# Supplementary material for: Characterization of Quasispecies of Pandemic 2009 Influenza A Virus (A/H1N1/2009) by De Novo Sequencing Using a Next-Generation DNA Sequencer
Source: PubMed Central journal article supplement (PMC2859049; doi:10.1371/journal.pone.0010256), 2010-04-23
Supplement: pone.0010256.s001.pdf [file pone.0010256.s001.pdf]

@HWI-EAS443:3:24:33:2036#0/1  
AGATGGCCATCCGAATTCTTTTGGTCGCTGTCTGGCTGTC  
+HWI-EAS443:3:24:33:2036#0/1  
^Z\_¥ZZ[a``^XZNQTQVZXTY]\_`\_WZY]ZWV][ ]J[  
@HWI-EAS443:3:74:1367:921#0/1  
AGATGGCCATCCGAATTCTTTTGGTCGCTGTCTGGCTGTC  
+HWI-EAS443:3:74:1367:921#0/1  
aabb\_bbabbabbbbaabbbb]`\_\_^ab`¥\_b`ab[\_G  
@HWI-EAS443:3:32:1050:283#0/1  
GGGTAAACCAGACATATGTTAACATCAGCAACACCAACTT  
+HWI-EAS443:3:32:1050:283#0/1  
aba[bbb`abaa`baaabaaa`\_aa[aaaaa]a^`\_Y\_a`  
@HWI-EAS443:3:32:1685:830#0/1  
AGTTGGTGTGCTGATGTTAACATATGTCTGGTTTACCCC  
+HWI-EAS443:3:32:1685:830#0/1  
Y```\_\_^``]W^a`¥Vb]`^`\_]aabb\_]`^`XNZ`[Y¥]L  
@HWI-EAS443:3:18:1139:1572#0/1  
AGTTGGTGTGCTGATGTTAACATATGTCTGGTTTACCCA  
+HWI-EAS443:3:18:1139:1572#0/1  
Va^abaaaa`]`ba\_aaaaaa`abaa```aUUab`U[aZ  
@HWI-EAS443:3:91:1157:1910#0/1  
AGTTGGTGTGCTGATGTTAACATATGTCTGGTTTACCCA  
+HWI-EAS443:3:91:1157:1910#0/1  
abWYX``b\_b``]ab\_\_aa]^`^baa\_FP`XPSaW¥]^a  
@HWI-EAS443:3:31:325:729#0/1  
GTTGGTGTGCTGATGTTAACATATGTCTGGTTTACCCAA  
+HWI-EAS443:3:31:325:729#0/1  
a`ab`Ya\_aa`aa^`a\_^UVYT]Y]^`\_]U\_a^Z``\_]`  
@HWI-EAS443:3:64:1370:1771#0/1  
TTTGGGTAAACCAGACATATGTTAACATCAGCAACACCAA  
+HWI-EAS443:3:64:1370:1771#0/1  
^b`a`[F]abab¥b]^`¥a\_¥b\_a^`\_aaY^`a\_`\_a]aa  
@HWI-EAS443:3:11:1050:1121#0/1  
CACTTGGGTAAACCAGACATATGTTAACATCAGCAACACC  
+HWI-EAS443:3:11:1050:1121#0/1  
aaaaa`\_a¥aaa\_aaaaaaaaaaaaaa`\_aa\_aa^a`\_a\_]`  
@HWI-EAS443:3:12:1561:1041#0/1  
TGGTGTGCTGATGTTAACATATGTCTGGTTTACCCAAGT  
+HWI-EAS443:3:12:1561:1041#0/1  
a```babbabb^b\_aba^]`aaaa\_\_aaa[aa]W]Y`\_\_Q  
@HWI-EAS443:3:14:1602:823#0/1  
CACTTGGGTAAACCAGACATATGTTAACATCAGCAACACC  
+HWI-EAS443:3:14:1602:823#0/1  
`aa`^bb\_abaa]aa\_bababaa^[`\_ab¥`b\_a`Wa^U  
@HWI-EAS443:3:14:498:532#0/1  
ACTTGGGTAAACCAGACATATGTTAACATCAGCAACACCA  
+HWI-EAS443:3:14:498:532#0/1  
a`\_\_aa`^a\_aaa\_\_X^a`^\_a]^`V]^`¥X\_^]a\_Z^XZ^  
@HWI-EAS443:3:36:824:786#0/1  
ACTTGGGTAAACCAGACATATGTTAACATCAGCAACACCA

+HWI-EAS443:3:36:824:786#0/1  
ab`\_`ba¥^`\_a[`a\_a``aab^)`\_^^a`[\_^aI^a`V`  
@HWI-EAS443:3:53:594:2036#0/1  
CTTGGGTAAACCAGACATATGTTAACATCAGCAACACCAA  
+HWI-EAS443:3:53:594:2036#0/1  
abaa]bV)`b`\_aa^a`a`aaaaabaa`aa^a`]aZ`aa  
@HWI-EAS443:3:63:331:41#0/1  
CTTGGGTAAACCAGACATATGTTAACATCAGCAACACCAA  
+HWI-EAS443:3:63:331:41#0/1  
aaaaaaU^`a`\_aaa\_a^a[aaa`\_a`\_aW\_a^`\_`^a\_W`J  
@HWI-EAS443:3:68:430:1714#0/1  
CACTTGGGTAAACCAGACATATGTTAACATCAGCAACACC  
+HWI-EAS443:3:68:430:1714#0/1  
Y]ba][[`W\_bb^S`\_Ubbaa[aaabbbb`a`¥bbbb\_b  
@HWI-EAS443:3:79:1038:1961#0/1  
CACTTGGGTAAACCAGACATATGTTAACATCAGCAACACC  
+HWI-EAS443:3:79:1038:1961#0/1  
aaabaaa\_Sbbb`abaaaaaaa\_\_baaaaa¥\_ba`a`\_  
@HWI-EAS443:3:83:138:1228#0/1  
CTTGGGTAAACCAGACATATGTTAACATCAGCAACACCAA  
+HWI-EAS443:3:83:138:1228#0/1  
aaZV[G`Y\_aa`Y\_aa``aaa\_¥`a`\_aa\_ZT]a``\_\_^  
@HWI-EAS443:3:8:1691:246#0/1  
ACTTGGGTAAACCAGACATATGTTAACATCAGCAACACCA  
+HWI-EAS443:3:8:1691:246#0/1  
aZbaa`aaa\_a][^`\_]\_aa]aaaaa]X`a]¥\_Ua\_U\_QLY  
@HWI-EAS443:3:93:442:34#0/1  
CACTTGGGTAAACCAGACATATGTTAACATCAGCAACACC  
+HWI-EAS443:3:93:442:34#0/1  
aaa\_a`a^`\_\_`[]aa\_aaaaa¥¥a\_¥)`\_`a]`\_\_`]  
@HWI-EAS443:3:50:948:300#0/1  
CTGCTTTTGCTGGAAAGAACACAGATCTTGAGGCTCTCAT  
+HWI-EAS443:3:50:948:300#0/1  
abbabbbb`Y`b`babbbbaabaababbaaba`ZQTS  
@HWI-EAS443:3:82:1782:211#0/1  
CTTCATTACTCATGTCAAAGGAAGGCACGATTGGGGTGGT  
+HWI-EAS443:3:82:1782:211#0/1  
ab]ZbbabX^^^a¥¥U^`VL`ba\_XR`BBBBBBBBBBBB  
@HWI-EAS443:3:55:1706:1447#0/1  
AGTGACCACGGAAGCTGCTTTTGGTCTAGTGTGTGCCACT  
+HWI-EAS443:3:55:1706:1447#0/1  
ab\_bb\_^]RO¥b`¥]TY]¥\_\_X`Q\_]\_Z[[]a][SY[\_`  
@HWI-EAS443:3:89:1675:996#0/1  
ACGAGAGGATCACTTGAATCGCTGTATCTGCACTCCCATT  
+HWI-EAS443:3:89:1675:996#0/1  
aab\_aabaaa`\_`babab`Y\_\_a\_\_^\_]\_a[^`\_\_^`\_]  
@HWI-EAS443:3:80:988:258#0/1  
CATCCTAGCTCCAGTGTCTGCTGAAGGACGACCTTCTTG  
+HWI-EAS443:3:80:988:258#0/1  
`ba]ab`]XX`¥0S\_X¥]XXS^W\_NJ`]FGJOZ][M[\_T

@HWI-EAS443:3:20:987:1160#0/1  
GTCGGATTGACCTCCATTCAAATGGTTTGCCTGCTTTTCC  
+HWI-EAS443:3:20:987:1160#0/1  
a`aaaa`aa]¥Z\_Z`\_\_]Sa]]^X\_\_ZZW^ZW\_^]]ZW  
@HWI-EAS443:3:72:1043:387#0/1  
CGGATTGACATCCATTCAAATGGTTTGCCTGCTTTTCCTA  
+HWI-EAS443:3:72:1043:387#0/1  
aaabaa¥a\_bb^S`]Zbb`a`aaIZKa]\_\_ZW]`a`^¥¥\_  
@HWI-EAS443:3:6:318:1784#0/1  
GCCCATCCGAATTCTTTTGGTCGCTGTCTGGCTGTCAGTA  
+HWI-EAS443:3:6:318:1784#0/1  
I\_X¥aaZaaabaZbb^[`bb]a\_aa`\_]bbb\_`b¥WX`UB  
@HWI-EAS443:3:44:773:453#0/1  
TAGCATACTTACTGACAGCCAGACAGCGACCCAAAGAATT  
+HWI-EAS443:3:44:773:453#0/1  
OR\_¥U\_Q^\_¥aaa^¥Y^\_I\_¥aSWV]a\_QRNG[0¥Q¥[JJ  
@HWI-EAS443:3:92:1551:480#0/1  
ATTCTGTTTTTCATGCCTGATTAGTGGATTGGTGATAGTAG  
+HWI-EAS443:3:92:1551:480#0/1  
aba\_bb]Y^^a\_`U`]\_XY¥a\_aaab^`^aaPLXP[a\_[W  
@HWI-EAS443:3:84:730:1940#0/1  
GAACAGGCAGCAGAGGCCATGGAGGTTGCTAATCAAGCTA  
+HWI-EAS443:3:84:730:1940#0/1  
\_`^^b^W\_¥P]Z[Za¥QZVOKXXOXBBBBBBBBBBBBBBB  
@HWI-EAS443:3:59:322:631#0/1  
AATTGGAAAATGTCCAAAACATGTAAAAAGCACAAAATTG  
+HWI-EAS443:3:59:322:631#0/1  
^baabb`b`aa```aa`aa]UT\_Z^UX]VZWSZZNMRXL  
@HWI-EAS443:3:58:1127:519#0/1  
AAAGAGTTCAACCACCTGGAAAAAGAATAGAGAATTTGA  
+HWI-EAS443:3:58:1127:519#0/1  
aaaaab\_aaaa`aa\_\_aaa`\_\_\_\_`b`aa`aaa``aa¥G\_  
@HWI-EAS443:3:59:1328:894#0/1  
AAAGTACACATCAGGAAGACAAGAGAAGAATCCCGAACTC  
+HWI-EAS443:3:59:1328:894#0/1  
^DQVV][R]N¥ZXX]PT]Q¥Z^`Z\_SYZTMXSUUXDKY]Y  
@HWI-EAS443:3:4:437:1272#0/1  
GACCATATGGCCATAATCAAAAAGTACACATCAAGAATTC  
+HWI-EAS443:3:4:437:1272#0/1  
\_b¥]]aaa\_Z`W^aaaa\_`[`[`Ra\_aVTRQTa¥ZS[TR  
@HWI-EAS443:3:62:354:225#0/1  
ACCATATGGCCATAATCAAAAAGTACACATCAAGAAGCTT  
+HWI-EAS443:3:62:354:225#0/1  
a¥b¥baabaa[I]^`^a[[]`aN^\_\_`\_\_a\_]\_][]Z  
@HWI-EAS443:3:31:1446:1068#0/1  
CTTCTTGATGTGTACTTTTTGATTATGGCCATATGGTCCA  
+HWI-EAS443:3:31:1446:1068#0/1  
\_¥aZ\_X`Y]a\_]Z\_bYbbaaaba^S\_^[]JR`HXYNBB  
@HWI-EAS443:3:100:50:1040#0/1  
ACCGGTTGGAATTTCTAGCATGGCGGAGGCCATGGTGTCT

+HWI-EAS443:3:100:50:1040#0/1  
[^^Z\_W¥b``YW^`aZ\_^Z\_aZG[DV]VZ¥]UP¥BBBBB  
@HWI-EAS443:3:37:1699:1609#0/1  
AATTTCTAGCATGGCGGAGGCCATGGTGTCTAGGGCCCGG  
+HWI-EAS443:3:37:1699:1609#0/1  
aaa]aabXa¥`\_aZGa^]SU`a]]^MIJVU^W`X¥X^]BB  
@HWI-EAS443:3:82:672:1710#0/1  
GTTGGAATTTCTAGCATGGCGGAGGCCATGGTGTCTAGGG  
+HWI-EAS443:3:82:672:1710#0/1  
^^]`a\_Xa]ba\_¥]`aab^aQbbaa`ZX`RTP^HIaU]aZ  
@HWI-EAS443:3:43:681:1973#0/1  
AGAGGACTTCTTTTGCTCATGTTGATTCCGACTAACTTG  
+HWI-EAS443:3:43:681:1973#0/1  
^[`KZa^baaYSVSTOQaaa]`X]Jb`¥IYIbR`a`V]S\_  
@HWI-EAS443:3:73:1169:1660#0/1  
CTGATGGCCATCCGAATTCTTTTGGTCGCTGTCTGGCTGT  
+HWI-EAS443:3:73:1169:1660#0/1  
aa`ba``babaaa]``aaaaaa¥^Taa`Ya\_`Y\_X`Z^U  
@HWI-EAS443:3:38:1492:591#0/1  
CTGATTAATGATCCCTGGGTTTTGCTTAATGCATCTTGGG  
+HWI-EAS443:3:38:1492:591#0/1  
`ZbVababbaUa\_^a^b`babbaV]a\_Yb[I`KZaa^bZF  
@HWI-EAS443:3:62:106:1042#0/1  
CGCCTGGGCTTTGCTTAATGCATCTTGGTTCAACTCCTTC  
+HWI-EAS443:3:62:106:1042#0/1  
ab^a\_X^aJa]]]]^Z`aaaaaa`a\_\_XU[``\_a]V][R`  
@HWI-EAS443:3:87:744:1078#0/1  
GCCTGATTAATGATCCCTGGGCTTTGCTTAATGCATCTTG  
+HWI-EAS443:3:87:744:1078#0/1  
a^ab`\_VZ`V`T]a\_ba¥TROF00\_]Y\_X[]a]WS`\_aW^  
@HWI-EAS443:3:96:1313:697#0/1  
GACCATCGTCAACATCCACAGCACTCTGTTGTTCTCCTGTTG  
+HWI-EAS443:3:96:1313:697#0/1  
`aPDX^\_\_QU\_WT[YVH]W\_]OPN[U`NFR¥^[QG`aZBB  
@HWI-EAS443:3:63:1071:373#0/1  
GACAAAATGACCATCGTCAACATCCACAGCACTCTGTTGT  
+HWI-EAS443:3:63:1071:373#0/1  
a`X]a]ab`WXY[]YSY[PLXZXRW^\_\_BBBBBBBBBB  
@HWI-EAS443:3:51:1710:228#0/1  
CTAATGGATGGCCATCCGAATTCTTTTGTTCGCTGTCTGG  
+HWI-EAS443:3:51:1710:228#0/1  
^XXQ\_H]QaXYYP``SS`NP¥b[TWb`WPHLFTBBBBBB  
@HWI-EAS443:3:98:578:1309#0/1  
TCCGAATTCTTTTGGTCGCTGTCTGGCTGTCAGCAAGAAG  
+HWI-EAS443:3:98:578:1309#0/1  
`^R\_abZ`]\_ba\_ba\_\_ba^W\_L`X\_a\_ZDIOVFFX[FYQ  
@HWI-EAS443:3:29:483:1907#0/1  
CATCCGAATTCTTTTGGTCGCTGTCTGGCTGTCAGAAAGA  
+HWI-EAS443:3:29:483:1907#0/1  
^a``¥UaZ]bbab`[S^VUY`ZUGWY\_BBBBBBBBBBBBB



@HWI-EAS443:3:42:539:1214#0/1  
TGTCAGTAAGAATGCTAGAGTCCCGTTTTTCGGTTCATTAC  
+HWI-EAS443:3:42:539:1214#0/1  
ZS`Q\_`W¥RDTQQZPZZ`b`aSRRIW¥U]H[PDVUMYN  
@HWI-EAS443:3:12:115:1801#0/1  
TTTTGGTCGCTGTCTGGCTGTCAGTAAGAATGCTAGAGTC  
+HWI-EAS443:3:12:115:1801#0/1  
[`aa`[Pbab]^`baTR\_aXXTWDXMXHDXWDZQ\_Y\_XU\_  
@HWI-EAS443:3:19:662:350#0/1  
ATCCGAATTCTTTTGGTCGCTGTCTGGCTGTCAGTAAGAA  
+HWI-EAS443:3:19:662:350#0/1  
ab\_]¥[aaaa`aaa^]L^a```[¥]a`[YaLGW`YBBBBB  
@HWI-EAS443:3:36:911:1681#0/1  
CTGGCTGTCAGTAAGAATGCTAGAGTCCCGTTTTTCGTTTC  
+HWI-EAS443:3:36:911:1681#0/1  
^aa`a`\_]a¥Wxa\_\_LVb]V]YUYa^¥UV`X]a```¥aaa  
@HWI-EAS443:3:51:1102:762#0/1  
TCCGAATTCTTTTGGTCGCTGTCTGGCTGTCAGTAAGAAT  
+HWI-EAS443:3:51:1102:762#0/1  
aX\_Z\_Yb]S\_aa^QV]a[\_aX[aBBBBBBBBBBBBBBBB  
@HWI-EAS443:3:83:794:866#0/1  
GACAAAATGACCATCGTCAACATCCACAGCACTCTGCTGA  
+HWI-EAS443:3:83:794:866#0/1  
X^aaYMU^X\_ab`^¥^R``\_¥\_aaYQ`\_]V`SY`OQ]JVD  
@HWI-EAS443:3:71:194:1040#0/1  
ACGCGAGATACTACTAAGACCACTGTGGACCATATGGCC  
+HWI-EAS443:3:71:194:1040#0/1  
aaQWRF¥WT\_\_\_`XY]WYYY[[]¥WYWTNTZZVYOQXYZZ  
@HWI-EAS443:3:18:1382:1667#0/1  
AGTGTCTTGTGAATTAGTCATCATCTTTCTCACAACATTT  
+HWI-EAS443:3:18:1382:1667#0/1  
aa^b^ab\_U[LP\_aaX`\_Z\_^^`\_\_aaa^\_[\_Yaa]\_¥Y^  
@HWI-EAS443:3:11:1484:1720#0/1  
AGTCCTCGTGTATGGGGCATTACCACCCATCTACTCTC  
+HWI-EAS443:3:11:1484:1720#0/1  
aa]^^aaaaa¥`a\_¥X[`a\_^^Y]]S`SXU^^U]^UZM^¥  
@HWI-EAS443:3:76:503:1088#0/1  
CATGAACCAGTCTCGTGACATTTCTCGATGGTCATGTCA  
+HWI-EAS443:3:76:503:1088#0/1  
aaVRVZa\_HP¥RQ\_aQ`R`a`[\_`[^SXH[ZTVUY\_W¥V  
@HWI-EAS443:3:38:714:578#0/1  
CTCGCCACTTTTCATTTCTGCTCTGGAGGTAGTGAAGGTT  
+HWI-EAS443:3:38:714:578#0/1  
aaa`\_abb]abaaaa\_aaa`aaa`aa`a`a`Y]\_0^¥^`]JF  
@HWI-EAS443:3:78:1212:1214#0/1  
CTCGCCACTTTTCATTTCTGCTCTGGAGGTAGTGAAGGTT  
+HWI-EAS443:3:78:1212:1214#0/1  
aaaa`aaaaaab`abaa`aa`^`a\_^^S`]V[]^[YIM  
@HWI-EAS443:3:18:1511:1244#0/1  
TTAGCCACAAATCCATAGCGATAAAAAAAGCTTGTGAGTT

+HWI-EAS443:3:18:1511:1244#0/1  
aaabaaaaaa`aa`\_a`\_`\_a`\_`\_\_\_\_\_^`¥a^`Y\_ZK[^  
@HWI-EAS443:3:78:687:1271#0/1  
ATTTGAACTCACAAAGCTTTTTTTATCGCTATGGATTTGTG  
+HWI-EAS443:3:78:687:1271#0/1  
aaaa`]aaabaa`aa\_\_a`\_`\_``\_`^`\_`a\_\_^^\_\_Y]  
@HWI-EAS443:3:53:669:495#0/1  
AGCTGGGCCATATCTCTTGTCTTCTTTGCCAAAATGAGA  
+HWI-EAS443:3:53:669:495#0/1  
aba\_ababaab`aa\_aba`\_aaaaaba`\_a`\_a\_a`aa`  
@HWI-EAS443:3:13:1224:1406#0/1  
CAAGAACCCCGCACTCAGAATGAGGTGGATGATGGNAATG  
+HWI-EAS443:3:13:1224:1406#0/1  
H]WaW\_\_^^\_b^]]a`\_baab`[b`¥b]aa`b\_\_UDY`]]  
@HWI-EAS443:3:73:897:706#0/1  
GAAGAACCCCGCACTCAGAATGAGGTGGATGATGGCAATG  
+HWI-EAS443:3:73:897:706#0/1  
aaababbbaaaaaabaaa¥\_aaXSZa`^aa`aa`\_`\_`\_a  
@HWI-EAS443:3:17:858:734#0/1  
ACTGTGCCCATGGAGTATCCTGTTCCCTGTTCCATGGCTGT  
+HWI-EAS443:3:17:858:734#0/1  
\_`baa\_VZX\_]b]Mb\_aabV]b`YHQ^^JaYYGX\_\_\_BBB  
@HWI-EAS443:3:96:419:527#0/1  
GTGCGTTTTAAATACGGTTTTGAAAAGAGGGCCTTGTTCGGA  
+HWI-EAS443:3:96:419:527#0/1  
aUaXNWVX]]`XN^aWR[\_`]UGV]R^LQ¥NX^GMHLXBB  
@HWI-EAS443:3:68:155:1066#0/1  
CGCGGGAAGTCTTCGAGCTCTCGGACGAAAAGGCAACGAA  
+HWI-EAS443:3:68:155:1066#0/1  
a¥]T¥KIPDIXON`XKR[XZ¥^VZZUKPPJPRTRXBBBB  
@HWI-EAS443:3:11:1653:958#0/1  
TGCCTGAGTCCATGAGGGAAGAGTATCAACAGGAACAGCA  
+HWI-EAS443:3:11:1653:958#0/1  
\_¥`]`^`aa\_RS[bNP`]0`aTP`]XXP^OZY¥[Z^¥ZKY  
@HWI-EAS443:3:68:846:731#0/1  
CTCTGCAAAGCAGGTAGATATTTAAAGATGAGTCTTCTA  
+HWI-EAS443:3:68:846:731#0/1  
abbaa`bb\_abaabb[baa\_^`baa\_¥aaaa`^\_aba`aa  
@HWI-EAS443:3:43:1159:1907#0/1  
GGGTTTTTTTTATCATTAAATAAGCTGAAACGAGAAAGCT  
+HWI-EAS443:3:43:1159:1907#0/1  
\_\_^Wa`baaaaa`¥]ba`aa`aa^W^^`\_``\_``\_`\_Zoy  
@HWI-EAS443:3:73:464:494#0/1  
CTGCAGCAAATATCATTGGGATCTTGACCTGATATTGTG  
+HWI-EAS443:3:73:464:494#0/1  
abbbbaba``baaaabaaYa`aaaaaaa`aba`aaaa]a  
@HWI-EAS443:3:5:550:967#0/1  
CTCTCGTCATTGCAGCAAATATCATTGGGATCTTGACCAT  
+HWI-EAS443:3:5:550:967#0/1  
a^`\_a¥HY^baY\_b]a\_TabbaS`Va\_U`\_aZ^`aaW^BB

@HWI-EAS443:3:100:899:992#0/1  
ATTGGGACTCATCCTAGCTCCAGTGCTGGCCTGAAAGATG  
+HWI-EAS443:3:100:899:992#0/1  
]¥[SaW¥P`U\_aZ]aSWUa]aabT¥ZaZUH\_]ba`a¥aaB  
@HWI-EAS443:3:74:483:1529#0/1  
GGTGTATCCTGTTCCATGGCTGTATGGGGGGTGT  
+HWI-EAS443:3:74:483:1529#0/1  
a`R`aYP¥QXXOQZUZ]^0^^ZBBBBBBBBBBBBBBBBB  
@HWI-EAS443:3:3:61:966#0/1  
ATTGAACATAATCAGAGGGCGACCCAAAGAGAACAATCT  
+HWI-EAS443:3:3:61:966#0/1  
`^]]aa[U[[U\_R]ZWEY`^[YU[¥[P`XXV^[`]ZFY¥S  
@HWI-EAS443:3:18:1199:1748#0/1  
CAACACTTGGGTAAACCAGACATATGTAAACATCAGCAAC  
+HWI-EAS443:3:18:1199:1748#0/1  
aab^b`ab`\_]0\_ab``a[aabaaa`[aaaXaaaa\_Y`aZ  
@HWI-EAS443:3:1:677:1923#0/1  
CAACACTTGGGTAAACCAGACATATGTAAACATCAGCAAC  
+HWI-EAS443:3:1:677:1923#0/1  
`bbWbaaabb`Y¥bbRJ¥bb\_baabbbbbb\_abbMabb  
@HWI-EAS443:3:21:1313:1573#0/1  
CAACACTTGGGTAAACCAGACATATGTAAACATCAGCAAC  
+HWI-EAS443:3:21:1313:1573#0/1  
a]VRXUY[YTOLVZ`XSMZR^a^]XMR]¥PU[PZGSQZK  
@HWI-EAS443:3:25:325:1061#0/1  
CAACACTTGGGTAAACCAGACATATGTAAACATCAGCAAC  
+HWI-EAS443:3:25:325:1061#0/1  
a¥\_]X]Z^\_N[`aaaa^aa`\_Q^`Xa`]^`a`\_aaa^¥S  
@HWI-EAS443:3:29:663:258#0/1  
ACACTTGGGTAAACCAGACATATGTAAACATCAGCAACAC  
+HWI-EAS443:3:29:663:258#0/1  
aa`a`aa`a[\_aa\_`Z]^`\_a`X`\_X\_\_\_`^\_a`\_]`\_]  
@HWI-EAS443:3:42:698:1406#0/1  
TGTTGCTGATGTAAACATATGTCTGGTTTACCCAAGTGTT  
+HWI-EAS443:3:42:698:1406#0/1  
^RV]]`a[X`a[[\_]W¥^¥`[`XYUUZ^Y[\_`¥Q¥L]S^  
@HWI-EAS443:3:66:1266:45#0/1  
CAACACTTGGGTAAACCAGACATATGTAAACATCAGCAAC  
+HWI-EAS443:3:66:1266:45#0/1  
abbababbbba\_bab`aaba`ababbaaa`\_aa]aa`aa^  
@HWI-EAS443:3:66:1389:388#0/1  
GTTGCTGATGTAAACATATGTCTGGTTTACCCAAGTGTTG  
+HWI-EAS443:3:66:1389:388#0/1  
a]\_`aba[a`\_V]]\_a\_a`[[`\_`Y`\_`^[¥^¥^ZVaY^Y  
@HWI-EAS443:3:6:899:1943#0/1  
CAACACTTGGGTAAACCAGACATATGTAAACATCAGCAAC  
+HWI-EAS443:3:6:899:1943#0/1  
`ab\_b\_aab`a`\_¥aa^aaa]^\_aaa\_aaa\_a¥\_b`\_bXB  
@HWI-EAS443:3:75:426:56#0/1  
CAACACTTGGGTAAACCAGACATATGTAAACATCAGCAAC

+HWI-EAS443:3:75:426:56#0/1  
`bab`\_bbbbabaaaa`aababa`a]aaaaabaaaaa\_  
@HWI-EAS443:3:87:695:732#0/1  
CAACACTTGGGTAAACCAGACATATGTAAACATCAGCAAC  
+HWI-EAS443:3:87:695:732#0/1  
abbbbabbbab\_bbbbbabbbbbbbabb\_abbabbabba  
@HWI-EAS443:3:89:1370:370#0/1  
AGGGGAGTCTTCGAGCTCTCGACGAAAAGGCAACGAACC  
+HWI-EAS443:3:89:1370:370#0/1  
``^abbbaab`bab\_bababbaaba\_aW]a]aa¥abaW¥  
@HWI-EAS443:3:83:77:89#0/1  
CTGGCTGTCAGTAAGCATGCTAGAGTCCCGTTCTCGTTTC  
+HWI-EAS443:3:83:77:89#0/1  
aaZY]]U\_YOW¥ZT]FPY]QVJX[BBBBBBBBBBBBBBB  
@HWI-EAS443:3:50:1256:1454#0/1  
TGGGGTTTGCTTAATGCATCTTGGTTCAACTCCTTCCACA  
+HWI-EAS443:3:50:1256:1454#0/1  
Sa¥\_I\_U`b\_[\_`Z\_YH]Ya[`¥K\_ST]Y[SHYGUQFSZ  
@HWI-EAS443:3:17:1675:608#0/1  
CCCTGGGGTTTGCTTAATGCATCTTGGTTCAACTCCTTCC  
+HWI-EAS443:3:17:1675:608#0/1  
Xa`^b`\_Lbbabbbab`a[SbabbbbaZFYaa\_W[a[I]  
@HWI-EAS443:3:20:1454:729#0/1  
CTGGGGTTTGCTTAATGCATCTTGGTTCAACTCCTTCCCTC  
+HWI-EAS443:3:20:1454:729#0/1  
`baRQGUUaXa]]]WWa`SQ`bWTQ\_a`H`MV`[UFTS  
@HWI-EAS443:3:49:888:1321#0/1  
CCCTGGGGTTTGCTTAATGCATCTTGGTTCAACTCCTTCC  
+HWI-EAS443:3:49:888:1321#0/1  
`ababbbHbbb)`a`b`bbba^bba[\_ab`]U\_\_`baaY  
@HWI-EAS443:3:13:1764:488#0/1  
AGCCCATCCACTAACAGGGCAGAGGGAGGAATTGCCAGCT  
+HWI-EAS443:3:13:1764:488#0/1  
a[^`\_MX^a]^aa¥`ZS[GMS]WPa¥WW¥WWU[RRH\_BB  
@HWI-EAS443:3:77:930:83#0/1  
ATTGTCAACATCCACAGCACTCTGCTGTTCCCTGTTGATAT  
+HWI-EAS443:3:77:930:83#0/1  
V`bb]`a]^b`Vb^ba[aG[]b]^baaaaR^a]Y`Z`\_]  
@HWI-EAS443:3:62:356:565#0/1  
CTCGGGACCACTAGATTTCCAGTTGCTTCGAATGTTATTT  
+HWI-EAS443:3:62:356:565#0/1  
¥¥U]RF¥W]WQY\_a\_XQW¥¥X^VW]]TX\_]TYZSZ[SWVV  
@HWI-EAS443:3:6:833:61#0/1  
AAGTGATCCCAAGAGGAAAGCTTTCCACAAGAGGGGTCCA  
+HWI-EAS443:3:6:833:61#0/1  
`aa`b\_a]Y[aa\_aaa`\_Y`¥`\_YTVZY[¥\_W^¥W¥UUQB  
@HWI-EAS443:3:39:822:2019#0/1  
AAGAAGCAGATACTGGGCAATAAGGACCAGGAGTGGAGGA  
+HWI-EAS443:3:39:822:2019#0/1  
aaSYaa^b^]^ba[`QTNK\_Za^^QbWS`[YLLU\_]`ZZV

@HWI-EAS443:3:49:617:338#0/1  
AGCGAGAGCAATTGGGACAGAAATTTGAGGAAATAAGGTG  
+HWI-EAS443:3:49:617:338#0/1  
`bab^baba\_]\_b\_aa`aba^aaaaaabb\_\_`aa\_a`0b  
@HWI-EAS443:3:72:1186:1866#0/1  
ACTACCTCCAGAGCAGAAATGAAAAGTAGCGAGAGCAATT  
+HWI-EAS443:3:72:1186:1866#0/1  
`R\_\_RS[\_a`\_] [Z^YYPY[`¥]^\_^^YJY]^^^X]XW^\_Y  
@HWI-EAS443:3:44:703:680#0/1  
GGGAGACCTTCACCACCTCCAGAGCAGAAATGAAAAGTGG  
+HWI-EAS443:3:44:703:680#0/1  
\_\_Z¥aba¥I\_`\_`P^]\_`\_[aaZb[L]\_¥Za\_^a^[`^^Q  
@HWI-EAS443:3:10:1444:337#0/1  
GTTATCTTTTGCCTAGGCATGAGCATGAACCAAGTGTCTGTG  
+HWI-EAS443:3:10:1444:337#0/1  
P[\_¥`T[Z`a]PSVP\_\_Va^\_GLRZZaBBBBBBBBBBBBB  
@HWI-EAS443:3:44:191:1533#0/1  
GCCTTATTGAATTCATTTTGGACCCAGCTTGCCAGAGATC  
+HWI-EAS443:3:44:191:1533#0/1  
```ba[[aab^`[ba`b]\_¥U\_baa\_Raa`^a^`U`^a[F  
@HWI-EAS443:3:40:233:602#0/1  
AACGACTTCCATTGGTTCAAGGCATGAATTCTCAAATATT  
+HWI-EAS443:3:40:233:602#0/1  
Ya`\_Y\_ZZ\_\_U]\_GUX¥\_a`S\_`¥\_FZ[]UWYV¥PL¥N]  
@HWI-EAS443:3:81:1584:1772#0/1  
AATTGTTTTCCCAAATGAAGTGGGGCAAGAATACTGACA  
+HWI-EAS443:3:81:1584:1772#0/1  
`abbba`aabXb¥aJbaa\_^0^Sa^a]`a\_aaaaaa^VS^  
@HWI-EAS443:3:71:927:1101#0/1  
TGATGTCAGCATTCTTGCCCCACTTCATTTGGGAAAACA  
+HWI-EAS443:3:71:927:1101#0/1  
X`V\_\_K` [ `RXQ\_`aYZa¥XP]Taaa`Y`aWP\_[`aa\_\_`  
@HWI-EAS443:3:69:1499:647#0/1  
GAAAGTGATTCCAAGAGGAAAGCCTTCCACAAGAGGGGTC  
+HWI-EAS443:3:69:1499:647#0/1  
W^\_\_X^b\_U¥\_H]aa\_a\_ba`V\_P\_`Z]YY\_\_aaa\_a\_YY  
@HWI-EAS443:3:3:369:63#0/1  
ATCCCACTGCATATGTATCCTATCTGATATTCTAGATTCT  
+HWI-EAS443:3:3:369:63#0/1  
a\_^]`aT^b¥\_^\_aa[\_aRORX\_Y]aW\_]\_H]HZ`YZ^BB  
@HWI-EAS443:3:1:1250:376#0/1  
CTAAGATCAAGATGAAATGGGGCATGGAAATGAGGAGCTG  
+HWI-EAS443:3:1:1250:376#0/1  
UNRRZP^J0XVQ^aaSS` [MNaa\_aWRJH^^a\_a`L[\_BB  
@HWI-EAS443:3:47:1641:469#0/1  
GAATAAGTGGGAGACCTTCACTACCTCCAGAGCAGAAATG  
+HWI-EAS443:3:47:1641:469#0/1  
aaab`\_bYabb]b\_] ^`\_\_`V\_\_]^`]U]^Y^\_^\_Y^`\_  
@HWI-EAS443:3:10:704:678#0/1  
GAGTGGGAGACCTTCACTAGCTCCAGAGCAGAAATGAAAA

+HWI-EAS443:3:10:704:678#0/1  
]UHQ[Za¥R¥NVUXX[^[LS[X[Y\_]\_TY^T¥[G^W¥VW  
@HWI-EAS443:3:34:19:1333#0/1  
AAAATGACCATCGTCAACATCCACAGCACTCCGCTGTTCC  
+HWI-EAS443:3:34:19:1333#0/1  
]X^b^\_aabaaa\_T`aa\_`[\_¥V\_`^^`a^`a¥¥WJ0ZQX  
@HWI-EAS443:3:74:825:862#0/1  
ATTCGAACACAAATACCCGAGAAATGCTAGCAAGCATTG  
+HWI-EAS443:3:74:825:862#0/1  
abba`aa`aabaaaba]^]^^`Z\_\_^\_]^[\_Y\_`^¥\_^R  
@HWI-EAS443:3:42:520:709#0/1  
CGCTGCCGGTTGATTTCTGTTTAATGTCCAATCATAAGTC  
+HWI-EAS443:3:42:520:709#0/1  
abb]baabb0aS¥W`aaaa¥``]]]a\_\_^`\_^`\_^`a\_G`  
@HWI-EAS443:3:48:182:1525#0/1  
CGCTGCCGGTTGATTTCTGTTTAATGTCCAATCATAAGTC  
+HWI-EAS443:3:48:182:1525#0/1  
^[R\_¥[`Xaa`QRHYS\_T¥VaZTV^^SR^a\_^[Q`V\_U[O  
@HWI-EAS443:3:56:1759:152#0/1  
CGCTGCCGGTTGATTTCTGTTTAATGTCCAATCATAAGTC  
+HWI-EAS443:3:56:1759:152#0/1  
ababa`abbaa¥]^abXa`[ba`a\_¥W¥¥`aaa\_a]\_Y[Y  
@HWI-EAS443:3:82:1272:64#0/1  
AAAAGTAGACCAAAAAGCAGCTTCTGTGGTCACTGGTACCA  
+HWI-EAS443:3:82:1272:64#0/1  
^QHQPQaZUU¥\_R¥ZQV\_\_RZ¥UVUK^FMY^\_BBBBBBB  
@HWI-EAS443:3:10:1149:67#0/1  
CGATGCTGTGAATCAGCAATCTGTTCAAGTGGCACAAA  
+HWI-EAS443:3:10:1149:67#0/1  
¥a^a\_ab\_b`Y\_a[bb`aJ`Z[aabbbaGb`UR]\_G`^aGa  
@HWI-EAS443:3:37:1566:233#0/1  
GAATCAGCAATCTGTTCAAGTGGCACAAAAGTAGACCAA  
+HWI-EAS443:3:37:1566:233#0/1  
aa¥^^`¥SYa`Xa`HT[QQ]^VZT¥]W]HZXX¥WVXYXZ  
@HWI-EAS443:3:37:258:158#0/1  
CTGTTCAAGTGGCACACACTAGACCACACGCAGCTTCT  
+HWI-EAS443:3:37:258:158#0/1  
a¥`Yaaa]¥XQZP]a`\_Y[a^Y^`ZZEYLVFV`^VZUSOP  
@HWI-EAS443:3:37:1071:180#0/1  
CAAAAAGTACACGTCAGGAAGACAAGAGAAGAACCCCGCA  
+HWI-EAS443:3:37:1071:180#0/1  
abbabbb`bbbbbaabbaabaabbbba`RP[aa`a\_aadW  
@HWI-EAS443:3:51:1612:58#0/1  
CAGGAAGACAAGAGAAGAACCCCTCACTCAGAATGAAGTG  
+HWI-EAS443:3:51:1612:58#0/1  
aab[a\_b[ZXbbaa`[b[[\_UaaIbbaaa\_]abbbbaVRa  
@HWI-EAS443:3:66:56:878#0/1  
CAGGAAGACAAGAGAAGAACCCCTCACTCAGAATGAAGTG  
+HWI-EAS443:3:66:56:878#0/1  
aY\_TFMU\_\_WU[[T]\_¥V[Z\_]GTUWUYMZLTY^P[VUV

@HWI-EAS443:3:40:870:2014#0/1  
CGTCGCTTTAAATACGGTTTGAAACGAGGGCCTTCTACGG  
+HWI-EAS443:3:40:870:2014#0/1  
`bbabab\_`aba^a^ba\_\_ba`bW0\_\_b\_UD¥FRa^ZIIYX  
@HWI-EAS443:3:37:172:1603#0/1  
GGGGTGGGGAGTCTTCGAGCTCTCGGACGACAAGGCAACG  
+HWI-EAS443:3:37:172:1603#0/1  
`a][S[[XX`¥^`a^`[`Y^¥`¥`¥V]^XPDYMNS^^][P  
@HWI-EAS443:3:62:1028:551#0/1  
CGGCCATCCGAATTCTTTTGGTCNCTGTCTGGCTGTCAGT  
+HWI-EAS443:3:62:1028:551#0/1  
abababbbbbbbbabbbbbbb`VDZ`b`aaa\_aaaY]]^P  
@HWI-EAS443:3:32:629:659#0/1  
CACGGCCATCCGAATTCTTTTGGTCGCTGTCTGGCTGTCA  
+HWI-EAS443:3:32:629:659#0/1  
abba\_[baaab^aaaa\_`aaa]a¥¥\_\_aS\_¥\_¥]`WaHMP  
@HWI-EAS443:3:42:939:1589#0/1  
TCGGCCATCCGAATTCTTTTGGTCGCTGTCTGGCTGTCAG  
+HWI-EAS443:3:42:939:1589#0/1  
`b^aaba`aa¥Z\_aa¥aaaa¥a\_^`a\_a]Y`WZBBBBBBB  
@HWI-EAS443:3:5:1094:807#0/1  
CGGCCATCCGAATTCTTTTGGTCGCTGTCTGGCTGTCAGG  
+HWI-EAS443:3:5:1094:807#0/1  
abb[]\_\_a^baabaYbbba[bSaba¥Va`a[^^baXZ^aB  
@HWI-EAS443:3:15:413:499#0/1  
CGGCCATCCGAATTCTTTTGGTCGCTGTCTGGCTGTCAGT  
+HWI-EAS443:3:15:413:499#0/1  
abababaa`baaabaaba`\_\_aXaa\_`aa¥\_^RULRTU  
@HWI-EAS443:3:21:988:731#0/1  
CGGCCATCCGAATTCTTTTGGTCGCTGTCTGGCTGTCAGT  
+HWI-EAS443:3:21:988:731#0/1  
a\_Y][]WSWXN[¥\_a\_W\_`PUY\_W`\_SR`Z\_XVYBBBBB  
@HWI-EAS443:3:24:250:1544#0/1  
CGGCCATCCGAATTCTTTTGGTCGCTGTCTGGCTGTCAGT  
+HWI-EAS443:3:24:250:1544#0/1  
aaYbb[¥abXOQZU\_`¥`[a`P\_a`][^a^]ZYYBBBBBB  
@HWI-EAS443:3:33:973:1266#0/1  
CGGCCATCCGAATTCTTTTGGTCGCTGTCTGGCTGTCAGT  
+HWI-EAS443:3:33:973:1266#0/1  
\_]¥a`\_\_][U\_S¥aaaaY```Ta``aa¥baaXR¥ZDRQUH  
@HWI-EAS443:3:34:27:1344#0/1  
CGGCCATCCGAATTCTTTTGGTCGCTGTCTGGCTGTCAGT  
+HWI-EAS443:3:34:27:1344#0/1  
aa[b^a]abb\_Zaa`aba^`a\_aZ``a\_a)`\_a\_¥Q[UYS  
@HWI-EAS443:3:37:640:841#0/1  
CGGCCATCCGAATTCTTTTGGTCGCTGTCTGGCTGTCAGT  
+HWI-EAS443:3:37:640:841#0/1  
VOV\_baS\_\_a\_aba`Uaa\_¥Ta¥\_aa[b[J`][BBBBBB  
@HWI-EAS443:3:45:1329:1928#0/1  
TTGACGGCCATCCGAATTCTTTTGGTCGCTGTCTGGCTGT

+HWI-EAS443:3:45:1329:1928#0/1  
aba¥`]YT]a`VV`¥`^^LX¥`^R\_SDU^BBBBBBBBBBBB  
@HWI-EAS443:3:46:103:1008#0/1  
CGGCCATCCGAATTCTTTTGGTCGCTGTCTGGCTGTCAGT  
+HWI-EAS443:3:46:103:1008#0/1  
aaaaa`abbbaZaaaaaaaa`aa^a`^\_a]¥Z^]Y¥[UP  
@HWI-EAS443:3:56:1785:709#0/1  
CGGCCATCCGAATTCTTTTGGTCGCTGTCTGGCTGTCAGT  
+HWI-EAS443:3:56:1785:709#0/1  
\_]¥\_^bbaab`[\_aaaa\_W\_X`a`^`]]][U][]BBBBB  
@HWI-EAS443:3:60:930:210#0/1  
CGGCCATCCGAATTCTTTTGGTCGCTGTCTGGCTGTCAGT  
+HWI-EAS443:3:60:930:210#0/1  
a^Z\_a`\_\_baa`aaaabb`aG\_aa\_bV[¥aa``BBBBBB  
@HWI-EAS443:3:64:907:352#0/1  
CGGCCATCCGAATTCTTTTGGTCGCTGTCTGGCTGTCAGT  
+HWI-EAS443:3:64:907:352#0/1  
`aabaaaaab\_aabaaaa]aYaa]aa][`a`a`^UQOTR  
@HWI-EAS443:3:71:38:826#0/1  
CGGCCATCCGAATTCTTTTGGTCGCTGTCTGGCTGTCAGT  
+HWI-EAS443:3:71:38:826#0/1  
\_babbbaa\_V\_b\_aabbbbb`¥aTaab\_bZ]aa\_\_TXLSQ  
@HWI-EAS443:3:88:1502:1857#0/1  
CGGCCATCCGAATTCTTTTGGTCGCTGTCTGGCTGTCAGT  
+HWI-EAS443:3:88:1502:1857#0/1  
\_a\_UZ\_WZ`[^a\_aa`a][a¥QaG¥TXVaaRS\_[RLPNN  
@HWI-EAS443:3:8:153:306#0/1  
CGGCCATCCGAATTCTTTTGGTCGCTGTCTGGCTGTCAGT  
+HWI-EAS443:3:8:153:306#0/1  
aaba¥]\_``]QI`a\_\_aaaaV`\_\_\_\_U^]Y^ZBBBBBB  
@HWI-EAS443:3:56:1738:1572#0/1  
AGCCTTTTCCGCAAGCTCGACGATCATTGGATTGAAGCAT  
+HWI-EAS443:3:56:1738:1572#0/1  
a`QWYbaba^ababa\_]`b]Va¥ZX\_\_XF[DX\_BBBBBBB  
@HWI-EAS443:3:8:1484:778#0/1  
AGCCTTTTCCGCAAGCTCGACGATCATTGGATTGAAGCAT  
+HWI-EAS443:3:8:1484:778#0/1  
aa]^baab`a`a^Z]aGaYnb^`WS\_^]\_¥\_]`^VfV]  
@HWI-EAS443:3:65:1621:1657#0/1  
AAAGCAGGTACCGATCCAAAATGGAAGGCTTTGTGCGACA  
+HWI-EAS443:3:65:1621:1657#0/1  
aa¥QYaaa\_baa`aa\_aa^a^aYR`^^\_\_\_\_]XZ]Sa\_[`  
@HWI-EAS443:3:26:296:769#0/1  
TAAGCAAACCCAGGGATCATTAAATCAGACACTCCTCGAT  
+HWI-EAS443:3:26:296:769#0/1  
abaaab`a\_\_abaaa`\_aaaa\_aaa]J¥a`aaa\_aa`\_  
@HWI-EAS443:3:2:1306:197#0/1  
GGGGATGTGGACGACAAACACAGAGACTGGAGCACCCCAG  
+HWI-EAS443:3:2:1306:197#0/1  
^\_\_I`b¥`]^UV\_aIX``S¥[\_``\_OF0aaG\_BBBBBBBB



@HWI-EAS443:3:75:592:975#0/1  
CAAAGCGTCTACGCTGCAGTCCTCGCTCACTGGGCACGGG  
+HWI-EAS443:3:75:592:975#0/1  
a[``a\_\_a\_`a^Z^`^\_ZU^^Y#Z`ZXY^KKR`aQUZ^N  
@HWI-EAS443:3:4:276:635#0/1  
CGTAGCGAAAGCAGGTACTGATCCAAAATGGAAGGCTTTG  
+HWI-EAS443:3:4:276:635#0/1  
ab`ababa`abaaaaUaa`a^\_\_aaa```a[a\_a\_Taaa\_  
@HWI-EAS443:3:45:923:332#0/1  
GAAAGCAGGCAAANCATTTGAATGGACGTCAATCCGACTC  
+HWI-EAS443:3:45:923:332#0/1  
abbaababbaab^D[`aa`baaaaa\_\_b]^aa`]U\_#Z\_X  
@HWI-EAS443:3:3:349:1958#0/1  
AGCAAAAGCAGGGAAGATAATCACTCAATGAGTGACATCA  
+HWI-EAS443:3:3:349:1958#0/1  
\_`baWaaU[JU[`WaI^]WaaYHT^`T^J\_aFPH#I]`ZG  
@HWI-EAS443:3:28:849:1541#0/1  
CAATTGCTCTCTCCACTTTTCATTTCTGCTCTGGAGGTAG  
+HWI-EAS443:3:28:849:1541#0/1  
aaba^`baZ\_aab``aaaa`aaaaa`]]^Z\_[\_aX]#X  
@HWI-EAS443:3:32:1696:2017#0/1  
GTCCCAATTGCTCTCTCCACTTTTCATTTCTGCTCTGGAG  
+HWI-EAS443:3:32:1696:2017#0/1  
aHZN#X\_a]VPNYaODTY#^ZX\_SUXaWLPVR^UWU\_^]B  
@HWI-EAS443:3:44:1382:837#0/1  
CCTTCACTACCTCCAGAGCAGAAATGAAAAGTGGAGAGAG  
+HWI-EAS443:3:44:1382:837#0/1  
`b^#^XU`]XWaa\_YPV\_aa^]#`a`bXY^]`Z`]G`V#^]  
@HWI-EAS443:3:74:778:211#0/1  
CAGAAATGAAAAGTGGAGAGAGCAATTGGGACAGAAATTT  
+HWI-EAS443:3:74:778:211#0/1  
\_[aaabb\_bbbba[\_\_\_I\_\_\_#T^T\_]^^bbb^HW`^Y#`\_a  
@HWI-EAS443:3:42:913:1857#0/1  
GAAAAAGGAGAGCAAGAGACAACATGACCAAGAAGATGGT  
+HWI-EAS443:3:42:913:1857#0/1  
`YYaa^`\_`aa^M\_bYa[`Zaa\_aX\_`]^\_\_a\_^U^#`^V  
@HWI-EAS443:3:67:750:650#0/1  
CTGGCTGTCAGTAAGTATGCTAGAGTCCCGGTTTTGTTTC  
+HWI-EAS443:3:67:750:650#0/1  
ab`^^aa````IYUUFRIX#TOW[#F#^`HFXaaQIH[`#  
@HWI-EAS443:3:34:1667:88#0/1  
GTCGCTGTCTGGCTGTCTAGTAAGTATGCTAGGGTCCCGGG  
+HWI-EAS443:3:34:1667:88#0/1  
aXQ`a]a]\_#LNVX`PQUVSSBBBBBBBBBBBBBBBBBBB  
@HWI-EAS443:3:1:624:96#0/1  
GTCGCTGTCTGGCTGTCTAGTAAGTATGCTAGAGGCCCGGT  
+HWI-EAS443:3:1:624:96#0/1  
a[Ua]^\_WYUY\_W#HTL#MRVVUWSUERWTTSBBBBBBB  
@HWI-EAS443:3:38:1454:1987#0/1  
GGTCGCTGTCTGGCTGTCTAGTAAGTATGCTAGNGTCCCGG

+HWI-EAS443:3:38:1454:1987#0/1  
aa]aaa\_a`a`\_\_^aa]^`Y`a^W`[^\_VYKDPOVVVPD  
@HWI-EAS443:3:86:1187:1157#0/1  
CGCTGTCTGGCTGTCAGTAAGTATGCTAGAGTCCCGGTTT  
+HWI-EAS443:3:86:1187:1157#0/1  
abaab\_\_`b\_a`b^aabV^bb`baa`b]]ba``bbaGaaa  
@HWI-EAS443:3:92:1284:1367#0/1  
CGCTGTCTGGCTGTCAGTAAGTATGCTAGAGTCCCGGTTT  
+HWI-EAS443:3:92:1284:1367#0/1  
aaaab[^R`\_a[a\_WJRNZUZaUa\_PQNZLQQ¥Ta\_GZ^`  
@HWI-EAS443:3:15:110:482#0/1  
GTCGCTGTCTGGCTGTCAGTAAGTATGCTAGAGTCCCGGT  
+HWI-EAS443:3:15:110:482#0/1  
`[bbaa¥R]aaaa\_ZTPYUN\_`]U¥V]¥ZX¥\_]LS¥ZTKV  
@HWI-EAS443:3:57:1770:1335#0/1  
TCGCTGTCTGGCTGTCAGTAAGTATGCTAGAGTCCCGGTT  
+HWI-EAS443:3:57:1770:1335#0/1  
aaaa]Z]^`^W`ZXFVW\_HOOX[[NNN^BBBBBBBBBBBB  
@HWI-EAS443:3:77:465:909#0/1  
GTCGCTGTCTGGCTGTCAGTAAGTATGCTAGAGTCCCGGT  
+HWI-EAS443:3:77:465:909#0/1  
a`\_`a^`[\_W[U^]^XTRZKXWDRYQYTL[WYN[L[ZFV  
@HWI-EAS443:3:9:1419:1610#0/1  
GGTCGCTGTCTGGCTGTCAGTAAGTATGCTAGAGTCCCGG  
+HWI-EAS443:3:9:1419:1610#0/1  
]aH\_bY`a¥abbaab`U`Ta^X`¥¥[]YZ[a`¥`[]NR¥D  
@HWI-EAS443:3:9:209:50#0/1  
ATGAAAAGAAGGCCAAACTGGCAAATGTCGTGAGAAAGAT  
+HWI-EAS443:3:9:209:50#0/1  
abbba`\_baaaabaaaaabaa\_`a`aaYJ[Za\_a\_]a\_\_  
@HWI-EAS443:3:81:1464:381#0/1  
TGTTGGTAATGAAACGAAAACGGGACTATAGAATACTTAC  
+HWI-EAS443:3:81:1464:381#0/1  
YZ]U[`\_a^MZ`b`Rb`^aYMa]WZVG^X]IZLZG\_X\_R  
@HWI-EAS443:3:76:1649:1700#0/1  
GGTCGCTGTCTGGCTGTCAGTAAGTATGCTATAGTCCCGT  
+HWI-EAS443:3:76:1649:1700#0/1  
a[WX\_[WaW\_^]YT[IMU^`BBBBBBBBBBBBBBBBBBBB  
@HWI-EAS443:3:68:1311:54#0/1  
CGGGGACCGGTTGGAATTTCTAGCATGGTGGAGGCCATGG  
+HWI-EAS443:3:68:1311:54#0/1  
]¥^`ZV^`a¥`^`^`a`\_a^`^`[]`[OaX[a`MFV¥`[  
@HWI-EAS443:3:17:1646:725#0/1  
CCTGGGATGATGATGGGAATGTTTAACATGCTAAGTACGG  
+HWI-EAS443:3:17:1646:725#0/1  
X¥``abYN^bb¥`U`\_W¥a\_`V]]X``bbb\_bab`H`\_]\_J  
@HWI-EAS443:3:73:1524:1778#0/1  
CTGGGATGATGATGGGCATGTTTAAGATGCTAAGTACGGT  
+HWI-EAS443:3:73:1524:1778#0/1  
X^a\_^T[^\_`¥[]WWab¥X\_SWaabVbb\_R\_aZYL[\_VP[

@HWI-EAS443:3:84:905:118#0/1  
TACTTAGCATGTTAAACATGCCATCATCATCCCAGGACT  
+HWI-EAS443:3:84:905:118#0/1  
aaaa\_aa\_aaa`a`¥\_a\_]`\_¥`a¥^^\_]Z^\_^]0^  
@HWI-EAS443:3:70:1674:111#0/1  
GTCCTGGGATGATGATGGGCATGTTTAAACATGCTAAGTAC  
+HWI-EAS443:3:70:1674:111#0/1  
`aa`bbbb`baabbabbba^`bbabaa\_^aaaXa\_\_a^aU  
@HWI-EAS443:3:91:650:548#0/1  
GTCCTGGGATGATGATGGGCATGTTTAAACATGCTAAGTAC  
+HWI-EAS443:3:91:650:548#0/1  
aUZX]`\_]GX\_UY\_W¥\_VXWVY^YYVX^UX]]WOUS]GVV  
@HWI-EAS443:3:14:1039:1173#0/1  
ACCTGGGATGATGATGGGCATGTTTAAACATGCTAAGTACG  
+HWI-EAS443:3:14:1039:1173#0/1  
aaaaaaaa`baab`a`\_\_aa]`a\_]`\_]\_^]`X`Y]  
@HWI-EAS443:3:20:847:841#0/1  
TCCTGGGATGATGATGGGCATGTTTAAACATGCTAAGTACG  
+HWI-EAS443:3:20:847:841#0/1  
`JW^b]V[]Ybbaaa[XZaabaaaa`¥V^a\_\_VVVZXa  
@HWI-EAS443:3:52:601:197#0/1  
CGTACTTAGCATGTTAAACATGCCATCATCATCCCAGGA  
+HWI-EAS443:3:52:601:197#0/1  
abZbbbbbbbabbbbbbb]abab\_a`abaabaaaa`aaa]  
@HWI-EAS443:3:23:1101:1549#0/1  
CTGGGATGATGATGGGCATGTTTAAACATGCTAAGTACGGT  
+HWI-EAS443:3:23:1101:1549#0/1  
abbb`baa\_bbabaa`babaab`aabababb`a`aa\_aX  
@HWI-EAS443:3:46:1318:86#0/1  
ACCGTACTTAGCATGTTAAACATGCCATCATCATCCCAG  
+HWI-EAS443:3:46:1318:86#0/1  
aaabU[[]`\_^[]a\_\_\_\_\_]\_\_[]¥^Z\_ZZ[TU^VVRV]  
@HWI-EAS443:3:47:21:1457#0/1  
CCTGGGATGATGATGGGCATGTTTAAACATGCTAAGTACGG  
+HWI-EAS443:3:47:21:1457#0/1  
aa`baaV¥`[a\_\_\_WOLY¥UaZ\_]VVRQ]¥S[`ZRNZSWN  
@HWI-EAS443:3:58:1508:1658#0/1  
CCTGGGATGATGATGGGCATGTTTAAACATGCTAAGTACGG  
+HWI-EAS443:3:58:1508:1658#0/1  
Saa[[]X\_a^a`\_bb[]X`^`]\_S^QZ^\_ZW\_\_\_¥]]QX\_  
@HWI-EAS443:3:59:511:193#0/1  
CCTGGGATGATGATGGGCATGTTTAAACATGCTAAGTACGG  
+HWI-EAS443:3:59:511:193#0/1  
`]Zaa[QZa`\_b`¥¥`\_¥\_Y\_R¥V[[]^S]a[¥^¥]WS^[Q  
@HWI-EAS443:3:62:1262:1109#0/1  
CTGGGATGATGATGGGCATGTTTAAACATGCTAAGTACGGT  
+HWI-EAS443:3:62:1262:1109#0/1  
ab`bbabbabbaabbaabbbabaa\_]abbabaaa\_a`aa[  
@HWI-EAS443:3:74:451:1354#0/1  
CTGGGATGATGATGGGCATGTTTAAACATGCTAAGTACGGT

+HWI-EAS443:3:74:451:1354#0/1  
abb`^Zb`abbaa``\_aaaa[aaaa\_aa`a\_`[]^a`][W  
@HWI-EAS443:3:81:269:1119#0/1  
CTGGGATGATGATGGGCATGTTTAAACATGCTAAGTACGGT  
+HWI-EAS443:3:81:269:1119#0/1  
abbaa]abaab^baXaaXaaaa`aa`aaa\_`\_WX]a`a\_X  
@HWI-EAS443:3:95:1411:860#0/1  
CTGGGATGATGATGGGCATGTTTAAACATGCTAAGTACGGT  
+HWI-EAS443:3:95:1411:860#0/1  
Vab`\_^bX¥[\_bb\_b\_S\_baabbb¥XaabY¥`b\_b^a`aP  
@HWI-EAS443:3:95:820:241#0/1  
CCTGGGATGATGATGGGCATGTTTAAACATGCTAAGTACGG  
+HWI-EAS443:3:95:820:241#0/1  
abbabb`abbbbbbbaababb`bbba\_bbb]baab`a]a\_  
@HWI-EAS443:3:87:296:693#0/1  
GTCTTATTCATATAGGACTTCTTTTTGCTCATGTTGATTC  
+HWI-EAS443:3:87:296:693#0/1  
a\_aaaaaaaa\_]Z```aaaa`aaa`a``a`\_[^`\_`^`  
@HWI-EAS443:3:4:239:1748#0/1  
ATCCGAATTCCTTTGGTCGCTGTCTGGCTGTCTAGTAAGTA  
+HWI-EAS443:3:4:239:1748#0/1  
a[a^`]aa`XU\_\_^`\_W`a¥¥ZT]\_]YZ¥^N¥NSG¥BBBB  
@HWI-EAS443:3:52:205:1941#0/1  
AATTGATGGCCATCCGAATTCCTTTGGTCGCTGTCTGGCT  
+HWI-EAS443:3:52:205:1941#0/1  
^`bbba`\_```aaaa[]aaaXG]`aaaS\_a]`a¥\_ZXRLV  
@HWI-EAS443:3:65:1114:1301#0/1  
ATTGATGGCCATCCGAATTCCTTTGGTCGCTGTCTGGCTG  
+HWI-EAS443:3:65:1114:1301#0/1  
^^]a]a¥ZZZaa[\_\_\_S\_^`]P¥NZa```TU\_L[]RSRX^  
@HWI-EAS443:3:63:755:186#0/1  
GTAGTTTTTTACTCTAGCTCTACGATGACAAAATGACCAT  
+HWI-EAS443:3:63:755:186#0/1  
a^`a`aaa\_]`a\_`^\_^``ZDV\_\_\_\_\_^^[a¥[U¥W  
@HWI-EAS443:3:35:1152:1398#0/1  
GAGGAGTCTTCGAGCTCTCGGACGAAAAGGCAACGAACCC  
+HWI-EAS443:3:35:1152:1398#0/1  
``¥`b^aaab^ab`aaaaaaaa`aa`a``\_aa`a^a``Qa  
@HWI-EAS443:3:34:716:1967#0/1  
CCCTGGGTTTTGCTTAATGCATCTTGGTTCAACTCCTTCA  
+HWI-EAS443:3:34:716:1967#0/1  
aba`^¥`P\_a```abbb\_S`a¥aa`a\_]`^bba\_\_^\_a]]F  
@HWI-EAS443:3:37:1593:61#0/1  
CGGAGAACAACCTGTATGGGTTTATTATAAAAGGNAGGT  
+HWI-EAS443:3:37:1593:61#0/1  
]U¥UISK]TZ¥a`\_`R\_aaZ\_\_\_^aa[UaGTXR^KDDIHQ  
@HWI-EAS443:3:65:247:301#0/1  
CTTTCTTTTGACAGAAGACTCGGCCTCAATCGTGCTCTC  
+HWI-EAS443:3:65:247:301#0/1  
¥a]aabb¥b\_\_\_]`abaababaab]O\_Z]]]K]WOZRVIXQ

@HWI-EAS443:3:46:1574:882#0/1  
TGTGGTAATGCCAGCCCATGGTCCAGCCAAAAGCGTGGAA  
+HWI-EAS443:3:46:1574:882#0/1  
\_\_T\_\_M\_``\_`^] ^ZWZ¥a]]^\_\_Z\_Z]^U¥ZZN\_Gaa\_\_  
@HWI-EAS443:3:85:152:1737#0/1  
CACGCTTTTGGCTGGACCATGGGCTGGCATTACCACAGCA  
+HWI-EAS443:3:85:152:1737#0/1  
\_XX\_baaUU¥Z^aZX]^\_0[TVW^GWZ¥U¥]]VXX` `[ZU  
@HWI-EAS443:3:26:1540:779#0/1  
GTGGTTTTTAAACAATTGACACTAATTGATGGCAATCCG  
+HWI-EAS443:3:26:1540:779#0/1  
a¥H\_ab`T`YQXH`T`\_`a[RNWYaY[XQVW\_a¥FEZ\_XKQ  
@HWI-EAS443:3:49:599:2024#0/1  
GTGGTTTTTAAACAATTGACACTAATTGATGGCAATCCG  
+HWI-EAS443:3:49:599:2024#0/1  
aWF^``aaaa\_`Va`a\_\_aYO¥VY¥¥¥]]Z[[[]ZRF¥[XRS  
@HWI-EAS443:3:18:1444:197#0/1  
GTCGTTTTTAAACAATTGACACTAATTGATGGCAATCCG  
+HWI-EAS443:3:18:1444:197#0/1  
\_X\_^[W^X\_UOL[^ZWXZ[Z¥S]`WYSUY[[WKDURUYW  
@HWI-EAS443:3:57:373:923#0/1  
CTAGTGGTCACTGTTCCCATCCTGTTGTATATGAGGCCCA  
+HWI-EAS443:3:57:373:923#0/1  
abb\_\_aa`aaa\_\_a]^`^^`\_\_a`aa^aaa\_]\_YUV¥\_a  
@HWI-EAS443:3:96:671:1981#0/1  
AACAAGGACAAACCCTCTGGAGCAAATAAACGATGCTGG  
+HWI-EAS443:3:96:671:1981#0/1  
aaTaTYYOaT]a\_\_a\_Y\_YZZa]Wa[¥¥]Y^W`\_OWZPBB  
@HWI-EAS443:3:73:1133:1256#0/1  
GTTCTGCACACTTTCCCAATAGAGCCTTCCTCCACTCCCC  
+HWI-EAS443:3:73:1133:1256#0/1  
a``aaaaaaaa^aa\_aa[[``XP¥Y^`]aZ` `V]Z\_^`]  
@HWI-EAS443:3:8:1482:1558#0/1  
AAATTTCTGGAGGGGCGAAAATGGACGGAGGACAAGGCGA  
+HWI-EAS443:3:8:1482:1558#0/1  
`ba`^[[Q\_aUa]]`GYSUX` `a¥¥[W^]`XREVQ¥OGXB  
@HWI-EAS443:3:80:528:59#0/1  
CAATGAATTGAGCAATCTTGCAAAAGGAGAGAAAGCTAAT  
+HWI-EAS443:3:80:528:59#0/1  
a``\_¥]aZ\_]¥[^a[\_\_aXa\_] ^S^YVXaa`\_¥]]Qa]^Z  
@HWI-EAS443:3:35:1491:893#0/1  
CATGGCCTCATATACAACAGGATGGGAACAGAGACAACA  
+HWI-EAS443:3:35:1491:893#0/1  
a`Y]aYSX\_Z¥U]^` `^`¥UXZ\_U¥Z¥N¥]FZXDD^VZ  
@HWI-EAS443:3:30:104:1615#0/1  
TCGCTGGATCAGACCGAGTGATGGTATCACCTCTGGCCGT  
+HWI-EAS443:3:30:104:1615#0/1  
`aa\_VWOTU\_\_W\_```U]SWVZRFWV¥GMTQ` `XT`BB  
@HWI-EAS443:3:17:1406:548#0/1  
CGGGTTCATTATAAAAAGGAAGGTCTCATTTGAGAAATGAT

+HWI-EAS443:3:17:1406:548#0/1  
abba^aaaaab^aa\_a\_a`^a^\_a\_aaaaa`a^\_`a`\_  
@HWI-EAS443:3:98:1412:1696#0/1  
CGAGGGGGAGGGAATACCGCTATATGATNTAATCAAATGC  
+HWI-EAS443:3:98:1412:1696#0/1  
Kb[bbbbbab]a¥bbaa[Wa\_baa[aaPDHbabWaab[bP  
@HWI-EAS443:3:39:214:919#0/1  
GGAGTTGAACCACGATGCATTAAGCAAAACCCAGGGATCA  
+HWI-EAS443:3:39:214:919#0/1  
aSOZZ]`¥Za^YR¥YZ`¥a^¥]V\_WDR¥\_\_TJFM^\_^U]M  
@HWI-EAS443:3:57:545:572#0/1  
CGTCTTTCTCTTTGACAGAAGACTCGGCCTCAATCATGCT  
+HWI-EAS443:3:57:545:572#0/1  
aa`ba^`b`aaaaba\_abaXOXaaaaa\_]HVGZZ[^WZ¥X  
@HWI-EAS443:3:63:200:362#0/1  
CTTTTTTGGACAGCATGGATAGCAAATAGAAGCATTGCCA  
+HWI-EAS443:3:63:200:362#0/1  
abaaaaaU[`aXH[aa¥W¥]IU]QY¥NL\_LS[¥RYPV^WX  
@HWI-EAS443:3:10:1306:318#0/1  
GTACTTTTTTGGACAGTATGGATAGCAAATAGCAACTTTG  
+HWI-EAS443:3:10:1306:318#0/1  
aU[\_\_\_[`\_TZSRBBBBBBBBBBBBBBBBBBBBBBBBBBB  
@HWI-EAS443:3:88:272:1230#0/1  
GTACTTTTTTGGACAGTATGGATAGCAAATAGCAGCATTG  
+HWI-EAS443:3:88:272:1230#0/1  
\_UWUZYU`]P]Z[SXYQ[`ZSPIO[Y[BBBBBBBBBBBBB  
@HWI-EAS443:3:63:1609:1370#0/1  
ATCCTGTTCCCTGTTCCATGGCTGTCTGGAGGGTCTCCTGT  
+HWI-EAS443:3:63:1609:1370#0/1  
a\_]^WZ¥`^^ab^XSXPX[`U]BBBBBBBBBBBBBBBBBBB  
@HWI-EAS443:3:2:456:1963#0/1  
GGTGTAGCCTGTTCCCTGTTCCATGGCTGTATGGAGGATGT  
+HWI-EAS443:3:2:456:1963#0/1  
`bVbX\_FRa`^VaXa`^WSPaaWV¥abBBBBBBBBBBBBB  
@HWI-EAS443:3:6:271:1210#0/1  
CTGTGAATCAGCAATCTGTTCAAGTAGCACACTCAA  
+HWI-EAS443:3:6:271:1210#0/1  
aaaababaaaaaaa`\_aa\_`a`aa\_]aa\_`^``\_\_\_\_`\_  
@HWI-EAS443:3:32:312:1863#0/1  
AGGTGCCACAGGGGAGACACACAAATTCAAACGAGAAGAT  
+HWI-EAS443:3:32:312:1863#0/1  
\_]WXTU]V]ULH[J[aWa\_]R^^SUU^]M]P]TNRKS]Y  
@HWI-EAS443:3:67:302:1346#0/1  
TGGAGAAGTTCGGTGGGAGACTTTGGTCCGCAAGCATGCG  
+HWI-EAS443:3:67:302:1346#0/1  
`bb[\_a`¥]aa[aUR[\_R\_`a]UV]U^\_a``[TF¥SY\_  
@HWI-EAS443:3:87:1555:543#0/1  
CTTTTTTGGACAGTATGGATAGCAAATTGTAGCATTGCCA  
+HWI-EAS443:3:87:1555:543#0/1  
]¥¥U¥^a\_ba]```a[aYa\_aV^`\_a^^\_bba^aa`L¥a

@HWI-EAS443:3:25:1165:705#0/1  
CAAATAGTAGCATTGCCATAACTACTTCAATGCATGTGTG  
+HWI-EAS443:3:25:1165:705#0/1  
^bbbbbb\_abbbaabababJ`bbbbbbb\_ababbbbbbbab  
@HWI-EAS443:3:90:1277:1983#0/1  
GACACTAATTGATGGCCATACGAATTCTTTTGGTCGCTGT  
+HWI-EAS443:3:90:1277:1983#0/1  
`\_^\_P]a`Z`b¥^a`¥]^\_QaaaTXZ¥`]^`\_\_RG]Y¥ZB  
@HWI-EAS443:3:77:1295:1617#0/1  
CAGTAAGTATGCTAGAGTCCCGTTTTCGTTTCAACACTAC  
+HWI-EAS443:3:77:1295:1617#0/1  
`b\_abababbbabbbb\_\_babbbbbbbaabbbbababbbb  
@HWI-EAS443:3:76:1682:1254#0/1  
CTGATGTGTACTTTTTAATTATGGCCATATGGTCCACAGT  
+HWI-EAS443:3:76:1682:1254#0/1  
aa`a`^bbabbbbbbbaaa`aaZGXX`^\_H\_] [  
@HWI-EAS443:3:45:830:934#0/1  
CCTCGTTTGAATTTGTGTGTCTCCCCTATGGCACCTATAT  
+HWI-EAS443:3:45:830:934#0/1  
aabaX¥ba`Waaab`a¥¥\_aaaXa\_`[Y`¥]TX^`\_^\_]`  
@HWI-EAS443:3:11:81:1325#0/1  
GAAGGCACGATCGGGTTCGTTGCCTTTTTGTCCGAGAGCT  
+HWI-EAS443:3:11:81:1325#0/1  
aXaaaa]baa¥[KJSM^¥XXXMTX[]a[BBBBBBBBBBBB  
@HWI-EAS443:3:80:1277:1858#0/1  
CACAAATTCAAACGAGAAGATCATTGAGATAAAGAAGCT  
+HWI-EAS443:3:80:1277:1858#0/1  
abb]M]aaba\_a\_`Yb`U^a]]`YYY¥R`F¥[a`^a]\_XS  
@HWI-EAS443:3:16:704:1117#0/1  
CAGGATGTGATTATGGAAGTTGTTTTCCCAATGAAGGGG  
+HWI-EAS443:3:16:704:1117#0/1  
`^abbabJbb[`aaab\_b[[[^TQY^U¥`GFQM]JLYBBB  
@HWI-EAS443:3:69:1078:263#0/1  
GAGAATTCATGCCTTGAAACAATGGAAGTCGTTCAAAAAA  
+HWI-EAS443:3:69:1078:263#0/1  
a`¥¥^aa¥`YJ[a\_a\_Sa`bX`a`^\_X¥RLWBBBBBBB  
@HWI-EAS443:3:96:1642:659#0/1  
TGAGAATTCATGCCTTGAAACAATGGAAGTCGTTCAAAAAA  
+HWI-EAS443:3:96:1642:659#0/1  
aa\_ZaKaaZb`VYa¥b`WRVPaJa]I\_]WLFFT\_HUY[U\_  
@HWI-EAS443:3:37:1682:967#0/1  
CATGCCTTGAAACAATGGAAGTCGTTCAAAAAACAAGGGT  
+HWI-EAS443:3:37:1682:967#0/1  
aaP[[abbbb^aaa\_b`^^adWaa^aaT\_Q`\_][PY\_aaaV  
@HWI-EAS443:3:3:1672:795#0/1  
AATTTCTAGCATGGGGGAGCCATGGTGTCTAGGGCCCGG  
+HWI-EAS443:3:3:1672:795#0/1  
aa\_X\_X\_aaW¥]aaSb`^^^UZ^]^M^¥KPX^WWSMG[B  
@HWI-EAS443:3:62:1366:341#0/1  
ATTTCTAGCATGGGGGAGCCATGGTGTCTAGGGCCCGGA

+HWI-EAS443:3:62:1366:341#0/1  
a^VZI\_¥UaaaZQDPaX`a]POSQ]UZWZ00[^^FK¥` `S  
@HWI-EAS443:3:36:881:902#0/1  
TTTCTGGACAGTATGGATAGCAAATAGTAGCATTGCCACA  
+HWI-EAS443:3:36:881:902#0/1  
aaZ0\_aba`aa¥\_aa`\_aY\_aa`^]S`\_aT]X[\_aSX]  
@HWI-EAS443:3:92:26:1709#0/1  
AAAGTACACATCAGGAAGACAAGAGAAGAACCCAGCACTC  
+HWI-EAS443:3:92:26:1709#0/1  
^¥¥V\_`abaVa\_a`\_]`T[^a^`a`¥\_]RZX¥F¥\_\_¥W\_  
@HWI-EAS443:3:65:233:1109#0/1  
GTGGATTGTCCCCGAAAATCCCACTGCATATGTATCCTAT  
+HWI-EAS443:3:65:233:1109#0/1  
RUYaSSa\_N]L`b\_Za¥U¥W^^MWW]HPY¥ZJ]`TV[]`^  
@HWI-EAS443:3:90:1397:2041#0/1  
ATTTCTAGCATGGCGGAGGCCATGGTGTCTAGGGGCCGGA  
+HWI-EAS443:3:90:1397:2041#0/1  
\_¥aXS0[W\_Q^VbJ\_U\_WHL¥ZY¥aFGKQJR[VWHX]a`^  
@HWI-EAS443:3:12:1081:2036#0/1  
ATTTCTAGCATGGTGGAGGCCATGGTGTCTAGGGGCCGGA  
+HWI-EAS443:3:12:1081:2036#0/1  
Z]ba]^`^Tba`[DUVTZN]VQ^^[TFJZWS\_`LEMN\_BB  
@HWI-EAS443:3:87:1190:79#0/1  
GGGGGACGTANTGTTGGGAATGAAACGAAAACGGGACTCT  
+HWI-EAS443:3:87:1190:79#0/1  
abaaa^\_bTJDRa]`a\_LP]`VO^`Z\_]\_XU`\_^XXYNU  
@HWI-EAS443:3:31:1595:280#0/1  
GGGGGACGTAGTGTGGTAATGAAACGAAAACGGGACTCT  
+HWI-EAS443:3:31:1595:280#0/1  
\_bbba\_abY¥¥R\_`aaa^¥\_\_Q^`\_NWN\_]\_LRZZ[HWTT  
@HWI-EAS443:3:33:947:1147#0/1  
GGGGGACGTAGTGTGGTAATGAAACGAAAACGGGACTCT  
+HWI-EAS443:3:33:947:1147#0/1  
a]a\_]`^NYW\_a¥a`¥N\_`aX^\_\_V]U]Z]SSMRWQV[\_  
@HWI-EAS443:3:40:343:1291#0/1  
GGGGGACGTAGTGTGGTAATGAAACGAAAACGGGACTCT  
+HWI-EAS443:3:40:343:1291#0/1  
aQ^]XRF^MYLNNWBBBBBBBBBBBBBBBBBBBBBBBB  
@HWI-EAS443:3:62:159:540#0/1  
GGGGGACGTAGTGTGGTAATGAAACGAAAACGGGACTCT  
+HWI-EAS443:3:62:159:540#0/1  
``X^M^\_V\_]Z^R]]^UW]]`U[`Y^ZPZUR[Z]RRX¥W  
@HWI-EAS443:3:64:1776:755#0/1  
GGGGGACGTAGTGTGGTAATGAAACGAAAACGGGACTCT  
+HWI-EAS443:3:64:1776:755#0/1  
ababaa`baa\_`aab`^R]^`aa]N^[aa^G[Y`¥Z[^  
@HWI-EAS443:3:69:928:1256#0/1  
GGGGGACGTAGTGTGGTAATGAAACGAAAACGGGACTCT  
+HWI-EAS443:3:69:928:1256#0/1  
`Y\_\_\_\_]\_\_PH`Q\_T\_\_[UT¥UN[Y\_YTGX\_\_TZ¥WHTN¥W



@HWI-EAS443:3:75:692:1059#0/1  
GGGGGACGTAGTGTGGTAATGAAACGAAAACGGGACTCT  
+HWI-EAS443:3:75:692:1059#0/1  
`aaba`aa\_aa[a\_aaa¥\_\_`X`\_a^^]a¥\_Z[\_\_\_[Z[\_¥  
@HWI-EAS443:3:77:415:768#0/1  
GGGGGACGTAGTGTGGTAATGAAACGAAAACGGGACTCT  
+HWI-EAS443:3:77:415:768#0/1  
aaaaa\_a\_Zaa\_a]`a[W^¥¥]\_`\_^\_X^\_] [¥W¥]\_]\_Y  
@HWI-EAS443:3:85:296:1786#0/1  
GGGGGACGTAGTGTGGTAATGAAACGAAAACGGGACTCT  
+HWI-EAS443:3:85:296:1786#0/1  
`^]Waabb\_`a]b\_aaaT`a^LXbb[]\_aaaLNU^`W^`]  
@HWI-EAS443:3:93:913:1765#0/1  
GGGGGACGTAGTGTGGTAATGAAACGAAAACGGGACTCT  
+HWI-EAS443:3:93:913:1765#0/1  
a]¥P]Y[^]a]N`^X]RNN\_R`H`RLOJV`^XZ`\_LSTVB  
@HWI-EAS443:3:95:1137:1241#0/1  
GGGGGACGTAGTGTGGTAATGAAACGAAAACGGGACTCT  
+HWI-EAS443:3:95:1137:1241#0/1  
abaab\_]aaa`\_baab]YaYaaaa]Q]aaaaVZ^` [HZUY  
@HWI-EAS443:3:95:1439:131#0/1  
GGGGGACGTAGTGTGGTAATGAAACGAAAACGGGACTCT  
+HWI-EAS443:3:95:1439:131#0/1  
aabba]RaYYa\_aP```VY\_a]Y[^TY]\_\_¥QYa`GPVIX  
@HWI-EAS443:3:9:165:19#0/1  
GGGGGACGTAGTGTGGTAATGAAACGAAAACGGGACTCT  
+HWI-EAS443:3:9:165:19#0/1  
abaab^\_a^]aT`V]aaPY[^\_TZ^PYT¥] []V^]XXXVY  
@HWI-EAS443:3:59:326:1810#0/1  
GTCTGCTGTAATTGGGTATCTCATTGCCATCATCCATTTC  
+HWI-EAS443:3:59:326:1810#0/1  
aWUY\_a`RY]Z\_SQVQSSQ[^] [ `ZV\_a¥X[NQT]BBBBB  
@HWI-EAS443:3:5:963:221#0/1  
GTGGAACGAAAATCAAAATCCTCGAATGTTCCCTGGCGATG  
+HWI-EAS443:3:5:963:221#0/1  
a]baa`^b^\_`\_\_\_aa`a\_\_V\_^]^^`\_Z\_ZSZ`\_0^^BB  
@HWI-EAS443:3:27:566:1562#0/1  
CCCCTTTTCGTTTTATTACCAACTACGTCCCCCAGCCC  
+HWI-EAS443:3:27:566:1562#0/1  
a^\_HPQXV¥RKM[ZV¥X^\_]UX\_PQNRHDT^^BBBBBBB  
@HWI-EAS443:3:32:1573:340#0/1  
GGGGCGGGGACGTAGTGTGGTAATGAAACGAAAACGGG  
+HWI-EAS443:3:32:1573:340#0/1  
\_` `abbbbbb[Ra` `]]R` ` \_T]RV` [aX^]J¥[V`OW`a`  
@HWI-EAS443:3:4:845:731#0/1  
GGGTGGGGGACGTAGTGTGGTAATGAAACGAAAACGGGA  
+HWI-EAS443:3:4:845:731#0/1  
`aaGYa[]`LV\_W[aWa¥X¥`RU^Y\_RV^SYGV^^SX^YB  
@HWI-EAS443:3:83:1736:1401#0/1  
GGGGGACGTAGTGTGGTAATGAAACGAAAACGGGAGTCT

+HWI-EAS443:3:83:1736:1401#0/1  
U\_\_W^b\_^U\_¥\_a]bbbWOZRF¥ZNP[^U`\_M\_bbUFWPV  
@HWI-EAS443:3:35:1121:734#0/1  
GTCNCGTTTTCGTTTCATTACCAACACTACGTCCCCCTGC  
+HWI-EAS443:3:35:1121:734#0/1  
aa¥D^baaaaabaaa]aaaaaaaa`a`aaa]`a]a¥VVa  
@HWI-EAS443:3:17:1666:580#0/1  
TGGGGGACGTAGTGTGGTAATGAAACGAAAACGGGACT  
+HWI-EAS443:3:17:1666:580#0/1  
[abaX\_b`IaXabQaT\_`^H¥\_Z]WaZG\_`JUQG\_S^[FU  
@HWI-EAS443:3:26:915:1209#0/1  
CGGGGACGTAGTGTGGTAATGAAACGAAAACGGGACTC  
+HWI-EAS443:3:26:915:1209#0/1  
aa\_bbb]baab¥`\_a`]I[¥¥a````\_`\_aaa]a\_a^PVF  
@HWI-EAS443:3:4:123:667#0/1  
CGGGGACGTAGTGTGGTAATGAAACGAAAACGGGACTC  
+HWI-EAS443:3:4:123:667#0/1  
a]bbb`]Ra\_``\_bIbabT\_[Saa¥¥U`YX``YSVRZU\_\_  
@HWI-EAS443:3:52:543:2017#0/1  
GTCCCCTTTTCGTTTCATTACCAACACTACGTCCCCCTGC  
+HWI-EAS443:3:52:543:2017#0/1  
]TQTNZW\_`]SUZ¥aaa`]b`R`a`YIKRGWXV][BBBBB  
@HWI-EAS443:3:59:866:615#0/1  
TGGGGACGTAGTGTGGTAATGAAACGAAAACGGGACTC  
+HWI-EAS443:3:59:866:615#0/1  
`aa\_Z\_XaaVV¥V`¥aa¥KW^[W\_a^`¥[[BBBBBBBBB  
@HWI-EAS443:3:66:259:1029#0/1  
GTCCCCTTTTCGTTTCATTACCAACACTACGTCCCCCTGC  
+HWI-EAS443:3:66:259:1029#0/1  
aaba`\_aaabab`aabbbaaa``baaaabbaabaa`a\_aa  
@HWI-EAS443:3:80:1043:1907#0/1  
CGGGGACGTAGTGTGGTAATGAAACGAAAACGGGACTC  
+HWI-EAS443:3:80:1043:1907#0/1  
a`b]\_aa[aSa\_Z`S`abNF`baaa[\_[aaaaZYa^\_ZZ[  
@HWI-EAS443:3:55:1729:857#0/1  
TTATGATTGGACATTAACAGAAATCAACAGGCAGCATGC  
+HWI-EAS443:3:55:1729:857#0/1  
¥]F[Ta[\_ZWTUS`Z]\_[N¥^S\_ZZ\_H[XP\_YY^]VFMVM  
@HWI-EAS443:3:17:1041:1547#0/1  
GATTGGACATTAACAGAAATCAACAGGCAGCAACTGCAT  
+HWI-EAS443:3:17:1041:1547#0/1  
QWRT[¥\_ZZaaZT`[¥`TZ^\_bb`^JFM¥]ZMU\_OGMHSN  
@HWI-EAS443:3:100:700:568#0/1  
GTCTGAGTTCTTCAATGGTGAACAGATTTTCATGATCTC  
+HWI-EAS443:3:100:700:568#0/1  
a`YY\_]ZWR][a\_[WUa^Ya`[¥\_`\_UVDU`¥\_^\_QRX^B  
@HWI-EAS443:3:71:1057:444#0/1  
GCCGTCTGAGTTCTTCAATGGTGAACAGATTTTCATGAT  
+HWI-EAS443:3:71:1057:444#0/1  
Ka\_¥Xaab]LFY\_aa[W[\_UM[¥\_TNTWYWIN[WY]ZJZ

@HWI-EAS443:3:40:939:130#0/1  
AAGCACCACATTCCCTTATACTGGAGATCCTCCGTACAGC  
+HWI-EAS443:3:40:939:130#0/1  
aYaa`]]a\_a¥`[\_¥]a`^b[\_b`¥¥PV\_[[^\LDKV[Z^S  
@HWI-EAS443:3:59:819:72#0/1  
AAGATTGGTCTTGTCTTTAGCCATTCCATGAGAGCATCAA  
+HWI-EAS443:3:59:819:72#0/1  
``b`abba`abab`abbaaaa\_a`aa\_aaa`P^\_XDK]YR  
@HWI-EAS443:3:8:1304:823#0/1  
ATGAAAATCAGAATCCTCGAATGTTACTGGCGATGATTAC  
+HWI-EAS443:3:8:1304:823#0/1  
Z[]TRW¥YTZO¥U\_]aYM[UW\_`SUI MYF¥^aYQJM^ZTB  
@HWI-EAS443:3:47:1421:971#0/1  
TGTAATCATCGCCAGGAACATTGAGGATTCTGATTTTCA  
+HWI-EAS443:3:47:1421:971#0/1  
Sa]SL\_`GS¥\_`¥`X0^XP\_Q\_`UaaOX¥bR[OV0Y]YV  
@HWI-EAS443:3:93:1591:682#0/1  
CATTGAGGATTCTGATTTTCATTCCACTTAGTGTTGTCC  
+HWI-EAS443:3:93:1591:682#0/1  
aa`aY]`ZY[\_`HYR¥a^aaJ`bbXGSGa^\_bSaWa^G\_B  
@HWI-EAS443:3:43:1187:1430#0/1  
GCCCAGACTGCTCAAGCTTTTCGCAGATGCTCCTAGCTAA  
+HWI-EAS443:3:43:1187:1430#0/1  
a`UOH¥\_Z[WH00XXYNXOX`W`][GTOLFVTLVW[WWTU  
@HWI-EAS443:3:13:1628:170#0/1  
CGCAGTTGCTGCCGTTGATTTCTGTTTAATGTCCAATCA  
+HWI-EAS443:3:13:1628:170#0/1  
[ba\_babb`bbaU\_b\_b[¥[a`^bb\_bbaaba``\_a\_aGa  
@HWI-EAS443:3:10:1015:727#0/1  
GTTCCGTTTTCGTTTTATTACCAACTACGTCCCTTGC  
+HWI-EAS443:3:10:1015:727#0/1  
aZ]NN\_S^OSX\_WWXNQYWZWZMHOZWXZOZZSXXXWX  
@HWI-EAS443:3:40:44:705#0/1  
GTTCCGTTTTCGTTTTATTACCAACTACGTCCCTTGC  
+HWI-EAS443:3:40:44:705#0/1  
a\_\_Yaa]^^\_]`U\_Z[OZ¥YZ]^YWZWROTVV^W¥WVYV[  
@HWI-EAS443:3:80:105:382#0/1  
CGTCTGAGTTCTTCAATGGTGAACAGATCTTCTTGATCC  
+HWI-EAS443:3:80:105:382#0/1  
ab^a`ab`aaaaa`bba^bZR\_Z]]\_^^a`\_\_¥`aX^\_  
@HWI-EAS443:3:36:123:913#0/1  
GTTCTTCAATGGTGAACAGATCTTCATGATCCCAGAGAA  
+HWI-EAS443:3:36:123:913#0/1  
a`a`\_aa`\_\_\_X`a`aaa`\_^^\_^^^`^`^`\_]`^MS\_S  
@HWI-EAS443:3:91:927:437#0/1  
GACAAGAGATATGGCCCAGCATTAAAGCATTAAATGAACTGA  
+HWI-EAS443:3:91:927:437#0/1  
aWUXJa`aa\_aa]NS¥^\_a^[Y]aW\_S]^\_\_\_\_]\_\_\_\_^S^^  
@HWI-EAS443:3:30:1462:1959#0/1  
AGATTGCTTAGTTCATTGATGCTTAATGCTGGGCCATATC

+HWI-EAS443:3:30:1462:1959#0/1  
aa^HZbaQVZMN¥`Z\_J\_X^][^PVY]NRW\_WTGT¥S\_Ga  
@HWI-EAS443:3:90:859:43#0/1  
TGCAAGATTGCTTAGTTCATTGATGCTTAATGCTGGGCCA  
+HWI-EAS443:3:90:859:43#0/1  
aaXTb`T^a`a\_H]^`^b`ZaaP`I^aZaabY[a\_ba^a  
@HWI-EAS443:3:43:530:276#0/1  
GAGCAATCTTGCAAAAGGGGAGAAAGCTAATGTGCTAATT  
+HWI-EAS443:3:43:530:276#0/1  
a]b[Y\_bb]bb`T]aabbbZabaa\_baab[a^¥a[aa\_a]  
@HWI-EAS443:3:77:311:1134#0/1  
CTTCATACCCTTCATGCACTCTTATTTTCAGTGTGGAG  
+HWI-EAS443:3:77:311:1134#0/1  
a\_]b\_U\_^[\`TPX\_`YHWbaaS¥]^a^¥¥QY\_aO[Za\_Y\_  
@HWI-EAS443:3:80:1158:1548#0/1  
AGGCAAACCATTTGAATGGATGTCAATCCGGCTGTACTTT  
+HWI-EAS443:3:80:1158:1548#0/1  
a[\`a`aY¥^]VWX\_]aUX]aHSMRSZVWIVVFT¥X\_U^  
@HWI-EAS443:3:14:554:368#0/1  
GCGAAAGCAGGCAAACCATTTGAATGGATGTCAATCCGGC  
+HWI-EAS443:3:14:554:368#0/1  
a]XFU\_\_Y\_aa\_]UPRWZw^XYOOZY¥WZPSSUNXUGFQ  
@HWI-EAS443:3:80:769:1689#0/1  
GCCGATTGACATCCATTCAAATGGTTTGCCTGCTTTTCGC  
+HWI-EAS443:3:80:769:1689#0/1  
YG]\_¥aZ¥¥]\_RR^W\_\_ZXZU¥[¥\_X\_XVXZZ\_\_]^]a\_Q  
@HWI-EAS443:3:75:252:1113#0/1  
CGGTCCTGTTCCCTGTTCCATGGCTGGAAGGAGGATCTCCA  
+HWI-EAS443:3:75:252:1113#0/1  
Z¥\_^ab\_¥WTba^WOQ`¥R\_]`Z]FGFN00X]PHNR]]K  
@HWI-EAS443:3:12:1721:221#0/1  
GGTGTATCCTGTTCCCTGTTCCATGGCTGTAAGGAGGATGT  
+HWI-EAS443:3:12:1721:221#0/1  
a\_TVYa`a^WOPZQ^MBBBBBBBBBBBBBBBBBBBBBBBB  
@HWI-EAS443:3:72:297:599#0/1  
CATTCTGTTTTTCATGCCTGATCAGTGGATTGGTGGGAGTA  
+HWI-EAS443:3:72:297:599#0/1  
aaba^`babaaaaaa`aa```[\`W``\_[V`¥BBBBBBBBB  
@HWI-EAS443:3:55:558:88#0/1  
CGTGGGGCAAGAATACTGACATCGGAGTCACAGCTGGCA  
+HWI-EAS443:3:55:558:88#0/1  
a\_S¥aaa`F`\_a[QZaR^a^R^[YG\_¥\_QVY¥¥\_PR¥BBB  
@HWI-EAS443:3:96:685:857#0/1  
ATATATTCAATATGGAGAGAATAAAAGAACTGAAAGATCT  
+HWI-EAS443:3:96:685:857#0/1  
aa`b\_aa`aaa`aaa\_a\_a`aa`]¥\_S\_\_`I`\_]`\_`  
@HWI-EAS443:3:24:1344:1524#0/1  
CGGTTGGAATTTCTAGCATGATGGAGGCCATGGTGTCTAG  
+HWI-EAS443:3:24:1344:1524#0/1  
]aaX`bbb]bbb`bbbababbaabbb]aWab``T]^a^a

@HWI-EAS443:3:62:1442:560#0/1  
CCGGTTGGAATTTCTAGCATGATGGAGGCCATGGTGTCTA  
+HWI-EAS443:3:62:1442:560#0/1  
abaa\_ab`b]bbbabbbaabbaaab`ba`abbb```]\_Xa  
@HWI-EAS443:3:74:1418:1008#0/1  
ACCGGGCCCTAGACACCATGGCCTCCATCATGCTAGAAAT  
+HWI-EAS443:3:74:1418:1008#0/1  
a\_^aa`a`^aaaaa^^aaa`]Y`]¥a`Ua\_\_\_\_`¥a`\_^]  
@HWI-EAS443:3:4:1213:435#0/1  
TAGGGGGGAATGAAAAGAAGGCCAAACTGGCAAATGTTGT  
+HWI-EAS443:3:4:1213:435#0/1  
UQU[ZY\_ROY¥^X^b^¥R\_¥XWX¥]UV\_ULIPRPLWRBBB  
@HWI-EAS443:3:49:1465:1077#0/1  
GGTGGAGGAAGGCTCTATTGGGAAAGTGTGCAGGACCTTA  
+HWI-EAS443:3:49:1465:1077#0/1  
a\_\_aaaaa`¥baaa\_a\_aab`a\_]aaV]\_aV]aWY^^`a\_  
@HWI-EAS443:3:39:729:571#0/1  
CATTAAGCATCAATGAGCTGAGCAACCTTGCAAAGGAGA  
+HWI-EAS443:3:39:729:571#0/1  
aaW[Q[V`\_^a[TLHZ]¥]^V^SGM`ULP[]PTQ\_W]Y  
@HWI-EAS443:3:12:133:578#0/1  
GGGGGAGGAGTTCTCTGAGATCATGGAGATCTGTTCCACC  
+HWI-EAS443:3:12:133:578#0/1  
T^]\_a^X^ab]]^¥a\_]¥]^ZZY\_Z[^\_X[TZZ^\_R  
@HWI-EAS443:3:86:59:344#0/1  
GTTTCTGTTAATGTCCAATCATAAGTCTGGCGACCTTGA  
+HWI-EAS443:3:86:59:344#0/1  
aaaaa\_b`^`aaa`a`X`]\_^`\_`Z]]\_[Z\_]\_[[]]]Z  
@HWI-EAS443:3:90:1302:766#0/1  
CACATATAGGTGCCATAGNGGAGACACACAAATTCAAACG  
+HWI-EAS443:3:90:1302:766#0/1  
a`bbbbbbabb]b]abbb[D^b¥`\_^b\_babb`b``abb`a  
@HWI-EAS443:3:56:114:658#0/1  
ATTAGAACACATCCAGAAACCGATTACCCCGAGGAGACT  
+HWI-EAS443:3:56:114:658#0/1  
abbb¥S^`\_]b¥]¥Xa]K\_a[`^]PRY`Z[V¥`P[^[X\_  
@HWI-EAS443:3:84:534:498#0/1  
AAACAATTGCACACTAATTGATGGCCAACCGAATTCCTTTT  
+HWI-EAS443:3:84:534:498#0/1  
J\_`ZVWq]`bab`\_\_U\_`\_\_Z^[¥¥`\_\_X¥\_Y^`\_V]``V  
@HWI-EAS443:3:64:902:517#0/1  
CATCAATGAACTGAGCAATCTTGCAAAGGAGAGATGGGA  
+HWI-EAS443:3:64:902:517#0/1  
ab^``bbb]bbaa`aababababaaaa`baab`baab`\_`\_  
@HWI-EAS443:3:96:593:1015#0/1  
AAGCATCAATGAACTGAGCAATCTTGCAAAGGAGAGATA  
+HWI-EAS443:3:96:593:1015#0/1  
WL\_¥X¥\_b¥¥]^a`^ba\_TaSM]\_]\_aaY]Wa`¥¥X`Z^]  
@HWI-EAS443:3:79:885:907#0/1  
AGCTAATGTGCTAATCGGGCAAGGGGACGTAGTGTGGTA

+HWI-EAS443:3:79:885:907#0/1  
aaaZ\_baa\_aaaYaaaaa`aaaaaa`^\_a^`a[`X\_a`X\_  
@HWI-EAS443:3:96:662:1102#0/1  
GTGCTAATCGGGCAAGGGGACGTAGTGTGGTAATGAAAC  
+HWI-EAS443:3:96:662:1102#0/1  
\_U`Z)``[FXW`\_N[aZ\_\_WV\_NW`a]a`[VXU][XQB BBB  
@HWI-EAS443:3:100:860:236#0/1  
CTCAGGCACTCCTTCCGTAGAAGGCCCTCTTTTCAAAGCG  
+HWI-EAS443:3:100:860:236#0/1  
aaaaaaaa`a\_]aa`\_a\_aa`]aaSVRa`\_a\_aY`\_[GLa  
@HWI-EAS443:3:94:1624:855#0/1  
ATCAAACCTTTGGTCAACATCATCATTCTCACTTCTCCCC  
+HWI-EAS443:3:94:1624:855#0/1  
aaZ¥RaabZSSSU¥`ababbb`YJ¥`\_`baaS¥S\_a\_ZFT  
@HWI-EAS443:3:35:1201:1784#0/1  
TCTCCTTTTCTATTCTGAGTGCGGGTTCTTCTTGTCTT  
+HWI-EAS443:3:35:1201:1784#0/1  
\_ZIV^`[`Y¥Wa[[]a¥WOMY`]UTNG¥XZR`¥X[LZL`¥Y  
@HWI-EAS443:3:68:675:506#0/1  
CTTCCTGATGTGCACTTTTTGATTATGGCCATATGGTCCA  
+HWI-EAS443:3:68:675:506#0/1  
a¥TZZ`Y[`Y`[GWUa]Yb¥]¥`abTELZYRGTYGWXW\_Z  
@HWI-EAS443:3:92:177:1893#0/1  
GGGCTCATATACAACAGGATGGGAACAGTGACCACCGAA  
+HWI-EAS443:3:92:177:1893#0/1  
T`^b¥Za[`] [T\_\_¥aYF[^P¥P¥^aaVQJUaX]SYFF¥X  
@HWI-EAS443:3:62:1681:1009#0/1  
GGCGATCTTAACCTTTGTCAATAGGGCAAACCAGCGACTGA  
+HWI-EAS443:3:62:1681:1009#0/1  
aaaaa\_UXGQa\_¥aaZ]^`aXZZ]^`V^aa[XZ]X`SUY]V  
@HWI-EAS443:3:31:177:1403#0/1  
ATAAACTTATTTTCGAAAAGGTTGAAAGTTGAAACATGG  
+HWI-EAS443:3:31:177:1403#0/1  
aaaa¥Ya`][^\_`a[ZR¥\_\_\_S\_^a`Y`]]\_`Y`\_`¥^^  
@HWI-EAS443:3:47:1050:201#0/1  
ATAAACTTATTTTCGAAAAGGTTGAAAGTTGAAACATGG  
+HWI-EAS443:3:47:1050:201#0/1  
abbba^`babbbb\_b`aaabbabb`a`ab^`aa¥a\_aaa\_  
@HWI-EAS443:3:64:161:150#0/1  
ATAAACTTATTTTCGAAAAGGTTGAAAGTTGAAACATGG  
+HWI-EAS443:3:64:161:150#0/1  
abb`a`a]J`a`a[¥`Z]Za`^^`\_Z^U`V^`^`\_  
@HWI-EAS443:3:9:728:1296#0/1  
ATAAACTTATTTTCGAAAAGGTTGAAAGTTGAAACATGG  
+HWI-EAS443:3:9:728:1296#0/1  
aYbaaa`^^aaa^SaS^a\_`WOU\_^\_¥^PMTWQX^Z`X]B  
@HWI-EAS443:3:70:525:1954#0/1  
TATAAACTTATTTTCGAAAAGGTTGAAAGTTGAAACATG  
+HWI-EAS443:3:70:525:1954#0/1  
ababbbbaaaabaaaaabaaa\_Waabaaaa^\_\_baa`b`\_`

@HWI-EAS443:3:78:509:1622#0/1  
TATAAACTTATTTGAAAAGGTTGAAAGTTGAAACATG  
+HWI-EAS443:3:78:509:1622#0/1  
ab¥^`\_aba\_Z^ba`]aa\_[]\_Yaaaa`Y`^a`baaaa\_\_  
@HWI-EAS443:3:7:753:613#0/1  
TATAAACTTATTTGAAAAGGTTGAAAGTTGAAACATG  
+HWI-EAS443:3:7:753:613#0/1  
`bb`a^`^`aa\_`Tq]a\_`a`Z][`¥`b\_\_a`]]`\_`a  
@HWI-EAS443:3:74:634:950#0/1  
TTTCAACCTTTCAACCTTTTCGAAATAAGTTTTATATACC  
+HWI-EAS443:3:74:634:950#0/1  
^\_W\_]`ab[WZ¥^\_^V^Z^W^UO¥TZ^Z`T`\_\_aa\_\_ZTT  
@HWI-EAS443:3:76:1084:2026#0/1  
GAATTTTAGGATTTGTGTTACGCTCACCGTGCCCAGCGA  
+HWI-EAS443:3:76:1084:2026#0/1  
TZ][`XTXX]]POTQYFMV\_aVNVX¥QU¥V\_VTX¥BBBB  
@HWI-EAS443:3:44:1206:1961#0/1  
ATTAGCTCATGTTTCAGTTTTGGCGGGTTCACTTTCAAAA  
+HWI-EAS443:3:44:1206:1961#0/1  
a^¥N¥TXV\_WIY\_`P[RWa`Z[HHR]]XX]OGOSVFU[^Y  
@HWI-EAS443:3:99:462:1927#0/1  
CTAGAGTCCAGTAATAGTTCATTCTCCCTTCTTGACCTCT  
+HWI-EAS443:3:99:462:1927#0/1  
aba^V\_`TaaaaV]bb[]baba\_[SZVSXVxbbaaSQ`K  
@HWI-EAS443:3:17:495:1054#0/1  
GTGGTAATGCCAGCCCATGGACCAGCNAAGCATGGAAT  
+HWI-EAS443:3:17:495:1054#0/1  
a]Y\_LaUV¥aaU¥`[[TZ\_[NS\_`SWDESY¥V¥\_Q¥¥YY¥  
@HWI-EAS443:3:63:1203:1771#0/1  
AATCAATGACCGAAATTTCTGGAGGGGAGAAAATGGAACG  
+HWI-EAS443:3:63:1203:1771#0/1  
ZYV]¥¥¥T¥]aaa`Yba\_QW\_¥X^baYDVP[\_a^[UYX`a  
@HWI-EAS443:3:25:1534:227#0/1  
CTGGGCATGAGCATGAACCAGTCTCGTGACATTTCTCGA  
+HWI-EAS443:3:25:1534:227#0/1  
`abbb\_bbbbbabbbbabbbb\_bab\_a\_Wbbbbaaa`ba  
@HWI-EAS443:3:100:1260:763#0/1  
TGGCTCTTCAATTGTTTATCAAAGACTACAGATAAACATA  
+HWI-EAS443:3:100:1260:763#0/1  
¥X¥Xb``]¥]`^X¥^IU]V^]`^SYMQFWaP^\_H^T^\_B  
@HWI-EAS443:3:77:1684:1679#0/1  
ATCTCATTGCCATCATCCACTTCATTCTGAGAGCGGGGTT  
+HWI-EAS443:3:77:1684:1679#0/1  
`aXYQ[b]\_VW[YP[[\_UXHZ[UL[QK¥WKUD[HW\_BBBB  
@HWI-EAS443:3:75:1751:1567#0/1  
CTCATTGCCATCATCCACTTCATTCTGAGAGCGGGGTTCT  
+HWI-EAS443:3:75:1751:1567#0/1  
][YQNP^[]\_aVXUHYaZS^PXa`aaaZ\_G\_a]`SaLQOY  
@HWI-EAS443:3:79:679:376#0/1  
GCGGGGTTCTTCTTCTTGTCTTCTGATGTGACTTCTTGA

+HWI-EAS443:3:79:679:376#0/1  
ababbbbabbbbabbbbaabbaaababbabaaabaabbab  
@HWI-EAS443:3:29:601:1786#0/1  
AGCAAATAGCAGCATTGCCACAACACTACTTCAATGCATGTG  
+HWI-EAS443:3:29:601:1786#0/1  
¥aa¥[¥]\_WFY`\_U¥Z[Y]\_U]`a``a\_X\_^[^aaa`XF0  
@HWI-EAS443:3:57:598:1980#0/1  
GCAAATAGCAGCATTGCCACAACACTACTTCAATGCATGTGT  
+HWI-EAS443:3:57:598:1980#0/1  
aaUNTHa]MYU]VZH[\_aRQ]TOJW][RPT`¥aRW\_^U`0  
@HWI-EAS443:3:62:1034:1918#0/1  
GCAGCATTGCCACAACACTACTTCAATGCATGTGTGAGGAAG  
+HWI-EAS443:3:62:1034:1918#0/1  
[D]aa\_aa`\_`a`````\_b\_a`\_a\_]V[``\_V`Xa^^^`\_]\_  
@HWI-EAS443:3:81:1008:1942#0/1  
CAAATAGCAGCATTGCCACAACACTACTTCAATGCATGTGTG  
+HWI-EAS443:3:81:1008:1942#0/1  
abb`]a[H¥ba`aa`Y`^a\_baab[\_Y]a¥S\_`]aa]^Xa  
@HWI-EAS443:3:43:1039:1840#0/1  
ATGGATAGCAAATAGCAGCATTGCCACAACACTACTTCAATG  
+HWI-EAS443:3:43:1039:1840#0/1  
[aa\_aa`a\_b^SZ]ZJ¥TKPWHU^aY]aa`\_aYa[\_`]Q\_  
@HWI-EAS443:3:64:312:1189#0/1  
ATGGATAGCAAATAGCAGCATTGCCACAACACTACTTCAATG  
+HWI-EAS443:3:64:312:1189#0/1  
[a`aa\_[aTab`Va[D[[]\_Ya[\_[¥[Y¥]\_a`^Y`\_]YY  
@HWI-EAS443:3:40:1533:150#0/1  
CAAATATATTCAATATGGAGAGAATAAAAGAACTGAGGGA  
+HWI-EAS443:3:40:1533:150#0/1  
abbababbbbbbabbababaaabbbabbbbbb`abbbaab  
@HWI-EAS443:3:13:222:1166#0/1  
AATATATTCAATATGGAGAGAATAAAAGAACTGAGGGATC  
+HWI-EAS443:3:13:222:1166#0/1  
\_`^Ya]UI\_`Z^a]YR[Y[^VT\_]Z]T^\_`a\_aZaX`[U0  
@HWI-EAS443:3:16:795:730#0/1  
CGCCGAACACTGTTGGTTCNATTGGAAAATGAAAGAACTTTG  
+HWI-EAS443:3:16:795:730#0/1  
aaaaa\_aaaa]aaaZ\_ZDZ`aa\_]\_\_a\_a\_\_a`\_]`^^\_  
@HWI-EAS443:3:4:66:238#0/1  
CGCCGAACACTGTTGGTTCNATTGGAAAATGAAAGAACTTTG  
+HWI-EAS443:3:4:66:238#0/1  
abbaba]abbabab\_a\_babb]a```aaa`a`¥`a¥``a\_  
@HWI-EAS443:3:23:355:1190#0/1  
GCCATTACTTATGAAAACAACACTTGGGTAAACCAGACAT  
+HWI-EAS443:3:23:355:1190#0/1  
]S^IYSW\_R¥TY`]]S\_a]YZ^¥YXX[TR]X`RW[SHY[¥  
@HWI-EAS443:3:68:163:1238#0/1  
AAGGAGTTGAACCAAGATGCATTAAGCAAAACCCAGGGGA  
+HWI-EAS443:3:68:163:1238#0/1  
\_`^Y\_]Qa`aaa^`a[\_^\_\_`Y^Z[\_^\_\_\_\_T]¥\_^Y¥¥S



@HWI-EAS443:3:1:1566:1074#0/1  
CTGGGTTTTGCTTAATGCATCTTGGTTCAACTACTTCCTC  
+HWI-EAS443:3:1:1566:1074#0/1  
VYba\_FW`\_`[]ba^PbW`bWb^]X¥Wia`\_¥Gga]S^aB  
@HWI-EAS443:3:33:1498:1219#0/1  
CTGGGTTTTGCTTAATGCATCTTGGTTCAACTACTTCCTC  
+HWI-EAS443:3:33:1498:1219#0/1  
^`R`b^¥`ab¥`a\_\_Zab^a`^][\_Z`\_\_```NW]^UaV  
@HWI-EAS443:3:7:192:263#0/1  
ATGGGCCTCATATACAACAGGATGGGAACAGTGACCGCAG  
+HWI-EAS443:3:7:192:263#0/1  
aaaVV^`ba^]b`VW^\_\_\_`R`^^\_\_\_WXKRUTUQBBBB  
@HWI-EAS443:3:11:142:1246#0/1  
CGCCTTCTACGGAAGGAGTGCCTGAGTCCATGAGGAAGGA  
+HWI-EAS443:3:11:142:1246#0/1  
^`]¥TTXR`TQV[U\_Z]`¥`a\_aa]`[\_`\_]\_KBBBBBBB  
@HWI-EAS443:3:51:68:375#0/1  
GGGCCTTCTACGGAAGGAGTGCCTGAGTCCATGTGGGAGA  
+HWI-EAS443:3:51:68:375#0/1  
abbbabaabaab]aaab\_aYa¥Yaa[a\_aY^^aY^aaX`X  
@HWI-EAS443:3:70:1362:918#0/1  
CTTTAAATACGGTTTTGAAAAGGGGCCTTCTACGGAAGGA  
+HWI-EAS443:3:70:1362:918#0/1  
abbbababbbaa`bbabbbb`^aabaaaabbaaba`aaa`  
@HWI-EAS443:3:31:342:1938#0/1  
CAAATATATTCAACATGGAGAGANTAAAAGAACTGAGAGA  
+HWI-EAS443:3:31:342:1938#0/1  
aaa^^aR[¥U\_R¥JNY^TPZMUMDV\_[YYI]WPXYZR^QZ  
@HWI-EAS443:3:25:1061:529#0/1  
CAAATATATTCAACATGGAGAGAATAAAAAGAACTGAGAGA  
+HWI-EAS443:3:25:1061:529#0/1  
¥a`YV`aX^ZZa\_PS¥`baZ\_Wab]aT`b¥OFRQ¥a[^`  
@HWI-EAS443:3:3:595:1241#0/1  
GTGATGAGAATGGGAGACCTTCACTATCTCCAGAGCAGAA  
+HWI-EAS443:3:3:595:1241#0/1  
`^V[aa]¥^Z[]`\_ZFSZWTLZUYVEKUTW¥]]]LHUZW  
@HWI-EAS443:3:76:1022:1368#0/1  
ATGAGAATGGGAGACCTTCACTATCTCCAGAGCAGAAATG  
+HWI-EAS443:3:76:1022:1368#0/1  
aaaa`\_aaa\_aaa`a`a\_a`\_a[¥^\_\_aa\_\_^^\_\_^^\_`  
@HWI-EAS443:3:16:953:1826#0/1  
GACGTAGTGTGGTAATGAAACGAAAACGGGACTCAGCAT  
+HWI-EAS443:3:16:953:1826#0/1  
aaa\_\_bb\_b[a`aS¥a`¥aab`[\_\_abW\_X¥aRXIU[0``  
@HWI-EAS443:3:29:591:1946#0/1  
CTTGGCGAAAATATGGCACCAGAAAAAGTAGACTTTGATG  
+HWI-EAS443:3:29:591:1946#0/1  
aaX`]D¥V¥R\_Y^`WQ\_`L[]Y^Ra¥¥Z^a\_^\_]\_[X]0  
@HWI-EAS443:3:31:789:1845#0/1  
CTCGGCGAAAATATGGCACCAGAAAAAGTAGACTTTGATG

+HWI-EAS443:3:31:789:1845#0/1  
a[ZX^I]\_`a`K[\_\_\_\_]X[]aY[WK]UUa\_[\_\_MR^\_VY  
@HWI-EAS443:3:1:321:517#0/1  
ACTCGGCGAAAATATGGCACCAGAAAAAGTAGACTTTGAT  
+HWI-EAS443:3:1:321:517#0/1  
¥\_bab`Ja\_`a¥`¥ab¥\_aS[Z`^aaa¥YV[\_a\_a\_SVBB  
@HWI-EAS443:3:35:127:1910#0/1  
ACTCGGCGAAAATATGGCACCAGAAAAAGTAGACTTTGAT  
+HWI-EAS443:3:35:127:1910#0/1  
\_ba`^ZHXb`bba\_Vaaba\_\_b^b¥baa\_Ga\_`ba[\_\_\_dW  
@HWI-EAS443:3:61:329:877#0/1  
ATTCGACACTAATTGATGGCCATCCGGATTCTTTTGGTCCG  
+HWI-EAS443:3:61:329:877#0/1  
a]aaab^`¥]]\_¥Z\_]Z`X]^UMX][XFV[QU^\_`YPHRQ  
@HWI-EAS443:3:26:829:328#0/1  
CGCTAAGAGTCTCGTTTTCGTTTCATTACCAACTACTACGT  
+HWI-EAS443:3:26:829:328#0/1  
ababb`b`a¥abab]bbbab`b`abaaba\_aaYa`aa`\_]  
@HWI-EAS443:3:20:49:473#0/1  
GAGTTGGTGCATAGGGTTCAATCGCTGTTTGGCCCTATTG  
+HWI-EAS443:3:20:49:473#0/1  
a`^`^\_`^ZV`^]`^aa\_R^aYLX\_¥]¥¥]U]XY\_¥¥¥¥¥\_\_  
@HWI-EAS443:3:55:1250:182#0/1  
CTCGGCGGAGCCGATCAAGGAATGGAGCATCACCCAATCC  
+HWI-EAS443:3:55:1250:182#0/1  
ab`aaabb[aXY`[RZZRW[LV]S[BBBBBBBBBBBBBBB  
@HWI-EAS443:3:62:1046:1105#0/1  
GGCCAATCGAACAAGTTTGCTGCAATATGCACACATTTGG  
+HWI-EAS443:3:62:1046:1105#0/1  
abb`bababbabbbb\_ab`a\_abbbbaabbab`¥aa\_ba  
@HWI-EAS443:3:12:220:725#0/1  
CGCCATCATCCACTTCATTCTGAGTGTGGGGTTCTTCTCT  
+HWI-EAS443:3:12:220:725#0/1  
aaabaabbabaabaa`aab`b[T¥]`^b^aa^aaaa``a  
@HWI-EAS443:3:84:873:430#0/1  
CACGCCATCATCCACTTCATTCTGAGTGCAGGGTTCTTCTCT  
+HWI-EAS443:3:84:873:430#0/1  
\_\_`ZUaa`b`ZR[¥]\_\_X¥b^aaa`\_XZ¥b\_\_aS`aaaa  
@HWI-EAS443:3:44:1356:898#0/1  
GAGAAGAACCCCGCACTCAGAATGAAGTGGATGATGGCGG  
+HWI-EAS443:3:44:1356:898#0/1  
a]ba^Z^a^`\_ab\_a``aaa]¥ab[TaYaa][a\_\_a`^`W  
@HWI-EAS443:3:27:867:214#0/1  
CGCCATCATCCACTTCATTCTGAGTGCAGGGTTCTTCTCT  
+HWI-EAS443:3:27:867:214#0/1  
\_\_\_aababaaaa`aa``b`aaaXa^`^`a`a[^^^\_\_[Z`  
@HWI-EAS443:3:32:605:322#0/1  
CGCCATCATCCACTTCATTCTGAGTGCAGGGTTCTTCTCT  
+HWI-EAS443:3:32:605:322#0/1  
`U`YQ]a\_a`b`aabbaaa`^TUa`a`a\_aaV`Tb\_baa`

@HWI-EAS443:3:60:1100:1788#0/1  
CGCCATCATCCACTTCATTCTGAGTGCGGGGTTCTTCTCT  
+HWI-EAS443:3:60:1100:1788#0/1  
aa`bbbabab`aa\_aabaaaaa\_]a\_aaa\_\_\_\_\_]]Za\_a  
@HWI-EAS443:3:87:1018:170#0/1  
CGCCATCATCCACTTCATTCTGAGTGCGGGGTTCTTCTCT  
+HWI-EAS443:3:87:1018:170#0/1  
U¥[\_[\_W\_XVU[a`]^`\_aabbaZ`^¥bbaY¥UU]R\_] ]  
@HWI-EAS443:3:95:392:1041#0/1  
CGCCATCATCCACTTCATTCTGAGTGCGGGGTTCTTCTCT  
+HWI-EAS443:3:95:392:1041#0/1  
`bbbbbaab`baaaaaaaaa^ab`a\_a]aaa^\_\_aa`Sa¥a  
@HWI-EAS443:3:98:1546:374#0/1  
CGCCATCATCCACTTCATTCTGAGTGCGGGGTTCTTCTCT  
+HWI-EAS443:3:98:1546:374#0/1  
`bYbbbab`^Y`\_bb^abbaaaaa\_`aa¥ab[a`b\_RaWa  
@HWI-EAS443:3:83:1384:97#0/1  
AAGCAAACCTTGCAAAAGCGAGAAAGCTAATGTGCTAATT  
+HWI-EAS443:3:83:1384:97#0/1  
[U[OW]0aZ]bPV\_aWa\_SYWa\_aTb\_]IG\_aa`\_aaY\_a  
@HWI-EAS443:3:28:1052:701#0/1  
GCTTTGCGGACAATGCTTCAATCCAATGATCGTCGAGCT  
+HWI-EAS443:3:28:1052:701#0/1  
\_U]`YZGUT]a^\_^\_aYW`M¥P¥RRQPI[[[WUNRSS^[S  
@HWI-EAS443:3:29:901:488#0/1  
TTGCCGTCTGAGTTTTTCAATGGTGAACAGATATTCATG  
+HWI-EAS443:3:29:901:488#0/1  
`¥a`aa\_XW`b`W¥DI`aT^]W\_SVG^[MXaX[FP^[BBB  
@HWI-EAS443:3:83:1102:230#0/1  
CCGGCTTCCAAGATCCAAGTTCCAGTTCCAGTTGTCC  
+HWI-EAS443:3:83:1102:230#0/1  
aab\_`a\_¥Z`W`a[Z\_a`a^VaVDY`a\_]VV]\_¥T]`VOO  
@HWI-EAS443:3:42:1706:1161#0/1  
ATGGATAGCAAATAGTAGCACTGCCACAACACTTCAATG  
+HWI-EAS443:3:42:1706:1161#0/1  
\_``¥bbbb`aZ^\_Z\_^aZ```aaa``ba`aba`bb^`a`  
@HWI-EAS443:3:69:1430:1085#0/1  
GTTCCATGGCTGTATGGTGGATCTCCAGTATAAGGGAATG  
+HWI-EAS443:3:69:1430:1085#0/1  
a\_aaa`aaaaaaQYWJ]R``RY\_^]VSYZ[S^\_^G]^]  
@HWI-EAS443:3:33:895:1510#0/1  
AAACGAAAACGAGACTCTAGCATACTTACTGAGAGCCAGA  
+HWI-EAS443:3:33:895:1510#0/1  
aaba^babb\_\_a]a\_aa\_a\_]`a^`\_a^a`\_G[RZ^`X\_  
@HWI-EAS443:3:74:545:1992#0/1  
GCTGTCAAGTATGCTAGAGTCTCGTTTTTCGTTTCATT  
+HWI-EAS443:3:74:545:1992#0/1  
aa\_aT`TT]\_a`WZYaaWaKa\_]W]EDM\_¥]HF[\_WYWN  
@HWI-EAS443:3:77:632:1030#0/1  
AATATGGAGNGAATAAAAGAACTGAGAGACCTAATGTCGC

+HWI-EAS443:3:77:632:1030#0/1  
\_a\_aa\_¥`^D¥b`b]\_Vaa]``abbaY`¥W]aaaaa\_`]^  
@HWI-EAS443:3:34:1748:1153#0/1  
GAGATACGGCCAGCATTAAAGCATCAATGAACTGAGCAAT  
+HWI-EAS443:3:34:1748:1153#0/1  
¥R\_WW\_RUab`ZSZ`a¥Y`Z]¥]aa\_¥\_]`UZNS\_Z\_RJ  
@HWI-EAS443:3:16:103:1518#0/1  
GGAGCCACTCAAATGGGAAAAATACTGTGTTCTAGAAATA  
+HWI-EAS443:3:16:103:1518#0/1  
a\_SQa`¥^[^aa\_RJXYZ]YY\_]\_]W[U]X]^\_\_UXW^Y[  
@HWI-EAS443:3:62:470:511#0/1  
CTGGAGCCACACAAATGGGAAAAATACTGTGTTCTAGAAA  
+HWI-EAS443:3:62:470:511#0/1  
abbbbb`aabababbbbabaaaaa\_baa`aaaa`a\_Y  
@HWI-EAS443:3:16:1439:1241#0/1  
ATTTCTAGAACACAGTATTTTTCCCATTTGTGTGGCTCCA  
+HWI-EAS443:3:16:1439:1241#0/1  
`¥aaa`^a\_ba`Yba\_ba`abb]]``^a[aaa`ZY[aQaX  
@HWI-EAS443:3:23:1105:2035#0/1  
GGAGCCACACAAATGGGAAAAATACTGTGTTCTAGAAATA  
+HWI-EAS443:3:23:1105:2035#0/1  
\_¥`b¥`Z]TP[bbba`[^\_^`[\_[^]Q¥Za]X`aaY¥^a  
@HWI-EAS443:3:47:1383:1839#0/1  
ATTTCTAGAACACAGTATTTTTCCCATTTGTGTGGCTCCA  
+HWI-EAS443:3:47:1383:1839#0/1  
`baabb`aaaa`baWa`baaa]\_\_`aV\_a^`Y`U]ZZU]  
@HWI-EAS443:3:52:239:1508#0/1  
ATTTCTAGAACACAGTATTTTTCCCATTTGTGTGGCTCCA  
+HWI-EAS443:3:52:239:1508#0/1  
`aaaabaaaaaaba\_abaaaa`a`aaa\_\_a``\_\_a``  
@HWI-EAS443:3:70:1009:573#0/1  
GAGCCACACAAATGGGAAAAATACTGTGTTCTAGAAATAG  
+HWI-EAS443:3:70:1009:573#0/1  
abaaaaa^\_^¥\_``]aa\_\_aa\_aa^a^`a`aa`\_\_^`X  
@HWI-EAS443:3:87:1727:680#0/1  
GAGCCACACAAATGGGAAAAATACTGTGTTCTAGAAATAG  
+HWI-EAS443:3:87:1727:680#0/1  
]`ab`bbb\_aabbb¥abb`^¥`^baabaa`bb```abab  
@HWI-EAS443:3:76:1138:987#0/1  
AAACGATCTGAGCAATCTTGCAAAGGAGAGAAAGCTAAT  
+HWI-EAS443:3:76:1138:987#0/1  
abaaa`aaaa`aa\_a`a\_a\_a\_`[\_^\_``\_``a]\_^`  
@HWI-EAS443:3:8:1744:1087#0/1  
CACGATCGGGTTCGTTGCCTTTTCGTCCGAGATCTCGAAG  
+HWI-EAS443:3:8:1744:1087#0/1  
]bb]]Ua]baVb`bXbaXGbabaGa¥\_HRXBBBBBBBBBB  
@HWI-EAS443:3:42:844:80#0/1  
TGGGGGCAATGAAAAGAAGGCCAAACTGGCAAATATTGTG  
+HWI-EAS443:3:42:844:80#0/1  
ab^^aaa]\_aaUM[[\_[^`^\_]\_^\_aa]^`^Y\_Y\_]aZa

@HWI-EAS443:3:94:659:1598#0/1  
TGGGGGCAATGAAAAGAAGGCCAAACTGGCAAATGGTGTG  
+HWI-EAS443:3:94:659:1598#0/1  
X¥ab¥\_]I\_^¥U¥a]QZ¥aYYUbWTXX\_HR]ba¥XGUbYX  
@HWI-EAS443:3:46:330:2022#0/1  
TGGGGGCAATGAAAAGAAGGCCAAACTGGCAAATGTTGTG  
+HWI-EAS443:3:46:330:2022#0/1  
T`bbba`^`^bbT^^TN]RJ[a[[a[¥VbM`U[\_`^R]b[a  
@HWI-EAS443:3:51:417:1240#0/1  
ATCAGACCGAGTGATGGTATCACCTCTGGCCGTGAGAGGA  
+HWI-EAS443:3:51:417:1240#0/1  
\_babbbbaaba\_baa`b]aa`a`\_aa`aa\_\_bZa\_`\_\_`^  
@HWI-EAS443:3:9:700:473#0/1  
ATCAGACCGAGTGATGGTATCACCTCTGGCCGTGAGAGGA  
+HWI-EAS443:3:9:700:473#0/1  
`a`abaaabbaabaaaa¥aaaa^\_\_]a\_b\_\_aY`¥a`aaR  
@HWI-EAS443:3:37:433:1447#0/1  
CACGGCCAGAGGTGATACCATCACTCGGTGTGATCCAGCA  
+HWI-EAS443:3:37:433:1447#0/1  
ab`\_Z`ba[a^\_UT]Y`Yaa^^^^[^YUPMQRNS^Y¥S[U  
@HWI-EAS443:3:34:1572:1851#0/1  
CTGGATCAGACCGAGTGATGGTATCACCTCTGGCCGTGAG  
+HWI-EAS443:3:34:1572:1851#0/1  
a`bbabbb`[[`bWaa\_baUa¥]aU\_`a[¥]¥¥\_SVU¥  
@HWI-EAS443:3:17:1612:998#0/1  
GCTGGATCAGACCGAGTGATGGTATCACCTCTGGCCGTGA  
+HWI-EAS443:3:17:1612:998#0/1  
^R^a`aa`a^W]\_a]¥\_aTV[¥G\_aY¥^¥ZZT]VRR\_KPB  
@HWI-EAS443:3:14:1340:1839#0/1  
AAGACAGGAGATATGGCCCAGCATTAAAGCATCAATGAACT  
+HWI-EAS443:3:14:1340:1839#0/1  
`ab```bbabaaaa[a`a`\_^SW\_\_aa^Z^`\_\_^``\_`Y\_  
@HWI-EAS443:3:42:1530:286#0/1  
GAAGACAGGAGATATGGCCCAGCATTAAAGCATCAATGAAC  
+HWI-EAS443:3:42:1530:286#0/1  
a^Z\_aaXE¥V`]a`aa`[[[\_]\_]\_^W¥]]YTZ]S^Z  
@HWI-EAS443:3:57:811:317#0/1  
AAATTGCATCCTACTCTGTTCCGGTGGAGCAGCAGCAAAG  
+HWI-EAS443:3:57:811:317#0/1  
`XY\_ab``Xa\_\_aaaa]a\_^`\_[`]\_`Z^¥¥\_`Z\_V]`  
@HWI-EAS443:3:55:258:1832#0/1  
CATATTCTTTCATTGCATTTTCCGCAAGCTCGACGATCAT  
+HWI-EAS443:3:55:258:1832#0/1  
a[b\_ababb\_ababbbGbbb`aa\_aaaSa\_a]`\_a^\_Z¥^  
@HWI-EAS443:3:25:1140:1696#0/1  
CCCTGGGTTTTGCTTAATGCATCTTGGTTCAACTCGCTCC  
+HWI-EAS443:3:25:1140:1696#0/1  
``ba`^`aab\_W¥aa\_QYX¥]aV¥X]^U\_\_XbaabU^F^]  
@HWI-EAS443:3:69:1340:584#0/1  
GCAGCGTTTTGCTCCAGAGGGTTTGTCTTGTTCATTCCT

+HWI-EAS443:3:69:1340:584#0/1  
aW#a[`R^`\_`\_]`¥`aV```Vaaa\_\_\_a\_a^a[U]^[[  
@HWI-EAS443:3:83:866:31#0/1  
CAATTATTGCCTCAGCAATTGACTGCTCGTCTCGCCCACT  
+HWI-EAS443:3:83:866:31#0/1  
a`Q]Z^Z`aZ\_WZ^a¥^VPZ]WS[ZWRRO^^YBBBBBBBB  
@HWI-EAS443:3:98:232:2019#0/1  
ATCAATGAACTGAGCAATCTTGCAAAAGGAGAGAAGGCAG  
+HWI-EAS443:3:98:232:2019#0/1  
^Xa[`bU\_W¥Y^H¥][bY[U`\_aab`TNT¥\_XSWYFMX\_\_  
@HWI-EAS443:3:52:1453:1432#0/1  
ACCAACTACTCGTCCCCTTGCCCTATTAGCACATTAGCTT  
+HWI-EAS443:3:52:1453:1432#0/1  
aa\_\_\_\_\_a^)`\_^^¥]¥]OU\_YXX[\_]¥]VGZG^]O]YH]V  
@HWI-EAS443:3:65:383:1411#0/1  
GACGCTGTCTGGCTGTCAGTAAGTATGCTAGAGTCCCGTT  
+HWI-EAS443:3:65:383:1411#0/1  
¥F[ab[\_`b``ab¥Z^\_RPY]ZZJX[]][V[NRVLa^XVFO  
@HWI-EAS443:3:81:1636:1404#0/1  
GTACTTTTTTGACAGTATGGATAGTAAATAGTAGCATTG  
+HWI-EAS443:3:81:1636:1404#0/1  
a[S^Z^\_\_V[`TSF]\_\_Yb\_U¥TUDN¥\_^VMKQ[QOZZB  
@HWI-EAS443:3:85:1645:1138#0/1  
CATCAGGAAGACAAGAGAAGAACCCAGCACTCAGAATGAA  
+HWI-EAS443:3:85:1645:1138#0/1  
`\_Z^a]ba[SMaaabbb[ZW¥bP`bIbSaa]]aabUbb\_T  
@HWI-EAS443:3:99:898:1727#0/1  
GAAGAACCCAGCACTCAGAATGAAGTGGATGATGGCAATG  
+HWI-EAS443:3:99:898:1727#0/1  
Y¥X^bSS¥ZDY`¥[[^G^\_aba\_]ZH\_¥X[a[I[``RQU]  
@HWI-EAS443:3:36:1767:774#0/1  
GGGGCGGGGAATCTTCGAGCTCTCGGAAGAAAAGGCAACG  
+HWI-EAS443:3:36:1767:774#0/1  
`^`¥X`¥¥PPFRXBBBBBBBBBBBBBBBBBBBBBBBBBBB  
@HWI-EAS443:3:48:912:259#0/1  
CAAATATATTCAATATGGAGAGAATAAAGGAACTGAGAGA  
+HWI-EAS443:3:48:912:259#0/1  
\_LY\_¥KQS]W^a¥`QYa[Q^¥^a\_`POQGZJLF¥Q[MP[W  
@HWI-EAS443:3:8:375:2030#0/1  
ATTTCTAGCATGGCGGAGGCCATGGTGTCTAGGGCTCGGA  
+HWI-EAS443:3:8:375:2030#0/1  
]ZWV]a^X¥a^\_TGSW`Xa\_BBBBBBBBBBBBBBBBBBBBBB  
@HWI-EAS443:3:22:1580:33#0/1  
GAAAACAAGACTTGGGTAAACCAGACATATGTAAACATCA  
+HWI-EAS443:3:22:1580:33#0/1  
aYY¥`Z]WLMR]P][¥SY^\_[Z[ZYY[PV^`Z]]XOV^WX  
@HWI-EAS443:3:46:262:180#0/1  
GAAAACAACACTTGGGTAAACCAGACATACGTAAACATCA  
+HWI-EAS443:3:46:262:180#0/1  
aa`aaaaa\_a\_```\_\_U`a\_]a\_^\_^\_a\_]`]]^`\_]

@HWI-EAS443:3:22:176:1869#0/1  
TATGAAAACAACACTTGGGTAAACCAGACATATGTTAACA  
+HWI-EAS443:3:22:176:1869#0/1  
\_¥`a`\_V`SSa`a]\_a`a¥\_¥\_b`\_^\_bb`b^^]`b\_`]  
@HWI-EAS443:3:2:753:202#0/1  
TATGAAAACAACACTTGGGTAAACCAGACATATGTTAACA  
+HWI-EAS443:3:2:753:202#0/1  
aaabaaaa\_a`[^a\_`a^]``a^Y``\_]\_^\_^\_]\_\_^[^  
@HWI-EAS443:3:33:26:528#0/1  
TATGAAAACAACACTTGGGTAAACCAGACATATGTTAACA  
+HWI-EAS443:3:33:26:528#0/1  
Z¥]`\_Z`^^[Y\_`aaaaV\_`^[^a¥]\_V[P[aaa¥aaZa^  
@HWI-EAS443:3:44:14:1116#0/1  
TATGAAAACAACACTTGGGTAAACCAGACATATGTTAACA  
+HWI-EAS443:3:44:14:1116#0/1  
aabba\_S¥\_b`aS¥¥]RY[Wa]ZR\_Z]`\_]\_[]a¥¥\_`^^`  
@HWI-EAS443:3:4:203:436#0/1  
TATGAAAACAACACTTGGGTAAACCAGACATATGTTAACA  
+HWI-EAS443:3:4:203:436#0/1  
¥b¥[[\_`Ybab^X\_TQa[^a¥`UV``aa^^aaXSYa\_a  
@HWI-EAS443:3:66:1051:752#0/1  
TATGAAAACAACACTTGGGTAAACCAGACATATGTTAACA  
+HWI-EAS443:3:66:1051:752#0/1  
aaabaa``aaaaaaaa`W`aa`aaa\_a``U`a\_`a`aa  
@HWI-EAS443:3:68:1364:1647#0/1  
TATGAAAACAACACTTGGGTAAACCAGACATATGTTAACA  
+HWI-EAS443:3:68:1364:1647#0/1  
\_a\_abbaaa\_baaZ\_ab`aW`\_baa`aa`aaaa`a`aa\_a  
@HWI-EAS443:3:68:639:1802#0/1  
AANCAACACTTGGGTAAACCAGACATATGTTAACATCAGC  
+HWI-EAS443:3:68:639:1802#0/1  
a]DT`a^W[RLPZSTV`\_aR¥Z[X^Z\_WP¥\_Y[LXXP`S[  
@HWI-EAS443:3:90:56:1862#0/1  
TATGAAAACAACACTTGGGTAAACCAGACATATGTTAACA  
+HWI-EAS443:3:90:56:1862#0/1  
U\_RZ\_YRUa\_WZ^``¥\_]Paaa^¥Z^aaaTa[QYX`\_aa  
@HWI-EAS443:3:92:964:109#0/1  
TATGAAAACAACACTTGGGTAAACCAGACATATGTTAACA  
+HWI-EAS443:3:92:964:109#0/1  
a¥\_`\_\_XXX]`[RITaa^WLZ¥VTJ`WSOaWTT\_[XTM[^  
@HWI-EAS443:3:93:1541:303#0/1  
TATGAAAACAACACTTGGGTAAACCAGACATATGTTAACA  
+HWI-EAS443:3:93:1541:303#0/1  
[Y\_\_^``]b``]\_`aaa`aIaaa\_U¥a\_\_Y`````\_\_\_\_]V`  
@HWI-EAS443:3:99:1778:1190#0/1  
TATGAAAACAACACTTGGGTAAACCAGACATATGTTAACA  
+HWI-EAS443:3:99:1778:1190#0/1  
U¥¥^bb¥`ab\_Z]PW\_J^¥Vbbb``baa`]a]`baaZaV\_  
@HWI-EAS443:3:13:133:661#0/1  
ATGAAAACAACACTTGGGTAAACCAGACATATGTTAACAT

+HWI-EAS443:3:13:133:661#0/1  
a^a^aaa]W[^ [\_[^[^Z\_^Z\_\_`\_]^^¥`^`X[[^]]]  
@HWI-EAS443:3:18:733:1313#0/1  
ATGAAAACAACACTTGGGTAAACCAGACATATGTTAACAT  
+HWI-EAS443:3:18:733:1313#0/1  
aa\_a^aaa¥`^`]^[]a[U`¥a` ``^`\_\_a`a^]¥^^\_`^  
@HWI-EAS443:3:19:1591:1828#0/1  
ATGAAAACAACACTTGGGTAAACCAGACATATGTTAACAT  
+HWI-EAS443:3:19:1591:1828#0/1  
aabaaab\_a` `aVaaa\_[]aaa^Va` `^` `aa\_` `^^` \_`  
@HWI-EAS443:3:23:498:1201#0/1  
ATGAAAACAACACTTGGGTAAACCAGACATATGTTAACAT  
+HWI-EAS443:3:23:498:1201#0/1  
a` `aabaa`a^^\_` `ZOM[aa` ` \_` `^`a` `\_\_` ` \_`a[\_\_\_  
@HWI-EAS443:3:28:85:326#0/1  
ATGAAAACAACACTTGGGTAAACCAGACATATGTTAACAT  
+HWI-EAS443:3:28:85:326#0/1  
aaaaaabaaaa`aa]Y^`Xaa`aa` ``aaaaaa\_`^V¥`a\_  
@HWI-EAS443:3:32:655:213#0/1  
ATGAAAACAACACTTGGGTAAACCAGACATATGTTAACAT  
+HWI-EAS443:3:32:655:213#0/1  
aaa[b` \_`abaaa^aa\_aZWaaaaa` \_\_]`^a\_a]` `X¥]^  
@HWI-EAS443:3:62:669:205#0/1  
ATGAAAACAACACTTGGGTAAACCAGACATATGTTAACAT  
+HWI-EAS443:3:62:669:205#0/1  
a` `T` [\_`\_aXX`0\_¥a`ZGa\_\_ST\_RP` `^[^Z\_X]^XY\_U  
@HWI-EAS443:3:69:1188:870#0/1  
ATGAAAACAACACTTGGGTAAACCAGACATATGTTAACAT  
+HWI-EAS443:3:69:1188:870#0/1  
ab`baabaaaaa`aaa^Waaa`\_a` `aaa\_\_a\_\_a^\_a\_  
@HWI-EAS443:3:75:1033:752#0/1  
ATGAAAACAACACTTGGGTAAACCAGACATATGTTAACAT  
+HWI-EAS443:3:75:1033:752#0/1  
aY\_¥abb`a¥NS¥a]a` `WZ\_[RIa\_]W` [X`aa\_]aS`a  
@HWI-EAS443:3:80:996:1089#0/1  
ATGAAAACAACACTTGGGTAAACCAGACATATGTTAACAT  
+HWI-EAS443:3:80:996:1089#0/1  
aa¥]babaaaa`a`^aPaP\_` ``]]\_`aa`^a\_` ``]^]^  
@HWI-EAS443:3:81:770:1483#0/1  
ATGAAAACAACACTTGGGTAAACCAGACATATGTTAACAT  
+HWI-EAS443:3:81:770:1483#0/1  
T]¥` \_`\_US`^^` `¥\_NGOW]a^aa`\_aaaa`¥HT^`\_[]a^  
@HWI-EAS443:3:82:478:289#0/1  
ATGAAAACAACACTTGGGTAAACCAGACATATGTTAACAT  
+HWI-EAS443:3:82:478:289#0/1  
\_` `abab^X`bab^ab\_a\_aaa^ab`aaa\_aaa\_` [\_Q\_`  
@HWI-EAS443:3:84:504:905#0/1  
ATGAAAACAACACTTGGGTAAACCAGACATATGTTAACAT  
+HWI-EAS443:3:84:504:905#0/1  
aab\_]a¥b\_\_]aaaaa\_N^]` `S]aab\_a\_aZ[a¥aa\_



@HWI-EAS443:3:8:1751:41#0/1  
ATGAAAACAACACTTGGGTAAACCAGACATATGTTAACAT  
+HWI-EAS443:3:8:1751:41#0/1  
¥a\_VbbaabYP^SXW\_\_\_0Z`LP]^N`[]a¥SX\_SWB  
@HWI-EAS443:3:90:311:1343#0/1  
ATGAAAACAACACTTGGGTAAACCAGACATATGTTAACAT  
+HWI-EAS443:3:90:311:1343#0/1  
a\_XVYR\_\_UU`¥Qa]UTU0]\_^]]`\_aaaa]WQ^^a`[]  
@HWI-EAS443:3:91:187:49#0/1  
ATGAAAACAACACTTGGGTAAACCAGACATATGTTAACAT  
+HWI-EAS443:3:91:187:49#0/1  
aaW¥V]abba^TY\_T^^X]S]]Y^]ONQ[TU^XRTXVYQ  
@HWI-EAS443:3:93:105:1573#0/1  
ATGAAAACAACACTTGGGTAAACCAGACATATGTTAACAT  
+HWI-EAS443:3:93:105:1573#0/1  
a`aaaaaaaa\_\_\_]^W\_VaV`a`^`\_\_^^`]]`\_X`U  
@HWI-EAS443:3:14:352:1719#0/1  
TGAAAACAACACTTGGGTAAACCAGACATATGTTAACATC  
+HWI-EAS443:3:14:352:1719#0/1  
abbbbabbbbaaaa\_^ababa`^baaaaa^\_baab\_\_\_  
@HWI-EAS443:3:39:998:124#0/1  
TGAAAACAACACTTGGGTAAACCAGACATATGTTAACATC  
+HWI-EAS443:3:39:998:124#0/1  
ab`]aaaaa`\_\_\_`aZ\_\_\_\_\_`^`^Z^Y]Y]]^\_]YX  
@HWI-EAS443:3:66:401:901#0/1  
TGAAAACAACACTTGGGTAAACCAGACATATGTTAACATC  
+HWI-EAS443:3:66:401:901#0/1  
a[``ab\_\_¥aaaa\_[R^\_aa]a`\_aa]^a``\_^TY``¥  
@HWI-EAS443:3:100:1555:411#0/1  
ACAACACTTGGGTAAACCAGACATATGTTAACATCAGCAA  
+HWI-EAS443:3:100:1555:411#0/1  
¥K`aaa`aaYVXa`^]baa[aa`Z`^\_aa0`[Y\_\_ZBB  
@HWI-EAS443:3:16:1622:1874#0/1  
AAACAACACTTGGGTAAACCAGACATATGTTAACATCAGC  
+HWI-EAS443:3:16:1622:1874#0/1  
`b`^baaa[b``]\_S\_aY¥G\_ab^a]a`X`aYZ¥^W\_\_\_  
@HWI-EAS443:3:17:1194:1205#0/1  
AAACAACACTTGGGTAAACCAGACATATGTTAACATCAGC  
+HWI-EAS443:3:17:1194:1205#0/1  
[^`aaaa`a`X`aG\_\_]P]\_\_^]\_\_`]X`^P^¥¥^\_S  
@HWI-EAS443:3:23:1453:904#0/1  
GAAAACAACACTTGGGTAAACCAGACATATGTTAACATCA  
+HWI-EAS443:3:23:1453:904#0/1  
aababab`a`aaaa^`aaW\_a^`\_`aaba`a`\_Yaa[a  
@HWI-EAS443:3:24:1583:1129#0/1  
GAAAACAACACTTGGGTAAACCAGACATATGTTAACATCA  
+HWI-EAS443:3:24:1583:1129#0/1  
`babbbabab`bba\_a\_bbb`]aabbbbbbabaabbbbaa  
@HWI-EAS443:3:24:81:292#0/1  
GCTGATGTTAACATATGTCTGGTTTACCCAAGTGTGTTT

+HWI-EAS443:3:24:81:292#0/1  
aa`a`a\_a]aaaa]``]\_\_adWa\_Z\_\_^Z^`U`[^\_W[^  
@HWI-EAS443:3:26:661:936#0/1  
AAAACAACACTTGGGTAAACCAGACATATGTTAACATCAG  
+HWI-EAS443:3:26:661:936#0/1  
aa`baba`aaaa`]b`a`a`aaaaa`\_a\_```\_a`  
@HWI-EAS443:3:28:1048:1405#0/1  
AACAACACTTGGGTAAACCAGACATATGTTAACATCAGCA  
+HWI-EAS443:3:28:1048:1405#0/1  
\_`b^a^aaaa^UUbaaaaaaaa`\_]^S`aa`a``aa¥a  
@HWI-EAS443:3:28:1209:1102#0/1  
GAAAACAACACTTGGGTAAACCAGACATATGTTAACATCA  
+HWI-EAS443:3:28:1209:1102#0/1  
`babbb\_babbabba`bbba\_baaaaabbaabbaaaaa  
@HWI-EAS443:3:30:323:967#0/1  
GCTGATGTTAACATATGTCTGGTTTACCCAAGTGTGTTT  
+HWI-EAS443:3:30:323:967#0/1  
aa`\_TY^]`Z\_]Va^\_¥^`¥¥XR]W\_aa\_S[TMZU^\_V^^  
@HWI-EAS443:3:36:192:1868#0/1  
AACAACACTTGGGTAAACCAGACATATGTTAACATCAGCA  
+HWI-EAS443:3:36:192:1868#0/1  
aaaTGV]`^^WU0`a[aa^^\_a\_]¥XZI¥W\_Wa[XS[  
@HWI-EAS443:3:36:412:291#0/1  
TGCTGATGTTAACATATGTCTGGTTTACCCAAGTGTGTT  
+HWI-EAS443:3:36:412:291#0/1  
YU¥`a[Z[`b\_\_[R^`V[[]]^a`Y^`X`]H^]QU00W[¥  
@HWI-EAS443:3:37:614:1488#0/1  
AAACAACACTTGGGTAAACCAGACATATGTTAACATCAGC  
+HWI-EAS443:3:37:614:1488#0/1  
abbaaaaa`\_\_\_\_\_]U\_aaaaa`a\_\_`]YVT^Z`a\_]\_]¥  
@HWI-EAS443:3:38:757:1217#0/1  
TGCTGATGTTAACATATGTCTGGTTTACCCAAGTGTGTT  
+HWI-EAS443:3:38:757:1217#0/1  
\_baa^JaaVaQZ`¥¥babQab`aQb`aaa`^`ZV\_Y\_`^\_  
@HWI-EAS443:3:40:1099:212#0/1  
GCTGATGTTAACATATGTCTGGTTTACCCAAGTGTGTTT  
+HWI-EAS443:3:40:1099:212#0/1  
a```^^\_]aZ^\_^]\_]`[^^\_\_X]^¥Y^VQ¥X¥V¥¥YY^  
@HWI-EAS443:3:45:1046:1060#0/1  
GAAAACAACACTTGGGTAAACCAGACATATGTTAACATCA  
+HWI-EAS443:3:45:1046:1060#0/1  
aab`[^a^ab`a^[]`a]`^`aaa\_a`aaa^^``\_\_`aa  
@HWI-EAS443:3:45:509:1905#0/1  
AAAACAACACTTGGGTAAACCAGACATATGTTAACATCAG  
+HWI-EAS443:3:45:509:1905#0/1  
aYVa\_aaa]ZYYZR¥^\_]aa]Z`¥0`aaa]^X``^a^MZY  
@HWI-EAS443:3:48:741:740#0/1  
AACAACACTTGGGTAAACCAGACATATGTTAACATCAGC  
+HWI-EAS443:3:48:741:740#0/1  
aaaaaaaaaab]aa[aa`\_a^\_a``\_¥\_b^¥a\_]aQab[

@HWI-EAS443:3:49:986:932#0/1  
GCTGATGTTAACATATGTCTGGTTTACCCAAGTGTGTTT  
+HWI-EAS443:3:49:986:932#0/1  
aa`aaa`a¥`¥\_\_T[`VY[aaXW^\_]WUX]`V^\_V^  
@HWI-EAS443:3:50:1196:1006#0/1  
AACAACTTGGGTAAACCAGACATATGTTAACATCAGCA  
+HWI-EAS443:3:50:1196:1006#0/1  
a`bbbb`bbbbba`bba¥bbaabaab\_ba]a`baaaaa  
@HWI-EAS443:3:51:1280:1126#0/1  
ACAACACTTGGGTAAACCAGACATATGTTAACATCAGCAA  
+HWI-EAS443:3:51:1280:1126#0/1  
aXWaSa[QY]P]XaTaaaZIY]\_\_T¥aT\_`\_^aaZ`RGa\_  
@HWI-EAS443:3:53:347:1961#0/1  
GCTGATGTTAACATATGTCTGGTTTACCCAAGTGTGTTT  
+HWI-EAS443:3:53:347:1961#0/1  
X\_¥]¥¥\_H^\_\_Xbb^^^^¥\_`b`^\_\_a\_XVG^Q`¥aab  
@HWI-EAS443:3:5:345:712#0/1  
GCTGATGTTAACATATGTCTGGTTTACCCAAGTGTGTTT  
+HWI-EAS443:3:5:345:712#0/1  
abbb`baaba`baabaaba\_aa`]a]^`aNaa`aa  
@HWI-EAS443:3:61:649:336#0/1  
TGCTGATGTTAACATATGTCTGGTTTACCCAAGTGTGTT  
+HWI-EAS443:3:61:649:336#0/1  
aa`aa\_\_aa`¥^`\_`\_`aY^V¥¥P[\_`\_`[WVYYQ^Z]^[]  
@HWI-EAS443:3:63:1367:358#0/1  
GCTGATGTTAACATATGTCTGGTTTACCCAAGTGTGTTT  
+HWI-EAS443:3:63:1367:358#0/1  
T\_\_b`\_]¥\_WT`\_`\_`b\_Y¥`\_`]V\_\_^[]\_aY`baab\_ab  
@HWI-EAS443:3:66:1181:248#0/1  
AAACAACACTTGGGTAAACCAGACATATGTTAACATCAGC  
+HWI-EAS443:3:66:1181:248#0/1  
ab`bbba`aaa]aaSab`a`aaa`\_\_aa\_aa\_]`[\_a^  
@HWI-EAS443:3:66:275:580#0/1  
GAAAACAACACTTGGGTAAACCAGACATATGTTAACATCA  
+HWI-EAS443:3:66:275:580#0/1  
]]H^`^`\_\_aa`\_`\_`]YWT^aa`a`¥`aWW]a¥\_¥SQZ^`\_`  
@HWI-EAS443:3:67:211:1603#0/1  
ACAACACTTGGGTAAACCAGACATATGTTAACATCAGCAA  
+HWI-EAS443:3:67:211:1603#0/1  
abbV`b`^^^`^Zbaa\_a\_\_`aL^`\_]`a\_[-^`\_\_Yaa  
@HWI-EAS443:3:73:397:1796#0/1  
CTGATGTTAACATATGTCTGGTTTACCCAAGTGTGTTT  
+HWI-EAS443:3:73:397:1796#0/1  
aaX]\_¥PV¥^`\_`\_`aa¥a`\_`\_`^`aa`a^\_]Za¥^¥V\_\_\_\_  
@HWI-EAS443:3:7:111:1403#0/1  
AAACAACACTTGGGTAAACCAGACATATGTTAACATCAGC  
+HWI-EAS443:3:7:111:1403#0/1  
a]aaa^a`Xa^aa]Z\_\_\_\_a`\_`^`\_\_a\_¥]`a^¥^`\_`Y\_  
@HWI-EAS443:3:81:725:761#0/1  
TGCTGATGTTAACATATGTCTGGTTTACCCAAGTGTGTT

+HWI-EAS443:3:81:725:761#0/1  
a`ab^V\_\_aaaa`aa^^b\_aa`a^aaa\_aa\_\_bXa]aa\_\_  
@HWI-EAS443:3:82:1001:1325#0/1  
GAAAACAACACTTGGGTAAACCAGACATATGTTAACATCA  
+HWI-EAS443:3:82:1001:1325#0/1  
]abbaabbbaabb^PYZbabYba`\_`ababa\_a\_aaaaaa  
@HWI-EAS443:3:83:303:1177#0/1  
AAACAACACTTGGGTAAACCAGACATATGTTAACATCAGC  
+HWI-EAS443:3:83:303:1177#0/1  
a`\_\_V\_\_a`\_] [Y¥Za]`\_a¥`\_^`\_\_Y^^¥^`\_Z^  
@HWI-EAS443:3:88:53:1455#0/1  
ACAACACTTGGGTAAACCAGACATATGTTAACATCAGCAA  
+HWI-EAS443:3:88:53:1455#0/1  
ababaaaa`a`V`]aaaa\_\_a¥a`\_]`\_`a\_^]]Z\_\_\_\_  
@HWI-EAS443:3:93:1374:130#0/1  
GAAAACAACACTTGGGTAAACCAGACATATGTTAACATCA  
+HWI-EAS443:3:93:1374:130#0/1  
aX\_aXU¥^`\_]\_OV`^S^VZXRZ[SZ¥^S\_S\_^ZXZ]WZ  
@HWI-EAS443:3:93:765:786#0/1  
GAAAACAACACTTGGGTAAACCAGACATATGTTAACATCA  
+HWI-EAS443:3:93:765:786#0/1  
`bbbbabbabaabbaa^aaaa`aaaaaaaaaaaaa`ba¥a  
@HWI-EAS443:3:94:1528:784#0/1  
GAAAACAACACTTGGGTAAACCAGACATATGTTAACATCA  
+HWI-EAS443:3:94:1528:784#0/1  
]\_^Maaa`]a[a¥U\_aMZ]a[`a\_a`a`a`b¥a`\_P^¥¥a  
@HWI-EAS443:3:90:293:979#0/1  
CACAGCCCCATTGTCTGGGCCAGAAATCCAATTGTTAGC  
+HWI-EAS443:3:90:293:979#0/1  
\_Z`ba`bb`bbbb\_aa^b\_Z`a`a`aaa`a`a\_aa]a^`\_  
@HWI-EAS443:3:72:1045:1116#0/1  
GCTCTGGATGCTGAACAAAACCTCCCGCTATATCCTGACCA  
+HWI-EAS443:3:72:1045:1116#0/1  
^aab`aaaa`\_aa\_bb`aa`\_a\_aZa`\_ba\_^\_\_`a`Z  
@HWI-EAS443:3:24:443:166#0/1  
CTTCCCTCATGGACTCAGGCACTCCTTCCTTAGAAGGACC  
+HWI-EAS443:3:24:443:166#0/1  
]OZ\_\_a`aU]`\_]Z`\_ROYR`¥VYBBBBBBBBBBBBBBB  
@HWI-EAS443:3:69:822:713#0/1  
CTTTCTCCTTGACAGAAGACTCGGCCTCAACCATGCTCTC  
+HWI-EAS443:3:69:822:713#0/1  
abb]aUa]]]TM]\_]X`XUS¥¥UOSZJT\_OIDOPW¥MFVX  
@HWI-EAS443:3:40:1184:803#0/1  
CAATGGTGAACAGATCTTCATGATCTCAGAGAACTTTTC  
+HWI-EAS443:3:40:1184:803#0/1  
¥```bbabbbb[a`a`a`ba^\_] [Y```^^`ZYaa`a`¥  
@HWI-EAS443:3:27:738:1109#0/1  
AGGGCGCCTTGCTAAATGACAAACATTCGAATGGAACCAT  
+HWI-EAS443:3:27:738:1109#0/1  
\_a`\_X`ba^Y^aaa]a`R][XU¥W[^]aa]aaa`^Ya\_

@HWI-EAS443:3:55:1126:1320#0/1  
GGGGGCCTTGCTAAATGACAAACATTCCAATGGAACCATT  
+HWI-EAS443:3:55:1126:1320#0/1  
a`\_aa\_\_`\_\_`a`\_a^a\_``\_^^`a\_¥]\_``]\_\_^Z\_]a  
@HWI-EAS443:3:73:344:925#0/1  
GCATCCTACTCTGTTCTGGTGGAGCAGCAGCAAGGGGAAA  
+HWI-EAS443:3:73:344:925#0/1  
`Z[Z`a¥\_\_\_\_]W[YZ¥[^\_W]V¥¥]\_¥Q\_^WURUT¥WWW[  
@HWI-EAS443:3:94:425:213#0/1  
CCCTCTCCCTTTGCTGCTGCTCCACCAGAACAGAGTAGG  
+HWI-EAS443:3:94:425:213#0/1  
a`a`^bbaa\_aaaaaa\_aa^\_V[\_W\_``^^Z\_\_¥^Q\_^\_  
@HWI-EAS443:3:3:533:667#0/1  
GCCGGTTGATTTCTGTTTAGTGTCCAGTCATAAGTCTGGT  
+HWI-EAS443:3:3:533:667#0/1  
W`\_U\_] [ `P^abZ]VRX^VGVa[SLOH[\_[\_X`X0^]\_BB  
@HWI-EAS443:3:58:1143:740#0/1  
TGCCGGTTGATTTCTGTTAATGTCCAGTCATAAGTCTGG  
+HWI-EAS443:3:58:1143:740#0/1  
a\_aabb`b\_V^aaaaaaaaaaaaT¥`\_a^aaa]]U^`a¥  
@HWI-EAS443:3:75:808:660#0/1  
TGCATTGCAATGGAAAGAAATACTGGATCTGGTATTATC  
+HWI-EAS443:3:75:808:660#0/1  
¥baTa¥ZaaUS` `abb\_Ybb`aY\_a[ba\_aYS0]\_\_aaa  
@HWI-EAS443:3:86:771:286#0/1  
GAAATACTGGATCTGGTATTATCATTTCAGATACACCAGT  
+HWI-EAS443:3:86:771:286#0/1  
aaba` ` ` [Y]]a^^aPZ\_W\_b[ba`^¥\_aa`a\_aaaa`]  
@HWI-EAS443:3:73:859:680#0/1  
AGAGAATAAAAACTGAGAGATCTAATGTCGAGTCCCGCA  
+HWI-EAS443:3:73:859:680#0/1  
aa`baabbabbbbaababbaaaababb]aa\_aa\_a\_a\_`\_  
@HWI-EAS443:3:37:622:228#0/1  
GCAAATAAGAGGGTAGCCCCATTGCATTTGGGCAATTG  
+HWI-EAS443:3:37:622:228#0/1  
a]Q[X]^Y[XDTVURUMT^Y\_Y\_WVBBBBBBBBBBBBBBBB  
@HWI-EAS443:3:67:1522:79#0/1  
AATGTAGGACCATGAGCTTGCTGTGGAGAGTAATTCACAC  
+HWI-EAS443:3:67:1522:79#0/1  
a]aaZaa` `YW\_\_\_\_]a[aX\_]\_\_TZZ[^`U]]^]UUX^Y  
@HWI-EAS443:3:37:958:730#0/1  
CTCCTGGGTAACACGTTCCATTGTCTGAATTAGTTGTTTC  
+HWI-EAS443:3:37:958:730#0/1  
abbbaYab^R\_\_[baaa` ` `aba\_^^` `G[aa\_a` `]a]  
@HWI-EAS443:3:76:1738:516#0/1  
GAGTGTGAATCACTCTCCACAGCAAGCTCATGGTCTTACA  
+HWI-EAS443:3:76:1738:516#0/1  
`\_aVG[b`aaR`\_a]\_Y`\_¥a\_Ya]\_X`0^RR\_[WGY¥G^  
@HWI-EAS443:3:38:259:281#0/1  
ATGTTTTTGTGGGGACATCAAGATACAGCAAGACGTTCAA

+HWI-EAS443:3:38:259:281#0/1  
X¥` [YU¥TZ^bVbZ¥QQ\_a]aUDOY¥N\_b]YNGYFGSbX  
@HWI-EAS443:3:91:1709:1060#0/1  
GGCTGGTTAAAAAAGGAAATTCATACCCAAAGCTCAGCAA  
+HWI-EAS443:3:91:1709:1060#0/1  
a` [WDWUXX\_[VQ[]aQ\_\_\_\_[TXW\_TQ0]\_[^RT^Z]TS\_  
@HWI-EAS443:3:81:1208:308#0/1  
CAGGGAGACTACGAGTACCAATGAACTGGCGACAGGTGAA  
+HWI-EAS443:3:81:1208:308#0/1  
V` ¥XQ\_¥¥UbaZH]b` \_` UX[\_a^^VaaaabV[a]FQa\_R  
@HWI-EAS443:3:65:1767:1938#0/1  
GATTGCCCCAGGGAGACTGCCAGTACCAATGAACTGGCG  
+HWI-EAS443:3:65:1767:1938#0/1  
a^aaaba^R\_[DZ[Y[`a``¥ZaVP\_XQ]^a[\_`WV^Y]B  
@HWI-EAS443:3:91:439:1047#0/1  
TGCCCCAGGGAGACTGCCAGTACCAATGAACTGGCGACA  
+HWI-EAS443:3:91:439:1047#0/1  
abbabbb\_aba`aba\_a]^¥a¥aaZ]\_aa\_\_\_\_^`Ya\_¥¥  
@HWI-EAS443:3:10:1229:1712#0/1  
AAGAAATAAGACCCTTCATTACTTATGTCAAAGGAAGGCA  
+HWI-EAS443:3:10:1229:1712#0/1  
a^a`aba`b\_b\_^\_^\_]aa`^`Wa^bW[\_a]\_^\_S`ZYa  
@HWI-EAS443:3:73:1658:412#0/1  
CAAGTAGTAGCATTGCCACA ACTACTTCAATGCATGTGTG  
+HWI-EAS443:3:73:1658:412#0/1  
abZH¥ba[aaa^aXa`0`^[Sa¥a¥]aK¥a]a^`ba]aUa  
@HWI-EAS443:3:89:1078:968#0/1  
CTCGGCCTCAATCATGCTCTCAATCTGCTGAATAGACTGA  
+HWI-EAS443:3:89:1078:968#0/1  
Q^\_\_[S\_ba^aa¥`bbaaZ\_abb\_bbb\_bb]ababbbbb`  
@HWI-EAS443:3:40:641:1019#0/1  
CTGTGATGAGAATGGGAGACCTTCACTACCTCCAAAGCAG  
+HWI-EAS443:3:40:641:1019#0/1  
abb)``a`^^¥Sabaabaaababaa]aa`\_aa`UH¥\_¥`  
@HWI-EAS443:3:33:900:1972#0/1  
CTTTGTTAGTAATCTCGTCAATAGCATTCTGTGTGCTCTT  
+HWI-EAS443:3:33:900:1972#0/1  
a^`Waaa\_Y¥\_Y^¥Z]\_QS` `PEXY\_Ya^YYWRVU\_OYMQ  
@HWI-EAS443:3:87:1070:1323#0/1  
TTTTGAGATGATTTGGGATCCGAACGGATGGAACAGGGAC  
+HWI-EAS443:3:87:1070:1323#0/1  
ababa`aaaaabba`a`a`\_a\_\_`\_`a`\_VG^]]a`Y]¥  
@HWI-EAS443:3:93:1735:640#0/1  
AAACGGGTTTGAGATGATTTGGGATCCGAACGGATGGAAT  
+HWI-EAS443:3:93:1735:640#0/1  
WUb`¥PH¥b` `¥ZGSSN`¥]a`TT`\_ZTU\_YW` [^DMUBB  
@HWI-EAS443:3:4:475:1019#0/1  
ATTTGGGATCCGAACGGATGGAATGGGACAGACAATAACT  
+HWI-EAS443:3:4:475:1019#0/1  
a\_\_b]P\_VYX` ]Z\_aa¥bb]MHbbba¥\_YUa^^`^` `RY

@HWI-EAS443:3:37:672:304#0/1  
CTCCTGTTTTCTTAGGGTCCTTCCCAGCACTGGGGTGCTC  
+HWI-EAS443:3:37:672:304#0/1  
`abb`a`bbbbbbbabababbbbababGaa`ab\_baa\_  
@HWI-EAS443:3:22:115:1872#0/1  
GCGGATCATCAGCCAAGAAAGAAGAAGTGCTAACGGG  
+HWI-EAS443:3:22:115:1872#0/1  
ab]TUT]^Z\_¥VHTXZ¥SMZ^W¥][`a`ZOFV]^X]^¥SV  
@HWI-EAS443:3:8:155:375#0/1  
GCTGATGATCCGCTTGTCTTTTTGAAAGTGAACCCACCAA  
+HWI-EAS443:3:8:155:375#0/1  
\_ZOZQXUT¥aaYV¥VQ\_NZ^a¥\_aP¥`aY]VZZFYX`W]N  
@HWI-EAS443:3:82:258:360#0/1  
AACCAGAAAGCTCTTATCTCTTGTCTACTTCAAGCAGTA  
+HWI-EAS443:3:82:258:360#0/1  
T[WMRXONZb¥WQ\_WS^]^aZXZWWZXZX[`a]RT`a\_OS  
@HWI-EAS443:3:72:751:262#0/1  
GAACAATTGAAGAGCCATCTGGGCCGTTGCAGGCCCAAGG  
+HWI-EAS443:3:72:751:262#0/1  
abaaa```\_bb¥¥¥¥a^]\_\_aaa¥a^\_aZTa`N\_V^[^^  
@HWI-EAS443:3:76:1282:743#0/1  
GAAGAGCCATCTGGGCCGTTGCAGGCCCAAGGTCATTGTT  
+HWI-EAS443:3:76:1282:743#0/1  
`[baN]]^`]]U^]\_UG\_TKLVGVTUXOUUYNWUUUUUUU]  
@HWI-EAS443:3:18:156:648#0/1  
ATGCAATTGTCATTCTAAGTGCCTCGCTGGGTTCTCTTT  
+HWI-EAS443:3:18:156:648#0/1  
\_]Y\_VX]YaZ^]W]H^`\_ZFGSaVNYO[FFN\_NXOMY^Q  
@HWI-EAS443:3:7:764:1612#0/1  
CAGATCGCCCCTAATTGCCTTGATCATGCAATCCTCTTGT  
+HWI-EAS443:3:7:764:1612#0/1  
abaaa`a`\_aa`b`\_aa`Qaa`\_^Ya\_W\_aa\_[\_\_\_\_V  
@HWI-EAS443:3:42:1488:131#0/1  
AACAACTCGACACTAATTGATGGCCATCCGAATTCTTTTG  
+HWI-EAS443:3:42:1488:131#0/1  
aaaaaaaa\_a`\_a^a```^^^\_]]Y\_\_Y`YYY]Y]^S  
@HWI-EAS443:3:62:439:2001#0/1  
GCCAGAAAGGTAGCGGAAGTAGGTACAGATGCAATTGTC  
+HWI-EAS443:3:62:439:2001#0/1  
UK\_]U[\_a`^`\_SUZaY]aYLZWOZ¥NYS]^W^]VTPLDW  
@HWI-EAS443:3:68:681:1190#0/1  
CCAGTCTCGTGACATTTCTCGAGGGTCATGCCAGAAAGG  
+HWI-EAS443:3:68:681:1190#0/1  
a¥OZ]\_¥XRX¥`XX`aa`\_]]W¥][NNaaaYG^YOUUWMQ  
@HWI-EAS443:3:21:1522:75#0/1  
GAAGCCAGTTAAAAACAATGCCAAGGAAATTGGAAATGG  
+HWI-EAS443:3:21:1522:75#0/1  
aL]W[]]`QZ`\_`\_^WNY\_¥¥PXIYYMSPUBBBBBBBBBB  
@HWI-EAS443:3:10:547:372#0/1  
ATCCCCTTGCCAATTAGCACATTAGCTTTCTCTCTTTT

+HWI-EAS443:3:10:547:372#0/1  
a`aaaa`bX`a^\_aa`X`aa`aaaa`\_aa``^a^`a\_`a  
@HWI-EAS443:3:33:337:1451#0/1  
ATCCCCTTGCCCAATTAGCACATTAGCTTTCTCTCCTTTT  
+HWI-EAS443:3:33:337:1451#0/1  
a`abbbba`^a`^b`\_bb]X\_^`U\_X\_aa^Ja\_S¥Y¥^  
@HWI-EAS443:3:39:1073:1920#0/1  
GAGAAAGCTAATGTGCTAATTGGGCAAGGGGATGTAGTGT  
+HWI-EAS443:3:39:1073:1920#0/1  
a`^`\_S¥` [PaaQVZaa\_a\_] [^`\_`Y]ZSMNKRY^PPP  
@HWI-EAS443:3:81:1344:993#0/1  
TGGCTGGATCCTGGGAAATCCAGAGTGTGAATCACTTTTC  
+HWI-EAS443:3:81:1344:993#0/1  
a`^`a^b]aaaRa\_Z\_]\_J`ZUUa`]HTaa\_a^``GSFV  
@HWI-EAS443:3:66:339:1834#0/1  
ACAAAAGCAACAAAATGAAGGCAACACTAGTAGTTCTGC  
+HWI-EAS443:3:66:339:1834#0/1  
abZ`ba\_b\_a`^¥^`aaa]\_\_ba^F]\_[a\_[aZGQ\_XS`  
@HWI-EAS443:3:51:883:1191#0/1  
ATCATTGAAAGTTTGGAGATATTCCTCAAGATCCTGCTT  
+HWI-EAS443:3:51:883:1191#0/1  
aa``bbab^bab`Uaaabbbbaaaaa^aa````a][aa\_a\_  
@HWI-EAS443:3:1:1455:1181#0/1  
CTAGAACACAGTATTTTTCCATTTGTGTGGCTCCAGTTT  
+HWI-EAS443:3:1:1455:1181#0/1  
aab\_bbabbbbabbbabba]abbaaab\_a\_Ya¥`\_`VaB  
@HWI-EAS443:3:46:1006:926#0/1  
GTGGGCTCTATGTTGACAAAATGACCATCGTCAACATCCA  
+HWI-EAS443:3:46:1006:926#0/1  
```b\_\_\_^X\_\_b]X`\_\_aa^ZY)`[Z\_S`]WR\_[Q¥X¥Y\_  
@HWI-EAS443:3:66:764:470#0/1  
GTTCTTGAAAGATGCAGGTGCATTGACTGAAGATCCAGA  
+HWI-EAS443:3:66:764:470#0/1  
a[^X]aa`UV[SJQPT]\_[RNOJOM][¥TVKT¥ZNSTZUP  
@HWI-EAS443:3:12:857:1602#0/1  
ATCAGCGAAAGCAGGCAAACCTTTGAATGGATGTCAATA  
+HWI-EAS443:3:12:857:1602#0/1  
aaYWW`QUZ[PZYJ¥` [WDTWY¥RTOSX\_\_G^\_UHXXBB  
@HWI-EAS443:3:33:129:803#0/1  
CAGCGAAAGCAGGCAAACCTTTGAATGGATGTCAATCCG  
+HWI-EAS443:3:33:129:803#0/1  
aaab`aaaaaa`abaXaaaaaaaSaaa]\_`¥U\_\_`¥S¥Y  
@HWI-EAS443:3:91:1696:1935#0/1  
CAGCGAAAGCAGGCAAACCTTTGAATGGATGTCAATCCG  
+HWI-EAS443:3:91:1696:1935#0/1  
XbbXbbabbbb\_aabababb`bbbbabbbbbbabbbbOab  
@HWI-EAS443:3:36:1438:1647#0/1  
ATGACTTTCAGCTGATCCCAATGGTAAGCAAATGTAGACC  
+HWI-EAS443:3:36:1438:1647#0/1  
a\_``abab\_`]`aaaa`\_a`¥`V`^`^`¥^ZW`\_]\_S`



@HWI-EAS443:3:86:637:439#0/1  
CTTTGGTTCTACATTTGCTTACCATTGGGATCAGCTGAAA  
+HWI-EAS443:3:86:637:439#0/1  
abbbbb^V\_babbabbbbabbabbabbbbaaaaa\_  
@HWI-EAS443:3:78:566:153#0/1  
AGGGGTTCCAGGGGATTACAAAGTCTTCCCCGATAATCATC  
+HWI-EAS443:3:78:566:153#0/1  
[aZ\_H[\`¥a¥aaa\_`^¥Z\_a^`\_JO\_\_aV¥¥XU]\_VZHPR  
@HWI-EAS443:3:11:1673:651#0/1  
GGGGTTCTTCTTGTCTTGCTGATGTGTACTTTTTGATT  
+HWI-EAS443:3:11:1673:651#0/1  
aa\_WOJM¥]X\_QY`[SKVWRTWVO[Y[^TKR]`ZLEU\_^B  
@HWI-EAS443:3:42:1753:76#0/1  
CGGGGTTCTTCTTGTCTTGCTGATGTGTACTTTTTGAT  
+HWI-EAS443:3:42:1753:76#0/1  
abbabbbbbbbbabbbbbbb\_G]bb`bbabaa`bbbbbbab  
@HWI-EAS443:3:69:1246:1359#0/1  
GTCGGAECTATGCGCAAGCTTGCCGACCAAAGTCTCCAC  
+HWI-EAS443:3:69:1246:1359#0/1  
`Z`]ZF^ab`ZbbaJ`bbbaaaaa`aab`WaWLVaYaaa  
@HWI-EAS443:3:18:1539:163#0/1  
GTGTTTTTTCTCAAGCTTCTGAAATCCTAATGTAAATAC  
+HWI-EAS443:3:18:1539:163#0/1  
a¥a]]`a\_`\_\_R]]`\_]`^¥^^[\_Y]`\_Y]\_[^\_XZ[^Y  
@HWI-EAS443:3:47:669:1731#0/1  
TGTGTTTTTTCTCATGCTTCTGAAATCCTAATGTAAATA  
+HWI-EAS443:3:47:669:1731#0/1  
H\_\_`[]¥abba\_¥babZbbbbbbaabbWI`bbabbbbbbbb  
@HWI-EAS443:3:10:75:1807#0/1  
GTTTTTTCTCATGCTTCTGAAATCCTAATGTAAATACAT  
+HWI-EAS443:3:10:75:1807#0/1  
aSHUU[\_^VX\_YPSZ¥[^[^W[HVP[NFLPH]KKO[[Z]Z  
@HWI-EAS443:3:18:314:978#0/1  
GGTGTTTTTTTCTCATGCTTCTGAAATCCTAATGTAAATA  
+HWI-EAS443:3:18:314:978#0/1  
^aRaX]bbbbbabbbbaabbbb`bbbaaaba\_aaaba`  
@HWI-EAS443:3:32:401:1944#0/1  
GTGTTTTTTCTCATGCTTCTGAAATCCTAATGTAAATAC  
+HWI-EAS443:3:32:401:1944#0/1  
¥`a]\_aaabbabaabb`abaaabbaababaa^`bbaabb  
@HWI-EAS443:3:35:885:458#0/1  
GTGTTTTTTCTCATGCTTCTGAAATCCTAATGTAAATAC  
+HWI-EAS443:3:35:885:458#0/1  
aab^`]]^aaa``]`¥]`T`a`X[`Z`[XW\_\_\_\_¥[`^^`a  
@HWI-EAS443:3:38:1231:1304#0/1  
GGTGTTTTTTTCTCATGCTTCTGAAATCCTAATGTAAATA  
+HWI-EAS443:3:38:1231:1304#0/1  
T\_0\_US\_`¥`^Z¥`a^\_abaZ`^\_¥^][^KY\_aaa[]`aY  
@HWI-EAS443:3:38:316:390#0/1  
GTGTTTTTTCTCATGCTTCTGAAATCCTAATGTAAATAC

+HWI-EAS443:3:38:316:390#0/1  
a¥b\_\_`a`aa`a\_\_`\_[Q]^a`a\_^`\_]a¥[X¥P  
@HWI-EAS443:3:42:291:278#0/1  
GTGTTTTTCTCATGCTTCTGAAATCCTAATGTAAATAC  
+HWI-EAS443:3:42:291:278#0/1  
aab`aabaaaaaaaaaaaaabaa\_aa`ab`aa\_`a`a`\_\_  
@HWI-EAS443:3:43:968:69#0/1  
GGTGTGTTTTCTCATGCTTCTGAAATCCTAATGTAAATA  
+HWI-EAS443:3:43:968:69#0/1  
ab]b^abaab`a\_aaa\_aa`aa\_\_`a\_¥aa¥aa`a\_]a`  
@HWI-EAS443:3:58:1690:82#0/1  
TGTTTTTCTCATGCTTCTGAAATCCTAATGTAAATACA  
+HWI-EAS443:3:58:1690:82#0/1  
ab\_aabb\_N\_a`ba\_aa`aa\_\_\_`[\_aa`ab\_a\_^`a]¥^  
@HWI-EAS443:3:59:960:1557#0/1  
TGTTTTTCTCATGCTTCTGAAATCCTAATGTAAATACA  
+HWI-EAS443:3:59:960:1557#0/1  
abaabbaaaaaabbaba`aa\_a`baaaaaba]aa\_]H`\_¥  
@HWI-EAS443:3:64:1077:1636#0/1  
GGTGTGTTTTCTCATGCTTCTGAAATCCTAATGTAAATA  
+HWI-EAS443:3:64:1077:1636#0/1  
^`Xa^ababbbaaaaaaa`]abaaa`a`aaaa`aa`a`b  
@HWI-EAS443:3:66:1267:1398#0/1  
TGTTTTTCTCATGCTTCTGAAATCCTAATGTAAATACA  
+HWI-EAS443:3:66:1267:1398#0/1  
abY[abbaab¥a\_¥¥aaab^`aaa]`aa`aaaa\_`aaa`  
@HWI-EAS443:3:67:1576:1783#0/1  
TGTTTTTCTCATGCTTCTGAAATCCTAATGTAAATACA  
+HWI-EAS443:3:67:1576:1783#0/1  
aaaaabbbaaabb`aaaaaaaaa]aaaaabaaa`aaaa  
@HWI-EAS443:3:67:730:495#0/1  
GTGTTTTTCTCATGCTTCTGAAATCCTAATGTAAATAC  
+HWI-EAS443:3:67:730:495#0/1  
a¥`¥`aaaaaa`aa`aaaaaa`aaaa\_aaaaa`a\_a`a\_  
@HWI-EAS443:3:89:1071:874#0/1  
GGTGTGTTTTCTCATGCTTCTGAAATCCTAATGTAAATA  
+HWI-EAS443:3:89:1071:874#0/1  
a^Ya[\_aaaaW]a)`aaa\_¥a¥ZW^`^`]X`a\_\_^`a`  
@HWI-EAS443:3:94:1103:741#0/1  
TGTTTTTCTCATGCTTCTGAAATCCTAATGTAAATACA  
+HWI-EAS443:3:94:1103:741#0/1  
aa\_\_a^\_aaa^a]aa\_ba¥^Ya^\_ba\_aa`a\_a\_a`^`  
@HWI-EAS443:3:95:1772:1077#0/1  
GTGTTTTTCTCATGCTTCTGAAATCCTAATGTAAATAC  
+HWI-EAS443:3:95:1772:1077#0/1  
]F\_¥¥aa`aaa`b\_aaa^aa\_aWa^\_aaa^¥`aaa`\_`W  
@HWI-EAS443:3:99:100:1510#0/1  
ACTCACTAAGACCACTGTGGACCATATTGCCATCATCCAC  
+HWI-EAS443:3:99:100:1510#0/1  
UWY^¥TabV[[[YV^b¥HH\_bb]Y^ZT^]aaTUU`W[U\_N

@HWI-EAS443:3:5:1575:1905#0/1  
ATTGAAGCACCGATTTGAGATAATTGAAGGAAGAGACAGA  
+HWI-EAS443:3:5:1575:1905#0/1  
`ZV[JLPZTWT^a\_aWbSbaaU^\_\_^Y\_a\_P^`¥BBBBBB  
@HWI-EAS443:3:91:1696:887#0/1  
GAGCGAAAGCAGGCAAACCATTTGAATGGATGTCAATACG  
+HWI-EAS443:3:91:1696:887#0/1  
a¥IWZ^[^G^\_XT\_^`QYZKZ\_ZJXVPTRTDMMWYFQS  
@HWI-EAS443:3:95:1398:1010#0/1  
GCGAGCGAAAGCAGGCAAACCATTTGAATGGATGTCAATC  
+HWI-EAS443:3:95:1398:1010#0/1  
Z\_aT`bbb\_¥aa^GWYVb\_¥`abbb`]ZW``\_]`YZ¥]WF  
@HWI-EAS443:3:93:159:1511#0/1  
CGGAGCGAAAGCAGGCAAACCATTTGAATGGATGTCAATC  
+HWI-EAS443:3:93:159:1511#0/1  
ab\_ZX]aY]a\_a¥aaaaZ[Za\_`aa`\_\_\_\_`\_\_`]``]¥  
@HWI-EAS443:3:23:976:519#0/1  
GAGCGAAAGCAGGCAAACCATTTGAATGGATGTCAATCCG  
+HWI-EAS443:3:23:976:519#0/1  
]]\_Q^`ba]^aaa`]a`\_aaaaa\_a]aXYa`]\_\_\_\_\_W[a  
@HWI-EAS443:3:45:1503:168#0/1  
GTTTGTTCCTTCCTTCTTTGGCCCCACATTTGCTT  
+HWI-EAS443:3:45:1503:168#0/1  
aY]X`\_`aSQZNR[\_VWV[UVUV]^RWWVRV]]XYYYWW  
@HWI-EAS443:3:6:451:1216#0/1  
TCTGATGTGTACTTTTTGATTATGGCCATATTGTCCACAC  
+HWI-EAS443:3:6:451:1216#0/1  
aaX¥U]aZ¥aaZ`Yba^^[\_aaRT^]\_TV¥GP[[\_BBBB  
@HWI-EAS443:3:24:415:16#0/1  
ATTACACTGGAGTTCGCTTTCAGTACTATGTTCTTTTCCA  
+HWI-EAS443:3:24:415:16#0/1  
^^^Y¥`b\_GU\_aaa^aYW`aaa]aaa]ab[^]Za`^[]¥  
@HWI-EAS443:3:12:1789:393#0/1  
ACCGGCTTGAAATTCTTGCTGTATCTTGATGTCCCCACAA  
+HWI-EAS443:3:12:1789:393#0/1  
aS^^^a`ON[Y^\_0\_]OXVMVMBBBBBBBBBBBBBBBBBB  
@HWI-EAS443:3:80:924:423#0/1  
ACCGGCTTGAAATTCTTGCTGTATCTTGATGTCCCCACAA  
+HWI-EAS443:3:80:924:423#0/1  
a`aaaaaa[W¥GX^V]\_NTW]SZ\_S^\_RXVKZSY\_[¥]]\_  
@HWI-EAS443:3:8:1416:996#0/1  
GCTATTTCCGGCTTGAAATTCTTGCTGTATCTTGATGTCA  
+HWI-EAS443:3:8:1416:996#0/1  
`aYa^^`[[a`Y`^UXDU¥NN^W^]]Z\_QGY^¥¥V^LOG  
@HWI-EAS443:3:37:1487:1043#0/1  
GACTCGGAGTCGACCCTGGCATCAATCCGTGCCCTAGACA  
+HWI-EAS443:3:37:1487:1043#0/1  
aaaa`b`ab`a\_baQZYXMDLNYa`¥VMYDYOg]UYXaY^  
@HWI-EAS443:3:1:1182:1880#0/1  
ATGACCGAAATTTCTGGAGAGGTGAAAATGGAGGAAGGAC

+HWI-EAS443:3:1:1182:1880#0/1  
a\_[UNZa`aa¥[U]aab`\_`¥^Nb^Y\_\_`a\_^Ga\_G`BBB  
@HWI-EAS443:3:12:83:1234#0/1  
CTTGTCTTCGTCATTTTCACCTCTCCAGAAATTTTCGGT  
+HWI-EAS443:3:12:83:1234#0/1  
``\_^¥aa]Z\_\_¥R\_P]]`adWVV¥T¥ZTX^XNXTYUUBB  
@HWI-EAS443:3:22:995:775#0/1  
CCTTGTCTTCGTCATTTTCACCTCTCCAGAAATTTTCGG  
+HWI-EAS443:3:22:995:775#0/1  
abbbb``abbaaa``abbbbaa```\_a```\_`a^aaa]`Y  
@HWI-EAS443:3:31:683:248#0/1  
GTCCATTTTCACCTCTCCAGAAATTTTCGGTCATTGATTCC  
+HWI-EAS443:3:31:683:248#0/1  
aaa``abbaaaaaaaaaa``aa`a`¥^a^]\_`\_`\_]\_X  
@HWI-EAS443:3:68:1023:1426#0/1  
GATCAAACGTGGAATCAATGACCGAAATTTCTGGAGAGGT  
+HWI-EAS443:3:68:1023:1426#0/1  
\_`¥a\_R]`\_\_[LW\_a]Y[a^aba`\_^aaaa`a\_]¥W¥`T  
@HWI-EAS443:3:75:231:496#0/1  
CAATGACCGAAATTTCTGGAGAGGTGAAAATGGACGAAGG  
+HWI-EAS443:3:75:231:496#0/1  
^WaaaaZY\_\_Q¥]\_]bab]Z`a][L^URXZY\_\_\_\_`[]][L  
@HWI-EAS443:3:81:1128:1275#0/1  
GTCCCCCATCTGATACTAATAGGCCTGCCTTTGATTNGGT  
+HWI-EAS443:3:81:1128:1275#0/1  
a¥TTTFVU`¥]\_a¥`X[\_`^RaWQOVNFXR]MSXV\_VDMRV  
@HWI-EAS443:3:37:984:228#0/1  
GGGGGCTATACGAAGCAATCGAGGAGTGCATGATTAATGA  
+HWI-EAS443:3:37:984:228#0/1  
a][HY[]```]`a`a]ZY[[L]]UUXFX¥PKTRSQNUQTQ  
@HWI-EAS443:3:52:261:1975#0/1  
GTTCCCTTGATGGTGGCGTACATGCTAGAAAGAGAATTGG  
+HWI-EAS443:3:52:261:1975#0/1  
a``aY\_\_X]]]``Za]^a]YZ[]\_`^V¥R]]][T¥¥¥W^^V  
@HWI-EAS443:3:19:1481:1427#0/1  
GCATGTCCCTTGGGTTAAGTGCAACTTCAATATAACA  
+HWI-EAS443:3:19:1481:1427#0/1  
\_0]GXI]PXRb\_aaMU[T`]a\_`ZN^^aZT^[]\_``ZYR[  
@HWI-EAS443:3:31:803:455#0/1  
GTCTCATATACAACAGGATGGGAACAGTGACCACAGAAGC  
+HWI-EAS443:3:31:803:455#0/1  
`^baaa`[`a\_`]ZM]a\_\_¥R¥a^]]¥aa]¥UW`X[]YS  
@HWI-EAS443:3:31:1366:695#0/1  
AGGAATTGCCCGCTAATTTACGGAAACCACTGAATGTCC  
+HWI-EAS443:3:31:1366:695#0/1  
Y`a¥bb`\_ZZ¥ZYHI\_V\_Y`X\_¥W\_]a[BBBBBBBBBBBB  
@HWI-EAS443:3:30:1254:816#0/1  
CCGCATTTCTTCAATTAACCACCTTATCTCCTCAAATTTTC  
+HWI-EAS443:3:30:1254:816#0/1  
XbbZ``¥`bba^\_a`bbbaba^¥^`b`aa[ab`ab]bWaa

@HWI-EAS443:3:31:518:1819#0/1  
GCCGCATTTCTTCAATTAACCACCTTATCTCCTCAAATTT  
+HWI-EAS443:3:31:518:1819#0/1  
a\_`Y¥\_Y¥T¥YXbba`¥R¥\_PZa\_X\_J\_H\_Y`\_a]ZO[¥Y  
@HWI-EAS443:3:40:698:355#0/1  
GCCGCATTTCTTCAATTAACCACCTTATCTCCTCAAATTT  
+HWI-EAS443:3:40:698:355#0/1  
a\_TXLQVTLR[XXLNTVQLLW^ZVVVRSTTQ]VYQFOYRT  
@HWI-EAS443:3:69:667:176#0/1  
GCCGCATTTCTTCAATTAACCACCTTATCTCCTCAAATTT  
+HWI-EAS443:3:69:667:176#0/1  
aa`aaa`\_Ya\_aa\_a\_¥[¥TY^\_`^Z^]]\_][^][YY]VV  
@HWI-EAS443:3:12:74:1186#0/1  
CAGGGCCGAAGGTACCATGCTTCAACCTTTCAACCTTTTC  
+HWI-EAS443:3:12:74:1186#0/1  
a]YT^aaa[RUTP`\_OR]¥DU[Y\_]aW`\_`^YU¥XZ]¥^  
@HWI-EAS443:3:35:1406:736#0/1  
GGTACCATGCTTCAACCTTTCAACCTTTTCGAAATAAGTT  
+HWI-EAS443:3:35:1406:736#0/1  
ababbabbbbbbbbbbbbabbbabbbbbbbbbbbbaa\_b  
@HWI-EAS443:3:70:143:175#0/1  
TTCAGTCAATGCACCTGCATCCTTTCCAAGAACTGTCATT  
+HWI-EAS443:3:70:143:175#0/1  
`\_XQY[`]JSJZY\_\_VV^¥^^TTVJZFW^UFS^IUVVRR]]  
@HWI-EAS443:3:27:1570:654#0/1  
GCAACATTGCTGGCTGGATCCTGGGAAATCCAGAGTGTGA  
+HWI-EAS443:3:27:1570:654#0/1  
\_H\_aaaaaaaaa`W^X`¥W`aXZZaS`\_`[LSVV\_W^VZ[  
@HWI-EAS443:3:38:841:280#0/1  
GCCCAATCATGACTCGAACAAAGGGGTAACGGCAGGATGT  
+HWI-EAS443:3:38:841:280#0/1  
aaaaa\_ZZ¥]¥^\_]aa^U]`\_¥]ZDVUBBBBBBBBBBBBBB  
@HWI-EAS443:3:69:988:446#0/1  
GGCCCAATCATGACTCGAACAAAGGGGTAACGGCAGGATGT  
+HWI-EAS443:3:69:988:446#0/1  
abaaa`\_babbbb\_ab\_a`[\_baaaH][aba`\_Z\_RBBBB  
@HWI-EAS443:3:80:879:124#0/1  
CACGCCAGCTGTGACTCTGATGTCAGTATTCTTGCCCCCA  
+HWI-EAS443:3:80:879:124#0/1  
ababaab`bab`ba^`aa\_\_a¥Uaa[`aa[[aYS]U¥V¥  
@HWI-EAS443:3:18:1256:993#0/1  
ATCAGGCACTCCTCGATTGCTTCATATAGCCCCCAAAGAT  
+HWI-EAS443:3:18:1256:993#0/1  
X\_[`UW\_b\_^ZSU\_VY0`]aa`VYQ[a\_\_`I`^OF]XV¥I  
@HWI-EAS443:3:19:1637:89#0/1  
CATTAAATCAGGCACTCCTCGATTGCTTCATATAGCCCCCA  
+HWI-EAS443:3:19:1637:89#0/1  
`a\_bKb`b[ab\_]U\_`^a\_]b`WJJ]Z\_bV`\_a^\_0IZ^G  
@HWI-EAS443:3:22:1042:122#0/1  
TGGGGGCTATATGAAGCAATCGAGGAGTGCCTGATTAATG

+HWI-EAS443:3:22:1042:122#0/1  
`bbaab\_`aa]`^`b`aQ`Z`VZYWY\_\_US[a]V`¥]`Y  
@HWI-EAS443:3:2:518:443#0/1  
TGGGGGCTATATGAAGCAATCGAGGAGTGCCTGATTAATG  
+HWI-EAS443:3:2:518:443#0/1  
]a`^a[¥Z`b`a]b\_\_J]]UY\_]`aKaYbU`U\_X[[aaab  
@HWI-EAS443:3:37:1495:1644#0/1  
TGGGGGCTATATGAAGCAATCGAGGAGTGCCTGATTAATG  
+HWI-EAS443:3:37:1495:1644#0/1  
ab`\_]Z\_aabba[b\_`Xaa\_aaaY[a\_U¥H]]`\_a\_aa`T  
@HWI-EAS443:3:50:21:1166#0/1  
TGGGGGCTATATGAAGCAATCGAGGAGTGCCTGATTAATG  
+HWI-EAS443:3:50:21:1166#0/1  
Zbaa^^`b]S^`a]aaaaa`^^^`X\_][[S^QZN\_`\_]`  
@HWI-EAS443:3:71:303:882#0/1  
TGGGGGCTATATGAAGCAATCGAGGAGTGCCTGATTAATG  
+HWI-EAS443:3:71:303:882#0/1  
aa^^^abb\_aZa```\_baaaaaaaaaY]\_`\_`aa\_a``Y]a  
@HWI-EAS443:3:92:1241:1682#0/1  
AAATGAGCAGGGGTCAGGATATGCAGCCGACATGAAGAGC  
+HWI-EAS443:3:92:1241:1682#0/1  
T[\_¥X\_GL¥HaVXQa^`P`aa`a^aZUMbaGGXX[\_¥^^`\_`  
@HWI-EAS443:3:74:1460:1351#0/1  
GGCAACACCCTTGGCCTTGATATCGAAACAGCGACTCTTG  
+HWI-EAS443:3:74:1460:1351#0/1  
^]\_bbbaab`^\_b\_W¥¥`abaaTa```]WbbQDYX`\_\_aa  
@HWI-EAS443:3:48:956:1260#0/1  
CAGATCTTATGATCTCAGAGAACTCTTCTTTCTTGATCCG  
+HWI-EAS443:3:48:956:1260#0/1  
Zb[Y\_baab^[^bbbaa^Xbbbbbabaa\_baabba`b`a^  
@HWI-EAS443:3:34:258:1523#0/1  
GACGGATCAAGAAAGAAGAGTTCTCTGAGATCATAAGATC  
+HWI-EAS443:3:34:258:1523#0/1  
abbb`baabbbbaa`abab`\_bbaba`a`aa`aaaa¥aa`  
@HWI-EAS443:3:94:1737:49#0/1  
ACTTGGGTAAACCAGACATATGTTAACATCGGCAACAGCA  
+HWI-EAS443:3:94:1737:49#0/1  
aX]aYU```a`^`\_`a`\_Y\_aa`^`\_aXP`\_¥]Z[^YFUDHZ  
@HWI-EAS443:3:32:36:614#0/1  
TAGTATTCTCACAAGAGGATTGCATGATCAAGGCAGTTAG  
+HWI-EAS443:3:32:36:614#0/1  
aab\_aaababaaaaa\_a]]`\_aaaa`^^^`Z`^]`^\_OXVX  
@HWI-EAS443:3:92:645:794#0/1  
CAAGTGGCACACACTAGACCAAAGTAGCTTCTGTGGTCA  
+HWI-EAS443:3:92:645:794#0/1  
\_¥`\_]`^`\_a`][VXaaZRF¥a``Z`^abb`\_Z`Z¥^]Y¥\_  
@HWI-EAS443:3:18:41:1718#0/1  
AACCGTTTATTGAAATTGGAGTAACACGGAGGGGAACAT  
+HWI-EAS443:3:18:41:1718#0/1  
`aaa¥UP[]]UU]XGR^```^`UY\_\_\_\_\_`Z[]UR[TWT^Z

@HWI-EAS443:3:22:284:1737#0/1  
TGGCCGGGAGACAAAATAACATTTCGAAGCAACTGGAAATC  
+HWI-EAS443:3:22:284:1737#0/1  
a^\_bbaa`aaaaab`babbab`aaaaaYaaaa¥\_a`a\_\_¥  
@HWI-EAS443:3:82:1231:2032#0/1  
CGGCCGGGAGACAAAATAACATTTCGAAGCAACTGGAAATC  
+HWI-EAS443:3:82:1231:2032#0/1  
ab\_\_V]b`\_`[]bbb`abbabb\_\_`aa\_\_ab\_b`\_aaaa  
@HWI-EAS443:3:23:1498:444#0/1  
GGCCGGGAGACAAAATAACATTTCGAAGCAACTGGAAATCT  
+HWI-EAS443:3:23:1498:444#0/1  
\_\_^\_b]babbababbabbbaaaaaa`b]aa\_`a`aaa`Na  
@HWI-EAS443:3:62:1690:1820#0/1  
GGCCGGGAGACAAAATAACATTTCGAAGCAACTGGAAATCT  
+HWI-EAS443:3:62:1690:1820#0/1  
abaaabb`^b`aabbba\_bba^aa`b]aa`bbaa\_`baa  
@HWI-EAS443:3:77:1468:330#0/1  
CGAAAATCGAAATTAACAAGTTTGCTGCAATATGCACGTT  
+HWI-EAS443:3:77:1468:330#0/1  
`b`\_ba\_bbPbbKbb`X\_V`^b\_YaWbb`bbbba\_¥`\_`Xa  
@HWI-EAS443:3:30:1747:1935#0/1  
ACACGTTCCATTGTCTGAACTAGTTGTTTCTACAATGTAG  
+HWI-EAS443:3:30:1747:1935#0/1  
`\_]\_YWSX`¥Z]WORZV¥OTJYW[UX\_BBBBBBBBBBBBBB  
@HWI-EAS443:3:25:103:391#0/1  
CTGTAATGAGAATGGGAGACCTTCACTACCTCCAGAGCAG  
+HWI-EAS443:3:25:103:391#0/1  
abb`\_V`bbb\_R\_b`¥\_ba`aaabbbba¥\_`^`a`a`a`\_\_`  
@HWI-EAS443:3:46:881:1494#0/1  
GTCTCTGAAAATATACAGAGATTCGCTTGGAGAACTGTA  
+HWI-EAS443:3:46:881:1494#0/1  
a]a[\_aa^XNL¥]a]`Z\_^\_[X¥XZ[]]¥`^^¥U]`¥Z  
@HWI-EAS443:3:73:807:1869#0/1  
CTGTAATGAGAATGGGAGACCTTCACTACCTCCAGAGCAG  
+HWI-EAS443:3:73:807:1869#0/1  
aa\_YF]aaaa^a`\_\_a`aa\_\_a]N\_a\_`\_`a\_\_^^`\_\_  
@HWI-EAS443:3:35:1218:238#0/1  
GCCTGCGGATGCCTTTTGTGATTGGTATTCCCTCCACTC  
+HWI-EAS443:3:35:1218:238#0/1  
]`a¥¥]a¥Za\_ZZb]V^^Z\_`\_`]UZYZZ\_a^¥ZPW]WKa  
@HWI-EAS443:3:96:933:248#0/1  
GGAATGCTCCTGTTATCCTGATTCTAGTGAATTACATGT  
+HWI-EAS443:3:96:933:248#0/1  
aaaaaaWa`a^aX¥aaa`[]R¥`0`Z^Y]U¥V`\_^Z][][]  
@HWI-EAS443:3:55:1512:1275#0/1  
ACTAATTGATGGCCATCCGAACCTTTTTGGTCGCTGTCTG  
+HWI-EAS443:3:55:1512:1275#0/1  
`\_aa][R¥a`baaZ`¥[¥\_]\_WSQW`\_`a\_\_[UVUa\_]W¥[  
@HWI-EAS443:3:68:1174:1527#0/1  
ATTCGACACTAATTGATGGCCATCCGAACCTTTTTGGTCG

+HWI-EAS443:3:68:1174:1527#0/1  
aba\_R¥¥aba`aa`X` `\_XDZaa`W` `aJ`X` `aaaR[¥  
@HWI-EAS443:3:54:350:951#0/1  
GAAGGTCCGACATCCGACATGCGAACAGAAGTTGCAGTGA  
+HWI-EAS443:3:54:350:951#0/1  
U`\_WTL]PUPa`]¥\_^]SM`XZaVVQGWXWSJQ`[J\_N\_M  
@HWI-EAS443:3:38:1232:1048#0/1  
CACCTTCATTGTTCCCGCTGAATGCTGCCATAACGGTTGC  
+HWI-EAS443:3:38:1232:1048#0/1  
\_¥\_S[[abb^\_GOQ]\_YabaaUabS\_Z`\_ZHZ[```[a[D  
@HWI-EAS443:3:91:418:698#0/1  
GAGGAAATACCAATCAACAAAAGGCATCTGCAGGCCAGAT  
+HWI-EAS443:3:91:418:698#0/1  
^Z¥`\_¥Z]\_\_]\_\_\_`[R[V`\_¥VY^¥UUUTUVRSUY¥WW  
@HWI-EAS443:3:71:205:956#0/1  
CGTTGGGCCATTCTATTCCACCATGTTACGGCCAGAGGT  
+HWI-EAS443:3:71:205:956#0/1  
aa``aa`aa^aa`aaa`aaaa`^^a¥^aa^a^¥¥^^VM  
@HWI-EAS443:3:40:523:966#0/1  
TTCCTGGCGATGATTACATATATTACCAGAAATCACCACG  
+HWI-EAS443:3:40:523:966#0/1  
XS¥¥\_¥`XZWY^\_\_[OWYaWX^¥^XEYYDRX\_\_`TIUH]T  
@HWI-EAS443:3:89:262:1330#0/1  
CATATATTACCAGAAATCAACCCGAGTGGTTCAGACTGAA  
+HWI-EAS443:3:89:262:1330#0/1  
aaaaab]a``aa¥^aaa\_¥]aa]\_\_\_V^[Y[\_a\_```\_\_\_\_  
@HWI-EAS443:3:25:1602:1433#0/1  
GAACCACCCGGTTGATTTCTGGTAATATATGTAATCATC  
+HWI-EAS443:3:25:1602:1433#0/1  
a\_ZH[\_aDP[S¥EM[IVT^I`\_BBBBBBBBBBBBBBBBBB  
@HWI-EAS443:3:50:766:1438#0/1  
TATTACCAGAAATCAACCCGAGTGGTTCAGAAAAATCCTG  
+HWI-EAS443:3:50:766:1438#0/1  
`bab\_¥bba`abbb\_ba\_^b^]`aa^^a]\_IU¥F]GQ^J^  
@HWI-EAS443:3:74:520:1538#0/1  
TATATTACCATAAATCAACCCGAGTGGTTCAGAAACATCC  
+HWI-EAS443:3:74:520:1538#0/1  
YXQT\_aY`Z¥HP[\_Sa¥Z^abaWTS^a`ab`\_aZ\_bb`aa  
@HWI-EAS443:3:90:1251:1372#0/1  
CTGAACCACTCGGGTTGATTTCTGGTAATATATGTGATCA  
+HWI-EAS443:3:90:1251:1372#0/1  
`b``b``aba^`b\_F\_bb¥bb`bba]``aaaabaXSab`]  
@HWI-EAS443:3:3:766:705#0/1  
GTCGGTTGATTTCTGGTAATATATGTAATCATCGCCAGG  
+HWI-EAS443:3:3:766:705#0/1  
a\_]\_]\_aXaa^aaa]aaa]`aa`aa```a\_`¥a\_^a[X\_aY  
@HWI-EAS443:3:13:1186:684#0/1  
ATGTTCTCGCGATGATTACATATATTACCAGAAATCAAC  
+HWI-EAS443:3:13:1186:684#0/1  
a^aWX¥`^aV]a\_\_\_\_^`¥ZX`\_\_^\_`^ZW\_0]\_^\_]`]W



@HWI-EAS443:3:13:840:1347#0/1  
GAACCACTCGGGTTGATTTCTGGTAATATATGTAATCATC  
+HWI-EAS443:3:13:840:1347#0/1  
a`bb`baabaaa\_baababaabb\_aaaaababaaaa^aaY  
@HWI-EAS443:3:1:954:391#0/1  
TCCTCGAATGTTCTGGCGATGATTACATATATTACCAGA  
+HWI-EAS443:3:1:954:391#0/1  
abb¥]\_`bbaaa`[`a\_Ra^S`]^`^`\_`[]baa\_¥0YaBB  
@HWI-EAS443:3:22:1216:1924#0/1  
CTGGTAATATATGTAATCATCGCCAGGAACATTCGAGGAT  
+HWI-EAS443:3:22:1216:1924#0/1  
abba^bbbbbbbbbabaabbaaaa\_a\_`aa`a\_\_\_\_]aa\_\_a  
@HWI-EAS443:3:23:792:845#0/1  
CAAAATCCTCGAATGTTCTGGCGATGATTACATATATTA  
+HWI-EAS443:3:23:792:845#0/1  
\_ZLZ[abbaS`ab]\_Q^^UQ\_aaZaU[¥]YWKFNX]`]\_\_  
@HWI-EAS443:3:24:1251:1428#0/1  
ATATTACCAGAAATCAACCCGAGTGGTTCAGAAACATCCT  
+HWI-EAS443:3:24:1251:1428#0/1  
aabaa`T[baab\_\_\_\_a\_[`VaW\_U`\_Y\_]`Y[^\_U\_^YR`  
@HWI-EAS443:3:25:1336:1643#0/1  
AGGATGTTTCTGAACCACTCGGGTTGATTTCTGGTAATAT  
+HWI-EAS443:3:25:1336:1643#0/1  
^^\_a^[Z\_bZ``\_aa\_VP`¥``[Qaa``a^Taba¥^\_a\_a  
@HWI-EAS443:3:2:176:1652#0/1  
GTTTCTGAACCACTCGGGTTGATTTCTGGTAATATATGTA  
+HWI-EAS443:3:2:176:1652#0/1  
aQWYX^\_AZI¥¥\_Y]a`aGSa][Z^V\_a¥0J¥XY]\_\_¥ZX  
@HWI-EAS443:3:30:107:403#0/1  
GATTACATATATTACCAGAAATCAACCCGAGTGGTTCAGA  
+HWI-EAS443:3:30:107:403#0/1  
a`aa\_]aaaaaaaa`aaa^Q\_`aa\_`a\_\_`S`\_]\_^`¥Q  
@HWI-EAS443:3:33:1176:1390#0/1  
CAGGATGTTTCTGAACCACTCGGGTTGATTTCTGGTAATA  
+HWI-EAS443:3:33:1176:1390#0/1  
a`]\_\_]^]aaa\_V\_aXaa``^STUXVV\_`^]YYOY¥]\_¥  
@HWI-EAS443:3:33:297:965#0/1  
CTCGAATGTTCTGGCGATGATTACATATATTACCAGAAA  
+HWI-EAS443:3:33:297:965#0/1  
aab`W`T^N]aa^\_\_\_\_`Z\_\_]¥W¥QW^YWZZWVU[UW¥W  
@HWI-EAS443:3:33:836:403#0/1  
GGTAATATATGTAATCATCGCCAGGAACATTCGAGGATTT  
+HWI-EAS443:3:33:836:403#0/1  
\_Z[`^`¥\_`[XW¥Z\_\_a`^]a]VUSU¥X]QWW¥¥TYXRQ  
@HWI-EAS443:3:36:897:1391#0/1  
ATGTTTCTGAACCACTCGGGTTGATTTCTGGTAATATATG  
+HWI-EAS443:3:36:897:1391#0/1  
`^\_W^bb\_Z\_\_\_\_bbbbba¥¥¥Z\_aaa^`[```Y`[^a`aa`  
@HWI-EAS443:3:38:1217:1408#0/1  
CAAAATCCTCGAATGTTCTGGCGATGATTACATATATTA

+HWI-EAS443:3:38:1217:1408#0/1  
ababbabaaba`aabaab``^aa`\_a`a`]Y^`\_\_`\_a¥  
@HWI-EAS443:3:3:609:1830#0/1  
AACCCTCGGGTTGATTTCTGGTAATATATGTAATCATCG  
+HWI-EAS443:3:3:609:1830#0/1  
`a]^\_Y`¥aaa[^\_\_Y\_a`^`\_Z`Yaa\_a]^`^`Z\_Ua^^\_  
@HWI-EAS443:3:40:740:127#0/1  
ATGTTCTGGCGATGATTACATATATTACCAGAAATCAAC  
+HWI-EAS443:3:40:740:127#0/1  
a\_aYZM^\_XZY^`\_][[\_¥ZZVYZUHx^[[SYJPTYXPN  
@HWI-EAS443:3:43:276:188#0/1  
ATATTACCAGAAATCAACCCGAGTGGTTCAGAAACATCCT  
+HWI-EAS443:3:43:276:188#0/1  
abbbbaababbbbaaaba`\_baa\_aa`^X`a^¥a`^`\_]^\_  
@HWI-EAS443:3:44:298:430#0/1  
CAAATCCTCGAATGTTCTGGCGATGATTACATATATTA  
+HWI-EAS443:3:44:298:430#0/1  
aababXaaa\_Z¥a\_b\_aa]\_a[¥ZW¥a`X]HLZXUUZ\_W  
@HWI-EAS443:3:45:1434:944#0/1  
CTGAACCTCGGGTTGATTTCTGGTAATATATGTAATCA  
+HWI-EAS443:3:45:1434:944#0/1  
`¥ZW¥a`[^`ZZ\_\_[EY\_V¥\_]^[^`ZOWWZX`^`\_X]X¥W\_  
@HWI-EAS443:3:45:1604:493#0/1  
CACTCGGGTTGATTTCTGGTAATATATGTAATCATCGCCA  
+HWI-EAS443:3:45:1604:493#0/1  
`Z¥OR`^`bSa`[¥\_X]aba`^`a]aa`aa`\_a`]^`YaTM¥  
@HWI-EAS443:3:47:118:1278#0/1  
CTCGGGTTGATTTCTGGTAATATATGTAATCATCGCCAGG  
+HWI-EAS443:3:47:118:1278#0/1  
abaabb\_babaaab^b\_aabbaaab^bbaaaaa`aa^a  
@HWI-EAS443:3:47:998:820#0/1  
CTGGCGATGATTACATATATTACCAGAAATCAACCCGAGT  
+HWI-EAS443:3:47:998:820#0/1  
a\_¥]X`^`b`ab`^¥babaaaa`b]W`^`a]UXa¥XL  
@HWI-EAS443:3:53:389:23#0/1  
GGATGTTTCTGAACCTCGGGTTGATTTCTGGTAATATA  
+HWI-EAS443:3:53:389:23#0/1  
a\_U¥^W\_\_V`UY]QUX[¥Z]a`X^]TZ\_]S]Y\_WSU[]]X  
@HWI-EAS443:3:56:1760:950#0/1  
GAACCTCGGGTTGATTTCTGGTAATATATGTAATCATC  
+HWI-EAS443:3:56:1760:950#0/1  
aaa`\_aaa`aaa]a¥U^aa^a^ZV\_\_`\_a`a`\_`\_`[0[]V  
@HWI-EAS443:3:58:1208:631#0/1  
GAACCTCGGGTTGATTTCTGGTAATATATGTAATCATC  
+HWI-EAS443:3:58:1208:631#0/1  
aaba\_a`^`aaaa^aa\_aaa\_aaa\_\_aa`aaaaa`^`a`\_`^`  
@HWI-EAS443:3:61:1335:695#0/1  
CTCGGGTTGATTTCTGGTAATATATGTAATCATCGCCAGG  
+HWI-EAS443:3:61:1335:695#0/1  
abbb`bKbbbabbbbaabbbbaabbbbaabbaXa`a

@HWI-EAS443:3:63:898:357#0/1  
CATATATTACCAGAAATCAACCCGAGTGGTTCAGAAACAT  
+HWI-EAS443:3:63:898:357#0/1  
abbaabaaa\_\_baaaaaa``aa\_aZa\_^\_a\_]``YaT  
@HWI-EAS443:3:68:580:294#0/1  
GAACCACTCGGGTTGATTTCTGGTAATATATGTAATCATC  
+HWI-EAS443:3:68:580:294#0/1  
\_^a`a]aaa\_U\_a^aa`\_aa`U`\_\_a\_a`a^`\_]W\_\_`  
@HWI-EAS443:3:6:198:420#0/1  
GGATGTTTCTGAACCACTCGGGTTGATTTCTGGTAATATA  
+HWI-EAS443:3:6:198:420#0/1  
aa`aab]aa^bIaL[Waaa\_N\_[VS`\_¥a`aN¥\_`\_\_\_\_  
@HWI-EAS443:3:71:106:1500#0/1  
CAGGATGTTTCTGAACCACTCGGGTTGATTTCTGGTAATA  
+HWI-EAS443:3:71:106:1500#0/1  
abbaa]a`^`¥]aab\_a`[\_`M\_]^^`\_a]\_Y`\_AY  
@HWI-EAS443:3:71:36:634#0/1  
CAAAATCCTCGAATGTTCTGGCGATGATTACATATATTA  
+HWI-EAS443:3:71:36:634#0/1  
aaa]UYab[ba`Q^\_Y\_aa\_\_`\_]\_[SY¥]^M¥^^\_] [Q  
@HWI-EAS443:3:72:1784:123#0/1  
GTTCTGGCGATGATTACATATATTACCAGAAATCAACCC  
+HWI-EAS443:3:72:1784:123#0/1  
aaaW\_aba^b`^a0^\_S]^]^\_Wa`UGX^`VSW\_X¥ZWSX  
@HWI-EAS443:3:72:524:225#0/1  
TCTGGTAATATATGTAATCATCGCCAGGAACATTCGAGGA  
+HWI-EAS443:3:72:524:225#0/1  
a`aaa`\_aaa\_aa\_aa`a\_]`Y[\_`\_^\_]`^Z`^`^Z  
@HWI-EAS443:3:79:277:1353#0/1  
TGTTTCTGAACCACTCGGGTTGATTTCTGGTAATATATGT  
+HWI-EAS443:3:79:277:1353#0/1  
UN[Za\_^V^^`]\_Y¥¥[U¥VQ]UZX`^ZXOR^Z^a\_¥YL  
@HWI-EAS443:3:7:1375:86#0/1  
TCAAAATCCTCGAATGTTCTGGCGATGATTACATATATT  
+HWI-EAS443:3:7:1375:86#0/1  
XY^`Y\_baa\_Yb\_a^`aXY`aUPa¥X]R`\_]UXFNZ[\_X  
@HWI-EAS443:3:7:1691:1357#0/1  
CATATATTACCAGAAATCAACCCGAGTGGTTCAGAAACAT  
+HWI-EAS443:3:7:1691:1357#0/1  
a`a^aaba`baaaaaaa`XUa\_a]a\_T\_Y`\_^\_X`  
@HWI-EAS443:3:7:922:1444#0/1  
CGAATGTTCTGGCGATGATTACATATATTACCAGAAATC  
+HWI-EAS443:3:7:922:1444#0/1  
`bbbabab``aaaab]aaXZ`W\_a`\_aaa[MSa`\_^`\_\_  
@HWI-EAS443:3:82:1780:396#0/1  
CAGGATGTTTCTGAACCACTCGGGTTGATTTCTGGTAATA  
+HWI-EAS443:3:82:1780:396#0/1  
Za`bbbbbbbbba¥a```bb[`a`bbbbbbS]^abb  
@HWI-EAS443:3:84:400:1372#0/1  
CTGGCGATGATTACATATATTACCAGAAATCAACCCGAGT

+HWI-EAS443:3:84:400:1372#0/1  
aaa`aaa\_a`a`a`a\_]\_aa\_a`a`a`a`\_]a^`\_`^]Y  
@HWI-EAS443:3:84:468:512#0/1  
CTGGTAATATATGTAATCATCGCCAGGAACATTCGAGGAT  
+HWI-EAS443:3:84:468:512#0/1  
abb`^abbbbabbbbabab`bba`aabaa`a`a`\_a  
@HWI-EAS443:3:90:43:2018#0/1  
ATATATTACCAGAAATCAACCCGAGTGGTTCAGAAACATC  
+HWI-EAS443:3:90:43:2018#0/1  
a[[]W^\_]aa`]a`a`b^a\_a`¥^0¥SU[¥[^XTZ[YT\_  
@HWI-EAS443:3:92:1144:448#0/1  
CAGGATGTTTCTGAACCACTCGGGTTGATTTCTGGTAATA  
+HWI-EAS443:3:92:1144:448#0/1  
abbaabbabaabbaaa\_a`aabba¥U^`aab\_aba\_a`aa  
@HWI-EAS443:3:93:1402:1954#0/1  
GAACCACTCGGGTTGATTTCTGGTAATATATGTAATCATC  
+HWI-EAS443:3:93:1402:1954#0/1  
aZa]ab\_b¥bbaIaaa\_abXb¥bWb\_aaa¥ab\_aaYY\_Ja  
@HWI-EAS443:3:94:462:1959#0/1  
CAAAATCCTCGAATGTTCCCTGGCGATGATTACATATATTA  
+HWI-EAS443:3:94:462:1959#0/1  
a¥ZZ¥UFWUa[]RU[VQZ`Y`VZ[V[WSTQMMSUa`^WWW  
@HWI-EAS443:3:97:467:441#0/1  
CAGGATGTTTCTGAACCACTCGGGTTGATTTCTGGTAATA  
+HWI-EAS443:3:97:467:441#0/1  
aabb`babbb`baabaaaa\_abbaababaa`aab^aaaa  
@HWI-EAS443:3:24:875:343#0/1  
TCGTCCTTCATTGTTCCCGCTGAATGCTGCCATAACGGTT  
+HWI-EAS443:3:24:875:343#0/1  
aabaaaaaaab`aaa`]^\_^]a`\_`^`^`a`a`\_Q\_  
@HWI-EAS443:3:84:893:464#0/1  
TCGTCCTTCATTGTTCCCGCTGAATGCTGCCATAACGGTT  
+HWI-EAS443:3:84:893:464#0/1  
`b`a`aa`aa\_aaa`\_T[Xab`a`VYZT`a¥^X¥]YX  
@HWI-EAS443:3:50:1236:1523#0/1  
AGTAGTGCTAGCCAGCACCATTCTGTTTTTCATGCCTGATT  
+HWI-EAS443:3:50:1236:1523#0/1  
Q¥YWaU\_H\_\_bW^`b`NaUSb\_Sa`^^Y`OHJYM]``[aG  
@HWI-EAS443:3:83:1099:1376#0/1  
TCTTGATGTCCCTACAAAATCATATGCATCTGCATTCTGA  
+HWI-EAS443:3:83:1099:1376#0/1  
a`bba¥`\_^`¥a\_^^aa^a`a``^\_a`\_]a`\_`^`^`]  
@HWI-EAS443:3:18:325:159#0/1  
CCGGCTTGAACCTTCTTGCTGTATCTTGATGTCCCTACAAA  
+HWI-EAS443:3:18:325:159#0/1  
ZS¥]YLXYROLMXV¥][HKXSXX¥^VOSZSSUYFJOLV[  
@HWI-EAS443:3:4:1016:1382#0/1  
CAAAAATGCAGTTGGGGTCTCATCGGAGGACTTAAATGG  
+HWI-EAS443:3:4:1016:1382#0/1  
^Z¥aQX\_b]Ia`Yabaa`a`\_Z0aa`aZ]^aaZ`a]a]

@HWI-EAS443:3:97:347:1255#0/1  
ATCGGAGGACTTAAATGGAATGGTAACACGGTTCGAGTCT  
+HWI-EAS443:3:97:347:1255#0/1  
a\_aa`\_\_a][`a`\_a\_a`\_\_\_\_\_a\_¥`W\_]W^¥\_^\_X]^  
@HWI-EAS443:3:32:713:170#0/1  
AGAGAACTCATCCTTTATGACAAAGAAGAAACAAGGAAAT  
+HWI-EAS443:3:32:713:170#0/1  
aaa\_\_aa]a`^\_Y^\_\_a^a\_\_`WY\_`a¥\_\_\_\_¥a`aXTWQR  
@HWI-EAS443:3:67:1649:1200#0/1  
GAATAATGAGAAGCAATTTTCTCGATTCCAGCCGAAAACCC  
+HWI-EAS443:3:67:1649:1200#0/1  
^a`ZXbb^0aS\_W`bRUaTaUaZ]Xa[`Ta\_\_`[T\_[]`^  
@HWI-EAS443:3:58:735:1199#0/1  
GGCGGGGGAGGTATATCTTTTCGCTCCGAGTCGGCATTTTG  
+HWI-EAS443:3:58:735:1199#0/1  
``^a`a`YXV\_K¥\_Z¥`]]`X^VXX¥Y]]PV[XQX]^`S  
@HWI-EAS443:3:82:818:1912#0/1  
GGGGGAGGTATATCTTTTCGCTCCGAGTCGGCATTTTGGGC  
+HWI-EAS443:3:82:818:1912#0/1  
``\_`\_\_[\_Xa\_\_a¥^`]]V¥¥a`]]¥`0¥`¥`¥\_VKPP¥  
@HWI-EAS443:3:97:1691:1759#0/1  
CGGGTGTCTGACAAGTTGTATTGCAATCGTGGACTGGTGT  
+HWI-EAS443:3:97:1691:1759#0/1  
Kb````\_bbbbW``]bbab`bbbbbbbab\_b^b`aaaba`ba  
@HWI-EAS443:3:20:1770:723#0/1  
ATCTTTTCGCTCCGAGTCGGCATTTTGGGCCCGGGGTAT  
+HWI-EAS443:3:20:1770:723#0/1  
a^Ra`¥¥]a)`¥`U¥Z¥`ZZZ^[]^GV¥QMQRPUZBBBB  
@HWI-EAS443:3:70:280:1602#0/1  
TATCTTTTCGCTCCGAGTCGGCATTTTGGGCCCGGGGTTA  
+HWI-EAS443:3:70:280:1602#0/1  
^W\_\_R\_a\_\_\_\_]^\_X^R¥b``]T]``a[GJ`\_¥`ZXVQTM`  
@HWI-EAS443:3:80:488:938#0/1  
CCCTGGGTCTTGCTTAATGCATCTTGGTTCAACTCCTTCC  
+HWI-EAS443:3:80:488:938#0/1  
abaaaa]aW`WZ`S^`Z[]\_Uaaa)`]]`\_a]``a\_\_`^^  
@HWI-EAS443:3:15:244:1307#0/1  
AGTGCTGGGAAGGACCCTAAGAAAACAGGAGGGAGATGCA  
+HWI-EAS443:3:15:244:1307#0/1  
abWa^]ba``aaa`a`aabaa`a\_`aaa\_abaa`aa^\_`a  
@HWI-EAS443:3:36:1119:1908#0/1  
GGGCCCTCCTGTTTTCTTAGGGTCCTTCCCAGCACTGGGA  
+HWI-EAS443:3:36:1119:1908#0/1  
`aabbbbabbbbabbbbbbba``baaaaaabaaaaaa\_a  
@HWI-EAS443:3:83:38:1927#0/1  
GCCCTCCTGTTTTCTTAGGGTCCTTCCCAGCACTGGGATG  
+HWI-EAS443:3:83:38:1927#0/1  
YK`\_X`\_R]TYXa]ZR\_Wa]Ya``Z]\_`^`[`Ya[XWS]V]  
@HWI-EAS443:3:86:1245:974#0/1  
ACGCTGTCCTGAGAGGATTTCTCATTTTGGGCAAAGAAGA

+HWI-EAS443:3:86:1245:974#0/1  
aab`Z]WOW\_¥Jaa[`W^]a`S^a`]Z\_aaRX]\_`aa`]  
@HWI-EAS443:3:61:1161:424#0/1  
AAAGAGTTCAACCACCTGGAAAAAGAATAGAGAACTTAA  
+HWI-EAS443:3:61:1161:424#0/1  
aaa^`b^a`aa][`^aaba`WKV¥\_a\_`\_`a[`^\_X\_`]Q  
@HWI-EAS443:3:60:1048:679#0/1  
GGGCCATCTAGCTCCAGTGCTGGTCTGAAAGATGACCTT  
+HWI-EAS443:3:60:1048:679#0/1  
aZX`aaW^aYSTT\_HWX¥Xa¥[a[SJUaTX[]TLNQP^NS  
@HWI-EAS443:3:67:246:1199#0/1  
CGGGCCCCTCCAATCTGTGTGCTGTGGCACATTTCCAAGA  
+HWI-EAS443:3:67:246:1199#0/1  
a`XV\_baaaaa`[aaaaU[[a^]X^`¥¥]V]\_\_^^`a\_^V  
@HWI-EAS443:3:63:1124:1998#0/1  
GATTTGTCTTCCAGGGCGGGGAGTTTTCGAGGTCTTGG  
+HWI-EAS443:3:63:1124:1998#0/1  
abaaaYaa^^^`]`Z¥`b]a¥BBBBBBBBBBBBBBBBBB  
@HWI-EAS443:3:80:44:1371#0/1  
GGGGTGGGAGTTTTCGAGCTCTCGGACGAAAAGGCAACG  
+HWI-EAS443:3:80:44:1371#0/1  
\_\_`¥S\_^[`^\_Waa```a^\_`\_¥`¥`\_`a¥aI[`T¥¥a`[  
@HWI-EAS443:3:52:452:1600#0/1  
GGGATCGGGTTGAGGATACTGGTAAGAGGCAATTCTCCA  
+HWI-EAS443:3:52:452:1600#0/1  
aab\_aaaaa\_abab`^`XaX`^Z^aZ\_aWNX]ZJV^[]  
@HWI-EAS443:3:62:1643:506#0/1  
AGCCCCGCACTCGCGAGATACTACTAAGACCACTGTGGA  
+HWI-EAS443:3:62:1643:506#0/1  
][FT[``bY\_\_`Ra^Y\_Z[\_]X\_U\_N]\_\_\_Y`SPZ¥X`U  
@HWI-EAS443:3:37:168:464#0/1  
ATGCCACAGAAATCAGAGCATCTGTGCGCAGAATGATTGG  
+HWI-EAS443:3:37:168:464#0/1  
\_`a\_a\_`b¥a¥RWaaa]aa`a`a\_Y^][FQRYLY^Y¥VUW  
@HWI-EAS443:3:94:271:606#0/1  
TAATCACTCAATGAGTGACATCGAAGCCATGGCGACTCAA  
+HWI-EAS443:3:94:271:606#0/1  
`aa\_[```\_¥U]a]\_OX^]¥SRMPWJ^^¥]`^XYFVNQTY  
@HWI-EAS443:3:42:966:602#0/1  
AGTAGAAATGAAAAGTGGCGAGAGCAATTGGGACAGAAAT  
+HWI-EAS443:3:42:966:602#0/1  
\_aP^`¥abbbbabababaab¥`[`¥a]`a\_aaa\_aaaaa`  
@HWI-EAS443:3:94:632:1623#0/1  
CAGAAGTGGAGGAAATACCAATCAACAAAAGGCATCCGCA  
+HWI-EAS443:3:94:632:1623#0/1  
a`[^]¥Xa^\_\_]¥`aaaY```\_aa\_\_`^]¥\_\_\_^]\_\_\_`  
@HWI-EAS443:3:15:1368:816#0/1  
ATCCCTTTTGAAGAGCAACNGTTATGGCAGCATTTAGCG  
+HWI-EAS443:3:15:1368:816#0/1  
¥¥`]¥a`b`baaa`¥b^aaWD^aa`aaaZ`]IMLWFQKKH

@HWI-EAS443:3:81:107:1213#0/1  
GGGGGCGATCTGAACCTTTGTCAATAGGGCAAATCAGCGAC  
+HWI-EAS443:3:81:107:1213#0/1  
aaa`ab[\_ZVTNX[ZX^]¥T`]X[XX`\_^ZTRUUTT][UM  
@HWI-EAS443:3:2:1190:688#0/1  
CATTCCTGAAGTCTGCTTAAAATGGGAACATAAATGTT  
+HWI-EAS443:3:2:1190:688#0/1  
aa\_¥¥[]TUQ]XRTXQ¥[[Yq]a``\_\_\_Y^N`\_ZU`Y\_YT  
@HWI-EAS443:3:33:1591:1202#0/1  
CGCCGTCTGAGTTCCTCAATGGTGGAACAGATATTCATGA  
+HWI-EAS443:3:33:1591:1202#0/1  
]SaaXHV`¥\_a`]¥`a\_OU]`]Ua^Y¥aa\_WUPWOSSSZ^  
@HWI-EAS443:3:53:254:1285#0/1  
CGCCGTCTGAGTTCCTCAATGGTGGACAAATCTTCATGA  
+HWI-EAS443:3:53:254:1285#0/1  
ababbabbbabaaabaabaaa`a`aa`^W^aaabaaaa  
@HWI-EAS443:3:16:950:1813#0/1  
CGCCGTCTGAGTTCCTCAATGGTGGAACAGATCTTCATGA  
+HWI-EAS443:3:16:950:1813#0/1  
aaUJXX^^a\_X]Za^[`]UR]RN[VW]Y]¥XSH¥W[¥]¥W  
@HWI-EAS443:3:22:1336:882#0/1  
CGCCGTCTGAGTTCCTCAATGGTGGAACAGATCTTCATGA  
+HWI-EAS443:3:22:1336:882#0/1  
aba```\_ab^a[aba^abaa\_YS[a\_a`\_^^^\_a`\_a`\_`\_`  
@HWI-EAS443:3:30:43:863#0/1  
CGCCGTCTGAGTTCCTCAATGGTGGAACAGATCTTCATGA  
+HWI-EAS443:3:30:43:863#0/1  
a^ZaZyaa\_L`^`a`a]TWXYZ[ST[¥¥TN¥\_[[S¥Y]\_  
@HWI-EAS443:3:40:1444:262#0/1  
CGCCGTCTGAGTTCCTCAATGGTGGAACAGATCTTCATGA  
+HWI-EAS443:3:40:1444:262#0/1  
abbbbbbbbbbbabbbbbbbbb`ba\_Z\_ab\_a\_aaaaaa`  
@HWI-EAS443:3:42:1656:1068#0/1  
TCGCCGTCTGAGTTCCTCAATGGTGGAACAGATCTTCATG  
+HWI-EAS443:3:42:1656:1068#0/1  
aa`\_]``^aaa`^a`aa`a`aadWaaaa`a^`[\_aaa\_]`  
@HWI-EAS443:3:47:745:709#0/1  
CGCCGTCTGAGTTCCTCAATGGTGGAACAGATCTTCATGA  
+HWI-EAS443:3:47:745:709#0/1  
aba`^baaYb`a`abaaaaa^Y`aa`a\_\_^\_aa`a\_]`  
@HWI-EAS443:3:48:320:553#0/1  
CGCCGTCTGAGTTCCTCAATGGTGGAACAGATCTTCATGA  
+HWI-EAS443:3:48:320:553#0/1  
Z`babbabaaabbbbbbbbb`Tbbbbabbaba`^¥bbbb  
@HWI-EAS443:3:50:367:549#0/1  
CGCCGTCTGAGTTCCTCAATGGTGGAACAGATCTTCATGA  
+HWI-EAS443:3:50:367:549#0/1  
`b¥\_a^baa^a`bbbaabaa¥^]ab`bW\_`ab`a``baa`  
@HWI-EAS443:3:62:958:1723#0/1  
CGCCGTCTGAGTTCCTCAATGGTGGAACAGATCTTCATGA

+HWI-EAS443:3:62:958:1723#0/1  
`aaaa^bbaaa\_\_abaabaaa[^a`¥aaaa`\_a`aZa`^a  
@HWI-EAS443:3:78:521:141#0/1  
CGCCGTCTGAGTTCTTCAATGGTGGAACAGATCTTCATGA  
+HWI-EAS443:3:78:521:141#0/1  
abaab`aa`b`a]a`a``a`]\_a\_\_\_\_\_^^[\_\_\_\_Z^[  
@HWI-EAS443:3:84:644:624#0/1  
CGCCGTCTGAGTTCTTCAATGGTGGAACAGATCTTCATGA  
+HWI-EAS443:3:84:644:624#0/1  
aabbbababaa\_aaaa`aaa`\_]`\_`aaba\_aaaa^a``\_`  
@HWI-EAS443:3:95:990:160#0/1  
CGCCGTCTGAGTTCTTCAATGGTGGAACAGATCTTCATGA  
+HWI-EAS443:3:95:990:160#0/1  
abb]aabab`b\_b\_babbbabb\_bbababaaa^bb\_aaba  
@HWI-EAS443:3:96:38:1457#0/1  
CGCCGTCTGAGTTCTTCAATGGTGGAACAGATCTTCATGA  
+HWI-EAS443:3:96:38:1457#0/1  
`\_bbbbbb`bb¥HZ`\_Z`\_Z\_bbX^a¥R`\_]PYaaaa\_^H  
@HWI-EAS443:3:31:1094:2036#0/1  
GCCGGTTGATTTCTGCTTAATGTCCAATCATAAGTCTGGC  
+HWI-EAS443:3:31:1094:2036#0/1  
]`\_P\_Vb``^Xa^a`S`Y^abb```]`\_P\_ab`PZ\_aZ`\_`  
@HWI-EAS443:3:97:732:272#0/1  
TGCCGTTGATTTCTGCTTAATGTCCAATCATAAGTCTGG  
+HWI-EAS443:3:97:732:272#0/1  
a`a[RW[Z\_\_¥a\_ZH\_ZS[PP¥ZR`^PX[]`¥TVSVR]\_B  
@HWI-EAS443:3:25:219:1113#0/1  
AGAATTTGGCGCCAAGCAAACAATGGCGAAGATGCAACAG  
+HWI-EAS443:3:25:219:1113#0/1  
aaabaaaaabaa`\_a`aaa]\_a¥¥^\_\_\_\_\_¥¥XR\_\_]W\_[  
@HWI-EAS443:3:3:1416:1401#0/1  
TGCTGTTGCATCTTCGCCATTGTTGCTTGCGCCAAATT  
+HWI-EAS443:3:3:1416:1401#0/1  
`bbbaa`[``b\_\_Y¥VORGUaNUa``]X[HYZY\_OLV]BB  
@HWI-EAS443:3:21:259:172#0/1  
CGATGCTGGATCAGACCGAGTGATGGTATCACCTCTGGCG  
+HWI-EAS443:3:21:259:172#0/1  
[a¥`\_ab`\_IT]\_¥aaa\_]\_Y^BBBBBBBBBBBBBBBBBB  
@HWI-EAS443:3:98:312:1703#0/1  
GGGCAGCAATAGGGTTGAGGATTAGCTCATCTTTCAGTTT  
+HWI-EAS443:3:98:312:1703#0/1  
]\_Z]\_¥`a\_\_^\_\_WQ\_bbbZaUSW[]ba`baba]b\_b^bb  
@HWI-EAS443:3:29:1185:1142#0/1  
GGCATGAGCATGGACCAGTCTCGTGACATTTCCCTCGAGGG  
+HWI-EAS443:3:29:1185:1142#0/1  
\_]ba`\_a`baa`aaaa\_\_aa\_]JYP^^`^`\_a\_[X^`^X  
@HWI-EAS443:3:28:424:390#0/1  
GAAAGTGATTCCCAGAGGAAAGCTTTCCACAAGAGGGGTC  
+HWI-EAS443:3:28:424:390#0/1  
`^a¥b[a`aabaGb\_aaWaaa^abaa\_\_aa``\_aZ\_Y`^\_`



@HWI-EAS443:3:99:1497:754#0/1  
CTCCAATATGTGTGCTGTGGCACATTTCCAAGAGAGATGC  
+HWI-EAS443:3:99:1497:754#0/1  
a`T\_a`bJ`bT[¥]abbb\_[b]a^a^a\_FWab¥bYbG\_aZ  
@HWI-EAS443:3:1:299:1318#0/1  
GGGCTGCACACTGATCTGGCCTGCGGATGCCTTTTGTGA  
+HWI-EAS443:3:1:299:1318#0/1  
`bb`^bUbZa^\_a\_b^aba\_X`U`a^]a\_V\_aaa\_a¥`U¥  
@HWI-EAS443:3:89:927:729#0/1  
ACCCTGTAGAATCTGTCCACTCCTGCTTGTATTCCCTCAT  
+HWI-EAS443:3:89:927:729#0/1  
RGV¥b`\_¥bbaaaUa`b\_NXR\_a`^aaS^bb\_a¥`^aW]  
@HWI-EAS443:3:22:726:1416#0/1  
CTAACTTGCAGGCCCTGTAGAATCTGTCCACTCCTGCTTG  
+HWI-EAS443:3:22:726:1416#0/1  
[^ba\_\_S\_Z^[[Y]aa¥Q^U`^\_P\_JONP``[¥¥UULT\_X  
@HWI-EAS443:3:61:1258:1305#0/1  
CGTCGCTTTCAATCTGTGCCGATTTCTTCAATTANCCAC  
+HWI-EAS443:3:61:1258:1305#0/1  
\_bbab\_abaZab`abb`bbbbbbaabbabbabaaa^DFY\_S  
@HWI-EAS443:3:31:41:191#0/1  
GGCGTCGCTTTCAATCTGTGCCGATTTCTTCAATTAACC  
+HWI-EAS443:3:31:41:191#0/1  
V\_ba[¥\_aba¥`\_`K¥U[¥``WO[]¥RY^WW\_W[0^Y]  
@HWI-EAS443:3:51:86:137#0/1  
CTCGCTTTCAATCTGTGCCGATTTCTTCAATTAACC  
+HWI-EAS443:3:51:86:137#0/1  
abbbbbbbaabb`baaba^bababb`^ba``Za  
@HWI-EAS443:3:1:1614:256#0/1  
CGTCGCTTTCAATCTGTGCCGATTTCTTCAATTAACCAC  
+HWI-EAS443:3:1:1614:256#0/1  
`baaaa`baaaaaab`aaa¥a\_\_aaa^`a]¥Saa``W]\_B  
@HWI-EAS443:3:27:52:1635#0/1  
CGTCGCTTTCAATCTGTGCCGATTTCTTCAATTAACCAC  
+HWI-EAS443:3:27:52:1635#0/1  
`Zaaa`aa\_\_¥\_a^`^^`abaa\_\_a`a`a^S`\_X^a\_\_a  
@HWI-EAS443:3:30:356:737#0/1  
CGTCGCTTTCAATCTGTGCCGATTTCTTCAATTAACCAC  
+HWI-EAS443:3:30:356:737#0/1  
aZUab`\_U]ZU¥\_\_`\_L]\_a¥a`\_a\_T`^^Z`\_Z^\_ZT^\_  
@HWI-EAS443:3:32:237:1574#0/1  
CGTCGCTTTCAATCTGTGCCGATTTCTTCAATTAACCAC  
+HWI-EAS443:3:32:237:1574#0/1  
a¥\_a\_a^`a^)`\_\_^W\_\_^^`\_^\_Z`^^^`\_^^\_\_a`\_a  
@HWI-EAS443:3:35:1468:334#0/1  
CGTCGCTTTCAATCTGTGCCGATTTCTTCAATTAACCAC  
+HWI-EAS443:3:35:1468:334#0/1  
abaababababaaaaaa\_baababaaaaaaba\_aaaa\_b`a  
@HWI-EAS443:3:48:963:737#0/1  
CGTCGCTTTCAATCTGTGCCGATTTCTTCAATTAACCAC

+HWI-EAS443:3:48:963:737#0/1  
ababbbbbbabb`bbabaab\_bbbbaabababbaa\_`a\_  
@HWI-EAS443:3:54:175:21#0/1  
CGTCGCTTTCAATCTGTGCCGATTTCTTCAATTAACCAC  
+HWI-EAS443:3:54:175:21#0/1  
ab`abbabbaaaaaab\_a`b]¥\_aa`aaa`¥aa]U]\_\_\_\_  
@HWI-EAS443:3:55:349:1930#0/1  
CGTCGCTTTCAATCTGTGCCGATTTCTTCAATTAACCAC  
+HWI-EAS443:3:55:349:1930#0/1  
aaTaaa`aaa`]^\_\_`\_^[\_]\_\_\_\_\_^\_^\_]^\_^^^Y]]]  
@HWI-EAS443:3:62:1131:1166#0/1  
CGTCGCTTTCAATCTGTGCCGATTTCTTCAATTAACCAC  
+HWI-EAS443:3:62:1131:1166#0/1  
Z\_`a`\_ba\_bbbabba`^`\_Z¥abW``aa\_\_abbaa\_aaa  
@HWI-EAS443:3:74:1519:462#0/1  
CGTCGCTTTCAATCTGTGCCGATTTCTTCAATTAACCAC  
+HWI-EAS443:3:74:1519:462#0/1  
abaababa\_Wa]baaa\_baab\_\_aaaa\_a]\_aa^b^^^W  
@HWI-EAS443:3:74:424:1185#0/1  
CGTCGCTTTCAATCTGTGCCGATTTCTTCAATTAACCAC  
+HWI-EAS443:3:74:424:1185#0/1  
a¥SVT¥UZ]^TR]YNY]P\_\_TW¥QHRUQQ^YVYSBBBBBB  
@HWI-EAS443:3:77:308:262#0/1  
CGTCGCTTTCAATCTGTGCCGATTTCTTCAATTAACCAC  
+HWI-EAS443:3:77:308:262#0/1  
^b`bbaa\_aaaaba`aYa`\_aaaa\_a\_a`a``\_^aa\_\_Z\_  
@HWI-EAS443:3:79:1033:421#0/1  
CGTCGCTTTCAATCTGTGCCGATTTCTTCAATTAACCAC  
+HWI-EAS443:3:79:1033:421#0/1  
`b]¥\_`^aaa`^`\_a]b\_a^Xa^]`````]¥a`aaa\_YN\_\_  
@HWI-EAS443:3:7:957:132#0/1  
CGTCGCTTTCAATCTGTGCCGATTTCTTCAATTAACCAC  
+HWI-EAS443:3:7:957:132#0/1  
ab]aa^\_a\_aa`a\_\_a\_aZ]a]Z`\_^\_a^^^a\_]^[^Z\_X  
@HWI-EAS443:3:81:1001:1379#0/1  
CGTCGCTTTCAATCTGTGCCGATTTCTTCAATTAACCAC  
+HWI-EAS443:3:81:1001:1379#0/1  
ab[¥^W`a¥Y¥LXa]XWZaab\_Y\_]Z^`\_S]^`^`^N][  
@HWI-EAS443:3:81:275:1762#0/1  
CGTCGCTTTCAATCTGTGCCGATTTCTTCAATTAACCAC  
+HWI-EAS443:3:81:275:1762#0/1  
a\_\_Wa\_X[[\_^\_aNHz```\_a\_Ya]\_\_a^Z^^`¥^`]  
@HWI-EAS443:3:87:333:1346#0/1  
CGTCGCTTTCAATCTGTGCCGATTTCTTCAATTAACCAC  
+HWI-EAS443:3:87:333:1346#0/1  
ab\_babaaba`Waa```]`aa\_b\_aaa`aa`\_\_a```^`\_`]  
@HWI-EAS443:3:89:1374:1714#0/1  
CGTCGCTTTCAATCTGTGCCGATTTCTTCAATTAACCAC  
+HWI-EAS443:3:89:1374:1714#0/1  
ab`bababb`a^ba```]b¥Naaa^b`^bb\_a^aaaa\_\_a]

@HWI-EAS443:3:89:683:1162#0/1  
CGTCGCTTTCAATCTGTGCCGATTTCTTCAATTAACCAC  
+HWI-EAS443:3:89:683:1162#0/1  
]baaa`¥ba`b`\_a^b[aa\_abbbaabbaabbbabababWab  
@HWI-EAS443:3:8:1166:1402#0/1  
CGTCGCTTTCAATCTGTGCCGATTTCTTCAATTAACCAC  
+HWI-EAS443:3:8:1166:1402#0/1  
ab``bTaaa^baa`a`Zbaa``aaaa¥aa]a`aa\_a]Sa^  
@HWI-EAS443:3:17:663:1236#0/1  
TGGGCTATTAGTGCAGATGGAGGACCCAACTTATACAAT  
+HWI-EAS443:3:17:663:1236#0/1  
`bbaaaa`Wb\_JHZ`a¥Sa`UX\_]VYHL]HQ`\_¥`^¥¥`  
@HWI-EAS443:3:26:40:1084#0/1  
CCTGTGCCGATTTCTTCAATTAACCACCTTATTTCTCA  
+HWI-EAS443:3:26:40:1084#0/1  
`aW`ab]\_^\_R^`][\_Yb^`[WTWYa^a`ZJYVQ`X]¥^  
@HWI-EAS443:3:79:429:1850#0/1  
GTCGCTTTCAACCTGTGCCGATTTCTTCAATTAACCACC  
+HWI-EAS443:3:79:429:1850#0/1  
[O]Z[PORaTLWYXZMO¥¥Q\_]Z^]S\_Y^[YWPKT[W[W`  
@HWI-EAS443:3:5:1606:1699#0/1  
ATCTGGAGTAAATGAATCAGCTGACATGAGTATTGGAGTA  
+HWI-EAS443:3:5:1606:1699#0/1  
abaab]`Taaa^b`aa\_a\_bYbb`[a`a`b`ba`[\_`\_a]Y  
@HWI-EAS443:3:23:61:322#0/1  
CACAAATCCTAGAATTCCTTAGTCAGAGGTGACAAGATT  
+HWI-EAS443:3:23:61:322#0/1  
a^^`[\_`[[aY[T\_R^AY`a^^W^OX]]^]SU]PVSU]]WS  
@HWI-EAS443:3:67:864:399#0/1  
GGATGCAGGTGCATTGACTGAAGATCCAGATGAAGAATCA  
+HWI-EAS443:3:67:864:399#0/1  
ab\_aaaaaT]^baaaaaaaaaa\_\_a\_\_a`\_a\_\_a`\_\_\_\_  
@HWI-EAS443:3:36:523:1301#0/1  
GCCGCTTTCTTCAATTGACCACCTTATTTCTCAAATTT  
+HWI-EAS443:3:36:523:1301#0/1  
aba\_a¥^]]a``^R\_¥M¥`\_aaaa\_]aa`a`aa^ZQaa^  
@HWI-EAS443:3:85:1222:574#0/1  
CCCAGGAATATTTGAGAATTCATGCCTTGAAACAATACGG  
+HWI-EAS443:3:85:1222:574#0/1  
ababb`Yaa\_ababbaa^aa`aaaa^aaaa\_`^aa\_aY^\_  
@HWI-EAS443:3:51:137:1638#0/1  
AAAGAAATCTCTGTGTCTTGTGAATTGGTCATCATCTTTC  
+HWI-EAS443:3:51:137:1638#0/1  
abbbbaa]bbbaab\_a`b`XXa¥^\_a^YSVWXZ^`^a`XP  
@HWI-EAS443:3:64:1158:683#0/1  
AAGAAATCTCTGTGTCTTGTGAATTGGTCATCATCTTTC  
+HWI-EAS443:3:64:1158:683#0/1  
a`aZ^bbbaaa^R\_`bbaa^aTaaa]`UZZ`[]a`aaa¥a  
@HWI-EAS443:3:5:311:1086#0/1  
AAAGGCGTAAATCCCAATTACCTCATGGCTTGAAGCAAG

+HWI-EAS443:3:5:311:1086#0/1  
[U`¥YPG]\_Rba]¥SKaX0^aaJ]I\_\_`X¥PW[BBBBBBB  
@HWI-EAS443:3:52:956:377#0/1  
CGCCTTTCTCATGTGGTTTGGACTATGTTAGGCTCTTTCCA  
+HWI-EAS443:3:52:956:377#0/1  
¥\_^R\_\_^aa`a[Sa^`b`XSb`^aS^Z]ZV\_Z¥baX¥0  
@HWI-EAS443:3:70:79:974#0/1  
TCCTTTTGCAAGATTGCCAGTTCATTGATGCTTAATGCT  
+HWI-EAS443:3:70:79:974#0/1  
aabaa`aa`]`a\_\_aa`Z`]`a`^`^`\_`\_\_[^]]  
@HWI-EAS443:3:95:1226:235#0/1  
CAGACTGTTGAGCTTTTCGCAAATGCTCCTAGCTAAAGT  
+HWI-EAS443:3:95:1226:235#0/1  
Z`a¥^b^``abbababb\_^aX`\_b`N`X^`bbZbUaa\_L  
@HWI-EAS443:3:61:808:1538#0/1  
CTGGCTGGATCCTGGGAAATCCAGAGTGTGAATCACTCTA  
+HWI-EAS443:3:61:808:1538#0/1  
abb¥bbV^]bbb\_\_^]b`bbbb[bbbXb`baa\_\_`Y\_`¥H  
@HWI-EAS443:3:53:226:666#0/1  
AGCCAATTGAAGTGGGCACTCGGTGAAAATATAGCACCAG  
+HWI-EAS443:3:53:226:666#0/1  
a`\_`V¥aa¥`VUGZ[]VW[T¥aSV¥RXV^[¥[X¥V¥Z[X]  
@HWI-EAS443:3:76:534:1199#0/1  
GTAAAGTGAACACTTCAATATAAAGACTACCTGTTCCGC  
+HWI-EAS443:3:76:534:1199#0/1  
a]UEMPWTJRWJQ]QZXY]YW^[]ODUZIDNWTSTXPLPB  
@HWI-EAS443:3:33:156:901#0/1  
GTCCAGGCCATGATCCGGTCTCTTCCTTCAATTATCTCAA  
+HWI-EAS443:3:33:156:901#0/1  
aab``abb`W]b^Q\_\_XYb\_ba`aa`a``[``R`aa]`a  
@HWI-EAS443:3:92:947:1730#0/1  
CGTCCATCATAATCATTGAGTTTGGAGTTCAGTGCACATTT  
+HWI-EAS443:3:92:947:1730#0/1  
ab`abaaababaa`abaaabaaaaa`ab`a\_a\_a\_aaaa  
@HWI-EAS443:3:13:1126:501#0/1  
GCTCCCGCTATATCCTGACCACTCATTTATTCCTACGATA  
+HWI-EAS443:3:13:1126:501#0/1  
a\_NXaaaX]\_\_¥¥]]`\_^]¥XZ\_a`\_\_\_\_]\_^0Z]]^a\_Z^  
@HWI-EAS443:3:23:402:1370#0/1  
AGAGAGGATGGTGCTTTCTGCTTTTGGATGAAAGAAGAAAT  
+HWI-EAS443:3:23:402:1370#0/1  
a\_QQ]a^a^]XRX`V]¥V¥`R¥`\_]FZZ`V]Z[Y\_\_`\_^R  
@HWI-EAS443:3:36:70:1027#0/1  
GGGCCATGTCCATTATTCTCTTGTCTGCTGTAATTGGGTA  
+HWI-EAS443:3:36:70:1027#0/1  
¥`\_baX¥`Z¥\_W`\_¥^¥aa\_`]¥]ab\_V^\_^Wab¥¥Z\_VZ  
@HWI-EAS443:3:95:1582:1221#0/1  
GGGCCATGTCCATTATTCTCTTGTCTGCTGTAATTGGGTA  
+HWI-EAS443:3:95:1582:1221#0/1  
abb\_¥¥``^babbbb\_YTXbbXL]Yb]\_b]\_]a\_Q\_aP¥

@HWI-EAS443:3:21:1284:308#0/1  
GCCATGTCCATTATTCTCTTGTCTGCTGTAATTGGGTATC  
+HWI-EAS443:3:21:1284:308#0/1  
aa`[\_a\_\_aaaa\_aa]`a\_\_^a\_]aZZ^`\_`\_W^YV  
@HWI-EAS443:3:58:365:1473#0/1  
GATACCCAATTACAGCAGACAAGAGAATAATGGACATGGC  
+HWI-EAS443:3:58:365:1473#0/1  
a`[aaaab]a`a\_\_a\_\_a`\_^\_a\_\_[Z\_\_\_\_\_]^a[^Z]¥^  
@HWI-EAS443:3:27:466:303#0/1  
AGGGGACGTAGTGTGATAATGAAACGAAAACGGGACTCT  
+HWI-EAS443:3:27:466:303#0/1  
aba``]bb[aaZW^b\_\_\_\_¥a`T^aaY[`aa\_ZY`^^^\_\_^  
@HWI-EAS443:3:63:1429:1618#0/1  
CAATCAACAAAAGGCATCCTCAGGCCAGGTCAAGTGTGCAG  
+HWI-EAS443:3:63:1429:1618#0/1  
a[Y¥]Q```abSaVTXSSGLIa`¥SS¥BBBBBBBBBBBBB  
@HWI-EAS443:3:25:401:1728#0/1  
GAGGAAATACCAATCAACAAAAGGCATCCGCAGGCCAGGT  
+HWI-EAS443:3:25:401:1728#0/1  
aa[aa\_^aaab¥]aaZ\_b\_\_][\_a``WJX¥aaZ]aaVSI  
@HWI-EAS443:3:6:828:1885#0/1  
AGGGCCTCATATACAACAGGATGGGAACAGTGACTACAGA  
+HWI-EAS443:3:6:828:1885#0/1  
aa\_baa^Z\_a¥XJR`Ra¥V]YMU]PM]Pa\_LVaTdk^ZX\_  
@HWI-EAS443:3:33:1775:823#0/1  
GCCTGTCCATCACTTGGTCCATCGGTCATTATAGTAAAGC  
+HWI-EAS443:3:33:1775:823#0/1  
S`^¥baW¥`a`XP¥bbbaaab\_¥aaYH``aTFJ`Mza^PG  
@HWI-EAS443:3:91:157:596#0/1  
CACCAATTGACTTTTTGTGAGCTGGGCTTTCATTTGGTCTC  
+HWI-EAS443:3:91:157:596#0/1  
`[b`Va[^aabba`][a]aaaa]`G\_\_\_\_¥`]U[¥PX]XZ  
@HWI-EAS443:3:100:868:538#0/1  
GCCTGATGAGACCAAATGAAAACCCAGCTCACAAAAGTCA  
+HWI-EAS443:3:100:868:538#0/1  
a\_\_aaa\_\_aaa`\_a\_\_aaa`a\_]\_]a[\_W\_Z\_]Z\_Z^B  
@HWI-EAS443:3:14:748:1478#0/1  
CAGCCTGATGAGACCAAATGAAAACCCAGCTCACAAAAGT  
+HWI-EAS443:3:14:748:1478#0/1  
a`aa\_a^aa`b`aaab^abaa\_\_ba`\_aa^\_`]`aaa\_NR  
@HWI-EAS443:3:16:831:598#0/1  
GGTCAGCCTGATGAGACCAAATGAAAACCCAGCTCACAAA  
+HWI-EAS443:3:16:831:598#0/1  
aa\_abaabab`abaa`a`a`aaa``aaaZ]\_`^\_]a\_a\_]`  
@HWI-EAS443:3:17:658:998#0/1  
ACTTTTGTGAGCTGGGTTTTTCTTTTGGTCTCATCAGGCTG  
+HWI-EAS443:3:17:658:998#0/1  
`bbaaa`ab`aaaaab\_a\_\_`aaa`a¥aaab`\_aa`\_a`  
@HWI-EAS443:3:17:798:1212#0/1  
GCCTGATGAGACCAAATGAAAACCCAGCTCACAAAAGTCA

+HWI-EAS443:3:17:798:1212#0/1  
aaaaaa`a\_\_\_aaa]aaa``\_a`\_^\_a`\_^\_\_^\_]\_a]\_Z  
@HWI-EAS443:3:18:1190:654#0/1  
CACCAATTGACTTTTGTGAGCTGGGTTTTTCATTTGGTCTC  
+HWI-EAS443:3:18:1190:654#0/1  
WOV^T`bbb[^SXVX`\_````ab\_\_Y^`]]][aW[`aX\_`T  
@HWI-EAS443:3:1:164:1217#0/1  
GATGAGACCAAATGAAAACCCAGCTCACAAAAGTCAATTG  
+HWI-EAS443:3:1:164:1217#0/1  
a\_aaaaa\_a`aaaa``\_a]Y`\_a`¥^^a`\_\_`Z^^]`BB  
@HWI-EAS443:3:21:1720:304#0/1  
CTTTTGTGAGCTGGGTTTTTCATTTGGTCTCATCAGGCTGA  
+HWI-EAS443:3:21:1720:304#0/1  
abbbbabbbba`baa\_aab[aaaaaa\_aa`ab\_`a`]aa`  
@HWI-EAS443:3:23:1430:310#0/1  
CTTTTGTGAGCTGGGTTTTTCATTTGGTCTCATCAGGCTGA  
+HWI-EAS443:3:23:1430:310#0/1  
`bbbbbabbaabbaa^bbaZ`babb]`aaaaaaaaaUb`a  
@HWI-EAS443:3:25:316:785#0/1  
CTGATGAGACCAAATGAAAACCCAGCTCACAAAAGTCAAT  
+HWI-EAS443:3:25:316:785#0/1  
abbb\_bbbbbabbabbbba`bbbabbaabbbb\_bbYaaba  
@HWI-EAS443:3:26:915:1227#0/1  
GCCTGATGAGACCAAATGAAAACCCAGCTCACAAAAGTCA  
+HWI-EAS443:3:26:915:1227#0/1  
``b```\_]¥Q]abbbbaabZ\_¥a]]ab]aa\_baaa\_b]aW  
@HWI-EAS443:3:27:66:1172#0/1  
TGATGAGACCAAATGAAAACCCAGCTCACAAAAGTCAATT  
+HWI-EAS443:3:27:66:1172#0/1  
``]¥]a^S`b\_I\_bbb\_\_¥a``\_a\_baaa^MUSF\_\_\_\_\_a  
@HWI-EAS443:3:28:152:1324#0/1  
ACTTTTGTGAGCTGGGTTTTTCATTTGGTCTCATCAGGCTG  
+HWI-EAS443:3:28:152:1324#0/1  
`baaaaa\_\_^`ba`\_^`aab\_aa`a]Ya`aa\_aa]^aW\_  
@HWI-EAS443:3:2:940:1287#0/1  
GACTTTTGTGAGCTGGGTTTTTCATTTGGTCTCATCAGGCT  
+HWI-EAS443:3:2:940:1287#0/1  
aZP]Z]\_\_I¥0`a`\_X]NFV[SV]Z¥^`NT]VZUYUOBBB  
@HWI-EAS443:3:30:59:524#0/1  
GATGAGACCAAATGAAAACCCAGCTCACAAAAGTCAATTG  
+HWI-EAS443:3:30:59:524#0/1  
aaaaaaaaaba`aaa\_aa`aa¥aa\_\_\_\_`\_X[¥]Z`¥\_\_^^  
@HWI-EAS443:3:33:622:252#0/1  
GCCTGATGAGACCAAATGAAAACCCAGCTCACAAAAGTCA  
+HWI-EAS443:3:33:622:252#0/1  
\_¥^RTXPXIRX^[X]^S¥X[Xaa^aVZaT\_[\_UNSY[S^R  
@HWI-EAS443:3:35:1139:328#0/1  
CACCAATTGACTTTTGTGAGCTGGGTTTTTCATTTGGTCTC  
+HWI-EAS443:3:35:1139:328#0/1  
abbbbaabbaabbbbbb]bababbbba¥baab`baaaa\_a`a

@HWI-EAS443:3:35:1720:1424#0/1  
CTGATGAGACCAAATGAAAACCCAGCTCACAAAAGTCAAT  
+HWI-EAS443:3:35:1720:1424#0/1  
¥b[Kbbb`^^a¥bbab\_bbaabbU\_WY^\_Saba^aYZ[  
@HWI-EAS443:3:35:483:1570#0/1  
TTTGTGAGCTGGGTTTTCATTTGGTCTCATCAGGCTGACC  
+HWI-EAS443:3:35:483:1570#0/1  
`ba`aa`^^W¥T]]aaa]\_¥^XYW]^LU\_YY\_a]¥¥Za  
@HWI-EAS443:3:37:949:1463#0/1  
GACTTTTGTGAGCTGGGTTTTCATTTGGTCTCATCAGGCT  
+HWI-EAS443:3:37:949:1463#0/1  
a`aaaabba\_`a`aba`aaaaabaaa]]Uabbabaa\_a`  
@HWI-EAS443:3:39:1754:1266#0/1  
CACCAATTGACTTTTGTGAGCTGGGTTTTCATTTGGTCTC  
+HWI-EAS443:3:39:1754:1266#0/1  
abbababbbaabbbba\_bab\_abab\_`bb`a^`a\_Z`a¥  
@HWI-EAS443:3:45:1024:486#0/1  
CACCAATTGACTTTTGTGAGCTGGGTTTTCATTTGGTCTC  
+HWI-EAS443:3:45:1024:486#0/1  
^bb]aab`bbabbbbababXbbbb\_`bbaabaabaaaa  
@HWI-EAS443:3:47:1501:942#0/1  
GCCTGATGAGACCAAATGAAAACCCAGCTCACAAAAGTCA  
+HWI-EAS443:3:47:1501:942#0/1  
a]]\_aaa`X`I\_a¥Y\_aa^^`\_¥\_`^`[\_YX[[W\_WZV  
@HWI-EAS443:3:52:1779:693#0/1  
GCCTGATGAGACCAAATGAAAACCCAGCTCACAAAAGTCA  
+HWI-EAS443:3:52:1779:693#0/1  
aaabYaaWQTUa`¥U[XTUPTY]UPYVNWVZY]^¥VQ]¥]  
@HWI-EAS443:3:54:1064:1556#0/1  
ATTGACTTTTGTGAGCTGGGTTTTCATTTGGTCTCATCAG  
+HWI-EAS443:3:54:1064:1556#0/1  
aaaa`^baaaa\_`[a`aa\_aVaaa\_\_a`aa]¥\_\_`\_^`\_`  
@HWI-EAS443:3:56:1314:647#0/1  
ATTGACTTTTGTGAGCTGGGTTTTCATTTGGTCTCATCAG  
+HWI-EAS443:3:56:1314:647#0/1  
aa`R`abbbb`\_aaa\_\_bba]aaa^aaaaa]\_`a\_aa^a`  
@HWI-EAS443:3:57:305:1606#0/1  
GGTCAGCCTGATGAGACCAAATGAAAACCCAGCTCACAAA  
+HWI-EAS443:3:57:305:1606#0/1  
ZQWT^[`b^\_OT^^YX¥M]SVZ]ZaZVQY]aZOV]BBBBB  
@HWI-EAS443:3:60:86:1372#0/1  
TTTGTGAGCTGGGTTTTCATTTGGTCTCATCAGGCTGACC  
+HWI-EAS443:3:60:86:1372#0/1  
a`b`\_a^baaaa\_Zaaaaaaa`\_]a`b`\_\_^]^^`\_`\_`  
@HWI-EAS443:3:62:1430:1574#0/1  
GTCAGCCTGATGAGACCAAATGAAAACCCAGCTCACAAA  
+HWI-EAS443:3:62:1430:1574#0/1  
\_T`\_`¥a\_aaa\_a```a`[\_aa\_a`\_\_¥^`W^M^^`\_`\_`  
@HWI-EAS443:3:63:1012:1939#0/1  
GATGAGACCAAATGAAAACCCAGCTCACAAAAGTCAATTG

+HWI-EAS443:3:63:1012:1939#0/1  
a]a`a\_aaZba`Z`aababba[aaaba]`\_]a]Ta`aa`]  
@HWI-EAS443:3:63:882:1738#0/1  
GATGAGACCAAATGAAAACCCAGCTCACAAAAGTCAATTG  
+HWI-EAS443:3:63:882:1738#0/1  
`Z¥\_aaabbabbaaaaba`aZ`aba^aa\_\_^^`\_`a``  
@HWI-EAS443:3:64:1081:1878#0/1  
ATTGACTTTTGTGAGCTGGGTTTTTCATTTGGTCTCATCAG  
+HWI-EAS443:3:64:1081:1878#0/1  
`aaa`\_\_\_X\_a¥\_\_a`aa^0\_aa`\_]`a\_W]\_^\_Z[a[  
@HWI-EAS443:3:64:1324:1024#0/1  
CTTTTGTGAGCTGGGTTTTTCATTTGGTCTCATCAGGCTGA  
+HWI-EAS443:3:64:1324:1024#0/1  
abbbb\_bab`bbaba\_bbb\_bbabaa`aaaaabab``abb  
@HWI-EAS443:3:64:552:196#0/1  
GGTCAGCCTGATGAGACCAAATGAAAACCCAGCTCACAAA  
+HWI-EAS443:3:64:552:196#0/1  
aa]aab\_abaaaaa`^^a\_\_`a`\_a`^[V^`\_\_`\_\_^]  
@HWI-EAS443:3:65:1431:1761#0/1  
GACTTTTGTGAGCTGGGTTTTTCATTTGGTCTCATCAGGCT  
+HWI-EAS443:3:65:1431:1761#0/1  
aaaabaaaUaaX]aabbQ^a\_V^\_] [a\_Jaaaa\_^[^S[[  
@HWI-EAS443:3:67:1212:1425#0/1  
CACCAATTGACTTTTGTGAGCTGGGTTTTTCATTTGGTCTC  
+HWI-EAS443:3:67:1212:1425#0/1  
``ababba^\_¥¥^aaWZb^Y`ab`b\_`b¥^ba\_a]aab\_  
@HWI-EAS443:3:6:587:1215#0/1  
GACTTTTGTGAGCTGGGTTTTTCATTTGGTCTCATCAGGCT  
+HWI-EAS443:3:6:587:1215#0/1  
aY[X[PZHM^`XV]aY\_U\_ZYYYSTR[\_¥WV^] ^S]\_\_U\_  
@HWI-EAS443:3:70:1354:938#0/1  
CACCAATTGACTTTTGTGAGCTGGGTTTTTCATTTGGTCTC  
+HWI-EAS443:3:70:1354:938#0/1  
^a[aa¥\_\_a``bb`W`R`]`Wa`a]b]abbb^V]TZa  
@HWI-EAS443:3:71:1540:1874#0/1  
GTCAGCCTGATGAGACCAAATGAAAACCCAGCTCACAAAA  
+HWI-EAS443:3:71:1540:1874#0/1  
aa`\_\_^\_]ZW[`X[[]``````¥`^¥XZ¥[Y¥[Q\_ZVT  
@HWI-EAS443:3:71:798:1617#0/1  
CTTTTGTGAGCTGGGTTTTTCATTTGGTCTCATCAGGCTGA  
+HWI-EAS443:3:71:798:1617#0/1  
aaa`^TWOZ`^a]a\_P\_Z[^X][\_`^N\_]b\_P^a¥`aa\_a  
@HWI-EAS443:3:73:224:315#0/1  
GACTTTTGTGAGCTGGGTTTTTCATTTGGTCTCATCAGGCT  
+HWI-EAS443:3:73:224:315#0/1  
a^\_a`aaa`a`^aa^aU\_aa`\_a\_^`W\_`\_a^Z^`^X\_  
@HWI-EAS443:3:74:1170:1788#0/1  
GACTTTTGTGAGCTGGGTTTTTCATTTGGTCTCATCAGGCT  
+HWI-EAS443:3:74:1170:1788#0/1  
abbbbabbV\_abaabbb¥`bbbbbabba`ab`baab\_\_a`



@HWI-EAS443:3:74:483:1256#0/1  
GCCTGATGAGACCAAATGAAAACCCAGCTCACAAAAGTCA  
+HWI-EAS443:3:74:483:1256#0/1  
ab¥[^][aZ]XU]]X\_^Q^^`aaS^[SYaaaWR]¥XRZU  
@HWI-EAS443:3:75:1026:988#0/1  
TTTGTGAGCTGGGTTTTTCATTTGGTCTCATCAGGCTGACC  
+HWI-EAS443:3:75:1026:988#0/1  
aa`a\_b`¥`aa``]aaa`aaaa\_Z^a\_a`\_a`^`\_a`\_a  
@HWI-EAS443:3:75:94:284#0/1  
GACTTTTGTGAGCTGGGTTTTTCATTTGGTCTCATCAGGCT  
+HWI-EAS443:3:75:94:284#0/1  
a\_a^Yaa``\_Ka^Z\_]aYaa````a\_^Ta\_^\_Ya\_\_[^]  
@HWI-EAS443:3:76:102:1818#0/1  
CTTTTGTGAGCTGGGTTTTTCATTTGGTCTCATCAGGCTGA  
+HWI-EAS443:3:76:102:1818#0/1  
aa¥aa````aaa^Z¥Maa¥\_0[aaQDP\_\_aa\_\_aVXV\_^\_  
@HWI-EAS443:3:7:118:343#0/1  
GACTTTTGTGAGCTGGGTTTTTCATTTGGTCTCATCAGGCT  
+HWI-EAS443:3:7:118:343#0/1  
a[Za[baa\_\_`aaaaaaSV¥^`Y\_`a^^`^\_`\_]`\_]R[^  
@HWI-EAS443:3:7:154:418#0/1  
GCCTGATGAGACCAAATGAAAACCCAGCTCACAAAAGTCA  
+HWI-EAS443:3:7:154:418#0/1  
aa]]YSW]]aYaa\_TZYWRWPL[ZYZ^LRU[^SPVW^RZB  
@HWI-EAS443:3:80:495:1561#0/1  
CTGATGAGACCAAATGAAAACCCAGCTCACAAAAGTCAAT  
+HWI-EAS443:3:80:495:1561#0/1  
a\_baaba]aaaa`aaaaaaaabaaa\_\_a\_a[aaaU\_^\_`  
@HWI-EAS443:3:81:1312:1681#0/1  
GATGAGACCAAATGAAAACCCAGCTCACAAAAGTCAATTG  
+HWI-EAS443:3:81:1312:1681#0/1  
aaabaaaaaaabaaaaab`\_`aaa\_[`]a`\_\_aX\_`\_`\_`  
@HWI-EAS443:3:83:1147:322#0/1  
GCCTGATGAGACCAAATGAAAACCCAGCTCACAAAAGTCA  
+HWI-EAS443:3:83:1147:322#0/1  
`a^SQZZU¥Y\_^]U^a`Z\_\_\_Y^\_`\_`¥]XUYQV`RY]  
@HWI-EAS443:3:83:1541:1114#0/1  
ATTGACTTTTGTGAGCTGGGTTTTTCATTTGGTCTCATCAG  
+HWI-EAS443:3:83:1541:1114#0/1  
a`W]VaV]P``\_WMVSQZ^PTZ[U^S¥UW\_ZOM[R^]WOT  
@HWI-EAS443:3:84:650:1726#0/1  
GACTTTTGTGAGCTGGGTTTTTCATTTGGTCTCATCAGGCT  
+HWI-EAS443:3:84:650:1726#0/1  
aabaaaaa\_a`a`\_^a^Taa`a`\_`¥QQR\_\_`aXa\_ZV¥\_  
@HWI-EAS443:3:85:1623:1386#0/1  
GGTCAGCCTGATGAGACCAAATGAAAACCCAGCTCACAAA  
+HWI-EAS443:3:85:1623:1386#0/1  
`[]aaaY[`a`aa]a^¥S\_\_^a^`\_^Y0[`^a^]]^\_`XY  
@HWI-EAS443:3:88:803:592#0/1  
GCCTGATGAGACCAAATGAAAACCCAGCTCACAAAAGTCA

+HWI-EAS443:3:88:803:592#0/1  
\_aabbabbbaa^`a^`bb\_R\_baa`[a\_^^`ZW\_[¥\_U`\_  
@HWI-EAS443:3:91:1154:415#0/1  
GATGAGACCAAATGAAAACCCAGCTCACAAAAGTCAATTG  
+HWI-EAS443:3:91:1154:415#0/1  
¥]V`^aaYZ\_WL¥¥X\_`]^ab`^S`a`^SS]UXQ^\_[\_\_¥  
@HWI-EAS443:3:91:468:1714#0/1  
GCCTGATGAGACCAAATGAAAACCCAGCTCACAAAAGTCA  
+HWI-EAS443:3:91:468:1714#0/1  
aaa][`Z[^`\_]`\_`\_a]\_a^a]]`^\_\_\_\_Y[\_^Q]^V¥\_  
@HWI-EAS443:3:92:157:1025#0/1  
TTTGTGAGCTGGGTTTTTCATTTGGTCTCATCAGGCTGACC  
+HWI-EAS443:3:92:157:1025#0/1  
aaaa\_`aa\_\_a`a]`aaa\_a\_\_a\_]a`\_`\_a\_a`\_\_^\_\_^]  
@HWI-EAS443:3:98:179:342#0/1  
ACCAATTGACTTTTGTGAGCTGGGTTTTTCATTTGGTCTCA  
+HWI-EAS443:3:98:179:342#0/1  
aR`\_\_aba`V[a\_a\_N^`\_`aaa`V[`ZW¥^`^`^`[T]\_] ]  
@HWI-EAS443:3:98:582:80#0/1  
GACTTTTGTGAGCTGGGTTTTTCATTTGGTCTCATCAGGCT  
+HWI-EAS443:3:98:582:80#0/1  
a\_abbbbababababbbb[aba\_\_aaaa\_`\_]aa]aa\_^a  
@HWI-EAS443:3:86:453:1332#0/1  
GGTAAAATGGACGAAACACAAGGGTTGCTTATGAAAGAA  
+HWI-EAS443:3:86:453:1332#0/1  
`b¥aaabaaba^aaa]GSYT^¥]]\_X]\_\_\_\_]^\_\_\_\_WYY]]  
@HWI-EAS443:3:2:417:879#0/1  
GAACAAGGACAGACCCTCTGGAGCAAAACAAACGATGCTG  
+HWI-EAS443:3:2:417:879#0/1  
a\_\_\_\_`¥aaTW`^[UU¥¥[^\_UV\_¥XX[VLY\_US^S[¥^BB  
@HWI-EAS443:3:24:1767:420#0/1  
CCCATGGCTGTATGGAGGATCTCCAGTATAAGGGAATGTG  
+HWI-EAS443:3:24:1767:420#0/1  
`baabababba`a\_aZabQ[Q¥U\_`^a^`\_Z\_aabQ^[ZU`  
@HWI-EAS443:3:4:293:1443#0/1  
GTGGGTTGGTCTTGGCCAGACGGTGCTGAGTTGCCGTTTA  
+HWI-EAS443:3:4:293:1443#0/1  
`Za]¥HVNHEV\_¥YXRU\_`\_S`^KVVN^\_`\_W¥¥W[PU^BB  
@HWI-EAS443:3:97:1442:191#0/1  
AAAAATTCGACACTAATTGATGGCCATCAGAATTCTTTTG  
+HWI-EAS443:3:97:1442:191#0/1  
]XF^aXLYa]]ZV\_b`a\_[\_`\_`KPRJKDOYY`XFY\_\_\_B  
@HWI-EAS443:3:49:1493:51#0/1  
CAACACTACGTCCCCTTGCCCAATTAGTACATTAGCTTTC  
+HWI-EAS443:3:49:1493:51#0/1  
abbabbb`\_b\_]\_\_ba\_Z\_OW[a]^SXGNaaa^]\_PXaa]  
@HWI-EAS443:3:93:60:402#0/1  
AGCTAATGTACTAATTGGGCAAGGGGACGTAGTGTGGTA  
+HWI-EAS443:3:93:60:402#0/1  
`bb\_ZZZ`SaZa][ba]`a^X¥`¥aaXaa\_\_ZOZZ][` [ ]

@HWI-EAS443:3:61:555:259#0/1  
GGAGGCGCTGCCTTTTTCAGTCTCTTCAGCAGATTGAGAG  
+HWI-EAS443:3:61:555:259#0/1  
aaX`\_`a^QTW¥WHR^`V^UZ¥\_W¥QRTN[TYYWWWQU  
@HWI-EAS443:3:34:571:1608#0/1  
CATTAATCAGGCACTCCTCGATTGCTTCATATAGCCCCAC  
+HWI-EAS443:3:34:571:1608#0/1  
]\_Z\_\_\_^]XSL\_¥\_XY`UQZOVF[YZ]WZS¥[[MDPB BBB  
@HWI-EAS443:3:69:419:485#0/1  
TGGGGCTATATGAAGCAATCGAGGAGTGCCTGATTAATGA  
+HWI-EAS443:3:69:419:485#0/1  
UXT]aZZQ^`^`Z¥\_Zaa`\_I\_]O\_Pa^[`¥R\_`a`]\_Z  
@HWI-EAS443:3:77:178:1373#0/1  
TGGGGCTATATGAAGCAATCGAGGAGTGCCTGATTAATGA  
+HWI-EAS443:3:77:178:1373#0/1  
aaabababaaaaba`a^`\_`a]]aW[X\_a\_`[^^]`\_Y\_\_  
@HWI-EAS443:3:18:1389:876#0/1  
TGACCAAAATTTGATTATCGCTACTAGAAACATAGTAAGA  
+HWI-EAS443:3:18:1389:876#0/1  
abaa\_\_\_YV]baa]aaa`\_a[^MW`^\_]`^`\_`a^]]]`^`\_  
@HWI-EAS443:3:58:874:908#0/1  
CTCCGATTGGCCATGTTTTCGATTTGTTTTCAAAGAATTC  
+HWI-EAS443:3:58:874:908#0/1  
a¥a[a^aaaY]^`^`P]]FWZX^a^aaaaR`]V¥WR]a¥  
@HWI-EAS443:3:23:964:385#0/1  
AATCACTCAATGAGTGACATCGAAGCCATGGCACCTTAAA  
+HWI-EAS443:3:23:964:385#0/1  
aaaaa\_aaa^aa\_`Zaa^a`^Z`^^U]^`\_\_\_UUWW\_\_\_]W]  
@HWI-EAS443:3:54:778:787#0/1  
CTCATTGTTGGCAAAGAAGACAAGAGATATGGCCCTGTCA  
+HWI-EAS443:3:54:778:787#0/1  
aabbbaababab`aaaaaba\_bbbabaaaaa``¥a`\_\_G  
@HWI-EAS443:3:81:1188:800#0/1  
CATCAGTTAAGAAAGAAGAAGTGTAAACGGGCAACCT  
+HWI-EAS443:3:81:1188:800#0/1  
aZa^W¥RJ\_\_\_^V``¥UY^\_]]]^X¥¥R¥`\_VZ¥ZG]XVHV  
@HWI-EAS443:3:3:645:134#0/1  
GGGGGGTGTATGAAGCAATCGAGGAGTGCCTGATTAATG  
+HWI-EAS443:3:3:645:134#0/1  
\_[]\_a]GXaSP[]SG¥¥SUSS]S^PU^WUJW¥WTPUBBB  
@HWI-EAS443:3:45:30:514#0/1  
CAGGGATCATTAAATCAGGCACTCCTCGATTGCTTCATACA  
+HWI-EAS443:3:45:30:514#0/1  
aa]VYZ\_`^W\_¥^SZSU^ZTZVURZUT[UYRH[ZWZ^BBB  
@HWI-EAS443:3:2:1022:254#0/1  
GGGGGGCTGTATGAAGCAATCGAGGAGTGCCTGGTTAATG  
+HWI-EAS443:3:2:1022:254#0/1  
ab`a]¥a\_a\_]\_¥[[JFX\_S[\_ZX\_UQF¥¥¥^¥[XSRPVXB  
@HWI-EAS443:3:1:745:1027#0/1  
GGGGGGCTATATGAAGCAATCGAGGAGTGCCTGGTTAATGA



@HWI-EAS443:3:86:343:1593#0/1  
ACTCCAGATTCTGGTTGAAAGACACCCACGGCCGATTTCGA  
+HWI-EAS443:3:86:343:1593#0/1  
XHW\_b`T`WVb\_`VU`b`\_Xb`bb^]`aa[D[]MYaTW¥  
@HWI-EAS443:3:86:388:1813#0/1  
AAGACACCCACGGCCGATTTCGAGCCATGCCAGTTATCCCT  
+HWI-EAS443:3:86:388:1813#0/1  
^`^a\_Z]b\_`\_¥OH^]SWQ\_¥Z\_]^JJWaPQORKT¥^^`M  
@HWI-EAS443:3:30:1328:1503#0/1  
CGATCTCGGCTTTGAGGGGGCCTGACGGGGTGATAGAAAG  
+HWI-EAS443:3:30:1328:1503#0/1  
aa\_JW]]\_\_a^`[[R`Z\_a^[`XMXM\_``IYUSDVTOUTB  
@HWI-EAS443:3:59:115:491#0/1  
CGCGATCTCGGCTTTGAGGGGGCCTGACGGGGTGATAGAA  
+HWI-EAS443:3:59:115:491#0/1  
`aaa\_aaaaa\_`aa`a¥aa\_`\_^`¥XXZ`\_¥K\_\_OFX^[Z  
@HWI-EAS443:3:48:333:1722#0/1  
GGATGATGATGGGCATGTCTAACATGCTAANTACGGTCTT  
+HWI-EAS443:3:48:333:1722#0/1  
ab``^aWRZa[``^Z`aYXa[[XZ^¥^ZYXDH¥SUZV¥]W  
@HWI-EAS443:3:42:1446:1808#0/1  
TGATGATGGGCATGTTTAAACATGCTAAGTACGGTCTTGGG  
+HWI-EAS443:3:42:1446:1808#0/1  
aaWa]`aaaa^aaa\_aaa\_^`a0a^a\_]aZa\_R¥a\_``^  
@HWI-EAS443:3:9:581:1634#0/1  
TGATGATGGGCATGTTTAAACATGCTAAGTACGGTCTTGGG  
+HWI-EAS443:3:9:581:1634#0/1  
]\_¥aaaaa[a^ba`aa`aaa^a\_aaaa\_`\_a\_]a\_a[Y\_  
@HWI-EAS443:3:9:960:156#0/1  
ATGATGATGGGCATGTTTAAACATGCTAAGTACGGTCTTGG  
+HWI-EAS443:3:9:960:156#0/1  
abbabababaaa\_aa]````^\_\_\_\_]`\_^\_Z\_Z`^ZZ^^`]  
@HWI-EAS443:3:26:235:947#0/1  
CAAGACCGTACTTAGCATGTTAAACATGCCCATCATCATC  
+HWI-EAS443:3:26:235:947#0/1  
a¥]`aaaa`a`\_a^aaaa`aaa\_a^^a\_a\_\_``^a\_\_a  
@HWI-EAS443:3:50:24:1962#0/1  
GGATGATGATGGGCATGTTTAAACATGCTAAGTACGGTCTG  
+HWI-EAS443:3:50:24:1962#0/1  
]\_X]aZ¥Wa\_XYT^aa¥WU]`\_]Z\_^a^]X¥]`\_]UTY\_  
@HWI-EAS443:3:64:1134:488#0/1  
CGGGATGATGATGGGCATGTTTAAACATGCTAAGTACGGTC  
+HWI-EAS443:3:64:1134:488#0/1  
`aaaHZU`\_b`[a[¥^[T¥\_aaa\_]a`¥a^aaP^VZUPH  
@HWI-EAS443:3:93:1292:2027#0/1  
GACCGTACTTAGCATGTTAAACATGCCCATCATCATCCA  
+HWI-EAS443:3:93:1292:2027#0/1  
aaab`\_]`a\_aa\_aaaaa`a\_a¥`\_YJ¥a\_`^^\_¥VYQ]  
@HWI-EAS443:3:17:1617:1730#0/1  
GGGATGATGATGGGCATGTTTAAACATGCTAAGTACGGTCT

+HWI-EAS443:3:17:1617:1730#0/1  
aba`b`^a]`aa`a`aaa`aa^a[a\_a^aa\_^]`Y`aXR\_  
@HWI-EAS443:3:18:1624:509#0/1  
GGGATGATGATGGGCATGTTTAAACATGCTAAGTACGGTCT  
+HWI-EAS443:3:18:1624:509#0/1  
`¥`][`Y^][0][SV[^SUBBBBBBBBBBBBBBBBBBBB  
@HWI-EAS443:3:24:843:432#0/1  
GGGATGATGATGGGCATGTTTAAACATGCTAAGTACGGTCT  
+HWI-EAS443:3:24:843:432#0/1  
a`¥]Z\_Z\_aa`a`[UTM^^`U`aU\_^^X¥]]aS^R`\_U[\_  
@HWI-EAS443:3:27:646:71#0/1  
GGGATGATGATGGGCATGTTTAAACATGCTAAGTACGGTCT  
+HWI-EAS443:3:27:646:71#0/1  
`bbabbabbbabaaa`aa\_aba`]a\_a`a`\_]a\_a\_WZ`  
@HWI-EAS443:3:55:145:108#0/1  
GGGATGATGATGGGCATGTTTAAACATGCTAAGTACGGTCT  
+HWI-EAS443:3:55:145:108#0/1  
aaa^\_a\_\_a`\_`^`^`^aY^^`]^]\_V^]X^X¥Y\_\_YY^  
@HWI-EAS443:3:61:647:323#0/1  
GGATGATGATGGGCATGTTTAAACATGCTAAGTACGGTCTT  
+HWI-EAS443:3:61:647:323#0/1  
a\_Waa`¥`][¥HL\_Y\_ZU\_`¥VYXXQNM^MUWVTQM JWYY  
@HWI-EAS443:3:70:52:655#0/1  
GGGATGATGATGGGCATGTTTAAACATGCTAAGTACGGTCT  
+HWI-EAS443:3:70:52:655#0/1  
W`\_RX`abb^^^^\_ab`Zba^I]`\_X\_[Y`\_¥aaaYY`Y  
@HWI-EAS443:3:71:1632:1921#0/1  
GGGATGATGATGGGCATGTTTAAACATGCTAAGTACGGTCT  
+HWI-EAS443:3:71:1632:1921#0/1  
aaZW`a\_aa`]a\_]`a`W`\_\_\_^[\_`a\_Z\_U`^[UQU[  
@HWI-EAS443:3:77:638:1898#0/1  
GGGATGATGATGGGCATGTTTAAACATGCTAAGTACGGTCT  
+HWI-EAS443:3:77:638:1898#0/1  
N[ `[bbb`^¥`a`aabb`Ybb`ab`a\_b\_ab` `baba^\_Z  
@HWI-EAS443:3:94:1256:430#0/1  
GGGATGATGATGGGCATGTTTAAACATGCTAAGTACGGTCT  
+HWI-EAS443:3:94:1256:430#0/1  
aba` `aaab`aa\_\_`\_ba\_```a\_a`W`\_`a]a\_dWHV`  
@HWI-EAS443:3:94:933:515#0/1  
GGGATGATGATGGGCATGTTTAAACATGCTAAGTACGGTCT  
+HWI-EAS443:3:94:933:515#0/1  
[X]\_aa`bbaaa\_a¥aaaaa\_`\_]`\_a^aa`Ra]a\_Y]a  
@HWI-EAS443:3:96:1306:1815#0/1  
GGATGATGATGGGCATGTTTAAACATGCTAAGTACGGTCTT  
+HWI-EAS443:3:96:1306:1815#0/1  
a` `a` `[`a\_]`T^aa`^\_]¥\_^U`\_\_[W\_U\_]ST^\_  
@HWI-EAS443:3:96:1745:796#0/1  
GGATGATGATGGGCATGTTTAAACATGCTAAGTACGGTCTT  
+HWI-EAS443:3:96:1745:796#0/1  
`]X`\_aX¥aXUU^\_UQ]QX\_\_Y[¥]W¥V¥¥WS\_¥S¥BBBB

@HWI-EAS443:3:97:336:973#0/1  
GGGATGATGATGGGCATGTTTAAACATGCTAAGTACGGTCT  
+HWI-EAS443:3:97:336:973#0/1  
aa`\_\_`\_`a`X`^^¥\_\_aZ`\_\_¥¥¥\_]¥^\_¥\_W^W\_¥WU^  
@HWI-EAS443:3:57:1319:1351#0/1  
GCGGGGAGTCTTCGAGCTCTCGGACGAAAAGGCTACGAAC  
+HWI-EAS443:3:57:1319:1351#0/1  
a`\_W]¥XYZaa`^aY`^`Y^Ya[¥]aRY^¥X]XX¥S¥VBB  
@HWI-EAS443:3:80:1377:1883#0/1  
GACCATCGTCAAAATCCACAGCACTNTGCTGTTCCCTGTTG  
+HWI-EAS443:3:80:1377:1883#0/1  
O[UaZ[YUFH]ND[PTOWO[¥PUUMDU^DDUYU^OXYKPT  
@HWI-EAS443:3:18:1203:2004#0/1  
GACAAAATGACCATCGTCAACATCCACAGCACTCTGCCGT  
+HWI-EAS443:3:18:1203:2004#0/1  
^^`\_`bbba[a¥]X¥S¥Yb)`a`P`b` `[`]ab]XRDxz  
@HWI-EAS443:3:24:995:354#0/1  
CACAAATTCAAACGAGGAGATCATTGAGTTAAAGAAGCT  
+HWI-EAS443:3:24:995:354#0/1  
ababb`bbbbbbbabbaabaaaabbbababb`aabaa`a  
@HWI-EAS443:3:95:1318:975#0/1  
CGAAAGCAGGTCAAATATATTCAATATGGGGGAATAAAA  
+HWI-EAS443:3:95:1318:975#0/1  
[Z`RQ]UP[¥¥I¥[ZVX\_]Y[Y`a[TTZJYD[Z¥SVS^P  
@HWI-EAS443:3:8:449:373#0/1  
GCAGGTCAAATATATTCAATATGGGGAGAATAAAAAGAACT  
+HWI-EAS443:3:8:449:373#0/1  
a\_W`aY`Zaa`\_Y¥`^`^X^Z` ``\_]\_0aPN¥`]]^`[^S`  
@HWI-EAS443:3:34:1305:2020#0/1  
AGCAGGTCAAATATATTCAATATGGGGAGAATAAAAAGAAC  
+HWI-EAS443:3:34:1305:2020#0/1  
aa`\_aa[abbbbaabaaa`aaaa^RG¥\_aa`^`^`[^U[  
@HWI-EAS443:3:80:1783:910#0/1  
GAAAGCAGGTCAAATATATTCAATATGGGGAGAATAAAAAG  
+HWI-EAS443:3:80:1783:910#0/1  
a`GKMX^^`S¥a^\_W[^`^`^`\_¥¥U\_]W\_]V\_Y^\_\_Z  
@HWI-EAS443:3:58:1620:658#0/1  
AAAGCAGGTCAAATATATTCAATATGGGGAGAATAAAAAGA  
+HWI-EAS443:3:58:1620:658#0/1  
\_bb\_H\_^Z[bb^\_X`b`bbaa\_aP[^NGSZ\_]¥`aa`][a  
@HWI-EAS443:3:16:1774:1694#0/1  
AACAATTCGACACTAATTGATGGGCATCCGAATTGTTTTG  
+HWI-EAS443:3:16:1774:1694#0/1  
a`^bb^¥WZ]bb`a`¥`[^aYWRD¥Za]Z`ZS\_WDT`^ [K  
@HWI-EAS443:3:77:75:117#0/1  
GTCTGGCTGTCAGTAAGTCTGCTAGAGTCCCGTTTTTCGTT  
+HWI-EAS443:3:77:75:117#0/1  
\_NW\_Y` [U\_QTLYPQWYDDK¥QWY^W¥QYYYY¥GTYYSUT  
@HWI-EAS443:3:48:399:358#0/1  
AACGAAAATGGGACTCTAGCATACTTACTGACAGCCAGAC

+HWI-EAS443:3:48:399:358#0/1  
`aU]^Tb`abb`]^`RD]T\_aY\_a^a`b`RHb\_UT`ZF  
@HWI-EAS443:3:84:659:1379#0/1  
TGGGACTCTAGCATACTTACTGACAGCCAGACAGCGACCA  
+HWI-EAS443:3:84:659:1379#0/1  
XX`W`W`a^^\_S]]a`QU`^a]\_a`aZX[`YXP]`WUZ`  
@HWI-EAS443:3:27:1074:1259#0/1  
CGGCTGTATGGAGGATCTCCAGTATAAGGGAATGTGGTGC  
+HWI-EAS443:3:27:1074:1259#0/1  
^\_`aaZYXY\_U]\_U[Z\_^XGWW[X]^a\_aSYUXX^[J]L  
@HWI-EAS443:3:66:924:213#0/1  
CGGCTGTATGGAGGATCTCCAGTATAAGGGAATGTGGTGC  
+HWI-EAS443:3:66:924:213#0/1  
aabbbbZ^a]\_Z]^X[UV\_ZH^X]\_[]]^`YX`W`\_`NRL  
@HWI-EAS443:3:83:582:1561#0/1  
CGATTCGACACTAATTGATGGCCATCCGAATTCTTTTGGT  
+HWI-EAS443:3:83:582:1561#0/1  
ab`]bYX]W`W`L[\_a]\_Saa[\_a[a`\_`\_`UZ^]G  
@HWI-EAS443:3:61:1491:1295#0/1  
CAGCACCGTCTGGCCAAGACCAACCCCAAGTGTCACTGTT  
+HWI-EAS443:3:61:1491:1295#0/1  
]]`bbaab\_^I[]UP`\_[Xaa]Vaa\_L]V`PWGZLGL\_GW  
@HWI-EAS443:3:46:249:861#0/1  
CACGATCGGGGTCTTGCCTTTTCGTCGAGAGCCCGGGC  
+HWI-EAS443:3:46:249:861#0/1  
``a`UXX\_XJDTNLTNVYBBBBBBBBBBBBBBBBBBBB  
@HWI-EAS443:3:44:285:345#0/1  
AGGCGGGGAGTCTTCGGGCTCTCGGACGAAAAGGCAACGA  
+HWI-EAS443:3:44:285:345#0/1  
`aa\_a\_]0`UW`XNTPX`XRR\_JGW`U`^XP[`TZ]  
@HWI-EAS443:3:19:630:1052#0/1  
CGGGGAGTCTTCGGGCTCTCGGACGAAAAGGCAACGAACC  
+HWI-EAS443:3:19:630:1052#0/1  
aR`Iaa`aa^[VFTWa`U```^RZ`U[`X`^X`^U  
@HWI-EAS443:3:76:523:1997#0/1  
GAGCAATTGGGACAGAAATTTGAGGAAATAAGGTGGCTAA  
+HWI-EAS443:3:76:523:1997#0/1  
`Y\_bb`[VaZ]Rbb```a`^]V`aa0\_\_a`^`PH`VJJS^  
@HWI-EAS443:3:56:1079:1326#0/1  
AGCCAACAAAATAAAATCTGAGAAGACACAGATTCATCTT  
+HWI-EAS443:3:56:1079:1326#0/1  
aaa`aaaaabaabaaaaaaaaa\_aaa`a\_aaa`a``a`^`  
@HWI-EAS443:3:3:593:1464#0/1  
CTGTTCGCATGTCCGATGTCCGTCCTTCATTGTTTCCGCC  
+HWI-EAS443:3:3:593:1464#0/1  
abab\_HTabaaUXZa\_bb`S\_b^ZHa`R^]\_bOUIRG\_BB  
@HWI-EAS443:3:78:65:1228#0/1  
CAGGTCCAAGGTCATTGTTTATCATGTTATTCTTTATCAC  
+HWI-EAS443:3:78:65:1228#0/1  
aa\_a^bba\_aa`aaa\_P[a`\_`aaa\_^[\_`\_aaa\_\_`^`^`



@HWI-EAS443:3:32:23:907#0/1  
AAAAAGTACACATCAGGGAGACAAGAGAAGAACCCCGCAC  
+HWI-EAS443:3:32:23:907#0/1  
`]X\_]\_X^\_abaaaa\_K]a\_^`a`^`a`¥a`^][]a[a  
@HWI-EAS443:3:81:375:1642#0/1  
TGCGGGGTTCTTCTTGTCTCCCTGATGTGTACTTTTTG  
+HWI-EAS443:3:81:375:1642#0/1  
ab`ba\_\_Sab]]`abb`\_\_aab`b\_\_\_W^]Y^\_b\_^a`]X  
@HWI-EAS443:3:75:1660:170#0/1  
CAAGATTGGTCTTGTCTTTAGCCATTCCATGAGAGCGTCA  
+HWI-EAS443:3:75:1660:170#0/1  
J\_^`Za^`^aa¥a¥Q\_bb¥]]\_¥Z\_I\_aaa¥b`\_MG[Q\_  
@HWI-EAS443:3:18:1177:655#0/1  
CTTGAGGATGAACAGATGTACCAGAAGTGCTGCCATCCAT  
+HWI-EAS443:3:18:1177:655#0/1  
ababaaa`a`b[`a\_ba]`\_a`aaa^a\_\_`^`\_`\_\_^`  
@HWI-EAS443:3:83:1486:746#0/1  
GCGAAAGCAGGTCAAATATATTCAATATGGAGAGAGTAAA  
+HWI-EAS443:3:83:1486:746#0/1  
a¥a[ZZ`XR¥¥P^`¥RTRNY]OVU^SY]NT[N`WI^WS[  
@HWI-EAS443:3:99:1386:1215#0/1  
GCGAAAGCAGGTCAAATATATTCAATATGGAGAGAGTAAA  
+HWI-EAS443:3:99:1386:1215#0/1  
`XU[`ab]^]a]^\_U`ba\_]aU^`\_]P^`\_b`aIG¥Z\_\_  
@HWI-EAS443:3:4:1268:1733#0/1  
AATTGATGGCCATCCGAATTCTTTTGGGCGCTGTGTGGCT  
+HWI-EAS443:3:4:1268:1733#0/1  
^`\_]b\_abaTT[a]Y\_aa``[aaab\_XFXYO\_¥DDZ`ZBB  
@HWI-EAS443:3:57:342:2039#0/1  
AATTGACACTAATTGATGGCCATCCGAATTCTTTTGGGC  
+HWI-EAS443:3:57:342:2039#0/1  
Z¥XXW¥\_S¥`\_PT]^]NJFUX^XWTTNY[VR]T^\_BBBB  
@HWI-EAS443:3:9:439:1335#0/1  
ATTGATGGCCATCCGAATTCTTTTGGGCGCTGTCTGGCTG  
+HWI-EAS443:3:9:439:1335#0/1  
aaaaa^X`aaa\_V[\_\_\_^a¥R]^]a]aMDH¥JVau\_\_¥VZ]B  
@HWI-EAS443:3:75:1019:833#0/1  
TACGGTTTGAAAAGAGGGCCTTCTACGGCAGGAGTGCCTG  
+HWI-EAS443:3:75:1019:833#0/1  
a¥a]TRQYW\_SWYb¥]b`TQLR\_TQ]Z`HW¥PV[GZYV^`  
@HWI-EAS443:3:9:1051:1197#0/1  
ATCTAATGTCGAGTCCCGCACTCGCGAGATACTGACTAA  
+HWI-EAS443:3:9:1051:1197#0/1  
]]bb`^ab`]aa]^`\_Uaa]X\_a`X]^`a^^\_[EY[\_`  
@HWI-EAS443:3:25:1193:252#0/1  
GGCTGGAGAAGTTCGGTGGGGACTTTGGTTCGCAAGCTT  
+HWI-EAS443:3:25:1193:252#0/1  
abaaa\_L\_WLXRaaa^Ua]FFWSRS\_\_\_aBBBBBBBBBBBB  
@HWI-EAS443:3:3:1368:1735#0/1  
ATCTAATGTCGAGTCCCGCACTCGCGAGATACTTACTAA

+HWI-EAS443:3:3:1368:1735#0/1  
aa`aI[[^]U`V]GQPV\_UY]BBBBBBBBBBBBBBBBBBBB  
@HWI-EAS443:3:80:1177:208#0/1  
GCGCGATCTCGGCTTTGAGGGGGCCTGAGGGGATGATAGA  
+HWI-EAS443:3:80:1177:208#0/1  
aabWa]a^`^^`SZ¥]¥M^`\_¥WNNVTQ00^[PP[BBBBB  
@HWI-EAS443:3:77:1344:1899#0/1  
GGGTCGCTGTCTGGCTGTCAGTAAGGATGCTAGAGTCCCG  
+HWI-EAS443:3:77:1344:1899#0/1  
T`\_WYabbaXbb\_H\_a]\_aaaab^`0`MMFH]X`X]Q`bS  
@HWI-EAS443:3:54:880:125#0/1  
CGGTCGCTGTCTGGCTGTCAGTAAGTATGCTAGAGTCCCG  
+HWI-EAS443:3:54:880:125#0/1  
abb`bb`abaaaab\_ba`^\_b¥YaaSU^\_[a¥aZ\_0Q]]^  
@HWI-EAS443:3:72:937:891#0/1  
CGGTCGCTGTCTGGCTGTCAGTAAGTATGCTAGAGTCCCG  
+HWI-EAS443:3:72:937:891#0/1  
aba`abbbbaabaaaaa[]\_^\_aba[a] []^a]Y¥PT[^  
@HWI-EAS443:3:74:701:1288#0/1  
CGGTCGCTGTCTGGCTGTCAGTAAGTATGCTAGAGTCCCG  
+HWI-EAS443:3:74:701:1288#0/1  
abb\_baaba`ba^aaa^P` [^Y]^`Wa¥`^^`¥¥M^a]Z  
@HWI-EAS443:3:33:624:1404#0/1  
CACAAAGCCTTCCATTTTGGATCAGTACCTGCTTTTCGGAA  
+HWI-EAS443:3:33:624:1404#0/1  
]WaaY\_aba^Za]J]a]\_\_\_\_\_[\_[NRV]W\_\_^ZU¥QNUZ^  
@HWI-EAS443:3:54:1548:1398#0/1  
GAAGAAATAAGGCCCTTCATTAGTCATGTCAAAGGAAGGC  
+HWI-EAS443:3:54:1548:1398#0/1  
a[^`\_MZ`\_]`UNOFT¥XWax^UDY^\_\_\_\_QTVLXV\_ZS^XN  
@HWI-EAS443:3:13:1553:842#0/1  
AACAGATGTACCAGAAATGCTGCAATCTATTTCGAGAAATT  
+HWI-EAS443:3:13:1553:842#0/1  
aZSS¥YOL[OX\_]a\_[DUaU^`V\_a\_`^U]aPaa^Y¥\_aW  
@HWI-EAS443:3:71:386:667#0/1  
CTGGGTTTTGCTTAATGCATCTTGGTTCAACTCCTTCCTA  
+HWI-EAS443:3:71:386:667#0/1  
ababbXabb`b`^bbbbbababbbabb\_a\_a`abab`NOF  
@HWI-EAS443:3:63:844:565#0/1  
GAACAGTGACCACAGAAGCAGCTTTTGGTCTAGTGTGTGC  
+HWI-EAS443:3:63:844:565#0/1  
H]\_\_YY]¥`]YU[`a¥^¥a¥^^W`aZ^UH\_¥BBBBBBBBB  
@HWI-EAS443:3:51:298:930#0/1  
GGGGTTCTTCTCTTGTCTTCTGATGTGTACTTTCTGATT  
+HWI-EAS443:3:51:298:930#0/1  
WY`]XZ^aZ`a]aY`a`aaa^[^¥]YaZ¥^a`Z`X^]Q]  
@HWI-EAS443:3:73:473:1467#0/1  
TTGGTGTGTTCTGTTTACTGTGTCCATGGTGTATCCTGTC  
+HWI-EAS443:3:73:473:1467#0/1  
Z]Y^ZQG[b^QRNT[WZaaUNT[TZ`V^GOZRSS]W^OQF

@HWI-EAS443:3:53:1618:497#0/1  
TCGAACCGTGTACCATTCCATTCAAGTCCTCCGATGAGT  
+HWI-EAS443:3:53:1618:497#0/1  
`\_¥aSaV\_a\_W\_\_K\_V^]`N]\_^bb`Z]¥V\_GN]XOWV\_J  
@HWI-EAS443:3:39:989:97#0/1  
CTTCGACTTTTCGACGAAAAGGCAACGAACCCGATCGTGC  
+HWI-EAS443:3:39:989:97#0/1  
abbbbbbbbabbaabaaab`b\_abaaa`a[Ua\_`¥a¥aW  
@HWI-EAS443:3:3:1005:1257#0/1  
TCCTGGGTTTTGCTTAATGCATCTTGTTCAACTCCTTCC  
+HWI-EAS443:3:3:1005:1257#0/1  
\_]`\_abb]baaaa`]aaaa`a\_aa\_a`¥`\_\_aZWVOW`X]  
@HWI-EAS443:3:40:12:1301#0/1  
TCCTGGGTTTTGCTTAATGCATCTTGTTCAACTCCTTCC  
+HWI-EAS443:3:40:12:1301#0/1  
aaa`]ab]aaaaa`aa\_\_aaaa`\_\_Ta`[\_`\_aa\_\_a\_  
@HWI-EAS443:3:76:284:548#0/1  
TCCTGGGTTTTGCTTAATGCATCTTGTTCAACTCCTTCC  
+HWI-EAS443:3:76:284:548#0/1  
abaabba^aaaaaaaaaaa\_`aaaa\_`]`a`\_`a`]a`\_\_  
@HWI-EAS443:3:99:556:872#0/1  
TCCTGGGTTTTGCTTAATGCATCTTGTTCAACTCCTTCC  
+HWI-EAS443:3:99:556:872#0/1  
a]Uabbb^baba]ab\_aab`abaaaa^\_]aaaXa\_\_a][\_  
@HWI-EAS443:3:76:1357:198#0/1  
ATAGGATACATATGCAGTGGGTTTTTCGGAGAGAATCCAA  
+HWI-EAS443:3:76:1357:198#0/1  
]``aaVaWH¥`QXSNZXJ`\_^IS\_\_YBBBBBBBBBBBBB  
@HWI-EAS443:3:54:364:1135#0/1  
CAAGAAATGGCCAGTAGGAGTCTATGGGATTCCTTTCGCC  
+HWI-EAS443:3:54:364:1135#0/1  
aaaa\_aaaa```aaZ\_`a[`]\_\_^\_\_`]^\_Y¥\_¥^Q^WV  
@HWI-EAS443:3:35:331:577#0/1  
GATCGAAGGTTCCAGGTTCCAGGCTGTCCCTAAGTGCCTG  
+HWI-EAS443:3:35:331:577#0/1  
aZ[\_]X^]ZN^a]P¥VM^a]`^YFQKK^`YBBBBBBBBBB  
@HWI-EAS443:3:65:754:657#0/1  
TTTTCGGTTCTTCCCATATTCTTTCATTGCCTTTTCCGC  
+HWI-EAS443:3:65:754:657#0/1  
aabb`b]N[Waa]a`aaa0ab\_babaabaaa`babaa^`¥  
@HWI-EAS443:3:32:144:51#0/1  
CAGTGGGTTGGTCTTGCCAGACGGTGCTGCGTTGCCCTT  
+HWI-EAS443:3:32:144:51#0/1  
TJXVXHWWW[]WZZ\_W\_ba`W\_W`YTYFTYFYITXBBBBB  
@HWI-EAS443:3:14:141:1507#0/1  
TCTGAGTGGGGTTCTTCTTGTCTTCTCCTGATGTGTAC  
+HWI-EAS443:3:14:141:1507#0/1  
a`bbWWWUaba^a\_X^^a\_`\_aa`a\_]aa^a```\_`[¥`¥\_]`  
@HWI-EAS443:3:22:511:1547#0/1  
GTACACATCAGGAAGACAAGAGAAGAACCCCGCACTCAGA

+HWI-EAS443:3:22:511:1547#0/1  
`\_`\_ab`\_b^U[aa`a\_aaaa\_b^aaaNa`ba]]\_`Z`a  
@HWI-EAS443:3:37:540:1154#0/1  
GTACACATCAGGAAGACAAGAGAAGAACCCCGCACTCAGA  
+HWI-EAS443:3:37:540:1154#0/1  
`0^XX¥ZSOSZT`^VNV^`Ha\_SVOJQ]QGYO\_SNUXNFL  
@HWI-EAS443:3:86:709:99#0/1  
GTACACATCAGGAAGACAAGAGAAGAACCCCGCACTCAGA  
+HWI-EAS443:3:86:709:99#0/1  
a¥a\_aa[¥aab\_T¥aWQ\_P\_a^NYa\_WMXX\_]LRUSUZM  
@HWI-EAS443:3:17:312:1634#0/1  
AAGCATCAATGAACTGAGCAATCTTGCAAAAGGAGAAAAA  
+HWI-EAS443:3:17:312:1634#0/1  
`a`aa`a`aaaaa\_`a`\_XY`\_`\_a`^`^]\_\_\_\_`^`^^^  
@HWI-EAS443:3:32:1107:804#0/1  
TTCGGATTTCCATTTTCATCGACGAACGGGGTGGATCAATA  
+HWI-EAS443:3:32:1107:804#0/1  
aaaa` `aaaa`Y]aa\_a]\_a` [aXXQ\_\_\_\_\_Raa^WVUSYX  
@HWI-EAS443:3:40:119:936#0/1  
CGGACAGTATGGATAGCAAATAGTAGCATTGCCACAATA  
+HWI-EAS443:3:40:119:936#0/1  
abb\_`¥a`bbbaaab`¥a`^ba]a`\_[]aYa]Z\_V¥Y`b  
@HWI-EAS443:3:45:1570:1193#0/1  
GGCTGGTGTATTATAGCACCTTTGGTGTCTGACAAGTTGT  
+HWI-EAS443:3:45:1570:1193#0/1  
aaa`bb\_` `bbaa][[a\_\_¥a¥H\_]BBBBBBBBBBBBBBB  
@HWI-EAS443:3:43:1316:2016#0/1  
GATTGGGCCATGAACTTGT TTTGGGGAANATCTCAAACCT  
+HWI-EAS443:3:43:1316:2016#0/1  
^XT`X\_XZ`aa`]]¥W^a]FSZb¥aa]JD[a\_]P]\_aWZa  
@HWI-EAS443:3:39:162:1614#0/1  
CATATCTCGGTACCACTAGATTCCCAGTTGCTTCGAATGT  
+HWI-EAS443:3:39:162:1614#0/1  
aaaa¥]\_b`aVaa\_0`Y]HX]aa[aa\_VaU`]^Z`]OY¥M  
@HWI-EAS443:3:76:1467:1076#0/1  
GGGGGATGGAAATGAGGCGCTGCCTTCTTCAGTCTCTCA  
+HWI-EAS443:3:76:1467:1076#0/1  
a^POFYRFON\_QN\_W[¥S\_U^\_UWRUNQ¥GVZWQSPPPUV  
@HWI-EAS443:3:48:1583:1266#0/1  
GGCGAATCAATAATTGTAGAATCTGGTGACCCGACTGGCA  
+HWI-EAS443:3:48:1583:1266#0/1  
a\_QWZ]a\_UOZZ`aaa¥¥]WWUT]ZWQ`\_`ZPZRRX^\_]Z  
@HWI-EAS443:3:62:585:557#0/1  
GATTCTTGCCCTGCTCTCTTCGTCAAGGGGGTAGTCCGCC  
+HWI-EAS443:3:62:585:557#0/1  
P\_VZ^ZP\_X¥aa[a\_`R^a`a`XQ][ZSZEYGGVGW`BB  
@HWI-EAS443:3:19:481:1366#0/1  
GGGCGAATCAATAATTGTAGAATCTGGTGACCCGAATGCA  
+HWI-EAS443:3:19:481:1366#0/1  
^a`P`^IZbba`aba]TZbbabaaaaaWa\_G\_aa]aVa\_\_

@HWI-EAS443:3:21:1429:384#0/1  
TAGCCCCCAAGATCGAAGGCTCCAGGCTCCAGGTTGTCC  
+HWI-EAS443:3:21:1429:384#0/1  
`bZa]X]aa`bXa]`\_WaYTKTWQ]^MVHMLRY¥BBBBB  
@HWI-EAS443:3:13:1067:775#0/1  
CAAACCATGAGGGAATACAAGCAGGAGAGGACAGGTTCTA  
+HWI-EAS443:3:13:1067:775#0/1  
]bb[aZ[b\_Z^`a\_aa\_¥JS``[a[aG¥N\_HNWG YLV[\_  
@HWI-EAS443:3:84:767:902#0/1  
GTCCACTCCTGCTTGTATTCCCTCATGGTTCGGTGCATTC  
+HWI-EAS443:3:84:767:902#0/1  
a¥\_\_aa`aa`aaaa]Yaaa`a`a^^]]¥\_\_a`Ya^\_\_\_\_  
@HWI-EAS443:3:95:172:1718#0/1  
CAGGAATGTGTAGTCGCAACGGCATCATATCCATGCTTT  
+HWI-EAS443:3:95:172:1718#0/1  
^aabXbaa]b\_aaLH[aa¥a^UW`aaa`a]a¥\_\_]]^  
@HWI-EAS443:3:44:1092:379#0/1  
GACCATATGGCCATAATCAAAAAGTACACATCAGGGAGAC  
+HWI-EAS443:3:44:1092:379#0/1  
aZY]RW\_\_a`V`[EZQ^T\_a`^XYS[aNOFL^`TDR\_NG  
@HWI-EAS443:3:51:732:152#0/1  
GGCCATCCGACTTCTTTTGGTCGCTGTCTGGCTGTAAGAA  
+HWI-EAS443:3:51:732:152#0/1  
^[a[`Z^X]HR\_YURRQ`^0]\_SV[\_]^U¥BBBBBBBBBB  
@HWI-EAS443:3:92:299:1119#0/1  
ATTCGACACTAATTGATGGCCATCCGACTTCTTTTGGTCG  
+HWI-EAS443:3:92:299:1119#0/1  
a`ab^]aaaa\_N¥S`^TV[`aa]XYU¥H¥`W`a\_\_\_ZZa  
@HWI-EAS443:3:39:1754:1449#0/1  
TTTTTGGACAGTATGGATAGCAAATAGTAGCGTTGCCACA  
+HWI-EAS443:3:39:1754:1449#0/1  
]b]^`[^a\_W`[TQ¥\_PX¥]]`\_]¥^MFMa¥GKSYZ\_¥TQ  
@HWI-EAS443:3:86:151:1559#0/1  
GGCACTTGGTGAATAATGGCACCAGAAAAAGTAGACTTT  
+HWI-EAS443:3:86:151:1559#0/1  
`bb\_\_P]¥]]PVHWa]a`]]a`\_\_[\_a`]ULGaSZT^^X  
@HWI-EAS443:3:59:1357:359#0/1  
GAAACAATGGAAGTCGTTCAACAAACAAGGGTAGAAAGAT  
+HWI-EAS443:3:59:1357:359#0/1  
a^XY^`aaa¥`\_QLYV¥MU]I\_\_¥U[YY\_]VV¥¥YNRSZ  
@HWI-EAS443:3:38:686:1047#0/1  
CCTTGAACAATGGAAGTCGTTCAACAAAAAAGGGTAGAT  
+HWI-EAS443:3:38:686:1047#0/1  
aa\_`\_a]a`bR\_\_[\_a^X¥OT]ZLN[[`YGF XUWZGVQGT  
@HWI-EAS443:3:3:998:126#0/1  
GCCTTGAACAATGGAAGGCGTTCAACAAACAAGGGTAGA  
+HWI-EAS443:3:3:998:126#0/1  
¥\_a\_ba^a\_[`a`baa`¥DI[X]UY\_0¥U^G¥]R`\_QZ]T  
@HWI-EAS443:3:100:736:1369#0/1  
TTGAAACAATGGAAGTCGTTCAACAAACAAGGGTAGATAA

+HWI-EAS443:3:100:736:1369#0/1  
a`^`a`ba\_]\_aZOWXZ¥X¥U\_\_XQZa`\_`Y^\_VZ^B  
@HWI-EAS443:3:61:1670:38#0/1  
TTGAAACAATGGAAGTCGTTCAACAAACAAGGGTAGATAA  
+HWI-EAS443:3:61:1670:38#0/1  
aabaaaa`abaa`a^\_a`^¥XPUZ`J^]^^¥PQYT]XZ  
@HWI-EAS443:3:34:869:1455#0/1  
CTTGAAACAATGGAAGTCGTTCAACAAACAAGGGTAGATA  
+HWI-EAS443:3:34:869:1455#0/1  
a`X`ab`abaa`X[a¥V[VXWSPYa\_aa^^^QJSY]UWBB  
@HWI-EAS443:3:58:684:870#0/1  
CTTGAAACAATGGAAGTCGTTCAACAAACAAGGGTAGATA  
+HWI-EAS443:3:58:684:870#0/1  
aaaa```ab\_b\_a\_a^WV¥Y\_S^\_W[\_`\_\_`]\_¥SZ^¥V\_  
@HWI-EAS443:3:64:323:630#0/1  
CTTGAAACAATGGAAGTCGTTCAACAAACAAGGGTAGATA  
+HWI-EAS443:3:64:323:630#0/1  
abaaWX`aa[aaaa]^Y]ZX\_[]]S\_`UR\_¥VZ[OOSXP^  
@HWI-EAS443:3:71:1162:1755#0/1  
CTTGAAACAATGGAAGTCGTTCAACAAACAAGGGTAGATA  
+HWI-EAS443:3:71:1162:1755#0/1  
YS^`Y^bbbab`^a¥]a`^aS[\_H]\_`¥`^`WWT\_X\_UY  
@HWI-EAS443:3:85:1218:1054#0/1  
CCTTGAAACAATGGAAGTCGTTCAACAAACAAGGGTAGAT  
+HWI-EAS443:3:85:1218:1054#0/1  
aabbbabababab^aab¥[]``[[a\_a`\_Q[``aaS\_\_Z^  
@HWI-EAS443:3:97:1404:709#0/1  
GTTGTGAATTGGTCATCATCTTTCTCACAACATTTGCCAG  
+HWI-EAS443:3:97:1404:709#0/1  
X\_\_¥`a`\_a\_S`SS[\_]aXab¥^V`ababbXXX]\_a¥HH\_  
@HWI-EAS443:3:9:452:1502#0/1  
ATCTACCCTTGTGTTGTTGAACGACTTCCATTGTTTCAAGG  
+HWI-EAS443:3:9:452:1502#0/1  
a`\_a\_]Y\_a`V^^[\_`Y[^P`]\_]\_\_ZP\_T[SZSOW[  
@HWI-EAS443:3:17:847:832#0/1  
GCCTTGAAACAATGGAAGTCGTTCAACAAACAAGGGTAGA  
+HWI-EAS443:3:17:847:832#0/1  
aba`aba^aa\_]\_aa```¥]`^][¥`a^aZLZS[`\_X^][  
@HWI-EAS443:3:20:114:2040#0/1  
TACCCTTGTGTTGTTGAACGACTTCCATTGTTTCAAGGCAT  
+HWI-EAS443:3:20:114:2040#0/1  
abbbbaaa`a`]\_aaabba¥aaaaaba`aXa`aaaa\_aa\_  
@HWI-EAS443:3:28:1162:1323#0/1  
TGCCTTGAAACAATGGAAGTCGTTCAACAAACAAGGGTAG  
+HWI-EAS443:3:28:1162:1323#0/1  
¥\_ba^a]¥Y¥a]W0]Z[T]a\_XOSRS^MW]^M^ZT[OJ^L  
@HWI-EAS443:3:46:1084:406#0/1  
TGCCTTGAAACAATGGAAGTCGTTCAACAAACAAGGGTAG  
+HWI-EAS443:3:46:1084:406#0/1  
abbabb`\_`bbbabbbaba[`a¥`Y^\_ZZ``^\_aa`a0^\_

@HWI-EAS443:3:4:740:851#0/1  
ATGCCTTGAAACAATGGAAGTCGTTCAACAAACAAGGGTA  
+HWI-EAS443:3:4:740:851#0/1  
aaaaabab`aa^a\_aaaaabUR¥^\_^]^^\_`WY^Y`\_P^  
@HWI-EAS443:3:59:657:551#0/1  
TGCCTTGAAACAATGGAAGTCGTTCAACAAACAAGGGTAG  
+HWI-EAS443:3:59:657:551#0/1  
aaaaabbaababaaa`aa[\_a^\_\_^[P]a`G\_`\_YX0^N  
@HWI-EAS443:3:92:1068:768#0/1  
TGCCTTGAAACAATGGAAGTCGTTCAACAAACAAGGGTAG  
+HWI-EAS443:3:92:1068:768#0/1  
ab`^`b`\_^bababab¥b`]]`QZaaa¥aba[^a]a^Y\_a  
@HWI-EAS443:3:89:88:704#0/1  
CAGGCAAAAGCAGGGCAGATAATCACTCAGTGAGTGACAT  
+HWI-EAS443:3:89:88:704#0/1  
a`a]aT^Z¥\_a[ab]Ga]X`a\_\_a^\_\_UX^)`\_`Z\_`[`¥  
@HWI-EAS443:3:38:1113:175#0/1  
AAGAGAAGAACCCCGCACTCAGAATGAAGTGGGGAGGGGC  
+HWI-EAS443:3:38:1113:175#0/1  
a]bbbabaa\_QZ^bb\_a`\_`a[\_a`Z^\_MPP]^¥\_^W\_Q  
@HWI-EAS443:3:4:268:610#0/1  
AAGAGAAGAACCCCGCACTCAGAATGAAGTGGGGCGATGG  
+HWI-EAS443:3:4:268:610#0/1  
a)`VO¥a`[[`¥TT^ZX¥NQZPJ[aNSVGY[¥YU]P^VP  
@HWI-EAS443:3:33:1018:1729#0/1  
CAAGAGAAGAACCCCGCACTCAGAATGAAGTGGGTGAGGG  
+HWI-EAS443:3:33:1018:1729#0/1  
\_XR\_N]ZT]ZSVRXHZ]RVHT[\_YU]]X^\_R]NFRUXF[[  
@HWI-EAS443:3:73:223:643#0/1  
CCCAGCACTAAGCATCAATGAACTGAGCAATCTTGCAAAA  
+HWI-EAS443:3:73:223:643#0/1  
abaY`a\_I\_a[[baabb¥`ZZa\_aaTaY]Uaa`a\_`\_¥0  
@HWI-EAS443:3:43:526:1226#0/1  
TTGACATCCATTCAAATGGTTTGCCTGCTTTTCGCTAAAA  
+HWI-EAS443:3:43:526:1226#0/1  
aabbaabaa]aaaZV\_a\_``aaaa```Za``\_^¥a```a\_  
@HWI-EAS443:3:21:1376:963#0/1  
GATTGACATCCATTCAAATGGTTTGCCTGCTTTTCGCTATT  
+HWI-EAS443:3:21:1376:963#0/1  
a\_```\_`\_]^[a^X\_\_^`\_V\_\_]YX^^W^\_aXaX]Z^^  
@HWI-EAS443:3:91:1124:1365#0/1  
ATTGACATCCATTCAAATGGTTTGCCTGCTTTTCGCTAAAA  
+HWI-EAS443:3:91:1124:1365#0/1  
aababaa``\_aaa^aa¥aa\_\_`aa\_Xaa`aa\_`aZ[aa``  
@HWI-EAS443:3:36:339:920#0/1  
GATTGACATCCATTCAAATGGTTTGCCTGCTTTTCGCTAAA  
+HWI-EAS443:3:36:339:920#0/1  
aa\_`````X]`[a`a\_\_a\_Z\_``^^]^\_\_`^^`]`^¥Q  
@HWI-EAS443:3:86:517:1967#0/1  
GATTGACATCCATTCAAATGGTTTGCCTGCTTTTCGCTAAA

+HWI-EAS443:3:86:517:1967#0/1  
]\_aaab`aY^ab`^bab`a`Sa`\_Y]\_`a^`\_\_`abaa  
@HWI-EAS443:3:8:1513:572#0/1  
GATTGACATCCATTCAAATGGTTTGCCTGCTTTCGCTAAA  
+HWI-EAS443:3:8:1513:572#0/1  
aaa`aa\_aa[\_`aa]\_\_\_a`\_Xa\_\_XX^`X`^\_U[X`\_\_\_\_  
@HWI-EAS443:3:13:1711:817#0/1  
CGGATTGACATCCATTCAAATGGTTTGCCTGCTTTCGCTA  
+HWI-EAS443:3:13:1711:817#0/1  
\_aa\_a\_a¥aZ\_^`Za¥Z¥^]`\_`Z^\_^ZG\_[LZ\_`\_]`]]\_`  
@HWI-EAS443:3:29:1125:453#0/1  
CGGATTGACATCCATTCAAATGGTTTGCCTGCTTTCGCTA  
+HWI-EAS443:3:29:1125:453#0/1  
]ab]b`^b`b¥Z^baaaaaab[[]a¥S]aaab¥¥\_Ybaa`  
@HWI-EAS443:3:2:507:58#0/1  
CGGATTGACATCCATTCAAATGGTTTGCCTGCTTTCGCTA  
+HWI-EAS443:3:2:507:58#0/1  
abaaaaa\_\_aaS^Z`\_S^[\_]JN\_\_a[U\_`0\_]^U^W^^  
@HWI-EAS443:3:90:964:1486#0/1  
ATCCGGGCTCTCCTTCCGTAGAAGGCCCTCTTTTCAAACC  
+HWI-EAS443:3:90:964:1486#0/1  
a\_bb\_b`^aWZUQ\_]a[V[aaaa\_aU]GY\_a¥aa\_¥R^M[  
@HWI-EAS443:3:19:1166:851#0/1  
GGGCACTCCTTCCGTAGAAGGCCCTCTTTTCAAACCGTAT  
+HWI-EAS443:3:19:1166:851#0/1  
a`^¥`]a`Vaa]aa`aa]]`]]X^`\_\_`a`[\_a\_aR]\_R[[  
@HWI-EAS443:3:35:78:1647#0/1  
CGGGCACTCCTTCCGTAGAAGGCCCTCTTTTCAAACCGTA  
+HWI-EAS443:3:35:78:1647#0/1  
a[S[abb`bbaaa`XZ^U¥UZ¥]¥`^a\_^W^a[M]`]YRO  
@HWI-EAS443:3:58:34:1277#0/1  
GTCGTCGCTTTAAATACGGTTTGAAAAGAGGGCCTTCTAC  
+HWI-EAS443:3:58:34:1277#0/1  
a`a`^a`]\_a`Y][VK\_[N^YUW^`[ZTHWSOJMWBBBB  
@HWI-EAS443:3:48:706:455#0/1  
GCATCAATGAACTGAGCAATCTTGCGAAAGGAGAGAAAAGC  
+HWI-EAS443:3:48:706:455#0/1  
a`aa\_babaaa`aa\_baaaa\_aaa\_b`^`\_b`]aaa`\_\_a^  
@HWI-EAS443:3:5:27:512#0/1  
GAACTGAGCAATCTTGCGAAAGGAGAGAAAAGCTAATGTGC  
+HWI-EAS443:3:5:27:512#0/1  
]`ba`^`\_aaa\_baaabaS\_[X\_W^^`[\_XaUa`]^`a\_a\_  
@HWI-EAS443:3:27:294:1562#0/1  
TGTGTTGGTAATGAAACGAAAACGGGACTCTAGCATACTT  
+HWI-EAS443:3:27:294:1562#0/1  
aa`[\_aaa[aaa]abbaaaZaa]\_`\_\_a\_a]\_`\_a^a\_¥]  
@HWI-EAS443:3:50:1088:514#0/1  
TGTGTTGGTAATGAAACGAAAACGGGACTCTAGCATACTT  
+HWI-EAS443:3:50:1088:514#0/1  
ab\_b`bba[[\_`a`\_V]¥\_`^Yaaa^^`\_\_¥]V[\_[T¥`



@HWI-EAS443:3:86:867:1325#0/1  
CCAGCATTAAGCATCAATGAACTGAGCAATCTCGCAGAAG  
+HWI-EAS443:3:86:867:1325#0/1  
aab[\_aa`[ab]aZba]aW^baa`\_ab\_X`aa¥\_aaHZW`  
@HWI-EAS443:3:68:1410:1380#0/1  
CTCATGTCAAAGGAAGGCACGAGCGGTTTGTTCCTTTT  
+HWI-EAS443:3:68:1410:1380#0/1  
Zbba\_aXaa^\_PQTX^^a`Xb[DW`^`IQF¥OJHFUBBBB  
@HWI-EAS443:3:32:418:1522#0/1  
GAGTCTTCGAGCTCTCGACGAAAAGGCAACAAACCCTGA  
+HWI-EAS443:3:32:418:1522#0/1  
`\_]abbab]\_\_`a`]`¥WabaaabaPT¥aaaa`a[b\_\_X  
@HWI-EAS443:3:34:162:1614#0/1  
TGGCCCATATCTTGTCTTCTTTGCCAAAATGAGAAAT  
+HWI-EAS443:3:34:162:1614#0/1  
R`[H]\_S\_```aaXW^^Yaaa]`abb^a``aaa[aZ]W`[  
@HWI-EAS443:3:67:369:1180#0/1  
ACCGGTTGGAATTTCTAGCATGGTGGAGCCATGGTTTCT  
+HWI-EAS443:3:67:369:1180#0/1  
Y^TR]P^`^ZZa[]^WT`TXR\_N\_YQWxBBBBBBBBBB  
@HWI-EAS443:3:60:1176:2027#0/1  
TTTATCGTCGTTTTAAATACGGTTTGAAAAGAAGGCCTTC  
+HWI-EAS443:3:60:1176:2027#0/1  
U^a[L`bTSUXX`Y]V^XZR]\_LU[OM`a]U]HTaUGV¥R  
@HWI-EAS443:3:29:198:660#0/1  
GGGGCTCTAGCATACTTACTGACAGCCAGACAGCGACCAA  
+HWI-EAS443:3:29:198:660#0/1  
]a`bbabY¥bbabaaabbbb`abbbbbbabbb`bbaabb  
@HWI-EAS443:3:91:534:1514#0/1  
GAGGGACTCTAGCATACTTACTGACAGCCAGACAGCGAAC  
+HWI-EAS443:3:91:534:1514#0/1  
H^\_¥¥]¥[\_\_`bbb\_`b\_``abbabb^^abUbb]abVQH[  
@HWI-EAS443:3:100:1160:1378#0/1  
AGGGACTCTAGCATACTTACTGACAGCCAGACAGCGACCA  
+HWI-EAS443:3:100:1160:1378#0/1  
``\_aaaaXa\_\_^aaaaaWI¥`a¥`\_Raa`HHV^U\_XIBB  
@HWI-EAS443:3:25:836:366#0/1  
AGGGACTCTAGCATACTTACTGACAGCCAGACAGCGACCA  
+HWI-EAS443:3:25:836:366#0/1  
\_UN`\_aW[aX[¥Za\_W\_\_\_Y\_V[^]Z`X]]\_^^^ [ZPS[  
@HWI-EAS443:3:30:1757:923#0/1  
AGGGACTCTAGCATACTTACTGACAGCCAGACAGCGACCA  
+HWI-EAS443:3:30:1757:923#0/1  
a¥T`ZW\_ba]baab`\_abb\_aba\_aa¥Xa]aaaaGZ^THV  
@HWI-EAS443:3:45:1236:1507#0/1  
AGGGACTCTAGCATACTTACTGACAGCCAGACAGCGACCA  
+HWI-EAS443:3:45:1236:1507#0/1  
ababa`baaaaaaaaaabbb`aba\_ab\_a\_`a\_a\_\_\_\_[\_`[  
@HWI-EAS443:3:68:78:685#0/1  
AGGGACTCTAGCATACTTACTGACAGCCAGACAGCGACCA

+HWI-EAS443:3:68:78:685#0/1  
S`\_^`aaa`aaba`\_aaa^aa`aa``aaaaa¥]`a\_\_`ZJ  
@HWI-EAS443:3:88:537:809#0/1  
AGGGACTCTAGCATACTTACTGACAGCCAGACAGCGACCA  
+HWI-EAS443:3:88:537:809#0/1  
aa]a\_a\_]`^a^a^`[^`aa]`^¥^aa\_`^a`\_`\_\_`^UX  
@HWI-EAS443:3:98:1628:588#0/1  
AGGGACTCTAGCATACTTACTGACAGCCAGACAGCGACCA  
+HWI-EAS443:3:98:1628:588#0/1  
ab`aa^\_aabbbbb]R^ab\_aaaabb]aa\_[XYR\_\_aJDY  
@HWI-EAS443:3:9:1036:1608#0/1  
AGGGACTCTAGCATACTTACTGACAGCCAGACAGCGACCA  
+HWI-EAS443:3:9:1036:1608#0/1  
a]aaaabY^TS]abaa[F[UZ¥a\_``]Ta^\_\_\_\_\_dWRVZ  
@HWI-EAS443:3:34:1595:1926#0/1  
CCCCGTTTTCGTTTCATTACCAACTATGTCCCCTTGCCC  
+HWI-EAS443:3:34:1595:1926#0/1  
\_¥]^K¥bba¥Z[a`aa^b[abb]TZ]ba`¥YV[PPMTHFF  
@HWI-EAS443:3:37:1203:751#0/1  
GCCCCGTTTTCGTTTCATTACCAACTATGTCCCCTTGCC  
+HWI-EAS443:3:37:1203:751#0/1  
]JRa^[Z^¥`WYaYZZa[ab\_`^`]`^]¥XFYUa`Z]UPRU  
@HWI-EAS443:3:83:1577:1167#0/1  
ACCCGTTTTCGTTTCATTACCAACTATGTCCCCTTGCC  
+HWI-EAS443:3:83:1577:1167#0/1  
a^¥Zb`aa`Xa]`\_`\_aaa\_[Z`^Va^\_XS[]R^[^]¥^RX  
@HWI-EAS443:3:43:1205:958#0/1  
GTCCCGTTTTCGTTTCATTACCAACTATGTCCCCTTGCC  
+HWI-EAS443:3:43:1205:958#0/1  
]FUZa^a[¥TT[`Y`[N\_¥^LSZUPZR\_TFI¥GN\_WM HGG  
@HWI-EAS443:3:52:1288:988#0/1  
CGCCGTCTGGGTTCTTCAATGGTGG AACAGATCTTCATGA  
+HWI-EAS443:3:52:1288:988#0/1  
a``abaab\_I^abbbba[aaabYb\_]IW]a^RHa`[]``a  
@HWI-EAS443:3:31:812:1341#0/1  
GCCGTCTGGGTTCTTCAATGGTGG AACAGATCTTCATGAT  
+HWI-EAS443:3:31:812:1341#0/1  
abb`PbaaaaZaaaaaa]a]^a\_]``aaa`^\_`\_`[^`  
@HWI-EAS443:3:73:63:1098#0/1  
CTGGGTTCTTCAATGGTGG AACAGATCTTCATGATCTCAG  
+HWI-EAS443:3:73:63:1098#0/1  
`]`W¥[Va\_`^RQ\_baX^QU[ab\_TX`]¥``¥[R¥]^ZXS  
@HWI-EAS443:3:81:1110:1426#0/1  
TGCCGTCTGAGTTCTTCAATGGTGG AACAGATCTTGATGA  
+HWI-EAS443:3:81:1110:1426#0/1  
[¥\_T\_^^`a`aW`aMZbaX^`bIabaaPX^`[a`^F¥]^R  
@HWI-EAS443:3:43:1525:954#0/1  
ACGCCGTTGATTTCTGTTTAATGTCCAATCATAAGTCTG  
+HWI-EAS443:3:43:1525:954#0/1  
a\_ba^bb`ba\_bba\_abaab\_`aa]\_]a`a^\_`\_`\_]`\_`

@HWI-EAS443:3:24:535:1872#0/1  
CGCCGGTTGATTTCTGTTTAATGTCCAATCATAAGTCTGG  
+HWI-EAS443:3:24:535:1872#0/1  
aaab`]Xaa`aaa`aa`a`aa\_a^`a`¥\_a\_`^[U\_^[^  
@HWI-EAS443:3:36:1027:1520#0/1  
CGCCGGTTGATTTCTGTTTAATGTCCAATCATAAGTCTGG  
+HWI-EAS443:3:36:1027:1520#0/1  
aaaa`a^abaaa`\_`^`aaaa\_\_`^`\_`Taaa^a\_a]a\_\_]  
@HWI-EAS443:3:49:1019:800#0/1  
CGCCGGTTGATTTCTGTTTAATGTCCAATCATAAGTCTGG  
+HWI-EAS443:3:49:1019:800#0/1  
`a^^`babbabb````abbaab\_TV^aa]^`aa[a\_`aa^  
@HWI-EAS443:3:93:1164:960#0/1  
GCGGGGGAGTCTTCGAGCTCTCGGACGAAAGGGCAACGAA  
+HWI-EAS443:3:93:1164:960#0/1  
\_a`\_¥Z^]a[````]`\_^¥`¥a^`a`X`[¥¥FN`¥¥^P^]X  
@HWI-EAS443:3:38:1757:1885#0/1  
GGATAGCAAATAGTAGCATTGCCACAAC TAATTCAATGCA  
+HWI-EAS443:3:38:1757:1885#0/1  
`ab`b`bab\_ba\_Sbaabaab\_ab\_bbT][D[[KVY`^EO  
@HWI-EAS443:3:6:1751:454#0/1  
ATGGATAGCAAATAGTAGCATTGCCACAAC TAATTCAATG  
+HWI-EAS443:3:6:1751:454#0/1  
abab\_[^\_¥a[¥aaaXa¥Wxa`NQL¥]\_\_H]XEUW^a\_\_]  
@HWI-EAS443:3:97:328:971#0/1  
ATAGCAAATAGTAGCATTGCCACAAC TAATTCAATGCATG  
+HWI-EAS443:3:97:328:971#0/1  
^Z¥bVb\_H\_a[W`a]Y^b`]^`^`aaIa]F]T¥[¥`^UP]`  
@HWI-EAS443:3:79:881:229#0/1  
ATGGATAGCAAATAGTAGCATTGCCACAAC TATTTCATG  
+HWI-EAS443:3:79:881:229#0/1  
abbaaa`]aa`aaa`^aa\_\_\_\_\_^a`\_a`^`\_`a\_dW\_]\_\_  
@HWI-EAS443:3:86:1586:686#0/1  
GGATAGCAAATAGTAGCATTGCCACAAC TATTTCATGCA  
+HWI-EAS443:3:86:1586:686#0/1  
\_a`aa^]\_aaaY]TZa`a^aa]Y¥V¥\_^^aHa\_¥\_`¥\_R^  
@HWI-EAS443:3:96:1276:1892#0/1  
TGGATAGCAAATAGTAGCATTGCCACAAC TATTTCATGC  
+HWI-EAS443:3:96:1276:1892#0/1  
aaa\_\_ab\_aaaaa¥G\_Va]\_`\_`¥¥Wa^Z\_]Gba¥aW\_`\_`  
@HWI-EAS443:3:13:691:242#0/1  
CAAATTGATGGCCATCCGAATTCTTTTGGTCGCTGTCTGG  
+HWI-EAS443:3:13:691:242#0/1  
^M`ababbabb\_abb`abaaaa`babb`\_\_aaab````T`  
@HWI-EAS443:3:34:875:2034#0/1  
CACTAATTGATGGCCATCCGAATTCTTTTGGTCGCTGTCT  
+HWI-EAS443:3:34:875:2034#0/1  
a^a`aa^XYU\_^Z`\_]N[ZZZ^[^]^`^^`NFQVWTBBBBB  
@HWI-EAS443:3:11:1207:1566#0/1  
GAGCAATCTTGCAAAAGGAGAGAAAGCTAATGTGCTGATT

+HWI-EAS443:3:11:1207:1566#0/1  
]b`bab\_Z[`b`\_Y\_abaabaaaa``aaa^Ya[aH\_`^aZ  
@HWI-EAS443:3:9:457:1177#0/1  
CCTTGTCTTTCGTCCATTTTCACCTCTCCAGAAATCCGG  
+HWI-EAS443:3:9:457:1177#0/1  
S\_aab^a`a]abb\_X\_]b¥Q\_``Yaa]bY\_^]`]ZGYaa  
@HWI-EAS443:3:90:177:1828#0/1  
GGCCGGCCATATCTCTTGTCTTCTTTGCCAAAATGAGA  
+HWI-EAS443:3:90:177:1828#0/1  
^`ab\_X\_aabbabbbbabab`bbbb`^babbbbaabab  
@HWI-EAS443:3:61:1639:1235#0/1  
TTGGCCATCCGAATTCTTTTGGTCGCTGTCTGGCTGGCAG  
+HWI-EAS443:3:61:1639:1235#0/1  
TRWWHT\_\_TQ\_\_b[P^[¥ZWa[[[[OUZ[^WTT^XFOW\_  
@HWI-EAS443:3:53:149:577#0/1  
CGGCTTGTCTTCTTCATGTTCTTTGCTTGGGGTCTTCT  
+HWI-EAS443:3:53:149:577#0/1  
ZZV`\_aV]XHY\_QUSVX\_a`]ZZFQXNWJX[YFNFXSMU  
@HWI-EAS443:3:27:1195:1116#0/1  
CGCGTCACTAATTGATGGCCATCCGAATTCTTTTGGTCGC  
+HWI-EAS443:3:27:1195:1116#0/1  
ab`\_WVW\_[aW`[T\_XVNS\_]Z\_`aRK[H¥^]ZZa¥HV\_\_  
@HWI-EAS443:3:94:1662:465#0/1  
CCACTTTTCATTTCTGCTCTGGAGGGAGTGAAGGTGTGCG  
+HWI-EAS443:3:94:1662:465#0/1  
a^TaZZUU]aa`]HUQM]O¥^GWYWS`UNYBBBBBBBBB  
@HWI-EAS443:3:12:243:938#0/1  
TCTCGCCACTTTTCATTTCTGCTCTGGAGGGAGGAAGGG  
+HWI-EAS443:3:12:243:938#0/1  
^VTWta\_YWXPk\_a\_VU]^R^BBBBBBBBBBBBBBBBB  
@HWI-EAS443:3:17:1734:195#0/1  
GCTCTCGCCACTTTTCATTTCTGCTCTGGAGGGAGGAAG  
+HWI-EAS443:3:17:1734:195#0/1  
aa\_`Y[¥ZYUN¥R^[VV[¥¥WNPPVUUMRUW¥BBBBBBBBB  
@HWI-EAS443:3:3:1240:92#0/1  
AATTGCTCTCGCCAGTTTTCATTTCTGCTCTGGAGGGAGT  
+HWI-EAS443:3:3:1240:92#0/1  
a`bVYZaT`^^YZQGQ`ZaU¥\_]Y\_\_WYW¥BBBBBBBBB  
@HWI-EAS443:3:6:481:556#0/1  
CTTCACTCCCTCCAGAGCAGAAATGAAAAGTGGCGAGAGC  
+HWI-EAS443:3:6:481:556#0/1  
abb`b`aS¥``\_a\_a\_\_¥\_aZ^]`¥Z\_\_TMX\_W`^YY^B  
@HWI-EAS443:3:45:434:35#0/1  
TATGGCCTCATATACAACAGGATGGGAACAGTGACCACA  
+HWI-EAS443:3:45:434:35#0/1  
abbabaaaba\_baaaaa^`aa^`aaa\_\_¥a]aa\_\_``\_  
@HWI-EAS443:3:79:323:1274#0/1  
TATGGCCTCATATACAACAGGATGGGAACAGTGACCACA  
+HWI-EAS443:3:79:323:1274#0/1  
Z\_S]\_`a¥¥a[¥`Tab[V¥¥W¥¥¥^¥UWS]a¥]LUbbaa\_Z

@HWI-EAS443:3:33:1461:1821#0/1  
GCTGGTTGATTTCTGTTAATGTCCAATCATAAGTCTGGC  
+HWI-EAS443:3:33:1461:1821#0/1  
aa\_`\_I[X¥`a`aababaaaaV¥aa[``\_SZRRO^]Y  
@HWI-EAS443:3:54:751:588#0/1  
TGGCGGGGAGTCTCGAGCTCTCGGACGAAAAAGCAACGA  
+HWI-EAS443:3:54:751:588#0/1  
aba`^a^\_]MV¥PZXJX]¥^T[QYQNYT¥a[ETNZXBBB  
@HWI-EAS443:3:82:483:1548#0/1  
GGGCGGGGAGTCTCGAGCTCTCGGACGAAAAAGCAACG  
+HWI-EAS443:3:82:483:1548#0/1  
¥^a\_aaa[VDY``a`¥Y`\_RX\_`aUa`VTW`a\_FP``a\_T  
@HWI-EAS443:3:72:626:1799#0/1  
CGGCGGGGAGTCTTCGAGCTCTCGGACGAAAAAGCAACGA  
+HWI-EAS443:3:72:626:1799#0/1  
a`¥aWYPKLEK]R¥XQOIDT¥RUMUQFQOU]ZDNUPXVSB  
@HWI-EAS443:3:17:735:45#0/1  
TCCAGGGGCGGGGAGTCTTCGAGCTCTCGGACGAAAAAGC  
+HWI-EAS443:3:17:735:45#0/1  
]aaRX\_`\_Y\_Z]X`XIRRZNUJXPZLQYUXUU¥MY\_YPBB  
@HWI-EAS443:3:64:1755:153#0/1  
GGAGACCTTCACTACCTCCAGAGAAGAAATGAAAAGTGGC  
+HWI-EAS443:3:64:1755:153#0/1  
ab`ba\_\_aa\_a\_`aW¥^YX¥\_\_aGW\_U]\_^`\_X`\_X^]Y  
@HWI-EAS443:3:28:568:744#0/1  
GCTGGACCATATCTCTTGTCTTCTTTGCCAAAATGAGAA  
+HWI-EAS443:3:28:568:744#0/1  
]aab``ab`\_aaaa`aa^baaa`aaaaaa]a``aaaa  
@HWI-EAS443:3:34:1223:269#0/1  
AGCGACCAAAGAATTCCGATGGCCATCAATTATGGAGAG  
+HWI-EAS443:3:34:1223:269#0/1  
`abYUZa]aaa\_aa`¥\_aa`a`HUW[``Y]¥^PPBBBB  
@HWI-EAS443:3:72:648:676#0/1  
CGAGGCCATCCGAATTCTTTTGGTCGCTGTCTGGCCGTCA  
+HWI-EAS443:3:72:648:676#0/1  
aaabaabbabbaaaaaaaaaa`\_aa\_``\_`\_a\_`ZaS\_Z  
@HWI-EAS443:3:59:1602:1553#0/1  
AGGCCATCCGAATTCTTTTGGTCGCTGTCTGGCTGTTAGT  
+HWI-EAS443:3:59:1602:1553#0/1  
^b]S]bb`a`^[b^R\_aa`][`ZZabaaBBBBBBBBBB  
@HWI-EAS443:3:85:1147:890#0/1  
AGGCCATCCGAATTCTTTTGGTCGCTGTCTGGCTGTCAGT  
+HWI-EAS443:3:85:1147:890#0/1  
a\_`\_V]aaabRX``a`]`a``]ZaSDZ`a\_`a\_`aV¥XaN  
@HWI-EAS443:3:19:485:582#0/1  
AGGCCATCCGAATTCTTTTGGTCGCTGTCTGGCTGTCAGG  
+HWI-EAS443:3:19:485:582#0/1  
W[¥¥`ba\_¥T\_¥W^T\_ZQPPP[`aU]aXRZ`BBBBBBBB  
@HWI-EAS443:3:100:1039:608#0/1  
AGGCCATCCGAATTCTTTTGGTCGCTGTCTGGCTGTCAGT

+HWI-EAS443:3:100:1039:608#0/1  
ab\_\_`¥a`]b\_^`aS\_aaba`a`]]N^)`F`\_Q[R[LOBBB  
@HWI-EAS443:3:22:1147:325#0/1  
AGGCCATCCGAATTCTTTTGGTCGCTGTCTGGCTGTCAGT  
+HWI-EAS443:3:22:1147:325#0/1  
a\_```aaaaaaaa\_abaa`¥^\_X`aa^W``\_^`aZU¥¥V  
@HWI-EAS443:3:28:146:893#0/1  
AGGCCATCCGAATTCTTTTGGTCGCTGTCTGGCTGTCAGT  
+HWI-EAS443:3:28:146:893#0/1  
a``bab`aabb`aaaa\_a\_aa¥aa`aa^``[\_\_\_\_`[[[YG  
@HWI-EAS443:3:43:845:489#0/1  
AGGCCATCCGAATTCTTTTGGTCGCTGTCTGGCTGTCAGT  
+HWI-EAS443:3:43:845:489#0/1  
aaaa`baaabaaaa\_aaaaa^`a\_a¥`\_aa[Za`TZU¥F  
@HWI-EAS443:3:46:1232:1485#0/1  
AGGCCATCCGAATTCTTTTGGTCGCTGTCTGGCTGTCAGT  
+HWI-EAS443:3:46:1232:1485#0/1  
^U¥aabbb`bbaabaab¥^^bbaaaa`]]`aaV[\_\_V  
@HWI-EAS443:3:46:284:245#0/1  
AGGCCATCCGAATTCTTTTGGTCGCTGTCTGGCTGTCAGT  
+HWI-EAS443:3:46:284:245#0/1  
aa\_babaaabaaaa\_aaaaa\_`a^`a¥`aaa\_`aRUYXT  
@HWI-EAS443:3:48:837:201#0/1  
AGGCCATCCGAATTCTTTTGGTCGCTGTCTGGCTGTCAGT  
+HWI-EAS443:3:48:837:201#0/1  
]`\_`abaa¥b`^aaaaaaaaa^`a\_`a^``a\_Q`a¥\_[[R  
@HWI-EAS443:3:6:1085:1899#0/1  
AGGCCATCCGAATTCTTTTGGTCGCTGTCTGGCTGTCAGT  
+HWI-EAS443:3:6:1085:1899#0/1  
a]\_\_aa^aab`^a`\_a\_a]a\_^aaZ[`^]\_]^^\_UUXBB  
@HWI-EAS443:3:73:19:853#0/1  
AGGCCATCCGAATTCTTTTGGTCGCTGTCTGGCTGTCAGT  
+HWI-EAS443:3:73:19:853#0/1  
\_]0\_`a¥a\_ZX¥\_¥\_^]\_a^TY\_]\_XZ]Z[a]BBBBBBBB  
@HWI-EAS443:3:8:922:1807#0/1  
AGGCCATCCGAATTCTTTTGGTCGCTGTCTGGCTGTCAGT  
+HWI-EAS443:3:8:922:1807#0/1  
`^^b`bba`aXa]`\_aa]aa¥^`a\_\_bSX\_`\_^]YLB BBB  
@HWI-EAS443:3:91:296:653#0/1  
AGGCCATCCGAATTCTTTTGGTCGCTGTCTGGCTGTCAGT  
+HWI-EAS443:3:91:296:653#0/1  
aaaabbaabaZa`ba`baa^aaaa`\_\_a\_b``a\_T^VT  
@HWI-EAS443:3:9:236:1531#0/1  
AGGCCATCCGAATTCTTTTGGTCGCTGTCTGGCTGTCAGT  
+HWI-EAS443:3:9:236:1531#0/1  
^^]bb]]\_b\_WT¥\_b^b]`a`^\_NZ``QZaa`aUaR\_QBB  
@HWI-EAS443:3:51:793:711#0/1  
CTGCCGTTGATTTCTGTTAACGTCCAATCATAAGTCTG  
+HWI-EAS443:3:51:793:711#0/1  
ab\_b]bb`bbZbaaa`baaba[G\_[aaU``a\_]a\_a^X`a

@HWI-EAS443:3:54:1158:933#0/1  
GTTCCCTTGCTGTATGGAGGATCTCCAGTATAAGGGAAT  
+HWI-EAS443:3:54:1158:933#0/1  
aba`aaabaaaab\_^XG\_S¥a[VXZY]RaUQUN]^a]G¥X  
@HWI-EAS443:3:17:1035:809#0/1  
TGCAGGAGCATTGACTGAAGATCCAGATGAAGGCACATCT  
+HWI-EAS443:3:17:1035:809#0/1  
]ZJ\_\_[N\_`QPZ\_`PXbbaYX\_Z^aa\_a\_PXbZX\_H\_`Z\_  
@HWI-EAS443:3:50:1487:399#0/1  
ATCTCCTGGTTGCCTTTCTGAGAATAGCAGTTGCTCTTCT  
+HWI-EAS443:3:50:1487:399#0/1  
aa`a``bb``bba`ababababaabaaaaa]^`^W\_]`\_[[  
@HWI-EAS443:3:99:1184:1912#0/1  
GGAAGAATGATTGGTGAATAGGGAGATTCTAAATCCAAA  
+HWI-EAS443:3:99:1184:1912#0/1  
aaW`aTa[ba\_ab`Z\_aa`YG^]a^ba\_a`a]U[]U\_W\_a  
@HWI-EAS443:3:94:534:1037#0/1  
TGTCTTCGAGCTCTCGGACGAAAAGGCAACGAACCCGATC  
+HWI-EAS443:3:94:534:1037#0/1  
aa`b]\_aa`¥aaaaaba^a```¥V¥aaaa`a\_`¥XUX`X  
@HWI-EAS443:3:16:1060:301#0/1  
ATGAGAATGAGAGACCTTCACTACCTCCAGAGCAGAAATG  
+HWI-EAS443:3:16:1060:301#0/1  
aaaUa`a`Y\_^a¥^`\_`a[`\_]\_\_\_\_]\_\_^a]^`Y^]]`  
@HWI-EAS443:3:21:1578:262#0/1  
CTAGCTTTCAGGTAGACTGTTTCCTTTGGCATATCCGCAA  
+HWI-EAS443:3:21:1578:262#0/1  
aaaa\_\_`aaaaa^aa\_¥a\_]\_\_¥Y\_\_^X^Y¥^¥V]V]XX[  
@HWI-EAS443:3:33:1029:453#0/1  
GAATGAGAGACCTTCACTACCTCCAGAGCAGAAATGAAAA  
+HWI-EAS443:3:33:1029:453#0/1  
^[b]bbaaa``bba\_babb\_Qaaa^`abZabXIXaa][a^  
@HWI-EAS443:3:73:1773:1709#0/1  
CCTTCACTACCTCCAGAGCAGAAATGAAAAGTGGCGGGAG  
+HWI-EAS443:3:73:1773:1709#0/1  
^QN]aaTRR[QOUQU^ORPHWWI]YXBBBBBBBBBBBBBBB  
@HWI-EAS443:3:89:746:1894#0/1  
GAGAATGAGAGACCTTCACTACCTCCAGAGCAGAAATGAA  
+HWI-EAS443:3:89:746:1894#0/1  
a¥0¥aa^N\_Z¥]\_]\_^¥[`[`a\_ab`\_\_¥¥^`aY\_\_a\_[-  
@HWI-EAS443:3:76:1242:922#0/1  
TGGTGGGCTATATGAAGCAATCGAGGAGTGCCTGATTAAT  
+HWI-EAS443:3:76:1242:922#0/1  
UaSP]]`¥¥bbaa`a`OU]W``Z[a\_`aU`GL]a^ZL¥WS  
@HWI-EAS443:3:77:1275:53#0/1  
CATTAAATCAGGCACTCCTCGATTGCTTCATATAGCCCACC  
+HWI-EAS443:3:77:1275:53#0/1  
`bbbbbaabbaaabbbbb`babbbbaabbaaab\_`[G\_a  
@HWI-EAS443:3:8:1352:1172#0/1  
ATTAATCAGGCACTCCTCGATTGCTTCATATAGCCCACCA

+HWI-EAS443:3:8:1352:1172#0/1  
a[POZWIUX`\_XIXMLYSZ[YVTW¥UDN[XX[[ZTB BBBB  
@HWI-EAS443:3:49:1055:1796#0/1  
ATTGGGAAAGTGTGCAGGACCTTACTGGCAAATCTGTGT  
+HWI-EAS443:3:49:1055:1796#0/1  
`^a^a`bb^[b`aa`])`aa`a`\_``\_`\_^]aMRN  
@HWI-EAS443:3:8:1318:804#0/1  
CCGATTGGCCATGTTTCCGACTTGTTCCTCAAAGAATTCCT  
+HWI-EAS443:3:8:1318:804#0/1  
`a^a\_aX`RUa]\_a^]Z`LE¥`^`ba]``[`X]aaT¥a  
@HWI-EAS443:3:78:780:1168#0/1  
TATGGTGTGGCCAATGCAGTTGCTGCCGTTGATTTTTG  
+HWI-EAS443:3:78:780:1168#0/1  
aa\_b`UaXVYa`Z^T`b^WQWP[^]`WNX[OO[OGUTONS  
@HWI-EAS443:3:47:1699:19#0/1  
GCGGGTTTGTCTTGTTCATTCCTCTCTGGAATCACGTCC  
+HWI-EAS443:3:47:1699:19#0/1  
TMZb`P\_T\_^TMTV``WTNTHL]URULLYQFTTSPDRYXB  
@HWI-EAS443:3:37:1070:1231#0/1  
CATTAAGCATCAATGAAGTGCAGTCTTGCCACAAGGAGA  
+HWI-EAS443:3:37:1070:1231#0/1  
a¥¥0[]Y\_\_^0aZWQIa^]¥a]\_X^^ZHNbWHRV^TS^  
@HWI-EAS443:3:27:1487:801#0/1  
GCATCAATGAAGTGCAGTCTTGCAAAGGAGAGAAAGC  
+HWI-EAS443:3:27:1487:801#0/1  
a^\_bU`a]b\_a¥`\_P`R`G`R\_Z`S\_¥¥W`^Ra]`W^Z^X  
@HWI-EAS443:3:18:40:603#0/1  
ATCCGATTCTTTTGGTCGCTGTCTGGCTGTCAGTAAGTA  
+HWI-EAS443:3:18:40:603#0/1  
VbaTQHX^U]aaUaa[Zaa\_aa]aa[[`\_\_RHXSGVPG\_  
@HWI-EAS443:3:15:460:1300#0/1  
TCAGGATGTTTCTGAACCACTCGGGTTGATTTCTGGTAAT  
+HWI-EAS443:3:15:460:1300#0/1  
ab`\_YX\_VO\_ab]Yaa\_aa`\_Z]¥XDJY^Z]Y]\_\_\_XMMW  
@HWI-EAS443:3:1:135:112#0/1  
GCTCAGGATGTTTCTGAACCACTCGGGTTGATTTCTGGTA  
+HWI-EAS443:3:1:135:112#0/1  
[ba^`aaaXZPYZZ[^`aHIa\_W\_]`¥ZZS^[ZW`[aBB  
@HWI-EAS443:3:26:1452:471#0/1  
CTCAGGATGTTTCTGAACCACTCGGGTTGATTTCTGGTAA  
+HWI-EAS443:3:26:1452:471#0/1  
aabaab[ab\_aa`ababa\_\_\_`\_aa\_Xaa]\_``^```]]^  
@HWI-EAS443:3:40:1104:1222#0/1  
GCTCAGGATGTTTCTGAACCACTCGGGTTGATTTCTGGTA  
+HWI-EAS443:3:40:1104:1222#0/1  
`\_\_\_]Z`a[`aX\_a]\_XDVW\_QVWVUQYVW\_][][]a¥ZOOX  
@HWI-EAS443:3:45:492:987#0/1  
CTCAGGATGTTTCTGAACCACTCGGGTTGATTTCTGGTAA  
+HWI-EAS443:3:45:492:987#0/1  
abbbbb`bbabbbb^abaaa[a`baa\_aaaaaaab¥\_]aa



@HWI-EAS443:3:60:593:305#0/1  
GCTCAGGATGTTTCTGAACCACTCGGGTTGATTTCTGGTA  
+HWI-EAS443:3:60:593:305#0/1  
a\_\_`[^VZ\_V`\_]\_\_¥^WV^W^V\_^¥XZ\_Y]YYX[Y[YZ  
@HWI-EAS443:3:61:768:248#0/1  
GCTCAGGATGTTTCTGAACCACTCGGGTTGATTTCTGGTA  
+HWI-EAS443:3:61:768:248#0/1  
a]^ZVY^XY\_Z^^RUTZ]WRXXOXWX^OYOUVZZZXZUXZ  
@HWI-EAS443:3:65:1632:1468#0/1  
GCTCAGGATGTTTCTGAACCACTCGGGTTGATTTCTGGTA  
+HWI-EAS443:3:65:1632:1468#0/1  
a`\_`aaSXXZERXKHTSYZRT\_YYPXPDP[XUQPSNYKDM  
@HWI-EAS443:3:86:244:1837#0/1  
GCTCAGGATGTTTCTGAACCACTCGGGTTGATTTCTGGTA  
+HWI-EAS443:3:86:244:1837#0/1  
ab`aT¥a^a\_^`aaa\_aa`\_aa^\_]Y\_Z\_\_^^]]W^]WZ^  
@HWI-EAS443:3:88:466:1238#0/1  
GCTCAGGATGTTTCTGAACCACTCGGGTTGATTTCTGGTA  
+HWI-EAS443:3:88:466:1238#0/1  
aaaabbaabaabab`a^`¥`a`aaaWa\_\_a`\_a[a]`  
@HWI-EAS443:3:88:896:213#0/1  
GCTCAGGATGTTTCTGAACCACTCGGGTTGATTTCTGGTA  
+HWI-EAS443:3:88:896:213#0/1  
ab\_a]¥^]aYZ\_a^WOF]WU`PRU`^V¥¥UZ[aU¥Y\_NS  
@HWI-EAS443:3:94:675:166#0/1  
GGCAACTCAGCACCGTCTGGCCAAGACCAACCCACAAGAT  
+HWI-EAS443:3:94:675:166#0/1  
VHT]VOP`\_Y¥\_MX`Y¥R[RZSMU^YV¥¥XRRRYUXBBBB  
@HWI-EAS443:3:63:958:588#0/1  
TATGGCCTCTGCTGCCTGTTCACTCGATCCAGCCATCTGT  
+HWI-EAS443:3:63:958:588#0/1  
HZZbbba\_abb^T[abZZWabX¥b\_WW`JbLWTWTZ`Uaa  
@HWI-EAS443:3:40:1328:668#0/1  
CACCTCTCGTCATTGCAGCAAATATCATTGGGATCTTGC  
+HWI-EAS443:3:40:1328:668#0/1  
abbbbbbbbababbbaba`aaaa`aa`^aZ^`[\_aa`\_X  
@HWI-EAS443:3:37:1486:806#0/1  
TACCATTCTGTTTTCATGCCTGATTAGTGGATTGGTGGTA  
+HWI-EAS443:3:37:1486:806#0/1  
aa`a`a`aab`aab[aa`a^ba\_aa\_aWaZaa`\_\_\_\_\_¥]  
@HWI-EAS443:3:97:356:378#0/1  
AGCAGGCAGATATTTAAAGATGAGGCTTCTAACCGAGGTC  
+HWI-EAS443:3:97:356:378#0/1  
UUS\_S\_KbXQW^^TUZTTYU\_aRT]]SL]LY]HaT¥[BB  
@HWI-EAS443:3:10:463:629#0/1  
TGCAAAAGCAGGCAGATATTTAAAGATGAGTCTTCTAACC  
+HWI-EAS443:3:10:463:629#0/1  
`bX¥`aaa¥b`\_P^a¥P¥b]a]b`VZ`ab¥\_Vab¥\_^aaa  
@HWI-EAS443:3:100:745:876#0/1  
GAAAGATGACCTTCTTGGAAAATTTGCAGGCCTCCCAAAGT

+HWI-EAS443:3:100:745:876#0/1  
\_Y`[a[``]W`aaaaabaaaaa[aa`\_Ya\_UPY¥Za\_  
@HWI-EAS443:3:39:848:1381#0/1  
CTTCCCTCATGGACTCAGGCACCCCTTCCGTAGAAGGCC  
+HWI-EAS443:3:39:848:1381#0/1  
a\_Z```\_[[aUU^]\_^RY\_a[GXa]aa\_\_a¥UVIMR^[Q  
@HWI-EAS443:3:5:533:1869#0/1  
GGTGCCTGAGTCCATGAGGGAAGAATATCAACAGGAACAG  
+HWI-EAS443:3:5:533:1869#0/1  
ab\_bb]abbaU`[bababbaa\_ba`a\_\_\_b^]aaZ\_]N`^  
@HWI-EAS443:3:93:543:371#0/1  
CGGTCTTGTCTTTAGCCATTCCATGAGAGCCTCAAGATCT  
+HWI-EAS443:3:93:543:371#0/1  
aab`a```U[abaaabaaa\_a`Xaa```\_`¥^Z^[a\_`^`  
@HWI-EAS443:3:36:1669:970#0/1  
CAGCACTTGTCTTCTGTTGATATTCTTCCCTCATGGA  
+HWI-EAS443:3:36:1669:970#0/1  
`bbb`]abbaaaaR`\_abbQ`aXaTaaNa`aT\_\_a`a[F\_  
@HWI-EAS443:3:31:1662:1099#0/1  
GCTGGATCGAGTGAACAGGCAGCAGAGGCCATTGAGGTTG  
+HWI-EAS443:3:31:1662:1099#0/1  
`^ZZ`^b`b`^¥ba]QVU^Y¥¥KXGWY`BBBBBBBBBBBB  
@HWI-EAS443:3:14:359:1845#0/1  
GCCTGAATCCATGAGGGAAGAATATCAACAGGAACAGCAG  
+HWI-EAS443:3:14:359:1845#0/1  
SZb]a\_Q\_\_VVZbZOHX]bU\_\_]SP\_¥SXX`aS`T`RbIB  
@HWI-EAS443:3:37:1741:1964#0/1  
TGGGAAACAAATTGTGGAATGGATCTTCAAAGAGGAATCG  
+HWI-EAS443:3:37:1741:1964#0/1  
abb`bV`aaba`S`[bb^a\_ZZW]XYY\_ZG\_¥abb`^`\_`0  
@HWI-EAS443:3:32:170:1445#0/1  
CCCCTGCAGGGCTACTGAATACATAATGAAGCGGTGTA  
+HWI-EAS443:3:32:170:1445#0/1  
ab`^`^¥¥SLKR`QTT\_XQPZ¥PV\_TGN[J]REIYPXQB  
@HWI-EAS443:3:15:1645:776#0/1  
ATTGGCCATGTTTTCGATTTGTTTTCAAAGAATTCCTTGG  
+HWI-EAS443:3:15:1645:776#0/1  
abbbabab`V^b\_HUaY^bbVXabbUZaa`a^\_]\_\_aa\_  
@HWI-EAS443:3:58:166:121#0/1  
CCTGGTTAATGATCCCTGGGTTTTGCTTAATGCATCTTGG  
+HWI-EAS443:3:58:166:121#0/1  
aaWb`Ua```]`T^a\_aaaZRX\_\_^^`\_[YW\_VR]¥]0]W  
@HWI-EAS443:3:46:1060:643#0/1  
GAGTGCTGCTGTTGAGAGGATTTCTCATTTTGGGCAAA  
+HWI-EAS443:3:46:1060:643#0/1  
a`a`aaaaab``aaa`aaaa]aba^a`\_aaaa\_a\_]`a  
@HWI-EAS443:3:65:1061:851#0/1  
CTAAGGTATATAAACTTATTTGAAAAGGTTGAAAGGTT  
+HWI-EAS443:3:65:1061:851#0/1  
a`a¥ab¥bbab`¥baba\_abbaaa]a``\_a[a`XT`a]a

@HWI-EAS443:3:29:1788:836#0/1  
GCATAAATGAACTGAGCAATCTTGCAAAAGGAGAGAAAGC  
+HWI-EAS443:3:29:1788:836#0/1  
a]PZLUNQ]H\_Y¥\_Y¥\_^S`W][ ]Z[V¥P[^SS\_^]BBB  
@HWI-EAS443:3:44:1716:1827#0/1  
CAAGGACAAACCCTCTGGAGTAAAACAAACGATGCTGGAT  
+HWI-EAS443:3:44:1716:1827#0/1  
``^]^[^`Z\_] [ `b`aaVba]G]\_YXQX[aYW`VQDQ]GUV  
@HWI-EAS443:3:50:14:1407#0/1  
ATCTCTTGTCTTCTTTGCCAAAATGAGAAATCCTCTCAA  
+HWI-EAS443:3:50:14:1407#0/1  
`abbbba]\_`aaaaaaaa`aabaaaaaaaaV\_\_^aaa\_]a  
@HWI-EAS443:3:9:560:567#0/1  
AAGAGATATGGCCAGCATTAAAGCATAAATGAACTGAGCA  
+HWI-EAS443:3:9:560:567#0/1  
a¥¥[R]a`[O[SGS]`T]]Z`^X[aTFQWTVMQRZX`^`\_  
@HWI-EAS443:3:67:1020:919#0/1  
ATTCTTTTGGTCGCTGTCTGGCTGTCCGTAAGTGTGCTAG  
+HWI-EAS443:3:67:1020:919#0/1  
V¥¥X¥`^Y^[OXUVab\_ba\_TWJ00YF[I]JOQGW¥^`YJ  
@HWI-EAS443:3:16:877:256#0/1  
CATATTTTCACCGAGTGGCCACTTCAACTGGCTTGGTCTC  
+HWI-EAS443:3:16:877:256#0/1  
a¥[OQ¥\_[¥Z¥a`^a]T`aWUaa`]¥¥L^aaBBBBBBBBBB  
@HWI-EAS443:3:24:387:1217#0/1  
ATGGAAATGAGACGCTGCCTTCTTCAGTCTCTTCAGCGGA  
+HWI-EAS443:3:24:387:1217#0/1  
¥ZZb\_\_bb^aZH\_\_`]W]¥WTPaab]aHGQXUU\_ZHHH]P  
@HWI-EAS443:3:60:582:579#0/1  
AGCGTCTCATTTCCATGCCCCATTTTCATCTTGATCTTGGA  
+HWI-EAS443:3:60:582:579#0/1  
[^bb]aaZ0^aaaaa`aaaaaaaa`^`\_`a\_^a`^`aaNY  
@HWI-EAS443:3:13:939:899#0/1  
TCTGTTTTTCATGCCTGATTAGTGGATTGGTGGGAGTTGTC  
+HWI-EAS443:3:13:939:899#0/1  
aa\_aW^a^`]aa][^\_Ua^JX\_a\_U\_BBBBBBBBBBBBBBB  
@HWI-EAS443:3:100:702:920#0/1  
TTCTGTTTTTCATGCCTGATTAGTGGATTGGTGGTAGTTGC  
+HWI-EAS443:3:100:702:920#0/1  
aXZZX]^aa]a`\_Y`a]YXVa¥Tb`\_aBBBBBBBBBBBBBB  
@HWI-EAS443:3:24:1377:1750#0/1  
GTGTTTTTTCTCATGGTTCTGAAATCCTAATGTTAAATAC  
+HWI-EAS443:3:24:1377:1750#0/1  
a^a]`baaaaaaba\_SVa\_aa`^`\_]`aaaaa\_`^`a\_\_a]  
@HWI-EAS443:3:60:146:633#0/1  
GTGTTTTTTCTCATGTTTCTGAAATCCTAATGTTAAATAC  
+HWI-EAS443:3:60:146:633#0/1  
a\_^Z`^`a\_a^`a\_^]S\_]\_`^^\_^^^\_\_\_\_\_Y\_YOY^`X  
@HWI-EAS443:3:97:648:422#0/1  
AGATGATCACTCAATGAGTGACATCGAAGCCATGGCGTCT

+HWI-EAS443:3:97:648:422#0/1  
\_`^`H]a`a]¥aY]¥[[`]^aa\_\_\_\_\_PTJX¥Z]L\_FOZ  
@HWI-EAS443:3:33:1119:1703#0/1  
GCCCAGATGGCTCTTCAATTGTTTCATCAAAGATTACAGAT  
+HWI-EAS443:3:33:1119:1703#0/1  
aabbaa[\_aa]a\_`bba`aaU\_aa\_N]a`VDP\_]`^]a^  
@HWI-EAS443:3:10:498:641#0/1  
AACCATTTGAATGGATGTCAATCCGACTCTACTCTTCCTA  
+HWI-EAS443:3:10:498:641#0/1  
a`\_aaaaab`aaaa\_\_`^`a\_^\_]`^UZ^^]`^`^[\_`^`\_  
@HWI-EAS443:3:19:891:1854#0/1  
GTTCCGATCTTCATTCTTTTACTCTCGAACATGTACCCTT  
+HWI-EAS443:3:19:891:1854#0/1  
]TQ[]ITTQ]]^Z\_YYU\_¥V^]]][VOYW^]WOSUWLY^^T  
@HWI-EAS443:3:82:760:716#0/1  
GCGAAAGCAGGCAAACACTATTTGAATGGATGTCAATCCGAC  
+HWI-EAS443:3:82:760:716#0/1  
^a`a¥TXa[^b¥Z\_aaba`]\_]`a`\_]Z\_W¥Q¥\_\_\_YWZ  
@HWI-EAS443:3:30:824:621#0/1  
CACAAATTCAAACGAGAAGATCATTTGAGCTAAAGAAGCT  
+HWI-EAS443:3:30:824:621#0/1  
a\_UXYWW\_]`[\_Y^`VYZYa`[\_]^Y¥]SXFYU\_N¥^OXFO  
@HWI-EAS443:3:99:64:858#0/1  
ACGCAACGGCATCATATTCCATGCTTTTGGCTGGACCATG  
+HWI-EAS443:3:99:64:858#0/1  
[[bbbbbb\_bbbbb`bbbbbbb\_`b]babaaaaaaaa\_aYXYP  
@HWI-EAS443:3:81:441:383#0/1  
CAGAAATCAACCAGCAGCAACTGCATTGGCCAACACCATA  
+HWI-EAS443:3:81:441:383#0/1  
aa^]]Z\_`X`aa^^]]`[\_YX`XXVSY\_¥`^`[UWV[XW]  
@HWI-EAS443:3:93:1419:1121#0/1  
AACCATTTGAATGGATGTCAATCCGACTTTTACTTTTCCTA  
+HWI-EAS443:3:93:1419:1121#0/1  
aZQ`aT[`b\_\_b^]^^V^`TaYVQTSTXFORSaa\_YBBBB  
@HWI-EAS443:3:13:945:613#0/1  
CTCGATACTGAATCTTGGACAAAAGAAAGACACAAAAGACA  
+HWI-EAS443:3:13:945:613#0/1  
a`ZaV]¥NY^\_Xa]Y]]PPW][WSS[]UDJFV[GWNXPPZ  
@HWI-EAS443:3:31:950:817#0/1  
CACGCCAGACTTATGATTGGACATTAACAGAAATCAACC  
+HWI-EAS443:3:31:950:817#0/1  
a`V^WQ\_JWSVaYS\_aaXQ¥SYaaa`\_]`X\_H\_\_W`U\_\_¥[  
@HWI-EAS443:3:3:616:1035#0/1  
CACGCCAGACTTATGATTGGACATTAACAGAAATCAACC  
+HWI-EAS443:3:3:616:1035#0/1  
abbbb`aaaabb`baabbbbaabbbbb`baabaaba^]  
@HWI-EAS443:3:46:134:744#0/1  
CACGCCAGACTTATGATTGGACATTAACAGAAATCAACC  
+HWI-EAS443:3:46:134:744#0/1  
`abaaabaabaabaaaaa`aaba\_aa`aa`a^aa`]

@HWI-EAS443:3:64:1490:415#0/1  
CACGCCAGACTTATGATTGGACATTAACAGAAATCAACC  
+HWI-EAS443:3:64:1490:415#0/1  
abbbbabbbabbbaabaaa`aabaaaWbaabaa` `aX`  
@HWI-EAS443:3:92:1322:1489#0/1  
CACGCCAGACTTATGATTGGACATTAACAGAAATCAACC  
+HWI-EAS443:3:92:1322:1489#0/1  
abbb`\_bbaYba\_`b` `bba`LG\_a]bb^b`bba\_Taa^]  
@HWI-EAS443:3:66:1479:917#0/1  
ACGCCAGACTTATGATTGGACATTAACAGAAATCAACCG  
+HWI-EAS443:3:66:1479:917#0/1  
aaaa`aaaaa` ]` ]`aaaa^[^aa\_\_`\_`¥]T\_``\_`W\_X  
@HWI-EAS443:3:43:596:1861#0/1  
GAAGAATCCCACCCAGGAATATTTGAGAATTCGTGCCTTG  
+HWI-EAS443:3:43:596:1861#0/1  
a]bbb`¥]\_aaa[Z`aa`a`a`^\_]\_aaaaWO^Ya[``\_a  
@HWI-EAS443:3:54:1764:587#0/1  
CCAGCTCACAAAAGTCAATTGGTGTGGATGGNATGCCAAT  
+HWI-EAS443:3:54:1764:587#0/1  
`abbabababbaaa\_a\_\_aa^\_Y]¥^a`abVDZOHEVWFY  
@HWI-EAS443:3:63:587:1238#0/1  
ACAGAGTGGTATGCCATCCACACCAATTGACTTTTGTGAG  
+HWI-EAS443:3:63:587:1238#0/1  
Ubabbaaab`bbb`ba`aa\_abbabaaa`^abaaaXaaaa  
@HWI-EAS443:3:40:1624:1332#0/1  
GAGGGGCATGCCATCCACACCAATTGACTTTTGTGAGCTG  
+HWI-EAS443:3:40:1624:1332#0/1  
a[¥FYWX^Z[R]RLNURV]\_¥^[UWNGRW¥SWYSRUURUR  
@HWI-EAS443:3:45:1665:1510#0/1  
ACCGAGCTCACAAAAGTCAATTGGTGTGGATGGCATGCCA  
+HWI-EAS443:3:45:1665:1510#0/1  
]^ [FZS[¥]]T\_SS]]\_\_`a\_a¥NT]]VBBBBBBBBBBB  
@HWI-EAS443:3:19:1038:1667#0/1  
CCCCAGCTCACAAAAGTCAATTGGTGTGGANGGCATGCCA  
+HWI-EAS443:3:19:1038:1667#0/1  
R\_a\_K\_`^TaYaJbZ\_GR]R[¥aa¥b¥bbYD[]X]I¥U`B  
@HWI-EAS443:3:11:1418:2045#0/1  
CAAATGAAAACCCAGCTCACAAAAGTAAATTGGTGTGGAT  
+HWI-EAS443:3:11:1418:2045#0/1  
[``aab``]\_baYaaa`SaaaUaYa[IVIb`]]` [``\_a\_BB  
@HWI-EAS443:3:13:887:392#0/1  
CAAATGAAAACCCAGCTCACAAAAGTCAATTGGGGTGGAT  
+HWI-EAS443:3:13:887:392#0/1  
a`b`bbab\_\_URaaba`a\_T^[aZaMUZL]¥`YF[¥a\_^Q  
@HWI-EAS443:3:15:569:1631#0/1  
CAGCTCACAAAAGTCAATTGGTGTGGATGGGATGCCACTC  
+HWI-EAS443:3:15:569:1631#0/1  
`b[ababaaaaa[HZaa` `Ya][`a`^^`\_`HYaY¥aa`^`  
@HWI-EAS443:3:15:912:441#0/1  
GGCATGCCATCCACAGCAATTGACTTTTGTGAGCTGGGTT

+HWI-EAS443:3:15:912:441#0/1  
aab`a`\_XQaa^YaILT^[`\_]\_aa^a\_aaGPW\_QZZN]OX  
@HWI-EAS443:3:19:1687:1585#0/1  
CATGCCATCCACACCAATTGACTTTTGTGAGCGGGGTTTT  
+HWI-EAS443:3:19:1687:1585#0/1  
a`\_b\_]¥^aVa\_a]abbb`¥^abbab]Ma[baQ\_ab`aab  
@HWI-EAS443:3:58:226:562#0/1  
ACCAAATGAAAACCCGGCTCACAAAAGTCAATTGGTGTGG  
+HWI-EAS443:3:58:226:562#0/1  
¥`\_^XW`a`\_`R¥\_[R]]\_`\_]`XR¥`Za^Y^)]\_TZ[\_Y  
@HWI-EAS443:3:66:164:550#0/1  
GCAGAGCGGCATGCCATCCACACCAATTGACTTTTGTGAG  
+HWI-EAS443:3:66:164:550#0/1  
aaXOX^G[U`\_`\_]`[[OZZ^^Z[¥PRWFNZMRWZ^^RQQRW  
@HWI-EAS443:3:77:80:661#0/1  
ATGAAAACCCAGCTCACACAAGTCAATTGGTGTGGATGGC  
+HWI-EAS443:3:77:80:661#0/1  
Za`Q\_UW`\_`a\_a`\_]Z`¥H¥U]Z]]`^]¥[`Z`XTZ^VB  
@HWI-EAS443:3:88:1002:190#0/1  
CACGCCATCCACACCAATTGACTTTTGTGAGCTGGGTTTT  
+HWI-EAS443:3:88:1002:190#0/1  
a`\_`\_`VU^V[[X\_¥\_\_¥aa^^]]^aa`]Y]]XaaaaUZU\_  
@HWI-EAS443:3:59:331:1543#0/1  
GTGGCATGCCATCCNCACCAATTGACTTTTGTGAGCTGGG  
+HWI-EAS443:3:59:331:1543#0/1  
`a^\_aa^a`a`\_`a¥DR^`aa]aa`\_`aaaa`U[`¥WT`\_`^  
@HWI-EAS443:3:72:767:1309#0/1  
GAGNGGCATGCCATCCACACCAATTGACTTTTGTGAGCTG  
+HWI-EAS443:3:72:767:1309#0/1  
a`XD^ab]babaaaaabaaa`[a`aa`aa`a¥^a`\_`\_aa  
@HWI-EAS443:3:26:1374:631#0/1  
TGAAAACCCAGCTCACAAAAGTCAATTGGTGTGGATGGAA  
+HWI-EAS443:3:26:1374:631#0/1  
a``YSQZF[]\_T¥QSU]LQXWLUPUZS^WBBBBBBBBBBB  
@HWI-EAS443:3:39:551:570#0/1  
GCGCCATCCACACCAATTGACTTTTGTGAGCTGGGTTTTTC  
+HWI-EAS443:3:39:551:570#0/1  
T\_aa`UK`Zbbbab`a]\_I`bQb\_aXa\_\_¥b`babNSVV\_  
@HWI-EAS443:3:46:196:1570#0/1  
CCAGCTCACAAAAGTCAATTGGTGTGGATGGCATGCCAAT  
+HWI-EAS443:3:46:196:1570#0/1  
a`YbWH`\_`a`¥ZP\_NXa]a]a]Z\_aaYS`\_`aXYBBBBBBB  
@HWI-EAS443:3:59:1530:657#0/1  
GCGCCATCCACACCAATTGACTTTTGTGAGCTGGGTTTTTC  
+HWI-EAS443:3:59:1530:657#0/1  
aXD¥¥a\_TQU^]YXVT`WXVU\_a`aa`\_¥`[^`YULSUYP  
@HWI-EAS443:3:61:478:1106#0/1  
AGCCCAGCTCACAAAAGTCAATTGGTGTGGATGGCATGCC  
+HWI-EAS443:3:61:478:1106#0/1  
]]bba]\_babbbb`\_`a\_\_PY\_\_aa^`Za`\_`[VUUXYXNR

@HWI-EAS443:3:6:853:184#0/1  
TGAAAACCCAGCTCACAAAAGTCAATTGGTGTGGATGGGA  
+HWI-EAS443:3:6:853:184#0/1  
`b]]`ba\_`aaaaaaba\_`aY\_`Va]\_`\_\_\_\_^\_\_BBBB  
@HWI-EAS443:3:99:1646:1913#0/1  
ACACCAATTGACTTTTGTGAGCTGGGTTTTTCATTTGGTTT  
+HWI-EAS443:3:99:1646:1913#0/1  
aaaaIabbaaWIa`Y^`[b`XZaaS]L`a^S\_`¥^¥`LFZ  
@HWI-EAS443:3:13:394:533#0/1  
GACCCAGCTCACAAAAGTCAATTGGTGTGGATGGCATGCC  
+HWI-EAS443:3:13:394:533#0/1  
abbabbbaababaaaaab]baaaba`\_a\_`aa\_`aZ\_\_XW]  
@HWI-EAS443:3:34:1244:1149#0/1  
CGCCATCCACACCAATTGACTTTTGTGAGCTGGGTTTTCA  
+HWI-EAS443:3:34:1244:1149#0/1  
abaababab`b`]aaaaaaaaa\_a`aaaa``]^\_\_T[  
@HWI-EAS443:3:35:88:2044#0/1  
GCCCAGCTCACAAAAGTCAATTGGTGTGGATGGCATGCCA  
+HWI-EAS443:3:35:88:2044#0/1  
[bbbbbbabbab`]bb\_babbabTX[`a\_a`aaaa\_`bTI  
@HWI-EAS443:3:40:150:1869#0/1  
CCCCAGCTCACAAAAGTCAATTGGTGTGGATGGCATGCCA  
+HWI-EAS443:3:40:150:1869#0/1  
abbbb`baabbbb]IT]baaaaaIXPN\_`a\_aP\_\_QX[\_`  
@HWI-EAS443:3:43:479:542#0/1  
GCCCAGCTCACAAAAGTCAATTGGTGTGGATGGCATGCCA  
+HWI-EAS443:3:43:479:542#0/1  
abbbbbbb`a\_`bb\_bbabbba]baaaaab`Y^ZT[``  
@HWI-EAS443:3:51:883:83#0/1  
GCCCAGCTCACAAAAGTCAATTGGTGTGGATGGCATGCCA  
+HWI-EAS443:3:51:883:83#0/1  
a`aabbabaaabba`a`aabbbbababaaabbXaa^SY\_  
@HWI-EAS443:3:52:1725:1956#0/1  
GAAAACCCAGCTCACAAAAGTCAATTGGTGTGGATGGCAG  
+HWI-EAS443:3:52:1725:1956#0/1  
```aa[WX¥`VXT^R^\_\_ZT[Y^]\_^[ZM`Y[PU[^BBBB  
@HWI-EAS443:3:57:811:354#0/1  
TCCCAGCTCACAAAAGTCAATTGGTGTGGATGGCATGCCA  
+HWI-EAS443:3:57:811:354#0/1  
aaa`ab`aa`]¥Ya\_aWaW^a`a\_¥\_`^^`^\_`V^[Z[¥X  
@HWI-EAS443:3:64:1310:1143#0/1  
GCCCAGCTCACAAAAGTCAATTGGTGTGGATGGCATGCCA  
+HWI-EAS443:3:64:1310:1143#0/1  
aaaaabaaaaababaa¥a\_`babaNa¥aa`]a`U\_Y\_\_^¥  
@HWI-EAS443:3:70:1013:34#0/1  
GCCCAGCTCACAAAAGTCAATTGGTGTGGATGGCATGCCA  
+HWI-EAS443:3:70:1013:34#0/1  
aabb]`¥`\_]`^aa]R[QZRZbb]¥YT¥\_`R^`YQBBBBBB  
@HWI-EAS443:3:70:1772:984#0/1  
GCCCAGCTCACAAAAGTCAATTGGTGTGGATGGCATGCCA

+HWI-EAS443:3:70:1772:984#0/1  
abbbbbbbbabbbbbbbbabbbbbbb]Y\_\_`aa[\_`Z[\_a  
@HWI-EAS443:3:92:684:1036#0/1  
TCCCAGCTCACAAAAGTCAATTGGTGTGGATGGCATGCCA  
+HWI-EAS443:3:92:684:1036#0/1  
`¥\_aba`]^aaaZ^^¥\_a]a`¥`G`X[aaT^VZBBBBBB  
@HWI-EAS443:3:100:644:1041#0/1  
GCCATCCACACCAATTGACTTTTGTGAGCTGGGTTTTTCAT  
+HWI-EAS443:3:100:644:1041#0/1  
aa[a`aa\_\_YWaa`a]\_\_a`a\_T\_Z]¥aaa`Z\_a`]^`  
@HWI-EAS443:3:10:1074:1036#0/1  
AGCAGAGTGGCATGCCATCCACACCAATTGACTTTTGTGA  
+HWI-EAS443:3:10:1074:1036#0/1  
aaabbab\_aabba\_a\_aa`^`\_a^^a\_a`\_Y`aa`\_]`^`  
@HWI-EAS443:3:10:816:574#0/1  
TGAAAACCCAGCTCACAAAAGTCAATTGGTGTGGATGGCA  
+HWI-EAS443:3:10:816:574#0/1  
abaaaa`a\_aa\_a\_]`\_a`X\_[^]`\_\_Y^Y\_YYX\_¥RV  
@HWI-EAS443:3:13:1198:2013#0/1  
GAGTGGCATGCCATCCACACCAATTGACTTTTGTGAGCTG  
+HWI-EAS443:3:13:1198:2013#0/1  
]^aVa\_\_`aaa\_b\_a\_a\_a`^[]\_[a`\_\_aa\_]T\_\_`^R]  
@HWI-EAS443:3:13:133:768#0/1  
AAATGAAAACCCAGCTCACAAAAGTCAATTGGTGTGGATG  
+HWI-EAS443:3:13:133:768#0/1  
a`baaaa]`aa\_aa`aa\_aYNQa]``^a\_\_`X`]`\_^`  
@HWI-EAS443:3:13:762:37#0/1  
CAAATGAAAACCCAGCTCACAAAAGTCAATTGGTGTGGAT  
+HWI-EAS443:3:13:762:37#0/1  
ababbbbaa^`\_aabaa``a``aX]\_\_a\_a`Xa]`^Y]  
@HWI-EAS443:3:15:1453:1608#0/1  
GAGTGGCATGCCATCCACACCAATTGACTTTTGTGAGCTG  
+HWI-EAS443:3:15:1453:1608#0/1  
¥¥`aa`a`aa¥`^b\_ba^`Z`\_`a`b`aab¥b^¥a`Y¥aa  
@HWI-EAS443:3:15:1491:1226#0/1  
ATGAAAACCCAGCTCACAAAAGTCAATTGGTGTGGATGGC  
+HWI-EAS443:3:15:1491:1226#0/1  
abb`bbba\_[\_a[a\_^\_[aXWaR[^^a\_^]]`\_[a]XTXF  
@HWI-EAS443:3:15:270:1353#0/1  
GTGGCATGCCATCCACACCAATTGACTTTTGTGAGCTGGG  
+HWI-EAS443:3:15:270:1353#0/1  
aUbb]b[[\_a`[aaZPNba`\_`ZZ[Z]`b`aH\_\_¥`¥a[\_  
@HWI-EAS443:3:15:697:126#0/1  
CAGCTCACAAAAGTCAATTGGTGTGGATGGCATGCCACTC  
+HWI-EAS443:3:15:697:126#0/1  
H\_bb[bbab`¥a`\_\_babbaabb[bbb[ZUaaaa\_IUR  
@HWI-EAS443:3:16:1461:1213#0/1  
CACACCAATTGACTTTTGTGAGCTGGGTTTTTCATTTGGTC  
+HWI-EAS443:3:16:1461:1213#0/1  
a`X`^¥`ab`ba\_bbaa]^\_W\_¥`]V\_^aT`XP``^aW¥\_



@HWI-EAS443:3:16:44:1487#0/1  
GAGTGGCATGCCATCCACACCAATTGACTTTTGTGAGCTG  
+HWI-EAS443:3:16:44:1487#0/1  
`a¥\_aabaaaa]aaa`aaaaa`\_`\_`a`\_a`V^`\_`  
@HWI-EAS443:3:18:752:1209#0/1  
GGCATGCCATCCACACCAATTGACTTTTGTGAGCTGGGT  
+HWI-EAS443:3:18:752:1209#0/1  
`¥]T`aaaabaaa`[a\_a`\_`aY`a[\_S\_¥[Sa\_[MU  
@HWI-EAS443:3:19:1728:344#0/1  
ACCAAATGAAAACCCAGCTCACAAAAGTCAATTGGTGTGG  
+HWI-EAS443:3:19:1728:344#0/1  
aaaba[ababba\_\_\_aa\_a\_a^a`\_`a\_]\_^aaaXW`V\_\_  
@HWI-EAS443:3:19:1789:601#0/1  
CAAATGAAAACCCAGCTCACAAAAGTCAATTGGTGTGGAT  
+HWI-EAS443:3:19:1789:601#0/1  
a`bbaababaaababbbababb`abUabaaaa`aa```\_`  
@HWI-EAS443:3:20:1384:756#0/1  
AGCAGAGTGGCATGCCATCCACACCAATTGACTTTTGTGA  
+HWI-EAS443:3:20:1384:756#0/1  
aaaa`aXb`aa`a`\_\_\_\_\_R`]Z\_\_`\_`^X`^a^VW^Y  
@HWI-EAS443:3:21:249:49#0/1  
AGCTCACAAAAGTCAATTGGTGTGGATGGCATGCCACTCT  
+HWI-EAS443:3:21:249:49#0/1  
aa`\_a\_aaY\_\_aXa\_¥````X\_^\_\_^X`\_NRSSY]]XYXX  
@HWI-EAS443:3:22:1584:896#0/1  
GACCAAATGAAAACCCAGCTCACAAAAGTCAATTGGTGTG  
+HWI-EAS443:3:22:1584:896#0/1  
abZK¥]`abZ`a``OXUa`\_U^Y\_^Y]`UV]Y\_\_\_][Y\_X\_  
@HWI-EAS443:3:23:1678:602#0/1  
ATGCCATCCACACCAATTGACTTTTGTGAGCTGGGTTTTTC  
+HWI-EAS443:3:23:1678:602#0/1  
¥b^^]`b[U^\_[\_`\_aab\_K^aaZU[baa^`\_`baP^[^G  
@HWI-EAS443:3:25:1463:346#0/1  
CAAATGAAAACCCAGCTCACAAAAGTCAATTGGTGTGGAT  
+HWI-EAS443:3:25:1463:346#0/1  
H\_\_b`\_Yab]``````U¥bbb]``W`\_bb¥`¥X``bbaa  
@HWI-EAS443:3:25:761:516#0/1  
AGCTCACAAAAGTCAATTGGTGTGGATGGCATGCCACTCT  
+HWI-EAS443:3:25:761:516#0/1  
aabbabbbabb`baaaaa\_aaaa`ab^a`\_aVYX`]`  
@HWI-EAS443:3:26:967:1919#0/1  
ATGAAAACCCAGCTCACAAAAGTCAATTGGTGTGGATGGC  
+HWI-EAS443:3:26:967:1919#0/1  
`aba`a`\_¥Pa\_Y`\_`\_`a`\_[Wa`\_`\_]XUYTT]^YZXU  
@HWI-EAS443:3:27:501:375#0/1  
CAGCTCACAAAAGTCAATTGGTGTGGATGGCATGCCACTC  
+HWI-EAS443:3:27:501:375#0/1  
abb\_bbbbb`bbb[baabaab\_aaba`\_b\_0[[]`W[YZ]  
@HWI-EAS443:3:27:523:954#0/1  
TGAAAACCCAGCTCACAAAAGTCAATTGGTGTGGATGGCA

+HWI-EAS443:3:27:523:954#0/1  
a`]^\_\_abaaaaaaa`\_W`\_`\_\_¥aW¥Y¥^`^UZ  
@HWI-EAS443:3:28:1176:368#0/1  
CCCAGCTCACAAAAGTCAATTGGTGTGGATGGCATGCCAC  
+HWI-EAS443:3:28:1176:368#0/1  
`a]\_b]\_a`ab`aaaYZa\_abb¥YaUa`[[b]G]RXQM^N  
@HWI-EAS443:3:28:178:392#0/1  
ATGCCATCCACACCAATTGACTTTTTGTGAGCTGGGTTTTTC  
+HWI-EAS443:3:28:178:392#0/1  
aaaaaa\_aaa`U`]\_a\_\_\_a`a`\_`\_^¥^a\_\_\_\_`\_W¥\_\_`  
@HWI-EAS443:3:28:478:140#0/1  
GAGTGGCATGCCATCCACACCAATTGACTTTTTGTGAGCTG  
+HWI-EAS443:3:28:478:140#0/1  
]Za]]VbaYaba¥\_a[a\_XWS[`PTaQ]OR\_Z^HIMS¥QQ  
@HWI-EAS443:3:28:532:886#0/1  
CCCAGCTCACAAAAGTCAATTGGTGTGGATGGCATGCCAC  
+HWI-EAS443:3:28:532:886#0/1  
abb`aaaa`aaa\_W\_Z\_`aaa`]X^WWa\_\_a^QY¥[ ]`XP  
@HWI-EAS443:3:29:1444:98#0/1  
CAAATGAAAACCCAGCTCACAAAAGTCAATTGGTGTGGAT  
+HWI-EAS443:3:29:1444:98#0/1  
ab`b]aaa]bUaa^`]a\_^YZa\_\_^]¥[Va`\_¥Y\_]aBBB  
@HWI-EAS443:3:2:1125:1862#0/1  
GTGGCATGCCATCCACACCAATTGACTTTTTGTGAGCTGGG  
+HWI-EAS443:3:2:1125:1862#0/1  
\_QYWZ^YZVYX\_¥SYL`WPS\_\_\_¥GG]\_[Y[V]Y]UU]]^  
@HWI-EAS443:3:2:1445:1136#0/1  
AAATGAAAACCCAGCTCACAAAAGTCAATTGGTGTGGATG  
+HWI-EAS443:3:2:1445:1136#0/1  
a`XV\_TZ]¥a]YZZYGPPIU[\_`\_`\_`]]SZSQ^P]^`^Z  
@HWI-EAS443:3:30:743:1234#0/1  
GCCATCCACACCAATTGACTTTTTGTGAGCTGGGTTTTTCAT  
+HWI-EAS443:3:30:743:1234#0/1  
abba`aba`bbb[a`\_aaaaaa\_a^a\_aaa\_V\_a\_\_Z\_  
@HWI-EAS443:3:31:1291:731#0/1  
CAGCTCACAAAAGTCAATTGGTGTGGATGGCATGCCACTC  
+HWI-EAS443:3:31:1291:731#0/1  
W^`¥[\_`\_Waa`¥0]QQZZ^S^`\_\_U]S``[PTPO[V[PR  
@HWI-EAS443:3:31:787:1098#0/1  
GCCATCCACACCAATTGACTTTTTGTGAGCTGGGTTTTTCAT  
+HWI-EAS443:3:31:787:1098#0/1  
a``^]Y]]`a`Z]\_V]\_\_\_\_[\_]LZWNN]¥VULSYXRN^R  
@HWI-EAS443:3:33:144:1198#0/1  
ACCAAATGAAAACCCAGCTCACAAAAGTCAATTGGTGTGG  
+HWI-EAS443:3:33:144:1198#0/1  
]abb\_Ma¥0\_^aaaaaaa`aa^Z`W\_[aX`\_\_[VP\_Q¥S  
@HWI-EAS443:3:33:972:1639#0/1  
ATGAAAACCCAGCTCACAAAAGTCAATTGGTGTGGATGGC  
+HWI-EAS443:3:33:972:1639#0/1  
aa`aaa```aaa\_\_\_aaa`\_\_aXa^`\_`\_[YZOO^^V]UN

@HWI-EAS443:3:34:460:1483#0/1  
ACACCAATTGACTTTTGTGAGCTGGGTTTTTCATTTGGTCT  
+HWI-EAS443:3:34:460:1483#0/1  
aaaabaa\_`Taaa`^`\_^`a\_Xaa^`Z^`\_aa^ZWZ¥ZXU  
@HWI-EAS443:3:35:1643:1698#0/1  
GCCATCCACACCAATTGACTTTTGTGAGCTGGGTTTTTCAT  
+HWI-EAS443:3:35:1643:1698#0/1  
aUM[[YR^`^¥\_\_VV^ZXV]]\_]RU^G\_\_\_a`X\_XRHPZ  
@HWI-EAS443:3:35:673:1200#0/1  
AACCCAGCTCACAAAAGTCAATTGGTGTGGATGGCATGCC  
+HWI-EAS443:3:35:673:1200#0/1  
]aba\_`^T\_a¥Z]QOVN]\_¥Q]aURPQUTPX\_XTTSLLY  
@HWI-EAS443:3:37:1139:1791#0/1  
GCCATCCACACCAATTGACTTTTGTGAGCTGGGTTTTTCAT  
+HWI-EAS443:3:37:1139:1791#0/1  
a`^aaaaa\_`\_\_`Z\_U[][\_`\_\_T^`\_Ua\_aUN[¥U]Y  
@HWI-EAS443:3:37:140:1343#0/1  
ACCCAGCTCACAAAAGTCAATTGGTGTGGATGGCATGCCA  
+HWI-EAS443:3:37:140:1343#0/1  
aabb]]]b¥aaa\_KZ^\_Ya``\_\_\_\_R]V^TSS`[]NZU^^X  
@HWI-EAS443:3:39:1355:172#0/1  
CCCAGCTCACAAAAGTCAATTGGTGTGGATGGCATGCCAC  
+HWI-EAS443:3:39:1355:172#0/1  
abbbbbaba\_baaab\_a`^aa`¥\_a\_¥U¥\_\_HJVYRPZYB  
@HWI-EAS443:3:42:1015:584#0/1  
ACCAAATGAAAACCCAGCTCACAAAAGTCAATTGGTGTGG  
+HWI-EAS443:3:42:1015:584#0/1  
aa\_b`aaba`aaaa\_abaaaa\_`\_^a]\_`\_a``\_]`^`\_  
@HWI-EAS443:3:43:724:45#0/1  
CAAATGAAAACCCAGCTCACAAAAGTCAATTGGTGTGGAT  
+HWI-EAS443:3:43:724:45#0/1  
`aa`¥\_ababbb`bbb``baba`\_aRR`a`aa]`b]a`a¥  
@HWI-EAS443:3:44:1713:725#0/1  
CCAGCTCACAAAAGTCAATTGGTGTGGATGGCATGCCACT  
+HWI-EAS443:3:44:1713:725#0/1  
abbbbbbbabbaY¥a`\_a^ab`^^a`a\_\_\_a^U[^^[X\_RU  
@HWI-EAS443:3:44:604:145#0/1  
AAAACCCAGCTCACAAAAGTCAATTGGTGTGGATGGCATG  
+HWI-EAS443:3:44:604:145#0/1  
a^U`^a^Y]a`\_\_^a`^\_\_YY`\_`\_a^W^Y`UMX]\_WQOS  
@HWI-EAS443:3:45:485:782#0/1  
ATGCCATCCACACCAATTGACTTTTGTGAGCTGGGTTTTTC  
+HWI-EAS443:3:45:485:782#0/1  
a`U¥YY[a\_]XVWVPNUZX]]\_]`^URUYV]Ra`GG^^V  
@HWI-EAS443:3:4:148:521#0/1  
GCAGAGTGGCATGCCATCCACACCAATTGACTTTTGTGAG  
+HWI-EAS443:3:4:148:521#0/1  
a\_Q\_WZW¥a\_UZ^¥[P[^Q[VQYX[]\_[^JNX[a[TY[UZ  
@HWI-EAS443:3:51:457:1312#0/1  
AGCAGAGTGGCATGCCATCCACACCAATTGACTTTTGTGA

+HWI-EAS443:3:51:457:1312#0/1  
aabba\_a\_aaaaa\_`aaa`a%a^b]\_aa`V\_`¥`Y\_]  
@HWI-EAS443:3:51:721:1829#0/1  
TGGCATGCCATCCACACCAATTGACTTTTGTGAGCTGGGT  
+HWI-EAS443:3:51:721:1829#0/1  
VaaaaabaaYba[aaaa`aab\_Va%a^`aVVU`Q]\_a\_\_  
@HWI-EAS443:3:51:859:1455#0/1  
AGCTCACAAAAGTCAATTGGTGTGGATGGCATGCCACTCT  
+HWI-EAS443:3:51:859:1455#0/1  
`bbaaa^`babbY`aabbab[VYa`V^`XV]W^S[\_\_\_]R%  
@HWI-EAS443:3:52:752:1459#0/1  
GTGGCATGCCATCCACACCAATTGACTTTTGTGAGCTGGG  
+HWI-EAS443:3:52:752:1459#0/1  
a%`a^`][%`\_`\_aYY\_`\_^%Y`aaaaX[Y^^\_`a`  
@HWI-EAS443:3:53:641:793#0/1  
AGCAGAGTGGCATGCCATCCACACCAATTGACTTTTGTGA  
+HWI-EAS443:3:53:641:793#0/1  
a\_aaba`Xaaaaa`aa\_\_\_aZ\_`a\_\_`\_V``aa\_^`Y  
@HWI-EAS443:3:53:787:744#0/1  
ACCCAGCTCACAAAAGTCAATTGGTGTGGATGGCATGCCA  
+HWI-EAS443:3:53:787:744#0/1  
a``bab`aaaaaaab[a^%aab`Y^%aa\_aaa]WYW]ZZ  
@HWI-EAS443:3:54:1565:1825#0/1  
ATGAAAACCCAGCTCACAAAAGTCAATTGGTGTGGATGGC  
+HWI-EAS443:3:54:1565:1825#0/1  
`bbabab\_YRb`]^Z]^bbaab^XaaaYaaX^aTa\_[VW  
@HWI-EAS443:3:54:386:1615#0/1  
CATCCACACCAATTGACTTTTGTGAGCTGGGTTTTCATTT  
+HWI-EAS443:3:54:386:1615#0/1  
ababbbbbbbbabbbbabab`b`^`]^`abbbaaba\_aaaa  
@HWI-EAS443:3:54:498:1809#0/1  
ATGAAAACCCAGCTCACAAAAGTCAATTGGTGTGGATGGC  
+HWI-EAS443:3:54:498:1809#0/1  
]W\_[a`a\_U]^`\_a^`]S]SYTJT\_YZ`\_]^NQ%`^]Ra\_Z  
@HWI-EAS443:3:54:615:1253#0/1  
GAGTGGCATGCCATCCACACCAATTGACTTTTGTGAGCTG  
+HWI-EAS443:3:54:615:1253#0/1  
WY\_[%`\_baZab%TZbb``a^`a]ba[aaaa^`T%`a]a  
@HWI-EAS443:3:55:1158:913#0/1  
ATCCACACCAATTGACTTTTGTGAGCTGGGTTTTCATTTG  
+HWI-EAS443:3:55:1158:913#0/1  
aa\_aaaa`baa`a\_\_aabaa\_a\_a%abaaVaaa\_\_a\_\_a  
@HWI-EAS443:3:55:150:1960#0/1  
ATGAAAACCCAGCTCACAAAAGTCAATTGGTGTGGATGGC  
+HWI-EAS443:3:55:150:1960#0/1  
Ua\_X][`\_a`\_P]a\_a\_a]^`\_Z`ZM^^VGTUU%`X^Z%XS  
@HWI-EAS443:3:55:923:740#0/1  
CCCAGCTCACAAAAGTCAATTGGTGTGGATGGCATGCCAC  
+HWI-EAS443:3:55:923:740#0/1  
\_\_\_\_UaYZSWG%Q\_\_aVNa\_Y^`NRY^`VUa%NJOLYVQW

@HWI-EAS443:3:57:147:1150#0/1  
GAGTGGCATGCCATCCACACCAATTGACTTTTGTGAGCTG  
+HWI-EAS443:3:57:147:1150#0/1  
\_ZZ]ababW\_¥a¥`a\_YDN]bMa``aZ\_``a\_\_T¥[YYa\_  
@HWI-EAS443:3:57:1562:423#0/1  
GCCATCCACACCAATTGACTTTTGTGAGCTGGGTTTTTCAT  
+HWI-EAS443:3:57:1562:423#0/1  
a`SYUZT[KKX¥UP[[]U[UXa\_[]`S¥SUT`ZW^\_¥V^]  
@HWI-EAS443:3:59:1564:1272#0/1  
GAAAACCCAGCTCACAAAAGTCAATTGGTGTGGATGGCAT  
+HWI-EAS443:3:59:1564:1272#0/1  
`bbaab`abU¥`aabbbbaVYb`abb[XS\_X][^VNLTK  
@HWI-EAS443:3:5:103:1607#0/1  
GCCATCCACACCAATTGACTTTTGTGAGCTGGGTTTTTCAT  
+HWI-EAS443:3:5:103:1607#0/1  
a`XQT[a^[¥aYWYXMM¥`)]ZU[S[[TPX¥ZTQU^BBBB  
@HWI-EAS443:3:5:604:444#0/1  
GCCATCCACACCAATTGACTTTTGTGAGCTGGGTTTTTCAT  
+HWI-EAS443:3:5:604:444#0/1  
\_¥\_[b\_aaU`¥M[]YX[VS^`U^¥V^W¥Y\_\_Y¥XXZ^UBB  
@HWI-EAS443:3:62:1471:75#0/1  
ATCCACACCAATTGACTTTTGTGAGCTGGGTTTTTCATTTG  
+HWI-EAS443:3:62:1471:75#0/1  
aa\_`a^a\_\_`\_a\_`\_\_`a``a]a]\_¥\_`a`[\_`\_Y¥`]]^  
@HWI-EAS443:3:63:635:396#0/1  
GGCATGCCATCCACACCAATTGACTTTTGTGAGCTGGGTT  
+HWI-EAS443:3:63:635:396#0/1  
`XS`Xa\_]X]V]\_Ta`]\_]¥`VW\_]`[]`]^Za\_`UR  
@HWI-EAS443:3:63:991:1787#0/1  
ATCCACACCAATTGACTTTTGTGAGCTGGGTTTTTCATTTG  
+HWI-EAS443:3:63:991:1787#0/1  
a\_aa`aaa]ba`aaa`\_aaa`]```aa\_a]\_`a¥\_a^\_a  
@HWI-EAS443:3:64:343:179#0/1  
GGCATGCCATCCACACCAATTGACTTTTGTGAGCTGGGTT  
+HWI-EAS443:3:64:343:179#0/1  
¥\_\_bb`\_`b\_\_Y`a]b]ba`¥a[\_[¥aXTRa¥\_]\_baaY^  
@HWI-EAS443:3:64:759:369#0/1  
GCCATCCACACCAATTGACTTTTGTGAGCTGGGTTTTTCAT  
+HWI-EAS443:3:64:759:369#0/1  
`ba]abaaaaa\_`a`a\_\_\_`a\_\_^\_\_\_\_`a`aY\_``\_Ya  
@HWI-EAS443:3:66:469:141#0/1  
GAGTGGCATGCCATCCACACCAATTGACTTTTGTGAGCTG  
+HWI-EAS443:3:66:469:141#0/1  
\_U\_Uaaaa`a]]Y^^`X]]^[¥N¥\_^WZ`\_^^¥W^RNRW`  
@HWI-EAS443:3:67:237:932#0/1  
GACCAAATGAAAACCCAGCTCACAAAAGTCAATTGGTGTG  
+HWI-EAS443:3:67:237:932#0/1  
`\_bbbabb\_b[bb`SZ¥abaaaW\_baXaa[aa`¥YZ]`  
@HWI-EAS443:3:68:1118:524#0/1  
ACCAAATGAAAACCCAGCTCACAAAAGTCAATTGGTGTGG

+HWI-EAS443:3:68:1118:524#0/1  
]`a`¥K^bW[`]¥[^Za^a\_aXY]``\_``\_Y¥][S0TV]  
@HWI-EAS443:3:69:1456:571#0/1  
GACCAAATGAAAACCCAGCTCACAAAAGTCAATTGGTGTG  
+HWI-EAS443:3:69:1456:571#0/1  
`bbbbba`baaabbaa`abaaaaaaa`ab\_aaabaaa\_aaa  
@HWI-EAS443:3:6:1340:199#0/1  
GCAGAGTGGCATGCCATCCACACCAATTGACTTTTGTGAG  
+HWI-EAS443:3:6:1340:199#0/1  
TZb`YTGv\_R`aba`aa]R\_Q`]``]aa^X[aaa¥`BBB  
@HWI-EAS443:3:6:437:704#0/1  
GACCAAATGAAAACCCAGCTCACAAAAGTCAATTGGTGTG  
+HWI-EAS443:3:6:437:704#0/1  
abaab`aabaaba`aYa`[a\_\_\_a\_a\_aV\_\_\_aa\_WOWY`  
@HWI-EAS443:3:70:1303:642#0/1  
AGCTCACAAAAGTCAATTGGTGTGGATGGCATGCCACTCT  
+HWI-EAS443:3:70:1303:642#0/1  
a^aaaaaa`Y`]a`aaaaYaUa\_^\_^Y[^ZW^^\_]Y^  
@HWI-EAS443:3:70:1624:868#0/1  
ACCCAGCTCACAAAAGTCAATTGGTGTGGATGGCATGCCA  
+HWI-EAS443:3:70:1624:868#0/1  
aaa`abaaaaaaaa^aZaa\_aaa`^a\_a\_\_a`]R[WZMV[  
@HWI-EAS443:3:71:1712:552#0/1  
CAAATGAAAACCCAGCTCACAAAAGTCAATTGGTGTGGAT  
+HWI-EAS443:3:71:1712:552#0/1  
abbbbb`a`\_a\_aabbbbaabbaab]aaaba^aU`aba\_  
@HWI-EAS443:3:71:63:780#0/1  
AGCTCACAAAAGTCAATTGGTGTGGATGGCATGCCACTCT  
+HWI-EAS443:3:71:63:780#0/1  
Uba]^a\_X\_a^VR[aa^aa`\_a[]NPT^¥R[WT^]PQLVT  
@HWI-EAS443:3:72:1090:1797#0/1  
GTGGCATGCCATCCACACCAATTGACTTTTGTGAGCTGGG  
+HWI-EAS443:3:72:1090:1797#0/1  
`XX]bbHaaa¥VY^\_]\_a¥a[\_[\_[^`VJ^a^\_UBBBBBB  
@HWI-EAS443:3:72:1405:2039#0/1  
ATGAAAACCCAGCTCACAAAAGTCAATTGGTGTGGATGGC  
+HWI-EAS443:3:72:1405:2039#0/1  
aba]aaaaaaa`^`a^`a^`W\_]`^`[UG]]][T[Y]]G  
@HWI-EAS443:3:72:1750:1737#0/1  
ACCCAGCTCACAAAAGTCAATTGGTGTGGATGGCATGCCA  
+HWI-EAS443:3:72:1750:1737#0/1  
a^`^`[V]T\_UURX^X`W`[U]¥]]LV[YG\_Y\_BBBBBBBBB  
@HWI-EAS443:3:72:975:744#0/1  
AGCTCACAAAAGTCAATTGGTGTGGATGGCATGCCACTCT  
+HWI-EAS443:3:72:975:744#0/1  
]bbaaaa`^`^`aaaaabab\_\_a\_a`aaaZX[¥]^a\_Y\_`[  
@HWI-EAS443:3:73:445:1766#0/1  
GAAAACCCAGCTCACAAAAGTCAATTGGTGTGGATGGCAT  
+HWI-EAS443:3:73:445:1766#0/1  
\_``[W`b\_ZW^¥a`¥HRU¥PZa\_]``RWYUZXX]UBBBB

@HWI-EAS443:3:74:1105:287#0/1  
GAAAACCCAGCTCACAAAAGTCAATTGGTGTGGATGGCAT  
+HWI-EAS443:3:74:1105:287#0/1  
a`a\_a]\_`\_a\_\_^\_¥^¥]\_aX^\_^^`\_U`Y^¥UX\_]VVV  
@HWI-EAS443:3:74:620:660#0/1  
GAGTGGCATGCCATCCACACCAATTGACTTTTTGTGAGCTG  
+HWI-EAS443:3:74:620:660#0/1  
a\_]\_a]abaaa\_a\_aaaaaaaaa\_aa`]`aaaa]Ta]\_^`  
@HWI-EAS443:3:74:902:200#0/1  
GAGTGGCATGCCATCCACACCAATTGACTTTTTGTGAGCTG  
+HWI-EAS443:3:74:902:200#0/1  
a`X\_abaZ]`UQ¥aZW¥V^]V^]VVVVJU[\_\_\_\_¥UYYPV¥  
@HWI-EAS443:3:74:930:1000#0/1  
CAGAGTGGCATGCCATCCACACCAATTGACTTTTTGTGAGC  
+HWI-EAS443:3:74:930:1000#0/1  
aaaa`\_a`ba`a\_aa^a\_aaa\_\_`\_]a\_\_]`\_a^\_U\_X\_Q  
@HWI-EAS443:3:74:946:325#0/1  
GCATGCCATCCACACCAATTGACTTTTTGTGAGCTGGGTTT  
+HWI-EAS443:3:74:946:325#0/1  
aa`^^Y\_¥]^^`V^[JZ¥\_a]VRV^¥]WS[PXM^^V[Z\_¥  
@HWI-EAS443:3:75:1009:857#0/1  
GAAAACCCAGCTCACAAAAGTCAATTGGTGTGGATGGCAT  
+HWI-EAS443:3:75:1009:857#0/1  
aabbbb``aa]`Z``baYa`PaaaabZU`\_Y]aaaBBBBB  
@HWI-EAS443:3:75:384:710#0/1  
CAGCTCACAAAAGTCAATTGGTGTGGATGGCATGCCACTC  
+HWI-EAS443:3:75:384:710#0/1  
`bbbabaabaa`a\_``aab`aXa\_`\_\_`\_``[]^\_\_\_\_]¥  
@HWI-EAS443:3:76:1235:352#0/1  
GTGGCATGCCATCCACACCAATTGACTTTTTGTGAGCTGGG  
+HWI-EAS443:3:76:1235:352#0/1  
a^aa^`^aYY`\_^[^¥aX^aa\_\_Z^O\_\_¥`\_Z\_Z`Z]\_]\_  
@HWI-EAS443:3:76:1327:1580#0/1  
AGCAGAGTGGCATGCCATCCACACCAATTGACTTTTTGTGA  
+HWI-EAS443:3:76:1327:1580#0/1  
a[^`aa\_[baaaa\_a^a`Ya`\_\_Y]\_^`\_V¥Xaa`^¥Y^^  
@HWI-EAS443:3:77:188:1003#0/1  
GTGGCATGCCATCCACACCAATTGACTTTTTGTGAGCTGGG  
+HWI-EAS443:3:77:188:1003#0/1  
a¥QORX¥`a`] [\_X¥¥RXZOU[SLKSXRUQUSLKRW[WZQ  
@HWI-EAS443:3:77:232:966#0/1  
GCCATCCACACCAATTGACTTTTTGTGAGCTGGGTTTTCAT  
+HWI-EAS443:3:77:232:966#0/1  
a`XQU`a¥]U^¥ML[Z\_]UYLY`RUTVY[`^RUJXXPPS  
@HWI-EAS443:3:78:1293:503#0/1  
GCATGCCATCCACACCAATTGACTTTTTGTGAGCTGGGTTT  
+HWI-EAS443:3:78:1293:503#0/1  
a]^`a^W\_\_\_\_]RX`Y[¥\_aa¥V\_``\_aX\_]\_Q``\_aU][  
@HWI-EAS443:3:79:127:662#0/1  
GACCAAATGAAAACCCAGCTCACAAAAGTCAATTGGTGTG

+HWI-EAS443:3:79:127:662#0/1  
aa[aaaaaaaa`\_]a^aaa\_`] `X\_TTN`^W\_\_`]TWV^  
@HWI-EAS443:3:7:1276:1233#0/1  
AATGAAAACCCAGCTCACAAAAGTCAATTGGTGTGGATGG  
+HWI-EAS443:3:7:1276:1233#0/1  
aa\_aba]b` `b` `aaaa¥a]aaSaaaX[ba^Z` `a`  
@HWI-EAS443:3:7:787:997#0/1  
TGAAAACCCAGCTCACAAAAGTCAATTGGTGTGGATGGCA  
+HWI-EAS443:3:7:787:997#0/1  
ab\_aa[ `\_]\_aaa\_a^aa` `X\_` ¥\_]a\_Y` ^a¥Y]` BBB  
@HWI-EAS443:3:80:885:785#0/1  
AACCCAGCTCACAAAAGTCAATTGGTGTGGATGGCATGCC  
+HWI-EAS443:3:80:885:785#0/1  
`X\_aaaa^a` ` [ `Xa[a\_`aaa\_T` ¥[RZaa`V[ `SML  
@HWI-EAS443:3:81:532:1052#0/1  
ATGAAAACCCAGCTCACAAAAGTCAATTGGTGTGGATGGC  
+HWI-EAS443:3:81:532:1052#0/1  
aaa¥aaa` `] ¥Z\_]\_]aa^`] []a^^^ [RV^U^Z]]^]R  
@HWI-EAS443:3:82:1152:1448#0/1  
CAGCTCACAAAAGTCAATTGGTGTGGATGGCATGCCACTC  
+HWI-EAS443:3:82:1152:1448#0/1  
` [ ` `^aa`a`a]Waaabaa`WaX`a\_\_a^Q[] [V`XT] [ `]  
@HWI-EAS443:3:83:1388:932#0/1  
GAGTGGCATGCCATCCACACCAATTGACTTTTGTGAGCTG  
+HWI-EAS443:3:83:1388:932#0/1  
` `aabbabbab]bbabbba`ababbb\_aaabbb`a\_b[ab  
@HWI-EAS443:3:83:271:580#0/1  
CAAATGAAAACCCAGCTCACAAAAGTCAATTGGTGTGGAT  
+HWI-EAS443:3:83:271:580#0/1  
aaM^bba`baaaaaaaaaaaaaa\_a[a\_aaaaU¥` `a\_\_\_\_  
@HWI-EAS443:3:83:72:362#0/1  
GCCATCCACACCAATTGACTTTTGTGAGCTGGGTTTTTCAT  
+HWI-EAS443:3:83:72:362#0/1  
V]ab¥Waa¥a\_¥\_U`bbaaUZaa[P[WQH` [VYG[IZW^V  
@HWI-EAS443:3:83:904:439#0/1  
CAAATGAAAACCCAGCTCACAAAAGTCAATTGGTGTGGAT  
+HWI-EAS443:3:83:904:439#0/1  
abbbbbbbbbbaaabaabab`]b\_aaababa`baab`a  
@HWI-EAS443:3:83:986:1888#0/1  
AGAGTGGCATGCCATCCACACCAATTGACTTTTGTGAGCT  
+HWI-EAS443:3:83:986:1888#0/1  
\_`^ [N`VWavT [LYFV\_¥ZYP^^V¥Z¥QSZ^] [RKNUKHL  
@HWI-EAS443:3:84:627:1427#0/1  
CCAAATGAAAACCCAGCTCACAAAAGTCAATTGGTGTGGA  
+HWI-EAS443:3:84:627:1427#0/1  
aababbaaa\_aaaaaaaa`aa`^TZUaa\_`a¥^W`^\_W\_  
@HWI-EAS443:3:85:1361:1067#0/1  
GCCATCCACACCAATTGACTTTTGTGAGCTGGGTTTTTCAT  
+HWI-EAS443:3:85:1361:1067#0/1  
a¥[^a`¥ZP^` [\_Z]^] [\_ZV` `]W\_U¥]] ` `]RWWZV^Y



@HWI-EAS443:3:85:687:1587#0/1  
AGCAGAGTGGCATGCCATCCACACCAATTGACTTTTGTGA  
+HWI-EAS443:3:85:687:1587#0/1  
a`aa\_\_a]`a`b^S\_`a\_¥aaaa`]\_\_\_\_Z^^`\_^\_VWX  
@HWI-EAS443:3:86:213:1680#0/1  
AGCAGAGTGGCATGCCATCCACACCAATTGACTTTTGTGA  
+HWI-EAS443:3:86:213:1680#0/1  
Yaa^aZYQa[ba]OZZ¥Y`a]``]]^^YVNY¥^`\_NSZU  
@HWI-EAS443:3:87:813:748#0/1  
CAAATGAAAACCCAGCTCACAAAAGTCAATTGGTGTGGAT  
+HWI-EAS443:3:87:813:748#0/1  
abaa`^]Yaa\_]aaa`a\_a`]¥]`\_``]aa\_\_]aX`UV\_  
@HWI-EAS443:3:89:184:1302#0/1  
GAGTGGCATGCCATCCACACCAATTGACTTTTGTGAGCTG  
+HWI-EAS443:3:89:184:1302#0/1  
aa¥U]aababaaa`aab]X\_a^aa\_[¥]`aa``]YR^\_\_`  
@HWI-EAS443:3:8:1141:1423#0/1  
GACCAAATGAAAACCCAGCTCACAAAAGTCAATTGGTGTG  
+HWI-EAS443:3:8:1141:1423#0/1  
aaa[aa`aaa`a\_]\_Qa\_aaaa]aX^`a^S\_]\_\_\_\_R\_X`  
@HWI-EAS443:3:90:890:423#0/1  
GAGTGGCATGCCATCCACACCAATTGACTTTTGTGAGCTG  
+HWI-EAS443:3:90:890:423#0/1  
abaaa```bb\_`bbaab`aabbaaaaaaaaaabYa`a\_aa  
@HWI-EAS443:3:91:771:338#0/1  
CATCCACACCAATTGACTTTTGTGAGCTGGGTTTTCATTT  
+HWI-EAS443:3:91:771:338#0/1  
^`a\_Z^^^`\_aa^¥]`¥JT\_a¥aVa`\_a]`S\_Y[R¥¥YY  
@HWI-EAS443:3:92:650:1778#0/1  
AGCAGAGTGGCATGCCATCCACACCAATTGACTTTTGTGA  
+HWI-EAS443:3:92:650:1778#0/1  
a`a^\_aaRZY¥\_¥Z`\_]W\_a]X`aaU]`^`^`\_aaYUPX^  
@HWI-EAS443:3:93:1140:1546#0/1  
AAACCCAGCTCACAAAAGTCAATTGGTGTGGATGGCATGC  
+HWI-EAS443:3:93:1140:1546#0/1  
``a`\_aaaa\_\_\_\_\_a]L`¥[``a`\_\_U\_YYJY^a^PMWWB  
@HWI-EAS443:3:93:1507:1717#0/1  
TGAAAACCCAGCTCACAAAAGTCAATTGGTGTGGATGGCA  
+HWI-EAS443:3:93:1507:1717#0/1  
Z]a\_a`\_T^[baa`a\_a`Xa¥LZY\_ZO[aX^BBBBBBBBBB  
@HWI-EAS443:3:95:591:736#0/1  
GAGTGGCATGCCATCCACACCAATTGACTTTTGTGAGCTG  
+HWI-EAS443:3:95:591:736#0/1  
`ab\_aa`baba\_aa\_aa\_a\_¥aa```\_\_aa\_a\_]a\_a^`a  
@HWI-EAS443:3:97:140:415#0/1  
GAGTGGCATGCCATCCACACCAATTGACTTTTGTGAGCTG  
+HWI-EAS443:3:97:140:415#0/1  
a`\_\_`aa^a``\_aa¥]Z\_`¥^\_]\_[\_Z^^^]X]Y\_W\_X]\_  
@HWI-EAS443:3:97:939:468#0/1  
CAGCTCACAAAAGTCAATTGGTGTGGATGGCATGCCACTC

+HWI-EAS443:3:97:939:468#0/1  
abbaaababaaab[aabbb`aab`a]a`bb]`XaZ``V[[  
@HWI-EAS443:3:98:1283:720#0/1  
GAGTGGCATGCCATCCACACCAATTGACTTTTTGTGAGCTG  
+HWI-EAS443:3:98:1283:720#0/1  
aaZJ]\_\_bbba]bb`b^`Q]JYX]]`[Saa\_ZUb¥\_S``  
@HWI-EAS443:3:9:312:514#0/1  
GCCATCCACACCAATTGACTTTTTGTGAGCTGGGTTTTTCAT  
+HWI-EAS443:3:9:312:514#0/1  
aXS][aa\_]a`\_YNW`¥V]^\_^Z\_X]^\_^][NXZ]W[Z  
@HWI-EAS443:3:29:1757:1458#0/1  
CTTAGCAAAAGCAGGGTAGATAATCACTCAATGAGTGACA  
+HWI-EAS443:3:29:1757:1458#0/1  
ab`VZZbaaabaaaWQU`a`aa]P`\_\_X[[`a`dW``\_`  
@HWI-EAS443:3:76:948:1068#0/1  
AGGGAGTCTCGATACTGAATCTTGGGCAAAAGAAATACAC  
+HWI-EAS443:3:76:948:1068#0/1  
aaabaaabbabaaa`aaaaaaaa`\_`\_aaa`a\_aa``^`^`  
@HWI-EAS443:3:6:471:67#0/1  
GGGAGTCTCGATACTGAATCTTGGGCAAAAGAAATACACC  
+HWI-EAS443:3:6:471:67#0/1  
a^`VPT^ZW\_SWOGSYXOXZWU^XSYWZ^ZZV]XUBBBBB  
@HWI-EAS443:3:15:201:1709#0/1  
CATCAATGAAC TAAGCAATCTTGCAAAAGGAGAGAAAGCT  
+HWI-EAS443:3:15:201:1709#0/1  
^\_]\_a`^^^Z^aaa`¥K\_b[^Vaaaaaa\_a`a\_a``\_a\_  
@HWI-EAS443:3:78:77:445#0/1  
CATCAATGAAC TAAGCAATCTTGCAAAAGGAGAGAAAGCT  
+HWI-EAS443:3:78:77:445#0/1  
aa^a`a]^¥^`Y¥Ya\_aa[``[^aZUU`\_Wa]\_¥WP^\_^  
@HWI-EAS443:3:96:416:703#0/1  
AGCTAATGTGCTAATTGGGCAAGGAGACGTAGTGTGGTA  
+HWI-EAS443:3:96:416:703#0/1  
a`aaaaa\_a\_a`aaaa\_a`\_a\_`^`\_a[]a]`U\_\_\_SW  
@HWI-EAS443:3:91:512:1446#0/1  
GTTGCAAAAGCAGGGTAGATAATCACTCAATGAGTGACAT  
+HWI-EAS443:3:91:512:1446#0/1  
\_``^`[U^`\_]`TY]]\_]`PW]\_U^\_]^^UV^UZX^^X  
@HWI-EAS443:3:52:713:194#0/1  
GTGCAAAAGCAGGGTAGATAATCACTCAATGAGTGACATC  
+HWI-EAS443:3:52:713:194#0/1  
a^a^```¥a\_]^[^aT`¥a`\_\_\_[Z^Z\_^\_¥Y\_S]^Z[]Z  
@HWI-EAS443:3:66:624:1962#0/1  
TGCAAAAGCAGGGTAGATAATCACTCAATGAGTGACATCG  
+HWI-EAS443:3:66:624:1962#0/1  
abbbbaaYSa¥ZYRGba¥[``]¥^aaZZ\_^MZaaNGaTMY\_U  
@HWI-EAS443:3:67:1749:1673#0/1  
TGCAAAAGCAGGGTAGATAATCACTCAATGAGTGACATCG  
+HWI-EAS443:3:67:1749:1673#0/1  
ab`aaaa`````\_`N\_Ya`````\_\_\_^]Xaa\_¥X^V^]a]\_R

@HWI-EAS443:3:69:1704:218#0/1  
TGCAAAAGCAGGGTAGATAATCACTCAATGAGTGACATCG  
+HWI-EAS443:3:69:1704:218#0/1  
^`bW[aa`b`aa]Rbbaaa]aT`Pa`\_`aa\_a^a`]\_\_VI  
@HWI-EAS443:3:20:172:1618#0/1  
GAAAAGTGGCGAGAGCAATTGGGCCAGAAATTTGAGGAAA  
+HWI-EAS443:3:20:172:1618#0/1  
^^b`bb`X^¥ab`\_¥\_S¥a\_Z]NFL`S\_b`PWbY\_aaR\_Y  
@HWI-EAS443:3:56:1304:1705#0/1  
TGCGGGGTTCTTCTTGTCTTCCTGATGTGTACTTGTGTTG  
+HWI-EAS443:3:56:1304:1705#0/1  
]`QV\_\_`¥`T^KH¥T^ab\_aZPP[TV^¥XOZVXW¥GGNRY  
@HWI-EAS443:3:92:356:2001#0/1  
AAATGTACACATCAGGAAGACAAGAGAAGAACCCCGCACT  
+HWI-EAS443:3:92:356:2001#0/1  
\_aaaa)``a¥a`\_aW0\_a^\_a`[W]\_a`\_a]¥SXU^`Z^  
@HWI-EAS443:3:16:736:211#0/1  
TATGGCCATAATCAAAAAGTACACATCAGGAAGAAAAGAG  
+HWI-EAS443:3:16:736:211#0/1  
a^aaa^a\_YX`[[^b`aYLO¥\_b¥^Y¥[^a\_aSFU\_\_TB  
@HWI-EAS443:3:19:798:1909#0/1  
TGCGGGGCTCTTCTTGTCTTCCTGATGTGTACTTTTTG  
+HWI-EAS443:3:19:798:1909#0/1  
aab^babV`ab`Ubb^`b¥`a`b[b`\_`aaXaXaa\_``\_\_\_\_  
@HWI-EAS443:3:21:1272:145#0/1  
AAAAAGTACACATCAGGAAGACAAGAGAAGAACCGCGCAC  
+HWI-EAS443:3:21:1272:145#0/1  
WV¥¥I\_ZV\_¥U\_¥^\_a`W¥aW\_ZS¥TUVV\_ZRMDDZ^PLT  
@HWI-EAS443:3:21:396:1400#0/1  
CAAAAAGCACACATCAGGAAGACAAGAGAAGAACCCCGCA  
+HWI-EAS443:3:21:396:1400#0/1  
aaaZ\_[TFT\_a\_a`\_\_aaa\_\_a¥^Za\_UNV`\_^]\_]X[  
@HWI-EAS443:3:24:1229:1393#0/1  
TGCGGGGGTCTTCTTGTCTTCCTGATGTGTACTTTTTG  
+HWI-EAS443:3:24:1229:1393#0/1  
V^Yb¥`¥FZ^aV]I]`a`ZIa\_T`YQ[ab^a\_\_`aa\_\_a`  
@HWI-EAS443:3:28:1300:1512#0/1  
AAAAGCACACATCAGGAAGACAAGAGAAGAACCCCGCACT  
+HWI-EAS443:3:28:1300:1512#0/1  
``ZZ¥G]¥\_aba``¥]S[bY^¥b¥Q\_XaaaaSQFY`]RWT  
@HWI-EAS443:3:36:1690:1672#0/1  
AAAAAGTACACATCAGTAAGACAAGAGAAGAACCCCGCAC  
+HWI-EAS443:3:36:1690:1672#0/1  
Ub]b\_]XbaV`baa`VJXaaaaa`aaa0\_ab\_W0a^ba^a  
@HWI-EAS443:3:3:201:1181#0/1  
TGCGGGGCTCTTCTTGTCTTCCTGATGTGTACTTTTTG  
+HWI-EAS443:3:3:201:1181#0/1  
aba]\_^\_Tbbba\_a``\_]aabTZa¥Y]`W\_bJ^baaaa[  
@HWI-EAS443:3:40:842:549#0/1  
TGCGGGGTTCTTCTTGTCTTCCTGCTGTGTACTTTTTG

+HWI-EAS443:3:40:842:549#0/1  
aaZa^R]aZUYYZa[UWWa]SOU\_[]HTaHDHYb`V[HVR  
@HWI-EAS443:3:42:913:614#0/1  
TGCGGGGCTCTTCTTGTCTTCCTGATGTGTACTTTTTG  
+HWI-EAS443:3:42:913:614#0/1  
ab¥`aY``\_baaa\_\_`a`VXW¥]\_a\_a\_\_ZTXU[^¥a`a  
@HWI-EAS443:3:43:1686:1765#0/1  
CAAAAAGTACACATCAGGAAGACATGAGAAGAACCCCGCA  
+HWI-EAS443:3:43:1686:1765#0/1  
aaZ^VZX^b\_aKb[a¥¥`\_b\_bbTH\_ab\_aaaaQa5]bW[  
@HWI-EAS443:3:43:1745:1912#0/1  
TGCGGGGGTCTTCTTGTCTTCCTGATGTGTACTTTTTG  
+HWI-EAS443:3:43:1745:1912#0/1  
WRUPWWXH[Z\_XQGM]]aVQ]PV[Y]V¥PVJ0¥SZZ[^XL  
@HWI-EAS443:3:47:261:1306#0/1  
GTGCGGGGTTCTTCTTGTCTTCCTCATGTGTACTTTTT  
+HWI-EAS443:3:47:261:1306#0/1  
aXT¥ba\_RJWY\_[N]N¥\_aPUVZ\_[VFK^\_XYVX\_]^[  
@HWI-EAS443:3:4:1731:135#0/1  
AAAGTACACATCAGGAAGAGAAGAGAAGAACCCCGCACTC  
+HWI-EAS443:3:4:1731:135#0/1  
abbbba^Yaana\_Sba^a]XL`WaWa\_`]``V^XXa^BBBB  
@HWI-EAS443:3:4:707:124#0/1  
CAAAAAGTCCACATCAGGAAGACAAGAGAAGAACCCCGCA  
+HWI-EAS443:3:4:707:124#0/1  
aabbbSbH[L\_\_S`[\_Q`Za]^a]aX`\_\_\_\_]TLLWSaXN  
@HWI-EAS443:3:50:621:1480#0/1  
AAAAAGCACACATCAGGAAGACAAGAGAAGAACCCCGCAC  
+HWI-EAS443:3:50:621:1480#0/1  
a`ab\_bRb\_babbabab\_ba^aab[aaababb`aabYb\_  
@HWI-EAS443:3:63:460:1229#0/1  
CAAAAAGTACACATTAGGAAGACAAGAGAAGAACCCCGCA  
+HWI-EAS443:3:63:460:1229#0/1  
T\_XV\_¥Z`NTba``\_TV^`\_ZX¥`¥R]\_[^\_U`\_a^ab\_  
@HWI-EAS443:3:68:508:1056#0/1  
CAAAACGTACACATCAGGAAGACAAGAGAAGAACCCCGCA  
+HWI-EAS443:3:68:508:1056#0/1  
aa[T[JYP\_aa`WZ^aaa`^]a\_\_a]`\_Z¥^`\_a\_Y\_]`  
@HWI-EAS443:3:69:360:1514#0/1  
GTGCGGGGCTCTTCTTGTCTTCCTGATGTGTACTTTTT  
+HWI-EAS443:3:69:360:1514#0/1  
aZ^``SWIY¥ZZ]]aa]]Yaa[a`PNMZ```V[a`a^ZX  
@HWI-EAS443:3:6:286:1239#0/1  
TGCGGGGTTCTTCTTGTCTTCCTGATGTGTACTTTTTG  
+HWI-EAS443:3:6:286:1239#0/1  
abaabba`a\_aaW`\_bab^`a`^\_aaaab``\_a`aa`\_`  
@HWI-EAS443:3:71:939:1187#0/1  
TGCGGGGGTCTTCTTGTCTTCCTGATGTGTACTTTTTG  
+HWI-EAS443:3:71:939:1187#0/1  
^baUaTWG\_bUaVZ\_R\_aaZb\_\_a]aZ^`XZWP\_abba^K

@HWI-EAS443:3:76:269:1983#0/1  
TGCGGGGTTCTTCTTGTCTTCCTGATGTGAACTTTTTG  
+HWI-EAS443:3:76:269:1983#0/1  
a`aKZ¥Naaaa`]]\_Y`XY`\_[a`\_a^P]HW\_Z^\_^`X  
@HWI-EAS443:3:78:1348:1939#0/1  
TGCGGGGTTCTTCTTGTCTTCCTGATGTGTACTTTTTTG  
+HWI-EAS443:3:78:1348:1939#0/1  
abaaa`^ZaZS]G`V```[^^^XR^]\_\_VTLsUV]¥TPB  
@HWI-EAS443:3:81:438:992#0/1  
TGCGGGGTTCTTCTTGTCTTCCTGATGTGCACTTTTTTG  
+HWI-EAS443:3:81:438:992#0/1  
]]\_RW¥XT\_b`abaaaaU[aaZ]]]]`X[FNZX¥PNZ]  
@HWI-EAS443:3:89:1058:570#0/1  
CAAAAAGCACACATCAGGAAGACAAGAGAAGAACCCCGCA  
+HWI-EAS443:3:89:1058:570#0/1  
abUOZTZG\_V\_X\_baaYZW]\_XXHOZaa`P`¥S\_UFSaNT  
@HWI-EAS443:3:8:367:1742#0/1  
TGCGGGGTTCTTCTTGTCTTCCTGATGTGTACTTTTTTG  
+HWI-EAS443:3:8:367:1742#0/1  
ababaa`\_aaaa^a]aab^\_aa\_a`^aaa\_a¥\_`a\_`a\_  
@HWI-EAS443:3:94:872:437#0/1  
CTTGTCTTCCTGATGTGTACTTTTTGATTATGGGCATA  
+HWI-EAS443:3:94:872:437#0/1  
a\_Vb]XUbb¥a]\_aU^aHVGba¥\_T`¥PSa^RabQHW[JT  
@HWI-EAS443:3:95:1226:26#0/1  
CAAAAAGTACACATCAGGAAGAGAAGAGAAGAACCCCGCA  
+HWI-EAS443:3:95:1226:26#0/1  
ababbbbabbbbabbbaab\_Qabbababbaa`\_S¥b\_a  
@HWI-EAS443:3:95:1606:557#0/1  
TATGGCCATAATCAAAAAGTACAAATCAGGAAGACAAGAG  
+HWI-EAS443:3:95:1606:557#0/1  
ab`a`a\_bUa\_]0[abaa\_]aSaG`^O\_aa]\_Wa`^UW^  
@HWI-EAS443:3:97:1632:580#0/1  
TATGGCCATAATCAAAAAGAACACATCAGGAAGACAAGAG  
+HWI-EAS443:3:97:1632:580#0/1  
aa`b`S\_^)^SYG^\_aa`\_DHU]¥\_\_VUDVZ`^XH^SZ][  
@HWI-EAS443:3:98:1496:1120#0/1  
CAAAGAGTACACATCAGGAAGACAAGAGAAGAACCCCGCA  
+HWI-EAS443:3:98:1496:1120#0/1  
Z\_[`KVb^][`babbb`\_Y^b\_\_aaaa`ba]ZU\_\_Ha`[b  
@HWI-EAS443:3:99:291:1594#0/1  
TGCGGGGTTCTTCTTGTCTTCCTGAGGTGTACTTTTTTG  
+HWI-EAS443:3:99:291:1594#0/1  
[[\_[QTZPY\_Z`\_`XU]QGT¥ZTaa\_QFZ]]HDLRR\_TBB  
@HWI-EAS443:3:15:346:204#0/1  
TGCGGGGTTCTTCTTGTCTTCCTGATGTGTACTTTGAT  
+HWI-EAS443:3:15:346:204#0/1  
abbbba^bbababaaa```aaaaa\_aa\_a^^X``aaaa  
@HWI-EAS443:3:20:1132:23#0/1  
TGCGGGGTTCTTCTNTTGTCTTCCTGATGTGTACTTTTTTG

+HWI-EAS443:3:20:1132:23#0/1  
^babbaa` ]`baa^D¥ab\_\_a`^aa` ]¥` [\_]a`^`Z`  
@HWI-EAS443:3:24:1539:58#0/1  
CAAAAAGTACACATCAGGAANACAAGAGAAGAACCCCGCA  
+HWI-EAS443:3:24:1539:58#0/1  
ababbabbbbbb`bbbb[DWabab`b`abaaa0[Zb`\_  
@HWI-EAS443:3:31:1722:1446#0/1  
TGCGGGGTTCTTCTTGTCTTCCTGATGNGTACTTTTTG  
+HWI-EAS443:3:31:1722:1446#0/1  
aba`\_aa`b`bbaa`b`¥` ``a\_\_a` `¥VD¥^\_]a`aaa]  
@HWI-EAS443:3:35:1767:1129#0/1  
CTCTTGTCTTCNTGATGTGTACTTTTTGATTATGGCCATA  
+HWI-EAS443:3:35:1767:1129#0/1  
ab`ba^` `a` [D¥` \_` `]\_W^abaaa\_Z`baa`R\_[ ]` ]`  
@HWI-EAS443:3:35:251:1136#0/1  
CTCTTNTCTTCCTGATGTGTACTTTTTGATTATGGCCATA  
+HWI-EAS443:3:35:251:1136#0/1  
a`baUDW]a`aaa`\_]\_YYS^` `\_\_aa\_\_\_^\_YOU`^XSS  
@HWI-EAS443:3:37:1586:361#0/1  
AAAAGTACACATCAGGAAGACAAGAGAAGNACCCCGCACT  
+HWI-EAS443:3:37:1586:361#0/1  
]TW\_\_O¥Y\_U¥\_]` ¥W[UUQQ^aWTOWMTDR[NPWOTXJL  
@HWI-EAS443:3:39:1291:1668#0/1  
CAAAAAGTACACATCNGGAAGACAAGAGAAGAACCCCGCA  
+HWI-EAS443:3:39:1291:1668#0/1  
Y` ` ]` ]¥Sa`¥baa]D][a` `b`\_aaaYbaaa]\_\_\_\_\_ `a\_N  
@HWI-EAS443:3:56:1350:1497#0/1  
CAAAAAGTACNCATCAGGAAGACAAGAGAAGAACCCCGCA  
+HWI-EAS443:3:56:1350:1497#0/1  
abbb`ababWD[ab`bbbbaba`aabababbbba\_[^b\_a  
@HWI-EAS443:3:59:615:174#0/1  
CAAAAAGTACACANCAGGAAGACAAGAGAAGAACCCCGCA  
+HWI-EAS443:3:59:615:174#0/1  
^¥abb`a0^\_bb[D[aaa\_ab`ababaa[R¥¥` []NRaa[  
@HWI-EAS443:3:62:1574:1282#0/1  
TGCGGGGTTCTTCTTGTNTTCCTGATGTGTACTTTTTG  
+HWI-EAS443:3:62:1574:1282#0/1  
aaaaa`a`\_¥abbaaaaa`TD^`aaaa]`a\_a`^^aa`aa[  
@HWI-EAS443:3:78:594:1177#0/1  
TGCGGGGTTCTTCTTGTCTTCCTGATGTGTACTTTTTG  
+HWI-EAS443:3:78:594:1177#0/1  
aaaaa`a[aYD¥`a`aaa^a`aa^`\_`\_a]a^` `aaaa\_  
@HWI-EAS443:3:95:1390:677#0/1  
AAAAAGTACACATCAGGAAGACNAGAGAAGAACCCCGCAC  
+HWI-EAS443:3:95:1390:677#0/1  
abb`ab`bababb¥abbaaaa¥D[babaaaa\_` `Xa^a\_  
@HWI-EAS443:3:19:836:1280#0/1  
CGTGCGGGGTTCTTCTTGTCTTCCTGATGTGTACTTTTT  
+HWI-EAS443:3:19:836:1280#0/1  
`b`bbbbba\_aabaaabaab`abaaaaaaa\_a^`\_aa`\_`

@HWI-EAS443:3:32:1459:1435#0/1  
CAAAAGTACACATCAGGAAGACAAGAGAAGAACCCCGCAC  
+HWI-EAS443:3:32:1459:1435#0/1  
aab`\_aabbbbabbbabbbbaaababaaaaabba\_a\_bbab  
@HWI-EAS443:3:49:1417:427#0/1  
ATGCGGGGTTCTTCTTGTCTTCCTGATGTGTACTTTTT  
+HWI-EAS443:3:49:1417:427#0/1  
aababbbb`babb`aabba\_`aaa`b`]a\_\_`\_^aaaaa  
@HWI-EAS443:3:63:843:1178#0/1  
CTGCGGGGTTCTTCTTGTCTTCCTGATGTGTACTTTTT  
+HWI-EAS443:3:63:843:1178#0/1  
ababbab^`babbbaabbbaabbabbaaaa\_a`a`baaaa  
@HWI-EAS443:3:96:224:458#0/1  
AAAAGTACACATCAGGAAGACAAGAGAAGAACCCCGCACA  
+HWI-EAS443:3:96:224:458#0/1  
XSYF^Wbaabaa\_Vaa\_]ZYWUY\_aa\_Sba[QRYMa[\_]\_  
@HWI-EAS443:3:100:1460:75#0/1  
TATGGCCATAATCAAAAAGTACACATCAGGAAGACAAGAG  
+HWI-EAS443:3:100:1460:75#0/1  
a\_aaaYU\_\_[]UQV\_``¥YG¥MXN[YTY^`¥[^WSZZBBB  
@HWI-EAS443:3:100:204:114#0/1  
TGCGGGGTTCTTCTTGTCTTCCTGATGTGTACTTTTTTG  
+HWI-EAS443:3:100:204:114#0/1  
aaabaa^^a`a\_\_a`a\_a\_`a`a\_`a]a¥Y`Z^Z``\_`^`]  
@HWI-EAS443:3:100:772:1874#0/1  
CAAAAAGTACACATCAGGAAGACAAGAGAAGAACCCCGCA  
+HWI-EAS443:3:100:772:1874#0/1  
`babaa[Xb\_[G^bYaba^YZWNab\_bY[^`ZN¥SHD`BB  
@HWI-EAS443:3:10:1283:695#0/1  
CTCTTGTCTTCCTGATGTGTACTTTTTGATTATGGCCATA  
+HWI-EAS443:3:10:1283:695#0/1  
abbbbabbbbbbbbbbbbab\_bbbbbabab`baa`]a\_a  
@HWI-EAS443:3:10:1370:1846#0/1  
TGCGGGGTTCTTCTTGTCTTCCTGATGTGTACTTTTTTG  
+HWI-EAS443:3:10:1370:1846#0/1  
ab¥U[^a\_aabaGaQaaa\_\_`]^a\_\_\_\_^[[^¥\_\_\_\_`Y  
@HWI-EAS443:3:10:608:1909#0/1  
TGCGGGGTTCTTCTTGTCTTCCTGATGTGTACTTTTTTG  
+HWI-EAS443:3:10:608:1909#0/1  
\_bbaab`\_b¥^U^\_[TabTab[aKaab]a\_aGa[ab`[aa  
@HWI-EAS443:3:10:80:104#0/1  
CAAAAAGTACACATCAGGAAGACAAGAGAAGAACCCCGCA  
+HWI-EAS443:3:10:80:104#0/1  
abbbbab```bbbbbabbbabaab`a`aaaaa\_[[Ya\_`  
@HWI-EAS443:3:10:842:1165#0/1  
CAAAAAGTACACATCAGGAAGACAAGAGAAGAACCCCGCA  
+HWI-EAS443:3:10:842:1165#0/1  
abbabbb\_b`bbaaaabaaaa`b`a\_aa`a`a\_W^¥a\_`  
@HWI-EAS443:3:11:1225:1401#0/1  
TATGGCCATAATCAAAAAGTACACATCAGGAAGACAAGAG

+HWI-EAS443:3:11:1225:1401#0/1  
aba`\_^a`a`\_W]``a¥Y[aY¥Z¥`\_`a`\_\_`TP`\_YZB  
@HWI-EAS443:3:11:1545:1946#0/1  
AAAAAGTACACATCAGGAAGACAAGAGAAGAACCCCGCAC  
+HWI-EAS443:3:11:1545:1946#0/1  
`bab`\_RbYaaaa^]b^a`^^a`\_^\_\_\_\_`\_^UOGXHXW  
@HWI-EAS443:3:11:1648:650#0/1  
AAAAAGTACACATCAGGAAGACAAGAGAAGAACCCCGCAC  
+HWI-EAS443:3:11:1648:650#0/1  
]bb]^\_G`a^ab[`aa`b`\_¥^`aba`\_`TXGNa]`\_  
@HWI-EAS443:3:12:1312:1807#0/1  
CAAAAAGTACACATCAGGAAGACAAGAGAAGAACCCCGCA  
+HWI-EAS443:3:12:1312:1807#0/1  
aaaba`aaba`bbZQ`bab`a\_a`aabaa`^b[\_^V\_X`  
@HWI-EAS443:3:12:1490:521#0/1  
AAAAAGTACACATCAGGAAGACAAGAGAAGAACCCCGCAC  
+HWI-EAS443:3:12:1490:521#0/1  
a^`]]^W^^^`\_\_V]a`\_`\_UVW¥^W[Z]\_¥]UYVTYQWZ  
@HWI-EAS443:3:12:166:1635#0/1  
TGCGGGGTTCTTCTTGTCTTCCTGATGTGTACTTTTTG  
+HWI-EAS443:3:12:166:1635#0/1  
aaab]^a\_aabb`aaaab\_aaaaaaa`a^\_]``a\_aaa^  
@HWI-EAS443:3:12:424:1853#0/1  
CTCTTGTCTTCCTGATGTGTACTTTTTGATTATGGCCATA  
+HWI-EAS443:3:12:424:1853#0/1  
a\_RXZ`Y^P\_aa`````\_OUU`V`````\_Sa]\_¥^^V¥\_\_QV  
@HWI-EAS443:3:12:842:1144#0/1  
CAAAAAGTACACATCAGGAAGACAAGAGAAGAACCCCGCA  
+HWI-EAS443:3:12:842:1144#0/1  
abbbbYbabbb`abababb`baab\_baaabaaba[\_\_\_`aa  
@HWI-EAS443:3:13:1006:1638#0/1  
TGCGGGGTTCTTCTTGTCTTCCTGATGTGTACTTTTTG  
+HWI-EAS443:3:13:1006:1638#0/1  
aabaTZZJ`X^^\_a\_a\_XQ\_abW¥a\_aa`SaR]aa``]¥]  
@HWI-EAS443:3:13:1184:1161#0/1  
CTCTTGTCTTCCTGATGTGTACTTTTTGATTATGGCCATA  
+HWI-EAS443:3:13:1184:1161#0/1  
aba\_ab]`ba\_a`\_`\_]¥aa`aaaaab[aaaa[U¥^aW]  
@HWI-EAS443:3:13:1427:1675#0/1  
TGCGGGGTTCTTCTTGTCTTCCTGATGTGTACTTTTTG  
+HWI-EAS443:3:13:1427:1675#0/1  
`baaaUaRa`a`WaH^Ya[[]]R^¥a\_aaH^]\_¥adWW\_¥  
@HWI-EAS443:3:13:417:274#0/1  
GTGCGGGTTCTTCTTGTCTTCCTGATGTGTACTTTTT  
+HWI-EAS443:3:13:417:274#0/1  
a`\_`aaaY]a\_``\_]`a\_a][\_¥`]\_\_V^\_Y`VYS]^\_Y  
@HWI-EAS443:3:13:534:1719#0/1  
AAAAGTACACATCAGGAAGACAAGAGAAGAACCCCGCACT  
+HWI-EAS443:3:13:534:1719#0/1  
a`X\_UZaa`aa\_aa`\_\_a\_^`\_`\_]\_^`\_`\_WZ^]^`\_`VX



@HWI-EAS443:3:13:721:985#0/1  
CAAAAAGTACACATCAGGAAGACAAGAGAAGAACCCCGCA  
+HWI-EAS443:3:13:721:985#0/1  
a\_]aaaaYbabaaa`abaaaaaa[U[aaaa\_a`^]`^a^a  
@HWI-EAS443:3:13:76:1231#0/1  
AAAAAGTACACATCAGGAAGACAAGAGAAGAACCCCGCAC  
+HWI-EAS443:3:13:76:1231#0/1  
X\_V`^`[[`b`baaaa^`a`aaa\_`aaa\_`a`^`\_`^`\_\_\_\_a  
@HWI-EAS443:3:13:792:1559#0/1  
GTGCGGGGTTCTTCTTGTCTTCCTGATGTGTACTTTTT  
+HWI-EAS443:3:13:792:1559#0/1  
\_X`\_X¥ZOSVQU\_[]T¥^][TY¥X`^Q`XaYSWVUYX]\_\_  
@HWI-EAS443:3:14:1045:1011#0/1  
CAAAAAGTACACATCAGGAAGACAAGAGAAGAACCCCGCA  
+HWI-EAS443:3:14:1045:1011#0/1  
aabb^aa\_baaaaa`^`aaa`aa`aYa```a\_`[S`a^a  
@HWI-EAS443:3:14:1302:150#0/1  
TGCGGGGTTCTTCTTGTCTTCCTGATGTGTACTTTTTG  
+HWI-EAS443:3:14:1302:150#0/1  
a^`a\_¥Z`a```[\_\_a]\_\_\_\_[Y``[\_aZ[]X0]\_^^\_]`  
@HWI-EAS443:3:14:1576:1642#0/1  
TGCGGGGTTCTTCTTGTCTTCCTGATGTGTACTTTTTG  
+HWI-EAS443:3:14:1576:1642#0/1  
aa`aa\_]ZaaaaV\_X`aa^]\_`¥Z`\_^]`\_]Za\_``^  
@HWI-EAS443:3:14:1681:874#0/1  
TGCGGGGTTCTTCTTGTCTTCCTGATGTGTACTTTTTG  
+HWI-EAS443:3:14:1681:874#0/1  
aababbb`\_a\_aaa^bab]aaa\_\_\_\_]`\_a\_^^[^aaaa`a  
@HWI-EAS443:3:14:1683:1061#0/1  
CAAAAAGTACACATCAGGAAGACAAGAGAAGAACCCCGCA  
+HWI-EAS443:3:14:1683:1061#0/1  
a`aa\_\_ZLaaa`a`U^aV`\_]`L[Xa^`\_^`\_]¥V]YV\_]`  
@HWI-EAS443:3:14:176:1679#0/1  
GTGCGGGGTTCTTCTTGTCTTCCTGATGTGTACTTTTT  
+HWI-EAS443:3:14:176:1679#0/1  
a`S¥R\_\_a^a`aaa\_Ua`J][ba\_a`Y`a`][O`aaaaZ  
@HWI-EAS443:3:14:413:1060#0/1  
CAAAAAGTACACATCAGGAAGACAAGAGAAGAACCCCGCA  
+HWI-EAS443:3:14:413:1060#0/1  
aaYU^ab\_baaaaa`b`baaa\_ab\_a`a\_aaa```\_]`a\_a  
@HWI-EAS443:3:14:569:1921#0/1  
AAAGTACACATCAGGAAGACAAGAGAAGAACCCCGCACTC  
+HWI-EAS443:3:14:569:1921#0/1  
¥aba\_abbabbabb\_aa`aa`ba`aaaaaab]^`\_`\_`\_\_\_\_  
@HWI-EAS443:3:15:1339:974#0/1  
CAAAAAGTACACATCAGGAAGACAAGAGAAGAACCCCGCA  
+HWI-EAS443:3:15:1339:974#0/1  
abbaaa[K\_ab\_a\_a`ba]b`\_\_a``aX¥[a```[^aU`  
@HWI-EAS443:3:15:1644:56#0/1  
AAAAGTACACATCAGGAAGACAAGAGAAGAACCCCGCACT

+HWI-EAS443:3:15:1644:56#0/1  
aUY`bUbZZW`LV]GW\_ab\_\_\_\_Y]\_\_W^[a`][VGaWVVU  
@HWI-EAS443:3:15:559:2017#0/1  
TGCGGGGTTCTTCTCTTGTCTTCCTGATGTGTACTTTTTG  
+HWI-EAS443:3:15:559:2017#0/1  
WbabaWaaa]¥\_a¥W¥b\_ab\_aa\_aYaa]TTa\_\_`aaTT  
@HWI-EAS443:3:15:780:544#0/1  
CAAAAAGTACACATCAGGAAGACAAGAGAAGAACCCCGCA  
+HWI-EAS443:3:15:780:544#0/1  
ababbbbaba`\_b`ab\_bbbab`b\_bbb[``a^\_S`^b]b  
@HWI-EAS443:3:16:1014:866#0/1  
AAAAAGTACACATCAGGAAGACAAGAGAAGAACCCCGCAC  
+HWI-EAS443:3:16:1014:866#0/1  
Ua[S\_``b`\_]bbbaaa`^b\_ab]¥`a^]``b¥a¥\_aaa\_  
@HWI-EAS443:3:16:168:1088#0/1  
TGCGGGGTTCTTCTCTTGTCTTCCTGATGTGTACTTTTTG  
+HWI-EAS443:3:16:168:1088#0/1  
JXa`a^\_WR`\_a`bb¥bbbbbbbabbb`ba``b\_bbb`^`  
@HWI-EAS443:3:16:315:938#0/1  
TGCGGGGTTCTTCTCTTGTCTTCCTGATGTGTACTTTTTG  
+HWI-EAS443:3:16:315:938#0/1  
`]a\_\_ba`\_baa\_``b\_a`a`\_bS\_`a^a¥bZ`^aa`\_WY  
@HWI-EAS443:3:16:960:280#0/1  
CAAAAAGTACACATCAGGAAGACAAGAGAAGAACCCCGCA  
+HWI-EAS443:3:16:960:280#0/1  
aa`aaaa^baaaaa`abaaaaa`a``a\_`a`a\_]\_\_Z`  
@HWI-EAS443:3:17:1055:1225#0/1  
TGCGGGGTTCTTCTCTTGTCTTCCTGATGTGTACTTTTTG  
+HWI-EAS443:3:17:1055:1225#0/1  
abab\_a`P``bbab``ab^aaaa`\_a`b^a[\_Yaaaaa^  
@HWI-EAS443:3:17:1230:1335#0/1  
CAAAAAGTACACATCAGGAAGACAAGAGAAGAACCCCGCA  
+HWI-EAS443:3:17:1230:1335#0/1  
a¥abbb0`bbbbbbba\_bb`bab^bab[\_G\_b0`baabaaa  
@HWI-EAS443:3:17:309:80#0/1  
AAAGTACACATCAGGAAGACAAGAGAAGAACCCCGCACTC  
+HWI-EAS443:3:17:309:80#0/1  
aaabXbaa`a`[\_bb\_aa\_]a\_\_Ya^`\_\_]]X]a\_R]\_  
@HWI-EAS443:3:17:385:39#0/1  
CAAAAAGTACACATCAGGAAGACAAGAGAAGAACCCCGCA  
+HWI-EAS443:3:17:385:39#0/1  
]ab\_a\_b¥bbba`aaY`ba]ba`\_a\_a\_aa\_aaa\_\_[\_`aa\_  
@HWI-EAS443:3:17:778:807#0/1  
CAAAAAGTACACATCAGGAAGACAAGAGAAGAACCCCGCA  
+HWI-EAS443:3:17:778:807#0/1  
aabba`aS¥abba``abaaab``aaa`ba`a`a[\_\_\_`\_\_`  
@HWI-EAS443:3:17:822:229#0/1  
AAAAGTACACATCAGGAAGACAAGAGAAGAACCCCGCACT  
+HWI-EAS443:3:17:822:229#0/1  
a\_]ab\_aa`a\_aaaaaaa````a`^`a`^`^]]a¥^XO

@HWI-EAS443:3:17:832:279#0/1  
CAAAAAGTACACATCAGGAAGACAAGAGAAGAACCCCGCA  
+HWI-EAS443:3:17:832:279#0/1  
[]Ybb\_bbb]baba``b\_bba`aabaab^aaaQGNPa\_  
@HWI-EAS443:3:17:978:407#0/1  
CAAAAAGTACACATCAGGAAGACAAGAGAAGAACCCCGCA  
+HWI-EAS443:3:17:978:407#0/1  
`]S^`a`Va^^^]aaaaa\_aa`aaa^\_a`]YOU`aX`  
@HWI-EAS443:3:18:234:1672#0/1  
CAAAAAGTACACATCAGGAAGACAAGAGAAGAACCCCGCA  
+HWI-EAS443:3:18:234:1672#0/1  
aabbabW]babaaa`aaaa^aaa`\_¥\_`Y]aa`a`a`aa  
@HWI-EAS443:3:18:305:96#0/1  
GTGCGGGTCTTCTCTTGTCTTCCTGATGTGTACTTTTT  
+HWI-EAS443:3:18:305:96#0/1  
a^a\_a¥a\_U\_\_\_\_\_`\_a[\_]\_\_ZX¥¥Y]\_XYX]^^^]Z  
@HWI-EAS443:3:18:488:1582#0/1  
CAAAAAGTACACATCAGGAAGACAAGAGAAGAACCCCGCA  
+HWI-EAS443:3:18:488:1582#0/1  
\_]¥QXW`SbaUa`aa^W\_VTa`^^Z\_\_X^Wa\_^^GPU¥`]  
@HWI-EAS443:3:18:493:2019#0/1  
AAAAAGTACACATCAGGAAGACAAGAGAAGAACCCCGCAC  
+HWI-EAS443:3:18:493:2019#0/1  
^aa`\_Ya\_a`a`aYY\_a\_^\_\_\_¥`\_\_\_^`\_¥X^\_X\_S  
@HWI-EAS443:3:18:499:678#0/1  
TGCGGGGTTCTTCTTGTCTTCCTGATGTGTACTTTTTG  
+HWI-EAS443:3:18:499:678#0/1  
aaZa]\_a]`\_aa`a`aaa\_a``\_\_`a`^^^`^`a`\_\_  
@HWI-EAS443:3:18:603:337#0/1  
TGCGGGGTTCTTCTTGTCTTCCTGATGTGTACTTTTTG  
+HWI-EAS443:3:18:603:337#0/1  
abbbbbbb`abbbabbbabaaaaaa\_a`b`a`aaba``aa  
@HWI-EAS443:3:18:971:1702#0/1  
TGCGGGGTTCTTCTTGTCTTCCTGATGTGTACTTTTTG  
+HWI-EAS443:3:18:971:1702#0/1  
ababbaa`ab`aabaaaa`aa`aa`aa`Z`\_aa``aa  
@HWI-EAS443:3:19:1069:655#0/1  
AAAAGTACACATCAGGAAGACAAGAGAAGAACCCCGCACT  
+HWI-EAS443:3:19:1069:655#0/1  
aa`^`]bba`abaaba]aaaaa``\_aaa\_]`R`a``^`  
@HWI-EAS443:3:19:170:747#0/1  
TGCGGGGTTCTTCTTGTCTTCCTGATGTGTACTTTTTG  
+HWI-EAS443:3:19:170:747#0/1  
abaaa`a^b`aaa`abaa`\_aaa\_a`\_aZa¥¥¥`\_a\_a`  
@HWI-EAS443:3:19:631:905#0/1  
AGTACACATCAGGAAGACAAGAGAAGAACCCCGCACTCAG  
+HWI-EAS443:3:19:631:905#0/1  
Zaaab¥aZ`ab`baabba¥[ab`aa`aaaYa`aaaa[ab  
@HWI-EAS443:3:19:64:1145#0/1  
AAAAAGTACACATCAGGAAGACAAGAGAAGAACCCCGCAC

+HWI-EAS443:3:19:64:1145#0/1  
^aa¥aaSbaaaa^`abaaaaabaa\_a\_a`]aa\_a\_a`aa  
@HWI-EAS443:3:1:1124:1495#0/1  
CAAAAAGTACACATCAGGAAGACAAGAGAAGAACCCCGCA  
+HWI-EAS443:3:1:1124:1495#0/1  
\_bbabbaababbbbaba`aababbbbbbbbaa`H\_aa`  
@HWI-EAS443:3:1:1451:318#0/1  
TATGGCCATAATCAAAAAGTACACATCAGGAAGACAAGAG  
+HWI-EAS443:3:1:1451:318#0/1  
`bZW]`¥\_¥^]`^W]a\_`^R[a\_a`VY\_a]\_\_UJY]BBB  
@HWI-EAS443:3:1:149:47#0/1  
CAAAAAGTACACATCAGGAAGACAAGAGAAGAACCCCGCA  
+HWI-EAS443:3:1:149:47#0/1  
aaaaaaaYaaaa`aaaa\_ab`\_a`a^b\_aa`\_`^]VaBB  
@HWI-EAS443:3:1:939:400#0/1  
CAAAAAGTACACATCAGGAAGACAAGAGAAGAACCCCGCA  
+HWI-EAS443:3:1:939:400#0/1  
``babbb`aY¥\_abX\_a\_`aa¥\_aab^aaa][N^UUV\_BB  
@HWI-EAS443:3:20:1485:319#0/1  
CAAAAAGTACACATCAGGAAGACAAGAGAAGAACCCCGCA  
+HWI-EAS443:3:20:1485:319#0/1  
^P\_`^`\_b]bba^¥^^abbabbbabbbabba`]][\_b\_`  
@HWI-EAS443:3:20:1618:1428#0/1  
TATGGCCATAATCAAAAAGTACACATCAGGAAGACAAGAG  
+HWI-EAS443:3:20:1618:1428#0/1  
a\_^]\_aa\_VYa¥S¥\_`Y^XRaWq]]]OW`a¥\_\_GS^[^^a  
@HWI-EAS443:3:20:242:401#0/1  
TGCGGGGTTCTTCTTGTCTTCCTGATGTGTACTTTTTG  
+HWI-EAS443:3:20:242:401#0/1  
ZZaaa`\_TZba[`^P[abab```ab\_R]a¥`V]]^`]]¥R  
@HWI-EAS443:3:20:422:433#0/1  
GTGCGGGTTCCTTCTTGTCTTCCTGATGTGTACTTTTT  
+HWI-EAS443:3:20:422:433#0/1  
`R\_`a\_]¥JYa]a]a[¥[`TVU^^V[[\_¥YN\_UU^\_¥^`^  
@HWI-EAS443:3:21:1636:99#0/1  
CAAAAAGTACACATCAGGAAGACAAGAGAAGAACCCCGCA  
+HWI-EAS443:3:21:1636:99#0/1  
`aaaa\_b\_a^a\_`a^\_aa\_\_a\_]\_\_a]]^]]^0LRW\_VX  
@HWI-EAS443:3:21:1779:117#0/1  
CAAAAAGTACACATCAGGAAGACAAGAGAAGAACCCCGCA  
+HWI-EAS443:3:21:1779:117#0/1  
aa[baaU¥b`babbaaba\_a\_]`b`aab^a``a][[O`U^  
@HWI-EAS443:3:21:1785:1485#0/1  
TGCGGGGTTCTTCTTGTCTTCCTGATGTGTACTTTTTG  
+HWI-EAS443:3:21:1785:1485#0/1  
aa^a\_`a]a¥aa^`\_a\_`X^a\_`X\_\_\_\_]U]\_Z]Z\_`^`^X  
@HWI-EAS443:3:21:506:1267#0/1  
AAAAGTACACATCAGGAAGACAAGAGAAGAACCCCGCACT  
+HWI-EAS443:3:21:506:1267#0/1  
aaaaaYbba`aaa`^`a`aa`aX¥\_\_`]]`a]]\_]`\_`^`^

@HWI-EAS443:3:22:607:1414#0/1  
CAAAAAGTACACATCAGGAAGACAAGAGAAGAACCCCGCA  
+HWI-EAS443:3:22:607:1414#0/1  
a¥[`aaaZbaaaa`aa`]aaaa``a`a`aa`a`]^a`\_`  
@HWI-EAS443:3:22:769:1828#0/1  
AAAAAGTACACATCAGGAAGACAAGAGAAGAACCCCGCAC  
+HWI-EAS443:3:22:769:1828#0/1  
a]a`aaWaaa`a]``a`a^`\_a`\_^\_\_\_\_``]]U^\_^\_  
@HWI-EAS443:3:22:870:229#0/1  
GTGCGGGTTCTTCTTGTCTTCCTGATGTGTACTTTTT  
+HWI-EAS443:3:22:870:229#0/1  
aa[^[^UVRNY]^^[K\_[a\_aZN`]RNR\_Y`[V\_[R[]¥^[W  
@HWI-EAS443:3:23:1323:1200#0/1  
AAAAAGTACACATCAGGAAGACAAGAGAAGAACCCCGCAC  
+HWI-EAS443:3:23:1323:1200#0/1  
abaaa\_Vba``ba`abaaba\_ab]aa\_abaaa`¥¥\_b\_a`  
@HWI-EAS443:3:23:175:1391#0/1  
TGCGGGGTTCTTCTTGTCTTCCTGATGTGTACTTTTTG  
+HWI-EAS443:3:23:175:1391#0/1  
W\_`a^ab^H\_bY`bbbb`^^a¥bZW]`URWQ[``^`\_`aa  
@HWI-EAS443:3:23:183:751#0/1  
TATGGCCATAATCAAAAAGTACACATCAGGAAGACAAGAG  
+HWI-EAS443:3:23:183:751#0/1  
aa[a\_aaa¥\_a`\_`a`XT\_M^Y^ZZ¥\_a\_\_\_VKV`a]^  
@HWI-EAS443:3:23:259:172#0/1  
TGCGGGGTTCTTCTTGTCTTCCTGATGTGTACTTTTTG  
+HWI-EAS443:3:23:259:172#0/1  
abbbba\_aaabb\_baab`aa`aaaaa^a^a\_\_a`\_a`  
@HWI-EAS443:3:23:311:1926#0/1  
GTGCGGGTTCTTCTTGTCTTCCTGATGTGTACTTTTT  
+HWI-EAS443:3:23:311:1926#0/1  
aPPZOW¥HT`X\_`]aULN]O]VXNZ^VFGTGOUVUSM^G^  
@HWI-EAS443:3:23:479:711#0/1  
CAAAAAGTACACATCAGGAAGACAAGAGAAGAACCCCGCA  
+HWI-EAS443:3:23:479:711#0/1  
\_bbb\_bb^aabbab^baa`bbabb`babbbbaa`b\_a¥a  
@HWI-EAS443:3:23:878:1469#0/1  
CAAAAAGTACACATCAGGAAGACAAGAGAAGAACCCCGCA  
+HWI-EAS443:3:23:878:1469#0/1  
``[T\_bZabUU¥bXGRZa`aa[aZ`aa\_¥¥^]\_``XU`^I  
@HWI-EAS443:3:25:1107:1770#0/1  
TGCGGGGTTCTTCTTGTCTTCCTGATGTGTACTTTTTG  
+HWI-EAS443:3:25:1107:1770#0/1  
a`R`Tab^VY¥¥QUaZaW`PVQV`\_WaUHGSNPGOZIQNB  
@HWI-EAS443:3:25:1205:1599#0/1  
AAAAGTACACATCAGGAAGACAAGAGAAGAACCCCGCACT  
+HWI-EAS443:3:25:1205:1599#0/1  
abbbaZbbbabaabaaaaa`aaaaa```aba\_\_^a``\_\_  
@HWI-EAS443:3:25:1383:227#0/1  
TGCGGGGTTCTTCTTGTCTTCCTGATGTGTACTTTTTG

+HWI-EAS443:3:25:1383:227#0/1  
a`abbab`aabbbaa\_aab`\_a`^Xaa]a`\_a\_Y]```aa\_  
@HWI-EAS443:3:25:1658:810#0/1  
CAAAAAGTACACATCAGGAAGACAAGAGAAGAACCCCGCA  
+HWI-EAS443:3:25:1658:810#0/1  
abbbbb\_G\_bbaab`bbabaa]a\_Z\_a`a]aaa`RYSa]\_  
@HWI-EAS443:3:25:180:861#0/1  
TGCGGGGTTCTTCTCTTGTCTTCCTGATGTGTACTTTTTG  
+HWI-EAS443:3:25:180:861#0/1  
ZI\_b]\_bUa[`baU^a]aYa`]b``]X\_[Wa¥S^`\_``aU  
@HWI-EAS443:3:25:377:1393#0/1  
TGCGGGGTTCTTCTCTTGTCTTCCTGATGTGTACTTTTTG  
+HWI-EAS443:3:25:377:1393#0/1  
]aa````aabbbaabaab`a`babaaaa^a\_Vaa\_a``a  
@HWI-EAS443:3:25:905:1993#0/1  
TGCGGGGTTCTTCTCTTGTCTTCCTGATGTGTACTTTTTG  
+HWI-EAS443:3:25:905:1993#0/1  
abbb\_``^abbbabaabb\_aa`aabaa\_a\_a`aaaaaaV  
@HWI-EAS443:3:25:913:1072#0/1  
CAAAAAGTACACATCAGGAAGACAAGAGAAGAACCCCGCA  
+HWI-EAS443:3:25:913:1072#0/1  
^^\_b\_]b[bbbabbbaa^aa]bb`bbaaaa``abaJ][a`a  
@HWI-EAS443:3:26:1008:1868#0/1  
CAAAAAGTACACATCAGGAAGACAAGAGAAGAACCCCGCA  
+HWI-EAS443:3:26:1008:1868#0/1  
a`Y`bbaUbabbbaaaa¥\_aaa``aaa``aaba`^\_\_`\_a  
@HWI-EAS443:3:26:1052:1511#0/1  
TGCGGGGTTCTTCTCTTGTCTTCCTGATGTGTACTTTTTG  
+HWI-EAS443:3:26:1052:1511#0/1  
VaaX[YH^RU[WPP¥]YZ[T\_a`S]`RZ]M\_UT``T`¥HV  
@HWI-EAS443:3:26:1090:834#0/1  
CAAAAAGTACACATCAGGAAGACAAGAGAAGAACCCCGCA  
+HWI-EAS443:3:26:1090:834#0/1  
abbbbbbIb`bababaZb`bb\_aa¥aaaaabab`]\_\_`^a  
@HWI-EAS443:3:26:1299:499#0/1  
CAAAAAGTACACATCAGGAAGACAAGAGAAGAACCCCGCA  
+HWI-EAS443:3:26:1299:499#0/1  
abbbbaababbbbbbbbabbbababbbbaabbbab[[aba^  
@HWI-EAS443:3:26:499:1512#0/1  
CAAAAAGTACACATCAGGAAGACAAGAGAAGAACCCCGCA  
+HWI-EAS443:3:26:499:1512#0/1  
aaaabaaQbaaaa\_aaa`ab``a]``\_a]\_¥\_`\_\_`\_a`  
@HWI-EAS443:3:27:1758:153#0/1  
TGCGGGGTTCTTCTCTTGTCTTCCTGATGTGTACTTTTTG  
+HWI-EAS443:3:27:1758:153#0/1  
ababb]aPaa[a¥`[[`\_U^`PTY^[UXU\_WUZ^\_]^[  
@HWI-EAS443:3:27:590:265#0/1  
AAAAAGTACACATCAGGAAGACAAGAGAAGAACCCCGCAC  
+HWI-EAS443:3:27:590:265#0/1  
abba`X\_bbbbaa[aaaa`]a\_[^X\_^Y[Za`\_U¥ZW`\_^U

@HWI-EAS443:3:27:602:1920#0/1  
AAAAGTACACATCAGGAAGACAAGAGAAGAACCCCGCACT  
+HWI-EAS443:3:27:602:1920#0/1  
a[`\_RTa`aaa`^\_]Saa[`\_a`^`^`a]`\_ZV^\_]\_ZKU  
@HWI-EAS443:3:27:991:639#0/1  
TGCGGGGTTCTTCTTGTCTTCCTGATGTGTACTTTTTG  
+HWI-EAS443:3:27:991:639#0/1  
S\_^\_W¥aW`¥¥ZR\_YaX\_]`^`\_ZZU¥W\_a`bYS]aabb¥X  
@HWI-EAS443:3:28:1291:789#0/1  
AAAGTACACATCAGGAAGACAAGAGAAGAACCCCGCACTC  
+HWI-EAS443:3:28:1291:789#0/1  
aaab^baaaab\_¥aaa`baaaaa\_aaaa`aZ]WXa^\_]`^`  
@HWI-EAS443:3:28:1296:851#0/1  
CAAAAAGTACACATCAGGAAGACAAGAGAAGAACCCCGCA  
+HWI-EAS443:3:28:1296:851#0/1  
a`bbaab\_baaaaa`a`bba\_a`a\_aaa`aaaa`\_\_\_aa`  
@HWI-EAS443:3:28:1396:1937#0/1  
TGCGGGGTTCTTCTTGTCTTCCTGATGTGTACTTTTTG  
+HWI-EAS443:3:28:1396:1937#0/1  
abababbZ`a`babYa\_`\_^`\_]`aa`]aZ^LLZa\_\_\_a\_  
@HWI-EAS443:3:28:1558:602#0/1  
CAAAAAGTACACATCAGGAAGACAAGAGAAGAACCCCGCA  
+HWI-EAS443:3:28:1558:602#0/1  
U\_b]bbaUab¥Y\_a]`aa]baa`W`abbabb[PIHRb\_]`  
@HWI-EAS443:3:28:168:827#0/1  
TGCGGGGTTCTTCTTGTCTTCCTGATGTGTACTTTTTG  
+HWI-EAS443:3:28:168:827#0/1  
abaZY\_[^`\_^babaaab^ba]bbba]a]`a][[ababa^`  
@HWI-EAS443:3:28:650:1265#0/1  
TGCGGGGTTCTTCTTGTCTTCCTGATGTGTACTTTTTG  
+HWI-EAS443:3:28:650:1265#0/1  
V¥b[S\_¥T\_`\_X`W[^V¥`^aa`aaYSZ]N\_N\_H`]aXPG  
@HWI-EAS443:3:29:1097:137#0/1  
AAAAGTACACATCAGGAAGACAAGAGAAGAACCCCGCACT  
+HWI-EAS443:3:29:1097:137#0/1  
\_¥`aaP^abbaa`Tb``a``a\_aa\_a\_aa\_a\_V\_[aX^`  
@HWI-EAS443:3:29:1353:1328#0/1  
AAAAAGTACACATCAGGAAGACAAGAGAAGAACCCCGCAC  
+HWI-EAS443:3:29:1353:1328#0/1  
`bbb¥RYb]ba]aa\_Q`T[`¥\_\_\_\_\_a`````a\_\_\_aa^`0  
@HWI-EAS443:3:29:1625:966#0/1  
AAAAAGTACACATCAGGAAGACAAGAGAAGAACCCCGCAC  
+HWI-EAS443:3:29:1625:966#0/1  
a\_a]^b¥\_aaab\_Ya`\_aaa`^aaa```\_aa```\_][a^\_]`  
@HWI-EAS443:3:29:1759:1361#0/1  
AAAAAGTACACATCAGGAAGACAAGAGAAGAACCCCGCAC  
+HWI-EAS443:3:29:1759:1361#0/1  
abbba`Yaabbaa\_\_`\_\_aaa\_a`^^a`^a`a`0^^a^`]  
@HWI-EAS443:3:2:176:249#0/1  
CAAAAAGTACACATCAGGAAGACAAGAGAAGAACCCCGCA

+HWI-EAS443:3:2:176:249#0/1  
abbabb`Rbaaaaaaaaaaaaa`a\_a`aaaaa]T^^`\_\_  
@HWI-EAS443:3:2:437:1459#0/1  
CAAAAAGTACACATCAGGAAGACAAGAGAAGAACCCCGCA  
+HWI-EAS443:3:2:437:1459#0/1  
`bbbbabZa``abbabaa\_b`aab`baaaa^ZVbY`  
@HWI-EAS443:3:2:906:1206#0/1  
CAAAAAGTACACATCAGGAAGACAAGAGAAGAACCCCGCA  
+HWI-EAS443:3:2:906:1206#0/1  
a^]¥¥^`V^]`HOVZ\_^^`aa]]a``\_b\_[aaa]UG[aX]  
@HWI-EAS443:3:30:1165:691#0/1  
TATGGCCATAATCAAAAAGTACACATCAGGAAGACAAGAG  
+HWI-EAS443:3:30:1165:691#0/1  
`a\_b]]\_aWV[[`a^a`\_`YGNX¥SVQ]ZTOY\_SVYNXV\_  
@HWI-EAS443:3:30:1207:991#0/1  
TGCGGGGTTCTTCTTGTCTTCCTGATGTGTACTTTTTG  
+HWI-EAS443:3:30:1207:991#0/1  
abab]¥\_[Y]Zabaaa\_a¥^^aa\_a\_¥¥b[a¥`^aa`\_`0  
@HWI-EAS443:3:30:15:1911#0/1  
GTGCGGGGTTCTTCTTGTCTTCCTGATGTGTACTTTTT  
+HWI-EAS443:3:30:15:1911#0/1  
a¥Y`aaaa¥abbab`aaaa`ba`ab]ZU[XQT¥[`Y[`\_^  
@HWI-EAS443:3:30:40:639#0/1  
TGCGGGGTTCTTCTTGTCTTCCTGATGTGTACTTTTTG  
+HWI-EAS443:3:30:40:639#0/1  
abbbba\_babaababb`abaab`aab\_aZ]`aa`aa`  
@HWI-EAS443:3:30:451:1849#0/1  
TGCGGGGTTCTTCTTGTCTTCCTGATGTGTACTTTTTG  
+HWI-EAS443:3:30:451:1849#0/1  
ab`Y`\_T\_ab`bbb\_QTZabbaabXW[ab\_bYaaaa``S  
@HWI-EAS443:3:30:765:42#0/1  
TGCGGGGTTCTTCTTGTCTTCCTGATGTGTACTTTTTG  
+HWI-EAS443:3:30:765:42#0/1  
abaabb`H^abaa`bbb\_aa^`a`a`a`a[\_\_\_aa^aa  
@HWI-EAS443:3:31:1591:931#0/1  
TATGGCCATAATCAAAAAGTACACATCAGGAAGACAAGAG  
+HWI-EAS443:3:31:1591:931#0/1  
aab^abaa]]a\_¥¥`baaZP[M^¥^a¥T]a\_\_a\_N\_Z]]]  
@HWI-EAS443:3:31:1744:1048#0/1  
CAAAAAGTACACATCAGGAAGACAAGAGAAGAACCCCGCA  
+HWI-EAS443:3:31:1744:1048#0/1  
]bbabbb]b`ba`aaaababbaababaaaabaaa]`ab\_\_  
@HWI-EAS443:3:32:189:1431#0/1  
TGCGGGGTTCTTCTTGTCTTCCTGATGTGTACTTTTTG  
+HWI-EAS443:3:32:189:1431#0/1  
a\_b`bab\_¥b^]bba]Z\_\_a\_aaa]^a``Ya`¥b`\_Za^X  
@HWI-EAS443:3:32:434:1903#0/1  
TGCGGGGTTCTTCTTGTCTTCCTGATGTGTACTTTTTG  
+HWI-EAS443:3:32:434:1903#0/1  
a^babYU\_a^a`aaaa\_a]baaa`\_\_a`Y]\_Wa`]a^\_\_



@HWI-EAS443:3:32:518:527#0/1  
TGCGGGGTTCTTCTTGTCTTCCTGATGTGTACTTTTTG  
+HWI-EAS443:3:32:518:527#0/1  
`a``baaa\_abaaa`Z¥aaaaaa`]¥^a\_a¥U¥a`\_``W  
@HWI-EAS443:3:32:605:1367#0/1  
AAAGTACACATCAGGAAGACAAGAGAAGAACCCCGCACTC  
+HWI-EAS443:3:32:605:1367#0/1  
`^VT[`ab\_^^`Z`] ]\_Z]`a`ZUX[`^Z\_a`\_`[]T¥[a  
@HWI-EAS443:3:32:763:1586#0/1  
CAAAAAGTACACATCAGGAAGACAAGAGAAGAACCCCGCA  
+HWI-EAS443:3:32:763:1586#0/1  
ababb\_a`aaa^`a\_\_aaaaaab``aaaa`aa\_`\_bXaa  
@HWI-EAS443:3:32:977:1155#0/1  
TGCGGGGTTCTTCTTGTCTTCCTGATGTGTACTTTTTG  
+HWI-EAS443:3:32:977:1155#0/1  
`abaa^a\_aaabaa`a`aaaaaa\_a``aY^a^\_^aa\_a\_\_  
@HWI-EAS443:3:33:1391:478#0/1  
TGCGGGGTTCTTCTTGTCTTCCTGATGTGTACTTTTTG  
+HWI-EAS443:3:33:1391:478#0/1  
aaaaaaa]a^aa`a\_aa\_`^a`^Ua\_]`\_]\_Y0¥\_\_`^\_\_  
@HWI-EAS443:3:33:1671:346#0/1  
CAAAAAGTACACATCAGGAAGACAAGAGAAGAACCCCGCA  
+HWI-EAS443:3:33:1671:346#0/1  
aa[R\_`^`N\_Z`^`[`¥Ub\_a``^P] ]a0a\_\_NNSFV][\_`^  
@HWI-EAS443:3:33:463:98#0/1  
CAAAAAGTACACATCAGGAAGACAAGAGAAGAACCCCGCA  
+HWI-EAS443:3:33:463:98#0/1  
abbbbbbb\_bbaabaaabbababaaaaa`a`aaa^`]\_\_`]\_  
@HWI-EAS443:3:33:980:963#0/1  
AAAAAGTACACATCAGGAAGACAAGAGAAGAACCCCGCAC  
+HWI-EAS443:3:33:980:963#0/1  
`bb\_\_babbbbbbababbbba`baa`aaabba0a^aa\_a^  
@HWI-EAS443:3:34:502:154#0/1  
TGCGGGGTTCTTCTTGTCTTCCTGATGTGTACTTTTTG  
+HWI-EAS443:3:34:502:154#0/1  
``baba\_\_Ubbaaabbaaaaaaba`a\_\_a`\_]\_\_\_\_a\_\_a]  
@HWI-EAS443:3:34:960:1407#0/1  
AAAAAGTACACATCAGGAAGACAAGAGAAGAACCCCGCAC  
+HWI-EAS443:3:34:960:1407#0/1  
aaaaaa]ab`aba\_`baab\_aaaa`\_`aa`aa`^Z\_Z]\_0  
@HWI-EAS443:3:35:109:1043#0/1  
CTCTTGTCTTCCTGATGTGTACTTTTTGATTATGGCCATA  
+HWI-EAS443:3:35:109:1043#0/1  
abbbba\_Zbaabba[`^a\_a[[aaaaa`a]\_]Z]^]a\_QON  
@HWI-EAS443:3:35:1467:307#0/1  
TGCGGGGTTCTTCTTGTCTTCCTGATGTGTACTTTTTG  
+HWI-EAS443:3:35:1467:307#0/1  
abba`aa¥a`ba[b\_abb`¥aaaaaba`aaa`a`aaaa^b  
@HWI-EAS443:3:35:288:1082#0/1  
CAAAAAGTACACATCAGGAAGACAAGAGAAGAACCCCGCA

+HWI-EAS443:3:35:288:1082#0/1  
abbbUbbRZ`ba\_ababaabb]ab[a\_a`aa`a]b\_aaaa  
@HWI-EAS443:3:35:506:964#0/1  
TGCGGGGTTCTTCTTGTCTTCCTGATGTGTACTTTTTG  
+HWI-EAS443:3:35:506:964#0/1  
aaa`\_aa\_aabaaaa\_a^aaa```a\_UN\_V\_\_\_`\_Va^  
@HWI-EAS443:3:35:964:39#0/1  
CTCTTGTCTTCCTGATGTGTACTTTTTGATTATGGCCATA  
+HWI-EAS443:3:35:964:39#0/1  
abbbbbbabbaabb`bbabaaabbbbb`\_baaaa`\_]S^  
@HWI-EAS443:3:36:1104:1351#0/1  
AAAGTACACATCAGGAAGACAAGAGAAGAACCCCGCACTC  
+HWI-EAS443:3:36:1104:1351#0/1  
^abZQ¥\_]a`Y```]Z]]][a]aaY]VR^^`¥\_X\_]a`\_a  
@HWI-EAS443:3:36:316:1095#0/1  
AAAAAGTACACATCAGGAAGACAAGAGAAGAACCCCGCAC  
+HWI-EAS443:3:36:316:1095#0/1  
aaaZaa]aaaa`aa\_\_a`aaaa`\_¥[a]`\_\_`aZa\_`  
@HWI-EAS443:3:36:383:2000#0/1  
AAAAGTACACATCAGGAAGACAAGAGAAGAACCCCGCACT  
+HWI-EAS443:3:36:383:2000#0/1  
aaa\_\_Vaa`aaZ\_\_\_^\_a]W\_\_^]\_^\_]`[\_¥^\_a^ZZ  
@HWI-EAS443:3:37:1205:1318#0/1  
AAAAGTACACATCAGGAAGACAAGAGAAGAACCCCGCACT  
+HWI-EAS443:3:37:1205:1318#0/1  
^URSPXV\_]^\_aX¥U^Q^\_¥T¥¥`aa`SMHRT]Z]X`ZTU  
@HWI-EAS443:3:37:1732:547#0/1  
TGCGGGGTTCTTCTTGTCTTCCTGATGTGTACTTTTTG  
+HWI-EAS443:3:37:1732:547#0/1  
\_```aa``aaaaX`Ubaba¥\_bb`ba\_abOb[bbb`aa`S  
@HWI-EAS443:3:37:291:658#0/1  
CTCTTGTCTTCCTGATGTGTACTTTTTGATTATGGCCATA  
+HWI-EAS443:3:37:291:658#0/1  
aaaa`a\_aaaaa`\_`a]\_]`aa`a`aY`]Za¥W^`^\_¥\_  
@HWI-EAS443:3:37:780:106#0/1  
CAAAAAGTACACATCAGGAAGACAAGAGAAGAACCCCGCA  
+HWI-EAS443:3:37:780:106#0/1  
abbbbbbb\_bbbaaaababbabaaaaba`IS`aaa\_[`a`\_  
@HWI-EAS443:3:37:794:361#0/1  
TATGGCCATAATCAAAAAGTACACATCAGGAAGACAAGAG  
+HWI-EAS443:3:37:794:361#0/1  
`ba\_\_\_aa`^a]]¥[W[^ZL`¥`a]]Y\_]QMWZTG\_Y\_ZP  
@HWI-EAS443:3:38:1280:840#0/1  
GTGCGGGGTTCTTCTTGTCTTCCTGATGTGTACTTTTT  
+HWI-EAS443:3:38:1280:840#0/1  
T[U¥^abaaa]ba\_ab]b`Ybb`baZO^XRUaTRW^¥\_a`  
@HWI-EAS443:3:38:356:252#0/1  
AAAAGTACACATCAGGAAGACAAGAGAAGAACCCCGCACT  
+HWI-EAS443:3:38:356:252#0/1  
ab\_R][aba`a`\_``a`ab^\_a^`\_aZ\_Y^\_WX^`\_UZVX

@HWI-EAS443:3:38:903:716#0/1  
AAAAAGTACACATCAGGAAGACAAGAGAAGAACCCCGCAC  
+HWI-EAS443:3:38:903:716#0/1  
aZ]aaaQbbabaaabb\_a]a\_a````\_aaaa\_a[Z[[a]`S  
@HWI-EAS443:3:39:1053:669#0/1  
GTGCGGGTCTTCTCTTGTCTTCCTGATGTGTACTTTTT  
+HWI-EAS443:3:39:1053:669#0/1  
a^``ZTa^P[Y^Sa\_¥UaJSa[WX[`Q\_[NSYHYaXZWB  
@HWI-EAS443:3:39:111:1046#0/1  
TGCGGGGTCTTCTCTTGTCTTCCTGATGTGTACTTTTTG  
+HWI-EAS443:3:39:111:1046#0/1  
aba\_\_a^Y]¥`[\_^Za`Paa]]Z]`aaZU^^`X[`]QZ¥  
@HWI-EAS443:3:39:1618:1694#0/1  
TGCGGGGTCTTCTCTTGTCTTCCTGATGTGTACTTTTTG  
+HWI-EAS443:3:39:1618:1694#0/1  
aa\_a\_^bXUaaaYa\_a`ZU\_]Y\_aa]^¥\_]Y]]`\_]\_^XX  
@HWI-EAS443:3:39:432:729#0/1  
AAAAAGTACACATCAGGAAGACAAGAGAAGAACCCCGCAC  
+HWI-EAS443:3:39:432:729#0/1  
aabbUb]aabab\_ab\_`aaa]ba\_a\_``a^a`^\_a`a\_a]  
@HWI-EAS443:3:39:956:1250#0/1  
CTCTTGTCTTCCTGATGTGTACTTTTTGATTATGGCCATA  
+HWI-EAS443:3:39:956:1250#0/1  
a`b`abaa^abb`]Mzb[`Xaaaa`\_]¥````\_`a`¥ZY  
@HWI-EAS443:3:3:1007:996#0/1  
CAAAAAGTACACATCAGGAAGACAAGAGAAGAACCCCGCA  
+HWI-EAS443:3:3:1007:996#0/1  
``bba[`Xbabbaa]0\_aaaaaa``Zaaaa`ZQ\_Y`]¥  
@HWI-EAS443:3:3:1315:895#0/1  
CAAAAAGTACACATCAGGAAGACAAGAGAAGAACCCCGCA  
+HWI-EAS443:3:3:1315:895#0/1  
¥¥TW¥¥aZaYJYa\_]`ba`Zbaa¥`] [babb`SYN^Mb\_a  
@HWI-EAS443:3:3:1332:1273#0/1  
TATGGCCATAATCAAAAAGTACACATCAGGAAGACAAGAG  
+HWI-EAS443:3:3:1332:1273#0/1  
`abaa]`a`a`]W¥`a``\_S\_W[^]X]\_`¥\_\_\_V^\_] ]^  
@HWI-EAS443:3:3:1450:1704#0/1  
TGCGGGGTCTTCTCTTGTCTTCCTGATGTGTACTTTTTG  
+HWI-EAS443:3:3:1450:1704#0/1  
aaaaa\_aUaaaa`a\_aa\_`^`\_]aa\_\_a]\_^X\_a^`\_\_  
@HWI-EAS443:3:3:1479:1390#0/1  
TGCGGGGTCTTCTCTTGTCTTCCTGATGTGTACTTTTTG  
+HWI-EAS443:3:3:1479:1390#0/1  
`a]a]Za¥X0\_]\_a]ab\_Y`aM[`]`\_[aRa0`WYaW[\_a  
@HWI-EAS443:3:3:295:1919#0/1  
AAAAAGTACACATCAGGAAGACAAGAGAAGAACCCCGCAC  
+HWI-EAS443:3:3:295:1919#0/1  
`ZZa``TSa\_aa`[aaaa^a\_\_baaa``aa`V\_]SRa^\_]`  
@HWI-EAS443:3:3:398:47#0/1  
CAAAAAGTACACATCAGGAAGACAAGAGAAGAACCCCGCA



@HWI-EAS443:3:42:28:634#0/1  
TGCGGGGTTCTTCTTGTCTTCCTGATGTGTACTTTTTG  
+HWI-EAS443:3:42:28:634#0/1  
\_``abaaabbbbaabbbbaabbbbaa^Qab\_a\_\_abaaab\_  
@HWI-EAS443:3:42:326:676#0/1  
TGCGGGGTTCTTCTTGTCTTCCTGATGTGTACTTTTTG  
+HWI-EAS443:3:42:326:676#0/1  
abaa`aG\_aaaaaTa^a`a`a^`a^^`X`OY\_b¥a`a\_  
@HWI-EAS443:3:42:428:490#0/1  
AAAAAGTACACATCAGGAAGACAAGAGAAGAACCCCGCAC  
+HWI-EAS443:3:42:428:490#0/1  
ab`a`b\_bbbbbbbbaabaaaaaaaaaaa`aa\_\_aaaa`  
@HWI-EAS443:3:42:621:1360#0/1  
TGCGGGGTTCTTCTTGTCTTCCTGATGTGTACTTTTTG  
+HWI-EAS443:3:42:621:1360#0/1  
aaaaaa`Xa`aa\_aaaaa\_a`\_a\_]¥`a\_a]``aaa`Z  
@HWI-EAS443:3:43:1067:292#0/1  
TGCGGGGTTCTTCTTGTCTTCCTGATGTGTACTTTTTG  
+HWI-EAS443:3:43:1067:292#0/1  
^abb]]bYaaa`aab\_bW[a`a`aa`]Z]`]\_\_aa`a\_\_  
@HWI-EAS443:3:43:1362:207#0/1  
TGCGGGGTTCTTCTTGTCTTCCTGATGTGTACTTTTTG  
+HWI-EAS443:3:43:1362:207#0/1  
abbbbaabababb\_a`ba`aaaa`baa`\_a\_\_\_a`a`a\_  
@HWI-EAS443:3:43:140:1379#0/1  
TGCGGGGTTCTTCTTGTCTTCCTGATGTGTACTTTTTG  
+HWI-EAS443:3:43:140:1379#0/1  
[¥a^Q]a[\_`a`a\_aa`\_\_\_aa\_YP¥`a¥[\_^U`Z`a[M  
@HWI-EAS443:3:43:33:1439#0/1  
TGCGGGGTTCTTCTTGTCTTCCTGATGTGTACTTTTTG  
+HWI-EAS443:3:43:33:1439#0/1  
aaabaa`\_b`aa\_baaaa`aaa`a`\_]\_aX\_^a`aaa\_  
@HWI-EAS443:3:44:1576:1199#0/1  
TGCGGGGTTCTTCTTGTCTTCCTGATGTGTACTTTTTG  
+HWI-EAS443:3:44:1576:1199#0/1  
abbaaaa]a`aa`baaaaa`aa\_^aa^ab\_aZ^¥a`a`a`  
@HWI-EAS443:3:44:527:467#0/1  
CAAAAAGTACACATCAGGAAGACAAGAGAAGAACCCCGCA  
+HWI-EAS443:3:44:527:467#0/1  
aaa`^]\_Zaaaaaa`aba`ba^a]aYaY\_a`^^]\_aW^  
@HWI-EAS443:3:45:1109:1567#0/1  
AAAAGTACACATCAGGAAGACAAGAGAAGAACCCCGCACT  
+HWI-EAS443:3:45:1109:1567#0/1  
WTOOGRa`a`X¥`^YZ]aa`^¥baSZ`^a\_a]XV``]]]Y  
@HWI-EAS443:3:45:122:154#0/1  
TGCGGGGTTCTTCTTGTCTTCCTGATGTGTACTTTTTG  
+HWI-EAS443:3:45:122:154#0/1  
\_S\_¥¥\_b]a]\_]Sa]bab\_a`a`aaaU^ZU\_^]a^\_`a]]  
@HWI-EAS443:3:45:1248:935#0/1  
CAAAAAGTACACATCAGGAAGACAAGAGAAGAACCCCGCA

+HWI-EAS443:3:45:1248:935#0/1  
abbbbab^ababbaabbbbaba`aabbbaabaaa][aa\_`  
@HWI-EAS443:3:45:1595:732#0/1  
TGCGGGGTTCTTCTTGTCTTCCTGATGTGTACTTTTTG  
+HWI-EAS443:3:45:1595:732#0/1  
WGUY\_Z^]aX`WZ]aT\_WW\_\_[R]ZW¥K]ZZ[HY^V]aa]  
@HWI-EAS443:3:45:1759:771#0/1  
TGCGGGGTTCTTCTTGTCTTCCTGATGTGTACTTTTTG  
+HWI-EAS443:3:45:1759:771#0/1  
ababbbb]babaaaabba\_abaa`aa```^a\_\_\_baaaaa  
@HWI-EAS443:3:45:256:12#0/1  
TATGGCCATAATCAAAAAGTACACATCAGGAAGACAAGAG  
+HWI-EAS443:3:45:256:12#0/1  
ab` `]`a\_Z^SYXQ]^¥XZZKUFXOVXXK\_`XVaQMvVX]\_  
@HWI-EAS443:3:45:258:1526#0/1  
CAAAAAGTACACATCAGGAAGACAAGAGAAGAACCCCGCA  
+HWI-EAS443:3:45:258:1526#0/1  
abaaaa]`aaa`ba`aaa\_`\_\_\_a^aa`aaaa^a\_\_` ` \_`  
@HWI-EAS443:3:45:285:925#0/1  
TGCGGGGTTCTTCTTGTCTTCCTGATGTGTACTTTTTG  
+HWI-EAS443:3:45:285:925#0/1  
ababaa`Va^ba]b]ab`\_aaaa\_baa`a\_a\_a\_aaaa`a  
@HWI-EAS443:3:46:1431:102#0/1  
AAAAAGTACACATCAGGAAGACAAGAGAAGAACCCCGCAC  
+HWI-EAS443:3:46:1431:102#0/1  
¥Z^UVXU`YSaaa\_`a^`[b\_\_¥Y\_W\_[^a]ZTOUVaN\_]`  
@HWI-EAS443:3:46:631:1565#0/1  
CAAAAAGTACACATCAGGAAGACAAGAGAAGAACCCCGCA  
+HWI-EAS443:3:46:631:1565#0/1  
a\_b^`bbaaabbaaaabbaaab`bbbaa`abbba^\_ab\_b  
@HWI-EAS443:3:46:782:972#0/1  
TGCGGGGTTCTTCTTGTCTTCCTGATGTGTACTTTTTG  
+HWI-EAS443:3:46:782:972#0/1  
aaaba\_bTbaab`a^\_aa``aaaaa\_aa\_`S\_]a`a\_a`  
@HWI-EAS443:3:46:833:325#0/1  
AAAAGTACACATCAGGAAGACAAGAGAAGAACCCCGCACT  
+HWI-EAS443:3:46:833:325#0/1  
```ba\_]`ba\_a\_[`aa\_a^aa`¥aa\_`Z^W\_`^¥a^\_Y]  
@HWI-EAS443:3:46:902:677#0/1  
CAAAAAGTACACATCAGGAAGACAAGAGAAGAACCCCGCA  
+HWI-EAS443:3:46:902:677#0/1  
aba`¥W^¥bb]a`a^`a\_ab^` `]aab¥ab]\_a\_`]a]^  
@HWI-EAS443:3:46:91:320#0/1  
TGCGGGGTTCTTCTTGTCTTCCTGATGTGTACTTTTTG  
+HWI-EAS443:3:46:91:320#0/1  
ab\_Z\_bb`bbaaababbaabbaaaab`bb]b\_a`bbaa`a  
@HWI-EAS443:3:47:1004:853#0/1  
TGCGGGGTTCTTCTTGTCTTCCTGATGTGTACTTTTTG  
+HWI-EAS443:3:47:1004:853#0/1  
SW` `¥¥¥M¥a¥X\_U`¥ROM¥bbbabXRQ`Q^]a^`Mbab]

@HWI-EAS443:3:47:1475:206#0/1  
TGCGGGGTTCTTCTTGTCTTCCTGATGTGTACTTTTTG  
+HWI-EAS443:3:47:1475:206#0/1  
ab^a`a\_babaaaa`ba\_a] [\_a`\_\_a] `YVSa`a\_\_S  
@HWI-EAS443:3:47:1553:468#0/1  
CAAAAAGTACACATCAGGAAGACAAGAGAAGAACCCCGCA  
+HWI-EAS443:3:47:1553:468#0/1  
aabab`aP`bbabbaabb`a\_aaa`baaaaaabXRR[b^\_  
@HWI-EAS443:3:47:506:90#0/1  
CAAAAAGTACACATCAGGAAGACAAGAGAAGAACCCCGCA  
+HWI-EAS443:3:47:506:90#0/1  
Tabb\_¥a`bbb\_baaabb^bbbabbbbbbbbb\_V\_`b``  
@HWI-EAS443:3:48:1456:1031#0/1  
CAAAAAGTACACATCAGGAAGACAAGAGAAGAACCCCGCA  
+HWI-EAS443:3:48:1456:1031#0/1  
]Y]`QWWHRR\_TT^SXabaaa`T\_`][`[\_a\_\_`XPW¥ZX  
@HWI-EAS443:3:48:1625:866#0/1  
TGCGGGGTTCTTCTTGTCTTCCTGATGTGTACTTTTTG  
+HWI-EAS443:3:48:1625:866#0/1  
\_bbb]ab\_abbaaaaaa\_\_aaa\_ab\_ab\_a¥`\_aaaaaX  
@HWI-EAS443:3:48:1628:49#0/1  
CAAAAAGTACACATCAGGAAGACAAGAGAAGAACCCCGCA  
+HWI-EAS443:3:48:1628:49#0/1  
abbbbababbbbabbbbbaabbbabbbbbbb\_baa`^\_aa\_a  
@HWI-EAS443:3:48:1758:1981#0/1  
TATGGCCATAATCAAAAAGTACACATCAGGAAGACAAGAG  
+HWI-EAS443:3:48:1758:1981#0/1  
]K\_U`\_]\_a^Za\_W[W]a^ZH]SX[WNV`aa¥^Y^GX`ZUG  
@HWI-EAS443:3:48:74:1302#0/1  
AAAAAGTACACATCAGGAAGACAAGAGAAGAACCCCGCAC  
+HWI-EAS443:3:48:74:1302#0/1  
aaa`]ZW\_`a`````\_]``]Z\_[]`a\_`a^]U]¥a[\_W  
@HWI-EAS443:3:48:854:234#0/1  
AAAGTACACATCAGGAAGACAAGAGAAGAACCCCGCACTC  
+HWI-EAS443:3:48:854:234#0/1  
Ya]\_QUX^^Ya[]b\_`Ra[aaab`b^^^aR[]][ab[YR^X  
@HWI-EAS443:3:48:882:491#0/1  
TGCGGGGTTCTTCTTGTCTTCCTGATGTGTACTTTTTG  
+HWI-EAS443:3:48:882:491#0/1  
abaaaa`aaaa`aaaa\_\_aa`\_aaaa\_a[\_\_\_a`aaaa  
@HWI-EAS443:3:49:1298:1683#0/1  
TGCGGGGTTCTTCTTGTCTTCCTGATGTGTACTTTTTG  
+HWI-EAS443:3:49:1298:1683#0/1  
¥¥U\_aaRG\_]¥^bbb`Y^\_baaaa]WGHZ[¥TX¥¥ZW^]Z  
@HWI-EAS443:3:49:546:618#0/1  
CAAAAAGTACACATCAGGAAGACAAGAGAAGAACCCCGCA  
+HWI-EAS443:3:49:546:618#0/1  
abbaabbJ`b\_a`babb`bbab¥`W^a]abbaab`\_aaab  
@HWI-EAS443:3:49:553:234#0/1  
TGCGGGGTTCTTCTTGTCTTCCTGATGTGTACTTTTTG

+HWI-EAS443:3:49:553:234#0/1  
a^bbbb`M`¥aa\_aa`^YZ`b\_]aaa\_b¥T¥`\_\_a\_`aa  
@HWI-EAS443:3:49:909:1754#0/1  
AAAGTACACATCAGGAAGACAAGAGAAGAACCCCGCACTC  
+HWI-EAS443:3:49:909:1754#0/1  
`¥b`Yaabba`^T`bbba`baa`aba`bb\_Y¥\_a`a\_aW  
@HWI-EAS443:3:4:1189:185#0/1  
AAAAAGTACACATCAGGAAGACAAGAGAAGAACCCCGCAC  
+HWI-EAS443:3:4:1189:185#0/1  
aa\_`a^aa]\_`\_^aa^`a\_Z^^X^^\_^ZXTMMZUWZBB  
@HWI-EAS443:3:4:1421:939#0/1  
TGCGGGGTTCTTCTTGTCTTCCTGATGTGTACTTTTTG  
+HWI-EAS443:3:4:1421:939#0/1  
aa]`\_`^`baaaZaaba^b`a`aa\_aa\_[]LXa`a\_`S  
@HWI-EAS443:3:4:1496:55#0/1  
CAAAAAGTACACATCAGGAAGACAAGAGAAGAACCCCGCA  
+HWI-EAS443:3:4:1496:55#0/1  
Ybbbaba`baaaaa`ab\_ab\_`a^a`a[^aa\_`UXWaZ\_  
@HWI-EAS443:3:4:1523:1508#0/1  
AAAAAGTACACATCAGGAAGACAAGAGAAGAACCCCGCAC  
+HWI-EAS443:3:4:1523:1508#0/1  
aaa¥`V`[^a\_a^`aaaa`a^¥Z`Z\_U`\_\_XV¥FX`\_`^  
@HWI-EAS443:3:4:1778:1848#0/1  
TGCGGGGTTCTTCTTGTCTTCCTGATGTGTACTTTTTG  
+HWI-EAS443:3:4:1778:1848#0/1  
abba]baYUR]a\_¥aa`aZV`YT[````aY`W]\_a\_\_\_\_\_[]  
@HWI-EAS443:3:4:765:548#0/1  
CAAAAAGTACACATCAGGAAGACAAGAGAAGAACCCCGCA  
+HWI-EAS443:3:4:765:548#0/1  
ab^`baa[aaa\_aa^aab\_aa`\_a]a\_a\_\_a`\_`\_^a]a^  
@HWI-EAS443:3:4:842:340#0/1  
CAAAAAGTACACATCAGGAAGACAAGAGAAGAACCCCGCA  
+HWI-EAS443:3:4:842:340#0/1  
aabbab^bababaaabbaaa\_aa`baaaaa\_aR`Ya\_`  
@HWI-EAS443:3:50:849:2000#0/1  
AAAAGTACACATCAGGAAGACAAGAGAAGAACCCCGCACT  
+HWI-EAS443:3:50:849:2000#0/1  
abba\_Pab`[[`aa¥¥aaa\_abaaa`aa\_aa]ODWbRaQ]  
@HWI-EAS443:3:51:1692:1269#0/1  
CAAAAAGTACACATCAGGAAGACAAGAGAAGAACCCCGCA  
+HWI-EAS443:3:51:1692:1269#0/1  
Z`bababUaab[baa\_ab`ab[[]`aT\_a`P`[]`abZK^`  
@HWI-EAS443:3:51:210:436#0/1  
CTCTTGTCTTCCTGATGTGTACTTTTTGATTATGGCCATA  
+HWI-EAS443:3:51:210:436#0/1  
a\_\_]`a\_a^`\_]¥^\_aY`\_\_X\_aaa`\_a^\_^a\_`YPPV  
@HWI-EAS443:3:52:1113:1322#0/1  
CAAAAAGTACACATCAGGAAGACAAGAGAAGAACCCCGCA  
+HWI-EAS443:3:52:1113:1322#0/1  
Z¥[RW\_\_VbW¥^b¥`bba```\_]`X\_a`ab`aba`^Sa`a



@HWI-EAS443:3:52:1320:1967#0/1  
AAAAAGTACACATCAGGAAGACAAGAGAAGAACCCCGCAC  
+HWI-EAS443:3:52:1320:1967#0/1  
X`a`b^b¥a[aZ^`aaaa]S`\_a\_\_\_\_\_a\_^\_¥]aX¥0  
@HWI-EAS443:3:52:743:281#0/1  
CAAAAAGTACACATCAGGAAGACAAGAGAAGAACCCCGCA  
+HWI-EAS443:3:52:743:281#0/1  
abbbbbbabababababbbbbba\_abaabaabab`a\_\_b\_a  
@HWI-EAS443:3:53:30:1403#0/1  
CAAAAAGTACACATCAGGAAGACAAGAGAAGAACCCCGCA  
+HWI-EAS443:3:53:30:1403#0/1  
a[bbUbb]`]]b\_[ba]aa`b`bbab`b^baaaaa\_baa  
@HWI-EAS443:3:53:58:273#0/1  
TGCGGGGTTCTTCTTGTCTTCCTGATGTGTACTTTTTG  
+HWI-EAS443:3:53:58:273#0/1  
abbaabaaa\_abaa`aba\_aaa\_aaa`aa\_aXX]`\_`\_`\_  
@HWI-EAS443:3:53:75:2018#0/1  
TGCGGGGTTCTTCTTGTCTTCCTGATGTGTACTTTTTG  
+HWI-EAS443:3:53:75:2018#0/1  
Vb`X\_\_Rb`bYYa]]ba\_X`¥]\_bbY\_Y^OY]^¥b]\_T  
@HWI-EAS443:3:53:821:1698#0/1  
AAAAGTACACATCAGGAAGACAAGAGAAGAACCCCGCACT  
+HWI-EAS443:3:53:821:1698#0/1  
^bbbb\_bb^]]b\_]b]][\_aab\_b`b¥abaYX[SbW``\_  
@HWI-EAS443:3:54:1177:1281#0/1  
CAAAAAGTACACATCAGGAAGACAAGAGAAGAACCCCGCA  
+HWI-EAS443:3:54:1177:1281#0/1  
abababaabbbbbbbbabbbb`abbbbabbbbbbababab  
@HWI-EAS443:3:54:255:659#0/1  
CAAAAAGTACACATCAGGAAGACAAGAGAAGAACCCCGCA  
+HWI-EAS443:3:54:255:659#0/1  
¥[`¥U0]LWa\_W^¥VTZa\_]¥\_`YZ[T¥MW\_^ZS]YZa`\_  
@HWI-EAS443:3:54:27:1377#0/1  
CAAAAAGTACACATCAGGAAGACAAGAGAAGAACCCCGCA  
+HWI-EAS443:3:54:27:1377#0/1  
a`b`b\_a^U^baaaa`aa`aaaa]aa\_]\_]`^S]`b``  
@HWI-EAS443:3:54:761:282#0/1  
CAAAAAGTACACATCAGGAAGACAAGAGAAGAACCCCGCA  
+HWI-EAS443:3:54:761:282#0/1  
abbb\_¥\_`b`a`ba^aaabaaaabaaaaaba`^`¥aaa  
@HWI-EAS443:3:54:823:148#0/1  
CTCTTGTCTTCCTGATGTGTACTTTTTGATTATGGCCATA  
+HWI-EAS443:3:54:823:148#0/1  
abbbbbbbbaababbbabbbabbbbabbbabababab\_b`a  
@HWI-EAS443:3:55:140:1821#0/1  
AAAAGTACACATCAGGAAGACAAGAGAAGAACCCCGCACT  
+HWI-EAS443:3:55:140:1821#0/1  
aaaa^a\_aa`\_\_`a\_\_`\_`\_`a`\_\_`\_¥]a\_\_]\_\_W^]^  
@HWI-EAS443:3:55:1433:1329#0/1  
CAAAAAGTACACATCAGGAAGACAAGAGAAGAACCCCGCA

+HWI-EAS443:3:55:1433:1329#0/1  
a`[W`Zb]bbaab\_Xabbbba`Wb[bbbbabbba¥X`aT`  
@HWI-EAS443:3:55:1649:1212#0/1  
GTGCGGGTTCTTCTCTTGCTTCCTGATGTGTACTTTTT  
+HWI-EAS443:3:55:1649:1212#0/1  
¥NWQ[\_b]RRaa¥QZUa¥¥]L\_¥KU`\_TTYX\_[MDP^X¥`  
@HWI-EAS443:3:55:750:521#0/1  
CAAAAAGTACACATCAGGAAGACAAGAGAAGAACCCCGCA  
+HWI-EAS443:3:55:750:521#0/1  
`b``\_\_a^aabaaaabbb\_\_a`ab\_b`b``baa[¥Zaa\_a  
@HWI-EAS443:3:56:1281:475#0/1  
AAAAAGTACACATCAGGAAGACAAGAGAAGAACCCCGCAC  
+HWI-EAS443:3:56:1281:475#0/1  
¥ZZ]X¥ZX¥\_V\_XSW)`^`]^a\_aa]aaa[a]XYO^U\_^  
@HWI-EAS443:3:56:525:1581#0/1  
AAAAAGTACACATCAGGAAGACAAGAGAAGAACCCCGCAC  
+HWI-EAS443:3:56:525:1581#0/1  
[`TWababb\_`baa¥Z¥a`Ta^[a`]abaW¥[¥a\_Yaaaa  
@HWI-EAS443:3:56:751:826#0/1  
TGCGGGGTTCTTCTCTTGCTTCCTGATGTGTACTTTTTG  
+HWI-EAS443:3:56:751:826#0/1  
a]bbabaH^aab\_a`aabaaaba`aa\_¥aZa\_]`aa`aaa  
@HWI-EAS443:3:57:778:219#0/1  
AAAAAGTACACATCAGGAAGACAAGAGAAGAACCCCGCAC  
+HWI-EAS443:3:57:778:219#0/1  
abbbababaabbaabbbbbbaaaab`a`abaa`]a\_b`\_`\_`  
@HWI-EAS443:3:58:1087:1725#0/1  
TGCGGGGTTCTTCTCTTGCTTCCTGATGTGTACTTTTTG  
+HWI-EAS443:3:58:1087:1725#0/1  
a\_Z`]a``]J¥a]aaaa^¥aa]U`a\_aY^]ZZF¥aaaa`  
@HWI-EAS443:3:58:148:490#0/1  
TATGGCCATAATCAAAAAGTACACATCAGGAAGACAAGAG  
+HWI-EAS443:3:58:148:490#0/1  
Vaabbbb\_[¥[^Z[^Z]TXV]W\_¥XYXW^]W)`[ZY\_¥UX  
@HWI-EAS443:3:58:1492:1560#0/1  
AAAAAGTACACATCAGGAAGACAAGAGAAGAACCCCGCAC  
+HWI-EAS443:3:58:1492:1560#0/1  
]aZab`Paaaa\_\_V]^Yaa`]Na\_a\_a`aaaW\_ZS\_\_a[  
@HWI-EAS443:3:58:1502:1309#0/1  
AAAAAGTACACATCAGGAAGACAAGAGAAGAACCCCGCAC  
+HWI-EAS443:3:58:1502:1309#0/1  
aaaa] ]^`\_b^ab``aaaab\_\_a^`\_aa`\_\_\_\_]X\_¥`\_\_^  
@HWI-EAS443:3:58:1644:957#0/1  
TATGGCCATAATCAAAAAGTACACATCAGGAAGACAAGAG  
+HWI-EAS443:3:58:1644:957#0/1  
aaaaa]`\_\_N`]TVY\_`¥RKOUXZ^ZMX^\_Y]\_XX]ZZW\_  
@HWI-EAS443:3:58:212:753#0/1  
AAAAGTACACATCAGGAAGACAAGAGAAGAACCCCGCACT  
+HWI-EAS443:3:58:212:753#0/1  
a\_XW¥Vaaaa``aa\_^aa\_`S`Za\_`\_``W¥\_\_\_\_^]

@HWI-EAS443:3:58:738:915#0/1  
TGCGGGGTTCTTCTTGTCTTCCTGATGTGTACTTTTTG  
+HWI-EAS443:3:58:738:915#0/1  
abbbba]babbabbbbaabba`bb`b`\_[\_a`babab^  
@HWI-EAS443:3:58:828:687#0/1  
TGCGGGGTTCTTCTTGTCTTCCTGATGTGTACTTTTTG  
+HWI-EAS443:3:58:828:687#0/1  
aZ`^`^\_aaZU¥a¥`Taab[V]`\_UaaV]R]a^¥U\_aaa]U  
@HWI-EAS443:3:58:8:989#0/1  
GTGCGGGGTTCTTCTTGTCTTCCTGATGTGTACTTTTT  
+HWI-EAS443:3:58:8:989#0/1  
aU[a^`T¥X\_a`a\_aa`^]aa\_\_\_a] []ZRZ\_\_\_a`\_`V  
@HWI-EAS443:3:59:1009:904#0/1  
TGCGGGGTTCTTCTTGTCTTCCTGATGTGTACTTTTTG  
+HWI-EAS443:3:59:1009:904#0/1  
[baa`a\_T]Q`\_SZ[V^\_RZ]]` `)\_US`W^QOLVWZX]X  
@HWI-EAS443:3:59:363:1139#0/1  
AAAAAGTACACATCAGGAAGACAAGAGAAGAACCCCGCAC  
+HWI-EAS443:3:59:363:1139#0/1  
a`a`]^0[\_aa]]\_`\_a`aa\_`Z]`a]`aY^]]XY]\_XX  
@HWI-EAS443:3:59:577:962#0/1  
TGCGGGGTTCTTCTTGTCTTCCTGATGTGTACTTTTTG  
+HWI-EAS443:3:59:577:962#0/1  
]b^\_a\_^a`][\_abbbba]]\_bbbaa\_a`b]aaa^`^a^  
@HWI-EAS443:3:59:617:216#0/1  
TGCGGGGTTCTTCTTGTCTTCCTGATGTGTACTTTTTG  
+HWI-EAS443:3:59:617:216#0/1  
aabbbb\_Qaaaaaaaab\_aaaa\_aaaa\_^V\_[a^^\_a\_  
@HWI-EAS443:3:5:1454:709#0/1  
TGCGGGGTTCTTCTTGTCTTCCTGATGTGTACTTTTTG  
+HWI-EAS443:3:5:1454:709#0/1  
¥b\_b`Z`ab]ab¥babb`¥`ba¥[ab\_aaaL¥]b]OZaa  
@HWI-EAS443:3:5:440:1841#0/1  
AAAAAGTACACATCAGGAAGACAAGAGAAGAACCCCGCAC  
+HWI-EAS443:3:5:440:1841#0/1  
aa`aaa¥ba`aa¥¥aaaaa\_\_ba``¥aaYa^^^`\_`¥\_B  
@HWI-EAS443:3:60:1038:1547#0/1  
TGCGGGGTTCTTCTTGTCTTCCTGATGTGTACTTTTTG  
+HWI-EAS443:3:60:1038:1547#0/1  
aaUW\_`XFY]a^[[`]a^]Y^aa\_a]]`a[`]WYa¥`a\_V  
@HWI-EAS443:3:60:1185:1000#0/1  
TGCGGGGTTCTTCTTGTCTTCCTGATGTGTACTTTTTG  
+HWI-EAS443:3:60:1185:1000#0/1  
aaaaaaa]aaaa`a\_aab\_aaa`^aa`\_`]a]]Xa\_\_\_`\_  
@HWI-EAS443:3:60:271:1112#0/1  
AAAAAGTACACATCAGGAAGACAAGAGAAGAACCCCGCAC  
+HWI-EAS443:3:60:271:1112#0/1  
\_a`a]\_P^ab```]`baa^baaba]abb]aa]aY^^]`a`  
@HWI-EAS443:3:60:785:1139#0/1  
TGCGGGGTTCTTCTTGTCTTCCTGATGTGTACTTTTTG

+HWI-EAS443:3:60:785:1139#0/1  
`bb`baaTZ\_bb¥`]bbaUa`X`\_ba]aa]a\_`\_baaaaV  
@HWI-EAS443:3:61:1285:710#0/1  
TGCGGGGTTCTTCTCTTGTCTTCCTGATGTGTACTTTTTG  
+HWI-EAS443:3:61:1285:710#0/1  
a^\_bbb`baba`aaabbaabbba`^aa^`^^^aa^^^  
@HWI-EAS443:3:61:1618:1560#0/1  
TGCGGGGTTCTTCTCTTGTCTTCCTGATGTGTACTTTTTG  
+HWI-EAS443:3:61:1618:1560#0/1  
`aabaaa¥babb`aabbbaabbbabba\_aa^`]aa\_a\_`  
@HWI-EAS443:3:61:1677:772#0/1  
AAAAGTACACATCAGGAAGACAAGAGAAGAACCCCGCACT  
+HWI-EAS443:3:61:1677:772#0/1  
abaa\_¥b\_aba\_]`^\_Z^bbabaabab\_abaa`RYS\_X^Y^  
@HWI-EAS443:3:61:170:416#0/1  
AAAAGTACACATCAGGAAGACAAGAGAAGAACCCCGCACT  
+HWI-EAS443:3:61:170:416#0/1  
aabab^aaaaaaa`aaaaa\_WW`P````Z`\_]\_¥\_`^`^^  
@HWI-EAS443:3:61:206:235#0/1  
TGCGGGGTTCTTCTCTTGTCTTCCTGATGTGTACTTTTTG  
+HWI-EAS443:3:61:206:235#0/1  
ababab`\_abbbaaaaa`a`]`a\_`[\_`a¥`U\_¥a^\_\_^Y  
@HWI-EAS443:3:61:666:902#0/1  
TGCGGGGTTCTTCTCTTGTCTTCCTGATGTGTACTTTTTG  
+HWI-EAS443:3:61:666:902#0/1  
`baab]a^aaaaaaaaa`aa\_ba`\_]a`]`Y]^a\_^\_YQ  
@HWI-EAS443:3:61:917:649#0/1  
TGCGGGGTTCTTCTCTTGTCTTCCTGATGTGTACTTTTTG  
+HWI-EAS443:3:61:917:649#0/1  
abaabab\_aaaaaaaba`aa\_baaa\_aa\_`Z\_\_a\_\_`]N  
@HWI-EAS443:3:62:1733:1782#0/1  
GTGCGGGTTCTTCTCTTGTCTTCCTGATGTGTACTTTTT  
+HWI-EAS443:3:62:1733:1782#0/1  
a\_V\_¥ZWTWZVa`^YU```]\_`XX[a`Y[0[ZGLRZ]\_`X  
@HWI-EAS443:3:62:370:857#0/1  
GTGCGGGTTCTTCTCTTGTCTTCCTGATGTGTACTTTTT  
+HWI-EAS443:3:62:370:857#0/1  
aQQU¥^[RQT¥U\_¥0aU00XXYYT^T`[U`GXFQ¥Z[PLR  
@HWI-EAS443:3:62:944:217#0/1  
CTCTTGTCTTCCTGATGTGTACTTTTTGATTATGGCCATA  
+HWI-EAS443:3:62:944:217#0/1  
abbbbbbbbabbbbbbb`b^a`bbbbbbabbaaa^^\_aU[  
@HWI-EAS443:3:63:120:685#0/1  
GTGCGGGTTCTTCTCTTGTCTTCCTGATGTGTACTTTTT  
+HWI-EAS443:3:63:120:685#0/1  
\_Z¥\_]X\_TMT]^`^`aa`^a`aaZa¥WQR¥XRRP¥`]YBBB  
@HWI-EAS443:3:63:192:1438#0/1  
AAAGTACACATCAGGAAGACAAGAGAAGAACCCCGCACTC  
+HWI-EAS443:3:63:192:1438#0/1  
aa\_K[aaaaa]a]Yaa\_`a`\_]\_\_\_\_\_Z]]\_]\_YX\_

@HWI-EAS443:3:63:628:1975#0/1  
AAAAAGTACACATCAGGAAGACAAGAGAAGAACCCCGCAC  
+HWI-EAS443:3:63:628:1975#0/1  
aaa]]¥Xaab`a[\_aa]aa¥^`]^`\_^\_`\_\_`\_V^^`\_  
@HWI-EAS443:3:63:745:1149#0/1  
CAAAAAGTACACATCAGGAAGACAAGAGAAGAACCCCGCA  
+HWI-EAS443:3:63:745:1149#0/1  
aaa^\_\_aXa]aaa`\_aaaba\_a\_a]a^`aaYaaaa]`^aa  
@HWI-EAS443:3:64:1078:411#0/1  
GTGCGGGGTTCTTCTTGTCTTCCTGATGTGTACTTTTT  
+HWI-EAS443:3:64:1078:411#0/1  
a]a`¥\_a\_^a]aa`a^a`a^a`\_¥\_\_[¥\_`S`ZW^a^\_^\_  
@HWI-EAS443:3:64:113:1967#0/1  
CAAAAAGTACACATCAGGAAGACAAGAGAAGAACCCCGCA  
+HWI-EAS443:3:64:113:1967#0/1  
aS`YZSYbaTSZ^\_\_\_\_\_`\_NN]\_\_OYX`\_W\_]¥[¥WUY  
@HWI-EAS443:3:64:1203:477#0/1  
TGCGGGGTTCTTCTTGTCTTCCTGATGTGTACTTTTTG  
+HWI-EAS443:3:64:1203:477#0/1  
aba\_\_ab]\_W\_a`\_Y]ba]`aaa`a`aa\_a\_]J^aa\_\_\_\_  
@HWI-EAS443:3:64:1628:1062#0/1  
TGCGGGGTTCTTCTTGTCTTCCTGATGTGTACTTTTTG  
+HWI-EAS443:3:64:1628:1062#0/1  
aa`\_`bb^a`bbab`bba`^baa\_aa\_aa\_a^a^baaaaY  
@HWI-EAS443:3:64:204:1391#0/1  
CAAAAAGTACACATCAGGAAGACAAGAGAAGAACCCCGCA  
+HWI-EAS443:3:64:204:1391#0/1  
aa\_¥¥aX^a`a`\_`a`\_\_`\_````\_\_\_\_\_`\_]X]^^^  
@HWI-EAS443:3:64:605:1032#0/1  
GTGCGGGGTTCTTCTTGTCTTCCTGATGTGTACTTTTT  
+HWI-EAS443:3:64:605:1032#0/1  
aZa`¥`aa^`aa`a`aa`\_`a`aa\_a`\_]XZ[\_]a\_\_\_a  
@HWI-EAS443:3:65:1131:24#0/1  
TGCGGGGTTCTTCTTGTCTTCCTGATGTGTACTTTTTG  
+HWI-EAS443:3:65:1131:24#0/1  
aaababb[aaaa\_a\_aaa`aa`^`aaa^a^^]aa\_a`\_  
@HWI-EAS443:3:65:1783:37#0/1  
TATGCCATAATCAAAAAGTACACATCAGGAAGACAAGAG  
+HWI-EAS443:3:65:1783:37#0/1  
aaaaaa[aVYa]X[aa`]UF¥X\_UWUXZ`\_U]WZNXTMVZ  
@HWI-EAS443:3:65:259:273#0/1  
TGCGGGGTTCTTCTTGTCTTCCTGATGTGTACTTTTTG  
+HWI-EAS443:3:65:259:273#0/1  
aa\_¥¥`^Taaaaaaaab^`]`aa\_aa`^^^a]a`\_a\_^V  
@HWI-EAS443:3:66:1292:306#0/1  
TGCGGGGTTCTTCTTGTCTTCCTGATGTGTACTTTTTG  
+HWI-EAS443:3:66:1292:306#0/1  
U`]ba\_\_ababb\_b¥abaaaba]ab\_bb\_b``\_b`aa\_Z  
@HWI-EAS443:3:66:1546:1177#0/1  
CTCTTGTCTTCCTGATGTGTACTTTTTGATTATGCCATA

+HWI-EAS443:3:66:1546:1177#0/1  
aaa`¥ZNT^aaW`Y][bZ][V```aa`^]Z[BBBBBBBB  
@HWI-EAS443:3:66:642:407#0/1  
GTGCGGGTTCTTCTCTTGCTTCCTGATGTGTACTTTTT  
+HWI-EAS443:3:66:642:407#0/1  
a`aaaaa]`aaaa`aaa\_a\_\_`aa\_``\_a]^\_`a\_a`  
@HWI-EAS443:3:66:875:1940#0/1  
TGCGGGGTTCTTCTCTTGCTTCCTGATGTGTACTTTTTG  
+HWI-EAS443:3:66:875:1940#0/1  
Z]bbY`aP`aabb`Y^\_aa`a`^\_]¥\_a\_UT]`a`aa[M  
@HWI-EAS443:3:67:684:1581#0/1  
CAAAAAGTACACATCAGGAAGACAAGAGAAGAACCCCGCA  
+HWI-EAS443:3:67:684:1581#0/1  
aaaaZaaG^`ba^]]L^a`\_\_`a\_\_\_XYW\_]`^\_X\_\_`\_  
@HWI-EAS443:3:67:935:526#0/1  
TATGCCATAATCAAAAAGTACACATCAGGAAGACAAGAG  
+HWI-EAS443:3:67:935:526#0/1  
aaaaaaaa`a`\_aaa^a\_0\_S^\_`^\_a\_\_`a\_N^a`\_a  
@HWI-EAS443:3:68:1520:1923#0/1  
TGCGGGGTTCTTCTCTTGCTTCCTGATGTGTACTTTTTG  
+HWI-EAS443:3:68:1520:1923#0/1  
]`aab`¥U]`aaa\_\_aaa\_\_a^a`a^[aaX`^\_aa`]a^  
@HWI-EAS443:3:68:1709:231#0/1  
TGCGGGGTTCTTCTCTTGCTTCCTGATGTGTACTTTTTG  
+HWI-EAS443:3:68:1709:231#0/1  
]\_]P¥a]\_aba\_`]a^SYU]a[L¥\_Y\_\_V¥W¥N¥^]]B  
@HWI-EAS443:3:68:412:368#0/1  
CAAAAAGTACACATCAGGAAGACAAGAGAAGAACCCCGCA  
+HWI-EAS443:3:68:412:368#0/1  
abb¥a`T`bbT^\_a`a]a¥`Vaba\_]\_Y`aaa\_a^\_aaa  
@HWI-EAS443:3:68:634:1337#0/1  
CAAAAAGTACACATCAGGAAGACAAGAGAAGAACCCCGCA  
+HWI-EAS443:3:68:634:1337#0/1  
abbaaa\_[]aaaaaa`^aaaaa`[aa\_a`^aa\_\_a`\_aa  
@HWI-EAS443:3:68:698:75#0/1  
CAAAAAGTACACATCAGGAAGACAAGAGAAGAACCCCGCA  
+HWI-EAS443:3:68:698:75#0/1  
Yabaaab\_baaa\_bb]aa\_ab`bb`b`bUaaaYa`^]\_`^  
@HWI-EAS443:3:68:930:366#0/1  
GTGCGGGTTCTTCTCTTGCTTCCTGATGTGTACTTTTT  
+HWI-EAS443:3:68:930:366#0/1  
aX^`aa^¥P``aaa^aa^¥XT¥aZ[a]Z`a\_\_]¥P``\_`a  
@HWI-EAS443:3:69:1677:220#0/1  
TATGCCATAATCAAAAAGTACACATCAGGAAGACAAGAG  
+HWI-EAS443:3:69:1677:220#0/1  
Xaaaaa`\_R\_YO[QYYZTHHQJGVTSXF¥MVZUOPYBBB  
@HWI-EAS443:3:69:396:458#0/1  
TGCGGGGTTCTTCTCTTGCTTCCTGATGTGTACTTTTTG  
+HWI-EAS443:3:69:396:458#0/1  
abbbbbbb`babbaaaaaa`aabaa`U\_a`a`aaaaaa`

@HWI-EAS443:3:69:500:155#0/1  
CAAAAAGTACACATCAGGAAGACAAGAGAAGAACCCCGCA  
+HWI-EAS443:3:69:500:155#0/1  
abbabbbaba\_bbaaabaabbabb`bbbab`bba`a\_aaa  
@HWI-EAS443:3:6:131:685#0/1  
GTGCGGGTCTTCTCTTGTCTTCCTGATGTGTACTTTTT  
+HWI-EAS443:3:6:131:685#0/1  
a¥^baa`a^a\_a`a`aaa\_`a`¥¥a\_\_^]V`]^¥`\_a`a  
@HWI-EAS443:3:6:1581:815#0/1  
CAAAAAGTACACATCAGGAAGACAAGAGAAGAACCCCGCA  
+HWI-EAS443:3:6:1581:815#0/1  
ab]b\_`WV`a\_a`bT^aY`babYbaaa`a``aa[[\_a`a  
@HWI-EAS443:3:6:231:245#0/1  
CAAAAAGTACACATCAGGAAGACAAGAGAAGAACCCCGCA  
+HWI-EAS443:3:6:231:245#0/1  
`baaaa`^b`ba`aabba`aaa`a`aaaa\_aa\_`a]\_a\_\_  
@HWI-EAS443:3:70:1102:1634#0/1  
AAAAGTACACATCAGGAAGACAAGAGAAGAACCCCGCACT  
+HWI-EAS443:3:70:1102:1634#0/1  
aba`Z[aababa\_aaaaaa`b`baaaaaa\_\_\_\_`\_aa]¥  
@HWI-EAS443:3:70:1271:1003#0/1  
CAAAAAGTACACATCAGGAAGACAAGAGAAGAACCCCGCA  
+HWI-EAS443:3:70:1271:1003#0/1  
abaaWWUL\_`^^`^`a]\_]b`a`X]`a¥Y\_`^¥Y]aS`  
@HWI-EAS443:3:70:1306:214#0/1  
CAAAAAGTACACATCAGGAAGACAAGAGAAGAACCCCGCA  
+HWI-EAS443:3:70:1306:214#0/1  
abaaZ`baba`b`\_aabb`ababbbbabbbbaYOTaba\_  
@HWI-EAS443:3:70:1497:204#0/1  
TGCGGGTCTTCTCTTGTCTTCCTGATGTGTACTTTTTG  
+HWI-EAS443:3:70:1497:204#0/1  
ab[aabb^a`ba`a\_aaba\_aa\_`a`^aa`a]^V`a`a`]  
@HWI-EAS443:3:70:250:1769#0/1  
CTCTTGTCTTCCTGATGTGTACTTTTTGATTATGGCCATA  
+HWI-EAS443:3:70:250:1769#0/1  
aaaaa`[a\_`baa`\_]X\_^aa```a\_`\_]\_[X\_\_`VY  
@HWI-EAS443:3:70:59:1956#0/1  
AAAAAGTACACATCAGGAAGACAAGAGAAGAACCCCGCAC  
+HWI-EAS443:3:70:59:1956#0/1  
a^][aYRa\_aaa`a]U]UY\_\_W^\_\_^[ZUS`]^\_]XVZ^  
@HWI-EAS443:3:71:1033:56#0/1  
TGCGGGTCTTCTCTTGTCTTCCTGATGTGTACTTTTTG  
+HWI-EAS443:3:71:1033:56#0/1  
ababbbb\_aaba\_b`baba`bb`\_abaabaa`a\_aaaaaa  
@HWI-EAS443:3:71:1250:1447#0/1  
TATGGCCATAATCAAAAAGTACACATCAGGAAGACAAGAG  
+HWI-EAS443:3:71:1250:1447#0/1  
aaaaXabaYVab`Xa\_bbWJHZ`U``\_\_ba\_^VS\_\_YOS  
@HWI-EAS443:3:71:1381:1374#0/1  
TGCGGGTCTTCTCTTGTCTTCCTGATGTGTACTTTTTG

+HWI-EAS443:3:71:1381:1374#0/1  
]^`a`a]Xaaa`^\_`a`VXZaaa]\_a`^]Z`X^\_]`\_^`  
@HWI-EAS443:3:71:1717:1804#0/1  
AAAAGTACACATCAGGAAGACAAGAGAAGAACCCCGCACT  
+HWI-EAS443:3:71:1717:1804#0/1  
aaaabaaaabba`abbaaba`aaa`baabbb`a`a`a`\_`  
@HWI-EAS443:3:71:298:690#0/1  
TGCGGGGTTCTTCTTGTCTTCCTGATGTGTACTTTTTG  
+HWI-EAS443:3:71:298:690#0/1  
aabbbbbb`bbbbbbbbbabaaaaab]ab\_a^abaaaaa¥  
@HWI-EAS443:3:71:354:2023#0/1  
CAAAAAGTACACATCAGGAAGACAAGAGAAGAACCCCGCA  
+HWI-EAS443:3:71:354:2023#0/1  
a]aZ`YXZabaaa\_aa`a`^]a`\_]¥`^a`\_`\_]`\_^  
@HWI-EAS443:3:71:399:574#0/1  
AAAAGTACACATCAGGAAGACAAGAGAAGAACCCCGCAC  
+HWI-EAS443:3:71:399:574#0/1  
aaaaa`[``aaaa`aaa`]`\_aa`aaa`aaaaa``\_a]\_^  
@HWI-EAS443:3:71:954:321#0/1  
AAAGTACACATCAGGAAGACAAGAGAAGAACCCCGCACTC  
+HWI-EAS443:3:71:954:321#0/1  
[ab\_Sbab`J`aa]``aXa^aaa\_W\_XbaaZaa\_bX`]\_\_  
@HWI-EAS443:3:72:1035:61#0/1  
AAAAGTACACATCAGGAAGACAAGAGAAGAACCCCGCAC  
+HWI-EAS443:3:72:1035:61#0/1  
aaaaa`\_`baba^baaa¥a^b\_\_a`b¥a`aaaaa^¥^a] ^U  
@HWI-EAS443:3:72:1606:145#0/1  
TGCGGGGTTCTTCTTGTCTTCCTGATGTGTACTTTTTG  
+HWI-EAS443:3:72:1606:145#0/1  
ab\_a]\_YVYaaa^a]\_aa`Za\_WX\_Z[``\_U`Z\_Y`a``\_N  
@HWI-EAS443:3:72:19:679#0/1  
AAAAGTACACATCAGGAAGACAAGAGAAGAACCCCGCAC  
+HWI-EAS443:3:72:19:679#0/1  
``^]Z\_]a^T^`aa`]aa]a\_\_a``^W[^`\_^X\_\_``\_  
@HWI-EAS443:3:72:529:772#0/1  
CAAAAAGTACACATCAGGAAGACAAGAGAAGAACCCCGCA  
+HWI-EAS443:3:72:529:772#0/1  
a`^`YT`]¥¥a]¥U`Za`R¥S¥Za`]a[``]aZa``aY[  
@HWI-EAS443:3:72:612:579#0/1  
CAAAAAGTACACATCAGGAAGACAAGAGAAGAACCCCGCA  
+HWI-EAS443:3:72:612:579#0/1  
abbbbabRbabbaaaaaa\_aa\_aaaaaa`\_aa````\_\_a\_a  
@HWI-EAS443:3:73:128:1055#0/1  
TGCGGGGTTCTTCTTGTCTTCCTGATGTGTACTTTTTG  
+HWI-EAS443:3:73:128:1055#0/1  
aabbb```^`aaabaaaa`aa`aaaaaaaZa]a`a\_a\_a`  
@HWI-EAS443:3:73:1550:451#0/1  
CTCTTGTCTTCCTGATGTGTACTTTTTGATTATGGCCATA  
+HWI-EAS443:3:73:1550:451#0/1  
aaY¥¥¥X`\_P]\_J\_^][T\_aa\_b`aaaaa]\_^PMEQ]^



@HWI-EAS443:3:73:1607:1223#0/1  
GTGCGGGTCTTCTTGTCTTCCTGATGTGTACTTTTT  
+HWI-EAS443:3:73:1607:1223#0/1  
aV`^W^X`Zaaaa]`\_\_a\_\_\_¥a^^\_WU][W[Y][^Z^V`  
@HWI-EAS443:3:73:261:1287#0/1  
AAAAAGTACACATCAGGAAGACAAGAGAAGAACCCCGCAC  
+HWI-EAS443:3:73:261:1287#0/1  
VWVQ\_aNWZ\_\_S¥a^[F]`a\_\_VWU^¥QUY`\_^^[Xa¥^  
@HWI-EAS443:3:73:394:965#0/1  
AAAGTACACATCAGGAAGACAAGAGAAGAACCCCGCACTC  
+HWI-EAS443:3:73:394:965#0/1  
\_[XZ[ab\_aaaa`aabaaaa[[`a`X`Z]^\_\_a`a\_\_a  
@HWI-EAS443:3:73:892:1927#0/1  
TGCGGGGTCTTCTTGTCTTCCTGATGTGTACTTTTTG  
+HWI-EAS443:3:73:892:1927#0/1  
aab`a``\_abbaabaaa\_aaaaa\_aaa\_`]`aa\_a`aZ  
@HWI-EAS443:3:74:571:924#0/1  
CAAAAAGTACACATCAGGAAGACAAGAGAAGAACCCCGCA  
+HWI-EAS443:3:74:571:924#0/1  
abbaaba\_bbbbababbaaab`aaa`aaa`aaaa`aaaa  
@HWI-EAS443:3:74:788:169#0/1  
TGCGGGGTCTTCTTGTCTTCCTGATGTGTACTTTTTG  
+HWI-EAS443:3:74:788:169#0/1  
aa¥baabXb`aa\_a^aaa\_aaaZ\_a`\_`a]`]`\_`\_`\_]\_  
@HWI-EAS443:3:75:1210:1987#0/1  
AAAAAGTACACATCAGGAAGACAAGAGAAGAACCCCGCAC  
+HWI-EAS443:3:75:1210:1987#0/1  
`bbab`\_bbbabaaabaabbaaaabaaaabaa\_\_a\_a`aa  
@HWI-EAS443:3:75:805:238#0/1  
AAAAAGTACACATCAGGAAGACAAGAGAAGAACCCCGCAC  
+HWI-EAS443:3:75:805:238#0/1  
aa`abaZb\_aaaa`abaaa`Ya`\_\_a\_\_\_`a^^V\_R\_Z  
@HWI-EAS443:3:76:1188:1610#0/1  
CAAAAAGTACACATCAGGAAGACAAGAGAAGAACCCCGCA  
+HWI-EAS443:3:76:1188:1610#0/1  
[`a`abb`Z^bb`babbbb]`bba`aa\_baaabbXZ\_^b  
@HWI-EAS443:3:76:271:898#0/1  
TGCGGGGTCTTCTTGTCTTCCTGATGTGTACTTTTTG  
+HWI-EAS443:3:76:271:898#0/1  
]a`YOR`\_aba`ZX`\_aXaaa`^`a\_]ZS[V\_``\_^^`\_  
@HWI-EAS443:3:76:275:1401#0/1  
TGCGGGGTCTTCTTGTCTTCCTGATGTGTACTTTTTG  
+HWI-EAS443:3:76:275:1401#0/1  
aab``a]¥`abaa`aa`a^aaaa^\_]][WaW\_a\_a\_\_\_^  
@HWI-EAS443:3:76:435:1298#0/1  
CAAAAAGTACACATCAGGAAGACAAGAGAAGAACCCCGCA  
+HWI-EAS443:3:76:435:1298#0/1  
abb`]`\_aaaaa`a`\_]R^`\_\_U\_^^`\_`a`[^\_]`Z  
@HWI-EAS443:3:76:526:166#0/1  
CAAAAAGTACACATCAGGAAGACAAGAGAAGAACCCCGCA

+HWI-EAS443:3:76:526:166#0/1  
a`\_\_aaa`b`aba\_aaba`\_b[]a\_a\_^`^`^`\_\_YWW\_[^  
@HWI-EAS443:3:76:592:1183#0/1  
AAAAGTACACATCAGGAAGACAAGAGAAGAACCCCGCACT  
+HWI-EAS443:3:76:592:1183#0/1  
^a\_aa]baaaaa`\_aaaa`\_`a`\_`\_\_\_\_a`\_`\_\_\_\_a`\_`\_]\_\_  
@HWI-EAS443:3:76:594:679#0/1  
AAAAAGTACACATCAGGAAGACAAGAGAAGAACCCCGCAC  
+HWI-EAS443:3:76:594:679#0/1  
`[\_ba\_QZ`aa`aaaa]a`aab`a`[\_`a\_aa`a\_ab]`a  
@HWI-EAS443:3:76:685:966#0/1  
TGCGGGGTTCTTCTTGTCTTCCTGATGTGTACTTTTTG  
+HWI-EAS443:3:76:685:966#0/1  
abbb]`^`]aaaaaa`aa\_aa^^a\_]Y[YWaY\_\_`^^`  
@HWI-EAS443:3:76:907:1453#0/1  
TGCGGGGTTCTTCTTGTCTTCCTGATGTGTACTTTTTG  
+HWI-EAS443:3:76:907:1453#0/1  
ZNX]W`a]YI]a`\_]W]`¥`\_a[\_]^`\_ZV^Y]^a^`\_`\_`  
@HWI-EAS443:3:76:965:1077#0/1  
AAAAAGTACACATCAGGAAGACAAGAGAAGAACCCCGCAC  
+HWI-EAS443:3:76:965:1077#0/1  
ZXX¥¥Za^`\_`a`¥X¥`]aW¥abb`^`W]`\_`a`[\_`^aX`a  
@HWI-EAS443:3:77:1052:794#0/1  
CAAAAAGTACACATCAGGAAGACAAGAGAAGAACCCCGCA  
+HWI-EAS443:3:77:1052:794#0/1  
Zab`bbbbabbabbbbbbbbbbbabbbbbbbbaa^bbbb  
@HWI-EAS443:3:77:1096:1735#0/1  
TGCGGGGTTCTTCTTGTCTTCCTGATGTGTACTTTTTG  
+HWI-EAS443:3:77:1096:1735#0/1  
ab\_\_\_\_^YZbaab`aaabZYaaa^aaa\_aaW^W¥Q\_[Xaa`  
@HWI-EAS443:3:77:1749:451#0/1  
AAAAGTACACATCAGGAAGACAAGAGAAGAACCCCGCACT  
+HWI-EAS443:3:77:1749:451#0/1  
^abYX¥`b`\_]Y]T\_bab`a]\_a`ba`b]bb]Q[`¥\_]T^`  
@HWI-EAS443:3:77:294:898#0/1  
CAAAAAGTACACATCAGGAAGACAAGAGAAGAACCCCGCA  
+HWI-EAS443:3:77:294:898#0/1  
abb^a^`\_`aa`\_`aaaab`Vab]aaaa`aXVa\_a`\_]\_aa\_a  
@HWI-EAS443:3:77:314:701#0/1  
TGCGGGGTTCTTCTTGTCTTCCTGATGTGTACTTTTTG  
+HWI-EAS443:3:77:314:701#0/1  
aaaaabaXaaaaaaaaab\_a`aaaaaaaa\_aR`]a`^^`a  
@HWI-EAS443:3:77:336:1989#0/1  
GTGCGGGTTCTTCTTGTCTTCCTGATGTGTACTTTTT  
+HWI-EAS443:3:77:336:1989#0/1  
aGNXLU[QVIZU`YPYTVYMPOTSNNRP^WXPU¥TOZ^U  
@HWI-EAS443:3:77:513:53#0/1  
AAAAAGTACACATCAGGAAGACAAGAGAAGAACCCCGCAC  
+HWI-EAS443:3:77:513:53#0/1  
a[FYXNL]a\_\_]`NP`XX\_W`[SX^U^RP`[^\_XTZ\_]SL

@HWI-EAS443:3:78:106:1037#0/1  
TGCGGGGTTCTTCTTGTCTTCCTGATGTGTACTTTTTG  
+HWI-EAS443:3:78:106:1037#0/1  
ababaaa\_a`aaaabaaa`a`a`a`^¥\_a`WW\_a`\_`^  
@HWI-EAS443:3:78:1073:907#0/1  
AAAAAGTACACATCAGGAAGACAAGAGAAGAACCCCGCAC  
+HWI-EAS443:3:78:1073:907#0/1  
^Y^VXa¥bababa^bba^aa\_`b¥`a`\_`b`^]\_[`a\_`^  
@HWI-EAS443:3:78:1081:1570#0/1  
TGCGGGGTTCTTCTTGTCTTCCTGATGTGTACTTTTTG  
+HWI-EAS443:3:78:1081:1570#0/1  
Za`TX`R[baa^Y`aaaa[\_]\_\_\_\_\_a\_aT`a^aaaR`a`S  
@HWI-EAS443:3:78:1172:1161#0/1  
GTGCGGGGTTCTTCTTGTCTTCCTGATGTGTACTTTTT  
+HWI-EAS443:3:78:1172:1161#0/1  
a^a\_a\_a`]^^a\_¥a\_a`^Z`\_ZW\_\_^^\_Z`^\_V\_\_\_\_^\_  
@HWI-EAS443:3:78:462:127#0/1  
TATGGCCATAATCAAAAAGTACACATCAGGAAGACAAGAG  
+HWI-EAS443:3:78:462:127#0/1  
^aa````[]`Y`a]aXUH[T]\_`WZY`^^YXPY¥NY[  
@HWI-EAS443:3:78:483:1434#0/1  
TGCGGGGTTCTTCTTGTCTTCCTGATGTGTACTTTTTG  
+HWI-EAS443:3:78:483:1434#0/1  
abbbbbbb`bbbababbba`bbbaaaaaa\_b`abaaaa\_  
@HWI-EAS443:3:78:943:995#0/1  
CAAAAAGTACACATCAGGAAGACAAGAGAAGAACCCCGCA  
+HWI-EAS443:3:78:943:995#0/1  
`W¥\_P¥^U`aaaa`^\_¥\_VU^^`````aa`aaa`XUP`Z\_  
@HWI-EAS443:3:79:1194:1050#0/1  
TGCGGGGTTCTTCTTGTCTTCCTGATGTGTACTTTTTG  
+HWI-EAS443:3:79:1194:1050#0/1  
abW]bab`b[bV\_b`a\_[PaaZ]]b\_]P\_X]X[X`aa^a`  
@HWI-EAS443:3:79:1570:602#0/1  
CTTCTTGTCTTCCTGATGTGTACTTTTTGATTATGGCCATA  
+HWI-EAS443:3:79:1570:602#0/1  
ababba^abbaa`bbb]ab`bbbbbbbabbbb`b]aaaa  
@HWI-EAS443:3:79:420:1326#0/1  
AAAAAGTACACATCAGGAAGACAAGAGAAGAACCCCGCAC  
+HWI-EAS443:3:79:420:1326#0/1  
aba¥KZZYbaaaaa`aaaa^S`aaaa\_^Z]aaa`\_aa`^  
@HWI-EAS443:3:79:867:1137#0/1  
TGCGGGGTTCTTCTTGTCTTCCTGATGTGTACTTTTTG  
+HWI-EAS443:3:79:867:1137#0/1  
`baa¥\_`Y`aaaababb\_babaaa\_aaa]aaZ¥aaa\_aa  
@HWI-EAS443:3:79:965:250#0/1  
TGCGGGGTTCTTCTTGTCTTCCTGATGTGTACTTTTTG  
+HWI-EAS443:3:79:965:250#0/1  
ababbbb]baba\_a\_bab\_Yaaaaa`aa`a\_]aaaaaa  
@HWI-EAS443:3:79:968:518#0/1  
CAAAAAGTACACATCAGGAAGACAAGAGAAGAACCCCGCA

+HWI-EAS443:3:79:968:518#0/1  
a`bb`ab[bbbbbb¥bbbbbaab\_aaabbbbbaaa\_[aaa  
@HWI-EAS443:3:7:1372:29#0/1  
AAAAAGTACACATCAGGAAGACAAGAGAAGAACCCCGCAC  
+HWI-EAS443:3:7:1372:29#0/1  
aaaaaWa``\_a\_aaaaaa^a\_]^^`\_\_^a]RZVaX¥W  
@HWI-EAS443:3:80:1464:1578#0/1  
AAAAAGTACACATCAGGAAGACAAGAGAAGAACCCCGCAC  
+HWI-EAS443:3:80:1464:1578#0/1  
``\_b¥Z\_b^b`[\_V]^`\_^Y¥¥bb`a`]\_]`^^ZXRWaa^  
@HWI-EAS443:3:80:613:800#0/1  
AAAAGTACACATCAGGAAGACAAGAGAAGAACCCCGCACT  
+HWI-EAS443:3:80:613:800#0/1  
`\_aa`\_b\_Z`\_aaaa¥aaa`\_a`\_aaaaa`\_a`\_a`\_`\_\_  
@HWI-EAS443:3:80:637:1464#0/1  
TATGGCATAATCAAAAAGTACACATCAGGAAGACAAGAG  
+HWI-EAS443:3:80:637:1464#0/1  
abaaabbbbaa\_]\_]`\_`a¥Q\_a`\_]Y\_a\_\_a^[a\_a^`  
@HWI-EAS443:3:80:793:884#0/1  
AAAGTACACATCAGGAAGACAAGAGAAGAACCCCGCACTC  
+HWI-EAS443:3:80:793:884#0/1  
`\_]NLW¥^]X]]``\_a`¥ZZ``baaZGXZ`ZTVa\_[¥\_ZR  
@HWI-EAS443:3:80:908:961#0/1  
GTGCGGGGTTCTTCTCTTGTCTTCCTGATGTGTACTTTTT  
+HWI-EAS443:3:80:908:961#0/1  
a\_^Ya]`a`\_¥aa^`aaa]\_a`\_`^`]]`Y\_\_\_\_`\_a^`  
@HWI-EAS443:3:81:1107:1521#0/1  
AAAAAGTACACATCAGGAAGACAAGAGAAGAACCCCGCAC  
+HWI-EAS443:3:81:1107:1521#0/1  
aaaa\_a\_baa^aV`¥`Y`a`\_a`aaa\_[aa^^XW]^a[  
@HWI-EAS443:3:81:1159:1329#0/1  
AAAAGTACACATCAGGAAGACAAGAGAAGAACCCCGCACT  
+HWI-EAS443:3:81:1159:1329#0/1  
Z[^]WQ``[a\_baabaX^b^W\_ab`\_a`X`U¥]^a`]U`\_`  
@HWI-EAS443:3:81:187:1719#0/1  
GTGCGGGGTTCTTCTTGTCTTCCTGATGTGTACTTTTT  
+HWI-EAS443:3:81:187:1719#0/1  
a\_abaa`\_a\_aabaaaa`\_\_aaaa^¥^\_a^aQ\_aa`\_`\_a  
@HWI-EAS443:3:81:313:226#0/1  
CAAAAAGTACACATCAGGAAGACAAGAGAAGAACCCCGCA  
+HWI-EAS443:3:81:313:226#0/1  
aaaa\_T\_Waaaaaaa\_aa`aa`aZ]`a`\_]\_]^^\_^^  
@HWI-EAS443:3:81:805:780#0/1  
GTGCGGGGTTCTTCTTGTCTTCCTGATGTGTACTTTTT  
+HWI-EAS443:3:81:805:780#0/1  
aRSX\_\_\_\_ZF0a`\_`\_`^¥W`R^`]\_]\_P¥XV\_W]\_[U]^\_  
@HWI-EAS443:3:82:1106:1101#0/1  
TGCGGGGTCTTCTTGTCTTCCTGATGTGTACTTTTTG  
+HWI-EAS443:3:82:1106:1101#0/1  
\_`b`]bb\_baabbab\_babbaba`b[aabbbbaa`bbbbbaa

@HWI-EAS443:3:82:1637:1831#0/1  
AAAAGTACACATCAGGAAGACAAGAGAAGAACCCCGCACT  
+HWI-EAS443:3:82:1637:1831#0/1  
U]]OVUZZYN^YN[JYY]W^M]Z[R^WT]]]W]FY]U[S^  
@HWI-EAS443:3:82:1674:104#0/1  
CTCTTGTCTTCTGATGTGTACTTTTTGATTATGGCCATA  
+HWI-EAS443:3:82:1674:104#0/1  
ab\_aabbaab`bba\_ba\_bb`bbbbbaS¥bbbab\_b\_0\_\_S  
@HWI-EAS443:3:82:1707:1653#0/1  
AAAAGTACACATCAGGAAGACAAGAGAAGAACCCCGCACT  
+HWI-EAS443:3:82:1707:1653#0/1  
aaabaa[a``aa[abba`¥a\_bbaabbaaaa[a¥[aRaa`  
@HWI-EAS443:3:82:53:233#0/1  
GTGCGGGGTTCTTCTTGTCTTCTGATGTGTACTTTTT  
+HWI-EAS443:3:82:53:233#0/1  
a\_aab`a]`aa`aa`a\_\_`\_[\_`a\_\_^\_\_^aWZ^\_\_\_\_\_  
@HWI-EAS443:3:82:843:52#0/1  
TGCGGGGTTCTTCTTGTCTTCTGATGTGTACTTTTTG  
+HWI-EAS443:3:82:843:52#0/1  
ababaab\_aaaaa`aa\_aaaa\_\_ab`\_a\_`\_[Raa`aaa  
@HWI-EAS443:3:83:1276:307#0/1  
TGCGGGGTTCTTCTTGTCTTCTGATGTGTACTTTTTG  
+HWI-EAS443:3:83:1276:307#0/1  
```bbbaW`abb\_aababa]ba\_[abaa`\_`\_aZaa``a^  
@HWI-EAS443:3:83:1554:705#0/1  
AGTACACATCAGGAAGACAAGAGAAGAACCCCGCACTCAG  
+HWI-EAS443:3:83:1554:705#0/1  
abaabbaa`b[\_aY]aa`a]`\_aa\_a\_Y]\_aYb0a\_^\_  
@HWI-EAS443:3:83:169:480#0/1  
GTGCGGGGTTCTTCTTGTCTTCTGATGTGTACTTTTT  
+HWI-EAS443:3:83:169:480#0/1  
a\_aaaaaa¥aaaaaa`aaa`aa`a`]aa\_a]\_\_`a\_\_a  
@HWI-EAS443:3:83:1754:750#0/1  
GTGCGGGGTTCTTCTTGTCTTCTGATGTGTACTTTTT  
+HWI-EAS443:3:83:1754:750#0/1  
`[\_N¥b`X\_aaaa`[aa^WPa`^aaS\_\_YG`^^SP]`\_\_  
@HWI-EAS443:3:83:370:1191#0/1  
TGCGGGGTTCTTCTTGTCTTCTGATGTGTACTTTTTG  
+HWI-EAS443:3:83:370:1191#0/1  
aa`a``aZaa`aaaaa`^`a`a\_a¥¥\_\_^^]^^¥\_\_a`¥  
@HWI-EAS443:3:83:39:563#0/1  
CAAAAAGTACACATCAGGAAGACAAGAGAAGAACCCCGCA  
+HWI-EAS443:3:83:39:563#0/1  
X``a¥`\_M\_^Z^b`X`b`[\_aaaZ^]\_X\_\_H^0``a`YR  
@HWI-EAS443:3:83:631:480#0/1  
CAAAAAGTACACATCAGGAAGACAAGAGAAGAACCCCGCA  
+HWI-EAS443:3:83:631:480#0/1  
^a^\_X]IRa\_b`baabbbabba¥a^`aaa`b`YT a^^ba^  
@HWI-EAS443:3:83:813:682#0/1  
CAAAAAGTACACATCAGGAAGACAAGAGAAGAACCCCGCA

+HWI-EAS443:3:83:813:682#0/1  
aba`bb\_\_bbaaaaaba`aa`aab`a`aaa`a\_\_`a\_^  
@HWI-EAS443:3:84:752:409#0/1  
TGCGGGGTTCTTCTTGTCTTCCTGATGTGTACTTTTTG  
+HWI-EAS443:3:84:752:409#0/1  
[[a`abbaa¥ab`aabbbaaaa`[baa\_b\_\_VDWaaaaa]  
@HWI-EAS443:3:85:1650:1142#0/1  
CAAAAAGTACACATCAGGAAGACAAGAGAAGAACCCCGCA  
+HWI-EAS443:3:85:1650:1142#0/1  
`¥ababbbaab]a\_`a¥HQaba\_ba``aab¥ab\_`W]aaa  
@HWI-EAS443:3:85:87:1446#0/1  
GTGCGGGGTTCTTCTTGTCTTCCTGATGTGTACTTTTT  
+HWI-EAS443:3:85:87:1446#0/1  
a^a^^^W^[Ra\_M`a`[a\_WZ[PR^VOWGNHGJ[^Ua`\_UO  
@HWI-EAS443:3:86:504:166#0/1  
AAAAGTACACATCAGGAAGACAAGAGAAGAACCCCGCACT  
+HWI-EAS443:3:86:504:166#0/1  
^baba[[\_abWbbbbba[b\_bbWbSbaaaaWH`Sia[aa¥  
@HWI-EAS443:3:86:557:751#0/1  
TGCGGGGTTCTTCTTGTCTTCCTGATGTGTACTTTTTG  
+HWI-EAS443:3:86:557:751#0/1  
aY¥Z`\_\_W`a`\_aa`a]\_Z¥``¥U[\_Y`P^^`^`[\_S  
@HWI-EAS443:3:86:670:1210#0/1  
TGCGGGGTTCTTCTTGTCTTCCTGATGTGTACTTTTTG  
+HWI-EAS443:3:86:670:1210#0/1  
a``baab0aba`a`aa\_\_ba`a\_\_a`Ya]aY\_Ya^`aZZ  
@HWI-EAS443:3:86:671:279#0/1  
CTCTTGTCTTCCTGATGTGTACTTTTTGATTATGGCCATA  
+HWI-EAS443:3:86:671:279#0/1  
ab`bbbabba`b``ab``^\_bbbb``aaaa`^``]]`  
@HWI-EAS443:3:87:1391:1987#0/1  
AAAAAGTACACATCAGGAAGACAAGAGAAGAACCCCGCAC  
+HWI-EAS443:3:87:1391:1987#0/1  
abaUb]F]ZWa`Ta[\_^YVa`\_]a]]baa^W\_WHQ¥aaY`  
@HWI-EAS443:3:87:1735:342#0/1  
TGCGGGGTTCTTCTTGTCTTCCTGATGTGTACTTTTTG  
+HWI-EAS443:3:87:1735:342#0/1  
a\_K\_``aab\_baUaaabba\_aa`^a]^a``aX]Xaaaaa  
@HWI-EAS443:3:87:585:1584#0/1  
CAAAAAGTACACATCAGGAAGACAAGAGAAGAACCCCGCA  
+HWI-EAS443:3:87:585:1584#0/1  
abaaabaRba\_aa`^]XaSa`aYa`\_\_Y`^ba]G[0\_\_^¥  
@HWI-EAS443:3:87:621:911#0/1  
CAAAAAGTACACATCAGGAAGACAAGAGAAGAACCCCGCA  
+HWI-EAS443:3:87:621:911#0/1  
`^¥\_Z¥`P\_`aZaZ`\_`\_]Z\_Z\_`^`]^aaa]a]V]^`^¥Z  
@HWI-EAS443:3:87:928:844#0/1  
TGCGGGGTTCTTCTTGTCTTCCTGATGTGTACTTTTTG  
+HWI-EAS443:3:87:928:844#0/1  
ab`aaaaVaaaa`aaaa^aaaaaa]aaZa^\_\_aaaaa

@HWI-EAS443:3:88:104:1111#0/1  
CAAAAAGTACACATCAGGAAGACAAGAGAAGAACCCCGCA  
+HWI-EAS443:3:88:104:1111#0/1  
a]bab`\_]\_bbbb¥`b`]a]ab`aa\_a`a]^aa[\_]```\_  
@HWI-EAS443:3:88:1508:1554#0/1  
CAAAAAGTACACATCAGGAAGACAAGAGAAGAACCCCGCA  
+HWI-EAS443:3:88:1508:1554#0/1  
aaaabbbabbbabbbbbbbaabbbbbbbaa\_^a]Q[  
@HWI-EAS443:3:88:841:1120#0/1  
CAAAAAGTACACATCAGGAAGACAAGAGAAGAACCCCGCA  
+HWI-EAS443:3:88:841:1120#0/1  
`aaa\_ab]a`a`a^^Z^aWabaaa`aa^`aaa\_^R```a  
@HWI-EAS443:3:89:1069:1314#0/1  
CAAAAAGTACACATCAGGAAGACAAGAGAAGAACCCCGCA  
+HWI-EAS443:3:89:1069:1314#0/1  
``¥`a\_\_0\_aaZ^ababba]aa``aa`aabab][LZ\_`a  
@HWI-EAS443:3:89:135:750#0/1  
CTCTTGTCTTCCTGATGTGTACTTTTTGATTATGGCCATA  
+HWI-EAS443:3:89:135:750#0/1  
ababbbbababbabb\_b`abbaabaaabaaaaa\_\_  
@HWI-EAS443:3:89:1600:710#0/1  
TGCGGGGTTCTTCTTGTCTTCCTGATGTGTACTTTTTG  
+HWI-EAS443:3:89:1600:710#0/1  
a`\_ba`]`ba`a`aab```aba\_aY\_aa\_a^a`\_```a[  
@HWI-EAS443:3:89:1652:445#0/1  
CAAAAAGTACACATCAGGAAGACAAGAGAAGAACCCCGCA  
+HWI-EAS443:3:89:1652:445#0/1  
aabbbbabbb\_aabbaabbabbaabbaabbaa[a¥bab  
@HWI-EAS443:3:89:222:976#0/1  
CAAAAAGTACACATCAGGAAGACAAGAGAAGAACCCCGCA  
+HWI-EAS443:3:89:222:976#0/1  
`bab`\_```bbbababbbbab`b`]`^bb^]baaaaabaa  
@HWI-EAS443:3:89:528:1535#0/1  
TGCGGGGTTCTTCTTGTCTTCCTGATGTGTACTTTTTG  
+HWI-EAS443:3:89:528:1535#0/1  
]a\_b¥\_VR\_`¥WZ\_aa¥S```]a`bb^\_b`a```aaba`aa  
@HWI-EAS443:3:89:996:1429#0/1  
AAAAGTACACATCAGGAAGACAAGAGAAGAACCCCGCACT  
+HWI-EAS443:3:89:996:1429#0/1  
`a]aaabbb`b\_b`b\_^Z¥abb`^bbbbb```b[abaaa\_  
@HWI-EAS443:3:8:1353:658#0/1  
CAAAAAGTACACATCAGGAAGACAAGAGAAGAACCCCGCA  
+HWI-EAS443:3:8:1353:658#0/1  
ab\_bba```baabb`abbbbbb`ab`abbabaa`[PXb^a  
@HWI-EAS443:3:8:352:51#0/1  
GTGCGGGTCTTCTTGTCTTCCTGATGTGTACTTTTT  
+HWI-EAS443:3:8:352:51#0/1  
aZaab¥X]Q]X\_`¥`\_a`a[^`]YY[a^\_`XaYTY]]\_] ]  
@HWI-EAS443:3:8:440:1338#0/1  
AAAAGTACACATCAGGAAGACAAGAGAAGAACCCCGCACT

+HWI-EAS443:3:8:440:1338#0/1  
aaaababa]ab¥¥ab¥[]a`HY\_T¥aaaaK]`¥XS\_\_^a^  
@HWI-EAS443:3:91:1405:99#0/1  
CAAAAAGTACACATCAGGAAGACAAGAGAAGAACCCCGCA  
+HWI-EAS443:3:91:1405:99#0/1  
abbab]b`b[b\_b`H\_aba`baXa\_bYbaabaaU^XQ¥NZ  
@HWI-EAS443:3:91:1489:790#0/1  
TGCGGGGTTCTTCTTGTCTTCCTGATGTGTACTTTTTG  
+HWI-EAS443:3:91:1489:790#0/1  
QV^``S\_a`W\_ZL\_^b\_R¥^^\_0JW\_[¥^^a¥TXabaa`Z  
@HWI-EAS443:3:91:273:14#0/1  
TGCGGGGTTCTTCTTGTCTTCCTGATGTGTACTTTTTG  
+HWI-EAS443:3:91:273:14#0/1  
ababbba\_aaaa`aabaa\_`aa^\_aaV``]\_YYY\_`]\_\_\_\_  
@HWI-EAS443:3:91:480:1410#0/1  
AAAGTACACATCAGGAAGACAAGAGAAGAACCCCGCACTC  
+HWI-EAS443:3:91:480:1410#0/1  
abaa]baaaaa`a`aaa\_aaaaaaaa\_`a`¥]a\_a^^\_  
@HWI-EAS443:3:91:536:1453#0/1  
AAAAAGTACACATCAGGAAGACAAGAGAAGAACCCCGCAC  
+HWI-EAS443:3:91:536:1453#0/1  
^XTY[UV[¥XR`OWbaZ^¥¥\_\_00]W`¥aS``T[aab`[\_  
@HWI-EAS443:3:91:608:1368#0/1  
TGCGGGGTTCTTCTTGTCTTCCTGATGTGTACTTTTTG  
+HWI-EAS443:3:91:608:1368#0/1  
`a^\_¥\_¥X`U\_a`aa\_`b\_\_aa\_\_\_ZZ]b[a^S[a]`Y\_V  
@HWI-EAS443:3:91:743:1711#0/1  
CTCTTGTCTTCCTGATGTGTACTTTTTGATTATGGCCATA  
+HWI-EAS443:3:91:743:1711#0/1  
]\_b\_bbbabbaabbbbab\_babbbb\_abbbbb\_abbbaa  
@HWI-EAS443:3:91:810:1376#0/1  
CAAAAAGTACACATCAGGAAGACAAGAGAAGAACCCCGCA  
+HWI-EAS443:3:91:810:1376#0/1  
Vbababbababbbaababbbaabb\_baabbbbbb`]babb  
@HWI-EAS443:3:92:1556:755#0/1  
TGCGGGGTTCTTCTTGTCTTCCTGATGTGTACTTTTTG  
+HWI-EAS443:3:92:1556:755#0/1  
`ba[TaX`\_^abUa`bba`Va`]UD¥`aa`a^\_[ab`^aa  
@HWI-EAS443:3:92:334:1162#0/1  
TGCGGGGTTCTTCTTGTCTTCCTGATGTGTACTTTTTG  
+HWI-EAS443:3:92:334:1162#0/1  
aaaabaa[aaa`a`abb^aaa\_a`\_a¥a^`^\_aaaa^  
@HWI-EAS443:3:92:619:1047#0/1  
TGCGGGGTTCTTCTTGTCTTCCTGATGTGTACTTTTTG  
+HWI-EAS443:3:92:619:1047#0/1  
a]aaaY\_[a`\_^W]aaa]Xa]\_]\_\_`^\_Ta\_a^^]]¥][\_X  
@HWI-EAS443:3:92:688:1200#0/1  
CAAAAAGTACACATCAGGAAGACAAGAGAAGAACCCCGCA  
+HWI-EAS443:3:92:688:1200#0/1  
`¥^`bba[¥``ba`abaa`a¥a`abba\_`a\_\_\_a^``a



@HWI-EAS443:3:93:1174:1729#0/1  
CAAAAAGTACACATCAGGAAGACAAGAGAAGAACCCCGCA  
+HWI-EAS443:3:93:1174:1729#0/1  
a¥abaaa^`b`\_Uabbbaabaab\_a\_aaaaa^WU¥a]]  
@HWI-EAS443:3:93:157:107#0/1  
TATGGCCATAATCAAAAAGTACACATCAGGAAGACAAGAG  
+HWI-EAS443:3:93:157:107#0/1  
aaababb`V]aX\_\_Vba¥RM\_[IY`[O[aa[a¥^S`\_W[`  
@HWI-EAS443:3:93:1762:207#0/1  
GTGCGGGTTCCTTCTTGTCTTCCTGATGTGTACTTTTT  
+HWI-EAS443:3:93:1762:207#0/1  
a[^HN]aYQP[UT]¥[P``VWVOOGY\_YWYOQTWN]X^ZZ  
@HWI-EAS443:3:93:845:171#0/1  
TGCGGGGTTCCTTCTTGTCTTCCTGATGTGTACTTTTTG  
+HWI-EAS443:3:93:845:171#0/1  
YQOZWaa[XPY\_P]`])`bT`aaaaa^^\_aZa]]]\_\_a[\_`  
@HWI-EAS443:3:93:984:1207#0/1  
AAAAAGTACACATCAGGAAGACAAGAGAAGAACCCCGCAC  
+HWI-EAS443:3:93:984:1207#0/1  
STV\_T]TY[`b\_]VG`b`¥a^S]a\_\_\_\_]IYUPXUU\_^UW\_  
@HWI-EAS443:3:94:983:844#0/1  
TGCGGGGTTCCTTCTTGTCTTCCTGATGTGTACTTTTTG  
+HWI-EAS443:3:94:983:844#0/1  
abaaa`aXa¥ba`baabaa\_aaa^a`Ya`^a\_¥`aaaa`  
@HWI-EAS443:3:95:402:1582#0/1  
TGCGGGGTTCCTTCTTGTCTTCCTGATGTGTACTTTTTG  
+HWI-EAS443:3:95:402:1582#0/1  
]bbbbbb¥ab`bbaaab`abaaa]aaa¥a]`\_aaaa`a  
@HWI-EAS443:3:96:1133:344#0/1  
GTGCGGGTTCCTTCTTGTCTTCCTGATGTGTACTTTTT  
+HWI-EAS443:3:96:1133:344#0/1  
a\_ba`abaaa\_aaa\_aba\_^ba^\_aa\_aa^a`\_Za```a  
@HWI-EAS443:3:96:1141:1906#0/1  
GTGCGGGTTCCTTCTTGTCTTCCTGATGTGTACTTTTT  
+HWI-EAS443:3:96:1141:1906#0/1  
a[^Q`\_\_a[]^P[\_YPV]WPW\_PR[¥^WX]X]U]O^ZXXB  
@HWI-EAS443:3:96:373:296#0/1  
GTGCGGGTTCCTTCTTGTCTTCCTGATGTGTACTTTTT  
+HWI-EAS443:3:96:373:296#0/1  
a^a`aa`[GT^a\_^a¥`^^^]\_\_X]\_`Y^`])`Y^Y\_\_^^\_  
@HWI-EAS443:3:96:660:456#0/1  
CAAAAAGTACACATCAGGAAGACAAGAGAAGAACCCCGCA  
+HWI-EAS443:3:96:660:456#0/1  
abaabab`a^aa`babbaabaaaab\_aaaaaa]\_\_a]a  
@HWI-EAS443:3:97:1008:41#0/1  
TGCGGGGTTCCTTCTTGTCTTCCTGATGTGTACTTTTTG  
+HWI-EAS443:3:97:1008:41#0/1  
ababab\_\_b`a\_^^V]ba[\_aaTTa\_\_`X`a]YY`aa^a\_  
@HWI-EAS443:3:97:1611:687#0/1  
CAAAAAGTACACATCAGGAAGACAAGAGAAGAACCCCGCA

+HWI-EAS443:3:97:1611:687#0/1  
\_babab`Yb\_bbba\_bb`abaW\_\_ab`)abbb`\_I\_a[ab  
@HWI-EAS443:3:98:111:1836#0/1  
CAAAAAGTACACATCAGGAAGACAAGAGAAGAACCCCGCA  
+HWI-EAS443:3:98:111:1836#0/1  
`bbY\_b`^baa\_aa`aaaaaaaa^aa\_aa`aa`\_[\_\_\_\_`  
@HWI-EAS443:3:99:1351:436#0/1  
TGCGGGGTTCTTCTTGTCTTCCTGATGTGTACTTTTTG  
+HWI-EAS443:3:99:1351:436#0/1  
a`XG][b[babbS^Yabba¥baI^b```baa\_``aaa]\_]`  
@HWI-EAS443:3:99:261:1835#0/1  
CAAAAAGTACACATCAGGAAGACAAGAGAAGAACCCCGCA  
+HWI-EAS443:3:99:261:1835#0/1  
ab`]aZ^P^\_a\_\_a`¥XMMZa][a]¥```aY`]PV^R¥S\_  
@HWI-EAS443:3:99:395:333#0/1  
AAAAAGTACACATCAGGAAGACAAGAGAAGAACCCCGCAC  
+HWI-EAS443:3:99:395:333#0/1  
abb`^b`a¥^\_a`\_aba\_^a]\_a^a^\_`a\_a^]X\_a\_^\_  
@HWI-EAS443:3:99:968:1652#0/1  
TGCGGGGTTCTTCTTGTCTTCCTGATGTGTACTTTTTG  
+HWI-EAS443:3:99:968:1652#0/1  
ab¥babaJ^ab`^a`abaSaaaWaba^a\_\_b`\_aUa`\_ab  
@HWI-EAS443:3:9:1323:2011#0/1  
TGCGGGGTTCTTCTTGTCTTCCTGATGTGTACTTTTTG  
+HWI-EAS443:3:9:1323:2011#0/1  
`bY``[ZSXS`\_aa]\_aa][a`^Z`U]]a\_a]^^\_\_\_\_`WO  
@HWI-EAS443:3:9:152:881#0/1  
GTGCGGGGTTCTTCTTGTCTTCCTGATGTGTACTTTTT  
+HWI-EAS443:3:9:152:881#0/1  
aYY[Z[[\_N\_a[`W^\_]Z`UV^XZQ\_]LX\_VYQGU\_Z[]T  
@HWI-EAS443:3:9:1531:83#0/1  
AAAGTACACATCAGGAAGACAAGAGAAGAACCCCGCACTC  
+HWI-EAS443:3:9:1531:83#0/1  
^\_abab`b[`b¥aa`baa`\_baa`a]¥a^a]R]Ra¥`R^]  
@HWI-EAS443:3:9:395:1958#0/1  
TGCGGGGTTCTTCTTGTCTTCCTGATGTGTACTTTTTG  
+HWI-EAS443:3:9:395:1958#0/1  
a`a\_a`aJbaaaaa[a`¥`\_a\_aa`aaaYSa^\_``\_]a]U  
@HWI-EAS443:3:9:407:1144#0/1  
TGCGGGGTTCTTCTTGTCTTCCTGATGTGTACTTTTTG  
+HWI-EAS443:3:9:407:1144#0/1  
a\_¥^aaa[\_aaa\_aaa`b\_\_\_aa`aa^aWaZ\_]a\_`a`\_  
@HWI-EAS443:3:9:481:223#0/1  
TGCGGGGTTCTTCTTGTCTTCCTGATGTGTACTTTTTG  
+HWI-EAS443:3:9:481:223#0/1  
^¥a`\_`b\_baba\_aaa```aaa`\_`a\_\_\_Ga^\_X\_a```aa  
@HWI-EAS443:3:9:630:1083#0/1  
AAAAAGTACACATCAGGAAGACAAGAGAAGAACCCCGCAC  
+HWI-EAS443:3:9:630:1083#0/1  
a^¥Z\_a]]`a\_][Ya]\_`\_a`\_`a`a`\_a`\_XZX\_aYa\_

@HWI-EAS443:3:9:682:1325#0/1  
TGCGGGGTTCTTCTTGTCTTCCTGATGTGTACTTTTTG  
+HWI-EAS443:3:9:682:1325#0/1  
a`bbabb\_]\_baaa\_aba`¥aaT\_aa`\_b\_``]]aa`aa\_  
@HWI-EAS443:3:9:748:1034#0/1  
TGCGGGGTTCTTCTTGTCTTCCTGATGTGTACTTTTTG  
+HWI-EAS443:3:9:748:1034#0/1  
a\_`\_`a¥R^aa¥\_\_\_a\_aYa\_aa^a`ZP\_\_bYY[a\_^[]\_  
@HWI-EAS443:3:9:749:1608#0/1  
CAAAAAGTACACATCAGGAAGACAAGAGAAGAACCCCGCA  
+HWI-EAS443:3:9:749:1608#0/1  
abbbb\_bPbababbbab\_bbb]b\_\_abbababb\_\_`Saaa  
@HWI-EAS443:3:29:1758:767#0/1  
CTCATTTTGGGCAAAGAAGACAAGAGATATGGCCCAAGT  
+HWI-EAS443:3:29:1758:767#0/1  
abbbbbbabbbbaababba\_bbaaaaaaaaa`\_[\_a`[Q  
@HWI-EAS443:3:51:1358:1250#0/1  
AGAATGGCCCCGCATTAAGCATCAATGAACTGAGCAATCT  
+HWI-EAS443:3:51:1358:1250#0/1  
ab`]ab^\_aHS`a`aZPSX`[S[\_\_\_^US^XZ`¥^VMUS  
@HWI-EAS443:3:35:255:1930#0/1  
AGATTGCTCAGCTCATTGATGCTTAATGCTGGGCNATCTC  
+HWI-EAS443:3:35:255:1930#0/1  
a`aaaa\_a`aa\_a^a`^^`^a^\_a`VZU¥XDXY^]a  
@HWI-EAS443:3:19:1728:1931#0/1  
GAAGACAAGAGATATGGCCCAGCATTAAAGCATCAATGAGC  
+HWI-EAS443:3:19:1728:1931#0/1  
ab`¥a^\_a^aaa^a\_\_aXQV\_]W^\_a`]¥W\_\_U\_^XTRUW  
@HWI-EAS443:3:91:243:1145#0/1  
CAGACAGCGACCAAAGAATTCGGATGGCCATTGTGTATA  
+HWI-EAS443:3:91:243:1145#0/1  
aabba[bbbabab]a[abbbba`^abaZ`^ba^^ba\_a\_  
@HWI-EAS443:3:72:1780:1975#0/1  
CACAAATACCAGCATAAATGCTAGCAACCATTGACCTGAA  
+HWI-EAS443:3:72:1780:1975#0/1  
Z`^V¥Z\_b^\_YSWYHXVY]TaWX^[`]G¥¥`aT^\_`UJZZ  
@HWI-EAS443:3:67:627:914#0/1  
ACAAAATGCAGCGATTCAAGTGATCCTCTCGTCATTGAAG  
+HWI-EAS443:3:67:627:914#0/1  
a\_XZYT[¥`]`\_\_`^\_\_\_`^0]`¥`\_^]]¥Z^\_¥]S]\_X  
@HWI-EAS443:3:19:520:1612#0/1  
GGATACACCATGGACACAGTAAACAGAACACATTCGAGAA  
+HWI-EAS443:3:19:520:1612#0/1  
aaabaaabba`baabaabaaa`a``aab`^aT]aaa\_aa  
@HWI-EAS443:3:3:41:1167#0/1  
CGCGAGATACTCACTAAGACAAGTGTGGACCATATGGCAA  
+HWI-EAS443:3:3:41:1167#0/1  
U`S``[^aa^`abbbbaa`TF]\_\_`Z^YJ[FXWb`a]BBB  
@HWI-EAS443:3:29:1182:18#0/1  
CTCACTAAGACCACTGTGGACCATATGGCAATAATCAAAA

+HWI-EAS443:3:29:1182:18#0/1  
Q\_^`¥Y[[a\_\_aa`XaWZW`YPZT[`XOFG¥X\_S]TXBBB  
@HWI-EAS443:3:54:393:291#0/1  
CCACTGTGGACCATATGGCAATAATCAAAAAGTACACATC  
+HWI-EAS443:3:54:393:291#0/1  
aa]¥ab^a\_` [¥PZ\_^`\_¥G[]]¥OUWZ][W[HX]]YQXY  
@HWI-EAS443:3:47:1270:1190#0/1  
CGAGGGATAAGAGTCAGCAAAATGGGAGTAGATGAATACT  
+HWI-EAS443:3:47:1270:1190#0/1  
R\_]`\_\_\_TY\_ba`abI]¥^¥UWa`^^a[RY^`\_¥¥U\_\_]  
@HWI-EAS443:3:69:1058:148#0/1  
GGGTTTAGTCGCTGGTTTGCCTATTGACAAAGTTCAGAT  
+HWI-EAS443:3:69:1058:148#0/1  
ab\_\_a` [a\_\_a\_`a`Q\_[ZTX^\_^\_aVUW^¥Z[U\_TZ[^Y  
@HWI-EAS443:3:23:1699:222#0/1  
AACTAATTCAATGCATGTGTGAGGAAGGAGTTGAACCAAG  
+HWI-EAS443:3:23:1699:222#0/1  
`a[aaIa[M\_]¥b\_L\_dMaXY\_aa]^^^X`\_UZZ^X^[BB  
@HWI-EAS443:3:75:359:1490#0/1  
AGATACTGGGCATAAGGACCAGGAGCGGAGGAAATACCA  
+HWI-EAS443:3:75:359:1490#0/1  
S[[^`\_^ZU`\_a`]KQa`^`aa`ZVWF¥¥]`YX]^V`aaa  
@HWI-EAS443:3:86:1017:1636#0/1  
CAAAAGTCAATTGGTGTGGATGGCATGCCACTGTGCTGCA  
+HWI-EAS443:3:86:1017:1636#0/1  
abU\_\_Y¥`aabVIYXa`aaa\_aaJZ\_QQG][PKU\_XRQPG  
@HWI-EAS443:3:86:1674:436#0/1  
CACAAAAGTCAATTGGTGTGGATGGGATGCCACTCTGCTG  
+HWI-EAS443:3:86:1674:436#0/1  
U^T\_\_PYU\_ba`a`\_[^bbaa¥bb\_HO\_aa]UabY¥TL¥\_  
@HWI-EAS443:3:95:924:280#0/1  
ATGCAGCAGAGTGGCATGGCATCCACACCAATTGACTTTT  
+HWI-EAS443:3:95:924:280#0/1  
aab]aa]aa[aSb]IY`YQO]\_Ia`RUR[\_S\_¥a`Q[^\_\_  
@HWI-EAS443:3:48:679:700#0/1  
CACAAAAGTCAATTGGTGTGGATGGCATGCCACTCTGGTG  
+HWI-EAS443:3:48:679:700#0/1  
[a`a`aa^`\_aba`bbaa`^Za¥YHRRW[NRWRRYWGy^  
@HWI-EAS443:3:25:1111:1637#0/1  
ATGCAGCAGAGTGGCATGNCATCCACACCAATTGACTTTT  
+HWI-EAS443:3:25:1111:1637#0/1  
aba\_`babaa`\_bbaa¥D^a`\_aa]a\_`\_]¥[Ya]`\_\_  
@HWI-EAS443:3:99:1730:1598#0/1  
CAAAAGTCAATTGGTGTGGATGGCATGCCACTCTGCTGTA  
+HWI-EAS443:3:99:1730:1598#0/1  
` [\_\_\_\_Waa` `¥¥^abba]b^` [^HYQH` `bbX` ^XYMZ  
@HWI-EAS443:3:19:344:243#0/1  
ACAAAAGTCAATTGGTGTGGATGGCATGCCACTCTGCTGG  
+HWI-EAS443:3:19:344:243#0/1  
`VSa^W` ¥`YX`b\_`Wa]a¥S`a]Za^\_\_^`P[\_\_\_\_VXTF

@HWI-EAS443:3:4:1104:1660#0/1  
ACAAAAGTCAATTGGTGTGGATGGCATGCCACTCTGCTGT  
+HWI-EAS443:3:4:1104:1660#0/1  
a\_[`\_^a]]`bV`a\_¥`W0[P]aaU[W`ZZYGQa^FFQRB  
@HWI-EAS443:3:75:775:2047#0/1  
NCAAAAAGTCAATTGGTGTGGATGGCATGCCACTCTGCTGC  
+HWI-EAS443:3:75:775:2047#0/1  
DNVVRSSOMSSXYSRRSYXTSVSQVQULUWWWTVVQMQL  
@HWI-EAS443:3:12:655:88#0/1  
CACAAAAGTCAATTGGTGTGGATGGCATGCCACTCTGCTG  
+HWI-EAS443:3:12:655:88#0/1  
ababaa^bV`\_`aaba^a\_a```aaXZU^U\_^[]X^QUZ^  
@HWI-EAS443:3:19:1294:961#0/1  
CAAAAAGTCAATTGGTGTGGATGGCATGCCACTCTGCTGCA  
+HWI-EAS443:3:19:1294:961#0/1  
a¥]bba\_\_a`ba`baaab\_`aaa^YXY`a\_Wa``aZ^`W]  
@HWI-EAS443:3:19:1410:809#0/1  
ATGCAGCAGAGTGGCATGCCATCCACACCAATTGACTTTT  
+HWI-EAS443:3:19:1410:809#0/1  
a\_aa`^a\_a^W`aZ\_a^YZ¥\_¥¥¥QZ¥VN¥\_WVSQ¥W^\_  
@HWI-EAS443:3:23:1326:698#0/1  
CAAAAAGTCAATTGGTGTGGATGGCATGCCACTCTGCTGCA  
+HWI-EAS443:3:23:1326:698#0/1  
ab^]¥ZXba]bbbb\_]Z[ZXR`XLY[bRUa]WS]WNWZ[^  
@HWI-EAS443:3:23:766:504#0/1  
CAAAAAGTCAATTGGTGTGGATGGCATGCCACTCTGCTGCA  
+HWI-EAS443:3:23:766:504#0/1  
¥\_ZS\_]\_]\_abXaaROYZ]V¥[LHVT`NMV[^YOZW]XZY  
@HWI-EAS443:3:23:773:1895#0/1  
AAATGCAGCAGAGTGGCATGCCATCCACACCAATTGACTT  
+HWI-EAS443:3:23:773:1895#0/1  
abbabababaa`[HP]abU[`\_[U]Qa\_\_\_^^\_UZR]RXZ  
@HWI-EAS443:3:24:42:202#0/1  
ACAAAAGTCAATTGGTGTGGATGGCATGCCACTCTGCTGC  
+HWI-EAS443:3:24:42:202#0/1  
abaZZV\_^a]S````Z`^``[[a][PJV]a¥SZ[S[XWUZ  
@HWI-EAS443:3:26:737:1787#0/1  
CAGCAGAGTGGCATGCCATCCACACCAATTGACTTTTGTG  
+HWI-EAS443:3:26:737:1787#0/1  
Z\_a`bbba\_bZbbb\_bbbabba[baab\_Z\_a\_`ab\_b^a\_  
@HWI-EAS443:3:27:993:1107#0/1  
CAGCAGAGTGGCATGCCATCCACACCAATTGACTTTTGTG  
+HWI-EAS443:3:27:993:1107#0/1  
ab`aa[aaYaaaa^`\_a]\_\_[Y^\_^a^VUY\_]`^\_[]]  
@HWI-EAS443:3:2:714:1497#0/1  
CAAAAAGTCAATTGGTGTGGATGGCATGCCACTCTGCTGCA  
+HWI-EAS443:3:2:714:1497#0/1  
aba]]]Wa^b]ab¥0aUaY\_Ra\_ZYUG[]aU¥P¥¥\_a¥GW  
@HWI-EAS443:3:33:1678:1082#0/1  
ATGCAGCAGAGTGGCATGCCATCCACACCAATTGACTTTT

+HWI-EAS443:3:33:1678:1082#0/1  
aabaabaaba\_^\_a\_aaa\_Y\_\_]]\_]Y^Y^^XW^YVYX\_Y  
@HWI-EAS443:3:33:967:966#0/1  
CAAAAAGTCAATTGGTGTGGATGGCATGCCACTCTGCTGCA  
+HWI-EAS443:3:33:967:966#0/1  
aa[[aaSbWb`ba\_Wa\_` `aab`Z]¥OU\_a[[FZ[`Z]WV  
@HWI-EAS443:3:35:902:1279#0/1  
GCAGCAGAGTGGCATGCCATCCACACCAATTGACTTTTGT  
+HWI-EAS443:3:35:902:1279#0/1  
abbabb` `b\_]aaa`aaaUZ`a¥`a\_b`a^ZVN\_\_`a\_\_Y  
@HWI-EAS443:3:36:145:1681#0/1  
ACAAAAGTCAATTGGTGTGGATGGCATGCCACTCTGCTGC  
+HWI-EAS443:3:36:145:1681#0/1  
`abaYR\_^baba\_]¥`^]^^^ [¥a]XO]\_Y]^^VT^¥Z[  
@HWI-EAS443:3:36:495:1751#0/1  
CAAAAAGTCAATTGGTGTGGATGGCATGCCACTCTGCTGCA  
+HWI-EAS443:3:36:495:1751#0/1  
aa\_^Z\_¥baaa` `V\_]` ]\_^\_a[UQQTa[\_XXZQZYUXX  
@HWI-EAS443:3:39:563:1109#0/1  
AAAAGTCAATTGGTGTGGATGGCATGCCACTCTGCTGCAT  
+HWI-EAS443:3:39:563:1109#0/1  
]^`Y^Ia`a\_aa\_]\_\_\_\_]\_¥`Z\_WX`Z]YJQV]Y¥HVT]Z  
@HWI-EAS443:3:3:328:1815#0/1  
ATGCAGCAGAGTGGCATGCCATCCACACCAATTGACTTTT  
+HWI-EAS443:3:3:328:1815#0/1  
a\_a\_aX\_` `]]¥\_RRaY`^Z¥SG\_YMWN\_XWQUVTBBBBB  
@HWI-EAS443:3:42:938:168#0/1  
CAAAAAGTCAATTGGTGTGGATGGCATGCCACTCTGCTGCA  
+HWI-EAS443:3:42:938:168#0/1  
a\_¥`^a\_baaaaab\_]Vaa`aab`\_UTQ¥[ZRX^^^UVVF  
@HWI-EAS443:3:49:1553:818#0/1  
ACAAAAGTCAATTGGTGTGGATGGCATGCCACTCTGCTGC  
+HWI-EAS443:3:49:1553:818#0/1  
a^^X\_`\_XZZ\_[`a\_F[TaaZ`]a^¥ZTVTWR]Y[XWX[K  
@HWI-EAS443:3:4:32:1015#0/1  
ATGCAGCAGAGTGGCATGCCATCCACACCAATTGACTTTT  
+HWI-EAS443:3:4:32:1015#0/1  
`\_Z\_aba`a^\_Q\_a`aZSRZ`T[YXZXWRRRYQSQ\_\_\_BB  
@HWI-EAS443:3:50:888:1421#0/1  
ACAAAAGTCAATTGGTGTGGATGGCATGCCACTCTGCTGC  
+HWI-EAS443:3:50:888:1421#0/1  
aabbabbabaabbab\_b`aa`aa`^^]Z^a`¥^^` [Y¥[Z  
@HWI-EAS443:3:54:318:1289#0/1  
AAAAGTCAATTGGTGTGGATGGCATGCCACTCTGCTGCAT  
+HWI-EAS443:3:54:318:1289#0/1  
a]a\_a]a]Pa`aaV^RN\_¥^\_]QMSOOZXXTRZ]XZYSKT  
@HWI-EAS443:3:55:1436:962#0/1  
ACAAAAGTCAATTGGTGTGGATGGCATGCCACTCTGCTGC  
+HWI-EAS443:3:55:1436:962#0/1  
aK^\_`\_\_Q\_`Y`a\_Z` [\_\_\_[a¥^b]X^`¥Y]FLR^[YQRW

@HWI-EAS443:3:57:1751:756#0/1  
AATGCAGCAGAGTGGCATGCCATCCACACCAATTGACTTT  
+HWI-EAS443:3:57:1751:756#0/1  
\_\_`b\_bb^^^¥]a^a`XZOPPWV][U[Ua`XJWYQLXZ^  
@HWI-EAS443:3:57:918:1165#0/1  
CACAAAAGTCAATTGGTGTGGATGGCATGCCACTCTGCTG  
+HWI-EAS443:3:57:918:1165#0/1  
ababa\_^babbabba^b\_aaaab`]¥`^`\_`\_]Y]V¥Y  
@HWI-EAS443:3:60:814:1952#0/1  
CAAAAGTCAATTGGTGTGGATGGCATGCCACTCTGCTGCA  
+HWI-EAS443:3:60:814:1952#0/1  
abaaaa^aaaa\_aV`^a`aaa^Q^YF[T`YUXXXWY[Y^  
@HWI-EAS443:3:62:1435:729#0/1  
AAATGCAGCAGAGTGGCATGCCATCCACACCAATTGACTT  
+HWI-EAS443:3:62:1435:729#0/1  
aabababbaaaa[Zaaababa\_\_`\_a`^\_\_^\_a`\_][V[`a  
@HWI-EAS443:3:65:710:657#0/1  
ATGCAGCAGAGTGGCATGCCATCCACACCAATTGACTTTT  
+HWI-EAS443:3:65:710:657#0/1  
\_X^aa¥a[^¥]U^P^a`\_aa`[WPNVV\_a)`\_\_\_^\_^\_\_]  
@HWI-EAS443:3:67:1279:414#0/1  
CAAAAGTCAATTGGTGTGGATGGCATGCCACTCTGCTGCA  
+HWI-EAS443:3:67:1279:414#0/1  
`aba^b`aaa\_abaYY`aa\_ab^J[Za[^`XTXX[X¥aWX  
@HWI-EAS443:3:68:1252:693#0/1  
ACAAAAGTCAATTGGTGTGGATGGCATGCCACTCTGCTGC  
+HWI-EAS443:3:68:1252:693#0/1  
abbabbb¥\_abbabaab\_baaaa^XaZS`\_`\_]¥]WLVZP  
@HWI-EAS443:3:69:949:720#0/1  
CACAAAAGTCAATTGGTGTGGATGGCATGCCACTCTGCTG  
+HWI-EAS443:3:69:949:720#0/1  
abab^Z\_\_\_baaab\_¥a]aa\_aaa[`ZWZ`ZUY[\_Z^\_  
@HWI-EAS443:3:6:485:1962#0/1  
CACAAAAGTCAATTGGTGTGGATGGCATGCCACTCTGCTG  
+HWI-EAS443:3:6:485:1962#0/1  
ababbbbaabbbbbbb\_^aab\_baba`aaaaab\_`\_]`a]a^  
@HWI-EAS443:3:71:1430:882#0/1  
CAAAAGTCAATTGGTGTGGATGGCATGCCACTCTGCTGCA  
+HWI-EAS443:3:71:1430:882#0/1  
H\_bZZbS[a`b``¥Uab`^^a\_0¥aY\_\_PX`a`\_Z\_WDP  
@HWI-EAS443:3:72:920:1076#0/1  
CAAAAGTCAATTGGTGTGGATGGCATGCCACTCTGCTGCA  
+HWI-EAS443:3:72:920:1076#0/1  
a]\_a`\_`[\_`\_`a`^X\_\_`T`\_]\_^X]^VQ¥][^]Z]ZZWW  
@HWI-EAS443:3:76:994:1745#0/1  
CACAAAAGTCAATTGGTGTGGATGGCATGCCACTCTGCTG  
+HWI-EAS443:3:76:994:1745#0/1  
`\_bbbbbbabbaaba\_aba^aaaaY[\_YZaaa[aa\_]Y]`  
@HWI-EAS443:3:78:771:161#0/1  
ACAAAAGTCAATTGGTGTGGATGGCATGCCACTCTGCTGC

+HWI-EAS443:3:78:771:161#0/1  
aa`a^[\_G`\_b\_a^aVUZ[`^K[Z[QW`¥T[XVRTXN  
@HWI-EAS443:3:82:912:115#0/1  
ATGCAGCAGAGTGGCATGCCATCCACACCAATTGACTTTT  
+HWI-EAS443:3:82:912:115#0/1  
abbabbaabbaUba`b\_aY]¥aa`^`Y¥I`^`aWV`^^`  
@HWI-EAS443:3:87:398:997#0/1  
ACAAAAGTCAATTGGTGTGGATGGCATGCCACTCTGCTGC  
+HWI-EAS443:3:87:398:997#0/1  
`bba[[\_]aaaa\_a]`aa`^a\_a\_]W\_a\_\_[\_^\_]^YS  
@HWI-EAS443:3:89:1250:419#0/1  
CACAAAAGTCAATTGGTGTGGATGGCATGCCACTCTGCTG  
+HWI-EAS443:3:89:1250:419#0/1  
aaabbbbaaba`bbbb\_a\_bbbaaba\_aaaaa`a`aa¥`a  
@HWI-EAS443:3:92:1215:996#0/1  
ACAAAAGTCAATTGGTGTGGATGGCATGCCACTCTGCTGC  
+HWI-EAS443:3:92:1215:996#0/1  
`abaaab\_aaabbaa\_baaa`ab`¥a`[[`a^]Z`ZS[UO  
@HWI-EAS443:3:95:1471:88#0/1  
AAAAGTCAATTGGTGTGGATGGCATGCCACTCTGCTGCAT  
+HWI-EAS443:3:95:1471:88#0/1  
a\_a`aWa`\_bbbb¥aaaZZX`a]\_a[\_`\_Y^W`\_]SNX`  
@HWI-EAS443:3:99:1030:629#0/1  
AATGCAGCAGAGTGGCATGCCATCCACACCAATTGACTTT  
+HWI-EAS443:3:99:1030:629#0/1  
a]\_b\_Z¥^Y¥]`^`a]aa^a\_NY[P¥WX\_WOZ`YS¥ZZ  
@HWI-EAS443:3:64:459:227#0/1  
AAGCCGTTGATTTCTGTTTAAATGTCCAATCATAAGTCTG  
+HWI-EAS443:3:64:459:227#0/1  
]]X`aa`ZbbY`^b\_b\_aaaaaYaXV^a^abaaaa^`a  
@HWI-EAS443:3:15:959:1544#0/1  
AGCCGTTGATTTCTGTTTAAATGTCCAATCATAAGTCTGG  
+HWI-EAS443:3:15:959:1544#0/1  
¥bbY[aJ^ba\_\_\_\_\_]`X^aa]`\_PZTaa`\_aaa\_\_¥\_\_a]  
@HWI-EAS443:3:2:1205:1580#0/1  
AGCCGTTGATTTCTGTTTAAATGTCCAATCATAAGTCTGG  
+HWI-EAS443:3:2:1205:1580#0/1  
`^¥^bbabb`abb¥baabbaaba\_a^aaaaaaa`a[Zaa\_  
@HWI-EAS443:3:46:305:1925#0/1  
AGCCGTTGATTTCTGTTTAAATGTCCAATCATAAGTCTGG  
+HWI-EAS443:3:46:305:1925#0/1  
a\_a`ababa^U]`¥^Xbaa`a\_\_H`\_]MONUYaBBBBBBB  
@HWI-EAS443:3:67:1425:230#0/1  
AGCCGTTGATTTCTGTTTAAATGTCCAATCATAAGTCTGG  
+HWI-EAS443:3:67:1425:230#0/1  
abba^^[[^Yaab`baabaab`\_aaa]R`\_a\_a¥^a\_¥  
@HWI-EAS443:3:66:1453:1093#0/1  
ACCCAGCTCACAAAAGTCAATTNGTGTGGATGGCATGCCA  
+HWI-EAS443:3:66:1453:1093#0/1  
aabbaaaaa`a`¥`[b\_a\_`\_]D^\_aabaaaa`H[^`U¥L



@HWI-EAS443:3:13:1406:280#0/1  
CTATGGTATTCTACAAGAGGATTGCATGATCAAGGCAGT  
+HWI-EAS443:3:13:1406:280#0/1  
abbbbaabbabaaaaab\_bb\_aaaaaaaa¥`a\_aX\_aX  
@HWI-EAS443:3:30:707:1196#0/1  
CCCTGGGTTTTGCTTAACGCATCTTGGTTCAACTCCTTCC  
+HWI-EAS443:3:30:707:1196#0/1  
ababba[¥a`\_aba`b`\_ab\_a\_aa]`\_^aaba\_¥DX\_`  
@HWI-EAS443:3:57:982:267#0/1  
CGTTGAGTTCTTCAATGGTGAACAGATCTTCATGATCTC  
+HWI-EAS443:3:57:982:267#0/1  
abZVYGY`bb`Za\_ba¥NX``\_Q0`¥T]bWT]X^aa[¥S  
@HWI-EAS443:3:98:1408:1761#0/1  
GGCCATATCTTGTCTTCTTCCCTTCCCAAAATGAGAAATC  
+HWI-EAS443:3:98:1408:1761#0/1  
aba^`\_`¥[V\_\_aabZUaZW]`aa]\_ab`ba^a]bbabb`  
@HWI-EAS443:3:63:1681:2016#0/1  
GATAAGAGATATGGCCAGCATTAAAGCATCAATGAACTGA  
+HWI-EAS443:3:63:1681:2016#0/1  
`b\_\_PYWa^¥Y`Y]^\_aQ`\_a\_]`UU^[[]¥\_^^¥[\_S  
@HWI-EAS443:3:45:590:1403#0/1  
GCCCCATTTTCATCTTGATCTTGGAGTTCCATTTGTTCTC  
+HWI-EAS443:3:45:590:1403#0/1  
a`\_aYV¥aaYV]X\_[XY]I`\_a`^aBBBBBBBBBBBBBBB  
@HWI-EAS443:3:40:389:1490#0/1  
CACCGGATTCTACAATTATTGATTCACCCCGTTCGTCGAT  
+HWI-EAS443:3:40:389:1490#0/1  
abbb\_aabaaab]\_aaaaaa[U\_`^aaa^YW\_\_]Xa^]  
@HWI-EAS443:3:73:1730:1319#0/1  
CAATGCTACTATTTGCTATCCATACTGTCCAAAAAAAAAAAA  
+HWI-EAS443:3:73:1730:1319#0/1  
a`bab``baaababaab`aaaa\_bbbbVbabbaa`Ybabb  
@HWI-EAS443:3:70:714:1679#0/1  
GGTGTATCCTGTTCTGTTCCATGGCTGTACTGAGGATGT  
+HWI-EAS443:3:70:714:1679#0/1  
\_PXbTT\_UR`YLaab[\_R]aa\_TQ¥Q\_BBBBBBBBBBBBBB  
@HWI-EAS443:3:100:802:1161#0/1  
ATTCGATATGGAGAGAATAAAAGAATTGAGAGATCTAATG  
+HWI-EAS443:3:100:802:1161#0/1  
^a^QG\_b¥`bbX`ISZ¥Y¥Zb`\_]¥F[¥^aaba^W^a\_BB  
@HWI-EAS443:3:33:948:1754#0/1  
CAAATATATTCAATATGGAGAGAATAAAAGAATTGAGAGA  
+HWI-EAS443:3:33:948:1754#0/1  
`[I\_]\_YS`Xaa`¥`]YXQ^^[[]W]ZTZ`\_WFYZ[\_]Y\_  
@HWI-EAS443:3:38:533:1889#0/1  
GAGAAGAACCCCGCACTTAGAATGAAGTGGATGATGGCAA  
+HWI-EAS443:3:38:533:1889#0/1  
`bab\_^`\_aa`\_bSba`¥a```a¥`\_¥HURIPXTKN^^ZH  
@HWI-EAS443:3:88:375:1362#0/1  
AGCAATCTTGCAAAAGGAGAGAAAGCCAATGTGCCAATTG

+HWI-EAS443:3:88:375:1362#0/1  
^^`b]baab`aa`aa[aU`aa\_a\_H`\_a`\_LZ\_^aaW`  
@HWI-EAS443:3:15:1079:1240#0/1  
AATGAACTGAGCAATCTTGCAAAAGGAGAGAAAGCCAATG  
+HWI-EAS443:3:15:1079:1240#0/1  
[aabZ\_a`^^`bbYbba`^`aa`ba\_babbb`\_aXW[ab  
@HWI-EAS443:3:46:209:1951#0/1  
ATCTTGCAAAAGGAGAGAAAGCCAATGTGCTAATTGGGCA  
+HWI-EAS443:3:46:209:1951#0/1  
aaaaaaaa^\_a`\_`\_a`a¥MU\_\_]a\_][]^`\_\_\_\_^S][  
@HWI-EAS443:3:53:955:1638#0/1  
GGCTTCTCTCCTTTTGCAAGATTGCTCAGTTCATTGATG  
+HWI-EAS443:3:53:955:1638#0/1  
a^^[`baa\_[aa]VYaY[aSa¥[``\_]W\_\_\_KZTa`\_]\_  
@HWI-EAS443:3:88:1640:288#0/1  
ATCTTGCAAAAGGAGAGAAAGCCAATGTGCTAATTGGGCA  
+HWI-EAS443:3:88:1640:288#0/1  
`b`bbbbbabab]abbbabba`\_[]`bba\_X``abb]]]G^  
@HWI-EAS443:3:100:929:1600#0/1  
TGTGAGACCGATGCTGAGAATCAGCAATCTGTTCAAGT  
+HWI-EAS443:3:100:929:1600#0/1  
`b^^¥^\_]bU`[a\_b`^b^aaaa`aaaaS`a\_\_\_\_]G``]B  
@HWI-EAS443:3:47:1689:1648#0/1  
CATCAATGAACTGAGCAATCTTGCAAAAGGAGAAACAAAG  
+HWI-EAS443:3:47:1689:1648#0/1  
aaa¥`baS\_aaa]aa\_b¥a\_\_`a`\_Z^\_\_a`\_\_\_\_V^^YZ  
@HWI-EAS443:3:95:1444:591#0/1  
GGTCTTCTTACCTTTTCATATAAGTTCTTCACATTTGAGT  
+HWI-EAS443:3:95:1444:591#0/1  
`\_GLPPKZO`\_Qa[U]NPaQ`\_`aYPNR\_UDRMX\_^V]BBB  
@HWI-EAS443:3:14:222:1771#0/1  
GTCAAAAATGCAGTTGGGGCCCTCATCGGAGGACTTGAAT  
+HWI-EAS443:3:14:222:1771#0/1  
aQaba[``ab`aaY\_aa\_\_GZa¥aX```\_W\_^^^a\_\_¥¥\_  
@HWI-EAS443:3:44:594:1672#0/1  
GGATGTCAAAAATGCAGTTGGGGCCCTCATCGGAGGACTT  
+HWI-EAS443:3:44:594:1672#0/1  
V`^bb^Q¥abaM`X`W\_]\_\_\_SWPXbX`\_RXPT]XHVaa^  
@HWI-EAS443:3:32:969:1148#0/1  
GGGGCCTATTATCTTTTGCCTAGGCATGAGCATGAACCAG  
+HWI-EAS443:3:32:969:1148#0/1  
\_Za``bbaaa`\_aaba`a`\_\_`aabaaba`[aaaa````  
@HWI-EAS443:3:14:755:61#0/1  
GCTCTGCCACTTTTCATTTCTGCTCTGGAGGAGTGGAG  
+HWI-EAS443:3:14:755:61#0/1  
ab\_ZZ^QXa¥a]a]¥VSM]\_[XW]a]YTYBBBBBBBBBBB  
@HWI-EAS443:3:75:225:223#0/1  
CGCCACTTTTCATTTCTGCTCTGGAGGGAGTGGAGGTCTC  
+HWI-EAS443:3:75:225:223#0/1  
\_`a[ab¥YNV]]]XYX[THRV[a¥BBBBBBBBBBBBBBBBB

@HWI-EAS443:3:16:262:915#0/1  
CATCGGGGACTTGAATGGAATGGTAACACGGTTCGAGTC  
+HWI-EAS443:3:16:262:915#0/1  
ZUaa^]bbb`a]ba[ab]V`\_XV`Za\_aa\_]Y[[Z]¥a  
@HWI-EAS443:3:69:986:798#0/1  
GCTCTCGCCACTTTTCATTTCTGCTCTGGAGGTAGTGGAG  
+HWI-EAS443:3:69:986:798#0/1  
a`Va^aY^aaR^b[aWYabaaW^RW]a]Z^UZGZBBBBBB  
@HWI-EAS443:3:48:208:469#0/1  
AGAATGGGAGACCTTCACTACCTCCAAAGCAGAAATGAAA  
+HWI-EAS443:3:48:208:469#0/1  
aaaaababaa\_`a`¥a`ab]\_a`Taaa`a\_b^a`aa\_`\_  
@HWI-EAS443:3:48:1581:383#0/1  
AGAAGGCCAACAAAATAAAATCTGAGAAGACACACATTCA  
+HWI-EAS443:3:48:1581:383#0/1  
P\_\_^F[Z^¥`]SY¥¥`aab[ba`^WO\_SQXV`ZN¥]XU  
@HWI-EAS443:3:66:846:266#0/1  
CTTTGGTCCTACATTTGCTTACCATCGGGATCAGCTGAAA  
+HWI-EAS443:3:66:846:266#0/1  
ababbaaabbbbbbbbabbb`abbaaa`a¥\_aa\_]`aaa  
@HWI-EAS443:3:19:180:1653#0/1  
ATGCCTGATTAATGATCCCTGGGTTTTGCTTAATGCATCT  
+HWI-EAS443:3:19:180:1653#0/1  
H]abbabbbbbbb¥bbbaabbabbb`ababbbb`aaab  
@HWI-EAS443:3:91:975:464#0/1  
GGAATTCTTTGAAAACAGATCGGAAACATGGCCAATCGGA  
+HWI-EAS443:3:91:975:464#0/1  
a\_\_]a\_]ZW^`TXQRaUDM^`ZTWY][X\_\_^U]YU^]X  
@HWI-EAS443:3:94:1418:477#0/1  
GGAGAGGAGATGGCCACCAGAGCGGACTACACCCTTGACG  
+HWI-EAS443:3:94:1418:477#0/1  
a`]]]a¥ZZQ^[\`ZZ¥WXUM]]`\_NYX[[Q`ZWNRX[GJ]  
@HWI-EAS443:3:55:1514:1899#0/1  
GGGGGCTATATGAAGCAATAGAGGAGAGCCTGATTAATGA  
+HWI-EAS443:3:55:1514:1899#0/1  
[\_`a^Y[b\_U`bb`V`\_HS\_SZKabIbUX\_aH`a]abba  
@HWI-EAS443:3:24:95:1264#0/1  
GCCTGGACAATGAGAAGCAATTTTCTCGATTCCAGCCGAAA  
+HWI-EAS443:3:24:95:1264#0/1  
aaYU]FZZNZ[WOX`aR`^SYQYQaPZPUBBBBBBBBBBB  
@HWI-EAS443:3:51:776:156#0/1  
GGGGGCTATATGAAGCAATAGAGGAGTGCCTGATTAATGA  
+HWI-EAS443:3:51:776:156#0/1  
`aba`bbaba`\_]abaaaaaabaaa[a`¥`aaaa`aa\_  
@HWI-EAS443:3:76:851:1868#0/1  
AGAGGAGTGCCTGATTAATGATCCCTGGGTTTTGCTTAAT  
+HWI-EAS443:3:76:851:1868#0/1  
a`aaa`a\_`aaaaaaabaaaa`a`aaaZa\_`\_``aaa\_  
@HWI-EAS443:3:1:644:88#0/1  
TGGAATGAGGCGCTGCCTTCTTCAGTCTTTCAGCAGGT

+HWI-EAS443:3:1:644:88#0/1  
abb^`a`aaaZ\_aV^a¥a\_Va^Z]a[Q\_N`¥NVY¥BBBB  
@HWI-EAS443:3:55:1202:40#0/1  
ATGGAAATGAGGCGCTGCCTTCTTCAGTCTCTTCAGCAGG  
+HWI-EAS443:3:55:1202:40#0/1  
[\_ba]a¥]^`U\_^b¥a`H¥]\_VZa]^`a`H^`KQXLW¥F  
@HWI-EAS443:3:36:347:1303#0/1  
GGCTCATGTTGATTCCCCTAACTTGCAGGTCCTGTAGAA  
+HWI-EAS443:3:36:347:1303#0/1  
abbabbbb\_bbbbaab`^`abb`aa`baa^¥aaaaZS\_`K  
@HWI-EAS443:3:90:96:1600#0/1  
TGCCGGTTGGTTTCTGTTTAATGTCCAATCATAAGCCTGG  
+HWI-EAS443:3:90:96:1600#0/1  
a`S]aa\_YFZaababaa¥\_\_a`^^aab¥`bZ\_JZG\_``Y  
@HWI-EAS443:3:86:1028:783#0/1  
TGCCGGTTGGTTTCTGTTTAATGTCCAATCATAAGTCTGG  
+HWI-EAS443:3:86:1028:783#0/1  
Ub]aa¥bWXH][^`¥PY¥SV\_aU]Y[HY^W\_XOZP^`\_[  
@HWI-EAS443:3:46:201:1080#0/1  
AGCCGTCTGAGTTCTTCAATGGTGAACAGATCTTATGAT  
+HWI-EAS443:3:46:201:1080#0/1  
\_Z^`]ZS`¥ab`aaaaab`]^`XFP[^`a`]X^]aa]aaaR  
@HWI-EAS443:3:48:1482:1717#0/1  
TGCCGTCTGAGTTCTTCAATGGTGAACAGATCTTATGAT  
+HWI-EAS443:3:48:1482:1717#0/1  
`\_```[`aaaaZa`a`aaa`aZ\_\_\_`]^`Z^^`\_\_\_\_\_Z  
@HWI-EAS443:3:72:1143:2013#0/1  
TGCCGTCTGAGTTCTTCAATGGTGAACAGATCTTATGAT  
+HWI-EAS443:3:72:1143:2013#0/1  
[Y]V¥babZ^a``aKV\_bb\_aaU\_a`aIZaKR\_a^\_SX\_Y  
@HWI-EAS443:3:91:1130:1958#0/1  
TGCCGTCTGAGTTCTTCAATGGTGAACAGATCTTATGAT  
+HWI-EAS443:3:91:1130:1958#0/1  
^a\_]aaabbab]aa`b\_aaaa\_baab\_aa`\_`\_b`\_\_^  
@HWI-EAS443:3:37:864:1354#0/1  
GAGAATTCATGCCTTGAAACAATGGAAGCAGTTCAACAAA  
+HWI-EAS443:3:37:864:1354#0/1  
`[W[Z¥aa\_\_\_^a^`aaa`Xba\_aY``XFSTTN\_UYT[`^  
@HWI-EAS443:3:36:21:66#0/1  
TTGCCGTCTGAGTTCTTCAATGGTGAACAGATCTTATGA  
+HWI-EAS443:3:36:21:66#0/1  
aaabba[`abY\_¥`\_\_`\_a\_a`T][NZ[Ya\_¥]^`[VYY  
@HWI-EAS443:3:100:1254:1467#0/1  
CAATGGTGAACAGATCTTAATGATCTCAGAGAACTCTTC  
+HWI-EAS443:3:100:1254:1467#0/1  
abbbb¥`a`ababb¥]^`a[D^abaaaa]YaaWa`PSY^^B  
@HWI-EAS443:3:1:537:1331#0/1  
GAGTTCTTCAATGGTGAACAGATCTTAATGATCTCAGAG  
+HWI-EAS443:3:1:537:1331#0/1  
aNb^[DP`a[\_Taa[T¥ba]a[\_\_\_X`SI`a\_^]H\_^BBBB

@HWI-EAS443:3:27:105:1921#0/1  
CATACCCACTTGGTTCATTATCCTCAGGCAGTGGTCCATC  
+HWI-EAS443:3:27:105:1921#0/1  
a`TZ`bb^`aT^aZ`aZ¥W\_`aaW^MXYFI[WLSF]XJKV  
@HWI-EAS443:3:62:800:493#0/1  
GCATACCCACTTGGTTCATTATCCTCAGGCAGTGGTCCAT  
+HWI-EAS443:3:62:800:493#0/1  
aabbba``\_ababa\_baaaaa\_a`a\_aaaa[XS^¥ZW^ZS  
@HWI-EAS443:3:80:1791:325#0/1  
CCGGCAGCAACTGCATTGGCCAACACCATAGAAGTATTTA  
+HWI-EAS443:3:80:1791:325#0/1  
Vabb¥aV^``]XSXaab\_\_]b]a^`Yaaa^`^a]SL\_ba]  
@HWI-EAS443:3:10:1122:321#0/1  
TGGGCTGGCATCACACAGCATTGTTTACAGAATCAATCT  
+HWI-EAS443:3:10:1122:321#0/1  
``\_`WYaa`aZFY\_X`\_aaZ\_\_`a`\_`¥W`\_\_^¥S\_]YW]  
@HWI-EAS443:3:43:1382:1215#0/1  
CTCTCTGCATCTTTGGTCATTGTATTTAATGTCAGTGCTC  
+HWI-EAS443:3:43:1382:1215#0/1  
aabbabbbb`baabb`aaaX\_^abbbbaaba`a``ZY^`P  
@HWI-EAS443:3:65:304:1263#0/1  
GGGTACTTTTTGATTATGGCCATATGGTCCACAGTGGTTT  
+HWI-EAS443:3:65:304:1263#0/1  
\_F]Yaa^\_V¥ZQX`[0¥XQ¥\_XVS00JPZYBBBBBBBBBB  
@HWI-EAS443:3:37:776:2035#0/1  
AATGTCGCAGTCCCGCACTCGCGAGATACTCACTAAAACC  
+HWI-EAS443:3:37:776:2035#0/1  
ab¥TZaa``a^`Wa^\_X\_]YX`¥`aZU\_aVa¥aZa]VWXY  
@HWI-EAS443:3:49:379:767#0/1  
CTAATGTCGCAGTCCCGCACTCGCGAGATACTCACCAAGA  
+HWI-EAS443:3:49:379:767#0/1  
`abbbbabbabbbbbbba]abbbbbaabaabb¥DZXa\_¥  
@HWI-EAS443:3:34:798:239#0/1  
AGCAACCGTTATGGCAGCCTTCAGCGGAACAAAGAAGGA  
+HWI-EAS443:3:34:798:239#0/1  
aba^^aa]¥¥a\_a]V`aBBBBBBBBBBBBBBBBBBBBBB  
@HWI-EAS443:3:60:65:1094#0/1  
CGCACTCGCGAGATACTCACTAAGACCACTGTGGACCACA  
+HWI-EAS443:3:60:65:1094#0/1  
a\_¥P\_`aaaaa^^`^^`\_]\_^^¥^^^\_\_[\_ZZP[TV\_[V¥Z  
@HWI-EAS443:3:57:220:578#0/1  
CACGGGCATGAACCAGTCTCGTGACATTTCCCTCGAGGGTC  
+HWI-EAS443:3:57:220:578#0/1  
NGP[U[OUYa\_`WSQ`\_a`aaRaXa¥L[]]b\_HIWRb`aGZ  
@HWI-EAS443:3:22:1600:1449#0/1  
GGGGAGCGCCAGGATGCCACAGAAATCAGAGCATCTGTAG  
+HWI-EAS443:3:22:1600:1449#0/1  
^[a`[a\_a¥SVW\_\_¥[¥¥RP]PY\_]UUM[UUUUVVVVRGV  
@HWI-EAS443:3:97:974:285#0/1  
TGGGGAGCGCCAGGATGCCACAGAAATCAGAGCATCTGTA

+HWI-EAS443:3:97:974:285#0/1  
a`Xaa\_b\_aTU[\_WSU^V^\_^`\_¥` ``LVYYUT][N¥VBB  
@HWI-EAS443:3:7:1753:415#0/1  
AATTTCTAGCATGGTGGAGGCCATGGGGTCTAGGGCCAGG  
+HWI-EAS443:3:7:1753:415#0/1  
¥\_¥]TRR¥\_QQab]MZ¥`Z[ZQ^Y]\_FZPKNY¥RBBBBBB  
@HWI-EAS443:3:59:502:687#0/1  
ATTGACAAAATGACCATCGTCAACATCCACAGCACTCTGC  
+HWI-EAS443:3:59:502:687#0/1  
^^aba`abbbbbbaaabaab]b\_baab`b`^^adWH\_[Q  
@HWI-EAS443:3:95:537:653#0/1  
ATATTGACAAAATGACCATCGTCAACATCCACAGCACTCT  
+HWI-EAS443:3:95:537:653#0/1  
`b\_]^[^aa]]\_b`]]][^a]^\_`V[\_\_\_a`a`aZ]X^V^  
@HWI-EAS443:3:73:1335:433#0/1  
AGGGCCTTCTACGGAAGGAGTGCCTGAGTCAATGAGGGGA  
+HWI-EAS443:3:73:1335:433#0/1  
aWaUFPTPU^¥M]\_X^XTQ\_W\_HQ`¥^¥RFKYONPS^^^U  
@HWI-EAS443:3:53:1626:1640#0/1  
AAGAGGGCCTTCTACGGAAGGAGTGCCTGAGTCAATGAGG  
+HWI-EAS443:3:53:1626:1640#0/1  
\_`^aaaabaabb^baaabYaaa`a^[\_`\_a`a[P¥]ba[a^  
@HWI-EAS443:3:25:137:1926#0/1  
TTGACACTAATTGATGGCCATCCGAATTCTTTTGGTCGCT  
+HWI-EAS443:3:25:137:1926#0/1  
]GUYb`WUW`a¥T^XZUZYRL[XZ`TXW[YYZ][[NVXUB  
@HWI-EAS443:3:55:313:858#0/1  
AGGGGGGTTATATGAAGCAATCGAGGAGTGCCTGATTAAT  
+HWI-EAS443:3:55:313:858#0/1  
abb\_bbbaabbbbaabaa\_¥` ``aba\_a\_b]Z\_`]aa` `¥  
@HWI-EAS443:3:43:1552:1800#0/1  
GGGGGGTTATATGAAGCAATCGAGGAGTGCCTGATTAATG  
+HWI-EAS443:3:43:1552:1800#0/1  
aa`XQOL[]a\_P¥P^\_PR^\_VaSLSVUQYX¥X\_VW^VVYY  
@HWI-EAS443:3:59:1277:1082#0/1  
CAAGATCGAAGGTTCCAGGCTCCAGGTTGTCCCTAAGTGC  
+HWI-EAS443:3:59:1277:1082#0/1  
\_aa` `` `aZ` `b^^]\_\_X[aaaa\_Z]Paa[[J[ `¥NGQXT  
@HWI-EAS443:3:72:1270:243#0/1  
CGGGGTTCTTCTTCTGACTTCTGTTGTGTACTTTTTGAT  
+HWI-EAS443:3:72:1270:243#0/1  
aabb]Ybbb\_¥V¥V[YDY\_aa¥` [NZ]QLMLMP`LYFONT  
@HWI-EAS443:3:66:992:1530#0/1  
TGGGTCACCAGATTCTACAATTATTGATTCACCCGTTTCG  
+HWI-EAS443:3:66:992:1530#0/1  
]Z[\_[ `aa\_a^¥`aaa[ `a`aaaaaaaa`W`aaY`\_KU[]  
@HWI-EAS443:3:3:1364:612#0/1  
CGTGCCTTCATCTGGATCTTCAGTCAATGCACCTGCAGAG  
+HWI-EAS443:3:3:1364:612#0/1  
a`\_]\_`a[\_`\_`¥W\_^\_^]bb\_T¥Z\_aba¥WSXLGROG[\_\_\_^

@HWI-EAS443:3:83:491:240#0/1  
TGCCATAATCAAAAAGCACACATCAGGAAGACAAGAGAA  
+HWI-EAS443:3:83:491:240#0/1  
a]G]\_SRNYT\_YR][\_ZVIZaX]W^Wa\_YQZHU¥WRNYWV  
@HWI-EAS443:3:100:807:1578#0/1  
GCCATAATCAAAAAGTACACATCAGGAAGAAAAGAGAAGA  
+HWI-EAS443:3:100:807:1578#0/1  
a^RH^]a¥0Za¥SU¥`aWaV[[S]XPGa^NG\_YYJBBBBB  
@HWI-EAS443:3:23:1531:1714#0/1  
GGCCATAATCAAAAAGGACACATCAGGAAGACAAGAGAAG  
+HWI-EAS443:3:23:1531:1714#0/1  
[aabVababVb]ZabaI]`b`bb[Zabb`b`ab[`aaaa^  
@HWI-EAS443:3:32:1527:952#0/1  
CCATAATCAAACAGTACACATCAGGAAGACAAGAGAAGAA  
+HWI-EAS443:3:32:1527:952#0/1  
a`^`¥PMZWONJT[KWJO[PX^SWVSTX[PUTHOZG¥XZB  
@HWI-EAS443:3:53:1187:539#0/1  
GTTCTTCTCTTGTTCCTGATGTGTACTTTTTGATTATG  
+HWI-EAS443:3:53:1187:539#0/1  
]a`aa`abbaab\_bb`aab\_abb\_b`a\_bbaaaZ\_ba`aQ  
@HWI-EAS443:3:73:238:1929#0/1  
GCCATAATCAAAAAGAACACATCAGGAAGACAAGAGAAGA  
+HWI-EAS443:3:73:238:1929#0/1  
abaaaVUTZV^0QL0FW`\_\_a\_]a\_\_a]U\_YYXGaZ``Y]  
@HWI-EAS443:3:78:1740:576#0/1  
AAAAGTACACATCAGGAAGACAAGAGAAGAACTCTGCACT  
+HWI-EAS443:3:78:1740:576#0/1  
]aaa`ZTT\_U\_^YTZa]¥`WR\_a]]UZ]a\_`XKUOSR[\_`  
@HWI-EAS443:3:79:171:941#0/1  
GCCACAATCAAAAAGTACACATCAGGAAGACAAGAGAAGA  
+HWI-EAS443:3:79:171:941#0/1  
aa\_U`T^a¥XJUUF^^][Y^`[\_]NS[]Y¥FYUXW^ZZ  
@HWI-EAS443:3:82:210:166#0/1  
TTCTTCTCTTGTCTTCCTGATGGGTACTTTTTGATTATGG  
+HWI-EAS443:3:82:210:166#0/1  
aaaaa\_a`aaa\_\_aa``a^\_U`ZZ^\_^^`\_¥`^]`^]  
@HWI-EAS443:3:94:324:983#0/1  
GCCATAATCAAAAAGGACACATCAGGAAGACAAGAGAAGA  
+HWI-EAS443:3:94:324:983#0/1  
aYZYa`aaaa`XJ]GS¥0Q^[\`¥a^^^a^^\_^^^[[\_\_^  
@HWI-EAS443:3:98:115:1572#0/1  
CTCTTGTCTTCCTGATGTGTACTTTTTGATTATGGCCCTA  
+HWI-EAS443:3:98:115:1572#0/1  
]b\_HO`ZT^^SW^^UNU\_WKZaYaba``Taa^aWISBBBB  
@HWI-EAS443:3:42:1090:548#0/1  
GCCATAATCAAAAAGTACNCATCAGGAAGACAAGAGAAGA  
+HWI-EAS443:3:42:1090:548#0/1  
aaaabaaaaaaaaaaa]a[DWaaaaaaaa`a\_a\_aaaa`  
@HWI-EAS443:3:54:1275:1670#0/1  
AAAAAGTACACATCAGGAAGACAAGAGAAGAACCNGCAC

+HWI-EAS443:3:54:1275:1670#0/1  
aab`¥b`baaaa\_`a`b\_aaaa\_ab¥ba`a``\_^TDV\_\_^  
@HWI-EAS443:3:87:981:1554#0/1  
GCCATAATCAAAAAGTACANATCAGGAAGACAAGAGAAGA  
+HWI-EAS443:3:87:981:1554#0/1  
`ab`bbbb`ababbbabb^D]babbbbaabbbbababbb  
@HWI-EAS443:3:23:1678:1034#0/1  
GNTCTCTTGCTTCCTGATGTGTACTTTTTGATTATGGCC  
+HWI-EAS443:3:23:1678:1034#0/1  
¥D]]]S]W\_YT`WN\_Z`ZL]Z¥M¥a`\_^`\_`[]X\_SBB  
@HWI-EAS443:3:76:759:547#0/1  
GCTCTTCTTGCTTCCTGATGTGTACTTTTTGATTATG  
+HWI-EAS443:3:76:759:547#0/1  
¥DO¥N^U[TX^¥NQVZUYU]¥¥[N^XRZ`[]\_Y[VZWZU\_  
@HWI-EAS443:3:91:539:1267#0/1  
ATGGCCATAATCAAAAAGTACACATCAGGAAGACAAGAGG  
+HWI-EAS443:3:91:539:1267#0/1  
aaa`bbababb¥`aaZaaZb`a`aa[``^`]]`\_a]aa]H  
@HWI-EAS443:3:10:1631:1201#0/1  
CATAATCAAAAAGTACACATCAGGAAGACAAGAGAAGAAC  
+HWI-EAS443:3:10:1631:1201#0/1  
]bbbbbabba^`baaba`aa`bbbbabb\_babbbbbb`b\_  
@HWI-EAS443:3:11:198:1303#0/1  
CATAATCAAAAAGTACACATCAGGAAGACAAGAGAAGAAC  
+HWI-EAS443:3:11:198:1303#0/1  
a`a\_a`Y\_\_[Va`a`^]\_\_^]`\_^\_\_^\_X]]^^\_^]  
@HWI-EAS443:3:15:288:1436#0/1  
TCTTCTTGTCTTCCTGATGTGTACTTTTTGATTATGGC  
+HWI-EAS443:3:15:288:1436#0/1  
]\_¥S]¥aa¥0[YUWQS]YLO`H[Z]^ [RZZWMMVURR\_\_`  
@HWI-EAS443:3:15:422:993#0/1  
GGCCATAATCAAAAAGTACACATCAGGAAGACAAGAGAAG  
+HWI-EAS443:3:15:422:993#0/1  
\_Va`¥W`\_]\_[^`aT¥QW`bba``^`abYaaaaa`a`]a  
@HWI-EAS443:3:16:968:836#0/1  
TGGCCATAATCAAAAAGTACACATCAGGAAGACAAGAGAA  
+HWI-EAS443:3:16:968:836#0/1  
abbbabaYF^bab`\_^`SX`baa\_a¥baaabb¥a`\_aa\_R  
@HWI-EAS443:3:17:1170:1319#0/1  
GTTCTTCTTGTCTTCCTGATGTGTACTTTTTGATTATG  
+HWI-EAS443:3:17:1170:1319#0/1  
aaaaaaaaaab]^aaaa`a`aa`aXa\_aaaaaaaa`\_`\_  
@HWI-EAS443:3:17:285:51#0/1  
ATGGCCATAATCAAAAAGTACACATCAGGAAGACAAGAGA  
+HWI-EAS443:3:17:285:51#0/1  
aWW¥`a\_a[TTJVbaa¥\_V]]Z]ZVOV]]`Q][^aXWW`]  
@HWI-EAS443:3:18:1121:1627#0/1  
GCCATAATCAAAAAGTACACATCAGGAAGACAAGAGAAGA  
+HWI-EAS443:3:18:1121:1627#0/1  
a\_\_\_\_YYYa^U[ZL¥[Y]T^VW]Y¥ULU][RY¥^]V\_VY\_Y



@HWI-EAS443:3:18:1440:422#0/1  
CCATAATCAAAAAGTACACATCAGGAAGACAAGAGAAGAA  
+HWI-EAS443:3:18:1440:422#0/1  
`aaaa^aaaa\_\_a¥aZ`\_`¥^\_b^]``S¥a\_a]\_^\_\_`  
@HWI-EAS443:3:18:52:1998#0/1  
GCCATAATCAAAAAGTACACATCAGGAAGACAAGAGAAGA  
+HWI-EAS443:3:18:52:1998#0/1  
\_abaaa[````\_]``Xbaaaa`a\_dW`a`\_`a`aa`aa`a  
@HWI-EAS443:3:19:795:84#0/1  
TTCTTCTTGTCTTCCTGATGTGTACTTTTTGATTATGG  
+HWI-EAS443:3:19:795:84#0/1  
`bb\_b]a`\_a]PHZ\_]`ab`YbYa`]V^aaaa`\_\_ZUP\_  
@HWI-EAS443:3:21:1087:1412#0/1  
CATAATCAAAAAGTACACATCAGGAAGACAAGAGAAGAAC  
+HWI-EAS443:3:21:1087:1412#0/1  
aba`aabaaaa[a`aaa[`aaa`a`\_`a`aa`\_`a`a`W  
@HWI-EAS443:3:21:204:421#0/1  
CATAATCAAAAAGTACACATCAGGAAGACAAGAGAAGAAC  
+HWI-EAS443:3:21:204:421#0/1  
abbaabbaabbab\_abbbaaaaa`a`aa^^`aa`aa]  
@HWI-EAS443:3:21:645:1362#0/1  
GGCCATAATCAAAAAGTACACATCAGGAAGACAAGAGAAG  
+HWI-EAS443:3:21:645:1362#0/1  
ab`]RI\_Z\_a¥^^¥Z]Q^00`]a¥YM^ZW`M` [UNNaU  
@HWI-EAS443:3:22:1544:1400#0/1  
CTTCTCTTGTCTTCCTGATGTGTACTTTTTGATTATGGCC  
+HWI-EAS443:3:22:1544:1400#0/1  
]a`a^aaa¥aa^X^b^\_UaU`TYZxb¥`b^Y^^¥^b]^MH  
@HWI-EAS443:3:22:225:1560#0/1  
GCCATAATCAAAAAGTACACATCAGGAAGACAAGAGAAGA  
+HWI-EAS443:3:22:225:1560#0/1  
`bbb[`^X`]aaa]¥Ha`a`aa¥RWa]Z¥\_aa`\_aa\_a\_]  
@HWI-EAS443:3:23:1201:1413#0/1  
CTTCTCTTGTCTTCCTGATGTGTACTTTTTGATTATGGCC  
+HWI-EAS443:3:23:1201:1413#0/1  
¥baa¥bbbbbabb\_^^a^M^\_\_\_aaaa`ababa`TT\_  
@HWI-EAS443:3:23:1589:352#0/1  
TTCTTCTCTTGTCTTCCTGATGTGTACTTTTTGATTATGG  
+HWI-EAS443:3:23:1589:352#0/1  
]W\_¥\_ZP\_ab\_`0¥PZ]ZS¥V^Y`^^]]Y[`^\_¥W]UT  
@HWI-EAS443:3:23:721:373#0/1  
GTTCTTCTTGTCTTCCTGATGTGTACTTTTTGATTATG  
+HWI-EAS443:3:23:721:373#0/1  
`UVSU]U^`X\_YLYTTW¥]RRWVO¥PNGNX^\_]VYUS[\_B  
@HWI-EAS443:3:23:75:1667#0/1  
GTTCTTCTTGTCTTCCTGATGTGTACTTTTTGATTATG  
+HWI-EAS443:3:23:75:1667#0/1  
aaaaabbba`\_`ab¥^aaa^`Z]]`V`^aa¥Y`\_`TFU  
@HWI-EAS443:3:25:23:1701#0/1  
CATAATCAAAAAGTACACATCAGGAAGACAAGAGAAGAAC

+HWI-EAS443:3:25:23:1701#0/1  
\_bbZV¥bab`¥`^\_bbbbbab^QQ]bbaaba\_a¥¥baa``  
@HWI-EAS443:3:26:1089:525#0/1  
CATAATCAAAAAGTACACATCAGGAAGACAAGAGAAGAAC  
+HWI-EAS443:3:26:1089:525#0/1  
`bbabbbbbbabababbaabbbbabaaa\_bababbaba  
@HWI-EAS443:3:26:508:1987#0/1  
GCCATAATCAAAAAGTACACATCAGGAAGACAAGAGAAGA  
+HWI-EAS443:3:26:508:1987#0/1  
a\_ab````aaaaa\_XX^^`a¥TZ`][`\_a\_aaa\_\_^aa\_`  
@HWI-EAS443:3:27:110:711#0/1  
GCCATAATCAAAAAGTACACATCAGGAAGACAAGAGAAGA  
+HWI-EAS443:3:27:110:711#0/1  
^¥W\_\_RWRa^YP[Z\_0¥`\_]Zaa`][`\_`^`aa^`¥R¥¥  
@HWI-EAS443:3:27:399:173#0/1  
ATGGCCATAATCAAAAAGTACACATCAGGAAGACAAGAGA  
+HWI-EAS443:3:27:399:173#0/1  
\_TV]bbaUU]Y`Ya`aYaJ``a¥^`\_^\_\_\_YYXY\_X]VOY  
@HWI-EAS443:3:28:1784:2005#0/1  
TGGCCATAATCAAAAAGTACACATCAGGAAGACAAGAGAA  
+HWI-EAS443:3:28:1784:2005#0/1  
aaa`\_\_¥\_b`\_`aa^\_UZaaa\_aaZaaaa^aaa`\_aa]\_`  
@HWI-EAS443:3:28:237:741#0/1  
GCCATAATCAAAAAGTACACATCAGGAAGACAAGAGAAGA  
+HWI-EAS443:3:28:237:741#0/1  
`b`^^`^^ba[]`RTPaa[]aa`Y^`a]a\_a[\_`a\_\_a  
@HWI-EAS443:3:28:351:2045#0/1  
CCATAATCAAAAAGTACACATCAGGAAGACAAGAGAAGAA  
+HWI-EAS443:3:28:351:2045#0/1  
aaZ^aa¥aaaa`YZZaa^aa\_aa\_¥aa`\_a]]Z`¥`^^`  
@HWI-EAS443:3:28:401:685#0/1  
CATAATCAAAAAGTACACATCAGGAAGACAAGAGAAGAAC  
+HWI-EAS443:3:28:401:685#0/1  
aa^¥a[aY^`¥^YYbaa]\_aYa]\_Zaaaaaab`^``aaa\_  
@HWI-EAS443:3:28:826:1776#0/1  
TGGCCATAATCAAAAAGTACACATCAGGAAGACAAGAGAA  
+HWI-EAS443:3:28:826:1776#0/1  
HX^^¥^R````ab```Yabbbbbb[[abbbababba``b  
@HWI-EAS443:3:29:168:490#0/1  
ATGGCCATAATCAAAAAGTACACATCAGGAAGACAAGAGA  
+HWI-EAS443:3:29:168:490#0/1  
a\_aaaaa\_a\_[aaa````X\_\_\_\_`\_\_a\_]\_]`^\_]`\_]`\_`  
@HWI-EAS443:3:29:284:1308#0/1  
CATAATCAAAAAGTACACATCAGGAAGACAAGAGAAGAAC  
+HWI-EAS443:3:29:284:1308#0/1  
aaa]aab]aaaa`]baaaaaa`\_aa\_]aa``a`\_`aa\_  
@HWI-EAS443:3:29:642:881#0/1  
GGCCATAATCAAAAAGTACACATCAGGAAGACAAGAGAAG  
+HWI-EAS443:3:29:642:881#0/1  
`babaaaab`b`a`aa]baaa``aaa\_a`a\_aaaa^a^`^`

@HWI-EAS443:3:2:1315:402#0/1  
ATGGCCATAATCAAAAAGTACACATCAGGAAGACAAGAGA  
+HWI-EAS443:3:2:1315:402#0/1  
aa[MX`a]]\_aU`a`aa^a][U\_]a`a\_Z]X`X`Z  
@HWI-EAS443:3:30:1304:712#0/1  
GCCATAATCAAAAAGTACACATCAGGAAGACAAGAGAAGA  
+HWI-EAS443:3:30:1304:712#0/1  
a]P]Z\_R\_]W^STZ^U]\_aa`RUYSQLZZYWX`W\_]V^T  
@HWI-EAS443:3:30:491:554#0/1  
GTTCTTCTTGTCTTCCTGATGTGTACTTTTTGATTATG  
+HWI-EAS443:3:30:491:554#0/1  
a`aababaaaba\_aabaaaa`a\_a^`a`a`a¥``\_\_\_Z  
@HWI-EAS443:3:30:631:198#0/1  
GCCATAATCAAAAAGTACACATCAGGAAGACAAGAGAAGA  
+HWI-EAS443:3:30:631:198#0/1  
^]aUOHQZV`bJ\_bXaaaaXaa]X`U[``W`a\_a\_¥\_`  
@HWI-EAS443:3:31:1360:413#0/1  
GCCATAATCAAAAAGTACACATCAGGAAGACAAGAGAAGA  
+HWI-EAS443:3:31:1360:413#0/1  
YZP\_`aa¥ba`a\_W\_Raa]Yaa\_\_a^Saa`\_aabaa`^^  
@HWI-EAS443:3:31:398:203#0/1  
GCCATAATCAAAAAGTACACATCAGGAAGACAAGAGAAGA  
+HWI-EAS443:3:31:398:203#0/1  
aabb\_`b`\_ababb^aaaba`aab`aaa^aaY`\_``\_a  
@HWI-EAS443:3:31:522:983#0/1  
GTTCTTCTTGTCTTCCTGATGTGTACTTTTTGATTATG  
+HWI-EAS443:3:31:522:983#0/1  
aaaaabaaaaaaaaaabbba\_a\_]Z\_¥aaaaaa\_`a`a\_Y  
@HWI-EAS443:3:32:1462:311#0/1  
GGCCATAATCAAAAAGTACACATCAGGAAGACAAGAGAAG  
+HWI-EAS443:3:32:1462:311#0/1  
`bSZZZ]W[[a]VUUZF]]\_^^aT[]^\_aaXU^V]QZO[a  
@HWI-EAS443:3:34:1202:796#0/1  
CTTCTTCTTGTCTTCCTGATGTGTACTTTTTGATTATGGCC  
+HWI-EAS443:3:34:1202:796#0/1  
abbbbbbbbaabbbbbbabaaaaaabbba`aaa¥JWU\_  
@HWI-EAS443:3:34:405:799#0/1  
GTTCTTCTTGTCTTCCTGATGTGTACTTTTTGATTATG  
+HWI-EAS443:3:34:405:799#0/1  
`abbbbbbbbaaaabbaaaa^aaa\_a\_aaaaaa`aa\_a\_\_  
@HWI-EAS443:3:35:1466:1833#0/1  
GTTCTTCTTGTCTTCCTGATGTGTACTTTTTGATTATG  
+HWI-EAS443:3:35:1466:1833#0/1  
a`\_S]\_^X`[¥`[[`X^\_]QTXXU[V]U\_aaaaYa`\_aZ\_  
@HWI-EAS443:3:35:1755:185#0/1  
GCCATAATCAAAAAGTACACATCAGGAAGACAAGAGAAGA  
+HWI-EAS443:3:35:1755:185#0/1  
]a\_\_b`]b`\_`aa]b\_aZ^VU`[a^P\_[`]\_aab^a^aWN  
@HWI-EAS443:3:35:224:982#0/1  
TGGCCATAATCAAAAAGTACACATCAGGAAGACAAGAGAA

+HWI-EAS443:3:35:224:982#0/1  
aaababa]baaaaa]aa]bbaaa`aaa]Y`a\_aaYa`a`a  
@HWI-EAS443:3:35:586:263#0/1  
ATGGCCATAATCAAAAAGTACACATCAGGAAGACAAGAGA  
+HWI-EAS443:3:35:586:263#0/1  
a\_`aa^\_¥W\_\_`\_^X]^`^X\_U^]Y¥^]]T]^`^XZ]^`^X^Z  
@HWI-EAS443:3:36:1399:968#0/1  
GTTCTTCTCTTGCTTCCTGATGTGTACTTTTTGATTATG  
+HWI-EAS443:3:36:1399:968#0/1  
aX¥b`\_aaaaaaM`aa\_\_JZ[MUaV¥T``]^`^U`][PK  
@HWI-EAS443:3:36:662:1247#0/1  
CTTCTCTTGCTTCCTGATGTGTACTTTTTGATTATGGCC  
+HWI-EAS443:3:36:662:1247#0/1  
abababaaa`baaaa[]aa^¥^¥[^aa`aaa`^^\_¥Z\_a  
@HWI-EAS443:3:37:764:1503#0/1  
GCCATAATCAAAAAGTACACATCAGGAAGACAAGAGAAGA  
+HWI-EAS443:3:37:764:1503#0/1  
aba`a^\_a^\_\_\_Y^Ra`aaaa\_a``\_^b`Q\_`]Z]\_\_\_  
@HWI-EAS443:3:38:794:654#0/1  
TCTCTTGCTTCCTGATGTGTACTTTTTGATTATGGCCAT  
+HWI-EAS443:3:38:794:654#0/1  
aabaaaa\_aaa[]\_]`\_a^`]\_\_a`a``\_¥\_\_Z\_^]VX¥0  
@HWI-EAS443:3:38:858:58#0/1  
CATAATCAAAAAGTACACATCAGGAAGACAAGAGAAGAAC  
+HWI-EAS443:3:38:858:58#0/1  
`abaababaaa\_b^baa`aaaaa`ab`a\_Ua^a`^`a\_X  
@HWI-EAS443:3:39:1740:457#0/1  
GCCATAATCAAAAAGTACACATCAGGAAGACAAGAGAAGA  
+HWI-EAS443:3:39:1740:457#0/1  
aaa`\_Z]a\_a^XXV`P^]]\_X[\_Xa`¥¥\_USXW^]\_YZ\_X  
@HWI-EAS443:3:3:193:444#0/1  
TTCTCTTGCTTCCTGATGTGTACTTTTTGATTATGGCCA  
+HWI-EAS443:3:3:193:444#0/1  
a`baaba^aaa`aa^`b^`\_\_\_a^a^aa`\_\_a\_]`^\_]¥  
@HWI-EAS443:3:3:700:1493#0/1  
GCCATAATCAAAAAGTACACATCAGGAAGACAAGAGAAGA  
+HWI-EAS443:3:3:700:1493#0/1  
a\_] [WXZ]]TX`^\_I`¥`\_]\_]X^[Y`^\_ZRU\_]\_[BBB  
@HWI-EAS443:3:3:723:707#0/1  
CATAATCAAAAAGTACACATCAGGAAGACAAGAGAAGAAC  
+HWI-EAS443:3:3:723:707#0/1  
abbabbbbbb`bb`baabbaabaabaabababababaa\_  
@HWI-EAS443:3:3:831:623#0/1  
CCATAATCAAAAAGTACACATCAGGAAGACAAGAGAAGAA  
+HWI-EAS443:3:3:831:623#0/1  
aa\_^] []Za[]aa¥F`aa`ba]^]baab¥`a\_a`b\_\_`aa  
@HWI-EAS443:3:40:1630:1321#0/1  
GCCATAATCAAAAAGTACACATCAGGAAGACAAGAGAAGA  
+HWI-EAS443:3:40:1630:1321#0/1  
aVSYN]^` [TZ\_`^VRRTYLYW]VQZ`PYRWVLXT[ZZVV\_]`

@HWI-EAS443:3:40:396:1807#0/1  
TGGCCATAATCAAAAAGTACACATCAGGAAGACAAGAGAA  
+HWI-EAS443:3:40:396:1807#0/1  
[bbabY`b`^¥a]¥a\_WYabbabba^[`S\_`]^b``[¥K^  
@HWI-EAS443:3:42:1050:287#0/1  
CATAATCAAAAAGTACACATCAGGAAGACAAGAGAAGAAC  
+HWI-EAS443:3:42:1050:287#0/1  
abaaababbab\_b¥babaaaaabaabaaaaaaa\_`a`a`  
@HWI-EAS443:3:42:1572:690#0/1  
ATGGCCATAATCAAAAAGTACACATCAGGAAGACAAGAGA  
+HWI-EAS443:3:42:1572:690#0/1  
Y^bb^\_Y^IW¥QT¥ab\_¥R]aZa¥LUS¥a^YXR^]\_aW\_  
@HWI-EAS443:3:42:653:1261#0/1  
ATGGCCATAATCAAAAAGTACACATCAGGAAGACAAGAGA  
+HWI-EAS443:3:42:653:1261#0/1  
a\_]a\_aa\_a\_aa`a`\_W\_¥`\_`\_`\_a\_a`^\_\_\_¥U^^  
@HWI-EAS443:3:42:796:670#0/1  
GCCATAATCAAAAAGTACACATCAGGAAGACAAGAGAAGA  
+HWI-EAS443:3:42:796:670#0/1  
aaa¥[S]¥]aY¥¥aS[¥\_^^^]\_a`\_Ya^\_`\_`\_Ya[Y]\_  
@HWI-EAS443:3:43:1342:979#0/1  
GGCCATAATCAAAAAGTACACATCAGGAAGACAAGAGAAG  
+HWI-EAS443:3:43:1342:979#0/1  
]M\_a]LOYZ]XUUS^^Y^`YY]^^` [[]\_QO[ZX[\_[S[  
@HWI-EAS443:3:44:1236:444#0/1  
GTTCTTCTCTTGCTTCCTGATGTGTACTTTTTGATTATG  
+HWI-EAS443:3:44:1236:444#0/1  
a¥a`a`\_a^aaa\_`a^\_\_a]\_aZ\_WO¥`a`\_`[U^Z^[M  
@HWI-EAS443:3:44:757:1757#0/1  
GGCCATAATCAAAAAGTACACATCAGGAAGACAAGAGAAG  
+HWI-EAS443:3:44:757:1757#0/1  
aababbbbaabbabbaYaaa`a`\_`a^aaaaaaaa\_aa`a`  
@HWI-EAS443:3:44:970:1434#0/1  
CATAATCAAAAAGTACACATCAGGAAGACAAGAGAAGAAC  
+HWI-EAS443:3:44:970:1434#0/1  
aabaababbabba^abaaa^abaaa`aa`baaaaaa^  
@HWI-EAS443:3:45:1377:1419#0/1  
CATAATCAAAAAGTACACATCAGGAAGACAAGAGAAGAAC  
+HWI-EAS443:3:45:1377:1419#0/1  
`abaaa`aa]`a^a\_a^`Z\_a^^``]`\_a\_a`^`\_]W  
@HWI-EAS443:3:48:1330:658#0/1  
TGGCCATAATCAAAAAGTACACATCAGGAAGACAAGAGAA  
+HWI-EAS443:3:48:1330:658#0/1  
RY`\_X]]WWZQ]aa`XZKZQ]]a\_]`^baYZ`QL[Wa]a\_X  
@HWI-EAS443:3:48:133:676#0/1  
TTCTCTTGCTTCCTGATGTGTACTTTTTGATTATGGCCA  
+HWI-EAS443:3:48:133:676#0/1  
aaab`aab^`baaaa``a¥¥[a`aaaaa\_``a¥¥]\_^^  
@HWI-EAS443:3:48:1598:455#0/1  
CATAATCAAAAAGTACACATCAGGAAGACAAGAGAAGAAC

+HWI-EAS443:3:48:1598:455#0/1  
`bbVQ\_T\_bbb^`ababab\_`aab`bbaabababa]ba`]  
@HWI-EAS443:3:49:1718:813#0/1  
GTTCTTCTCTTGCTTCCTGATGTGTACTTTTTGATTATG  
+HWI-EAS443:3:49:1718:813#0/1  
a]babbbbbbba\_aaa````aaZ\_\_¥aaaaa]^`a`\_]  
@HWI-EAS443:3:49:679:118#0/1  
CTTCTCTTGCTTCCTGATGTGTACTTTTTGATTATGGCC  
+HWI-EAS443:3:49:679:118#0/1  
abbabbbbbbbaa````bbabababbbb^bbbbbZ``  
@HWI-EAS443:3:4:1240:1800#0/1  
TGGCCATAATCAAAAAGTACACATCAGGAAGACAAGAGAA  
+HWI-EAS443:3:4:1240:1800#0/1  
abb`a^a`b`]bababa\_b]bab\_NabaaaaZJ]aaaa`a  
@HWI-EAS443:3:4:154:408#0/1  
CTTCTCTTGCTTCCTGATGTGTACTTTTTGATTATGGCC  
+HWI-EAS443:3:4:154:408#0/1  
abb\_b^bbb^aaaaaaaaa^aY``ba``a\_^¥Yaa`Y`\_  
@HWI-EAS443:3:50:249:721#0/1  
GTTCTTCTCTTGCTTCCTGATGTGTACTTTTTGATTATG  
+HWI-EAS443:3:50:249:721#0/1  
\_\_aaaaaa\_aaa^[abaa`a\_`¥RaZ\_\_baaa`X[a`\_a\_  
@HWI-EAS443:3:50:391:440#0/1  
GTTCTTCTCTTGCTTCCTGATGTGTACTTTTTGATTATG  
+HWI-EAS443:3:50:391:440#0/1  
T¥\_ab]¥¥`\_b`b^\_`^`][Y]\_H\_a]bbbbbb````bbab`  
@HWI-EAS443:3:50:700:1046#0/1  
CATAATCAAAAAGTACACATCAGGAAGACAAGAGAAGAAC  
+HWI-EAS443:3:50:700:1046#0/1  
¥bbbab]b\_V\_b]ab`[ab[a\_aaba`bab\_baa`[`a  
@HWI-EAS443:3:50:853:1637#0/1  
TTCTTCTCTTGCTTCCTGATGTGTACTTTTTGATTATGG  
+HWI-EAS443:3:50:853:1637#0/1  
[aa^a`Z``[a`aa`X]\_¥[\_YaSaaa^WZ\_]^[NZ  
@HWI-EAS443:3:51:1327:2038#0/1  
GCCATAATCAAAAAGTACACATCAGGAAGACAAGAGAAGA  
+HWI-EAS443:3:51:1327:2038#0/1  
aaaaaa`b`aaaZ`\_]aa\_[aa`\_b[aaaa\_a][[\_Y`\_`\_  
@HWI-EAS443:3:51:690:312#0/1  
ATGGCCATAATCAAAAAGTACACATCAGGAAGACAAGAGA  
+HWI-EAS443:3:51:690:312#0/1  
aab]aa``\_] ^W\_aaaaL\_^`U]]¥`baV\_a¥Za]aZa\_  
@HWI-EAS443:3:52:1512:835#0/1  
ATGGCCATAATCAAAAAGTACACATCAGGAAGACAAGAGA  
+HWI-EAS443:3:52:1512:835#0/1  
`a\_Y\_a^a^`a`X`\_]\_a¥a^`a\_Ya]Ya¥¥\_\_aa`a\_  
@HWI-EAS443:3:52:899:364#0/1  
GTTCTTCTCTTGCTTCCTGATGTGTACTTTTTGATTATG  
+HWI-EAS443:3:52:899:364#0/1  
aababaababbaaaaa\_aaa`aa\_a\_\_\_aaa`a\_\_a``\_^

@HWI-EAS443:3:54:1060:1029#0/1  
GGCCATAATCAAAAAGTACACATCAGGAAGACAAGAGAAG  
+HWI-EAS443:3:54:1060:1029#0/1  
aaaaabbab^baabba\_bbbaababbaa`b`\_b``aaaaa  
@HWI-EAS443:3:55:884:659#0/1  
GCCATAATCAAAAAGTACACATCAGGAAGACAAGAGAAGA  
+HWI-EAS443:3:55:884:659#0/1  
a]TFQ```\_TRU^aU^Za`P¥P¥PP`aYJ[XWZ\_\_X\_\_X[[  
@HWI-EAS443:3:55:93:1310#0/1  
TTCTTCTCTTGTCTTCCTGATGTGTACTTTTTGATTATGG  
+HWI-EAS443:3:55:93:1310#0/1  
aaaaaabaaaa`aaa`aa\_\_`aX`^\_\_aaaaaZ\_````\_Y  
@HWI-EAS443:3:56:1126:457#0/1  
TCTTCTCTTGTCTTCCTGATGTGTACTTTTTGATTATGGC  
+HWI-EAS443:3:56:1126:457#0/1  
a`aW`^¥^[V\_a¥`^\_^Z\_X[YZ^\_aa^aZ^\_^\_WW^Y  
@HWI-EAS443:3:56:1765:1173#0/1  
GCCATAATCAAAAAGTACACATCAGGAAGACAAGAGAAGA  
+HWI-EAS443:3:56:1765:1173#0/1  
abaaaaabab`^aa\_\_aaa^a`]]`]]`¥]aaaa\_`U¥\_  
@HWI-EAS443:3:56:381:1849#0/1  
GCCATAATCAAAAAGTACACATCAGGAAGACAAGAGAAGA  
+HWI-EAS443:3:56:381:1849#0/1  
aa`bbbababbaaaaaXbaaaaa`aa`abaaaaa`a`a^\_  
@HWI-EAS443:3:57:119:503#0/1  
GCCATAATCAAAAAGTACACATCAGGAAGACAAGAGAAGA  
+HWI-EAS443:3:57:119:503#0/1  
`aaaa\_`aba`aa]a¥`a\_aa`aaaaaaa¥\_a```a¥Z\_a  
@HWI-EAS443:3:57:1232:993#0/1  
GTTCTTCTCTTGTCTTCCTGATGTGTACTTTTTGATTATG  
+HWI-EAS443:3:57:1232:993#0/1  
^[a]a`aa¥¥^a`]`a¥TZ\_S¥\_S¥W¥Za`aaaX`\_`[\_¥  
@HWI-EAS443:3:58:566:1924#0/1  
GGCCATAATCAAAAAGTACACATCAGGAAGACAAGAGAAG  
+HWI-EAS443:3:58:566:1924#0/1  
abbab`\_bbababb^bZbbbabb\_bb`bbbabbabab^  
@HWI-EAS443:3:59:1741:567#0/1  
GGCCATAATCAAAAAGTACACATCAGGAAGACAAGAGAAG  
+HWI-EAS443:3:59:1741:567#0/1  
ababbabaaa]]\_aa`a`a]a`^aaaaba`G```NH\_¥Z  
@HWI-EAS443:3:59:674:381#0/1  
GTTCTTCTCTTGTCTTCCTGATGTGTACTTTTTGATTATG  
+HWI-EAS443:3:59:674:381#0/1  
aab`bbaaabbaaabbaabbaaa\_bZT^baaaaaa\_^aa[  
@HWI-EAS443:3:61:1232:83#0/1  
CATAATCAAAAAGTACACATCAGGAAGACAAGAGAAGAAC  
+HWI-EAS443:3:61:1232:83#0/1  
abbbababbbbbbabbababbbbaabbbb\_bab`aaa`a`^  
@HWI-EAS443:3:61:1713:253#0/1  
GCCATAATCAAAAAGTACACATCAGGAAGACAAGAGAAGA

+HWI-EAS443:3:61:1713:253#0/1  
a\_]aaaaX¥aaa`aWa\_a]Y\_\_abaa\_\_[R`^^]\_][]  
@HWI-EAS443:3:63:111:1264#0/1  
GTTCTTCTCTTGCTTCCTGATGTGTACTTTTTGATTATG  
+HWI-EAS443:3:63:111:1264#0/1  
]OTZM^ba^]\_\_T`aa\_¥OXW^GYYJRS^aa\_H]XaBBB  
@HWI-EAS443:3:63:389:1200#0/1  
CTTCTCTTGCTTCCTGATGTGTACTTTTTGATTATGGCC  
+HWI-EAS443:3:63:389:1200#0/1  
aaababaaa\_aaaaaa^`a^a^¥`aaa`T`a`a\_S[\_a  
@HWI-EAS443:3:64:439:1006#0/1  
TGGCCATAATCAAAAAGTACACATCAGGAAGACAAGAGAA  
+HWI-EAS443:3:64:439:1006#0/1  
[aWaa`\_\_][bbbZZRP[bab\_¥¥XH]Z`]]`aXXTN`ZN  
@HWI-EAS443:3:65:593:1900#0/1  
CATAATCAAAAAGTACACATCAGGAAGACAAGAGAAGAAC  
+HWI-EAS443:3:65:593:1900#0/1  
aaa`\_aa\_aZQ[Ua]\_]`Y`aa\_\_ZQ]a`[U`Z[ZXZ^a  
@HWI-EAS443:3:67:1378:901#0/1  
GCCATAATCAAAAAGTACACATCAGGAAGACAAGAGAAGA  
+HWI-EAS443:3:67:1378:901#0/1  
^`ab\_abaabba`XYbabaabbaabaaaa`bababaaaa  
@HWI-EAS443:3:67:163:1829#0/1  
GGCCATAATCAAAAAGTACACATCAGGAAGACAAGAGAAG  
+HWI-EAS443:3:67:163:1829#0/1  
¥ab\_X\_\_`b`bbb`aZa`bbb\_b`a`a\_JTba\_a^¥]`ba  
@HWI-EAS443:3:67:1699:474#0/1  
CCATAATCAAAAAGTACACATCAGGAAGACAAGAGAAGAA  
+HWI-EAS443:3:67:1699:474#0/1  
ab``aaa`a]^baa\_baaaaaaaaabaaaa^b\_aaa`  
@HWI-EAS443:3:68:1695:793#0/1  
GCCATAATCAAAAAGTACACATCAGGAAGACAAGAGAAGA  
+HWI-EAS443:3:68:1695:793#0/1  
^a```\_`^`^`^`\_S^Wa`\_]a`aaa]^¥X]a`¥^^  
@HWI-EAS443:3:68:399:820#0/1  
GGCCATAATCAAAAAGTACACATCAGGAAGACAAGAGAAG  
+HWI-EAS443:3:68:399:820#0/1  
aabbba`aba]baaaa]baaabaaaaabaa`a\_aa`\_a`  
@HWI-EAS443:3:68:456:1162#0/1  
TGGCCATAATCAAAAAGTACACATCAGGAAGACAAGAGAA  
+HWI-EAS443:3:68:456:1162#0/1  
aa`bbabbbbbbabaaa^bbaa`a\_aa`abaaaaa```a  
@HWI-EAS443:3:68:527:1484#0/1  
ATGGCCATAATCAAAAAGTACACATCAGGAAGACAAGAGA  
+HWI-EAS443:3:68:527:1484#0/1  
a`abaaaa`a]`a`a\_Za\_aaa\_^^^\_aa\_¥\_\_Y^\_]`^  
@HWI-EAS443:3:69:738:1479#0/1  
GTTCTTCTCTTGCTTCCTGATGTGTACTTTTTGATTATG  
+HWI-EAS443:3:69:738:1479#0/1  
\_abbbbabbaaa\_aaa`aa`aa`\_a^aaaaaa]a`````\_`



@HWI-EAS443:3:69:985:1266#0/1  
ATGGCCATAATCAAAAAGTACACATCAGGAAGACAAGAGA  
+HWI-EAS443:3:69:985:1266#0/1  
a\_[X\_\_\_\_]^Z]\_^\_\_ZWR^VZV^Z]ZW]Z^¥XX]OZZXZ  
@HWI-EAS443:3:6:304:1848#0/1  
GGCCATAATCAAAAAGTACACATCAGGAAGACAAGAGAAG  
+HWI-EAS443:3:6:304:1848#0/1  
JTa`baS\_a`bbb`baJabaVaa]ba^baa`baabaa`aa  
@HWI-EAS443:3:6:956:177#0/1  
GCCATAATCAAAAAGTACACATCAGGAAGACAAGAGAAGA  
+HWI-EAS443:3:6:956:177#0/1  
ab]\_\_\_\_\_`\_\_\_\_]\_]aX^U^Y]^YX^X]V\_YY^^^]`BBBB  
@HWI-EAS443:3:70:1690:1230#0/1  
CCATAATCAAAAAGTACACATCAGGAAGACAAGAGAAGAA  
+HWI-EAS443:3:70:1690:1230#0/1  
abbbbbbbabbbbbbababbbbbabbbbbbbbbbbbab  
@HWI-EAS443:3:70:185:191#0/1  
TGGCCATAATCAAAAAGTACACATCAGGAAGACAAGAGAA  
+HWI-EAS443:3:70:185:191#0/1  
a`\_`\_^\_¥\_Zb\_\_\_\_`[\_F\_a`U[^^^X\_] ]^aa`\_]a`¥  
@HWI-EAS443:3:71:199:628#0/1  
CATAATCAAAAAGTACACATCAGGAAGACAAGAGAAGAAC  
+HWI-EAS443:3:71:199:628#0/1  
ab\_aabaabaabb¥baaa\_aba`aa^`aWaa^`\_\_`aaZ  
@HWI-EAS443:3:72:1361:928#0/1  
TGGCCATAATCAAAAAGTACACATCAGGAAGACAAGAGAA  
+HWI-EAS443:3:72:1361:928#0/1  
`\_SZ`aaaa]b]ab^SVI\_HaYaZNSb`]a`\_`]a`a[a]  
@HWI-EAS443:3:72:1427:318#0/1  
TTCTTCTTGTCTTCCTGATGTGTACTTTTTGATTATGG  
+HWI-EAS443:3:72:1427:318#0/1  
]a`]Z][OW`aZVX^¥aaZ¥```a^MLZ`aaa^[a^\_`BB  
@HWI-EAS443:3:72:515:804#0/1  
TGGCCATAATCAAAAAGTACACATCAGGAAGACAAGAGAA  
+HWI-EAS443:3:72:515:804#0/1  
a][^^a^`\_Z\_]][^]V^aa`aa]]`^^\_aa`a^`\_a  
@HWI-EAS443:3:72:727:1526#0/1  
CTTCTTGTCTTCCTGATGTGTACTTTTTGATTATGGCC  
+HWI-EAS443:3:72:727:1526#0/1  
a`^^a`]aa^]```[``[¥VT^UZ¥aa`][[]]¥YKDW\_  
@HWI-EAS443:3:73:537:763#0/1  
ATGGCCATAATCAAAAAGTACACATCAGGAAGACAAGAGA  
+HWI-EAS443:3:73:537:763#0/1  
¥^\_ab\_S`^Wba\_baZZQZ¥X[aaa\_W¥``baa\_bY]Y[Z  
@HWI-EAS443:3:74:318:887#0/1  
GTTCTTCTTGTCTTCCTGATGTGTACTTTTTGATTATG  
+HWI-EAS443:3:74:318:887#0/1  
`¥`a`[\_aaa^LX\_a]aa]S]]P]YQT][`\_Z^a\_\_U]R  
@HWI-EAS443:3:74:905:1044#0/1  
GGCCATAATCAAAAAGTACACATCAGGAAGACAAGAGAAG

+HWI-EAS443:3:74:905:1044#0/1  
abaabbaabaab`baa\_bbaaba`aaaaab`abaaaaaa\_  
@HWI-EAS443:3:75:822:990#0/1  
TGGCCATAATCAAAAAGTACACATCAGGAAGACAAGAGAA  
+HWI-EAS443:3:75:822:990#0/1  
`bb`bbbabb`^`b¥X`aabbba\_[ba``bb`Y````aa`a  
@HWI-EAS443:3:75:829:406#0/1  
GTTCTTCTTGTCTTCCTGATGTGTACTTTTTGATTATG  
+HWI-EAS443:3:75:829:406#0/1  
aaabbbabbba\_`aaaabaa`aaaaXa\_b`abaaaaaaa  
@HWI-EAS443:3:77:344:1962#0/1  
GCCATAATCAAAAAGTACACATCAGGAAGACAAGAGAAGA  
+HWI-EAS443:3:77:344:1962#0/1  
]bbbbaXRZ`V^aV\_Rb\_U\_a\_b^ZZ\_SZ`Yb]a]aaa]Z  
@HWI-EAS443:3:79:909:1759#0/1  
GCCATAATCAAAAAGTACACATCAGGAAGACAAGAGAAGA  
+HWI-EAS443:3:79:909:1759#0/1  
\_^]\_^]¥ZU]\_^V\_aa`[[a`aa`[]\_a¥S^\_\_`[\_`\_  
@HWI-EAS443:3:7:1493:357#0/1  
TGGCCATAATCAAAAAGTACACATCAGGAAGACAAGAGAA  
+HWI-EAS443:3:7:1493:357#0/1  
]b\_YW¥bRW¥aaab\_0]QZ¥aY]\_V\_aaa`aZLZ\_a\_``]  
@HWI-EAS443:3:7:539:926#0/1  
TGGCCATAATCAAAAAGTACACATCAGGAAGACAAGAGAA  
+HWI-EAS443:3:7:539:926#0/1  
aba`aaba[^aa`\_aba^a`baa^\_aaa\_a`a]a`aa``a  
@HWI-EAS443:3:7:587:590#0/1  
GGCCATAATCAAAAAGTACACATCAGGAAGACAAGAGAAG  
+HWI-EAS443:3:7:587:590#0/1  
Z\_U```X`\_R\_aa`\_U]`WaVa]aabb`bba]aXa^baab  
@HWI-EAS443:3:82:1242:625#0/1  
CCATAATCAAAAAGTACACATCAGGAAGACAAGAGAAGAA  
+HWI-EAS443:3:82:1242:625#0/1  
```aa]\_babX]\_]WS^Z]Za`a^ba`aaa`b`aaa`\_\_\_\_a  
@HWI-EAS443:3:82:296:1964#0/1  
GGCCATAATCAAAAAGTACACATCAGGAAGACAAGAGAAG  
+HWI-EAS443:3:82:296:1964#0/1  
[^bbbb`babbbbbbbabb]bbabbbbbbb\_\_bbbbbbbbbb  
@HWI-EAS443:3:82:981:1289#0/1  
GGCCATAATCAAAAAGTACACATCAGGAAGACAAGAGAAG  
+HWI-EAS443:3:82:981:1289#0/1  
`a\_baaabaaa``aba\_baa`aaaaaaaaaaba`a`aa  
@HWI-EAS443:3:83:1678:1134#0/1  
GGCCATAATCAAAAAGTACACATCAGGAAGACAAGAGAAG  
+HWI-EAS443:3:83:1678:1134#0/1  
`aR]`a^Ya````aaWaYb]aY\_`^aWa\_[a`\_`¥a]a\_\_a  
@HWI-EAS443:3:84:37:592#0/1  
CTTCTCTTGTCTTCCTGATGTGTACTTTTTGATTATGGCC  
+HWI-EAS443:3:84:37:592#0/1  
abaaabaaa\_aaaaaa^Q^aY`XT]`a`a^``]S[a^`\_`

@HWI-EAS443:3:84:771:500#0/1  
GCCATAATCAAAAAGTACACATCAGGAAGACAAGAGAAGA  
+HWI-EAS443:3:84:771:500#0/1  
a]baa[aa¥ZaaT\_a`baa¥aXU\_]aY\_a\_Za\_`]`\_\_Y]  
@HWI-EAS443:3:85:327:695#0/1  
GGCCATAATCAAAAAGTACACATCAGGAAGACAAGAGAAG  
+HWI-EAS443:3:85:327:695#0/1  
abaabaaba` `[a\_a^aaaaaaaaba]aaa¥a¥aaa\_a`  
@HWI-EAS443:3:85:446:1390#0/1  
GCCATAATCAAAAAGTACACATCAGGAAGACAAGAGAAGA  
+HWI-EAS443:3:85:446:1390#0/1  
]`b`bbbb`aU^`aa[b]`aabaa`aaaaa]]Zaaaa  
@HWI-EAS443:3:85:592:611#0/1  
TGGCCATAATCAAAAAGTACACATCAGGAAGACAAGAGAA  
+HWI-EAS443:3:85:592:611#0/1  
[ `^¥`\_ORV\_^b[¥WWW¥a`bb`Yb^a¥a^W`a`X\_Za  
@HWI-EAS443:3:85:925:1737#0/1  
CATAATCAAAAAGTACACATCAGGAAGACAAGAGAAGAAC  
+HWI-EAS443:3:85:925:1737#0/1  
a`^aX^aL\_U`\_Naa`¥`aaaa\_^\_]baa]]Yaa` `^  
@HWI-EAS443:3:85:93:1148#0/1  
GGCCATAATCAAAAAGTACACATCAGGAAGACAAGAGAAG  
+HWI-EAS443:3:85:93:1148#0/1  
[^aaWZababbaW¥¥\_]\_ZS`]]` `bbaaZaaaa`aaa`  
@HWI-EAS443:3:86:864:509#0/1  
GCCATAATCAAAAAGTACACATCAGGAAGACAAGAGAAGA  
+HWI-EAS443:3:86:864:509#0/1  
a`\_\_a`[aaa^aa\_a^a`a\_aa`a`a^aa`^\_\_a]`YUZ¥  
@HWI-EAS443:3:87:1509:372#0/1  
CCATAATCAAAAAGTACACATCAGGAAGACAAGAGAAGAA  
+HWI-EAS443:3:87:1509:372#0/1  
aaaabbbababbaa`baaaba^¥aaa\_aaababbabb^aa  
@HWI-EAS443:3:88:1034:1241#0/1  
GGCCATAATCAAAAAGTACACATCAGGAAGACAAGAGAAG  
+HWI-EAS443:3:88:1034:1241#0/1  
abab\_Y\_abbbb`ab]\_aaabbaaaa`bbb`ab``aaaa  
@HWI-EAS443:3:88:218:771#0/1  
GTTCTTCTTGTCTTCCTGATGTGTACTTTTTGATTATG  
+HWI-EAS443:3:88:218:771#0/1  
aaaaaaaaaaaaaaaaaaaa`aa`a`\_a^`a``aaaa\_a\_``^  
@HWI-EAS443:3:88:411:973#0/1  
CATAATCAAAAAGTACACATCAGGAAGACAAGAGAAGAAC  
+HWI-EAS443:3:88:411:973#0/1  
aba^X^abaa`ab`ababbb` `b`bbbabbbbaaababa  
@HWI-EAS443:3:8:1287:325#0/1  
TTCTTCTCTTGTCTTCCTGATGTGTACTTTTTGATTATGG  
+HWI-EAS443:3:8:1287:325#0/1  
]¥]^aZ^[^`aZH`¥RV^a\_abT[WPW`Y``ZZZT`XTYB  
@HWI-EAS443:3:8:399:1367#0/1  
GGCCATAATCAAAAAGTACACATCAGGAAGACAAGAGAAG

+HWI-EAS443:3:8:399:1367#0/1  
aaaaab^W`aa`¥^[^Va`aa`^aa¥Z]aa[\_`\_\_\_Za\_  
@HWI-EAS443:3:90:1043:1536#0/1  
TTCTTCTCTTGTCTTCCTGATGTGTACTTTTTGATTATGG  
+HWI-EAS443:3:90:1043:1536#0/1  
\_bbababaabb`baaaa\_\_ab`]`\_]J]\_a\_^\_\_\_\_UY  
@HWI-EAS443:3:90:1136:1043#0/1  
CTTCTCTTGTCTTCCTGATGTGTACTTTTTGATTATGGCC  
+HWI-EAS443:3:90:1136:1043#0/1  
abbbbaabbb`baabaababbab^`babbbbabaaa¥aa\_  
@HWI-EAS443:3:90:1138:550#0/1  
GCCATAATCAAAAAGTACACATCAGGAAGACAAGAGA  
+HWI-EAS443:3:90:1138:550#0/1  
ab`abbabbaa`aaa]baaaaaa`a`aa\_aa`aaa\_a  
@HWI-EAS443:3:92:1491:760#0/1  
ATGGCCATAATCAAAAAGTACACATCAGGAAGACAAGAGA  
+HWI-EAS443:3:92:1491:760#0/1  
aa\_`a`a`a\_Ya\_\_a`adMZ]\_0\_`^¥aa\_\_^\_[Z\_]U  
@HWI-EAS443:3:93:113:390#0/1  
TTCTCTTGTCTTCCTGATGTGTACTTTTTGATTATGGCCA  
+HWI-EAS443:3:93:113:390#0/1  
aaba^a`[[]`abaaa\_X\_aUa\_aaaaaa`a\_\_`]^\_^  
@HWI-EAS443:3:98:469:1622#0/1  
ATGGCCATAATCAAAAAGTACACATCAGGAAGACAAGAGA  
+HWI-EAS443:3:98:469:1622#0/1  
`aaba\_b\_]`\_\_`aaaa^Taa`a\_\_\_\_\_`^``¥a\_]\_\_\_\_  
@HWI-EAS443:3:98:787:1376#0/1  
CATAATCAAAAAGTACACATCAGGAAGACAAGAGAAGAAC  
+HWI-EAS443:3:98:787:1376#0/1  
a\_abababab`bbabbabbb`bbbbbabbabbbbbbbbbb`  
@HWI-EAS443:3:99:215:172#0/1  
GCCATAATCAAAAAGTACACATCAGGAAGACAAGAGA  
+HWI-EAS443:3:99:215:172#0/1  
abaa^¥Z^`baa`a]D]VVZ`^Y]ab`V`^`Xa]¥]`aa  
@HWI-EAS443:3:9:1456:970#0/1  
GTTCTTCTCTTGTCTTCCTGATGTGTACTTTTTGATTATG  
+HWI-EAS443:3:9:1456:970#0/1  
aabaabaaaaba`aa[^aaa`a`\_]a`a`a`a`a`\_a\_  
@HWI-EAS443:3:9:1472:1479#0/1  
ATGGCCATAATCAAAAAGTACACATCAGGAAGACAAGAGA  
+HWI-EAS443:3:9:1472:1479#0/1  
aaaa\_\_aa`\_^Q]`aa\_a[a`^`\_`\_a\_a]a^V^\_a\_a^  
@HWI-EAS443:3:9:407:170#0/1  
ATGGCCATAATCAAAAAGTACACATCAGGAAGACAAGAGA  
+HWI-EAS443:3:9:407:170#0/1  
a`aaaaaaa`aaaaa\_aZa\_\_Q\_\_^]`^`\_¥T¥\_]\_^  
@HWI-EAS443:3:84:602:1639#0/1  
GGCCATGTACCATTCTGTTTTTCATGCCTGATTAGTGGATT  
+HWI-EAS443:3:84:602:1639#0/1  
aab`[\_`¥0aabba`^ab\_aaaaaaaaaaaaaaaaaZaa\_a`

@HWI-EAS443:3:14:56:978#0/1  
AAGCAGGTCAAATATATTCAATATGGAGAGAAAAAGATGT  
+HWI-EAS443:3:14:56:978#0/1  
\_a\_bbaa[abbab`aaaa`a`aab`a`]aaaa]¥aa`a[  
@HWI-EAS443:3:10:1733:328#0/1  
TAGGGCTACTGAATACATAATGAAGGGAGTGTACATAAAT  
+HWI-EAS443:3:10:1733:328#0/1  
aaba`bbbaabb\_baQ`bbabbaa`]baa\_baa\_]aaab`  
@HWI-EAS443:3:88:1390:1178#0/1  
GGCCGTCTGAGTTCTTCAATGGTGAACAGATNTTCATGA  
+HWI-EAS443:3:88:1390:1178#0/1  
ab\_[b\_U]^R`V```bba[bb`aaaW]]bb\_¥D^bVbaab  
@HWI-EAS443:3:89:270:1739#0/1  
AGGGCCGTCTGAGTTCTTCAATGGTGAACAGATCTTCAT  
+HWI-EAS443:3:89:270:1739#0/1  
^QOS¥^[S\_XTY¥Y¥[\_V^]]R]VTRSZ^UV[Z[\_\_\_[[`S  
@HWI-EAS443:3:47:1455:1552#0/1  
TGGCCGTCTGAGTTCTTCAATGGTGAACAGATCTTCATG  
+HWI-EAS443:3:47:1455:1552#0/1  
ababab\_a`]\_a\_a`aa`a`a[Ua\_`\_N\_]`] `a¥` ` ]  
@HWI-EAS443:3:57:110:1099#0/1  
GGCCGTCTGAGTTCTTCAATGGTGAACAGATCTTCATGA  
+HWI-EAS443:3:57:110:1099#0/1  
aabba]abba\_Ya\_aaaVaa`bYaa`a^a\_a\_aaa` `a\_\_  
@HWI-EAS443:3:60:1563:1950#0/1  
GGCCGTCTGAGTTCTTCAATGGTGAACAGATCTTCATGA  
+HWI-EAS443:3:60:1563:1950#0/1  
ab]``GYaaZ]P[¥Ya\_Wa\_¥TSLZP[U^^X¥RPW^ZYMU  
@HWI-EAS443:3:30:1721:1269#0/1  
CTCTGGAGCAAACAAACGATGCTGGATCAGATCGAGTGA  
+HWI-EAS443:3:30:1721:1269#0/1  
ab`bbabbbbb`\_bbbbXH^bbT`bba^L`N^HDY]aWaU  
@HWI-EAS443:3:77:475:23#0/1  
CAAGGTACTTTTTGGACAGTATGGATAACAAATAGTAGC  
+HWI-EAS443:3:77:475:23#0/1  
aabbaW`bbbbbbbaabb\_baba`a\_P`] `a^` `aWaaU  
@HWI-EAS443:3:38:1066:1410#0/1  
AGAAATCCAACCGTCTCCTATATGAGCTGCTAGGGACA  
+HWI-EAS443:3:38:1066:1410#0/1  
aa` `a`aa\_aW¥\_\_]\_\_\_¥\_^\_]^^^[^VWWU¥UUWWWU  
@HWI-EAS443:3:9:304:395#0/1  
GCCTGGGTTTTGCTTAATGCATCATGGTTCAACTCCTCC  
+HWI-EAS443:3:9:304:395#0/1  
a]\_\_aa\_TX\_¥`^^¥a`¥a\_[^][L[^ZU][[RX¥\_V^VU¥  
@HWI-EAS443:3:82:1114:306#0/1  
AGGTTCCAGTTGTCCCTAAGTGCCTGGACAATGAGAAGC  
+HWI-EAS443:3:82:1114:306#0/1  
aZTJa`\_a]aQXaZa\_UaX¥FU¥` ]\_[I^^`\_]a^a]\_\_^  
@HWI-EAS443:3:89:1181:726#0/1  
TTCAAATACGGTAATGGTGTGGATAGGGAGAACTAAAA

+HWI-EAS443:3:89:1181:726#0/1  
\_aaaa`baabaP^a`^b]`\_abaa^`\_aaa`aaaa`\_a^`  
@HWI-EAS443:3:34:211:1230#0/1  
ATTAAGCATCAATGAACTGAGCAACCTTGCAAAAGGAGAG  
+HWI-EAS443:3:34:211:1230#0/1  
``a`\_`\_a`Ya`\_`\_`^`\_]¥^¥\_`^`\_]]]]X]^][  
@HWI-EAS443:3:56:1089:30#0/1  
GATATGGCCCAGCATTAAAGCATCAATGAACTGAGCAACCT  
+HWI-EAS443:3:56:1089:30#0/1  
aaaa`aaa`a`b\_aa`\_`a[^aV\_\_a\_]\_¥\_`^`^ZJ0`  
@HWI-EAS443:3:44:1087:1148#0/1  
CGCCGCTTTTCATTTCTGCTCTGGAGGTAGTGAAGGCGTT  
+HWI-EAS443:3:44:1087:1148#0/1  
`a`]a[`b]\_\_\_a[ZH^b][`Z¥¥Q`BBBBBBBBBBBBBB  
@HWI-EAS443:3:48:1321:262#0/1  
TGCAACCTCCATGGCCTCTGCTGCCTGTTCACTCGATCCA  
+HWI-EAS443:3:48:1321:262#0/1  
aa^a^¥^a]¥\_a``\_a]``¥^a¥¥`W^U\_S¥U`W¥UW  
@HWI-EAS443:3:65:696:504#0/1  
TGGGGTCTTCTTCTTGTCTTCCTGATGTGTACTTTTTGA  
+HWI-EAS443:3:65:696:504#0/1  
abZM^`abaaaa`a`aa\_aa`aaa`````a`]\_aaaaa\_^  
@HWI-EAS443:3:3:669:919#0/1  
GCGGGGATCTTCTTCTTGTCTTCCTGATGTGTACTTTTTGAT  
+HWI-EAS443:3:3:669:919#0/1  
a`Z]¥S``ZG^¥`]]¥`a^^^a`]\_\_R]WXZ\_]\_W\_^  
@HWI-EAS443:3:9:1403:1221#0/1  
TGAGGGGTTGTTCTTCTTGTCTTCCTGATGTGTACTTTTTG  
+HWI-EAS443:3:9:1403:1221#0/1  
abIY\_b\_RaI\_X¥I]^]aWUbaPa^b`aaT\_Y\_Z\_a\_aa\_  
@HWI-EAS443:3:100:1516:1298#0/1  
AAAAAGTACACATCAGGAAGACAAGAGAAGAACCAAGCAC  
+HWI-EAS443:3:100:1516:1298#0/1  
`¥]YH\_^ZYXRxa[`b`aaaaQ\_]b^\_\_aUaSUBBBBBBB  
@HWI-EAS443:3:12:374:1799#0/1  
GGGGGTTTCTTCTTCTTGTCTTCCTGATGTGTACTTTTTGA  
+HWI-EAS443:3:12:374:1799#0/1  
aaa`bY\_a`aaaaba`\_`a`\_`\_a^`\_a\_PL[V``]]`\_\_  
@HWI-EAS443:3:14:874:1591#0/1  
GGGGGTTTCTTCTTCTTGTCTTCCTGATGTGTACTTTTTGA  
+HWI-EAS443:3:14:874:1591#0/1  
\_`aaWQ\_^U[ZJS\_a\_\_YUa`Z`[¥`WT\_S\_T¥¥UYW0]  
@HWI-EAS443:3:36:106:1029#0/1  
GGGGGTTTCTTCTTCTTGTCTTCCTGATGTGTACTTTTTGA  
+HWI-EAS443:3:36:106:1029#0/1  
^`\_`b]abbabaaaaababbaba¥ZY`a]`Z``a]a``VJ  
@HWI-EAS443:3:51:602:962#0/1  
AAAAAGTACACATCAGGAAGACAAGAGAAGAACCCGCACT  
+HWI-EAS443:3:51:602:962#0/1  
VW¥`bb^Y``[YUUP\_Z^a^`b`¥RU¥RURZG]`BBBBBB

@HWI-EAS443:3:73:1140:835#0/1  
GGCTCTTCTCTTGCTTCCTGATGTGTACTTTTTGATTNT  
+HWI-EAS443:3:73:1140:835#0/1  
a\_FW[aa[a\_`aZW\_`\_\_R``]\_a^\_]\_Za``\_[Y¥`WDR  
@HWI-EAS443:3:19:78:1476#0/1  
CTGGGTTCTTCTNTTGTCTTCCTGATGTGTACTTTTTGAT  
+HWI-EAS443:3:19:78:1476#0/1  
aa¥[ZQaa^¥a[D[a`[]\_¥aa]]\_XaZaT\_\_\_\_^\_XN¥`  
@HWI-EAS443:3:67:1667:1124#0/1  
GGGCGGGGTTCTTCTCTTGCTTCCTGATNTGTACTTTTT  
+HWI-EAS443:3:67:1667:1124#0/1  
a`ZQ`]baYaZ\_\_N[Ua¥`UZ^WQQZJWVDU¥X^U\_ZUV¥  
@HWI-EAS443:3:12:861:302#0/1  
CGCGGGGGTCTTCTCTTGCTTCCTGATGTGTACTTTTTG  
+HWI-EAS443:3:12:861:302#0/1  
^bbaXZVGT¥\_U\_\_ZU¥\_R\_URaaa`PXaa]HG[`]GVZ^  
@HWI-EAS443:3:35:113:1480#0/1  
TGGGGCTCTTCTCTTGCTTCCTGATGTGTACTTTTTGAT  
+HWI-EAS443:3:35:113:1480#0/1  
¥¥ZRXR`b]H¥U¥`^`Y`aba`[[ZMXT[LV^W¥WHVQ^Y  
@HWI-EAS443:3:79:1280:276#0/1  
AGGGGTTGTTCTTCTTGCTTCCTGATGTGTACTTTTTGAT  
+HWI-EAS443:3:79:1280:276#0/1  
`baabaaSZ^YV¥aZ\_\_^ba\_V]N¥b¥b``]b[aaa]\_\_  
@HWI-EAS443:3:85:196:418#0/1  
CGCGGGGCTCTTCTCTTGCTTCCTGATGTGTACTTTTTG  
+HWI-EAS443:3:85:196:418#0/1  
aba\_¥\_aH^aZZR]b`aaU`a¥^a[]J\_bY`Z\_Z\_`\_a`H  
@HWI-EAS443:3:10:593:2013#0/1  
CGGGGTTCTTCTCTTGCTTCCTGATGTGTACTTTTTCGAT  
+HWI-EAS443:3:10:593:2013#0/1  
a\_`bb`bbbbbbabb`abbbabbbaa\_b\_aa`\_aa¥`aa  
@HWI-EAS443:3:16:586:1752#0/1  
GCGTGGTTCTTCTCTTGCTTCCTGATGTGTACTTTTTGA  
+HWI-EAS443:3:16:586:1752#0/1  
a`a`a`[\_]aa¥`aaaaWa^`¥`\_¥]WTTX\_\_X`a[\_`\_`  
@HWI-EAS443:3:25:508:1424#0/1  
CGCGCGGGGTTCTTCTCTTGCTTCCTGATGTGTACTTTN  
+HWI-EAS443:3:25:508:1424#0/1  
S\_```a`IXJYa\_¥`Va^\_][]^a]IMOZUFQQH`¥]WD  
@HWI-EAS443:3:28:907:299#0/1  
CGGGCTTCTCTTGCTTCCTGATGTGTACTTTTTGATTAT  
+HWI-EAS443:3:28:907:299#0/1  
Z\_a`a\_baba``bZZabbab`ab]]aa`S`bb`\_bbbaa¥  
@HWI-EAS443:3:59:1254:464#0/1  
GGCGGGGGTCTTCTCTTGCTTCCTGATGTGTACTTTTT  
+HWI-EAS443:3:59:1254:464#0/1  
abaa^\_¥\_¥`\_`a]````^]Ya```````\_`WMZ^USV`^\_  
@HWI-EAS443:3:71:1584:1430#0/1  
GGGCTCTTCTCTTGCTTCCTGATGTGTACTTTTTGATTA

+HWI-EAS443:3:71:1584:1430#0/1  
\_aM]a`b¥^[``Q`b]]\_\_b`RUV^[^^aabXKY]Z\_  
@HWI-EAS443:3:75:1733:798#0/1  
CGGTGTTCTTCTTGTCTTCCTGATGTGTACTTTTTGAT  
+HWI-EAS443:3:75:1733:798#0/1  
I^a`¥bb`b\_bbbaba`bbbabb`aba\_``babbbba\_ab  
@HWI-EAS443:3:7:441:450#0/1  
CGGGGTTCTTCTTGTCTTCCTGATGTGTACTTTTTGATT  
+HWI-EAS443:3:7:441:450#0/1  
\_babaRb`baab`abb¥[bb``]`abVV`aa\_abbba\_bb  
@HWI-EAS443:3:82:614:1796#0/1  
GCGAGTTCTTCTTGTCTTCCTGATGTGTACTTTTTGA  
+HWI-EAS443:3:82:614:1796#0/1  
ab`U\_ZM¥ba]\_]ba^]Za^Zab\_U\_`]P^LU`\_\_aY\_] ]  
@HWI-EAS443:3:88:783:1935#0/1  
GGGTTCTTCTTGTCTTCCTGATGTGTACTTTTTGGTTA  
+HWI-EAS443:3:88:783:1935#0/1  
aa`Wbbbbbbbabbbbbb``abaa\_`aaabbbba]a`b  
@HWI-EAS443:3:89:1787:1287#0/1  
GAAGAATCAAAAAGTACACATCAGGAAGACAAGAGAAGAA  
+HWI-EAS443:3:89:1787:1287#0/1  
[`bbbbbbbabbbabbT^ababbbba]a`baaaaba\_aa]`a  
@HWI-EAS443:3:94:865:354#0/1  
GGGTGGGGTTCTTCTTGTCTTCCTGATGTGTACTTTTT  
+HWI-EAS443:3:94:865:354#0/1  
aaZG]UU\_`a] ]aW`\_`^`^Za\_YRYS]^aSWZ]X\_\_\_^a  
@HWI-EAS443:3:98:641:1645#0/1  
CGGGGTTCTTCTTGTCTTCCTGATGTGTACTTTTAGAT  
+HWI-EAS443:3:98:641:1645#0/1  
abbKYU\_`VIQUa^^\_S\_[U¥TQUXZ]Pa^`\_``¥WK[\_S  
@HWI-EAS443:3:36:1398:1892#0/1  
ACGGGGTTCTTCTTGTCTNCCTGATGTGTACTTTTTGA  
+HWI-EAS443:3:36:1398:1892#0/1  
aabaaZ]abaaaa^a`Saa¥DYa`Z\_a^\_^]\_^aaaa^N\_  
@HWI-EAS443:3:56:370:1816#0/1  
GGGGGTTCTNCTTGTCTTCCTGATGTGTACTTTTTGAT  
+HWI-EAS443:3:56:370:1816#0/1  
`a¥abT\_`MDM¥]\_UQXUaS`Y¥TT[[S[[WU¥W``^W[[  
@HWI-EAS443:3:84:842:869#0/1  
TCGGGGTTCTTCTTGTCTNCCTGATGTGTACTTTTTGA  
+HWI-EAS443:3:84:842:869#0/1  
abbbba]bbaaaa\_ab\_\_ZD]aaaa^\_Y\_a\_\_aaaaa\_a  
@HWI-EAS443:3:10:398:654#0/1  
CGGGGTTCTTCTTGTCTTCCTGATGTGTACTATTTGAT  
+HWI-EAS443:3:10:398:654#0/1  
aabbaabbbbbbbbaabbabab`aa`b^aabaabbab  
@HWI-EAS443:3:11:937:1204#0/1  
GGGGATCTTCTTGTCTTCCTGATGTGTACTTTTTGATT  
+HWI-EAS443:3:11:937:1204#0/1  
ab\_U`aababa\_aa`^`aaa\_\_NY`a\_`^`^`\_a\_aa^`a



@HWI-EAS443:3:12:1054:297#0/1  
GGGTTCTTCTTGTCTTCCTGATGTGTTCTTTTTGATTA  
+HWI-EAS443:3:12:1054:297#0/1  
aaaSa`abaaa\_a\_\_\_aa`\_aa^`a^a\_]aaaa`Y\_`^\_  
@HWI-EAS443:3:12:1421:2033#0/1  
CGGGGTTCTTCTTTTGTCTTCCTGATGTGTACTTTTTGAT  
+HWI-EAS443:3:12:1421:2033#0/1  
abbbb^bbaa`[HWbaa\_bba\_abaaa\_aX`\_bbaaa`a\_  
@HWI-EAS443:3:14:655:950#0/1  
CGGGGCTCTTCTTGTCTTCCTGATGTGTACTTTTTGAT  
+HWI-EAS443:3:14:655:950#0/1  
a^X`HDXW^]¥\_`SVSU\_¥`\_\_[\_Y][¥^BBBBBBBBBBBB  
@HWI-EAS443:3:15:1212:451#0/1  
GGGTTCTTCTTGTCTTCTTGTACTTTTTGATT  
+HWI-EAS443:3:15:1212:451#0/1  
abaaVa`aaXa¥b)`^\_a`TF¥`X^¥Za]a\_\_a\_a\_`aa`  
@HWI-EAS443:3:18:1693:1491#0/1  
AGCGGGGCTTCTTGTCTTCCTGATGTGTACTTTTTG  
+HWI-EAS443:3:18:1693:1491#0/1  
¥HVV\_\_aR`^aY[ba`a\_Z^a\_]a¥]\_a0`^^]a\_\_\_aU  
@HWI-EAS443:3:1:676:867#0/1  
GCGGGGCTTCTTGTCTTCCTGATGTGTACTTTTTGA  
+HWI-EAS443:3:1:676:867#0/1  
aYT`^XFY\_`aY```]R]V]Y[Y`[^¥VG^WIDV]^B^BBB  
@HWI-EAS443:3:20:709:1401#0/1  
GCGGGGCTTCTTGTCTTCCTGATGTGTACTTTTTGA  
+HWI-EAS443:3:20:709:1401#0/1  
Z\_[Z\_YLaa[b``bb¥^¥STaUU`WJWQV\_[R`U`¥`I`  
@HWI-EAS443:3:21:562:1379#0/1  
GGGTTCTTCTTGTCTTCCTGATGTGTACTTTTTGATTA  
+HWI-EAS443:3:21:562:1379#0/1  
a\_`RY[a\_a]a^W`H\_\_`^a\_a`]aHaW]\_]\_\_`^\_\_W¥W\_  
@HWI-EAS443:3:21:947:343#0/1  
GGTTCTTCTTGTCTTCCTGATGTGTACTTTTTCATTAT  
+HWI-EAS443:3:21:947:343#0/1  
a\_Ya^aa\_a```a\_]\_\_`]\_a^[\`S\_YYY\_¥^][FV\_]\_^  
@HWI-EAS443:3:22:1003:820#0/1  
TCAAAAAGCACACATCAGGAAGACAAGAGAAGAACCCCGC  
+HWI-EAS443:3:22:1003:820#0/1  
VXX¥`X\_XF]`aaZ¥YX^`aab[] [Z\_¥`\_Y][^OR[[Z[  
@HWI-EAS443:3:22:1315:568#0/1  
GCGGGGTTCTTCTTGTCTTCCTGATGTGTACTTTTTGA  
+HWI-EAS443:3:22:1315:568#0/1  
a``aaa\_a`a`[\_`\_aaa\_[¥Z\_T\_\_U¥[W[V]Z^YTY¥WZ  
@HWI-EAS443:3:22:677:1051#0/1  
GCGGGGTTCTTCTTGTCTTCCTGATGTGTACTTTTTGA  
+HWI-EAS443:3:22:677:1051#0/1  
aaaa¥^ [aa\_a]aWaa`S^a\_\_U`^\_\_a]`X]^\_^\_\_^¥X  
@HWI-EAS443:3:24:1251:367#0/1  
CGGGGTTCTTCTTGTCTTCCTGATGTGTACTTTTTGAT

+HWI-EAS443:3:24:1251:367#0/1  
¥QQ\_YZW[]YW[\_Y^\_Z\_¥PN]YY\_X\_WWZT\_aZ]ZZ[S  
@HWI-EAS443:3:26:1372:1970#0/1  
GGGGCTCTTCTTGTCTTCCTGATGTGTACTTTTTGATT  
+HWI-EAS443:3:26:1372:1970#0/1  
]RXaT¥[aa\_[YPY^\_aW¥I¥\_]Q`X`ZZ[PZ]]\_VZXB  
@HWI-EAS443:3:29:238:1669#0/1  
CGGGCTTCTTCTTGTCTTCCTGATGTGTACTTTTTGAT  
+HWI-EAS443:3:29:238:1669#0/1  
U\_`TIPR^Z^\_¥aZ¥¥`\_`a¥ab\_TVbXHWRGY\_`[\_`¥H^B  
@HWI-EAS443:3:32:1680:1857#0/1  
CGGGGTCCTTCTTGTCTTCCTGATGTGTACTTTTTGAT  
+HWI-EAS443:3:32:1680:1857#0/1  
aa^a\_\_HX`\_`Y^]ZQbX]b`]ZV\_Xb]^aMOab]\_`a^aa  
@HWI-EAS443:3:32:233:393#0/1  
AGCGGGGTTCTTCTTGTCTTCCTCATGTGTACTTTTTG  
+HWI-EAS443:3:32:233:393#0/1  
^`abb\_]`ab`\_`a`aaab¥aaaaaYHHUUMNFT\_^][^\_]`  
@HWI-EAS443:3:33:1393:1924#0/1  
ATCAAAAAGTACACATCAGGAAGACAAGAGAACAACCCCG  
+HWI-EAS443:3:33:1393:1924#0/1  
abaab`aaYD]aaaa^aa]Y¥OR`a\_\_a`\_`TDT\_WLHLV  
@HWI-EAS443:3:33:501:1120#0/1  
CGGGGTTCTTCTTGTCTTCCTAATGTGTACTTTTTGAT  
+HWI-EAS443:3:33:501:1120#0/1  
a`\_`a[\_`\_`aaa]a`\_`^aa]aa^0^¥¥V\_¥\_^^\_`^^P^^  
@HWI-EAS443:3:34:686:211#0/1  
GCGGGGTTGTTCTTGTCTTCCTGATGTGTACTTTTTGA  
+HWI-EAS443:3:34:686:211#0/1  
aaa]XbPZGMTa\_YRR^RP¥WQXLUNW]]SM\_YQTXXV[B  
@HWI-EAS443:3:35:1539:259#0/1  
GCGGGGTCCTTCTTGTCTTCCTGATGTGTACTTTTTGA  
+HWI-EAS443:3:35:1539:259#0/1  
a^a`\_`[DY`XUYTP\_Z\_]V^UZ\_[UWY`^aYXYZ]]Y[YZ  
@HWI-EAS443:3:36:834:1302#0/1  
CGGGGATCTTCTTGTCTTCCTGATGTGTACTTTTTGAT  
+HWI-EAS443:3:36:834:1302#0/1  
aaS]¥F)`\_`\_`[\_`Ta`]P`[[Yaa]¥LaZ^U`¥Y`¥UV\_  
@HWI-EAS443:3:40:1229:1087#0/1  
GGGGTCTTCACTTGTCTTCCTGATGTGTACTTTTTGATT  
+HWI-EAS443:3:40:1229:1087#0/1  
a]\_\_^a\_^]X\_\_aY]Y^`]WXPVYV¥V]TP¥^\_VO^^Y  
@HWI-EAS443:3:42:586:480#0/1  
CGGGGCTCTTCTTGTCTTCCTGATGTGTACTTTTTGAT  
+HWI-EAS443:3:42:586:480#0/1  
ab\_Y]JTa`aUQQ¥JaQTZWYaa¥[X^FTUHU^\_\_a`[V[  
@HWI-EAS443:3:4:1376:79#0/1  
GCGGGGTTCTTCTTGTCTTCCTGATGGGTACTTTTTGA  
+HWI-EAS443:3:4:1376:79#0/1  
a\_bab\_[\_abaabU`aYZ`\_`\_`¥\_ab^a\_H\_]^Vaaaaa\_`

@HWI-EAS443:3:51:732:1225#0/1  
GCGGGGATCTTCTTGTCTTCCTGATGTGTACTTTTTGA  
+HWI-EAS443:3:51:732:1225#0/1  
]XX`\_ZDY\_ba[a\_a]aa^a`¥S\_¥0[]S¥RZZ`aba`Y¥  
@HWI-EAS443:3:53:1348:1793#0/1  
AGCGGGGTTCTTCTTGTCTTCCTGATGGGTACTTTTTG  
+HWI-EAS443:3:53:1348:1793#0/1  
`aUab[a\_a[\_[HRaba\_[]aa[ `[`a`G¥UaYaaa\_a\_  
@HWI-EAS443:3:56:210:1523#0/1  
GGTTCTTCTTGTCTTCCTGATGTGGACTTTTTGATTAT  
+HWI-EAS443:3:56:210:1523#0/1  
[V\$abbaaaba]^¥V`aaaa`a`¥G`\_aa`aba\_aa`a  
@HWI-EAS443:3:58:720:1244#0/1  
GCGGGGCTTCTTGTCTTCCTGATGTGTACTTTTTGA  
+HWI-EAS443:3:58:720:1244#0/1  
]`U\_a]IY\_aS`¥¥a¥WQI`X]\_ab\_bb[[[K`ZZUNZTS  
@HWI-EAS443:3:58:821:879#0/1  
GGGTTCTTCTTGTCTTCCTGATGGGTACTTTTTGATTA  
+HWI-EAS443:3:58:821:879#0/1  
]00FYVHWVYTPR]X\_\_a]NHQSFYHTTPG`VV[`VN[^[  
@HWI-EAS443:3:58:902:627#0/1  
GCGGGGCTTCTTGTCTTCCTGATGTGTACTTTTTGA  
+HWI-EAS443:3:58:902:627#0/1  
aaaaa]Uaa]aaa\_a`PXXZUXMOU]]VaSZTWaa\_X[Z  
@HWI-EAS443:3:59:1628:1735#0/1  
CGGGGTTCTTCTTGTCTTCCTGATGAGTACTTTTTGAT  
+HWI-EAS443:3:59:1628:1735#0/1  
a\_QW`US^Z0]Y¥]U]¥ZZYUYL]NFXRTUGRPX¥TR]MQ  
@HWI-EAS443:3:5:601:979#0/1  
GGGGTTCTTCTTGTCTTCCTGATGCGTACTTTTTGATT  
+HWI-EAS443:3:5:601:979#0/1  
abaa]a`aa`\_aa`\_`a\_a^a^`G`Z\_W\_\_\_```\_^\_  
@HWI-EAS443:3:5:874:1435#0/1  
GGGGTTCTTCTTGTCTTCCTGATGAGTACTTTTTGATT  
+HWI-EAS443:3:5:874:1435#0/1  
abbWR^^Y\_\_baaaXMSS[a^ab[EVG[ZaG^\_^X¥``YB  
@HWI-EAS443:3:61:1394:161#0/1  
CGGGGTTCTTCTTAGTCTTCCTGATGTGTACTTTTTGAT  
+HWI-EAS443:3:61:1394:161#0/1  
abbbbababbbbababbbbbaaQab`b`a`aaaa``a  
@HWI-EAS443:3:62:313:1710#0/1  
CGGGGTTCTTCTTGTCTTCCTGATGTGTGCTTTTTGAT  
+HWI-EAS443:3:62:313:1710#0/1  
abPQ¥`bbbb`b]a`b\_ba\_TT^Waa`Xabbab]b\_  
@HWI-EAS443:3:63:1673:1903#0/1  
ATCAAAAAGTACAGATCAGGAAGACAAGAGAAGAACCCCG  
+HWI-EAS443:3:63:1673:1903#0/1  
aaaab\_aa]V`N`F¥aabba\_\_baabaaa¥ba\_\_RaW`a  
@HWI-EAS443:3:63:296:887#0/1  
GGGGCTTCTTGTCTTCCTGATGTGTACTTTTTGATT

+HWI-EAS443:3:63:296:887#0/1  
abaaJaa`VaaabW[U`abaaa\_aa^L^a]Yaa`aa\_¥\_¥  
@HWI-EAS443:3:64:85:1098#0/1  
ATCAAAAAGTACACACCAGGAAGACAAGAGAAGAACCCCG  
+HWI-EAS443:3:64:85:1098#0/1  
abaSVVRUXT]\_a^YF^[XY\_TZY][^[[^`]ZVZLRRY  
@HWI-EAS443:3:67:131:1114#0/1  
GCGGGGTTCTTCTTGTCTTCCTGCTGTGTACTTTTTGA  
+HWI-EAS443:3:67:131:1114#0/1  
`^^\_¥¥M¥a`X`[\`Y]\_^]HZaa`]FW]Y]YT]\_Z`\_UW[  
@HWI-EAS443:3:67:1472:885#0/1  
AGCGGGGTTCTTCTTATCTTCCTGATGTGTACTTTTTG  
+HWI-EAS443:3:67:1472:885#0/1  
aa[ab`aG\_\_`aWaSa\_^aZ`^`a`Z\_\_\_aZ¥W`aX`\_\_  
@HWI-EAS443:3:68:878:819#0/1  
GGGGCTTCTTCTTGTCTTCCTGATGTGTACTTTTTGATT  
+HWI-EAS443:3:68:878:819#0/1  
^Z\_¥G\_a]V`¥][YPOZ¥[¥TZRTPXNaM[[[\_`VZ\_¥  
@HWI-EAS443:3:70:614:584#0/1  
CGGGGTTCTTCTTGTCTTCCTGATGTGTACATTTTGAT  
+HWI-EAS443:3:70:614:584#0/1  
abbbbaYbababaaaababaaaaaaaaaZa\_aZL]a`¥`a`  
@HWI-EAS443:3:71:1699:889#0/1  
CGGGGTTCTTCTTGTATTCTGATGTGTACTTTTTGAT  
+HWI-EAS443:3:71:1699:889#0/1  
TQ\_a¥PY\_^]N]Z\_\_[YHRPZ[O]]X]F[GWY¥^W]]Q[M  
@HWI-EAS443:3:72:854:707#0/1  
CGGGGTTCTTCTTGTCTTCCTGATATGTACTTTTTGAT  
+HWI-EAS443:3:72:854:707#0/1  
`bbbb^¥¥`b¥bbbb`aaab\_bba]`aaaVaa`a`a`Yaa  
@HWI-EAS443:3:73:689:1627#0/1  
CGGGGTTCTTCTTGTCTTCCTGATGAGTACTTTTTGAT  
+HWI-EAS443:3:73:689:1627#0/1  
Z¥baaWV]bWbWa¥LX\_\_bZZb`bb\_I¥Paaa\_J¥aaa\_  
@HWI-EAS443:3:78:1472:44#0/1  
AGCGGGGTTCTTCTTGTCTTACTGATGTGTACTTTTTG  
+HWI-EAS443:3:78:1472:44#0/1  
a\_SW`abaa\_b\_Z¥V`b^Z[VFW\_\_[ZNSaP\_]\_\_\_\_^a  
@HWI-EAS443:3:78:90:1421#0/1  
GGGGTTCTTCACTTGTCTTCCTGATGTGTACTTTTTGATT  
+HWI-EAS443:3:78:90:1421#0/1  
aa¥QS[^X]¥T\_¥\_0¥`aab\_XPT¥^^WVW[^[[^\_[UR  
@HWI-EAS443:3:7:1565:340#0/1  
GCGGGGTTCTTCTTGTGTTCTGATGTGTACTTTTTGA  
+HWI-EAS443:3:7:1565:340#0/1  
aZOX^UI¥\_W\_\_`KKXZRHLZJMMIM^ZTXVOPUTQP¥BB  
@HWI-EAS443:3:83:853:1257#0/1  
GGGTTCTTCTTGTCTTCCTGATGAGTACTTTTTGATTA  
+HWI-EAS443:3:83:853:1257#0/1  
Ya\_NUM`IU`a]SaZ[SYWR`a^¥UIZWXL[bY^aBBBBB

@HWI-EAS443:3:87:1419:1168#0/1  
TTCCTGATGTACTTTTTGATTATTGCCATATGGGCCAC  
+HWI-EAS443:3:87:1419:1168#0/1  
^TQ[U`Y^`RMDU]\_X\_^]XWZ`aZDT[WUFS¥Q^NQRNO  
@HWI-EAS443:3:88:1615:2038#0/1  
CGGGGTTCTTCTTGTCTTCCTGATGGGTACTTTTTGAT  
+HWI-EAS443:3:88:1615:2038#0/1  
`bba[NN[b`Z]]a`¥`^^YYX[¥Z]G`ZMN[aaa]\_[]  
@HWI-EAS443:3:8:1463:1640#0/1  
GGGTTCTTCTTGTCTTCGTGATGTGTACTTTTTGATTA  
+HWI-EAS443:3:8:1463:1640#0/1  
X\_¥H[a\_S]YUYX\_[V]^YWWVU[UOaURRZ]XZ]\_\_YBB  
@HWI-EAS443:3:90:353:1637#0/1  
CGGGGTTCTTCTTGTCTTCCTGATGTGTACTTTTTGAT  
+HWI-EAS443:3:90:353:1637#0/1  
a[bab`bbbb\_bbbaabbbbbaaaa`Za\_abaaaaaaaa  
@HWI-EAS443:3:91:240:406#0/1  
CGGGGATCTTCTTGTCTTCCTGATGTGTACTTTTTGAT  
+HWI-EAS443:3:91:240:406#0/1  
aa\_`¥G`bb^aa¥XW]V`^^\_Z]\_W]^TUQTX¥]]`aa¥`  
@HWI-EAS443:3:92:1468:1354#0/1  
GGGGTTCTTCTTGTCTTCCTGATGTGCACTTTTTGATT  
+HWI-EAS443:3:92:1468:1354#0/1  
abaa\_bbbaSbaba`ba`bWY^aa]`ab\_a[bbabbaaba  
@HWI-EAS443:3:94:1207:1816#0/1  
CGGGGGTCTTCTTGTCTTCCTGATGTGTACTTTTTGAT  
+HWI-EAS443:3:94:1207:1816#0/1  
`bba[D¥abaababbba¥b`babb]ab^b\_a^abaaaaaaaa  
@HWI-EAS443:3:94:509:1278#0/1  
CGGGGGTCTTCTTGTCTTCCTGATGTGTACTTTTTGAT  
+HWI-EAS443:3:94:509:1278#0/1  
aa^OZL\_YY`ZZVT[PMUTW`QZ[OT\_FZVGUPPa^RRO^  
@HWI-EAS443:3:96:1181:1720#0/1  
CGGGGGTCTTCTTGTCTTCCTGATGTGTACTTTTTGAT  
+HWI-EAS443:3:96:1181:1720#0/1  
ab]`aGaaaa\_a\_b\_\_VZa`\_[a\_¥`\_W`YaRa\_\_^\_\_]a  
@HWI-EAS443:3:97:1085:257#0/1  
GCGGGTTCTTCTTGTCTTCCTGCTGTGTACTTTTTGA  
+HWI-EAS443:3:97:1085:257#0/1  
a\_]a`aSK[aa\_\_^a`a\_VQaOW[HDT\_Xa]V]`\_^\_0JQ  
@HWI-EAS443:3:98:339:229#0/1  
CGGGGTTCTTCTTGTCTTCCTGATGTGTACTTTTTGAT  
+HWI-EAS443:3:98:339:229#0/1  
ababb\_babbbbbbaba^Ia]abaabb\_b\_a\_abbaa\_ab  
@HWI-EAS443:3:17:1315:1879#0/1  
TGTGGGGTTCTTCTTGTCTTCCTGATGTGTACTTTTTG  
+HWI-EAS443:3:17:1315:1879#0/1  
ab\_\_\_\_a\_aaaaaa`aaa`\_ba`^a\_a`a^\_^\_Xa\_\_aa¥  
@HWI-EAS443:3:19:1264:127#0/1  
TGTGGGGTTCTTCTTGTCTTCCTGATGTGTACTTTTTG

+HWI-EAS443:3:19:1264:127#0/1  
aa`aaaa]`\_aa\_a`aa^```]a`\_`^\_Z]W``\_U]^  
@HWI-EAS443:3:24:1213:870#0/1  
CGGGCGGGTTCTTCTTGTCTTCCTGATGTGTACTTTT  
+HWI-EAS443:3:24:1213:870#0/1  
abbabb`]baa^ba\_a`baa\_aabaabb``b`]VZaaaa  
@HWI-EAS443:3:28:786:1354#0/1  
GGCTTCTTCTTGTCTTCCTGATGTGTACTTTTTGATTA  
+HWI-EAS443:3:28:786:1354#0/1  
`RFY\_a\_^WZ¥`ZU\_]`]^M¥\_]\_Z^\_]QW\_\_^][Y]  
@HWI-EAS443:3:32:641:76#0/1  
CGGGTTCTTCTTGTCTTCCTGATGTGTACTTTTTATG  
+HWI-EAS443:3:32:641:76#0/1  
ababbabbbabaa``b]b`X[aba`a`aaa¥aaab\_``  
@HWI-EAS443:3:36:673:955#0/1  
CGTGGGGTTCTTCTTGTCTTCCTGATGTGTACTTTTTG  
+HWI-EAS443:3:36:673:955#0/1  
`b\_bbb`abbabb`aaaa]a`aaaaTZaVaY\_\_`a\_\_aR  
@HWI-EAS443:3:37:760:595#0/1  
CTCGTTCTTCTTGTCTTCCTGATGTGTACTTTTTGAT  
+HWI-EAS443:3:37:760:595#0/1  
a]H^\_\_bbbaaaaa`aaaabaaa`aa^[aY\_\_`aaaa``a  
@HWI-EAS443:3:40:980:573#0/1  
TGCGCGGGTTCTTCTTGTCTTCCTGATGTGTACTTTT  
+HWI-EAS443:3:40:980:573#0/1  
Maab]bU]`baP\_a]\_aabbUa\_b``\_\_^bVYb`aI\_bbb  
@HWI-EAS443:3:5:879:842#0/1  
CGCGCGGGTTCTTCTTGTCTTCCTGATGTGTACTTTT  
+HWI-EAS443:3:5:879:842#0/1  
abbb`bbba\_aaaa`b`babaaaa`\_ba`ab\_b`a¥b`ab  
@HWI-EAS443:3:61:950:1101#0/1  
CGGGTTCTTCTTGTCTTCCTGATGTGTACTTTTTATG  
+HWI-EAS443:3:61:950:1101#0/1  
aabb\_Y\_bba\_\_ab`bb\_bbbabb[abaaaaaaabaaaa  
@HWI-EAS443:3:71:123:445#0/1  
CTCGCGGGTTCTTCTTGTCTTCCTGATGTGTACTTTT  
+HWI-EAS443:3:71:123:445#0/1  
aaaaaV]UWQ[\_^`YN\_\_`\_]\_Z\_\_`]VTR]W¥YNTSLO^  
@HWI-EAS443:3:79:1304:405#0/1  
GCGGGTTCTTCTTGTCTTCCTGATGTGTACTTTTTGAT  
+HWI-EAS443:3:79:1304:405#0/1  
a¥^`a\_wwz\_[`az`^]G¥`[UU`NEPXG\_OJZa]UXSVX  
@HWI-EAS443:3:99:456:1508#0/1  
CACCGGGTTCTTCTTGTCTTCCTGATGTGTACTTTTT  
+HWI-EAS443:3:99:456:1508#0/1  
`¥`ab`\_`Ya\_Y``^aa\_b\_a`^[]``[`a^`P¥\_a\_dUa  
@HWI-EAS443:3:17:1083:1892#0/1  
CGGGNTCTTCTTGTCTTCCTGATGTGTACTTTTTGAT  
+HWI-EAS443:3:17:1083:1892#0/1  
a`^^¥D[bb¥\_``aZb\_a`aaaaa`\_`aZ\_]```\_aa`aa

@HWI-EAS443:3:17:1321:702#0/1  
CGGGGTTCTTCTTGTCTTCCTGATGTGTACTNTTTGAT  
+HWI-EAS443:3:17:1321:702#0/1  
abba` `abbbababb` ` \_aa` `a]\_a\_\_a^aa^D^aaV` `

@HWI-EAS443:3:17:1622:175#0/1  
CGGGGTTCTTCTTGTCTTCCTGATGTGTACTTTNTGAT  
+HWI-EAS443:3:17:1622:175#0/1  
ab`a[\_a\_U\_Z¥U]aa\_`^`aVW¥MS^`YaX]W^`XD^NZ^

@HWI-EAS443:3:25:41:1847#0/1  
GCGGGTTCCTTCTTNTCTTCCTGATGTGTACTTTTTGA  
+HWI-EAS443:3:25:41:1847#0/1  
a`ba`\_Uaaaaaaaa[DR\_a\_aa\_Z[ZNXV^a\_Y¥a[R[

@HWI-EAS443:3:28:799:56#0/1  
CGGGGTTCTTCTTGTCTTCCTGATGTGTACTTTTNGAT  
+HWI-EAS443:3:28:799:56#0/1  
]bbbbS[Vaa\_aa`aa`\_a` `]b\_\_¥RZR[X]aaa^DMYa

@HWI-EAS443:3:3:858:1029#0/1  
CGGGGTTCTTCTTGTCTTCCTGATGNGTACTTTTTGAT  
+HWI-EAS443:3:3:858:1029#0/1  
aaabb\_bbbbbabbbbbbbabb`a]D]\_a`bbbaaaaa

@HWI-EAS443:3:40:1252:526#0/1  
CGGGGTTCTTCTTGTCTTCCTGATNTGTACTTTTTGAT  
+HWI-EAS443:3:40:1252:526#0/1  
ababa`abbbabZbb`aab`aa`^][DU`\_`^`a`^aaZ]`

@HWI-EAS443:3:48:1208:1027#0/1  
CGGGGNTCTTCTTGTCTTCCTGATGTGTACTTTTTGAT  
+HWI-EAS443:3:48:1208:1027#0/1  
abbb¥D^bbbab¥bba`\_ba\_aba\_aa^a`\_\_aa\_aa]`\_

@HWI-EAS443:3:52:1125:860#0/1  
GCGGGTTCCTTCTTGTNTTCCTGATGTGTACTTTTTGA  
+HWI-EAS443:3:52:1125:860#0/1  
aaabba\_bbaaab\_aa\_^D¥a\_\_a`\_aa^a^\_^aaba[\_

@HWI-EAS443:3:53:872:1368#0/1  
AGCGGGNTTCTTCTTGTCTTCCTGATGTGTACTTTTTG  
+HWI-EAS443:3:53:872:1368#0/1  
abaab]DZbaaa`baaaaa^baaaaaaab\_b`^\_abaaaX

@HWI-EAS443:3:55:575:1220#0/1  
GGGGTTCCTCCTTGTCTTCCTGATGTGTACTTTTTGATT  
+HWI-EAS443:3:55:575:1220#0/1  
aaaa[aaaaYD[aaa`\_aa`^aa`a`^\_^^aa\_a\_T[\_\_

@HWI-EAS443:3:63:260:1246#0/1  
CGGGGTTNTTCTTGTCTTCCTGATGTGTACTTTTTGAT  
+HWI-EAS443:3:63:260:1246#0/1  
` ` \_ab`¥DW^`\_`^]Z¥b`aZ[Z]S]QF]\_\_X]ba`aRZ\_

@HWI-EAS443:3:65:499:1487#0/1  
CGGGGTTCTTCTTGTCTTCCTGATGTGTACTTTTTGAT  
+HWI-EAS443:3:65:499:1487#0/1  
`]HZ`^b`aV¥\_]\_TXX\_]\_aW]YUR\_YRFDY`\_`aab`^a

@HWI-EAS443:3:77:569:1561#0/1  
GGGGTNTTCTTGTCTTCCTGATGTGTACTTTTTGATT

+HWI-EAS443:3:77:569:1561#0/1  
a`a`¥D[abaaaba\_baa`b`a[a]Wa\_a`baa``\_aaa  
@HWI-EAS443:3:82:1588:696#0/1  
CGGGGTTCTTCTTGTCTTCCTGATGTGTACTTTNTGAT  
+HWI-EAS443:3:82:1588:696#0/1  
¥[[\_baabbbbab`Zabbabb¥\_\_QXb^b^bb]D[^a`  
@HWI-EAS443:3:89:62:179#0/1  
CGGGGTTCTTCTTGTCTTCCTGATGNGTACTTTTTGAT  
+HWI-EAS443:3:89:62:179#0/1  
a`aba`aaaaaaaa`aabaaba[aWDY\_\_\_a`aaa\_\_a  
@HWI-EAS443:3:91:1519:1227#0/1  
GCGGGGTTCTTCTTGTCTTCCTGATGNGTACTTTTTGA  
+HWI-EAS443:3:91:1519:1227#0/1  
aZa[W]GY^^^R[\_^]YRHT`ZP[^]TDDJTRWZU]SSBB  
@HWI-EAS443:3:93:1353:658#0/1  
GCGGGNTCTTCTTGTCTTCCTGATGTGTACTTTTTGA  
+HWI-EAS443:3:93:1353:658#0/1  
``baaYD¥abbababba``abaaaaaa`a\_a\_aaa\_a`a  
@HWI-EAS443:3:16:1704:560#0/1  
GCGCGGGTCTTCTTGTCTTCCTGATGTGTACTTTTT  
+HWI-EAS443:3:16:1704:560#0/1  
a\_PY^`a\_X¥`PNVPVQTVGXNSPP¥QH[YURMHDHTBBB  
@HWI-EAS443:3:16:710:585#0/1  
CAGGGGTTCTTCTTGTCTTCCTGATGTGTACTTTTTGA  
+HWI-EAS443:3:16:710:585#0/1  
a`abba¥\_\_bbbaaaaa\_aaa]``^`aa]a\_^`a```\_`  
@HWI-EAS443:3:22:925:1231#0/1  
ACGGGTTCTTCTTGTCTTCCTGATGTGTACTTTTTGAT  
+HWI-EAS443:3:22:925:1231#0/1  
a\_a`aVaaa]a¥`^aaaaa\_``]^^UaURUa``\_aZ^`  
@HWI-EAS443:3:23:911:1722#0/1  
GTGGGGTTCTTCTTGTCTTCCTGATGTGTACTTTTTGA  
+HWI-EAS443:3:23:911:1722#0/1  
BBBBBBBBBBBBBBBBBBBBBBBBBBBBBBBBBBBBB  
@HWI-EAS443:3:24:354:190#0/1  
GAGGTTCTTCTTGTCTTCCTGATGTGTACTTTTTGATT  
+HWI-EAS443:3:24:354:190#0/1  
aaaa\_aaaaabaa`Zaaa\_\_\_\_\_aZ\_\_`aa\_\_\_`^  
@HWI-EAS443:3:24:967:1590#0/1  
CAAAAAGTACACATCAGGAAGACAAGAGAAGAACCCCGNA  
+HWI-EAS443:3:24:967:1590#0/1  
aaba]aa^b^abaa`abaabbaabba`bbaab\_]NXa[D¥  
@HWI-EAS443:3:30:1135:150#0/1  
GTGGGGTTCTTCTTGTCTTCCTGATGTGTACTTTTTGA  
+HWI-EAS443:3:30:1135:150#0/1  
a\_aa`\_Za\_baaa\_aaaa\_^ZX`\_\_`^\_^\_Sa````]Z\_  
@HWI-EAS443:3:31:125:701#0/1  
GTGGGGTTCTTCTTGTCTTCCTGATGTGTACTTTTTGA  
+HWI-EAS443:3:31:125:701#0/1  
a^aaaaY\_aa```a\_¥]X]`\_aa\_XNY\_P\_Y\_\_ZX\_Z]LZ



@HWI-EAS443:3:32:378:1045#0/1  
GCGCGGGTTCCTCTTGTCTTCCTGATGTGTACTTTTT  
+HWI-EAS443:3:32:378:1045#0/1  
`babbbaa[aaaaaaaaa]aaaa]````a]a\_\_\_a^`\_\_  
@HWI-EAS443:3:34:1185:696#0/1  
GGGCGGGTTCCTCTTGTCTTCCTGATGTGTACTTTTT  
+HWI-EAS443:3:34:1185:696#0/1  
^bbabbbbab`bbbbabbb`abbaabaaaa`aaaZa`aa`  
@HWI-EAS443:3:38:1565:1619#0/1  
TTCTTCTCTTGTCTTCCTGATGTGTACTTTTTGATTATCG  
+HWI-EAS443:3:38:1565:1619#0/1  
¥[^\_bb^bbaaPDW]Z¥`^P[aXaT^a``Wa[Y[U]`WFH  
@HWI-EAS443:3:3:491:1407#0/1  
GTGGGGTTCCTCTTGTCTTCCTGATGTGTACTTTTTGA  
+HWI-EAS443:3:3:491:1407#0/1  
a`^aa\_aaaaaaabaaa`aaaa\_`a`^aYVY^\_``a¥^  
@HWI-EAS443:3:43:1594:547#0/1  
GCGGGTTCCTCTTGTCTTCCTGATGTGTACTTTTTAA  
+HWI-EAS443:3:43:1594:547#0/1  
aabbbb]aaba`aabaaa`bba`a`]\_a\_a\_`\_aabaaa\_  
@HWI-EAS443:3:46:892:348#0/1  
GACGGGGTTCCTCTTGTCTTCCTGATGTGTACTTTTTG  
+HWI-EAS443:3:46:892:348#0/1  
aa`aaa]Q]a`\_`\_\_^a\_]¥`\_`a\_\_[[X¥]S\_WY¥\_`\_`\_¥R  
@HWI-EAS443:3:47:388:188#0/1  
CCGCGGGTTCCTCTTGTCTTCCTGATGTGTACTTTTT  
+HWI-EAS443:3:47:388:188#0/1  
abb`bbbaV\_aab`aaba\_^aa\_\_aa]a\_\_\_\_\_`]aaaa¥  
@HWI-EAS443:3:56:410:1529#0/1  
TGGCGGGTTCCTCTTGTCTTCCTGATGTGTACTTTTT  
+HWI-EAS443:3:56:410:1529#0/1  
Xbaa\_a]DYZKaX\_[aaRYYPY]\_\_WSX]X¥JSZa`a`a  
@HWI-EAS443:3:56:842:985#0/1  
GCGCGGGTTCCTCTTGTCTTCCTGATGTGTACTTTTT  
+HWI-EAS443:3:56:842:985#0/1  
a^Q[\_WQ^V\_``SFZ\_\_`\_QZ[^YX\_UQY\_N[N[]YVZZ  
@HWI-EAS443:3:59:145:1317#0/1  
CAAAAAGTACACATCAGGAAGACAAGAGAAGAACCCCGTC  
+HWI-EAS443:3:59:145:1317#0/1  
a\_V\_b`[^b¥baabb`aVZK¥aab^^^b```SaYMG]UZ]  
@HWI-EAS443:3:59:1476:58#0/1  
CGGGTTCCTCTTGTCTTCCTGATGTGTACTTTTTGGT  
+HWI-EAS443:3:59:1476:58#0/1  
`bbbbabbbbbbbbbbbbabbbbbbbbabbb`Ubbbaabaa  
@HWI-EAS443:3:61:1042:1641#0/1  
GCGCGGGTTCCTCTTGTCTTCCTGATGTGTACTTTTT  
+HWI-EAS443:3:61:1042:1641#0/1  
`\_`JNV\_[W¥L[[U¥T`Y\_T^\_]U]WLPYW[TWY¥GU¥U  
@HWI-EAS443:3:63:1144:360#0/1  
GTGGGGTTCCTCTTGTCTTCCTGATGTGTACTTTTTGA

+HWI-EAS443:3:63:1144:360#0/1  
aSWRO^QYZQZV^U[^^NXXZNTZ`¥V\_RZQNLW\_\_^Z\_X  
@HWI-EAS443:3:65:1055:1313#0/1  
TCGCGGGGTTCTTCTTGTCTTCCTGATGTGTACTTTTT  
+HWI-EAS443:3:65:1055:1313#0/1  
a\_WU`aV¥^`¥Ia`a`aaa\_`a]MZYPW^UR\_\_a``\_\_YW  
@HWI-EAS443:3:65:1108:533#0/1  
GCGGGTCTTCTTGTCTTCCTGATGTGTACTTTTTGAT  
+HWI-EAS443:3:65:1108:533#0/1  
aa\_R\_F]a]]aaa\_]aVY^^W\_a`ZU\_N]VYGZ`\_\_\_HV\_  
@HWI-EAS443:3:66:1254:889#0/1  
GCCGGGTTCTTCTTGTCTTCCTGATGTGTACTTTTTG  
+HWI-EAS443:3:66:1254:889#0/1  
^¥\_Z^`¥\_X¥baa]b`[Y^`a[a^XZ\_bZ`ZZ[`¥]U\_¥  
@HWI-EAS443:3:66:513:1155#0/1  
TACGGGTTCTTCTTGTCTTCCTGATGTGTACTTTTTG  
+HWI-EAS443:3:66:513:1155#0/1  
^aaZ]^XDY]``Z\_[Q\_¥^]aa]aa[`aZ\_Z`\_`a]\_¥\_  
@HWI-EAS443:3:67:1626:830#0/1  
CTGGGTTCTTCTTGTCTTCCTGATGTGTACTTTTTGA  
+HWI-EAS443:3:67:1626:830#0/1  
ab\_``^abbabababbabbabbabb]`]aabbbaa`  
@HWI-EAS443:3:69:711:756#0/1  
GTGGGTTCTTCTTGTCTTCCTGATGTGTACTTTTTGA  
+HWI-EAS443:3:69:711:756#0/1  
`X^a`^¥aaaaaa`aaa\_`aaaa`ZT^¥^X¥\_`\_a\_\_[\_  
@HWI-EAS443:3:75:607:798#0/1  
TGGCGGGTCTTCTTGTCTTCCTGATGTGTACTTTTT  
+HWI-EAS443:3:75:607:798#0/1  
a\_^`aa\_[¥\_X`WORR\_\_^WVZ^`XUMRPYNVX[VU^^`  
@HWI-EAS443:3:81:1489:262#0/1  
CTGGGTTCTTCTTGTCTTCCTGATGTGTACTTTTTGAT  
+HWI-EAS443:3:81:1489:262#0/1  
ab`][\_`abb`bXbbab\_`b\_\_`]]¥U\_b\_a\_b`aba^b  
@HWI-EAS443:3:85:352:611#0/1  
GTGGGTTCTTCTTGTCTTCCTGATGTGTACTTTTTGA  
+HWI-EAS443:3:85:352:611#0/1  
a]\_`XV^[\_Z`X]]V`ZX]UYW^]]ZTR]UWYTRVWUW  
@HWI-EAS443:3:8:1009:1576#0/1  
GACGGGTTCTTCTTGTCTTCCTGATGTGTACTTTTTG  
+HWI-EAS443:3:8:1009:1576#0/1  
aXa\_aV\_RaaaaU]¥`^`PT^ZWP[TW\_\_X`SYW¥^a]W]  
@HWI-EAS443:3:93:102:63#0/1  
CGGGGTTCTTCTTGTCTTCCTGATGTGTACTTTTTGA  
+HWI-EAS443:3:93:102:63#0/1  
abbbbaabaaa]]Zaaba\_aaaaaa`ab\_a^WSZ`aaaa\_  
@HWI-EAS443:3:95:80:1962#0/1  
GTGGGTTCTTCTTGTCTTCCTGATGTGTACTTTTTGA  
+HWI-EAS443:3:95:80:1962#0/1  
aYaaaaT\_`aaaaaaaa^ba``aa\_\_\_`]]NW]]\_```Z\_

@HWI-EAS443:3:99:732:1520#0/1  
GTGGGGTTCTTCTTGTCTTCCTGATGTGTACTTTTTGA  
+HWI-EAS443:3:99:732:1520#0/1  
``baa`^a`\_a\_a]`b``\_aaa`a]\_`W]\_\_^`\_aaa`\_^  
@HWI-EAS443:3:9:314:220#0/1  
CAGGGGTTCTTCTTGTCTTCCTGATGTGTACTTTTTGA  
+HWI-EAS443:3:9:314:220#0/1  
a\_bbab^bababbb`aa`abbb]aaZ``a]`aaaa`\_a\_  
@HWI-EAS443:3:100:1402:1692#0/1  
AGGGGTTCTTCTTGTCTTCCTGATGTGTACTTTTTGAT  
+HWI-EAS443:3:100:1402:1692#0/1  
aaJab¥bTa\_\_a``\_a\_L``\_Saa`^aQ[[\_\_`aSU[P\_a  
@HWI-EAS443:3:100:1611:908#0/1  
TGGGGTCTTCTTGTCTTCCTGATGTGTACTTTTTGAT  
+HWI-EAS443:3:100:1611:908#0/1  
abaaJZb¥`aa\_aa\_\_US[a0Ga``]V]NMYJWW`WNBB  
@HWI-EAS443:3:10:1520:176#0/1  
TGGGGTCTTCTTGTCTTCCTGATGTGTACTTTTTGAT  
+HWI-EAS443:3:10:1520:176#0/1  
a``\_`^V\_X\_]\_Z\_^]YZ`^]Z]]ZX^Z\_ZZZ^^Z^^ZZZ  
@HWI-EAS443:3:10:420:475#0/1  
TCGGGGTTCTTCTTGTCTTCCTGATGTGTACTTTTTGA  
+HWI-EAS443:3:10:420:475#0/1  
a^aa]]L]a`aa`a`a`LL]a^^]`^`\_Za`[\_aa\_a\_\_\_  
@HWI-EAS443:3:11:751:581#0/1  
CGCGGGGTTCTTCTTGTCTTCCTGATGTGTACTTTTTG  
+HWI-EAS443:3:11:751:581#0/1  
ababbba\_babaaaabaa`aaaaaaaa\_a^`\_aaa\_aa  
@HWI-EAS443:3:12:1243:996#0/1  
TGGGGTCTTCTTGTCTTCCTGATGTGTACTTTTTGAT  
+HWI-EAS443:3:12:1243:996#0/1  
abbaa`a`aa`aW`aaX\_aa\_¥`a[\_a]a]^^\_\_a^`\_\_\_\_  
@HWI-EAS443:3:13:1211:1463#0/1  
CGCGGGGTTCTTCTTGTCTTCCTGATGTGTACTTTTTG  
+HWI-EAS443:3:13:1211:1463#0/1  
abaaa]a`abaaa``bba`aa¥[baaaa\_b``\_a`aaaa  
@HWI-EAS443:3:13:1302:825#0/1  
GGCGGGGTTCTTCTTGTCTTCCTGATGTGTACTTTTTG  
+HWI-EAS443:3:13:1302:825#0/1  
U^\_bba\_Na]a^Z^^¥`[\_Z¥aZ¥^]`aaab^aaaaaaL  
@HWI-EAS443:3:14:1319:343#0/1  
GGGGGTTCTTCTTGTCTTCCTGATGTGTACTTTTTGAT  
+HWI-EAS443:3:14:1319:343#0/1  
aabba]a\_ab`a`aaa`aaa`[aa\_aa`a`\_aaaaa`\_a  
@HWI-EAS443:3:14:346:1220#0/1  
AGGGGTTCTTCTTGTCTTCCTGATGTGTACTTTTTGAT  
+HWI-EAS443:3:14:346:1220#0/1  
`abaa\_babbbaaaba`aaa`aaaaa\_\_\_aaaaaaW\_a  
@HWI-EAS443:3:15:877:1779#0/1  
CGCGGGGTTCTTCTTGTCTTCCTGATGTGTACTTTTTG

+HWI-EAS443:3:15:877:1779#0/1  
abbabbbabbbbaaabbbaaaaaabbaaaa`a\_aaabaaa`  
@HWI-EAS443:3:16:1053:1233#0/1  
TGGGGTCTTCTCTTGTCTTCCTGATGTGTACTTTTTGAT  
+HWI-EAS443:3:16:1053:1233#0/1  
a`\_`[Yababaaabaa`aaaaaaa`\_a\_]\_aa\_aa\_a  
@HWI-EAS443:3:17:162:1254#0/1  
CGCGGGTCTTCTCTTGTCTTCCTGATGTGTACTTTTTG  
+HWI-EAS443:3:17:162:1254#0/1  
aa\_^a`Gbaa\_aa`a\_`[aa\_^aa¥`^T^W]\_a``\_`^  
@HWI-EAS443:3:17:1726:259#0/1  
TGGGGTCTTCTCTTGTCTTCCTGATGTGTACTTTTTGAT  
+HWI-EAS443:3:17:1726:259#0/1  
X^TbaSbbbaUa`abaa^aa\_\_[^[\_a\_^R`[a\_\_`]Z\_a  
@HWI-EAS443:3:18:1375:1249#0/1  
GGGGTCTTCTCTTGTCTTCCTGATGTGTACTTTTTGAT  
+HWI-EAS443:3:18:1375:1249#0/1  
aaaa\_Ua^aa\_`aa\_\_aa]\_\_`]`^Z`]^Z\_\_\_\_\_ [W^  
@HWI-EAS443:3:18:1657:1042#0/1  
ACGGGGTCTTCTCTTGTCTTCCTGATGTGTACTTTTTGA  
+HWI-EAS443:3:18:1657:1042#0/1  
^Y¥\_W[Ja\_`\_`baa^P]aaa]UUXD¥YYSQY]aaa^^LW  
@HWI-EAS443:3:18:322:1716#0/1  
TGGGGTCTTCTCTTGTCTTCCTGATGTGTACTTTTTGAT  
+HWI-EAS443:3:18:322:1716#0/1  
a\_a`YQaba]aaaa\_`Ibaa\_aQPP\_`¥¥¥UY`\_\_¥][ZT  
@HWI-EAS443:3:18:576:1493#0/1  
CCGGGGTCTTCTCTTGTCTTCCTGATGTGTACTTTTTGA  
+HWI-EAS443:3:18:576:1493#0/1  
a^[W^\_LX`\_`\_a\_¥YV]a`^[] [RZ]^UXW\_T^`[^XRZ  
@HWI-EAS443:3:18:67:402#0/1  
GGCGGGTCTTCTCTTGTCTTCCTGATGTGTACTTTTTG  
+HWI-EAS443:3:18:67:402#0/1  
a\_aaa\_aH\_\_`a\_\_^a^\_]\_`\_^ [[]^\_V^V]Y^`\_]\_S  
@HWI-EAS443:3:1:1616:314#0/1  
CGCGGGTCTTCTCTTGTCTTCCTGATGTGTACTTTTTG  
+HWI-EAS443:3:1:1616:314#0/1  
VbbV^]Y]b\_Yaa`Yaaa`Ha\_S\_aaVa`^\_]¥Xaa\_BBB  
@HWI-EAS443:3:1:913:1304#0/1  
ACGGGGTCTTCTCTTGTCTTCCTGATGTGTACTTTTTGA  
+HWI-EAS443:3:1:913:1304#0/1  
`\_a`b¥G¥WaU\_`U¥a^VW\_VPMY\_a\_YMS\_XWW\_]XB BBB  
@HWI-EAS443:3:21:1086:1460#0/1  
TGGGGTCTTCTCTTGTCTTCCTGATGTGTACTTTTTGAT  
+HWI-EAS443:3:21:1086:1460#0/1  
aaaa`R\_PV\_`a\_`YX[aaa\_\_` `[¥GU\_Z^\_a\_\_\_ZYU^  
@HWI-EAS443:3:21:265:1155#0/1  
CGCGGGTCTTCTCTTGTCTTCCTGATGTGTACTTTTTG  
+HWI-EAS443:3:21:265:1155#0/1  
aa```a`]aWaaa\_^aa`\_aaa`X` [Y^a¥\_W\_aa^a¥`\_`

@HWI-EAS443:3:22:976:452#0/1  
TGGGGTTCTTCTTGTCTTCCTGATGTGTACTTTTTGAT  
+HWI-EAS443:3:22:976:452#0/1  
aabaaTa\_\_a^a`aa`aaaXM`a\_\_a]aZU^\_a^`a\_^  
@HWI-EAS443:3:24:1281:164#0/1  
GGCGGGTTCTTCTTGTCTTCCTGATGTGTACTTTTTG  
+HWI-EAS443:3:24:1281:164#0/1  
H\_bababbb\_aba`Xa``¥b`bab[babb]bbbbabbb`b  
@HWI-EAS443:3:25:1180:1598#0/1  
AGGGGTTCTTCTTGTCTTCCTGATGTGTACTTTTTGAT  
+HWI-EAS443:3:25:1180:1598#0/1  
\_^\_]\_\_babbbbaaba^`a]`aaaa`a\_`Waa\_a\_[]`  
@HWI-EAS443:3:26:1096:826#0/1  
ACGGGGTTCTTCTTGTCTTCCTGATGTGTACTTTTTGA  
+HWI-EAS443:3:26:1096:826#0/1  
a`babb\_a`bbababaa`aaaa`aa\_aa\_\_`]aaaaa]`  
@HWI-EAS443:3:27:423:281#0/1  
ACGGGGTTCTTCTTGTCTTCCTGATGTGTACTTTTTGA  
+HWI-EAS443:3:27:423:281#0/1  
aabbbbaabbaaa^aa`aabaaaa`aa\_`\_\_`aa\_a`\_a  
@HWI-EAS443:3:27:701:611#0/1  
GGCGGGTTCTTCTTGTCTTCCTGATGTGTACTTTTTG  
+HWI-EAS443:3:27:701:611#0/1  
aabbbab]`aab\_aabaaaab\_a`¥\_`T`^a``aabbU  
@HWI-EAS443:3:28:1577:1473#0/1  
TGGGGTTCTTCTTGTCTTCCTGATGTGTACTTTTTGAT  
+HWI-EAS443:3:28:1577:1473#0/1  
aa[¥PQP\_^]Z]XZZW\_QW¥QNa\_HS\_OUN\_L`Y^Xaaa]  
@HWI-EAS443:3:28:938:270#0/1  
TGGGGTTCTTCTTGTCTTCCTGATGTGTACTTTTTGAT  
+HWI-EAS443:3:28:938:270#0/1  
abaaaYbaaaaa`aaa\_`aa\_]a^[\_`^¥\_\_\_a`a`U]`  
@HWI-EAS443:3:2:196:562#0/1  
CGCGGGTTCTTCTTGTCTTCCTGATGTGTACTTTTTG  
+HWI-EAS443:3:2:196:562#0/1  
`b\_aa^]\_\_a`aI`U^`¥¥¥`Y`¥X\_Y^a]^Z^U^UW^¥`  
@HWI-EAS443:3:2:623:1346#0/1  
CGCGGGTTCTTCTTGTCTTCCTGATGTGTACTTTTTG  
+HWI-EAS443:3:2:623:1346#0/1  
a[P\_¥YLQZ¥[a[\_`ZY^¥`\_a¥R``[[bYUGQG`Z]¥a]  
@HWI-EAS443:3:30:1173:298#0/1  
TCGGGGTTCTTCTTGTCTTCCTGATGTGTACTTTTTGA  
+HWI-EAS443:3:30:1173:298#0/1  
`aba^^`aaba`VZabY`\_a¥\_aa\_\_\_\_\_aW`^a`\_\_\_\_\_]  
@HWI-EAS443:3:30:505:1236#0/1  
TGGGGTTCTTCTTGTCTTCCTGATGTGTACTTTTTGAT  
+HWI-EAS443:3:30:505:1236#0/1  
S\_TV\_V¥^¥¥¥^^bab]\_b\_a`^^[W\_`Ua^b`^abbb\_G  
@HWI-EAS443:3:32:956:233#0/1  
TGGGTTCTTCTTGTCTTCCTGATGTGTACTTTTTGATT

+HWI-EAS443:3:32:956:233#0/1  
^`b]\_]¥aa]aa`aa\_aa`\_`ZSP\_aZ\_]`^`\_```a\_\_^  
@HWI-EAS443:3:34:1371:92#0/1  
CGCGGGGTTCTTCTTGTCTTCCTGATGTGTACTTTTTG  
+HWI-EAS443:3:34:1371:92#0/1  
``\_ababbbbab`bbbaba`abb`ab]ba`\_aaYa\_a  
@HWI-EAS443:3:34:495:1580#0/1  
CGCGGGGTTCTTCTTGTCTTCCTGATGTGTACTTTTTG  
+HWI-EAS443:3:34:495:1580#0/1  
`]aa]]][Q]aZW`\_]][N^YYTXSPRQWLVMQYZ[^XZV  
@HWI-EAS443:3:36:187:1436#0/1  
CGCGGGGTTCTTCTTGTCTTCCTGATGTGTACTTTTTG  
+HWI-EAS443:3:36:187:1436#0/1  
aabaaab]abaaaaaa¥\_baabaaaS[^^^``aaa`\_a\_  
@HWI-EAS443:3:37:162:1976#0/1  
TGGGGTTCTTCTTGTCTTCCTGATGTGTACTTTTTGAT  
+HWI-EAS443:3:37:162:1976#0/1  
[]F[XUba]`baaaZ¥¥a`abba\_^X\_aXKLY¥]]`]]]a  
@HWI-EAS443:3:37:217:191#0/1  
TGGGGTTCTTCTTGTCTTCCTGATGTGTACTTTTTGAT  
+HWI-EAS443:3:37:217:191#0/1  
ab^Ya¥baaabaaaa[aaa`a`]R[a\_[GV^\_\_``^VUZ  
@HWI-EAS443:3:37:236:825#0/1  
TGGGGTTCTTCTTGTCTTCCTGATGTGTACTTTTTGAT  
+HWI-EAS443:3:37:236:825#0/1  
a^aXaJabaa`b``a`Waa``aa``a\_XWP^`\_`\_a\_W\_  
@HWI-EAS443:3:38:1357:1328#0/1  
TCGGGGTTCTTCTTGTCTTCCTGATGTGTACTTTTTGA  
+HWI-EAS443:3:38:1357:1328#0/1  
`bb]V\_R[]aba¥`^^¥\_aaa```a^`WY[Y[]\_```\_a]  
@HWI-EAS443:3:39:834:1575#0/1  
GGCGGGGTTCTTCTTGTCTTCCTGATGTGTACTTTTTG  
+HWI-EAS443:3:39:834:1575#0/1  
a^aaa\_aYaa]aa\_aaba`^\_b^\_`YRYA^¥VZ^\_a`a\_J  
@HWI-EAS443:3:3:345:321#0/1  
GGCGGGGTTCTTCTTGTCTTCCTGATGTGTACTTTTTG  
+HWI-EAS443:3:3:345:321#0/1  
a^Y^baa]^Z``[]]T\_aYY]\_]`\_V^\_X\_YYGX^^Y\_Q  
@HWI-EAS443:3:3:773:469#0/1  
CGGGTTCTTCTTGTCTTCCTGATGTGTACTTTTTGATT  
+HWI-EAS443:3:3:773:469#0/1  
UaabaaU\_a\_b¥^a`¥Tabaaaa`[a]b\_^\_b\_aa^b[`a  
@HWI-EAS443:3:3:884:610#0/1  
GGGGGTTCTTCTTGTCTTCCTGATGTGTACTTTTTGAT  
+HWI-EAS443:3:3:884:610#0/1  
ababb\_bYaaba¥Z¥Sa\_`^aa] []`a^T^¥\_Ya]aa^¥  
@HWI-EAS443:3:40:1487:1665#0/1  
CGCGGGGTTCTTCTTGTCTTCCTGATGTGTACTTTTTG  
+HWI-EAS443:3:40:1487:1665#0/1  
aabbbbaabbbbaababba`aabaaa`U`a`]\_aaa\_a\_aa

@HWI-EAS443:3:43:1132:711#0/1  
GGCGGGGTTCTTCTTGTCTTCCTGATGTGTACTTTTTTG  
+HWI-EAS443:3:43:1132:711#0/1  
aaaaaabU\_`^`a][\_aa`][\_a\_\_\_\_[U`\_TV]]]`\_^T  
@HWI-EAS443:3:43:11:1285#0/1  
CGCGGGGTTCTTCTTGTCTTCCTGATGTGTACTTTTTTG  
+HWI-EAS443:3:43:11:1285#0/1  
abab`ab\_bbbbaaaabaabaaaaa`\_\_`^¥^`aaaa`  
@HWI-EAS443:3:43:72:1217#0/1  
ACGGGGTTCTTCTTGTCTTCCTGATGTGTACTTTTTGA  
+HWI-EAS443:3:43:72:1217#0/1  
`ab```^bbbbbbbaabaaa]U\_abab\_aaaaba`  
@HWI-EAS443:3:43:848:841#0/1  
ACGGGGTTCTTCTTGTCTTCCTGATGTGTACTTTTTGA  
+HWI-EAS443:3:43:848:841#0/1  
aba`aa^aaaaaaabb\_\_aa\_aaa`a\_a\_\_^aaaa`^  
@HWI-EAS443:3:45:1380:930#0/1  
TCGGGGTTCTTCTTGTCTTCCTGATGTGTACTTTTTGA  
+HWI-EAS443:3:45:1380:930#0/1  
a`aab¥aaaaa][\_ab[\_`\_YY¥`^R¥Y¥]V[]`\_^a\_]`  
@HWI-EAS443:3:45:736:524#0/1  
CAAAAAGTACACATCAGGAAGACAAGAGAAGAACCCCGCG  
+HWI-EAS443:3:45:736:524#0/1  
aabaaaaR`b`]a`\_bbaa`\_a^)`abaaba]a[`a]0  
@HWI-EAS443:3:46:611:1639#0/1  
CGCGGGGTTCTTCTTGTCTTCCTGATGTGTACTTTTTTG  
+HWI-EAS443:3:46:611:1639#0/1  
Q`[\_`^`L[bbb]b][¥[\_`bb]RN[a`\_`PZ]bbb`a`  
@HWI-EAS443:3:46:835:299#0/1  
GGGGGTTCTTCTTGTCTTCCTGATGTGTACTTTTTGAT  
+HWI-EAS443:3:46:835:299#0/1  
a`ba`]aa\_aX`\_`a`^`a`\_`a\_[\_\_^`V^^a\_a`\_`¥]  
@HWI-EAS443:3:48:1037:1731#0/1  
CCGGGGTTCTTCTTGTCTTCCTGATGTGTACTTTTTGA  
+HWI-EAS443:3:48:1037:1731#0/1  
G[S\_XYXbbb\_PO\_b]bb\_a\_ZW¥aYa¥Y\_XVX]Y`b^[Z  
@HWI-EAS443:3:48:1071:1714#0/1  
GGCGGGGTTCTTCTTGTCTTCCTGATGTGTACTTTTTTG  
+HWI-EAS443:3:48:1071:1714#0/1  
``\_a\_\_\_\_Z^[\_]`^`\_¥\_X¥\_`]¥VY`ZZNXX[`^a[Q  
@HWI-EAS443:3:48:316:1932#0/1  
AGGGGTTCTTCTTGTCTTCCTGATGTGTACTTTTTGAT  
+HWI-EAS443:3:48:316:1932#0/1  
\_`\_b\_aaaba`b^\_a`baa\_a`aVWT`]¥`a^`SZ\_  
@HWI-EAS443:3:49:298:1890#0/1  
AGGGGTTCTTCTTGTCTTCCTGATGTGTACTTTTTGAT  
+HWI-EAS443:3:49:298:1890#0/1  
\_a`a^Ta]Y)`a]aa^Sa^\_[aaZ`]a\_aW^0a\_\_`¥PZa  
@HWI-EAS443:3:4:1515:769#0/1  
TGGGGTTCTTCTTGTCTTCCTGATGTGTACTTTTTGAT

+HWI-EAS443:3:4:1515:769#0/1  
a^^`Za\_\_`\_]\_T`\_]\_`^PR^UW^\_X`XZZ^\_]\_^]B  
@HWI-EAS443:3:50:1661:1234#0/1  
CAGCGGGTTCTTCTCTTGTCTTCCTGATGTGTACTTTTT  
+HWI-EAS443:3:50:1661:1234#0/1  
a\_`abaZ\_]`U\_```abab`Yaa\_X`Z[a`\_\_[^\_``aaa  
@HWI-EAS443:3:50:1689:359#0/1  
ACGGGGTTCTTCTCTTGTCTTCCTGATGTGTACTTTTTGA  
+HWI-EAS443:3:50:1689:359#0/1  
aabbbbaQa\_a^Va`bbbaab\_T¥aa`]^TbY`Zbabab¥Z  
@HWI-EAS443:3:50:866:1462#0/1  
GGCGGGTTCTTCTCTTGTCTTCCTGATGTGTACTTTTTG  
+HWI-EAS443:3:50:866:1462#0/1  
a`^\_a]^PWV¥UXZT\_¥WRVYVQV¥XU]WFZQRRZRZ^ZB  
@HWI-EAS443:3:53:730:1031#0/1  
CGCGGGTTCTTCTCTTGTCTTCCTGATGTGTACTTTTTG  
+HWI-EAS443:3:53:730:1031#0/1  
`bababb`baabababab`bba`b`aa]\_a]``baaaa`  
@HWI-EAS443:3:54:201:831#0/1  
AGGGGTTCTTCTCTTGTCTTCCTGATGTGTACTTTTTGAT  
+HWI-EAS443:3:54:201:831#0/1  
abbbb`baabbaababaaaba`aa`a]^b`\_\_aaa``]Xa  
@HWI-EAS443:3:54:292:1684#0/1  
TGGGGTTCTTCTCTTGTCTTCCTGATGTGTACTTTTTGAT  
+HWI-EAS443:3:54:292:1684#0/1  
Xa\_\_bZ`bb`]aab`¥`babb¥a]^aWHWXa`bbbaaQ[b  
@HWI-EAS443:3:54:332:1446#0/1  
TGGGGTTCTTCTCTTGTCTTCCTGATGTGTACTTTTTGAT  
+HWI-EAS443:3:54:332:1446#0/1  
]]YV]P]\_bb[aa`aaYaaa`a]YTZbY^XPTa¥^\_\_\_S`  
@HWI-EAS443:3:54:649:1966#0/1  
ACGGGGTTCTTCTCTTGTCTTCCTGATGTGTACTTTTTGA  
+HWI-EAS443:3:54:649:1966#0/1  
aa`^\_\_Ua\_abUaZa`\_\_`aWT]H]\_¥`W\_\_Zaaa``W\_  
@HWI-EAS443:3:54:664:425#0/1  
CGCGGGTTCTTCTCTTGTCTTCCTGATGTGTACTTTTTG  
+HWI-EAS443:3:54:664:425#0/1  
\_`aaaaXN\_W`Y[\_Z¥```]ab]^¥^`b`Z\_XSM^ba^[R  
@HWI-EAS443:3:55:551:541#0/1  
TGGGGTTCTTCTCTTGTCTTCCTGATGTGTACTTTTTGAT  
+HWI-EAS443:3:55:551:541#0/1  
Y\_V¥bUUa``\_IW`aY[\_Y`WXYZ[\_Q\_¥\_bbabaa¥X¥  
@HWI-EAS443:3:56:1587:1547#0/1  
TGGGGTTCTTCTCTTGTCTTCCTGATGTGTACTTTTTGAT  
+HWI-EAS443:3:56:1587:1547#0/1  
aa`a`]a`ba\_bW\_aaaaa¥0¥XYaX¥a`^WaaaaT\_a  
@HWI-EAS443:3:56:892:443#0/1  
TGGGGTTCTTCTCTTGTCTTCCTGATGTGTACTTTTTGAT  
+HWI-EAS443:3:56:892:443#0/1  
aab`aZa`aa`aaaa\_\_aa`\_¥QYV[`\_aZ^¥\_a\_a\_[^\_



@HWI-EAS443:3:57:1128:953#0/1  
AGGGGTTCTTCTTGTCTTCCTGATGTGTACTTTTTGAT  
+HWI-EAS443:3:57:1128:953#0/1  
¥`a`bVbbbbabbbba\_Zbaabbabbbba`abbbbbbba`ab  
@HWI-EAS443:3:59:1410:69#0/1  
TGGGGTTCTTCTTGTCTTCCTGATGTGTACTTTTTGAT  
+HWI-EAS443:3:59:1410:69#0/1  
ab`^`\_a¥a`\_a^aaa\_Za\_ZWaa]`a]a\_VHZ^`ZXZTZ  
@HWI-EAS443:3:59:827:637#0/1  
TGGGGTTCTTCTTGTCTTCCTGATGTGTACTTTTTGAT  
+HWI-EAS443:3:59:827:637#0/1  
abbbba^aaaaaaaaaaa`aaa``aaZ`a^a^\_Waaa^Y¥¥\_  
@HWI-EAS443:3:59:948:897#0/1  
TGGGGTTCTTCTTGTCTTCCTGATGTGTACTTTTTGAT  
+HWI-EAS443:3:59:948:897#0/1  
aaa\_a\_a^a`\_aaaaa\_Za`aaaa`\_`\_a^WVaaaYWVZ]  
@HWI-EAS443:3:60:227:1062#0/1  
TGGGGTTCTTCTTGTCTTCCTGATGTGTACTTTTTGAT  
+HWI-EAS443:3:60:227:1062#0/1  
aba[aSaaaaa`a]^U`aaaa]`[a`[[`\_`\_\_\_\_`[¥\_  
@HWI-EAS443:3:60:461:647#0/1  
GGCGGGGTTCTTCTTGTCTTCCTGATGTGTACTTTTTG  
+HWI-EAS443:3:60:461:647#0/1  
a]`aaa^P\_[^a^¥^\_]MS`Y`\_]UXNUVT\_RQTY]\_\_ZP  
@HWI-EAS443:3:61:339:107#0/1  
TGGGGTTCTTCTTGTCTTCCTGATGTGTACTTTTTGAT  
+HWI-EAS443:3:61:339:107#0/1  
aaaa`Z`\_a```\_\_`a^\_\_```\_\_W]aZaZWZ^\_^^^ZZ]  
@HWI-EAS443:3:62:601:895#0/1  
GGCGGGGTTCTTCTTGTCTTCCTGATGTGTACTTTTTG  
+HWI-EAS443:3:62:601:895#0/1  
\_`Ya`S`G\_ZPU`\_`\_RYSSXHRXTBBBBBBBBBBBBBBBB  
@HWI-EAS443:3:63:1307:252#0/1  
GGGGGTTCTTCTTGTCTTCCTGATGTGTACTTTTTGAT  
+HWI-EAS443:3:63:1307:252#0/1  
a^YZ`NJ¥]]]XNY]aU```¥VZ`Z`¥Z^VUS[\_\_\_`^`[^`^`  
@HWI-EAS443:3:63:1475:432#0/1  
GGCGGGGTTCTTCTTGTCTTCCTGATGTGTACTTTTTG  
+HWI-EAS443:3:63:1475:432#0/1  
]ab¥bb^Jbb[b\_aaaaa\_aaaa`b\_aaXYM^Y`aaaa]  
@HWI-EAS443:3:63:169:41#0/1  
AGGGGTTCTTCTTGTCTTCCTGATGTGTACTTTTTGAT  
+HWI-EAS443:3:63:169:41#0/1  
abaaa¥aaba`a`aba\_baa```a\_aa`a]\_]`aaaaPY\_  
@HWI-EAS443:3:63:730:748#0/1  
GGCGGGGTTCTTCTTGTCTTCCTGATGTGTACTTTTTG  
+HWI-EAS443:3:63:730:748#0/1  
aYbaaa\_R`aab^aa`a¥`\_`aaaaa`¥Y\_\_[[\_\_\_\_a\_R  
@HWI-EAS443:3:64:23:498#0/1  
TGGGGTTCTTCTTGTCTTCCTGATGTGTACTTTTTGAT

+HWI-EAS443:3:64:23:498#0/1  
^^b`¥Zbbb\_\_bba\_¥baaaaa\_Uaa\_b`XaaaaaaaaXa  
@HWI-EAS443:3:64:44:2037#0/1  
GGCGGGGTTCTTCTTGTCTTCCTGATGTGTACTTTTTG  
+HWI-EAS443:3:64:44:2037#0/1  
aab^Y^]V`X^aa`^`Y\_`W`aa\_XXOLV\_ZWV¥Z`^¥H  
@HWI-EAS443:3:65:1394:1567#0/1  
TGGGGTCTTCTTGTCTTCCTGATGTGTACTTTTTGAT  
+HWI-EAS443:3:65:1394:1567#0/1  
Y[b^LNab``]^`^^¥\_aa^¥[^aaa`[a\_[\_aaaa`\_W`  
@HWI-EAS443:3:65:673:1681#0/1  
CGCGGGGTTCTTCTTGTCTTCCTGATGTGTACTTTTTG  
+HWI-EAS443:3:65:673:1681#0/1  
aaaYbaaU[`a`¥VYaab^b[`]LYUa`]WV[^Z\_^a^¥V  
@HWI-EAS443:3:65:944:1384#0/1  
CGGGTCTTCTTGTCTTCCTGATGTGTACTTTTTGATT  
+HWI-EAS443:3:65:944:1384#0/1  
a`XYbbbabababba\_baa`aa`[`a`aa`]baaa`0\_aa  
@HWI-EAS443:3:66:1387:1220#0/1  
CGCGGGGTTCTTCTTGTCTTCCTGATGTGTACTTTTTG  
+HWI-EAS443:3:66:1387:1220#0/1  
¥¥`^`b^`bbb^babbbaaa]a¥`a\_ab`b`¥V``baa]  
@HWI-EAS443:3:66:553:595#0/1  
GGCGGGGTTCTTCTTGTCTTCCTGATGTGTACTTTTTG  
+HWI-EAS443:3:66:553:595#0/1  
aabbaaaPa`Yaaa`a`Q¥^`Y^¥V¥T`PZ]^Z`\_`\_a^P  
@HWI-EAS443:3:66:627:1334#0/1  
CGGGTCTTCTTGTCTTCCTGATGTGTACTTTTTGATT  
+HWI-EAS443:3:66:627:1334#0/1  
]V\_\_GUa\_^aR^ZXNO\_XPYT¥RNOOLRPDWPWIOZXXB  
@HWI-EAS443:3:67:1622:733#0/1  
CGCGGGGTTCTTCTTGTCTTCCTGATGTGTACTTTTTG  
+HWI-EAS443:3:67:1622:733#0/1  
abaabbaababaab\_bbba^bbaaababb^b``\_bbbaba  
@HWI-EAS443:3:67:443:1315#0/1  
AGGGGTTCTTCTTGTCTTCCTGATGTGTACTTTTTGAT  
+HWI-EAS443:3:67:443:1315#0/1  
W\_bbb`bbbbbbabbabbabb`^\_aa`aZaaaaabTa`  
@HWI-EAS443:3:67:885:844#0/1  
GGGGGTTCTTCTTGTCTTCCTGATGTGTACTTTTTGAT  
+HWI-EAS443:3:67:885:844#0/1  
aa\_]RT`ab`a`baaa\_aa`aaa¥^`^a\_aaaa\_a`aaa  
@HWI-EAS443:3:68:105:1428#0/1  
CGCGGGGTTCTTCTTGTCTTCCTGATGTGTACTTTTTG  
+HWI-EAS443:3:68:105:1428#0/1  
abbbaaa[abb`baaab[`aaa`aa`\_aa`]`^aaaaa`X  
@HWI-EAS443:3:69:1025:253#0/1  
GGGGGTTCTTCTTGTCTTCCTGATGTGTACTTTTTGAT  
+HWI-EAS443:3:69:1025:253#0/1  
\_Nab^XabbaaabaTSaaZTQ\_XTWSR`YTQGVSYZWSWZ

@HWI-EAS443:3:69:1394:400#0/1  
AGGGGTTCTTCTTGTCTTCCTGATGTGTACTTTTTGAT  
+HWI-EAS443:3:69:1394:400#0/1  
abab\_N\_bbbb`aaaaaaba`aa[aa`a]\_\_aaa`b`\_a  
@HWI-EAS443:3:69:1395:1725#0/1  
AGGGGTTCTTCTTGTCTTCCTGATGTGTACTTTTTGAT  
+HWI-EAS443:3:69:1395:1725#0/1  
Zabb`a^a`ba\_]¥\_Y[a`Ya\_a^¥\_Ya[a^aaa`\_[]  
@HWI-EAS443:3:69:1773:1972#0/1  
AGGGGTTCTTCTTGTCTTCCTGATGTGTACTTTTTGAT  
+HWI-EAS443:3:69:1773:1972#0/1  
^`b\_abbbbbabb]WYaaaaaaaaa[^a\_a^aaaa^aa  
@HWI-EAS443:3:72:887:1102#0/1  
CGCGGGGTTCTTCTTGTCTTCCTGATGTGTACTTTTTG  
+HWI-EAS443:3:72:887:1102#0/1  
aba]Za]S`¥X`aa¥]¥`aX^[X^`aU`Ua\_`¥U\_XZ  
@HWI-EAS443:3:73:793:2035#0/1  
CGGGTTCTTCTTGTCTTCCTGATGTGTACTTTTTGATT  
+HWI-EAS443:3:73:793:2035#0/1  
a`\_[KZaaaa¥\_\_a¥^\_\_\_]\_YJ¥^0\_Y[]^\_\_^^\_\_^Z  
@HWI-EAS443:3:74:907:624#0/1  
TCGGGGTTCTTCTTGTCTTCCTGATGTGTACTTTTTGA  
+HWI-EAS443:3:74:907:624#0/1  
Y¥¥YUTF¥^aZV\_[]`W`Z[^YTYaVHY¥¥VGSP]a[Y^QZ  
@HWI-EAS443:3:76:401:708#0/1  
TGGGGTTCTTCTTGTCTTCCTGATGTGTACTTTTTGAT  
+HWI-EAS443:3:76:401:708#0/1  
a\_XHXR\_]VL^R^]]XR]]W]QX^ZOMGPVVQNTTZ]U]]  
@HWI-EAS443:3:76:49:830#0/1  
AGGGGTTCTTCTTGTCTTCCTGATGTGTACTTTTTGAT  
+HWI-EAS443:3:76:49:830#0/1  
abaab`bbbbbbabb`bbabbaaaaa\_a\_a`aaaaWa`  
@HWI-EAS443:3:76:641:1904#0/1  
TGGGGTTCTTCTTGTCTTCCTGATGTGTACTTTTTGAT  
+HWI-EAS443:3:76:641:1904#0/1  
\_]a[RY]`aa`\_]a\_\_a`^\_UV[Z¥W^\_\_^\_]`\_  
@HWI-EAS443:3:76:901:93#0/1  
CGCGGGGTTCTTCTTGTCTTCCTGATGTGTACTTTTTG  
+HWI-EAS443:3:76:901:93#0/1  
`b`abbaaaabaaaWbba\_ba`\_`a\_aa`^\_]abaab`  
@HWI-EAS443:3:77:705:791#0/1  
GCGGGTTCTTCTTGTCTTCCTGATGTGTACTTTTTGT  
+HWI-EAS443:3:77:705:791#0/1  
`^`WI]GQ\_I\_YaSG]`G^a\_RY[[R]\_`aUU]^\_[]BBB  
@HWI-EAS443:3:79:220:1032#0/1  
ACGGGGTTCTTCTTGTCTTCCTGATGTGTACTTTTTGA  
+HWI-EAS443:3:79:220:1032#0/1  
``\_]\_bV]aaa`aa\_a^aa`aa\_\_W\_aZ`Y``a```\_a  
@HWI-EAS443:3:79:945:1078#0/1  
AGGGGTTCTTCTTGTCTTCCTGATGTGTACTTTTTGAT

+HWI-EAS443:3:79:945:1078#0/1  
V\_\_¥`Yabb¥\_^\_\_`\_bb¥X^abba0Y]`aX¥\_`a\_¥¥a  
@HWI-EAS443:3:83:177:581#0/1  
CGCGGGTTCTTCTTGTCTTCCTGATGTGTACTTTTTG  
+HWI-EAS443:3:83:177:581#0/1  
a[`a¥¥a0^^`\_aY^a`]\_\_\_\_\_`VNN^Z[U\_YV[]U\_^  
@HWI-EAS443:3:83:242:607#0/1  
TGGGGTTCTTCTTGTCTTCCTGATGTGTACTTTTTGAT  
+HWI-EAS443:3:83:242:607#0/1  
\_babY\_`b`a`a\_[\_a]`YVaa\_]V]a^a\_Q]``^^\_\_\_\_`  
@HWI-EAS443:3:84:227:1165#0/1  
ACGGGGTTCTTCTTGTCTTCCTGATGTGTACTTTTTGA  
+HWI-EAS443:3:84:227:1165#0/1  
aaaa\_aYZaab\_aaa`a]a\_aa\_KP]``Z^Wa^]\_\_\_\_]\_]\_  
@HWI-EAS443:3:85:359:1109#0/1  
ACGGGGTTCTTCTTGTCTTCCTGATGTGTACTTTTTGA  
+HWI-EAS443:3:85:359:1109#0/1  
[a`ZT]Y`\_¥^aaba¥V[aa`ZW\_]Z\_YPWWQ^``a`[T[  
@HWI-EAS443:3:86:71:587#0/1  
TGGGGTTCTTCTTGTCTTCCTGATGTGTACTTTTTGAT  
+HWI-EAS443:3:86:71:587#0/1  
`bbb]Vaa`aaa]a\_Z[aa]\_a]WY\_a^aZ[Z\_````a\_Z\_  
@HWI-EAS443:3:87:119:1238#0/1  
TGGGGTTCTTCTTGTCTTCCTGATGTGTACTTTTTGAT  
+HWI-EAS443:3:87:119:1238#0/1  
aaaaX^aaaaaaaa`aaa`aa`\_¥\_a^a]]^aa\_`a``a  
@HWI-EAS443:3:87:1579:580#0/1  
ACGGGGTTCTTCTTGTCTTCCTGATGTGTACTTTTTGA  
+HWI-EAS443:3:87:1579:580#0/1  
abaaaa`RaaYbabbbY¥b``aabaab`ba\_\_aabbaa`  
@HWI-EAS443:3:87:722:871#0/1  
CGGGTTCTTCTTGTCTTCCTGATGTGTACTTTTTGATT  
+HWI-EAS443:3:87:722:871#0/1  
ababZabbaaaabaa`aaaa`a``aa`a`a`aaaaaaaa^  
@HWI-EAS443:3:88:1101:1621#0/1  
CGCGGGTTCTTCTTGTCTTCCTGATGTGTACTTTTTG  
+HWI-EAS443:3:88:1101:1621#0/1  
`b`a`\_`J^aba]\_\_bba\_^`ababaaabababTbbbaba  
@HWI-EAS443:3:88:1236:399#0/1  
TAGCGGGTTCTTCTTGTCTTCCTGATGTGTACTTTTT  
+HWI-EAS443:3:88:1236:399#0/1  
a`¥YaQ]a^a\_aT`]a]aaWaa]Zaaa\_aaaTFMa\_aaa  
@HWI-EAS443:3:88:169:1186#0/1  
TGGGGTTCTTCTTGTCTTCCTGATGTGTACTTTTTGAT  
+HWI-EAS443:3:88:169:1186#0/1  
aba]^\_abaaaaaaaa]Yaaaaa`¥a`]a]``aaaaa\_[a  
@HWI-EAS443:3:88:61:907#0/1  
AGGGGTCTTCTTGTCTTCCTGATGTGTACTTTTTGAT  
+HWI-EAS443:3:88:61:907#0/1  
aab```]`ab```abab[a¥aaa`aa\_¥\_¥]\_\_`a`a`\_^\_

@HWI-EAS443:3:91:226:302#0/1  
TGGGGTCTTCTTGTCTTCCTGATGTGTACTTTTTGAT  
+HWI-EAS443:3:91:226:302#0/1  
a¥aaUZ[\_a[]a\_a`¥YP¥\_\_`\_^UZ0a]\_Z]Z\_^\_\_V^  
@HWI-EAS443:3:91:505:461#0/1  
CCGGGGTCTTCTTGTCTTCCTGATGTGTACTTTTTGA  
+HWI-EAS443:3:91:505:461#0/1  
WaaabaX`aa^`aT]Q\_\_b\_Z^¥a`]Va`b[]abb`````a  
@HWI-EAS443:3:92:584:1928#0/1  
AGGGGTCTTCTTGTCTTCCTGATGTGTACTTTTTGAT  
+HWI-EAS443:3:92:584:1928#0/1  
\_\_^ab]]`aaaabaa`a^abab^Z^aW`\_]aaT\_`aSaJ  
@HWI-EAS443:3:93:821:1558#0/1  
CGCGGGTCTTCTTGTCTTCCTGATGTGTACTTTTTG  
+HWI-EAS443:3:93:821:1558#0/1  
aaaa¥]a¥`aaaZ]`ba\_\_\_\_aaaaa\_]a]`Y\_Vaaa`aa  
@HWI-EAS443:3:94:1413:100#0/1  
CGCGGGTCTTCTTGTCTTCCTGATGTGTACTTTTTG  
+HWI-EAS443:3:94:1413:100#0/1  
W^`bbb[^[^YZ]¥[bbbb[S^bYR]^Y[[[[[Y[I]bbbb¥  
@HWI-EAS443:3:94:391:345#0/1  
CGCGGGTCTTCTTGTCTTCCTGATGTGTACTTTTTG  
+HWI-EAS443:3:94:391:345#0/1  
abbbba`b`bbaaaaba\_a`a`aa[aa^a\_\_]aa`a`a  
@HWI-EAS443:3:94:912:847#0/1  
ACGGGGTCTTCTTGTCTTCCTGATGTGTACTTTTTGA  
+HWI-EAS443:3:94:912:847#0/1  
aa^[baT`bV\_\_bba\_H[^¥¥ba]P]aYbWWZa`b¥`a`  
@HWI-EAS443:3:95:44:1611#0/1  
AGGGGTCTTCTTGTCTTCCTGATGTGTACTTTTTGAT  
+HWI-EAS443:3:95:44:1611#0/1  
]S[X¥^bab\_`0\_`b\_Za]a`aTbZX`T]P]a\_\_¥\_¥XYa  
@HWI-EAS443:3:96:26:1290#0/1  
CGGGTCTTCTTGTCTTCCTGATGTGTACTTTTTGATT  
+HWI-EAS443:3:96:26:1290#0/1  
aa`\_W^MVXR]YWSXYURWZ[\_`\_YLMTPSSTRLTVVRBB  
@HWI-EAS443:3:96:789:793#0/1  
TCGGGGTCTTCTTGTCTTCCTGATGTGTACTTTTTGA  
+HWI-EAS443:3:96:789:793#0/1  
`bbba`L^b\_a[`b`aaa`a[Z[aaYa`¥[Xaab`a¥XR\_  
@HWI-EAS443:3:97:535:344#0/1  
AGGGGTCTTCTTGTCTTCCTGATGTGTACTTTTTGAT  
+HWI-EAS443:3:97:535:344#0/1  
ababa¥a]bbaaaaa`\_ba[\_aaa\_a^a\_\_\_\_a\_``a]\_`  
@HWI-EAS443:3:98:1734:1979#0/1  
GGTCTTCTTGTCTTCCTGATGTGTACTTTTTGATTAC  
+HWI-EAS443:3:98:1734:1979#0/1  
aa^WW`a¥`SXU^XLN\_ZPT]RGPWP]QLQZ][\_BBBBBB  
@HWI-EAS443:3:9:976:2041#0/1  
TGGGGTCTTCTTGTCTTCCTGATGTGTACTTTTTGAT

+HWI-EAS443:3:9:976:2041#0/1  
`[ab\_W`¥^aT\_[a`a\_^`[]a`^\_^]`ZLW`a]`Y\_`  
@HWI-EAS443:3:100:1176:356#0/1  
CGGGGTCTTCTCTTGTCTTCCTGATGTGTACTTTTTGAT  
+HWI-EAS443:3:100:1176:356#0/1  
abbZ`babbSb\_baaa`ba\_Sabaababaa^babbaRBB  
@HWI-EAS443:3:100:1731:91#0/1  
CGGGGTCTTCTCTTGTCTTCCTGATGTGTACTTTTTGAT  
+HWI-EAS443:3:100:1731:91#0/1  
aaba`^a\_a[NYabTbb\_b\_RK^^[]b\_a^a^baba`UBB  
@HWI-EAS443:3:100:1756:686#0/1  
CGGGGTCTTCTCTTGTCTTCCTGATGTGTACTTTTTGAT  
+HWI-EAS443:3:100:1756:686#0/1  
aba[baaabbbbabaa`\_baa[a\_`a`a^^`Zba`bYBBB  
@HWI-EAS443:3:100:183:1571#0/1  
GCGGGTCTTCTCTTGTCTTCCTGATGTGTACTTTTTGA  
+HWI-EAS443:3:100:183:1571#0/1  
\_aabbab[b`a]ZVaab`¥\_`a`aa[aa``\_Y\_\_¥^^a^\_  
@HWI-EAS443:3:100:259:1222#0/1  
CGGGGTCTTCTCTTGTCTTCCTGATGTGTACTTTTTGAT  
+HWI-EAS443:3:100:259:1222#0/1  
abbbaRabbba`bbbbabbaaab^`aa\_``aaaa`a¥Z]a  
@HWI-EAS443:3:100:50:2001#0/1  
GGGGTCTTCTCTTGTCTTCCTGATGTGTACTTTTTGATT  
+HWI-EAS443:3:100:50:2001#0/1  
`¥]`MZSa`Y]aaa\_\_aa\_aa`]XX\_Z^¥Y\_]`\_Y`VTBB  
@HWI-EAS443:3:100:690:984#0/1  
GCGGGTCTTCTCTTGTCTTCCTGATGTGTACTTTTTGA  
+HWI-EAS443:3:100:690:984#0/1  
a]`a`^N\_\_a[Z\_`a]VQYa\_`^`R^aV`Z]^`¥`Y`\_B  
@HWI-EAS443:3:10:128:1983#0/1  
CGGGGTCTTCTCTTGTCTTCCTGATGTGTACTTTTTGAT  
+HWI-EAS443:3:10:128:1983#0/1  
abbabPab]aaa``S^b`]`\_]`\_aLXWQYJa`\_a]aU`a  
@HWI-EAS443:3:10:1688:304#0/1  
AGCGGGGTCTTCTCTTGTCTTCCTGATGTGTACTTTTTG  
+HWI-EAS443:3:10:1688:304#0/1  
aW`\_`ab`ba`]a\_[abaa`aaZYa\_¥\_`^a\_¥X^\_[``a  
@HWI-EAS443:3:10:1707:1431#0/1  
CGGGGTCTTCTCTTGTCTTCCTGATGTGTACTTTTTGAT  
+HWI-EAS443:3:10:1707:1431#0/1  
a`baI^bbbaH`T\_]`ab¥`ab[ab`a\_aW^`a`a¥aa  
@HWI-EAS443:3:10:307:1140#0/1  
ATCAAAAAGTACACATCAGGAAGACAAGAGAAGAACCCCG  
+HWI-EAS443:3:10:307:1140#0/1  
`bbabb`ab\_babbbaabbaaababbab\_aaaaa`a^\_``  
@HWI-EAS443:3:10:312:1011#0/1  
GGGTCTTCTCTTGTCTTCCTGATGTGTACTTTTTGATTA  
+HWI-EAS443:3:10:312:1011#0/1  
a`]NY`\_Y]\_`TTZXQ[V]\_\_\_WXWUYQ[WZW\_]¥UXZU

@HWI-EAS443:3:10:379:1031#0/1  
GGGGTTCTTCTTGTCTTCCTGATGTGTACTTTTTGATT  
+HWI-EAS443:3:10:379:1031#0/1  
a`XT]QO\_W]QOWYYUY]¥ZFO[OOQLVYOXG[[\_TRS¥Q  
@HWI-EAS443:3:10:476:470#0/1  
CGGGGTCTTCTTGTCTTCCTGATGTGTACTTTTTGAT  
+HWI-EAS443:3:10:476:470#0/1  
`[\_b`\_bbbabb`bbbaaaaaabbaa`]b`a`baaaa\_`a  
@HWI-EAS443:3:10:522:861#0/1  
AGCGGGGTCTTCTTGTCTTCCTGATGTGTACTTTTTG  
+HWI-EAS443:3:10:522:861#0/1  
Yaaabbbabaaa[\_b`bb``ab\_[aaT[]ab^a`a]\_\_ab  
@HWI-EAS443:3:10:889:1708#0/1  
CGGGGTCTTCTTGTCTTCCTGATGTGTACTTTTTGAT  
+HWI-EAS443:3:10:889:1708#0/1  
abb`¥aa``baXHZZ^^]¥\_\_¥aY]Z]^a]a`^W\_V`]]`  
@HWI-EAS443:3:10:894:1607#0/1  
CGGGGTCTTCTTGTCTTCCTGATGTGTACTTTTTGAT  
+HWI-EAS443:3:10:894:1607#0/1  
ab]^\_aUabbaaa`a`\_aaaa]a^\_\_b^]]`^a\_a\_`]\_a  
@HWI-EAS443:3:11:1077:860#0/1  
AGCGGGGTCTTCTTGTCTTCCTGATGTGTACTTTTTG  
+HWI-EAS443:3:11:1077:860#0/1  
[W¥U\_W^SX\_[[]^¥]aa[^a]\_Y\_^]]^RaUaZ^[\_`\_`]  
@HWI-EAS443:3:11:1330:587#0/1  
CGGGGTCTTCTTGTCTTCCTGATGTGTACTTTTTGAT  
+HWI-EAS443:3:11:1330:587#0/1  
]]`bb]\_bYSHY]UZaRbaaYVab]`aQQ]YHa]a`X[\_\_\_  
@HWI-EAS443:3:11:1470:820#0/1  
GGGTCTTCTTGTCTTCCTGATGTGTACTTTTTGATTA  
+HWI-EAS443:3:11:1470:820#0/1  
a]ZFWWX[^aY`]LQ]ZVJZXY¥]LVXXR¥Y¥\_]WVBBB  
@HWI-EAS443:3:11:1525:685#0/1  
CGGGGTCTTCTTGTCTTCCTGATGTGTACTTTTTGAT  
+HWI-EAS443:3:11:1525:685#0/1  
[bba`Sa`aaaa\_\_a]X\_a``]]T^bV¥R\_N\_aa\_\_\_\_]]  
@HWI-EAS443:3:11:1538:805#0/1  
GGGTCTTCTTGTCTTCCTGATGTGTACTTTTTGATTA  
+HWI-EAS443:3:11:1538:805#0/1  
aab¥a`bb\_a`aba\_^aa`^a`\_`a^a\_^Zaaa`a\_\_\_\_a`  
@HWI-EAS443:3:11:1685:651#0/1  
CGGGGTCTTCTTGTCTTCCTGATGTGTACTTTTTGAT  
+HWI-EAS443:3:11:1685:651#0/1  
abba^YaXab]a\_bab`]baa`^`bb\_``\_T`bb`b]]b  
@HWI-EAS443:3:11:21:538#0/1  
GGGGTTCTTCTTGTCTTCCTGATGTGTACTTTTTGATT  
+HWI-EAS443:3:11:21:538#0/1  
a]I[MZ`]a\_¥a\_\_P]`[[a]¥U¥`UYSY[[]\_Z\_\_\_¥B  
@HWI-EAS443:3:11:271:1205#0/1  
GGGGTTCTTCTTGTCTTCCTGATGTGTACTTTTTGATT

+HWI-EAS443:3:11:271:1205#0/1  
a`aaQaa`abab\_aa[^a`aaaa\_`[^a]`^^^`\_\_\_\_^  
@HWI-EAS443:3:11:274:627#0/1  
AGCGGGTTCTTCTTGTCTTCCTGATGTGTACTTTTTG  
+HWI-EAS443:3:11:274:627#0/1  
aba^bbb^bbab\_aaaba`aaaaaa^aa^a^\_`a\_aa^P  
@HWI-EAS443:3:12:1158:455#0/1  
GGGTTCTTCTTGTCTTCCTGATGTGTACTTTTTGATTA  
+HWI-EAS443:3:12:1158:455#0/1  
a`WEVaab\_a`]a\_\_\_\_`a\_\_\_\_\_¥\_`T^] ^Y\_\_`a[¥`¥\_  
@HWI-EAS443:3:12:1322:465#0/1  
AGCGGGTTCTTCTTGTCTTCCTGATGTGTACTTTTTG  
+HWI-EAS443:3:12:1322:465#0/1  
abbaa`b]]X]aaaaaaaa\_aa`a`\_\_a\_\_[\_`\_]\_`a\_`a  
@HWI-EAS443:3:12:1537:1016#0/1  
GGGTTCTTCTTGTCTTCCTGATGTGTACTTTTTGATT  
+HWI-EAS443:3:12:1537:1016#0/1  
abbaP^^a]^] ^aX]XXaPL0a`^\_aSa]]Ra^WN\_\_¥\_B  
@HWI-EAS443:3:12:1600:1469#0/1  
AGCGGGTTCTTCTTGTCTTCCTGATGTGTACTTTTTG  
+HWI-EAS443:3:12:1600:1469#0/1  
WV\_¥a`X]0¥]R`^^ZXW[\_\_\_\_¥[X`[[[\_^HZ``^\_]B  
@HWI-EAS443:3:12:175:1359#0/1  
GGGTTCTTCTTGTCTTCCTGATGTGTACTTTTTGATT  
+HWI-EAS443:3:12:175:1359#0/1  
a]UaYX\_\_W\_a\_^XRS\_\_^]a[XY]I^¥XWYI^^]VSBBB  
@HWI-EAS443:3:12:1787:607#0/1  
GGGTTCTTCTTGTCTTCCTGATGTGTACTTTTTGATTA  
+HWI-EAS443:3:12:1787:607#0/1  
a\_¥R¥^`]¥\_a[[[SX¥\_X^`X^]U\_0XUUU¥W]X]]WB  
@HWI-EAS443:3:12:259:1910#0/1  
CGGGTTCTTCTTGTCTTCCTGATGTGTACTTTTTGAT  
+HWI-EAS443:3:12:259:1910#0/1  
aa\_]a\_`bbbaaaa`a\_ababaa^\_aa`[\_aaaaaba^aa  
@HWI-EAS443:3:12:327:219#0/1  
CGGGTTCTTCTTGTCTTCCTGATGTGTACTTTTTGAT  
+HWI-EAS443:3:12:327:219#0/1  
abbbb\_a[\_0`]\_\_W^J^\_TPYYZS\_\_NOJU]\_`\_^\_[NB  
@HWI-EAS443:3:12:716:551#0/1  
CGGGTTCTTCTTGTCTTCCTGATGTGTACTTTTTGAT  
+HWI-EAS443:3:12:716:551#0/1  
^TZa\_aa`bbb\_babb\_a`aa`aba`bIaa\_aa\_bab\_\_a  
@HWI-EAS443:3:12:72:251#0/1  
AGCGGGTTCTTCTTGTCTTCCTGATGTGTACTTTTTG  
+HWI-EAS443:3:12:72:251#0/1  
`abbaaa\_aaaaaaaaa`aaa`a`\_\_a^a]\_\_\_\_`\_`\_`\_`  
@HWI-EAS443:3:13:1125:360#0/1  
GCGGGTTCTTCTTGTCTTCCTGATGTGTACTTTTTGA  
+HWI-EAS443:3:13:1125:360#0/1  
a`TW¥GTHS¥¥XONVUURNXTQVROGUQNNPRWB BBBB



@HWI-EAS443:3:13:115:231#0/1  
GGGGTTCTTCTTGTCTTCCTGATGTGTACTTTTTGATT  
+HWI-EAS443:3:13:115:231#0/1  
abba¥ababaaaaa\_aaaa`aa`aa]a\_``aaaaa`a`  
@HWI-EAS443:3:13:1307:509#0/1  
CGGGTTCTTCTTGTCTTCCTGATGTGTACTTTTTGAT  
+HWI-EAS443:3:13:1307:509#0/1  
abbbbababaababbbbaabba\_baaaa`b^a\_aaabbaaa  
@HWI-EAS443:3:13:20:1689#0/1  
CGGGTTCTTCTTGTCTTCCTGATGTGTACTTTTTGAT  
+HWI-EAS443:3:13:20:1689#0/1  
a``\_]aaaaaaa\_aaa\_``\_]XS^Z`]`a`\_aW\_`  
@HWI-EAS443:3:13:222:320#0/1  
CGGGTTCTTCTTGTCTTCCTGATGTGTACTTTTTGAT  
+HWI-EAS443:3:13:222:320#0/1  
aaba`^b\_aaaaaab`bbaaaa`aa\_a^\_\_aaa\_aa`a  
@HWI-EAS443:3:13:23:1515#0/1  
GGGGTTCTTCTTGTCTTCCTGATGTGTACTTTTTGATT  
+HWI-EAS443:3:13:23:1515#0/1  
a``\_Q\_aaaaaaa^aaa`^\_[Z\_`¥]Z]`]¥\_\_a¥^\_[  
@HWI-EAS443:3:13:259:1593#0/1  
GGGGTTCTTCTTGTCTTCCTGATGTGTACTTTTTGATT  
+HWI-EAS443:3:13:259:1593#0/1  
`¥S\_U¥Z\_¥a`\_aaaabZb`\_]a[NVJPb^aWaa]]`B  
@HWI-EAS443:3:13:374:1328#0/1  
CGGGTTCTTCTTGTCTTCCTGATGTGTACTTTTTGAT  
+HWI-EAS443:3:13:374:1328#0/1  
aaU]a0^\_]aa`\_]X[P[^`\_\_\_\_^[[X`ZZ^^]¥¥^^X^  
@HWI-EAS443:3:13:510:126#0/1  
GCGGGTTCTTCTTGTCTTCCTGATGTGTACTTTTTGA  
+HWI-EAS443:3:13:510:126#0/1  
aab```Q`aaaaa[a``\_a`\_a\_\_\_\_\_a]`Y[]`^^`[\_  
@HWI-EAS443:3:13:520:252#0/1  
GGGGTTCTTCTTGTCTTCCTGATGTGTACTTTTTGATT  
+HWI-EAS443:3:13:520:252#0/1  
aaaa\_aaaa\_aaaab\_aa`a`a`\_`a]`^a\_aaa````\_a\_  
@HWI-EAS443:3:13:641:1407#0/1  
CGGGTTCTTCTTGTCTTCCTGATGTGTACTTTTTGAT  
+HWI-EAS443:3:13:641:1407#0/1  
Za¥^aZ]`R[X^[b`\_¥b\_b]W``P¥RQbITX[a\_aa\_Tb  
@HWI-EAS443:3:13:814:459#0/1  
GCGGGTTCTTCTTGTCTTCCTGATGTGTACTTTTTGA  
+HWI-EAS443:3:13:814:459#0/1  
a\_abWVYX\_I]a`S^\_NGP¥SW^^T0`ZSJGO\_`Wa^`]B  
@HWI-EAS443:3:14:118:1272#0/1  
CGGGTTCTTCTTGTCTTCCTGATGTGTACTTTTTGAT  
+HWI-EAS443:3:14:118:1272#0/1  
abaabXaa`abaUaa`aaa`a]]\_a\_\_R```aa``]]\_  
@HWI-EAS443:3:14:1238:166#0/1  
CGGGTTCTTCTTGTCTTCCTGATGTGTACTTTTTGAT

+HWI-EAS443:3:14:1238:166#0/1  
abbbbababa\_baabaaaaba]a`ab\_a`^^aaaabaaa  
@HWI-EAS443:3:14:1320:1353#0/1  
CGGGGTTCTTCTTGTCTTCCTGATGTGTACTTTTTGAT  
+HWI-EAS443:3:14:1320:1353#0/1  
aabba[abaababbbbZaaa^a`ba\_bVa` `[baaab` `a  
@HWI-EAS443:3:14:229:474#0/1  
GGGGTTCTTCTTGTCTTCCTGATGTGTACTTTTTGATT  
+HWI-EAS443:3:14:229:474#0/1  
`aaa]\_\_aa` `` `aWZ]` `` `\_\_a\_aWPW\_` \_Z[[`\_\_`  
@HWI-EAS443:3:14:29:1857#0/1  
GCGGGGTTCTTCTTGTCTTCCTGATGTGTACTTTTTGA  
+HWI-EAS443:3:14:29:1857#0/1  
aaa\_]\_N\_\_a`aa` \_\_a\_` `` `a` ¥V¥VU` ^^bX^\_]XY  
@HWI-EAS443:3:14:516:180#0/1  
CGGGGTTCTTCTTGTCTTCCTGATGTGTACTTTTTGAT  
+HWI-EAS443:3:14:516:180#0/1  
aaaaa]a`a\_`a` \_aa\_` `` `Z^` ^^aW` X^Z^\_] ^` \_Z\_  
@HWI-EAS443:3:14:590:357#0/1  
GGGGTTCTTCTTGTCTTCCTGATGTGTACTTTTTGATT  
+HWI-EAS443:3:14:590:357#0/1  
aaaaUa`aaaaaaaa\_` `` `^` \_aaaZ` \_\_[ `a`a` \_a`  
@HWI-EAS443:3:14:627:201#0/1  
GGGGTTCTTCTTGTCTTCCTGATGTGTACTTTTTGATT  
+HWI-EAS443:3:14:627:201#0/1  
\_QYHJ\_\_^Z^] ^\_]RT^W^[\_ZNX\_X\_R^Z\_^^YYYYY  
@HWI-EAS443:3:14:898:412#0/1  
CGGGGTTCTTCTTGTCTTCCTGATGTGTACTTTTTGAT  
+HWI-EAS443:3:14:898:412#0/1  
]YSa`Pa\_ZW]`W\_¥]^`b\_a^]SSRa[a[]N\_^Ya`]Z[  
@HWI-EAS443:3:15:203:979#0/1  
AGCGGGGTTCTTCTTGTCTTCCTGATGTGTACTTTTTG  
+HWI-EAS443:3:15:203:979#0/1  
TZ\_[\_aa^U` \_` `a\_bab\_Y` [a`]ba` \_` [ `¥¥Z¥`aaa  
@HWI-EAS443:3:15:317:345#0/1  
CGGGGTTCTTCTTGTCTTCCTGATGTGTACTTTTTGAT  
+HWI-EAS443:3:15:317:345#0/1  
abbbUSaba\_[a`abXJ^a`aa^`\_a`] `Q]S` [ `aa`\_`a  
@HWI-EAS443:3:15:328:587#0/1  
GGGGTTCTTCTTGTCTTCCTGATGTGTACTTTTTGATT  
+HWI-EAS443:3:15:328:587#0/1  
aab\_\_bbbaabaaaa\_\_baaaa`aa[¥a]a^aaaaaaaa\_  
@HWI-EAS443:3:16:1558:280#0/1  
GGTTCTTCTTGTCTTCCTGATGTGTACTTTTTGATTAT  
+HWI-EAS443:3:16:1558:280#0/1  
aa\_`N\_\_R^]aaWPR\_` [ `` ]¥`a^[]QO[ `¥]TR¥^` ]¥  
@HWI-EAS443:3:16:1567:261#0/1  
AGCGGGGTTCTTCTTGTCTTCCTGATGTGTACTTTTTG  
+HWI-EAS443:3:16:1567:261#0/1  
ababbab\_a`ba\_baaaa`\_aaaaaa\_aa^` \_\_\_\_`aa` ` \_

@HWI-EAS443:3:16:205:413#0/1  
GGTTCTTCTCTTGTCTTCCTGATGTGTACTTTTTGATTAT  
+HWI-EAS443:3:16:205:413#0/1  
a¥PZ`ab¥X¥ZaZ]aa¥[XS] []SR¥W]U] []a\_YR]a`X  
@HWI-EAS443:3:16:214:413#0/1  
GCGGGGTTCTTCTTGTCTTCCTGATGTGTACTTTTTGA  
+HWI-EAS443:3:16:214:413#0/1  
Vbb\_\_ba^bb`[\_babb\_\_`baaa^\_a\_aW[^aab`b\_a  
@HWI-EAS443:3:16:509:143#0/1  
AGCGGGGTTCTTCTTGTCTTCCTGATGTGTACTTTTTG  
+HWI-EAS443:3:16:509:143#0/1  
¥` ]\_X\_a[\_a]YQ^\_a^¥` `\_\_[^` [ [] `UaYX[^]\_^]\_  
@HWI-EAS443:3:16:547:800#0/1  
GCGGGGTTCTTCTTGTCTTCCTGATGTGTACTTTTTGA  
+HWI-EAS443:3:16:547:800#0/1  
Zaaaa^^`\_aa[] [a\_` ]`aa[a\_]`a`IJZ^`\_W¥`a`a  
@HWI-EAS443:3:16:650:1389#0/1  
GGGGTTCTTCTTGTCTTCCTGATGTGTACTTTTTGATT  
+HWI-EAS443:3:16:650:1389#0/1  
aaaa\_ababaa^aaa\_aaa\_a`\_aa\_a\_\_`aaaa\_`a\_  
@HWI-EAS443:3:16:653:268#0/1  
TCAAAAAGTACACATCAGGAAGACAAGAGAAGAACCCCGC  
+HWI-EAS443:3:16:653:268#0/1  
S¥¥`^¥]VT^]b^\_aaabb^X`a`a^a\_a`a\_` ]¥VZN``  
@HWI-EAS443:3:16:660:134#0/1  
CGGGGTTCTTCTTGTCTTCCTGATGTGTACTTTTTGAT  
+HWI-EAS443:3:16:660:134#0/1  
abaaa^`aaa¥`¥\_a`\_a` `\_^\_\_^a]aZ]Z` \_\_^a\_^a  
@HWI-EAS443:3:16:70:49#0/1  
GCGGGGTTCTTCTTGTCTTCCTGATGTGTACTTTTTGA  
+HWI-EAS443:3:16:70:49#0/1  
aaa¥^Y¥Y^^Z[Z¥[ [Y¥Y]]]V]YV]WVQUQWSUBBBB  
@HWI-EAS443:3:16:748:698#0/1  
AGCGGGGTTCTTCTTGTCTTCCTGATGTGTACTTTTTG  
+HWI-EAS443:3:16:748:698#0/1  
a`aaaa^aaaa\_a^aa`aa`\_a\_` \_\_\_aZa\_^\_\_\_a`\_Z  
@HWI-EAS443:3:17:1125:249#0/1  
CGGGGTTCTTCTTGTCTTCCTGATGTGTACTTTTTGAT  
+HWI-EAS443:3:17:1125:249#0/1  
ab]ZXPbaa]RZY¥\_]\_aa^PY]\_Uab\_VKGGR^\_[^¥PW  
@HWI-EAS443:3:17:114:1172#0/1  
CGGGGTTCTTCTTGTCTTCCTGATGTGTACTTTTTGAT  
+HWI-EAS443:3:17:114:1172#0/1  
abbb¥\_bbaabbbababaaab`aab`aaa`^^aaaaa^aaaa  
@HWI-EAS443:3:17:1296:1593#0/1  
CGGGGTTCTTCTTGTCTTCCTGATGTGTACTTTTTGAT  
+HWI-EAS443:3:17:1296:1593#0/1  
```b^Qabbaababa\_`bba^`aaa`aX^^`aaaa`aYaa  
@HWI-EAS443:3:17:166:1034#0/1  
GGGGTTCTTCTTGTCTTCCTGATGTGTACTTTTTGATT

+HWI-EAS443:3:17:166:1034#0/1  
aa^¥Vabbaaaaaa\_a`aa`\_`Y^`[a]`aa\_a\_\_]\_^\_  
@HWI-EAS443:3:17:1680:1350#0/1  
GGGGTTCTTCTTGTCTTCCTGATGTGTACTTTTTGATT  
+HWI-EAS443:3:17:1680:1350#0/1  
a`b\_\_abbabbbba\_abaaaa``^\_a\_`aaaaaaaa`  
@HWI-EAS443:3:17:220:1427#0/1  
CGGGTTCTTCTTGTCTTCCTGATGTGTACTTTTTGAT  
+HWI-EAS443:3:17:220:1427#0/1  
aa`XEUaaaaaaaaaa\_aa`\_`a\_Z`a]]Y\_^``````[a\_  
@HWI-EAS443:3:17:262:1659#0/1  
GGGGTTCTTCTTGTCTTCCTGATGTGTACTTTTTGATT  
+HWI-EAS443:3:17:262:1659#0/1  
a\_X¥F\_aa^bba\_aaH`\_a¥`\_NVYST\_^`X`\_]`]a`SY  
@HWI-EAS443:3:17:392:306#0/1  
CGGGTTCTTCTTGTCTTCCTGATGTGTACTTTTTGAT  
+HWI-EAS443:3:17:392:306#0/1  
abbab^babbbbaabaaabaabbaab`a\_a`baaaaaa  
@HWI-EAS443:3:17:429:423#0/1  
GCGGGTTCTTCTTGTCTTCCTGATGTGTACTTTTTGA  
+HWI-EAS443:3:17:429:423#0/1  
aaaaaa]aa\_\_\_\_[a[`¥¥a\_aa^V[[\_PFXYTW^\_\_\_\_Z]  
@HWI-EAS443:3:17:433:1932#0/1  
GGTTCTTCTTGTCTTCCTGATGTGTACTTTTTGATTAT  
+HWI-EAS443:3:17:433:1932#0/1  
aa¥aaaaaaaa`\_a\_aa\_aaa\_a\_\_^^a`\_`\_]Y\_]a^\_a\_  
@HWI-EAS443:3:17:536:659#0/1  
GGGGTTCTTCTTGTCTTCCTGATGTGTACTTTTTGATT  
+HWI-EAS443:3:17:536:659#0/1  
abaaXabaaaa`aaa^\_a\_\_\_\_aaa`a`\_]a`\_`\_[]^\_  
@HWI-EAS443:3:17:77:462#0/1  
GCGGGTTCTTCTTGTCTTCCTGATGTGTACTTTTTGA  
+HWI-EAS443:3:17:77:462#0/1  
aaba¥WV^`a^aaa`^\_V\_a`]]`YPYG¥WUY[`^¥^[\_  
@HWI-EAS443:3:18:1050:74#0/1  
AGCGGGTTCTTCTTGTCTTCCTGATGTGTACTTTTTG  
+HWI-EAS443:3:18:1050:74#0/1  
ababaaa\_aabaa\_aba`^aa\_]aa\_\_a]a]^Va\_\_aa\_  
@HWI-EAS443:3:18:1310:1332#0/1  
GGGTTCTTCTTGTCTTCCTGATGTGTACTTTTTGATTA  
+HWI-EAS443:3:18:1310:1332#0/1  
¥`b`ab`\_`````\_a]]]aa`aa[^WH¥IZ^a`]]`PY\_]`  
@HWI-EAS443:3:18:1463:1122#0/1  
GGGGTTCTTCTTGTCTTCCTGATGTGTACTTTTTGATT  
+HWI-EAS443:3:18:1463:1122#0/1  
\_]UP^`aZW\_^b^`[U^\_\_``^\_]YaYZXa`a`a`````  
@HWI-EAS443:3:18:163:2027#0/1  
GGGTTCTTCTTGTCTTCCTGATGTGTACTTTTTGATTA  
+HWI-EAS443:3:18:163:2027#0/1  
`\_\_TL^^aaWW¥Ya¥``¥b`^QTVV\_a]\_\_^`aa\_Z^a\_a

@HWI-EAS443:3:18:653:1037#0/1  
ATCAAAAAGTACACATCAGGAAGACAAGAGAAGAACCCCG  
+HWI-EAS443:3:18:653:1037#0/1  
WZWWU\_WTVYb^b\_a^`aba^^a\_a]P^`\_XZ\_^]]`R``  
@HWI-EAS443:3:19:1129:280#0/1  
CGGGGTTCTTCTTGTCTTCCTGATGTGTACTTTTTGAT  
+HWI-EAS443:3:19:1129:280#0/1  
Zaaabaa````bbbabaaabb\_````bba`\_``babbbaab  
@HWI-EAS443:3:19:1161:1071#0/1  
GCGGGGTTCTTCTTGTCTTCCTGATGTGTACTTTTTGA  
+HWI-EAS443:3:19:1161:1071#0/1  
aa`^`ZT][a`\_aa`\_aU`aa\_^\_`][\_]`\_`\_`a]]\_  
@HWI-EAS443:3:19:1239:1956#0/1  
CGGGGTTCTTCTTGTCTTCCTGATGTGTACTTTTTGAT  
+HWI-EAS443:3:19:1239:1956#0/1  
aa\_bb\_\_\_aaabababaaaaaaaaaaa^a^`\_aaaaa\_aa  
@HWI-EAS443:3:19:1279:1514#0/1  
CGGGGTTCTTCTTGTCTTCCTGATGTGTACTTTTTGAT  
+HWI-EAS443:3:19:1279:1514#0/1  
a`bbb\_aa`bbbaaaa^[aaaaaa[`^b[¥Vaaaa\_``  
@HWI-EAS443:3:19:1624:1495#0/1  
GGGGTTCTTCTTGTCTTCCTGATGTGTACTTTTTGATT  
+HWI-EAS443:3:19:1624:1495#0/1  
ab`aRbbbabZ`Ybaaaaa^b`a`baa`a^bba`aWxa\_  
@HWI-EAS443:3:19:327:377#0/1  
GCGGGGTTCTTCTTGTCTTCCTGATGTGTACTTTTTGA  
+HWI-EAS443:3:19:327:377#0/1  
a`\_a\_]X]aa^^^\_a¥\_`^¥^]]\_ZZ^W]WOW]]\_`^XZ  
@HWI-EAS443:3:19:399:1297#0/1  
CGGGGTTCTTCTTGTCTTCCTGATGTGTACTTTTTGAT  
+HWI-EAS443:3:19:399:1297#0/1  
aaaaYRYaaa`a`a`\_aaa`a`TTWXXX\_^\_\_\_`\_]\_B  
@HWI-EAS443:3:19:447:2027#0/1  
CGGGGTTCTTCTTGTCTTCCTGATGTGTACTTTTTGAT  
+HWI-EAS443:3:19:447:2027#0/1  
`X]\_\_M¥\_a\_aaa\_¥Y]^`\_a`\_a]`R\_X[W]\_`^^[Q\_  
@HWI-EAS443:3:19:46:1812#0/1  
CGGGGTTCTTCTTGTCTTCCTGATGTGTACTTTTTGAT  
+HWI-EAS443:3:19:46:1812#0/1  
a[FY\_KYaa¥W\_aa`¥X]\_`]a\_]ZP[Ra]\_]\_\_`\_\_HWY  
@HWI-EAS443:3:19:663:15#0/1  
GGGGTTCTTCTTGTCTTCCTGATGTGTACTTTTTGATT  
+HWI-EAS443:3:19:663:15#0/1  
aaaaZaaaa\_a¥a`a^\_``\_a\_\_^^\_`^^X\_^\_]\_^`^U  
@HWI-EAS443:3:19:695:132#0/1  
GCGGGGTTCTTCTTGTCTTCCTGATGTGTACTTTTTGA  
+HWI-EAS443:3:19:695:132#0/1  
a\_¥\_a^R]X¥\_]\_]\_^\_S]^`WZ]]VV\_Z¥WVOXZ]ZVRX  
@HWI-EAS443:3:19:760:1853#0/1  
CGGGGTTCTTCTTGTCTTCCTGATGTGTACTTTTTGAT

+HWI-EAS443:3:19:760:1853#0/1  
aaaaa[\_a^`a`U¥]XUa`[[\_a\_\_\_^^`SXT[\_^^]UY^  
@HWI-EAS443:3:19:793:1367#0/1  
GCGGGTTCTTCTTGTCTTCCTGATGTGTACTTTTTGA  
+HWI-EAS443:3:19:793:1367#0/1  
abaaaaWaaaaaa`aaYaa`\_aa`\_\_^Z\_\_\_\_^a\_\_^S^  
@HWI-EAS443:3:19:795:225#0/1  
CGGGTTCTTCTTGTCTTCCTGATGTGTACTTTTTGAT  
+HWI-EAS443:3:19:795:225#0/1  
abbab\_bbbabaaab^aaaa\_aaab^a\_a^aaa\_a` `a  
@HWI-EAS443:3:19:815:1367#0/1  
CGGGTTCTTCTTGTCTTCCTGATGTGTACTTTTTGAT  
+HWI-EAS443:3:19:815:1367#0/1  
aa`aa[b`baba`baa\_aa\_aaaa[aa^a[^]a`a^`a`a  
@HWI-EAS443:3:1:1186:238#0/1  
GGTCTTCTTGTCTTCCTGATGTGTACTTTTTGATTAT  
+HWI-EAS443:3:1:1186:238#0/1  
aa¥\_aa`^a]a`a]¥`\_\_^\_a\_`a^a^]\_]\_a\_a`¥]BBBB  
@HWI-EAS443:3:1:1297:431#0/1  
GCGGGTTCTTCTTGTCTTCCTGATGTGTACTTTTTGA  
+HWI-EAS443:3:1:1297:431#0/1  
aaa`adWa```\_a^aaa\_^aa\_]a`\_``\_a]^Z`\_a\_\_`B  
@HWI-EAS443:3:1:1400:427#0/1  
GCGGGTTCTTCTTGTCTTCCTGATGTGTACTTTTTGA  
+HWI-EAS443:3:1:1400:427#0/1  
`aaa`[Zab`b\_\_]aaa\_^aRXYaa\_]aZaZYZ\_`a`a\_B  
@HWI-EAS443:3:1:1411:1204#0/1  
GGGTTCTTCTTGTCTTCCTGATGTGTACTTTTTGATT  
+HWI-EAS443:3:1:1411:1204#0/1  
[¥X]baaabbbabbbaabb]Waa¥]a\_b` `Yabaaaa`aB  
@HWI-EAS443:3:1:1543:1302#0/1  
CGGGTTCTTCTTGTCTTCCTGATGTGTACTTTTTGAT  
+HWI-EAS443:3:1:1543:1302#0/1  
`a[^`^T^aba]aIb\_b]^b`Y`abYaaZ``]Oa`SXaa`B  
@HWI-EAS443:3:1:161:1934#0/1  
CGGGTTCTTCTTGTCTTCCTGATGTGTACTTTTTGAT  
+HWI-EAS443:3:1:161:1934#0/1  
a\_b\_bM`[ab\_a\_b\_¥` `bb¥VaaObbKa`aa]^a[bV`B  
@HWI-EAS443:3:20:1287:1189#0/1  
GCGGGTTCTTCTTGTCTTCCTGATGTGTACTTTTTGA  
+HWI-EAS443:3:20:1287:1189#0/1  
`R]^¥LX\_[[SYRG[XVWYZURQVWV^SQTkinVVRWNV  
@HWI-EAS443:3:20:1440:452#0/1  
GCGGGTTCTTCTTGTCTTCCTGATGTGTACTTTTTGA  
+HWI-EAS443:3:20:1440:452#0/1  
a^STZZ^`0\_a\_aR\_a`[UX`[X`aZXTT]XLV¥\_`^¥]UB  
@HWI-EAS443:3:20:1459:60#0/1  
GCGGGTTCTTCTTGTCTTCCTGATGTGTACTTTTTGA  
+HWI-EAS443:3:20:1459:60#0/1  
\_Uabaa¥`Za\_\_a\_aaa`V`^UU\_`¥]\_]\_]YY^` `\_\_RU

@HWI-EAS443:3:20:145:988#0/1  
CGGGGTTCTTCTTGTCTTCCTGATGTGTACTTTTTGAT  
+HWI-EAS443:3:20:145:988#0/1  
ab\_Z\_J]baaaaba`][baaa`[``]]UZSY¥\_`W]^RY\_  
@HWI-EAS443:3:20:249:1547#0/1  
CGGGGTTCTTCTTGTCTTCCTGATGTGTACTTTTTGA  
+HWI-EAS443:3:20:249:1547#0/1  
a`aa`^QZbaaa\_X[aaZ[[a\_``a`\_a]a\_`a[`]\_Z\_]`  
@HWI-EAS443:3:20:271:360#0/1  
CGGGGTTCTTCTTGTCTTCCTGATGTGTACTTTTTGAT  
+HWI-EAS443:3:20:271:360#0/1  
Z\_X\_``b`\_a`\_\_a¥¥a¥aa^a\_`¥ZZb¥``]`aabZ¥a  
@HWI-EAS443:3:20:309:273#0/1  
CGGGGTTCTTCTTGTCTTCCTGATGTGTACTTTTTGAT  
+HWI-EAS443:3:20:309:273#0/1  
abbbb`bab`baaaaa]baa`aa\_a`a`a`\_`aaaaa^¥]  
@HWI-EAS443:3:20:580:543#0/1  
CGGGGTTCTTCTTGTCTTCCTGATGTGTACTTTTTGA  
+HWI-EAS443:3:20:580:543#0/1  
aa0Y\_aZaaa\_a\_a]X]X`a^^[[T[\_a^aZ^PU`]]^`]  
@HWI-EAS443:3:20:630:280#0/1  
CGGGGTTCTTCTTGTCTTCCTGATGTGTACTTTTTGAT  
+HWI-EAS443:3:20:630:280#0/1  
aa`¥¥R[SY¥a¥\_T\_YY`]^]\_^¥RZMNxVZ^ZX]ZZ^Z]  
@HWI-EAS443:3:20:802:516#0/1  
GGGGTTCTTCTTGTCTTCCTGATGTGTACTTTTTGATT  
+HWI-EAS443:3:20:802:516#0/1  
a`ZUFN¥]]Y\_L[¥bWY[U]`\_`¥\_^X[X\_¥\_`^^Z^Z^]  
@HWI-EAS443:3:20:865:1049#0/1  
CGGGGTTCTTCTTGTCTTCCTGATGTGTACTTTTTGAT  
+HWI-EAS443:3:20:865:1049#0/1  
aa^aa^aZWWa`a\_`aSaa\_aYa\_]a^`U\_\_\_a\_\_^^][  
@HWI-EAS443:3:21:1606:122#0/1  
CGGGGTTCTTCTTGTCTTCCTGATGTGTACTTTTTGAT  
+HWI-EAS443:3:21:1606:122#0/1  
abaaa\_a^b`\_b^aaa\_¥aaZ\_`^^`\_]UXZa^\_`\_¥Z^  
@HWI-EAS443:3:21:1621:117#0/1  
CGGGGTTCTTCTTGTCTTCCTGATGTGTACTTTTTGAT  
+HWI-EAS443:3:21:1621:117#0/1  
abbab`babb`babbbaabbaabaaaa\_`\_a^bbbaV\_a  
@HWI-EAS443:3:21:1650:1367#0/1  
CGGGGTTCTTCTTGTCTTCCTGATGTGTACTTTTTGAT  
+HWI-EAS443:3:21:1650:1367#0/1  
a]a]a\_a^bbaa]`a\_\_\_a[[^a`\_\_`]a\_¥]a```W]`\_  
@HWI-EAS443:3:21:1736:1225#0/1  
CGGGGTTCTTCTTGTCTTCCTGATGTGTACTTTTTGAT  
+HWI-EAS443:3:21:1736:1225#0/1  
a\_] ^YU\_¥aa`a`aaa\_\_a\_]aa^^]Za\_\_Xaaaa¥PYa  
@HWI-EAS443:3:21:244:1112#0/1  
CGGGGTTCTTCTTGTCTTCCTGATGTGTACTTTTTGAT

+HWI-EAS443:3:21:244:1112#0/1  
a`¥^UPR`ZYY¥\_\_\_]PYV\_aa\_]\_`¥V\_W\_]\_\_\_^XR^^  
@HWI-EAS443:3:21:568:1638#0/1  
CGGGGTTCTTCTTGTCTTCCTGATGTGTACTTTTTGAT  
+HWI-EAS443:3:21:568:1638#0/1  
aaa`a[aaaaa`b`^`^`[`aaaaS^\_`X[Y\_^a\_a\_a\_``  
@HWI-EAS443:3:21:649:38#0/1  
GCGGGTTCCTTCTTGTCTTCCTGATGTGTACTTTTTGA  
+HWI-EAS443:3:21:649:38#0/1  
`[\_^]N^\_ZZQVGW¥`ZLLWQ\_X\_JSY[VXNT]¥Z¥`¥X  
@HWI-EAS443:3:21:813:107#0/1  
GGGGTTCCTTCTTGTCTTCCTGATGTGTACTTTTTGATT  
+HWI-EAS443:3:21:813:107#0/1  
aaaa\_aaa`\_a\_```]¥`a^X^\_]Z\_Z`WXW\_^\_]\_\_^]  
@HWI-EAS443:3:21:865:1057#0/1  
AGCGGGTTCCTTCTTGTCTTCCTGATGTGTACTTTTTG  
+HWI-EAS443:3:21:865:1057#0/1  
¥\_b```b\_`bbabaab`b\_b`^^a`aXaaOb\_\_`a`a`a[  
@HWI-EAS443:3:21:877:1963#0/1  
CGGGGTTCTTCTTGTCTTCCTGATGTGTACTTTTTGAT  
+HWI-EAS443:3:21:877:1963#0/1  
\_\_`b[bbabaab`````aabab`aa\_^bZa\_aaa\_a`ba  
@HWI-EAS443:3:22:1101:878#0/1  
CGGGGTTCTTCTTGTCTTCCTGATGTGTACTTTTTGAT  
+HWI-EAS443:3:22:1101:878#0/1  
]R]Vsx\_]GZ]ZUZZ]N[V]U[ZZLZMP[X^`¥^]¥UY\_  
@HWI-EAS443:3:22:1161:295#0/1  
AGCGGGTTCCTTCTTGTCTTCCTGATGTGTACTTTTTG  
+HWI-EAS443:3:22:1161:295#0/1  
a\_b^\_aaab]bbababbbaV\_ba\_ba`aa`bW\_`babaaZ  
@HWI-EAS443:3:22:1181:807#0/1  
GCGGGTTCCTTCTTGTCTTCCTGATGTGTACTTTTTGA  
+HWI-EAS443:3:22:1181:807#0/1  
aa\_aba]\_\_\_`\_\_¥``\_^a\_\_Z`^X]\_Z\_ZXX^`X`^]  
@HWI-EAS443:3:22:1223:1796#0/1  
GCGGGTTCCTTCTTGTCTTCCTGATGTGTACTTTTTGA  
+HWI-EAS443:3:22:1223:1796#0/1  
```aa`\_aaabaaaa\_a\_aa^aaaa]a^aZa`a``Y\_  
@HWI-EAS443:3:22:1247:1123#0/1  
AGCGGGTTCCTTCTTGTCTTCCTGATGTGTACTTTTTG  
+HWI-EAS443:3:22:1247:1123#0/1  
abbbaba`aaba`a`bbbaaab\_aaa`aa`a\_`]aaaaU  
@HWI-EAS443:3:22:1247:96#0/1  
GCGGGTTCCTTCTTGTCTTCCTGATGTGTACTTTTTGA  
+HWI-EAS443:3:22:1247:96#0/1  
RTNOb\_T[U]¥`a]\_aa\_¥\_]\_\_aRNOZV^XYN\_a`aaY`  
@HWI-EAS443:3:22:159:1237#0/1  
CGGGGTTCTTCTTGTCTTCCTGATGTGTACTTTTTGAT  
+HWI-EAS443:3:22:159:1237#0/1  
a`a\_`Y`aaa``[\_``\_a`````\_^\_^Z`Y]\_a\_``]¥`\_`



@HWI-EAS443:3:22:264:529#0/1  
GGGGTTCCTTCTTGTCTTCCTGATGTGTACTTTTTGATT  
+HWI-EAS443:3:22:264:529#0/1  
a]ZVK\_aa\_¥\_YWV0[\_\_\_\_\_`XP\_aTZUNY\_^]^WRWB  
@HWI-EAS443:3:22:27:1022#0/1  
GCGGGTTCCTTCTTGTCTTCCTGATGTGTACTTTTTGA  
+HWI-EAS443:3:22:27:1022#0/1  
aa`\_`a\_baababaaaaaaaaaaaa`aa\_a^]^aaaa^U[  
@HWI-EAS443:3:22:552:931#0/1  
CGGGGTTCCTTCTTGTCTTCCTGATGTGTACTTTTTGAT  
+HWI-EAS443:3:22:552:931#0/1  
aaaa`]aaaabaaaaabb`Y^`a^a^`\_a\_a\_a`a`  
@HWI-EAS443:3:22:632:1132#0/1  
ATCAAAAAGTACACATCAGGAAGACAAGAGAAGAACCCCG  
+HWI-EAS443:3:22:632:1132#0/1  
]babaa¥\_aYbbbaabb`aaaaa`Z]aaaa`\_aaa\_\_a  
@HWI-EAS443:3:22:64:693#0/1  
CGGGGTTCCTTCTTGTCTTCCTGATGTGTACTTTTTGAT  
+HWI-EAS443:3:22:64:693#0/1  
`b\_aa\_baa]bbabb`bbba]``aa`b`¥abbaab`b  
@HWI-EAS443:3:22:764:60#0/1  
GGGGTTCCTTCTTGTCTTCCTGATGTGTACTTTTTGATT  
+HWI-EAS443:3:22:764:60#0/1  
aaa`^`aaa`a\_aaa`\_a`\_X````\_Za]^a^`^`^`\_\_\_\_  
@HWI-EAS443:3:22:778:424#0/1  
GGTTCCTTCTTGTCTTCCTGATGTGTACTTTTTGATTAT  
+HWI-EAS443:3:22:778:424#0/1  
¥¥XWV[¥^TGZ\_a¥Y¥^`\_`¥V¥`TaXTG]aaaaJJ]^a  
@HWI-EAS443:3:22:790:743#0/1  
GGTTCCTTCTTGTCTTCCTGATGTGTACTTTTTGATTAT  
+HWI-EAS443:3:22:790:743#0/1  
^\_X`aa`aa\_\_`a`]aaaa`]]^`\_^]Uaaa``aZ¥aa¥  
@HWI-EAS443:3:22:812:456#0/1  
CGGGGTTCCTTCTTGTCTTCCTGATGTGTACTTTTTGAT  
+HWI-EAS443:3:22:812:456#0/1  
ab`\_aa[\_abababbbbabbaaaabaZa`ababaaaa  
@HWI-EAS443:3:22:988:867#0/1  
GGTTCCTTCTTGTCTTCCTGATGTGTACTTTTTGATTAT  
+HWI-EAS443:3:22:988:867#0/1  
aaR[^aa`\_`a]Uaa]\_]WT¥\_YaX`X`^`\_`XV^`^^  
@HWI-EAS443:3:22:998:765#0/1  
GGGGTTCCTTCTTGTCTTCCTGATGTGTACTTTTTGATT  
+HWI-EAS443:3:22:998:765#0/1  
a\_¥\_R^X\_][]SW`STV`\_TRZ\_U\_]Y^]SQY`X`\_]¥¥Y  
@HWI-EAS443:3:23:1059:245#0/1  
GGGTTCCTTCTTGTCTTCCTGATGTGTACTTTTTGATTA  
+HWI-EAS443:3:23:1059:245#0/1  
aaa[aaaaaa`aaa\_aa\_\_`\_\_^\_]\_]^^\_aa^`\_\_`\_]  
@HWI-EAS443:3:23:1230:1510#0/1  
CGGGGTTCCTTCTTGTCTTCCTGATGTGTACTTTTTGAT

+HWI-EAS443:3:23:1230:1510#0/1  
abbbbababb`babb\_aabb\_ab¥`aa^`\_a\_baaa\_`a  
@HWI-EAS443:3:23:1396:168#0/1  
CGGGGTTCTTCTTGTCTTCCTGATGTGTACTTTTTGAT  
+HWI-EAS443:3:23:1396:168#0/1  
aaZRY¥TY\_\_aY\_]XLZ`Y^[ZR[[[aUQF[\_]\_[NR]  
@HWI-EAS443:3:23:1428:1210#0/1  
CGGGGTTCTTCTTGTCTTCCTGATGTGTACTTTTTGAT  
+HWI-EAS443:3:23:1428:1210#0/1  
abba`abbbab\_bb`[ababa\_a`\_aa^b^\_Za`aaaa\_a  
@HWI-EAS443:3:23:1749:245#0/1  
GGGTTCTTCTTGTCTTCCTGATGTGTACTTTTTGATTA  
+HWI-EAS443:3:23:1749:245#0/1  
ab]\_\_aaa\_aba\_ba¥aa`^a\_WaZxa\_\_^\_aaZ]0[a^B  
@HWI-EAS443:3:23:1767:210#0/1  
GCGGGGTTCTTCTTGTCTTCCTGATGTGTACTTTTTGA  
+HWI-EAS443:3:23:1767:210#0/1  
ab`bababbbbabaaaa`abbP^\_X\_a`\_a`\_`a^bb`\_  
@HWI-EAS443:3:23:442:1358#0/1  
GGGGTTCTTCTTGTCTTCCTGATGTGTACTTTTTGATT  
+HWI-EAS443:3:23:442:1358#0/1  
aaa^Gbaaaa`aaXV[aa`W\_[a^^]¥Z\_^`^`\_^\_`^  
@HWI-EAS443:3:23:496:86#0/1  
GGTTCTTCTTGTCTTCCTGATGTGTACTTTTTGATTAT  
+HWI-EAS443:3:23:496:86#0/1  
abZaa\_\_aa`aa`[^`^^`^]`^^^XX^`^^\_]^^]Z  
@HWI-EAS443:3:23:742:868#0/1  
GGGTTCTTCTTGTCTTCCTGATGTGTACTTTTTGATTA  
+HWI-EAS443:3:23:742:868#0/1  
\_b`\_aabbbbbaaaaaaaaaabaaa\_a]¥]aaaa`\_Za`\_  
@HWI-EAS443:3:23:747:1493#0/1  
GGGGTTCTTCTTGTCTTCCTGATGTGTACTTTTTGATT  
+HWI-EAS443:3:23:747:1493#0/1  
\_T¥EPT\_Z]Y[``\_]a`]UWTUXYLFPL]W\_¥\_]Y`\_ZY  
@HWI-EAS443:3:23:759:241#0/1  
GCGGGGTTCTTCTTGTCTTCCTGATGTGTACTTTTTGA  
+HWI-EAS443:3:23:759:241#0/1  
]aaY[b]aZY`¥`Zaaa`bVN¥ZaY^aabMYaaa\_^aaa  
@HWI-EAS443:3:23:914:1697#0/1  
GGGGTTCTTCTTGTCTTCCTGATGTGTACTTTTTGATT  
+HWI-EAS443:3:23:914:1697#0/1  
aba[P`L`]0]Z`\_aX`YQ^SU^\_[VF[R^\_W[U\_]\_]\_X  
@HWI-EAS443:3:24:1014:1356#0/1  
AGCGGGGTTCTTCTTGTCTTCCTGATGTGTACTTTTTG  
+HWI-EAS443:3:24:1014:1356#0/1  
aaa\_\_a`Waaaaaa^`\_`\_`\_^\_]`\_`\_^]Z\_^`\_`a\_Q  
@HWI-EAS443:3:24:1037:778#0/1  
ATCAAAAAGTACACATCAGGAAGACAAGAGAAGAACCCCG  
+HWI-EAS443:3:24:1037:778#0/1  
aa`\_a\_b]bKbbaa]`babaaba`a`ba`aaaaaba`UWb

@HWI-EAS443:3:24:108:525#0/1  
GCGGGTTCTTCTTGTCTTCCTGATGTGTACTTTTTGA  
+HWI-EAS443:3:24:108:525#0/1  
abaaaaabbbabbabab`abbaaba\_aaaa^aaabaabaa  
@HWI-EAS443:3:24:1144:1859#0/1  
ATCAAAAAGTACACATCAGGAAGACAAGAGAAGAACCCCG  
+HWI-EAS443:3:24:1144:1859#0/1  
^¥¥`b`bb\_G\_abb`bb^XY^]Z]]ba^a`^^^`bbXN\_a  
@HWI-EAS443:3:24:434:1690#0/1  
CGGGGTTCTTCTTGTCTTCCTGATGTGTACTTTTTGAT  
+HWI-EAS443:3:24:434:1690#0/1  
ab`\_a\_bbb```bbaaaaaabaaVa`a^¥^a`a``\_a]aa  
@HWI-EAS443:3:24:830:599#0/1  
GGTTCCTTCTTGTCTTCCTGATGTGTACTTTTTGATTAT  
+HWI-EAS443:3:24:830:599#0/1  
¥` `b¥bbb\_[b`Y]Ybaa`XS^\_a`a¥`aaaaba^a\_\_\_a  
@HWI-EAS443:3:25:1003:99#0/1  
CGGGGTTCTTCTTGTCTTCCTGATGTGTACTTTTTGAT  
+HWI-EAS443:3:25:1003:99#0/1  
\_bbbbba`\_babaabbaabb[\_\_\_babbaaa\_T`abbb[bb  
@HWI-EAS443:3:25:1181:1209#0/1  
GCGGGTTCTTCTTGTCTTCCTGATGTGTACTTTTTGA  
+HWI-EAS443:3:25:1181:1209#0/1  
abaaa]U]^aaaaaaa]\_T^`[\_`a^[UV`[SS]a` `aV¥  
@HWI-EAS443:3:25:1313:1489#0/1  
CGGGGTTCTTCTTGTCTTCCTGATGTGTACTTTTTGAT  
+HWI-EAS443:3:25:1313:1489#0/1  
[`¥abUbbabbbbabbbbababbbbaa[aa^bbbbbabb  
@HWI-EAS443:3:25:1581:1471#0/1  
ATAATCAAAAAGTACACATCAGGAAGACAAGAGAAGAACC  
+HWI-EAS443:3:25:1581:1471#0/1  
a^\_`b` `a[a`aa\_ba\_aaa\_0¥aX\_RY]aa`^¥[a\_^U  
@HWI-EAS443:3:25:1585:231#0/1  
AGCGGGTTCTTCTTGTCTTCCTGATGTGTACTTTTTG  
+HWI-EAS443:3:25:1585:231#0/1  
aabbbab`babb`b\_bb``\_aa\_\_ba\_a`^`a\_Wabaaa[  
@HWI-EAS443:3:25:1686:1388#0/1  
CGGGGTTCTTCTTGTCTTCCTGATGTGTACTTTTTGAT  
+HWI-EAS443:3:25:1686:1388#0/1  
a]a`babbabbbabbab`bbaabb¥bbaa]`Ybbbbbbab  
@HWI-EAS443:3:25:382:964#0/1  
GCGGGTTCTTCTTGTCTTCCTGATGTGTACTTTTTGA  
+HWI-EAS443:3:25:382:964#0/1  
aba\_[\_PPX[\_\_\_\_^\_\_`U\_\_¥Y\_^[WZZZ^Y¥¥¥¥¥^¥[VT  
@HWI-EAS443:3:25:460:806#0/1  
GGGTTCTTCTTGTCTTCCTGATGTGTACTTTTTGATTA  
+HWI-EAS443:3:25:460:806#0/1  
aa\_\_ba]\_\_WTPaUWT]\_\_]\_S`Q`T\_G`][^\_]\_XUV¥^  
@HWI-EAS443:3:25:549:427#0/1  
CGGGGTTCTTCTTGTCTTCCTGATGTGTACTTTTTGAT

+HWI-EAS443:3:25:549:427#0/1  
`aa`aXab\_bbbbb\_b`abbaabba`\_`b`Z\_b`bab[^`  
@HWI-EAS443:3:25:568:162#0/1  
CGGGGTTCTTCTTGTCTTCCTGATGTGTACTTTTTGAT  
+HWI-EAS443:3:25:568:162#0/1  
aaabb]abbb`]`bababbb`aaaa`]ZZa\_a`\_ba`a`  
@HWI-EAS443:3:25:688:1039#0/1  
GGGGTTCTTCTTGTCTTCCTGATGTGTACTTTTTGATT  
+HWI-EAS443:3:25:688:1039#0/1  
a[a`Yaa`a^a`\_a`^]a`\_\_\_\_^^\_Y\_V\_Y^\_^\_\_^]^^  
@HWI-EAS443:3:25:839:248#0/1  
GGTTCTTCTTGTCTTCCTGATGTGTACTTTTTGATTAT  
+HWI-EAS443:3:25:839:248#0/1  
a[SZ^X\_]X\_\_^Q^]¥Z]^WIX]N]UWOZZ^Z]SWZZZX  
@HWI-EAS443:3:25:928:816#0/1  
GGGGTTCTTCTTGTCTTCCTGATGTGTACTTTTTGATT  
+HWI-EAS443:3:25:928:816#0/1  
a`^XXa\_aSD¥\_``\_`]¥RY`VU[\_U^O]]\_`^\_W\_YU`\_  
@HWI-EAS443:3:26:1063:1498#0/1  
GCGGGGTTCTTCTTGTCTTCCTGATGTGTACTTTTTGA  
+HWI-EAS443:3:26:1063:1498#0/1  
^``[¥Y\_V¥a\_X\_0¥[¥Y¥\_`I\_a¥W¥\_T\_TU¥^\_ZY¥^[  
@HWI-EAS443:3:26:1121:959#0/1  
GCGGGGTTCTTCTTGTCTTCCTGATGTGTACTTTTTGA  
+HWI-EAS443:3:26:1121:959#0/1  
a\_S]XTKXY\_\_a]]\_`YY^¥`YW]]\_`X\_W[\_[\_]`]PZ  
@HWI-EAS443:3:26:1144:1681#0/1  
CGGGGTTCTTCTTGTCTTCCTGATGTGTACTTTTTGAT  
+HWI-EAS443:3:26:1144:1681#0/1  
VbaZTJbaSY`ab¥aaXab``XVVbb\_]aa^bbabb\_¥a`  
@HWI-EAS443:3:26:1183:876#0/1  
CGGGGTTCTTCTTGTCTTCCTGATGTGTACTTTTTGAT  
+HWI-EAS443:3:26:1183:876#0/1  
abbbbab`babbabbaa`bba`baabaabaa`bbabb]ab  
@HWI-EAS443:3:26:1373:755#0/1  
CGGGGTTCTTCTTGTCTTCCTGATGTGTACTTTTTGAT  
+HWI-EAS443:3:26:1373:755#0/1  
a\_]Y¥]\_\_^aZ^aYa^WU\_a[a`a`a``R`^a`ab\_]a  
@HWI-EAS443:3:26:1691:615#0/1  
GGGTTCTTCTTGTCTTCCTGATGTGTACTTTTTGATTA  
+HWI-EAS443:3:26:1691:615#0/1  
abaW\_Wa^[]]aaa]X``YL\_a\_\_aYa]\_U\_a\_^\_¥^\_AY  
@HWI-EAS443:3:26:279:580#0/1  
GGGGTTCTTCTTGTCTTCCTGATGTGTACTTTTTGATT  
+HWI-EAS443:3:26:279:580#0/1  
``aaYaa\_[aabXbb[YVXbaVWZVNY]PVYa[aa\_`\_\_\_\_  
@HWI-EAS443:3:26:691:738#0/1  
CGGGGTTCTTCTTGTCTTCCTGATGTGTACTTTTTGAT  
+HWI-EAS443:3:26:691:738#0/1  
a`Z¥[[\_Zb^Xbbaaa\_[ba]]a``a`Ya\_^`ba`baWa\_

@HWI-EAS443:3:26:814:836#0/1  
CGGGGTTCTTCTTGTCTTCCTGATGTGTACTTTTTGAT  
+HWI-EAS443:3:26:814:836#0/1  
`a\_T]a[aabbbaaa]aX]]ab]Xa`^Waab`a`ba\_X]b  
@HWI-EAS443:3:26:899:1046#0/1  
GGGTTCTTCTTGTCTTCCTGATGTGTACTTTTTGATTA  
+HWI-EAS443:3:26:899:1046#0/1  
aa`^baaaabaaaa`baaaaa^aa\_a^\_aaaaa\_a`a  
@HWI-EAS443:3:26:926:1329#0/1  
GGGGTTCTTCTTGTCTTCCTGATGTGTACTTTTTGATT  
+HWI-EAS443:3:26:926:1329#0/1  
aaa\_Z`aa`aa`\_\_\_`a`^a]\_X\_]`^`\_\_a^\_\_^  
@HWI-EAS443:3:27:1167:1855#0/1  
CGGGGTTCTTCTTGTCTTCCTGATGTGTACTTTTTGAT  
+HWI-EAS443:3:27:1167:1855#0/1  
a\_GN^X`aHY^UbYa`IZS^a\_XNGQ`^^SUUXS¥ULL^]  
@HWI-EAS443:3:27:1187:1073#0/1  
GGGGTTCTTCTTGTCTTCCTGATGTGTACTTTTTGATT  
+HWI-EAS443:3:27:1187:1073#0/1  
aXYaS¥[a]¥[^\_WYW[``]``\_UZ\_TZY\_^^``^^]]`W  
@HWI-EAS443:3:27:1296:715#0/1  
GGTTCTTCTTGTCTTCCTGATGTGTACTTTTTGATTAT  
+HWI-EAS443:3:27:1296:715#0/1  
`UYa\_aa]a`aa^V`aaaS]^\_^^Y[^\_`aaa^\_^\_  
@HWI-EAS443:3:27:167:1178#0/1  
GCGGGGTTCTTCTTGTCTTCCTGATGTGTACTTTTTGA  
+HWI-EAS443:3:27:167:1178#0/1  
`baabYVY`b`b`aaa\_\_`aab`a\_a`\_^`]aa`aa\_a[\_  
@HWI-EAS443:3:27:274:1646#0/1  
CGGGGTTCTTCTTGTCTTCCTGATGTGTACTTTTTGAT  
+HWI-EAS443:3:27:274:1646#0/1  
a\_P\_Q¥````^`a`]P\_[`aaV]`[RY\_Z^T]a]]\_V\_`  
@HWI-EAS443:3:27:397:1130#0/1  
CGGGGTTCTTCTTGTCTTCCTGATGTGTACTTTTTGAT  
+HWI-EAS443:3:27:397:1130#0/1  
aabaaYabaaa`^aaa`aaaa\_a\_\_^¥a\_a`a`a`a`a`a`  
@HWI-EAS443:3:27:900:1291#0/1  
ATAATCAAAAAGTACACATCAGGAAGACAAGAGAAGAACC  
+HWI-EAS443:3:27:900:1291#0/1  
^X[Z¥a]ab`U`ab`\_]baaaaba\_baV``aaaa`a\_W  
@HWI-EAS443:3:28:1489:208#0/1  
GCGGGGTTCTTCTTGTCTTCCTGATGTGTACTTTTTGA  
+HWI-EAS443:3:28:1489:208#0/1  
a^a]aaXa[\_a]a^`a\_^`\_\_^`\_^]aX\_Y^^`^`\_^]  
@HWI-EAS443:3:28:1647:552#0/1  
CGGGGTTCTTCTTGTCTTCCTGATGTGTACTTTTTGAT  
+HWI-EAS443:3:28:1647:552#0/1  
abbb¥0^UUTX\_V^]QHI`]WZa`T`aZbS\_¥aX\_a\_NNY  
@HWI-EAS443:3:28:382:1177#0/1  
GCGGGGTTCTTCTTGTCTTCCTGATGTGTACTTTTTGA

+HWI-EAS443:3:28:382:1177#0/1  
ab]`aaaaaa\_aabaa`X`^]aaa\_`]]TZT^Za\_`¥a]`  
@HWI-EAS443:3:28:784:1834#0/1  
CGGGGTTCTTCTTGTCTTCCTGATGTGTACTTTTTGAT  
+HWI-EAS443:3:28:784:1834#0/1  
[\_R¥WR`aZ\_bbaa`Jaba\_\_[U`Y`a``\_]`Va][`S¥\_  
@HWI-EAS443:3:29:1049:781#0/1  
TCAAAAAGTACACATCAGGAAGACAAGAGAAGAACCCCGC  
+HWI-EAS443:3:29:1049:781#0/1  
abaaaa`^baaaaaaaaa`aa``a`a\_a\_aaa`aZZ\_a]  
@HWI-EAS443:3:29:113:1507#0/1  
CGGGGTTCTTCTTGTCTTCCTGATGTGTACTTTTTGAT  
+HWI-EAS443:3:29:113:1507#0/1  
a`¥`\_¥`baaaaa``\_a`aaa\_``^[VaX¥^`\_`\_`]^`^  
@HWI-EAS443:3:29:1154:354#0/1  
GCGGGGTTCTTCTTGTCTTCCTGATGTGTACTTTTTGA  
+HWI-EAS443:3:29:1154:354#0/1  
`TW¥W^¥aa]b^aaa¥ZQ`¥^[Y`a\_Y¥TVR`[Y¥Y`\_Y`  
@HWI-EAS443:3:29:1240:488#0/1  
GCGGGGTTCTTCTTGTCTTCCTGATGTGTACTTTTTGA  
+HWI-EAS443:3:29:1240:488#0/1  
a`abb`H`abbZa¥ba]Vaabaaabaaa[^N^^aaaaa]a  
@HWI-EAS443:3:29:1299:2025#0/1  
GCGGGGTTCTTCTTGTCTTCCTGATGTGTACTTTTTGA  
+HWI-EAS443:3:29:1299:2025#0/1  
a¥X\_OHXbaa]\_a\_¥WMP]X^`\_\_[\_]WYT[\_]\_]`\_Y^  
@HWI-EAS443:3:29:1674:626#0/1  
CGGGGTTCTTCTTGTCTTCCTGATGTGTACTTTTTGAT  
+HWI-EAS443:3:29:1674:626#0/1  
\_b¥bb¥X\_bb0¥`¥bX¥\_baVab\_abb`bbbbbb`b\_  
@HWI-EAS443:3:29:239:479#0/1  
CGGGGTTCTTCTTGTCTTCCTGATGTGTACTTTTTGAT  
+HWI-EAS443:3:29:239:479#0/1  
aba``^bbbbbbbaa`abaaaabaaa^^¥a\_aaaab]`a  
@HWI-EAS443:3:29:262:1209#0/1  
CGGGGTTCTTCTTGTCTTCCTGATGTGTACTTTTTGAT  
+HWI-EAS443:3:29:262:1209#0/1  
aaaa]^aaaabaa``a^a\_`a^^^P[\_Y\_UV]``^`\_\_^a\_  
@HWI-EAS443:3:29:444:136#0/1  
CGGGGTTCTTCTTGTCTTCCTGATGTGTACTTTTTGAT  
+HWI-EAS443:3:29:444:136#0/1  
a`¥`a0]^abaaaaaa]``\_`^Y\_\_¥\_V\_PTY[\_\_\_\_^[^B  
@HWI-EAS443:3:29:48:659#0/1  
GCGGGGTTCTTCTTGTCTTCCTGATGTGTACTTTTTGA  
+HWI-EAS443:3:29:48:659#0/1  
abbaaa]aaaaaaaaa]\_a^`a`a\_`^V[] []`\_a\_`Y^  
@HWI-EAS443:3:29:634:21#0/1  
AGCGGGGTTCTTCTTGTCTTCCTGATGTGTACTTTTTG  
+HWI-EAS443:3:29:634:21#0/1  
a]]aaY`0]]a`^¥``]]X^W`\_]aZX^¥`U\_W^^a]\_B

@HWI-EAS443:3:29:768:858#0/1  
GGGTTCTTCTTGTCTTCCTGATGTGTACTTTTTGATTA  
+HWI-EAS443:3:29:768:858#0/1  
abaUaaaaaaa`aa^aaaaaa\_`aX\_^\_`aa`aa`^``\_`  
@HWI-EAS443:3:29:896:86#0/1  
CGGGGTTCTTCTTGTCTTCCTGATGTGTACTTTTTGAT  
+HWI-EAS443:3:29:896:86#0/1  
abbb^Va`bbbababaaba]bbaababaaaabbbb^aa  
@HWI-EAS443:3:2:1001:432#0/1  
CGGGGTTCTTCTTGTCTTCCTGATGTGTACTTTTTGAT  
+HWI-EAS443:3:2:1001:432#0/1  
abbba^aba\_a`aaa`aba\_`a`a`a`\_Zaa`aa\_a`  
@HWI-EAS443:3:2:1052:2004#0/1  
AGCGGGGTTCTTCTTGTCTTCCTGATGTGTACTTTTTG  
+HWI-EAS443:3:2:1052:2004#0/1  
aaXabZ[[aX^Y^]SN^a^\_]YN\_]`\_\_a^a\_\_V\_^¥YB  
@HWI-EAS443:3:2:1125:326#0/1  
CGGGGTTCTTCTTGTCTTCCTGATGTGTACTTTTTGAT  
+HWI-EAS443:3:2:1125:326#0/1  
abb^`[b]abaa¥aaa]`a\_aY``¥\_a]a]\_\_`a`^^]]\_`  
@HWI-EAS443:3:2:1167:1460#0/1  
GGGTTCTTCTTGTCTTCCTGATGTGTACTTTTTGATTA  
+HWI-EAS443:3:2:1167:1460#0/1  
aXOPX^\_VPYI]YP]Q¥`\_^W[U]\_W]S^U`^\_U]BBBB  
@HWI-EAS443:3:2:1769:360#0/1  
CGGGGTTCTTCTTGTCTTCCTGATGTGTACTTTTTGAT  
+HWI-EAS443:3:2:1769:360#0/1  
¥`XZb]bbbabab`bb]`abbaab¥``Y`b\_a^baaa\_Q`a  
@HWI-EAS443:3:2:178:693#0/1  
CGGGGTTCTTCTTGTCTTCCTGATGTGTACTTTTTGAT  
+HWI-EAS443:3:2:178:693#0/1  
abbaaRaaaa\_a^a\_aa\_\_aa\_``\_^`U^Za]`a`a\_  
@HWI-EAS443:3:2:315:923#0/1  
GGTTCTTCTTGTCTTCCTGATGTGTACTTTTTGATTAT  
+HWI-EAS443:3:2:315:923#0/1  
a`a`\_a\_aaXa]\_\_aX`a`\_Y`\_^\_aW`X\_Z\_\_\_X\_\_^\_]Z  
@HWI-EAS443:3:2:722:1220#0/1  
GCGGGGTTCTTCTTGTCTTCCTGATGTGTACTTTTTGA  
+HWI-EAS443:3:2:722:1220#0/1  
a`\_^`[[Y[Ya`0`Za\_\_\_Z\_\_\_]a\_\_`^]\_Z]X]`]]a]]  
@HWI-EAS443:3:2:750:967#0/1  
GGGGTTCTTCTTGTCTTCCTGATGTGTACTTTTTGATT  
+HWI-EAS443:3:2:750:967#0/1  
a`\_]Ya`\_a`a`\_aaa¥^aaXX`\_`\_\_aU\_I¥W\_^aaa\_\_Y`  
@HWI-EAS443:3:30:1120:1375#0/1  
GCGGGGTTCTTCTTGTCTTCCTGATGTGTACTTTTTGA  
+HWI-EAS443:3:30:1120:1375#0/1  
ababa\_Xaaaa`aaaba`aaaa\_aa`^V`]`\_\_a`\_`[\_`  
@HWI-EAS443:3:30:1320:1355#0/1  
GGGGTTCTTCTTGTCTTCCTGATGTGTACTTTTTGATT

+HWI-EAS443:3:30:1320:1355#0/1  
aba\_Za[a`aa`aaQ¥aa`^`\_`\_`X^U`S`Z`]^`^U  
@HWI-EAS443:3:30:1359:1585#0/1  
GCGGGTTCTTCTTGTCTTCCTGATGTGTACTTTTTGA  
+HWI-EAS443:3:30:1359:1585#0/1  
\_bbbb`bbb` `aabb\_abba\_a`\_aa^Z`aaaaaa`a  
@HWI-EAS443:3:30:1550:1024#0/1  
CGGGGTTCTTCTTGTCTTCCTGATGTGTACTTTTTGAT  
+HWI-EAS443:3:30:1550:1024#0/1  
]bbaT`a`^` `abb`bbbabY^ba]]aaaa`bb`a\_RYa  
@HWI-EAS443:3:30:1552:159#0/1  
ATCAAAAAGTACACATCAGGAAGACAAGAGAAGAACCCCG  
+HWI-EAS443:3:30:1552:159#0/1  
abaaaa¥¥Xb`ba` `aaa`aa`^a`^`^`\_`\_XXRUP¥  
@HWI-EAS443:3:30:282:1396#0/1  
CGGGGTTCTTCTTGTCTTCCTGATGTGTACTTTTTGAT  
+HWI-EAS443:3:30:282:1396#0/1  
Z`^XWaa`YYZb^a^aaa`YaZYY`U¥Taa]Z¥a\_]a[  
@HWI-EAS443:3:30:339:1457#0/1  
GGTTCCTTCTTGTCTTCCTGATGTGTACTTTTTGATTAT  
+HWI-EAS443:3:30:339:1457#0/1  
W]aZa^¥` `¥¥V^[]`Ja`b^YSaYH\_abbVb¥¥QV¥aaaB  
@HWI-EAS443:3:30:434:1858#0/1  
ATCAAAAAGTACACATCAGGAAGACAAGAGAAGAACCCCG  
+HWI-EAS443:3:30:434:1858#0/1  
a`b`abbV^\_baaba`ba` `aa`\_ba`\_a`\_a^aa`¥` `^  
@HWI-EAS443:3:30:480:1060#0/1  
CGGGGTTCTTCTTGTCTTCCTGATGTGTACTTTTTGAT  
+HWI-EAS443:3:30:480:1060#0/1  
aaa^ZWaaaabaaa`a`aa` `a`^a`a`\_X]`\_a`\_aa¥`\_`  
@HWI-EAS443:3:30:627:922#0/1  
CGGGGTTCTTCTTGTCTTCCTGATGTGTACTTTTTGAT  
+HWI-EAS443:3:30:627:922#0/1  
abbb`Saaabbbaa]bTbb\_ba]Ya\_Y[\_U` `ab` []TY`  
@HWI-EAS443:3:30:876:1237#0/1  
GCGGGTTCTTCTTGTCTTCCTGATGTGTACTTTTTGA  
+HWI-EAS443:3:30:876:1237#0/1  
a`¥` ` []aa`aaa¥Z^¥a` `aaTNVY[SPZ[]^¥¥`^¥¥  
@HWI-EAS443:3:31:1204:292#0/1  
GCGGGTTCTTCTTGTCTTCCTGATGTGTACTTTTTGA  
+HWI-EAS443:3:31:1204:292#0/1  
a\_baaa^aaa`\_a`\_aa¥^`\_S[a`\_[]]`\_`^`\_`\_a`Y]  
@HWI-EAS443:3:31:1527:1017#0/1  
GCGGGTTCTTCTTGTCTTCCTGATGTGTACTTTTTGA  
+HWI-EAS443:3:31:1527:1017#0/1  
aab`b`G` `aaa` [aa` `a[ `a`^]`\_`Ya]`\_`^aW`^a`U  
@HWI-EAS443:3:31:1610:1068#0/1  
GCGGGTTCTTCTTGTCTTCCTGATGTGTACTTTTTGA  
+HWI-EAS443:3:31:1610:1068#0/1  
abaa^YR`a`]baaaab^` `aaa`a^^[ `a]][\_`^]`\_aa^



@HWI-EAS443:3:31:1629:330#0/1  
GGGGTTCTTCTTGTCTTCCTGATGTGTACTTTTTGATT  
+HWI-EAS443:3:31:1629:330#0/1  
`\_b¥Lb[aaP^abb`a`b`UaaaUaaUa[aWa\_aaaa\_a[  
@HWI-EAS443:3:31:178:490#0/1  
GCGGGTTCTTCTTGTCTTCCTGATGTGTACTTTTTGA  
+HWI-EAS443:3:31:178:490#0/1  
abaaba^abaaaaaaa`aa`a`aXaa^V]^`^\_a`a\_a]\_  
@HWI-EAS443:3:31:516:489#0/1  
CGGGTTCTTCTTGTCTTCCTGATGTGTACTTTTTGAT  
+HWI-EAS443:3:31:516:489#0/1  
¥^Y``La^^UZyU`\_`\_Y\_ab^a]V¥T\_YQ[GV]aZN¥I`\_  
@HWI-EAS443:3:31:669:563#0/1  
GGGGTTCTTCTTGTCTTCCTGATGTGTACTTTTTGATT  
+HWI-EAS443:3:31:669:563#0/1  
aaab\_baabbbaaaaaabaaaaaa`\_]a^\_\_aaa`a`\_a\_  
@HWI-EAS443:3:31:701:1882#0/1  
CGGGTTCTTCTTGTCTTCCTGATGTGTACTTTTTGAT  
+HWI-EAS443:3:31:701:1882#0/1  
aa`^¥¥^a^\_a\_a`\_`R`^`\_`¥¥RU]Z^X\_Z^^]]XX\_Z  
@HWI-EAS443:3:31:726:556#0/1  
AGCGGGTTCTTCTTGTCTTCCTGATGTGTACTTTTTG  
+HWI-EAS443:3:31:726:556#0/1  
a\_aaaaa0aaaaaa`a`a^a`\_`\_`\_`\_`^aY]^\_a^\_Z]  
@HWI-EAS443:3:31:761:1893#0/1  
GGGTTCTTCTTGTCTTCCTGATGTGTACTTTTTGATTA  
+HWI-EAS443:3:31:761:1893#0/1  
````aba`bb\_bbb^abbaa`^abaaTL]a`aaab`aaa[  
@HWI-EAS443:3:31:78:530#0/1  
CGGGTTCTTCTTGTCTTCCTGATGTGTACTTTTTGAT  
+HWI-EAS443:3:31:78:530#0/1  
ab^^^S]] [aa\_a]¥Uaaaaa\_PW`UN]X^Xa\_UXZFP[  
@HWI-EAS443:3:31:819:1171#0/1  
CGGGTTCTTCTTGTCTTCCTGATGTGTACTTTTTGAT  
+HWI-EAS443:3:31:819:1171#0/1  
`V[``^aaaa^aaaa`aaaa`\_`\_`a`W]U^¥a\_a\_```^  
@HWI-EAS443:3:31:83:1764#0/1  
CGGGTTCTTCTTGTCTTCCTGATGTGTACTTTTTGAT  
+HWI-EAS443:3:31:83:1764#0/1  
aa`¥]¥aa``aaa`a`^ba\_aa`\_\_\_\_\_]]¥[aa^``\_Xa^  
@HWI-EAS443:3:32:1081:675#0/1  
CGGGTTCTTCTTGTCTTCCTGATGTGTACTTTTTGAT  
+HWI-EAS443:3:32:1081:675#0/1  
abb^`YbbbabbbbbbabbaabaaXaaTP]]aaaabaa``  
@HWI-EAS443:3:32:1120:344#0/1  
GCGGGTTCTTCTTGTCTTCCTGATGTGTACTTTTTGA  
+HWI-EAS443:3:32:1120:344#0/1  
`aX¥ababbbab\_baa^P`b`[R\_MU¥YR]SX\_`aaba``  
@HWI-EAS443:3:32:1208:377#0/1  
CGGGTTCTTCTTGTCTTCCTGATGTGTACTTTTTGAT

+HWI-EAS443:3:32:1208:377#0/1  
abbb^¥babb`b`bba`^b`0`bba`b\_a^a]babaa\_aa  
@HWI-EAS443:3:32:1483:1465#0/1  
GGGGTTCTTCTTGTCTTCCTGATGTGTACTTTTTGATT  
+HWI-EAS443:3:32:1483:1465#0/1  
a)¥\_Z\_] ^¥QZa)\_`XT\_`U[Z^Y¥ZVXTX^]X^^\_[\_]  
@HWI-EAS443:3:32:1605:121#0/1  
GCGGGTTCTTCTTGTCTTCCTGATGTGTACTTTTTGA  
+HWI-EAS443:3:32:1605:121#0/1  
a`a`aa[a` ``¥\_]\_\_`^]``TX`^Z\_]`WZZ^`^`\_[Y  
@HWI-EAS443:3:32:359:686#0/1  
GGGTTCTTCTTGTCTTCCTGATGTGTACTTTTTGATTA  
+HWI-EAS443:3:32:359:686#0/1  
S^`V`Z`ab`baY`aaa]b\_]baaaVa`ba^abbaaXaa`  
@HWI-EAS443:3:32:442:1980#0/1  
GCGGGTTCTTCTTGTCTTCCTGATGTGTACTTTTTGA  
+HWI-EAS443:3:32:442:1980#0/1  
ab\_a¥\_G\_b`aa`a\_a`]a`aab\_\_a\_`\_\_^aa` `` ` \_I\_  
@HWI-EAS443:3:32:596:674#0/1  
CGGGTTCTTCTTGTCTTCCTGATGTGTACTTTTTGAT  
+HWI-EAS443:3:32:596:674#0/1  
^\_^\_S^\_a` `Z`baababba^X^WU^` `^W]X[a]a`Z¥^  
@HWI-EAS443:3:32:669:1309#0/1  
GGGGTTCTTCTTGTCTTCCTGATGTGTACTTTTTGATT  
+HWI-EAS443:3:32:669:1309#0/1  
a`V`SRaa^`^b[`]J[Z\_XZWWa\_aVVSXX^\_]ZS[^T  
@HWI-EAS443:3:32:707:1313#0/1  
GGGTTCTTCTTGTCTTCCTGATGTGTACTTTTTGATTA  
+HWI-EAS443:3:32:707:1313#0/1  
aaa^bbbababbbb^a`abaaa\_a[^^^` `aaaaa\_¥]\_a  
@HWI-EAS443:3:32:841:1070#0/1  
CGGGTTCTTCTTGTCTTCCTGATGTGTACTTTTTGAT  
+HWI-EAS443:3:32:841:1070#0/1  
^^aZZQ]^^]`b¥¥]` [ `V\_¥V`PWVXN\_Taa^UY]UQ[Z  
@HWI-EAS443:3:32:842:343#0/1  
GGTTCTTCTTGTCTTCCTGATGTGTACTTTTTGATTAT  
+HWI-EAS443:3:32:842:343#0/1  
a`T`aaaaa`aaa`aa\_a`\_`\_] [ `]` `\_\_`a`^^¥`a\_\_  
@HWI-EAS443:3:32:860:1974#0/1  
ATCAAAAAGTACACATCAGGAAGACAAGAGAAGAACCCCG  
+HWI-EAS443:3:32:860:1974#0/1  
¥W¥aX^`^ [Ua`Y`^Pa^OV`^X]^`\_]W\_`a\_WWaw^X^R  
@HWI-EAS443:3:32:91:797#0/1  
CGGGTTCTTCTTGTCTTCCTGATGTGTACTTTTTGAT  
+HWI-EAS443:3:32:91:797#0/1  
aba`\_P]babbaaaaa\_aa]aaa` `a^`PS\_`aaa¥`\_`\_  
@HWI-EAS443:3:32:930:1275#0/1  
GGGGTTCTTCTTGTCTTCCTGATGTGTACTTTTTGATT  
+HWI-EAS443:3:32:930:1275#0/1  
aaaa\_aaab`baba`\_\_bba\_`a` `` `^a\_` `aaa`baaa\_

@HWI-EAS443:3:33:1063:648#0/1  
GCGGGTTCTTCTTGTCTTCCTGATGTGTACTTTTTGA  
+HWI-EAS443:3:33:1063:648#0/1  
aabaaa^abb`a\_aaa^`a`]]a]a^MHXYa\_a[^  
@HWI-EAS443:3:33:1468:738#0/1  
GGGGTTCTTCTTGTCTTCCTGATGTGTACTTTTTGATT  
+HWI-EAS443:3:33:1468:738#0/1  
abaa[aaaa\_a`abb¥aaaa\_aaZ\_bXa[\_^\_Y\_\_`^^`a  
@HWI-EAS443:3:33:1512:1758#0/1  
CGGGTTCTTCTTGTCTTCCTGATGTGTACTTTTTGAT  
+HWI-EAS443:3:33:1512:1758#0/1  
ababbabbbbababbbbaaba`bbbaa`aaaM^aaab\_`a  
@HWI-EAS443:3:33:360:603#0/1  
GCGGGTTCTTCTTGTCTTCCTGATGTGTACTTTTTGA  
+HWI-EAS443:3:33:360:603#0/1  
aaaaa]Q`aaa`aaa`Za\_\_a``\_\_]\_[^SYS^`[\_][\_  
@HWI-EAS443:3:33:434:584#0/1  
GGGTTCTTCTTGTCTTCCTGATGTGTACTTTTTGATTA  
+HWI-EAS443:3:33:434:584#0/1  
^Y^]a`babbbbaaaaaa¥a[[ZaXX`aaa\_``\_a\_a  
@HWI-EAS443:3:33:89:1326#0/1  
GGGGTTCTTCTTGTCTTCCTGATGTGTACTTTTTGATT  
+HWI-EAS443:3:33:89:1326#0/1  
a`^¥`\_b¥\_b\_ba¥V]U`^``YJY\_]\_[Y\_\_Y]]\_Q]]\_  
@HWI-EAS443:3:34:110:958#0/1  
GCGGGTTCTTCTTGTCTTCCTGATGTGTACTTTTTGA  
+HWI-EAS443:3:34:110:958#0/1  
aa`X`WPU\_^]b\_aaYTV\_Z[^¥TZVY]HQQ^^`^¥^TBB  
@HWI-EAS443:3:34:1213:967#0/1  
CGGGTTCTTCTTGTCTTCCTGATGTGTACTTTTTGAT  
+HWI-EAS443:3:34:1213:967#0/1  
aaaab\_a^b\_`b\_bbaaba\_a^aaa`^\_a``^`\_`\_`^BBB  
@HWI-EAS443:3:34:1215:1226#0/1  
GGGGTTCTTCTTGTCTTCCTGATGTGTACTTTTTGATT  
+HWI-EAS443:3:34:1215:1226#0/1  
^a``^abbaabbbb\_`abaa\_ba^aa`a`^`aaa`^R]]`\_  
@HWI-EAS443:3:34:1218:1669#0/1  
GGTTCTTCTTGTCTTCCTGATGTGTACTTTTTGATTAT  
+HWI-EAS443:3:34:1218:1669#0/1  
`a`\_abbbababbaaaabbaa^a``^a]a`aaaa\_`a^]]T  
@HWI-EAS443:3:34:1238:183#0/1  
GGGGTTCTTCTTGTCTTCCTGATGTGTACTTTTTGATT  
+HWI-EAS443:3:34:1238:183#0/1  
Yaa\_M]ba\_`bb[```S`\_¥Zab\_]`a^]]WTZ^a`\_P\_\_B  
@HWI-EAS443:3:34:1417:1028#0/1  
GCGGGTTCTTCTTGTCTTCCTGATGTGTACTTTTTGA  
+HWI-EAS443:3:34:1417:1028#0/1  
aabba`aaaaab`baa`aaa`aaa\_`a`]]\_W\_aa\_][^  
@HWI-EAS443:3:34:1791:1928#0/1  
CGGGTTCTTCTTGTCTTCCTGATGTGTACTTTTTGAT

+HWI-EAS443:3:34:1791:1928#0/1  
abbbbababb`bbabb`bbba\_bab`b¥b¥\_M`a`a]]`  
@HWI-EAS443:3:34:196:1509#0/1  
CGGGGTTCTTCTTGTCTTCCTGATGTGTACTTTTTGAT  
+HWI-EAS443:3:34:196:1509#0/1  
`[Yaa\_bbaababbaa`baa`baaaa\_]`^\_aaaaaa\_aa  
@HWI-EAS443:3:34:519:288#0/1  
CGGGGTTCTTCTTGTCTTCCTGATGTGTACTTTTTGAT  
+HWI-EAS443:3:34:519:288#0/1  
abab`Yabbaaaaaaa\_aaaaaa`\_a`\_Xa^`^a`\_]`  
@HWI-EAS443:3:34:692:829#0/1  
GCGGGTTCCTTCTTGTCTTCCTGATGTGTACTTTTTGA  
+HWI-EAS443:3:34:692:829#0/1  
aa]]\_a\_aa]ab`a`a````\_`a\_XP¥[S\_X[Y\_\_^a]Z  
@HWI-EAS443:3:34:768:1775#0/1  
CGGGGTTCTTCTTGTCTTCCTGATGTGTACTTTTTGAT  
+HWI-EAS443:3:34:768:1775#0/1  
^VUXMYPaZ¥YV`\_[\_WZTZ¥¥^^^Z[OWOWWTV^ZBBBB  
@HWI-EAS443:3:35:1176:2031#0/1  
CGGGGTTCTTCTTGTCTTCCTGATGTGTACTTTTTGAT  
+HWI-EAS443:3:35:1176:2031#0/1  
ab]b``baaaaaa`\_T\_a\_aa`^`[]`]a]]`\_`\_`\_]`^`\_`  
@HWI-EAS443:3:35:1184:1297#0/1  
GGGTTCTTCTTGTCTTCCTGATGTGTACTTTTTGATTA  
+HWI-EAS443:3:35:1184:1297#0/1  
a[aY[a]Y^a\_a\_\_QS\_\_`a\_\_¥[ZVa0a\_\_`\_]V^\_VY  
@HWI-EAS443:3:35:1328:1162#0/1  
GGGGTTCTTCTTGTCTTCCTGATGTGTACTTTTTGATT  
+HWI-EAS443:3:35:1328:1162#0/1  
a`[a[T]aa\_aaa`a`[a[]¥\_\_¥U\_S¥SR¥`\_]`\_`V¥^  
@HWI-EAS443:3:35:1371:1549#0/1  
GCGGGTTCCTTCTTGTCTTCCTGATGTGTACTTTTTGA  
+HWI-EAS443:3:35:1371:1549#0/1  
abaabaZabbabbabab`aaaaaa`\_aa`a`aabaa`a]a  
@HWI-EAS443:3:35:347:1251#0/1  
CGGGGTTCTTCTTGTCTTCCTGATGTGTACTTTTTGAT  
+HWI-EAS443:3:35:347:1251#0/1  
aa]a]^aaaaaaa`Z``aaa^Y^\_Y¥TS`\_`\_`a^`\_`  
@HWI-EAS443:3:35:357:1888#0/1  
CGGGGTTCTTCTTGTCTTCCTGATGTGTACTTTTTGAT  
+HWI-EAS443:3:35:357:1888#0/1  
aa^U]Z`aa\_baaaaa^aa`aaa^a`\_Y\_]aa`\_`\_aS`  
@HWI-EAS443:3:35:511:708#0/1  
GCGGGTTCCTTCTTGTCTTCCTGATGTGTACTTTTTGA  
+HWI-EAS443:3:35:511:708#0/1  
aaXL^`\_`¥Taaaaaaa]`\_`a^^WY^WXW]R¥a^Z^\_VHR  
@HWI-EAS443:3:35:519:725#0/1  
CGGGGTTCTTCTTGTCTTCCTGATGTGTACTTTTTGAT  
+HWI-EAS443:3:35:519:725#0/1  
aaaaaY`aaaa\_aa`a`\_a\_a\_aa\_a\_]`VZ`\_`a`a¥]`\_`

@HWI-EAS443:3:35:622:762#0/1  
CGGGGTTCTTCTTGTCTTCCTGATGTGTACTTTTTGAT  
+HWI-EAS443:3:35:622:762#0/1  
a\_\_\_aXaa`a`a`a`\_aa`\_````\_`\_X]YX`\_`^\_a\_^]  
@HWI-EAS443:3:35:656:1741#0/1  
CGGGGTTCTTCTTGTCTTCCTGATGTGTACTTTTTGAT  
+HWI-EAS443:3:35:656:1741#0/1  
a¥W]^ [aaaab`aaaaZaa`aa^^¥\_\_^\_V^`\_]`\_^SUY  
@HWI-EAS443:3:35:725:287#0/1  
GCGGGTTCCTTCTTGTCTTCCTGATGTGTACTTTTTGA  
+HWI-EAS443:3:35:725:287#0/1  
^babba\_abbbbbbaaa`bbaaabaaab\_`R`aaaaaa\_a  
@HWI-EAS443:3:35:998:75#0/1  
CGGGGTTCTTCTTGTCTTCCTGATGTGTACTTTTTGAT  
+HWI-EAS443:3:35:998:75#0/1  
ab`\_WZaaa`bbYa\_aaaa\_RX`b\_aaZaZQ^abaa`YWa  
@HWI-EAS443:3:36:105:111#0/1  
CGGGGTTCTTCTTGTCTTCCTGATGTGTACTTTTTGAT  
+HWI-EAS443:3:36:105:111#0/1  
aba¥aNaaaa`aa\_aa\_\_`a^`\_\_\_\_[aYMYaa^]]\_X\_  
@HWI-EAS443:3:36:1271:388#0/1  
CGGGGTTCTTCTTGTCTTCCTGATGTGTACTTTTTGAT  
+HWI-EAS443:3:36:1271:388#0/1  
abaab`babbbabbbb\_bbb`abb`ab`bZUUaaba`¥\_a  
@HWI-EAS443:3:36:1459:903#0/1  
GCGGGTTCCTTCTTGTCTTCCTGATGTGTACTTTTTGA  
+HWI-EAS443:3:36:1459:903#0/1  
aa^\_\_`aaaab\_a`aaaaaaaa^\_aa`a`^a\_[U`a`\_`aXW  
@HWI-EAS443:3:36:1528:1687#0/1  
GGGGTTCCTTCTTGTCTTCCTGATGTGTACTTTTTGATT  
+HWI-EAS443:3:36:1528:1687#0/1  
ab``V`bbbabaa```aaaaaa\_`\_^`]aaaa`aa`a`\_  
@HWI-EAS443:3:36:411:473#0/1  
GCGGGTTCCTTCTTGTCTTCCTGATGTGTACTTTTTGA  
+HWI-EAS443:3:36:411:473#0/1  
aa¥RZ\_N\_Z^Z¥¥a\_aaX]^aYSOT]aTTZ\_YXU¥`YLS  
@HWI-EAS443:3:36:431:1390#0/1  
CGGGGTTCTTCTTGTCTTCCTGATGTGTACTTTTTGAT  
+HWI-EAS443:3:36:431:1390#0/1  
`aa``Ybb`ababaaa\_baabbaXaaa]^a\_aa^`^U``  
@HWI-EAS443:3:36:534:1103#0/1  
GCGGGTTCCTTCTTGTCTTCCTGATGTGTACTTTTTGA  
+HWI-EAS443:3:36:534:1103#0/1  
a\_TXZ^LSS[W^^^W[P[\_WY\_ZW]]UJSXSVZ[BBBBBB  
@HWI-EAS443:3:36:850:615#0/1  
CGGGGTTCTTCTTGTCTTCCTGATGTGTACTTTTTGAT  
+HWI-EAS443:3:36:850:615#0/1  
ababb]^`bbaa\_aa``aaaa\_a`¥`a^a¥[Ya`aa`a`^`  
@HWI-EAS443:3:36:883:1936#0/1  
GGGTTCTTCTTGTCTTCCTGATGTGTACTTTTTGATTA

+HWI-EAS443:3:36:883:1936#0/1  
Z¥\_T`[^a^V¥\_aT¥`][M]ZY`RQ]¥a`\_\_\_\_]^X[ZVT  
@HWI-EAS443:3:36:980:342#0/1  
GCGGGTTCTTCTTGTCTTCCTGATGTGTACTTTTTGA  
+HWI-EAS443:3:36:980:342#0/1  
a`U^`aR]^aa\_a`aaa\_aaa\_\_aa^`\_[]WZY`\_`^`XZ  
@HWI-EAS443:3:37:1036:1828#0/1  
GCGGGTTCTTCTTGTCTTCCTGATGTGTACTTTTTGA  
+HWI-EAS443:3:37:1036:1828#0/1  
`ba]^`a^aaaa`aa`aa¥`\_a`\_a^``]NU¥`aa\_``aS\_  
@HWI-EAS443:3:37:1138:519#0/1  
CGGGTTCTTCTTGTCTTCCTGATGTGTACTTTTTGAT  
+HWI-EAS443:3:37:1138:519#0/1  
abbab^baabb`babbaabbabab^b\_^¥H0aaabbaab  
@HWI-EAS443:3:37:1165:716#0/1  
GCGGGTTCTTCTTGTCTTCCTGATGTGTACTTTTTGA  
+HWI-EAS443:3:37:1165:716#0/1  
abba`a^a]aaaaaaaa`aaaa`aaa¥UZY\_aa`aa`\_\_  
@HWI-EAS443:3:37:1246:890#0/1  
CGGGTTCTTCTTGTCTTCCTGATGTGTACTTTTTGAT  
+HWI-EAS443:3:37:1246:890#0/1  
aabab`b`baaaaaaabab\_aaa\_aa``Xa`aa\_aa`a`  
@HWI-EAS443:3:37:1665:506#0/1  
CGGGTTCTTCTTGTCTTCCTGATGTGTACTTTTTGAT  
+HWI-EAS443:3:37:1665:506#0/1  
aaaaaH^a``a`[aab\_\_aa]a`a`\_a¥aV]Z]aaaaXa\_  
@HWI-EAS443:3:37:618:290#0/1  
GGTTCTTCTTGTCTTCCTGATGTGTACTTTTTGATTAT  
+HWI-EAS443:3:37:618:290#0/1  
aaT¥¥aa`][¥¥SW[^`WWW^V\_T]\_UM\_R\_\_]]\_]\_  
@HWI-EAS443:3:37:625:985#0/1  
CGGGTTCTTCTTGTCTTCCTGATGTGTACTTTTTGAT  
+HWI-EAS443:3:37:625:985#0/1  
aba\_aVabaaaa`aaa\_aaaaaa\_^¥Z`S`\_`\_`aa\_^[\_  
@HWI-EAS443:3:37:678:185#0/1  
GCGGGTTCTTCTTGTCTTCCTGATGTGTACTTTTTGA  
+HWI-EAS443:3:37:678:185#0/1  
aaaaVVRaWW\_]XP[\_a¥U^XV¥[OWRWPOMSP]\_]TO[  
@HWI-EAS443:3:37:853:700#0/1  
CGGGTTCTTCTTGTCTTCCTGATGTGTACTTTTTGAT  
+HWI-EAS443:3:37:853:700#0/1  
aba\_a]^aaaa`a`a`\_`aa`a¥\_\_a[aVT]\_`\_a``\_\_  
@HWI-EAS443:3:38:1018:854#0/1  
GGGTTCTTCTTGTCTTCCTGATGTGTACTTTTTGATT  
+HWI-EAS443:3:38:1018:854#0/1  
H¥abUba\_aabbababa``bababbaV]^`a`bbbba\_aaa  
@HWI-EAS443:3:38:1251:377#0/1  
CGGGTTCTTCTTGTCTTCCTGATGTGTACTTTTTGAT  
+HWI-EAS443:3:38:1251:377#0/1  
]^``aL^aba\_aabbb\_baa`bababb\_b]Y[aaaa\_\_a

@HWI-EAS443:3:38:1690:1766#0/1  
CGGGGTTCTTCTTGTCTTCCTGATGTGTACTTTTTGAT  
+HWI-EAS443:3:38:1690:1766#0/1  
Saba^IX¥¥¥Ub`][a[^a^`[ab`[bRZLNVV[]\_aX`¥  
@HWI-EAS443:3:38:1698:1906#0/1  
CGGGGTTCTTCTTGTCTTCCTGATGTGTACTTTTTGAT  
+HWI-EAS443:3:38:1698:1906#0/1  
aa]aaSa`aY^^\_baW`\_]\_\_a^¥`V¥NTSZZ^[^[]V  
@HWI-EAS443:3:38:1781:1547#0/1  
GCGGGGTTCTTCTTGTCTTCCTGATGTGTACTTTTTGA  
+HWI-EAS443:3:38:1781:1547#0/1  
a^a\_Z\_Y^]¥\_Z^]`\_\_^^^R^¥^¥^]^^VWVU]ZX^ZZZ  
@HWI-EAS443:3:38:264:1843#0/1  
AGCGGGGTTCTTCTTGTCTTCCTGATGTGTACTTTTTG  
+HWI-EAS443:3:38:264:1843#0/1  
a\_aaa`aZabaa\_aa\_a^\_a\_a`\_W\_\_^XUZ]]\_^\_\_\_I  
@HWI-EAS443:3:38:324:1370#0/1  
GCGGGGTTCTTCTTGTCTTCCTGATGTGTACTTTTTGA  
+HWI-EAS443:3:38:324:1370#0/1  
]¥\_\_a\_N^bbb]¥R^]VF[¥[Zba[NR^]`MZZZ[[Xa^^  
@HWI-EAS443:3:38:343:985#0/1  
CGGGGTTCTTCTTGTCTTCCTGATGTGTACTTTTTGAT  
+HWI-EAS443:3:38:343:985#0/1  
`bb`^^abaab`aa`baaaabaa[aaa^`[]^`\_`aa\_Y\_  
@HWI-EAS443:3:38:437:1220#0/1  
GCGGGGTTCTTCTTGTCTTCCTGATGTGTACTTTTTGA  
+HWI-EAS443:3:38:437:1220#0/1  
abb`]Zaba`aaaaaa\_aaaaa`U^`XaY^]a`a`a¥Z  
@HWI-EAS443:3:38:712:1652#0/1  
CGGGGTTCTTCTTGTCTTCCTGATGTGTACTTTTTGAT  
+HWI-EAS443:3:38:712:1652#0/1  
aaa[`Q\_a`\_a\_]^[^a`aa`[P`¥]SZZZ\_\_`\_¥V^V  
@HWI-EAS443:3:38:715:673#0/1  
CGGGGTTCTTCTTGTCTTCCTGATGTGTACTTTTTGAT  
+HWI-EAS443:3:38:715:673#0/1  
ab`a^L\_aaaa`\_aa\_aaaa`^^`[\_]\_WYW`\_aZGZ^  
@HWI-EAS443:3:38:726:364#0/1  
GCGGGGTTCTTCTTGTCTTCCTGATGTGTACTTTTTGA  
+HWI-EAS443:3:38:726:364#0/1  
a`[`a]NRVLUXQJY[VUWKDR`]YBBBBBBBBBBBBB  
@HWI-EAS443:3:38:853:337#0/1  
GCGGGGTTCTTCTTGTCTTCCTGATGTGTACTTTTTGA  
+HWI-EAS443:3:38:853:337#0/1  
aabaa`UX\_\_XZ\_V^^`WW]ZT¥^^ZYUVXOEN^Z^Y]ZV  
@HWI-EAS443:3:39:1413:406#0/1  
GGGGTTCTTCTTGTCTTCCTGATGTGTACTTTTTGATT  
+HWI-EAS443:3:39:1413:406#0/1  
aa\_a]a`\_a]`\_\_^\_a^^Z\_\_^^\_X^X]XZ\_^a^]]^Z  
@HWI-EAS443:3:39:1695:1450#0/1  
GGGTTCTTCTTGTCTTCCTGATGTGTACTTTTTGATTA

+HWI-EAS443:3:39:1695:1450#0/1  
¥\_a]bbbbbbbabbb^\_bbbbbbba\_ZV]a`ba\_`baaaaa  
@HWI-EAS443:3:39:314:716#0/1  
CGGGGTTCTTCTTGTCTTCCTGATGTGTACTTTTTGAT  
+HWI-EAS443:3:39:314:716#0/1  
\_b\_bb`[ZZ^`b^Zab[aaa]¥I[^I^`]aab`\_aKKa  
@HWI-EAS443:3:39:405:20#0/1  
GCGGGTTCCTTCTTGTCTTCCTGATGTGTACTTTTTGA  
+HWI-EAS443:3:39:405:20#0/1  
a]`aZ\_VX\_\_[S[VXKVFP^¥VPWQFS]WSSVV]VXXXQS  
@HWI-EAS443:3:39:480:423#0/1  
GGGGTTCCTTCTTGTCTTCCTGATGTGTACTTTTTGATT  
+HWI-EAS443:3:39:480:423#0/1  
aa]^\_a^`aaa\_[`¥[\_`\_a\_\_¥R[VZXTIS[]\_`^¥RU¥¥  
@HWI-EAS443:3:39:672:1541#0/1  
CGGGGTTCTTCTTGTCTTCCTGATGTGTACTTTTTGAT  
+HWI-EAS443:3:39:672:1541#0/1  
aaaaa\_bbb\_]`baba\_baaab``\_aa\_a]\_Taa`aaSa\_  
@HWI-EAS443:3:39:939:346#0/1  
TCAAAAAGTACACATCAGGAAGACAAGAGAAGAACCCCGC  
+HWI-EAS443:3:39:939:346#0/1  
a`^`aaaaZ\_\_``aaa\_aa`^a^a`\_\_`\_\_]\_`a]^`W  
@HWI-EAS443:3:3:108:1680#0/1  
CGGGGTTCTTCTTGTCTTCCTGATGTGTACTTTTTGAT  
+HWI-EAS443:3:3:108:1680#0/1  
a`\_WXHb\_b[¥`^¥RQ¥a`XKR\_\_Qba]Z\_¥`aa^\_\_\_\_`  
@HWI-EAS443:3:3:1419:731#0/1  
GGTTCCTTCTTGTCTTCCTGATGTGTACTTTTTGATTAT  
+HWI-EAS443:3:3:1419:731#0/1  
aa^¥\_aaaa`aa\_]^^`ZWa^Y`YYa]¥M`\_\_\_\_`\_^\_^\_]`  
@HWI-EAS443:3:3:460:1560#0/1  
GGGTTCTTCTTGTCTTCCTGATGTGTACTTTTTGATTA  
+HWI-EAS443:3:3:460:1560#0/1  
¥[aPaabbbbaabbbba`bbbaaba`\_a`b[bababaaaa  
@HWI-EAS443:3:3:829:859#0/1  
GGGGTTCCTTCTTGTCTTCCTGATGTGTACTTTTTGATT  
+HWI-EAS443:3:3:829:859#0/1  
aaa`Ga[aa`b`^aa\_\_`^USVa\_\_`W\_XZY\_\_`^\_\_\_\_]¥B  
@HWI-EAS443:3:40:1237:1395#0/1  
GGGGTTCCTTCTTGTCTTCCTGATGTGTACTTTTTGATT  
+HWI-EAS443:3:40:1237:1395#0/1  
\_XY¥XTTZ\_QRHXTVN¥^[UW[]YRHTRNSPQZYSVPUS  
@HWI-EAS443:3:40:1326:1617#0/1  
CGGGGTTCTTCTTGTCTTCCTGATGTGTACTTTTTGAT  
+HWI-EAS443:3:40:1326:1617#0/1  
abbbbbbbbbbbbabbbbabbbbab`bbabaaabbbb]bb  
@HWI-EAS443:3:40:1452:538#0/1  
ATCAAAAAGTACACATCAGGAAGACAAGAGAAGAACCCCG  
+HWI-EAS443:3:40:1452:538#0/1  
a`bba`aababaaa`aaabb]abaa^Q\_Ya`abbab`U`a



@HWI-EAS443:3:40:1732:168#0/1  
GCGGGGTTCTTCTTGTCTTCCTGATGTGTACTTTTTGA  
+HWI-EAS443:3:40:1732:168#0/1  
a]baaa^[\_`[SX^^`U[[\_]]ZOJO[[YLVV¥\_]]X  
@HWI-EAS443:3:40:1758:1494#0/1  
ATCAAAAAGTACACATCAGGAAGACAAGAGAAGAACCCCG  
+HWI-EAS443:3:40:1758:1494#0/1  
aa`aaaa`a]aaa\_a``aba`aaa\_]¥^`\_^a\_baa^V\_\_  
@HWI-EAS443:3:40:586:91#0/1  
CGGGGTTCTTCTTGTCTTCCTGATGTGTACTTTTTGAT  
+HWI-EAS443:3:40:586:91#0/1  
abbab]b`a^a\_aa\_a\_[¥`a\_``[^^^\_UPU^X¥^\_\_^[  
@HWI-EAS443:3:40:66:1664#0/1  
GGTTCTTCTTGTCTTCCTGATGTGTACTTTTTGATTAT  
+HWI-EAS443:3:40:66:1664#0/1  
a`Z\_aa\_\_^a]^UX\_`^`a¥W¥XWSVMQZa^\_^YRVYYO¥  
@HWI-EAS443:3:40:761:186#0/1  
GCGGGGTTCTTCTTGTCTTCCTGATGTGTACTTTTTGA  
+HWI-EAS443:3:40:761:186#0/1  
aSU^P]X^\_XVFSUZ][WWW^\_RVYVRTTWQUQRXYOYX  
@HWI-EAS443:3:42:1020:1666#0/1  
GGTTCTTCTTGTCTTCCTGATGTGTACTTTTTGATTAT  
+HWI-EAS443:3:42:1020:1666#0/1  
aaababbbbabba\_`ba`]a[¥^\_]b`aabaaab\_baaaa  
@HWI-EAS443:3:42:1072:572#0/1  
GCGGGGTTCTTCTTGTCTTCCTGATGTGTACTTTTTGA  
+HWI-EAS443:3:42:1072:572#0/1  
aabbbb]aaab`aaaba\_`aaa`a]^aa\_a]V¥a`aa\_^`  
@HWI-EAS443:3:42:12:690#0/1  
CGGGGTTCTTCTTGTCTTCCTGATGTGTACTTTTTGAT  
+HWI-EAS443:3:42:12:690#0/1  
aabbbabbbbbbbbbbaabbabbaaaa]^`\_\_^`aaa`^\_a  
@HWI-EAS443:3:42:1374:43#0/1  
CGGGGTTCTTCTTGTCTTCCTGATGTGTACTTTTTGAT  
+HWI-EAS443:3:42:1374:43#0/1  
abbab^a`ab`b`aaa]^`aa`aa\_¥``[a``\_a`aaaa[a  
@HWI-EAS443:3:42:1423:1825#0/1  
GGGTTCTTCTTGTCTTCCTGATGTGTACTTTTTGATTA  
+HWI-EAS443:3:42:1423:1825#0/1  
\_\_b^bbbbabababa^aaa`aaaab`a^a]bbaaaY`ba\_  
@HWI-EAS443:3:42:1439:415#0/1  
CGGGGTTCTTCTTGTCTTCCTGATGTGTACTTTTTGAT  
+HWI-EAS443:3:42:1439:415#0/1  
abbbb`bbbbabaaba`aba^`bb\_ab`b^`]aaaaaba\_  
@HWI-EAS443:3:42:1452:1034#0/1  
CGGGGTTCTTCTTGTCTTCCTGATGTGTACTTTTTGAT  
+HWI-EAS443:3:42:1452:1034#0/1  
ababbababbbbbbbbaabaaaabaaaaa\_abababaaa  
@HWI-EAS443:3:42:237:2034#0/1  
AGCGGGGTTCTTCTTGTCTTCCTGATGTGTACTTTTTG

+HWI-EAS443:3:42:237:2034#0/1  
[Q¥\_SPY`^a^^]`^`aZ\_`Y\_0^[a[PTZR^]ZU^`\_X  
@HWI-EAS443:3:42:273:784#0/1  
GCGGGTTCCTTCTTGTCTTCCTGATGTGTACTTTTTGA  
+HWI-EAS443:3:42:273:784#0/1  
abbbab\_bab`aaa`aa\_a\_a^aaa`\_a^aY]aaaa\_]R\_  
@HWI-EAS443:3:42:310:1430#0/1  
GCGGGTTCCTTCTTGTCTTCCTGATGTGTACTTTTTGA  
+HWI-EAS443:3:42:310:1430#0/1  
`bbaba¥abbaba\_a^a[`aab`a[[a\_b^`a`a`aa\_`  
@HWI-EAS443:3:42:611:437#0/1  
CGGGTTCCTTCTTGTCTTCCTGATGTGTACTTTTTGAT  
+HWI-EAS443:3:42:611:437#0/1  
abbb`b`baab`bbb\_abaa`aaa`b^`^\_\_aaaa`a\_a  
@HWI-EAS443:3:42:654:690#0/1  
GCGGGTTCCTTCTTGTCTTCCTGATGTGTACTTTTTGAT  
+HWI-EAS443:3:42:654:690#0/1  
abbb]P`\_a]bba`[SJ^^^aa`a`ab^b^[\`a```aa``  
@HWI-EAS443:3:42:750:857#0/1  
GGGGTTCCTTCTTGTCTTCCTGATGTGTACTTTTTGATT  
+HWI-EAS443:3:42:750:857#0/1  
abab\_b`bbaa`bba^aaa`aaa\_aaaa\_a^aa`aa\_aaa  
@HWI-EAS443:3:42:950:366#0/1  
GCGGGTTCCTTCTTGTCTTCCTGATGTGTACTTTTTGA  
+HWI-EAS443:3:42:950:366#0/1  
aababa\_baba`aaaa\_aaa^aaa\_aa\_a`\_^aaa`a[`  
@HWI-EAS443:3:43:1241:289#0/1  
AATCAAAAAGTACACATCAGGAAGACAAGAGAAGAACCCC  
+HWI-EAS443:3:43:1241:289#0/1  
]^\_UWU¥TRS¥GWa^a^]aaYX]`a\_Y\_W¥QNZ[XVNRQ  
@HWI-EAS443:3:43:1273:1284#0/1  
GGTTCCTTCTTGTCTTCCTGATGTGTACTTTTTGATTAT  
+HWI-EAS443:3:43:1273:1284#0/1  
aaWa\_`aa`aaaa``aaa[`a]\_aYaXQ^aa`aaWY\_a^`  
@HWI-EAS443:3:43:1553:1072#0/1  
GCGGGTTCCTTCTTGTCTTCCTGATGTGTACTTTTTGA  
+HWI-EAS443:3:43:1553:1072#0/1  
a``\_ab]``aaaa]a``^`\_a]]\_`X`]T`WP[`a^a`¥]  
@HWI-EAS443:3:43:157:1428#0/1  
AGCGGGTTCCTTCTTGTCTTCCTGATGTGTACTTTTTG  
+HWI-EAS443:3:43:157:1428#0/1  
aabaabb]abaaa\_\_ba\_^abaaaa`\_`\_]`\_a`baa^  
@HWI-EAS443:3:43:1676:32#0/1  
GCGGGTTCCTTCTTGTCTTCCTGATGTGTACTTTTTGA  
+HWI-EAS443:3:43:1676:32#0/1  
S`a^R¥J[bba\_`]Y\_b¥a`WX¥]¥T`aR\_`YV]``a[`]  
@HWI-EAS443:3:43:283:254#0/1  
CGGGTTCCTTCTTGTCTTCCTGATGTGTACTTTTTGAT  
+HWI-EAS443:3:43:283:254#0/1  
\_[X\_^Z\_0Za\_Z``a¥P`¥¥T¥`XRU]X`QH¥[a][W\_]`

@HWI-EAS443:3:43:367:1182#0/1  
GGGGTTCTTCTTGTCTTCCTGATGTGTACTTTTTGATT  
+HWI-EAS443:3:43:367:1182#0/1  
ababS``[a^]b\_a]a`Raaaa\_SUaTVQ]]`][Z^``^Y  
@HWI-EAS443:3:43:57:1361#0/1  
CGGGTTCTTCTTGTCTTCCTGATGTGTACTTTTTGAT  
+HWI-EAS443:3:43:57:1361#0/1  
aa\_a]aaaabbbab`aaaa`a\_b`ab[``\_`a\_abaaa`\_a  
@HWI-EAS443:3:43:661:846#0/1  
CGGGTTCTTCTTGTCTTCCTGATGTGTACTTTTTGAT  
+HWI-EAS443:3:43:661:846#0/1  
abbb\_Yaababaabbb`aab^aaa\_ab[\_J]Yaa`[^a`a  
@HWI-EAS443:3:43:857:691#0/1  
CGGGTTCTTCTTGTCTTCCTGATGTGTACTTTTTGAT  
+HWI-EAS443:3:43:857:691#0/1  
`bbba\_bbbaababbaa`bba\_ba`ba`aUa`bbaabaaa  
@HWI-EAS443:3:44:106:608#0/1  
CGGGTTCTTCTTGTCTTCCTGATGTGTACTTTTTGAT  
+HWI-EAS443:3:44:106:608#0/1  
aba¥S¥^aa\_MQVYZRR\_]Z`\_VV^L^G]JSNZX^SSTK\_  
@HWI-EAS443:3:44:1131:616#0/1  
GCGGGTTCTTCTTGTCTTCCTGATGTGTACTTTTTGA  
+HWI-EAS443:3:44:1131:616#0/1  
aaaaa\_]a]aaaa\_aa^`aaa`\_aa`\_a\_a^`]aaa\_aa\_  
@HWI-EAS443:3:44:1322:1517#0/1  
GCGGGTTCTTCTTGTCTTCCTGATGTGTACTTTTTGA  
+HWI-EAS443:3:44:1322:1517#0/1  
a`\_Z\_a^a\_a]aa^`aV^[\_J]Za`X¥^VVZ^^\_aa\_a¥¥  
@HWI-EAS443:3:44:150:800#0/1  
GGGGTTCTTCTTGTCTTCCTGATGTGTACTTTTTGATT  
+HWI-EAS443:3:44:150:800#0/1  
aaa^Ya\_aa^``aaaaZaa^Sa]V^XS[V\_X`a`\_UQT`]  
@HWI-EAS443:3:44:1591:1203#0/1  
CGGGTTCTTCTTGTCTTCCTGATGTGTACTTTTTGAT  
+HWI-EAS443:3:44:1591:1203#0/1  
^UaYHOb[bTLY¥^^]Taa]]TVaT^H^V`a`]aW\_\_¥\_`^  
@HWI-EAS443:3:44:337:333#0/1  
GCGGGTTCTTCTTGTCTTCCTGATGTGTACTTTTTGA  
+HWI-EAS443:3:44:337:333#0/1  
aabbbbabaaa\_abbabaaab¥[^[\_`\_a\_a¥\_\_aaaaaa`  
@HWI-EAS443:3:44:421:812#0/1  
GCGGGTTCTTCTTGTCTTCCTGATGTGTACTTTTTGA  
+HWI-EAS443:3:44:421:812#0/1  
aabaa]Y\_aa`\_a\_a\_\_`\_aaZ`¥[^\_\_^\_Y[Y\_`a`\_\_`\_\_  
@HWI-EAS443:3:44:564:914#0/1  
GCGGGTTCTTCTTGTCTTCCTGATGTGTACTTTTTGA  
+HWI-EAS443:3:44:564:914#0/1  
abbabbababbabbabbaabbaabaa`a¥a``]baaaa`a  
@HWI-EAS443:3:44:59:865#0/1  
GGGTTCTTCTTGTCTTCCTGATGTGTACTTTTTGATTA

+HWI-EAS443:3:44:59:865#0/1  
aaa\_aaaaa`a`aa\_`\_\_\_\_W]\_`¥aRXYa`a\_\_a\_\_¥  
@HWI-EAS443:3:44:812:19#0/1  
CGGGGTTCTTCTTGTCTTCCTGATGTGTACTTTTTGAT  
+HWI-EAS443:3:44:812:19#0/1  
``bbaZabbbababbb`abaaaab`ab`b\_\_aaaa`baaa  
@HWI-EAS443:3:44:873:1270#0/1  
GCGGGTTCCTTCTTGTCTTCCTGATGTGTACTTTTTGA  
+HWI-EAS443:3:44:873:1270#0/1  
aU¥babXW^^\_aa\_aaa]aaa^Q¥`¥]^ZXYRL[\_\_\_aa\_^  
@HWI-EAS443:3:44:953:973#0/1  
GGGGTTCCTTCTTGTCTTCCTGATGTGTACTTTTTGATT  
+HWI-EAS443:3:44:953:973#0/1  
\_NUKKY`X]SU\_^GNP\_Z^]RLTQYNURQR[[[RV]UZB  
@HWI-EAS443:3:45:1167:39#0/1  
ATCAAAAAGTACACATCAGGAAGACAAGAGAAGAACCCCG  
+HWI-EAS443:3:45:1167:39#0/1  
abbbbaa`b\_aaaaabaabbaaba`a`a`a`a`^Z\_¥a  
@HWI-EAS443:3:45:128:898#0/1  
AGCGGGTTCCTTCTTGTCTTCCTGATGTGTACTTTTTG  
+HWI-EAS443:3:45:128:898#0/1  
abb`U``````]a`aa^W]\_`\_X]a\_]^[aYWY``\_Z¥Q  
@HWI-EAS443:3:45:1345:1667#0/1  
GCGGGTTCCTTCTTGTCTTCCTGATGTGTACTTTTTGA  
+HWI-EAS443:3:45:1345:1667#0/1  
a\_b\_`WNa]a^[\_WabZP\_aa\_a` `[aaR]LW[ab\_\_a[\_  
@HWI-EAS443:3:45:1347:1990#0/1  
CGGGGTTCTTCTTGTCTTCCTGATGTGTACTTTTTGAT  
+HWI-EAS443:3:45:1347:1990#0/1  
ab^baVaV\_a\_aaaab\_\_aaY^`\_W\_¥Y^W¥V\_¥`^`]\_\_  
@HWI-EAS443:3:45:1535:124#0/1  
AGCGGGTTCCTTCTTGTCTTCCTGATGTGTACTTTTTG  
+HWI-EAS443:3:45:1535:124#0/1  
aabbaab`babaaaaabaaaaaaaa^aa\_a][\_aaaaa]  
@HWI-EAS443:3:45:1679:352#0/1  
GCGGGTTCCTTCTTGTCTTCCTGATGTGTACTTTTTGA  
+HWI-EAS443:3:45:1679:352#0/1  
a]aaaaY`aaa^a^`\_\_\_\_`a^]^X]\_aZ\_Z]Z`\_\_a\_[Z  
@HWI-EAS443:3:45:173:1059#0/1  
GGTTCCTTCTTGTCTTCCTGATGTGTACTTTTTGATTAT  
+HWI-EAS443:3:45:173:1059#0/1  
``abbbbbbbbaabbaaaaaa`aaaabbaaba`baaa  
@HWI-EAS443:3:45:215:107#0/1  
CGGGGTTCTTCTTGTCTTCCTGATGTGTACTTTTTGAT  
+HWI-EAS443:3:45:215:107#0/1  
abaa`Hbbab^baab^a`aaa\_ab`aa`aa\_\_abbb\_S]a  
@HWI-EAS443:3:45:271:205#0/1  
GCGGGTTCCTTCTTGTCTTCCTGATGTGTACTTTTTGA  
+HWI-EAS443:3:45:271:205#0/1  
aWa¥\_\_U]YG]^ [N\_\_XRV]\_^RZUWLRHPNSS^ZY\_VWM

@HWI-EAS443:3:45:516:1132#0/1  
CGGGGTTCTTCTTGTCTTCCTGATGTGTACTTTTTGAT  
+HWI-EAS443:3:45:516:1132#0/1  
`baaaabbbbaa^bbb`\_ba`\_ba]a`¥`\_a^baaaa^`a  
@HWI-EAS443:3:45:619:1004#0/1  
CGGGGTTCTTCTTGTCTTCCTGATGTGTACTTTTTGAT  
+HWI-EAS443:3:45:619:1004#0/1  
abbbb\_aba`\_a\_a[abababWaVMaaW\_\_aWaa`a^^Ub  
@HWI-EAS443:3:45:731:389#0/1  
CGGGGTTCTTCTTGTCTTCCTGATGTGTACTTTTTGAT  
+HWI-EAS443:3:45:731:389#0/1  
ababaabbb\_]a\_bbb\_abb]Za`]`aab`\_`baaabaaa  
@HWI-EAS443:3:45:826:1586#0/1  
GCGGGGTTCTTCTTGTCTTCCTGATGTGTACTTTTTGA  
+HWI-EAS443:3:45:826:1586#0/1  
¥\_^^\_XQ¥a`[Kbaab\_bbaS\_¥bbaaabaa\_X¥b]aaa\_  
@HWI-EAS443:3:45:858:1320#0/1  
GCGGGGTTCTTCTTGTCTTCCTGATGTGTACTTTTTGA  
+HWI-EAS443:3:45:858:1320#0/1  
a\_a`\_`]aaa\_\_a]`\_\_]^\_`]`\_V\_\_X\_\_XXUaa^^R[  
@HWI-EAS443:3:45:883:453#0/1  
GGGTTCTTCTTGTCTTCCTGATGTGTACTTTTTGATTA  
+HWI-EAS443:3:45:883:453#0/1  
\_ba\_b]baabaabaaaa`\_aa`\_a`a`\_`aaaa\_]aa\_  
@HWI-EAS443:3:45:941:41#0/1  
CGGGGTTCTTCTTGTCTTCCTGATGTGTACTTTTTGAT  
+HWI-EAS443:3:45:941:41#0/1  
aabbbbbbbbbbbbabbbbababab`bbabb^abbbbabab  
@HWI-EAS443:3:46:1204:1838#0/1  
ATCAAAAAGTACACATCAGGAAGACAAGAGAAGAACCCCG  
+HWI-EAS443:3:46:1204:1838#0/1  
abaaaaaaaa\_aa`T`a\_¥[aa`^a]\_\_^Z\_\_aa¥TN¥`  
@HWI-EAS443:3:46:1204:710#0/1  
CGGGGTTCTTCTTGTCTTCCTGATGTGTACTTTTTGAT  
+HWI-EAS443:3:46:1204:710#0/1  
abbab\_bbbbababbb`aabaabbaab\_b\_\_`aaabbaaa  
@HWI-EAS443:3:46:1225:971#0/1  
CGGGGTTCTTCTTGTCTTCCTGATGTGTACTTTTTGAT  
+HWI-EAS443:3:46:1225:971#0/1  
`baXUG^ba`^a^`Z^\_a`¥UU^WZWX[`]T^^Z]^]SW  
@HWI-EAS443:3:46:1280:477#0/1  
ATCAAAAAGTACACATCAGGAAGACAAGAGAAGAACCCCG  
+HWI-EAS443:3:46:1280:477#0/1  
aaaaa`aaaWaaaaaaaab`]``^aaa`a`\_`aaa\_\_^a  
@HWI-EAS443:3:46:1613:1090#0/1  
CGGGGTTCTTCTTGTCTTCCTGATGTGTACTTTTTGAT  
+HWI-EAS443:3:46:1613:1090#0/1  
abbab\_bbbbaaababa`bba`aa`aa`a\_\_`ababaa`a  
@HWI-EAS443:3:46:1658:640#0/1  
CGGGGTTCTTCTTGTCTTCCTGATGTGTACTTTTTGAT

+HWI-EAS443:3:46:1658:640#0/1  
a`aabababbabbb`\_abbb`bb¥`ba^^aabbbbb^aa  
@HWI-EAS443:3:46:226:102#0/1  
GGGGTTCTTCTTGTCTTCCTGATGTGTACTTTTTGATT  
+HWI-EAS443:3:46:226:102#0/1  
aabaVa`aa\_a`aa`a\_\_\_`\_Z\_\_^\_]^^`\_a^`^\_]`  
@HWI-EAS443:3:46:308:119#0/1  
CGGGGTTCTTCTTGTCTTCCTGATGTGTACTTTTTGAT  
+HWI-EAS443:3:46:308:119#0/1  
N^bbbaabbababbbabbbabbbWababaT¥bbbbbb  
@HWI-EAS443:3:46:354:1295#0/1  
GCGGGTTCTTCTTGTCTTCCTGATGTGTACTTTTTGA  
+HWI-EAS443:3:46:354:1295#0/1  
\_]`\_]ZJ\_VD[]YY\_\_a\_\_a\_\_`ZW[L^ZaW^^^a¥^][¥  
@HWI-EAS443:3:46:42:715#0/1  
CGGGGTTCTTCTTGTCTTCCTGATGTGTACTTTTTGAT  
+HWI-EAS443:3:46:42:715#0/1  
^\_X]¥P^]\_^]\_^`^W\_W[]\_¥VSZ[WVXZ\_]a¥V[]  
@HWI-EAS443:3:46:487:323#0/1  
GCGGGTTCTTCTTGTCTTCCTGATGTGTACTTTTTGA  
+HWI-EAS443:3:46:487:323#0/1  
a`baaa^`\_a\_\_a\_aaa]`a`\_]a`Y^a]a]\_Y\_`a`a\_]`  
@HWI-EAS443:3:46:572:1514#0/1  
GCGGGTTCTTCTTGTCTTCCTGATGTGTACTTTTTGA  
+HWI-EAS443:3:46:572:1514#0/1  
aaa]`YUa`aaaaYa\_aa\_a\_]a`\_S\_aV\_X^Ya``a`W\_  
@HWI-EAS443:3:46:623:1066#0/1  
CGGGGTTCTTCTTGTCTTCCTGATGTGTACTTTTTGAT  
+HWI-EAS443:3:46:623:1066#0/1  
aa]bZaabbbaaaabaaaa`[`aa```Y`¥a`aaaa\_\_^  
@HWI-EAS443:3:46:657:132#0/1  
CGGGGTTCTTCTTGTCTTCCTGATGTGTACTTTTTGAT  
+HWI-EAS443:3:46:657:132#0/1  
Xa]`¥\_b¥bbV`bbb`T]b]`Jbb[ababa[```abbaY]`  
@HWI-EAS443:3:46:681:1237#0/1  
CGGGGTTCTTCTTGTCTTCCTGATGTGTACTTTTTGAT  
+HWI-EAS443:3:46:681:1237#0/1  
abaaa`babbababaa[abaaabaaaa¥\_^\_\_aaaab`\_a  
@HWI-EAS443:3:46:783:1319#0/1  
GGGTTCTTCTTGTCTTCCTGATGTGTACTTTTTGATTA  
+HWI-EAS443:3:46:783:1319#0/1  
aa\_[bab]abYbaa`[[`bb]]Ta`V]X\_`a`U^\_a^XJ  
@HWI-EAS443:3:46:836:1830#0/1  
GCGGGTTCTTCTTGTCTTCCTGATGTGTACTTTTTGA  
+HWI-EAS443:3:46:836:1830#0/1  
a`aa\_`^aaaa\_`^aaaa`ba\_\_a```¥]\_^Ya``a^X]  
@HWI-EAS443:3:46:892:619#0/1  
GCGGGTTCTTCTTGTCTTCCTGATGTGTACTTTTTGA  
+HWI-EAS443:3:46:892:619#0/1  
a^¥T¥\_FV\_aaa[]\_`a\_\_¥^VX^`\_]aX\_NTU[^```\_\_[

@HWI-EAS443:3:47:112:1997#0/1  
GGGGTTCTTCTTGTCTTCCTGATGTGTACTTTTTGATT  
+HWI-EAS443:3:47:112:1997#0/1  
aa]VP]``a#a^`\_Y\_a\_#^\_`]]]0aX]]^`\_YTZ\_]`  
@HWI-EAS443:3:47:1206:1741#0/1  
CGGGGTCTTCTTGTCTTCCTGATGTGTACTTTTTGAT  
+HWI-EAS443:3:47:1206:1741#0/1  
aa#^`]]`a^abaaaaba]H]aaa`\_aX00`a^T]`[`  
@HWI-EAS443:3:47:1261:229#0/1  
CGGGGTCTTCTTGTCTTCCTGATGTGTACTTTTTGAT  
+HWI-EAS443:3:47:1261:229#0/1  
Ya`YV#VZQ\_#V\_TQaabL`#VNY`[`TP]babaa`#a  
@HWI-EAS443:3:47:1681:325#0/1  
GCGGGTCTTCTTGTCTTCCTGATGTGTACTTTTTGA  
+HWI-EAS443:3:47:1681:325#0/1  
aab]aaV\_\_a`#^]\_\_`X^]\_^^\_]\_\_W[RVY#\_#^[[[  
@HWI-EAS443:3:47:1773:1952#0/1  
GGGGTCTTCTTGTCTTCCTGATGTGTACTTTTTGATT  
+HWI-EAS443:3:47:1773:1952#0/1  
abaW\_a[ba\_a#a]a]\_`YHa\_]RaR\_W\_X^`\_#^^#\_#  
@HWI-EAS443:3:47:1776:1408#0/1  
CGGGGTCTTCTTGTCTTCCTGATGTGTACTTTTTGAT  
+HWI-EAS443:3:47:1776:1408#0/1  
[abb`#bbb`babbabbaabaabaaba^abbbb#bb  
@HWI-EAS443:3:47:312:1808#0/1  
GGGTCTTCTTGTCTTCCTGATGTGTACTTTTTGATTA  
+HWI-EAS443:3:47:312:1808#0/1  
aaaYaaaaab#aa\_`\_aa\_#\_a\_a#\_#\_a`#`#\_a`\_]  
@HWI-EAS443:3:47:497:296#0/1  
CGGGGTCTTCTTGTCTTCCTGATGTGTACTTTTTGAT  
+HWI-EAS443:3:47:497:296#0/1  
`bbabZ`#baW^Z`bb#b]\_X\_a[#Vaaa\_b^abba]  
@HWI-EAS443:3:47:600:534#0/1  
CGGGGTCTTCTTGTCTTCCTGATGTGTACTTTTTGAT  
+HWI-EAS443:3:47:600:534#0/1  
aba`a#a`bab`aaaa^\_a`#^a]`#`X[#YZaaaa^\_`  
@HWI-EAS443:3:47:661:681#0/1  
CGGGGTCTTCTTGTCTTCCTGATGTGTACTTTTTGAT  
+HWI-EAS443:3:47:661:681#0/1  
[bbbbabUbbabbabaaWbb`\_baVa\_V`#`\_#aaba`T  
@HWI-EAS443:3:47:685:444#0/1  
GGGGTCTTCTTGTCTTCCTGATGTGTACTTTTTGATT  
+HWI-EAS443:3:47:685:444#0/1  
abbaab`ababababa`bb\_\_ba]a`#a]X^aaaaaW#`a  
@HWI-EAS443:3:47:731:116#0/1  
AGCGGGTCTTCTTGTCTTCCTGATGTGTACTTTTTG  
+HWI-EAS443:3:47:731:116#0/1  
ab]bbbbV`abb`baabaa\_aa\_`#^YXaXaW^W]a`a`#  
@HWI-EAS443:3:47:989:1509#0/1  
GCGGGTCTTCTTGTCTTCCTGATGTGTACTTTTTGA

+HWI-EAS443:3:47:989:1509#0/1  
a\_¥`R`aabaaVaaa`\_aaZaaa`\_a\_a`\_aaaaaY¥  
@HWI-EAS443:3:48:145:1629#0/1  
CGGGGTCTCTCTTGCTTCCTGATGTGTACTTTTTGAT  
+HWI-EAS443:3:48:145:1629#0/1  
ab`bbabbbbbabbabbbbabbab¥`baabbbbb]ab  
@HWI-EAS443:3:48:158:1345#0/1  
GCGGGTCTCTCTTGCTTCCTGATGTGTACTTTTTGA  
+HWI-EAS443:3:48:158:1345#0/1  
abbaaa`aabb`a`bbaaba`aaaa`^\_a`a`aaaa`\_  
@HWI-EAS443:3:48:277:288#0/1  
GCGGGTCTCTCTTGCTTCCTGATGTGTACTTTTTGA  
+HWI-EAS443:3:48:277:288#0/1  
aaa\_]¥0`aa`]a`a`Z^\_\_\_\_^]ZW¥^S]TVQ[^^\_]W]  
@HWI-EAS443:3:48:388:543#0/1  
CGGGGTCTCTCTTGCTTCCTGATGTGTACTTTTTGAT  
+HWI-EAS443:3:48:388:543#0/1  
abbba]a\_baba`abaabba\_a^`aaa\_\_a\_bbaaa^ab  
@HWI-EAS443:3:48:461:196#0/1  
GCGGGTCTCTCTTGCTTCCTGATGTGTACTTTTTGA  
+HWI-EAS443:3:48:461:196#0/1  
a\_a\_^ [HZXST[MZ\_]aRUZWV[\_XV]V\_QVV\_`^^[TY  
@HWI-EAS443:3:48:489:778#0/1  
GGGTCTCTCTTGCTTCCTGATGTGTACTTTTTGATT  
+HWI-EAS443:3:48:489:778#0/1  
aaaa]b`aaab`aaaa\_aa`aaa^`X`^]`^`aaaa`^`  
@HWI-EAS443:3:48:496:910#0/1  
CGGGGTCTCTCTTGCTTCCTGATGTGTACTTTTTGAT  
+HWI-EAS443:3:48:496:910#0/1  
\_baab¥abbaababaaababaaaaa\_\_a]a\_abaaaaa  
@HWI-EAS443:3:48:512:1708#0/1  
GTTCTCTCTTGCTTCCTGATGTGTACTTTTTGATTAT  
+HWI-EAS443:3:48:512:1708#0/1  
`bY]\_ZXXabXbaK`aaabb`\_Va]baa\_\_aa`aa^^`b  
@HWI-EAS443:3:48:981:1956#0/1  
GCGGGTCTCTCTTGCTTCCTGATGTGTACTTTTTGA  
+HWI-EAS443:3:48:981:1956#0/1  
a\_WX]`P`a`\_\_\_\_`U^VJ[]^[]\_Y\_U^S\_]]]]]  
@HWI-EAS443:3:49:1032:797#0/1  
GCGGGTCTCTCTTGCTTCCTGATGTGTACTTTTTGA  
+HWI-EAS443:3:49:1032:797#0/1  
abb`bbabbbbababbbaabb\_aaaaab\_a`a`babba¥a  
@HWI-EAS443:3:49:1191:1270#0/1  
AGCGGGTCTCTCTTGCTTCCTGATGTGTACTTTTTG  
+HWI-EAS443:3:49:1191:1270#0/1  
aa\_a`bbYbaba`a`bbb`aaa`\_bb\_\_aY`\_a`aabaaa  
@HWI-EAS443:3:49:1262:1641#0/1  
CGGGGTCTCTCTTGCTTCCTGATGTGTACTTTTTGAT  
+HWI-EAS443:3:49:1262:1641#0/1  
`bbab]baa]\_\_ab`ba^b\_a`bWFTb`b]W`bbab`\_ba



@HWI-EAS443:3:49:1378:349#0/1  
GCGGGTTCTTCTTGTCTTCCTGATGTGTACTTTTTGA  
+HWI-EAS443:3:49:1378:349#0/1  
aQX^`aV^ZVZY[¥QYPDQJYYSUNUVNML[YO^ZNRTR  
@HWI-EAS443:3:49:1387:1323#0/1  
GCGGGTTCTTCTTGTCTTCCTGATGTGTACTTTTTGAT  
+HWI-EAS443:3:49:1387:1323#0/1  
abab^aaabbaa\_abaa`ba\_a`^Taa`a```aaaabV\_a  
@HWI-EAS443:3:49:139:80#0/1  
GGGTTCTTCTTGTCTTCCTGATGTGTACTTTTTGATTA  
+HWI-EAS443:3:49:139:80#0/1  
`¥\_QU\_W¥aX¥[[X]Y[Z`a]`[\_Y¥WZWaa\_b\_SVbb^  
@HWI-EAS443:3:49:1702:1810#0/1  
GGGTTCTTCTTGTCTTCCTGATGTGTACTTTTTGATTA  
+HWI-EAS443:3:49:1702:1810#0/1  
\_N^IRMW\_X^[U]SO\_^\_O]]OMPYGWVOGTS¥^ZSUZWW  
@HWI-EAS443:3:49:216:735#0/1  
GCGGGTTCTTCTTGTCTTCCTGATGTGTACTTTTTGAT  
+HWI-EAS443:3:49:216:735#0/1  
abbbbaabbbbbbabbababbabbababbbbbbab  
@HWI-EAS443:3:49:330:612#0/1  
GCGGGTTCTTCTTGTCTTCCTGATGTGTACTTTTTGAT  
+HWI-EAS443:3:49:330:612#0/1  
abbbb]baab`\_`abaPY\_aa\_b^R]]][a[[V^aaa]`\_b  
@HWI-EAS443:3:49:36:611#0/1  
GCGGGTTCTTCTTGTCTTCCTGATGTGTACTTTTTGAT  
+HWI-EAS443:3:49:36:611#0/1  
a^[YU[]babb\_bbbbbb\_[`aaba[aX`[a\_aabb]Y\_b  
@HWI-EAS443:3:49:756:1133#0/1  
GCGGGTTCTTCTTGTCTTCCTGATGTGTACTTTTTGA  
+HWI-EAS443:3:49:756:1133#0/1  
aa]``^\_X¥aaaa\_`bb``[ZV\_`VZ¥U¥^^^`]a`aa]\_  
@HWI-EAS443:3:49:888:75#0/1  
GCGGGTTCTTCTTGTCTTCCTGATGTGTACTTTTTGAT  
+HWI-EAS443:3:49:888:75#0/1  
ababbab¥bbba\_bbZ`abbKVbbabbaaTaZbbbbbbaab  
@HWI-EAS443:3:4:1084:1277#0/1  
GCGGGTTCTTCTTGTCTTCCTGATGTGTACTTTTTGAT  
+HWI-EAS443:3:4:1084:1277#0/1  
abbbbababbaa`bab``ba`abb\_aaab\_a\_aaa`aaab  
@HWI-EAS443:3:4:1519:527#0/1  
GGGTTCTTCTTGTCTTCCTGATGTGTACTTTTTGATT  
+HWI-EAS443:3:4:1519:527#0/1  
abbb``aa^`a]a]¥]aa]^\_aZ\_`^aX]^`a\_\_\_\_]\_]`  
@HWI-EAS443:3:4:1532:871#0/1  
GCGGGTTCTTCTTGTCTTCCTGATGTGTACTTTTTGAT  
+HWI-EAS443:3:4:1532:871#0/1  
ab]bb]aa`bUaX\_`a\_]`\_R\_¥WYaTN\_\_ZQXa\_\_]¥Y^  
@HWI-EAS443:3:4:1594:93#0/1  
GCGGGTTCTTCTTGTCTTCCTGATGTGTACTTTTTGAT

+HWI-EAS443:3:4:1594:93#0/1  
]bbbaab`bbb`\_bbba`ba`bbb^bbabb`^bbbaabb  
@HWI-EAS443:3:4:275:928#0/1  
GGGGTTCTTCTTGTCTTCCTGATGTGTACTTTTTGATT  
+HWI-EAS443:3:4:275:928#0/1  
[ba^K`a`[Ua\_`aaa[a[aV\_`aaa\_WaYaH`aU`\_`¥``  
@HWI-EAS443:3:4:432:324#0/1  
CGGGTTCTTCTTGTCTTCCTGATGTGTACTTTTTGAT  
+HWI-EAS443:3:4:432:324#0/1  
abbba^a`aa`a\_aabX\_aa\_^`YZ`a\_a]\_^a`aaaa^a  
@HWI-EAS443:3:4:559:842#0/1  
CGGGTTCTTCTTGTCTTCCTGATGTGTACTTTTTGAT  
+HWI-EAS443:3:4:559:842#0/1  
abbaZbbabb\_aaabbabb`aabaab\_b`¥a\_aaab`aa  
@HWI-EAS443:3:4:721:982#0/1  
GGGGTTCTTCTTGTCTTCCTGATGTGTACTTTTTGATT  
+HWI-EAS443:3:4:721:982#0/1  
abbaK[Xa`T^Ra]]aW`\_V¥a^T^]Xa^\_X\_`\_]a¥\_B  
@HWI-EAS443:3:4:829:1417#0/1  
CGGGTTCTTCTTGTCTTCCTGATGTGTACTTTTTGAT  
+HWI-EAS443:3:4:829:1417#0/1  
]`a\_^FY^Zb]baZV\_``aa`\_aba^b`a\_a`^ab`a`aa  
@HWI-EAS443:3:50:1041:2030#0/1  
GCGGGTTCTTCTTGTCTTCCTGATGTGTACTTTTTGA  
+HWI-EAS443:3:50:1041:2030#0/1  
\_Taa^WOWa`¥`XQT`W^\_^^^[[^^]W`VW]^V^R[  
@HWI-EAS443:3:50:1065:427#0/1  
GCGGGTTCTTCTTGTCTTCCTGATGTGTACTTTTTGA  
+HWI-EAS443:3:50:1065:427#0/1  
a^Q\_aZFR^Y]VS0[]]V]TX^XTRX¥L^UQLMVY[^BB  
@HWI-EAS443:3:50:1098:603#0/1  
GCGGGTTCTTCTTGTCTTCCTGATGTGTACTTTTTGA  
+HWI-EAS443:3:50:1098:603#0/1  
\_X`Z¥aV¥[[\_WY\_X^a^VO\_Q¥TPPZGW]VJOWQSZTBB  
@HWI-EAS443:3:50:1105:598#0/1  
GCGGGTTCTTCTTGTCTTCCTGATGTGTACTTTTTGA  
+HWI-EAS443:3:50:1105:598#0/1  
abbabb\_`Y`babbbbaaab¥^`[`baaa`\_a]abbb\_a  
@HWI-EAS443:3:50:1106:303#0/1  
CGGGTTCTTCTTGTCTTCCTGATGTGTACTTTTTGAT  
+HWI-EAS443:3:50:1106:303#0/1  
`a```^aaaa]aaaa`a^abaaa^`b`ba]^\_bbbaU\_a  
@HWI-EAS443:3:50:1117:1623#0/1  
CGGGTTCTTCTTGTCTTCCTGATGTGTACTTTTTGAT  
+HWI-EAS443:3:50:1117:1623#0/1  
ababbabbbbbbabbbbabba\_baabababbabbbbaab  
@HWI-EAS443:3:50:1153:1262#0/1  
GCGGGTTCTTCTTGTCTTCCTGATGTGTACTTTTTGA  
+HWI-EAS443:3:50:1153:1262#0/1  
aaa`^]Paaa`aaaba]\_a`a\_\_WVaa¥]R][`\_aa`\_]

@HWI-EAS443:3:50:1307:517#0/1  
GCGGGGTTCTTCTTGTCTTCCTGATGTGTACTTTTTGA  
+HWI-EAS443:3:50:1307:517#0/1  
a\_baa`\_¥Taa`\_\_aa^¥\_RU`\_`¥`aNaw\_^``\_a]^Z  
@HWI-EAS443:3:50:1328:1578#0/1  
GGGTTCTTCTTGTCTTCCTGATGTGTACTTTTTGATTA  
+HWI-EAS443:3:50:1328:1578#0/1  
abb\_babbbbaabb`bba`aaaaba`b\_a^a`aaaaa`a  
@HWI-EAS443:3:50:1336:2025#0/1  
GGGGTTCTTCTTGTCTTCCTGATGTGTACTTTTTGATT  
+HWI-EAS443:3:50:1336:2025#0/1  
ab``[[[a`I\_\_ORaST¥PLS`V`W`MZHYYa\_\_\_\_[[^  
@HWI-EAS443:3:50:1481:291#0/1  
GCGGGGTTCTTCTTGTCTTCCTGATGTGTACTTTTTGA  
+HWI-EAS443:3:50:1481:291#0/1  
a^`aab\_]aa^aaaa^[\_a`[^\_\_[^aZ^[[^a\_`a`\_^  
@HWI-EAS443:3:50:1605:494#0/1  
CGGGGTTCTTCTTGTCTTCCTGATGTGTACTTTTTGAT  
+HWI-EAS443:3:50:1605:494#0/1  
`bbba\_bbbb\_babbbbaabba`b`aab\_aaa`bbbbbaaa  
@HWI-EAS443:3:50:1791:1618#0/1  
GCGGGGTTCTTCTTGTCTTCCTGATGTGTACTTTTTGA  
+HWI-EAS443:3:50:1791:1618#0/1  
`^`a\_]U`aaa\_b\_b`\_aa\_\_`Z¥a\_]TV¥\_aaa\_NU  
@HWI-EAS443:3:50:666:1211#0/1  
CGGGGTTCTTCTTGTCTTCCTGATGTGTACTTTTTGAT  
+HWI-EAS443:3:50:666:1211#0/1  
^`bbaab[bbbb\_baaaaabaaba\_bb\_b\_¥Ubabbbba\_`  
@HWI-EAS443:3:50:694:926#0/1  
GCGGGGTTCTTCTTGTCTTCCTGATGTGTACTTTTTGA  
+HWI-EAS443:3:50:694:926#0/1  
aabbbb\_babbababbaa^ba\_`b^\_aa`\_^`\_aaaa`a  
@HWI-EAS443:3:50:697:1852#0/1  
CGGGGTTCTTCTTGTCTTCCTGATGTGTACTTTTTGAT  
+HWI-EAS443:3:50:697:1852#0/1  
`ababbbababbbbabbbbabbbba\_aaababbbbabbb  
@HWI-EAS443:3:50:801:1875#0/1  
CGGGGTTCTTCTTGTCTTCCTGATGTGTACTTTTTGAT  
+HWI-EAS443:3:50:801:1875#0/1  
abbbb\_bbbb`bababaabba`bbaabab^a`bbbbbaaa  
@HWI-EAS443:3:51:1112:540#0/1  
GCGGGGTTCTTCTTGTCTTCCTGATGTGTACTTTTTGA  
+HWI-EAS443:3:51:1112:540#0/1  
[^\_`\_babbbbaabaabba`bbaaaa`b`\_`a`abbaa^`  
@HWI-EAS443:3:51:1332:289#0/1  
GGGTTCTTCTTGTCTTCCTGATGTGTACTTTTTGATTA  
+HWI-EAS443:3:51:1332:289#0/1  
abb`b`bb`babbbba^bb\_\_b]aab\_aa]]babbbbaaaaa  
@HWI-EAS443:3:51:1407:916#0/1  
CGGGGTTCTTCTTGTCTTCCTGATGTGTACTTTTTGAT

+HWI-EAS443:3:51:1407:916#0/1  
¥abb\_ZbXb¥`bX\_`b¥¥aba¥¥a¥\_VVbabaa`bbbbb^  
@HWI-EAS443:3:51:1435:819#0/1  
CGGGGTTCTTCTTGTCTTCCTGATGTGTACTTTTTGAT  
+HWI-EAS443:3:51:1435:819#0/1  
UX`ZSa\_aa¥babbbbaSZ`baa``aba]a`^b\_bba^ab  
@HWI-EAS443:3:51:1582:1187#0/1  
GGGGTTCCTTCTTGTCTTCCTGATGTGTACTTTTTGATT  
+HWI-EAS443:3:51:1582:1187#0/1  
Sabb`babbababbZbbbbbaabb)`aa\_abbbbbXbba  
@HWI-EAS443:3:51:297:694#0/1  
CGGGGTTCTTCTTGTCTTCCTGATGTGTACTTTTTGAT  
+HWI-EAS443:3:51:297:694#0/1  
abbbbababbbabb`abbaabaabbab`a^bbabbaaa  
@HWI-EAS443:3:51:7:1552#0/1  
CGGGGTTCTTCTTGTCTTCCTGATGTGTACTTTTTGAT  
+HWI-EAS443:3:51:7:1552#0/1  
aa`ab\_bbbaaaab`[T`aaaX`\_]\_Y`\_a\_a\_aaa`Z^a  
@HWI-EAS443:3:51:7:1958#0/1  
GCGGGGTTCTTCTTGTCTTCCTGATGTGTACTTTTTGA  
+HWI-EAS443:3:51:7:1958#0/1  
aa^Za\_V¥`\_Y]^R^a^^Za^Z^]\_\_[^[\_ZY`][¥Y[  
@HWI-EAS443:3:52:1031:978#0/1  
GCGGGGTTCTTCTTGTCTTCCTGATGTGTACTTTTTGA  
+HWI-EAS443:3:52:1031:978#0/1  
a\_a`¥a`aaaa^a\_a`a]¥`^Z`][\_]V`^\_\_\_¥]\_a[^  
@HWI-EAS443:3:52:1378:1290#0/1  
GGGGTTCCTTCTTGTCTTCCTGATGTGTACTTTTTGATT  
+HWI-EAS443:3:52:1378:1290#0/1  
a`a`Y\_\_ab^a[b`¥[\_a`\_]\_^\_\_ZRUX\_a\_\_]XX\_\_  
@HWI-EAS443:3:52:1476:178#0/1  
CGGGGTTCTTCTTGTCTTCCTGATGTGTACTTTTTGAT  
+HWI-EAS443:3:52:1476:178#0/1  
H\_¥\_Z¥WS`^¥aa)``Xab`[ba^a^aaa)``bbbb`0\_b  
@HWI-EAS443:3:52:1536:313#0/1  
GGGGTTCCTTCTTGTCTTCCTGATGTGTACTTTTTGATT  
+HWI-EAS443:3:52:1536:313#0/1  
aaa\_\_a^baaa\_b`a^\_aaa\_a`a`a]a]\_]ab`aa`]\_`  
@HWI-EAS443:3:52:199:319#0/1  
CGGGGTTCTTCTTGTCTTCCTGATGTGTACTTTTTGAT  
+HWI-EAS443:3:52:199:319#0/1  
a\_`ba¥[`b`¥\_aababab`aa^Qa]Q\_\_\_abbaaaZ¥a  
@HWI-EAS443:3:52:284:730#0/1  
CGGGGTTCTTCTTGTCTTCCTGATGTGTACTTTTTGAT  
+HWI-EAS443:3:52:284:730#0/1  
abaa\_`^`aba^]Y^XaZ[`a¥]aYOSWI`]VS]aa`¥LQa  
@HWI-EAS443:3:52:419:838#0/1  
CGGGGTTCTTCTTGTCTTCCTGATGTGTACTTTTTGAT  
+HWI-EAS443:3:52:419:838#0/1  
aaab]^a`aaaaa`a\_aaa\_a`a\_a]Za]`\_aaaa`X^a

@HWI-EAS443:3:52:520:669#0/1  
AGCGGGGTTCTTCTTGTCTTCCTGATGTGTACTTTTTTG  
+HWI-EAS443:3:52:520:669#0/1  
abbbaa\_[aaaaaaaaaaa\_aaa\_\_abVaa\_a\_\_^a`a^aa  
@HWI-EAS443:3:52:651:836#0/1  
CGGGGTTCTTCTTGTCTTCCTGATGTGTACTTTTTTGAT  
+HWI-EAS443:3:52:651:836#0/1  
abaab\_bbbbbbabbbbaabbaabbabaaa`a`bbbbbaab  
@HWI-EAS443:3:52:863:588#0/1  
GCGGGGTTCTTCTTGTCTTCCTGATGTGTACTTTTTGA  
+HWI-EAS443:3:52:863:588#0/1  
aaaaa\_Saaaa`aaaa`\_aa\_\_`\_]`a]\_W¥[a`^a`]Y  
@HWI-EAS443:3:53:1036:599#0/1  
AGCGGGGTTCTTCTTGTCTTCCTGATGTGTACTTTTTTG  
+HWI-EAS443:3:53:1036:599#0/1  
ababba\_`baaa\_babab]]baaaaa^ab[a]`\_baaaa\_  
@HWI-EAS443:3:53:1327:200#0/1  
GCGGGGTTCTTCTTGTCTTCCTGATGTGTACTTTTTGA  
+HWI-EAS443:3:53:1327:200#0/1  
a`X`bb\_babbaa\_bbb`aaa`aaa`V`b`^`babaa¥Z  
@HWI-EAS443:3:53:1545:1783#0/1  
GGGGTTCTTCTTGTCTTCCTGATGTGTACTTTTTGATT  
+HWI-EAS443:3:53:1545:1783#0/1  
`ab\_0\_S¥baaaba`bab[a^\_Y[b[b¥aaabbbbaaba  
@HWI-EAS443:3:53:169:1967#0/1  
GGGGTTCTTCTTGTCTTCCTGATGTGTACTTTTTGATT  
+HWI-EAS443:3:53:169:1967#0/1  
aa^\_[a\_`b`aaa`¥V\_a\_T\_\_]aa[Z]^aWa\_`aa\_aa^  
@HWI-EAS443:3:53:1784:1149#0/1  
GCGGGGTTCTTCTTGTCTTCCTGATGTGTACTTTTTGA  
+HWI-EAS443:3:53:1784:1149#0/1  
^bbaT`^bbba^bbb`bbb`ba¥`b[`\_`a`bbb`R\_  
@HWI-EAS443:3:53:226:1422#0/1  
CGGGGTTCTTCTTGTCTTCCTGATGTGTACTTTTTGAT  
+HWI-EAS443:3:53:226:1422#0/1  
\_baab]bababababa`bbbbbbbbbab`aabbbb`ab  
@HWI-EAS443:3:53:337:78#0/1  
GGGGTTCTTCTTGTCTTCCTGATGTGTACTTTTTGATT  
+HWI-EAS443:3:53:337:78#0/1  
aa`^LV^[`[a]\_[`^^\_\_]\_^`UZZYaOZ^\_\_aZaZY\_V  
@HWI-EAS443:3:53:696:105#0/1  
GCGGGGTTCTTCTTGTCTTCCTGATGTGTACTTTTTGA  
+HWI-EAS443:3:53:696:105#0/1  
¥]aba`a``aba`X\_bbaaabZY\_`X`aYa`W[a`\_]`aXY  
@HWI-EAS443:3:53:964:306#0/1  
GCGGGGTTCTTCTTGTCTTCCTGATGTGTACTTTTTGA  
+HWI-EAS443:3:53:964:306#0/1  
``abbbababa\_``abba`aa\_aaa\_aa`b`^\_aabaaa^  
@HWI-EAS443:3:54:1369:1710#0/1  
GCGGGGTTCTTCTTGTCTTCCTGATGTGTACTTTTTGA

+HWI-EAS443:3:54:1369:1710#0/1  
`]W¥aa`baab[a\_aaa\_¥aa\_]`a`\_a\_a^]]aaaa^U  
@HWI-EAS443:3:54:1374:604#0/1  
GGGTTCTTCTCTTGCTTCCTGATGTGTACTTTTTGATTA  
+HWI-EAS443:3:54:1374:604#0/1  
]QLKXX]a\_``X^QQ^`PM`^X^aNUETQW]\_a]\_^\_U  
@HWI-EAS443:3:54:1555:1067#0/1  
CGGGGTTCTTCTCTTGCTTCCTGATGTGTACTTTTTGAT  
+HWI-EAS443:3:54:1555:1067#0/1  
a`baaZaabb`\_^bbb¥bbabaababba`aa\_b\_`b^aab  
@HWI-EAS443:3:54:229:1103#0/1  
CGGGGTTCTTCTCTTGCTTCCTGATGTGTACTTTTTGAT  
+HWI-EAS443:3:54:229:1103#0/1  
`aaaa]baa`aaV[¥a\_\_a`YV`[`]QSY[\_¥`^\_a^NZ\_  
@HWI-EAS443:3:54:331:1632#0/1  
GGTTCTTCTCTTGCTTCCTGATGTGTACTTTTTGATTAT  
+HWI-EAS443:3:54:331:1632#0/1  
ab\_baababaaa`]\_aa`aaa^a\_\_a^`^`aa\_a`aa\_\_`  
@HWI-EAS443:3:54:373:953#0/1  
GCGGGGTTCTTCTCTTGCTTCCTGATGTGTACTTTTTGA  
+HWI-EAS443:3:54:373:953#0/1  
a\_`aa\_U`\_aa\_a^a\_`^\_``^`U[^]\_X]]\_^^`]VV  
@HWI-EAS443:3:54:615:1282#0/1  
AGCGGGGTTCTTCTCTTGCTTCCTGATGTGTACTTTTTG  
+HWI-EAS443:3:54:615:1282#0/1  
aa`baaaUaaba\_aaabbaaaa\_\_aY\_¥^Y^V`Ya`aa\_U  
@HWI-EAS443:3:54:669:1851#0/1  
ATCAAAAAGTACACATCAGGAAGACAAGAGAAGAACCCCG  
+HWI-EAS443:3:54:669:1851#0/1  
ababbbba]baa\_baaaaaaaaaaaaaaaaa`a``^`]a  
@HWI-EAS443:3:55:1115:869#0/1  
ATCAAAAAGTACACATCAGGAAGACAAGAGAAGAACCCCG  
+HWI-EAS443:3:55:1115:869#0/1  
a`aa`Y`baZ[aaa``\_`aaa`Z`a`aa¥b`a`ba`a[[b  
@HWI-EAS443:3:55:1354:134#0/1  
GCGGGGTTCTTCTCTTGCTTCCTGATGTGTACTTTTTGA  
+HWI-EAS443:3:55:1354:134#0/1  
aabaab\_b\_bb\_a^abaa^ab^]aa^aaa`\_^]aaaaa\_  
@HWI-EAS443:3:55:1407:470#0/1  
GCGGGGTTCTTCTCTTGCTTCCTGATGTGTACTTTTTGA  
+HWI-EAS443:3:55:1407:470#0/1  
`\_`aab\_a\_aa\_a^aaa\_\_aa\_\_a¥]aaaa`]^aaaa`]\_  
@HWI-EAS443:3:55:1502:1224#0/1  
CGGGGTTCTTCTCTTGCTTCCTGATGTGTACTTTTTGAT  
+HWI-EAS443:3:55:1502:1224#0/1  
abb`¥¥babbbb`bb`]^`bTS¥babb`]Y`\_bbbb`bb  
@HWI-EAS443:3:55:1719:192#0/1  
GGGGTTCTTCTCTTGCTTCCTGATGTGTACTTTTTGATT  
+HWI-EAS443:3:55:1719:192#0/1  
a`aa`babbab\_bbaa\_bb¥`]U¥a]aa`^[aaaaba\_ba

@HWI-EAS443:3:55:621:530#0/1  
GCGGGTTCTTCTTGTCTTCCTGATGTGTACTTTTTGA  
+HWI-EAS443:3:55:621:530#0/1  
aaaa\_a\_a\_aa\_a`]a^`a\_ZZ\_Z[¥ZaY]]``YaW[  
@HWI-EAS443:3:55:640:440#0/1  
GCGGGTTCTTCTTGTCTTCCTGATGTGTACTTTTTGA  
+HWI-EAS443:3:55:640:440#0/1  
aaa`aa\_b¥bb\_a\_a`a\_\_aa`]\_a¥`\_^aZZ^^a^a\_\_\_\_  
@HWI-EAS443:3:55:787:1150#0/1  
GCGGGTTCTTCTTGTCTTCCTGATGTGTACTTTTTGA  
+HWI-EAS443:3:55:787:1150#0/1  
aaaa`aUY¥\_]`[]VU\_GY^^SWT[Y^\_Y\_Y]X^`\_]Y\_^  
@HWI-EAS443:3:55:92:1093#0/1  
GGGTTCTTCTTGTCTTCCTGATGTGTACTTTTTGATTA  
+HWI-EAS443:3:55:92:1093#0/1  
aa]N^^¥[``¥\_\_UXXLPXVYYZ[GZTLQS[WXU\_X^¥X  
@HWI-EAS443:3:55:952:1239#0/1  
AGCGGGTTCTTCTTGTCTTCCTGATGTGTACTTTTTG  
+HWI-EAS443:3:55:952:1239#0/1  
Ma\_]SUX]\_S\_Y\_ababW]a^R\_`\_`YQZS][\_aaaa\_a  
@HWI-EAS443:3:56:1037:444#0/1  
CGGGTTCTTCTTGTCTTCCTGATGTGTACTTTTTGAT  
+HWI-EAS443:3:56:1037:444#0/1  
aaR`^`b`aZ^aYZ]aV\_aUN^a`^\_aVZSXXa```\_U¥\_  
@HWI-EAS443:3:56:1057:689#0/1  
CGGGTTCTTCTTGTCTTCCTGATGTGTACTTTTTGAT  
+HWI-EAS443:3:56:1057:689#0/1  
aabba\_aa`Zabaa¥XW]aaY`\_RPaaTP\_\_^aaab\_I]]  
@HWI-EAS443:3:56:1327:1231#0/1  
CGGGTTCTTCTTGTCTTCCTGATGTGTACTTTTTGAT  
+HWI-EAS443:3:56:1327:1231#0/1  
``aaaS\_¥\_aaaS`aaaaaaaaXaa¥aa`a`a^aaaaba^a  
@HWI-EAS443:3:56:1387:1491#0/1  
CGGGTTCTTCTTGTCTTCCTGATGTGTACTTTTTGAT  
+HWI-EAS443:3:56:1387:1491#0/1  
]bbb\_P`W¥¥J¥]`bb\_\_]ba``[Y\_¥J¥YXOWa]aaK]\_  
@HWI-EAS443:3:56:1452:857#0/1  
CGGGTTCTTCTTGTCTTCCTGATGTGTACTTTTTGAT  
+HWI-EAS443:3:56:1452:857#0/1  
abbab]bIbb\_b`bab\_\_bb\_\_aaa``\_b\_a^bb`abb`b  
@HWI-EAS443:3:56:1700:565#0/1  
CGGGTTCTTCTTGTCTTCCTGATGTGTACTTTTTGAT  
+HWI-EAS443:3:56:1700:565#0/1  
```b`\_babbababa^¥abaaa`Z`b¥``[a]baaa\_Q^a  
@HWI-EAS443:3:56:506:342#0/1  
CGGGTTCTTCTTGTCTTCCTGATGTGTACTTTTTGAT  
+HWI-EAS443:3:56:506:342#0/1  
[bb[TNabaaW`a\_^I\_`a]\_aaaa¥Z`SYW¥a¥]ZZY]  
@HWI-EAS443:3:56:834:450#0/1  
GGGGTTCTTCTTGTCTTCCTGATGTGTACTTTTTGATT

+HWI-EAS443:3:56:834:450#0/1  
aaa^RX`Kaa\_aa^VRRaXQ[¥P]\_N`ZYYZU¥BBBBBB  
@HWI-EAS443:3:56:930:826#0/1  
TCAAAAAGTACACATCAGGAAGACAAGAGAAGAACCCCGC  
+HWI-EAS443:3:56:930:826#0/1  
aaaaaab]babaaa\_abbaaba`aaa`aaaaa\_¥^¥a`  
@HWI-EAS443:3:57:1074:1121#0/1  
CGGGGTTCTTCTTGTCTTCCTGATGTGTACTTTTTGAT  
+HWI-EAS443:3:57:1074:1121#0/1  
abbbaZ`a\_b``aaaaa\_a`aaa\_a\_[aZ¥\_`^aaa\_`a  
@HWI-EAS443:3:57:1113:1656#0/1  
CGGGGTTCTTCTTGTCTTCCTGATGTGTACTTTTTGAT  
+HWI-EAS443:3:57:1113:1656#0/1  
aa^Va\_`aa^aa]`aaX\_abaaba]ab`¥¥aYa^bbbYa  
@HWI-EAS443:3:57:1242:228#0/1  
GCGGGTTCTTCTTGTCTTCCTGATGTGTACTTTTTGA  
+HWI-EAS443:3:57:1242:228#0/1  
aabbbb\_b\_bb\_baabbaab\_`ba\_aa\_a\_a`aaaaaa  
@HWI-EAS443:3:57:1346:767#0/1  
GCGGGTTCTTCTTGTCTTCCTGATGTGTACTTTTTGA  
+HWI-EAS443:3:57:1346:767#0/1  
IX\_\_\_^VW\_a^¥a\_]\_a]a^^aaaaY\_a]b]Y^^`a``¥^  
@HWI-EAS443:3:57:1605:1113#0/1  
GCGGGTTCTTCTTGTCTTCCTGATGTGTACTTTTTGA  
+HWI-EAS443:3:57:1605:1113#0/1  
[^^^`^abbaab[\_ab]]bNbbaX^]abb^Ta\_¥bbbbaaa  
@HWI-EAS443:3:57:1707:1319#0/1  
AGCGGGTTCTTCTTGTCTTCCTGATGTGTACTTTTTG  
+HWI-EAS443:3:57:1707:1319#0/1  
`\_```ba]aab``a\_a``a^a\_ZZ`a\_a`ZX¥\_\_a```¥V  
@HWI-EAS443:3:57:410:1319#0/1  
GGTCTTCTCTTGTCTTCCTGATGTGTACTTTTTGATTAT  
+HWI-EAS443:3:57:410:1319#0/1  
]`\_bbaabb`bbabbbbbb`aaa`Y\_ab\_bbbbaabaa  
@HWI-EAS443:3:57:628:581#0/1  
CGGGGTTCTTCTTGTCTTCCTGATGTGTACTTTTTGAT  
+HWI-EAS443:3:57:628:581#0/1  
abb\_``baaaaaaaa]aa`aaa```a\_a]\_\_aaa`a[Va  
@HWI-EAS443:3:57:888:1014#0/1  
GCGGGTTCTTCTTGTCTTCCTGATGTGTACTTTTTGA  
+HWI-EAS443:3:57:888:1014#0/1  
`\_baaa`bbbabababaaaabaabaaaa`¥\_aaaaab`a  
@HWI-EAS443:3:58:1004:296#0/1  
GCGGGTTCTTCTTGTCTTCCTGATGTGTACTTTTTGA  
+HWI-EAS443:3:58:1004:296#0/1  
a`baaa\_a\_aa`a\_aabaaaaX[¥a\_```[a^\_```aa\_`\_\_  
@HWI-EAS443:3:58:1094:319#0/1  
GGGGTTCTTCTTGTCTTCCTGATGTGTACTTTTTGATT  
+HWI-EAS443:3:58:1094:319#0/1  
aaa\_T``^]a¥```^\_`\_^\_¥\_`X`Y]]a`\_``\_^\_^



@HWI-EAS443:3:58:1145:936#0/1  
GGGGTTCTTCTTGTCTTCCTGATGTGTACTTTTTGATT  
+HWI-EAS443:3:58:1145:936#0/1  
a][¥V`aa`^^^a`W^a]^^^WZ\_\_YV[ZZa`^a¥U¥\_\_  
@HWI-EAS443:3:58:1302:1537#0/1  
ATCAAAAAGTACACATCAGGAAGACAAGAGAAGAACCCCG  
+HWI-EAS443:3:58:1302:1537#0/1  
aaaaabb[bYba]X\_R^aa`¥\_\_aYa¥W^ba`ba`^Y[Wa  
@HWI-EAS443:3:58:1383:686#0/1  
GCGGGTTCTTCTTGTCTTCCTGATGTGTACTTTTTGA  
+HWI-EAS443:3:58:1383:686#0/1  
a¥` `]a0aPZ` [¥[¥[aN\_aW[Z`^U^\_^T^^\_¥\_\_ `V  
@HWI-EAS443:3:58:1486:606#0/1  
CGGGTTCTTCTTGTCTTCCTGATGTGTACTTTTTGAT  
+HWI-EAS443:3:58:1486:606#0/1  
abbb\_\_baabababbbbaabaa`a`\_abaa\_a\_bbaab`aa  
@HWI-EAS443:3:58:719:964#0/1  
GGGGTTCTTCTTGTCTTCCTGATGTGTACTTTTTGATT  
+HWI-EAS443:3:58:719:964#0/1  
a\_V^GP\_N[UW¥a`XU`X`]QNVU¥^T[XJO\_`W\_\_UN]`  
@HWI-EAS443:3:58:745:201#0/1  
CGGGTTCTTCTTGTCTTCCTGATGTGTACTTTTTGAT  
+HWI-EAS443:3:58:745:201#0/1  
a`a` `¥¥`a\_U\_`]^a\_a` ` ` \_aaV`b`aZ¥`a`aaa]\_\_  
@HWI-EAS443:3:58:986:1119#0/1  
GCGGGTTCTTCTTGTCTTCCTGATGTGTACTTTTTGA  
+HWI-EAS443:3:58:986:1119#0/1  
aaa¥`bUbbbbbbaabbaabbaaaaaaabbbbb`a  
@HWI-EAS443:3:59:1186:1175#0/1  
CGGGTTCTTCTTGTCTTCCTGATGTGTACTTTTTGAT  
+HWI-EAS443:3:59:1186:1175#0/1  
Zbb¥00b¥^`bbbabb`aaaa`aUaa`aa]Tbaa]^a`T  
@HWI-EAS443:3:59:1567:1439#0/1  
GGGGTTCTTCTTGTCTTCCTGATGTGTACTTTTTGATT  
+HWI-EAS443:3:59:1567:1439#0/1  
aa`^¥babbaaababababa\_baaa` `b`a]aaaa\_]\_a¥  
@HWI-EAS443:3:59:1569:903#0/1  
CGGGTTCTTCTTGTCTTCCTGATGTGTACTTTTTGAT  
+HWI-EAS443:3:59:1569:903#0/1  
abbbbabbbbababbbbbaabbab`a`ab]bbbZZaaa  
@HWI-EAS443:3:59:1580:1799#0/1  
GGTTCTTCTTGTCTTCCTGATGTGTACTTTTTGATTAT  
+HWI-EAS443:3:59:1580:1799#0/1  
ab^aaba\_a¥aaa\_]ba0^aa\_aa\_a\_`\_aa` `a\_]X`VV  
@HWI-EAS443:3:59:560:698#0/1  
CGGGTTCTTCTTGTCTTCCTGATGTGTACTTTTTGAT  
+HWI-EAS443:3:59:560:698#0/1  
abbaa`abbaabaaaa^aaaaab`^ab\_a\_]Yaba^YZ]a  
@HWI-EAS443:3:59:566:1199#0/1  
CGGGTTCTTCTTGTCTTCCTGATGTGTACTTTTTGAT

+HWI-EAS443:3:59:566:1199#0/1  
abbba`bbbbababbaaababaabaabaa\_a]aaa^\_aaa  
@HWI-EAS443:3:59:576:109#0/1  
GTTCTTCTCTTGCTTCCTGATGTGTACTTTTTGATTATT  
+HWI-EAS443:3:59:576:109#0/1  
a\_aW`]aaN¥`R`\_¥\_aRZY^R^Qa]X`a\_`^\_XKSYBBB  
@HWI-EAS443:3:59:819:380#0/1  
GCGGGTTCTTCTCTTGCTTCCTGATGTGTACTTTTTGA  
+HWI-EAS443:3:59:819:380#0/1  
aaOR^¥P¥^\_]Z[Y]]X`U\_W`a^TV`HaUZ^\_^NYTLJ  
@HWI-EAS443:3:5:1423:476#0/1  
CGGGTTCTTCTCTTGCTTCCTGATGTGTACTTTTTGAT  
+HWI-EAS443:3:5:1423:476#0/1  
^\_ba`^b^ZT`bba¥¥`\_`abb]ab`\_b^bab^`\_`\_`aBB  
@HWI-EAS443:3:5:1480:471#0/1  
GCGGGTTCTTCTCTTGCTTCCTGATGTGTACTTTTTGA  
+HWI-EAS443:3:5:1480:471#0/1  
aab`\_^a[aa^aaa`]¥Zba]\_`\_]aa]a\_\_Za`aa`\_B  
@HWI-EAS443:3:5:1574:1615#0/1  
CGGGTTCTTCTCTTGCTTCCTGATGTGTACTTTTTGAT  
+HWI-EAS443:3:5:1574:1615#0/1  
a\_bbbbabbb`bbbbbbbbbbbababbaababbabB  
@HWI-EAS443:3:5:1661:1486#0/1  
GGGGTTCTTCTCTTGCTTCCTGATGTGTACTTTTTGATT  
+HWI-EAS443:3:5:1661:1486#0/1  
ab`aXaYYZP`VYaa\_a`^^`a[\_a`M¥PY`````[W¥B  
@HWI-EAS443:3:5:220:1181#0/1  
GGGGTTCTTCTCTTGCTTCCTGATGTGTACTTTTTGATT  
+HWI-EAS443:3:5:220:1181#0/1  
^`baYbabb`bbaab`ababaa`\_ab\_b\_\_``aaaaaa¥  
@HWI-EAS443:3:5:302:1683#0/1  
CGGGTTCTTCTCTTGCTTCCTGATGTGTACTTTTTGAT  
+HWI-EAS443:3:5:302:1683#0/1  
[baa[Kb``¥b\_Vab`Uaba\_bb[b[baab`\_Wbabaab  
@HWI-EAS443:3:5:476:1208#0/1  
CGGGTTCTTCTCTTGCTTCCTGATGTGTACTTTTTGAT  
+HWI-EAS443:3:5:476:1208#0/1  
\_abbaababb^b`bbb`abaabb`abaaaa\_bbbba`BB  
@HWI-EAS443:3:5:575:935#0/1  
GCGGGTTCTTCTCTTGCTTCCTGATGTGTACTTTTTGA  
+HWI-EAS443:3:5:575:935#0/1  
[`b`¥]OQ¥Y\_UQIP^^Z][SN][\_HG\_W`OJOPT¥WBBB  
@HWI-EAS443:3:5:719:1238#0/1  
CGGGTTCTTCTCTTGCTTCCTGATGTGTACTTTTTGAT  
+HWI-EAS443:3:5:719:1238#0/1  
abbbbabbbba`bbab`bbba[bbabbab`a`abbbbaa  
@HWI-EAS443:3:5:813:1205#0/1  
CGGGTTCTTCTCTTGCTTCCTGATGTGTACTTTTTGAT  
+HWI-EAS443:3:5:813:1205#0/1  
abbbb\_babaababab`abaa`baaab\_b^`^aaaa\_a`a

@HWI-EAS443:3:5:823:657#0/1  
CGGGGTTCTTCTTGTCTTCCTGATGTGTACTTTTTGAT  
+HWI-EAS443:3:5:823:657#0/1  
`bb\_b`bbbab`bbbbbbba\_bb`bbabaaabbbbab  
@HWI-EAS443:3:60:118:1245#0/1  
CGGGGTTCTTCTTGTCTTCCTGATGTGTACTTTTTGAT  
+HWI-EAS443:3:60:118:1245#0/1  
aaa¥^¥aaaaaaa^aaa\_¥aa`a]\_Y\_^``a`\_Z^\_  
@HWI-EAS443:3:60:1622:704#0/1  
GCGGGTCTTCTTGTCTTCCTGATGTGTACTTTTTGA  
+HWI-EAS443:3:60:1622:704#0/1  
a``a`\_]a`ab`a^aa]``\_]\_\_\_\_\_aZa^\_Z`a`a\_Z\_  
@HWI-EAS443:3:60:1689:224#0/1  
CGGGGTTCTTCTTGTCTTCCTGATGTGTACTTTTTGAT  
+HWI-EAS443:3:60:1689:224#0/1  
`ab`aZb`bb`b`aaba`bb\_\_baaaaa^\_^aabaa\_aa  
@HWI-EAS443:3:60:1708:806#0/1  
GGGTTCTTCTTGTCTTCCTGATGTGTACTTTTTGATTA  
+HWI-EAS443:3:60:1708:806#0/1  
^VU¥a`Y^¥\_]Y]YR]Y[YZWRXXOMLY]ZYYYBBBBBB  
@HWI-EAS443:3:60:460:408#0/1  
GCGGGTCTTCTTGTCTTCCTGATGTGTACTTTTTGA  
+HWI-EAS443:3:60:460:408#0/1  
]abbb`[````^aaabaaaa`]a`]``]a\_\_\_aaaaX]  
@HWI-EAS443:3:60:512:438#0/1  
CGGGGTTCTTCTTGTCTTCCTGATGTGTACTTTTTGAT  
+HWI-EAS443:3:60:512:438#0/1  
aaaaa\_aaaaaaabab`abaa`a¥`a`^a^`\_aaaa``a  
@HWI-EAS443:3:60:78:1779#0/1  
CGGGGTTCTTCTTGTCTTCCTGATGTGTACTTTTTGAT  
+HWI-EAS443:3:60:78:1779#0/1  
ab^[\_Za`aaaaaaa\_aaaaa\_a`\_]\_^a\_\_`\_¥`\_  
@HWI-EAS443:3:61:1150:630#0/1  
GGGTTCTTCTTGTCTTCCTGATGTGTACTTTTTGATTA  
+HWI-EAS443:3:61:1150:630#0/1  
`b^H`]a`¥Z[a`\_N^]a`¥`¥QNYR\_LF[ZTUYXRPYGQ  
@HWI-EAS443:3:61:1211:1381#0/1  
CGGGGTTCTTCTTGTCTTCCTGATGTGTACTTTTTGAT  
+HWI-EAS443:3:61:1211:1381#0/1  
]baS¥JbWbbb]\_abaabbaabaT^a`aU`^U¥aTYY  
@HWI-EAS443:3:61:1224:1179#0/1  
CGGGGTTCTTCTTGTCTTCCTGATGTGTACTTTTTGAT  
+HWI-EAS443:3:61:1224:1179#0/1  
aa^bb]aabbabbaabbbbbbbaa`aaaaabbaa[\_a  
@HWI-EAS443:3:61:1263:339#0/1  
GGTCTTCTTGTCTTCCTGATGTGTACTTTTTGATTAT  
+HWI-EAS443:3:61:1263:339#0/1  
a[W^U]\_[^R^^YWX[ZU[ZZPS^R`X¥SWU¥X¥\_YXWPU  
@HWI-EAS443:3:61:1437:1041#0/1  
CGGGGTTCTTCTTGTCTTCCTGATGTGTACTTTTTGAT

+HWI-EAS443:3:61:1437:1041#0/1  
abbbabbabbbbbbbbbbabb^abbbbbbbabb`\_a  
@HWI-EAS443:3:61:1685:175#0/1  
CGGGGTTCTTCTTGTCTTCCTGATGTGTACTTTTGGAT  
+HWI-EAS443:3:61:1685:175#0/1  
ababbababbbbbbbabbbabbbbbbbbaa`aabb`\_a  
@HWI-EAS443:3:61:182:201#0/1  
CGGGGTTCTTCTTGTCTTCCTGATGTGTACTTTTGGAT  
+HWI-EAS443:3:61:182:201#0/1  
a`bbb[aabbb^bbab\_aaaaa^T^a\_a` ``aaa`a¥^`  
@HWI-EAS443:3:61:196:367#0/1  
GGTTCTTCTTGTCTTCCTGATGTGTACTTTTGGATTAT  
+HWI-EAS443:3:61:196:367#0/1  
ab¥aaa`\_aaaaa[`a`¥]a¥FX\_Y`UX[\_`\_]`^^\_XTZ  
@HWI-EAS443:3:61:239:516#0/1  
CGGGGTTCTTCTTGTCTTCCTGATGTGTACTTTTGGAT  
+HWI-EAS443:3:61:239:516#0/1  
aaaaa]`bab`aab\_a`aaaa`\_ZI¥a\_aY]^\_\_` ``\_¥`  
@HWI-EAS443:3:61:349:212#0/1  
AGCGGGGTTCTTCTTGTCTTCCTGATGTGTACTTTTGG  
+HWI-EAS443:3:61:349:212#0/1  
abbbba¥abaaaaaa`a`\_aa¥ZZ`a\_a[¥¥` ``\_\_`\_`\_`  
@HWI-EAS443:3:61:767:903#0/1  
GCGGGTTCTTCTTGTCTTCCTGATGTGTACTTTTGA  
+HWI-EAS443:3:61:767:903#0/1  
``SZ`UG^¥Z]^Y^`\_\_Y\_Z`\_a]YZ[VWGNX^^YXVFQ  
@HWI-EAS443:3:61:919:1705#0/1  
CGGGGTTCTTCTTGTCTTCCTGATGTGTACTTTTGGAT  
+HWI-EAS443:3:61:919:1705#0/1  
ababbabababbab`\_abbbbabaaaab\_aaaaaaa\_a  
@HWI-EAS443:3:62:1001:514#0/1  
GCGGGTTCTTCTTGTCTTCCTGATGTGTACTTTTGA  
+HWI-EAS443:3:62:1001:514#0/1  
`TWT¥WYOL^WNT`TP\_\_WT[ZWSQYaNFLRN`¥BBBBB  
@HWI-EAS443:3:62:1261:276#0/1  
GCGGGTTCTTCTTGTCTTCCTGATGTGTACTTTTGA  
+HWI-EAS443:3:62:1261:276#0/1  
a¥^a\_aWYU`^`\_¥a` `[¥a^Z]\_[0]]ZaXZXa` `^`Z]  
@HWI-EAS443:3:62:1333:1052#0/1  
AGCGGGGTTCTTCTTGTCTTCCTGATGTGTACTTTTGG  
+HWI-EAS443:3:62:1333:1052#0/1  
`]a]^¥ZUZ¥bb\_\_UZS¥]a`aZ]NV[ ]VPY` `P^¥XR`P  
@HWI-EAS443:3:62:1420:1618#0/1  
CGGGGTTCTTCTTGTCTTCCTGATGTGTACTTTTGGAT  
+HWI-EAS443:3:62:1420:1618#0/1  
¥abbbbbbbbab`\_baaabbabb]`ba\_bab\_bbaabbbb  
@HWI-EAS443:3:62:158:240#0/1  
CGGGGTTCTTCTTGTCTTCCTGATGTGTACTTTTGGAT  
+HWI-EAS443:3:62:158:240#0/1  
ZY`¥` [\_\_\_\_\_[`a`\_aU¥aZ`a`W]\_a\_aYU¥a\_aa` [` [

@HWI-EAS443:3:62:279:1449#0/1  
GGGGTTCTTCTTGTCTTCCTGATGTGTACTTTTTGATT  
+HWI-EAS443:3:62:279:1449#0/1  
aa]`]aaaaaaaa^DWaaa````\_`aYUY^a\_`a``U¥`^  
@HWI-EAS443:3:62:333:973#0/1  
CGGGTTCTTCTTGTCTTCCTGATGTGTACTTTTTGAT  
+HWI-EAS443:3:62:333:973#0/1  
a\_bab\_bbbbbbaabaabaaaa`\_aa``\_¥\_aaaa[Ta  
@HWI-EAS443:3:62:625:576#0/1  
GGTTCTTCTTGTCTTCCTGATGTGTACTTTTTGATTAT  
+HWI-EAS443:3:62:625:576#0/1  
aa0^bbbaaab`^\_abbaaaa\_a`\_a``\_a\_]a[a\_``a\_  
@HWI-EAS443:3:62:674:983#0/1  
CGGGTTCTTCTTGTCTTCCTGATGTGTACTTTTTGAT  
+HWI-EAS443:3:62:674:983#0/1  
aV]\_NF` `[XRXL[ZHUa\_aa\_VOOMMO¥G[RVS^]\_XP]  
@HWI-EAS443:3:62:737:723#0/1  
GGGGTTCTTCTTGTCTTCCTGATGTGTACTTTTTGATT  
+HWI-EAS443:3:62:737:723#0/1  
`[^YW]Y\_\_YXN¥\_aL¥VV\_^[QNU`V^BBBBBBBBBBBB  
@HWI-EAS443:3:62:803:912#0/1  
GGTTCTTCTTGTCTTCCTGATGTGTACTTTTTGATTAT  
+HWI-EAS443:3:62:803:912#0/1  
`\_LYbba\_abb^``^a]b``][\_¥a`aaaa]\_Q]a\_VY  
@HWI-EAS443:3:63:1144:247#0/1  
AGCGGGTTCTTCTTGTCTTCCTGATGTGTACTTTTTG  
+HWI-EAS443:3:63:1144:247#0/1  
ababbaa`baabaaaaaaa\_bba\_aa```]a\_`Zaaaaa^  
@HWI-EAS443:3:63:1666:163#0/1  
CGGGTTCTTCTTGTCTTCCTGATGTGTACTTTTTGAT  
+HWI-EAS443:3:63:1666:163#0/1  
abbbb\_b^^bab[babbab^aabba]\_T^]aababbb]ab  
@HWI-EAS443:3:63:320:890#0/1  
CGGGTTCTTCTTGTCTTCCTGATGTGTACTTTTTGAT  
+HWI-EAS443:3:63:320:890#0/1  
abaaa¥aaaa`aa`aa^aaaa`\_```]]aY]]aa`a``\_^  
@HWI-EAS443:3:63:333:799#0/1  
AGCGGGTTCTTCTTGTCTTCCTGATGTGTACTTTTTG  
+HWI-EAS443:3:63:333:799#0/1  
¥¥aba`]aa`^ZU\_[]`aab`abaaXY¥a[`STRa^L[V0  
@HWI-EAS443:3:63:563:219#0/1  
GCGGGTTCTTCTTGTCTTCCTGATGTGTACTTTTTGA  
+HWI-EAS443:3:63:563:219#0/1  
`abbbb`baaaabaaaa`aaaaa`¥`a^a\_``aa`a`\_\_  
@HWI-EAS443:3:63:667:532#0/1  
CGGGTTCTTCTTGTCTTCCTGATGTGTACTTTTTGAT  
+HWI-EAS443:3:63:667:532#0/1  
abbb`[bab```\_a]aa`]\_¥WW\_V¥Y0][W^]]`a¥TZ  
@HWI-EAS443:3:63:757:900#0/1  
AGCGGGTTCTTCTTGTCTTCCTGATGTGTACTTTTTG

+HWI-EAS443:3:63:757:900#0/1  
aaa^a`a\_`aaa`aa`a\_``aaaaaa`\_]\_[^aa`a\_\_  
@HWI-EAS443:3:63:797:1449#0/1  
CGGGGTTCTTCTTGTCTTCCTGATGTGTACTTTTTGAT  
+HWI-EAS443:3:63:797:1449#0/1  
`abbb`bbbbbbba]abbabb`^`b`¥`aabaaaaab`  
@HWI-EAS443:3:63:807:1109#0/1  
GCGGGTTCCTTCTTGTCTTCCTGATGTGTACTTTTTGA  
+HWI-EAS443:3:63:807:1109#0/1  
`aaa`a^`aaaa\_\_aa`^\_a\_``a\_`^`a`]`Z^`\_`a\_\_aV`  
@HWI-EAS443:3:64:1098:795#0/1  
CGGGGTTCTTCTTGTCTTCCTGATGTGTACTTTTTGAT  
+HWI-EAS443:3:64:1098:795#0/1  
abaa`R\_abbababaaaabaa\_a``aa\_b]]`aaaa`[`a  
@HWI-EAS443:3:64:1216:1292#0/1  
CGGGGTTCTTCTTGTCTTCCTGATGTGTACTTTTTGAT  
+HWI-EAS443:3:64:1216:1292#0/1  
aaaaaTbaaaaaa[a[`aa`\_\_aWV\_\_]]]\_aa\_aaa]^a  
@HWI-EAS443:3:64:1312:1580#0/1  
GGGGTTCCTTCTTGTCTTCCTGATGTGTACTTTTTGATT  
+HWI-EAS443:3:64:1312:1580#0/1  
`aaa[babb`aabab\_ab`\_`aa\_`V^`\_`^aa`aa[aa\_  
@HWI-EAS443:3:64:1764:737#0/1  
CGGGGTTCTTCTTGTCTTCCTGATGTGTACTTTTTGAT  
+HWI-EAS443:3:64:1764:737#0/1  
\_`a`\_`¥`a\_aa``b^\_]ab\_¥`bba\_¥`a`\_`Wa`baa^a`  
@HWI-EAS443:3:64:23:266#0/1  
CGGGGTTCTTCTTGTCTTCCTGATGTGTACTTTTTGAT  
+HWI-EAS443:3:64:23:266#0/1  
abbb\_U`baaabaab`aaaa\_a\_P\_a[a]T¥`a``a^`a  
@HWI-EAS443:3:64:255:951#0/1  
GCGGGTTCCTTCTTGTCTTCCTGATGTGTACTTTTTGA  
+HWI-EAS443:3:64:255:951#0/1  
ababb¥Z^baab]a\_aZY\_\_aY`\_aZ¥a]\_RP]`\_a\_`T¥  
@HWI-EAS443:3:64:535:324#0/1  
CGGGGTTCTTCTTGTCTTCCTGATGTGTACTTTTTGAT  
+HWI-EAS443:3:64:535:324#0/1  
ZabXS`bbaba\_bbb`bbbbbbbab]a]\_¥bbabab^Y\_b  
@HWI-EAS443:3:64:542:722#0/1  
CGGGGTTCTTCTTGTCTTCCTGATGTGTACTTTTTGAT  
+HWI-EAS443:3:64:542:722#0/1  
abbab\_babbbbabbbabaab`a^aaa`b\_a`ab`abaaa  
@HWI-EAS443:3:64:576:1789#0/1  
CGGGGTTCTTCTTGTCTTCCTGATGTGTACTTTTTGAT  
+HWI-EAS443:3:64:576:1789#0/1  
a^TWXMWa]]W]a]\_\_^\_\_\_\_]aJFWYVW\_N\_\_\_\_aXXPZZ  
@HWI-EAS443:3:64:698:299#0/1  
CGGGGTTCTTCTTGTCTTCCTGATGTGTACTTTTTGAT  
+HWI-EAS443:3:64:698:299#0/1  
aa`ba[a\_aaaaaaa^\_aaaaaa¥^a]^\_`^\_aaaaa``a

@HWI-EAS443:3:64:744:1191#0/1  
CGGGGTTCTTCTTGTCTTCCTGATGTGTACTTTTTGAT  
+HWI-EAS443:3:64:744:1191#0/1  
a`^]]R]V`aX\_WVZ^`]Z`\_RYJT][G[P^]aaW\_a`\_\_  
@HWI-EAS443:3:64:76:99#0/1  
CGGGGTTCTTCTTGTCTTCCTGATGTGTACTTTTTGAT  
+HWI-EAS443:3:64:76:99#0/1  
aba\_aGa]]`^\_X\_]^[X^`^\_]\_V^\_]YRW]]^]W^  
@HWI-EAS443:3:65:1361:199#0/1  
CGGGGTTCTTCTTGTCTTCCTGATGTGTACTTTTTGAT  
+HWI-EAS443:3:65:1361:199#0/1  
\_bbba]aabbababa[b`b][¥aaabQa`aZaaaabY¥\_  
@HWI-EAS443:3:65:350:1876#0/1  
GCGGGTTCTTCTTGTCTTCCTGATGTGTACTTTTTGA  
+HWI-EAS443:3:65:350:1876#0/1  
V\_`Z[aaababbbaa0Y]W^abbaab`[a\_Uabaaabb\_b  
@HWI-EAS443:3:65:38:63#0/1  
GCGGGTTCTTCTTGTCTTCCTGATGTGTACTTTTTGA  
+HWI-EAS443:3:65:38:63#0/1  
abaaaaYaaaa\_a`aa`^\_a`^`\_\_\_YaX`]^Y`\_\_\_a]]  
@HWI-EAS443:3:65:55:1972#0/1  
AGCGGGTTCTTCTTGTCTTCCTGATGTGTACTTTTTG  
+HWI-EAS443:3:65:55:1972#0/1  
Y[ba]Z\_Va^]\_a`^ab`^\_W¥^U^`aYZ[^QW^\_aaa\_]  
@HWI-EAS443:3:65:571:1556#0/1  
CGGGGTTCTTCTTGTCTTCCTGATGTGTACTTTTTGAT  
+HWI-EAS443:3:65:571:1556#0/1  
ab`^`^][abaabba`\_\_bbabbaaaba[T\_baba`^^`  
@HWI-EAS443:3:65:592:865#0/1  
GGGTTCTTCTTGTCTTCCTGATGTGTACTTTTTGATTA  
+HWI-EAS443:3:65:592:865#0/1  
aaa¥aaaaabaaaa]aaaaa][\_a\_aZ^`aaaaa¥]a\_a  
@HWI-EAS443:3:65:833:1758#0/1  
GCGGGTTCTTCTTGTCTTCCTGATGTGTACTTTTTGA  
+HWI-EAS443:3:65:833:1758#0/1  
aa¥`aaZbbababaabb`a]abaaa`[\_a\_a\_aaaa`[a  
@HWI-EAS443:3:65:871:66#0/1  
GGGTTCTTCTTGTCTTCCTGATGTGTACTTTTTGATTA  
+HWI-EAS443:3:65:871:66#0/1  
abaYaa]a¥a`\_aa[\_\_\_`\_a\_^]a]a]WX\_`^^`¥]\_\_¥  
@HWI-EAS443:3:65:89:887#0/1  
GCGGGTTCTTCTTGTCTTCCTGATGTGTACTTTTTGA  
+HWI-EAS443:3:65:89:887#0/1  
abaa[aP`a``¥W\_a]`Y`aaa]\_^PY`Q\_YQ^\_^a[\_[\_  
@HWI-EAS443:3:66:1130:790#0/1  
GCGGGTTCTTCTTGTCTTCCTGATGTGTACTTTTTGA  
+HWI-EAS443:3:66:1130:790#0/1  
I\_¥[\_Q\_`^`\_bb``¥]a``^ab`S`¥X^¥\_Z¥¥\_¥\_  
@HWI-EAS443:3:66:1230:1716#0/1  
ATCAAAAAGTACACATCAGGAAGACAAGAGAAGAACCCCG

+HWI-EAS443:3:66:1230:1716#0/1  
ab^bbbaaa^baa`aaaaaaaa`aaa`aaaaa\_U]Ya  
@HWI-EAS443:3:66:1233:665#0/1  
GGGGTTCTTCTTGTCTTCCTGATGTGTACTTTTTGATT  
+HWI-EAS443:3:66:1233:665#0/1  
abb`]aabbababbaaaba`ab\_a`\_\_aaba`a`  
@HWI-EAS443:3:66:1240:1580#0/1  
GCGGGTTCTTCTTGTCTTCCTGATGTGTACTTTTTGA  
+HWI-EAS443:3:66:1240:1580#0/1  
aba\_^¥Yaaa¥\_`a`\_aWRYHU`aaWP`X\_PX\_a[[`^ZU  
@HWI-EAS443:3:66:1258:1112#0/1  
CGGGTTCTTCTTGTCTTCCTGATGTGTACTTTTTGAT  
+HWI-EAS443:3:66:1258:1112#0/1  
aaaa¥]aabb`aaaaaaba¥\_a\_`\_]`\_Z\_aa\_a`]^`  
@HWI-EAS443:3:66:1596:448#0/1  
GCGGGTTCTTCTTGTCTTCCTGATGTGTACTTTTTGA  
+HWI-EAS443:3:66:1596:448#0/1  
a^aab`]`\_\_`\_`^\_\_a^`\_\_^\_[\_\_Y`]YXY]^a\_¥^  
@HWI-EAS443:3:66:188:55#0/1  
GCGGGTTCTTCTTGTCTTCCTGATGTGTACTTTTTGA  
+HWI-EAS443:3:66:188:55#0/1  
aaba`aa]aaaaaaaa`¥\_a`^aa`^`\_]`^¥]^`\_`\_X^  
@HWI-EAS443:3:66:198:476#0/1  
CGGGTTCTTCTTGTCTTCCTGATGTGTACTTTTTGAT  
+HWI-EAS443:3:66:198:476#0/1  
aaaa[G]aa`a^P`\_a\_````[`[^X¥VaYSV`\_\_\_\_Z^Z]  
@HWI-EAS443:3:66:303:863#0/1  
CGGGTTCTTCTTGTCTTCCTGATGTGTACTTTTTGAT  
+HWI-EAS443:3:66:303:863#0/1  
aa`^^Q]aaa[aa`\_NY\_[Z]a\_J¥¥TS[\_\_\_\_a`[`Y\_\_  
@HWI-EAS443:3:66:597:609#0/1  
GCGGGTTCTTCTTGTCTTCCTGATGTGTACTTTTTGA  
+HWI-EAS443:3:66:597:609#0/1  
[bb`b`Xbb`a\_^b`aa]aba\_WaaWaa\_a¥a`a\_aaab^  
@HWI-EAS443:3:66:651:419#0/1  
GGTTCTTCTTGTCTTCCTGATGTGTACTTTTTGATTA  
+HWI-EAS443:3:66:651:419#0/1  
a^^X\_```]^a`a¥[^a`\_\_^a^\_U]S¥Z\_Y\_\_`\_]`^`  
@HWI-EAS443:3:66:73:653#0/1  
CGGGTTCTTCTTGTCTTCCTGATGTGTACTTTTTGAT  
+HWI-EAS443:3:66:73:653#0/1  
aaba\_^abaaaa`aa`aaa\_`a`\_]aYX¥`a\_`^[[`  
@HWI-EAS443:3:67:1016:228#0/1  
GGTTCTTCTTGTCTTCCTGATGTGTACTTTTTGATTAT  
+HWI-EAS443:3:67:1016:228#0/1  
``SaY^babaaab\_[a\_U]a¥aa`W]P^`a`aa[JX\_`\_W  
@HWI-EAS443:3:67:1203:577#0/1  
CGGGTTCTTCTTGTCTTCCTGATGTGTACTTTTTGAT  
+HWI-EAS443:3:67:1203:577#0/1  
abaaa¥bbbbabab\_`\_aba\_``aaaaaaaa¥bbaaaaa



@HWI-EAS443:3:67:1274:1862#0/1  
GCGGGTTCTTCTTGTCTTCCTGATGTGTACTTTTTGA  
+HWI-EAS443:3:67:1274:1862#0/1  
a^WQ\_XRV^`a^[WaaaY^\_`X¥\_VYX\_Z[U]V\_^\_W`^\_  
@HWI-EAS443:3:67:1733:1737#0/1  
CGGGTTCTTCTTGTCTTCCTGATGTGTACTTTTTGAT  
+HWI-EAS443:3:67:1733:1737#0/1  
`¥UXUO^¥¥V^aaaa]X`a`^][NXUG[L[[XXY¥]\_TY  
@HWI-EAS443:3:67:232:1072#0/1  
GCGGGTTCTTCTTGTCTTCCTGATGTGTACTTTTTGA  
+HWI-EAS443:3:67:232:1072#0/1  
aaaa\_ZHY`Z[\_^`^`\_R`^^`YRRPYU]SQWR[X\_UVZ  
@HWI-EAS443:3:67:23:826#0/1  
ATCAAAAAGTACACATCAGGAAGACAAGAGAAGAACCCCG  
+HWI-EAS443:3:67:23:826#0/1  
¥ab`¥aZ\_\_Zbbbaababbbbabaabababababaaaa`a  
@HWI-EAS443:3:67:268:776#0/1  
GCGGGTTCTTCTTGTCTTCCTGATGTGTACTTTTTGA  
+HWI-EAS443:3:67:268:776#0/1  
abaaba^baabbbabbb`aaaaabaab\_a\_`aaaa`aa`  
@HWI-EAS443:3:67:445:64#0/1  
CGGGTTCTTCTTGTCTTCCTGATGTGTACTTTTTGAT  
+HWI-EAS443:3:67:445:64#0/1  
abbbb\_bbbbababbbbaaaaa`aaaa\_a\_`\_aaaaaaaa  
@HWI-EAS443:3:67:455:738#0/1  
CGGGTTCTTCTTGTCTTCCTGATGTGTACTTTTTGAT  
+HWI-EAS443:3:67:455:738#0/1  
]W]YH[\_Za]Y`\_\_aa`aa`\_YaSY[¥^]N[]`[a\_a\_\_^  
@HWI-EAS443:3:67:494:1102#0/1  
CGGGTTCTTCTTGTCTTCCTGATGTGTACTTTTTGAT  
+HWI-EAS443:3:67:494:1102#0/1  
a`\_Z¥HbbaaaaaaZa[aa`aaaZU]]¥aR¥`\_\_\_`¥^`  
@HWI-EAS443:3:67:968:616#0/1  
CGGGTTCTTCTTGTCTTCCTGATGTGTACTTTTTGAT  
+HWI-EAS443:3:67:968:616#0/1  
abbabaaabaaaaabaaba`a```\_a¥`¥``aaaaa[`a  
@HWI-EAS443:3:68:1074:768#0/1  
GGTTCTTCTTGTCTTCCTGATGTGTACTTTTTGATTA  
+HWI-EAS443:3:68:1074:768#0/1  
aa]Qaa¥[`]TY[TN¥`UTL[[SW¥HWHSW\_\_Y\_YY]\_Z[  
@HWI-EAS443:3:68:1159:1277#0/1  
CGGGTTCTTCTTGTCTTCCTGATGTGTACTTTTTGAT  
+HWI-EAS443:3:68:1159:1277#0/1  
a``aa`babbbbbbba]bbababY`a`[aaa]babbaaa`  
@HWI-EAS443:3:68:1412:1068#0/1  
GCGGGTTCTTCTTGTCTTCCTGATGTGTACTTTTTGA  
+HWI-EAS443:3:68:1412:1068#0/1  
aabb]]Ya`ba`^b`a`\_a``\_] [X`Y\_a\_^¥^`\_^`^`  
@HWI-EAS443:3:68:1557:310#0/1  
CGGGTTCTTCTTGTCTTCCTGATGTGTACTTTTTGAT

+HWI-EAS443:3:68:1557:310#0/1  
S¥bbbU¥^``bbbbbabb[bba]babbbabaaN`\_\_bbaaa  
@HWI-EAS443:3:68:1621:1834#0/1  
CGGGGTCTTCTCTTGCTTCCTGATGTGTACTTTTTGAT  
+HWI-EAS443:3:68:1621:1834#0/1  
`b`Za[aaba[bbabb`Sabaabbaab]aT``aaaaaaa  
@HWI-EAS443:3:68:183:903#0/1  
GCGGGTCTTCTCTTGCTTCCTGATGTGTACTTTTTGA  
+HWI-EAS443:3:68:183:903#0/1  
abbbbb`bbaaaaaaaa¥baaaaa]X^`^a[V\_a`aaaa  
@HWI-EAS443:3:68:447:1691#0/1  
GCGGGTCTTCTCTTGCTTCCTGATGTGTACTTTTTGA  
+HWI-EAS443:3:68:447:1691#0/1  
aa^QVXH[b\_\_aaa\_ZRUb\_^a\_RUX¥UY\_VZ[\_WZ^\_QN  
@HWI-EAS443:3:68:452:1558#0/1  
GCGGGTCTTCTCTTGCTTCCTGATGTGTACTTTTTGA  
+HWI-EAS443:3:68:452:1558#0/1  
abba]\_¥abbbabbbba\_bbabba``aa¥^]`aaaaba[a  
@HWI-EAS443:3:68:812:1405#0/1  
GCGGGTCTTCTCTTGCTTCCTGATGTGTACTTTTTGA  
+HWI-EAS443:3:68:812:1405#0/1  
`aa]aaZab`a``aaa^`\_a\_a\_[a`X^a\_\_^`^\_R[  
@HWI-EAS443:3:68:996:1415#0/1  
GCGGGTCTTCTCTTGCTTCCTGATGTGTACTTTTTGA  
+HWI-EAS443:3:68:996:1415#0/1  
`bab`\_a\_abaaa`aaaa`aaaaa`a``\_aYa``aa\_`¥`  
@HWI-EAS443:3:69:1092:1888#0/1  
CGGGGTCTTCTCTTGCTTCCTGATGTGTACTTTTTGAT  
+HWI-EAS443:3:69:1092:1888#0/1  
aaaa`bb`aabbba`abbaababba\_^aa\_bbabababa  
@HWI-EAS443:3:69:116:107#0/1  
GCGGGTCTTCTCTTGCTTCCTGATGTGTACTTTTTGA  
+HWI-EAS443:3:69:116:107#0/1  
aabaay`aa^a`aa\_\_\_a^\_\_`\_]X\_X]Y\_\_a`][  
@HWI-EAS443:3:69:1727:1079#0/1  
AGCGGGTCTTCTCTTGCTTCCTGATGTGTACTTTTTG  
+HWI-EAS443:3:69:1727:1079#0/1  
`^abbab`babbaabbaaaaa`aa``a\_a\_aaaaa`  
@HWI-EAS443:3:69:233:524#0/1  
CGGGTCTTCTCTTGCTTCCTGATGTGTACTTTTTGAT  
+HWI-EAS443:3:69:233:524#0/1  
a`[¥\_Q¥aaaa`a`a\_\_aaba`[UU\_]`\_```aa```  
@HWI-EAS443:3:69:305:153#0/1  
CGGGTCTTCTCTTGCTTCCTGATGTGTACTTTTTGAT  
+HWI-EAS443:3:69:305:153#0/1  
abbbbababbbbabbaabaaaaa`a\_a¥`Zaaaa^]`  
@HWI-EAS443:3:69:439:323#0/1  
GGGTCTTCTCTTGCTTCCTGATGTGTACTTTTTGATT  
+HWI-EAS443:3:69:439:323#0/1  
aaaa[aaaa`aaaa`¥aa`a]ZZZV\_Y\_YYV]]^X[ZY]]

@HWI-EAS443:3:69:538:1982#0/1  
GCGGGTTCTTCTTGTCTTCCTGATGTGTACTTTTTGA  
+HWI-EAS443:3:69:538:1982#0/1  
ab¥]`]Rab]baabba]`b^¥bba^S[WTa[ba`a`a\_X\_  
@HWI-EAS443:3:69:606:225#0/1  
GCGGGTTCTTCTTGTCTTCCTGATGTGTACTTTTTGA  
+HWI-EAS443:3:69:606:225#0/1  
]a`a`Z]abb\_¥a\_bab\_Z`aY\_\_\_^]\_¥`Yaababaaaa  
@HWI-EAS443:3:69:613:1260#0/1  
CGGGTTCTTCTTGTCTTCCTGATGTGTACTTTTTGAT  
+HWI-EAS443:3:69:613:1260#0/1  
abbbba]\_`]\_a^U^`b^aaa\_a^V`aa\_a^¥Za\_a¥\_a`^  
@HWI-EAS443:3:69:654:271#0/1  
CGGGTTCTTCTTGTCTTCCTGATGTGTACTTTTTGAT  
+HWI-EAS443:3:69:654:271#0/1  
aba\_a`b`aaa`\_`]RY]a\_a`a[Vab]a]a\_``a\_a]\_`  
@HWI-EAS443:3:69:919:347#0/1  
GCGGGTTCTTCTTGTCTTCCTGATGTGTACTTTTTGA  
+HWI-EAS443:3:69:919:347#0/1  
aaa`a`^\_aaaa`aaa^`\_`^`a`\_`\_`^\_\_a`a`\_P\_  
@HWI-EAS443:3:69:929:696#0/1  
GCGGGTTCTTCTTGTCTTCCTGATGTGTACTTTTTGA  
+HWI-EAS443:3:69:929:696#0/1  
aab`bbRbabbabab`abaabbab`aa]ababbbbaa^  
@HWI-EAS443:3:69:978:1124#0/1  
AGCGGGTTCTTCTTGTCTTCCTGATGTGTACTTTTTG  
+HWI-EAS443:3:69:978:1124#0/1  
abbbbaaa]babaaabba`a`baa`ba`aa]]^a]a`aa\_`  
@HWI-EAS443:3:6:109:1736#0/1  
CGGGTTCTTCTTGTCTTCCTGATGTGTACTTTTTGAT  
+HWI-EAS443:3:6:109:1736#0/1  
aaaabRabaaaa\_aaa\_[a`a`aTH\_ZWa^[Ya]¥ZaZa`  
@HWI-EAS443:3:6:1319:238#0/1  
CGGGTTCTTCTTGTCTTCCTGATGTGTACTTTTTGAT  
+HWI-EAS443:3:6:1319:238#0/1  
\_abbb]``ba`bPbbba`a`a^b\_\_abaa\_`\_bbaabb`a  
@HWI-EAS443:3:6:1404:939#0/1  
GGTTCTTCTTGTCTTCCTGATGTGTACTTTTTGATTA  
+HWI-EAS443:3:6:1404:939#0/1  
aa`OaRa`Va^aaa\_]a`¥^\_\_Z\_`X^]]Zaa````]\_a^^  
@HWI-EAS443:3:6:372:488#0/1  
CGGGTTCTTCTTGTCTTCCTGATGTGTACTTTTTGAT  
+HWI-EAS443:3:6:372:488#0/1  
abb[``bb`[X`\_a¥]\_\_aaa]aZ¥a[SYR¥U[\_aa\_``^  
@HWI-EAS443:3:6:702:821#0/1  
CGGGTTCTTCTTGTCTTCCTGATGTGTACTTTTTGAT  
+HWI-EAS443:3:6:702:821#0/1  
Vb\_baTaaabbab[ab[a`b\_`ababb^b^a`bb`aabaa  
@HWI-EAS443:3:70:1004:103#0/1  
CGGGTTCTTCTTGTCTTCCTGATGTGTACTTTTTGAT

+HWI-EAS443:3:70:1004:103#0/1  
abb`b`bbbbbbabbbbaabbbbbbbb\_bbb\_bbbbbba`b`  
@HWI-EAS443:3:70:1281:388#0/1  
GCGGGTTCTTCTTGTCTTCCTGATGTGTACTTTTTGA  
+HWI-EAS443:3:70:1281:388#0/1  
a`abababaabaa`bbb\_abaaabb`bbYaaaRaaabbaa  
@HWI-EAS443:3:70:1372:286#0/1  
GCGGGTTCTTCTTGTCTTCCTGATGTGTACTTTTTGA  
+HWI-EAS443:3:70:1372:286#0/1  
aaaaaa]a\_aa\_a^aaa`b`\_aa\_^`a^a^\_]``\_``X^  
@HWI-EAS443:3:70:1611:86#0/1  
CGGGTTCTTCTTGTCTTCCTGATGTGTACTTTTTGAT  
+HWI-EAS443:3:70:1611:86#0/1  
abbaKGb]aaa\_Ta\_a\_a`a[a`Y`XUa]^^a``a]Z\_  
@HWI-EAS443:3:70:345:75#0/1  
GGGGTTCTTCTTGTCTTCCTGATGTGTACTTTTTGATT  
+HWI-EAS443:3:70:345:75#0/1  
aa\_aV\_a\_\_\_\_````]`^`\_\_^`\_]`\_^\_YR[^`^^`\_]`^  
@HWI-EAS443:3:70:384:875#0/1  
CGGGTTCTTCTTGTCTTCCTGATGTGTACTTTTTGAT  
+HWI-EAS443:3:70:384:875#0/1  
a`bbb]aaaaaaaaaba`ababaaaa`\_a]aaaaaaaa`aa  
@HWI-EAS443:3:70:445:928#0/1  
GGGGTTCTTCTTGTCTTCCTGATGTGTACTTTTTGATT  
+HWI-EAS443:3:70:445:928#0/1  
`\_aa^aaabaaaa\_a\_aa`a\_aa¥`a^`]]]aa`a`^]\_\_  
@HWI-EAS443:3:70:487:674#0/1  
CGGGTTCTTCTTGTCTTCCTGATGTGTACTTTTTGAT  
+HWI-EAS443:3:70:487:674#0/1  
abZZ^U]ba`baaa^`aaaaaba`aa^`X]aaaa\_P^a  
@HWI-EAS443:3:70:57:105#0/1  
CGGGTTCTTCTTGTCTTCCTGATGTGTACTTTTTGAT  
+HWI-EAS443:3:70:57:105#0/1  
ababaY`^¥]Y\_`a¥L¥a`]]`[QQYUYWUua`\_a\_Y\_T  
@HWI-EAS443:3:70:614:1417#0/1  
CGGGTTCTTCTTGTCTTCCTGATGTGTACTTTTTGAT  
+HWI-EAS443:3:70:614:1417#0/1  
aa¥a`Waab\_baa`ba`aabaaa```a`RUTaa\_aaa\_aa  
@HWI-EAS443:3:70:653:1251#0/1  
GCGGGTTCTTCTTGTCTTCCTGATGTGTACTTTTTGA  
+HWI-EAS443:3:70:653:1251#0/1  
abbaaa]aa^`aaa`Xaa`baa¥Y\_]Na^`¥a\_a\_`^`  
@HWI-EAS443:3:70:737:198#0/1  
CGGGTTCTTCTTGTCTTCCTGATGTGTACTTTTTGAT  
+HWI-EAS443:3:70:737:198#0/1  
a\_baa\_baab`bbab`]bba`aaaa\_b`a\_\_\_\_aaaaaa\_a  
@HWI-EAS443:3:70:82:453#0/1  
AGCGGGTTCTTCTTGTCTTCCTGATGTGTACTTTTTG  
+HWI-EAS443:3:70:82:453#0/1  
aTa]ab\_\_aa`aWNW`a[Z\_aR^\_a\_\_¥][YX`^a\_X¥[Y

@HWI-EAS443:3:70:919:1323#0/1  
CGGGGTTCTTCTTGTCTTCCTGATGTGTACTTTTTGAT  
+HWI-EAS443:3:70:919:1323#0/1  
`\_UZbaabbbbbbbba`bbaaab\_\_aa`a``aaaabaXaa  
@HWI-EAS443:3:71:1015:1009#0/1  
CGGGGTTCTTCTTGTCTTCCTGATGTGTACTTTTTGAT  
+HWI-EAS443:3:71:1015:1009#0/1  
a^^\_TF^ba`aa\_ab\_S]a`aaaa`\_]][W\_]`^`UZ¥  
@HWI-EAS443:3:71:1032:934#0/1  
GCGGGGTTCTTCTTGTCTTCCTGATGTGTACTTTTTGA  
+HWI-EAS443:3:71:1032:934#0/1  
abbbaZXa`b\_L[aba]\_`b^[H¥Y^a`QaGPaaa\_aaP[  
@HWI-EAS443:3:71:14:249#0/1  
GGGGTTCTTCTTGTCTTCCTGATGTGTACTTTTTGATT  
+HWI-EAS443:3:71:14:249#0/1  
a¥¥VLY^TR][`Y[\_Y¥Z¥W¥^ZW¥\_W¥NUU¥Y[V[YXXU  
@HWI-EAS443:3:71:1513:1970#0/1  
CGGGGTTCTTCTTGTCTTCCTGATGTGTACTTTTTGAT  
+HWI-EAS443:3:71:1513:1970#0/1  
ababbZbbaba^aabaabaaa`aba]`b`a^baaa``aa  
@HWI-EAS443:3:71:1577:1625#0/1  
CGGGGTTCTTCTTGTCTTCCTGATGTGTACTTTTTGAT  
+HWI-EAS443:3:71:1577:1625#0/1  
X\_¥¥WY\_¥`a\_\_\_R\_aa`a\_VZ¥aY[S\_VL]^a`]`Z]  
@HWI-EAS443:3:71:1585:1224#0/1  
GCGGGGTTCTTCTTGTCTTCCTGATGTGTACTTTTTGA  
+HWI-EAS443:3:71:1585:1224#0/1  
\_OaXaaVZ¥]\_G]^V[a]`X[WZ``X[^M`QU[Z^\_Z]YV  
@HWI-EAS443:3:71:177:90#0/1  
AGCGGGGTTCTTCTTGTCTTCCTGATGTGTACTTTTTG  
+HWI-EAS443:3:71:177:90#0/1  
aaaaaa\_Xaa`a``\_`aa^a`a`\_\_\_X^aZY^^^\_a¥`^  
@HWI-EAS443:3:71:302:466#0/1  
GCGGGGTTCTTCTTGTCTTCCTGATGTGTACTTTTTGA  
+HWI-EAS443:3:71:302:466#0/1  
\_a¥`YMTa\_YTTYZORWZTWGOXYV^]LEYRV`XVPY\_X^  
@HWI-EAS443:3:71:340:218#0/1  
GGGTTCTTCTTGTCTTCCTGATGTGTACTTTTTGATTA  
+HWI-EAS443:3:71:340:218#0/1  
a\_[U\_a`[W]NRZ]R¥^QPY[RNR\_X\_XMOXX¥T^\_]YTV  
@HWI-EAS443:3:71:347:1660#0/1  
GCGGGGTTCTTCTTGTCTTCCTGATGTGTACTTTTTGA  
+HWI-EAS443:3:71:347:1660#0/1  
ab\_aZFIU``[`aa`YUU\_Yaba¥\_]¥]HW[^aY]YX\_\_[  
@HWI-EAS443:3:71:593:699#0/1  
CGGGGTTCTTCTTGTCTTCCTGATGTGTACTTTTTGAT  
+HWI-EAS443:3:71:593:699#0/1  
ab\_aaWaa]]`aaaab\_]aaa]baTaZY]Z[\_`aaaa`\_  
@HWI-EAS443:3:71:868:1038#0/1  
GGGGTTCTTCTTGTCTTCCTGATGTGTACTTTTTGATT

+HWI-EAS443:3:71:868:1038#0/1  
¥aZ]S\_a`babbabbaba`a^b^\_]babaaabbbbbbaaab  
@HWI-EAS443:3:71:893:579#0/1  
GCGGGGTTCTTCTCTTGCTTCCTGATGTGTACTTTTTGA  
+HWI-EAS443:3:71:893:579#0/1  
aa`ba`Yaaaaa\_^ba\_\_aa^`\_\_\_\_aVaY]a`a`\_a^\_  
@HWI-EAS443:3:71:984:836#0/1  
GCGGGGTTCTTCTCTTGCTTCCTGATGTGTACTTTTTGA  
+HWI-EAS443:3:71:984:836#0/1  
`b]Qa`aaaa`\_]U^[Zaa]Q[X[¥aQ`Ra\_]aY`YZ  
@HWI-EAS443:3:72:1775:1076#0/1  
CGGGGTTCTTCTCTTGCTTCCTGATGTGTACTTTTTGAT  
+HWI-EAS443:3:72:1775:1076#0/1  
abaaa]bbbaababaa\_aaa^`[\_`\_a^a`\_`\_aabaa¥`a  
@HWI-EAS443:3:72:215:833#0/1  
GGGGTTCTTCTCTTGCTTCCTGATGTGTACTTTTTGATT  
+HWI-EAS443:3:72:215:833#0/1  
ab\_a]abbaaaaaa`aaa\_aa] []a\_\_^\_\_aa`a`[[`^  
@HWI-EAS443:3:72:291:430#0/1  
GGGGTTCTTCTCTTGCTTCCTGATGTGTACTTTTTGATT  
+HWI-EAS443:3:72:291:430#0/1  
ab``]aaaaaaa`a^a`a\_a\_VX^Y^aX\_\_`\_`a\_\_\_\_  
@HWI-EAS443:3:72:380:667#0/1  
AGCGGGGTTCTTCTCTTGCTTCCTGATGTGTACTTTTTG  
+HWI-EAS443:3:72:380:667#0/1  
aaaa\_aUaaaaa^aaa]aa``aaa`a]a]U^a`\_\_`[  
@HWI-EAS443:3:72:442:1754#0/1  
GGGGTTCTTCTCTTGCTTCCTGATGTGTACTTTTTGATT  
+HWI-EAS443:3:72:442:1754#0/1  
aaaa]bbabbababaabaabba`\_aa`a`abaaa`a```  
@HWI-EAS443:3:72:457:290#0/1  
GGGTCTTCTCTTGCTTCCTGATGTGTACTTTTTGATTA  
+HWI-EAS443:3:72:457:290#0/1  
R\_\_J\_^YXXa\_QVT\_W¥\_\_^\_WUJWW\_GW`Y`ab]`b\_^  
@HWI-EAS443:3:72:481:559#0/1  
GCGGGGTTCTTCTCTTGCTTCCTGATGTGTACTTTTTGA  
+HWI-EAS443:3:72:481:559#0/1  
`¥`a`\_^aaaaa`aa`P`aaa`aa\_a^]]`\_a`a`U]  
@HWI-EAS443:3:72:646:1069#0/1  
GGGTCTTCTCTTGCTTCCTGATGTGTACTTTTTGATTA  
+HWI-EAS443:3:72:646:1069#0/1  
`]\_Z``baa`aaaa^aaaaaaa]]^\_¥aaaaaa`````  
@HWI-EAS443:3:72:659:692#0/1  
CGGGGTTCTTCTCTTGCTTCCTGATGTGTACTTTTTGAT  
+HWI-EAS443:3:72:659:692#0/1  
ab`b^Wb\_aaaaaaa`aa[^`\_^aaM]Z]¥aaaa`a\_  
@HWI-EAS443:3:72:701:134#0/1  
GCGGGGTTCTTCTCTTGCTTCCTGATGTGTACTTTTTGA  
+HWI-EAS443:3:72:701:134#0/1  
aab]aZU]`aa[a`a\_a]¥\_\_^\_\_aYH]¥\_Y^^`\_^\_]

@HWI-EAS443:3:72:860:1700#0/1  
CGGGGTTCTTCTTGTCTTCCTGATGTGTACTTTTTGAT  
+HWI-EAS443:3:72:860:1700#0/1  
aaa¥aZZbabb`b¥b\_aaab`\_W\_`\_\_[[aaaa\_`a]a\_  
@HWI-EAS443:3:72:886:1322#0/1  
GGGGTTCTTCTTGTCTTCCTGATGTGTACTTTTTGATT  
+HWI-EAS443:3:72:886:1322#0/1  
`ba\_Wbbb\_abb``\_\_\_a`aaa`a\_a^\_\_`a`aa\_aa\_  
@HWI-EAS443:3:72:908:342#0/1  
AGCGGGGTTCTTCTTGTCTTCCTGATGTGTACTTTTTG  
+HWI-EAS443:3:72:908:342#0/1  
^S`a¥Z¥Q¥ba^a`[[a`[[aaaa`W`a^]`YL`^\_``¥  
@HWI-EAS443:3:73:1061:146#0/1  
GGTTCTTCTTGTCTTCCTGATGTGTACTTTTTGATTAT  
+HWI-EAS443:3:73:1061:146#0/1  
a`W`\_aa`\_]`\_]`^`^Z`^`\_]`\_]XX`\_]`^`^Z`  
@HWI-EAS443:3:73:1193:1249#0/1  
CGGGGTTCTTCTTGTCTTCCTGATGTGTACTTTTTGAT  
+HWI-EAS443:3:73:1193:1249#0/1  
aa`\_]`[aba`\_a^aaa]aa`\_a^[\_`\_]`\_Z`a``[\_```  
@HWI-EAS443:3:73:123:361#0/1  
CGGGGTTCTTCTTGTCTTCCTGATGTGTACTTTTTGAT  
+HWI-EAS443:3:73:123:361#0/1  
a\_WYXQ[`¥`^`\_]`\_]T¥[]^Z¥VWYUZUW^`^`[[LW]  
@HWI-EAS443:3:73:1311:361#0/1  
CGGGGTTCTTCTTGTCTTCCTGATGTGTACTTTTTGAT  
+HWI-EAS443:3:73:1311:361#0/1  
Y\_aab]a¥\_ba`\_Y`b[Wa`Ya`¥^ba\_]aaRZ`babb]\_  
@HWI-EAS443:3:73:1322:1635#0/1  
CGGGGTTCTTCTTGTCTTCCTGATGTGTACTTTTTGAT  
+HWI-EAS443:3:73:1322:1635#0/1  
^a\_bbabbaaa¥L\_aaU`YbWbbaaa^b`aba`aa`aab  
@HWI-EAS443:3:73:1419:169#0/1  
GGGTTCTTCTTGTCTTCCTGATGTGTACTTTTTGATTA  
+HWI-EAS443:3:73:1419:169#0/1  
`YFMa`[[Sa\_a]XZ]aa`U`¥\_]X[0¥Q]`a`a\_]`^]  
@HWI-EAS443:3:73:1620:1300#0/1  
CGGGGTTCTTCTTGTCTTCCTGATGTGTACTTTTTGAT  
+HWI-EAS443:3:73:1620:1300#0/1  
a`^`b`aabbab`baaY`b`Y[\_b```]JXX^a\_aa]¥V^`  
@HWI-EAS443:3:73:312:234#0/1  
AGCGGGGTTCTTCTTGTCTTCCTGATGTGTACTTTTTG  
+HWI-EAS443:3:73:312:234#0/1  
^`a`\_aaa^a``aa`a`\_a`W`\_```[]`\_]`[`NJV]`a¥`\_  
@HWI-EAS443:3:73:430:1331#0/1  
GCGGGGTTCTTCTTGTCTTCCTGATGTGTACTTTTTGA  
+HWI-EAS443:3:73:430:1331#0/1  
aaa[aaWY`[\_aQ[aSa\_aX`]YYO^XYO`GG`\_SS¥[GR  
@HWI-EAS443:3:73:432:303#0/1  
GGGTTCTTCTTGTCTTCCTGATGTGTACTTTTTGATTA

+HWI-EAS443:3:73:432:303#0/1  
a\_aW`aa\_\_a\_a\_\_a`\_\_a¥`\_`W\_Z^`\_`^`\_`\_\_^^\_  
@HWI-EAS443:3:73:515:248#0/1  
AGCGGGGTTCTTCTCTTGTCTTCCTGATGTGTACTTTTTG  
+HWI-EAS443:3:73:515:248#0/1  
[\_Y\_`\_`\_T¥\_U\_aZ]ab\_\_S\_`]Y[ZW]`URYZ\_\_YY]\_Y  
@HWI-EAS443:3:73:668:765#0/1  
GCGGGGTTCTTCTCTTGTCTTCCTGATGTGTACTTTTTGA  
+HWI-EAS443:3:73:668:765#0/1  
Y`babbZbbbababb`\_`ba`aaa`a`\_`a\_\_`\_`aaaa]`  
@HWI-EAS443:3:73:758:471#0/1  
CGGGGTTCTTCTCTTGTCTTCCTGATGTGTACTTTTTGAT  
+HWI-EAS443:3:73:758:471#0/1  
Waa`\_O\_YOX¥b`\_Ja[XVVV]b^[^bXaH¥baa][aa`\_  
@HWI-EAS443:3:73:828:1862#0/1  
CGGGGTTCTTCTCTTGTCTTCCTGATGTGTACTTTTTGAT  
+HWI-EAS443:3:73:828:1862#0/1  
a\_TYIJ\_a\_\_`^^TQNO^KT[ZSX]UUQ\_UVUWU^ZXZZZ  
@HWI-EAS443:3:73:849:1488#0/1  
CGGGGTTCTTCTCTTGTCTTCCTGATGTGTACTTTTTGAT  
+HWI-EAS443:3:73:849:1488#0/1  
`a\_a]`abbbababbaaabaabaaaa\_baa\_abbab^aa  
@HWI-EAS443:3:73:84:595#0/1  
CGGGGTTCTTCTCTTGTCTTCCTGATGTGTACTTTTTGAT  
+HWI-EAS443:3:73:84:595#0/1  
aaaaaXaaaa`\_`a\_\_a]a`^`\_\_\_\_ZVWV^X]^^Y^]]]]\_`  
@HWI-EAS443:3:73:911:1244#0/1  
GGGTTCTTCTCTTGTCTTCCTGATGTGTACTTTTTGATTA  
+HWI-EAS443:3:73:911:1244#0/1  
aab0bbaaba\_ba^aaaaaaaaa]\_`X`\_aaa`a`\_`\_`\_`a  
@HWI-EAS443:3:74:1116:674#0/1  
GCGGGGTTCTTCTCTTGTCTTCCTGATGTGTACTTTTTGA  
+HWI-EAS443:3:74:1116:674#0/1  
a`aa`]\_a\_aa\_a`aa]`\_a`]^a\_^\_a]a\_^Za`\_`\_]]  
@HWI-EAS443:3:74:1288:1069#0/1  
CGGGGTTCTTCTCTTGTCTTCCTGATGTGTACTTTTTGAT  
+HWI-EAS443:3:74:1288:1069#0/1  
abba¥^ba\_bbbbbbbVaabaab`babV\_a¥Y`baa`bbb  
@HWI-EAS443:3:74:157:47#0/1  
CGGGGTTCTTCTCTTGTCTTCCTGATGTGTACTTTTTGAT  
+HWI-EAS443:3:74:157:47#0/1  
ababbHPP\_[a]YY^)`V^^aYbaR]XX`MLFY^aWaBBB  
@HWI-EAS443:3:74:1587:1421#0/1  
GCGGGGTTCTTCTCTTGTCTTCCTGATGTGTACTTTTTGA  
+HWI-EAS443:3:74:1587:1421#0/1  
U¥\_Z`a\_a`a\_\_^¥b`\_]Vab`\_aa^^`V`a]`bbba¥`\_`  
@HWI-EAS443:3:74:1594:1044#0/1  
GGGGTTCTTCTCTTGTCTTCCTGATGTGTACTTTTTGATT  
+HWI-EAS443:3:74:1594:1044#0/1  
ababaabb`bababababb`baa\_baaa\_a`bbbab`aba



@HWI-EAS443:3:74:1624:1426#0/1  
GGGGTTCTTCTTGTCTTCCTGATGTGTACTTTTTGATT  
+HWI-EAS443:3:74:1624:1426#0/1  
a\_QY[``^]a`a\_X\_\_a`\_aaM]^`^\_YYVZ\_a]\_V\$`^  
@HWI-EAS443:3:74:174:408#0/1  
CGGGGTTCTTCTTGTCTTCCTGATGTGTACTTTTTGAT  
+HWI-EAS443:3:74:174:408#0/1  
\_b`abX`aa\_``aa]a`X`\_\_]\_`aa^`[U\$`aa^`^`\_  
@HWI-EAS443:3:74:353:1901#0/1  
CGGGGTTCTTCTTGTCTTCCTGATGTGTACTTTTTGAT  
+HWI-EAS443:3:74:353:1901#0/1  
aba^Q[\$^Z\_ZZ][UTNb`\_]a\_\_WxFNJSpy\_RZSY\_`Z  
@HWI-EAS443:3:74:476:828#0/1  
CGGGGTTCTTCTTGTCTTCCTGATGTGTACTTTTTGAT  
+HWI-EAS443:3:74:476:828#0/1  
^a`^`VH^baa`\_`aa`aa[aba^WSVWaH\$`bba``Y[`  
@HWI-EAS443:3:74:524:724#0/1  
GGGGTTCTTCTTGTCTTCCTGATGTGTACTTTTTGATT  
+HWI-EAS443:3:74:524:724#0/1  
`\_VFDP\_[a^RT\$`\_YK^T^aY`RZU\$[^J\_\_]ZY`TK[]  
@HWI-EAS443:3:74:603:1971#0/1  
GGGGTTCTTCTTGTCTTCCTGATGTGTACTTTTTGATT  
+HWI-EAS443:3:74:603:1971#0/1  
^FZSL`ba\_aab`aa\_ab\_bb[`X^[SaY```a\_`\$T[``]  
@HWI-EAS443:3:74:724:571#0/1  
AGCGGGGTTCTTCTTGTCTTCCTGATGTGTACTTTTTG  
+HWI-EAS443:3:74:724:571#0/1  
`baU\_bbZ\$``Z\_]\_``b\_`Z\_]a`aaaaX^PV^aaa]]Y  
@HWI-EAS443:3:74:747:1426#0/1  
CGGGGTTCTTCTTGTCTTCCTGATGTGTACTTTTTGAT  
+HWI-EAS443:3:74:747:1426#0/1  
aaaaa\$ab`abaaaa\_S\_aaaa`a\_a`][ ]\_`a\_``a[a`  
@HWI-EAS443:3:74:843:272#0/1  
GGTTCTTCTTGTCTTCCTGATGTGTACTTTTTGATTAT  
+HWI-EAS443:3:74:843:272#0/1  
a`]a^aa^a\_aaa]^a\_a\_`a\$XT`^^]aa\_\_`^\_\_^[^  
@HWI-EAS443:3:74:876:680#0/1  
CGGGGTTCTTCTTGTCTTCCTGATGTGTACTTTTTGAT  
+HWI-EAS443:3:74:876:680#0/1  
abba`abbaabaaaa\_aabaaaa``aaa\$a^`aaaa]aa  
@HWI-EAS443:3:74:88:54#0/1  
AGCGGGGTTCTTCTTGTCTTCCTGATGTGTACTTTTTG  
+HWI-EAS443:3:74:88:54#0/1  
\_Z\_a\_`]aaa`\$[^aabW\_`a]^`Y]^`H^QXZ][^\_`S  
@HWI-EAS443:3:75:1120:1667#0/1  
AGCGGGGTTCTTCTTGTCTTCCTGATGTGTACTTTTTG  
+HWI-EAS443:3:75:1120:1667#0/1  
Sabb`WG\$`^]a`b`]`N\$baba^\$[^`R]H^^\_a]^`Y  
@HWI-EAS443:3:75:1336:1614#0/1  
CGGGGTTCTTCTTGTCTTCCTGATGTGTACTTTTTGAT

+HWI-EAS443:3:75:1336:1614#0/1  
ab`a^abbbbabbabbabbbbbbabbba]]ababbbbbb  
@HWI-EAS443:3:75:1552:976#0/1  
GCGGGTTCTTCTTGTCTTCCTGATGTGTACTTTTTGA  
+HWI-EAS443:3:75:1552:976#0/1  
aa`a\_b^babbab¥abba`bbaaa`aabaaaa[aaaaa^a  
@HWI-EAS443:3:75:53:619#0/1  
CGGGTTCTTCTTGTCTTCCTGATGTGTACTTTTTGAT  
+HWI-EAS443:3:75:53:619#0/1  
aabba\_bbbbb`a`ab`baabaaaa`b\_`^\_aaa`aa[aa  
@HWI-EAS443:3:75:674:1386#0/1  
GCGGGTTCTTCTTGTCTTCCTGATGTGTACTTTTTGA  
+HWI-EAS443:3:75:674:1386#0/1  
aa\_`[^[abaaaaa\_`\_a`X`aa\_\_\_`Y`W`\_`[a``^Y  
@HWI-EAS443:3:75:687:202#0/1  
GGGTTCTTCTTGTCTTCCTGATGTGTACTTTTTGATTA  
+HWI-EAS443:3:75:687:202#0/1  
¥^a]^\_`^XU[aa^Uaba^U¥¥aa`VaN]a\_abaaa\_\_\_^  
@HWI-EAS443:3:75:717:397#0/1  
GCGGGTTCTTCTTGTCTTCCTGATGTGTACTTTTTGA  
+HWI-EAS443:3:75:717:397#0/1  
abaab\_N\_ba\_]\_`a``aZaa¥`a`aab\_\_\_^¥Wba`ab^`  
@HWI-EAS443:3:76:1038:1658#0/1  
GCGGGTTCTTCTTGTCTTCCTGATGTGTACTTTTTGA  
+HWI-EAS443:3:76:1038:1658#0/1  
a^^SS^U^]^^Z[U[^`[¥\_`\_\_YSW]]Z^VZX^^ZV^WZ  
@HWI-EAS443:3:76:105:255#0/1  
CGGGTTCTTCTTGTCTTCCTGATGTGTACTTTTTGAT  
+HWI-EAS443:3:76:105:255#0/1  
Zab^^Xabbba\_b`ab`\_\_aba`Y\_a`^VaZ^`\_`^`aa  
@HWI-EAS443:3:76:1396:696#0/1  
CGGGTTCTTCTTGTCTTCCTGATGTGTACTTTTTGAT  
+HWI-EAS443:3:76:1396:696#0/1  
`[aa^^`a`bb\_[``babb`\_a`baa``aa\_X\_a`ba\_ab  
@HWI-EAS443:3:76:1414:156#0/1  
GGGTTCTTCTTGTCTTCCTGATGTGTACTTTTTGATT  
+HWI-EAS443:3:76:1414:156#0/1  
a¥]^Xa]aaY[X¥Z\_¥T^¥VW¥VRVZV\_QUZZ^\_\_]^S]Z  
@HWI-EAS443:3:76:1433:451#0/1  
CGGGTTCTTCTTGTCTTCCTGATGTGTACTTTTTGAT  
+HWI-EAS443:3:76:1433:451#0/1  
ababbababbbbbbabb\_bbbaababaa^bbbbbaba  
@HWI-EAS443:3:76:148:65#0/1  
CGGGTTCTTCTTGTCTTCCTGATGTGTACTTTTTGAT  
+HWI-EAS443:3:76:148:65#0/1  
ab``a\_babaaaabaa^aaaaaa\_\_a\_^`¥Va`aa\_\_`a  
@HWI-EAS443:3:76:1552:1959#0/1  
ATCAAAAAGTACACATCAGGAAGACAAGAGAAGAACCCCG  
+HWI-EAS443:3:76:1552:1959#0/1  
\_][\_aaa``0a¥`V[¥]^`^`\_[\_]\_aU]\_\_^\_a\_]YRVO\_

@HWI-EAS443:3:76:1783:1282#0/1  
CGGGGTTCTTCTTGTCTTCCTGATGTGTACTTTTTGAT  
+HWI-EAS443:3:76:1783:1282#0/1  
S¥`bbUbabbbbab\_ba`babaa\_\_baba``Zbbbb\_ba  
@HWI-EAS443:3:76:224:900#0/1  
GCGGGGTTCTTCTTGTCTTCCTGATGTGTACTTTTTGA  
+HWI-EAS443:3:76:224:900#0/1  
aaba\_`EMNV[YOTX¥¥`XXQYU¥RLW^P\_WY\_Z\_[\_\_]^  
@HWI-EAS443:3:76:249:1124#0/1  
CGGGGTTCTTCTTGTCTTCCTGATGTGTACTTTTTGAT  
+HWI-EAS443:3:76:249:1124#0/1  
aaabbabbbbabbbbaababaaaa`ab\_a^``aaaaZaa  
@HWI-EAS443:3:76:762:1391#0/1  
GCGGGGTTCTTCTTGTCTTCCTGATGTGTACTTTTTGA  
+HWI-EAS443:3:76:762:1391#0/1  
abZa`a0Z`a\_\_`\_\_\_\_¥]\_\_^^WU\_^^V\_^TQX¥^][XY  
@HWI-EAS443:3:76:854:325#0/1  
CGGGGTTCTTCTTGTCTTCCTGATGTGTACTTTTTGAT  
+HWI-EAS443:3:76:854:325#0/1  
^`aba^`b`b\_aaa`a¥\_ab`^^¥\_^a]`[\_]\_`^\_`^^a  
@HWI-EAS443:3:76:889:598#0/1  
GCGGGGTTCTTCTTGTCTTCCTGATGTGTACTTTTTGA  
+HWI-EAS443:3:76:889:598#0/1  
a^\_\_VVO\_W\_SKN[\_¥RO¥¥TTKTSUTLQOFSNPWX]¥FB  
@HWI-EAS443:3:76:944:740#0/1  
GGGGTTCTTCTTGTCTTCCTGATGTGTACTTTTTGATT  
+HWI-EAS443:3:76:944:740#0/1  
`abbUbaaa``aa`b\_aaabaab^¥a\_``aaaaab]¥a`  
@HWI-EAS443:3:77:1416:281#0/1  
CGGGGTTCTTCTTGTCTTCCTGATGTGTACTTTTTGAT  
+HWI-EAS443:3:77:1416:281#0/1  
a`¥`b]b[babbKab`bXb`aabba\_aabbaXbbbbbb\_bb  
@HWI-EAS443:3:77:1742:886#0/1  
GGTTCTTCTTGTCTTCCTGATGTGTACTTTTTGATTAT  
+HWI-EAS443:3:77:1742:886#0/1  
a¥F^`\_babaaaa`bb``a]aabYW¥a¥`aaaa]\_aa`]  
@HWI-EAS443:3:77:1757:1016#0/1  
CGGGGTTCTTCTTGTCTTCCTGATGTGTACTTTTTGAT  
+HWI-EAS443:3:77:1757:1016#0/1  
IV^bb\_babbbbabbaabbbaba``^X`bb^bbbbbb`I[b  
@HWI-EAS443:3:77:415:673#0/1  
CGGGGTTCTTCTTGTCTTCCTGATGTGTACTTTTTGAT  
+HWI-EAS443:3:77:415:673#0/1  
abbaa¥`a``^bbba^^aabbbaaaaZ[a[a\_aaaa\_Z^  
@HWI-EAS443:3:77:506:789#0/1  
GGTTCTTCTTGTCTTCCTGATGTGTACTTTTTGATTAT  
+HWI-EAS443:3:77:506:789#0/1  
aa\_a]baaaaa`aaaaaab`ab`]\_``babaa`\_aa``  
@HWI-EAS443:3:77:839:1526#0/1  
GGTTCTTCTTGTCTTCCTGATGTGTACTTTTTGATTAT

+HWI-EAS443:3:77:839:1526#0/1  
a\_^baaa`aaa\_``a][aaa`\_a\_aX`Za\_`\_`^a\_\_`\_  
@HWI-EAS443:3:78:1091:567#0/1  
CGGGGTTCTTCTTGTCTTCCTGATGTGTACTTTTTGAT  
+HWI-EAS443:3:78:1091:567#0/1  
]¥[a`\_`a`babaW\_b\_]ZaY¥`aT`bSa]\_¥¥aaaaX¥a  
@HWI-EAS443:3:78:1182:49#0/1  
CGGGGTTCTTCTTGTCTTCCTGATGTGTACTTTTTGAT  
+HWI-EAS443:3:78:1182:49#0/1  
¥abbbab\_\_b\_]bbababb\_Xa``bbY`¥aabbaab`]a  
@HWI-EAS443:3:78:1205:898#0/1  
GGGTTCTTCTTGTCTTCCTGATGTGTACTTTTTGATTA  
+HWI-EAS443:3:78:1205:898#0/1  
a`a^a`aa\_a\_a\_\_\_]a`\_a`\_W\_a^\_^\_]a\_aa`^^`\_\_  
@HWI-EAS443:3:78:1539:1109#0/1  
GCGGGTCTTCTTGTCTTCCTGATGTGTACTTTTTGA  
+HWI-EAS443:3:78:1539:1109#0/1  
a^a]ZPM¥SYa\_]YZ``[Ra\_]QVQW^¥[[PXZ`][`¥[[  
@HWI-EAS443:3:78:1648:1572#0/1  
GCGGGTCTTCTTGTCTTCCTGATGTGTACTTTTTGA  
+HWI-EAS443:3:78:1648:1572#0/1  
\_\_aaa]aYL[[\_a`\_aaIUa\_]\_]LY`\_^¥aR`a\_`YR¥  
@HWI-EAS443:3:78:1666:1845#0/1  
CGGGGTTCTTCTTGTCTTCCTGATGTGTACTTTTTGAT  
+HWI-EAS443:3:78:1666:1845#0/1  
^baab\_bVaa\_b^abaa]ba[\_a`]¥b`a]a\_bbaaa`]b  
@HWI-EAS443:3:78:1723:1261#0/1  
CGGGGTTCTTCTTGTCTTCCTGATGTGTACTTTTTGAT  
+HWI-EAS443:3:78:1723:1261#0/1  
abab`\_baaaaa\_aab`aabaW`]`aZ¥Y^aaaaa``a  
@HWI-EAS443:3:78:252:471#0/1  
CGGGGTTCTTCTTGTCTTCCTGATGTGTACTTTTTGAT  
+HWI-EAS443:3:78:252:471#0/1  
aa]\_[¥aaa¥aK^a\_a¥aaYa\_]Z¥adWaG[¥aX\_\_\_\_\_^  
@HWI-EAS443:3:78:522:1168#0/1  
GCGGGTCTTCTTGTCTTCCTGATGTGTACTTTTTGA  
+HWI-EAS443:3:78:522:1168#0/1  
`bb`baRabbab`baba`ababa`Z`aa\_a\_\_\_aaa`aa\_  
@HWI-EAS443:3:78:662:1652#0/1  
ATCAAAAAGTACACATCAGGAAGACAAGAGAAGAACCCCG  
+HWI-EAS443:3:78:662:1652#0/1  
aabaaaa\_a^aaaaaaaa```a`aaa\_\_\_\_\_a`W`\_`\_]\_`  
@HWI-EAS443:3:78:69:481#0/1  
GGGTTCTTCTTGTCTTCCTGATGTGTACTTTTTGATT  
+HWI-EAS443:3:78:69:481#0/1  
`\_R¥ME[`Ra¥MRVYJ[ZRVUXPNSULTFQVVY[]VWZZP  
@HWI-EAS443:3:78:725:802#0/1  
GCGGGTCTTCTTGTCTTCCTGATGTGTACTTTTTGA  
+HWI-EAS443:3:78:725:802#0/1  
a`bbababbbbbbababaaa\_abbba`baa`\_`abaabbaa

@HWI-EAS443:3:78:853:1842#0/1  
GGGGTTCTTCTTGTCTTCCTGATGTGTACTTTTTGATT  
+HWI-EAS443:3:78:853:1842#0/1  
Vb]RWbbaababaaa\_a\_ab`aW`aa[aa`a`\_V`\_^  
@HWI-EAS443:3:78:893:458#0/1  
GGGGTTCTTCTTGTCTTCCTGATGTGTACTTTTTGATTA  
+HWI-EAS443:3:78:893:458#0/1  
]OSWaaa][`^`¥]Xaa`aa\_V\_a]`][`\_a`\_^`\_^`\_^]  
@HWI-EAS443:3:79:1042:1486#0/1  
CGGGGTCTTCTTGTCTTCCTGATGTGTACTTTTTGAT  
+HWI-EAS443:3:79:1042:1486#0/1  
a`^aaZ^b`ab\_ab`b`bbaaa`a`\_b`aaa]aaaa\_Y\_a  
@HWI-EAS443:3:79:128:522#0/1  
CGGGGTCTTCTTGTCTTCCTGATGTGTACTTTTTGAT  
+HWI-EAS443:3:79:128:522#0/1  
[\_OY[T]X\_ZY]`PP[LT¥RZYXW^G^Q¥L[]Z\_a`YYVX  
@HWI-EAS443:3:79:1344:309#0/1  
GCGGGTCTTCTTGTCTTCCTGATGTGTACTTTTTGA  
+HWI-EAS443:3:79:1344:309#0/1  
a`abbb`babb\_aabbbbabba`bbaaa]b`^[bbaaa[\_  
@HWI-EAS443:3:79:1448:149#0/1  
CGGGGTCTTCTTGTCTTCCTGATGTGTACTTTTTGAT  
+HWI-EAS443:3:79:1448:149#0/1  
abbaSK`Ya`bb`bbbbbaZaaa`aaa^aaa\_b^baa`aa  
@HWI-EAS443:3:79:1474:1662#0/1  
ATCAAAAAGTACACATCAGGAAGACAAGAGAAGAACCCCG  
+HWI-EAS443:3:79:1474:1662#0/1  
abb\_ba\_`^¥ba]aaaaabaa`\_a`a^aabaaaaaYS\_Ya  
@HWI-EAS443:3:79:1643:749#0/1  
CGGGGTCTTCTTGTCTTCCTGATGTGTACTTTTTGAT  
+HWI-EAS443:3:79:1643:749#0/1  
aaabb\_bbbbababbbabbaaabbbb`bbababbbb^bb  
@HWI-EAS443:3:79:1655:1651#0/1  
GGTTCTTCTTGTCTTCCTGATGTGTACTTTTTGATTAT  
+HWI-EAS443:3:79:1655:1651#0/1  
a`W\_Ybbb\_TbabT\_K[Y\_aSW^bXaPYaa^bJb¥a[[Z¥  
@HWI-EAS443:3:79:265:1517#0/1  
GCGGGTCTTCTTGTCTTCCTGATGTGTACTTTTTGA  
+HWI-EAS443:3:79:265:1517#0/1  
ab^^X¥X^babaabaa`aaY^]aa\_T¥a`^W]aa\_a`a[W  
@HWI-EAS443:3:79:265:2019#0/1  
GCGGGTCTTCTTGTCTTCCTGATGTGTACTTTTTGA  
+HWI-EAS443:3:79:265:2019#0/1  
abZ^^[]aa^`aaaa`\_]aT`aaZW\_U¥Z\_W[^[¥`¥SV^  
@HWI-EAS443:3:79:507:1853#0/1  
GCGGGTCTTCTTGTCTTCCTGATGTGTACTTTTTGA  
+HWI-EAS443:3:79:507:1853#0/1  
ab`aa]]``aaaaba\_a^aaaa`\_`\_`\_]a`\_a`\_a  
@HWI-EAS443:3:79:750:717#0/1  
GCGGGTCTTCTTGTCTTCCTGATGTGTACTTTTTGA

+HWI-EAS443:3:79:750:717#0/1  
abbab`^babbabbb`bbabbabba`baaaa`aab`  
@HWI-EAS443:3:79:909:1640#0/1  
CGGGGTTCTTCTTGTCTTCCTGATGTGTACTTTTTGAT  
+HWI-EAS443:3:79:909:1640#0/1  
a`¥\_babbb`a`Vab\_`bbba`aaabb]^`aabbbabSbb  
@HWI-EAS443:3:79:951:1430#0/1  
CGGGGTTCTTCTTGTCTTCCTGATGTGTACTTTTTGAT  
+HWI-EAS443:3:79:951:1430#0/1  
a`aab]bbbbaba`a`Zabab`abZba`a`aaaaa[a¥  
@HWI-EAS443:3:79:982:1736#0/1  
CGGGGTTCTTCTTGTCTTCCTGATGTGTACTTTTTGAT  
+HWI-EAS443:3:79:982:1736#0/1  
ab`aaaaabbababaa`bbaaab`aa`\_b^a\_babaa[ab  
@HWI-EAS443:3:7:1148:251#0/1  
GCGGGTCTTCTTGTCTTCCTGATGTGTACTTTTTGA  
+HWI-EAS443:3:7:1148:251#0/1  
a`babaQ`¥aa^a^aaa¥T`aUY`aX\_`]^`^X\_\_`^X[  
@HWI-EAS443:3:7:1162:1599#0/1  
GGGTTCTTCTTGTCTTCCTGATGTGTACTTTTTGATTA  
+HWI-EAS443:3:7:1162:1599#0/1  
a`¥ZaSa]\_a[a^a\_\_\_a\_Z^Z¥ZZXa[[^\_\_[^`\_`VXB  
@HWI-EAS443:3:7:138:49#0/1  
GCGGGTCTTCTTGTCTTCCTGATGTGTACTTTTTGA  
+HWI-EAS443:3:7:138:49#0/1  
aaSQ¥\_GWNWZVWUZ]`NXPVRRZ[YS¥W]UJGS][STPB  
@HWI-EAS443:3:7:1403:532#0/1  
CGGGGTTCTTCTTGTCTTCCTGATGTGTACTTTTTGAT  
+HWI-EAS443:3:7:1403:532#0/1  
abbab`aba`aba`aaaaba^aa^aa]a]]aa`]aa`\_  
@HWI-EAS443:3:7:1431:1144#0/1  
GCGGGTCTTCTTGTCTTCCTGATGTGTACTTTTTGA  
+HWI-EAS443:3:7:1431:1144#0/1  
`ab`aaY\_]`bab\_baba]a`YM^a\_aaaa`\_[aaaa[\_  
@HWI-EAS443:3:7:1438:1601#0/1  
CGGGGTTCTTCTTGTCTTCCTGATGTGTACTTTTTGAT  
+HWI-EAS443:3:7:1438:1601#0/1  
\_bbb¥0`Zaba\_\_aaY^b\_abVbbaabab]a\_bbbbb\_aa  
@HWI-EAS443:3:7:292:1050#0/1  
GGGTTCTTCTTGTCTTCCTGATGTGTACTTTTTGATTA  
+HWI-EAS443:3:7:292:1050#0/1  
a\_aZaaaa`ba`aa`aaa\_a^`\_]\_W^Sa\_``\_¥`\_\_\_\_  
@HWI-EAS443:3:7:53:455#0/1  
ATCAAAAAGTACACATCAGGAAGACAAGAGAAGAACCCCG  
+HWI-EAS443:3:7:53:455#0/1  
aaba`]X^a^aaaa`a\_baaab^`\_\_a\_a\_aaa`\_`\_\_`  
@HWI-EAS443:3:7:881:1098#0/1  
GCGGGTCTTCTTGTCTTCCTGATGTGTACTTTTTGA  
+HWI-EAS443:3:7:881:1098#0/1  
a```[YFT]`a\_UUTO¥N]¥W\_]`^¥FXaW]VRHY\_^]\_\_Y

@HWI-EAS443:3:7:964:672#0/1  
GCGGGTTCTTCTTGTCTTCCTGATGTGTACTTTTTGA  
+HWI-EAS443:3:7:964:672#0/1  
a`\_]\_aaI`^aa\_a¥aa`ZXa\_0X`aZ\_`^`^]W^X`[\_^]  
@HWI-EAS443:3:7:980:1227#0/1  
GCGGGTTCTTCTTGTCTTCCTGATGTGTACTTTTTGAT  
+HWI-EAS443:3:7:980:1227#0/1  
abb`\_`SWbababa`bb\_ab`\_¥a\_aab\_b`a\_bbbabY`a  
@HWI-EAS443:3:80:1328:1370#0/1  
AGCGGGTTCTTCTTGTCTTCCTGATGTGTACTTTTTG  
+HWI-EAS443:3:80:1328:1370#0/1  
abbbab`]a`bb\_a`baaa`aa``aa`a`^a\_`^aaaa\_  
@HWI-EAS443:3:80:135:2012#0/1  
GCGGGTTCTTCTTGTCTTCCTGATGTGTACTTTTTGA  
+HWI-EAS443:3:80:135:2012#0/1  
ab]Z`a`\_aa]bbaabaTV\_aba`\_`\_`G`Z]^`\_\_aaYa  
@HWI-EAS443:3:80:1736:1613#0/1  
GCGGGTTCTTCTTGTCTTCCTGATGTGTACTTTTTGAT  
+HWI-EAS443:3:80:1736:1613#0/1  
aaba`ab`bbba\_bbbaabba`b`aaaa\_aaabbbb\_aa  
@HWI-EAS443:3:80:304:206#0/1  
GCGGGTTCTTCTTGTCTTCCTGATGTGTACTTTTTGAT  
+HWI-EAS443:3:80:304:206#0/1  
Va`¥WT¥`¥¥a^abbaX[a\_Z]\_VX]\_I]VR[]``]^]]  
@HWI-EAS443:3:80:460:898#0/1  
GCGGGTTCTTCTTGTCTTCCTGATGTGTACTTTTTGAT  
+HWI-EAS443:3:80:460:898#0/1  
a`bba\_\_`\_aaaaaaaaaaaaaaaaaaaa^a\_``aaaa`]`a  
@HWI-EAS443:3:80:821:901#0/1  
GCGGGTTCTTCTTGTCTTCCTGATGTGTACTTTTTGA  
+HWI-EAS443:3:80:821:901#0/1  
abaaaa\_aabaaa`aaa`aaaaaa`a```a^`\_aaaa`a  
@HWI-EAS443:3:80:966:1134#0/1  
GGGGTTCTTCTTGTCTTCCTGATGTGTACTTTTTGATT  
+HWI-EAS443:3:80:966:1134#0/1  
\_````]\_\_^Y¥a¥`¥ZU¥b]V\_`^X``]^[Z¥]a¥^^ZZ`V  
@HWI-EAS443:3:81:1083:174#0/1  
GCGGGTTCTTCTTGTCTTCCTGATGTGTACTTTTTGAT  
+HWI-EAS443:3:81:1083:174#0/1  
ab`ba`baba]b\_abbaa`aab¥aab\_a``[aaaab^aa  
@HWI-EAS443:3:81:1144:109#0/1  
GGGTCTTCTTGTCTTCCTGATGTGTACTTTTTGATTA  
+HWI-EAS443:3:81:1144:109#0/1  
aba[a`ab\_a`baa`\_aba`aaaa\_\_a]^Xaaa`a^]``\_  
@HWI-EAS443:3:81:1179:695#0/1  
GGGTCTTCTTGTCTTCCTGATGTGTACTTTTTGATTA  
+HWI-EAS443:3:81:1179:695#0/1  
aa¥J¥]VYSR]ZZ¥QTVW^X^aZ^^GWNPL[aSY[NUX]N  
@HWI-EAS443:3:81:1276:254#0/1  
GGGGTTCTTCTTGTCTTCCTGATGTGTACTTTTTGATT

+HWI-EAS443:3:81:1276:254#0/1  
`bba[baab]b`aaba^bb\_\_bba` `\_baa\_aaaaa`aa  
@HWI-EAS443:3:81:1336:644#0/1  
CGGGGTTCTTCTTGTCTTCCTGATGTGTACTTTTTGAT  
+HWI-EAS443:3:81:1336:644#0/1  
abbaabbbbababaaabbbbaabbaaa`aaa`bbbab`ab  
@HWI-EAS443:3:81:1355:910#0/1  
GGGGTTCCTTCTTGTCTTCCTGATGTGTACTTTTTGATT  
+HWI-EAS443:3:81:1355:910#0/1  
abWP^^T\_b[RR^[]\_[W[VVb`aWaG[V^PNVP\_^\_]aB  
@HWI-EAS443:3:81:147:115#0/1  
GGGTTCCTTCTTGTCTTCCTGATGTGTACTTTTTGATTA  
+HWI-EAS443:3:81:147:115#0/1  
aaa¥aaaa`a`aaa^aa`\_```\_`a^a^\_^\_\_aaa\_^a[¥  
@HWI-EAS443:3:81:1492:198#0/1  
GCGGGTTCCTTCTTGTCTTCCTGATGTGTACTTTTTGA  
+HWI-EAS443:3:81:1492:198#0/1  
a\_^aa^Wb^]a\_\_U\_a^\_R]]TT]^Z]Y¥X¥YY\_a\_^¥RW  
@HWI-EAS443:3:81:1576:880#0/1  
CGGGGTTCTTCTTGTCTTCCTGATGTGTACTTTTTGAT  
+HWI-EAS443:3:81:1576:880#0/1  
ab\_a^¥¥[\_¥\_b]\_¥\_Zaaa^Zzb^a`T¥[ZI\_]`^YSY`  
@HWI-EAS443:3:81:158:619#0/1  
GCGGGTTCCTTCTTGTCTTCCTGATGTGTACTTTTTGA  
+HWI-EAS443:3:81:158:619#0/1  
aa\_Z^a\_aa`\_^`]a]\_a```a`\_WY`P]PQY`¥^\_^YS  
@HWI-EAS443:3:81:1637:1585#0/1  
CGGGGTTCTTCTTGTCTTCCTGATGTGTACTTTTTGAT  
+HWI-EAS443:3:81:1637:1585#0/1  
]bb`V\_baba^a\_abaVXb\_bbbbbab`b^]abaaaaV`a  
@HWI-EAS443:3:81:212:1328#0/1  
GCGGGTTCCTTCTTGTCTTCCTGATGTGTACTTTTTGA  
+HWI-EAS443:3:81:212:1328#0/1  
aba\_aa\_^a\_aba]a`\_N`¥`bb`XaV[V\_\_a^¥^V\_\_^\_  
@HWI-EAS443:3:81:438:1137#0/1  
CGGGGTTCTTCTTGTCTTCCTGATGTGTACTTTTTGAT  
+HWI-EAS443:3:81:438:1137#0/1  
a¥```[aaaa`\_a``````^\_XV[^]\_\_\_^`^¥\_`^  
@HWI-EAS443:3:81:457:453#0/1  
CGGGGTTCTTCTTGTCTTCCTGATGTGTACTTTTTGAT  
+HWI-EAS443:3:81:457:453#0/1  
a```aYaaaaaaaaa^\_aaaaa`a]a]\_^````a\_\_`  
@HWI-EAS443:3:81:926:796#0/1  
CGGGGTTCTTCTTGTCTTCCTGATGTGTACTTTTTGAT  
+HWI-EAS443:3:81:926:796#0/1  
aa`a¥¥a\_a]Zbaa`^`a\_]ZZZ[]a]a\_\_[aa[``[^a  
@HWI-EAS443:3:82:1012:1083#0/1  
GGGGTTCCTTCTTGTCTTCCTGATGTGTACTTTTTGATT  
+HWI-EAS443:3:82:1012:1083#0/1  
aWXVPTV\_¥\_aa^\_NN¥\_a[]\_\_XT]]\_U^[`\_aa`[Z\_^



@HWI-EAS443:3:82:1077:1259#0/1  
CGGGGTTCTTCTTGTCTTCCTGATGTGTACTTTTTGAT  
+HWI-EAS443:3:82:1077:1259#0/1  
abaa`^abbbaaaabbaaa\_`aa`aa^a\_\_aaaaa\_`a  
@HWI-EAS443:3:82:277:1121#0/1  
GCGGGTCTTCTTGTCTTCCTGATGTGTACTTTTTGA  
+HWI-EAS443:3:82:277:1121#0/1  
]a`)]`[D^`baabbba`aa`bbaba\_\_Wb^aabaabaa  
@HWI-EAS443:3:82:391:1873#0/1  
CGGGGTTCTTCTTGTCTTCCTGATGTGTACTTTTTGAT  
+HWI-EAS443:3:82:391:1873#0/1  
\_b`\_a]`aaaaabaaabaaaaa\_[\_aaaaa\_Zaa  
@HWI-EAS443:3:82:615:560#0/1  
CGGGGTTCTTCTTGTCTTCCTGATGTGTACTTTTTGAT  
+HWI-EAS443:3:82:615:560#0/1  
`b`VaJ]\_Z]^aaaab\_X`\_baa¥a`]^a`aa\_``^Y\_\_  
@HWI-EAS443:3:82:636:748#0/1  
CGGGGTTCTTCTTGTCTTCCTGATGTGTACTTTTTGAT  
+HWI-EAS443:3:82:636:748#0/1  
^`abaababbaabbbb]abbbbbba`[]baaabab`baba  
@HWI-EAS443:3:82:691:254#0/1  
GCGGGTCTTCTTGTCTTCCTGATGTGTACTTTTTGA  
+HWI-EAS443:3:82:691:254#0/1  
aabaaa\_a\_bb\_aaabb\_aaaaa]``a\_a``^aa`aa]\_  
@HWI-EAS443:3:82:70:1512#0/1  
CGGGGTTCTTCTTGTCTTCCTGATGTGTACTTTTTGAT  
+HWI-EAS443:3:82:70:1512#0/1  
`¥VWFU`aXabY\_bY`\_b`]`a`V`W\_T\_[]aa\_a]`[^\_  
@HWI-EAS443:3:83:1004:1310#0/1  
GCGGGTCTTCTTGTCTTCCTGATGTGTACTTTTTGA  
+HWI-EAS443:3:83:1004:1310#0/1  
\_abbaabbbbbbbbbbaabbbUbabab`]ab`bbbb`a  
@HWI-EAS443:3:83:1050:87#0/1  
GGGGTCTTCTTGTCTTCCTGATGTGTACTTTTTGATT  
+HWI-EAS443:3:83:1050:87#0/1  
aa]WS`^`\_[]\_Z\_^XQY\_^YV\_]RW^W]WSP^[]`YVYZZ  
@HWI-EAS443:3:83:1054:64#0/1  
GGGGTCTTCTTGTCTTCCTGATGTGTACTTTTTGATT  
+HWI-EAS443:3:83:1054:64#0/1  
ababJ^aa[S^Laa[]aa`RU`W\_\_\_]PVP\_\_a`\_[Y\_\_  
@HWI-EAS443:3:83:396:461#0/1  
GGGTCTTCTTGTCTTCCTGATGTGTACTTTTTGATTA  
+HWI-EAS443:3:83:396:461#0/1  
aba`bbbaabbbbbbaab\_aaabaaa\_a^`\_aa`a\_\_`a  
@HWI-EAS443:3:83:396:517#0/1  
CGGGGTTCTTCTTGTCTTCCTGATGTGTACTTTTTGAT  
+HWI-EAS443:3:83:396:517#0/1  
ab\_aa\_aaaaa`aab\_aaaa`aa\_`aW\_^`¥aaaa\_``a  
@HWI-EAS443:3:83:518:678#0/1  
ATCAAAAAGTACACATCAGGAAGACAAGAGAAGAACCCCG

+HWI-EAS443:3:83:518:678#0/1  
`baa^aaa^0^abaa\_a\_aaaba` `]Zaaa¥aa`b\_a\_\_a  
@HWI-EAS443:3:83:627:1004#0/1  
GCGGGTTCTTCTTGTCTTCCTGATGTGTACTTTTTGA  
+HWI-EAS443:3:83:627:1004#0/1  
aababaYOX^aaa¥a\_a\_a`a]\_a]\_^]][\_aaa\_aaZ[  
@HWI-EAS443:3:84:1036:1232#0/1  
CGGGTTCTTCTTGTCTTCCTGATGTGTACTTTTTGAT  
+HWI-EAS443:3:84:1036:1232#0/1  
`aa`bX\_\_abbbbbbaabaababbaaaaa`aaabb`]^a  
@HWI-EAS443:3:84:1211:320#0/1  
CGGGTTCTTCTTGTCTTCCTGATGTGTACTTTTTGAT  
+HWI-EAS443:3:84:1211:320#0/1  
abbbb\_baba^b\_aaa`]aa\_aaaaa]a\_`^aaaaa\_a  
@HWI-EAS443:3:84:1465:696#0/1  
CGGGTTCTTCTTGTCTTCCTGATGTGTACTTTTTGAT  
+HWI-EAS443:3:84:1465:696#0/1  
abba`ababbababba`ab\_aa`aaa^b\_a`bbbab` `b  
@HWI-EAS443:3:84:1474:1456#0/1  
GCGGGTTCTTCTTGTCTTCCTGATGTGTACTTTTTGA  
+HWI-EAS443:3:84:1474:1456#0/1  
aa` ``YL[ZZ]WSOQ¥ZXTR\_¥`¥]¥P¥NRRXS[`Y^[XN  
@HWI-EAS443:3:84:212:734#0/1  
GCGGGTTCTTCTTGTCTTCCTGATGTGTACTTTTTGA  
+HWI-EAS443:3:84:212:734#0/1  
aa`aaaYaanaa` `\_adW` ``aa` `]\_`]^]\_`a\_\_\_\_\_`  
@HWI-EAS443:3:84:409:829#0/1  
CGGGTTCTTCTTGTCTTCCTGATGTGTACTTTTTGAT  
+HWI-EAS443:3:84:409:829#0/1  
ab\_bZJb^S\_W\_Yaaa]UH[aW[QUY\_M[S[]U\_]aaYZ  
@HWI-EAS443:3:84:412:1081#0/1  
CGGGTTCTTCTTGTCTTCCTGATGTGTACTTTTTGAT  
+HWI-EAS443:3:84:412:1081#0/1  
a]\_]\_U`aa¥TYaa`XP^U[Y¥OXRTVRTLKTWYSXWVS^  
@HWI-EAS443:3:84:425:1841#0/1  
GGTTCTTCTTGTCTTCCTGATGTGTACTTTTTGATTA  
+HWI-EAS443:3:84:425:1841#0/1  
abaY`abbbba`aaabb`babaa^a^`^aaaba`a`aaba  
@HWI-EAS443:3:84:827:349#0/1  
GGTTCTTCTTGTCTTCCTGATGTGTACTTTTTGATTA  
+HWI-EAS443:3:84:827:349#0/1  
aa^R^^^`^aaa\_a[\_aY`^aY]ab]^`^\_Uaa`\_a`[\_\_\_\_  
@HWI-EAS443:3:85:1106:1028#0/1  
CGGGTTCTTCTTGTCTTCCTGATGTGTACTTTTTGAT  
+HWI-EAS443:3:85:1106:1028#0/1  
\_a`b]W` ``\_`bbaabY[a\_b^baa]aXb\_X\_babbbaba  
@HWI-EAS443:3:85:272:1101#0/1  
AGCGGGTTCTTCTTGTCTTCCTGATGTGTACTTTTTG  
+HWI-EAS443:3:85:272:1101#0/1  
a]`WPY][RV` `^` `` ` `Y\_]YVXZ]T]\_¥\_][\_\_\_\_][WK

@HWI-EAS443:3:85:573:1048#0/1  
CGGGGTTCTTCTTGTCTTCCTGATGTGTACTTTTTGAT  
+HWI-EAS443:3:85:573:1048#0/1  
abbbb\_bbbbabbbbabbbaabaaaa\_[\_aaaaaa\_`a  
@HWI-EAS443:3:85:642:247#0/1  
CGGGGTTCTTCTTGTCTTCCTGATGTGTACTTTTTGAT  
+HWI-EAS443:3:85:642:247#0/1  
aaaba]aaaa`aa`aaZ`a`^aaa`\_a¥a^^`\_`\_`\_`\_\_\_\_  
@HWI-EAS443:3:85:709:605#0/1  
CGGGGTTCTTCTTGTCTTCCTGATGTGTACTTTTTGAT  
+HWI-EAS443:3:85:709:605#0/1  
abba]F]aa[aaaa`a\_`a`\_a`^^^aYa]XWa\_ba`aaa  
@HWI-EAS443:3:85:838:521#0/1  
GCGGGGTTCTTCTTGTCTTCCTGATGTGTACTTTTTGA  
+HWI-EAS443:3:85:838:521#0/1  
\_T¥^WXNVW^`X[Q\_UTHaaa`]W]NST\_R[aU`[\_]]SX  
@HWI-EAS443:3:86:1164:511#0/1  
GGGTTCTTCTTGTCTTCCTGATGTGTACTTTTTGATTA  
+HWI-EAS443:3:86:1164:511#0/1  
aba\_b`bbababbbaabbaaaaaab`a\_aaaaaaa\_aaa  
@HWI-EAS443:3:86:1733:489#0/1  
CGGGGTTCTTCTTGTCTTCCTGATGTGTACTTTTTGAT  
+HWI-EAS443:3:86:1733:489#0/1  
abaaXaaU]`X`]b¥`Ybb0^Ua^S^aa]b\_Ubbbbb^b]  
@HWI-EAS443:3:86:252:618#0/1  
AGCGGGGTTCTTCTTGTCTTCCTGATGTGTACTTTTTG  
+HWI-EAS443:3:86:252:618#0/1  
^HWbb`\_Sa`aaaa`ba`aa\_a\_^\_¥a`W]a`Y\_a\_\_\_  
@HWI-EAS443:3:86:375:940#0/1  
CGGGGTTCTTCTTGTCTTCCTGATGTGTACTTTTTGAT  
+HWI-EAS443:3:86:375:940#0/1  
abb`b`aabbbaab`aaaa`abaaaa\_a\_aaaaaaa`a`  
@HWI-EAS443:3:86:565:206#0/1  
CGGGGTTCTTCTTGTCTTCCTGATGTGTACTTTTTGAT  
+HWI-EAS443:3:86:565:206#0/1  
abbbb\_aaababbbbabbbaabaaaa\_a`aVbaaabaaa  
@HWI-EAS443:3:86:708:1287#0/1  
CGGGGTTCTTCTTGTCTTCCTGATGTGTACTTTTTGAT  
+HWI-EAS443:3:86:708:1287#0/1  
abb[babbbbaaabba`bb`abbbbaaab]`\_b`aba¥ab  
@HWI-EAS443:3:86:75:1328#0/1  
AGCGGGGTTCTTCTTGTCTTCCTGATGTGTACTTTTTG  
+HWI-EAS443:3:86:75:1328#0/1  
a`a\_\_\_\_ZG¥^^\_¥a\_\_\_\_Y]a]^`\_\_]^\_]^XX\_]YX\_S  
@HWI-EAS443:3:86:772:60#0/1  
GGGGTTCTTCTTGTCTTCCTGATGTGTACTTTTTGATT  
+HWI-EAS443:3:86:772:60#0/1  
abaa]aaa¥`a\_a^^Z^aaW]`a^`^\_¥]UY^]`]\_\_^\_]`  
@HWI-EAS443:3:87:1005:1192#0/1  
GCGGGGTTCTTCTTGTCTTCCTGATGTGTACTTTTTGA

+HWI-EAS443:3:87:1005:1192#0/1  
a[aXLZPP]]UG\_W\_[¥SRNTR\_\_OR\_\_S`QQ^¥\_V\_^0[  
@HWI-EAS443:3:87:1081:614#0/1  
GCGGGTTCTTCTCTTGCTTCCTGATGTGTACTTTTTGA  
+HWI-EAS443:3:87:1081:614#0/1  
aabba]Yaaaa^b\_baa`aa`aa\_aa]`\_\_`aaaaV^  
@HWI-EAS443:3:87:1130:1340#0/1  
GGGTTCTTCTTGTCTTCCTGATGTGTACTTTTTGATTA  
+HWI-EAS443:3:87:1130:1340#0/1  
`a00^¥\_WYXV^\_ZT¥`YQ0¥¥^Y¥ONMGQX^SRW^\_Y[]  
@HWI-EAS443:3:87:1205:592#0/1  
CGGGTTCTTCTTGTCTTCCTGATGTGTACTTTTTGAT  
+HWI-EAS443:3:87:1205:592#0/1  
UabbbH`b\_ab]aab`\_aa\_bbaaaabaaaGbabbbaab  
@HWI-EAS443:3:87:127:1454#0/1  
GGTTCTTCTTGTCTTCCTGATGTGTACTTTTTGATTAT  
+HWI-EAS443:3:87:127:1454#0/1  
a\_^bbab[bb\_baaabbb\_ab```\_[]]bbUb\_b`a\_`^a  
@HWI-EAS443:3:87:1532:773#0/1  
CGGGTTCTTCTTGTCTTCCTGATGTGTACTTTTTGAT  
+HWI-EAS443:3:87:1532:773#0/1  
ab`aaabbbba[`bbbabb`abbbb`bbbabbbbbb  
@HWI-EAS443:3:87:209:502#0/1  
CGGGTTCTTCTTGTCTTCCTGATGTGTACTTTTTGAT  
+HWI-EAS443:3:87:209:502#0/1  
abaab\_bbbbab`bbb`ababb\_P\_b\_bY\_\_bbaaaaa  
@HWI-EAS443:3:87:701:1505#0/1  
GCGGGTTCTTCTTGTCTTCCTGATGTGTACTTTTTGA  
+HWI-EAS443:3:87:701:1505#0/1  
``aa`\_X[aa``\_\_a`0`\_`^a\_\_¥^\_WaZ```^^^R^  
@HWI-EAS443:3:87:717:539#0/1  
GGGTTCTTCTTGTCTTCCTGATGTGTACTTTTTGATT  
+HWI-EAS443:3:87:717:539#0/1  
abab]aaaaa`aab`aaa`a`aaa`a^a^aa`aaaa`\_  
@HWI-EAS443:3:87:904:1966#0/1  
GGGTTCTTCTTGTCTTCCTGATGTGTACTTTTTGATT  
+HWI-EAS443:3:87:904:1966#0/1  
aZ^]WR¥[\_\_ZX\_Z^UZZW¥YZ^WR^W]UZ^WZXXWUZZB  
@HWI-EAS443:3:88:1177:1204#0/1  
GCGGGTTCTTCTTGTCTTCCTGATGTGTACTTTTTGA  
+HWI-EAS443:3:88:1177:1204#0/1  
`aabbaba`ab`bbbbbabbZ[^abbb`\_aaababbab  
@HWI-EAS443:3:88:1224:1134#0/1  
CGGGTTCTTCTTGTCTTCCTGATGTGTACTTTTTGAT  
+HWI-EAS443:3:88:1224:1134#0/1  
a``]aR`ab`baaab`b`\_XaaZa^¥aY[[babaaU`\_  
@HWI-EAS443:3:88:126:294#0/1  
GCGGGTTCTTCTTGTCTTCCTGATGTGTACTTTTTGA  
+HWI-EAS443:3:88:126:294#0/1  
aZS\_WV\_\_`^NPI[0][RX\_]aVR`]ZZU\_NW\_]ZUY^¥^

@HWI-EAS443:3:88:1350:1932#0/1  
CGGGGTTCTTCTTGTCTTCCTGATGTGTACTTTTTGAT  
+HWI-EAS443:3:88:1350:1932#0/1  
ab¥Z\_F0^aK\_\`ba\_Q0T`Ta^a`UIb\_b\_a¥]`[babaa  
@HWI-EAS443:3:88:1517:1222#0/1  
CGGGGTTCTTCTTGTCTTCCTGATGTGTACTTTTTGAT  
+HWI-EAS443:3:88:1517:1222#0/1  
abbbb\_bbab¥ba`bbaabaaabbabb\_¥aa¥aabb¥aa  
@HWI-EAS443:3:88:200:868#0/1  
GGGTTCTTCTTGTCTTCCTGATGTGTACTTTTTGATTA  
+HWI-EAS443:3:88:200:868#0/1  
WZYHabaa``ZV]`IaaY^a\_aa\_\_ZX[S[aa]\_\_aQQP^  
@HWI-EAS443:3:88:410:365#0/1  
CGGGGTTCTTCTTGTCTTCCTGATGTGTACTTTTTGA  
+HWI-EAS443:3:88:410:365#0/1  
abbabaPbbbbbabababababaaaaaab`a\_a`aaaa[a  
@HWI-EAS443:3:88:699:1436#0/1  
CGGGGTTCTTCTTGTCTTCCTGATGTGTACTTTTTGAT  
+HWI-EAS443:3:88:699:1436#0/1  
\_^ab`] `bb\_babaa`aaaaa^`]a^a^` `aaaa[a]  
@HWI-EAS443:3:88:793:81#0/1  
CGGGGTTCTTCTTGTCTTCCTGATGTGTACTTTTTGAT  
+HWI-EAS443:3:88:793:81#0/1  
abbbba\_b`bbababbbba\_baa`baaab`b`^abaaa``]  
@HWI-EAS443:3:89:1062:261#0/1  
CGGGGTTCTTCTTGTCTTCCTGATGTGTACTTTTTGAT  
+HWI-EAS443:3:89:1062:261#0/1  
a`XW\_Haaaa`^]a^`¥` `^\_^]`Y\_a[\_]^Zaaaa]¥]a  
@HWI-EAS443:3:89:1604:379#0/1  
GGGTTCTTCTTGTCTTCCTGATGTGTACTTTTTGATTA  
+HWI-EAS443:3:89:1604:379#0/1  
aba\_a`baab^aaa`^aa\_`aa\_\_`W`\_\_\_aaba` `a^\_  
@HWI-EAS443:3:89:214:1056#0/1  
CGGGGTTCTTCTTGTCTTCCTGATGTGTACTTTTTGAT  
+HWI-EAS443:3:89:214:1056#0/1  
abbabW`a`XYaaaUZSa`\_]Y`aZS\_[Y^a]^`^RP^\_  
@HWI-EAS443:3:89:468:1536#0/1  
GGGTTCTTCTTGTCTTCCTGATGTGTACTTTTTGATTA  
+HWI-EAS443:3:89:468:1536#0/1  
]baaU` `aWb`\_]bVb[RKP]YZ`S`Y\_ba]aa\_a]a\_  
@HWI-EAS443:3:89:550:1443#0/1  
CGGGGTTCTTCTTGTCTTCCTGATGTGTACTTTTTGAT  
+HWI-EAS443:3:89:550:1443#0/1  
a`b\_bPbaa`aa]baa` `b`baa` `]aY`NT[aaa\_\_\_\_a  
@HWI-EAS443:3:89:563:264#0/1  
CGGGGTTCTTCTTGTCTTCCTGATGTGTACTTTTTGAT  
+HWI-EAS443:3:89:563:264#0/1  
`aaaa\_b`aaaa`aa^aaaaab`\_aZaXX`a\_`\_a`\_`\_`  
@HWI-EAS443:3:89:650:262#0/1  
AGCGGGGTTCTTCTTGTCTTCCTGATGTGTACTTTTTG

+HWI-EAS443:3:89:650:262#0/1  
ababab]Zba`aaa`aaa`\_aa\_\_`\_]a`^\_^\_`a`````Z  
@HWI-EAS443:3:89:674:1290#0/1  
CGGGGTCTTCTCTTGCTTCCTGATGTGTACTTTTTGAT  
+HWI-EAS443:3:89:674:1290#0/1  
aba\_a`bbbbabbbbaaaababbbbaa`[`a`babbbaba  
@HWI-EAS443:3:89:836:858#0/1  
CGGGGTCTTCTCTTGCTTCCTGATGTGTACTTTTTGAT  
+HWI-EAS443:3:89:836:858#0/1  
a\_ab`Z]bYaabbba`Z\_bbb\_bbb`[b`babaabbaa  
@HWI-EAS443:3:89:876:1580#0/1  
CGGGGTCTTCTCTTGCTTCCTGATGTGTACTTTTTGAT  
+HWI-EAS443:3:89:876:1580#0/1  
^abba][`ab\_abbbb\_abbbbbbabaaaabaababa`ab  
@HWI-EAS443:3:8:1144:2041#0/1  
AGCGGGTCTTCTCTTGCTTCCTGATGTGTACTTTTTG  
+HWI-EAS443:3:8:1144:2041#0/1  
a^G`aa[Y]]aa^aWaaa`R``S\_`^`\_[HX]UX\_YU\_\_\_\_  
@HWI-EAS443:3:8:1216:1541#0/1  
CGGGGTCTTCTCTTGCTTCCTGATGTGTACTTTTTGAT  
+HWI-EAS443:3:8:1216:1541#0/1  
`aab[H\_\_b\_\_b^b\_bVbba^[`^aaaZb¥[\_`a¥Z¥ZU]  
@HWI-EAS443:3:8:1660:782#0/1  
CGGGGTCTTCTCTTGCTTCCTGATGTGTACTTTTTGAT  
+HWI-EAS443:3:8:1660:782#0/1  
a^`ab`\_bbbbabbbbaa\_baVbbbbba``\_`bbbbM`b  
@HWI-EAS443:3:8:1682:950#0/1  
CGGGGTCTTCTCTTGCTTCCTGATGTGTACTTTTTGAT  
+HWI-EAS443:3:8:1682:950#0/1  
Za\_W\_H\_b``^T`\_abbZbbTZ¥a`a]Y\_aaZabaabVab  
@HWI-EAS443:3:8:234:1793#0/1  
CGGGGTCTTCTCTTGCTTCCTGATGTGTACTTTTTGAT  
+HWI-EAS443:3:8:234:1793#0/1  
aaba\_]aaaa`[`¥V^W\_^\_T¥¥QHTDM]H\_``¥]\_FV`S  
@HWI-EAS443:3:8:281:844#0/1  
GCGGGTCTTCTCTTGCTTCCTGATGTGTACTTTTTGA  
+HWI-EAS443:3:8:281:844#0/1  
abbaba`babbbaaab`\_aaa`aaa\_a\_a\_\_`aa\_aaa`  
@HWI-EAS443:3:8:353:1513#0/1  
CGGGGTCTTCTCTTGCTTCCTGATGTGTACTTTTTGAT  
+HWI-EAS443:3:8:353:1513#0/1  
aVaaa\_a``VTaZTVa\_a`a`\_a``Ya^YU\_X`]a\_\_NY`  
@HWI-EAS443:3:8:41:427#0/1  
ATAATCAAAAAGTACACATCAGGAAGACAAGAGAAGAACC  
+HWI-EAS443:3:8:41:427#0/1  
``[\_`\_`aYa`a¥\_aa^^`\_a`a`\_a`^a`\_`^a`\_aa\_\_[  
@HWI-EAS443:3:8:498:47#0/1  
GCGGGTCTTCTCTTGCTTCCTGATGTGTACTTTTTGA  
+HWI-EAS443:3:8:498:47#0/1  
a`TP\_TGGY\_YGUPUU]JMO^TQVSSRPS¥ZWTRSBBBBB

@HWI-EAS443:3:8:567:658#0/1  
GGTTCTTCTCTTGTCTTCCTGATGTGTACTTTTTGATTAT  
+HWI-EAS443:3:8:567:658#0/1  
a`X`\_`\_`^`\_]`^`]`^^^`]^\_`Z`\_`Z`^`^`[^`\_]`YVZ`]  
@HWI-EAS443:3:8:830:424#0/1  
CGGGGTTCTTCTTGTCTTCCTGATGTGTACTTTTTGAT  
+HWI-EAS443:3:8:830:424#0/1  
a\_Za\_]`^^a\_Sba\_V`a]aaVY\_a` `b[a\_^YaaaaaXSa  
@HWI-EAS443:3:8:944:1265#0/1  
GCGGGGTTCTTCTTGTCTTCCTGATGTGTACTTTTTGA  
+HWI-EAS443:3:8:944:1265#0/1  
aaa`\_a¥aaaa\_a`\_`a`^`a\_\_a`^^a^a]OYa`¥\_a\_\_  
@HWI-EAS443:3:8:980:490#0/1  
GCGGGGTTCTTCTTGTCTTCCTGATGTGTACTTTTTGA  
+HWI-EAS443:3:8:980:490#0/1  
` `bb\_bab¥bb^bba`baaab¥bba`a`aa\_aXaabb` `a  
@HWI-EAS443:3:90:1051:824#0/1  
GGTTCTTCTCTTGTCTTCCTGATGTGTACTTTTTGATTAT  
+HWI-EAS443:3:90:1051:824#0/1  
aabbabbababbbbbbbbab`abaab`a`ababaaaaaba  
@HWI-EAS443:3:90:1134:2022#0/1  
GCGGGGTTCTTCTTGTCTTCCTGATGTGTACTTTTTGA  
+HWI-EAS443:3:90:1134:2022#0/1  
aa`ab`]Y\_bbbaaabb^aaa` `aa\_a`\_`^`aa\_b`aaa  
@HWI-EAS443:3:90:1160:1871#0/1  
GGGTTCTTCTTGTCTTCCTGATGTGTACTTTTTGATTA  
+HWI-EAS443:3:90:1160:1871#0/1  
^a^a[bVab`]Y¥^Hbb¥GYb`bW`\_a^Tab\_a`\_`Y\_[aa  
@HWI-EAS443:3:90:1204:653#0/1  
GGGGTTCTTCTTGTCTTCCTGATGTGTACTTTTTGATT  
+HWI-EAS443:3:90:1204:653#0/1  
abaa\_aaaa]a`aaa]\_a`\_`aa`\_a]a]\_\_aa`\_`a\_\_`  
@HWI-EAS443:3:90:1312:315#0/1  
ATCAAAAAGTACACATCAGGAAGACAAGAGAAGAACCCCG  
+HWI-EAS443:3:90:1312:315#0/1  
^¥Kabb]¥WY\_U`^Raa`X^^b\_QT^a\_S`a^V\_]`^LDD¥  
@HWI-EAS443:3:90:1635:951#0/1  
CGGGGTTCTTCTTGTCTTCCTGATGTGTACTTTTTGAT  
+HWI-EAS443:3:90:1635:951#0/1  
a`bbb`bbbbbbabbbaabbbabbaab\_b`a[babbbaaa  
@HWI-EAS443:3:90:432:448#0/1  
CGGGGTTCTTCTTGTCTTCCTGATGTGTACTTTTTGAT  
+HWI-EAS443:3:90:432:448#0/1  
aba`aR[abaab`a`a¥a]¥b` `a`¥`Va¥YOY` `a\_a`^  
@HWI-EAS443:3:90:451:1949#0/1  
GCGGGGTTCTTCTTGTCTTCCTGATGTGTACTTTTTGA  
+HWI-EAS443:3:90:451:1949#0/1  
^b`^V¥Q[aaba`b`b`a`aabYaa\_a`[]aa`\_aa`R]  
@HWI-EAS443:3:90:494:271#0/1  
CGGGGTTCTTCTTGTCTTCCTGATGTGTACTTTTTGAT

+HWI-EAS443:3:90:494:271#0/1  
ababbababbabaabbbaaaabaaa`][a]a`b`aaaaaa  
@HWI-EAS443:3:90:496:873#0/1  
GCGGGGTTCTTCTCTTGCTTCCTGATGTGTACTTTTTGA  
+HWI-EAS443:3:90:496:873#0/1  
aabaaa^a`aaaaaaa\_`a`aaa\_`^`\_Xa^`^^a]aa\_\_  
@HWI-EAS443:3:90:564:184#0/1  
GGGTTCTTCTCTTGCTTCCTGATGTGTACTTTTTGATTA  
+HWI-EAS443:3:90:564:184#0/1  
aba\_abaaababab\_`aa\_aabaaa^a\_a`aaaaa``aa  
@HWI-EAS443:3:90:691:559#0/1  
GCGGGGTTCTTCTCTTGCTTCCTGATGTGTACTTTTTGA  
+HWI-EAS443:3:90:691:559#0/1  
aa``\_`abab`^`b^a`aabaaaa]`[`U\_[aa\_a[abaa  
@HWI-EAS443:3:90:741:900#0/1  
GCGGGGTTCTTCTCTTGCTTCCTGATGTGTACTTTTTGA  
+HWI-EAS443:3:90:741:900#0/1  
aaab`b0`aaaa`\_a^HR\_aaaa``\_`VYa]aW`\_\_aa\_\_  
@HWI-EAS443:3:90:753:1875#0/1  
CGGGGTTCTTCTCTTGCTTCCTGATGTGTACTTTTTGAT  
+HWI-EAS443:3:90:753:1875#0/1  
aa`^`Zaaaaa\_`]a\_`a`aa\_```\_`¥`]\_\_`aaa`¥a`  
@HWI-EAS443:3:90:972:635#0/1  
GGGGTTCTTCTCTTGCTTCCTGATGTGTACTTTTTGATT  
+HWI-EAS443:3:90:972:635#0/1  
aabaV```a`Xa^]S\_aaa`a`¥^`X\_P¥¥`a\_\_[][[[  
@HWI-EAS443:3:90:981:1492#0/1  
CGGGGTTCTTCTCTTGCTTCCTGATGTGTACTTTTTGAT  
+HWI-EAS443:3:90:981:1492#0/1  
abaaa]a[^aIYW[\_]]^aW\_Y[aXa`Jb^^0a`Raa\_aa  
@HWI-EAS443:3:91:1032:930#0/1  
ATAATCAAAAAGTACACATCAGGAAGACAAGAGAAGAACC  
+HWI-EAS443:3:91:1032:930#0/1  
M¥aab\_a`a]¥]bRZ^aJa¥b¥V\_aLXb]\_b\_^bbbb\_`  
@HWI-EAS443:3:91:1128:1685#0/1  
AGCGGGGTTCTTCTCTTGCTTCCTGATGTGTACTTTTTG  
+HWI-EAS443:3:91:1128:1685#0/1  
abb¥Z]bZ¥T¥aX[XS`SI^aVVTTQYZaVaSVHV`\_QZP  
@HWI-EAS443:3:91:1259:1044#0/1  
TCAAAAAGTACACATCAGGAAGACAAGAGAAGAACCCCGC  
+HWI-EAS443:3:91:1259:1044#0/1  
a`aa^a\_a0ba`a`a^aa`a`aaaa\_a\_a\_\_``\_0]Z`Y  
@HWI-EAS443:3:91:1278:2013#0/1  
CGGGGTTCTTCTCTTGCTTCCTGATGTGTACTTTTTGAT  
+HWI-EAS443:3:91:1278:2013#0/1  
abbbabaabbbbbbaa`bbabbbbbbaaaba`abbaab\_a^  
@HWI-EAS443:3:91:1293:739#0/1  
GGTTCTTCTCTTGCTTCCTGATGTGTACTTTTTGATTAT  
+HWI-EAS443:3:91:1293:739#0/1  
a\_GZZ¥\_`\_\_`\_WXX`\_[ZZOX^aZ][YO\_\_\_\_`^¥R\_\_]]



@HWI-EAS443:3:91:1518:1790#0/1  
CGGGGTTCTTCTTGTCTTCCTGATGTGTACTTTTTGAT  
+HWI-EAS443:3:91:1518:1790#0/1  
abbab`babb\_b¥babaaaa`baaaa`^aaa\_aaa`baa\_  
@HWI-EAS443:3:91:178:502#0/1  
CGGGGTTCTTCTTGTCTTCCTGATGTGTACTTTTTGAT  
+HWI-EAS443:3:91:178:502#0/1  
I[abb`aaab`¥abbb`^ababb```babaaabab`baZ\_  
@HWI-EAS443:3:91:474:1333#0/1  
CGGGGTTCTTCTTGTCTTCCTGATGTGTACTTTTTGAT  
+HWI-EAS443:3:91:474:1333#0/1  
ab¥R¥]bbbaba]aaa\_ba\_a```a\_a^a]\_\_`aa\_a\_`^  
@HWI-EAS443:3:91:587:412#0/1  
GCGGGTTCCTTCTTGTCTTCCTGATGTGTACTTTTTGA  
+HWI-EAS443:3:91:587:412#0/1  
a`]a^DZQ\_ZX[Ua`YZY`\_]UXUZTZNSU]Y¥S\_UU[  
@HWI-EAS443:3:91:827:887#0/1  
ATCAAAAAGTACACATCAGGAAGACAAGAGAAGAACCCCG  
+HWI-EAS443:3:91:827:887#0/1  
abba^aaab`]\_a`aa[aa]^bb`aa`baaaabaaX]Nwa  
@HWI-EAS443:3:92:1024:904#0/1  
GCGGGTTCCTTCTTGTCTTCCTGATGTGTACTTTTTGA  
+HWI-EAS443:3:92:1024:904#0/1  
aaaaaa0aaaaaa\_aaba`a``\_aa`\_a\_a^\_]aaa`aa`  
@HWI-EAS443:3:92:1087:177#0/1  
ATCAAAAAGTACACATCAGGAAGACAAGAGAAGAACCCCG  
+HWI-EAS443:3:92:1087:177#0/1  
a[``^`NRWZTMV]a]Y\_Y¥X\_RZ`^aXa]WZ]\_TQPF^  
@HWI-EAS443:3:92:1638:999#0/1  
CGGGGTTCTTCTTGTCTTCCTGATGTGTACTTTTTGAT  
+HWI-EAS443:3:92:1638:999#0/1  
abbbb\_aabbbb\_bbbbaabba\_baabbabaa\_bbaba`ab  
@HWI-EAS443:3:92:1770:412#0/1  
ATAATCAAAAAGTACACATCAGGAAGACAAGAGAAGAACCC  
+HWI-EAS443:3:92:1770:412#0/1  
abaaa`aaaaab^a\_a`aa\_aa`a`a`\_aaa\_a`a`\_`[Q  
@HWI-EAS443:3:92:326:663#0/1  
GGGGTTCTTCTTGTCTTCCTGATGTGTACTTTTTGATT  
+HWI-EAS443:3:92:326:663#0/1  
aa]aZ[Y¥`a^¥\_]Z\_\_]\_`\_]W\_U\_ZR^\_]\_UWZ¥]  
@HWI-EAS443:3:92:377:1142#0/1  
CGGGGTTCTTCTTGTCTTCCTGATGTGTACTTTTTGAT  
+HWI-EAS443:3:92:377:1142#0/1  
abaaa\_aaaaaabaaaaaba\_baa]aa\_a\_\_\_\_baaaaaaa  
@HWI-EAS443:3:92:404:996#0/1  
GGGTTCTTCTTGTCTTCCTGATGTGTACTTTTTGATTA  
+HWI-EAS443:3:92:404:996#0/1  
K`^^`\_`bbba^`\_abb\_Xa¥^\_abab]Y`V¥ba^Y^^X\_  
@HWI-EAS443:3:92:516:52#0/1  
CGGGGTTCTTCTTGTCTTCCTGATGTGTACTTTTTGAT

+HWI-EAS443:3:92:516:52#0/1  
abbbb`b`abaaaaab^]ab\_aaa\_a\_\_a^^\_a\_`aaa\_\_  
@HWI-EAS443:3:92:681:990#0/1  
GGTTCTTCTCTTGCTTCCTGATGTGTACTTTTTGATTAT  
+HWI-EAS443:3:92:681:990#0/1  
aaWa`a`^a`aaa^^`\_\_\_`a\_a¥X`]\_a\_`a\_a\_\_\_\_\_`  
@HWI-EAS443:3:92:725:176#0/1  
GCGGGTTCCTTCTTGTCTTCCTGATGTGTACTTTTTGA  
+HWI-EAS443:3:92:725:176#0/1  
a`aa`aW]]``]`X\_\_`]Y`\_Y¥^Z¥^^X\_X]Z]\_^\_^]Z  
@HWI-EAS443:3:92:919:391#0/1  
GCGGGTTCCTTCTTGTCTTCCTGATGTGTACTTTTTGA  
+HWI-EAS443:3:92:919:391#0/1  
aaaaaa]aaabbb`bab`aaaaaaa`a`\_a]\_]aaaaaa`  
@HWI-EAS443:3:93:1055:1270#0/1  
CGGGGTTCCTTCTTGTCTTCCTGATGTGTACTTTTTGAT  
+HWI-EAS443:3:93:1055:1270#0/1  
ab`abXaaa\_aa\_aaa^aa\_`^a\_\_a\_a]^^\_aaa`[^`  
@HWI-EAS443:3:93:1147:1428#0/1  
GCGGGTTCCTTCTTGTCTTCCTGATGTGTACTTTTTGA  
+HWI-EAS443:3:93:1147:1428#0/1  
]L¥\_JQJ\_¥ZR^REX`aPZZSP]]PQT[U]FPK¥\_UHJ¥B  
@HWI-EAS443:3:93:1245:162#0/1  
AGCGGGTTCCTTCTTGTCTTCCTGATGTGTACTTTTTG  
+HWI-EAS443:3:93:1245:162#0/1  
\_a\_b^aa¥b\_bb\_a\_bab`\_ba``aa\_`aZa^\_Z`\_\_a\_`  
@HWI-EAS443:3:93:1331:951#0/1  
CGGGGTTCCTTCTTGTCTTCCTGATGTGTACTTTTTGAT  
+HWI-EAS443:3:93:1331:951#0/1  
abaa``baba`aTabaa\_bba^abaaa^aZaaaaaaaaa  
@HWI-EAS443:3:93:1630:870#0/1  
GCGGGTTCCTTCTTGTCTTCCTGATGTGTACTTTTTGA  
+HWI-EAS443:3:93:1630:870#0/1  
`]ba]WLY\_\_aa]^baa]V`aa``Y¥\_[\_]P^¥]`^][G[  
@HWI-EAS443:3:93:1679:521#0/1  
GGGGTTCCTTCTTGTCTTCCTGATGTGTACTTTTTGATT  
+HWI-EAS443:3:93:1679:521#0/1  
a^¥`Xa\_`a]a]`\_a^\_``]\_aa\_`\_^\_Z]]a`\_\_\_\_]]^^  
@HWI-EAS443:3:93:42:1433#0/1  
GGGGTTCCTTCTTGTCTTCCTGATGTGTACTTTTTGATT  
+HWI-EAS443:3:93:42:1433#0/1  
`KZ^[aaaba^R\_`]\_^]`\_]`NYa`R^^\_Ra\_`\_a\_`\_`\_  
@HWI-EAS443:3:93:432:329#0/1  
CGGGGTTCCTTCTTGTCTTCCTGATGTGTACTTTTTGAT  
+HWI-EAS443:3:93:432:329#0/1  
aa¥ab\_``ba`baaaba`a^aa\_a`aa\_bZa^aaaaa[X\_  
@HWI-EAS443:3:93:716:733#0/1  
CGGGGTTCCTTCTTGTCTTCCTGATGTGTACTTTTTGAT  
+HWI-EAS443:3:93:716:733#0/1  
abaab^baaaabaabba`aaaa`]`aa`a¥]aaaaaa\_\_a

@HWI-EAS443:3:93:963:651#0/1  
CGGGGTTCTTCTTGTCTTCCTGATGTGTACTTTTTGAT  
+HWI-EAS443:3:93:963:651#0/1  
abbbbX^\_a`baaa`ba`aaa`ab\_`bSa]a`aaaa\_a`  
@HWI-EAS443:3:94:1278:1649#0/1  
CGGGGTTCTTCTTGTCTTCCTGATGTGTACTTTTTGAT  
+HWI-EAS443:3:94:1278:1649#0/1  
abaaa^aaaaa¥\_ab`\_\_baSaba^`a\_b`^`^ba`abaaa  
@HWI-EAS443:3:94:146:60#0/1  
GGTTCCTTCTTGTCTTCCTGATGTGTACTTTTTGATTAT  
+HWI-EAS443:3:94:146:60#0/1  
^ZVVG\_`[\_Z]aa^TYZL¥`a^^aX^¥ZZ\_`\_^]Y[]VZ  
@HWI-EAS443:3:94:1580:1022#0/1  
CGGGGTTCTTCTTGTCTTCCTGATGTGTACTTTTTGAT  
+HWI-EAS443:3:94:1580:1022#0/1  
abbba`b]bbabaabba`bba^ab\_aa\_b]a\_babaaa`a  
@HWI-EAS443:3:94:165:1339#0/1  
CGGGGTTCTTCTTGTCTTCCTGATGTGTACTTTTTGAT  
+HWI-EAS443:3:94:165:1339#0/1  
aaZ\_aYaa`Xaaaa\_a`\_[`V]]^¥[V¥¥^¥\_\_\_\_ZMX^  
@HWI-EAS443:3:94:213:128#0/1  
AGCGGGGTTCTTCTTGTCTTCCTGATGTGTACTTTTTG  
+HWI-EAS443:3:94:213:128#0/1  
`aaaa`Zaa`\_`aa`\_a^`a\_Y]\_]`¥^Y^`]\_\_\_\_^  
@HWI-EAS443:3:94:233:1780#0/1  
GGGTTCTTCTTGTCTTCCTGATGTGTACTTTTTGATTA  
+HWI-EAS443:3:94:233:1780#0/1  
aaaXR¥`UZYX¥aVX`\_X\_¥aa\_ZRMT\_\_H]`GWaSVFK]  
@HWI-EAS443:3:94:417:1866#0/1  
CGGGGTTCTTCTTGTCTTCCTGATGTGTACTTTTTGAT  
+HWI-EAS443:3:94:417:1866#0/1  
abbbb\_bbbbababaaabaaaaaaaaaXa\_a`baa`a^aa  
@HWI-EAS443:3:94:556:1324#0/1  
AGCGGGGTTCTTCTTGTCTTCCTGATGTGTACTTTTTG  
+HWI-EAS443:3:94:556:1324#0/1  
a`a`a`Z\_\_\_\_a\_a^`\_aW\_\_^a^\_\_^\_\_RXMRR^\_\_^ZS  
@HWI-EAS443:3:94:790:1874#0/1  
GGGGTTCTTCTTGTCTTCCTGATGTGTACTTTTTGATT  
+HWI-EAS443:3:94:790:1874#0/1  
a`\_0\_\_aa`^X¥a`]aa`\_\_^^`W^[¥bY`^^VW¥]]  
@HWI-EAS443:3:94:909:366#0/1  
TAATCAAAAAGTACACATCAGGAAGACAAGAGAAGAACCC  
+HWI-EAS443:3:94:909:366#0/1  
aa`a\_a`aa\_a]``a\_aa\_\_aaa`a^]\_`a^a\_aa``^X  
@HWI-EAS443:3:94:951:67#0/1  
CGGGGTTCTTCTTGTCTTCCTGATGTGTACTTTTTGAT  
+HWI-EAS443:3:94:951:67#0/1  
abbbbabbbb¥babbbbabba^bbabbabaa\_bbbbbbab  
@HWI-EAS443:3:95:1086:1604#0/1  
CGGGGTTCTTCTTGTCTTCCTGATGTGTACTTTTTGAT

+HWI-EAS443:3:95:1086:1604#0/1  
abbabab^bbbbbbbaaaabbaabbbbbbbbabbbbabbb  
@HWI-EAS443:3:95:1144:332#0/1  
CGGGGTTCTTCTTGTCTTCCTGATGTGTACTTTTTGAT  
+HWI-EAS443:3:95:1144:332#0/1  
`bbababbbbbbbbabbbbab`bbbbabbb`babbbbabbb  
@HWI-EAS443:3:95:1549:1782#0/1  
GGGGTTCCTTCTTGTCTTCCTGATGTGTACTTTTTGATT  
+HWI-EAS443:3:95:1549:1782#0/1  
M¥ba`ba\_a¥abaaaaX¥aab\_RIba]aXb\_aU`T^`b^a  
@HWI-EAS443:3:95:1586:1183#0/1  
CGGGGTTCTTCTTGTCTTCCTGATGTGTACTTTTTGAT  
+HWI-EAS443:3:95:1586:1183#0/1  
aba`aWaS\_`¥bbbbbbabbaabb`a\_\_bbbVabbbbabba  
@HWI-EAS443:3:95:31:139#0/1  
GCGGGGTTCTTCTTGTCTTCCTGATGTGTACTTTTTGA  
+HWI-EAS443:3:95:31:139#0/1  
Y^bba^`U\_b\_`¥Za^`\_abb]aa¥Qaaaa`\_\_aaaa\_\_  
@HWI-EAS443:3:95:773:1610#0/1  
GGGTTCTTCTTGTCTTCCTGATGTGTACTTTTTGATTA  
+HWI-EAS443:3:95:773:1610#0/1  
¥a`K¥¥bVbabbaaabbak\_aVba[GV\_bZ\_bb\_b`aabb  
@HWI-EAS443:3:95:939:35#0/1  
GCGGGGTTCTTCTTGTCTTCCTGATGTGTACTTTTTGA  
+HWI-EAS443:3:95:939:35#0/1  
\_`a`ab^b`bbababbba[ba\_Yabaab`b\_`Sbb`aaa`  
@HWI-EAS443:3:96:1739:499#0/1  
ATCAAAAAGTACACATCAGGAAGACAAGAGAAGAACCCCG  
+HWI-EAS443:3:96:1739:499#0/1  
aa`a\_aaaa`a\_bZaa`a`^`aaa\_Ya\_\_a]\_a^^^ZZWB  
@HWI-EAS443:3:96:248:1656#0/1  
GCGGGGTTCTTCTTGTCTTCCTGATGTGTACTTTTTGA  
+HWI-EAS443:3:96:248:1656#0/1  
`a¥^aa^abb`aaaabbaaaa`aaa`aa]][`aa`\_\_a\_\_  
@HWI-EAS443:3:96:339:719#0/1  
CGGGGTTCTTCTTGTCTTCCTGATGTGTACTTTTTGAT  
+HWI-EAS443:3:96:339:719#0/1  
abbbb^babbaa]aabaaaa`aa`aaa`b]a\_bab\_b`aa  
@HWI-EAS443:3:96:403:927#0/1  
CGGGGTTCTTCTTGTCTTCCTGATGTGTACTTTTTGAT  
+HWI-EAS443:3:96:403:927#0/1  
aba``]abababab`baa`aa`¥ab^a^`^aa`aa```  
@HWI-EAS443:3:96:409:1490#0/1  
GCGGGGTTCTTCTTGTCTTCCTGATGTGTACTTTTTGA  
+HWI-EAS443:3:96:409:1490#0/1  
ab\_b`[FZ``aaaa`ba\_a`]\_a\_]`^]QZY`\_`aa\_[  
@HWI-EAS443:3:96:49:1216#0/1  
GCGGGGTTCTTCTTGTCTTCCTGATGTGTACTTTTTGA  
+HWI-EAS443:3:96:49:1216#0/1  
VVTP¥X¥^a`YZ`¥X\_aX]Q^`]XUZXYXT^aa\_]¥]B

@HWI-EAS443:3:96:556:1380#0/1  
CGGGGTTCTTCTTGTCTTCCTGATGTGTACTTTTTGAT  
+HWI-EAS443:3:96:556:1380#0/1  
ab]Q\_]a`bV\_¥^\_\_`NVZ\_`\_``a\_aXaW\_^^^\_`aUaB  
@HWI-EAS443:3:96:563:804#0/1  
GGGTTCTTCTTGTCTTCCTGATGTGTACTTTTTGATTA  
+HWI-EAS443:3:96:563:804#0/1  
a`aYaaabaaab\_Z`\_aa¥Z`]``a\_b\_TP\_a[````^``B  
@HWI-EAS443:3:96:679:1878#0/1  
CGGGGTTCTTCTTGTCTTCCTGATGTGTACTTTTTGAT  
+HWI-EAS443:3:96:679:1878#0/1  
aa`b¥Saabababbbb]bb`bbb\_bb``baa\_ababb`bb  
@HWI-EAS443:3:96:96:478#0/1  
CGGGGTTCTTCTTGTCTTCCTGATGTGTACTTTTTGAT  
+HWI-EAS443:3:96:96:478#0/1  
abbabYaaaaab`abbaba\_aaaa^ab]a^`\_aba``^`\_`  
@HWI-EAS443:3:97:1027:612#0/1  
ATCAAAAAGTACACATCAGGAAGACAAGAGAAGAACCCCG  
+HWI-EAS443:3:97:1027:612#0/1  
\_babb`bababbbabba\_bbabbbabbb^bbabaa`a^aa  
@HWI-EAS443:3:97:146:608#0/1  
GGGGTTCTTCTTGTCTTCCTGATGTGTACTTTTTGATT  
+HWI-EAS443:3:97:146:608#0/1  
`Z`a¥WW][^[\_¥Ta\_\_\_\_]X\_XU\_X\_VY]\_\_^\_¥YZ]]  
@HWI-EAS443:3:97:1513:1236#0/1  
GGGTTCTTCTTGTCTTCCTGATGTGTACTTTTTGATTA  
+HWI-EAS443:3:97:1513:1236#0/1  
P\_X^^a`\_b]M\_b^b]abaabbZV^Xb\_¥^aR``a`aa\_a  
@HWI-EAS443:3:97:1602:1561#0/1  
CGGGGTTCTTCTTGTCTTCCTGATGTGTACTTTTTGAT  
+HWI-EAS443:3:97:1602:1561#0/1  
`bab]Z]bbb¥aabbbbbb¥ababbb`]Z¥\_bbbbbS]]  
@HWI-EAS443:3:97:222:1321#0/1  
CGGGGTTCTTCTTGTCTTCCTGATGTGTACTTTTTGAT  
+HWI-EAS443:3:97:222:1321#0/1  
abbaba`abbbbaaa\_aaba]bba``aa`aabababT¥`  
@HWI-EAS443:3:97:306:1975#0/1  
GCGGGTTCTTCTTGTCTTCCTGATGTGTACTTTTTGA  
+HWI-EAS443:3:97:306:1975#0/1  
abb¥b\_G¥a\_a[`b¥\_\_Z^\_[`aY]U\_a¥XFWP¥¥¥\_\_SZ  
@HWI-EAS443:3:97:431:1753#0/1  
GCGGGTTCTTCTTGTCTTCCTGATGTGTACTTTTTGA  
+HWI-EAS443:3:97:431:1753#0/1  
ab\_\_\_\_\_`a`]]Sa`\_Z^Saba]Q]a\_Z[UbSYa````\_`a  
@HWI-EAS443:3:97:580:1353#0/1  
CGGGGTTCTTCTTGTCTTCCTGATGTGTACTTTTTGAT  
+HWI-EAS443:3:97:580:1353#0/1  
`bbba\_babbababbb`abaaabbaabaa\_a`baaabYaa  
@HWI-EAS443:3:97:707:1969#0/1  
CGGGGTTCTTCTTGTCTTCCTGATGTGTACTTTTTGAT

+HWI-EAS443:3:97:707:1969#0/1  
aa`\_`\_]a`aa`a`aaa]a`aa``¥\_\_`^aXa^a\_a¥a^aa  
@HWI-EAS443:3:97:737:1275#0/1  
GCGGGTTCTTCTTGTCTTCCTGATGTGTACTTTTTGA  
+HWI-EAS443:3:97:737:1275#0/1  
abbbb\_babbbbabaa`abb\_`baaaaabaab\_a`b\_a  
@HWI-EAS443:3:97:978:1391#0/1  
GCGGGTTCTTCTTGTCTTCCTGATGTGTACTTTTTGA  
+HWI-EAS443:3:97:978:1391#0/1  
aabbabYb^bb\_babb\_a^a`^b`]ab^b`^Waaaaa`  
@HWI-EAS443:3:98:1104:580#0/1  
GGTCTTCTTGTCTTCCTGATGTGTACTTTTTGATTAT  
+HWI-EAS443:3:98:1104:580#0/1  
aa^`^a`\_a¥aaa]`a`\_\_`]`\_]`^Xaa]\_`]`^`]`^  
@HWI-EAS443:3:98:1306:424#0/1  
CGGGTTCTTCTTGTCTTCCTGATGTGTACTTTTTGAT  
+HWI-EAS443:3:98:1306:424#0/1  
ab\_a\_Vbaa`J\_`bbb`b[bZIbbbbaa\_\_`\_bbbbaaa\_  
@HWI-EAS443:3:98:1591:42#0/1  
CGGGTTCTTCTTGTCTTCCTGATGTGTACTTTTTGAT  
+HWI-EAS443:3:98:1591:42#0/1  
aaa]J^bbb\_¥bXbbZbaa`aW`baba]a^]I¥baa`abb  
@HWI-EAS443:3:98:1685:1863#0/1  
GGTCTTCTTGTCTTCCTGATGTGTACTTTTTGATTA  
+HWI-EAS443:3:98:1685:1863#0/1  
abW\_^0^a^b`\_a^aXa^\_Waaa\_a^b^\_Vaaaba`\_baa  
@HWI-EAS443:3:98:266:312#0/1  
CGGGTTCTTCTTGTCTTCCTGATGTGTACTTTTTGAT  
+HWI-EAS443:3:98:266:312#0/1  
aaaaa\_aa`a\_a]aaa`]`^`\_]`\_¥\_Z\_``\_a\_\_`  
@HWI-EAS443:3:98:457:63#0/1  
GCGGGTTCTTCTTGTCTTCCTGATGTGTACTTTTTGA  
+HWI-EAS443:3:98:457:63#0/1  
^G^W]aVZ[`TV[OLO¥LVPUWKHKSR[LXNJOSVQBBBB  
@HWI-EAS443:3:98:460:982#0/1  
CGGGTTCTTCTTGTCTTCCTGATGTGTACTTTTTGAT  
+HWI-EAS443:3:98:460:982#0/1  
]ba^a]\_`V`bb]aabbaXba`bb]ab]a\_\_aab`baaa`  
@HWI-EAS443:3:98:584:1569#0/1  
CGGGTTCTTCTTGTCTTCCTGATGTGTACTTTTTGAT  
+HWI-EAS443:3:98:584:1569#0/1  
RTR\_ar`\_\_¥Q^^X^`a^S\_\_T¥\_W^WVRW\_^`[`a[a¥  
@HWI-EAS443:3:98:689:1148#0/1  
GCGGGTTCTTCTTGTCTTCCTGATGTGTACTTTTTGA  
+HWI-EAS443:3:98:689:1148#0/1  
aabaa^QZ[a`¥\_\_a`¥X[`^^`\_]`\_\_^`W]V`\_]`^TZ  
@HWI-EAS443:3:98:689:585#0/1  
GCGGGTTCTTCTTGTCTTCCTGATGTGTACTTTTTGA  
+HWI-EAS443:3:98:689:585#0/1  
abbbb\_aaabaaaabaaaaa`aa\_aaS\_^XG[b`aaX^

@HWI-EAS443:3:98:745:1074#0/1  
CGGGGTTCTTCTTGTCTTCCTGATGTGTACTTTTTGAT  
+HWI-EAS443:3:98:745:1074#0/1  
aaaa`S]aa`\_a``¥X^`[Qaa\_\_aR`U¥Z\_\_^X^]^^  
@HWI-EAS443:3:99:1007:396#0/1  
GCGGGGTTCTTCTTGTCTTCCTGATGTGTACTTTTTGA  
+HWI-EAS443:3:99:1007:396#0/1  
^`Y¥\_a¥aaaa`Xa`ba`b¥\_aaa]YWaZ`^aaaa^a  
@HWI-EAS443:3:99:1097:1146#0/1  
CGGGGTTCTTCTTGTCTTCCTGATGTGTACTTTTTGAT  
+HWI-EAS443:3:99:1097:1146#0/1  
`bbbbU`]bbaaaaa`ababaaaaaa]aababa^`ab  
@HWI-EAS443:3:99:120:208#0/1  
GCGGGGTTCTTCTTGTCTTCCTGATGTGTACTTTTTGA  
+HWI-EAS443:3:99:120:208#0/1  
aWaa\_XF¥\_UY\_\_R[O`PL¥]V]\_XQ\_V^ZVZ]VYXU^Z  
@HWI-EAS443:3:99:1694:793#0/1  
GGGTTCTTCTTGTCTTCCTGATGTGTACTTTTTGATTA  
+HWI-EAS443:3:99:1694:793#0/1  
a`\_\_`Rabab`bb`a`bb`\_bb`a^^Yaa`bbabba`\_aa  
@HWI-EAS443:3:99:352:1542#0/1  
CGGGGTTCTTCTTGTCTTCCTGATGTGTACTTTTTGAT  
+HWI-EAS443:3:99:352:1542#0/1  
ababb\_aabbbababababbb`b`aa`\_¥\_aaaaaa\_aa  
@HWI-EAS443:3:99:676:1285#0/1  
GGGGTTCTTCTTGTCTTCCTGATGTGTACTTTTTGATT  
+HWI-EAS443:3:99:676:1285#0/1  
a]¥^WY[[ZZYZXRUSZPVX[\_^YSQ^SW]WMY^Q]BBB  
@HWI-EAS443:3:99:791:1410#0/1  
GGGGTTCTTCTTGTCTTCCTGATGTGTACTTTTTGATT  
+HWI-EAS443:3:99:791:1410#0/1  
WX``]`^`\_aba`abbZb`]a]a]a`\_\_X\_\_`^babba\_  
@HWI-EAS443:3:99:981:1652#0/1  
GGGGTTCTTCTTGTCTTCCTGATGTGTACTTTTTGATT  
+HWI-EAS443:3:99:981:1652#0/1  
ab`¥SVYbba]abb`\_a]baa`babYbb`Waab`a\_\_  
@HWI-EAS443:3:9:114:1154#0/1  
GGTTCTTCTTGTCTTCCTGATGTGTACTTTTTGATTAT  
+HWI-EAS443:3:9:114:1154#0/1  
^aTa]``a\_aaba¥]aabaab`^b`[\_`aaaa`a\_`  
@HWI-EAS443:3:9:1184:1194#0/1  
GCGGGGTTCTTCTTGTCTTCCTGATGTGTACTTTTTGA  
+HWI-EAS443:3:9:1184:1194#0/1  
abbaaa`babbababbbbbbabb\_aaabbaabbbbaab  
@HWI-EAS443:3:9:1288:1596#0/1  
CGGGGTTCTTCTTGTCTTCCTGATGTGTACTTTTTGAT  
+HWI-EAS443:3:9:1288:1596#0/1  
^a`Y^T\_\_V[\_]Ua^[X`V¥FZ[R`aX\_`^T`ab`aaba  
@HWI-EAS443:3:9:1317:963#0/1  
GGGGTTCTTCTTGTCTTCCTGATGTGTACTTTTTGATT

+HWI-EAS443:3:9:1317:963#0/1  
ZbbaVaaaa\_a\_a\_b\_[`a\_aa\_[^aUUQaa\_a``\_`]  
@HWI-EAS443:3:9:1370:824#0/1  
ATCAAAAAGTACACATCAGGAAGACAAGAGAAGAACCCCG  
+HWI-EAS443:3:9:1370:824#0/1  
ab]a`]]\_a\_aabaa`abaaaa^aaa`[aa`aa^]aa  
@HWI-EAS443:3:9:1469:66#0/1  
CGGGGTTCTTCTTGTCTTCCTGATGTGTACTTTTTGAT  
+HWI-EAS443:3:9:1469:66#0/1  
abbaa`bbbbabbbbbabbbbabbbbbbabbbbabbb  
@HWI-EAS443:3:9:1505:912#0/1  
CGGGGTTCTTCTTGTCTTCCTGATGTGTACTTTTTGAT  
+HWI-EAS443:3:9:1505:912#0/1  
aa\_a]\_^¥ba^bababbabba^aaaaYZ\_^aaaa\_aa  
@HWI-EAS443:3:9:165:639#0/1  
GCGGGTCTTCTTGTCTTCCTGATGTGTACTTTTTGA  
+HWI-EAS443:3:9:165:639#0/1  
aaa¥PUGV[`^`\_\_YW]U\_`a]\_UQZQLJLTVQV\_YY^BB  
@HWI-EAS443:3:9:228:1217#0/1  
GCGGGTCTTCTTGTCTTCCTGATGTGTACTTTTTGA  
+HWI-EAS443:3:9:228:1217#0/1  
`bbaaZF\_aaba]^aaaXaaaaa``a\_a[\_`aaaa`\_  
@HWI-EAS443:3:9:405:1932#0/1  
CGGGGTTCTTCTTGTCTTCCTGATGTGTACTTTTTGAT  
+HWI-EAS443:3:9:405:1932#0/1  
aaaaa`bb`ababb\_a\_ababaaaa^a\_aba``aaaba  
@HWI-EAS443:3:9:490:1383#0/1  
CGGGGTTCTTCTTGTCTTCCTGATGTGTACTTTTTGAT  
+HWI-EAS443:3:9:490:1383#0/1  
aaba`aabbabaaa`aaaa`]`^`\_aX\_\_aaaaaa^\_\_  
@HWI-EAS443:3:9:717:363#0/1  
CGGGGTTCTTCTTGTCTTCCTGATGTGTACTTTTTGAT  
+HWI-EAS443:3:9:717:363#0/1  
abaaaWa`aa\_a[aaa¥]a`^aaa\_\_`WaW\_````Y¥\_`^  
@HWI-EAS443:3:9:800:226#0/1  
AGCGGGTCTTCTTGTCTTCCTGATGTGTACTTTTTG  
+HWI-EAS443:3:9:800:226#0/1  
aaab`b\_]aaaa`a\_aaa`\_a`]``]aa]a^^^aa`a\_  
@HWI-EAS443:3:9:807:1251#0/1  
AGCGGGTCTTCTTGTCTTCCTGATGTGTACTTTTTG  
+HWI-EAS443:3:9:807:1251#0/1  
a]abbaYG\_W^a\_\_^`\_a`aaaY¥aaaRaX`]\_¥a\_\_aa¥  
@HWI-EAS443:3:78:155:429#0/1  
CTGGCATGGCTCGAATCGACCGGGGGTGTCTTCAACCAA  
+HWI-EAS443:3:78:155:429#0/1  
aaa\_ba\_a\_\_\_\_`^VX^][Y\_[YFSZ¥FWJNJ^[QSZ[BBB  
@HWI-EAS443:3:20:684:1714#0/1  
CTGGCATGGCTCGAATCGACCGTGGGTGTCTTCAACCAA  
+HWI-EAS443:3:20:684:1714#0/1  
`aa^]\_XY\_`WQOLZRBBBBBBBBBBBBBBBBBBBB



@HWI-EAS443:3:58:354:397#0/1  
TCCATTTGTTTCATATGATCGTTTGGTGCCTGAGACGCCA  
+HWI-EAS443:3:58:354:397#0/1  
`a]Z^`bbaabb^ab`baa`aaba^aa`a`a`a]\_\_a\_a  
@HWI-EAS443:3:38:1035:1602#0/1  
CTACTGAATACATAATGAAGGGAGTGCACATAAATACGGC  
+HWI-EAS443:3:38:1035:1602#0/1  
a\_XWV¥]\_^]NNQZ^a¥]\_]\_QX¥[]Z^]ZQT^RZ]\_ZMF  
@HWI-EAS443:3:40:415:1827#0/1  
GTCTGCTGTCTGGCTGTCAGTAAATATGCTAAAGTCCCGCT  
+HWI-EAS443:3:40:415:1827#0/1  
[K[aa\_\_[a¥¥¥ZNWRVPWSWWEI¥NR`HTDHJY^a[ SUR  
@HWI-EAS443:3:92:936:1926#0/1  
CCAAGATCGAAGGTTCCAGGTTCCAGGTTATCCCTAAGTG  
+HWI-EAS443:3:92:936:1926#0/1  
aaa`Z[]W\_aa`]^aa`¥]SSQ¥\_]N`a^NQKV]]NTQ  
@HWI-EAS443:3:4:370:647#0/1  
ACTGATCCAAAATGGAAGGCTTTGTGCGACAATGCTTTAA  
+HWI-EAS443:3:4:370:647#0/1  
¥aaIY^ZM]]\_Y[\_Z¥ZWOR`]ZQXa`a`¥^JUWP[TDWU  
@HWI-EAS443:3:54:1381:1641#0/1  
GAAGAGCATCCCAGTGCTGGGAAGGACCCGAAGAAGATCT  
+HWI-EAS443:3:54:1381:1641#0/1  
R]]Z]Z]bbabb]babMaab`a]b^a`ba\_GW]^ZH^\_PI  
@HWI-EAS443:3:69:602:1977#0/1  
CTGTCTTCTTAGGGTCTTCCCAGCACTGGGATGCTCTTC  
+HWI-EAS443:3:69:602:1977#0/1  
a`UJ^bbbbbaa¥\_baa`baaa`^`\_aa]aa\_a^a`\_a  
@HWI-EAS443:3:25:1566:1237#0/1  
TGCTGGGTTCTTCTTGTCTTCTGATGTGTACTTTTTG  
+HWI-EAS443:3:25:1566:1237#0/1  
a\_\_aaaa`[\_]\_\_aa`^`\_[Za`Z^a]]Y]]^`\_^\_^  
@HWI-EAS443:3:33:447:967#0/1  
CAGAATGCCATAAGCACCACATTCCCTTATACTGGAGATC  
+HWI-EAS443:3:33:447:967#0/1  
ab]aa`aaaa]a`ababaaaa`a\_a`^a\_a^¥¥¥\_¥^Y^  
@HWI-EAS443:3:39:1136:335#0/1  
TGATTCCAGAGAGGAATGAACAAGGACAAACTCTCTGGAG  
+HWI-EAS443:3:39:1136:335#0/1  
^aaaaS[]a^\_a]ZU^^S^T¥YZ]]P[aXSPDRa`Ta`RU  
@HWI-EAS443:3:60:389:956#0/1  
TGTGGATCATATGGCCATAATCAAAAAGTACACATCAGGA  
+HWI-EAS443:3:60:389:956#0/1  
aaZaa¥\_¥L¥¥[¥`aaV¥]`XXZ\_a^\_PP¥XXZZUZ[X¥Z  
@HWI-EAS443:3:19:1182:41#0/1  
AGAGATATGGTCCAGCATTAAGCATCAATGAACTGAGCAA  
+HWI-EAS443:3:19:1182:41#0/1  
aaaaaabab]^a\_b\_^aaa`a`\_a`a\_aa^^^a\_\_\_0\_^  
@HWI-EAS443:3:22:809:867#0/1  
GAAGACAAGAGATATGGTCCAGCATTAAGCATCAATGAAC

+HWI-EAS443:3:22:809:867#0/1  
^]Z]^a\_aa¥a\_¥]\_[a]\_\_Z\_[[SU][Z^\_^^V\_]\_\_[  
@HWI-EAS443:3:79:566:1757#0/1  
AGATTGCTCAGTTCATTGATGCTTAATGCTGGACCATATC  
+HWI-EAS443:3:79:566:1757#0/1  
abaaa`baaX`Xaaaa^R`[^a`^^`a`^^]]\_a\_\_`  
@HWI-EAS443:3:2:353:202#0/1  
AATCGCTCCTAACTGCCTTGATCATGCAATCCTCTTGTGA  
+HWI-EAS443:3:2:353:202#0/1  
aaa^a\_\_[^`\_\_U]\_Y\_]\_[^V`]\_V^`¥Y]YY\_^]Y\_Y  
@HWI-EAS443:3:79:648:1698#0/1  
ATGGAAATAAGGCGCTGCCTTCTTCAGTCTTTCAGCAGA  
+HWI-EAS443:3:79:648:1698#0/1  
a`a]aa`\_\_a`a`aa`aa`a`[^aa\_\_aZ\_^Z\_  
@HWI-EAS443:3:82:428:1462#0/1  
GTAAACCAAGATGCATTAAGCAAAACCCAGGGATCATT  
+HWI-EAS443:3:82:428:1462#0/1  
a^aab`ab`b`a`aaaaaaaaaUaaa`^^`\_]\_]`a¥a  
@HWI-EAS443:3:64:708:521#0/1  
CCTGCTGTCTGAGTTCTTCAATGGTGAACAGATCTTCAT  
+HWI-EAS443:3:64:708:521#0/1  
abab^a\_a`^`V\_\_aaaa\_]\_]a`Xa]`^^`\_`^a`a\_\_  
@HWI-EAS443:3:71:489:1374#0/1  
CGGGATTCTTCTTGTCTTCCTGATGTGTACTTTTTGAT  
+HWI-EAS443:3:71:489:1374#0/1  
\_¥`[Z``bbb^]ab^`]Z`Ta^ZZ]¥¥V`^`aa`\_`\_`a]  
@HWI-EAS443:3:18:581:1764#0/1  
CAAGGACAAACCCTCTGGAGCAAAACAAACGATGCTGGGG  
+HWI-EAS443:3:18:581:1764#0/1  
^[^`\_V`]¥T^Y]^]TQ`\_L^R\_]b]Wa¥a\_R`Z\_\_a\_a  
@HWI-EAS443:3:99:1000:1707#0/1  
TATGGCCAGCATTAAAGCATTAAATGAATTGAGAAATCTTG  
+HWI-EAS443:3:99:1000:1707#0/1  
\_`a\_Y\_bbZU`bbb^^`abaJ^a\_\_N\_G[KaUG^VY]aaa  
@HWI-EAS443:3:40:1048:444#0/1  
CGTGTCCATGGTGTATCCTGTTCCCTGTTCCATGGCTGTAT  
+HWI-EAS443:3:40:1048:444#0/1  
[\_¥`\_`b¥`\_b\_]^[a\_aba`^^`U\_^ZW¥`a`a`GFJ  
@HWI-EAS443:3:37:162:1501#0/1  
AGCAGGGTAGATAATCACTCAATGAGTGATATCGAAGTCA  
+HWI-EAS443:3:37:162:1501#0/1  
`¥^WXPD^^`[ba]`U[\_`¥U¥]]Z\_]NF0a\_\_]YQP¥Q  
@HWI-EAS443:3:22:738:1211#0/1  
GGGAGCAAAAGCAGGGTAGATAATCACTCAATGAGTGACA  
+HWI-EAS443:3:22:738:1211#0/1  
abb\_]bbabZabbaa¥bab]]aabaaaa`\_`aa\_G`\_`a  
@HWI-EAS443:3:69:964:2021#0/1  
GGGTCTTATTTCTTCGGAGACAATGCAGAGGAGTTTGAGA  
+HWI-EAS443:3:69:964:2021#0/1  
[`bSbb`^\_^[ba`ba^]Xaaba`\_aaaTb[X]T¥aWQ¥[

@HWI-EAS443:3:75:416:706#0/1  
TTTCAGACCAGCACTGGAGCTAGGATGAGTCCCAATCGTT  
+HWI-EAS443:3:75:416:706#0/1  
`^\_a\_\_aab¥a][LaZZ`NN]`X\_LXX¥V[\_UTZXGVTZ  
@HWI-EAS443:3:15:1479:356#0/1  
TCCATGGTGTATCCTGTTCCCTGTTCAATGGCTGTATGGGG  
+HWI-EAS443:3:15:1479:356#0/1  
]SZ^^a¥XSW^SNS¥\_Z^¥]bXXQHRZabLK YFJHXYDW  
@HWI-EAS443:3:10:626:1280#0/1  
GTTCCCTGTTCCATGGCTGTATGGGGGATCTCCAGTATAAG  
+HWI-EAS443:3:10:626:1280#0/1  
a\_ZZ[\_^UX\_[PWa¥TXZGTUGVQ^\_GWGSWQBBBBBBBB  
@HWI-EAS443:3:95:934:641#0/1  
TCCATGGTGTATCCTGTTCCCTGTTCCATGGCTGTATGGGG  
+HWI-EAS443:3:95:934:641#0/1  
a\_QQX^`UZYXZ^L][```Va\_`Y^PLS`]BBBBBBBBBB  
@HWI-EAS443:3:64:1721:1020#0/1  
TCACAAGACCCTGTGGACCATATGGCCATAATCAATAAG  
+HWI-EAS443:3:64:1721:1020#0/1  
abaaa`^a^aaY\_\_Q\_a\_\_YV¥\_]`]]Y]Y\_UH`BBBBB  
@HWI-EAS443:3:66:405:1733#0/1  
AAGACCCTGTGGACCATATGGCCATAATCAAAAAATACA  
+HWI-EAS443:3:66:405:1733#0/1  
aaPP¥abX¥\_K¥a`a^]Ya\_a]aSZR]UDMNH^`]GFW\_a  
@HWI-EAS443:3:5:1532:1493#0/1  
TGCCATCTTCAGTCAATGCACCAGCATCCTTTCCAAGAAG  
+HWI-EAS443:3:5:1532:1493#0/1  
ab\_Zb\_^bbSba\_M^`a\_Qb^U^TRWZHX]abYUaabaG  
@HWI-EAS443:3:1:1606:918#0/1  
AAAAGCTTGTGAATTCAAATGTCCCTGTCTTGTATATA  
+HWI-EAS443:3:1:1606:918#0/1  
ab`]`V\_Qa`^Vb^¥a]IZa\_THYY^\_\_`¥I\_aa`\_BBB  
@HWI-EAS443:3:9:597:183#0/1  
TGTACACTCCAGGAGGAGTGTGAGAAATGATGATGTTGA  
+HWI-EAS443:3:9:597:183#0/1  
Z]]aaaa`\_a\_aa^aaX^aW\_UXU]V]]^`]Z^X]^X]¥]  
@HWI-EAS443:3:14:1045:297#0/1  
CTTTGTGCGACAATGCTTCAATCCAATGATCGTCGAGCTA  
+HWI-EAS443:3:14:1045:297#0/1  
abbbb`babbbaaabaabaaaa\_aaaaaa^`]\_a\_`\_\_`  
@HWI-EAS443:3:58:791:933#0/1  
AAAGTTTTCAAGGCTGGAGAAGTTCGGTGGGAGGCTTTTG  
+HWI-EAS443:3:58:791:933#0/1  
`aaa[aaaa\_`a^a\_aa¥a¥\_¥U¥S\_]TY\_\_NSKPW``HZ  
@HWI-EAS443:3:60:492:653#0/1  
AAGCCTCCCACCGAATTCTCCAGCCTTGAAAACCTTAGA  
+HWI-EAS443:3:60:492:653#0/1  
a]]G¥[Y\_QW]a\_^^^\_^W]\_\_UXSLEJZU[XSX]T[`ZN  
@HWI-EAS443:3:70:317:522#0/1  
CCCTAATTGATGGCCATCCGAATTCTTTTGGTCGCTGTCT

+HWI-EAS443:3:70:317:522#0/1  
QI\_T\_RPZ]¥a`¥¥^VZa^aYY\_``]a^X^^X[T^ZOZQ\_  
@HWI-EAS443:3:36:548:601#0/1  
AAGAGAATAATGGACATGATCCCAGAGAGGAATGAACAAG  
+HWI-EAS443:3:36:548:601#0/1  
aaaaa^^a`aaaaa\_aa]\_aaV[^]X^\_^\_^[[\_Q\_]\_  
@HWI-EAS443:3:52:720:1813#0/1  
CTTTTGCAAGATTGTTTCAGTTCATTGATGCTTAATGCTGG  
+HWI-EAS443:3:52:720:1813#0/1  
aYQ\_] [MX^a\_YSUF¥L]ZQVaTSN\_WWY[VRYZZSDTYO  
@HWI-EAS443:3:58:1408:46#0/1  
CGGTGGTCTTATGGCATTTCGCGCTGGAACCTTTTAGGAA  
+HWI-EAS443:3:58:1408:46#0/1  
abbabbaaaabbb`\_Y\_bbbbZZ\_^aab`V`bbbabbb¥a  
@HWI-EAS443:3:45:1788:1789#0/1  
CATGAGCAAAAAGAAGTCCTATATAAATAAGACAGGAAAC  
+HWI-EAS443:3:45:1788:1789#0/1  
^]aS¥a\_PPY\_¥PXL[UV]]aS]X`NUYXa[OFI^GZXW  
@HWI-EAS443:3:38:1087:1793#0/1  
ATCGTCTTCTTCTTTGGTCCTACATTTGCTTACCATTGG  
+HWI-EAS443:3:38:1087:1793#0/1  
aab\_^YRZa\_TYMQY][^GST^X`][\_[ZMEMJTMZ^TGP  
@HWI-EAS443:3:98:1221:1090#0/1  
TCGTCTTCTTCTTTGGTCCTACATTTGCTTACCATTGGG  
+HWI-EAS443:3:98:1221:1090#0/1  
aa\_[\_ba]\_aa^aaaa`\_]a\_\_\_`a\_`[`a`Y]a\_^\_\_\_`  
@HWI-EAS443:3:59:1108:1151#0/1  
ACAATGGATTGGGGGATGCCCCATCCCTTGATCGGCTCCG  
+HWI-EAS443:3:59:1108:1151#0/1  
U`^TQb`\_\_baUQGVa[b`bbba\_\_Ya]aWXN^G]UQYTY  
@HWI-EAS443:3:89:943:1175#0/1  
GACCTTCACTATCTCCAGAGCAGAAATGAAAAGTGTGAG  
+HWI-EAS443:3:89:943:1175#0/1  
abaTaaTTa\_^QT`aa]PRSZ`W`^`¥N^Y]H[HN^\_^  
@HWI-EAS443:3:36:750:1797#0/1  
AGCAATAGTTGGAGAAATTTTACCATTACCTTNTCTTCCA  
+HWI-EAS443:3:36:750:1797#0/1  
a^baa\_b`TRS^\_Wa`[`\_\_I`^`]]X`\_]MDT\_V]\_S`  
@HWI-EAS443:3:57:347:692#0/1  
CTGCCTTGCATATGTCTACGGCTTGTTCCTCCGTTGGATT  
+HWI-EAS443:3:57:347:692#0/1  
a\_bbb`\_ba^`a`^a\_aaa^aa`H¥`VTJZBBBBBBBBB  
@HWI-EAS443:3:80:1693:1843#0/1  
AGAATTGCCTCTTACCAGTATCCTCAATCCTGATCCTCTC  
+HWI-EAS443:3:80:1693:1843#0/1  
aa^`aa\_a`X^¥[R¥aa0\_]XY`Q)`YYW\_\_^\_]N¥XW^  
@HWI-EAS443:3:97:723:767#0/1  
GGACCTTCGATCTTGGGGGGCTATATGAAGCAATCGAGGA  
+HWI-EAS443:3:97:723:767#0/1  
a`\_^aVa`¥`Uaa`^a`[\_\_\_a^aa\_\_\_U\_¥UY`^`¥¥

@HWI-EAS443:3:64:121:1997#0/1  
AGCCAATTGAAGTGGGCACTTGGTGAAAATATGGCATCAG  
+HWI-EAS443:3:64:121:1997#0/1  
a`b`V]\_`X¥NTT\_T\_`U¥\_PWP¥X]R]X]RTQT¥]^¥Y  
@HWI-EAS443:3:66:72:780#0/1  
CCATATTTTCACCAAGTGCCCACTTCAATTGGCTTGTCT  
+HWI-EAS443:3:66:72:780#0/1  
abbbbabbbbabb\_aV[bbaabbbaa[`a`]^]a`OZ^^`  
@HWI-EAS443:3:20:904:1387#0/1  
AGCCAATTGAAGTGGGCACTTGGTGAAAATATGGCACCAG  
+HWI-EAS443:3:20:904:1387#0/1  
```aaba^aa]XaWaaa\_b\_aa`b^a\_[aa\_\_aaaaa]\_aa  
@HWI-EAS443:3:49:1000:1518#0/1  
GTGCCATATTTTCACCAAGTGCCCACTTCAATTGGCTTGT  
+HWI-EAS443:3:49:1000:1518#0/1  
a[¥¥¥a`W`aa`W`\_aa`aZa\_XP^)`\_Wa]\_\_a]Y]\_OH  
@HWI-EAS443:3:79:74:833#0/1  
GCCAATTGAAGTGGGCACTTGGTGAAAATATGGCACCAGA  
+HWI-EAS443:3:79:74:833#0/1  
aba]baaa¥aaXaaaaba`\_aaZ[S[[`^\_\_\_^^\_`^`\_\_^  
@HWI-EAS443:3:49:1553:233#0/1  
ATTGATGCCATCATGGCAAGCACTTGCTGACCAAGCGACT  
+HWI-EAS443:3:49:1553:233#0/1  
abba`ab```a`a`][\_YY^¥WSZ\_ZU\_Q[WS^^UO\_]0¥  
@HWI-EAS443:3:92:798:1839#0/1  
AGGATTTTCATTTAAATACGGCAATGGTGTGGATAGGG  
+HWI-EAS443:3:92:798:1839#0/1  
aZUOMMVYTSPXT\_[U¥`¥]ZVWUWXUGVVQZWSZ^QJQY  
@HWI-EAS443:3:7:1639:1360#0/1  
NAAGAAGAGTTTTCTGAGATCATGAAGATCTGTTCCACCA  
+HWI-EAS443:3:7:1639:1360#0/1  
DIPPPWROVNXRTPTZZTPSTXTQTNQRXWOZSZSZZOMQ  
@HWI-EAS443:3:44:1034:909#0/1  
ATTTATCGTCGCTTTAAATACGGTTTGAAAAGAGGGCCTG  
+HWI-EAS443:3:44:1034:909#0/1  
abbbay[VRUa\_aaaVT\_`IQ¥aSTPSLOY¥WJY¥`KFLF  
@HWI-EAS443:3:87:1449:573#0/1  
ATTTATCGTCGCTTTAAATACGGTTTGAAAAGAGGGCCTG  
+HWI-EAS443:3:87:1449:573#0/1  
[bababa`U]S\_bbV¥]aaa]b¥\_`a[a`aY]RR]\_`MJ^  
@HWI-EAS443:3:80:1423:104#0/1  
GTCAGGATATAGCGGGAGTTTTGTTTAGCATCCAGAAATA  
+HWI-EAS443:3:80:1423:104#0/1  
a[^`aa^\_aa[a]\_XaXa¥\_a\_SXWFGTDIYPUU\_NTL]O  
@HWI-EAS443:3:96:96:1691#0/1  
CGCGCGAAAACAGGCAAACCATTTGAATGGATGTCAATCC  
+HWI-EAS443:3:96:96:1691#0/1  
YT¥¥\_UR]^W]]SO\_RVW\_`]]Y[]ZU[W[¥]\_OOHHD¥B  
@HWI-EAS443:3:36:702:574#0/1  
GGGACGCGAAAGCAGGCAAACCATTTGAATGGATGTCAAT

+HWI-EAS443:3:36:702:574#0/1  
aa]R^a`¥LVY¥TZWZ`^a¥¥¥X`[XW^[`[Z¥^WVYVR  
@HWI-EAS443:3:21:665:963#0/1  
AGCCGCGAAAGCAGGCAAACCATTTGAATGGATGTCAATC  
+HWI-EAS443:3:21:665:963#0/1  
aaaa]¥a[W]\_Z`[^a¥R^^^[\_^^\_[[Z\_]XX`UYUVRL  
@HWI-EAS443:3:29:1335:65#0/1  
CACGCGAAAGCAGGCAAACCATTTGAATGGATGTCAATCC  
+HWI-EAS443:3:29:1335:65#0/1  
[baba\_aaaaaaaaa`a`a]^a\_aaa`aa\_\_aa\_^^`\_]R  
@HWI-EAS443:3:32:492:144#0/1  
CCCXGCGAAAGCAGGCAAACCATTTGAATGGATGTCAATCC  
+HWI-EAS443:3:32:492:144#0/1  
abaaabaa]aa`]^aa`^]\_\_^\_\_^`^`[\_X¥WVVTs\_Z  
@HWI-EAS443:3:13:956:1377#0/1  
CGCGAAAGCAGGCAAACCATTTGAATGGATGTCAATCCGA  
+HWI-EAS443:3:13:956:1377#0/1  
\_`baba¥baaa^a`\_a`a\_aa^\_TWa`a`\_SPW^\_U`¥W  
@HWI-EAS443:3:23:1639:1192#0/1  
CGCGAAAGCAGGCAAACCATTTGAATGGATGTCAATCCGA  
+HWI-EAS443:3:23:1639:1192#0/1  
aa[aYbaaabaa\_bbaaab[ab]aaaa\_]b\_]`a^[U` [  
@HWI-EAS443:3:23:18:706#0/1  
CGCGAAAGCAGGCAAACCATTTGAATGGATGTCAATCCGA  
+HWI-EAS443:3:23:18:706#0/1  
abbb`WJ\_baaaa\_a`b]aa`b\_aaaa\_\_a[``a]\_^\_\_  
@HWI-EAS443:3:25:605:887#0/1  
CGCGAAAGCAGGCAAACCATTTGAATGGATGTCAATCCGA  
+HWI-EAS443:3:25:605:887#0/1  
`bb\_Wa`aabaaabb`bbbbabb`babab¥UXZ\_Y]`\_  
@HWI-EAS443:3:2:902:715#0/1  
CGCGAAAGCAGGCAAACCATTTGAATGGATGTCAATCCGA  
+HWI-EAS443:3:2:902:715#0/1  
aabbbbbbbbbbbababababab`bbabab^aaa^\_a`  
@HWI-EAS443:3:32:1583:1992#0/1  
CGCGAAAGCAGGCAAACCATTTGAATGGATGTCAATCCGA  
+HWI-EAS443:3:32:1583:1992#0/1  
`aa¥]W`ZH[^]Y\_a`aS\_a¥U^IR]]GaGS[aW^LSB  
@HWI-EAS443:3:36:109:1239#0/1  
CGCGAAAGCAGGCAAACCATTTGAATGGATGTCAATCCGA  
+HWI-EAS443:3:36:109:1239#0/1  
abbbabaabaaabab^bbaaaaaa`ab`a\_aaaaaa]P  
@HWI-EAS443:3:38:522:344#0/1  
CGCGAAAGCAGGCAAACCATTTGAATGGATGTCAATCCGA  
+HWI-EAS443:3:38:522:344#0/1  
abaaY`abaa`\_`¥`\_`\_`\_a`a^a\_]`^ZU\_\_UW[^W  
@HWI-EAS443:3:69:161:1130#0/1  
CGCGAAAGCAGGCAAACCATTTGAATGGATGTCAATCCGA  
+HWI-EAS443:3:69:161:1130#0/1  
aaaa]TP\_a]a`a^]\_¥`\_aa\_\_`Y\_]\_]XSUMJSPYRX

@HWI-EAS443:3:82:1377:757#0/1  
CGCGAAAGCAGGCAAACCATTTGAATGGATGTCAATCCGA  
+HWI-EAS443:3:82:1377:757#0/1  
`bbbb`aaaabaabbbabbbbbbbbbbb`bbba`abaXa`a  
@HWI-EAS443:3:98:136:1226#0/1  
CGCGAAAGCAGGCAAACCATTTGAATGGATGTCAATCCGA  
+HWI-EAS443:3:98:136:1226#0/1  
aa``]]`a`\_a[WLT¥Y^^\_YV[Y¥\_^UYZOTX¥VTULW  
@HWI-EAS443:3:5:330:1897#0/1  
AGGCGGGGAGTCTTCGAGCTCTCGGAGGAAAAGGCAAGGA  
+HWI-EAS443:3:5:330:1897#0/1  
YGQM`aZa[^¥Z`a\_R¥T¥a^^\_[VQZ¥¥¥QVRBBBBB  
@HWI-EAS443:3:63:149:123#0/1  
GGGGGCGGGGAGTCTTCGAGCTCTCGGACGAAAAGGCAAC  
+HWI-EAS443:3:63:149:123#0/1  
a\_R`¥^[XP]R`RU`PSSXTTZ[ZZRYPZNPTRTST  
@HWI-EAS443:3:55:626:2020#0/1  
GCCATAATCAAGAAGTATACATCAGGAAGACAAGAGAAGA  
+HWI-EAS443:3:55:626:2020#0/1  
aaT[]WYTab\_K[^UYT`\_^¥RRZNU[TSGY`VZ`¥`¥  
@HWI-EAS443:3:2:1389:1185#0/1  
CTCTTGCTTCCTGATGTGTACTTNTTGATTATGGCCATA  
+HWI-EAS443:3:2:1389:1185#0/1  
Q\_bbbbbba]bb`bZV]bVbbUbb[D^bbabab`\_`[aaab  
@HWI-EAS443:3:34:1310:223#0/1  
ATGGCCATAATCAAGAAGTACACATCAGGAAGACAAGAGA  
+HWI-EAS443:3:34:1310:223#0/1  
a]]\_0]^`^`¥Z¥FR\_[[`T\_X¥\_XZ`YU]YXXW^¥¥BB  
@HWI-EAS443:3:38:360:986#0/1  
GGGTTCTTCTTGTCTTCCTGATGTGTACTTCTTGATTA  
+HWI-EAS443:3:38:360:986#0/1  
\_aYG]bYX\_U`¥`Z^`aYUY¥^T]ZT[YO[\_P¥\_X[XWS  
@HWI-EAS443:3:100:1437:425#0/1  
CGGGGAGTCTTCGATCTCTCGGACGAAAAGGCAACGAACA  
+HWI-EAS443:3:100:1437:425#0/1  
ab^RbJa`aaZ`¥`IRIZM^Zbbbb\_I\_S\_UJQUG\_YBBB  
@HWI-EAS443:3:96:1146:111#0/1  
GGGAGTCTTCGAGCTCTCGGACGAAAAGGGAACGAACACG  
+HWI-EAS443:3:96:1146:111#0/1  
aP^^`RLRXM`S^DDMUJBBBBBBBBBBBBBBBBBBBBB  
@HWI-EAS443:3:10:405:24#0/1  
AGCATGTTAAACATGCCATCATCATCCCAGGACTCAGTG  
+HWI-EAS443:3:10:405:24#0/1  
]\_^Y^`]^b`^]a\_\_¥X^`ZYZ]Z[ZXWWW^^^]TDN\_GY  
@HWI-EAS443:3:26:1648:566#0/1  
CTGAGTCCTGGGATGATGATGGGCATGTTAACATGCTAA  
+HWI-EAS443:3:26:1648:566#0/1  
`a`Yb^bUa[aaaaabb^aa`\_abaaaaa^Zb\_a\_aa`  
@HWI-EAS443:3:32:130:1559#0/1  
TGAGTCCTGGGATGATGATGGGCATGTTAACATGCTAAG

+HWI-EAS443:3:32:130:1559#0/1  
aabb\_bbb`aaaa`aaa\_` `aaaaaaaaaaa\_\_a`ba[  
@HWI-EAS443:3:48:247:1118#0/1  
ACTGAGTCCTGGGATGATGATGGGCATGTTAACATGCTA  
+HWI-EAS443:3:48:247:1118#0/1  
a\$`\_]b`^]b]a^[a^a`b` `a` [ `aaa`aaa^Vaaa\_aa  
@HWI-EAS443:3:50:1196:902#0/1  
CACTGAGTCCTGGGATGATGATGGGCATGTTAACATGCT  
+HWI-EAS443:3:50:1196:902#0/1  
`bbbaabaaabbbbbbbbbbabaaaaabbbbbbaabaaaa  
@HWI-EAS443:3:69:1060:1064#0/1  
CACTGAGTCCTGGGATGATGATGGGCATGTTAACATGCT  
+HWI-EAS443:3:69:1060:1064#0/1  
aVaZVa`\_b` `a[ `^`b^[ `a]^`^`aaaaR^a]a[a[ `b`  
@HWI-EAS443:3:87:470:881#0/1  
AGCATGTTAACATGCCATCATCATCCCAGGACTCAGTG  
+HWI-EAS443:3:87:470:881#0/1  
a\_aaaaWaaba^`\_\_`\_`\_aa`\_a```\_]`\_`^` `\_\_`X^  
@HWI-EAS443:3:89:1510:1221#0/1  
CACTGAGTCCTGGGATGATGATGGGCATGTTAACATGCT  
+HWI-EAS443:3:89:1510:1221#0/1  
aa^\_bU`¥Yab¥a`ab`aba\_baaaaabbaabba¥\_a\_[Z  
@HWI-EAS443:3:98:704:930#0/1  
AGCATGTTAACATGCCATCATCATCCCAGGACTCAGTG  
+HWI-EAS443:3:98:704:930#0/1  
]V]aabaabaaab` ``aaabbaa`aa\_a^` `a\_T\_^a\_^a  
@HWI-EAS443:3:20:928:1288#0/1  
CGTCGCTTTAAATACGGGTTGAAAAGAGGGCCTTCTACGG  
+HWI-EAS443:3:20:928:1288#0/1  
abaa\_b¥\_]`^`b¥a\_ZTGYa^S\_a]QS]¥`XOMS]^aKTH  
@HWI-EAS443:3:54:604:530#0/1  
CAATTTCAATGAACCGTTCTCTTTGTAGTCATACAAATC  
+HWI-EAS443:3:54:604:530#0/1  
ab\_bb`b¥]^a\_\_^`bb`a\_aaaabaa^a]aa`a¥aa^a`  
@HWI-EAS443:3:76:1392:1363#0/1  
GCCTGAGTCCATGAGGGAAGAATATAAACAGGAAAAGCAG  
+HWI-EAS443:3:76:1392:1363#0/1  
a^V`P][JSQSWTTQY^^]Y]XVUGRYUTVYUZHUVUQSV  
@HWI-EAS443:3:33:1095:262#0/1  
AGGAGGGCCTTCTACGGAAGGAGTGCCTGAGTCCATGAGG  
+HWI-EAS443:3:33:1095:262#0/1  
a`]Z¥\_aba^aWa\_¥\_]W`\_[QXTYGJ]]V\_MPY[^¥P^X  
@HWI-EAS443:3:29:930:1461#0/1  
ATCCCAGTGCTGGGAAGGACCCTAAGAAAACAGGAGGCAG  
+HWI-EAS443:3:29:930:1461#0/1  
]^`\_WTU``Z[YUa]RX^`aa]a¥P`[X^aaXO^Z¥a`a  
@HWI-EAS443:3:96:77:518#0/1  
AGGGGCCTCCTGTTTTCTTAGGGTCCTTCCCAGCACTGGG  
+HWI-EAS443:3:96:77:518#0/1  
`bb]OZaaa`W``]a` `¥]¥G]]N]^`QTJS[^`YRX[R¥



@HWI-EAS443:3:82:1075:343#0/1  
GCCTCCTGTTTTCTTAGGGTCCTTCCCAGCACTGGGATGC  
+HWI-EAS443:3:82:1075:343#0/1  
aaaaa\_ababbbabaa\_aa^abaa``a[a\_b`[aa`b`  
@HWI-EAS443:3:83:1074:66#0/1  
GCCTCCTGTTTTCTTAGGGTCCTTCCCAGCACTGGGATGC  
+HWI-EAS443:3:83:1074:66#0/1  
a``a\_aab`abb¥bbaaa]\_`\_aa\_^]\_\_\_^Y`aa^^``V  
@HWI-EAS443:3:53:132:1714#0/1  
ATCCCCAGTGATTGTGAAAGAAATCTCTGTGTCTTGTGAA  
+HWI-EAS443:3:53:132:1714#0/1  
^^b]\_¥ZX[¥`][WVU^a]JMU\_\_[S¥0]\_WLX[T]OMVW  
@HWI-EAS443:3:61:953:1112#0/1  
CTCGAATCGACCGTGGGTGTCTTTCACCCAGAATCTGGAA  
+HWI-EAS443:3:61:953:1112#0/1  
M`abbbaa\_b\_aVa¥aWZ\_]bb¥b`^HWb`ZW`Z[\_K\_Z^  
@HWI-EAS443:3:4:1643:2023#0/1  
TGGCTGATTTGAATTTTACCACAAATGCGATAACACGTGC  
+HWI-EAS443:3:4:1643:2023#0/1  
aabbb\_HQa]b\_`L\_a[VTa\_V^b^\_VDSYa^ZYTM BBB  
@HWI-EAS443:3:91:235:752#0/1  
TGGCTGCTTTGAATTTTACCACAAATGCGATAACACGTGC  
+HWI-EAS443:3:91:235:752#0/1  
aabaabYaaa^\_aa``¥Z[\_a^a]]\_`Z^\_\_[^^^`Z^Y  
@HWI-EAS443:3:29:1640:1817#0/1  
ATTCTGTGTGCTCTTCAGGTCTGCTGCATATCCTGACACG  
+HWI-EAS443:3:29:1640:1817#0/1  
\_Z\_Z\_\_SUZb`b\_`a\_a¥\_U`UXHU[Qa^aZRP¥UBBBBB  
@HWI-EAS443:3:38:285:1679#0/1  
ATCAGTTTCTGGATGTGCTCTAATGGGTCTCTACAGTGCC  
+HWI-EAS443:3:38:285:1679#0/1  
aaa``^`aaZ^Z]]`WSa[U\_`XVU^XX]NNWYUXYVV]V  
@HWI-EAS443:3:38:194:1902#0/1  
GAACTGAGCAATCTTGCAAAGGAGAGAAAGCTAATGTGT  
+HWI-EAS443:3:38:194:1902#0/1  
UXaba\_Y\_]aa`a`ab`¥¥aa]]Z\_bb\_HHYbaa\_¥¥GOF  
@HWI-EAS443:3:83:857:519#0/1  
GTGGTTTTTAAACAATTCGACACTAATTGATGGCCATCCG  
+HWI-EAS443:3:83:857:519#0/1  
]PFR]¥TYXR]QW0¥a]VUUYZXZVTV]X^a¥[`QX[`[  
@HWI-EAS443:3:87:1296:209#0/1  
AGCATCATTACTTATGAAAACAACACTTGGGTAAACCAGA  
+HWI-EAS443:3:87:1296:209#0/1  
`b`bbb`bbbab`¥^`aaaaaaa``Z`bbaaT`]a]WZaa  
@HWI-EAS443:3:14:1222:1622#0/1  
CTCCAGCGCAAATGCCATAAGCACCATTCCTTATAC  
+HWI-EAS443:3:14:1222:1622#0/1  
aba`ZZaaV`]aX\_aaaba`a\_`S]\_S`\_`NTS[]\_abV  
@HWI-EAS443:3:68:1625:455#0/1  
CTCCAGCGCAAATGCCATAAGCACCATTCCTTATAC

+HWI-EAS443:3:68:1625:455#0/1  
aY[`S\_`^\_aWaaa^J`]^`¥¥baaaV`UH^]UDE\_ZUY[Q  
@HWI-EAS443:3:81:1040:1687#0/1  
TTTGCATTTTCCATCATTCTTATAACTTCTGTTCGCATGT  
+HWI-EAS443:3:81:1040:1687#0/1  
aTXa]¥I^aYYQVSTsb\_SWJ^bXaX\_^ON\_\_a\_`Y`\_\_]  
@HWI-EAS443:3:61:1020:1078#0/1  
AACAGATCTTCATGATCTCAGCGAACTCTTCTTTCTTGAT  
+HWI-EAS443:3:61:1020:1078#0/1  
¥`\_¥^^abba¥aa`aba]aSRK\_¥a^``aa[b^`a\_\_\_\_`]  
@HWI-EAS443:3:85:293:530#0/1  
GCGAAATCACATGTGTGTGCAGGGATAACTGGCATGGCTC  
+HWI-EAS443:3:85:293:530#0/1  
YE[^\_OX``XZXW¥¥PUK¥YSXRKQXONPZ¥KWBBBBBBBB  
@HWI-EAS443:3:98:1756:835#0/1  
ACGGCCATATGGTCCACAGTGGTCTTAGTGAGTATCTAGA  
+HWI-EAS443:3:98:1756:835#0/1  
^]RZ[baWa``XRYZZR^\_N¥HMDT`\_\_SR]^`WaVLBBBB  
@HWI-EAS443:3:38:1660:1558#0/1  
ACGGCCATATGGTCCACAGTGGTCTTAGTGAGTATCTCGC  
+HWI-EAS443:3:38:1660:1558#0/1  
aaX]^`¥Z]X¥]TDM`¥ZQZMW[FV¥¥RBBBBBBBBBBBBBB  
@HWI-EAS443:3:86:929:1207#0/1  
CTCCTGGGTAACACGTTCCCTTGTCTGAACTAGTTGTTTC  
+HWI-EAS443:3:86:929:1207#0/1  
a`aaa`aa\_baaaab`aaWPT^`NZ\_]U\_X\_[\_Y^\_\_Y\_R  
@HWI-EAS443:3:79:72:1605#0/1  
ATTCGCAAGCGATTTGCAGACAATGGATTGGGTGATGCCC  
+HWI-EAS443:3:79:72:1605#0/1  
a``a\_a]^`a`^`^\_\_¥`[ZZ\_¥[ZXUWVUWQSQWWSSWW^  
@HWI-EAS443:3:54:100:504#0/1  
TCGGGTCTTCCCATATTCTTTTATTGCCTTTTCCGCAAG  
+HWI-EAS443:3:54:100:504#0/1  
ab¥\_[X[ [U0`a¥HUQT^\_b]b`¥b]YX]aba0QL\_F[¥¥  
@HWI-EAS443:3:54:198:1368#0/1  
CGGGTCTTCCCATATTCTTTTATTGCCTTTTCCGCAAGC  
+HWI-EAS443:3:54:198:1368#0/1  
a¥LLU^W`[a\_\_aaa`aaaa[ZVZ`UXN`aa]a\_aa]MQT  
@HWI-EAS443:3:51:612:185#0/1  
GACTCAGGCACTCCTTCCGTAGAAGGCCCTCCTTTCAAAC  
+HWI-EAS443:3:51:612:185#0/1  
`XYaa`IPU`RT`aRPV[aaTbTaaZZ\_YJJP\_`[XZ\_a\_  
@HWI-EAS443:3:33:910:1855#0/1  
ACTTCAAGCAGTAGTTGTAAGGCTTGAATAAATGTTATTT  
+HWI-EAS443:3:33:910:1855#0/1  
a`VaaaXL\_¥`L`a[`\_Za\_a[\_\_\_[[G]Q\_[W[^S^Z[V^  
@HWI-EAS443:3:36:121:1479#0/1  
GTCCCCAGTGATCGTGAAAGAAATCTCTGTGTCTTGTGAA  
+HWI-EAS443:3:36:121:1479#0/1  
aabbba^aaaa^F¥\_a`¥a\_Z^baaab``\_a^aa]XZ`a`

@HWI-EAS443:3:99:152:1392#0/1  
GAGTTCTTCAATGGTGAACAGATCTTCATAATCTCAGAG  
+HWI-EAS443:3:99:152:1392#0/1  
a\_`IY[`a`]^a``]^a\_\_\_ab^¥¥^`a`aYa\_¥`^`]\_a  
@HWI-EAS443:3:77:1741:501#0/1  
ATTCATTTTGGACCCAGCTTGCTAGAGATCTGGGCTCCGG  
+HWI-EAS443:3:77:1741:501#0/1  
^`]XWU^[a^`¥OMSab\_aWLUXWR^ZQFVWT\_[RT¥GZB  
@HWI-EAS443:3:46:636:1254#0/1  
GCTTCCGGCAGATGCTCTGATTTCTGTGGCATCCTGGCGC  
+HWI-EAS443:3:46:636:1254#0/1  
\_abaaa`ba`b``\_¥\_\_\_a\_\_`a^a\_X`\_\_[\_¥^[XX]^]  
@HWI-EAS443:3:56:1472:521#0/1  
CCGGCAGATGCTCTGATTTCTGTGGCATCCTGGCGCTCCC  
+HWI-EAS443:3:56:1472:521#0/1  
aaba`bb\_Uaaab``a])babb^aa\_a[[[S`aR`[¥¥¥`  
@HWI-EAS443:3:7:1049:1563#0/1  
CTTCGTCCATTTTCACCCCTCCAGAAATTTTCGGTCATCGA  
+HWI-EAS443:3:7:1049:1563#0/1  
ab¥]\_\_\_b[a^\_ZZ\_^0\_`ZYa¥\_ZJS)`\_W\_a^¥SSDZB  
@HWI-EAS443:3:31:920:962#0/1  
GAGACAATCCACGCCCTAATGATAAGACAGGCTGAGGCAG  
+HWI-EAS443:3:31:920:962#0/1  
R]\_QZ\_\_R]HVVQ[V¥X]¥¥\_W]XYZX]¥X^YW]JPZ[QS  
@HWI-EAS443:3:14:141:1041#0/1  
AGCCTGTCTTATCATTAGGGCGTGGATTGTGTCCGAAAAT  
+HWI-EAS443:3:14:141:1041#0/1  
¥¥`ZLYM\_baaV`Y^^b¥S^````\_a]Y^WDY]]\_\_``]\_  
@HWI-EAS443:3:89:365:1138#0/1  
AGCCTGTCTTATCATTAGAGCGTGGATTGTCTCCGAAAAT  
+HWI-EAS443:3:89:365:1138#0/1  
\_`aSXQ^^`YI^X¥\_X\_\_OZTQM]^Z\_MNXaa¥`\_XNFZ\_  
@HWI-EAS443:3:23:883:1286#0/1  
AGCCTGTCTTATCATTAGGGCGTGGATTGTCTCCGAAAAT  
+HWI-EAS443:3:23:883:1286#0/1  
aaba````ba`\_a¥aa`\_]Z^^\_YZ¥]^]^TYVVQXX\_^\_^  
@HWI-EAS443:3:3:872:899#0/1  
AGCCTGTCTTATCATTAGGGCGTGGATTGTCTCCGAAAAT  
+HWI-EAS443:3:3:872:899#0/1  
aba\_``b^aa`a^`a`aaa\_aaXa]^`\_]X\_]R[\_^\_\_`B  
@HWI-EAS443:3:97:1178:1836#0/1  
CGTCTTTTTTCAAATGTATTTATGGTCGCTTTAAATATG  
+HWI-EAS443:3:97:1178:1836#0/1  
[^a]`¥a\_b\_bba`aba\_¥¥bba]G[``^^Wb¥ba\_b\_Mb  
@HWI-EAS443:3:11:1305:1557#0/1  
AAAGAAGTGAAGATCTAATGTGCGAGTCTCGCACTCGCG  
+HWI-EAS443:3:11:1305:1557#0/1  
\_]\_¥a]]a]\_V]U^`[aaW^`R]¥X]XWUDTLV¥NR[BBB  
@HWI-EAS443:3:2:47:1756#0/1  
GAGAATAAAAGAAGTGAAGATCTAATGTGCGAGTCTCGC

+HWI-EAS443:3:2:47:1756#0/1  
T\_bbbZ`abb]aababaaab`b`aabbaaaaRba]WDX`¥  
@HWI-EAS443:3:49:993:809#0/1  
GAACTGAGAGATCTAATGTCGAGTCTCGCACTCGCGAGA  
+HWI-EAS443:3:49:993:809#0/1  
a[a`b\_aabaaaaa\_ab\_aa\_a\_¥^a\_a\_V`a`^`¥`¥  
@HWI-EAS443:3:66:763:906#0/1  
GCCGGTATTTCTTCAATTAACCACCTTATTTCTCAAATT  
+HWI-EAS443:3:66:763:906#0/1  
abb\_\_SXP¥ZS^¥¥[^`[Q¥\_WYSMY]]\_`\_]Z]YXT\_`Z  
@HWI-EAS443:3:34:1133:1689#0/1  
GTCGTATTTCTTCAATTAACCACCTTATTTCTCAAATTT  
+HWI-EAS443:3:34:1133:1689#0/1  
¥J`^`Sab^Yaba^]`Vaaab`aa^`XaaaaV`\_\_`^`\_^  
@HWI-EAS443:3:4:828:1107#0/1  
CGCGCTACCTTTCTGACATAACCCTCGAGGAAATGTCACG  
+HWI-EAS443:3:4:828:1107#0/1  
aba]a`\_`abba`aaa\_baaa`^`\_\_aab^S\_a`\_¥Ra¥a  
@HWI-EAS443:3:50:1161:604#0/1  
AGGGGACGTAGTGTGGTAATGAAACGAAAGGGGACTAT  
+HWI-EAS443:3:50:1161:604#0/1  
^`^`bbU¥\_UXZa]\_`a`V\_X\_[V¥`J\_GZ]UG[b\_GOZDQ  
@HWI-EAS443:3:14:1646:20#0/1  
ATTGGGCAAGGGGACGTAGTGTGGTAATGAAAAGGAAAC  
+HWI-EAS443:3:14:1646:20#0/1  
a[``\_Z¥¥M]`aa^^`R]a^BBBBBBBBBBBBBBBBBBBB  
@HWI-EAS443:3:100:1083:570#0/1  
CGTCCCGTTTCCGTTTCATTACCAACTACGTCCCTTG  
+HWI-EAS443:3:100:1083:570#0/1  
`b`^]Z\_a¥Z[]T[a\_¥UaU¥\_a¥W[]U^`TWZ[QBBBBB  
@HWI-EAS443:3:17:1572:1312#0/1  
ACCGTTTCATTACCAACTACGTCCCTTGCCCAATTAG  
+HWI-EAS443:3:17:1572:1312#0/1  
^\_¥a`aa`¥a¥\_S¥[W[a`a]`a]YQZVT[Z¥RV^[[UTT  
@HWI-EAS443:3:37:79:420#0/1  
CCCGTTTCCGTTTCATTACCAACTACGTCCCTTGCCC  
+HWI-EAS443:3:37:79:420#0/1  
abbaW^`^`ab]`a`Z[M]PXa`W]N\_`VL\_a`YV^[[V  
@HWI-EAS443:3:50:1766:1013#0/1  
GTCCCGTTTCCGTTTCATTACCAACTACGTCCCTTGCC  
+HWI-EAS443:3:50:1766:1013#0/1  
a`^`AQ\_aaa[^a^]\_\_aa^`¥¥]XW[^`^`X]S¥TZVZTXS  
@HWI-EAS443:3:55:510:1386#0/1  
ATATCAACAGGAACAGCAGAGTGCTGTGGATGTTGNCGGT  
+HWI-EAS443:3:55:510:1386#0/1  
Q¥\_XW\_aab`\_[W\_\_TY\_WR\_V¥W`\_`\_`BBBBBBBBBBBBB  
@HWI-EAS443:3:83:358:603#0/1  
CGTGGGTTGGTCTTGCCAGACGGTGCTGAGTTGCCATTT  
+HWI-EAS443:3:83:358:603#0/1  
aaZ\_]NV[XS^\_ZUY^\_]UYZ[YFZ^[V[]LSRRU[SSZ

@HWI-EAS443:3:90:1018:533#0/1  
CGTGGGTTGGTCTTGGCCAGACGGTGCTGAGTTGCCATTT  
+HWI-EAS443:3:90:1018:533#0/1  
aaaa^`ZabaabZbaa`aabaaa^[a\_a][a[`aXYUXaa  
@HWI-EAS443:3:44:162:552#0/1  
GGCCAACCGAATTCTTTTGGTCGCTGTCTGGCTGGCAGTA  
+HWI-EAS443:3:44:162:552#0/1  
\_V¥\_]¥XU]W¥]\_aU¥\_\_WY]\_`X`XM¥^RZTVTFUVJF  
@HWI-EAS443:3:55:1159:1619#0/1  
CTAATTGATGGCCAACCGAATTCTTTTGGTCGCTGTCTGG  
+HWI-EAS443:3:55:1159:1619#0/1  
`bXXZ¥P`S`P`G`PZTOYV\_[[PYTTN`G`a]PaHTV\_\_  
@HWI-EAS443:3:61:976:1947#0/1  
CAATGCTTCAATCCAATGATCGTCGAGCTTGGCGAAAAAG  
+HWI-EAS443:3:61:976:1947#0/1  
abb)`aaabb`a``aaaabaaa\_aaaa^^]Y^\_^Z]YY^  
@HWI-EAS443:3:63:1487:519#0/1  
TTGTGTATTCATCTTTTCAATAACAGAATTTACTTTGTTA  
+HWI-EAS443:3:63:1487:519#0/1  
aa`\_a^\_a`a`^aa`\_a¥`^`\_aa`^\_`^`a`\_a¥`\_`  
@HWI-EAS443:3:49:1637:1516#0/1  
GAATCCCACCCAGGAATATTTGAGAATTCATGTCTTGAAA  
+HWI-EAS443:3:49:1637:1516#0/1  
a¥bbb`a¥a`baab\_ababb`aaaaabaYaaa\_\_aaa¥aa  
@HWI-EAS443:3:37:1024:1756#0/1  
GCTGGCTGGATCCTGGGAAATCCAGAGTGGGAATCACCT  
+HWI-EAS443:3:37:1024:1756#0/1  
^\_¥\_a\_¥¥XQWWRYYXZQ]X]\_¥\_[BBBBBBBBBBBBBBB  
@HWI-EAS443:3:19:414:246#0/1  
AACAGTGACCACAGAAGCTGCTTTTGGTCTGGTGTGTGCC  
+HWI-EAS443:3:19:414:246#0/1  
aaaaaU^aaa^aaabaaaV[¥\_¥\_\_^¥VUTZ^¥\_SSN¥UZ  
@HWI-EAS443:3:48:217:258#0/1  
GCCCAATCATGACTCGAACAAAGGTGTAACGGCAGCGTGT  
+HWI-EAS443:3:48:217:258#0/1  
aa`a[aaTG``\_`YYZT^[\_^\_\_QTHZ`[\_BBBBBBBBBB  
@HWI-EAS443:3:61:1724:651#0/1  
CGCTGCCGTTACACCTTTGTTTCGAGTCATGATTGGGCCAT  
+HWI-EAS443:3:61:1724:651#0/1  
ab^bb`bbbbbb\_a\_^bbbababb`b`baab`a^b``U¥S\_  
@HWI-EAS443:3:53:15:852#0/1  
GCCGGTCAAATATATTCAATATGGAGAGAATAAAGAAGT  
+HWI-EAS443:3:53:15:852#0/1  
a`L\_[Vba¥¥\_\_a\_aaa`a^`^SO¥Z\_R]a`a`a^[\_[^  
@HWI-EAS443:3:34:1157:1336#0/1  
ATAAATCCCAATTACCTCATGGCTTGAAGCAGGTTCTAA  
+HWI-EAS443:3:34:1157:1336#0/1  
abaaaa\_`bb]a[[ST``TYKS`aWBBBBBBBBBBBBBBB  
@HWI-EAS443:3:90:218:227#0/1  
AGGTCTGGTGCCGAGGTGCTGCGGTGGAAGGAGGTGGGA

+HWI-EAS443:3:90:218:227#0/1  
V^¥GXaS^RZa\_X¥X^`T`ZZ][S\_BBBBBBBBBBBBBBBB  
@HWI-EAS443:3:60:1122:1090#0/1  
ACTTCCCAGAAGGTCTGGTGCCGCAGGTGCTGCGGCGGAA  
+HWI-EAS443:3:60:1122:1090#0/1  
aa\_aa]]¥ZY``Ua\_[XXZR]`¥XS]P^`Z`QYWBBBBB  
@HWI-EAS443:3:68:1690:1199#0/1  
CTTCCCAGAAGGTCTGGTGCCGCAGGTGCTGCGGGGGAAG  
+HWI-EAS443:3:68:1690:1199#0/1  
]W[^[a[¥OG]]ZWSY¥GOVYLYNRVVMPPRF¥BBBBBBB  
@HWI-EAS443:3:88:1783:574#0/1  
ACTTCCCAGAAGGTCTGGTGCCGCAGGTGCTGCGGGGGAAG  
+HWI-EAS443:3:88:1783:574#0/1  
Z¥a^Z[a^a\_RT[QX¥]\_M\_[¥\_V\_¥LJSNYXJ[]MBBBB  
@HWI-EAS443:3:99:1567:1320#0/1  
AAGGTCTGGTGCCGCAGGTGCTGAGGTGGAAGGAGTTGGA  
+HWI-EAS443:3:99:1567:1320#0/1  
a]]aXab\_aaaTL\_U^^ZNHP\_SGa\_YaP¥\_M^BBBBBBB  
@HWI-EAS443:3:25:1712:1792#0/1  
CTTCCCAGAAGGTCTGGTGCCGCAGGTGCTGCGGTGGAAG  
+HWI-EAS443:3:25:1712:1792#0/1  
abbaab¥`\_bbaaabbb]b\_]aabab]b\_aa¥a`SaHZ]T  
@HWI-EAS443:3:45:366:12#0/1  
ACTTCCCAGAAGGTCTGGTGCCGCAGGTGCTGCGGTGGAAG  
+HWI-EAS443:3:45:366:12#0/1  
aT[\_]\_`\_^U^`\_XZ¥a]N]XLT]TM[DXZQY¥^XBBBBB  
@HWI-EAS443:3:86:715:51#0/1  
GCCGCAGGTGCTGCGGTGGAAGGAGTTGGAACAATAGCAA  
+HWI-EAS443:3:86:715:51#0/1  
aa]]`\_a]V`WPa]ZaUYGVU`[WVH[[VLVS]]ZVUVWT  
@HWI-EAS443:3:78:1419:1406#0/1  
ATTTCTTCGAGACAATGCAGAGGAGTATGACAGTTGAGA  
+HWI-EAS443:3:78:1419:1406#0/1  
ababab``\_U]a\_abaabWb^`a\_X[[aaTq]^YF`a``\_`  
@HWI-EAS443:3:56:1381:747#0/1  
GGGCCATGAACTTGTCTTAGGGAATATCTCAAACCTTTCA  
+HWI-EAS443:3:56:1381:747#0/1  
a¥OV^\_¥`\_`U`U`0`\_a`XT\_ZZ¥¥\_OWU¥ZGZ\_a\_\_R¥  
@HWI-EAS443:3:27:261:1972#0/1  
GACCAAATGAAAACCCAGCTCACAAAAGCCAATTGGTGTG  
+HWI-EAS443:3:27:261:1972#0/1  
0\_\_[a¥QZ^R¥\_a]a`V\_U\_`\_[Z\_L[H^S[abb\_PY`Z  
@HWI-EAS443:3:50:675:1423#0/1  
AGAGCACTGACATTAATACGATGACCAAAGACGCAGAAG  
+HWI-EAS443:3:50:675:1423#0/1  
`YQ]Yaabba`^bba]]aL^¥aaaaVT`aaZVa\_S\_^^0^  
@HWI-EAS443:3:69:569:1313#0/1  
TCATTGTTCCCCTGAATGCTGCCATAACGGTTGCCCTTT  
+HWI-EAS443:3:69:569:1313#0/1  
a``\_`\_`ab`^`baaabWZ\_X`aVOU\_0^]]XV¥TDW¥]T

@HWI-EAS443:3:14:629:1843#0/1  
TCACCATCCACTACTAGTGCTGACCAACAAAGTCTCTAT  
+HWI-EAS443:3:14:629:1843#0/1  
abbaaa\_`aaaa\_b`aaYKPaa\_dW`aa\_a`a^XS`\_\_`\_  
@HWI-EAS443:3:83:300:1272#0/1  
GGGCCTTCTACGGAAGGAGTGCCTGAGTCCCTGAGGGAAG  
+HWI-EAS443:3:83:300:1272#0/1  
\_]`aa`aa`[a\_V^`[]X`[^aa\_]V]U^[HY^W`^ZNLX  
@HWI-EAS443:3:99:1299:569#0/1  
CAGCGATTCAAGTGATCCTCTTGTCTNTTGCAGCAAATATC  
+HWI-EAS443:3:99:1299:569#0/1  
U\_`¥\_¥aS`¥¥0X\_a`]\_a]M[OYD^\_]¥\_\_LUSYU]IX  
@HWI-EAS443:3:14:491:1767#0/1  
AAGGGAAAGTGGACGACAAACACAGAGACTGGTGCCATA  
+HWI-EAS443:3:14:491:1767#0/1  
^T`\_`X]aUaaaSba[X\_a]aba`[\_^\_^\_U`W`^Z^  
@HWI-EAS443:3:34:1093:607#0/1  
GGGTTTTTTATCATTAAATAAGCTGAAACGAGAAAGCTCT  
+HWI-EAS443:3:34:1093:607#0/1  
¥JYQU^^\_U\_b]Z`\_TT\_ZQVW¥Ya`SPR]¥¥T^MWPZYB  
@HWI-EAS443:3:70:1558:791#0/1  
GGGGTTTTTTATCATTAAATAAGCTGAAACGAGAAAGCTC  
+HWI-EAS443:3:70:1558:791#0/1  
abIbYVaaab`]W\_aa\_a```aV\_aY[aWaa\_]¥S`^\_]`  
@HWI-EAS443:3:52:1586:2023#0/1  
ATTGTTTCTCCAACCTTTGATAGTGTCTGGTTTTATGGCG  
+HWI-EAS443:3:52:1586:2023#0/1  
``b]`ZTSXEVaZ]^aZ`Y]a^BBBBBBBBBBBBBBBB  
@HWI-EAS443:3:59:336:799#0/1  
TGTTTCTCCAACCTTTGATAGTGTCTGGTATTATTCGTT  
+HWI-EAS443:3:59:336:799#0/1  
aa\_aa`aaa`aaaaaaaaaaa\_a\_aaBBBBBBBBBBBBBBBB  
@HWI-EAS443:3:93:508:1385#0/1  
AATATATTGTTTCTCCAACCTTTGATAGTGTCTGGTTTTA  
+HWI-EAS443:3:93:508:1385#0/1  
`Z^¥]Zbab\_a`a`aa\_V[V`\_`ZX`[a]aBBBBBBBB  
@HWI-EAS443:3:66:795:1835#0/1  
GATAGTGTCTGGTATTATGCCGTTGTACTTTAACAAAGCC  
+HWI-EAS443:3:66:795:1835#0/1  
abaa^[a^b\_¥NMVM[TNHW^WLUSXVHV[ZPYD¥FSGOV  
@HWI-EAS443:3:95:429:696#0/1  
CAATATATTGTTTCTCCAACCTTTGATAGTGTCTGGTTTT  
+HWI-EAS443:3:95:429:696#0/1  
]Tabb\_V¥T^H¥[b^[VWWY`Y`Y[¥VWIRZU\_^BBBBBB  
@HWI-EAS443:3:100:496:172#0/1  
TCTCAATATATTGTTTCTCCAACCTTTGATAGTGTCTGGT  
+HWI-EAS443:3:100:496:172#0/1  
aaa`b`ba\_a^\_bPYa`Ya`\_¥Va¥`aa\_^a`[aBBBBBB  
@HWI-EAS443:3:10:998:1149#0/1  
CTCAATATATTGTTTCTCCAACCTTTGATAGTGTCTGGTA

+HWI-EAS443:3:10:998:1149#0/1  
abbbbbbbbabababaaab\_aaaaaaaaa]`^\_BBBBB  
@HWI-EAS443:3:14:742:1151#0/1  
AATATATTGTTTCTCCAACCTTTGATAGTGTCTGGTATTA  
+HWI-EAS443:3:14:742:1151#0/1  
\_aa\_``aaaR\_a\_\_\_a\_a`Y`\_`¥\_`^`a¥^^BBBBBBBBB  
@HWI-EAS443:3:57:1025:401#0/1  
GTTTCTCCAACCTTTGATAGTGTCTGGTATTATGCCGTTG  
+HWI-EAS443:3:57:1025:401#0/1  
a`aaabaaaa`aaaaa`aa^a`\_`BBBBBBBBBBBBBBB  
@HWI-EAS443:3:86:619:1052#0/1  
ATATTGTTTCTCCAACCTTTGATAGTGTCTGGTATTATGC  
+HWI-EAS443:3:86:619:1052#0/1  
ababbaa`aaaa\_aaaaaaaaa\_`\_]\_\_aaBBBBBBBBBBB  
@HWI-EAS443:3:36:1098:916#0/1  
GGGCCCTTGAGTCAAGAAGAAGTTCTGCATTCCAAGGG  
+HWI-EAS443:3:36:1098:916#0/1  
¥a\_b`bb]b\_S\_^bab`abbabaaRaa\_aa[`\_`aZ\_a`  
@HWI-EAS443:3:62:139:1094#0/1  
GGATTTCTCATTTTGGGCAAAGAAGACACGAGATGGCCCA  
+HWI-EAS443:3:62:139:1094#0/1  
\_] ]^]aba`¥a`a]Z\_W`]P\_]¥^[ZaXH[V¥\_Z^Y\_SVF  
@HWI-EAS443:3:21:427:1763#0/1  
GAGAGATTTCTCATTTTGGGCAAAGAAGACACGAGATAT  
+HWI-EAS443:3:21:427:1763#0/1  
UHUS¥T`bYb\_VXURa]¥RTb`bWabbaaZM\_HH¥`a`UP  
@HWI-EAS443:3:71:791:1012#0/1  
GCATCAATGAACTGAGCAATCTTGCAAAAAGGAAAAAAGG  
+HWI-EAS443:3:71:791:1012#0/1  
a\_\_¥W`Z]`baVZ\_Z^^0S\_¥\_aa`Y^W[\_X\$Xa`\_ZX¥  
@HWI-EAS443:3:68:1486:1320#0/1  
ATTAAGCATCAATGAACTGAGCAATCTTGCAAAAAGGAAAG  
+HWI-EAS443:3:68:1486:1320#0/1  
\_``aa]]`a`\_`aa\_¥`a]\_`R`P`\_`]Z^\_\_\_aXX]`  
@HWI-EAS443:3:81:952:241#0/1  
TGCGAGAGTCCCGTTTTCGTTTCATTACCAACTACGNC  
+HWI-EAS443:3:81:952:241#0/1  
ababZb¥a\_^[`bWaba`b^aa\_aaaa]\_a\_¥a^\_a\_UDK  
@HWI-EAS443:3:37:318:565#0/1  
GTTGGTAATGAAACGAAAACGGGACTCTCGCATACTTACT  
+HWI-EAS443:3:37:318:565#0/1  
a^aaa^\_a`a\_]`\_`^`\_]X^QU^]]YHW]^X\_[\_WUW]  
@HWI-EAS443:3:92:530:1678#0/1  
ATCGACGAACAGGGTGAATCAATAATTGTAGAATCTGGTG  
+HWI-EAS443:3:92:530:1678#0/1  
aUZWZaa`¥FY\_`Ob`\_\_`^V\_\_W`\_aN\_¥\_]\_]Y]XX^  
@HWI-EAS443:3:40:733:1882#0/1  
GTGCTGACCAACAAAGTCTCTATCAGCATGCAGATGCATA  
+HWI-EAS443:3:40:733:1882#0/1  
a]¥G]\_`^`a\_S`\_`^U[0aW`W[]OFYWOO`SPMR\_WUY



@HWI-EAS443:3:11:441:1119#0/1  
AGCGAAAGCAGGCCAATTATATTCAATATGGAGAGAATAA  
+HWI-EAS443:3:11:441:1119#0/1  
a``\_Z\_aZZ¥`]L\_aUF\_a[aP`aa0a]VLXJVUaaTPaa  
@HWI-EAS443:3:62:1264:420#0/1  
GCCTCATATACAACCGGATGGGAACAGTGACCACAGAAGC  
+HWI-EAS443:3:62:1264:420#0/1  
`aabaabaaa`a`¥H`a]\_aaa`aV]WZ`aa[\_Z^`^]`\_  
@HWI-EAS443:3:30:1652:287#0/1  
CTCTCATGGAATGGCTAAAGACAAGACCAATCTTGTCATC  
+HWI-EAS443:3:30:1652:287#0/1  
]QbaaX^^`a\_bbbZbbaabbb`b\_b`[Y`aabb\_XPZK[  
@HWI-EAS443:3:60:1171:1068#0/1  
AACAAATCGTGAATGGATATTGAAAGAGGAATCCAGCGA  
+HWI-EAS443:3:60:1171:1068#0/1  
aXPYa\_RPbPYU`[U`QPNGL\_YR]X¥]X[XUYXBBBBBB  
@HWI-EAS443:3:35:732:446#0/1  
CGGCTCTACTAGTGTCCAGTAATAGTTCCTTCTCCCCTCT  
+HWI-EAS443:3:35:732:446#0/1  
a\_b\_aa¥¥0[]]NZLY`S`GZX[Z¥Y^ZHT`^Y[`^FRJP  
@HWI-EAS443:3:28:1120:53#0/1  
GGGGAGAATGAAC TACTACTGGACACTAGTAGAGCCGGGA  
+HWI-EAS443:3:28:1120:53#0/1  
]a¥[Yb\_aab`aa`a\_a`ab```^^Za^\_\_`a\_a¥Zb¥\_X  
@HWI-EAS443:3:20:433:702#0/1  
CGTCAATCGCATTCTGTGTGCTCTTCAGGTTGGCTGCATA  
+HWI-EAS443:3:20:433:702#0/1  
aaa`\_X]^\_]W`\_a^\_RZZ^Z`\_V[VZ¥¥`^\_NZNX¥a  
@HWI-EAS443:3:37:644:1801#0/1  
ATCGCATTCTGTGTGCTCTTCAGGTCGGCTGCATATCCTT  
+HWI-EAS443:3:37:644:1801#0/1  
U\_HXbbbabXS]\_Qbb\_¥X¥b`RNOb]Rb¥`T]PaS]aTH  
@HWI-EAS443:3:30:667:1978#0/1  
ATCGCATTCTGTGTGCTCTTCAGGTCGGCTGCATATCCTG  
+HWI-EAS443:3:30:667:1978#0/1  
]]R\_bbR`a`WH\_Xab^ba\_SaZ\_GaZY`^abaaaSa\_NV  
@HWI-EAS443:3:70:947:1189#0/1  
AGCCTTGCTAAATGACAAACATTCCAATGGAACCATTAAA  
+HWI-EAS443:3:70:947:1189#0/1  
Q\_\_\_ZbT`YTQ¥\_\_bb`\_^¥`\_`abaTY]¥\_Z^a\_`a^UP  
@HWI-EAS443:3:73:263:1939#0/1  
ACCTGGAGCTCTTCTTTCTTCTTTTTGTTATTGCCATCT  
+HWI-EAS443:3:73:263:1939#0/1  
Y¥aOQ[^`aX¥ZHa]¥\_a]XS\_a`^\_U\_S]Q¥WMMTTFPV  
@HWI-EAS443:3:48:277:1195#0/1  
CAAGAAACGGTTTTGAGATGATTTGGGATCCAAACGGATG  
+HWI-EAS443:3:48:277:1195#0/1  
abaa\_a`a[\_Ra\_`b[^]`a`^a\_X]`^TZ^`^aYa\_]\_  
@HWI-EAS443:3:92:1684:1027#0/1  
GGACCAGCATTAAAGCATCAATGAACTGAGAAATCTTGCAA

+HWI-EAS443:3:92:1684:1027#0/1  
`K^¥`bVa\_bbabba\_baXbb¥aab[aXJb\_aabTbY[`  
@HWI-EAS443:3:20:1416:896#0/1  
AAGAGATATGGCCCAGCATTAAAGCATCAATGAACTGAGAA  
+HWI-EAS443:3:20:1416:896#0/1  
¥UPZbaYY[VVa`\_\_[aaaZZT[WUaYYXX]\_¥I^UWFW  
@HWI-EAS443:3:19:1150:1375#0/1  
TTAAGCATCAATGAACTGAGCACTCTTGCAAGAGGAGAGA  
+HWI-EAS443:3:19:1150:1375#0/1  
a`\_]\_Q[UZ[RV```]TYXZ\_XFP^U`a^LOFJ`a]a^a^  
@HWI-EAS443:3:11:263:192#0/1  
GCATCAATGAACTGAGCAATCTTGCAAGAGGAGAGAAAAGG  
+HWI-EAS443:3:11:263:192#0/1  
`a[R¥SH``\_\_^YTNa¥]GY]]LZX[ODH]`U¥W¥]UBBB  
@HWI-EAS443:3:67:772:319#0/1  
GCATCAATGAACTGAGCAATCTTGCAAGAGGAGAGAAAAGC  
+HWI-EAS443:3:67:772:319#0/1  
a`VU`WxaW`b`aZ]Ya``a\_aaZWVRFsa`]aaaa\_I¥Q  
@HWI-EAS443:3:72:852:678#0/1  
CAGCATTAAAGCATCAATGAACTGAGCAATCTTGCAAGGGG  
+HWI-EAS443:3:72:852:678#0/1  
`bbbbbbbbbbbababbbbaba]]bab`aabab`[\_bbaa  
@HWI-EAS443:3:34:1025:314#0/1  
GCATTAAGCATCAATGAACTGAGCAATCTTGCAAGAGGAG  
+HWI-EAS443:3:34:1025:314#0/1  
abbbabbbabababbbabaaaab`a`aaaa[a\_Q\_a\_^`  
@HWI-EAS443:3:59:444:173#0/1  
CAGCATTAAAGCATCAATGAACTGAGCAATCTTGCAAGAGG  
+HWI-EAS443:3:59:444:173#0/1  
^T¥^WaXaa`^¥]a\_\_ba\_]a¥W``\_a\_a`^^^^LGL\_]`  
@HWI-EAS443:3:21:1765:632#0/1  
TGTCTTTAGCCATTCCATGAAAGCCTCAAGATCTGTGTTC  
+HWI-EAS443:3:21:1765:632#0/1  
[^\_^\_aaaa]]Y\_aVQM\_\_\_OFYWX^[ZVXGWN^\_VXXXV  
@HWI-EAS443:3:99:907:1969#0/1  
ATAGGTTTTACTCTAGCTCTATGTTGACAAAATGACCAT  
+HWI-EAS443:3:99:907:1969#0/1  
a¥b`IYbbababbS`b`bbaa`a^`ba``bbbaab[Vaa  
@HWI-EAS443:3:45:1420:1601#0/1  
GGTTTTTACTCTAGCTCTATGTTGACAAAATGACCATCGT  
+HWI-EAS443:3:45:1420:1601#0/1  
ab`bbbbbab`bba`b\_babaabaa\_aaaaaa^V`a^\_Z  
@HWI-EAS443:3:18:1405:1025#0/1  
TTCTCGCCACTTTTCATTTCTGCTCTGGAGGTAGTGAAGG  
+HWI-EAS443:3:18:1405:1025#0/1  
¥`\_XJ]WF¥Wb\_a`URZYN\_¥YR]Y[b\_Y\_\_Y[`BBBBBB  
@HWI-EAS443:3:31:839:70#0/1  
CTTCACTACCTCCAGAGCAGAAATGAAAAGTGGCGAGAAC  
+HWI-EAS443:3:31:839:70#0/1  
^abbb]]`babb``abbbbabVbbbbbbbab`baabaa`\_U

@HWI-EAS443:3:96:1611:558#0/1  
GTTCTCGCCACTTTTCATTTCTGCTCTGGAGGTAGTGAAG  
+HWI-EAS443:3:96:1611:558#0/1  
a[[\_`[U`]Z\_`aaT`a`]^`X`N]RVZ]]Z[PUBBBB  
@HWI-EAS443:3:95:1175:977#0/1  
CTGGGGTCTGAGTTCTTCAATGGTGAACAGATCTTCATG  
+HWI-EAS443:3:95:1175:977#0/1  
a`bb\_`a^ab`bababbbbaa\_a``baaaaa`aaba\_``a  
@HWI-EAS443:3:51:888:227#0/1  
TGGGGTCTGAGTTCTTCAATGGTGAACAGATCTTCATGA  
+HWI-EAS443:3:51:888:227#0/1  
]`¥aaaabb`bbbbbbbabbbWbbba\_bb[aabbaabba  
@HWI-EAS443:3:76:1353:439#0/1  
GGTCTGAGTTCTTCAATGGTGAACAGATCTTCATGATCT  
+HWI-EAS443:3:76:1353:439#0/1  
QQ¥¥¥[ZZaaS`\_¥aa`b\_\_^a]aJa¥V`[[^\_ba^YF\_  
@HWI-EAS443:3:61:1032:1194#0/1  
GGGCCCCCTCAAAGCCGAGATCGCGCAGAGACTGGAAAGT  
+HWI-EAS443:3:61:1032:1194#0/1  
`]UXV¥`\_]ZURZV]]R^YX\_^\_`UZVZZ¥UU[URXSQ  
@HWI-EAS443:3:43:1574:1694#0/1  
CAACAGAATGGGAACAGTGACCACAGAAGCTGCTTTTGGT  
+HWI-EAS443:3:43:1574:1694#0/1  
`XZa``abbbb[\_Zbb\_b\_S¥\_abbb]a`VH\_aaa]`X  
@HWI-EAS443:3:75:99:1541#0/1  
CCTCTCTGGAATCATATCCATTATTCTCTTGCTGCTGTA  
+HWI-EAS443:3:75:99:1541#0/1  
`aabab\_aa[aaaaaaaaaaaa`\_\_a``a\_[Z\_  
@HWI-EAS443:3:21:1233:717#0/1  
TCCCAATTGCTCTCGCCATTTTTCATTTCTGCTCTGGAGG  
+HWI-EAS443:3:21:1233:717#0/1  
`a]¥TI^a`N[RRNQRNNLLL^YZTFX[GSYF¥^`¥W[BB  
@HWI-EAS443:3:76:1686:435#0/1  
GCCGATCAAGGAAAGGGGCATCACCCAATCCATTGTCTGC  
+HWI-EAS443:3:76:1686:435#0/1  
a\_\_aS\_SZ^YTQLDS¥\_^M[YV\_UWXVV¥WWWUUVWVUVS  
@HWI-EAS443:3:98:503:19#0/1  
CGAGAGCAATTGGGACAGAAATTTGAGGAGATAAGGTGGT  
+HWI-EAS443:3:98:503:19#0/1  
\_b^``baa\_aa\_`^`Xbba¥aabbYbbVD]ba\_abOb^M  
@HWI-EAS443:3:89:414:1071#0/1  
GCCGCACTTCTTCAATTAACCACCTCATTTCCCTCAAATTT  
+HWI-EAS443:3:89:414:1071#0/1  
aa¥Q¥\_QJT\_\_YaT\_Y\_`ZYM¥\_\_[ZP\_`^^Z]Z^WV\_\_¥  
@HWI-EAS443:3:25:1035:547#0/1  
GCGGCACAGATTGAAAGCAACAGAGAATAGTTTCGAACAA  
+HWI-EAS443:3:25:1035:547#0/1  
aaaa`aY\_\_`\_]`a\_`\_[]\_^`¥\_¥]\_^^[^^Y]Z`S]\_  
@HWI-EAS443:3:26:940:1695#0/1  
GCCGCACTTCTTCAATTAACCACCTTATTTCCCTCAAATTT

+HWI-EAS443:3:26:940:1695#0/1  
a`Y^\$S\_YY\_[XLTYa\_`XVZI^Y\_\_\_U\$PT]VZ\$]X  
@HWI-EAS443:3:67:1595:1051#0/1  
TCGAGGATTTTGTATTTTCATTCCATTTAGTGTGTCCCA  
+HWI-EAS443:3:67:1595:1051#0/1  
a`aaaa`abbababbba`aa`\_a`aaaa^aa`\_\_\_\_\_]\_\_\_  
@HWI-EAS443:3:70:1356:188#0/1  
CTTGTGAATTAGTCATCATCTTTCTCACAACATTTGCTAG  
+HWI-EAS443:3:70:1356:188#0/1  
Y\_^^`baXa`\$`\_^]`I\_\_X]aa^aX^b\$`U\$^aaaZDVa  
@HWI-EAS443:3:58:1102:690#0/1  
AAAAGTCAATTGGTNTGGATGGCATGCCACTCTGCTGCAT  
+HWI-EAS443:3:58:1102:690#0/1  
aab```aaaaaabWDXaaZ]`\_YPX\_]\_]WZ^UWKR^VW[  
@HWI-EAS443:3:50:1252:1426#0/1  
GAATGATTGGTGGATCGGGAGATTCTACATCCAAATGTG  
+HWI-EAS443:3:50:1252:1426#0/1  
aXRxbY]baQb[DXb`\$aXaG^\$`\_]`\$Y]LY[Z[BB  
@HWI-EAS443:3:50:925:180#0/1  
GATTGCTCAAATGAGAATGTGGAAGCCATGGACTCCAAT  
+HWI-EAS443:3:50:925:180#0/1  
`bbbbabbbbabbabbbbabbab`\_]`aaaa^V`\_`\$`a`  
@HWI-EAS443:3:98:1109:1545#0/1  
CAATGACCGAAATTTCTGGAGGGGTGAAAATGGACGAAGA  
+HWI-EAS443:3:98:1109:1545#0/1  
a\_abbba`bab`bbb`b`b`bbabYbaabba]abaababb  
@HWI-EAS443:3:12:1546:486#0/1  
GATTGGTGGTAGTAGCCATTTGTCTGTGGGACCGATGGTG  
+HWI-EAS443:3:12:1546:486#0/1  
a`aaab^b`Q`UZV\_^V[```HUSYXUUFXHMTZZBBBBB  
@HWI-EAS443:3:94:1455:1657#0/1  
GATGGCTGGATCGAGTGAACAGGCAGCAGAGGCAATGGAG  
+HWI-EAS443:3:94:1455:1657#0/1  
^`\$^`bb`]`aaaaZ\_X]]R\_N`\$WOFX\_^U\$BBBBBBBB  
@HWI-EAS443:3:50:678:1765#0/1  
ACCGAATTTCTCCAGCCTTGAAAATTTAGAGCCTATGTA  
+HWI-EAS443:3:50:678:1765#0/1  
\_HWX`[HRXVba^`Sa^`MMSW`X]aRX\_aR\$DDIa\_]`[a  
@HWI-EAS443:3:54:859:614#0/1  
GTGGCTCCAGTCTCGGGTCAGTGAGGAGAACTCCATACT  
+HWI-EAS443:3:54:859:614#0/1  
`\$`a\_\_`]OYVVX[W`BBBBBBBBBBBBBBBBBBBBBB  
@HWI-EAS443:3:32:424:1838#0/1  
ACCATATNGCCATAATCAAAAAGTACACACCAGGAAGACA  
+HWI-EAS443:3:32:424:1838#0/1  
aabaaa\$DUaaa[\_a`aaaaa[[]a]aaaYaaXPZ^Y\_a^  
@HWI-EAS443:3:26:274:61#0/1  
TGTCTTCTGATGTGTACTTTTTGATTTGGCCATATGGTC  
+HWI-EAS443:3:26:274:61#0/1  
\_Y\_WQV\_^PLRW]LUMOI[\_TTO^BBBBBBBBBBBBBBBB

@HWI-EAS443:3:84:836:1314#0/1  
GTCTTCCTGATGTGTACTTTTTGATTATGGCCAAATGGCC  
+HWI-EAS443:3:84:836:1314#0/1  
`^aaZ[T^L[ZX^WS¥OVY[VU]X\_]ZZS[^VG¥SSKDV  
@HWI-EAS443:3:12:434:198#0/1  
ATATGGCCATAATCAAAAAGTACACATCAGGAAGAAGTGG  
+HWI-EAS443:3:12:434:198#0/1  
aaa^`aaaaa\_a]\_\_`\_\_\_^`^^U^^^]\_\_^\_\_WZ\_X\_^  
@HWI-EAS443:3:56:861:1171#0/1  
ATATGGCCATAATCAAAAAGTACACATCAGAAAGACAAGC  
+HWI-EAS443:3:56:861:1171#0/1  
^\_ba`aabaa`¥b`Z\_baba]b^aa`b^a\_abbba^aaba  
@HWI-EAS443:3:17:245:788#0/1  
GTCTTCCTGATGTGTACTTTTTGATTATGGCCATATTGTC  
+HWI-EAS443:3:17:245:788#0/1  
\_X`abb]\_aa\_Za[aaa`a`aa\_a[SXaaa\_\_QYJF]Q^  
@HWI-EAS443:3:2:1550:533#0/1  
GACCGTCTTCCTGATGTGTACTTTTTGATTATGGCCATAT  
+HWI-EAS443:3:2:1550:533#0/1  
]S`ba\_]^^`[\_]OS]\_¥¥\_aa\_aa`\_\_\_\_\_Y`BBBBBBB  
@HWI-EAS443:3:79:1325:1655#0/1  
GTCTTCCTGATGTGTACTTTTTGATTATGGCCATATTGTC  
+HWI-EAS443:3:79:1325:1655#0/1  
^¥\_`^``Y¥ZU\_0\_HQWX\_a^a^\_abaa`]X\_[T¥VHN[Z  
@HWI-EAS443:3:100:964:1363#0/1  
CGGGGGTCTTTTCTTGCTTCCTGATGTGTACTTTTTGAT  
+HWI-EAS443:3:100:964:1363#0/1  
]bb\_^DZ``R]\_]^\_KX`a\_^`baVH¥^RaT`KZ`\_aBB  
@HWI-EAS443:3:15:1769:483#0/1  
GGACCATATGGCCATAATCAAAAAGTACACATCACGAAGA  
+HWI-EAS443:3:15:1769:483#0/1  
QYa]a\_bby``\_aXV]`a]aWY¥X\_R¥X`WUX^RT]U]`Y  
@HWI-EAS443:3:20:971:183#0/1  
CATATGGCCATAATCAAAAAGGACACATCAGGAAGACAAG  
+HWI-EAS443:3:20:971:183#0/1  
a`¥ZMO^¥S]YaUUP\_\_XMVOY\_W]]]US^[UW`]UV[\_  
@HWI-EAS443:3:27:1231:1136#0/1  
CGGGGTTCTTATCTTGTCTTCCTGATGTGTACTTTTTGAT  
+HWI-EAS443:3:27:1231:1136#0/1  
ab\_]NH`b`^H]X]Yb¥`\_]¥W[YYZaWYPW]`Y\_a`]`  
@HWI-EAS443:3:27:1760:131#0/1  
CATATGGCCATAATGAAAAAGTACACATCAGGAAGACAAG  
+HWI-EAS443:3:27:1760:131#0/1  
^XTXX]bYTa`\_¥YLV\_aTaaY\_UZfVQ[R¥ZPPWXG]BB  
@HWI-EAS443:3:31:1635:99#0/1  
CATATGGCCATAATCAAAAAGTACACATCATGAAGACAAG  
+HWI-EAS443:3:31:1635:99#0/1  
`ba\_abbWbbX¥`a¥a`\_`aaaa\_¥a`\_WH]aaa`]aaN  
@HWI-EAS443:3:35:1215:1968#0/1  
GACCATATGGCCATAATCAAAAAGGACACATCAGGAAGAC

+HWI-EAS443:3:35:1215:1968#0/1  
¥WT¥ZY¥SON[a`UX\_TYZ[X]VQG\_a]aa¥^`\_a\_\_]P[  
@HWI-EAS443:3:53:976:754#0/1  
ATATGGCTATAATCAAAAAGTACACATCAGGAAGACAAGA  
+HWI-EAS443:3:53:976:754#0/1  
ababbbaba`\_b`]`baba[WaWa\_aaXabb[aa\_\_aa¥]  
@HWI-EAS443:3:60:1505:1987#0/1  
CATATGGCCATAATCAAAAAGAACACATCAGGAAGACAAG  
+HWI-EAS443:3:60:1505:1987#0/1  
X¥T`bbbYGZ`abb]ababVaG\_T\_Z^HHbbaa[a`Paa^  
@HWI-EAS443:3:7:513:888#0/1  
CGGGGTTCTTGTCTTGTCTTCCTGATGTGTACTTTTTGAT  
+HWI-EAS443:3:7:513:888#0/1  
`\_¥NHSaa[KVbbbb`aVaX]a`\_WaKINXGa\_\_[Sia\_  
@HWI-EAS443:3:8:1739:214#0/1  
CGGGGTTCTTGTCTTGTCTTCCTGATGTGTACTTTTTGAT  
+HWI-EAS443:3:8:1739:214#0/1  
aa\_W^0a^a`Ja[aab¥^baVN^ZQ\_a\_aY^]`a`\_]RTa  
@HWI-EAS443:3:91:1595:451#0/1  
CATATGGCCATAATCAAAAAGTACAAATCAGGAAGACAAG  
+HWI-EAS443:3:91:1595:451#0/1  
¥b¥\_bb`[UaK`\_b^aaaVab[`VaF\_a^a¥U¥`aa^^`\_  
@HWI-EAS443:3:99:480:552#0/1  
ACCATCTGGCCATAATCAAAAAGTACACATCAGGAAGACA  
+HWI-EAS443:3:99:480:552#0/1  
a]VX¥JN\_^T`\_a¥¥`¥XYXX\_^][Y][UO`[^\_^\_]WP[  
@HWI-EAS443:3:16:244:2030#0/1  
GTCTTCCTGATGTGTACTTTTTGATTATNGCCATATGGTC  
+HWI-EAS443:3:16:244:2030#0/1  
a`\_] [Z]SSWZ`VaMZa`\_\_^\_\_\_\_[aQDO`\_BBBBBBBB  
@HWI-EAS443:3:32:1512:725#0/1  
ATATGGCCATAATCAAAAAGTACACATCNGGAAGACAAGA  
+HWI-EAS443:3:32:1512:725#0/1  
aaba[`\_aba^baa`aaaaZbaa\_aaTDU]]a\_\_Ta`a\_  
@HWI-EAS443:3:20:720:1181#0/1  
GTCTTCCTGATGTGTACTTTTTGATTATGGCCATATGGGC  
+HWI-EAS443:3:20:720:1181#0/1  
a`\_aaZ]a`]UY\_X¥U¥\_\_\_\_\_`\_`\_]LZ^[]W]SW¥GN  
@HWI-EAS443:3:23:1367:28#0/1  
ACCATATGGCCATAATCAAAAAGTACACATCAGGAAGAAA  
+HWI-EAS443:3:23:1367:28#0/1  
V`\_R`a^`Ja`\_YPYZaa`\_]\_Z^UDX`U`[`] [ `XM¥  
@HWI-EAS443:3:2:588:521#0/1  
ACCATATGGCCATAATCAAAAAGTACACATCAGGAAGAAA  
+HWI-EAS443:3:2:588:521#0/1  
^aaY`Z^aa\_N]^aaZJZa¥\_Q\_U`Y]R]SU\_aa]`UG[  
@HWI-EAS443:3:67:675:341#0/1  
ACCATATGGCCATAATCAAAAAGTACACATCAGGAAGAAG  
+HWI-EAS443:3:67:675:341#0/1  
a\_aaaa]]`W[^Y^^¥[[`\_`\_`¥U^Y\_\_ [O]^¥QY\_¥U]

@HWI-EAS443:3:87:1725:1005#0/1  
ATGGCCATAATCAAAAAGTACACATCAGGAAGACAAGATA  
+HWI-EAS443:3:87:1725:1005#0/1  
¥a^`J¥^XZb]0[b[`Z¥N`M^X][QY¥]Ya¥VX\_a`\_HW  
@HWI-EAS443:3:14:619:225#0/1  
CGTCTTCCTGATGTGTACTTTTTGATTATGGCCATATGGT  
+HWI-EAS443:3:14:619:225#0/1  
\_]aaaaa`]¥Z\_VaXY]a`a\_]U\_U]\_XRSZ¥WWURHVB  
@HWI-EAS443:3:40:1712:850#0/1  
TTCTTCCTGATGTGTACTTTTTGATTATGGCCATATGGTC  
+HWI-EAS443:3:40:1712:850#0/1  
aaaaaa`aa`a`a\_]\_aa^\_aa`\_¥Za`UYX[YSURYPQ  
@HWI-EAS443:3:87:130:1435#0/1  
TGTCTTCCTGATGTGTACTTTTTGATTATGGCCATATGGG  
+HWI-EAS443:3:87:130:1435#0/1  
`a^`]`a`\_]YVYY]`a`aaaa``\_^\_\_\_\_\_aWBBBBBB  
@HWI-EAS443:3:100:1202:479#0/1  
ACCATATGGCCATAATCAAAAAGTACACATCAGGAAGACA  
+HWI-EAS443:3:100:1202:479#0/1  
a`^aba`aa^`¥aa``\_`a\_\_\_a`X^S\_¥W`[aX¥UBBB  
@HWI-EAS443:3:100:1354:1721#0/1  
ATATGGCCATAATCAAAAAGTACACATCAGGAAGACAAGA  
+HWI-EAS443:3:100:1354:1721#0/1  
aaa`b`aIb\_aa\_P\_a\_^`aS[K[P[KZ\_aZXS^LH[WBB  
@HWI-EAS443:3:11:515:1867#0/1  
GACCATATGGCCATAATCAAAAAGTACACATCAGGAAGAC  
+HWI-EAS443:3:11:515:1867#0/1  
T^`^`bbb`aab`bb`Z`bbaVXS\_U]Sa[G\_baaaa^U  
@HWI-EAS443:3:12:134:599#0/1  
GGACCATATGGCCATAATCAAAAAGTACACATCAGGAAGA  
+HWI-EAS443:3:12:134:599#0/1  
Y`aba\_\_¥P[bb]aa¥ZZ``\_S¥abGN^^\_PT\_^QS`aa[  
@HWI-EAS443:3:14:820:1386#0/1  
ACCATATGGCCATAATCAAAAAGTACACATCAGGAAGACA  
+HWI-EAS443:3:14:820:1386#0/1  
`aa^aa^X\_aa\_^\_\_\_\_\_`\_]Wq]`¥^^][^\_^XW\_  
@HWI-EAS443:3:15:1367:285#0/1  
GTCTTCCTGATGTGTACTTTTTGATTATGGCCATATGGTC  
+HWI-EAS443:3:15:1367:285#0/1  
^aabbabbbabbabaa\_abbabbaabba`a`\_aYa¥UaUY  
@HWI-EAS443:3:15:372:1757#0/1  
GTCTTCCTGATGTGTACTTTTTGATTATGGCCATATGGTC  
+HWI-EAS443:3:15:372:1757#0/1  
a`bbbaaaaa`aa^aaaaaaaa\_a`a`\_`aaa^`00XZ`  
@HWI-EAS443:3:15:384:368#0/1  
CATATGGCCATAATCAAAAAGTACACATCAGGAAGACAAG  
+HWI-EAS443:3:15:384:368#0/1  
a¥abaaaaabb`b`aa`a`baaXaaa\_\_\_S``a^aa`aaaa  
@HWI-EAS443:3:16:1731:1311#0/1  
ATATGGCCATAATCAAAAAGTACACATCAGGAAGACAAGA

+HWI-EAS443:3:16:1731:1311#0/1  
\_`a`R]Q]aa`^[ZUY`a^XYT`b]T^Zaa```]¥\_[Z¥  
@HWI-EAS443:3:16:911:743#0/1  
CATATGGCCATAATCAAAAAGTACACATCAGGAAGACAAG  
+HWI-EAS443:3:16:911:743#0/1  
aa`aa`\_bbb\_a[b`ZZ^aa\_a¥][`a\_^S^Yaaa\_ZP\_  
@HWI-EAS443:3:17:527:1859#0/1  
CATATGGCCATAATCAAAAAGTACACATCAGGAAGACAAG  
+HWI-EAS443:3:17:527:1859#0/1  
¥XQS]]¥aa`ZaYT^^`\_\_`[T¥Z^`a\_\_`]``\_\_^`\_  
@HWI-EAS443:3:18:1044:619#0/1  
GTCTTCCTGATGTGTACTTTTTGATTATGGCCATATGGTC  
+HWI-EAS443:3:18:1044:619#0/1  
``abaabbbabbaaaaabbbbabaaaaaa`\_`aX\_¥[[VZ  
@HWI-EAS443:3:18:748:485#0/1  
GTCTTCCTGATGTGTACTTTTTGATTATGGCCATATGGTC  
+HWI-EAS443:3:18:748:485#0/1  
a\_a`aaaa]`YP`YRUTa\_X`\_`\_]\_^]]\_Z^\_]R]VWNPS  
@HWI-EAS443:3:19:1492:1547#0/1  
CATATGGCCATAATCAAAAAGTACACATCAGGAAGACAAG  
+HWI-EAS443:3:19:1492:1547#0/1  
aabbbbbbabaaaaabbbb¥baaaaaa``aabaaaaa  
@HWI-EAS443:3:1:907:358#0/1  
GACCATATGGCCATAATCAAAAAGTACACATCAGGAAGAC  
+HWI-EAS443:3:1:907:358#0/1  
aaaabba`bba\_ba``a]`\_aa`aWa^[FV\_S\_`¥]a`BB  
@HWI-EAS443:3:1:940:1416#0/1  
CATATGGCCATAATCAAAAAGTACACATCAGGAAGACAAG  
+HWI-EAS443:3:1:940:1416#0/1  
`Q`]aaWHaba`Ra\_]`aaaZTZ\_`S\_^]\_aaSaa\_`aaB  
@HWI-EAS443:3:20:155:1241#0/1  
CATATGGCCATAATCAAAAAGTACACATCAGGAAGACAAG  
+HWI-EAS443:3:20:155:1241#0/1  
aa¥aaaab`[X^a`aaXZa`^R\_Za¥T]\_\_`\_]a`^\_^`]  
@HWI-EAS443:3:21:1533:632#0/1  
CATATGGCCATAATCAAAAAGTACACATCAGGAAGACAAG  
+HWI-EAS443:3:21:1533:632#0/1  
a\_YPZ\_W\_]TYU]¥KV`\_\_S`UaWTFsUXW¥¥VW\_\_^^X]  
@HWI-EAS443:3:22:606:682#0/1  
CATATGGCCATAATCAAAAAGTACACATCAGGAAGACAAG  
+HWI-EAS443:3:22:606:682#0/1  
aZ`aa^V¥^¥WZ¥WY^^ZRW]V`^`\_\_[Z[^^\_Z^UX]]\_  
@HWI-EAS443:3:24:224:713#0/1  
CATATGGCCATAATCAAAAAGTACACATCAGGAAGACAAG  
+HWI-EAS443:3:24:224:713#0/1  
a`¥^\_aa\_abXFQaRX[^[aVJR\_\_a\_\_^\_^]aYI`^\_\_\_\_  
@HWI-EAS443:3:25:1679:1024#0/1  
CATATGGCCATAATCAAAAAGTACACATCAGGAAGACAAG  
+HWI-EAS443:3:25:1679:1024#0/1  
[Qa\_\_bb[[``\_a`bbbZb`\_Xb]`bbbV`a`bbKaYa`T



@HWI-EAS443:3:26:464:854#0/1  
CATATGGCCATAATCAAAAAGTACACATCAGGAAGACAAG  
+HWI-EAS443:3:26:464:854#0/1  
a[a]`aZ`^X\_\_`\_\_`a`][¥0][\_Z[^\_]`\_]`^]`^`\_\_]  
@HWI-EAS443:3:27:181:509#0/1  
CATATGGCCATAATCAAAAAGTACACATCAGGAAGACAAG  
+HWI-EAS443:3:27:181:509#0/1  
a`a]\_`abaa\_\_`\_a^`aWP`Vq]R^a\_aaaU`aa\_aaa^  
@HWI-EAS443:3:27:200:1024#0/1  
GGACCATATGGCCATAATCAAAAAGTACACATCAGGAAGA  
+HWI-EAS443:3:27:200:1024#0/1  
aaaba\_aa\_\_^aaaaa\_[aa`a\_`V```^aY\_\_a`\_\_^X  
@HWI-EAS443:3:28:1065:1118#0/1  
ATATGGCCATAATCAAAAAGTACACATCAGGAAGACAAGA  
+HWI-EAS443:3:28:1065:1118#0/1  
a\_ba\_R`a`a^aa`\_aba`\_b`^W\_\_`]aa\_a`a¥aX`\_  
@HWI-EAS443:3:28:539:102#0/1  
ATATGGCCATAATCAAAAAGTACACATCAGGAAGACAAGA  
+HWI-EAS443:3:28:539:102#0/1  
aaaaba`a\_\_`aaW``\_a`Z`][\_`\_^]`\_`\_^]Z^`\_]  
@HWI-EAS443:3:29:913:528#0/1  
GTCTTCCTGATGTGTACTTTTTGATTATGGCCATATGGTC  
+HWI-EAS443:3:29:913:528#0/1  
aaabaaaaaab`a`\_baaa``\_a`a`[a`Y[PFWRB  
@HWI-EAS443:3:30:1379:1024#0/1  
TCTTGCTTCCTGATGTGTACTTTTTGATTATGGCCATAT  
+HWI-EAS443:3:30:1379:1024#0/1  
a¥a^`\_¥a`a`aa\_a\_]a]^\_a\_a\_]a¥a\_\_\_\_U]RRM  
@HWI-EAS443:3:30:312:148#0/1  
GGACCATATGGCCATAATCAAAAAGTACACATCAGGAAGA  
+HWI-EAS443:3:30:312:148#0/1  
a`abbaab`aabaaa\_[aaaaa`Sa`a[`[\_`\_\_^\_VM  
@HWI-EAS443:3:31:103:429#0/1  
CATATGGCCATAATCAAAAAGTACACATCAGGAAGACAAG  
+HWI-EAS443:3:31:103:429#0/1  
aUZL¥aa`Z[Y\_aa]^[^`¥]W^`[¥^TZ^^^\_\_Z[]`[T  
@HWI-EAS443:3:31:1136:777#0/1  
ACCATATGGCCATAATCAAAAAGTACACATCAGGAAGACA  
+HWI-EAS443:3:31:1136:777#0/1  
abaaaZ\_^aaabY¥U`[XY¥`¥VS]Waa]`G\_Y[^]\_PU^  
@HWI-EAS443:3:32:1157:546#0/1  
ATATGGCCATAATCAAAAAGTACACATCAGGAAGACAAGA  
+HWI-EAS443:3:32:1157:546#0/1  
abbaaa`aaaabaaaa`aaaZa`a\_a`\_a]Z\_a``Xaaa`  
@HWI-EAS443:3:32:407:1448#0/1  
ATATGGCCATAATCAAAAAGTACACATCAGGAAGACAAGA  
+HWI-EAS443:3:32:407:1448#0/1  
\_[]^\_¥a`a`[a\_\_\_\_`[YZR]S\_`\_]`^¥PZ]\_V¥ST¥SU  
@HWI-EAS443:3:32:668:960#0/1  
ATATGGCCATAATCAAAAAGTACACATCAGGAAGACAAGA

+HWI-EAS443:3:32:668:960#0/1  
aa\_`a¥^aa\_R\_\_¥` `a\_]T` `]a¥\_\_\_^a^]\_\_¥\_Z¥Z  
@HWI-EAS443:3:33:191:1128#0/1  
GACCATATGGCCATAATCAAAAAGTACACATCAGGAAGAC  
+HWI-EAS443:3:33:191:1128#0/1  
`ba¥`aabb\_bb`aab\_\_HVaS\_^Q\_aaaa]` `aaaaaaa  
@HWI-EAS443:3:33:720:552#0/1  
ATATGGCCATAATCAAAAAGTACACATCAGGAAGACAAGA  
+HWI-EAS443:3:33:720:552#0/1  
abaaaaaaaaaaaaaba\_aa^aaa\_a^` `aa\_]a^V\_\_\_\_  
@HWI-EAS443:3:33:72:1781#0/1  
GACCATATGGCCATAATCAAAAAGTACACATCAGGAAGAC  
+HWI-EAS443:3:33:72:1781#0/1  
[ `bb`¥IXa]bbaa\_QZ^X`V\_^ZO] `Z\_X^aVV]^]]^  
@HWI-EAS443:3:35:894:458#0/1  
CATATGGCCATAATCAAAAAGTACACATCAGGAAGACAAG  
+HWI-EAS443:3:35:894:458#0/1  
aabb^]aa`a]RTY]a` `aaV\_¥` ` `^aYaa^YX[\_\_^\_  
@HWI-EAS443:3:35:971:981#0/1  
GTCTTCCTGATGTGTACTTTTTGATTATGGCCATATGGTC  
+HWI-EAS443:3:35:971:981#0/1  
aabaaaaaZ`aa^a\_Xbaaaaaabaaa\_¥aaa\_SaN[SJ¥  
@HWI-EAS443:3:36:1129:1226#0/1  
ATATGGCCATAATCAAAAAGTACACATCAGGAAGACAAGA  
+HWI-EAS443:3:36:1129:1226#0/1  
aa[ `aababaaaa]\_aa`aaYa^`W`aR\_a` ` \_`a]^¥` [  
@HWI-EAS443:3:36:1209:469#0/1  
GTCTTCCTGATGTGTACTTTTTGATTATGGCCATATGGTC  
+HWI-EAS443:3:36:1209:469#0/1  
a`aaaa¥]aRYZWWZ\_¥a` ` `[W` \_\_]WH[aTMK¥BBBBB  
@HWI-EAS443:3:36:642:705#0/1  
ACCATATGGCCATAATCAAAAAGTACACATCAGGAAGACA  
+HWI-EAS443:3:36:642:705#0/1  
aa\_0[^Z¥LZ¥U[PT[XYQWTQYOYWHSYV\_Z[Z^`¥VWY  
@HWI-EAS443:3:37:764:1432#0/1  
CATATGGCCATAATCAAAAAGTACACATCAGGAAGACAAG  
+HWI-EAS443:3:37:764:1432#0/1  
abbaT]`aa`\_aa[^` `aa`XUaa`a` `aW\_X[]^Z¥^¥  
@HWI-EAS443:3:37:847:1679#0/1  
CATATGGCCATAATCAAAAAGTACACATCAGGAAGACAAG  
+HWI-EAS443:3:37:847:1679#0/1  
UPPPS\_\_`a`\_a`Z^^bba^ZTaYbba]bZ]a¥`a`VZa`  
@HWI-EAS443:3:38:1298:767#0/1  
ACCATATGGCCATAATCAAAAAGTACACATCAGGAAGACA  
+HWI-EAS443:3:38:1298:767#0/1  
abaa`baaa\_`\_]a`\_\_a\_\_\_a]`\_a`a]Z]` `[\_a]^  
@HWI-EAS443:3:38:1587:377#0/1  
ACCATATGGCCATAATCAAAAAGTACACATCAGGAAGACA  
+HWI-EAS443:3:38:1587:377#0/1  
a`aYaaaa¥]XY^\_\_^Xa^]¥\_Z\_W\_]\_ZZZX]V]^WOW

@HWI-EAS443:3:3:1179:2043#0/1  
ATATGGCCATAATCAAAAAGTACACATCAGGAAGACAAGA  
+HWI-EAS443:3:3:1179:2043#0/1  
```abbb]baa\_\_`b^aba\_¥bXaI]\_[aa^`aa`Sa^a\_  
@HWI-EAS443:3:40:1196:1960#0/1  
CATATGGCCATAATCAAAAAGTACACATCAGGAAGACAAG  
+HWI-EAS443:3:40:1196:1960#0/1  
`bbbab\_abbabbb]bbbb`¥aa]DTYbaa\_aab``bb\_  
@HWI-EAS443:3:40:159:1393#0/1  
CATATGGCCATAATCAAAAAGTACACATCAGGAAGACAAG  
+HWI-EAS443:3:40:159:1393#0/1  
abbbbb`bb\_\_¥a``abbb]\_YaaaWGTaaa[ZU\_`aaa^  
@HWI-EAS443:3:42:124:195#0/1  
ACCATATGGCCATAATCAAAAAGTACACATCAGGAAGACA  
+HWI-EAS443:3:42:124:195#0/1  
abaaa`\_`a`]] [TU\_]S^`X^T\_aY]^W¥^`\_X^]T]^  
@HWI-EAS443:3:42:170:1401#0/1  
GTCTTCCTGATGTGTACTTTTTGATTATGGCCATATGGTC  
+HWI-EAS443:3:42:170:1401#0/1  
aabb^`a`a``aZ¥\_]aaa`b\_`aaaaU]aa\_YTYJRT¥  
@HWI-EAS443:3:44:1153:1686#0/1  
GTCTTCCTGATGTGTACTTTTTGATTATGGCCATATGGTC  
+HWI-EAS443:3:44:1153:1686#0/1  
a\_aYY]^¥¥\_[a^YXQS`\_`\_[OSY^BBBBBBBBBBBBBB  
@HWI-EAS443:3:44:1168:163#0/1  
TGTCTTCCTGATGTGTACTTTTTGATTATGGCCATATGGT  
+HWI-EAS443:3:44:1168:163#0/1  
aa\_`aa\_\_aa]aa\_a\_^^aaaa`^a``\_W\_Z]X]WVYW  
@HWI-EAS443:3:45:1017:554#0/1  
CCATATGGCCATAATCAAAAAGTACACATCAGGAAGACAA  
+HWI-EAS443:3:45:1017:554#0/1  
aaaba¥b`^aa\_aaWV`\_aaWF]Ma\_`\_`\_a¥``a\_W`\_`  
@HWI-EAS443:3:45:1507:1340#0/1  
CATATGGCCATAATCAAAAAGTACACATCAGGAAGACAAG  
+HWI-EAS443:3:45:1507:1340#0/1  
aabbabaa`a`[`a\_aaaaa]a`\_a`\_`a]^`¥^`\_`\_`  
@HWI-EAS443:3:45:423:1837#0/1  
ACCATATGGCCATAATCAAAAAGTACACATCAGGAAGACA  
+HWI-EAS443:3:45:423:1837#0/1  
a````a`\_Y\_V`\_Ya]\_`a`\_\_PKU^aX\_¥X\_^^^]Y\_  
@HWI-EAS443:3:46:1341:199#0/1  
CCATATGGCCATAATCAAAAAGTACACATCAGGAAGACAA  
+HWI-EAS443:3:46:1341:199#0/1  
aaaaaaaaa`¥]]\_^^a``aaX^ZYY\_^^^`\_`^`ZV[^  
@HWI-EAS443:3:46:1418:164#0/1  
ATATGGCCATAATCAAAAAGTACACATCAGGAAGACAAGA  
+HWI-EAS443:3:46:1418:164#0/1  
abaaaa^a`^`]]^a`[\_aX\_¥`[a^\_\_ba\_`aXQ¥^`]  
@HWI-EAS443:3:46:1490:1041#0/1  
ACCATATGGCCATAATCAAAAAGTACACATCAGGAAGACA

+HWI-EAS443:3:46:1490:1041#0/1  
aab[ `[ `a\_aaa]Zaa^` `a`a^\_]\_^\_\_^\_a` \_\_\_\_]]\_@HWI-EAS443:3:48:269:1131#0/1  
ACCATATGGCCATAATCAAAAAGTACACATCAGGAAGACA  
+HWI-EAS443:3:48:269:1131#0/1  
aaa]aa][X` `aa\_a`ZY^a[ `aUaaU\_]\_¥\_\_\_\_ ` `¥^^@HWI-EAS443:3:49:1770:524#0/1  
GACCATATGGCCATAATCAAAAAGTACACATCAGGAAGAC  
+HWI-EAS443:3:49:1770:524#0/1  
abbbab` `baYaaabbbab`aa\_aaaa^`\_a]ab]\_aa\_^@HWI-EAS443:3:49:593:933#0/1  
ATATGGCCATAATCAAAAAGTACACATCAGGAAGACAAGA  
+HWI-EAS443:3:49:593:933#0/1  
aba]]baaabaaa]\_aa`aaZa^]¥a\_\_abaaaa\_\_ ` \_a^@HWI-EAS443:3:4:1620:1054#0/1  
ACCATATGGCCATAATCAAAAAGTACACATCAGGAAGACA  
+HWI-EAS443:3:4:1620:1054#0/1  
aaaaba`aa^^`a^aa]\_a\_a` `V` [ ` ]\_\_¥\_aa^^a]X\_@HWI-EAS443:3:50:237:758#0/1  
TCTTCCTGATGTGTACTTTTTGATTATGGCCATATGGTCC  
+HWI-EAS443:3:50:237:758#0/1  
aab`aaaaaaa`a\_`\_bbaab\_\_aaa`\_[a^^]ZTGQWT[  
@HWI-EAS443:3:51:571:61#0/1  
ATATGGCCATAATCAAAAAGTACACATCAGGAAGACAAGA  
+HWI-EAS443:3:51:571:61#0/1  
aaZV]aY¥\_¥ZR^\_WZ]a` `STNX[[[WPZ`N\_¥NZaZ]X  
@HWI-EAS443:3:52:1126:1072#0/1  
ACCATATGGCCATAATCAAAAAGTACACATCAGGAAGACA  
+HWI-EAS443:3:52:1126:1072#0/1  
a]\_Y¥`aa^\_\_a` `Z]T` \_\_ `a\_]`X\_^`\_[\_` `^aa[Y\_@HWI-EAS443:3:52:1388:1072#0/1  
CATATGGCCATAATCAAAAAGTACACATCAGGAAGACAAG  
+HWI-EAS443:3:52:1388:1072#0/1  
aab]aabaaab`ab^` `aaZ`^aUaY^a][\_aaaa`X`\_^@HWI-EAS443:3:53:1327:1474#0/1  
ACCATATGGCCATAATCAAAAAGTACACATCAGGAAGACA  
+HWI-EAS443:3:53:1327:1474#0/1  
aaaabbbbbaa]aa]ab`ab`a`a\_`]a\_a\_TU\_aa`a\_^`@HWI-EAS443:3:55:1018:662#0/1  
GTCTTCCTGATGTGTACTTTTTGATTATGGCCATATGGTC  
+HWI-EAS443:3:55:1018:662#0/1  
aa\_abbabb^ab[ `Za]abbab` `aa\_a¥\_\_ ` \_S` [PZW[  
@HWI-EAS443:3:55:386:191#0/1  
CATATGGCCATAATCAAAAAGTACACATCAGGAAGACAAG  
+HWI-EAS443:3:55:386:191#0/1  
a^]W]a[Y¥\_\_ [¥Y[[\_X]¥TQXP]U]] [¥`^TW] [¥]¥¥  
@HWI-EAS443:3:56:1278:1244#0/1  
ACCATATGGCCATAATCAAAAAGTACACATCAGGAAGACA  
+HWI-EAS443:3:56:1278:1244#0/1  
abbab^aa]ZaaaZ^` \_\_ `[\_^ZLZ`¥`UW[\_aa` \_` [R`

@HWI-EAS443:3:57:1116:39#0/1  
ACCATATGGCCATAATCAAAAAGTACACATCAGGAAGACA  
+HWI-EAS443:3:57:1116:39#0/1  
aaabbbbbb\_aabaaa^aaaaab]a]`\_\_a]\_b`^^`\_\_a  
@HWI-EAS443:3:58:122:1511#0/1  
CATATGGCCATAATCAAAAAGTACACATCAGGAAGACAAG  
+HWI-EAS443:3:58:122:1511#0/1  
a^ba`baXY]Z^¥\_```bbaTT¥V\_]aX]baa\_aZaabba  
@HWI-EAS443:3:58:1558:551#0/1  
CATATGGCCATAATCAAAAAGTACACATCAGGAAGACAAG  
+HWI-EAS443:3:58:1558:551#0/1  
abaa]abaaba`aa0`W`X`aS¥Y\_Vaa]ZabaaaaVaa]  
@HWI-EAS443:3:59:1039:204#0/1  
GTCTTCCTGATGTGTACTTTTTGATTATGGCCATATGGTC  
+HWI-EAS443:3:59:1039:204#0/1  
a``ba`aaaaab]a\_`^aaa`aa`aa`a^\_[U]]ZPLYVS  
@HWI-EAS443:3:59:124:1055#0/1  
GTCTTCCTGATGTGTACTTTTTGATTATGGCCATATGGTC  
+HWI-EAS443:3:59:124:1055#0/1  
aaabbaaabaab^aaaaaba]aaaaa\_\_`Xa\_\_SRYHW  
@HWI-EAS443:3:59:796:173#0/1  
CATATGGCCATAATCAAAAAGTACACATCAGGAAGACAAG  
+HWI-EAS443:3:59:796:173#0/1  
\_aba\_b`aab`Z]^`[^a`a]D^``abaaZ\_W\_aa¥UV]]  
@HWI-EAS443:3:60:446:169#0/1  
ACCATATGGCCATAATCAAAAAGTACACATCAGGAAGACA  
+HWI-EAS443:3:60:446:169#0/1  
aaaaa`aa`aa`a\_aa\_\_a`\_\_`Y`Z```^^^\_aZ`^¥W^  
@HWI-EAS443:3:61:676:169#0/1  
ACCATATGGCCATAATCAAAAAGTACACATCAGGAAGACA  
+HWI-EAS443:3:61:676:169#0/1  
a\_a`]^`[a`¥VTW]¥\_YZa[`YNR^`\_`YXY[Z^ZWVP[  
@HWI-EAS443:3:61:834:943#0/1  
ATATGGCCATAATCAAAAAGTACACATCAGGAAGACAAGA  
+HWI-EAS443:3:61:834:943#0/1  
abbabaaa`a^a^^^a^aaa[aaaW`a^]\_¥^\_T¥\_^\_]`  
@HWI-EAS443:3:62:1015:40#0/1  
CATATGGCCATAATCAAAAAGTACACATCAGGAAGACAAG  
+HWI-EAS443:3:62:1015:40#0/1  
^bb\_abbabbbba¥`\_a``aab\_\_^`a`bbbaa]a¥^]]  
@HWI-EAS443:3:62:1614:1048#0/1  
CTTGTCTTCCTGATGTGTACTTTTTGATTATGGCCATATG  
+HWI-EAS443:3:62:1614:1048#0/1  
abbababbaabbbbbbababbbb¥bbbb`baaaa`\_0  
@HWI-EAS443:3:62:682:406#0/1  
ACCATATGGCCATAATCAAAAAGTACACATCAGGAAGACA  
+HWI-EAS443:3:62:682:406#0/1  
a¥^`ab`aba^OWaY`]Z]¥]a\_FW]¥^WG¥W^a\_`^YQ¥  
@HWI-EAS443:3:64:1157:1735#0/1  
ATATGGCCATAATCAAAAAGTACACATCAGGAAGACAAGA

+HWI-EAS443:3:66:1157:1735#0/1  
^a^X\_a\_aabaa`a\_T`aXPUYT`\_b\_¥FU`\_  
@HWI-EAS443:3:66:1104:1236#0/1  
CATATGGCCATAATCAAAAAGTACACATCAGGAAGACAAG  
+HWI-EAS443:3:66:1104:1236#0/1  
`Y[\_YZ]`^^a]]`a`\_Ua\_\_a`\_\_`¥QY\_^Z`\_  
@HWI-EAS443:3:66:122:490#0/1  
CATATGGCCATAATCAAAAAGTACACATCAGGAAGACAAG  
+HWI-EAS443:3:66:122:490#0/1  
`)`aaaaaaaa`a`[]X`\_^RU[Z^SZ]^`^`[\_]Y¥  
@HWI-EAS443:3:66:1254:538#0/1  
ATATGGCCATAATCAAAAAGTACACATCAGGAAGACAAGA  
+HWI-EAS443:3:66:1254:538#0/1  
[abbaaaUa`a`babbaaba\_aaaab\_[[`bab`a`[aa  
@HWI-EAS443:3:66:362:208#0/1  
TCTTCCTGATGTGTACTTTTTGATTATGGCCATATGGTCC  
+HWI-EAS443:3:66:362:208#0/1  
aaaaaaaa\_\_`Za]\_aaaa`]`\_a[\_`\_¥\_VOOZWTN^Z  
@HWI-EAS443:3:66:62:1630#0/1  
ACCATATGGCCATAATCAAAAAGTACACATCAGGAAGACA  
+HWI-EAS443:3:66:62:1630#0/1  
aba`a]\_\_`\_X¥R¥[]\_\_a[G[[UYVYY[SY¥ZZZ\_^  
@HWI-EAS443:3:67:601:1842#0/1  
ACCATATGGCCATAATCAAAAAGTACACATCAGGAAGACA  
+HWI-EAS443:3:67:601:1842#0/1  
a\_a`\_`a[W¥aa`\_`\_`\_`a\_[Z[]aa\_]`^\_^X\_\_^\_^`  
@HWI-EAS443:3:67:624:1429#0/1  
ACCATATGGCCATAATCAAAAAGTACACATCAGGAAGACA  
+HWI-EAS443:3:67:624:1429#0/1  
abbaa`a`^aaaaa`aaa]\_\_Xa\_]aa\_a`\_`\_a[^`a  
@HWI-EAS443:3:6:639:475#0/1  
ATATGGCCATAATCAAAAAGTACACATCAGGAAGACAAGA  
+HWI-EAS443:3:6:639:475#0/1  
a^¥`abaP\_abaaaaaba\_^a^[a`aaa\_aaaa`^aa  
@HWI-EAS443:3:70:468:630#0/1  
GTCTTCCTGATGTGTACTTTTTGATTATGGCCATATGGTC  
+HWI-EAS443:3:70:468:630#0/1  
\_R\_a`a]WR[aOYSGY][¥`\_`[W[WYUQV^ZNTXMIHRW  
@HWI-EAS443:3:70:546:870#0/1  
CATATGGCCATAATCAAAAAGTACACATCAGGAAGACAAG  
+HWI-EAS443:3:70:546:870#0/1  
a^aa`ZZ¥b]aaaa`Z`aY]^V¥aV`^^¥`\_\_^¥^`\_\_\_\_  
@HWI-EAS443:3:70:954:979#0/1  
CATATGGCCATAATCAAAAAGTACACATCAGGAAGACAAG  
+HWI-EAS443:3:70:954:979#0/1  
a^^a¥\_a^`]`aa``¥]]`^`W\_\_a`a`¥`aa`aa``aa\_  
@HWI-EAS443:3:71:416:530#0/1  
ATATGGCCATAATCAAAAAGTACACATCAGGAAGACAAGA  
+HWI-EAS443:3:71:416:530#0/1  
\_Q¥]a`\_`¥`a`\_`\_`Y`a\_[TY\_a]HY`\_ba][`]\_\_\_\_\_

@HWI-EAS443:3:73:207:1405#0/1  
ACCATATGGCCATAATCAAAAAGTACACATCAGGAAGACA  
+HWI-EAS443:3:73:207:1405#0/1  
aa]]NPLW[``ZGSWO[UTTXVONTVHPQTUZZWYSSW  
@HWI-EAS443:3:73:66:1745#0/1  
ACCATATGGCCATAATCAAAAAGTACACATCAGGAAGACA  
+HWI-EAS443:3:73:66:1745#0/1  
abba`a`\_`aaa]W`\_\_\_^Z^`^W[X^][Y\_\_^]\_\_^^\_  
@HWI-EAS443:3:73:915:121#0/1  
GTCTTCCTGATGTGTACTTTTTGATTATGGCCATATGGTC  
+HWI-EAS443:3:73:915:121#0/1  
aZS]aa`\_\_Y\_bZ`]`Yaa\_[`¥^\_\_^a^\_VW\_UXRKVQL  
@HWI-EAS443:3:75:509:1250#0/1  
GTCTTCCTGATGTGTACTTTTTGATTATGGCCATATGGTC  
+HWI-EAS443:3:75:509:1250#0/1  
a\_aa`¥¥Z]^]aU]T]\_aa``aZ¥`\_]\_W¥`[XJ]MQKMX  
@HWI-EAS443:3:75:58:769#0/1  
TCTTCCTGATGTGTACTTTTTGATTATGGCCATATGGTCC  
+HWI-EAS443:3:75:58:769#0/1  
abaaaab`aaa\_`^¥abaaa```a\_\_\_\_\_`aa^[^¥SYY^a  
@HWI-EAS443:3:76:952:1062#0/1  
CATATGGCCATAATCAAAAAGTACACATCAGGAAGACAAG  
+HWI-EAS443:3:76:952:1062#0/1  
¥SZZ^LWa^^^XSZTYXSb`¥``baJ`V`aZY¥¥^\_[KV]  
@HWI-EAS443:3:79:1515:1470#0/1  
GTCTTCCTGATGTGTACTTTTTGATTATGGCCATATGGTC  
+HWI-EAS443:3:79:1515:1470#0/1  
aa\_ba[aaaaa\_\_`\_^\_baaaa^\_aaaa\_[V]\_Z\_]GU]Y  
@HWI-EAS443:3:79:1587:1026#0/1  
TCTTCCTGATGTGTACTTTTTGATTATGGCCATATGGTCC  
+HWI-EAS443:3:79:1587:1026#0/1  
`b\_^\_ba^Waa\_a`\_\_bb]`aR^bbaa``Z\_\_WXaYOPTL  
@HWI-EAS443:3:79:589:492#0/1  
TCTTCCTGATGTGTACTTTTTGATTATGGCCATATGGTCC  
+HWI-EAS443:3:79:589:492#0/1  
`ba\_b¥¥aa`bR^R[\_aa[a¥\_ZaRPZ]JOYSVOSTQJDJ]  
@HWI-EAS443:3:79:84:105#0/1  
ACCATATGGCCATAATCAAAAAGTACACATCAGGAAGACA  
+HWI-EAS443:3:79:84:105#0/1  
a`a^aY`a`a^a\_\_]¥]\_W]^]\_W\_¥\_\_]W¥]^Z^^ZR]  
@HWI-EAS443:3:7:668:341#0/1  
CATATGGCCATAATCAAAAAGTACACATCAGGAAGACAAG  
+HWI-EAS443:3:7:668:341#0/1  
]¥W\_Z\_`^^OX]ZZW[[\_aZWSYLWRY¥P¥\_aYZ[SL[Z`  
@HWI-EAS443:3:80:1073:699#0/1  
GTCTTCCTGATGTGTACTTTTTGATTATGGCCATATGGTC  
+HWI-EAS443:3:80:1073:699#0/1  
aYXaa[a[``ZZYYa\_ab\_ba`]]`[\_^\_Z[S[ZHYPP  
@HWI-EAS443:3:80:523:330#0/1  
ATATGGCCATAATCAAAAAGTACACATCAGGAAGACAAGA

+HWI-EAS443:3:80:523:330#0/1  
aaaaa`a`aaaaaaa`aaXa`a\_`a`aa]`\_]a`a^  
@HWI-EAS443:3:80:669:759#0/1  
GTCTTCCTGATGTGTACTTTTTGATTATGGCCATATGGTC  
+HWI-EAS443:3:80:669:759#0/1  
]baabaaaaa`a`]abbbb\_0\_aaab``aa\_][[\_S^  
@HWI-EAS443:3:81:1465:885#0/1  
ATATGGCCATAATCAAAAAGTACACATCAGGAAGACAAGA  
+HWI-EAS443:3:81:1465:885#0/1  
Za\_X[a\_\_bbaaa^`b\_aaa\_bbaaab`aba¥baa\_b[a`  
@HWI-EAS443:3:81:1634:1895#0/1  
TGTCTTCCTGATGTGTACTTTTTGATTATGGCCATATGGT  
+HWI-EAS443:3:81:1634:1895#0/1  
a]]`\_a^aaa\_`aX`¥a^aa`aaa\_``\_\_^``S]XG]X  
@HWI-EAS443:3:81:241:199#0/1  
CATATGGCCATAATCAAAAAGTACACATCAGGAAGACAAG  
+HWI-EAS443:3:81:241:199#0/1  
a\_aaaaa`]a¥\_`^aa[Z\_dW`¥`Z\_^^`\_`\_\_`[[\_\_]  
@HWI-EAS443:3:81:618:659#0/1  
ACCATATGGCCATAATCAAAAAGTACACATCAGGAAGACA  
+HWI-EAS443:3:81:618:659#0/1  
a`a`YbYa``aa`a\_`a\_^]X`a¥\_]a`aX]\_\_a\_`aUO¥  
@HWI-EAS443:3:82:1001:416#0/1  
ACCATATGGCCATAATCAAAAAGTACACATCAGGAAGACA  
+HWI-EAS443:3:82:1001:416#0/1  
^]¥bbaba`\_a\_\_a\_TST`a^a]N\_`aT^`^ab\_T¥``Va  
@HWI-EAS443:3:82:1187:465#0/1  
GTCTTCCTGATGTGTACTTTTTGATTATGGCCATATGGTC  
+HWI-EAS443:3:82:1187:465#0/1  
`babb^^bba`aa`]`aabbbab\_abba`aaaab^^^SPS]  
@HWI-EAS443:3:82:791:1016#0/1  
ACCATATGGCCATAATCAAAAAGTACACATCAGGAAGACA  
+HWI-EAS443:3:82:791:1016#0/1  
ab```bbb`abaa¥`aaa`a¥YV]baa\_aaaaaaaV\_\_a  
@HWI-EAS443:3:83:1267:896#0/1  
ATATGGCCATAATCAAAAAGTACACATCAGGAAGACAAGA  
+HWI-EAS443:3:83:1267:896#0/1  
a`a`]aa^aYTaaT`[``]bS\_Ta[aYYbbb\_aaY¥a\_aa  
@HWI-EAS443:3:83:875:1030#0/1  
GTCTTCCTGATGTGTACTTTTTGATTATGGCCATATGGTC  
+HWI-EAS443:3:83:875:1030#0/1  
a\_aabaaaaZaa\_a\_aaaabaa]abaa`ZZ^`\_[\_Q\_YS  
@HWI-EAS443:3:84:1363:1485#0/1  
CATATGGCCATAATCAAAAAGTACACATCAGGAAGACAAG  
+HWI-EAS443:3:84:1363:1485#0/1  
aab`bbbaaaabb`KUaaa`a]b\_`\_\_W\_b`aa[¥`b^\_  
@HWI-EAS443:3:84:1660:848#0/1  
ATATGGCCATAATCAAAAAGTACACATCAGGAAGACAAGA  
+HWI-EAS443:3:84:1660:848#0/1  
aT^bbb[aXb`\_bJ\_ba`a`[\_bb¥baaaZZ]baa\_aa]Z



@HWI-EAS443:3:84:211:1852#0/1  
CATATGGCCATAATCAAAAAGTACACATCAGGAAGACAAG  
+HWI-EAS443:3:84:211:1852#0/1  
aYXMO\_`^aa`V]V]\_YSPX¥PW^\_a`Za\_^\_WTU]^\_^]  
@HWI-EAS443:3:86:568:523#0/1  
CTTGTCTTCCTGATGTGTACTTTTTGATTATGGCCATATG  
+HWI-EAS443:3:86:568:523#0/1  
¥¥T]^`^XZ\_WSa^^`\_¥VT^¥\_\_`a``¥Z\_a]`]^]V¥TT  
@HWI-EAS443:3:86:693:830#0/1  
CATATGGCCATAATCAAAAAGTACACATCAGGAAGACAAG  
+HWI-EAS443:3:86:693:830#0/1  
]RYW]]b]Y¥^Z`^ba¥\_a]aX^]\_Z]¥ZX\_a[aa\_a^`V  
@HWI-EAS443:3:87:59:1199#0/1  
CATATGGCCATAATCAAAAAGTACACATCAGGAAGACAAG  
+HWI-EAS443:3:87:59:1199#0/1  
`S\_]\_`\_aaa\_]\_\_\_\_TY^ZT]Sa`Z``Y`][XV[Y\_[VV  
@HWI-EAS443:3:89:577:409#0/1  
TGTCTTCCTGATGTGTACTTTTTGATTATGGCCATATGGT  
+HWI-EAS443:3:89:577:409#0/1  
abaabaaaa`aa`a]X\_aaaaa`aa`a`WT[\_`\_VY¥YNS  
@HWI-EAS443:3:89:867:1693#0/1  
CATATGGCCATAATCAAAAAGTACACATCAGGAAGACAAG  
+HWI-EAS443:3:89:867:1693#0/1  
```aaaa`abaaabaaaaaaa¥a`aaa`¥aa[abaaXaa[  
@HWI-EAS443:3:8:877:480#0/1  
CATATGGCCATAATCAAAAAGTACACATCAGGAAGACAAG  
+HWI-EAS443:3:8:877:480#0/1  
abababaaaababaaaaaaU`Za\_`^a¥`aaaSa`^¥`aa  
@HWI-EAS443:3:90:1250:209#0/1  
CATATGGCCATAATCAAAAAGTACACATCAGGAAGACAAG  
+HWI-EAS443:3:90:1250:209#0/1  
aXbaabba¥Q¥`\_bYaa`¥aa\_a¥`Xaa``aaa`\_`\_`aa  
@HWI-EAS443:3:90:1646:279#0/1  
CATATGGCCATAATCAAAAAGTACACATCAGGAAGACAAG  
+HWI-EAS443:3:90:1646:279#0/1  
`a````\_b\_aaa]`\_I`aa`\_]U`][\_¥]YY^a\_Xa\_J\_\_`  
@HWI-EAS443:3:90:926:1889#0/1  
GTCTTCCTGATGTGTACTTTTTGATTATGGCCATATGGTC  
+HWI-EAS443:3:90:926:1889#0/1  
`aabaabbaaaaWaXaab`aba`aaabaa\_\_^aR\_\_\_\_RV  
@HWI-EAS443:3:91:1181:768#0/1  
GACCATATGGCCATAATCAAAAAGTACACATCAGGAAGAC  
+HWI-EAS443:3:91:1181:768#0/1  
aa`R\_]\_]`^a¥\_^]W^ZWWZ\_YWXT]H]UV]W]WXXUZZX  
@HWI-EAS443:3:92:825:89#0/1  
CATATGGCCATAATCAAAAAGTACACATCAGGAAGACAAG  
+HWI-EAS443:3:92:825:89#0/1  
a\_]Y]bbaabb^Z^\_]`^Z]YZ[]U]N]]][[a]]Z^]K[]]  
@HWI-EAS443:3:93:249:1038#0/1  
ACCATATGGCCATAATCAAAAAGTACACATCAGGAAGACA

+HWI-EAS443:3:93:249:1038#0/1  
¥`a¥Z\_aba^`a^^aZ\_\_`WaZ^X``¥V^XX[]¥Q¥¥[^`  
@HWI-EAS443:3:94:513:1923#0/1  
ATATGGCCATAATCAAAAAGTACACATCAGGAAGACAAGA  
+HWI-EAS443:3:94:513:1923#0/1  
a`aa\_aaa`\_a`\_a`\_`aXa\_a`WX^]\_\_a^`[^`^\_\_  
@HWI-EAS443:3:95:1169:278#0/1  
CCATATGGCCATAATCAAAAAGTACACATCAGGAAGACAA  
+HWI-EAS443:3:95:1169:278#0/1  
aabbbbbbaabab`bbbaab\_baa`ba`aabbaaa\_aa  
@HWI-EAS443:3:95:208:646#0/1  
GCGGGGTTCTTTCTTGCTTCCTGATGTGTACTTTTTGA  
+HWI-EAS443:3:95:208:646#0/1  
a`baa¥MU`R`¥^Y\_`[S`a]X[WZ[`]a]Z]\_`\_]X[R  
@HWI-EAS443:3:95:595:1761#0/1  
CATATGGCCATAATCAAAAAGTACACATCAGGAAGACAAG  
+HWI-EAS443:3:95:595:1761#0/1  
aaa¥bb^b\_`a[a\_bbaabaGa]a\_^¥\_`a\_\_b`¥¥a\_a  
@HWI-EAS443:3:95:695:1284#0/1  
CATATGGCCATAATCAAAAAGTACACATCAGGAAGACAAG  
+HWI-EAS443:3:95:695:1284#0/1  
`L\_b`]¥¥aX^\_]¥^\_]`b]a\_]U]V^¥[``a\_aaX\_aaa  
@HWI-EAS443:3:96:38:375#0/1  
GTCTTCCTGATGTGTACTTTTTGATTATGGCCATATGGTC  
+HWI-EAS443:3:96:38:375#0/1  
a\_aaaa`aa[``\_b]`^aa`aaaIa`aa^V\_\_`Y]YW^YX  
@HWI-EAS443:3:99:1121:1207#0/1  
TCTTCCTGATGTGTACTTTTTGATTATGGCCATATGGTCC  
+HWI-EAS443:3:99:1121:1207#0/1  
a^`Z`]a[ZZRXNY¥\_a`\_\_`aaaa`^^ZXT[BBBBBBB  
@HWI-EAS443:3:9:169:1257#0/1  
GACCATATGGCCATAATCAAAAAGTACACATCAGGAAGAC  
+HWI-EAS443:3:9:169:1257#0/1  
`Z]\_`\_]a`aaa\_YW``[S]^a`TV^]^]^][[]VXYMQ  
@HWI-EAS443:3:60:839:555#0/1  
ATCAATGAAGTACTGAGTAATCTTGCAAAGGAGAGAAAGCTA  
+HWI-EAS443:3:60:839:555#0/1  
a`baab`¥\_aa`\_b\_aaaaaabaa``\_aa`\_`^a``a`a`\_`  
@HWI-EAS443:3:94:621:1423#0/1  
CAATCCGACCCTACTTTTCCTAAAAATTCCAGCGCAAAAT  
+HWI-EAS443:3:94:621:1423#0/1  
aaabaa¥OQGXa]a\_¥aa`^abbbbaa\_a]^¥^`\_aaaaa¥  
@HWI-EAS443:3:49:390:1418#0/1  
GAACATTATGGGCGCCATGCTCAGGATGTTTCTGAACCAC  
+HWI-EAS443:3:49:390:1418#0/1  
a`aba^a\_b`¥YFX`aR`^\_]¥aaY]¥PP\_`\_]X\_^¥\_P  
@HWI-EAS443:3:14:1778:634#0/1  
ATTTTTGCCGTCTGAGTTCTTCAATGGTAGAACAGATCTT  
+HWI-EAS443:3:14:1778:634#0/1  
abba`ab[]\_Z\_ab]aY\_`ba^]aaaaY`a\_^Na\_\_aYa]

@HWI-EAS443:3:31:877:1498#0/1  
ATGGGCGCCATGCTCAGGATGTTTCTGAACCACTCGGGTT  
+HWI-EAS443:3:31:877:1498#0/1  
a\_a`YFQ\_aaXLZ`aSV\_V]WZ\_`\_\_V¥¥V^\_[S]Y¥VSR  
@HWI-EAS443:3:58:1063:1417#0/1  
AACATTATGGGCGCCATGCTCAGGATGTTTCTGAACCACT  
+HWI-EAS443:3:58:1063:1417#0/1  
O^¥`a^`¥YMDUZaab\_a]a`\_`L\_]YZXW\_¥`aaGRU[  
@HWI-EAS443:3:91:1275:1552#0/1  
CATTAGAGCACATCCAGAACTGATTGCCCCCAATAGAAT  
+HWI-EAS443:3:91:1275:1552#0/1  
`bbbbbabbbbbb\_bbbbbbbbbbbbbbbabbbbbbabb  
@HWI-EAS443:3:82:1148:1799#0/1  
TACCAGCCTCCATTTTCCAGAAATATACATCCGATCACAATT  
+HWI-EAS443:3:82:1148:1799#0/1  
ababba\_aaa^T\_aab]bbb`bbababaTbba]]aabX\_R  
@HWI-EAS443:3:76:1683:1721#0/1  
CGATTGGCCATGTCTCCGATTTGTTTTCAAAGAATTCCTT  
+HWI-EAS443:3:76:1683:1721#0/1  
aab`RI^bbabYSR0Hb\_S[ba]GYaaI[\_a\_][a`S[\_`\_`  
@HWI-EAS443:3:8:1003:265#0/1  
CATCAAGCATCAATGAATTGAGCAATCTTGCAAAAGGAGA  
+HWI-EAS443:3:8:1003:265#0/1  
Xb\_VZ[JWS`\_aZa¥a`Jaab`Ua¥aL`\_aW`ba\_a`]`\_`  
@HWI-EAS443:3:37:1599:216#0/1  
GGCCCAGCATTAAGCATCAATGAATTGAGCAATCTTGCAA  
+HWI-EAS443:3:37:1599:216#0/1  
aaaX`U`\_]Z^UVU[¥0XZ`\_`XDX¥VQKDJGXZZ¥UMJ  
@HWI-EAS443:3:80:1315:1011#0/1  
GGGCTATCGCAACACCTGGGATGCAGATTAGAGGGTTCGT  
+HWI-EAS443:3:80:1315:1011#0/1  
ab`aa`\_SaZa`Xa\_T\_] [aa\_\_aP]ZY`^Z`¥GY^R\_\_  
@HWI-EAS443:3:1:1785:1295#0/1  
GGGGCATGGAAATGAGGCGTTGCCTTCTTCAGTGTCTTTA  
+HWI-EAS443:3:1:1785:1295#0/1  
]aY^`M`YU]aW```aIJ[H[a`\_]`\_`]H¥aYBBBBBBB  
@HWI-EAS443:3:44:1634:372#0/1  
GGTTCTTCTCTTGTCTTCCTGATGTGTACTTTTGATTATG  
+HWI-EAS443:3:44:1634:372#0/1  
aa`\_`aa`a`aaa`\_aa^\_aa^]]¥`^]]a\_a`]]`\_\_X  
@HWI-EAS443:3:35:59:1860#0/1  
GCGGGTCTTCTTCTTGTCTTCCTGATGTGTACCTTTTGA  
+HWI-EAS443:3:35:59:1860#0/1  
ab\_\_Z¥Zab`abbaaaa`baabaaXa`]V`W[`R^`a¥QS  
@HWI-EAS443:3:48:922:210#0/1  
GGGGTCTTCTTCTTGTCTTCCTGATGTGTACCTTTTGATT  
+HWI-EAS443:3:48:922:210#0/1  
ab`aV¥aaaaa¥aaa^\_a\_W`\_`^`[^Ta¥^SG]^`^\_¥]\_Z  
@HWI-EAS443:3:19:1052:1182#0/1  
GGTTCTTCTTCTTGTCTTCCTGATGTGTACCTTTTGATTAT

+HWI-EAS443:3:19:1052:1182#0/1  
\_\_T\_`abbbbaaabba`baa^]V\_T`^^baaWZ\_a`  
@HWI-EAS443:3:58:508:1920#0/1  
CAGGAAGACAAGAGAAGAACCCTGCACTCAGAATGAAGTG  
+HWI-EAS443:3:58:508:1920#0/1  
abbabbbbababbabaa`aY\_aaaa\_aaaaa^\_\_Ya  
@HWI-EAS443:3:67:565:1157#0/1  
ATTGCCATCATCCACTTCATTCTGAGTGCAGGGTCTTCT  
+HWI-EAS443:3:67:565:1157#0/1  
`aaZ^a`\_aa[aa`\_`S`^`^a\_]\_Z^\_W\_\_ZVRXU^]\_  
@HWI-EAS443:3:95:36:148#0/1  
AGCATTAAGCATCAATGAACTGAGCAATCTTGCGAAAGGA  
+HWI-EAS443:3:95:36:148#0/1  
a`a`ba`bZ\_\_ZGU¥]XWZ[NXWYSSWZX\_UGYWZ^UZ  
@HWI-EAS443:3:13:1618:812#0/1  
TCCAAAATGCCCTAAATGGGAATGGGGACCCGAATAACAT  
+HWI-EAS443:3:13:1618:812#0/1  
¥Ma]Waba`a\_X][`aWb]V[V[Z`\_ZG^RWUOIHLWO^  
@HWI-EAS443:3:53:11:1548#0/1  
GTGCGTTTAAAGTACGGTTTAAAAAGAGGGCCTTCTACGGA  
+HWI-EAS443:3:53:11:1548#0/1  
a^\_`a`\_a`\_`^aS]`Y\_\_ZT]\_¥``[¥[¥¥¥¥¥YPZ¥ZN  
@HWI-EAS443:3:74:39:498#0/1  
AGGCAAACCATTTGAATGGATGTCAACCCGACTCTACTTT  
+HWI-EAS443:3:74:39:498#0/1  
Y`a\_¥aa`ba`b^UH]aaXZaWU]\_a][¥\_[\_\_\_\_Z`¥  
@HWI-EAS443:3:40:1785:800#0/1  
ATTGGAGTGACAGTGATAAAGAACAACATGATAAACAATG  
+HWI-EAS443:3:40:1785:800#0/1  
ab`a`aZab`[`aZb^b[Z^`aaX^)`a[W¥T0^XL]¥[W  
@HWI-EAS443:3:25:940:1890#0/1  
AGGACCGCAGAAGCTGCTTTTGGTCTAGTGTGCCACTT  
+HWI-EAS443:3:25:940:1890#0/1  
abbbbb`baba¥aY^a^^¥Z`^T`^aY[\_[[[\_\_\_\_`[V[  
@HWI-EAS443:3:18:1061:218#0/1  
TGGGTCCCCATTCCCATTAGGGCATTGGACAAAGCGT  
+HWI-EAS443:3:18:1061:218#0/1  
TQ]¥FYba]`X\_P]YY\_\_ZZT¥]SYY0¥a¥^\_Y^^`UMJ  
@HWI-EAS443:3:66:1274:1082#0/1  
TGGCGGCTGTCTGGCTGTCAGTAAGTATGCTAGAGTCTCG  
+HWI-EAS443:3:66:1274:1082#0/1  
aa^YQ\_Y[aYXR[[VQ[OORNLYBBBBBBBBBBBBBBB  
@HWI-EAS443:3:24:1216:1416#0/1  
CGCTGTCTGGCTGTCAGTAAGTATGCTAGAGTCTCGTTTCG  
+HWI-EAS443:3:24:1216:1416#0/1  
aaab¥VbabbaabY^a]aaba\_aaa`a^Vaa`\_b\_aZ\_]`  
@HWI-EAS443:3:38:982:595#0/1  
GAAATGAAAAGTGGCGAGAGCAGTTGGGACAGAAATTTGA  
+HWI-EAS443:3:38:982:595#0/1  
aZ]aXa\_`Y¥aFURa\_[^P]QKHMxJWRUXWPU^TPVWPJ

@HWI-EAS443:3:32:1546:1013#0/1  
CCGCCAGACTTATGATTGGACATTAACAGAAATNAACCG  
+HWI-EAS443:3:32:1546:1013#0/1  
aaabbbbbbbbabbbbaa`bbbabbab`bbaYD[babb  
@HWI-EAS443:3:32:760:85#0/1  
GGTCCGGATTGATGCCAGGATCGACTTCGAGTCTGGACGG  
+HWI-EAS443:3:32:760:85#0/1  
aY\_Z^`¥\_aVY\_\_XM[^¥UYSP^VXYSRR^Z[[VW¥¥  
@HWI-EAS443:3:72:1071:1742#0/1  
GCCCGGATTGATGCCAGGATCGACTTCGAGTCTGGACGGA  
+HWI-EAS443:3:72:1071:1742#0/1  
^baabbaaaababbbbaabaaaaa`\_aaa`\_aa[a\_`aaa  
@HWI-EAS443:3:74:964:56#0/1  
GCCCGGATTGATGCCAGGATCGACTTCGAGTCTGGACGGA  
+HWI-EAS443:3:74:964:56#0/1  
V\_`^abIZ\_bbbbbbb]bb\_b\_bababababS]aa\_VZ^aW  
@HWI-EAS443:3:80:617:689#0/1  
GCTGAATCGAGAAAATTGCTTCTCATTGTTTCAGGCATCAA  
+HWI-EAS443:3:80:617:689#0/1  
`aaabaa`aab`ab\_a[a`¥a^`a\_X\_\_\_Y)\_`\_]\_^  
@HWI-EAS443:3:91:1753:618#0/1  
CCGCCACTTTTCATTTCTGCTCTGGAGGTAGTGAAGGGCT  
+HWI-EAS443:3:91:1753:618#0/1  
¥S\_0¥¥W`RQ[W\_¥I\_\_R\_aaa`X]X\_¥I[VZ]BBBB  
@HWI-EAS443:3:46:1695:1137#0/1  
CGGGAGACCTTCACTACCTCCAGAGCAGAAATGAAAAGTG  
+HWI-EAS443:3:46:1695:1137#0/1  
Ua^ZU¥¥\_IUaaba]aaaZP[XaZU\_¥aV¥Vb]¥\_¥UaU\_  
@HWI-EAS443:3:85:978:1936#0/1  
AAAAATTCCAGCGCAAATGCCATAAGCACTACATACCTT  
+HWI-EAS443:3:85:978:1936#0/1  
\_`^`^W`a[O\_YaaJWI`\_XSX]`a\_\_T¥]QGHIRITUF¥  
@HWI-EAS443:3:12:1670:891#0/1  
AAAAATTCCAGCGCAAATGCCATAAGCACTACATTCCTT  
+HWI-EAS443:3:12:1670:891#0/1  
a\_\_a`aaVa`bX``a\_a\_a`\_S^`^]]U\_XGWZ\_\_`OUGS  
@HWI-EAS443:3:59:1567:666#0/1  
AGGCCATGGTGTCTAGGGCCCGGATTGATGCGAGGATCGA  
+HWI-EAS443:3:59:1567:666#0/1  
a`bb]bbab[]a]ZbbabZ¥V`baab]ZbaZGa`ZDL`X^  
@HWI-EAS443:3:23:847:2009#0/1  
GCATCATATTCCATGCTTTTGGCTGGGCCATGGGCTGGCA  
+HWI-EAS443:3:23:847:2009#0/1  
ab`VZ]\_aa]SOPV^¥ST¥BBBBBBBBBBBBBBBBBBBBBB  
@HWI-EAS443:3:37:991:245#0/1  
GCCATGGTGTCTAGGGCCCGGATTGATGCCAGGATCGACT  
+HWI-EAS443:3:37:991:245#0/1  
abaaaa`^a^a¥`aa`a]`aa[^XKO¥\_ZDFVUYUU¥VUU  
@HWI-EAS443:3:18:1418:498#0/1  
TGTTTATAGCACCTTGGGTGTCTGACAAGTCGTATTGCA

+HWI-EAS443:3:18:1418:498#0/1  
aa`aaa`a`\_^`a\_a\_\_X\_]X\_a]]^`^X\_\_X]\_Y¥]]  
@HWI-EAS443:3:7:227:291#0/1  
CCGGATGTATATTCTGAAATGGGAGGCTGGTGTATTATAGC  
+HWI-EAS443:3:7:227:291#0/1  
aabbabb`ababbabbaaabbbaa\_aabaaQa``a``\_a]  
@HWI-EAS443:3:87:782:711#0/1  
GACCGGATGTATATTCTGAAATGGGAGGCTGGTGTATTATA  
+HWI-EAS443:3:87:782:711#0/1  
aaaabbaa``aaaa`a`[a\_a`Z\_[\_^Z\_a`¥[\_`^`\_Z`  
@HWI-EAS443:3:1:583:474#0/1  
GGGGGGATATATGAGGCAATCGAGGAGTGCCTGATTAATG  
+HWI-EAS443:3:1:583:474#0/1  
a¥VaZ\_K\_]M`[SF[[G[VBBBBBBBBBBBBBBBBBBBB  
@HWI-EAS443:3:22:735:110#0/1  
CGCGTCTCCACAACCTTGAGGGGTTTTCGGCTGAATCGAGA  
+HWI-EAS443:3:22:735:110#0/1  
\_a```baUbbayMbb`b`Va]aaa\_[a`\_[aaaVb\_]Xa]  
@HWI-EAS443:3:39:457:1364#0/1  
ATCGAAGTTCCAGGTTCCAGGTTGCCCTAAATGCCTGA  
+HWI-EAS443:3:39:457:1364#0/1  
aaaZ\_aaaMY]¥YSOMT^]VDVOYYY\_`^BBBBBBBBBBBB  
@HWI-EAS443:3:61:1599:614#0/1  
CGCGTCTCCACAACCTTGAGGGGTTTTCGGCTGAATCGAGA  
+HWI-EAS443:3:61:1599:614#0/1  
aaaba^b]aaY[YQabbaT`baG\_bb[aaJT\_[ZZIV[aU  
@HWI-EAS443:3:71:113:2030#0/1  
CGCGTCTCCACAACCTTGAGGGGTTTTCGGCTGAATCGAGA  
+HWI-EAS443:3:71:113:2030#0/1  
a\_ba`a`b``aZa```]a`\_]S\_Z^^Z]]^a\_XZ]NXY  
@HWI-EAS443:3:9:802:1856#0/1  
CAATCACAGCAGACAAGAGAATAATGGACATGATTCCAGA  
+HWI-EAS443:3:9:802:1856#0/1  
ab\_[FRa]a\_a¥X^a\_a^a]\_\_\_[]\_aUL]X[¥SXNS¥\_`^  
@HWI-EAS443:3:78:1566:734#0/1  
GGCCCATCCACTAACAGGGCAGAGAGGAATTGCCCGAT  
+HWI-EAS443:3:78:1566:734#0/1  
a¥^TZa\_TZa`baa`X¥\_¥HZ^`\_`\_X\_a¥XZ`]NKNWH`  
@HWI-EAS443:3:84:168:344#0/1  
GGCCCATCCACTAACAGGGCAGAGAGGAATTGCCCGCT  
+HWI-EAS443:3:84:168:344#0/1  
`baababaab^]ab\_b`a\_ba`\_a[aaaaa]\_a`[U`\_\_  
@HWI-EAS443:3:1:170:240#0/1  
CCTCCCGATTCCACCAATCATTCTTCCGACAGATGCTCTG  
+HWI-EAS443:3:1:170:240#0/1  
ab]a[^YaXbaa\_¥a]`TUWa^¥[\_[U`VU[`^][M^SaB  
@HWI-EAS443:3:79:1499:199#0/1  
TGGGATCCATTCCGGTGCGAACAAGCGCTCTTGTCTTTG  
+HWI-EAS443:3:79:1499:199#0/1  
``]bU]UaaY[WHQ^M[`ba^[`ab\_ZFP`abaU\_M¥F\_a

@HWI-EAS443:3:60:966:772#0/1  
CTCCTGTTTTCTTAGGGCCTTCCCAGCACTGGGATGCTC  
+HWI-EAS443:3:60:966:772#0/1  
``a^\_X^b\_\_ab^¥^^G\_\_¥\_b]]`aa\_\_¥`a[\_a\_T¥`  
@HWI-EAS443:3:30:876:1573#0/1  
GTCCGAGAGCTCGAAGACTCCCCGCCCTGGAAGGATAAA  
+HWI-EAS443:3:30:876:1573#0/1  
aab`[\_¥L¥Y]]^\_b]a`a`XRa]`bbU^\_QaaQGRERZa  
@HWI-EAS443:3:2:1320:1876#0/1  
GCGGTGTGTTCTGTTTACTGTGTCCATGGTGTATCCTGTT  
+HWI-EAS443:3:2:1320:1876#0/1  
``^aUQXa^XYa^[a\_\_Z\_VQaZT¥¥N`\_G\_¥^ZPU`XVV  
@HWI-EAS443:3:48:206:545#0/1  
GCGGTGTGTTCTGTTTACTGTGTCCATGGTGTATCCTGTT  
+HWI-EAS443:3:48:206:545#0/1  
aaa`YaWa\_`\_`a\_a`\_`a`¥\_W[Z¥\_`aWaT^\_ZU[\_VU  
@HWI-EAS443:3:86:612:1757#0/1  
CGGTGTGTTCTGTTTACTGTGTCCATGGTGTATCCTGTTC  
+HWI-EAS443:3:86:612:1757#0/1  
^bb`b\_b[aba[`bbbabbaba^aaaa][b\_abba`\_aab  
@HWI-EAS443:3:94:735:642#0/1  
CGGTGTGTTCTGTTTACTGTGTCCATGGTGTATCCTGTTC  
+HWI-EAS443:3:94:735:642#0/1  
abaYa\_b]baab`ba`ba\_a\_b`a`\_]\_a`^a\_aa`a\_  
@HWI-EAS443:3:95:742:21#0/1  
CGGTGTGTTCTGTTTACTGTGTCCATGGTGTATCCTGTTC  
+HWI-EAS443:3:95:742:21#0/1  
]bbUba\_W\_¥\_bbbb`abbaa]VIX`b`]^`^[\_]P`bbbX  
@HWI-EAS443:3:21:244:162#0/1  
GCCGGCTGATTTCTGTTTAAATGTCCAATCATAAGTCTGGC  
+HWI-EAS443:3:21:244:162#0/1  
Ja¥`^F^WS\_XV`bY\_VVaY[`]a¥^T[aR^aS]YSPY\_\_  
@HWI-EAS443:3:8:621:1422#0/1  
ATGGGCCTGCAGTAGCAAGTGGGCATGACTTTGAAAGGGA  
+HWI-EAS443:3:8:621:1422#0/1  
aaaaa^HL^^aa`aaa^^RVVa\_a\_^a[a\_\_aZbZ]QRY  
@HWI-EAS443:3:12:646:2015#0/1  
GTACTTTTTTGGACAGTACGGATAGCAAATAGTAGCATTG  
+HWI-EAS443:3:12:646:2015#0/1  
^TYYa`XW]^S[^ab\_`Xbaa`YY]a^aYXNW^`VY[IY  
@HWI-EAS443:3:11:1090:1647#0/1  
ATGGCTCTTGCTTTACTGTAATGACCGATGGACCAAGTGA  
+HWI-EAS443:3:11:1090:1647#0/1  
^\_b¥F]aaaa]YbaY¥[\_^baa\_`¥UX[``a`\_X`\_aXaa  
@HWI-EAS443:3:69:1206:771#0/1  
GTGCAGGGATAACTGGCATGGCTCGAATCGGCCGAGGGGG  
+HWI-EAS443:3:69:1206:771#0/1  
a\_aaa\_]YXaYa\_]\_XT^\_BBBBBBBBBBBBBBBBBBBB  
@HWI-EAS443:3:50:1722:87#0/1  
GTGCAGGGATAACTGGCATGGCTCGAATCGGCCGTGGGGG

+HWI-EAS443:3:50:1722:87#0/1  
`V^]ZT\_Z[a`TL^a]U\_UBBBBBBBBBBBBBBBBBBBBBB  
@HWI-EAS443:3:31:108:2031#0/1  
AGGGTCTTCAATCTCAGCGTTTCCTGGGTTTCGACTTTCT  
+HWI-EAS443:3:31:108:2031#0/1  
X\_aSH]aa`^QS^`Z¥M^a¥¥T]a[NKMDTXa^H[[^¥YX  
@HWI-EAS443:3:11:684:182#0/1  
GCCCCGAGACTGGAGCCACACAAATGGGAAAAATACTGTGT  
+HWI-EAS443:3:11:684:182#0/1  
abaZTSSQXZW^R¥Z¥Y¥UYVPU]¥¥¥Y^]^^WYVZZUXW  
@HWI-EAS443:3:98:1107:983#0/1  
AGAGGATTTCTCATTTTGGGCAAAGAAGACAAGAAGATCC  
+HWI-EAS443:3:98:1107:983#0/1  
]ba`[^a`YGZQ¥Y`bV¥Z¥b¥¥`bV]a¥XaaYa\_a\_\_Z\_  
@HWI-EAS443:3:73:278:1359#0/1  
GAAAAATGGCCAGCATTAAAGCATCAATGAACTGAGCAAT  
+HWI-EAS443:3:73:278:1359#0/1  
abbbb¥Za`a]abaab`^^`^bN\_aa`a]``]\_aa`a\_`Z  
@HWI-EAS443:3:86:789:678#0/1  
AAGAAATATGGCCAGCATTAAAGCATCAATGAACTGAGCA  
+HWI-EAS443:3:86:789:678#0/1  
abb^`baabaaaa^`aaa`a\_a`aa\_a\_a`\_a[a  
@HWI-EAS443:3:97:1173:1195#0/1  
CAGCATTAAAGCATCNACGAACTGAGCAATCTTGGAAAAGG  
+HWI-EAS443:3:97:1173:1195#0/1  
Ya^aa[¥`ZbabaZD^`aZYS`bV]aYb\_U`b]DY¥IRaa  
@HWI-EAS443:3:28:158:671#0/1  
CTTTTTTGGACAGTATGGATAGCAAACAGTAGCATTGCCA  
+HWI-EAS443:3:28:158:671#0/1  
aaaaaaaa^a\_aaa¥^^]aT¥^SWZ`YWUJVS^]WVXVJYYY¥  
@HWI-EAS443:3:33:1091:665#0/1  
ATTTTCCACCGAGTGGCCACTTCAATTGGCTTTTTTTCTTC  
+HWI-EAS443:3:33:1091:665#0/1  
\_``abbbb`a`baa^`a`abaa`aa`^^\_a[DDZF¥X^`Q  
@HWI-EAS443:3:61:1202:1263#0/1  
CATATTTTCCCGACTGCCCCACTTCAATTGGCTTGTTTTC  
+HWI-EAS443:3:61:1202:1263#0/1  
TM^X[a`Vb`a[X¥SZX^a\_\_aabbb\_aaKS¥a\_X^^R\_R  
@HWI-EAS443:3:90:1322:652#0/1  
CATGCTCTCAATCTGCTGAAGAGACTGAAGAAGACAGCGC  
+HWI-EAS443:3:90:1322:652#0/1  
[`\_\_IU^bb^^a\_W¥PZ\_[`¥UW¥`[W`aaVY[HMOaTYL  
@HWI-EAS443:3:99:1408:386#0/1  
CAGTGGTCTTAGTGAGTATCTCGCGGGTGC GGACTGAGA  
+HWI-EAS443:3:99:1408:386#0/1  
Y`abb¥b^bbKbba[\_ZZ][\_b[Q\_KbIbbb\_^V^W[BBB  
@HWI-EAS443:3:34:488:20#0/1  
CACCCGCGAGATACTACTAAGACCACTGTGGACCATATG  
+HWI-EAS443:3:34:488:20#0/1  
`aaba`abab`abaaaa`aaaa]a`a^`]Ta[[]UT[¥ZW



@HWI-EAS443:3:38:196:1561#0/1  
GCCTTTTCCGCAAGCTCGACGATCATTGGGTTGAAGCATT  
+HWI-EAS443:3:38:196:1561#0/1  
a¥[H[PTa[]]]ZU[K]]BBBBBBBBBBBBBBBBBBBB  
@HWI-EAS443:3:44:1645:351#0/1  
ATCGAAGGGTCCAGGTTCCAGGTTATCCCTAAGTGCCTTA  
+HWI-EAS443:3:44:1645:351#0/1  
ababaaa\_Ja`[S\_\_\_Y\_\_[\_aKaGUUaWG\_WFFWX^[FK  
@HWI-EAS443:3:82:796:1701#0/1  
GGAAGACAAGAGAAGAACCCCGCACTCAGGATGTGAGAAG  
+HWI-EAS443:3:82:796:1701#0/1  
\_aab\_babbbbab\_abbbbaa\_babbab\_a`ab`baaaaa  
@HWI-EAS443:3:61:1120:493#0/1  
TGCTGCTGTCTGGCTGTCAGTAAGTATGCTAGAGTCCCGT  
+HWI-EAS443:3:61:1120:493#0/1  
abbb\_Z\_baaaba\_ab[a`aUYY¥V¥][][Y¥VWS]]V  
@HWI-EAS443:3:90:960:670#0/1  
CTGCTGTCTGGCTGTCAGTAAGTATGCTAGAGTCCCGTTT  
+HWI-EAS443:3:90:960:670#0/1  
abbaabba` `` `^^`b[aaaV\_¥Z¥^` `` `a` ]\_\_b]\_a  
@HWI-EAS443:3:72:400:893#0/1  
GGGATTTATGCCTTTCTCATGTGGTTTGACTATGTTGGGC  
+HWI-EAS443:3:72:400:893#0/1  
aab\_\_abb`bbbaabbb\_b\_Q` ]]a\_aaaaa` ]a\_aX¥  
@HWI-EAS443:3:86:1024:1094#0/1  
CCAAGATCGAAGGTTCCAGGTTCCAGGTTGCCCTAAGCG  
+HWI-EAS443:3:86:1024:1094#0/1  
abba`a^Z\_^a^OZMZY\_Y\_W^O]VZP^]YL^V]a]OFS  
@HWI-EAS443:3:98:85:110#0/1  
ATCGGGTTCGTTGCCTTTTCGTCGAGAACTCGAAGACTC  
+HWI-EAS443:3:98:85:110#0/1  
\_a[\_UX¥QSV\_a`XQ]Y^^¥GVBBBBBBBBBBBBBBBB  
@HWI-EAS443:3:30:14:1832#0/1  
GCTTGCAGAAAAGGCAATGAAAGAATATGGGGAAGATCCC  
+HWI-EAS443:3:30:14:1832#0/1  
abaa`baV]\_^GXabbaaa\_S\_a\_Z\_\_\_\_]Z\_WW]`a^]YO  
@HWI-EAS443:3:45:633:1070#0/1  
AGGCTCTAAAGTTTTCAAGGCTGGAGAAGTTTGGTGGGAG  
+HWI-EAS443:3:45:633:1070#0/1  
aa`bbbaa]\_Tba\_^a\_\_\_NU]aG^H]aUXFOaZ[M\_JZ  
@HWI-EAS443:3:33:302:1000#0/1  
CAATGCTACTATTTGCTATCCATACTGTCTCAAAAAAAAA  
+HWI-EAS443:3:33:302:1000#0/1  
aa]a`a`aa`a`a`a`\_a\_a\_aa`\_``\_ZXa``¥^^\_\_\_\_Z\_  
@HWI-EAS443:3:67:1741:1035#0/1  
GAACTGAGCAATCTTGCAAAGGAGAGAAAGCTAACGTGC  
+HWI-EAS443:3:67:1741:1035#0/1  
OTaa¥X\_a¥^\_a^Z\_YYU¥a` `a[V\_\_]`¥Z`bY`V¥¥]V  
@HWI-EAS443:3:92:141:670#0/1  
TCGGATCTTCATTGCCTTTTCCGCAAGCTCGACGATCATT

+HWI-EAS443:3:92:141:670#0/1  
abbb\_aa\_`\_aabaa¥]aa`\_`b\_a\_]^^`\_\_\_a[\_VX^\_  
@HWI-EAS443:3:14:1222:272#0/1  
CCGTGCGACAATGCTTCAATCCAATGATCGTCGAGCTTGC  
+HWI-EAS443:3:14:1222:272#0/1  
aab\_aab\_aa`b\_aa¥]\_``a\_aa]a]`X\_aY`]\_\_]X  
@HWI-EAS443:3:65:1094:350#0/1  
ACCCTGATGTGTACTTTTTGATTATGACCATATGGTCCAC  
+HWI-EAS443:3:65:1094:350#0/1  
`aaaVTT`¥G¥\_`Sb`a``]LXabaXDX¥TYBBBBBBBBB  
@HWI-EAS443:3:52:1375:540#0/1  
CCCTGATNTGTACTTTTTGATTATGGCCATATGGTCCACA  
+HWI-EAS443:3:52:1375:540#0/1  
aaabba[D^aaaabbbabababaaaa`a`J]`^¥¥`ZUP`  
@HWI-EAS443:3:61:1606:1874#0/1  
CCGGGCCATTCTATTCCACCATGTTACGGCCAGAGGTGA  
+HWI-EAS443:3:61:1606:1874#0/1  
abaababbbbababababaa^aa\_aaa]`aY`PWZJW¥  
@HWI-EAS443:3:25:510:341#0/1  
CCATCATCCATTTCTATTCTGAGTGCGGGGTTCTTCTCTTG  
+HWI-EAS443:3:25:510:341#0/1  
aabbbbbbbbbbbbbbbbbbababbbbbbb\_bab`aabbaa  
@HWI-EAS443:3:62:1000:956#0/1  
CGGGCCATTCTATTCCACCATGTTACGGCCAGAGGTGAT  
+HWI-EAS443:3:62:1000:956#0/1  
aZF^aa`a¥UW\_aaba^RWZYV^a]VP]\_aWZXZHLWYB  
@HWI-EAS443:3:68:473:1969#0/1  
CGGGCCATTCTATTCCACCATGTTACGGCCAGAGGTGAT  
+HWI-EAS443:3:68:473:1969#0/1  
a^FQZ\_X¥\_`\_]¥^a`aa[a¥aa`b\_YX\_`YHULTXBBB  
@HWI-EAS443:3:97:726:1777#0/1  
TAAGCATCAATGAACTGAGCAATCTTGCAAAGGGAAGAAA  
+HWI-EAS443:3:97:726:1777#0/1  
]b[a]]`aba\_aa^aa¥\_`bbaaYa[`¥`\_\_X\_BBBBBBB  
@HWI-EAS443:3:22:700:210#0/1  
GTCCCCTTGCAAGATTGCTCAGTTCATTGATGCTTAATGC  
+HWI-EAS443:3:22:700:210#0/1  
aa\_V\_a`aa\_a`a\_\_aa`]X\_``^`\_\_\_`Y`\_\_^^^]  
@HWI-EAS443:3:46:1409:1165#0/1  
GTCCCCTTGCAAGATTGCTCAGTTCATTGATGCTTAATGC  
+HWI-EAS443:3:46:1409:1165#0/1  
aZa[HQZ[X^`V\_VVTQL¥``[U^Q`^[XYU`YVTTYV^O  
@HWI-EAS443:3:33:1300:1856#0/1  
GTTGCCTTAGGGACAAGAGACTGAAATGGTTCGAATTCCA  
+HWI-EAS443:3:33:1300:1856#0/1  
\_TS]X¥W\_Y\_XNW\_W^]W\_\_\_`aY\_YY\_YQRQFOTTTOTV  
@HWI-EAS443:3:49:83:1408#0/1  
CAGCATTAAAGCATCAATGAACTGAGCAATCTTGCAAAGGA  
+HWI-EAS443:3:49:83:1408#0/1  
abbbbbbbbaab`bbb`abbbb^`^bbb\_``aabaaba`

@HWI-EAS443:3:20:1029:1073#0/1  
CGGGGCGATCTGAACCTTTGTCAATAGGGCAAACCAGCGAC  
+HWI-EAS443:3:20:1029:1073#0/1  
a`T\_Xa¥^k\_ZW]R¥\_ZY¥[[X`^^¥\_\_\_\_\_V^[TS^[W  
@HWI-EAS443:3:23:549:122#0/1  
CGGGGCGATCTGAACCTTTGTCAATAGGGCAAACCAGCGAC  
+HWI-EAS443:3:23:549:122#0/1  
abbabbbb`\_`b^JYaa`a\_`b¥`Z`\_K``aS`\_]\_`^W  
@HWI-EAS443:3:78:1381:156#0/1  
CGGGGCGATCTGAACCTTTGTCAATAGGGCAAACCAGCGAC  
+HWI-EAS443:3:78:1381:156#0/1  
ab^baZZ¥ZUa]\_aXaaa\_¥TUYXS^a¥BBBBBBBBBBBBB  
@HWI-EAS443:3:86:1068:534#0/1  
CCAGCATTAAGCATCAATGAACCTGAGCAATCTTGCAAAGG  
+HWI-EAS443:3:86:1068:534#0/1  
`¥]`a`^¥`a¥\_a``aabbaaab``aX^]`]aaa\_^UZaZ  
@HWI-EAS443:3:11:1210:1585#0/1  
GGGCATCGTTTGTCTCCAGAGGGTTTGTCTTGTTC  
+HWI-EAS443:3:11:1210:1585#0/1  
aa`\_\_a\_b`aaZ]S]\_V`Z^^`X[^\_V]]\_XVV]]ZUXY  
@HWI-EAS443:3:54:741:1597#0/1  
AGTCCGTCATAATCACTGAGTTTGTGAGTTCAGTGCACATTT  
+HWI-EAS443:3:54:741:1597#0/1  
aa`aaa`baaaaa\_a`aa`aaaa`aa`\_a`\_]aZaaaa`a  
@HWI-EAS443:3:88:235:1611#0/1  
AAATCCCAATTACCTCATGGCTTGAAGCAGGTGTTAGCA  
+HWI-EAS443:3:88:235:1611#0/1  
[`bbb]\_X[Yaabb[T[^ZH\_]]TT¥GRSXTWHIOVLR  
@HWI-EAS443:3:72:757:938#0/1  
GATGGTTTCTGGATATTTGGACTTACAATGCCGAACCTGT  
+HWI-EAS443:3:72:757:938#0/1  
a][`U[[VWY¥[VWV]YYXYM[[¥[`X^[^[[[OT[]][W  
@HWI-EAS443:3:93:1202:423#0/1  
AAGATCCAGATGAAGGCACATCTGGGATGGAGTCTGCTGT  
+HWI-EAS443:3:93:1202:423#0/1  
aaba¥¥`aaaa\_aaa^aZ`\_`\_aaa\_aaT^b¥P`a¥`\_\_  
@HWI-EAS443:3:43:294:1491#0/1  
ATGAATGGCTCCCTTATGACAAACACATCCCCCTTGGAAC  
+HWI-EAS443:3:43:294:1491#0/1  
^a\_a[[VQHZ]aaZ]\_ZX]U[\_][`OXRR]Za\_\_][\_\_M  
@HWI-EAS443:3:53:1743:190#0/1  
ATTTTGTCTCCTGGCTCTACTAGTGTCCAGTAATAGTTCA  
+HWI-EAS443:3:53:1743:190#0/1  
`bbbbbbabb\_\_a\_Y]a[`\_Pa\_a]]]]V\_a`[ab]\_¥]QW  
@HWI-EAS443:3:7:565:26#0/1  
ATGGAAATGAGGCGCTGCCTTCTTCAGTCTCTTCAGCAAA  
+HWI-EAS443:3:7:565:26#0/1  
[F^`\_ZW\_b¥bbabU`[UU¥Z[QBBBBBBBBBBBBBBBBB  
@HWI-EAS443:3:97:305:293#0/1  
TGGAATGAGGCGCTGCCTTCTTCAGTCTCTTCAGCAAAT

+HWI-EAS443:3:97:305:293#0/1  
\_Z\_]Q`a`¥[P`a`\_\_[VV¥^V`RU[¥[ZKVYSUZVY  
@HWI-EAS443:3:69:1653:245#0/1  
ACCAGAAATCCAATTGTTAGCCAATTGATGCCATCATGA  
+HWI-EAS443:3:69:1653:245#0/1  
Maabbbabbbabbaab`bbb\_abbabbb`aba`bbaa  
@HWI-EAS443:3:42:1709:112#0/1  
CGGTCCAGTATCGTCTAATGGAGCAAATGGAGTAAAAGGA  
+HWI-EAS443:3:42:1709:112#0/1  
abbab\_bbabbbbaabaabbb`b^a]`bb\_Zb``a`aa]  
@HWI-EAS443:3:72:550:284#0/1  
TGTTTCTCCAACCTTGATAGTGTCTGTTATTATTCCGTT  
+HWI-EAS443:3:72:550:284#0/1  
aa\_a`a\_aa`¥\_\_\_`]`\_`\_Y\_]BBBBBBBBBBBBBBB  
@HWI-EAS443:3:11:1084:1844#0/1  
GTGATGATTAGGGCATTTCATTCGACTGATTTGACTATC  
+HWI-EAS443:3:11:1084:1844#0/1  
\_V`aa`a]aa^^[]a\_`\_\_\_^\_\_^a][^\_ZXX^Q  
@HWI-EAS443:3:79:728:1196#0/1  
ACTCTTCAGGTCGGCTGCATATCCTGACCCCTGCTCATTT  
+HWI-EAS443:3:79:728:1196#0/1  
Vabaabbbba`bbbbbbbababbYbbabbbbbbba  
@HWI-EAS443:3:76:1569:1573#0/1  
ATGGAAGTCGTTCAACAAACAAGGGCAGATAAACTAACTC  
+HWI-EAS443:3:76:1569:1573#0/1  
a`^`\_a^HVa¥`Z`¥R`WPZYT¥SE[a]PTW¥F[^ZFXX  
@HWI-EAS443:3:22:1129:568#0/1  
GAAAAAGGAGAGTAAGCGACAACATGACCAAGAAGATGGT  
+HWI-EAS443:3:22:1129:568#0/1  
a`\_\_\_\_\_^Za^`\_\_ab¥^ZYXRZ^)^XZZZXXXWZVZ00  
@HWI-EAS443:3:36:452:101#0/1  
GCTCCCTCATAATCGATGAAATCTCCTGGGTAACACGTTC  
+HWI-EAS443:3:36:452:101#0/1  
aa^[`b¥¥`Za^Z`[a]\_a\_]Vaa^Q`V`a\_\_Z\_\_  
@HWI-EAS443:3:3:1781:860#0/1  
GGCCAGCAGGAGTCTATGGGATTCCTTTTCGTCAGTCCGAA  
+HWI-EAS443:3:3:1781:860#0/1  
^¥a`V[O\_]HYbSQ^LU[`\_SU`aQ`^aZ`Z¥W`VBBBBB  
@HWI-EAS443:3:92:28:903#0/1  
CAGCAGGAGTCTATGGGATTCCTTTTCGTCAGTCCGAAAGA  
+HWI-EAS443:3:92:28:903#0/1  
aa¥FTZ^[`VZ]¥¥`ZZT]UNX[Z[U^UZUXQSUUZWWWV  
@HWI-EAS443:3:17:252:589#0/1  
CAGTGATGCTGTGCCATCTATTAGAAGAGGCTTCTTCTCT  
+HWI-EAS443:3:17:252:589#0/1  
\_¥WZ\_`]aa`YR\_baWX¥b^T¥¥^UII¥ba`Z^GWaWIHF  
@HWI-EAS443:3:36:1131:198#0/1  
GCTGGCAATAACAAAAGAGAAGAAAGAAGATCTCCAGGAT  
+HWI-EAS443:3:36:1131:198#0/1  
abbaabb\_aaa\_baaab`baaa`aaa`a`a]a]`aa`\_`

@HWI-EAS443:3:82:893:2034#0/1  
CAATCCAGCCCTGTTAGTTCTGGATGTTGAACAAAACCTCC  
+HWI-EAS443:3:82:893:2034#0/1  
R[[^PGTF[^GR^WH[W[ZU^YWWPZKWY[^GZ[[WRVRY  
@HWI-EAS443:3:23:234:1291#0/1  
CGTGTAGGGATAACTGGCATGGCTCGAATCGACCGTGGGG  
+HWI-EAS443:3:23:234:1291#0/1  
``aZH\_bbababa`aaaaa``]ba\_TUWW¥`WS\_TTO]BB  
@HWI-EAS443:3:54:415:1866#0/1  
CACGGCTTCTGTCTTTAATGGTTCCATTGGAATGTTTGT  
+HWI-EAS443:3:54:415:1866#0/1  
`YU`ba\_Y]``^L[[aa^]a`LPSW`[VTX\_a¥SNY]V¥  
@HWI-EAS443:3:98:1433:1323#0/1  
GGCTTCTGTCTTTAATGGTTCCATTGGAATGTTTGTCTATT  
+HWI-EAS443:3:98:1433:1323#0/1  
abVba\_aaaabababaaaab\_a\_`[aa`a\_]`WR[bUUKV^a  
@HWI-EAS443:3:37:1248:1229#0/1  
GCATCGTCTAATGGAGCAAATGGAGTAAAAGGATTTTCAT  
+HWI-EAS443:3:37:1248:1229#0/1  
aa`aa\_aa`aa`a]aa\_\_`aaa````aUa^T¥^`^a`\_  
@HWI-EAS443:3:82:1257:610#0/1  
ATATTGTTTCTCCAGCTCTTGATAGTGTCTGGTATTATTC  
+HWI-EAS443:3:82:1257:610#0/1  
Y`b`a\_S[b¥]V\_\_HZO¥\_¥¥W\_NUH`[BBBBBBBBBBBB  
@HWI-EAS443:3:73:700:1565#0/1  
GCTGGAGAAACAATATATTGAGAACAAGAGTCTGAATG  
+HWI-EAS443:3:73:700:1565#0/1  
^L^¥Z^[¥V\_a``\_YU\_[`\_a\_\_Y]`[ZZ`^TQ^Z`PTV  
@HWI-EAS443:3:43:1278:250#0/1  
CAACTTTGCTGCTGGACAATCAGTGGTTTCCGTGAAATTA  
+HWI-EAS443:3:43:1278:250#0/1  
abaabbabaabaabaSa][a[[aU`\_[a\_a`a\_`0`a¥^  
@HWI-EAS443:3:5:1326:1872#0/1  
TGCAGGGATAACTGGCATGGCTCGAAAAGACCGTGGGTGT  
+HWI-EAS443:3:5:1326:1872#0/1  
]\_bW¥KZ\_aaaZZaba[a]VabaKaaUH[QBBBBBBBBBB  
@HWI-EAS443:3:82:836:130#0/1  
GGCCACCCGAATTCTTTTGGTCGCTGTCTGGCTGTCCAGTA  
+HWI-EAS443:3:82:836:130#0/1  
aaaaa`aaa^Va`\_Xa]ZU]^`\_`\_U^TZ[Y[]RNT¥TS  
@HWI-EAS443:3:86:854:1284#0/1  
CGCTCTTGTCTTTGATATGTGGCATCATTGAGTTGGAA  
+HWI-EAS443:3:86:854:1284#0/1  
``¥¥¥\_bb^aVa`\_Y`a`^^V[\_`aaaa`a\_``\_`\_aa  
@HWI-EAS443:3:24:735:1404#0/1  
CTGAAATGATAATACCAGATCCAGCATTCTTCCCATTGC  
+HWI-EAS443:3:24:735:1404#0/1  
abba\_`b\_¥babababa`a`\_abaaaa`aa\_aaab^`\_a  
@HWI-EAS443:3:78:1338:836#0/1  
ATTTTGTATGTCACCAAAAACATATGNATCTGCATTCTG

+HWI-EAS443:3:78:1338:836#0/1  
abababYbbaaa^aaaaba\_^^`^`\_[D¥aaaa`Za\_Waa  
@HWI-EAS443:3:86:1275:179#0/1  
AGGGACATCAAATACAGCAAGAAGTTCAAGCCGGAAATA  
+HWI-EAS443:3:86:1275:179#0/1  
¥S`¥SZaZZa\_PYb]a`U^ba]\_X]`aab¥Haaa¥^aX  
@HWI-EAS443:3:19:1411:401#0/1  
GTGGGACATCAAATACAGCAAGAAGTTCAAGCCGGAAA  
+HWI-EAS443:3:19:1411:401#0/1  
a¥baa^aY\_aa]a^a`\_\_aa\_aaaaaOYP^^^aYQ]\_^\_  
@HWI-EAS443:3:45:361:2012#0/1  
GGGACATCAAATACAGCAAGAAGTTCAAGCCGGAAATAG  
+HWI-EAS443:3:45:361:2012#0/1  
¥ba`Ia\_a\_V\_aababa\_bbbab]T¥baaZYba\_ab`b`  
@HWI-EAS443:3:53:1166:1807#0/1  
TTCTTGCTGTATTTTGTATGTCCCCACAAAAACATATGCAT  
+HWI-EAS443:3:53:1166:1807#0/1  
aa`a`babb`abbbaaaabaZ[ZYa¥aaba^Oaaa\_[Ya`  
@HWI-EAS443:3:55:685:426#0/1  
GGGACATCAAATACAGCAAGAAGTTCAAGCCGGAAATAG  
+HWI-EAS443:3:55:685:426#0/1  
abaa\_aaaa\_aaaa`baaaaba`b^`\_baaa^b`\_\_`aaa  
@HWI-EAS443:3:70:990:1194#0/1  
ATCAGAATGCAGATGCATATGTTTTTGTGGGACATCAAA  
+HWI-EAS443:3:70:990:1194#0/1  
aaabaa\_Z\_aaa\_\_`a`a]`R``\_\_aW`\_]`^`^`\_[X\_  
@HWI-EAS443:3:25:395:299#0/1  
ATCTAGCGAAAGCAGGTCAAATATATTCAATATGGAGAGA  
+HWI-EAS443:3:25:395:299#0/1  
`bb`babbbba\_aaaaaWaaaaaaaY`aa`\_aaaaa\_a\_a^  
@HWI-EAS443:3:8:765:1993#0/1  
AGCTAGCGAAAGCAGGTCAAATATATTCAATATGGAGAGA  
+HWI-EAS443:3:8:765:1993#0/1  
a]YZaa\_aaaaa^\_¥WKT\_a\_^`\_aURW^`^`^`\_RORSU^  
@HWI-EAS443:3:46:1334:1122#0/1  
GACTTGGAGAAACTGCGATGAGAATGGGAGACCTTCACTA  
+HWI-EAS443:3:46:1334:1122#0/1  
aaaaaaaa\_a`\_[^\_a`a`a¥`ZZ[a^^X\_¥[W^Y\_U^^  
@HWI-EAS443:3:95:593:1569#0/1  
CATACTTGGAGAAACTGTGATGAGAATGGGAGACCTTCACTA  
+HWI-EAS443:3:95:593:1569#0/1  
S]a¥bbbbbbbaaaa`a\_]a[`b`b[Zaa\_aaba[`\_RZb\_  
@HWI-EAS443:3:73:276:891#0/1  
CACTTGGAGAAACTGTGATGAGAATGGGAGACCTTCACTA  
+HWI-EAS443:3:73:276:891#0/1  
¥V^a¥¥OSZN¥XYTYV¥FFLVZOVKDRYUXLX^WVSY[YH  
@HWI-EAS443:3:39:557:263#0/1  
TGCCGAGATATGCATTGCAATGGAAAGAAATGCTGGATC  
+HWI-EAS443:3:39:557:263#0/1  
ab`bbbb`]aW`¥ZWZ``ab\_^`a`\_aWP\_]R`W^YROW

@HWI-EAS443:3:99:1010:1037#0/1  
TCAGTACCAATGAACTGGCGACAGTTGAATAGATCGCCAA  
+HWI-EAS443:3:99:1010:1037#0/1  
ab\_b[\_`¥aaaa¥a`aa`\_\_\_\_[\_Y[R]]\_T\_]aWYXW\_^  
@HWI-EAS443:3:7:219:2008#0/1  
GTTGGGCCTTTCCTATTCCACCATGTTACGGCCAAAGGGG  
+HWI-EAS443:3:7:219:2008#0/1  
¥PVaaU`\_U[\_`XWODX\_\_QXa]¥P^NOUMYLNBBBBBBB  
@HWI-EAS443:3:72:36:1653#0/1  
GAATTTTACCACAAATGCGATAACACGTGCATGAAAAGCT  
+HWI-EAS443:3:72:36:1653#0/1  
abbbbaa^abab`aaaab`\_a`aaa`\_^\_aaa``\_]`\_\_[\_  
@HWI-EAS443:3:66:42:291#0/1  
TGCACCATCACTCGGTCTGATCCAGCATCGTTTGTTTTGC  
+HWI-EAS443:3:66:42:291#0/1  
`b]Z`\_I¥\_\_`^^]RO¥SZ[]^¥]\_^]¥¥`V]SY^]W[  
@HWI-EAS443:3:22:773:1993#0/1  
GAAAGCAGGCAAACCATTTGAATGGATGTCAATCCGACTC  
+HWI-EAS443:3:22:773:1993#0/1  
a`aa`ab¥¥aaaa`a^\_\_`\_\_\_\_`\_`^\_XZ\_\_W\_\_^]XXY  
@HWI-EAS443:3:51:1544:423#0/1  
GAAAGCAGGCAAACCATTTGAATGGATGTCAATCCGACTC  
+HWI-EAS443:3:51:1544:423#0/1  
aab]MYabbabaa¥ab`]\_^Y^aaa`ab`Q^^`\_^RR]Q  
@HWI-EAS443:3:25:1518:1906#0/1  
TTTTCACCGAGTGCCCACTTCAATTGGCTTGTTTTCTTCA  
+HWI-EAS443:3:25:1518:1906#0/1  
`bbbbbaab`[\_`b`QOY]a]^]Z]OX`UVFVDRSZRJV  
@HWI-EAS443:3:96:1594:944#0/1  
TCCGAAAAAATAAGACCCTTCATTACTCATGTCAAAGGAA  
+HWI-EAS443:3:96:1594:944#0/1  
\_HYa\_^^`¥[WDH\_YYOGSORRSSTUZQSUXWZWXZZBB  
@HWI-EAS443:3:71:1410:866#0/1  
GTGCTTTAAATACGGTTTAAAAAGAGGGCCCTCTACGGA  
+HWI-EAS443:3:71:1410:866#0/1  
a\_\_a`aaa`a\_\_\_\_]a`]a`^^¥\_\_\_\_\_Za[]^\_^^X]]  
@HWI-EAS443:3:42:1753:1077#0/1  
TGGCAATGAGATACCCAATTACAGCAGACAAAAGAGAAGA  
+HWI-EAS443:3:42:1753:1077#0/1  
\_¥Z``abbXW¥aaaa]aa\_b`]a`abaabbaa`\_^]aa`  
@HWI-EAS443:3:1:1696:1280#0/1  
ATTGCTATTTACAGGCTTGAACCTTCTTGCTGTATCTTGATG  
+HWI-EAS443:3:1:1696:1280#0/1  
a``¥aaab¥a]G`\_`VSaX[\_X\_^SO[UGPGS\_^BBBBBBB  
@HWI-EAS443:3:11:808:1835#0/1  
TTTGGCGATCTATTCAACTGTCGCCAGTTCATTGGTAATG  
+HWI-EAS443:3:11:808:1835#0/1  
a^aaa`aaP^`aa\_\_\_\_\_]`TNU\_\_TPVQ[YR[^GRYBBBB  
@HWI-EAS443:3:11:153:421#0/1  
CTGTCTCAGTCCATCCGTTCCGATCCCAAATCATCTCAAA

+HWI-EAS443:3:11:153:421#0/1  
abbaaabba\_bbaaaaa`\_`aaa\_aa`X`\_`a\_\_`\_¥Y`  
@HWI-EAS443:3:46:421:1144#0/1  
CTGTTTTTCATGCCTGATTAGTGGATTGGTGGTAAGAGCCC  
+HWI-EAS443:3:46:421:1144#0/1  
abbbabbbaba\_aab\_bbbbabab`bb`a`aBBBBBBBBB  
@HWI-EAS443:3:27:687:1844#0/1  
CTGTTTTTCATGCCTGATTAGTGGATTGGTGGGAATAGCCA  
+HWI-EAS443:3:27:687:1844#0/1  
a^ZT]^`\_`¥YW`P¥\_VXXBBBBBBBBBBBBBBBBB  
@HWI-EAS443:3:83:1540:2037#0/1  
ATTCTGTTTTTCATGCCTGATTAGTGGATTGGTGGGAATAG  
+HWI-EAS443:3:83:1540:2037#0/1  
`\_aab\_aabbaa]a`aaba`\_¥UHWWSaa\_BBBBBBBBBB  
@HWI-EAS443:3:38:1356:954#0/1  
TGCTTTTCGCTAAAAATCCAGCGCAAATGCCATAAGCAG  
+HWI-EAS443:3:38:1356:954#0/1  
^\_bb\_]`a`a¥¥a`a`]\_a\_abbaZZ¥a`T^a[Q\_SQJ  
@HWI-EAS443:3:37:839:1389#0/1  
TTTCGCTAAAAATCCAGCGCAAATGCCATAAGCACCAC  
+HWI-EAS443:3:37:839:1389#0/1  
aba`^aababaaaaZaaaa`\_a`W^`Z[aQU]HWa`a`[  
@HWI-EAS443:3:10:546:322#0/1  
GTGCTTATGGCATTGCGCTGGAATTTTAGCGAAAGCA  
+HWI-EAS443:3:10:546:322#0/1  
^OVREMUSX[YWTYXQTZX¥¥¥\_]RU¥IYP[SOSVTORFR  
@HWI-EAS443:3:11:1001:1258#0/1  
ATGGTTTGCCTGCTTTTCGCTAAAAATCCAGCGCAAATG  
+HWI-EAS443:3:11:1001:1258#0/1  
\_WXWLVZO]aPPMW\_VZTTZ`[TZY¥RL[UGSQLTYPVUR  
@HWI-EAS443:3:11:364:1116#0/1  
TTCAAATGGTTTGCCTGCTTTTCGCTAAAAATCCAGCGCA  
+HWI-EAS443:3:11:364:1116#0/1  
aW`aaaYaX\_aXU¥Y`[\_\_\_Y`Za^\_aa[PZR\_\_\_]^¥`Y[  
@HWI-EAS443:3:16:1277:555#0/1  
CATTCAAATGGTTTGCCTGCTTTTCGCTAAAAATCCAGCG  
+HWI-EAS443:3:16:1277:555#0/1  
`Y]b\_]¥Y`^R\_b`PV¥ba`[UOZPQ]M[\_WYROTTKN^  
@HWI-EAS443:3:19:1248:1825#0/1  
CATCCATTCAAATGGTTTGCCTGCTTTTCGCTAAAAATCC  
+HWI-EAS443:3:19:1248:1825#0/1  
a`\_Q`a\_\_a\_Za¥^R^XU]^U¥^`a\_[Y¥Ya`Za]Z¥XX  
@HWI-EAS443:3:21:1698:1334#0/1  
TGCTTTTCGCTAAAAATCCAGCGCAAATGCCATAAGCAC  
+HWI-EAS443:3:21:1698:1334#0/1  
\_b`aaaab`abaab`aa`a\_a¥\_\_\_\_^\_a\_W]a\_a\_\_[a¥  
@HWI-EAS443:3:58:1641:1183#0/1  
GACATCCATTCAAATGGTTTGCCTGCTTTTCGCTAAAAAT  
+HWI-EAS443:3:58:1641:1183#0/1  
a[W]^`]^a`[`VY`TT]^TXTPHZSRa`Y`YX]¥SYY`a



@HWI-EAS443:3:64:673:1655#0/1  
ATCCATTCAAATGGTTTGCCTGCTTTTCGCTAAAAATTCCA  
+HWI-EAS443:3:64:673:1655#0/1  
`[\_PY]`a`]]¥Y¥Z\_WU][\_`a``\_¥\_`^aa`aZ¥]]]¥  
@HWI-EAS443:3:76:1126:1497#0/1  
ATCCATTCAAATGGTTTGCCTGCTTTTCGCTAAAAATTCCA  
+HWI-EAS443:3:76:1126:1497#0/1  
abbbababbbbbbba`baaaaa`abaaaaaaaabaaaaY\_`  
@HWI-EAS443:3:77:430:602#0/1  
ATCCATTCAAATGGTTTGCCTGCTTTTCGCTAAAAATTCCA  
+HWI-EAS443:3:77:430:602#0/1  
aabb^abaa\_aaab^aa¥`\_`¥aY\_\_a\_aa\_X^Y^[\_^]  
@HWI-EAS443:3:80:896:172#0/1  
ATCCATTCAAATGGTTTGCCTGCTTTTCGCTAAAAATTCCA  
+HWI-EAS443:3:80:896:172#0/1  
\_a]^aab`a`^aaaXaaaa\_ab````L^^¥a`\_aaa^N¥Y  
@HWI-EAS443:3:82:1770:336#0/1  
ATCCATTCAAATGGTTTGCCTGCTTTTCGCTAAAAATTCCA  
+HWI-EAS443:3:82:1770:336#0/1  
]``aYR\_`^\_a\_Y¥0\_`^GVa\_¥Y`][Zab^ba`]\_F[Z  
@HWI-EAS443:3:84:939:1161#0/1  
CATCCATTCAAATGGTTTGCCTGCTTTTCGCTAAAAATTCC  
+HWI-EAS443:3:84:939:1161#0/1  
a^aaaaaaaaaaaa`^aaa`^aa`aaaa`aaaa\_```¥  
@HWI-EAS443:3:84:987:890#0/1  
CTTTTCGCTAAAAATTCCAGCGCAAATGCCATAAGCACCA  
+HWI-EAS443:3:84:987:890#0/1  
a`bbbbbaa]bbbab¥\_bbWF]b`a\_aaaaaab^a]]`U`  
@HWI-EAS443:3:86:329:1348#0/1  
ATCCATTCAAATGGTTTGCCTGCTTTTCGCTAAAAATTCCA  
+HWI-EAS443:3:86:329:1348#0/1  
\_P^]G¥X\_`VPV^\_]¥XVZ\_[\_`PRWWR^\_`^^YXS[[NZ  
@HWI-EAS443:3:88:1198:273#0/1  
ATCCATTCAAATGGTTTGCCTGCTTTTCGCTAAAAATTCCA  
+HWI-EAS443:3:88:1198:273#0/1  
abaabbbbbbbab``abbb¥`ab`bbbab]bbbbbaabW[^  
@HWI-EAS443:3:93:916:2044#0/1  
GGTTTGCCTGCTTTTCGCTAAAAATTCCAGCGCAAATGCC  
+HWI-EAS443:3:93:916:2044#0/1  
aa`[Z`\_WL]bU\_aaa^R^aaaaa]`a\_`[Ua]\_\_PVZZ\_  
@HWI-EAS443:3:6:1058:1065#0/1  
TTTCGCTAAAAATTCCAGCGCAAATGCCATAAGCACCA  
+HWI-EAS443:3:6:1058:1065#0/1  
aYT`\_`Y]W\_a`\_\_`\_^^`^`\_`^V[[[YW\_`^`YS\_Z\_  
@HWI-EAS443:3:12:868:415#0/1  
GCTTTTGCCTAAAAATTCCAGCGCAAATGCCATAAGCACC  
+HWI-EAS443:3:12:868:415#0/1  
Yaa¥^ZZJX¥U^XT]aa[aa\_`YQR\_baQ\_bb]ba\_]ba`  
@HWI-EAS443:3:13:1584:1900#0/1  
AAATGAGCAGGGGTGAGGATATGCAGCTAACCTGAAGAGC

+HWI-EAS443:3:13:1584:1900#0/1  
a`aaa^\_`\_`\_]VKM\_\_^[\_[[\_]\_]\_MIP^IMO^YX[BBB  
@HWI-EAS443:3:25:851:1848#0/1  
ATGGCATTCTGTGTGCTCTTCAGGTCAGCTGCATATCCTG  
+HWI-EAS443:3:25:851:1848#0/1  
a`[a]aaaa`aY`\_]`a\_a\_\_\_a\_]W\_a\_\_¥\_Z\_\_a[\_^¥^  
@HWI-EAS443:3:31:1476:1545#0/1  
GTCAATGGCATTCTGTGTGCTCTTCAGGTCAGCTGCATAT  
+HWI-EAS443:3:31:1476:1545#0/1  
a`abba`[^aaa\_ba```a\_aaaa`aaa\_aa\_¥aa]``a\_  
@HWI-EAS443:3:33:740:867#0/1  
ATGGCATTCTGTGTGCTCTTCAGGTCAGCTGCATATCCTG  
+HWI-EAS443:3:33:740:867#0/1  
WT¥]]WT\_] ^XFSRa^aa]R^0¥aQaY\_¥VSTSOMFORXO  
@HWI-EAS443:3:48:515:352#0/1  
GTGCTCTTCAGGTCAGCTGCATATCCTGACCCCTGCTCAT  
+HWI-EAS443:3:48:515:352#0/1  
a[a[^VaX`a`a¥¥N\_a`aZ¥\_a¥\_¥¥\_`^^XU^\_ ^WNZ¥  
@HWI-EAS443:3:50:84:333#0/1  
GCAGCTGACCTGAAGAGCACACAGAATGCCATTGACGAGA  
+HWI-EAS443:3:50:84:333#0/1  
aba[abbbbb`\_bbabaaaaaaaa`aaaa]aaab^aaba\_[  
@HWI-EAS443:3:60:231:169#0/1  
AGCAGGGGTCAGGATATGCAGCTGACCTGAAGAGCACACA  
+HWI-EAS443:3:60:231:169#0/1  
`bb\_`a`aZ¥a^`S\_\_\_a`X¥[\_^`\_\_Y[U]`¥\_^\_\_\_`^  
@HWI-EAS443:3:64:1714:1670#0/1  
AAAAATCCCAGCGCAAATGCCATAAGCACCATTCCT  
+HWI-EAS443:3:64:1714:1670#0/1  
UT\_W\_\_bbUbb`a]^Z¥]`\_a`\_a`VWa`UZa[``\_WRY  
@HWI-EAS443:3:44:1001:1629#0/1  
AGCAGCAAAAAGCAGGTAGATATTTAAAGATGAGTCTTCTA  
+HWI-EAS443:3:44:1001:1629#0/1  
`\_]`b^aa`\_]aa^]U\_a`aaaa`a^^a`\_\_`\_]\_a^Ta^  
@HWI-EAS443:3:54:110:96#0/1  
GCAGCAAAAAGCAGGTAGATATTTAAAGATGAGTCTTCTAA  
+HWI-EAS443:3:54:110:96#0/1  
a`^`YVQJW\_ZIaZX^a]^`\_ \_WRMVGy^U^NXSSVWY[  
@HWI-EAS443:3:14:373:747#0/1  
ACGTTCGAATGGGAGTGCAGATGCAGCGATTCAAGTGATC  
+HWI-EAS443:3:14:373:747#0/1  
a`\_\_a`WXZa\_^G`SWQV]^N[a\_\_\_`UPVZU^QPTQN¥  
@HWI-EAS443:3:34:1047:1718#0/1  
TAGAAGGGACATTCCTCAATCCTGTGGCCAGTTTCAATTT  
+HWI-EAS443:3:34:1047:1718#0/1  
Xa```abaaab\_a`a¥\_baaaa]MTaaa\_ZBBBBBBBBBB  
@HWI-EAS443:3:56:714:487#0/1  
ACAGGATTGAGGAATGTCCCTTCTATTCAATCTAGCGGCC  
+HWI-EAS443:3:56:714:487#0/1  
XWW``]aYba\_\_[\_^b`\_ZZbaa]RWTX¥YZRZ`[WO`¥^

@HWI-EAS443:3:62:189:1980#0/1  
ACAGGATTGAGGAATGTCCCTTCTATTCAAGCTAGAGGCC  
+HWI-EAS443:3:62:189:1980#0/1  
a`a\_VXYNN¥]RI]Y]Waa¥\_PRZR]N[XTBBBBBBBBBBB  
@HWI-EAS443:3:64:337:772#0/1  
ATAGAAGGGACATTCCTCAATCCTGTGGCCAGGCTCAATT  
+HWI-EAS443:3:64:337:772#0/1  
^\_]ZY^`XTX¥aa`)]Y\_`\_W[^RSYZ¥SBBBBBBBBBBB  
@HWI-EAS443:3:81:793:1876#0/1  
CTGGCCACAGGATTGAGGAATGTCCCTTATATTCAATCTA  
+HWI-EAS443:3:81:793:1876#0/1  
a]aa`\_XY\_XXFXUUVZVZ\_[QPPNX\_¥GJ\_\_\_\_X]¥SMX`  
@HWI-EAS443:3:97:1130:1843#0/1  
CAGAGGATTGAGGAATGTCCCTTCTATTCAATCTAGAGGC  
+HWI-EAS443:3:97:1130:1843#0/1  
O¥Q\_bbbbab]a\_bbbaaa[baabaaababbbbaaabU  
@HWI-EAS443:3:63:766:1197#0/1  
GGAATGTCCCTTCTATTCAATCTAGAGGCCTATTTNGGGC  
+HWI-EAS443:3:63:766:1197#0/1  
``\_X\_^^aaa`aaaa````[^]^`¥Z[\_\_\_^[\_YD[Z^Y  
@HWI-EAS443:3:64:202:1773#0/1  
GAGGAATNTCCCTTCTATTCAATCTAGAGGCCTATTTGGG  
+HWI-EAS443:3:64:202:1773#0/1  
a`]Z]aXDUaaaaa`a`]W^Z``]\_]\_^R]X\_R]]¥PPZ  
@HWI-EAS443:3:21:510:406#0/1  
GTGGCCCCAAATAGGCCTCTAGATTGAATAGAAGGGACAT  
+HWI-EAS443:3:21:510:406#0/1  
aU`P^AS\_\_[aZVPaQRVPY[¥KKU^]VTTUUGG^]PGQV  
@HWI-EAS443:3:5:480:1832#0/1  
CACTGGCCACAGGATTGAGGAATGTCCCTTCTATTCAATC  
+HWI-EAS443:3:5:480:1832#0/1  
abba^`a`b`\_b\_abaabababW^``aababba`[Y[^  
@HWI-EAS443:3:69:659:1523#0/1  
CGGCCACAGGATTGAGGAATGTCCCTTCTATTCAATCTAG  
+HWI-EAS443:3:69:659:1523#0/1  
aaabbab¥aa\_\_`¥\_\_\_\_\_a\_[Zaaa^\_\_^\_\_¥`\_^¥^W\_S  
@HWI-EAS443:3:11:444:1001#0/1  
AAAATTGAGACTGGCCACAGGATTGAGGAATGTCCCTTCT  
+HWI-EAS443:3:11:444:1001#0/1  
aaaaaabaabaa\_a`a¥aa`^`\_`\_`[a`\_\_\_\_U^[^^^]]  
@HWI-EAS443:3:11:807:1775#0/1  
CAGGATTGAGGAATGTCCCTTCTATTCAATCTAGAGGCCT  
+HWI-EAS443:3:11:807:1775#0/1  
a`aZHVU[[`^a\_[YY\_`aWW\_Y]]¥]^RVOV`XRRXBBB  
@HWI-EAS443:3:15:1624:1062#0/1  
TGAATAGAAGGGACATTCCTCAATCCTGTGGCCAGTCTCA  
+HWI-EAS443:3:15:1624:1062#0/1  
a`\_ababVa``a\_\_aaaa`a^````\_]a`Xa\_YY^XLW\_SZ  
@HWI-EAS443:3:18:1107:36#0/1  
ACAGGATTGAGGAATGTCCCTTCTATTCAATCTAGAGGCC

+HWI-EAS443:3:18:1107:36#0/1  
`bbba\_]ababbaaaaa`]aaa^^aaa`]¥`\_`a\_\_\_aZT  
@HWI-EAS443:3:18:1301:295#0/1  
GGAATGTCCCTTCTATTCAATCTAGAGGCCTATTTGGGGC  
+HWI-EAS443:3:18:1301:295#0/1  
abaaaa`]a^b`]b]baZUXa`a`]aaaX¥[`^`\_`\_¥aR  
@HWI-EAS443:3:1:126:585#0/1  
ACAGGATTGAGGAATGTCCCTTCTATTCAATCTAGAGGCC  
+HWI-EAS443:3:1:126:585#0/1  
aaab]a\_^UZ`aaaa`\_`^Q``Ya\_aa\_\_\_a^aa`\_S`BB  
@HWI-EAS443:3:1:460:983#0/1  
CACAGGATTGAGGAATGTCCCTTCTATTCAATCTAGAGGC  
+HWI-EAS443:3:1:460:983#0/1  
ab`[bbabbbbaabbbabaa[[bbaaabb\_a^a]aaa\_^aB  
@HWI-EAS443:3:20:703:1499#0/1  
AATAGGCCTCTAGATTGAATAGAAGGGACATTCCTCAATC  
+HWI-EAS443:3:20:703:1499#0/1  
a`Z\_YX\_] [¥\_`W^ZS^¥¥]XXSY]X]]XYZXZ]^ZZX  
@HWI-EAS443:3:20:882:725#0/1  
CACAGGATTGAGGAATGTCCCTTCTATTCAATCTAGAGGC  
+HWI-EAS443:3:20:882:725#0/1  
a`\_[ba`ba`aaa\_aa\_a`^a`a\_aa\_\_¥\_Y`a^¥]¥¥  
@HWI-EAS443:3:21:1008:2025#0/1  
TAGGCCTCTAGATTGAATAGAAGGGACATTCCTCAATCCT  
+HWI-EAS443:3:21:1008:2025#0/1  
¥`b\_^\_[Za`bbb\_aZabaa]aaaU[\_]a`a]¥a]GZa  
@HWI-EAS443:3:21:233:475#0/1  
CAGGATTGAGGAATGTCCCTTCTATTCAATCTAGAGGCCT  
+HWI-EAS443:3:21:233:475#0/1  
`a`b`aa`aa¥Z\_a^aaaa`\_aaa`\_\_]`Z]\_`\_`\_`  
@HWI-EAS443:3:23:1375:323#0/1  
ATGTCCCTTCTATTCAATCTAGAGGCCTATTTGGGGCCAT  
+HWI-EAS443:3:23:1375:323#0/1  
ab`aabbbbaaabaZ`Yaaaa\_`¥X]a`a`\_\_]\_`[X]^  
@HWI-EAS443:3:23:647:468#0/1  
AATTGAGACTGGCCACAGGATTGAGGAATGTCCCTTCTAT  
+HWI-EAS443:3:23:647:468#0/1  
`bababaaaaabaa`I\_ab\_¥aZYaaWaYI¥WaWW`\_^  
@HWI-EAS443:3:25:1024:1245#0/1  
CAAAATTGAGACTGGCCACAGGATTGAGGAATGTCCCTTC  
+HWI-EAS443:3:25:1024:1245#0/1  
aa]Z¥¥a`]a]b\_\_`¥aa`aa`T¥`X`][PNYJL\_^Z\_W  
@HWI-EAS443:3:25:1424:332#0/1  
CAGGATTGAGGAATGTCCCTTCTATTCAATCTAGAGGCCT  
+HWI-EAS443:3:25:1424:332#0/1  
^bbbabbbbbbbbbbbbbbbbbbbbbbbbabbaaabaab  
@HWI-EAS443:3:25:178:229#0/1  
ACAGGATTGAGGAATGTCCCTTCTATTCAATCTAGAGGCC  
+HWI-EAS443:3:25:178:229#0/1  
a^V\_aX```¥aa`^`U\_a\_]¥]]X]XY¥[[\_ZZR¥ZP[^

@HWI-EAS443:3:25:801:484#0/1  
ACAGGATTGAGGAATGTCCCTTCTATTCAATCTAGAGGCC  
+HWI-EAS443:3:25:801:484#0/1  
aaabbabbbaba^aaaa`aaaaaaa`\_aaa`a[\_a\_\_W  
@HWI-EAS443:3:28:1502:1577#0/1  
ACAAAATTGAGACTGGCCACAGGATTGAGGAATGTCCCTT  
+HWI-EAS443:3:28:1502:1577#0/1  
a`^\_a[[]`[aWJ]Y^`00S^]Z^PYX]J`^ZBBBBBB  
@HWI-EAS443:3:28:305:284#0/1  
ACAGGATTGAGGAATGTCCCTTCTATTCAATCTAGAGGCC  
+HWI-EAS443:3:28:305:284#0/1  
abb\_b`bbabba`^a`aab`\_a\_aaa\_`\_`\_`a\_`\_`\_¥W  
@HWI-EAS443:3:2:1019:1478#0/1  
CTTCTATTCAATCTAGAGGCCTATTTGGGGCCATTGCCGG  
+HWI-EAS443:3:2:1019:1478#0/1  
`baababbbaa`\_ba][baa^aaaa[[ab[[[Sa]aaX\_aa  
@HWI-EAS443:3:2:560:101#0/1  
CACAGGATTGAGGAATGTCCCTTCTATTCAATCTAGAGGC  
+HWI-EAS443:3:2:560:101#0/1  
\_a\_\_bb\_b`]^aa\_^b^aNS^\_`\_a\_Q^^\_]\_\_^¥]\_W  
@HWI-EAS443:3:2:703:407#0/1  
GGCCACAGGATTGAGGAATGTCCCTTCTATTCAATCTAGA  
+HWI-EAS443:3:2:703:407#0/1  
N^WL[^Xa\_[^b]V]b`b[aV`¥\_bbZaabaaU[b`[aab  
@HWI-EAS443:3:31:324:1941#0/1  
CACAGGATTGAGGAATGTCCCTTCTATTCAATCTAGAGGC  
+HWI-EAS443:3:31:324:1941#0/1  
a\_\_U]`^[X`aaP]S¥\_V^\_Y]^ZX[S\_a[U\_NaTWNNQ  
@HWI-EAS443:3:32:1061:401#0/1  
AATGTCCCTTCTATTCAATCTAGAGGCCTATTTGGGGCCA  
+HWI-EAS443:3:32:1061:401#0/1  
QX\_ZT\_Xa¥^`\_¥¥\_UZa`\_`a\_[\_WZQ^[]][WRY`a`a`a  
@HWI-EAS443:3:32:1657:254#0/1  
CTGGCCACAGGATTGAGGAATGTCCCTTCTATTCAATCTA  
+HWI-EAS443:3:32:1657:254#0/1  
abbb`]abbbbaabb`baaaba`¥]\_aa\_aaaaU`\_b\_ab  
@HWI-EAS443:3:32:1687:1224#0/1  
CAAAATTGAGACTGGCCACAGGATTGAGGAATGTCCCTTC  
+HWI-EAS443:3:32:1687:1224#0/1  
aY][aa^baa`WFWY\_ZM[\_]MYY[QaaQ]^SQEDZ^V¥  
@HWI-EAS443:3:33:1445:984#0/1  
CAGGATTGAGGAATGTCCCTTCTATTCAATCTAGAGGCCT  
+HWI-EAS443:3:33:1445:984#0/1  
aab\_P^bba`aYaaa\_aaaa`\_aaaaYa^`\_]PUWV\_N^`  
@HWI-EAS443:3:34:1594:1062#0/1  
CAAAATTGAGACTGGCCACAGGATTGAGGAATGTCCCTTC  
+HWI-EAS443:3:34:1594:1062#0/1  
abaaabbaaabbbbababa`bba\_b`bbab`a¥^`0\_WK  
@HWI-EAS443:3:34:920:789#0/1  
TTGAGGAATGTCCCTTCTATTCAATCTAGAGGCCTATTTG

+HWI-EAS443:3:34:920:789#0/1  
`aa`a^Z]aa]a`aa`aa\_aa^^Z^]\_a[^\_]\_^^YXX  
@HWI-EAS443:3:35:1212:1943#0/1  
AATGGCCCCAAATAGGCCTCTAGATTGAATAGAAGGGACA  
+HWI-EAS443:3:35:1212:1943#0/1  
aa`a[^^^aab\_F¥X¥\_\_¥^V\_ZZU^XQ\_U]PY`Y¥W¥U^  
@HWI-EAS443:3:35:1346:1437#0/1  
CGGCAATGGCCCCAAATAGGCCTCTAGATTGAATAGAAGG  
+HWI-EAS443:3:35:1346:1437#0/1  
abbbb\_ababbbbabaa`aaaa`b\_aaaaa`\_\_a\_a  
@HWI-EAS443:3:35:403:383#0/1  
AATTGAGACTGGCCACAGGATTGAGGAATGTCCCTTCTAT  
+HWI-EAS443:3:35:403:383#0/1  
\_`b`b^babbbaaa\_\_\_\_]`a]`a[``^`S^aaa¥\_\_[W  
@HWI-EAS443:3:35:725:1146#0/1  
ATAGAAGGGACATTCCTCAATCCTGTGGCCAGTCTCAATT  
+HWI-EAS443:3:35:725:1146#0/1  
``a¥Q]]HT`\_\_^¥`^^a^`]\_aWLV[J^a\_XQZV¥ZSOQ  
@HWI-EAS443:3:35:796:26#0/1  
ACCGCAATGGCCCCAAATAGGCCTCTAGATTGAATAGAA  
+HWI-EAS443:3:35:796:26#0/1  
a`abaa\_a¥\_`aa\_`bb^FZLYX\_TV VY¥VV[[[XUUTQ]  
@HWI-EAS443:3:37:515:1251#0/1  
ACAGGATTGAGGAATGTCCCTTCTATTCAATCTAGAGGCC  
+HWI-EAS443:3:37:515:1251#0/1  
abbaaa\_baaa`aaa\_aa`^aaa`aXFMM]Wa]^^\_]`  
@HWI-EAS443:3:38:1080:94#0/1  
AAGGGACATTCCTCAATCCTGTGGCCAGTCTCAATTTTGT  
+HWI-EAS443:3:38:1080:94#0/1  
a¥^\_\_a\_]a]aaa\_\_abaaaaTa`\_`¥^YPXXX^\_\_]]V  
@HWI-EAS443:3:38:232:271#0/1  
TGGCCACAGGATTGAGGAATGTCCCTTCTATTCAATCTAG  
+HWI-EAS443:3:38:232:271#0/1  
abbbb¥Y`[bQV\_`V^ZUZ[XKUa^YHYSVQUQFL[[[V`G  
@HWI-EAS443:3:38:490:2004#0/1  
TGTCCCTTCTATTCAATCTAGAGGCCTATTTGGGGCCATT  
+HWI-EAS443:3:38:490:2004#0/1  
a\_Z`bbaaaaa\_a`¥aa`a`a\_\_W\_aa\_SKKZ¥ZQY^¥T  
@HWI-EAS443:3:38:999:734#0/1  
TGAGGAATGTCCCTTCTATTCAATCTAGAGGCCTATTTGG  
+HWI-EAS443:3:38:999:734#0/1  
aaT]^WYR^[^]V\_^X[`XYaBBBBBBBBBBBBBBBBBBB  
@HWI-EAS443:3:40:1122:999#0/1  
ACAGGATTGAGGAATGTCCCTTCTATTCAATCTAGAGGCC  
+HWI-EAS443:3:40:1122:999#0/1  
aabbaaa`^]`ba`a`aaa`a`^\_R\_V]¥¥]a\_`\_\_aR  
@HWI-EAS443:3:40:1504:377#0/1  
CACAGGATTGAGGAATGTCCCTTCTATTCAATCTAGAGGC  
+HWI-EAS443:3:40:1504:377#0/1  
`baabb`bbba¥baaaba`a¥aa`a`aaa\_a[\_aaaX^Z

@HWI-EAS443:3:44:1779:755#0/1  
ATGGCCCCAAATAGGCCTCTAGATTGAATAGAAGGGACAT  
+HWI-EAS443:3:44:1779:755#0/1  
a`b`a`aaaa`\_`^^`\_\_\_a]\_\_`[^\_¥[^\_`^TP[Y  
@HWI-EAS443:3:44:780:775#0/1  
GTCCCTTCTATTCAATCTAGAGGCCTATTTGGGGCCATTG  
+HWI-EAS443:3:44:780:775#0/1  
aabaabaabaaaaa`aaaa`a`a¥a`^^`^aa`\_[^¥`  
@HWI-EAS443:3:44:831:444#0/1  
AGGCCTCTAGATTGAATAGAAGGGACATTCCTCAATCCTG  
+HWI-EAS443:3:44:831:444#0/1  
a`\_`¥[bZa`\_`b`\_K\_aa¥a`ba\_Y]]\_`Y`X]]`\_`a\_  
@HWI-EAS443:3:45:1132:1578#0/1  
CCAAATAGGCCTCTAGATTGAATAGAAGGGACATTCCTCA  
+HWI-EAS443:3:45:1132:1578#0/1  
S¥bbbbbbbbbYZ]bbbaa`baaababab`W^a`Ya\_U\_  
@HWI-EAS443:3:45:846:676#0/1  
GGATTGAGGAATGTCCCTTCTATTCAATCTAGAGGCCTAT  
+HWI-EAS443:3:45:846:676#0/1  
\_a¥][a\_bb]]a\_GZaS^¥T[XaaZ[PZQab\_][[ZQ][\_  
@HWI-EAS443:3:46:1039:20#0/1  
AGATTGAATAGAAGGGACATTCCTCAATCCTGTGGCCAGT  
+HWI-EAS443:3:46:1039:20#0/1  
a`T)`bXVT^a[]]aa^`¥)`[S``[Y]¥\_`X`ZV0[V  
@HWI-EAS443:3:46:1653:117#0/1  
CCCTTCTATTCAATCTAGAGGCCTATTTGGGGCCATTGCC  
+HWI-EAS443:3:46:1653:117#0/1  
`babaaaZbbbaabaabaabb\_\_a`\_`aa`a\_a`¥X^`\_`¥¥  
@HWI-EAS443:3:47:1539:1288#0/1  
TAGAAGGGACATTCCTCAATCCTGTGGCCAGTCTCAATTT  
+HWI-EAS443:3:47:1539:1288#0/1  
aaa\_\_a\_`\_`\_`\_`^`\_`\_`\_a[]\_]`\_]X¥YY]XXXZZ]Z  
@HWI-EAS443:3:48:1263:1716#0/1  
CAGGATTGAGGAATGTCCCTTCTATTCAATCTAGAGGCCT  
+HWI-EAS443:3:48:1263:1716#0/1  
^`\_`Y[\_¥^Z\_b[aaS¥bbba`bbb¥Z]abZ`b`\_`aaW`a  
@HWI-EAS443:3:48:440:1727#0/1  
CCCTTCTATTCAATCTAGAGGCCTATTTGGGGCCATTGCC  
+HWI-EAS443:3:48:440:1727#0/1  
aaabab\_babbbaababbb\_`Zaaabbb]]`a\_a\_`a\_0`  
@HWI-EAS443:3:49:268:1331#0/1  
AAGGGACATTCCTCAATCCTGTGGCCAGTCTCAATTTGT  
+HWI-EAS443:3:49:268:1331#0/1  
a^ZYVQbab`\_`aaa¥`\_]`a`M¥¥]S`Za\_`S\_U[¥aaUa  
@HWI-EAS443:3:51:864:1952#0/1  
CAGGATTGAGGAATGTCCCTTCTATTCAATCTAGAGGCCT  
+HWI-EAS443:3:51:864:1952#0/1  
abababbbbababbaaaabbbbbbbaabab`[NWZ  
@HWI-EAS443:3:53:1637:1106#0/1  
CCCTTCTATTCAATCTAGAGGCCTATTTGGGGCCATTGCC

+HWI-EAS443:3:53:1637:1106#0/1  
Z``]abbb^abbab`b\_Saaaaa\_`aaVaZH]aa\_aaXa  
@HWI-EAS443:3:57:821:750#0/1  
ACAGGATTGAGGAATGTCCCTTCTATTCAATCTAGAGGCC  
+HWI-EAS443:3:57:821:750#0/1  
`\_aba[ab`\_^Yabbabbaa\_¥`¥baa`\_aa¥[XU]a\_  
@HWI-EAS443:3:5:562:1885#0/1  
GAATGTCCCTTCTATTCAATCTAGAGGCCTATTTGGGGCC  
+HWI-EAS443:3:5:562:1885#0/1  
`abaa^`]X`a`\_aa\_Z`\_Q^\_¥`\_ZVSZ¥\_\_X\_YBBB  
@HWI-EAS443:3:60:1233:1181#0/1  
CAGGATTGAGGAATGTCCCTTCTATTCAATCTAGAGGCCT  
+HWI-EAS443:3:60:1233:1181#0/1  
aVbb\_bbb\_a\_aa`bbaaa`bbaa\_aabQ`[a]`b`¥[a`  
@HWI-EAS443:3:60:141:77#0/1  
ATAGAAGGGACATTCCTCAATCCTGTGGCCAGTCTCAATT  
+HWI-EAS443:3:60:141:77#0/1  
`b`ba\_a```TVa`]^a\_\_`[L`^ZaXPPW`RT\_WRU^\_  
@HWI-EAS443:3:60:289:313#0/1  
GGCCACAGGATTGAGGAATGTCCCTTCTATTCAATCTAGA  
+HWI-EAS443:3:60:289:313#0/1  
abaa`a]aaH\_aaaa\_[T^a¥\_¥¥¥\_\_\_\_]¥¥ZVVW¥W^WU  
@HWI-EAS443:3:62:130:63#0/1  
TTGAGACTGGCCACAGGATTGAGGAATGTCCCTTCTATTC  
+HWI-EAS443:3:62:130:63#0/1  
aba\_a^`\_`a`\_^\_¥`\_V[\_^X]^WUXYXXXXXXYSKTYT  
@HWI-EAS443:3:62:978:370#0/1  
TGAGGAATGTCCCTTCTATTCAATCTAGAGGCCTATTTGG  
+HWI-EAS443:3:62:978:370#0/1  
abab``bab`aa`baaaaba`aa\_aab]]`¥Xaa\_^Z\_a\_  
@HWI-EAS443:3:63:68:439#0/1  
AATTGAGACTGGCCACAGGATTGAGGAATGTCCCTTCTAT  
+HWI-EAS443:3:63:68:439#0/1  
\_a^]^WaY^\_baa^^^]Q[JY`]W]\_NVQSVVSZTY^ULT  
@HWI-EAS443:3:64:1314:1361#0/1  
AAGGGACATTCCTCAATCCTGTGGCCAGTCTCAATTTTGT  
+HWI-EAS443:3:64:1314:1361#0/1  
aa\_```bbab\_aaa``¥`Y]^U¥a\_a]`Y[^^WT`a`\_XV  
@HWI-EAS443:3:66:1669:681#0/1  
ACAGGATTGAGGAATGTCCCTTCTATTCAATCTAGAGGCC  
+HWI-EAS443:3:66:1669:681#0/1  
`]abaab`baba]aaa^`aa]^a\_b`a`^¥aaaaa]X^  
@HWI-EAS443:3:67:1128:310#0/1  
CAGGATTGAGGAATGTCCCTTCTATTCAATCTAGAGGCCT  
+HWI-EAS443:3:67:1128:310#0/1  
aa\_b\_bab``baa`b`b]^`Xa`aa`a`\_aa`a^VXR[  
@HWI-EAS443:3:67:1184:1787#0/1  
GGAATGTCCCTTCTATTCAATCTAGAGGCCTATTTGGGGC  
+HWI-EAS443:3:67:1184:1787#0/1  
\_abbbb]abbbbababbabaaaaabaaaa\_aaa`aa\_\_\_\_\_



@HWI-EAS443:3:67:1221:1123#0/1  
CTGCCACAGGATTGAGGAATGTCCCTTCTATTCAATCTA  
+HWI-EAS443:3:67:1221:1123#0/1  
a`b`aa`aa^\_\_\_\_\_aa^`\_a\_\_`\_aa\_`¥¥\_\_\_\_^¥W\_`  
@HWI-EAS443:3:69:663:1748#0/1  
TAGGCCTCTAGATTGAATAGAAGGGACATTCCTCAATCCT  
+HWI-EAS443:3:69:663:1748#0/1  
ab¥`bb```baabaaabbb`aaaa\_a`aaa``aaabaa\_  
@HWI-EAS443:3:6:1348:247#0/1  
GCCCCAAATAGGCCTCTAGATTGAATAGAAGGGACATTCC  
+HWI-EAS443:3:6:1348:247#0/1  
\_abaaaabbb\_bbabbbbbbbbbbbbbbbbabbaabbaa\_  
@HWI-EAS443:3:70:1724:754#0/1  
GAATAGAAGGGACATTCCTCAATCCTGTGGCCAGTCTCAA  
+HWI-EAS443:3:70:1724:754#0/1  
aaaa^a`\_`\_`\_¥\_\_ZSaa``aa\_X¥UT¥[¥]YSOUXWWW  
@HWI-EAS443:3:71:367:870#0/1  
GTCCCTTCTATTCAATCTAGAGGCCTATTTGGGGCCATTG  
+HWI-EAS443:3:71:367:870#0/1  
aa\_`a`TZS\_\_`S`¥`¥Z[YOY\_ZH[]\_]¥X[^X`]¥^  
@HWI-EAS443:3:73:1317:154#0/1  
GAATGTCCCTTCTATTCAATCTAGAGGCCTATTTGGGGCC  
+HWI-EAS443:3:73:1317:154#0/1  
`TXX`N[¥`\_V[X[XPYW[V\_^SVYPRUZPPUV^]WVQT  
@HWI-EAS443:3:74:399:1262#0/1  
CCCTTCTATTCAATCTAGAGGCCTATTTGGGGCCATTGCC  
+HWI-EAS443:3:74:399:1262#0/1  
aa`a`a`aaaa[`a\_a][Z`\_`a¥^[TU¥\_\_^\_WY\_]U  
@HWI-EAS443:3:76:1027:583#0/1  
ATTGAATAGAAGGGACATTCCTCAATCCTGTGGCCAGTCT  
+HWI-EAS443:3:76:1027:583#0/1  
abbaaabaaaaa`\_`a`aaaa\_aaaa\_Y[`a\_^`^VUX  
@HWI-EAS443:3:76:765:646#0/1  
CAGGATTGAGGAATGTCCCTTCTATTCAATCTAGAGGCCT  
+HWI-EAS443:3:76:765:646#0/1  
a]\_`b`aa`[]b\_baa``aaaa\_aaa\_a\_a`aa\_P\_NS\_  
@HWI-EAS443:3:78:834:317#0/1  
TTCTATTCAATCTAGAGGCCTATTTGGGGCCATTGCCGGT  
+HWI-EAS443:3:78:834:317#0/1  
aaaa\_a\_`a`\_a`\_\_\_\_]a\_¥\_W\_^Z]]¥\_^^\_X¥`\_^  
@HWI-EAS443:3:79:1769:289#0/1  
TGGCCACAGGATTGAGGAATGTCCCTTCTATTCAATCTAG  
+HWI-EAS443:3:79:1769:289#0/1  
`b``aaa¥bbabb]]aaaa[UaZa^^b\_baaZSaZHH^\_  
@HWI-EAS443:3:7:1282:1206#0/1  
GCCCCAAATAGGCCTCTAGATTGAATAGAAGGGACATTCC  
+HWI-EAS443:3:7:1282:1206#0/1  
abaaabba]bZaaaa\_\_aa\_aaaZa^aa\_\_\_\_\_¥R\_]R  
@HWI-EAS443:3:7:232:1388#0/1  
AAGGGACATTCCTCAATCCTGTGGCCAGTCTCAATTTGT

+HWI-EAS443:3:7:232:1388#0/1  
aW[[WQ[]X][aa^`b\_a\_\_aTRX[W\_JOUT¥]ZSS\_ZVR  
@HWI-EAS443:3:83:1021:546#0/1  
GGCCACAGGATTGAGGAATGTCCCTTCTATTCAATCTAGA  
+HWI-EAS443:3:83:1021:546#0/1  
X\_a^bbabbabbbbaaa\_bba\_babbaaaba[ababbaa  
@HWI-EAS443:3:83:572:368#0/1  
GAGGAATGTCCCTTCTATTCAATCTAGAGGCCTATTTGGG  
+HWI-EAS443:3:83:572:368#0/1  
a`aaaaaa\_aa\_`\_`aa`\_`\_`^`¥`\_[ZZ\_]`^X]`\_`\_`  
@HWI-EAS443:3:84:625:134#0/1  
ATTGAATAGAAGGGACATTCCTCAATCCTGTGGCCAGTCT  
+HWI-EAS443:3:84:625:134#0/1  
ab`^^aaaaa`[X^^[^\_\_Y\_^[\_`\_`\_`U^[¥ZTB BBB  
@HWI-EAS443:3:84:706:1011#0/1  
ATTGAATAGAAGGGACATTCCTCAATCCTGTGGCCAGTCT  
+HWI-EAS443:3:84:706:1011#0/1  
¥\_[\_S]\_Z\_X\_\_W\_`aZYY`T^`\_¥a`[WQV`QZ]`YFOR  
@HWI-EAS443:3:86:738:203#0/1  
CCCCAAATAGGCCTCTAGATTGAATAGAAGGGACATTCCT  
+HWI-EAS443:3:86:738:203#0/1  
ab\_abab\_]`\_a^^a]aa\_aaa]a`\_a`\_`\_`\_`\_`^¥X^  
@HWI-EAS443:3:87:139:1455#0/1  
ACAGGATTGAGGAATGTCCCTTCTATTCAATCTAGAGGCC  
+HWI-EAS443:3:87:139:1455#0/1  
aa^aa]¥^^[Y¥¥\_\_ZU\_\_\_^¥\_T[\_W^Y¥Y^¥\_WY¥WWW^  
@HWI-EAS443:3:88:1151:1038#0/1  
ACAGGATTGAGGAATGTCCCTTCTATTCAATCTAGAGGCC  
+HWI-EAS443:3:88:1151:1038#0/1  
aa`baaaba]`\_`aaaa]a`\_aa\_`\_a[[\_`a\_^\_a`a\_\_Y^  
@HWI-EAS443:3:90:641:1802#0/1  
CCCTTCTATTCAATCTAGAGGCCTATTTGGGGCCATTGCC  
+HWI-EAS443:3:90:641:1802#0/1  
`b[FW\_Z\_Z]aaa]\_¥WR^]ZVaW]¥X^[¥YZa]Z^¥`\_]  
@HWI-EAS443:3:90:884:360#0/1  
GAAGGGACATTCCTCAATCCTGTGGCCAGTCTCAATTTTG  
+HWI-EAS443:3:90:884:360#0/1  
aaaaa`aa`b`\_`\_a^`aa`aaa[\_^\_]`\_`Z]\_aZ^^`\_`\_`\_`  
@HWI-EAS443:3:91:1556:1295#0/1  
CACAGGATTGAGGAATGTCCCTTCTATTCAATCTAGAGGC  
+HWI-EAS443:3:91:1556:1295#0/1  
a\_baba¥b\_bb`VXV\_`\_`aaa]`VVaaaY`]`¥`\_`^[^aR  
@HWI-EAS443:3:91:687:181#0/1  
CTTCTATTCAATCTAGAGGCCTATTTGGGGCCATTGCCGG  
+HWI-EAS443:3:91:687:181#0/1  
abbbbbbbbbbaabba`aaabaaaa\_a`a[aa\_\_\_^a`  
@HWI-EAS443:3:93:1338:494#0/1  
ACAGGATTGAGGAATGTCCCTTCTATTCAATCTAGAGGCC  
+HWI-EAS443:3:93:1338:494#0/1  
[aaaZV¥W`\_`bbUW¥UYQH¥`ab[\_`X\_F¥]a\_HHWZNS

@HWI-EAS443:3:98:1487:152#0/1  
AAGGGACATTCCTCAATCCTGTGGCCAGTCTCAATTTTGT  
+HWI-EAS443:3:98:1487:152#0/1  
aabaV`aaa\_NR\_^aaa]a`a^a\_YN\_`XW[¥Z]\_VX[GG  
@HWI-EAS443:3:99:1731:1781#0/1  
GGCCACAGGATTGAGGAATGTCCCTTCTATTCAATCTAGA  
+HWI-EAS443:3:99:1731:1781#0/1  
]^P`\_][bbUa`\_]baba[^a`aR`\_`a]aa^aaaP]aX`  
@HWI-EAS443:3:99:664:1232#0/1  
GAGGAATGTCCCTTCTATTCAATCTAGAGGCCTATTTGGG  
+HWI-EAS443:3:99:664:1232#0/1  
aabbbbbbb\_aaabbbbaaba`aaaab`aYa^Yaaa`\_\_\_\_  
@HWI-EAS443:3:9:453:1641#0/1  
GGAATGTCCCTTCTATTCAATCTAGAGGCCTATTTGGGGC  
+HWI-EAS443:3:9:453:1641#0/1  
`\_ZW^aaab\_TQ\_a[TI`aV]Sa¥NS\_ZJ[\_`SZ^[¥¥\_`^  
@HWI-EAS443:3:9:682:322#0/1  
CAGGATTGAGGAATGTCCCTTCTATTCAATCTAGAGGCCT  
+HWI-EAS443:3:9:682:322#0/1  
ab`a\_bbbabba]bbaaaaab`abb`ab]a`aab`\_\_L[a  
@HWI-EAS443:3:1:525:1574#0/1  
CAACTACTTCAATGCATGTGTGAGGAAGGAGTTGAACCAA  
+HWI-EAS443:3:1:525:1574#0/1  
¥¥aa`]0abW[`aa`¥bb`aSbYaaaaab^\_I¥\_WbG^PB  
@HWI-EAS443:3:43:1471:1482#0/1  
CAACTACTTCAATGCATGTGTGAGGAAGGAGTTGAACCAA  
+HWI-EAS443:3:43:1471:1482#0/1  
abb\_bbbaaaa`\_RaabJaPTZbbaaab\_a^`a]a\_G\_a  
@HWI-EAS443:3:95:821:1955#0/1  
CAACTACTTCAATGCATGTGTGAGGAAGGAGTTGAACCAA  
+HWI-EAS443:3:95:821:1955#0/1  
¥bb`bbababb`aaaaa]\_b^babaaba`a^\_\_aa[F]`  
@HWI-EAS443:3:96:1600:1517#0/1  
CAACTACTTCAATNCATGTGTGAGGAAGGAGTTGAACCAA  
+HWI-EAS443:3:96:1600:1517#0/1  
abbbbb`bbab`RDYbabaaaaaaabbbq]`abaa¥aP\_a  
@HWI-EAS443:3:55:1386:1617#0/1  
AACTACTTCAATGCATGTGTGAGGAAGGAGTTGAACCNAG  
+HWI-EAS443:3:55:1386:1617#0/1  
ab^Za`b\_\_\_\_^VaZ¥`b\_^\_a^^`\_W`X^`\_``\_^PEDZ\_  
@HWI-EAS443:3:94:1103:661#0/1  
ACNACTACTTCAATGCATGTGTGAGGAAGGAGTTGAACCA  
+HWI-EAS443:3:94:1103:661#0/1  
aYD^^ab`\_aaa`aa^`ab`aXb`\_`\_\_a`]a^\_\_^a^W\_  
@HWI-EAS443:3:23:957:1971#0/1  
CTACTTCAATGCATGGGTGAGGAAGGAGTTGAACCAAGAT  
+HWI-EAS443:3:23:957:1971#0/1  
aabb[][^Z\_Y¥^¥XGY[^`^`R]P\_UJOR^\_\_LLWQNSF  
@HWI-EAS443:3:40:394:184#0/1  
CTTCAATGCATGTGTGAGGAAGGAGTTGCACCAAGATGCA

+HWI-EAS443:3:40:394:184#0/1  
WVWV\_ZO`a`a]aT^U`a^W\_\_`TQQ^FOUZU]]PP]]Y  
@HWI-EAS443:3:10:1024:1336#0/1  
CAACTACTTCAATGCATGTGTGAGGAAGGAGTTGAACCAA  
+HWI-EAS443:3:10:1024:1336#0/1  
ababbbbbbbbbb¥bbaababbabababab\_baaa`]aa  
@HWI-EAS443:3:11:108:401#0/1  
CAACTACTTCAATGCATGTGTGAGGAAGGAGTTGAACCAA  
+HWI-EAS443:3:11:108:401#0/1  
aaaaa\_^aa`aaaa`aaW`Xa\_aa]W\_aX`[```a]¥ZZ  
@HWI-EAS443:3:12:868:58#0/1  
CAACTACTTCAATGCATGTGTGAGGAAGGAGTTGAACCAA  
+HWI-EAS443:3:12:868:58#0/1  
aabaaa`aaaa`abW`b¥aUb]aa^`a]W`]^\_^]XZ^Z  
@HWI-EAS443:3:14:558:1785#0/1  
CAACTACTTCAATGCATGTGTGAGGAAGGAGTTGAACCAA  
+HWI-EAS443:3:14:558:1785#0/1  
V^aabb`bbabbab[`aaab0ab`\_`b`^a^`aUaaa\_ab  
@HWI-EAS443:3:16:21:1934#0/1  
CAACTACTTCAATGCATGTGTGAGGAAGGAGTTGAACCAA  
+HWI-EAS443:3:16:21:1934#0/1  
aa]``a^\_\_a`W\_\_W^\_]\_R^]]X\_]ZY]V]Z^]Z\_] ]  
@HWI-EAS443:3:18:1652:545#0/1  
CAACTACTTCAATGCATGTGTGAGGAAGGAGTTGAACCAA  
+HWI-EAS443:3:18:1652:545#0/1  
YY¥X^[PS^WXb]\_\_aabYaLaXbb[]`a[a\_`\_^VFKa¥  
@HWI-EAS443:3:18:625:594#0/1  
CAACTACTTCAATGCATGTGTGAGGAAGGAGTTGAACCAA  
+HWI-EAS443:3:18:625:594#0/1  
¥]R\_Z[a]\_`¥YL`¥¥¥[XQZ^aabYSZa[`^a^PU`ZXP  
@HWI-EAS443:3:20:1329:498#0/1  
CAACTACTTCAATGCATGTGTGAGGAAGGAGTTGAACCAA  
+HWI-EAS443:3:20:1329:498#0/1  
\_abb`b\_abbba`ab`b^`W][bbaaaa¥`\_\_\_aaa^a]  
@HWI-EAS443:3:21:1112:1000#0/1  
CAACTACTTCAATGCATGTGTGAGGAAGGAGTTGAACCAA  
+HWI-EAS443:3:21:1112:1000#0/1  
ababbbbbbabababbbbb\_abbababaa\_ab^aabaa]ba  
@HWI-EAS443:3:21:848:1564#0/1  
CAACTACTTCAATGCATGTGTGAGGAAGGAGTTGAACCAA  
+HWI-EAS443:3:21:848:1564#0/1  
a`V`UQZ`]^XX^¥]Y\_NZTa\_aV[\_\_\_][WU]]Y`]XYY  
@HWI-EAS443:3:23:58:481#0/1  
CAACTACTTCAATGCATGTGTGAGGAAGGAGTTGAACCAA  
+HWI-EAS443:3:23:58:481#0/1  
abbaababaa^aaaa\_aaSa]`\_\_```aa\_a]aa\_a`\_]Z  
@HWI-EAS443:3:24:1369:220#0/1  
CAACTACTTCAATGCATGTGTGAGGAAGGAGTTGAACCAA  
+HWI-EAS443:3:24:1369:220#0/1  
`bbb\_baa^\_aaaa`¥bbab]`bbb`abbaaaaabbNNaa

@HWI-EAS443:3:25:1034:625#0/1  
CAACTACTTCAATGCATGTGTGAGGAAGGAGTTGAACCAA  
+HWI-EAS443:3:25:1034:625#0/1  
aaZH`bab\_`Ta#b^`Xa\_a^a\_a`b\_``a^#`^a^I]W  
@HWI-EAS443:3:25:256:1913#0/1  
CAACTACTTCAATGCATGTGTGAGGAAGGAGTTGAACCAA  
+HWI-EAS443:3:25:256:1913#0/1  
]a\_`Ua`^R\_`#QTYPVXYTX^URQOXQZOTWZUW]ZHOT  
@HWI-EAS443:3:27:1143:1853#0/1  
CAACTACTTCAATGCATGTGTGAGGAAGGAGTTGAACCAA  
+HWI-EAS443:3:27:1143:1853#0/1  
\_bb`abbbabbbbaa`bbb[babababbbaba^abaaa`ab  
@HWI-EAS443:3:27:1187:437#0/1  
CAACTACTTCAATGCATGTGTGAGGAAGGAGTTGAACCAA  
+HWI-EAS443:3:27:1187:437#0/1  
`b#bbab`\_bb`\_`bV#`a`a`]bbba^ab`babYaXab  
@HWI-EAS443:3:27:827:1317#0/1  
CAACTACTTCAATGCATGTGTGAGGAAGGAGTTGAACCAA  
+HWI-EAS443:3:27:827:1317#0/1  
Z#aZ#a[H]#aYRXVSW]N^aba`\_]00ZTS]W`V[aa  
@HWI-EAS443:3:2:1180:20#0/1  
CAACTACTTCAATGCATGTGTGAGGAAGGAGTTGAACCAA  
+HWI-EAS443:3:2:1180:20#0/1  
a]baaa`ab`a\_aaTRaW\_V\_Y]Z#]a`W\_#^a\_]QN[]  
@HWI-EAS443:3:33:517:1761#0/1  
CAACTACTTCAATGCATGTGTGAGGAAGGAGTTGAACCAA  
+HWI-EAS443:3:33:517:1761#0/1  
a\_``a\_``aa#^`[\_aaa]`V``^`\_PY]`Z]]Z\_#PXW  
@HWI-EAS443:3:33:821:1220#0/1  
CAACTACTTCAATGCATGTGTGAGGAAGGAGTTGAACCAA  
+HWI-EAS443:3:33:821:1220#0/1  
abbaabaaaba`a\_#\_b[a]a`````^#a`]R\_\_a]]\_\_  
@HWI-EAS443:3:34:202:1818#0/1  
CAACTACTTCAATGCATGTGTGAGGAAGGAGTTGAACCAA  
+HWI-EAS443:3:34:202:1818#0/1  
^Xab\_b#W]\_b^`H\_aaXT]LQ`YUTa`S]XU`S#YXX#\_  
@HWI-EAS443:3:37:1608:832#0/1  
CAACTACTTCAATGCATGTGTGAGGAAGGAGTTGAACCAA  
+HWI-EAS443:3:37:1608:832#0/1  
^^YP`bbbb`bbbaU`bbabV\_bbbbb]O]abbaab^\_a  
@HWI-EAS443:3:3:1571:970#0/1  
CAACTACTTCAATGCATGTGTGAGGAAGGAGTTGAACCAA  
+HWI-EAS443:3:3:1571:970#0/1  
aababbabb[a```aXabab]aa`Y``a```]aa\_a`Y^W  
@HWI-EAS443:3:3:973:1449#0/1  
CAACTACTTCAATGCATGTGTGAGGAAGGAGTTGAACCAA  
+HWI-EAS443:3:3:973:1449#0/1  
ababbababbb`bbaabababaaabaaa`aaaa\_0aa  
@HWI-EAS443:3:40:1287:734#0/1  
CAACTACTTCAATGCATGTGTGAGGAAGGAGTTGAACCAA

+HWI-EAS443:3:40:1287:734#0/1  
abbbbbbbbab`abbab]baba^Sabaa\_bbbbbUS`  
@HWI-EAS443:3:40:1545:1725#0/1  
CAACTACTTCAATGCATGTGTGAGGAAGGAGTTGAACCAA  
+HWI-EAS443:3:40:1545:1725#0/1  
abbabbbbababaaabab¥baba\_\_`bbb^aaba`P`a  
@HWI-EAS443:3:40:706:311#0/1  
CAACTACTTCAATGCATGTGTGAGGAAGGAGTTGAACCAA  
+HWI-EAS443:3:40:706:311#0/1  
\_Z¥^a\_V]`aa]TTYQaa\_aYaZZNQQ\_]^^^^[TZZ[W  
@HWI-EAS443:3:42:116:247#0/1  
CAACTACTTCAATGCATGTGTGAGGAAGGAGTTGAACCAA  
+HWI-EAS443:3:42:116:247#0/1  
`ba`\_`aaa`a`\_a^`\_a^aZa\_a``]a`\_a]`^`\_^^aY  
@HWI-EAS443:3:46:1557:304#0/1  
CAACTACTTCAATGCATGTGTGAGGAAGGAGTTGAACCAA  
+HWI-EAS443:3:46:1557:304#0/1  
a]Zab\_]aaaZM]^`b\_`aaa\_aa^`\_]Xa`]`\_UY[Z\_  
@HWI-EAS443:3:46:77:829#0/1  
CAACTACTTCAATGCATGTGTGAGGAAGGAGTTGAACCAA  
+HWI-EAS443:3:46:77:829#0/1  
abbabbbba`aababbbababbbbabaabaabaa`ba  
@HWI-EAS443:3:52:200:139#0/1  
CAACTACTTCAATGCATGTGTGAGGAAGGAGTTGAACCAA  
+HWI-EAS443:3:52:200:139#0/1  
abbabbbbaaabbaaab\_b\_a`ba\_aaa^a\_aaa`XDR`  
@HWI-EAS443:3:53:170:509#0/1  
CAACTACTTCAATGCATGTGTGAGGAAGGAGTTGAACCAA  
+HWI-EAS443:3:53:170:509#0/1  
a^Waa\_\_a`[^`bb^^]a[\_Va]a\_]Za^aa\_aaa\_VV¥¥  
@HWI-EAS443:3:55:1512:338#0/1  
CAACTACTTCAATGCATGTGTGAGGAAGGAGTTGAACCAA  
+HWI-EAS443:3:55:1512:338#0/1  
Xb¥abbX`X]]Vabaa]a`b]aaaa`\_bbaaaaaaaaa^aa  
@HWI-EAS443:3:55:1554:316#0/1  
CAACTACTTCAATGCATGTGTGAGGAAGGAGTTGAACCAA  
+HWI-EAS443:3:55:1554:316#0/1  
U`abababb¥bb`b]babbb¥`bababb\_aaabbbbab\_ab  
@HWI-EAS443:3:55:1590:17#0/1  
CAACTACTTCAATGCATGTGTGAGGAAGGAGTTGAACCAA  
+HWI-EAS443:3:55:1590:17#0/1  
¥ba`abaaa\_aaaa[\_ab¥a`b^aaa\_aa]```a`a`G\_^  
@HWI-EAS443:3:55:755:20#0/1  
CAACTACTTCAATGCATGTGTGAGGAAGGAGTTGAACCAA  
+HWI-EAS443:3:55:755:20#0/1  
`\_baababa`a`aaaaab^b\_babb\_\_baaa\_aa\_\_Wa`  
@HWI-EAS443:3:57:1322:2036#0/1  
TAACTACTTCAATGCATGTGTGAGGAAGGAGTTGAACCAA  
+HWI-EAS443:3:57:1322:2036#0/1  
LYabba`b`bbabaabababababaaab`abab\_b`GG`

@HWI-EAS443:3:5:1247:1831#0/1  
CAACTACTTCAATGCATGTGTGAGGAAGGAGTTGAACCAA  
+HWI-EAS443:3:5:1247:1831#0/1  
^abbbbbbb^aabbXabb\_b`babaabab`a\_`aaa\_^]a  
@HWI-EAS443:3:5:1588:1311#0/1  
CAACTACTTCAATGCATGTGTGAGGAAGGAGTTGAACCAA  
+HWI-EAS443:3:5:1588:1311#0/1  
aaa\_bb`¥W^aaa]`ab\_b`^a\_\_\_ba\_bV`aa\_aR\_^  
@HWI-EAS443:3:61:1670:879#0/1  
CAACTACTTCAATGCATGTGTGAGGAAGGAGTTGAACCAA  
+HWI-EAS443:3:61:1670:879#0/1  
abbbbbbbbbbaab\_bbab[bbbbba[ba`aaaab\_\_\_\_  
@HWI-EAS443:3:61:484:127#0/1  
CAACTACTTCAATGCATGTGTGAGGAAGGAGTTGAACCAA  
+HWI-EAS443:3:61:484:127#0/1  
aba`¥bbbb`]^a\_a]aaYaV¥T`¥OU¥a^\_W^\_WVSPXS  
@HWI-EAS443:3:63:402:719#0/1  
CAACTACTTCAATGCATGTGTGAGGAAGGAGTTGAACCAA  
+HWI-EAS443:3:63:402:719#0/1  
a]aa`¥[Za]^a`X\_Yaa`U\_Ua]\_]\_Z```a\_a^HYL  
@HWI-EAS443:3:63:686:1184#0/1  
CAACTACTTCAATGCATGTGTGAGGAAGGAGTTGAACCAA  
+HWI-EAS443:3:63:686:1184#0/1  
a\_baabaaaab```aaaa^a]aaaa`a`\_``\_```aa¥a[  
@HWI-EAS443:3:64:1737:123#0/1  
CAACTACTTCAATGCATGTGTGAGGAAGGAGTTGAACCAA  
+HWI-EAS443:3:64:1737:123#0/1  
aab`baabb`ababaabbaa`babaaba\_baba`¥X\_\_`  
@HWI-EAS443:3:64:773:683#0/1  
CAACTACTTCAATGCATGTGTGAGGAAGGAGTTGAACCAA  
+HWI-EAS443:3:64:773:683#0/1  
abbbabbabbbba`^Q\_b\_aZaaaa`^a^`a\_`\_\_aa\_a¥  
@HWI-EAS443:3:67:610:888#0/1  
CAACTACTTCAATGCATGTGTGAGGAAGGAGTTGAACCAA  
+HWI-EAS443:3:67:610:888#0/1  
abbaaabaaaaa\_aa`aa`^a`a\_\_a\_\_a`^\_aa\_\_X`]  
@HWI-EAS443:3:67:963:1231#0/1  
CAACTACTTCAATGCATGTGTGAGGAAGGAGTTGAACCAA  
+HWI-EAS443:3:67:963:1231#0/1  
abbbbaaaaaa`a``aaa`a\_`a\_aa\_`\_`]]`\_a\_]\_^  
@HWI-EAS443:3:68:1767:552#0/1  
CAACTACTTCAATGCATGTGTGAGGAAGGAGTTGAACCAA  
+HWI-EAS443:3:68:1767:552#0/1  
abbbababbabaaa\_abb\_a`aaaa`aaaaa^aaa\_ZS^]  
@HWI-EAS443:3:68:351:617#0/1  
CAACTACTTCAATGCATGTGTGAGGAAGGAGTTGAACCAA  
+HWI-EAS443:3:68:351:617#0/1  
Y\_ababbbbabZbbbbbaaaa`a`bba\_b`aabbbabbb  
@HWI-EAS443:3:69:1382:794#0/1  
CAACTACTTCAATGCATGTGTGAGGAAGGAGTTGAACCAA

+HWI-EAS443:3:69:1382:794#0/1  
abbababaaabab\_aabbaa`a\_baa`ba\_a`aaa`\_\_a`  
@HWI-EAS443:3:69:901:1434#0/1  
CAACTACTTCAATGCATGTGTGAGGAAGGAGTTGAACCAA  
+HWI-EAS443:3:69:901:1434#0/1  
abbaabbbbabbbaaa[aa]a\_]a``a``\_Za````[aa  
@HWI-EAS443:3:6:701:1202#0/1  
CAACTACTTCAATGCATGTGTGAGGAAGGAGTTGAACCAA  
+HWI-EAS443:3:6:701:1202#0/1  
a¥`a]bb`b¥bbbaababXb\_b\_bbbabb`bbaa^\_^\_bb  
@HWI-EAS443:3:70:293:1211#0/1  
CAACTACTTCAATGCATGTGTGAGGAAGGAGTTGAACCAA  
+HWI-EAS443:3:70:293:1211#0/1  
`b¥aabaa\_ba`^\_\_NZaYa¥b]\_\_W¥[ZHZW``\_\_a¥[]  
@HWI-EAS443:3:70:914:439#0/1  
CAACTACTTCAATGCATGTGTGAGGAAGGAGTTGAACCAA  
+HWI-EAS443:3:70:914:439#0/1  
a¥\_`^a`\_[\_¥\_bbVX\_bY``^`aa`]Z\_\_\_\_^ab\_TZ\_  
@HWI-EAS443:3:76:1296:608#0/1  
CAACTACTTCAATGCATGTGTGAGGAAGGAGTTGAACCAA  
+HWI-EAS443:3:76:1296:608#0/1  
aXb]``\_abbbabb]aabY`abaaa`¥\_bY``bba^¥NaY  
@HWI-EAS443:3:76:542:531#0/1  
CAACTACTTCAATGCATGTGTGAGGAAGGAGTTGAACCAA  
+HWI-EAS443:3:76:542:531#0/1  
IYbbbab`b``^^]Z\_\_Za`^aa``\_ba^aaaa^abZZ`b  
@HWI-EAS443:3:79:896:1952#0/1  
CAACTACTTCAATGCATGTGTGAGGAAGGAGTTGAACCAA  
+HWI-EAS443:3:79:896:1952#0/1  
aU`babbaaab`aTZabaS`\_aa`\_]a`¥a]ab`\_G]\_  
@HWI-EAS443:3:81:866:2020#0/1  
CAACTACTTCAATGCATGTGTGAGGAAGGAGTTGAACCAA  
+HWI-EAS443:3:81:866:2020#0/1  
aa]`Xaaa^]aWW]Zaa\_]USUYaX\_YK\_b]aYN\_WF\_Y  
@HWI-EAS443:3:82:1358:30#0/1  
CAACTACTTCAATGCATGTGTGAGGAAGGAGTTGAACCAA  
+HWI-EAS443:3:82:1358:30#0/1  
`bbbb\_babbabaaaabb]b]\_bba\_abbabababaaGb`  
@HWI-EAS443:3:83:39:1850#0/1  
CAACTACTTCAATGCATGTGTGAGGAAGGAGTTGAACCAA  
+HWI-EAS443:3:83:39:1850#0/1  
aa\_]L¥X^`\_`[\_¥¥]VUX]^¥ZP^POX^RZX^ZZSUX  
@HWI-EAS443:3:83:551:1221#0/1  
CAACTACTTCAATGCATGTGTGAGGAAGGAGTTGAACCAA  
+HWI-EAS443:3:83:551:1221#0/1  
aaa`aabaaa]X\_`aaaa^\_Za\_¥^``\_]Y`\_\_\_\_^W]\_  
@HWI-EAS443:3:83:870:1126#0/1  
CAACTACTTCAATGCATGTGTGAGGAAGGAGTTGAACCAA  
+HWI-EAS443:3:83:870:1126#0/1  
aaa`abaaaa`aaaaa\_a^a]Yaaa`\_\_Xaa``a[a\_



@HWI-EAS443:3:84:308:1570#0/1  
CAACTACTTCAATGCATGTGTGAGGAAGGAGTTGAACCAA  
+HWI-EAS443:3:84:308:1570#0/1  
]Zb\_X¥ab¥Y`a`V¥a\_F\_`b\_aa]`b¥]aN`a^`a[`a  
@HWI-EAS443:3:85:306:211#0/1  
CAACTACTTCAATGCATGTGTGAGGAAGGAGTTGAACCAA  
+HWI-EAS443:3:85:306:211#0/1  
aaaa]a\_\_^aU]`a^`\_\_X]X\_XW]]]]]Y\_X]^Z^W¥TW  
@HWI-EAS443:3:86:175:857#0/1  
CAACTACTTCAATGCATGTGTGAGGAAGGAGTTGAACCAA  
+HWI-EAS443:3:86:175:857#0/1  
]ab[]\_TTa`a¥UZ^`ab^[S^Y^XTZ`\_PaR]baX^V]a  
@HWI-EAS443:3:86:274:81#0/1  
CAACTACTTCAATGCATGTGTGAGGAAGGAGTTGAACCAA  
+HWI-EAS443:3:86:274:81#0/1  
abbbbb`baa^Qabaaaa`b]b\_aaa`a`\_a\_\_a\_\_¥S]]  
@HWI-EAS443:3:87:365:197#0/1  
CAACTACTTCAATGCATGTGTGAGGAAGGAGTTGAACCAA  
+HWI-EAS443:3:87:365:197#0/1  
abbbbabbbbaabaabbab`aabaaaa`a[aaaa`]a¥  
@HWI-EAS443:3:88:418:970#0/1  
CAACTACTTCAATGCATGTGTGAGGAAGGAGTTGAACCAA  
+HWI-EAS443:3:88:418:970#0/1  
a]]`VaZQW\_a\_X¥^XaV`a]¥X[ZXVa`V[GW`X¥VWYY  
@HWI-EAS443:3:88:923:476#0/1  
CAACTACTTCAATGCATGTGTGAGGAAGGAGTTGAACCAA  
+HWI-EAS443:3:88:923:476#0/1  
abbbbbbbbbbbbaabbab`baaababaababbbba`bb  
@HWI-EAS443:3:89:1379:1312#0/1  
CAACTACTTCAATGCATGTGTGAGGAAGGAGTTGAACCAA  
+HWI-EAS443:3:89:1379:1312#0/1  
abbaba¥a\_b¥aXb\_aba^ba`]bbaaba\_`^aa`^\_^^`  
@HWI-EAS443:3:89:375:2001#0/1  
CAACTACTTCAATGCATGTGTGAGGAAGGAGTTGAACCAA  
+HWI-EAS443:3:89:375:2001#0/1  
\_a^^babb^baaSa\_\_a\_LV¥``UW\_`a`a]\_\_a`\_`Ja\_  
@HWI-EAS443:3:89:646:1038#0/1  
CAACTACTTCAATGCATGTGTGAGGAAGGAGTTGAACCAA  
+HWI-EAS443:3:89:646:1038#0/1  
aV]\_a^aaa`Y^^^`VZaSa\_^I`XQUaP^\_YX¥^^]]]\_  
@HWI-EAS443:3:89:917:1146#0/1  
CAACTACTTCAATGCATGTGTGAGGAAGGAGTTGAACCAA  
+HWI-EAS443:3:89:917:1146#0/1  
aa``Zabb``aYS¥^Z`\_R\_¥¥\_\_^aaa^aaX]aaa\_N\_^  
@HWI-EAS443:3:92:961:729#0/1  
CAACTACTTCAATGCATGTGTGAGGAAGGAGTTGAACCAA  
+HWI-EAS443:3:92:961:729#0/1  
`b`baZa^Xabbb]aab^bZbaabaaaaabaaba^RT\_`  
@HWI-EAS443:3:95:1276:210#0/1  
CAACTACTTCAATGCATGTGTGAGGAAGGAGTTGAACCAA



@HWI-EAS443:3:33:883:1316#0/1  
AACTACTTCAATGCATGTGTGAGGAAGGAGTTGAACCAAG  
+HWI-EAS443:3:33:883:1316#0/1  
aaabaaaaaba\_a\_aa`aX`a`^`^`[\_\_\_W`]^`\_^`]^`^`  
@HWI-EAS443:3:38:451:1995#0/1  
AACTACTTCAATGCATGTGTGAGGAAGGAGTTGAACCAAG  
+HWI-EAS443:3:38:451:1995#0/1  
aaa`aa\_\_aaa^]\_a`\_]\_U]^\_\_\_\_a\_^\_[W]^\_\_Xa`\_W  
@HWI-EAS443:3:3:317:1734#0/1  
AACTACTTCAATGCATGTGTGAGGAAGGAGTTGAACCAAG  
+HWI-EAS443:3:3:317:1734#0/1  
aaa`aaa`]baab\_aaa^aQ\_\_a¥^a\_U`^`\_\_\_\_`X\_U^]  
@HWI-EAS443:3:40:1073:137#0/1  
AACTACTTCAATGCATGTGTGAGGAAGGAGTTGAACCAAG  
+HWI-EAS443:3:40:1073:137#0/1  
aaa`bab`^ba`a`aa]a\_a]aa\_]\_a¥\_]`^aa`a`\_\_`  
@HWI-EAS443:3:42:391:2030#0/1  
AACTACTTCAATGCATGTGTGAGGAAGGAGTTGAACCAAG  
+HWI-EAS443:3:42:391:2030#0/1  
aaa[aa\_\_Z`a`YV\_a`S\_TZ¥RW^\_¥^\_Y¥ZY\_\_`[`[Z  
@HWI-EAS443:3:43:70:883#0/1  
AACTACTTCAATGCATGTGTGAGGAAGGAGTTGAACCAAG  
+HWI-EAS443:3:43:70:883#0/1  
a\_aabaaabbaaaa`baZa\_a\_baa`¥`^`^`aa``````\_`  
@HWI-EAS443:3:45:931:653#0/1  
AACTACTTCAATGCATGTGTGAGGAAGGAGTTGAACCAAG  
+HWI-EAS443:3:45:931:653#0/1  
^Y\_Z¥¥`¥^^Xa]a^\_Q\_X^```ZP¥¥Y`\_]`P`aaa`a  
@HWI-EAS443:3:46:1792:326#0/1  
NACTACTTCAATGCATGTGTGAGGAAGGAGTTGAACCAAG  
+HWI-EAS443:3:46:1792:326#0/1  
DOZZZZYYYYYZZZXYXZYXYXXYXXWYZZYWYZXXXXXV  
@HWI-EAS443:3:51:105:134#0/1  
AACTACTTCAATGCATGTGTGAGGAAGGAGTTGAACCAAG  
+HWI-EAS443:3:51:105:134#0/1  
[aaaa^`aaaa\_b^Y^\_XaRa]`a^^`^U[V\_`¥a^S]¥a  
@HWI-EAS443:3:51:1583:181#0/1  
AACTACTTCAATGCATGTGTGAGGAAGGAGTTGAACCAAG  
+HWI-EAS443:3:51:1583:181#0/1  
ababbbbaaabaabb`]`\_`^W\_a`b\_]\_aa`a`\_````]  
@HWI-EAS443:3:53:604:643#0/1  
AACTACTTCAATGCATGTGTGAGGAAGGAGTTGAACCAAG  
+HWI-EAS443:3:53:604:643#0/1  
aa`aaab`^^^a\_\_aa`a]a]a`\_\_aP¥a\_\_a`\_`]^`^`  
@HWI-EAS443:3:57:729:325#0/1  
AACTACTTCAATGCATGTGTGAGGAAGGAGTTGAACCAAG  
+HWI-EAS443:3:57:729:325#0/1  
aa\_aaaaa\_a\_aa\_\_aaWaZa`a`^`aa^aZ\_a\_`^`[^`]  
@HWI-EAS443:3:59:1392:1147#0/1  
AACTACTTCAATGCATGTGTGAGGAAGGAGTTGAACCAAG

+HWI-EAS443:3:59:1392:1147#0/1  
\_\_a\_a`bba`\_\_ba\_`¥Xaab]bbabbbaba]aa\_ZU^``  
@HWI-EAS443:3:59:428:1264#0/1  
AACTACTTCAATGCATGTGTGAGGAAGGAGTTGAACCAAG  
+HWI-EAS443:3:59:428:1264#0/1  
UU\_Z]aa`^aabaaa`aS^K`ba`aba\_`NNS¥SPO[]V  
@HWI-EAS443:3:65:1078:856#0/1  
AACTACTTCAATGCATGTGTGAGGAAGGAGTTGAACCAAG  
+HWI-EAS443:3:65:1078:856#0/1  
a]T]aaaa`X\_W[¥[^\_Z^`XW^¥]`Y¥`¥`¥Y¥^[  
@HWI-EAS443:3:70:162:906#0/1  
AACTACTTCAATGCATGTGTGAGGAAGGAGTTGAACCAAG  
+HWI-EAS443:3:70:162:906#0/1  
a\_aabaaaa`a`a`\_]aX\_\_\_\_^`^^\_Z\_a`^`^`\_]  
@HWI-EAS443:3:72:1365:1680#0/1  
AACTACTTCAATGCATGTGTGAGGAAGGAGTTGAACCAAG  
+HWI-EAS443:3:72:1365:1680#0/1  
aa\_\_a]a\_abaaT[\_`aY\_0\_Y`^\_[a\_]`0\_a\_a0S\_^\_  
@HWI-EAS443:3:72:716:369#0/1  
AACTACTTCAATGCATGTGTGAGGAAGGAGTTGAACCAAG  
+HWI-EAS443:3:72:716:369#0/1  
abaaaaba`aaaaaabWq]a\_aa^`b\_\_`^`\_`\_`\_`^\_  
@HWI-EAS443:3:75:492:1959#0/1  
AACTACTTCAATGCATGTGTGAGGAAGGAGTTGAACCAAG  
+HWI-EAS443:3:75:492:1959#0/1  
^bb]b`aa`^a`aaaa^Xa\_`^`^\_a`¥a[``\_aa\_a`\_`  
@HWI-EAS443:3:78:1609:1026#0/1  
AACTACTTCAATGCATGTGTGAGGAAGGAGTTGAACCAAG  
+HWI-EAS443:3:78:1609:1026#0/1  
aaaaa`abaaab\_aU\_]VbS^aaa\_\_ba`a^aaaa`¥\_Qa  
@HWI-EAS443:3:8:807:1874#0/1  
AACTACTTCAATGCATGTGTGAGGAAGGAGTTGAACCAAG  
+HWI-EAS443:3:8:807:1874#0/1  
a`aa`a\_\_^a`\_^\_aa]a]\_\_\_\_^`¥\_\_\_\_X\_\_\_\_^`^^  
@HWI-EAS443:3:97:421:1769#0/1  
AACTACTTCAATGCATGTGTGAGGAAGGAGTTGAACCAAG  
+HWI-EAS443:3:97:421:1769#0/1  
aa\_aaaa`aa\_\_`a`aa]a]a\_a`^`\_\_aZ\_\_``\_X\_^\_  
@HWI-EAS443:3:98:1337:1866#0/1  
AACTACTTCAATGCATGTGTGAGGAAGGAGTTGAACCAAG  
+HWI-EAS443:3:98:1337:1866#0/1  
a`0``^`aab\_aa¥\_bb^b¥¥YaaSaba^a^`aaaSGaS`  
@HWI-EAS443:3:21:788:352#0/1  
ACTACTTCAATGCATGTGTGAGGAAGGAGTTGAACCAAGA  
+HWI-EAS443:3:21:788:352#0/1  
aaZ^`aab`W`ba\_a`¥a\_a\_ba¥¥aa[^]\_````\_¥\_Z\_]`  
@HWI-EAS443:3:22:513:545#0/1  
ACTACTTCAATGCATGTGTGAGGAAGGAGTTGAACCAAGA  
+HWI-EAS443:3:22:513:545#0/1  
^`\_]OYR¥\_\_U¥ZYRbUaQQ¥V\_\_^]NZYXZ[T^Q]TOYU

@HWI-EAS443:3:50:448:1121#0/1  
ACTACTTCAATGCATGTGTGAGGAAGGAGTTGAACCAAGA  
+HWI-EAS443:3:50:448:1121#0/1  
^ZVaZS^`WTSba\_`aW`S]TX`U\_\_\_XaY\_\_a\_RWXTY^  
@HWI-EAS443:3:53:937:485#0/1  
ACTACTTCAATGCATGTGTGAGGAAGGAGTTGAACCAAGA  
+HWI-EAS443:3:53:937:485#0/1  
\_\_abbbaabbab\_\_bb\_bU\_\_ba`a`a```a`\_a`^\_\_`\_  
@HWI-EAS443:3:100:113:1323#0/1  
CAATGCATGTGTGAGGAAGGAGTTGAACCAAGATGCATTA  
+HWI-EAS443:3:100:113:1323#0/1  
WQ\_a\_U\_^`R`\_`[\_`^aaa¥SOZ^[ZXF^Xa\_WaRW``\_  
@HWI-EAS443:3:10:1205:302#0/1  
CTTCAATGCATGTGTGAGGAAGGAGTTGAACCAAGATGCA  
+HWI-EAS443:3:10:1205:302#0/1  
abbbbbab\_babbbabababaabWaab`aa\_\_a\_\_a\_aS\_  
@HWI-EAS443:3:12:1629:1341#0/1  
CTACTTCAATGCATGTGTGAGGAAGGAGTTGAACCAAGAT  
+HWI-EAS443:3:12:1629:1341#0/1  
abb\_abaXbbbbbbbbbab`abbabba\_aaaaKaabaa  
@HWI-EAS443:3:17:650:755#0/1  
CAATGCATGTGTGAGGAAGGAGTTGAACCAAGATGCATTA  
+HWI-EAS443:3:17:650:755#0/1  
YVbUaY`^\_]b]^bZ^S^bZa`\_a\_ab^^`ab^\_Xba\_a  
@HWI-EAS443:3:18:1088:705#0/1  
AATGCATCTTGGTTCAACTCCTTCCTCACACATGCATTGA  
+HWI-EAS443:3:18:1088:705#0/1  
abaaa`a^baaaaaaaaa]aa\_[a`aaaaaaaa`\_aaa`  
@HWI-EAS443:3:19:758:233#0/1  
ACTTCAATGCATGTGTGAGGAAGGAGTTGAACCAAGATGC  
+HWI-EAS443:3:19:758:233#0/1  
`b\_¥^a`Q]aaa¥b¥\_`aa^bYY^^^]\_a¥X`\_¥\_^\_Z  
@HWI-EAS443:3:1:239:1964#0/1  
AATGCATGTGTGAGGAAGGAGTTGAACCAAGATGCATTAA  
+HWI-EAS443:3:1:239:1964#0/1  
aa`SIU\_ZFY`bYabIab\_J\_^`aV^¥G¥\_S]SU`\_]BBB  
@HWI-EAS443:3:21:1723:233#0/1  
CAATGCATGTGTGAGGAAGGAGTTGAACCAAGATGCATTA  
+HWI-EAS443:3:21:1723:233#0/1  
Y^VV]X`b`\_aZaZSaaabaR^`aa¥]UTQYaX¥^OHa`V  
@HWI-EAS443:3:21:486:719#0/1  
CTACTTCAATGCATGTGTGAGGAAGGAGTTGAACCAAGAT  
+HWI-EAS443:3:21:486:719#0/1  
a`aa\_a\_] [ ]a[T`\_X`^a]`U¥\_\_^]\_^¥^U^]\_^]^  
@HWI-EAS443:3:22:835:206#0/1  
CAATGCATGTGTGAGGAAGGAGTTGAACCAAGATGCATTA  
+HWI-EAS443:3:22:835:206#0/1  
abbbb`abbab^bab`abb`\_b`ababa`a\_aaab\_aa`a  
@HWI-EAS443:3:38:262:953#0/1  
ACTTCAATGCATGTGTGAGGAAGGAGTTGAACCAAGATGC

+HWI-EAS443:3:38:262:953#0/1  
aaaabbaaaa`aa^aY`[`[¥`a\_^`Y\_\_\_\_]^)`\_`\_]Y\_`]  
@HWI-EAS443:3:42:1645:1072#0/1  
GCATCTTGGTTCAACTCCTTCCTCACACATGCATTGAAGT  
+HWI-EAS443:3:42:1645:1072#0/1  
aa`[baab¥`a^^`a`\_aGX^]Z`\_\_aaa`Y``\_`U¥^U  
@HWI-EAS443:3:43:285:1204#0/1  
CTACTTCAATGCATGTGTGAGGAAGGAGTTGAACCAAGAT  
+HWI-EAS443:3:43:285:1204#0/1  
`\_ba`aaTY`baV\_a^`aY``[aab`]b`aaaaYQ\_`aa^  
@HWI-EAS443:3:43:392:353#0/1  
CTACTTCAATGCATGTGTGAGGAAGGAGTTGAACCAAGAT  
+HWI-EAS443:3:43:392:353#0/1  
abbaaa]b`Z`aaaa[b\_baa\_^[^aab\_aa`aa¥aa]\_\_  
@HWI-EAS443:3:44:71:2029#0/1  
CTTCAATGCATGTGTGAGGAAGGAGTTGAACCAAGATGCA  
+HWI-EAS443:3:44:71:2029#0/1  
a\_R0[R[0\_a`bRUFX``[W\_\_aYa^[aaa¥a\_\_[RS`]]  
@HWI-EAS443:3:4:1072:540#0/1  
CTACTTCAATGCATGTGTGAGGAAGGAGTTGAACCAAGAT  
+HWI-EAS443:3:4:1072:540#0/1  
`bbabbababba\_bb`b^a`\_```ba¥a`aa\_a`V`\_aa`  
@HWI-EAS443:3:4:644:1750#0/1  
ATGCATGTGTGAGGAAGGAGTTGAACCAAGATGCATTAAG  
+HWI-EAS443:3:4:644:1750#0/1  
a`\_aaab^a^`a`^a\_a\_¥^^`\_\_U\_\_`^]`X\_\_^`¥^  
@HWI-EAS443:3:55:1137:1133#0/1  
CTTCAATGCATGTGTGAGGAAGGAGTTGAACCAAGATGCA  
+HWI-EAS443:3:55:1137:1133#0/1  
`^Y`Y\_X¥U^bb\_ZP`\_bba^`]\_\_]bb^]NX¥]]\_ab]`  
@HWI-EAS443:3:62:1660:1114#0/1  
CTACTTCAATGCATGTGTGAGGAAGGAGTTGAACCAAGAT  
+HWI-EAS443:3:62:1660:1114#0/1  
\_S\_NU`a\_Y`a]P¥b`a]UM¥`a^`^`Y^`a`VQ[T``a  
@HWI-EAS443:3:63:325:633#0/1  
TACTTCAATGCATGTGTGAGGAAGGAGTTGAACCAAGATG  
+HWI-EAS443:3:63:325:633#0/1  
ababbb]U`ba`ababZ`aba`aabaa^aa^aaaZ`[W^`  
@HWI-EAS443:3:68:1485:1540#0/1  
ATGCATGTGTGAGGAAGGAGTTGAACCAAGATGCATTAAG  
+HWI-EAS443:3:68:1485:1540#0/1  
a[I¥U^^a`Kaa^[T]aV¥a[RUTW\_\_aX```UPaV[S\_a  
@HWI-EAS443:3:73:1074:1792#0/1  
CTACTTCAATGCATGTGTGAGGAAGGAGTTGAACCAAGAT  
+HWI-EAS443:3:73:1074:1792#0/1  
aaaaa¥]ab\_aaa\_[Qa^a\_¥Yaa]VS`\_aaa\_^`[`aV  
@HWI-EAS443:3:7:834:1705#0/1  
CAATGCATGTGTGAGGAAGGAGTTGAACCAAGATGCATTA  
+HWI-EAS443:3:7:834:1705#0/1  
aabaaa`^`Ubabaaabbbba\_``aaaa]\_aab\_`^W`a`a

@HWI-EAS443:3:90:984:967#0/1  
CTTCAATGCATGTGTGAGGAAGGAGTTGAACCAAGATGCA  
+HWI-EAS443:3:90:984:967#0/1  
^`aa\_b`abbbbabbbyab\_\_aaabb^bbbbbabbbbaa  
@HWI-EAS443:3:91:1319:1237#0/1  
CTACTTCAATGCATGTGTGAGGAAGGAGTTGAACCAAGAT  
+HWI-EAS443:3:91:1319:1237#0/1  
ab¥0\_[IaTa`aX^¥``aZWaXX^`]\`ba\_[JYX^[^¥ba  
@HWI-EAS443:3:92:1539:1694#0/1  
CAATGCATGTGTGAGGAAGGAGTTGAACCAAGATGCATTA  
+HWI-EAS443:3:92:1539:1694#0/1  
`bbabbabb`b\_b\_baaaba`aaabaa``baaaaa\_aaaa  
@HWI-EAS443:3:9:399:1143#0/1  
CTACTTCAATGCATGTGTGAGGAAGGAGTTGAACCAAGAT  
+HWI-EAS443:3:9:399:1143#0/1  
aab`aaa^aaaa`aa^a^aZ`^aa`a`a]\`aaa\_[a\_a``  
@HWI-EAS443:3:84:1023:1831#0/1  
CTTGCCTCAGTAATTGACTGCTCGTCTCTCCCACTTACTA  
+HWI-EAS443:3:84:1023:1831#0/1  
aaa`aaabab\_ab\_\_aa\_a^[`a`Z`aa`^X¥`\_\_\_\_]R][  
@HWI-EAS443:3:65:65:232#0/1  
ATTGACTGCTCGTCTCTCCCACTTACTATCAACTGGTGAG  
+HWI-EAS443:3:65:65:232#0/1  
ababbbaaa]ba[a¥`¥`^^[Y`W\_\_Y¥VU¥¥`^X¥XUTTY  
@HWI-EAS443:3:20:1112:770#0/1  
GAAAGGCAACCAGGAGATTGATCCAGTTGATAGAAAAGTGG  
+HWI-EAS443:3:20:1112:770#0/1  
TXZ\_bbb``\_¥¥bbab`¥Z¥`^RPP\_Oabaa`[F\_S\_Paa  
@HWI-EAS443:3:36:1544:1129#0/1  
CTCAAGAGTTGGTGCATAGGGTTCAGTGGCTGGTTTGCCC  
+HWI-EAS443:3:36:1544:1129#0/1  
a¥TWX`U¥`\_ab^b^`ba\_X[N^a\_aVD¥`a`¥NVZS[GZ  
@HWI-EAS443:3:44:477:460#0/1  
GCCTCAAGAGTTGGTGCATAGGGTTCAGTCGCTGGGTTGC  
+HWI-EAS443:3:44:477:460#0/1  
aaaba¥ZZ^bWba\_G^aa]S\_bS`\_VaX\_a^\_aZFU`\_¥  
@HWI-EAS443:3:72:645:1319#0/1  
CAGTTGATAGTAAGTGGGAGAGACGAGCAGTCAACTGCTG  
+HWI-EAS443:3:72:645:1319#0/1  
aaba\_X¥a``¥`^\_\_aaa\_U\_aaa\_[\_\_`\_V\_aZIZS]ZZ  
@HWI-EAS443:3:96:1283:686#0/1  
GAAAGGCAACAAGGAGATTGATCCAGTTGATAGTAAGTGG  
+HWI-EAS443:3:96:1283:686#0/1  
XY\_Z¥`VPT[I\_Z`YS]\`Z`^U00¥GY\_a\_^bZ[UaY]a  
@HWI-EAS443:3:92:335:1792#0/1  
AGTTGGTGCATAGGGTTCAGTCGCTGGTTTGNCTATTGA  
+HWI-EAS443:3:92:335:1792#0/1  
a\_Zaa\_aUaa`ab\_[Jb^W^`a`\_a[`[Pa¥DLSY¥`\_`^  
@HWI-EAS443:3:11:41:759#0/1  
CTTTTTGGAAATGCCTCAAGAGTTGGTGCATAGGGTTCCG

+HWI-EAS443:3:11:41:759#0/1  
a`Y[Zaab\_T^bba[baa[bUa` `WaZa[\_W^bb]]]aUaa  
@HWI-EAS443:3:11:1454:1497#0/1  
CGGTGCATAGGGTTCAGTCGCTGGTTTGCCTATTGACAA  
+HWI-EAS443:3:11:1454:1497#0/1  
abbab`abb`bbababbbabb` [bba\_[U`aaab` [aa  
@HWI-EAS443:3:31:1209:1391#0/1  
CGCGACTGAACCCTATGCACCAACTCTTGAGGCATTCCA  
+HWI-EAS443:3:31:1209:1391#0/1  
abaabab^^aaaaababba`aaa`aabbabaa^^aaa\_\_a  
@HWI-EAS443:3:43:845:851#0/1  
GTGAACCTTGTCAATAGGGCAAACCAGCGACTGAACCTA  
+HWI-EAS443:3:43:845:851#0/1  
I¥WYO^`¥W`^^ZRW[Z\_bb\_XXab`Z\_X`K[a^WY` `]S  
@HWI-EAS443:3:56:1066:438#0/1  
CCCCACTTACTATCAACTGGATCAATCTCCTGGTTGCCTT  
+HWI-EAS443:3:56:1066:438#0/1  
`aa^ZXbb^bba\_^`a]\_a]a^^¥`aa`aaaa\_`a\_X\_]`  
@HWI-EAS443:3:61:1342:422#0/1  
GCTCTCCACTTACTATCAACTGGATCAATCTCCTGGTTG  
+HWI-EAS443:3:61:1342:422#0/1  
aaaaaaaa]\_X`^`\_`\_`\_a]`\_a]^`\_^\_Z\_UWXYUUSP  
@HWI-EAS443:3:86:886:413#0/1  
CGCCTCAGCAATTGACTGCTCGTCTCTCCACTTACTATC  
+HWI-EAS443:3:86:886:413#0/1  
abbbbabbbbaabbbbab\_\_]`bab^aaaabba`aaa^  
@HWI-EAS443:3:89:1305:469#0/1  
GGGAGATTGATCCAGTTGATAGTAAGTGGGAGAGACGAGC  
+HWI-EAS443:3:89:1305:469#0/1  
`b` ``abababababb`b\_bT`ab¥baaabaaa`b`aT  
@HWI-EAS443:3:100:855:493#0/1  
GCAATTGACTGCTCGTCTCTCCACTTACTATCAACTGGA  
+HWI-EAS443:3:100:855:493#0/1  
`[\_a^`]\_W\_¥XV\_`V^^^^`\_a]Y^[UYa`\_VZ^^^^VB  
@HWI-EAS443:3:11:213:994#0/1  
GATTGATCCAGTTGATAGTAAGTGGGAGAGACGAGCAGTC  
+HWI-EAS443:3:11:213:994#0/1  
a^aba` `ba[aaaa]a`a]aaa¥`b`^a`\_` `a\_` `\_\_^^  
@HWI-EAS443:3:12:257:706#0/1  
GAGTTGGTGCATAGGGTTCAGTCGCTGGTTTGCCTATTG  
+HWI-EAS443:3:12:257:706#0/1  
a[WYaaa`\_aaa\_aUa]`a\_aZ\_\_^\_aaY\_\_XW\_\_^\_^\_  
@HWI-EAS443:3:13:1393:1531#0/1  
TGCTCGTCTCTCCACTTACTATCAACTGGATCAATCTCC  
+HWI-EAS443:3:13:1393:1531#0/1  
aaaaab`\_b`a\_\_\_\_`]aaa`aaa` `aa`]\_` `U`\_aUaW\_  
@HWI-EAS443:3:15:1201:1011#0/1  
ACTTACTATCAACTGGATCAATCTCCTGGTTGCCTTTCTG  
+HWI-EAS443:3:15:1201:1011#0/1  
abbbbabbaabbabbaaa\_`babaaaabaaaa\_\_`a\_a\_\_





+HWI-EAS443:3:23:861:1915#0/1  
`aba`aaa\_a`aaaa`\_`a`^`^`\_`\_`ZU`\_]`^`^`\_  
@HWI-EAS443:3:24:345:526#0/1  
AGGAGATTGATCCAGTTGATAGTAAGTGGGAGAGACGAGC  
+HWI-EAS443:3:24:345:526#0/1  
abaa\_abb\_a`a\_Y\_N¥baa`aN``a^a`b\_^]aa`V\_`^  
@HWI-EAS443:3:25:856:1431#0/1  
AGGAGATTGATCCAGTTGATAGTAAGTGGGAGAGACGAGC  
+HWI-EAS443:3:25:856:1431#0/1  
a\_Y][[^aaZ`a¥\_Z`a]a\_]Q`]aT`TT`\_`\_`[^\_`¥  
@HWI-EAS443:3:27:994:689#0/1  
AGAGTTGGTGCATAGGGTTCAGTCGCTGGTTTGCCTATT  
+HWI-EAS443:3:27:994:689#0/1  
`¥[b`b`a]bba]T\_bb[baab\_\_b\_ab\_V\_a\_S\_Y`aaa  
@HWI-EAS443:3:2:508:515#0/1  
ACTTTGTCAATAGGGCAAACCAGCGACTGAACCCTATGCA  
+HWI-EAS443:3:2:508:515#0/1  
aa\_aaa\_[a\_]aa\_a\_]a`Z[\_`¥\_\_W¥`^YTTZ¥`^aW]  
@HWI-EAS443:3:30:806:475#0/1  
CTCGTCTCTCCACTTACTATCAACTGGATCAATCTCCTG  
+HWI-EAS443:3:30:806:475#0/1  
a]aaa`ba^aa]X^\_aa`a\_```a^`aaa`T^a`^]¥]XV  
@HWI-EAS443:3:30:845:1531#0/1  
CAAGAGTTGGTGCATAGGGTTCAGTCGCTGGTTTGCCCTA  
+HWI-EAS443:3:30:845:1531#0/1  
aZV^[¥H`aa]^ba[POX][\_aaZM`````\_VU[\_XX\_] ]]  
@HWI-EAS443:3:31:902:666#0/1  
CATAGGGTTCAGTCGCTGGTTTGCCTATTGACAAAGTTC  
+HWI-EAS443:3:31:902:666#0/1  
a`aW¥\_b\_bbab\_bbab^a`bba`ab`])`a]`aaaaX[]T  
@HWI-EAS443:3:32:1159:1516#0/1  
GCATAGGGTTCAGTCGCTGGTTTGCCTATTGACAAAGTT  
+HWI-EAS443:3:32:1159:1516#0/1  
a`]ba^ba[abab``a`aaU¥`bY\_¥aa`^a\_`Za]a]\_a  
@HWI-EAS443:3:32:790:349#0/1  
TCTGAACCTTTGTCAATAGGGCAAACCAGCGACTGAACCCT  
+HWI-EAS443:3:32:790:349#0/1  
aab^aaaaaa`\_\_aa\_^\_aaa`a`\_a`\_`aU^^a\_`Z\_\_  
@HWI-EAS443:3:33:1109:1009#0/1  
GCATAGGGTTCAGTCGCTGGTTTGCCTATTGACAAAGTT  
+HWI-EAS443:3:33:1109:1009#0/1  
a\_X^`ba¥HYa\_a\_[]`¥aZT`[V¥aW``\_`¥T¥¥^¥YW¥  
@HWI-EAS443:3:36:1063:943#0/1  
ATAGGGTTCAGTCGCTGGTTTGCCTATTGACAAAGTTCA  
+HWI-EAS443:3:36:1063:943#0/1  
`ba\_baXbb`baaaaab`P]a¥\_a`\_a\_aY[Y\_\_a\_U^VU  
@HWI-EAS443:3:37:808:598#0/1  
GAGTTGGTGCATAGGGTTCAGTCGCTGGTTTGCCTATTG  
+HWI-EAS443:3:37:808:598#0/1  
aaa[X\_^[¥[\_aVW[\_P¥¥Z^Y```\_`a[DLSR\_`¥QRV¥¥

@HWI-EAS443:3:39:116:1279#0/1  
ACTGAACCCTATGCACCAACTCTTGAGGCATTTCCAAAAA  
+HWI-EAS443:3:39:116:1279#0/1  
S\_¥Sa`bbb\_\_W]aaaba`\_`a]aa¥^\_[`¥aab``¥a\_  
@HWI-EAS443:3:39:151:247#0/1  
GCATAGGGTTCAGTCGCTGGTTTGGCCCTATTGACAAAGTT  
+HWI-EAS443:3:39:151:247#0/1  
aaa^UX]ZNW]aaUZaa`]QQXU^]Z`R]S¥NRYPMWWJM  
@HWI-EAS443:3:3:885:1809#0/1  
AGCGACTGAACCCTATGCACCAACTCTTGAGGCATTTCCA  
+HWI-EAS443:3:3:885:1809#0/1  
aa\_aaUa`a\_^¥Va^\_\_\_a]V`a^¥^\_\_\_]`^\_R`]\_SH[\_  
@HWI-EAS443:3:40:731:192#0/1  
GATAGTAAGTGGGAGAGACGAGCAGTCAATTGCTGAGGCA  
+HWI-EAS443:3:40:731:192#0/1  
a`\_`a^\_`aXaa`U^V¥]^W]]]YQT^OYY]VYYYYVXV  
@HWI-EAS443:3:42:362:205#0/1  
GTTGGTGCATAGGGTTCAGTCGCTGGTTTGGCCCTATTGAC  
+HWI-EAS443:3:42:362:205#0/1  
a\_aaa¥a\_a`Waa\_U\_^¥`^\_`]`a^U^]U[W^\_¥^\_¥^^  
@HWI-EAS443:3:42:88:2002#0/1  
CAAGAGTTGGTGCATAGGGTTCAGTCGCTGGTTTGGCCCTA  
+HWI-EAS443:3:42:88:2002#0/1  
`a\_^aVWQ¥W¥W\_¥¥\_\_PXZW\_¥WWZSYH¥PLVR^]`  
@HWI-EAS443:3:42:969:1332#0/1  
CTCAAGAGTTGGTGCATAGGGTTCAGTCGCTGGTTTGGCC  
+HWI-EAS443:3:42:969:1332#0/1  
]`bbZbZ\_W]\_\_N^`\_`a[Q`RZ¥a\_YW`a^`\_N\_UYG^U  
@HWI-EAS443:3:43:1430:110#0/1  
TCTCCCACTTACTATCAACTGGATCAATCTCCTGGTTGCC  
+HWI-EAS443:3:43:1430:110#0/1  
aab`\_`a\_\_\_X\_[\_^S\_\_G\_\_XY[XZ[¥MZVVS^VWY]WY  
@HWI-EAS443:3:44:1533:1673#0/1  
CTCAAGAGTTGGTGCATAGGGTTCAGTCGCTGGTTTGGCC  
+HWI-EAS443:3:44:1533:1673#0/1  
aaa^`[W\_Z`\_`aTTT^¥[¥\_`Z¥XTRP^^^`\_RIPZ]TQN  
@HWI-EAS443:3:44:779:969#0/1  
CTGCTCGTCTCTCCCACTTACTATCAACTGGATCAATCTC  
+HWI-EAS443:3:44:779:969#0/1  
abbababaababaaa\_^aaaaaaaaaaaaaaaaa\_`[a^a`  
@HWI-EAS443:3:45:1039:778#0/1  
CTTTTTGAAATGCCTCAAGAGTTGGTGCATAGGGTTCAG  
+HWI-EAS443:3:45:1039:778#0/1  
abb`\_\_`b]]aabaa\_]¥b\_b`aaaU\_`Y[[]aaaV^W`a  
@HWI-EAS443:3:45:1680:270#0/1  
TTGGTGCATAGGGTTCAGTCGCTGGTTTGGCCCTATTGACA  
+HWI-EAS443:3:45:1680:270#0/1  
`aa`P\_`\_a¥`[aG[Raa¥TX`\_`]R\_^TPYRRVX[UV^  
@HWI-EAS443:3:45:1758:217#0/1  
AGTTGGTGCATAGGGTTCAGTCGCTGGTTTGGCCCTATTGA

+HWI-EAS443:3:45:1758:217#0/1  
`baaabab`aaabbaUaa\_a`a`aaZ`ZGY¥`\_\_a`Y  
@HWI-EAS443:3:45:728:1596#0/1  
AGGGTTCAGTCGCTGGTTTGGCCCTATTGACAAAGTTCAGA  
+HWI-EAS443:3:45:728:1596#0/1  
a`a`]aabaa[aaa]`W`]\_\_aaaaa[aaa`]`^¥`  
@HWI-EAS443:3:46:912:1919#0/1  
ACTTACTATCAACTGGATCAATCTCCTGGTTGCCTTTCTG  
+HWI-EAS443:3:46:912:1919#0/1  
aabaaabbaaaa\_aaaa`aa`\_a`a\_a`\_`^X`\_`^^  
@HWI-EAS443:3:48:1760:880#0/1  
ACTTTGTCAATAGGGCAAACCAGCGACTGAACCCTATGCA  
+HWI-EAS443:3:48:1760:880#0/1  
aabaabaaaaaaaa]aababa`a`\_`\_a`aa\_[`\_\_aa\_\_  
@HWI-EAS443:3:48:563:1151#0/1  
ATGCCTCAAGAGTTGGTGCATAGGGTTCAGTCGCTGGTTT  
+HWI-EAS443:3:48:563:1151#0/1  
aaaa[aaa\_b\_aZa`\_^b`\_\_aaaaUaU`\_^\_\_\_\_`\_]`  
@HWI-EAS443:3:50:268:1643#0/1  
CAACCAGGAGATTGATCCAGTTGATAGTAAGTGGGAGAGA  
+HWI-EAS443:3:50:268:1643#0/1  
`bbaSabb[UY````¥Yaabab`abbTZaaUb^TYb``b  
@HWI-EAS443:3:51:261:197#0/1  
GGAGATTGATCCAGTTGATAGTAAGTGGGAGAGACGAGCA  
+HWI-EAS443:3:51:261:197#0/1  
aba``bbbaa`^baabaa`aW`\_a^ab^[a¥a¥^a`^V\_  
@HWI-EAS443:3:54:1097:904#0/1  
ATGCCTCAAGAGTTGGTGCATAGGGTTCAGTCGCTGGTTT  
+HWI-EAS443:3:54:1097:904#0/1  
a`W`^`aa\_aa]aaaTa`\_a`aaU`\_`aNP^`\_`\_¥^^  
@HWI-EAS443:3:54:248:385#0/1  
CAGGAGATTGATCCAGTTGATAGTAAGTGGGAGAGACGAG  
+HWI-EAS443:3:54:248:385#0/1  
\_]`a¥W^^a`bb^\_a\_\_baa`\_UY`^0^aWT¥ZU¥]`RT  
@HWI-EAS443:3:54:696:1384#0/1  
GCGACTGAACCCTATGCACCAACTCTTGAGGCATTTCCAA  
+HWI-EAS443:3:54:696:1384#0/1  
aaaaababaaa`abab`aa`aaa\_aaaaa`aa`\_¥^a`  
@HWI-EAS443:3:55:259:1196#0/1  
GAGTTGGTGCATAGGGTTCAGTCGCTGGTTTGGCCCTATTG  
+HWI-EAS443:3:55:259:1196#0/1  
abb`ba^`\_bbaaabUaaba`ababab^aaaaaabaaa  
@HWI-EAS443:3:55:844:1736#0/1  
AAATGCCTCAAGAGTTGGTGCATAGGGTTCAGTCGCTGGT  
+HWI-EAS443:3:55:844:1736#0/1  
a¥aUYa`\_Wa`\_ZZU]a\_W\_]\_\_\_\_\_QVQ[[X`]^]¥X  
@HWI-EAS443:3:56:1043:1463#0/1  
GGCAACCAGGAGATTGATCCAGTTGATAGTAAGTGGGAGA  
+HWI-EAS443:3:56:1043:1463#0/1  
aa^``¥[\_`¥S[Z^\_a¥^UW¥\_U]`¥¥]]W^V¥Q\_Z^¥\_W

@HWI-EAS443:3:56:1444:403#0/1  
TGAACCTTTGTCAATAGGGCAAACCAGCGACTGAACCCTAT  
+HWI-EAS443:3:56:1444:403#0/1  
aa\_`^aaaaa]aa`a`[aU\_\_\_Y]``V`\_^aa`\_]UW[`^  
@HWI-EAS443:3:56:147:1273#0/1  
AATGCCTCAAGAGTTGGTGCATAGGGTTCAGTCGCTGGTT  
+HWI-EAS443:3:56:147:1273#0/1  
aa````\_`aaa`X`^V`X]^[[Z\_Y`]] [X\_^VZ`QU^  
@HWI-EAS443:3:56:1759:1539#0/1  
CAATTATTGCCTCAGCAATTGACTGCTCGTCTCTCCCACT  
+HWI-EAS443:3:56:1759:1539#0/1  
Y^[¥``babJXaU[T¥R\_`¥baZXVPX0`VHR\_TO¥\_ZQ\_  
@HWI-EAS443:3:56:261:865#0/1  
CAACCAGGAGATTGATCCAGTTGATAGTAAGTGGGAGAGA  
+HWI-EAS443:3:56:261:865#0/1  
abaabbbbababbbbaaaabaab`a`a¥a`aZaa¥\_aaa\_  
@HWI-EAS443:3:57:1397:638#0/1  
AACCAGGAGATTGATCCAGTTGATAGTAAGTGGGAGAGAC  
+HWI-EAS443:3:57:1397:638#0/1  
Vaa````^bba]\_]aaXaaabb`\_a\_a`b[bba^P`aa\_  
@HWI-EAS443:3:57:1620:249#0/1  
TCTGAACCTTTGTCAATAGGGCAAACCAGCGACTGAACCCT  
+HWI-EAS443:3:57:1620:249#0/1  
a¥bb`a`baab[Raaaa`a\_`a\_[]`UT^[]`^^RT[\_  
@HWI-EAS443:3:57:625:43#0/1  
TTTGTCAATAGGGCAAACCAGCGACTGAACCCTATGCACC  
+HWI-EAS443:3:57:625:43#0/1  
a][`L¥TFZ]Ya\_YS¥PW[SVZ[YU[NNTS ZTUTWUUVNV  
@HWI-EAS443:3:58:1107:413#0/1  
GCAATTGACTGCTCGTCTCTCCCACTTACTATCAACTGGA  
+HWI-EAS443:3:58:1107:413#0/1  
aaaaaaaa`ab]`aaa`aa\_a\_aZYa`T^a^`Y¥]^`^a^  
@HWI-EAS443:3:58:905:588#0/1  
GGTGCATAGGGTTCAGTCGCTGGTTTGCCTATTGACAAA  
+HWI-EAS443:3:58:905:588#0/1  
aa\_\_``bbbb`Uaaaa^b^`b```ab[\_\_\_aaaa\_K\_a`\_a  
@HWI-EAS443:3:59:1362:1294#0/1  
GAAAGGCAACCAGGAGATTGATCCAGTTGATAGTAAGTGG  
+HWI-EAS443:3:59:1362:1294#0/1  
`bb^`abab^``baab\_aaa`aba[b`ba`a^`\_\_T]R`]  
@HWI-EAS443:3:59:280:1045#0/1  
AGGCAACCAGGAGATTGATCCAGTTGATAGTAAGTGGGAG  
+HWI-EAS443:3:59:280:1045#0/1  
VX^^`bbb`^^`^[\`¥a\_W\_N\_`]aa]aWT\_]aLP]aa[  
@HWI-EAS443:3:61:1001:91#0/1  
TGAAGTCTCGTCTCTCCCACTTACTATCAACTGGATCAAT  
+HWI-EAS443:3:61:1001:91#0/1  
aba`aa`a\_baaa\_\_\_\_\_aa`\_a]`^^\_Y\_]\_Y^VYY^  
@HWI-EAS443:3:61:1489:1305#0/1  
CACTTACTATCAACTGGATCAATCTCCTGGTTGCCTTTCT

+HWI-EAS443:3:61:1489:1305#0/1  
`bbbbbbbbbbbabbbbbb\_abaababa]a`]^a\_aX^  
@HWI-EAS443:3:61:769:992#0/1  
TTTGGAAATGCCTCAAGAGTTGGTGCATAGGGTTCAGTCG  
+HWI-EAS443:3:61:769:992#0/1  
¥b\_`W`b`]Z\_`V[^OZYZH]^YU\_¥X]``\_]QW\_[XUYV  
@HWI-EAS443:3:62:46:1608#0/1  
GTTGGTGCATAGGGTTCAGTCGCTGGTTTGCCTATTGAC  
+HWI-EAS443:3:62:46:1608#0/1  
a`a]a\_abaaaa`^aaaa¥a`a\_`^V^`\_`^`¥`\_`^¥Z  
@HWI-EAS443:3:62:475:773#0/1  
TAAGTGGGAGAGACGAGCAGTCAATTGCTGAGGCAATAAT  
+HWI-EAS443:3:62:475:773#0/1  
aaV¥R]`^`aa^[a`]Y\_\_]¥`bSaUXT]]Y\_¥`a`aZV\_  
@HWI-EAS443:3:63:1439:182#0/1  
CTCAAGAGTTGGTGCATAGGGTTCAGTCGCTGGTTTGGCC  
+HWI-EAS443:3:63:1439:182#0/1  
U\_[[`\_a\_s\_a[S[\_0\_¥b]b`\_[[^UGYHXb]MY¥VNRI  
@HWI-EAS443:3:63:186:1168#0/1  
GTTGGTGCATAGGGTTCAGTCGCTGGTTTGCCTATTGAC  
+HWI-EAS443:3:63:186:1168#0/1  
Ua\_[^`]H[^`^]aaaaY`ba`^]Z\_aI[^¥^\_¥XIMX  
@HWI-EAS443:3:63:368:1452#0/1  
TTTTGAAATGCCTCAAGAGTTGGTGCATAGGGTTCAGTC  
+HWI-EAS443:3:63:368:1452#0/1  
aabaaXVaab\_`^^`¥\_a¥]\_`\_]aa\_\_`WX\_R\_Z¥RJS  
@HWI-EAS443:3:63:496:1412#0/1  
AGAGTTGGTGCATAGGGTTCAGTCGCTGGTTTGCCTATT  
+HWI-EAS443:3:63:496:1412#0/1  
a]]U`^a`Ra`Y^\_]`]V^^]`Z^Z\_`aZVXZNY`X^[Z\_  
@HWI-EAS443:3:66:1093:2021#0/1  
ATAGGGTTCAGTCGCTGGTTTGCCTATTGACAAAGTTCA  
+HWI-EAS443:3:66:1093:2021#0/1  
`aZ`Y¥G[bb[]b`\_]SVF]ZS\_^^aa` `a`[baaUS^]¥  
@HWI-EAS443:3:67:118:1333#0/1  
TTGATAGTAAGTGGGAGAGACGAGCAGTCAATTGCTGAGG  
+HWI-EAS443:3:67:118:1333#0/1  
aN^a`\_a^]Y\_Y^aa`aa\_[a\_`^Va^\_Ya]aW^]a^U`W^  
@HWI-EAS443:3:67:1746:101#0/1  
ACTTTGTCAATAGGGCAAACCAGCGACTGAACCCTATGCA  
+HWI-EAS443:3:67:1746:101#0/1  
aY[`ZXaaYab^[`\_X`a\_P¥RaX` `¥V^¥UUN^U[QJX  
@HWI-EAS443:3:68:784:767#0/1  
AAGGCAACCAGGAGATTGATCCAGTTGATAGTAAGTGGGA  
+HWI-EAS443:3:68:784:767#0/1  
aa\_]`a\_aa]Y]¥a\_aa`\_a`\_V]\_ab`a`aX`Y]X\_\_\_\_`  
@HWI-EAS443:3:69:256:18#0/1  
CTGAACCTTTGTCAATAGGGCAAACCAGCGACTGAACCCTA  
+HWI-EAS443:3:69:256:18#0/1  
abb^S`a` `baaa[\_aabaaa\_]X` `a`¥[^`V`]S]\_R

@HWI-EAS443:3:69:348:195#0/1  
ACCCTATGCACCAACTCTTGAGGCATTTCCAAAAAGATGC  
+HWI-EAS443:3:69:348:195#0/1  
a\_aa¥^\_a\_YZXZS¥\_\_^¥¥^`\_]\_][WWY]WY^ZX  
@HWI-EAS443:3:69:772:568#0/1  
ATAGGGTTCAGTCGCTGGTTTGCCTATTGACAAAGTTCA  
+HWI-EAS443:3:69:772:568#0/1  
`\_V[ab]ZX^^a]ZN[YUW\_]ZX\_]RQ\_]P¥]a\_WWI[[  
@HWI-EAS443:3:6:1514:1432#0/1  
CACAATTATTGCCTCAGCAATTGACTGCTCGTCTCTCCCA  
+HWI-EAS443:3:6:1514:1432#0/1  
`¥bbbbbbbbbbbaab^ba\_ab]Wbbbb`a^babb]\_a  
@HWI-EAS443:3:6:250:193#0/1  
GCCTCAGCAATTGACTGCTCGTCTCTCCCACTTACTATCA  
+HWI-EAS443:3:6:250:193#0/1  
`aaaaaaa\_]RX\_\_a^ZUa][¥WZ]\_V^U`^^¥¥^^BB  
@HWI-EAS443:3:70:673:520#0/1  
GAGTTGGTGCATAGGGTTCAGTCGCTGGTTTGCCTATTG  
+HWI-EAS443:3:70:673:520#0/1  
a\_ba`b^`aaabbaaa\_aabaaaaabaZaa`Zaaaa]U  
@HWI-EAS443:3:70:926:1174#0/1  
CAAGAGTTGGTGCATAGGGTTCAGTCGCTGGTTTGCCTA  
+HWI-EAS443:3:70:926:1174#0/1  
aa`baaba`\_aa\_baaba¥bbba\_b`aaaaRaa]\_aaa\_  
@HWI-EAS443:3:72:635:1164#0/1  
TGAACCCTATGCACCAACTCTTGAGGCATTTCCAAAAAGA  
+HWI-EAS443:3:72:635:1164#0/1  
^bbba[Zba]bb\_\_\_ZaXaUab^ab`X¥\_W¥``¥`ab¥aa  
@HWI-EAS443:3:73:1228:1356#0/1  
CAAGAGTTGGTGCATAGGGTTCAGTCGCTGGTTTGCCTA  
+HWI-EAS443:3:73:1228:1356#0/1  
a[ba`^aa]¥`abaab[`Z[]a^[^`aaa`a`aaRX`¥aa  
@HWI-EAS443:3:75:58:780#0/1  
CAATTATTGCCTCAGCAATTGACTGCTCGTCTCTCCCACT  
+HWI-EAS443:3:75:58:780#0/1  
aaaa`U`aabaaaa]a`a`a`a`\_`\_`a^`\_`^`\_`^X  
@HWI-EAS443:3:75:892:110#0/1  
CTTTTTGAAATGCCTCAAGAGTTGGTGCATAGGGTTCAG  
+HWI-EAS443:3:75:892:110#0/1  
a`a¥`^ab`ba[\_bKa`aab^aba^b\_aaU`ba\_aZ\_]`  
@HWI-EAS443:3:76:489:100#0/1  
AGGAGATTGATCCAGTTGATAGTAAGTGGGAGAGACGAGC  
+HWI-EAS443:3:76:489:100#0/1  
a\_aIaSVVR\_\_LYV`]ZSU[PSY^QZPW\_^UZLQYZZUNN  
@HWI-EAS443:3:79:1205:1535#0/1  
CAACCAGGAGATTGATCCAGTTGATAGTAAGTGGGAGAGA  
+HWI-EAS443:3:79:1205:1535#0/1  
a]baM`ababV¥R\_Ub[`\_aabUa]a[ba`S\_ab0`¥]P  
@HWI-EAS443:3:7:1206:216#0/1  
CTCAAGAGTTGGTGCATAGGGTTCAGTCGCTGGTTTGCCT

+HWI-EAS443:3:7:1206:216#0/1  
aaWS^b[aRaba\_\_`\_aaa\_]Na\_]`Y]b\_\_a`NT]\_XVW  
@HWI-EAS443:3:81:464:294#0/1  
TCTTTTTGGAAATGCCTCAAGAGTTGGTGCATAGGGTTCA  
+HWI-EAS443:3:81:464:294#0/1  
aaaababaaaaaaa`\_V^\_a^aa\_X`Z]^``\_W]\_\_  
@HWI-EAS443:3:84:850:1645#0/1  
TCTGAACCTTTGTCAATAGGGCAAACCAGCGACTGAACCCT  
+HWI-EAS443:3:84:850:1645#0/1  
aa`^`b`^a\_]\_a``\_a\_[a^`aaa`\_P\_aaa\_\_aa``^^  
@HWI-EAS443:3:85:1119:915#0/1  
AGCGACTGAACCCTATGCACCAACTCTTGAGGCATTTCCA  
+HWI-EAS443:3:85:1119:915#0/1  
abaaa^¥^\_b`aa\_aaab`b`a¥a^aa\_a``a^aaa\_a^  
@HWI-EAS443:3:85:529:2034#0/1  
CAATTATTGCCTCAGCAATTGACTGCTCGTCTCTCCCACT  
+HWI-EAS443:3:85:529:2034#0/1  
^`XZ\_abX^^`]aa^\_`^[]]^`X`]N[W\_\_aa]`¥Y  
@HWI-EAS443:3:8:935:920#0/1  
ATGCCTCAAGAGTTGGTGCATAGGGTTCAGTCGCTGGTTT  
+HWI-EAS443:3:8:935:920#0/1  
WV\_[^^a`Q¥^TaaUZZ]Xa[]V]ZNU\_ab¥a\_Q]RWQ[^  
@HWI-EAS443:3:90:226:2041#0/1  
CGTCTCTCCCACTTACTATCAACTGGATCAATCTCCTGGT  
+HWI-EAS443:3:90:226:2041#0/1  
¥]\_baab`^^[¥`]a`ba\_¥\_\_`aXa`U^b``a``\_YVP  
@HWI-EAS443:3:91:1787:439#0/1  
CAAGAGTTGGTGCATAGGGTTCAGTCGCTGGTTTGCCTA  
+HWI-EAS443:3:91:1787:439#0/1  
abbbVbababab`bbbaba]babba\_a\_a\_]X`a[X`\_aa  
@HWI-EAS443:3:91:419:446#0/1  
CAATTATTGCCTCAGCAATTGACTGCTCGTCTCTCCCACT  
+HWI-EAS443:3:91:419:446#0/1  
abbbbabbbbbbbbabbbbbbbbaa`baaaa`a\_``aa  
@HWI-EAS443:3:93:1130:1837#0/1  
GGTGCATAGGGTTCAGTCGCTGGTTTGCCTATTGACAAA  
+HWI-EAS443:3:93:1130:1837#0/1  
a`W`Yaa`aa¥R]S`a]`U^aaT\_\_¥¥VN[\_\_\_aYP[\_`  
@HWI-EAS443:3:93:1280:1185#0/1  
CTGAACCTTTGTCAATAGGGCAAACCAGCGACTGAACCCTA  
+HWI-EAS443:3:93:1280:1185#0/1  
aaa`X]]¥^`a`\_`^b¥\_aS^W¥^SW¥S]¥Qaa`PUM^\_  
@HWI-EAS443:3:93:1789:121#0/1  
AGTTGGTGCATAGGGTTCAGTCGCTGGTTTGCCTATTGA  
+HWI-EAS443:3:93:1789:121#0/1  
a`abaa\_aaaaaaaaa¥a^`b``a\_`aa^`\_`^`X`^^a^\_  
@HWI-EAS443:3:94:1288:910#0/1  
GCATAGGGTTCAGTCGCTGGTTTGCCTATTGACAAAGTT  
+HWI-EAS443:3:94:1288:910#0/1  
a\_¥`X^^\_N]\_[\_]V`Uaa`V`]¥WQZWS^¥¥¥N[]¥YW\_



@HWI-EAS443:3:97:1109:1717#0/1  
GATTGATCCAGTTGATAGTAAGTGGGAGAGACGAGCAGTC  
+HWI-EAS443:3:97:1109:1717#0/1  
^bbbbbb¥^`abaabaa\_aaaUaaa]`aaa\_aa\_\_`][[  
@HWI-EAS443:3:97:335:613#0/1  
CAACCAGGAGATTGATCCAGTTGATAGTAAGTGGGAGAGA  
+HWI-EAS443:3:97:335:613#0/1  
a]\_a`ab\_H\_Zaa¥^`[\_aX\_bV\_]\_Y\_\_aV\_`SW\_V^V  
@HWI-EAS443:3:97:651:1937#0/1  
TCTGAACCTTTGTCAATAGGGCAAACCAGCGACTGAACCCT  
+HWI-EAS443:3:97:651:1937#0/1  
aaaa`b¥`baaaa`\_\_aaaZaaba\_aaa]`[\_W]`^`\_Q¥]  
@HWI-EAS443:3:97:865:1292#0/1  
AGTTGGTGCATAGGGTTCAGTCGCTGGTTTGCCTATTGA  
+HWI-EAS443:3:97:865:1292#0/1  
`abbbbaaaba`]bb`bbbaX`a^b\_XJabb^^aaaaaa`  
@HWI-EAS443:3:98:1108:117#0/1  
CTTTTTGGAAATGCCTCAAGAGTTGGTGCATAGGGTTCAG  
+HWI-EAS443:3:98:1108:117#0/1  
a`abbbbbbbbbb`bb`aaaababba^b`bbaba^NY`b\_  
@HWI-EAS443:3:99:913:236#0/1  
CAATTATTGCCTCAGCAATTGACTGCTCGTCTCTCCCACT  
+HWI-EAS443:3:99:913:236#0/1  
¥\_ba\_\_aa\_`[\_¥S\_aab\_\_[ab`^`¥bbbaabXab\_b]Qa  
@HWI-EAS443:3:6:51:1575#0/1  
TGTGCCGATTTCTTCAATCAACCACCTTATTCCTCAAA  
+HWI-EAS443:3:6:51:1575#0/1  
¥aaaa\_Z`bbba`bb`\_b\_LZa^S^XX\_¥\_a]`¥`Y\_]LB  
@HWI-EAS443:3:98:651:1488#0/1  
CGCATTCTTCAATCAACCACCTTATTCCTCAAATTTCT  
+HWI-EAS443:3:98:651:1488#0/1  
aaaT^abaaa\_a`aa`\_V¥`Y\_aYaaaa][a\_aX]\_a\_Z^  
@HWI-EAS443:3:90:97:147#0/1  
CCCAGTGATTGTGAAAGAAATCTCTGTGTCTTGTGAGTTA  
+HWI-EAS443:3:90:97:147#0/1  
a`\_YWZ]WP]¥T¥YXX[[ZUPVZZUZWQRTBBBBBBBBBB  
@HWI-EAS443:3:92:1680:100#0/1  
CTCCTGGTTGCCTTTCTGAGAATAGCTGTTGCTCTTTTTC  
+HWI-EAS443:3:92:1680:100#0/1  
`]PYba\_^bb]a`^]`\_abaaaa\_YRP^BBBBBBBBBB  
@HWI-EAS443:3:69:353:1477#0/1  
AAAAGAGCAACAGCTATTCTCAGAAAGCAACCAGGAGAT  
+HWI-EAS443:3:69:353:1477#0/1  
]AZL^¥aa^`^^aY^T^a^^Q[[`^UF`]]`YWRPSKX¥  
@HWI-EAS443:3:21:274:1342#0/1  
AAAAGCTTCTACAAAAATTTAATATGGCTAAGTAAAAAAG  
+HWI-EAS443:3:21:274:1342#0/1  
P[`a]W`b`b\_WW`a\_b\_¥^`¥aa]aab`\_HHS`]b`abM  
@HWI-EAS443:3:56:661:1228#0/1  
GAAGCAATCTGGACCCCTCTTGTGGAAAGCTTCCCTCA

+HWI-EAS443:3:56:661:1228#0/1  
^aaaaabbaaaY`a`Ya`\_P[X^\_`\_^\_^Z`\_`\_  
@HWI-EAS443:3:40:933:1826#0/1  
GGGCTATTAGTATCAGGTGGGGACCAAACCTTATACAATA  
+HWI-EAS443:3:40:933:1826#0/1  
a)V\_Q\_NTW`X]^]NLSLTRBBBBBBBBBBBBBBBBBBB  
@HWI-EAS443:3:11:1220:1202#0/1  
GGGGGACCAAACCTTATACAATATACGGAATCTTCACATTC  
+HWI-EAS443:3:11:1220:1202#0/1  
a`\_aZ`a`[`aa^\_a`\_a`a^\_^`W`X]^`^Z  
@HWI-EAS443:3:7:141:984#0/1  
GGGACGTAGTGTGGTGAAACGAAACGGGACTCTAG  
+HWI-EAS443:3:7:141:984#0/1  
`aa\_ab`b\_b^`baX\_aRXU`aVZ¥\_\_\_[^a\_]T\_YZV  
@HWI-EAS443:3:28:263:1224#0/1  
TGGGCAAGGGGACGTAGTGTGGTGATGAAACGAAACGG  
+HWI-EAS443:3:28:263:1224#0/1  
[\_]^X`[\_`V\_\_Ya\_aaaHUZZUZV\_R`[[VZ[`  
@HWI-EAS443:3:46:770:912#0/1  
AGCTAATGTGCTAATTGGGCAAGGGGACGTAGTGTGGTG  
+HWI-EAS443:3:46:770:912#0/1  
ab`aY`bb\_a\_a¥aaaaba]]¥`^^a^aaY\_a^aVY¥aN¥  
@HWI-EAS443:3:63:963:1464#0/1  
TGCTAATTGGGCAAGGGGACGTAGTGTGGTGATGAAACG  
+HWI-EAS443:3:63:963:1464#0/1  
]UbM\_S\_\_WRLY\_^\_¥SabaP]]N\_aW¥WTHQ[X\_\_\_]W  
@HWI-EAS443:3:99:896:286#0/1  
GTCCCGTTTTCGTTTCATCACCACACTACGTCCCCTTGC  
+HWI-EAS443:3:99:896:286#0/1  
a`aa\_\_Raa]Ra\_\_a`\_Y`aZ``Za\_[a`\_]`]QL¥]ZP  
@HWI-EAS443:3:34:1269:1797#0/1  
CACGGCCGTCCGAATTCTTTTGGTCGCTGTCTGGCTGTCA  
+HWI-EAS443:3:34:1269:1797#0/1  
aZFSab`YQab`a`Y]aa`\_aY¥UR``ZT]V\_]BBBBB  
@HWI-EAS443:3:96:699:1225#0/1  
CTCCTCTTGTGGAAAGCTTTCTTCTTGAATCACTTTCTT  
+HWI-EAS443:3:96:699:1225#0/1  
a\_aa^`baa\_````]`\_`a^W``aa`]^`\_a]`\_```a  
@HWI-EAS443:3:89:613:1690#0/1  
CTTGAAAAAAGCTGTGATGAGAATGGGAGACCTTCACTACC  
+HWI-EAS443:3:89:613:1690#0/1  
abbbaabab^aab\_aaaaabaaaa\_\_aaa`\_a^aa^aa\_  
@HWI-EAS443:3:11:911:71#0/1  
AGCTTCTACAAAAATTAATATGGCTAGTTAAAAAAGAAA  
+HWI-EAS443:3:11:911:71#0/1  
a`^¥W\_¥WUa^^^X]W`Za`BBBBBBBBBBBBBBBBBB  
@HWI-EAS443:3:1:262:667#0/1  
GAGCTTTGGGTATGAATATTCTTTTTTAAGCATATT  
+HWI-EAS443:3:1:262:667#0/1  
a\_a[Y`aa\_QS¥^aYVZU[¥N]\_]\_\_`^Z[^]WPOS\_¥^B

@HWI-EAS443:3:49:578:981#0/1  
GCTTCTACAAAAATTTAATATGGCTAATTAAGAAAA  
+HWI-EAS443:3:49:578:981#0/1  
`a`a]bb\_a`^aaabb[`a¥\_a][a\_JKTJJY\_`BBBBB  
@HWI-EAS443:3:15:1305:797#0/1  
CAGGGCTAGTTAAAAAAGAAAATTCATACCCAAAGCTCAG  
+HWI-EAS443:3:15:1305:797#0/1  
abbbbbbb^babbbbbbbbabbbabbbbaaaaaaba`b  
@HWI-EAS443:3:21:1122:335#0/1  
GGCTTTTCTTTTTTAACTAGCCATATTAATTTTTGTAGA  
+HWI-EAS443:3:21:1122:335#0/1  
^RS`[]a\_`[a[ZUG`a¥WR\_NYZXP`VL¥`NT[[¥SYB  
@HWI-EAS443:3:30:969:249#0/1  
CGGGTATGAATTTTCTTTTTTAACTAGCCATATTAATTT  
+HWI-EAS443:3:30:969:249#0/1  
aa^`U`a]U\_\_¥Z``¥`\_`b\_¥Zaab`\_Vaa`]aaY``a  
@HWI-EAS443:3:75:1244:1108#0/1  
GGGGTATGAATTTTCTTTTTTAACTAGCCATATTAATTT  
+HWI-EAS443:3:75:1244:1108#0/1  
abab\_bbb`\_bbbb`bbbaaaaaa\_`aa`bb`a`bab  
@HWI-EAS443:3:11:399:778#0/1  
GGCTAGTTAAAAAAGAAAATTCATACCCAAAGCTCAGCAA  
+HWI-EAS443:3:11:399:778#0/1  
abbaab`aaaab`aaaX^T^`ab[a[\_a`a^`\_^`\_`Y`\_  
@HWI-EAS443:3:16:703:623#0/1  
TGGCTAGTTAAAAAAGAAAATTCATACCCAAAGCTCAGCA  
+HWI-EAS443:3:16:703:623#0/1  
\_a^]a^]ZWa^`^[a]]`¥SZ`a\_a`a\_a`W``PVSZ]U^  
@HWI-EAS443:3:21:1335:1131#0/1  
GGCTAGTTAAAAAAGAAAATTCATACCCAAAGCTCAGCAA  
+HWI-EAS443:3:21:1335:1131#0/1  
\_X]HSXP\_YIWQ]O^[V`NUV^¥SY\_YHG¥\_`BBBBBBBB  
@HWI-EAS443:3:26:688:169#0/1  
CATTAATGTAGGATTTGCTGAGCTTTGGGTATGAATTTTC  
+HWI-EAS443:3:26:688:169#0/1  
abbbbbbb\_ba``bbabbbbabbbbb`a\_baba`bbaaa  
@HWI-EAS443:3:27:256:1586#0/1  
TGAATTTTCTTTTTTAACTAGCCATATTAATTTTTGTAG  
+HWI-EAS443:3:27:256:1586#0/1  
a\_\_X\_``abaaaa`aaaaa\_a\_`^`aaaba\_a\_a\_[-¥^\_  
@HWI-EAS443:3:30:490:816#0/1  
CTGAGCTTTGGGTATGAATTTTCTTTTTTAACTAGCCATA  
+HWI-EAS443:3:30:490:816#0/1  
aab`ababaa`^]aa`Xa`aaaaa`aa`aaa\_`\_`\_a^a  
@HWI-EAS443:3:34:896:1485#0/1  
GGCTAGTTAAAAAAGAAAATTCATACCCAAAGCTCAGCAA  
+HWI-EAS443:3:34:896:1485#0/1  
a`aaaaaba]`aba\_aaa\_``aaa\_a`aaaY¥^[\_[]]^  
@HWI-EAS443:3:35:236:505#0/1  
GCTAGTTAAAAAAGAAAATTCATACCCAAAGCTCAGCAAA

+HWI-EAS443:3:35:236:505#0/1  
aa\_a\_[a`^¥RYXZa`TW`XT]\_\_`\_WR¥`]¥X¥^Z\_^  
@HWI-EAS443:3:36:1159:43#0/1  
ATTTGCTGAGCTTTGGGTATGAATTTTCTTTTTTAACTAG  
+HWI-EAS443:3:36:1159:43#0/1  
`aabbaab`b`aabbbb]aab¥Yaaaa^aaaa\_\_aa^a`  
@HWI-EAS443:3:37:1253:1225#0/1  
GGCTAGTTAAAAAAGAAAATTCATACCCAAAGCTCAGCAA  
+HWI-EAS443:3:37:1253:1225#0/1  
^aa`a\_WX^abbb`ZYa`Y^bb¥U` ``VLDHY`\_[X`\_]U  
@HWI-EAS443:3:52:678:948#0/1  
GGCTAGTTAAAAAAGAAAATTCATACCCAAAGCTCAGCAA  
+HWI-EAS443:3:52:678:948#0/1  
aaaa`a`aa`^`a`\_]`a`\_aaa\_a`\_` ``\_\_^^\_a`\_`  
@HWI-EAS443:3:57:228:544#0/1  
GTTAAAAAAGAAAATTCATACCCAAAGCTCAGCAAATCCT  
+HWI-EAS443:3:57:228:544#0/1  
aaaaaaY^aaaZ`¥aaaa`a`^`^`¥^`\_`¥X^`^^\_]`^`^`  
@HWI-EAS443:3:59:1046:191#0/1  
GGCTAGTTAAAAAAGAAAATTCATACCCAAAGCTCAGCAA  
+HWI-EAS443:3:59:1046:191#0/1  
`baaabababaabbaa\_aaab`bbb` `aaa`\_`ZYV`^`^`  
@HWI-EAS443:3:59:1397:88#0/1  
AAGAAAATTCATACCCAAAGCTCAGCAAATCCTACATTAA  
+HWI-EAS443:3:59:1397:88#0/1  
¥b\_b^babaI\_ba^`U`b^b`a\_a`abb\_aPYZ\_]LTa¥  
@HWI-EAS443:3:63:264:450#0/1  
GGCTAGTTAAAAAAGAAAATTCATACCCAAAGCTCAGCAA  
+HWI-EAS443:3:63:264:450#0/1  
``ba]\_\_a` `baaaaaaaaa` `a]a^^¥]T]ZR^[¥[R[V  
@HWI-EAS443:3:64:1431:1300#0/1  
ACCGGGAGACAAAATAACATTTCGAAGCAACTGGAAATCTA  
+HWI-EAS443:3:64:1431:1300#0/1  
aa]]]¥`baaababaaaaaaaa^aa`b\_aa\_]ab`\_`\_aa  
@HWI-EAS443:3:65:1023:1150#0/1  
GAATTTTCTTTTTTAACTAGCCATATTAATTTTGTAGA  
+HWI-EAS443:3:65:1023:1150#0/1  
` `Yabaabbaaaa\_[^`\_ab`\_abaaaa`aaa`a`\_aa¥  
@HWI-EAS443:3:66:452:1883#0/1  
GAATTTTCTTTTTTAACTAGCCATATTAATTTTGTAGA  
+HWI-EAS443:3:66:452:1883#0/1  
a[ `aba\_X\_ab`a`\_U` `WY]^aWaa]¥VW\_TZ` `¥¥TaX`  
@HWI-EAS443:3:66:474:1812#0/1  
GCTTTGGGTATGAATTTTCTTTTTTAACTAGCCATATTAA  
+HWI-EAS443:3:66:474:1812#0/1  
abbabab` `ab^Z\_aababaaaababbaababaaabaab`  
@HWI-EAS443:3:69:1107:508#0/1  
AGAAAATTCATACCCAAAGCTCAGCAAATCCTACATTAAT  
+HWI-EAS443:3:69:1107:508#0/1  
`^`a`Saaaaa`\_`abaa`\_`]a`\_`a^`a`\_`\_`\_]¥a

@HWI-EAS443:3:69:1313:1296#0/1  
GATTTGCTGAGCTTTGGGTATGAATTTTCTTTTTTAACTA  
+HWI-EAS443:3:69:1313:1296#0/1  
aabbbaaaaaabbbba]abaa¥bbbaaaaaaaaaa\_a^  
@HWI-EAS443:3:71:1068:1498#0/1  
AAGAAAATTCATACCCAAAGCTCAGCAAATCCTACATTAA  
+HWI-EAS443:3:71:1068:1498#0/1  
`X\$XaYTTWZ^aa^`b`[Y\_WPQT[`Y]XYYORX\_R¥GN  
@HWI-EAS443:3:71:1605:1435#0/1  
GGCTAGTTAAAAAAGAAAATTCATACCCAAAGCTCAGCAA  
+HWI-EAS443:3:71:1605:1435#0/1  
\_[a`[^Z¥^PP¥\_a`PK]\_]UW\_WTSU]a\_PPVU¥XYX[]  
@HWI-EAS443:3:75:359:1009#0/1  
GGCTAGTTAAAAAAGAAAATTCATACCCAAAGCTCAGCAA  
+HWI-EAS443:3:75:359:1009#0/1  
aaa`\_a\_a[Xaaaa\_aaaaaaaaa^a^a\_]Sa`^\_Y\_`a`  
@HWI-EAS443:3:77:1066:565#0/1  
GCTGAGCTTTGGGTATGAATTTTCTTTTTTAACTAGCCAT  
+HWI-EAS443:3:77:1066:565#0/1  
`aab\_aaaaaaaY`aar[aa`Zaab`aba`\_`\_a\_Z`a  
@HWI-EAS443:3:78:715:1682#0/1  
GAAAATTCATACCCAAAGCTCAGCAAATCCTACATTAATG  
+HWI-EAS443:3:78:715:1682#0/1  
ababb\_\_`baabaab\_`aa`a^abaaaaaaaaaaa\_aaa`  
@HWI-EAS443:3:80:461:998#0/1  
TTTGGGTATGAATTTTCTTTTTTAACTAGCCATATTAAT  
+HWI-EAS443:3:80:461:998#0/1  
^\_[¥¥RDY¥VY``[^\_¥WXZPaa¥XPWXM[^S`^\_QZS]R  
@HWI-EAS443:3:82:1120:1050#0/1  
AGAAAATTCATACCCAAAGCTCAGCAAATCCTACATTAAT  
+HWI-EAS443:3:82:1120:1050#0/1  
abbabaababaaa\_aaaaaa\_aa`\_a\_aa`aa`aa`\_]a  
@HWI-EAS443:3:82:92:429#0/1  
TTGGGTATGAATTTTCTTTTTTAACTAGCCATATTAAT  
+HWI-EAS443:3:82:92:429#0/1  
aaabb^Wa`¥J[baaaaaba`V`\_a\_aaaa`\_aa^^`  
@HWI-EAS443:3:87:918:719#0/1  
AGCTTTGGGTATGAATTTTCTTTTTTAACTAGCCATATTA  
+HWI-EAS443:3:87:918:719#0/1  
abaababbbabbaY`bbbababbbabbaabbbbaabbbbbb  
@HWI-EAS443:3:88:1087:453#0/1  
TTTGCTGAGCTTTGGGTATGAATTTTCTTTTTTAACTAGC  
+HWI-EAS443:3:88:1087:453#0/1  
`baaaba`baaaabaa^aaa`aaaa\_aabaaaaa^b\_a\_  
@HWI-EAS443:3:88:420:888#0/1  
GGCTAGTTAAAAAAGAAAATTCATACCCAAAGCTCAGCAA  
+HWI-EAS443:3:88:420:888#0/1  
`b`bba¥^`\_a\_`b¥aa`aaaa\_`aa`XR]a]`[^`^]J  
@HWI-EAS443:3:94:317:1770#0/1  
TGCTGAGCTTTGGGTATGAATTTTCTTTTTTAACTAGCCA

+HWI-EAS443:3:94:317:1770#0/1  
ab```¥baaaabb\_`aa`a`abaaa^aaa`aa^a\_a^`S[a  
@HWI-EAS443:3:97:615:2006#0/1  
AAAATTCATACCCAAAGCTCAGCAAATCCTACATTAATGA  
+HWI-EAS443:3:97:615:2006#0/1  
a[aYaaa¥`a`a]a`^aa\_\_`a]Y\_^]`a¥\_\_\_^UU]^  
@HWI-EAS443:3:9:1573:144#0/1  
ATGAATTTTCTTTTTTAACTAGCCATATTAATTTTTTGTA  
+HWI-EAS443:3:9:1573:144#0/1  
aab`abbab\_babaaaa`a\_\_YR¥``aa`^a\_\_`\_`^\_  
@HWI-EAS443:3:27:106:937#0/1  
ACCGCATTTCTTCAATTAACCACCTTATTTCTCAAATTT  
+HWI-EAS443:3:27:106:937#0/1  
^`ba\_Y\_babaab```abbbb\_bababbbbbbbaba¥a\_]`  
@HWI-EAS443:3:66:1279:1316#0/1  
ACCGCATTTCTTCAATTAACCACCTTATTTCTCAAATTT  
+HWI-EAS443:3:66:1279:1316#0/1  
[ab]aa\_aa`b]aa\_a\_aa\_a`\_``aaaaaaaaaa\_`a\_  
@HWI-EAS443:3:81:851:506#0/1  
ACCGCATTTCTTCAATTAACCACCTTATTTCTCAAATTT  
+HWI-EAS443:3:81:851:506#0/1  
I`bbb`bbbabbbbbbbbbbbbbbbbabbbbbbbbbbbb  
@HWI-EAS443:3:83:735:602#0/1  
ACCGCATTTCTTCAATTAACCACCTTATTTCTCAAATTT  
+HWI-EAS443:3:83:735:602#0/1  
G]b``bbbbbb`^¥``Z``bbbbbbbbbb`bb\_¥abaa  
@HWI-EAS443:3:78:1591:1032#0/1  
ATTCTAAACTGTAGAGACCCATTAGAGCACATGCAGAAAC  
+HWI-EAS443:3:78:1591:1032#0/1  
aSXZ¥bY[`V`\_]`\_`aQUV[SLZ[TS`OVV[IDRBBBBBB  
@HWI-EAS443:3:87:271:1214#0/1  
GGAGATTTTTGAACAAATTACTTGTCAATGGTAAATGGCA  
+HWI-EAS443:3:87:271:1214#0/1  
^T[a0[``\_¥a\_H]bbba^VV`bb\_Xa]bb^0]aa\_a¥¥a  
@HWI-EAS443:3:11:1276:497#0/1  
AGGTTTTTGAACAAATTACTTGTCAATGGTAAATGGCAAC  
+HWI-EAS443:3:11:1276:497#0/1  
Z¥H[aaa`^U^`^¥Z`\_`ab^``^^S\_a^VW`RZa^QYa^  
@HWI-EAS443:3:31:320:1943#0/1  
CGGGTGGCTGGCGTTTATAGCACCCCTTGGGTGTCTGACAA  
+HWI-EAS443:3:31:320:1943#0/1  
`\_`WSPaba`aG`a`abaaTababaa^^[GKYPX`R\_\_`¥  
@HWI-EAS443:3:85:377:1896#0/1  
GGCGTTTATAGCACCCCTTGGGTGTCTGACAAGTTGTATTG  
+HWI-EAS443:3:85:377:1896#0/1  
Z\_NTaK\_a¥[SU¥a[VZU¥`WLYOW¥[]^¥P¥\_U¥[\_ZU\_  
@HWI-EAS443:3:35:261:419#0/1  
CCCTAATTATCACTATGAGGAATGCTCCTGTCTCATCCTGAT  
+HWI-EAS443:3:35:261:419#0/1  
U\_\_T\_UOY¥U\_\_QV\_ZX]XZBBBBBBBBBBBBBBBBBBBB

@HWI-EAS443:3:63:929:1316#0/1  
CGGGAATCAAATCAGATTGAAACATGCAATCAAAGCGTC  
+HWI-EAS443:3:63:929:1316#0/1  
aa`a`aaa``\_\_`abaaa\_a`^a`a`aa\_\_a\_]`a`^a  
@HWI-EAS443:3:2:1310:1602#0/1  
GCAGGGAGAACTAAAAGCATTAGTTCAAGAAACGGTTCTG  
+HWI-EAS443:3:2:1310:1602#0/1  
aaaa[¥Ta\_¥DXa\_a[\_U\_\_`RRQ[\_WZ\_Z^^S\_ZOL]MB  
@HWI-EAS443:3:44:1514:810#0/1  
CAAGAAACGGTTCTGAGATGATTTGGGATCCGAACGGATG  
+HWI-EAS443:3:44:1514:810#0/1  
aaabbabaab\_babb`b^ababaa^aa\_``\_a\_\_^a]W`a  
@HWI-EAS443:3:42:958:595#0/1  
AGCTTCTGTGGTCACTGTTCCCATCCCGTTGTATATGAGG  
+HWI-EAS443:3:42:958:595#0/1  
T¥bbabbbaWUPK]\_``^¥R\_J\_VZWHX\_Z¥DZXMYTYXX  
@HWI-EAS443:3:11:872:41#0/1  
TGCCCGTTAATTTACGGAAACCACTGACTGTCCAGCAGC  
+HWI-EAS443:3:11:872:41#0/1  
aaaaa\_F]aaaaa\_aTa`^\_\_¥\_\_¥\_\_^¥]\_WWWUTLPWW  
@HWI-EAS443:3:100:512:860#0/1  
CGCTCCATTGTCTGAAGTAGTTGTTCCACAATGTAGGAC  
+HWI-EAS443:3:100:512:860#0/1  
abb\_b[`VWa\_[a]\_GT[Q]W`a`aa^a^`\_¥T[U^^]^B  
@HWI-EAS443:3:84:406:315#0/1  
AATCGATGAAATTTCTGGGTAACACGCTCCATTGTCTGA  
+HWI-EAS443:3:84:406:315#0/1  
\_Yabbbab^baabaaaaaa]`[`a`ab\_a]¥¥\_\_]^a\_]`  
@HWI-EAS443:3:44:951:1818#0/1  
AATCGATGAAATCTCCTGGGTAACACGCTCCATTGTCTGA  
+HWI-EAS443:3:44:951:1818#0/1  
a\_\_\_a\_`a`\_\_`\_[^]^^¥Za]W\_]W]XWR^Z]XXXZXZ  
@HWI-EAS443:3:64:567:461#0/1  
CTCCTGCCTTTAATGGTTCCATTGGAATGTTTGTCAATTA  
+HWI-EAS443:3:64:567:461#0/1  
QV\_[\_\_H\_TY¥\_ZVaUR\_]aZXWRYBBBBBBBBBBBBBB  
@HWI-EAS443:3:97:264:422#0/1  
GGAGTTTTTTTTGAACAAATTACTTGTCAATGGCAAATGGC  
+HWI-EAS443:3:97:264:422#0/1  
ab`a\_a\_bbaa\_Saaaa`aaa^aaaZa`\_aa`P¥\_^X^¥W  
@HWI-EAS443:3:89:62:1457#0/1  
GGAGTTTTTTTTGAACAAATTACTTGTCAATGGTAAATGGC  
+HWI-EAS443:3:89:62:1457#0/1  
aa`a]a\_aaa`¥¥aaaa]\_¥[\_^\_`Z\_a]Y\_`WXS\_W]W^  
@HWI-EAS443:3:76:1562:1110#0/1  
GGCAAAAGCAGGTAGATATTTAAAGATGAGTCTTCTAACC  
+HWI-EAS443:3:76:1562:1110#0/1  
a]\_\_¥]Y^]X]OXX^]\_]^^W\_UX]US^XZXW]XBBBBBB  
@HWI-EAS443:3:48:1170:801#0/1  
GTGGGCGGGGTTTTGTTTCAGCATCCAGAACTAACAGGGC

+HWI-EAS443:3:48:1170:801#0/1  
a\_`a]]`YG\_`X¥¥¥NTRNLV[^^UZ^UU[WZQNRZRS  
@HWI-EAS443:3:43:692:1012#0/1  
ACGGGGGTTTTGTTTCAGCATCCAGAACTAACAGGGCTGGA  
+HWI-EAS443:3:43:692:1012#0/1  
SXX\_Y`aXU^` [Mabaabbab`[\_N]`Q[¥`b`aZX]` `Q  
@HWI-EAS443:3:32:665:264#0/1  
CTGGGTCCATGAGGTAAGAATATCAACAGGAACAGCAGAG  
+HWI-EAS443:3:32:665:264#0/1  
a\_\_]\_Q\_a]aa\_aYFI\_\_XYXW¥VYU[^VTUV¥W^S^ZYW  
@HWI-EAS443:3:56:173:680#0/1  
GGTCCATGAGGGAAGAATATCAACAGGAACNGCAGAGTGC  
+HWI-EAS443:3:56:173:680#0/1  
ab\_aaa`a\_a`a\_aa[^`]\_a\_` `aa\_\_\_RD[^`^\_\_\_S\_¥  
@HWI-EAS443:3:22:1696:1245#0/1  
GCCTGGGTCCATGAGGGAAGAATATCAACAGGAACAGCAG  
+HWI-EAS443:3:22:1696:1245#0/1  
aa]abba]\_T¥` [NU` `W` `aaa^` ` `WIT\_P`QLVYFQW  
@HWI-EAS443:3:22:726:1738#0/1  
CCTGGGTCCATGAGGGAAGAATATCAACAGGAACAGCAGA  
+HWI-EAS443:3:22:726:1738#0/1  
abaabVU]^¥¥¥M]]Q\_PT\_]U`XV`\_Z\_YQX[ `W[Y^Z\_  
@HWI-EAS443:3:30:80:1439#0/1  
AAAGAGGGCCTTCTACGGAAGGAGTGCCTGGGTCCATGAG  
+HWI-EAS443:3:30:80:1439#0/1  
[T[^¥VU`a\_ZY]]XNV¥^RHNOOQPP^BBBBBBBBBBBB  
@HWI-EAS443:3:39:1393:1389#0/1  
GAAAAGAGGGCCTTCTACGGAAGGAGTGCCTGGGTCCATG  
+HWI-EAS443:3:39:1393:1389#0/1  
`HZPKSVWZWOQL]ZBBBBBBBBBBBBBBBBBBBBBBBB  
@HWI-EAS443:3:54:162:1862#0/1  
TGGGTCCATGAGGGAAGAATATCAACAGGAACAGCAGAGT  
+HWI-EAS443:3:54:162:1862#0/1  
aabb^a`aa]abaa\_]X\_baaaaabWba`aaZaa[ ` `aU  
@HWI-EAS443:3:56:293:633#0/1  
GCCTGGGTCCATGAGGGAAGAATATCAACAGGAACAGCAG  
+HWI-EAS443:3:56:293:633#0/1  
aaa` `aa¥a`\_\_a¥\_a\_\_\_]¥\_\_^\_\_^¥`\_¥¥¥¥¥^^Z\_  
@HWI-EAS443:3:60:143:1460#0/1  
GCCTGGGTCCATGAGGGAAGAATATCAACAGGAACAGCAG  
+HWI-EAS443:3:60:143:1460#0/1  
aa^PD[aQ[a][ ]T¥P\_UT\_¥¥\_W^\_^X¥[^W[S[\_^U^\_  
@HWI-EAS443:3:60:511:367#0/1  
CCTGGGTCCATGAGGGAAGAATATCAACAGGAACAGCAGA  
+HWI-EAS443:3:60:511:367#0/1  
ababab` `aQaa\_aaa`abaaaaaaaaa`a`^W`a^\_a\_  
@HWI-EAS443:3:71:610:521#0/1  
CCTGGGTCCATGAGGGAAGAATATCAACAGGAACAGCAGA  
+HWI-EAS443:3:71:610:521#0/1  
aaaaaa`aaaabaaaaabaaa`\_aa\_aa`aab`aaa`a^



@HWI-EAS443:3:7:1299:424#0/1  
GCCTGGGTCCATGAGGGAAGAATATCAACAGGAACAGCAG  
+HWI-EAS443:3:7:1299:424#0/1  
aa^RZb\_]\_SXa`P\_Y\_G0`]XaZa\_R]¥\_\_a^¥TXaS`a  
@HWI-EAS443:3:3:612:1148#0/1  
TAACATTGCTGGCTGGATCCTGGGAAATCCAGAGCGTGAA  
+HWI-EAS443:3:3:612:1148#0/1  
a\_¥Ra¥^a\_ab¥T`a\_`¥]XOHU\_¥`a^ZUXa\_`GWWZ]`  
@HWI-EAS443:3:63:227:1311#0/1  
GCTGGATCCTGGGAAATCCAGAGCGTGAATCACTCTCCAC  
+HWI-EAS443:3:63:227:1311#0/1  
]S^aaaZ^]T^[Q[aaXa`]]`¥XDWYY][ZNT¥XXL¥VTY  
@HWI-EAS443:3:99:648:560#0/1  
GTGCTCTCTTTGGGTCGCCCTCTGATTAGTTCAACCCAGA  
+HWI-EAS443:3:99:648:560#0/1  
a\_a[]`\_`\_`\_`\_`\_[T\_\_^\_W`Waa\_¥\_^\_¥^T^¥YZN^\_¥  
@HWI-EAS443:3:35:539:155#0/1  
TATACAACAGGATGGGAACAGTGACCACAGAAGCTGCTTC  
+HWI-EAS443:3:35:539:155#0/1  
Z\_bb`ba]Z[SW\_`R`ZYZ`]X^aaaWLZ[]P]Z¥XUR[J  
@HWI-EAS443:3:64:1064:1169#0/1  
GCCACAGAAGCTGCTTTTGGTCTAGCGTGTGCCACTTGTG  
+HWI-EAS443:3:64:1064:1169#0/1  
W^b^\_\_[T`Ybab[`V^¥¥[T^bU¥H^¥aNyaaaaQWZXZ  
@HWI-EAS443:3:51:401:190#0/1  
GTCAGGATATAGTGGGAGTTTTGTTTCAGCATACAGAAATA  
+HWI-EAS443:3:51:401:190#0/1  
¥0¥[^aab]`[`HZaabT^[[V[]XRY¥\_ZNO^\_`¥DU]  
@HWI-EAS443:3:28:453:1554#0/1  
TGGGAGTTTTGTTTCAGCATCCAGAACTAACAGGGCTGGAT  
+HWI-EAS443:3:28:453:1554#0/1  
]a¥¥^`]aa^a\_aab]bbab`^W¥`aaaaaa`a[a`a\_\_^  
@HWI-EAS443:3:44:1636:814#0/1  
GCCGGCTTGAACCTTCTGCTGTATCTTGACGTCCCCACAA  
+HWI-EAS443:3:44:1636:814#0/1  
aaaaa\_a\_VU]R]a\_\_`Y^^`¥Y]S^\_WRDR[STV^VOLT  
@HWI-EAS443:3:93:1191:995#0/1  
GAGAGCCTCAAGATCTGTGTTCTTTCTGTAAAGACACTT  
+HWI-EAS443:3:93:1191:995#0/1  
aY]LW\_`OSPOXNNZUXFX\_\_Y]a\_XTWTGTaZP`RZGV^  
@HWI-EAS443:3:19:994:1215#0/1  
GAGAATGGGAGACCTTCACTACCTCGAGAGCAGAAATAAA  
+HWI-EAS443:3:19:994:1215#0/1  
a[a\_a`V`XL]YYNXRT)`WWZ[YSFWXH`YQXNRFV¥RR  
@HWI-EAS443:3:12:1574:1054#0/1  
GAGAATGGGAGACCTTCACTACCTCCAGAGCAGAAATAAA  
+HWI-EAS443:3:12:1574:1054#0/1  
aabaa`aab`ba[\_aaZa`aaRZaYV^XZaV]a\_ZY\_\_^]  
@HWI-EAS443:3:7:713:321#0/1  
GCTCTGCCACTTTTTATTCTGCTCTGGAGGTAGTGAAG

+HWI-EAS443:3:7:713:321#0/1  
``\_`a[a\_aa\_aaRabaa\_a`Va\_]``\_`\_N]]U]UBB  
@HWI-EAS443:3:43:772:1123#0/1  
AACATTCTTTGGCTGGAAAGAGCCTAACATAGCCAAACCA  
+HWI-EAS443:3:43:772:1123#0/1  
H^bbbbabbbbabbbbabbbba`ababbbba`Xabbbbab  
@HWI-EAS443:3:9:1455:1976#0/1  
ACGCAAAGAACAATAGGGAAGAAAAACAAAGACTAAGAG  
+HWI-EAS443:3:9:1455:1976#0/1  
a\_\_L]\_aa\_`¥`[]\_`\_[]`a[\_`\_Y\_Q\_\_^a^V^`\_\_a¥  
@HWI-EAS443:3:10:751:1365#0/1  
GCCTTGTTGTAATTGAATACTGGAGAATTGCCTCTTATTC  
+HWI-EAS443:3:10:751:1365#0/1  
`a\_``¥`ab`aYa^\_aa[G^\_W][`P`Y\_\_]W`^`^^`[[  
@HWI-EAS443:3:64:729:1340#0/1  
GCCTTGTTGTAATTGAATACTGGAGAATTGCCTCTTATCA  
+HWI-EAS443:3:64:729:1340#0/1  
aba\_\_YDY¥F]^`\_[]a`RRYa\_baa\_\_```]^a]TX\_\_  
@HWI-EAS443:3:73:674:1194#0/1  
TTGTTTCCACAATGTAGGACCATGATCTTGCTGTGGAGAG  
+HWI-EAS443:3:73:674:1194#0/1  
¥XS]Y^a`\_][WHX]bTR`\_T\_V`WDXR]`a\_OSDJVYY  
@HWI-EAS443:3:47:1492:533#0/1  
GTCCAGTATCGTCTAATGGAGCAAATGGAATAAAAGGATT  
+HWI-EAS443:3:47:1492:533#0/1  
aaa^`a\_aa`a`Za`a`VZ`^]\_^`]^X`\_`^`\_a¥^\_  
@HWI-EAS443:3:8:1220:207#0/1  
TGGTCCTCCATCTGATACTAATAGCGCTACTTTTGATTGG  
+HWI-EAS443:3:8:1220:207#0/1  
]aSLZH[Vaa`RS¥QZ]R]\_\_aY]XEHT¥FF¥\_`OF^XBB  
@HWI-EAS443:3:46:164:190#0/1  
AGACCCACCAGAACAGAGTAGGATGCAATTTTCCTCATTG  
+HWI-EAS443:3:46:164:190#0/1  
`YH\_[aYX[`^N]TD¥\_YRaXNXUVYR[UYVTQXY\_UYV  
@HWI-EAS443:3:72:1085:742#0/1  
CCCTAAGTGCCTGAACAATGAGAAGCAATTTTCTATTGCA  
+HWI-EAS443:3:72:1085:742#0/1  
V\_b¥`]X\_W¥M¥aa`\_X^QX\_[YWN]^aa^\_b``aba]^`  
@HWI-EAS443:3:66:1559:1715#0/1  
GTCCCTAAGTGCCTGAACAATGAGAAGCAATTTTCTATTG  
+HWI-EAS443:3:66:1559:1715#0/1  
aabbabbbb^aaaaabaaaaabaaba`baaaaa\_aaaaa  
@HWI-EAS443:3:16:1358:656#0/1  
ATAGAAAATTGCTTCTCATTGTTTCAGGCACTTAGGGACAA  
+HWI-EAS443:3:16:1358:656#0/1  
ab^baaaaaaaaaaaa\_aaa`aa\_a^`\_^aZa```^`\_\_`a  
@HWI-EAS443:3:34:664:618#0/1  
TAGAAAATTGCTTCTCATTGTTTCAGGCACTTAGGGACAAC  
+HWI-EAS443:3:34:664:618#0/1  
aKaabaX]baaa`a`\_`\_aaUP\_]a\_aaV]¥a\_\_^]ZSBB

@HWI-EAS443:3:89:1387:850#0/1  
CACGTTCCATTGCCTGAAGTGTGTTCCACAATGTAGG  
+HWI-EAS443:3:89:1387:850#0/1  
a\_`\_^X¥a^`W` [¥P\_a\_T\_\_aa]`a^\_a[aa`aaa^`  
@HWI-EAS443:3:75:1107:139#0/1  
GCCGGTTTCATTGAAGGGGGTGGACAGGAATGGTAGATG  
+HWI-EAS443:3:75:1107:139#0/1  
a\_R\_aZaa\_aaaa]Q`a^a^aM^\_UUQ¥\_¥¥\_a\_UVZWW`  
@HWI-EAS443:3:67:1648:1643#0/1  
CTCTGGGTGACTCTCCGATTGGCCATGTTCCGATTTGTT  
+HWI-EAS443:3:67:1648:1643#0/1  
abbb`bb\_ba`bbb`ababbaaaaa`W]aa[aZSXaa`\_]\_  
@HWI-EAS443:3:2:126:1055#0/1  
CTTGCTTTATTGAGAAGTTATTGTCTGTCCCAGTCCACAC  
+HWI-EAS443:3:2:126:1055#0/1  
a`)]`[`ab]a`R][`\_bSU]ba`BBBBBBBBBBBBBBBB  
@HWI-EAS443:3:19:578:281#0/1  
ATTCAAGTAAAATCAGTGTGTGCAGGATAACTGGCA  
+HWI-EAS443:3:19:578:281#0/1  
\_^]ba^aYb[baa\_`aYbaYb\_a]^`aa`]^Za[\_\_\_]]]\_  
@HWI-EAS443:3:82:596:1217#0/1  
AGCCCCTAATTTACGGAAACCACTGACTGTCCAACAAC  
+HWI-EAS443:3:82:596:1217#0/1  
¥MUNV\_RRW]PRWSYNWa^YaZBBBBBBBBBBBBBBBB  
@HWI-EAS443:3:16:1199:87#0/1  
AGCCCCTAATTTACGGAAACCACTGACTGTCCAGCAGC  
+HWI-EAS443:3:16:1199:87#0/1  
\_]\_]\_aS`R][VZ\_^R`\_¥\_^VP[WY^WX\_¥ZTRNQG UUB  
@HWI-EAS443:3:17:1037:388#0/1  
AGCCCCTAATTTACGGAAACCACTGACTGTCCAGCAGC  
+HWI-EAS443:3:17:1037:388#0/1  
`a`a[aa]S\_\_\_`\_\_\_]^V`\_[¥\_S¥\_¥W]\_VRQ[YWQUW  
@HWI-EAS443:3:19:1049:1597#0/1  
AGCCCCTAATTTACGGAAACCACTGACTGTCCAGCAGC  
+HWI-EAS443:3:19:1049:1597#0/1  
`\_[a]\_\_\_`aa^`a\_\_¥W\_a¥\_^W\_\_`¥]]TZ^`¥Y¥ZB  
@HWI-EAS443:3:32:602:1362#0/1  
AGCCCCTAATTTACGGAAACCACTGACTGTCCAGCAGC  
+HWI-EAS443:3:32:602:1362#0/1  
¥X\_aaaa`¥`aaaaa`[]`aa][[``a`^ZaYRL]TR¥  
@HWI-EAS443:3:42:409:1884#0/1  
AGCCCCTAATTTACGGAAACCACTGACTGTCCAGCAGC  
+HWI-EAS443:3:42:409:1884#0/1  
aH^a`a`]aa\_\_^Ua\_\_WTY^Y[`M`X\_a¥¥TY\_]Y]PDW  
@HWI-EAS443:3:65:363:2041#0/1  
AGCCCCTAATTTACGGAAACCACTGACTGTCCAGCAGC  
+HWI-EAS443:3:65:363:2041#0/1  
¥^\_bb\_[a`a`NZa]a[`aaS]a`\_\_Y`\_¥RQ`\_PRSZS^  
@HWI-EAS443:3:77:361:137#0/1  
AGCCCCTAATTTACGGAAACCACTGACTGTCCAGCAGC

+HWI-EAS443:3:77:361:137#0/1  
ab``ab`a\_\_a`^^a\_aa]a[S`\_^^^\_¥\_\_VSTYZUUUK  
@HWI-EAS443:3:7:1642:635#0/1  
AGCCCCGCTAATTTACGGAAACCACTGACTGTCCAGCAGC  
+HWI-EAS443:3:7:1642:635#0/1  
ZOSXa\_abaaaab`aQ`a\_aa[a[Y\_[aWaBBBBBBBBBB  
@HWI-EAS443:3:87:541:1712#0/1  
AGCCCCGCTAATTTACGGAAACCACTGACTGTCCAGCAGC  
+HWI-EAS443:3:87:541:1712#0/1  
a``b\_\_L[a`\_aa\_ZW^a\_¥]\_^W[\_¥¥KMLYYSZ¥BB  
@HWI-EAS443:3:90:885:1665#0/1  
AGCCCCGCTAATTTACGGAAACCACTGACTGTCCAGCAGC  
+HWI-EAS443:3:90:885:1665#0/1  
aa\_abba`babb`aa\_]`a\_b`aaXZ`baa]¥]Naaa`\_¥  
@HWI-EAS443:3:19:229:1270#0/1  
TGGGTCTTCAATACTTAATTTACAGAGCATCCATCAGCAGG  
+HWI-EAS443:3:19:229:1270#0/1  
[baaT^`aa]`a`a[`\_a^bZ^]¥aaa]\_U\_\_`]a]Y  
@HWI-EAS443:3:33:1224:1438#0/1  
CTCCACAAGAAAATTGCTTCTCATTGTTTCAGGCACTTAGG  
+HWI-EAS443:3:33:1224:1438#0/1  
aabbabaaaaaaaaaaaaaaaaaaaaa\_``aa[R`\_a\_``\_  
@HWI-EAS443:3:63:956:360#0/1  
CGTTCCCATCCTGTTGTATATGAGGCCCATGCAACTGGCA  
+HWI-EAS443:3:63:956:360#0/1  
a\_aaaabbbbabb\_abbbbbab[a`abaaaa`aaaa`aa  
@HWI-EAS443:3:86:1485:305#0/1  
CATGCTCCCCCTTGAATGCAGAAAATTCTTCTTACTCA  
+HWI-EAS443:3:86:1485:305#0/1  
R``ZIWSZZYUbb`\_]a¥^`\_bb\_FHbb¥ab^abb^\_aSW  
@HWI-EAS443:3:100:314:584#0/1  
ATTTTCGGAGACAATCCACGCCCTAATGACAAGACAGGCC  
+HWI-EAS443:3:100:314:584#0/1  
[aabaaZbbaa\_b`ba`b``][\_aa[aaaYb`¥\_^\_aY`]  
@HWI-EAS443:3:80:1786:637#0/1  
TCAGACTAGGCAGATGGTACATGCGATGAGAACTATTGGG  
+HWI-EAS443:3:80:1786:637#0/1  
ab\_`\_^b¥¥¥ZZ^Y^Z^P^PR]XRDR^SY`\_[YO¥T]RJU  
@HWI-EAS443:3:2:1271:837#0/1  
AAGGGTCCCCATTCCCATTTAGGGCATTGACAAAAGCG  
+HWI-EAS443:3:2:1271:837#0/1  
`a```[\_Y`aaaa[]N[aa\_\_a¥VN\_\_a\_\_a\_¥¥¥¥\_S\_  
@HWI-EAS443:3:47:992:1063#0/1  
CAGGGTCCCCATTCCCATTTAGGGCATTGACAAAAGCG  
+HWI-EAS443:3:47:992:1063#0/1  
aba¥WW`a¥U^aa\_aaa\_XWa\_a\_X`aa^a`TV]`\_aaX\_  
@HWI-EAS443:3:32:1487:724#0/1  
AGGGTCCCCATTCCCATTTAGGGCATTGACAAAAGCGT  
+HWI-EAS443:3:32:1487:724#0/1  
^a^XXZ\_aX\_aVPH\_^b`b]]^XST]`aa]ZUXX^Q]BBB

@HWI-EAS443:3:98:1545:613#0/1  
AGGGTCCCCATTCCCATTTAGGGCATTGACAAAGCGT  
+HWI-EAS443:3:98:1545:613#0/1  
`aZaaZaaaabb`aZabbb`][`^aaaa[baaWaaa`Haa  
@HWI-EAS443:3:78:737:1325#0/1  
CTGATGTTGTGGATTACTGATCGTCTCTTTTTCAAATGTA  
+HWI-EAS443:3:78:737:1325#0/1  
aaa\_OHZV]RT¥R¥Y]ZXa`XU]OX[HZR¥¥YJHTUHHKX  
@HWI-EAS443:3:16:588:381#0/1  
AGCTGGAATCAACAAGGATTTACCAGATTTTGGCGATTAA  
+HWI-EAS443:3:16:588:381#0/1  
\_\_aba\_V^a^a]\_aaba¥\_\_a^^aba`a`aBBBBBBBBB  
@HWI-EAS443:3:52:1762:1543#0/1  
GCTGGAATCAACAAGGATTTACCAGATTTTGGCGATTAT  
+HWI-EAS443:3:52:1762:1543#0/1  
]`b`^`b`aa[^baab^`ab\_]¥aaaaaaT`^^^F[BB  
@HWI-EAS443:3:45:515:1064#0/1  
GGCGTGGACTGTCTCCGAAAATCCCCTGCATATGTATCC  
+HWI-EAS443:3:45:515:1064#0/1  
a\_a`aa^\_a]HWZ[\_aZ]\_SWP\_]Y^YSU^Y[VZ\_]VX  
@HWI-EAS443:3:43:1207:1403#0/1  
GCTCCATTAGACGATATTGGACCACAACCTGCCTGTCTTAT  
+HWI-EAS443:3:43:1207:1403#0/1  
Xa\_\_b`Ybbaab\_Yb\_0\_HZ^¥IZ[`]^¥QV]HWaa]\_[  
@HWI-EAS443:3:37:500:1698#0/1  
CGCCTGCTGTTGCATCTTCGCCATTGTTTGCTTGGCGCCA  
+HWI-EAS443:3:37:500:1698#0/1  
aabbbabb`b^b`baabbabbaab^abaQba`S]a[ab]  
@HWI-EAS443:3:47:1705:192#0/1  
CGCCTGCTGTTGCATCTTCGCCATTGTTTGCTTGGCGCCA  
+HWI-EAS443:3:47:1705:192#0/1  
``aaaaabbab\_]Q\_\_]¥I`^^\_V\_\_^a^UT\_¥FFMZXR¥  
@HWI-EAS443:3:16:620:1294#0/1  
ATGCAACAGCAGGCCTTACTCATATCATGATTTGGCATT  
+HWI-EAS443:3:16:620:1294#0/1  
a`ab\_OV[R^a\_RM^aKaa\_`a]]`Sa¥TY^\_[RQ[\_^]]  
@HWI-EAS443:3:37:654:1375#0/1  
GGCGAAGATGCAACAGCAGGCCTTACTCATATCATGATTT  
+HWI-EAS443:3:37:654:1375#0/1  
\_K`\_\_Z\_`ZaY]`aa^[[[M^RWWa\_\_INH\_aa[a[VXT  
@HWI-EAS443:3:61:1535:1537#0/1  
GCGCCAAGCAAACAATGGCGAAGATGCAACAGCAGGCCTT  
+HWI-EAS443:3:61:1535:1537#0/1  
aY]]UWXS¥\_]TT\_UW\_^U\_]\_^`^SP[¥WNT¥TUWNHGTG  
@HWI-EAS443:3:82:1364:866#0/1  
AACTGGCATGGCTCGAATCGACCGTGGGGTCTTTTAACC  
+HWI-EAS443:3:82:1364:866#0/1  
ab`baaa`ba`a`¥P[`P]\_S\_`R`aZH]JW^a`FP[VZ  
@HWI-EAS443:3:9:462:1556#0/1  
GCTCCTCATAATCGATGAAATCTCCTGGATAACACGTTCC

+HWI-EAS443:3:9:462:1556#0/1  
^b``b`bb`b`\_`\_`b[b`bb`bZ`a`\_`bb`bbab``bb¥aaaa  
@HWI-EAS443:3:60:119:863#0/1  
AGAGCACTGACATTAATACGATGACCAAAGATGCAGAAG  
+HWI-EAS443:3:60:119:863#0/1  
a^Y`abb]]aaabbaaaZaaaaa\_aaa[¥a\_[\_a\_\_VHU  
@HWI-EAS443:3:37:1395:1841#0/1  
GTGATTCCAAGAGGAAAGCTTTCCACAAGAGAGGTCCAAA  
+HWI-EAS443:3:37:1395:1841#0/1  
^¥\_UWT^Z^WMXWY[\_¥ZY[a^URZV][WFYY]XKMSPWL  
@HWI-EAS443:3:34:1441:423#0/1  
TTGCTGACTTTATCCCTCTCAGCGACATCTCCGTGTTTG  
+HWI-EAS443:3:34:1441:423#0/1  
\_bb`babaZa\_b¥```a\_`aaa¥b]aa\_¥aRYPBBBBBBBBB  
@HWI-EAS443:3:15:1605:1346#0/1  
AAAGAAGTGGAGATCTAATGTCACAGTCCCGCACTCGCG  
+HWI-EAS443:3:15:1605:1346#0/1  
`\_]\_Y``Zba^Yaa`a`bba]WZaa¥a`KDVZ\_]XYX\_¥SZ  
@HWI-EAS443:3:75:1471:564#0/1  
GAGAGATCTAATGTCACAGTCCCGCACTCGCGAGATACTC  
+HWI-EAS443:3:75:1471:564#0/1  
ab`bb`bb`\_ab`bb`ba```ba\_\_aaaa\_b`baa\_\_a[  
@HWI-EAS443:3:35:1766:825#0/1  
GAGAGAGTGGTAGTGAGTATTGACCGTTTTTTAAGGGTTA  
+HWI-EAS443:3:35:1766:825#0/1  
a`a\_bZaXba¥ab]UQ`XW[`YRPKDHM`aa`[VT`\_[TT  
@HWI-EAS443:3:42:435:1806#0/1  
AAAGAAGTGGAGATTTAATGTCGAGTCCCGCACTCGCG  
+HWI-EAS443:3:42:435:1806#0/1  
abNWaT\_[]aW\_Sb`IbJbaYORi`aIba[^`SaV`¥HM^`  
@HWI-EAS443:3:80:1194:1125#0/1  
ATCAAAATACAGCAAGAAGTTCAAGCCGAAATAGCAATA  
+HWI-EAS443:3:80:1194:1125#0/1  
abb`abaabb`bbaabb`baaa\_a`b\_a¥\_aa`aaaa\_`\_a\_  
@HWI-EAS443:3:98:58:743#0/1  
AAAATGGGACTTATGACTACCCAAAATACTCAGGAGGATG  
+HWI-EAS443:3:98:58:743#0/1  
a`aaaa`\_`^aa```a````^^[\_`^`¥\_Z`\_]\_\_^Y`ZZ`  
@HWI-EAS443:3:46:1537:2020#0/1  
CCTGAGTATTTTGGGTAGTCATAAGTCCCATTTTTGACAC  
+HWI-EAS443:3:46:1537:2020#0/1  
HYbbbaaabb`bb`b`Tbbaabb`bb`ba[ab`bb`bb`bb`bab]ba  
@HWI-EAS443:3:100:144:946#0/1  
CACTAATTTTACGGAAACCACTGACTGTCCAGCAGCAAAG  
+HWI-EAS443:3:100:144:946#0/1  
aaaababb`b`aaa]\_aaaa`\_a```aa\_\_aa\_^W¥¥^]\_B  
@HWI-EAS443:3:39:282:658#0/1  
ACTAATTTTACGGAAACCACTGACTGTCCAGCAGCAAAGT  
+HWI-EAS443:3:39:282:658#0/1  
a`a¥¥aaaa`\_a`¥Q]\_\_\_\_^^^\_X\_YUPW[UZRW]^X

@HWI-EAS443:3:18:449:1322#0/1  
GGATGCTGAACAAAACCTCCCGCTATATCCTGACCACTCAC  
+HWI-EAS443:3:18:449:1322#0/1  
aZY`]aaa`ba`b`\_\_bba\_a\_a`a^a^aa`\_]^[P  
@HWI-EAS443:3:29:1615:1639#0/1  
GGCAAATGGAGTAAAAGGATTTTCATTCAAATACGGCAAT  
+HWI-EAS443:3:29:1615:1639#0/1  
aa\_a`\_aaa`a¥`\_aaa\_]^^`\_\_\_^^`\_`\_]\_\_^^]\_  
@HWI-EAS443:3:32:970:207#0/1  
GTGGTCCAGTATCGTCTAATGGGGCAAATGGAGTAAAAGG  
+HWI-EAS443:3:32:970:207#0/1  
aXa`]\_\_Z\_Z^]X^ZWZU¥ZL[GUPTTV^TXM^TUX^[]U  
@HWI-EAS443:3:72:1006:1087#0/1  
AGGNCTCCTGTCTTTAATGGTTCCATTGGAATGTTTGTCA  
+HWI-EAS443:3:72:1006:1087#0/1  
aa¥D[`]X[[a`^aa`^`a]]aa`\_a\_]SP^]¥a`^X]U  
@HWI-EAS443:3:72:115:918#0/1  
AGGGCTCCTGTCTTTAATGGTTCCATTGGAATGTTTGTTA  
+HWI-EAS443:3:72:115:918#0/1  
`TU\_aY[aa[SVYX\_aa]`[QQ\_IUVMPMJWW]YUTPMFS  
@HWI-EAS443:3:28:1169:859#0/1  
AGGGCTCCTGTCTTTAATGGTTCCATTGGAATGTTTGTCA  
+HWI-EAS443:3:28:1169:859#0/1  
ZWUa\_^]R\_`W\_baY`UQU[ORNN^^P\_XaaYM]ZRZ`X  
@HWI-EAS443:3:52:195:1340#0/1  
AGGGCTCCTGTCTTTAATGGTTCCATTGGAATGTTTGTCA  
+HWI-EAS443:3:52:195:1340#0/1  
aa^\_a`aaaa\_]\_`\_\_\_\_\_`]]]\_\_`\_]]]\_\_]]^]YWA  
@HWI-EAS443:3:71:1089:89#0/1  
AGGGCTCCTGTCTTTAATGGTTCCATTGGAATGTTTGTCA  
+HWI-EAS443:3:71:1089:89#0/1  
aaaa`baaab\_\_`aaaaaaaa^a\_[\_a^aa\_\_`a^\_a`]X]  
@HWI-EAS443:3:73:1460:793#0/1  
AGGGCTCCTGTCTTTAATGGTTCCATTGGAATGTTTGTCA  
+HWI-EAS443:3:73:1460:793#0/1  
a`Kab`^b\_aaaaabaa`a\_\_b\_\_]\_a\_\_\_\_`^^`a^\_a^`  
@HWI-EAS443:3:87:957:1619#0/1  
AGGGCTCCTGTCTTTAATGGTTCCATTGGAATGTTTGTCA  
+HWI-EAS443:3:87:957:1619#0/1  
aa]X`ZX\_]MWZHLQa`¥`\_UaU]YNSFRX¥Z[PF[NK[X  
@HWI-EAS443:3:95:1084:1636#0/1  
AGGGCTCCTGTCTTTAATGGTTCCATTGGAATGTTTGTCA  
+HWI-EAS443:3:95:1084:1636#0/1  
¥^`ab]\_SZS¥Vb`^a¥H]T^^V]XX]¥[]SV\_``LLXS  
@HWI-EAS443:3:63:19:187#0/1  
AGCACAGTCAGCACTCATTCTGAGGGGATCAGTTGCACAT  
+HWI-EAS443:3:63:19:187#0/1  
Z^aZ\_]U]OZ[^U[`X¥T[YNT^^\_NFUVMXGZ^UQFMB  
@HWI-EAS443:3:51:240:896#0/1  
TGCACACTGATCTGGCCTGCGGATGCCCTTTGTTGATTGG

+HWI-EAS443:3:51:240:896#0/1  
aabbbb`bbababbbaab^\_aa[a` `aaaaba\_baV`aaa  
@HWI-EAS443:3:6:1123:1506#0/1  
TGATGGGGAGCGCCAGGATGCCACAGAAATGAGAGCATGT  
+HWI-EAS443:3:6:1123:1506#0/1  
L` `Zb\_¥W]b¥QQ¥T\_QXWJ^`XRTaa\_HYDV]abJ]LGS  
@HWI-EAS443:3:61:1379:931#0/1  
GATCATATGAACAAATGGAGACTGATGGGGAGCGCACGGA  
+HWI-EAS443:3:61:1379:931#0/1  
aZ`Y]\_a`ZTRLVQQ^^VRaYT`¥N¥`¥YTWBBBBBBBBB  
@HWI-EAS443:3:7:1511:373#0/1  
GAACAAATGGAGACTGATGGGGAGCGCCAGGATGCGAGAG  
+HWI-EAS443:3:7:1511:373#0/1  
G[bUVV\_XTbbaaU^` `]`Ub`UV\_GJ^b\_\_Tha^H¥HVb  
@HWI-EAS443:3:91:1256:2013#0/1  
CACCCCATCAGTCTCCNTTTGTTTCATATGATCGTTTGGTG  
+HWI-EAS443:3:91:1256:2013#0/1  
abZaaa` `abTZZ`\_ZD[SP`\_`aaabbaaS`IX`aaRO  
@HWI-EAS443:3:28:708:611#0/1  
CTCTGATTTCTGTGGCATCCTGGCGCTCCCATCAGGCTC  
+HWI-EAS443:3:28:708:611#0/1  
abba\_\_aaa`aa`[[^aa`aaaa\_`BBBBBBBBBBBBBB  
@HWI-EAS443:3:57:1680:943#0/1  
TGCTCTGATTTCTGTGGCATCCTGGCGCTCCCATCGGTC  
+HWI-EAS443:3:57:1680:943#0/1  
aa\_b`baabbb^aa\_]`a`¥Z^V[¥^¥^^VY^¥^[Y¥Q[  
@HWI-EAS443:3:63:808:1288#0/1  
ATCCCATCAGTCTCNATTTGTTTCATATGATCGTTTGGTG  
+HWI-EAS443:3:63:808:1288#0/1  
^^baba^^a` `aaa[DTaaaa`aaabaaaa`a`a`a^V^  
@HWI-EAS443:3:18:1636:106#0/1  
TTCTGTGGCATCCTGGCGGTCCCATCAGTCTCCATTTGT  
+HWI-EAS443:3:18:1636:106#0/1  
aa`¥PTbaSa`^¥a¥a\_^GVN¥VYSGSZXNRWVUGNRWGS  
@HWI-EAS443:3:20:917:1215#0/1  
GCTCCTCATCAGTCTCCATTTGTTTCATATGATCGTTTGGT  
+HWI-EAS443:3:20:917:1215#0/1  
ab^Y` [ ` `]QRGQRSQVY¥ZRO[ ] ] ]aXN]U]S`aSPP  
@HWI-EAS443:3:21:889:1866#0/1  
ATGGGGAGCGCGAGGATGCCACAGAAATCAGAGCATCTGT  
+HWI-EAS443:3:21:889:1866#0/1  
aZ\_^]X¥]a\_USJZ¥aZ` [Y`Sba^aa\_S\_G\_¥Z\_\_UZ]W  
@HWI-EAS443:3:22:178:360#0/1  
ATCCTGGCGCTCCCATCAGTCTCCATTAGTTCATATGAT  
+HWI-EAS443:3:22:178:360#0/1  
aba` [ ` ¥ab`aab\_a^a]\_a^\_a[aZ`\_GHUa\_\_`^][[Y  
@HWI-EAS443:3:33:791:1088#0/1  
ATCCTGGCGCTCCCATCAGTCTCCATTTGTTTATATGAT  
+HWI-EAS443:3:33:791:1088#0/1  
a[ `a[aaa¥^V` \_\_aT[\_NSRYYZ¥RSZ]MMRFN¥UZMUV



@HWI-EAS443:3:33:923:1615#0/1  
CTGATTTCTGTAGCATCCTGGCGCTCCCCATCAGTCTCCA  
+HWI-EAS443:3:33:923:1615#0/1  
a\_\_`abbaa^`^bbaaaa¥aaaX\_X\_\_RZ`¥ZNY[[\_[  
@HWI-EAS443:3:50:1486:353#0/1  
ATCCTGGCGCTCCCCATCAGTCTCCATTTTTTTCATATGAT  
+HWI-EAS443:3:50:1486:353#0/1  
aabaa`\_`^aY¥a^aY¥\_Z]WY\_^TVP`ZFX`0]`V]]V]  
@HWI-EAS443:3:62:1755:522#0/1  
TCCCCGTCAGTCTCCATTTGTTTCATATGATCGTTTGGTGC  
+HWI-EAS443:3:62:1755:522#0/1  
Z]\_\_\_¥ab\_ZYY]`a`¥]^\_X^N[`U[W^QTRWZUPNY¥¥  
@HWI-EAS443:3:65:440:995#0/1  
CGCTCCTCATCAGTCTCCATTTGTTTCATATGATCGTTTGG  
+HWI-EAS443:3:65:440:995#0/1  
a`a`aaaaaaa[PS]a`¥`\_`\_`[\_\_\_\_`a^`\_`\_]U\_]\_¥  
@HWI-EAS443:3:69:412:1356#0/1  
ATCCGACATGCGAACCGAAGTTATAAGAATGACGGAAAGT  
+HWI-EAS443:3:69:412:1356#0/1  
a^^a`]`aa`aYV¥¥F[\_aa^`[^\_^]`X¥`\_`\_\_^X^VP  
@HWI-EAS443:3:79:1487:1695#0/1  
CTCTGATTTCTGGGCATCCTGGCGCTCCCCATCAGTCTC  
+HWI-EAS443:3:79:1487:1695#0/1  
^^\_bbabbbY[F]^`\_]^[aa^\_aa\_a^aU]]¥JGFL]Z  
@HWI-EAS443:3:83:1458:1799#0/1  
GATCATATGAACAAATGGAGACTGATGGGGGGCGCCAGGA  
+HWI-EAS443:3:83:1458:1799#0/1  
J`b^UaU\_aaZbaaaTbaa]RbbaaZbJ`\_Ua`bUH^b\_U  
@HWI-EAS443:3:84:1354:1525#0/1  
CCCCATCAGTCTCCATTCGTTTCATATGATCGTTTGGTGCC  
+HWI-EAS443:3:84:1354:1525#0/1  
`a\_JYITVSW[]`[a^¥WZQ][¥RR^N^J\_GQ`[ONNT[  
@HWI-EAS443:3:89:502:2021#0/1  
CCCATGAGTCTCCATTTGTTTCATATGATCGTTTGGTGCCT  
+HWI-EAS443:3:89:502:2021#0/1  
]¥`\_RF[\_Q\_^a`\_XUU¥WU\_Z\_Z\_¥TZHVOZ¥aa\_aVOL  
@HWI-EAS443:3:92:939:207#0/1  
TCTGATTTCTGTGGCATCCTGGCGCTCCCCGTCAGTCTCC  
+HWI-EAS443:3:92:939:207#0/1  
V\_Z\_Ja¥Z\_bb^¥Z^aa``abb^^VP[U]^JHHHP¥U[U  
@HWI-EAS443:3:7:132:1348#0/1  
AACGATCATATGAACAAATGGAGACTGATGGGGAGCGTCA  
+HWI-EAS443:3:7:132:1348#0/1  
WPZbR¥Q\_XUPQY\_XXT`\_YT]aNTKHYY\_aa^] ^UBBBB  
@HWI-EAS443:3:91:1141:188#0/1  
GCCATCAGTCTCCATTTGTTTCATATGATCGTTTGGTGCCT  
+HWI-EAS443:3:91:1141:188#0/1  
I\_`baaab\_T¥`\_Z\_bb`^`aa^`b`^^aa```XP\_[F]  
@HWI-EAS443:3:24:44:1541#0/1  
GCTCCCCATCAGTCTCCATTTGTTTCATNTGATCGTTTGGT

+HWI-EAS443:3:24:44:1541#0/1  
ab\_aba\_`aY#P\_ab^T^abaWV#b^D[aa\_ab`\_a#XJ  
@HWI-EAS443:3:90:1413:559#0/1  
CTGATTTCTGTGGCATCCTNGCGCTCCCCATCAGTCTCCA  
+HWI-EAS443:3:90:1413:559#0/1  
`bbaabbabba]aUba`b[D]ba`\_ZYaNSNN^]GL[ZYW  
@HWI-EAS443:3:94:1000:1455#0/1  
CACCANACGATCATATGAACAAATGGAGACTGATGGGGAG  
+HWI-EAS443:3:94:1000:1455#0/1  
aaaa[D#aaaaaa`aba]]Xa`X`a`\_`\_#aa`\_\_^`\_]\_  
@HWI-EAS443:3:97:236:1106#0/1  
CTCTGATTTCTGTGGCATCCTNGCGCTCCCCATCAGTCTC  
+HWI-EAS443:3:97:236:1106#0/1  
]^a#\_S\_a#W\_a`a^a`^SX#DVTY[MO]#\_XYY#]XT[V  
@HWI-EAS443:3:9:939:565#0/1  
CAAATGGAGACTGATGGGGAGCGCNAGGATGCCACAGAAA  
+HWI-EAS443:3:9:939:565#0/1  
aa`a^X]a^aa\_\_Uaaa^Xaa\_aXDXVU]^\_#]a]aX`a\_  
@HWI-EAS443:3:12:1504:167#0/1  
GGCATCCTGGCGCTCCCCATCAGTCTCCATTTGTTTCATTT  
+HWI-EAS443:3:12:1504:167#0/1  
aaaaa`#`aa\_\_W[#Y#Y#Y^W#Y#TGWVVV#\_#XW#UW#^#  
@HWI-EAS443:3:20:1350:816#0/1  
TGCCCATCAGTCTCCATTTGTTTCATATGATCGTTTGGTGC  
+HWI-EAS443:3:20:1350:816#0/1  
a```Z``a`XRTaaY\_\_\_\_\_a#PX\_``\_a[`Qa\_a\_a`U\_#  
@HWI-EAS443:3:42:1028:435#0/1  
CTGATGGGGAGCGCCAGGATGCCACAGAAATCAGAGCAGA  
+HWI-EAS443:3:42:1028:435#0/1  
a`bb`babaX`bbbabbbbabbb`aabbZ`bbbabbbba  
@HWI-EAS443:3:42:514:878#0/1  
CACCCATCAGTCTCCATTTGTTTCATATGATCGTTTGGTGC  
+HWI-EAS443:3:42:514:878#0/1  
aaaaaaaaa`^`^]R`baaa\_a\_aaa#a`a`a`a]\_WX^  
@HWI-EAS443:3:58:383:891#0/1  
GGCCCCATCAGTCTCCATTTGTTTCATATGATCGTTTGGTG  
+HWI-EAS443:3:58:383:891#0/1  
abbbbaabb]aab\_]#ba`bUabaaa`aa`aaaa\_b  
@HWI-EAS443:3:5:1682:1811#0/1  
GATGGGGAGCGCCAGGATGCCACAGAAATCAGAGCATCCG  
+HWI-EAS443:3:5:1682:1811#0/1  
aaa```aaa]aVYaa`Za^N^`aaZa]`#a`YaS[BBBB  
@HWI-EAS443:3:84:1240:1312#0/1  
GTCTGATGGGGAGCGCCAGGATGCCACAGAAATCAGAGCA  
+HWI-EAS443:3:84:1240:1312#0/1  
a`a`\_`X`a`#^Y^]#^TRTX]]]X]Xa^`#Y#PV^U]ON  
@HWI-EAS443:3:21:28:68#0/1  
CTGATTTCTGTGGCATCCTGGCGCTCCCCATCAGTCTCCC  
+HWI-EAS443:3:21:28:68#0/1  
^^\_]Ybbabaab\_Z\_\_\_\_\_W[\_^ZOVBBBBBBBBBBBBBB

@HWI-EAS443:3:25:339:299#0/1  
CGGCGCTCCCATCAGTCTCCATTTGTTTCATATGATCGTT  
+HWI-EAS443:3:25:339:299#0/1  
aabbbaab^aZR`SWZ¥¥]\_JV`PX]RQYT¥[Y^U[V`  
@HWI-EAS443:3:31:1138:512#0/1  
GCTCCCATCAGTCTCCATTTGTTTCATATGATCGTTTGGG  
+HWI-EAS443:3:31:1138:512#0/1  
a]bX`\_]`aa`\_G]aZ`¥]^]X`[\_a`X\_V\_\_aVZ\_\_¥K  
@HWI-EAS443:3:38:1621:745#0/1  
CGCTCTGATTTCTGTGGCATCCTGGCGCTCCCATCAGTC  
+HWI-EAS443:3:38:1621:745#0/1  
abbabbbabba\_baaba`baaaabaabaaUT\_Sa\_¥\_^UU  
@HWI-EAS443:3:48:848:1197#0/1  
GCCCCATCAGTCTCCATTTGTTTCATATGATCGTTTGGTGC  
+HWI-EAS443:3:48:848:1197#0/1  
\_\_\_\_¥``[]\_^]]]a^a\_a¥`a^`a`a`]`T¥Q\_`V\_X  
@HWI-EAS443:3:48:966:1593#0/1  
CGCTCTGATTTCTGTGGCATCCTGGCGCTCCCATCAGTC  
+HWI-EAS443:3:48:966:1593#0/1  
abbbabbbabbaba`aaaba\_aaaa`aaa[`]Z[`^\_¥PW  
@HWI-EAS443:3:4:214:891#0/1  
ACCCCATCAGTCTCCATTTGTTTCATATGATCGTTTGGTGC  
+HWI-EAS443:3:4:214:891#0/1  
aaabaa`abaMU`RPH¥YaW\_Z¥a\_^a\_`^a[Z\_[[]^B  
@HWI-EAS443:3:61:1503:1096#0/1  
GTCCCATCAGTCTCCATTTGTTTCATATGATCGTTTGGTG  
+HWI-EAS443:3:61:1503:1096#0/1  
N[b\_Q^YaUUaaZbbbbYbaa`a\_[¥bbbVab\_`b\_b][[]  
@HWI-EAS443:3:63:1041:1599#0/1  
ACTCCCATCAGTCTCCATTTGTTTCATATGATCGTTTGGT  
+HWI-EAS443:3:63:1041:1599#0/1  
¥Z^`WZ¥W^`b[TLT\_a]]Z]^Z¥R`]W\_aWLW\_`BBBB  
@HWI-EAS443:3:69:1302:1024#0/1  
CGCTCTGATTTCTGTGGCATCCTGGCGCTCCCATCAGTC  
+HWI-EAS443:3:69:1302:1024#0/1  
aa`aabb`abaaa^]\_\_a````\_aaa^`^\_\_\_\_¥^ZBBBB  
@HWI-EAS443:3:73:849:1174#0/1  
ACCCCATCAGTCTCCATTTGTTTCATATGATCGTTTGGTGC  
+HWI-EAS443:3:73:849:1174#0/1  
abababbb`a\_a`aaV]aaa^aaaa\_aa\_`a`\_`aaZY\_a  
@HWI-EAS443:3:85:600:1194#0/1  
AGCTCCCATCAGTCTCCATTTGTTTCATATGATCGTTTGG  
+HWI-EAS443:3:85:600:1194#0/1  
`bababbbbabaaaaaaaabbb`a¥baaa`ab\_bGa\_`V  
@HWI-EAS443:3:100:1155:673#0/1  
CTCTGATTTCTGTGGCATCCTGGCGCTCCCATCAGTCTC  
+HWI-EAS443:3:100:1155:673#0/1  
T`bbbZbbbaab````bb]]]bbbb`aZTVaaba`\_aaS]Z  
@HWI-EAS443:3:100:56:819#0/1  
CTGATGGGGAGCGCCAGGATGCCACAGAAATCAGAGCATC

+HWI-EAS443:3:100:56:819#0/1  
`b)``bab^]baaa¥\_aa¥`b`a`\_aaV^¥]^a\_Y[TBBB  
@HWI-EAS443:3:10:139:327#0/1  
ACCAAACGATCATATGAACAAATGGAGACTGATGGGGAGC  
+HWI-EAS443:3:10:139:327#0/1  
aaaa^¥a[X¥\_`\_`\_\_¥`^\_\_¥`^^^`^^^\_[¥`Z[^V[V  
@HWI-EAS443:3:11:1043:1211#0/1  
AAACGATCATATGAACAAATGGAGACTGATGGGGAGCGCC  
+HWI-EAS443:3:11:1043:1211#0/1  
aaa`^\_[¥Pa]aW¥`\_]ZVa`\_Y\_UM`YJ[U`^WZ[R\_XR  
@HWI-EAS443:3:11:1780:870#0/1  
ATGGGGAGCGCCAGGATGCCACAGAAATCAGAGCATCTGT  
+HWI-EAS443:3:11:1780:870#0/1  
V¥`ba¥`¥`[^XH\_[WY\_W]aX\_QY¥VW]a^^YR¥`G]RB  
@HWI-EAS443:3:11:34:1089#0/1  
ATGGGGAGCGCCAGGATGCCACAGAAATCAGAGCATCTGT  
+HWI-EAS443:3:11:34:1089#0/1  
ab`\_aaabaZa\_Y\_\_`\_aaa`ba`^`¥\_\_\_\_\_¥a\_[-`W  
@HWI-EAS443:3:11:594:1244#0/1  
GCTCCCATCAGTCTCCATTTGTTTCATATGATCGTTTGGT  
+HWI-EAS443:3:11:594:1244#0/1  
`a`\_`aa`^`a`T`^^a]^`^¥a]\_\_a^Z¥^¥\_¥Wa[[B  
@HWI-EAS443:3:13:114:1167#0/1  
ATGGGGAGCGCCAGGATGCCACAGAAATCAGAGCATCTGT  
+HWI-EAS443:3:13:114:1167#0/1  
aaa`a¥^aa`^U\_[U^^¥]Z^^a`\_`^`¥^]Z[^`^ZV¥¥W  
@HWI-EAS443:3:16:890:739#0/1  
CATCAGTCTCCATTTGTTTCATATGATCGTTTGGTGCCTTG  
+HWI-EAS443:3:16:890:739#0/1  
a]abb`Laabbababaa\_abb`bb`abb^bbba\_b^a`b`  
@HWI-EAS443:3:17:521:859#0/1  
ACCAAACGATCATATGAACAAATGGAGACTGATGGGGAGC  
+HWI-EAS443:3:17:521:859#0/1  
aaaaaaaa\_\_^\_\_a`^`\_Y^`^\_W`WW^`Y^`¥¥¥W¥W  
@HWI-EAS443:3:17:849:1770#0/1  
CTCCCATCAGTCTCCATTTGTTTCATATGATCGTTTGGTG  
+HWI-EAS443:3:17:849:1770#0/1  
``[aaaa]\_aa^\_\_\_\_`^`\_S[\_\_\_\_^a\_ZW\_]Y\_¥¥MKP  
@HWI-EAS443:3:18:1039:1590#0/1  
ATGGGGAGCGCCAGGATGCCACAGAAATCAGAGCATCTGT  
+HWI-EAS443:3:18:1039:1590#0/1  
\_`baaa`aa`a`a\_\_aUa\_a\_\_aa]¥¥Sa`\_`\_aX[GW`H  
@HWI-EAS443:3:18:1147:1965#0/1  
ATGGGGAGCGCCAGGATGCCACAGAAATCAGAGCATCTGT  
+HWI-EAS443:3:18:1147:1965#0/1  
aa\_\_^`\_aaS\_\_aa\_Z]\_`¥LLNaHQX[RP[]\_BBBBBBBB  
@HWI-EAS443:3:18:786:216#0/1  
CAAATGGAGACTGATGGGGAGCGCCAGGATGCCACAGAAA  
+HWI-EAS443:3:18:786:216#0/1  
abaabbb\_a`abbaaaaa\_a`a¥¥^`\_`¥V¥¥^^S\_`^¥\_¥

@HWI-EAS443:3:19:1177:1785#0/1  
TCTGATTTCTGTGGCATCCTGGCGCTCCCCATCAGTCTCC  
+HWI-EAS443:3:19:1177:1785#0/1  
a`aaaaaaaa]`\_a`a`aa`^¥[ ]^\_\_\_\_]\_^XU^Y]  
@HWI-EAS443:3:19:674:739#0/1  
CACCAAACGATCATATGAACAAATGGAGACTGATGGGGAG  
+HWI-EAS443:3:19:674:739#0/1  
¥RW^^ZZ\_X[[ ]a^\_\_]\_UQR\_]Z\_VU¥P`a\_Y\_¥\_^PB  
@HWI-EAS443:3:19:719:1652#0/1  
GCTCCCCATCAGTCTCCATTTGTTTCATATGATCGTTTGGT  
+HWI-EAS443:3:19:719:1652#0/1  
``aaa`]a\_\_`aZ^a`a`\_`\_UU\_\_```\_\_]]U\_X`\_]RX  
@HWI-EAS443:3:21:336:377#0/1  
CGATCATATGAACAAATGGAGACTGATGGGGAGCGCCAGG  
+HWI-EAS443:3:21:336:377#0/1  
aba\_a\_ab[Z`aaa\_\_a`a`a\_]``ZZa^`\_`a\_\_^\_]`X  
@HWI-EAS443:3:21:412:1515#0/1  
GCTCCCCATCAGTCTCCATTTGTTTCATATGATCGTTTGGT  
+HWI-EAS443:3:21:412:1515#0/1  
^\_K\_ab`X`\_]UU]\_\_\_\_¥Z[V¥a``]XP^\_¥XD¥aMFD  
@HWI-EAS443:3:21:878:1193#0/1  
GATTTCTGTGGCATCCTGGCGCTCCCCATCAGTCTCCATT  
+HWI-EAS443:3:21:878:1193#0/1  
a\_```\_a`W¥[`a\_^\_ZWU\_\_ZY\_\_`UZWWXYUX[UX\_X  
@HWI-EAS443:3:22:637:1077#0/1  
TCTGATTTCTGTGGCATCCTGGCGCTCCCCATCAGTCTCC  
+HWI-EAS443:3:22:637:1077#0/1  
`^X\_]a[¥`]]Za`aaa]V^U[[¥^ZR^XUPGY\_NGTRVB  
@HWI-EAS443:3:22:772:1055#0/1  
GTGGCATCCTGGCGCTCCCCATCAGTCTCCATTTGTTTCAT  
+HWI-EAS443:3:22:772:1055#0/1  
`P]VZaa\_YTDJ^¥RY[¥SXXZ\_ZTNZ¥S[L[VZROOURT  
@HWI-EAS443:3:22:893:1565#0/1  
ATTTCTGTGGCATCCTGGCGCTCCCCATCAGTCTCCATTT  
+HWI-EAS443:3:22:893:1565#0/1  
`baaaaaa^[bbaa``\_Z`\_^]`\_a^W[U[^USYVUUZ^`  
@HWI-EAS443:3:23:1482:1462#0/1  
ACGATCATATGAACAAATGGAGACTGATGGGGAGCGCCAG  
+HWI-EAS443:3:23:1482:1462#0/1  
`a\_W[^¥`abbaaX^]aaaaNa\_X\_RP\_Ya]\_\_a]\_^WGW  
@HWI-EAS443:3:23:1568:1922#0/1  
CTCCCCATCAGTCTCCATTTGTTTCATATGATCGTTTGGTG  
+HWI-EAS443:3:23:1568:1922#0/1  
a`a`a`bbbabbb\_baabbbbaabaabbbbab`aabaaa`  
@HWI-EAS443:3:24:1015:970#0/1  
ATGGGGAGCGCCAGGATGCCACAGAAATCAGAGCATCTGT  
+HWI-EAS443:3:24:1015:970#0/1  
^]`¥P^a^a\_aa`XX^`Z[Z]Uaa\_]^\_R\_¥^a```Z^YQ  
@HWI-EAS443:3:24:254:1092#0/1  
CTCCCCATCAGTCTCCATTTGTTTCATATGATCGTTTGGTG

+HWI-EAS443:3:24:254:1092#0/1  
a\_bbba^a\_ba`baaaaa`a[aa[^aaaa`aa\_`a\_XX`  
@HWI-EAS443:3:24:945:1265#0/1  
TGTGGCATCCTGGCGCTCCCCATCAGTCTCCATTTGTTCA  
+HWI-EAS443:3:24:945:1265#0/1  
aa\_a`ababba`aaaa`aaaY[U]PT\_¥Y[LU\_`T]ZP[  
@HWI-EAS443:3:25:1073:1361#0/1  
CACCAAACGATCATATGAACAAATGGAGACTGATGGGGAG  
+HWI-EAS443:3:25:1073:1361#0/1  
aaaaabbbbaabbbbbbabab`abb\_aa\_aaa`aaaaaaa  
@HWI-EAS443:3:25:31:527#0/1  
TCCCCATCAGTCTCCATTTGTTTCATATGATCGTTTGGTGC  
+HWI-EAS443:3:25:31:527#0/1  
X\_b`\_¥¥¥`]U[¥`\_]Y`¥`¥XYOH¥W^TUW¥^aba]VV\_  
@HWI-EAS443:3:25:552:820#0/1  
TGGCGCTCCCCATCAGTCTCCATTTGTTTCATATGATCGTT  
+HWI-EAS443:3:25:552:820#0/1  
ab`a¥`\_`abbbW]\_[VZa]]\_¥]]aX[[P[`ZX]X^[^T¥  
@HWI-EAS443:3:26:1184:489#0/1  
GATGGGGAGCGCCAGGATGCCACAGAAATCAGAGCATCTG  
+HWI-EAS443:3:26:1184:489#0/1  
aaaaaaa\_aX^`¥`\_`¥`\_¥Z^\_a`\_`\_`¥`\_`[`Z[¥T^¥  
@HWI-EAS443:3:26:1459:368#0/1  
ATTTCTGTGGCATCCTGGCGCTCCCCATCAGTCTCCATTT  
+HWI-EAS443:3:26:1459:368#0/1  
abbbabbabaabbaaabb^baa\_`a^\_a]]RU`\_X\_\_\_a^  
@HWI-EAS443:3:26:462:874#0/1  
AACGATCATATGAACAAATGGAGACTGATGGGGAGCGCCA  
+HWI-EAS443:3:26:462:874#0/1  
aaa`\_aaaaaaaaaaaaa[[`]]`\_`\_`[^¥a`[[Z]\_Z^`¥  
@HWI-EAS443:3:27:1190:1285#0/1  
CTCCCCATCAGTCTCCATTTGTTTCATATGATCGTTTGGTG  
+HWI-EAS443:3:27:1190:1285#0/1  
aabb`\_Wabbb^ba`a`baa^`a\_baaaaab\_Yaaaa\_¥`  
@HWI-EAS443:3:27:692:1932#0/1  
CACCAAACGATCATATGAACAAATGGAGACTGATGGGGAG  
+HWI-EAS443:3:27:692:1932#0/1  
abbbba`aab`abaaa`aaaaa`aa`]¥^¥Y[a][\_Za\_  
@HWI-EAS443:3:28:1074:1663#0/1  
CTGATGGGGAGCGCCAGGATGCCACAGAAATCAGAGCATC  
+HWI-EAS443:3:28:1074:1663#0/1  
\_W¥¥`]Y[T¥W^ZS]XZaXMXa)`¥`a`a`]Z\_W\_^JNUS  
@HWI-EAS443:3:28:1284:1193#0/1  
GCTCCCCATCAGTCTCCATTTGTTTCATATGATCGTTTGGT  
+HWI-EAS443:3:28:1284:1193#0/1  
`a`] [a`aXV^`Z¥`a`T[V^¥` [FV[a\_]\_\_^V^U\_\_YU  
@HWI-EAS443:3:28:1396:878#0/1  
TCCCCATCAGTCTCCATTTGTTTCATATGATCGTTTGGTGC  
+HWI-EAS443:3:28:1396:878#0/1  
[bb^R`W`]J]bURa\_abaR¥\_\_\_\_[b]^PaaaaYL¥Y

@HWI-EAS443:3:28:692:823#0/1  
CTCTGATTTCTGTGGCATCCTGGCGCTCCCCATCAGTCTC  
+HWI-EAS443:3:28:692:823#0/1  
abbb\_X\_]bb`[Y`aa`\_aa]aaaaXaaaWS]ZXHXVY  
@HWI-EAS443:3:29:1140:382#0/1  
TGATGGGGAGCGCCAGGATGCCACAGAAATCAGAGCATCT  
+HWI-EAS443:3:29:1140:382#0/1  
abXa]bba¥]Z^[Y^\_¥OR]YP[Pa`U^VKY]^U]TSVBB  
@HWI-EAS443:3:29:1232:959#0/1  
CTGATGGGGAGCGCCAGGATGCCACAGAAATCAGAGCATC  
+HWI-EAS443:3:29:1232:959#0/1  
ab`a\_T[aT0¥baa^PZHPVZUZZTS`^^MPRHRW[BBBB  
@HWI-EAS443:3:2:1012:340#0/1  
GGCATCCTGGCGCTCCCCATCAGTCTCCATTTGTTTCATAT  
+HWI-EAS443:3:2:1012:340#0/1  
O\_\_Zbb[a¥`X\_aZYZaa\_]YTS]]R]aaaVbZ^a[`aSZ  
@HWI-EAS443:3:2:1265:933#0/1  
CAGATGCTCTGATTTCTGTGGCATCCTGGCGCTCCCCATC  
+HWI-EAS443:3:2:1265:933#0/1  
`bb]babbb]bbb¥ab^\_bbb^aab\_Y\_¥]a^¥a¥a^  
@HWI-EAS443:3:30:158:1307#0/1  
ATCAGTCTCCATTTGTTTCATATGATCGTTTGGTGCCTTGA  
+HWI-EAS443:3:30:158:1307#0/1  
[V`Tab]a\_Y`\_`\_`^`a`\_a`a`]a\_¥]\_^\_U]]`V]]\_  
@HWI-EAS443:3:31:1416:1070#0/1  
ATGGGGAGCGCCAGGATGCCACAGAAATCAGAGCATCTGT  
+HWI-EAS443:3:31:1416:1070#0/1  
]a`bb`\_`abbbb`ba\_a`a\_]¥`^\_abba`\_b]\_\_abaS  
@HWI-EAS443:3:31:298:919#0/1  
CAAATGGAGACTGATGGGGAGCGCCAGGATGCCACAGAAA  
+HWI-EAS443:3:31:298:919#0/1  
`RV\_¥]`[`Xaaaaa`\_]\_K\_ba`a]UZVW\_aa^^a^WW^  
@HWI-EAS443:3:33:1673:1807#0/1  
ATTTCTGTGGCATCCTGGCGCTCCCCATCAGTCTCCATTT  
+HWI-EAS443:3:33:1673:1807#0/1  
`[]a`K^\_aaaa`\_VZTQ¥[a^GX`UUZ`[PPNYTVQZH  
@HWI-EAS443:3:33:1764:1016#0/1  
GAACAAATGGAGACTGATGGGGAGCGCCAGGATGCCACAG  
+HWI-EAS443:3:33:1764:1016#0/1  
a`¥aX]]aaU\_^V^][Q\_UUKT¥`TVT\_ZRXWPWNTUQ\_U  
@HWI-EAS443:3:34:548:744#0/1  
CGCTCCCCATCAGTCTCCATTTGTTTCATATGATCGTTTGG  
+HWI-EAS443:3:34:548:744#0/1  
abbababbaabaa^baabaaa`a^a`abaaaa\_\_]^`a\_Z  
@HWI-EAS443:3:34:603:1815#0/1  
CCCATCAGTCTCCATTTGTTTCATATGATCGTTTGGTGCCT  
+HWI-EAS443:3:34:603:1815#0/1  
`baXUa¥KGa¥aU``\_aY]Z`SZYSSSQYUM\_BBBBBBBB  
@HWI-EAS443:3:34:64:119#0/1  
CTGGCGCTCCCCATCAGTCTCCATTTGTTTCATATGATCGT

+HWI-EAS443:3:34:64:119#0/1  
`aa\_aba`MX`¥\_S`¥¥¥^SUW¥VZSS[WZY^B  
@HWI-EAS443:3:35:165:841#0/1  
CATCAGTCTCCATTTGTTTCATATGATCGTTTGGTGCCTTG  
+HWI-EAS443:3:35:165:841#0/1  
`¥`aba`babbaa`a¥`aaaaa\_a^Z^a`dWaaa^a\_  
@HWI-EAS443:3:35:691:580#0/1  
AATGGAGACTGATGGGAGCGCCAGGATGCCACAGAAATC  
+HWI-EAS443:3:35:691:580#0/1  
aaba¥Xb`baa\_aba`a]a`a^aa\_Z\_aaaaa\_a\_```  
@HWI-EAS443:3:36:1579:868#0/1  
GATGGGAGCGCCAGGATGCCACAGAAATCAGAGCATCTG  
+HWI-EAS443:3:36:1579:868#0/1  
aabaabaXa¥a¥[]^a\_]aW¥ZUa\_\_\_W¥T`WW¥¥UZUU^  
@HWI-EAS443:3:37:1162:1288#0/1  
AACAAATGGAGACTGATGGGAGCGCCAGGATGCCACAGA  
+HWI-EAS443:3:37:1162:1288#0/1  
a```^`^baaa`\_`a`]`]aXa[U^YaYL]U^]]^YaX¥  
@HWI-EAS443:3:37:733:1979#0/1  
CATATGAACAAATGGAGACTGATGGGAGCGCCAGGATGC  
+HWI-EAS443:3:37:733:1979#0/1  
`bbbbbababaabba`aaaabaaaa]aaG`aa\_Z`W\_^  
@HWI-EAS443:3:38:1719:944#0/1  
ATCAGTCTCCATTTGTTTCATATGATCGTTTGGTGCCTTGA  
+HWI-EAS443:3:38:1719:944#0/1  
abaaaaY[`VY^^aaa\_VZ¥X\_^^[R`[aSLSUTKNZRUP  
@HWI-EAS443:3:38:494:799#0/1  
CACCAAACGATCATATGAACAAATGGAGACTGATGGGAG  
+HWI-EAS443:3:38:494:799#0/1  
aaa\_]`^ba]V^\_\_\_^^U¥U[XT^a`\_]NT¥W¥`T[VGU  
@HWI-EAS443:3:39:538:146#0/1  
CTCCCCATCAGTCTCCATTTGTTTCATATGATCGTTTGGTG  
+HWI-EAS443:3:39:538:146#0/1  
aa¥aab¥`bba`baba`aaa`\_a``aaaa]S`^\_aa^U^  
@HWI-EAS443:3:39:775:667#0/1  
GCTCCCCATCAGTCTCCATTTGTTTCATATGATCGTTTGGT  
+HWI-EAS443:3:39:775:667#0/1  
Z¥J[]\_a]Ya\_Y`XWZY^`[XLZWJO\_[WXTDP`\_^]N  
@HWI-EAS443:3:3:155:1251#0/1  
CTGATGGGAGCGCCAGGATGCCACAGAAATCAGAGCATC  
+HWI-EAS443:3:3:155:1251#0/1  
`bWZ]b\_\_¥`\_]`^a]a`a`a]^Ybaaa`\_]`a\_\_S]^T  
@HWI-EAS443:3:3:792:1220#0/1  
ATGGGAGCGCCAGGATGCCACAGAAATCAGAGCATCTGT  
+HWI-EAS443:3:3:792:1220#0/1  
`babbb]ab`X^]a`¥aaaZa`\_`a`aXbXa`¥aX^VH`aB  
@HWI-EAS443:3:3:991:439#0/1  
CTCCCCATCAGTCTCCATTTGTTTCATATGATCGTTTGGTG  
+HWI-EAS443:3:3:991:439#0/1  
abab^abbabb^^a[^abaaa]aa`aZ`a¥\_\_bX`\_`aX\_



@HWI-EAS443:3:40:1366:493#0/1  
GATGGGGAGCGCCAGGATGCCACAGAAATCAGAGCATCTG  
+HWI-EAS443:3:40:1366:493#0/1  
\_Y\_a`\_R¥0[ILT^ZSV¥ZS\_SV\_WJWDPU[^[XTPNYY  
@HWI-EAS443:3:40:79:1349#0/1  
AACGATCATATGAACAAATGGAGACTGATGGGGAGCGCCA  
+HWI-EAS443:3:40:79:1349#0/1  
\_a\_WT^0\_aZV0\_aZ^PWXPTR^[]OGOZX\_^UBBBBBB  
@HWI-EAS443:3:42:1044:1146#0/1  
GATGGGGAGCGCCAGGATGCCACAGAAATCAGAGCATCTG  
+HWI-EAS443:3:42:1044:1146#0/1  
Z[]a\_¥\_¥abb^b^b\_aa`¥]aab`baa^aa^aa^b¥`aa  
@HWI-EAS443:3:42:215:1929#0/1  
ATGGGGAGCGCCAGGATGCCACAGAAATCAGAGCATCTGT  
+HWI-EAS443:3:42:215:1929#0/1  
a\_[`a\_a^^P`a[\_XXS`\_`aVbaa^]¥T`\_YY^^X[a\_^  
@HWI-EAS443:3:42:225:844#0/1  
ATGGGGAGCGCCAGGATGCCACAGAAATCAGAGCATCTGT  
+HWI-EAS443:3:42:225:844#0/1  
abbbaa[]]b`b`aa``aaa\_aaaaaUaa]aaaaaaaa\_aa\_  
@HWI-EAS443:3:42:615:1644#0/1  
GTGGCATCCTGGCGCTCCCCATCAGTCTCCATTTGTTTCAT  
+HWI-EAS443:3:42:615:1644#0/1  
a`aa\_babbbb^`aab^`aa^[[`YXN^[]^WX``JZ\_```  
@HWI-EAS443:3:43:355:210#0/1  
CTCTGATTTCTGTGGCATCCTGGCGCTCCCCATCAGTCTC  
+HWI-EAS443:3:43:355:210#0/1  
a[abbaababb`abaaab`abaa`a¥[a\_`XP¥TZVXUP  
@HWI-EAS443:3:43:473:312#0/1  
CTCTGATTTCTGTGGCATCCTGGCGCTCCCCATCAGTCTC  
+HWI-EAS443:3:43:473:312#0/1  
ababbbbbbbbababbaaaaaabaaa`¥aa`[\_^^¥V[]^  
@HWI-EAS443:3:43:639:1181#0/1  
GATCATATGAACAAATGGAGACTGATGGGGAGCGCCAGGA  
+HWI-EAS443:3:43:639:1181#0/1  
aaabb`bbbbbb`aaabb[ba^aa`abYaa`\_``VX^a]^`  
@HWI-EAS443:3:45:1768:1018#0/1  
AACAAATGGAGACTGATGGGGAGCGCCAGGATGCCACAGA  
+HWI-EAS443:3:45:1768:1018#0/1  
\_a¥¥\_abY`Z`Ra^ba¥]X¥aXU`]a]K[XTM[[YPH]a[  
@HWI-EAS443:3:45:531:477#0/1  
GCGCTCCCCATCAGTCTCCATTTGTTTCATATGATCGTTTG  
+HWI-EAS443:3:45:531:477#0/1  
aaaaaa`aaaa^`Z^¥a\_``a`a]^`V\_a\_^`^]¥`¥\_aZ  
@HWI-EAS443:3:45:657:1143#0/1  
CTCCCCATCAGTCTCCATTTGTTTCATATGATCGTTTGGTG  
+HWI-EAS443:3:45:657:1143#0/1  
aa\_]¥Z¥^^][N[`[\_W`a]UY\_a\_`\_]`ZYP]Ua\_`VX\_  
@HWI-EAS443:3:46:242:419#0/1  
ATTTCTGTGGCATCCTGGCGCTCCCCATCAGTCTCCATTT

+HWI-EAS443:3:46:242:419#0/1  
a^baab^¥YX`aa\_a\_aa\_a`]U]a\_¥Z¥\_QUYY^VFLZY  
@HWI-EAS443:3:47:1005:404#0/1  
ATGGGGAGCGCCAGGATGCCACAGAAATCAGAGCATCTGT  
+HWI-EAS443:3:47:1005:404#0/1  
aa\_\_ababbbbaaba]]aS`aZa]]a\_[Va\_`aV``[^\_G  
@HWI-EAS443:3:48:1129:1152#0/1  
CTGATGGGGAGCGCCAGGATGCCACAGAAATCAGAGCATC  
+HWI-EAS443:3:48:1129:1152#0/1  
`bb`bbbb\_bab`bbb\_`]]^`aab` `a`b[ababXaa\_  
@HWI-EAS443:3:48:97:830#0/1  
GAACAAATGGAGACTGATGGGGAGCGCCAGGATGCCACAG  
+HWI-EAS443:3:48:97:830#0/1  
aV`\_\_\_¥`¥`T^S¥aa^^`[[^^[[\_¥^W`\_¥[ZSTNS¥[  
@HWI-EAS443:3:4:381:715#0/1  
GCGCTCCCATCAGTCTCCATTTGTTTCATATGATCGTTTG  
+HWI-EAS443:3:4:381:715#0/1  
Z\_\_a]\_\_]U\_^aa^XWaSHWZU\_aTWYVW^U[TYWbBBBB  
@HWI-EAS443:3:50:1451:1186#0/1  
CTCTGATTTCTGTGGCATCCTGGCGCTCCCATCAGTCTC  
+HWI-EAS443:3:50:1451:1186#0/1  
aa`ab\_bba`ab¥babab`a`b` `aa¥]\_`X[XZ^]T[]]  
@HWI-EAS443:3:50:421:601#0/1  
AGATGCTCTGATTTCTGTGGCATCCTGGCGCTCCCATCA  
+HWI-EAS443:3:50:421:601#0/1  
aaba[ `aaa\_abb` ]baUaaaaa[¥^aa` `^[ ` \_aaXVQV  
@HWI-EAS443:3:51:1119:792#0/1  
AACGATCATATGAACAAATGGAGACTGATGGGGAGCGCCA  
+HWI-EAS443:3:51:1119:792#0/1  
abbbabaabaaa`b¥`abaaa\_b\_`aa`a^`abYa^a`^¥  
@HWI-EAS443:3:52:1713:355#0/1  
GCTCCCATCAGTCTCCATTTGTTTCATATGATCGTTTGGT  
+HWI-EAS443:3:52:1713:355#0/1  
][¥¥¥bb`]S¥F^X¥YL^`a[ROZ]`]]]`QNZZ^[¥LSM  
@HWI-EAS443:3:52:373:460#0/1  
GCGCTCCCATCAGTCTCCATTTGTTTCATATGATCGTTTG  
+HWI-EAS443:3:52:373:460#0/1  
aaaa^`a`a`a]]\_¥]`a\_``\_a`^\_V`a`\_]X`^a[ `^¥  
@HWI-EAS443:3:53:134:1790#0/1  
GCGCTCCCATCAGTCTCCATTTGTTTCATATGATCGTTTG  
+HWI-EAS443:3:53:134:1790#0/1  
a`V`\_]`\_] [[`XX[\_\_XS0Z[\_Y`\_TYU[\_[¥\_^U[^¥  
@HWI-EAS443:3:53:31:1379#0/1  
AGGCACCAAACGATCATATGAACAAATGGAGACTGATGGG  
+HWI-EAS443:3:53:31:1379#0/1  
aabb\_a^W\_baa^^`aaa` `XaaaWP]aVaa\_\_`a¥` `aZ  
@HWI-EAS443:3:55:1586:1756#0/1  
CAAACGATCATATGAACAAATGGAGACTGATGGGGAGCGC  
+HWI-EAS443:3:55:1586:1756#0/1  
abababaaaababb\_a\_aaaaba^^a\_ab\_abaaa\_aY` [

@HWI-EAS443:3:57:876:420#0/1  
TCTGATTTCTGTGGCATCCTGGCGCTCCCCATCAGTCTCC  
+HWI-EAS443:3:57:876:420#0/1  
aaaa^aa`\_aa\_aa``a`\_a`¥`\_^Z^^`]XR\_XYSYP]  
@HWI-EAS443:3:58:503:809#0/1  
CCCCATCAGTCTCCATTTGTTTCATATGATCGTTTGGTGCC  
+HWI-EAS443:3:58:503:809#0/1  
\_WaaS\_abb]Zabaa]aa\_aa`aaba]`baabb\_IV^aX  
@HWI-EAS443:3:5:1589:636#0/1  
CATCAGTCTCCATTTGTTTCATATGATCGTTTGGTGCCCTTG  
+HWI-EAS443:3:5:1589:636#0/1  
]^`^¥¥bb`\_Uab``[WUb\_aaUbab`VY¥`^baTαSI]b¥  
@HWI-EAS443:3:5:693:1448#0/1  
ATGGGGAGCGCCAGGATGCCACAGAAATCAGAGCATCTGT  
+HWI-EAS443:3:5:693:1448#0/1  
ababba`bba^¥\_\_aaaa^aaabbabaa]b\_aXaaaaa\_B  
@HWI-EAS443:3:60:1442:33#0/1  
GATGGGGAGCGCCAGGATGCCACAGAAATCAGAGCATCTG  
+HWI-EAS443:3:60:1442:33#0/1  
a[VaaaaWXX¥^UPLDJWZZUVNY[WWHWNWZQWXBBBBB  
@HWI-EAS443:3:60:1483:378#0/1  
CTGATGGGGAGCGCCAGGATGCCACAGAAATCAGAGCATC  
+HWI-EAS443:3:60:1483:378#0/1  
aaa]aX\_\_b]W\_aaa`\_T[X]Z]^X]^`]^`^W¥Y\_KV[U  
@HWI-EAS443:3:61:749:499#0/1  
CGATCATATGAACAAATGGAGACTGATGGGGAGCGCCAGG  
+HWI-EAS443:3:61:749:499#0/1  
abaaabbb\_[`a^a`]bba``Q^aa\_aaaba^]Z^]Y¥\_[  
@HWI-EAS443:3:61:889:1967#0/1  
CTGGCGCTCCCCATCAGTCTCCATTTGTTTCATATGATCGT  
+HWI-EAS443:3:61:889:1967#0/1  
^abb``^a`[¥`][^W^]\_baW\_¥¥WZ`a][XXa\_TRQW  
@HWI-EAS443:3:62:455:535#0/1  
CTGATTTCTGTGGCATCCTGGCGCTCCCCATCAGTCTCCA  
+HWI-EAS443:3:62:455:535#0/1  
aa\_[`aaa`\_]¥`]^aa^UT]SaS¥[^[BBBBBBBBBBBB  
@HWI-EAS443:3:62:505:1010#0/1  
CTCCCCATCAGTCTCCATTTGTTTCATATGATCGTTTGGTG  
+HWI-EAS443:3:62:505:1010#0/1  
aabaaaaaab`Y`aaa``a`[a`a\_a\_a¥Z^^V\_Y`UP¥  
@HWI-EAS443:3:62:597:1679#0/1  
CATATGAACAAATGGAGACTGATGGGGAGCGCCAGGATGC  
+HWI-EAS443:3:62:597:1679#0/1  
abbbbbbbbbbbabbbabbaabaabaaaa`a\_baaaa\_aa  
@HWI-EAS443:3:63:1234:1270#0/1  
GGAGACTGATGGGGAGCGCCAGGATGCCACAGAAATCAGA  
+HWI-EAS443:3:63:1234:1270#0/1  
aaZa`aa`Zb`aa\_`aa`a¥`]a¥^a^^¥\_aaa`^^`^^  
@HWI-EAS443:3:63:471:1339#0/1  
CATCAGTCTCCATTTGTTTCATATGATCGTTTGGTGCCCTTG

+HWI-EAS443:3:63:471:1339#0/1  
a`QXZZaa\_ZGN¥aaa\_aaaaaaITY`ZS^\_\_^U`\_\_`^^  
@HWI-EAS443:3:63:512:1733#0/1  
CAAACGATCATATGAACAAATGGAGACTGATGGGGAGCGC  
+HWI-EAS443:3:63:512:1733#0/1  
[aaba\_[¥\_abba`bbabaa\_V^XXZba`aa\_J¥\_\_`a`^  
@HWI-EAS443:3:63:717:540#0/1  
CCCATCAGTCTCCATTTGTTTCATATGATCGTTTGGTGCCT  
+HWI-EAS443:3:63:717:540#0/1  
abba^a^\_a\_Q`a¥]a\_\_[a¥a\_Y`aQ^`a\_`a`]V`¥\_`  
@HWI-EAS443:3:64:1412:636#0/1  
TCTGATTTCTGTGGCATCCTGGCGCTCCCCATCAGTCTCC  
+HWI-EAS443:3:64:1412:636#0/1  
\_aab¥abaaaaWaa\_`a\_[Z[`\_\_TW]X\_] [QPRYFSVNT  
@HWI-EAS443:3:64:1700:1577#0/1  
CTGATGGGGAGCGCCAGGATGCCACAGAAATCAGAGCATC  
+HWI-EAS443:3:64:1700:1577#0/1  
abbabbababbbbaaXaabbabaaa\_baababK`\_]`a`\_`  
@HWI-EAS443:3:65:1168:1160#0/1  
CAAATGGAGACTGATGGGGAGCGCCAGGATGCCACAGAAA  
+HWI-EAS443:3:65:1168:1160#0/1  
abbZbbb\_```a`aabb`^a\_a\_````a`][[Xa`b`aaa  
@HWI-EAS443:3:65:872:470#0/1  
CAAGGCACCAAACGATCATATGAACAAATGGAGACTGATG  
+HWI-EAS443:3:65:872:470#0/1  
a¥]\_bb\_```ab`ba\_`aaa^abaaaaa\_aa`\_a`^aa`a`  
@HWI-EAS443:3:66:1485:1986#0/1  
TCTGATTTCTGTGGCATCCTGGCGCTCCCCATCAGTCTCC  
+HWI-EAS443:3:66:1485:1986#0/1  
abaa`aaa\_aaZ`¥aaa\_```\_]¥WW\_]¥]\_¥^^SNUT¥  
@HWI-EAS443:3:66:941:1162#0/1  
CTCCCCATCAGTCTCCATTTGTTTCATATGATCGTTTGGTG  
+HWI-EAS443:3:66:941:1162#0/1  
aa`¥GMUwb¥aUXUL¥MZZNPR[YLZXaa[¥S]ZQ[^¥MZ  
@HWI-EAS443:3:67:1209:1130#0/1  
GAGACTGATGGGGAGCGCCAGGATGCCACAGAAATCAGAG  
+HWI-EAS443:3:67:1209:1130#0/1  
^\_`aaababbaaaaaaa]WV]WYa\_\_a`aa[]¥`^\_`]  
@HWI-EAS443:3:67:534:2034#0/1  
TCTGATTTCTGTGGCATCCTGGCGCTCCCCATCAGTCTCC  
+HWI-EAS443:3:67:534:2034#0/1  
ab`^^^\_^^UXYU0[^]\_\_WVW\_X\_\_aZ`¥[EXXYMNHQX  
@HWI-EAS443:3:69:229:437#0/1  
TGTGGCATCCTGGCGCTCCCCATCAGTCTCCATTTGTTCA  
+HWI-EAS443:3:69:229:437#0/1  
a^aaa`baaaS`^\_^]N`]a]SOPWXXUVZ¥TU`XEW\_]\_  
@HWI-EAS443:3:69:936:1023#0/1  
AAACGATCATATGAACAAATGGAGACTGATGGGGAGCGCC  
+HWI-EAS443:3:69:936:1023#0/1  
a\_\_`ba`\_\_`X^]a`]W\_aa`[^^^aa^a``\_\_\_\_\_ZZ

@HWI-EAS443:3:6:1561:147#0/1  
CATCAGTCTCCATTTGTTTCATATGATCGTTTGGTGCCTTG  
+HWI-EAS443:3:6:1561:147#0/1  
\_\_a\_bba\_ba]a``a^a^`a`aZ[\_0a^\_aa\_Y\_¥Xa\_\_  
@HWI-EAS443:3:6:189:643#0/1  
CTCAAGGCACCAAACGATCATATGAACAAATGGAGACTGA  
+HWI-EAS443:3:6:189:643#0/1  
ababbbabaPZS\_]a\_X\_\_aaaaZ`H\_W]aa¥[\_LSa\_\_  
@HWI-EAS443:3:70:1025:77#0/1  
AACAAATGGAGACTGATGGGGAGCGCCAGGATGCCACAGA  
+HWI-EAS443:3:70:1025:77#0/1  
ab^\_¥X`baU``aababaa`a\_a``VPV\_a^X¥RVHZa`^  
@HWI-EAS443:3:70:1501:1918#0/1  
CTGATGGGGAGCGCCAGGATGCCACAGAAATCAGAGCATC  
+HWI-EAS443:3:70:1501:1918#0/1  
a\_¥`^a^`Waa¥^`^`bb]abaa\_baaaa`^aaa`a``M  
@HWI-EAS443:3:70:681:1111#0/1  
ATGGGGAGCGCCAGGATGCCACAGAAATCAGAGCATCTGT  
+HWI-EAS443:3:70:681:1111#0/1  
ab`\_b`\_`babaaaa^aaaaabaaaaabaaaaaa``Y  
@HWI-EAS443:3:71:248:284#0/1  
CGCTCCCCATCAGTCTCCATTTGTTTCATATGATCGTTTGG  
+HWI-EAS443:3:71:248:284#0/1  
aabbbbbbaaab\_abbbaaaaaaaaaaaaaa\_`aa\_aaa\_  
@HWI-EAS443:3:72:1463:535#0/1  
CATCAGTCTCCATTTGTTTCATATGATCGTTTGGTGCCTTG  
+HWI-EAS443:3:72:1463:535#0/1  
`bbba`]X\_Va]b^bbab``ba\_ba`S\_`bbbbT`^¥`\_a  
@HWI-EAS443:3:72:358:416#0/1  
CGATCATATGAACAAATGGAGACTGATGGGGAGCGCCAGG  
+HWI-EAS443:3:72:358:416#0/1  
U`TWOUa¥Z¥I\_^[TT\_\_[X\_X¥UaTUaab\_I¥`VYROOB  
@HWI-EAS443:3:73:1737:646#0/1  
CTCTGATTTCTGTGGCATCCTGGCGCTCCCCATCAGTCTC  
+HWI-EAS443:3:73:1737:646#0/1  
a¥`¥bUbaa[baZ\_b]ab\_`Za`])`a`])`^^^YPWZFQQJ  
@HWI-EAS443:3:73:482:1271#0/1  
GATGGGGAGCGCCAGGATGCCACAGAAATCAGAGCATCTG  
+HWI-EAS443:3:73:482:1271#0/1  
^ab\_^\_[^\_\_¥Z^`]X`\_aa\_`ab`])\_\_aaa^]\_ZYR]Z  
@HWI-EAS443:3:73:532:1744#0/1  
GATCATATGAACAAATGGAGACTGATGGGGAGCGCCAGGA  
+HWI-EAS443:3:73:532:1744#0/1  
aabaaaba\_`aaa\_aa]UV`\_\_a^`a\_]`^W\_[[O^¥\_\_  
@HWI-EAS443:3:74:1203:1474#0/1  
GCTCCCCATCAGTCTCCATTTGTTTCATATGATCGTTTGGT  
+HWI-EAS443:3:74:1203:1474#0/1  
a``]Y\_aaa^Z]Va`ZXZ`aaa^a\_`^¥^^TY[UaY\_`[UN  
@HWI-EAS443:3:74:97:730#0/1  
CCCCATCAGTCTCCATTTGTTTCATATGATCGTTTGGTGC

+HWI-EAS443:3:74:97:730#0/1  
aaa\_a\_b\_¥[Z[Z[UZ¥W¥WZVU¥¥¥^WY\_¥W^WSWUWTV  
@HWI-EAS443:3:75:331:519#0/1  
CAAATGGAGACTGATGGGGAGCGCCAGGATGCCACAGAAA  
+HWI-EAS443:3:75:331:519#0/1  
abaabbbabaaabV`baaa^aaaa`a\_`^aaaa`aa`aa  
@HWI-EAS443:3:76:1365:1417#0/1  
CGATCATATGAACAAATGGAGACTGATGGGGAGCGCCAGG  
+HWI-EAS443:3:76:1365:1417#0/1  
aba[ [bbbabbbZaabbb\_\_bbaa`^bba`aab[PX\_a]  
@HWI-EAS443:3:76:286:1120#0/1  
GCTCTGATTTCTGTGGCATCCTGGCGCTCCCCATCAGTCT  
+HWI-EAS443:3:76:286:1120#0/1  
a\_`[ ]SPW^U[\_NHWX`]`\_]Z[Q]`ZZX\_ZTNYXTVWW  
@HWI-EAS443:3:76:470:2036#0/1  
AACAAATGGAGACTGATGGGGAGCGCCAGGATGCCACAGA  
+HWI-EAS443:3:76:470:2036#0/1  
^¥\_`^`]b\_W\_[^]a[]^\_[ZQ¥`¥^¥X^XaWV`\_[Z\_\_W  
@HWI-EAS443:3:76:607:1746#0/1  
ATGCTCTGATTTCTGTGGCATCCTGGCGCTCCCCATCAGT  
+HWI-EAS443:3:76:607:1746#0/1  
aaaa\_ba`aabab¥VZ`\_aaaa\_\_[\_¥a[W^^a\_¥XTQN  
@HWI-EAS443:3:76:771:1215#0/1  
CTCTGATTTCTGTGGCATCCTGGCGCTCCCCATCAGTCTC  
+HWI-EAS443:3:76:771:1215#0/1  
ababaabbaabaaaabbaaa¥aa`aa¥aa``UJY\_\_ZUZ\_  
@HWI-EAS443:3:77:1664:1716#0/1  
CGCTCCCCATCAGTCTCCATTTGTTTCATATGATCGTTTGG  
+HWI-EAS443:3:77:1664:1716#0/1  
abbabbbabbbbaabbbbbbabbabbb`bbabb  
@HWI-EAS443:3:78:1238:410#0/1  
CCCCATCAGTCTCCATTTGTTTCATATGATCGTTTGGTGCC  
+HWI-EAS443:3:78:1238:410#0/1  
`ZFN`\_[TL]PR¥W]Ya[U]LY\_¥Q\_[TL]T\_`Y^W[NU  
@HWI-EAS443:3:78:225:532#0/1  
CTCTGATTTCTGTGGCATCCTGGCGCTCCCCATCAGTCTC  
+HWI-EAS443:3:78:225:532#0/1  
aa\_a^a`ba`aT[\_a[\_aaVZa\_\_WNU^\_^HUWTZTQW]  
@HWI-EAS443:3:78:469:673#0/1  
ATGGGGAGCGCCAGGATGCCACAGAAATCAGAGCATCTGT  
+HWI-EAS443:3:78:469:673#0/1  
aa\_aa\_P\_\_aaa`]a\_\_W`a\_a]aXVY]\_``\_a``]¥XK  
@HWI-EAS443:3:79:1019:188#0/1  
TGATGGGGAGCGCCAGGATGCCACAGAAATCAGAGCATCT  
+HWI-EAS443:3:79:1019:188#0/1  
ab`aaaa`a\_`¥^^`\_`^¥¥¥¥¥¥¥aa¥¥\_¥Q¥]Y¥Q^WTW  
@HWI-EAS443:3:79:1704:112#0/1  
CGATCATATGAACAAATGGAGACTGATGGGGAGCGCCAGG  
+HWI-EAS443:3:79:1704:112#0/1  
aaJb`bb^bba`Ga¥aabaV^]\_aa\_ba`a\_[aVaRZT]X

@HWI-EAS443:3:79:524:677#0/1  
CCCCATCAGTCTCCATTTGTTTCATATGATCGTTTGGTGCC  
+HWI-EAS443:3:79:524:677#0/1  
Z\_bbb`baaa\_bbbabbbbaabbabb`\_abbabab` `bab  
@HWI-EAS443:3:80:1204:663#0/1  
CCCCATCAGTCTCCATTTGTTTCATATGATCGTTTGGTGCC  
+HWI-EAS443:3:80:1204:663#0/1  
a`aa]N\_]ZUZY¥]P¥WKZNS[ZVZ[YJYTVU^PX^NYRU  
@HWI-EAS443:3:80:222:926#0/1  
CAAATGGAGACTGATGGGGAGCGCCAGGATGCCACAGAAA  
+HWI-EAS443:3:80:222:926#0/1  
a`¥R`^a]¥Ya^\_`^`^]X¥aa¥^¥¥UU[¥TT[UU`YU^U  
@HWI-EAS443:3:81:1158:1523#0/1  
ATGGGGAGCGCCAGGATGCCACAGAAATCAGAGCATCTGT  
+HWI-EAS443:3:81:1158:1523#0/1  
abaZ\_aab^`\_a]^aa\_`[`b]aa`\_`a¥`[\_`a\_`Y¥^aV  
@HWI-EAS443:3:82:1112:1092#0/1  
CCCCATCAGTCTCCATTTGTTTCATATGATCGTTTGGTGCC  
+HWI-EAS443:3:82:1112:1092#0/1  
`a^aabbaabbba^abbbbaa\_bbabbaab` `bba¥[``]  
@HWI-EAS443:3:82:542:293#0/1  
CTGATTTCTGTGGCATCCTGGCGCTCCCCATCAGTCTCCA  
+HWI-EAS443:3:82:542:293#0/1  
a^aaaaa`^`^a^^[a^[\_`\_]\_XY^Y\_\_Y[X\_YU^S¥Z  
@HWI-EAS443:3:83:710:270#0/1  
ATGAACAAATGGAGACTGATGGGGAGCGCCAGGATGCCAC  
+HWI-EAS443:3:83:710:270#0/1  
aaaaaaaa\_aab^^Zaaa`\_aa\_\_\_\_\_a]¥\_` `Y\_\_¥\_¥W  
@HWI-EAS443:3:85:555:1867#0/1  
CAGATGCTCTGATTTCTGTGGCATCCTGGCGCTCCCCATC  
+HWI-EAS443:3:85:555:1867#0/1  
`¥`\_YJ^Za¥]P\_bb]`a]WU^aa`\_]UUaWGXYSa[¥VW  
@HWI-EAS443:3:86:1157:1579#0/1  
CACCAAACGATCATATGAACAAATGGAGACTGATGGGGAG  
+HWI-EAS443:3:86:1157:1579#0/1  
[U^` [ [WaXaV`Y[ `VV¥ZRbVZ\_\_b[bb`bab`RQR¥^  
@HWI-EAS443:3:86:159:427#0/1  
TGATGGGGAGCGCCAGGATGCCACAGAAATCAGAGCATCT  
+HWI-EAS443:3:86:159:427#0/1  
aaXY\_a`\_H\_aa`Y[a]TX¥^]a` [PSTZT^Y[YWYP^¥¥  
@HWI-EAS443:3:86:192:364#0/1  
GATGGGGAGCGCCAGGATGCCACAGAAATCAGAGCATCTG  
+HWI-EAS443:3:86:192:364#0/1  
a`aa\_]a]a]^]U^¥¥^^¥U¥P^^Y^Z¥Y¥¥¥¥W¥WWWWS  
@HWI-EAS443:3:86:997:774#0/1  
ATCCTGGCGCTCCCCATCAGTCTCCATTTGTTTCATATGAT  
+HWI-EAS443:3:86:997:774#0/1  
abbaab`\_]` `aab]aXOMQ]¥LYUaa`WY\_Z[a\_[XZ\_  
@HWI-EAS443:3:87:1143:1165#0/1  
TCTGATTTCTGTGGCATCCTGGCGCTCCCCATCAGTCTCC

+HWI-EAS443:3:87:1143:1165#0/1  
`aabaaba\_a`¥\_a`aaaQ¥^]¥Z`MU``\_[¥[VTU¥ZQ\_  
@HWI-EAS443:3:87:469:162#0/1  
GCTCCCCATCAGTCTCCATTTGTTTCATATGATCGTTTGGT  
+HWI-EAS443:3:87:469:162#0/1  
[``^`a]Y[T[^U¥`\_\_\_\_\_][`\_^\_Y]a^^[\_W¥\_\_ZW  
@HWI-EAS443:3:88:1019:1125#0/1  
ATGGGGAGCGCCAGGATGCCACAGAAATCAGAGCATCTGT  
+HWI-EAS443:3:88:1019:1125#0/1  
\_\_^G¥Z]]T^\_^`¥PUP^UHRH`^XTOKJV]Z`ZVVYVBB  
@HWI-EAS443:3:88:904:366#0/1  
GATGGGGAGCGCCAGGATGCCACAGAAATCAGAGCATCTG  
+HWI-EAS443:3:88:904:366#0/1  
a]````a¥a]a[^`\_¥^Z^^`[a[X^\_`YWXU¥YR[TU[  
@HWI-EAS443:3:89:1041:678#0/1  
CTCTGATTTCTGTGGCATCCTGGCGCTCCCCATCAGTCTC  
+HWI-EAS443:3:89:1041:678#0/1  
abaab]bbbbbbaaa]`baa`bb`ba``]aa\_^[Y^\_¥\_V  
@HWI-EAS443:3:89:675:1749#0/1  
GAACAAATGGAGACTGATGGGGAGCGCCAGGATGCCACAG  
+HWI-EAS443:3:89:675:1749#0/1  
abbbbaaba]Za^^^bJaba`a`a`b¥]b`aaa^TLTaSba  
@HWI-EAS443:3:91:463:671#0/1  
AAACGATCATATGAACAAATGGAGACTGATGGGGAGCGCC  
+HWI-EAS443:3:91:463:671#0/1  
`¥]]]U\_W¥aaa\_aa\_aa[[^aZ``Za`Y`^a`aQ\_^^V¥  
@HWI-EAS443:3:91:487:62#0/1  
CATCAGTCTCCATTTGTTTCATATGATCGTTTGGTGCCTTG  
+HWI-EAS443:3:91:487:62#0/1  
ab`bab`bb`Ta`b``baaabbbb`aZaabbbb\_bSaaaa  
@HWI-EAS443:3:91:555:1049#0/1  
GATGGGGAGCGCCAGGATGCCACAGAAATCAGAGCATCTG  
+HWI-EAS443:3:91:555:1049#0/1  
\_`aa`a`[`aa`[¥^a\_Q`]^`\_X¥aZ^Xa¥^\_¥^¥]]¥  
@HWI-EAS443:3:92:1489:2032#0/1  
GATGGGGAGCGCCAGGATGCCACAGAAATCAGAGCATCTG  
+HWI-EAS443:3:92:1489:2032#0/1  
a``bbaaaa]a\_Saaaa]aa]aZbaa`a`\_a`]\_¥a]¥\_`  
@HWI-EAS443:3:92:1587:740#0/1  
GAACAAATGGAGACTGATGGGGAGCGCCAGGATGCCACAG  
+HWI-EAS443:3:92:1587:740#0/1  
aba[]baabaaaa[bb^aaa\_a\_ba\_]¥aaa^aaV\_]Qa\_  
@HWI-EAS443:3:92:460:1043#0/1  
GCTCCCCATCAGTCTCCATTTGTTTCATATGATCGTTTGGT  
+HWI-EAS443:3:92:460:1043#0/1  
a\_bababaa[aaaa`a\_abab¥baabaaaa\_aaaaa]¥  
@HWI-EAS443:3:92:543:182#0/1  
CTGATGGGGAGCGCCAGGATGCCACAGAAATCAGAGCATC  
+HWI-EAS443:3:92:543:182#0/1  
`baabaabbXbbb`a\_`b``ba`^abaaaa\_\_aaa¥\_`



@HWI-EAS443:3:92:892:1335#0/1  
TCCCCATCAGTCTCCATTTGTTTCATATGATCGTTTGGTGC  
+HWI-EAS443:3:92:892:1335#0/1  
abababb`^]abaaaaaaaa]aaaa\_a\_a]\_\_aaa\_U`\_  
@HWI-EAS443:3:93:983:1170#0/1  
CTGATTTCTGTGGCATCCTGGCGCTCCCCATCAGTCTCCA  
+HWI-EAS443:3:93:983:1170#0/1  
abbRY\_a\_XaTa\_a`a`^¥``\_`[\_a\_¥PN^[[UZUU¥Z  
@HWI-EAS443:3:94:1508:1845#0/1  
CTGATGGGGAGCGCCAGGATGCCACAGAAATCAGAGCATC  
+HWI-EAS443:3:94:1508:1845#0/1  
abaabbbabaaaaX\_aab\_\_a]\_aGba\_aaa\_\_`\_^Za`[  
@HWI-EAS443:3:94:237:1191#0/1  
CAAACGATCATATGAACAAATGGAGACTGATGGGGAGCGC  
+HWI-EAS443:3:94:237:1191#0/1  
aaa^`a]`a``aa`a``]\_\_\_\_\_^`^^\_\_^^\_]Y\_]`]]  
@HWI-EAS443:3:94:467:620#0/1  
CAGATGCTCTGATTTCTGTGGCATCCTGGCGCTCCCCATC  
+HWI-EAS443:3:94:467:620#0/1  
`¥`a`Z`ab`¥[b`^bbaaa`^`aaaRb^aa^¥``[`]RY  
@HWI-EAS443:3:94:932:1647#0/1  
CTCCCCATCAGTCTCCATTTGTTTCATATGATCGTTTGGTG  
+HWI-EAS443:3:94:932:1647#0/1  
`¥`RG]]S`]]LRPaa^X`YU`a`ZYLX`a]P[R^`^NX[  
@HWI-EAS443:3:96:1712:1289#0/1  
GATGGGGAGCGCCAGGATGCCACAGAAATCAGAGCATCTG  
+HWI-EAS443:3:96:1712:1289#0/1  
`N```a]¥aa\_^Z`\_^]U^Z]\_\_U^RYT¥^^\_UYZBBB  
@HWI-EAS443:3:96:439:121#0/1  
CTCTGATTTCTGTGGCATCCTGGCGCTCCCCATCAGTCTC  
+HWI-EAS443:3:96:439:121#0/1  
`bbbbabbbba\_ba`bba`abbaa\_a^\_\_¥\_a^a\_\_¥`\_  
@HWI-EAS443:3:96:750:1387#0/1  
TGCTCTGATTTCTGTGGCATCCTGGCGCTCCCCATCAGTC  
+HWI-EAS443:3:96:750:1387#0/1  
aa\_`Xa^¥baaa`a\_a\_aa`aa]`\_Z[`\_V\_a`UZ[U¥¥  
@HWI-EAS443:3:97:228:451#0/1  
AGGCACCAAACGATCATATGAACAAATGGAGACTGATGGG  
+HWI-EAS443:3:97:228:451#0/1  
Yabb`bbb\_]Wbaa``bb\_`ZPa`a`a`a[a¥Z]^]aaa^  
@HWI-EAS443:3:97:464:1304#0/1  
GAACAAATGGAGACTGATGGGGAGCGCCAGGATGCCACAG  
+HWI-EAS443:3:97:464:1304#0/1  
aa`¥Z\_a\_ab^Taab`abba]aaZaa`^`\_a][a]U[¥aa  
@HWI-EAS443:3:98:1213:292#0/1  
TGATGGGGAGCGCCAGGATGCCACAGAAATCAGAGCATCT  
+HWI-EAS443:3:98:1213:292#0/1  
ab]aaaa`^aV`¥Z¥`]Z¥^UP[Wa`]^SUS^\_¥¥USWM^  
@HWI-EAS443:3:9:433:93#0/1  
CTGATGGGGAGCGCCAGGATGCCACAGAAATCAGAGCATC

+HWI-EAS443:3:9:433:93#0/1  
`bbabbbbbbbaa`b^aaba`a`bbbba`bbaaa```Q  
@HWI-EAS443:3:4:1562:1565#0/1  
CAGAAATGAAAAGTGGCGAGGGCAATTGGGGCAGAAATTT  
+HWI-EAS443:3:4:1562:1565#0/1  
a[at[]]X¥\_ZbW\_YLa\_aGYQZTUWX]\_GGJ]XOSZ^\_  
@HWI-EAS443:3:21:996:1008#0/1  
CAAATTTCTGCCCCAATTGCTCTCGCCACTTTTCATTTCT  
+HWI-EAS443:3:21:996:1008#0/1  
`WZ¥[\_Ua^[DUU][^¥aYY^YYXa`\_Y\_[[WPFYYZ]]]  
@HWI-EAS443:3:62:859:1431#0/1  
GCAGAAATGAAAAGTGGCGAGAGCAATTGGGGCAGAAATT  
+HWI-EAS443:3:62:859:1431#0/1  
aaaba\_bbbba`\_]\_a^a[a`a¥^`Ra`aaa\_F\_aaa`\_`  
@HWI-EAS443:3:72:1731:132#0/1  
GAAAAGTGGCGAGAGCAATTGGGGCAGAAATTTGAGGAAA  
+HWI-EAS443:3:72:1731:132#0/1  
a][VYa¥\_\_\_a[]TUTU¥S]^PSDLQ\_XYVTY¥OQWTDMY  
@HWI-EAS443:3:74:361:1287#0/1  
GCCCCAATTGCTCTCGCCACTTTTCATTTCTGCTCTGGAG  
+HWI-EAS443:3:74:361:1287#0/1  
aU]WX[R\_`\_aYa\_\_ZX¥^\_PFZ¥^\_W^\_\_]\_PS\_Q¥QW¥  
@HWI-EAS443:3:85:1230:125#0/1  
TGAAAAGTGGCGAGAGCAATTGGGGCAGAAATTTGAGGAA  
+HWI-EAS443:3:85:1230:125#0/1  
aa\_a`\_a^ba\_a\_\_X\_WX^^`aa`X\_a^^Z^a`W`\_XZ  
@HWI-EAS443:3:29:1779:1523#0/1  
ATCGCAGCCCTCAAGAGCATGTCTCCTATTTCTAGAACAC  
+HWI-EAS443:3:29:1779:1523#0/1  
aa¥aa^\_G[```¥T]\_^W\_]¥\_W`Y]^Z\_a\_¥\_^^]`R^Z  
@HWI-EAS443:3:61:906:1903#0/1  
GGCCTATCGCAGCCCTCAAGAGCATGTCTCCTATTTCTAG  
+HWI-EAS443:3:61:906:1903#0/1  
X\_V]R^a\_a¥^E[UT¥\_\_\_ZO\_MRRTZHZGVPYVRSWUY  
@HWI-EAS443:3:32:1323:1212#0/1  
GGCCACCAAAGCNGACTACACCCTTGACGAAGAGAGCAGA  
+HWI-EAS443:3:32:1323:1212#0/1  
a`\_]`^bbbbaZDZ`¥`X`aaaa]aabXa`aYa]b]a]  
@HWI-EAS443:3:33:1780:324#0/1  
ATCCTGTTCCCTGTTCCATGGCTGTATGGAGGGNCTCCAGT  
+HWI-EAS443:3:33:1780:324#0/1  
a`a^a`¥a`aa\_aTV\_a]aUaBBBBBBBBBBBBBBBBBBB  
@HWI-EAS443:3:5:837:1146#0/1  
GGGGTCTCCAGTATAAGGGAATGTGGTGCTTATGGCATTT  
+HWI-EAS443:3:5:837:1146#0/1  
aa`a^aa`\_a\_\_`ZW^^\_]\_\_a^a¥]a`\_`^\_^[^`\_\_  
@HWI-EAS443:3:52:304:1620#0/1  
GATGCCAGGGTCTGACTTCGAGTCTGGACGGGTCAAGAAAG  
+HWI-EAS443:3:52:304:1620#0/1  
a¥[]XSM]VOQWPVR[[^YXSTU^\_^UW]MKNNTR[U[[Z

@HWI-EAS443:3:57:1005:186#0/1  
CGACTTCGAGTCTGGACGGGTCAAGAAAGAAGAGTTCTCT  
+HWI-EAS443:3:57:1005:186#0/1  
aa\_`aaaa\_a]\_a]W]\_b`^`\_[Xa¥W\_\_``\_]\_U`Z`Wa  
@HWI-EAS443:3:87:421:1350#0/1  
GATTGATGCCAGGGTCTGACTTCGAGTCTGGACGGGTCAAG  
+HWI-EAS443:3:87:421:1350#0/1  
\_SUaU\_aVZ`TG^WJW^XV¥SPYU[GR¥Z`aZVYFOFSV¥  
@HWI-EAS443:3:36:1337:941#0/1  
AAGATGCAGAGAGAGGCAAGTTAAAAAGAAGAGCCTGAAC  
+HWI-EAS443:3:36:1337:941#0/1  
aaaa`bbabaaaa\_`aaa`^Yaa\_`\_a[\_aa^\_Z\_\_a]^`  
@HWI-EAS443:3:33:932:619#0/1  
CAAAATGNCCACCGTCAACATCCACAGCACTCTGCTGTTC  
+HWI-EAS443:3:33:932:619#0/1  
aa^\_\_\_\_]D[aaa`\_`\_`\_Zaaa`aaaZ^aa\_TW\_W`^V^W  
@HWI-EAS443:3:64:912:533#0/1  
CAAAATGACCACCGTCAACATCCACAGCACTCTGCTGTTC  
+HWI-EAS443:3:64:912:533#0/1  
`]]bbbbb\_aa¥N[^\_a¥[[\_aaa\_V¥[Y¥`a`a`\_] [[a^  
@HWI-EAS443:3:89:1131:30#0/1  
GACAAAATGACCACCGTCAACATCCACAGCACTCTGCTGT  
+HWI-EAS443:3:89:1131:30#0/1  
a¥¥[\_]\_`^`aU¥^MWa[\_^¥Taa\_VTT\_\_^\_SYX\_\_XTZU  
@HWI-EAS443:3:31:578:1529#0/1  
AAATGATCATCGTCAACATCCACAGCACTCTGCTGTTCCT  
+HWI-EAS443:3:31:578:1529#0/1  
aa^VULSSXX`TT\_]V¥`PX^ZUXYXZXNYUSVSVXXXXYZ  
@HWI-EAS443:3:86:711:1068#0/1  
CAGGCACTCCTCCGTAGAAGGCCCTTTTTCAAGCCGTA  
+HWI-EAS443:3:86:711:1068#0/1  
]TV\_VG[¥\_W[ZNPYK^QTZ^XTQ^BBBBBBBBBBBBBBB  
@HWI-EAS443:3:94:1346:111#0/1  
AGCTTTTGGTCTAGTGTGTGCCACTTGTGAACAGATTGCT  
+HWI-EAS443:3:94:1346:111#0/1  
aaabbbba`\_a\_aaa\_aaa\_a\_Gb]aaa^bZ^J^a][`\_T\_  
@HWI-EAS443:3:17:1338:1523#0/1  
GGCATTCCCTCCGTAGAAGGCCCTTTTTCAAACCGTATT  
+HWI-EAS443:3:17:1338:1523#0/1  
aaa^]¥a¥^^`]UMU]``¥^T¥\_[VU]¥^N\_^ZVR^TX[\_  
@HWI-EAS443:3:67:642:1781#0/1  
CCCCATTCCCATTAGTGCATTTTGGACAAAGCGTCTACG  
+HWI-EAS443:3:67:642:1781#0/1  
a\_]\_aaaaa`\_`\_`\_¥PFW^Z\_\_\_\_aRDX]``aXVSNY[\_BB  
@HWI-EAS443:3:92:263:2033#0/1  
ATTCAGGGCATTTTTGGACAAAGCGTCTACGCTGGAGTCCT  
+HWI-EAS443:3:92:263:2033#0/1  
T]\_T]QFP^WWW]O^MO]Ta¥^aaVXZ\_0^TSLG^GVYBB  
@HWI-EAS443:3:30:542:1592#0/1  
CCCATTCCCATTAGGCGATTTTGGACAAAGCGTCTACGC

+HWI-EAS443:3:30:542:1592#0/1  
abbba`bbba]I]]Y¥aaa^`¥aaa]`S`]UW¥^¥SV  
@HWI-EAS443:3:19:643:431#0/1  
AGGGCGGATGGGAGTGCAGATGCAGCGATTCAAGTGATCC  
+HWI-EAS443:3:19:643:431#0/1  
abbbabbXbbbb^aU`aabaaa`Xa]b`\_`a`adW`a¥`^  
@HWI-EAS443:3:44:30:208#0/1  
GCAGGCCTACCAGAAGCGGATGGGAGTGCAGATGCAGCGA  
+HWI-EAS443:3:44:30:208#0/1  
aa`]a^aa\_a`\_`X\_\_[^DR[\_^aR^HU^PVQWXQQVKXR  
@HWI-EAS443:3:8:1774:101#0/1  
CAAAATGACCATTGTCAACATCCACAGTACTCTGCTGTTC  
+HWI-EAS443:3:8:1774:101#0/1  
`M[`baNYZ\_]D[[LU\_X¥^^OWGI¥OZX^OX]WXUBBB  
@HWI-EAS443:3:11:1005:186#0/1  
CAAAATGACCATCGTCAACATCCACAGCACTCTGCTGCTC  
+HWI-EAS443:3:11:1005:186#0/1  
R`\_\_Xa`aa[```\_¥\_S[¥`[[Y¥bba[\_0`b]a^EXF  
@HWI-EAS443:3:97:1659:797#0/1  
GGTCTCCATTTGTTTCATATGATCGTTTTGGTGCCTTGAGAC  
+HWI-EAS443:3:97:1659:797#0/1  
MWb\_\_YZ]bab`ab\_bbU`[[a\_ba[aI\_a][aabYJ¥\_H  
@HWI-EAS443:3:67:728:510#0/1  
ATGCCCATTCCTGATCGGCTCCGCCGGGATCAAAAGTC  
+HWI-EAS443:3:67:728:510#0/1  
WV`\_`\_`a`\_]\_¥V]\_VXa[]^`]V[YYRG[]¥¥Z\_STZZ^  
@HWI-EAS443:3:13:225:497#0/1  
CACGCTCGGGTTTCGTTGCCTTTTCGTCGAGAGCTCAGAT  
+HWI-EAS443:3:13:225:497#0/1  
¥R`[I]\_TXa0]UV`¥UaTZ¥]¥`aVW¥TX\_^ZVZ^^XXP  
@HWI-EAS443:3:15:238:487#0/1  
CACCGAACTTCTCCAGCCTTGAAAACCTTTAGAGTCTATGT  
+HWI-EAS443:3:15:238:487#0/1  
`bbba``aaaaabbaaaaaa`aa``aa`aa]\_F]aa`aZ  
@HWI-EAS443:3:16:1531:183#0/1  
CGGTGGGTTCACTTTCAAAGGACAAGCGGATTATCAGTC  
+HWI-EAS443:3:16:1531:183#0/1  
\_\_W[¥``OQUQa¥^aV`]^`¥]YS`^]Y\_UVVFYTQT^UV  
@HWI-EAS443:3:44:419:1573#0/1  
GCCACATACCAGAGAACAAGAGCGCTTGTTTCGCACCGGAA  
+HWI-EAS443:3:44:419:1573#0/1  
a`^[^baXGR\_]a``a^W]`a`a\_\_^]RZaa^¥¥`\_\_^^  
@HWI-EAS443:3:23:775:721#0/1  
CTAATGGTACCGAGATATGCATTTCGAATGGAAAGAAATG  
+HWI-EAS443:3:23:775:721#0/1  
aaa\_\_aa]baabaaaabaaaaa`\_`a```[`a`\_`a\_\_X  
@HWI-EAS443:3:46:1678:1597#0/1  
CAAGAAGTTCAAGACGAAATAGCAACAAGACCCAAAGCG  
+HWI-EAS443:3:46:1678:1597#0/1  
a^VbMYbaaa[\_`IabXUaZ`\_[UU`Ga^`XZ`XSTYVD¥

@HWI-EAS443:3:26:1203:426#0/1  
GGAAATTCCAATTGTTAGCCAATTGATGCCATCATGACAA  
+HWI-EAS443:3:26:1203:426#0/1  
JZZab`ZW\_`¥`\_¥WW\_XVV\_`Wa\_`^ZK\_``]Y`a[UQ¥  
@HWI-EAS443:3:9:1756:1873#0/1  
ATGCAGCAGAGTGGCATGCCATCCACACCAATTGGCTTTT  
+HWI-EAS443:3:9:1756:1873#0/1  
]`ba^a`aa^\_J0a^XXVUGTTXX\_X\_KQ\_`^¥¥SSUH^I\_  
@HWI-EAS443:3:77:1601:426#0/1  
GAGCTCTTCAATGGTGAACAGATCTTCATGATCTCAGAG  
+HWI-EAS443:3:77:1601:426#0/1  
]a¥]`^aa]`b\_RXU^abb\_\_bbb]a\_`\_``aaaaRaV\_`  
@HWI-EAS443:3:38:1093:1839#0/1  
GTTTTTTTGAACAAATTACTTGTCAATGGTAAATGGCAAC  
+HWI-EAS443:3:38:1093:1839#0/1  
a]\_aa`aaa`aa`\_\_a`a\_\_`Z\_\_\_a^¥XGUOXSYS^\_U  
@HWI-EAS443:3:99:1439:235#0/1  
AATCCCAATTACCTCATGGCTTGAAGCAGGGGCTAGGAG  
+HWI-EAS443:3:99:1439:235#0/1  
aVb\_YL\_\_baaW^U^\_ba^[]a[RGX`UZTWGG\_WWB  
@HWI-EAS443:3:86:1349:663#0/1  
CTCATGGCTTGAAGCAGGTGCTAGGAGAGCTACAGGACA  
+HWI-EAS443:3:86:1349:663#0/1  
abba`\_b]b`¥`WaTh\_`bVba\_W[FUaUaQ\_]ab\_X[`  
@HWI-EAS443:3:39:771:828#0/1  
CTGGCGACAGTTGACTAGATCGCCAAAATTTGGTAAATCC  
+HWI-EAS443:3:39:771:828#0/1  
`ababb¥WQ\_]a]XFVLRZ^^[[XOFQZNHIFQXXV]¥WV  
@HWI-EAS443:3:12:483:531#0/1  
AGGCACTCCTCGATTGCTTCATATAGCCCCCAAGATCAA  
+HWI-EAS443:3:12:483:531#0/1  
aa`aaMQ\_`\_UZ^QW`\_XX]^a^\_VZ`US^X`¥`^SZ¥B  
@HWI-EAS443:3:27:112:1351#0/1  
CAACTTGAGGGTTTTTCGGCTAAATCGAGAAAATTGCTTC  
+HWI-EAS443:3:27:112:1351#0/1  
a`a`a`a`a`a`aW`\_aa`]a¥F]^`^ZY\_aa``a\_^¥`\_^\_  
@HWI-EAS443:3:53:1310:295#0/1  
GAACAATGAGAAGCAATTTTCTCGATTTAGCCGAAAACCC  
+HWI-EAS443:3:53:1310:295#0/1  
aaaaaaaaabaa`aaaaabaaaaaaaa]bbaaa\_Zaa`a`]S  
@HWI-EAS443:3:54:1679:1617#0/1  
GTAAAATGGAATCAACAAGGATTTACCAGATTTTGGCGA  
+HWI-EAS443:3:54:1679:1617#0/1  
aaa^aaaaaaaa\_a\_`\_¥a\_a`^`^`\_]X]^Z``\_\_\_\_^`  
@HWI-EAS443:3:35:263:565#0/1  
AATAGATGGGGTAACGCTGGAATCAACACGATTTACCAG  
+HWI-EAS443:3:35:263:565#0/1  
YP\_Waa]aaZ^W`]DZ]^aa]^Y`¥`\_^GR^YWETa\_PW[  
@HWI-EAS443:3:35:1375:774#0/1  
AAGAAATAGATGGGGTAACGCTGGAATCAACAAGGATTTA

+HWI-EAS443:3:35:1375:774#0/1  
aaa`a`aab`abaa\_`a\_`¥¥^`^^ZZ^UT¥]]^^SWZ]X]  
@HWI-EAS443:3:40:786:361#0/1  
CAATGCCAAGGAGGCACAGGATGTGATTATGGAAGGTGGT  
+HWI-EAS443:3:40:786:361#0/1  
X`X[b]aba]babbbb]`^aSa¥GYZK[ZO\_\_RW[BBBBB  
@HWI-EAS443:3:73:1568:1877#0/1  
CAATGCCAAGGAGGCACAGGATGTGATTATGGAAGGTGGT  
+HWI-EAS443:3:73:1568:1877#0/1  
ab`ababaaa]`a`aaaa\_aaaS```\_\_^`\_`aYBBBBBB  
@HWI-EAS443:3:91:1378:1189#0/1  
GACCCTGGCCATGCAGATCTCAATGCCAAGGAGGGACAGG  
+HWI-EAS443:3:91:1378:1189#0/1  
````]]]`aZ^`^Z^Sa^UX`^^`\_`UTU]¥^V^¥GWSW^¥  
@HWI-EAS443:3:84:133:1859#0/1  
ATCACATCCTGTGCCTCCTTGGCATTGAGATCTGCACGGC  
+HWI-EAS443:3:84:133:1859#0/1  
a`a\_`baa\_[\_XZU¥Za¥ZLMVa^UHU\_QYWVSN¥MDMW]  
@HWI-EAS443:3:100:692:516#0/1  
AGTTGATACAAACCCTGGCCATGCAGATCTCAATACCAAG  
+HWI-EAS443:3:100:692:516#0/1  
`YWabbaababaaYaa]aa\_\_[\_`abU\_Qa^`^^JS¥]\_a  
@HWI-EAS443:3:13:490:332#0/1  
GGAGAGTTGATACCAACCCTGGCCATGCAGATCTCAATGC  
+HWI-EAS443:3:13:490:332#0/1  
a`b`aVaaa``\_V[V\_\_\_Z\_\_\_]\_¥¥¥[¥\_ZUWW^^VWSX  
@HWI-EAS443:3:14:761:707#0/1  
GAGGAGAGTTGGTACAAACCCTGGCCATGCAGATCTCAAT  
+HWI-EAS443:3:14:761:707#0/1  
a`ba\_a\_a\_``\_Ua¥`^a^[¥^^VXVS^¥U¥\_SSUWS\_SU  
@HWI-EAS443:3:27:1494:453#0/1  
TTGGTATTGAGATCTGCATGGCCAGGGTTTGTATCAACTC  
+HWI-EAS443:3:27:1494:453#0/1  
aaaa]\_aaaaba`\_]`a]^`^[\_¥\_a`\_Z`\_\_Y^\_XUYR[W  
@HWI-EAS443:3:27:575:1790#0/1  
GAGGAGAGTTGATACAAACCCTGGCCATGCAGATCACAAT  
+HWI-EAS443:3:27:575:1790#0/1  
a`aa`baaaaa\_babaa`adWN^Z^UZN¥^\_UU¥a```aS  
@HWI-EAS443:3:39:221:128#0/1  
GCAGATCTCAATGCCAAGGAGGCACAGGATGGGATTATGG  
+HWI-EAS443:3:39:221:128#0/1  
a\_S\_Y^^U^\_¥^\_AY^V]]¥Y]YXYX]^YV^GYGYUVYXX  
@HWI-EAS443:3:76:502:1916#0/1  
TGCAGATCTCAATGCCAAGGAGGCACAGGATGTGGTTATG  
+HWI-EAS443:3:76:502:1916#0/1  
Z\_]S^[ab]^FW`^ZL[\_ZV¥]]^ZN¥]ZR^BBBBBBBBB  
@HWI-EAS443:3:85:1494:1066#0/1  
TCCTGTACCTCCTTGGCATTGAGATCTGCATGGCCAGGGT  
+HWI-EAS443:3:85:1494:1066#0/1  
XaX[[X[a\_aaa\_bb\_ZabbVZ]bb`ab[Tab[[a`bb`S

@HWI-EAS443:3:93:1187:1614#0/1  
ATGCAGATCTCAATGCCAAGGAGGCACAGGATGGGATTAT  
+HWI-EAS443:3:93:1187:1614#0/1  
a\_``a`\_\_\_\_a^\_^]a`a\_¥\_]a]]^aGZRU]]B  
@HWI-EAS443:3:8:90:1911#0/1  
TGGCCATGCAGATCTCAATGNCAAGGAGGCACAGGATGTG  
+HWI-EAS443:3:8:90:1911#0/1  
aaaa`]^aa]]UYa`aa]¥VD¥[]\_`X\_]aaZ]XSU\_RB  
@HWI-EAS443:3:22:89:1989#0/1  
CGGAGAGTTGATACAAACCCTGGCCATGCAGATCTCAATG  
+HWI-EAS443:3:22:89:1989#0/1  
a^0)`[WMyaaT]R^^ZORPZR\_UKMY]YV[ZVBBBBBBB  
@HWI-EAS443:3:38:1276:1457#0/1  
ATACAAACCCTGGCCATGCAGATCTCAATGCCAAGGAGGA  
+HWI-EAS443:3:38:1276:1457#0/1  
`Ya]ba]\_[a^M[O[]QBBBBBBBBBBBBBBBBBBBBB  
@HWI-EAS443:3:92:1161:1213#0/1  
CGGCCATGCAGATCTCAATGCCAAGGAGGCACAGGATGTG  
+HWI-EAS443:3:92:1161:1213#0/1  
`\_\_\_\_`b`\_]a\_X¥`a[\_]Z``^`b\_bba`P¥aaIa`Z¥  
@HWI-EAS443:3:93:1112:1765#0/1  
NGCCATGCAGATCTCAATGCCAAGGAGGCACAGGATGTGA  
+HWI-EAS443:3:93:1112:1765#0/1  
DOWWYUYUYUYYWWWYWYVWUWWWYUWYYNWYWWWB  
@HWI-EAS443:3:11:239:698#0/1  
GAGAGTTGATACAAACCCTGGCCATGCAGATCTCAATGCC  
+HWI-EAS443:3:11:239:698#0/1  
a```\_`a`a`\_`a`Y`a`\_`\_`\_UX^[YRWZ¥W]KSZSR  
@HWI-EAS443:3:13:1159:261#0/1  
CCTTGGCATTGAGATCTGCATGGCCAGGGTTTGTATCAAC  
+HWI-EAS443:3:13:1159:261#0/1  
[]UU¥`U[a[ba\_aT\_`b]``]ZRXZbaaWa^a\_a^PXU¥  
@HWI-EAS443:3:13:1477:1245#0/1  
TGCAGATCTCAATGCCAAGGAGGCACAGGATGTGATTATG  
+HWI-EAS443:3:13:1477:1245#0/1  
Waab\_bbbbbbbbbbbbbbbabaa\_baabbbababbbb^  
@HWI-EAS443:3:13:731:1147#0/1  
GGAGAGTTGATACAAACCCTGGCCATGCAGATCTCAATGC  
+HWI-EAS443:3:13:731:1147#0/1  
aaZaZa\_aa`a`\_`a`Va\_]P¥[\_\_YZ\_\_\_\_SUQZ¥]¥UWW  
@HWI-EAS443:3:14:1086:703#0/1  
GCCATGCAGATCTCAATGCCAAGGAGGCACAGGATGTGAT  
+HWI-EAS443:3:14:1086:703#0/1  
aaa]aa`[`aa\_a`aaa`U^\_ba^a\_\_^\_^aa¥^aQ`S¥  
@HWI-EAS443:3:15:56:603#0/1  
AAACAACCTCCATAATCACATCCTGTGCCTCCTTGGCATT  
+HWI-EAS443:3:15:56:603#0/1  
U\_\_[\_[¥Z]aa¥R[PUXXWT¥]\_¥\_\_U``Z\_^[FSY`ZZ¥V  
@HWI-EAS443:3:16:751:1077#0/1  
AACAACCTCCATAATCACATCCTGTGCCTCCTTGGCATTG

+HWI-EAS443:3:16:751:1077#0/1  
aa`\_`X`a\_a`\_a\_`\_]`\_`\_]`^`^^`\_`Y^VU]X]`^^]`\_`  
@HWI-EAS443:3:17:1182:972#0/1  
TGCAGATCTCAATGCCAAGGAGGCACAGGATGTGATTATG  
+HWI-EAS443:3:17:1182:972#0/1  
`a`UUKaYWaWWIS¥ZZZaa`baaaPI^VTV[SaH^QXBB  
@HWI-EAS443:3:17:855:552#0/1  
TGCAGATCTCAATGCCAAGGAGGCACAGGATGTGATTATG  
+HWI-EAS443:3:17:855:552#0/1  
Z\_\_[¥Y[\_\_\_[T`\_`\_]¥\_\_¥`\_`\_[WZ\_\_XW^W`FUUPRZ  
@HWI-EAS443:3:18:348:889#0/1  
CATAATCACATCCTGTGCCTCCTTGGCATTGAGATCTGCA  
+HWI-EAS443:3:18:348:889#0/1  
aa`\_`]ab\_aaa`a\_\_T`\_`a\_^`\_`^ZWZ`^^`\_Z¥^\_Z\_\_[  
@HWI-EAS443:3:22:1003:459#0/1  
ACATCCTGTGCCTCCTTGGCATTGAGATCTGCATGGCCAG  
+HWI-EAS443:3:22:1003:459#0/1  
a\_a`¥`\_`^Xa`\_aa\_\_abaY\_\_aa\_a^`[a`\_VZ]`¥\_¥a  
@HWI-EAS443:3:22:1106:1983#0/1  
CCTGTGCCTCCTTGGCATTGAGATCTGCATGGCCAGGGTT  
+HWI-EAS443:3:22:1106:1983#0/1  
]bab[bbb\_ab`aaaaab`aba^`[X\_a\_a`]\_a`\_`¥`  
@HWI-EAS443:3:22:765:848#0/1  
CTCCTTGGCATTGAGATCTGCATGGCCAGGGTTTGTATCA  
+HWI-EAS443:3:22:765:848#0/1  
aaaaaa`\_a¥aaa^aaa`aaaa\_a]`a`\_`]`aX`]]^  
@HWI-EAS443:3:23:1748:936#0/1  
CACATCCTGTGCCTCCTTGGCATTGAGATCTGCATGGCCA  
+HWI-EAS443:3:23:1748:936#0/1  
`baabbbbaab\_bb\_ababb\_abbbaa\_a`aa`\_`bb\_¥a  
@HWI-EAS443:3:27:1048:541#0/1  
ACAACCTCCATAATCACATCCTGTGCCTCCTTGGCATTGA  
+HWI-EAS443:3:27:1048:541#0/1  
^O^[YXSSX`\_`[W]U¥\_RNNSX`M`QR[P\_[NVTQSX[^T  
@HWI-EAS443:3:28:528:1370#0/1  
ACAACCTCCATAATCACATCCTGTGCCTCCTTGGCATTGA  
+HWI-EAS443:3:28:528:1370#0/1  
aa]I[ZP¥a`aaaa¥aa`a`ZZYT^`\_`HY¥[\_\_\_`\_`U]  
@HWI-EAS443:3:29:332:843#0/1  
ATAATCACATCCTGTGCCTCCTTGGCATTGAGATCTGCAT  
+HWI-EAS443:3:29:332:843#0/1  
`aaa`^`\_N\_`\_`\_`¥aa`]a\_W\_^Z`^^]¥Y`\_Z\_W¥¥¥U  
@HWI-EAS443:3:30:1771:1292#0/1  
CATGCAGATCTCAATGCCAAGGAGGCACAGGATGTGATTA  
+HWI-EAS443:3:30:1771:1292#0/1  
aabb\_bbbbababaab\_babba\_aaa`\_aa`\_a`U\_R`^`\_  
@HWI-EAS443:3:31:512:150#0/1  
ATCCTGTGCCTCCTTGGCATTGAGATCTGCATGGCCAGGG  
+HWI-EAS443:3:31:512:150#0/1  
`abaaa^baaaaa[[`]aaaa`aaa`\_`^^`\_`^¥W`^`^`\_¥



@HWI-EAS443:3:32:1459:243#0/1  
CTTGGCATTGAGATCTGCATGGCCAGGGTTTGTATCAACT  
+HWI-EAS443:3:32:1459:243#0/1  
abbbbbbbbabbbabb`abb`\_`bbb]abbaabP`ab  
@HWI-EAS443:3:32:931:683#0/1  
GAGGAGAGTTGATACAAACCCTGGCCATGCAGATCTCAAT  
+HWI-EAS443:3:32:931:683#0/1  
\_J`YaQ^Ua\_]^\_a¥`[\_¥U\_^\_Z^Q[RR[UUTW\_[VB  
@HWI-EAS443:3:34:978:493#0/1  
AGGAGAGTTGATACAAACCCTGGCCATGCAGATCTCAATG  
+HWI-EAS443:3:34:978:493#0/1  
`]J¥bab^Y\_b`\_aaaaX¥YY\_]a]K\_`ZUV^S\_^^^U^  
@HWI-EAS443:3:36:1310:272#0/1  
AGTTGATACAAACCCTGGCCATGCAGATCTCAATGCCAAG  
+HWI-EAS443:3:36:1310:272#0/1  
abXb`^baa`a\_\_aaZ\_a`[YY^\_U¥ZQ\_Z\_]VUS[`]V]  
@HWI-EAS443:3:38:1260:626#0/1  
ACATCCTGTGCCTCCTTGGCATTGAGATCTGCATGGCCAG  
+HWI-EAS443:3:38:1260:626#0/1  
\_[a¥[^Z^H\_Z]aVa]]Z]U^]¥a`\_ZQZ`PPPRZ^^WRY  
@HWI-EAS443:3:45:964:236#0/1  
GGAGGAGAGTTGATACAAACCCTGGCCATGCAGATCTCAA  
+HWI-EAS443:3:45:964:236#0/1  
ab]a\_Ubab¥aa`\_a`aa[QZQ\_`Z¥S`\_¥[W\_\_WW^V¥Z  
@HWI-EAS443:3:47:289:981#0/1  
ACATCCTGTGCCTCCTTGGCATTGAGATCTGCATGGCCAG  
+HWI-EAS443:3:47:289:981#0/1  
`a`\_abbb``[^`UU¥[W^[\_a]^``[aX`[a`]]W]a  
@HWI-EAS443:3:4:159:26#0/1  
TGGCCATGCAGATCTCAATGCCAAGGAGGCACAGGATGTG  
+HWI-EAS443:3:4:159:26#0/1  
abb`aZU`]R\_¥VUZ\_]RXa[UJQ^\_W\_¥ZST^^BBBBB  
@HWI-EAS443:3:4:1740:204#0/1  
ACCCTGGCCATGCAGATCTCAATGCCAAGGAGGCACAGGA  
+HWI-EAS443:3:4:1740:204#0/1  
aa^Y`bb`\_`^¥]¥a`^X¥`U\_^¥\_UW[[U[P\_SUSNBBBB  
@HWI-EAS443:3:50:1673:421#0/1  
TACAAACCCTGGCCATGCAGATCTCAATGCCAAGGAGGCA  
+HWI-EAS443:3:50:1673:421#0/1  
a`^aa``]aaa]a\_aab\_\_a\_^[[X\_^Y¥Y[YP[ZJV^ZZ  
@HWI-EAS443:3:51:988:819#0/1  
TGCAGATCTCAATGCCAAGGAGGCACAGGATGTGATTATG  
+HWI-EAS443:3:51:988:819#0/1  
\_a`WaaaW^\_a¥T\_R0babbbXbbYJaI]bV]b\_`QX[[``  
@HWI-EAS443:3:55:950:366#0/1  
TGCAGATCTCAATGCCAAGGAGGCACAGGATGTGATTATG  
+HWI-EAS443:3:55:950:366#0/1  
ab\_abaa\_aaa`a^`[^a`\_aa`\_`\_ab]a\_U]N¥\_Q`a  
@HWI-EAS443:3:56:1459:1297#0/1  
ATTGAGATCTGCATGGCCAGGGTTTGTATCAACTCTCCTC

+HWI-EAS443:3:56:1459:1297#0/1  
aa]W`a^`Z¥¥a\_bb`[T^UQ]N]baY`^SX[Y\_\_SMT[G  
@HWI-EAS443:3:56:871:691#0/1  
TGCAGATCTCAATGCCAAGGAGGCACAGGATGTGATTATG  
+HWI-EAS443:3:56:871:691#0/1  
abbabaaaabb\_abaaa]b`^\_a^aa\_ba```Va¥`a\_^¥  
@HWI-EAS443:3:5:741:841#0/1  
GGAGGAGAGTTGATACAAACCCTGGCCATGCAGATCTCAA  
+HWI-EAS443:3:5:741:841#0/1  
aaabb\_bab\_aaa`a¥^a\_¥]¥]\_\_\_W^Y\_¥¥`Y]U\_UBB  
@HWI-EAS443:3:61:1020:1265#0/1  
CCTGGCCATGCAGATCTCAATGCCAAGGAGGCACAGGATG  
+HWI-EAS443:3:61:1020:1265#0/1  
abbbbbbaaab\_aa`aa\_Z\_a`baWW^a\_`¥a[^\_`ZZZ[  
@HWI-EAS443:3:61:279:698#0/1  
AGTTGATACAAACCCTGGCCATGCAGATCTCAATGCCAAG  
+HWI-EAS443:3:61:279:698#0/1  
ababbaabaaaa\_aaaaa`a¥^\_N^\_^^\_\_\_\_¥\_\_V[Y¥  
@HWI-EAS443:3:63:1411:682#0/1  
GCCTCCTTGGCATTGAGATCTGCATGGCCAGGGTTTGTAT  
+HWI-EAS443:3:63:1411:682#0/1  
]]]b`a¥¥\_\_^aabaaa`b`baaa`a¥\_\_\_\_a^¥a\_aZaa  
@HWI-EAS443:3:63:177:868#0/1  
TGCAGATCTCAATGCCAAGGAGGCACAGGATGTGATTATG  
+HWI-EAS443:3:63:177:868#0/1  
ab``baaaab\_¥aaa]Y]bTH^aaaa\_`U¥\_\_Ta]X[Z^`  
@HWI-EAS443:3:64:1720:1675#0/1  
ACATCCTGTGCCTCCTTGGCATTGAGATCTGCATGGCCAG  
+HWI-EAS443:3:64:1720:1675#0/1  
abaaaaa\_\_\_\_V)`aaa`a¥QVZ\_\_VZZ\_¥`¥\_V¥\_\_\_\_`\_[  
@HWI-EAS443:3:65:1427:1013#0/1  
ATCACATCCTGTGCCTCCTTGGCATTGAGATCTGCATGGC  
+HWI-EAS443:3:65:1427:1013#0/1  
`aaa`\_aaaaa[]\_\_`aaaa^a\_``aa``aaaa`\_Z`^V¥  
@HWI-EAS443:3:66:1535:326#0/1  
GAGGAGAGTTGATACAAACCCTGGCCATGCAGATCTCAAT  
+HWI-EAS443:3:66:1535:326#0/1  
aabbabaaaababaaa`M`Y\_a[Y`\_[]^]¥T¥YS¥V  
@HWI-EAS443:3:69:1218:256#0/1  
AAACAACCTCCATAATCACATCCTGTGCCTCCTTGGCATT  
+HWI-EAS443:3:69:1218:256#0/1  
aa]a`\_ab`a^Zaaabaa\_`a]Sabaa\_¥\_U¥\_\_\_\_SSaa  
@HWI-EAS443:3:72:1387:1135#0/1  
CCTTGGCATTGAGATCTGCATGGCCAGGGTTTGTATCAAC  
+HWI-EAS443:3:72:1387:1135#0/1  
abbabba^bbbabaa`bbaaa`a``abaa[aabZ\_a\_\_[[  
@HWI-EAS443:3:73:1170:244#0/1  
GCAGATCTCAATGCCAAGGAGGCACAGGATGTGATTATGG  
+HWI-EAS443:3:73:1170:244#0/1  
aaaaaa\_a`aa\_a]\_aaa\_`a¥\_\_^\_\_X\_aU`S¥\_X^^\_

@HWI-EAS443:3:73:823:654#0/1  
TACAAACCCTGGCCATGCAGATCTCAATGCCAAGGAGGCA  
+HWI-EAS443:3:73:823:654#0/1  
aa^a^U`aaX\_Z`\_Q`a\_[\_U^`\_Xa[X`[P¥V[ZGXaYL  
@HWI-EAS443:3:74:1307:1607#0/1  
ATCCTGTGCCTCCTTGGCATTGAGATCTGCATGGCCAGGG  
+HWI-EAS443:3:74:1307:1607#0/1  
aaaaaa`a`b\_aaaaaaaaa`a`\_a`\_b\_\_a\_S`\_a`]  
@HWI-EAS443:3:76:734:628#0/1  
GGCCATGCAGATCTCAATGCCAAGGAGGCACAGGATGTGA  
+HWI-EAS443:3:76:734:628#0/1  
a`^\_RXVa\_VOP\_\_]SYTY]TKXZSSPS^NSV[VBBBBBB  
@HWI-EAS443:3:77:709:1862#0/1  
CCTTGGCATTGAGATCTGCATGGCCAGGGTTTGTATCAAC  
+HWI-EAS443:3:77:709:1862#0/1  
K[Uabbbba]]b[baba`\_baaab\_baaZX^aaabbbbaa  
@HWI-EAS443:3:78:842:1743#0/1  
GAGTTGATACAAACCCTGGCCATGCAGATCTCAATGCCAA  
+HWI-EAS443:3:78:842:1743#0/1  
a^a`\_b`aaa]aX^ab\_\_aaY`\_`\_\_\_\_[\_`\_a`[S]\_S\_¥  
@HWI-EAS443:3:7:60:508#0/1  
CATGCAGATCTCAATGCCAAGGAGGCACAGGATGTGATTA  
+HWI-EAS443:3:7:60:508#0/1  
aW¥WZ\_VTV]]XaZ\_\_a]\_Z]`V]Za^¥HZa\_XSHXMX^T  
@HWI-EAS443:3:80:608:1722#0/1  
AAACAACCTCCATAATCACATCCTGTGCCTCCTTGGCATT  
+HWI-EAS443:3:80:608:1722#0/1  
Z^Z¥WU`a¥F¥bab^[^a`a`\_a[ZUXZU`UT¥FXVXVa¥  
@HWI-EAS443:3:80:727:509#0/1  
CACATCCTGTGCCTCCTTGGCATTGAGATCTGCATGGCCA  
+HWI-EAS443:3:80:727:509#0/1  
W`\_b`\_\_b`X`\_\_`\_bb¥YT\_a`\_\_`¥]\_]bab`aa]]¥V  
@HWI-EAS443:3:83:747:670#0/1  
GGAGGAGAGTTGATACAAACCCTGGCCATGCAGATCTCAA  
+HWI-EAS443:3:83:747:670#0/1  
aY`]ZP\_]`^a`a`\_a`\_`^¥¥^X^^^)^¥^YYTYWWYU[¥  
@HWI-EAS443:3:84:1023:1417#0/1  
TGCAGATCTCAATGCCAAGGAGGCACAGGATGTGATTATG  
+HWI-EAS443:3:84:1023:1417#0/1  
aba`\_\_aaaba]a`a`\_a`\_a`\_a`\_ba``aVa^\_\_]\_`  
@HWI-EAS443:3:88:1288:641#0/1  
CAACTTCCATAATCACATCCTGTGCCTCCTTGGCATTGAG  
+HWI-EAS443:3:88:1288:641#0/1  
abbabb`abb`aaababbaa`b¥a``a]\_a`\_a`\_aaaab  
@HWI-EAS443:3:91:293:1137#0/1  
ACAAACCCTGGCCATGCAGATCTCAATGCCAAGGAGGCAC  
+HWI-EAS443:3:91:293:1137#0/1  
`aYQ^aa¥a¥`¥¥VYaVZ]]^Z[\_`^RZ^\_[[V[V`\_`¥V  
@HWI-EAS443:3:95:1715:711#0/1  
CCTTGGCATTGAGATCTGCATGGCCAGGGTTTGTATCAAC

+HWI-EAS443:3:95:1715:711#0/1  
\_\_bb`V`b\_bba[bb`aaUbbbab\_a\_babbb\_bbb\_a]D  
@HWI-EAS443:3:96:1204:1178#0/1  
CAACTTCCATAATCACATCCTGTGCCTCCTTGGCATTGAG  
+HWI-EAS443:3:96:1204:1178#0/1  
aa¥^Y\_XWZ\_]¥Z]WX¥\_a`\_]^ZX\_G^]^^^Z¥aaa]\_  
@HWI-EAS443:3:97:153:790#0/1  
AGTTGATACAAACCCTGGCCATGCAGATCTCAATGCCAAG  
+HWI-EAS443:3:97:153:790#0/1  
`babbbbbbba^`aabb]^\_aa¥aa^¥U[^YS[`¥YY[`  
@HWI-EAS443:3:98:646:1497#0/1  
TGGCCATGCAGATCTCAATGCCAAGGAGGCACAGGATGTG  
+HWI-EAS443:3:98:646:1497#0/1  
^\_¥WV[T\_`[^WaW\_] [U\_`U^X\_a\_UZ]\_XaUaZVHYSB  
@HWI-EAS443:3:14:1034:884#0/1  
CCCCTGGGTTTTGCTTAATGCATCTTGGTTCAACTCCTTC  
+HWI-EAS443:3:14:1034:884#0/1  
aaaaaa`aZaaa`\_aaa^^^¥]`¥a``¥T^\_\_Z` `[W\_\_^  
@HWI-EAS443:3:19:774:612#0/1  
CCCCTGGGTTTTGCTTAATGCATCTTGGTTCAACTCCTTC  
+HWI-EAS443:3:19:774:612#0/1  
`ba` `[V]`YTbWb`Na` `PJN\_a\_TbSHSPaa` `Y`¥\_  
@HWI-EAS443:3:64:1181:833#0/1  
CCCCTGGGTTTTGCTTAATGCATCTTGGTTCAACTCCTTC  
+HWI-EAS443:3:64:1181:833#0/1  
aa` `UXX^QV]\_^^\_Z\_^¥W[Z`]a\_ZR¥]^a\_TZY¥` ]`  
@HWI-EAS443:3:98:1282:990#0/1  
TCCCAGTTCGTGATTATCCATTGATAAGTGTGACTAGAA  
+HWI-EAS443:3:98:1282:990#0/1  
Y]\_Z\_Z`XPHY^Fa]Q[UO¥`\_ba[VE[XaS\_`SLQ¥\_Ga  
@HWI-EAS443:3:59:1738:1096#0/1  
TGGCGCCAAGCAAACAATGGCGAAGATGCAAAGCAGGTA  
+HWI-EAS443:3:59:1738:1096#0/1  
aa` `aa` `aY\_`a`F\_`RT¥0¥X`¥]] [X`aG\_RULT^BB  
@HWI-EAS443:3:59:1290:270#0/1  
TGGAGATCCAGATGAAGGCACATCTGGGGTGGAGTCTGCT  
+HWI-EAS443:3:59:1290:270#0/1  
[[`^ [¥¥\_bab^]^\_`\_b]R` `UKa\_RX]^OL]TEM[OH  
@HWI-EAS443:3:43:615:1524#0/1  
GTCTGGTGCCGCAGGTGCTGCGGTAAAAGGAGTTGGAAAA  
+HWI-EAS443:3:43:615:1524#0/1  
`YZ\_` [SQ[[X\_S^VRRX¥[T]VBBBBBBBBBBBBBBBB  
@HWI-EAS443:3:3:741:1226#0/1  
CGTCCATCATAATCACTGAGTTTAAGTTCAGTGCACATTT  
+HWI-EAS443:3:3:741:1226#0/1  
abbbbbbbabbaababababbb`S¥babaaa`ba¥^aaa`  
@HWI-EAS443:3:55:105:611#0/1  
GGTTAATTGAAGAAATGCGGCACAGATTGAAAGAGACAGA  
+HWI-EAS443:3:55:105:611#0/1  
ab¥XOH^UYZU^`THP]X\_a`¥`a\_VXX`UZTWQ¥` [TWV

@HWI-EAS443:3:14:1602:904#0/1  
CATATAGCCCCCAAGATCGAAGGTTCCAGGTTCCAGATT  
+HWI-EAS443:3:14:1602:904#0/1  
\_`b¥\_a^^^\_^^^a^\_Za``]]aa¥R\_a`[`SMVaTa`  
@HWI-EAS443:3:59:695:1759#0/1  
TCCCGATCCAAAATGGAAGGCTTTGTGCGACAATGCTCCA  
+HWI-EAS443:3:59:695:1759#0/1  
S¥XQ]FUU[]`aaSGTa\_YZa\_`SLRZa]Y\_YGYGXNR`  
@HWI-EAS443:3:2:646:270#0/1  
TACTGATCCAAAATGGAAGGCTTTGTGCGAGAATGCTTCA  
+HWI-EAS443:3:2:646:270#0/1  
YWUT\_WVW^WaX^U\_VV\_¥\_[YP[[FPLV¥G]UUS`BBBB  
@HWI-EAS443:3:56:1696:1572#0/1  
TACTGATCCAAAATGCAAGGCTTTGTGCGACAATGCTTCA  
+HWI-EAS443:3:56:1696:1572#0/1  
aa`aa`\_a`\_`\_`^V]QUOZW^VZWWVUPYYQ][QLRWBB  
@HWI-EAS443:3:95:820:606#0/1  
TACTGATCCAAAATGGAAGGCTTTGTGCGACAATGGTTCA  
+HWI-EAS443:3:95:820:606#0/1  
¥``R]`\_`aaW``Zab^XaZ¥X`[Y`\_^XI`a]\_FU^`\_  
@HWI-EAS443:3:7:1078:1404#0/1  
TACTCATCCAAAATGGAAGGCTTTGTGCGACAATGCTTCA  
+HWI-EAS443:3:7:1078:1404#0/1  
ab\_[FWV``\_\_ba¥\_Wa¥RT]aa\_a^^RbX^a`¥\_SBBBB  
@HWI-EAS443:3:25:399:222#0/1  
CTGATCCAAAATGGAAGGCTTTGTGCGACAATGNTTCAAT  
+HWI-EAS443:3:25:399:222#0/1  
[`bb^abab``abbbbbbabbbbaababbb\_a[D]babba  
@HWI-EAS443:3:13:1445:1293#0/1  
ATCCAAAATGGAAGGCTTTGTGCGACAATGGTTCAATCCA  
+HWI-EAS443:3:13:1445:1293#0/1  
aa`¥`aY`\_]P¥¥WT\_ZW]Za^]a\_^Z`XHYV^\_W¥BBB  
@HWI-EAS443:3:14:1653:214#0/1  
AAAATAGAAGGCTTTGTGCGACAATGCTTCAATCCAATGA  
+HWI-EAS443:3:14:1653:214#0/1  
aa`abba`^a`\_^\_aa]a``[a``^]¥X^^^][\_Z`^X  
@HWI-EAS443:3:25:692:1851#0/1  
CGACGATCATTGGATTGAAGCATTGTAGCACAAAGCCTTC  
+HWI-EAS443:3:25:692:1851#0/1  
abba`a``aaaaaaaa^¥b`\_\_¥\_QRKS\_\_\_a\_aV^\_¥^¥  
@HWI-EAS443:3:100:338:938#0/1  
TACTGATCCAAAATGGAAGGCTTTGTGCGACAATGCTTCA  
+HWI-EAS443:3:100:338:938#0/1  
[a`a````aaa^^U[^]aa^aa`\_Z[¥Z^aa`]¥SX^]B  
@HWI-EAS443:3:11:1074:1470#0/1  
TACTGATCCAAAATGGAAGGCTTTGTGCGACAATGCTTCA  
+HWI-EAS443:3:11:1074:1470#0/1  
aa\_]`¥]`````\_aa\_a]a\_^\_\_`¥\_\_\_\_\_]^`^^X\_ZX`  
@HWI-EAS443:3:11:613:1421#0/1  
TACTGATCCAAAATGGAAGGCTTTGTGCGACAATGCTTCA

+HWI-EAS443:3:11:613:1421#0/1  
aa[^aW[a`b\_^\_aa^aaba[^aaXb`\_\_`\_]a^^^\_^\_`  
@HWI-EAS443:3:13:1661:596#0/1  
TACTGATCCAAAATGGAAGGCTTTGTGCGACAATGCTTCA  
+HWI-EAS443:3:13:1661:596#0/1  
`baa¥`a^`aab^aRFZ\_[`Ya\_```b^\_^\_S`a`¥\_\_W\_  
@HWI-EAS443:3:14:1286:783#0/1  
TACTGATCCAAAATGGAAGGCTTTGTGCGACAATGCTTCA  
+HWI-EAS443:3:14:1286:783#0/1  
``aaba^`aa]^a`aaaaa¥``a`]¥¥aa\_]`a`]`ZOY  
@HWI-EAS443:3:17:959:1870#0/1  
TACTGATCCAAAATGGAAGGCTTTGTGCGACAATGCTTCA  
+HWI-EAS443:3:17:959:1870#0/1  
ab`^aaa`babb`Paa\_a\_\_a\_WTZ`a`WaaUTXZaUa  
@HWI-EAS443:3:18:1062:1067#0/1  
TACTGATCCAAAATGGAAGGCTTTGTGCGACAATGCTTCA  
+HWI-EAS443:3:18:1062:1067#0/1  
\_]a]XX^aa\_OURY\_aQVYa]`\_Y^UY`\_VDS\_a¥Y]¥]]  
@HWI-EAS443:3:18:1720:364#0/1  
TACTGATCCAAAATGGAAGGCTTTGTGCGACAATGCTTCA  
+HWI-EAS443:3:18:1720:364#0/1  
abbQYW]OZaa]Y\_ba`Uaa\_a]\_`Q`UaRN\_\_`a[U\_\_]  
@HWI-EAS443:3:1:362:1317#0/1  
TACTGATCCAAAATGGAAGGCTTTGTGCGACAATGCTTCA  
+HWI-EAS443:3:1:362:1317#0/1  
a^U^bb`[^¥YV[VYX`\_`a^aaa¥R`S¥a^ZWabBBBBB  
@HWI-EAS443:3:24:1382:755#0/1  
TACTGATCCAAAATGGAAGGCTTTGTGCGACAATGCTTCA  
+HWI-EAS443:3:24:1382:755#0/1  
¥`[¥Y`¥SHY`aSaZZ¥^VT¥]`XS\_M\_XM\_aaXW[^W]  
@HWI-EAS443:3:25:80:1724#0/1  
TACTGATCCAAAATGGAAGGCTTTGTGCGACAATGCTTCA  
+HWI-EAS443:3:25:80:1724#0/1  
aba]Z\_\_abba]^aa`aa\_\_a\_\_]PY\_\_[\_`\_[Va^Y^a  
@HWI-EAS443:3:26:1522:706#0/1  
TACTGATCCAAAATGGAAGGCTTTGTGCGACAATGCTTCA  
+HWI-EAS443:3:26:1522:706#0/1  
`bRaaaa\_`ab`a`aabY\_\_\_`\_aX]\_a¥]``^`Y^¥]^  
@HWI-EAS443:3:2:1130:60#0/1  
TACTGATCCAAAATGGAAGGCTTTGTGCGACAATGCTTCA  
+HWI-EAS443:3:2:1130:60#0/1  
aaaabaa`\_aa^\_aaa`\_a]aa\_`¥a^a0¥^Y\_\_]^]V^  
@HWI-EAS443:3:32:1479:836#0/1  
TACTGATCCAAAATGGAAGGCTTTGTGCGACAATGCTTCA  
+HWI-EAS443:3:32:1479:836#0/1  
aaba``babaaaZb¥[a`aa\_`a^aW^Ma[Wa]\_a0aa`a  
@HWI-EAS443:3:32:829:999#0/1  
TANTGATCCAAAATGGAAGGCTTTGTGCGACAATGCTTCA  
+HWI-EAS443:3:32:829:999#0/1  
]^D¥^aa^aa`[^`XW`aa]\_aa^V^aX]Za`aX\_¥[ab`

@HWI-EAS443:3:3:136:722#0/1  
TACTGATCCAAAATGGAAGGCTTTGTGCGACAATGCTTCA  
+HWI-EAS443:3:3:136:722#0/1  
ZT\_aaU^U\_\_Z^aaaa\_]`^aaaaa]\_Q¥]P\_`^`V¥¥NX  
@HWI-EAS443:3:3:1729:184#0/1  
TACTGATCCAAAATGGAAGGCTTTGTGCGACAATGCTTCA  
+HWI-EAS443:3:3:1729:184#0/1  
a`aabaa\_```aaaa^`aa^]```a\_\_OXTM`^\_]U^BBB  
@HWI-EAS443:3:44:314:773#0/1  
TACTGATCCAAAATGGAAGGCTTTGTGCGACAATGCTTCA  
+HWI-EAS443:3:44:314:773#0/1  
`aa`a\_a]aba\_`a`a`Sba\_`aaa^a`aa]\_`]a\_``]a  
@HWI-EAS443:3:47:1044:430#0/1  
TACTGATCCAAAATGGAAGGCTTTGTGCGACAATGCTTCA  
+HWI-EAS443:3:47:1044:430#0/1  
^^abaX^``]baa\_aaa]a`Ia```aab`aa`a`ab\_Y^a^  
@HWI-EAS443:3:49:1441:556#0/1  
TACTGATCCAAAATGGAAGGCTTTGTGCGACAATGCTTCA  
+HWI-EAS443:3:49:1441:556#0/1  
^b\_`¥a`a\_aabbaa]a`aaXaa\_]X``ba\_aaaaY`a``  
@HWI-EAS443:3:53:1023:1406#0/1  
TACTGATCCAAAATGGAAGGCTTTGTGCGACAATGCTTCA  
+HWI-EAS443:3:53:1023:1406#0/1  
`aaaaaaaa`aa`aaa`aaaaaaaa`¥a\_aaa\_`aa\_Z`\_\_  
@HWI-EAS443:3:54:1608:1734#0/1  
TACTGATCCAAAATGGAAGGCTTTGTGCGACAATGCTTCA  
+HWI-EAS443:3:54:1608:1734#0/1  
aa[abaa^Zaa`aaa\_a^aa^aa[``\_aaa``]]`a[H[[Q\_  
@HWI-EAS443:3:58:1612:413#0/1  
TACTGATCCAAAATGGAAGGCTTTGTGCGACAATGCTTCA  
+HWI-EAS443:3:58:1612:413#0/1  
aa`aaa`QJ^```aa[X\_a¥[a\_`a^`\_\_[R`^`aQNZVY  
@HWI-EAS443:3:60:273:1049#0/1  
TACTGATCCAAAATGGAAGGCTTTGTGCGACAATGCTTCA  
+HWI-EAS443:3:60:273:1049#0/1  
a`bSRTVaV[X^a\_[aX]aaTPX]bN[\_\_\_\_]\_`]UZ]WPX  
@HWI-EAS443:3:62:1269:1922#0/1  
TACTGATCCAAAATGGAAGGCTTTGTGCGACAATGCTTCA  
+HWI-EAS443:3:62:1269:1922#0/1  
]Uaaabbaabb[b`abbb^X^a]ab`aaababbab``ba`  
@HWI-EAS443:3:66:1271:814#0/1  
TACTGATCCAAAATGGAAGGCTTTGTGCGACAATGCTTCA  
+HWI-EAS443:3:66:1271:814#0/1  
]¥`aa\_abaa`bba`Y^`aa¥aaaa\_a¥aa\_`]\_a]a`^a  
@HWI-EAS443:3:67:1140:804#0/1  
TACTGATCCAAAATGGAAGGCTTTGTGCGACAATGCTTCA  
+HWI-EAS443:3:67:1140:804#0/1  
abbbbbbba^HZ`aa\_a^[\_a\_\_aaa\_ba```aaa`ba¥a^`  
@HWI-EAS443:3:69:596:1728#0/1  
TACTGATCCAAAATGGAAGGCTTTGTGCGACAATGCTTCA

+HWI-EAS443:3:69:596:1728#0/1  
abaa`aabaaa`aa`¥^]¥aa\_a`^`\_`\_`^`aaa\_\_\_\_\_aa  
@HWI-EAS443:3:74:1147:1466#0/1  
TACTGATCCAAAATGGAAGGCTTTGTGCGACAATGCTTCA  
+HWI-EAS443:3:74:1147:1466#0/1  
]aaa`aVZbbaa\_^[^`aT¥TWaa\_[a\_`a[a\_]a\_R][`  
@HWI-EAS443:3:74:349:151#0/1  
TACTGATCCAAAATGGAAGGCTTTGTGCGACAATGCTTCA  
+HWI-EAS443:3:74:349:151#0/1  
a]R^a^`\_`a`\_`\_`^]`\_`\_`¥^\_V\_Z\_X]^X^^¥^Z^ZZ^  
@HWI-EAS443:3:76:253:601#0/1  
TACTGATCCAAAATGGAAGGCTTTGTGCGACAATGCTTCA  
+HWI-EAS443:3:76:253:601#0/1  
aaaa` `aabaa^````a]`aaaa````\_Z`[^¥[¥^Z\_  
@HWI-EAS443:3:77:329:1145#0/1  
TACTGATCCAAAATGGAAGGCTTTGTGCGACAATGCTTCA  
+HWI-EAS443:3:77:329:1145#0/1  
\_bb` `Z^bb\_a`Z\_aaa¥aa\_ab]`Vba`^`a^a]]\_a`  
@HWI-EAS443:3:77:705:883#0/1  
TACTGATCCAAAATGGAAGGCTTTGTGCGACAATGCTTCA  
+HWI-EAS443:3:77:705:883#0/1  
aY`a`a\_b^\_X¥]Yaa^a\_\_a`a\_]\_\_Y\_W`\_a`a`\_`\_`  
@HWI-EAS443:3:78:1185:1881#0/1  
TACTGATCCAAAATGGAAGGCTTTGTGCGACAATGCTTCA  
+HWI-EAS443:3:78:1185:1881#0/1  
``[ `aab` `a[babaab`a]]Za`]`ZR¥]aa`¥b\_^VT`  
@HWI-EAS443:3:78:67:947#0/1  
TACTGATCCAAAATGGAAGGCTTTGTGCGACAATGCTTCA  
+HWI-EAS443:3:78:67:947#0/1  
ababb`abbbbbaaaaa\_a`ba` `a\_aa`\_\_aaaa`\_`\_`  
@HWI-EAS443:3:79:1481:75#0/1  
TACTGATCCAAAATGGAAGGCTTTGTGCGACAATGCTTCA  
+HWI-EAS443:3:79:1481:75#0/1  
[\_N¥QQRbaZ] `b]baab¥]¥U¥b[¥aaSH]aa\_P\_MMV  
@HWI-EAS443:3:81:209:1237#0/1  
TACTGATCCAAAATGGAAGGCTTTGTGCGACAATGCTTCA  
+HWI-EAS443:3:81:209:1237#0/1  
abba]\_`bbabaaaa`a`\_\_aaaaW`aa]\_Z` `aa\_]aa  
@HWI-EAS443:3:85:481:153#0/1  
TACTGATCCAAAATGGAAGGCTTTGTGCGACAATGCTTCA  
+HWI-EAS443:3:85:481:153#0/1  
aaa`aaaa`aaaa\_a`ZV]]aa`aX\_Ya\_]`\_`\_`\_]`^  
@HWI-EAS443:3:86:1790:566#0/1  
TACTGATCCAAAATGGAAGGCTTTGTGCGACAATGCTTCA  
+HWI-EAS443:3:86:1790:566#0/1  
]b`]ba\_¥Y]bab^\_V\_aRJ]aaa\_]\_aWb^a` `\_\_`ZS]  
@HWI-EAS443:3:87:1044:1024#0/1  
TACTGATCCAAAATGGAAGGCTTTGTGCGACAATGCTTCA  
+HWI-EAS443:3:87:1044:1024#0/1  
a\_aa`\_a`aa] `aaaa[ `]a\_`aW]M\_^`\_`\_`\_`^`\_Za



@HWI-EAS443:3:92:1109:1480#0/1  
TACTGATCCAAAATGGAAGGCTTTGTGCGACAATGCTTCA  
+HWI-EAS443:3:92:1109:1480#0/1  
]b¥a^[\_` `` ` \_¥¥b\_aXZb^ba]\_Yb`aa\_aa`a`aa[\_  
@HWI-EAS443:3:95:1143:1162#0/1  
TACTGATCCAAAATGGAAGGCTTTGTGCGACAATGCTTCA  
+HWI-EAS443:3:95:1143:1162#0/1  
WZ\_UaZ¥\_S\_[\_\_\_\_` ` \_¥\_b[`U\_b^^\_¥YFY^¥¥`\_N[¥  
@HWI-EAS443:3:99:620:1054#0/1  
TACTGATCCAAAATGGAAGGCTTTGTGCGACAATGCTTCA  
+HWI-EAS443:3:99:620:1054#0/1  
aaWZa^a¥aa`^aab`a\_aa[a\_X\_[a\_aa\_aa^a` `a\_a  
@HWI-EAS443:3:69:1301:1515#0/1  
CAAAAATGGAAGGCTTTGTGCGACAANGCTTCAATCCAATG  
+HWI-EAS443:3:69:1301:1515#0/1  
aYa[ab¥^\_b`bbbaa`V`[`aba[DWaababbbb`baa`  
@HWI-EAS443:3:21:1138:913#0/1  
ACTGATCCAAAATGGAAGGCTTTGTGCGACAATGCTTCAA  
+HWI-EAS443:3:21:1138:913#0/1  
a]XaaZa` ` ` ]`ZW\_a¥ZZ^` ` \_]¥0¥[^^^`\_XZZ^a¥  
@HWI-EAS443:3:31:1441:1615#0/1  
ACTGATCCAAAATGGAAGGCTTTGTGCGACAATGCTTCAA  
+HWI-EAS443:3:31:1441:1615#0/1  
aaaaaa` `aaaaaaaa`a^\_aaa]a^a\_]\_` `aZ`^ [^^  
@HWI-EAS443:3:33:1466:876#0/1  
ACTGATCCAAAATGGAAGGCTTTGTGCGACAATGCTTCAA  
+HWI-EAS443:3:33:1466:876#0/1  
aaaa`baaaaaaaaa`a`a\_aaaaYaWa^` ` \_V` ]^^T\_]`  
@HWI-EAS443:3:42:513:1339#0/1  
ACTGATCCAAAATGGAAGGCTTTGTGCGACAATGCTTCAA  
+HWI-EAS443:3:42:513:1339#0/1  
aaVQ]Pba\_¥[^YRIR^V¥]\_^\_0]`a]Z\_]\_^Y]]\_]\_`  
@HWI-EAS443:3:48:472:1323#0/1  
ACTGATCCAAAATGGAAGGCTTTGTGCGACAATGCTTCAA  
+HWI-EAS443:3:48:472:1323#0/1  
a¥baaabaaba`abaaaa`aaa`\_a]`aaaa\_]\_`a\_\_`  
@HWI-EAS443:3:50:1067:1421#0/1  
ACTGATCCAAAATGGAAGGCTTTGTGCGACAATGCTTCAA  
+HWI-EAS443:3:50:1067:1421#0/1  
a¥aa\_` `X\_`a`TN[aaTTTaaa¥SaYbZL\_` `a0\_YFVY  
@HWI-EAS443:3:59:351:1806#0/1  
ACTGATCCAAAATGGAAGGCTTTGTGCGACAATGCTTCAA  
+HWI-EAS443:3:59:351:1806#0/1  
`^¥0VZ\_]\_YY\_QU^\_RD[NVPZXZ[aV` `]Y]SWSU\_\_Y  
@HWI-EAS443:3:66:696:586#0/1  
ACTGATCCAAAATGGAAGGCTTTGTGCGACAATGCTTCAA  
+HWI-EAS443:3:66:696:586#0/1  
]a¥\_ZX]`XWWZWa¥ZXP¥TT\_S[`a`\_[YLWY]P]SXU  
@HWI-EAS443:3:67:1369:1262#0/1  
ACTGATCCAAAATGGAAGGCTTTGTGCGACAATGCTTCAA

+HWI-EAS443:3:67:1369:1262#0/1  
a`aaaaaaa`a`aaa]`\_`aa`\_¥a``¥a`\_a`\_`^V`\_`\_`  
@HWI-EAS443:3:69:53:2036#0/1  
ACTGATCCAAAATGGAAGGCTTTGTGCGACAATGCTTCAA  
+HWI-EAS443:3:69:53:2036#0/1  
\_aUT^¥`\_Z¥LK\_^`\_[aZa`]^`PXWNV[^Z^]\_]O\_[N  
@HWI-EAS443:3:6:454:1836#0/1  
ACTGATCCAAAATGGAAGGCTTTGTGCGACAATGCTTCAA  
+HWI-EAS443:3:6:454:1836#0/1  
ab¥b]\_baaaaZX]\_\_aRZYV¥]YR`]^a^\_]ZZ¥RQ¥¥\_`  
@HWI-EAS443:3:70:243:173#0/1  
ACTGATCCAAAATGGAAGGCTTTGTGCGACAATGCTTCAA  
+HWI-EAS443:3:70:243:173#0/1  
aa`a``aa`a]`aa`\_a`\_`\_`^`\_]`\_^`[V]]V^]]`[  
@HWI-EAS443:3:78:678:502#0/1  
ACTGATCCAAAATGGAAGGCTTTGTGCGACAATGCTTCAA  
+HWI-EAS443:3:78:678:502#0/1  
a^`b`aaa]a¥a\_a`aaaZ^`a`\_`\_`^ZS`\_]\_\_\_\_\_¥[\_\_\_\_`  
@HWI-EAS443:3:79:1073:90#0/1  
ACTGATCCAAAATGGAAGGCTTTGTGCGACAATGCTTCAA  
+HWI-EAS443:3:79:1073:90#0/1  
]abbbbabab`abaaaba\_aaa\_Wb`a`\_`\_`^`\_aa^¥¥U`a`  
@HWI-EAS443:3:81:351:795#0/1  
ACTGATCCAAAATGGAAGGCTTTGTGCGACAATGCTTCAA  
+HWI-EAS443:3:81:351:795#0/1  
aa]aaaaa^a^]Z`TR]`\_`\_`\_`^`Sa\_a`\_X[¥`a^^`VU`  
@HWI-EAS443:3:97:881:186#0/1  
ACTGATCCAAAATGGAAGGCTTTGTGCGACAATGCTTCAA  
+HWI-EAS443:3:97:881:186#0/1  
a\_abaaaaa`\_`\_`aa`^`[]`\_]a`aa^`Z`W^`^^aU`^X`\_`  
@HWI-EAS443:3:98:1332:925#0/1  
ACTGATCCAAAATGGAAGGCTTTGTGCGACAATGCTTCAA  
+HWI-EAS443:3:98:1332:925#0/1  
``ab\_b\_\_aaa`aaXaaVJabba^a```]¥a``a¥]^Ga^`  
@HWI-EAS443:3:99:367:1081#0/1  
ACTGATCCAAAATGGAAGGCTTTGTGCGACAATGCTTCAA  
+HWI-EAS443:3:99:367:1081#0/1  
a^Z\_\_a`[\_]0[\_a`\_`[^¥`\_Y\_ZY[[[NWZZ\_X\_^Q`\_`  
@HWI-EAS443:3:24:866:1889#0/1  
GTGATCCAAAATGGAAGGCTTTGTGCGACAATGCTTCAAT  
+HWI-EAS443:3:24:866:1889#0/1  
IVa¥W[¥]``UY[^a`^aVZMI[KWa\_]UK\_\_aJONLWa`  
@HWI-EAS443:3:28:1320:1203#0/1  
CTGATCCAAAATGGAAGGCTTTGTGCGACAATGCTTCAAT  
+HWI-EAS443:3:28:1320:1203#0/1  
W`\_aaaaabbbba^```aaba`\_]\_\_Uabb\_YZ`\_]`\_`^`  
@HWI-EAS443:3:51:1015:314#0/1  
CTGATCCAAAATGGAAGGCTTTGTGCGACAATGCTTCAAT  
+HWI-EAS443:3:51:1015:314#0/1  
abbbbababbbbbbababbaabbbabbb

@HWI-EAS443:3:58:1122:259#0/1  
CTGATCCAAAATGGAAGGCTTTGTGCGACAATGCTTCAAT  
+HWI-EAS443:3:58:1122:259#0/1  
abbabbba`aabbbbbaabab]a`baUaaab\_a`aa`a  
@HWI-EAS443:3:58:1629:674#0/1  
CTGATCCAAAATGGAAGGCTTTGTGCGACAATGCTTCAAT  
+HWI-EAS443:3:58:1629:674#0/1  
abbababbbaabbbbbaabaaaa`a\_aa\_baaa`aaaaa  
@HWI-EAS443:3:66:971:213#0/1  
CAAATGGAAGGCTTTGTGCGACAATGCTTCAATCCAATGA  
+HWI-EAS443:3:66:971:213#0/1  
aabaabaaababaXa\_abba^abbbb\_aa`ab`a]a`baa  
@HWI-EAS443:3:73:1318:951#0/1  
CTGATCCAAAATGGAAGGCTTTGTGCGACAATGCTTCAAT  
+HWI-EAS443:3:73:1318:951#0/1  
aaaabababaaaa`ba\_a\_abbb`b`aaabaab\_aaaaa`  
@HWI-EAS443:3:76:446:1210#0/1  
CTGATCCAAAATGGAAGGCTTTGTGCGACAATGCTTCAAT  
+HWI-EAS443:3:76:446:1210#0/1  
ab`Tabbb``bbb`ababbbbbaababbba`ba`aaaa  
@HWI-EAS443:3:78:582:1000#0/1  
CTGATCCAAAATGGAAGGCTTTGTGCGACAATGCTTCAAT  
+HWI-EAS443:3:78:582:1000#0/1  
aVX`[aa\_[^V]ZT¥RW[V]\_]\_]`\_^]RU¥\_]Z^^\_¥  
@HWI-EAS443:3:81:431:1219#0/1  
TGCTTTGTGCGACAATGCTTCAATCCAATGATCGTCGAGC  
+HWI-EAS443:3:81:431:1219#0/1  
¥Zaaaa¥\_ababaa`aaaa`]\_aaaaa`aba`Y^^¥  
@HWI-EAS443:3:89:1005:1007#0/1  
CTGATCCAAAATGGAAGGCTTTGTGCGACAATGCTTCAAT  
+HWI-EAS443:3:89:1005:1007#0/1  
abb`b`baYb\_a^baaaabab\_a\_aa`a]bbaaa`aaaa`  
@HWI-EAS443:3:11:1276:1882#0/1  
CAAAATGGAAGGCTTTGTGCGACAATGCTTCAATCCAATG  
+HWI-EAS443:3:11:1276:1882#0/1  
abb`abbab`W¥`a\_b`Z\_¥`aU`\_\_YK[]Y`¥\_¥XaaTa  
@HWI-EAS443:3:15:648:296#0/1  
GATCCAAAATGGAAGGCTTTGTGCGACAATGCTTCAATCC  
+HWI-EAS443:3:15:648:296#0/1  
ab\_X^babaaab^a\_]aa¥\_\_aaaaZa`a^`a`\_Z]\_^\_  
@HWI-EAS443:3:15:728:165#0/1  
CAAAATGGAAGGCTTTGTGCGACAATGCTTCAATCCAATG  
+HWI-EAS443:3:15:728:165#0/1  
`bbaaaa`a^^XX\_aa`]^U¥a\_a\_]\_[^¥\_\_a^R^\_[]W  
@HWI-EAS443:3:21:1391:1817#0/1  
CAAAATGGAAGGCTTTGTGCGACAATGCTTCAATCCAATG  
+HWI-EAS443:3:21:1391:1817#0/1  
ab¥`^Zaaa\_]Z¥QPZTORF¥\_Q]\_\_aUSUVa[]\_^LRWZ  
@HWI-EAS443:3:25:931:910#0/1  
CCAAAATGGAAGGCTTTGTGCGACAATGCTTCAATCCAAT

+HWI-EAS443:3:25:931:910#0/1  
abbb\_bbabaaaabbba`aba```aaabaaa`aa\_`aaa`  
@HWI-EAS443:3:2:1726:1768#0/1  
AGGCTTTGTGCGACAATGCTTCAATCCAATGATCGTCGAG  
+HWI-EAS443:3:2:1726:1768#0/1  
`aaMaaaaX`\_aaU`\_[a[\_^TY^TS\_¥^]^[V\_WN¥YU  
@HWI-EAS443:3:30:1023:317#0/1  
GATCCAAAATGGAAGGCTTTGTGCGACAATGCTTCAATCC  
+HWI-EAS443:3:30:1023:317#0/1  
aab]¥aaaaabaaaa`aaaa^\_Va`^a`^a\_``^^^R`  
@HWI-EAS443:3:30:942:883#0/1  
ATGGAAGGCTTTGTGCGACAATGCTTCAATCCAATGATCG  
+HWI-EAS443:3:30:942:883#0/1  
¥\_\_^RZ\_UZ\_b\_]Uaaaaa`^aa\_W]aaaa\_]^[XHPa  
@HWI-EAS443:3:31:434:233#0/1  
AAAATGGAAGGCTTTGTGCGACAATGCTTCAATCCAATGA  
+HWI-EAS443:3:31:434:233#0/1  
a`WZ[aaaaab`[]`a``aa``aa\_aaa\_a`ZZ\_¥`Y¥`\_  
@HWI-EAS443:3:34:727:922#0/1  
AAATGGAAGGCTTTGTGCGACAATGCTTCAATCCAATGAT  
+HWI-EAS443:3:34:727:922#0/1  
^¥0Ha\_ZU`a\_\_aa]Z`T`\_[P`TPY]]U¥[[[ZHQYBB  
@HWI-EAS443:3:37:100:1253#0/1  
CCAAAATGGAAGGCTTTGTGCGACAATGCTTCAATCCAAT  
+HWI-EAS443:3:37:100:1253#0/1  
ab`\_]X[W`¥V¥\_a^`][ab`X`ZXS`a^R]Z`¥aa¥`^  
@HWI-EAS443:3:38:1193:963#0/1  
AAGGCTTTGTGCGACAATGCTTCAATCCAATGATCGTCGA  
+HWI-EAS443:3:38:1193:963#0/1  
aaa]aaaa`\_a\_`\_aaaaa[`^`\_a\_a[ZWW¥¥¥Y^¥¥^W  
@HWI-EAS443:3:39:1522:614#0/1  
AAATGGAAGGCTTTGTGCGACAATGCTTCAATCCAATGAT  
+HWI-EAS443:3:39:1522:614#0/1  
``\_aa]ab\_[a`babaa^a[S`^¥`^`\_a\_UX[X`^`[]W  
@HWI-EAS443:3:40:1055:1653#0/1  
ATGGAAGGCTTTGTGCGACAATGCTTCAATCCAATGATCG  
+HWI-EAS443:3:40:1055:1653#0/1  
a\_`^`a^^`aa`\_]`\_aaa`^^^\_a\_Y]^[\_\_ZY¥Y\_]`  
@HWI-EAS443:3:40:458:106#0/1  
GGCTTTGTGCGACAATGCTTCAATCCAATGATCGTCGAGC  
+HWI-EAS443:3:40:458:106#0/1  
aba``ab^ba`a\_`\_\_a\_¥^\_[V]]X^Y]]]]Y]^YR  
@HWI-EAS443:3:45:431:578#0/1  
CCAAAATGGAAGGCTTTGTGCGACAATGCTTCAATCCAAT  
+HWI-EAS443:3:45:431:578#0/1  
a`aTJ`^0\_b\_P^aaa]]VZ[\_\_[`\_\_¥Ua`[aV¥X^`^`  
@HWI-EAS443:3:48:1185:1274#0/1  
AGGCTTTGTGCGACAATGCTTCAATCCAATGATCGTCGAG  
+HWI-EAS443:3:48:1185:1274#0/1  
aaaaaabbb`aaaaaaabaaaaaaa`aaaa`\_`\_a]^a\_`

@HWI-EAS443:3:48:1734:1959#0/1  
CCAAAATGGAAGGCTTTGTGCGACAATGCTTCAATCCAAT  
+HWI-EAS443:3:48:1734:1959#0/1  
`\_LW^PV[QW]SXQZ^aa^`]a\_\_a\_``\_]\_]\_LKYRUVQ^  
@HWI-EAS443:3:53:1143:1787#0/1  
AGGCTTTGTGCGACAATGCTTCAATCCAATGATCGTCGAG  
+HWI-EAS443:3:53:1143:1787#0/1  
a`W0`ab\_W]Zb\_^aWaa\_`^\_a`aYaaaa``\_`a\_``\_a  
@HWI-EAS443:3:55:100:352#0/1  
CAAAATGGAAGGCTTTGTGCGACAATGCTTCAATCCAATG  
+HWI-EAS443:3:55:100:352#0/1  
aaXUSU`\_]\_Xa^Wa[aWSZ\_[S[[\_aa¥a][ZLR]TRNV`  
@HWI-EAS443:3:55:1671:1424#0/1  
GCTTTGTGCGACAATGCTTCAATCCAATGATCGTCGAGCT  
+HWI-EAS443:3:55:1671:1424#0/1  
aaaa\_]\_a]aa\_aaaaYaa^`\_]Z¥`aa`\_\_\_\_YZ^^[W^  
@HWI-EAS443:3:60:1443:777#0/1  
GCTTTGTGCGACAATGCTTCAATCCAATGATCGTCGAGCT  
+HWI-EAS443:3:60:1443:777#0/1  
`]aa]b`a\_a``aaa]\_aa`a`\_]\_¥]^`^\_`^SaZaZ^  
@HWI-EAS443:3:60:852:982#0/1  
AAATGGAAGGCTTTGTGCGACAATGCTTCAATCCAATGAT  
+HWI-EAS443:3:60:852:982#0/1  
aaaaaaaaaaaa`aaaa\_a\_a\_]aaaa\_```a\_a¥V¥````\_`  
@HWI-EAS443:3:62:55:820#0/1  
CGATCATTGGATTGAAGCATTGTCGCACAAAGCCTTCCAT  
+HWI-EAS443:3:62:55:820#0/1  
ab]aaaaaaaaaaaa\_aaaaa`aZ^````\_a`P¥``^^]\_[^  
@HWI-EAS443:3:63:1539:619#0/1  
GGAAGGCTTTGTGCGACAATGCTTCAATCCAATGATCGTC  
+HWI-EAS443:3:63:1539:619#0/1  
`bb\_¥Y`bb^¥]bbbabbbabbabaa[`[a^aaaa`aa[`  
@HWI-EAS443:3:70:537:236#0/1  
GCTTTGTGCGACAATGCTTCAATCCAATGATCGTCGAGCT  
+HWI-EAS443:3:70:537:236#0/1  
a`[^V`G]XVVMYTKPUS^¥SXV[R\_SUQ[UTYNHST[MN  
@HWI-EAS443:3:71:1290:123#0/1  
CCAAAATGGAAGGCTTTGTGCGACAATGCTTCAATCCAAT  
+HWI-EAS443:3:71:1290:123#0/1  
^^b`\_``b[[ba¥S\_bbaVbaa\_¥¥Z\_abb````\_bbbabbb  
@HWI-EAS443:3:7:930:1756#0/1  
ATCCAAAATGGAAGGCTTTGTGCGACAATGCTTCAATCCA  
+HWI-EAS443:3:7:930:1756#0/1  
a`J^aaabaa\_HWT`aaaV\_Saa`a\_a^`a\_a\_]a\_XP^B  
@HWI-EAS443:3:82:1009:773#0/1  
AGGCTTTGTGCGACAATGCTTCAATCCAATGATCGTCGAG  
+HWI-EAS443:3:82:1009:773#0/1  
aaaaaaaa`baaaaaaaaaaaaaaaaa``\_`^ab`a`a]^`^\_a  
@HWI-EAS443:3:83:121:1718#0/1  
AAAATGGAAGGCTTTGTGCGACAATGCTTCAATCCAATGA

+HWI-EAS443:3:83:121:1718#0/1  
a)`a]TRWaa`\_aa[] [Y\_Q]W]\_\_\_a`^`a]¥Ua[QXVV  
@HWI-EAS443:3:8:1141:544#0/1  
CCAAAATGGAAGGCTTTGTGCGACAATGCTTCAATCCAAT  
+HWI-EAS443:3:8:1141:544#0/1  
`bbbbbbbaababbab`a[`a]b`ba\_abaabY]a`a  
@HWI-EAS443:3:8:1200:247#0/1  
AAAATGGAAGGCTTTGTGCGACAATGCTTCAATCCAATGA  
+HWI-EAS443:3:8:1200:247#0/1  
WW¥aabaUaa\_\_baa\_XY¥]aX` ]`PRO]UX^\_YN]aU\_^  
@HWI-EAS443:3:91:453:448#0/1  
AAGGCTTTGTGCGACAATGCTTCAATCCAATGATCGTCGA  
+HWI-EAS443:3:91:453:448#0/1  
aaaaaaaa\_b^aa\_aaa`aa`\_`Y^`a`\_`a¥^`\_`Y^a]  
@HWI-EAS443:3:92:865:401#0/1  
ATGGAAGGCTTTGTGCGACAATGCTTCAATCCAATGATCG  
+HWI-EAS443:3:92:865:401#0/1  
aa` `aaaa`aaa\_a`aa[baaa`\_a^a\_a¥aa`aa¥^¥a  
@HWI-EAS443:3:94:1369:956#0/1  
AAATGGAAGGCTTTGTGCGACAATGCTTCAATCCAATGAT  
+HWI-EAS443:3:94:1369:956#0/1  
^`]abbaabaS`a\_V`aIba[abaaSaa\_aaa\_^a` `aaa  
@HWI-EAS443:3:95:527:92#0/1  
GGCTTTGTGCGACAATGCTTCAATCCAATGATCGTCGAGC  
+HWI-EAS443:3:95:527:92#0/1  
abbbbab^baabababb`abbbbbbbbabbbbabbbab^  
@HWI-EAS443:3:98:110:1290#0/1  
CAAAATGGAAGGCTTTGTGCGACAATGCTTCAATCCAATG  
+HWI-EAS443:3:98:110:1290#0/1  
aabababbbbaaaaa` `[a\_\_`aaaa`aa^^`Y\_a]\_\_  
@HWI-EAS443:3:98:853:1617#0/1  
AGGCTTTGTGCGACAATGCTTCAATCCAATGATCGTCGAG  
+HWI-EAS443:3:98:853:1617#0/1  
\_Z`aaaba]a\_aa`aaa`b\_aaa\_a`a\_a\_```Wa`QY`^  
@HWI-EAS443:3:9:469:29#0/1  
GCTTTGTGCGACAATGCTTCAATCCAATGATCGTCGAGCT  
+HWI-EAS443:3:9:469:29#0/1  
a`a\_ZJV a\_[^] ][^\_[Y]¥^RFTXXY^Y]U]XUVNYB  
@HWI-EAS443:3:9:864:1330#0/1  
TTGGATTGAAGCATTGTCGCACAAAGCCTTCCATTTTGGGA  
+HWI-EAS443:3:9:864:1330#0/1  
¥Z¥¥]bb)`¥WkaYX]¥X`ZJ`\_a¥XW]`ZNPYT^[\_\_[\_  
@HWI-EAS443:3:16:239:500#0/1  
CCAAAATTGAACCATTCTTGAGGACGACACCACACTCC  
+HWI-EAS443:3:16:239:500#0/1  
abZZa\_00`\_¥a\_\_ [V¥X`\_`^a`\_`S¥`a\_] [ `SX`¥TBB  
@HWI-EAS443:3:24:813:315#0/1  
GAGAAGCCTGAGGCGCTGCCTTCTTCAGTCTTTCAGCAG  
+HWI-EAS443:3:24:813:315#0/1  
Z`abZbabWX\_QYab\_a^UaU¥Q`\_¥\_b[ `Q\_\_RG\_[KKX

@HWI-EAS443:3:12:955:1399#0/1  
CATCCGACGATTTTGTCTCATAGTGAATGCACCAGACCA  
+HWI-EAS443:3:12:955:1399#0/1  
T¥b[`aU`bNaUbb]`ab[abbb[`ababb[aNbK`¥\_`  
@HWI-EAS443:3:44:387:160#0/1  
CACTATGAGAGCAAATCGTCAGATGATTGGAGCCCATCC  
+HWI-EAS443:3:44:387:160#0/1  
`aababb`aaaa`aa`aaa^[F^^`a]\_`a\_Y^]¥VMYWX  
@HWI-EAS443:3:68:91:807#0/1  
GGGTTGTACTCTATTTCTCTTTGTTTCATTGATTCCAT  
+HWI-EAS443:3:68:91:807#0/1  
^aa`¥^VXVI`a]a[[ba¥b]a``¥Z]\_\_aaY^`^\_`T\_a  
@HWI-EAS443:3:87:1081:1420#0/1  
CGCTGCATCTGCACTCCCATTCGTTTCTGGGAGGCCTGAA  
+HWI-EAS443:3:87:1081:1420#0/1  
ab[^`\_XV]OYM][HP^BBBBBBBBBBBBBBBBBBBBBBB  
@HWI-EAS443:3:46:1402:507#0/1  
CAAAATGACTATCGTCAACATCCACAGCACTCTGCTGTTC  
+HWI-EAS443:3:46:1402:507#0/1  
a[[`aaa]`bab[Z¥`aa]\_\_`a[U¥VZ¥\_\_\_a[Z`\_\_`]  
@HWI-EAS443:3:45:1114:1567#0/1  
GCGAGCGAAAGCAGGTACTGATCCAAAATGGAAGCCTTG  
+HWI-EAS443:3:45:1114:1567#0/1  
YG¥aU^bWa[aYF^\_WNNaaZ[YUYNNPXX\_Z¥WQ[\_\_\_]  
@HWI-EAS443:3:97:841:2033#0/1  
GGACCAGAGCGAAAGCAGGTCAAATATATTCAATATGGAG  
+HWI-EAS443:3:97:841:2033#0/1  
YLV¥MQa[YZ\_a^aaXXZNa¥^[aa¥^a`¥XW`aaaX\_¥  
@HWI-EAS443:3:18:926:288#0/1  
CTCTCCATATTGAATATATTTGACCTGCTTTCGCTCTGGT  
+HWI-EAS443:3:18:926:288#0/1  
ababaabbbbbbbbbbbbbbaaaaaaaaaaba`aa\_\_\_\_a`¥  
@HWI-EAS443:3:42:525:1264#0/1  
ACCAGAGCGAAAGCAGGTCAAATATATTCAATATGGAGAG  
+HWI-EAS443:3:42:525:1264#0/1  
aa`aaa`\_`a\_aa``aa^aa\_a^`\_\_\_\_]\_\_`¥`\_^Z`[`  
@HWI-EAS443:3:5:162:275#0/1  
CAGCGAGCGAAAGCAGGTCAAATATATTCAATATGGAGAG  
+HWI-EAS443:3:5:162:275#0/1  
abaaba`abba]aa\_aa^aa`aaa`aa\_^`^a`aa^a^a  
@HWI-EAS443:3:85:575:88#0/1  
GTCTGGAGCGAAAGCAGGTCAAATATATTCAATATGGAGA  
+HWI-EAS443:3:85:575:88#0/1  
aa^aaa]a\_a\_`\_a\_\_`aW]\_\_`\_\_\_\_\_^\_]\_[\_\_\_\_W`Z  
@HWI-EAS443:3:35:751:215#0/1  
CGAGAGCGAAAGCAGGTCAAATATATTCAATATGGAGAGA  
+HWI-EAS443:3:35:751:215#0/1  
aa¥aaaa[^^^^a[^aZba`[\_P[```\_^¥Z\_````\_`G¥P  
@HWI-EAS443:3:93:454:1448#0/1  
CGCGAGCGAAAGCAGGTCAAATATATTCAATATGGAGAGA

+HWI-EAS443:3:93:454:1448#0/1  
abaa`abba\_aaaaa^bbaaaa`aaa^^a`a`^a\_aa  
@HWI-EAS443:3:39:359:89#0/1  
CAGGAGCGAAAGCAGGTCAAATATATTCAATATGGAGAGA  
+HWI-EAS443:3:39:359:89#0/1  
aabb`bbbaa`baaaa\_a`\_aa\_a`^a`GXa]^a\_]a[aY  
@HWI-EAS443:3:7:1481:863#0/1  
GCGAGCGAAAGCAGGTCAAATATATTCAATATGGAGAGAA  
+HWI-EAS443:3:7:1481:863#0/1  
a\_b\_a^aa`^a^aa\_[^`\_a^a^a`\_^a`^`^`[\_]a[]  
@HWI-EAS443:3:50:919:1843#0/1  
GAGCGAAAGCAGGTCAAATATATTCAATATGGAGAGAATA  
+HWI-EAS443:3:50:919:1843#0/1  
`abaaabb`W`aab`a^Y`abaa\_`¥b\_aa¥Ta\_`^aab  
@HWI-EAS443:3:61:1639:1608#0/1  
AGCAGGTCAAATATATTCAATATGGAGAGAATAAAAGAAT  
+HWI-EAS443:3:61:1639:1608#0/1  
S]ab`[^\_a\_\_\_b]^`^Q\_UXaV¥\_TGTXYVbb`^Z\_VXV  
@HWI-EAS443:3:74:174:1790#0/1  
GAGCGAAAGCAGGTCAAATATATTCAATATGGAGAGAATA  
+HWI-EAS443:3:74:174:1790#0/1  
`ab`a^bbabbaa^bbbbbabababaaaaa`]`aaaaaaa  
@HWI-EAS443:3:81:487:437#0/1  
GGAGCGAAAGCAGGTCAAATATATTCAATATGGAGAGAAT  
+HWI-EAS443:3:81:487:437#0/1  
aa\_a]baaaa`aaa]^aa`a`aaaa`^\_a\_`^`[[]a]\_\_  
@HWI-EAS443:3:100:263:1135#0/1  
AATGGGACTTATGACTACCCAAAATACTCAGAGGAACTT  
+HWI-EAS443:3:100:263:1135#0/1  
a`^YU]¥\_a`aa\_ZHPS^[^]^[TWS]^`\_^]]^^^B  
@HWI-EAS443:3:37:1309:465#0/1  
AGTGGGGACATCAAGATACGGCAAGAAGTTCAAGCCGGAA  
+HWI-EAS443:3:37:1309:465#0/1  
IZ`X¥`¥U\_U\_aZ\_\_ba\_¥H¥`a¥b¥¥`WF\_V\_ZVW\_^\_Z  
@HWI-EAS443:3:56:1546:87#0/1  
CGTTTCCTCTGAGTATTTTGGGTAGTCATAAGTCCCATTT  
+HWI-EAS443:3:56:1546:87#0/1  
`\_MT`VJ``bbab]U[Y\_ba`aW¥VYR`^RLY[QFJaaaa  
@HWI-EAS443:3:73:1693:1805#0/1  
AAAATGGGACTTATGACTACCCAAAATACTCAGAGGAAAC  
+HWI-EAS443:3:73:1693:1805#0/1  
a\_a¥[a]^`\_^]``\_`\_`\_`^]Z`^^^¥\_^[^^[]]YQQ^^V  
@HWI-EAS443:3:75:998:262#0/1  
GTGGGGACATCAAGATACGGCAAGAAGTTCAAGCCGGAAA  
+HWI-EAS443:3:75:998:262#0/1  
a\_baaa[\_aa`\_aa`\_\_YT\_U\_a[^a]]Y\_]¥MV`^Z]^  
@HWI-EAS443:3:76:1295:1843#0/1  
GTTTCCTCTGAGTATTTTGGGTAGTCATAAGTCCCATTTT  
+HWI-EAS443:3:76:1295:1843#0/1  
^GY^[TY]][\_[JY^RUYP RRK]ZYW]XZZ]R[Z]XZRXR



@HWI-EAS443:3:9:531:1678#0/1  
GTCATGGGAATATCTCAAACCTTTCAAATGATGACTG  
+HWI-EAS443:3:9:531:1678#0/1  
`¥bNa`bba\_Y¥^a¥a^abaQ`aba\_aZ\_aYaaRaab`¥\_  
@HWI-EAS443:3:62:401:1953#0/1  
CGCCCTTTGGGAGCTGTTTAAAATTTTCCTTTGAGGATA  
+HWI-EAS443:3:62:401:1953#0/1  
a^^a\_\_QZU`a`Vab^^X0¥^XVXNXYa^^`\_`\_¥X  
@HWI-EAS443:3:72:1197:1127#0/1  
GAAGGACGGACATCCGACATGCGGACAGAAGTTATAAGAA  
+HWI-EAS443:3:72:1197:1127#0/1  
aaa`aa`bb]]`a]\_aU]a\_a\_ba`0\_]Y`^G^L\_]a\_^  
@HWI-EAS443:3:20:1676:1746#0/1  
CGCCAGACTTATGATTGGACATTAATAGAAATCAACAGG  
+HWI-EAS443:3:20:1676:1746#0/1  
^b]aXb`]a\_WI¥a`\_bb`bbXXXbHGTW\_``QR[\_^I]a  
@HWI-EAS443:3:3:361:613#0/1  
ATGGACATAAAGAAGACAAGAGATATGGCCAGCATTAAAG  
+HWI-EAS443:3:3:361:613#0/1  
a`b^Vab]aabaab^`aa\_\_a]Y\_Wa\_\_V[a\_\_¥^]`Y\_  
@HWI-EAS443:3:71:101:1327#0/1  
TAGACATAAAGAAGACAAGAGATATGGCCAGCATTAAAGC  
+HWI-EAS443:3:71:101:1327#0/1  
UI\_baa¥XX¥Z]`)]`aa^\_\_a[a``¥aab`W[0^^Z^\_`  
@HWI-EAS443:3:30:1660:880#0/1  
GACATAAAGAAGACAAGAGATATGGCCAGCATTAAAGCAT  
+HWI-EAS443:3:30:1660:880#0/1  
abaa`ab`aa^bbaaab`b¥^^a\_Z]Xaa¥Y`\_\_`\_\_^]]  
@HWI-EAS443:3:40:854:307#0/1  
CATAAAGAAGACAAGAGATATGGCCAGCATTAAAGCATCA  
+HWI-EAS443:3:40:854:307#0/1  
abbabbbbabaaaaabaab\_baa\_[H¥a`a`\_U]\_`\_`\_  
@HWI-EAS443:3:48:1275:1511#0/1  
ATAAAGAAGACAAGAGATATGGCCAGCATTAAAGCATCAA  
+HWI-EAS443:3:48:1275:1511#0/1  
abaaaba\_aa`a]^^[\_]`\_a\_]ZVYU^\_^\_W\_X^\_^\_^  
@HWI-EAS443:3:13:1144:186#0/1  
CGCACTCAGAATGAAGTGGATGATGGCAATGAAATACCCA  
+HWI-EAS443:3:13:1144:186#0/1  
abaaaaaab``aaa\_a]b`Q]a\_^]a[Y^`\_\_\_XW]VWR\_  
@HWI-EAS443:3:19:998:1726#0/1  
TGCCACCATCAAGGGAGCAATTTTACAATCCTGGAGCTCT  
+HWI-EAS443:3:19:998:1726#0/1  
[X¥a`b`b]V`]\_¥]]Xbb`ab^[^][b\_a^Y^a\_ZM]\_\_]  
@HWI-EAS443:3:4:1087:2005#0/1  
GTGGCCCACTTCAATTGGCTTGTCTCTTCATGTTCTTTG  
+HWI-EAS443:3:4:1087:2005#0/1  
a¥`aZ]\_a`[PUaaQX^]`XR[Z`MMURVUV¥VGXPN]SB  
@HWI-EAS443:3:24:1685:1139#0/1  
TGGCCCACTTCAATTGGCTTGTCTCTTCATGTTCTTTGT

+HWI-EAS443:3:24:1685:1139#0/1  
aaaabbaaaababaa]\_aaYY¥FZ]`bY]aV]aYbaa\_^  
@HWI-EAS443:3:69:616:377#0/1  
CGGCCCACTTCAATTGGCTTGTCTCTTCATGTTCTTTGT  
+HWI-EAS443:3:69:616:377#0/1  
abaaaa`aaYa\_]\_\_`\_`aRU^Y[VaSJQ¥[W]RZ\_\_YZ  
@HWI-EAS443:3:35:108:197#0/1  
GGCCCACTTCAATTGGCTTGTCTCTTCATGTTCTTTGTC  
+HWI-EAS443:3:35:108:197#0/1  
aaabaZaa`Z`a`aa`a\_UW`¥^Z¥^[X¥[V^^\_a`ZZ[  
@HWI-EAS443:3:50:1237:706#0/1  
GGCCCACTTCAATTGGCTTGTCTCTTCATGTTCTTTGTC  
+HWI-EAS443:3:50:1237:706#0/1  
¥aa`aaaa]X\_aaaaa^T[^T]U^^RW`X^¥0]aaZX0  
@HWI-EAS443:3:67:130:807#0/1  
GGCCCACTTCAATTGGCTTGTCTCTTCATGTTCTTTGTC  
+HWI-EAS443:3:67:130:807#0/1  
Z^`baY^bbaVU`Y^\_a^^GM\_[``aa\_T\_\_Z\_aaaZIX[  
@HWI-EAS443:3:82:493:598#0/1  
TGAGTCTTCTGTCAAAGAGAAAGACATGACCAAGGAATTC  
+HWI-EAS443:3:82:493:598#0/1  
^Z¥`^`abbabaa^I\_b\_[`\_bbYabab`bb`a`]ab`aa  
@HWI-EAS443:3:20:1580:1766#0/1  
CTCAAAGGAAAATTTCAAACAGCTGCCCAAAGGGCAAAGG  
+HWI-EAS443:3:20:1580:1766#0/1  
aZ]VV¥ab^^`bbaYX^a^^`^`¥]`\_`[\_a`]U]\_\_^Y  
@HWI-EAS443:3:91:622:1128#0/1  
GAGGACTTGAATGGAATGGTAACACGGTTCGAGGCTCTGA  
+HWI-EAS443:3:91:622:1128#0/1  
ZIP[a[babZS^ZaTV¥a\_VaaYRR[aZ[GVGZKV\_Y[XZ  
@HWI-EAS443:3:5:301:1315#0/1  
TAGGGCGTGGATTGTCTCCGAAAATCCCACTGCATATATA  
+HWI-EAS443:3:5:301:1315#0/1  
[aba`]aabaaa`\_[\_¥b`\_I][adWP\_a\_aa]aa^^K\_a  
@HWI-EAS443:3:43:335:1344#0/1  
CAAGGAAATTGGAAACGGCTGCTTTTAATTTTATCACAAA  
+HWI-EAS443:3:43:335:1344#0/1  
ab`babbabaaa\_bbbba\_b^YUbb`IH¥Y\_ba[FWbaba]  
@HWI-EAS443:3:98:1587:881#0/1  
CAAGGAAATTGGAAACGGCTGCTTTGAATTTTATAACAAA  
+HWI-EAS443:3:98:1587:881#0/1  
^bbbbb^bbbbb`aab`aabb`NZbb¥P\_¥babHDFaUabb  
@HWI-EAS443:3:15:861:693#0/1  
AAGGAAATTGGAAACGGCTGCTTTGAATTTTATCACAAA  
+HWI-EAS443:3:15:861:693#0/1  
\_Y^abaT^\_^\_YV`R\_XQXbRGWa\_\_XV[YUFFRQWNBBB  
@HWI-EAS443:3:25:1630:1629#0/1  
AGGAAATTGGAAACGGCTGCTTTGAATTTTATCACAAATG  
+HWI-EAS443:3:25:1630:1629#0/1  
¥`[a^ab\_¥[\_`^^a\_Y^\_00¥\_HURW¥`¥RJY[]][Y]BB

@HWI-EAS443:3:6:1271:1802#0/1  
AGGAAATTGGAAACGGCTGCTTTGAATTTTATCACAAATG  
+HWI-EAS443:3:6:1271:1802#0/1  
`ba¥`^`^`bbb¥`¥Z^¥S]X\_OXVU\_Y\_PPG`UBBBBB  
@HWI-EAS443:3:58:858:1059#0/1  
ATTTGTCCTTCCAGGGGCGGGGGTCTTCGGGCTCTCGGA  
+HWI-EAS443:3:58:858:1059#0/1  
`a`b]Zbaaab]^baa```a][PYKPa[UODZWMQNTL  
@HWI-EAS443:3:48:1647:835#0/1  
TGCAAAGCCAGAAGATTTGTCCTTCCAGGGGCGGGGGTG  
+HWI-EAS443:3:48:1647:835#0/1  
OX`\_^aab`X]NFZX¥\_`baRRZ\_\_```Z¥\_\_Y¥Z[BBBB  
@HWI-EAS443:3:95:1142:912#0/1  
CGGGGGTCTTCGAGCTCTCGGACGAAAAGCAACGAACCC  
+HWI-EAS443:3:95:1142:912#0/1  
`aa[ZR]V``[``a\_\_`^Xaa`aaX^a\_\_```a\_[UYPFY  
@HWI-EAS443:3:43:1254:146#0/1  
GCAAAGCCAGAAGATTTGTCCTTCCAGGGGCGGGGGTCT  
+HWI-EAS443:3:43:1254:146#0/1  
`\_a^]^^^¥^^^aS^\_V^W¥¥[V^U[\_X[\_BBBBBBBBBB  
@HWI-EAS443:3:4:246:327#0/1  
AGAAGATTTGTCCTTCCAGGGGCGGGGGTCTTCGAGCTC  
+HWI-EAS443:3:4:246:327#0/1  
Za`^a`ababZ^\_\_aaaabaQ`]]T\_FYYS]Y¥\_TVNBB  
@HWI-EAS443:3:38:953:1014#0/1  
TCCGGCTTTCGTTTCATTACCAACTACGTCCCCTTGCC  
+HWI-EAS443:3:38:953:1014#0/1  
aaba¥]Zaaaa¥\_\_[^¥aa]^\_a`a\_[R`^UVTY¥[RR^W  
@HWI-EAS443:3:73:805:763#0/1  
GTGGACAGGGCCGAAGGTACCATGTTTCAATCTTTCAACC  
+HWI-EAS443:3:73:805:763#0/1  
a)`X`\_````a`¥H[OYUZYaZU\_\_\_`[aPDNTa¥ON]QX  
@HWI-EAS443:3:15:1783:1240#0/1  
CCCCTTTTCGTTTCATTACCAACTACGTCCCTTGCCC  
+HWI-EAS443:3:15:1783:1240#0/1  
a\_W^E^baRXQY`Uaa¥\_SNa`]S]baZaWYFZPOPTWLY  
@HWI-EAS443:3:59:170:662#0/1  
CCCCTTTTCGTTTCATTACCAACTACGTCCCTTGCCC  
+HWI-EAS443:3:59:170:662#0/1  
¥H[WHJ]\_\_OLYU¥WW^aZZ[J^X[OYYYWJFRNUPJWUW  
@HWI-EAS443:3:28:125:148#0/1  
GGCTTTCGTTTCATTACCAACTACGTCCCCTTGCCAA  
+HWI-EAS443:3:28:125:148#0/1  
aaa`aaaa]aa\_``aa\_``\_``\_`[\_YX\_\_^¥XU\_X]YY  
@HWI-EAS443:3:13:1529:1177#0/1  
GTCCCCTTTTCGTTTCATTACCAACTACGTCCCCTTGCC  
+HWI-EAS443:3:13:1529:1177#0/1  
^^aR[```UaRY[¥`\_PS^aZ\_^XH]¥\_[R^JGPNPVVWN  
@HWI-EAS443:3:17:217:1726#0/1  
CGCTTTCGTTTCATTACCAACTACGTCCCCTTGCCAA

+HWI-EAS443:3:17:217:1726#0/1  
abU[aYabJMZXXPab`Sa]bTPaRG[\_`ba[SNTPWNTN  
@HWI-EAS443:3:75:626:467#0/1  
CCCCGTTTTCGTTTTATTACCAACTACTGCCCCCTTGCCC  
+HWI-EAS443:3:75:626:467#0/1  
^Pa\_FO`b`\_V¥`SZ]X\_^]\_\_^WTa^aG[V[]US¥WS]  
@HWI-EAS443:3:91:415:378#0/1  
GTCCCGTTTTCGTTTTATTACCAACTACTGCCCCCTTGCC  
+HWI-EAS443:3:91:415:378#0/1  
aY^U]\_GQUZX`U¥]XT]X\_NVGQUUGHYBBBBBBBBBBB  
@HWI-EAS443:3:100:1780:1972#0/1  
CATCGACGAACGGGTGAATCAATAATTGTAGAATCTGGC  
+HWI-EAS443:3:100:1780:1972#0/1  
aWUb\_a\_b`a]a`UDZa[^[SS¥YVP[[OVWPHRBBBBB  
@HWI-EAS443:3:49:339:301#0/1  
CAATAATTGTAGAATCTGGCGACCCGAATGCACTATTGAA  
+HWI-EAS443:3:49:339:301#0/1  
\_[Ubbbb¥`\_¥^[URZbb`I^b¥babbb\_[H\_abbb¥X¥T  
@HWI-EAS443:3:52:873:1065#0/1  
TATTGCAGCAAACCTGTTAGTTTTGATTTTTGGATCTTCC  
+HWI-EAS443:3:52:873:1065#0/1  
aa\_\_WWU`R^X`[a`N`[a^`U^U¥``[FRYHTON¥LP  
@HWI-EAS443:3:94:195:1826#0/1  
AGAAGATCCCAAGGACAAAGAACATGAAAAGAACAAGCCA  
+HWI-EAS443:3:94:195:1826#0/1  
`VaaWaaaa`a`]¥`aa]`a`\_aa\_\_\_`\_`¥aaa]P[QQ[  
@HWI-EAS443:3:47:1165:267#0/1  
GATCGGAATACTGCCCGACATGACCCCAAGCATTAAAGGAA  
+HWI-EAS443:3:47:1165:267#0/1  
a`aaa`aaa`\_aa^\_a\_\_\_a`W\_ZZ^^\_Q¥¥^UU\_\_¥W  
@HWI-EAS443:3:100:419:1525#0/1  
ATTGGGCAAGGGGACGTAGTGCTGGGAATGAAACGAAAAC  
+HWI-EAS443:3:100:419:1525#0/1  
\_baZ^`baaba\_V\_\_a`Z]V]FT`aN^[[a]a`GaVBBBB  
@HWI-EAS443:3:62:767:1581#0/1  
GTGCTGGTAATGAAACGAAAACGGGACTCTAGCATACTTA  
+HWI-EAS443:3:62:767:1581#0/1  
XVaWa`bZabbabbab\_`^^aX\_\_Xbabb\_¥¥\_baa¥\_\_b  
@HWI-EAS443:3:31:63:831#0/1  
CGGGTGGGATTCTTCAAGGAAAGCCATAGCCTCTAGAACA  
+HWI-EAS443:3:31:63:831#0/1  
aaZ[S[]X0¥a`\_]\_\_`^\_]\_Z`\_Z`a`]\_]\_Z¥V¥\_`  
@HWI-EAS443:3:37:689:143#0/1  
AATAACAGACACTATCAAGAGTTGGAGACACAATATATTG  
+HWI-EAS443:3:37:689:143#0/1  
abaaaaaaaa`a]`a]a¥`a`Z]ZHQa¥X[`¥V[[^  
@HWI-EAS443:3:60:1087:1685#0/1  
CAGGGCAGAGAGGAATTGCCCGCTAATTTACGGGAAC  
+HWI-EAS443:3:60:1087:1685#0/1  
TXVZTW`bb\_aZ^`^^aTbaUba`P`a`babaZX`^Gab`

@HWI-EAS443:3:94:1638:1714#0/1  
GTTGAAAGATACCCACGGTCGATTTCGAGCCATGCCAGTTA  
+HWI-EAS443:3:94:1638:1714#0/1  
a\_a[\_[``^N`]¥S\_T`[PFUS¥VS¥XTRNPPWNQV¥WWO  
@HWI-EAS443:3:15:490:1530#0/1  
AGATAACATGGTGAATAGGAATGGCCCAACAACAAGTAC  
+HWI-EAS443:3:15:490:1530#0/1  
\_bba¥aaabba\_aaa`b]a]aaaaab[`aa\_\_a[\_\_\_`\_a`  
@HWI-EAS443:3:48:497:1068#0/1  
TGGGGCTATTAGTATCAGATGGAGGACCAAACCTTATACAA  
+HWI-EAS443:3:48:497:1068#0/1  
a]]`ba^ba\_`aPWZ]X[\_`ab¥K¥RY\_YG`aY\_Z^\_]`  
@HWI-EAS443:3:54:606:528#0/1  
GGGGCTATTAGTATCAGATGGAGGACCAAACCTTATACAAT  
+HWI-EAS443:3:54:606:528#0/1  
a`abaabaaabS\_aa\_a\_\_aa^aa^\_]\_a\_^aa``^]`^`\_  
@HWI-EAS443:3:79:687:1536#0/1  
ACAAAAGCAACAAAAATGAAGGCAATACTAGTAGTTTGTG  
+HWI-EAS443:3:79:687:1536#0/1  
abaU`[]aa```a`aXY`Y]]a][^^]\_^U¥X0]]]XU  
@HWI-EAS443:3:14:1281:135#0/1  
CGCAGCAAAAGCAGGGGAAAACAAAAGCAACAAAAATGAA  
+HWI-EAS443:3:14:1281:135#0/1  
a`\_aa`aaa`a]]\_aaa\_\_\_\_\_a```a\_[KR\_]\_^\_\_]Z  
@HWI-EAS443:3:40:517:57#0/1  
AGCAAAAGCAGGGGAAAACAAAAGCAACAAAAANGAAGGC  
+HWI-EAS443:3:40:517:57#0/1  
¥WX[]¥YaX]a^]aY^a`\_\_`Z]Z¥G[YY¥UVDXX]\_¥\_  
@HWI-EAS443:3:35:1219:574#0/1  
GGCAGGGGAAAACAAAAGCAACAAAAATGAAGGCAATACT  
+HWI-EAS443:3:35:1219:574#0/1  
aaaababba`aa\_aaa¥a¥`a\_a^\_\_a`a`U`\_aa\_^\_S]  
@HWI-EAS443:3:74:95:379#0/1  
GGCAAAAGCAGGGGAAAACAAAAGCAACAAAAATGAAGGC  
+HWI-EAS443:3:74:95:379#0/1  
[[¥[`SZZ\_]YR`]P¥aWY\_a¥^`\_a^``WSV\_\_[F[ZZ  
@HWI-EAS443:3:94:365:1811#0/1  
CAGCAAAAGCAGGGGAAAACAAAAGCAACAAAAATGAAGG  
+HWI-EAS443:3:94:365:1811#0/1  
aa`aaa^a\_``a\_aa\_`aa`aaa`\_aaa\_aa\_``a``^^¥  
@HWI-EAS443:3:100:464:130#0/1  
AGCAAAAGCAGGGGAAAACAAAAGCAACAAAAATGAAGGC  
+HWI-EAS443:3:100:464:130#0/1  
aaaba\_aa]\_aa`aaa\_a\_aa``aY`\_^``¥\_\_\_\_`\_\_\_\_^  
@HWI-EAS443:3:10:1266:1198#0/1  
CAAAAGCAGGGGAAAACAAAAGCAACAAAAATGAAGGCAA  
+HWI-EAS443:3:10:1266:1198#0/1  
abbbbbbbbbbbbbbbbabbbbaabaaa`aaaaaab\_a`a^aa  
@HWI-EAS443:3:10:437:1837#0/1  
AAGCAGGGGAAAACAAAAGCAACAAAAATGAAGGCAATAC



@HWI-EAS443:3:25:364:996#0/1  
CAAAAGCAGGGGAAAACAAAAGCAACAAAAATGAAGGCAA  
+HWI-EAS443:3:25:364:996#0/1  
V]``^Va\_``Z\_URR`babaaY`¥bbbb\_a[^bbb`\_bba  
@HWI-EAS443:3:26:1255:1440#0/1  
ACAAAAGCAACAAAAATGAAGGCAATACTAGTAGTTCTGC  
+HWI-EAS443:3:26:1255:1440#0/1  
a`ababa`ab`ba\_aaaaaaaa`a^aa`]baZ\_\_``\_  
@HWI-EAS443:3:27:1205:1614#0/1  
CAAAAGCAGGGGAAAACAAAAGCAACAAAAATGAAGGCAA  
+HWI-EAS443:3:27:1205:1614#0/1  
SY\_IYa`\_`¥UZaXaaa^ISbb\_`^`abbbabaaaba]Lab  
@HWI-EAS443:3:2:528:907#0/1  
GGAAAACAAAAGCAACAAAAATGAAGGCAATACTAGTAGT  
+HWI-EAS443:3:2:528:907#0/1  
`aZSS^W\_^YRF[aa\_aa`a`]^[^Z]TMT\_\_``aRR\_aa¥  
@HWI-EAS443:3:32:1305:997#0/1  
GCAGGGGAAAACAAAAGCAACAAAAATGAAGGCAATACTA  
+HWI-EAS443:3:32:1305:997#0/1  
`^]a^`[^]`a`a\_a\_aa^`\_]````\_``\_]Z`\_aa  
@HWI-EAS443:3:35:1331:1717#0/1  
CAAAAGCAGGGGAAAACAAAAGCAACAAAAATGAAGGCAA  
+HWI-EAS443:3:35:1331:1717#0/1  
abbaaaaaaaaaabaaabaa``\_aa^a`ba`aa`a^^`a  
@HWI-EAS443:3:38:670:1839#0/1  
GCAGGGGAAAACAAAAGCAACAAAAATGAAGGCAATACTA  
+HWI-EAS443:3:38:670:1839#0/1  
abbb^¥]`bbaab\_¥``aaabbabba]\_¥\_YP``abUa`  
@HWI-EAS443:3:3:593:839#0/1  
AACAAAAGCAACAAAAATGAAGGCAATACTAGTAGTTCTG  
+HWI-EAS443:3:3:593:839#0/1  
abbaa`aaabb`ab`aabbaaba`aa`^aaa[aa``\_``  
@HWI-EAS443:3:42:1095:1506#0/1  
GCAAAAGCAGGGGAAAACAAAAGCAACAAAAATGAAGGCA  
+HWI-EAS443:3:42:1095:1506#0/1  
`aaaaaaaa`a`\_\_`ab\_aa^``\_a`\_a`^\_\_\_a\_\_\_\_  
@HWI-EAS443:3:46:1647:801#0/1  
GAAAACAAAAGCAACAAAAATGAAGGCAATACTAGTAGTT  
+HWI-EAS443:3:46:1647:801#0/1  
a`a\_aaaaaaa\_aa\_``\_`aa]¥aa\_\_\_a^)`\_a]^[\_  
@HWI-EAS443:3:46:50:1459#0/1  
AACAAAAGCAACAAAAATGAAGGCAATACTAGTAGTTCTG  
+HWI-EAS443:3:46:50:1459#0/1  
\_]aX`a`]\_\_V¥aaa`a]a`]]`¥\_¥¥a\_SL¥][^Y  
@HWI-EAS443:3:48:1388:1345#0/1  
GGAAAACAAAAGCAACAAAAATGAAGGCAATACTAGTAGT  
+HWI-EAS443:3:48:1388:1345#0/1  
`a`aaaaaaaa`a`a`a`\_aa`\_a```\_``¥`a\_^`\_`  
@HWI-EAS443:3:4:205:1064#0/1  
GCAGGGGAAAACAAAAGCAACAAAAATGAAGGCAATACTA

+HWI-EAS443:3:4:205:1064#0/1  
`ba]S]\_¥¥VTD¥\_aJ`aaZF¥WXXZ^a¥]a\_L`Xa`\_¥[  
@HWI-EAS443:3:4:750:1049#0/1  
AGCAGGGGAAAACAAAAGCAACAAAAATGAAGGCAATACT  
+HWI-EAS443:3:4:750:1049#0/1  
aa`aabaaa`aYY\_\_aa`a`a\_aa\_a\_\_`a`^`Y^  
@HWI-EAS443:3:50:1696:1668#0/1  
AACAAAAGCAACAAAAATGAAGGCAATACTAGTAGTTCTG  
+HWI-EAS443:3:50:1696:1668#0/1  
abababa^`bba^aababaaaaaaaaa\_a\_a\_aa\_\_UZY  
@HWI-EAS443:3:50:1778:715#0/1  
GGGGAAAACAAAAGCAACAAAAATGAAGGCAATACTAGTA  
+HWI-EAS443:3:50:1778:715#0/1  
ababaaaaaaaaabb\_ab\_aaaaaba`aaaaaaaa\_aaa]a  
@HWI-EAS443:3:52:370:1130#0/1  
GCAGGGGAAAACAAAAGCAACAAAAATGAAGGCAATACTA  
+HWI-EAS443:3:52:370:1130#0/1  
abab`a¥¥\_aa^\_U\_`aaaa`aa`\_a`a`]a`^`^a`]\_`  
@HWI-EAS443:3:53:1276:371#0/1  
CAAAGCAGGGGAAAACAAAAGCAACAAAAATGAAGGCAA  
+HWI-EAS443:3:53:1276:371#0/1  
^babbbabb`b`abbb`bbbba`bbbabbabbbbbb`a\_  
@HWI-EAS443:3:53:665:985#0/1  
ACAAAAGCAACAAAAATGAAGGCAATACTAGTAGTTCTGC  
+HWI-EAS443:3:53:665:985#0/1  
aabbaa`baaaa`]aabaabaaaaaaaa`aba^`a\_a`aa^  
@HWI-EAS443:3:55:757:1353#0/1  
AAGCAGGGGAAAACAAAAGCAACAAAAATGAAGGCAATAC  
+HWI-EAS443:3:55:757:1353#0/1  
a^b`X^¥Z^aa`aaaaa]aaaaa`a\_a\_aa`aaaaa`a`  
@HWI-EAS443:3:58:1667:676#0/1  
GAAAACAAAAGCAACAAAAATGAAGGCAATACTAGTAGTT  
+HWI-EAS443:3:58:1667:676#0/1  
a\_a`a^`a^]a\_\_a\_\_a\_\_a\_a\_aa^`a]`\_`^`  
@HWI-EAS443:3:5:811:201#0/1  
GCAAAAAGCAGGGGAAAACAAAAGCAACAAAAATGAAGGCA  
+HWI-EAS443:3:5:811:201#0/1  
aa\_Pa]\_\_`¥WZ[^]Q\_]S[^]¥[^]VW[Z]^XW]]BB  
@HWI-EAS443:3:60:775:669#0/1  
AAAAGCAGGGGAAAACAAAAGCAACAAAAATGAAGGCAAT  
+HWI-EAS443:3:60:775:669#0/1  
\_]a`a^ba`baaaa`a^aa]aa`a`Y`\_aa`aa`aa  
@HWI-EAS443:3:61:812:334#0/1  
GGGAAAACAAAAGCAACAAAAATGAAGGCAATACTAGTAG  
+HWI-EAS443:3:61:812:334#0/1  
aaa\_\_`\_a`\_\_`\_\_`\_`¥[]IY^YZ^]]\_^^]]ZUV^Y  
@HWI-EAS443:3:62:212:1261#0/1  
GGGGAAAACAAAAGCAACAAAAATGAAGGCAATACTAGTA  
+HWI-EAS443:3:62:212:1261#0/1  
`¥V^]¥\_[T`]X\_aZ\_aa^^VUYYY¥L]TS`¥Y][Y`^WY



@HWI-EAS443:3:63:323:1840#0/1  
GAAAACAAAAGCAACAAAAATGAAGGCAACTAGTAGTT  
+HWI-EAS443:3:63:323:1840#0/1  
\_bbaabbbabbbababa`baabb`aabbaaa`aaa^a[S`  
@HWI-EAS443:3:69:268:1958#0/1  
GGAAAACAAAAGCAACAAAAATGAAGGCAACTAGTAGT  
+HWI-EAS443:3:69:268:1958#0/1  
a[a`U\_`b¥Xa\_\_T¥baaaaa\_\_aa[\_aa\_\_``b\_Ua^Y  
@HWI-EAS443:3:70:685:250#0/1  
GGGAAAACAAAAGCAACAAAAATGAAGGCAACTAGTAG  
+HWI-EAS443:3:70:685:250#0/1  
abababbbbb`aabbbabbaabbb`aaaaaba`aaa\_``  
@HWI-EAS443:3:73:1287:1434#0/1  
ACAAAAGCAACAAAAATGAAGGCAACTAGTAGTTCTGC  
+HWI-EAS443:3:73:1287:1434#0/1  
a^aaaaaaa\_¥\_\_[a^`a\_`aaa`¥`^)`¥^[a\_Y\_\_¥^[  
@HWI-EAS443:3:76:367:831#0/1  
AAAACAAAAGCAACAAAAATGAAGGCAACTAGTAGTTC  
+HWI-EAS443:3:76:367:831#0/1  
ab¥bbbaabbbbabbaaaaa`aaaa]aa^\_a  
@HWI-EAS443:3:77:869:434#0/1  
GCCGGCTTCATTGAAGGGGGTGGACAGGGATGGTAGATG  
+HWI-EAS443:3:77:869:434#0/1  
a^[^XG¥\_]aa`aS^Y`^]\_a¥`]W`Qa\_aGO\_`P^PUSU  
@HWI-EAS443:3:81:1278:84#0/1  
AAGCAGGGGAAAACAAAAGCAACAAAAATGAAGGCAATAC  
+HWI-EAS443:3:81:1278:84#0/1  
\_ab`^`^abb]Zaa`Uaba\_X[W^`])`¥`\_`\_aXaaa\_S]aG  
@HWI-EAS443:3:81:670:1415#0/1  
CAGGGGAAAACAAAAGCAACAAAAATGAAGGCAACTAG  
+HWI-EAS443:3:81:670:1415#0/1  
aa^`aa^¥^aX¥^`aaaa`b¥^Y\_\_`baaa`aa`aaa]`  
@HWI-EAS443:3:84:1490:786#0/1  
ACAAAAGCAACAAAAATGAAGGCAACTAGTAGTTCTGC  
+HWI-EAS443:3:84:1490:786#0/1  
\_[\_0¥abaa^`aa\_\_aa`[aba`\_`a\_\_a^^a\_S]P]VZ  
@HWI-EAS443:3:84:203:1732#0/1  
AGCAAAAGCAGGGGAAAACAAAAGCAACAAAAATGAAGGC  
+HWI-EAS443:3:84:203:1732#0/1  
a```Za`^`[Y\_Z`]W\_`a`Y¥\_a]```Z\_\_[\_¥]^\_`^]0`  
@HWI-EAS443:3:86:303:859#0/1  
GCAAAAAGCAGGGGAAAACAAAAGCAACAAAAATGAAGGCA  
+HWI-EAS443:3:86:303:859#0/1  
UURUNH[^Yab`Y¥`Y`aSU[PZYYST\_\_ZV^¥]abaVa  
@HWI-EAS443:3:87:644:1860#0/1  
GAAAACAAAAGCAACAAAAATGAAGGCAACTAGTAGTT  
+HWI-EAS443:3:87:644:1860#0/1  
abbbbbbZ]aaabbabb¥`aba\_]abaaaa]aaa^aa\_a  
@HWI-EAS443:3:8:1665:15#0/1  
GGAAAACAAAAGCAACAAAAATGAAGGCAACTAGTAGT

+HWI-EAS443:3:8:1665:15#0/1  
]a`a`QT^a`QTGPZZRYXa`T¥aV¥^\_YS^\_[YZ\_X  
@HWI-EAS443:3:8:428:1649#0/1  
ACAAAAGCAACAAAAATGAAGGCAACTAGTAGTTCTGC  
+HWI-EAS443:3:8:428:1649#0/1  
aaaaaaa`a\_a`a`a`^\_\_\_\_\_^\_a[`a^[\_[]S^]Z  
@HWI-EAS443:3:95:214:53#0/1  
AACAAAAGCAACAAAAATGAAGGCAACTAGTAGTTCTG  
+HWI-EAS443:3:95:214:53#0/1  
aa\_aaaYaaaaY`a\_\_\_aaY\_ba\_a`aa^\_aaZ`¥\_W\_\_\_  
@HWI-EAS443:3:48:1218:196#0/1  
GCAAAAAGCAGGAGTTTAAAATGAATCCAAACCAAAGATA  
+HWI-EAS443:3:48:1218:196#0/1  
a`a`\_`a\_\_aa¥a]aa]Y\_\_`\_`\_^\_^[¥^^YY¥]]Z]]]^  
@HWI-EAS443:3:55:564:1421#0/1  
CAAAAGCAGGAGTTTAAAATGAATCCAAACCAAAGATA  
+HWI-EAS443:3:55:564:1421#0/1  
aababb^abbaa[`aa`aaaaaa``aaa`aa\_\_aa^aa`  
@HWI-EAS443:3:85:117:557#0/1  
GCAAAAAGCAGGAGTTTAAAATGAATCCAAACCAAAGATA  
+HWI-EAS443:3:85:117:557#0/1  
aa^`U^aa\_a`b\_aa`\_``aaa`^a`^^^^^`^J`\_`a  
@HWI-EAS443:3:29:804:264#0/1  
AAAGAGGGCCTTCTACAGAAGGAGTGCCTGAGTCCATGAG  
+HWI-EAS443:3:29:804:264#0/1  
`aaaaaaa`a\_\_^]¥`\_¥]a\_dWa¥U`\_¥aU¥^¥\_\_U¥  
@HWI-EAS443:3:88:824:1262#0/1  
TGTTGATATTCTCCCTCATGGACTCAGGCACTCCTTCTG  
+HWI-EAS443:3:88:824:1262#0/1  
IY[[\_X^ZRQOXa]]R\_¥UV¥]]]QLO\_^[]\_QIWH]¥HY  
@HWI-EAS443:3:57:114:678#0/1  
GGGGCCCTCTTTGCGTGCGATTGGACCAGGCGGGCATGGG  
+HWI-EAS443:3:57:114:678#0/1  
^bb^b\_V^aa\_a\_Y^aaa]^`\_`^^]BBBBBBBBBB  
@HWI-EAS443:3:18:809:1385#0/1  
GCAGTTGCAACGGCATCATATTCCATGCTTTTGGCTGGAC  
+HWI-EAS443:3:18:809:1385#0/1  
¥FS\_RZ`a^¥¥a\_WTRYXX[ZZZUJVTVWUTUYVUWSWN  
@HWI-EAS443:3:92:797:154#0/1  
CCAGTTGCTTCGAATGTTATTTTGTCTCCCGCTCTATTA  
+HWI-EAS443:3:92:797:154#0/1  
aabb\_bbbbaabaaababaaaaa\_\_`a\_a``¥`\_`\_RIXS  
@HWI-EAS443:3:81:1551:1521#0/1  
GATTGCTTCAAATGAGAATGTGGAAACCATGGGCTCCAAT  
+HWI-EAS443:3:81:1551:1521#0/1  
a`V¥V¥`\_]\_a\_a`aabaaaa^aa\_\_ZGXZ`aVJLPXYQZ^  
@HWI-EAS443:3:51:1236:437#0/1  
AGATCGGCTGCATATCCTGACCCCTGCTCATTGATGGT  
+HWI-EAS443:3:51:1236:437#0/1  
aaaa`abaa`a¥J^GUa`Y^ZT[[WNV\_\_VNT`\_[BBBBB

@HWI-EAS443:3:94:131:126#0/1  
ATTCCCCAAGACAAGTTCATGGCCCAATCATGAATCGAAC  
+HWI-EAS443:3:94:131:126#0/1  
a¥aaa]^XabZY\_`a\_aaJY]PXSPKPTULRUVGYF[QQN  
@HWI-EAS443:3:17:267:788#0/1  
CAAAAGCAACAAAAATGAAGGCAATACTAGTAGTTCTGCT  
+HWI-EAS443:3:17:267:788#0/1  
aab`aaaaaa]aaaa\_aaaaaba`aaa`aa]aa^`^\_a\_\_  
@HWI-EAS443:3:18:1081:418#0/1  
CAAAAATGAAGGCAATACTAGTAGTTCTGCTATATACATT  
+HWI-EAS443:3:18:1081:418#0/1  
aaSTX^a^WR¥XRV]aZWVaPER` `[ ]\_YNZ^W]WS` `^T  
@HWI-EAS443:3:1:1791:1583#0/1  
AAGCAACAAAAATGAAGGCAATACTAGTAGTTCTGCTATA  
+HWI-EAS443:3:1:1791:1583#0/1  
¥a`PUaaaabV)`[a\_]a\_a\_a[LFJX\_a]\_OL`ZQSWBB  
@HWI-EAS443:3:36:985:747#0/1  
CAAAAGCAACAAAAATGAAGGCAATACTAGTAGTTCTGCT  
+HWI-EAS443:3:36:985:747#0/1  
aababbbaaabbaabbaabaabbbbaaba`aaaa`aaaa  
@HWI-EAS443:3:52:332:1544#0/1  
CAAAAGCAACAAAAATGAAGGCAATACTAGTAGTTCTGCT  
+HWI-EAS443:3:52:332:1544#0/1  
abbb`abbaabaaaaab`b`aaaaa`aaa^aa^`\_a\_``  
@HWI-EAS443:3:53:743:1379#0/1  
AAGCAACAAAAATGAAGGCAATACTAGTAGTTCTGCTATA  
+HWI-EAS443:3:53:743:1379#0/1  
aU¥ab¥bbaVaaaa`Z\_a\_\_aa]¥aaa\_aa`\_a`\_\_a```  
@HWI-EAS443:3:92:504:1939#0/1  
CAAAAGCAACAAAAATGAAGGCAATACTAGTAGTTCTGCT  
+HWI-EAS443:3:92:504:1939#0/1  
abbab¥bba\_bbabaa`aa^a¥aaaa`\_aa[a]\_aa`\_\_\_\_  
@HWI-EAS443:3:61:1119:450#0/1  
GTCCCGTTTTCGTTTCATTACCAACACTACATCCCCCTTGG  
+HWI-EAS443:3:61:1119:450#0/1  
aXVWZaOZ]^`¥WX^XX^YW^YZX]\_^XXTXXUUSZPOG  
@HWI-EAS443:3:33:1788:1324#0/1  
AAAGCTAATGTGCTAATTGGGCAAGGGGATGTAGTGTGG  
+HWI-EAS443:3:33:1788:1324#0/1  
aaababaaba\_a\_a\_`b[aa`]^`^aa^`]aXZ]U\_^¥\_^  
@HWI-EAS443:3:72:375:335#0/1  
CCCCGTTTTCGTTTCATTACCAACACTACATCCCCCTTGGCC  
+HWI-EAS443:3:72:375:335#0/1  
aa`b\_aabbb\_aaaabaaaaaaaaaaaaa[FWaaa`]^W^]  
@HWI-EAS443:3:81:89:604#0/1  
TGTAGTGTGGTAATGAAACGAAACGGGACTCTAGCATA  
+HWI-EAS443:3:81:89:604#0/1  
`\_U]a)`^aa[QPP[WQ[\_]XSJ¥`GSYLTUWVIPPW¥G]  
@HWI-EAS443:3:91:1580:1603#0/1  
AGCTAATGTGCTAATTGGGCAAGGGGATGTAGTGTGGTA

+HWI-EAS443:3:91:1580:1603#0/1  
Z[¥a[abb^[VZQX\_`^^¥^V[`\_bSPEZR`b[aI¥b]]\_@HWI-EAS443:3:59:768:1312#0/1  
GAAATCTCCCTTTCGAAAGAGCAACCGTTATGGCAGCATT  
+HWI-EAS443:3:59:768:1312#0/1  
ab[``^`a`UbVDUa\_[\_U¥`¥aa`a[``SP]¥SHGUU  
@HWI-EAS443:3:22:1408:956#0/1  
AATGAATTCAATAAGGCATGTGAATTGACTGATTCAAGTT  
+HWI-EAS443:3:22:1408:956#0/1  
S\_`YXX\_a\_a¥YZTFOS`a\_XXT)`]SS)`VZ[XTM[[D[  
@HWI-EAS443:3:90:718:601#0/1  
GCTCAGTTCATTGATGCTTAATGCTGGGCCATCTCTTGTC  
+HWI-EAS443:3:90:718:601#0/1  
abbaa`Ya^`a`\_`a`aa\_aa^a\_\_a^`a`^^\_\_aZ\_  
@HWI-EAS443:3:21:1281:1242#0/1  
CAAGAGATGGCCCAGCATTAAAGCATCAATGAACTGAGCAA  
+HWI-EAS443:3:21:1281:1242#0/1  
a\_0¥`aZTb][WZa^`Y````¥`WZ\_\_^\_\_Y\_OR¥¥¥\_\_^  
@HWI-EAS443:3:22:912:662#0/1  
CAAGAGATGGCCCAGCATTAAAGCATCAATGAACTGAGCAA  
+HWI-EAS443:3:22:912:662#0/1  
\_ZQ``^WaaaaX````\_a`aa]\_\_a\_¥a``aY\_W]^\_\_ZX  
@HWI-EAS443:3:2:1446:1024#0/1  
CAAGAGATGGCCCAGCATTAAAGCATCAATGAACTGAGCAA  
+HWI-EAS443:3:2:1446:1024#0/1  
abaaaa\_a`aa`¥aa¥\_aab```\_`^\_aa\_\_\_\_]^]\_\_Y^Y  
@HWI-EAS443:3:2:1603:1165#0/1  
CAAGAGATGGCCCAGCATTAAAGCATCAATGAACTGAGCAA  
+HWI-EAS443:3:2:1603:1165#0/1  
aa^aaa\_aa]a^^a^¥a``a\_\_\_\_^\_\_X`aY[\_]aZ^^G[^  
@HWI-EAS443:3:3:53:1988#0/1  
CAAGAGATGGCCCAGCATTAAAGCATCAATGAACTGAGCAA  
+HWI-EAS443:3:3:53:1988#0/1  
]VbZ\_]b\_\_U\_b0[a0[b\_ab]]b`bbbba\_`aW¥[\_W^]  
@HWI-EAS443:3:46:1320:1094#0/1  
CAAGAGATGGCCCAGCATTAAAGCATCAATGAACTGAGCAA  
+HWI-EAS443:3:46:1320:1094#0/1  
a`\_`Ya`aab\_Z\_\_a`aaaa\_a\_\_a`\_``[[Z^`^`¥`\_  
@HWI-EAS443:3:49:1231:1129#0/1  
CAAGAGATGGCCCAGCATTAAAGCATCAATGAACTGAGCAA  
+HWI-EAS443:3:49:1231:1129#0/1  
abaaab`\_abaaaa\_aa\_a`\_\_^`ZV\_a\_[Va`\_\_Z`W  
@HWI-EAS443:3:69:1071:400#0/1  
CAAGAGATGGCCCAGCATTAAAGCATCAATGAACTGAGCAA  
+HWI-EAS443:3:69:1071:400#0/1  
a`]a``aaba^b]`a`¥^aa``[`aa\_\_aa\_\_a¥XW\_`a  
@HWI-EAS443:3:89:925:45#0/1  
TTGCTCAGTTCATTGATGCTTAATGCTGGGCCATCTCTTG  
+HWI-EAS443:3:89:925:45#0/1  
abb`[\_`aa\_a]ababaaa^^\_a^Wa]`aa`^Xa``¥\_¥`a

@HWI-EAS443:3:1:554:751#0/1  
AAGAGATGGCCAGCATTAAAGCATCAATGAACTGAGCAAT  
+HWI-EAS443:3:1:554:751#0/1  
aaa`b\_\_\_a\_Sa`a]a\_`a`\_\_`X````Z\_Z]`^`W`BB  
@HWI-EAS443:3:54:160:839#0/1  
ATTGCTCAGTTCATTGATGCTTAATGCTGGGCCATCTCTT  
+HWI-EAS443:3:54:160:839#0/1  
aaababaaa^baabaaaa\_`a^aaaa^a]a`\_````\_`\_`  
@HWI-EAS443:3:69:702:83#0/1  
AAGAGATGGCCAGCATTAAAGCATCAATGAACTGAGCAAT  
+HWI-EAS443:3:69:702:83#0/1  
`]aaa`aaa\_]\_^a]aa`\_¥a`\_]W¥]a\_^]Y\_]^PZ^^  
@HWI-EAS443:3:98:87:1876#0/1  
ATTGCTCAGTTCATTGATGCTTAATGCTGGGCCATGTCTT  
+HWI-EAS443:3:98:87:1876#0/1  
Q\_]HY\_\_VX0]\_W¥Y\_[OY\_^Y\_T^^¥IO¥ZS¥ZRG¥¥ZM  
@HWI-EAS443:3:54:153:1043#0/1  
CAGGGCTATTAGTATCAGATGGAGGACCAAACCTATACAA  
+HWI-EAS443:3:54:153:1043#0/1  
a]¥b\_]a\_P]Y\_Yaaa\_¥Y`a\_P\_`Y¥R]`\_¥\_`^\_]\_a  
@HWI-EAS443:3:95:426:1246#0/1  
TGGCAATGAGATACCCAATTACAGCGGACAAGAGAAAGCT  
+HWI-EAS443:3:95:426:1246#0/1  
aa`\_a`abab\_abaaaa`a\_a`aaQDXa^`Y`]a\_^¥aZa  
@HWI-EAS443:3:3:1497:1732#0/1  
AGGTAATATATGTGGACTTCCCCCGTGTACTCCAATTT  
+HWI-EAS443:3:3:1497:1732#0/1  
^\_^S\_baW^aa[Ra\_XF\_a]aaVZ[``bPL\_\_a\_a^¥aU]  
@HWI-EAS443:3:97:597:869#0/1  
CACGGAGGGAAGTCCACATATATTACCTATAGAAAGCCAA  
+HWI-EAS443:3:97:597:869#0/1  
aa\_\_b^bbbY```aa`aaa\_Y``a]`\_aa`aZ\_\_a\_`S\_  
@HWI-EAS443:3:12:1057:1212#0/1  
ATATATTACCTAGAGAAAGCCAACAAAATAAAATCTGAGA  
+HWI-EAS443:3:12:1057:1212#0/1  
`a\_Y^^[aaYaXU`¥X`Z`]a\_`\_a```\_a^\_``\_a^\_\_\_\_`  
@HWI-EAS443:3:15:1243:793#0/1  
GTTGGCTTTCTCTAGGTAATATATGTGGACTTCCCCTCCGT  
+HWI-EAS443:3:15:1243:793#0/1  
`\_babab`aa`\_Y```ZY\_a\_a\_aa¥aa\_Z]\_R¥[a\_Za^  
@HWI-EAS443:3:15:391:93#0/1  
GAAGTCCACATATATTACCTAGAGAAAGCCAACAAAATAA  
+HWI-EAS443:3:15:391:93#0/1  
abba``abaabab`ba¥aaaaaaba`aa\_`aaZ`T\_`a```  
@HWI-EAS443:3:15:753:609#0/1  
GAGGGAAGTCCACATATATTACCTAGAGAAAGCCAACAAA  
+HWI-EAS443:3:15:753:609#0/1  
aba`baab\_a`a\_ba\_aaaaaaaaaaaa\_\_aa`]\_`a\_a^a  
@HWI-EAS443:3:17:1688:321#0/1  
AGTCCACATATATTACCTAGAGAAAGCCAACAAAATAAAA

+HWI-EAS443:3:17:1688:321#0/1  
a`WVP\_]I` `` `Y`aYR[¥`WaX^`^RW¥¥[ ]\_Y]Y¥^^  
@HWI-EAS443:3:17:314:1036#0/1  
AGGTAATATATGTGGACTTCCCTCCGTGTTACTCCAATTT  
+HWI-EAS443:3:17:314:1036#0/1  
[a^Z^`aaaa\_\_\_\_QX\_a]\_Z\_a`a`Za^Z\_[\_\_¥\_P¥W\_  
@HWI-EAS443:3:17:380:1028#0/1  
TCCACATATATTACCTAGAGAAAGCCAACAAAATAAAATC  
+HWI-EAS443:3:17:380:1028#0/1  
\_baaa¥bb`\_a`ba`¥`b`a^b`aV`a¥G`[ababWb\_a\_  
@HWI-EAS443:3:19:641:1745#0/1  
GTCCACATATATTACCTAGAGAAAGCCAACAAAATAAAAT  
+HWI-EAS443:3:19:641:1745#0/1  
aW]MY[X¥]SS\_RTZY\_YOSX^¥[¥aa^^]``OVZ[ZW¥X  
@HWI-EAS443:3:1:208:549#0/1  
ACATATATTACCTAGAGAAAGCCAACAAAATAAAATCTGA  
+HWI-EAS443:3:1:208:549#0/1  
aaa`a` `aaa\_\_aaaa`aa\_a^` `^` `^^a^a\_^\_Yaab  
@HWI-EAS443:3:22:378:1664#0/1  
GTCCACATATATTACCTAGAGAAAGCCAACAAAATAAAAT  
+HWI-EAS443:3:22:378:1664#0/1  
` ]`` `a`aV\_ZWP]ba`¥^`\_^`Y]\_``^S]W`^aW\_a\_  
@HWI-EAS443:3:23:1014:228#0/1  
GAAGTCCACATATATTACCTAGAGAAAGCCAACAAAATAA  
+HWI-EAS443:3:23:1014:228#0/1  
a\_aaa`Ya\_aaaaaaaaa\_a`aa\_` ]`` ` ` `^` ` ` `\_  
@HWI-EAS443:3:23:127:721#0/1  
GGCTTTCTCTAGGTAATATATGTGGACTTCCCTCCGTGTT  
+HWI-EAS443:3:23:127:721#0/1  
aaaaaaaaabaaaaNa`aaa\_a` [ ]a\_a`\_a`^aa`S\_]\_  
@HWI-EAS443:3:24:606:1610#0/1  
GGTAATATATGTGGACTTCCCTCCGTGTTACTCCAATTC  
+HWI-EAS443:3:24:606:1610#0/1  
`b^b]babbaa\_¥a`aabaab`\_`\_\_` `a` ` ` `aal[aaa  
@HWI-EAS443:3:26:356:1823#0/1  
CATATATTACCTAGAGAAAGCCAACAAAATAAAATCTGAG  
+HWI-EAS443:3:26:356:1823#0/1  
``[N]Waa]abbaVY]V\_^Qa¥aab` `YY^`X^^V¥\_a\_]\_  
@HWI-EAS443:3:26:639:854#0/1  
AACACGGAGGGAAGTCCACATATATTACCTAGAGAAAGCC  
+HWI-EAS443:3:26:639:854#0/1  
abba\_abaa^a¥^`Ua[ ]aaa`a`^\_a]\_aaa\_\_\_\_]\_a¥Y  
@HWI-EAS443:3:28:1634:427#0/1  
GAGGGAAGTCCACATATATTACCTAGAGAAAGCCAACAAA  
+HWI-EAS443:3:28:1634:427#0/1  
aZY\_`Z^Z¥RV]` ]\_`\_a` [ ]]aT\_]` ]^[aVX^^V^^]  
@HWI-EAS443:3:37:699:993#0/1  
CTAGGTAATATATGTGGACTTCCCTCCGTGTTACTCCAAT  
+HWI-EAS443:3:37:699:993#0/1  
abVabP^]Z`aba]Va^YMG]bb`^a\_\_V\_VWW\_[^ZUXR

@HWI-EAS443:3:3:108:81#0/1  
AGGTAATATATGTGGACTTCCCTCCGTGTTACTCCAATTT  
+HWI-EAS443:3:3:108:81#0/1  
aaa`abbaaaaa\_\_]\_aaaa]`aa\_a\_a``\_¥a`^^¥``^  
@HWI-EAS443:3:40:942:1318#0/1  
ACGGAGGGAAGTCCACATATATTACCTAGAGAAAAGCCAAC  
+HWI-EAS443:3:40:942:1318#0/1  
`¥bb^YO^XY¥U``S[Y[X[^X`^\_V`\_\_[\_a`¥[^W^¥  
@HWI-EAS443:3:45:1196:1618#0/1  
TGGCTTTCTCTAGGTAATATATGTGGACTTCCCTCCGTGT  
+HWI-EAS443:3:45:1196:1618#0/1  
aaa\_abb`a\_b\_a`¥aaa`a`a\_\_`\_`]a\_[^\_a\_X`]^`^  
@HWI-EAS443:3:45:358:265#0/1  
GCTTTCTCTAGGTAATATATGTGGACTTCCCTCCGTGTTA  
+HWI-EAS443:3:45:358:265#0/1  
a[aaa`b\_aa[QSa`aabaa]`aaY]aa\_\_`\_\_\_\_a^aX\_\_  
@HWI-EAS443:3:45:474:303#0/1  
GTTGGCTTTCTCTAGGTAATATATGTGGACTTCCCTCCGT  
+HWI-EAS443:3:45:474:303#0/1  
a¥aaaaaaa`\_`\_adW\_\_^`\_]\_\_^`a[^\_\_\_\_[]^`X\_Y  
@HWI-EAS443:3:46:684:2008#0/1  
GGTAATATATGTGGACTTCCCTCCGTGTTACTCCAATTT  
+HWI-EAS443:3:46:684:2008#0/1  
a`¥\_\_^aaaa`]a`]aa]\_¥]`\_X[W^^^]R[Y\_\_\_\_]]¥U  
@HWI-EAS443:3:47:1628:543#0/1  
GAAGTCCACATATATTACCTAGAGAAAAGCCAACAAAATAA  
+HWI-EAS443:3:47:1628:543#0/1  
a`aa`a`a\_aa`\_`\_a\_a`Y\_\_`[\_`\_\_\_\_]^MX^]^]U\_^^^  
@HWI-EAS443:3:48:958:49#0/1  
CATATATTACCTAGAGAAAAGCCAACAAAATAAAATCTGAG  
+HWI-EAS443:3:48:958:49#0/1  
ab\_bbbab`^Z`bbba\_Yab]`bRK\_\_abba¥aa`H^b\_a  
@HWI-EAS443:3:51:1248:1055#0/1  
CACATATATTACCTAGAGAAAAGCCAACAAAATAAAATCTG  
+HWI-EAS443:3:51:1248:1055#0/1  
]`bbbabbbaba]abbaaaaa`¥a`aababbaabbb\_ba  
@HWI-EAS443:3:54:283:1906#0/1  
AACACGGAGGGAAGTCCACATATATTACCTAGAGAAAAGCC  
+HWI-EAS443:3:54:283:1906#0/1  
ab^a`¥[¥]aaXU\_U[]a^a`a^]a¥\_^\_a[S\_\_\_\_`^UP`  
@HWI-EAS443:3:56:1239:385#0/1  
GTTGGCTTTCTCTAGGTAATATATGTGGACTTCCCTCCGT  
+HWI-EAS443:3:56:1239:385#0/1  
a`bbaabb`aab\_aaYaaaaaaaa`a`\_`^aa\_¥`a`¥`\_`  
@HWI-EAS443:3:56:217:2024#0/1  
GTTGGCTTTCTCTAGGTAATATATGTGGACTTCCCTCCGT  
+HWI-EAS443:3:56:217:2024#0/1  
aaabaabbbbaaaa\_^\_[bbbaaaa^^aa\_\_aaaa\_`a\_aY  
@HWI-EAS443:3:57:1515:1753#0/1  
GTCCACATATATTACCTAGAGAAAAGCCAACAAAATAAAAT

+HWI-EAS443:3:57:1515:1753#0/1  
]H[`Y[\_b¥a`a`\_XW^]a[[]]Y¥JOY\_^`][Va^^\_Z^  
@HWI-EAS443:3:57:803:620#0/1  
CACGGAGGGAAGTCCACATATATTACCTAGAGAAAGCCAA  
+HWI-EAS443:3:57:803:620#0/1  
a\_Y\_XUX`aaaa¥¥]```aaaa`\_\_^a`aaa`^a`X\_a`  
@HWI-EAS443:3:57:999:1524#0/1  
ACACGGAGGGAAGTCCACATATATTACCTAGAGAAAGCCA  
+HWI-EAS443:3:57:999:1524#0/1  
aUa`aa`bb\_\_bYXZa\_\_a`[a`\_a`\_aaa\_\_^a`^^\_  
@HWI-EAS443:3:60:860:619#0/1  
TCCACATATATTACCTAGAGAAAGCCAACAAAATAAAATC  
+HWI-EAS443:3:60:860:619#0/1  
]XTH[X`baaaaba`^a\_abaaa`^`^^`aa\_a¥¥aaaZ  
@HWI-EAS443:3:61:470:132#0/1  
TCCACATATATTACCTAGAGAAAGCCAACAAAATAAAATC  
+HWI-EAS443:3:61:470:132#0/1  
aaaaaaaa`baaaa`¥aa`a\_]\_a`aZ¥`\_`\_`\_]^^W  
@HWI-EAS443:3:63:1123:1492#0/1  
GAGGGAAGTCCACATATATTACCTAGAGAAAGCCAACAAA  
+HWI-EAS443:3:63:1123:1492#0/1  
`\_¥S[¥¥[HNaaR]¥¥^a^a]\_Y`a`]baa\_a^`¥^]ZZY  
@HWI-EAS443:3:66:680:101#0/1  
CACATATATTACCTAGAGAAAGCCAACAAAATAAAATCTG  
+HWI-EAS443:3:66:680:101#0/1  
abbbbbbbbababbabaaba^ba`aa\_aaa^aaaaaa]aa  
@HWI-EAS443:3:6:569:1490#0/1  
CACATATATTACCTAGAGAAAGCCAACAAAATAAAATCTG  
+HWI-EAS443:3:6:569:1490#0/1  
XM`US\_a\_a\_a`^b`b^¥aX`aaaa\_aa\_b`Yaba`T\_`  
@HWI-EAS443:3:72:1201:895#0/1  
CACATATATTACCTAGAGAAAGCCAACAAAATAAAATCTG  
+HWI-EAS443:3:72:1201:895#0/1  
abbb\_a^`aba`bab[baaa\_[aba\_X\_a\_bbaa\_aY^\_  
@HWI-EAS443:3:76:451:847#0/1  
CTCAGATTTTATTTTGTGGCTTTCTCTAGGTAATATATG  
+HWI-EAS443:3:76:451:847#0/1  
ab`^`a)`aaZ^aa`\_aZ\_\_a\_\_[¥^\_[I^aX]W[\_\_\_\_^`  
@HWI-EAS443:3:78:1370:154#0/1  
AGTCCACATATATTACCTAGAGAAAGCCAACAAAATAAAA  
+HWI-EAS443:3:78:1370:154#0/1  
a\_[Q\_\_\_aa\_aa\_`\_ZZa\_a`\_]\_]][[VN^\_^¥][^][  
@HWI-EAS443:3:82:1778:912#0/1  
GTCCACATATATTACCTAGAGAAAGCCAACAAAATAAAAT  
+HWI-EAS443:3:82:1778:912#0/1  
Y\_^`^`a^a`baabaY\_bba^aX`aabaaa\_aaaa`aaa`  
@HWI-EAS443:3:83:1101:209#0/1  
CTAGGTAATATATGTGGACTTCCCTCCGTGTTACTCCAAT  
+HWI-EAS443:3:83:1101:209#0/1  
a`XZ`\_`]^`b\_a\_]``USa`^¥Ya[Ya^^`\_]P¥Y^`^`



@HWI-EAS443:3:88:1307:220#0/1  
AGGTAATATATGTGGACTTCCCTCCGTGTTACTCCAATTT  
+HWI-EAS443:3:88:1307:220#0/1  
]a¥^babbbabb]b\_aabb\_P\_`aabaab¥Q\_[Xb` `a\_  
@HWI-EAS443:3:88:533:913#0/1  
CACATATATTACCTAGAGAAAGCCAACAAAATAAAATCTG  
+HWI-EAS443:3:88:533:913#0/1  
Ua`^a`¥Xa¥aab`¥`a^abbbba\_`\_Y\_`\_¥a\_XM\_bb^a  
@HWI-EAS443:3:92:330:1336#0/1  
GAAGTCCACATATATTACCTAGAGAAAGCCAACAAAATAA  
+HWI-EAS443:3:92:330:1336#0/1  
aba`\_abbaaa`aabbaa`aababbbbaa` `a\_`aaaa`a  
@HWI-EAS443:3:92:384:1188#0/1  
CACGGAGGGAAGTCCACATATATTACCTAGAGAAAGCCAA  
+HWI-EAS443:3:92:384:1188#0/1  
aMaaaa¥aW\_aa0aaa` `a` `\_\_`\_`^`a^` `aZ]^`\_`]  
@HWI-EAS443:3:93:1486:1443#0/1  
ATTGGAGTAACACGGAGGGAAGTCCACATATATTACCTAG  
+HWI-EAS443:3:93:1486:1443#0/1  
X\_\_Y\_^b¥a`^VU^ba\_aaW^aV¥]]`^`\_aaaa`0J[[a  
@HWI-EAS443:3:77:867:1207#0/1  
AAAATGAAGGCAATACTAGTAGTTCTGCTATATACATTTG  
+HWI-EAS443:3:77:867:1207#0/1  
aa]a^SZaVa`X` [\_baaZNXa\_\_`\_` ` `a\_aa\_a\_^\_^^  
@HWI-EAS443:3:38:339:501#0/1  
CGAATGTTATTTTGTCTCCCGGCTCTACCAGTTTCCAGTA  
+HWI-EAS443:3:38:339:501#0/1  
aa[HUVPSOU^`^[ORYOT]^`\_BBBBBBBBBBBBBBBB  
@HWI-EAS443:3:31:613:294#0/1  
GCCAGTTGCTTCGAATGTTATTTTGTCTCCCGGCTCTACC  
+HWI-EAS443:3:31:613:294#0/1  
aa^[[I[[^[[aaXVYX\_LYQ]a[¥MFV¥]X^S\_BBBBBBB  
@HWI-EAS443:3:30:1291:2019#0/1  
ATGGGTGTCTTTCAACCAGAATCTGGAATATCAGATAGGA  
+HWI-EAS443:3:30:1291:2019#0/1  
a¥`\_`\_¥Z^aa\_\_aaa¥][\_\_Za^`a`^][ ]\_Z\_] [WY\_P]  
@HWI-EAS443:3:25:1589:1238#0/1  
GGGATGCAATTTTCTCATTGACTGTGAATGTGAGAGGAT  
+HWI-EAS443:3:25:1589:1238#0/1  
aa`Y`]X\_^]]aZXaaZD^]`X]]^XaU^Xa[\_^XFW\_¥R  
@HWI-EAS443:3:77:1243:288#0/1  
GAAAATTGCATCCCCTCTGTTCTGGTGGAGCAGCAGCAA  
+HWI-EAS443:3:77:1243:288#0/1  
a`]]]aaaa`aaUMFW]a[``^`X` ` \_V\_\_][VUY]]]ZNTV  
@HWI-EAS443:3:35:583:798#0/1  
GAAAAGAGAAAGCCAACAAAATAAAATCTGAGAAGACACA  
+HWI-EAS443:3:35:583:798#0/1  
\_`^0Zaa`aXXT`\_\_R\_\_a`^[[aaa`Z^`\_`\_`¥\_`^` `U\_  
@HWI-EAS443:3:14:1636:1898#0/1  
GGGGTCTTCTCAGATTTTATTTTGTGGCTTTCTCTAGGT

+HWI-EAS443:3:14:1636:1898#0/1  
V\_b`UPK`a`XZ\_R¥ba`ZX¥bY`]ROX` `0[GRT^IS  
@HWI-EAS443:3:27:1702:824#0/1  
GTCTTCTCAGATTTTATTTTGTGGNTTCTCTAGGTAAT  
+HWI-EAS443:3:27:1702:824#0/1  
aa\_baaaaaba`aaaabaaa\_a[D[a`[^`^`]¥aY\_^a  
@HWI-EAS443:3:67:441:184#0/1  
ATGAAAGCCAACAAAATAAAATCTGAGAAGACACACATTC  
+HWI-EAS443:3:67:441:184#0/1  
ababV^`aa^\_a^aaaaaaa^a\_Wa\_]a`\_`\_`^^]TU  
@HWI-EAS443:3:25:216:2013#0/1  
AGGGAGTGCCTGATTAATGATCCCTGGGTTTTGCTTAATG  
+HWI-EAS443:3:25:216:2013#0/1  
a`aa\_\_[^`aa^\_a\_\_a\_]\_^]\_\_\_S`[X\_]^[^\_]`^W¥  
@HWI-EAS443:3:12:1773:1563#0/1  
CTAGAGAAAGCCAACAAAATAAAATCTGAGAAGACACACA  
+HWI-EAS443:3:12:1773:1563#0/1  
¥`aa`bb^X`bbb\_Y\_bbbbbbabbbbabbb¥bb`bbbaa  
@HWI-EAS443:3:12:221:1578#0/1  
GTCTTCTCAGATTTTATTTTGTGGCTTTCTCTAGGTAAT  
+HWI-EAS443:3:12:221:1578#0/1  
`Xaa`^`\_[]¥X`YW`\_ZZ\_\_N¥^`\_PQP\_^`WW[¥NX¥X  
@HWI-EAS443:3:18:1431:1257#0/1  
AAAGCCAACAAAATAAAATCTGAGAAGACACACATTCACA  
+HWI-EAS443:3:18:1431:1257#0/1  
^`WY¥ZXZb¥`aaa``][\_aa¥T\_aa`W\_]\_Wa^WX\_Z\_  
@HWI-EAS443:3:27:1095:1132#0/1  
GTCTTCTCAGATTTTATTTTGTGGCTTTCTCTAGGTAAT  
+HWI-EAS443:3:27:1095:1132#0/1  
a\_aaaab`Y\_¥aaaa^a`^a]\_`Ua\_^`X^`^V^]\_  
@HWI-EAS443:3:4:1788:652#0/1  
GTCTTCTCAGATTTTATTTTGTGGCTTTCTCTAGGTAAT  
+HWI-EAS443:3:4:1788:652#0/1  
aRVWZRTXU`RW`^ZW]a^\_UX^WNNT^SZUY[]^USZB  
@HWI-EAS443:3:67:319:101#0/1  
GTCTTCTCAGATTTTATTTTGTGGCTTTCTCTAGGTAAT  
+HWI-EAS443:3:67:319:101#0/1  
a[^^W\_YR`]¥aaa`aaa]Y]a\_aa`\_`\_`^T`U]X\_  
@HWI-EAS443:3:75:862:1342#0/1  
GAAAGCCAACAAAATAAAATCTGAGAAGACACACATTCAC  
+HWI-EAS443:3:75:862:1342#0/1  
^`aZ`bbaabbb`a`ba``aba`¥aa`abbaabaaa\_ab  
@HWI-EAS443:3:81:1311:666#0/1  
GTCTTCTCAGATTTTATTTTGTGGCTTTCTCTAGGTAAT  
+HWI-EAS443:3:81:1311:666#0/1  
a`aa`aaa`aaaaabaaab\_a\_\_Xaa`Za]a\_a`^\_\_a  
@HWI-EAS443:3:97:619:1468#0/1  
ATTACCTAGAGAAAGCCAACAAAATAAAATCTGAGAAGAC  
+HWI-EAS443:3:97:619:1468#0/1  
aa`aaaab`a`aaa``aa¥aaaaaaa``a`a^a`^\_\_\_\_

@HWI-EAS443:3:18:141:1722#0/1  
GCAAAAAGCAGGGGAAAACAAAAGCAACAAAAATAACGGTA  
+HWI-EAS443:3:18:141:1722#0/1  
abbbbbbababababbbbbbabb`bbbbbbbbbbabawU]  
@HWI-EAS443:3:48:1066:129#0/1  
GGGCAGCAAAAGCAGGGGAAAACAAAAGCAACAAAAATAC  
+HWI-EAS443:3:48:1066:129#0/1  
a\_aa\_baa`aaa`a`a\_\_\_`^]\_^\_`^Z¥\_\_\_^W^]ZW  
@HWI-EAS443:3:35:1460:1167#0/1  
GAAATCCTNATGTAAATACATATTCTACACTGTAAAGAC  
+HWI-EAS443:3:35:1460:1167#0/1  
¥\_TVa`\_`ODY^¥W]]X^`b`aa¥aaPb\_ba\_]a\_WHH¥V`  
@HWI-EAS443:3:39:548:29#0/1  
AAATCCTAATCTTAAATACATATTCTACACTGTAGAGACC  
+HWI-EAS443:3:39:548:29#0/1  
]\_`a`aa¥W]GZaa]]\_Z¥[]^¥\_\_[][^`ZTRT\_`¥UM  
@HWI-EAS443:3:44:41:678#0/1  
GAAATCCTAATCTTAAATACATATTCTACACTGTAGAGAC  
+HWI-EAS443:3:44:41:678#0/1  
`\_a\_a`a`aaXEYaa`^aa`aaa`\_a`Y\_^^X\_[]^\_X  
@HWI-EAS443:3:56:1026:622#0/1  
TTCTCATTCTTCTGAAATCCTAATGTAAATACATATTCT  
+HWI-EAS443:3:56:1026:622#0/1  
¥RFURPQFRP]UP\_]`¥` [TPTV]^¥QVRaWRUXFKXODR  
@HWI-EAS443:3:19:1227:1092#0/1  
GAAATCCTAATGTAAATACATATTCTACACTGTAGANAC  
+HWI-EAS443:3:19:1227:1092#0/1  
\_RQZ`SPJ^¥YZ]P]\_PSa¥S[^aYL[^`^YTZ^\_ZPODLG  
@HWI-EAS443:3:89:493:1357#0/1  
CGGGCTTCTGAAATCCTAATGTAAATACATATTCTACAC  
+HWI-EAS443:3:89:493:1357#0/1  
abb`babbbababababbbabbXabbabababbbaba  
@HWI-EAS443:3:12:1463:1385#0/1  
GAAATCCTAATGTAAATACATATTCTACACTGTAGAGAC  
+HWI-EAS443:3:12:1463:1385#0/1  
a`Y¥`¥Q]¥`\_`\_]Y]]a`a\_^^``[^`aW\_[^a¥\_`^\_]X  
@HWI-EAS443:3:13:958:441#0/1  
ATGCTTCTGAAATCCTAATGTAAATACATATTCTACACT  
+HWI-EAS443:3:13:958:441#0/1  
abZRY^TZ`ab\_`TLZ¥a`^^¥\_U^[X¥`^]`]]`¥^\_L]  
@HWI-EAS443:3:14:668:1612#0/1  
GAAATCCTAATGTAAATACATATTCTACACTGTAGAGAC  
+HWI-EAS443:3:14:668:1612#0/1  
`bb`a\_aabaaaaaaaaaaaaaaaaaaaaa`\_`\_`\_`baaa`\_`  
@HWI-EAS443:3:16:91:2014#0/1  
GCTTCTGAAATCCTAATGTAAATACATATTCTACACTGT  
+HWI-EAS443:3:16:91:2014#0/1  
aa`^`ab\_R`Ybbabbbaaa¥Vaa\_`¥aba\_aabaab\_aW  
@HWI-EAS443:3:25:31:1284#0/1  
GAAATCCTAATGTAAATACATATTCTACACTGTAGAGAC

+HWI-EAS443:3:25:31:1284#0/1  
¥J¥\_aba`[\_`a\_a^]]^YaV`aaaaa]aaa`a\_aa```\_`  
@HWI-EAS443:3:26:1381:1235#0/1  
TGAAATCCTAATGTAAATACATATTCTACACTGTAGAGA  
+HWI-EAS443:3:26:1381:1235#0/1  
abaaaaaaaa`aaaaaaaaaaaaaaaaaa\_aa`a^`^^\_  
@HWI-EAS443:3:33:641:24#0/1  
TGCTTCTGAAATCCTAATGTAAATACATATTCTACACTG  
+HWI-EAS443:3:33:641:24#0/1  
aaa[\_\_\_WQZS\_Y]Y]TX]T\_\_ZW¥[X^[W¥TWXXX¥YY[  
@HWI-EAS443:3:34:164:1845#0/1  
TTTTTCTCATGCTTCTGAAATCCTAATGTAAATACATAT  
+HWI-EAS443:3:34:164:1845#0/1  
aaba\_bab\_aabaabaa¥¥aaba`a``\_aa`aaaa````  
@HWI-EAS443:3:35:880:784#0/1  
CTGAAATCCTAATGTAAATACATATTCTACACTGTAGAG  
+HWI-EAS443:3:35:880:784#0/1  
abbbbbbbba`baabbaabbbbbbb`b`abbbaaa^`^  
@HWI-EAS443:3:37:1228:1238#0/1  
TGCTTCTGAAATCCTAATGTAAATACATATTCTACACTG  
+HWI-EAS443:3:37:1228:1238#0/1  
`bba`aab[aaaab]T^abaaaaaaaa`a`[aab`a\_aa`\_  
@HWI-EAS443:3:37:844:484#0/1  
GAAATCCTAATGTAAATACATATTCTACACTGTAGAGAC  
+HWI-EAS443:3:37:844:484#0/1  
aaaaaaaa`aaaaaa`abaabaa``aa\_a^a`a]a^````]  
@HWI-EAS443:3:39:1601:102#0/1  
CTAATGTAAATACATATTCTACACTGTAGAGACCCATTA  
+HWI-EAS443:3:39:1601:102#0/1  
abbabbbbbbbbaabbbbabbabbabbabbaX`\_^Wa\_]`^  
@HWI-EAS443:3:39:293:382#0/1  
CTCATGCTTCTGAAATCCTAATGTAAATACATATTCTAC  
+HWI-EAS443:3:39:293:382#0/1  
\_ba^`bbbbaaa\_ZZ`b]abb`\_]`a`\_a`aa\_\_\_aaaa\_  
@HWI-EAS443:3:40:243:561#0/1  
TTCTCATGCTTCTGAAATCCTAATGTAAATACATATTCT  
+HWI-EAS443:3:40:243:561#0/1  
aaaabaaaaaaaa`aa`X`aaa\_aaa^[aXaaa```W\_^a`  
@HWI-EAS443:3:46:1372:777#0/1  
TGCTTCTGAAATCCTAATGTAAATACATATTCTACACTG  
+HWI-EAS443:3:46:1372:777#0/1  
a[``^`\_a]Y[Z¥^`\_\_^^aV]^T^W]]`^]]^`^]W^WU]  
@HWI-EAS443:3:53:1215:540#0/1  
AAATCCTAATGTAAATACATATTCTACACTGTAGAGACC  
+HWI-EAS443:3:53:1215:540#0/1  
aaabaababbbbaabbbbaabbbbaaba`aaba`aaa\_a`Y  
@HWI-EAS443:3:54:88:757#0/1  
ATGCTTCTGAAATCCTAATGTAAATACATATTCTACACT  
+HWI-EAS443:3:54:88:757#0/1  
`aababbbb\_aababaabbbab`aabaababbaaa`a`a

@HWI-EAS443:3:54:961:1128#0/1  
TTTTCTCATGCTTCTGAAATCCTAATGTTAAATACATATT  
+HWI-EAS443:3:54:961:1128#0/1  
aa\_`aa`[a^[^\_T^V¥VZ¥\_\_^bbab`aa^\_]\_\_b\_Y]\_  
@HWI-EAS443:3:55:97:829#0/1  
ATGCTTCTGAAATCCTAATGTTAAATACATATTCTACT  
+HWI-EAS443:3:55:97:829#0/1  
`^^\_`\_]¥Y)`\_\_[\_\_`^`a^\_Z\_`\_WQV¥Z`ZX^)]\_Y]  
@HWI-EAS443:3:58:973:940#0/1  
CTCATGCTTCTGAAATCCTAATGTTAAATACATATTCTAC  
+HWI-EAS443:3:58:973:940#0/1  
abbbbabbbababaaaaabaabbaaa\_\_aaaab`baaaaa  
@HWI-EAS443:3:59:1602:831#0/1  
GCTTCTGAAATCCTAATGTTAAATACATATTCTACTGT  
+HWI-EAS443:3:59:1602:831#0/1  
U¥¥V^aa\_\_Ya`¥`¥a^aZ[`a`b`ba^`aUF\_]TM[a]G  
@HWI-EAS443:3:65:1486:210#0/1  
GAAATCCTAATGTTAAATACATATTCTACTGTAGAGAC  
+HWI-EAS443:3:65:1486:210#0/1  
a`\_`\_`^`\_`\_\_\_`\_`X`\_`[^`\_\_\_]\_\_\_[^Y[^^]ZYWUT  
@HWI-EAS443:3:67:585:1011#0/1  
TTTTTCTCATGCTTCTGAAATCCTAATGTTAAATACATAT  
+HWI-EAS443:3:67:585:1011#0/1  
aaaaabaa\_aaa`aaa`^]\_aaaaaa\_a`a`a`a`\_`````  
@HWI-EAS443:3:69:787:1946#0/1  
AAATCCTAATGTTAAATACATATTCTACTGTAGAGACC  
+HWI-EAS443:3:69:787:1946#0/1  
`VPX`bW]]Y`UZ^¥aV`a\_\_a\_\_a^aa`\_Z[V]WRM`YG  
@HWI-EAS443:3:70:1429:1261#0/1  
CTGAAATCCTAATGTTAAATACATATTCTACTGTAGAG  
+HWI-EAS443:3:70:1429:1261#0/1  
abba[^abbbb`bb`bab`bbbbbbbaabbababaaa\_\_  
@HWI-EAS443:3:75:188:190#0/1  
GAAATCCTAATGTTAAATACATATTCTACTGTAGAGAC  
+HWI-EAS443:3:75:188:190#0/1  
aaaaaaaaaaaa`aa`aa`\_`a`a`aa\_a`\_`aX\_\_\_^\_]`  
@HWI-EAS443:3:75:405:1305#0/1  
GAAATCCTAATGTTAAATACATATTCTACTGTAGAGAC  
+HWI-EAS443:3:75:405:1305#0/1  
^V¥¥`bb```bbabb`abbabb`baaba^Xaaa\_b]`\_aa  
@HWI-EAS443:3:76:1234:693#0/1  
TGAAATCCTAATGTTAAATACATATTCTACTGTAGAGA  
+HWI-EAS443:3:76:1234:693#0/1  
Ta\_`ababb\_bW^`b^^aabb`bab]Wab`¥W\_bbabab  
@HWI-EAS443:3:76:747:1028#0/1  
CTCATGCTTCTGAAATCCTAATGTTAAATACATATTCTAC  
+HWI-EAS443:3:76:747:1028#0/1  
aaaaa`baaaaaaa\_a\_aaab`a¥a`aa`a`\_`a`\_`\_aa\_  
@HWI-EAS443:3:76:764:1451#0/1  
TTTTTCTCATGCTTCTGAAATCCTAATGTTAAATACATAT

+HWI-EAS443:3:76:764:1451#0/1  
aaaa`\_`aaa\_\_`\_`\_`\_]`^\_\_`a\_^`^^¥\_`\_`^`^`\_  
@HWI-EAS443:3:82:1478:1214#0/1  
GAAATCCTAATGTTAAATACATATTCTACACTGTAGAGAC  
+HWI-EAS443:3:82:1478:1214#0/1  
a\_Y`^¥^baaa\_aa^¥\_aa\_^a`aYaa`^a¥`a]\_]a`]U  
@HWI-EAS443:3:83:437:580#0/1  
GAAATCCTAATGTTAAATACATATTCTACACTGTAGAGAC  
+HWI-EAS443:3:83:437:580#0/1  
`\_\_Y¥\_WWTXZUU`][WX`]¥aaa```aSaaaa``]ZTVY  
@HWI-EAS443:3:84:839:229#0/1  
GAAATCCTAATGTTAAATACATATTCTACACTGTAGAGAC  
+HWI-EAS443:3:84:839:229#0/1  
aa]^a`¥^a¥`a\_\_a`a\_[Y`\_`a\_\_\_\_`[Y`\_`[^`^¥Z\_Y  
@HWI-EAS443:3:87:345:578#0/1  
GCTTCTGAAATCCTAATGTTAAATACATATTCTACACTGT  
+HWI-EAS443:3:87:345:578#0/1  
aa\_^`a`[\_`\_R`¥`a[XX\_aaa\_`a`a\_\_`aX`\_`\_`¥  
@HWI-EAS443:3:93:362:1878#0/1  
GCTTCTGAAATCCTAATGTTAAATACATATTCTACACTGT  
+HWI-EAS443:3:93:362:1878#0/1  
aabaab¥aa\_aaaabaaa`^aaa`a]a`a`V\_\_\_Sa^^¥W  
@HWI-EAS443:3:93:934:388#0/1  
GCTTCTGAAATCCTAATGTTAAATACATATTCTACACTGT  
+HWI-EAS443:3:93:934:388#0/1  
aObaaaaabaaaaabaabaaaaaaa``aaa`aaa\_a[``\_`  
@HWI-EAS443:3:94:100:1007#0/1  
GAAATCCTAATGTTAAATACATATTCTACACTGTAGAGAC  
+HWI-EAS443:3:94:100:1007#0/1  
¥^`bbbba]baaab``aaabbab`a`b^a^^aYVa\_V¥Y  
@HWI-EAS443:3:95:475:1567#0/1  
GAAATCCTAATGTTAAATACATATTCTACACTGTAGAGAC  
+HWI-EAS443:3:95:475:1567#0/1  
`¥\_S`Z¥^\_T```]`baa]a`]`]VZa\_a0`a`a\_\_``[  
@HWI-EAS443:3:24:1775:1702#0/1  
GGGAGTTTTTTCCTCAACTGTCATACTCCTCTGCATTGTCT  
+HWI-EAS443:3:24:1775:1702#0/1  
\_`bI^ZQ¥`[\_`[a^\_b``XQ[MHR`UUYDNW]XILOaW\_G  
@HWI-EAS443:3:51:489:447#0/1  
TTCGGAGACAATGCAGAGGAGTATGACAGTTGAGGGGCTA  
+HWI-EAS443:3:51:489:447#0/1  
]ZXabaa\_ab]ab[F\_[b`Ra\_¥a`PPQaX^\_Y^WH¥HX^  
@HWI-EAS443:3:17:806:304#0/1  
GGGCATTTTTTCCTCAACTGTCATACTCCTCTGCATTGTCT  
+HWI-EAS443:3:17:806:304#0/1  
aa]G\_`a\_\_\_\_aa`\_a^aaZ`\_`^`]`\_`\_`U`\_`^`^`]]^^  
@HWI-EAS443:3:47:1488:878#0/1  
GGGCATTTTTTCCTCAACTGTCATACTCCTCTGCATTGTCT  
+HWI-EAS443:3:47:1488:878#0/1  
]aaHYb^aaa`[a`¥\_\_[\_V[`a\_\_[^WT]U^^\_`^UU]]

@HWI-EAS443:3:50:1734:942#0/1  
CTCAACTGTCATACTCCTCTGCATTGTCTCCGAAGAGATA  
+HWI-EAS443:3:50:1734:942#0/1  
`¥`a`^`\_]¥][X¥\_UZ^¥`aa^^`^^`b`\_`aZWaLFYYa  
@HWI-EAS443:3:77:145:1477#0/1  
GGGTATTTTTCTCAACTGTCATACTCCTCTGCATTCT  
+HWI-EAS443:3:77:145:1477#0/1  
S`UOUP\_]\_]\_aTZZa`USLa^PaUR¥L¥UU¥MRPBBBBB  
@HWI-EAS443:3:7:1403:1752#0/1  
GGGCATTTTTCTCAACTGTCATACTCCTCTGCATTGTCT  
+HWI-EAS443:3:7:1403:1752#0/1  
abRO¥\_\_\_aa`[^]R]WSa0\_\_\_VW^VV\_^`XV\_]X\_G[B  
@HWI-EAS443:3:87:247:1319#0/1  
GGGCATTTTTCTCAACTGTCATACTCCTCTGCATTGTCT  
+HWI-EAS443:3:87:247:1319#0/1  
]a\_V`YZTX[^]\_HSZYX`SX^Tab[^]a`ZXYX\_ZYRa¥  
@HWI-EAS443:3:92:813:851#0/1  
GGGCATTTTTCTCAACTGTCATACTCCTCTGCATTGTCT  
+HWI-EAS443:3:92:813:851#0/1  
`¥FY]`]T]Q^`\_a`VPO^TSTXNOV^[T^^UWYYQJV  
@HWI-EAS443:3:25:72:237#0/1  
TTTTCTCAACTGTCATACTCCCCTGCATTGTCTCCGAAG  
+HWI-EAS443:3:25:72:237#0/1  
`bbaa`a`[aaa`bb\_S^`ab`[^Y^a`¥` `[``YS¥  
@HWI-EAS443:3:45:150:1108#0/1  
GGGTATTTTTCTCACCTGTCATACTCCTCTGCATTGTCT  
+HWI-EAS443:3:45:150:1108#0/1  
aaWH¥a^\_T¥]^^^VX^ZRYT`YYU[^VQ[^V¥VZT  
@HWI-EAS443:3:47:1373:1458#0/1  
TTTTCTCAACTGTCATACTTCTCTGCATTGTCTCCGAAG  
+HWI-EAS443:3:47:1373:1458#0/1  
]\_^bbba\_baY\_¥¥^Y¥^`T\_[^Z`Xb`Y\_¥¥NGT`]S`  
@HWI-EAS443:3:50:551:239#0/1  
GTATTTTTCTCAACTGTCATACTCCTCTGCATTGGCTCC  
+HWI-EAS443:3:50:551:239#0/1  
a¥S^a```[X]a`][^]P¥[PNX`\_Z^aZSHZ]YJ[ZPX  
@HWI-EAS443:3:61:1450:604#0/1  
ATTTTTCTCAACTCTCATACTCCTCTGCATTGTCTCCGA  
+HWI-EAS443:3:61:1450:604#0/1  
abbbba`a^\_aa^XUaa\_X`abaaaaa^¥aWTTUVNLSQ  
@HWI-EAS443:3:62:1668:579#0/1  
CAAGGGGATTTTTCTCAACTGTCATACTCCTCTGCATTG  
+HWI-EAS443:3:62:1668:579#0/1  
aabbbbYZ[bbbb^`aaVZb`aabbaaaaa[a^ab`\_aab  
@HWI-EAS443:3:76:1379:128#0/1  
GGTATTTTTCTCAACTGTCATACCCCTCTGCATTGTCTC  
+HWI-EAS443:3:76:1379:128#0/1  
abVa`b`baY]aY\_\_Waa^\_\_aaR[RYWMW^W]`\_^ZW¥W  
@HWI-EAS443:3:7:385:497#0/1  
GTATTTTTCTCAACTGTCATATTCCTCTGCATTGTCTCC





@HWI-EAS443:3:95:224:706#0/1  
GGGTATTNTTCCTCAACTGTCATACTCCTCTGCATTGTCT  
+HWI-EAS443:3:95:224:706#0/1  
aaaZ]V#D#a\_]\_\_`]^a\_QR`¥^^^`WZ`ZVQ[`W#Z^#  
@HWI-EAS443:3:56:220:288#0/1  
GCATTTTTTCCTCAACTGTCATACTCCTCTGCATTGTCTCC  
+HWI-EAS443:3:56:220:288#0/1  
`FU]`aaa^a\_\_¥SXXaW#`[WW]]`\_\_^Z#^^]]X^X  
@HWI-EAS443:3:27:1411:1635#0/1  
ATTTTCCTCAACTGTCATACTCCTCTGCATTGTCTCCGAA  
+HWI-EAS443:3:27:1411:1635#0/1  
`URP]aXUZ`aUaVN^``¥`]][\_\_a]`\_^ZZ\_\_]]^]]  
@HWI-EAS443:3:46:1750:1428#0/1  
NGTATTTTTTCCTCAACTGTCATACTCCTCTGCATTGTCTC  
+HWI-EAS443:3:46:1750:1428#0/1  
DMUXXZZYXXYYXZZYXXZZZZZZXZZYWWZZZZXZV  
@HWI-EAS443:3:69:1584:1470#0/1  
ATTTCTTCGGAGACAATGCAGAGGAGTATGACAGTTGAGC  
+HWI-EAS443:3:69:1584:1470#0/1  
aaaaabaaba`a``aaaa\_^]`a^^[\_\_a\_]\_aZ\_^#^T  
@HWI-EAS443:3:78:153:1250#0/1  
CCCTCAACTGTCATACTCCTCTGCATTGTCTCCGAAGAAA  
+HWI-EAS443:3:78:153:1250#0/1  
abbaba`aaa^baaa``a#^a\_#a``\_]`\_\_a\_\_\_\_^\_\_  
@HWI-EAS443:3:92:1697:856#0/1  
TGGTATTTTTTCCTCAACTGTCATACTCCTCTGCATTGTCT  
+HWI-EAS443:3:92:1697:856#0/1  
Z`¥L\_bb]a`W`a\_aa\_`^Y````aWWa[^aXaaa\_NYa  
@HWI-EAS443:3:100:1152:1227#0/1  
GGTATTTTTTCCTCAACTGTCATACTCCTCTGCATTGTCTC  
+HWI-EAS443:3:100:1152:1227#0/1  
aaHa[[KZ^TU#Z[^UPWPXXa^`GH]#`\_]\_U^BBB  
@HWI-EAS443:3:100:475:260#0/1  
ATTTTTTCCTCAACTGTCATACTCCTCTGCATTGTCTCCGA  
+HWI-EAS443:3:100:475:260#0/1  
¥\_bbb\_bababaaba\_b]\_b`aVaa`\_\_aa[a]#`\_0a^  
@HWI-EAS443:3:11:1168:377#0/1  
ATTTTTTCCTCAACTGTCATACTCCTCTGCATTGTCTCCGA  
+HWI-EAS443:3:11:1168:377#0/1  
abbaaa`aaaaaa]`]]`aa`aa`a\_aa\_aa`a\_]`^a`  
@HWI-EAS443:3:11:1480:977#0/1  
TTTTTCCTCAACTGTCATACTCCTCTGCATTGTCTCCGAAG  
+HWI-EAS443:3:11:1480:977#0/1  
^`\_`^X^#bb#\_WG[aa`]ZU^^]a#a``a[YYTV`\_`\_  
@HWI-EAS443:3:12:1105:1683#0/1  
GGTATTTTTTCCTCAACTGTCATACTCCTCTGCATTGTCTC  
+HWI-EAS443:3:12:1105:1683#0/1  
aaZaaa`aa^Z\_Yaa#`a``aa]W]a`a\_`\_^\_a\_`\_X\_[  
@HWI-EAS443:3:12:1505:1392#0/1  
TTTTTCCTCAACTGTCATACTCCTCTGCATTGTCTCCGAAG

+HWI-EAS443:3:12:1505:1392#0/1  
¥\_`^]RT`baa^]U\_bb^ZWTZaaa^[`a`aYF¥aT^^\_  
@HWI-EAS443:3:13:972:253#0/1  
GGTATTTTTCTCAACTGTCATACTCCTCTGCATTGTCTC  
+HWI-EAS443:3:13:972:253#0/1  
a`P[`^[\_¥¥^`W]]`V]]X^LW[¥Y]^\_VW]]^WUWT  
@HWI-EAS443:3:14:1237:301#0/1  
TTTTCTCAACTGTCATACTCCTCTGCATTGTCTCCGAAG  
+HWI-EAS443:3:14:1237:301#0/1  
aaaa`\_a^\_]\_`\_]\_\_``\_\_\_W`Y\_`^^`\_]U\_]W\_]Z\_  
@HWI-EAS443:3:15:1050:1870#0/1  
AGGGTATTTTTCTCAACTGTCATACTCCTCTGCATTGTCTC  
+HWI-EAS443:3:15:1050:1870#0/1  
\_\_aaU\_^^aaa^[`a``aaa^aa`a`a^^`aa`Y```]^\_  
@HWI-EAS443:3:15:114:1458#0/1  
TTTTCTCAACTGTCATACTCCTCTGCATTGTCTCCGAAG  
+HWI-EAS443:3:15:114:1458#0/1  
abbaaaaaabaaa\_aaaaaa^a\_a`a]\_aa¥]``aa\_\_\_`  
@HWI-EAS443:3:15:341:43#0/1  
GTATTTTTCTCAACTGTCATACTCCTCTGCATTGTCTCC  
+HWI-EAS443:3:15:341:43#0/1  
a]\_\_a`a```]\_U^Y^a`YQ`[^WZYW^\_^^Z¥^^\_]V]^U  
@HWI-EAS443:3:17:109:806#0/1  
GTATTTTTCTCAACTGTCATACTCCTCTGCATTGTCTCC  
+HWI-EAS443:3:17:109:806#0/1  
aZXaaa\_`aaaaa\_a^a\_`^`\_\_a\_\_\_aa\_\_\_`\_^\_^\_\_\_]  
@HWI-EAS443:3:17:1194:692#0/1  
GGTATTTTTCTCAACTGTCATACTCCTCTGCATTGTCTC  
+HWI-EAS443:3:17:1194:692#0/1  
aaVaa`aa```a\_\_\_]\_a]¥¥^\_]^^\_\_X^\_]\_\_^\_[X[]  
@HWI-EAS443:3:17:416:891#0/1  
GGGTATTTTTCTCAACTGTCATACTCCTCTGCATTGTCT  
+HWI-EAS443:3:17:416:891#0/1  
aaaYaaaaa`````a```\_`a`a\_\_a\_\_`^\_\_`\_\_^^\_`^  
@HWI-EAS443:3:18:1527:1526#0/1  
GGGTATTTTTCTCAACTGTCATACTCCTCTGCATTGTCT  
+HWI-EAS443:3:18:1527:1526#0/1  
a`X`abaaaaaaa\_aa^aa`\_aa^`^\_a\_\_`\_]\_`  
@HWI-EAS443:3:18:215:1484#0/1  
TTTTCTCAACTGTCATACTCCTCTGCATTGTCTCCGAAG  
+HWI-EAS443:3:18:215:1484#0/1  
aa`bababbba`a``aa]aa\_\_\_`^^\_aaaZY[\_X\_\_\_]  
@HWI-EAS443:3:19:127:921#0/1  
GTATTTTTCTCAACTGTCATACTCCTCTGCATTGTCTCC  
+HWI-EAS443:3:19:127:921#0/1  
aU`]^a\_`a\_\_¥]a^^U]YWa`\_`a]\_\_^\_\_¥]\_Z\_]\_\_  
@HWI-EAS443:3:19:1393:667#0/1  
GGGTATTTTTCTCAACTGTCATACTCCTCTGCATTGTCT  
+HWI-EAS443:3:19:1393:667#0/1  
aY^TX¥`]]\_[LZS]XOMSPSOZRP^MU^VTTWYYSWWZ¥

@HWI-EAS443:3:19:211:830#0/1  
GTATTTTTCCTCAACTGTCATACTCCTCTGCATTGTCTCC  
+HWI-EAS443:3:19:211:830#0/1  
VTJ`¥`baa`]baa¥R[]`baYa¥`ab\_`^aaa`aa\_  
@HWI-EAS443:3:1:1307:567#0/1  
GTATTTTTCCTCAACTGTCATACTCCTCTGCATTGTCTCC  
+HWI-EAS443:3:1:1307:567#0/1  
`SW^`\_\_]ZX¥]\_\_Y]^¥X¥^¥X¥UX]U]^ZW]]^ZXBBB  
@HWI-EAS443:3:1:341:648#0/1  
GGGTATTTTTCCTCAACTGTCATACTCCTCTGCATTGTCT  
+HWI-EAS443:3:1:341:648#0/1  
abaYaaaaaaZWa\_\_`]]\_W¥``^`0\_]W][S`^U]BBB  
@HWI-EAS443:3:21:109:962#0/1  
CTCAACTGTCATACTCCTCTGCATTGTCTCCGAAGAAATA  
+HWI-EAS443:3:21:109:962#0/1  
aaa`aaaa\_aaaaa`aa`\_```\_`^^`\_`\_\_\_\_`^`\_`]  
@HWI-EAS443:3:21:1268:1414#0/1  
TCCTCAACTGTCATACTCCTCTGCATTGTCTCCGAAGAAA  
+HWI-EAS443:3:21:1268:1414#0/1  
[ab]a]`ab\_a^[^\_a`aa`a]\_\_`a]^\_\_\_\_aaYVW][  
@HWI-EAS443:3:21:1275:1885#0/1  
GGTATTTTTCCTCAACTGTCATACTCCTCTGCATTGTCTC  
+HWI-EAS443:3:21:1275:1885#0/1  
ab\_a` `[TX\_aa\_T`VV\_]ZaaXHWHS[F^]Ua¥`\_G`^W  
@HWI-EAS443:3:21:840:1296#0/1  
GGTATTTTTCCTCAACTGTCATACTCCTCTGCATTGTCTC  
+HWI-EAS443:3:21:840:1296#0/1  
a`XaaaaaaaaaabaYa]\_a`a^\_U\_\_a^^`a^`\_`\_¥  
@HWI-EAS443:3:22:1386:1527#0/1  
GGGTATTTTTCCTCAACTGTCATACTCCTCTGCATTGTCT  
+HWI-EAS443:3:22:1386:1527#0/1  
XaYmb\_]bb`]I`WX^^aa`aa\_W`]XUW\_^R]]`bWQ]  
@HWI-EAS443:3:22:37:662#0/1  
GTATTTTTCCTCAACTGTCATACTCCTCTGCATTGTCTCC  
+HWI-EAS443:3:22:37:662#0/1  
aJ¥a`a^\_X`[T¥^[WOTX¥[L[VHWLYPSSRQOS\_¥UU  
@HWI-EAS443:3:22:441:1798#0/1  
TTTTCCTCAACTGTCATACTCCTCTGCATTGTCTCCGAAG  
+HWI-EAS443:3:22:441:1798#0/1  
a\_a\_\_a\_abaa\_`^aaaaa^`[\_\_^`a\_\_\_^`\_`^^`^  
@HWI-EAS443:3:22:442:899#0/1  
TTTTCCTCAACTGTCATACTCCTCTGCATTGTCTCCGAAG  
+HWI-EAS443:3:22:442:899#0/1  
ab\_aabbbbaU^0[\_¥`ba`\_`ba^aaaa`X\_^`^]\_Y^\_  
@HWI-EAS443:3:24:1303:1313#0/1  
TTTTCCTCAACTGTCATACTCCTCTGCATTGTCTCCGAAG  
+HWI-EAS443:3:24:1303:1313#0/1  
]`¥T`b\_\_KZUWGP\_]¥bXOU\_`b[a]V^HP]US`Wb`  
@HWI-EAS443:3:24:694:75#0/1  
GGTATTTTTCCTCAACTGTCATACTCCTCTGCATTGTCTC

+HWI-EAS443:3:24:694:75#0/1  
`YIU`^UU\_]XZ]SVXV^GZRX\_OGXMPKZ¥0ZBBBBBBBB  
@HWI-EAS443:3:25:1425:1146#0/1  
GGGTATTTTTCTCAACTGTCATACTCCTCTGCATTGTCT  
+HWI-EAS443:3:25:1425:1146#0/1  
abaH\_bbbb`\_ab\_aa\_``\_``aa`a`\_`^\_a[a`a]]U\_  
@HWI-EAS443:3:26:1240:1551#0/1  
TTTTCTCAACTGTCATACTCCTCTGCATTGTCTCCGAAG  
+HWI-EAS443:3:26:1240:1551#0/1  
abbaaaaaaaaaa`baa`a`aaaaaa\_a`a`aaa\_\_a  
@HWI-EAS443:3:26:703:1190#0/1  
GTATTTTTCTCAACTGTCATACTCCTCTGCATTGTCTCC  
+HWI-EAS443:3:26:703:1190#0/1  
a]]bbabbaabbaaaaa`aa]aaaa`aaaa`\_\_a\_a`  
@HWI-EAS443:3:26:891:198#0/1  
GTATTTTTCTCAACTGTCATACTCCTCTGCATTGTCTCC  
+HWI-EAS443:3:26:891:198#0/1  
]NT]Z[UPX^P\_Y[LYYGXRNXY^YLO]]\_XUMSSZZWSW  
@HWI-EAS443:3:27:957:990#0/1  
GGTATTTTTCTCAACTGTCATACTCCTCTGCATTGTCTC  
+HWI-EAS443:3:27:957:990#0/1  
abJaaaa]\_b]a`^a\_ZaX`\_[[Ua\_X\_]\_^`a\_\_RX^  
@HWI-EAS443:3:27:976:833#0/1  
TTTTCTCAACTGTCATACTCCTCTGCATTGTCTCCGAAG  
+HWI-EAS443:3:27:976:833#0/1  
a^T^`a\_¥`aa^\_J\_¥\_RPW`Va`a^ZU\_[`X]X^`XT¥  
@HWI-EAS443:3:28:1062:765#0/1  
GGGTATTTTTCTCAACTGTCATACTCCTCTGCATTGTCT  
+HWI-EAS443:3:28:1062:765#0/1  
`b]abbbba`b¥aaaaa\_aaaa\_b\_\_aaaa]`aaa`\_`\_`  
@HWI-EAS443:3:28:34:864#0/1  
TTTTCTCAACTGTCATACTCCTCTGCATTGTCTCCGAAG  
+HWI-EAS443:3:28:34:864#0/1  
abbbabbbbabaa`aaaaabaaaabaaaaaaaa`a`¥`¥  
@HWI-EAS443:3:28:557:1062#0/1  
GGGTATTTTTCTCAACTGTCATACTCCTCTGCATTGTCT  
+HWI-EAS443:3:28:557:1062#0/1  
ab\_L^ababbaaaaaaaaaa¥aaa`aaa\_aa\_\_`aa`\_\_\_\_`  
@HWI-EAS443:3:28:935:1213#0/1  
GGTATTTTTCTCAACTGTCATACTCCTCTGCATTGTCTC  
+HWI-EAS443:3:28:935:1213#0/1  
abXaaaaa^^YX\_aba`a`^a\_aa\_^`a`[\_`\_^`^`\_a\_\_`  
@HWI-EAS443:3:28:938:891#0/1  
GGTATTTTTCTCAACTGTCATACTCCTCTGCATTGTCTC  
+HWI-EAS443:3:28:938:891#0/1  
a^X^a`aa`a[¥`X^]RZV¥[\_\_Z^`\_`a]`^\_U¥Z\_Y  
@HWI-EAS443:3:29:342:1327#0/1  
GGTATTTTTCTCAACTGTCATACTCCTCTGCATTGTCTC  
+HWI-EAS443:3:29:342:1327#0/1  
TYZXHXX`a\_XX^b]V\_baS[a`ab^aab\_aaa¥R¥]`

@HWI-EAS443:3:29:469:2038#0/1  
GGGTATTTTTCCTCAACTGTCATACTCCTCTGCATTGTCT  
+HWI-EAS443:3:29:469:2038#0/1  
abbRbabbbabbbabba`Ybbaba`baaa`bba\_a^a^  
@HWI-EAS443:3:2:1439:651#0/1  
GGGTATTTTTCCTCAACTGTCATACTCCTCTGCATTGTCT  
+HWI-EAS443:3:2:1439:651#0/1  
aaaXaaa\_aa\_^]^[^\_`Z]]Y]V\_^]]¥\_]W]^]VZZZ  
@HWI-EAS443:3:2:517:1803#0/1  
ATTTTTCCTCAACTGTCATACTCCTCTGCATTGTCTCCGA  
+HWI-EAS443:3:2:517:1803#0/1  
`[¥\_`YYM`¥bbH\_a^¥¥a`aa\_\_\_`\_a\_`a\_a\_Y^STaa  
@HWI-EAS443:3:30:1401:1078#0/1  
TTTTTTCCTCAACTGTCATACTCCTCTGCATTGTCTCCGAAG  
+HWI-EAS443:3:30:1401:1078#0/1  
ab\_XS`bbaaR\_]\_aaaaYaaa^aX]a`Y\_¥\_a00`Z[a  
@HWI-EAS443:3:31:461:1420#0/1  
GGTATTTTTCCTCAACTGTCATACTCCTCTGCATTGTCTC  
+HWI-EAS443:3:31:461:1420#0/1  
aaPa[[`]aaa¥Z[T¥[\_Waa^[¥¥\_``\_\_[\_`a^^^^^  
@HWI-EAS443:3:32:1147:1315#0/1  
GGTATTTTTCCTCAACTGTCATACTCCTCTGCATTGTCTC  
+HWI-EAS443:3:32:1147:1315#0/1  
]¥]bbbbbabbabb`aa`aab\_aaaaab]aaaaa^bab  
@HWI-EAS443:3:32:17:183#0/1  
GGTATTTTTCCTCAACTGTCATACTCCTCTGCATTGTCTC  
+HWI-EAS443:3:32:17:183#0/1  
a`H[¥``\_aa]`\_YX]X`Z^\_ZY^^XW]]Y]YZXXYYYYZ  
@HWI-EAS443:3:33:1154:1044#0/1  
GGTATTTTTCCTCAACTGTCATACTCCTCTGCATTGTCTC  
+HWI-EAS443:3:33:1154:1044#0/1  
a`V¥`ab`baaaaa`aabXaa`a`ab^aaa\_] [a\_¥\_Wa\_  
@HWI-EAS443:3:33:1163:413#0/1  
ATTTTTCCTCAACTGTCATACTCCTCTGCATTGTCTCCGA  
+HWI-EAS443:3:33:1163:413#0/1  
abaaabaaaaaaaaabaaa`a[]aa`a\_aa`¥^]\_[Ua^  
@HWI-EAS443:3:33:963:787#0/1  
GGTATTTTTCCTCAACTGTCATACTCCTCTGCATTGTCTC  
+HWI-EAS443:3:33:963:787#0/1  
ab¥S\_b`b``ab`Xa\_aa\_\_a\_aaa`[]\_\_[\_]\_^\_AW`^  
@HWI-EAS443:3:34:1423:594#0/1  
GGTATTTTTCCTCAACTGTCATACTCCTCTGCATTGTCTC  
+HWI-EAS443:3:34:1423:594#0/1  
Z¥[¥`^X`ba[`aXX\_VYQ¥`aZ\_a]¥\_X`UJ¥aYWYWBB  
@HWI-EAS443:3:35:486:1638#0/1  
CCTCAACTGTCATACTCCTCTGCATTGTCTCCGAAGAAAT  
+HWI-EAS443:3:35:486:1638#0/1  
a`\_]\_abbT]Q]]^Y]SaZGWY\_a\_]UNVaX`^\_\_\_^[J^S  
@HWI-EAS443:3:36:1079:176#0/1  
GGTATTTTTCCTCAACTGTCATACTCCTCTGCATTGTCTC

+HWI-EAS443:3:36:1079:176#0/1  
\_`[(`baa\_aaaa`a`ab\_aaaaaa\_`a\_\_R``Z`X`\_a  
@HWI-EAS443:3:36:1218:1232#0/1  
GGGTATTTTTCCTCAACTGTCATACTCCTCTGCATTGTCT  
+HWI-EAS443:3:36:1218:1232#0/1  
¥ba¥¥baaaa`aZ`abaWaaaa¥`a\_aaYa\_aaaaa[`  
@HWI-EAS443:3:36:1573:1660#0/1  
CTCAACTGTCATACTCCTCTGCATTGTCTCCGAAGAAATA  
+HWI-EAS443:3:36:1573:1660#0/1  
SZba\_ab`XX`bTZP¥`a`UX^\_^ZN^`aW\_\_^¥Z`]¥  
@HWI-EAS443:3:37:1303:1183#0/1  
GGTATTTTTCCTCAACTGTCATACTCCTCTGCATTGTCTC  
+HWI-EAS443:3:37:1303:1183#0/1  
^bZaababaaaaaab`a[\_aaaabbaaaXa\_aaa`\_ba\_  
@HWI-EAS443:3:37:1313:314#0/1  
GTATTTTTCCTCAACTGTCATACTCCTCTGCATTGTCTCC  
+HWI-EAS443:3:37:1313:314#0/1  
`Q^\_`aba`^`\_¥ZXa]Z^]\_`X\_^`XRVSa`^`][¥]]T  
@HWI-EAS443:3:37:1341:702#0/1  
GGGTATTTTTCCTCAACTGTCATACTCCTCTGCATTGTCT  
+HWI-EAS443:3:37:1341:702#0/1  
abbYaabaaaa\_aaaa`a]aaaa^a\_]\_W`aaaa\_a]`\_  
@HWI-EAS443:3:38:506:505#0/1  
GGGTATTTTTCCTCAACTGTCATACTCCTCTGCATTGTCT  
+HWI-EAS443:3:38:506:505#0/1  
a`aS`aa\_[^^^`\_Y^\_]\_\_]\_]\_Y]WY]]X]\_Y]Y  
@HWI-EAS443:3:39:1421:960#0/1  
ATTTTTCCTCAACTGTCATACTCCTCTGCATTGTCTCCGA  
+HWI-EAS443:3:39:1421:960#0/1  
`abbbbaabaaaaa`aaaa^b^\_aa`aaa`^`\_a`aWa]  
@HWI-EAS443:3:3:770:680#0/1  
TTTTCTCAACTGTCATACTCCTCTGCATTGTCTCCGAAG  
+HWI-EAS443:3:3:770:680#0/1  
aabba\_a^a`aa`Za`a^a`\_`aa^`a[Xa]]a¥]`  
@HWI-EAS443:3:3:825:895#0/1  
GTATTTTTCCTCAACTGTCATACTCCTCTGCATTGTCTCC  
+HWI-EAS443:3:3:825:895#0/1  
`M`Xba¥^aba`aYa^a\_Y\_a`a`^`a[aa`aSY¥XF  
@HWI-EAS443:3:42:1080:460#0/1  
TTTTCTCAACTGTCATACTCCTCTGCATTGTCTCCGAAG  
+HWI-EAS443:3:42:1080:460#0/1  
^SXYFY¥SZZ`^`X¥¥Z`WQWPP]]\_UV\_NFRZSPHM¥TY  
@HWI-EAS443:3:42:149:1975#0/1  
CTCAACTGTCATACTCCTCTGCATTGTCTCCGAAGAAATA  
+HWI-EAS443:3:42:149:1975#0/1  
aa``a]^R\_`aa]`W`X\_Z]`^O`^aa¥¥]\_`Z^  
@HWI-EAS443:3:44:1208:1533#0/1  
GGTATTTTTCCTCAACTGTCATACTCCTCTGCATTGTCTC  
+HWI-EAS443:3:44:1208:1533#0/1  
a[FV^`¥XT¥Z`ZY]]\_W[]\_[UZZQY]T¥VQXTWTXPM

@HWI-EAS443:3:44:1476:889#0/1  
GGTATTTTCTCACTGTCATACTCCTCTGCATTGTCTC  
+HWI-EAS443:3:44:1476:889#0/1  
ab^aabaaaa`a`a^a`\_`aa\_\_a`^`\_\_a\_\_a`^`\_]\_Z  
@HWI-EAS443:3:44:789:1208#0/1  
GGTATTTTCTCACTGTCATACTCCTCTGCATTGTCTC  
+HWI-EAS443:3:44:789:1208#0/1  
aYS^aa`\_^RVT`W`\_X[MS\_YSR`WX[^T[^]^]\_SMVY  
@HWI-EAS443:3:45:257:2038#0/1  
CTCACTGTCATACTCCTCTGCATTGTCTCCGAAGAAATA  
+HWI-EAS443:3:45:257:2038#0/1  
Q\_`b`UaVaZ`b]K`ZQ\_abbVV\_bb\_¥¥`L\_ba\_ab`Ya  
@HWI-EAS443:3:45:61:493#0/1  
TTCCTCACTGTCATACTCCTCTGCATTGTCTCCGAAGAA  
+HWI-EAS443:3:45:61:493#0/1  
a^Va`\_VS`^`^\_]\_^UXSYXT]ZTV`a^]W\_Z\_Y^ZNZ  
@HWI-EAS443:3:45:80:1177#0/1  
GGTATTTTCTCACTGTCATACTCCTCTGCATTGTCTC  
+HWI-EAS443:3:45:80:1177#0/1  
]\_LX¥a`\_]\_\_YU¥`\_SY¥`\_Y)`\_]¥\_[W¥\_`¥YW\_[  
@HWI-EAS443:3:45:81:1647#0/1  
GGGTATTTTCTCACTGTCATACTCCTCTGCATTGTCT  
+HWI-EAS443:3:45:81:1647#0/1  
abZT[b`abb^ababbaa`\_aaaa`^`bSaaT^aaa`aa  
@HWI-EAS443:3:47:190:455#0/1  
GGTATTTTCTCACTGTCATACTCCTCTGCATTGTCTC  
+HWI-EAS443:3:47:190:455#0/1  
aaW`abaaaa]\_a`a]a`\_]\_\_`W\_^Y\_¥`\_S\_`\_]ZY^¥  
@HWI-EAS443:3:48:1702:115#0/1  
GGTATTTTCTCACTGTCATACTCCTCTGCATTGTCTC  
+HWI-EAS443:3:48:1702:115#0/1  
abIaa^a`aXYb\_`^aWaba^W`¥]\_UU`¥`¥RN`\_`¥T\_R  
@HWI-EAS443:3:48:588:2045#0/1  
GGGTATTTTCTCACTGTCATACTCCTCTGCATTGTCT  
+HWI-EAS443:3:48:588:2045#0/1  
H\_¥^`bbVbb¥^bba\_XXba]b\_a¥bbaISVZxX`Y]T^  
@HWI-EAS443:3:48:635:1066#0/1  
GGTATTTTCTCACTGTCATACTCCTCTGCATTGTCTC  
+HWI-EAS443:3:48:635:1066#0/1  
abZaabaaaa`aaa`a`a[```````\_`aaa\_\_`a`\_`\_\_`\_`\_`  
@HWI-EAS443:3:48:660:1446#0/1  
GGGTATTTTCTCACTGTCATACTCCTCTGCATTGTCT  
+HWI-EAS443:3:48:660:1446#0/1  
aa`T`aa`````a`aa^`a^`a^[\_`¥YZ`^`^`\_`\_`¥V]  
@HWI-EAS443:3:49:1111:654#0/1  
GGTATTTTCTCACTGTCATACTCCTCTGCATTGTCTC  
+HWI-EAS443:3:49:1111:654#0/1  
¥\_Ua¥\_bbabab`aa\_]b`Vbaa\_]^Ta`^aa¥\_aba\_aa  
@HWI-EAS443:3:49:1609:259#0/1  
GGGTATTTTCTCACTGTCATACTCCTCTGCATTGTCT

+HWI-EAS443:3:49:1609:259#0/1  
aabR\_aaab`]aS`\_\_aaZN[`\_^`Y]Y]Z^\_^\_\_X#^  
@HWI-EAS443:3:4:348:1034#0/1  
GGTATTTTTCCTCAACTGTCATACTCCTCTGCATTGTCTC  
+HWI-EAS443:3:4:348:1034#0/1  
aaYaaaaaaaa`aaaa\_adW````^`^^`^\_\_\_\_a\_a\_]\_Z  
@HWI-EAS443:3:50:1328:1762#0/1  
TTTTCTCAACTGTCATACTCCTCTGCATTGTCTCCGAAG  
+HWI-EAS443:3:50:1328:1762#0/1  
\_^```baaaaa`^^\_b^Ua^^`\_a¥abaa[a`][`]`a  
@HWI-EAS443:3:51:1356:1204#0/1  
GGGTATTTTTCCTCAACTGTCATACTCCTCTGCATTGTCT  
+HWI-EAS443:3:51:1356:1204#0/1  
abaY]`baa```^aa`aaaZ]a`\_\_a\_a`^```^```Z^\_  
@HWI-EAS443:3:51:404:592#0/1  
GGTATTTTTCCTCAACTGTCATACTCCTCTGCATTGTCTC  
+HWI-EAS443:3:51:404:592#0/1  
aa¥Xaaaba\_\_a¥a`\_`a\_]`a\_]\_]`a\_aa^\_\_`^]`^`  
@HWI-EAS443:3:51:630:732#0/1  
GGGTATTTTTCCTCAACTGTCATACTCCTCTGCATTGTCT  
+HWI-EAS443:3:51:630:732#0/1  
ab]Q[baaaa`\_aa]Y\_a`\_Ya\_]`Y[]^a`\_-[\_]\_`  
@HWI-EAS443:3:51:980:1109#0/1  
TTCCTCAACTGTCATACTCCTCTGCATTGTCTCCGAAGAA  
+HWI-EAS443:3:51:980:1109#0/1  
abbaaabaab\_aba`aba\_b\_ba\_aabba\_\_a^b\_\_a\_^  
@HWI-EAS443:3:52:1096:253#0/1  
TTTCCTCAACTGTCATACTCCTCTGCATTGTCTCCGAAGA  
+HWI-EAS443:3:52:1096:253#0/1  
ab`Z]^a^\_[`a`]`a`aa¥[`^`Z^a\_a`^a]Y\_^V^Z  
@HWI-EAS443:3:52:1211:628#0/1  
GGTATTTTTCCTCAACTGTCATACTCCTCTGCATTGTCTC  
+HWI-EAS443:3:52:1211:628#0/1  
ab[`aaaa`a`a\_\_`a^`\_a\_\_`]`^`Xaa^`\_`\_W`]  
@HWI-EAS443:3:52:1407:808#0/1  
GGTATTTTTCCTCAACTGTCATACTCCTCTGCATTGTCTC  
+HWI-EAS443:3:52:1407:808#0/1  
]]\_ZTYb`]TV]``T`¥\_TJWXSJOJR`Sa^T`¥`^^GYO  
@HWI-EAS443:3:52:842:624#0/1  
TTTTCTCAACTGTCATACTCCTCTGCATTGTCTCCGAAG  
+HWI-EAS443:3:52:842:624#0/1  
]`a\_Z¥a¥\_`^¥^`¥^Z\_a`aa\_\_Z\_\_¥`ba`\_]ZV]a]]\_  
@HWI-EAS443:3:53:820:1079#0/1  
TCCTCAACTGTCATACTCCTCTGCATTGTCTCCGAAGAAA  
+HWI-EAS443:3:53:820:1079#0/1  
^\_\_`\_bab\_^aaaa`^a`]`aa\_aa`\_b^\_a¥]\_\_]\_¥\_[  
@HWI-EAS443:3:55:150:905#0/1  
CTCAACTGTCATACTCCTCTGCATTGTCTCCGAAGAAATA  
+HWI-EAS443:3:55:150:905#0/1  
a[OXV]a\_VZ¥Z]YZ\_YY^¥\_YPYYZSYV¥^ZPQXT0YXY



@HWI-EAS443:3:56:1077:379#0/1  
ATTTTTCCTCAACTGTCATACTCCTCTGCATTGTCTCCGA  
+HWI-EAS443:3:56:1077:379#0/1  
`^`a^¥ab`\_^\_] ^¥RQ^a]V¥^a`^¥b¥aa]]Ua``aa`  
@HWI-EAS443:3:56:557:1952#0/1  
GGGTATTTTTCCTCAACTGTCATACTCCTCTGCATTGTCT  
+HWI-EAS443:3:56:557:1952#0/1  
¥ZYGX\_¥`aa````]Y]]YV¥T^^]WW[^¥^\_`^¥WV¥Z  
@HWI-EAS443:3:57:1293:899#0/1  
TTTTCTCAACTGTCATACTCCTCTGCATTGTCTCCGAAG  
+HWI-EAS443:3:57:1293:899#0/1  
aba`[¥aa`a\_aa``aaa\_a`\_]\_]a`¥`a`a\_\_\_\_]Y\_]\_`  
@HWI-EAS443:3:57:1414:358#0/1  
GGGTATTTTTCCTCAACTGTCATACTCCTCTGCATTGTCT  
+HWI-EAS443:3:57:1414:358#0/1  
]baWaababb[ab\_aa\_aaYS`a^\_a[]a\_aa^Vba`^\_a  
@HWI-EAS443:3:57:1481:598#0/1  
GTATTTTTCCTCAACTGTCATACTCCTCTGCATTGTCTCC  
+HWI-EAS443:3:57:1481:598#0/1  
\_T\_aaaa``¥a^\_a\_] ^TX`aa]\_Z^`^`Q\_^Z^]]\_]X  
@HWI-EAS443:3:57:677:563#0/1  
TTTTCTCAACTGTCATACTCCTCTGCATTGTCTCCGAA  
+HWI-EAS443:3:57:677:563#0/1  
]ba]^]b\_Q]b\_]Y^Vb^Pa]\_a\_^[]a^`a`\_`a\_L^\_\_  
@HWI-EAS443:3:58:176:1850#0/1  
GGGTATTTTTCCTCAACTGTCATACTCCTCTGCATTGTCT  
+HWI-EAS443:3:58:176:1850#0/1  
`b`Uab`aaa]aa\_aa\_`^\_`^`a^`\_]^^`]\_^\_^^]0]  
@HWI-EAS443:3:59:1211:736#0/1  
TTTTCTCAACTGTCATACTCCTCTGCATTGTCTCCGAAG  
+HWI-EAS443:3:59:1211:736#0/1  
abaaaababaaaa\_`aaaWa\_aa`aaaabaa^```ZR^[[  
@HWI-EAS443:3:59:312:24#0/1  
GGGTATTTTTCCTCAACTGTCATACTCCTCTGCATTGTCT  
+HWI-EAS443:3:59:312:24#0/1  
abb0`a`a\_a`\_]\_a\_\_^`^^¥^\_]`\_] ^]\_Y]^^ZWYY]  
@HWI-EAS443:3:59:347:621#0/1  
TATTTTTCCTCAACTGTCATACTCCTCTGCATTGTCTCCG  
+HWI-EAS443:3:59:347:621#0/1  
abab\_aV`bbaYaa`\_]aYaa`aba]¥aba\_^aPMK¥[[  
@HWI-EAS443:3:5:739:110#0/1  
TTTTCTCAACTGTCATACTCCTCTGCATTGTCTCCGAAG  
+HWI-EAS443:3:5:739:110#0/1  
abaaa\_a^`aZaaZSaaa]a\_]aZa\_W\_a`a^]\_[a^\_B  
@HWI-EAS443:3:60:783:1620#0/1  
GGGTATTTTTCCTCAACTGTCATACTCCTCTGCATTGTCT  
+HWI-EAS443:3:60:783:1620#0/1  
]a`Xabbb`a``babbaba\_ababaaa`aaaa^`a^^`a`  
@HWI-EAS443:3:61:1006:1028#0/1  
ATTTTTCCTCAACTGTCATACTCCTCTGCATTGTCTCCGA



@HWI-EAS443:3:6:171:1144#0/1  
GGTATTTTTCCTCAACTGTCATACTCCTCTGCATTGTCTC  
+HWI-EAS443:3:6:171:1144#0/1  
aaH`aaaaaaaa\_aa\_aaY`aa\_\_\_\_\_^`\_`a^`^`a]X]a  
@HWI-EAS443:3:6:541:1331#0/1  
TATTTTTCCTCAACTGTCATACTCCTCTGCATTGTCTCCG  
+HWI-EAS443:3:6:541:1331#0/1  
Taa\_H]^bbba\_ZVb`R\_bZX[X^`\_NYb`b[Y]^OWEN^  
@HWI-EAS443:3:6:907:1527#0/1  
TTTTCTCAACTGTCATACTCCTCTGCATTGTCTCCGAAG  
+HWI-EAS443:3:6:907:1527#0/1  
ababa]baab\_aa\_`aa^V\_\_^]^aa\_a`aa\_^aZ]a\_\_`  
@HWI-EAS443:3:70:612:1421#0/1  
GGGTATTTTTCCTCAACTGTCATACTCCTCTGCATTGTCT  
+HWI-EAS443:3:70:612:1421#0/1  
`a`Waaa`a\_a]aaa\_S]`\_```aa^]a`a]\_]``^^Z^^  
@HWI-EAS443:3:72:1154:232#0/1  
TTTTCTCAACTGTCATACTCCTCTGCATTGTCTCCGAAG  
+HWI-EAS443:3:72:1154:232#0/1  
¥¥``UWN]\_a[H]JRW^UYU[[U[`a[\_]VR¥U]YY^^VZ  
@HWI-EAS443:3:72:239:494#0/1  
GGTATTTTTCCTCAACTGTCATACTCCTCTGCATTGTCTC  
+HWI-EAS443:3:72:239:494#0/1  
aaXaaaaa`a`^`\_`\_`[`a`a^`\_\_`\_\_\_\_\_`]^\_\_\_\_  
@HWI-EAS443:3:72:362:1231#0/1  
GTATTTTTCCTCAACTGTCATACTCCTCTGCATTGTCTCC  
+HWI-EAS443:3:72:362:1231#0/1  
^^W\_aaaa\_¥Z^VSUaW]^\_]aaa]Tb]¥aY^a^[\`Z`a  
@HWI-EAS443:3:72:488:706#0/1  
GGGTATTTTTCCTCAACTGTCATACTCCTCTGCATTGTCT  
+HWI-EAS443:3:72:488:706#0/1  
`bbTa\_aaa`]aaa^`^]aWaa]W`^`\_`aa`\_`]a`^`\_  
@HWI-EAS443:3:72:736:1781#0/1  
ATTTTTCCTCAACTGTCATACTCCTCTGCATTGTCTCCGA  
+HWI-EAS443:3:72:736:1781#0/1  
[aaaaaab`aa]b`^b]^aa`abaaa`aa\_`]`\_\_`\_\_  
@HWI-EAS443:3:72:809:1751#0/1  
GGTATTTTTCCTCAACTGTCATACTCCTCTGCATTGTCTC  
+HWI-EAS443:3:72:809:1751#0/1  
a]Paaabb^abaa^\_[aa\_aaaa`^`]``a`^\_W]\_Ya]a  
@HWI-EAS443:3:73:636:1970#0/1  
GGGTATTTTTCCTCAACTGTCATACTCCTCTGCATTGTCT  
+HWI-EAS443:3:73:636:1970#0/1  
aa]Ua¥GZ`Saa\_aYS`^U[Y]Y`^`^YS]\_^a\_]¥TN[Z  
@HWI-EAS443:3:73:979:545#0/1  
GTATTTTTCCTCAACTGTCATACTCCTCTGCATTGTCTCC  
+HWI-EAS443:3:73:979:545#0/1  
`[]aaaa`a\_¥`¥\_X¥^`\_\_^¥Z^`^`^\_a\_\_^^\_]`  
@HWI-EAS443:3:74:876:1388#0/1  
TTCCTCAACTGTCATACTCCTCTGCATTGTCTCCGAAGAA

+HWI-EAS443:3:74:876:1388#0/1  
][RRZLS]WaW^¥\_Z\_¥]a][a^aY`OGI¥`´Y]L^]\_  
@HWI-EAS443:3:75:1335:1022#0/1  
ATTTTTCCTCAACTGTCATACTCCTCTGCATTGTCTCCGA  
+HWI-EAS443:3:75:1335:1022#0/1  
a^`XH¥Y\_bb`´Z\_¥N¥aaa[Z^^\_]`VZ[GUBOK][ZbY  
@HWI-EAS443:3:76:940:1094#0/1  
TTTTTTCCTCAACTGTCATACTCCTCTGCATTGTCTCCGAAG  
+HWI-EAS443:3:76:940:1094#0/1  
aaabaa^b\_aa\_aT`\_a`\_aaaa\_a^\_]`¥`^^^`^a¥\_\_  
@HWI-EAS443:3:77:1416:1630#0/1  
TTTTTTCCTCAACTGTCATACTCCTCTGCATTGTCTCCGAAG  
+HWI-EAS443:3:77:1416:1630#0/1  
Ua[bUbbbaabb`bYbbb¥`a[´b`^]U[aaaaaaaa\_``\_a  
@HWI-EAS443:3:77:751:835#0/1  
GGTATTTTTCTCAACTGTCATACTCCTCTGCATTGTCTC  
+HWI-EAS443:3:77:751:835#0/1  
aaSaaaa\_[]`aa]^`a`aaaa\_aa^`\_]`[\_`a`\_`\_]`  
@HWI-EAS443:3:77:843:261#0/1  
GGTATTTTTCTCAACTGTCATACTCCTCTGCATTGTCTC  
+HWI-EAS443:3:77:843:261#0/1  
aaWOT[a[XRX`Y\_[XZ\_WW^^\_X¥]ZUQ]^Z^Z^\_VZZ^  
@HWI-EAS443:3:78:1704:1965#0/1  
TTTTTTCCTCAACTGTCATACTCCTCTGCATTGTCTCCGAAG  
+HWI-EAS443:3:78:1704:1965#0/1  
a^aYMY\_]\_aP¥WUW^`\_Y]XWZY\_]VW^X\_]XWMDXX[]  
@HWI-EAS443:3:78:236:112#0/1  
GGGTATTTTTCTCAACTGTCATACTCCTCTGCATTGTCT  
+HWI-EAS443:3:78:236:112#0/1  
aaaZ^a`\_aa`]RYa`]]^]]`\_]`\_^]`^^^^^^^^XW]  
@HWI-EAS443:3:78:284:915#0/1  
TTTTTTCCTCAACTGTCATACTCCTCTGCATTGTCTCCGAAG  
+HWI-EAS443:3:78:284:915#0/1  
abaaaaaabaa\_a`b¥\_aaa`´\_aa\_]aa\_aZ`\_\_^`^`\_`  
@HWI-EAS443:3:78:379:1155#0/1  
CTCAACTGTCATACTCCTCTGCATTGTCTCCGAAGAAATA  
+HWI-EAS443:3:78:379:1155#0/1  
a\_¥X\_W[XWP[Y¥S\_X\_aaa^ZZ¥0¥Z]]`\_YZY[ORYY`  
@HWI-EAS443:3:78:707:1012#0/1  
GGGTATTTTTCTCAACTGTCATACTCCTCTGCATTGTCT  
+HWI-EAS443:3:78:707:1012#0/1  
\_S\_Ga`U`¥`\_]\_aSa\_¥\_\_I]VRZVWZ\_]\_X\_]¥VQTSU[  
@HWI-EAS443:3:79:869:232#0/1  
GGGTATTTTTCTCAACTGTCATACTCCTCTGCATTGTCT  
+HWI-EAS443:3:79:869:232#0/1  
a`´W`\_Z[Z[^a\_TZMXZTT^X\_¥^YH]VSW\_^^QZ[X^  
@HWI-EAS443:3:80:1760:71#0/1  
GGGTATTTTTCTCAACTGTCATACTCCTCTGCATTGTCT  
+HWI-EAS443:3:80:1760:71#0/1  
abbYaabaab`\_a^a`\_aa\_Zaa`]´T¥`´`W`\_`\_]X[

@HWI-EAS443:3:81:1185:948#0/1  
CCTCAACTGTCATACTCCTCTGCATTGTCTCCGAAGAAAT  
+HWI-EAS443:3:81:1185:948#0/1  
aaa`¥`\_aa`^Zaaa`a`\_\_aZX\_dW^\_T¥a]\_^OSSS  
@HWI-EAS443:3:81:1627:1099#0/1  
GGGTATTTTTCTCAACTGTCATACTCCTCTGCATTGTCT  
+HWI-EAS443:3:81:1627:1099#0/1  
`aYD[bbabaaaa`a\_a`\_`a^\_a`\_a\_aa`baa[]`  
@HWI-EAS443:3:81:964:1672#0/1  
TTTTCTCAACTGTCATACTCCTCTGCATTGTCTCCGAAG  
+HWI-EAS443:3:81:964:1672#0/1  
aaa]R`aaa`Y]V[`\_¥Ya^R\_``]¥¥`\_Z``a¥][\_Z  
@HWI-EAS443:3:82:1694:1489#0/1  
TTTTCTCAACTGTCATACTCCTCTGCATTGTCTCCGAAG  
+HWI-EAS443:3:82:1694:1489#0/1  
abbba`bbabbbbaabbb`b¥ab`b^]abbaaaa`a`aa  
@HWI-EAS443:3:83:1375:707#0/1  
TTTTCTCAACTGTCATACTCCTCTGCATTGTCTCCGAAG  
+HWI-EAS443:3:83:1375:707#0/1  
a`b`\_aaYb`abQN]a`aS\_^Y]0`\_]`a¥TXSaaGaZ^]  
@HWI-EAS443:3:85:1132:241#0/1  
GGGTATTTTTCTCAACTGTCATACTCCTCTGCATTGTCT  
+HWI-EAS443:3:85:1132:241#0/1  
aaaXabbaaa\_\_a\_aa^aa^aa^^]UYa^\_\_^\_a^\_Y]^  
@HWI-EAS443:3:85:1394:533#0/1  
TCCTCAACTGTCATACTCCTCTGCATTGTCTCCGAAGAAA  
+HWI-EAS443:3:85:1394:533#0/1  
`]]^a]a¥a`XYa]]¥a][\_Y]`Y[YU¥¥\_`[`¥][a]\_\_  
@HWI-EAS443:3:85:59:1009#0/1  
TTTTCTCAACTGTCATACTCCTCTGCATTGTCTCCGAAG  
+HWI-EAS443:3:85:59:1009#0/1  
aaaaaaaa`ab\_\_a`aaaa`aa``^`\_a^]\_^a`^^[^  
@HWI-EAS443:3:86:107:1992#0/1  
TTTCTTCGGAGACAATGCAGAGGAGTATGACAGTTGAGGA  
+HWI-EAS443:3:86:107:1992#0/1  
ababaaa¥^`¥aaaaaa^[¥[Y`]SaY^¥WLSZ[HUNZZ  
@HWI-EAS443:3:86:499:1082#0/1  
GGTATTTTTCTCAACTGTCATACTCCTCTGCATTGTCTC  
+HWI-EAS443:3:86:499:1082#0/1  
^aQSZab^Y^aaWWWa`a]a`^^]\_\_`^a`aaaa`\_a``  
@HWI-EAS443:3:86:731:1074#0/1  
TATTTTTCTCAACTGTCATACTCCTCTGCATTGTCTCCG  
+HWI-EAS443:3:86:731:1074#0/1  
`a`\_W^a\_\_aaa`[\_aGaaa^\_\_a\_¥PT\_\_a`0\_ZVLS]\_  
@HWI-EAS443:3:87:657:723#0/1  
TATTTTTCTCAACTGTCATACTCCTCTGCATTGTCTCCG  
+HWI-EAS443:3:87:657:723#0/1  
[^a¥Z`a¥]\_\_L[[XY\_V`W¥a^`^T\_baa]]YX\_P[UY  
@HWI-EAS443:3:88:1078:247#0/1  
GGTATTTTTCTCAACTGTCATACTCCTCTGCATTGTCTC

+HWI-EAS443:3:88:1078:247#0/1  
`aS^babab\_aaaa¥aa`TR\_aa\_`\_]a^]IR\_`\_`^]a^]  
@HWI-EAS443:3:89:955:1793#0/1  
TTTTCTCAACTGTCATACTCCTCTGCATTGTCTCCGAAG  
+HWI-EAS443:3:89:955:1793#0/1  
aaabYbaa^`P\_`^`aaab`ab]\_`ab\_`^aa^\_a\_]aZ`\_  
@HWI-EAS443:3:8:279:358#0/1  
CCTCAACTGTCATACTCCTCTGCATTGTCTCCGAAGAAAT  
+HWI-EAS443:3:8:279:358#0/1  
aaVa]aa^`\_YY`aa¥`\_]`\_^\_X]\_`\_`ZXW]^\_YX\_]Z][  
@HWI-EAS443:3:90:1727:389#0/1  
GGGTATTTTTCTCAACTGTCATACTCCTCTGCATTGTCT  
+HWI-EAS443:3:90:1727:389#0/1  
abb]abbbba`a\_\_a`aa`\_aaa^a\_\_a\_aaa^aaa`^`  
@HWI-EAS443:3:90:913:1280#0/1  
GGTATTTTTCTCAACTGTCATACTCCTCTGCATTGTCTC  
+HWI-EAS443:3:90:913:1280#0/1  
ab¥abbbbbbbaaabaXaaba`a`[\_`\_`a\_b`aa\_`^`Y  
@HWI-EAS443:3:92:1001:1770#0/1  
TATTTTTCTCAACTGTCATACTCCTCTGCATTGTCTCCG  
+HWI-EAS443:3:92:1001:1770#0/1  
aaaaa`\_`a`\_`a`\_`a`X]a^`aa[]a\_aa`a\_`\_YV[^`^`\_  
@HWI-EAS443:3:92:1641:180#0/1  
GGTATTTTTCTCAACTGTCATACTCCTCTGCATTGTCTC  
+HWI-EAS443:3:92:1641:180#0/1  
`^WI\_\_\_^YSQ]ZU^Z]]VVZZZGVTUQSUVXWZVXXGZX  
@HWI-EAS443:3:92:530:1424#0/1  
TTCCTCAACTGTCATACTCCTCTGCATTGTCTCCGAAGAA  
+HWI-EAS443:3:92:530:1424#0/1  
`bbbaa^aa`aTaa`WX¥bb\_K^^bba\_`^aaa`\_]a\_aaa  
@HWI-EAS443:3:93:533:1667#0/1  
TTTTCTCAACTGTCATACTCCTCTGCATTGTCTCCGAAG  
+HWI-EAS443:3:93:533:1667#0/1  
Ybbb^Y\_Z¥`\_]NY]^Ya`X^\_Za\_aaa¥WaZXR¥\_b`Q^  
@HWI-EAS443:3:94:148:1433#0/1  
GGTATTTTTCTCAACTGTCATACTCCTCTGCATTGTCTC  
+HWI-EAS443:3:94:148:1433#0/1  
ab[abba`aaaa`bbaab\_a`ab`a`a`a`a`aaa^\_`\_`  
@HWI-EAS443:3:94:230:1711#0/1  
GGTATTTTTCTCAACTGTCATACTCCTCTGCATTGTCTC  
+HWI-EAS443:3:94:230:1711#0/1  
`a¥a¥b`aaaaYaa`bZP¥aa\_`a\_`\_`a`\_`X^aa]X^`\_Z  
@HWI-EAS443:3:95:60:1018#0/1  
GGTATTTTTCTCAACTGTCATACTCCTCTGCATTGTCTC  
+HWI-EAS443:3:95:60:1018#0/1  
a\_QOW[HRU\_W]\_a^[X¥VZVTZW^ZNZ\_\_\_]TW]^PPLRW  
@HWI-EAS443:3:95:907:708#0/1  
TTTCCTCAACTGTCATACTCCTCTGCATTGTCTCCGAAGA  
+HWI-EAS443:3:95:907:708#0/1  
abb`aaaa\_`aa^^`aa]a^aa\_a`[aaaa^^a^\_b^\_a]

@HWI-EAS443:3:95:955:317#0/1  
TTTCCTCAACTGTCATACTCCTCTGCATTGTCTCCGAAGA  
+HWI-EAS443:3:95:955:317#0/1  
abbaab`abaaba\_abb\_b\_\_aaab^abaa\_\_`N^``^a\_  
@HWI-EAS443:3:96:1241:1622#0/1  
GGGTATTTTTCTCAACTGTCATACTCCTCTGCATTGTCT  
+HWI-EAS443:3:96:1241:1622#0/1  
aa]X`aaaab\_\_\_\_`aa`aa^\_\_`\_``ZW`\_\_^\_``^\_^]\_  
@HWI-EAS443:3:96:258:1454#0/1  
TTCCTCAACTGTCATACTCCTCTGCATTGTCTCCGAAGAA  
+HWI-EAS443:3:96:258:1454#0/1  
aabba\_YW¥^WNU\_S[a^]`¥]````]`aOMZaXZJW`N[  
@HWI-EAS443:3:96:539:984#0/1  
TTTCCTCAACTGTCATACTCCTCTGCATTGTCTCCGAAGA  
+HWI-EAS443:3:96:539:984#0/1  
\_VRXa`^^a`a\_`^`W`a[GYY[\_XRZ]^]V\_`^^a`[[  
@HWI-EAS443:3:97:1175:399#0/1  
ATTTTTCTCAACTGTCATACTCCTCTGCATTGTCTCCGA  
+HWI-EAS443:3:97:1175:399#0/1  
abbbabaabX\_aaab]baba\_\_¥U¥`ab]aaaa`Xa\_Xa\_  
@HWI-EAS443:3:97:1448:1014#0/1  
GTATTTTTCTCAACTGTCATACTCCTCTGCATTGTCTCC  
+HWI-EAS443:3:97:1448:1014#0/1  
`a`\_aaba¥¥\_W`\_]\_a]V\_\_\_XaX¥\_Z``XX\_^]^Z^ZX  
@HWI-EAS443:3:97:412:1747#0/1  
GGGTATTTTTCTCAACTGTCATACTCCTCTGCATTGTCT  
+HWI-EAS443:3:97:412:1747#0/1  
^`aYabbbbbbaa¥baabaWba`aaaaa[aaa``a\_\_¥aa  
@HWI-EAS443:3:98:1007:1787#0/1  
TTTCCTCAACTGTCATACTCCTCTGCATTGTCTCCGAAGA  
+HWI-EAS443:3:98:1007:1787#0/1  
`[V^]aa`b\_aaX\_aaaa^^¥\_\_`\_aa\_a^¥^WY`\_[a\_  
@HWI-EAS443:3:98:230:243#0/1  
TTTTCTCAACTGTCATACTCCTCTGCATTGTCTCCGAAG  
+HWI-EAS443:3:98:230:243#0/1  
\_¥¥ZS`ba¥bVaST\_]¥a\_]\_Zba\_aYa`¥b\_\_aa\_a]Na  
@HWI-EAS443:3:98:433:691#0/1  
GGTATTTTTCTCAACTGTCATACTCCTCTGCATTGTCTC  
+HWI-EAS443:3:98:433:691#0/1  
aaP\_a`[`Z`[^\_\_aW`a[\_a\_\_\_^[^¥Z``^¥\_ZZ]^]\_  
@HWI-EAS443:3:98:790:913#0/1  
GGGTATTTTTCTCAACTGTCATACTCCTCTGCATTGTCT  
+HWI-EAS443:3:98:790:913#0/1  
ab]Q`\_a`YYRTa[YS``YP^X[Xa[M^Y¥]SW]]V^MRW  
@HWI-EAS443:3:99:1063:1023#0/1  
GTATTTTTCTCAACTGTCATACTCCTCTGCATTGTCTCC  
+HWI-EAS443:3:99:1063:1023#0/1  
`aaabbbb\_aa\_aaaaaa^aab\_a`\_a\_aa\_aaaa````^  
@HWI-EAS443:3:76:1012:1971#0/1  
GAGGGTGACAAAAACATAATGGACTCCAACAGCATGTCAA

+HWI-EAS443:3:76:1012:1971#0/1  
TYJYb00\_\_\_`bbbabaaa\_]XT¥SHJ\_]Y¥DLa\_V\_\_aa  
@HWI-EAS443:3:67:657:1363#0/1  
GCAGGGCGACAAAAACATAATGGACTCCAACACCATGTCA  
+HWI-EAS443:3:67:657:1363#0/1  
abba`[DWabYab`\_`babaa`\_aaaa`\_a`a]aaaa^aa  
@HWI-EAS443:3:75:687:413#0/1  
GCAGGGCGACAAAAACATAATGGACTCCAACACCATGTCA  
+HWI-EAS443:3:75:687:413#0/1  
````^]GY^]b`\_a^\_`\_Z]aa]aaa\_`¥Z\_aa\_aa\_]`^  
@HWI-EAS443:3:98:494:863#0/1  
GGGTGACAAAAACATAATGGACTCCAACACCANGTCAAGC  
+HWI-EAS443:3:98:494:863#0/1  
`YY^\_Y`^¥`[^`U`\_``\_T¥^`Z`^^][\_\_XDT[]\_Y\_]`  
@HWI-EAS443:3:20:1382:511#0/1  
TGGGTGACAAAAACATAATGGACTCCAACACCATGTCAAG  
+HWI-EAS443:3:20:1382:511#0/1  
abbb\_bbababaa`bbaaaaa\_ba\_aaaa\_\_aaa\_X```  
@HWI-EAS443:3:54:419:1217#0/1  
TGCAGGGTGACAAAAACATAATGGACTCCAACACCATGTGC  
+HWI-EAS443:3:54:419:1217#0/1  
abaaaa^¥\_aba^`a`abbbaaa`\_aaaaa`\_aa^aaa`a  
@HWI-EAS443:3:68:236:732#0/1  
GGGGTGACAAAAACATAATGGACTCCAACACCATGTCAAG  
+HWI-EAS443:3:68:236:732#0/1  
aaZYZbbaa]Q\_`bb\_ab\_a\_a^]a\_`a`aa`a\_a¥\_\_^`  
@HWI-EAS443:3:11:1087:23#0/1  
AGGGTGACAAAAACATAATGGACTCCAACACCATGTCAAG  
+HWI-EAS443:3:11:1087:23#0/1  
abbb]baabba`ab\_a]N^\_\_^]]]]]\_Z]ZZ]]^ZU]Z^  
@HWI-EAS443:3:12:1488:855#0/1  
AGCAGGGTGACAAAAACATAATGGACTCCAACACCATGTGC  
+HWI-EAS443:3:12:1488:855#0/1  
`aaaabbWbb\_\_a^aa`\_aaa\_a¥a^a\_`a\_`R\_aaa\_]`  
@HWI-EAS443:3:13:41:391#0/1  
GGGTGACAAAAACATAATGGACTCCAACACCATGTCAAGC  
+HWI-EAS443:3:13:41:391#0/1  
aabHa]a`VVT\_\_V\_`\_\_aaaa\_a[^a`a]`^\_\_Y`\_`P\_`^  
@HWI-EAS443:3:13:974:277#0/1  
CAGGGTGACAAAAACATAATGGACTCCAACACCATGTCAA  
+HWI-EAS443:3:13:974:277#0/1  
aaa\_OF\_aaaa¥V]a\_a[`a^`a^aaaZXXaYWa^aZZ¥X  
@HWI-EAS443:3:14:1241:767#0/1  
CAGGGTGACAAAAACATAATGGACTCCAACACCATGTCAA  
+HWI-EAS443:3:14:1241:767#0/1  
aabba^ababaabaaaa`aaaaaaaa`^F^`^aaa`\_a\_  
@HWI-EAS443:3:14:181:1693#0/1  
CAGGGTGACAAAAACATAATGGACTCCAACACCATGTCAA  
+HWI-EAS443:3:14:181:1693#0/1  
aa\_Y\_V[`aa`aaa\_a`a]`¥^a`\_```a`a\_Za\_]\_\_^



@HWI-EAS443:3:15:1112:1631#0/1  
CAGGGTGACAAAAACATAATGGACTCCAACACCATGTCAA  
+HWI-EAS443:3:15:1112:1631#0/1  
\_a`a\_RYab`ba\_bbbbaa^W^baa`^bbbb\_Y¥b`R\_\_U  
@HWI-EAS443:3:17:192:641#0/1  
AGCAGGGTGACAAAAACATAATGGACTCCAACACCATGTGTC  
+HWI-EAS443:3:17:192:641#0/1  
aaaa`a`Waa\_a][aa\_a`a`a\_Z\_\_^`^a\_a\_¥\_`\_Z\_  
@HWI-EAS443:3:19:739:1168#0/1  
AGCAGGGTGACAAAAACATAATGGACTCCAACACCATGTGTC  
+HWI-EAS443:3:19:739:1168#0/1  
``Y`aaVa`aa^`baaaa\_aa\_`aaaa`aa^a`aZ^  
@HWI-EAS443:3:19:845:759#0/1  
GGGTGACAAAAACATAATGGACTCCAACACCATGTCAAGC  
+HWI-EAS443:3:19:845:759#0/1  
`¥YU``][a\_\_]\_]\_a`a^\_^]X\_]`Q^XQ\_^\_WT]]^0  
@HWI-EAS443:3:22:1449:1633#0/1  
GGGTGACAAAAACATAATGGACTCCAACACCATGTCAAGC  
+HWI-EAS443:3:22:1449:1633#0/1  
`b`Oba\_a\_Y`\_]¥\_`a`\_^`a``Z`^^`^\_]^[X[X  
@HWI-EAS443:3:23:1179:945#0/1  
AAAAGCAGGGTGACAAAAACATAATGGACTCCAACACCAT  
+HWI-EAS443:3:23:1179:945#0/1  
```abbbba¥baaaaaabaaaa\_aa`a\_aa]a``aa]aa  
@HWI-EAS443:3:23:1587:361#0/1  
GGGTGACAAAAACATAATGGACTCCAACACCATGTCAAGC  
+HWI-EAS443:3:23:1587:361#0/1  
ab`^\_aabbaba`baaabbb\_\_a\_\_aa\_b^`aaa`\_a\_a]  
@HWI-EAS443:3:25:925:121#0/1  
CAGGGTGACAAAAACATAATGGACTCCAACACCATGTCAA  
+HWI-EAS443:3:25:925:121#0/1  
^bbbbb\_bbbbbbbabbbbbbbbaaba`abab`Ybab\_Uaa  
@HWI-EAS443:3:26:116:1514#0/1  
GGGTGACAAAAACATAATGGACTCCAACACCATGTCAAGC  
+HWI-EAS443:3:26:116:1514#0/1  
¥Y¥PY\_aM[baU[aX¥a]`R`\_`a^Ra]`a\_a`aNXaKWW  
@HWI-EAS443:3:26:139:206#0/1  
GCAGGGTGACAAAAACATAATGGACTCCAACACCATGTCA  
+HWI-EAS443:3:26:139:206#0/1  
`ababbVbabaa`aa`a`aaaa`\_`a`[\_`\_a\_\_a`a^\_\_  
@HWI-EAS443:3:27:1473:1815#0/1  
AGGGTGACAAAAACATAATGGACTCCAACACCATGTCAAG  
+HWI-EAS443:3:27:1473:1815#0/1  
\_¥^¥Haa``bb\_bb`bbb\_bb`aa\_a\_a]``\_¥bb`\_aaa  
@HWI-EAS443:3:27:226:1146#0/1  
AAAGCAGGGTGACAAAAACATAATGGACTCCAACACCATG  
+HWI-EAS443:3:27:226:1146#0/1  
YR]`a``TSPb]b]`KL^`Z`W`¥¥`ZY`aa]W]XY`\_^`  
@HWI-EAS443:3:28:160:1434#0/1  
AGCAGGGTGACAAAAACATAATGGACTCCAACACCATGTGTC

+HWI-EAS443:3:28:160:1434#0/1  
a]a\_[aY]a`bbaaaaab\_`T^a`abaaa\_Q\_aaaa]`U^  
@HWI-EAS443:3:29:348:186#0/1  
GGGTGACAAAAACATAATGGACTCCAACACCATGTCAAGC  
+HWI-EAS443:3:29:348:186#0/1  
ab`\_a\_bbbaabaaaaaaaaaaaaaaaaaaaa`a`a^\_]`^  
@HWI-EAS443:3:2:598:1187#0/1  
CAGGGTGACAAAAACATAATGGACTCCAACACCATGTCAA  
+HWI-EAS443:3:2:598:1187#0/1  
Y``abHbb`V`a`¥a`b`baba[a]¥``aaa\_aabUZ\_\_  
@HWI-EAS443:3:32:219:132#0/1  
GCAGGGTGACAAAAACATAATGGACTCCAACACCATGTCA  
+HWI-EAS443:3:32:219:132#0/1  
aaa\_Y]G``Y\_\_[\_¥]^^^V]^XXX^^]XXXX]YX]XXXV  
@HWI-EAS443:3:32:392:956#0/1  
GCAGGGTGACAAAAACATAATGGACTCCAACACCATGTCA  
+HWI-EAS443:3:32:392:956#0/1  
]abb`b\_b\_ba`¥b`abaUYUab]aabbabaZbaYaa\_bb  
@HWI-EAS443:3:32:438:532#0/1  
AAGCAGGGTGACAAAAACATAATGGACTCCAACACCATGT  
+HWI-EAS443:3:32:438:532#0/1  
a`a````^S^Y^`X¥\_\_\_`\_a\_^\_]Y]`\_`\_]^^]]]]Z  
@HWI-EAS443:3:32:528:1404#0/1  
AAGCAGGGTGACAAAAACATAATGGACTCCAACACCATGT  
+HWI-EAS443:3:32:528:1404#0/1  
aa`aaaa^Vaaa\_[a\_\_\_^`[\_XY`a\_\_\_\_\_`a`\_]\_OTM  
@HWI-EAS443:3:32:713:500#0/1  
GCAGGGTGACAAAAACATAATGGACTCCAACACCATGTCA  
+HWI-EAS443:3:32:713:500#0/1  
`bb`\_¥Vab\_b``aa]a\_bZ^`[^\_\_`]]`]aa\_aXaT`R  
@HWI-EAS443:3:33:491:602#0/1  
GGGTGACAAAAACATAATGGACTCCAACACCATGTCAAGC  
+HWI-EAS443:3:33:491:602#0/1  
^^aZaZa^^aaaba`¥[¥aabbbb`\_abbbbab`abaa`  
@HWI-EAS443:3:45:935:376#0/1  
AGCAGGGTGACAAAAACATAATGGACTCCAACACCATGTC  
+HWI-EAS443:3:45:935:376#0/1  
`baaabb^bbaaaa\_aa\_baaabaa`a^\_aa\_``a`aa\_\_  
@HWI-EAS443:3:47:1430:953#0/1  
GCAAAAGCAGGGTGACAAAAACATAATGGACTCCAACACC  
+HWI-EAS443:3:47:1430:953#0/1  
^a\_¥]Vaaab`aX``¥a\_[XWKa\_T\_`aa¥^XS¥¥HR¥ZH  
@HWI-EAS443:3:47:1618:1616#0/1  
CAAAAGCAGGGTGACAAAAACATAATGGACTCCAACACCA  
+HWI-EAS443:3:47:1618:1616#0/1  
`^XaUa``b¥R[\_``\_P\_a\_``\_`^`aa[\_`Y\_`WSaWX]  
@HWI-EAS443:3:47:212:1830#0/1  
AGCAGGGTGACAAAAACATAATGGACTCCAACACCATGTC  
+HWI-EAS443:3:47:212:1830#0/1  
a]Y\_Y[aUS`a`ZXba`baaZ]`M`[a]aW\_\_a`a`aa^^

@HWI-EAS443:3:49:338:723#0/1  
AAAGCAGGGTGACAAAACATAATGGACTCCAACACCATG  
+HWI-EAS443:3:49:338:723#0/1  
aaaaa]^baX``a`a`a^aaaa[a`a]a]\_`\_``]\_`ba  
@HWI-EAS443:3:50:1528:500#0/1  
GGGTGACAAAACATAATGGACTCCAACACCATGTCAAGC  
+HWI-EAS443:3:50:1528:500#0/1  
abb]^`babaabbabbaab]aa\_aa\_aa`a\_\_aaa]\_```\_  
@HWI-EAS443:3:52:1189:1685#0/1  
GGGTGACAAAACATAATGGACTCCAACACCATGTCAAGC  
+HWI-EAS443:3:52:1189:1685#0/1  
abaWa\_aab\_aa\_aa^`a`\_\_\_\_]^\_a¥``\_\_aa\_^`]\_\_  
@HWI-EAS443:3:52:966:75#0/1  
AGGGTGACAAAACATAATGGACTCCAACACCATGTCAAG  
+HWI-EAS443:3:52:966:75#0/1  
abbaG[¥¥a¥^\_a^\_a`ba`\_^\_\_¥\_\_X]¥\_aaa[\_[X`  
@HWI-EAS443:3:53:859:1043#0/1  
GCAGGGTGACAAAACATAATGGACTCCAACACCATGTCA  
+HWI-EAS443:3:53:859:1043#0/1  
aaaaabWaaaa``a``a]aa`^aa\_^`^`\_\_`aZ^\_  
@HWI-EAS443:3:55:353:1146#0/1  
CAGGGTGACAAAACATAATGGACTCCAACACCATGTCAA  
+HWI-EAS443:3:55:353:1146#0/1  
`^SZ`bbb`Z`\_bb]bbbabaa`baaabab`^aabZa`a  
@HWI-EAS443:3:61:1754:188#0/1  
GCAGGGTGACAAAACATAATGGACTCCAACACCATGTCA  
+HWI-EAS443:3:61:1754:188#0/1  
aaaa`aWa\_¥\_\_¥\_^^^a\_\_`a\_\_`U[]^V^SQ^\_]VUW  
@HWI-EAS443:3:61:588:1109#0/1  
GGGTGACAAAACATAATGGACTCCAACACCATGTCAAGC  
+HWI-EAS443:3:61:588:1109#0/1  
aX]Z\_abbbaaaaa`[a\_X[a\_^aaW^`X¥Z\_]V]XXY]  
@HWI-EAS443:3:67:1433:1169#0/1  
CAGGGTGACAAAACATAATGGACTCCAACACCATGTCAA  
+HWI-EAS443:3:67:1433:1169#0/1  
a]b\_[FY^a]Zaaa\_\_aZWa`^^`\_^`^^`a``\_aa¥X]\_  
@HWI-EAS443:3:69:1602:1947#0/1  
CAGGGTGACAAAACATAATGGACTCCAACACCATGTCAA  
+HWI-EAS443:3:69:1602:1947#0/1  
`abba\_bbbaa]ababaaa[a[`babaa`aaaaaa^aa[  
@HWI-EAS443:3:69:385:691#0/1  
GGGTGACAAAACATAATGGACTCCAACACCATGTCAAGC  
+HWI-EAS443:3:69:385:691#0/1  
a`aS^aa\_^`]a`aaa]``\_a``aaa[]aaaaaa^aa\_aW  
@HWI-EAS443:3:69:800:214#0/1  
GCAGGGTGACAAAACATAATGGACTCCAACACCATGTCA  
+HWI-EAS443:3:69:800:214#0/1  
ab`^aaYbaaaaa\_Q[aa\_]^\_^`]\_^`\_Y^YY\_^`XX]  
@HWI-EAS443:3:6:410:1318#0/1  
GGGTGACAAAACATAATGGACTCCAACACCATGTCAAGC

+HWI-EAS443:3:6:410:1318#0/1  
abUV\_\_bbbYaa]`abb`a`aa`[[[Za`[babaXaV\_aR  
@HWI-EAS443:3:70:350:1781#0/1  
AGCAGGGTGACAAAAACATAATGGACTCCAACACCATGTC  
+HWI-EAS443:3:70:350:1781#0/1  
\_a\_¥a[F^`a\_]Z[Y`]Z[U[\_aa^\_WZX\_`]]\_Z[[  
@HWI-EAS443:3:71:1473:734#0/1  
CAGGGTGACAAAAACATAATGGACTCCAACACCATGTCAA  
+HWI-EAS443:3:71:1473:734#0/1  
abbbbabbbbbaaabbabbabbbbaa  
@HWI-EAS443:3:72:1016:479#0/1  
CAAAGCAGGGTGACAAAAACATAATGGACTCCAACACCA  
+HWI-EAS443:3:72:1016:479#0/1  
ababaaabaaa]ba\_aabaabababaaTaaa`aa\_a  
@HWI-EAS443:3:72:1344:958#0/1  
AGCAGGGTGACAAAAACATAATGGACTCCAACACCATGTC  
+HWI-EAS443:3:72:1344:958#0/1  
aa`a`[\_Gaa`a\_a`a^aaa\_`a^`]]`aY\_^^`Y\_  
@HWI-EAS443:3:81:243:2025#0/1  
AAAGCAGGGTGACAAAAACATAATGGACTCCAACACCATG  
+HWI-EAS443:3:81:243:2025#0/1  
[\_`]]\_\_`XHX^aaZJR\_\_]]^YRVY[^YXY^^^S\_^V]B  
@HWI-EAS443:3:81:393:1330#0/1  
AGCAGGGTGACAAAAACATAATGGACTCCAACACCATGTC  
+HWI-EAS443:3:81:393:1330#0/1  
a`¥a`ZG\_b\_[`a]\_aaaaY[a¥``\_aaa\_aa^a`\_`X]  
@HWI-EAS443:3:81:962:1224#0/1  
CAGGGTGACAAAAACATAATGGACTCCAACACCATGTCAA  
+HWI-EAS443:3:81:962:1224#0/1  
a`¥\_]bba`¥Z\_b``ba`a[aa`a`a\_abaaaab[[a\_  
@HWI-EAS443:3:83:1015:730#0/1  
GGGTGACAAAAACATAATGGACTCCAACACCATGTCAAGC  
+HWI-EAS443:3:83:1015:730#0/1  
``aR\_aaa^]aaaab^]aaaa^\_aaa\_b[\_`aa\_\_a^a\_  
@HWI-EAS443:3:83:914:1329#0/1  
CAAAGCAGGGTGACAAAAACATAATGGACTCCAACACCA  
+HWI-EAS443:3:83:914:1329#0/1  
``bab]a`Qa`¥[[`\_T^¥aab^WJ^ZGX``\_\_aXaW``  
@HWI-EAS443:3:85:106:1235#0/1  
GGGTGACAAAAACATAATGGACTCCAACACCATGTCAAGC  
+HWI-EAS443:3:85:106:1235#0/1  
Ybb`bbZbZnZab\_`¥`[R`b`ab\_UY`Y[\_`\_]aaXR\_  
@HWI-EAS443:3:85:933:1153#0/1  
GCAGGGTGACAAAAACATAATGGACTCCAACACCATGTCA  
+HWI-EAS443:3:85:933:1153#0/1  
a`^a^U\_\_[UZZa\_`¥^aYWN¥[\_a\_¥[XW``U^¥LX^  
@HWI-EAS443:3:86:760:689#0/1  
GCAGGGTGACAAAAACATAATGGACTCCAACACCATGTCA  
+HWI-EAS443:3:86:760:689#0/1  
aaabb\_SZa``[a`\_`aa`aaa\_`^`\_a`]RZaa`a`SY\_

@HWI-EAS443:3:87:891:381#0/1  
GGGTGACAAAAACATAATGGACTCCAACACCATGTCAAGC  
+HWI-EAS443:3:87:891:381#0/1  
]b^Zb`ba`^`H¥bz`aaa`[abbabaaabaSaa`W  
@HWI-EAS443:3:8:942:1175#0/1  
GCAAAAAGCAGGGTGACAAAAACATAATGGACTCCAACACC  
+HWI-EAS443:3:8:942:1175#0/1  
T\_]\_ab\_`a¥\_aSba[`Z^`Y`a`aXYba^`a]\_\_\_[XZ  
@HWI-EAS443:3:90:777:1423#0/1  
CAGGGTGACAAAAACATAATGGACTCCAACACCATGTCAA  
+HWI-EAS443:3:90:777:1423#0/1  
``^`WXaa]`\_^`^^[ZW`YZ`TY\_PX`a\_\_Qa^V  
@HWI-EAS443:3:92:1118:442#0/1  
GGGTGACAAAAACATAATGGACTCCAACACCATGTCAAGC  
+HWI-EAS443:3:92:1118:442#0/1  
J\_¥Sa]bb¥T¥^X\_a¥a^a`a^^baaM¥aa¥aa`a`]`a  
@HWI-EAS443:3:93:1674:611#0/1  
AGCAGGGTGACAAAAACATAATGGACTCCAACACCATGTC  
+HWI-EAS443:3:93:1674:611#0/1  
a`^aZ`aYaa`\_]aa\_`a`a`^Y\_^^]\_\_\_XU^\_\_XU  
@HWI-EAS443:3:94:1295:968#0/1  
CAGGGTGACAAAAACATAATGGACTCCAACACCATGTCAA  
+HWI-EAS443:3:94:1295:968#0/1  
IV`bbY`aa[a¥¥`bbbb\_\_bbbabbabbab]Uabba\_b`  
@HWI-EAS443:3:98:1220:850#0/1  
CAGGGTGACAAAAACATAATGGACTCCAACACCATGTCAA  
+HWI-EAS443:3:98:1220:850#0/1  
]bbbb`bbabbbbbbbbbbbbabbaabab]^abba^ba  
@HWI-EAS443:3:99:807:436#0/1  
GGGTGACAAAAACATAATGGACTCCAACACCATGTCAAGC  
+HWI-EAS443:3:99:807:436#0/1  
abaSb`babbaa\_bbaabaaaa\_aaaaa`]aaba\_a`\_a  
@HWI-EAS443:3:52:1356:1798#0/1  
CAATATGGGGAGAATAAAAGAACTGAGAGATCTAATGTCCG  
+HWI-EAS443:3:52:1356:1798#0/1  
¥¥b`b]W¥¥[Ubbbbbb][ab`^`[\_a`aaWab^^`aa  
@HWI-EAS443:3:81:91:1074#0/1  
CAATATGGAGAGAATAAAAGAACTGACAGATCTAATGTCCG  
+HWI-EAS443:3:81:91:1074#0/1  
a]`]U^ba`a\_[\_^aaaa`\_`\_\_aY¥0`] ]^\_\_X^\_] ]^  
@HWI-EAS443:3:53:485:765#0/1  
CAATATGGAGAGAATAAAAGAACTNAGAGATCTAATGTCCG  
+HWI-EAS443:3:53:485:765#0/1  
abab`b`babababbbabababa^D^babab`baabbaa\_  
@HWI-EAS443:3:10:1044:1875#0/1  
TATGGAGAGAATAAAAGAACTGAGAGATCTAATGTCCGAG  
+HWI-EAS443:3:10:1044:1875#0/1  
\_]a[``bX^W`bbaaaa]a\_^[a\_a[a`[`b`abYQ[^aa  
@HWI-EAS443:3:12:286:741#0/1  
ATATGGAGAGAATAAAAGAACTGAGAGATCTAATGTCCGA



@HWI-EAS443:3:49:788:1182#0/1  
CAATATGGAGAGAATAAAAGAACTGAGAGATCTAATGTCCG  
+HWI-EAS443:3:49:788:1182#0/1  
`U^YZQX^^\_[¥PX`\_UN\_]Wa`][Y`a\_Ya`aZabX^]  
@HWI-EAS443:3:50:1241:1724#0/1  
CAATATGGAGAGAATAAAAGAACTGAGAGATCTAATGTCCG  
+HWI-EAS443:3:50:1241:1724#0/1  
W[a¥¥^¥`Xa`\_`bb`Wab\_bbbbbbbbZ\_ab¥bbXS`  
@HWI-EAS443:3:50:1475:1511#0/1  
CAATATGGAGAGAATAAAAGAACTGAGAGATCTAATGTCCG  
+HWI-EAS443:3:50:1475:1511#0/1  
aaa`ZabbUbaa`^ab\_\_`aaaa`aaS\_ab`aa`abYV\_  
@HWI-EAS443:3:52:1323:1174#0/1  
TATGGAGAGAATAAAAGAACTGAGAGATCTAATGTCCGAG  
+HWI-EAS443:3:52:1323:1174#0/1  
`aa[aaa¥b`aba\_aa`¥¥`a[aaa^a\_a^aa[\_a]\_]`  
@HWI-EAS443:3:53:1402:320#0/1  
CAATATGGAGAGAATAAAAGAACTGAGAGATCTAATGTCCG  
+HWI-EAS443:3:53:1402:320#0/1  
SSTaa`¥`aS^b`abbbbabYM\_aab[\_`a[b\_Waaaaa  
@HWI-EAS443:3:54:1054:891#0/1  
AATATGGAGAGAATAAAAGAACTGAGAGATCTAATGTCCG  
+HWI-EAS443:3:54:1054:891#0/1  
aab\_bbbababaabbaabaa`bbbbbaababbabb\_\_ba  
@HWI-EAS443:3:5:590:556#0/1  
AATATGGAGAGAATAAAAGAACTGAGAGATCTAATGTCCG  
+HWI-EAS443:3:5:590:556#0/1  
aabaabb`bab`\_aaa`aa]bbaabaa\_a`\_aa`\_X  
@HWI-EAS443:3:62:1529:109#0/1  
CAATATGGAGAGAATAAAAGAACTGAGAGATCTAATGTCCG  
+HWI-EAS443:3:62:1529:109#0/1  
[bababbb\_b\_baa^`abb`\_\_aaa`Xaa`ab]^a^`\_  
@HWI-EAS443:3:63:714:1576#0/1  
CAATATGGAGAGAATAAAAGAACTGAGAGATCTAATGTCCG  
+HWI-EAS443:3:63:714:1576#0/1  
aaaa[`ab`PaU```M\_P]aaaa]a\_\_]\_\_\_a\_aU]a  
@HWI-EAS443:3:65:528:917#0/1  
CAATATGGAGAGAATAAAAGAACTGAGAGATCTAATGTCCG  
+HWI-EAS443:3:65:528:917#0/1  
aba`Z\_]S\_aaZ¥VYabaQ]`Ta]]U`\_\_U[\_`ZZ^aWZZ  
@HWI-EAS443:3:68:1183:995#0/1  
CAATATGGAGAGAATAAAAGAACTGAGAGATCTAATGTCCG  
+HWI-EAS443:3:68:1183:995#0/1  
abbbabbbbabab^aaaabbbbaabbbabbbbaabb¥ab^a`  
@HWI-EAS443:3:75:444:565#0/1  
TGCGACATTAGATCTCTCAGTTCTTTTATTCTCTCCATAT  
+HWI-EAS443:3:75:444:565#0/1  
aabbab¥FZ¥`]aaa`aa^a\_a`a`aaaaaa`\_aa\_a`  
@HWI-EAS443:3:76:935:653#0/1  
AATATGGAGAGAATAAAAGAACTGAGAGATCTAATGTCCG

+HWI-EAS443:3:76:935:653#0/1  
\_aZU\_ab^¥]`babbb]baaa[bbbbaaa\_`aa]ab\_`^Y  
@HWI-EAS443:3:81:1760:1620#0/1  
AATATGGAGAGAATAAAAGAACTGAGAGATCTAATGTTCG  
+HWI-EAS443:3:81:1760:1620#0/1  
a]a\_\_abYbR\_`0aa¥`^RI]^`\_`\_]a`¥^R^¥]\_dW]¥X  
@HWI-EAS443:3:87:242:888#0/1  
TATGGAGAGAATAAAAGAACTGAGAGATCTAATGTTCGAG  
+HWI-EAS443:3:87:242:888#0/1  
aabaX[]ab¥aa\_^[a^a\_`aa\_`[]\_\_`\_]Y\_a^a\_\_`  
@HWI-EAS443:3:89:1706:26#0/1  
CAATATGGAGAGAATAAAAGAACTGAGAGATCTAATGTTCG  
+HWI-EAS443:3:89:1706:26#0/1  
^bbbbbbabbabbbbbabbbbbabbbbbVbbabba^b  
@HWI-EAS443:3:8:345:1024#0/1  
TATGGAGAGAATAAAAGAACTGAGAGATCTAATGTTCGAG  
+HWI-EAS443:3:8:345:1024#0/1  
aaa\_RR^ZQ¥aa`\_\_aa[aUa¥aaaa\_\_\_^a^abPL]S\_`  
@HWI-EAS443:3:90:112:944#0/1  
CAATATGGAGAGAATAAAAGAACTGAGAGATCTAATGTTCG  
+HWI-EAS443:3:90:112:944#0/1  
^¥¥baba`T`a^QR¥aZ^ba`TZaT^aaa^W[aa``b[`\_  
@HWI-EAS443:3:92:170:157#0/1  
AATATGGAGAGAATAAAAGAACTGAGAGATCTAATGTTCG  
+HWI-EAS443:3:92:170:157#0/1  
TQ\_N\_bbbaa^`[a¥bb`bbb``baaa`[`aaa^abNZ`T  
@HWI-EAS443:3:95:617:299#0/1  
CAATATGGAGAGAATAAAAGAACTGAGAGATCTAATGTTCG  
+HWI-EAS443:3:95:617:299#0/1  
]baa\_`¥`abba\_babbbbaaa[bbaabbaa]ababb\_`a  
@HWI-EAS443:3:97:1612:1381#0/1  
CAATATGGAGAGAATAAAAGAACTGAGAGATCTAATGTTCG  
+HWI-EAS443:3:97:1612:1381#0/1  
ab\_bK^^b`bX`^abab^a`aaaaba`b`\_[F[babaMI¥  
@HWI-EAS443:3:9:1589:990#0/1  
TATGGAGAGAATAAAAGAACTGAGAGATCTAATGTTCGAG  
+HWI-EAS443:3:9:1589:990#0/1  
aUa\_a\_`[aY]b\_`]¥a`RR\_XX\_a\_`^T^]a]^`^YLTBB  
@HWI-EAS443:3:9:516:686#0/1  
CAATATGGAGAGAATAAAAGAACTGAGAGATCTAATGTTCG  
+HWI-EAS443:3:9:516:686#0/1  
]]^`aabbbaYa^Y`b`¥\_Z\_a`bbbbbaa`\_baaba`^  
@HWI-EAS443:3:11:1063:1477#0/1  
ATTTGAATGGATGTCAATCCGCTCTACTTTTCCTAAAAA  
+HWI-EAS443:3:11:1063:1477#0/1  
abbabbbbab]^`abbaaaaa\_b`aaaaaa^a`aaaa  
@HWI-EAS443:3:51:1036:870#0/1  
GATTGACATCCATTCAAATGGTTTGCCTGCTTTTCCTAAA  
+HWI-EAS443:3:51:1036:870#0/1  
``a\_aaaab`]aba\_`^`a\_Z^¥a`^¥¥^`\_`\_`aa^^^aa`



@HWI-EAS443:3:68:1642:1395#0/1  
GATTGACATCCATTCAAATGGTTTGCCTGCTTTTCCTAAA  
+HWI-EAS443:3:68:1642:1395#0/1  
a``aaa`ba\_a`aa\_aa`\_]VV`a``\_`a^aa`\_]Y``a`  
@HWI-EAS443:3:89:1392:292#0/1  
GATTGACATCCATTCAAATGGTTTGCCTGCTTTTCCTAAA  
+HWI-EAS443:3:89:1392:292#0/1  
``babbaab`\_aaaaa\_ab`¥]^aV\_baQ\_\_]b[Rbba`  
@HWI-EAS443:3:16:1180:1596#0/1  
ATTTGAATGGATGTCAATCCGACTCTACNTTTCCTAAAAA  
+HWI-EAS443:3:16:1180:1596#0/1  
¥abaaaba`b`^]YZ\_^Ya^PVYa^V]XD[``\_`aaaaa  
@HWI-EAS443:3:100:388:1112#0/1  
ATTTGAATGGATGTCAATCCGACTCTACTTTTCCTAAAAA  
+HWI-EAS443:3:100:388:1112#0/1  
abbaabaabaabaabb^\_Xa\_\_a`a`\_`aa`\_Zaaa`a`  
@HWI-EAS443:3:10:966:1673#0/1  
ATTTGAATGGATGTCAATCCGACTCTACTTTTCCTAAAAA  
+HWI-EAS443:3:10:966:1673#0/1  
aabaaaa\_baaaa`aa`\_Y\_^Y`[\_Y`\_\_aW^]aa``\_  
@HWI-EAS443:3:13:463:931#0/1  
ATTTGAATGGATGTCAATCCGACTCTACTTTTCCTAAAAA  
+HWI-EAS443:3:13:463:931#0/1  
`baabaa\_b\_a`a^\_\_aaa``\_]``\_a\_\_a`a]^`aaa``  
@HWI-EAS443:3:1:1491:1173#0/1  
TTTGAATGGATGTCAATCCGACTCTACTTTTCCTAAAAAT  
+HWI-EAS443:3:1:1491:1173#0/1  
abba\_a`\_^\_aaWY\_\_a^¥aZ^^[ ]^`^\_\_VX```\_`\_BB  
@HWI-EAS443:3:24:470:1290#0/1  
ATTTGAATGGATGTCAATCCGACTCTACTTTTCCTAAAAA  
+HWI-EAS443:3:24:470:1290#0/1  
ababb[\_abaaa`\_a\_a¥`aa\_aaaaa`aaaa\_a\_abaaa  
@HWI-EAS443:3:33:1076:71#0/1  
ATTTGAATGGATGTCAATCCGACTCTACTTTTCCTAAAAA  
+HWI-EAS443:3:33:1076:71#0/1  
aabbaaaabaaab`\_`aa`\_a^¥`\_a]^`a`aUX\_\_`\_a^  
@HWI-EAS443:3:34:1225:1144#0/1  
ATTTGAATGGATGTCAATCCGACTCTACTTTTCCTAAAAA  
+HWI-EAS443:3:34:1225:1144#0/1  
aaaaaaba`[a`\_```a`^XV¥aa¥TUaaa\_[^`\_`^\_Z  
@HWI-EAS443:3:38:1501:1392#0/1  
ATTTGAATGGATGTCAATCCGACTCTACTTTTCCTAAAAA  
+HWI-EAS443:3:38:1501:1392#0/1  
Va\_N`\_a`^`\_Z\_NPZ^`\_XPRNZ`\_`^¥aZ¥XPX^\_\_[\_P  
@HWI-EAS443:3:44:622:1406#0/1  
ATTTGAATGGATGTCAATCCGACTCTACTTTTCCTAAAAA  
+HWI-EAS443:3:44:622:1406#0/1  
aabaa\_a][^aaa¥`^a\_\_a\_]\_a[a`\_`\_aa[^\_aaaa`  
@HWI-EAS443:3:45:1693:1217#0/1  
ATTTGAATGGATGTCAATCCGACTCTACTTTTCCTAAAAA

+HWI-EAS443:3:45:1693:1217#0/1  
abbb^abbbababa\_aaaa`a]\_aaba\_aabaYaaaaaa\_  
@HWI-EAS443:3:49:661:2024#0/1  
GGAATTTTTAGGAAAAGTAGAGTCGGATTGACATCCATTC  
+HWI-EAS443:3:49:661:2024#0/1  
`b^ZX\_abb\_bb\_`¥S[J[a\_TVL^a[QJ][VKWHKZ\_Y¥T  
@HWI-EAS443:3:51:1241:1120#0/1  
GAATGGATGTCAATCCGACTCTACTTTTCCTAAAAATTCC  
+HWI-EAS443:3:51:1241:1120#0/1  
\_`bbbbabb\_[\_a`Z¥b]\_a``¥Za^`aY[aababaaa[X  
@HWI-EAS443:3:53:1423:1899#0/1  
AATGGATGTCAATCCGACTCTACTTTTCCTAAAAATTCCA  
+HWI-EAS443:3:53:1423:1899#0/1  
ababba\_bXV\_a]R[a¥R¥Y\_`U^a`b^¥a^aaa`^\_]U\_  
@HWI-EAS443:3:54:103:371#0/1  
TTTGAATGGATGTCAATCCGACTCTACTTTTCCTAAAAAT  
+HWI-EAS443:3:54:103:371#0/1  
a\_¥a^`abbabba`aaaa\_a\_`\_`\_Za`aa^\_aaaaaa\_  
@HWI-EAS443:3:55:43:126#0/1  
ATTTGAATGGATGTCAATCCGACTCTACTTTTCCTAAAAA  
+HWI-EAS443:3:55:43:126#0/1  
aaa^aaaabb\_`a^`\_[\_\_\_\_`Y]\_\_a^]\_^\_]`U  
@HWI-EAS443:3:5:304:1130#0/1  
TTTGAATGGATGTCAATCCGACTCTACTTTTCCTAAAAAT  
+HWI-EAS443:3:5:304:1130#0/1  
abbba\_b```ba`\_bbbaaa^Zaaaa``abaa\_aaaab\_a  
@HWI-EAS443:3:61:901:610#0/1  
ATTTGAATGGATGTCAATCCGACTCTACTTTTCCTAAAAA  
+HWI-EAS443:3:61:901:610#0/1  
aababa`aaa`ab[```aaa`\_W\_\_a```\_aaa¥S[a`a```]  
@HWI-EAS443:3:62:1261:736#0/1  
CATTTGAATGGATGTCAATCCGACTCTACTTTTCCTAAAAA  
+HWI-EAS443:3:62:1261:736#0/1  
aaabbabbbbabbbaabababbaababb\_bbbba`abbbb  
@HWI-EAS443:3:68:1562:48#0/1  
ATTTGAATGGATGTCAATCCGACTCTACTTTTCCTAAAAA  
+HWI-EAS443:3:68:1562:48#0/1  
abbbbbbbbbbbba]aab]]a\_\_a]ba`aaab¥Yaaaaa`  
@HWI-EAS443:3:71:805:1270#0/1  
ATTTGAATGGATGTCAATCCGACTCTACTTTTCCTAAAAA  
+HWI-EAS443:3:71:805:1270#0/1  
aa`abab\_\_aa`a^aa`aa¥U^`a\_]`\_\_\_\_\_``a\_aa`  
@HWI-EAS443:3:75:965:2015#0/1  
ATTTGAATGGATGTCAATCCGACTCTACTTTTCCTAAAAA  
+HWI-EAS443:3:75:965:2015#0/1  
aaaaaaba`Yaaa¥^aa\_a\_\_¥M¥]^\_¥\_¥\_]`\_`aaaaa  
@HWI-EAS443:3:76:1586:1332#0/1  
ATTTGAATGGATGTCAATCCGACTCTACTTTTCCTAAAAA  
+HWI-EAS443:3:76:1586:1332#0/1  
abbbbaabbaaab\_`aba\_aa]\_a\_a`[aaaaXaaaaa`

@HWI-EAS443:3:77:1476:57#0/1  
ATTTGAATGGATGTCAATCCGACTCTACTTTTCCTAAAAA  
+HWI-EAS443:3:77:1476:57#0/1  
V`bbb¥¥abbbb^U`¥RWP`X^a`TT\_bbbb\_bbabab  
@HWI-EAS443:3:77:772:1792#0/1  
ATTTGAATGGATGTCAATCCGACTCTACTTTTCCTAAAAA  
+HWI-EAS443:3:77:772:1792#0/1  
abab`abaaaabaaabb`aa¥aaaaa`aaaa`baaaa  
@HWI-EAS443:3:7:605:1077#0/1  
ATTTGAATGGATGTCAATCCGACTCTACTTTTCCTAAAAA  
+HWI-EAS443:3:7:605:1077#0/1  
aaaaaa`[N[]aa\_^\_aa\_^aVU\_[\_^]^^^\_]X^`a`aY  
@HWI-EAS443:3:83:871:1365#0/1  
ATTTGAATGGATGTCAATCCGACTCTACTTTTCCTAAAAA  
+HWI-EAS443:3:83:871:1365#0/1  
aaaaa^¥^aaaa`W`a`^]a^[\_^^`\_`\_`\_`a`^^`  
@HWI-EAS443:3:86:394:860#0/1  
TTTGAATGGATGTCAATCCGACTCTACTTTTCCTAAAAAT  
+HWI-EAS443:3:86:394:860#0/1  
`baaaa`aa`a^aaa`a\_[\_]a`X]``a`a`a`a`a`a`  
@HWI-EAS443:3:89:755:511#0/1  
ATTTGAATGGATGTCAATCCGACTCTACTTTTCCTAAAAA  
+HWI-EAS443:3:89:755:511#0/1  
ababaa[ab`aa`\_bbaaa`a`\_a`a¥^aaa`a\_a`a`a`  
@HWI-EAS443:3:91:1600:1507#0/1  
TTTGAATGGATGTCAATCCGACTCTACTTTTCCTAAAAAT  
+HWI-EAS443:3:91:1600:1507#0/1  
abbaababaaab`a`aa\_[`aa`a\_0\_aaa^abaaa`a`  
@HWI-EAS443:3:91:937:613#0/1  
ATTTGAATGGATGTCAATCCGACTCTACTTTTCCTAAAAA  
+HWI-EAS443:3:91:937:613#0/1  
ab^`bbbbbbaaZX\_`X]¥Z¥aX\_^S]`aaYN`a`\_`  
@HWI-EAS443:3:95:1679:1324#0/1  
ATTTGAATGGATGTCAATCCGACTCTACTTTTCCTAAAAA  
+HWI-EAS443:3:95:1679:1324#0/1  
`bbbbbbbbbbbaa]Sb`\_]`aSa`aaaaab\_aaaaaa  
@HWI-EAS443:3:97:428:1076#0/1  
ATTTGAATGGATGTCAATCCGACTCTACTTTTCCTAAAAA  
+HWI-EAS443:3:97:428:1076#0/1  
aa[`\_bbabb]¥\_Y`a`[Sa¥[aWa`]^aaa`[aa\_]a  
@HWI-EAS443:3:97:881:1542#0/1  
ATTTGAATGGATGTCAATCCGACTCTACTTTTCCTAAAAA  
+HWI-EAS443:3:97:881:1542#0/1  
aabbbaaaaaabb\_aaaa`\_a`Ya\_a^]aaaa]aaaaa  
@HWI-EAS443:3:17:1331:1843#0/1  
GGACACGTTAAATTCATTATTTTTGCCGTCTGAGTTCTTC  
+HWI-EAS443:3:17:1331:1843#0/1  
R]¥b\_VV`b`^`]ababK^b]b`Y^a`aaaab`b\_]WaJP  
@HWI-EAS443:3:17:1397:584#0/1  
GGCATTATTTTCATGAAGGACAGGTTAAATTCATTATTTTT

+HWI-EAS443:3:17:1397:584#0/1  
a^^`SX`TL[\_a\_¥¥U]V]]Y\_TZ]]\_[\_¥^S[`^]\_\_  
@HWI-EAS443:3:37:1255:1055#0/1  
GTTAAATTCATTATTTTTGCCGTCTGAGTTCTCCAATGGT  
+HWI-EAS443:3:37:1255:1055#0/1  
]HXYSU\_¥\_S[YTW[T[LRMN^M\_ZS^a[YaY\_FW^VBBB  
@HWI-EAS443:3:44:1084:829#0/1  
GTTAAATCCATTATTTTTGCCGTCTGAGTTCTTCAATGGT  
+HWI-EAS443:3:44:1084:829#0/1  
a`a`^aa\_aaa`aaa`a`]a^^`aZ`\_]a`¥^^`¥Y  
@HWI-EAS443:3:49:490:219#0/1  
GACAAGTTAAATTCATTATTTTTGCAGTCTGAGTTCTTCA  
+HWI-EAS443:3:49:490:219#0/1  
^`b¥S[Z¥^Xaba^J¥b^b^^`Z[Hb¥Ta]]a^a]a¥F¥  
@HWI-EAS443:3:57:672:841#0/1  
GAAGGACAAGTTAAATTCATTATTTTTGCCGTCTGCGTTC  
+HWI-EAS443:3:57:672:841#0/1  
aaa^^^aaZ\_\_a]T[aaa`aaaa`a`\_a`\_aX^^]HX^\_\_  
@HWI-EAS443:3:62:1551:105#0/1  
GGCATTATTTTCATGAAGGATAAGTTAAATTCATTATTTTT  
+HWI-EAS443:3:62:1551:105#0/1  
aa\_Q^Y\_a^^^U\_\_XNa]JFL^\_W]UWY^¥VMUY[WWY^¥  
@HWI-EAS443:3:62:222:266#0/1  
TTTTTCATGAAGGACAAGTTAAATCCATTATTTTTGCCGT  
+HWI-EAS443:3:62:222:266#0/1  
ababaaaaaaaa`a`\_a`\_a\_]G¥`][¥\_\_\_\_\_]\_\_^\_X  
@HWI-EAS443:3:69:1298:1589#0/1  
TTTTTCATGAAGGACAAGTTAAATTCATTATTTTTACCGT  
+HWI-EAS443:3:69:1298:1589#0/1  
\_baaX`\_\_aa`b`\_`[^U`\_aa`^\_]XX^```[``[a\_  
@HWI-EAS443:3:73:538:557#0/1  
GACACGTAAATTCATTATTTTTGCCGTCTGAGTTCTTCA  
+HWI-EAS443:3:73:538:557#0/1  
`a\_XHPUXW\_a^SW¥`X[WTRLU\_[\_aZSSb¥¥ETZ[¥XV  
@HWI-EAS443:3:74:265:754#0/1  
GGCATTATTTTCATGAAGGACAAGTTAAACTCATTATTTTT  
+HWI-EAS443:3:74:265:754#0/1  
\_a¥b`^V`abb`\_¥b````ab^^]]`aa``baabaa`  
@HWI-EAS443:3:76:1404:1454#0/1  
GGCATTATTTTCATGAGGACAAGTTAAATTCATTATTTTT  
+HWI-EAS443:3:76:1404:1454#0/1  
aa^^^\_aa`a`\_`[[\_\_`[^¥\_[]`Z^^a\_Y]\_^\_a\_]\_]  
@HWI-EAS443:3:85:1073:482#0/1  
GGACAAGTTAAATTCATTATTTTTGCCGTCCGAGTTCTTC  
+HWI-EAS443:3:85:1073:482#0/1  
^b¥b]^aTYS]aba¥aaa[aa^a\_a`ab`]0]a`\_aX¥ZL  
@HWI-EAS443:3:87:506:381#0/1  
GGACAAGTTAAATTCATTATTTTTGCCGTCCGAGTTCTTC  
+HWI-EAS443:3:87:506:381#0/1  
abbbbababb`abaaabaabbbbabaabababab\_aaaaa

@HWI-EAS443:3:91:1307:951#0/1  
CATGAAGGACGAGTTAAATTCATTATTTTTGCCGTCTGAG  
+HWI-EAS443:3:91:1307:951#0/1  
Y\_bbbbbbaa^`b`b`abbbbbbbbbbb^b¥bbbb\_`  
@HWI-EAS443:3:95:1231:710#0/1  
GGACAAGTTAAGTTCATTATTTTTGCCGTCTGAGTTCTTC  
+HWI-EAS443:3:95:1231:710#0/1  
ab\_\_a¥`^abaPaba`ba\_a`aaabR[aa\_[a\_b`¥[a`\_  
@HWI-EAS443:3:98:1170:1718#0/1  
GGCATTTTTTTCATGAAGGACAAGTTTAAATTCATTATTTTT  
+HWI-EAS443:3:98:1170:1718#0/1  
Xba```b`Xbab\_bbY^baVaabY\_¥babaUYY`aY\_b`[  
@HWI-EAS443:3:14:1490:1696#0/1  
ATNGATGCCAGGGTCGACTTCGAGTCTGGAAGGATCAAGA  
+HWI-EAS443:3:14:1490:1696#0/1  
a[DUaS`^aaa^aR\_Y^a`\_\_RaYN`^O^MPaNQN]\_NX  
@HWI-EAS443:3:86:1021:1712#0/1  
CAAAAATAATGAATTTAACTTGCCTTCATGAAAAAAAAA  
+HWI-EAS443:3:86:1021:1712#0/1  
abbbbbbabbbabbabb\_aaba¥`abbbbbaaaaaa¥a  
@HWI-EAS443:3:24:1685:1401#0/1  
GGCANTTTTTTCATGAAGGACAAGTTAAATTCATTATTTTT  
+HWI-EAS443:3:24:1685:1401#0/1  
]^\_aPD[aaabVaa\_\_^U`X\_XT\_\_b```abTQaa\_b\_aa\_  
@HWI-EAS443:3:2:1416:1557#0/1  
GGCATNTTTTCATGAAGGACAAGTTAAATTCATTATTTTT  
+HWI-EAS443:3:2:1416:1557#0/1  
aa\_a¥D^aaa\_``\_\_^aa^]¥[``\_]`\_Y^a\_^^`\_^\_  
@HWI-EAS443:3:30:1056:2045#0/1  
AGTTAAATTCATTATTTTTGCCGTCTGAGTNCCTCAATGG  
+HWI-EAS443:3:30:1056:2045#0/1  
aa`¥babaaabbbbaa\_baaaa`a\_b\_b[DYaaaa`\_`^  
@HWI-EAS443:3:70:86:1505#0/1  
CATTNTTTCATGAAGGACAAGTTAAATTCATTATTTTTGC  
+HWI-EAS443:3:70:86:1505#0/1  
a¥ab^DWaa`a`^¥\_a\_XZa]aaaa\_a\_a`````\_\_\_\_\_  
@HWI-EAS443:3:81:413:505#0/1  
TTTTTCNTGAAGGACAAGTTAAATTCATTATTTTTGCCGT  
+HWI-EAS443:3:81:413:505#0/1  
[N]aWUD]SaVabTO`\_\_aaXaa]Y`^X\_^]¥ZX`XWL  
@HWI-EAS443:3:81:675:663#0/1  
GACAAGTTAAATNCATTATTTTTGCCGTCTGAGTTCTTCA  
+HWI-EAS443:3:81:675:663#0/1  
abaY^a\_^\_Zb]DZaaa`aaaaa\_\_`\_`aaaaP`^a^``  
@HWI-EAS443:3:84:1404:762#0/1  
GACAAGTTAAANTCATTATTTTTGCCGTCTGAGTTCTTCA  
+HWI-EAS443:3:84:1404:762#0/1  
aabYab]aa\_[D[]^aa]\_aaaa[^¥]\_`a]a[\_]``XX  
@HWI-EAS443:3:93:1575:1081#0/1  
ATGANGGACAAGTTAAATTCATTATTTTTGCCGTCTGAGT

+HWI-EAS443:3:93:1575:1081#0/1  
a]X¥DY\_\_`\_Wa[a^[\_aa[U`]\`aaaaa\_\_\_\_`RSa\_QaP  
@HWI-EAS443:3:49:169:1355#0/1  
GGCATTTCATGAAGGACAAGTTAAATTCATTATTNT  
+HWI-EAS443:3:49:169:1355#0/1  
¥baaaaa`\_aa`a`aaa`\`SYaVaa`P\_[\_\_a^\_a\_[DY  
@HWI-EAS443:3:22:1139:276#0/1  
GGCATTTCATGAAGGACAAGTTAAATTCATTATTTTC  
+HWI-EAS443:3:22:1139:276#0/1  
aa]W`aaaaaa`\^a^\_a]\`¥\_YW\_a¥¥`\`^^`\_`\_\_^`^V  
@HWI-EAS443:3:100:49:162#0/1  
AAGTTAAATTCATTATTTTGGCGTCTGAGTTCTCAATG  
+HWI-EAS443:3:100:49:162#0/1  
R`[OYaaS[U\_bX¥[bbbb[O\_aaVP[¥V^RJF`XYXBBB  
@HWI-EAS443:3:10:341:1534#0/1  
CATTTCATGAAGGACAAGTTAAATTCATTATTTTGC  
+HWI-EAS443:3:10:341:1534#0/1  
abbbbbbbbbbbbaaba^a\_aaaaaaa`aaaaaa`^`a  
@HWI-EAS443:3:10:660:1961#0/1  
AAGTTAAATTCATTATTTTGGCGTCTGAGTTCTCAATG  
+HWI-EAS443:3:10:660:1961#0/1  
aZ^Uaa¥aaa\_X\_]`aa`U\_]¥`]a^^XY^]W\_^\_]  
@HWI-EAS443:3:10:725:305#0/1  
GCATTTTCATGAAGGACAAGTTAAATTCATTATTTTGC  
+HWI-EAS443:3:10:725:305#0/1  
a^R[TQW¥XMY^RYQLTNITZZSPR[TOTQTYYSXTPU[X  
@HWI-EAS443:3:11:1121:984#0/1  
GTTAAATTCATTATTTTGGCGTCTGAGTTCTCAATGGT  
+HWI-EAS443:3:11:1121:984#0/1  
`XWRYV¥]]X[WWXTYS^SQW][ZJ^XXDRTQPS^[S^aV  
@HWI-EAS443:3:11:1571:1371#0/1  
ATTTTCATGAAGGACAAGTTAAATTCATTATTTTGGC  
+HWI-EAS443:3:11:1571:1371#0/1  
abaaabbbabbaaaU`\_`[aXa`a^`a\_aa`Ya\_a\_^\_\_V  
@HWI-EAS443:3:11:845:1842#0/1  
AGGACAAGTTAAATTCATTATTTTGGCGTCTGAGTTCTT  
+HWI-EAS443:3:11:845:1842#0/1  
aaaX¥K¥\_S\_aWL[]W[[]`b`^`\_SaZR^UUZ``aJYI]\_  
@HWI-EAS443:3:11:999:107#0/1  
GGACAAGTTAAATTCATTATTTTGGCGTCTGAGTTCTT  
+HWI-EAS443:3:11:999:107#0/1  
abaaa`b\_aa`aa]\_b`aabba`a^\_a^]aa^a^\_Z``]  
@HWI-EAS443:3:12:171:1340#0/1  
TTTTTCATGAAGGACAAGTTAAATTCATTATTTTGGCGT  
+HWI-EAS443:3:12:171:1340#0/1  
[a¥[\_¥WY\_WY]]\_]a¥¥\_ZP]aa`^Y`a`^`^]ZW[[]`  
@HWI-EAS443:3:12:656:653#0/1  
GGCATTTCATGAAGGACAAGTTAAATTCATTATTTT  
+HWI-EAS443:3:12:656:653#0/1  
aa\_]\_`]\`a`Z\_a\_T`\_a^]\_`Y`\_\_^]Y[[]`\_\_^`[[

@HWI-EAS443:3:12:901:736#0/1  
TTCATGAAGGACAAGTTAAATTCATTATTTTTGCCGTCTG  
+HWI-EAS443:3:12:901:736#0/1  
a]¥X]Z][MSTa]abWb]]][a\_TMZ[¥^a^\_\_aYT`X]\_\_\_  
@HWI-EAS443:3:13:1052:1517#0/1  
TGAAGGACAAGTTAAATTCATTATTTTTGCCGTCTGAGTT  
+HWI-EAS443:3:13:1052:1517#0/1  
`ba\_a¥\_^abaRaa^`aa\_\_aaaaa`aa`SbZU`ba`X[  
@HWI-EAS443:3:13:1160:1319#0/1  
GGACAAGTTAAATTCATTATTTTTGCCGTCTGAGTTCTTC  
+HWI-EAS443:3:13:1160:1319#0/1  
aa\_\_`]aS\_`a\_`\_a¥\_[]`\_\_\_\_\_a\_\_\_\_`][\_\_][00ZR^[]  
@HWI-EAS443:3:13:1657:1710#0/1  
GGCATTTTTTTCATGAAGGACAAGTTAAATTCATTATTTTT  
+HWI-EAS443:3:13:1657:1710#0/1  
a]UY`a\_]`^RPV\_`T^`[YYYYUQ`^¥^\_`[^YFR^]W]¥VV]  
@HWI-EAS443:3:13:477:989#0/1  
ATTGAAGAAGTTCAGACGGCAAAAATAATGAATTTAACTTG  
+HWI-EAS443:3:13:477:989#0/1  
a```aaa\_X\_aa`]]``¥`a]Z\_aX¥`a`\_¥\_\_\_a``[\_¥  
@HWI-EAS443:3:13:893:1529#0/1  
GGCATTTTTTTCATGAAGGACAAGTTAAATTCATTATTTTT  
+HWI-EAS443:3:13:893:1529#0/1  
a^]Z¥\_^^ab```]]\_]QW¥^\_a\_a[]`\_a¥Z]`UYa`\_\_`  
@HWI-EAS443:3:14:1600:160#0/1  
GACAAGTTAAATTCATTATTTTTGCCGTCTGAGTTCTTCA  
+HWI-EAS443:3:14:1600:160#0/1  
aab]X\_]a\_]aa]a\_aa`b`aaW`PV`X^\_`]a]¥P`YL[  
@HWI-EAS443:3:14:983:1713#0/1  
GGCATTTTTTTCATGAAGGACAAGTTAAATTCATTATTTTT  
+HWI-EAS443:3:14:983:1713#0/1  
a[^aaa\_ba``aaa\_\_\_¥]^\_\_\_^a\_Z\_`\_^\_aU\_\_\_^^\_  
@HWI-EAS443:3:15:1006:1454#0/1  
GGCATTTTTTTCATGAAGGACAAGTTAAATTCATTATTTTT  
+HWI-EAS443:3:15:1006:1454#0/1  
`Y`^aaa`\_`[\_`^aaa`]V][a\_\_^]`\_\_W[¥]^a\_\_^¥  
@HWI-EAS443:3:15:1370:1102#0/1  
TTTTTCATGAAGGACAAGTTAAATTCATTATTTTTGCCGT  
+HWI-EAS443:3:15:1370:1102#0/1  
`a¥`^S¥\_]aY¥[JRW¥\_U`YT]Z\_HSYa]ba`WX]a[`T  
@HWI-EAS443:3:15:779:1875#0/1  
ATGAAGGACAAGTTAAATTCATTATTTTTGCCGTCTGAGT  
+HWI-EAS443:3:15:779:1875#0/1  
a\_¥baaaba^^a^\_a[a```\_`\_a\_`\_`]]\_]\_Z\_W\_X][  
@HWI-EAS443:3:16:1713:1805#0/1  
CATTTTTTTCATGAAGGACAAGTTAAATTCATTATTTTTGC  
+HWI-EAS443:3:16:1713:1805#0/1  
`U`b¥W`aa`]]``^^`a^][aa\_¥aa`\_a\_`a[ab```a\_\_  
@HWI-EAS443:3:16:448:361#0/1  
TTTTTCATGAAGGACAAGTTAAATTCATTATTTTTGCCGT

+HWI-EAS443:3:16:448:361#0/1  
^aa¥\_Q\_ba`Z¥Za¥aaa\_`\_aba\_a``bb^baaaa[bP`  
@HWI-EAS443:3:16:72:1301#0/1  
ATGAAGGACAAGTTAAATTCATTATTTTTGCCGTCTGAGT  
+HWI-EAS443:3:16:72:1301#0/1  
aab`V\_a\_a`^a\_``^\_``\_`\_]\_`\_a``\_`a^`^a]aY  
@HWI-EAS443:3:16:941:1107#0/1  
ATGAAGGACAAGTTAAATTCATTATTTTTGCCGTCTGAGT  
+HWI-EAS443:3:16:941:1107#0/1  
abaaabaaaaaa\_aaa\_abaaaaaaaaaaa`a`a\_]aa`a^  
@HWI-EAS443:3:17:1117:1021#0/1  
GGCATTTTTTTCATGAAGGACAAGTTAAATTCATTATTTTT  
+HWI-EAS443:3:17:1117:1021#0/1  
``R[bbbaaaaab]Y]baaa]a^a`^aa^a`\_aaa^`^  
@HWI-EAS443:3:17:552:75#0/1  
AAGGACAAGTTAAATTCATTATTTTTGCCGTCTGAGTTCT  
+HWI-EAS443:3:17:552:75#0/1  
¥^bbVa^`aR`\_¥\_a`^J¥]Y^[¥WN^a¥aW[`a[aZV^a  
@HWI-EAS443:3:17:930:1836#0/1  
CATTTTTTTCATGAAGGACAAGTTAAATTCATTATTTTTGC  
+HWI-EAS443:3:17:930:1836#0/1  
a`baaabbbbaabb`a`bba``abaabbaababbba\_a`  
@HWI-EAS443:3:18:1256:460#0/1  
GGACAAGTTAAATTCATTATTTTTGCCGTCTGAGTTCTTC  
+HWI-EAS443:3:18:1256:460#0/1  
aba^`^b`a```aaaa`aaaa^\_a[ab^[ab]a[``\_`^  
@HWI-EAS443:3:18:1513:1381#0/1  
GGCATTTTTTTCATGAAGGACAAGTTAAATTCATTATTTTT  
+HWI-EAS443:3:18:1513:1381#0/1  
aaaaabbaab`aa`^abb]W]a)`a`^`aa``b\_`aa``a  
@HWI-EAS443:3:18:1774:1310#0/1  
CATTTTTTTCATGAAGGACAAGTTAAATTCATTATTTTTGC  
+HWI-EAS443:3:18:1774:1310#0/1  
ab\_V`^`ZQ[bb`Z]^¥S¥a^V`\_]\_Zaa\_R^¥[`¥[`WP[  
@HWI-EAS443:3:19:1083:1179#0/1  
GAAGGACAAGTTAAATTCATTATTTTTGCCGTCTGAGTTC  
+HWI-EAS443:3:19:1083:1179#0/1  
a`\_`[^aZ[]baaX`a]a`aaa\_`^aYFY^)`a\_`¥\_V  
@HWI-EAS443:3:19:1143:426#0/1  
GTTAAATTCATTATTTTTGCCGTCTGAGTTCTTCAATGGT  
+HWI-EAS443:3:19:1143:426#0/1  
a[aa\_]aaYaaa`a¥\_a\_]\_]Sa`\_aY\_Y]\_\_^\_]Y  
@HWI-EAS443:3:1:1480:1158#0/1  
GTTAAATTCATTATTTTTGCCGTCTGAGTTCTTCAATGGT  
+HWI-EAS443:3:1:1480:1158#0/1  
a[`NN[`a^Z`¥^`^^Y\_WU\_ZM`]L]XUT]^Y¥[\_[BB  
@HWI-EAS443:3:1:1611:620#0/1  
GCATTTTTTCATGAAGGACAAGTTAAATTCATTATTTTTG  
+HWI-EAS443:3:1:1611:620#0/1  
aaaba`abbTabba`aa`^`\_`\_ba\_aba]`aaaa`a`\_`



@HWI-EAS443:3:20:1394:504#0/1  
GTTAAATTCATTATTTTTGCCGTCTGAGTTCTTCAATGGT  
+HWI-EAS443:3:20:1394:504#0/1  
aUaWYY\_`¥W[aYaa][¥S`]a)`\_`\_W¥M\_UNX]SVW[  
@HWI-EAS443:3:20:687:1294#0/1  
GCATTTTTTCATGAAGGACAAGTTAAATTCATTATTTTTG  
+HWI-EAS443:3:20:687:1294#0/1  
\_abbabbbababaaaabbaa`aaaaabaa\_`aaa\_\_a  
@HWI-EAS443:3:20:951:373#0/1  
CAAGTTAAATTCATTATTTTTGCCGTCTGAGTTCTTCAAT  
+HWI-EAS443:3:20:951:373#0/1  
Z^`\_W\_[a\_\_\_W`a^Za```aY\_U\_¥\_`^baa`\_Za\_aXW[  
@HWI-EAS443:3:21:101:1086#0/1  
ATTTTTTCATGAAGGACAAGTTAAATTCATTATTTTTGCC  
+HWI-EAS443:3:21:101:1086#0/1  
aaaa`aa`aaaaa]``a\_a\_aa^``aaaa`\_a\_a\_``\_]`  
@HWI-EAS443:3:21:1039:312#0/1  
GAAGGACAAGTTAAATTCATTATTTTTGCCGTCTGAGTTC  
+HWI-EAS443:3:21:1039:312#0/1  
aYW^\_]Z¥a`a\_W\_^\_]^^^\_]`[^¥^W]^U^YY^][XY  
@HWI-EAS443:3:21:1214:1923#0/1  
GGACAAGTTAAATTCATTATTTTTGCCGTCTGAGTTCTTC  
+HWI-EAS443:3:21:1214:1923#0/1  
a\_NQWWP¥Y^[^X^[NSYVNNRXSNTYWWL]]NQNNWST  
@HWI-EAS443:3:21:718:1530#0/1  
GACAAGTTAAATTCATTATTTTTGCCGTCTGAGTTCTTCA  
+HWI-EAS443:3:21:718:1530#0/1  
^abb`abbaabbbbaabba\_aa`\_a`abab``a`aab  
@HWI-EAS443:3:22:188:1392#0/1  
TGAAGGACAAGTTAAATTCATTATTTTTGCCGTCTGAGTT  
+HWI-EAS443:3:22:188:1392#0/1  
a\_`\_aaaaa^b]a`a^aaaaa^b\_aa\_[a``Za`aa\_]`  
@HWI-EAS443:3:22:417:501#0/1  
GGCATTTTTTCATGAAGGACAAGTTAAATTCATTATTTTT  
+HWI-EAS443:3:22:417:501#0/1  
a\_a`a^P]X`aa^¥a]\_a[[]UW]S^\_[[]\_]`^]\_XX\_]`^YY  
@HWI-EAS443:3:23:1074:657#0/1  
ATTTTTTCATGAAGGACAAGTTAAATTCATTATTTTTGCC  
+HWI-EAS443:3:23:1074:657#0/1  
abbbbbbb`baaaaaa\_aaaa`aa\_ba`\_baabaaa\_`\_\_  
@HWI-EAS443:3:23:422:932#0/1  
GGACAAGTTAAATTCATTATTTTTGCCGTCTGAGTTCTTC  
+HWI-EAS443:3:23:422:932#0/1  
`bba`V\_`abaababa^aZbaabaaa]aaabab¥aaaa\_  
@HWI-EAS443:3:23:509:1607#0/1  
GACAAGTTAAATTCATTATTTTTGCCGTCTGAGTTCTTCA  
+HWI-EAS443:3:23:509:1607#0/1  
abb¥bb`baabbbbaabbbbb`aabRT]bb^[JRWab\_b  
@HWI-EAS443:3:23:683:1310#0/1  
TTTTTTCATGAAGGACAAGTTAAATTCATTATTTTTGCCG

+HWI-EAS443:3:23:683:1310#0/1  
^^\_a^Za`¥^ZZaaYaa\_¥\_\_\_\_\_M]\_\_ab^aaa`X`a`\_a  
@HWI-EAS443:3:24:1415:2013#0/1  
GGCATTTCATGAAGGACAAGTTAAATTCATTATTTTT  
+HWI-EAS443:3:24:1415:2013#0/1  
aa[Z¥]V\_\_[N[\_`a\_a\_X\_`][P^`[^TV\_\_]]\_^[ ]\_  
@HWI-EAS443:3:24:1571:1100#0/1  
AGGACAAGTTAAATTCATTATTTTTGCCGTCTGAGTTCTT  
+HWI-EAS443:3:24:1571:1100#0/1  
abb`aa`b\_bababaaabaabaaaaa\_ab^Yaaaa`\_¥a\_  
@HWI-EAS443:3:24:1758:114#0/1  
TTTTTCATGAAGGACAAGTTAAATTCATTATTTTTGCCGTC  
+HWI-EAS443:3:24:1758:114#0/1  
aaba\_aa`\_a^b\_]^[^`a`\_`\_a\_a\_^]aa^`a```^^Y^^[  
@HWI-EAS443:3:24:730:1125#0/1  
GGCATTTCATGAAGGACAAGTTAAATTCATTATTTTT  
+HWI-EAS443:3:24:730:1125#0/1  
`baaabaaaaaaaa`a``aa`a^aaa\_a``aa`\_`\_a``  
@HWI-EAS443:3:25:1049:265#0/1  
TTTTTTCATGAAGGACAAGTTAAATTCATTATTTTTGCCG  
+HWI-EAS443:3:25:1049:265#0/1  
abbbaababbaaba`aaaa\_aa`\_aa`\_aaaa``\_aa\_]`  
@HWI-EAS443:3:25:1147:1121#0/1  
AAGTTAAATTCATTATTTTTGCCGTCTGAGTTCTTCAATG  
+HWI-EAS443:3:25:1147:1121#0/1  
¥`a[`ba^`a```b`R`bb`a]aaaabba`^aaaaa`aa  
@HWI-EAS443:3:25:1591:1397#0/1  
ATGAAGGACAAGTTAAATTCATTATTTTTGCCGTCTGAGT  
+HWI-EAS443:3:25:1591:1397#0/1  
``a`bbbbaa``\_aba]aba`\_b\_abaaaaa\_a`]aa^^^  
@HWI-EAS443:3:25:1613:707#0/1  
CATTTTTTCATGAAGGACAAGTTAAATTCATTATTTTTGC  
+HWI-EAS443:3:25:1613:707#0/1  
\_^abbbbbbbbababb\_bbbbbbbbbbabbbbbba  
@HWI-EAS443:3:25:1686:502#0/1  
TTTTTCATGAAGGACAAGTTAAATTCATTATTTTTGCCGTC  
+HWI-EAS443:3:25:1686:502#0/1  
abbaaaaaabb`\_a`\_a`\_\_a`\_a`\_aa`\_`\_]^[`[Z  
@HWI-EAS443:3:25:216:1862#0/1  
TGAAGGACAAGTTAAATTCATTATTTTTGCCGTCTGAGTT  
+HWI-EAS443:3:25:216:1862#0/1  
`ba^b^ab][URYaVaaY¥ba]H[ ]^a`Wab^R`\_a`^¥¥  
@HWI-EAS443:3:26:1173:842#0/1  
AGAAGTCTGACGGCAAAAATAATGAATTTAACTTGTCCTT  
+HWI-EAS443:3:26:1173:842#0/1  
aaaaabaabaaaaaaaa`aaaaa]aaa`\_`\_`a]\_^``  
@HWI-EAS443:3:27:38:634#0/1  
GACAAGTTAAATTCATTATTTTTGCCGTCTGAGTTCTTCA  
+HWI-EAS443:3:27:38:634#0/1  
aaaaa`baaabaaaa`aaaaaa`a\_aaa[^`\_a\_aaaa

@HWI-EAS443:3:27:475:206#0/1  
GGCATTTCATGAAGGACAAGTTAAATTCATTATTTT  
+HWI-EAS443:3:27:475:206#0/1  
a`]aaaaaaaaW^^aa][`Z^\_\_^`\_\_\_^^`\_\_^Y  
@HWI-EAS443:3:28:1064:1335#0/1  
GAAGGACAAGTTAAATTCATTATTTTGGCGTCTGAGTTC  
+HWI-EAS443:3:28:1064:1335#0/1  
a^aST¥^^Uaa\_X\_`aXG¥`bbaa]aW¥`^aW`V`\_aGSV  
@HWI-EAS443:3:28:440:218#0/1  
ATGAAGGACAAGTTAAATTCATTATTTTGGCGTCTGAGT  
+HWI-EAS443:3:28:440:218#0/1  
`a\_aa\_aU]\_\_b\_a\_¥¥aZVPa][`aaaaTF¥PU[b[a`  
@HWI-EAS443:3:28:49:714#0/1  
GGCATTTCATGAAGGACAAGTTAAATTCATTATTTT  
+HWI-EAS443:3:28:49:714#0/1  
aa\_UY`^ZU]bb\_ZVMYa`\_]\_b[[WI[^\_¥`a`a`a`\_`  
@HWI-EAS443:3:29:1242:739#0/1  
GTTAAATTCATTATTTTGGCGTCTGAGTCTTCAATGGT  
+HWI-EAS443:3:29:1242:739#0/1  
ZIXabbabab\_VYba¥]`a¥][¥ZO\_\_b[aaa`]`a^WNR  
@HWI-EAS443:3:29:1748:1146#0/1  
GGCATTTCATGAAGGACAAGTTAAATTCATTATTTT  
+HWI-EAS443:3:29:1748:1146#0/1  
a`]\_a\_a`aa\_\_^`^`\_`^V^[\_`^][\_]X`^^`\_`^^  
@HWI-EAS443:3:2:1051:1299#0/1  
GAAGGACAAGTTAAATTCATTATTTTGGCGTCTGAGTTC  
+HWI-EAS443:3:2:1051:1299#0/1  
YZ^]ZW\_\_Za[a`Uaaaaa`aa\_aaa\_\_a^]`a`\_`^aP  
@HWI-EAS443:3:2:429:1517#0/1  
GGCATTTCATGAAGGACAAGTTAAATTCATTATTTT  
+HWI-EAS443:3:2:429:1517#0/1  
abW\_^a\_\_ba[¥^a¥Ya`¥\_aX\_^W^]`\_]S`\_Y`\_]`^X^  
@HWI-EAS443:3:30:830:1200#0/1  
GTTAAATTCATTATTTTGGCGTCTGAGTCTTCAATGGT  
+HWI-EAS443:3:30:830:1200#0/1  
a^`^¥][`^^aaaa`\_\_][`^¥^`\_`^]ZZ`a\_\_\_\_][  
@HWI-EAS443:3:31:1036:654#0/1  
AGTTAAATTCATTATTTTGGCGTCTGAGTCTTCAATGG  
+HWI-EAS443:3:31:1036:654#0/1  
abaa\_¥aba`Z\_bbbaXaa`^aS`a]]a^a]`]\_\_V[\_`^  
@HWI-EAS443:3:31:1346:1069#0/1  
GGACAAGTTAAATTCATTATTTTGGCGTCTGAGTCTTC  
+HWI-EAS443:3:31:1346:1069#0/1  
Za¥\_P¥`bba`\_aba^aa^abab`a\_\_aaab`ab\_a^``]  
@HWI-EAS443:3:31:1361:1477#0/1  
GCATTTTCATGAAGGACAAGTTAAATTCATTATTTTGG  
+HWI-EAS443:3:31:1361:1477#0/1  
`aV[YNZ[`VSYb`a¥U`aZTaU`aa`a`\_`^`\_\_\_\_`\_]`\_`^  
@HWI-EAS443:3:31:180:712#0/1  
GGCATTTCATGAAGGACAAGTTAAATTCATTATTTT

+HWI-EAS443:3:31:180:712#0/1  
^baPbbbbbab`abbaaaabaa`abaaaaabb\_abaa`T  
@HWI-EAS443:3:31:672:324#0/1  
GGACAAGTTAAATTCATTATTTTTGCCGTCTGAGTTCTTC  
+HWI-EAS443:3:31:672:324#0/1  
`])`a]a[``a`\_\_`\_`[`a¥^`^^`\_`Q\_^^Z^Y\_\_^]X  
@HWI-EAS443:3:31:877:66#0/1  
GACAAGTTAAATTCATTATTTTTGCCGTCTGAGTTCTTCA  
+HWI-EAS443:3:31:877:66#0/1  
`WZZ^a^b`K¥aa]\_aaYaa````J[a]\_``¥`\_^]aZ]Z  
@HWI-EAS443:3:32:1443:1675#0/1  
GGCATTATTTTCATGAAGGACAAGTTAAATTCATTATTTTT  
+HWI-EAS443:3:32:1443:1675#0/1  
V\_^Y`])U[PZZ¥]^a\_Z^\_U]V^Z¥U¥V[]aZ`[[^X\_  
@HWI-EAS443:3:32:737:1064#0/1  
GGCATTATTTTCATGAAGGACAAGTTAAATTCATTATTTTT  
+HWI-EAS443:3:32:737:1064#0/1  
`bbbbab\_aab`a`¥Z`\_^a`^`^a`a`aaaa]X`\_a`  
@HWI-EAS443:3:32:958:531#0/1  
GGCATTATTTTCATGAAGGACAAGTTAAATTCATTATTTTT  
+HWI-EAS443:3:32:958:531#0/1  
[aZZXV^a\_¥b`a^VXYUP^XY¥T`Z[P]Z¥V`]a`[\_]U  
@HWI-EAS443:3:33:158:280#0/1  
GGACAAGTTAAATTCATTATTTTTGCCGTCTGAGTTCTTC  
+HWI-EAS443:3:33:158:280#0/1  
]Y¥\_X[^\_]aaYaabbaaaaa^aaab\_a`a\_a]aU\_aa¥a  
@HWI-EAS443:3:33:378:647#0/1  
GGCATTATTTTCATGAAGGACAAGTTAAATTCATTATTTTT  
+HWI-EAS443:3:33:378:647#0/1  
ab`Z]\_aa`aaa```aaa]a]\_aW`\_`\_`\_a`\_^`a^\_¥a  
@HWI-EAS443:3:34:1354:1298#0/1  
CATTATTTTCATGAAGGACAAGTTAAATTCATTATTTTTGC  
+HWI-EAS443:3:34:1354:1298#0/1  
aabbbbaaaaabaa`a\_aaaa`aaa`aaaaa`a```]\_^  
@HWI-EAS443:3:34:1670:673#0/1  
GCATTTTTCATGAAGGACAAGTTAAATTCATTATTTTTG  
+HWI-EAS443:3:34:1670:673#0/1  
a^```bbab`aaa`Wba^a`\_`aaa]\_\_aaWaa^`\_`[]WR  
@HWI-EAS443:3:34:443:1675#0/1  
GTTAAATTCATTATTTTTGCCGTCTGAGTTCTTCAATGGT  
+HWI-EAS443:3:34:443:1675#0/1  
a`^```abb`^`ba`aba¥aa\_]a\_Y`]^\_a\_\_aa\_\_QY  
@HWI-EAS443:3:35:1591:847#0/1  
ATGAAGGACAAGTTAAATTCATTATTTTTGCCGTCTGAGT  
+HWI-EAS443:3:35:1591:847#0/1  
aaaaabaa`aa`\_aa`\_aa[\_aaaa`b\_aaa^a`^a`^^\_  
@HWI-EAS443:3:35:663:1918#0/1  
CATTATTTTCATGAAGGACAAGTTAAATTCATTATTTTTGC  
+HWI-EAS443:3:35:663:1918#0/1  
`¥`aababbb\_abaa`abaa`\_aaaa`aaa```aaa```^a

@HWI-EAS443:3:35:697:996#0/1  
GCATTTTTTTCATGAAGGACAAGTTAAATTCATTATTTTTTG  
+HWI-EAS443:3:35:697:996#0/1  
abaaaaaaaaab^\_aa`a`a`]a\_`a``\_`a``\_`a\_\_[\_  
@HWI-EAS443:3:36:1492:60#0/1  
GGCATTTTTTTCATGAAGGACAAGTTAAATTCATTATTTTT  
+HWI-EAS443:3:36:1492:60#0/1  
abbabbbbbbb`abb`abb\_`abaaab\_baaaba`aaaab  
@HWI-EAS443:3:36:418:790#0/1  
CATTTTTTTCATGAAGGACAAGTTAAATTCATTATTTTTGC  
+HWI-EAS443:3:36:418:790#0/1  
abbbbaabbbabaabaab[`b`aa\_`a`a¥aa[a`a^aaa  
@HWI-EAS443:3:37:1259:1198#0/1  
GGACAAGTTAAATTCATTATTTTTGCCGTCTGAGTTCTTC  
+HWI-EAS443:3:37:1259:1198#0/1  
a`U\_\_`^`aa\_a^ab`^a``aa`a^``^UNK`\_K¥0]a^\_R  
@HWI-EAS443:3:37:1506:467#0/1  
GGCATTTTTTTCATGAAGGACAAGTTAAATTCATTATTTTT  
+HWI-EAS443:3:37:1506:467#0/1  
aa\_\_aaaaa^a\_a\_`a\_\_[\_``\_`a]]a[``\_`^\_\_`^^  
@HWI-EAS443:3:37:1603:585#0/1  
TTTCATGAAGGACAAGTTAAATTCATTATTTTTGCCGTCT  
+HWI-EAS443:3:37:1603:585#0/1  
`b`aaaba`aa\_\_`\_`¥a^`¥aa^ab`\_aQa`aaa^a^\_`  
@HWI-EAS443:3:37:1640:1319#0/1  
GCATTTTTTTCATGAAGGACAAGTTAAATTCATTATTTTTTG  
+HWI-EAS443:3:37:1640:1319#0/1  
aa\_`aaaaaaaabaaaa\_\_`a¥aa^\_aa0Y\_aaa^aa\_]`  
@HWI-EAS443:3:37:379:136#0/1  
TGAAGGACAAGTTAAATTCATTATTTTTGCCGTCTGAGTT  
+HWI-EAS443:3:37:379:136#0/1  
aabaabaa`\_`a\_a[a\_aaa`aaabaa`\_`Y`a[``]`\_a^\_  
@HWI-EAS443:3:37:738:1713#0/1  
GGCATTTTTTTCATGAAGGACAAGTTAAATTCATTATTTTT  
+HWI-EAS443:3:37:738:1713#0/1  
]aaa[\_`^VWY`a`^``Z^^[\_a\_aaab¥XaYY\_Z`aXP\_  
@HWI-EAS443:3:37:785:1211#0/1  
GACAAGTTAAATTCATTATTTTTGCCGTCTGAGTTCTTCA  
+HWI-EAS443:3:37:785:1211#0/1  
aa^`\_aaaaaaa`a\_aVaaa`a\_aa`^aY`]]]a\_\_^a\_  
@HWI-EAS443:3:37:988:990#0/1  
GAAGGACAAGTTAAATTCATTATTTTTGCCGTCTGAGTTC  
+HWI-EAS443:3:37:988:990#0/1  
a]]]]a`[\_]a\_`Y]`a`a`a`\_`]a\_aG\_^a^\_`S¥\_  
@HWI-EAS443:3:38:1149:1879#0/1  
AGGACAAGTTAAATTCATTATTTTTGCCGTCTGAGTTCTT  
+HWI-EAS443:3:38:1149:1879#0/1  
a\_`a[a`aYa\_`\_`aaaa`\_`aaa\_]aZ`WIZ]\_\_Y]Z^]  
@HWI-EAS443:3:38:1495:574#0/1  
GAAGGACAAGTTAAATTCATTATTTTTGCCGTCTGAGTTC

+HWI-EAS443:3:38:1495:574#0/1  
a`\_aa^\_\_`a^`XR\_a`\_`\_a`\_\_\_^\_XWZY]\_ZaZZV  
@HWI-EAS443:3:39:124:230#0/1  
ATGAAGGACAAGTTAAATTCATTATTTTTGCCGTCTGAGT  
+HWI-EAS443:3:39:124:230#0/1  
^`a\_X^R\_YQ[RX^QV^`^aXYY]^`\_`\_]`Z`WP[N  
@HWI-EAS443:3:39:1386:1012#0/1  
GACAAGTTAAATTCATTATTTTTGCCGTCTGAGTTCTTCA  
+HWI-EAS443:3:39:1386:1012#0/1  
aabaaa`baa`baaabaaaa`aaaaa¥`aa[`[\_[a]`[  
@HWI-EAS443:3:39:1547:703#0/1  
GGACAAGTTAAATTCATTATTTTTGCCGTCTGAGTTCTTC  
+HWI-EAS443:3:39:1547:703#0/1  
aa` `a`a`b`a`aa\_aa`\_a\_aaa\_\_W`^`^Y]\_^\_]\_\_[  
@HWI-EAS443:3:39:1639:1369#0/1  
GGACAAGTTAAATTCATTATTTTTGCCGTCTGAGTTCTTC  
+HWI-EAS443:3:39:1639:1369#0/1  
abaJa\_b^aaa\_b\_abaa`aaaaaaaYa`aa^Y`\_\_\_a`Y  
@HWI-EAS443:3:3:320:852#0/1  
GGCATTATTTTCATGAAGGACAAGTTAAATTCATTATTTTT  
+HWI-EAS443:3:3:320:852#0/1  
S\_`S[b¥^`baZab\_P]a`\_bab^b\_abbba]aabbabb^  
@HWI-EAS443:3:3:664:619#0/1  
GAAGGACAAGTTAAATTCATTATTTTTGCCGTCTGAGTTCTTC  
+HWI-EAS443:3:3:664:619#0/1  
a[^TV¥^`aZ\_\_`\_a^a\_`^`^`Y[\_\_\_NU`[U^[Xa[[T  
@HWI-EAS443:3:40:40:2024#0/1  
TTTTTCATGAAGGACAAGTTAAATTCATTATTTTTGCCGTC  
+HWI-EAS443:3:40:40:2024#0/1  
aaaabaaaab\_` `aa^`[`aaaa`a\_Z¥Taa`\_^`a\_`R`  
@HWI-EAS443:3:40:681:356#0/1  
GGACAAGTTAAATTCATTATTTTTGCCGTCTGAGTTCTTC  
+HWI-EAS443:3:40:681:356#0/1  
`a^\_¥0\_X\_X]X^^X\_`^\_^]^^^XZTKO\_\_Y]ZZ]\_XZ  
@HWI-EAS443:3:42:1018:1114#0/1  
GCATTTTTTCATGAAGGACAAGTTAAATTCATTATTTTTG  
+HWI-EAS443:3:42:1018:1114#0/1  
` `^aa` `baZ` `¥X^\_^\_]^[`\_`^` `]`aa` ` `Y`ZDUY^  
@HWI-EAS443:3:42:138:410#0/1  
GTTAAATTCATTATTTTTGCCGTCTGAGTTCTTCAATGGT  
+HWI-EAS443:3:42:138:410#0/1  
a\_`U^`^\_a]` `]`\_]\_\_\_\_\_]\_]\_]\_[^^\_Z]\_^\_YX  
@HWI-EAS443:3:42:277:352#0/1  
TTTCATGAAGGACAAGTTAAATTCATTATTTTTGCCGTCT  
+HWI-EAS443:3:42:277:352#0/1  
aaaaa`aaaa`\_^`\_`a^a\_¥Wa\_\_]a\_¥a`^a[`^aaU\_\_  
@HWI-EAS443:3:42:433:1654#0/1  
GGCATTATTTTCATGAAGGACAAGTTAAATTCATTATTTTT  
+HWI-EAS443:3:42:433:1654#0/1  
`Wa`[a^ba` `a¥aaa]\_\_aa]\_Wa¥W]a\_a`a\_aaa\_[\_`

@HWI-EAS443:3:42:977:1481#0/1  
GGCATTTCATGAAGGACAAGTTAAATTCATTATTTT  
+HWI-EAS443:3:42:977:1481#0/1  
abaabbbbabaaaabYaa^]]`aa^aab\_aa`aaaaa\_  
@HWI-EAS443:3:43:1220:1070#0/1  
GACAAGTTAAATTCATTATTTTGCCGTCTGAGTTCTTCA  
+HWI-EAS443:3:43:1220:1070#0/1  
\_^SVX[HXWU¥b\_]`aa`b`[aT`a`^L]ab`aZ^^a``]  
@HWI-EAS443:3:43:1338:1738#0/1  
CATTTCATGAAGGACAAGTTAAATTCATTATTTTGC  
+HWI-EAS443:3:43:1338:1738#0/1  
ZY\_\_T\_`a`abZVZ`^Zb`U\_UYYa``YZa`[YXabaa`Y  
@HWI-EAS443:3:43:504:1685#0/1  
CATGAAGGACAAGTTAAATTCATTATTTTGCCGTCTGAG  
+HWI-EAS443:3:43:504:1685#0/1  
aa¥^]Zb\_\_\_\_`]]`¥^^HZ¥aaaaaaabaa\_[\_MXT`aY  
@HWI-EAS443:3:44:1202:601#0/1  
GGCATTTCATGAAGGACAAGTTAAATTCATTATTTT  
+HWI-EAS443:3:44:1202:601#0/1  
a`^`a`aa¥`aa\_aa¥```a\_]\_]``aS¥a`\_a\_\_`^  
@HWI-EAS443:3:44:1322:1157#0/1  
TGAAGGACAAGTTAAATTCATTATTTTGCCGTCTGAGTT  
+HWI-EAS443:3:44:1322:1157#0/1  
¥]XTV[Z\_]a`MU\_¥]]^Z`baaaaa\_a`][`\_]aYaWN  
@HWI-EAS443:3:44:403:957#0/1  
GGCATTTCATGAAGGACAAGTTAAATTCATTATTTT  
+HWI-EAS443:3:44:403:957#0/1  
]`WU`UTUaUVX`bYF]aWX`^SR]VNP]a^M\_ZL]aa^a  
@HWI-EAS443:3:45:1188:532#0/1  
TGAAGGACAAGTTAAATTCATTATTTTGCCGTCTGAGTT  
+HWI-EAS443:3:45:1188:532#0/1  
aa`a\_U\_\_`a`a`a^aa\_\_a`aaaaaa\_[a]¥`a\_a[\_  
@HWI-EAS443:3:45:891:815#0/1  
GACAAGTTAAATTCATTATTTTGCCGTCTGAGTTCTTCA  
+HWI-EAS443:3:45:891:815#0/1  
aa`\_\_`a````a\_Ya`\_aa`\_a\_\_\_\_]S`\_^\_]^^a[^]  
@HWI-EAS443:3:46:1021:1030#0/1  
TGAAGGACAAGTTAAATTCATTATTTTGCCGTCTGAGTT  
+HWI-EAS443:3:46:1021:1030#0/1  
ab\_`bb`a`\_a]a`abaaaaaaaaaaaa`^a\_aaa\_aZa  
@HWI-EAS443:3:46:1210:727#0/1  
GCATTTTCATGAAGGACAAGTTAAATTCATTATTTTG  
+HWI-EAS443:3:46:1210:727#0/1  
aa^\_aaaaaaaa`a`\_`\_\_a^a`[]aa`\_a\_\_a`a\_^\_  
@HWI-EAS443:3:46:1234:972#0/1  
GTTAAATTCATTATTTTGCCGTCTGAGTTCTTCAATGGT  
+HWI-EAS443:3:46:1234:972#0/1  
a`[GM]`YW¥\_\_X]a`aaa\_¥VT]ZVX^VVY[¥^]L]^YF  
@HWI-EAS443:3:46:445:1119#0/1  
TTTTTCATGAAGGACAAGTTAAATTCATTATTTTGCCG

+HWI-EAS443:3:46:445:1119#0/1  
ababaaaaaa^a``a`b\_aaa^````aaaaaa\_a]¥a  
@HWI-EAS443:3:46:980:1189#0/1  
GGCATTTCATGAAGGACAAGTTAAATTCATTATTTT  
+HWI-EAS443:3:46:980:1189#0/1  
aaaaaaaaa`a`aa`aa``\_a^`\_^^``]`a``a`^`^`  
@HWI-EAS443:3:47:1749:360#0/1  
GGCATTTCATGAAGGACAAGTTAAATTCATTATTTT  
+HWI-EAS443:3:47:1749:360#0/1  
aa`Y^`[]^ZV[¥XTT]]MM[[R^[\_T^^PS\_VW¥US¥X  
@HWI-EAS443:3:47:523:1611#0/1  
CATTTCATGAAGGACAAGTTAAATTCATTATTTTGC  
+HWI-EAS443:3:47:523:1611#0/1  
`Yaba\_aaa`^]^^aa]TVVb\_\_`]X`^X^`^V^`\_`^ZWO  
@HWI-EAS443:3:47:864:459#0/1  
GGACAAGTTAAATTCATTATTTTGGCGTCTGAGTTCTTC  
+HWI-EAS443:3:47:864:459#0/1  
ab\_\_¥P¥[aaaaba^]b`aaaa]WU^^[^a\_a^`[\_`\_  
@HWI-EAS443:3:48:1003:1597#0/1  
GGACAAGTTAAATTCATTATTTTGGCGTCTGAGTTCTTC  
+HWI-EAS443:3:48:1003:1597#0/1  
aZZ`^Y^TX[``\_`\_`\_a^¥`\_Y`^^^Z\_]WG¥[YW[^  
@HWI-EAS443:3:48:686:1765#0/1  
GGACAAGTTAAATTCATTATTTTGGCGTCTGAGTTCTTC  
+HWI-EAS443:3:48:686:1765#0/1  
¥[ab`X`^U^`¥bb`b`bXb\_a`bbT`bZZ¥`b\_a\_^`\_  
@HWI-EAS443:3:49:1104:1065#0/1  
CATTTCATGAAGGACAAGTTAAATTCATTATTTTGC  
+HWI-EAS443:3:49:1104:1065#0/1  
ab`bab\_b`bbbaabbaaaababba¥baaabbaaabaab\_  
@HWI-EAS443:3:49:1547:326#0/1  
GACAAGTTAAATTCATTATTTTGGCGTCTGAGTTCTTCA  
+HWI-EAS443:3:49:1547:326#0/1  
``^a`a`b`aabaaaabbbba`a\_[^b]aaaabaabaa\_  
@HWI-EAS443:3:4:1690:1506#0/1  
GTTAAATTCATTATTTTGGCGTCTGAGTTCTTCAATGGT  
+HWI-EAS443:3:4:1690:1506#0/1  
a`aZZ`Y\_[a[[[¥`[\_^VS\_Z[S\_YaT[[[]][S[^[[  
@HWI-EAS443:3:4:736:1601#0/1  
TGAAGGACAAGTTAAATTCATTATTTTGGCGTCTGAGTT  
+HWI-EAS443:3:4:736:1601#0/1  
`bbabbbabbaba`bbabbaabbbbaa\_aaa\_abab`a  
@HWI-EAS443:3:4:798:1388#0/1  
GTTAAATTCATTATTTTGGCGTCTGAGTTCTTCAATGGT  
+HWI-EAS443:3:4:798:1388#0/1  
aaaaaabbaaaa`aaaaa`\_a^]aa`a^`\_aa\_\_\_\_\_`[[  
@HWI-EAS443:3:51:1049:1469#0/1  
CATGAAGGACAAGTTAAATTCATTATTTTGGCGTCTGAG  
+HWI-EAS443:3:51:1049:1469#0/1  
abbbbabbabb\_b`bbbbabbbbabbbbaa`aab`bb`b



@HWI-EAS443:3:51:1102:812#0/1  
GTAAATTCATTATTTTTGCCGTCTGAGTTCTCAATGGT  
+HWI-EAS443:3:51:1102:812#0/1  
]\_b]aaa`]]`````[\_aa`^a\_^\_a]aTZ¥`-[\_-]\_^T  
@HWI-EAS443:3:51:128:784#0/1  
GTAAATTCATTATTTTTGCCGTCTGAGTTCTCAATGGT  
+HWI-EAS443:3:51:128:784#0/1  
`¥aa`aabaaba`baaba^[]`¥\_`a`a\_^\_a^\_ZOYa`R  
@HWI-EAS443:3:51:1602:770#0/1  
GGCATTTCATGAAGGACAAGTTAAATTCATTATTTTT  
+HWI-EAS443:3:51:1602:770#0/1  
``X\_b¥I`abb`b\_bbaaT`]^\_abb`bYR^bbbbbba`b  
@HWI-EAS443:3:51:464:1048#0/1  
TTTTTCATGAAGGACAAGTTAAATTCATTATTTTTGCCGT  
+HWI-EAS443:3:51:464:1048#0/1  
aaababaaa]¥`a^`a\_a^``\_W\_^\_a\_Wa`a`a[^]^Y  
@HWI-EAS443:3:51:572:1774#0/1  
GGCATTTCATGAAGGACAAGTTAAATTCATTATTTTT  
+HWI-EAS443:3:51:572:1774#0/1  
¥`bbbbbb`]^baa^aa^[a\_Za\_babaa`a\_aaaba[a`  
@HWI-EAS443:3:51:631:1032#0/1  
GCATTTTTTCATGAAGGACAAGTTAAATTCATTATTTTTG  
+HWI-EAS443:3:51:631:1032#0/1  
aa`aaaaa\_\_\_aaaa\_a^`^a\_``]Yaa\_]aa`aaa`\_`\_`  
@HWI-EAS443:3:51:83:1214#0/1  
TGAAGGACAAGTTAAATTCATTATTTTTGCCGTCTGAGTT  
+HWI-EAS443:3:51:83:1214#0/1  
abababa\_aaabbaa`bbaabbababababaaa\_aaa]a[`  
@HWI-EAS443:3:51:988:1284#0/1  
GAAGGACAAGTTAAATTCATTATTTTTGCCGTCTGAGTTC  
+HWI-EAS443:3:51:988:1284#0/1  
a^abaa\_]aaaaYU]aYW\_`^a`aaaa^\_a\_\_`a[a^a^]  
@HWI-EAS443:3:52:1375:660#0/1  
GGCATTTCATGAAGGACAAGTTAAATTCATTATTTTT  
+HWI-EAS443:3:52:1375:660#0/1  
`^aaaabababab\_aaabb```¥\_`a```aa`\_baaaaa[a  
@HWI-EAS443:3:52:357:683#0/1  
GGACAAGTTAAATTCATTATTTTTGCCGTCTGAGTTCTTC  
+HWI-EAS443:3:52:357:683#0/1  
`WX\_\_^a^^\_\_Yaa[]\_`X\_^]Y\_^`V]]\_]`WYZ^]X  
@HWI-EAS443:3:52:643:1880#0/1  
GACAAGTTAAATTCATTATTTTTGCCGTCTGAGTTCTCA  
+HWI-EAS443:3:52:643:1880#0/1  
^b\_X\_\_[[]]`aR]¥`[L[XS`\_[]]U\_¥a¥WQX``¥[\_`  
@HWI-EAS443:3:52:677:1468#0/1  
GTAAATTCATTATTTTTGCCGTCTGAGTTCTCAATGGT  
+HWI-EAS443:3:52:677:1468#0/1  
`\_bbaaba`abaaaba¥aaa¥a[\_ab\_^\_`aaaa`aa^R  
@HWI-EAS443:3:52:735:1009#0/1  
GGCATTTCATGAAGGACAAGTTAAATTCATTATTTTT

+HWI-EAS443:3:52:735:1009#0/1  
abb`baaaaabaa^^`a^T`a[b^`a]a`a`\_aa\_aaa``  
@HWI-EAS443:3:53:50:643#0/1  
ATTTTTTTCATGAAGGACAAGTTAAATTCATTATTTTTGCC  
+HWI-EAS443:3:53:50:643#0/1  
abbb`\_^a^U\_aab`¥`^a^a`\_\_a`\_]a`\_a`\_`\_a`\_T  
@HWI-EAS443:3:54:1056:646#0/1  
GCATTTTTTTCATGAAGGACAAGTTAAATTCATTATTTTTG  
+HWI-EAS443:3:54:1056:646#0/1  
aa`aaaaaa[aaa\_]aa]\_^\_a^`^]a`^^a^\_a``\_\_^  
@HWI-EAS443:3:54:131:1994#0/1  
GACAAGTTAAATTCATTATTTTTGCCGTCTGAGTTCTTCA  
+HWI-EAS443:3:54:131:1994#0/1  
KZa^TXaba`¥`\_\_b`Zabbabb`a]aVabaa¥Z^^]^\_a  
@HWI-EAS443:3:54:1551:1467#0/1  
GACAAGTTAAATTCATTATTTTTGCCGTCTGAGTTCTTCA  
+HWI-EAS443:3:54:1551:1467#0/1  
a]W`^]M¥`aL^\_W`]\_\_YW[[aTLJ¥MFTa^a¥L]\_^[[  
@HWI-EAS443:3:54:519:306#0/1  
GTTAAATTCATTATTTTTGCCGTCTGAGTTCTTCAATGGT  
+HWI-EAS443:3:54:519:306#0/1  
a\_aa`\_ba^aaaaaa```\_]a]^a`\_a[`^`\_]\_`^`\_Y  
@HWI-EAS443:3:54:656:1419#0/1  
GTTAAATTCATTATTTTTGCCGTCTGAGTTCTTCAATGGT  
+HWI-EAS443:3:54:656:1419#0/1  
`[\_WUUY^¥a[]Q]aa`QQQ\_ZK¥X[QXY\_UZ^PQWWUPQ  
@HWI-EAS443:3:54:708:1476#0/1  
GGCATTTTTTTCATGAAGGACAAGTTAAATTCATTATTTTT  
+HWI-EAS443:3:54:708:1476#0/1  
a^a]bbaaaaa`\_]\_W\_a`]^¥aZa\_a`a`\_\_`aaa`````  
@HWI-EAS443:3:55:243:695#0/1  
GCATTTTTTTCATGAAGGACAAGTTAAATTCATTATTTTTG  
+HWI-EAS443:3:55:243:695#0/1  
a`a`Zaaa`\_`aa`\_a`^`\_Qa^`\_¥]a`\_\_`\_]\_\_`^`\_\_  
@HWI-EAS443:3:55:538:1377#0/1  
GGCATTTTTTTCATGAAGGACAAGTTAAATTCATTATTTTT  
+HWI-EAS443:3:55:538:1377#0/1  
^aa^a`¥```aa^¥aa`a]a\_]^[`\_¥UZb`\_`aaaaa]`  
@HWI-EAS443:3:56:1529:1751#0/1  
GGCATTTTTTTCATGAAGGACAAGTTAAATTCATTATTTTT  
+HWI-EAS443:3:56:1529:1751#0/1  
abaabbbbbaaa`bbaabbaS`ab`aaaaab^`aaaaaaaa  
@HWI-EAS443:3:56:1709:1542#0/1  
GCATTTTTTTCATGAAGGACAAGTTAAATTCATTATTTTTG  
+HWI-EAS443:3:56:1709:1542#0/1  
aX[\_aa`a^H]^`\_^`]VQS^\_X\_]`^`YTX`\_\_`^a`\_V  
@HWI-EAS443:3:56:1764:138#0/1  
GGCATTTTTTTCATGAAGGACAAGTTAAATTCATTATTTTT  
+HWI-EAS443:3:56:1764:138#0/1  
X\_\_WYW\_Y\_¥[Y¥\_W¥¥^TV^`¥QZ\_U\_]\_RZa]Z`````[

@HWI-EAS443:3:56:666:1037#0/1  
AAGTTAAATTCATTATTTTTGCCGTCTGAGTTCTTCAATG  
+HWI-EAS443:3:56:666:1037#0/1  
^^aabb`bb`aabbabbaa]`a`aababaaaaaa^a`  
@HWI-EAS443:3:56:996:2009#0/1  
GGACAAGTTAAATTCATTATTTTTGCCGTCTGAGTTCTTC  
+HWI-EAS443:3:56:996:2009#0/1  
aba`aab\_aaaaa`a`\_aa`aba\_]¥a^\_aa``\_^\_a`¥  
@HWI-EAS443:3:57:1120:544#0/1  
GGACAAGTTAAATTCATTATTTTTGCCGTCTGAGTTCTTC  
+HWI-EAS443:3:57:1120:544#0/1  
aa`aaaaabababaaaababab^aa`a\_aaaaa]a^a`  
@HWI-EAS443:3:57:1217:200#0/1  
CATTTTTTCATGAAGGACAAGTTAAATTCATTATTTTTGC  
+HWI-EAS443:3:57:1217:200#0/1  
aabbabbabbbaabbaba`baba\_aaaaabbabbabaaa  
@HWI-EAS443:3:57:529:561#0/1  
CATTTTTTCATGAAGGACAAGTTAAATTCATTATTTTTGC  
+HWI-EAS443:3:57:529:561#0/1  
abbbbaa`babaaa`aa`aYaaaaa^`aaaba\_a`W  
@HWI-EAS443:3:57:823:1849#0/1  
GGCATTTTTTTCATGAAGGACAAGTTAAATTCATTATTTTT  
+HWI-EAS443:3:57:823:1849#0/1  
Y`a`^`b¥a``abb`¥PX`X`¥]^bb``]]LZbb^aZ  
@HWI-EAS443:3:58:1214:867#0/1  
GGCATTTTTTTCATGAAGGACAAGTTAAATTCATTATTTTT  
+HWI-EAS443:3:58:1214:867#0/1  
a`^\_aabaaaX\_a\_`Y¥`^^^`]^\_]^\_\_^W`\_Y`\_^\_  
@HWI-EAS443:3:58:214:390#0/1  
GTTAAATTCATTATTTTTGCCGTCTGAGTTCTTCAATGGT  
+HWI-EAS443:3:58:214:390#0/1  
a\_aaa\_aa`aaaa\_`\_]`U\_^\_a][\_W`¥\_^]Y\_\_^[  
@HWI-EAS443:3:58:79:1320#0/1  
GGACAAGTTAAATTCATTATTTTTGCCGTCTGAGTTCTTC  
+HWI-EAS443:3:58:79:1320#0/1  
`[Va]WWW]¥[YZ]Wa^Q¥][[¥^aYV^\_\_\_\_X^S[YY\_\_  
@HWI-EAS443:3:59:1247:1955#0/1  
TTCATGAAGGACAAGTTAAATTCATTATTTTTGCCGTCTG  
+HWI-EAS443:3:59:1247:1955#0/1  
^]\_babbbbaa`bab]`aaa`aaaaabaab\_aaP[[[a]  
@HWI-EAS443:3:59:667:359#0/1  
GTTAAATTCATTATTTTTGCCGTCTGAGTTCTTCAATGGT  
+HWI-EAS443:3:59:667:359#0/1  
aabaaaba`abbaaaabaaa^`aaaa^`a`\_\_`Y]``[  
@HWI-EAS443:3:59:863:270#0/1  
GGCATTTTTTTCATGAAGGACAAGTTAAATTCATTATTTTT  
+HWI-EAS443:3:59:863:270#0/1  
aa`]``abaa\_``^ab`^^`¥Q^^`\_^``\_^``^UX`^^  
@HWI-EAS443:3:5:1239:1807#0/1  
GGACAAGTTAAATTCATTATTTTTGCCGTCTGAGTTCTTC

+HWI-EAS443:3:5:1239:1807#0/1  
¥`\_PR¥``a``^babab¥\_`b¥Y]S^\_abba[babaU  
@HWI-EAS443:3:60:1725:1861#0/1  
ATGAAGGACAAGTTAAATTCATTATTTTTGCCGTCTGAGT  
+HWI-EAS443:3:60:1725:1861#0/1  
a]aZ\_aaL\_TVYZ`\_][\_]^¥T[\_^`\_^\_HUZMM\_] ^V  
@HWI-EAS443:3:60:413:208#0/1  
TTTCATGAAGGACAAGTTAAATTCATTATTTTTGCCGTCT  
+HWI-EAS443:3:60:413:208#0/1  
aa`\_^aa^aa`\_Q^a\_\_[^`^`Ya^]``¥^\_[Z^W]^  
@HWI-EAS443:3:61:1585:317#0/1  
GACAAGTTAAATTCATTATTTTTGCCGTCTGAGTTCTTCA  
+HWI-EAS443:3:61:1585:317#0/1  
aaa\_\_\_aa`\_`aa\_^a^`aa^\_a``]]\_``\_][^Y^^HU  
@HWI-EAS443:3:61:278:1834#0/1  
CATGAAGGACAAGTTAAATTCATTATTTTTGCCGTCTGAG  
+HWI-EAS443:3:61:278:1834#0/1  
abbbbbbbbabbaabbbbaa`S]a^baaaaabZa^^`\_\_\_\_`  
@HWI-EAS443:3:61:447:466#0/1  
GCATTTTTTCATGAAGGACAAGTTAAATTCATTATTTTTG  
+HWI-EAS443:3:61:447:466#0/1  
a\_T¥]S[SU]]STSU`VTWSXYVUQPROY]Y]TVVYWZ  
@HWI-EAS443:3:61:506:1037#0/1  
CATTTTTTCATGAAGGACAAGTTAAATTCATTATTTTTGC  
+HWI-EAS443:3:61:506:1037#0/1  
aababbbbbbabbaabbbbabaa¥[`a`ba]aaa\_a\_UY  
@HWI-EAS443:3:63:167:877#0/1  
GGCATTTTTTCATGAAGGACAAGTTAAATTCATTATTTTT  
+HWI-EAS443:3:63:167:877#0/1  
`babaabaaaaa]aaa\_\_`\_a`a[^`\_a```a`a\_a\_^  
@HWI-EAS443:3:63:332:38#0/1  
GGCATTTTTTCATGAAGGACAAGTTAAATTCATTATTTTT  
+HWI-EAS443:3:63:332:38#0/1  
abb]bbbbabaaab\_\_aa````baaaYaa`\_\_a`\_a`a\_\_  
@HWI-EAS443:3:63:346:868#0/1  
GGACAAGTTAAATTCATTATTTTTGCCGTCTGAGTTCTTC  
+HWI-EAS443:3:63:346:868#0/1  
`^bba`bbabbaaaa`aaaaaa`\_`aa\_\_aaaa^`ba^b  
@HWI-EAS443:3:63:586:1096#0/1  
GGACAAGTTAAATTCATTATTTTTGCCGTCTGAGTTCTTC  
+HWI-EAS443:3:63:586:1096#0/1  
`aba`T`abaVbb`a^b`[abaaa`bb`¥aaa``]\_\_aaa  
@HWI-EAS443:3:64:701:140#0/1  
GTTAAATTCATTATTTTTGCCGTCTGAGTTCTTCAATGGT  
+HWI-EAS443:3:64:701:140#0/1  
aa``aaaa\_¥`\_¥`\_```\_[^\_]¥^a]^[][\_^]W[]^Z  
@HWI-EAS443:3:65:1359:918#0/1  
AGGACAAGTTAAATTCATTATTTTTGCCGTCTGAGTTCTT  
+HWI-EAS443:3:65:1359:918#0/1  
abaaa^```aaaaaaaaaaaaaaaa`a`aaa^a^aZa`

@HWI-EAS443:3:65:197:456#0/1  
GGACAAGTTAAATTCATTATTTTTGCCGTCTGAGTTCTTC  
+HWI-EAS443:3:65:197:456#0/1  
abbaaaaaaaaa`abbaabbaa`aaab\_aaaab[`aaa\_  
@HWI-EAS443:3:65:600:503#0/1  
ATGAAGGACAAGTTAAATTCATTATTTTTGCCGTCTGAGT  
+HWI-EAS443:3:65:600:503#0/1  
aaaaa`]¥a`aaZaaba`^\_a`X`aaaY[aa\_b[]a`T`U  
@HWI-EAS443:3:65:825:570#0/1  
GAAGGACAAGTTAAATTCATTATTTTTGCCGTCTGAGTTC  
+HWI-EAS443:3:65:825:570#0/1  
a¥bY[V\_Z]b\_aa]aaab\_\_aaaaaa^aa`\_Y^^`N\_U]¥  
@HWI-EAS443:3:66:1000:1447#0/1  
GGACAAGTTAAATTCATTATTTTTGCCGTCTGAGTTCTTC  
+HWI-EAS443:3:66:1000:1447#0/1  
aaaa^X`\_aaaaa`a\_a`aaa\_a`\_a`a`\_`a\_\_^^`\_^^  
@HWI-EAS443:3:66:1286:24#0/1  
ATTTTTTCATGAAGGACAAGTTAAATTCATTATTTTTGCC  
+HWI-EAS443:3:66:1286:24#0/1  
abbbab`aba``aba\_^a¥b\_\_a`^^VHZbbabaaaa\_[\_  
@HWI-EAS443:3:66:1468:1495#0/1  
GGACAAGTTAAATTCATTATTTTTGCCGTCTGAGTTCTTC  
+HWI-EAS443:3:66:1468:1495#0/1  
\_SQWY[(`^PX\_a^)]\_¥\_\_[\_][^IZ¥SWS`]SZX][ZW  
@HWI-EAS443:3:67:1127:625#0/1  
CATTTTTTCATGAAGGACAAGTTAAATTCATTATTTTTGC  
+HWI-EAS443:3:67:1127:625#0/1  
a^`[\_Z]a\_\_a[`\_X]]aa\_\_a¥`\_a\_]^^`]`aaa`\_U  
@HWI-EAS443:3:67:1249:202#0/1  
TTGAAGAACTCAGACGGCAAAAATAATGAATTTAACTTGT  
+HWI-EAS443:3:67:1249:202#0/1  
Xbba\_abaaaaaZJ\_ba`ba\_abbbbbbaaa\_a\_a]aa\_\_  
@HWI-EAS443:3:68:112:1247#0/1  
GGACAAGTTAAATTCATTATTTTTGCCGTCTGAGTTCTTC  
+HWI-EAS443:3:68:112:1247#0/1  
\_bbb`X`abbbabbaaaaabbbabaaa^`aab`\_`aaaab  
@HWI-EAS443:3:68:1395:1434#0/1  
GTTAAATTCATTATTTTTGCCGTCTGAGTTCTTCAATGGT  
+HWI-EAS443:3:68:1395:1434#0/1  
a]\_R^X`\_\_\_aYU^\_[^I]UU^[¥]YZSIYYZ¥YW^XUWI  
@HWI-EAS443:3:68:1690:135#0/1  
GGACAAGTTAAATTCATTATTTTTGCCGTCTGAGTTCTTC  
+HWI-EAS443:3:68:1690:135#0/1  
aa`]YZHMZa]aaaaaaaaaaaa`^^`\_`^\_\_\_X`¥\_Y`\_V  
@HWI-EAS443:3:68:1781:679#0/1  
GGCATTTTTTTCATGAAGGACAAGTTAAATTCATTATTTTT  
+HWI-EAS443:3:68:1781:679#0/1  
aa]abaab`\_`\_`aaaaaY^^`\_`\_X`]aa`]`\_`\_`a`\_`  
@HWI-EAS443:3:68:405:1583#0/1  
ATGAAGGACAAGTTAAATTCATTATTTTTGCCGTCTGAGT

+HWI-EAS443:3:68:405:1583#0/1  
`¥]VYW¥U\_^\_aQa]NZ]a`^)`aaaaaaba]^a` `a`V  
@HWI-EAS443:3:68:778:1012#0/1  
GTTAAATTCATTATTTTTGCCGTCTGAGTTCTTCAATGGT  
+HWI-EAS443:3:68:778:1012#0/1  
a`aZ^\_aaa`a`[aaa`a\_[\_^`\_`^aZ^\_\_`\_a[\_\_\_[Y  
@HWI-EAS443:3:68:840:1430#0/1  
GGCATTMTTTCATGAAGGACAAGTTAAATTCATTATTTTT  
+HWI-EAS443:3:68:840:1430#0/1  
a\_`[abbba`bb]b¥[^`aaa`S]ab`aaa`a`[^``a`a  
@HWI-EAS443:3:69:1053:1713#0/1  
GGACAAGTTAAATTCATTATTTTTGCCGTCTGAGTTCTTC  
+HWI-EAS443:3:69:1053:1713#0/1  
Y[a¥T` `Kbb[Y¥b^^a`ba^ba]aa^`\_aaaab^a`aa\_  
@HWI-EAS443:3:69:1789:894#0/1  
GGCATTMTTTCATGAAGGACAAGTTAAATTCATTATTTTT  
+HWI-EAS443:3:69:1789:894#0/1  
aaa`aaaaaa`aa`a`b`Y^^Z`¥a\_\_\_`a]\_a^`\_`\_\_\_\_  
@HWI-EAS443:3:69:292:1854#0/1  
GCATTTTTTCATGAAGGACAAGTTAAATTCATTATTTTTG  
+HWI-EAS443:3:69:292:1854#0/1  
aY\_W]¥]¥]Za¥T\_a`¥]Y]\_\_RZ`¥WY]a^^]\_\_]¥^]\_  
@HWI-EAS443:3:69:842:654#0/1  
CATTTTTTCATGAAGGACAAGTTAAATTCATTATTTTTGC  
+HWI-EAS443:3:69:842:654#0/1  
aaabbbbbbabababaaaa\_b\_bba`ba`]aaabb`aaaa  
@HWI-EAS443:3:69:879:1081#0/1  
GGACAAGTTAAATTCATTATTTTTGCCGTCTGAGTTCTTC  
+HWI-EAS443:3:69:879:1081#0/1  
^)`YSW¥[a^[0`a]]a^`^a^`^`^`]]` `¥V\_X¥\_Y[^  
@HWI-EAS443:3:69:929:1429#0/1  
GACAAGTTAAATTCATTATTTTTGCCGTCTGAGTTCTTCA  
+HWI-EAS443:3:69:929:1429#0/1  
a]aW0[[aaaaaaa`^aa[F[\_Y`a\_]\_[X]][\_a^¥^a  
@HWI-EAS443:3:6:1146:1819#0/1  
GTTAAATTCATTATTTTTGCCGTCTGAGTTCTTCAATGGT  
+HWI-EAS443:3:6:1146:1819#0/1  
aa^¥IR¥VV]Z][]¥^\_\_\_`^`USX\_Z`PQW^VZ\_X[¥YR  
@HWI-EAS443:3:6:77:1764#0/1  
GGCATTMTTTCATGAAGGACAAGTTAAATTCATTATTTTT  
+HWI-EAS443:3:6:77:1764#0/1  
^baabbbbbbabbbbb`abaababaaabbbabababaaaa  
@HWI-EAS443:3:6:945:1633#0/1  
CAAGTTAAATTCATTATTTTTGCCGTCTGAGTTCTTCAAT  
+HWI-EAS443:3:6:945:1633#0/1  
aa`b`baa`ab\_bb`^bb`aa`a[b`^aaa`^``a\_aa]\_  
@HWI-EAS443:3:71:1036:1609#0/1  
GAAGGACAAGTTAAATTCATTATTTTTGCCGTCTGAGTTTC  
+HWI-EAS443:3:71:1036:1609#0/1  
a\_aa\_a`baW¥Y```aaaaaaa`a`\_^b`\_`a````\_V``

@HWI-EAS443:3:71:1256:695#0/1  
GACAAGTTAAATTCATTATTTTTGCCGTCTGAGTTCTTCA  
+HWI-EAS443:3:71:1256:695#0/1  
a[aaVa[\_JM[XOVZV¥Q¥Q`WNLVWL[Z^^Y¥P[R[XR  
@HWI-EAS443:3:71:1264:1670#0/1  
GGACAAGTTAAATTCATTATTTTTGCCGTCTGAGTTCTTC  
+HWI-EAS443:3:71:1264:1670#0/1  
aa¥D[YW[a`¥NOQR`a]Y]YW[UT¥PPXFW\_]TJLOTV  
@HWI-EAS443:3:71:1305:1793#0/1  
TGAAGGACAAGTTAAATTCATTATTTTTGCCGTCTGAGTT  
+HWI-EAS443:3:71:1305:1793#0/1  
aaaaa`aaa^a\_aaa\_a`\_aaa\_aaa^b\_dWa]aa¥^^]¥  
@HWI-EAS443:3:71:768:501#0/1  
AGGACAAGTTAAATTCATTATTTTTGCCGTCTGAGTTCTT  
+HWI-EAS443:3:71:768:501#0/1  
^¥RX\_R^RaYLUaaZT`^Z`\_aW\_a\_[`X`\_ZL]VTMSO  
@HWI-EAS443:3:72:1245:168#0/1  
GTTAAATTCATTATTTTTGCCGTCTGAGTTCTTCAATGGT  
+HWI-EAS443:3:72:1245:168#0/1  
a````aaYaa`\_a`a\_a\_Y\_aZ]\_`^`[^[[^Y^[^\_^[  
@HWI-EAS443:3:72:394:796#0/1  
CATTTTTTCATGAAGGACAAGTTAAATTCATTATTTTTGC  
+HWI-EAS443:3:72:394:796#0/1  
\_`bba\_WZaaa`¥J¥^V\_a\_a\_a\_Z\_aZU]a[H[aa\_a`Z  
@HWI-EAS443:3:72:759:329#0/1  
GACAAGTTAAATTCATTATTTTTGCCGTCTGAGTTCTTCA  
+HWI-EAS443:3:72:759:329#0/1  
`a``]a\_a`aaaa`ba^aaa\_aa`]a`^\_a\_\_U`[a\_¥a  
@HWI-EAS443:3:72:822:1663#0/1  
GACAAGTTAAATTCATTATTTTTGCCGTCTGAGTTCTTCA  
+HWI-EAS443:3:72:822:1663#0/1  
\_bbabbabb`¥babbbbaabaabaaba`bbbaaa`aa`aa  
@HWI-EAS443:3:73:1704:1551#0/1  
GGCATTTTTTTCATGAAGGACAAGTTAAATTCATTATTTTT  
+HWI-EAS443:3:73:1704:1551#0/1  
aa\_``ba``a]\_`a^^`aW]¥¥a]\_\_\_\_\_`[X\_YZ\_`¥^\_  
@HWI-EAS443:3:73:692:43#0/1  
GGCATTTTTTTCATGAAGGACAAGTTAAATTCATTATTTTT  
+HWI-EAS443:3:73:692:43#0/1  
a]R^¥`TW[`]^[a[]]^[YSSYSUSUX]ZXY^W[\_]VUZ  
@HWI-EAS443:3:73:842:446#0/1  
AGTTAAATTCATTATTTTTGCCGTCTGAGTTCTTCAATGG  
+HWI-EAS443:3:73:842:446#0/1  
```baa^abb^]babbbbaaab^Y\_baab\_aaaaaa\_aaZ  
@HWI-EAS443:3:73:933:536#0/1  
GGCATTTTTTTCATGAAGGACAAGTTAAATTCATTATTTTT  
+HWI-EAS443:3:73:933:536#0/1  
aaa^aabbbbaaaaaaba`\_`\_a\_a``aaa\_abaaa``aa  
@HWI-EAS443:3:74:1095:18#0/1  
GACAAGTTAAATTCATTATTTTTGCCGTCTGAGTTCTTCA

+HWI-EAS443:3:74:1095:18#0/1  
`baWa`baaaaab`aa`aaa^aaa`b\_\_bb`b``a\_]\_  
@HWI-EAS443:3:74:1731:569#0/1  
TGAAGGACAAGTTAAATTCATTATTTTTGCCGTCTGAGTT  
+HWI-EAS443:3:74:1731:569#0/1  
aaaaaaaaabaaaaabaabaabaaaa`a\_aaaab`a^a  
@HWI-EAS443:3:74:413:755#0/1  
GGCATTTCATGAAGGACAAGTTAAATTCATTATTTTT  
+HWI-EAS443:3:74:413:755#0/1  
ababbbabbabaabaaaaaaa`a`aaa\_aaaabaaaaaaa  
@HWI-EAS443:3:74:712:1942#0/1  
GGCATTTCATGAAGGACAAGTTAAATTCATTATTTTT  
+HWI-EAS443:3:74:712:1942#0/1  
abaXS`^¥a`bbb`ba¥aaa`W\_^a`XLa`\_b[[a`aa`  
@HWI-EAS443:3:75:1015:1137#0/1  
ACAAGTTAAATTCATTATTTTTGCCGTCTGAGTTCTTCAA  
+HWI-EAS443:3:75:1015:1137#0/1  
aaa`b[aabaaa`aaaabaa`aa`a[aaaa`a\_aaa\_`  
@HWI-EAS443:3:75:1024:168#0/1  
GACAAGTTAAATTCATTATTTTTGCCGTCTGAGTTCTTCA  
+HWI-EAS443:3:75:1024:168#0/1  
^`\_aaba\_`a`bbaaabab^`aa^¥^b`\_bbab^`aa^a  
@HWI-EAS443:3:75:1381:1382#0/1  
GGCATTTCATGAAGGACAAGTTAAATTCATTATTTTT  
+HWI-EAS443:3:75:1381:1382#0/1  
YS]POW`WSQ]X`\_SS]]\_FIUT`XM[a`R^`V^Ia\_`]  
@HWI-EAS443:3:75:1454:971#0/1  
TGAAGGACAAGTTAAATTCATTATTTTTGCCGTCTGAGTT  
+HWI-EAS443:3:75:1454:971#0/1  
Q\_b^bbbab]\_abbaa\_b`abbbb`¥\_YY`aU`]b[a`a  
@HWI-EAS443:3:75:1579:1008#0/1  
GTTAAATTCATTATTTTTGCCGTCTGAGTTCTTCAATGGT  
+HWI-EAS443:3:75:1579:1008#0/1  
`^VY`a\_QU¥Z\_aa`[\_Z]ZWX^a]V^Y`^a^^¥^Y¥`P  
@HWI-EAS443:3:75:1638:1951#0/1  
GTTAAATTCATTATTTTTGCCGTCTGAGTTCTTCAATGGT  
+HWI-EAS443:3:75:1638:1951#0/1  
abba[^baba\_¥baab\_b`bab\_`aa`b]aabaZ`]aaa[  
@HWI-EAS443:3:75:1641:515#0/1  
CATTTTTTCATGAAGGACAAGTTAAATTCATTATTTTTGC  
+HWI-EAS443:3:75:1641:515#0/1  
abbbbbbbbabbbbabbaabaabbbbabbbbbbba  
@HWI-EAS443:3:76:74:1412#0/1  
GACAAGTTAAATTCATTATTTTTGCCGTCTGAGTTCTTCA  
+HWI-EAS443:3:76:74:1412#0/1  
a`a¥]\_H\_`S\_^Y^`\_¥]^\_^Y]XTT\_Y\_S¥Y[[[^]Z  
@HWI-EAS443:3:77:1223:791#0/1  
GTTAAATTCATTATTTTTGCCGTCTGAGTTCTTCAATGGT  
+HWI-EAS443:3:77:1223:791#0/1  
aaaa`abaaaba\_aaaaaa\_\_a]^a\_\_a]\_^`\_Y``aa\_]



@HWI-EAS443:3:77:1534:1897#0/1  
CATTTCATGAAGGACAAGTTAAATTCATTATTTTGC  
+HWI-EAS443:3:77:1534:1897#0/1  
aaaabbbbaaa`bbaaa`aa`aaaabaaaaaaaaaaaaaW  
@HWI-EAS443:3:77:406:1851#0/1  
GGCATTTCATGAAGGACAAGTTAAATTCATTATTTT  
+HWI-EAS443:3:77:406:1851#0/1  
a]¥`Z\_`Z¥^aYYaYUYZNVWVQPRZ`\_\_`¥`\_\_a[N[[  
@HWI-EAS443:3:77:452:953#0/1  
GGCATTTCATGAAGGACAAGTTAAATTCATTATTTT  
+HWI-EAS443:3:77:452:953#0/1  
aab`aabababaaaaaaaa`aa\_\_\_a`aaaa```aaa`a\_  
@HWI-EAS443:3:77:792:836#0/1  
GACAAGTTAAATTCATTATTTTGCCTGAGTTCTTCA  
+HWI-EAS443:3:77:792:836#0/1  
aabaab`a`baaaaabaaaaaaaa`a\_a\_aaa\_a]`aa\_aa  
@HWI-EAS443:3:78:1000:1986#0/1  
GTTAAATTCATTATTTTGCCTGAGTTCTTCAATGGT  
+HWI-EAS443:3:78:1000:1986#0/1  
^Zb``abbabaaaabaaba\_a````\_a\_aab`a`a^a`Y  
@HWI-EAS443:3:78:1280:804#0/1  
ATTTTCATGAAGGACAAGTTAAATTCATTATTTTGC  
+HWI-EAS443:3:78:1280:804#0/1  
abba`b`aa^Taa^`Sa\_\_\_T`a\_\_\_a`[aa`a^¥RR  
@HWI-EAS443:3:78:537:754#0/1  
ATGAAGGACAAGTTAAATTCATTATTTTGCCTGAGT  
+HWI-EAS443:3:78:537:754#0/1  
aaa`aa\_a`]a^`a`a\_a``\_\_`\_\_^`\_^\_]Z\_\_]\_  
@HWI-EAS443:3:78:785:1116#0/1  
GTTAAATTCATTATTTTGCCTGAGTTCTTCAATGGT  
+HWI-EAS443:3:78:785:1116#0/1  
^P]^TX`ZG[aa`a\_a`a\_aX^`\_[a^[¥`^[Z^]^X  
@HWI-EAS443:3:79:69:1380#0/1  
GGCATTTCATGAAGGACAAGTTAAATTCATTATTTT  
+HWI-EAS443:3:79:69:1380#0/1  
`a\_SS`aaa\_V]VYQZ``\_\_SS[I`XF[T¥a`PTM^```U  
@HWI-EAS443:3:79:759:1444#0/1  
CAAGTTAAATTCATTATTTTGCCTGAGTTCTTCAAT  
+HWI-EAS443:3:79:759:1444#0/1  
aabaabba¥bbbabbababaa`bbb`abbaa`a`b`aa`a  
@HWI-EAS443:3:7:1264:1967#0/1  
TTTTTCATGAAGGACAAGTTAAATTCATTATTTTGC  
+HWI-EAS443:3:7:1264:1967#0/1  
¥`aa^]¥W\_aMS¥\_Y`[aaXa¥^Y^[¥aZ`a]\_`RT]^¥  
@HWI-EAS443:3:7:1279:755#0/1  
TGAAGGACAAGTTAAATTCATTATTTTGCCTGAGT  
+HWI-EAS443:3:7:1279:755#0/1  
`b`[^Y^]^¥YSbaaba`aa^aVY`W]b^PJ\_a\_J\_]aaNN  
@HWI-EAS443:3:7:172:426#0/1  
TTTTTCATGAAGGACAAGTTAAATTCATTATTTTGC

+HWI-EAS443:3:7:172:426#0/1  
abbabbbaabbabbaa`babaaaba`ab`aaaa`a`\_b  
@HWI-EAS443:3:7:388:289#0/1  
GGCATTTCATGAAGGACAAGTTAAATTCATTATTTT  
+HWI-EAS443:3:7:388:289#0/1  
a[¥R`\_\_a\_\_\_\_]`VP[W¥[]Y\_Y\_W]\_\_¥]]^][^S]Y  
@HWI-EAS443:3:7:612:1399#0/1  
GTTAAATTCATTATTTTGGCGTCTGAGTTCTTCAATGGT  
+HWI-EAS443:3:7:612:1399#0/1  
a\_\_a\_`aa^aa`aaa\_`¥\_^R]PPYRX\_[[X`ZP\_VV^BB  
@HWI-EAS443:3:80:160:171#0/1  
CATTTCATGAAGGACAAGTTAAATTCATTATTTTGC  
+HWI-EAS443:3:80:160:171#0/1  
UU`a`a`\_`bb\_P¥W\_]`a\_a[HR]b`abba`¥Z`aba  
@HWI-EAS443:3:81:1159:1840#0/1  
GACAAGTTAAATTCATTATTTTGGCGTCTGAGTTCTTCA  
+HWI-EAS443:3:81:1159:1840#0/1  
ab`ZY¥a`^Ybbaa`]]a\_a\_\_b`bU[^a\_aZ[X`XY`  
@HWI-EAS443:3:81:1717:1440#0/1  
GACAAGTTAAATTCATTATTTTGGCGTCTGAGTTCTTCA  
+HWI-EAS443:3:81:1717:1440#0/1  
abX`b^aab\_aaaaabaaaaa`\_¥a\_\_`\_\_a^a]aa]^  
@HWI-EAS443:3:81:500:1135#0/1  
TTTTTCATGAAGGACAAGTTAAATTCATTATTTTGGCG  
+HWI-EAS443:3:81:500:1135#0/1  
ababbaa\_]\_aaaaaaaa\_aaaa\_a`^^^a`a\_aa\_`  
@HWI-EAS443:3:82:168:76#0/1  
GGCATTTCATGAAGGACAAGTTAAATTCATTATTTT  
+HWI-EAS443:3:82:168:76#0/1  
ab[\_[\_U^a¥Ra^RR`^NY`L`N\_`\_\_\_\_^¥^\_\_WYV¥\_]`  
@HWI-EAS443:3:82:337:1061#0/1  
GGCATTTCATGAAGGACAAGTTAAATTCATTATTTT  
+HWI-EAS443:3:82:337:1061#0/1  
aa^U\_\_XY`[\_bba`X`b[]`^\_F¥`\_`^H\_]a`\_a\_\_\_\_`  
@HWI-EAS443:3:82:344:165#0/1  
TGAAGGACAAGTTAAATTCATTATTTTGGCGTCTGAGTT  
+HWI-EAS443:3:82:344:165#0/1  
aba^`V\_a^¥a^`aaaab`aaaaa`b[X`a^a¥`  
@HWI-EAS443:3:83:584:276#0/1  
CATTTCATGAAGGACAAGTTAAATTCATTATTTTGC  
+HWI-EAS443:3:83:584:276#0/1  
^]a`b\_a`a`a`Xaaaa`\_`\_aa\_]ababaa¥`b`  
@HWI-EAS443:3:84:1087:488#0/1  
GACAAGTTAAATTCATTATTTTGGCGTCTGAGTTCTTCA  
+HWI-EAS443:3:84:1087:488#0/1  
aaaa`b^baaab¥\_ba`bbaaba`\_a`\_aa`a\_a]aa`\_`  
@HWI-EAS443:3:85:1432:901#0/1  
GGCATTTCATGAAGGACAAGTTAAATTCATTATTTT  
+HWI-EAS443:3:85:1432:901#0/1  
aa^`aaaa`T¥aaa`a`]YX¥a]a^^]a\_]`\_`a\_\_\_\_^

@HWI-EAS443:3:86:1371:408#0/1  
GTTAAATTCATTATTTTTGCCGTCTGAGTTCTTCAATGGT  
+HWI-EAS443:3:86:1371:408#0/1  
^UR`WOWOX]ZHUbbb¥a]TZaaV^]a`M¥XYZI\_VQNPG  
@HWI-EAS443:3:86:617:819#0/1  
GGCATTATTTTCATGAAGGACAAGTTAAATTCATTATTTTT  
+HWI-EAS443:3:86:617:819#0/1  
`baaaaaaaaaa\_a`^aa``aaa]^\_][a^`a``\_a``^  
@HWI-EAS443:3:86:772:962#0/1  
TTAAATTCATTATTTTTGCCGTCTGAGTTCTTCAATGGTG  
+HWI-EAS443:3:86:772:962#0/1  
`a^]a`^¥a\_\_`ba^a`]^`^`a`\_]`¥^ab`][Y\_]P^  
@HWI-EAS443:3:86:817:685#0/1  
GGCATTATTTTCATGAAGGACAAGTTAAATTCATTATTTTT  
+HWI-EAS443:3:86:817:685#0/1  
\_¥bb¥`\_a\_Ybabb`ab`\_bVb^aa[[aabbabaab\_  
@HWI-EAS443:3:87:1493:790#0/1  
GGCATTATTTTCATGAAGGACAAGTTAAATTCATTATTTTT  
+HWI-EAS443:3:87:1493:790#0/1  
`aa`bbab`baaab``aaa``ab\_ba``aaa`ba^a\_aaa  
@HWI-EAS443:3:87:651:47#0/1  
GACAAGTTAAATTCATTATTTTTGCCGTCTGAGTTCTTCA  
+HWI-EAS443:3:87:651:47#0/1  
aaa]\_aaa^Y¥a\_^`\_`\_`aaa^[a^^a\_Va[\_^`\_`¥  
@HWI-EAS443:3:88:359:1637#0/1  
GGACAAGTTAAATTCATTATTTTTGCCGTCTGAGTTCTTC  
+HWI-EAS443:3:88:359:1637#0/1  
\_aSaYZG[a^VR\_[SGWa`^a[WUMM`^XM^TWRR[\_a]]  
@HWI-EAS443:3:88:67:838#0/1  
AAGTTAAATTCATTATTTTTGCCGTCTGAGTTCTTCAATG  
+HWI-EAS443:3:88:67:838#0/1  
V¥^bb`T]\_`aba`babaabVa[^^abaUaa```X^a¥  
@HWI-EAS443:3:88:685:941#0/1  
GGACAAGTTAAATTCATTATTTTTGCCGTCTGAGTTCTTC  
+HWI-EAS443:3:88:685:941#0/1  
aaab][`a`\_Q`\_a`aa¥`aaa`\_a]a]a`a\_a]\_\_`\_`  
@HWI-EAS443:3:89:1216:1597#0/1  
GGACAAGTTAAATTCATTATTTTTGCCGTCTGAGTTCTTC  
+HWI-EAS443:3:89:1216:1597#0/1  
`JR^[Q]N`¥[Y^\_\_\_\_]\_`SY\_WMMW[]\_¥VIaS[S¥GO  
@HWI-EAS443:3:89:1347:239#0/1  
GTTAAATTCATTATTTTTGCCGTCTGAGTTCTTCAATGGT  
+HWI-EAS443:3:89:1347:239#0/1  
YYY`\_Q]QPb`\_W¥`aaabY0^Y\_b¥Yb[YQ[`\_QEWaaQ  
@HWI-EAS443:3:89:159:1267#0/1  
GGCATTATTTTCATGAAGGACAAGTTAAATTCATTATTTTT  
+HWI-EAS443:3:89:159:1267#0/1  
aa`^`XaY[OXSSHT¥NW[¥¥]LNXQY¥WV[[Y[RHRPS  
@HWI-EAS443:3:8:1080:2010#0/1  
CATTATTTTCATGAAGGACAAGTTAAATTCATTATTTTTGC

+HWI-EAS443:3:8:1080:2010#0/1  
¥`¥bab`a`bbbabb`abab`bb^Ybaaaab`^^`\_`ba  
@HWI-EAS443:3:8:1742:442#0/1  
GGCATTTCATGAAGGACAAGTTAAATTCATTATTTTT  
+HWI-EAS443:3:8:1742:442#0/1  
ab`bbbbbb`aabaab`a`\_a\_aa`¥aaU`a`aaaa  
@HWI-EAS443:3:8:283:1359#0/1  
GGCATTTCATGAAGGACAAGTTAAATTCATTATTTTT  
+HWI-EAS443:3:8:283:1359#0/1  
aaaaaaaaa`a`aaaaa`\_`a^`\_`\_`a¥W`\_¥`\_^¥S]  
@HWI-EAS443:3:8:978:611#0/1  
GGCATTTCATGAAGGACAAGTTAAATTCATTATTTTT  
+HWI-EAS443:3:8:978:611#0/1  
aX¥\_aaa\_aa\_\_¥¥^^aa]W\_]a\_]^\_]`W^`^`[\_`\_]`\_]  
@HWI-EAS443:3:90:1055:1132#0/1  
GACAAGTTAAATTCATTATTTTTGCCGTCTGAGTTCTTCA  
+HWI-EAS443:3:90:1055:1132#0/1  
aa\_¥\_a`a`\_aa\_^a\_aa`a`\_`\_¥`^`\_`a\_a[^`\_]Z  
@HWI-EAS443:3:90:639:516#0/1  
TGAAGGACAAGTTAAATTCATTATTTTTGCCGTCTGAGTT  
+HWI-EAS443:3:90:639:516#0/1  
^J\$W¥`U^\_\_V\$X]Y^aaZ^aYa¥Z]W^¥T]WX`\_\_\_W\_  
@HWI-EAS443:3:90:898:1376#0/1  
GGCATTTCATGAAGGACAAGTTAAATTCATTATTTTT  
+HWI-EAS443:3:90:898:1376#0/1  
aaa^`]¥U``[[]\_Z[aa[[]Y`XV¥PR[\_\_\_^[Y[Y]Y^  
@HWI-EAS443:3:91:462:325#0/1  
ATGAAGGACAAGTTAAATTCATTATTTTTGCCGTCTGAGT  
+HWI-EAS443:3:91:462:325#0/1  
`TO[a`>`]`TUb]¥aZW]a^\_\_`^`\_`^`^¥UY\_YX]`Z` [  
@HWI-EAS443:3:92:1623:613#0/1  
TGAAGGACAAGTTAAATTCATTATTTTTGCCGTCTGAGTT  
+HWI-EAS443:3:92:1623:613#0/1  
aba\_\_^`a\_ababa`aabX^aaaaabaa`aXS]YaV¥\_VZ  
@HWI-EAS443:3:92:607:77#0/1  
GGCATTTCATGAAGGACAAGTTAAATTCATTATTTTT  
+HWI-EAS443:3:92:607:77#0/1  
aa^]aaaaa\_\_]\_]^a`W]\_[a]``[Z\_\_ZZa^^`Z]^\_  
@HWI-EAS443:3:93:319:1089#0/1  
TTTTTCATGAAGGACAAGTTAAATTCATTATTTTTGCCGTC  
+HWI-EAS443:3:93:319:1089#0/1  
aaa^a]¥aaa`¥\_aZQX\_a`\_\_`\_\_a]^a`\_`[\_`\_Y\_VX  
@HWI-EAS443:3:93:744:345#0/1  
TTTTTCATGAAGGACAAGTTAAATTCATTATTTTTGCCGTC  
+HWI-EAS443:3:93:744:345#0/1  
aab^¥`bab\_ba`]a\_]\_aa`\_`a\_\_a`\_`^`a`\_`^`]\_  
@HWI-EAS443:3:93:913:1237#0/1  
GTTAAATTCATTATTTTTGCCGTCTGAGTTCTTCAATGGT  
+HWI-EAS443:3:93:913:1237#0/1  
`\_aaa`b`abaaaabaaaa`aa`aaa^aaaa\_aaaa^^

@HWI-EAS443:3:94:1138:53#0/1  
GACAAGTTAAATTCATTATTTTTGCCGTCTGAGTTCTTCA  
+HWI-EAS443:3:94:1138:53#0/1  
`^\_`bab`aaa[\_aa`b`aaa`^¥a\_\_aa\_a]\_^\_^W^  
@HWI-EAS443:3:94:1170:1106#0/1  
GGCATTTCATGAAGGACAAGTTAAATTCATTATTTTT  
+HWI-EAS443:3:94:1170:1106#0/1  
aaaa`bbb`\_\_`aaa`a]ZP[¥b`\_`\_`a\_¥\_a\_\_aaaa\_  
@HWI-EAS443:3:94:1437:245#0/1  
CATTTCATGAAGGACAAGTTAAATTCATTATTTTTGC  
+HWI-EAS443:3:94:1437:245#0/1  
`abbbbb`\_bbbb`a`a`\_aa\_bba\_ab`abaaab\_\_  
@HWI-EAS443:3:94:1529:811#0/1  
CAAGTTAAATTCATTATTTTTGCCGTCTGAGTTCTTCAAT  
+HWI-EAS443:3:94:1529:811#0/1  
`\_P\_bbaaaa¥`\_`aU`aabba¥L¥aaaaba\_baba`aab  
@HWI-EAS443:3:94:873:236#0/1  
GCATTCATGAAGGACAAGTTAAATTCATTATTTTTG  
+HWI-EAS443:3:94:873:236#0/1  
\_Y`aa¥¥a`P\_`baYb`^]¥`]`¥N]aa\_`a\_YaU`^\_`  
@HWI-EAS443:3:95:1540:416#0/1  
GGACAAGTTAAATTCATTATTTTTGCCGTCTGAGTTCTTC  
+HWI-EAS443:3:95:1540:416#0/1  
`b`a`b[`baSS]Saa\_a¥a]¥`aV\_aSWZ`YbMJL]^S  
@HWI-EAS443:3:95:1670:1771#0/1  
GGACAAGTTAAATTCATTATTTTTGCCGTCTGAGTTCTTC  
+HWI-EAS443:3:95:1670:1771#0/1  
aa`aaa`aaaaba^ab`ababa`bUVb^\_\_a\_b`\_]`a[  
@HWI-EAS443:3:95:82:1512#0/1  
GGCATTTCATGAAGGACAAGTTAAATTCATTATTTTT  
+HWI-EAS443:3:95:82:1512#0/1  
¥bbb\_Tab\_bVaaV^^\_¥ZRab\_aba\_^b`ab`^`ba[a  
@HWI-EAS443:3:97:1120:480#0/1  
GGCATTTCATGAAGGACAAGTTAAATTCATTATTTTT  
+HWI-EAS443:3:97:1120:480#0/1  
aa]\_aabbb`Waaa`aaa\_\_`]b\_a\_\_aa]¥a\_\_a`\_\_\_\_  
@HWI-EAS443:3:97:920:209#0/1  
AGGACAAGTTAAATTCATTATTTTTGCCGTCTGAGTTCTT  
+HWI-EAS443:3:97:920:209#0/1  
aba`aab`aaa`bb\_abaabbaaaaW\_a\_]`a\_a`\_Xa^  
@HWI-EAS443:3:98:1560:576#0/1  
GGCATTTCATGAAGGACAAGTTAAATTCATTATTTTT  
+HWI-EAS443:3:98:1560:576#0/1  
\_aPa\_bbbbaIYbb`bba`\_]P`a]b`bab`aabab¥^\_b  
@HWI-EAS443:3:98:328:1637#0/1  
ATTTTCATGAAGGACAAGTTAAATTCATTATTTTTGCC  
+HWI-EAS443:3:98:328:1637#0/1  
U`b¥bb[bb\_`Wq]`aaa¥baaaa`[^`aaa`a¥SSa^¥¥  
@HWI-EAS443:3:98:480:2032#0/1  
TTTTTCATGAAGGACAAGTTAAATTCATTATTTTTGCCGT

+HWI-EAS443:3:98:480:2032#0/1  
a`aa`¥aa` ]`ba\_aaaa\_aa^`^`^^a\_aa]]^^^\_\_aU  
@HWI-EAS443:3:98:587:2010#0/1  
GGACAAGTTAAATTCATTATTTTTGCCGTCTGAGTTCTTC  
+HWI-EAS443:3:98:587:2010#0/1  
aaab¥]a]aa\_aaa^`Y]ba`WZaX`a[[`aaa\_¥T\_a\_  
@HWI-EAS443:3:98:927:1163#0/1  
AGGACAAGTTAAATTCATTATTTTTGCCGTCTGAGTTCTT  
+HWI-EAS443:3:98:927:1163#0/1  
ab`\_] ]aaUa[`ab^`bb]baa`aaaa`b\_aaa\_bZ` [ `a  
@HWI-EAS443:3:99:388:1834#0/1  
GGACAAGTTAAATTCATTATTTTTGCCGTCTGAGTTCTTC  
+HWI-EAS443:3:99:388:1834#0/1  
`\_YOY]`PQ\_PYQWZYWQP]WPWZ`\_URNLXXV\_QPU^X^  
@HWI-EAS443:3:99:988:74#0/1  
GCATTTTTTTCATGAAGGACAAGTTAAATTCATTATTTTTG  
+HWI-EAS443:3:99:988:74#0/1  
`S^aa]^\_JVS]bZWa]NX^^a]\_T¥W`\_ [ ]\_ ] `^YY\_\_  
@HWI-EAS443:3:9:114:1650#0/1  
GGCATTTTTTTCATGAAGGACAAGTTAAATTCATTATTTTT  
+HWI-EAS443:3:9:114:1650#0/1  
aaaaaaaaaaaaaaaa\_a^a^\_a]aaa^a`a`a`^aaa\_\_  
@HWI-EAS443:3:9:1605:1699#0/1  
GGACAAGTTAAATTCATTATTTTTGCCGTCTGAGTTCTTC  
+HWI-EAS443:3:9:1605:1699#0/1  
abW` `V¥Wb[XUa` [^a`^aa]\_^aTGaMG]a\_\_W\_]^^Y  
@HWI-EAS443:3:9:215:55#0/1  
GCATTTTTTTCATGAAGGACAAGTTAAATTCATTATTTTTG  
+HWI-EAS443:3:9:215:55#0/1  
a`0^[YZ]^W^V\_Y^^ [ ]YV]Z^V[[W[Z[^[[^][[^Z  
@HWI-EAS443:3:9:721:1238#0/1  
GGCATTTTTTTTCATGAAGGACAAGTTAAATTCATTATTTTT  
+HWI-EAS443:3:9:721:1238#0/1  
ab`bbbbbbbbbbbbbaaabababbaabb\_bbabaabab  
@HWI-EAS443:3:17:1490:1983#0/1  
CTGAAAGTCATCCATGGCTGCACAGGATGCATTAACCAAG  
+HWI-EAS443:3:17:1490:1983#0/1  
`]S¥V\_TQW\_]WU[ZTYYN^BBBBBBBBBBBBBBBBBBBB  
@HWI-EAS443:3:22:481:333#0/1  
GAGACCGATATGCGTCTCCACAAC TTGAGGGGTTTTCGGC  
+HWI-EAS443:3:22:481:333#0/1  
¥\_bb]]baaabbaaXaba` `a^a`bbbaabaH`ab\_^a\_  
@HWI-EAS443:3:24:1364:642#0/1  
AGCGGGGCCAAAATGAATTCATAAGGCATGTGAATTGAC  
+HWI-EAS443:3:24:1364:642#0/1  
aa`WUYF¥a\_PY[^YS`aSP]] [X¥[ON^`aZa`a [ \_a^J  
@HWI-EAS443:3:2:512:1023#0/1  
CGGTCCGTCTTCTTCTTTGGTCCTACATTTGCTTACCAT  
+HWI-EAS443:3:2:512:1023#0/1  
\_bbaba\_^^[aaab]a`bbbba` ``aabaaa`a`aaaQZa

@HWI-EAS443:3:39:227:1379#0/1  
GAGAAGCCTGGAGAGGAGATGGCCACCAAAGCGGACTACA  
+HWI-EAS443:3:39:227:1379#0/1  
aZbababbaZa`aab^a\_a]S`abab`b`¥\_W¥]`\_^aa^  
@HWI-EAS443:3:47:819:84#0/1  
AGAAGACACACATTCACATCTTTTCATTCACTGAAAAATA  
+HWI-EAS443:3:47:819:84#0/1  
aa^ba¥ba]\_^aa``]]abWaa`aY\_a`Q^^aa\_^¥¥``\_  
@HWI-EAS443:3:70:977:1980#0/1  
CATAAATCCCAATTACCTCATGGCTTGAAGCAAGGCCTA  
+HWI-EAS443:3:70:977:1980#0/1  
aaab\_\_aYaaaa\_[aaV¥\_TZX]aa]U[\_\_\_BBBBBBBBBB  
@HWI-EAS443:3:71:1496:945#0/1  
TGGTCCGTCTTCTTCTTTGGTCCTACATTTGCTTACCAT  
+HWI-EAS443:3:71:1496:945#0/1  
aaaXaab\_aa`M]aaaaaaaa\_\_^`aa`aaaa\_a\_¥^YV`  
@HWI-EAS443:3:88:932:57#0/1  
ACGAACGGCACTATTGAAGCACCGATTTGAGATAATTGAA  
+HWI-EAS443:3:88:932:57#0/1  
aabaa]abaa\_b`bb`¥[aV]`[`Na`aa]a^a``aaa\_\_  
@HWI-EAS443:3:90:1430:227#0/1  
GTGCACTTTGATGACTGCAAAGATGTTGGAGACCTGAAC  
+HWI-EAS443:3:90:1430:227#0/1  
a¥H]a\_aba``a`[^\_aZ\_aaa\_^aR`a]\_^Z0\_`\_^\_U  
@HWI-EAS443:3:92:607:244#0/1  
AGTTCCTGCTGATGGCAAAGAGGCCCATCAGGCAATCTGA  
+HWI-EAS443:3:92:607:244#0/1  
`\_^`aa`Zaa^`\_^a^¥¥]\_^¥Za^¥Z^]¥ZTZRZRZB  
@HWI-EAS443:3:93:1290:726#0/1  
GAGACCGATATGCGTCTCCACAACCTGAGGGGTTTTCGGC  
+HWI-EAS443:3:93:1290:726#0/1  
aabb`\_bab`ba^a\_aa\_\_aa\_\_`aaa`a``aQ\_\_`¥\_\_[  
@HWI-EAS443:3:93:1645:103#0/1  
CTCCAGTCTCGGGTCAGTGAGTGAGAACTCCATCTGGGAG  
+HWI-EAS443:3:93:1645:103#0/1  
`bb`^¥`\_\_V`ab^\_ab\_bXb`a`¥X[FYTPY`U`\_^YBB  
@HWI-EAS443:3:94:517:1453#0/1  
CAAAGATGTTGGAGACCTTAAACAGTATGACAGCGGTGAG  
+HWI-EAS443:3:94:517:1453#0/1  
R\_ab]bUbJaab¥RZ^bbb^bbabba`\_abab^DMMa``a  
@HWI-EAS443:3:29:590:1285#0/1  
GACCTTGGTCGGCAAGCTTGCGCATAGTTCCTNTAATCTC  
+HWI-EAS443:3:29:590:1285#0/1  
aaababa^ab`¥^a\_V[X\_a`Vab\_a^^^XTDEO\_\_T` [  
@HWI-EAS443:3:15:594:1717#0/1  
TGCGGGGCTATATGAAGCAATCGAGGGGTGCCTGATTAAT  
+HWI-EAS443:3:15:594:1717#0/1  
aaOP]I\_aa\_]UVaaQU\_ONXVWOYGXFWa[LV]V\_[Z\_  
@HWI-EAS443:3:19:612:1970#0/1  
GAGGATCCCAAGGACAAAGAACATGAAGAGAAAAAGCCAA

+HWI-EAS443:3:19:612:1970#0/1  
aUYNI[\_`b`S``^`Y\_adWa`\_Y\_Wa`]X^UGY\_HGKVS  
@HWI-EAS443:3:26:892:86#0/1  
AGGGGGGCTTTCGGCTGAATCGAGAAAATTGCTTCTCATT  
+HWI-EAS443:3:26:892:86#0/1  
a^^b¥SUHaab]X^aba[ZaXPWRPJa]]`bPY]]aQ^PT  
@HWI-EAS443:3:34:774:36#0/1  
AGCCCCCAAGATCGAAGGCTCCAGGTTCCAGGTTGTGCC  
+HWI-EAS443:3:34:774:36#0/1  
¥¥``\_W\_[O¥\_\_VYTVRZYDTZ]YVWBBBBBBBBBBBBBB  
@HWI-EAS443:3:46:184:953#0/1  
CATCCATGGCTGCACAGGTGCATTGAGCAAGGCCGTGTT  
+HWI-EAS443:3:46:184:953#0/1  
MX`ababbbb`b^W¥`\_K`bV]^`^]U¥IU]]]aa[PDSb  
@HWI-EAS443:3:52:1474:1682#0/1  
TACCATTGGGATCAGCTGAAAGGCATCCATGGCTGCACAG  
+HWI-EAS443:3:52:1474:1682#0/1  
Y^`UOSW\_XWHSX\_]ZU```XTN[V[NRBBBBBBBBBBBB  
@HWI-EAS443:3:5:1735:1773#0/1  
CATATTTTACCAGGTGCCCAATTCAATTGGCTTGTGTC  
+HWI-EAS443:3:5:1735:1773#0/1  
aaaaa`aabbaaVa]VaaXJaZbbaaabbW\_a`\_VS]GZB  
@HWI-EAS443:3:61:1773:1530#0/1  
TCGGGGGGTTCGGCTGAATCGAGAAAATTGCTTCTCATT  
+HWI-EAS443:3:61:1773:1530#0/1  
a^YUWabG`a`]NT^aa\_`¥^^X^\_^`a¥¥[ZYZR[QUWU  
@HWI-EAS443:3:67:1601:707#0/1  
TTCCACAACACTTCAATGCATGTGTGAGGAAGGAGTTG  
+HWI-EAS443:3:67:1601:707#0/1  
a\_I]ababb\_bbaaa]baaaaaabPZWa\_W\_`[aa`b`\_a  
@HWI-EAS443:3:82:318:911#0/1  
GGCCTATCGCAGTCCCCAAGAGCATGTCTCCTATTTCTAG  
+HWI-EAS443:3:82:318:911#0/1  
`¥aaT`¥bbTQZZ`YFQNU¥V¥`[O^NU]a^MJYW¥UTa`  
@HWI-EAS443:3:88:317:137#0/1  
ACGGCATTGCCACAACACTTCAATGCATGTGTGAGGAAG  
+HWI-EAS443:3:88:317:137#0/1  
aabbaa`a\_a`P^aaU`a\_``VU[``\_]X]`UaXaU^a^Z`  
@HWI-EAS443:3:89:1603:719#0/1  
CACACATTCACATCTTTTCATTCACTTGAGAGGAGATAGC  
+HWI-EAS443:3:89:1603:719#0/1  
SXbb`b0bbab\_a`a^ba¥bba0b`aKUb`aabb[baLOY  
@HWI-EAS443:3:96:1008:868#0/1  
TGGGTCTTCTTCTTTGGTCTACATTTGCTTACCATTGG  
+HWI-EAS443:3:96:1008:868#0/1  
^Y\_a^`b¥[¥\_]`[^aa`Z]ZS^]¥``a¥]SZ`\_SV]aZ``  
@HWI-EAS443:3:10:1732:262#0/1  
CTCAAGTTGTGGAGACGCATATAGACNGTTGAATAAAGAT  
+HWI-EAS443:3:10:1732:262#0/1  
G]b¥¥¥`Za\_^X[b¥[\_ZR¥bbb]HDTMTY]SY]HZ^^S



@HWI-EAS443:3:12:1055:433#0/1  
AGCANTGCCACA ACTACTTCAATGCATGTGTGAGGAAGGA  
+HWI-EAS443:3:12:1055:433#0/1  
`b`RD[¥]Ta]`¥`\_][\_a[\_`¥`]]\_aVa¥\_Va¥TM^\_V  
@HWI-EAS443:3:16:740:1372#0/1  
CAAATAGTAGCATTGCCACA ACTACTTNAATGCATGTGTG  
+HWI-EAS443:3:16:740:1372#0/1  
abbbaabYbbba[b^aaa`a]Qb\_aa¥D]aaaWaaYOXX^  
@HWI-EAS443:3:46:336:1755#0/1  
CATTGCCACA ACTACTTCNATGCATGTGTGAGGAAGGAGT  
+HWI-EAS443:3:46:336:1755#0/1  
a\_b^abX^Zbbaa`\_a`UD^`^Vaa[[a[`\_aa`\_\_Y`Y  
@HWI-EAS443:3:57:1063:1609#0/1  
CACATTACATCTTTTCATTCACTGGAGAAGAGANGGCCA  
+HWI-EAS443:3:57:1063:1609#0/1  
USYS` `[V[baaaT[[ZY`^^`ab`b`b[baMD¥]LX^  
@HWI-EAS443:3:57:760:1892#0/1  
CGATTGNTTCATATAGCCCCCAAGATCGAAGGCTCCAGG  
+HWI-EAS443:3:57:760:1892#0/1  
aX`TH^D¥abb^aa`aba^aT^ba\_ba` `bba`KWW\_TDF  
@HWI-EAS443:3:76:992:1922#0/1  
AGCAGGTGCTAGTAGAGCTACAGGACATTGNAATGAAGA  
+HWI-EAS443:3:76:992:1922#0/1  
a][ ]0\_`a`ab\_FZ^^` `^a^a\_\_\_`^`\_aVDW\_[ ]`^¥G\_  
@HWI-EAS443:3:85:963:687#0/1  
CTTCCTCACACATGCATTGAAGTAGTTGTGGCNATGCTAC  
+HWI-EAS443:3:85:963:687#0/1  
a`Y`a^GYV\_RZ]` `V¥]YTS\_V`U¥` `a\_T[DR¥¥TNT]  
@HWI-EAS443:3:93:880:1793#0/1  
CATTGCTTACCATTGGGATCNGCTGAAAGTCATCCATGG  
+HWI-EAS443:3:93:880:1793#0/1  
\_`b[R¥a`aa` `a]aa\_\_WYMDYaX\_[ ]a`M¥¥]TZ^[¥X  
@HWI-EAS443:3:10:154:139#0/1  
CACATGAGAAAGGCATAATCCCAATTACCTCATGGCTTGG  
+HWI-EAS443:3:10:154:139#0/1  
a\_bb`babUb`aaaabbaXU`aZ\_Y^UL]QSGX`\_Q\_]BB  
@HWI-EAS443:3:53:918:95#0/1  
GCATGAAATGAGGCGCTGCCTCTTCAGTCTCTTCAGCAG  
+HWI-EAS443:3:53:918:95#0/1  
Tb`\_abaaabbaab]b^abXZb^a\_\_\_b`X`Z`aV^aU[ `  
@HWI-EAS443:3:67:335:1602#0/1  
CGGGTCTTCAATACTTAATTTTCAGAGCATCATCAGCAGGA  
+HWI-EAS443:3:67:335:1602#0/1  
aaaaQbaaaa`a¥` `aaaaaaaY`aa`aBBBBBBBBBBBB  
@HWI-EAS443:3:69:780:946#0/1  
ATCAAAGTCTACTTTTTCTGGTGCCATATTTACCGAGTG  
+HWI-EAS443:3:69:780:946#0/1  
a`X^\_Z`Y\_baabaa`]^aa¥Za`]¥`Y` `a`baV\_` `\_^  
@HWI-EAS443:3:97:1354:198#0/1  
GGGATTTATGCCTTCTCATGTGGTTTACTATGTTAGGCT

+HWI-EAS443:3:97:1354:198#0/1  
^^^aaaaba`X\_aa`a`aaX`^)`a`\_^a``aZ`\_`\_[W\_  
@HWI-EAS443:3:16:1249:543#0/1  
GTCTTCTACAAATCAGGAAGAAATTTAGGCTTCTCTACCC  
+HWI-EAS443:3:16:1249:543#0/1  
a^a\_a\_Y^P`][^`Z[\_]aaY¥`\_`]^`^^`\_G\_X[VT]T  
@HWI-EAS443:3:16:698:1451#0/1  
GGNCCGCGACACTTGGCCTATCGCAGTCCTCAAGAGCATG  
+HWI-EAS443:3:16:698:1451#0/1  
a[D[\_]aQ`^TQ\_VRPa^[a`\_ZRU^UZ[\_R[\_¥¥¥WB  
@HWI-EAS443:3:25:648:1396#0/1  
ATGGCTTGAAGCAGGTGCTAGCAGAGCTACAGGCGATTG  
+HWI-EAS443:3:25:648:1396#0/1  
^Z`¥`aaR[U`\_ZPXPP\_] ^YQ¥[TX^^UZ^PX\_GSJML  
@HWI-EAS443:3:26:514:570#0/1  
ATTGGTTCTCACATATAGGAACATGGGCCTCGACCGGTTC  
+HWI-EAS443:3:26:514:570#0/1  
\_Z][aabb\_R]ab\_WQa]\_`b^)]`[¥¥H`^T`¥Za\_ZX^  
@HWI-EAS443:3:30:1554:1136#0/1  
GATGATTGAAGGAAGAGACCGAATCATGGCCTGGACAGGG  
+HWI-EAS443:3:30:1554:1136#0/1  
aaXF]XaRY¥`[XXY^a^^^aNT]]\_`UUUV^W^OIMSBB  
@HWI-EAS443:3:42:1704:1587#0/1  
AAGAAATTTAGGCTTCTCTACCCCTGTTGTGTTAAAATTA  
+HWI-EAS443:3:42:1704:1587#0/1  
aa\_0¥`babaVW\_baHa^]aa[b\_a]`\_Z\_a[aPFUFLOM  
@HWI-EAS443:3:43:1122:497#0/1  
ATAAATCCCAATTACCTCATGGCTTGAAGCAGGGGCGAG  
+HWI-EAS443:3:43:1122:497#0/1  
a\_HUY]^\_]`a`\_Y\_ZR^VZ`Z¥¥XWBBBBBBBBBBBBBB  
@HWI-EAS443:3:44:1662:215#0/1  
CACCCGGTATTCAACAGTCTATATGCGTCTCCACA ACTTG  
+HWI-EAS443:3:44:1662:215#0/1  
abbabbb]bb\_baaa`^aabaa`¥^^b`]aaa¥aa\_^a^]  
@HWI-EAS443:3:46:68:896#0/1  
CTGGTGATATGCGTCTCCACA ACTTGAGGGGTTTTTCGGCT  
+HWI-EAS443:3:46:68:896#0/1  
aa`Y`aY``WRZW¥Qab`N`XXbba]]a`[TOZZXRW`^  
@HWI-EAS443:3:51:1371:315#0/1  
CAGGCACTCCTCGATTGCTTCATATAGCCCCCAGTTTCG  
+HWI-EAS443:3:51:1371:315#0/1  
`aaa`abbbab`babbaTab[`babab`a`\_`a`abbaaab  
@HWI-EAS443:3:70:1211:844#0/1  
CCGGTTCATTGAAATTGGAGTAACACGGAGGGAACCCACA  
+HWI-EAS443:3:70:1211:844#0/1  
abYb`¥¥^babbbb\_¥[PY`[`a^^¥a`aa]a\_\_UN][¥a  
@HWI-EAS443:3:81:155:1551#0/1  
AAGAGACCGAATCATGGCCTGGACAGTGGTGAACCACTCC  
+HWI-EAS443:3:81:155:1551#0/1  
¥WVHPW]]Y`PR^ST¥UV`UMVPRQSGUJSM[XBBBBBBB

@HWI-EAS443:3:15:313:1180#0/1  
TGCGTCTTCCTTCTTTGGTCCTACATTTGCTTACCATTGG  
+HWI-EAS443:3:15:313:1180#0/1  
aa` `\_bb\_a]Z¥WX¥[`^`]bbbT0Ta^R\_[Q`aS¥[Y[a  
@HWI-EAS443:3:21:199:1185#0/1  
CTTCCTCACACATGCATTGAAGTAGTTGTGGCAATGCTCC  
+HWI-EAS443:3:21:199:1185#0/1  
aa\_aY` `a[\_a]^`^`a\_NWZ[[\_aR[¥X\_UZYV`SXRiH  
@HWI-EAS443:3:26:1703:1683#0/1  
GGGGCATGGAATGAGGCGCTGCCTTCTTTAGTCTCTTGA  
+HWI-EAS443:3:26:1703:1683#0/1  
a]U\_X¥^aZ\_aaa` [NLG¥^\_aYS]BBBBBBBBBBBBBBB  
@HWI-EAS443:3:27:1381:1522#0/1  
AGGGGGGTTTCGGCTGAATCGAGAAAATTGCTTCTCATTG  
+HWI-EAS443:3:27:1381:1522#0/1  
aab` `\_¥\_baZ`a`bbb`a]aaaaaaaa`a¥^\_a\_a\_aa`a  
@HWI-EAS443:3:37:547:787#0/1  
GCGAAAAATACTGTGTTCTAGAAATAGGAGACATGCTCTT  
+HWI-EAS443:3:37:547:787#0/1  
a^\_T\_YTG[Y`¥YW¥^`a^]W^¥^P]ZHZO[SO\_\_\_aZZ  
@HWI-EAS443:3:40:549:1680#0/1  
ANTTCCTTGGTCATGACTTTCTCTTTGACAGAAGACTCGG  
+HWI-EAS443:3:40:549:1680#0/1  
¥DYZ`bMLX]R)`]Y[\_¥a`^`Z\_[[`a`\_\_a]` `]\_\_¥  
@HWI-EAS443:3:45:1048:1280#0/1  
GAGAAAGACATGACCAAGGAATTCCTTTGAAATCAAATCNG  
+HWI-EAS443:3:45:1048:1280#0/1  
a`a` `aaaaaa^\_Ya^aa\_aaaaaa\_aa^a`\_a`aPDZ  
@HWI-EAS443:3:54:1087:729#0/1  
GGGGCCGTCTCCTCTCCAGTGAATGAAAAGATGTGAATGT  
+HWI-EAS443:3:54:1087:729#0/1  
` `aaZUa¥` `aY`YaaVX\_`^`]]` [YZaVZR\_a[X^¥¥`¥  
@HWI-EAS443:3:54:228:1726#0/1  
GTCCCCGATTGAACATATCACAAGCATGAGGAGGAATATT  
+HWI-EAS443:3:54:228:1726#0/1  
aZaZaa`\_`[^aYX\_\_]^X`\_U^RX^`^a][`^^Z[^X]]  
@HWI-EAS443:3:54:972:1369#0/1  
GGTCCGTCTTCCTTCTTTGGTCCTACATTTGCTTACCATT  
+HWI-EAS443:3:54:972:1369#0/1  
`aa`]aa\_b`aaaa\_aaaa\_Y]Xaa`aa`\_a\_a`a\_]` `\_  
@HWI-EAS443:3:57:584:1877#0/1  
CACAATACTTCAATGCATGTGTGAGGAAGGAGTTGAAAC  
+HWI-EAS443:3:57:584:1877#0/1  
ZY[\_a]GN¥]¥T][\_baY`SXa]`X^[\_HHIPIYZ¥a¥HM  
@HWI-EAS443:3:62:573:1326#0/1  
AGGGCGTAGTCCGCTTTGGTGGCCATCTCCTCTCCAGTCC  
+HWI-EAS443:3:62:573:1326#0/1  
^\_\_ [GVYa`a`\_\_¥XXSPWU\_X¥\_]TQV]\_Y[R[XYBBBB  
@HWI-EAS443:3:64:530:1208#0/1  
GGTCCGTCTTCCTTCTTTGGTCCTACATTTGCTTACCATT

+HWI-EAS443:3:64:530:1208#0/1  
`aaa[^ab\_`aa`^bab`b]ababab`[\_aba`baa`b  
@HWI-EAS443:3:70:1755:1727#0/1  
ATGCCGAGTCTTCTGTCAAAGAGAAATACATGACCAAGGA  
+HWI-EAS443:3:70:1755:1727#0/1  
WDMPOY¥^S\_b`^aOUSa^^\_¥\_\_a`I\_]a`^WFP\_`YWW  
@HWI-EAS443:3:72:1379:1024#0/1  
GATCCGTCTTCCTTCTTTGGTCCTACATTTGCTTACCATT  
+HWI-EAS443:3:72:1379:1024#0/1  
a[`a^a\_V`a`aa`\_aab\_\_]\_^\_\_][^\_``]`WU^^\_  
@HWI-EAS443:3:76:340:1685#0/1  
AGTCCGTCTTCCTTCTTTGGTCCTACATTTGCTTACCATT  
+HWI-EAS443:3:76:340:1685#0/1  
]b\_bb`abaaabaaa`aa[]`baaaaaa`\_aa`aa\_a`\_  
@HWI-EAS443:3:78:864:377#0/1  
GTCCTACATTTGCTTACCATTGGGATCAGCTGAAAGTCGT  
+HWI-EAS443:3:78:864:377#0/1  
aZ][`a[a^]`a^`a^]`a`a`\_^[^a^\_`^]]\_RRS¥  
@HWI-EAS443:3:7:1257:138#0/1  
GAGGAActATTTTACAGCAGAAGTGTCCACTGCAGGGAT  
+HWI-EAS443:3:7:1257:138#0/1  
`\_¥`]VZ\_Z¥YZ¥[FNY^U^¥XYVSBBBBBBBBBBBBBBB  
@HWI-EAS443:3:82:1715:1166#0/1  
GAGGTTTTCGACTGAATCGAGAAAATTGCTTCTCATTGTT  
+HWI-EAS443:3:82:1715:1166#0/1  
WQa[Q``ba\_ZVbbabb`bababaaba\_Yab^b¥aa`b`\_  
@HWI-EAS443:3:83:717:1528#0/1  
GGTCCGTCTTCCTTCTTTGGTCCTACATTTGCTTACCATT  
+HWI-EAS443:3:83:717:1528#0/1  
WYMXQ¥H\_]¥``aVaaaa^`U\_¥ab\_^X0^^`baaaa]]Z  
@HWI-EAS443:3:92:1033:1095#0/1  
GGTCCGTCTTCCTTCTTTGGTCCTACATTTGCTTACCATT  
+HWI-EAS443:3:92:1033:1095#0/1  
¥b^bb¥XH`V]aa\_Q`a\_bbY]\_``aa\_\_a`abaZ^a\_`  
@HWI-EAS443:3:99:62:657#0/1  
AGTCCGTCTTCCTTCTTTGGTCCTACATTTGCTTACCATT  
+HWI-EAS443:3:99:62:657#0/1  
`b¥`aaaKZabWT^aa¥X\_aR`[^aa¥[aa]a¥a¥W0aa  
@HWI-EAS443:3:96:1768:1069#0/1  
ACGGCCTTGCTNAATGCATCCTGTGCNGCCATGGATGACT  
+HWI-EAS443:3:96:1768:1069#0/1  
a¥``[\_a`a\_XDZa``\_aa[R``\_]KDXPU^W]]V]]UQB  
@HWI-EAS443:3:12:1792:562#0/1  
AATTGAAGGAAGAGACCGAATCATGGCCTGGACAGGTGGT  
+HWI-EAS443:3:12:1792:562#0/1  
X\_``^^`\_^abba[VSOV`aaaY\_\_`WNYZaUTIPFS¥QL  
@HWI-EAS443:3:13:1145:60#0/1  
CGTGGGAGGGGTTTTCGGCTGAATCGAGAAAATTGCTTCT  
+HWI-EAS443:3:13:1145:60#0/1  
abbbb``babb]a`b¥\_b^aaaaZT`\_`\_a``Z\_bZa[N\_

@HWI-EAS443:3:19:1108:247#0/1  
GGCCGGTTTCCGATTTGTTTTCAAAGAATTCCTTGGTCAT  
+HWI-EAS443:3:19:1108:247#0/1  
aaaaba[ab^ab]aaab\_aaa\_a]aa\_`a`YV\_`aa]X\_`  
@HWI-EAS443:3:22:1343:1176#0/1  
GCTGGCCCGAATGCACTATTGAAGCACCGATTTGAGATAA  
+HWI-EAS443:3:22:1343:1176#0/1  
\_`^\_aaaa`\_]\_aa]``^Y`a`\_`\_] [\_ZT`U^a\_`U`\_\_\_\_`  
@HWI-EAS443:3:22:386:604#0/1  
GGGGGTGGGGGGCTATATGAAGCAATCGAGGAGTGCCTGA  
+HWI-EAS443:3:22:386:604#0/1  
aaaaaXaaaaa]a^`aa`aa]\_aa\_\_\_\_a¥\_ZU\_W`YW\_aZ  
@HWI-EAS443:3:25:296:1354#0/1  
TGTGGCCCGAATGCACTATTGAAGCACCGATTTGAGATAA  
+HWI-EAS443:3:25:296:1354#0/1  
abS[`aaXT\_aQP`\_WTa`Z¥[aWGYFTaZS\_`^¥\_S^Y`  
@HWI-EAS443:3:26:1773:162#0/1  
AGAAAGGCATAAATCCCAATTACCTCATGGCTTGGTCCTT  
+HWI-EAS443:3:26:1773:162#0/1  
aa^Y^bb\_XO\_aa¥ZXHYX]VY\_TQLZW\_RJVGRSLNWWW  
@HWI-EAS443:3:27:1313:884#0/1  
AGAGCCTATGTAGATGGATTGAGCCGAACGGCTGGAATG  
+HWI-EAS443:3:27:1313:884#0/1  
`ba`S^¥X\_`[\_]\_aaaaba]T^a`V^\_\_PY[]BBBBBBB  
@HWI-EAS443:3:44:658:1163#0/1  
GCGGGGAAGGCTCTATTGGGAAAGTGTGCAGGACCTTAC  
+HWI-EAS443:3:44:658:1163#0/1  
\_[\_ZW][RV[Y\_\_Za^^`¥`\_ZRZ^WRP`¥WYUZ¥V[ZZT  
@HWI-EAS443:3:44:938:863#0/1  
GATTTTACATGAAACAACTTCCAAATGTGTGCATATTGC  
+HWI-EAS443:3:44:938:863#0/1  
aaYY`WQSSYU¥TV]Z^Y]a`a`PaUZ^NXLQVPVYY¥XR  
@HWI-EAS443:3:46:1460:1420#0/1  
GCCGGTCATTGAAATTGGAGTAACACGGAGGGAAGTCCAC  
+HWI-EAS443:3:46:1460:1420#0/1  
a`aaXZR`\_\_\_\_SZ`\_[\_^]NXMYW^Z`\_¥MY\_aXV¥LLZSW  
@HWI-EAS443:3:49:1181:18#0/1  
CGCCCTCAATGCAGCCGTTGCGCTCGAATCCATCTAAATA  
+HWI-EAS443:3:49:1181:18#0/1  
abababbabba\_ab^\_b]\_Zb\_\_\_\_^¥[Y^\_W]]U]UGYVS  
@HWI-EAS443:3:50:1752:549#0/1  
GGAAGATCCGAAAATCGAAACTAACAAGTTTGCTGAATCG  
+HWI-EAS443:3:50:1752:549#0/1  
aa\_bbabb`ababbabaaaaV^ba\_a`aab`aaaaaaa^a  
@HWI-EAS443:3:59:1005:1805#0/1  
GTCCGCTTTGGTGGCCATCTCCTCTCCAGTGAATGGTAAG  
+HWI-EAS443:3:59:1005:1805#0/1  
aU[`WFPUQR[OX]\_UZZYYNVTXL[BBBBBBBBBBBBBBB  
@HWI-EAS443:3:60:1401:246#0/1  
ATTGAAGCACCGATTTGAGATAATTGAAGGAAGAGCAGGA

+HWI-EAS443:3:60:1401:246#0/1  
aba^aaa\_a\_]baabab\_a`^a^aaa\_\_a`\_\_`X`UaZZ  
@HWI-EAS443:3:68:159:1879#0/1  
CCAAGGACAAAGAACATGAAGAGAACAAGCCAATTTTTAA  
+HWI-EAS443:3:68:159:1879#0/1  
abb^aaabaaaabbab`a`\_aa\_aabaa`a`b[a\_^a\_a`  
@HWI-EAS443:3:71:201:1381#0/1  
GGGGTTCTTCTTTCATTTTCAATGTCCTGTAGCTCTGCT  
+HWI-EAS443:3:71:201:1381#0/1  
a\_]\_S\_`aa`aba`aaaaaW]a^Yaa\_\_Y]\_a\_X[¥¥P  
@HWI-EAS443:3:78:1506:450#0/1  
GGGGGCTCCAACATCTTTCAGTCATCAAAGTCTACTTTT  
+HWI-EAS443:3:78:1506:450#0/1  
aaYVMTaR]OW`[WS\_\_W`aSJMTNTFU[WRFTZ^U¥L¥L  
@HWI-EAS443:3:89:1566:320#0/1  
GTGAATACATAATGAAGGGAGTGTACATAAATACGGACTT  
+HWI-EAS443:3:89:1566:320#0/1  
SaSWXb]a¥a¥X`bbb\_\_b^bba\_\_ISb`abXaR`VH]a`  
@HWI-EAS443:3:10:1793:251#0/1  
NTGAAATGGAATCCGAATACATGAAACAACTTCAAAT  
+HWI-EAS443:3:10:1793:251#0/1  
DM[W[Y[[[[[[[UT[[[[[VYWY[[[YXNT[[W[VTI[Z[[  
@HWI-EAS443:3:11:1289:2022#0/1  
CAGGGGTTTTCGTCTGAATCGAGAAAATTGCTTCTCATTG  
+HWI-EAS443:3:11:1289:2022#0/1  
aaabbbVabb`]G¥`aaa\_aa\_a`S`a]\_^T\_\_X\_]`^`\_`  
@HWI-EAS443:3:13:1271:128#0/1  
ACCGTCTTCCTTCTTTGGTCCTACATTTGCTTACCATTGG  
+HWI-EAS443:3:13:1271:128#0/1  
a\_aa\_\_`\_`¥^`X`^`\_\_^`^Y]^Y]\_`\_\_V\_^`V^]V^]^^  
@HWI-EAS443:3:15:958:2047#0/1  
NTCGCAGTCCTCAAGAGCATGTCTCCTATTTCTAGAACAC  
+HWI-EAS443:3:15:958:2047#0/1  
DKRLQOPKMVVUVTTTTVTSQTQQNNTUXTTVXPXXXWT  
@HWI-EAS443:3:23:693:1678#0/1  
GGGGGGTTTTCGGCTGAATCGAGAAAATTGCTTCTCATTGT  
+HWI-EAS443:3:23:693:1678#0/1  
\_aI^I`Y\_\_a`a\_a]a^P[`NK[\_[[\_\_U]\_¥\_Z^^^YKO  
@HWI-EAS443:3:26:1740:124#0/1  
GAGAAAGGCATAAATCACAATTACCTCATGGCTTGAAGG  
+HWI-EAS443:3:26:1740:124#0/1  
`a`^a[b`\_[aa`\_PGZ`\_[ZaOV¥V^¥a\_Y^ZZG0]G  
@HWI-EAS443:3:29:91:539#0/1  
GCCGTCTTCCTTCTTTGGTCCTACATTTGCTTACCATTGG  
+HWI-EAS443:3:29:91:539#0/1  
aa`bUb\_\_[]Xb`a`a`NX\_aaa]P]a\_aa\_`T`NY^^\_  
@HWI-EAS443:3:32:18:1241#0/1  
ACCGTCTTCCTTCTTTGGTCCTACATTTGCTTACCATTGG  
+HWI-EAS443:3:32:18:1241#0/1  
aaaa]a``aaa``¥¥][YYa¥X]`[\_\_\_][\_ZPY`]]\_`^

@HWI-EAS443:3:35:680:1452#0/1  
CGCATGGAAATGAGGCGCTGCCTTCTCCGTCTCTTCAGC  
+HWI-EAS443:3:35:680:1452#0/1  
HZ[][\_QY[\_a[¥^¥\_`Z¥Z^^\_X\_\_LIYTbaa]`\_XZ`  
@HWI-EAS443:3:36:1063:1896#0/1  
AGAGGGGCTTTCGGCTGAATCGAGAAAATTGCTTCTCATT  
+HWI-EAS443:3:36:1063:1896#0/1  
aaa`U¥¥H`aYWWYW\_H`\_\_]]]]][aYYJYQV¥`U`\_[T  
@HWI-EAS443:3:38:1615:2038#0/1  
CATTGCCACAACACTTCAATGCATGTGTGAGGAAGGAGA  
+HWI-EAS443:3:38:1615:2038#0/1  
I[S^^ba`T^\_Vabbb]`a]bba\_b`ab``X^SaTWRIYG  
@HWI-EAS443:3:39:198:894#0/1  
GTCCGTCTTCCTTCTTTGGTCCTACATTTGCTTACCATTG  
+HWI-EAS443:3:39:198:894#0/1  
\_Taa`[b]a`\_]ab\_aa`\_ZT`^^^a`]]`[]\_a^`¥X  
@HWI-EAS443:3:43:893:149#0/1  
TATCGGAGAGTCACCCAGGGGAGTGGAGGAGGGCTCTATT  
+HWI-EAS443:3:43:893:149#0/1  
\_IZ^]aUZx`V]aZ\_`0`^`STa¥YZT[\_OEq[UVSOGUY  
@HWI-EAS443:3:46:66:569#0/1  
ATAAATCCCAATTACCTCATGGCTTTGAAGCAGGTGCTAT  
+HWI-EAS443:3:46:66:569#0/1  
`S¥a`\_aa`a`a^^`\_]\_a`^a^BBBBBBBBBBBBBBBB  
@HWI-EAS443:3:49:1315:784#0/1  
CGCCCACTTCAATTGGCTTGTCTCTTCATGTTTTTTGTC  
+HWI-EAS443:3:49:1315:784#0/1  
aabb^Z]b¥\_a\_[aaaabba[¥GVN`T]aa]RD[a`HXD  
@HWI-EAS443:3:4:588:103#0/1  
GGTCTCTTCAGCAGATTGATAGCATGATTGAGGCCGAGTC  
+HWI-EAS443:3:4:588:103#0/1  
]bTT`\_¥aY^`^a\_\_\_aa```¥]\_\_\_\_[^]`]VV¥Y`WS  
@HWI-EAS443:3:51:90:552#0/1  
GTCCGTCTTCCTTCTTTGGTCCTACATTTGCTTACCATTG  
+HWI-EAS443:3:51:90:552#0/1  
a¥^a]`\_aa^^aa\_aa`¥¥Z`^`\_\_`aa`^`^¥T\_]\_\_\_\_  
@HWI-EAS443:3:54:219:1863#0/1  
GTCCGTCTTCCTTCTTTGGTCCTACATTTGCTTACCATTG  
+HWI-EAS443:3:54:219:1863#0/1  
aa\_^a\_a¥G]``\_\_\_a^`\_^`]Y\_aaU\_\_\_\_[]\_S\_^YV]  
@HWI-EAS443:3:55:535:995#0/1  
GTCCGTCTTCCTTCTTTGGTCCTACATTTGCTTACCATTG  
+HWI-EAS443:3:55:535:995#0/1  
aaaaababbab`a`a`ab`\_a\_aa`aa`baaa``a[J]aa  
@HWI-EAS443:3:59:523:1830#0/1  
GGGTTTTCGGCTGAAACGAGAAAATTGCTTCTCATTGTTA  
+HWI-EAS443:3:59:523:1830#0/1  
^¥[Qa`a¥SYa`¥aa¥\_Y^\_\_\_\_¥\_\_\_\_\_`\_[QWZ[^]Z[]G  
@HWI-EAS443:3:63:1016:1153#0/1  
GTCCGTCTTCCTTCTTTGGTCCTACATTTGCTTACCATTG

+HWI-EAS443:3:63:1016:1153#0/1  
aaba`aaaaaaba`aaaa``aaaa`aaaa`\_]`-[\_]`¥  
@HWI-EAS443:3:64:52:939#0/1  
TTGCTTGCATATGTTCAACCGGGGCAACATCTTCTCCTA  
+HWI-EAS443:3:64:52:939#0/1  
X^aYW¥Za[XaVU\_I^`¥NF[V`a`YVa]]a¥W¥Z¥`W¥  
@HWI-EAS443:3:65:795:1112#0/1  
GTCCGTCTTCTTCTTTGGTCCTACATTTGCTTACCATTG  
+HWI-EAS443:3:65:795:1112#0/1  
`^baa^aabaa`aaaa``\_`aaa\_\_aaa\_aa\_a^`a`aa  
@HWI-EAS443:3:6:1729:1241#0/1  
GAGCATTGCCACAACACTTCAATGCATGTGTGAGGAAGG  
+HWI-EAS443:3:6:1729:1241#0/1  
Mabb\_aa[ZVbab\_`ab^aZaabaabbab[U[baba\_bY  
@HWI-EAS443:3:70:758:429#0/1  
CTTCCGTCTTCTTCTTTGGTCCTACATTTGCTTACCATT  
+HWI-EAS443:3:70:758:429#0/1  
ababaaa\_abaabaabaaaa^aaaa`a`aabaa``aaa  
@HWI-EAS443:3:72:1216:844#0/1  
CCCGTCTTCTTCTTTGGTCCTACATTTGCTTACCATTGG  
+HWI-EAS443:3:72:1216:844#0/1  
``aa`bab]bbbabbbb^baab`bababbbaa`]aaaa]  
@HWI-EAS443:3:72:1759:419#0/1  
GCCGTCTTCTTCTTTGGTCCTACATTTGCTTACCATTGG  
+HWI-EAS443:3:72:1759:419#0/1  
a[ab^abaaaba`aaaa^[`a\_\_^aaaSU]`aZa\_aaZ\_  
@HWI-EAS443:3:75:37:1051#0/1  
GGGGGGTTTCGGCTGAATCGAGAAAATTGCTTCTCATTGT  
+HWI-EAS443:3:75:37:1051#0/1  
V\_W^W)`W^)`¥`¥¥[X\_\_\_XTWZY[\_`])`¥¥\_]X`a\_^R  
@HWI-EAS443:3:77:1680:549#0/1  
GGGGGGTTTCGGCTGAATCGAGAAAATTGCTTCTCATTGT  
+HWI-EAS443:3:77:1680:549#0/1  
abb`baXab¥aa`bbba[\_a\_ba[a`a[b`aa]\_]a[aa  
@HWI-EAS443:3:7:855:745#0/1  
TGAGCCTATGTAGATGGATTGAGCGGAACGGCTGCATTG  
+HWI-EAS443:3:7:855:745#0/1  
ab`aZNZSaa\_]¥]JZYX\_0]XNYG\_\_ZVBBBBBBBBBB  
@HWI-EAS443:3:88:1077:1350#0/1  
ATCCGTCTTCTTCTTTGGTCCTACATTTGCTTACCATTG  
+HWI-EAS443:3:88:1077:1350#0/1  
^XY\_ZQW¥¥`b`^a`a`TZ\_`]abba^`^^`]YZWX^  
@HWI-EAS443:3:96:1723:1482#0/1  
GAAATAGTAGCATTGCCACAACACTTCAATGCATGTGTG  
+HWI-EAS443:3:96:1723:1482#0/1  
G^abbbbaba¥`bbbaabbbbabbbbabbbb`\_ababbb  
@HWI-EAS443:3:97:1004:622#0/1  
GGGGGGTTTCGGCTGAATCGAGAAAATTGCTTCTCATTGT  
+HWI-EAS443:3:97:1004:622#0/1  
abaaaa^ab\_aa\_aabaa\_a\_aa\_`\_`a\_\_`W`\_`````]



@HWI-EAS443:3:9:534:63#0/1  
GTCCGTCTTCTTCTTTGGTCCTACATTTGCTTACCATTG  
+HWI-EAS443:3:9:534:63#0/1  
a]Y]`VX\_]UV^^VX]^]WWWYXY]YYXXX^YXYXXY^  
@HWI-EAS443:3:15:1225:351#0/1  
TGTGCAGCCATGGATGACTTTTCAGCTGATCCCAATGGTAA  
+HWI-EAS443:3:15:1225:351#0/1  
`a^aaaa\_aa\_a`\_`\_aXa\_a]\_aY]`[^[X^\_\_^a¥Y^U  
@HWI-EAS443:3:17:1261:273#0/1  
TCGGGGGGGGCTATATGAAGCAATCGAGGAGTGCCTGATT  
+HWI-EAS443:3:17:1261:273#0/1  
]aaa^baa` `[ ]`¥^]^[^Q¥\_^PVF¥]TVR]NP\_^U\_\_  
@HWI-EAS443:3:19:1013:981#0/1  
GCCATATTTTCACCGAGTGCCCACTTCAATTGGCTTTTAA  
+HWI-EAS443:3:19:1013:981#0/1  
Q\_^Y^V`¥S`bbZ^\_`\_]L]Z]W]¥¥Y\_a`SH\_[GSTBBBB  
@HWI-EAS443:3:1:482:1327#0/1  
AGCGCCCCAAGATCGAAGTTCCAGTTCCAGTTGTCCC  
+HWI-EAS443:3:1:482:1327#0/1  
a]ZG`¥\_[^\_`a^¥]^\_a^P`]^\_a\_U¥^]¥¥\_W^BBBBB  
@HWI-EAS443:3:20:1419:1220#0/1  
CGCCGTGTGCATATTGCAGCAAACCTGTTAGTTTCGATTT  
+HWI-EAS443:3:20:1419:1220#0/1  
L\_ba\_^^aY¥T`bb\_Zb\_W`aabWa`ML^bb^b]GQaa`a  
@HWI-EAS443:3:20:177:1274#0/1  
CCGCGACTGGAGCCACACAAATGGGAAAAATACTGTGTTC  
+HWI-EAS443:3:20:177:1274#0/1  
`X[HR[aZSUZW[ZWZ`YNQRZUP¥MZNUZ\_XV]XU]UUU  
@HWI-EAS443:3:21:1635:1258#0/1  
TGTGCAGCCATGGATGACTTTTCAGCTGATCCCAATGGTAA  
+HWI-EAS443:3:21:1635:1258#0/1  
aa^\_\_\_a[Y^\_\_\_[\_\_\_]^\_\_\_]^^^UV¥YUV[[]]RZZVRUX  
@HWI-EAS443:3:23:785:681#0/1  
GCCCCACTGCAGGGCTACTGAATACATAATGAAGGGAGAGT  
+HWI-EAS443:3:23:785:681#0/1  
a``[K\_[V`SMR[\_N\_]¥aUR¥RY]ZNSW]U[Z^]N¥BBB  
@HWI-EAS443:3:24:1118:1167#0/1  
TTCCGGGATCTTCTTTCATTTTCAATGTCCTGTAGCTCT  
+HWI-EAS443:3:24:1118:1167#0/1  
`aabaa\_[\_^abba`aa`aaaaaaa`a\_a\_aa\_``\_\_\_]  
@HWI-EAS443:3:25:956:2014#0/1  
CAACTTCTATCCAGCTTGAATCAGTCAATTCACATGCCTT  
+HWI-EAS443:3:25:956:2014#0/1  
\_¥]Y¥`aaXQ\_b^\_^]^OR\_X[¥XMX¥b^^aaR¥GN¥[G[  
@HWI-EAS443:3:29:399:211#0/1  
CCTTAAGTTGTGGAGACGCATATAGACTGTTGAATACAGA  
+HWI-EAS443:3:29:399:211#0/1  
ab^`aZ^]]b¥b`\_^Y`¥SZa¥^]a]PV]N\_]][BBBBBB  
@HWI-EAS443:3:29:459:748#0/1  
ATAAAATGAAGGGAGTGTACATAAATACGGCCTTGCTCAA

+HWI-EAS443:3:29:459:748#0/1  
aaaZa`\_a`\_a¥`\_\_X\_W[Y\_\_¥Za`\_\_a\_aY^^] ^V]\_^  
@HWI-EAS443:3:30:1011:2030#0/1  
GACGAAAGGAATCCCATAGACTCCTACTGGCCATTTTTTT  
+HWI-EAS443:3:30:1011:2030#0/1  
¥\_\_¥ab¥]a`a^`]T\_`[UWYXQ\_\_¥FPN[WQSMSBBBB  
@HWI-EAS443:3:30:114:903#0/1  
GAACTTTAGGCTTCTCTACCCCTGTTGTGTACATATACT  
+HWI-EAS443:3:30:114:903#0/1  
ZVVHX^`^a`baa]\_^``¥¥aaWXP^ZZ\_a\_aa]\_aZ\_SQ  
@HWI-EAS443:3:32:283:1062#0/1  
CAAGGACAAAGAACATGAAGAGAACAAGCCAATTGACGTG  
+HWI-EAS443:3:32:283:1062#0/1  
aaa)`aa\_a^\_Y\_aaaaaaaaa\_W\_aa`^Z``\_^[[GYX[  
@HWI-EAS443:3:37:692:266#0/1  
AGGTGTTCACTTCTTTTGACATTTGGGAAAGCTTGCCCTC  
+HWI-EAS443:3:37:692:266#0/1  
`^^GU]ZS`\_aX\_a\_a`aRaa\_X[``[HFQJF[[TVZ]X  
@HWI-EAS443:3:38:771:432#0/1  
GTGGAGTCCGCTTTGGTGGCCATCTCCTCTCCAGTGAATG  
+HWI-EAS443:3:38:771:432#0/1  
`^`PT\_aa^]]\_XUY\_V^\_^^\_\_\_[U]YaTGZN[W[[U¥¥  
@HWI-EAS443:3:48:427:215#0/1  
CTCAGATTGCCTGATGGGCCTCTTTGCCATCAGCGGGCAA  
+HWI-EAS443:3:48:427:215#0/1  
`X`a`¥HV^^HQaWVa\_\_MVOVZ]U^]SKT¥BBBBBBBBB  
@HWI-EAS443:3:4:335:870#0/1  
GGCCATGTTTCCGATTTGTTTTCAAAGAATTCCTTGATTC  
+HWI-EAS443:3:4:335:870#0/1  
a\_] [YSPZ^XN^aPPP¥]TYX]¥TW[aUS`QRYXT]VYQB  
@HWI-EAS443:3:52:544:1353#0/1  
CGCGAGCTTGCCGACCAAAGTCTCCACCGAACTTCTCCA  
+HWI-EAS443:3:52:544:1353#0/1  
ab]\_UUZ¥Q\_aS``]HYP]VMZ[¥Qa\_YWaPVS]aRYG]¥  
@HWI-EAS443:3:55:1607:25#0/1  
CGGGGAGTCACCCAGGGGAGTGGAGGAAGGCTCTATTGGG  
+HWI-EAS443:3:55:1607:25#0/1  
`b\_¥\_\_baaba\_] ^bb\_b\_baba^baZT] `X`^` [ ]UX]\_  
@HWI-EAS443:3:56:1104:1114#0/1  
GAGAAAGGCATAAATCCCAATTACCTCATGGCTTGGGAGC  
+HWI-EAS443:3:56:1104:1114#0/1  
aaa]\_¥[ZTaaab[^ZSTZP^`^¥YTKZ^`XR]BBBBBBB  
@HWI-EAS443:3:57:200:465#0/1  
TTACCATTGGGATCAGCTGAAAGTCATCCATGGCTGCACA  
+HWI-EAS443:3:57:200:465#0/1  
aaaa\_Z`aabaa`]]`\_aaaaaZ^^\_]VW\_aaW^\_]VLL  
@HWI-EAS443:3:57:726:1142#0/1  
ATTTTCATCGACGAACGGGTGAATCAATAATTGTAGTATC  
+HWI-EAS443:3:57:726:1142#0/1  
abaaabaaaaa``¥`a`U`\_[^¥\_`^]`a`^a[X^`^

@HWI-EAS443:3:59:451:244#0/1  
GCCATATTTTCACCGAGTGCCCACTTCAATTGGCTTTTTC  
+HWI-EAS443:3:59:451:244#0/1  
aa¥¥a¥aaa`abaZ^X¥W]\_Z^X`a`^Z^^SSY]RFPUN  
@HWI-EAS443:3:59:695:1441#0/1  
CACTGCAGGGCTACTGAATACATAATGAAGGGAGTGAAAA  
+HWI-EAS443:3:59:695:1441#0/1  
[``a^]V\_aX\_aWa\_`a`^aa`\_PN^¥F]BBBBBBBBBB  
@HWI-EAS443:3:5:1608:759#0/1  
GCCATGCTCAATGCATCCTGTGCAGCCATGGATGACTTTC  
+HWI-EAS443:3:5:1608:759#0/1  
abba¥bb^QY]aa¥ab]a]bababba`aaaa^[\_^\_a`B  
@HWI-EAS443:3:60:1208:1393#0/1  
GAGAAAGGCATAAATCCCAATTACCTCATGGCTTGGGAGC  
+HWI-EAS443:3:60:1208:1393#0/1  
\_F^aaa`aX¥b\_`]Z`Taa[P]XQWXa[ZTFHSF¥KF  
@HWI-EAS443:3:64:717:88#0/1  
AATCCCTTGGTCATGTCTTTCTCTTTGACAGAAGACTCGG  
+HWI-EAS443:3:64:717:88#0/1  
]``^aa^a[\_`a`PY^a\_\_^¥`\_\_W^[\_W]VXX^V^]  
@HWI-EAS443:3:67:1662:1725#0/1  
GGCCATGTTTCCGATTTGTTTTCAAAGAATTCCTTGATTC  
+HWI-EAS443:3:67:1662:1725#0/1  
`a`\_`\_\_aa\_aa`aaaa`\_aa\_aaa`\_aa\_T`\_a\_a`¥  
@HWI-EAS443:3:68:531:219#0/1  
CGCCCTCCCAACTTGAGGGTTTTTCGGCTGAATCGAGAA  
+HWI-EAS443:3:68:531:219#0/1  
``a`\_¥¥U`W¥\_^^\_¥\_\_\_[L^\_]`]]aa`ZV[`¥ZUG  
@HWI-EAS443:3:69:1143:1045#0/1  
CGGGGCTTCAATAGTGCATTCCGGTCACCAGATTCTACAA  
+HWI-EAS443:3:69:1143:1045#0/1  
\_W\_0\_a`Z¥\_`VO^[WSa¥VX`\_XY^XaXT]¥`a`^XXZX  
@HWI-EAS443:3:69:789:381#0/1  
CTCAAGAATGGTTCAATTTTGGCGTTCCTTCTTTTACA  
+HWI-EAS443:3:69:789:381#0/1  
abbbabb^aab`aababbbbV`abaZUY]W\_Y`aa^HYO¥  
@HWI-EAS443:3:69:846:106#0/1  
CGGCTGCATCCTGTGCAGCCATGGATGACTTTCAGCTGAT  
+HWI-EAS443:3:69:846:106#0/1  
abbbbab`]VZ`b]`^a^SY[]``X\_`X¥``^X\_¥FV][X  
@HWI-EAS443:3:6:24:359#0/1  
TCATGCTCTGCTAGCACCTGCTTCCAAGCCATGAGGTAAT  
+HWI-EAS443:3:6:24:359#0/1  
abbaaaaa`aa\_W\_¥]a`aa\_\_\_`]Q\_]W\_\_a]`\_Y]^a  
@HWI-EAS443:3:72:1371:881#0/1  
GGCAAGATCCGAAAATCGAAACTAACAAGTTTGCTGCAA  
+HWI-EAS443:3:72:1371:881#0/1  
R\_QJ¥PRXabaY\_a\_\_IY`YR¥^\_SSZ\_¥aZ`Z`]Vba^T  
@HWI-EAS443:3:80:1209:1131#0/1  
CACCCCTGTTGTGTTACATATACTGTTCCACTGTGCGAG

+HWI-EAS443:3:80:1209:1131#0/1  
V\_aaSV\_Ma[S\_\_ab][Saaba]aa`bb`UYabba\_VHRa  
@HWI-EAS443:3:81:1197:1162#0/1  
GGGCTTTCGGCTGAATCGAGAAAATTGCTTCTCATTGTTC  
+HWI-EAS443:3:81:1197:1162#0/1  
V\_^JXaa`\_]`baba`bbbbabbaaaabb^abUbUbSaa  
@HWI-EAS443:3:81:568:598#0/1  
CTGAAGAGGAGATGGCCACCAAAGCGGACTACACCCTTGA  
+HWI-EAS443:3:81:568:598#0/1  
abbbbbbaabbbbaa`aaaa`ba`aa^a^`aaaa]^\_`a  
@HWI-EAS443:3:84:326:152#0/1  
AGCAGGTGCTAGCAGAGCTACAGGACATTGAAAATGTAGA  
+HWI-EAS443:3:84:326:152#0/1  
aaa\_aa^aaaaa`a\_aa\_a\_a¥^`^`^`]¥Y¥^]U\_`^  
@HWI-EAS443:3:85:1279:713#0/1  
GGGCTTTCGGCTGAATCGAGAAAATTGCTTCTCATTGTTC  
+HWI-EAS443:3:85:1279:713#0/1  
Z`WFZW[a\_XQ`[YbZbaV¥R\_V^`aYVXZR\_`[b`b`^F  
@HWI-EAS443:3:93:1220:789#0/1  
CGTGACTCGGTCTTCAATACTTAATTTTCAGAGCATGCAT  
+HWI-EAS443:3:93:1220:789#0/1  
]T¥^VM^]Z\_aYQLWRY`¥aZJL]VNWOFVWLRVBBBBBB  
@HWI-EAS443:3:94:1603:190#0/1  
CCCGTGTGTGTTACATATACTGTTCACTGTCCAGGC  
+HWI-EAS443:3:94:1603:190#0/1  
a\_`aXaa^[`\_[a\_`aaaa`aaa\_`V`¥R`[\_`\_VUV¥MSP  
@HWI-EAS443:3:94:460:425#0/1  
GGGGTTTCGGCTGAATCGAGAAAATTGCTTCTCATTGTTC  
+HWI-EAS443:3:94:460:425#0/1  
aaab[aaaa\_aa`\_`\_]a\_`\_]\_\_\_\_\_^`\_]a\_`\_`\_]`Y  
@HWI-EAS443:3:95:1603:1232#0/1  
GGGGTTTCGGCTGAATCGAGAAAATTGCTTCTCATTGTTC  
+HWI-EAS443:3:95:1603:1232#0/1  
ab[b`bbKbabbbabbabbbba]bb`bbbab\_bbbb]bX  
@HWI-EAS443:3:97:1536:448#0/1  
ACTGGAGCCACACAAATGGGAAAAATACTGTGTTCTAGAA  
+HWI-EAS443:3:97:1536:448#0/1  
a¥aHT\_a``WDX\_]¥a]\_KRUZTX^TMJWV^^ZOXXRZB  
@HWI-EAS443:3:98:96:779#0/1  
CGGTTCTCTTTGTAATCATACAAATCAGGAAGAAATCTAG  
+HWI-EAS443:3:98:96:779#0/1  
aa`¥Yab`^`aaabbb\_``ZU`a`^a`aa¥V¥\_`X`\_`Y^  
@HWI-EAS443:3:26:644:1500#0/1  
AGGGCGTGGTGTGTCNTCCTCAAGAATGGTTCAATTTTGGCG  
+HWI-EAS443:3:26:644:1500#0/1  
```bb\_a`aX`[¥DR`aa]¥]aa`\_]\_Wa\_a\_\_^`^]G`\_  
@HWI-EAS443:3:34:1557:1729#0/1  
TTGGCCTATCGCAGTCTCAAGAGCANGTCTCCTATTTCT  
+HWI-EAS443:3:34:1557:1729#0/1  
UXX\_`Xbab`¥aa``b\_bbbbaa¥]¥[D^¥\_^^Ya\_\_^XHU

@HWI-EAS443:3:63:425:132#0/1  
CTATTTTACAGCAGAAGTGTCCCACTGCAGGGCTNCTGAC  
+HWI-EAS443:3:63:425:132#0/1  
a]X]^a`\_a`b`\_a]Y]]aT\_]`a^S¥VV\_`Y]MDT^^QF  
@HWI-EAS443:3:74:479:1166#0/1  
CGGCCAGTAGGAGTCTATGGGATTCCTTNCGTGAGTCCGA  
+HWI-EAS443:3:74:479:1166#0/1  
G¥]]^]]¥YWQ`\_W`Z`^^baXa¥`X`ZD^baa```bbaX  
@HWI-EAS443:3:100:388:1119#0/1  
CACTATAAGACAAGAAATGGCCAGTAGGAGTGTATGGGAT  
+HWI-EAS443:3:100:388:1119#0/1  
aa^\_\_Q\_a]ZZ\_\_V¥YR^W\_¥T]MI¥PTVVFH]\_^\_BBB  
@HWI-EAS443:3:100:482:211#0/1  
GTCTTCCTTCTTTGGTCCTACATTTGCTTACCATTGGGAT  
+HWI-EAS443:3:100:482:211#0/1  
a`^ab`\_ab^bbba`W\_a`\_a`\_a`¥a`^X\_\_\_\_`\_`^^^  
@HWI-EAS443:3:100:646:407#0/1  
GGCGTTCACCTTATTTTGACATTTGGGAAAGCTTGCCCTCA  
+HWI-EAS443:3:100:646:407#0/1  
ZaS`[aSTNa`I^a`ZNP]Sa^WT\_a^`¥YX[[aS\_\_XVB  
@HWI-EAS443:3:100:742:679#0/1  
CATTTGCTTACCATTGGGATCAGCTGAAAGTCATCCATGG  
+HWI-EAS443:3:100:742:679#0/1  
Waba^`b`b\_QZabb`\_]`aabaababaaa`aaa]\_`ba  
@HWI-EAS443:3:100:795:382#0/1  
CAAATAGTAGCATTGCCACAACACTTCAATGCATGTGTG  
+HWI-EAS443:3:100:795:382#0/1  
`bb]baa]ababaaaa`a\_aa^baaaa`aa`\_`aaa^b]b  
@HWI-EAS443:3:100:809:1484#0/1  
TCCGTCTTCCTTCTTTGGTCCTACATTTGCTTACCATTGG  
+HWI-EAS443:3:100:809:1484#0/1  
`[Qb\_^aYTaa\_]\_`[¥XUH¥a`\_\_a`\_Y\_\_a\_RW`\_`B  
@HWI-EAS443:3:10:1282:1206#0/1  
CAAATAGTAGCATTGCCACAACACTTCAATGCATGTGTG  
+HWI-EAS443:3:10:1282:1206#0/1  
[ba`[aRI\_¥a^aab^bbba\_Z¥`aaba]abb]ab`ab¥b  
@HWI-EAS443:3:10:1602:1595#0/1  
CAAATAGTAGCATTGCCACAACACTTCAATGCATGTGTG  
+HWI-EAS443:3:10:1602:1595#0/1  
^bbbbbab]ababba[bbb\_bbabbabbabb^aab]`ba  
@HWI-EAS443:3:10:1602:2044#0/1  
ATCAGCAGGAAGTTTGACCGCTGATGGCAAAGAGGCCCAT  
+HWI-EAS443:3:10:1602:2044#0/1  
aa`a]¥aa¥a\_GH\_¥Z\_ZZRXYUYUVXNY¥¥NWS¥QGNUS  
@HWI-EAS443:3:10:1676:1348#0/1  
ATTTGCTTACCATTGGGATCAGCTGAAAGTCATCCATGGC  
+HWI-EAS443:3:10:1676:1348#0/1  
^`bbb`bba\_]\_abb]baa`\_a¥a`aa`\_QRaa¥Z\_a``W  
@HWI-EAS443:3:10:1766:1490#0/1  
ATCGCAGTCCTCAAGAGCATGTCTCCTATTTCTAGAACAC

+HWI-EAS443:3:10:1766:1490#0/1  
]ba\_`a\_] [\_WY]a`^¥^\_]P¥`WWZ¥`Z\_]\_]X[YLYY  
@HWI-EAS443:3:10:253:1434#0/1  
CACAACTACTTCAATGCATGTGTGAGGAAGGAGTTGAACC  
+HWI-EAS443:3:10:253:1434#0/1  
ababbbbbb\_bbbbbabbab`bbb`abb[bbabbaaa^  
@HWI-EAS443:3:10:356:433#0/1  
CTTCCTTCTTTGGTCCTACATTTGCTTACCATTGGGATCA  
+HWI-EAS443:3:10:356:433#0/1  
]abbbba`abbbbaabbbbabbbbbbababa`aab`Waaa`a  
@HWI-EAS443:3:10:751:1887#0/1  
CATTGCCACAACACTTCAATGCATGTGTGAGGAAGGAGT  
+HWI-EAS443:3:10:751:1887#0/1  
¥\_b¥X^bbbb^0^bbbb\_ba`T^a`a¥b`bbb`aa\_ab`\_  
@HWI-EAS443:3:10:837:106#0/1  
GGGGCTATATGAAGCAATCGAGGAGGCCTGATTAATGAT  
+HWI-EAS443:3:10:837:106#0/1  
aZ\_[VUU]OQTLRRTR]VV]Y]YVVHVYYYYVXYVVXYVV  
@HWI-EAS443:3:10:910:366#0/1  
GCAAGAATCAAACTAGGCTTTTCACTATAAGAGAAGAAA  
+HWI-EAS443:3:10:910:366#0/1  
aX[Z^QYYZ¥XQSQSZW¥RT^Z^YWPNYX¥BBBBBBBBBB  
@HWI-EAS443:3:11:1033:1506#0/1  
CAAATAGTAGCATTGCCACAACACTTCAATGCATGTGTG  
+HWI-EAS443:3:11:1033:1506#0/1  
aaV`aabT[^bab`a[aaaba[ba\_a\_`aaa`^`aa\_a^`  
@HWI-EAS443:3:11:130:1290#0/1  
ATTGCCACAACACTTCAATGCATGTGTGAGGAAGGAGTT  
+HWI-EAS443:3:11:130:1290#0/1  
`baabaabbaaaba\_baY`aaaaa\_a]a\_a`\_a`\_\_`^\_  
@HWI-EAS443:3:11:1348:980#0/1  
GGGGGGCTATATGAAGCAATCGAGGAGCGCCTGATTAATG  
+HWI-EAS443:3:11:1348:980#0/1  
aaa`aaa`aaa`\_a\_\_\_a\_a\_a\_Wa`ZUW^¥W¥YWWBB  
@HWI-EAS443:3:11:1405:1956#0/1  
CAAATAGTAGCATTGCCACAACACTTCAATGCATGTGTG  
+HWI-EAS443:3:11:1405:1956#0/1  
abbbabb\_aaaaba`abbaba`ababaab\_baa\_a^X]V[  
@HWI-EAS443:3:11:165:1573#0/1  
CCGAAAGAGGCGAAGAGACAATTGACGAAAAATTTGAGAT  
+HWI-EAS443:3:11:165:1573#0/1  
]X\_VZXa[Z^aR`YFZ\_\_YV[YVMIEO[YXVLTYNBBBBB  
@HWI-EAS443:3:11:384:73#0/1  
AAATAGTAGCATTGCCACAACACTTCAATGCATGTGTGA  
+HWI-EAS443:3:11:384:73#0/1  
ababaaZabb`aa\_a\_a`aa\_a\_\_\_a\_a\_\_a`\_aZaZa[  
@HWI-EAS443:3:11:420:1636#0/1  
CTCAAGAGCATGTCTCCTATTTCTAGAACACAGTATTTTT  
+HWI-EAS443:3:11:420:1636#0/1  
aaaa^\_]a`aaa`b``aaTaaa\_\_¥aY]\_`aaUMY^`^^S

@HWI-EAS443:3:11:447:1936#0/1  
TTTCCGTCTTCTTTGGTCCTACATTTGCTTACCATT  
+HWI-EAS443:3:11:447:1936#0/1  
aaaaba\_ba`aaa`a``\_ ]Z\_a`a`a\_\_^`\_`\_`\_`^a``  
@HWI-EAS443:3:11:477:1391#0/1  
ATCGACGAACGGGGGAATCAATAATTGTAGAATCTGGTG  
+HWI-EAS443:3:11:477:1391#0/1  
a[b`aW`aaaba\_a0[MYa]PT]`\_a\_]\_aa\_a¥X\_^\_V\_  
@HWI-EAS443:3:11:725:401#0/1  
AAAATACTGTGTTCTAGAAATAGGAGACATGCTCTTGAGG  
+HWI-EAS443:3:11:725:401#0/1  
a`aaa]abbab^aabaaa``a``\_a^``aa\_``a\_aa``  
@HWI-EAS443:3:11:995:321#0/1  
AAATAGTAGCATTGCCACAACACTTCAATGCATGTGTGA  
+HWI-EAS443:3:11:995:321#0/1  
a`¥``Y`baaab\_] [[aa`a\_aW`\_]\_]`W¥]^]`W\_^  
@HWI-EAS443:3:12:1022:873#0/1  
TCCCTTCATTATGTATTCACTAGCCCTGCAGAGGGACACT  
+HWI-EAS443:3:12:1022:873#0/1  
[]SZT`Q`^a\_¥¥]^Y`¥]PQPα]GULR^XFOLGK[\_XB  
@HWI-EAS443:3:12:1108:1296#0/1  
CATTTGCTTACCATTGGGATCAGCTGAAAGTCATCCATGG  
+HWI-EAS443:3:12:1108:1296#0/1  
aa[`aaZba[\_^bbb\_¥Za\_Z\_Vbbaaa`aX[baa^aba`  
@HWI-EAS443:3:12:1233:145#0/1  
CATTTGCTTACCATTGGGATCAGCTGAAAGTCATCCATGG  
+HWI-EAS443:3:12:1233:145#0/1  
VU\_a\_IV\_\_XV]Vba\_0[^TT¥a¥W`^``¥U\_``XRQa¥]  
@HWI-EAS443:3:12:1344:1530#0/1  
TGAAAAGCCTAGTTTTGATTCTTGCCCCGCTCTCTTCGTC  
+HWI-EAS443:3:12:1344:1530#0/1  
`b\_QT\_`a^`UUPW\_[b`^WOHZTZWU]b`]SZaHS`aYa  
@HWI-EAS443:3:12:135:1825#0/1  
CATGACCAAGGTATTCTTTGAAAACAAATCGGAAACATGG  
+HWI-EAS443:3:12:135:1825#0/1  
¥V\_\_ [aaa^^]Va`\_^`\_X\_W`^`a¥ZUDWGXXaZ\_]W]  
@HWI-EAS443:3:12:1513:39#0/1  
AAATAGTAGCATTGCCACAACACTTCAATGCATGTGTGA  
+HWI-EAS443:3:12:1513:39#0/1  
¥aa\_aaL`¥]\_ab`a\_\_^`a0a\_T^a`\_^`a\_X^aXaW]S  
@HWI-EAS443:3:12:1523:190#0/1  
GCAGGAGCTAGCAGAGCTACAGGACATTGAAAATGAAGAG  
+HWI-EAS443:3:12:1523:190#0/1  
`^^`^ZZ`a``Y^a[Y¥]]Y\_\_[[[S]Z\_XV\_Z]^ZW\_]\_] ]  
@HWI-EAS443:3:12:273:811#0/1  
CACAACTACTTCAATGCATGTGTGAGGAAGGAGTTGAACC  
+HWI-EAS443:3:12:273:811#0/1  
aabaa`abbaa¥a[aa`Xaa\_a^a^`a^¥¥`\_a\_a[\_\_\_Q  
@HWI-EAS443:3:12:521:703#0/1  
CATTTGCTTACCATTGGGATCAGCTGAAAGTCATCCATGG

+HWI-EAS443:3:12:521:703#0/1  
abbabbba`\_\_\_\_¥a\_R\_baabbaab]Z\_]`Q\_a¥Q0^aa  
@HWI-EAS443:3:13:1055:1457#0/1  
GGGGGGCTATATGAAGCAATCGAGGAGTGCCTGATTAATG  
+HWI-EAS443:3:13:1055:1457#0/1  
S\_ab][a¥Z]b]YY]baabYa]aU^TROYUFN\_a\_¥[X\_a  
@HWI-EAS443:3:13:1077:312#0/1  
ACATAATGAAGGGAGTGTACATAAATACGGCCTTGGTCAA  
+HWI-EAS443:3:13:1077:312#0/1  
ZZ¥WaZ`¥a\_^Q¥WRP`^a`abaab]aab`\_[XXXFW`\_`  
@HWI-EAS443:3:13:1133:824#0/1  
ACTTTTTCTGGTCCATATTTTACCAGACTGCCACTTCA  
+HWI-EAS443:3:13:1133:824#0/1  
a]b\_babaaab`baaaaa```]]baaa¥XVa`\_`\_]`a][  
@HWI-EAS443:3:13:1509:785#0/1  
CCTGGGTGACTCTCAGATTGGCCATGTTTCCGATTTGTTT  
+HWI-EAS443:3:13:1509:785#0/1  
a`abbbb[^ba`baabaaab\_\_a`aYZbb\_TPP\_baaaba  
@HWI-EAS443:3:13:556:675#0/1  
CAAATAGTAGCATTGCCACAACACTTCAATGCATGTGTG  
+HWI-EAS443:3:13:556:675#0/1  
aa[UR^GP¥ZQ\_a\_NR`TT^\_`aaa^SZ`YL^XX`¥KX`a  
@HWI-EAS443:3:14:1724:327#0/1  
GCTTACCATTGGGATCAGCTGAAAGTCATCCATGGCTGCA  
+HWI-EAS443:3:14:1724:327#0/1  
\_XZ¥ZYXXaZTXVRQV^\_R[¥ZU^]WTVVSUVZZTUZRB  
@HWI-EAS443:3:14:369:2045#0/1  
CTCAAGAATGGTTCAATTTTGGCGTTCACGTCTTTTGACA  
+HWI-EAS443:3:14:369:2045#0/1  
`NYW]ZWRJM]GRRO[WXR\_[PU]HGZBBBBBBBBBBBBB  
@HWI-EAS443:3:14:379:1499#0/1  
CAAATAGTAGCATTGCCACAACACTTCAATGCATGTGTG  
+HWI-EAS443:3:14:379:1499#0/1  
aa`aa¥0¥`ZU[[[a]S`Y\_aZPY`[^a^Y^^^Y^VZX`  
@HWI-EAS443:3:14:454:1868#0/1  
ATTGCCACAACACTTCAATGCATGTGTGAGGAAGGAGTT  
+HWI-EAS443:3:14:454:1868#0/1  
VSYVb¥UaUbZZS\_aab`aSRQT\_]RMMaZY`]¥\_``a\_\_  
@HWI-EAS443:3:14:484:607#0/1  
GCCACAACACTTCAATGCATGTGTGAGGAAGGAGTTGAA  
+HWI-EAS443:3:14:484:607#0/1  
abaPX\_^[]aaa]]¥R¥Z]]XZ\_P`¥J`SP^ZU\_GS¥UE  
@HWI-EAS443:3:14:686:210#0/1  
GTTCCGGTGGGAGACTTTGGTCCGCAAGCTTGGCACAGTT  
+HWI-EAS443:3:14:686:210#0/1  
a[[`a\_SS`^Y[ONU¥^^ZRY¥¥Z¥[WUWQZQYRNFWRUB  
@HWI-EAS443:3:15:1026:947#0/1  
CAAATAGTAGCATTGCCACAACACTTCAATGCATGTGTG  
+HWI-EAS443:3:15:1026:947#0/1  
Y^XXa`b¥¥¥```b`\_a^a`^babba^V\_Z`bb`abab^a



@HWI-EAS443:3:15:1394:538#0/1  
AGCATGTCTCTATTTCTAGAACACAGTATTTTTCCCATT  
+HWI-EAS443:3:15:1394:538#0/1  
ab`Va`Xb``^a¥aa[Ya`\_\_a¥]a^bVS`a`aa\_¥\_\_\_\_`  
@HWI-EAS443:3:15:1501:1510#0/1  
CAAATAGTAGCATTGCCACAACACTTCAATGCATGTGTG  
+HWI-EAS443:3:15:1501:1510#0/1  
^^a``bbaa\_a`[bb``¥^abbbababa^\_a]a`[ab\_bXb  
@HWI-EAS443:3:15:154:1329#0/1  
CTCACGTTGTGGAGACGCATATAGACTGTTGAATACAGAT  
+HWI-EAS443:3:15:154:1329#0/1  
aI`XHHYUORaY`Y``N[NZ\_Z]\_XU¥BBBBBBBBBBBBBB  
@HWI-EAS443:3:15:290:984#0/1  
CATTTGCTTACCATTGGGATCAGCTGAAAGTCATCCATGG  
+HWI-EAS443:3:15:290:984#0/1  
abbbabbbaaba```bZU\_aabaaaabaa\_ab\_`aa`a^  
@HWI-EAS443:3:15:423:1987#0/1  
GCTTGCATATGTTCAATCGGGGCAAATCTTCTCCTATT  
+HWI-EAS443:3:15:423:1987#0/1  
]Xab¥^`¥^^a`H¥a\_aa^]N¥QZV]JaaaaSG]ab``Wa  
@HWI-EAS443:3:15:979:1115#0/1  
CATTGCCACAACACTTCAATGCATGTGTGAGGAAGGAGT  
+HWI-EAS443:3:15:979:1115#0/1  
abbbabbaaaaaabaabbbbaab``aaaa¥aaaaaaaa`\_^  
@HWI-EAS443:3:15:988:1992#0/1  
AACCGTTCTCTTTGTAATCATACAAATCAGGACGAAATT  
+HWI-EAS443:3:15:988:1992#0/1  
abaaab^a]aaaaaaaa``][a`aa\_a\_ZQ\_\_`WIIYa`^VR  
@HWI-EAS443:3:16:1044:1863#0/1  
CATGGAATGAGGCGCTGCCTTCTTCTCAGTCTTTAGCAG  
+HWI-EAS443:3:16:1044:1863#0/1  
a`[aa`]ab`aaV`T[\_``¥\_\_¥a\_a\_]M]¥`]\_GXHHTN  
@HWI-EAS443:3:16:105:1704#0/1  
GTAGCATTGCCACAACACTTCAATGCATGTGTGAGGAAG  
+HWI-EAS443:3:16:105:1704#0/1  
[]bZbbb`a`a]abbbbbbbabbaa`baab^^[a`aaaa  
@HWI-EAS443:3:16:1110:267#0/1  
TGACTTTCAGCTGATCCCAATGGTAAGCAAATGTAGGACC  
+HWI-EAS443:3:16:1110:267#0/1  
aa¥S¥W^¥`^^VaX[\_V\_¥ZY¥ZOQ^aWTYJ\_aRZ\_``^P  
@HWI-EAS443:3:16:1153:2013#0/1  
AAATAGTAGCATTGCCACAACACTTCAATGCATGTGTGA  
+HWI-EAS443:3:16:1153:2013#0/1  
aaaaa]Ua\_\_``\_^^^\_^^^Z\_a]`X\_`^^^\_`^ZXLX¥  
@HWI-EAS443:3:16:1297:477#0/1  
ATCGCAGTCCTCAAGAGCATGTCTCCTATTTCTAGAACAC  
+HWI-EAS443:3:16:1297:477#0/1  
aaba\_S]\_a]a`aa\_`]¥`]Y]Ta\_[-[-`]a`\_¥\_U\_\_  
@HWI-EAS443:3:16:1423:1931#0/1  
AAAGAATTCCTTGGACATGTCTTTCTTTGACAGAAGAC

+HWI-EAS443:3:16:1423:1931#0/1  
\_ ^ ^ [RaXI[WHFa^ ^L]U¥HT^ZY¥\_XRXZ^ ^BB  
@HWI-EAS443:3:16:1720:1080#0/1  
CAAATCAGGAAGAAATTTAGGCTTCGCTACCCCTGTTGTG  
+HWI-EAS443:3:16:1720:1080#0/1  
\_XHV\_Q¥RW\_\_`[LQ^UMSXO`]ZQFULJVXLR¥X^BBBB  
@HWI-EAS443:3:16:687:1324#0/1  
GCCACA ACTACTTCAATGCATGTGTGAGGAAGGAGTTGAA  
+HWI-EAS443:3:16:687:1324#0/1  
ab`babbabbabbbab`aabba`[aaa`aaa`a``a^`a  
@HWI-EAS443:3:17:1113:2016#0/1  
AGGGGGTTTCGGCTGAATCGAGAAAATTGCTTCTCATTGT  
+HWI-EAS443:3:17:1113:2016#0/1  
abaaaa^a`aaa¥a`ba]`a\_\_aa` `^\_\_Z^Z\_^a^^`X  
@HWI-EAS443:3:17:151:1466#0/1  
AATAATTCTAGAATCTGGTGACCCGAATGCACTATTGAAG  
+HWI-EAS443:3:17:151:1466#0/1  
aaaaaa¥N[[a`\_^\_\_a\_^`\_\_`a]\_\_\_`\_`\_\_`\_^\_^\_¥  
@HWI-EAS443:3:17:1523:815#0/1  
ATCGCAAGCATGAGGAGTA ACTATTTTACAGCAGAAGTGT  
+HWI-EAS443:3:17:1523:815#0/1  
`\_^`^WWZ[YQ[UF^Z\_]DUTRX^RXXU[YZ[[¥^V\_[RZV  
@HWI-EAS443:3:17:1550:1354#0/1  
CTACTGGCCATTTCTTGTCTTATAGTGAAAAGCGTAGTTT  
+HWI-EAS443:3:17:1550:1354#0/1  
\_YYVW`^0]UPSSWYY`OL[VO^OOR^VS[¥¥SDRSX^Y^  
@HWI-EAS443:3:17:1737:1034#0/1  
AGCATTGCCACA ACTACTTCAATGCATGTGTGAGGAAGGA  
+HWI-EAS443:3:17:1737:1034#0/1  
a^XU]¥\_]\_U^U\_Q[XXZ`] \_XZ^ZY¥\_XaX\_[¥YSY[YL  
@HWI-EAS443:3:17:418:629#0/1  
GCCATGGATGACTTTCAGCTGATCCCAATGGTAAGCAAAT  
+HWI-EAS443:3:17:418:629#0/1  
abaaaba`a`a`a`\_aa`a]a^`]\_a\_Y^a\_V\_X^\_^¥^  
@HWI-EAS443:3:17:554:562#0/1  
GTGAATTGACTGATTCAAGCTGGATAGAAGTTGATGAAAT  
+HWI-EAS443:3:17:554:562#0/1  
aM¥]a]¥`S[^`Y[\_^][¥QY[[aSU`¥\_]PX\_^Y^`V^S]  
@HWI-EAS443:3:18:1018:1023#0/1  
AAGAGCATGTCTCCTATTTCTAGAACACAGTATTTTTCCC  
+HWI-EAS443:3:18:1018:1023#0/1  
a[`aaaaJaU¥`aa\_T`\_]\_\_`\_\_V\_X`aV[¥`\_^`]¥X  
@HWI-EAS443:3:18:1301:1406#0/1  
CAAATAGTAGCATTGCCACA ACTACTTCAATGCATGTGTG  
+HWI-EAS443:3:18:1301:1406#0/1  
abbbbbbbabb`abbababbba`bbaabaaaab`abbaa`b  
@HWI-EAS443:3:18:1658:1425#0/1  
ATAGGAACATGGGCCTCGACACTTGGCATATCGCAGTCCT  
+HWI-EAS443:3:18:1658:1425#0/1  
XX¥b^Ya\_a`aSN0a\_S]\_¥QR¥V^U]G]\_Z\_aW¥SUR[^

@HWI-EAS443:3:18:423:1083#0/1  
CTCATCACTGTCATACTGTTTAAGGTCTGCAACATCTTTG  
+HWI-EAS443:3:18:423:1083#0/1  
a¥TILXHZ\_`¥YY[YQ[`LOWSV]QFSQFRVXWUWVSYZ]  
@HWI-EAS443:3:19:1119:182#0/1  
CGAATACATGAAACAACTTCAAAATGTGTGCATATTGCA  
+HWI-EAS443:3:19:1119:182#0/1  
aabaaa`baaaaaaaaa^aaaHa``aa¥a`a\_^a``\_\_^`  
@HWI-EAS443:3:19:1139:1996#0/1  
AGCAGGTGCTAGCAGAGCTACAGGACATTGAATATGAAGA  
+HWI-EAS443:3:19:1139:1996#0/1  
aa`b^bQ\_aP\_GX`a\_a\_`aaaa\_`[\_^\_\_`\_`[^\_\_¥\_  
@HWI-EAS443:3:19:1617:365#0/1  
TTTCCGTCTTCCTTCTTTGGTCCTACATTTGCTTACCATT  
+HWI-EAS443:3:19:1617:365#0/1  
`a\_ZW\_]]]OS\_ROYa\_]]][¥VQ[W¥Z^ZW]¥XLT][B  
@HWI-EAS443:3:19:223:984#0/1  
CAAATAGTAGCATTGCCACAACACTTCAATGCATGTGTG  
+HWI-EAS443:3:19:223:984#0/1  
ab`b`\_`aa`aa`\_`\_aa`a^b^a\_`a\_aaXa¥a  
@HWI-EAS443:3:19:435:940#0/1  
ATGGCTTTGAAGCAGGTGCTAGCAGAGCTACAGGACATTG  
+HWI-EAS443:3:19:435:940#0/1  
^\_`^aWFXN\_RVY]\_SORLYSSJ[S\_XPZS\_Z^WUULWW  
@HWI-EAS443:3:19:946:1583#0/1  
CTTCCTTCTTTGGTCCTACATTTGCTTACCATTGGGATCA  
+HWI-EAS443:3:19:946:1583#0/1  
abbbabbbbaaaa^\_aabaabbaaaaaaabaZKOYBB  
@HWI-EAS443:3:1:1078:1124#0/1  
ACTCGGAGAAAATATGGCACCAGAAAAAGTAGACTTTGAT  
+HWI-EAS443:3:1:1078:1124#0/1  
]`ZU^AD[Z\_ST^Z]a\_]]]QP¥`¥`^YaU]]`\_[GSa[B  
@HWI-EAS443:3:1:1094:651#0/1  
CTTGGAAGCAGGTGGTAGCAGAGCTACAGGACATTGAAAA  
+HWI-EAS443:3:1:1094:651#0/1  
\_W]]^YV]`^`\_XDWaaWQPUa^aa\_]a`[GRU¥ZUSBB  
@HWI-EAS443:3:1:328:1716#0/1  
ATTGCCACAACACTTCAATGCATGTGTGAGGAAGGAGTT  
+HWI-EAS443:3:1:328:1716#0/1  
^aaa`YO\_\_b\_aaW`¥¥bbba`aba^U]YWb\_aa]BBBB  
@HWI-EAS443:3:1:585:291#0/1  
CAAATAGTAGCATTGCCACAACACTTCAATGCATGTGTG  
+HWI-EAS443:3:1:585:291#0/1  
aVb¥a\_TP¥\_YZba¥QZ`Saa[TYOX`\_]\_^`^]aa\_aBB  
@HWI-EAS443:3:20:1247:432#0/1  
TTGCCACAACACTTCAATGCATGTGTGAGGAAGGAGTTG  
+HWI-EAS443:3:20:1247:432#0/1  
]aaV\_a¥a\_VaaYaa[aa]\_[^aa]`]b]\_UX¥`¥W`]^\_  
@HWI-EAS443:3:20:1358:353#0/1  
TACATTTGCTTACCATTGGGATCAGCTGAAAGTCATCCAT

+HWI-EAS443:3:20:1358:353#0/1  
aaaababaab^`]^`aab`R`\_\_aaY`a`aaa^\_aa]PX\_  
@HWI-EAS443:3:20:1461:391#0/1  
CAAATAGTAGCATTGCCACAACACTTCAATGCATGTGTG  
+HWI-EAS443:3:20:1461:391#0/1  
abbbbbbbabbbbbba\_`aaa\_baaaa`aaaaaabab`a  
@HWI-EAS443:3:20:151:1401#0/1  
GGGGTTTTTCGGCTGAATCGAGAAAATTGCTTCTCTTTGTT  
+HWI-EAS443:3:20:151:1401#0/1  
¥ZTZ]ab]]WGXZ\_]`bb]]]]`a\_\_aY\_a`^a¥]\_aa[\_  
@HWI-EAS443:3:20:1775:1881#0/1  
GTAGCATTGCCACAACACTTCAATGCATGTGTGAGGAAG  
+HWI-EAS443:3:20:1775:1881#0/1  
a^a\_Y\_\_a\_]`^\_V`^V`\_`\_`^`^a]]\_`Y\_]\_X`Z]Z^  
@HWI-EAS443:3:20:216:236#0/1  
CAAATAGTAGCATTGCCACAACACTTCAATGCATGTGTG  
+HWI-EAS443:3:20:216:236#0/1  
`bbab[a\_`ababaaaababa\_aaaaab``aaa\_aa\_a]a  
@HWI-EAS443:3:20:345:1809#0/1  
CAAATAGTAGCATTGCCACAACACTTCAATGCATGTGTG  
+HWI-EAS443:3:20:345:1809#0/1  
¥bbbbbb[Q`bbbbbabbbb^`ab\_bbabbaa\_bbaa]bSb  
@HWI-EAS443:3:20:79:740#0/1  
CAAATAGTAGCATTGCCACAACACTTCAATGCATGTGTG  
+HWI-EAS443:3:20:79:740#0/1  
abba```]abaaaaaaaaaaaaaaaaaaaaa`\_aa``a^a]\_  
@HWI-EAS443:3:20:987:647#0/1  
GCCATGGATGACTTTCAGCTGATCCCAATGGTAAGCAAAT  
+HWI-EAS443:3:20:987:647#0/1  
aaa`````a\_aU`a`\_`\_\_Y\_]^^^][\_]\_\_ZXZUNP^YY  
@HWI-EAS443:3:21:1183:1927#0/1  
ATTGCCACAACACTTCAATGCATGTGTGAGGAAGGAGTT  
+HWI-EAS443:3:21:1183:1927#0/1  
^]TU¥^W\_\_^¥Z`a^]]a]Z\_Y]]XX]P¥¥¥[[[UZXSOFV  
@HWI-EAS443:3:21:1440:1575#0/1  
TCCGTCTTCTTCTTTGGTCCTACATTTGCTTACCATTGG  
+HWI-EAS443:3:21:1440:1575#0/1  
aaa^U[aaa\_\_a\_\_a`a`^ZY\_\_Q`^aZR`^aVZ[]^X¥  
@HWI-EAS443:3:21:185:1321#0/1  
CAAATAGTAGCATTGCCACAACACTTCAATGCATGTGTG  
+HWI-EAS443:3:21:185:1321#0/1  
ab\_bab[^baaa\_a`aabba]aaa^a^a`a^\_aa`a]`\_]\_  
@HWI-EAS443:3:21:36:675#0/1  
GTCCTACATTTGCTTACCATTGGGATCAGCTGAAAGTCAT  
+HWI-EAS443:3:21:36:675#0/1  
a]`aa`aaaa`a`[[[^`\_`\_`^^^VTW`\_`\_`Z^Y\_\_]  
@HWI-EAS443:3:21:479:358#0/1  
CTTGGGGGGCTATATGAAGCAATCGAGGAGCGCCTGATTA  
+HWI-EAS443:3:21:479:358#0/1  
^\_¥\_\_YOPW\_baba^aZ[W^\_`\_]`a\_a]\_[FZa\_`W``[\_

@HWI-EAS443:3:21:522:503#0/1  
CATAAATCCCAATTACCTCATGGCTTGGAAAGCAGGCGCTA  
+HWI-EAS443:3:21:522:503#0/1  
^`a`baVV¥T^[^]`aba^[aaa]\_BBBBBBBBBBBBBB  
@HWI-EAS443:3:21:62:1559#0/1  
GGGGCTATATGACGCAATCGAGGAGTGCCTGATTAATGAT  
+HWI-EAS443:3:21:62:1559#0/1  
]\_TR[\_^a`^ZQHT`baabbabSVa[b]F[ba¥QaXS]XV  
@HWI-EAS443:3:21:837:1287#0/1  
AAATAGTAGCATTGCCACAACACTTCAATGCATGTGTGA  
+HWI-EAS443:3:21:837:1287#0/1  
aaaaaa^aaYaaaaa\_a```\_aa^`^\_\_\_^\_^\_`Z`Z`^  
@HWI-EAS443:3:22:1296:1491#0/1  
GGAACTATTTTACAGCAGAAGTGTCACTGCAGGGCTAC  
+HWI-EAS443:3:22:1296:1491#0/1  
\_POWFQVPU[¥]L]X]\_a[UU¥^BBBBBBBBBBBBBBBBBB  
@HWI-EAS443:3:22:1462:1971#0/1  
ACTGGTCACCACTGTCCAGGCCATGATTCGGTCTCTTCCT  
+HWI-EAS443:3:22:1462:1971#0/1  
`a`HVZaa`b`¥PS[H\_UL]^¥U`YS¥XGXPWYG]¥]XX  
@HWI-EAS443:3:22:1784:148#0/1  
CATTGCCACAACACTTCAATGCATGTGTGAGGAAGGAGT  
+HWI-EAS443:3:22:1784:148#0/1  
[^abb¥U\_^a\_I`Z`\_U\_a\_bMaaa]a[`\_aSa``T`Y[  
@HWI-EAS443:3:22:276:452#0/1  
TGACTTTCAGCTGATCCCAATGGTAAGCAAATGTAGGACC  
+HWI-EAS443:3:22:276:452#0/1  
abaaaaaaaa\_aa\_`\_aaba`\_a\_Z`a]`\_\_\_\_\_dW\_a`\_^¥  
@HWI-EAS443:3:22:794:1623#0/1  
CAAATAGTAGCATTGCCACAACACTTCAATGCATGTGTG  
+HWI-EAS443:3:22:794:1623#0/1  
[`Z¥aab]bZbb`^]aabba`aaa`aaa`a]`aa\_^\_0^  
@HWI-EAS443:3:22:880:714#0/1  
CAAATAGTAGCATTGCCACAACACTTCAATGCATGTGTG  
+HWI-EAS443:3:22:880:714#0/1  
abaa`^`a`^`aabaaY^aaa`abaabaaa`aa]aabWb]a  
@HWI-EAS443:3:23:1069:801#0/1  
CAAATAGTAGCATTGCCACAACACTTCAATGCATGTGTG  
+HWI-EAS443:3:23:1069:801#0/1  
abb`bbaaaaaab`aaababa`abaaaa`\_aa`aaZ`Wb  
@HWI-EAS443:3:23:633:196#0/1  
ATCGCAGTCCTCAAGAGCATGTCTCCTATTTCTAGAACAC  
+HWI-EAS443:3:23:633:196#0/1  
ab`SUabR¥V\_]a\_\_\_`aZV^\_YSSZXZ]\_\_\_]Z\_V]ZVQWR  
@HWI-EAS443:3:23:888:1666#0/1  
GGCATGGAAATGAGGCGCTGCCTTCTTCAGTATCTTCAGC  
+HWI-EAS443:3:23:888:1666#0/1  
```T`a\_^ab]aaZNXb^¥Z[`VSR]¥¥\_YFH^^N]TTEP  
@HWI-EAS443:3:23:996:875#0/1  
CAAATAGTAGCATTGCCACAACACTTCAATGCATGTGTG

+HWI-EAS443:3:23:996:875#0/1  
`bbbabV[aa`W^aaa`aaaYZaa`a`[```Ya^a\_XaT¥  
@HWI-EAS443:3:24:1294:1214#0/1  
AAGAGCATGTCTCCTATTTCTAGAACACAGTATTTTTCCC  
+HWI-EAS443:3:24:1294:1214#0/1  
]\_]baababaX`b`a`aa`a\_\_\_aaa\_aaX^aaa\_a[\_\_\_  
@HWI-EAS443:3:24:1342:255#0/1  
CTTCCTTCTTTGGTCCTACATTTGCTTACCATTGGGATCA  
+HWI-EAS443:3:24:1342:255#0/1  
abbbbbbbbabbaabbbbabbbbabbbaaabbb^a`a\_a  
@HWI-EAS443:3:24:301:701#0/1  
CAAATAGTAGCATTGCCACAACACTTCAATGCATGTGTG  
+HWI-EAS443:3:24:301:701#0/1  
abbabbb^bba]aabababbabb`babbabb`aaa¥a\_b  
@HWI-EAS443:3:24:679:273#0/1  
ATGAAATGGAAATCCGAACACATGAAACAACTTCCAAAT  
+HWI-EAS443:3:24:679:273#0/1  
aababaaaaaa`aa¥aaa`a`a\_`aa`\_aa```^^^\_\_\_\_  
@HWI-EAS443:3:24:773:1817#0/1  
AAATGGGAAAATACTGTGTTCTAGAAATAGGAGACATGC  
+HWI-EAS443:3:24:773:1817#0/1  
U]aZ`\_]\_bbb\_¥[]a^^^¥^Yaa^```ab]^Ybabaab`  
@HWI-EAS443:3:24:96:943#0/1  
CAAATAGTAGCATTGCCACAACACTTCAATGCATGTGTG  
+HWI-EAS443:3:24:96:943#0/1  
abbbab\_¥aaabaaaaaaaaaaaaabbaaaaaaaaaaaaaa^a¥a  
@HWI-EAS443:3:25:1245:441#0/1  
AGGAACTTTGACCGCTGATGGCAAAGAGGCCCATGAGGCA  
+HWI-EAS443:3:25:1245:441#0/1  
\_Z¥VX[\_X]a^^\_¥\_¥T]RUVMZ^XTY¥TQJRTQEX[]SW  
@HWI-EAS443:3:25:1282:670#0/1  
CGCAGTCCTCAAGAGCATGTCTCCTATTTCTAGAACACAG  
+HWI-EAS443:3:25:1282:670#0/1  
\_\_]V^¥`\_aaa^abba`^X`aY``¥```^`\_a^^[\_¥\_`  
@HWI-EAS443:3:25:164:1111#0/1  
CAAATAGTAGCATTGCCACAACACTTCAATGCATGTGTG  
+HWI-EAS443:3:25:164:1111#0/1  
abbbaa^]¥`\_S\_]abba^\_a`aaa`aa`Z^aaa``\_a¥a  
@HWI-EAS443:3:25:186:762#0/1  
CAAATAGTAGCATTGCCACAACACTTCAATGCATGTGTG  
+HWI-EAS443:3:25:186:762#0/1  
[\_Z[[\_¥`¥V\_^Y[XY\_\_``Va^^PaYaa¥¥\_¥OQRZ¥R\_Z  
@HWI-EAS443:3:25:464:490#0/1  
CAAATAGTAGCATTGCCACAACACTTCAATGCATGTGTG  
+HWI-EAS443:3:25:464:490#0/1  
[`babbbbaabbbbbbbbbbbbbabbabbabbabbabab  
@HWI-EAS443:3:25:482:436#0/1  
CAAATAGTAGCATTGCCACAACACTTCAATGCATGTGTG  
+HWI-EAS443:3:25:482:436#0/1  
abbbbb\_baba\_bbbbbabbbbbbbbbabbbaabbb\_b`

@HWI-EAS443:3:25:514:1038#0/1  
GTCCTACATTTGCTTACCATTGGGATCAGCTGAAAGTCAT  
+HWI-EAS443:3:25:514:1038#0/1  
aZ[`V¥a\_\_VUY¥\_UX^\_¥¥¥[PR^U^VUR^V¥ZTUV¥¥W  
@HWI-EAS443:3:25:544:355#0/1  
CAAATAGTAGCATTGCCACAACACTTCAATGCATGTGTG  
+HWI-EAS443:3:25:544:355#0/1  
\_```bba^a`a^a`aZ\_X^aa¥\_a^ab`bbba`\_`bbb\_  
@HWI-EAS443:3:25:559:775#0/1  
CAAATAGTAGCATTGCCACAACACTTCAATGCATGTGTG  
+HWI-EAS443:3:25:559:775#0/1  
abb`¥]¥\_`b]N]aaaa`bbba¥Z`babbaabaaaaabYa  
@HWI-EAS443:3:25:615:1180#0/1  
CAAATAGTAGCATTGCCACAACACTTCAATGCATGTGTG  
+HWI-EAS443:3:25:615:1180#0/1  
G]baZ``\_`bbbabaa`abb``babbbabbbbbbabb  
@HWI-EAS443:3:25:724:849#0/1  
GGATCTCCTCTTCATTTTCAATGTCCTGTAGCTCTGCTAG  
+HWI-EAS443:3:25:724:849#0/1  
aaV^Z]HPKXN\_^]\_¥N^[¥S¥]QSWU[N¥WWYSWWWWV  
@HWI-EAS443:3:25:845:837#0/1  
CGAGACTGGAGACACACAAATGGGAAAAATACTGTGTTCT  
+HWI-EAS443:3:25:845:837#0/1  
aZO\_XZab[a]DWa`V¥^`)]¥UGOST¥aa`[aW¥`UZ\_  
@HWI-EAS443:3:26:1006:158#0/1  
GGGATTTATGCCTTTCTCATGTGGTTTGAGTATGTTAGGC  
+HWI-EAS443:3:26:1006:158#0/1  
\_Z¥UJR[QQXSVHYTU`YT]¥Y[TW[MYOETPRWQQKUBB  
@HWI-EAS443:3:26:1234:420#0/1  
GCCACACAAATGGGAAAAATACTGTGTTCTAGAAATAGGA  
+HWI-EAS443:3:26:1234:420#0/1  
\_Y`\_aa^¥`¥a`^¥`\_[a\_\_`Z\_Z¥¥aaa`^^`\_a^^  
@HWI-EAS443:3:26:1611:1480#0/1  
CAAATAGTAGCATTGCCACAACACTTCAATGCATGTGTG  
+HWI-EAS443:3:26:1611:1480#0/1  
^¥aa\_abJ\_ba[bV\_a\_aaab`abaaa^\_\_`0`aa^bO\_  
@HWI-EAS443:3:26:242:648#0/1  
CGGCTGAATCGAGAAAATTGCTTCTCATTTTTTCAGGCACT  
+HWI-EAS443:3:26:242:648#0/1  
`]M\_K[a``aaUM`]U\_¥U`Z\_\_`^\_APHY\_ZFRMFOW]  
@HWI-EAS443:3:26:322:163#0/1  
AAATAGTAGCATTGCCACAACACTTCAATGCATGTGTGA  
+HWI-EAS443:3:26:322:163#0/1  
abbbba\_baaaaaabaabbaaaaa`aa`aa`aZa]a\_  
@HWI-EAS443:3:26:619:1559#0/1  
CACTGGAGAGGAGATGGCCACCAAAGCGCACTACACCCTT  
+HWI-EAS443:3:26:619:1559#0/1  
ab]X]SNTW¥YPDWZYPM`\_¥[RXBBBBBBBBBBBBBBB  
@HWI-EAS443:3:26:670:244#0/1  
ATCGCAGTCCTCAAGAGCATGTCTCCTATTTCTAGAACAC

+HWI-EAS443:3:26:670:244#0/1  
a\_``\_\_ZY\_¥`\_\_^Z`\_^\_]Z]]ZV^^ZZ^^ZZZZZZ  
@HWI-EAS443:3:27:1290:921#0/1  
GTCCGGGCCATGATTCGGTCTCTTCCTTCAATTATCTCAA  
+HWI-EAS443:3:27:1290:921#0/1  
a^``^^]a^`^¥`^^^[[^Y[`]]]`^Z\_\_\_Y^V^X\_^  
@HWI-EAS443:3:27:1409:1610#0/1  
CATTGCCACA ACTACTTCAATGCATGTGTGAGGAAGGAGT  
+HWI-EAS443:3:27:1409:1610#0/1  
aab\_`b^`b`bb^aX`\_`a]aba]]\_aZ^\_a\_`a\_a\_  
@HWI-EAS443:3:27:1557:711#0/1  
ATATAGCCCCCAAGATCGATGGTTCAGGTTCCAGGTTG  
+HWI-EAS443:3:27:1557:711#0/1  
ab`aaa\_`aa`[a`]]``````a\_Z]P[ZV¥V]UYSY\_T^]  
@HWI-EAS443:3:27:226:560#0/1  
CATTGCCACA ACTACTTCAATGCATGTGTGAGGAAGGAGT  
+HWI-EAS443:3:27:226:560#0/1  
a[bbbbbb`bbabbbabbbbaaba\_ab`babaaa\_abaab`  
@HWI-EAS443:3:28:1025:998#0/1  
CAAATAGTAGCATTGCCACA ACTACTTCAATGCATGTGTG  
+HWI-EAS443:3:28:1025:998#0/1  
abbbbbbb`¥bbbabbaabbbbbbbbbbba`abbaaababab  
@HWI-EAS443:3:28:1094:1345#0/1  
CAGCTTGCTACAGATCTGGGCTCTGGCTCATCACTGTCAT  
+HWI-EAS443:3:28:1094:1345#0/1  
\_S^abbab]ZD^`ZLUaaY`aaaaba]ab]\_V`TT`]R[`  
@HWI-EAS443:3:28:1113:1049#0/1  
GCCACA ACTACTTCAATGCATGTGTGAGGAAGGAGTTGAA  
+HWI-EAS443:3:28:1113:1049#0/1  
a`aaabaaab`a\_¥`aaa`\_ba¥a^aaa^aa\_] ^W\_Z¥`  
@HWI-EAS443:3:28:1450:688#0/1  
CAAATAGTAGCATTGCCACA ACTACTTCAATGCATGTGTG  
+HWI-EAS443:3:28:1450:688#0/1  
abbabbbabaabbbb\_bbbbb\_babbbabbbb`ababb\_b  
@HWI-EAS443:3:28:1590:674#0/1  
CAAATAGTAGCATTGCCACA ACTACTTCAATGCATGTGTG  
+HWI-EAS443:3:28:1590:674#0/1  
Y`bbbbbbba`\_aba\_\_bbbbbbbbbabbbbb`bbbab\_b  
@HWI-EAS443:3:28:1624:449#0/1  
CAAATAGTAGCATTGCCACA ACTACTTCAATGCATGTGTG  
+HWI-EAS443:3:28:1624:449#0/1  
a\_babbbba`bb`bbaX¥b^bb`bbab\_Zaabaab`b\_b\_b  
@HWI-EAS443:3:28:1744:129#0/1  
ATTGCAGCAA ACTTGTTAGTTTTCGTTTTTCGGATCTTCCC  
+HWI-EAS443:3:28:1744:129#0/1  
abbbabb^aa`abb]]`bUa\_baY`G\_`aa^ZIFPLZaXGT  
@HWI-EAS443:3:28:586:315#0/1  
CAAATAGTAGCATTGCCACA ACTACTTCAATGCATGTGTG  
+HWI-EAS443:3:28:586:315#0/1  
abbb`ba\_baabaaaaSbaaaaabaa\_aa]\_a\_`aa^a]a



@HWI-EAS443:3:28:624:1686#0/1  
CAAGAGCATGTCTCTATTTCTAGAACACAGTATTTTCC  
+HWI-EAS443:3:28:624:1686#0/1  
a`a\_Waba\_[\_a\_\_a^`]\`a\_a]^aa[\_`XLT]Z^\_YWO  
@HWI-EAS443:3:28:724:537#0/1  
CCCCAAGATCGAAGTTCCAGGTTCCAGGTTGTTCCCTAAG  
+HWI-EAS443:3:28:724:537#0/1  
abbb\_Za]]babbbb^\_]\`WZ^a`^^ZXa[`a[X\_[```¥  
@HWI-EAS443:3:28:957:571#0/1  
CAAATAGTAGCATTGCCACAACACTTCAATGCATGTGTG  
+HWI-EAS443:3:28:957:571#0/1  
`aabbbb¥Zbbaaaaa]bb`aabaa`bba`bV^\_aZaXb  
@HWI-EAS443:3:29:1641:1609#0/1  
AGAGAACAAGCCAATTGAAGTGGGCACTCGGGAAAATAT  
+HWI-EAS443:3:29:1641:1609#0/1  
\_`\_aNyKabUbSUX^\_WRQXMT[OPTPRNMVMBBBBBBB  
@HWI-EAS443:3:29:176:1788#0/1  
CCCCTTCAATTGGCTTGTCTCTTCATTTTCTTTGTCCT  
+HWI-EAS443:3:29:176:1788#0/1  
a`a¥^\_U]\_`PYOPT^WDESY¥XZYVVSJOVTW^THNBBB  
@HWI-EAS443:3:29:340:1906#0/1  
AGCAGGTGCTAGCAGAGCTACAGGACATTGAAAAGGAAGA  
+HWI-EAS443:3:29:340:1906#0/1  
a^aaaa^ab^`\_`aaa\_a\_aa\_[X`aaZ¥Z`^Y¥]W]^`^`  
@HWI-EAS443:3:29:369:1965#0/1  
ATGAAATGGAAATCCGAATACATGAAACAAACCTCCAAAT  
+HWI-EAS443:3:29:369:1965#0/1  
a\_\_aaa]^[\_^]\_`\_]\_a\_a`a^]`\_`aaa^WKZZ\_S^^  
@HWI-EAS443:3:29:417:483#0/1  
GCTGGAAATAGCCTAACATAGTCAAACCACATGAGAAAGG  
+HWI-EAS443:3:29:417:483#0/1  
a\_ab`abaaa`aaaa\_aa`a^aa\_a`\_]\_a\_`^\_a`^]  
@HWI-EAS443:3:29:442:1694#0/1  
GAAAAATACTGTGTTCTAGAAATAGGAGACATGCTCTTGA  
+HWI-EAS443:3:29:442:1694#0/1  
aa^a`baab`a\_aaabbb\_a`aaaWaYaba\_\_b`\_`\_`^`  
@HWI-EAS443:3:2:1049:850#0/1  
ATTGCCACAACACTTCAATGCATGTGTGAGGAAGGAGTT  
+HWI-EAS443:3:2:1049:850#0/1  
TZaba^¥\_bbba]bba`]^aaVbbab``\_ba\_a]aYa¥]  
@HWI-EAS443:3:2:1438:1083#0/1  
GTGCAGCCATGGATGACTTTCAGCTGATCCCAATGGTAAG  
+HWI-EAS443:3:2:1438:1083#0/1  
a¥¥`\_`\_UWY[XLR]LUT\_V[PNQSPUIWIDHVVTUWUBBB  
@HWI-EAS443:3:2:1579:375#0/1  
GCCGAGTCTTCTGACAAAGAGAAAGACATGACCAAGGAAT  
+HWI-EAS443:3:2:1579:375#0/1  
[`aa^[`Z¥\_Vb\_FUaaaa\_aa\_aa]`aX[\_TN\_]\_Z]Y\_  
@HWI-EAS443:3:2:244:1748#0/1  
AGCCGAACGGCTGCATTGAGGGCAAGATTTCCCAAATGTC

+HWI-EAS443:3:2:244:1748#0/1  
`^TQ\_^a^T¥]`]BBBBBBBBBBBBBBBBBBBBBBBBBBBBB  
@HWI-EAS443:3:2:316:2039#0/1  
GGGGTTTTTCGGCTGAATCGAGAAAATTGCTTGTCATTGTT  
+HWI-EAS443:3:2:316:2039#0/1  
`baa[a\_a]aV^a`a`aba\_]¥Ya`aIXPG`Ha¥^a]\_  
@HWI-EAS443:3:2:631:829#0/1  
CAAAGATGTTGGAGACCTTAAACAGTATGACAGAGATGAG  
+HWI-EAS443:3:2:631:829#0/1  
ab`[ZR[b`bbRZa^[\_`\_aa^\_ba[Taa^[\_aP\_\_0[`Y  
@HWI-EAS443:3:2:689:1739#0/1  
AGAAGCAATTTCTCGATTCCGAAAACACCTCAAGTT  
+HWI-EAS443:3:2:689:1739#0/1  
¥TZaRZa`baaYG\_V^\_a\_\_\_\_[VVa^¥\_\_FFG¥S\_`\_\_XQ  
@HWI-EAS443:3:2:758:1699#0/1  
GCCTTTCTCATGTGGTTTGAGTATGTTAGGCTCTTCCAG  
+HWI-EAS443:3:2:758:1699#0/1  
aYL¥HZ^N\_^Sb0`^UXV]YGW^V\_OVUV]YXX]BBBBBB  
@HWI-EAS443:3:30:1065:753#0/1  
AAGAGCATGTCTCCTATTTCTAGAACACAGTATTTTCCC  
+HWI-EAS443:3:30:1065:753#0/1  
a`aa`a^a`aaa\_aa^a`a\_a`S^\_aaa`Waaa`\_]SSU  
@HWI-EAS443:3:30:1328:445#0/1  
GCAGGGGCTAGCAGAGCTACAGGACATTGAAAATGAAGAG  
+HWI-EAS443:3:30:1328:445#0/1  
aaU\_\_0\_b`UaaU[XP]\_baQaaa\_aa^\_U]\_aa`[[\_\_a  
@HWI-EAS443:3:30:212:454#0/1  
AGTGGTATCCCTCCCCCTCGTGACTIONCGGGCCTTCAATAC  
+HWI-EAS443:3:30:212:454#0/1  
a^Q^UF0aX[```\_a\_¥¥¥\_[¥Y¥TXR]RFU¥STTPRRW  
@HWI-EAS443:3:30:338:1898#0/1  
CATTGCCACAACACTTCAATGCATGTGTGAGGAAGGAGT  
+HWI-EAS443:3:30:338:1898#0/1  
aaa¥T]baa\_b[^\_`]¥aaaXXa\_[XT[Q[aPS[\_\_\_ZWRU  
@HWI-EAS443:3:30:406:1289#0/1  
TCGCAGTCTCAAGAGCATGTCTCCTATTTCTAGAACACA  
+HWI-EAS443:3:30:406:1289#0/1  
¥`a`Zabb\_baba`^\_]\_a\_aaaa^`]\_aa\_a]U\_a\_\_a  
@HWI-EAS443:3:30:586:554#0/1  
GTTTCCGATTTGTTTTCAAAGAATTCCGTGGTCATGTCTT  
+HWI-EAS443:3:30:586:554#0/1  
\_QY^¥QW[QW]]]W^\_YYW]XZ`]WMDP^[R`Z^VLX[  
@HWI-EAS443:3:30:598:1616#0/1  
CAAATAGTAGCATTGCCACAACACTTCAATGCATGTGTG  
+HWI-EAS443:3:30:598:1616#0/1  
\_bbbaba¥b]abaaWS^bab]abbaa^abaabaaa\_R\_^`  
@HWI-EAS443:3:30:744:971#0/1  
AGTAGCATTGCCACAACACTTCAATGCATGTGTGAGGAA  
+HWI-EAS443:3:30:744:971#0/1  
V¥YV]^XX]`\_a¥a`W`^]¥\_¥¥^\_[S^W[YNay[¥Y¥Z^

@HWI-EAS443:3:31:1042:511#0/1  
CTTCCTTCTTTGGTCCTACATTTGCTTACCATTGGGATCA  
+HWI-EAS443:3:31:1042:511#0/1  
^\_]aaaa`^a\_aa`ab`aa`a`aab```aa\_]`[^`^^]  
@HWI-EAS443:3:31:1460:541#0/1  
GCTCAATGCATCCTGTGCAGCCATGGATGATTTTCAGCTG  
+HWI-EAS443:3:31:1460:541#0/1  
¥a¥\_a]^^¥`\_b\_bb`¥babYLab`abWD^\_¥`¥`]  
@HWI-EAS443:3:31:1506:908#0/1  
CATTGCCACAACACTTCAATGCATGTGTGAGGAAGGAGT  
+HWI-EAS443:3:31:1506:908#0/1  
a]bbbaab\_abaaa^baaaaa\_aaaab\_bXba`\_aa^aZ  
@HWI-EAS443:3:31:1752:630#0/1  
CTCGATTGCTTCATATAGCCCCCAAGATCGAAGGATCCA  
+HWI-EAS443:3:31:1752:630#0/1  
aabZbbbbbbbaaaaba]aaa]`aab`bba\_aaa\_SE[PZN  
@HWI-EAS443:3:31:344:1360#0/1  
TCGCAGTCTCAAGAGCATGTCTCCTATTTCTAGAACACA  
+HWI-EAS443:3:31:344:1360#0/1  
aaab`aW^`ZW^XVW\_KRa`a\_Za[MS\_Y`]`T]a`\_Q  
@HWI-EAS443:3:31:502:1591#0/1  
CAAATAGTAGCATTGCCACAACACTTCAATGCATGTGTG  
+HWI-EAS443:3:31:502:1591#0/1  
abba]\_bXb\_bbaaQabbba`bbbbabba`\_aabb\_`[T[  
@HWI-EAS443:3:32:1003:90#0/1  
CAAATAGTAGCATTGCCACAACACTTCAATGCATGTGTG  
+HWI-EAS443:3:32:1003:90#0/1  
abbbbbbbabbabbbb\_aaba`bb`bbabaaba`bbabab  
@HWI-EAS443:3:32:1171:797#0/1  
CCGTCTTCTTCTTTGGTCCTACATTTGCTTACCATTGGG  
+HWI-EAS443:3:32:1171:797#0/1  
ababaaabbbbbbbabba`abbbbaabaabbaaababaaa  
@HWI-EAS443:3:32:1421:106#0/1  
ATGACTTTCAGCTGATCCCAATGGTAAGCAAATGTAGGAC  
+HWI-EAS443:3:32:1421:106#0/1  
a`bI\_\_b`VY][R^XPTSS¥\_PUV][UXY\_]`^M¥]^¥  
@HWI-EAS443:3:32:1649:2034#0/1  
AGCATTGCCACAACACTTCAATGCATGTGTGAGGAAGGA  
+HWI-EAS443:3:32:1649:2034#0/1  
OMU^]X]`]FX]¥ba`aaa¥aaaI¥\_ZLYF¥Y`YNOR¥^  
@HWI-EAS443:3:32:255:1700#0/1  
CAAGAGCATGTCTCCTATTTCTAGAACACAGTATTTTCC  
+HWI-EAS443:3:32:255:1700#0/1  
aa\_R][a^SVYZQ\_a¥0¥^\_]`[¥X]`aa[Z`\_\_\_\_ZZ\_a  
@HWI-EAS443:3:32:978:1022#0/1  
AGAAGACCCCAAGGACAAAGAACATGAAGAGAACAAGCCA  
+HWI-EAS443:3:32:978:1022#0/1  
ZbbYZZH`ZZb\_a\_PTY][`a\_ZZ\_a`a`]YSZ\_[Q¥`  
@HWI-EAS443:3:33:1027:214#0/1  
AAATAGTAGCATTGCCACAACACTTCAATGCATGTGTGA

+HWI-EAS443:3:33:1027:214#0/1  
aaaaaaWaa\_`\_`^¥\_`\_]^\_\_`^\_`^MKU^Z`X^Z  
@HWI-EAS443:3:33:1139:515#0/1  
GGGCATGGAAATGAGGCGCTGCCTTCTTAAGTCTCTTCAG  
+HWI-EAS443:3:33:1139:515#0/1  
\_`^a¥^]b^X]Za\_W\_X`aX¥a[VSBBBBBBBBBBBBBBB  
@HWI-EAS443:3:33:1163:85#0/1  
GAAAGGCATAAATCCCAATTACCTCATGGCATGGAAGCAG  
+HWI-EAS443:3:33:1163:85#0/1  
a\_a`aT]`V`aaaY^XNY][[PWX\_W\_TZXYT^XUWQSX  
@HWI-EAS443:3:33:1305:1886#0/1  
GTTTTCGGCTGAATCGTGAAAATTGCTTCTCATTGTTCAG  
+HWI-EAS443:3:33:1305:1886#0/1  
a\_`[^`^a\_`\_]P^`Y\_Z\_a`\_\_`^Z^W^]]^[YUPSSNV]  
@HWI-EAS443:3:33:1749:809#0/1  
CGATTGGCCGTGTTTCCGATTTGTTTTCAAAGAATTCCTT  
+HWI-EAS443:3:33:1749:809#0/1  
aaZ`VT\_[[KY`a]]YY¥`\_aa`UYaXOX\_Y[W[YJNQ`W  
@HWI-EAS443:3:33:455:1101#0/1  
CTTGGAAGCAGGTGCTAGCAGGGCTACAGGACATTGAAAA  
+HWI-EAS443:3:33:455:1101#0/1  
aa\_YT`a]a`a`W¥`¥]^aXZ^¥¥¥¥PVaZ^\_TW¥RIR\_\_  
@HWI-EAS443:3:33:515:61#0/1  
CGATTTGTTTTCAAAGAATTCCTTGGTCATGTTTTTCTCT  
+HWI-EAS443:3:33:515:61#0/1  
\_Y``W`\_abab^ZZa`aaaaRaaa^R```aVHY\_`^]\_[\_`  
@HWI-EAS443:3:33:756:1844#0/1  
ATTCGAGCCGAACGGCTGCATTGAGGGCAAGCTTTTCCAA  
+HWI-EAS443:3:33:756:1844#0/1  
a^^a^a\_aa\_]MVY\_^][U^GVVWR^XWQIIIRROXZ]  
@HWI-EAS443:3:33:83:1568#0/1  
ATCGCAGTCCTCAAGAGCATGTCTCCTATTTCTAGAACAC  
+HWI-EAS443:3:33:83:1568#0/1  
\_V¥U^YSY`W`[WOW¥aYWVRXT¥¥QOQYW^YZWZ^W^]  
@HWI-EAS443:3:33:87:1066#0/1  
CAAATAGTAGCATTGCCACA ACTACTTCAATGCATGTGTG  
+HWI-EAS443:3:33:87:1066#0/1  
ab\_U`Z]Y`bbba``abb\_]V\_^ba`ab`V`]X`aa\_aY`  
@HWI-EAS443:3:33:889:1480#0/1  
AATGCATCCTGTGCAGCCATGGATGACTTTTCAGCGGATCC  
+HWI-EAS443:3:33:889:1480#0/1  
a^UJM^UW\_\_Z[HUQTZ[aVZQPRR\_P^X[]¥\_SGPM\_\_]  
@HWI-EAS443:3:34:1161:401#0/1  
GGCGTGGTGTCTCCTCAAGAATGGTTCAATTTTTGCGTT  
+HWI-EAS443:3:34:1161:401#0/1  
a`a\_N\_TZ]QS`^R^RZ\_a`\_`^]¥¥¥V^ZBBBBBBBBBB  
@HWI-EAS443:3:34:1610:630#0/1  
ACA ACTACTTCAATGCATGTGTGAGGAAGGAGTTGAACCA  
+HWI-EAS443:3:34:1610:630#0/1  
aaabaaa]a\_Z`baa[aba\_`¥a`aaX^`a\_^Z^¥^ZVHV

@HWI-EAS443:3:34:1681:272#0/1  
CTCCTTCCCTCACACATGCATTGAAGTAGTTGTGGCAATGC  
+HWI-EAS443:3:34:1681:272#0/1  
ab`bbbaabbaabbbbbb`bbbbaab\_ab`ab^aaX]^XPM  
@HWI-EAS443:3:34:172:1069#0/1  
CTCAAGTTGTGGAGACGCATATAGACTGTTTAATACAGAT  
+HWI-EAS443:3:34:172:1069#0/1  
aaa\_\_`aa\_a\_aaa\_\_aa`Y`a\_`a`\_SYGYWY^ZLTV  
@HWI-EAS443:3:34:225:543#0/1  
CAAGAGCATGTCTCTATTTCTAGAACACAGTATTTTTCC  
+HWI-EAS443:3:34:225:543#0/1  
aaaa`aa\_a^b`aa^Ya\_``\_`^V^\_aaaaW\_\_`\_]^U  
@HWI-EAS443:3:34:256:1483#0/1  
CAAATAGTAGCATTGCCACAACACTTCAATGCATGTGTG  
+HWI-EAS443:3:34:256:1483#0/1  
ab`bbba\_a\_baaa[abba\_baba`abaN]aaaaa^T[  
@HWI-EAS443:3:34:291:174#0/1  
TCCGTCTTCTTCTTTGGTCCTACATTTGCTTACCATTGG  
+HWI-EAS443:3:34:291:174#0/1  
^`b\_NZ\_aabaa`a`S\_\_aa`a\_a`\_`^`a\_a^^\_^[Z  
@HWI-EAS443:3:34:391:1939#0/1  
CGCAGTCCTCAAGAGCATGTCTCCTATTTCTAGAACACAG  
+HWI-EAS443:3:34:391:1939#0/1  
^^`\_YR`a]a]^¥¥\_`^TYTWaYab`[V¥`b\_aX^`aaaaJ  
@HWI-EAS443:3:34:47:894#0/1  
GAACCGGTTCTCTTTGTAATCATACAAACCAGGAAGAAAT  
+HWI-EAS443:3:34:47:894#0/1  
T\_`````\_[[^`bb``¥`aab\_[¥\_¥V`¥a^\_a¥NZaY^]  
@HWI-EAS443:3:34:482:1980#0/1  
CATAAATCCCAATTACCTCATGGCTTGAAGCAGGGGCTA  
+HWI-EAS443:3:34:482:1980#0/1  
``^RZ^bbbaZY\_ab`]a[ZYaU`HPU^VBBBBBBBBB  
@HWI-EAS443:3:34:572:1302#0/1  
CATTGCCACAACACTTCAATGCATGTGTGAGGAAGGAGT  
+HWI-EAS443:3:34:572:1302#0/1  
\_¥^AY\_a^\_Y^Sb¥¥^^\_aZT\_`\_a^]W\_\_a\_^W^Z^Z]  
@HWI-EAS443:3:34:606:382#0/1  
CAAATAGTAGCATTGCCACAACACTTCAATGCATGTGTG  
+HWI-EAS443:3:34:606:382#0/1  
¥`\_]abbU¥bb]baababa]aa\_Z`aba`¥Ia]\_abW]\_a  
@HWI-EAS443:3:34:850:1364#0/1  
ATAAGACAAGAAATGGCCAGTAGGAGGCTATGGGATTCCT  
+HWI-EAS443:3:34:850:1364#0/1  
aaS`\_¥`aYRXZS[X`aa¥][Y\_SSSG]^``^ZYBBBBB  
@HWI-EAS443:3:35:1160:601#0/1  
CCTACATTTGCTTACCATTGGGATCAGCTGAAAGTCATCC  
+HWI-EAS443:3:35:1160:601#0/1  
a\_`^Qaa¥`Y`\_¥U¥Y`[``US^]\_`V\_aSV]¥SSWV¥  
@HWI-EAS443:3:35:1215:1877#0/1  
GAGCATGTCTCCTATTTCTAGAACACAGTATTTTTCCCAT

+HWI-EAS443:3:35:1215:1877#0/1  
`b\_```aabaabaaa```aaaa`¥`\_`b\_[aabaaaa\_aZa  
@HWI-EAS443:3:35:1217:1004#0/1  
GACCCGAATGCACTATTGAGGCACCGATTTGAGATAATTG  
+HWI-EAS443:3:35:1217:1004#0/1  
^Ya\_WU^M[]Q^TYLXU]UG¥LYYHPRP[Y[HY`\_VMTUV  
@HWI-EAS443:3:35:1345:426#0/1  
CAAATAGTAGCATTGCCACA ACTACTTCAATGCATGTGTG  
+HWI-EAS443:3:35:1345:426#0/1  
Z¥Z\_V[\_I\_`[¥¥SPYZ^VZ]a^Z\_W]¥YY¥^U`a`^DY  
@HWI-EAS443:3:35:174:460#0/1  
CACACATTCACATCTTTTCACTTCACTGGAGAAGAGATGGC  
+HWI-EAS443:3:35:174:460#0/1  
ab`\_TZZ]^a\_ZZa\_`¥¥aa]^\_Z\_^XZI¥X[`VX`YN]\_  
@HWI-EAS443:3:35:182:348#0/1  
CAAATAGTAGCATTGCCACA ACTACTTCAATGCATGTGTG  
+HWI-EAS443:3:35:182:348#0/1  
aa]a^`\_\_bbaaaaaaaaaaaaaaaa`a^W^aa]aaZa]`  
@HWI-EAS443:3:35:248:475#0/1  
GCCACA ACTACTTCAATGCATGTGTGAGGAAGGAGTTGAA  
+HWI-EAS443:3:35:248:475#0/1  
`bb\_abbabbaabaaaaa]ab\_b\_`K`XP\_a\_a\_```Z  
@HWI-EAS443:3:35:292:1837#0/1  
TTTCCGTCTTCCTTCTTTGGTCCTACATTTGCTTACCATT  
+HWI-EAS443:3:35:292:1837#0/1  
aaabb^S`aabbaaaa`\_SZXaa^a`a`\_^a\_]a`\_`^Y  
@HWI-EAS443:3:35:38:456#0/1  
GCTTCCAAGCCATGAGGCAATTGGGATTTATGCCTTTCTC  
+HWI-EAS443:3:35:38:456#0/1  
`a^`baM`abbbaa]baGaaaaaa¥a`a\_aY^`b\_a[a``  
@HWI-EAS443:3:35:521:1752#0/1  
TCCGTCTTCCTTCTTTGGTCCTACATTTGCTTACCATTGG  
+HWI-EAS443:3:35:521:1752#0/1  
`aaZM]`abba`\_V\_¥ZSX^b`]aa`]ab]OZaaa\_`¥R  
@HWI-EAS443:3:35:688:1954#0/1  
CAAATAGTAGCATTGCCACA ACTACTTCAATGCATGTGTG  
+HWI-EAS443:3:35:688:1954#0/1  
abaZabWG[¥b\_aa\_aa]`^Y\_`a`aUa^\_a``Y\_Y\_  
@HWI-EAS443:3:36:1111:1264#0/1  
GTAGCATTGCCACA ACTACTTCAATGCATGTGTGAGGAAG  
+HWI-EAS443:3:36:1111:1264#0/1  
UZPYa`¥ZV\_WY]R\_¥aW¥a\_`^abb`^[^W]]aZW\_]`  
@HWI-EAS443:3:36:1142:1465#0/1  
CAAATAGTAGCATTGCCACA ACTACTTCAATGCATGTGTG  
+HWI-EAS443:3:36:1142:1465#0/1  
abbbbbbbab]baba\_\_b`bbbaababb`bbaaa\_ba`a\_a  
@HWI-EAS443:3:36:139:34#0/1  
CAAATAGTAGCATTGCCACA ACTACTTCAATGCATGTGTG  
+HWI-EAS443:3:36:139:34#0/1  
aba\_aabU[baaaaaaa`aa]aa````aaX^aa^`V`¥\_

@HWI-EAS443:3:36:1435:270#0/1  
AGGAGAAGATGTTGCCCCGATTGAATATATCGCAAGCATG  
+HWI-EAS443:3:36:1435:270#0/1  
abbXV\_bb]]baa¥a`abba]XaaX0¥]aa\_aXU]`[\_Xa  
@HWI-EAS443:3:36:1486:480#0/1  
ATCGCAGTCCTCAAGAGCATGTCTCCTATTTCTAGAACAC  
+HWI-EAS443:3:36:1486:480#0/1  
a¥a`^`^`[\_aZ]^^^`^\_YY^^]^^ZY¥XZ\_[JVV\_Y¥TT^  
@HWI-EAS443:3:36:1506:495#0/1  
CAAATAGTAGCATTGCCACAACACTTCAATGCATGTGTG  
+HWI-EAS443:3:36:1506:495#0/1  
abbabbb^baaabbaabbbaaabbb`baaa]`ba\_b^a  
@HWI-EAS443:3:36:1506:765#0/1  
CCTTCTTTGGTCTACATTTGCTTACCATTGGGATCAGCT  
+HWI-EAS443:3:36:1506:765#0/1  
ab]¥\_S^Zb`aaaa]\_Ua`aaaaTa`aRPy¥Z^Z[\_a¥\_  
@HWI-EAS443:3:36:497:1039#0/1  
CGATTTGAGATAATTGAAGGAAGAGACCCAATCATGGCCT  
+HWI-EAS443:3:36:497:1039#0/1  
a¥Q]]aba\_¥`ababaa`bTYa`aaa`[GV[\_`\_`\_`Y`\_]`  
@HWI-EAS443:3:37:1210:188#0/1  
ACATTTGCTTACCATTGGGATCAGCTGAAAGTCATCCATG  
+HWI-EAS443:3:37:1210:188#0/1  
aba`aba`aaa\_\_aaaa`^`\_aa`aa^aT^]aa`\_¥\_\_\_\_  
@HWI-EAS443:3:37:1470:1641#0/1  
CAAATAGTAGCATTGCCACAACACTTCAATGCATGTGTG  
+HWI-EAS443:3:37:1470:1641#0/1  
abbaaaaWaa`\_`b`\_aaaaabababa`Z^bab`aa^a]`  
@HWI-EAS443:3:37:1512:25#0/1  
AAATAGTAGCATTGCCACAACACTTCAATGCATGTGTGA  
+HWI-EAS443:3:37:1512:25#0/1  
a`a\_a`X`baabaa\_aa`aaaa`aa`aSTa`\_aa^a^a]  
@HWI-EAS443:3:37:1653:1888#0/1  
GGGTTTTCGGCTGAATCGCGAAAATTGCTTCTCATTGTTC  
+HWI-EAS443:3:37:1653:1888#0/1  
aa\_U[S[[[\_\_\_\_Z^Z`Vfy\_[SRY`\_T]U\_¥^WZ`^X^X  
@HWI-EAS443:3:37:1740:253#0/1  
ATAAATACGGCCTTGCTCAATGCATCCTGTGCCGCCATGG  
+HWI-EAS443:3:37:1740:253#0/1  
[a^]\_b`bbb`WX\_ZUVaa]\_X]]SU]Q¥RR]HS\_R^^[Z  
@HWI-EAS443:3:37:303:1090#0/1  
AAATAGTAGCATTGCCACAACACTTCAATGCATGTGTGA  
+HWI-EAS443:3:37:303:1090#0/1  
a^ababX`aaabaa[aaba`aaa\_a`b\_H[aaa`a\_aZa^  
@HWI-EAS443:3:37:408:1804#0/1  
CAGTGATGAGCCAGAGCCCAGATCTCTAGAAAGCTGGGTC  
+HWI-EAS443:3:37:408:1804#0/1  
`¥]JWba`baa^]\_a\_bb\_aaaaaa\_aUFOU¥`\_`\_UX\_  
@HWI-EAS443:3:37:504:926#0/1  
TGTCGTCCTCAAGAATGGTTCAATTTTGGAGTTCACCTCT

+HWI-EAS443:3:37:504:926#0/1  
`]a\_a\_Zb^X^`^`VXTVH`]Y^Y^WMXMZa[SQYXTLT  
@HWI-EAS443:3:37:586:1318#0/1  
GCCACAACACTTCAATGCATGTGTGAGGAAGGAGTTGAA  
+HWI-EAS443:3:37:586:1318#0/1  
abbbab\_baTa[bbbababbb`\_`aa`ZVY¥a\_a^aab\_  
@HWI-EAS443:3:37:604:155#0/1  
GCATTGCCACAACACTTCAATGCATGTGTGAGGAAGGAG  
+HWI-EAS443:3:37:604:155#0/1  
ab]a^`a`aaaa```a\_\_\_\_\_a^¥`Y¥TVYYV¥^\_X]]  
@HWI-EAS443:3:37:694:1324#0/1  
ATTGCCACAACACTTCAATGCATGTGTGAGGAAGGAGTT  
+HWI-EAS443:3:37:694:1324#0/1  
abb`abb`bb\_aaaaaaaaa\_aaaaa`]`W`\_[a`\_a]\_  
@HWI-EAS443:3:37:694:1628#0/1  
GGGGGCTATATGAACCAATCGAGGAGTGCCTGATTAATGA  
+HWI-EAS443:3:37:694:1628#0/1  
a^XN\_b\_Y^^^aaRHZb`¥``¥aK]GSbM¥\_OT[]\_Zaa  
@HWI-EAS443:3:37:86:1668#0/1  
GGGGCATGGTAATGAGGCGCTGCCTTCTTCAGTCTCTTCA  
+HWI-EAS443:3:37:86:1668#0/1  
YKY^aba`]\_\_bba``]^aaaaaab^^a`YQJYPbaa`^a^  
@HWI-EAS443:3:38:1583:1328#0/1  
ATAAATACGGCCTTGCTCAATGCATCCTGTGAAGCCATGG  
+HWI-EAS443:3:38:1583:1328#0/1  
a\_b`a`\_\_baa`\_R\_ZXS¥a[`a``]SU^MRVGSWWSVGM  
@HWI-EAS443:3:38:502:705#0/1  
TTTTACAGCAGAAGTCTCCCACTGCAGGGCTACTGAATAC  
+HWI-EAS443:3:38:502:705#0/1  
\_baaY^aa^W]aa`ZN¥`^ZY]Y[`\_\_\_\_^MZU^a\_]\_\_]  
@HWI-EAS443:3:38:755:1812#0/1  
CATTTGAGAAATGACACTGATGTGGTGAACCTTGTAAGTA  
+HWI-EAS443:3:38:755:1812#0/1  
\_^bbb``bbba`¥Q[`aaa`aZ¥VY``bQW```S^a]V[  
@HWI-EAS443:3:38:863:1525#0/1  
ATTTTCACCAAGTGCCCACTTCAATTGGCTTGTCTCTTC  
+HWI-EAS443:3:38:863:1525#0/1  
\_\_a`aa`aaa`a^`baaaa`a^aa\_\_Va\_[OTXJVSOTI  
@HWI-EAS443:3:39:1053:233#0/1  
GTAGCATTGCCACAACACTTCAATGCATGTGTGAGGAAG  
+HWI-EAS443:3:39:1053:233#0/1  
a[``[\_`\_a][a\_a```\_Y^]^^^\_UY``Y]W^Z\_\_ZV^  
@HWI-EAS443:3:39:1340:335#0/1  
ATTTGTGTGGCTCCAGTCTCGGGTCCAGTGAGTGAGGACTC  
+HWI-EAS443:3:39:1340:335#0/1  
abbbb]¥¥baabaa`^S¥VXZ\_[BBBBBBBBBBBBBBBBBB  
@HWI-EAS443:3:39:1727:747#0/1  
AATCAGGCACTCCTCGATTGCTTCATATAGCACCCCAAGA  
+HWI-EAS443:3:39:1727:747#0/1  
aabaaaa\_`a`aaaaZ\_\_¥`\_T\_`^`a[VFLT^Y\_WUW



@HWI-EAS443:3:39:554:382#0/1  
AATACATAATGAAGGGAGTGTACATATATACGGCCTTGCT  
+HWI-EAS443:3:39:554:382#0/1  
aa`]aa\_PU\_aZV[a`[]TaWX^\_a¥XY]\_¥^\_\_\_¥U^]\_  
@HWI-EAS443:3:39:791:936#0/1  
CACAACTACTTCAATGCATGTGTGAGGAAGGAGTTGAACC  
+HWI-EAS443:3:39:791:936#0/1  
\_\_a`\_¥a`\_]a^]aaaXaaabaa`ZY`aaX¥^`Y`\_[W  
@HWI-EAS443:3:3:1638:658#0/1  
AATAGTAGCATTGCCACAACACTTCAATGCATGTGTGAG  
+HWI-EAS443:3:3:1638:658#0/1  
aaaab\_bbaabaa`\_a\_aaaaa^aa`\_\_``[\_aa]aX`]a  
@HWI-EAS443:3:3:221:1722#0/1  
CATAAATCCCAATTACCTCATGGCTTGGAAAGTAGGTGCTA  
+HWI-EAS443:3:3:221:1722#0/1  
abRO]]a\_]X`]¥[US]]Y\_\_¥\_]X^¥\_BBBBBBBBBBBB  
@HWI-EAS443:3:3:279:952#0/1  
CATATAGCCCCCAAGATCGAAGGGTCCAGGTTCCAGGTT  
+HWI-EAS443:3:3:279:952#0/1  
a\_]baaa`a^a`\_]\_Z\_\_^^]\_^GYSVYR[0JNU^BBBB  
@HWI-EAS443:3:3:321:1548#0/1  
AAATAGTAGCATTGCCACAACACTTCAATGCATGTGTGA  
+HWI-EAS443:3:3:321:1548#0/1  
a[Vaaa\_\_a``WWXYZ`a¥W^``\_^a^[\_Z\_Y¥[aG\_Y  
@HWI-EAS443:3:3:516:1044#0/1  
ACGGCTGCATTGAGGGCAAGCTTTTCCAAATGTCAAAAAGA  
+HWI-EAS443:3:3:516:1044#0/1  
^YaaRY`U^`]X]a`\_VX¥QY^STFVU`\_]U¥\_^Ya^Y\_0  
@HWI-EAS443:3:3:679:517#0/1  
CATTGCCACAACACTTCAATGCATGTGTGAGGAAGGAGT  
+HWI-EAS443:3:3:679:517#0/1  
a``]a]\_bab\_\_baaabbbaaaaaab\_bXaab[a`aaa`]  
@HWI-EAS443:3:3:737:226#0/1  
AAATAGTAGCATTGCCACAACACTTCAATGCATGTGTGA  
+HWI-EAS443:3:3:737:226#0/1  
a`a\_aaWaaa`\_^\_^`]`a\_]a`\_\_`]\_¥`X¥^]aU`V`]  
@HWI-EAS443:3:3:819:440#0/1  
CCTCCGTGTTACTCCAATTTCAATGAACAGGTTCTCTTTG  
+HWI-EAS443:3:3:819:440#0/1  
abbbbaaabbaba`babbaaabbbaa[D]b\_a`a\_aaa`  
@HWI-EAS443:3:3:835:1616#0/1  
GTTCTCTTCATTTTCTTTGTCCTTGGGATCTTCTCTTCAT  
+HWI-EAS443:3:3:835:1616#0/1  
]`baaYaabbbbbbababbaa`bba`a\_a\_aa\_aabaaab  
@HWI-EAS443:3:3:860:952#0/1  
AACCACATGAGAAAGGATAAATCCCAATTACCTCATGGC  
+HWI-EAS443:3:3:860:952#0/1  
`Xb`ZV\_]Zb`ZbZ`aJ`b¥abb`Qa`baa[Rab¥`¥a¥B  
@HWI-EAS443:3:3:961:927#0/1  
CATGAAAATGAGGCGCTGCCTTCTTCAGTCTCTTCAGCAG

+HWI-EAS443:3:3:961:927#0/1  
\_Z]\_T\_T`babab\_baa`a\_Vaaaa`^a]\_aa^\_^Y\_N^Z  
@HWI-EAS443:3:40:1111:419#0/1  
CAAATAGTAGCATTGCCACAACACTTCAATGCATGTGTG  
+HWI-EAS443:3:40:1111:419#0/1  
abbabbaabbabbbbbbbbaa`a]\_S\_`bb`ab^b^b  
@HWI-EAS443:3:40:1188:411#0/1  
GGCTTCTCTACCCCTGTTGTGTTACACATACTGTTACCA  
+HWI-EAS443:3:40:1188:411#0/1  
aaXaaaa\_a]^[^U\_YX¥U[Z`XLUH[WVRU^R\_^WU\_^  
@HWI-EAS443:3:40:1247:667#0/1  
TGTGGTTTACTATGTTAGGCTCTTCCCGCCAAAGAATG  
+HWI-EAS443:3:40:1247:667#0/1  
[`abV]b^`¥\_U`b\_N¥VVZ`\_a\_aa^YFPY`¥PXUR¥\_¥  
@HWI-EAS443:3:40:1286:1452#0/1  
TATAGCCCCCAAGATCGAAGGTTCCCGGTTCCAGGTTGT  
+HWI-EAS443:3:40:1286:1452#0/1  
aaa\_Y¥\_\_¥^^`]R]YMX`VUW[ZIDMXUWZRUPU[V  
@HWI-EAS443:3:40:1589:117#0/1  
AGCTGAAAGTCATCCATGGCTGCACAGGATGCCTTGAGCA  
+HWI-EAS443:3:40:1589:117#0/1  
aa`\_]aXD[¥]\_a¥^^aa`^Y\_YYTS[[NRVIDVSMQLO  
@HWI-EAS443:3:40:425:1188#0/1  
CTTCCTTCTTTGGTCCTACATTTGCTTACCATTGGGATCA  
+HWI-EAS443:3:40:425:1188#0/1  
abb^bbb`[\_ZQTL[ab¥¥a\_aa^[TFX[\_[Z[OFRTU^Y  
@HWI-EAS443:3:40:52:713#0/1  
GTTCAATCGGGCAACATCTTCTCCTTTTCATCAAGTTC  
+HWI-EAS443:3:40:52:713#0/1  
aWWWXUSX^¥^VUTY\_R[WRVZY][SGVYSTOWYPTOLUT  
@HWI-EAS443:3:42:1023:1781#0/1  
CATTCTTTGGCTGGAAAGAGCCTGACATAGTCAAACCACA  
+HWI-EAS443:3:42:1023:1781#0/1  
]VRYPW[S`\_¥XJWT``QL[[XLJMN]^^[SV`\_`WVXN]  
@HWI-EAS443:3:42:1029:1503#0/1  
GGGGGAGGGAATACCACTATATGATACAATCAAATGCATG  
+HWI-EAS443:3:42:1029:1503#0/1  
aaYUaYbVXVVQa^`bS\_Vaa\_a``¥N]]R¥`\_\_^[`a\_S  
@HWI-EAS443:3:42:1146:1276#0/1  
ATCCTGGGCAGCCATGGATGACTTTCAGCTGATCCCAATG  
+HWI-EAS443:3:42:1146:1276#0/1  
a`\_^XLS`^a\_\_a¥a]a^]aP[\_UYWZLW`[MRUTYLUX  
@HWI-EAS443:3:42:1147:912#0/1  
CAAATAGTAGCATTGCCACAACACTTCAATGCATGTGTG  
+HWI-EAS443:3:42:1147:912#0/1  
abbbbbbabbbbbbbbabbbbbbbbabbbb`abbab\_b  
@HWI-EAS443:3:42:1312:1283#0/1  
CAAATAGTAGCATTGCCACAACACTTCAATGCATGTGTG  
+HWI-EAS443:3:42:1312:1283#0/1  
a\_\_¥`U¥\_\_\_¥S\_\_\_]VZa`\_Y]\_``aa`\_^¥X¥\_]aZaM^

@HWI-EAS443:3:42:1472:1771#0/1  
CAAATAGTAGCATTGCCACAACACTTCAATGCATGTGTG  
+HWI-EAS443:3:42:1472:1771#0/1  
R]WS[Z\_aZ\_`^bZa¥^abbb\_a¥b\_^T\_abbb^aaa`]]  
@HWI-EAS443:3:42:1767:524#0/1  
ATACTGTGTTCTAGAAATAGGAGACATGCTCTTGAGGACT  
+HWI-EAS443:3:42:1767:524#0/1  
[ba]``U`V\_]ZbbaUU\_¥RUHaa¥aZaaa\_aa]Pa[`Y`  
@HWI-EAS443:3:42:241:1133#0/1  
CATTTGCTTACCATTGGGATCAGCTGAAAGTCATCCATGG  
+HWI-EAS443:3:42:241:1133#0/1  
`bZK``a[babb]`a\_b[\_T¥b][^\_U\_YRZ``aa``bUa  
@HWI-EAS443:3:42:343:1674#0/1  
GACTTTCAGCTGATCCCAATGGTAAGCAAATGTAGGACCA  
+HWI-EAS443:3:42:343:1674#0/1  
]aab\_`bbbaabbaaaaaaaaa[aa]aaaaaa\_a`a``a  
@HWI-EAS443:3:42:460:2043#0/1  
CAAATAGTAGCATTGCCACAACACTTCAATGCATGTGTG  
+HWI-EAS443:3:42:460:2043#0/1  
^bbb`MYPY`a^aQYba¥aaa^\_a`¥]a``¥\_ZZ^VMVIR  
@HWI-EAS443:3:42:701:1941#0/1  
AGTAGCATTGCCACAACACTTCAATGCATGTGTGAGGAA  
+HWI-EAS443:3:42:701:1941#0/1  
a`Yaaaa\_a\_a^aaaa\_``\_``\_a\_\_````\_``[MXa`\_a\_  
@HWI-EAS443:3:42:901:802#0/1  
CAAATAGTAGCATTGCCACAACACTTCAATGCATGTGTG  
+HWI-EAS443:3:42:901:802#0/1  
`bbabbaZaaa`a`b`aaaa\_ba`baaaa`a\_`aa^a^a  
@HWI-EAS443:3:43:1035:1670#0/1  
CAAATAGTAGCATTGCCACAACACTTCAATGCATGTGTG  
+HWI-EAS443:3:43:1035:1670#0/1  
X``^aa`a¥`^¥`T¥¥\_Y¥bbKbbbbb`bbbaX¥````^\_  
@HWI-EAS443:3:43:1099:339#0/1  
CATTGCCACAACACTTCAATGCATGTGTGAGGAAGGAGT  
+HWI-EAS443:3:43:1099:339#0/1  
abab]`abbbb`bbabbaaabbbaabb\_bab]^``ba`a\_  
@HWI-EAS443:3:43:1428:281#0/1  
CAAATAGTAGCATTGCCACAACACTTCAATGCATGTGTG  
+HWI-EAS443:3:43:1428:281#0/1  
abab\_^[^bb`M`baba^^X^\_bb[bYVSa]`]SR^Za]b  
@HWI-EAS443:3:43:1516:1532#0/1  
ATAAATCCCAATTACCTCATGGATTGGAAGCAGGTGCTAG  
+HWI-EAS443:3:43:1516:1532#0/1  
^TZbaaaa`bbb`a\_aJaaaP`Iaa`¥R^TKRW^QSV]X\_  
@HWI-EAS443:3:43:1647:1396#0/1  
CGCAGTCCTCAAGAGCATGTCTCCTATTTCTAGAACACAG  
+HWI-EAS443:3:43:1647:1396#0/1  
abbbb]b`]a`bbabaaaa]`aa`a\_bba`b\_a]a\_\_`aa  
@HWI-EAS443:3:43:223:18#0/1  
CATTTGCTTACCATTGGGATCAGCTGAAAGTCATCCATGG

+HWI-EAS443:3:43:223:18#0/1  
`bbb`babbbbbb\_abaaaa`ab[ba`aab\_aaaa``aba  
@HWI-EAS443:3:43:480:372#0/1  
CAAATAGTAGCATTGCCACAACACTTCAATGCATGTGTG  
+HWI-EAS443:3:43:480:372#0/1  
abaaaab\_ab\_]aaaa^]aaa^abaaa`\_a\_a``aa^bWa  
@HWI-EAS443:3:43:516:94#0/1  
GCCACAACACTTCAATGCATGTGTGAGGAAGGAGTTGAA  
+HWI-EAS443:3:43:516:94#0/1  
`ab\_aaaa`a]a^aa[b\_\_ab`b[bVaR]\_ba\_aUaa`a  
@HWI-EAS443:3:43:709:1798#0/1  
GGGGCATGGAAATGAGGCGGTGCCTTCTTCAGTCTCTTCA  
+HWI-EAS443:3:43:709:1798#0/1  
aa````XZ[\_]\_XZ^\_aYFO[VSYNDRNUW[NMWSTXNR  
@HWI-EAS443:3:44:1459:967#0/1  
AAATAGTAGCATTGCCACAACACTTCAATGCATGTGTGA  
+HWI-EAS443:3:44:1459:967#0/1  
a\_baab`ba¥aZ¥a[\_\_a]\_aa\_aaVa\_aY¥\_`W[a\_aY  
@HWI-EAS443:3:44:1678:1727#0/1  
ACGGCCCTGCTCAATGCATCCTGTGCAGCCATGGATGACT  
+HWI-EAS443:3:44:1678:1727#0/1  
[SNaGSW]Ya]^UUTMMS\_U]\_TBTTTTTTTTTTTTTTTT  
@HWI-EAS443:3:44:420:1172#0/1  
ATTGCCACAACACTTCAATGCATGTGTGAGGAAGGAGTT  
+HWI-EAS443:3:44:420:1172#0/1  
abba]Xaa`a`aaaba]`abaaaa`\_^a\_`\_^\_\_a]aY\_  
@HWI-EAS443:3:44:607:592#0/1  
CAGCCATGGATGACTTTCAGCTGATCCCAATGGTAAGCAA  
+HWI-EAS443:3:44:607:592#0/1  
[`a¥^\_U[aa^a]^Z[OQZ\_ZRJWQW]aa¥]]`S]VVSRRH  
@HWI-EAS443:3:44:644:191#0/1  
GTCCTCAAGAGCATGTCTCCTATTTCTAGAACACAGTATT  
+HWI-EAS443:3:44:644:191#0/1  
a``aYS^M[R^¥XU\_QTWZXXYZYUVOSYGVUSUYVMSPQ  
@HWI-EAS443:3:44:705:879#0/1  
CGTCTCCACAACCTTGAGGGTTTTTCGGCTGAACCGAGAAA  
+HWI-EAS443:3:44:705:879#0/1  
`aa`aaa^`aaaaab\_aaaa\_aa`\_a\_aa\_`\_Z\_`^^^\_  
@HWI-EAS443:3:45:1060:897#0/1  
GCCCATTCAATTGGCTTGTCTCTTCATGGTCTTTGTCC  
+HWI-EAS443:3:45:1060:897#0/1  
a^`[^Ya][][X]\_Y\_WQVUVUTX[OLXVM[SSXVJMQQ  
@HWI-EAS443:3:45:123:321#0/1  
GTGCAGCCATGGATGACTTTCAGCTGATCCCAATGGTAAG  
+HWI-EAS443:3:45:123:321#0/1  
^`a`a`\_Xbab[a^a\_\_\_a[a\_a`\_U^\_]\_]\_¥`^PU^^]  
@HWI-EAS443:3:45:1589:709#0/1  
CCGTCTTCTTCTTTGGTCCTACATTTGCTTACCATTGGG  
+HWI-EAS443:3:45:1589:709#0/1  
aabaabaaabbab\_abb`aaa`ab`abaaaaaaaaaaaa`\_`

@HWI-EAS443:3:45:1706:1340#0/1  
GATTTCGAGCCGAACGGCTGCATTTAGGGCAAGCTTTCCCA  
+HWI-EAS443:3:45:1706:1340#0/1  
a\_b`XX`YPXTSWU`YVVSBBBBBBBBBBBBBBBBBBBBB  
@HWI-EAS443:3:45:430:864#0/1  
TGCCACAACACTTCAATGCATGTGTGAGGAAGGAGTTGA  
+HWI-EAS443:3:45:430:864#0/1  
¥]]aabbaab`babaaaaaaabb¥`^`^`aa\_`aa```\_`\_`  
@HWI-EAS443:3:46:1351:685#0/1  
AGAGAACAAGCCAATTGAAGTGGGCACTCGGGGAAAATAT  
+HWI-EAS443:3:46:1351:685#0/1  
Z`Q¥¥UaWV\_RT\_V[dMU00Ya\_aWTQJ\_\_VF\_P¥SFFYS  
@HWI-EAS443:3:46:1602:1861#0/1  
CATATAGCCCCCAAGATCGAAGGGTCCAGGTTCCAGGTT  
+HWI-EAS443:3:46:1602:1861#0/1  
\_abbbba\_¥a````^baa¥\_]aa[F^[^^^HZU^`¥M^  
@HWI-EAS443:3:46:1685:762#0/1  
CAATTACCTCATGGCTTGAAGCAGGGGCTAGCAGAGCTA  
+HWI-EAS443:3:46:1685:762#0/1  
aa`b`aaaaa`a`aaa¥a[¥\_Y^`GW^YP¥ZQXKVUPT  
@HWI-EAS443:3:46:215:227#0/1  
ATCCCAATTACCTCATGGCTTGAAGGAGGTGCTAGCAGA  
+HWI-EAS443:3:46:215:227#0/1  
a```\_bba\_a`a^]\_\_aa\_\_`S¥UUYDHUaQ\_SQZBBBBB  
@HWI-EAS443:3:46:378:524#0/1  
GGCTCTATTGGGAAAGTGTGAAGGACCTTACTGGCAAAAT  
+HWI-EAS443:3:46:378:524#0/1  
abbbaa`aa`b\_T]\_b¥a``aaaa]aaaa`\_X`^aa\_aa  
@HWI-EAS443:3:46:713:1907#0/1  
CATGAAGACATTCTTTGGCTGGAAAGGGCCTAACATAGTC  
+HWI-EAS443:3:46:713:1907#0/1  
UU[¥\_Yb\_`¥\_]a¥WHXST\_`ZX\_]SHS¥[Q¥ONYGX`VF  
@HWI-EAS443:3:47:1113:709#0/1  
GAAAAACTGTGTTCTAGAAATAGGAGACATGCTCTTGA  
+HWI-EAS443:3:47:1113:709#0/1  
aaaaa`aa]aa]a^`^aaa````^\_^^```^]a\_`^]  
@HWI-EAS443:3:47:385:471#0/1  
CAAATAGTAGCATTGCCACAACACTTCAATGCATGTGTG  
+HWI-EAS443:3:47:385:471#0/1  
aaaababba¥^``abba¥\_ba]`\_[aa]VZ```[`bbab`b  
@HWI-EAS443:3:47:583:636#0/1  
ATAAATCCCAATTACCTCATGGCTTGAAGCAGGGGCTAG  
+HWI-EAS443:3:47:583:636#0/1  
aa^ZY]`\_a^Xaa`a]```¥V[^]`\_`\_[NT¥RFK^000  
@HWI-EAS443:3:47:672:105#0/1  
CGGGTCTTCAATACTTAATTCAGACCATCCATCAGCAGG  
+HWI-EAS443:3:47:672:105#0/1  
\_bab\_I¥``W\_TXZ^]bbaabTa^]HTaaYWR]`[^H]a\_  
@HWI-EAS443:3:47:751:96#0/1  
AAATAGTAGCATTGCCACAACACTTCAATGCATGTGTGA

+HWI-EAS443:3:47:751:96#0/1  
aaabaaaab`bba^\_aaaa\_aa^a`\_`\_\_a]^aa\_`^aZ  
@HWI-EAS443:3:48:1108:1721#0/1  
CCGTCTTCCTTCTTTGGTCCTACATTTGCTTACCATTGGG  
+HWI-EAS443:3:48:1108:1721#0/1  
abRFXYZQSS¥]^TaYD¥^UZa`HVQ]^`[K\_^`VP^\_\_  
@HWI-EAS443:3:48:1786:396#0/1  
CAAATAGTAGCATTGCCACAACACTTCAATGCATGTGTG  
+HWI-EAS443:3:48:1786:396#0/1  
Xa]\_bba^`a^`^^a]\_`a[I]ba`ZUa^aba[aaabP`  
@HWI-EAS443:3:48:1790:126#0/1  
CATTGCCACAACACTTCAATGCATGTGTGAGGAAGGAGT  
+HWI-EAS443:3:48:1790:126#0/1  
aabbb\_aaabbabb^aaaa`a\_a\_bb\_a^a^a\_\_]aa]aX  
@HWI-EAS443:3:48:272:1370#0/1  
GCTTGCCTCAATGCAGCCGTTCCGCTCGGATCCATCTAC  
+HWI-EAS443:3:48:272:1370#0/1  
\_^`\_^[^WaQZZ[[]UVQBBBBBBBBBBBBBBBBBBBBB  
@HWI-EAS443:3:48:27:308#0/1  
CAAATAGTAGCATTGCCACAACACTTCAATGCATGTGTG  
+HWI-EAS443:3:48:27:308#0/1  
\_`\_`\_abbba^U^b]\_a^^a`a^VW`aRaba`a`VT`^YZaZ[  
@HWI-EAS443:3:48:422:733#0/1  
CAAATAGTAGCATTGCCACAACACTTCAATGCATGTGTG  
+HWI-EAS443:3:48:422:733#0/1  
R\_¥aZbbbX`Zabbab\_b\_ba\_ab\_\_baaaab]aabba`  
@HWI-EAS443:3:48:574:774#0/1  
GCCACAACACTTCAATGCATGTGTGAGGAAGGAGTTGAA  
+HWI-EAS443:3:48:574:774#0/1  
]^¥`a[[\_NL]^`^`aa``b\_SXa^]^a\_`]^YX^Z^\_QQa\_]`  
@HWI-EAS443:3:48:882:379#0/1  
CATTAAATCAGGCACTCCTCGATTGCTTGATATAGCCCCC  
+HWI-EAS443:3:48:882:379#0/1  
U\_a[aa`ab`ab`b[¥Wbb`]\_bZ[XH]aa^]\_V[FXOR  
@HWI-EAS443:3:48:94:710#0/1  
AAGACATTCTTTGGCCGAAAGAGCCTAACATAGTCAAAC  
+HWI-EAS443:3:48:94:710#0/1  
a^¥a^a`baaaa`]^`^`X]¥X[]W¥]^W[^¥XR[][^Z  
@HWI-EAS443:3:49:1374:124#0/1  
CAAATAGTAGCATTGCCACAACACTTCAATGCATGTGTG  
+HWI-EAS443:3:49:1374:124#0/1  
^ba`aaa`ba`bbbbaaaaa^aa^aa]a`aa^\_aa\_a\_b  
@HWI-EAS443:3:49:1423:119#0/1  
CACACATGCATTGAAGTAGTTGTGGCAATGCTACTATTTG  
+HWI-EAS443:3:49:1423:119#0/1  
abbb[bbbbbbbabbbbabbbbabbb^b\_a]P^\_aaa`bba  
@HWI-EAS443:3:49:1493:444#0/1  
CCGTTCTCTTTGTAGTCATACAAATCAGGAAGAAATTTA  
+HWI-EAS443:3:49:1493:444#0/1  
a`LVQ\_^Z\_ZabaUYUUT]^]Z¥Z¥]\_`b^]aaa`^aaa

@HWI-EAS443:3:49:1584:1258#0/1  
GCCACAACACTTCAATGCATGTGTGAGGAAGGAGTTGAA  
+HWI-EAS443:3:49:1584:1258#0/1  
a\_aaaa¥b`\_ba\_aaa\_\_\_^a^aZa^\_^^`\_\_^`Z\_X\_^  
@HWI-EAS443:3:49:1646:1396#0/1  
TACTGTATACATAATGAAGGGAGTGTACATAAATACGGCC  
+HWI-EAS443:3:49:1646:1396#0/1  
a`a]VYbaaabaabb\_¥^`a`aWbaa\_aa\_[[a\_^¥X¥Z  
@HWI-EAS443:3:49:266:352#0/1  
AGCCTATGTAGATGGATTGAGCCGAACGGCTGGATTGAG  
+HWI-EAS443:3:49:266:352#0/1  
aa]¥baba\_[a^``abbbabba^^ba\_\_ab]a[FVU^]YZ  
@HWI-EAS443:3:49:385:422#0/1  
TTCAATTACCTCAAATCGGTGCTTCAATAGTGCATTCGGG  
+HWI-EAS443:3:49:385:422#0/1  
ababbbbaaaaaa`b`aaW`]aa\_aaaa\_b`aaa^`[`  
@HWI-EAS443:3:49:863:1881#0/1  
CTTGAATCTTCTTTCATTTTCAATGCCTGTAGCTCTG  
+HWI-EAS443:3:49:863:1881#0/1  
U\_Vbbab]]abW\_b]ab]baa`bbbbbaaY`bX[Z\_abSJ  
@HWI-EAS443:3:49:91:1637#0/1  
ATGGCTTTGAAGCAGGTGCTAGCAGAGCTACAGGACATTG  
+HWI-EAS443:3:49:91:1637#0/1  
`a`bb^GZ]a\_\_WaYR]Z\_\_ZY`][\_\_aa]aaaNSZa`I  
@HWI-EAS443:3:4:1063:88#0/1  
TGGCACCAGAAAAAGGAGACTTTGATGACTGCAAAGATGT  
+HWI-EAS443:3:4:1063:88#0/1  
Za`R`aa^b`a`\_¥PFYaVNaaaaOVa\_U`^[QWH[Y\_]]  
@HWI-EAS443:3:4:1114:1809#0/1  
CATAAATACGGCCTCGCTCAATGCATCCTGTGCAGCCATG  
+HWI-EAS443:3:4:1114:1809#0/1  
]Y]`baabbbbaaaTD¥QVT\_a\_b[`aZRW\_R\_H`HRGaOP  
@HWI-EAS443:3:4:1291:1884#0/1  
CAAATAGTAGCATTGCCACAACACTTCAATGCATGTGTG  
+HWI-EAS443:3:4:1291:1884#0/1  
aa\_aba]D^aababa`\_]N`\_Zab\_a\_aa\_a^X\_`\_¥a[¥  
@HWI-EAS443:3:4:132:1997#0/1  
TTGGGGGGCTATATGAAGCAAACGAGGAGTGCCTGATTAA  
+HWI-EAS443:3:4:132:1997#0/1  
\_[a^^XP¥R¥[bVQH][J^UPSaVK[FTPF^\_`a\_Na`XY  
@HWI-EAS443:3:4:1491:197#0/1  
CAAATAGTAGCATTGCCACAACACTTCAATGCATGTGTG  
+HWI-EAS443:3:4:1491:197#0/1  
abbbbaa`abaaaa`\_W`aaa\_\_aXaa\_`\_`aS\_Z]^aZ\_  
@HWI-EAS443:3:4:1584:1883#0/1  
ATCCCAAGGAGAAAGAACATGAAGAGAACAAGCCAATTGA  
+HWI-EAS443:3:4:1584:1883#0/1  
\_a[Q\_^`[`¥LU\_aa`\_Z^\_¥¥\_\_ZX]\_Z`¥RGNZ^\_^ZX  
@HWI-EAS443:3:4:503:895#0/1  
TTTCCGTCTTCTTCTTTGGTCCTACATTTGCTTACCATT

+HWI-EAS443:3:4:503:895#0/1  
aabaaaa\_aa`aa`a^a^]]Z]a`a\_a`\_\_\_\_]^`^^  
@HWI-EAS443:3:4:874:1507#0/1  
GCCACAACACTTCAATGCATGTGTGAGGAAGGAGTTGAA  
+HWI-EAS443:3:4:874:1507#0/1  
aU]bLbbaab^aa]aaaa`^a\_a`^a^^\_a`aX]\_`\_  
@HWI-EAS443:3:50:131:852#0/1  
CAAATAGTAGCATTGCCACAACACTTCAATGCATGTGTG  
+HWI-EAS443:3:50:131:852#0/1  
`bbbbbbabbaabbbbababbabbabbab\_abb`b\_b  
@HWI-EAS443:3:50:1712:1227#0/1  
TCCTGCTGATGGATGGTCTGAAATTAAGTATTGAAGACCC  
+HWI-EAS443:3:50:1712:1227#0/1  
]\_T`babba^a`aa]H]a`][`aba\_^`[aa\_VXaa\_\_\_X  
@HWI-EAS443:3:50:179:163#0/1  
GTGCAGCCATGGATGACTTTCAGCTGATCCCAATGGTAAG  
+HWI-EAS443:3:50:179:163#0/1  
`bbabbabbbabbbbbbabbabb`bbba`b`b  
@HWI-EAS443:3:50:212:843#0/1  
TGGCCATGTTTCCGATTTGTTTTCAAAGTATTCCTTGGTC  
+HWI-EAS443:3:50:212:843#0/1  
aaW`a`baabba`babbaa`ba`aa`aaa\_aa`abba\_]`  
@HWI-EAS443:3:50:212:866#0/1  
CAAATAGTAGCATTGCCACAACACTTCAATGCATGTGTG  
+HWI-EAS443:3:50:212:866#0/1  
Y\_aa\_aa^bbbaba]``aaaabbaabababbaa`^aab  
@HWI-EAS443:3:50:278:1115#0/1  
GCATTGCCACAACACTTCAATGCATGTGTGAGGAAGGAG  
+HWI-EAS443:3:50:278:1115#0/1  
aaaaa`a\_a`a]abaaa`aaa`\_\_aaXbaa]b^`aa\_^`  
@HWI-EAS443:3:50:370:350#0/1  
CATTGCCACAACACTTCAATGCATGTGTGAGGAAGGAGT  
+HWI-EAS443:3:50:370:350#0/1  
`bbb\_bbbbbbbbaabb`bb\_bbabbbabbabbaabbaa`  
@HWI-EAS443:3:50:482:218#0/1  
GATGGCCACCAAAGCGGTCTACACCCTTGACGAAGAGAGC  
+HWI-EAS443:3:50:482:218#0/1  
¥Sbaa``[\_`aba^URVT[baZb^b]]`ba[bXab`b`a\_  
@HWI-EAS443:3:50:558:972#0/1  
GTAGCATTGCCACAACACTTCAATGCATGTGTGAGGAAG  
+HWI-EAS443:3:50:558:972#0/1  
a\_H]]\_bbaa`YNURV^a[]ZW\_X¥`]Taa`a]¥\_a¥0[W  
@HWI-EAS443:3:50:612:598#0/1  
CATTTGCTTACCATTGGGATCAGCTGAAAGTCATCCATGG  
+HWI-EAS443:3:50:612:598#0/1  
aaaaa`baa]]b`bb]bYZ`bbSaab`b\_a`bbaaa`b`b  
@HWI-EAS443:3:50:652:62#0/1  
ACACAAATGGGAAAATACTGTGTTCTAGAAATAGGAGAC  
+HWI-EAS443:3:50:652:62#0/1  
a`a`b]babbaVbab¥aaaaa\_ba\_\_a]\_aaab`a[aaa



@HWI-EAS443:3:50:736:633#0/1  
GTCTCCTATTTCTAGAACACAGTATTTTTCCCATTTGTGT  
+HWI-EAS443:3:50:736:633#0/1  
aa`aaa`bababaa^baaabb^abbaaa\_`aa`aaa\_a^  
@HWI-EAS443:3:50:914:1039#0/1  
CCGAAAATCGAAACTAACAAAGTTTGCTGCAACATGCACAC  
+HWI-EAS443:3:50:914:1039#0/1  
a`a`ab\_^¥V[^aNb\_\_aab[PS`aW]\_]a`[T\_a\_^\_¥Q  
@HWI-EAS443:3:50:993:205#0/1  
GCTCTCTTCGTCAAGGGTGGAGTCCGCTTTGGTGGCCATC  
+HWI-EAS443:3:50:993:205#0/1  
`aab\_Zbbbbaa`a`bb\_\_GW^a\_`aQZ``HYS``[^XTY  
@HWI-EAS443:3:51:1199:393#0/1  
CCGTCTTCTTCTTTGGTCCTACATTTGCTTACCATTGGG  
+HWI-EAS443:3:51:1199:393#0/1  
a`aYaa]bUbb][a]\_a]\_W`aaba\_ab^`b`aXab^aaa  
@HWI-EAS443:3:51:1227:451#0/1  
CAAATAGTAGCATTGCCACAACACTTCAATGCATGTGTG  
+HWI-EAS443:3:51:1227:451#0/1  
aaaabbbaba¥bab^Vababaabaaba`baabaaaa^aXb  
@HWI-EAS443:3:51:1548:36#0/1  
CAAATAGTAGCATTGCCACAACACTTCAATGCATGTGTG  
+HWI-EAS443:3:51:1548:36#0/1  
a`]`\_¥¥S[M^`bb`\_``abaa`a``a`b`b``abb]Y]\_  
@HWI-EAS443:3:51:366:1207#0/1  
CAAGAGCATGTCTCCTATTTCTAGAACACAGTATTTTTCC  
+HWI-EAS443:3:51:366:1207#0/1  
abababbaaa`aaaaabaa`aaa`aaa\_aa]`a`aa`\_Z  
@HWI-EAS443:3:51:384:1814#0/1  
CACAACACTTCAATGCATGTGTGAGGAAGGAGTTGAACC  
+HWI-EAS443:3:51:384:1814#0/1  
`aVb]\_a\_Ya`\_b`\_a¥aa`Z`^¥``\_\_^]`a`````\_aY^  
@HWI-EAS443:3:51:42:202#0/1  
AGAGCATGTCTCCTATTTCTAGAACACAGTATTTTTCCCA  
+HWI-EAS443:3:51:42:202#0/1  
XTVa\_ZZa]a`PY¥R]baS][a`\_X]^^`RV¥]`Y`\_FOZ  
@HWI-EAS443:3:51:558:774#0/1  
AATAGTAGCATTGCCACAACACTTCAATGCATGTGTGAG  
+HWI-EAS443:3:51:558:774#0/1  
``a`b`baa`bba^]abaaaaaaaaaaaaa``aaaa`a`a  
@HWI-EAS443:3:52:1107:326#0/1  
AAATAGTAGCATTGCCACAACACTTCAATGCATGTGTGA  
+HWI-EAS443:3:52:1107:326#0/1  
aaabaa\_aa`aaa¥`a\_aaa^aa\_aa^a\_`a```a`aY\_\_  
@HWI-EAS443:3:52:112:557#0/1  
GATTGAGCCGAACGGCTGCATTGAGGGGAAGCTTTCCCA  
+HWI-EAS443:3:52:112:557#0/1  
aaaa^`aaaa`VV]^[[`[NRR¥HPIU[DOTOISYUNSUZ  
@HWI-EAS443:3:52:1220:42#0/1  
CGATTAGCCATGTTTCCGATTTGTTTTCAAAGAATTCCTT

+HWI-EAS443:3:52:1220:42#0/1  
``b\_0¥^^`bbbb`\_¥a`b`babbaPZaaba`a¥Tab  
@HWI-EAS443:3:52:1249:625#0/1  
CCGTCTTCCTTCTTTGGTCCTACATTTGCTTACCATTGGG  
+HWI-EAS443:3:52:1249:625#0/1  
a`aa\_aaaaaa\_baaa`\_`aa`\_aaa]¥aaaa[aaa\_\_\_\_  
@HWI-EAS443:3:52:1322:1880#0/1  
CAAATAGTAGCATTGCCACAACACTTCAATGCATGTGTG  
+HWI-EAS443:3:52:1322:1880#0/1  
¥aa¥baXaabb¥aba\_Y\_Vba\_ab`a\_W¥baaXabb`bX^  
@HWI-EAS443:3:52:1479:772#0/1  
TGTCCGGGCCATGATTCCGGTCTCTTCCTTCAATTATCTCA  
+HWI-EAS443:3:52:1479:772#0/1  
\_a[`¥a¥N\_Ya`a¥`^^^VU^UZ]TXX^V¥S][Z`[YUT  
@HWI-EAS443:3:52:1729:1087#0/1  
TTTCCGTCTTCCTTCTTTGGTCCTACATTTGCTTACCATT  
+HWI-EAS443:3:52:1729:1087#0/1  
ab`^Z^\_\_b`^Zaa^a`aV`Y\_]``^`a`\_`^a`\_¥X¥\_`  
@HWI-EAS443:3:52:340:1386#0/1  
CAAATAGTAGCATTGCCACAACACTTCAATGCATGTGTG  
+HWI-EAS443:3:52:340:1386#0/1  
abaaaaaRaaaaa`[`a\_\_aa\_a`aa\_\_a`aaa\_aaY]Xa  
@HWI-EAS443:3:52:442:1025#0/1  
CAAATAGTAGCATTGCCACAACACTTCAATGCATGTGTG  
+HWI-EAS443:3:52:442:1025#0/1  
abaab`aXbaaaaaa`a`aaaaaaaaaaaa`aa`aa]aZa  
@HWI-EAS443:3:52:687:1709#0/1  
CAAATAGTAGCATTGCCACAACACTTCAATGCATGTGTG  
+HWI-EAS443:3:52:687:1709#0/1  
a`\_aYK¥^bb\_W`]\_\_aaa\_`^`aaaaa\_a`aa^Z``Q¥[[  
@HWI-EAS443:3:53:1205:1342#0/1  
GTAGCATTGCCACAACACTTCAATGCATGTGTGAGGAAG  
+HWI-EAS443:3:53:1205:1342#0/1  
a[[¥VSaaaa¥\_WYa\_ZaY\_aZ¥S\_X[\_a[U]\_`Ta\_^T[  
@HWI-EAS443:3:53:189:550#0/1  
CCATGGATGACTTTCAGCTGATCCCAATGGTAAGCAAATG  
+HWI-EAS443:3:53:189:550#0/1  
aa\_bbbabababbaabbaab\_aa`aY`ab^R^`a\_``]aa  
@HWI-EAS443:3:53:195:772#0/1  
CAAATAGTAGCATTGCCACAACACTTCAATGCATGTGTG  
+HWI-EAS443:3:53:195:772#0/1  
ababbbbabababbbbaabbaababbb`baab`abbab`b  
@HWI-EAS443:3:53:373:946#0/1  
GCCACAACACTTCAATGCATGTGTGAGGAAGGAGTTGAA  
+HWI-EAS443:3:53:373:946#0/1  
aaa[bbaabbbbaabab`bb`b\_aab^Vaba`a^aa`a  
@HWI-EAS443:3:53:784:948#0/1  
GAGAAGATGTTGCCCGATTGAACATATCCCAAGCATGAG  
+HWI-EAS443:3:53:784:948#0/1  
`abbbb\_babbbb`bbbaababbbbbb\_T\_`]aaaabaa

@HWI-EAS443:3:54:1418:1346#0/1  
ATCGCAGTCCTCAAGAGCATGTCTCCTATTTCTAGAACAC  
+HWI-EAS443:3:54:1418:1346#0/1  
\_YPaaV\_a`YZaa]\_NNS\_UQN`WN]]`aa]a`]Z\_W`R  
@HWI-EAS443:3:54:1455:665#0/1  
TGGGGGGCTATATGAAGCAATCGAGGAGTGCCTTATTAAT  
+HWI-EAS443:3:54:1455:665#0/1  
a`]¥\_XYU\_]`Z`[¥]TNR\_\_R]V\_ZOSS[VZaUZ`^][¥  
@HWI-EAS443:3:54:1716:406#0/1  
CAAATAGTAGCATTGCCACAACACTTCAATGCATGTGTG  
+HWI-EAS443:3:54:1716:406#0/1  
a`^[\`SaaV`aa\_OP[\_\_ZZaaa\_`^`a[b`^[Y]]a[a]`  
@HWI-EAS443:3:54:216:897#0/1  
TGGTCCTACATTTGCTTACCATTGGGATCAGCTGAAAGTC  
+HWI-EAS443:3:54:216:897#0/1  
aaa\_a`abaaaaaaa`baa\_aabaa```aaaa`a``^\_  
@HWI-EAS443:3:54:257:759#0/1  
CAAATAGTAGCATTGCCACAACACTTCAATGCATGTGTG  
+HWI-EAS443:3:54:257:759#0/1  
abbbbbbb]bbbababbabb`abbaababaaa`aab]b`a  
@HWI-EAS443:3:54:367:833#0/1  
AAATAGTAGCATTGCCACAACACTTCAATGCATGTGTGA  
+HWI-EAS443:3:54:367:833#0/1  
abab^Yab\_a\_baaaaa`aaaab`aaaa`b^\_aa\_a]a\_  
@HWI-EAS443:3:54:645:335#0/1  
TAGCATTGCCACAACACTTCAATGCATGTGTGAGGAAGG  
+HWI-EAS443:3:54:645:335#0/1  
aba^]`aaaaa\_aa^aaba^aa\_aaX`b`][b^aa\_`aa  
@HWI-EAS443:3:55:102:1335#0/1  
TGCAGTGGGACACTTCTGCTGTAGAATAGTTCCTCCTCAT  
+HWI-EAS443:3:55:102:1335#0/1  
a]\_aaaabaaabaaaabbabaaabbaaa\_\_\_\_a`^a``aa  
@HWI-EAS443:3:55:1134:1354#0/1  
AAATAGTAGCATTGCCACAACACTTCAATGCATGTGTGA  
+HWI-EAS443:3:55:1134:1354#0/1  
aa¥X]\_Yba]T^¥[YQJS^WPaa^Ua\_`a\_aUZ¥[\_Y``  
@HWI-EAS443:3:55:1229:1984#0/1  
CCAGGAAGGTCCTGCACACTTTCCCAATAGAGCCTTCCTC  
+HWI-EAS443:3:55:1229:1984#0/1  
aSabG`]\_a]YTa`K\_\_a¥a`]\_^Paaa^``\_¥Wa^HU^W  
@HWI-EAS443:3:55:1250:199#0/1  
GCAGCCGTTGCGCTCGAATCCATCTACATAGTCTCTAAAG  
+HWI-EAS443:3:55:1250:199#0/1  
abbbabba`a\_b`a`U^XJ[]ZS]UR]YU[[Z\_V\_QU\_W  
@HWI-EAS443:3:55:1302:694#0/1  
GCCACAACACTTCAATGCATGTGTGAGGAAGGAGTTGAA  
+HWI-EAS443:3:55:1302:694#0/1  
``]`abaW`\_X\_`¥\_Z\_`U¥ba]bY\_]`a```a[`U¥Y\_^  
@HWI-EAS443:3:55:161:1743#0/1  
CCGTCTTCCTTCTTTGGTCCTACATTTGCTTACCATTGGG

+HWI-EAS443:3:55:161:1743#0/1  
aba\_aaa`aaa`aaa`\_^`aaaaa`~~~~`\_\_\_`^\_Z]  
@HWI-EAS443:3:55:271:1815#0/1  
GCCAAAATTGAACAATTCTTGAGGACGACACCACGCCCC  
+HWI-EAS443:3:55:271:1815#0/1  
]U¥WM]aa¥[a[]I¥a`\_`V\_RHPZZUTWTP`¥HR\_FKK  
@HWI-EAS443:3:55:390:979#0/1  
GGCTTCTCTACCACTGTTGTGTTACATATACTGTTACCA  
+HWI-EAS443:3:55:390:979#0/1  
`]bba`abab`a``a`\_ZZ`^^]XOX`~~~~`aV¥X^]a[  
@HWI-EAS443:3:56:1229:583#0/1  
CAAATAGTAGCATTGCCACAACACTTCAATGCATGTGTG  
+HWI-EAS443:3:56:1229:583#0/1  
ababbbb\_bbaabbaa\_aaaaaab`ba`a`a`^aaa[b\_a  
@HWI-EAS443:3:56:1628:163#0/1  
CAAATAGTAGCATTGCCACAACACTTCAATGCATGTGTG  
+HWI-EAS443:3:56:1628:163#0/1  
S`bbbab]``b`ZaXaWZaX`^W`¥Xa`abbaba]b`b  
@HWI-EAS443:3:56:200:1389#0/1  
ATTTGCTTACCATTGGGATCAGCTGAAAGTCATCCATGGC  
+HWI-EAS443:3:56:200:1389#0/1  
abbaaaaa`^aa\_]`^¥[\_`a`\_`^a`\_`^aaZY\_^[[¥`  
@HWI-EAS443:3:56:443:200#0/1  
CAAATAGTAGCATTGCCACAACACTTCAATGCATGTGTG  
+HWI-EAS443:3:56:443:200#0/1  
ab`abab`abaabbaaaaaabaaaaba\_a^ab`\_bb]a`b  
@HWI-EAS443:3:56:462:178#0/1  
CTGGAGAAGTTCGGTGGGAGGCTTTGGTCGGCAAGCTTGC  
+HWI-EAS443:3:56:462:178#0/1  
aaab`ba\_bU\_]`WZa\_\_a¥GN`\_[LRUQUBBBBBBBBBB  
@HWI-EAS443:3:56:553:872#0/1  
GTCACGAGGGGAGGGAATACCTCTATATGATGCAATCAA  
+HWI-EAS443:3:56:553:872#0/1  
`\_`bab¥baaaaNZb[]]^]¥a`W\_Y^\_\_\_^aa`^`^\_\_\_\_  
@HWI-EAS443:3:56:984:1594#0/1  
CAAATAGTAGCATTGCCACAACACTTCAATGCATGTGTG  
+HWI-EAS443:3:56:984:1594#0/1  
abbabb¥abaabbab`ba[[T^bb`baabbbb``baabab  
@HWI-EAS443:3:57:1032:649#0/1  
CAAATAGTAGCATTGCCACAACACTTCAATGCATGTGTG  
+HWI-EAS443:3:57:1032:649#0/1  
^abaa¥¥Paa¥a\_bbbVb^bbab^]bbXbabb``ababa`  
@HWI-EAS443:3:57:1359:483#0/1  
GTCCTACATTTGCTTACCATTGGGATCAGCTGAAAGTCAT  
+HWI-EAS443:3:57:1359:483#0/1  
a``abbabbbba`bbbaabb`baa`a`a`\_bba\_`a[Ua`  
@HWI-EAS443:3:57:1425:265#0/1  
ATCGCAGTCCTCAAGAGCATGTCTCCTATTTCTAGAACAC  
+HWI-EAS443:3:57:1425:265#0/1  
`\_[aZ`a\_TU\_]`\_`^[[¥^^]]Z\_W]^]\_\_\_\_\_]\_]YW¥Z

@HWI-EAS443:3:57:1443:675#0/1  
GGGGGCTATATGGAGCAATCGAGGAGTGCCTGATTAATGA  
+HWI-EAS443:3:57:1443:675#0/1  
abaaabbbbbbaaaaaa\_`^a`^a\_a\_``a\_`aa\_\_a`  
@HWI-EAS443:3:57:44:489#0/1  
CCAATGGTAAGCAAATGTAGGACCAAAGAAGGAAGACGGA  
+HWI-EAS443:3:57:44:489#0/1  
aba`ba\_\_Saaaa`a^`a`^^\_aYa`^`¥U^\_WY\_^Y  
@HWI-EAS443:3:57:495:1579#0/1  
AATGCATCCTGCGCAGCCATGGATGACTTTCAGCTGATCC  
+HWI-EAS443:3:57:495:1579#0/1  
¥Ua[S^¥aaXVHN\_XN\_ZPXROT^`aW^^¥`¥RLTPL\_BB  
@HWI-EAS443:3:57:598:632#0/1  
CAAATAGTAGCATTGCCACAACACTTCAATGCATGTGTG  
+HWI-EAS443:3:57:598:632#0/1  
`a`aabbbbbbb\_bbbY\_bbaaa`aaaaaaaab``b`aXb  
@HWI-EAS443:3:57:933:676#0/1  
CAAATAGTAGCATTGCCACAACACTTCAATGCATGTGTG  
+HWI-EAS443:3:57:933:676#0/1  
Z``b`Za[`a^Va`a\_aaYaba\_U]]aXY\_aa¥\_a[\_^`b  
@HWI-EAS443:3:58:1085:883#0/1  
ATAAATCCCAATTACCTCATGGCTTGAAAGCAGGTGCTAG  
+HWI-EAS443:3:58:1085:883#0/1  
a``aaaa`aaaa`\_aa`a`a[OVY`ZLV[YNUSYY[  
@HWI-EAS443:3:58:1106:393#0/1  
CAAATAGTAGCATTGCCACAACACTTCAATGCATGTGTG  
+HWI-EAS443:3:58:1106:393#0/1  
aaaaabaaab\_aaaaa\_a^aa`aa\_aaaaaa\_\_ab^a^a  
@HWI-EAS443:3:58:1233:487#0/1  
GCCACAACACTTCAATGCATGTGTGAGGAAGGAGTTGAA  
+HWI-EAS443:3:58:1233:487#0/1  
aa[X`¥a`aV]aSa\_\_a\_[[aV\_Ya\_a¥RVa\_V\_Z^^`  
@HWI-EAS443:3:58:1586:184#0/1  
GTTCAATCGGGCAACATCTTCTCCTATTTTCATCAGGTTC  
+HWI-EAS443:3:58:1586:184#0/1  
aT[ZNXZQVX`\_SJPXQQPTYOSRILM[XOPBBBBBBBBB  
@HWI-EAS443:3:58:1652:582#0/1  
TTTCCGTCTTCTTCTTTGGTCCTACATTTGCTTACCATT  
+HWI-EAS443:3:58:1652:582#0/1  
a^¥Y\_a]T\_a\_\_`aNa`R[\_OW\_\_^^\_\_aa[\_WHLV``  
@HWI-EAS443:3:58:1686:938#0/1  
TCGAGTCCTCAAGAGCATGTCTCCTATTTCTAGAACACA  
+HWI-EAS443:3:58:1686:938#0/1  
`Y¥\_[aZP`YXRTYaXLMKZTV¥V¥]\_\_\_\_[[`SPX]V¥^]  
@HWI-EAS443:3:58:1722:1459#0/1  
GTAGCATTGCCACAACACTTCAATGCATGTGTGAGGAAG  
+HWI-EAS443:3:58:1722:1459#0/1  
`V¥^[Y[\_Q[OZ\_Y]a][`^UQYUaRX[^M[X^V`¥U[`  
@HWI-EAS443:3:58:189:1410#0/1  
CAGGCCATGATTCCGTCTTCTTCAATTATCTCAAATC

+HWI-EAS443:3:58:189:1410#0/1  
QXb0[U]V\_S`baabT\_aa`\_[a[a¥R\_ab\_b\_a``aa\_a  
@HWI-EAS443:3:58:209:2002#0/1  
AGTCAAACCACATGAGAAAGGCATAAATCCCAAGTACCTC  
+HWI-EAS443:3:58:209:2002#0/1  
a`Rb¥YY¥SJJ`^GN`]QZLVU\_^¥¥¥JVQO[WHLZU[¥W  
@HWI-EAS443:3:58:431:151#0/1  
CCGTCTTCTTCTTTGGTCCTACATTTGCTTACCATTGGG  
+HWI-EAS443:3:58:431:151#0/1  
abbaabbaabbaaabbbbaaaaaabaaaaabaa^^aaa^a  
@HWI-EAS443:3:58:520:1503#0/1  
CATTTGCTTACCATTGGGATCAGCTGAAAGTCATCCATGG  
+HWI-EAS443:3:58:520:1503#0/1  
abbbaaaa`a^]a`^R\_\_\_\_]`a\_aa``a`V`\_\_[Z```^  
@HWI-EAS443:3:58:586:1206#0/1  
ATGAAATGTAAATCCGAATACATGAAACAACTTCCAAAT  
+HWI-EAS443:3:58:586:1206#0/1  
^Ya¥\_]a¥IW]aba^]a^``\_[¥^^ZZ\_V\_[a`][`¥aa  
@HWI-EAS443:3:58:755:1490#0/1  
CAAATAGTAGCATTGCCACAACACTTCAATGCATGTGTG  
+HWI-EAS443:3:58:755:1490#0/1  
Y`aabaa\_b\_`b\_`^`Zab`bbbbbbb\_ab`babba`a\_b  
@HWI-EAS443:3:58:766:1036#0/1  
CACAACACTTCAATGCATGTGTGAGGAAGGAGTTGAACC  
+HWI-EAS443:3:58:766:1036#0/1  
`U`]Y]^]V\_U\_[X``][a[`¥aYb^Y¥]¥Q¥L][¥]ZV  
@HWI-EAS443:3:58:976:1021#0/1  
TGCCACAACACTTCAATGCATGTGTGAGGAAGGAGTTGA  
+HWI-EAS443:3:58:976:1021#0/1  
\_`^^¥a`Yab`Y\_\_Z\_\_\_\_]T^`aY`V`\_a\_]ZYP]X\_[Y  
@HWI-EAS443:3:59:1040:578#0/1  
GTCCTACATTTGCTTACCATTGGGATCAGCTGAAAGTCAT  
+HWI-EAS443:3:59:1040:578#0/1  
aaZWX SUS]^XRWPUR\_Q¥U¥T[aZK[a^X\_LL\_VVY\_GF  
@HWI-EAS443:3:59:1141:213#0/1  
ATGACTTTCAGCTGATCCCAATGGTAAGCAAATGTAGGAC  
+HWI-EAS443:3:59:1141:213#0/1  
a`a\_\_aaa\_`a`aaa\_]\_^]a`\_Y\_\_a`\_\_V^\_YOV^YY  
@HWI-EAS443:3:59:1358:1227#0/1  
CATTGCCACAACACTTCAATGCATGTGTGAGGAAGGAGT  
+HWI-EAS443:3:59:1358:1227#0/1  
[bbbbVbb```aababbbb`ba[aa`baba\_\_`aX^``^  
@HWI-EAS443:3:59:1674:193#0/1  
CTACATTTGCTTACCATTGGGATCAGCTGAAAGTCATCCA  
+HWI-EAS443:3:59:1674:193#0/1  
aabaabbbbbbbbbabbbabbaaaabbabbb\_b\_a\_YaQ[  
@HWI-EAS443:3:59:230:1032#0/1  
CGGTGGGAGACTTTGGTCGGCAAGCTTGCCTTAGTTCCT  
+HWI-EAS443:3:59:230:1032#0/1  
ab`^aaaa¥Q[aaa¥`^^[^aaaaa`a```ZN\_] ^UY¥T[

@HWI-EAS443:3:59:386:584#0/1  
CAAATAGTAGCATTGCCACAACACTTCAATGCATGTGTG  
+HWI-EAS443:3:59:386:584#0/1  
T¥`ZaQHVa^^¥\_TTUZ¥aXa[aZ^aa[`¥YZZb^]F¥[^  
@HWI-EAS443:3:59:524:1331#0/1  
GCAGTCCTCAAGAGCATGTCTCCTATTTCTAGAACACAGT  
+HWI-EAS443:3:59:524:1331#0/1  
a]XQO\_]a^`\_a^]Y^^bV`]``¥V`\_aa\_]ZXUGTHZPQ  
@HWI-EAS443:3:59:525:1604#0/1  
GAGAAAGGCATAAATCCCAATTACCTCATGTCTTGAAGC  
+HWI-EAS443:3:59:525:1604#0/1  
\_QY¥ab`aaa`\_baX`V`\_¥aaa\_Z]\_BBBBBBBBBBBBB  
@HWI-EAS443:3:59:67:1965#0/1  
AAGGCATGTGAATTGACTGATTCAAGCCGATAGAACTTG  
+HWI-EAS443:3:59:67:1965#0/1  
aaaa]bab^¥b`]^\_aaa\_\_S^a`\_`\_`][[X^Z]XS\_XZ  
@HWI-EAS443:3:59:925:512#0/1  
CAAATAGTAGCATTGCCACAACACTTCAATGCATGTGTG  
+HWI-EAS443:3:59:925:512#0/1  
abbbba`aababbaaababaabbbabb`ba\_aa]Xb^\_  
@HWI-EAS443:3:5:1012:1089#0/1  
CAAATAGTAGCATTGCCACAACACTTCAATGCATGTGTG  
+HWI-EAS443:3:5:1012:1089#0/1  
aab`a`Ia[aS\_] [aWOZ`\_]``a\_^Y^`bI`b]H[M[  
@HWI-EAS443:3:5:1059:773#0/1  
AAACTTTAGAGCCTATGTAGATGGATTTCGAGCAGAACGGC  
+HWI-EAS443:3:5:1059:773#0/1  
`aabaababSxaabb[^`\_`a\_\_aa`\_`a¥G`\_\_Ra^B  
@HWI-EAS443:3:5:1368:390#0/1  
AGAGAGCAGGCAGGAATCAAACTAGGCTTTTCACTATA  
+HWI-EAS443:3:5:1368:390#0/1  
X`\_Y^baWXP^WGX]\_[]abPaUa\_`^X`a\_a\_bH`\_ [B  
@HWI-EAS443:3:5:1390:362#0/1  
GGGGCATGGAATGAGGCGCTGCCTTGTTCAGTCTCTTCA  
+HWI-EAS443:3:5:1390:362#0/1  
a¥TSG¥X]]Y\_]\_aV]`PYQ][OGVVG[¥PTPNNBBBBB  
@HWI-EAS443:3:5:1411:1668#0/1  
GACCCAGCTTGCTAGAGATCTGGGCTCTGGCTGATCACTG  
+HWI-EAS443:3:5:1411:1668#0/1  
aa[\_HQbU`¥[Va`Yab`bUWY]TS\_`^`QZFZ^F]^BB  
@HWI-EAS443:3:5:1420:1264#0/1  
GGTTCTCACATATAGGAACATGGGCGTCGACACTTGGCCT  
+HWI-EAS443:3:5:1420:1264#0/1  
ab`bbba`]bbabbabab]bba`¥`U^Saa^a]`\_`\_`\_`\_`  
@HWI-EAS443:3:5:1434:376#0/1  
GTCTTATAGTAAAAGCCTAGTTTTGATTCTTCCCCTGCT  
+HWI-EAS443:3:5:1434:376#0/1  
aTYRYNNUWOYNU¥W\_Z¥]O\_^WZYXWYZBBBBBBBBBBB  
@HWI-EAS443:3:5:1521:1759#0/1  
ACCCCGTGCATGAAATGAAATCCGAATACATGAAA

+HWI-EAS443:3:5:1521:1759#0/1  
^W¥abZDYL\_]W^`a\_UM[]a^YS]UH\_\_\_\_\_XW^]`\_\_B  
@HWI-EAS443:3:5:328:1757#0/1  
CCGTCTTCCTTCTTTGGTCCTACATTTGCTTACCATTGGG  
+HWI-EAS443:3:5:328:1757#0/1  
[`aab`MaTa\_bb`V` `[Y`\_\_Vbbba]Zb[bU\_\_\_a¥TJ  
@HWI-EAS443:3:5:958:719#0/1  
CGGGGCACCAGATTCTACAATTATTGATTCACCCCGTTCG  
+HWI-EAS443:3:5:958:719#0/1  
aa¥\_HO[b\_\_aa[^\_] ]QU\_`b`baaaa¥T\_SLJT¥UaZT  
@HWI-EAS443:3:5:993:577#0/1  
GGCCAGTATGAGTCTATGGGATTCCTTTTCGTCAGTCCGAA  
+HWI-EAS443:3:5:993:577#0/1  
ab^]¥baabbab\_^abbbbaab\_a`baYba\_aa]¥^a`\_  
@HWI-EAS443:3:60:1360:1821#0/1  
ATCGCAGTCTCAAGAGCATGTCTCCTATTTCTAGAACAC  
+HWI-EAS443:3:60:1360:1821#0/1  
a`¥`\_a`]\_^a\_````\_``\_[]\_^\_\_Z^^X`]^`Z\_^ZT^Z  
@HWI-EAS443:3:60:294:1498#0/1  
TAGCATTGCCACAACACTTCAATGCATGTGTGAGGAAGG  
+HWI-EAS443:3:60:294:1498#0/1  
abbbabb\_abaaba``baa`aa`a`aa`a\_\_Wa`a^^`S\_  
@HWI-EAS443:3:60:34:1078#0/1  
CAAATAGTAGCATTGCCACAACACTTCAATGCATGTGTG  
+HWI-EAS443:3:60:34:1078#0/1  
aba\_abaXbbbaababaaaaW`aa\_a`aaa^^^\_aUa^\_  
@HWI-EAS443:3:60:928:1994#0/1  
AGAAATTTAGGCTTCTCTACCCCTGTTGTGTTATATATAC  
+HWI-EAS443:3:60:928:1994#0/1  
a[X`Z^Z``\_UY]PaZW\_^VXXRZZV`XWM`MER^\_^\_V  
@HWI-EAS443:3:61:1035:1060#0/1  
CAAATAGTAGCATTGCCACAACACTTCAATGCATGTGTG  
+HWI-EAS443:3:61:1035:1060#0/1  
ab`^baa^ababbbbbbabbbba`baa\_baaa]\_aa^`\_a  
@HWI-EAS443:3:61:1496:679#0/1  
AAGAATTCCTTGGTCACGTCTTTCTTTTACAGAAAGACT  
+HWI-EAS443:3:61:1496:679#0/1  
abbaabb\_aabb` [ `abbaabbaabaaaa`a¥\_\_\_V[T[  
@HWI-EAS443:3:61:1530:321#0/1  
GACATTCTTTGGCTGGAAAGAGCCTAACATACTCAAACCA  
+HWI-EAS443:3:61:1530:321#0/1  
a`\_aaaa`a`^a\_aaa^a\_`U^`a\_``\_]`\_`]YLH]]XWKO  
@HWI-EAS443:3:61:244:296#0/1  
TGGCTCCAGTCTCGGGTCAGTGAGTGAGAAATCCATACTT  
+HWI-EAS443:3:61:244:296#0/1  
abaa`¥`X`Y`\_^`\_¥RVSQXVNXKVN VVZFRNTRTTLQO  
@HWI-EAS443:3:61:526:820#0/1  
TACATAAATACGGCCTTGCTCAATGCATCATGTGCAGCCA  
+HWI-EAS443:3:61:526:820#0/1  
ab`abb`\_\_ba`a\_``aaa^`aa]^aaa^G``\_]`\_]]^ [VY



@HWI-EAS443:3:61:745:1820#0/1  
GTTCTCTTCATGTTCTTTGTCCTTGGAACTTCTCTTCAT  
+HWI-EAS443:3:61:745:1820#0/1  
aSZ^WWO[ZS¥DXR\_U\_¥^0\_^X^BBBBBBBBBBBBBBB  
@HWI-EAS443:3:61:901:1472#0/1  
CAAATAGTAGCATTGCCACAACACTTCAATGCATGTGTG  
+HWI-EAS443:3:61:901:1472#0/1  
a`bbbaabababbabbbba¥abbbabbabba[aab\_a^a  
@HWI-EAS443:3:61:90:966#0/1  
GTAGCATTGCCACAACACTTCAATGCATGTGTGAGGAAG  
+HWI-EAS443:3:61:90:966#0/1  
^LUaVV]YG¥¥0^\_a]\_X^\_]¥PQO[\_XPVT¥OWOT¥TWP  
@HWI-EAS443:3:62:1008:1156#0/1  
GAAAACCTCAGAGCCTATGTAGATGGATTCGAGCCGAACG  
+HWI-EAS443:3:62:1008:1156#0/1  
¥`\_W\_Y`^b^^Y`a¥a]aZV\_b`\_ZZ]``aaa]`^a^aaa  
@HWI-EAS443:3:62:1168:125#0/1  
CAAATAGTAGCATTGCCACAACACTTCAATGCATGTGTG  
+HWI-EAS443:3:62:1168:125#0/1  
`\_a\_abba]bbaabbbb`aaababba`\_a\_aZbba]aa\_b]a  
@HWI-EAS443:3:62:1185:1556#0/1  
AACTTGAGGGGTTTTCGGCTGAATGGAGAAAATTGCTTCT  
+HWI-EAS443:3:62:1185:1556#0/1  
^aZa¥\_bb^^\_Vaba\_\_¥W`bbb[FV\_`\_a`[ba\_P\_a`  
@HWI-EAS443:3:62:172:302#0/1  
GCCCCATTTTCATCTTGATCTTGGAGGTTCCATTGTTTCTC  
+HWI-EAS443:3:62:172:302#0/1  
a\_\_Y\_¥YaPT\_UG^¥a]XU[PZLFQ^UBBBBBBBBBBBBBB  
@HWI-EAS443:3:62:195:780#0/1  
TATTTTTCCCATTTGTGTGGCTCCAGTCCCGGGTCAGTGA  
+HWI-EAS443:3:62:195:780#0/1  
aab`aa\_ba^[¥b`^`[^aaa`b`[YY^BBBBBBBBBBBBB  
@HWI-EAS443:3:62:27:1109#0/1  
CGCAGTCCTCAAGAGCATGTCTCCTATTTCTAGAACACAG  
+HWI-EAS443:3:62:27:1109#0/1  
aaab`\_aa\_aaa]P^aa\_\_`a`^`a`^\_\_a`\_Y]a^\_a¥\_  
@HWI-EAS443:3:62:34:695#0/1  
CAAATAGTAGCATTGCCACAACACTTCAATGCATGTGTG  
+HWI-EAS443:3:62:34:695#0/1  
aaaabab¥bbbaaaaaaaaaaaaaaaaaaaaaa\_\_`^^¥XaZ`  
@HWI-EAS443:3:62:553:20#0/1  
GGGCATGAAATGAGGCACTGCCTTCTTCAGTCTCTTCAG  
+HWI-EAS443:3:62:553:20#0/1  
abaaaaaT]aaa`\_a`^`\_¥`^^`\_`Za¥¥^¥\_¥Y¥V  
@HWI-EAS443:3:63:1346:978#0/1  
GCATTGCCACAACACTTCAATGCATGTGTGAGGAAGGAG  
+HWI-EAS443:3:63:1346:978#0/1  
a]S`\_Wa\_^\_a\_¥Xa\_\_a]]`a]Y]Y\_YWY\_\_X]¥NQ]  
@HWI-EAS443:3:63:1362:535#0/1  
TGGGGCACGAAATGAGGCGCTGCCTTCTTCAGTCTCTTC

+HWI-EAS443:3:63:1362:535#0/1  
aaaaaaa\_a`\_aa`aYZ`\_a¥`a\_\_a\_¥\_\_^¥`YW^]`^BB  
@HWI-EAS443:3:63:864:1333#0/1  
AAATAGTAGCATTGCCACAACCTACTTCAATGCATGTGTGA  
+HWI-EAS443:3:63:864:1333#0/1  
a`[a`]Ya`^]`^\_`a`abaa\_\_aa¥`aa\_¥^[\_]`[¥`^  
@HWI-EAS443:3:64:1107:448#0/1  
AGCATTGCCACAACCTACTTCAATGCATGTGTGAGGAAGGA  
+HWI-EAS443:3:64:1107:448#0/1  
`a`Yaaaaa`\_a`\_`\_`\_]a^`\_`^`\_a^`\_Z\_\_\_\_ZZ^^^  
@HWI-EAS443:3:64:1482:591#0/1  
ATCGCAGTCTCAAGAGCATGTCTCCTATTTCTAGAACAC  
+HWI-EAS443:3:64:1482:591#0/1  
]Vaaa]b[baVZ]aaRa]U]aYX\_XVZRYZ`]aZ\_T^Y^U  
@HWI-EAS443:3:64:154:1265#0/1  
GTCGCTCTCAAGAATAGTTCAATTTTGCGTTCACCTTCTT  
+HWI-EAS443:3:64:154:1265#0/1  
¥J\_`\_`b\_X\_¥`\_ab\_S\_X`aa^a`\_`a]V]\_Za`X]^^[\_a  
@HWI-EAS443:3:64:16:811#0/1  
CTTCCTTCTTTGGTCTACATTTGCTTACCATTGGGATCA  
+HWI-EAS443:3:64:16:811#0/1  
a¥^`ZXX¥a`]S][OSLW\_\_\_\_`\_VU^Z]BBBBBBBBBB  
@HWI-EAS443:3:64:373:1492#0/1  
ATCGCAGTCTCAAGAGCATGTCTCCTATTTCTAGAACAC  
+HWI-EAS443:3:64:373:1492#0/1  
a^¥XZ\_`^aa\_]YIRT]`VSYa^Y]][¥WX\_]ZX\_]WY^  
@HWI-EAS443:3:64:387:963#0/1  
CTTTGGTCTACATTTGCTTACCATTGGGATCAGCTGAAA  
+HWI-EAS443:3:64:387:963#0/1  
`Z\_`\_`^bbaa`]^a^[\_`¥aaa`]a`¥`a`aa]a\_\_^]Y  
@HWI-EAS443:3:64:448:1253#0/1  
CAAATAGTAGCATTGCCACAACCTACTTCAATGCATGTGTG  
+HWI-EAS443:3:64:448:1253#0/1  
Z\_`Z\_Y\_LYa^baSX[`]YX`ZVa¥]]ZaSUW\_M\_]X¥Xa  
@HWI-EAS443:3:64:567:766#0/1  
GACCCAGCTTGCTAGAGATCTGGGCTATGGCTCATCACTG  
+HWI-EAS443:3:64:567:766#0/1  
]T[\_UW¥][\_]Z\_RZS]¥VOVLUVTXX`Q¥¥YR]VL[¥BBB  
@HWI-EAS443:3:64:613:883#0/1  
CATAAATCCCAATTACCTCATGGCTTGACGCAGGTGCTA  
+HWI-EAS443:3:64:613:883#0/1  
KU\_WaYaba^Va`\_a`U`^T[X]^aBBBBBBBBBBBBBBBB  
@HWI-EAS443:3:64:68:1276#0/1  
TACATTTGCTTACCATTGGGATCAGCTGAAAGTCATCCAT  
+HWI-EAS443:3:64:68:1276#0/1  
aaababaabba`\_aaaa`a`aa\_aaaaa\_P]^aa\_aV¥^  
@HWI-EAS443:3:64:778:1655#0/1  
CCTTCTTTGGTCTACATTTGCTTACCATTGGGATCAGCT  
+HWI-EAS443:3:64:778:1655#0/1  
Z\_ZZWRRO\_W]\_`^TWGW]^XMOU^MYOTM¥FRPLVU^\_YL

@HWI-EAS443:3:65:1085:1010#0/1  
AATAGTAGCATTGCCACAACACTTCAATGCATGTGTGAG  
+HWI-EAS443:3:65:1085:1010#0/1  
aabba\_abaaaaa`\_a`aa`aaaaaaa`\_`\_`a\_a^a\_\_  
@HWI-EAS443:3:65:110:238#0/1  
CAAATAGTAGCATTGCCACAACACTTCAATGCATGTGTG  
+HWI-EAS443:3:65:110:238#0/1  
abaaa`Xaabaa`aaa`^^`\_a`\_`a\_\_\_`[]¥VaY\_  
@HWI-EAS443:3:65:1257:1208#0/1  
ATTCAGTAGCCCTGCAGTGGGACACTTCTGCTATAAAATA  
+HWI-EAS443:3:65:1257:1208#0/1  
ab]Z^]\_\_V\_\_bS[aa^```]H]\_`[[a``\_`abZ^[  
@HWI-EAS443:3:65:1432:504#0/1  
TTCCTTCTTTGGTCTACATTTGCTTACCATTGGGATCAG  
+HWI-EAS443:3:65:1432:504#0/1  
aaaabaaba^X`\_Y\_a`¥aa`aaM```[\_]a`\_Z[W\_Z\_]`  
@HWI-EAS443:3:65:1617:952#0/1  
CTTTGGTCTACATTTGCTTACCATTGGGATCAGCTGAAA  
+HWI-EAS443:3:65:1617:952#0/1  
\_bb\_baabbb`bbbbbbabbbbbbbbabbb`ba`a`bbb  
@HWI-EAS443:3:65:753:2027#0/1  
CAAATAGTAGCATTGCCACAACACTTCAATGCATGTGTG  
+HWI-EAS443:3:65:753:2027#0/1  
a^^`a`[GY^a`a]\_\_^`ab`a^[aaaaa`aZ]Z[\_X`  
@HWI-EAS443:3:65:79:655#0/1  
TCGCCTCTTTGGGCTGACGAAAGGAATCCCATAGACTCC  
+HWI-EAS443:3:65:79:655#0/1  
aaabaabaaXaa`aa^aaaa`^^```a\_\_¥a^^US`^¥\_¥  
@HWI-EAS443:3:66:1016:420#0/1  
CAAATAGTAGCATTGCCACAACACTTCAATGCATGTGTG  
+HWI-EAS443:3:66:1016:420#0/1  
aba`aab\_aa^]b^]aaa`aaa\_aaa`aaaa`YaaaX^\_a  
@HWI-EAS443:3:66:128:2028#0/1  
CAAATAGTAGCATTGCCACAACACTTCAATGCATGTGTG  
+HWI-EAS443:3:66:128:2028#0/1  
aba`^WUa[aa\_\_^a`aa`\_\_a\_]\_]TY]^`[[U¥X]  
@HWI-EAS443:3:66:134:1615#0/1  
GGGCAATATGAAGCAATCGAGGAGTGCCTGATTAATGAT  
+HWI-EAS443:3:66:134:1615#0/1  
`b`^a`^^ab`]X^`]aaa¥¥`aa^Vaaa``¥]ZR\_[[`^  
@HWI-EAS443:3:66:1443:1558#0/1  
GTAGCATTGCCACAACACTTCAATGCATGTGTGAGGAAG  
+HWI-EAS443:3:66:1443:1558#0/1  
R\_[`W^b¥b`ba¥abaa¥`bb`a^R`aabb^aababbab^  
@HWI-EAS443:3:66:1476:75#0/1  
GTCCTACATTTGCTTACCATTGGGATCAGCTGAAAGTCAT  
+HWI-EAS443:3:66:1476:75#0/1  
aSb\_R]H¥bba^`¥X¥Qaa¥\_aaa]\_\_aQ`\_^Z\_^PZVZ  
@HWI-EAS443:3:66:1540:1454#0/1  
CTCAAGAGCATGTCTCCTATTTCTAGAACACAGTATTTTT

+HWI-EAS443:3:66:1540:1454#0/1  
ab^[^^`bba`^Uaa^^aaaa`aaaa\_a`bb]\_a\_aa¥  
@HWI-EAS443:3:66:236:1421#0/1  
AGCATGTCTCCTATTTCTAGAACACAGTATTTTTCCCATT  
+HWI-EAS443:3:66:236:1421#0/1  
aaaa\_`\_aaa`a]`a`a\_a\_\_a``aa\_VR]`\_\_\_\_\_`^`^  
@HWI-EAS443:3:66:539:1001#0/1  
CAAATAGTAGCATTGCCACAACACTTCAATGCATGTGTG  
+HWI-EAS443:3:66:539:1001#0/1  
abaaba]Ua\_`a`ZY^aa`a`^ab``\_aY]^^^`aXaY\_  
@HWI-EAS443:3:66:550:1981#0/1  
CCACAACCTTGAGGGCTTTTCGGCTGAATCGAGAAAATTGC  
+HWI-EAS443:3:66:550:1981#0/1  
¥Z\_ROXU^`bb`UUUDYaa`TL\_^Z^¥]¥]a\_]\_\_aX\_L^  
@HWI-EAS443:3:66:560:116#0/1  
CAAATAGTAGCATTGCCACAACACTTCAATGCATGTGTG  
+HWI-EAS443:3:66:560:116#0/1  
aba`aa`]bbaaa\_`a\_`a``\_aa\_aa\_`\_`a\_\_aaX`\_]`  
@HWI-EAS443:3:66:709:2013#0/1  
CATTAATCCGGCACTCCTCGATTGCTTCATATAGCCCCC  
+HWI-EAS443:3:66:709:2013#0/1  
a\_UW]X^SIS[ba]V^[0a¥KMK`VYR\_\_X[XXW[NGQVL  
@HWI-EAS443:3:66:768:496#0/1  
TCCGTCTTCCTTCTTTGGTCCTACATTTGCTTACCATTGG  
+HWI-EAS443:3:66:768:496#0/1  
aaba\_aaaa`aaaaaaaa\_Zaa[[[[a`PRHZUU^XU`]]]  
@HWI-EAS443:3:67:1111:1207#0/1  
CAAATAGTAGCATTGCCACAACACTTCAATGCATGTGTG  
+HWI-EAS443:3:67:1111:1207#0/1  
¥`b``\_\_]bbaa\_a^abb^abaabaaa\_aaa`]aaaWaYa  
@HWI-EAS443:3:67:1124:1963#0/1  
TTCCGTCTTCCTTCTTTGGTCCTACATTTGCTTACCATTG  
+HWI-EAS443:3:67:1124:1963#0/1  
]`aba\_b`b¥¥\_\_a\_`a`WF]aaaa]`]aa[a\_a\_aa\_a  
@HWI-EAS443:3:67:1152:1810#0/1  
CACAAATGGGAAAAATACTGTGTTCTAGAAATAGGAGACA  
+HWI-EAS443:3:67:1152:1810#0/1  
a`a\_]b```bab^abbb`\_[baabaab`Zaaa`aaa^`  
@HWI-EAS443:3:67:1186:1874#0/1  
AGCATTGCCACAACACTTCAATGCATGTGTGAGGAAGGA  
+HWI-EAS443:3:67:1186:1874#0/1  
a`a`a`\_aaa\_aa^`aa`\_a`a^]\_`\_]a]\_]\_\_^^`\_Z^  
@HWI-EAS443:3:67:1388:203#0/1  
ATTGCCACAACACTTCAATGCATGTGTGAGGAAGGAGTT  
+HWI-EAS443:3:67:1388:203#0/1  
a`aabbbaabaabaabbbb]\_Vabb]b`aaba`ab`[b\_`  
@HWI-EAS443:3:67:1785:592#0/1  
GCCATGGATGACTTTCAGCTGATCCCAATGGTAAGCAAAT  
+HWI-EAS443:3:67:1785:592#0/1  
aa\_\_a`b\_aa^`a`¥[aa`a\_`[Z¥`\_`\_`Y\_[^YX\_\_Y

@HWI-EAS443:3:67:265:895#0/1  
CTTCCTTCTTTGGTCCTACATTTGCTTACCATTGGGATCA  
+HWI-EAS443:3:67:265:895#0/1  
`bb¥a`aa\_a^aaRX`\_`ba\_\_^^a``][\_\_aaa]``U^\_  
@HWI-EAS443:3:67:322:1289#0/1  
GTAGCATTGCCACAACACTTCAATGCATGTGTGAGGAAG  
+HWI-EAS443:3:67:322:1289#0/1  
\_`bb`ba``\_abb`aabbbbabbbaaaaba`a\_a^`]]`Z  
@HWI-EAS443:3:67:408:873#0/1  
CAAATAGTAGCATTGCCACAACACTTCAATGCATGTGTG  
+HWI-EAS443:3:67:408:873#0/1  
abba\_aa\_aaabaabaaaaaabaaaa\_aa``aa^a]a  
@HWI-EAS443:3:67:55:608#0/1  
CAAATAGTAGCATTGCCACAACACTTCAATGCATGTGTG  
+HWI-EAS443:3:67:55:608#0/1  
abbbazT\_\_aaaaaaaa`aa\_aba``WP¥aa^a\_a]az`  
@HWI-EAS443:3:67:909:734#0/1  
ATGGCTTGAAGCAGGTGCTAGCAGAGCTACAGGAAATTG  
+HWI-EAS443:3:67:909:734#0/1  
V\_\_XQ[[]WZGQWWT][RVYXPV\_]][ZTS¥ZYFPUUZ  
@HWI-EAS443:3:67:921:559#0/1  
ATCCCAATGGTAAGCAAATGTAGGACCAAAGAAGGAAGAC  
+HWI-EAS443:3:67:921:559#0/1  
a]F¥V`aXa¥PWW]\_STaa[L`VSST][[]Z`VVZ¥WV¥P¥  
@HWI-EAS443:3:68:1037:500#0/1  
GGATGACTTTCAGCTGATCCCAATGGTAAGCAAATGTAGG  
+HWI-EAS443:3:68:1037:500#0/1  
^aaba]ab`aa`^aaaaa``ababZaaa]`X`\_¥Zaa\_  
@HWI-EAS443:3:68:1147:91#0/1  
CATTGCCACAACACTTCAATGCATGTGTGAGGAAGGAGT  
+HWI-EAS443:3:68:1147:91#0/1  
`abbaaaaabb`bbabaaaabb`\_ab`a\_a\_a`H^a`\_a^  
@HWI-EAS443:3:68:20:1069#0/1  
ATGACTTTCAGCTGATCCCAATGGTAAGCAAATGTAGGAC  
+HWI-EAS443:3:68:20:1069#0/1  
a\_ZH¥`a``^^[¥`\_a¥^[X^`XQT\_\_\_YXXW]NU[V[]  
@HWI-EAS443:3:68:371:144#0/1  
GTAGCATTGCCACAACACTTCAATGCATGTGTGAGGAAG  
+HWI-EAS443:3:68:371:144#0/1  
`\_\_a][\_]a\_a]aaa`a\_\_\_]a\_]`\_]aV`Z\_]a\_^¥\_  
@HWI-EAS443:3:68:877:526#0/1  
CAAATAGTAGCATTGCCACAACACTTCAATGCATGTGTG  
+HWI-EAS443:3:68:877:526#0/1  
`b`abba^baaabbbabbaabaab\_aaaaaaaaba\_a`  
@HWI-EAS443:3:68:901:1424#0/1  
CAAATAGTAGCATTGCCACAACACTTCAATGCATGTGTG  
+HWI-EAS443:3:68:901:1424#0/1  
abbbb`\_U`ab`^^^baZabaaabaaaa\_aaaaaa\_b\_a  
@HWI-EAS443:3:69:1010:1061#0/1  
CAAATAGTAGCATTGCCACAACACTTCAATGCATGTGTG

+HWI-EAS443:3:69:1010:1061#0/1  
aa^Ya\_Y]^XSX`ba¥]\_Y]Ya]\_Y[^ZVa`]U^\_Ra¥Z  
@HWI-EAS443:3:69:1238:1788#0/1  
TTTCCGTCTTCCTTCTTTGGTCCTACATTTGCTTACCATT  
+HWI-EAS443:3:69:1238:1788#0/1  
abbbaa]aaa\_abaaaa`a`\_aa`baba\_a`aa`aa[a`\_  
@HWI-EAS443:3:69:1244:1283#0/1  
CGATTGGCCATGTTTCCGCTTTGTTTTCAAAGAATTCCTT  
+HWI-EAS443:3:69:1244:1283#0/1  
abb`abbbZY¥JP]\_^b^ON`\_T]`adW]Ta\_\_aa^\_\_a  
@HWI-EAS443:3:69:1371:1808#0/1  
CAGGGGAGTGGAGGAAGGCTCTATTGGGAAAGGGTGCAGG  
+HWI-EAS443:3:69:1371:1808#0/1  
\_¥`\_aaSbS^]UbaVXba[QXU[HSX`[Q`Z\_N`]\_ZVVY  
@HWI-EAS443:3:69:1429:1488#0/1  
CAAATAGTAGCATTGCCACAACACTTCAATGCATGTGTG  
+HWI-EAS443:3:69:1429:1488#0/1  
abbbaabZ`baTaaba`^\_a^a]bab`\_baabaaa\_aZa  
@HWI-EAS443:3:69:1492:1443#0/1  
CAAATAGTAGCATTGCCACAACACTTCAATGCATGTGTG  
+HWI-EAS443:3:69:1492:1443#0/1  
ababbb`Xabaabaab^`aaa\_ab`aaaaabaab\_a\_a  
@HWI-EAS443:3:69:1748:643#0/1  
CATGAAATGAGGCGCTGCCTTCTTCAGCCTCTTCAGCAG  
+HWI-EAS443:3:69:1748:643#0/1  
aaZ]^UQYUX]ZY^¥HS`^ZYS^BBBBBBBBBBBBBBB  
@HWI-EAS443:3:69:315:1263#0/1  
TGACTTTCAGCTGATCCCAATGGTAAGCAAATGTAGGACC  
+HWI-EAS443:3:69:315:1263#0/1  
ababa[ab¥T\_[¥]aaaPY]]VLRW\_¥U[¥UWY[XY^\_  
@HWI-EAS443:3:69:330:197#0/1  
TAAATCCCAATTACCTCATGGCTTGAAGCAGGGGCTAGC  
+HWI-EAS443:3:69:330:197#0/1  
``Y`\_[\_J[^a^U[aaa^]¥]^ [RRLTTETXBBBBBBBBB  
@HWI-EAS443:3:69:501:512#0/1  
ATTAATCAGTCACTCCTCGATTGCTTCATATAGCCCCCA  
+HWI-EAS443:3:69:501:512#0/1  
aab^\_aa]a`a^aaaaaaaa\_a\_aa`aaaa`\_a^`\_`\_`  
@HWI-EAS443:3:69:51:412#0/1  
CAAATAGTAGCATTGCCACAACACTTCAATGCATGTGTG  
+HWI-EAS443:3:69:51:412#0/1  
a`OR^aaU`aba`a`aa`\_a`aa`\_\_R^a]^`\_`]ZY`  
@HWI-EAS443:3:69:543:289#0/1  
CGGGCCTTCAATACTTAATTTTCAGAGCATCCATCAGCAGG  
+HWI-EAS443:3:69:543:289#0/1  
`b]MaZ¥bb`\_ab`\_`Z`XWabaaaaaaaaZaaa`^^V  
@HWI-EAS443:3:69:564:26#0/1  
GTGCAGCCATGGATGACTTTCAGCTGATCCCAATGGTAAG  
+HWI-EAS443:3:69:564:26#0/1  
^[^`^^¥`aa]]`\_¥Y\_\_\_\_\_OLV`\_XQJRNZYUUQZ

@HWI-EAS443:3:69:674:1662#0/1  
TGCCCTGTTCTTTCGTCAAGGGTGTAGTCCGCTTTGGTG  
+HWI-EAS443:3:69:674:1662#0/1  
aaaaaVZ`bZba`aS\_`aK^RaRIKGYMza^Q`ZV¥SDJ]  
@HWI-EAS443:3:69:680:1041#0/1  
GTTTCCGATTTGTTTTCAAAGAATTCCTTGGACATGTCTT  
+HWI-EAS443:3:69:680:1041#0/1  
aa^``aa¥PY^aWVTT[`I[Y\_a`SXR[SMWG[W`]UVPS  
@HWI-EAS443:3:69:85:807#0/1  
TGAAGAGACTGAAGAAGGCAGCGCCCCATTTCCATGCCCC  
+HWI-EAS443:3:69:85:807#0/1  
aba\_b]aaa`aa^`X^]\_`¥``\_`a`\_\_`\_\_^^Z[¥^\_`^`  
@HWI-EAS443:3:6:1048:662#0/1  
ATCGCAGTCTCAAGAGCATGTCTCCTATTTCTAGAACAC  
+HWI-EAS443:3:6:1048:662#0/1  
abZa`ab¥a`aaaaa¥Y`aaYV`PV\_\_``^^^\_`]\_X]^  
@HWI-EAS443:3:6:143:1904#0/1  
CACATTTGGAAGTTTGTTCATGTATTAGGATTTCCATTT  
+HWI-EAS443:3:6:143:1904#0/1  
¥\_ZTT\_\_RR``¥^\_QXa`aWW]``I\_FF^X^^QJ\_VZ\_¥  
@HWI-EAS443:3:6:1473:2030#0/1  
TTTCCGATTTGTTTTCAAAGAATTCCTTGGTCTTGTCTTT  
+HWI-EAS443:3:6:1473:2030#0/1  
`b\_\_LS\_VY]\_ZY`VHTG\_bb[aYFG`Y`\_`OHJZBBBBB  
@HWI-EAS443:3:6:1483:1109#0/1  
GTCCGCTTTGGTGGCCATCTCCACTCCAGTGAATGAAAAG  
+HWI-EAS443:3:6:1483:1109#0/1  
a\_^aa]`aaaa]`a^^\_aU`[UHU]]Z^aX`U\_\_`UXXXB  
@HWI-EAS443:3:6:1529:956#0/1  
GACCGAATCATGGCCTGGACAGTGGTGAAGTATATGTA  
+HWI-EAS443:3:6:1529:956#0/1  
aa¥X]^a[OYab\_XVZb¥WG¥00\_YJGY[JS^VV]^¥BBB  
@HWI-EAS443:3:6:1539:488#0/1  
CAAATAGTAGCATTGCCACAACACTTCAATGCATGTGTG  
+HWI-EAS443:3:6:1539:488#0/1  
I\_bbabb\_a`\_bbbb`aab\_a0`b\_bbabbbb\_bbaab[]  
@HWI-EAS443:3:6:552:1038#0/1  
CAAATAGTAGCATTGCCACAACACTTCAATGCATGTGTG  
+HWI-EAS443:3:6:552:1038#0/1  
a`[````]ba`b`]Za]a\_MaaUY\_[abb^\_U^\_]N\_Y[  
@HWI-EAS443:3:6:599:639#0/1  
CAGAGCCCAGATCTCTAGCAAGCTGTGTCCAAAATGAATT  
+HWI-EAS443:3:6:599:639#0/1  
]a[UaSS\_a\_GSU¥\_\_SY\_\_U^^BBBBBBBBBBBBBBBBB  
@HWI-EAS443:3:6:730:1439#0/1  
GCAGTCTCAAGAGCATGTCTCCTATTTCTAGAACACAGT  
+HWI-EAS443:3:6:730:1439#0/1  
a\_\_[GSN¥`\_^[UaZa`[]RZXT^]\_\_SX¥]\_^Z[X\_`B  
@HWI-EAS443:3:6:732:1374#0/1  
CAGCCATGGATGACTTTCAGCTGATCCCAATGGTAAGCAA

+HWI-EAS443:3:6:732:1374#0/1  
aa`^`^`\_`UWQb\_R]¥¥¥a^X`>`PJGZa`aaa[PX]L]B  
@HWI-EAS443:3:6:826:565#0/1  
CCGTCTTCCTTCTTTGGTCCTACATTTGCTTACCATTGGG  
+HWI-EAS443:3:6:826:565#0/1  
a]\_b`[ `[aab`\_`a\_abZ`abbbabb^[ababYT` `aUaY  
@HWI-EAS443:3:70:1200:1585#0/1  
CTCCAGTCTCGGGTCAGTGAGTGAGAACTGCATACTTACA  
+HWI-EAS443:3:70:1200:1585#0/1  
ab\_babaa`^X`aHN¥`J]]MD[a` `L]YKPbaU`¥^¥`a  
@HWI-EAS443:3:70:1618:1940#0/1  
CATTTGCTTAGCATTGGGATCAGCTGAAAGTCATCCATGG  
+HWI-EAS443:3:70:1618:1940#0/1  
aba`aabbURHVUaaZUZaa`\_a[]NY`^YV` `\_\_\_a^ZU  
@HWI-EAS443:3:70:1656:1144#0/1  
CGTCTTCCTTCTTTGGTCCTACATTTGCTTACCATTGGGA  
+HWI-EAS443:3:70:1656:1144#0/1  
\_\_`Y^YUV`ba\_Z^a[]P\_PTTKRRSVFSP`^RU[YU¥`\_V  
@HWI-EAS443:3:70:1741:228#0/1  
CGTGGTGCCGTCTCAAGAATGGTTCAATTTTGGCGTTCA  
+HWI-EAS443:3:70:1741:228#0/1  
`b` `b\_aaaaa` `[¥^a]aaa\_a`^X`\_`aabVSS\_TYNY  
@HWI-EAS443:3:70:430:1566#0/1  
AAATAGTAGCATTGCCACAACACTTCAATGCATGTGTGA  
+HWI-EAS443:3:70:430:1566#0/1  
aaaaa\_Vaab`\_^]aa\_aaaa]a[\_\_\_a`a^¥a^\_SLOY^^  
@HWI-EAS443:3:70:466:1965#0/1  
GAATTCCTTGGTCATGTCTTTCTTTTGGACAGAAGACTCG  
+HWI-EAS443:3:70:466:1965#0/1  
¥WPU¥YY`VVSP^KZaY` `\_\_\_]Z`\_[] [S`\_ZZ\_XZX[RTR  
@HWI-EAS443:3:70:523:1160#0/1  
AAATAGTAGCATTGCCACAACACTTCAATGCATGTGTGA  
+HWI-EAS443:3:70:523:1160#0/1  
a`a` `¥LY]a]`\_\_a`\_a¥]Z`]a`S^]]`a` `¥^¥^U\_\_  
@HWI-EAS443:3:70:555:233#0/1  
GCCCCCTTCAATTGGCTTGTCTTCTTTCATGTTCTTTGTCC  
+HWI-EAS443:3:70:555:233#0/1  
aaaab`aaa`a` `a` `¥X[\_N^T^ZVS^^^\_]\_\_`VX]Z  
@HWI-EAS443:3:70:561:1757#0/1  
AGCCCCCTCAAGATCGAAGTTCCAGTTCCAGTTGTCCC  
+HWI-EAS443:3:70:561:1757#0/1  
`]baW` ` `YW]`V\_XR¥`YT^]\_WTPXX^SY]¥¥GQNW  
@HWI-EAS443:3:70:759:1710#0/1  
CCTACATTTGCTTACCATTGGGATCAGCTGAAAGTCATCC  
+HWI-EAS443:3:70:759:1710#0/1  
abbbababbabbbbbbbbbbaabaabaababbaaaba\_a  
@HWI-EAS443:3:70:885:1005#0/1  
CAAATAGTAGCATTGCCACAACACTTCAATGCATGTGTG  
+HWI-EAS443:3:70:885:1005#0/1  
a`ZRO` `]aYaY\_]` `^a` `aaa` ` `aa`^a`\_\_`^Y`X^



@HWI-EAS443:3:71:1759:63#0/1  
CACAACTACTTCAATGCATGTGTGAGGAAGGAGTTGAACC  
+HWI-EAS443:3:71:1759:63#0/1  
aa^a\_Xaaabb\_aaa\_\_b`bab¥¥]baP`\_W]^`^^`a¥R  
@HWI-EAS443:3:71:699:1021#0/1  
CAAATAGTAGCATTGCCACAACACTTCAATGCATGTGTG  
+HWI-EAS443:3:71:699:1021#0/1  
abbaaba`aaa\_aa\_ababaaaaaaaa\_aa\_aaaaa^a\_a  
@HWI-EAS443:3:71:982:1864#0/1  
ATTGCCACAACACTTCAATGCATGTGTGAGGAAGGAGTT  
+HWI-EAS443:3:71:982:1864#0/1  
Y¥VO\_^W`\_b\_[^T\_X`a^¥[V`^XW[a]UZ]¥]\_aJ]Q  
@HWI-EAS443:3:72:1013:659#0/1  
AAATAGTAGCATTGCCACAACACTTCAATGCATGTGTGA  
+HWI-EAS443:3:72:1013:659#0/1  
¥X^\_\_^NY^W^`TW]abaaa]¥S\_Q[b^V^]Z]]]F\_H\_\_  
@HWI-EAS443:3:72:1156:1954#0/1  
CAAATAGTAGCATTGCCACAACACTTCAATGCATGTGTG  
+HWI-EAS443:3:72:1156:1954#0/1  
abbbbaababbabbbbbbabbabababbbbabaa  
@HWI-EAS443:3:72:1271:813#0/1  
ATGGATGACTTTCAGCTGATCCCAATGGTAAGCAAATGTA  
+HWI-EAS443:3:72:1271:813#0/1  
aabb`ba`[`aaaa[aba\_\_`a\_\_aaY`\_\_\_\_`\_\_dWa  
@HWI-EAS443:3:72:36:955#0/1  
CACTCCCCTGGGTGACTCTCCGATTGGCCATGATTCCGAT  
+HWI-EAS443:3:72:36:955#0/1  
aaa`aab`aa\_WZQ[^`]`\_\_X]PUZ[UUVSSZUTWWU  
@HWI-EAS443:3:72:409:397#0/1  
CAAATAGTAGCATTGCCACAACACTTCAATGCATGTGTG  
+HWI-EAS443:3:72:409:397#0/1  
abaabbb`ababZ]a]bbb`abb`babb`abaa]a\_b^b  
@HWI-EAS443:3:72:496:1626#0/1  
CTTGCGCATAGCTCCTGTAATCTCAAATTTTTCTTCAATT  
+HWI-EAS443:3:72:496:1626#0/1  
]MYX^Q]WS\_ZGZ^ZQMSYLU[Y\_YRMVKWGM[XXZYoyo  
@HWI-EAS443:3:72:622:1984#0/1  
CAAATAGTAGCATTGCCACAACACTTCAATGCATGTGTG  
+HWI-EAS443:3:72:622:1984#0/1  
^\_Z]^\_UF¥`\_Z]T]a\_V\_aa\_]^[¥X\_V¥Z]ZZRZTT  
@HWI-EAS443:3:72:975:1929#0/1  
CAAGAGCATGTCTCCTATTTCTAGAACACAGTATTTTCC  
+HWI-EAS443:3:72:975:1929#0/1  
\_\_\_\_V`Ybba`^aa\_a\_]b¥b`\_a^aXa`ab`\_a¥\_^a\_\_]  
@HWI-EAS443:3:73:101:1634#0/1  
CAAATAGTAGCATTGCCACAACACTTCAATGCATGTGTG  
+HWI-EAS443:3:73:101:1634#0/1  
aa`¥V¥T`¥[YYQ¥^`^`^X]^\_\_^^[\_[¥]\_^]X]YY  
@HWI-EAS443:3:73:1064:983#0/1  
GTGTTCTAGAAATAGGAGACATGCTCTTGAGGACTGCGAT

+HWI-EAS443:3:73:1064:983#0/1  
``aaa^a`bZaaaaaaaaXaabba```baaaX`\_¥`\_`\_`H  
@HWI-EAS443:3:73:1786:633#0/1  
TTCATCGACGAACGGGGGAATCAATAATTGTAGAATCTG  
+HWI-EAS443:3:73:1786:633#0/1  
ab`^a`^`\_`[^X\_aaaP^\_WX]ZZY^TT^]YR\_^UJQUZ  
@HWI-EAS443:3:73:271:1780#0/1  
ATTGCCACAACACTTCAATGCATGTGTGAGGAAGGAGTT  
+HWI-EAS443:3:73:271:1780#0/1  
aXDT^]0^]]X^a\_\_a`a\_\_Y\_\_\_\_OSSX^^XWPN^^UUX  
@HWI-EAS443:3:73:645:701#0/1  
GGCATGGGAATGAGGCGCTGCCTTCTTCAGTCTCTTCAGC  
+HWI-EAS443:3:73:645:701#0/1  
a\_aa`a¥X[\_aa^`^`^a`a^^\_a]`a^SaW^a^a`¥^]`^  
@HWI-EAS443:3:73:738:702#0/1  
ATAGTAGCATTGCCACAACACTTCAATGCATGTGTGAGG  
+HWI-EAS443:3:73:738:702#0/1  
ababaabaabaa`^aaaa`aaaaaaaa\_aaaab\_aZa\_aa  
@HWI-EAS443:3:73:944:1304#0/1  
GGGGTTTTTCGGCTGAATCGAGAGAATTGCTTCTCATTGTT  
+HWI-EAS443:3:73:944:1304#0/1  
aaaaUaa`baa`\_aaa`^a`^a`a]¥`]]`\_\_`^^^\_]  
@HWI-EAS443:3:74:1016:1093#0/1  
AGCCCCCTCAAGATCGAAGGTTCCAGGTTCCAGGTTGTCCC  
+HWI-EAS443:3:74:1016:1093#0/1  
a`a`aaa\_a`a`\_`^^^`\_V\_Z^^^\_W[[a^¥ZRU\_V^VW  
@HWI-EAS443:3:74:1682:1286#0/1  
CACAAATGGGAAAAATACTGTGTTCTAGAAATAGGAGACA  
+HWI-EAS443:3:74:1682:1286#0/1  
abbbbbbbbbbabbbbbbaabab`babbbbaabaaaaaaa  
@HWI-EAS443:3:74:196:1763#0/1  
CGAAAATCGAAACTAACAAGCTTGCTGCAATATGCACACA  
+HWI-EAS443:3:74:196:1763#0/1  
a]¥X`aY]``ZS[W]XZ`VXTRPYTLQQ[TN\_XX\_\_\_\_\_]]  
@HWI-EAS443:3:75:1339:453#0/1  
GAAAGGAATCCCATAGACTCCTACTGGCCATTTATTGTCT  
+HWI-EAS443:3:75:1339:453#0/1  
][`Sa]\_\_b\_VL\_b^b^X^aZ^¥N`\_¥abb`T[F]\_\_GXF  
@HWI-EAS443:3:75:1508:1858#0/1  
GGCCTTGCTCAATGCATCCTGTGCAGCGATGGATGACTTT  
+HWI-EAS443:3:75:1508:1858#0/1  
aa¥]``^a¥`aba\_T```]`aX[DYaTJ^]aa]a\_\_`[aY  
@HWI-EAS443:3:75:1707:1733#0/1  
CAAATAGTAGCATTGCCACAACACTTCAATGCATGTGTG  
+HWI-EAS443:3:75:1707:1733#0/1  
aabbbbbb`bbabbaabbbbbbbbabbb`bbbb`bbbab\_b  
@HWI-EAS443:3:75:1745:1077#0/1  
TGTCCTGTAGCTCTGATAGCACCTGCTTCCAAGCCATGAG  
+HWI-EAS443:3:75:1745:1077#0/1  
`]`babbabb`^aaXGXaa`\_]a\_]V¥\_\_^PY^W]\_X]O\_

@HWI-EAS443:3:75:200:1973#0/1  
ATCGCAGTCCTCAAGAGCATGTCTCCTATTTCTAGAACAC  
+HWI-EAS443:3:75:200:1973#0/1  
a`\_^a^V\_[Z\_^\_]a¥]WV]W]]\_^XYZ]]W¥X¥]^]Z  
@HWI-EAS443:3:75:559:348#0/1  
TAGCATTGCCACAACACTTCAATGCATGTGTGAGGAAGG  
+HWI-EAS443:3:75:559:348#0/1  
abbaababa`babaabbaabbb\_aa\_abb`baaabaaaa  
@HWI-EAS443:3:75:570:754#0/1  
CAAATAGTAGCATTGCCACAACACTTCAATGCATGTGTG  
+HWI-EAS443:3:75:570:754#0/1  
\_a`b`aZabbabbbbabbabbbbbbab]bbbbbabbbb\_b  
@HWI-EAS443:3:75:687:109#0/1  
GGCCAGTAAGAGTCTATGGGATTCCTTTCGTCAGTCCGAA  
+HWI-EAS443:3:75:687:109#0/1  
aababbaabbbab`aaabaa]Z]b¥`aaa`a^`\_a^ZZa^Y  
@HWI-EAS443:3:76:1060:972#0/1  
CACTCCCCTGGGTGACTCTCCGATTGGCCATGTTTGCAT  
+HWI-EAS443:3:76:1060:972#0/1  
]`a[Y[a`\_\_b`Q]V\_]`]Z¥XQW^VOVYPNTNZZDVNQ  
@HWI-EAS443:3:76:1071:1071#0/1  
ACAGATTTTACCAGTAAGGTCCTGCACACTTCCCAATAG  
+HWI-EAS443:3:76:1071:1071#0/1  
aa\_`aababaaaab\_aaa`Zaa`a`a`a`aa`aaab\_`a`  
@HWI-EAS443:3:76:124:256#0/1  
CATTGCCACAACACTTCAATGCATGTGTGAGGAAGGAGT  
+HWI-EAS443:3:76:124:256#0/1  
abbabbbabbbabbbb`b^aabaaaa]babbaaaa`a\_  
@HWI-EAS443:3:76:1503:1053#0/1  
CAAATAGTAGCATTGCCACAACACTTCAATGCATGTGTG  
+HWI-EAS443:3:76:1503:1053#0/1  
`bbbbbbbaabbabaabbbbbbbbbbbbaabbbbabab  
@HWI-EAS443:3:76:1772:1110#0/1  
CAAATAGTAGCATTGCCACAACACTTCAATGCATGTGTG  
+HWI-EAS443:3:76:1772:1110#0/1  
aab\_Z\_aab¥a`]aMaaaabaabaaaa\_aa[]`bb`aY`  
@HWI-EAS443:3:76:356:656#0/1  
CGAAAACCCCTCAAATTGTGGAGACGCATATAGACTGTTG  
+HWI-EAS443:3:76:356:656#0/1  
^``b`bb`a`aa`^a\_a\_[\_`b`]a`b`^^b^V^]JZN  
@HWI-EAS443:3:76:552:1329#0/1  
CATTGCCACAACACTTCAATGCATGTGTGAGGAAGGAGT  
+HWI-EAS443:3:76:552:1329#0/1  
OY¥¥¥```bbbbbbbaa¥¥`aabbbbb`b[`Sa```^`ba\_  
@HWI-EAS443:3:76:638:91#0/1  
CATTGCCACAACACTTCAATGCATGTGTGAGGAAGGAGT  
+HWI-EAS443:3:76:638:91#0/1  
`bbbabbbbbbabbabbaaabb`bbbab^b`baaabaaa`  
@HWI-EAS443:3:76:738:592#0/1  
TCATATAGCCCCCAAGATCGAAGGGTCCAGGTTCCAGGT

+HWI-EAS443:3:76:738:592#0/1  
]baaa^\_WYT]` [RZ`a`YS\_^VX\_FMN[STSIMSPU`QV  
@HWI-EAS443:3:77:1114:911#0/1  
GAGAAAGGCATAAATCCCAATTACCTCACGGCTTGAAGC  
+HWI-EAS443:3:77:1114:911#0/1  
a\_babbbaababbaaaa\_babbb`aaab`Z^\_aaX^W[[L  
@HWI-EAS443:3:77:137:1652#0/1  
CAAATAGTAGCATTGCCACA ACTACTTCAATGCATGTGTG  
+HWI-EAS443:3:77:137:1652#0/1  
a\_\_`\_^Oaa[^`UY^abaab`b`]ZaaW\_`¥U[a]PWA  
@HWI-EAS443:3:77:204:854#0/1  
AGTAGCATTGCCACA ACTACTTCAATGCATGTGTGAGGAA  
+HWI-EAS443:3:77:204:854#0/1  
a]`]]Y` [XTVW]`aaW\_a\_] [TQR[T\_RUQZHY¥[¥0\_  
@HWI-EAS443:3:77:382:570#0/1  
TGACTTTCAGCTGATCCCAATGGTAAGCAAATGTAGGACC  
+HWI-EAS443:3:77:382:570#0/1  
aaaaaaaaa]J]\_^YX]]`^U¥^\_\_\_\_[^]^W[^¥YU  
@HWI-EAS443:3:77:551:1414#0/1  
GACTTTGGTCGGCAAGCTTGC GCGTAGTTCCTGTAATCTC  
+HWI-EAS443:3:77:551:1414#0/1  
a`a]bUFZaIWTXSub`\_]a[a^LNHLaY]\_X^^[aa\_a  
@HWI-EAS443:3:77:597:1648#0/1  
ACTCCCCTGGGTGACTCTCCGATTGGTCATGTTTCCGATT  
+HWI-EAS443:3:77:597:1648#0/1  
aa[abaaS`aaV`b`\_a^`\_[LU]^`X]W^\_¥¥\_`^`¥]Z]  
@HWI-EAS443:3:77:683:638#0/1  
ACCCCTATTGTGTTACATATACTGTTCACTGTCCAGG  
+HWI-EAS443:3:77:683:638#0/1  
aaaa`aaa\_a`^)`aaaa\_\_\_\_\_aa`^`a\_a`\_`^]\_^\_\_Y  
@HWI-EAS443:3:77:720:1270#0/1  
CATTTGCTTACCATTGGGATCAGCTGAAAGTCATCCATGG  
+HWI-EAS443:3:77:720:1270#0/1  
`\_`aaababbabaaaa]aa\_aba`aaaa\_\_aa`a```a\_  
@HWI-EAS443:3:77:735:1928#0/1  
ATTGCCACA ACTACTTCAATGCATGTGTGAGGAAGGAGTT  
+HWI-EAS443:3:77:735:1928#0/1  
`\_`^a`¥```\_`\_TR^a^¥X[aU`\_S`R`T]`a¥^\_\_aY`  
@HWI-EAS443:3:77:868:703#0/1  
AGACGTAAACAGTATGACAGTGATGAGCCAGAGCCCAGA  
+HWI-EAS443:3:77:868:703#0/1  
ab`\_HWb``aaa]\_\_\_\_^aaa\_\_a`^`¥aa`Z[Z]aa\_aaZ  
@HWI-EAS443:3:78:1220:740#0/1  
GGGGCTATATGAAGCAATCGAGGAGTGACTGATTAATGAT  
+HWI-EAS443:3:78:1220:740#0/1  
\_Z\_NP\_[T¥aWT^^J][\_L¥GZ`VNUMFFXa\_`YU]BBBB  
@HWI-EAS443:3:78:391:1885#0/1  
AAATCCCAATTACCTCATGGCTTTGAAGCAGGTGCTAGCA  
+HWI-EAS443:3:78:391:1885#0/1  
a`[]\_a\_a^\_^ZVZ]\_^]]^^XFRVZTQ[STQTWPVGLR

@HWI-EAS443:3:78:566:791#0/1  
TACATTTGCTTACCATTGGGATCAGCTGAAAGTCATCCAT  
+HWI-EAS443:3:78:566:791#0/1  
Z]`\_`^WaaaaXZ`\_\_```]Z[``^`^`a]]\_a`\_`\_`Y  
@HWI-EAS443:3:78:569:486#0/1  
TTCGGATTTCCATTTTCATCGACGAACGGGGCGAATCAATA  
+HWI-EAS443:3:78:569:486#0/1  
`W`Z\_]a^]aa^aa`a^`^`\_¥N]^`\_]M^aa[[aY TZ  
@HWI-EAS443:3:78:718:280#0/1  
GCTTCATATAGCCCCCAAGATCGAAGGTTCCAGGGTCCA  
+HWI-EAS443:3:78:718:280#0/1  
aaaaaa`XVaU\_]NUaa`XOMJY`XVFPTRUZ\_HZBBB  
@HWI-EAS443:3:78:960:1839#0/1  
CAGTCCTCAAGAGCATGTCTCCTATTTCTAGAACACAGTA  
+HWI-EAS443:3:78:960:1839#0/1  
a`^`[^aaaa^a\_]T\_a[]^```\_\_\_\_\_^`\_\_`````^a]W`  
@HWI-EAS443:3:79:1301:2015#0/1  
CAAATAGTAGCATTGCCACAACACTTCAATGCATGTGTG  
+HWI-EAS443:3:79:1301:2015#0/1  
Z\_bbbb\_Xabbbb``ba^`bbbbbaabbabb¥bbab\_b  
@HWI-EAS443:3:79:1324:1586#0/1  
TGTTGCCCCGATTGAACATATCGCAAGAATGAGGAGGAAC  
+HWI-EAS443:3:79:1324:1586#0/1  
Y\_Q\_VZ\_¥J\_¥Sa]a]]¥WU]\_Y[^¥F[^\_HS¥OY^\_QW  
@HWI-EAS443:3:79:1444:1177#0/1  
CAAATAGTAGCATTGCCACAACACTTCAATGCATGTGTG  
+HWI-EAS443:3:79:1444:1177#0/1  
abababb`aaaaababaaabbbbaab`baaba`ba\_a^`  
@HWI-EAS443:3:79:1565:1088#0/1  
GCAGCAAACCTGTTAGTTTCGATTTTCGGATCTTCGCCAT  
+HWI-EAS443:3:79:1565:1088#0/1  
aaaaaaaa`babaa¥b\_baY`U[a`X`^FSR[¥ZGXXY\_  
@HWI-EAS443:3:79:1749:1341#0/1  
ATTGCAGCAAACCTGTTAGTTTCGATTTTCGGACCTTCCC  
+HWI-EAS443:3:79:1749:1341#0/1  
aa\_¥bba`b\_b\_aba^]T]UbaHXN`\_a`WHWIIERaW[[  
@HWI-EAS443:3:79:414:736#0/1  
CAAATAGTAGCATTGCCACAACACTTCAATGCATGTGTG  
+HWI-EAS443:3:79:414:736#0/1  
abbaaba[baaaaaa`aaaa`aaa`\_a]aaa\_aa^a]a  
@HWI-EAS443:3:79:522:125#0/1  
GGAAAAATACTGTGTTCTAGAAATAGGAGACATGCTCTTG  
+HWI-EAS443:3:79:522:125#0/1  
U\_`^`¥\_¥\_U¥¥Q\_XY[Sa`^X¥¥aa]]bbaaaa\_`\_baa  
@HWI-EAS443:3:79:604:1813#0/1  
GGGGCATGGAAATGAGGCGCTGCCTTCTTCAGCCTCTTCA  
+HWI-EAS443:3:79:604:1813#0/1  
aUWGTX¥V`U]aQa]]RXZUQ`TNU\_aBBBBBBBBBBBBB  
@HWI-EAS443:3:79:765:1658#0/1  
TTCGGATTTCCATTTTCATCGACGAACGGGGGGAATCAATA

+HWI-EAS443:3:79:765:1658#0/1  
`bb]aTb\_bbbZ\_a\_bbbbaa[b`b\_aaaaHb`U`YYa`]  
@HWI-EAS443:3:79:80:113#0/1  
CAAATAGTAGCATTGCCACAACACTTCAATGCATGTGTG  
+HWI-EAS443:3:79:80:113#0/1  
¥aaabba\_\_aabaaaa]Mbb`a`\_a\_baaaabaYba\_`ab  
@HWI-EAS443:3:7:1013:73#0/1  
ATTCTTGGACATGTCTTTCTCTTTGACAGAAGACTCGGC  
+HWI-EAS443:3:7:1013:73#0/1  
abbbabbabW`bbba¥ba`]b^bbba\_\_a]^a\_R\_]a\_S  
@HWI-EAS443:3:7:1017:125#0/1  
ATGGCTTGAAGCAGGTGCTAGCAGAGCTACAGGAAATTG  
+HWI-EAS443:3:7:1017:125#0/1  
`aa`[\_aaa\_]ZG[¥\_TX[V¥NO¥]SZLY^HZU[TGRRWB  
@HWI-EAS443:3:7:1035:1053#0/1  
CAAATAGTAGCATTGCCACAACACTTCAATGCATGTGTG  
+HWI-EAS443:3:7:1035:1053#0/1  
abb\_baba`ba`baaaaa`aa¥b`\_aa^aaaa¥aaaXa]b  
@HWI-EAS443:3:7:1515:651#0/1  
CATTTGCTTACCATTGGGATCAGCTGAAAGTCATCCATGG  
+HWI-EAS443:3:7:1515:651#0/1  
abbbbbb`bbbbbbbbbaaab`ba\_bbbaabaabaZ\_baa`  
@HWI-EAS443:3:7:204:803#0/1  
CAAATAGTAGCATTGCCACAACACTTCAATGCATGTGTG  
+HWI-EAS443:3:7:204:803#0/1  
aaaabaa^bb`aaaaaa`aa\_aaaa`\_aa`a\_\_aa^a^a  
@HWI-EAS443:3:7:394:57#0/1  
TTCTTTGGCTGGAAAGAGCCTAATATAGTCAAACCACATG  
+HWI-EAS443:3:7:394:57#0/1  
aaa^a^baaabbaaaa`a^[a\_¥G`\_`Z^\_\_`]W\_\_\_\_^  
@HWI-EAS443:3:7:651:1644#0/1  
GGGGGCTAGATGAAGCAATCGAGGAGTGCCTGATTAATGA  
+HWI-EAS443:3:7:651:1644#0/1  
`RZ\_YFR`X\_¥aYT\_Q[X]L\_N`¥N\_NZQYMUGQ¥T^QBB  
@HWI-EAS443:3:7:873:307#0/1  
CAAATAGTAGCATTGCCACAACACTTCAATGCATGTGTG  
+HWI-EAS443:3:7:873:307#0/1  
abbbbbbaba`abbaab`aa`bbaaa\_baaaYaaa\_b^b  
@HWI-EAS443:3:80:1067:681#0/1  
GTAGCATTGCCACAACACTTCAATGCATGTGTGAGGAAG  
+HWI-EAS443:3:80:1067:681#0/1  
aabb`abaaaaaaaaaba`baaaaab`\_abaa\_a`b\_aaa  
@HWI-EAS443:3:80:1308:850#0/1  
TAGATGGATTGAGCCGAACGGCTGCATTTAGGGCAAGCT  
+HWI-EAS443:3:80:1308:850#0/1  
^Xa^`a`¥abaaa`\_aa`\_]\_a\_[NLPY¥FS¥^RVLY[RM  
@HWI-EAS443:3:80:1372:1460#0/1  
GATGAAATGGGGCATGGAAATGAGGCGCTGCCTTATTTCAG  
+HWI-EAS443:3:80:1372:1460#0/1  
aaaabaa[aa``U\_a\_\_`a`a\_\_R`Y\_aQG\_SD[\_V^Y

@HWI-EAS443:3:80:194:1109#0/1  
CATTGCTTACCATTGGGATCAGCTGAAAGTCATCCATGG  
+HWI-EAS443:3:80:194:1109#0/1  
a^^a`\_a\_`a`aX`\_`^Z\_]`a^\_\_\_\_]W]WWZ[`Z^^XN  
@HWI-EAS443:3:80:247:1234#0/1  
TACAGATTTTCCCAGTAAGGTCCTGCACACTTTCCCAATA  
+HWI-EAS443:3:80:247:1234#0/1  
``bbb^\_]YD[bab\_aba¥`aaaaaa`a`¥aa¥^a`\_  
@HWI-EAS443:3:80:454:1680#0/1  
AGAATATGGGGAAGACCCGAAAATCGAAACTAACAAAGTTT  
+HWI-EAS443:3:80:454:1680#0/1  
^]¥`ab¥QJX]``T\_ab`aa\_aa`a`¥^aa`a``aa\_W]\_  
@HWI-EAS443:3:80:64:94#0/1  
CATTAATCAGGCACTCCTCGATTGCTTCTATAGCCCCC  
+HWI-EAS443:3:80:64:94#0/1  
abbbbabaabaaaab\_aa\_a`\_`aZa`H``]Z\_U^WUBB  
@HWI-EAS443:3:81:1002:375#0/1  
CAAATAGTAGCATTGCCACAACACTTCAATGCATGTGTG  
+HWI-EAS443:3:81:1002:375#0/1  
^`bbba`Sb``bbaa^b`ba`abaaaaaaaaaaaa¥aUa  
@HWI-EAS443:3:81:1303:73#0/1  
TTCGGCTGAATTGAGAAAATTGCTTCTCATTGTTTCAGGCA  
+HWI-EAS443:3:81:1303:73#0/1  
ab\_aa[aa`aaaX[\_a`a\_aaa]a\_V`Z]````]\_ZZ`\_] ]  
@HWI-EAS443:3:81:1577:590#0/1  
CAAATAGTAGCATTGCCACAACACTTCAATGCATGTGTG  
+HWI-EAS443:3:81:1577:590#0/1  
`bab`^XY^^[`bbb`Ubaa`Yaa¥b]P\_ab`[ `b\_\_`]b  
@HWI-EAS443:3:81:1598:339#0/1  
ATTGCCACAACACTTCAATGCATGTGTGAGGAAGGAGTT  
+HWI-EAS443:3:81:1598:339#0/1  
abaa]aaabb\_abaab`bbabaaab`a]]`b¥`ab\_`\_\_\_\_  
@HWI-EAS443:3:81:957:1956#0/1  
AGCCTATGTAGACGGATTGAGCCGAACGGCTGCATTGAG  
+HWI-EAS443:3:81:957:1956#0/1  
aW`ba]\_a``b]X\_b`Vq]U[U¥`Z[^V^¥`R¥KZNTJLX  
@HWI-EAS443:3:82:1207:511#0/1  
ACCCGAGTCACGAGGGGGAGGGAATACAACACTATATGATGC  
+HWI-EAS443:3:82:1207:511#0/1  
¥¥¥Z¥\_\_W\_a¥\_OW^\_^WSq][UZ\_^YHTOX¥]X]bK[aZ  
@HWI-EAS443:3:82:1247:364#0/1  
CAAATAGTAGCATTGCCACAACACTTCAATGCATGTGTG  
+HWI-EAS443:3:82:1247:364#0/1  
abbbbbbbbbbbbbbbbababaabbbbbbababbbbbbaabb  
@HWI-EAS443:3:82:1408:927#0/1  
CACAACACTTCAATGCATGTGTGAGGAAGGAGTTGAACC  
+HWI-EAS443:3:82:1408:927#0/1  
abaa\_U`aY`baba`b¥Y\_\_aYaaaa\_`b`b`aba^\_^  
@HWI-EAS443:3:82:1579:674#0/1  
GGGCACTCGGTGAAAATATGGCACCAGAAAATGTAGACTT

+HWI-EAS443:3:82:1579:674#0/1  
Ybb\_b]a[ab\_]aab]aa]\_aab\_¥ab^\_aaaaU`b0LZ\_  
@HWI-EAS443:3:82:1737:1499#0/1  
CAAATAGTAGCATTGCCACAACACTTCAATGCATGTGTG  
+HWI-EAS443:3:82:1737:1499#0/1  
\_`[``¥Y\_¥^`Z^S\_NF^b¥``¥\_^^^a[\_¥\_`ab]¥¥b  
@HWI-EAS443:3:82:681:1421#0/1  
TTGCTCAATGCAACCTGTGCAGCCATGGATGACTTTCAGC  
+HWI-EAS443:3:82:681:1421#0/1  
aa\_a`aab\_aa`S¥\_aaRR`a\_a`a\_Ua\_]\_\_¥a¥\_ZS  
@HWI-EAS443:3:83:128:1545#0/1  
TCCGTCTTCCTTTGGTCCTACATTTGCTTACCATTGG  
+HWI-EAS443:3:83:128:1545#0/1  
abba\_babaaaaaaaaabY^aaaaa`\_a`a`\_aaaa\_\_aX  
@HWI-EAS443:3:83:1750:350#0/1  
CATTTGCTTACCATTGGGATCAGCTGAAAGTCATCCATGG  
+HWI-EAS443:3:83:1750:350#0/1  
Y\_``\_Z]aY\_ZbbYb\_^\_a¥Q`\_aabbbZ\_S¥¥Yb^abaa  
@HWI-EAS443:3:83:1776:1081#0/1  
GTAGCATTGCCACAACACTTCAATGCATGTGTGAGGAAG  
+HWI-EAS443:3:83:1776:1081#0/1  
a\_]¥WU\_aX]¥`¥`ZZ\_`Z[]U]X^[SW]\_\_^U^)`WYZ  
@HWI-EAS443:3:84:487:372#0/1  
AGCCCCTCAAGATCGAAGGTTCCAGGTTCCAGGTTGTCCC  
+HWI-EAS443:3:84:487:372#0/1  
T`\_[\_\_aa`])`a`UZU^``]¥TYOWPK]VXV`HXSXKV\_  
@HWI-EAS443:3:84:563:1456#0/1  
ATCGCAGTCCTCAAGAGCATGTCTCCTATTTCTAGAACAC  
+HWI-EAS443:3:84:563:1456#0/1  
aY¥0¥[`X^\_\_`T¥MX^`\_¥]\_]`¥\_X]UW¥WU^]ZZ  
@HWI-EAS443:3:84:661:2021#0/1  
CTCCTATTTCTAGAACACAGTATTTTTCCCATTGTGTGG  
+HWI-EAS443:3:84:661:2021#0/1  
^\_¥SZOXX]Z\_Z]a[Za^aWNU]]]Y\_\_T^)`G¥ZX[``^  
@HWI-EAS443:3:84:747:240#0/1  
GCCACAACACTTCAATGCATGTGTGAGGAAGGAGTTGAA  
+HWI-EAS443:3:84:747:240#0/1  
X^ZZbbb`a[`aTZabbbX[bb]b]ab^¥`Ua``bUb``a  
@HWI-EAS443:3:84:760:457#0/1  
CAAAGAAGCCCATCAGGCAATCTGAGGGGGCGTGGTGTGCG  
+HWI-EAS443:3:84:760:457#0/1  
aabbbbaaabba\_bbbb`a\_bbbbb`aaa`baab\_a``\_  
@HWI-EAS443:3:84:853:1111#0/1  
CAAATAGTAGCATTGCCACAACACTTCAATGCATGTGTG  
+HWI-EAS443:3:84:853:1111#0/1  
aa`\_aa\_Xaa[\_aT`\_aa\_a\_^`a\_\_\_Za`Za`^\_aX`X`  
@HWI-EAS443:3:85:1004:1755#0/1  
CATTAATCAGGCACTCCTCGATTGCTTTATATAGCCCCC  
+HWI-EAS443:3:85:1004:1755#0/1  
abaabbaab\_¥`baaaaa\_aaaaaaaaaabaab\_]a\_^\_[



@HWI-EAS443:3:85:1200:292#0/1  
CAAATAGTAGCATTGCCACAACACTTTCAATGCATGTGTG  
+HWI-EAS443:3:85:1200:292#0/1  
``R\_bbbabbbbbbbaaabaabbaab^baaba`bbabab  
@HWI-EAS443:3:85:1260:908#0/1  
GGAGAAGGTCGGTGGGAGACTTTGGTCGGCAAGCTTGCGC  
+HWI-EAS443:3:85:1260:908#0/1  
abMba]ZGaZba]^a^`ZS]^abZZQ¥^]\_``a^`^Z¥\_¥  
@HWI-EAS443:3:85:1483:129#0/1  
AAGGGAGTGACATGAATACGGCCTTGCTCAATGCATCCT  
+HWI-EAS443:3:85:1483:129#0/1  
a^baa]a`NYNa`Ha[a\_\_a¥Z^\_]S\_U\_S]¥H`TYW¥  
@HWI-EAS443:3:85:1738:1389#0/1  
AAATAGTAGCATTGCCACAACACTTTCAATGCATGTGTGA  
+HWI-EAS443:3:85:1738:1389#0/1  
aaa`aa]ba\_¥\_a\_\_[\_`\_`a\_a\_Wa^`\_`a`U]^a^aZ`]  
@HWI-EAS443:3:85:521:873#0/1  
AAATAGTAGCATTGCCACAACACTTTCAATGCATGTGTGA  
+HWI-EAS443:3:85:521:873#0/1  
aaaa`aQ\_`a`aaaa`\_]\_`a``aa`^`aa`a^[a¥`^`  
@HWI-EAS443:3:85:579:1418#0/1  
GCATTGCCACAACACTTTCAATGCATGTGTGAGGAAGGAG  
+HWI-EAS443:3:85:579:1418#0/1  
aa\_aa\_aa`\_`aaa`aaa`\_]`a`aa`\_aZa\_a`\_]\_\_`]  
@HWI-EAS443:3:85:888:888#0/1  
CAAATAGTAGCATTGCCACAACACTTTCAATGCATGTGTG  
+HWI-EAS443:3:85:888:888#0/1  
ab`Y\_b^a^`¥¥]^`bbaaabZabaaba\_a^aaba^babTa  
@HWI-EAS443:3:86:326:17#0/1  
CTTGGGGGCTATATGAAGCAATCGATGAGTGCCTGATTA  
+HWI-EAS443:3:86:326:17#0/1  
^^UX¥Z[T\_]^[MMUT¥[`UQGONR[HQLG[HZQ¥¥Wa\_[  
@HWI-EAS443:3:86:556:1538#0/1  
GCATTGCCACAACACTTTCAATGCATGTGTGAGGAAGGAG  
+HWI-EAS443:3:86:556:1538#0/1  
\_\_[O[R`]WSWZXP\_aTWaa\_XQ\_\_Q\_P`Y¥\_`XMZ¥¥UY  
@HWI-EAS443:3:86:691:219#0/1  
CGTTTCGTCGATGAAATGGAAATCCGCATACATGAAACAAA  
+HWI-EAS443:3:86:691:219#0/1  
ababb```bbabaaaabbabba``]I]aaaaaaaa\_N``\_  
@HWI-EAS443:3:86:783:143#0/1  
CATTTGCTTACCATTGGGATCAGCTGAAAGTCATCCATGG  
+HWI-EAS443:3:86:783:143#0/1  
aaaaababba^aa\_\_`]^`a\_a¥aVabaZYXU[[]W`^``\_  
@HWI-EAS443:3:86:827:1064#0/1  
GAAGAAATTTAGGCTTCTTACCCCTGTTGCGTTACATAT  
+HWI-EAS443:3:86:827:1064#0/1  
`Z\_aa`]baaa``\_aa\_]aa]Z[[]^\_]\_aZ`R`]W]^`[  
@HWI-EAS443:3:87:1349:908#0/1  
CAAATAGTAGCATTGCCACAACACTTTCAATGCATGTGTG

+HWI-EAS443:3:87:1349:908#0/1  
`babbbb^bbaabbbabbabbaababbabaa`aabaab\_b  
@HWI-EAS443:3:87:1360:1734#0/1  
CAAATAGTAGCATTGCCACAACACTTCAATGCATGTGTG  
+HWI-EAS443:3:87:1360:1734#0/1  
ab\_[\_\_\_\_¥b[MW^[\_G0Taaaa`Ta[aaa\_a`Sab0a^b  
@HWI-EAS443:3:87:1736:523#0/1  
GCATTGCCACAACACTTCAATGCATGTGTGAGGAAGGAG  
+HWI-EAS443:3:87:1736:523#0/1  
[[`aab`Zaaaa`ab\_ab` `` `a[^aa\_`Ra\_aaa\_a\_^a  
@HWI-EAS443:3:87:1782:596#0/1  
GAACAAGCCAATAGAAGTGGGCACTCGGTGAAAATATGGC  
+HWI-EAS443:3:87:1782:596#0/1  
aab]bbbbabbabbab`baa`b^a[aa\_b\_\_ba`aa^`Z  
@HWI-EAS443:3:87:702:1813#0/1  
CACATTCACATCTTTTCATTCCTGGAGAGTAGATGGCCA  
+HWI-EAS443:3:87:702:1813#0/1  
aaaa[aab\_b]Ta\_`a\_aaa\_a]`a\_\_W\_[G^[RMW`US^  
@HWI-EAS443:3:88:1041:1267#0/1  
ATTGCCACAACACTTCAATGCATGTGTGAGGAAGGAGTT  
+HWI-EAS443:3:88:1041:1267#0/1  
aa^\_[b]bba`aba¥a]a\_^bTaaaUaX\_`a\_a\_]ZaW^  
@HWI-EAS443:3:88:1192:879#0/1  
CATTGCCACAACACTTCAATGCATGTGTGAGGAAGGAGT  
+HWI-EAS443:3:88:1192:879#0/1  
aab^^[S]` ` `Vb]aaYa[bbT\_ab`b\_bYa`S]bb]aZ  
@HWI-EAS443:3:88:1209:1054#0/1  
CATTGCCACAACACTTCAATGCATGTGTGAGGAAGGAGT  
+HWI-EAS443:3:88:1209:1054#0/1  
\_`[P\_HZW]a`\_U^^`^^¥SX`aa\_YU¥0]`\_X\_a]]aa  
@HWI-EAS443:3:88:135:1759#0/1  
GAAGCCTAAATTTCTTCCTGATTAGTATGATTACAAAGAG  
+HWI-EAS443:3:88:135:1759#0/1  
aXa`a[¥P[]`a]ba`aaaa\_\_aPaTaa\_`aaaa^[M]Z  
@HWI-EAS443:3:88:1512:1233#0/1  
AGCCGAACGGCTGGATTGAGGGCAAGCTTTCCCAAATGTC  
+HWI-EAS443:3:88:1512:1233#0/1  
`aX^babZ¥\_UbHDM[¥0QVZYLPVOVX`]Q[\_`a¥`a¥R  
@HWI-EAS443:3:88:1528:259#0/1  
GAACGGGGTGAATCAATAATTGTAGAATCTGGTGAACCGA  
+HWI-EAS443:3:88:1528:259#0/1  
Y`a^¥^`UDY`\_`I\_aa`Ra]a`\_]¥^\_W[a^WaXDHG\_0  
@HWI-EAS443:3:88:1587:619#0/1  
ATACTGTTACCACACTGTCCAGGCCATGATTCGGGCTCTTC  
+HWI-EAS443:3:88:1587:619#0/1  
^TUaaa\_]¥`¥`\_aa\_`\_` `¥[^]X[ZW]UZ[NQ[T[¥¥  
@HWI-EAS443:3:88:1665:1033#0/1  
TGGGCCTCGACACTTGGCCTATCGCAGTCCACAAGAGCAT  
+HWI-EAS443:3:88:1665:1033#0/1  
a¥bb\_\_T[PXTJ\_a`¥TWVD[]a\_`]ZZRFLV¥¥\_WaH\_\_

@HWI-EAS443:3:88:1733:1181#0/1  
CAAGAGCATGTCTCTATTTCTAGAACACAGTATTTTCC  
+HWI-EAS443:3:88:1733:1181#0/1  
aabbabbbbaab`aa[abb[baaabRaabbWabaa`aP`  
@HWI-EAS443:3:88:326:497#0/1  
ATTGCAGCAAACCTGTTAGTTTCGATTTTCGGCTCTTCCC  
+HWI-EAS443:3:88:326:497#0/1  
]^abababba`aa`b`\_\_bX` `a\_` `a`X]]XDT]\_]\_[Y  
@HWI-EAS443:3:88:348:1603#0/1  
TAGATGGATTTCGAGCCGAACGGCTGCATTTAGGGCAAGCT  
+HWI-EAS443:3:88:348:1603#0/1  
]aaaL\_^bZ¥bR` `aaXaa\_baYSaSSV\_I\_` `aaX^`PDI  
@HWI-EAS443:3:88:352:129#0/1  
CTGGGTGACTCTCCGATTGGCCATGCTTCCGATTTGTTTT  
+HWI-EAS443:3:88:352:129#0/1  
abbbb]bbaaab`aa`abaa`[a]b` `U` `U]` `aY` `]  
@HWI-EAS443:3:88:384:738#0/1  
CAGCAAACCTGTTAGTTTCGATTTTCGGATATTTCCCATATA  
+HWI-EAS443:3:88:384:738#0/1  
a\_[aab`]abb^babUaaaYHGQ\_\_a`]MMG^[TPI` [[X  
@HWI-EAS443:3:88:640:428#0/1  
CATTTGCTTACCATTGGGATCAGCTGAAAGTCATCCATGG  
+HWI-EAS443:3:88:640:428#0/1  
abbb`b`b\_aaaa`abaaaa`]aaaa\_aa`^\_a`a¥]aaa  
@HWI-EAS443:3:88:816:1936#0/1  
ATGAAATGGAAATCCGAATACATGAAATAAACTTCCAAAT  
+HWI-EAS443:3:88:816:1936#0/1  
`a\_]aa\_a\_Y` `a\_]` `aaa` `a\_\_aaaaba` `\_\_\_\_^` ` \_` `\_  
@HWI-EAS443:3:88:858:1230#0/1  
ACTGCCGGGCTACTGAATACATAATGAAGGGAGTGATACAT  
+HWI-EAS443:3:88:858:1230#0/1  
aabb¥F]abaabbbbaaaaaabaaaa`aaaa\_a\_a^a\_\_`  
@HWI-EAS443:3:89:1045:1722#0/1  
ATACTGTGTTCTAGAAATAGGAGACATGCTCTTGAGGACT  
+HWI-EAS443:3:89:1045:1722#0/1  
abba^aabaaabbbba]b` `aba\_aa\_a\_\_\_\_\_aV` ^aa` \_  
@HWI-EAS443:3:89:1240:1715#0/1  
CGGCTGCATTGAGGGCAATCTTTCCCAAATGTCAAAGAA  
+HWI-EAS443:3:89:1240:1715#0/1  
a[babY`b[b\_[a`Z¥`H\_b\_b[SLZaa][aWMbb` `]` `a  
@HWI-EAS443:3:89:1300:815#0/1  
AAATAGTAGCATTGCCACAACCTTCAATGCATGTGTGA  
+HWI-EAS443:3:89:1300:815#0/1  
abaaaa\_aba\_aaaa` ` \_aa[ab^aa\_a`aa\_a`a\_aZ` \_  
@HWI-EAS443:3:89:147:488#0/1  
CGGTGGGAGACCTTGGTCGGCAAGCTTGCGCATAGTTCCT  
+HWI-EAS443:3:89:147:488#0/1  
aWZW^Wa]PP¥a` `¥ZJO^` `^W¥^Y` `^` ` `WVQ`LNPYV  
@HWI-EAS443:3:89:1667:1530#0/1  
GGGGTCTATATGAAGCAATCGAGGAGTGCTGATTAATGA

+HWI-EAS443:3:89:1667:1530#0/1  
[`b`Rbbabbabbba]bbb^abbaaa`a]abb`baaa`a`  
@HWI-EAS443:3:89:996:1462#0/1  
CTTTCAGCTGATCCCAATGGTAAGCAAATGTAGGACCAAA  
+HWI-EAS443:3:89:996:1462#0/1  
abbabb`[babaaababbbb]b\_`[babaa\_ba`b`\_b`b  
@HWI-EAS443:3:8:1042:804#0/1  
TCCGTCTTCCTTCTTTGGTCCTACATTTGCTTACCATTGG  
+HWI-EAS443:3:8:1042:804#0/1  
aa\_a`a`ba`ba\_baaX`\_`aa\_¥`aaaa]a`aW\_\_`\_]\_\_  
@HWI-EAS443:3:8:1236:685#0/1  
CAGTCCTCAAGAGCATGTCTCCTATTTCTAGAACACAGTA  
+HWI-EAS443:3:8:1236:685#0/1  
aab`^`bbbbbaaabbaabaaab`babbaaa\_aaba^a  
@HWI-EAS443:3:8:1591:168#0/1  
CAAATAGTAGCATTGCCACAACACTTCAATGCATGTGTG  
+HWI-EAS443:3:8:1591:168#0/1  
aabbabba`baabbbabbaba\_ab^aaaaU^b`^bbaa\_a  
@HWI-EAS443:3:8:1689:1134#0/1  
AGAGCATGTCTCCTATTTCTAGAACACAGTATTTTTCCCA  
+HWI-EAS443:3:8:1689:1134#0/1  
ababaabb\_abaaa\_aaa^aaa\_`\_]aaW`a\_`\_`WZ\_^  
@HWI-EAS443:3:8:1759:845#0/1  
CATTTGCTTACCATTGGGATCAGCTGAAAGTCATCCATGG  
+HWI-EAS443:3:8:1759:845#0/1  
aaaabbaabaa\_aab`^ba¥DW`\_aa`aaa\_\_a`Z]\_\_a\_  
@HWI-EAS443:3:8:411:1503#0/1  
CAAATAGTAGCATTGCCACAACACTTCAATGCATGTGTG  
+HWI-EAS443:3:8:411:1503#0/1  
aaa`aa`Xa\_`aY\_]W)`a`\_`^a`\_\_\_\_`\_]\_\_[``^]U  
@HWI-EAS443:3:8:564:1634#0/1  
ATTGACTGATTCAAGCTGGATAGAAATTGATGAAATAGGA  
+HWI-EAS443:3:8:564:1634#0/1  
aa\_¥T\_Za\_^\_a`b`Yab`YYa\_G`Ha`^]V`¥`Z¥\_U^\_  
@HWI-EAS443:3:90:1005:1248#0/1  
CAAATAGTAGCATTGCCACAACACTTCAATGCATGTGTG  
+HWI-EAS443:3:90:1005:1248#0/1  
aaYR]`\_Z\_aa``XRR¥]PT¥baaa]bab¥]\_X]¥`H`]`  
@HWI-EAS443:3:90:1131:1698#0/1  
CAGTCCTCAAGAGCATGTCTCCTATTTCTAGAACACAGTA  
+HWI-EAS443:3:90:1131:1698#0/1  
ab`aabbabbababbaabbbbbbbbbbb`bbbbbb`bab]V]  
@HWI-EAS443:3:90:1420:171#0/1  
ACCAGATTCTACAATTATTGATTCACCCCGTTCGTGGATG  
+HWI-EAS443:3:90:1420:171#0/1  
^¥`\_¥Ub`W\_\_V[[MV\_b]]]Pa`UXFV]¥Q[QS]GaSPZ  
@HWI-EAS443:3:90:1490:1326#0/1  
AGCATTGCCACAACACTTCAATGCATGTGTGAGGAAGGA  
+HWI-EAS443:3:90:1490:1326#0/1  
abb`bb]a]baa``aaaba\_aaab`\_ab\_b]aaa\_\_aa^`

@HWI-EAS443:3:90:1750:277#0/1  
CAAATAGTAGCATTGCCACAACACTTTCAATGCATGTGTG  
+HWI-EAS443:3:90:1750:277#0/1  
abbbbbbbababbbbabbbbbb\_baabbbbaabb`bZb  
@HWI-EAS443:3:90:363:816#0/1  
CAAATAGTAGCATTGCCACAACACTTTCAATGCATGTGTG  
+HWI-EAS443:3:90:363:816#0/1  
ab]aa`aUaaaaa``aba``a\_a``a\_`\_\_aa]\_`¥a]a  
@HWI-EAS443:3:90:47:1050#0/1  
ATTGCCACAACACTTTCAATGCATGTGTGAGGAAGGAGTT  
+HWI-EAS443:3:90:47:1050#0/1  
``Ja¥¥`a`aaaa^a¥a][XXW¥a^a^a`a[^aa^\_\_G\_  
@HWI-EAS443:3:90:735:1132#0/1  
AAATAGTAGCATTGCCACAACACTTTCAATGCATGTGTGA  
+HWI-EAS443:3:90:735:1132#0/1  
[^\_\_ab`a``aaaa¥`aaaaaaaa\_a^aaaaa\_aWa]  
@HWI-EAS443:3:91:1085:204#0/1  
ATTGCTTTATATAGCCCCCAAGATCGAAGGTTCCAGGTT  
+HWI-EAS443:3:91:1085:204#0/1  
ab`a`b\_H^baaaa`]\_\_\_\_aaaa\_a^\_aaG\_PST`^V^  
@HWI-EAS443:3:91:1277:335#0/1  
AGCATTGCCACAACACTTTCAATGCATGTGTGAGGAAGGA  
+HWI-EAS443:3:91:1277:335#0/1  
``^aba\_Y]aYa[aab[baab\_ab\_[aa^a\_a\_a\_[`a\_`  
@HWI-EAS443:3:91:1282:320#0/1  
GAAGTTCGGTGGGAGACTTTGGTTCGAAAGCTTGCGCATA  
+HWI-EAS443:3:91:1282:320#0/1  
a``\_Oaa`YR`a`^[¥\_]`^`aWV^ZG[]YOXXYZFNYO  
@HWI-EAS443:3:91:1380:294#0/1  
AGCAGGGCAAGGATCAAACTAGGCTTTTCACTATAAGAC  
+HWI-EAS443:3:91:1380:294#0/1  
abIa¥`]^\_a^D[aa`[b^L^aa`YR`a`M\_F]Ta[aIW[  
@HWI-EAS443:3:91:1570:896#0/1  
CATTGCCACAACACTTTCAATGCATGTGTGAGGAAGGAGT  
+HWI-EAS443:3:91:1570:896#0/1  
R`a`Vb[``\_b¥b¥¥Va```aa`bba\_b``JbXbb`bba]  
@HWI-EAS443:3:91:1717:173#0/1  
CTTCCTTCTTTGGTCCTACATTTGCTTACCATTGGGATCA  
+HWI-EAS443:3:91:1717:173#0/1  
aaa¥\_\_b`abba¥`a`bbabbabb]bbaa^bbbb`^ab\_b  
@HWI-EAS443:3:91:298:574#0/1  
GCACCAGAAAAAGTAGACTTTGATGACTGCGAAGATGTTG  
+HWI-EAS443:3:91:298:574#0/1  
aZKX^SNL¥¥YOWG^\_`SZYW]WIXWWWXIHMMWUOIHZ  
@HWI-EAS443:3:91:316:1913#0/1  
CATTGCCACAACACTTTCAATGCATGTGTGAGGAAGGAGT  
+HWI-EAS443:3:91:316:1913#0/1  
abbb`ababbbb`bbbabbbbabbbaababa^`aaa\_a^]  
@HWI-EAS443:3:91:860:954#0/1  
CCTACATTTGCTTACCATTGGGATCAGCTGAAAGTCATCC

+HWI-EAS443:3:91:860:954#0/1  
abbbbabbbbbbbbbbbbbbbabbabbabaa`aba`a  
@HWI-EAS443:3:92:1157:719#0/1  
CGATTTGAGTTAATTGAAGGAAGAGACCGAATCATGGCCT  
+HWI-EAS443:3:92:1157:719#0/1  
S`\_¥aW[avi^bbaab\_0\_\_b\_S[baIabZ\_N]aaba]X]  
@HWI-EAS443:3:92:1493:1745#0/1  
GAGATCTGGGCTCTGGCTCATCACTGTAATACTGTTAAG  
+HWI-EAS443:3:92:1493:1745#0/1  
aaaa`aa]]a``[\_`a`aa¥QZ]adWG````\_`a^`a\_\_  
@HWI-EAS443:3:92:1525:922#0/1  
CATTGCCACAACACTTCAATGCATGTGTGAGGAAGGAGT  
+HWI-EAS443:3:92:1525:922#0/1  
\_`ba¥Ybbabb`bbbbbaabbbbaabbaaabbababab`  
@HWI-EAS443:3:92:1616:175#0/1  
CTCTACCCCTGTTGTGGTACATATACTGTTCACTGTC  
+HWI-EAS443:3:92:1616:175#0/1  
abTY]X`RHUa\_N``]J¥RR[\_aZa`^^P¥R[^Q[UN\_]B  
@HWI-EAS443:3:92:865:1433#0/1  
CATTGCTTACCATTGGGATCAGCTGAAAGTCATCCATGG  
+HWI-EAS443:3:92:865:1433#0/1  
``b\_Y[Ya^ababbbaaa\_aaaaa`bb``a`a\_Ua\_a][  
@HWI-EAS443:3:92:899:1961#0/1  
AAGGAATTCTTTGAAACAAATCGGAAACATGGCCAATCG  
+HWI-EAS443:3:92:899:1961#0/1  
[\_UW¥aaabb\_b[H[^ba]b`b][aSaaaX`VYW\_\_SaKZ  
@HWI-EAS443:3:93:1079:1118#0/1  
CAAATAGTAGCATTGCCACAACACTTCAATGCATGTGTG  
+HWI-EAS443:3:93:1079:1118#0/1  
`bb`aba]bb``baa`aaaaaabaaaaa`ab^aaa]a^a  
@HWI-EAS443:3:93:1091:1874#0/1  
GGGGAGGGGAGGAAGGCTCTATTGGGAAAGTGTGCAGGAC  
+HWI-EAS443:3:93:1091:1874#0/1  
``WTQ¥QYFobas`VXXabSZWa`XbGaabMaHXNVVT\_N  
@HWI-EAS443:3:93:1339:378#0/1  
TAGAACTTGATGAAATAGGAGAAGATGTTGCCACGATTGA  
+HWI-EAS443:3:93:1339:378#0/1  
\_b`Zaabb`bbb¥\_ab\_``TYa]`ZZbY``YTG^aZ\_a\_^  
@HWI-EAS443:3:93:1568:1875#0/1  
CAAATAGTAGCATTGCCACAACACTTCAATGCATGTGTG  
+HWI-EAS443:3:93:1568:1875#0/1  
abbbb^]b`\_a^bbaaa`abaabaaa\_a\_ab^aaa`a]b  
@HWI-EAS443:3:93:1604:796#0/1  
CAAATAGTAGCATTGCCACAACACTTCAATGCATGTGTG  
+HWI-EAS443:3:93:1604:796#0/1  
aa[\_`\_Ya``Uaa`a[Za\_T`]baaaaKZ^aa[a`TGaPa  
@HWI-EAS443:3:93:354:1375#0/1  
GCATTGCCACAACACTTCAATGCATGTGTGAGGAAGGAG  
+HWI-EAS443:3:93:354:1375#0/1  
abaaa`baaa]aaaaaa`a\_a`a[a`\_a\_\_\_\_\_^^Y\_^a

@HWI-EAS443:3:93:482:1678#0/1  
ATGACTTTCAGCTGATCCCAATGGTAAGCAAATGTAGGAC  
+HWI-EAS443:3:93:482:1678#0/1  
``Z^aa^aaaa\_`a`\_`\_`a`Za`]¥\_aa`\_X`V\_^  
@HWI-EAS443:3:93:511:1831#0/1  
AGCATTGCCACAACACTTCAATGCATGTGTGAGGAAGGA  
+HWI-EAS443:3:93:511:1831#0/1  
a]WQ[aZ\_`aa`aYN^a]^`aZ\_\_]^`^]]Y^`^]\_\_¥Y]  
@HWI-EAS443:3:93:721:749#0/1  
AAATAGTAGCATTGCCACAACACTTCAATGCATGTGTGA  
+HWI-EAS443:3:93:721:749#0/1  
YUU\_aWD^`^Z\_a^[R^\_`^`]^a^^\_\_][a`]]b^`XaT  
@HWI-EAS443:3:94:1093:641#0/1  
TCCGTCTTCTTCTTTGGTCCTACATTTGCTTACCATTGG  
+HWI-EAS443:3:94:1093:641#0/1  
a\_aa`W\_a`¥`b[`aa\_a`aaaaZ[\_aaa\_``a¥W[\_\_\_`^  
@HWI-EAS443:3:94:1143:927#0/1  
CTCCAGTCTCGGGTCAGTGAGTGAGAAGTCCATACTTACA  
+HWI-EAS443:3:94:1143:927#0/1  
`VTO]Ytb`][ab\_R¥\_[]WY[]]XFMG[TNFPZV]]ZT¥  
@HWI-EAS443:3:94:1636:127#0/1  
ATGCCCCATTTTCATCTTGATCTTGGAGGTTCTATTGGTTC  
+HWI-EAS443:3:94:1636:127#0/1  
¥YaNSI[\_¥aU^LGN\_`aZ`^aXXHBBBBBBBBBBBBBBBB  
@HWI-EAS443:3:94:1670:235#0/1  
CATAAATCCCAATTACCTCATGGCTTGAAACAGGTGCTA  
+HWI-EAS443:3:94:1670:235#0/1  
V`bab\_bW`TbbbabW`bbbbbbUbb[SaZGQa]`Hb[^Y  
@HWI-EAS443:3:94:236:1022#0/1  
CAAATAGTAGCATTGCCACAACACTTCAATGCATGTGTG  
+HWI-EAS443:3:94:236:1022#0/1  
a`^`bbbabbb`baaba\_a\_a`aabaa\_W¥a`aa`b`a\_b  
@HWI-EAS443:3:94:765:1558#0/1  
ACAAAATAAAATCTGAGAAGACATACATTCACATCTTTTC  
+HWI-EAS443:3:94:765:1558#0/1  
aVTZV¥ba`a]aQ`ba`¥a¥a[bI\_a\_`Vaaa\_baaa^YU  
@HWI-EAS443:3:94:893:1089#0/1  
CAAATAGTAGCATTGCCACAACACTTCAATGCATGTGTG  
+HWI-EAS443:3:94:893:1089#0/1  
aaaaa``¥aaa``aa^\_a`a``ab^aa]`Y`^¥\_aa^a]a  
@HWI-EAS443:3:95:1040:240#0/1  
CTTCCTTCTTTGGTCCTACATTTGCTTACCATTGGGATCA  
+HWI-EAS443:3:95:1040:240#0/1  
I^a^\_b\_\_a`a\_\_`a`\_]\_bbb```bbbaZbbb\_babaa  
@HWI-EAS443:3:95:1215:1123#0/1  
CTCGATTGCTTCATATAGCCCCCAAGATCGAAGGGTCCA  
+HWI-EAS443:3:95:1215:1123#0/1  
`W¥\_abb]bbbaba\_K\_b`Zb]Zabbaabb^baIa\_aN  
@HWI-EAS443:3:95:134:887#0/1  
GCCACAACACTTCAATGCATGTGTGAGGAAGGAGTTGAA

+HWI-EAS443:3:95:134:887#0/1  
^abbbbbabbbbbbaXabbabb`babbb`]ba`abaabaa  
@HWI-EAS443:3:95:1555:231#0/1  
CAGCAAACCTTGTAGTTTCGATTTTCGGTCTTCCCCATA  
+HWI-EAS443:3:95:1555:231#0/1  
0^[\_ab\_]¥ababbbb\_W`^\_bbb^baG`Na`]VWS]]L  
@HWI-EAS443:3:95:51:202#0/1  
GTGAATCACTAATTGTAGAATCTGGTGACCCGAATGCACT  
+HWI-EAS443:3:95:51:202#0/1  
a\_a^U¥a]UTVZXZ^QQQVZXXYZ^ZZVMVUZTLTZVVVR  
@HWI-EAS443:3:95:57:1548#0/1  
AACTCCTTCCTCACACATGCATTGAAGTAGTTGTGGCAAT  
+HWI-EAS443:3:95:57:1548#0/1  
`aabb]abaabab]ba`aa¥`aaaaa^aaTW¥^^^^a`\_  
@HWI-EAS443:3:96:1066:1320#0/1  
CAGGTGCTAGCAGAGCTACAGGACATTGGAAATGAAGAGA  
+HWI-EAS443:3:96:1066:1320#0/1  
aaaaU\_ba¥Z^[\_`¥aS¥a`^\_N\_T\_RHW¥^a`¥¥QU]\_  
@HWI-EAS443:3:96:1371:2042#0/1  
CACTCCCCTGGGTGACTCTCCGATTGGGCATGTTTCCGAT  
+HWI-EAS443:3:96:1371:2042#0/1  
^Z`]Sa]Gabbahb`N`\_RMVaS`[b\_QG\_]aVXXQZ`RB  
@HWI-EAS443:3:96:1543:633#0/1  
CAATTACCTCATGGCTTGAAGCAGGGGCTAGCAGAGCTA  
+HWI-EAS443:3:96:1543:633#0/1  
aaWJVbY`aSa¥\_Y]a\_¥\_[[TYN]^HW\_]YRDXSZZMNV  
@HWI-EAS443:3:96:1561:1859#0/1  
CAAATAGTAGCATTGCCACAACACTTCAATGCATGTGTG  
+HWI-EAS443:3:96:1561:1859#0/1  
`a\_`b``Xba`bbbaaaa]\_a¥b`aaa¥abab``ab¥aab  
@HWI-EAS443:3:96:293:22#0/1  
AGCATTGCCACAACACTTCAATGCATGTGTGAGGAAGGA  
+HWI-EAS443:3:96:293:22#0/1  
^a¥^^\_]Za\_Waa`b^S^`RbY`YYaaaVa\_`\_aZ\_]\_[P  
@HWI-EAS443:3:96:421:588#0/1  
CGTCTCCACAACCTTGAGGGGTTTTCGGCTGAATGGAGAAA  
+HWI-EAS443:3:96:421:588#0/1  
abab¥YW[^Y\_]\_]ba\_]^\_HSIZP]V^^VV`NM[[Y`BB  
@HWI-EAS443:3:96:826:1253#0/1  
GTAGGAGTCTATGGGATTACTTTTCGTCAGTCCGAAAGAGG  
+HWI-EAS443:3:96:826:1253#0/1  
a[\_aaab`ab`bba`aa[KV`ba`b[Z^a\_[-a`\_``^`\_  
@HWI-EAS443:3:96:845:1052#0/1  
CAAGAGCATGTCTCCTATTTCTAGAACACAGTATTTTCC  
+HWI-EAS443:3:96:845:1052#0/1  
]Y¥`\_aaZ^HVR¥ba]Z^]aaaa`VX¥aaV\_R¥`aVa`\_^  
@HWI-EAS443:3:97:101:107#0/1  
ATAAATCCCAATTACCTGATGGCTTGAAGCAGGTGCTAG  
+HWI-EAS443:3:97:101:107#0/1  
a`aaU]^U\_\_\_\_a`\_]ZVY^`\_W]`[^SP^WP^^XVUVVB



@HWI-EAS443:3:97:1363:652#0/1  
CATAAATACGGCCTTGCTCAATGCATCCTGTGCAGACATG  
+HWI-EAS443:3:97:1363:652#0/1  
Yb¥Saba\_\_\_b\_[a¥U\_^Uaaaaba¥W\_T`QYQT\_HZ]Vb  
@HWI-EAS443:3:97:144:1862#0/1  
GCAGTCCTCAAGAGCATGTCTCCTATTTCTAGAACACAGT  
+HWI-EAS443:3:97:144:1862#0/1  
`` `[TMY\_\_YXZ\_`aT\_QSZT\_]W^VLW¥a¥SWU]¥^YN  
@HWI-EAS443:3:97:253:1582#0/1  
CATTTGCTTACCATTGGGATCAGCTGAAAGTCATCCATGG  
+HWI-EAS443:3:97:253:1582#0/1  
^bbaa^\_b``]baaa`]ba]bbba]aaaabXaaa]\_a`\_`  
@HWI-EAS443:3:97:301:1349#0/1  
CACCGAGTGGCCACTTCAATTGGCTTGTTCCTCATGTT  
+HWI-EAS443:3:97:301:1349#0/1  
T^bba^aR`XT^`aa^aVT]U^T\_[PZ[ZSMH[^W]TOZ  
@HWI-EAS443:3:97:649:918#0/1  
CACAACTTGAGGGTTTTTCGGCTGAATCGCGAAAATTGCT  
+HWI-EAS443:3:97:649:918#0/1  
a`a\_abbbbabbaaabbb\_b`aabaaa`UO¥[UTR``\_¥\_  
@HWI-EAS443:3:97:874:1491#0/1  
CAGTCCTCAAGAGCATGTCTCCTATTTCTAGAACACAGTA  
+HWI-EAS443:3:97:874:1491#0/1  
abXa`abab\_bab¥bab`abaaa`aa`\_aaabb]aab]R[  
@HWI-EAS443:3:98:378:1224#0/1  
CTTTCCCATTAGAGCCTTCCCTCCACTCCCCTGGGTGACTC  
+HWI-EAS443:3:98:378:1224#0/1  
abbbbbbbbbbbbaabbaabaaaaabaaaaaaaa^ba\_a`  
@HWI-EAS443:3:98:422:1790#0/1  
CACACATGCATTGAAGTAGTTGTGGCAATGCTACTATTTG  
+HWI-EAS443:3:98:422:1790#0/1  
abbb\_bbbbab`bbbabaaba`\_aabb`b\_ba\_aaaa[[  
@HWI-EAS443:3:98:507:771#0/1  
GGGGGGTATATGAAGCAATCGAGGAGTGCCTGATTAATGA  
+HWI-EAS443:3:98:507:771#0/1  
SX\_bYF[US¥^]XWRTTZXWaUR]^\_¥[H[aa[aV[Z`\_^  
@HWI-EAS443:3:98:557:1522#0/1  
CATTTGCTTACCATTGGGATCAGCTGAAAGTCATCCATGG  
+HWI-EAS443:3:98:557:1522#0/1  
abaaba\_a^aa`b\_abbaa`babaaaaaaZUba\_aab`a`  
@HWI-EAS443:3:98:863:1174#0/1  
ATTGCCACAACACTTCAATGCATGTGTGAGGAAGGAGTT  
+HWI-EAS443:3:98:863:1174#0/1  
ZQ¥````\_\_a¥¥Sa¥L`a¥X¥`^aa\_QaX[`^¥\_Z]]R[  
@HWI-EAS443:3:99:1338:92#0/1  
GACCCGAGTCACGAGGGGAGGGAATAGCACTATATGATG  
+HWI-EAS443:3:99:1338:92#0/1  
aaXX¥b`Zb]a]a`a]aba\_\_b\_T][\_GHSZ\_Qa`YTZ^`  
@HWI-EAS443:3:99:146:47#0/1  
AGCATTGCCACAACACTTCAATGCATGTGTGAGGAAGGA

+HWI-EAS443:3:99:146:47#0/1  
ab\_]`aa\_a][`a\_\_\_^a\_¥aSXa^\_aaZaRa]a`]Qa^X  
@HWI-EAS443:3:99:1566:405#0/1  
AGGAAATTGAAAATGAAGAGAAGATCCCAAGGACAAAGAA  
+HWI-EAS443:3:99:1566:405#0/1  
`^^]H`aXPPaaa)`a\_\_`baba^¥VW[`\_aJ\_Ga\_a\_¥a  
@HWI-EAS443:3:9:1095:1800#0/1  
GGGGCTATATGAAGCAATCGAGGAGGGCCTGATTAATGAT  
+HWI-EAS443:3:9:1095:1800#0/1  
aZba^L[a\_X]Ub[Sb]b\_b\_a\_¥SHTV\_aa¥`\_Y^\_a\_N  
@HWI-EAS443:3:9:1108:182#0/1  
CAAATAGTAGCATTGCCACAACACTTCAATGCATGTGTG  
+HWI-EAS443:3:9:1108:182#0/1  
¥^bbb`b^b`abbb`[a\_`\_babb^b`Zbbab¥\_abab\_b  
@HWI-EAS443:3:9:1445:1695#0/1  
ACCCGAATGCAATATTGAAGCACCGATTTGAGATAATTGA  
+HWI-EAS443:3:9:1445:1695#0/1  
aLXYaTWaa\_¥F^[\_`aab\_¥ZMY\_\_a\_a`W^\_\_\_^\_`^  
@HWI-EAS443:3:9:1468:307#0/1  
AGCCAAGTGAAGTGGGCACTCGGTGAAAATATGGCACCAG  
+HWI-EAS443:3:9:1468:307#0/1  
`ba¥aaaQa¥¥b\_aaa\_\_\_a\_a`SWQ\_[\_\_X]\_`Y[STV]  
@HWI-EAS443:3:9:1567:1605#0/1  
CATTGCCACAACACTTCAATGCATGTGTGAGGAAGGAGT  
+HWI-EAS443:3:9:1567:1605#0/1  
^bb0a0ab`¥¥baa`aaab`YR^ab`ZZF\_\_bT]a`a^a]  
@HWI-EAS443:3:9:1699:1783#0/1  
ATTGCAGCAAACCTTGTAGTTTTCGATTTTCGGAGCTTCCC  
+HWI-EAS443:3:9:1699:1783#0/1  
`bV^a\_YZ`\_X[b]\_PQ`¥¥[\_WDZ\_]^^GUDHIP\_USW  
@HWI-EAS443:3:9:737:242#0/1  
CATAAATCCCAATTACCTCATGGCTTGAAGCAGGGGCTA  
+HWI-EAS443:3:9:737:242#0/1  
abbbabaabaaba\_aaab`aa]`\_]\_^P]]`XXUZ^HUXXU  
@HWI-EAS443:3:9:779:1462#0/1  
CAAATAGTAGCATTGCCACAACACTTCAATGCATGTGTG  
+HWI-EAS443:3:9:779:1462#0/1  
a`Z[]\_¥UbZbaba]a`aa\_]a^aZ\_]M``]a]\_a`UaR`  
@HWI-EAS443:3:9:995:1342#0/1  
CAAATAGTAGCATTGCCACAACACTTCAATGCATGTGTG  
+HWI-EAS443:3:9:995:1342#0/1  
aa]abbbSb[[abbb`aaa`a`bbaa`ab``a]\_abWa[a  
@HWI-EAS443:3:12:63:1049#0/1  
CGCGGGATCTTCTTTCATTTTCAATGTCCTGTAGCTCTG  
+HWI-EAS443:3:12:63:1049#0/1  
a`a^`Z¥]`^\_[```````````\_W^\_W¥`\_`\_]\_\_\_\_]Y  
@HWI-EAS443:3:17:58:2004#0/1  
ACACCGAGTGCCCACTTCAATTGGCTTGTCTTCTTCAATTT  
+HWI-EAS443:3:17:58:2004#0/1  
abbbba\_W]HY\_b\_]Y0]`]RTOQBbbbbbbbbbbbbbb

@HWI-EAS443:3:18:325:1774#0/1  
AATAATTCCTTGATCATGTCTTTCTCTTTGACAGAAGACT  
+HWI-EAS443:3:18:325:1774#0/1  
¥TGRYaaaXaa`U^aaal¥]`Z`\_\_^W`\_]`WY\_W^\_X  
@HWI-EAS443:3:21:1655:1603#0/1  
GCGAGTAGGAGTCTATGGGATTCCTTTTCGTGAGTCCGAAA  
+HWI-EAS443:3:21:1655:1603#0/1  
aQFV\_W`\_`¥TSSMYWXZUUUVZ¥XUWWWUJUUW¥WWWVWNS  
@HWI-EAS443:3:24:1566:1893#0/1  
GGGGAAGATCCGAAAATCGAAACTAACAAGTTTGCTGAAT  
+HWI-EAS443:3:24:1566:1893#0/1  
aab]baaaa`^Z\_baa^ab\_^Vsa`a¥b`\_X`RLSaI^^  
@HWI-EAS443:3:25:744:181#0/1  
CCTCGATTGCTTCATATAGCCCCCAAGATCGAAGGTGCC  
+HWI-EAS443:3:25:744:181#0/1  
aa^bb\_aaba`a^RTb^^¥\_\_¥aaZQX]^M¥STU[\_MGJE  
@HWI-EAS443:3:33:793:580#0/1  
TGACGAAAGGAATCCCATAGACTCCTACTGGCCATTTTTT  
+HWI-EAS443:3:33:793:580#0/1  
aaabbb]aa`aaaaaab\_\_aa\_a`a`\_\_^`^SSRY]]LU`  
@HWI-EAS443:3:34:1372:1475#0/1  
CCTCCCCGTTTCGTGATGAAATGGAAATCCGAATACATGA  
+HWI-EAS443:3:34:1372:1475#0/1  
aabbbba`[\_\_\_Q\_b`a`b^`aaa\_\_a^a\_\_`Z\_]R^  
@HWI-EAS443:3:42:741:875#0/1  
ATCGCAAGCATGAGGAGGAACTATTTTACAGCAGAAGCCA  
+HWI-EAS443:3:42:741:875#0/1  
aaa`a`a`^aa`b`\_a`\_]aaaaa`\_\_\_a\_]a\_]`^`  
@HWI-EAS443:3:48:1581:237#0/1  
AGCCTATGTAGATGGATTCGAGCCGAACGGCTGCATTTAG  
+HWI-EAS443:3:48:1581:237#0/1  
¥`aY^\_aXaaabbb]\_^`^`PZIoT]P]BBBBBBBBBB  
@HWI-EAS443:3:49:1002:1354#0/1  
GGCATAAATCCCAATTACCTCATGGCTTGGAAAGCAGGGGC  
+HWI-EAS443:3:49:1002:1354#0/1  
aaaa^)`]ba`a\_aaa`^`\_`\_ab\_a`[^¥^\_T[S`BBB  
@HWI-EAS443:3:49:1757:819#0/1  
TAGATGGATTCGAGCCGAACGGCTGCATTGAGGGCAAAGT  
+HWI-EAS443:3:49:1757:819#0/1  
a^P\_bbbab`\_`aZ¥W¥[RR\_a`\_¥GF¥^\_OBBBBBBBBB  
@HWI-EAS443:3:4:1467:1965#0/1  
CATGGAAATGAGGCGCTGCCTTCTTCAGTCTCTTCAGGAG  
+HWI-EAS443:3:4:1467:1965#0/1  
VbabbJU[abb^]WRXab]a`^\_ab\_]aPR\_HX`MaZG]^  
@HWI-EAS443:3:4:350:235#0/1  
ATGAAGGGAGTGTACATAAATACGGCCTTGCTCAATGAAT  
+HWI-EAS443:3:4:350:235#0/1  
a`¥^aa^\_Xa`YUZ]aVYY`a\_]`Y^`]]Q¥R[¥^XLOV  
@HWI-EAS443:3:4:652:363#0/1  
GGGTCTTCTCTTCATTTTCAATGCCTGTAGCTCTGCTAG

+HWI-EAS443:3:4:652:363#0/1  
aba]\_a``]aa\_`a^a\_]`\_\_NZa\_X`Z\_^]YY]AT  
@HWI-EAS443:3:51:581:46#0/1  
GGTCACCAAAGCGGACTACACCCTTGACGAAGAGAGCAGG  
+HWI-EAS443:3:51:581:46#0/1  
T\_a]Y`bbU¥b`bWI\_Yaabaaa^\_`a`R\_a\_W\_a`]`a  
@HWI-EAS443:3:51:75:1320#0/1  
TCCGGCTTCTCTACCCCTGTTGTGTACATATACTGTTCA  
+HWI-EAS443:3:51:75:1320#0/1  
aaaab``]^^]RXV\_`a`RP¥QU`V[`Q\_^U^ZY`U^W¥\_  
@HWI-EAS443:3:53:1117:653#0/1  
CGGGGTCTCATTGAGAAATGATACTGATGTGGTGAACCT  
+HWI-EAS443:3:53:1117:653#0/1  
aa[[b\_baaa\_bab`^`aab`aaabb`ab][\_\_a¥VYaa  
@HWI-EAS443:3:53:1517:454#0/1  
GTCACCCAGGGGAGTGGAGGAAGGCTCTATTGGGAAACAG  
+HWI-EAS443:3:53:1517:454#0/1  
RR`a`XZX]a^¥TIZ`ZY¥^\_ZWWPXPPP`ZVK\_¥X^FFE  
@HWI-EAS443:3:55:1140:644#0/1  
GATTGCTTCATATAGCCCCCAAGATCGAAGGTTCCAAGT  
+HWI-EAS443:3:55:1140:644#0/1  
ab`ZXXaaaaa`aV^a\_P¥``\_[X\_Y\_¥¥\_YMQN^VXH  
@HWI-EAS443:3:55:649:1942#0/1  
GAGAAGCCTAAATTTCTTCTGATTTGTATGATTACAGAG  
+HWI-EAS443:3:55:649:1942#0/1  
¥VV^JWY^baUYX`SW\_WVQY¥YS]PS`^aQXV¥\_PBBBB  
@HWI-EAS443:3:62:21:551#0/1  
TCCGGGGCTATATGAAGCAATCGAGGAGTGCCTGATTAA  
+HWI-EAS443:3:62:21:551#0/1  
a\_\_aa^aabbaaaa\_``\_Z¥a\_`^Raa\_a¥`]Z\_a```\_[¥  
@HWI-EAS443:3:62:354:410#0/1  
TACTTGAAGGAAGAGACCGAATCATGGCCTGGACAGTGGT  
+HWI-EAS443:3:62:354:410#0/1  
RVI\_V¥ZZO^VO^aba]^`aYY^ZY\_QPPX^`P]RTP^WT  
@HWI-EAS443:3:65:1636:1230#0/1  
TGTTGTAATAAGTTCCTCCTCATGCTTGCATATGTTCA  
+HWI-EAS443:3:65:1636:1230#0/1  
aa\_baaabaaaaa^a^\_a`\_a\_aaa\_aaa^a`a\_a\_\_\_^¥  
@HWI-EAS443:3:65:687:1805#0/1  
GTTTTCCGTCTTCCTTCTTTGGTCCTACATTTGCTTACCA  
+HWI-EAS443:3:65:687:1805#0/1  
a¥aaaaaaYaaaa`aab`a\_a`^a\_abaaa\_a`ba^aaaa  
@HWI-EAS443:3:68:1212:460#0/1  
GCTCCACTTCAATTGGCTTGTCTCTTCATGTTCTTTGTC  
+HWI-EAS443:3:68:1212:460#0/1  
aba`ababb``babaaaaaRZaZa^aa]\_a]aa`aaaa`\_  
@HWI-EAS443:3:69:734:268#0/1  
ACCCGGCTGAATCGAGAAAATTGCTTCTCATTGTTTCAGGC  
+HWI-EAS443:3:69:734:268#0/1  
a[b\_W\_[ZI¥aTUYI¥[\_`aa`ZX\_aU¥``aa¥HaG^\_^F

@HWI-EAS443:3:6:464:57#0/1  
GTGAATCAATAATTGTAGAATCTGGTGACCCGAATGCGCT  
+HWI-EAS443:3:6:464:57#0/1  
a\_aa`\_a^¥a`aaa\_\_a^\_\_Y]a\_Z\_^]]W`Z^^\_VaZ[  
@HWI-EAS443:3:72:426:1412#0/1  
ATAAATCCCAATTACCTCATGGCTTGAAGCAGGTGCCAG  
+HWI-EAS443:3:72:426:1412#0/1  
\_``U]Z]]``^Q^a\_\_a¥Y[X^¥UURQ^BBBBBBBBBBB  
@HWI-EAS443:3:72:491:788#0/1  
GCGGTCTCCACAACCTTGAGGGTTTTTCGGCTGAATCGAGA  
+HWI-EAS443:3:72:491:788#0/1  
ab^`\_`aaaa`\_Va^] ^Z\_aaVZa\_a^a\_aa`a[[a\_`^  
@HWI-EAS443:3:74:1404:985#0/1  
GACGCATTGAGCAAGCCGTATTTATGTACTCCCTTCA  
+HWI-EAS443:3:74:1404:985#0/1  
aaIbaaabaaaab`b`a\_b\_\_aaa\_aa¥aaaSa`X¥\_aR\_  
@HWI-EAS443:3:78:984:258#0/1  
GAAAGGCATAAATCCCAATTACCTCATGGCTTGAAGAAG  
+HWI-EAS443:3:78:984:258#0/1  
a^a^RSS¥aa`\_^XT^a\_\_\_\_Z^ZL¥X^ZP\_[NBBBBBBB  
@HWI-EAS443:3:80:798:1577#0/1  
GGGGGCTATATGAAGCAATCGAGGAGTGCCTGATTAANGA  
+HWI-EAS443:3:80:798:1577#0/1  
aUYXaba` `ZY` `a^^^][\_] [WU¥[QZYQYTZVR\_ZDFY  
@HWI-EAS443:3:81:90:1495#0/1  
TGACCAAGGAATCTTTGAAAACAAATCGGAAACATGNCC  
+HWI-EAS443:3:81:90:1495#0/1  
a[Qabab\_abaabbaaababbabbaaaa`aS\_a`\_WD¥a  
@HWI-EAS443:3:83:1042:1153#0/1  
CAGTGGGAAAGTGTGCAGGACCTTACTGGCAAATCTGTA  
+HWI-EAS443:3:83:1042:1153#0/1  
aaaQaabaa\_aZa`baabaaa`aa]a`^aaa`^a\_ab]a  
@HWI-EAS443:3:83:70:2024#0/1  
GGCCTATCGCAGTCCTCAAGAGCATGTCTCCTATTTCTAG  
+HWI-EAS443:3:83:70:2024#0/1  
`\_ba`\_`aZb` `G`^¥aa`\_a[PR]\_S`\_aa[H[]`a\_`¥  
@HWI-EAS443:3:84:822:851#0/1  
AGAAGTTCGGTGGGAGACTTTGGTCGGCAAGCTTGCGAGA  
+HWI-EAS443:3:84:822:851#0/1  
aa^TbN`a`UYa\_a^`Z`^]Z`¥Qa\_^[W]VYV^\_G`^U  
@HWI-EAS443:3:85:986:593#0/1  
CCTCGATTGAACATATCGCAAGCATGAGGAGGAACATTT  
+HWI-EAS443:3:85:986:593#0/1  
]aabbbbbbbbabbbbabba`babbbbbbababababab  
@HWI-EAS443:3:86:1209:63#0/1  
AGGGTACATAAATACGGCCTTGCTCAATGCATCCTGTGCA  
+HWI-EAS443:3:86:1209:63#0/1  
^ZKaWJ^bba][bbaa\_¥VR^a`a\_\_` `aaa\_YY`]R]FW  
@HWI-EAS443:3:88:485:1887#0/1  
ACCGAATCATGGCCTGGACAGTGGTGAACAGTATATGGAA

+HWI-EAS443:3:88:485:1887#0/1  
a`^]^^`X`R`\_aa\_¥V\_¥VaZUX[YU[¥T`\_^Q^X^\_  
@HWI-EAS443:3:89:630:1833#0/1  
AGCCTATGTAGATGGATTTCGAGCCGAACGGCTGCATTTAC  
+HWI-EAS443:3:89:630:1833#0/1  
\_W^a\_bY]^b`a^`Z^YF]]T[`aRUQBBBBBBBBBBB  
@HWI-EAS443:3:8:773:1316#0/1  
TGCATATTGCAGCAAAC TTGTTAGTTTCGATTTTCGGGTG  
+HWI-EAS443:3:8:773:1316#0/1  
aabaab\_abbaXU^a^aaaa^a`\_`aaa`]^`^`\_SOZUZB  
@HWI-EAS443:3:91:980:888#0/1  
GCCCTGCTCTTCGTCAAGGGTGTAGTCCGCTTTGGGGG  
+HWI-EAS443:3:91:980:888#0/1  
aRDQRZZ[¥[`¥VMOUPNU`XMK`R¥YYPMPFOX¥¥XBBB  
@HWI-EAS443:3:94:212:710#0/1  
ACACAGCTTGCTAGAGATCTGGGCTCTGGCTCATCACTGT  
+HWI-EAS443:3:94:212:710#0/1  
a\_G`]a`a`a`a\_a`\_`^`\_`^`]\_]\_\_^^]]^Y`^X]^Y]W  
@HWI-EAS443:3:95:243:1580#0/1  
GGCCTATCGCAGTCCTCAAGAGCATGTCTCCTATTTCTAG  
+HWI-EAS443:3:95:243:1580#0/1  
abbabbbb]bbaabababa`babaaaa`ba\_aaaaa`aa`  
@HWI-EAS443:3:96:1311:726#0/1  
ATGCATCCTGTGCAGCCATGGATGACTTTTCAGCTGATACC  
+HWI-EAS443:3:96:1311:726#0/1  
\_\_KZb[UYYa0a\_abUX^\_bQa\_b[Ua\_\_GZbWUPa]GNB  
@HWI-EAS443:3:96:942:999#0/1  
ACCGAATCATGGCCTGGACAGTGGTGAACAGTATATGGAA  
+HWI-EAS443:3:96:942:999#0/1  
a`X¥aaaaa`aaRTXa`\_XZ[H]¥[\_V^QZ¥¥`¥VG`^\_B  
@HWI-EAS443:3:97:938:1686#0/1  
GAGGAAGAGAGCAGGGCAAGAATCAAAACTAGGCTTTTCA  
+HWI-EAS443:3:97:938:1686#0/1  
\_¥N`[]TPY[S]HNP`a[aaaX]Wa^\_]YFZOHVK]Y[^[  
@HWI-EAS443:3:98:1429:1313#0/1  
GGGCACTCGGTGAAAATATGGCACCAGAAAAAGTAGAGTT  
+HWI-EAS443:3:98:1429:1313#0/1  
aa``]¥[¥bbYbaa\_Za`aa\_[\_VYa``\_]Q\_`G\_\_TQYY  
@HWI-EAS443:3:98:828:1156#0/1  
GAAAGGCATAAATCCCAATTACCTCATGGCTTGAAGAAG  
+HWI-EAS443:3:98:828:1156#0/1  
^b]b]\_a`aaaa`]aY\_¥aaaX¥a¥a\_a`\_aZWU\_[BBBB  
@HWI-EAS443:3:99:1198:1006#0/1  
AGATGTTGGAGACCTTAAACAGTATGACAGTGATGAGACA  
+HWI-EAS443:3:99:1198:1006#0/1  
¥^\_bbabbb[aaSY¥`¥aaaaaaa`\_Q[T]U^`\_a]XDNZ  
@HWI-EAS443:3:10:560:1558#0/1  
CGAATGCACTATTGAAGCACCGATTTGAGNTAATTGAAGG  
+HWI-EAS443:3:10:560:1558#0/1  
`bba`bbaa\_b[Vb^`aba\_^\_YT\_YYY[D[a\_aaa^``\_`

@HWI-EAS443:3:15:1073:274#0/1  
GGTGAACCTTTGTAAGTATGGAGNTCTCACTCACTGACCCG  
+HWI-EAS443:3:15:1073:274#0/1  
aa¥aa¥`aaaa[ `aVa`a^VWD[[\_a^`\_a¥` `a\_ZN`  
@HWI-EAS443:3:15:1414:220#0/1  
CAAATAGTAGCATTGCCACAACACTTTCANTGCATGTGTG  
+HWI-EAS443:3:15:1414:220#0/1  
ab\_abaa`ababbbaaYabba`bbabaa¥D¥bYaab`b\_a  
@HWI-EAS443:3:16:1116:2006#0/1  
CTTGGGGGGCTATATGAAGCAATCGAGGAGTGCCNGATTA  
+HWI-EAS443:3:16:1116:2006#0/1  
``J\_[I`ba^bb\_baaZaaaabaa\_`Z^aaSV`SDX`\_``  
@HWI-EAS443:3:16:220:1132#0/1  
AAGAGCCTAACATAGTCAAACCACNTGAGAAAGGCATAAA  
+HWI-EAS443:3:16:220:1132#0/1  
abaaaaa`abaaaaa\_aaaaa` `YDWa]\_\_`^`^`[\_`^`\_a  
@HWI-EAS443:3:17:521:1261#0/1  
AATTGANTGATTCAAGCTGGATAGAACTTGATGAAATAGG  
+HWI-EAS443:3:17:521:1261#0/1  
\_aab\_^D^aaaaaaaa` `a` `aa\_aaa`a\_aa`\_a`a\_\_  
@HWI-EAS443:3:17:538:864#0/1  
CATTCTTTGGCNGGAAAGAGCCTAACATAGTCAAACCACA  
+HWI-EAS443:3:17:538:864#0/1  
aa`ZY`Z¥a`^D[b\_a`\_]W¥^a`]\_^a\_W^^`]\_[\_]`^  
@HWI-EAS443:3:17:541:1924#0/1  
CAAACCTGTTANTTTTCGATTTTCGGATCTTCCCATATTC  
+HWI-EAS443:3:17:541:1924#0/1  
aaaa`aabaa[DUaaaWMM` `` `XKPMXNPN\_ZZ\_Wa^V  
@HWI-EAS443:3:22:1311:1531#0/1  
CAAATGAATTCAATAAGNCATGTGAATTGACTGATTCAA  
+HWI-EAS443:3:22:1311:1531#0/1  
]`a^`b¥[ `ba\_aabab]D¥abaSbaba^aaaabaaa]ba  
@HWI-EAS443:3:22:1744:1347#0/1  
GGGGGCTATATGAAGCAATCGAGGAGTGCCTGATTNATGA  
+HWI-EAS443:3:22:1744:1347#0/1  
aaa[aabababa\_a`VZa`^XZa` [ `^a\_UaaX`YDT\_\_Z  
@HWI-EAS443:3:23:1337:727#0/1  
CTCTGCTNGCACCTGCTTCCAAGCCATGAGGTAATTGGGA  
+HWI-EAS443:3:23:1337:727#0/1  
a`\_[aaSD[aa\_\_\_aST\_\_W\_¥[^ZZ¥a¥^\_UWS]\_`U¥W  
@HWI-EAS443:3:23:1776:1538#0/1  
CACCTGCTTCCAAGCCATGAGGTAATTGGGNTTATGCCT  
+HWI-EAS443:3:23:1776:1538#0/1  
a`Y\_babb]]`aK`ULU]babaHWXaabaUDM\_XXa]XL]  
@HWI-EAS443:3:25:1601:980#0/1  
GAGGGGTTTTTCGGCTGAATCGAGAAAATTGNTTCTCATTG  
+HWI-EAS443:3:25:1601:980#0/1  
aaaa\_bUa`a` `\_]a\_b\_¥SX[\_\_`\_a`\_KDZMH]Y\_YR\_  
@HWI-EAS443:3:26:221:1886#0/1  
TACATAGGCTCTAAAGTTTTCAAGGCTGGAGANGTTCGGT

+HWI-EAS443:3:26:221:1886#0/1  
abbbbaaabaaMab\_ZVa]]¥L]a\_a\_a[GWPDLV\_]PZL  
@HWI-EAS443:3:27:245:1750#0/1  
CCCGAATGCACTATTGAAGCACCGNTTGGAGATAATTGAA  
+HWI-EAS443:3:27:245:1750#0/1  
abaaY\_`]aVaZ^\_Z]]\_XaaaaXDX`^[]^W\_``^\_\_[]I  
@HWI-EAS443:3:28:13:161#0/1  
GCACCAGANAAAGTAGACTTTGATGACTGCAAAGATGTTG  
+HWI-EAS443:3:28:13:161#0/1  
\_abbb`]^DUZ^aYb`aaa`a]^aa¥` `a`¥`¥`\_\_a]^\_  
@HWI-EAS443:3:29:445:1915#0/1  
ATATTTTCACCGAGTGCCCACTTCAATNGGCTTGTCTCT  
+HWI-EAS443:3:29:445:1915#0/1  
a`a]\_\_\_aaaaY`VPZ\_\_¥^X^a\_XRDSJXZ]UOZZXBB  
@HWI-EAS443:3:31:383:1239#0/1  
GTCCCACTGCAGGGCTACTGAATACATAATGAAGGGNGTG  
+HWI-EAS443:3:31:383:1239#0/1  
^H\_b`V`Y`\_¥UZ^`Y`Ua]\_Z\_]^^RY`\_YXXQTDSY]  
@HWI-EAS443:3:32:1230:1714#0/1  
CAGTCANTTCACATGCCTTATTGAATTCATTTTGGACCCA  
+HWI-EAS443:3:32:1230:1714#0/1  
a\_Z¥a^D[¥aba\_aQJ¥a`]aaZ]\_aa`[][\_TMVXa\_a`  
@HWI-EAS443:3:32:1443:624#0/1  
GGAGACCTTAAACAGTATGANAGTGATGAGCCAGAGCCCA  
+HWI-EAS443:3:32:1443:624#0/1  
a\_`^`a`ab]]`\_a]^a\_`ZDY`^`¥]]\_]X\_Y]Z]^\_  
@HWI-EAS443:3:35:504:1695#0/1  
CATTTGATTGCATCATNTAGTGGTATTCCTCCCCCTCGT  
+HWI-EAS443:3:35:504:1695#0/1  
aba\_`a]``aa`aa¥DY`]^¥[[^a\_`a`\_aaa]^`^]X  
@HWI-EAS443:3:36:546:1951#0/1  
AAGAATTCCTTGGTCATGTCNTTCTCTTTGACAGAAGACT  
+HWI-EAS443:3:36:546:1951#0/1  
aaaaT\_abb\_a]YGaa`^]UDT``\_a`Y`]^`^`\_\_\_\_]\_`X  
@HWI-EAS443:3:37:1324:411#0/1  
ATTTGTTTTNAAAGAATTCCTTGGTCATGTCTTTCTCTTT  
+HWI-EAS443:3:37:1324:411#0/1  
^\_` `a`^aD^aa`¥`bba` `b\_\_S`\_abGba` ` `aaa\_  
@HWI-EAS443:3:37:261:670#0/1  
CAGGCCATGATTCGGTNTCTTCTTCAATTATCTCAAATC  
+HWI-EAS443:3:37:261:670#0/1  
`Y^¥SYZU`^U\_Z[SKDO¥RV\_Z\_`^VVOOLT^PXXUWMP  
@HWI-EAS443:3:39:1305:517#0/1  
ATCAGCNGGAACCTTTGACCGCTGATGGCAAAGAGGCCCAT  
+HWI-EAS443:3:39:1305:517#0/1  
`¥a^^YD^¥Ta` `a`V\_`¥¥¥`YU¥]]^^^SUUZSSUPVW  
@HWI-EAS443:3:3:1169:1364#0/1  
TGAAGNGAAGATCCCAAGGACAAAGAACATGAAGAGAACA  
+HWI-EAS443:3:3:1169:1364#0/1  
a`^a^DU¥]^`^`^`[]a]WV\_\_\_\_`\_]\_^\_]a\_^a]^\_^^X\_



@HWI-EAS443:3:40:1048:1050#0/1  
CATTAAATCAGGCACTNCTCGATTGCTTCATATAGCCCCC  
+HWI-EAS443:3:40:1048:1050#0/1  
`Ya[^U^`XWa`\_]\_UDUaa`X`\_`MaMZPZZZ[U^`XQ¥U  
@HWI-EAS443:3:42:815:643#0/1  
ATACTGTTCCACTGTCCAGGCCANGATTCCGGTCTCTTC  
+HWI-EAS443:3:42:815:643#0/1  
ab`Zab^]aaa]^X\_`]aa\_a][\_¥DX\_\_`a¥[SW\_SP]]  
@HWI-EAS443:3:46:15:620#0/1  
TTTCAAAGAATTCCTTGGTCATGTCTTNCTCTTTGACAGA  
+HWI-EAS443:3:46:15:620#0/1  
aaa``aabaa`a\_`bY`^^\_aaZ^a[DH\_^a``]]\_\_^  
@HWI-EAS443:3:47:201:1561#0/1  
GGGGCANGGAAATGAGGCGCTGCCTTCTTCAGTCTCTTCA  
+HWI-EAS443:3:47:201:1561#0/1  
aa`]a[D[a\_a^abbaaaa\_\_`STX\_W[a¥\_`[V\_¥\_`¥^  
@HWI-EAS443:3:49:1255:1697#0/1  
AAAATAGTTCCTCCTCANGCTTGGCATATGTTCAATCGGG  
+HWI-EAS443:3:49:1255:1697#0/1  
ababba]Y``¥a¥\_``[DXW[\_a]``\_^`XT[SY\_`TT\_Z  
@HWI-EAS443:3:4:1051:1433#0/1  
AACAAAATAAAAANCTGAGAAGACACACATTACATCTTTT  
+HWI-EAS443:3:4:1051:1433#0/1  
aa^aaaabaa`YD¥a¥¥aa`a`aa]a\_]a[aZa\_]\_^\_`  
@HWI-EAS443:3:50:1268:1472#0/1  
ATTTTCTCGATTAGCCGAAANCCCTCAAGTTGTGGAGA  
+HWI-EAS443:3:50:1268:1472#0/1  
abbabbb]`b`aba]ab^``YDW^ZUTXXM^Z`XRb`aa`  
@HWI-EAS443:3:50:17:636#0/1  
GAAATTTAGGCTTCTCTACCCCTGTTGTNTTACATATACT  
+HWI-EAS443:3:50:17:636#0/1  
^aababbb\_aabbaaab`baa`]]^QXDX`a]``aa`\_a  
@HWI-EAS443:3:50:872:1701#0/1  
ATCCCAATTACCTCATGGCTTNGAAGCAGGTGCTAGCAGA  
+HWI-EAS443:3:50:872:1701#0/1  
aa[\_`aaaa[\_`^\_aa^\_a[DPQ]ZW]TVWQQ]^ [PUZV  
@HWI-EAS443:3:51:676:949#0/1  
TGGCACCAGAAAAAGTAGACTTTNATGACTGCAAAGATGT  
+HWI-EAS443:3:51:676:949#0/1  
\_baaaa\_]`PZ]^aU0a\_P`S`WDXab\_Z\_`\_\_``]]^[  
@HWI-EAS443:3:52:1071:1218#0/1  
CGTCTCAAGAATGGTTCAATTTTGGCGTTCANTTCTTTT  
+HWI-EAS443:3:52:1071:1218#0/1  
aaa`bbb\_bbbbbbaab]Z`bb\_^][`][¥GDU¥N`aa`  
@HWI-EAS443:3:53:1303:648#0/1  
AGCNTAAATTTCTCCTGATTTGTATGATTACAAAGAGAA  
+HWI-EAS443:3:53:1303:648#0/1  
aa[D]baabbaabaaba`ababaabb`aaa\_aaaaa`a\_  
@HWI-EAS443:3:53:914:1242#0/1  
AGAGAACAAGCCAATTGAAGTGGGCACTCNGTAAAAATAT

+HWI-EAS443:3:53:914:1242#0/1  
a``\_aaabaa\_a\_aaaa\_\_\_\_]aaa`a`XD]X]\_\_```X  
@HWI-EAS443:3:55:308:628#0/1  
AAGAGGCGAAGAGACAATTGAAGAAAAANTTGAGATTACA  
+HWI-EAS443:3:55:308:628#0/1  
aaa]ababa^`aa\_a`\_aaa`aa^`aXD[aaU```a\_\_[  
@HWI-EAS443:3:56:1386:1042#0/1  
GCATGGAAATGAGGCGCTGCCTTCTTCAGTCTCTNCAGCA  
+HWI-EAS443:3:56:1386:1042#0/1  
aa¥]Z^NUa\_]XUa\_a¥a\_^P[ZPUUW`\_ZL\_YZDDXSUU  
@HWI-EAS443:3:56:689:11#0/1  
ATCGACGAACGGGGTGAATCAATAATTGTAGAATNTGGTG  
+HWI-EAS443:3:56:689:11#0/1  
\_¥]`Z`\_]XV\_ab\_L\_RY`YX¥^V[a^Y[W[UaZDZW^U`  
@HWI-EAS443:3:56:75:441#0/1  
AAGATGTTGGAGACCTTAAACAGNATGACAGTGATGAGCC  
+HWI-EAS443:3:56:75:441#0/1  
aabXabaaba`aa`\_`a```\_`YDZ`a`^^`S`^[^^^W^  
@HWI-EAS443:3:58:1409:502#0/1  
GGGATCTTCTTTCATNTTCAATGTCCTGTAGCTCTGCTA  
+HWI-EAS443:3:58:1409:502#0/1  
aabZ`baaaaaa`[D[a``\_a\_\_\_\_`a`a```\_`[W`a^\_]`  
@HWI-EAS443:3:5:183:967#0/1  
AAAGAATTCCTTGGTCATGTCTTTCTNTTTGACAGAAGAC  
+HWI-EAS443:3:5:183:967#0/1  
abbb\_\_bb`abbaa]abaaaaaba^D[aaa^^`a\_aa]B  
@HWI-EAS443:3:60:1128:902#0/1  
CCACTTCAATTGGCTTGNTCTTTCATGTTCTTTGTCCTT  
+HWI-EAS443:3:60:1128:902#0/1  
aaaaa````^Z^]0`]WD¥MXU^^`Y`]RZ\_a```VPXY^[  
@HWI-EAS443:3:61:565:530#0/1  
CGATTGGNCATGTTTCCGATTTGTTTTCAAAGAATTCCTT  
+HWI-EAS443:3:61:565:530#0/1  
^abbbba^D]\_¥`]bb^\_ZX^^abUaab\_¥¥a`X[a]Z`[  
@HWI-EAS443:3:63:1116:1572#0/1  
ATTCGGATTTCCATTTTCATCGACGAACGGGGTGAANCAAT  
+HWI-EAS443:3:63:1116:1572#0/1  
abba`¥\_```ZYaaabbb]ZZ`^`\_`\_N[[]][a`VDSXW\_  
@HWI-EAS443:3:64:1221:1796#0/1  
CAAATAGTAGCATTGCCACAACACTTCANTGCATGTGTG  
+HWI-EAS443:3:64:1221:1796#0/1  
aa`babb^abaabaaaab`bbabb^aaa^D[aaa`a\_aSa  
@HWI-EAS443:3:65:550:1146#0/1  
GCTTGCATATGTTCAATCGGGCAACATNTTCTCCTATT  
+HWI-EAS443:3:65:550:1146#0/1  
abbbabbbbabbb`abb``aa`a`aa]aaWDYaaaaaaba  
@HWI-EAS443:3:69:1451:1421#0/1  
ACTTCCCTCCGTGTTACTCNAATTTCAATGAACCGTTCT  
+HWI-EAS443:3:69:1451:1421#0/1  
aaaa^aT^aYa[V]¥Y]\_WDWX`a``a^]]a^`\_`¥X[[Z

@HWI-EAS443:3:71:1169:285#0/1  
AAATNGGAGACATGCTCTTGAGGACTGCGATAGGCCAAGT  
+HWI-EAS443:3:71:1169:285#0/1  
^X^ZD^¥¥Z]a`aa`aaa\_b^b`¥VS¥Ua\_^\_\_¥T¥V^^M  
@HWI-EAS443:3:71:844:1994#0/1  
CATATAGCCCCNAAGATCGAAGGTTCCAGGTTCCAGGTT  
+HWI-EAS443:3:71:844:1994#0/1  
`b`babababbZD^a]b`b\_TY^\_^abb¥FHY^aa`FVW^  
@HWI-EAS443:3:72:1573:628#0/1  
GAACAAGCCAATTGNAGTGGGCACTCGGTGAAAATATGGC  
+HWI-EAS443:3:72:1573:628#0/1  
aaaaabaabaaa¥D[b`aaa\_a\_``aa]a`aa\_`````Z  
@HWI-EAS443:3:72:733:1480#0/1  
CAGATTTTGGCAGTAAGGTCCTGCNCACTTTCCCAATAGA  
+HWI-EAS443:3:72:733:1480#0/1  
`W^\_X]aaababa¥ab`aZab`a[D[a`aa]baa\_]Xa^¥  
@HWI-EAS443:3:75:1115:735#0/1  
ACCTTCGATCTTGGGGGGCTATATGAAGCAATCGANGAGT  
+HWI-EAS443:3:75:1115:735#0/1  
ab``aaa[\_S\_\_[ba[`]U]0]`ZN¥XY\_``U`\_UD]T\_H  
@HWI-EAS443:3:75:1771:988#0/1  
CCGAGTCTTCTGTCAAAGAGAANGACATGACCAAGGAATT  
+HWI-EAS443:3:75:1771:988#0/1  
abaa`abbbabb\_``aab`^a^D[aaaaa`a`aaa\_`\_a  
@HWI-EAS443:3:76:1757:477#0/1  
CAGGCACTCCTCGATTGNTTCATATAGCCCCCAAGATCG  
+HWI-EAS443:3:76:1757:477#0/1  
\_\_bbbbbb^T``\_\_`[D^```baa[^]b]Z¥ba`a\_\_Ub  
@HWI-EAS443:3:79:960:1334#0/1  
GGCAAGCTTTCCCAAATGTCAAAGAAGTGAACNCCAAAA  
+HWI-EAS443:3:79:960:1334#0/1  
a\_`ZI\_a\_aa¥`aa`Y`b\_W]Y[^^FZ[FXaa[D[S\_XZ]  
@HWI-EAS443:3:83:87:1980#0/1  
TCCACTCCCCTGGGTGACTCTNCGATTGGCCATGTTTCCG  
+HWI-EAS443:3:83:87:1980#0/1  
abbbbaabaab`\_\_\_\_R[aa`UDZFL[^\_Z\_aXYSWY^U\_R  
@HWI-EAS443:3:85:1419:602#0/1  
AAGAATTCCTTGGTCATGTCNTTCTCTTTGACAGAAGACT  
+HWI-EAS443:3:85:1419:602#0/1  
abbb`b^X`baaa^\_aaa¥TD^a]bYbaabWN\_aa\_`\_^\_  
@HWI-EAS443:3:86:1158:1360#0/1  
CACCGAGTGGCCACTTCAATTGGCTTGTNCTCTTCATGTT  
+HWI-EAS443:3:86:1158:1360#0/1  
a``babbbba`abbabaabbabbNb`¥¥DNbHba\_a`Z^a  
@HWI-EAS443:3:88:1081:635#0/1  
GGCCTTGCTCAATGCATCCTGTGCAGCCATGGANGACTTT  
+HWI-EAS443:3:88:1081:635#0/1  
Zb`a]aa`b`T`bbbb\_[``bbab`a^aaZbaUD¥`¥b`a  
@HWI-EAS443:3:88:1250:1472#0/1  
ATTTNAGAAATGATACTGATGTGGTGAACCTTTGTAAGTAT

+HWI-EAS443:3:88:1250:1472#0/1  
^b`¥DWbbab\_0`abab\_`bbaVb^a`ZJaaababaa^¥^  
@HWI-EAS443:3:8:943:680#0/1  
CATGGGCCTCGACACTTGGNCTATCGCAGTCCTCAAGAGC  
+HWI-EAS443:3:8:943:680#0/1  
aba\_a][^`aa^\_`ZVaaVDX` `a`\_\_aU\_¥\_]\_¥a^`Q  
@HWI-EAS443:3:90:744:190#0/1  
GGGACAANCTGGAACCTGGAACCTTCGATCTTGGGGGGCT  
+HWI-EAS443:3:90:744:190#0/1  
\_\_Tbb`[D[a`X\_b`a\_ba`aab^Zaa^a`bab``^a`[[  
@HWI-EAS443:3:91:1726:1919#0/1  
CAGGCCATGATTNGGTCTCTTCCTTCAATTATCTCAAATC  
+HWI-EAS443:3:91:1726:1919#0/1  
aaaaabbabba^DV`aaaaaa^\_bbXaa`aab\_\_\_\_`adW¥  
@HWI-EAS443:3:91:238:1708#0/1  
GAGNAAGGCATAAATCCCAATTACCTCATGGCTTGGAAAGC  
+HWI-EAS443:3:91:238:1708#0/1  
ZU^D[]\_ZZ` `b][M[Y]^N\_a\_X¥W`[WBBBBBBBBBB  
@HWI-EAS443:3:94:1269:1794#0/1  
AACTTCTCCAGCCTTGAAAACCTTAGAGCCNATGTAGATG  
+HWI-EAS443:3:94:1269:1794#0/1  
``\_b]KZa``a\_\_a]```Y\_\_[\_`^]a\_ODN` `X^\_\_`\_  
@HWI-EAS443:3:94:1677:1734#0/1  
CAGCAAACCTGTTAGTTTTCGATTTTCGGATCTTCCCNATA  
+HWI-EAS443:3:94:1677:1734#0/1  
^aaabbb`aababbbYbbVaPKaab\_YUKWDX`PP[DD\_H  
@HWI-EAS443:3:94:467:132#0/1  
AATTCCTTGGTCATGTCTTTNTCTTTGACAGAAGACTCGG  
+HWI-EAS443:3:94:467:132#0/1  
a\_\_` `^a\_aa^^]\_aYZ` `XDW\_\_\_\_^\_]Y[\_^^X^XYV^^  
@HWI-EAS443:3:94:83:860#0/1  
AGTGTACATAAATACNGCCTTGCTCAATGCATCCTGTGCA  
+HWI-EAS443:3:94:83:860#0/1  
aa]b` `^aaaS]a\_[DP\_\_\_\_[\_`\_^[^`Z]\_\_\_\_U^^`^W  
@HWI-EAS443:3:97:1558:15#0/1  
ACTGTTTAAGGTCTCCAACATCTTTGCAGTCATCNAAGTC  
+HWI-EAS443:3:97:1558:15#0/1  
a\_abSbaba`SKLaWW`aZ`¥H[``^Y\_BBBBBBBBBBBB  
@HWI-EAS443:3:97:448:1380#0/1  
CCGATTTGNGATAATTGAAGGAAGAGACCGAATCATGGCC  
+HWI-EAS443:3:97:448:1380#0/1  
^b\_Y`a\_[D]abbbbb`ba]`b¥bbbaab\_ababba]a`  
@HWI-EAS443:3:9:1471:1368#0/1  
GGCTGGANAAGTTCGGTGGGAGACTTTGGTCGGCAAGCTT  
+HWI-EAS443:3:9:1471:1368#0/1  
Y`TW\_b¥DVX\_\_^`¥^T¥\_XaaY¥V]X]VYJEWZ[]TRX  
@HWI-EAS443:3:9:960:992#0/1  
GGGGCATGGAANTGAGGCGCTGCCTTCTTCAGTCTCTTCA  
+HWI-EAS443:3:9:960:992#0/1  
aYa][a`[^RXDX]a[¥ZZ` `¥Y[^S[^Y`QUZYV[UU

@HWI-EAS443:3:100:332:640#0/1  
CGGGGGGGCTATATGAAGCAATCGAGGAGTGCCTGATTAA  
+HWI-EAS443:3:100:332:640#0/1  
ab``bbaabababbaaab]a\_a`aa\_\_SaZ\_aa\_\_`\_B  
@HWI-EAS443:3:10:497:1225#0/1  
CGGGGGGGCTATATGAAGCAATCGAGGAGTGCCTGATTAA  
+HWI-EAS443:3:10:497:1225#0/1  
Zb`W¥\_HQQZ\_a¥Waaaa`X¥]RSKYXPXRRSN\_\_^¥¥^¥  
@HWI-EAS443:3:12:1330:1040#0/1  
GATTGAGGGTTTTTCGGCTGAATCGAGAAAATTGCTTCTC  
+HWI-EAS443:3:12:1330:1040#0/1  
a``aaa``]aZa`[[aa]a^\_\_\_¥¥YVa`^^¥¥`W^¥X^M  
@HWI-EAS443:3:12:1767:148#0/1  
CAGCTGAAAGTCATCCATGGCTGCACAGGATGCATTGAAA  
+HWI-EAS443:3:12:1767:148#0/1  
a\_bT````TaG]SXTSLWa¥[\_\_YBBBBBBBBBBBBBBB  
@HWI-EAS443:3:13:1581:1737#0/1  
AATGAAGGGAGTGACATAAATACGGCCTTGCTCAATGAA  
+HWI-EAS443:3:13:1581:1737#0/1  
`ba\_Z¥W^^YaQb`]Ga\_GXaaa\_[`\_UXWFJ\_\_a`G]BB  
@HWI-EAS443:3:15:1784:803#0/1  
ATGAGAAAGGCATAAATCCCAATTACCTCATGGCTTGGGA  
+HWI-EAS443:3:15:1784:803#0/1  
a¥aV¥YW¥0]baaY¥[`[Yaa][P``UaRaa¥]ZBBBBBB  
@HWI-EAS443:3:16:1619:288#0/1  
AGCCTGCACACTTTCCCAATAGAGCCTTCTCCACTCCCC  
+HWI-EAS443:3:16:1619:288#0/1  
abZT^``aXa]`\_a[^`aa`]YY`YG`[MR\_SU¥KXWMBB  
@HWI-EAS443:3:17:725:394#0/1  
ACCGACGAACGGGGTGAATCAATAATTGTAGAATCTGGTG  
+HWI-EAS443:3:17:725:394#0/1  
[¥\_[QXaI`¥`^\_]Q]`\_]X\_[^PT`X^QZ]GX`¥\_THT^  
@HWI-EAS443:3:18:646:1377#0/1  
CGGGGATCTTCTTTCATTTTCAATGTCCTGTAGCTCTGC  
+HWI-EAS443:3:18:646:1377#0/1  
a\_`[`Kaba]abbT^abaaVS^YU^bQ`Q\_aYaa`\_a\_`^  
@HWI-EAS443:3:19:331:1583#0/1  
GTCCCCGATTGAACATATCGCAAGCATGAGGAGGAECTATT  
+HWI-EAS443:3:19:331:1583#0/1  
^GQZUSQ`]]]bXa\_`^`a¥¥YVU\_\_\_^\_0¥^^S\_^Y[V]  
@HWI-EAS443:3:20:233:380#0/1  
CTAGAACACAGTATTTTTCCCATTTGTGTGGCTCCAGTCT  
+HWI-EAS443:3:20:233:380#0/1  
abbaaa``abb¥b`aabaa`a\_aaaa\_a¥`Z\_\_\_a^UM^W  
@HWI-EAS443:3:21:1189:1750#0/1  
TGGAAAGAGCCTAACATAGTCAAACCACATGAGAAAGGAA  
+HWI-EAS443:3:21:1189:1750#0/1  
abb`\_X\_]aSHU^b[\_W¥VS^baV`Q¥SXWX\_`aaJWYGU  
@HWI-EAS443:3:22:1491:966#0/1  
CGGGGGGGCTATATGAAGCAATCGAGGAGTGCCTGATTAA



@HWI-EAS443:3:30:978:536#0/1  
CCGGGCTCTGGCTCATCACTGTCATACTGTTTAAGGTCTC  
+HWI-EAS443:3:30:978:536#0/1  
ab`abaaababa\_aa\_\_`aa]^aaa\_aaaaaa\_\_\_TT\_]  
@HWI-EAS443:3:31:100:488#0/1  
TACAAAGATGTTGGAGACCTTAAACAGTATGACAGTGATG  
+HWI-EAS443:3:31:100:488#0/1  
ababa^aaaa`aaaa`aa\_\_aa`aaaXa\_`Z``XDZZZ  
@HWI-EAS443:3:31:1040:1397#0/1  
TGCGTCTCCACAACCTTGAGGGGTTTTCGGCTGAATCGACA  
+HWI-EAS443:3:31:1040:1397#0/1  
Wab\_`[]W^`WQW\_`[`ZXUa^UaU\_HSab^JT#P]QYKZ  
@HWI-EAS443:3:31:131:957#0/1  
ACATATCGCAAGCATGAGGAGGAACTATTTTACAGCAGCA  
+HWI-EAS443:3:31:131:957#0/1  
aaVDU^^\_a\_^#]P#XV\_^YWURV^#^^WUJ^#^\_^NFV  
@HWI-EAS443:3:31:29:1680#0/1  
TTACTTCTTTTGACATTTGGGAAAGCTTGCCCTCAATGCA  
+HWI-EAS443:3:31:29:1680#0/1  
aabbbaaaaaa#W`a`#ZO[^`[]]a`^^\_a\_\_RZ^]a`  
@HWI-EAS443:3:32:474:934#0/1  
CCGGGGCTATATGAAGCAATCGAGGAGTGCCTGATTAATG  
+HWI-EAS443:3:32:474:934#0/1  
#DP\_\_[RLJ^ZZ^NRV^#`QY[N#^Y#U^VWT#URRB  
@HWI-EAS443:3:34:1678:1563#0/1  
CACAACTTGAGGGGTTTTCGGCTGAATCGAGAAAATTGGT  
+HWI-EAS443:3:34:1678:1563#0/1  
`#Y^\_YaWVW\_Z\_^Z]WaROULT[Z`#BBBBBBBBBBBB  
@HWI-EAS443:3:36:1327:873#0/1  
CTCTTCCTTCAATTATCTCAAATCGGTGCTTCAATAGTAC  
+HWI-EAS443:3:36:1327:873#0/1  
abbbbbbabbbbaaaaabbaa^`baaa\_``aa\_aaab#aa  
@HWI-EAS443:3:36:1352:210#0/1  
TAGGGGGCTATATGAAGCAATCGAGGAGTGCCTGATTAA  
+HWI-EAS443:3:36:1352:210#0/1  
aabbbaabaaa````#aaZa````ZNa]aSP[aZ^Y#  
@HWI-EAS443:3:36:63:457#0/1  
GCATTCCTTGGTCATGTCTTTCTCTTTGACAGAAGACTCG  
+HWI-EAS443:3:36:63:457#0/1  
]GP\_Z`a^\_\_S[0#ZW`a\_]YZYZ[WJ[[[U[V]#RYX  
@HWI-EAS443:3:36:815:902#0/1  
AGGAATTCCTTGGTCATGTCTTTCTCTTTGACAGAAGACT  
+HWI-EAS443:3:36:815:902#0/1  
Z`S^T#Y`b\_KU\_\_bbb`#`b#V\_a\_a]\_a]P\_]Z]\_`aX  
@HWI-EAS443:3:38:1485:532#0/1  
CCGGGGGGCTATATGAAGCAATCGAGGAGTGCCTGATTAA  
+HWI-EAS443:3:38:1485:532#0/1  
`ba^\_]`aaaa`a`ab```aaa^`a\_bRWUN^#Za\_\_V  
@HWI-EAS443:3:38:414:997#0/1  
CCGGGGGGCTATATGAAGCAATCGAGGAGTGCCTGATTAAT

+HWI-EAS443:3:38:414:997#0/1  
a`a`\_ZaZa`V\_[YRY`YR`PNRYXXGTUYVUUZ#V[Q  
@HWI-EAS443:3:3:1390:320#0/1  
GCCCTCCTCATGCTTGCATATGTTCAATCGGGGCAACAT  
+HWI-EAS443:3:3:1390:320#0/1  
a]a#a#`a\_aaZ#aaaZaaa`a`[\_^`\_T^[[`T#U#  
@HWI-EAS443:3:3:646:760#0/1  
ACGGGGGCTATATGAAGCAATCGAGGAGTGCCTGATTAA  
+HWI-EAS443:3:3:646:760#0/1  
a`a\_a[ab`abaaba\_[`\_\_\_Za`a#a#aVT)`^U\_^  
@HWI-EAS443:3:40:26:1598#0/1  
AGCCCGTTTCGTCGATGAAATGGAAATCCGAATACATGAAA  
+HWI-EAS443:3:40:26:1598#0/1  
a)`aba\_`aa^aa\_`^a\_a`^]a\_`\_`^`\_`\_`ZT^G^  
@HWI-EAS443:3:42:425:703#0/1  
GCCGAAGAGACAATTGAAGAAAAATTTGAGATTACAGGAA  
+HWI-EAS443:3:42:425:703#0/1  
[G^P\_YVRVXW`a`Y`U`\_a[YPaV]X\_^[[W#U^VYYa  
@HWI-EAS443:3:43:1220:255#0/1  
CTAGAACACAGTATTTTTCCCATTTGTGTGGCTCCAGTCT  
+HWI-EAS443:3:43:1220:255#0/1  
`bba\_aaba`a`abbbaaaa`bab`^a^`a]`Y#\_XZ]  
@HWI-EAS443:3:43:323:466#0/1  
GTCATGGAAATGAGGCGCTGCCTTCTTCAGTCTCTTCAGC  
+HWI-EAS443:3:43:323:466#0/1  
aYS`\_aa`````aaa``^`\_`\_\_\_ZZ^WX[[``][#U  
@HWI-EAS443:3:45:1466:211#0/1  
TAGAAATAGGAGACATGCTCTTGAGGACTGCGATAGGCCA  
+HWI-EAS443:3:45:1466:211#0/1  
a`baaaaa`aa`a^`aa`\_`\_`a^`^Z^\_[a[V[[[QSU  
@HWI-EAS443:3:47:1346:481#0/1  
GNTCAATCGGGGCAACATCTTCTCCTATTTCATCAAGTTC  
+HWI-EAS443:3:47:1346:481#0/1  
#D^aaaaaaaa`]`a\_aa\_aa\_a\_\_a`aaa\_\_`#\_Za\_`]  
@HWI-EAS443:3:48:299:835#0/1  
AAGAATTCCTTGGTCATGTCTTTCTTTGACAGAAGAAT  
+HWI-EAS443:3:48:299:835#0/1  
a\_`b]ba`bb\_U`aab\_^]ZbaZ\_aa`UUV^[YaQH]  
@HWI-EAS443:3:48:349:526#0/1  
TGGGGGGCTATATGAAGCAATCGAGGAGTGCCTGATTAA  
+HWI-EAS443:3:48:349:526#0/1  
U#\_Y#\_]PR]XYXZ#^[M#]#X^Y^]X\_N\_XLT[MUZRR  
@HWI-EAS443:3:4:1295:717#0/1  
GGGAGGGTTTTTCGGCTGAATCGAGAAAATTGCTTCTCAT  
+HWI-EAS443:3:4:1295:717#0/1  
`baYab`S`a\_ZU\_] [aa^VUaPX#]#^V\_RV[Y[M^]  
@HWI-EAS443:3:4:26:180#0/1  
ACCATTGGGATCAGCTGAAAGTCATCCATGGCTGCACAGG  
+HWI-EAS443:3:4:26:180#0/1  
aa)`^aa^]\_#\_YXY`Z\_`ZURQV^\_\_^Z\_YYP]BBBBBB



@HWI-EAS443:3:4:527:281#0/1  
CGCCAGAAAAAGTAGACTTTGATGACTGCAAAGATGTTGG  
+HWI-EAS443:3:4:527:281#0/1  
a```\_^aaaa^aaa\_aaa^\_\_a\_\_a^[\^\_[\^`a^\_^Y  
@HWI-EAS443:3:53:212:1828#0/1  
GGGGAGGAAGTATTTTACAGCAGAAGTGTCCCACTGCAGG  
+HWI-EAS443:3:53:212:1828#0/1  
¥^^^\_ba`Yaa`aaaaba^¥[\_`^¥¥ZZX^]^]UUaZ`VT  
@HWI-EAS443:3:55:1114:327#0/1  
GTCTGGACAGTGGTGAACAGTATATGTAACACAACAGGGG  
+HWI-EAS443:3:55:1114:327#0/1  
a\_\_aaa`\_aa^a\_X``\_\_\_aZ\_\_\_\_aZ\_\_^`]^\_Z^a\_``  
@HWI-EAS443:3:56:431:595#0/1  
CNCCTCTTTCGGACTGACGAAAGGAATCCCATAGACTCCT  
+HWI-EAS443:3:56:431:595#0/1  
VD[\_\_\_`\_`aaa`\_`\_^`a\_\_^a¥N^`Y`\_Z\_]\_\_]^]]  
@HWI-EAS443:3:57:304:989#0/1  
GGACTGGAGAGGAGATGGCCACCAAAGCGGACTACACCCT  
+HWI-EAS443:3:57:304:989#0/1  
abaabaaaaaaa]aaa`[\_a]aZaa^aaaa^\_\_^`YSU\_  
@HWI-EAS443:3:58:717:76#0/1  
CACCTATTTTCATCAAGTTCTATCCAGCTTGAATCAGTCAA  
+HWI-EAS443:3:58:717:76#0/1  
abaababbbbaaabaabaaaaaaa`aababa¥a\_`a^`\_`a  
@HWI-EAS443:3:59:1353:1044#0/1  
TCGGGGCTATATGAAGCAATCGAGGAGTGCCTGATTAATG  
+HWI-EAS443:3:59:1353:1044#0/1  
`aaaab`abaaaba`[[b`\_`^`[ZaU`ba[\_VaW¥aYT  
@HWI-EAS443:3:5:214:341#0/1  
GAGATGGCCACCAAAGCGGACTACACCCTTGACGAAGAAG  
+HWI-EAS443:3:5:214:341#0/1  
`Uaa`\_````¥\_W^[a^`[\_`a`Z``[]¥`¥Y¥`¥X`¥`B  
@HWI-EAS443:3:60:1329:1434#0/1  
CGTAAATACGGCCTTGCTCAATGCATCCTGTGCAGCCATG  
+HWI-EAS443:3:60:1329:1434#0/1  
YHXbbabb`a^aabbaabaa`abaaa```a`aaa]aaa  
@HWI-EAS443:3:65:1009:1931#0/1  
CTAGAACACAGTATTTTTCCCATTTGTGTGGCTCCAGTCT  
+HWI-EAS443:3:65:1009:1931#0/1  
a[ZaXa\_aa\_UT][\_a]X[^]X`\_a¥P^^`W][[TBBBBB  
@HWI-EAS443:3:68:277:743#0/1  
GTCCCCGATTGAACATATCGCAAGCATGAGGAGGAAGTATT  
+HWI-EAS443:3:68:277:743#0/1  
a`abba`aaaab\_a\_a^¥`a\_\_`\_`[^]Z`\_ZS^^`]  
@HWI-EAS443:3:71:1603:232#0/1  
CTATGTTAGGCTCTTTCCAGCCAAAGAATGTCTTCATGNA  
+HWI-EAS443:3:71:1603:232#0/1  
abb`bbbab`a`aabba`baaaaabaab```bb\_aa¥D[  
@HWI-EAS443:3:72:1243:1864#0/1  
AAACCACATGAGAAAGGCATAAATCCCAATTACCTCATTG

+HWI-EAS443:3:72:1243:1864#0/1  
\_¥ba`[\_aS^RX`P[``\_Z\_]aX`R`a[\_`aZY]Z\_\_X\_  
@HWI-EAS443:3:74:1130:1080#0/1  
ACGGGGGCGTGGTGTCTCAAGAATGGTTCAATTTTG  
+HWI-EAS443:3:74:1130:1080#0/1  
`\_\_]¥`)\_JZZVa¥a[NY\_X[PUZSJY]]N[UWHW¥BBB  
@HWI-EAS443:3:77:1650:1999#0/1  
AGCCGGTTCATTGAAATTGGAGTAACACGGAGGGAAGTCC  
+HWI-EAS443:3:77:1650:1999#0/1  
aba\_ZW^¥G`)\_I^¥TZ`UT[S\_SZW\_\_][V[Z\_[SQI[G  
@HWI-EAS443:3:79:471:1365#0/1  
AGGGCCGTATTTATGTACTCCCTTCATTATGTATTAG  
+HWI-EAS443:3:79:471:1365#0/1  
WX[[]baY\_\_a¥¥\_YVab\_WO[Z\_¥T\_]\_TQ¥[VXVT]a^  
@HWI-EAS443:3:80:361:1202#0/1  
CATGAAGACATTCTTTGGCTGGAAAGAGCCTAACATAGAC  
+HWI-EAS443:3:80:361:1202#0/1  
aY]aaa\_aaaaZ]¥[XT¥aVXZUJ\_¥^[Q[\_a]VYX`VHX  
@HWI-EAS443:3:80:618:1976#0/1  
CCACAACCTTGAGGGGTTTTCGGCTGAATCGAGAAAATTCC  
+HWI-EAS443:3:80:618:1976#0/1  
`b¥]Q]a`ba]^`aaYW\_aaS¥YZ^RLSSQ\_``]H]SBB  
@HWI-EAS443:3:83:1084:1389#0/1  
GATGGGCTCTGGCTCATCACTGTCATACTGTTAAGGTCT  
+HWI-EAS443:3:83:1084:1389#0/1  
a`a\_aaa`\_aaaaaaaaaa\_aa^aaaa\_a^a\_`^[\_]`\_  
@HWI-EAS443:3:83:244:143#0/1  
GGCTTTCTCATGTGGTTTACTATGTTAGGCTCTTCCAG  
+HWI-EAS443:3:83:244:143#0/1  
^HQV¥Y`[^[]`P\_\_]TVTRV¥TYXYSSPFRSJW[TQLJ  
@HWI-EAS443:3:85:1372:1416#0/1  
TNTGGGCACTCGGTGAAAATATGGCACCAGAAAAAGTAGA  
+HWI-EAS443:3:85:1372:1416#0/1  
WD[baa]`a]ab\_0^aaaa\_aaa^\_`XUaaaa[]aXaa[  
@HWI-EAS443:3:87:795:605#0/1  
GGGGCTTTTCACTATAAGACAAGAAATGGCCAGTAGGAGT  
+HWI-EAS443:3:87:795:605#0/1  
G^\_XbY¥`\_Waa\_[[`Vbb\_\_`Ubb[bba]UbaJM[bb[[  
@HWI-EAS443:3:8:1322:57#0/1  
TCATTTTGGACCCAGCTTGCTAGAGATCTGGGCTCTGGAT  
+HWI-EAS443:3:8:1322:57#0/1  
\_aaaaaab`b¥P[P[Za¥\_]TR[^W[RGV^`BBBBBBBBB  
@HWI-EAS443:3:8:436:1054#0/1  
CGCAAGCTTGCCGACCAAAGTCTCCCACCGAACTTCTCAA  
+HWI-EAS443:3:8:436:1054#0/1  
aa`Z]aa\_T\_]^aa`^]a¥\_^`\_`ZV\_`TTZZWT¥TDL  
@HWI-EAS443:3:90:1444:1362#0/1  
CATTAATCAGGCACTCCTCGATTGCTTCATATAGCCCCTC  
+HWI-EAS443:3:90:1444:1362#0/1  
aY\_] [VV[YO[a\_X\_\_a¥Z[a¥VW]a`[^Zaa^SFQVYKY

@HWI-EAS443:3:93:953:640#0/1  
CTGTAGCTCTGCTAGCACCTGCTTCCAAGCCATGAGGTGA  
+HWI-EAS443:3:93:953:640#0/1  
abbabbbabab¥aaaaa\_aaa\_aa¥`a`aN\_\_aa[a`MDX  
@HWI-EAS443:3:94:884:877#0/1  
TCCATTTTCATCGACGAACGGGGTGAATCAATAATTGTATG  
+HWI-EAS443:3:94:884:877#0/1  
aabbaaaaa`a`a`]\_\_\_\_\_]aZ^\_\_\_\_`\_\_\_\_`[S^`\_0\_\_¥  
@HWI-EAS443:3:98:460:98#0/1  
CATTTGTGTGGCTCCAGTCTCGGGTCAGTGAGTGAGAAAT  
+HWI-EAS443:3:98:460:98#0/1  
abba[\_R\_\_b]\_b\_`b¥\_¥\_PbbGHY^YSGaGaJXG\_QW  
@HWI-EAS443:3:99:412:2005#0/1  
TACATATACTGTTCACTGTCCAGGCCATGATTCGGCC  
+HWI-EAS443:3:99:412:2005#0/1  
\_a`bab\_bb\_USa`abVbaa[XUU`aaJJ\_P]a]a[aZBB  
@HWI-EAS443:3:100:875:1337#0/1  
ACCCGTTCGTCGATGAAATGGAAATCCGAATACATGAAAC  
+HWI-EAS443:3:100:875:1337#0/1  
aa`OWQ[YXVY\_Z`aW\_TRZ\_]aUXJOYV¥X`]`XUWXBB  
@HWI-EAS443:3:10:79:2046#0/1  
NCCGAATGCACTATTGAAGCACCGATTTGAGATAATTGAA  
+HWI-EAS443:3:10:79:2046#0/1  
DNVSSYWNUTUUURUTQTVUUVWRVVVTQRWWUSSVRUVV  
@HWI-EAS443:3:11:367:597#0/1  
CGCCATATTTTCACCGAGTGCCCACTTCAATTGGCTTGTT  
+HWI-EAS443:3:11:367:597#0/1  
abab\_a`abbaaaaab`]S`]]a`aa`aa\_\_Z\_\_`]\_WUU  
@HWI-EAS443:3:12:1081:942#0/1  
TGGGTGTAGTCCGCTTTGGTGGCCATCTCCTCTCCAGTGA  
+HWI-EAS443:3:12:1081:942#0/1  
aaaaJ]Y]aTaa¥ZYUa\_\_Y`RV\_Y\_¥VXW\_¥[NT[T\_V  
@HWI-EAS443:3:12:1346:185#0/1  
CGGCGTTCACCTTCTTTTGACATTTGGGAAAGCTTGCCCTC  
+HWI-EAS443:3:12:1346:185#0/1  
aaa\_b\_aaa^aaS]aa]X¥R`\_`a^`a¥`^a¥`\_U[T¥^W  
@HWI-EAS443:3:12:1720:1109#0/1  
NTGAGAAGCAATTTTCTCGATTGAGCCGAAAACCCCTCAA  
+HWI-EAS443:3:12:1720:1109#0/1  
DLVQVVXYXVYYXVXRYUXRRYXVOGWXXUYVXUXYXBB  
@HWI-EAS443:3:13:735:793#0/1  
ATGGGGGGCTATATGAAGCAATCGAGGAGTGCCTGATTAA  
+HWI-EAS443:3:13:735:793#0/1  
aabaa^`aaabaaa]a`aaa\_a\_`[a\_]a^aU^`a\_^]\_\_  
@HWI-EAS443:3:13:891:1359#0/1  
TGCCCCCAAGATCGAAGGTTCCAGGTTCCAGGTTGTCCC  
+HWI-EAS443:3:13:891:1359#0/1  
WW\_b\_\_XW^]Q]a\_YQVSTYZ¥Y¥ZWMTZSNX^TUZTONE  
@HWI-EAS443:3:14:1138:282#0/1  
GCTCCCTTATTATGTATTGAGTCCCTGCAGTGGGACA

+HWI-EAS443:3:14:1138:282#0/1  
a[\_`a`\_`¥`\_^`a^`\_^]`U\_\_^ZU]a]Y\_Y\_V^USY  
@HWI-EAS443:3:14:1561:1533#0/1  
CGGTCTCCAACATCTTTGCAGTCATCAAAGTCTACTTTTT  
+HWI-EAS443:3:14:1561:1533#0/1  
a`^Sa]^UU¥M[¥T¥¥0ZL^b`^U`^a\_WbWJYaZY][Ya  
@HWI-EAS443:3:15:1499:1027#0/1  
AGGGGGGCTATATGAAGCAATCGAGGAGTGCCTGATTAAT  
+HWI-EAS443:3:15:1499:1027#0/1  
\_¥a\_^a\_T\_abb\_]abbab^ZX`^U`^Z\_\_aab`][a  
@HWI-EAS443:3:15:1647:1829#0/1  
GTGAAATTAAGTATTGAAGACCCGAGTCACGAGGGGGAGG  
+HWI-EAS443:3:15:1647:1829#0/1  
G[¥\_¥abb`baba`¥`¥`YRXS\_\_aOGZ`^bbba\_aba  
@HWI-EAS443:3:16:1159:231#0/1  
CCCCATTTGTGTGGCTCCAGTCTCGGGTCAGTGAGTGAGA  
+HWI-EAS443:3:16:1159:231#0/1  
ab`^aaaa^a]aa\_\_^XU\_W^¥^^\_aWZTXK^UWS^UVQ  
@HWI-EAS443:3:16:319:1530#0/1  
CAGTGGGCACTCGGTGAAAATATGGCACCAGAAAAAGTAG  
+HWI-EAS443:3:16:319:1530#0/1  
^RXRZSRa[PXTOPFMXRaa\_a^^^\_]¥a[`W]^\_VPX^W  
@HWI-EAS443:3:16:736:650#0/1  
CCCCTGTTGTGTTACATATACTGTTCCACTGTCCAGGA  
+HWI-EAS443:3:16:736:650#0/1  
`a^M^]V[UbIT^]abZa\_¥ba\_aXaa`a[`a¥¥^Z`^G  
@HWI-EAS443:3:17:1178:733#0/1  
CGGGGGGCTATATGAAGCAATCGAGGAGTGCCTGATTAAT  
+HWI-EAS443:3:17:1178:733#0/1  
]`bbbX`abbabaaa\_ZW\_aabaa`ZJ¥T^¥aaa\_\_\_a\_\_\_  
@HWI-EAS443:3:17:1292:349#0/1  
CCCCTTTGGTGGCCATCTCCTCTCCAGTGAATGAAAAGA  
+HWI-EAS443:3:17:1292:349#0/1  
ababZabaab\_ba`^\_\_\_a\_[^^a[[`a\_a`a`^`¥\_ZX`¥  
@HWI-EAS443:3:17:1624:676#0/1  
CGTCCTTGGGATCTTCTCTTCAATGTCCTGTAGC  
+HWI-EAS443:3:17:1624:676#0/1  
\_bbbabbbba\_aabbbbabbbbabbbaba\_\_aaaa`  
@HWI-EAS443:3:17:1774:546#0/1  
ACGGGGCAACATCTTCTCCTATTTCAATCAAGTTCTATCCA  
+HWI-EAS443:3:17:1774:546#0/1  
`]a¥a\_W^`SVa^]]Ta^[a\_a\_\_\_`a[`^`]\_\_a`^XZ`  
@HWI-EAS443:3:17:233:314#0/1  
CGGGGGGCTATATGAAGCAATCGAGGAGTGCCTGATTAAT  
+HWI-EAS443:3:17:233:314#0/1  
a\_I\_\_¥¥T`\_Sa\_aW¥Q\_a^0]STFR\_Na[X\_[P¥YPY`  
@HWI-EAS443:3:17:384:60#0/1  
CGGGGGGCTATATGAAGCAATCGAGGAGTGCCTGATTAAT  
+HWI-EAS443:3:17:384:60#0/1  
ab\_aaa`a`a^a`a\_a]\_\_^\_¥\_`^^W`]]¥\_UWHP¥¥

@HWI-EAS443:3:17:442:146#0/1  
GGTGGTGAACCTTTGTAAGTATGGAGTTCTCACTCACTGAC  
+HWI-EAS443:3:17:442:146#0/1  
ab]ba]a\_`aaa`\_`a`Za``\_\_^^^`\_\_`^^`\_¥\_\_¥  
@HWI-EAS443:3:17:667:592#0/1  
CGGCTTCTTACCCCTGTTGTGTTACATATACTGTTCCACC  
+HWI-EAS443:3:17:667:592#0/1  
ab`aaa`Q]Waa`b¥VPS^[J^Z\_TKVRZZ\_^Z^^WR[[R  
@HWI-EAS443:3:18:1372:969#0/1  
TTCCCAATTACCTCATGGCTTGAAGCAGGTGCTAGCAGA  
+HWI-EAS443:3:18:1372:969#0/1  
aa`V]aa`a`[aa\_\_a^^\_\_^]V[ZVNNLSHU[[LR\_V  
@HWI-EAS443:3:18:1464:787#0/1  
CGGCCATGTTTCCGATTTGTTTTCAAAGAATTCCTTGGTC  
+HWI-EAS443:3:18:1464:787#0/1  
aaaa`aaaaabaaa\_aaab\_aaaa`\_a`^^`a``aaa\_^^  
@HWI-EAS443:3:18:1525:508#0/1  
AACAAACTTCCAAATGTGTGCATATTGCAGCAAACCTGTA  
+HWI-EAS443:3:18:1525:508#0/1  
aaaaaaaaaY\_a`\_a`[a\_`\_]\_a^`\_a]a\_Y``\_]`\_^^]  
@HWI-EAS443:3:19:1072:754#0/1  
GCCCCGTTTCGTCGATGAAATGGAAATCCGAATACATGAAAC  
+HWI-EAS443:3:19:1072:754#0/1  
aaYaaaZRTN\_bVVWFLVXY]OUYW]`ZKX^\_\_\_\_\_YU^U  
@HWI-EAS443:3:19:1412:1889#0/1  
AGGGGGGCTATATGAAGCAATCGAGGAGTGCCTGATTAAT  
+HWI-EAS443:3:19:1412:1889#0/1  
a^V^\_X`¥aaababaaa\_a`[`]Za^^`U^Ya\_\_\_aaZ``  
@HWI-EAS443:3:19:263:1173#0/1  
CGCCGAGTCTTCTGTCAAAGAGAAAGACATGACCAAGGAA  
+HWI-EAS443:3:19:263:1173#0/1  
a`\_]`a\_0¥¥`\_Y[U\_\_\_Y\_V\_Z]\_^^[QU[\_XZ\_\_\_]]^^  
@HWI-EAS443:3:20:1008:374#0/1  
GCGATTTGTTTTCAAAGAATTCCTTGGTCATGTCTTTCTC  
+HWI-EAS443:3:20:1008:374#0/1  
I\_`^Z\_\_]Y\_VZ^aYa[bb`Z`baZ\_JJ¥bab`^]ab^``  
@HWI-EAS443:3:20:1274:228#0/1  
TGGGGTTTTCGGCTGAATCGAGAAAATTGCTTCTCATTGT  
+HWI-EAS443:3:20:1274:228#0/1  
abbbb\_a¥b\_aa\_aaaaa^a\_a^`\_`aaaUaa^`\_^`a\_]`  
@HWI-EAS443:3:20:823:584#0/1  
CGTTCTCTTCATGTTCTTTGTCCTTGGGATCTTCTCTTCA  
+HWI-EAS443:3:20:823:584#0/1  
aabbbbbbb`bb`babbbba`abbbbaababbababaaa  
@HWI-EAS443:3:20:83:349#0/1  
CGGCTTCTTACCCCTGTTGTGTTACATATACTGTTCCACC  
+HWI-EAS443:3:20:83:349#0/1  
\_OZba`TF¥^VZ¥`^NZNX`TTUVZPY[^Q^TXUUU]NLZ  
@HWI-EAS443:3:21:100:1431#0/1  
ATCAGCTGAAAGTCATCCATGGCTGCACAGGATGCATTGG

+HWI-EAS443:3:21:100:1431#0/1  
aXbMa\_aT¥]`U`aa^`\_Xaa`PQT\_XK]SGP`]X]\_SF  
@HWI-EAS443:3:21:423:976#0/1  
CGCTAGCAGAGCTACAGGACATTGAAAATGAAGAGAAGAT  
+HWI-EAS443:3:21:423:976#0/1  
`^b\_a`][^]aa`aaaa`aaZ`\_a\_\_ZIY[``a\_\_^\_]`  
@HWI-EAS443:3:22:479:489#0/1  
GGCATGTGAATTGACTGATTCAAGCTGGATAGAACTTGAA  
+HWI-EAS443:3:22:479:489#0/1  
abaaaa¥baaaaa`ba`\_a\_a\_aaaaa\_aaa\_a]a\_a\_G  
@HWI-EAS443:3:23:450:117#0/1  
CGTCCTGTAGCTCTGCTAGCACCTGCTTCCAAGCCATGAG  
+HWI-EAS443:3:23:450:117#0/1  
abba` `[Zbbaa`J`\_U]aa`a^^aXVO\_\_XX[^\_V^\_U`  
@HWI-EAS443:3:23:917:1121#0/1  
TAGGTCTCCAACATCTTTGCAGTCATCAAAGTCTACTTTT  
+HWI-EAS443:3:23:917:1121#0/1  
Y[]\_S¥WSS]X\_¥SFY\_ZP\_\_\_W\_\_\_ZZS¥ZV\_\_VOZR]U  
@HWI-EAS443:3:24:236:1236#0/1  
CGGGGCATGGAAATGAGGCGCTGCCTTCTTCAGTCTCTTC  
+HWI-EAS443:3:24:236:1236#0/1  
aaa`bbXbaaa`[aaZ^\_[aa`a\_aaaaaaba]aaaaa^  
@HWI-EAS443:3:24:48:952#0/1  
CGTCCTTGGGATCTTCTTTCATTTTCAATGTCCTGTAGC  
+HWI-EAS443:3:24:48:952#0/1  
aa\_aa\_\_aaa^]aa`\_]a\_\_a¥a\_``\_a`[\_W``¥^X\_Ua  
@HWI-EAS443:3:25:181:1034#0/1  
GGCCTATGTAGATGGATTGAGCCGAACGGCTGCATTGAG  
+HWI-EAS443:3:25:181:1034#0/1  
`bbabba\_abbabbbabaababbabbbbaaaa\_aYbUaa  
@HWI-EAS443:3:25:705:381#0/1  
NGAGCCAGAGCCCAGATCTCTAGCAAGCTGGGTCCAAAAT  
+HWI-EAS443:3:25:705:381#0/1  
DPWVVXWWWXXWWWVYYUXXYYXUYUXXXXXXXTWVWYXY  
@HWI-EAS443:3:26:1251:60#0/1  
TCCCTGCTCTTTCGTCAGGGTGTAGTCCGCTTTGGTGG  
+HWI-EAS443:3:26:1251:60#0/1  
a^`aa^]YG`a`^aZ^]\_^\_]U`P^^U¥U`W^¥¥]^U^]  
@HWI-EAS443:3:26:149:710#0/1  
GCGGGTCTTCAATACTTAATTTAGAGCATCCATCAGCAG  
+HWI-EAS443:3:26:149:710#0/1  
abab`Gbaaa\_aaaaaaaaa`aa^]aa\_aa\_`aa\_aa\_  
@HWI-EAS443:3:26:1621:253#0/1  
GAATAATTGTAGAATCTGGTGACCCGAATGCACTATTGAA  
+HWI-EAS443:3:26:1621:253#0/1  
I\_bbVab```bbaVbaabbb¥aY^Vb¥bbbXSJ`¥\_b¥^`  
@HWI-EAS443:3:27:981:1676#0/1  
CGTCCTGCACACTTTCCCAATAGAGCCTTCCCTCCACTCCC  
+HWI-EAS443:3:27:981:1676#0/1  
`^¥\_\_aZ\_\_^a`a\_`\_a`aaaaR```[[^`\_X¥^`^`^]X

@HWI-EAS443:3:28:192:595#0/1  
CATCGGGCAACATCTTCTCCTATTTTCATCAAGTTCTATC  
+HWI-EAS443:3:28:192:595#0/1  
aa]a`bbbaaa`abaaa`aaabbabb\_a^XV]ab`aab  
@HWI-EAS443:3:28:252:1225#0/1  
GACCCAGGGGAGTGGAGGAAGGCTCTATTGGGAAAGTGTG  
+HWI-EAS443:3:28:252:1225#0/1  
HXabbbb]`b¥babbbbb`b]bbba^`ba\_bbbab]b^]  
@HWI-EAS443:3:28:349:738#0/1  
GGCTGGGTCCAAAATGAATTCAATAAGGCATGTGAATTGA  
+HWI-EAS443:3:28:349:738#0/1  
a\_baabaYbababaa]^abbaaaaa`aaaa\_a`aaaa  
@HWI-EAS443:3:28:535:2029#0/1  
CGGGGGGCTATATGAAGCAATCGAGGAGTGCCTGATTAAT  
+HWI-EAS443:3:28:535:2029#0/1  
ab`^aaab`baaaaa\_aaa`a`\_]`\_`a^\_\_^\_\_aZR  
@HWI-EAS443:3:29:883:979#0/1  
GCCCCGTCGTCGATGAAATGGAATCCGAATACATGAAAC  
+HWI-EAS443:3:29:883:979#0/1  
aabab[abbabbaaa`abaaaabaa`aaaab`a\_a\_aa\_  
@HWI-EAS443:3:2:1549:1088#0/1  
CGGCCAGTAGGAGTCTATGGGATTCCTTTCGTCAGTCCGA  
+HWI-EAS443:3:2:1549:1088#0/1  
abbabab[]bbaba\_b\_baa\_\_aaaZaabNa\_Z\_b^RZaZ  
@HWI-EAS443:3:2:360:857#0/1  
CGGGGCATGGAAATGAGGCGCTGCCTTCTTCAGTCTCTTC  
+HWI-EAS443:3:2:360:857#0/1  
`b`[ab\_aaba^a\_\_F¥\_a^UaXT`aU]\_S]`W\_`VZVS  
@HWI-EAS443:3:30:1444:1125#0/1  
GACCGTTTCATTGAAATTGGAGTAACACGGAGGGAAGTCC  
+HWI-EAS443:3:30:1444:1125#0/1  
ababbaababbb]aaabbb^ab]aa`aaaa`aa\_a`]^]  
@HWI-EAS443:3:30:247:2020#0/1  
TTAGTGGTATTCCTCCCCCTCGTGAAGTCCGGTCTTCAAT  
+HWI-EAS443:3:30:247:2020#0/1  
\_Za]X\_]YS\_abba`bbba^a]]]`a^\_NRZYa^ZX^`V  
@HWI-EAS443:3:31:1708:640#0/1  
CATGAGAAAGGCATAAATCCCAATTACCTCATGGCTTGGG  
+HWI-EAS443:3:31:1708:640#0/1  
aaT[Tb[``^\_Ib`UaabaTzaabaa\_T`Xa[ZYPV]aBB  
@HWI-EAS443:3:31:406:1710#0/1  
ACCCGTTTCGTCGATGAAATGGAATCCGAATACATGAAAC  
+HWI-EAS443:3:31:406:1710#0/1  
aaab`Y\_\_RP\_]`^ZZ¥^X¥XZ][U\_`[^]W\_NTUS\_\_\_N  
@HWI-EAS443:3:32:1118:232#0/1  
GGGGGCATGGAAATGAGGCGCTGCCTTCTTCAGTCTCTTC  
+HWI-EAS443:3:32:1118:232#0/1  
abb^aababa`]aaaa`\_aa^aW^`\_\_\_^\_¥`¥V``¥¥W  
@HWI-EAS443:3:33:1351:961#0/1  
CGCCAATCGGAGAGTCACCCAGGGGAGTGGAGGAAGGCTC

+HWI-EAS443:3:33:1351:961#0/1  
aaaaaaaa`a`aaaaaaaa`a`aaa`¥T`a¥`WTT¥^R]Y  
@HWI-EAS443:3:33:1677:491#0/1  
AGGTGCTTCAATAGTGCATTTCGGGTCACCAGATTCTACAA  
+HWI-EAS443:3:33:1677:491#0/1  
aab\_ba]b\_aab`a\_a¥`a`^aa\_V`\_\_¥`a]VVV\_^R]]  
@HWI-EAS443:3:33:889:1074#0/1  
GCGGCCTTGCTCAATGCATCCTGTGCAGCCATGGATGACT  
+HWI-EAS443:3:33:889:1074#0/1  
ab¥]]aaaaa\_aa`\_aaaa`\_`a^a`\_¥Za\_aZ\_¥]\_VW`  
@HWI-EAS443:3:34:725:2042#0/1  
GGTCCTTGGGATCTTCTCTTCATTTTCAATGCCTGTAGC  
+HWI-EAS443:3:34:725:2042#0/1  
aa\_b`^aa`¥a`\_`a`aaa`a`aa`a`\_a`\_`a^¥]¥\_X\_XL  
@HWI-EAS443:3:34:949:304#0/1  
TGTCTCTTCAGCAGATTGAGAGCATGATTGAGGCCGAGTC  
+HWI-EAS443:3:34:949:304#0/1  
aa`aaaaaaaaaaa`aa`\_a`^`a`\_`^`\_Y]V]X^WV  
@HWI-EAS443:3:36:1293:1817#0/1  
AGCCCTGCTCTTTCGTCAAGGGTGTAGTCCGCTTTGGTG  
+HWI-EAS443:3:36:1293:1817#0/1  
abbb\_]\_aaabaa\_aaaaa\_]¥]G`]aYY^a^T¥¥\_] [TY  
@HWI-EAS443:3:36:340:250#0/1  
CGGGGTTTTCGGCTGAATCGAGAAAATTGCTTCTCATTGT  
+HWI-EAS443:3:36:340:250#0/1  
abbbaVababb`baabbbbb^aaa`\_aaaa\_aaaaa\_aaw  
@HWI-EAS443:3:36:599:587#0/1  
CGGGGCTATATGAAGCAATCGAGGAGTGCCTGATTAATGA  
+HWI-EAS443:3:36:599:587#0/1  
`a`b`babaaaa`a`aaaa`a`^aX^aa^a]\_a^`\_]\_  
@HWI-EAS443:3:37:1078:758#0/1  
GGGCTGGAGAAGTTTCGGTGGGAGACTTTGGTCGGCAAGCT  
+HWI-EAS443:3:37:1078:758#0/1  
aa\_^\_aa¥a^]a¥^^`]STEYY^U^^^XNSW[QU^TNTUV  
@HWI-EAS443:3:37:536:1909#0/1  
CACGGGTGAATCAATAATTGTAGAATCTGGTGACCCGAA  
+HWI-EAS443:3:37:536:1909#0/1  
`\_]PXXW`\_]aaa`^¥`\_`Za`aa`^UGZU^`\_`¥a\_  
@HWI-EAS443:3:38:1298:1299#0/1  
GGATTCGAGCCGAACGGCTGCATTGAGGGCAAGCTTTCCA  
+HWI-EAS443:3:38:1298:1299#0/1  
ab`abaa]]aa`\_]aa`aa¥\_\_\_^GUXZ^RR¥[PZ]^RRN  
@HWI-EAS443:3:38:1753:615#0/1  
ATTTTCATCGACGAACGGGTGAATCAATAATTGTAGAATG  
+HWI-EAS443:3:38:1753:615#0/1  
`a`X¥`\_a`U\_b`X^LP`\_[a^0]RY¥[YZTTTLU\_JYPD  
@HWI-EAS443:3:38:188:687#0/1  
AGGCCAATCGGAGAGTCACCCAGGGGAGTGGAGGAAGGCT  
+HWI-EAS443:3:38:188:687#0/1  
a[^`^^`^`a¥`]¥^Y`^^`aX`]¥]K¥S^SPX¥R¥¥^SK



@HWI-EAS443:3:38:569:146#0/1  
CGGGGCTATATGAAGCAATCGAGGAGTGCCTGATTAATGA  
+HWI-EAS443:3:38:569:146#0/1  
a\_baaab`bbaaa`aaa`\_ab[aa[aX\_`VZa[^\_\_\_\_]`]  
@HWI-EAS443:3:38:610:431#0/1  
GCCCCGTTTCGATGAAATGGAAATCCGAATACATGAAAC  
+HWI-EAS443:3:38:610:431#0/1  
aa`Q\_aa\_`U`\_[a¥]a`aa\_a^Y¥aa`\_]VaS`XW``\_U  
@HWI-EAS443:3:38:806:1568#0/1  
CGGGGGGCTATATGAAGCAATCGAGGAGTGCCTGATTAAT  
+HWI-EAS443:3:38:806:1568#0/1  
ababaaaaaaaaa``aaaaaaaa`^\_\_Y^WW\_`^\_\_¥\_¥  
@HWI-EAS443:3:39:766:446#0/1  
TCCCCGTTTCGATGAAATGGAAATCCGAATACATGAAAC  
+HWI-EAS443:3:39:766:446#0/1  
a```aZ]````VS¥VSYUJZYT\_W]YQ[`¥WMQV^^\_[YV  
@HWI-EAS443:3:3:658:491#0/1  
CGGGGGGCTATATGAAGCAATCGAGGAGTGCCTGATTAAT  
+HWI-EAS443:3:3:658:491#0/1  
aabbbaabbaaa^¥ababaa`b\_a`\_a¥a¥X`a\_`aa``  
@HWI-EAS443:3:40:1241:358#0/1  
GGGTGAATCAATAATTGTAGAATCTGGTGACCCGAATGCC  
+HWI-EAS443:3:40:1241:358#0/1  
a\_¥U^aZJ\_[RW^]^^^\_ZY`ZXZZ¥ZWZYXX]ZXWZZWR  
@HWI-EAS443:3:42:1422:585#0/1  
GGTGGCTCCAGTCTCGGGTCAGTGAGTGAGAACTCCATAC  
+HWI-EAS443:3:42:1422:585#0/1  
\_b`a\_aaaa^\_Wa\_[Z``L¥X]^\_^[F^S^ZYGUU]YR]S  
@HWI-EAS443:3:42:840:1990#0/1  
TGGTGCTAGCAGAGCTACAGGACATTGAAAATGAAGAGAA  
+HWI-EAS443:3:42:840:1990#0/1  
aaX¥`bbaaab\_`^^aaaa`YMa`aaa\_aaaa¥aaaaXaa  
@HWI-EAS443:3:42:869:883#0/1  
GCTCCCTTCAATTATGTATTAGTAGCCCTGCAGTGGGACA  
+HWI-EAS443:3:42:869:883#0/1  
¥abbbbbbb`\_`bbbbbabbabbabb`\_baabb^baa^aa  
@HWI-EAS443:3:43:1560:1051#0/1  
CGTCATACTGTTTAAGGTCTCCAACATCTTTGCAGTCATC  
+HWI-EAS443:3:43:1560:1051#0/1  
aa¥X^\_\_`¥a`aba`aaZZaSWX\_V`^0^^]`Y[\_]Y`X  
@HWI-EAS443:3:45:1650:1715#0/1  
AACAAACTTCCAAATGTGTGCATATTGCAGCAAACCTTGTA  
+HWI-EAS443:3:45:1650:1715#0/1  
`\_`¥aa]abPMU`^ba\_\_]\_W[T[aY\_\_^NL]\_]0]ZPTX  
@HWI-EAS443:3:45:532:1060#0/1  
CAGGGGGCGTGGTGTCTCCTCAAGAATGGTTCAATTTTG  
+HWI-EAS443:3:45:532:1060#0/1  
\_T^¥aababab\_]T^a¥`a]¥[aa``aaaUV^`¥^[\_``  
@HWI-EAS443:3:45:599:396#0/1  
CGGGGCATGGAAATGAGGCGCTGCCTTCTTCAGTCTCTTC

+HWI-EAS443:3:45:599:396#0/1  
ababa¥`a`^Xaba]]ba`abb`Waa`]\`\_\_a`Y¥`]\`]\`  
@HWI-EAS443:3:46:1023:1872#0/1  
TCGGCCTTGCTCAATGCATCCTGTGCAGCCATGGATGACT  
+HWI-EAS443:3:46:1023:1872#0/1  
aa^aaaa^]\`^]aSRYaa¥X¥W¥^X]\`]\`]\`¥U¥  
@HWI-EAS443:3:46:1168:23#0/1  
ATTTTCACCGAGTGCCCACTTCAATTGGCTTGTCTCTTT  
+HWI-EAS443:3:46:1168:23#0/1  
abab`ab\_\_bab`baaaa`aa^]\`\_M\_a[\`]VUUSUFWJ  
@HWI-EAS443:3:46:1792:1373#0/1  
NCGAAAGAGGCGAAGAGACAATTGAAGAAAAATTTGAGAT  
+HWI-EAS443:3:46:1792:1373#0/1  
DNXZXZZWWXXZZZZZZVZXZZZZXWYZZZXZZWZZZZ  
@HWI-EAS443:3:46:553:744#0/1  
ACCCGTTTCGTCGATGAAATGGAAATCCGAATACATGAAAC  
+HWI-EAS443:3:46:553:744#0/1  
¥^bab\_a\_a`a^HQYXZZ^S\_]\`\_YL¥Y\_YVS[0¥\_\_]\`H  
@HWI-EAS443:3:47:1132:1857#0/1  
AGGGGCTATATGAAGCAATCGAGGAGTGCCTGATTAATGA  
+HWI-EAS443:3:47:1132:1857#0/1  
abbaabaaaa¥aaa`\_aa^\_V`\_]\`aV\_]\`Z]\`\_\_WV\_\_U^  
@HWI-EAS443:3:47:830:1366#0/1  
GTTGTCTTATAGTAAAAGCCTAGTTTTGATTCTTGCCCT  
+HWI-EAS443:3:47:830:1366#0/1  
K\_`]\`Z[b`^`abbYV¥`\_Y^]\`YZ^`^bbb¥\_`]\`^bSYIYSW  
@HWI-EAS443:3:48:1716:1587#0/1  
ACTCCGTGTTACTCCAATTTCAATGAACCGTTCTCTTTG  
+HWI-EAS443:3:48:1716:1587#0/1  
]abSa`S`I\_`¥`a\_`]\`^a\_\_Z[\_a\_\_W]\`\_a^XPVS^[\_T  
@HWI-EAS443:3:49:1222:1452#0/1  
GGGGGGGCTATATGAAGCAATCGAGGAGTGCCTGATTAAT  
+HWI-EAS443:3:49:1222:1452#0/1  
a[PIUHTY^WH¥X]YY^U¥UTYUV[aXVRSFOUYRR^UXX  
@HWI-EAS443:3:49:792:424#0/1  
GGGCTCCAGTCTCGGGTCAGTGAGTGAGAACTCCATACTT  
+HWI-EAS443:3:49:792:424#0/1  
``a`aa]a^X`\_\_a`aQ\_a[F[XYS`U[\_X]^¥\_`\_¥``  
@HWI-EAS443:3:4:1015:712#0/1  
TGGAGGAATAATTTTACAGCAGAAGTGTCCCACTGCAGGG  
+HWI-EAS443:3:4:1015:712#0/1  
abbabbbbaaaaaaaa\_a`^aaa`\_`\_a\_\_]\`¥`Y`a^]a`\_`  
@HWI-EAS443:3:4:1034:365#0/1  
AGGGGAGGGAATACCACTATATGATGCAATCAAATGCATG  
+HWI-EAS443:3:4:1034:365#0/1  
abbbbabbb`aaa`\_`a\_baaaaa\_a`aaaXa\_a`a\_a`\_`  
@HWI-EAS443:3:4:456:274#0/1  
TCCCGAGTCACGAGGGGGAGGGAATACCACTATATGATGC  
+HWI-EAS443:3:4:456:274#0/1  
a`aabab`baab`bababaa`\_`\_a`W^a¥`\_`\_a\_a`^\_¥

@HWI-EAS443:3:4:571:698#0/1  
CTGGGGCATGGAAATGAGGCGCTGCCTTCTTCAGTCTCTT  
+HWI-EAS443:3:4:571:698#0/1  
abb\_ba`ba`]ab`bbbbaaaaabaaaaaba`ab\_]a`aa  
@HWI-EAS443:3:4:923:938#0/1  
ACTCTTCCTTCAATTATCTCAAATCGGTGCTTCAATAGTG  
+HWI-EAS443:3:4:923:938#0/1  
ab`ababb`baaaa`b`]a]aaa\_`\_`[[aPYa\_a\_`^PX\_  
@HWI-EAS443:3:50:1163:612#0/1  
CGGGCATGGAAATGAGGCGCTGCCTTCTTCAGTCTCTTCA  
+HWI-EAS443:3:50:1163:612#0/1  
`bab\_bbabababbabaaabbaaba`abaaba^baaa\_a  
@HWI-EAS443:3:50:751:1898#0/1  
AGGGCATGGAAATGAGGCGCTGCCTTCTTCAGTCTCTTCA  
+HWI-EAS443:3:50:751:1898#0/1  
`a]b`babbbaaaba`aaaaaa`\_`[bb`aa¥[\_`\_a`\_a  
@HWI-EAS443:3:51:1010:627#0/1  
AGGCACCAGAAAAAGTAGACTTTGATGACTGCAAAGATGT  
+HWI-EAS443:3:51:1010:627#0/1  
abb\_ababbaaaaa\_a`baaaaaa`aa`a`aa`\_`a\_  
@HWI-EAS443:3:52:1452:1115#0/1  
CTTTCCCAAATGTCAAAGAAGTGAACGCCAAAATTGAAG  
+HWI-EAS443:3:52:1452:1115#0/1  
Sa``¥baaabaZXU¥¥aa`aab\_KXabaa^`bba``bJ  
@HWI-EAS443:3:52:1462:1140#0/1  
GGGTCCTGCACACTTTCCAATAGAGCCTTCTCCACTCC  
+HWI-EAS443:3:52:1462:1140#0/1  
\_\_¥U]Z\_\_T¥X¥S`[\_`¥^¥Z¥`[NVNXZ[ZVPXNRTQTZZ  
@HWI-EAS443:3:52:1692:1481#0/1  
CGGGGGGCTATATGAAGCAATCGAGGAGTGCCTGATTAAT  
+HWI-EAS443:3:52:1692:1481#0/1  
a\_]\_aab]aababaa`T^a`aaa\_`[Z`P^Uaa\_aa\_^a  
@HWI-EAS443:3:53:315:949#0/1  
GGGGGGGCTATATGAAGCAATCGAGGAGTGCCTGATTAAT  
+HWI-EAS443:3:53:315:949#0/1  
abaababaaaaabaaa`a`a`¥`aa¥a¥aa¥aa^`\_\_`\_  
@HWI-EAS443:3:54:1014:1449#0/1  
CGAGGGGTTTTCGGCTGAATCGAGAAAATTGCTTCTCATT  
+HWI-EAS443:3:54:1014:1449#0/1  
a\_Qa\_baW`ba`aa]a`aaa`aaaa`aaa`¥\_a¥Pa¥[`[  
@HWI-EAS443:3:54:555:1380#0/1  
GCTTTGTCTTGGGATCTTCTTTCATTTTCAATGTCCTG  
+HWI-EAS443:3:54:555:1380#0/1  
abbbbbbaa`abb`a\_babbaa`abaabaabaabaaa`^a\_  
@HWI-EAS443:3:55:1284:1212#0/1  
CGGCACCAGAAAAAGTAGACTTTGATGACTGCAAAGATGT  
+HWI-EAS443:3:55:1284:1212#0/1  
ab`a`\_`]`\_`^[\_]`Z^bbba]ZVY^a\_a``¥ba[ba  
@HWI-EAS443:3:55:74:657#0/1  
CGGCCATTTCTTGTCTTATAGTAAAAGCCTAGTTTTGAT

+HWI-EAS443:3:55:74:657#0/1  
`bbb`abbb\_bbbaabb\_babababaaaaa^ba`a`a`a  
@HWI-EAS443:3:56:507:1201#0/1  
TGGGGTGAATCAATAATTGTAGAATCTGGTGACCCGAATG  
+HWI-EAS443:3:56:507:1201#0/1  
a`]^bZbbbaabbb`bbabaab`baa`ab^a`a\_\_`aa`a  
@HWI-EAS443:3:57:107:467#0/1  
AGGGGGGCTATATGAAGCAATCGAGGAGTGCCTGATTAAT  
+HWI-EAS443:3:57:107:467#0/1  
a`aaabaa\_]aZaa^Y\_`aa`a\_a\_ZaZa`\_`aZ\_\_\_¥\_  
@HWI-EAS443:3:57:238:1378#0/1  
ATGGGGGGCTATATGAAGCAATCGAGGAGTGCCTGATTAA  
+HWI-EAS443:3:57:238:1378#0/1  
`baba``[^aaab]P]PXa]aaa`¥a[[a¥a`]``\_`¥^  
@HWI-EAS443:3:57:513:633#0/1  
GGAGGGGTTTTCGGCTGAATCGAGAAAATTGCTTCTCATT  
+HWI-EAS443:3:57:513:633#0/1  
aa[`aa\_U\_a`] ^`\_aaa\_U\_a`\_`\_`\_\_^`\_`\_\_\_\_]\_]\_  
@HWI-EAS443:3:58:1159:1017#0/1  
CTTCAATTGGCTTGTCTTCTTCATGTTCTTTGTCCTTGGA  
+HWI-EAS443:3:58:1159:1017#0/1  
aa`aaaa¥b`]`aYV[\_¥00WSN\_]Z^XZ`\_]ZV¥[``¥0  
@HWI-EAS443:3:58:1334:871#0/1  
CGGGCATGGAAATGAGGCGCTGCCTTCTTCAGTCTCTTCA  
+HWI-EAS443:3:58:1334:871#0/1  
a\_`^^[aaYDXY`\_^a¥P``aaa^]b¥a\_]`WW]\_a][L  
@HWI-EAS443:3:58:336:34#0/1  
GACAACCTTGAGGGTTTTCGGCTGAATCGAGAAAATTGCT  
+HWI-EAS443:3:58:336:34#0/1  
I\_]¥]`bbbaba^\_a`¥[¥^[]]`¥Y¥Z]W^`\_]X\_Y\_Z]  
@HWI-EAS443:3:58:501:660#0/1  
CGGGGCATGGAAATGAGGCGCTGCCTTCTTCAGTCTCTTC  
+HWI-EAS443:3:58:501:660#0/1  
aabaaaaaaaabaabaaaaa`\_aa\_aa`aa\_\_`\_\_[M  
@HWI-EAS443:3:59:1570:876#0/1  
GCCCCAATGCACCTATTGAAGCACCGATTTGAGATAATTGA  
+HWI-EAS443:3:59:1570:876#0/1  
aa\_X]]aaa`\_aa\_aaa\_Xa]``]a]\_aa`]X]]]YX]XL  
@HWI-EAS443:3:59:262:747#0/1  
CGGCATGTGAATTGACTGATTCAAGCTGGATAGAACTTGA  
+HWI-EAS443:3:59:262:747#0/1  
abaaabb[bbabbaabaabaaaaababb\_baa`bZ`aa^  
@HWI-EAS443:3:59:386:693#0/1  
TGGGGTTTTCGGCTGAATCGAGAAAATTGCTTCTCATTGT  
+HWI-EAS443:3:59:386:693#0/1  
aaa\_a]a\_\_\_\_\_a`aa`]\_a]\_^]\_J\_^`\_^`\_^YW]XY  
@HWI-EAS443:3:59:982:1307#0/1  
CCACAACCTTGAGGGTTTTCGGCTGAATCGAGAAAATTGA  
+HWI-EAS443:3:59:982:1307#0/1  
abbaababbbaabaa\_bba\_aabbabaaaaaZ`aaXXaUD

@HWI-EAS443:3:5:1216:78#0/1  
AGGGCCTCGACACTTGGCCTATCGCAGTCCTCAAGAGCAT  
+HWI-EAS443:3:5:1216:78#0/1  
Z¥]aaa\_Z`HZ` `baba` ]baba` ¥aa` P¥aZaabaa\_aB  
@HWI-EAS443:3:5:1349:1893#0/1  
GGGGGGGCTATATGAAGCAATCGAGGAGTGCCTGATTAAT  
+HWI-EAS443:3:5:1349:1893#0/1  
abbbb[X[babbabaa\_Y]b]¥baa` `a` a^^aa\_aaa^\_  
@HWI-EAS443:3:5:1477:1622#0/1  
ATCTTCGTCAAGGGTGTAGTCCGCTTTGGTGGCCATCTCC  
+HWI-EAS443:3:5:1477:1622#0/1  
HV]Z¥^bbaTbbbbaa\_b\_dWH]R] `baQK` ZHI]^aBBB  
@HWI-EAS443:3:5:1748:889#0/1  
CGGGGGGCTATATGAAGCAATCGAGGAGTGCCTGATTAAT  
+HWI-EAS443:3:5:1748:889#0/1  
aaab` `` [aZabbbaababbaab` b]ab¥b\_Xbb` abaaa  
@HWI-EAS443:3:60:1170:664#0/1  
TCCCCGTTCGTTCGATGAAATGGAAATCCGAATACATGAAA  
+HWI-EAS443:3:60:1170:664#0/1  
aab` abaa` \_^ [aa` aa` \_` ^\_a` \_` a` ]Y` \_` ]T¥` ``  
@HWI-EAS443:3:60:1335:1739#0/1  
AGACCCGAATGCACTATTGAAGCACCGATTTGAGATAATT  
+HWI-EAS443:3:60:1335:1739#0/1  
[]` QX\_UUa[¥HZ¥b` `\_OPY\_YI[Xb[aa¥¥V]\_` ¥^a[  
@HWI-EAS443:3:60:412:150#0/1  
AACCGGTTCAATTGAAATTGGAGTAACACGGAGGGAAGTCA  
+HWI-EAS443:3:60:412:150#0/1  
aa` abb[]YY\_aaaa` a\_\_a\_a` \_` ¥` `a` ^a^\_YX\_WWM  
@HWI-EAS443:3:60:972:210#0/1  
AAAATGGCCAGTAGGAGTCTATGGGATTCCTTTTCGTTCAGT  
+HWI-EAS443:3:60:972:210#0/1  
`Z\_ba` \_[[]aVV\_\_V\_R]^]\_]ZNZ¥V]T\_YOVQOQXT  
@HWI-EAS443:3:61:1190:252#0/1  
GAGAAAGGCATAAATCCCAATTACCTCATGGCTTGGGAAGA  
+HWI-EAS443:3:61:1190:252#0/1  
a]^PZ` \_^[^¥Z]^ [XU¥a^\_SLY\_] ^ZZ[ZVB BBBBBBBB  
@HWI-EAS443:3:61:295:909#0/1  
TCGGGGTGAATCAATAATTGTAGAATCTGGTGACCCGAAT  
+HWI-EAS443:3:61:295:909#0/1  
ZabbaaWbba` ¥U\_aSX\_^aTV^PV¥^aa[NSOU` YV^[\_  
@HWI-EAS443:3:62:703:1226#0/1  
AGGGGGGCTATATGAAGCAATCGAGGAGTGCCTGATTAAT  
+HWI-EAS443:3:62:703:1226#0/1  
a` Z` ]Z¥¥[\_ba[aYVaWS\_a^Y]^XPZV]¥T^a\_\_^` a[  
@HWI-EAS443:3:63:1793:1144#0/1  
NGGGCATGGAATGAGGCGCTGCCTTCTTCAGTCTCTTCA  
+HWI-EAS443:3:63:1793:1144#0/1  
BBBBBBBBBBBBBBBBBBBBBBBBBBBBBBBBBBBBBBBB  
@HWI-EAS443:3:64:1411:999#0/1  
GCAGGGGTAGAGAAGCCTAAATTTCTTCTGATTTGTATG

+HWI-EAS443:3:64:1411:999#0/1  
^Zab`b^¥[aTVSa`aa¥a\_aabZPR[WJ]W\_S[aa\_\_ab  
@HWI-EAS443:3:64:580:1218#0/1  
CGGGATTTATGCCTTTCTCATGTGGTTTGGACTATGTTAGG  
+HWI-EAS443:3:64:580:1218#0/1  
a`]^)^`aa¥¥\_`aa`aa\_a^^`W]\_`^`\_aa[]V^YU¥  
@HWI-EAS443:3:65:1011:39#0/1  
ACGGTCTCTTCCTTCAATTATCTCAAATCGGTGCTTCAAT  
+HWI-EAS443:3:65:1011:39#0/1  
a``]0]Z^`^YZ^ZZWZ`]YYZVQZ`X`\_]Q]VN\_ZNUU  
@HWI-EAS443:3:65:236:352#0/1  
CAGGCATGTGAATTGACTGATTCAAGCTGGATAGAACTTG  
+HWI-EAS443:3:65:236:352#0/1  
[bbbbbbbabbbXabba\_abb`]a`aa`b`Yb]S^`\_a`  
@HWI-EAS443:3:66:464:308#0/1  
CACCCCTGTTGTGTTACATATACTGTTCACTGTTCCAG  
+HWI-EAS443:3:66:464:308#0/1  
``abbaaa]ab`a¥`aaaa```]`aa[[aaaa`a``V\_\_^Z  
@HWI-EAS443:3:67:600:1686#0/1  
AGACACTTGGCCTATCGCAGTCCTCAAGAGCATGTCTCCT  
+HWI-EAS443:3:67:600:1686#0/1  
\_NY[[^IWPM[^`^aX\_\_^YROW[XZSZNZ\_ZW]R¥YZU^Z  
@HWI-EAS443:3:67:689:1554#0/1  
GAGGGAGTGACATAAATACGGCCTTGCTCAATGCATCCT  
+HWI-EAS443:3:67:689:1554#0/1  
]\_S^aa[\_b`ba`ba`Pa`¥¥aV\_W[Z]\_RWR\_[YX\_N  
@HWI-EAS443:3:68:1231:1487#0/1  
CGTGGGCACTCGGTGAAAATATGGCACCAGAAAAAGTAGA  
+HWI-EAS443:3:68:1231:1487#0/1  
[b`b`bbbb^\_]bHba`bbabbb\_a^aa`baaabG`\_a  
@HWI-EAS443:3:68:1480:810#0/1  
ACCTCCTCATGCTTGGCATATGTTCAATCGGGCAACATC  
+HWI-EAS443:3:68:1480:810#0/1  
aabbbbababb]bbb\_baba\_bab\_baaabaaU[a^ab`  
@HWI-EAS443:3:68:1544:194#0/1  
GGGTGCCATATTTTACCGAGTGCCCACTTCAATTGGCTT  
+HWI-EAS443:3:68:1544:194#0/1  
`\_`0^T^X`baaZVaa^V^¥bbZ\_]¥]YSS]`^^`X\_F  
@HWI-EAS443:3:68:169:1210#0/1  
TCCTGTGCAGCCATGGATGACTTTTCACTGATCCCAATGG  
+HWI-EAS443:3:68:169:1210#0/1  
abbb[\_`bbb]bbaaaaaaaaabaaaa`a`aa]U\_^^a  
@HWI-EAS443:3:68:246:279#0/1  
CGCAGGGCAAGAATCAAACTAGGCTTTTCACTATAAGAC  
+HWI-EAS443:3:68:246:279#0/1  
a`abbbbaaababbababbabbaa`aa`a¥a`a`aa]aS  
@HWI-EAS443:3:68:92:443#0/1  
TCAGGTGCTAGCAGAGCTACAGGACATTGAAAATGAAGAG  
+HWI-EAS443:3:68:92:443#0/1  
a`a`a\_\_a`aaa\_`a`^aa^a`\_]\_^\_XZ^^]\_^\_]`]

@HWI-EAS443:3:69:512:575#0/1  
AGGGTCACCAGATTCTACAATTATTGATTCACCCCGTTTCG  
+HWI-EAS443:3:69:512:575#0/1  
a]G]R[[Y` [ZU^][[X[N\_]`YaZYLTP[\_\_\_R\_\_WY¥\_  
@HWI-EAS443:3:70:1441:1518#0/1  
AGGGGCTATATGAAGCAATCGAGGAGTGCCTGATTAATGA  
+HWI-EAS443:3:70:1441:1518#0/1  
aa\_`\_aab`^`aaa`aba\_a\_`^\_0\_0^`^\_`Z]X\_\_  
@HWI-EAS443:3:70:1690:230#0/1  
CGGGGTTTTCGGCTGAATCGAGAAAATTGCTTCTCATTGT  
+HWI-EAS443:3:70:1690:230#0/1  
ab\_aaQa^a¥XRM`a`XV[a]\_\_`a]]¥Y\_bb``T^``^  
@HWI-EAS443:3:70:527:384#0/1  
GGCGTCTCCACAACCTTGAGGGGTTTTCGGCTGAATCGAGA  
+HWI-EAS443:3:70:527:384#0/1  
abaa\_a`aa`a\_\_¥a`a\_a`\_a^`a\_T`ZZ^Y`\_U¥\_W[X  
@HWI-EAS443:3:70:718:155#0/1  
CTTCCCTCCGTGTTACTCCAATTTCAATGAACCGGTTCTT  
+HWI-EAS443:3:70:718:155#0/1  
]`bbbbbaZ\_babbbabbbbbbaaa`S\_bW`bb\_a`ba  
@HWI-EAS443:3:71:1356:286#0/1  
GGCATGGAAATGAGGCGCTGCCTTCTCAGTCTCTTCAGA  
+HWI-EAS443:3:71:1356:286#0/1  
aabR^ab`[a`a`^R]a`a]UXa]\_a]Q]\_^X\_W`\_\_V]G  
@HWI-EAS443:3:72:1554:956#0/1  
GACGGGGTGAATCAATAATTGTAGAATCTGGTGACCCGAA  
+HWI-EAS443:3:72:1554:956#0/1  
aaaaaaZ¥abaa`a`a`\_`aab\_aa\_aa\_aaaVa\_\_¥^a\_^  
@HWI-EAS443:3:72:1558:2021#0/1  
CGGGGCTATATGAAGCAATCGAGGAGTGCCTGATTAATGA  
+HWI-EAS443:3:72:1558:2021#0/1  
`a^^`^b]b`b^^^Ja\_\_aaa\_ba\_]\_a\_aabaaaa\_\_]Z  
@HWI-EAS443:3:72:515:908#0/1  
GGGCTCTATTGGGAAAGTGTGCAGGACCTTACTGGCAAAA  
+HWI-EAS443:3:72:515:908#0/1  
`R`a`^NO^ZVWTJX``PRYZ[Z[]^YTRNWZP¥UQ[\_VR  
@HWI-EAS443:3:72:692:366#0/1  
TGGGGCGTGGTGTCTCCTCAAGAATGGTTCAATTTTGGC  
+HWI-EAS443:3:72:692:366#0/1  
a\_QWa]\_RTa]^SaY¥aa`a¥Y\_\_R[a¥XX[V]``a¥VVZ  
@HWI-EAS443:3:72:813:680#0/1  
TGTCTCTCAGCAGATTGAGAGCATGATTGAGGCCGAGTC  
+HWI-EAS443:3:72:813:680#0/1  
`\_Z]a`bb^` `[``T`¥ZXZ[`]a]^a[]YOZ[``\_\_\_S¥  
@HWI-EAS443:3:73:1031:798#0/1  
GGGGGGGCTATATGAAGCAATCGAGGAGTGCCTGATTAAT  
+HWI-EAS443:3:73:1031:798#0/1  
abaa`a\_aabb`aa]\_a\_aa`\_a\_aa`a^`^]`aaa``\_\_  
@HWI-EAS443:3:73:1079:202#0/1  
GGCGTCTCCACAACCTTGAGGGGTTTTCGGCTGAATCGAGA

+HWI-EAS443:3:73:1079:202#0/1  
WaSa^\_ZXSba]aYabaP\_X¥`^]aSJZ\_^Va\_]XL\_L\_V  
@HWI-EAS443:3:73:344:684#0/1  
AGGGCACTCGGTGAAAATATGGCACCAGAAAAAGTAGACT  
+HWI-EAS443:3:73:344:684#0/1  
a`^`^abaaaa^][Z^\_Y]a]¥¥^^^a\_\_¥]P[PY^^¥¥  
@HWI-EAS443:3:74:379:545#0/1  
GCCTTGGTCATGTCTTTCTCTTTGACAGAAGACTCGGCCT  
+HWI-EAS443:3:74:379:545#0/1  
a`a`ba`aa[aaa^YZ\_aaaX`[a`\_`\_]\_\_\_\_`a]Y[  
@HWI-EAS443:3:74:579:1033#0/1  
GCCTCCTCATGCTTGCATATGTTCAATCGGGGCAACATC  
+HWI-EAS443:3:74:579:1033#0/1  
aZb¥bbb`Z^\_aabaaa\_bbaaVYa^^`\_`a\_aab]^a  
@HWI-EAS443:3:74:792:415#0/1  
CTCTTTCATGTTCTTTGTCCTTGGGATCTTCTTTCATT  
+HWI-EAS443:3:74:792:415#0/1  
`aabbbbabbb¥\_bbabaababb\_W^N`Yba\_aabaa\_bb  
@HWI-EAS443:3:75:1176:1122#0/1  
TGGGCGTGGTGTCTCCTCAAGAATGGTTCAATTTTGGCG  
+HWI-EAS443:3:75:1176:1122#0/1  
a`Z\_^aab`P\_a¥a\_^[QT`[K`Y]`aWQOHXVU\_^TLT  
@HWI-EAS443:3:75:754:1906#0/1  
CGGCCAGTAGGAGTCTATGGGATTCCTTTTCGTCAGTCCGA  
+HWI-EAS443:3:75:754:1906#0/1  
a[¥baaa^`¥aa^Z¥aa`\_Z`\_a^T¥aa\_YU\_aYS^`[\_  
@HWI-EAS443:3:76:167:962#0/1  
CGCCCTGCTCTTTCGTCAGGGTGTAGTCCGCTTTGGTG  
+HWI-EAS443:3:76:167:962#0/1  
\_aa^^aa`aaaaa\_aa`a`\_`PaX`X[`a`^a^`^T`  
@HWI-EAS443:3:76:1793:1451#0/1  
NGTCGATGAAATGGAAATCCGAATACATGAAACAACTTC  
+HWI-EAS443:3:76:1793:1451#0/1  
DMXWSUWPUXZXVYWYUXWXZZZZZZUXYZXXZXZZT  
@HWI-EAS443:3:77:1287:73#0/1  
TTGCGTCTCCACAAC TTGAGGGGTTTTCGGCTGAATCGAG  
+HWI-EAS443:3:77:1287:73#0/1  
]\_aSaa[^Z0^Y^Y]ab]bb`\_T^X[Xa`S\_^¥¥FQ]N\_  
@HWI-EAS443:3:77:1314:1067#0/1  
CGGGGGCTATATGAAGCAATCGAGGAGTGCCTGATTAAT  
+HWI-EAS443:3:77:1314:1067#0/1  
^\_I\_a^`\_b^b[^\_]abaaabab`[¥YaQ^a\_aaa¥S\_a`  
@HWI-EAS443:3:77:272:750#0/1  
CGGGGCATGGAAATGAGGCGCTGCCTTCTTCTCAGTCTCTTC  
+HWI-EAS443:3:77:272:750#0/1  
abb\_P^\_¥b][T^X¥aaaaXX`]YTX`X[VY]]XT]^\_Y  
@HWI-EAS443:3:77:859:1270#0/1  
AGAAGTTCGGTGGGAGACTTTGGTCCGCAAGCTTGCGCAG  
+HWI-EAS443:3:77:859:1270#0/1  
a`W^XZ`Z¥b¥`a`U`\_ba`\_^aXabbb\_N\_^]a`\_aa



@HWI-EAS443:3:77:907:249#0/1  
CTGCGATATGTTCAATCGGGGCAACATCTTCTCCTATTTC  
+HWI-EAS443:3:77:907:249#0/1  
abbabbbbabababbbabbabbabbabb`babbba  
@HWI-EAS443:3:79:147:834#0/1  
AGCCCACTTCAATTGGCTTGTCTTTCATGTTCTTTGTC  
+HWI-EAS443:3:79:147:834#0/1  
a\_`a`\_`aZ\_]^[^\_RU]YRWX¥]]X]RXMMW`]]YX  
@HWI-EAS443:3:79:193:1530#0/1  
TGCCACCAAAGCGGACTACACCCTTGACGAAGAGAGCAGG  
+HWI-EAS443:3:79:193:1530#0/1  
ab`b`ZW\_a\_b]ZY\_babbbababUU`baP\_\_aa]aab^O  
@HWI-EAS443:3:79:360:54#0/1  
AGCCCCATTTTCATCTTGATCTTGGAGGTTCCATTGGTTCT  
+HWI-EAS443:3:79:360:54#0/1  
abaab`¥ab^^aaba`aaZaaaa\_baT``XXTV¥WFYWT  
@HWI-EAS443:3:7:1057:879#0/1  
ACCCGATTGAACATATCGCAAGCATGAGGAGGAACTATTT  
+HWI-EAS443:3:7:1057:879#0/1  
^Yb`[]`¥Ha]b]QUR¥SZ\_\_OVTQTZa\_`^[WG^Z^SP  
@HWI-EAS443:3:7:120:1451#0/1  
CGGGGCATGGAAATGAGGCGCTGCCTTCTCAGTCTCTTC  
+HWI-EAS443:3:7:120:1451#0/1  
XZOIaZaaa\_Xaaa`W]^aaaa\_a`¥`\_\_XZ]]^`]a  
@HWI-EAS443:3:7:1517:631#0/1  
CGGGGCTATATGAAGCAATCGAGGAGTGCCTGATTAATGA  
+HWI-EAS443:3:7:1517:631#0/1  
]a\_^R\_[a[^abbb^[a]P\_^]`Z^a^UM^``aaaU`ba  
@HWI-EAS443:3:80:1377:609#0/1  
GGCAGGGCAAGAATCAAACTAGGCTTTTCACTATAAGAC  
+HWI-EAS443:3:80:1377:609#0/1  
a`aaa`[\_```]Z\_aaa]\_]\_[[\_`a¥aT\_\_`^`[Z  
@HWI-EAS443:3:80:1710:863#0/1  
AGGGGCTATATGAAGCAATCGAGGAGTGCCTGATTAATGA  
+HWI-EAS443:3:80:1710:863#0/1  
abaa``ababaW``Yaaa\_ZZRVY¥aS\_\_R`VY¥a`a\_S`  
@HWI-EAS443:3:80:595:18#0/1  
CGGGGCTATATGAAGCAATCGAGGAGTGCCTGATTAATGA  
+HWI-EAS443:3:80:595:18#0/1  
\_`a\_\_baa\_aa``aba`]a]a`¥`[a¥]]a\_¥Z^¥\_\_\_  
@HWI-EAS443:3:81:1039:526#0/1  
GGAGGGGTTTTCGGCTGAATCGAGAAAATTGCTTCTCATT  
+HWI-EAS443:3:81:1039:526#0/1  
`a\_aaa`Y`\_^`aZaaa\_]a[^^^`\_`a\_````\_]`^  
@HWI-EAS443:3:82:1731:1148#0/1  
GCCGAATGCACTATTGAAGCACCGATTTGAGATAATTGAA  
+HWI-EAS443:3:82:1731:1148#0/1  
Q\_Za\_abb[abbbabba`a`a`X`bbbbbbbabbbXb\_  
@HWI-EAS443:3:82:1747:1078#0/1  
GATTAATCAGGCACTCCTCGATTGCTTCATATAGCCCCC

+HWI-EAS443:3:82:1747:1078#0/1  
[aa¥\_]a\_^SbabbVb¥\_abZR]ab^^^\_`b`a`XXa\_  
@HWI-EAS443:3:82:691:217#0/1  
TAGAACACAGTATTTTTCCCATTTGTGTGGCTCCAGTCTC  
+HWI-EAS443:3:82:691:217#0/1  
ab`abaabbb]abaaa\_`^¥Y\_`a]`¥a]V[]\_X[VWTZ  
@HWI-EAS443:3:83:1183:1982#0/1  
CGGGGCTATATGAAGCAATCGAGGAGTGCCTGATTAATGA  
+HWI-EAS443:3:83:1183:1982#0/1  
aba[\_bbbaabba`aabbaLaaaaGaXaa\_aaa\_a]a\_a]  
@HWI-EAS443:3:83:309:1592#0/1  
AGCGCAAGCTTGCCGACCAAAGTCTCCACCGAACTTCTC  
+HWI-EAS443:3:83:309:1592#0/1  
]]\_WW¥]K\_\_\_\_N¥]aa`]Z¥]YF¥Y\_XZ¥]R\_XX[R[U[V  
@HWI-EAS443:3:83:997:63#0/1  
CGGCATGTGAATTGACTGATTCAAGCTGGATAGAACTTGA  
+HWI-EAS443:3:83:997:63#0/1  
abbaabbaba`aab`]b¥Y`aa` `b`ab^S^\_\_N\_G\_aa\_  
@HWI-EAS443:3:85:1010:490#0/1  
CGGGCACTCGGTGAAAATATGGCACCAGAAAAAGTAGACT  
+HWI-EAS443:3:85:1010:490#0/1  
a]bb`bUbbb`Ha]U\_\_`abbaaa[\_baS\_[]aa^aaaU\_  
@HWI-EAS443:3:85:449:735#0/1  
CGGGGGGCTATATGAAGCAATCGAGGAGTGCCTGATTAAT  
+HWI-EAS443:3:85:449:735#0/1  
aaba\_TWab\_a]a\_[^`\_\_\_\_\_aaa`ZQ\_W\_`^^a¥`aa¥¥  
@HWI-EAS443:3:86:1221:1259#0/1  
AGGCACCAGAAAAAGTAGACTTTGATGACTGCAAAGATGT  
+HWI-EAS443:3:86:1221:1259#0/1  
\_`aaa^a^` `b^¥bYbba^aaababaa^`b^aaaa` `a\_  
@HWI-EAS443:3:87:1003:1015#0/1  
CGGGGGGCTATATGAAGCAATCGAGGAGTGCCTGATTAAT  
+HWI-EAS443:3:87:1003:1015#0/1  
`\_[\_¥\_\_\_\_bbbb`b`bbba` `aa^bab`Ua]P\_b`Y\_\_`b  
@HWI-EAS443:3:87:1483:178#0/1  
CGGGGTTTTCGGCTGAATCGAGAAAATTGCTTCTCATTGT  
+HWI-EAS443:3:87:1483:178#0/1  
[\_bbaa]¥` [a^\_UUW¥W]HYaYaa`RHVIOKS]J[a\_QP  
@HWI-EAS443:3:87:545:444#0/1  
GACCGTTCTCTTTGTAATCATACAAATCAGGAAGAAATT  
+HWI-EAS443:3:87:545:444#0/1  
a` `W\_RYXPZS^aaa\_\_\_aWL\_[TH^]\_¥a`a[SaPP\_\_Z  
@HWI-EAS443:3:87:816:443#0/1  
GGAGGGGTTTTCGGCTGAATCGAGAAAATTGCTTCTCATT  
+HWI-EAS443:3:87:816:443#0/1  
J\_^ab`a¥¥`\_baUKbbb`Uaaabb`¥`aTGS`\_baaW¥a  
@HWI-EAS443:3:87:916:689#0/1  
CGCCCCATTTTCATCTTGATCTTGGAGGTTCCATTGGTTCT  
+HWI-EAS443:3:87:916:689#0/1  
aa`baaabbaa\_b\_babaaabbab\_\_`Xa^ZVR]^aRZL]

@HWI-EAS443:3:88:20:299#0/1  
CGCGCATAGTTCCTGTAATCTCAAATTTTTCTTCAATTGT  
+HWI-EAS443:3:88:20:299#0/1  
aaaba¥`aa\_`a``¥^[\_a`a[ZG]\_``^aa``\_S^\_\_\_\_  
@HWI-EAS443:3:88:882:1302#0/1  
CGGGGCATGGAAATGAGGCGCTGCCTTCTTCAGTCTCTTC  
+HWI-EAS443:3:88:882:1302#0/1  
ab`baaabbbbaaa`aaaaaabaa``a\_aa¥aa^`aa`]a  
@HWI-EAS443:3:89:1392:1033#0/1  
ATACTGTTCCACTGTCCAGGCCATGATTCCGGTCTCTTG  
+HWI-EAS443:3:89:1392:1033#0/1  
^V\_b\_^\_]Ta^aVS\_bababa\_^Q\_\_V\_a^N¥VFJYM  
@HWI-EAS443:3:89:1444:453#0/1  
ACTTGGTCATGTCTTTCTTTGACAGAAGACTCGGCCTC  
+HWI-EAS443:3:89:1444:453#0/1  
aab¥\_\_\_\_\_ab\_abba`b¥ba\_aaab^aaba\_a]a]RW][  
@HWI-EAS443:3:8:290:382#0/1  
ATTGCAGCAAACCTGTTAGTTTCGATTTTCGGATCTTCCG  
+HWI-EAS443:3:8:290:382#0/1  
Z]]^a\_JW¥0[Ya]^aZ\_a\_a¥V¥PSZa\_YPXUY][VBB  
@HWI-EAS443:3:8:763:1211#0/1  
AGTCTCCACAACCTGAGGGGTTTTCGGCTGAATCGAGAAA  
+HWI-EAS443:3:8:763:1211#0/1  
ab``a`a\_`aa]`abab`a`]a`a`````a\_``VZ[^[^`  
@HWI-EAS443:3:8:913:1605#0/1  
CTCTCTTCATGTTCTTTGTCCTTGGGATCTTCTTTCATT  
+HWI-EAS443:3:8:913:1605#0/1  
ZZba`bbaab¥¥a\_bb\_bUYab`a]a^a\_b^I\_`Xaba\_\_  
@HWI-EAS443:3:90:1277:1616#0/1  
CGAGGGGTTTTCGGCTGAATCGAGAAAATTGCTTCTCATT  
+HWI-EAS443:3:90:1277:1616#0/1  
ab``aYaababb`^[¥ba`bb\_`[Za`aa^R\_`a``aba  
@HWI-EAS443:3:90:392:588#0/1  
GCCCCAATGCACTATTGAAGCACCGATTTGAGATAATTGA  
+HWI-EAS443:3:90:392:588#0/1  
aaaYa]a[\_ZS]`Xaa^]]aaa`\_a]\_`a`\_`¥Z^\_\_\_\_  
@HWI-EAS443:3:90:753:1357#0/1  
GGGGGGGCTATATGAAGCAATCGAGGAGTGCCTGATTAAT  
+HWI-EAS443:3:90:753:1357#0/1  
YFRZ\_a]VUa`\_S\_[]^ZXaX`\_[a^¥\_G`P[\_XPK¥U^Z  
@HWI-EAS443:3:91:1197:825#0/1  
CACCCGAATGCACTATTGAAGCACCGATTTGAGATAATTG  
+HWI-EAS443:3:91:1197:825#0/1  
abbabbbbbbbaaababbbabbbbaaaa`abbab\_aaab`a  
@HWI-EAS443:3:91:1519:1262#0/1  
CGGGGTGAATCAATAATTGTAGAATCTGGTGACCCGAATN  
+HWI-EAS443:3:91:1519:1262#0/1  
aaa^aHa¥K`\_a^b`aaa]W[a¥Ta^^a\_]a\_[ZS\_`XZD  
@HWI-EAS443:3:91:831:1411#0/1  
TGCCCCCAAGATCGAAGGTTCCAGGTTCCAGGTTGCC

+HWI-EAS443:3:91:831:1411#0/1  
`Z¥aa`a`¥`\_a\_a]aaa`U\_[\_\_XNSZZZ\_¥¥XV\_0JMV  
@HWI-EAS443:3:92:210:1161#0/1  
AGCCAGTAAGGTCCTGCACACTTTCCCAATAGAGCCTTCC  
+HWI-EAS443:3:92:210:1161#0/1  
^`\_b]¥]aaaa`a\_a¥]a`aZa`^aaXa]X``¥P¥¥`P^¥  
@HWI-EAS443:3:92:515:1510#0/1  
CACATTCTTTGGCTGGAAAGAGCCTAACATAGTCAAACCA  
+HWI-EAS443:3:92:515:1510#0/1  
GP[^VabbUZaX\_W`b` `a¥a`HQYbKbbYbbbaab¥G\_b  
@HWI-EAS443:3:92:569:361#0/1  
CGGGGGCTATATGAAGCAATCGAGGAGTGCCTGATTAATG  
+HWI-EAS443:3:92:569:361#0/1  
abbbb`abbbb`b\_b^\_aaabaaaa`b\_]abaaa` `a`  
@HWI-EAS443:3:92:872:154#0/1  
CGGGTCCAAAATGAATTCAATAAGGCATGTGAATTGACTG  
+HWI-EAS443:3:92:872:154#0/1  
\_`a^^a`\_abbbbabbabbabb^aabb` `ababa\_aa  
@HWI-EAS443:3:93:1196:894#0/1  
GGCGTCTCCACAACCTTGAGGGGTTTTCGGCTGAATCGAGA  
+HWI-EAS443:3:93:1196:894#0/1  
aab`a`a`a`aaa`abb`b\_` `[`aa\_aa`\_aaa`RZ¥Za  
@HWI-EAS443:3:93:1345:415#0/1  
AGGCGTTCACCTTCTTTTGACATTTGGGAAAGCTTGCCCTC  
+HWI-EAS443:3:93:1345:415#0/1  
`[ `V[V[SZZa\_T]`aaY¥]\_` `^U^]]^Y^[[¥TZXWWU  
@HWI-EAS443:3:93:925:805#0/1  
CACCCGAGACTGGAGCCACACAAATGGGAAAAATACTGTG  
+HWI-EAS443:3:93:925:805#0/1  
\_Z`Z`^^¥abbbba\_a`a^]a^` `aa^a\_` `aaaZaaZa  
@HWI-EAS443:3:94:1280:797#0/1  
GAGGCTTCTCTACCCCTGTTGTGTACATATACTGTTTAC  
+HWI-EAS443:3:94:1280:797#0/1  
`\_bba`\_`\_]`bVaaa[a\_a[¥ZZ`ZV\_aaa^¥ab¥\_`¥G  
@HWI-EAS443:3:94:1606:1393#0/1  
ACTCGGTGAAAATATGGCACCAGAAAAGTAGACTTTGAN  
+HWI-EAS443:3:94:1606:1393#0/1  
`aa\_b`G¥`Q]a[\_aaa\_`W^\_a[U\_`^`aU\_¥`XXa^aPD  
@HWI-EAS443:3:94:501:399#0/1  
CGGGGGCTATATGAAGCAATCGAGGAGTGCCTGATTAAT  
+HWI-EAS443:3:94:501:399#0/1  
abbababaaabbbbaa`aaaa`baaa`a\_b\_\_bb`aaa`a  
@HWI-EAS443:3:94:803:504#0/1  
AGCGTCTCCACAACCTTGAGGGGTTTTCGGCTGAATCGAGA  
+HWI-EAS443:3:94:803:504#0/1  
aaabaa`a¥`\_`XWNZ`a]aaa]Za`a[^`\_`aa`\_N\_\_\_\_]  
@HWI-EAS443:3:95:1634:617#0/1  
GACGAAAGGAATCCCATAGACTCCTACTGGCCATTTCTTT  
+HWI-EAS443:3:95:1634:617#0/1  
`b`baX\_aXb\_a`^b\_a\_aYa`aaa` `^bbaaa\_bbR^\_N

@HWI-EAS443:3:95:674:397#0/1  
TACAAGTTTGTGCAATATGCACACATTTGGAAGTTTGT  
+HWI-EAS443:3:95:674:397#0/1  
]`abbb^bbabbba`]a`aabbb`abbbbbaVb[aabaa  
@HWI-EAS443:3:96:1300:829#0/1  
ACGGCCTCAATCATGCTCTCAATCTGCTGAAGAGACTGAA  
+HWI-EAS443:3:96:1300:829#0/1  
¥]b\_\_WYQ[\_WXYZ\_^aa`aaa]T`abaa]\_`]a]\_X\_P`  
@HWI-EAS443:3:96:315:418#0/1  
CGGCCATGTTTCCGATTTGTTTTCAAAGAATTCCTTGGTC  
+HWI-EAS443:3:96:315:418#0/1  
abbbbaabb\_aaaaaabab^aa`aa\_aa`aaa`\_a`aaY]  
@HWI-EAS443:3:97:1008:1771#0/1  
TGCTAGCAGAGCTACAGGACATTGAAAATGAAGAGAAGAA  
+HWI-EAS443:3:97:1008:1771#0/1  
abaa`[T\_WaQ\_aa`\_b[a^P`]a^a]^^`S^a¥]`U^aY  
@HWI-EAS443:3:97:1500:723#0/1  
GCCATATTTTCCCGAGTGGCCACTTCAATTGGCTTGTTA  
+HWI-EAS443:3:97:1500:723#0/1  
a`V¥¥a`a¥DM\_HZZVbU¥NN¥`PRaYaWYSb]¥BBBBBB  
@HWI-EAS443:3:97:926:984#0/1  
ACCTCCTCATGCTTGGCATATGTTCAATCGGGGCAACATC  
+HWI-EAS443:3:97:926:984#0/1  
aa`babbababababaabbb`aaa`a\_a`\_aaaa\_aa]  
@HWI-EAS443:3:98:1117:700#0/1  
ATCCCTTCATTATGTATTAGTAGCCCTGCAGTGGGACAC  
+HWI-EAS443:3:98:1117:700#0/1  
aba]`abaaaaabb\_aaaaa\_aa^¥`\_a`\_a¥aa`^[\_  
@HWI-EAS443:3:9:1206:872#0/1  
CGGCATGTGAATTGACTGATTCAAGCTGGATAGAACTTGA  
+HWI-EAS443:3:9:1206:872#0/1  
aba^`bWaaV\_\_a`\_`aX\_a\_\_Q\_]a\_\_^]TZ^]\_\_a]  
@HWI-EAS443:3:9:334:769#0/1  
ACCCGTTCTCGATGAAATGAAATCCGAATACATGAAAC  
+HWI-EAS443:3:9:334:769#0/1  
aa`\_a¥S\_\_WW]\_\_\_XXT\_¥a\_a\_[P^TT]WRR^¥YY^\_W  
@HWI-EAS443:3:100:1034:542#0/1  
CTCCAGCCTTAAAACTTTAGAGCCTATGTAGATGGATTC  
+HWI-EAS443:3:100:1034:542#0/1  
[bb\_``\_Xabbbbba\_aabbbab\_\_baba]]V\_[a]\_ba^  
@HWI-EAS443:3:100:1097:798#0/1  
AGCTGGGTCCAAAATGAATTCAATAAGGCATGTGAATTGA  
+HWI-EAS443:3:100:1097:798#0/1  
\_`^^\_¥¥K\_Xbaaabababaaa\_ab\_aaYa`^\_a\_a`XXa  
@HWI-EAS443:3:100:109:365#0/1  
ACCGGTTCTCTTTGTAATCATACAAATCAGGAAGAAATTT  
+HWI-EAS443:3:100:109:365#0/1  
aaa\_a]`\_\_Z`a]`VZ[\_a^\_a`\_\_^\_\_\_^a^[^\_[B  
@HWI-EAS443:3:100:1483:419#0/1  
CCCCGATTGAACATATCGCAAGCATGAGGAGGAACTATTT

+HWI-EAS443:3:100:1483:419#0/1  
abbabab\_`a^abba\_baaaa^`ba\_b\_ab`aaa\_aa\_a  
@HWI-EAS443:3:100:1564:1375#0/1  
CTCATGGCTTGGAAGCAGGTGCTAGCAGAGCTACAGGACA  
+HWI-EAS443:3:100:1564:1375#0/1  
ab`b`a`b`K`U`\_][aaa\_GQa]^Y`a\_RS`\_Qa\_aYQ`  
@HWI-EAS443:3:100:1635:1390#0/1  
GGGGGCTATATGAAGCAATCGAGGAGTGCCTGATTAATGA  
+HWI-EAS443:3:100:1635:1390#0/1  
aa\_`aaaaaba\_aaa^aa[¥VV[UXTYTH¥^U¥XWS\_BB  
@HWI-EAS443:3:100:1654:856#0/1  
CGGGTCACCAGATTCTACAATTATTGATTCACCCCGTTCG  
+HWI-EAS443:3:100:1654:856#0/1  
ababaab`aababb\_ba\_aabaabbaabb^a`[\_[aYa`a  
@HWI-EAS443:3:100:284:685#0/1  
GGGATCTTCTTTCATTTTCAATGTCCTGTAGCTCTGCTA  
+HWI-EAS443:3:100:284:685#0/1  
aa¥]Y]a\_`a`\_\_`^^^aa^aVa`^Y`^a]a\_U\_¥[\_V\_\_  
@HWI-EAS443:3:100:284:927#0/1  
AGGCAATCTGAGGGGGCGTGGTGTCTCCTCAAGAATGGT  
+HWI-EAS443:3:100:284:927#0/1  
aaa`baa\_aaaXaa]`aaa\_`W^Z\_a\_VQ^\_`^^`^[\_`¥  
@HWI-EAS443:3:100:306:1541#0/1  
AATGAAGGGAGTGACATAAATACGGCCTTGCTCAATGCA  
+HWI-EAS443:3:100:306:1541#0/1  
]b`bbbaa^aba¥P`abaab^^`abaZaa^¥\_aa\_^YYUB  
@HWI-EAS443:3:100:314:1130#0/1  
AAATGGCCAGTAGGAGTCTATGGGATTCCTTTCGTCAGTC  
+HWI-EAS443:3:100:314:1130#0/1  
ab`aaaaaaa^ab`ab]aa`aa^a\_`aa\_`a`\_aX\_V^U\_  
@HWI-EAS443:3:100:333:1902#0/1  
CACCGATTTGAGATAATTGAAGGAAGAGACCGAATCATGG  
+HWI-EAS443:3:100:333:1902#0/1  
[aVa][I^aGbWb`aa]\_U`a^b\_a^\_`[OON`aa[BBBB  
@HWI-EAS443:3:100:365:625#0/1  
GGTTTGACTATGTTAGGCTCTTCCAGCCAAAGAATGTCT  
+HWI-EAS443:3:100:365:625#0/1  
\_a`a\_ba¥abbbW^`aa\_`\_a`b`\_a`Sa[\_Z^a¥aRBB  
@HWI-EAS443:3:100:404:1287#0/1  
CGATTGGCCATGTTTCCGATTTGTTTTCAAAGAATTCCTT  
+HWI-EAS443:3:100:404:1287#0/1  
abXZVYR`aWXU[\_GW]PX`W[X]`X`Y`a]Y]ZZPTPB  
@HWI-EAS443:3:100:537:1206#0/1  
AGATGTTGCCCGATTGAACATATCGCAAGCATGAGGAGG  
+HWI-EAS443:3:100:537:1206#0/1  
abaa`aa`]`^\_aaab^`b]a\_`]\_a^\_a]X``\_\_aZ\_B  
@HWI-EAS443:3:100:562:1600#0/1  
CATTAATCAGGCACTCCTCGATTGCTTCATATAGCCCCC  
+HWI-EAS443:3:100:562:1600#0/1  
aa^\_\_ba\_\_^\_Xabbab`bbb[U`abba\_ab^b^a`a`^B

@HWI-EAS443:3:100:586:1375#0/1  
CTGAATACATAATGAAGGGAGTGTACATAAATACGGCCTT  
+HWI-EAS443:3:100:586:1375#0/1  
`ab`abb`bbbbbb`bbb]`a`abb`babbabab`aYaa  
@HWI-EAS443:3:100:610:782#0/1  
CAGCTTGCTAGAGATCTGGGCTCTGGCTCATCACTGTCAT  
+HWI-EAS443:3:100:610:782#0/1  
aab`bbbabbbbbb`bbbb`bbbbbababa`babba`ab  
@HWI-EAS443:3:100:647:1136#0/1  
AATGGTTCAATTTTGGCGTTCACCTTTTGGACATTTGGG  
+HWI-EAS443:3:100:647:1136#0/1  
aa`ab\_a\_a¥aa`a`\_\_a^\_^\_Y``]``\_`S[]\_¥]^P\_Y  
@HWI-EAS443:3:100:728:537#0/1  
CATGTGGTTGACTATGTTAGGCTCTTCCAGCCAAAGAA  
+HWI-EAS443:3:100:728:537#0/1  
a^ab`abaaH[UUX[UaZ]¥S¥¥\_\_ZUaPH[SYPY^`aBB  
@HWI-EAS443:3:100:749:88#0/1  
GGCATGGAAATGAGGCGCTGCCTTCTTCAGTCTTTCAGC  
+HWI-EAS443:3:100:749:88#0/1  
aa[YT\_a¥\_¥`^ZRUA¥\_U¥\_¥¥¥\_UW\_¥¥^W¥^SWBB  
@HWI-EAS443:3:100:757:1816#0/1  
ATCCAGCTTGAATCAGTCAATTCACATGCCTTATTGAATT  
+HWI-EAS443:3:100:757:1816#0/1  
aa`Zaa^`aba^aYaa]\_\_^\_\_^a]\_^\_¥[^`^`\_`¥¥P`^  
@HWI-EAS443:3:100:782:205#0/1  
GGCGTTCACCTCTTTTGGACATTTGGGAAAGCTTGCCCTCA  
+HWI-EAS443:3:100:782:205#0/1  
\_Q¥a\_WPIR]\_NX\_``[]UU¥WUQ`\_GU]XGZ\_¥MVB BBB  
@HWI-EAS443:3:100:820:1317#0/1  
GTATTCAGTAGCCCTGCAGTGGGACACTTCTGCTGTAAAA  
+HWI-EAS443:3:100:820:1317#0/1  
^ababa]`]bb`b^`aabb`abb[``\_aaaa`[a`^`U`B  
@HWI-EAS443:3:100:821:1807#0/1  
GGGGGCTATATGAAGCAATCGAGGAGTGCCTGATTAATGA  
+HWI-EAS443:3:100:821:1807#0/1  
aaaa\_\_aa\_``a^L`^b`aG`¥^`\_QT^G]aa`\_^\_Y\_aB  
@HWI-EAS443:3:100:849:428#0/1  
ATATGTTCAATCGGGCAACATCTTCTCCTATTTTCATCAA  
+HWI-EAS443:3:100:849:428#0/1  
abaab\_^\_`b]aa`XU\_\_W\_a^aa[``^a`\_`a]`a^  
@HWI-EAS443:3:100:902:833#0/1  
GTCAAACCACATGAGAAAGGCATAAATCCCAATTACCTCA  
+HWI-EAS443:3:100:902:833#0/1  
a]Yabb`\_aZbab]aa^Y^a]babaaa`\_]\_aaa`\_X]^\_`  
@HWI-EAS443:3:100:929:712#0/1  
CATCTTTGCAGTCATCAAAGTCTACTTTTTTCTGGTGCCAT  
+HWI-EAS443:3:100:929:712#0/1  
abaa\_¥V^babaabbUb\_\_a`P`\_[a\_ba`[R`aaaK[ab  
@HWI-EAS443:3:100:975:718#0/1  
CAAAGATGTTGGAGACCTTAAACAGTATGACAGTGATGAG

+HWI-EAS443:3:100:975:718#0/1  
aabbabbabbbbaa`bbbaabb`bab`b`a`\_`\_]\_  
@HWI-EAS443:3:100:97:1490#0/1  
GACATTCTTTGGCTGGAAAGAGCCTAACATAGTCAAACCA  
+HWI-EAS443:3:100:97:1490#0/1  
abbabbabbaaba^`S^`aa\_aa\_Vaa\_\_aaaaOU^  
@HWI-EAS443:3:100:995:262#0/1  
CCTTGACGAAGAGAGCAGGGCAAGAATCAAACCTAGGCTT  
+HWI-EAS443:3:100:995:262#0/1  
abbbba¥`VV`a]a`S¥\_[VS[aa^aaY`^`a\_aaa\_G\_B  
@HWI-EAS443:3:10:1121:711#0/1  
CATTAATCAGGCACTCCTCGATTGCTTCATATAGCCCCC  
+HWI-EAS443:3:10:1121:711#0/1  
Z[`¥`[aTSaaaU[NaZbababW¥]`SaVU^]a`¥YHZa\_  
@HWI-EAS443:3:10:1170:539#0/1  
CATAAATACGGCCTTGCTCAATGCATCCTGTGCAGCCATG  
+HWI-EAS443:3:10:1170:539#0/1  
G^bbbbb\_a¥U¥``aaabZaaba¥¥b`bb`]FZaZZ\_\_a  
@HWI-EAS443:3:10:1173:992#0/1  
AGGCAATCTGAGGGGGCGTGGTGTCTCCTCAAGAATGGT  
+HWI-EAS443:3:10:1173:992#0/1  
`aZO\_ba`a`aaaaXaP`Paa]\_YU^^]SV\_S\_a]QP\_a\_  
@HWI-EAS443:3:10:1224:1011#0/1  
GCACTATTGAAGCACCGATTTGAGATAATTGAAGGAAGAG  
+HWI-EAS443:3:10:1224:1011#0/1  
a]^X`¥``aV^\_V^YY`X`\_]V¥U]]X]]^XW]UXV^XY  
@HWI-EAS443:3:10:1275:1033#0/1  
CATTAATCAGGCACTCCTCGATTGCTTCATATAGCCCCC  
+HWI-EAS443:3:10:1275:1033#0/1  
OT\_\_[W\_T\_¥^[bb\_Q^\_\_WZ^\_^]]Zbb^`^\_SW[ZLS  
@HWI-EAS443:3:10:1282:1801#0/1  
CACCGATTTGAGATAATTGAAGGAAGAGACCGAATCATGG  
+HWI-EAS443:3:10:1282:1801#0/1  
aWUbbaa]baa\_a^`a¥\_`^``aa¥\_abbb¥]b`aSIaa¥`  
@HWI-EAS443:3:10:1364:1595#0/1  
AGAATTCCTTGGTCATGTCTTTCTTTGACAGAAGACTC  
+HWI-EAS443:3:10:1364:1595#0/1  
abbaba\_Zaaaa¥`a¥]^a`\_]`Zaa^`]X`\_]W[^W\_R  
@HWI-EAS443:3:10:1380:1024#0/1  
AGCAGGTGCTAGCAGAGCTACAGGACATTGAAAATGAAGA  
+HWI-EAS443:3:10:1380:1024#0/1  
ab`\_`ba^`abb]aa\_aXba`aaa\_Yaa]\_\_¥`a^``\_a`  
@HWI-EAS443:3:10:1429:609#0/1  
ATAAGACAAGAAATGGCCAGTAGGAGTCTATGGGATTCCT  
+HWI-EAS443:3:10:1429:609#0/1  
aaaaaa[\_aa`\_]`¥SSW^V^\_\_X^YU]Y^\_]VX¥RV]  
@HWI-EAS443:3:10:1433:1062#0/1  
AGACATTCTTTGGCTGGAAAGAGCCTAACATAGTCAAACC  
+HWI-EAS443:3:10:1433:1062#0/1  
\_]`a`bR`abba`a^`¥a\_[]\_[]`aa^``\_\_^]\_a`UR



@HWI-EAS443:3:10:1440:1339#0/1  
TCCGATTGCCATGTTTCCGATTTGTTTTCAAAGAATTCC  
+HWI-EAS443:3:10:1440:1339#0/1  
a`aa`a`^`\_\_^`\_XY\_X]\_`]]\_`W]]\_`]]X^]YY  
@HWI-EAS443:3:10:1518:1866#0/1  
GGGGCATGGAATGAGGCGCTGCCTTCTTCAGTCTCTTCA  
+HWI-EAS443:3:10:1518:1866#0/1  
a\_aaN\_\_\_\_[W\_VWVU\_¥SPSYSUSTUX¥HVWVQWVVVBB  
@HWI-EAS443:3:10:1577:1182#0/1  
AATGGAACCTCCAAGATCAAGATGAAATGGGGCATGGAAA  
+HWI-EAS443:3:10:1577:1182#0/1  
a\_aa]aa¥]aZ\_^]^\_Z`¥\_¥^`W¥¥\_`¥\_¥WW¥^SWWW  
@HWI-EAS443:3:10:1609:1608#0/1  
TGTCATACTGTTTAAGGTCTCCAACATCTTTGCAGTCATC  
+HWI-EAS443:3:10:1609:1608#0/1  
aba`abb\_baaaa`aa\_a\_¥`\_]\_a]a]\_`]\_]`^a¥  
@HWI-EAS443:3:10:1619:1243#0/1  
TAGCAAGCTGGGTCCAAAATGAATTCAATAAGGCATGTGA  
+HWI-EAS443:3:10:1619:1243#0/1  
a\_aa`^¥R\_a¥ZNTY]aa\_`Z^a`W`¥`Y\_\_OY]UV`Y  
@HWI-EAS443:3:10:190:648#0/1  
AGTAGCCCTGCAGTGGGACACTTCTGCTGTAAAATAGTTC  
+HWI-EAS443:3:10:190:648#0/1  
T[aaV]aaaa`a`Ua`^`^a`^a\_a`aaa`U[^W¥¥  
@HWI-EAS443:3:10:203:441#0/1  
AACAAATGAGAAGCAATTTTCTCGATTCAGCCGAAAACCCC  
+HWI-EAS443:3:10:203:441#0/1  
aaaaaaaa`b`aa\_b\_aaa`\_aba``a\_a``a^`\_\_^]\_\_\_\_  
@HWI-EAS443:3:10:226:1486#0/1  
CTAAATTTCTTCCTGATTTGTATGATTACAAAGAGAACCG  
+HWI-EAS443:3:10:226:1486#0/1  
aaa\_^`baaabbaaa`aa\_aQa`a]\_\_a`a\_^X`¥Z\_\_[[  
@HWI-EAS443:3:10:284:845#0/1  
CCCCAAGATCGAAGTTCCAGGTTCCAGGTTGCCCTAA  
+HWI-EAS443:3:10:284:845#0/1  
abbbab¥ba]a`a`aa\_a]]\_aa\_a`a\_a^`\_[U`YW¥\_  
@HWI-EAS443:3:10:307:1828#0/1  
TCGGCTGAATCGAGAAAATTGCTTCTCATTGTTCCAGGCAC  
+HWI-EAS443:3:10:307:1828#0/1  
V^Z¥Y`¥`V^[X`b\_]\_VN^XY^[]\_]X¥[UZ[`S  
@HWI-EAS443:3:10:406:838#0/1  
AATGGCCAGTAGGAGTCTATGGGATTCCTTTCGTCAGTCC  
+HWI-EAS443:3:10:406:838#0/1  
^Yaaaab`Xa]\_V¥T^`^`a^X^[\_^\_\_\_\_VX¥XRYV  
@HWI-EAS443:3:10:454:44#0/1  
TGTTTCATGTATTCGATTTCCATTTTCATCGACGAACGGG  
+HWI-EAS443:3:10:454:44#0/1  
abaa\_]\_aaa`aa\_a`^`\_\_^Z^`a[\_a`\_]R\_¥]V¥]^  
@HWI-EAS443:3:10:480:1689#0/1  
TGCCTGAACAATGAGAAGCAATTTTCTCGATTCAGCCGAA

+HWI-EAS443:3:10:480:1689#0/1  
]aaba]]abZ\_\_bbabbababba`aababaaaaaa`aaa  
@HWI-EAS443:3:10:486:739#0/1  
ACTATGTTAGGCTCTTTCCAGCCAAAGAATGTCTTCATGC  
+HWI-EAS443:3:10:486:739#0/1  
ab¥[ `a`^Y]GPLX^ZSQab^V\_[aaa[\_`RZ`\_\_[\_`¥Q  
@HWI-EAS443:3:10:533:1016#0/1  
AGACATGACCAAGGAATTCTTTGAAAACAAATCGGAAACA  
+HWI-EAS443:3:10:533:1016#0/1  
^`a`aabaa]aaaaaaaaaaaaa\_aa\_aa^`aa\_\_\_aa`  
@HWI-EAS443:3:10:695:355#0/1  
CACACATTTGGAAGTTTGTTCATGTATTCCGATTTCCAT  
+HWI-EAS443:3:10:695:355#0/1  
abbbb`abbbba`b`abbabaaaa`baba^aaaaa]`aa  
@HWI-EAS443:3:10:720:482#0/1  
GTCCTTGGGATCTTCTTTCATTTTCAATGTCCTGTAGCT  
+HWI-EAS443:3:10:720:482#0/1  
a\_a]a\_]X¥DX[a\_\_a¥a\_[[\_`\_]¥\_¥¥^WWS¥ZRUXUU  
@HWI-EAS443:3:10:721:1426#0/1  
ATCGACGAACGGGGTGAATCAATAATTGTAGAATCTGGTG  
+HWI-EAS443:3:10:721:1426#0/1  
a`aaa\_a\_a]^\_\_\_G^`a^V]\_a\_[\_\_XY^^`^ZR]¥VX¥  
@HWI-EAS443:3:10:743:860#0/1  
AGGCACTCCTCGATTGCTTCATATAGCCCCCAAGATCGA  
+HWI-EAS443:3:10:743:860#0/1  
]babbZ`\_]X`a¥¥\_W^aa`aaa\_a^^ZV^T]^X^^XY]`  
@HWI-EAS443:3:10:784:1570#0/1  
ATATGGCACCAGAAAAAGTAGACTTTGATGACTGCAAAGA  
+HWI-EAS443:3:10:784:1570#0/1  
`a`^^`\_`¥^^^ab]\_b`G`b^a`[b`^^`\_\_]a]\_\_\_R`  
@HWI-EAS443:3:10:86:1199#0/1  
CTTGGGGGGCTATATGAAGCAATCGAGGAGTGCCTGATTA  
+HWI-EAS443:3:10:86:1199#0/1  
abbb`¥^babababba]bb`aaabb^aa`a\_aa``a\_aaa  
@HWI-EAS443:3:10:919:127#0/1  
TAGCCCTGCAGTGGGACACTTCTGCTGTAAAATAGTTCCT  
+HWI-EAS443:3:10:919:127#0/1  
a`¥[\_Zaa\_ab`\_\_[RWY\_`¥]^S¥aRWX]V]OYXXLNR  
@HWI-EAS443:3:10:966:1580#0/1  
ATGAATTCAATAAGGCATGTGAATTGACTGATTCAAGCTG  
+HWI-EAS443:3:10:966:1580#0/1  
aaaa`aa\_aaaa```]aaa\_a`aa```^`a```\_\_\_\_\_¥\_`  
@HWI-EAS443:3:10:970:1258#0/1  
CTCCCTTCATTATGTATTAGTAGCCCTGCAGTGGGACAC  
+HWI-EAS443:3:10:970:1258#0/1  
aababbbabbbbaaaabbbbabbaaaabaaaVa````\_a\_  
@HWI-EAS443:3:11:1034:1402#0/1  
CTCCACTCCCCTGGGTGACTCTCCGATTGGCCATGTTTCC  
+HWI-EAS443:3:11:1034:1402#0/1  
aab\_b^aaaaa`aa^Raaaa¥\_`aa`VY[US[^[VPY¥U[

@HWI-EAS443:3:11:1113:491#0/1  
CGATTGGCCATGTTTCCGATTTGTTTTCAAAGAATTCCTT  
+HWI-EAS443:3:11:1113:491#0/1  
a`Zabba\_a`aaaab\_`^^aaab\_aaa^`aa\_`^`]¥aa  
@HWI-EAS443:3:11:1249:1132#0/1  
CGATAGGCCAAGTGTGCGAGGCCCATGTTCCCTATATGTGAG  
+HWI-EAS443:3:11:1249:1132#0/1  
Va`V[\_ZZ\_`aXZ¥^``[^a`[L[X`^UTT[a`a\_b[¥T]  
@HWI-EAS443:3:11:1343:436#0/1  
CAAGAATGGTTCAATTTTGGCGTTCACCTCTTTTGACATT  
+HWI-EAS443:3:11:1343:436#0/1  
aababaabb`a`aa`baaaa^a[a¥^Ya¥S¥a`\_\_]^\_¥Y  
@HWI-EAS443:3:11:1358:1280#0/1  
CGGCTGAATCGAGAAAATTGCTTCTCATTGTTTCAGGCACT  
+HWI-EAS443:3:11:1358:1280#0/1  
aba\_`b`^Zabab`^`aaaa]`a]]W]aaa[`]^]\_Z^Z`  
@HWI-EAS443:3:11:1403:1990#0/1  
GAAAGGCATAAATCCCAATTACCTCATGGCTTGAAGCAG  
+HWI-EAS443:3:11:1403:1990#0/1  
a\_Y`aa\_ba`baa^\_\_aaaa`WaUaa`TIX^UQQBBBBB  
@HWI-EAS443:3:11:1406:1464#0/1  
GGACATTGAAAATGAAGAGAAGATCCCAAGGACAAAGAAC  
+HWI-EAS443:3:11:1406:1464#0/1  
aa`[ `a`aaaaaa\_\_a\_aa\_\_VWT]^`^]Z\_]\_^]W  
@HWI-EAS443:3:11:1431:551#0/1  
TGAGAAAGGCATAAATCCCAATTACCTCATGGCTTGAAG  
+HWI-EAS443:3:11:1431:551#0/1  
abbabbabbaaab`\_a]aaaaa`\_[aaa`a\_[aa¥a¥]B  
@HWI-EAS443:3:11:1590:399#0/1  
TTTGTTCCTCAAAGAATTCCTTGGTCATGTCTTCTCTTTG  
+HWI-EAS443:3:11:1590:399#0/1  
¥`aaYb\_babb¥`^Z^aa¥a``a\_^Uab]`aaaW`]^\_a`  
@HWI-EAS443:3:11:1601:473#0/1  
AAAGAATTCCTTGGTCATGTCTTCTCTTTGACAGAAGAC  
+HWI-EAS443:3:11:1601:473#0/1  
`\_aaaZba]aaaabU\_aab\_Za`aY`\_a\_aa¥X`\_\_]`\_X  
@HWI-EAS443:3:11:162:909#0/1  
GGGGGCTATATGAAGCAATCGAGGAGTGCCTGATTAATGA  
+HWI-EAS443:3:11:162:909#0/1  
^aaaaaa]`a`aa]abaY`aaaa`aW``a``\_`\_`^`\_`\_`  
@HWI-EAS443:3:11:1737:673#0/1  
GCGCATAGTTCCTGTAATCTCAAATTTTCTTCAATTGTC  
+HWI-EAS443:3:11:1737:673#0/1  
a`ba\_bab`baabb\_\_ababa`b`babbb\_bb\_aaaaa\_\_  
@HWI-EAS443:3:11:1748:932#0/1  
GAAGGAAGAGACCGAATCATGGCCTGGACAGTGGTGAACA  
+HWI-EAS443:3:11:1748:932#0/1  
[[a\_V^aba\_a\_¥a\_\_\_\_`aba]^`^YXR]^V`\_RZ]\_R\_  
@HWI-EAS443:3:11:1765:327#0/1  
TAGCCCCCAAGATCGAAGGTTCCAGGTTCCAGGTTGTCC



@HWI-EAS443:3:11:594:1174#0/1  
ATATACTGTTCCACTGTCCAGGCCATGATTCGGTCTCT  
+HWI-EAS443:3:11:594:1174#0/1  
[`S¥T¥a^\_a`\_bbaaaaY^a`ba\_[U^XT^¥NU^JYWL¥  
@HWI-EAS443:3:11:620:1711#0/1  
TGCCTTTCTCATGTGGTTTGACTATGTTAGGCTCTTTCCA  
+HWI-EAS443:3:11:620:1711#0/1  
``¥]YUT\_a¥U\_QYbR``[¥]\_aaaF`\_X\_V^aHU\_`aa  
@HWI-EAS443:3:11:700:1714#0/1  
GGGGGAGGGAATACCACTATATGATGCAATCAAATGCATG  
+HWI-EAS443:3:11:700:1714#0/1  
T\_`[¥a\_\_U]\_XbXabb¥\_aaabbabab[UHY`bUa^`UM  
@HWI-EAS443:3:11:709:468#0/1  
GGGGCATGGAAATGAGGCGCTGCCTTCTTCAGTCTCTTCA  
+HWI-EAS443:3:11:709:468#0/1  
a\_¥J`S`a`^`ZWY]OV¥\_Q^Z[SZZ¥\_\_¥¥¥VS¥SUZUU  
@HWI-EAS443:3:11:712:1969#0/1  
AGCAGGTGCTAGCAGAGCTACAGGACATTGAAAATGAAGA  
+HWI-EAS443:3:11:712:1969#0/1  
`aa[`aZa]\_a\_\_^aaW`\_¥aa]^\_^^^\_^\_\_]^\_`a\_\_  
@HWI-EAS443:3:11:718:1430#0/1  
GGGGCATGGAAATGAGGCGCTGCCTTCTTCAGTCTCTTCA  
+HWI-EAS443:3:11:718:1430#0/1  
`aT]`Q`aaabbbab`a`bXaaa`a`a`a\_aa^^`YaaZa  
@HWI-EAS443:3:11:735:1328#0/1  
GGAATTCTTTGAAAACAAATCGGAAACATGGCCAATCGGA  
+HWI-EAS443:3:11:735:1328#0/1  
ababbbabbbbaa\_ab¥bb`baababa]U]\_aa\_\_^Z\_  
@HWI-EAS443:3:11:836:262#0/1  
AATCAGTCAATTCACATGCCTTATTGAATTCATTTTGGAC  
+HWI-EAS443:3:11:836:262#0/1  
```\_a\_FW^^[^R]aa¥]aa]P`^a`a^^]\_\_\_X]a\_^U  
@HWI-EAS443:3:11:853:952#0/1  
ATCCGAAAATCGAAACTAACAAGTTTGCTGCAATATGCAC  
+HWI-EAS443:3:11:853:952#0/1  
aabaa\_abaaab\_\_`\_aa\_]`\_a^\_\_`^\_a\_^]^^\_¥\_]`  
@HWI-EAS443:3:11:862:1592#0/1  
GGGGGCTATATGAAGCAATCGAGGAGTGCCTGATTAATGA  
+HWI-EAS443:3:11:862:1592#0/1  
Wabb\_XZb]a`a^\_U¥W`a[\_b`X`¥aaT^a\_]`[`aaa\_  
@HWI-EAS443:3:11:896:1567#0/1  
CGGGGTGAATCAATAATTGTAGAATCTGGTGACCCGAATG  
+HWI-EAS443:3:11:896:1567#0/1  
```ab]abbaaab`ab\_b\_a`a`aaaaWa\_\_\_\_`\_a`a]  
@HWI-EAS443:3:11:944:926#0/1  
CTTGGGATCTTCTTTCATTTTCAATGTCCTGTAGCTCTG  
+HWI-EAS443:3:11:944:926#0/1  
abbbba``abbaabbbbaabbbba`baa\_`ba`baaaaaa  
@HWI-EAS443:3:11:950:1609#0/1  
ATTCATCGACGAACGGGGTGAATCAATAATTGTAGAATC

+HWI-EAS443:3:11:950:1609#0/1  
aaaaaa\_a\_a`\_`\_\_^\_\_WOX\_^`Z^^^\_a\_] [\_\_\_]Z[Z  
@HWI-EAS443:3:11:955:259#0/1  
ATTTTCACCGAGTGGCCACTTCAATTGGCTTGTCTCTTC  
+HWI-EAS443:3:11:955:259#0/1  
abbaaaaaa`a^a`\_`\_\_a`\_]`\_\_a\_Z^aS^VDTX\_\_R  
@HWI-EAS443:3:12:1068:1861#0/1  
CAGTCATCAAAGTCTACTTTTTCTGGTGCCATATTTTCAC  
+HWI-EAS443:3:12:1068:1861#0/1  
aaa¥^aaa`\_\_Y[``¥]\_a\_\_a^`a`W^S)``aba\_`]a\_  
@HWI-EAS443:3:12:1121:1363#0/1  
GGGGGCTATATGAAGCAATCGAGGAGTGCCTGATTAATGA  
+HWI-EAS443:3:12:1121:1363#0/1  
aaa`a`aaa¥aa]aa\_aaa¥a`^Z\_aZ`\_¥^a\_aa\_\_^`\_  
@HWI-EAS443:3:12:1180:215#0/1  
ATCAATAATTGTAGAATCTGGTGACCCGAATGCACTATTG  
+HWI-EAS443:3:12:1180:215#0/1  
`YU`\_\_a]¥T\_U]QWPX¥W\_dW¥XZWV^UX¥]O¥^P¥YTQ  
@HWI-EAS443:3:12:1197:1206#0/1  
AGCCAACAAAATAAAATCTGAGAAGACACACATTCACATC  
+HWI-EAS443:3:12:1197:1206#0/1  
`aba`\_`abb`\_^baba]aa][`^[W`^a\_a`\_`a`aSY`aZ  
@HWI-EAS443:3:12:1274:960#0/1  
CGATTGGCCATGTTTCCGATTTGTTTTCAAAGAATTCCTT  
+HWI-EAS443:3:12:1274:960#0/1  
aaab\_bbb`\_`b`Y\_`N`\_aa`ba`aaa`a`a¥a`\_`aS\_aa  
@HWI-EAS443:3:12:1359:563#0/1  
CCTGCTCTCTTCGTCAGGGTGTAGTCCGCTTTGGTGGCC  
+HWI-EAS443:3:12:1359:563#0/1  
¥]bbabbbb`babb]abb\_ZDYSWbab\_b]abb`b]\_baa  
@HWI-EAS443:3:12:1382:94#0/1  
AGCAGGTGCTAGCAGAGCTACAGGACATTGAAAATGAAGA  
+HWI-EAS443:3:12:1382:94#0/1  
`a^\_a`P¥`aa`Q\_\_Y\_^`\_¥\_]\_WU¥aaTP[^\_\_Z¥]\_\_  
@HWI-EAS443:3:12:1426:1082#0/1  
ATAAAATCTGAGAAGACACACATTCACATCTTTTCATTCA  
+HWI-EAS443:3:12:1426:1082#0/1  
a¥`\_ZZaaaa^^][¥^aa¥^)^`\_\_`aa`^`\_`Z¥a\_\_\_\_  
@HWI-EAS443:3:12:1435:73#0/1  
ATGAAGACATTCTTTGGCTGGAAAGAGCCTAACATAGTCA  
+HWI-EAS443:3:12:1435:73#0/1  
aabbaaaaaaa^]Y\_`a\_ba`\_^]`\_`RM^^^S^\_YWR^\_  
@HWI-EAS443:3:12:1454:779#0/1  
CATTACATCTTTTCATTCACTGGAGAGGAGATGGCCACC  
+HWI-EAS443:3:12:1454:779#0/1  
a[\_TYaa\_bb`bbbabab\_X^ba]Z\_ba¥`bZaXaX^SUS  
@HWI-EAS443:3:12:1497:1055#0/1  
ATTCCTTGGTCATGTCTTTCTCTTTGACAGAAGACTCGGC  
+HWI-EAS443:3:12:1497:1055#0/1  
a\_]\_^\_bab^RY¥a`\_Y^bbY`Z^`]]]W]aa][X^]R]XB

@HWI-EAS443:3:12:1509:555#0/1  
CATGTTTCCGATTTGTTTTCAAAGAATTCCTTGGTCATGT  
+HWI-EAS443:3:12:1509:555#0/1  
``bbbbbbbabbbabababaabb\_Vabb\_`¥^aba  
@HWI-EAS443:3:12:154:884#0/1  
TTGGGATTTATGCCTTCTCATGTGGTTTGACTATGTTAG  
+HWI-EAS443:3:12:154:884#0/1  
abbaababababaaaaaaaaaaa\_aa\_aaa`a`aaa]\_`\_  
@HWI-EAS443:3:12:1606:1107#0/1  
CAGTCATCAAAGTCTACTTTTTCTGGTGCCATATTTTCAC  
+HWI-EAS443:3:12:1606:1107#0/1  
a`b\_aaa\_^`aa`aaabbbab`b\_b\_\_\_\_\_]aa\_b`b`\_`a  
@HWI-EAS443:3:12:160:602#0/1  
ATTACAAAGAGAACCGGTTTCATTGAAATTGGAGTAACACG  
+HWI-EAS443:3:12:160:602#0/1  
\_a``aaaaaaaa\_aaa`a^```a`a^Z\_a```\_aZ`]`a``  
@HWI-EAS443:3:12:1712:511#0/1  
CAGCAAACCTTGTAGTTTCGATTTTCGGATCTTCCCCATA  
+HWI-EAS443:3:12:1712:511#0/1  
¥^b\_b`a]ba`\_bb]Xa¥Z`U][^aI\_\_PIZ`ZGYLSS[0  
@HWI-EAS443:3:12:1721:1367#0/1  
GGGGGCTATATGAAGCAATCGAGGAGTGCCTGATTAATGA  
+HWI-EAS443:3:12:1721:1367#0/1  
abbbbaabbabaaaab^\_\_\_Rb\_aa\_a¥aV¥aa^`a`\_`\_  
@HWI-EAS443:3:12:1785:778#0/1  
GAAGCAGGTGCTAGCAGAGCTACAGGACATTGAAAATGAA  
+HWI-EAS443:3:12:1785:778#0/1  
aa][Ya`aQZ\_[^a^aa^W\_XY\_\_\_\_\_]W\_¥¥WZ)`a^]Z  
@HWI-EAS443:3:12:294:771#0/1  
AAGAATTCCTTGGTCATGTCTTTCTCTTTGACAGAAGACT  
+HWI-EAS443:3:12:294:771#0/1  
aa\_Z`aaa\_aaaX``aa^a`aaaa```a\_aa\_`S\_^^\_  
@HWI-EAS443:3:12:296:707#0/1  
GGGGCATGGAATGAGGCGCTGCCTTCTTCTCAGTCTCTTCA  
+HWI-EAS443:3:12:296:707#0/1  
abbabb`baabbbbbbbaaaaaabaaa\_^a\_aa`aa]a  
@HWI-EAS443:3:12:313:280#0/1  
GGGGGCTATATGAAGCAATCGAGGAGTGCCTGATTAATGA  
+HWI-EAS443:3:12:313:280#0/1  
a\_Za¥aaW[\_`a¥`[V[Z^]]]a\_[TSZ\_^¥^TW[ZQZ¥Y  
@HWI-EAS443:3:12:313:369#0/1  
AGAATTCCTTGGTCATGTCTTTCTCTTTGACAGAAGACTC  
+HWI-EAS443:3:12:313:369#0/1  
a\_U¥aV``]a\_^U\_U]\_\_baa^Z^¥`aa^T``¥Y\_X\_a¥Z  
@HWI-EAS443:3:12:367:1367#0/1  
AGCTTGCTAGAGATCTGGGCTCTGGCTCATCACTGTCATA  
+HWI-EAS443:3:12:367:1367#0/1  
U`bbbabbaa\_¥Wbba\_a`````aaa^abba]aaaaVaaa  
@HWI-EAS443:3:12:377:667#0/1  
ATCCTGTGCAGCCATGGATGACTTTCAGCTGATCCCAATG

+HWI-EAS443:3:12:377:667#0/1  
`]b`\_]L^\_aa\_N\_\_`PW\_aQZ`aJZ]Y^^YVYZ]]^\_`  
@HWI-EAS443:3:12:394:917#0/1  
TGTCCAGGCCATGATTCCGGTCTCTTCCTTCAATTATCTCA  
+HWI-EAS443:3:12:394:917#0/1  
aa^ab`\_^aa^\_^]\_a\_V\_X^¥]Z`Z\_¥]]^^Y\_0[V`  
@HWI-EAS443:3:12:461:1167#0/1  
ACCGAACTTCTCCAGCCTTGAAAACCTTAGAGCCTATGTA  
+HWI-EAS443:3:12:461:1167#0/1  
^`¥X[a¥¥X\_`¥¥TRaYRaYUNHV\_^`]\_]\_S^`[^`R\_  
@HWI-EAS443:3:12:483:101#0/1  
AGGCTGGAGAAGTTCGGTGGGAGACTTTGGTCGGCAAGCT  
+HWI-EAS443:3:12:483:101#0/1  
ab]bba`bba]a`aa]ZQba`[aMX\_\_[L[QW¥]XU\_¥ZB  
@HWI-EAS443:3:12:484:1955#0/1  
TTCGGTCTCTTCCTTCAATTATCTCAAATCGGTGCTTCAA  
+HWI-EAS443:3:12:484:1955#0/1  
aaZWVTUNL^VOSVU`ZT]]\_`\_]`\_\_\_WSX`J^]MZ[BB  
@HWI-EAS443:3:12:501:691#0/1  
GGGGCTATATGAAGCAATCGAGGAGTGCCTGATTAATGAT  
+HWI-EAS443:3:12:501:691#0/1  
ab`\_`\_`\_¥VRa`Y`[\_^P¥[T\_ZG[GZU^T¥NQSSSUZTT  
@HWI-EAS443:3:12:507:1062#0/1  
AAGGAAGAGACCGAATCATGGCCTGGACAGTGGTGAACAG  
+HWI-EAS443:3:12:507:1062#0/1  
a\_U\_Ua][aaa`J`a`M`^W\_`\_`\_]`RTU`^Z\_[^\_Z^  
@HWI-EAS443:3:12:555:711#0/1  
GGCATGGAAATGAGGCGCTGCCTTCTTCAGTCTCTTCAGC  
+HWI-EAS443:3:12:555:711#0/1  
`b`a`\_WI\_T¥aa`\_Raaaaaaaa`aX[VaTaaZ\_a\_XaW  
@HWI-EAS443:3:12:634:354#0/1  
GGGGGCTATATGAAGCAATCGAGGAGTGCCTGATTAATGA  
+HWI-EAS443:3:12:634:354#0/1  
`^¥OY^`a\_aaa\_\_^`\_`\_`\_`\_¥\_\_\_\_W\_Q¥V`¥^^¥¥¥\_¥  
@HWI-EAS443:3:12:682:1692#0/1  
GGGTTTTCGGCTGAATCGAGAAAATTGCTTCTCATTGTTC  
+HWI-EAS443:3:12:682:1692#0/1  
a`a]a`b`a`\_b\_^`Y`\_`a`]\_^`]\_`\_`^WW\_Z]]  
@HWI-EAS443:3:12:733:781#0/1  
CCACTATATGATGCAATCAAATGCATGAAGACATTCTTTG  
+HWI-EAS443:3:12:733:781#0/1  
a\_P[aaa`YU¥XYQ][Z^aaa]a]Zaa`[WW¥`\_Y]^\_¥  
@HWI-EAS443:3:12:775:1928#0/1  
GTGAATTGACTGATTCAAGCTGGATAGAACTTGATGAAAT  
+HWI-EAS443:3:12:775:1928#0/1  
a`babbaab^aa`a`\_bba`aa`a`a`\_b^`aaaaa\_aa\_  
@HWI-EAS443:3:12:825:257#0/1  
CGATTGGCCATGTTTCCGATTTGTTTTCAAAGAATTCCTT  
+HWI-EAS443:3:12:825:257#0/1  
abaa`baaa\_ab]aa\_aa]`aaa\_\_aa\_\_`a`\_`\_^aXW\_\_



@HWI-EAS443:3:12:826:1104#0/1  
AGTAGGAGTCTATGGGATTCCTTTTCGTCAGTCCGAAAGAG  
+HWI-EAS443:3:12:826:1104#0/1  
a]¥a[\_`ab`ababaaaa`\_`aTa\_\_]`¥\_]\_\_^\_\_]\_  
@HWI-EAS443:3:12:842:422#0/1  
GGCTGAATCGAGAAAATTGCTTCTCATTGTTTCAGGCACTT  
+HWI-EAS443:3:12:842:422#0/1  
abab^X¥a`YaU`aa`\_]a][`N`\_T¥Y^]`R¥^`]  
@HWI-EAS443:3:12:873:807#0/1  
TTGAAAACCTTTAGAGCCTATGTAGATGGATTTCGAGCCGAA  
+HWI-EAS443:3:12:873:807#0/1  
aaa`a`aabababaaaababb`T``ab`a`ba`\_`a`\_  
@HWI-EAS443:3:12:98:1933#0/1  
TTCCAAATGTGTGCATATTGCAGCAAACCTGTTAGTTTCG  
+HWI-EAS443:3:12:98:1933#0/1  
`aa\_bbbaa`\_]Z`aaaa^\_\_aa¥aa¥\_a`^`^`\_W\_] [Y  
@HWI-EAS443:3:13:1061:1106#0/1  
GGTGAACCTTTGTAAGTATGGAGTTCTCACTCACTGACCCG  
+HWI-EAS443:3:13:1061:1106#0/1  
aa\_bbbaabaa\_b]aWaaaa^a\_aaaa`a`aa`\_]a  
@HWI-EAS443:3:13:1092:301#0/1  
GTCCAGGCCATGATTCCGGTCTCTTCAATTATCTCAA  
+HWI-EAS443:3:13:1092:301#0/1  
`[[`]T[¥aaaZ[^]`WO\_WR`^]\_^]^^^0^¥Z^  
@HWI-EAS443:3:13:1177:264#0/1  
CACCTGCTTCCAAGCCATGAGGTAATTGGGATTTATGCCT  
+HWI-EAS443:3:13:1177:264#0/1  
ab`abbbabbbbaaaa\_aba`aa[\_`bbaaa``aaaaVYa  
@HWI-EAS443:3:13:1180:1887#0/1  
CTGAAATTAAGTATTGAAGACCCGAGTCACGAGGGGGAGG  
+HWI-EAS443:3:13:1180:1887#0/1  
a\_bbb`b`Ybb[bba\_aa^b[W¥`Zaaa[]^ba]aZ]]`  
@HWI-EAS443:3:13:1181:689#0/1  
CGTCTCCACAACCTTGAGGGGTTTTTCGGCTGAATCGAGAAA  
+HWI-EAS443:3:13:1181:689#0/1  
a`¥`aaa¥¥aaaYaaVaXM]Paa\_`a\_a]^YXXaV]aa`  
@HWI-EAS443:3:13:1201:173#0/1  
CAGCCTTGAAAACCTTTAGAGCCTATGTAGATGGATTTCGAG  
+HWI-EAS443:3:13:1201:173#0/1  
abbaa\_aZWba][ba`abSba\_a`aa^aa[`aaaX`^\_\_¥  
@HWI-EAS443:3:13:1258:181#0/1  
GGCCTGGACAGTGGTGAACAGTATATGTAACACAACAGGG  
+HWI-EAS443:3:13:1258:181#0/1  
`aZUa¥SUbbb`X^I]`a``¥PX¥N\_aQT[¥\_`ZVW¥a\_\_  
@HWI-EAS443:3:13:126:286#0/1  
GGGGCATGGAAATGAGGCGCTGCCTTCTTCAGTCTCTTCA  
+HWI-EAS443:3:13:126:286#0/1  
`[`¥ba]¥`UHOb\_a`Uaba]Z¥Z]a^^aa`aYV]^a[[^  
@HWI-EAS443:3:13:1371:1814#0/1  
CGGGTCACCAGATTCTACAATTATTGATTCACCCCGTTTCG

+HWI-EAS443:3:13:1371:1814#0/1  
abSZ]^\_`X\_R\_b`W`a]a]a]aa¥ZX`a¥aS]`aaQHFa  
@HWI-EAS443:3:13:1519:1071#0/1  
GGGGCATGGAAATGAGGCGCTGCCTTCTTCAGTCTCTTCA  
+HWI-EAS443:3:13:1519:1071#0/1  
aa`a\_`^¥Z`^^`aZ\_a`\_U`[aX\_¥`U\_RQYUZ^RW  
@HWI-EAS443:3:13:1591:550#0/1  
ATCAGCAGGAACCTTTGACCGCTGATGGCAAAGAGGCCCAT  
+HWI-EAS443:3:13:1591:550#0/1  
a^F]a¥¥P^V\_G[¥VLW\_UXFT¥XLXUUWRUUVV[RUGUB  
@HWI-EAS443:3:13:1619:1464#0/1  
AGCGGACTACACCTTGACGAAGAGAGCAGGGCAAGAATC  
+HWI-EAS443:3:13:1619:1464#0/1  
\_aaaa`ababTV`aaa\_X¥Z\_a`\_]aZ`\_`Q\_\_\_Z\_VM  
@HWI-EAS443:3:13:1655:918#0/1  
ACCGATTTGAGATAATTGAAGGAAGAGACCGAATCATGGC  
+HWI-EAS443:3:13:1655:918#0/1  
^]a`N\_babaaa`\_]aaa^`a\_\_`a\_]¥\_]Z^[^\_\_VS  
@HWI-EAS443:3:13:165:985#0/1  
AGCCAACAAAATAAAATCTGAGAAGACACACATTCACATC  
+HWI-EAS443:3:13:165:985#0/1  
a\_ba^aa`Ya¥a`aaa`aaa\_aaa`^^^\_a`aaX\_\_\_^`\_  
@HWI-EAS443:3:13:166:405#0/1  
GGGGCATGGAAATGAGGCGCTGCCTTCTTCAGTCTCTTCA  
+HWI-EAS443:3:13:166:405#0/1  
\_`ab]aabbababba`ab¥ab``aaaa`\_\_^aa]`a`]  
@HWI-EAS443:3:13:1692:834#0/1  
ATGCACTATTGAAGCACCGATTTGAGATAATTGAAGGAAG  
+HWI-EAS443:3:13:1692:834#0/1  
`¥a`b`baba`^^`¥[^aaaaaaa^ba`a`aa\_`^`X`^`  
@HWI-EAS443:3:13:1742:912#0/1  
AATGAATTCAATAAGGCATGTGAATTGACTGATTCAAGCT  
+HWI-EAS443:3:13:1742:912#0/1  
abbaab`b`baaaa]a^aaa]]FW\_ab\_Ya`\_`a0[\_a¥\_  
@HWI-EAS443:3:13:1755:105#0/1  
AAACCCCTCAAGTTGTGGAGACGCATATAGACTGTTGAAT  
+HWI-EAS443:3:13:1755:105#0/1  
][b^¥R¥\_[`V`Z^[U\_a]aWFUYLa``W[YO^YZ¥BBBB  
@HWI-EAS443:3:13:1766:208#0/1  
GTGGGCACTCGGTGAAAATATGGCACCAGAAAAAGTAGAC  
+HWI-EAS443:3:13:1766:208#0/1  
aaaabYWV¥^¥0T^ZXMY\_N^[WRTTLTZXWUBBBBB  
@HWI-EAS443:3:13:1784:1398#0/1  
CGACGAACGGGTGAATCAATAATTGTAGAATCTGGTGAC  
+HWI-EAS443:3:13:1784:1398#0/1  
`baXa`a^`aaaNa\_^a]aaa\_[aaa`a\_\_\_^`\_`X`[T  
@HWI-EAS443:3:13:191:410#0/1  
CAATGAGAAGCAATTTTCTCGATTGAGCCGAAAACCCCTC  
+HWI-EAS443:3:13:191:410#0/1  
abaababaaa`a`aaaaa`a`a\_\_aaaa^^aa\_^`^]\_

@HWI-EAS443:3:13:214:782#0/1  
ATCCCAAGGACAAAGAACATGAAGAGAACAAGCCAATTGA  
+HWI-EAS443:3:13:214:782#0/1  
a[ `bZVQa\_\_`S¥Xa\_^ [U¥a]V^[\_¥P¥^YQ^¥^RZ^` ]  
@HWI-EAS443:3:13:346:1905#0/1  
GGAAGAAATTTAGGCTTCTCTACCCCTGTTGTGTACATA  
+HWI-EAS443:3:13:346:1905#0/1  
`bb^¥Sabaa\_b\_`baa`^`abaY` ``aX`\_Wa^^a\_a\_a  
@HWI-EAS443:3:13:351:1853#0/1  
AGTTCCTGTAATCTCAAATTTTTCTTCAATTGTCTCTTCG  
+HWI-EAS443:3:13:351:1853#0/1  
a¥L^¥b^¥¥\_b]a¥ab\_]¥Za¥baabbb\_aa^Xb\_]aa^V  
@HWI-EAS443:3:13:36:184#0/1  
GAAAGGCATAAATCCCAATTACCTCATGGCTTGAAGCAG  
+HWI-EAS443:3:13:36:184#0/1  
abb¥a`aaaaa`W\_aa`a`¥` ` `a[VYQVWSZB  
@HWI-EAS443:3:13:385:794#0/1  
GGGGCATGGAATGAGGCGCTGCCTTCTCAGTCTCTTCA  
+HWI-EAS443:3:13:385:794#0/1  
abaa\_U\_aa\_aaa`a^aa`aaa\_[aa\_a`\_`\_]a\_a\_Z\_  
@HWI-EAS443:3:13:395:1337#0/1  
TTCGGATTTCCATTTTCATCGACGAACGGGGTGAATCAATA  
+HWI-EAS443:3:13:395:1337#0/1  
abb`abaa`aaabbabaaa\_aaa`a^^^\_VK¥a`^` `a\_  
@HWI-EAS443:3:13:460:105#0/1  
GATCCGAAAATCGAACTAACAAGTTTGCTGCAATATGCA  
+HWI-EAS443:3:13:460:105#0/1  
][X\$¥]ZbVTZP¥VK¥\_a\_RWaPY`¥^Z[]\_`S\_`^VMRUV  
@HWI-EAS443:3:13:465:618#0/1  
CATTTGAGAAATGATACTGATGTGGTGAACTTTGTAAGTA  
+HWI-EAS443:3:13:465:618#0/1  
aaT[^]UUQa^\_[[^a`Y^^\_W\_TUSOJPX^^UY^Y]XW  
@HWI-EAS443:3:13:549:1496#0/1  
GCCGAGTCTTCTGTCAAAGAGAAAGACATGACCAAGGAAT  
+HWI-EAS443:3:13:549:1496#0/1  
aab`aZL¥\_a]Q]\_\_`\_ [[^a¥^¥`\_`a^^` `^\_¥T]^YW  
@HWI-EAS443:3:13:644:1651#0/1  
TGGGGGCTATATGAAGCAATCGAGGAGTGCCTGATTAAT  
+HWI-EAS443:3:13:644:1651#0/1  
abaaa`\_\_aaaa`\_`\_`aaa\_^`¥\_\_Qa]U`\_`^^`\_]`  
@HWI-EAS443:3:13:685:1209#0/1  
TAATCAGGCACTCCTCGATTGCTTCATATAGCCCCCAAG  
+HWI-EAS443:3:13:685:1209#0/1  
ab]a`a\_aabaaaaYaa`aaa^a[\_aa`a[^W[]]aQ^\_\_  
@HWI-EAS443:3:13:69:1850#0/1  
GCCGTATTTATGTACTCCCTTCATTATGTATTAGTAG  
+HWI-EAS443:3:13:69:1850#0/1  
````\_Za\_\_T`\_aN\_] ]PYbb]¥Y`YRaSK^GS^ZXa\_G\_]`  
@HWI-EAS443:3:13:75:227#0/1  
TCATTTTCAATGTCCTGTAGCTCTGCTAGCACCTGCTTCC

+HWI-EAS443:3:13:75:227#0/1  
abaaaa\_aa\_RaRa¥\_a¥aSa]aUZ]][]\_\_ [ZM^^\_]\_  
@HWI-EAS443:3:13:761:283#0/1  
AGAACCAATGGAACCTCCAAGATCAAGATGAAATGGGGCA  
+HWI-EAS443:3:13:761:283#0/1  
a``baaa`aa^`a\_\_\_a\_\_\_a]\_[[Z`^^`]]]^\_]]X]  
@HWI-EAS443:3:13:784:686#0/1  
TGAATTCAATAAGGCATGTGAATTGACTGATTCAAGCTGG  
+HWI-EAS443:3:13:784:686#0/1  
¥ZaWaPVS¥aa^Y\_\_WYYJY^^]TR¥Z[\_^ [WV\_`\_IP\_\_  
@HWI-EAS443:3:13:814:731#0/1  
CGTCTCCACAACCTGAGGGGTTTTCGGCTGAATCGAGAAA  
+HWI-EAS443:3:13:814:731#0/1  
aaZ` `a\_¥\_aaabaa`bbaa^aaaa`a`baa\_` `a\_a\_aa  
@HWI-EAS443:3:13:889:2021#0/1  
GGGGGCTATATGAAGCAATCGAGGAGTGCCTGATTAATGA  
+HWI-EAS443:3:13:889:2021#0/1  
abaaaaa^\_bX\_]aa\_`aVa\_\_a\_]\_^Z¥UQ\_¥M[]\_\_\_\_ [  
@HWI-EAS443:3:13:916:600#0/1  
GGGTGAATCAATAATTGTAGAATCTGGTGACCCGAATGCA  
+HWI-EAS443:3:13:916:600#0/1  
XabPXZa^T\_U\_QW^T`a\_]a`baab^a`\_ZWY¥^WU¥H]  
@HWI-EAS443:3:13:917:1848#0/1  
GGAGGAACTATTTTACAGCAGAAGTGTCCCACTGCAGGGC  
+HWI-EAS443:3:13:917:1848#0/1  
abaaabb`]abaaaaaaaa`aaa\_a`^\_a` ` `Y\_a^a\_  
@HWI-EAS443:3:13:93:539#0/1  
CGGGTCTTCAATACTTAATTTTCAGAGCATCCATCAGCAGG  
+HWI-EAS443:3:13:93:539#0/1  
aa` `R`aa\_¥] [T]a`^]aa\_\_\_\_ ` `]WHYZPUX[^\_VL¥\_  
@HWI-EAS443:3:13:955:1222#0/1  
ATTTGTGTGGCTCCAGTCTCGGGTCAGTGAGTGAGAACTC  
+HWI-EAS443:3:13:955:1222#0/1  
abbbaaa`b\_abaaa\_aaaa\_aaUa` `\_]\_aX`^\_\_ `Z]\_  
@HWI-EAS443:3:13:970:914#0/1  
AAGCAATTTTCTCGATTCAGCCGAAAACCCCTCAAGTTGT  
+HWI-EAS443:3:13:970:914#0/1  
^`]`XWVX¥`Z¥Q¥Y` `¥` aabaWZ[YOZ¥¥ZX\_PTY\_^N  
@HWI-EAS443:3:14:1016:1086#0/1  
CGTTCGTCGATGAAATGGAAATCCGAATACATGAAACAAA  
+HWI-EAS443:3:14:1016:1086#0/1  
aaabba\_\_baaaaa`\_aa`\_^` `a\_a`a` ` `]`¥a`^  
@HWI-EAS443:3:14:1065:555#0/1  
CAGATTTTGCCAGTAAGGTCCTGCACACTTTCCCAATAGA  
+HWI-EAS443:3:14:1065:555#0/1  
`ba`ab]aSb^]aY`^aaaa`\_aaaa`\_^a[\_¥`a`]^a  
@HWI-EAS443:3:14:1094:375#0/1  
ACTGAATACATAATGAAGGGAGGTACATAAATACGGCCT  
+HWI-EAS443:3:14:1094:375#0/1  
¥abZUZaYaa` `XX^L]aWY[]JZX\_^Z^\_\_\_\_ ` \_RWYUTa

@HWI-EAS443:3:14:1128:851#0/1  
GGGGGCTATATGAAGCAATCGAGGAGTGCCTGATTAATGA  
+HWI-EAS443:3:14:1128:851#0/1  
a\_```[\`aaaa\_\_^\_]``a\_a]a`Z\_V^V[\`a]^`\_\_]^W  
@HWI-EAS443:3:14:1160:61#0/1  
AAGAATTCCTTGGTCATGTCTTTCTCTTTGACAGAAGACT  
+HWI-EAS443:3:14:1160:61#0/1  
abb\_aabX]babaX\_]abaab``]a^aaab\_\_\_a\_a`^W\_  
@HWI-EAS443:3:14:1200:1177#0/1  
ACGAACGGGGTGAATCAATAATTGTAGAATCTGGTGACCC  
+HWI-EAS443:3:14:1200:1177#0/1  
^^\_aZ``\_a\_OZSHT[QWaZVa]ZYU\_\_a\$SZWRY^\$XN[  
@HWI-EAS443:3:14:1223:963#0/1  
GCCTTTCTCATGTGGTTTACTATGTTAGGCTCTTCCAG  
+HWI-EAS443:3:14:1223:963#0/1  
a`^^aTUXaaba[a^S`aa][aa^aV`[\_^U\$VS`\_V`YL  
@HWI-EAS443:3:14:1255:670#0/1  
GGCATGGAAATGAGGCGCTGCCTTCTTCAGTCTTTCAGC  
+HWI-EAS443:3:14:1255:670#0/1  
a\_aa\_a``a\_aa`^\_\_\_``\_\_\_\$^V``X\$\_\_\$V[VZWW  
@HWI-EAS443:3:14:1271:605#0/1  
GATCCCAAGGACAAAGAACATGAAGAGAACAAGCCAATTG  
+HWI-EAS443:3:14:1271:605#0/1  
a\_a^a`\_]\_aY`^]\_]\_]aa`]\_a`a^^]^`R^\_]\_U]  
@HWI-EAS443:3:14:1276:1039#0/1  
ATCAAAGTCTACTTTTTCTGGTGCCATATTTTCACCGAGT  
+HWI-EAS443:3:14:1276:1039#0/1  
a^aaaa`]a`aZ`aaaaa`a\_Z`a^a`\_a\_a`U]V^X  
@HWI-EAS443:3:14:1284:2032#0/1  
GGGGCTATATGAAGCAATCGAGGAGTGCCTGATTAATGAT  
+HWI-EAS443:3:14:1284:2032#0/1  
a`\_a\_aaab`\_aaa\_aa^a\_a`\_aV\_YU\_Z]^`^\_^]^a  
@HWI-EAS443:3:14:1289:278#0/1  
ACATGAGAAAGGCATAAATCCCAATTACCTCATGGCTTGG  
+HWI-EAS443:3:14:1289:278#0/1  
aaa``Z`aaa\_^\_aaaa\_aa[V\_\_`\$^^R`MX[^aY\_^]B  
@HWI-EAS443:3:14:1298:1021#0/1  
GCACACATTTGGAAGTTTGTTCATGTATTCCGATTTCCA  
+HWI-EAS443:3:14:1298:1021#0/1  
a\_baa\$`\_a^\_\_aSa]\_\_a\_aa`a[]a`][\_aZ`P`\$\$\_  
@HWI-EAS443:3:14:1312:1225#0/1  
GCAATGTAGGACCAAGAAGGACGAAAAACAAACCT  
+HWI-EAS443:3:14:1312:1225#0/1  
aaaaaaaa]aaa`\_\_a`\_a\_\_a`]````\_\_a^\_^`]]\_V\_  
@HWI-EAS443:3:14:1320:1485#0/1  
GACGAAAGGAATCCCATAGACTCCTACTGGCCATTTCTTG  
+HWI-EAS443:3:14:1320:1485#0/1  
abbabbb\_bbbaaaSaab\_aaaaa\_aaa\$a\_Xa\$a\_Xa\_I  
@HWI-EAS443:3:14:1391:874#0/1  
CACTATATGATGCAATCAAATGCATGAAGACATTCTTTGG

+HWI-EAS443:3:14:1391:874#0/1  
aaabaaaab]abaa`a`aaaa]a`aa`a^aa``a^`\_¥  
@HWI-EAS443:3:14:1413:119#0/1  
GCCTATGTAGATGGATTTCGAGCCGAACGGCTGCATTGAGG  
+HWI-EAS443:3:14:1413:119#0/1  
aaaa`aa¥a\_\_a`^^^`\_\_\_\_S^S^¥^ZVRGRUWMPBB  
@HWI-EAS443:3:14:142:1360#0/1  
CAAATCAGGAAGAAATTTAGGCTTCTCTACCCCTGTTGTG  
+HWI-EAS443:3:14:142:1360#0/1  
aabaaaa`a`aa^aa`^`a^]`\_^\_a\_aa]a\_\_`Y\_\_X\_  
@HWI-EAS443:3:14:1509:649#0/1  
TCCACTCCCCTGGGTGACTCTCCGATTGGCCATGTTTCCG  
+HWI-EAS443:3:14:1509:649#0/1  
aaaZTY[\_`\_`[[[Y\_\_]][\_XY[U\_\_Z]]X]]T¥ZWU¥  
@HWI-EAS443:3:14:150:516#0/1  
TGGCGTTCACTTCTTTTGACATTTGGGAAAGCTTGCCCTC  
+HWI-EAS443:3:14:150:516#0/1  
aab`b`T^[\_`\_a`a`a¥`a[ZYYGW`\_`\_`Z¥\_V^^Y^`  
@HWI-EAS443:3:14:1521:1663#0/1  
ATGAAATGGGCATGGAAATGAGGCGCTGCCTTCTTCAGT  
+HWI-EAS443:3:14:1521:1663#0/1  
\_a\_[R]aV\_¥a]aQ^aa\_`a]aa`GXaab`HaX^¥[H`YS  
@HWI-EAS443:3:14:1523:549#0/1  
GTGAATCAATAATTGTAGAATCTGGTGACCCGAATGCACT  
+HWI-EAS443:3:14:1523:549#0/1  
``baa``\_````]`\_\_aa]`\_a^a\_Ya\_[¥U]`\_[-T^Y\_  
@HWI-EAS443:3:14:1534:619#0/1  
GCGCATAGTTCCTGTAATCTCAAATTTTTCTTCAATTGTC  
+HWI-EAS443:3:14:1534:619#0/1  
aaa[`a`a\_a\_Wa`X^[a^`\_``[\_a``a\_`^]``\_\_`IQ  
@HWI-EAS443:3:14:1606:1093#0/1  
ATTCAGTAGCCCTGCAGTGGGACACTTCTGCTGTAATA  
+HWI-EAS443:3:14:1606:1093#0/1  
aba`ba`a`\_aa`[``^a`a`^a\_aa\_\_aVaa^\_aba`\_  
@HWI-EAS443:3:14:1651:1080#0/1  
GAAAGGCATAAATCCCAATTACCTCATGGCTTGAAGCAG  
+HWI-EAS443:3:14:1651:1080#0/1  
aa[aaY\_¥[^S]\_¥STWTW]]YQWR]T\_\_YO]BBBBBBBB  
@HWI-EAS443:3:14:224:334#0/1  
GGGGGCTATATGAAGCAATCGAGGAGTGCCTGATTAATGA  
+HWI-EAS443:3:14:224:334#0/1  
abb]`aaabaabaaa`aa`aa\_a\_\_a^``\_aa\_a`a\_\_`\_  
@HWI-EAS443:3:14:248:182#0/1  
CCACAACCTTGAGGGGTTTTCGGCTGAATCGAGAAAATTGC  
+HWI-EAS443:3:14:248:182#0/1  
a\_Y`]a^aaaa¥aaa\_a`\_\_QX^^\_a`\_\_`W[Y]^[\_^`T  
@HWI-EAS443:3:14:364:1779#0/1  
TATTGAAGCACCGATTTGAGATAATTGAAGGAAGAGACCG  
+HWI-EAS443:3:14:364:1779#0/1  
``ba\_abbabbb\_aaaa^abaaaaaaba\_\_aa`a`a¥\_\_

@HWI-EAS443:3:14:368:1927#0/1  
GGCATGGAAATGAGGCGCTGCCTTCTTCAGTCTCTTCAGC  
+HWI-EAS443:3:14:368:1927#0/1  
a``\_aSaaS\_aaWN^TPPVV]0^PVRZ¥XSPJRFR`¥UW  
@HWI-EAS443:3:14:464:1241#0/1  
GGCATGGAAATGAGGCGCTGCCTTCTTCAGTCTCTTCAGC  
+HWI-EAS443:3:14:464:1241#0/1  
abbbbaabbbbbbbbab`bbabaabbbbaba`babaa\_aXa  
@HWI-EAS443:3:14:471:1008#0/1  
TTCCGATTTGTTTTCAAAGAATTCCTTGGTCATGTCTTTC  
+HWI-EAS443:3:14:471:1008#0/1  
a`bbb`V`ab^a`\_`aaY`a`a``aaaaY^aaaaW]ZR^^  
@HWI-EAS443:3:14:510:807#0/1  
GGGGTTTTCGGCTGAATCGAGAAAATTGCTTCTCATTGTT  
+HWI-EAS443:3:14:510:807#0/1  
a`a^Paa`b\_aa`aa\_[^a`^S^`\_\_a`\_\_\_\_`\_\_^`\_^  
@HWI-EAS443:3:14:524:1090#0/1  
GGGGCATGGAAATGAGGCGCTGCCTTCTTCAGTCTCTTCA  
+HWI-EAS443:3:14:524:1090#0/1  
`aaaaabb\_bbbbababba`b`a[b\_aaba\_a]a\_\_a\_a  
@HWI-EAS443:3:14:56:733#0/1  
TGTTAGGCTCTTTCCAGCCAAAGAATGTCTTCATGCATTT  
+HWI-EAS443:3:14:56:733#0/1  
ab^\_baaa`a`\_aa\_\_[aa`\_\_a\_[`a^\_\_Y]\_\_^]]`^  
@HWI-EAS443:3:14:59:1352#0/1  
GCGTGGTGTCTCCTCAAGAATGGTTCAATTTTGGCGTTC  
+HWI-EAS443:3:14:59:1352#0/1  
aab\_`\_`baababaaaab`aaaa`a\_\_^aab]a\_]P  
@HWI-EAS443:3:14:664:1137#0/1  
GGGGCATGGAAATGAGGCGCTGCCTTCTTCAGTCTCTTCA  
+HWI-EAS443:3:14:664:1137#0/1  
a\_V\_¥\_\_\_\_`¥[Y^`PYXY\_Z`¥V¥^U[^]¥¥UMZU]VWS  
@HWI-EAS443:3:14:792:1791#0/1  
AGTGTACATAAATACGGCCTTGCTCAATGCATCCTGTGCA  
+HWI-EAS443:3:14:792:1791#0/1  
`\_]\_]aaa``¥0[][^Z]`\_`][`¥¥`a^]Z^ZZ^Z^  
@HWI-EAS443:3:14:854:1294#0/1  
GGGGGCTATATGAAGCAATCGAGGAGTGCCTGATTAATGA  
+HWI-EAS443:3:14:854:1294#0/1  
^aaWX\_ab¥b¥ba¥`aa^]a\_]b\_a^¥Y^Z]]`\_`a`  
@HWI-EAS443:3:14:862:1734#0/1  
TTCTTGAGGACGACACCACGCCCTCAGATTGCCTGATG  
+HWI-EAS443:3:14:862:1734#0/1  
\_Ua`X¥\_a\_¥Z\_W¥``[\_`¥YJU]UXZ¥FX¥XUXPPXB  
@HWI-EAS443:3:14:889:844#0/1  
GAATCAGTCAATTCACATGCCTTATTGAATTCATTTTGGGA  
+HWI-EAS443:3:14:889:844#0/1  
a\_`a`ab`b`[Va¥Z`¥]`\_^[\_`^aa]]\_YGX[`¥\_]^[^  
@HWI-EAS443:3:14:903:133#0/1  
ATTCGGATTTCCATTTTCATCGACGAACGGGTGAATCAAT

+HWI-EAS443:3:14:903:133#0/1  
abaaaa\_`aa\_[]`a`a\_`a^a\_`aX\_`a\_\_\_\_Za\_`^UY]`  
@HWI-EAS443:3:14:91:1921#0/1  
ATGGAACCTCCAAGATCAAGATGAAATGGGGCATGGAAAT  
+HWI-EAS443:3:14:91:1921#0/1  
aaa\_aaaaaaa]`aQa`a\_`a`¥]TWYZ\_]XNQ\_Z\_  
@HWI-EAS443:3:14:923:656#0/1  
AGGTGCTAGCAGAGCTACAGGACATTGAAAATGAAGAGAA  
+HWI-EAS443:3:14:923:656#0/1  
aaa]^\_aabaaa`\_`aa\_a]\_^\_a`a`[\_\_\_\_a^`\_`a\_\_  
@HWI-EAS443:3:14:929:1559#0/1  
CAAGAAATGGCCAGTAGGAGTCTATGGGATTCCTTCGTC  
+HWI-EAS443:3:14:929:1559#0/1  
aa`Y`a]aa]``NXa¥K[X\_ZX¥`XTUS^`S\_\_^[PN  
@HWI-EAS443:3:14:965:1853#0/1  
CTAAATTTCTTCCTGATTTGTATGATTACAAAGAGAACCG  
+HWI-EAS443:3:14:965:1853#0/1  
aa`a\_\_\_\_XYbL]V\_aWY\_`V[aa^G]]a\_^\_R]\_SZU`P]  
@HWI-EAS443:3:15:1067:366#0/1  
GGTCGGCAAGCTTGCGCATAGTTCCTGTAATCTCAAATTT  
+HWI-EAS443:3:15:1067:366#0/1  
a]Xa]a^aaaa\_`¥^`¥]a`a`a`¥\_aX[Z\_\_aVP[\_\_\_\_a  
@HWI-EAS443:3:15:1069:1994#0/1  
ACCCGAATGCACTATTGAAGCACCGATTTGAGATAATTGA  
+HWI-EAS443:3:15:1069:1994#0/1  
a`aa\_a\_aaRT\_a^`^X]\_Z\_Y\_\_\_\_X]Y\_a^YW\_]\_]\_^  
@HWI-EAS443:3:15:1083:138#0/1  
CTTCAATTGGCTTGTTCTTCTTCATGTTCTTTGTCCTTGGG  
+HWI-EAS443:3:15:1083:138#0/1  
aaaaabaaba\_aa\_`P[[^a\_`a\_¥[DYaa\_^]Yaa^^a  
@HWI-EAS443:3:15:110:1024#0/1  
AAAGAATTCCTTGGTCATGTCTTTCTCTTTGACAGAAGAC  
+HWI-EAS443:3:15:110:1024#0/1  
`aaaZX`a`U^aaa\_]^^a]`^XYa`a`\_\_]``\_a```[  
@HWI-EAS443:3:15:1204:1766#0/1  
GCCTGGACAGTGGTGAACAGTATATGTAACACAACAGGGG  
+HWI-EAS443:3:15:1204:1766#0/1  
aaabbabaaa¥aa¥aaaaba\_aaaaa]a`\_`aa\_`^`^`¥\_  
@HWI-EAS443:3:15:1298:602#0/1  
AGGACATTGAAAATGAAGAGAAGATCCCAAGGACAAAGAA  
+HWI-EAS443:3:15:1298:602#0/1  
a¥a¥]a^^^]^^YaaaabVSX¥aaaZWFSbYN¥[QO^a\_`  
@HWI-EAS443:3:15:137:1639#0/1  
GAAGTTCGGTGGGAGACTTTGGTCGGCAAGCTTGCGCATA  
+HWI-EAS443:3:15:137:1639#0/1  
aZZ]S[^T[Oa^¥aaa`a]`ZUUaS\_^`^[a[^[^\_aa][  
@HWI-EAS443:3:15:1394:48#0/1  
ATGGGCCTCGACACTTGGCCTATCGCAGTCCTCAAGAGCA  
+HWI-EAS443:3:15:1394:48#0/1  
a^ba^ab¥`X¥^\_a¥\_`[N\_\_\_\_\_Q^\_U\_XS\_¥Z]\_`H¥



@HWI-EAS443:3:15:1396:22#0/1  
CTCCACAACCTTGAGGGGTTTTTCGGCTGAATCGAGAAAATT  
+HWI-EAS443:3:15:1396:22#0/1  
aTa\_T¥UWbb\_bTZ]Z\_S^`¥]`a\_`XZ]X`XWVYWUWY  
@HWI-EAS443:3:15:1517:1652#0/1  
GAGGAACCTATTTTACAGCAGAAGTGTCCCACTGCAGGGCT  
+HWI-EAS443:3:15:1517:1652#0/1  
^\_ZYVa`baba]a`aaa\_aaW`^]b^[VXa`^a]]a]\_V[  
@HWI-EAS443:3:15:1542:736#0/1  
ATTCTTTGGCTGGAAAGAGCCTAACATAGTCAAACCACAT  
+HWI-EAS443:3:15:1542:736#0/1  
aaa]`\_S`^^`[X\_\_RWZ^Z`S`U[^[Z[\_`¥ZSNTN\_X  
@HWI-EAS443:3:15:154:224#0/1  
CCCGAATGCACTATTGAAGCACCGATTTGAGATAATTGAA  
+HWI-EAS443:3:15:154:224#0/1  
abbaabaaaaaaaaaaaa`aa\_`a\_\_`a^a\_`^^^^^^^  
@HWI-EAS443:3:15:1741:1180#0/1  
TGGCGTTCACCTCTTTTGACATTTGGGAAAGCTTGCCCTC  
+HWI-EAS443:3:15:1741:1180#0/1  
abbbbaaTaYa\_V`ba`N^W`\_`U]a\_\_`SZ`\_ZR^S\_^  
@HWI-EAS443:3:15:245:1166#0/1  
GCGTCTCCACAACCTTGAGGGGTTTTTCGGCTGAATCGAGAA  
+HWI-EAS443:3:15:245:1166#0/1  
abbYaabbab`aabaabaaa]abaaa[aaaab`aaaa`a  
@HWI-EAS443:3:15:246:488#0/1  
AGCCAACAAAATAAAATCTGAGAAGACACACATTCACATC  
+HWI-EAS443:3:15:246:488#0/1  
abbaQY^¥`aa^abaaa\_aaaa[[\_`bU\_aaaa\_aa¥  
@HWI-EAS443:3:15:259:726#0/1  
GGGGCATGGAAATGAGGCGCTGCCTTCTTCAGTCTCTTCA  
+HWI-EAS443:3:15:259:726#0/1  
^]\_\_aa\_aaaa\_aaaa[a`\_`a`U\_`]`]\_YNM\_¥\_^ZFY  
@HWI-EAS443:3:15:27:1366#0/1  
GGGGGCTATATGAAGCAATCGAGGAGTGCCTGATTAATGA  
+HWI-EAS443:3:15:27:1366#0/1  
]bbabbaabbaabbbbbbbaabab^baabb`bbbbaaa  
@HWI-EAS443:3:15:368:286#0/1  
GTTTCCGATTTGTTTTCAAAGAATTCCTTGGTCATGTCTT  
+HWI-EAS443:3:15:368:286#0/1  
aY\_\_\_\_\_aWZ[W\_T`[]`^\_ZN[Z\_[]^^]WUT[]Z^^^  
@HWI-EAS443:3:15:504:629#0/1  
GCAACATCTTCTCCTATTTTCATCAAGTTCTATCCAGCTTG  
+HWI-EAS443:3:15:504:629#0/1  
aaaaaaaaaaaaaaaa^aa`aa\_a\_\_^\_\_\_\_a\_`\_a\_a`\_a  
@HWI-EAS443:3:15:538:1315#0/1  
AACCCATACAGTTTGTTCCTTCCGCTTCTTCTTTGGTCC  
+HWI-EAS443:3:15:538:1315#0/1  
abaaaa`aaaaU\_^a[\_`\_\_WW]\_\_W\_¥^^¥\_\_Z¥XX^  
@HWI-EAS443:3:15:548:601#0/1  
CTTGAATCAGTCAATTCACATGCCTTATTGAATTCATTTT

+HWI-EAS443:3:15:548:601#0/1  
abbb`ba````bbaaabbaaaa`aaa`aaa`\_`aaaaa^`  
@HWI-EAS443:3:15:594:574#0/1  
GGGTTTTCGGCTGAATCGAGAAAATTGCTTCTCATTGTTC  
+HWI-EAS443:3:15:594:574#0/1  
a`b\_aaa`^`Xbba`a]a¥`[`a`¥`^^`¥[`^`a^]\_  
@HWI-EAS443:3:15:609:1961#0/1  
CAGGCCATGATTGGTCTCTTCCTTCAATTATCTCAAATC  
+HWI-EAS443:3:15:609:1961#0/1  
abbbbabbbababbaa\_a\_\_abab\_aaaaaaaaa\_abbSU  
@HWI-EAS443:3:15:650:374#0/1  
CATGTTTCCGATTTGTTTTCAAAGAATTCCTTGGTCATGT  
+HWI-EAS443:3:15:650:374#0/1  
abbbbbbbbaabbbbaabbababba^bababbbba`a`ab\_  
@HWI-EAS443:3:15:74:1386#0/1  
GATCTCTAGCAAGCTGGGTCCAAAATGAATTCATAAGGC  
+HWI-EAS443:3:15:74:1386#0/1  
S]^Y[^```\_[^`TPPa`¥]Z`[^`Y^Z`b\_a`^a^`  
@HWI-EAS443:3:15:812:1396#0/1  
AATTGAAGGAAGAGACCGAATCATGGCCTGGACAGTGGTG  
+HWI-EAS443:3:15:812:1396#0/1  
`babbbbaa\_abb`a^`a`a`aaaa\_Q`¥U][`\_0\_dW`  
@HWI-EAS443:3:15:880:1889#0/1  
GAAGAGACCGAATCATGGCCTGGACAGTGGTGAACAGTAT  
+HWI-EAS443:3:15:880:1889#0/1  
]RU^Va`0`a\_WV]\_`YZQ]I\_U`\_]N[^Z\_\_X\_¥  
@HWI-EAS443:3:15:997:1033#0/1  
CGAATGCACTATTGAAGCACCGATTTGAGATAATTGAAGG  
+HWI-EAS443:3:15:997:1033#0/1  
¥`bbbaaababb`bababbaababbbbabababababaaaa  
@HWI-EAS443:3:16:1019:461#0/1  
GGAGGAAGGCTCTATTGGGAAAGTGTGCAGGACCTTACTG  
+HWI-EAS443:3:16:1019:461#0/1  
aa\_aaHP]\_`^`\_¥X]a`a[U[[T\_WaU^]VSYU]]]ST]  
@HWI-EAS443:3:16:103:1768#0/1  
TGAGAAAGGCATAAATCCCAATTACCTCATGGCTTGAAG  
+HWI-EAS443:3:16:103:1768#0/1  
`V`ababaabb`a\_a`a`aaaaaa\_\_aaa]\_`\_J`X`B  
@HWI-EAS443:3:16:1153:408#0/1  
CAGAGCCCAGATCTCTAGCAAGCTGGGTCCAAAATGAATT  
+HWI-EAS443:3:16:1153:408#0/1  
aba`b`[^`aaabaa`aaaaaa`aaa^aaa`a^aa`\_`^`  
@HWI-EAS443:3:16:1161:1005#0/1  
GGCTCTGGCTCATCACTGTCATACTGTTTAAGGTCTCCAA  
+HWI-EAS443:3:16:1161:1005#0/1  
`X]Q]`YRY\_¥QUUVNX¥NY^ZVGSPKZXSXVZTUNWRY^  
@HWI-EAS443:3:16:1172:304#0/1  
TATTTTACCAGAGTGGCCACTTCAATTGGCTTGTCTCTT  
+HWI-EAS443:3:16:1172:304#0/1  
`]bb`aabaaaa`GaX\_a^\_a\_YZ\_\_Z¥XNVaJUZRFRZU

@HWI-EAS443:3:16:1243:212#0/1  
GAAC TTTGTAAGTATGGAGTTCTCACTCACTGACCCGAGA  
+HWI-EAS443:3:16:1243:212#0/1  
ab[ `H` ]¥F]a`V¥TaUV^Z[a[UMUR\_`R`BBBBBBBB  
@HWI-EAS443:3:16:1301:541#0/1  
GAAAAAGTAGACTTTGATGACTGCAAAGATGTTGGAGACC  
+HWI-EAS443:3:16:1301:541#0/1  
a`aaa`a\_ba`aaa`aaaa\_\_\_a\_\_`````\_a\_`a\_\_a]]Y  
@HWI-EAS443:3:16:1360:1457#0/1  
GACTGAAGAAGGCAGCGCCTCATTTCATGCCCCATTTC  
+HWI-EAS443:3:16:1360:1457#0/1  
\_ba`aaaaa¥X¥\_b\_^aPX^Q]\_Y`QX[Q\_XLN]¥`\_[Y¥  
@HWI-EAS443:3:16:136:160#0/1  
CCAATTTCAATGAACCGTTCTCTTTGTAATCATACAAAT  
+HWI-EAS443:3:16:136:160#0/1  
aaaab^^aa[^[^`aaaa]`a\_`^`\_aZ]\_\_]\_¥\_\_]^\_^  
@HWI-EAS443:3:16:1377:342#0/1  
GTCCGCTTTGGTGGCCATCTCCTCTCCAGTGAATGAAAAG  
+HWI-EAS443:3:16:1377:342#0/1  
a\_aaa`abaaY\_aa^^[Ya]\_]\_¥V][^U`a^^Y^\_Y\_  
@HWI-EAS443:3:16:1446:1273#0/1  
ACTTGAGGGGTTTTTCGGCTGAATCGAGAAAATTGCTTCTC  
+HWI-EAS443:3:16:1446:1273#0/1  
ab`ZS` `bba\_b]Z`T[]b\_a[ ` `S]P[\_aa\_`R^[TZ\_  
@HWI-EAS443:3:16:146:460#0/1  
ATTTTACAGCAGAAGTGTCCCACTGCAGGGCTACTGAATA  
+HWI-EAS443:3:16:146:460#0/1  
a`bbabaabbb]ab`G`\_a`aaa^a`[aXXa\_\_`\_a^\_\_\_\_  
@HWI-EAS443:3:16:1528:1044#0/1  
TGGGGGCTATATGAAGCAATCGAGGAGTGCCTGATTAAT  
+HWI-EAS443:3:16:1528:1044#0/1  
URR]IOQ\_`PQ`aUTQ\_VRYT]`KZYQVLXMLUaW\_¥]ZS  
@HWI-EAS443:3:16:1601:1979#0/1  
CACTCACTGACCCGAGACTGGAGCCACACAAATGGGAAAA  
+HWI-EAS443:3:16:1601:1979#0/1  
ababbbbb`b`SX¥`\_Ka`a`ZV\_S^`[UbaaY¥a` `]`a  
@HWI-EAS443:3:16:1613:348#0/1  
GCCATATTTTCACCGAGTGCCCACTTCAATTGGCTTGTTTC  
+HWI-EAS443:3:16:1613:348#0/1  
a`ZZ[]]`a]a\_KV^QYYaUOT^]ZWZ`ZZ[\_LQ[[MTBB  
@HWI-EAS443:3:16:1619:552#0/1  
ACATAATGAAGGGAGTGTACATAAATACGGCCTTGCTCAA  
+HWI-EAS443:3:16:1619:552#0/1  
aaabaabb`aaaa`a]a]a^`\_a` `a^a`^^]^^]ZX^  
@HWI-EAS443:3:16:1654:382#0/1  
GGCATGGAAATGAGGCGCTGCCTTCTTCAGTCTTTCAGC  
+HWI-EAS443:3:16:1654:382#0/1  
aa\_aa`Y¥` ` `¥a`Wa\_aaWQ\_`Y]]W¥\_[Q^¥¥WUWYB  
@HWI-EAS443:3:16:1673:794#0/1  
ACATAATGAAGGGAGTGTACATAAATACGGCCTTGCTCAA

+HWI-EAS443:3:16:1673:794#0/1  
ababaabbaab`a^a\_b\_a`\_aa`a`\_\_`^`Xaa^`\_¥¥\_  
@HWI-EAS443:3:16:1718:333#0/1  
GCATAAATCCCAATTACCTCATGGCTTGGAAGCAGGTGCT  
+HWI-EAS443:3:16:1718:333#0/1  
aa\_ab`a`S^`\_`a\_\_ZV\_^^^a\_\_\_\_\_]V\_[VYU[IVBB  
@HWI-EAS443:3:16:1721:1483#0/1  
ATTCAGTAGCCCTGCAGTGGGACACTTCTGCTGTAAAATA  
+HWI-EAS443:3:16:1721:1483#0/1  
aa\_QZ`^^a^`WP]P^\_G\_¥`^`\_`\_`^aa^``]Z]^0\_  
@HWI-EAS443:3:16:290:707#0/1  
CCTCTTTCGGACTGACGAAAGGAATCCCATAGACTCCTAC  
+HWI-EAS443:3:16:290:707#0/1  
ab`aa\_¥¥`^aaXZ]aa`Z\_a]`a¥`X`a`\_V^`Y`\_\_`\_  
@HWI-EAS443:3:16:343:1481#0/1  
GGGGCATGGAAATGAGGCGCTGCCTTCTTCAGTCTTCA  
+HWI-EAS443:3:16:343:1481#0/1  
aa`]aa]a````aaaa\_a]`])`a`\_¥`]a^]ZSa¥`^¥S¥  
@HWI-EAS443:3:16:35:111#0/1  
GCTGAAAGTCATCCATGGCTGCACAGGATGCATTGAGCAA  
+HWI-EAS443:3:16:35:111#0/1  
a\_a`Sa]a\_aa`[a`\_a`^\_]NU¥^¥[¥SYSTQ[TTUS[B  
@HWI-EAS443:3:16:371:1124#0/1  
CCCTGCTCTTTCGTCAAGGGTGTAGTCCGCTTTGGTGGC  
+HWI-EAS443:3:16:371:1124#0/1  
aaaa`]]]aaaa`aV]S]`V[Qa[`^U^]X][^YK]W^UY  
@HWI-EAS443:3:16:378:106#0/1  
CATTCTTTGGCTGGAAAGAGCCTAACATAGTCAAACCACA  
+HWI-EAS443:3:16:378:106#0/1  
abbbababababbb`aaaaa]Yaaa^aaaa^``\_a`\_\_\_\_  
@HWI-EAS443:3:16:379:1741#0/1  
TTTCGGCTGAATCGAGAAAATTGCTTCTCATTGTTTCAGGC  
+HWI-EAS443:3:16:379:1741#0/1  
[KYa`a`]a[\_]\_aa`\_aa`\_\_Y\_[¥\_YW`\_¥¥XY\_]]]]  
@HWI-EAS443:3:16:413:152#0/1  
CTCCAGCCTTGAAAACCTTAGAGCCTATGTAGATGGATTC  
+HWI-EAS443:3:16:413:152#0/1  
abba\_bbababaa`aababbaaa`aabb`abaaa`a`a`  
@HWI-EAS443:3:16:431:1092#0/1  
AGTCATCAAAGTCTACTTTTTCTGGTGCCATATTTTCACC  
+HWI-EAS443:3:16:431:1092#0/1  
aa¥baa`[aZZYaa``aaaa`aa`Za`a`aaa``¥aa\_^  
@HWI-EAS443:3:16:501:1398#0/1  
AGAATTCCTTGGTCATGTCTTTCTCTTTGACAGAAGACTC  
+HWI-EAS443:3:16:501:1398#0/1  
aaa`ab]baaa\_Xaaaa\_ba\_a\_aaa\_\_a[`aa\_a^`]\_\_  
@HWI-EAS443:3:16:548:528#0/1  
CAGATCTCTAGCAAGCTGGGTCCAAAATGAATTCAATAAG  
+HWI-EAS443:3:16:548:528#0/1  
a\_a`a`ab`ab`b`aa`baUaa\_b\_^aa`\_a\_\_a`aaaa

@HWI-EAS443:3:16:627:496#0/1  
ACAAGAAATGGCCAGTAGGAGTCTATGGGATTCCTTTCGT  
+HWI-EAS443:3:16:627:496#0/1  
`b`bba^[\`a[\`a]aaaa\_\_aaa¥aa\_\_^V]\_\_`Y[Y  
@HWI-EAS443:3:16:62:251#0/1  
GCCCACTTCAATTGGCTTGTCTCTTCATGTTCTTTGTCC  
+HWI-EAS443:3:16:62:251#0/1  
abaaa\_aaa¥`\_\_a`a\_¥XQ]X`] ]\_V\_]RY^W[\_\_¥WYZ  
@HWI-EAS443:3:16:707:1357#0/1  
GGGGTTTTCGGCTGAATCGAGAAAATTGCTTCTCATTGTT  
+HWI-EAS443:3:16:707:1357#0/1  
aaaV0a\_a`a\_a`aa\_¥\_^\_\_\_a\_`][\_^^\_`\_\_`^]\_ZZ  
@HWI-EAS443:3:16:769:1764#0/1  
GAGATAATTGAAGGAAGAGACCGAATCATGGCCTGGACAG  
+HWI-EAS443:3:16:769:1764#0/1  
`Zaaaaaaaaaaaaaaaaaaaa`aa\_a`aa\_\_\_\_\_]\_\_Z^R`]  
@HWI-EAS443:3:16:786:738#0/1  
AACATCTTTGCAGTCATCAAAGTCTACTTTTTCTGGTGCC  
+HWI-EAS443:3:16:786:738#0/1  
`aabaabaa`aa`aaa`a^¥a]`aa`aaaa`a`\_Y``\_  
@HWI-EAS443:3:16:796:871#0/1  
AAGACATTCTTTGGCTGGAAAGAGCCTAACATAGTCAAAC  
+HWI-EAS443:3:16:796:871#0/1  
a^]]^^[^]`\_\_\_\_\_^\_a\_^\_]Y`\_]^[ ]\_^^\_T]^`\_U  
@HWI-EAS443:3:16:935:204#0/1  
CGATTTGAGATAATTGAAGGAAGAGACCGAATCATGGCCT  
+HWI-EAS443:3:16:935:204#0/1  
ab¥aaba\_a\_aa`a][^`\_aV`\_`a\_`[\_]\_`\_`^`\_WV^  
@HWI-EAS443:3:17:1065:1055#0/1  
ATTTTACAGCAGAAGTGTCCCACTGCAGGGCTACTGAATA  
+HWI-EAS443:3:17:1065:1055#0/1  
aaababaaaaaaaaaVa`a\_`a`\_`a\_`\_a\_X\_`¥`a\_\_`\_  
@HWI-EAS443:3:17:1116:1691#0/1  
GGTGAACCTTTGTAAGTATGGAGTTCTCACTCACTGACCCG  
+HWI-EAS443:3:17:1116:1691#0/1  
T\_[``[ab`ba`ba`b`bba`aababbbabbababaaaaa  
@HWI-EAS443:3:17:1130:1337#0/1  
CTTGCTAGAGATCTGGGCTCTGGCTCATCACTGTCATACT  
+HWI-EAS443:3:17:1130:1337#0/1  
aaa``aaa`aa`\_`¥`aaaa`Z^U\_`a[``\_aaUY`\_]\_a  
@HWI-EAS443:3:17:1131:302#0/1  
AGACAATTGAAGAAAAATTTGAGATTACAGGAACTATGCG  
+HWI-EAS443:3:17:1131:302#0/1  
ab```aabaaaabaa\_\_\_\_\_aaaa\_a```a\_a`]\_a^`a\_`\_`  
@HWI-EAS443:3:17:122:114#0/1  
ATCGGAAACATGGCCAATCGGAGAGTCACCCAGGGGAGTG  
+HWI-EAS443:3:17:122:114#0/1  
Zbbaaa]Zaaaabaa]^`]¥^^a]`Wa^Z^]S^Y\_aU`T`  
@HWI-EAS443:3:17:132:1431#0/1  
CATAAATACGGCCTTGCTCAATGCATCCTGTGCAGCCATG

+HWI-EAS443:3:17:132:1431#0/1  
a`abbb)`aaaUaaaab\_aYaa[]`aaaa^^^ [K]a\_[GU  
@HWI-EAS443:3:17:1330:728#0/1  
GAGCCTTCCCTCCACTCCCCTGGGTGACTCTCCGATTGGCC  
+HWI-EAS443:3:17:1330:728#0/1  
^R```a`a`\_W]W]SX[SZ¥U]aP\_[FX0Q¥S^KUJYVT¥  
@HWI-EAS443:3:17:1365:771#0/1  
ATCTTTTTCATTCACTGGAGAGGAGATGGCCACCAAAGCGG  
+HWI-EAS443:3:17:1365:771#0/1  
a[aba`Vaa`aaa¥]Z]aaa]V^[a¥]a`\_][^aLRTX^X  
@HWI-EAS443:3:17:137:331#0/1  
GAAGATCCCAAGGACAAAGAACATGAAGAGAACAAGCCAA  
+HWI-EAS443:3:17:137:331#0/1  
aabaaaabaaX`\_abaa\_aaaaaaaa`aa`a`aa`a\_a\_  
@HWI-EAS443:3:17:1419:669#0/1  
CTTGCTCAATGCATCCTGTGCAGCCATGGATGACTTTCAG  
+HWI-EAS443:3:17:1419:669#0/1  
`bbbaabaabbabbbb\_ba\_b^aaa\_aaaaaab`Wa``¥`a  
@HWI-EAS443:3:17:1430:1839#0/1  
CATTAATCAGGCACTCCTCGATTGCTTCATATAGCCCCC  
+HWI-EAS443:3:17:1430:1839#0/1  
`baabbaabba`abba`aa^b`bb\_abaabaUa\_`aQ\_aa  
@HWI-EAS443:3:17:1439:618#0/1  
CAATGCATCCTGTGCAGCCATGGATGACTTTCAGCTGATC  
+HWI-EAS443:3:17:1439:618#0/1  
V\_\_¥a``bb`]bUX[aaV^ab\_`[\_^baaZ[QZ^XX\_a  
@HWI-EAS443:3:17:1453:444#0/1  
ATCCCAATTACCTCATGGCTTGGAAGCAGGTGCTAGCAGA  
+HWI-EAS443:3:17:1453:444#0/1  
aa[a\_ab``a]¥aTRaa[\_aaY\_¥\_V^`U^HYVW¥`UZ\_Q  
@HWI-EAS443:3:17:1474:411#0/1  
ATTCGGATTTCCATTTTCATCGACGAACGGGGTGAATCAAT  
+HWI-EAS443:3:17:1474:411#0/1  
aba\_^JRa\_`¥aabaaX\_a`aa\_`\_`]]aa\_]a`\_ZZ^^\_  
@HWI-EAS443:3:17:1750:372#0/1  
CATGGAAATGAGGCGCTGCCTTCTTCAGTCTTTCAGCAG  
+HWI-EAS443:3:17:1750:372#0/1  
aabbbb\_ba]bbbb`[`b``a\_¥\_Y^^`]a\_aa[\_`Z^`  
@HWI-EAS443:3:17:1772:279#0/1  
CCACTCCCCTGGGTGACTCTCCGATTGGCCATGTTTCCGA  
+HWI-EAS443:3:17:1772:279#0/1  
aaaabbbbaaaabb^b`\_\_\_a\_[`¥\_^a\_\_\_^^XW^aWW]U  
@HWI-EAS443:3:17:207:1592#0/1  
GAGCCTATGTAGATGGATTCGAGCCGAACGGCTGCATTGA  
+HWI-EAS443:3:17:207:1592#0/1  
aaYGW¥a\_bV¥^V]NPPT]^\_aXUYRS¥¥]WVBBBBBBBB  
@HWI-EAS443:3:17:218:1150#0/1  
GGGGCATGGAAATGAGGCGCTGCCTTCTTCAGTCTTCA  
+HWI-EAS443:3:17:218:1150#0/1  
R][TVV`Q[XYbba^^abab¥ZabaabW]`W`S```¥aZ`

@HWI-EAS443:3:17:219:1305#0/1  
CATTAATCAGGCACTCCTCGATTGCTTCATATAGCCCCC  
+HWI-EAS443:3:17:219:1305#0/1  
]]Y\_¥Y^^\_N]a\_b¥^WW\_[a`a]a\_abZ]]NK\_aIZU]`  
@HWI-EAS443:3:17:270:1860#0/1  
ACCGAACTTCTCCAGCCTTGAAAACCTTTAGAGCCTATGTA  
+HWI-EAS443:3:17:270:1860#0/1  
^baa`aaaaaaaa\_aa`\_`aaaa`\_\_a`\_]a^aaa`^a  
@HWI-EAS443:3:17:271:563#0/1  
CTGGGCTCTGGCTCATCACTGTCATACTGTTAAGGTCTC  
+HWI-EAS443:3:17:271:563#0/1  
aa\_aa\_a`a`aaaa`a^`\_aUaaa¥\_aa^\_a\_\_\_\_\_XR^¥  
@HWI-EAS443:3:17:27:138#0/1  
TCAAAACTAGGCTTTTCACTATAAGACAAGAAATGGCCAG  
+HWI-EAS443:3:17:27:138#0/1  
Y¥^TT`\_a¥\_¥¥VX`S```]T`aa]`TJ[XYOXT]X[RRY  
@HWI-EAS443:3:17:340:1040#0/1  
GAGACCTTAAACAGTATGACAGTGATGAGCCAGAGCCCAG  
+HWI-EAS443:3:17:340:1040#0/1  
`a`aZ^\_[]a`[`b]]^aaa]]]YW`V`WN[Z^^`RTQVL  
@HWI-EAS443:3:17:410:1975#0/1  
GGGGGCTATATGAAGCAATCGAGGAGTGCCTGATTAATGA  
+HWI-EAS443:3:17:410:1975#0/1  
aa`YJ`a[]`VZba[`abS\_aa¥T]aW`^a`\_aS\_a\_``\_  
@HWI-EAS443:3:17:419:799#0/1  
CAGGGGTAGAGAAGCCTAAATTTCTCCTGATTTGTATGA  
+HWI-EAS443:3:17:419:799#0/1  
`[\_`UY[Y¥Za\_a\_`aYaW\_a\_``^[\_][[MZ]^\_Y[^a]  
@HWI-EAS443:3:17:421:1237#0/1  
GCCCCATTCAATTGGCTTGTCTCTTCATGTTCTTTGTCC  
+HWI-EAS443:3:17:421:1237#0/1  
abZb`a`a\_b]]`]PU]]Q¥]RPXa`[Y^SQ[QW`XDNW`  
@HWI-EAS443:3:17:463:1563#0/1  
AGACATTCTTTGGCTGGAAGAGCCTAACATAGTCAAACC  
+HWI-EAS443:3:17:463:1563#0/1  
\_[a`a`aaa^`\_Yaa^^[a`ZXZW^^\_a``¥\_\_YX```\_^^  
@HWI-EAS443:3:17:490:2001#0/1  
GGGGGCTATATGAAGCAATCGAGGAGTGCCTGATTAATGA  
+HWI-EAS443:3:17:490:2001#0/1  
aa]PNZ`\_a\_¥Y[\_ZH\_a^V]NTNNNLZVTSSLXR\_]TW\_  
@HWI-EAS443:3:17:502:1357#0/1  
TGAACCTTTGTAAGTATGGAGTTCTCACTCACTGACCCGAG  
+HWI-EAS443:3:17:502:1357#0/1  
M[VQ¥bbbbbaaWJa]\_W\_abab\_YWbab\_S`W¥]`aa`a  
@HWI-EAS443:3:17:554:92#0/1  
ATAGCCCCCAAGATCGAAGTTCCAGGTTCCAGGTTGTC  
+HWI-EAS443:3:17:554:92#0/1  
abaa`^aaa`]aa^¥¥]Z\_^XIRQSG¥^U¥T¥¥¥^PW^WW  
@HWI-EAS443:3:17:556:160#0/1  
GGACAGTGGTGAACAGTATATGTAACACAACAGGGGTAGA

+HWI-EAS443:3:17:556:160#0/1  
ab¥abbabbab`a`ab]aaaaa`aa\_a\_a`\_`aa\_`Z\_\_^  
@HWI-EAS443:3:17:607:79#0/1  
ATCCGAAAATCGAACTAACAAGTTTGTGCAATATGCAC  
+HWI-EAS443:3:17:607:79#0/1  
\_`ba`baaa^S`\_`\_¥\_\_aX^\_\_\_^a]\_\_`\_¥X^]  
@HWI-EAS443:3:17:64:42#0/1  
TTCTTGTCTTATAGTGAAAAGCCTAGTTTTGATTCTTGCC  
+HWI-EAS443:3:17:64:42#0/1  
aaaaaa\_aaaa`a]a\_`\_`\_\_\_^`a^\_^\_]\_^]\_^]\_`  
@HWI-EAS443:3:17:693:1742#0/1  
CACCACGCCCCCTCAGATTGCCTGATGGGCCTCTTGCCA  
+HWI-EAS443:3:17:693:1742#0/1  
`a^\_aa`\_a\_`\_`a`PFF¥P^HZ\_F^TPUaF\_DMI]BBB  
@HWI-EAS443:3:17:719:1545#0/1  
CAATAATTGTAGAATCTGGTGACCCGAATGCACTATTGAA  
+HWI-EAS443:3:17:719:1545#0/1  
aabba`abb\_ba`bab\_aa[aaaa^aaa\_`Xa\_`\_`a\_]a]  
@HWI-EAS443:3:17:782:264#0/1  
GTTTTGATTCTTGCCCTGCTCTTTCGTC AAGGGTGTAGT  
+HWI-EAS443:3:17:782:264#0/1  
a¥^aaa\_aa`\_`^^`[[`\_`¥`\_`\_¥\_a\_`\_Uaa^VaV¥^U  
@HWI-EAS443:3:17:788:1293#0/1  
ACCGAATCATGGCCTGGACAGTGGTGAACAGTATATGTAA  
+HWI-EAS443:3:17:788:1293#0/1  
abb`]`a`[`\_`a`\_`\_\_\_a`\_ZW^V[Z¥`\_`W]^]]\_V]]  
@HWI-EAS443:3:17:795:1493#0/1  
TGGCGTTCACCTTCTTTTGACATTTGGGAAAGCTTGCCCTC  
+HWI-EAS443:3:17:795:1493#0/1  
aab`b\_a¥TL^\_U\_a\_`S¥a[[aaWa[[a\_^]a\_^\_aT^  
@HWI-EAS443:3:17:79:907#0/1  
CAAGAAATGGCCAGTAGGAGTCTATGGGATTCCTTTTCGTC  
+HWI-EAS443:3:17:79:907#0/1  
aaaa\_aa\_a\_`a`Z^WT]^V^`\_\_\_\_^Y\_^]¥\_^[YPZ  
@HWI-EAS443:3:17:809:905#0/1  
GGGGCATGGAAATGAGGCGCTGCCTTCTTCAGTCTCTTCA  
+HWI-EAS443:3:17:809:905#0/1  
aa\_a`aaaa\_aaaaa]aa\_`a^\_\_\_a¥^\_ZMM\_¥\_W^  
@HWI-EAS443:3:17:82:189#0/1  
CACTGTCATACTGTTTAAGGTCTCCAACATCTTTGCAGTC  
+HWI-EAS443:3:17:82:189#0/1  
abaab`bbabaaaabaa]^aZaaa\_a`\_`\_`\_a\_\_a^`\_`X\_  
@HWI-EAS443:3:17:971:921#0/1  
AGACAATTGAAGAAAAATTTGAGATTACAGGAACTATGCG  
+HWI-EAS443:3:17:971:921#0/1  
]Y¥Y`\_aa]Z¥b\_a\_`\_`\_\_\_a\_`\_`\_^]LX\_]][Z`P^¥X\_  
@HWI-EAS443:3:17:98:601#0/1  
TGGGATTTATGCCTTTCTCATGTGGTTTGGACTATGTTAGG  
+HWI-EAS443:3:17:98:601#0/1  
ab¥]]aaa[]¥\_`aa`aa\_`a\_`\_`\_\_\_^T^[]^]\_YZ[^^



@HWI-EAS443:3:18:1023:1426#0/1  
AAGCAATTTTCTCGATTCAGCCGAAAACCCCTCAAGTTGT  
+HWI-EAS443:3:18:1023:1426#0/1  
abaa^`aa\_`^`baa]aa\_aaaa`a`a`\_`a\_aaZ`U¥`W  
@HWI-EAS443:3:18:1094:130#0/1  
CGAACTTCTCCAGCCTTGAAAACCTTTAGAGCCTATGTAGA  
+HWI-EAS443:3:18:1094:130#0/1  
abaaaaaaaaa`a`a`aaa\_a^`a`\_`aRa]`a`\_`aY^`\_¥  
@HWI-EAS443:3:18:1164:767#0/1  
GGGGGCTATATGAAGCAATCGAGGAGTGCCTGATTAATGA  
+HWI-EAS443:3:18:1164:767#0/1  
\_ba[`]aa\_]bb`^`aa]Y`Zaa^a`\_]``a\_\_aZV¥``  
@HWI-EAS443:3:18:1166:1242#0/1  
TCAAGTTCTATCCAGCTTGAATCAGTCAATTCACATGCCT  
+HWI-EAS443:3:18:1166:1242#0/1  
aaab`\_aabbba\_\_aaaa`baaaa`\_\_a`a`aa`\_`^Y[`  
@HWI-EAS443:3:18:1177:1233#0/1  
TCCGATTGGCCATGTTTCCGATTTGTTTCAAAGAATTCC  
+HWI-EAS443:3:18:1177:1233#0/1  
aabbaaa`aaaa`[ab\_\_\_\_a`aa]aa`\_\_aa\_\_\_\_^`^`  
@HWI-EAS443:3:18:1231:446#0/1  
AATGCATCCTGTGCAGCCATGGATGACTTTCAGCTGATCC  
+HWI-EAS443:3:18:1231:446#0/1  
a`ba[aa^]a]aa\_^\_Y^¥^`^X\_YN\_YVY]^VY]VXXV  
@HWI-EAS443:3:18:1265:158#0/1  
GGCCATGTTTCCGATTTGTTTCAAAGAATTCCTTGGTCA  
+HWI-EAS443:3:18:1265:158#0/1  
aaaa`bb\_aa`aaaaaab````\_\_\_\_a`Z``\_\_a`a\_Z\_^  
@HWI-EAS443:3:18:1399:610#0/1  
GGGTGAATCAATAATTGTAGAATCTGGTGACCCGAATGCA  
+HWI-EAS443:3:18:1399:610#0/1  
aaaT\_¥aa`¥X^`\_a`^¥^`Xa[¥\_a`Za^W]W`^^^^^]  
@HWI-EAS443:3:18:1403:1142#0/1  
CGGCTGAATCGAGAAAATTGCTTCTCATTGTTTCAGGCACT  
+HWI-EAS443:3:18:1403:1142#0/1  
a`aaabab`a`\_b`\_`aaaa]aa\_a`aaaa````\_`aaY^`\_`  
@HWI-EAS443:3:18:1447:276#0/1  
ATCCCAAGGACAAAGAACATGAAGAGAACAAGCCAATTGA  
+HWI-EAS443:3:18:1447:276#0/1  
aaaa[^^aa¥\_a`aa`\_^`a^`\_`\_`\_`^[\_`\_aVNZ^\_V^]  
@HWI-EAS443:3:18:1447:412#0/1  
GTCTCCACAACCTTGAGGGGTTTTTCGGCTGAATCGAGAAAA  
+HWI-EAS443:3:18:1447:412#0/1  
a\_]Z[a]^a^aab`\_`aa`Pa\_]Xa\_¥`\_a^]W]]\_]^^[  
@HWI-EAS443:3:18:1499:1072#0/1  
GTGCTTCAATAGTGCATTTCGGTCCAGATTCTACAATT  
+HWI-EAS443:3:18:1499:1072#0/1  
aaaaaa`aaaaa¥bXaa`a[Za¥\_a^^¥a\_aa¥a`U^Ya`  
@HWI-EAS443:3:18:1502:1009#0/1  
AACCAATGGAACCTCCAAGATCAAGATGAAATGGGGCATG

+HWI-EAS443:3:18:1502:1009#0/1  
¥V^`abaU\_Z`K`b`S^aZYT`a^Q`V``\_SUa\_QV^Z\_XV  
@HWI-EAS443:3:18:158:1022#0/1  
CCGATTTGAGATAATTGAAGGAAGAGACCGAATCATGGCC  
+HWI-EAS443:3:18:158:1022#0/1  
aa^\_aaa`a`a\_a\_a`a\_Y[\_\_\_a`[^\_^\_\_^^]aY  
@HWI-EAS443:3:18:1665:1870#0/1  
GTCCTGCACACTTTCCCAATAGAGCCTTCCCTCCACTCCCC  
+HWI-EAS443:3:18:1665:1870#0/1  
ZLYa`^`aa[]^¥YUbXQZY¥^`YUUUM\_UU[UUUUW  
@HWI-EAS443:3:18:1693:598#0/1  
CCTGATTTGTATGATTACAAAGAGAACCGTTCATTGAAA  
+HWI-EAS443:3:18:1693:598#0/1  
abbbbbbbbabbaabbbbaa`ababaaa^`b`a^ababaaa  
@HWI-EAS443:3:18:170:1591#0/1  
CCCCTGTTGTGTACATATACTGTTCCACTGTCCAGGC  
+HWI-EAS443:3:18:170:1591#0/1  
abaa\_`W^aQ\_\_`a`aa]\_aa^`aaa`a\_¥[R\_¥¥Z]  
@HWI-EAS443:3:18:1732:1903#0/1  
GAGCCTTCCCTCCACTCCCCTGGGTGACTCTCCGATTGGCC  
+HWI-EAS443:3:18:1732:1903#0/1  
`^^a\_[^a]X¥aS`Iaa]a\_^`UZab¥¥a^\_a]a]`¥MQ  
@HWI-EAS443:3:18:1755:1069#0/1  
AAGAGACCGAATCATGGCCTGGACAGTGGTGAACAGTATA  
+HWI-EAS443:3:18:1755:1069#0/1  
[^]¥RZ\_¥¥]¥Y^\_¥¥]WRR[^¥VV¥[`YTTQRDKVY  
@HWI-EAS443:3:18:211:1069#0/1  
CGAAAATCGAAACTAACAAGTTTGCTGCAATATGCACACA  
+HWI-EAS443:3:18:211:1069#0/1  
aa\_ab^aa^)`]aa`^`aaa]````\_\_aa\_`\_a\_aa`^`\_  
@HWI-EAS443:3:18:268:320#0/1  
GAAGATCCCAAGGACAAAGAACATGAAGAGAACAAGCCAA  
+HWI-EAS443:3:18:268:320#0/1  
]\_TZ`Z`[KZbb`]ab¥N^`a[`ab`]Y^aaa]`^`aa\_X  
@HWI-EAS443:3:18:300:356#0/1  
AGGACATTGAAAATGAAGAGAAGATCCCAAGGACAAAGAA  
+HWI-EAS443:3:18:300:356#0/1  
a`\_[^`^aaa]¥\_aba\_a^¥¥````\_a\_`\_¥\_^`\_a`\_  
@HWI-EAS443:3:18:367:1694#0/1  
AAGAATTCCTTGGTCATGTCTTTCTTTGACAGAAGACT  
+HWI-EAS443:3:18:367:1694#0/1  
aa^^\_aS`^aa]UWaYaaPY`\_\_[a\_\_^aS`\_W¥a]`^\_  
@HWI-EAS443:3:18:406:1177#0/1  
AAACAAACTTCCAAATGTGTGCATATTGCAGCAAACCTGT  
+HWI-EAS443:3:18:406:1177#0/1  
\_ba\_bbbaaa\_aaa`a^`Y\_a\_a`\_^\_a^aa¥^\_^`\_  
@HWI-EAS443:3:18:415:239#0/1  
CCGAGACTGGAGCCACACAAATGGGAAAAATACTGTGTTC  
+HWI-EAS443:3:18:415:239#0/1  
aa`aa`\_`\_`aaY`\_\_^\_]^`\_`^`Y¥]]^^\_W^^Y\_^UL

@HWI-EAS443:3:18:448:1118#0/1  
TCCACTCCCCTGGGTGACTCTCCGATTGGCCATGTTTCCG  
+HWI-EAS443:3:18:448:1118#0/1  
aaabaaaa\_\_a^aUa\_[`a^^`\_[U¥`^Z[¥T¥T¥^V[Q  
@HWI-EAS443:3:18:471:268#0/1  
GCATTGAGCAAGGCCGTATTTATGTACTCCCTTCATTA  
+HWI-EAS443:3:18:471:268#0/1  
a````\_``\_aa]`[]^\_V[^¥^^]Z^]¥UZZ]YWXZZWZZ  
@HWI-EAS443:3:18:607:753#0/1  
GGTGACCCGAATGCACTATTGAAGCACCGATTTGAGATAA  
+HWI-EAS443:3:18:607:753#0/1  
abOb`a[^aYaXVW\_^^aa`\_`^\_\_^¥Z`[\_[TORRV^^\_  
@HWI-EAS443:3:18:639:614#0/1  
ATCAAATGCATGAAGACATTCTTTGGCTGGAAAGAGCCTA  
+HWI-EAS443:3:18:639:614#0/1  
]aa`baa\_ZYaaba`aaa\_X`\_`\_a`\_`a^^aa`\_`WP`\_  
@HWI-EAS443:3:18:703:628#0/1  
CGTCTCCACAACCTTGAGGGGTTTTCGGCTGAATCGAGAAA  
+HWI-EAS443:3:18:703:628#0/1  
aaabaa\_]\_aa`bb`bab`G^aa\_aa`]Xaa[[^`a`Ya  
@HWI-EAS443:3:18:789:1534#0/1  
CATTGAAAATGAAGAGAAGATCCCAAGGACAAAGAACATG  
+HWI-EAS443:3:18:789:1534#0/1  
abbabbbabaabaaa`bbaaaa\_aa`a\_a\_aaaaa`aaa  
@HWI-EAS443:3:18:842:564#0/1  
CCCGAATGCACTATTGAAGCACCGATTTGAGATAATTGAA  
+HWI-EAS443:3:18:842:564#0/1  
aZb\_IYYa[`a[aaa\_a[X^\_\_\_\_`\_Y\_\_W\_]\_]\_\_¥\_`^  
@HWI-EAS443:3:18:848:365#0/1  
CTCCAACATCTTTGCAGTCATCAAAGTCTACTTTTTCTGG  
+HWI-EAS443:3:18:848:365#0/1  
abbaababbbbaaabab`abaaaaa¥aaa\_aa`\_```aa  
@HWI-EAS443:3:18:856:315#0/1  
TTGGGGGGCTATATGAAGCAATCGAGGAGTGCCTGATTAA  
+HWI-EAS443:3:18:856:315#0/1  
^abba\_aab``bbab`aaaa\_a¥a`\_`a\_aY`\_`\_`¥`\_`^  
@HWI-EAS443:3:18:875:1581#0/1  
TGTGGTTTACTATGTTAGGCTCTTTCCAGCCAAAGAATG  
+HWI-EAS443:3:18:875:1581#0/1  
a`\_baYb``a\_^`b¥^aaa]VYP\_aa\_Wa`\_aa\_aU^`^0  
@HWI-EAS443:3:18:895:771#0/1  
AAGAGCCTAACATAGTCAAACCACATGAGAAAGGCATAAA  
+HWI-EAS443:3:18:895:771#0/1  
^``]baba`\_`baa]a\_]aaa^`a`\_`aa`^`\_¥X]\_\_\_\_`\_a`  
@HWI-EAS443:3:18:983:45#0/1  
GCCCACTTCAATTGGCTTGTCTCTTCATGTTCTTTGTCC  
+HWI-EAS443:3:18:983:45#0/1  
a``U`]^\_]\_^`\_R\_W[U¥SMWWVMTT]WWHW^WWYWY  
@HWI-EAS443:3:19:1000:554#0/1  
GTGCCATATTTTACCAGAGTGCCCACTTCAATTGGCTTGT

+HWI-EAS443:3:19:1000:554#0/1  
aaba`ab`bbaaabaaa`a\_aa\_`^`aa\_\_aa\_`a\_a\_P¥  
@HWI-EAS443:3:19:1006:622#0/1  
CACCTGCTTCCAAGCCATGAGGTAATTGGGATTTATGCCT  
+HWI-EAS443:3:19:1006:622#0/1  
]W\_a^`^S\_a¥]a¥[Y`^ZWaXPXP)`\_`aX`a[`]^UY[  
@HWI-EAS443:3:19:1008:857#0/1  
GCCAAGTGTGCGAGGCCCATGTTCCCTATATGTGAGAACCAA  
+HWI-EAS443:3:19:1008:857#0/1  
```]\_b^a\_abbaaaa]aa`^aa\_a]N]\_a\_a``a^UV``  
@HWI-EAS443:3:19:1061:550#0/1  
ATTAATCAGGCACTCCTCGATTGCTTCATATAGCCCCCA  
+HWI-EAS443:3:19:1061:550#0/1  
a``\_W¥ab`J¥baaa\_V^]^bbb`aXU¥`aaaa`P^PXa\_  
@HWI-EAS443:3:19:1075:100#0/1  
ATGAAATGGAAATCCGAATACATGAAACAACTTCCAAAT  
+HWI-EAS443:3:19:1075:100#0/1  
aa\_b\_aaa`\_\_\_aa^a`\_a\_^a`\_\_`^a\_^a\_^¥\_]`^`  
@HWI-EAS443:3:19:107:185#0/1  
GAGAAAGGCATAAATCCCAATTACCTCATGGCTTGAAGC  
+HWI-EAS443:3:19:107:185#0/1  
V]`baa\_X\_`Y``ba\_\_aa^^Zaaa`]P``aYMT^BBBB  
@HWI-EAS443:3:19:1291:1040#0/1  
AATTACCTCATGGCTTGAAGCAGGTGCTAGCAGAGCTAC  
+HWI-EAS443:3:19:1291:1040#0/1  
ab^```a`\_a^a`aa`U¥S^[SWZWMN\_QRVQVRVBBBB  
@HWI-EAS443:3:19:1317:79#0/1  
CGGGGTGAATCAATAATTGTAGAATCTGGTGACCCGAATG  
+HWI-EAS443:3:19:1317:79#0/1  
aaa¥VFZ¥Xa^RRa]¥`baNPax¥]LZ¥]S\_^PST[]R^^  
@HWI-EAS443:3:19:1365:1037#0/1  
TGCTAGCAGAGCTACAGGACATTGAAAATGAAGAGAAGAT  
+HWI-EAS443:3:19:1365:1037#0/1  
\_V¥\_bbba¥[P]b`aa\_aaaaa\_`aaa^]```a\_\_\_\_\_]  
@HWI-EAS443:3:19:1513:88#0/1  
GGGGCATGGAAATGAGGCGCTGCCTTCTTCAGTCTCTTCA  
+HWI-EAS443:3:19:1513:88#0/1  
aaaa``aba^\_`abaa^Ya^`\_WW¥\_U`\_VU^US^WWWWS  
@HWI-EAS443:3:19:152:1121#0/1  
GCAGGGCAAGAATCAAACTAGGCTTTTCACTATAAGACA  
+HWI-EAS443:3:19:152:1121#0/1  
[\_\_¥U`\_`aULU^¥aa[]aa¥OTVDRX^G`WU]VZ[EPX^  
@HWI-EAS443:3:19:1582:1499#0/1  
TTCCGATTTGTTTTCAAAGAATTCCTTGGTCATGTCTTTC  
+HWI-EAS443:3:19:1582:1499#0/1  
aaaaa\_`¥Yaaaa\_\_a^]`\_R\_`^`a`a\_Z^\_]Y¥]`^\_V  
@HWI-EAS443:3:19:1640:184#0/1  
TGGGGCATGGAAATGAGGCGCTGCCTTCTTCAGTCTCTTC  
+HWI-EAS443:3:19:1640:184#0/1  
a\_^aa\_`aba`a`aa\_a\_¥\_\_\_\_]NYW\_W`¥WV\_UQZWY¥B

@HWI-EAS443:3:19:169:473#0/1  
GGGCACTCGGTGAAAATATGGCACCAGAAAAAGTAGACTT  
+HWI-EAS443:3:19:169:473#0/1  
\_WS]¥]W[Y]NQV]a]WBBBBBBBBBBBBBBBBBBBBB  
@HWI-EAS443:3:19:1711:1250#0/1  
CATTAATCAGGCACTCCTCGATTGCTTCATATAGCCCCC  
+HWI-EAS443:3:19:1711:1250#0/1  
aabbaaaaababb\_b`ZbaaaaaaUaa\_aaaaaWLQ^\_¥  
@HWI-EAS443:3:19:1717:1106#0/1  
GGGGGCTATATGAAGCAATCGAGGAGTGCCTGATTAATGA  
+HWI-EAS443:3:19:1717:1106#0/1  
aabbaabababbaaa\_aaa`^ba\_`\_a[P`aUaa\_V\_\_Y  
@HWI-EAS443:3:19:1780:1424#0/1  
GGGGCATGGAATGAGGCGCTGCCTTCTTCAGTCTCTCA  
+HWI-EAS443:3:19:1780:1424#0/1  
ab\_aabbab`baba\_`ab`ba^\_a\_aa`Q¥aQ`a\_aa\_`  
@HWI-EAS443:3:19:230:1075#0/1  
CTCATTTGAGAAATGATACTGATGTGGTGAACCTTGTAAG  
+HWI-EAS443:3:19:230:1075#0/1  
¥R^X`aaRL]`a`Y`a[\_^^\_VYWY^NN`RUT`^\_\_]WL^  
@HWI-EAS443:3:19:23:770#0/1  
GAAAATCGAAACTAACAAGTTTGCTGCAATATGCACACAT  
+HWI-EAS443:3:19:23:770#0/1  
abbbba^a`ba`aaa`\_a`a`^\_aaaa`aa\_`````\_`  
@HWI-EAS443:3:19:263:130#0/1  
ATAAATACGGCCTTGCTCAATGCATCCTGTGCAGCCATGG  
+HWI-EAS443:3:19:263:130#0/1  
abab`aaaa`\_`\_`\_`^`\_`X```^\_]`^\_Y^^^]`^Y]`^  
@HWI-EAS443:3:19:286:220#0/1  
AATTCCTTGGTCATGTCTTTCTCTTTGACAGAAGACTCGG  
+HWI-EAS443:3:19:286:220#0/1  
Y]\_`]W]Zb\_MZ\_bb^b\_`bb\_\_b¥ba``abaa]abaab\_  
@HWI-EAS443:3:19:310:1160#0/1  
CAATAATTGTAGAATCTGGTGACCCGAATGCACTATTGAA  
+HWI-EAS443:3:19:310:1160#0/1  
a¥[^aZaaa`\_\_\_aaaaa]aaaaa```a[ ]aa\_`a`[`  
@HWI-EAS443:3:19:319:1602#0/1  
CGGCCTTGCTCAATGCATCCTGTGCAGCCATGGATGACTT  
+HWI-EAS443:3:19:319:1602#0/1  
a¥¥\_a\_abaababa]bb]aaa^RZaa^ba````]Y`^`^  
@HWI-EAS443:3:19:352:147#0/1  
GAGAGGAGATGGCCACCAAAGCGGACTACACCCTTGACGA  
+HWI-EAS443:3:19:352:147#0/1  
aY^X`^¥`Z[PYUU\_[UXYUaU¥\_WPUSWTMWSWSTUS¥W  
@HWI-EAS443:3:19:361:1706#0/1  
GGGGGCTATATGAAGCAATCGAGGAGTGCCTGATTAATGA  
+HWI-EAS443:3:19:361:1706#0/1  
UUW\_a\_[X]aaVRVV\_aa]\_TY]JZWP¥Y`bba^b^aVW`  
@HWI-EAS443:3:19:393:1532#0/1  
GGGTTTTCGGCTGAATCGAGAAAATTGCTTCTCATTGTTC

+HWI-EAS443:3:19:393:1532#0/1  
aaaIb]ababba\_`bba`a\_\_b]a]a]aaaaaa[aa\_\_a\_  
@HWI-EAS443:3:19:401:1566#0/1  
GTGCCATATTTTCACCGAGTGGCCACTTCAATTGGCTTGT  
+HWI-EAS443:3:19:401:1566#0/1  
`\_]\_Z`ab`aaZT`Za`]N¥a\_¥XY¥Z]^¥U¥^0\_^]]X  
@HWI-EAS443:3:19:40:675#0/1  
TGGAGAAGTTTCGGTGGGAGACTTTGGTCGCAAGCTTGCG  
+HWI-EAS443:3:19:40:675#0/1  
ab\_a`aabaaaaZa`\_T\_]¥^a\_W^^a\_ZQ^a\_\_^^Y^`  
@HWI-EAS443:3:19:422:520#0/1  
AAATTTAGGCTTCTCTACCCCTGTTGTGTTACATATACTG  
+HWI-EAS443:3:19:422:520#0/1  
`bba[¥bbabbabX]ab`aaZ^a0\_\_\_\_\_]S``\_aa`aY[\_  
@HWI-EAS443:3:19:436:513#0/1  
GAACAGTATATGTAACACAACAGGGGTAGAGAAGCCTAAA  
+HWI-EAS443:3:19:436:513#0/1  
aaaaaaX]\_^R¥]a`a\_aP[\_`\_a\_\_W^\_]`UGY\_Z]^\_  
@HWI-EAS443:3:19:475:501#0/1  
TTTTCGGCTGAATCGAGAAAATTGCTTCTCATTGTTTCAGG  
+HWI-EAS443:3:19:475:501#0/1  
`b`]]Z^[Yba`\_]a\_]U\_aaaaa`¥]`\_`^[X]R\_Z[``  
@HWI-EAS443:3:19:510:1533#0/1  
CACCCCTTGACGAAGAGAGCAGGGCAAGAATCAAACTAGG  
+HWI-EAS443:3:19:510:1533#0/1  
aba`\_a[aaa^```\_^]\_`^][¥a]a`a`\_^a\_^\_]Za]X  
@HWI-EAS443:3:19:597:1425#0/1  
GAAAACCCCTCAAGTTGTGGAGACGCATATAGACTGTTGA  
+HWI-EAS443:3:19:597:1425#0/1  
aaaaabbbbaaaa```\_a^aXa`a`a\_\_`a^`\_```\_X[GP  
@HWI-EAS443:3:19:625:230#0/1  
ATCGAAACTAACAAGTTTGCTGCAATATGCACACATTTGG  
+HWI-EAS443:3:19:625:230#0/1  
a`\_aaaa\_aba`W]^`a`¥a`X\_\_\_\_`\_`\_`^\_\_\_\_][a^  
@HWI-EAS443:3:19:69:575#0/1  
CACATCTTTTCATTCACTGGAGAGGAGATGGCCACCAAAG  
+HWI-EAS443:3:19:69:575#0/1  
\_\_\_\_Yb\_T^bbabba\_[a`ab^U\_V]]XL]Z`^```^`a`  
@HWI-EAS443:3:19:729:1306#0/1  
GAACGCCAAAATTGAACCATTCTTGAGGACGACACCACGC  
+HWI-EAS443:3:19:729:1306#0/1  
a^aaaa\_PFMX\_WVZ]TX0`T`[[[[]SSS\_]W\_S¥\_RBB  
@HWI-EAS443:3:19:742:89#0/1  
AGAAGATCCCAAGGACAAAGAACATGAAGAGAACAAGCCA  
+HWI-EAS443:3:19:742:89#0/1  
abaaaX`[`aa]\_\_`\_[[`a[^^\_aYRW\_\_a^\_X]^`^^^  
@HWI-EAS443:3:19:769:229#0/1  
CTTCTGTCAAAGAGAAAGACATGACCAAGGAATTCTTTGA  
+HWI-EAS443:3:19:769:229#0/1  
abbaaaabaaababaaabaaaaaaaZ`J^`\_ZaVP^aITa

@HWI-EAS443:3:19:827:1598#0/1  
GGACATTGAAAATGAAGAGAAGATCCCAAGGACAAAGAAC  
+HWI-EAS443:3:19:827:1598#0/1  
aYL¥[YXa\_`W[ZY^W¥U][SXS[[Y`ZSR^`^\_\_^a\_[W  
@HWI-EAS443:3:19:831:1300#0/1  
GGGGCATGGAAATGAGGCGCTGCCTTCTTCAGTCTCTTCA  
+HWI-EAS443:3:19:831:1300#0/1  
aaa`a`aaaaa`[^¥aa¥`\_\_ZY[\_\_\_`]U\_\_`P``^^S^  
@HWI-EAS443:3:19:848:883#0/1  
ACGGCCTTGCTCAATGCATCCTGTGCAGCCATGGATGACT  
+HWI-EAS443:3:19:848:883#0/1  
a\_aa¥¥\_`aUXa^]]V[\_^`\_[YRX[Z[^VSQaX¥^\_UUU  
@HWI-EAS443:3:19:855:1271#0/1  
ATGAAGGGAGTGTACATAAATACGGCCTTGCTCAATGCAT  
+HWI-EAS443:3:19:855:1271#0/1  
aaba¥ba`aa¥a]baa`aaa`aaa\_]\_\_\_\_[TW\_^\_^]\_^\_]  
@HWI-EAS443:3:19:890:905#0/1  
ATCAGGCACTCCTCGATTGCTTCATATAGCCCCCAAGAT  
+HWI-EAS443:3:19:890:905#0/1  
\_\_aaa[^`^abaa\_]aaXV\_U\_aaa\_a`a^YU]`¥a`¥^\_\_  
@HWI-EAS443:3:19:936:995#0/1  
CATTAAATCAGGCACTCCTCGATTGCTTCATATAGCCCCC  
+HWI-EAS443:3:19:936:995#0/1  
abbbbabbbbbbbabbabbbbbabbabbbbababa`aaa  
@HWI-EAS443:3:19:945:471#0/1  
ATAAATACGGCCTTGCTCAATGCATCCTGTGCAGCCATGG  
+HWI-EAS443:3:19:945:471#0/1  
aaaa`aa\_a`a\_a`\_GW\_a`\_\_`a\_\_U`X]S¥\_\_0^\_\_\_\_  
@HWI-EAS443:3:19:971:1212#0/1  
ACCGAATCATGGCCTGGACAGTGGTGAACAGTATATGTAA  
+HWI-EAS443:3:19:971:1212#0/1  
a`[a`[a^]`aa`aX[[\_\_\_\_S¥a¥`[a\_`^U^``¥VX\_\_  
@HWI-EAS443:3:19:988:213#0/1  
GACCCGAATGCACTATTGAAGCACCGATTTGAGATAATTG  
+HWI-EAS443:3:19:988:213#0/1  
\_¥```\_Y¥]]J`¥aX`¥`^]Y[S]]^a`\_]Q\_] [¥Z]¥\_  
@HWI-EAS443:3:1:1019:1502#0/1  
TACAAAGAGAACCGTTTCATTGAAATTGGAGTAACACGGA  
+HWI-EAS443:3:1:1019:1502#0/1  
`b^[a`aabb`abb\_]ababa\_^aabS^b^aba^a`BB  
@HWI-EAS443:3:1:1019:464#0/1  
TGAGAAAGGCATAAATCCCAATTACCTCATGGCTTGAAG  
+HWI-EAS443:3:1:1019:464#0/1  
aaa\_a`\_`aXaaaa\_a]]]\_\_a`W[\_]``\_\_W`^T^BBB  
@HWI-EAS443:3:1:1112:296#0/1  
TGGGCACTCGGTGAAAATATGGCACCAGAAAAAGTAGACT  
+HWI-EAS443:3:1:1112:296#0/1  
]QZOU]ZTOXYL]TQWPY¥ZP[BBBBBBBBBBBBBBBBBB  
@HWI-EAS443:3:1:1137:1236#0/1  
GGTGAACCTTTGTAAGTATGGAGTTCTCACTCACTGACCCG

+HWI-EAS443:3:1:1137:1236#0/1  
`b\_`aUa\_aa^b\_bWa\_[aaa\_aYa\_`^`Z\_¥a[`BBBB  
@HWI-EAS443:3:1:1152:202#0/1  
CTTTGACCGCTGATGGCAAAGAGGCCCATCAGGCAATCTG  
+HWI-EAS443:3:1:1152:202#0/1  
aabba`[aUba\_aZb\_RZa\_baaabaUaJb`aa`\_aBBB  
@HWI-EAS443:3:1:1273:140#0/1  
GCTCATCACTGTCATACTGTTTAAGGTCTCCAACATCTTT  
+HWI-EAS443:3:1:1273:140#0/1  
a\_aUa]]V[aa\_`^]Y]`Z`\_W\_SSZW\_]U^^\_XBBB  
@HWI-EAS443:3:1:1317:616#0/1  
CGACGAACGGGGTGAATCAATAATTGTAGAATCTGGTGAC  
+HWI-EAS443:3:1:1317:616#0/1  
ab`abba\_b\_ab^bbabaaba\_abbbaabba\_]a`aZb`  
@HWI-EAS443:3:1:1338:174#0/1  
GTTTGTTCCTCGTCTTCCTTCTTTGGTCCTACATTTGCTT  
+HWI-EAS443:3:1:1338:174#0/1  
aa[^VP¥W`M[^S[]UKP¥^Z\_¥ZXXRUXVWZZ]BBBBBB  
@HWI-EAS443:3:1:1347:1663#0/1  
TGTGAATTGACTGATTCAAGCTGGATAGAACTTGATGAAA  
+HWI-EAS443:3:1:1347:1663#0/1  
ab¥a^a`aa\_^aaaa0a[¥Xaa[\_a^`^aSaaa]a\_^^B  
@HWI-EAS443:3:1:1445:661#0/1  
TAAGCAAATGTAGGACCAAAGAAGGAAGACGGAAAACAAA  
+HWI-EAS443:3:1:1445:661#0/1  
`X[RVN[`X¥][[GP¥a\_W`Y`Y[\_^WS`^`]SBBBBB  
@HWI-EAS443:3:1:1449:36#0/1  
ACGGCCTTGCTCAATGCATCCTGTGCAGCCATGGATGACT  
+HWI-EAS443:3:1:1449:36#0/1  
]a^VYUUa[D¥[^YaXR[aEKZLYWN^WPFTBBBBBBBBB  
@HWI-EAS443:3:1:1553:261#0/1  
ACATAATGAAGGGAGTGTACATAAATACGGCCTTGCTCAA  
+HWI-EAS443:3:1:1553:261#0/1  
aWQ^a¥^`[`aa`VWU`[^¥R[¥`\_a\_]YVRPV`BBBBBB  
@HWI-EAS443:3:1:1563:1150#0/1  
TGGTGAACCTTGTAAGTATGGAGTTCTCACTCACTGACCC  
+HWI-EAS443:3:1:1563:1150#0/1  
`b\_K\_]bbab\_aaaZ]aaa\_a`XZ`\_`^a^¥U`^VBB  
@HWI-EAS443:3:1:162:1242#0/1  
AAGAATTCCTTGGTCATGTCTTTCTTTGACAGAAGACT  
+HWI-EAS443:3:1:162:1242#0/1  
¥a¥`a¥b)`abbaPY]ab`Z^[Y^\_`ba`^`^aa^a`]BB  
@HWI-EAS443:3:1:1678:1457#0/1  
CTCATTTGAGAAATGATACTGATGTGGTGAACCTTGTAAG  
+HWI-EAS443:3:1:1678:1457#0/1  
ab`bbbbbbba`bbbbbb`bbbab¥ababaa\_aaaa\_aab  
@HWI-EAS443:3:1:338:1503#0/1  
GGGTTTTCGGCTGAATCGAGAAAATTGCTTCTCATTGTTC  
+HWI-EAS443:3:1:338:1503#0/1  
`bbG^baYZRV^a^aY]^YZ]`Y^`O\_0¥\_\_^^\_AZ\_BBB



@HWI-EAS443:3:1:384:247#0/1  
GGGGGGCTATATGAAGCAATCGAGGAGTGCCTGATTAATG  
+HWI-EAS443:3:1:384:247#0/1  
aaa\_a`a`a``\_[¥Y^\_\_¥¥\_¥\_\_¥]W`WY¥\_Z^¥¥TBB  
@HWI-EAS443:3:1:441:600#0/1  
GTGAATCAATAATTGTAGAATCTGGTGACCCGAATGCACT  
+HWI-EAS443:3:1:441:600#0/1  
a¥aaY\_`^^\_\_Y]ab]UaZ`¥\_aaXZ`SW¥`^`^XBBB  
@HWI-EAS443:3:1:445:130#0/1  
CCACATGAGAAAGGCATAAATCCCAATTACCTCATGGCTT  
+HWI-EAS443:3:1:445:130#0/1  
aaaG`¥aa`W]Ub`^SZYYV]YS``XY\_^S[[]]`SBBBBB  
@HWI-EAS443:3:1:452:526#0/1  
GGGAGTGTACATAAATACGGCCTTGCTCAATGCATCCTGT  
+HWI-EAS443:3:1:452:526#0/1  
a`\_^`V\_¥\_Q\_`¥`\_\_^W¥¥TT¥T¥T¥Y\_¥Y¥U^¥USBBB  
@HWI-EAS443:3:1:520:563#0/1  
CCTGTTGTGTTACATATACTGTTCACTACTGTCCAGGCCA  
+HWI-EAS443:3:1:520:563#0/1  
`V¥VGTW[`Q^¥URZW]aUb¥W^¥aQGVZ\_a\_[TPBBBBB  
@HWI-EAS443:3:1:584:1016#0/1  
AATTGACTGATTCAAGCTGGATAGAATTGATGAAATAGG  
+HWI-EAS443:3:1:584:1016#0/1  
aUa\_b`¥`````\_a\_\_[P^`^`\_`¥^¥a`\_¥^a¥^¥`^BB  
@HWI-EAS443:3:1:704:792#0/1  
TTCCGATTTGTTTTCAAAGAATTCCTTGGTCATGTCTTTC  
+HWI-EAS443:3:1:704:792#0/1  
[[¥¥``babbWaaaV¥``b^b`YXY]\_aaaWab\_Zaaa\_  
@HWI-EAS443:3:1:743:912#0/1  
GATTTGTTTTCAAAGAATTCCTTGGTCATGTCTTCTCTT  
+HWI-EAS443:3:1:743:912#0/1  
]¥b`a`abba¥X`a`bba\_aba¥Z[\_ab[W`aaGa\_BB  
@HWI-EAS443:3:1:88:1071#0/1  
AGAAGCCTAAATTTCTTCTGATTTGTATGATTACAAAGA  
+HWI-EAS443:3:1:88:1071#0/1  
aaaa\_\_^aaaaaaaa```\_a\_¥\_a`a]\_aa````\_\_`\_\_B  
@HWI-EAS443:3:1:925:1497#0/1  
AAGAATTCCTTGGTCATGTCTTCTCTTTGACAGAAGACT  
+HWI-EAS443:3:1:925:1497#0/1  
aaa`\_bb\_abbbaaaabbaab`a\_baabab`Zaaa]^[]B  
@HWI-EAS443:3:1:997:1285#0/1  
ATAAATACGGCCTTGCTCAATGCATCCTGTGCAGCCATGG  
+HWI-EAS443:3:1:997:1285#0/1  
a`aa```Z`^`^]aaaZ^Ya`\_¥^a^LUaa\_YTY\_]\_]\_BB  
@HWI-EAS443:3:20:100:437#0/1  
GGTGAACCTTGTAAAGTATGGAGTTCTCACTCACTGACCCG  
+HWI-EAS443:3:20:100:437#0/1  
abbabb¥\_XabUb`a]`bab[aY\_baabba\_ba`ba`aa  
@HWI-EAS443:3:20:1010:671#0/1  
AGCTTGCCGACCAAAGTCTCCACCGAACTTCTCCAGCCT

+HWI-EAS443:3:20:1010:671#0/1  
^aaaa`a`aaa\_aa^¥Y`a`X^\_ZaaZL]`\_^¥\_¥U\_WUW  
@HWI-EAS443:3:20:1052:881#0/1  
CCAGATTCTACAATTATTGATTACCCCCGTTTCGTCGATGA  
+HWI-EAS443:3:20:1052:881#0/1  
a`ab`aabbaaaba`aaaa\_aa\_]a\_a\_a^\_[^¥¥^  
@HWI-EAS443:3:20:1069:301#0/1  
CATAATGAAGGGAGTGTACATAAATACGGCCTTGCTCAAT  
+HWI-EAS443:3:20:1069:301#0/1  
^\_b¥W[bbaabbaa]b\_a`aaaaaa`aaXa`aaa^]`^`  
@HWI-EAS443:3:20:1070:1948#0/1  
GCCAGTAAGGTCCTGCACACTTCCCAATAGAGCCTTCCT  
+HWI-EAS443:3:20:1070:1948#0/1  
aaab`Y`a]`ab]WZ`aa`aa]^^`^W\_b`aMN]]aZS`  
@HWI-EAS443:3:20:1078:1270#0/1  
TTCGGCTGAATCGAGAAAATTGCTTCTCATTGTTTCAGGCA  
+HWI-EAS443:3:20:1078:1270#0/1  
ZUN]`QR\_RW]\_`ZQX\_a¥S^`aa`aVa`]O¥VT\_WTYQM  
@HWI-EAS443:3:20:1183:1010#0/1  
TTTGGACCCAGCTTGCTAGAGATCTGGGCTCTGGCTCATC  
+HWI-EAS443:3:20:1183:1010#0/1  
^a`\_`\_`baaab\_baaa\_a\_`a`^¥`aaa\_aaa`^a\_]a` [  
@HWI-EAS443:3:20:1367:601#0/1  
GGGATTTATGCCTTTCTCATGTGGTTTGACTATGTTAGGC  
+HWI-EAS443:3:20:1367:601#0/1  
aaaaaaaaaaaa`aaa`a`aa]aa\_aaa`]aaa]`\_`VO  
@HWI-EAS443:3:20:1394:1375#0/1  
AGAGAACCGGTTTCATTGAAATTGGAGTAACACGGAGGGAA  
+HWI-EAS443:3:20:1394:1375#0/1  
[`[```aYb`Xaabaaba\_`a`b`aa`aa^U\_P[]\_^[^  
@HWI-EAS443:3:20:1399:1029#0/1  
GAGGGGGAGGGAATACCACTATATGATGCAATCAAATGCA  
+HWI-EAS443:3:20:1399:1029#0/1  
a`baa`aaa\_a]`a`^`a^a\_\_a`a\_\_`^a\_a]`^`]^Z^  
@HWI-EAS443:3:20:1443:624#0/1  
GGGGCTATATGAAGCAATCGAGGAGTGCCTGATTAATGAT  
+HWI-EAS443:3:20:1443:624#0/1  
a\_TOVPQUSR¥Z]YLS^^Z`Y¥¥Z^U`ZTKVSYUTW^XZ  
@HWI-EAS443:3:20:1449:901#0/1  
GGGGGCTATATGAAGCAATCGAGGAGTGCCTGATTAATGA  
+HWI-EAS443:3:20:1449:901#0/1  
[a]```bbbbbbba`]abbab`b`^a]aZ^ba[```\_`ab`  
@HWI-EAS443:3:20:1487:304#0/1  
CCACTCCCCTGGGTGACTCTCCGATTGGCCATGTTTCCGA  
+HWI-EAS443:3:20:1487:304#0/1  
aaaaabaaa`bab^aa¥a]`Z\_a\_`a^[\_XZ^aU[^MZYH  
@HWI-EAS443:3:20:1584:606#0/1  
GGCTGCATTGAGGGCAAGCTTCCCAAATGTCAAAGAAG  
+HWI-EAS443:3:20:1584:606#0/1  
a`\_`\_`¥a\_aW\_`aW]^aV\_a`YWV]^\_\_a^V^^]^\_\_¥V

@HWI-EAS443:3:20:159:174#0/1  
GGGGGCTATATGAAGCAATCGAGGAGTGCCTGATTAATGA  
+HWI-EAS443:3:20:159:174#0/1  
ab^Xa`a\_a¥¥aaa\_a`\_`a]\_^PXU\_]Y\_]XX^^XU\_Y  
@HWI-EAS443:3:20:1607:1424#0/1  
GAGAAATGATACTGATGTGGTGAACCTTTGTAAGTATGGAG  
+HWI-EAS443:3:20:1607:1424#0/1  
a]TUa`YY\_]\_]\_^][ZX[\_¥Z\_^\_^]\_]\_0^]]ZUR  
@HWI-EAS443:3:20:1609:278#0/1  
TGCTCAATGCATCCTGTGCAGCCATGGATGACTTTCAGCT  
+HWI-EAS443:3:20:1609:278#0/1  
\_S`aJbabba`a¥GZaYaS[a^UXVU`S]¥\_\_^Y^N[^U[  
@HWI-EAS443:3:20:1614:911#0/1  
ATCCGAATACATGAAACAACTTCCAAATGTGTGCATATT  
+HWI-EAS443:3:20:1614:911#0/1  
`baaaabbb`baaaab\_bb`aa\_\_`Yaaa`b`\_`aa\_a`  
@HWI-EAS443:3:20:1622:138#0/1  
CACCGATTTGAGATAATTGAAGGAAGAGACCGAATCATGG  
+HWI-EAS443:3:20:1622:138#0/1  
\_\_^\_¥\_`\_bababbabb`ba^^ababbaaaba`aa\_  
@HWI-EAS443:3:20:1622:1587#0/1  
AGAAGTTCGGTGGGAGACTTTGGTCGGCAAGCTTGCAT  
+HWI-EAS443:3:20:1622:1587#0/1  
aa`aa¥babW\_b^ST`^\_¥^^\_0^\_`Z^^]OYRYO^UXY  
@HWI-EAS443:3:20:1624:613#0/1  
AGCAGGTGCTAGCAGAGCTACAGGACATTGAAAATGAAGA  
+HWI-EAS443:3:20:1624:613#0/1  
a`^a\_ZX^aa\_aS¥\_Z^T]^X`^aZ`\_]\_^\_][Z]Z  
@HWI-EAS443:3:20:1683:143#0/1  
GCCCTGCAGTGGGACACTTCTGCTGTAAAATAGTTCCTCC  
+HWI-EAS443:3:20:1683:143#0/1  
aa\_[\_a\_ababa`\_[`¥aaY`¥`a`[`bV`\_W[LFYPU  
@HWI-EAS443:3:20:1683:1755#0/1  
ATCGACGAACGGGGTGAATCAATAATTGTAGAATCTGGTG  
+HWI-EAS443:3:20:1683:1755#0/1  
`a\_a`aa^\_W`aaX`V\_YJV^\_V\_]\_X]\_¥V^X^]]OY  
@HWI-EAS443:3:20:1727:855#0/1  
TGAAATTGGAGTAACACGGAGGAAGTCCACATATATTAC  
+HWI-EAS443:3:20:1727:855#0/1  
aaV[Wa^Y[Xa^`\_]\_]a\_]\_^]XZ^]YU][]^W^]^]YY  
@HWI-EAS443:3:20:1738:795#0/1  
TAGCCCCCAAGATCGAAGTTCCAGGTTCCAGGTTGTCC  
+HWI-EAS443:3:20:1738:795#0/1  
aba`Z\_a\_aaaa`a[`\_aa¥W^¥U^^¥^¥¥W¥^¥W^¥VWW  
@HWI-EAS443:3:20:245:531#0/1  
AGCCTATGTAGATGGATTGAGCCGAACGGCTGCATTGAG  
+HWI-EAS443:3:20:245:531#0/1  
`bba`ab^aaaabb]`aa`aa`[]\_^\_a`]aaX\_^`R^S  
@HWI-EAS443:3:20:308:1549#0/1  
CATAAATACGGCCTTGCTCAATGCATCCTGTGCAGCCATG

+HWI-EAS443:3:20:308:1549#0/1  
ababb`aabaabaa\_`]aabb\_[a^\_a^`]V\_``a\_\_a]Z  
@HWI-EAS443:3:20:314:1210#0/1  
CCCAAGGACAAAGAACATGAAGAGAACAAGCCAATTGAAG  
+HWI-EAS443:3:20:314:1210#0/1  
ab^]\_a\_aa\_aaaaa`aa\_Y`aa\_`\_\_a[]`\_`\_\_\_\_\_]^`  
@HWI-EAS443:3:20:355:1129#0/1  
CAATTATTGATTACCCCGTTCGTCGATGAAATGGAAATC  
+HWI-EAS443:3:20:355:1129#0/1  
aaaaa\_aabaa[aa```aa]\_]a\_\_\_\_`¥a\_a`\_\_\_\_]\_`¥U  
@HWI-EAS443:3:20:391:1599#0/1  
GGCTCATCACTGTCATACTGTTTAAGGTCTCCAACATCTT  
+HWI-EAS443:3:20:391:1599#0/1  
U`abaY¥bbaaaaabbabbaaabaaa\_b`ababa\_aaaa  
@HWI-EAS443:3:20:466:1053#0/1  
AGAAGTTCGGTGGGAGACTTTGGTCGGCAAGCTTGCGCAT  
+HWI-EAS443:3:20:466:1053#0/1  
ab``]GZba`X]\_``a\_a```^¥[a`a`X]`\_^\_Y^^\_  
@HWI-EAS443:3:20:572:1613#0/1  
GGGTGAATCAATAATTGTAGAATCTGGTGACCCGAATGCA  
+HWI-EAS443:3:20:572:1613#0/1  
]`\_\_baaabbbbababVbaabba\_b]Y]bbb\_b`b`baa  
@HWI-EAS443:3:20:61:115#0/1  
GGCATGTGAATTGACTGATTCAAGCTGGATAGAACTTGAT  
+HWI-EAS443:3:20:61:115#0/1  
aaaabb^aaabba\_aaaaaa\_baaba\_`aa`a\_a\_a\_`  
@HWI-EAS443:3:20:629:416#0/1  
GGCATGGAAATGAGGCGCTGCCTTCTTCAGTCTCTTCAGC  
+HWI-EAS443:3:20:629:416#0/1  
`a`\_`b`¥```aaa`\_`a`\_a]¥\_`^¥```¥Z\_W]\_¥¥WTW¥Q  
@HWI-EAS443:3:20:635:1279#0/1  
GAAAGGCATAAATCCCAATTACCTCATGGCTTGGAAGCAG  
+HWI-EAS443:3:20:635:1279#0/1  
^a]aa^a\_```]\_P\_\_`a`aa`\_`\_\_a\_a\_[JOZ`YYWB  
@HWI-EAS443:3:20:649:22#0/1  
GGGGCTATATGAAGCAATCGAGGAGTGCCTGATTAATGAT  
+HWI-EAS443:3:20:649:22#0/1  
a`aaa`Z[V\_a^¥¥WT]]`W^^Q[LYUYW^SV]ZUWWWT  
@HWI-EAS443:3:20:685:553#0/1  
GGAGTCTATGGGATTCCTTTCGTCAGTCCGAAAGAGGCGA  
+HWI-EAS443:3:20:685:553#0/1  
aa^a`[] [aa`\_] [ ]a`[^]\_\_`Z\_] [ ]`Z\_^M]Z  
@HWI-EAS443:3:20:717:109#0/1  
CAGCTTGCTAGAGATCTGGGCTCTGGCTCATCACTGTCAT  
+HWI-EAS443:3:20:717:109#0/1  
aababbbabaaaaa\_`a\_`^`\_`a¥\_\_```¥`]^`^`  
@HWI-EAS443:3:20:739:129#0/1  
GAAATGGAAATCCGAATACATGAAACAACTTCCAAATGT  
+HWI-EAS443:3:20:739:129#0/1  
^bb`a`\_\_^]`aa\_`aaa\_aa``aa¥aa\_`a\_^Y\_\_^\_^Z

@HWI-EAS443:3:20:82:249#0/1  
GAATTCCTTGGTCATGTCTTTCTCTTTGACAGAAGACTCG  
+HWI-EAS443:3:20:82:249#0/1  
aa\_`aaaa]\_`S]^\_Y]a\_\_b\_Y]a`a`]]`a``¥^\_]^X  
@HWI-EAS443:3:20:834:1620#0/1  
CATTAATCAGGCACTCCTCGATTGCTTCATATAGCCCCC  
+HWI-EAS443:3:20:834:1620#0/1  
V]bb`]bbb`a\_b]\_`\_a^`a[[a\_`TU`bb^^^]W`[^  
@HWI-EAS443:3:20:876:2043#0/1  
CATGCCTTATTGAATTCATTTTGGACCCAGCTTGCTAGAG  
+HWI-EAS443:3:20:876:2043#0/1  
abaaaab\_\_aZa`a\_\_aa`^`[\_[a^\_a\_\_^\_\_R\_\_`\_\_`\_\_  
@HWI-EAS443:3:20:893:587#0/1  
CAGCTTGCTAGAGATCTGGGCTCTGGCTCATCACTGTCAT  
+HWI-EAS443:3:20:893:587#0/1  
a¥`b¥Xa^^bbb\_abaa\_¥]`^`\_aaaaaa]aaaa\_[^X  
@HWI-EAS443:3:20:956:585#0/1  
AACAAAGTTTGTGCAATATGCACACATTTGGAAGTTTGTT  
+HWI-EAS443:3:20:956:585#0/1  
Y¥^YWXJ¥b\_^baYUabaa\_W]TX`abaabba[^V[``NN  
@HWI-EAS443:3:20:99:773#0/1  
CAGCAAACCTTGTAGTTTTCGATTTTCGGATCTTCCCATA  
+HWI-EAS443:3:20:99:773#0/1  
ab[bba`¥aa`[\_Z\_^`a^\_\_`^JW`[I\_^]aIa`WP¥^  
@HWI-EAS443:3:21:1000:870#0/1  
TAGGAGTCTATGGGATTCCTTTTCGTCAGTCCGAAAGAGGC  
+HWI-EAS443:3:21:1000:870#0/1  
a]b¥ZXa\_``aa¥¥`abba]\_]a`[]¥]`\_a\_^ZZ]Ya[Y  
@HWI-EAS443:3:21:1013:912#0/1  
AAGAATTCCTTGGTCATGTCTTTCTCTTTGACAGAAGACT  
+HWI-EAS443:3:21:1013:912#0/1  
]abb\_abaabba^^a`bb`abaaaaabb^``aa\_\_a\_a^\_  
@HWI-EAS443:3:21:1014:1448#0/1  
TGGGGCATGGAAATGAGGCGCTGCCTTCTTCAGTCTCTTC  
+HWI-EAS443:3:21:1014:1448#0/1  
abbaaabababbba\_aaaaaaaa`\_aaaaa\_``U`a```W  
@HWI-EAS443:3:21:101:683#0/1  
ATTTAGGCTTCTCTACCCCTGTTGTGTTACATATACTGTT  
+HWI-EAS443:3:21:101:683#0/1  
abba`]aaaaa`\_aaaaa\_`a`]``¥\_YFY`Y¥UQW]\_\_  
@HWI-EAS443:3:21:1027:768#0/1  
ATTTTTCCATTTGTGTGGCTCCAGTCTCGGGTCAGTGAG  
+HWI-EAS443:3:21:1027:768#0/1  
\_bbabaaaa`baaa[aW```````[NV]^\_^aPPZYFVU]  
@HWI-EAS443:3:21:1030:296#0/1  
GAGACCGAATCATGGCCTGGACAGTGGTGAACAGTATATG  
+HWI-EAS443:3:21:1030:296#0/1  
`^`]ZZS¥ZTYaZ^U[[]]SO[YR^¥L¥SSKTYUGTBB  
@HWI-EAS443:3:21:1043:424#0/1  
CACATTTGGAAGTTTGTTCATGTATTCGGATTTCCATTT

+HWI-EAS443:3:21:1043:424#0/1  
`aaaabbba`aa]aa\_[aa][a`¥]Z`aaa¥Y^^[`]``Z  
@HWI-EAS443:3:21:1067:1272#0/1  
CAAAGATGTTGGAGACCTTAAACAGTATGACAGTGATGAG  
+HWI-EAS443:3:21:1067:1272#0/1  
`¥¥U\_Xabaa`]b\_\_a`a]aYaY`[a[]\_a\_\_R^¥LQS`  
@HWI-EAS443:3:21:1088:1073#0/1  
GGGGCATGGAAATGAGGCGCTGCCTTCTTCAGTCTCTTCA  
+HWI-EAS443:3:21:1088:1073#0/1  
a\_R`\_Za^\_S]Y`]Va[¥Va\_\_\_Z[¥^X^[PZ`ZZ\_¥Y  
@HWI-EAS443:3:21:1092:1793#0/1  
CGATTTGTTTTCAAAGAATTCCTTGGTCATGTCTTTCTCT  
+HWI-EAS443:3:21:1092:1793#0/1  
H[b\_¥aaVxb\_```[\_babb^ba`baa\_baba^babab\_a  
@HWI-EAS443:3:21:1179:477#0/1  
GCTGCATTGAGGGCAAGCTTTCCCAAATGTCAAAGAAGT  
+HWI-EAS443:3:21:1179:477#0/1  
aaaa^aaa\_`a`a]`aa\_``a\_``\_\_^`Z¥`\_\_``^\_\_Z  
@HWI-EAS443:3:21:1181:1811#0/1  
CAAATGTCAAAGAAGTGAACGCCAAAATTGAACCATTCT  
+HWI-EAS443:3:21:1181:1811#0/1  
aaa\_YWYVQ^V\_]`\_[RX^aYaIDV¥QUX`[¥`XZ¥]XG[  
@HWI-EAS443:3:21:1189:1825#0/1  
ATAAATACGGCCTTGCTCAATGCATCCTGTGCAGCCATGG  
+HWI-EAS443:3:21:1189:1825#0/1  
a\_]a^\_a`aa\_^\_YY\_[a[OMW\_YPZ]^U]VR\_WT\_]U  
@HWI-EAS443:3:21:1213:1626#0/1  
AATTGAAGGAAGAGACCGAATCATGGCCTGGACAGTGGTG  
+HWI-EAS443:3:21:1213:1626#0/1  
UUZ]UXX[[W[```\_`\_V^]VQ¥]P[SGVWTSNX\_`ZVYYB  
@HWI-EAS443:3:21:1263:1632#0/1  
GGCATAAATCCCAATTACCTCATGGCTTGGAAAGCAGGTGC  
+HWI-EAS443:3:21:1263:1632#0/1  
a][VXWZ\_YPS`XY\_^]LP¥[¥a^BBBBBBBBBBBBBBB  
@HWI-EAS443:3:21:1263:708#0/1  
TGCCCACTTCAATTGGCTTGTCTCTTCATGTTCTTTGTC  
+HWI-EAS443:3:21:1263:708#0/1  
aba\_\_aaa`¥\_aaa`Y\_\_\_[Y\_0\_U`\_UUZZY`M¥``¥WS  
@HWI-EAS443:3:21:1278:938#0/1  
CTCGATTGCTTCATATAGCCCCCAAGATCGAAGGTTCCA  
+HWI-EAS443:3:21:1278:938#0/1  
abaaaaaaabbaabaaaa`a`aZa\_a\_\_`a`V`YN`Y¥¥  
@HWI-EAS443:3:21:1303:1133#0/1  
TCCGATTGCCATGTTTCCGATTTGTTTTCAAAGAATTCC  
+HWI-EAS443:3:21:1303:1133#0/1  
aaaa\_aaaa\_``a^aa^\_\_Z^a`^`^\_aaX\_a\_\_^]a`SV  
@HWI-EAS443:3:21:1324:534#0/1  
GACATTCTTTGGCTGGAAAGAGCCTAACATAGTCAAACCA  
+HWI-EAS443:3:21:1324:534#0/1  
aa[\_[a`a`\_a`aaa^a\_Y\_\_[\_^^\_[]]\_]^^`\_XU]

@HWI-EAS443:3:21:136:1143#0/1  
CATAAATACGGCCTTGCTCAATGCATCCTGTGCAGCCATG  
+HWI-EAS443:3:21:136:1143#0/1  
aba`S)`X\_a[T`[^[]^`a¥[[^]T^a]TTS¥^^\_^U^  
@HWI-EAS443:3:21:1424:491#0/1  
CACCGATTTGAGATAATTGAAGGAAGAGACCGAATCATGG  
+HWI-EAS443:3:21:1424:491#0/1  
aa`ab`bbbb\_a`aa`abb`aaa\_^a``\_^]a\_^a[\_a`\_  
@HWI-EAS443:3:21:1454:1627#0/1  
CAGAAAAAGTAGACTTTGATGACTGCAAAGATGTTGGAGA  
+HWI-EAS443:3:21:1454:1627#0/1  
Y\_^XM¥\_\_`Tb^VOQ]W`^aX\_¥aa`[]^\_a\_NP``[``  
@HWI-EAS443:3:21:1482:1744#0/1  
TCGGGTCAGTGAGTGAGAACTCCATACTTACAAAGTTCAC  
+HWI-EAS443:3:21:1482:1744#0/1  
\_a¥^[U^[\_W¥¥\_Qa`¥¥^]Z^aa][`a`0`a`\_`]Y]Z  
@HWI-EAS443:3:21:1483:277#0/1  
AGCAGGTGCTAGCAGAGCTACAGGACATTGAAAATGAAGA  
+HWI-EAS443:3:21:1483:277#0/1  
`WW^[^V)`ZV]]\_UW[YXYX\_YVXVWQ]YVYVY[YVYVX  
@HWI-EAS443:3:21:1513:819#0/1  
GCCTATGTAGATGGATTCGAGCCGAACGGCTGCATTGAGG  
+HWI-EAS443:3:21:1513:819#0/1  
a^\_aa`^`aaaa`^aa[]```U¥V]U\_UUZSTZS¥BBBB  
@HWI-EAS443:3:21:1517:1399#0/1  
GAAAGAGCGGAAGAGACAATTGAAGAAAAATTTGAGATTA  
+HWI-EAS443:3:21:1517:1399#0/1  
aaa]a\_baa`aaa`aSZ\_a`aa]\_\_\_\_`]\_\_aaa\_]a[\_\_\_\_  
@HWI-EAS443:3:21:1539:1783#0/1  
AAGAATTCCTTGGTCATGTCTTTCTCTTTGACAGAAGACT  
+HWI-EAS443:3:21:1539:1783#0/1  
[XaYZ`XZ`]aa`\_`K`aa^`\_`P[^a`]a\_^aa`\_]\_VP  
@HWI-EAS443:3:21:1562:586#0/1  
TGGGCCTCGACACTTGGCCTATCGCAGTCCCTCAAGAGCAT  
+HWI-EAS443:3:21:1562:586#0/1  
^T]Z`aaJ^^`X`¥abaa\_\_aX]\_¥`aaUX\_Y[WaZ^SY`  
@HWI-EAS443:3:21:1658:619#0/1  
GGGGGCTATATGAAGCAATCGAGGAGTGCCTGATTAATGA  
+HWI-EAS443:3:21:1658:619#0/1  
aa`Y`\_`\_aaaa\_\_`]a`\_Ua\_a`U`VTVU]`X]^XXXYY  
@HWI-EAS443:3:21:166:1027#0/1  
GGGCATGGAATGAGGCGCTGCCTTCTTCAGTCTCTTCAG  
+HWI-EAS443:3:21:166:1027#0/1  
abaabab`\_b`aaa\_\_a`aaaa]¥`[a\_\_^a\_\_a``a]`Y  
@HWI-EAS443:3:21:1733:1583#0/1  
GAAAGGCATAAATCCCAATTACCTCATGGCTTGAAGCAG  
+HWI-EAS443:3:21:1733:1583#0/1  
a`aa]ba\_aaa`a[^\_a\_a``Wa]G`TQ[¥a\_S¥NXQTSB  
@HWI-EAS443:3:21:1774:1355#0/1  
ATTTTGGACCCAGCTTGCTAGAGATCTGGGCTCTGGCTCA

+HWI-EAS443:3:21:1774:1355#0/1  
]b`b`T[ `aVa`R[a^^\_aaaa`X\_\_Z[T[N\_\_\_a[Q`¥U  
@HWI-EAS443:3:21:201:568#0/1  
ATCTTGATCTTGGAGGTTCCATTGGTTCTCACATATAGGA  
+HWI-EAS443:3:21:201:568#0/1  
aaaaab`abaa]aaa\_`aa\_`¥¥VN` ` `\_\_]`QX¥GZ¥  
@HWI-EAS443:3:21:205:749#0/1  
CGACGAACGGGGTGAATCAATAATTGTAGAATCTGGTGAC  
+HWI-EAS443:3:21:205:749#0/1  
abb` `Q]^¥aabYaY\_]\_a`a`Z` `aV¥` [a\_^^aWV^\_\_  
@HWI-EAS443:3:21:21:1173#0/1  
AATTGAAGGAAGAGACCGAATCATGGCCTGGACAGTGGTG  
+HWI-EAS443:3:21:21:1173#0/1  
^`abba^`aa` `aaaaaba`aaaa`a^a`a`a` `^a` [¥  
@HWI-EAS443:3:21:222:1633#0/1  
CCTCGATTGCTTCATATAGCCCCCAAGATCGAAGGTTC  
+HWI-EAS443:3:21:222:1633#0/1  
` `^\_a[¥¥¥Z^Z]XZ^a^Z¥VZa\_SNZXWSYSTQNS¥NU  
@HWI-EAS443:3:21:223:1243#0/1  
GGCTGAATCGAGAAAATTGCTTCTCATTGTTCCAGGCACTT  
+HWI-EAS443:3:21:223:1243#0/1  
`Sa`baaSa\_]\_]¥]^\_a\_]\_0\_^^XY][ ]`X^\_[G^  
@HWI-EAS443:3:21:237:1862#0/1  
CATGATTCGGTCTCTTCCTTCAATTATCTCAAATCGGTGC  
+HWI-EAS443:3:21:237:1862#0/1  
Y`PYY¥ba` `]Y`\_0I\_ba]a\_Z^a` `¥U\_\_^Z]^YVW^]  
@HWI-EAS443:3:21:25:463#0/1  
GGGGCATGGAATGAGGCGCTGCCTTCTTCAGTCTCTTCA  
+HWI-EAS443:3:21:25:463#0/1  
a\_a]a`\_a`^\_` `\_[^` `^` `\_\_¥\_V`¥¥¥\_W¥\_^¥¥W¥  
@HWI-EAS443:3:21:274:327#0/1  
TAATCAGGCACTCCTCGATTGCTTCATATAGCCCCCAAG  
+HWI-EAS443:3:21:274:327#0/1  
aabaaaaa`aaa`a`]¥` ` `^` `\_\_`\_a]\_` `\_\_YWV\_  
@HWI-EAS443:3:21:329:184#0/1  
ACCCGAGTCACGAGGGGGAGGGAATACCACTATATGATGC  
+HWI-EAS443:3:21:329:184#0/1  
abaaaa`ba`\_Uaaaa`\_aaaX`^\_] ^\_¥] `]]^\_^]ZW  
@HWI-EAS443:3:21:338:1706#0/1  
ATGCATCCTGTGCAGCCATGGATGACTTTTCAGCTGATCCC  
+HWI-EAS443:3:21:338:1706#0/1  
a¥^abaa¥^[UMY\_\_\_S\_W][ ` `\_\_[ `^\_¥\_Y]X^[  
@HWI-EAS443:3:21:398:225#0/1  
CATGGCCTGGACAGTGGTGAACAGTATATGTAACACAACA  
+HWI-EAS443:3:21:398:225#0/1  
[]\_bK\_abb[[bV[bbaHaa¥Z[bQaa\_aaH¥]aaa\_]GH  
@HWI-EAS443:3:21:399:1778#0/1  
AAAGAGCCTAACATAGTCAAACCACATGAGAAAGGCATAA  
+HWI-EAS443:3:21:399:1778#0/1  
\_b¥L[W^ZYLabT^[[T\_^[a` [P`\_]\_\_W¥` `^\_SX`aa



@HWI-EAS443:3:21:415:1141#0/1  
CGTCTCCACAACCTTGAGGGGTTTTCGGCTGAATCGAGAAA  
+HWI-EAS443:3:21:415:1141#0/1  
abab`abbbbaaba]a]\_`\_aaa`\_a\_aa`a\_\_a\_\_^aa  
@HWI-EAS443:3:21:417:210#0/1  
CCTTTCTCATGTGGTTTGACTATGTTAGGCTCTTTCCAGC  
+HWI-EAS443:3:21:417:210#0/1  
abbbbaabaab\_ba\_\_ab`\_aa`a`\_`\_] [ ]\_\_a\_Y^\_^]  
@HWI-EAS443:3:21:426:255#0/1  
GGAAGAGACCGAATCATGGCCTGGACAGTGGTGAACAGTA  
+HWI-EAS443:3:21:426:255#0/1  
aa``\_aba\_]``aaaaaa]a\_aaa\_[aa[a\_\_U\_aV`  
@HWI-EAS443:3:21:431:347#0/1  
AAGAATTCCTTGGTCATGTCTTTCTTTGACAGAAGACT  
+HWI-EAS443:3:21:431:347#0/1  
\_ [ ``` [\_X`aaaa¥[ [ ` ] \_\_\_a^VVR`T¥a^X\_aX\_X\_Y]  
@HWI-EAS443:3:21:470:1373#0/1  
TTGGGGGGCTATATGAAGCAATCGAGGAGTGCCTGATTAA  
+HWI-EAS443:3:21:470:1373#0/1  
ZWUTbaaa`\_`^¥¥`]Q]T]a`\_^H[aVM^[\_a\_\_\_^Y¥  
@HWI-EAS443:3:21:492:322#0/1  
CCACTCCCCTGGGTGACTCTCCGATTGGCCATGTTTCCGA  
+HWI-EAS443:3:21:492:322#0/1  
`]]]¥\_] ]NW\_aT[VN¥[\_Z[U[¥T^XFXUUXRKPQLSM  
@HWI-EAS443:3:21:540:32#0/1  
CAAAGAGAAAAGACATGACCAAGGAATTCCTTGAAAACAAA  
+HWI-EAS443:3:21:540:32#0/1  
aaaab`b`aaaaa`\_aaa```a`\_`\_`\_] ^\_a\_\_a\_^\_\_  
@HWI-EAS443:3:21:542:580#0/1  
GGGGCATGGAAATGAGGCGCTGCCTTCTTCAGTCTCTTCA  
+HWI-EAS443:3:21:542:580#0/1  
ab^Z\_`aabXaaaaa\_] ^\_aa`\_`aaa\_aaaSWZ\_\_a\_] ]  
@HWI-EAS443:3:21:569:461#0/1  
CTTTGGTCGGCAAGCTTGCGCATAGTTCCTGTAATCTCAA  
+HWI-EAS443:3:21:569:461#0/1  
abbbbbb`a\_\_¥\_^ [¥aaa] [ ```\_`^ [ ``^aa^^] aT^\_\_`  
@HWI-EAS443:3:21:705:1766#0/1  
CAAGAATCAAAACTAGGCTTTTTCACTATAAGACAAGAAAT  
+HWI-EAS443:3:21:705:1766#0/1  
a`a`\_`\_a`^\_a¥Y\_\_Z\_] ^\_^^] ] ^\_ [ ] XZZ\_Z] ZZZW  
@HWI-EAS443:3:21:711:833#0/1  
TGTGAATTGACTGATTCAAGCTGGATAGAACTTGATGAAA  
+HWI-EAS443:3:21:711:833#0/1  
aaabbbbb`\_abbabaa`a`aaaaaa`^`\_aaa\_\_a\_\_`  
@HWI-EAS443:3:21:736:682#0/1  
CCCTGTTGTGTACATATACTGTTCACTGTCCAGGCC  
+HWI-EAS443:3:21:736:682#0/1  
aa`¥`YY\_¥] ^`\_`\_`\_`\_] Z^V\_X] \_\_^WT] W\_\_UT^  
@HWI-EAS443:3:21:749:1462#0/1  
CATGTTTCCGATTTGTTTTCAAAGAATTCCTTGGTCATGT

+HWI-EAS443:3:21:749:1462#0/1  
aaaa¥a\_\_baaaaa]aaaa`[\`\_a^^^a\_\_\_[[\_]`¥  
@HWI-EAS443:3:21:753:192#0/1  
GCGCATAGTTCCTGTAATCTCAAATTTTTCTTCAATTGTC  
+HWI-EAS443:3:21:753:192#0/1  
`abbbba\_bbabb\_bababbb\_\_bbbb\_bbabbbab`a  
@HWI-EAS443:3:21:765:899#0/1  
TAATCAGGCACTCCTCGATTGCTTCATATAGCCCCCAAG  
+HWI-EAS443:3:21:765:899#0/1  
`aa`aab]aZaaa\_a`a`^`a^^a`\_\_a\_[\_\_[\_X]  
@HWI-EAS443:3:21:773:855#0/1  
GGTGAACCTTTGTAAGTATGGAGTTCTCACTCACTGACCCG  
+HWI-EAS443:3:21:773:855#0/1  
a`L¥\_]a`\_`W`¥RUVaa¥`\_`\_\_\_\_\_]\_Z\_\_^`\_¥[W^  
@HWI-EAS443:3:21:787:631#0/1  
CGGCTGCATTGAGGGCAAGCTTTCCCAAATGTCAAAGAA  
+HWI-EAS443:3:21:787:631#0/1  
a]V`\_aaa\_^X^`\_b^]X¥Z[a^Z^]`^a`Y]`a]`^\_a  
@HWI-EAS443:3:21:794:1214#0/1  
TTCGCCTCTTCGACTGACGAAAGGAATCCCATAGACTC  
+HWI-EAS443:3:21:794:1214#0/1  
aa^aa`aaaaa`[\`aa`^`a^^aa\_\_a^U`\_a\_\_`\_a\_\_  
@HWI-EAS443:3:21:796:477#0/1  
AAGAGACCGAATCATGGCCTGGACAGTGGTGAACAGTATA  
+HWI-EAS443:3:21:796:477#0/1  
aba`a`\_`a`\_\_`^\_Z]^\_[\_]U[\_X\_X]R^\_UU^]  
@HWI-EAS443:3:21:815:1228#0/1  
CGGCTGAATCGAGAAAATTGCTTCTCATTGTTCAAGCACT  
+HWI-EAS443:3:21:815:1228#0/1  
aa`baabb`aa`^^^`\_a`\_`^^^`\_Z^]`^\_\_^Y]  
@HWI-EAS443:3:21:835:1941#0/1  
GCTTGAAGCAGGTGCTAGCAGAGCTACAGGACATTGAAA  
+HWI-EAS443:3:21:835:1941#0/1  
abaaa]a`a^a\_]X]aaa[¥a\_]`^`\_a`\_`^`\_`\_`\_¥\_\_`  
@HWI-EAS443:3:21:88:1380#0/1  
ATAAATACGGCCTTGCTCAATGCATCCTGTGCAGCCATGG  
+HWI-EAS443:3:21:88:1380#0/1  
a`aaaaa]T]aa\_a`\_a^¥^`aa`\_`\_YV^Z\_ZW`Y]^`^  
@HWI-EAS443:3:21:893:638#0/1  
ACGGGGTGAATCAATAATTGTAGAATCTGGTGACCCGAAT  
+HWI-EAS443:3:21:893:638#0/1  
aaZ\_abX\_]a^]`\_`aab\_aaY[\_`\_TTa`TZ`ZSZ`  
@HWI-EAS443:3:21:947:1722#0/1  
GGGGCATGGAATGAGGCGCTGCCTTCTTCACTCTTCA  
+HWI-EAS443:3:21:947:1722#0/1  
\_]Z`aa`\_aaaaa`][a`a`\_`\_¥[a¥\_`[a^\_¥`\_`\_`\_¥\_  
@HWI-EAS443:3:21:997:131#0/1  
GTATTTTTCCCATTTGTGTGGCTCCAGTCTCGGGTCAGTG  
+HWI-EAS443:3:21:997:131#0/1  
a\_J]a¥`\_`\_¥^¥\_\_^YNZQYZ¥[WBBBBBBBBBBBBBBB

@HWI-EAS443:3:22:1025:493#0/1  
CAAGAATCAAACTAGGCTTTTCACTATAAGACAAGAAAT  
+HWI-EAS443:3:22:1025:493#0/1  
\_\_`a¥`U`b`a`SS\_aa\_bbbabaabbb]``\_¥b\_Y¥```  
@HWI-EAS443:3:22:1065:377#0/1  
CTCGGTGAAAATATGGCACCAGAAAAAGTAGACTTTGATG  
+HWI-EAS443:3:22:1065:377#0/1  
a`\_aa\_a\_aaaaaaaaaa\_\_aa\_aa`^`V`aa]]`\_a`\_a  
@HWI-EAS443:3:22:1079:566#0/1  
ACCGGTTCTCTTTGTAATCATACAAATCAGGAAGAAATTT  
+HWI-EAS443:3:22:1079:566#0/1  
a\_`aa^aaaaa`\_a[\_`a¥`^`\_a^`^Y\_a\_]\_[\_[]\_`^  
@HWI-EAS443:3:22:115:1717#0/1  
ATACAAATCAGGAAGAAATTTAGGCTTCTCTACCCCTGTT  
+HWI-EAS443:3:22:115:1717#0/1  
aaaabaa`aa\_]`^`\_a\_\_^\_a^]a`^`^`^`^`a\_]X]  
@HWI-EAS443:3:22:116:549#0/1  
CTTGCGCATAGTTCCTGTAATCTCAAATTTTTCTTCAATT  
+HWI-EAS443:3:22:116:549#0/1  
a\_`aaa\_aa¥Y[[Z`\_\_¥TW`a`^`V\_`^]`\_`[\_]\_]\_\_  
@HWI-EAS443:3:22:1172:1853#0/1  
GGTGAATCAATAATTGTAGAATCTGGTGACCCGAATGCAC  
+HWI-EAS443:3:22:1172:1853#0/1  
aaZ```a`\_`\_`WS\_a\_WWa`a`[]`^Xa`\_`Z`¥Y]`\_`^  
@HWI-EAS443:3:22:1185:110#0/1  
GAAAGGCATAAATCCCAATTACCTCATGGCTTGAAGCAG  
+HWI-EAS443:3:22:1185:110#0/1  
aa`\_\_^\_aa[\_\_\_aQTZ\_¥G`\_[WYWY¥aWW]WQ[NUYQTB  
@HWI-EAS443:3:22:1217:427#0/1  
CTTGGTCATGTCTTTCTCTTTGACAGAAGACTCGGCCTCA  
+HWI-EAS443:3:22:1217:427#0/1  
ab\_bba`baaaaabbbabbaab\_abbbaaa^b[bb]\_a\_b  
@HWI-EAS443:3:22:121:1134#0/1  
TGTCCTTGGGATCTTCTCTTCAATTTTCAATGTCCTGTAGC  
+HWI-EAS443:3:22:121:1134#0/1  
aaP`V\_aa`[\_`\_aaaabaaa\_a`\_`\_aaa\_]aa`\_`^`YZ  
@HWI-EAS443:3:22:1248:1015#0/1  
GAAATAGGAGACATGCTCTTGAGGACTGCGATAGGCCAAG  
+HWI-EAS443:3:22:1248:1015#0/1  
aa`]aaaaa`¥^`a`^`a`aa^Z^^Va^\_\_^[[VZ[^  
@HWI-EAS443:3:22:1283:1713#0/1  
CAGTATTTTTCCATTTGTGTGGCTCCAGTCTCGGGTCAG  
+HWI-EAS443:3:22:1283:1713#0/1  
aa]Q]aaaaaaa\_\_aaaa]a^aR]a\_^[^W[WU[\_]LY]V  
@HWI-EAS443:3:22:133:1696#0/1  
GGAAGAAATTTAGGCTTCTCTACCCCTGTTGTGTACATA  
+HWI-EAS443:3:22:133:1696#0/1  
a`bbbbabaaaaV^baa`abababbbUVZ\_\_[aa\_T\_aaa  
@HWI-EAS443:3:22:1367:903#0/1  
CAGCTTGCTAGAGATCTGGGCTCTGGCTCATCACTGTCAT

+HWI-EAS443:3:22:1367:903#0/1  
\_ab\_bbaabaaaaa\_ab`aXa]^a`\_a^aa[a\_`a^`\_`\_`  
@HWI-EAS443:3:22:1385:1249#0/1  
AGGAGAAGATGTTGCCCCGATTGAACATATCGCAAGCATG  
+HWI-EAS443:3:22:1385:1249#0/1  
^bbWba` `[]baaaaaJ[]NWaPU`a` `\_\_\_\_XW\_dW[Ua  
@HWI-EAS443:3:22:138:1965#0/1  
GGGGTTTTTCGGCTGAATCGAGAAAATTGCTTCTCATTGTT  
+HWI-EAS443:3:22:138:1965#0/1  
aaa^]bbaba\_`aabbab`bab^aaaa]aa\_aaa`\_aVQV  
@HWI-EAS443:3:22:141:289#0/1  
ATTCCTCCCCCTCGTGAATCGGGTCTTCAATACTTAATT  
+HWI-EAS443:3:22:141:289#0/1  
a\_\_abbaab`aa`aa\_]Y¥aa\_Z^T^`\_`Z\_^VW¥`\_G^\_  
@HWI-EAS443:3:22:1449:205#0/1  
GAGAAGATCCCAAGGACAAAGAACATGAAGAGAACAAGCC  
+HWI-EAS443:3:22:1449:205#0/1  
a^]^aa^RPT¥P^\_¥Y[U\_\_[^RPY\_\_^^[^a\_WSZ]`LH  
@HWI-EAS443:3:22:1475:484#0/1  
TACATAAATACGGCCTTGCTCAATGCATCCTGTGCAGCCA  
+HWI-EAS443:3:22:1475:484#0/1  
aa\_` `]^`baa`\_\_\_\_Y\_^a\_\_]\_]ZWZ\_\_ST\_`WYV]`¥ZZ  
@HWI-EAS443:3:22:1568:1452#0/1  
TTTCAAAGAATTCTTGTCATGTCTTTCTCTTTGACAGA  
+HWI-EAS443:3:22:1568:1452#0/1  
ab^\_`a` ` `Va` ` `baab\_\_\_\_a^^\_aaa0^aaa`¥YQ\_\_  
@HWI-EAS443:3:22:1602:528#0/1  
GTTACATATACTGTTCCACTGTCCAGGCCATGATTCGG  
+HWI-EAS443:3:22:1602:528#0/1  
a\_^U^aa\_a`¥`a[\_\_\_\_^W¥Va^W¥Z][UUUV]Z\_Z]¥YZR  
@HWI-EAS443:3:22:1609:28#0/1  
GCAGGTGCTAGCAGAGCTACAGGACATTGAAAATGAAGAG  
+HWI-EAS443:3:22:1609:28#0/1  
aZ\_aaM[PaX]YXa]\_QXWNVa[[VS]\_\_YZ]XYUZ]\_^  
@HWI-EAS443:3:22:1613:1740#0/1  
CCTCATGCTTGGGATATGTTCAATCGGGGCAACATCTTCT  
+HWI-EAS443:3:22:1613:1740#0/1  
`]YH\_b\_H^a` `X^¥b` ` `]U`^W` `b`^LT[WW` [Wa]Z  
@HWI-EAS443:3:22:1615:1885#0/1  
GAAAGGCATAAATCCCAATTACCTCATGGCTTGAAGCAG  
+HWI-EAS443:3:22:1615:1885#0/1  
¥¥¥U^a\_b`\_`bbb¥WVbbbb`aa`b])a` `\_NSOZX[BB  
@HWI-EAS443:3:22:1670:1498#0/1  
CGATTGCCATGTTTCCGATTTGTTTTCAAAGAATTCCTT  
+HWI-EAS443:3:22:1670:1498#0/1  
`^M^b`Za\_T^^^bb[X¥S¥`YZaab\_¥[aaba`ZaX^aa  
@HWI-EAS443:3:22:183:1115#0/1  
GGCATGGAATGAGGCGCTGCCTTCTTCAGTCTTTCAGC  
+HWI-EAS443:3:22:183:1115#0/1  
¥`baa\_`aaabab`aa]bb`ab`aaa\_aaa`aabaaaa\_a



+HWI-EAS443:3:22:519:1241#0/1  
aaa^T¥`YbaZa\_baXaaaa`\_a`\_\_\_X\_`aa\_`\_\_[^\_  
@HWI-EAS443:3:22:525:124#0/1  
AGTGTACATAAATACGGCCTTGCTCAATGCATCCTGTGCA  
+HWI-EAS443:3:22:525:124#0/1  
\_[MZaba¥]WK`bb¥\_¥`Y¥QX^VUVYV^YQPJVJQ¥FZ^  
@HWI-EAS443:3:22:552:188#0/1  
CTCCTCGATTGCTTCATATAGCCCCCAAGATCGAAGGTT  
+HWI-EAS443:3:22:552:188#0/1  
aa¥aSY]UXUaZ`ZRS¥Y[YVZY\_SaZ`^S¥¥UQUBBBBB  
@HWI-EAS443:3:22:609:1730#0/1  
GGGATCTTCTTTCATTTTCAATGTCCTGTAGCTCTGCTA  
+HWI-EAS443:3:22:609:1730#0/1  
`b`ababbbbbbbbbbbbbbbba\_bbb``baa\_b`aa`a  
@HWI-EAS443:3:22:628:1057#0/1  
CGAGTCACGAGGGGAGGAATACCACTATATGATGCAAT  
+HWI-EAS443:3:22:628:1057#0/1  
abbb`ababa\_`aaa]bab`]`a\_abaaaa\_\_\_`a`a]\_  
@HWI-EAS443:3:22:636:424#0/1  
CTGGCTCATCACTGTCATACTGTTTAAGGTCTCCAACATC  
+HWI-EAS443:3:22:636:424#0/1  
abbababbbabab`aaaa`ab\_aaaaa]`a\_aaa`aa^  
@HWI-EAS443:3:22:688:793#0/1  
CTTGTCTTATAGTGAAAAGCCTAGTTTTGATTCTTGCCCT  
+HWI-EAS443:3:22:688:793#0/1  
aa`\_R]a\_\_SYaW^`\_a`a¥\_]`[\_V^]`\_]`^ZSL\_^X  
@HWI-EAS443:3:22:757:203#0/1  
GCCATGTTTCCGATTTGTTTTCAAAGAATTCCTTGTCAT  
+HWI-EAS443:3:22:757:203#0/1  
aaa`aaXaaaaa`\_\_`S`[YY`aa]a^\_\_`^]\_a\_Y^\_^  
@HWI-EAS443:3:22:757:345#0/1  
GAATCAATAATTGTAGAATCTGGTGACCCGAATGCACTAT  
+HWI-EAS443:3:22:757:345#0/1  
T[ZUZ¥`¥`Y`a[\_\_\_baababb\_`^aa\_aVbabaSa\_`a\_  
@HWI-EAS443:3:22:770:924#0/1  
CACCAGAAAAAGTAGACTTTGATGACTGCAAAGATGTTGG  
+HWI-EAS443:3:22:770:924#0/1  
^bbabbb]^b`babbb^babbaabaaba\_bba`^ab¥^`a  
@HWI-EAS443:3:22:795:1345#0/1  
ATTGCAGCAAACCTGTTAGTTTCGATTTTCGGATCTTCCC  
+HWI-EAS443:3:22:795:1345#0/1  
a``\_aa\_ab\_`````^^`\_[\_\_]\_VW]¥^Y]NLO[^YY[W  
@HWI-EAS443:3:22:799:95#0/1  
TCATTATGTATTGACTAGCCCTGCAGTGGGACACTTCTGC  
+HWI-EAS443:3:22:799:95#0/1  
aZX\_aS[a^aaa`\_P\_YX^^¥`\_`\_^\_Ga]\_XZ^VXV^^ZV  
@HWI-EAS443:3:22:824:1932#0/1  
GGGGAGTGGAGGAAGGCTCTATTGGGAAAGTGTGCAGGAC  
+HWI-EAS443:3:22:824:1932#0/1  
aaaaabZb^a`a`aa`aaa`a`a^a^\_``^QKLX^^\_\_^¥

@HWI-EAS443:3:22:882:1688#0/1  
GGGGCATGGAAATGAGGCGCTGCCTTCTTCAGTCTCTTCA  
+HWI-EAS443:3:22:882:1688#0/1  
a\_]`[\`¥^]baSab`VaabW\_¥a^`¥¥\_¥b]VX^a[^\_]  
@HWI-EAS443:3:22:939:1038#0/1  
TATAGCCCCCAAGATCGAAGTTCCAGTTCCAGTTGT  
+HWI-EAS443:3:22:939:1038#0/1  
abab`]aaa^`aa]aa`]V`]aV`Z^]¥Z¥PTZZRJ[[^  
@HWI-EAS443:3:23:1135:741#0/1  
GGGGGCTATATGAAGCAATCGAGGAGTGCCTGATTAATGA  
+HWI-EAS443:3:23:1135:741#0/1  
abbbabbbaaaaa]aaaba\_a\_a]^a\_`\_`a^Za```a`  
@HWI-EAS443:3:23:1139:933#0/1  
GGGGCATGGAAATGAGGCGCTGCCTTCTTCAGTCTCTTCA  
+HWI-EAS443:3:23:1139:933#0/1  
ababbbba\_a`ab`aabaaa\_`aa]aa`aa\_\_a``a^^  
@HWI-EAS443:3:23:1145:1021#0/1  
AACTTGATGAAATAGGAGAAGATGTTGCCCGATTGAACA  
+HWI-EAS443:3:23:1145:1021#0/1  
Q\_bb`¥Y`¥^bababbabaaaa\_ab`Y```aaaaa^b  
@HWI-EAS443:3:23:1157:238#0/1  
GGTGAACCTTTGTAAGTATGGAGTTCTCACTCACTGACCCG  
+HWI-EAS443:3:23:1157:238#0/1  
\_a`aababaababaa\_baabaaa`aa]a``aa`aba\_¥Ya  
@HWI-EAS443:3:23:1179:401#0/1  
CGAAAATCGAACTAACAAGTTTGCTGCAATATGCACACA  
+HWI-EAS443:3:23:1179:401#0/1  
aababaaaba`a\_aaa^ba`[a\_\_\_aa\_\_aa`a`Ua\_\_\_]  
@HWI-EAS443:3:23:1220:286#0/1  
GTTTGTTCATGTATTCCGATTTCCATTTTCATCGACGAAC  
+HWI-EAS443:3:23:1220:286#0/1  
a\_aaa¥`a\_``]X`\_\_\_aa\_^`X[^\_^\_^\_^]\_^Z^ZWU  
@HWI-EAS443:3:23:1359:369#0/1  
GAGATGGCCACCAAAGCGGACTACACCCTTGACGAAGAGA  
+HWI-EAS443:3:23:1359:369#0/1  
`bbabbbba\_a]Qabaa]baaUaaWaU[¥\_\_^W`¥\_aZ\_\_  
@HWI-EAS443:3:23:1369:1429#0/1  
GGGCCTCGACACTTGGCCTATCGCAGTCCTCAAGAGCATG  
+HWI-EAS443:3:23:1369:1429#0/1  
Zaabaabbbab`bb`b^baaaa^ZZY\_`¥a¥¥YY¥Za^YV  
@HWI-EAS443:3:23:1371:1792#0/1  
CAGTCATCAAAGTCTACTTTTTCTGGTGCCATATTTTCAC  
+HWI-EAS443:3:23:1371:1792#0/1  
abb^¥b````^`\_^a\_bbaa`a\_\_\_Waa`a\_aaaaa\_`^  
@HWI-EAS443:3:23:1388:40#0/1  
AATAGGAGAAGATGTTGCCCGATTGAACATATCGCAAGC  
+HWI-EAS443:3:23:1388:40#0/1  
a¥b[`a]\_Ya`Z^`P[a¥U^Z`]VTUYaW\_[XYSPWHWQU  
@HWI-EAS443:3:23:1433:1173#0/1  
GGGGTTTTTCGGCTGAATCGAGAAAATTGCTTCTCATTGTT

+HWI-EAS443:3:23:1433:1173#0/1  
abab^abaaa` `abaaa`a\_a^\_\_\_\_a\_Zaa[ `^`a\_V`  
@HWI-EAS443:3:23:1498:1297#0/1  
TACATATACTGTTCACCACTGTCCAGGCCATGATTCGGTC  
+HWI-EAS443:3:23:1498:1297#0/1  
^\_\_babb\_aab`b]aa\_aaaa\_WK` [ `\_\_aYPX^\_S^^[Z  
@HWI-EAS443:3:23:1534:1616#0/1  
CATAAATCCCAATTACCTCATGGCTTGAAGCAGGTGCTA  
+HWI-EAS443:3:23:1534:1616#0/1  
abbbbbba¥T`b`ab\_a]aa`a`^baLYQaZYYQ^G]XY\_  
@HWI-EAS443:3:23:1541:913#0/1  
CTTGGGATCTTCTTTCATTTTCAATGTCCTGTAGCTCTG  
+HWI-EAS443:3:23:1541:913#0/1  
abbbbbW¥abbbbbbaaab\_baaa`aaa`ba`aa`\_Z`  
@HWI-EAS443:3:23:1593:1911#0/1  
CATGAAATGAGGCGCTGCCTTCTTCAGTCTTTCAGCAG  
+HWI-EAS443:3:23:1593:1911#0/1  
aab¥babbbVbV]\_QQVaSaa[Ubb\_b`] ^¥[]a`aaX[]  
@HWI-EAS443:3:23:1626:1033#0/1  
GGGGGCTATATGAAGCAATCGAGGAGTGCCTGATTAATGA  
+HWI-EAS443:3:23:1626:1033#0/1  
Yabb` [\_b¥^baWa]]\_]N]P\_S[\_[aVK`a¥ZVSY^`^  
@HWI-EAS443:3:23:168:1675#0/1  
AACGGGTGAATCAATAATTGTAGAATCTGGTGACCCGAA  
+HWI-EAS443:3:23:168:1675#0/1  
a`ZTHZSa]OVbaa^]aaRaRaa`a\_OXXRND``V]]\_Z  
@HWI-EAS443:3:23:16:1556#0/1  
GCCTAACATAGTCAAACCACATGAGAAAGGCATAAATCCC  
+HWI-EAS443:3:23:16:1556#0/1  
abaaaaabaaV¥a^^` `aa` `^^[\_]\_\_¥^a`aa\_a\_¥\_  
@HWI-EAS443:3:23:1710:1979#0/1  
GAACTATTTTACAGCAGAAGTGTCCCACTGCAGGGCTACT  
+HWI-EAS443:3:23:1710:1979#0/1  
aabbabbbbb`bbab]bb\_]\_^a[ `aa¥a`aaa^^a\_X`  
@HWI-EAS443:3:23:1774:924#0/1  
GATATGTTCAATCGGGCAACATCTTCTCCTATTTTCATCA  
+HWI-EAS443:3:23:1774:924#0/1  
aaa\_abY^LP`YY`SX\_]ZV¥XRX^ZWQV¥^¥^\_] ]S]  
@HWI-EAS443:3:23:212:1178#0/1  
CTTGGGATCTTCTTTCATTTTCAATGTCCTGTAGCTCTG  
+HWI-EAS443:3:23:212:1178#0/1  
aabbabTaabbaabaababbabaaaa`aaa\_\_a\_a\_aV[  
@HWI-EAS443:3:23:222:264#0/1  
CTCGATTGCTTCATATAGCCCCCAAGATCGAAGGTTCCA  
+HWI-EAS443:3:23:222:264#0/1  
`\_\_Z`baa`a`bbbabbb\_\_T\_a\_`aaa`aa]]\_¥V]]ZX  
@HWI-EAS443:3:23:294:617#0/1  
CACCGATTTGAGATAATTGAAGGAAGAGACCGAATCATGG  
+HWI-EAS443:3:23:294:617#0/1  
ababb`ababaa`aaaa^aa\_a[ `a\_\_` `a\_`a\_¥]\_`\_Z



@HWI-EAS443:3:23:29:99#0/1  
CGATTGGCCATGTTTCCGATTTGTTTTCAAAGAATTCCTT  
+HWI-EAS443:3:23:29:99#0/1  
abb`XaU`VYaa¥a\_¥J]aa`Vaaab]^Y\_^0¥aa[T^^  
@HWI-EAS443:3:23:310:1148#0/1  
GAAAATGAAGAGAAGATCCCAAGGACAAAGAACATGAAGA  
+HWI-EAS443:3:23:310:1148#0/1  
^^aa^¥W]``[``^`a`Yba^R¥SV^aaYa`\_\_aaa^`\_]  
@HWI-EAS443:3:23:322:912#0/1  
CATGTTTCCGATTTGTTTTCAAAGAATTCCTTGGTCATGT  
+HWI-EAS443:3:23:322:912#0/1  
aaaa\_aaaaa\_\_aaa^aa^\_UYa\_^]aXZ\_``\_\_Z]\_\_a]  
@HWI-EAS443:3:23:324:1527#0/1  
CATTCTTTGGCTGGAAAGAGCCTAACATAGTCAAACCACA  
+HWI-EAS443:3:23:324:1527#0/1  
ab]`abaa\_¥X`baaab`V^a\_\_^^aa\_baZ]Y`MY`aS]  
@HWI-EAS443:3:23:326:453#0/1  
CCCAGATCTCTAGCAAGCTGGGTCCAAAATGAATTCAATA  
+HWI-EAS443:3:23:326:453#0/1  
abbaaaaa\_aaaaa`aa`a`X`a`a`Y`a`\_`]^`\_^a  
@HWI-EAS443:3:23:400:310#0/1  
GTGAACCTTTGTAAGTATGGAGTTCTCACTCACTGACCCGA  
+HWI-EAS443:3:23:400:310#0/1  
a[\_ZNQ^P]VJUTVPUXP¥UVX\_`VNV¥Y]^WZ^Z^¥VUW  
@HWI-EAS443:3:23:401:741#0/1  
GGAAATCCGAATACATGAAACAAACTTCCAAATGTGTGCA  
+HWI-EAS443:3:23:401:741#0/1  
aaL\_\_V]Y`a`T]Ybbbbaba`[Ya[]`bY]aa\_\_a`XOX  
@HWI-EAS443:3:23:453:1985#0/1  
AGGGAATACCACTATATGATGCAATCAAATGCATGAAGAC  
+HWI-EAS443:3:23:453:1985#0/1  
a]^X\_\_abaaYa`bXaa`\_a`aa`aaa^Za`\_^aa^`\_  
@HWI-EAS443:3:23:467:323#0/1  
AGATCTCTAGCAAGCTGGGTCCAAAATGAATTCAATAAGG  
+HWI-EAS443:3:23:467:323#0/1  
abaaaaaaaa]a`b\_a`aa]\_aaa`a`]^`Y\_a`\_`\_^`^  
@HWI-EAS443:3:23:500:919#0/1  
CTTTCCCAATAGAGCCTTCCCTCCACTCCCCTGGGTGACTC  
+HWI-EAS443:3:23:500:919#0/1  
abbbbabbabb`a]Zbaa[]]a`Q`^`a^`^`a\_S]`\_`\_  
@HWI-EAS443:3:23:508:1787#0/1  
GCCGAACGGCTGCATTGAGGGCAAGCTTCCCAAATGTCA  
+HWI-EAS443:3:23:508:1787#0/1  
]abbbbab[baaaba`K`T\_\_abbb[aaaa^¥L`bYU[aa  
@HWI-EAS443:3:23:580:1672#0/1  
CGGCTGAATCGAGAAAATTGCTTCTCATTGTTTCAGGCACT  
+HWI-EAS443:3:23:580:1672#0/1  
`\_\_[b]baaNFU[`aabaX]SVS[a\_b`aaN]\_]Gab\_W\_  
@HWI-EAS443:3:23:588:143#0/1  
AATGAATTCAATAAGGCATGTGAATTGACTGATTCAAGCT

+HWI-EAS443:3:23:588:143#0/1  
a¥aaa` `` `` \_]U^aPVU¥\_]aYU^[ZLZW[\_XY`]VTY  
@HWI-EAS443:3:23:608:887#0/1  
TGCATGAAGACATTCTTTGGCTGGAAAGAGCCTAACATAG  
+HWI-EAS443:3:23:608:887#0/1  
VV[Z`^`a`aab\_]¥`\_`¥YT\_\_QH^¥YT[WMQVZM`\_X]  
@HWI-EAS443:3:23:627:1857#0/1  
CTTGGGGGCTATATGAAGCAATCGAGGAGTGCCTGATTA  
+HWI-EAS443:3:23:627:1857#0/1  
abb` `aab`aaaabaXaa`\_aaa\_a\_a` `a]`a]`aa¥¥a  
@HWI-EAS443:3:23:656:1484#0/1  
GTTTCCGATTTGTTTTCAAAGAATTCCTTGGTCATGTCTT  
+HWI-EAS443:3:23:656:1484#0/1  
`aa\_b`^^\_aaa\_abaa`\_aa\_\_a`a^aa\_a[aa` `^a`  
@HWI-EAS443:3:23:657:1109#0/1  
TTTTCAAAGAATTCCTTGGTCATGTCTTTCTCTTTGACAG  
+HWI-EAS443:3:23:657:1109#0/1  
¥b]`a]aa]T]a]`\_]\_ab¥Raaab^^a`\_RaY[[[\_a\_]a¥  
@HWI-EAS443:3:23:739:1214#0/1  
GGGGCTATATGAAGCAATCGAGGAGTGCCTGATTAATGAT  
+HWI-EAS443:3:23:739:1214#0/1  
abaababab`aaaa` `aa`aa`a]aY\_X\_\_` `` `^\_\_\_\_  
@HWI-EAS443:3:23:835:380#0/1  
GGGGCATGGAATGAGGCGCTGCCTTCTTCAGTCTCTTCA  
+HWI-EAS443:3:23:835:380#0/1  
aa` `\_aba\_a` `a`^\_a^`a]`\_Y\_Z^¥¥a¥S\_^` ¥¥V  
@HWI-EAS443:3:23:854:1762#0/1  
CCGAAAGAGGCGAAGAGACAATTGAAGAAAAATTTGAGAT  
+HWI-EAS443:3:23:854:1762#0/1  
ababbababbbbabbbbbaabbaabbbabaaaab`aaaa^  
@HWI-EAS443:3:23:86:749#0/1  
CGGCTGAATCGAGAAAATTGCTTCTCATTGTTTCAGGCACT  
+HWI-EAS443:3:23:86:749#0/1  
ababa`baaaaabaabaabYa\_aa`a]aaa\_a`a` `a`\_\_  
@HWI-EAS443:3:23:872:1863#0/1  
CTTGGGGGCTATATGAAGCAATCGAGGAGTGCCTGATTA  
+HWI-EAS443:3:23:872:1863#0/1  
aba`a`[L`bab`X]aWT`aXaa^^`\_]W¥^`]a¥^\_\_  
@HWI-EAS443:3:23:899:1364#0/1  
ATGGCCAGTAGGAGTCTATGGGATTCCTTTTCAGTCCG  
+HWI-EAS443:3:23:899:1364#0/1  
ab^aa]WUN^aZXWGVaU`[^Xa^VTV` `` RTQNNWJJZZ  
@HWI-EAS443:3:23:942:475#0/1  
AGATAATTGAAGGAAGAGACCGAATCATGGCCTGGACAGT  
+HWI-EAS443:3:23:942:475#0/1  
^bba]abbbbbbabababaaaaba\_a`aaaa`aaa]^a\_X  
@HWI-EAS443:3:24:1035:237#0/1  
CGTCTCCACAACCTTGAGGGGTTTTCGGCTGAATCGAGAAA  
+HWI-EAS443:3:24:1035:237#0/1  
ab\_Za^W\_`a` `b\_baa]ba\_` `Z`[N[`` `\_\_\_\_\_`U^X

@HWI-EAS443:3:24:1049:482#0/1  
GCGATATGTTCAATCGGGGCAACATCTTCTCCTATTTTCAT  
+HWI-EAS443:3:24:1049:482#0/1  
aabaaaab``aaa``\_`\_`^^^\_a\_aa]a\_\_``a`\_]`  
@HWI-EAS443:3:24:1072:1484#0/1  
GACGAAAGGAATCCCATAGACTCCTACTGGCCATTTCTTG  
+HWI-EAS443:3:24:1072:1484#0/1  
abab[b`bbb]ba]aabaababab\_aaa`baa`T\_aX\_a]  
@HWI-EAS443:3:24:1112:391#0/1  
CATTAATCAGGCACTCCTCGATTGCTTCATATAGCCCCC  
+HWI-EAS443:3:24:1112:391#0/1  
`¥[\_a\_ba\_a\_¥\_\_YVZaXY\_UY¥¥UH¥^]¥[QYFMGOLD  
@HWI-EAS443:3:24:1117:1067#0/1  
GAGGGGTTTTCGGCTGAATCGAGAAAATTGCTTCTCATTG  
+HWI-EAS443:3:24:1117:1067#0/1  
aaaaab\_a`^^a``\_\_aa^`\_a]`\_Za\_`V[`¥]````\_`  
@HWI-EAS443:3:24:1120:501#0/1  
GGGCATGGAAATGAGGCGCTGCCTTCTTCAGTCTTTCAG  
+HWI-EAS443:3:24:1120:501#0/1  
a`¥`Z^b[Za`b^)`TTaWTZMT]]W]\_ZQ]NP\_T\_Z[^¥  
@HWI-EAS443:3:24:116:1706#0/1  
AACTTGATGAAATAGGAGAAGATGTTGCCCGATTGAACA  
+HWI-EAS443:3:24:116:1706#0/1  
U¥b¥b]bb`]]bb\_ba`^\_S\_]\_]XUWa`ZV\_a[NZa\_a  
@HWI-EAS443:3:24:1202:1945#0/1  
GATGAGCCAGAGCCCAGATCTCTAGCAAGCTGGGTCCAAA  
+HWI-EAS443:3:24:1202:1945#0/1  
a]b\_b^aab[bb]`aab\_]`^TZab\_aabYSa\_¥PFV`^`  
@HWI-EAS443:3:24:1248:1040#0/1  
GCAGAGCTACAGGACATTGAAAATGAAGAGAAGATCCCAA  
+HWI-EAS443:3:24:1248:1040#0/1  
aaR]X¥`a\_a]a\_LR\_\_a\_^]`\_a]Ya\_]`[`¥ZUURUS  
@HWI-EAS443:3:24:1249:857#0/1  
GAGAAGACACACATTCACATCTTTTCATTCCTGGAGAGG  
+HWI-EAS443:3:24:1249:857#0/1  
`\_Z\_bbbba\_baa`bbababbaabab\_baaaa`ba`a```a  
@HWI-EAS443:3:24:1263:1886#0/1  
CCAGCTTGCTAGAGATCTGGGCTCTGGCTCATCACTGTCA  
+HWI-EAS443:3:24:1263:1886#0/1  
aba`UaX`abbabab`Ya`aa`aabaa`\_a^aTaaY^b  
@HWI-EAS443:3:24:1285:339#0/1  
ATTGAGCAAGGCCGTATTTATGTACTCCCTTCATTATG  
+HWI-EAS443:3:24:1285:339#0/1  
]b`bababbabbab\_aaaaa`aaa`\_Sa\_Y\_``\_\_aa`a`  
@HWI-EAS443:3:24:1376:1940#0/1  
ATTCTTTGGCTGGAAAGAGCCTAACATAGTCAAACCACAT  
+HWI-EAS443:3:24:1376:1940#0/1  
aaa\_aa\_aa`aa¥`aaaa^a\_\_U\_a`\_]¥aaaZa\_[a]  
@HWI-EAS443:3:24:1379:1493#0/1  
TATTGGGAAAGTGTGCAGGACCTTACTGGCAAATCTGTA

+HWI-EAS443:3:24:1379:1493#0/1  
`abbaaa`ba^W`a`aab`]\_abbaJH^`a\_aa`]aa^`  
@HWI-EAS443:3:24:1504:241#0/1  
TGGCTCCAGTCTCGGGTCAGTGAGTGAGAACTCCATACTT  
+HWI-EAS443:3:24:1504:241#0/1  
aaaa`a`Z\_`a`^^U[U`G[^\_Z`[aW\_LYUR¥[TPWZ  
@HWI-EAS443:3:24:1620:519#0/1  
GGGGCGTGGTGTCTCCTCAAGAATGGTTCAATTTTGGCG  
+HWI-EAS443:3:24:1620:519#0/1  
aa\_X¥^V]`U`\_^[^Z\_V[\_^V¥[XSWS][^X`][U¥  
@HWI-EAS443:3:24:1625:92#0/1  
ATTCTTTGGCTGAAAGAGCCTAACATAGTCAAACCACAT  
+HWI-EAS443:3:24:1625:92#0/1  
abb`bbabbabbaaaa`a^^`aY\_`\_a^^aaSU]Z^]  
@HWI-EAS443:3:24:1636:264#0/1  
GAGAAGATCCCAAGGACAAAGAACATGAAGAGAACAAGCC  
+HWI-EAS443:3:24:1636:264#0/1  
aaaaa\_¥[``Xa\_`\_]^^\_^]\_X]\_]\_]\_]\_Z^]]RZ  
@HWI-EAS443:3:24:203:687#0/1  
CTCGATTGCTTCATATAGCCCCCAAGATCGAAGGTTCCA  
+HWI-EAS443:3:24:203:687#0/1  
ab\_¥`aa^`aaaaaaaa¥a`aaaaa`aZ^``\_^R^¥PQ  
@HWI-EAS443:3:24:227:1285#0/1  
CCCCGTCGTCGATGAAATGGAAATCCGAATACATGAAACA  
+HWI-EAS443:3:24:227:1285#0/1  
aba`W`\_SW]\_Q]aaa\_]YZaa^`^a\_`a`aQ`[`]a  
@HWI-EAS443:3:24:246:1548#0/1  
CAAAGTCTACTTTTTCTGGTGCCATATTTTCACCGAGTGC  
+HWI-EAS443:3:24:246:1548#0/1  
abaaa]b`baaaaaaaaa`[^aaaa`aa``bbbaa¥¥]aa  
@HWI-EAS443:3:24:257:617#0/1  
GGCCATGTTTCCGATTTGTTTTCAAAGAATCCTTGGTCA  
+HWI-EAS443:3:24:257:617#0/1  
`^ababb^aba`aa]aab`aaa]aaaaZaaa\_aa\_aW\_a  
@HWI-EAS443:3:24:262:917#0/1  
GGGGCATGGAAATGAGGCGCTGCCTTCTTCTCAGTCTTCA  
+HWI-EAS443:3:24:262:917#0/1  
aaa`aa^aaa``a\_\_^````¥¥\_¥\_\_VLX¥\_\_S¥U\_  
@HWI-EAS443:3:24:270:989#0/1  
CTCCAGTCTCGGGTCAGTGAGTGAGAACTCCATACTTACA  
+HWI-EAS443:3:24:270:989#0/1  
abaabbabab`b`Ya`\_Z]`^aaa`b`\_aabaa[aaa^`  
@HWI-EAS443:3:24:276:151#0/1  
AGTGTACATAAATACGGCCTTGCTCAATGCATCCTGTGCA  
+HWI-EAS443:3:24:276:151#0/1  
]`]a¥\_Z`ba`b`baa`^`aaa`^[`\_aa````aU\_\_\_\_  
@HWI-EAS443:3:24:321:1434#0/1  
GAGATAATTGAAGGAAGAGACCGAATCATGGCCTGGACAG  
+HWI-EAS443:3:24:321:1434#0/1  
`a[aaabaaaaa\_a]aaa``\_a\_a\_aaa\_]a^[\_¥`\_`

@HWI-EAS443:3:24:353:698#0/1  
CAAACCTGTTAGTTTTCGATTTTCGGATCTTCCCCATATTC  
+HWI-EAS443:3:24:353:698#0/1  
abba`bbaabba`babb^aaa\_\_a`H[Sa`X]`aa`\_aa`  
@HWI-EAS443:3:24:384:2027#0/1  
GAGGAGGAACCTATTTTACAGCAGAAGTGTCCCACTGCAGG  
+HWI-EAS443:3:24:384:2027#0/1  
aaa`]^\_baa\_`a`\_abaaX`aaa\_\_XXXa\_`aaX\_]``]  
@HWI-EAS443:3:24:38:1865#0/1  
GGGGTTTTCGGCTGAATCGAGAAAATTGCTTCTCATTGTT  
+HWI-EAS443:3:24:38:1865#0/1  
aabaWababbaba]ab\_a\_ba`ba\_aa\_aa`a`aaa`\_V\_  
@HWI-EAS443:3:24:412:205#0/1  
AACACAACAGGGGTAGAGAAGCCTAAATTTCTCCTGATT  
+HWI-EAS443:3:24:412:205#0/1  
[\_[abb`babb`[K`bbbbbaba¥^`^`\_V\_`ab[a\_\_aa  
@HWI-EAS443:3:24:478:1476#0/1  
AGAATTCCTTGGTCATGTCTTTCTCTTTGACAGAAGACTC  
+HWI-EAS443:3:24:478:1476#0/1  
aaabaa[``]`^H\_X^`Y`aaaa`a`\_a¥W\_`NQ¥\_\_WWP  
@HWI-EAS443:3:24:569:184#0/1  
CAATAATTGTAGAATCTGGTGACCCGAATGCACTATTGAA  
+HWI-EAS443:3:24:569:184#0/1  
abbbb`b\_b`bbbaaaba\_bb`\_aba`ba`a`aaa`a`\_  
@HWI-EAS443:3:24:587:860#0/1  
AATTGACTGATTCAAGCTGGATAGAAGCTTGATGAAATAGG  
+HWI-EAS443:3:24:587:860#0/1  
abbb]\_U\_b`aa`]`aaaba`aaaaaaaaaaaa`\_`a^a`  
@HWI-EAS443:3:24:596:181#0/1  
GAGCAGGGCAAGAATCAAACTAGGCTTTTCACTATAAGA  
+HWI-EAS443:3:24:596:181#0/1  
aZVWTaaa¥b`a¥`aa`aaa\_a```\_\_\_\_\_¥a\_X^[¥Z[]  
@HWI-EAS443:3:24:59:407#0/1  
GCCTTATTGAATTCATTTTGGACCCAGCTTGCTAGAGATC  
+HWI-EAS443:3:24:59:407#0/1  
abbbbabbbbaabb`aaaaaaaa```aaaaa^aaa^\_a  
@HWI-EAS443:3:24:613:1312#0/1  
GAAATAGGAGAAGATGTTGCCCGATTGAACATATCGCAA  
+HWI-EAS443:3:24:613:1312#0/1  
aaaaaaaaa]aaa`\_`¥aaa`¥]aZ\_]\_`b`a\_`]\_`W]\_  
@HWI-EAS443:3:24:640:545#0/1  
ATGTTCTTTGTCTTGGGATCTTCTCTTCATTTTCAATGT  
+HWI-EAS443:3:24:640:545#0/1  
aa`abbbbbbab^aa`Zb\_a^a`ababbaaaba`]baaa`  
@HWI-EAS443:3:24:699:1969#0/1  
ACACCCTTGACGAAGAGAGCAGGGCAAGAATCAAACTAG  
+HWI-EAS443:3:24:699:1969#0/1  
aab][`[aba]U^a\_aZIJ`^\_\_W\_]a\_]`^^S¥\_UNJ\_0  
@HWI-EAS443:3:24:702:542#0/1  
AAGAAATTTAGGCTTCTCTACCCCTGTTGTGTTACATATA

+HWI-EAS443:3:24:702:542#0/1  
aaaaabba`aba`aa`a^aaa\_a[`¥[`a^a\_`a^aaa`a  
@HWI-EAS443:3:24:726:1092#0/1  
GGCCGAGTCTTCTGTCAAAGAGAAAGACATGACCAAGGAA  
+HWI-EAS443:3:24:726:1092#0/1  
abbba]baaaababaa`aab`baaab`aaaa`aa`aa`a  
@HWI-EAS443:3:24:734:917#0/1  
GCATGGAAATGAGGCGCTGCCTTCTTCAGTCTTTCAGCA  
+HWI-EAS443:3:24:734:917#0/1  
abbabbababa`b`aaaaaaaaabaaaaa\_`aaa``\_\_`\_  
@HWI-EAS443:3:24:748:1871#0/1  
TAATCAGGCACTCCTCGATTGCTTCATATAGCCCCCAAG  
+HWI-EAS443:3:24:748:1871#0/1  
[\_Ubb`]WZ\_]`Xa\_UaUa]\_aHwa\_aaaQST^XUX^a\_  
@HWI-EAS443:3:24:78:1258#0/1  
AATGGAAATCCGAATACATGAAACAACTTCCAAATGTGT  
+HWI-EAS443:3:24:78:1258#0/1  
[^VYWZVU]``^U[`\_]`^`¥`^`a¥^^Y`L¥ZTZOT  
@HWI-EAS443:3:24:795:455#0/1  
AGGACATTGAAAATGAAGAGAAGATCCCAAGGACAAAGAA  
+HWI-EAS443:3:24:795:455#0/1  
a`aaaabbbbaaaaaa`baa`aa`^`\_\_a^a```\_\_a```  
@HWI-EAS443:3:24:803:391#0/1  
CATTCTTTGGCTGGAAGAGCCTAACATAGTCAAACCACA  
+HWI-EAS443:3:24:803:391#0/1  
abbb^baY)`]abaaa]a`aa^\_\_a^\_a\_a^`aaa[\_\_\_X\_  
@HWI-EAS443:3:24:826:971#0/1  
ATCAAAACTAGGCTTTTCACTATAAGACAAGAAATGGCCA  
+HWI-EAS443:3:24:826:971#0/1  
UY`a^aaaa`^`a`¥`V\_\_VV^\_\_¥`T]]\_]\_Z[V\_RFS[  
@HWI-EAS443:3:24:861:1570#0/1  
GGACAACCTGGAACCTGGAACCTTCGATCTTGGGGGGCTA  
+HWI-EAS443:3:24:861:1570#0/1  
a\_\_\_a^P\_a\_[M``[^HUVa`W\_Ta\_^NU\_\_^TZ\_QZ]¥¥  
@HWI-EAS443:3:24:867:57#0/1  
ATTGAAAATGAAGAGAAGATCCCAAGGACAAAGAACATGA  
+HWI-EAS443:3:24:867:57#0/1  
abbbaababb\_bbbbaabaaa]aa\_baa^aaaaa\_a\_`a`  
@HWI-EAS443:3:24:86:277#0/1  
GGGTTTTCGGCTGAATCGAGAAAATTGCTTCTCATTGTTC  
+HWI-EAS443:3:24:86:277#0/1  
aaaX```a`\_`\_a`^`[^`^\_\_^VZ^^`\_]X^^^WX^  
@HWI-EAS443:3:24:987:997#0/1  
GCCAACAAAATAAAATCTGAGAAGACACACATTCACATCT  
+HWI-EAS443:3:24:987:997#0/1  
abaa\_b¥P]Y^¥V^a^a]]][a`]`Y[¥`^`\_`\_`\_a^Z`  
@HWI-EAS443:3:25:1034:1303#0/1  
TGAAGACATTCTTTGGCTGGAAGAGCCTAACATAGTCAA  
+HWI-EAS443:3:25:1034:1303#0/1  
]bbbbbbbbbaaaaaaaaaaaaaa`a¥¥`a^```aa```[Z\_a

@HWI-EAS443:3:25:1101:1395#0/1  
TGGAAGCAGGTGCTAGCAGAGCTACAGGACATTGAAAATG  
+HWI-EAS443:3:25:1101:1395#0/1  
a`a`bba\_baUaaaa`a`a`aa\_aa\_a\_a\_`\_\_`\_`\_`  
@HWI-EAS443:3:25:1116:1567#0/1  
CTTGGGGGCTATATGAAGCAATCGAGGAGTGCCTGATTA  
+HWI-EAS443:3:25:1116:1567#0/1  
aaa`\_`¥a[^abb`b\_ba^a`ababab`bVbab¥b^ba\_  
@HWI-EAS443:3:25:1121:1628#0/1  
GGGGGCTATATGAAGCAATCGAGGAGTGCCTGATTAATGA  
+HWI-EAS443:3:25:1121:1628#0/1  
aaWPa\_a[``U`^]``VXZ^]R¥U¥]Y\_^XX\_]¥]XY  
@HWI-EAS443:3:25:1134:1768#0/1  
AAGAACATGAAGAGAACAAGCCAATTGAAGTGGGCACTCG  
+HWI-EAS443:3:25:1134:1768#0/1  
[`YS¥Za\_Z^a`bbbaaba^`¥a¥U]XZUYL\_T]T]LT`a  
@HWI-EAS443:3:25:1163:755#0/1  
CCCAGATCTCTAGCAAGCTGGGTCCAAAATGAATTCAATA  
+HWI-EAS443:3:25:1163:755#0/1  
a`¥baababbbabb`baa`b]]Ta``¥^baaaa]`a`^a  
@HWI-EAS443:3:25:121:986#0/1  
CCACTCCCCTGGGTGACTCTCCGATTGGCCATGTTTCCGA  
+HWI-EAS443:3:25:121:986#0/1  
a`bbbabbba\_aZHwb`aaaaW`Z¥`a`S\_^Ta\_^aYL  
@HWI-EAS443:3:25:1349:1139#0/1  
TTCCCATTGTGTGGCTCCAGTCTCGGGTCAGTGAGTGAG  
+HWI-EAS443:3:25:1349:1139#0/1  
aa[\_aabaaa\_b]b\_]a\_OZ[WV[]\_¥\_OV]XGVY]GZPP  
@HWI-EAS443:3:25:1395:2030#0/1  
CTCCTATTTTCATCAAGTTCTATCCAGCTTGAATCAGTCAA  
+HWI-EAS443:3:25:1395:2030#0/1  
O]aa`abb`a`bb`\_^`bbb`a`a`\_`bb`bbb\_b\_a`b  
@HWI-EAS443:3:25:1492:869#0/1  
ATGGCTTGAAGCAGGTGCTAGCAGAGCTACAGGACATTG  
+HWI-EAS443:3:25:1492:869#0/1  
aba`ab\_JZ^a¥VR]aQaUT¥VTY[XSZSL[¥\_KKZQ]Z  
@HWI-EAS443:3:25:1539:652#0/1  
CTTGCTAGAGATCTGGGCTCTGGCTCATCACTGTCATACT  
+HWI-EAS443:3:25:1539:652#0/1  
J[bbbbbb]bbab`bbabbabbba\_babaaabaabbbb[b  
@HWI-EAS443:3:25:153:835#0/1  
AAGAATTCCTTGGTCATGTCTTTCTCTTTGACAGAAGACT  
+HWI-EAS443:3:25:153:835#0/1  
^^`aabaabbbba\_aZab`aaa`aaba\_aaaaS^\_a\_  
@HWI-EAS443:3:25:1553:1072#0/1  
CCCCGTTTCGTCGATGAAATGGAAATCCGAATACATGAAAC  
+HWI-EAS443:3:25:1553:1072#0/1  
\_`ab\_Y[¥`Sa¥bbaXHTabbabb`TY\_aaaZW¥\_`aVZV  
@HWI-EAS443:3:25:1583:1866#0/1  
AGGGAATACCACTATATGATGCAATCAAATGCATGAAGAC

+HWI-EAS443:3:25:1583:1866#0/1  
]T\_^^babaaabaaaaaba\_YZb`a\_a\_]a[]a`Za`\_aS  
@HWI-EAS443:3:25:1789:1760#0/1  
TATTTTCACCGAGTGGCCACTTCAATTGGCTTGTCTCTT  
+HWI-EAS443:3:25:1789:1760#0/1  
abbabbbbabbaabaaaa\_aaa`a\_``]`\_HX]QY0\_\_  
@HWI-EAS443:3:25:191:488#0/1  
AATGAACCCATACAGTTTTGTTTTCCGTCTTCCTTCTTTG  
+HWI-EAS443:3:25:191:488#0/1  
\_Va``bbabaaa\_W]]Xa`a\_a`a`\_\_^`a`[\_````^\_  
@HWI-EAS443:3:25:219:321#0/1  
CTTTGGTCGGCAAGCTTGCGCATAGTTCCTGTAATCTCAA  
+HWI-EAS443:3:25:219:321#0/1  
S`ab`aaaaabaa`bbbb`bbbaa]a¥^]`\_\_^aab``b]  
@HWI-EAS443:3:25:240:1062#0/1  
CCCCTGTTGTGTTACATATACTGTTCCACTGTCCAGGC  
+HWI-EAS443:3:25:240:1062#0/1  
abbbbbbabababababbbbaaba`aaa`baa\_\_a`a`]\_  
@HWI-EAS443:3:25:283:1660#0/1  
CTGATTCAAGCTGGATAGAACTTGATGAAATAGGAGAAGA  
+HWI-EAS443:3:25:283:1660#0/1  
I\_WT\_`a\_Y`a\_\_`\_Z\_S^`b`bbb`babbaX`bbbb`^¥  
@HWI-EAS443:3:25:31:1865#0/1  
ACTCGGTGAAAATATGGCACCAGAAAAAGTAGACTTTGAT  
+HWI-EAS443:3:25:31:1865#0/1  
\_`aabaX]]^Y^aaZY[`baaaa\_P\_`\_]N\_\_¥aUY][ZZ  
@HWI-EAS443:3:25:334:906#0/1  
CCGATTGGCCATGTTCCGATTTGTTTTCAAAGAATTCCT  
+HWI-EAS443:3:25:334:906#0/1  
abbbbbbb`[^`bbaaa\_aaaa^aa`^\_aa`^`a`a`  
@HWI-EAS443:3:25:409:356#0/1  
CTCGGTCTTCAATACTTAATTTCAAGCATCCATCAGCA  
+HWI-EAS443:3:25:409:356#0/1  
aababaZabbabbab`a`babbaaaa^aaaaa\_`a\_`a  
@HWI-EAS443:3:25:410:72#0/1  
TGTGGACTTCCCTCCGTGTTACTCCAATTTCAATGAACCG  
+HWI-EAS443:3:25:410:72#0/1  
¥\_V`Za\_[UHZZa\_Z\_H\_\_ZS^[V¥YP[Za^PT[PJ]Y]^  
@HWI-EAS443:3:25:443:1312#0/1  
ACTTGATGAAATAGGAGAAGATGTTGCCCCGATTGAACAT  
+HWI-EAS443:3:25:443:1312#0/1  
aaaaaaaaaaaaaaaa`aaa]a`a^\_\_a\_a``\_\_^`^b\_a^  
@HWI-EAS443:3:25:450:936#0/1  
ACCGATTTGAGATAATTGAAGGAAGAGACCGAATCATGGC  
+HWI-EAS443:3:25:450:936#0/1  
abbaabbababababbbbaaaaaaaa`aaa\_a^aaa^`  
@HWI-EAS443:3:25:452:643#0/1  
CAGTAAGTCTGCACACTTTCCCAATAGAGCCTTCCTCC  
+HWI-EAS443:3:25:452:643#0/1  
aabbbabaaaabbbb\_bbbbbbabbaaaba`\_aab`aaa



@HWI-EAS443:3:25:462:1485#0/1  
TGGGGGGCTATATGAAGCAATCGAGGAGTGCCTGATTAAT  
+HWI-EAS443:3:25:462:1485#0/1  
aaa`aaaaaaaaaaa\_aaa`a]``^Z[Z^a`\_\_^`\_`\_\_  
@HWI-EAS443:3:25:539:1663#0/1  
CTGGACAGTGGTGAACAGTATATGTAACACAACAGGGGTA  
+HWI-EAS443:3:25:539:1663#0/1  
Xababbbba`^bab`aba`ab`b\_abbabbbb^^aa`]`  
@HWI-EAS443:3:25:541:29#0/1  
ATCAAAGTCTACTTTTTCTGGTGCCATATTTTCACCGAGT  
+HWI-EAS443:3:25:541:29#0/1  
abbbbab`aa\_abbbaaabbba\_aaaaabaaaaaaaaaZ  
@HWI-EAS443:3:25:57:1625#0/1  
CATGCTTGCGATATGTTCAATCGGGGCAACATCTTCTCCT  
+HWI-EAS443:3:25:57:1625#0/1  
H\_`^``````bbb^ba`Zabbbb`b\_a¥bbbbabbb`bb  
@HWI-EAS443:3:25:655:1425#0/1  
AGAGATCTGGGCTCTGGCTCATCACTGTCATACTGTTTAA  
+HWI-EAS443:3:25:655:1425#0/1  
aaaaa[b\_`[`b`aa\_a```a\_``\_]\_]`\_`¥^^]\_^a\_  
@HWI-EAS443:3:25:728:623#0/1  
GATTGAGCCGAAAACCCCTCAAGTTGTGGAGACGCATATA  
+HWI-EAS443:3:25:728:623#0/1  
`¥^`]\_\_¥a`]G^[VYVVU]RU\_VUYR]WY^YU^OYXXUV  
@HWI-EAS443:3:25:757:455#0/1  
CTCAAGTTGTGGAGACGCATATAGACTGTTGAATACAGAT  
+HWI-EAS443:3:25:757:455#0/1  
a\_W\_[¥]`K\_\_¥^b\_a^`\_a^[Y^XY]RXYa`\_]J[aRJ  
@HWI-EAS443:3:25:772:1766#0/1  
GTATTCAGTAGCCCTGCAGTGGGACACTTCTGCTGTAAAA  
+HWI-EAS443:3:25:772:1766#0/1  
`Xaa[`a`¥a\_`[a\_`aa\_X`^`¥VUS]O]]WRU]V¥\_a^  
@HWI-EAS443:3:25:838:1680#0/1  
TCAATACTTAATTTTCAGAGCATCCATCAGCAGGAACTTTG  
+HWI-EAS443:3:25:838:1680#0/1  
`O[\_\_\_\_[X\_^Z]Y^aaZ\_Y]¥YX^aZSZX^`VQW¥ZZVXR  
@HWI-EAS443:3:25:846:1221#0/1  
TGCCCTGCTCTTTCGTCAAGGGTGTAGTCCGCTTTGGTG  
+HWI-EAS443:3:25:846:1221#0/1  
abbZ^a]\_¥W`a^[```]a]a`a[a]XXQS\_]UW\_¥¥VXV  
@HWI-EAS443:3:25:886:1598#0/1  
CAATAATTGTAGAATCTGGTGACCCGAATGCACTATTGAA  
+HWI-EAS443:3:25:886:1598#0/1  
abbbbabab\_bba`a`baa^abaabab`aaa``ba`aa`a  
@HWI-EAS443:3:25:932:1449#0/1  
CATAAATCCCAATTACCTCATGGCTTGAAGCAGGTGCTA  
+HWI-EAS443:3:25:932:1449#0/1  
abbb`bbbbbbbaaaabbaaaaaaa`[\_a[QYZ\_V[X¥]  
@HWI-EAS443:3:25:965:831#0/1  
TTGACTGATTCAAGCTGGATAGAACTTGATGAAATAGGAG

+HWI-EAS443:3:25:965:831#0/1  
a`a^PZ¥aaaaXV¥X\_\_^\_a¥`a\_aa]\_a^ZZ`aa[Va  
@HWI-EAS443:3:25:970:1573#0/1  
ACCGATTTGAGATAATTGAAGGAAGAGACCGAATCATGGC  
+HWI-EAS443:3:25:970:1573#0/1  
aaabaa\_baaaaa`aaaba\_\_aaaa^a\_aaaa`\_a`¥\_  
@HWI-EAS443:3:25:970:1897#0/1  
TTCGGATTTCCATTTTCATCGACGAACGGGGTGAATCAATA  
+HWI-EAS443:3:25:970:1897#0/1  
a^^b`¥X^^[^][X`\_\_¥\_¥Za`aWUYYZX`^XXW`\_]\_  
@HWI-EAS443:3:26:1022:1777#0/1  
CGGTTCATTGAAATTGGAGTAACACGGAGGGAAGTCCACA  
+HWI-EAS443:3:26:1022:1777#0/1  
\_]aW\_YXa^¥^`[¥aYR\_\_[^aaa\_aa[]`)][]`Y\_^\_\_\_\_  
@HWI-EAS443:3:26:1267:1350#0/1  
GGAAATCCGAATACATGAAACAACTTCCAAATGTGTGCA  
+HWI-EAS443:3:26:1267:1350#0/1  
ab``abbb\_bba^ab``X`a^^a[``a`\_^aa[\_a¥`\_a  
@HWI-EAS443:3:26:1298:296#0/1  
GGAGTGTACATAAATACGGCCTTGCTCAATGCATCCTGTG  
+HWI-EAS443:3:26:1298:296#0/1  
a\_\_b¥b\_`\_`a]\_\_a^V^\_]¥\_\_\_UZU\_¥S\_¥¥YYQYWQZ  
@HWI-EAS443:3:26:1353:1029#0/1  
CATTAAATCAGGCACTCCTCGATTGCTTCATATAGCCCCC  
+HWI-EAS443:3:26:1353:1029#0/1  
`bbabZbabb\_baabb\_babaaababba\_`aa\_b¥\_``]\_  
@HWI-EAS443:3:26:1415:769#0/1  
CTGTAGCTCTGCTAGCACCTGCTCCAAGCCATGAGGTAA  
+HWI-EAS443:3:26:1415:769#0/1  
YabN^T\_b`baS\_````Ub[b^`X¥KXVW\_ZbW¥Hab`¥\_  
@HWI-EAS443:3:26:1445:1076#0/1  
TGGAGTTCTCACTCACTGACCCGAGACTGGAGCCACACAA  
+HWI-EAS443:3:26:1445:1076#0/1  
Ma``¥ZbU[`Y¥Y]bVU]``YZ]Tb[aa`ab`Zaaa[QZR  
@HWI-EAS443:3:26:1447:704#0/1  
ACTGTTCACTCACTGTCCAGCCATGATTCCGGTCTCTCCT  
+HWI-EAS443:3:26:1447:704#0/1  
\_T]b\_]aYZZZI[]L^M[RWW¥a]]TSONVVJJSGRZUZY  
@HWI-EAS443:3:26:1520:1612#0/1  
GGCTTCTCTACCCCTGTTGTGTTACATATACTGTTACCA  
+HWI-EAS443:3:26:1520:1612#0/1  
aabb¥\_U¥P\_Zab``\_^¥[¥`[a`[^aaa\_[abU]Y\_XY\_  
@HWI-EAS443:3:26:153:1299#0/1  
ATCCGAAAATCGAAACTAACAAGTTTGCTGCAATATGCAC  
+HWI-EAS443:3:26:153:1299#0/1  
aaab[`ab`aa^]aa\_`aa````Z\_^¥a\_`a````\_^`\_a\_  
@HWI-EAS443:3:26:1545:1015#0/1  
GCCATGATTCGGTCTCTTCCCTTCAATTATCTCAAATCGGT  
+HWI-EAS443:3:26:1545:1015#0/1  
a`aabbbab\_bba]a]`aU¥`a\_aaa`b\_aa`aa]¥[^Z

@HWI-EAS443:3:26:1568:483#0/1  
AAACTTTAGAGCCTATGTAGATGGATTCGAGCCGAACGGC  
+HWI-EAS443:3:26:1568:483#0/1  
aabbbaa\_b`bbYbabb\_aaa`ZX]``]a`aaZaU`[\_]Q  
@HWI-EAS443:3:26:1610:1155#0/1  
ATTTTGGCGTTCACCTTCTTTTGACATTTGGGAAAGCTTGC  
+HWI-EAS443:3:26:1610:1155#0/1  
abbbbab^b\_a^a¥\_aaaaaK\_^^`a\_K`a^^a]W`]XX  
@HWI-EAS443:3:26:175:1730#0/1  
GGGCATGGAAATGAGGCGCTGCCTTCTTCAGTCTCTTCA  
+HWI-EAS443:3:26:175:1730#0/1  
aba`abaaabbababa\_babaabbababbaaa^aaaaaaa  
@HWI-EAS443:3:26:210:176#0/1  
GCCATGTTTCCGATTTGTTTTCAAAGAATTCCTTGGTCAT  
+HWI-EAS443:3:26:210:176#0/1  
abb^bb`aaab\_Waaab`aaaaaaaa`aa\_aa`a`]``a  
@HWI-EAS443:3:26:216:1025#0/1  
CTGGAGAGGAGATGGCCACCAAAGCGGACTACACCCTTGA  
+HWI-EAS443:3:26:216:1025#0/1  
aaab\_aba\_\_TbX]a\_aa`b`b^\_aa\_Zaa¥`b`b`Za`  
@HWI-EAS443:3:26:229:211#0/1  
TTCAGTAGCCCTGCAGTGGGACACTTCTGCTGTAATAATAG  
+HWI-EAS443:3:26:229:211#0/1  
aabba`aaaaa\_a]a\_`\_a`aa`\_aa```\_`b\_]`^  
@HWI-EAS443:3:26:244:1806#0/1  
GAGGGAATACCACTATATGATGCAATCAAATGCATGAAGA  
+HWI-EAS443:3:26:244:1806#0/1  
^^a`[^I^bbbbbbbbbb\_b^Sbbbb\_baa`aaa[\_a`ab  
@HWI-EAS443:3:26:283:800#0/1  
TTGGGGGGCTATATGAAGCAATCGAGGAGTGCCTGATTAA  
+HWI-EAS443:3:26:283:800#0/1  
`aba\_UOG[`Z^`VW`RRV\_Q]TaV¥¥JPY\_[WV`\_QFRU  
@HWI-EAS443:3:26:298:1571#0/1  
GAAGTTCGGTGGGAGACTTTGGTCCGCAAGCTTGCGCATA  
+HWI-EAS443:3:26:298:1571#0/1  
MXbaaabUb\_]XSaaaaaaaa`Za\_Xa¥KW\_a`Uaa\_]\_\_  
@HWI-EAS443:3:26:303:644#0/1  
CACTCGGTGAAAATATGGCACCAGAAAAAGTAGACTTTGA  
+HWI-EAS443:3:26:303:644#0/1  
abbbbaQ`bbbbbbbbbaababbabaa`aZb`baaaaba  
@HWI-EAS443:3:26:328:558#0/1  
GTTTCCGATTTGTTTTCAAAGAATTCCTTGGTCATGTCTT  
+HWI-EAS443:3:26:328:558#0/1  
\_Xaa`bb`ba`b¥\_\_\_\_`aaaba]a]`S`aa]N\_\_aa^aa\_  
@HWI-EAS443:3:26:337:1878#0/1  
AAAATAGTTCCTCCTCATGCTTGGGATATGTTCAATCGGG  
+HWI-EAS443:3:26:337:1878#0/1  
abb\_aa\_]`aa`\_a`a]¥\_\_^`\_]`^`\_QKL¥\_]XVZ  
@HWI-EAS443:3:26:355:1938#0/1  
CAGGTGCTAGCAGAGCTACAGGACATTGAAAATGAAGAGA

+HWI-EAS443:3:26:355:1938#0/1  
ab\_] [b`a\_aa` ``\_\_a\_a\_] `a\_\_` \_` ``^\_^\_a^` ^  
@HWI-EAS443:3:26:364:1305#0/1  
GGGGGCTATATGAAGCAATCGAGGAGTGCCTGATTAATGA  
+HWI-EAS443:3:26:364:1305#0/1  
`a] a\_a` aaaa] `a` `a` `a` ^` \_\_` X` `` `` `^` \_` \_` []  
@HWI-EAS443:3:26:399:950#0/1  
ACCGTTTCATTGAAATTGGAGTAACACGGAGGGAAGTCCA  
+HWI-EAS443:3:26:399:950#0/1  
Z\_\_a` a\_] \_Vaaa^\_W] `SVNa^aab` `` `] aYaaT [TZ  
@HWI-EAS443:3:26:411:292#0/1  
CGTCTCCACAATTGAGGGTTTTCGGCTGAATCGAGAAA  
+HWI-EAS443:3:26:411:292#0/1  
aNbbab\_b] ` \_N\_] ba\_b [PaaaZUXZX` aaa` a\_aaaU  
@HWI-EAS443:3:26:487:765#0/1  
CACTGTCATACTGTTAAGGTCTCCAACATCTTTGCAGTC  
+HWI-EAS443:3:26:487:765#0/1  
abaZ [Ya] Vb\_\_U^` `U\_UZ\_aa` X`] `` ` ]` \_a\_] OW  
@HWI-EAS443:3:26:495:696#0/1  
CTTGATGAAATAGGAGAAGATGTTGCCCGATTGAACATA  
+HWI-EAS443:3:26:495:696#0/1  
abbba` ba`] a[] ` [aaa` a\_\_a` aa [Y` ^` \_Zab^` ^`  
@HWI-EAS443:3:26:532:2012#0/1  
GAGATAATTGAAGGAAGAGACCGAATCATGGCCTGGACAG  
+HWI-EAS443:3:26:532:2012#0/1  
HZaabbbaa] ` bbaab [bb` ` Ubaaba` abab` ababb  
@HWI-EAS443:3:26:545:603#0/1  
ATCTGGGCTCTGGCTCATCACTGTCATACTGTTAAGGTC  
+HWI-EAS443:3:26:545:603#0/1  
aab^a` `a` b` `Sa` Y\_aaa\_W` Z` ^a` ` `aV` ^^` ^] V\_  
@HWI-EAS443:3:26:557:677#0/1  
GGTGAACAGTATATGTAACACAACAGGGTAGAGAAGCCT  
+HWI-EAS443:3:26:557:677#0/1  
abXa` b` ^ [ `Y` a` a` \_Y` aaa` \_\_` a` `a [\_\_IaYWa` a^] \_Y  
@HWI-EAS443:3:26:584:1405#0/1  
GTTTTCGGCTGAATCGAGAAAATTGCTTCTCATTGTTTCAG  
+HWI-EAS443:3:26:584:1405#0/1  
a [ ^ ` a ` `` ` X` ^ [ ^ Y ] Ya ` a ] Y [ ^ Y Y ] ZZ ] Y [ YU [UZVY  
@HWI-EAS443:3:26:585:1946#0/1  
CACACATTCACATCTTTTCATTCACTGGAGAGGATGGC  
+HWI-EAS443:3:26:585:1946#0/1  
 [ ` babbaabbbbabababbbbaabaaa` aaa\_\_a\_aa\_` ]  
@HWI-EAS443:3:26:587:1279#0/1  
TTTCTTGCTTATAGTGAAAAGCCTAGTTTTGATTCTTGC  
+HWI-EAS443:3:26:587:1279#0/1  
aaVbbb] U` a` Y` V` a` ] [ a ` ] aaa^ZVa\_a] aaaYa\_a\_  
@HWI-EAS443:3:26:620:176#0/1  
TGGAAATCCGAATACATGAAACAACTTCCAAATGTGTGC  
+HWI-EAS443:3:26:620:176#0/1  
] ` \_YbVR^ bbaabbababbb ] \_ab\_aaZZa [K] a` a` ` ^`

@HWI-EAS443:3:26:636:1521#0/1  
AAGAGCCTAACATAGTCAAACCACATGAGAAAGGCATAAA  
+HWI-EAS443:3:26:636:1521#0/1  
`a]aaaa`abba\_a`\_aa¥baaaaa``\_aaa\_\_\_a\_ba`  
@HWI-EAS443:3:26:674:1073#0/1  
AATTACCTCATGGCTTGAAGCAGGTGCTAGCAGAGCTAC  
+HWI-EAS443:3:26:674:1073#0/1  
\_aabaaaaaaaa`\_W\_X^[UOX]VV]ZZXUXYRTPTXR  
@HWI-EAS443:3:26:706:205#0/1  
TTCATCGACGAACGGGTGAATCAATAATTGTAGAATCTG  
+HWI-EAS443:3:26:706:205#0/1  
aaabaabaaaaa\_\_`a\_0[\_`[U[\_`\_`^`\_]`\_`^\_UYV^  
@HWI-EAS443:3:26:729:1917#0/1  
ACGGCCTTGCTCAATGCATCCTGTGCAGCCATGGATGACT  
+HWI-EAS443:3:26:729:1917#0/1  
aaU]`a]SS`^aT`\_U[`¥]\_X¥WUS^U^UZWSWWU¥UWS  
@HWI-EAS443:3:26:769:1301#0/1  
AACCGTTTCATTGAAATTGGAGTAACACGGAGGGAAGTCC  
+HWI-EAS443:3:26:769:1301#0/1  
\_\_`b`¥Ya`^bbb\_S\_a`ZS¥X`baY\_aaaaa¥0¥¥\_[  
@HWI-EAS443:3:26:773:953#0/1  
GGCCAGTAGGAGTCTATGGGATTCCTTTTCGTCAGTCCGAA  
+HWI-EAS443:3:26:773:953#0/1  
`ab`\_`\_\_aba`a]¥aaaab\_QXWT\_X`\_R¥WSS`Z[^]¥`  
@HWI-EAS443:3:26:779:1394#0/1  
GCTGGGTCCAAAATGAATTCAATAAGGCATGTGAATTGAC  
+HWI-EAS443:3:26:779:1394#0/1  
abbbbb¥^bab\_S¥V`a`\_aaaa\_a`^a¥T¥`a`W¥`\_  
@HWI-EAS443:3:26:830:1436#0/1  
CACAACTTGAGGGTTTTTCGGCTGAATCGAGAAAATTGCT  
+HWI-EAS443:3:26:830:1436#0/1  
a`]¥WaaWX^`X[]\_`XZ[a\_aX\_\_\_^Z`UY\_^X\_WRXWW  
@HWI-EAS443:3:26:932:902#0/1  
CATGTTTCCGATTTGTTTTCAAAGAATTCCTTGGTCATGT  
+HWI-EAS443:3:26:932:902#0/1  
\_aabaabbb`U`bb`abb\_bbbbbabaaab^`abbbb`  
@HWI-EAS443:3:26:933:1448#0/1  
GCAGGTGCTAGCAGAGCTACAGGACATTGAAAATGAAGAG  
+HWI-EAS443:3:26:933:1448#0/1  
``baa`aaab\_baaabaaaaba`a\_aaa`\_aaaaaaaa`aa  
@HWI-EAS443:3:26:967:851#0/1  
CGTCTCCACAATTGAGGGTTTTTCGGCTGAATCGAGAAA  
+HWI-EAS443:3:26:967:851#0/1  
a`QZ^¥^[^`a\_a`ZLU\_ZS[GPWSDIHYaYRQaT]]Z\_]`  
@HWI-EAS443:3:26:982:1052#0/1  
GGTGAACCTTGTAAGTATGGAGTTCTCACTCACTGACCCG  
+HWI-EAS443:3:26:982:1052#0/1  
`^Xba\_J]a^\_Zaaa\_aa]]U^`\_¥`a\_\_`aa[¥¥^XQ]  
@HWI-EAS443:3:26:998:180#0/1  
GAAATTTAGGCTTCTCTACCCCTGTTGTGTTACATATACT



@HWI-EAS443:3:27:1651:860#0/1  
AAGGGAGTGACATAAATACGGCCTTGCTCAATGCATCCT  
+HWI-EAS443:3:27:1651:860#0/1  
ab\_^VybUa\_XL[aaa\_b`^^[WN`aZabaabaa[¥]]S^  
@HWI-EAS443:3:27:1658:401#0/1  
CATTAATCAGGCACTCCTCGATTGCTTCATATAGCCCCC  
+HWI-EAS443:3:27:1658:401#0/1  
a`bbbbbb[`a`\_¥^¥^aT`^`\_¥Z\_a]aaaa\_XPL`]V]  
@HWI-EAS443:3:27:1690:1079#0/1  
CTCCTCATGCTTGCGATATGTTCAATCGGGGCAACATCTT  
+HWI-EAS443:3:27:1690:1079#0/1  
abbaaaW\_babbb¥aabbaaaa\_aa]abab\_a`]aa^aa  
@HWI-EAS443:3:27:211:794#0/1  
GGGGTTTTCGGCTGAATCGAGAAAATTGCTTCTCATTGTT  
+HWI-EAS443:3:27:211:794#0/1  
aX^\_R\_a]\_]`^a^a`^0]V[ZWZ]¥]^¥^\_]S]^\_[^  
@HWI-EAS443:3:27:242:1665#0/1  
GAAAGGCATAAATCCCAATTACCTCATGGCTTGAAGCAG  
+HWI-EAS443:3:27:242:1665#0/1  
`bYbabbbbbbabbba``abaaabb`a\_aa\_W]\_a]N][  
@HWI-EAS443:3:27:291:650#0/1  
ACCGATTTGAGATAATTGAAGGAAGAGACCGAATCATGGC  
+HWI-EAS443:3:27:291:650#0/1  
^aab[aa]a`^]aaaa`a^\_aa``a`^aaa`a\_\_```\_\_^  
@HWI-EAS443:3:27:357:763#0/1  
AGTCTATATGCGTCTCCACAACCTGAGGGGTTTTCGGCTG  
+HWI-EAS443:3:27:357:763#0/1  
ababababaab`\_b\_ba``S\_aaaa``aaaZaaZ\_¥`\_¥^  
@HWI-EAS443:3:27:379:748#0/1  
CTCCTCATGCTTGCGATATGTTCAATCGGGGCAACATCTT  
+HWI-EAS443:3:27:379:748#0/1  
a``\_`ba`\_Y¥`¥```]]¥b[[Z]^`ZZN]ZVXW]]W¥\_`  
@HWI-EAS443:3:27:440:725#0/1  
CCGAAAGAGGCGAAGAGACAATTGAAGAAAAATTTGAGAT  
+HWI-EAS443:3:27:440:725#0/1  
abTQ[`XU[`a``Y¥SMY[Q^][VLZa\_``\_]\_SP`\_\_Z  
@HWI-EAS443:3:27:486:1382#0/1  
AGACAAGAAATGGCCAGTAGGAGTCTATGGGATTCCTTTC  
+HWI-EAS443:3:27:486:1382#0/1  
^abaa^baM¥aa^`aaa¥b[\_`\_¥``aa`\_``\_`a\_]a  
@HWI-EAS443:3:27:526:1022#0/1  
AGGCTTCTTACCCCTGTTGTGTTACATATACTGTTACC  
+HWI-EAS443:3:27:526:1022#0/1  
^T\_SZZ`]]]a\_^baU\_UXMD[W\_Z]LWaaa`X^Z^[]P`  
@HWI-EAS443:3:27:557:1541#0/1  
GCCTAACATAGTCAAACCACATGAGAAAGGCATAAATCCC  
+HWI-EAS443:3:27:557:1541#0/1  
`bbaabb`aba]abbb`baabbababba\_aaaabab`````  
@HWI-EAS443:3:27:705:1068#0/1  
ATGGCACCAGAAAAAGTAGACTTTGATGACTGCAAAGATG

+HWI-EAS443:3:27:705:1068#0/1  
a`]aaabbbba\_`aa\_a^aaaaaaaaaaaaa¥EZa\_aaa\_a  
@HWI-EAS443:3:27:777:1598#0/1  
CTCTTCATGTTCTTTGTCCTTGGGATCTTCTTCATTTT  
+HWI-EAS443:3:27:777:1598#0/1  
a`\_Xa`Y[T]X`a`Z^L¥Ya\_\_OTXZ[[]^\_``X]\_]X  
@HWI-EAS443:3:27:816:668#0/1  
CCGATTGGCCATGTTTCCGATTTGTTTTCAAAGAATTCCT  
+HWI-EAS443:3:27:816:668#0/1  
`aa`baaaaa\_a`ab\_a]Z\_aa\_\_\_aa]\_\_\_``\_`a\_[¥\_  
@HWI-EAS443:3:27:86:1101#0/1  
GGCATGTGAATTGACTGATTCAAGCTGGATAGAACTTGAT  
+HWI-EAS443:3:27:86:1101#0/1  
`bbbbbb^bb`aabbbabaaabb^aab\_aabaabaa``aa  
@HWI-EAS443:3:27:874:1199#0/1  
GCAATATGCACACATTTGGAAGTTTGTTCATGTATTCGG  
+HWI-EAS443:3:27:874:1199#0/1  
aaaa`aaaa\_a`aa`a`^aY\_\_`]a\_a\_\_\_]\_aZ^\_\_  
@HWI-EAS443:3:27:880:447#0/1  
GCCTGGACAGTGGTGAACAGTATATGTAACACAACAGGGG  
+HWI-EAS443:3:27:880:447#0/1  
aa\_aaaa`a]`¥ZaW]a^¥]`a\_a`\_\_^Y`^`]]\_\_\_\_`  
@HWI-EAS443:3:27:900:475#0/1  
CACCCAGGGGAGTGGAGGAAGGCTCTATTGGGAAAGTGTG  
+HWI-EAS443:3:27:900:475#0/1  
aaabaabaaaaa^aa`aa^`a\_`^`\_`\_aaaa`Y`\_¥U\_Y^  
@HWI-EAS443:3:27:945:453#0/1  
AGCTGAAAGTCATCCATGGCTGCACAGGATGCATTGAGCA  
+HWI-EAS443:3:27:945:453#0/1  
aaabbbbbbaaba`\_aab`aaa`\_`\_`a`\_`\_`¥`\_`\_]\_\_¥a  
@HWI-EAS443:3:27:979:1920#0/1  
GGAGGGAATACCACTATATGATGCAATCAAATGCATGAAG  
+HWI-EAS443:3:27:979:1920#0/1  
\_baaaabbbbbaaaabbbbbaaaa`b`aaaabaa\_baaa`  
@HWI-EAS443:3:27:989:1537#0/1  
GAGAAGATCCCAAGGACAAAGAACATGAAGAGAACAAGCC  
+HWI-EAS443:3:27:989:1537#0/1  
abbbbbbbabbaaaa`babaaaaaaaaaaa`aa`aab`a\_^  
@HWI-EAS443:3:28:1011:1069#0/1  
ACTTCTCCAGCCTTGAAAACTTTAGAGCCTATGTAGATGG  
+HWI-EAS443:3:28:1011:1069#0/1  
aabbaabaaaaabaa`aaa\_a^aaa\_\_\_a`aa^``\_aa`  
@HWI-EAS443:3:28:1076:254#0/1  
ATAAATACGGCCTTGCTCAATGCATCCTGTGCAGCCATGG  
+HWI-EAS443:3:28:1076:254#0/1  
a\_]a\_^Y```NFQTT^X][[X\_QR`\_YNPNU¥GP¥U]]  
@HWI-EAS443:3:28:1092:1860#0/1  
AGCAGGTGCTAGCAGAGCTACAGGACATTGAAAATGAAGA  
+HWI-EAS443:3:28:1092:1860#0/1  
Y^a¥X`I`\_Q\_PQ`a\_`a]a`^¥]\_]``YV`\_\_aaY\_^



@HWI-EAS443:3:28:1146:381#0/1  
AGGACATTGAAAATGAAGAGAAGATCCCAAGGACAAAGAA  
+HWI-EAS443:3:28:1146:381#0/1  
abaaaabbbba`aaaaaaa`aaa\_a`\_`aa\_\_^a`a`\_`  
@HWI-EAS443:3:28:1147:364#0/1  
CGATTGGCCATGTTTCCGATTTGTTTTCAAAGAATTCCTT  
+HWI-EAS443:3:28:1147:364#0/1  
ababbbba`aa`ba^abaab`¥\_abb\_`aaba`aa^aa  
@HWI-EAS443:3:28:1155:1523#0/1  
CTGGAACCTTCGATCTTGGGGGCTATATGAAGCAATCGA  
+HWI-EAS443:3:28:1155:1523#0/1  
\_ba]abbabb]\_aa\_bbba\_aba[ba`aZSa`b\_aaaZ\_  
@HWI-EAS443:3:28:1179:353#0/1  
GGGGCATGGAATGAGGCGCTGCCTTCTTCAGTCTCTTCA  
+HWI-EAS443:3:28:1179:353#0/1  
aaba¥aabaaaaa`aa\_b`aa^\_\_aWa`Z`YP`W\_aW¥  
@HWI-EAS443:3:28:1188:1088#0/1  
CAAAATGAATTCAATAAGGCATGTGAATTGACTGATTCAA  
+HWI-EAS443:3:28:1188:1088#0/1  
[`¥a¥^^QIZ[S`¥b`a`^^^a]aaababVaa^]^a[\_a\_  
@HWI-EAS443:3:28:1192:1292#0/1  
GTGTGCATATTGCAGCAAACCTGTTAGTTTCGATTTTCGG  
+HWI-EAS443:3:28:1192:1292#0/1  
\_V`[¥XHZ`\_]`aa\_¥[ZX`^`\_a`¥[\_T\_]a^^a`T  
@HWI-EAS443:3:28:1200:1442#0/1  
AGCCCCCAAGATCGAAGTTCCAGTTCCAGTTGTCCC  
+HWI-EAS443:3:28:1200:1442#0/1  
a\_¥`^aaaaa]\_`Va]^\_ZS^¥W^][T¥SU]¥^MYQSWUW  
@HWI-EAS443:3:28:1201:295#0/1  
ACGGCCTTGCTCAATGCATCCTGTGCAGCCATGGATGACT  
+HWI-EAS443:3:28:1201:295#0/1  
¥`\_^\_[^Z¥a^\_a[RS^]S[]W[DZZW`WTN]\_\_ZO`MKP  
@HWI-EAS443:3:28:1222:263#0/1  
GGCTGCATTGAGGGCAAGCTTTCCCAAATGTCAAAGAAG  
+HWI-EAS443:3:28:1222:263#0/1  
a\_aa¥[`]\_QZ\_aa\_]\_[LW`]TSW^]\_a`T^W\_X]TOV  
@HWI-EAS443:3:28:1224:71#0/1  
CAAGGACAAAGAACATGAAGAGAACAAGCCAATTGAAGTG  
+HWI-EAS443:3:28:1224:71#0/1  
aa\_b`¥ababba\_^aab\_`b``\_a`aa\_SW\_\_a`¥ZVXNX  
@HWI-EAS443:3:28:1282:256#0/1  
GATCTTGGGGGCTATATGAAGCAATCGAGGAGTGCCTGA  
+HWI-EAS443:3:28:1282:256#0/1  
abbaaab`baaaaaab`abaaa\_aaa[a\_\_aU[NZXU\_`T  
@HWI-EAS443:3:28:1282:496#0/1  
GCCCCCAAGATCGAAGTTCCAGTTCCAGTTGTCCCT  
+HWI-EAS443:3:28:1282:496#0/1  
`aa`aa¥aaa`a`aaaa`S`^a`a[T^Z¥\_^\_U]]^]SU¥  
@HWI-EAS443:3:28:1293:1527#0/1  
CATTTCTTGTCTTATAGTAAAAGCCTAGTTTTGATTCTT

+HWI-EAS443:3:28:1293:1527#0/1  
`aa^¥babaI`^Y[\_\_\_Xb]S[`bYaI\_aLF[abaY^T\_a  
@HWI-EAS443:3:28:1302:1829#0/1  
ACCGAACTTCTCCAGCCTTGAAAACCTTTAGAGCCTATGTA  
+HWI-EAS443:3:28:1302:1829#0/1  
`a`[^a^¥Q¥Z\_aa^UY`aX`a`X¥a^`^^\_ZV¥¥^\_U]  
@HWI-EAS443:3:28:1365:1727#0/1  
GACACACATTACATCTTTTCATTCACTGGAGAGGAGATG  
+HWI-EAS443:3:28:1365:1727#0/1  
aW^U^)]\_Y`bbaa^]N]aa`[`Qb[aaaXLa[UaZ\_H^  
@HWI-EAS443:3:28:1402:1406#0/1  
CCCGAATGCACTATTGAAGCACCGATTTGAGATAATTGAA  
+HWI-EAS443:3:28:1402:1406#0/1  
ab^`]^aZ^Y^aa¥aa¥a`WW¥aVU[aa[a[]\_\_X\_a]]  
@HWI-EAS443:3:28:1457:1507#0/1  
TTCGGATTTCCATTTTCATCGACGAACGGGGTGAATCAATA  
+HWI-EAS443:3:28:1457:1507#0/1  
TVa^\_ZaYa`\_a\_\_aa\_¥a^^aa\_\_`\_]aR^\_]aW`Z\_V  
@HWI-EAS443:3:28:1504:1129#0/1  
GAAATGGCCAGTAGGAGTCTATGGGATTCCTTTCGTCAGT  
+HWI-EAS443:3:28:1504:1129#0/1  
`UGS]```]\_\_P¥`[WVW[a[[a`^SPa¥¥\_^\_^]¥WYUK  
@HWI-EAS443:3:28:1516:712#0/1  
CCCTGTTGTGTACATATACTGTTCCACTGTCCAGGCC  
+HWI-EAS443:3:28:1516:712#0/1  
a`b\_aXbYH\_``babb`bb`ba`bbba\_aa`baZaaa\_`U  
@HWI-EAS443:3:28:1518:204#0/1  
AGAAAAAGTAGACTTTGATGACTGCAAAGATGTTGGAGAC  
+HWI-EAS443:3:28:1518:204#0/1  
aba`¥^¥b[ab¥[^N\_aa`^J^a\_L[KQ[¥`\_TV\_[¥\_\_Q  
@HWI-EAS443:3:28:151:834#0/1  
GCCAGTAGGAGTCTATGGGATTCCTTTCGTCAGTCCGAAA  
+HWI-EAS443:3:28:151:834#0/1  
abaUaabb```\_abaaaaa`aabaaa`a^aa`¥^`]Y`a  
@HWI-EAS443:3:28:1533:975#0/1  
GGGGGCTATATGAAGCAATCGAGGAGTGCCTGATTAATGA  
+HWI-EAS443:3:28:1533:975#0/1  
aa`\_a`bbbabb\_aaaaa\_`a`aa^a^a^Z`[\_`\_```[\_`  
@HWI-EAS443:3:28:1547:1169#0/1  
AACTTCTCCAGCCTTGAAAACCTTTAGAGCCTATGTAGATG  
+HWI-EAS443:3:28:1547:1169#0/1  
ab`ababaaaaZ\_aaa`a`^aaa\_b\_a¥\_a\_a`\_]¥`]  
@HWI-EAS443:3:28:1604:601#0/1  
GTCGTCTCAAGAATGGTTCAATTTTGGCGTTCACCTTCTT  
+HWI-EAS443:3:28:1604:601#0/1  
a\_``^`\_a`aaaa\_`aa^a^\_]aa`a\_`U`^\_Y^]\_`T`^  
@HWI-EAS443:3:28:1609:1192#0/1  
CCCCGTTTCGTCGATGAAATGGAAATCCGAATACATGAAAC  
+HWI-EAS443:3:28:1609:1192#0/1  
a````bba]a]\_I[b[¥aaYWQ^a\_UPUYTa`\_```\_]U

@HWI-EAS443:3:28:1614:1895#0/1  
CAGTCATCAAAGTCTACTTTTTCTGGTGCCATATTTTCAC  
+HWI-EAS443:3:28:1614:1895#0/1  
a¥WQ]`a^ab^^\_¥ba\_baaa[]`^`V\_QD¥aaa`a\_]aU  
@HWI-EAS443:3:28:1644:1598#0/1  
GACATTCTTTGGCTGGAAAGAGCCTAACATAGTCAAACCA  
+HWI-EAS443:3:28:1644:1598#0/1  
ababaa]ba¥a^I]aaUb\_aaa^\_]a^R\_aa]]]a\_`]\_\_  
@HWI-EAS443:3:28:1722:1822#0/1  
AAGAATTCCTTGGTCATGTCTTTCTCTTTGACAGAAGACT  
+HWI-EAS443:3:28:1722:1822#0/1  
YRR\_\_`^VM[^X\_`Y]^\_K0]R^¥]^VXNZ]UI^^VLZ`Y  
@HWI-EAS443:3:28:1789:906#0/1  
TAAATCCCAATTACCTCATGGCTTGAAGCAGGTGCTAGC  
+HWI-EAS443:3:28:1789:906#0/1  
[a`a`aa\_a][^¥ZZaaa\_a`V`ZO¥¥[WNUQ[VVB BBBB  
@HWI-EAS443:3:28:21:300#0/1  
GCTTCATATAGCCCCCAAGATCGAAGGTTCCAGGTTCCA  
+HWI-EAS443:3:28:21:300#0/1  
abaa`bbb`a\_aaaa^a[X\_`^]aWMWYNY¥V VVNYX^Y  
@HWI-EAS443:3:28:32:161#0/1  
CTCCAACATCTTTGCAGTCATCAAAGTCTACTTTTTCTGG  
+HWI-EAS443:3:28:32:161#0/1  
abbb`Va^^`^aaaa```aba`S`^aa^``aaaa`^\_  
@HWI-EAS443:3:28:410:1560#0/1  
GATGGCCACCAAAGCGGACTACACCCTTGACGAAGAGAGC  
+HWI-EAS443:3:28:410:1560#0/1  
YW`^^`b`b]W]^]ab```b^baababaab]abaaa`Z\_  
@HWI-EAS443:3:28:454:1631#0/1  
ATCATTAATCAGGCACTCCTCGATTGCTTCATATAGCCCC  
+HWI-EAS443:3:28:454:1631#0/1  
a^\_a`\_\_¥^b¥Sa\_a^`^¥SU^SO\_]^^`^aXaU^X^\_  
@HWI-EAS443:3:28:489:734#0/1  
ATCTTTGCAGTCATCAAAGTCTACTTTTTCTGGTGCCATA  
+HWI-EAS443:3:28:489:734#0/1  
\_Xa]\_ZX\_¥¥X^Z[FYY^[]]a\_W\_¥a`\_`¥^XV]Z¥¥]]X  
@HWI-EAS443:3:28:509:195#0/1  
GATGAAATGGAAATCCGAATACATGAAACAAACTTCCAAA  
+HWI-EAS443:3:28:509:195#0/1  
^^]^^¥Xa`^W]¥]aa] []`a\_\_\_aaaaa\_\_\_]a^ZZa[^  
@HWI-EAS443:3:28:530:1139#0/1  
GGGGGGCTATATGAAGCAATCGAGGAGTGCCTGATTAATG  
+HWI-EAS443:3:28:530:1139#0/1  
aaaaaaaaaba\_N^\_[Z`\_]\_[a^Y\_^UWW¥^XZ\_YZV^RS]  
@HWI-EAS443:3:28:603:147#0/1  
AAACTTTAGAGCCTATGTAGATGGATTGAGCCGAACGGC  
+HWI-EAS443:3:28:603:147#0/1  
^\_^a¥Zab[UQWaaRWUHSaaVaa¥VQ^[^UVGZ[VBBBB  
@HWI-EAS443:3:28:66:1267#0/1  
TGAGGGGTTTTCGGCTGAATCGAGAAAATTGCTTCTCATT

+HWI-EAS443:3:28:66:1267#0/1  
ab`[aaZ[aaaa`R¥`aba\_baa\_aaaa^¥`a\_\_`\_a\_^  
@HWI-EAS443:3:28:693:567#0/1  
CGGTGGGAGACTTTGGTCGGCAAGCTTGCGCATAGTTCCT  
+HWI-EAS443:3:28:693:567#0/1  
abb`bb\_`^Z\_ab`U[babbbaaaa\_]^^[a^a\_a[^  
@HWI-EAS443:3:28:694:1686#0/1  
TCAAAACTAGGCTTTTCACTATAAGACAAGAAATGGCCAG  
+HWI-EAS443:3:28:694:1686#0/1  
a\_\_aZ\_Z]^UOZWH¥¥\_aXM[Y^YQZ\_YSEXVBBBBBBBB  
@HWI-EAS443:3:28:702:274#0/1  
GTCCTGCACACTTTCCAATAGAGCCTTCTCCACTCCCC  
+HWI-EAS443:3:28:702:274#0/1  
^a`)]`aa[aaa\_W`aaaa¥¥`^^[a`\_^a¥[¥^PS  
@HWI-EAS443:3:28:725:470#0/1  
GGGGAAGATCCGAAAATCGAAACTAACAAGTTTGCTGCAA  
+HWI-EAS443:3:28:725:470#0/1  
ab`bbbbabaaababbabaaaa`bababaa`aa`\_ab\_aa  
@HWI-EAS443:3:28:76:1744#0/1  
TCGGCTGAATCGAGAAAATTGCTTCTCATTGTTTCAGGCAC  
+HWI-EAS443:3:28:76:1744#0/1  
ab\_`YZab\_aV\_]Yb¥]XF]\_\_`P\_[]a]\_`aa]Y^`U  
@HWI-EAS443:3:28:834:874#0/1  
GTGCATTGGGTCACCAGATTCTACAATTATTGATTCACC  
+HWI-EAS443:3:28:834:874#0/1  
a`aaaaa`aaa\_\_a`^`T`\_`aa`\_`a`a`\_`\_]`ZZ  
@HWI-EAS443:3:28:871:777#0/1  
CGAAGAGACAATTGAAGAAAAATTTGAGATTACAGGAACT  
+HWI-EAS443:3:28:871:777#0/1  
`aLV^QVXTaK`Z`^^aZZZ]aZaabWZ^X]¥IQ[VQ`[`  
@HWI-EAS443:3:28:919:789#0/1  
CCCGAATGCACTATTGAAGCACCGATTTGAGATAATTGAA  
+HWI-EAS443:3:28:919:789#0/1  
`aabaaaa\_b¥b\_abYbbabbbbaWbb\_b\_bab`bbaaaa  
@HWI-EAS443:3:28:941:1235#0/1  
TTTCGGCTGAATCGAGAAAATTGCTTCTCATTGTTTCAGGC  
+HWI-EAS443:3:28:941:1235#0/1  
aaa\_Z`a`¥aa]`[\_a`a^\_\_\_\_`[`¥¥[^\_]^^UV  
@HWI-EAS443:3:28:954:1756#0/1  
ATAAGACAAGAAATGGCCAGTAGGAGTCTATGGGATTCCT  
+HWI-EAS443:3:28:954:1756#0/1  
a\_aaaaa\_a`\_\_`\_]QZ\_\_V\_]\_V[WW[^^\_]XVVZV  
@HWI-EAS443:3:28:976:563#0/1  
TGGCGTTCACTTCTTTTGGCATTGGGAAAGCTTGCCCTC  
+HWI-EAS443:3:28:976:563#0/1  
\_baabb\_[¥[Z]X\_ab\_OY¥]P\_^I[¥FY\_UX\_ZOO[Y¥Z  
@HWI-EAS443:3:28:984:1008#0/1  
TCCTGTAATCTCAAATTTTTCTTCAATTGTCTCTTCGCCT  
+HWI-EAS443:3:28:984:1008#0/1  
aaaaa\_a`baaaba`bbbbaaaaaaaa\_a`\_aaa\_\_`^`

@HWI-EAS443:3:28:991:778#0/1  
AGGAGGAAGTATTTTACAGCAGAAGTGTCCCACTGCAGGG  
+HWI-EAS443:3:28:991:778#0/1  
]b`\_bba^ababbbbbbaba`aaaa\_a\_a\_\_a\_ab[\_\_\_a^  
@HWI-EAS443:3:29:1017:655#0/1  
CACCGATTTGAGATAATTGAAGGAAGAGACCGAATCATGG  
+HWI-EAS443:3:29:1017:655#0/1  
`abababaabbb`\_`abbab`bbb]bb[bbabaabbbb\_b`  
@HWI-EAS443:3:29:1035:1193#0/1  
AGCAGGTGCTAGCAGAGCTACAGGACATTGAAAATGAAGA  
+HWI-EAS443:3:29:1035:1193#0/1  
¥YabaYWQYaXYO^N]¥XWa¥R]XXZ¥ZX¥UR¥`\_`U¥Z\_  
@HWI-EAS443:3:29:1137:1176#0/1  
CATTAATCAGGCACTCCTCGATTGCTTCATATAGCCCCC  
+HWI-EAS443:3:29:1137:1176#0/1  
aba^a]a`a^R^`\_a`\_aba`¥¥]`a[``aaa\_^^^B  
@HWI-EAS443:3:29:1152:1879#0/1  
CCAGGGGAGTGGAGGAAGGCTCTATTGGGAAAGTGTGCAG  
+HWI-EAS443:3:29:1152:1879#0/1  
ab\_]SR^TaX[¥X`VSZYY]^[[X\_`aSUNWa^KVQKXZX  
@HWI-EAS443:3:29:1164:1629#0/1  
AACTTCTCCAGCCTTGAACCTTTAGAGCCTATGTAGATG  
+HWI-EAS443:3:29:1164:1629#0/1  
``]Z`VXaaU\_]¥a¥MQW¥[W\_\_^TTVSLSO`\_`X`]\_VB  
@HWI-EAS443:3:29:1227:719#0/1  
GTTTGTTCATGTATTCCGATTTCATTTCATCGACGAAC  
+HWI-EAS443:3:29:1227:719#0/1  
\_LZ^aPaaaWRWT[\_`]`\_X\_\_Y^^^\_]X^¥^Q[U^WBB  
@HWI-EAS443:3:29:1266:821#0/1  
GTTTTCGGCTGAATCGAGAAAATTGCTTCTCATTGTTTCAG  
+HWI-EAS443:3:29:1266:821#0/1  
a\_`aa`XR\_a\_`\_]a¥ZWa¥\_`a¥]^]W]]]\_`^\_X]]  
@HWI-EAS443:3:29:1280:953#0/1  
GCCAAGTGTGAGGCCCATGTTCCCTATATGTGAGAACCAA  
+HWI-EAS443:3:29:1280:953#0/1  
aabbba`baabaaaa]aaa]`aa```]`aa¥aaaaaaPaa  
@HWI-EAS443:3:29:1303:1562#0/1  
AAGACATTCTTTGGCTGGAAAGAGCCTAACATAGTCAAAC  
+HWI-EAS443:3:29:1303:1562#0/1  
\_ZaS[\_^Z]YZaZa^\_aX¥]¥RT^]Y^¥`[[VY[VPa]BB  
@HWI-EAS443:3:29:1317:1031#0/1  
GGGGGGCTATATGAAGCAATCGAGGAGTGCCTGATTAATG  
+HWI-EAS443:3:29:1317:1031#0/1  
\_aaa^aaaaaaaa`aZa`\_`\_[a^[\_W\_^[\_`[a^a¥¥^  
@HWI-EAS443:3:29:1336:553#0/1  
TCGGCTGAATCGAGAAAATTGCTTCTCATTGTTTCAGGCAC  
+HWI-EAS443:3:29:1336:553#0/1  
aaaa\_\_a`a\_\_a\_a]\_\_`\_\_^a`^\_]a`^`[]\_Y\_\_^¥\_Y  
@HWI-EAS443:3:29:133:797#0/1  
GGCGTGGTGTCTCCTCAAGAATGGTTCAATTTTGGCGTT

+HWI-EAS443:3:29:133:797#0/1  
aab\_Q]]YWU`XT\_]U\_]``^]TYQT^PZS][^YTU`BBB  
@HWI-EAS443:3:29:1515:1495#0/1  
GAGAACAAGCCAATTGAAGTGGGCACTCGGTGAAAAATATG  
+HWI-EAS443:3:29:1515:1495#0/1  
abaabaaabbbbab]ba^VTaaaaa[a\_aX`R``aa\_`\_  
@HWI-EAS443:3:29:152:1451#0/1  
GAAAGGCATAAATCCCAATTACCTCATGGCTTGAAGCAG  
+HWI-EAS443:3:29:152:1451#0/1  
`ba``^`aa`¥`aabb\_baaaaabbaaba^[SV¥Y]ZB  
@HWI-EAS443:3:29:156:759#0/1  
GGCCAATCGGAGAGTCACCCAGGGGAGTGGAGGAAGGCTC  
+HWI-EAS443:3:29:156:759#0/1  
`aa]XX\_\_\_\_]OVa`[\_]¥Z`\_]\_]X`X`XX[¥SY]XYRT  
@HWI-EAS443:3:29:157:967#0/1  
GTCTTCATGCATTTGATTGCATCATATAGTGGTATTCCCT  
+HWI-EAS443:3:29:157:967#0/1  
\_R^`^]Z]`[\_`YX^V]`]]^[SV]¥]\_[W¥QMX]V[[YT  
@HWI-EAS443:3:29:158:1979#0/1  
GAACGGCTGCATTGAGGGCAAGCTTTCCCAAATGTCAAAA  
+HWI-EAS443:3:29:158:1979#0/1  
]bbaaabaaa]]`^aSQWaU^aa\_a`aa`J\_aU^Xa``Xb  
@HWI-EAS443:3:29:160:49#0/1  
CATAATCAGGCACTCCTCGATTGCTTCATATAGCCCCC  
+HWI-EAS443:3:29:160:49#0/1  
abbaaababaaaaaaaaaaaaa`\_\_a\_```a`a^U```\_\_\_\_^  
@HWI-EAS443:3:29:1666:515#0/1  
TTGCCAGTAAGGTCCTGCACACTTTCCCAATAGAGCCTTC  
+HWI-EAS443:3:29:1666:515#0/1  
a`^M\_b\_aab`UU¥`UaU\_Wa``UU¥`¥^\_¥WQVBBB  
@HWI-EAS443:3:29:1684:339#0/1  
CACAACTTGAGGGTTTTTCGGCTGAATCGAGAAAATTGCT  
+HWI-EAS443:3:29:1684:339#0/1  
\_PTZXZQVTUaXX`N\_[PPLFLX[[UTWVW[X¥^OXWBBB  
@HWI-EAS443:3:29:188:1656#0/1  
GGCTTGTTCTTTCATGTTCTTTGCCTTGGGATCTTCTC  
+HWI-EAS443:3:29:188:1656#0/1  
aaaa^L^aZaaaa^^`\_aa]a`Waaa`aaKU[[\_`[¥\_  
@HWI-EAS443:3:29:18:463#0/1  
TTCCAAATGTGTGCATATTGCAGCAAACCTGTTAGTTTCG  
+HWI-EAS443:3:29:18:463#0/1  
a`¥\_]TP\_`\_aL[]\_\_\_\_[TZ¥¥^[`ZW`^X`[ZZZW^][B  
@HWI-EAS443:3:29:199:292#0/1  
CCACATCAGTATCATTCTCAAATGAGACCTTCCTTTTAT  
+HWI-EAS443:3:29:199:292#0/1  
ababaaaa\_baaaa`aaa\_aa[`aa`[\_``[```\_\_\_\_]a  
@HWI-EAS443:3:29:233:334#0/1  
GCTCAATGCATCCTGTGCAGCCATGGATGACTTTCAGCTG  
+HWI-EAS443:3:29:233:334#0/1  
]\_Q\_^`XLa]]aaXWLYPT¥a\_P]a``\_aa`WYYRWYZYB

@HWI-EAS443:3:29:233:847#0/1  
AGAGATCTGGGCTCTGGCTCATCACTGTCATACTGTTTAA  
+HWI-EAS443:3:29:233:847#0/1  
``\_RWO^YSY[`YNXXN][[[[]]]^VTXV\_WQY¥V^WBB  
@HWI-EAS443:3:29:36:962#0/1  
ATTCATCGACGAACGGGTGAATCAATAATTGTAGAATC  
+HWI-EAS443:3:29:36:962#0/1  
aaa\_a`a`W`\_^\_\_\_\_\_V\_\_\_^\_^^^\_\_\_\_\_]XX¥^]XX  
@HWI-EAS443:3:29:432:348#0/1  
ACCGAATCATGGCCTGGACAGTGGTGAACAGTATATGTAA  
+HWI-EAS443:3:29:432:348#0/1  
a^b\_a[aaUb\_\_aa\_aa`[SNLRMR¥GR\_SYHX^aW]G\_B  
@HWI-EAS443:3:29:475:966#0/1  
TGGGGCATGGAAATGAGGCGCTGCCTTCTTCAGTCTCTTC  
+HWI-EAS443:3:29:475:966#0/1  
ababaa[aaaa¥aaa[^````aa[````\_]YPY¥\_\_`H^¥  
@HWI-EAS443:3:29:51:1194#0/1  
GATGCATTGAGCAAGCCGTATTTATGTACACTCCCTTCA  
+HWI-EAS443:3:29:51:1194#0/1  
````abbaaa^]baZ]^aa^^aaaa`^X[Za\_¥aaa¥\_`]  
@HWI-EAS443:3:29:542:776#0/1  
TGGGGGCTATATGAAGCAATCGAGGAGTGCCTGATTAAT  
+HWI-EAS443:3:29:542:776#0/1  
aaaa````aabaa`aaa\_^[^V\_]M¥¥¥`¥`\_¥¥\_\_^W`¥¥  
@HWI-EAS443:3:29:590:771#0/1  
ATTTTACAGCAGAAGTGTCCCACTGCAGGGCTACTGAATA  
+HWI-EAS443:3:29:590:771#0/1  
ab]a`a`aaaba`]^ZX[a\_a`^\_a`a`[\_`Ya`[\_`W^`  
@HWI-EAS443:3:29:619:422#0/1  
GAGGAATTTTTACAGCAGAAGTGTCCCACTGCAGGGCT  
+HWI-EAS443:3:29:619:422#0/1  
¥RRY[[]][MX``[XS¥VSZVXZY^Z[[XUZRV[[^ORWY  
@HWI-EAS443:3:29:627:1893#0/1  
GAGAAAGGCATAAATCCCAATTACCTCATGGCTTGGAAAGC  
+HWI-EAS443:3:29:627:1893#0/1  
`]U¥`b^`ba\_\_b`aaa`^ba\_aabaTb``Uaa`YWBBBB  
@HWI-EAS443:3:29:629:1883#0/1  
TTTCATCGACGAACGGGTGAATCAATAATTGTAGAATCT  
+HWI-EAS443:3:29:629:1883#0/1  
aaabbab`bba]a[^¥a`OV`Y\_ZU]\_aa]^VYa]a\_Q\_¥  
@HWI-EAS443:3:29:696:659#0/1  
CACTCCTCGATTGCTTCATATAGCCCCCAAGATCGAAGG  
+HWI-EAS443:3:29:696:659#0/1  
`aaaaW[a````aaa^\_aa`^`]PX`^\_\_S`\_`\_\_`\_\_B  
@HWI-EAS443:3:29:732:1235#0/1  
ATCTGGTGACCCGAATGCACTATTGAAGCACCGATTTGAG  
+HWI-EAS443:3:29:732:1235#0/1  
[[ZH^¥NVb^\_YW`aaa`\_Z^¥[Y^R^`\_\_]S[```[a  
@HWI-EAS443:3:29:740:1197#0/1  
GAGCCTATGTAGATGGATTCGAGCCGAACGGCTGCATTGA

+HWI-EAS443:3:29:740:1197#0/1  
aa]ZZ`¥`b]a^`ZV[^`Yaa^^^V[^Y`^Y¥BBBBBB  
@HWI-EAS443:3:29:749:1561#0/1  
AGAATTCCTTGGTCATGTCTTTCTCTTTGACAGAAGACTC  
+HWI-EAS443:3:29:749:1561#0/1  
]\_a^a`a`\_a]\_^aa`a]`a\_`a\_^]a]\_¥]`]a^]]\_X\_  
@HWI-EAS443:3:29:762:805#0/1  
GGGATCTTCTTTCATTTTCAATGCCTGTAGCTCTGCTA  
+HWI-EAS443:3:29:762:805#0/1  
`[]`\_P\_\_a`a\_^`\_`a^\_\_\_\_\_¥^^\_V`\_¥W\_W^^WB  
@HWI-EAS443:3:29:785:547#0/1  
GAGGGGTTTTCGGCTGAATCGAGAAAATTGCTTCTCATTG  
+HWI-EAS443:3:29:785:547#0/1  
abba`]]`\_baa[a`abaa\_``\_Y\_`]a\_X]a\_aV\_a[`  
@HWI-EAS443:3:29:80:1284#0/1  
CCACAACCTTGAGGGGTTTTCGGCTGAATCGAGAAAATTGC  
+HWI-EAS443:3:29:80:1284#0/1  
abba]`\_^\_W]a¥]\_]\_]\_\_JNX`W[[WWU]UQS¥ZSXZW  
@HWI-EAS443:3:29:842:1605#0/1  
CGAGGGGGAGGGAATACCACTATATGATGCAATCAAATGC  
+HWI-EAS443:3:29:842:1605#0/1  
abbaabbabbabbaabbabaaababab`\_`abaabbaa`ab  
@HWI-EAS443:3:29:844:528#0/1  
GGGGCATGGAATGAGGCGCTGCCTTCTTCAGTCTCTTCA  
+HWI-EAS443:3:29:844:528#0/1  
`TZOX]aa\_TYa^a`\_aaa]^aa`a\_Ya^\_¥\_```\_\_\_\_[U  
@HWI-EAS443:3:29:859:678#0/1  
ACCCCGTTTCGTCGATGAAATGGAAATCCGAATACATGAAA  
+HWI-EAS443:3:29:859:678#0/1  
abbYZ¥`^a^Z\_\_VZb]aY^XH[`SXQ[a\_]¥KVZ\_a\_[^  
@HWI-EAS443:3:29:904:31#0/1  
AAGACATTCTTTGGCTGGAAAGAGCCTAACATAGTCAAAC  
+HWI-EAS443:3:29:904:31#0/1  
a¥baaW`a\_a`aaa`aaa`aa\_`a\_^`\_`^`\_`\_]\_\_\_\_X  
@HWI-EAS443:3:29:918:728#0/1  
AGCAGGTGCTAGCAGAGCTACAGGACATTGAAAATGAAGA  
+HWI-EAS443:3:29:918:728#0/1  
aa``UV^`aa`]X\_\_VZX\_S\_\_Z]YW^\_RUXYXV]a]Z^  
@HWI-EAS443:3:29:963:1320#0/1  
AAGCAGGTGCTAGCAGAGCTACAGGACATTGAAAATGAAG  
+HWI-EAS443:3:29:963:1320#0/1  
`a^aaaa^\_aaaa`\_a\_\_a`\_aa\_\_a\_\_\_\_\_``^`^`¥  
@HWI-EAS443:3:29:97:1454#0/1  
CTTCCCTCCGTGTTACTCCAATTTCAATGAACCGGTTCTC  
+HWI-EAS443:3:29:97:1454#0/1  
`¥`bb\_Tab^N]W]¥\_Y[¥[\_^HWX\_\_Y\_`ZR][\_LWYVa  
@HWI-EAS443:3:2:1016:1357#0/1  
GATTGGCCATGTTTCCGATTTGTTTTCAAAGAATTCCTTG  
+HWI-EAS443:3:2:1016:1357#0/1  
a\_a¥UYXV[Z`¥¥]WS[X¥\_Z^X^^^]^WZ\_]UYXSMZ]]



@HWI-EAS443:3:2:1046:813#0/1  
TACATATACTGTTCCACTGTCCAGGCCATGATTCGGTC  
+HWI-EAS443:3:2:1046:813#0/1  
abaabaaaaabaaaa\_aaaaa``^[Ya`a`W^^\_]0  
@HWI-EAS443:3:2:1172:1115#0/1  
ATCTACATAGGCTCTAAAGTTTTCAAGGCTGGAGAAGTTC  
+HWI-EAS443:3:2:1172:1115#0/1  
`\_Z\_\_`U^`ba\_GYUZ[`TIZ][P^[YRXV^LRDUTHWB  
@HWI-EAS443:3:2:1238:282#0/1  
AGGAGTCTATGGGATTCCTTTCGTCAGTCCGAAAGAGGCG  
+HWI-EAS443:3:2:1238:282#0/1  
```]b[X`]aaa[`]P^aa^`¥V\_\_^¥LZVRT^[SB  
@HWI-EAS443:3:2:1246:1846#0/1  
GGAAGCAGGTGCTAGCAGAGCTACAGGACATTGAAAATGA  
+HWI-EAS443:3:2:1246:1846#0/1  
ab`[ba`baHa\_¥aa[abaa]\_^\_aa¥`]^`\_U\_[\_\_aX  
@HWI-EAS443:3:2:1249:372#0/1  
CTTGGGGGCTATATGAAGCAATCGAGGAGTGCCTGATTA  
+HWI-EAS443:3:2:1249:372#0/1  
aabbba`abbabaaba`\_Q][`]a\_b\_^aW\_¥vba[\_]S  
@HWI-EAS443:3:2:1333:1356#0/1  
CAAAGAATTCCTTGGTCATGTCTTCTCTTTGACAGAAGA  
+HWI-EAS443:3:2:1333:1356#0/1  
aa`ab\_\_aa\_\_aab\_^\_aaa^\_a\_a¥`\_aa\_a^]\_W^\_[\_`  
@HWI-EAS443:3:2:1368:1266#0/1  
GGGAGACTTTGGTCGGCAAGCTTGCGCATAGTTCCTGTAA  
+HWI-EAS443:3:2:1368:1266#0/1  
]NWUWU]`a\_]VR]WXR]]VV\_¥]S[]XVGMSPRRGPQWU  
@HWI-EAS443:3:2:1585:779#0/1  
CTCTTGAGGACTGCGATAGGCCAAGTGTGAGGCCCATGT  
+HWI-EAS443:3:2:1585:779#0/1  
\_WaabbZbb`a¥b[Wa]aaaWSMRT\_b`[a\_\_ZTRZ¥`^T  
@HWI-EAS443:3:2:1585:813#0/1  
ATCAGGCAATCTGAGGGGCGTGGTGTGTCCTCAAGAAT  
+HWI-EAS443:3:2:1585:813#0/1  
`aY`ba`b^baabR`a\_aa\_a`a^Z\_¥¥\_¥SU\_LZU¥aVB  
@HWI-EAS443:3:2:1616:523#0/1  
GGTTTTCGGCTGAATCGAGAAAATTGCTTCTCATTGTTCA  
+HWI-EAS443:3:2:1616:523#0/1  
ab]```Zaa\_aaaa\_S\_[`]^\_\_Y\_`[\_^UUOZ`]\_Z^RX  
@HWI-EAS443:3:2:1663:536#0/1  
GGCTTGAAGCAGGTGCTAGCAGAGCTACAGGACATTGAA  
+HWI-EAS443:3:2:1663:536#0/1  
aYRLW[`ZWFNMU^QTUWL SMKHUUQNNYUUUYSUMBBBB  
@HWI-EAS443:3:2:1775:1801#0/1  
GCTAGCACCTGCTTCCAAGCCATGAGGTAATTGGGATTTA  
+HWI-EAS443:3:2:1775:1801#0/1  
\_`b]ab`^\_WaaaYW]`b`¥]aaa[``Y[Z`a]a`¥a¥X\_  
@HWI-EAS443:3:2:192:373#0/1  
CGGTTCAATTGAAATTGGAGTAACACGGAGGAAGTCCACA

+HWI-EAS443:3:2:192:373#0/1  
abbTa`aaa\_aaa`\_ba\_a[Y`^]aa\_ba`a\_a]YY^`¥  
@HWI-EAS443:3:2:193:1102#0/1  
AATGAAGGGAGTGACATAAATACGGCCTTGCTCAATGCA  
+HWI-EAS443:3:2:193:1102#0/1  
ab`b`abb\_ab0`0\_Y\_aaa]`a\_YHW`^`a\_YXU\_  
@HWI-EAS443:3:2:263:811#0/1  
CACGAGGGGGAGGGAATACCACTATATGATGCAATCAAAT  
+HWI-EAS443:3:2:263:811#0/1  
`YaaPabab\_¥Z^\_S[S[UHTUS`T]a^aaZ[Z[DSZNB  
@HWI-EAS443:3:2:279:879#0/1  
GGGGGCTATATGAAGCAATCGAGGAGTGCCTGATTAATGA  
+HWI-EAS443:3:2:279:879#0/1  
aaaaa`a^a`aa`\_`YZa\_[a^a^[\_N^SS^a[^[AY[Y[  
@HWI-EAS443:3:2:347:426#0/1  
AAGAATTCCTTGTCATGTCTTTCTCTTTGACAGAAGACT  
+HWI-EAS443:3:2:347:426#0/1  
YUVVW¥`YZ¥¥b\_Xa]W`WVX^]aa¥Yaa[^\_P[V\_\_XBB  
@HWI-EAS443:3:2:354:1656#0/1  
GGGGCATGGAATGAGGCGCTGCCTTCTTCAGTCTCTTCA  
+HWI-EAS443:3:2:354:1656#0/1  
aa^b\_ZZab]aZ`a][`U]U^a^TSQJY`TY^PX^^¥]U¥  
@HWI-EAS443:3:2:403:868#0/1  
AGAGCCTAACATAGTCAAACCACATGAGAAAGGCATAAAT  
+HWI-EAS443:3:2:403:868#0/1  
aa\_^a^aaa\_\_\_\_\_`W\_\_\_\_aX^¥^\_]\_\_`]]`X^\_[\_X]B  
@HWI-EAS443:3:2:421:520#0/1  
GAGAGGAGATGGCCACCAAAGCGACTACACCCTTGACGA  
+HWI-EAS443:3:2:421:520#0/1  
a`aa^``[\_`aa^¥[KZa`a]a¥^\_]\_¥^UYGY¥\_\_¥^¥  
@HWI-EAS443:3:2:555:430#0/1  
CGAAAATCGAAACTAACAAGTTTGCTGCAATATGCACACA  
+HWI-EAS443:3:2:555:430#0/1  
aabbbbabab`b`aabababYbbaUabb`ababb\_aaaSa  
@HWI-EAS443:3:2:628:1476#0/1  
CAATAATTGTAGAATCTGGTGACCCGAATGCACTATTGAA  
+HWI-EAS443:3:2:628:1476#0/1  
aaabaabab`bbaaaa]^`¥aa^¥]a`a\_aa\_¥aa`a\_\_  
@HWI-EAS443:3:2:678:1529#0/1  
CAAGAAATGGCCAGTAGGAGTCTATGGGATTCCTTTTCGTC  
+HWI-EAS443:3:2:678:1529#0/1  
abaabbbb`a`a\_M`]aab\_aaa\_b\_aaaa`^`a\_\_a¥\_  
@HWI-EAS443:3:2:720:1323#0/1  
TGAACCTTTGTAAGTATGGAGTTCTCACTCACTGACCCGAG  
+HWI-EAS443:3:2:720:1323#0/1  
abaab[^]^aa`aGaa]b[aY^`V`^`^`^`^XWD[^  
@HWI-EAS443:3:2:738:1545#0/1  
GGCCTGGACAGTGGTGAACAGTATATGTAACACAACAGGG  
+HWI-EAS443:3:2:738:1545#0/1  
abab\_aba]ba`Ub`Za\_]b`]`^b^\_U¥aQXFW`\_\_`^`^`

@HWI-EAS443:3:2:751:628#0/1  
ATATCGCAAGCATGAGGAGGAACTATTTTACAGCAGAAGT  
+HWI-EAS443:3:2:751:628#0/1  
^\_]^^^ZYPO\_`^YZ]X`a`¥W\_^`[b`[Y\_^UYVZTTL  
@HWI-EAS443:3:2:86:1187#0/1  
GAAAGGCATAAATCCCAATTACCTCATGGCTTGGAGCAG  
+HWI-EAS443:3:2:86:1187#0/1  
]\_]VbU\_a[`babW]Wabb[abbaSb\_aaZ]`[aX``\_BB  
@HWI-EAS443:3:2:87:1163#0/1  
CACTGCAGGGCTACTGAATACATAATGAAGGGAGTGTACA  
+HWI-EAS443:3:2:87:1163#0/1  
`JGQ`W[XaTJWWT^¥ZJ[RVP]SO\_\_]WQ\_[LFL]BBBB  
@HWI-EAS443:3:2:974:259#0/1  
CGGTGAAAATATGGCACCAGAAAAAGTAGACTTTGATGAC  
+HWI-EAS443:3:2:974:259#0/1  
aab\_bba\_aaabWa^\_[a`aa`a\_\_a\_aa`\_abab`a`\_^  
@HWI-EAS443:3:2:997:415#0/1  
GAAGGGAGTGTACATAAATACGGCCTTGCTCAATGCATCC  
+HWI-EAS443:3:2:997:415#0/1  
a`a`aZUUXa¥\_¥Z\_¥Wa^\_Y\_¥W¥¥¥[WX¥WW¥¥S¥¥YY  
@HWI-EAS443:3:30:1027:1138#0/1  
GGTTTTCGGCTGAATCGAGAAAATTGCTTCTCATTGTTCA  
+HWI-EAS443:3:30:1027:1138#0/1  
aa]aaaa`aaaa`a`a`aa`\_`\_\_`\_`\_]\_\_\_^XZX^  
@HWI-EAS443:3:30:1076:1113#0/1  
GGGGGCTATATGAAGCAATCGAGGAGTGCCTGATTAATGA  
+HWI-EAS443:3:30:1076:1113#0/1  
a`]`aabb`abbaa`aaaaaaa`\_aX`aaaa^`\_\_`\_U^  
@HWI-EAS443:3:30:1099:1493#0/1  
GCTGAAAGTCATCCATGGCTGCACAGGATGCATTGAGCAA  
+HWI-EAS443:3:30:1099:1493#0/1  
ab`b`bba¥`a`bbbabaaaa\_aU]Xa\_a]U`^VX^^QX  
@HWI-EAS443:3:30:1146:2030#0/1  
TGCGTCTCCACAACCTGAGGGGTTTTCGGCTGAATCGAGA  
+HWI-EAS443:3:30:1146:2030#0/1  
\_`V\_`a`^b\_`aaaVXZUa`aV[`\_¥X\_a^\_aaXYZQa]  
@HWI-EAS443:3:30:1180:409#0/1  
GAACTTCTCCAGCCTTGAAAACCTTTAGAGCCTATGTAGAT  
+HWI-EAS443:3:30:1180:409#0/1  
\_aabaT]^UZb]W]U`aaS\_\_\_\_\_aJXTV`U`aYQaRY  
@HWI-EAS443:3:30:1193:1536#0/1  
ACCCCTGTTGTGTACATATACTGTTCACTGTTCCAGG  
+HWI-EAS443:3:30:1193:1536#0/1  
`ba\_[]`\_\_b[`aaYaa]aa`VM^a\_\_[S`\_]\_GZZ]  
@HWI-EAS443:3:30:1207:224#0/1  
CTGCTGTAATAAGTTCCCTCCTCATGCTTGCATATGTTC  
+HWI-EAS443:3:30:1207:224#0/1  
aabbabbbbbbbaabaabbaab\_\_]bbbabb\_bbbX`  
@HWI-EAS443:3:30:1241:1509#0/1  
GAAGTTGGTGGGAGACTTTGGTCGGCAAGCTTGCGCATA

+HWI-EAS443:3:30:1241:1509#0/1  
a^W`¥aa^]¥^`\_]`¥\_`]YVQU^NS]^PY[Y¥VRTSSUT  
@HWI-EAS443:3:30:1311:1941#0/1  
ATCCCAAGGACAAAGAACATGAAGAGAACAAGCCAATTGA  
+HWI-EAS443:3:30:1311:1941#0/1  
aZTPON¥ZPZYza\_aa][WW¥ZW^[Z^\_Va`USNSRRRUZ  
@HWI-EAS443:3:30:1337:866#0/1  
ATTGCAGCAAACCTTGTAGTTTCGATTTTCGGATCTTCCC  
+HWI-EAS443:3:30:1337:866#0/1  
^a`babb\_aa\_]J\_abb\_`ab`ZW^`b^^a\_G[S][DIN  
@HWI-EAS443:3:30:1559:505#0/1  
CAAATGCATGAAGACATTCTTTGGCTGGAAAGAGCCTAAC  
+HWI-EAS443:3:30:1559:505#0/1  
^abbbbbbbbababbbbbababba`\_]a`a^\_F[baaa  
@HWI-EAS443:3:30:1563:1906#0/1  
GGGGCATGGAAATGAGGCGCTGCCTTCTTCAGTCTTCA  
+HWI-EAS443:3:30:1563:1906#0/1  
\_VX`S`^`a\_aYX``a]N]\_¥aRNKZUZ\_¥¥WLKZWS¥WV  
@HWI-EAS443:3:30:1606:446#0/1  
ACCACATGAGAAAGGCATAAATCCCAATTACCTCATGGCT  
+HWI-EAS443:3:30:1606:446#0/1  
a¥YX¥a`b\_`aaT]aXb^L^P[U`\_`a\_`aVaa\_`^YY^G[  
@HWI-EAS443:3:30:1649:427#0/1  
ATAAATACGGCCTTGCTCAATGCATCCTGTGCAGCCATGG  
+HWI-EAS443:3:30:1649:427#0/1  
abababbY[^`aa`ZU`a`b\_a]a^¥Y``¥a\_\_`VR\_\_`]  
@HWI-EAS443:3:30:1678:1359#0/1  
AAATAGTTCCTCCTCATGCTTGCGATATGTTCAATCGGGG  
+HWI-EAS443:3:30:1678:1359#0/1  
aa`\_\_]Wa\_\_a¥\_]X\_]\_]`W[^Z\_[Y]V]^XOZZX  
@HWI-EAS443:3:30:1685:498#0/1  
GGCATGGAAATGAGGCGCTGCCTTCTTCAGTCTTTCAGC  
+HWI-EAS443:3:30:1685:498#0/1  
abbbabbaaaba`a\_aaaa¥\_`aS`a\_[aW¥`\_\_\_Q[¥W  
@HWI-EAS443:3:30:16:256#0/1  
GGGGCATGGAAATGAGGCGCTGCCTTCTTCAGTCTTCA  
+HWI-EAS443:3:30:16:256#0/1  
\_¥^`^]b`ZZ\_`a]``aaa`a^]\_`^^^\_YZZ`^^[YTP  
@HWI-EAS443:3:30:1711:243#0/1  
CAGGAACCTTGACCGCTGATGGCAAAGAGGCCCATCAGGC  
+HWI-EAS443:3:30:1711:243#0/1  
`b\_b`b]bb^a\_`¥b]abba`bVa¥`aa`OQUY`^UPa¥S  
@HWI-EAS443:3:30:184:1155#0/1  
GGGGGCTATATGAAGCAATCGAGGAGTGCCTGATTAATGA  
+HWI-EAS443:3:30:184:1155#0/1  
aabbababbb`abb^b[bbb`\_``Ub]`a`a`aaaa[[a^  
@HWI-EAS443:3:30:184:422#0/1  
AATAGTTCCTCCTCATGCTTGCGATATGTTCAATCGGGGC  
+HWI-EAS443:3:30:184:422#0/1  
`XUU^RRY^VTYN[TU[WY¥W¥ZQQTRVTRQUSNRSSBBB



+HWI-EAS443:3:30:777:1819#0/1  
a\_`^bb`\_`aaaa`aaa\_]a^`a[aZa\_^]\_a^\_`\_`  
@HWI-EAS443:3:30:782:1885#0/1  
GTTACATATACTGTTCACCACTGTCCAGCCATGATTCGG  
+HWI-EAS443:3:30:782:1885#0/1  
^bbbabbbbbbab`bbbbbbbaa`\_abb^aabaa`a\_a]]Q  
@HWI-EAS443:3:30:798:520#0/1  
GATGAAATGGAAATCCGAATACATGAAACAAACTTCCAAA  
+HWI-EAS443:3:30:798:520#0/1  
]¥`\_a`a\_VZ[Z\_aa`a`aaa\_```aaabb\_R\_a\_]W`a`  
@HWI-EAS443:3:30:834:1534#0/1  
GGAAAGAGCCTAACATAGTCAAACCACATGAGAAAGGCAT  
+HWI-EAS443:3:30:834:1534#0/1  
aabbb`abbaaabaaaba`babaa\_\_aa``aaaa`^]]aa  
@HWI-EAS443:3:30:867:1962#0/1  
GAAAGAGCGAAGAGACAATTGAAGAAAAATTTGAGATTA  
+HWI-EAS443:3:30:867:1962#0/1  
``a``\_aaa\_b``a`abbaab^aaaaaaaaaaaa`a^`a]a  
@HWI-EAS443:3:30:869:1524#0/1  
CATGACCAAGGAATTCTTTGAAAACAAATCGGAAACATGG  
+HWI-EAS443:3:30:869:1524#0/1  
aaaaaaaaaaa]aa`aaa```\_a`¥``a^\_\_\_\_`\_a^\_^]W  
@HWI-EAS443:3:30:909:1048#0/1  
CGATGAAATGGAAATCCGAATACATGAAACAAACTTCCAA  
+HWI-EAS443:3:30:909:1048#0/1  
¥bbabaYab``ba`babaaabb¥bbabbbabbbbbb`\_ab  
@HWI-EAS443:3:30:909:1301#0/1  
CATTTTGGACCCAGCTTGCTAGAGATCTGGGCTCTGGCTC  
+HWI-EAS443:3:30:909:1301#0/1  
a^aaaaaabaaaaaaa\_a\_a\_```¥\_\_\_\_S\_b\_a^Z\_]a  
@HWI-EAS443:3:30:969:1494#0/1  
GCCATGTTTCCGATTTGTTTTCAAAGAATTCCTTGGTCAT  
+HWI-EAS443:3:30:969:1494#0/1  
aaaaaaUaaaa\_aaabU`aaa``aa\_`^`¥`]a¥W\_¥\_  
@HWI-EAS443:3:30:96:678#0/1  
GAAAGGCATAAATCCCAATTACCTCATGGCTTGAAGCAG  
+HWI-EAS443:3:30:96:678#0/1  
`\_^aaababaaa^aaaaaa]a`a`a\_]Y)`\_`WV\_^[[B  
@HWI-EAS443:3:31:1022:1583#0/1  
CAAATGCATGAAGACATTCTTTGGCTGGAAAGAGCCTAAC  
+HWI-EAS443:3:31:1022:1583#0/1  
abbbbaaba]bbababbaaa`ab\_aaababa\_a`U[abb^  
@HWI-EAS443:3:31:1043:1646#0/1  
GAAAAGATGTGAATGTGTGTCTTCTCAGATTTTATTTTGT  
+HWI-EAS443:3:31:1043:1646#0/1  
a``a^a`\_b0a\_`aa\_]a]]^`a`¥^`Z\_```][a[aWY  
@HWI-EAS443:3:31:1061:510#0/1  
TCTCATTTGAGAAATGATACTGATGTGGTGAACCTTTGTAA  
+HWI-EAS443:3:31:1061:510#0/1  
Z\_b]bbbbbbb\_bbbb`baab`ba^Vbbaabbab^bbaT^

@HWI-EAS443:3:31:1129:1327#0/1  
GAGCCTTCCTCCACTCCCCTGGGTGACTCTCCGATTGGCC  
+HWI-EAS443:3:31:1129:1327#0/1  
Zaabbabbbbbb`bba`abbb[TTabaaaabbU``aa[[  
@HWI-EAS443:3:31:1135:1620#0/1  
CATAGTCAAACCACATGAGAAAGGCATAAATCCCAATTAC  
+HWI-EAS443:3:31:1135:1620#0/1  
Vbabb]b\_bbabaab[abbbbbbbbaaaabbba\_\_bba`aa  
@HWI-EAS443:3:31:1194:1030#0/1  
ATTCATCGACGAACGGGTGAATCAATAATTGTAGAATC  
+HWI-EAS443:3:31:1194:1030#0/1  
\_a\_aa`aaaaa[^^Ya`]¥L]`¥XOW\_¥\_\_\_\_^\_]``]`XU  
@HWI-EAS443:3:31:1328:1888#0/1  
AGCCAACAAAATAAAATCTGAGAAGACACACATTCACATC  
+HWI-EAS443:3:31:1328:1888#0/1  
T\_^R[T¥UYMPZa¥`^`^VW^aaaQ¥aWUJUX]UJZG[XD  
@HWI-EAS443:3:31:1431:912#0/1  
CTTGCTAGAGATCTGGGCTCTGGCTCATCACTGTCATACT  
+HWI-EAS443:3:31:1431:912#0/1  
^abbab\_bbbbbbab`bbab\_baba\_\_bb`b]bbaabbbbb  
@HWI-EAS443:3:31:1455:588#0/1  
GGCCACCAAAGCGGACTACACCCTTGACGAAGAGAGCAGG  
+HWI-EAS443:3:31:1455:588#0/1  
abbbbaabbbbab^`^abab`aaa`^a``aaaa\_a``a\_  
@HWI-EAS443:3:31:1510:1750#0/1  
AAGAAATGGCCAGTAGGAGTCTATGGGATTCCTTTCGTCA  
+HWI-EAS443:3:31:1510:1750#0/1  
a\_bab\_bbaab^aRXaa^XPV\_aa\_[\_`^[[^`\_\_L¥TVZ  
@HWI-EAS443:3:31:1536:1412#0/1  
CATATCGCAAGCATGAGGAGGAATAATTTACAGCAGAAG  
+HWI-EAS443:3:31:1536:1412#0/1  
`bbabba`abb\_]bbaabbbabaabbbbabba`]^a`aaa  
@HWI-EAS443:3:31:1566:1137#0/1  
TGCGTCTCCACAACCTTGAGGGGTTTTCGGCTGAATCGAGA  
+HWI-EAS443:3:31:1566:1137#0/1  
abab\_\_aa`a]aa\_bbb\_b\_`b\_aa^a^aXaaba\_¥a¥a¥  
@HWI-EAS443:3:31:157:180#0/1  
GGCTGAATCGAGAAAATTGCTTCTCATTGTTTCAGGCACTT  
+HWI-EAS443:3:31:157:180#0/1  
^bbb\_ba``¥N]baUab][aa[a^baQab^Ua^P`a`aY[  
@HWI-EAS443:3:31:1580:1787#0/1  
GAGAAAGGCATAAATCCCAATTACCTCATGGCTTGAAGC  
+HWI-EAS443:3:31:1580:1787#0/1  
M`bab`Z¥WababbaW]\_`^`b^W^[\`aba]aaW]H\_VF  
@HWI-EAS443:3:31:17:754#0/1  
CCAACATCTTTGCAGTCATCAAAGTCTACTTTTTCTGGTG  
+HWI-EAS443:3:31:17:754#0/1  
`^`¥^\_Z`¥N¥`a`aR\_]\_STMYT[¥\_Q]VW[U`]LMEH  
@HWI-EAS443:3:31:186:1760#0/1  
GGGGGCTATATGAAGCAATCGAGGAGTGCCTGATTAATGA

+HWI-EAS443:3:31:186:1760#0/1  
[a\_`bbbaaa`baabbb^aaaa\_a`W`a`\_`^\_aaU^¥`  
@HWI-EAS443:3:31:247:135#0/1  
CAGCCTTGAAAACCTTTAGAGCCTATGTAGATGGATTGAG  
+HWI-EAS443:3:31:247:135#0/1  
aa^^]Z¥]\_b\_\_\_\_]^ab]a¥b]¥aaaHZ`[]¥\_]`\_a\_\_^  
@HWI-EAS443:3:31:278:1966#0/1  
GGGCAAGAATCAAACTAGGCTTTTCACTATAAGACAAGA  
+HWI-EAS443:3:31:278:1966#0/1  
`bbaYaaaZ`bbb[abaa`aba`a`bba\_b\_aa\_\_aaa``  
@HWI-EAS443:3:31:293:1947#0/1  
ACAGTCTATATGCGTCTCCACAACCTGAGGGGTTTTCGGC  
+HWI-EAS443:3:31:293:1947#0/1  
aa]ZZa]\_\_`\_Sa\_Y\_[a`W\_\_\_\_\_^^SW[]][ZGVZ]OUY  
@HWI-EAS443:3:31:309:128#0/1  
ATCATTAATCAGGCACTCCTCGATTGCTTCATATAGCCCC  
+HWI-EAS443:3:31:309:128#0/1  
aabb¥[V¥][`Y^Y`^]\_X^\_[[VX]]¥V^X]\_]\_SXVVP  
@HWI-EAS443:3:31:309:1906#0/1  
CTCGGTGAAAATATGGCACCAGAAAAAGTAGACTTTGATG  
+HWI-EAS443:3:31:309:1906#0/1  
aYaaaZa`aa\_aa\_\_\_\_`a`\_aaa``\_\_Ua[Y`[^]^\_X  
@HWI-EAS443:3:31:372:1210#0/1  
AGAGCCTAACATAGTCAAACCACATGAGAAAGGCATAAAT  
+HWI-EAS443:3:31:372:1210#0/1  
\_ZWV`a]RS^^Y]QTaaa`\_V``[Y[[YGOVU`]]`]^X  
@HWI-EAS443:3:31:403:1824#0/1  
CGAAAGAGGCGAAGAGACAATTGAAGAAAAATTTGAGATT  
+HWI-EAS443:3:31:403:1824#0/1  
aab\_SX]a\_b\_\_aZa`[P\_a\_ZXV]¥\_`Xa^¥\_WU\_V^]Y  
@HWI-EAS443:3:31:403:377#0/1  
GAATATGGGGAAGATCCGAAAATCGAACTAACAAGTTTG  
+HWI-EAS443:3:31:403:377#0/1  
a[a^bba\_\_aT0^aYa`a^]ba\_`^ZYa`^[\_]a\_a0][^  
@HWI-EAS443:3:31:425:197#0/1  
CAATAATTGTAGAATCTGGTGACCCGAATGCACTATTGAA  
+HWI-EAS443:3:31:425:197#0/1  
aa`ba¥XVb\_b`\_b`a\_bbW\_aaaYa`a^[\_]S`\_`ZFS  
@HWI-EAS443:3:31:45:682#0/1  
CGTCTCCACAACCTGAGGGGTTTTCGGCTGAATCGAGAAA  
+HWI-EAS443:3:31:45:682#0/1  
aa[a\_b\_W`¥Y`aa^`aS`aY]YUa\_aa`aaa\_]TO[¥U`  
@HWI-EAS443:3:31:491:500#0/1  
ATGGCTTGGAAGCAGGTGCTAGCAGAGCTACAGGACATTG  
+HWI-EAS443:3:31:491:500#0/1  
`ba`a`¥OW\_]UN\_¥ORZWY\_[OXG[GXXK\_TQUX\_ZTV  
@HWI-EAS443:3:31:498:1191#0/1  
AATCAGGCACTCCTCGATTGCTTCATATAGCCCCCAAGA  
+HWI-EAS443:3:31:498:1191#0/1  
aaaab]`aaaaaaaaa][^a`^]\_a[aZLZ`\_Z\_\_¥\_`^¥^



@HWI-EAS443:3:31:541:469#0/1  
ATATACTGTTCCACTGTCCAGGCCATGATTCGGTCTCT  
+HWI-EAS443:3:31:541:469#0/1  
aaaaaab^aaaaa\_a^`\_\_`^^`^^`\_^^Z^`W\_\_^]  
@HWI-EAS443:3:31:610:228#0/1  
AAAGTCTACTTTTTCTGGTGCCATATTTTCACCGAGTGCC  
+HWI-EAS443:3:31:610:228#0/1  
`bab[abaaaa`a`a`VOXaaaa`a`a`a`\_`a`TTY`]  
@HWI-EAS443:3:31:633:1516#0/1  
AAGACATTCTTTGGCTGGAAAGAGCCTAACATAGTCAAAC  
+HWI-EAS443:3:31:633:1516#0/1  
a`¥`¥L]`MT]¥\_ZRZ^]¥T\_LTSUMUYa\_`^^NYRY\_\_I  
@HWI-EAS443:3:31:635:58#0/1  
AGAAAAAGTAGACTTTGATGACTGCAAAGATGTTGGAGAC  
+HWI-EAS443:3:31:635:58#0/1  
abaaa`ab]aaaabaabaaa\_\_`\_`a`aa`\_`a^aa\_]`^` [  
@HWI-EAS443:3:31:671:870#0/1  
AGCCGAAAACCCCTCAAGTTGTGGAGACGCATATAGACTG  
+HWI-EAS443:3:31:671:870#0/1  
ZZabb\_\_[bb\_ab`a\_Ya^aa]bb\_aaaaaa^`aa`a`a`a`  
@HWI-EAS443:3:31:721:647#0/1  
CAAACCTCCAAATGTGTGCATATTGCAGCAAACCTGTTAG  
+HWI-EAS443:3:31:721:647#0/1  
abbabbbbaaaaba\_a\_aaaaa`aab^baa`aa`aa`aX  
@HWI-EAS443:3:31:810:772#0/1  
CTGAAATTAAGTATTGAAGACCCGAGTCACGAGGGGGAGG  
+HWI-EAS443:3:31:810:772#0/1  
abbZX^]\_aba\_baZXZ]\_a`Y`a`[^Z^a`\_`TQ[^¥a^  
@HWI-EAS443:3:31:813:1182#0/1  
CATGACCAAGGAATTCTTTGAAAACAAATCGGAAACATGG  
+HWI-EAS443:3:31:813:1182#0/1  
abbbbbba``bbbbbabbbbabaaaa¥`aa`\_`\_`aabaaa  
@HWI-EAS443:3:31:833:61#0/1  
AACAAGTTTGTGCAATATGCACACATTTGGAAGTTTGT  
+HWI-EAS443:3:31:833:61#0/1  
[^TVbaa`^ZVabbXbb`\_a^aaaa\_Z¥\_ba\_aaV¥``\_]\_  
@HWI-EAS443:3:31:854:619#0/1  
GACGAAAGGAATCCCATAGACTCCTACTGGCCATTTCTTG  
+HWI-EAS443:3:31:854:619#0/1  
\_`bb¥a`T^b^bb`\_\_a^\_`b`aaa\_a¥`¥^`[W\_¥GYFF  
@HWI-EAS443:3:31:890:265#0/1  
GTTTCCGATTTGTTTTCAAAGAATTCCTTGGTCATGTCTT  
+HWI-EAS443:3:31:890:265#0/1  
aYZ^Za\_VW\_]YX`a^]^^`¥XR^\_S`\_`a`^W^^^]Z]\_]\_  
@HWI-EAS443:3:31:894:1310#0/1  
CAAATCGGTGCTTCAATAGTGCATTCGGGTCACCAGATTC  
+HWI-EAS443:3:31:894:1310#0/1  
ab\_`aba`W`aaaa\_aaa\_X`a`\_`a\_\_Xa```¥\_`TZP  
@HWI-EAS443:3:31:935:1174#0/1  
ATCAGTATCATTCTCAAATGAGACCTTCCTTTTATAATG

+HWI-EAS443:3:31:935:1174#0/1  
¥a`\_\_\_a^a¥`\_\_X`aaaa`\_aa^`\_aa\_aaa\_``¥P]a  
@HWI-EAS443:3:31:939:810#0/1  
GCCCTGCTCTCTTCGTCAAGGGTGTAGTCCGCTTTGGTGG  
+HWI-EAS443:3:31:939:810#0/1  
`aaaa\_a\_\_a`a`\_^\_a`a\_\_[]`[Z``]aaaa`^)`^  
@HWI-EAS443:3:31:948:423#0/1  
GTAAAATAGTTCCTCCTCATGCTTGCATATGTTCAATCG  
+HWI-EAS443:3:31:948:423#0/1  
S`babZ```Ya]S``X`b]a^[\_U]]aaa`ab]\_a]bV^^  
@HWI-EAS443:3:31:969:1015#0/1  
GTGTTACATATACTGTTCCACTGTCCAGGCCATGATTC  
+HWI-EAS443:3:31:969:1015#0/1  
aab\_aaaaaaaaa`a``aa`\_\_a\_[Yaa[ZQ[WX¥^¥^UU  
@HWI-EAS443:3:31:96:392#0/1  
CACTCGGTGAAAATATGGCACCAGAAAAAGTAGACTTTGA  
+HWI-EAS443:3:31:96:392#0/1  
aaa`aaa]]Y]V0¥T[[\_]V][V^[[\_¥[]W[\_^\_\_X]^]  
@HWI-EAS443:3:32:1003:663#0/1  
TCCGTGTTACTCCAATTTCAATGAACCGTTCTCTTTGTA  
+HWI-EAS443:3:32:1003:663#0/1  
abaa`a`a]aa`aa\_`a``a``\_`\_`\_a\_]\_]`[^^^]Z]  
@HWI-EAS443:3:32:1024:463#0/1  
CTTGGGATCTTCTTTCATTTTCAATGTCCTGTAGCTCTG  
+HWI-EAS443:3:32:1024:463#0/1  
^a\_W\_¥V¥bbbbbb[bbaa`\_abVa]`\_X\_]aaa^W\_`b^`  
@HWI-EAS443:3:32:1046:2022#0/1  
GCACACATTTGGAAGTTTGTTCATGTATTCCGATTTCCA  
+HWI-EAS443:3:32:1046:2022#0/1  
Ya`^^`aaabab\_`baba¥T¥a`bb`Waa``ZYa]W`aba  
@HWI-EAS443:3:32:1066:267#0/1  
GGCATGGAAATGAGGCGCTGCCTTCTTCAGTCTCTTCAGC  
+HWI-EAS443:3:32:1066:267#0/1  
a`a`\_\_a\_a)`\_a\_a\_]aY[V[WW[¥¥[VW¥WU[TVV^Z[W  
@HWI-EAS443:3:32:1088:1077#0/1  
ATTCCTTGGTCATGTCTTTCTTTGACAGAAGACTCGGC  
+HWI-EAS443:3:32:1088:1077#0/1  
\_\_^RXU^bb\_Y\_\_V]]T^Z\_a` `[Z]W\_a\_\_¥]YNaWS]  
@HWI-EAS443:3:32:1104:453#0/1  
CCTGCTTCCAAGCCATGAGGTAATTGGGATTTATGCCTTT  
+HWI-EAS443:3:32:1104:453#0/1  
abbab`a^bbabbbaaa\_a`[Uaaa[`baaaaaa]aaaa  
@HWI-EAS443:3:32:1145:904#0/1  
CATTAAATCAGGCACTCCTCGATTGCTTCATATAGCCCCC  
+HWI-EAS443:3:32:1145:904#0/1  
a^]S]]a]\_V\_JQ^]YQWV`^UVZ¥ZS][Z^TX¥^¥\_¥[U  
@HWI-EAS443:3:32:114:1885#0/1  
AGAAGATGTTGCCCGATTGAACATATCGCAAGCATGAGG  
+HWI-EAS443:3:32:114:1885#0/1  
a\_`]T\_[VW\_\_\_¥¥ZW¥\_\_Uab\_`^aUXUXSPW^WYY]X

@HWI-EAS443:3:32:1296:1425#0/1  
GAAATTTAGGCTTCTCTACCCCTGTTGTGTACATATACT  
+HWI-EAS443:3:32:1296:1425#0/1  
aaaabbabb`baaaa\_aa^aaaa\_`\_\_a[aa\_`a`\_\_a\_  
@HWI-EAS443:3:32:1304:1633#0/1  
ACCGAATCATGGCCTGGACAGTGGTGAACAGTATATGTAA  
+HWI-EAS443:3:32:1304:1633#0/1  
]^b`¥¥[¥\_\_[S]a`W^\_ab`a¥]]X]ZZ`XR[X`[]Sa\_  
@HWI-EAS443:3:32:1310:1449#0/1  
AAGCGACTACACCCTTGACGAAGAGAGCAGGGCAAGAAT  
+HWI-EAS443:3:32:1310:1449#0/1  
QR\_\_XVZZS\_`ZXXYSZU¥\_[XaR[Z^NX¥ZZFYU¥V]Y  
@HWI-EAS443:3:32:1339:20#0/1  
GCCTGGACAGTGGTGAACAGTATATGTAACACAACAGGGG  
+HWI-EAS443:3:32:1339:20#0/1  
a``\_a^^`\_[J]\_S\_]XV[aUX\_VX\_]YVTV^WPWq]\_\_  
@HWI-EAS443:3:32:139:1149#0/1  
CTCCCTTCATTATGTATTAGTAGCCCTGCAGTGGGACAC  
+HWI-EAS443:3:32:139:1149#0/1  
aabaaaaU\_`a][a```\_V]`]\_\_^\_]Y\_^ZN[Z[  
@HWI-EAS443:3:32:1417:1786#0/1  
ATGAAATGGGCATGGAAATGAGGCGCTGCCTTCTTCAGT  
+HWI-EAS443:3:32:1417:1786#0/1  
`aa`]aa`aaaYa^^Va`^Za\_VY[\_^M] []W\_Ua\_\_W  
@HWI-EAS443:3:32:1450:1645#0/1  
AACATAGTCAAACCACATGAGAAAGGCATAAATCCCAATT  
+HWI-EAS443:3:32:1450:1645#0/1  
abaaaa`b`ab\_]`^aaaa\_aaa\_`^a`aaa`P\_Uaa`\_  
@HWI-EAS443:3:32:1453:274#0/1  
GGGGCATGGAAATGAGGCGCTGCCTTCTTCAGTCTCTTCA  
+HWI-EAS443:3:32:1453:274#0/1  
`W\_b]RR\_WMYWW]^¥P[L¥ZXV\_BBBBBBBBBBBBBB  
@HWI-EAS443:3:32:145:803#0/1  
GCCTTATTGAATTCATTTTGGACCCAGCTTGCTAGAGATC  
+HWI-EAS443:3:32:145:803#0/1  
abbbbaaab`bbb\_aabaaaaa\_`aa``a`a¥`\_`¥a  
@HWI-EAS443:3:32:1470:1309#0/1  
CTTCATTATGTATTAGTAGCCCTGCAGTGGGACACTTCT  
+HWI-EAS443:3:32:1470:1309#0/1  
ab```abbb`bbbab`^a`a`abbabb¥ab^][b\_b\_aa  
@HWI-EAS443:3:32:1472:116#0/1  
AATTCATTTTGGACCCAGCTTGCTAGAGATCTGGGCTCTG  
+HWI-EAS443:3:32:1472:116#0/1  
`bbbaaabbaab\_aRNQYZ`a`Va\_^]a^\_`aa^[F¥]]a  
@HWI-EAS443:3:32:1476:54#0/1  
AGCTTTCCCAAATGTCAAAGAAGTGAACGCCAAAATTGA  
+HWI-EAS443:3:32:1476:54#0/1  
`b]aba`aababa`^aa`aaa\_]\_aaa]\_`Y\_\_¥aaaa  
@HWI-EAS443:3:32:148:251#0/1  
GCCATGTTTCCGATTTGTTTTCAAAGAATTCCTTGGTCAT

+HWI-EAS443:3:32:148:251#0/1  
abaOV^\_¥[a\_]JQ¥\_aXV\_`aT¥[U¥WTZ]Y[R][X[S[  
@HWI-EAS443:3:32:1529:1030#0/1  
GACGAAAGGAATCCCATAGACTCCTACTGGCCATTTCTTG  
+HWI-EAS443:3:32:1529:1030#0/1  
¥\_abaaabb`baa`aaa`aa\_a`Z`\_]YY¥\_TJ^]W[aY  
@HWI-EAS443:3:32:1574:1062#0/1  
CAGTTTTGTTTTCCGTCTTCCTTCTTTGGTCCTACATTTG  
+HWI-EAS443:3:32:1574:1062#0/1  
aab`Xb`bababaaZa[ba`YaaRbabb^^`Sa\_`\_bab\_  
@HWI-EAS443:3:32:1673:673#0/1  
AGCCTATGTAGATGGATTTCGAGCCGAACGGCTGCATTGAG  
+HWI-EAS443:3:32:1673:673#0/1  
aaY^baabaaaa`]a^aa`a\_a`¥a¥a¥a^]¥`G^W]HZ]  
@HWI-EAS443:3:32:194:1825#0/1  
GTGACCCGAATGCACTATTGAAGCACCGATTTGAGATAAT  
+HWI-EAS443:3:32:194:1825#0/1  
a`Wbbba]bbabbbabbbabbbbbb`aaaaaba^aa`  
@HWI-EAS443:3:32:196:654#0/1  
GGGGCATGGAAATGAGGCGCTGCCTTCTTCAGTCTCTTCA  
+HWI-EAS443:3:32:196:654#0/1  
`babb`abbaa`bbababbbaaaaa`a`aaaaWa\_a¥\_]\_  
@HWI-EAS443:3:32:208:1002#0/1  
TAATCAGGCACTCCTCGATTGCTTCATATAGCCCCCAAG  
+HWI-EAS443:3:32:208:1002#0/1  
``aabb^W`aaaa]``V\_Y¥a]``^``a\_a`b^b\_NT  
@HWI-EAS443:3:32:264:1570#0/1  
CACGAGGGGGGAGGAATACCACTATATGATGCAATCAAAT  
+HWI-EAS443:3:32:264:1570#0/1  
a`a`^]Y\_a`Y\_Y`^U]a]¥]^`\_^^¥^\_\_Y^MZ[]]  
@HWI-EAS443:3:32:278:98#0/1  
GGACTTCCCTCCGTGTTACTCCAATTTCAATGAACCGGTT  
+HWI-EAS443:3:32:278:98#0/1  
aaa\_aaaaaa`aZa\_\_a\_^\_\_^^¥^^^]]]]^X]TON  
@HWI-EAS443:3:32:324:1256#0/1  
CGAAGAGACAATTGAAGAAAAATTTGAGATTACAGGAACT  
+HWI-EAS443:3:32:324:1256#0/1  
aaaa`[[HQUX^^ZZR0^X^RZ][X\_]^^^]^[^\_ZXZ¥a`  
@HWI-EAS443:3:32:324:1878#0/1  
ATCATTAATCAGGCACTCCTCGATTGCTTCATATAGCCCC  
+HWI-EAS443:3:32:324:1878#0/1  
]Yb^Z\_WS\_b^W^bb`\_aaHaZ]XWQa\_[X`U^[aY\_]`\_  
@HWI-EAS443:3:32:329:1139#0/1  
GGCCAGTAGGAGTCTATGGGATTCCTTTTCGTCAGTCCGAA  
+HWI-EAS443:3:32:329:1139#0/1  
a]bbba¥bab`^\_aaaa`]a`a`a`aa`aa^`a`[`]¥`  
@HWI-EAS443:3:32:376:1457#0/1  
CTCATTTGAGAAATGATACTGATGTGGTGAACTTTGTAAAG  
+HWI-EAS443:3:32:376:1457#0/1  
a\_a^aaaa`a`Y````¥`a\_\_\_\_\_W¥THX\_\_[\_^Z^Y]LQ

@HWI-EAS443:3:32:394:414#0/1  
GAACTATGCGCAAGCTTGCCGACCAAAGTCTCCCACCGAA  
+HWI-EAS443:3:32:394:414#0/1  
a`^`aZ\_a\_a`Z\_^`XX`\_\_[Z\_¥Z`\_PUUVSZVVWUJ  
@HWI-EAS443:3:32:394:713#0/1  
ATTCAGTAGCCCTGCAGTGGGACACTTCTGCTGTAAAATA  
+HWI-EAS443:3:32:394:713#0/1  
a`^`a[Z\_a`aaa\_\_\_a\_W\_WZ[`\_]`^`]ZZ[^TVQFSWT  
@HWI-EAS443:3:32:412:1040#0/1  
GTCCAAAATGAATTCAATAAGGCATGTGAATTGACTGATT  
+HWI-EAS443:3:32:412:1040#0/1  
`abab`b`bbabaaaa^aaaa^aa`aaa`aaa`\_`  
@HWI-EAS443:3:32:466:1788#0/1  
GAAAGGCATAAATCCCAATTACCTCATGGCTTGAAGCAG  
+HWI-EAS443:3:32:466:1788#0/1  
aaab^bbbababbbbaaaaaa[b`a]Y`^R¥`W¥QP  
@HWI-EAS443:3:32:485:1683#0/1  
TTCCGATTTGTTTTCAAAGAATTCCTTGGTCATGTCTTTC  
+HWI-EAS443:3:32:485:1683#0/1  
aabba^Ta`]`aaaba`¥Za\_\_^]aaY]YPa^\_N[]\_a\_\_  
@HWI-EAS443:3:32:488:852#0/1  
CTCATTTGAGAAATGATACTGATGTGGTGAACTTTGTAAG  
+HWI-EAS443:3:32:488:852#0/1  
`ab\_\_b`¥abV^babaabb\_^`^a`Y[Y`^Y]`a\_aP`^]  
@HWI-EAS443:3:32:518:1316#0/1  
ATCAGGCACTCCTCGATTGCTTCATATAGCCCCCAAGAT  
+HWI-EAS443:3:32:518:1316#0/1  
aab\_NR`baaabaaaaa]a[\_a`aa\_aY`\_Ya[``UV]R  
@HWI-EAS443:3:32:520:1683#0/1  
ATCAGCAGGAACCTTGACCGCTGATGGCAAAGAGGCCCAT  
+HWI-EAS443:3:32:520:1683#0/1  
`abba¥T`a^T^^]Z`R[^]QSYPIKa\_]ZPM]UV^YUB  
@HWI-EAS443:3:32:557:1219#0/1  
ATTGCAGCAAACCTTGTTAGTTTCGATTTTCGGATCTTCCC  
+HWI-EAS443:3:32:557:1219#0/1  
a`a¥ba[b`VV]aa^\_\_a`Y`^a`W¥V^^VR]I[YXYRV^  
@HWI-EAS443:3:32:701:992#0/1  
CCCGAATGCACTATTGAAGCACCGATTTGAGATAATTGAA  
+HWI-EAS443:3:32:701:992#0/1  
aba`baa`aa`aaaa\_a`aaa`\_a^\_a\_\_\_`\_`\_`^`\_U  
@HWI-EAS443:3:32:858:1944#0/1  
CGGAGAGTCACCCAGGGGAGTGGAGGAAGGCTCTATTGGG  
+HWI-EAS443:3:32:858:1944#0/1  
aXa`^TUYba^^`¥VMP`^[QVYVSVGUHVYVSMBBBBBBB  
@HWI-EAS443:3:32:874:1251#0/1  
GCTCTCTTCGTCAAGGGTGTAGTCCGCTTTGGTGGCCATC  
+HWI-EAS443:3:32:874:1251#0/1  
]\_]\_R`bba`^]Z[V`a^bT^XWZXTZ^aaZ¥^¥aT\_RMZ  
@HWI-EAS443:3:32:981:1636#0/1  
AACATCTTTGCAGTCATCAAAGTCTACTTTTTCTGGTGCC

+HWI-EAS443:3:32:981:1636#0/1  
aa`aaaaaR`a`a`aa\_\_\_\_\_]0`\_`a^\_\_\_\_`]\_^Z^a`  
@HWI-EAS443:3:33:1005:1110#0/1  
AGAAGTTCGGTGGGAGACTTTGGTCGGCAAGCTTGCGCAT  
+HWI-EAS443:3:33:1005:1110#0/1  
aaa\_aHaaaa^a^a`\_\_a\_`Y[^`][[\_YLWVX^X]V^X  
@HWI-EAS443:3:33:1125:1563#0/1  
CAGGGGTAGAGAAGCCTAAATTTCTTCCTGATTTGTATGA  
+HWI-EAS443:3:33:1125:1563#0/1  
a^]aV\_JbaaUJXS\_¥a`Z¥0U¥aXFKR]XLDDZ¥V¥VZU  
@HWI-EAS443:3:33:1134:1132#0/1  
CAATCTGAGGGGCGTGGTGTCTCCTCAAGAATGGTTCA  
+HWI-EAS443:3:33:1134:1132#0/1  
aa\_aabba^`Vb¥bb[^R\_aY¥b\_]XT¥\_U`a¥^YaVZ\_Q  
@HWI-EAS443:3:33:113:1277#0/1  
ATCGACGAACGGGGTGAATCAATAATTGTAGAATCTGGTG  
+HWI-EAS443:3:33:113:1277#0/1  
a\_a^aaa\_aVU[Y]VVUWZ\_TTZ[UY^][VUZUV][Z[TT  
@HWI-EAS443:3:33:1176:1086#0/1  
GGCCATCTCCTCTCCAGTGAATGAAAAGATGTGAATGTGT  
+HWI-EAS443:3:33:1176:1086#0/1  
aba`Z\_Z^a]]^`]]]H]\_VZ]\_`]¥\_aY\_[Y¥WU¥PRQ  
@HWI-EAS443:3:33:1303:1505#0/1  
CCCCGATTGAACATATCGCAAGCATGAGGAGGAACTATTT  
+HWI-EAS443:3:33:1303:1505#0/1  
[bbbb`b^WXa]]bbXXaI\_^\_aaaU[^QQb`Z`G[SXaa  
@HWI-EAS443:3:33:1327:918#0/1  
GGTGAACCTTTGTAAGTATGGAGTTCTCACTCACTGACCCG  
+HWI-EAS443:3:33:1327:918#0/1  
]MQYT`¥ZaY^TZM]KVYVYQTRVZ[GT^^^MHPU\_PPF¥  
@HWI-EAS443:3:33:1351:1192#0/1  
AGCAGAGCTACAGGACATTGAAAATGAAGAGAAGATCCCA  
+HWI-EAS443:3:33:1351:1192#0/1  
aaa`\_^b`ab\_a`a\_aaaa`\_aa`]]`aZ0^^]ZWW¥  
@HWI-EAS443:3:33:1412:1706#0/1  
ATTCACATGCCTTATTGAATTCATTTTGGACCCAGCTTGC  
+HWI-EAS443:3:33:1412:1706#0/1  
aaaaa]]]a`aaa\_a\_a\_\_a`\_`\_`^^^\_YSMY]X^WVY  
@HWI-EAS443:3:33:141:1330#0/1  
GGGTTTTCGGCTGAATCGAGAAAATTGCTTCTCATTGTTC  
+HWI-EAS443:3:33:141:1330#0/1  
aa^]aaaba]a\_\_S\_aaa^`a\_QZ`\_`a`\_a\_Va`\_U\_a  
@HWI-EAS443:3:33:1446:122#0/1  
GGGGGCTATATGAAGCAATCGAGGAGTGCCTGATTAATGA  
+HWI-EAS443:3:33:1446:122#0/1  
abab`bbaabbabba\_aa`\_a\_a`\_aXa\_\_a¥U\_]Q]\_U  
@HWI-EAS443:3:33:1463:748#0/1  
AGAGAAGATCCCAAGGACAAAGAACATGAAGAGAACAAGC  
+HWI-EAS443:3:33:1463:748#0/1  
aabaabaaaaaS^0^`¥^aa\_¥a\_¥a\_]a^V\_¥T¥RN¥S^a[

@HWI-EAS443:3:33:1467:1074#0/1  
AACCACATACAGTTTGTTCCTTCCTTCTTTGGTCC  
+HWI-EAS443:3:33:1467:1074#0/1  
\_aaaabaaaa]Xa`a^aaa]^YT¥\_^Z\_\_\_OW\_\_¥^VXX  
@HWI-EAS443:3:33:1550:894#0/1  
ATGAAGACATTCTTTGGCTGGAAAGAGCCTAACATAGTCA  
+HWI-EAS443:3:33:1550:894#0/1  
abaaaba^abaaa`aaa\_aaa^`a\_\_^\_^\_]TKT^]WXX\_  
@HWI-EAS443:3:33:1587:169#0/1  
ACCGTTCTCTTTGTAATCATACAAATCAGGAAGAAATTT  
+HWI-EAS443:3:33:1587:169#0/1  
\_\_\_\_\_`\_a\_`\_`a\_\_¥]\_aY`a\_]`^a]^`^NIVZ]ZZ^X  
@HWI-EAS443:3:33:1599:56#0/1  
GGTGAATCAATAATTGTAGAATCTGGTGACCCGAATGCAC  
+HWI-EAS443:3:33:1599:56#0/1  
`aXb^\_^aK\_abWaa`aX\_^a^aabbJaaa^MOIW`bWUR  
@HWI-EAS443:3:33:15:627#0/1  
AGGAGACATGCTCTTGAGGACTGCGATAGGCCAAGTGTCG  
+HWI-EAS443:3:33:15:627#0/1  
abb`babaaa``a`a\_\_a\_a```\_Z^\_^`\_W^\_USN\_\_  
@HWI-EAS443:3:33:188:1410#0/1  
AGAAAAAGTAGACTTTGATGACTGCAAAGATGTTGGAGAC  
+HWI-EAS443:3:33:188:1410#0/1  
aaa`WZa`WaaYa\_aa\_^aaa\_\_a\_\_a\_]\_¥W\_^]X`\_  
@HWI-EAS443:3:33:277:794#0/1  
CAGCTTGCTAGAGATCTGGGCTCTGGCTCATCACTGTCAT  
+HWI-EAS443:3:33:277:794#0/1  
[Wtaabb`a^^^aba\_aabbbba`aba`a`a\_a\_\_¥^`a  
@HWI-EAS443:3:33:368:1903#0/1  
GGGGGCTATATGAAGCAATCGAGGAGTGCCTGATTAATG  
+HWI-EAS443:3:33:368:1903#0/1  
ab``\_`[`ababa\_ababa\_\_\_\_\_YaZ`ZW\_a\_XRR]\_a\_¥¥  
@HWI-EAS443:3:33:509:1121#0/1  
GGGGCTATATGAAGCAATCGAGGAGTGCCTGATTAATGAT  
+HWI-EAS443:3:33:509:1121#0/1  
aUaa`a`]^X`YPNaaJ]Y]¥K\_\_aU\_VX[TIV]\_]X\_V  
@HWI-EAS443:3:33:520:244#0/1  
GGGGGCTATATGAAGCAATCGAGGAGTGCCTGATTAATGA  
+HWI-EAS443:3:33:520:244#0/1  
aaaaaaaa`aaa`aa`\_]\_a`\_\_`Y\_^[Q\_U¥^]¥¥WY  
@HWI-EAS443:3:33:52:324#0/1  
GGCCAATCGAGAGTCACCCAGGGGAGTGGAGGAAGGCTC  
+HWI-EAS443:3:33:52:324#0/1  
``aa`aaa\_\_Z\_]`¥a`a`\_U\_¥Xa]`S¥`V¥TRZWZXXW  
@HWI-EAS443:3:33:538:1751#0/1  
CCCCCAAGATCGAAGTTCCAGGTTCCAGGTTGTCCCTA  
+HWI-EAS443:3:33:538:1751#0/1  
abababaa\_a`a\_aaTWO`\_\_\_¥IKWU^\_¥¥NKKKNWUW\_  
@HWI-EAS443:3:33:570:503#0/1  
GCTAGCAGAGCTACAGGACATTGAAAATGAAGAGAAGATC

+HWI-EAS443:3:33:570:503#0/1  
abba^abbbb`aaa`a^baa`\_`^Z^a^`PZa]Xa\_R  
@HWI-EAS443:3:33:647:319#0/1  
GATTGGCCATGTTTCCGATTTGTTTTCAAAGAATTCCTTG  
+HWI-EAS443:3:33:647:319#0/1  
`[^`^`^`\_U]aaXY¥^``\_\_\_]S[[]^VWYYST[¥V  
@HWI-EAS443:3:33:662:1005#0/1  
ATTCCTTGGTCATGTCTTTCTCTTTGACAGAAGACTCGGC  
+HWI-EAS443:3:33:662:1005#0/1  
a\_aaaaaaa[bb`]`aa\_\_aaaaaaUaa`\_`Z^^`VSR  
@HWI-EAS443:3:33:740:438#0/1  
GTGGGAGACTTTGGTCGCAAGCTTGCGCATAGTTCCTGT  
+HWI-EAS443:3:33:740:438#0/1  
a`aaa]b]aaaba\_ZaX`\_`\_^\_^^]U\_]XHJWZZXX]\_X  
@HWI-EAS443:3:33:742:1809#0/1  
AGCCCCCAAGATCGAAGGTTCCAGGTTCCAGGTTGTCCC  
+HWI-EAS443:3:33:742:1809#0/1  
a\_aaaaa`a\_`¥\_`^aZZWM^W\_`^VWQVWW^WUWUVSUWW  
@HWI-EAS443:3:33:748:1272#0/1  
TGAAAATGAAGAGAAGATCCCAAGGACAAAGAACATGAAG  
+HWI-EAS443:3:33:748:1272#0/1  
\_`¥[`\_`^Zaaaaa\_a^aa`a`\_a`0\_\_`]¥]S\_]\_`\_`  
@HWI-EAS443:3:33:778:1820#0/1  
GGGGTTTTCGGCTGAATCGAGAAAATTGCTTCTCATTGTT  
+HWI-EAS443:3:33:778:1820#0/1  
aaab¥`aaaaabaaba]`\_`^a^\_`^^`Y¥W]`^]\_`\_`  
@HWI-EAS443:3:33:803:1376#0/1  
AGTCAATTCACATGCCTTATTGAATTCATTTTGGACCCAG  
+HWI-EAS443:3:33:803:1376#0/1  
^`^b[\_\_\_[`a`X[Zaaa`\_\_¥Z`^aZ^`\_`\_]\_UU¥^^R]]  
@HWI-EAS443:3:33:826:1804#0/1  
GTCAATTCACATGCCTTATTGAATTCATTTTGGACCCAGC  
+HWI-EAS443:3:33:826:1804#0/1  
a`bbbbbababaabababaaaaaababaaa\_X`Y]^a\_\_  
@HWI-EAS443:3:33:857:970#0/1  
AGCAGGTGCTAGCAGAGCTACAGGACATTGAAAATGAAGA  
+HWI-EAS443:3:33:857:970#0/1  
aaaa\_a^^aaaa`\_`\_`a`a\_\_`^`V^^`\_`\_W]V]\_`^]]\_`  
@HWI-EAS443:3:33:861:1067#0/1  
CGTCTCCACAACCTGAGGGTTTTCGGCTGAATCGAGAAA  
+HWI-EAS443:3:33:861:1067#0/1  
a`T`Xa`\_`a]S\_aXM]¥FZG¥`\_`¥`X`^`PVDX[SWMXX  
@HWI-EAS443:3:33:882:108#0/1  
GGCATGGAAATGAGGCGCTGCCTTCTTCAGTCTTTCAGC  
+HWI-EAS443:3:33:882:108#0/1  
abaaaaaaaaab`a`\_a\_\_a\_V^\_`^`\_`\_Y`YYY¥¥¥YW¥Y  
@HWI-EAS443:3:33:888:107#0/1  
TATGTTAGGCTCTTTCCAGCCAAAGAATGTCTTCATGCAT  
+HWI-EAS443:3:33:888:107#0/1  
aXbbab¥0TbV[\_aa\_a¥¥`VXS^XFY[[K^\_TVVZ^U\_`^



@HWI-EAS443:3:33:892:1817#0/1  
GGGGGCTATATGAAGCAATCGAGGAGTGCCTGATTAATGA  
+HWI-EAS443:3:33:892:1817#0/1  
IRbU\_Y`]U\_bba\_^¥\_ba\_\_bbbaVZ]\_^a[YaLVa\_ab  
@HWI-EAS443:3:33:892:820#0/1  
GGGGGCTATATGAAGCAATCGAGGAGTGCCTGATTAATGA  
+HWI-EAS443:3:33:892:820#0/1  
a`aa`abbbabaaaabb`bab`\_a`aVa\_aaa^a\_a```a  
@HWI-EAS443:3:33:975:1607#0/1  
GAATCATGGCCTGGACAGTGGTGAACAGTATATGTAACAC  
+HWI-EAS443:3:33:975:1607#0/1  
a`\_abbaaaaa`¥`\_\_a`\_]aY\_``^\_^a`[U\_N`\_U`S  
@HWI-EAS443:3:33:97:1689#0/1  
GGAGTCTATGGGATTCCTTTTCGTCAGTCCGAAAGAGGCGA  
+HWI-EAS443:3:33:97:1689#0/1  
]VaX`ba^\_aa\_aaaaa\_a^a\_W]]][Waa^WTY^\_^Z[[¥  
@HWI-EAS443:3:34:1029:732#0/1  
ATTGGTTCTCACATATAGGAACATGGGCCTCGACACTTGG  
+HWI-EAS443:3:34:1029:732#0/1  
aaa`¥Q]a\_]a\_\_\_\_\_`\_`\_]`\_]\_QV^`Z¥YWUWYW¥YW  
@HWI-EAS443:3:34:1040:806#0/1  
CAAGAATCAAAACTAGGCTTTTCACTATAAGACAAGAAAT  
+HWI-EAS443:3:34:1040:806#0/1  
ab\_baabbab]aab]aaaaabaabaaaaaaa`]a\_`^^^^  
@HWI-EAS443:3:34:1102:1503#0/1  
CTCGATTGCTTCATATAGCCCCCAAGATCGAAGGTTCCA  
+HWI-EAS443:3:34:1102:1503#0/1  
`bbbbbabbbbbbbbab`\_aabbabaabaaaaa\_]U\_WQ]  
@HWI-EAS443:3:34:1120:1497#0/1  
GATTCTACAATTATTGATTCACCCCGTTCGTCGATGAAAT  
+HWI-EAS443:3:34:1120:1497#0/1  
aaaaaaaa\_a`aaaaaaaaaaa\_aaa\_\_`\_^a`]`\_Z]\_^^^Z  
@HWI-EAS443:3:34:1121:1777#0/1  
GACCGAATCATGGCCTGGACAGTGGTGAACAGTATATGTA  
+HWI-EAS443:3:34:1121:1777#0/1  
ababbaabababbbbbbbbaaba^aRa\_a`b[TVaa\_aHZ  
@HWI-EAS443:3:34:1181:237#0/1  
CTGGAAAGAGCCTAACATAGTCAAACCACATGAGAAAGGC  
+HWI-EAS443:3:34:1181:237#0/1  
abbbbbbb`bbbb^a\_aa`baabaaa¥aaaaa`a]^^\_^]  
@HWI-EAS443:3:34:1238:1017#0/1  
CATAATCAGGCACTCCTCGATTGCTTCATATAGCCCCC  
+HWI-EAS443:3:34:1238:1017#0/1  
abaaa\_aa]`aaaaa^`\_`\_aV\_`^^]Y\_a\_] [\_UUQQVB  
@HWI-EAS443:3:34:1265:60#0/1  
AAGAATTCCTTGGTCATGTCTTTCTCTTTGACAGAAGACT  
+HWI-EAS443:3:34:1265:60#0/1  
Y`baa`a^`baa^`XV^¥]]a`abWa`\_X^aa¥W]]BB  
@HWI-EAS443:3:34:1281:1897#0/1  
CAAAGAGGCCCATCAGGCAATCTGAGGGGGCGTGGTGTGCG

+HWI-EAS443:3:34:1281:1897#0/1  
Xaa]JR^^\_EXa\_aaa\_X]`aa¥` `aBBBBBBBBBBBBBBB  
@HWI-EAS443:3:34:1288:442#0/1  
CATGACCAAGGAATTCCTTTGAAAACAAATCGGAAACATGG  
+HWI-EAS443:3:34:1288:442#0/1  
WTW\_TY\_¥X\_\_RW¥a^` `\_\_^aaa\_]¥\_^\_\_\_a` `WY¥B  
@HWI-EAS443:3:34:1319:1472#0/1  
CCTCCGTGTTACTCCAATTTCAATGAACCGTTCTCTTTG  
+HWI-EAS443:3:34:1319:1472#0/1  
`a^abYYa]ZV^^^YZa` `a\_^\_\_aa`ab]^Z¥YRTU^R  
@HWI-EAS443:3:34:1389:1171#0/1  
GCGTCTCCACAACCTTGAGGGGTTTTCGGCTGAATCGAGAA  
+HWI-EAS443:3:34:1389:1171#0/1  
]` [¥b^\_Wa[^Z^aabZbb` `UZ`a][a`aZ\_\_`XWMUSZ  
@HWI-EAS443:3:34:1403:1171#0/1  
AAGAAATTTAGGCTTCTCTACCCCTGTTGTGTACATATA  
+HWI-EAS443:3:34:1403:1171#0/1  
abbabVb` `\_ \_V¥aa`aa]ba` `^P]\_]a`a¥a[S\_BBBB  
@HWI-EAS443:3:34:1417:1497#0/1  
TGGCCATGTTTCCGATTTGTTTTCAAAGAATTCCTTGGTC  
+HWI-EAS443:3:34:1417:1497#0/1  
`baa`¥bbbbbaabaabbaabbbbaa^aaaaaU]\_` `WZ  
@HWI-EAS443:3:34:1432:183#0/1  
GTTTCGTCGATGAAATGGAAATCCGAATACATGAAACAAAC  
+HWI-EAS443:3:34:1432:183#0/1  
aaaaaaaa\_abaaa`a`a\_\_` `a\_\_` `\_\_` `^` `[Y]^XW  
@HWI-EAS443:3:34:1461:918#0/1  
CCAAGGACAAAGAACATGAAGAGAACAAGCCAATTGAAGT  
+HWI-EAS443:3:34:1461:918#0/1  
\_UaabYLVT^ab` \_\_abaQ`aa^` ]\_\_aXUN]`U¥NSZB  
@HWI-EAS443:3:34:1465:1843#0/1  
GCTTGCTAGAGATCTGGGCTCTGGCTCATCACTGTCATAC  
+HWI-EAS443:3:34:1465:1843#0/1  
aaaaa`]^b\_a¥` ` `aa]a`\_aa[\_W\_\_\_`T\_\_ZWW\_¥B  
@HWI-EAS443:3:34:151:1255#0/1  
AGCTTGAATCAGTCAATTCACATGCCTTATTGAATTCATT  
+HWI-EAS443:3:34:151:1255#0/1  
^]a\_[\_Sa^aaaZ` `^XVaa¥W]`Z`XW[S]TZX[UZWZ  
@HWI-EAS443:3:34:1566:1624#0/1  
GGCATAAATCCCAATTACCTCATGGCTTGGAAAGCAGGTGC  
+HWI-EAS443:3:34:1566:1624#0/1  
abbbbbbbbbbaabaaaaaaYaaa]^aa¥YBBBBBBBBBBB  
@HWI-EAS443:3:34:1591:898#0/1  
GGTGTCTCCTCAAGAATGGTTCAATTTTGGCGTTCACCT  
+HWI-EAS443:3:34:1591:898#0/1  
ab[b\_]a` `X` [¥[¥]aX0[Q\_\_ZS¥aa`WSOVQ¥UTNTZ  
@HWI-EAS443:3:34:1609:567#0/1  
AGAGCCTAACATAGTCAAACCACATGAGAAAGGCATAAAT  
+HWI-EAS443:3:34:1609:567#0/1  
aXX\_YPWZ[`` `a[U]NVGMWZ` [ ` [aBBBBBBBBBBBBB

@HWI-EAS443:3:34:1624:1913#0/1  
GAGGGGTTTTTCGGCTGAATCGAGAAAATTGCTTCTCATTG  
+HWI-EAS443:3:34:1624:1913#0/1  
a`¥`aa\_^VWYU\_YV]]OF[^`^S¥VMVBBBBBBBBBB  
@HWI-EAS443:3:34:227:1520#0/1  
CAATAATTGTAGAATCTGGTGACCCGAATGCACTATTGAA  
+HWI-EAS443:3:34:227:1520#0/1  
\_0¥a^a^`^b`\_aa\_\_¥aRWa]aa¥]\_]`\_Y`\_\_\_\_^]  
@HWI-EAS443:3:34:252:2034#0/1  
AAGGGAGTGACATAAATACGGCCTTGCTCAATGCATCCT  
+HWI-EAS443:3:34:252:2034#0/1  
UVWZ^S[[Y\_a]]S\_U^^`\_[aaa\_`X[^`]¥`Q]GFFN  
@HWI-EAS443:3:34:256:324#0/1  
CAAGTGTGAGGCCCATGTTCCCTATATGTGAGAACCAATG  
+HWI-EAS443:3:34:256:324#0/1  
aa[^POJ]]`aaa`[\_¥Z^\_[XTZ\_^XR[V]X\_WV]VVB  
@HWI-EAS443:3:34:261:988#0/1  
ATCTTGGGGGCTATATGAAGCAATCGAGGAGTGCCTGAT  
+HWI-EAS443:3:34:261:988#0/1  
abbbba^`a`abaaa`aZUYaaX`^^a`[]\_W[[^]^Z\_  
@HWI-EAS443:3:34:262:1565#0/1  
CATCAGCAGGAACCTTGGACCGCTGATGGCAAAGAGGCCCA  
+HWI-EAS443:3:34:262:1565#0/1  
^W]`bab¥aZX^b`¥`¥aaa\_a\_]RR\_\_S\_`^aRY\_[R[  
@HWI-EAS443:3:34:29:2023#0/1  
GGACCAAAGAAGGAAGACGGAAAACAAACCTGTATGGGTT  
+HWI-EAS443:3:34:29:2023#0/1  
aabaa^^Y\_ZW\_\_\_\_^]]\_\_`aa`aZ]^]V¥0¥Z][U]  
@HWI-EAS443:3:34:328:807#0/1  
GGGTTTTTCGGCTGAATCGAGAAAATTGCTTCTCATTGTTC  
+HWI-EAS443:3:34:328:807#0/1  
`aa`abbbbababbbababa`\_`\_a\_\_aaaa`aa`a\_`^  
@HWI-EAS443:3:34:36:1853#0/1  
GTCCCACTGCAGGGCTACTGAATACATAATGAAGGGAGTG  
+HWI-EAS443:3:34:36:1853#0/1  
aabbbabaaabbaababbb\_aabbbabb`^]aaY`Y\_V[  
@HWI-EAS443:3:34:402:549#0/1  
GCGTCTCCACAACCTTGAGGGGTTTTTCGGCTGAATCGAGAA  
+HWI-EAS443:3:34:402:549#0/1  
abbabaab`\_\_[^a`b`baa\_Ra`aaa\_a\_Y]\_\_YWV\_\_\_\_  
@HWI-EAS443:3:34:530:869#0/1  
GGCATAAATCCCAATTACCTCATGGCTTGAAGCAGGTGC  
+HWI-EAS443:3:34:530:869#0/1  
ababbbb[abba\_bbaabaabba\_aa\_Z`¥a[GTYVFRX  
@HWI-EAS443:3:34:589:108#0/1  
GATAATTGAAGGAAGAGACCGAATCATGGCCTGGACAGTG  
+HWI-EAS443:3:34:589:108#0/1  
aaabaaaaaaaaa`aaaa`\_\_aaa\_a`^`\_]Y]Y^  
@HWI-EAS443:3:34:606:918#0/1  
ATTCGGATTTCCATTTTCATCGACGAACGGGGTGAATCAAT

+HWI-EAS443:3:34:606:918#0/1  
a\_`a`\_RY\_\_aaaaa`a\_a]\_\_a\_\_]^^\_]XYTV]SYVZ  
@HWI-EAS443:3:34:656:1072#0/1  
ATTTTCATCGACGAACGGGGTGAATCAATAATTGTAGAATC  
+HWI-EAS443:3:34:656:1072#0/1  
ababbba]a^¥]`a\_\_Ra¥RaSa\_^XUaaV`¥FX¥WX^RP  
@HWI-EAS443:3:34:711:743#0/1  
AGCAGGGCAAGAATCAAACTAGGCTTTTCACTATAAGAC  
+HWI-EAS443:3:34:711:743#0/1  
ab[YS`bb^\_b`aba¥\_I\_\_aaa`Yaaaaab¥aYZ`\_\_]^  
@HWI-EAS443:3:34:744:1491#0/1  
GGGGGCTATATGAAGCAATCGAGGAGTGCCTGATTAATGA  
+HWI-EAS443:3:34:744:1491#0/1  
aa\_a\_b\_aa```\_¥]\_aZ\_`[^YY]U[^ZZ[^^^\_]TU¥B  
@HWI-EAS443:3:34:846:1914#0/1  
GGGGGCTATATGAAGCAATCGAGGAGTGCCTGATTAATGA  
+HWI-EAS443:3:34:846:1914#0/1  
`b^Xaa\_bba`aba`aaa\_aa\_\_\_\_`\_¥\_a`^a`W¥\_[U¥\_  
@HWI-EAS443:3:34:859:476#0/1  
GAGTCTATGGGATTCCTTTCGTCAGTCCGAAAGAGGCGAA  
+HWI-EAS443:3:34:859:476#0/1  
aab`abaaabaaaaaaabaaa[¥a`^`a`\_\_^]`\_R[^  
@HWI-EAS443:3:34:876:982#0/1  
AGTCAAACCACATGAGAAAGGCATAAATCCCAATTACCTC  
+HWI-EAS443:3:34:876:982#0/1  
aa\_bba]`aaaaaaaa`a]`\_\_`aa\_a`\_`\_`¥^^]WY]S  
@HWI-EAS443:3:34:900:478#0/1  
CTATGCGCAAGCTTGCCGACCAAAGTCTCCCACCGAACTT  
+HWI-EAS443:3:34:900:478#0/1  
ababaabababbaaa]^`a`^aaa\_^Yaa^`UR¥¥¥S^¥  
@HWI-EAS443:3:34:908:686#0/1  
GAGCAGGGCAAGAATCAAACTAGGCTTTTCACTATAAGA  
+HWI-EAS443:3:34:908:686#0/1  
a\_\_\_\_`aaaaaaZ\_aaaaab``\_a`\_`\_\_`a]`\_\_V^][  
@HWI-EAS443:3:34:996:198#0/1  
CATGACCAAGGAATTCTTTGAAAACAAATCGGAAACATGG  
+HWI-EAS443:3:34:996:198#0/1  
^a[`bZ^V`a]ZZ]`Z`[^`a^^`^¥[[aaaa]\_]Z]^B  
@HWI-EAS443:3:34:997:415#0/1  
ACCGATTTGAGATAATTGAAGGAAGAGACCGAATCATGGC  
+HWI-EAS443:3:34:997:415#0/1  
aaaaaabab`\_aa\_X`abaaaa`a`aa\_\_\_\_^]\_W`^\_ZW  
@HWI-EAS443:3:34:998:858#0/1  
CAATAATTGTAGAATCTGGTGACCCGAATGCACTATTGAA  
+HWI-EAS443:3:34:998:858#0/1  
aa^baaab`aba`aaa`aZa\_a`a`````]\_Za\_a]]YW  
@HWI-EAS443:3:35:1005:498#0/1  
CCCAGCTTGCTAGAGATCTGGGCTCTGGCTCATCACTGTC  
+HWI-EAS443:3:35:1005:498#0/1  
aaaaa```aaaa]aa^`aa`^\_\_\_\_`\_a\_a`\_]`\_`Z`\_¥`

@HWI-EAS443:3:35:1024:307#0/1  
GGCATGGAAATGAGGCGCTGCCTTCTTCAGTCTCTTCAGC  
+HWI-EAS443:3:35:1024:307#0/1  
]baaaa^`[aaa`a¥aaa[¥]\_\_\_^^\_PS]Z^Z^^YQYR^  
@HWI-EAS443:3:35:1056:881#0/1  
GTTCGTCGATGAAATGGAAATCCGAATACATGAAACAAAC  
+HWI-EAS443:3:35:1056:881#0/1  
\_^aa][\_a`a^^]WZ¥a^`\_\_`\_`[\_Y[`]T¥^^R¥`  
@HWI-EAS443:3:35:1094:344#0/1  
TTTAGAGCCTATGTAGATGGATTCGAGCCGAACGGCTGCA  
+HWI-EAS443:3:35:1094:344#0/1  
abbaaaaaaaaabb¥aaaaaaaaaaa`a¥`a\_`\_a^^¥]PZ  
@HWI-EAS443:3:35:1121:1562#0/1  
GAACTATGCGCAAGCTTGCCGACCAAAGTCTCCCACCGAA  
+HWI-EAS443:3:35:1121:1562#0/1  
\_\_¥^\_bZSab`aa^^¥]^Y`[`aX` `a`[aa^)`X^[a)`  
@HWI-EAS443:3:35:1136:1074#0/1  
AAACCCCTCAAGTTGTGGAGACGCATATAGACTGTTGAAT  
+HWI-EAS443:3:35:1136:1074#0/1  
aa`\_]aaZa^]b^ab^aaaa`]a]^\_`^¥^\_`^\_Z]PZWN  
@HWI-EAS443:3:35:1159:1132#0/1  
ACCCCTCAAGTTGTGGAGACGCATATAGACTGTTGAATAC  
+HWI-EAS443:3:35:1159:1132#0/1  
aaa`a`aa\_X¥aaXa\_aa\_\_\_\_\_`[\_TU` `aaR^RWYWUZ  
@HWI-EAS443:3:35:1248:481#0/1  
GGCCATGTTTCCGATTTGTTTTCAAAGAATTCCTTGGTCA  
+HWI-EAS443:3:35:1248:481#0/1  
a\_aa]`UR`bba\_\_aab`ab^\_aaaa\_Y^\_\_`]aa^P[^  
@HWI-EAS443:3:35:1273:879#0/1  
TTCGATTTCCATTTTCATCGACGAACGGGGTGAATCAATA  
+HWI-EAS443:3:35:1273:879#0/1  
aaabaaaa`aaaaaa\_aa\_\_`\_\_\_\_`Y^^`ZGZX[WYZ^SX  
@HWI-EAS443:3:35:1330:803#0/1  
ATGAGGAGGAECTATTTTACAGCAGAAGTGTCCCACTGCA  
+HWI-EAS443:3:35:1330:803#0/1  
abbaZ` `ababa]abbabaaaaaa`a`a`babaaa^`a\_a  
@HWI-EAS443:3:35:1341:640#0/1  
GGTTCTCACATATAGGAACATGGGCCTCGACACTTGGCCT  
+HWI-EAS443:3:35:1341:640#0/1  
[X[abbbbbbbbabaaabaa`a^`[V`Yabba`a\_`aWa  
@HWI-EAS443:3:35:1382:1307#0/1  
CATTAATCAGGCACTCCTCGATTGCTTCATATAGCCCCC  
+HWI-EAS443:3:35:1382:1307#0/1  
`bbaaaabb`aba`a`\_a`aaaaaa`\_Q^aaaa]`\_]aS\_  
@HWI-EAS443:3:35:1382:808#0/1  
GAGCCTTCTCCACTCCCCTGGGTGACTCTCCGATTGGCC  
+HWI-EAS443:3:35:1382:808#0/1  
]UT[]`W]^\_bba]a\_YWQUPZTHZXT¥]\_H\_\_UXX[^F^  
@HWI-EAS443:3:35:1402:124#0/1  
GTGAACCTTTGTAAGTATGGAGTTCTCACTCACTGACCCGA

+HWI-EAS443:3:35:1402:124#0/1  
`Z]UZaZUSZTW\_YDS¥Y¥Ua¥aaa`\_Q`\_\_^^^]T¥[R  
@HWI-EAS443:3:35:1409:512#0/1  
ATTGAATTCATTTTGGACCCAGCTTGCTAGAGATCTGGGC  
+HWI-EAS443:3:35:1409:512#0/1  
¥`VRH0aa\_ab``¥WTbV`¥aNaXQNOJSRKUF^PX¥Wx  
@HWI-EAS443:3:35:1454:912#0/1  
AAGCAGGTGCTAGCAGAGCTACAGGACATTGAAAATGAAG  
+HWI-EAS443:3:35:1454:912#0/1  
\_\_`^`^P[¥^`a^\_\_X\_\_a`\_a\_a`a[aa\_V¥\_¥`^\_Ta  
@HWI-EAS443:3:35:1523:852#0/1  
TAGCAAGCTGGGTCCAAAATGAATTCAATAAGGCATGTGA  
+HWI-EAS443:3:35:1523:852#0/1  
abbb]R]ab\_]VSaababa\_baaaa\_b¥ab^ba\_aaa`a\_  
@HWI-EAS443:3:35:1639:1610#0/1  
CTTGACGAAGAGAGCAGGGCAAGAATCAAACACTAGGCTTT  
+HWI-EAS443:3:35:1639:1610#0/1  
`aab`\_`ababbaaaaa`\_`a\_\_`\_a`ba`ab`\_^\_W`  
@HWI-EAS443:3:35:1661:1525#0/1  
AGGCACTCCTCGATTGCTTCATATAGCCCCCAAGATCGA  
+HWI-EAS443:3:35:1661:1525#0/1  
ab`\_a`baaab`[a``aa¥a`a`\_¥aS`a\_aaY^^U`S`  
@HWI-EAS443:3:35:1701:589#0/1  
ATAAAATCTGAGAAGACACACATTCACATCTTTTCATTCA  
+HWI-EAS443:3:35:1701:589#0/1  
ababbab^b`bb\_a`[\_`[\_aaZ^`Yaaaaa¥`aaLZ  
@HWI-EAS443:3:35:1707:274#0/1  
GAGGCGAAGAGACAATTGAAGAAAAATTTGAGATTACAGG  
+HWI-EAS443:3:35:1707:274#0/1  
aaa^aaaaa`^`\_\_\_\_\_aa^]a^\_^]a]aa`\_`^^Z\_Za  
@HWI-EAS443:3:35:268:1437#0/1  
GCAGAAGTGTCCCACTGCAGGGCTACTGAATACATAATGA  
+HWI-EAS443:3:35:268:1437#0/1  
`aa`a\_¥P\_Sbaaa`\_`abZNXa\_YXX^][[¥`Y`\_a][V  
@HWI-EAS443:3:35:312:2023#0/1  
ACCGATTTGAGATAATTGAAGGAAGAGACCGAATCATGGC  
+HWI-EAS443:3:35:312:2023#0/1  
abaX\_a^a]ZXZ^¥\_\_\_\_[T¥Z\_\_\_\_ZT¥`a\_\_^¥[\_`V]Ua  
@HWI-EAS443:3:35:347:1557#0/1  
GAAATGGCCAGTAGGAGTCTATGGGATTCCTTTTCGTCAGT  
+HWI-EAS443:3:35:347:1557#0/1  
^aYLX`Za\_]XOVTU]LW[`R[Z\_\_UX``[^ZYURV[LU  
@HWI-EAS443:3:35:412:1430#0/1  
CCAGCTTGCTAGAGATCTGGGCTCTGGCTCATCACTGTCA  
+HWI-EAS443:3:35:412:1430#0/1  
a^QU^[]Ta0`\_QYVZ\_UNNTWU[NLULV\_XUZNWU^VQN  
@HWI-EAS443:3:35:439:520#0/1  
CATGGAATGAGGCGCTGCCTTCTTCAGTCTTTCAGCAG  
+HWI-EAS443:3:35:439:520#0/1  
abb\_aaaaaaababaaaaa`a`a`a`a`\_a¥\_\_a^a`a`a`[`

@HWI-EAS443:3:35:446:2030#0/1  
ACATCTTCTCCTATTTTCATCAAGTTCTATCCAGCTTGAAT  
+HWI-EAS443:3:35:446:2030#0/1  
¥`U`[\_a¥a\_W]^SY`b^baYPF]a`\_¥bbaWa`]Z]^X  
@HWI-EAS443:3:35:461:1393#0/1  
TAATCAGGCACTCCTCGATTGCTTCATATAGCCCCCAAG  
+HWI-EAS443:3:35:461:1393#0/1  
a]a`a`\_^b`a`aa\_aaaZZ^U^^`]\_\_VJSb`\_`a[I¥W  
@HWI-EAS443:3:35:470:501#0/1  
CCGAACTTCTCCAGCCTTGAAAACCTTAGAGCCTATGTAG  
+HWI-EAS443:3:35:470:501#0/1  
abbabaa^baa`]a`aaaa^W\_I¥aaXa\_[aaa`W^]P\_^  
@HWI-EAS443:3:35:517:475#0/1  
AGACATTCTTTGGCTGGAAAGAGCCTAACATAGTCAAACC  
+HWI-EAS443:3:35:517:475#0/1  
abbabaaaaY^Wa`^U\_^^¥QQ[X\_WaXY`\_\_\_\_\_Q\_YG^  
@HWI-EAS443:3:35:537:1821#0/1  
GGGCATGGAAATGAGGCGCTGCCTTCTTCAGTCTCTTCA  
+HWI-EAS443:3:35:537:1821#0/1  
\_]bbbbbb`bbbbbbb`abbbbabaabaab`Zaaa^ab`a  
@HWI-EAS443:3:35:623:728#0/1  
CTTCAGTCTCTTCAGCAGATTGAGAGCATGATTGAGGCCG  
+HWI-EAS443:3:35:623:728#0/1  
aa`[DX`\_]`\_]0U[Za^`^Y\_\_UZ\_LT\_\_Y^UV\_^\_^U  
@HWI-EAS443:3:35:639:418#0/1  
GGCATGGAAATGAGGCGCTGCCTTCTTCAGTCTCTTCAGC  
+HWI-EAS443:3:35:639:418#0/1  
aaaa]a`^\_¥aa`\_aaa\_\_aa`a`^\_^W^^\_a``]US[\_  
@HWI-EAS443:3:35:710:133#0/1  
GGTGAACCTTTGTAAGTATGGAGTTCTCACTCACTGACCCG  
+HWI-EAS443:3:35:710:133#0/1  
a\_U\_aaaa\_aa¥\_\_aT`\_`\_\_\_\_¥^\_\_\_\_¥\_¥\_\_\_\_¥^`¥\_Y^  
@HWI-EAS443:3:35:72:514#0/1  
AATTCCTTGGTCATGTCTTTCTCTTTGACAGAAGACTCGG  
+HWI-EAS443:3:35:72:514#0/1  
[\_L`aa`a^[Raaaa[]aa\_a`aa\_a\_]U]P\_\_Z`^`a¥  
@HWI-EAS443:3:35:73:214#0/1  
GGGCATGGAAATGAGGCGCTGCCTTCTTCAGTCTCTTCA  
+HWI-EAS443:3:35:73:214#0/1  
a`\_\_a`\_`\_`[\_`\_\_Z\_\_\_\_\_`\_\_\_\_\_¥¥^¥VZO¥WYY^¥W[T  
@HWI-EAS443:3:35:747:1000#0/1  
CATAGTTCCTGTAATCTCAAATTTTTCTTCAATTGTCTCT  
+HWI-EAS443:3:35:747:1000#0/1  
\_^\_VZ\_abaaba\_]aaaa^`abaaaa`aba\_\_`\_\_`\_\_X  
@HWI-EAS443:3:35:75:479#0/1  
GCCCACTTCAATTGGCTTGTCTCTTCATGTTCTTTGTCC  
+HWI-EAS443:3:35:75:479#0/1  
aba\_VZZ[a`]ZPZYaZTTG[[R]TLYZRNMX\_]\_^WFVO  
@HWI-EAS443:3:35:765:1245#0/1  
AGAACACAGTATTTTTCCCATTTGTGTGGCTCCAGTCTCG

+HWI-EAS443:3:35:765:1245#0/1  
abaababbbZ¥bbbaaab`[aa`^Za`a\_a`aaT]SVOMR  
@HWI-EAS443:3:35:786:2030#0/1  
GAATTCCTTGGTCATGTCTTTCTCTTTGACAGAAGACTCG  
+HWI-EAS443:3:35:786:2030#0/1  
]S[ba`b`\_Y``\_b^YI^\_aabV¥][U\_X^aa`[¥`XVT`  
@HWI-EAS443:3:35:814:1323#0/1  
ACCGATTTGAGATAATTGAAGGAAGAGACCGAATCATGGC  
+HWI-EAS443:3:35:814:1323#0/1  
aab]a`aaa]a]a\_a¥R^b\_VNZaW[\_W\_a`U\_ZaaX\_Va  
@HWI-EAS443:3:35:822:1337#0/1  
GATGGCAAAGAGGCCATCAGGCAATCTGAGGGGGCGTGG  
+HWI-EAS443:3:35:822:1337#0/1  
````]bb^aa]¥]a]a]Xa^¥¥`^`¥a^¥[X]^VYU^QTV  
@HWI-EAS443:3:35:939:1763#0/1  
CCAGATTCTACAATTATTGATTCACCCCGTTCGTCGATGA  
+HWI-EAS443:3:35:939:1763#0/1  
ab\_I]aabaaab]bab`a]a]a^¥b`aa\_a^`a\_\_a``\_`^`  
@HWI-EAS443:3:35:942:712#0/1  
GATGCATTGAGCAAGGCCGATTTATGTACACTCCCTTCA  
+HWI-EAS443:3:35:942:712#0/1  
\_aaabbbba]abaaaaaba^`\_aaaaaZ`Z`a`a\_Y\_\_^Z  
@HWI-EAS443:3:35:951:63#0/1  
CTTCAGTCTCTTCAGCAGATTGAGAGCATGATTGAGGCCG  
+HWI-EAS443:3:35:951:63#0/1  
abbbbaababbbbaaababbbbaaab\_aabaaa``aaV\_  
@HWI-EAS443:3:35:96:59#0/1  
GGGCACTCGGTGAAAATATGGCACCAGAAAAAGTAGACTT  
+HWI-EAS443:3:35:96:59#0/1  
abaaa\_]a`V````\_``\_`a\_]Y\_\_\_^RWPZ\_U`\_\_Z\_Z  
@HWI-EAS443:3:36:103:1921#0/1  
TGGCCAATCGGAGAGTCACCCAGGGGAGTGGAGGAAGGCT  
+HWI-EAS443:3:36:103:1921#0/1  
X`aa`]JVaxa`SS[`a\_Xa\_PVX[`ax0¥]EY`WZ¥PTI  
@HWI-EAS443:3:36:1079:1404#0/1  
TCCGATTTGTTTTCAAAGAATTCCTTGGTCATGTCTTTCT  
+HWI-EAS443:3:36:1079:1404#0/1  
`ab\_X\_a`\_aa^Z\_aa```aaaaa``\_¥\_Y\_aZa`^a``  
@HWI-EAS443:3:36:1098:510#0/1  
ATGGCCAGTAGGAGTCTATGGGATTCCTTTTCGTCAGTCCG  
+HWI-EAS443:3:36:1098:510#0/1  
W^\_b`]]`Wa^¥P¥TF]WZa^]]`a\_\_V\_\_[TV[\_XP¥YV  
@HWI-EAS443:3:36:1138:1428#0/1  
GGGGAAGATCCGAAAATCGAAACTAACAAGTTTGCTGCAA  
+HWI-EAS443:3:36:1138:1428#0/1  
aaaa``^ba`aaabbaaaa^aaaaaab`aa\_\_`\_a`aaaa  
@HWI-EAS443:3:36:1172:559#0/1  
TCGGCTGAATCGAGAAAATTGCTTCTCATTGTTTCAGGCAC  
+HWI-EAS443:3:36:1172:559#0/1  
^aabbb\_]\_``\_\_`\_aa¥`a`\_¥a`aa\_]Sa¥^````a\_]a



@HWI-EAS443:3:36:1181:1410#0/1  
CTCCGTGTTACTCCAATTTCAATGAACCGTTCTCTTTGT  
+HWI-EAS443:3:36:1181:1410#0/1  
abbbbababbbabb`bbaaaba`bbbaa`\_a`abbaa`\_  
@HWI-EAS443:3:36:1207:288#0/1  
GTGAATCAATAATTGTAGAATCTGGTGACCCGAATGCACT  
+HWI-EAS443:3:36:1207:288#0/1  
aab^aaba^aa`aab^ab`\_a`\_a`\_]`\_^``\_\_^\_\_a\_Y\_  
@HWI-EAS443:3:36:1294:905#0/1  
GTGTACATAAATACGGCCTTGCTCAATGCATCCTGTGCAG  
+HWI-EAS443:3:36:1294:905#0/1  
a[aa]`\_]`IZa]]`a`ba`\_a^\_\_a``]`[YZUSYW\_\_YO  
@HWI-EAS443:3:36:1326:1256#0/1  
CATTAATCAGGCACTCCTCGATTGCTTCATATAGCCCCC  
+HWI-EAS443:3:36:1326:1256#0/1  
aba`\_`aabbbabb`babbbbab`baaa[aba]a`\_`aa`b  
@HWI-EAS443:3:36:1393:1840#0/1  
ACCGTTCATTGAAATTGGAGTAACACGGAGGGAAGTCCA  
+HWI-EAS443:3:36:1393:1840#0/1  
`a`\_`b`ba`abaa^abaaaa]aa`aa^aa^W\_\_`\_]\_Ra  
@HWI-EAS443:3:36:1414:752#0/1  
ATTTTGGACCCAGCTTGCTAGAGATCTGGGCTCTGGCTCA  
+HWI-EAS443:3:36:1414:752#0/1  
Q^¥\_^`\_a\_\_WX\_ba¥\_¥¥babb¥]Z¥Z\_W\_Q^abbbb]`  
@HWI-EAS443:3:36:1418:619#0/1  
CTTGGGATCTTCTCTTCATTTTCAATGTCCTGTAGCTCTG  
+HWI-EAS443:3:36:1418:619#0/1  
`U¥ZWWP`][aa[[Y`\_`\_\_aaZ¥^\_Y[Z]\_YQ\_¥`b]¥W  
@HWI-EAS443:3:36:1428:688#0/1  
CAGAGCTACAGGACATTGAAAATGAAGAGAAGATCCCAAG  
+HWI-EAS443:3:36:1428:688#0/1  
`ababbbbbbbbaaabba\_aaaabaaa\_aaa]^`¥U\_a]a  
@HWI-EAS443:3:36:1467:34#0/1  
ATTCGATTTCCATTTTCATCGACGAACGGGGTGAATCAAT  
+HWI-EAS443:3:36:1467:34#0/1  
`bbbbbbb\_\_a^`abaa`aab`a`]]aa`a^T\_\_^`aZV`  
@HWI-EAS443:3:36:1477:84#0/1  
TGCTTCAATAGTGCATTCGGGTCACCAGATTCTACAATTA  
+HWI-EAS443:3:36:1477:84#0/1  
aaSS\_^b]bY[HWX\_]\_ZXZ\_Y]]¥\_Q][`XY]¥ZTV¥XI  
@HWI-EAS443:3:36:153:1838#0/1  
GAGGAGATGGCCACCAAAGCGGACTACACCCTTGACGAAG  
+HWI-EAS443:3:36:153:1838#0/1  
V\_\_VZ¥^\_Ub`a`a`ZKWaa`abbabbbba\_^aabXL\_S  
@HWI-EAS443:3:36:1553:1340#0/1  
ACACCCTTGACGAAGAGAGCAGGGCAAGAATCAAACTAG  
+HWI-EAS443:3:36:1553:1340#0/1  
a`\_`\_`aab^^`\_ZV]]aa\_a\_Y`\_`\_\_`\_]YR]L[R\_S[\_]  
@HWI-EAS443:3:36:1555:341#0/1  
CGGGGCAACATCTTCTCCTATTTTCATCAAGTTCTATCCAG

+HWI-EAS443:3:36:1555:341#0/1  
aaS¥^ba\_\_aa`a\_\_`aaaaa\_\_a`X`a`^`aaa`\_`  
@HWI-EAS443:3:36:1560:1039#0/1  
CGATTGGCCATGTTTCCGATTTGTTTTCAAAGAATTCCTT  
+HWI-EAS443:3:36:1560:1039#0/1  
¥`U`a`¥b`Y`\_YWVZ\_a^`abZPWa`RNLT YVRZ\_ba\_`  
@HWI-EAS443:3:36:1573:653#0/1  
ATCAGGCACTCCTCGATTGCTTCATATAGCCCCCAAGAT  
+HWI-EAS443:3:36:1573:653#0/1  
abb¥Z\_a`\_]\_Q`a``[aa^`a¥abaXZ]\_TVJ¥]ba]`  
@HWI-EAS443:3:36:1674:1754#0/1  
AATGGTTC AATTTGGCGTTC ACTTCTTTTGACATTTGGG  
+HWI-EAS443:3:36:1674:1754#0/1  
aaaa[Xb[b\_^\_YPX\_a^SG[MPQJYWZ[SQGUTNYLL]  
@HWI-EAS443:3:36:1684:1216#0/1  
GCCAAGTGTGAGGCCCATGTTCTATATGTGAGAACCAA  
+HWI-EAS443:3:36:1684:1216#0/1  
aaa\_\_[OZJY]ZUNYNZXXVNX¥WP[\_TTVQQONRV^`[T  
@HWI-EAS443:3:36:1788:1165#0/1  
TTCCGATTTGTTTTCAAAGAATTCCTTGGTCATGTCTTTC  
+HWI-EAS443:3:36:1788:1165#0/1  
aabababbbb\_aaaa`aaaa\_aa]Zaa\_`¥`^a``[aa\_a  
@HWI-EAS443:3:36:195:1252#0/1  
CGTCTCAAGAATGGTTCAATTTTGGCGTTC ACTTCTTTT  
+HWI-EAS443:3:36:195:1252#0/1  
a`[bb\_a\_S^a^aa`\_a]`a`X^TUROMY^YP]^\_S  
@HWI-EAS443:3:36:277:1049#0/1  
GGAGTGGAGGAAGGCTCTATTGGGAAAGTGTGCAGGACCT  
+HWI-EAS443:3:36:277:1049#0/1  
a`¥aNW\_Q¥^]OSRaaXT[]\_WUJL^ZMLUWV¥]NFXQQ  
@HWI-EAS443:3:36:289:787#0/1  
GCAGGTGCTAGCAGAGCTACAGGACATTGAAAATGAAGAG  
+HWI-EAS443:3:36:289:787#0/1  
abbaa^Wba\_aa`\_abb]aabba¥`a`b`a`aaaa`^a\_  
@HWI-EAS443:3:36:358:1678#0/1  
GAAATTTAGGCTTCTCTACCCCTGTTGTGTACATATACT  
+HWI-EAS443:3:36:358:1678#0/1  
aW\_bbbbabaaabaaaUaab\_ab¥UU[`[\_aaaaab`a^\_  
@HWI-EAS443:3:36:38:1207#0/1  
ACCGATTTGAGATAATTGAAGGAAGAGACCGAATCATGGC  
+HWI-EAS443:3:36:38:1207#0/1  
a`baaaa`a`a`a\_Va`aa`a[[^aa¥\_a`\_`^`\_]\_\_`  
@HWI-EAS443:3:36:39:1437#0/1  
TAGCCCCCAAGATCGAAGGTTCCAGGTTCCAGGTTGTCC  
+HWI-EAS443:3:36:39:1437#0/1  
ababbbbaaaa`a`]T[a¥`\_[HRZN]`aPY¥T\_¥RW`  
@HWI-EAS443:3:36:45:1079#0/1  
AAGAATTCCTTGGTCATGTCTTTCTCTTTGACAGAAGACT  
+HWI-EAS443:3:36:45:1079#0/1  
abaaaa\_ab`\_aYaa\_a¥a`\_`\_`a^\_\_\_\_]aa\_¥W\_\_\_\_^

@HWI-EAS443:3:36:499:259#0/1  
AGTCATCAAAGTCTACTTTTTCTGGTGCCATATTTTCACC  
+HWI-EAS443:3:36:499:259#0/1  
a`X^R]]¥¥`a0`[Y^`\_\_\_\_[¥\_\_\_\_Za\_`\_]`^¥a^]\_\_]]  
@HWI-EAS443:3:36:519:1556#0/1  
CTTCATGTTCTTTGTCCTTGGGATCTTCTCTTCATTTTCA  
+HWI-EAS443:3:36:519:1556#0/1  
a\_b\_W¥`TZa\_YZT[ba¥V\_¥MH[¥aP]\_a`aa^Sa]]¥]  
@HWI-EAS443:3:36:51:1453#0/1  
GAACTTCTCCAGCCTTGAAAACCTTAGAGCCTATGTAGAT  
+HWI-EAS443:3:36:51:1453#0/1  
a`^a`ababbaabaa`aaXS\_ba`aa`\_`a`aaZ[]\_\_  
@HWI-EAS443:3:36:525:964#0/1  
CATTAATCAGGCACTCCTCGATTGCTTCATATAGCCCCC  
+HWI-EAS443:3:36:525:964#0/1  
abba`]abbbabaaaba`aaaaaaaa`aa`aa`\_a```[a  
@HWI-EAS443:3:36:530:1273#0/1  
CATGAAGACATTCTTTGGCTGGAAAGAGCCTAACATAGTC  
+HWI-EAS443:3:36:530:1273#0/1  
[`SXTY\_\_`^\_X¥^¥^¥YY`R\_`R[a`]XT\_VJ¥S¥W\_  
@HWI-EAS443:3:36:544:1584#0/1  
AGCCCCCAAGATCGAAGGTTCCAGGTTCCAGGTTGTC  
+HWI-EAS443:3:36:544:1584#0/1  
a^ababaa\_`¥a^a`\_\_Z[QU^`^^[QS^ZPPSUWPHM¥^  
@HWI-EAS443:3:36:576:455#0/1  
GGATCTTCTCTTCATTTTCAATGTCCTGTAGCTCTGCTAG  
+HWI-EAS443:3:36:576:455#0/1  
abbababbabaabbbbb`aabaaaa`^^aa``\_aa`^a\_  
@HWI-EAS443:3:36:57:821#0/1  
GTCCTGCACACTTTCCCAATAGAGCCTTCCCTCCACTCCCC  
+HWI-EAS443:3:36:57:821#0/1  
a`bb`\_baaZaaaaaa]YZ\_]^^`a`a`a`\_\_XZ```¥^  
@HWI-EAS443:3:36:66:1436#0/1  
CCCGAATGCACTATTGAAGCACCGATTTGAGATAATTGAA  
+HWI-EAS443:3:36:66:1436#0/1  
abbaa`]ab^aaaaaa]a[\_a`aa\_\_`a`\_`^\_¥V\_^\_¥R  
@HWI-EAS443:3:36:71:637#0/1  
AATCAGGCACTCCTCGATTGCTTCATATAGCCCCCAAGA  
+HWI-EAS443:3:36:71:637#0/1  
\_Z]]^`a`P\_aaa`aaa\_`a\_\_a`^¥][¥a^\_``\_VW]O  
@HWI-EAS443:3:36:783:1547#0/1  
CTCTTGAGGACTGCGATAGCCAAGTGTGAGGCCCATGT  
+HWI-EAS443:3:36:783:1547#0/1  
aWTVW`V¥\_\_ZUZY\_¥XNNVURVT\_U¥VZYHG]UTUNSUL  
@HWI-EAS443:3:36:784:642#0/1  
GGGGGCTATATGAAGCAATCGAGGAGTGCCTGATTAATGA  
+HWI-EAS443:3:36:784:642#0/1  
aa\_¥\_baaabba`aabaa`aaa`a]^`\_`^`\_`]]\_\_  
@HWI-EAS443:3:36:822:849#0/1  
ATGAGAAAGGCATAAATCCCAATTACCTCATGGCTTGAA

+HWI-EAS443:3:36:822:849#0/1  
a`a\_bb\_`ba\_`ba^a`\_`aa`baaa`\_\_a[\_a^]YVZ  
@HWI-EAS443:3:36:835:1001#0/1  
GGCTCCAGTCTCGGGTCAGTGAGTGAGAAGTCCATACTTA  
+HWI-EAS443:3:36:835:1001#0/1  
a`a`bb`a]a^`aaaRaS\_X\_ZaR\_¥`Za\_^[\`X^`a[^S  
@HWI-EAS443:3:36:906:147#0/1  
CTACTGAATACATAATGAAGGGAGTGACATAAATACGGC  
+HWI-EAS443:3:36:906:147#0/1  
a\_]Za]ZWa\_R^YXT`NY\_\_ZZ\_X`]^\_¥WTVXa\_]X\_  
@HWI-EAS443:3:36:909:408#0/1  
GGGGTTTTCGGCTGAATCGAGAAAATTGCTTCTCATTGTT  
+HWI-EAS443:3:36:909:408#0/1  
a`]aQXaRIOYLWaT\_[TSFMXR\_[H[V\_TYL][SOJ^NN  
@HWI-EAS443:3:36:924:1798#0/1  
CATGTTTCCGATTTGTTTTCAAAGAATTCCTTGGTCATGT  
+HWI-EAS443:3:36:924:1798#0/1  
aaa][aabbba\_``X`\_\_¥`aa`\_\_````\_]`^Y]\_`^¥W  
@HWI-EAS443:3:36:952:1002#0/1  
CACTTTCCCAATAGAGCCTTCCCTCCACTCCCCTGGGTGAC  
+HWI-EAS443:3:36:952:1002#0/1  
a]`^[a`bbba]¥Qaaaa]\_¥]a`a\_``a^[X^^V\_[\`  
@HWI-EAS443:3:36:960:760#0/1  
GTCCGCTTTGGTGGCCATCTCCTCTCCAGTGAATGAAAAG  
+HWI-EAS443:3:36:960:760#0/1  
`\_b\_]a\_\_a`aU]`Y\_XUY¥\_\_YX¥Y`G[U\_U¥¥ZVZ`X  
@HWI-EAS443:3:37:1033:162#0/1  
CAAAATAAAATCTGAGAAGACACACATTCACATCTTTTCA  
+HWI-EAS443:3:37:1033:162#0/1  
aba\_`b]]b^WZ]a\_aa\_aa[]a`]\_]XZO[\_\_\_\_]NUULT  
@HWI-EAS443:3:37:1065:961#0/1  
AATGAGAAGCAATTTTCTCGATTGAGCCGAAAACCCCTCA  
+HWI-EAS443:3:37:1065:961#0/1  
ab¥\_Z\_bbb^\_T`aab`aa^a`[^`\_`aQN]V^`^`WaZ  
@HWI-EAS443:3:37:1113:1273#0/1  
CGGCCTTGCTCAATGCATCCTGTGCAGCCATGGATGACTT  
+HWI-EAS443:3:37:1113:1273#0/1  
aa`aabaababaababbaa\_aba`ba`\_aU\_a\_aa\_\_a`Y  
@HWI-EAS443:3:37:1149:1181#0/1  
GGGGGCTATATGAAGCAATCGAGGAGTGCCTGATTAATGA  
+HWI-EAS443:3:37:1149:1181#0/1  
ab\_]baababa`¥b`\_ba]a^b^aa\_SbM`^[\`aa``a`  
@HWI-EAS443:3:37:1198:914#0/1  
GCGCATAGTTCTGTAATCTCAAATTTTTCTTCAATTGTC  
+HWI-EAS443:3:37:1198:914#0/1  
aba`aaabZa`\_ab]]][a`a`aaUaaaaXDX`aa``a`^\_  
@HWI-EAS443:3:37:11:699#0/1  
CAACAAAATAAAATCTGAGAAGACACACATTCACATCTTT  
+HWI-EAS443:3:37:11:699#0/1  
`V]aa`^aaa\_V[\_aa`V^^[aZ¥]aa¥V`Wa\_a\_\_\_\_`]a

@HWI-EAS443:3:37:1236:108#0/1  
CCGATTCTACAATTATTGATTCACCCCGTTCGTCGATGA  
+HWI-EAS443:3:37:1236:108#0/1  
abb`aababa`abaababaaaaab^abS\_`a\_aa\_aaY  
@HWI-EAS443:3:37:1250:122#0/1  
GGGGGCTATATGAAGCAATCGAGGAGTGCCTGATTAATGA  
+HWI-EAS443:3:37:1250:122#0/1  
abaaaabaaaaaaaa`aa\_a\_aa\_a^aaN\_\_\_\_\_`[a``^  
@HWI-EAS443:3:37:1279:1449#0/1  
AGCAAACCTGTTAGTTTTCGATTTTCGGATCTTCCCCATAT  
+HWI-EAS443:3:37:1279:1449#0/1  
^``^ab^YYa`\_Rba^]W``aa^^0JSDZ^^`\_^]X]  
@HWI-EAS443:3:37:127:502#0/1  
TGTGGTTTACTATGTTAGGCTCTTCCAGCCAAAGAATG  
+HWI-EAS443:3:37:127:502#0/1  
aaXaa\_a\_XV]a`a`^`a\_]¥¥`\_`^^^S[\_ZHU]TXXV\_  
@HWI-EAS443:3:37:130:708#0/1  
AAAGGCATAAATCCCAATTACCTCATGGCTTGAAGCAGG  
+HWI-EAS443:3:37:130:708#0/1  
a`^¥\_aa]`^`aZa\_\_`\_\_a\_[\_aaZ\_W\_\_WPYWW¥ULX]  
@HWI-EAS443:3:37:1340:321#0/1  
GGGGCATGGAAATGAGGCGCTGCCTTCTTCAGTCTCTTCA  
+HWI-EAS443:3:37:1340:321#0/1  
aa`[\_`aa\_¥`\_aYa¥\_\_W^`^¥¥\_V`¥PS]ZZ^¥¥XWV  
@HWI-EAS443:3:37:1349:997#0/1  
GGGGGAGGGAATACCACTATATGATGCAATCAAATGCATG  
+HWI-EAS443:3:37:1349:997#0/1  
ab\_Yaaaa]VZa]\_\_\_\_`a`]X]^`^\_a`]UXaaa]^`\_a]\_  
@HWI-EAS443:3:37:1352:904#0/1  
TGCCCTGCTCTTTCGTCAAGGGTGTAGTCCGCTTTGGTG  
+HWI-EAS443:3:37:1352:904#0/1  
abaa`]\_\_bbaabbYZXY^\_aabSb\_a¥\_Gba`^a``VY^  
@HWI-EAS443:3:37:1365:1570#0/1  
CATTAATCAGGCACTCCTCGATTGCTTCATATAGCCCCC  
+HWI-EAS443:3:37:1365:1570#0/1  
a\_\_¥]\_\_ab`\_`a^Za]b``]^`\_Z`\_WaN]]][[]^`a^X  
@HWI-EAS443:3:37:1376:1026#0/1  
GGCACTCGGTGAAAATATGGCACCAGAAAAAGTAGACTTT  
+HWI-EAS443:3:37:1376:1026#0/1  
``aaaabbaRb]abaaabaa``aa`a[]¥NS¥N¥\_]XXa`  
@HWI-EAS443:3:37:1393:981#0/1  
AAGAATTCCTTGGTCATGTCTTTCTTTGACAGAAGACT  
+HWI-EAS443:3:37:1393:981#0/1  
abaa`aaabbbba``abbaabbbabaaaaXZabaa`aa`\_  
@HWI-EAS443:3:37:1413:556#0/1  
CGAACGGGGTGAATCAATAATTGTAGAATCTGGTGACCCG  
+HWI-EAS443:3:37:1413:556#0/1  
abbbbbbbbabbbbababbbbbbabbNbba^baabba  
@HWI-EAS443:3:37:1433:1388#0/1  
GGCATGGAAATGAGGCGCTGCCTTCTTCAGTCTCTCAGC

+HWI-EAS443:3:37:1433:1388#0/1  
]a]¥\_a`Y`a]]\_^^T^]¥aU\_a^Waa¥[R`Xb\_aa\_a^Q  
@HWI-EAS443:3:37:1462:1399#0/1  
CAGCTTGCTAGAGATCTGGGCTCTGGCTCATCACTGTCAT  
+HWI-EAS443:3:37:1462:1399#0/1  
\_[ba\_]Wb\_[Xaab^I][`^V]^¥UZD[ZbYY\_UZQ¥\_X  
@HWI-EAS443:3:37:150:1232#0/1  
GGCATAAATCCCAATTACCTCATGGCTTGAAGCAGGTGC  
+HWI-EAS443:3:37:150:1232#0/1  
`^bbbb`abbbbb`bbbbabaa]ba^GM¥\_P[¥\_a¥X`  
@HWI-EAS443:3:37:1531:557#0/1  
GCACCGATTTGAGATAATTGAAGGAAGAGACCGAATCATG  
+HWI-EAS443:3:37:1531:557#0/1  
\_ba^ababbbb`baaaaaaaaaaaaa`¥I¥^aaa`Zaa`  
@HWI-EAS443:3:37:1551:964#0/1  
CACTTCTGCTGTAATAAGTTCCCTCATGCTTGCATA  
+HWI-EAS443:3:37:1551:964#0/1  
^^\_babbb[bbbabbbb`bbabbbb`\_Zbbbbbb`bb  
@HWI-EAS443:3:37:1601:913#0/1  
AGCCAACAAAATAAATCTGAGAAGACACACATTCACATC  
+HWI-EAS443:3:37:1601:913#0/1  
aaaaabaab`aabaaaaa\_a\_aab\_a[N[\_aaa`aaa\_  
@HWI-EAS443:3:37:1662:339#0/1  
ACAGATTTTGCCAGTAAGGTCCTGCACACTTCCCAATAG  
+HWI-EAS443:3:37:1662:339#0/1  
aaaa`baabaa\_\_`¥aaaa[\_aaaab`\_aU`\_aa`b`\_`¥  
@HWI-EAS443:3:37:173:732#0/1  
CATAAATCCCAATTACCTCATGGCTTGAAGCAGGTGCTA  
+HWI-EAS443:3:37:173:732#0/1  
aaaa`aaaba`a`aaaa`\_[R¥a¥PZQYPZQNWMW^RS  
@HWI-EAS443:3:37:184:577#0/1  
TTGGGGGGCTATATGAAGCAATCGAGGAGTGCCTGATTAA  
+HWI-EAS443:3:37:184:577#0/1  
¥¥¥`aaXI`\_\_a]]\_Ya]aaa]a`^¥^¥a^`aa¥\_]\_V`Z  
@HWI-EAS443:3:37:208:32#0/1  
GCTTGAATCAGTCAATTCACATGCCTTATTGAATTCATTT  
+HWI-EAS443:3:37:208:32#0/1  
abaaaaaaaa[b\_baaaaa`a\_aaa\_a]Z\_^\_H^`\_`\_`  
@HWI-EAS443:3:37:20:1397#0/1  
CTGCTGTAAAATAGTTCCCTCATGCTTGCATATGTTC  
+HWI-EAS443:3:37:20:1397#0/1  
a]]`aabbbba\_`Yaaa¥)`[a`ZY]]XV\_aXXZ\_aZ^]  
@HWI-EAS443:3:37:241:1190#0/1  
GGGGCTATATGAAGCAATCGAGGAGTGCCTGATTAATGAT  
+HWI-EAS443:3:37:241:1190#0/1  
a`]]`^aZ\_\_¥WQ[^baaaXU]`\_`Ya\_a]T]^S`a\_^]Y  
@HWI-EAS443:3:37:251:265#0/1  
GGGGGCTATATGAAGCAATCGAGGAGTGCCTGATTAATGA  
+HWI-EAS443:3:37:251:265#0/1  
aaaa]aaaaa]aaaaa\_]P]ZX^X\_\_LS^Z^[¥UW^\_

@HWI-EAS443:3:37:273:1779#0/1  
GATATGTTCAATCGGGGCAACATCTTCTCCTATTTTCATCA  
+HWI-EAS443:3:37:273:1779#0/1  
T¥^aX]]aa^a\_J]\_Y`a`[a¥^\_ba\_FXb^aaabab\_  
@HWI-EAS443:3:37:306:33#0/1  
GGGGTTTTCGGCTGAATCGAGAAAATTGCTTCTCATTGTT  
+HWI-EAS443:3:37:306:33#0/1  
abaa]aaa`aa\_\_`\_]^`[\_]\_]^^[XTUT\_U]X]TW  
@HWI-EAS443:3:37:370:751#0/1  
CCTCCTCATGCTTGCGATATGTTCAATCGGGGCAACATCT  
+HWI-EAS443:3:37:370:751#0/1  
abaaaa]aaaa\_aaa`]aa]\_a`V^`^ZZ\_¥HZ^`\_\_`  
@HWI-EAS443:3:37:391:1130#0/1  
ATCTTCTCTTCATTTTCAATGTCCTGTAGCTCTGCTAGCA  
+HWI-EAS443:3:37:391:1130#0/1  
abbabbabbbbbbbaabaabbaab[U`b\_\_a¥R`a`  
@HWI-EAS443:3:37:430:950#0/1  
CCAGATTCTACAATTATTGATTCACCCCGTTCGTCGATGA  
+HWI-EAS443:3:37:430:950#0/1  
ab¥a\_U\_aa[[^V\_]Ta\_]aaaaaaaa\_]Wa\_^aa^Z`¥  
@HWI-EAS443:3:37:447:571#0/1  
CGAAAATCGAACTAACAAGTTTGCTGCAATATGCACACA  
+HWI-EAS443:3:37:447:571#0/1  
abaab`a`aa]a\_aaYaaa`^`\_`a`\_]^\_\_\_aa\_`a`  
@HWI-EAS443:3:37:514:440#0/1  
GAACAATGAGAAGCAATTTTCTCGATTGAGCCGAAAACCC  
+HWI-EAS443:3:37:514:440#0/1  
a`aaaaaaaa`\_a`b\_aabaaba\_\_`a^]¥]X¥aa`\_\_  
@HWI-EAS443:3:37:576:1479#0/1  
GGGGCATGGAAATGAGGCGCTGCCTTCTTCTCAGTCTTCA  
+HWI-EAS443:3:37:576:1479#0/1  
[aTV\_\_a¥¥`bb`[\_^]\_`a`[\_`b\_a`^`MJX`baa`aa\_  
@HWI-EAS443:3:37:583:1912#0/1  
GGAAAGAGCCTAACATAGTCAAACCACATGAGAAAGGCAT  
+HWI-EAS443:3:37:583:1912#0/1  
R¥I[baaaabbbbbbbba`[\_`bbb`^`abaZZS[^X``ba  
@HWI-EAS443:3:37:611:135#0/1  
GGGGTTTTCGGCTGAATCGAGAAAATTGCTTCTCATTGTT  
+HWI-EAS443:3:37:611:135#0/1  
ab`^Zaa^a[V\_V``]\_]\_¥\_] [XSZ] [\_XX]Y^^XY]YX  
@HWI-EAS443:3:37:696:1113#0/1  
AAGAGACCGAATCATGGCCTGGACAGTGGTGAACAGTATA  
+HWI-EAS443:3:37:696:1113#0/1  
\_baaaaaaa`^`\_`[\_`a```a\_¥^`\_\_W\_\_X][N¥\_\_TN]^  
@HWI-EAS443:3:37:716:842#0/1  
TAATCAGGCACTCCTCGATTGCTTCATATAGCCCCCAAG  
+HWI-EAS443:3:37:716:842#0/1  
````\_¥Z`aa`aaaab\_^aaa`aaaaa\_XXaaa`[\_`[\_  
@HWI-EAS443:3:37:754:561#0/1  
TTCCTTCTTTTGACATTTGGGAAAGCTTGCCCTCAATGC

+HWI-EAS443:3:37:754:561#0/1  
\_`ba\_ababaZabba\_`^¥]SZ` `[a`^Z[\_ab\_bTT^Z\_  
@HWI-EAS443:3:37:757:444#0/1  
AGAGAACAAGCCAATTGAAGTGGGCACTCGGTGAAAATAT  
+HWI-EAS443:3:37:757:444#0/1  
aababbaabaa^aaaa`aa^aaa`a\_\_aR\_G[]\_]a\_]`  
@HWI-EAS443:3:37:762:366#0/1  
GTGCTAGCAGAGCTACAGGACATTGAAAATGAAGAGAAGA  
+HWI-EAS443:3:37:762:366#0/1  
X`ZX¥¥a\_\_ba`^`^`a]a]¥\_]` [] [ZXY\_I\_Z]]`^^`  
@HWI-EAS443:3:37:77:854#0/1  
TTTTCACCGAGTGGCCACTTCAATTGGCTTGTCTCTTCA  
+HWI-EAS443:3:37:77:854#0/1  
aaa`abba`Ya\_aaaaR`aaaa^\_^^^Y^Y^WX¥T^WRD  
@HWI-EAS443:3:37:786:182#0/1  
GACTCGGCCTCAATCATGCTCTCAATCTGCTGAAGAGACT  
+HWI-EAS443:3:37:786:182#0/1  
\_\_^Y`b]]Y¥Z^ba]VV[¥¥a^ZXa\_a^aG¥^\_\_`a^Z^S  
@HWI-EAS443:3:37:791:837#0/1  
GCCGAACGGCTGCATTGAGGGCAAGCTTTCCCAAATGTCA  
+HWI-EAS443:3:37:791:837#0/1  
ab`bbbbbaaaa`a`a\_]`UH^`X[\_`S\_`Z^[][\_[\_  
@HWI-EAS443:3:37:82:332#0/1  
AGCAGGTGCTAGCAGAGCTACAGGACATTGAAAATGAAGA  
+HWI-EAS443:3:37:82:332#0/1  
]aaab`\_baaa^aa]\_aaa^^^\_aaa\_aVGDHU\_a\_G]YY  
@HWI-EAS443:3:37:852:2015#0/1  
AAGCTTGCGCATAGTTCCTGTAATCTCAAATTTTTCTTCA  
+HWI-EAS443:3:37:852:2015#0/1  
aba```\_b\_aaa`Zaa^aa\_```¥\_\_`OMU`^a`\_\_^\_a  
@HWI-EAS443:3:37:903:1682#0/1  
CTTGGTCATGTCTTTCTCTTTGACAGAAGACTCGGCCTCA  
+HWI-EAS443:3:37:903:1682#0/1  
\_ba^ [J¥a]a`a`^ [aaa`a`\_a`\_aa^Xa\_a\_]V]Y\_^  
@HWI-EAS443:3:37:913:817#0/1  
AGCCAACAAAATAAAATCTGAGAAGACACACATTCACATC  
+HWI-EAS443:3:37:913:817#0/1  
aaaaaaababaaaaa`aaaa]aaa\_a`aaVb`\_`aa`¥aa  
@HWI-EAS443:3:37:962:1151#0/1  
GGCTTGAAGCAGGTGCTAGCAGAGCTACAGGACATTGAA  
+HWI-EAS443:3:37:962:1151#0/1  
U^`T\_[bbb`Ua\_^`\_b\_Z\_]Y^¥a^` [b]ZTG\_]GXMFA  
@HWI-EAS443:3:37:998:1573#0/1  
GTTACATATACTGTTCCACTGTCCAGGCCATGATTCGG  
+HWI-EAS443:3:37:998:1573#0/1  
a`]¥YUM¥Z\_]`¥¥V]]aaaa[\_Wab]GYO¥aW¥^`^`ZM  
@HWI-EAS443:3:38:1008:904#0/1  
GTCCTGCACACTTTCCCAATAGAGCCTTCCTCCACTCCCC  
+HWI-EAS443:3:38:1008:904#0/1  
a[^WRaaa[¥`^^U\_]VUXU]¥OYY][SVLQWUUPW^UXU



@HWI-EAS443:3:38:1022:1494#0/1  
GTGGGCACTCGGTGAAAATATGGCACCAGAAAAAGTAGAC  
+HWI-EAS443:3:38:1022:1494#0/1  
\_SUZa\_¥a\_\_¥UZaa¥]]`ba`[`abXZLTUV¥PNYP^P  
@HWI-EAS443:3:38:109:970#0/1  
CTTTGTAATCATACAAATCAGGAAGAAATTTAGGCTTCTC  
+HWI-EAS443:3:38:109:970#0/1  
\_^b^^\_b\_bbaaaa^¥`aa`^`^`\_\_S\_`a]aa¥aa`¥`^  
@HWI-EAS443:3:38:1282:94#0/1  
GAACTATTTTACAGCAGAAGTGTCCCACTGCAGGGCTACT  
+HWI-EAS443:3:38:1282:94#0/1  
aababaaabba\_aaa`b`]^^a`a`^a^a\_X[\_`]W`^^U  
@HWI-EAS443:3:38:1340:1316#0/1  
GAACCCATACAGGTTTGTTCCTTCCCTTCTTTGGTC  
+HWI-EAS443:3:38:1340:1316#0/1  
`abaaaaaba^¥a0a\_\_[aa`\_a]\_aaaQ\_Z]a]\_\_\_]PG  
@HWI-EAS443:3:38:1345:140#0/1  
GCATCCTGTGCAGCCATGGATGACTTTCAGCTGATCCCAA  
+HWI-EAS443:3:38:1345:140#0/1  
aaba`a`aaaa`XZ`Vaa¥¥a^^^]XV`RDVZK¥UUQYW  
@HWI-EAS443:3:38:1358:162#0/1  
ATCCCAATTACCTCATGGCTTGGAAAGCAGGTGCTAGCAGA  
+HWI-EAS443:3:38:1358:162#0/1  
a`a`ababaa\_aZaaaa\_\_T]UWXZT]WLPNRVTVTRL  
@HWI-EAS443:3:38:1407:247#0/1  
GCGTCTCCACAACCTTGAGGGTTTTTCGGCTGAATCGAGAA  
+HWI-EAS443:3:38:1407:247#0/1  
aab`\_aaaa\_]Y\_ab^aa\_a¥`a`^`^XYVXVV¥X^^Y  
@HWI-EAS443:3:38:140:1552#0/1  
GAAAGTCATCCATGGCTGCACAGGATGCATTGAGCAAGGC  
+HWI-EAS443:3:38:140:1552#0/1  
a][\_]b¥`bbaaaba`a^aa`\_ZX\_`^]]¥¥¥ZZ\_[\_]U  
@HWI-EAS443:3:38:1440:1984#0/1  
CAGGCACTCCTCGATTGCTTCATATAGCCCCCAAGATCG  
+HWI-EAS443:3:38:1440:1984#0/1  
WZY\_]bb]\_]^[^a\_]a]Zba]bbaaZa\_^DKGN¥^V^GVH  
@HWI-EAS443:3:38:1468:381#0/1  
GGGCACTCGGTGAAAATATGGCACCAGAAAAAGTAGACTT  
+HWI-EAS443:3:38:1468:381#0/1  
abb`¥\_\_aab\_aWRY]]`ZWYR\_]\_\_`VOSO]WNW¥]WUS  
@HWI-EAS443:3:38:153:763#0/1  
GATTGCTTCATATAGCCCCCAAGATCGAAGGTTCCAGGT  
+HWI-EAS443:3:38:153:763#0/1  
abaaabaa\_`^`aaaa````aaaZ]a`aZPXT¥NL[Z[]VR  
@HWI-EAS443:3:38:1556:99#0/1  
CAAATGTAGGACCAAAGAAGGAAGACGAAAACAAACCTG  
+HWI-EAS443:3:38:1556:99#0/1  
`bbbabababba`abbba`a`\_aa\_abaa\_¥]]^`YV\_\_  
@HWI-EAS443:3:38:1574:1291#0/1  
TTTGTAAATCATACAAATCAGGAAGAAATTTAGGCTTCTCT

+HWI-EAS443:3:38:1574:1291#0/1  
¥b¥`WX[Yaba¥ZV]a\_\_\_\_\_]a\_]H]\_¥YYYY¥YYYYVS  
@HWI-EAS443:3:38:1576:981#0/1  
ACAGGACATTGAAAATGAAGAGAAGATCCCAAGGACAAAG  
+HWI-EAS443:3:38:1576:981#0/1  
aaaa¥a\_aaa\_U¥\_a\_`a\_]a\_aa\_]aUZSSWW^ZZX  
@HWI-EAS443:3:38:158:1869#0/1  
CCCTGGGTGACTCTCCGATTGCCATGTTTCCGATTTGTT  
+HWI-EAS443:3:38:158:1869#0/1  
abbbbbbb\_bbbbaabbUaa[`bba]W¥aa¥`]a\_aa`a`  
@HWI-EAS443:3:38:1652:111#0/1  
ATCTTCTCTTCATTTTCAATGTCCTGTAGCTCTGCTAGCA  
+HWI-EAS443:3:38:1652:111#0/1  
a\_bbbababb]]bbb`\_`bbbababbbab][V\_]U[^XU  
@HWI-EAS443:3:38:169:741#0/1  
GTGGGCACTCGGTGAAAATATGGCACCAGAAAAAGTAGAC  
+HWI-EAS443:3:38:169:741#0/1  
a\_`aa`[aaaZaU\_`¥`]\_\_\_\_\_`U``\_¥¥]N¥[S\_[ZS  
@HWI-EAS443:3:38:1784:2016#0/1  
AGCCGAACGGCTGCATTGAGGGCAAGCTTTCCCAAATGTC  
+HWI-EAS443:3:38:1784:2016#0/1  
aV`\_`aaN^Y¥U¥N^X^GNTU^GS¥WTV`UWHYTYYSMFR  
@HWI-EAS443:3:38:183:664#0/1  
CCCAATAGAGCCTTCCCTCCACTCCCCTGGGTGACTCTCCG  
+HWI-EAS443:3:38:183:664#0/1  
aaabaa`aaaaaaaa\_aaaaaa`aaaa^^¥^W^\_`a^¥^¥^  
@HWI-EAS443:3:38:18:1382#0/1  
TACAAATCAGGAAGAAATTTAGGCTTCTCTACCCCTGTTG  
+HWI-EAS443:3:38:18:1382#0/1  
^aa`^`aa]`^^`\_aa`\_[^`a`a`a\_b\_a`^`a^\_U\_]  
@HWI-EAS443:3:38:190:1927#0/1  
GTCCTTGGGATCTTCTTTCATTTTCAATGTCCTGTAGCT  
+HWI-EAS443:3:38:190:1927#0/1  
a\_a]`Pa¥XSU¥aa`a`\_`[\_\_\_\_\_[X¥LMRV¥P^XX`\_`  
@HWI-EAS443:3:38:248:487#0/1  
TATGTAGATGGATTGAGCCGAACGGCTGCATTGAGGGCA  
+HWI-EAS443:3:38:248:487#0/1  
aaa\_]a\_]abb`aaaaaaaaa]a\_¥a]¥U¥ZYSS\_]U]  
@HWI-EAS443:3:38:263:1095#0/1  
TGAAATTGGAGTAACACGGAGGGAAGTCCACATATATTAC  
+HWI-EAS443:3:38:263:1095#0/1  
aabaa`aa^aa[abaaa[```\_^`R\_X\_a^Z`\_\_``^¥^X  
@HWI-EAS443:3:38:319:1777#0/1  
CCAATTTCAATGAACCGTTCTCTTTGTAATCATACAAAT  
+HWI-EAS443:3:38:319:1777#0/1  
a`\_`aa`aa]\_\_`aaa`\_^`\_`\_[YWX\_^]P\_]\_\_\_\_]`[  
@HWI-EAS443:3:38:356:704#0/1  
AATATGGCACCAGAAAAAGTAGACTTTGATGACTGCAAAG  
+HWI-EAS443:3:38:356:704#0/1  
aa[aaa`a\_a\_\_a`a\_a\_`X\_\_[^`^^\_]\_][]]X\_UX

@HWI-EAS443:3:38:428:1482#0/1  
CATATCGCAAGCATGAGGAGGAAGTATTTTACAGCAGAAG  
+HWI-EAS443:3:38:428:1482#0/1  
^`bbba^^a^Z\_aaaa]a\_a]Waa\_`]\_]\_\_`\_a[[]^a`V  
@HWI-EAS443:3:38:458:861#0/1  
GTCCCACTGCAGGGCTACTGAATACATAATGAAGGGAGTG  
+HWI-EAS443:3:38:458:861#0/1  
a\_bbbaaabaaa\_`baaaabaaba`\_]`aa\_\_\_\_]a\_\_\_\_a^\_  
@HWI-EAS443:3:38:462:190#0/1  
CTCGGGTCAGTGAGTGAGAAGTCCATACTTACAAAGTTCA  
+HWI-EAS443:3:38:462:190#0/1  
aaba\_ZZa]`Z^^a^a`]T^¥U^aYVQ[\_]`^\_\_a\_X[^]  
@HWI-EAS443:3:38:483:302#0/1  
CATTAATCAGGCACTCCTCGATTGCTTCATATAGCCCCC  
+HWI-EAS443:3:38:483:302#0/1  
aaabZabbbbaaaabaaaab`\_`\_`a`\_aa`\_`\_`a\_\_\_\_a]`X  
@HWI-EAS443:3:38:500:1017#0/1  
TTGATTCTTGCCCTGCTCTCTTCGTCAGGGGTAGTCCG  
+HWI-EAS443:3:38:500:1017#0/1  
a`WX]WV]]``[¥QOX^aa^]¥`ZNW^^^QKKRTT^VU` [  
@HWI-EAS443:3:38:522:780#0/1  
CTTGAAGCAGGTGCTAGCAGAGCTACAGGACATTGAAAA  
+HWI-EAS443:3:38:522:780#0/1  
abb`b`bbaaV\_Uabababab\_aaa\_aab`^a]\_aZZZ\_\_  
@HWI-EAS443:3:38:582:266#0/1  
CCTGAACAATGAGAAGCAATTTTCTCGATTGAGCCGAAAA  
+HWI-EAS443:3:38:582:266#0/1  
a`\_a\_a`\_]Z`¥`^a`]`\_\_a^`\_a\_\_\_\_]YXV\_] [[S[MU  
@HWI-EAS443:3:38:60:95#0/1  
CATTAATCAGGCACTCCTCGATTGCTTCATATAGCCCCC  
+HWI-EAS443:3:38:60:95#0/1  
aaaa^[^`a`\_X^\_a¥^\_a]\_^\_\_\_\_\_¥[TRZZ¥¥¥¥¥V  
@HWI-EAS443:3:38:623:142#0/1  
GAAATCCGAATACATGAAACAACTTCCAAATGTGTGCAT  
+HWI-EAS443:3:38:623:142#0/1  
^W¥^\_`\_]^[W`^aaa¥aY^¥0¥a`a\_a]ZY\_VaZa\_\_X  
@HWI-EAS443:3:38:658:1133#0/1  
AGCAGGTGCTAGCAGAGCTACAGGACATTGAAAATGAAGA  
+HWI-EAS443:3:38:658:1133#0/1  
]a`Y]a]\_a`a\_\_\_\_a`\_`^aaaa`\_`Y\_`\_Y^]\_\_\_\_`\_\_^  
@HWI-EAS443:3:38:665:877#0/1  
GGGGAAGATCCGAAAATCGAAACTAACAAGTTTCTGCTGCAA  
+HWI-EAS443:3:38:665:877#0/1  
aZaa\_`^`¥`¥`\_`^aa\_aa\_Y\_`\_WRW¥I[U[Y\_^^\_^YW  
@HWI-EAS443:3:38:679:1747#0/1  
GGGGCATGGAAATGAGGCGCTGCCTTCTTCAGTCTCTTCA  
+HWI-EAS443:3:38:679:1747#0/1  
W¥\_VU`\_]Y^Z\_]`b¥Y\_¥\_`^\_\_\_\_^Z\_\_adW`V`^`a]a\_  
@HWI-EAS443:3:38:691:463#0/1  
CGGCCTCAATCATGCTCTCAATCTGCTGAAGAGACTGAAG

+HWI-EAS443:3:38:691:463#0/1  
\_b¥bbbbb`Zb[WW`[W¥\_\_X`aa^WZ¥XZ\_aa]T`baaZ  
@HWI-EAS443:3:38:717:351#0/1  
GGGGCATGGAAATGAGGCGCTGCCTTCTTCAGTCTCTTCA  
+HWI-EAS443:3:38:717:351#0/1  
aba`aaabbaaaaa`aa`aaa`\_a`aWW`X\_\_¥\_\_^¥  
@HWI-EAS443:3:38:721:371#0/1  
TGTATTCCGATTTCCATTTTCATCGACGAACGGGGTGAATC  
+HWI-EAS443:3:38:721:371#0/1  
ab^bba`bb`^`\_\_^aaa^aa`\_\_aaa\_T¥^`Qa`\_¥S  
@HWI-EAS443:3:38:756:404#0/1  
ACAATTGAAGAAAAATTTGAGATTACAGGAACTATGCGCA  
+HWI-EAS443:3:38:756:404#0/1  
\_b`Na^\_b`^\_]a\_abaa¥^b`bbab`aaa`\_ab\_aZa\_\_  
@HWI-EAS443:3:38:764:74#0/1  
GAGAAATGATACTGATGTGGTGAACCTTTGTAAGTATGGAG  
+HWI-EAS443:3:38:764:74#0/1  
a^a]\_\_a\_^¥^\_]\_¥\_Z`^U`]ZZ^XZZXOZ]ZZX¥ZXZ  
@HWI-EAS443:3:38:860:266#0/1  
CAAATGCATGAAGACATTCTTTGGCTGGAAAGAGCCTAAC  
+HWI-EAS443:3:38:860:266#0/1  
abbbabbbbabaaaaa\_Y`aa[aaaaa\_Y]]`ZZ\_^ZG  
@HWI-EAS443:3:38:88:1760#0/1  
GTTCGTCGATGAAATGGAAATCCGAATACATGAAACAAAC  
+HWI-EAS443:3:38:88:1760#0/1  
]]aa^PY¥`H^\_]RYa]bbb\_bbTba`bbaT^aaba\_ba^  
@HWI-EAS443:3:38:902:63#0/1  
CAACAAAATAAAATCTGAGAAGACACACATTCACATCTTT  
+HWI-EAS443:3:38:902:63#0/1  
Ybbbbababbbbbbabbbbababbb`aaaaabbabaa  
@HWI-EAS443:3:38:913:1228#0/1  
AGCAGGGCAAGAATCAAACACTAGGCTTTTCACTATAAGAC  
+HWI-EAS443:3:38:913:1228#0/1  
aaaaaababaaaabbaab`aa`a\_\_\_\_`]\_]`\_\_`\_`W  
@HWI-EAS443:3:38:944:812#0/1  
GTGGGAGACTTTGGTCGGCAAGCTTGCGCATAGTTCCTGT  
+HWI-EAS443:3:38:944:812#0/1  
a\_aaa\_a¥MZa\_H¥G¥\_]Y[YQ`][\_Z^^RUVQLTXZXWM  
@HWI-EAS443:3:38:960:447#0/1  
GTGGGAGACTTTGGTCGGCAAGCTTGCGCATAGTTCCTGT  
+HWI-EAS443:3:38:960:447#0/1  
a]aaaa`a`\_]`^][\_]`^]¥`ZXXXR]YY^^X  
@HWI-EAS443:3:39:100:1590#0/1  
GCCCACTTCAATTGGCTTGTCTCTTCATGTTCTTTGTCC  
+HWI-EAS443:3:39:100:1590#0/1  
`bbbbbbbabaaaabaa^[\_^`aaaaaa`\_`aabR]a]  
@HWI-EAS443:3:39:102:1082#0/1  
GTTTGTTCATGTATTCCGATTTCCATTTTCATCGACGAAC  
+HWI-EAS443:3:39:102:1082#0/1  
`]`a`\_`aa`\_\_aaa`a¥^^\_a]P`\_^`\_]`^`^^\_[Y

@HWI-EAS443:3:39:1053:816#0/1  
CAGGAAGTATGCGCAAGCTTGCCGACCAAAGTCTCCCACC  
+HWI-EAS443:3:39:1053:816#0/1  
a\_ab¥baaaaaabaaa\_``\_aa\_aa^a][^W¥\_a¥\_\_^Q  
@HWI-EAS443:3:39:1063:498#0/1  
ACCAGAAAAAGTAGACTTTGATGACTGCAAAGATGTTGGA  
+HWI-EAS443:3:39:1063:498#0/1  
aaa\_b¥^a^`a\_aa`aaaa`aa\_¥a`a``\_¥\_aZ\_``]  
@HWI-EAS443:3:39:10:1487#0/1  
CATGGAATGAGGCGCTGCCTTCTTCAGTCTCTTCAGCAG  
+HWI-EAS443:3:39:10:1487#0/1  
a`a`Z¥U\_\_]^`aaa\_`a^^``a`][a`U^\_a¥X[NX  
@HWI-EAS443:3:39:1103:1806#0/1  
GGAAATCCGAATACATGAAACAAACTTCCAAATGTGTGCA  
+HWI-EAS443:3:39:1103:1806#0/1  
aaa\_a\_bbabaabaaa`a`aZbaaa`\_\_aaXOT`YVLV\_Y  
@HWI-EAS443:3:39:1111:1174#0/1  
GAATCAGTCAATTCACATGCCTTATTGAATTCATTTTGGGA  
+HWI-EAS443:3:39:1111:1174#0/1  
abba`aY\_]\_aaaa¥`aa\_[aa^\_aa`[FZ\_``\_\_a]  
@HWI-EAS443:3:39:111:116#0/1  
CACTCCTCGATTGCTTCATATAGCCCCCAAGATCGAAGG  
+HWI-EAS443:3:39:111:116#0/1  
aabbbbaaaa]Z]a\_]VW]¥W]Xa¥X`\_\_X¥¥RZ[NZ[Z  
@HWI-EAS443:3:39:1129:274#0/1  
ATTGCAGCAAACCTGTTAGTTTCGATTTTCGGATCTTCCC  
+HWI-EAS443:3:39:1129:274#0/1  
abbabbbbbb\_`bbbaaa^aa`aU`a``]OGRV\_YWWW  
@HWI-EAS443:3:39:1139:1489#0/1  
AGGCAATCTGAGGGGCGTGGTGTCTCCTCAAGAAATGGT  
+HWI-EAS443:3:39:1139:1489#0/1  
Q\_bb`\_`a][QX¥bbZWP\_\_TWN]aPQ\_aa\_W\_aa`^`V  
@HWI-EAS443:3:39:1169:858#0/1  
CACTGCAGGGCTACTGAATACATAATGAAGGGAGTGACA  
+HWI-EAS443:3:39:1169:858#0/1  
aaaabaaaaaaaa^bba`aa^`aa\_a`a\_a\_]`^aZ\_]Z  
@HWI-EAS443:3:39:1190:206#0/1  
CTCATTTGAGAAATGATACTGATGTGGTGAACCTTTGTAAG  
+HWI-EAS443:3:39:1190:206#0/1  
abb\_ba\_a`a\_bbbbbbb\_aaaa^a[M^TZ¥a]ZZ\_\_^  
@HWI-EAS443:3:39:1199:390#0/1  
CTTTGTAAGTATGGAGTTCTCACTCACTGACCCGAGACTG  
+HWI-EAS443:3:39:1199:390#0/1  
[babaaaabababb[\_`a]baba`bbabbbbV`b`ba\_aa  
@HWI-EAS443:3:39:1422:601#0/1  
GAGGAAGTATTTTACAGCAGAAGTGTCCCACTGCAGGGCT  
+HWI-EAS443:3:39:1422:601#0/1  
ab`aa`b\_baabbbbabaa`\_aWVa^Va`a`¥\_Xa[aV^]  
@HWI-EAS443:3:39:144:1754#0/1  
AAAGAGGCGAAGAGACAATTGAAGAAAAATTTGAGATTAC

+HWI-EAS443:3:39:144:1754#0/1  
aba^a\_\_b`abaaa]`a`\_`[¥]Y]aa\_``\_`^¥a\_a`\_a^  
@HWI-EAS443:3:39:1463:1715#0/1  
ACGGGGTGAATCAATAATTGTAGAATCTGGTGACCCGAAT  
+HWI-EAS443:3:39:1463:1715#0/1  
[\_Z``a^YVa]0^T\_`W^\_]0]^ [ZVZ]XVFR¥[ `[U]RT  
@HWI-EAS443:3:39:1499:167#0/1  
TGTATTCAACAGTCTATATGCGTCTCCACAACCTGAGGGG  
+HWI-EAS443:3:39:1499:167#0/1  
aa]a` `aa` `] `] ]\_\_^^[TS[WXX¥TZUXXHXVWUYWTV  
@HWI-EAS443:3:39:1507:673#0/1  
GGGCACTCGGTGAAAATATGGCACCAGAAAAAGTAGACTT  
+HWI-EAS443:3:39:1507:673#0/1  
a¥aa` ]^aa\_]a]Z\_`\_¥Z\_¥\_]Z]\_`^¥^]TLTZ\_`^XX]Z  
@HWI-EAS443:3:39:1518:890#0/1  
CCTGATTTGTATGATTACAAAGAGAACCGGTTTATTGAAA  
+HWI-EAS443:3:39:1518:890#0/1  
abb¥bbbbbbabbbbbbbbaaaaaaaZV\_bb[ ` \_`aaa^`Z  
@HWI-EAS443:3:39:1564:1705#0/1  
GGGGGCTATATGAAGCAATCGAGGAGTGCCTGATTAATGA  
+HWI-EAS443:3:39:1564:1705#0/1  
`VZUTXV[\_ [a[OZTXY]LNPPUZUXYJTY^LGR[RQBBB  
@HWI-EAS443:3:39:156:195#0/1  
CAGGGCAAGAATCAAACTAGGCTTTTCACTATAAGACAA  
+HWI-EAS443:3:39:156:195#0/1  
abbabbaaa`bbbbXbbababaaa`aaaaaaaaa` ` \_`¥a  
@HWI-EAS443:3:39:168:123#0/1  
AATTCACATGCCTTATTGAATTCATTTTGGACCCAGCTTG  
+HWI-EAS443:3:39:168:123#0/1  
aV`bbaaVa\_¥Z`aaaaaaaaa\_\_\_^a` `Z]\_`^aUa` \_]\_`  
@HWI-EAS443:3:39:1724:102#0/1  
TGGGGGGCTATATGAAGCAATCGAGGAGTGCCTGATTAAT  
+HWI-EAS443:3:39:1724:102#0/1  
]ab`aZaaa\_aZZ`^[[MY[^TXU`^G]R[PKRXKVVVVV  
@HWI-EAS443:3:39:1728:968#0/1  
AAATCCCAATTACCTCATGGCTTGAAGCAGGTGCTAGCA  
+HWI-EAS443:3:39:1728:968#0/1  
ab\_a`a` [Z`]Za\_\_\_a` `ZRaXT\_YBBBBBBBBBBBBBBB  
@HWI-EAS443:3:39:1742:180#0/1  
ATGAGAAGCAATTTTCTCGATTGAGCCGAAAACCCCTCAA  
+HWI-EAS443:3:39:1742:180#0/1  
abbaaab`aababaa\_a^`a[[a\_X`^a^XSP[YYWZY  
@HWI-EAS443:3:39:1749:251#0/1  
AGTAGGAGTCTATGGGATTCCTTTTCGTCAGTCCGAAAGAG  
+HWI-EAS443:3:39:1749:251#0/1  
abaaabab^` `^\_baa` ` `\_]`a` `aY\_\_\_^VY]\_`^]`^YY  
@HWI-EAS443:3:39:1761:681#0/1  
CTAACATAGTCAAACCACATGAGAAAAGGCATAAATCCCAA  
+HWI-EAS443:3:39:1761:681#0/1  
^`aXTH\_VUY\_¥NS\_ZWVZa`UN]YYTaSQY\_`^XaWPN][

@HWI-EAS443:3:39:1781:1887#0/1  
GTTTGTTCATGTATTCCGATTTCATTTCATCGACGAAC  
+HWI-EAS443:3:39:1781:1887#0/1  
\_`aaa]aa\_a`a[`aa`aZ^\_\_^]\_a\_aa`YQUZ^W]]VR  
@HWI-EAS443:3:39:179:576#0/1  
GCCAGTAGGAGTCTATGGGATTCTTTTCGTTCAGTCCGAAA  
+HWI-EAS443:3:39:179:576#0/1  
aaaaa^aa]\_a¥a`\_^\_^^\_\_\_\_`\_¥^`\_W\_[^P^^^[[[  
@HWI-EAS443:3:39:228:347#0/1  
CAACAGTCTATATGCGTCTCCACAATTGAGGGGTTTTTCG  
+HWI-EAS443:3:39:228:347#0/1  
`W¥aS\_WbYb`aabbb¥a]a]UaX\_ZYIYX^¥aSga\_\_\_X  
@HWI-EAS443:3:39:228:939#0/1  
GGGGTTTTTCGGCTGAATCGAGAAAATTGCTTCTCATTGTT  
+HWI-EAS443:3:39:228:939#0/1  
`\_b¥Q\_`a^a\_`a``[]a`Zaa[a`]a\_a^aV[^T^\_\_UR  
@HWI-EAS443:3:39:281:787#0/1  
AAGAATTCCTTGGTCATGTCTTTCTCTTTGACAGAAGACT  
+HWI-EAS443:3:39:281:787#0/1  
a\_b`W\_bbaabbaZ]S`aaaaaa`aa`^a\_]`\_a`\_\_][  
@HWI-EAS443:3:39:303:962#0/1  
CATGTTTCCGATTTGTTTTCAAAGAATTCCTTGGTCATGT  
+HWI-EAS443:3:39:303:962#0/1  
^WX`X)`ba\_Q]baa)`a^^`\_¥Z\_H^][b`[¥PIZaa[X  
@HWI-EAS443:3:39:367:384#0/1  
AATTGACTGATTCAAGCTGGATAGAATTGATGAAATAGG  
+HWI-EAS443:3:39:367:384#0/1  
a`baaa\_abaaaaaaa`aaa\_`a`a^a``\_`a\_\_^`\_a\_  
@HWI-EAS443:3:39:367:461#0/1  
GTGGACTTCCCTCCGTGTTACTCCAATTTCAATGAACCGG  
+HWI-EAS443:3:39:367:461#0/1  
a¥aTQ¥`abaaaa^¥P]]aa\_\_a\_\_\_\_\_]^`[\_XFS\_YZ`]  
@HWI-EAS443:3:39:371:588#0/1  
GGGCACTCGGTGAAAATATGGCACCAGAAAAAGTAGACTT  
+HWI-EAS443:3:39:371:588#0/1  
aaaaba`bbb[]¥a]Ya¥`aaaWaS\_aa^^)`Taa\_¥\_\_  
@HWI-EAS443:3:39:372:1428#0/1  
GGGGCATGGAAATGAGGCGCTGCCTTCTTCAGTCTCTTCA  
+HWI-EAS443:3:39:372:1428#0/1  
aa\_ab\_aaa^`aa\_aa`a\_a`a\_`\_]¥\_a\_\_N¥\_`aT`VW  
@HWI-EAS443:3:39:448:859#0/1  
GAAATGGCCAGTAGGAGTCTATGGGATTCTTTTCGTTCAGT  
+HWI-EAS443:3:39:448:859#0/1  
WTZ¥]a`aaa^^)``Z]¥`a[]^`\_`^^¥`Z¥]ZYU[[U  
@HWI-EAS443:3:39:483:366#0/1  
ATAAATACGGCCTTGCTCAATGCATCCTGTGCAGCCATGG  
+HWI-EAS443:3:39:483:366#0/1  
\_b¥\_\_bbaa`bbVaa`aba\_^[aaYa[\_\_YUN[Za¥\_U\_¥  
@HWI-EAS443:3:39:608:1626#0/1  
GGGGTTTTTCGGCTGAATCGAGAAAATTGCTTCTCATTGTT

+HWI-EAS443:3:39:608:1626#0/1  
¥\_¥`U\_Z\_b[Wb`[aSQab`aa\_aa``aba^¥[aa\_X^]]  
@HWI-EAS443:3:39:644:160#0/1  
ATAGTTCCTCCTCATGCTTGCATATGTTCAATCGGGGCA  
+HWI-EAS443:3:39:644:160#0/1  
]babaabaabbaa\_\_\_`a\_ba]]]aW^aa]^¥]Y¥\_^^  
@HWI-EAS443:3:39:697:1030#0/1  
TTGCCCCGATTGAACATATCGCAAGCATGAGGAGGAACTA  
+HWI-EAS443:3:39:697:1030#0/1  
aababaaa\_a^aaaabaa`\_a`\_^`a^a^X`\_Xa\_^UZ\_X  
@HWI-EAS443:3:39:697:479#0/1  
CGGCTGAATCGAGAAAATTGCTTCTCATTGTTGAGGCACT  
+HWI-EAS443:3:39:697:479#0/1  
ab`aabababb`b`Ubaaaa^aa`aaa\_a\_ZU^`aa`\_]\_  
@HWI-EAS443:3:39:710:1299#0/1  
CGGTTTATTGAAATTGGAGTAACACGGAGGGAAGTCCACA  
+HWI-EAS443:3:39:710:1299#0/1  
a`YX^``^`[`^^`a]`aU\_a¥][\_[R^TRT]\_XZY]^]  
@HWI-EAS443:3:39:770:541#0/1  
TACTGTTAAGGTCTCCAACATCTTTGCAGTCATCAAAGT  
+HWI-EAS443:3:39:770:541#0/1  
aababaabaa`^a`aaa`\_`aa`aaa``¥W\_`a`\_`Z`  
@HWI-EAS443:3:39:800:1810#0/1  
ATCCGAAAATCGAAACTAACAAGTTTGCTGCAATATGCAC  
+HWI-EAS443:3:39:800:1810#0/1  
aVa`\_]aba`a\_\_\_aaaa^`^\_U]a^Y\_]\_WTL]\_`\_^`W  
@HWI-EAS443:3:39:827:1876#0/1  
AAGAAATTTAGGCTTCTCTACCCCTGTTGTGTTACATATA  
+HWI-EAS443:3:39:827:1876#0/1  
`a\_bba`b`[\_a\_]`R`0a\_\_0¥Z^]RPDN[]WMVOZ  
@HWI-EAS443:3:39:851:735#0/1  
CTCTTCATGTTCTTTGCTTGGGATCTTCTTCATTTT  
+HWI-EAS443:3:39:851:735#0/1  
a¥aabb\_¥\_Z`\_abbb`aba\_bX[a`ab¥[\_`\_abb\_^a`b  
@HWI-EAS443:3:39:897:321#0/1  
CTCGTACTCGGGTCTTCAACTTAATTTTCAGAGCATCC  
+HWI-EAS443:3:39:897:321#0/1  
a\_aaZa]`aa`\_`0\_\_\_^^`Y\_\_^a\_]\_]PY]XWFQS]X  
@HWI-EAS443:3:39:901:1349#0/1  
GCAAATGTAGGACCAAAGAAGGAAGACGAAAACAAACCT  
+HWI-EAS443:3:39:901:1349#0/1  
abb\_abb`aabaaaabbaaaa\_\_aaa\_babaaa\_baa^\_\_  
@HWI-EAS443:3:39:933:1251#0/1  
GAAAGGCATAAATCCCAATTACCTCATGGCTTGAAGCAG  
+HWI-EAS443:3:39:933:1251#0/1  
`a`\_\_^`¥`bbb\_[]\_\_`^^`[IX`Z]`BBBBBBBBBBB  
@HWI-EAS443:3:3:1026:220#0/1  
GGTGAACCTTTGTAAGTATGGAGTTCTCACTCACTGACCCG  
+HWI-EAS443:3:3:1026:220#0/1  
aa]a`\_\_a`aaY\_^X\_``^^`^^U^X^X^Y^X^\_YYYYX



@HWI-EAS443:3:3:1033:496#0/1  
GAAC TTTGTAAGTATGGAGTTCTCACTCACTGACCCGAGA  
+HWI-EAS443:3:3:1033:496#0/1  
a\_XY`RSYGXW`\_XT[US]]`Z]]ZQ`XU^¥\_XW]Z]YXU  
@HWI-EAS443:3:3:1102:1815#0/1  
TTCCTCCACTCCCCTGGGTGACTCTCCGATTGGCCATGTT  
+HWI-EAS443:3:3:1102:1815#0/1  
a^Z\_a]a`¥\_\_`YUY]\_a0``MTY\_\_M^T¥¥^¥SSV]¥G¥  
@HWI-EAS443:3:3:1256:1254#0/1  
AGGCATGTGAATTGACTGATTCAAGCTGGATAGA ACTTGA  
+HWI-EAS443:3:3:1256:1254#0/1  
a\_aVOYWTa[b[\_a\_a`b`bb¥a\_`\_`\_\_^\_aaKa\_aT a^  
@HWI-EAS443:3:3:1383:356#0/1  
GAGACATGCTCTTGAGGACTGCGATAGGCCAAGTGTGAG  
+HWI-EAS443:3:3:1383:356#0/1  
^a`\_`\_]bb`bab^bZP`bTaa]ba`ba\_ZZ``¥Z\_NN``a  
@HWI-EAS443:3:3:141:326#0/1  
CGAGGGGGGAGGGAATACCACTATATGATGCAATCAAATGC  
+HWI-EAS443:3:3:141:326#0/1  
ababbbb`bbba[aaa^aaa\_aabaaa0aaaYa`^`\_`\_  
@HWI-EAS443:3:3:1490:1258#0/1  
CTTGGGGGGCTATATGAAGCAATCGAGGAGTGCCTGATTA  
+HWI-EAS443:3:3:1490:1258#0/1  
abb[b^¥bbba^Q^`S\_YG[a[R\_\_a]PZabUU[WTZ¥]  
@HWI-EAS443:3:3:1546:834#0/1  
CATTAATCAGGCACTCCTCGATTGCTTCATATAGCCCCC  
+HWI-EAS443:3:3:1546:834#0/1  
a]\_`aa\_\_`^^a\_J[Xa[Waaa`X`a]^aa`a`Q`¥[\_R  
@HWI-EAS443:3:3:162:1612#0/1  
CACAACTTGAGGGGTTTTCGGCTGAATCGAGAAAATTGCT  
+HWI-EAS443:3:3:162:1612#0/1  
abaaa^baba`¥\_`Vaaa`\_`\_aa`^¥]¥X]\_a`\_\_[WX  
@HWI-EAS443:3:3:1644:519#0/1  
TTCGTCGATGAAATGGAAATCCGAATACATGAAACAACT  
+HWI-EAS443:3:3:1644:519#0/1  
aa\_``\_a^```^^\_Y[^]^¥\_^^`ZZ[^]^Y]]][W[  
@HWI-EAS443:3:3:1699:336#0/1  
AGAAATTTAGGCTTCTCTACCCCTGTTGTGTTACATATAC  
+HWI-EAS443:3:3:1699:336#0/1  
ab`\_a`a\_aa`\_aa`Zaa]]Z\_\_^`\_`Z[Z\_^¥]^X\_Z  
@HWI-EAS443:3:3:1721:514#0/1  
GAAAGGCATAAATCCCAATTACCTCATGGCTTGGAAAGCAG  
+HWI-EAS443:3:3:1721:514#0/1  
`\_b`b\_aaaaaa\_]Za\_a`\_W\_]¥\_a]X`a[]Y]]VBB  
@HWI-EAS443:3:3:1762:1221#0/1  
ATAATGAAGGGAGTGACATAAATACGGCCTTGCTCAATG  
+HWI-EAS443:3:3:1762:1221#0/1  
`b^`aa^\_aa[J[I¥TXT`\_YYVRUIYZTWR^]BBBBBBB  
@HWI-EAS443:3:3:1762:820#0/1  
TGGGGCATGGAATGAGGCGCTGCCTTCTTCAGTCTCTTC

+HWI-EAS443:3:3:1762:820#0/1  
a\_YXUFZR\_a[¥[]]^\_\_KYNK]NNXSPYZPT[ZP^¥ZTB  
@HWI-EAS443:3:3:190:1306#0/1  
AGAAAAATTTGAGATTACAGGAATATGCGCAAGCTTGCC  
+HWI-EAS443:3:3:190:1306#0/1  
ababaa^abba`aa\_aaaaa\_\_a`\_a`a`\_`\_a^\_[\_^^X[  
@HWI-EAS443:3:3:221:99#0/1  
AGAAAGGCATAAATCCCAATTACCTCATGGCTTGGAAGCA  
+HWI-EAS443:3:3:221:99#0/1  
`a`aaaa¥\_a`a`a¥]Y\_\_\_\_]^`\_^¥\_\_\_\_^]¥\_¥\_XYXBB  
@HWI-EAS443:3:3:241:1884#0/1  
CAAGGACAAAGAACATGAAGAGAACAAGCCAATTGAAGTG  
+HWI-EAS443:3:3:241:1884#0/1  
]¥^T¥]¥¥\_abb\_[[X¥\_\_Ua`b`b`bX]aab¥`ba¥MY  
@HWI-EAS443:3:3:266:1599#0/1  
ATCCCAATTACCTCATGGCTTGGAAGCAGGTGCTAGCAGA  
+HWI-EAS443:3:3:266:1599#0/1  
aaaa``aaa`^a`¥a\_¥\_`\_V`\_\_]VYZ\_GQW¥VBBBBB  
@HWI-EAS443:3:3:359:222#0/1  
TCGGCCTCAATCATGCTCTCAATCTGCTGAAGAGACTGAA  
+HWI-EAS443:3:3:359:222#0/1  
[^`aXaXfQ\_aR]`a`\_Z¥aa`\_a\_a\_]X¥SaX`ZGW`[Q  
@HWI-EAS443:3:3:439:1015#0/1  
CTGTAATCTCAAATTTTTCTTCAATTGTCTCTTCGCCTCT  
+HWI-EAS443:3:3:439:1015#0/1  
aa`Z¥¥baV[ab¥baaab\_aaaaba`aa]\_baabba`a¥a  
@HWI-EAS443:3:3:484:1755#0/1  
CAGGCACTCCTCGATTGCTTCATATAGCCCCCAAGATCG  
+HWI-EAS443:3:3:484:1755#0/1  
aaab`ba`\_N`^`b]Zb`\_b¥`a`^a\_VQXHG]\_¥aZBBB  
@HWI-EAS443:3:3:538:233#0/1  
GGGGTTTTCGGCTGAATCGAGAAAATTGCTTCTCATTGTT  
+HWI-EAS443:3:3:538:233#0/1  
ababV\_a[Zaa^a\_\_¥\_aX`]\_\_]V]^`^Y\_Y¥]]XY\_YY  
@HWI-EAS443:3:3:599:69#0/1  
AGGGAATACCACTATATGATGCAATCAAATGCATGAAGAC  
+HWI-EAS443:3:3:599:69#0/1  
^baab^aaaaaH`^baaa`b^aa`a`a`a]a^`aa`aa^G  
@HWI-EAS443:3:3:609:181#0/1  
GAAGATCCCAAGGACAAAGAACATGAAGAGAACAAGCCAA  
+HWI-EAS443:3:3:609:181#0/1  
aaa]]^`\_a`^aa^^\_\_b]\_]\_`^^a\_`^Z`^`[V^^  
@HWI-EAS443:3:3:62:590#0/1  
ATGGCTTGGAAGCAGGTGCTAGCAGAGCTACAGGACATTG  
+HWI-EAS443:3:3:62:590#0/1  
`Ya`a\_aZJV\_KXT\_\_UNRUQNLQXXUGVXTRXYNUBBB  
@HWI-EAS443:3:3:684:1732#0/1  
GCATAGTTCTGTAATCTCAAATTTTTCTTCAATTGTCTC  
+HWI-EAS443:3:3:684:1732#0/1  
```Xa`a`\_a\_S\_aI^WTO]¥\_\_\_\_\_X`\_\_W¥]\_`YXLXKI¥Z

@HWI-EAS443:3:3:689:1198#0/1  
CTGCAAAGATGTTGGAGACCTTAAACAGTATGACAGTGAT  
+HWI-EAS443:3:3:689:1198#0/1  
abbbb¥aabb]\_ab`aa^aaabbaabYbaaaa`b^a`  
@HWI-EAS443:3:3:700:749#0/1  
ATCAGCAGGAACCTTTGACCGCTGATGGCAAAGAGGCCCAT  
+HWI-EAS443:3:3:700:749#0/1  
a\_TaaaZbbZaV\_]\_J`ab^¥\_]¥[aWU^\_¥`Q`aPGF^]  
@HWI-EAS443:3:3:709:1385#0/1  
TACCCCTGTTGTGTACATATACTGTTCAACTGTCCAG  
+HWI-EAS443:3:3:709:1385#0/1  
aa\_Yb^abaabY`a¥aaba^aaa\_0a`[a\_a\_¥L]a`  
@HWI-EAS443:3:3:724:673#0/1  
CATGTTTCCGATTTGTTTTCAAAGAATTCCTTGGTCATGT  
+HWI-EAS443:3:3:724:673#0/1  
P[a`¥bb`aaa`b^bb^`bbbbb¥ab`V`aa``]aaab`  
@HWI-EAS443:3:3:734:652#0/1  
GGCCAAGTGTGAGGCCCATGTTCCCTATATGTGAGAACCA  
+HWI-EAS443:3:3:734:652#0/1  
a`a^X^a\_a^`\_]WV[a\_ZR\_WT¥`\_\_¥\_Y\_^`¥^WG\_  
@HWI-EAS443:3:3:73:1857#0/1  
ACCGAACTTCTCCAGCCTTGAAAACCTTAGAGCCTATGTA  
+HWI-EAS443:3:3:73:1857#0/1  
a`\_^aaaaaa\_aa\_[aa\_aa\_\_R\_\_`aW^\_^]\_`\_\_W^  
@HWI-EAS443:3:3:903:1577#0/1  
GGCCAATCGGAGAGTCACCCAGGGAGTGGAGGAAGGCTC  
+HWI-EAS443:3:3:903:1577#0/1  
`a`Z]XXP[YM]^¥Z¥^Y¥Z]X¥¥S`K^ZN`TVPBBBBB  
@HWI-EAS443:3:3:958:704#0/1  
AAAGAATTCCTTGGTCATGTCTTTCTCTTTGACAGAAGAC  
+HWI-EAS443:3:3:958:704#0/1  
abaa\_^ba\_`bab`¥\_^bba`aab\_b^abb[ZNa`\_\_\_\_B  
@HWI-EAS443:3:40:1066:761#0/1  
ACCACTATATGATGCAATCAAATGCATGAAGACATTCTTT  
+HWI-EAS443:3:40:1066:761#0/1  
aaaa`bababa\_ab`a`a`aaaa\_a^P]``^Z`^a\_^\_  
@HWI-EAS443:3:40:1070:1521#0/1  
CTGGACAGTGGTGAACAGTATATGTAACACAACAGGGGTA  
+HWI-EAS443:3:40:1070:1521#0/1  
\_`¥aabb```Z¥]`ab]a\_\_¥a¥Y\_RXWX``\_ba¥\_¥^]  
@HWI-EAS443:3:40:1072:444#0/1  
CAAGGACAAAGAACATGAAGAGAACAAGCCAATTGAAGTG  
+HWI-EAS443:3:40:1072:444#0/1  
abbbbbbbabbaabaaaaa`Ya\_\_`\_aUa`\_aZ\_  
@HWI-EAS443:3:40:1077:1961#0/1  
CGATTGGCCATGTTTCCGATTTGTTTTCAAAGAATTCCTT  
+HWI-EAS443:3:40:1077:1961#0/1  
`ab\_aba\_aaab]baa\_a^ba````\_Q\_^`^aa\_\_Ya\_  
@HWI-EAS443:3:40:1184:788#0/1  
CACATATAGGAACATGGGCCTCGACACTTGGCCTATCGCA

+HWI-EAS443:3:40:1184:788#0/1  
I[\_a`aa^¥a[abb[]a^\_`aaaaa`\_\_`¥\_\_\_\_\_^bba¥  
@HWI-EAS443:3:40:1230:407#0/1  
ATGGCCAGTAGGAGTCTATGGGATTCCCTTCGTCAGTCCG  
+HWI-EAS443:3:40:1230:407#0/1  
abbb``a[^aa\_a[^aa`ba`^\_`R`^aVXZ`]\_]Y\_\_  
@HWI-EAS443:3:40:1261:1601#0/1  
AAATACGGCCTTGCTCAATGCATCCTGTGCAGCCATGGAT  
+HWI-EAS443:3:40:1261:1601#0/1  
^bbababaaa`a^a[\_`a^`ba\_`¥^W]`\_`aa`^`\_Z[  
@HWI-EAS443:3:40:1288:92#0/1  
ACCGATTTGAGATAATTGAAGGAAGAGACCGAATCATGGC  
+HWI-EAS443:3:40:1288:92#0/1  
a\_abaaaaa`b\_aaaaaa\_aa\_`^]]W]\_VZ]]YZ¥ZW  
@HWI-EAS443:3:40:1296:1863#0/1  
CCCGAATGCACTATTGAAGCACCGATTTGAGATAATTGAA  
+HWI-EAS443:3:40:1296:1863#0/1  
aaababaabaaaaa`aaaaa]aa\_\_\_`a\_\_a[aaa¥]a`  
@HWI-EAS443:3:40:1328:1976#0/1  
ACCCGAGTCACGAGGGGGAGGGAATACCACTATATGATGC  
+HWI-EAS443:3:40:1328:1976#0/1  
ab`aaaa`ba\_aV`aaaaYa\_aaa\_]a]aZ¥^W¥[¥][`V  
@HWI-EAS443:3:40:1373:1280#0/1  
CCCCGTTTCGTCGATGAAATGGAAATCCGAATACATGAAAC  
+HWI-EAS443:3:40:1373:1280#0/1  
a\_bbb\_`a`YO\_abaTTaa`a`a\_W`b\_a\_`ab\_`^`aZR  
@HWI-EAS443:3:40:1376:739#0/1  
ACATGAGAAAAGGCATAAATCCCAATTACCTCATGGCTTGG  
+HWI-EAS443:3:40:1376:739#0/1  
\_¥^ba]babb`a`baaa\_a^T\_aa`\_Zaaa\_a\_\_\_a\_a\_Y  
@HWI-EAS443:3:40:139:669#0/1  
GGGGCATGGAAATGAGGCGCTGCCTTCTTCAGTCTCTCA  
+HWI-EAS443:3:40:139:669#0/1  
a¥WTZX`XZQR¥[^UQZ`¥`Ya`^U[U[U^ZZU[W]NLUS  
@HWI-EAS443:3:40:1439:1821#0/1  
GGGGGCTATATGAAGCAATCGAGGAGTGCCTGATTAATGA  
+HWI-EAS443:3:40:1439:1821#0/1  
a\_`aa`\_aaaa`\_a]aa^\_a^a\_]ZU`aTZ\_`^`\_\_`\_`\_¥  
@HWI-EAS443:3:40:148:1078#0/1  
TGGGGGCTATATGAAGCAATCGAGGAGTGCCTGATTAAT  
+HWI-EAS443:3:40:148:1078#0/1  
`aa¥aa`\_aaaabaaaabaU\_aa\_¥[M^Xa\_`\_`\_]a\_\_  
@HWI-EAS443:3:40:1517:1913#0/1  
TGGGAAAGCTTGCCCTCAATGCAGCCGTTCCGGCTCGAATC  
+HWI-EAS443:3:40:1517:1913#0/1  
[aab`bbaaa[Za\_]\_JW¥\_\_aaaJU]`[]R^^^ZUYVLJ  
@HWI-EAS443:3:40:1579:572#0/1  
CTTTGTAAGTATGGAGTTCTCACTCACTGACCCGAGACTG  
+HWI-EAS443:3:40:1579:572#0/1  
`bbbabbbbbbbbbbbbbbbbbbbbbbbbbbbbbaabb`baa`a

@HWI-EAS443:3:40:1596:169#0/1  
CATATCGCAAGCATGAGGAGGA ACTATTTTACAGCAGAAG  
+HWI-EAS443:3:40:1596:169#0/1  
abbbbabaabbaabbabb`babba`a¥^\_aaa`^`aaaaa  
@HWI-EAS443:3:40:1649:469#0/1  
GGTGA ACTTTGTAAGTATGGAGTTCTCACTCACTGACCCG  
+HWI-EAS443:3:40:1649:469#0/1  
aaNa^`\_\_aa\_Y]\_aT\_aa^¥a[¥W\_`^``WSb¥`¥¥UQZ  
@HWI-EAS443:3:40:1669:1438#0/1  
ATTCTTTGGCTGGAAAGAGCCTAACATAGTCAAACCACAT  
+HWI-EAS443:3:40:1669:1438#0/1  
¥^aX^baY¥Z¥ba]^`TV¥^KaZZ`ROZaRV^][`baXZ]  
@HWI-EAS443:3:40:1692:973#0/1  
TAAATCCCAATTACCTCATGGCTTGGAAAGCAGGTGCTAGC  
+HWI-EAS443:3:40:1692:973#0/1  
aaa\_aaa\_a`a`^`U\_\_\_\_\_`a^``WPMS[RTY¥XX[TUQL  
@HWI-EAS443:3:40:1775:1585#0/1  
CACTGCAGGGCTACTGAATACATAATGAAGGGAGTGTACA  
+HWI-EAS443:3:40:1775:1585#0/1  
`bab`b`ZX^bb[bbbbbb\_bbaa`aa`a\_`b\_bV^aa  
@HWI-EAS443:3:40:186:1618#0/1  
AACAAATCGGAAACATGGCCAATCGGAGAGTCACCCAGGG  
+HWI-EAS443:3:40:186:1618#0/1  
¥T\_abab`RPW\_`a\_ZW¥¥`a\_a`UKZM[SZ]\_baYYVP  
@HWI-EAS443:3:40:192:1785#0/1  
ATCATGGCCTGGACAGTGGTGAACAGTATATGTAACACAA  
+HWI-EAS443:3:40:192:1785#0/1  
a\_baa^`aa`¥P]¥a\_[Z\_Y¥\_Z]¥[Wa¥a][Y`a`V]`  
@HWI-EAS443:3:40:229:1966#0/1  
TG TAGCTCTGCTAGCACCTGCTTCCAAGCCATGAGGTAAT  
+HWI-EAS443:3:40:229:1966#0/1  
Z^^¥I`\_`RV][R\_a\_\_aY¥[Y[\_YHLWa`\_[YZ^\_TYRV  
@HWI-EAS443:3:40:22:1750#0/1  
GGGGGCTATATGAAGCAATCGAGGAGTGCCTGATTAATGA  
+HWI-EAS443:3:40:22:1750#0/1  
ZH^T^a[^a\_XX`\_V]^]¥^][Z][PGXZ`^XXYXXYYY¥  
@HWI-EAS443:3:40:244:470#0/1  
GCAGGTGCTAGCAGAGCTACAGGACATTGAAAATGAAGAG  
+HWI-EAS443:3:40:244:470#0/1  
a\_V]]Y^^\_Y\_ZQY]\_] ^]¥]Y]XYV]YU]Y]XVVRW]Z  
@HWI-EAS443:3:40:254:625#0/1  
CACACATTTGGAAGTTTGTTCATGTATTCCGATTTCCAT  
+HWI-EAS443:3:40:254:625#0/1  
a\_`]]Y`a^^^¥GZU¥aa\_\_\_\_a[`YXL¥XY^`\_YVV]YHY  
@HWI-EAS443:3:40:314:924#0/1  
CAAGAAATGGCCAGTAGGAGTCTATGGGATTCCTTTTCGTC  
+HWI-EAS443:3:40:314:924#0/1  
a\_bba[[`\_abbabbX\_\_`bb`bbaba\_^RY`ab\_]`a\_T]  
@HWI-EAS443:3:40:391:361#0/1  
GGGGGCTATATGAAGCAATCGAGGAGTGCCTGATTAATGA

+HWI-EAS443:3:40:391:361#0/1  
ab`aaa`a`a`a`aa\_`Z¥aa\_aa^`X`\_^W`]]Y\_^]\_  
@HWI-EAS443:3:40:400:1353#0/1  
CCCCTGTTGTGTACATATACTGTTCACTGTCCAGGC  
+HWI-EAS443:3:40:400:1353#0/1  
aababb``\_a`aa`aaaY\_^``^^`¥H^ba[a`Wba^[R\_  
@HWI-EAS443:3:40:424:1821#0/1  
GCCTGGACAGTGGTGAACAGTATATGTAACACAACAGGGG  
+HWI-EAS443:3:40:424:1821#0/1  
a^MW[TY\_¥]VPVYa`a^¥a]a]Z[[U[0¥[^ZZY[^^[Q  
@HWI-EAS443:3:40:427:1466#0/1  
ATTTGGGAAAGCTTCCCCTCAATGCAGCCGTTCCGGCTCGA  
+HWI-EAS443:3:40:427:1466#0/1  
aaaa`aa`aa`a^aa\_`^a`W¥\_a`¥a`\_¥X^¥¥\_X¥WS  
@HWI-EAS443:3:40:452:719#0/1  
GTGGGAGACTTTGGTCGGCAAGCTTGCGCATAGTTCCTGT  
+HWI-EAS443:3:40:452:719#0/1  
`Ra][`G`¥\_^UOUOZO\_Y^[aZZXXOTZRWYUZS]U]U  
@HWI-EAS443:3:40:479:1729#0/1  
AGAACACAGTATTTTTCCCATTGTGTGGCTCCAGTCTCG  
+HWI-EAS443:3:40:479:1729#0/1  
^aTabba`PYaa`aa^aaa]^`¥[Y`Vaa`^ORK^Q]N  
@HWI-EAS443:3:40:494:650#0/1  
GGTGTTCATAGTGCATTCGGGTCACCAGATTCTACAAT  
+HWI-EAS443:3:40:494:650#0/1  
abHa`a`^¥YY¥XQ\_`a\_Y]Qa\_0\_\_^¥GTRR][YYPY]GX  
@HWI-EAS443:3:40:539:1464#0/1  
GACTGACGAAAGGAATCCCATAGACTCCTACTGGCCATTT  
+HWI-EAS443:3:40:539:1464#0/1  
a]a``\_a^aaa[^`^`a¥aa\_a^^\_``]a^^\_]a\_XY¥Y  
@HWI-EAS443:3:40:740:479#0/1  
CGACACTTGGCCTATCGCAGTCCTCAAGAGCATGTCTCCT  
+HWI-EAS443:3:40:740:479#0/1  
a`baabaaab\_`^baabaaa]a``a\_P\_I`\_^``^a^``¥  
@HWI-EAS443:3:40:757:79#0/1  
GCGCATAGTTCCTGTAATCTCAAATTTTTCTTCAATTGTC  
+HWI-EAS443:3:40:757:79#0/1  
a][[^a[^`Z\_WX\_\_ZZ]^X]]ZSS]^Z\_UW¥WWWUXYXXW  
@HWI-EAS443:3:40:782:589#0/1  
ATTCTTTGGCTGGAAAGAGCCTAACATAGTCAAACCACAT  
+HWI-EAS443:3:40:782:589#0/1  
aaaabaaaaabaaaa`aaaaabXaXa\_\_`a`Raa\_[P]  
@HWI-EAS443:3:40:786:526#0/1  
AAGAGACCGAATCATGGCCTGGACAGTGGTGAACAGTATA  
+HWI-EAS443:3:40:786:526#0/1  
``baaaaaba`a]]``a\_aaa`\_\_^]R]\_]\_^[\_`\_\_Y\_^\_  
@HWI-EAS443:3:40:80:338#0/1  
GCCGAAAACCCCTCAAGTTGTGGAGACGCATATAGACTGT  
+HWI-EAS443:3:40:80:338#0/1  
aaa`¥IXZ\_\_^`^][^^Q[[R][\_\_¥ZRXZZNXQSPSZSN

@HWI-EAS443:3:40:814:1233#0/1  
GACCGAATCATGGCCTGGACAGTGGTGAACAGTATATGTA  
+HWI-EAS443:3:40:814:1233#0/1  
\_aaZJV]`a`a]\_a\_\_`[\_UZZRNZRKSTVNT^^T¥UX  
@HWI-EAS443:3:40:867:1212#0/1  
CGAACTTCTCCAGCCTTGAAAACCTTTAGAGCCTATGTAGA  
+HWI-EAS443:3:40:867:1212#0/1  
aaa\_bab^[W]aaaa\_T^ZaU`YXZ]Va\_`^\_\_\_UZ[`  
@HWI-EAS443:3:40:886:64#0/1  
GGCTGCACAGGATGCATTGAGCAAGGCCGTATTTATGTAC  
+HWI-EAS443:3:40:886:64#0/1  
a^^]\_]XXX]YYX^¥XYXYXYXYXYXQSPWYVWVUWQ  
@HWI-EAS443:3:40:93:1274#0/1  
TTTCGGCTGAATCGAGAAAATTGCTTCTCATTGTTTCAGGC  
+HWI-EAS443:3:40:93:1274#0/1  
\_V]¥¥`babbbab\_K`\_XYUVZR]]`\_\_[JUUVFV`\_Y¥Z  
@HWI-EAS443:3:40:974:514#0/1  
CAATAATTGTAGAATCTGGTGACCCGAATGCACTATTGAA  
+HWI-EAS443:3:40:974:514#0/1  
aaaa]^a\_b`^`\_V^`[^b\_baba`N\_WVZa^X\_SZbaa  
@HWI-EAS443:3:42:1015:1292#0/1  
AGCAGGTGCTAGCAGAGCTACAGGACATTGAAAATGAAGA  
+HWI-EAS443:3:42:1015:1292#0/1  
a`````\_aabaaaa`\_aa`aa^]^^¥\_a\_^``a^``\_  
@HWI-EAS443:3:42:101:1133#0/1  
GCATGGAAATGAGGCGCTGCCTTCTTCAGTCTCTTCAGCA  
+HWI-EAS443:3:42:101:1133#0/1  
a\_[Q\_] ^W]^VVTa[aY`¥\_T]^X`Y[VU[¥V\_]Z]]R  
@HWI-EAS443:3:42:101:947#0/1  
CACGAGGGGGAGGGAATACCACTATATGATGCAATCAAAT  
+HWI-EAS443:3:42:101:947#0/1  
abb\_[^bab`Yaaaa`a`abaa`aaaba`a`aaaa¥0^`  
@HWI-EAS443:3:42:1059:395#0/1  
GCGCATAGTTCTGTAATCTCAAATTTTTCTTCAATTGTC  
+HWI-EAS443:3:42:1059:395#0/1  
aabaaa`b^aaaab`ababaa`abbabaaaa`^aaa`a  
@HWI-EAS443:3:42:1086:1778#0/1  
CAAGGACAAAGAACATGAAGAGAACAAGCCAATTGAAGTG  
+HWI-EAS443:3:42:1086:1778#0/1  
`bb`baaaaaa`aab`abb\_ba`baa]`a```\_aaaU¥  
@HWI-EAS443:3:42:1095:1297#0/1  
AATGGCCAGTAGGAGTCTATGGGATTCCTTTCGTGAGTCC  
+HWI-EAS443:3:42:1095:1297#0/1  
\_abVabb`^Yb`\_`aHa`abVZaabY[abb^^Z^[RR]]  
@HWI-EAS443:3:42:1097:1186#0/1  
GGCATGGAAATGAGGCGCTGCCTTCTTCAGTCTCTTCAGC  
+HWI-EAS443:3:42:1097:1186#0/1  
aa`aabaaaaabaaa`b`aa`aaaaaaa`aZ]a\_`aZ[¥¥  
@HWI-EAS443:3:42:1127:1288#0/1  
ATTCATCGACGAACGGGGTGAATCAATAATTGTAGAATC

+HWI-EAS443:3:42:1127:1288#0/1  
R¥^aabbbbb[V^`\_a`TUZQ\_]\_W\_UU^]\_Z\_\_\_\_`^X  
@HWI-EAS443:3:42:1210:323#0/1  
CTCTTCATGTTCTTTGTCCTTGGGATCTTCTTCATTTT  
+HWI-EAS443:3:42:1210:323#0/1  
a``bZ`bbaa^ab`bbabbbbbbab\_baab\_bbb`bbab  
@HWI-EAS443:3:42:1252:1799#0/1  
CATTCTTTGGCTGGAAAGAGCCTAACATAGTCAAACCACA  
+HWI-EAS443:3:42:1252:1799#0/1  
\_aaa`^aa`U`aXIaZ`b`aa]baa^¥b\_\_\_\_``aba[^`a  
@HWI-EAS443:3:42:1304:1329#0/1  
GTCAATTCACATGCCTTATTGAATTCATTTTGGACCCAGC  
+HWI-EAS443:3:42:1304:1329#0/1  
a`aabaaa\_ba`aaba`aaa`aaa^aabaa\_Z\_`a^\_\_¥  
@HWI-EAS443:3:42:1311:191#0/1  
CTCCCCTGGGTGACTCTCCGATTGGCCATGTTTCCGATTT  
+HWI-EAS443:3:42:1311:191#0/1  
abaabbbba]aaaaa]^^`a`\_a\_\_aW`a\_Z^P```  
@HWI-EAS443:3:42:1342:1597#0/1  
AGCAGGTGCTAGCAGAGCTACAGGACATTGAAAATGAAGA  
+HWI-EAS443:3:42:1342:1597#0/1  
SS`^a\_SY\_¥¥aaXM^`XabaaZZ[^]Z\_TX\_aaaa`a^  
@HWI-EAS443:3:42:1381:1143#0/1  
GGTGAACCTTTGTAAGTATGGAGTTCTCACTCACTGACCCG  
+HWI-EAS443:3:42:1381:1143#0/1  
aaY][`\_a`a]\_\_]U\_\_^\_[ZY\_\_`]Z`\_]Y^`]\_^WW  
@HWI-EAS443:3:42:1440:876#0/1  
GACATTCTTTGGCTGGAAAGAGCCTAACATAGTCAAACCA  
+HWI-EAS443:3:42:1440:876#0/1  
aa^`\_a\_a\_`\_`Yaa\_Z^\_Z^¥Z\_]^^`XX^\_\_^XY  
@HWI-EAS443:3:42:1455:14#0/1  
GGCATGTGAATTGACTGATTCAAGCTGGATAGAACTTGAT  
+HWI-EAS443:3:42:1455:14#0/1  
a`¥LW`W`Z^```]Z\_aX¥^¥VW¥U]\_\_]^¥]VXOZ^]Y[  
@HWI-EAS443:3:42:1483:84#0/1  
TGAGAAGCAATTTTCTCGATTGAGCCGAAAACCCCTCAAG  
+HWI-EAS443:3:42:1483:84#0/1  
abababaaaaabab`aaa\_aa\_aa\_`b\_`\_`^\_¥a\_\_^a  
@HWI-EAS443:3:42:1529:988#0/1  
GAATTCAATAAGGCATGTGAATTGACTGATTCAAGCTGGA  
+HWI-EAS443:3:42:1529:988#0/1  
a\_^ab]baa\_aba`aaa\_``\_aaa`\_aaaa\_a^a\_aaaX  
@HWI-EAS443:3:42:1541:1556#0/1  
GTTTGTTCCTTCCTTCTTTGGTCCTACATTTGCTT  
+HWI-EAS443:3:42:1541:1556#0/1  
^H^UONZYYSUV[SSZQU[XRU¥SSONSSVRZWTWY][[¥T  
@HWI-EAS443:3:42:1598:529#0/1  
CCTCAAGAATGGTTCAATTTTGGCGTTCACCTCTTTTGAC  
+HWI-EAS443:3:42:1598:529#0/1  
H\_``ZZb```\_][Y¥V\_¥\_`````aabaa`aa[G]bbaXJG



@HWI-EAS443:3:42:1660:638#0/1  
GGGAGACTTTGGTCGGCAAGCTTGCGCATAGTTCCTGTAA  
+HWI-EAS443:3:42:1660:638#0/1  
abb`b`aabab]aa`baaaa`aaaUaa``aa``^aaZZ\_  
@HWI-EAS443:3:42:1668:1645#0/1  
GGCACTCGGTGAAAATATGGCACCAGAAAAAGTAGACTTT  
+HWI-EAS443:3:42:1668:1645#0/1  
a\_U\_bba`[^QX^¥aa\_Y`Z¥MTL[\_¥^`¥[\_N]YZ[S[^  
@HWI-EAS443:3:42:1722:232#0/1  
GGGGTAGAGAAGCCTAAATTTCTTCCTGATTTGTATGATT  
+HWI-EAS443:3:42:1722:232#0/1  
ab\_]V`a\_a```YY`^^^`\_\_X^\_UU]¥Y\_\_\_\_\_Z]`\_Z^X  
@HWI-EAS443:3:42:1778:1616#0/1  
ATTTGAGAAATGATACTGATGTGGTGAACCTTTGTAAGTAT  
+HWI-EAS443:3:42:1778:1616#0/1  
abaX^`^a`aaaaa\_`a\_a`Wa[^aa^¥\_aaR^\_^\_\_\_\_[  
@HWI-EAS443:3:42:235:349#0/1  
AACTAGGCTTTTCACTATAAGACAAGAAATGGCCAGTAGG  
+HWI-EAS443:3:42:235:349#0/1  
abaY\_\_\_\_]Y`\_\_X]WXRZ```WNQYZWM]ZXZNY\$OKVT  
@HWI-EAS443:3:42:266:925#0/1  
CGATTGGCCATGTTTCCGATTTGTTTTCAAAGAATTCCTT  
+HWI-EAS443:3:42:266:925#0/1  
abaa\_aaaa¥a`^`^Va\_V\_a`aX`\_Z[\_`¥]`^a\_^Z`^  
@HWI-EAS443:3:42:269:1408#0/1  
TGCATCCTGTGCAGCCATGGATGACTTTTCAGCTGATCCCA  
+HWI-EAS443:3:42:269:1408#0/1  
ab¥\_abaa[aabab[]aab\_]b¥b`\_aaaaU``aba``  
@HWI-EAS443:3:42:286:1081#0/1  
GGGGGCTATATGAAGCAATCGAGGAGTGCCTGATTAATGA  
+HWI-EAS443:3:42:286:1081#0/1  
T\_````aY`Wababb\_Xa`abaa`a`]abbabba]a`a^`  
@HWI-EAS443:3:42:383:1668#0/1  
CTTGCTAGAGATCTGGGCTCTGGCTCATCACTGTCATACT  
+HWI-EAS443:3:42:383:1668#0/1  
abbbbbbbbabbbb`bbabbbbaabbbabbbab`\_\_abbb  
@HWI-EAS443:3:42:452:789#0/1  
CAATGAGAAGCAATTTTCTCGATTTCAGCCGAAAACCCCTC  
+HWI-EAS443:3:42:452:789#0/1  
^abbbbbbbba\_[abbbababbbabbbbaabbb\_ba`¥bba  
@HWI-EAS443:3:42:456:1611#0/1  
GGGGGCTATATGAAGCAATCGAGGAGTGCCTGATTAATGA  
+HWI-EAS443:3:42:456:1611#0/1  
`QSZ]a]a``^a```¥aa\_[`0`¥UU¥\_a\_[[Z\_]UZV`]  
@HWI-EAS443:3:42:490:954#0/1  
AATGAAGGGAGTGACATAAATACGGCCTTGCTCAATGCA  
+HWI-EAS443:3:42:490:954#0/1  
WR`¥I\_b```\_]a]`a`R\_a\_`]\_\_aaX[^a]^`V]`a^  
@HWI-EAS443:3:42:630:1078#0/1  
AGCAGAGCTACAGGACATTGAAAATGAAGAGAAGATCCCA

+HWI-EAS443:3:42:630:1078#0/1  
aaa[a\_T\_`ZXQaa]aa`aXT¥[T^aa`a\_\_U[]][PZ^Y`  
@HWI-EAS443:3:42:675:817#0/1  
GGGGCATGGAAATGAGGCGCTGCCTTCTTCAGTCTCTTCA  
+HWI-EAS443:3:42:675:817#0/1  
abbabbaabaabbbbaabbaaaa`ab`ba`]aa\_aaaaa`  
@HWI-EAS443:3:42:786:429#0/1  
ATCGACGAACGGGGTGAATCAATAATTGTAGAATCTGGTG  
+HWI-EAS443:3:42:786:429#0/1  
abb¥Q]aa`]\_``Ua]ZYJ]`Y`[a`¥]```VYFT`aG\_  
@HWI-EAS443:3:42:863:444#0/1  
GGCATGGAAATGAGGCGCTGCCTTCTTCAGTCTCTTCAGC  
+HWI-EAS443:3:42:863:444#0/1  
abaaabb``\_abaaaaa`aa\_¥^aa^^^`\_`\_\_a]\_a¥  
@HWI-EAS443:3:42:879:1136#0/1  
GGCTCCAGTCTCGGGTCAGTGAGTGAGAACTCCATACTTA  
+HWI-EAS443:3:42:879:1136#0/1  
abaaa`\_¥S\_]`[ZSM[XXQ]W[PUX^]`[`ZNQ¥¥X`[J  
@HWI-EAS443:3:42:889:777#0/1  
TCTTTGCAGTCATCAAAGTCTACTTTTTCTGGTGCCATAT  
+HWI-EAS443:3:42:889:777#0/1  
aabaaa]\_¥[a`a\_a\_\_UYaZa``aaa\_a]YXa]`a`Ya  
@HWI-EAS443:3:42:912:620#0/1  
TGTTCCACTGTCCAGGCCATGATTCGGTCTCTTCCTTC  
+HWI-EAS443:3:42:912:620#0/1  
abM`ababa`\_[[[`¥`[\_Y]]\_Y^¥X]]XYMHO[GQ[\_X  
@HWI-EAS443:3:42:942:448#0/1  
CCTCAAGTTGTGGAGACGCATATAGACTGTTGAATACAGA  
+HWI-EAS443:3:42:942:448#0/1  
aa]\_XN`[^V0^Y``]aa\_^^`\_ZVUS^\_[ITVDVVQQMN  
@HWI-EAS443:3:43:1000:1234#0/1  
GAACCTTTGTAAGTATGGAGTTCTCACTCACTGACCCGAGA  
+HWI-EAS443:3:43:1000:1234#0/1  
`Ub`b`^aT`\_]\_b^ba`[aaaabbaba\_aba\_a^b\_aa  
@HWI-EAS443:3:43:1144:1131#0/1  
CTGATTCAAGCTGGATAGAATTGATGAAATAGGAGAAGA  
+HWI-EAS443:3:43:1144:1131#0/1  
abb\_bba`aa^ba]\_ab`a¥0\_abaab`\_aba\_a`a\_``\_  
@HWI-EAS443:3:43:1158:1395#0/1  
CACCTGCTTCCAAGCCATGAGGTAATTGGGATTTATGCCT  
+HWI-EAS443:3:43:1158:1395#0/1  
a[bbbbbababbbb`bab`¥``]`[\_aa\_aababbaa\_Wa  
@HWI-EAS443:3:43:1188:833#0/1  
CTTCTCCACTCCCCTGGGTGACTCTCCGATTGGCCATGT  
+HWI-EAS443:3:43:1188:833#0/1  
abbbbbabbbbbbb^bbbbbb]bbbbababbaaab\_aabaa  
@HWI-EAS443:3:43:11:1242#0/1  
GGGCACTCGGTGAAAATATGGCACCAGAAAAAGTAGACTT  
+HWI-EAS443:3:43:11:1242#0/1  
ababaaabaaX`YW]aa`¥XZ^¥a`X\_¥][^]XQ`Z^[[Z



+HWI-EAS443:3:43:1643:1148#0/1  
aaa`b^bb`a]aa^\_aaa\_\_\_^^a\_\_\_¥` `a^]`^]`^` ZW  
@HWI-EAS443:3:43:1650:1317#0/1  
AATTGAAGGAAGAGACCGAATCATGGCCTGGACAGTGGTG  
+HWI-EAS443:3:43:1650:1317#0/1  
^IaabaaYaaa[\_`a]\_\_X^RGNSXKPOXLSF0¥ZQT]VU  
@HWI-EAS443:3:43:1657:275#0/1  
CATCGACGAACGGGTGAATCAATAATTGTAGAATCTGGT  
+HWI-EAS443:3:43:1657:275#0/1  
abb]aa`aaa`ba¥`S]Z\_]XZ\_`¥]`aa]Z[[`^R[``Y  
@HWI-EAS443:3:43:1735:971#0/1  
CAGTCATCAAAGTCTACTTTTTCTGGTGCCATATTTTCAC  
+HWI-EAS443:3:43:1735:971#0/1  
a^XX^\_bb`WGUJZ`Z¥\_`]YT^¥\_WQ\_]a`^Ua`\_]\_X¥[  
@HWI-EAS443:3:43:1748:1761#0/1  
CAGAGCCCAGATCTCTAGCAAGCTGGGTCCAAAATGAATT  
+HWI-EAS443:3:43:1748:1761#0/1  
a`]a`aaaaa`R\_¥\_aaaZ]a^`a`\_XT\_W`^\_]`\_]`  
@HWI-EAS443:3:43:1754:553#0/1  
ATTCGAGCCGAACGGCTGCATTGAGGGCAAGCTTTCCCAA  
+HWI-EAS443:3:43:1754:553#0/1  
a`]a^a` ```aaaYa`\_`¥T]Z]RXX]XIN]XRU[[LTQVY  
@HWI-EAS443:3:43:227:1071#0/1  
TGTCCAGGCCATGATTGGTCTCTTCCTTCAATTATCTCA  
+HWI-EAS443:3:43:227:1071#0/1  
aa[b`aaaaa]aYQ[\_aSHU¥\_\_`\_\_[[` ```[[V^[]Y]  
@HWI-EAS443:3:43:286:84#0/1  
CATGATTCGGTCTCTTCCTTCAATTATCTCAAATCGGTGC  
+HWI-EAS443:3:43:286:84#0/1  
\_bbbabbaab^a\_aab`\_`a^\_[aa\_`¥]]Z``S]]XO\_W  
@HWI-EAS443:3:43:293:1891#0/1  
CCCGAATGCACTATTGAAGCACCGATTTGAGATAATTGAA  
+HWI-EAS443:3:43:293:1891#0/1  
]b`aY`aa]baaaba[`b]aaaaaaaa`YZaaa`aaaa\_  
@HWI-EAS443:3:43:360:1153#0/1  
GGGCACTCGGTGAAAATATGGCACCGAAAAGTAGACTT  
+HWI-EAS443:3:43:360:1153#0/1  
abb`aabbbbR`]aa` `a`U` [a^a\_` `¥GNaws\_[YW^R  
@HWI-EAS443:3:43:409:813#0/1  
CATGAAGACATTCTTTGGCTGGAAAGAGCCTAACATAGTC  
+HWI-EAS443:3:43:409:813#0/1  
abbbbbbbbabbaaabbbabb`abbaaaaaab`aaaa`a  
@HWI-EAS443:3:43:429:806#0/1  
GAACCTTGTAAAGTATGGAGTTCTCACTCACTGACCCGAGA  
+HWI-EAS443:3:43:429:806#0/1  
aab\_aaab[aab\_a¥`a]a\_a`\_`a\_a\_]Ya^aa^\_` [a\_  
@HWI-EAS443:3:43:452:1202#0/1  
CACTGTCATACTGTTAAGGTCTCCAACATCTTTGCAGTC  
+HWI-EAS443:3:43:452:1202#0/1  
^¥a` `¥`^aba`a`b` `]`aSbb`b\_b\_babbbaw\_aa`b

@HWI-EAS443:3:43:517:1312#0/1  
GGGGCATGAAATGAGGCGCTGCCTTCTTCAGTCTCTTCA  
+HWI-EAS443:3:43:517:1312#0/1  
aJV[a`a^W\_\_\_aQ^H^N\_^VV]YV`¥`YSZUSWNS¥  
@HWI-EAS443:3:43:524:1363#0/1  
AAAAGGAAGGTCTCATTTGAGAAATGATACTGATGTGGTG  
+HWI-EAS443:3:43:524:1363#0/1  
]¥Y^\_aaa`]¥`^ab`aa\_aabaaa`ba``bb¥S\_a¥^  
@HWI-EAS443:3:43:569:1705#0/1  
CGATTGCCATGTTTCCGATTTGTTTTCAAAGAATTCCTT  
+HWI-EAS443:3:43:569:1705#0/1  
`aaa`Zaa`aa]\_abaab`ababWaab`aab`a`aa]`aa  
@HWI-EAS443:3:43:590:1555#0/1  
GGGCACTCGGTGAAAATATGGCACCAGAAAAAGTAGACTT  
+HWI-EAS443:3:43:590:1555#0/1  
aa`ba`b\_b]^TU\_]a`^\_aa\_aaa^¥Yaa`\_^^`a`\_`\_¥  
@HWI-EAS443:3:43:595:142#0/1  
TGTGGACTTCCCTCCGTGTTACTCCAATTTCAATGAACCG  
+HWI-EAS443:3:43:595:142#0/1  
ab]baa`aaa`\_aab]a^\_a]\_]\_a¥¥a^^^Z`\_`¥V`  
@HWI-EAS443:3:43:622:460#0/1  
CCCTGTTGTGTACATATACTGTTCACTGTCCAGGCC  
+HWI-EAS443:3:43:622:460#0/1  
`bbbbabb`b\_baa`bbaabb\_aaaaaaaaa\_aa`a\_a^  
@HWI-EAS443:3:43:648:554#0/1  
CAATAATTGTAGAATCTGGTGACCCGAATGCACTATTGAA  
+HWI-EAS443:3:43:648:554#0/1  
`Y`YRK^ab`ZXaZ^]VY]``]Ya\_VR\_]\_^ZW¥ZR^  
@HWI-EAS443:3:43:685:460#0/1  
AGCAGGTGCTAGCAGAGCTACAGGACATTGAAAATGAAGA  
+HWI-EAS443:3:43:685:460#0/1  
aaaa`a]aaaa`ab\_aaa`aa`\_aaaa\_````\_`a`  
@HWI-EAS443:3:43:702:156#0/1  
ATTCATCGACGAACGGGTGAATCAATAATTGTAGAATC  
+HWI-EAS443:3:43:702:156#0/1  
aabaaaaabaaa`W^\_a\_Y\_\_`\_YZ[\_]\_\_`UT\_^\_]U  
@HWI-EAS443:3:43:887:61#0/1  
ATCTACATAGGCTCTAAAGTTTTCAAGGCTGGAGAAGTTC  
+HWI-EAS443:3:43:887:61#0/1  
ab`baa[aZ`abbabZ¥Z^V`a^UXZ^`Q[\_¥D¥HZ[RWM  
@HWI-EAS443:3:43:990:987#0/1  
TAGAGATCTGGGCTCTGGCTCATCACTGTCATACTGTTTA  
+HWI-EAS443:3:43:990:987#0/1  
aabaaaaabaaa`a`aa`aa`aaa`\_`\_`a]^\_aY]\_\_  
@HWI-EAS443:3:44:1035:888#0/1  
AATTCACATGCCTTATTGAATTCATTTTGGACCCAGCTTG  
+HWI-EAS443:3:44:1035:888#0/1  
aabaab`aaaabbbaa`a`]aa`aa`a`\_`^a\_]````\_`  
@HWI-EAS443:3:44:105:1953#0/1  
ATCGCAAGCATGAGGAGGAAGTATTTTACAGCAGAAGTGT

+HWI-EAS443:3:44:105:1953#0/1  
\_a`^`T¥X¥`b[a¥¥\_[abP^a\_¥b`\_`aY\_\_N^\_[]U\_  
@HWI-EAS443:3:44:1102:1444#0/1  
CTCCAGCCTTGAAAACCTTAGAGCCTATGTAGATGGATTC  
+HWI-EAS443:3:44:1102:1444#0/1  
I\_¥\_bbaTa`b`¥¥a`\_[\_\_U\_ZVX`\_\_`Xab[M[bZG\_Y  
@HWI-EAS443:3:44:1129:613#0/1  
GTCCAGGCCATGATTCCGGTCTCTTCCTTCAATTATCTCAA  
+HWI-EAS443:3:44:1129:613#0/1  
a``\_aaaaaa^aaaa[^a]aa\_a`\_\_aa\_[\_aa`aa`]\_\_  
@HWI-EAS443:3:44:1160:583#0/1  
GGGCAAGCTTCCCAAATGTCAAAGAAGTGAACGCCAAA  
+HWI-EAS443:3:44:1160:583#0/1  
a`a`\_ZZ)`a`a^^a[^`b^\_a¥^Xa]a\_Y¥X¥U`]^)]^  
@HWI-EAS443:3:44:1174:589#0/1  
GGGGCATGGAAATGAGGCGCTGCCTTCTTCAGTCTCTTCA  
+HWI-EAS443:3:44:1174:589#0/1  
aaba\_a`bbaa\_ab``\_]a`aa]\_`a\_aa\_`a^¥\_\_\_`UZ  
@HWI-EAS443:3:44:1209:1935#0/1  
GCGTCTCCACAACCTTGAGGGGTTTTCGGCTGAATCGAGAA  
+HWI-EAS443:3:44:1209:1935#0/1  
`aba`aa\_a^\_a\_aaa\_`aaaT\_\_\_Z[a]\_\_\_a`\_YXY\_\_\_  
@HWI-EAS443:3:44:1256:1423#0/1  
GTTTCCGATTTGTTTTCAAAGAATTCCTTGGTCATGTCTT  
+HWI-EAS443:3:44:1256:1423#0/1  
\_`aaa`b`Zaaba`baaa]aa^Raa][aab`YS[\_a]\_a`  
@HWI-EAS443:3:44:1269:825#0/1  
GGGGGGCTATATGAAGCAATCGAGGAGTGCCTGATTAATG  
+HWI-EAS443:3:44:1269:825#0/1  
a`^V[X)`^^^`\_[RU]^^^^U]ZT^N\_Z[ZRTYWUWW  
@HWI-EAS443:3:44:1280:1057#0/1  
GATGCTCTGAAATTAAGTATTGAAGACCCGAGTCACGAGG  
+HWI-EAS443:3:44:1280:1057#0/1  
a`\_Yaa`Z\_Z[\_^a`]Naaaaa^^X`^\_Z\_UZ\_\_a]\_`  
@HWI-EAS443:3:44:1332:830#0/1  
ACCGATTTGAGATAATTGAAGGAAGAGACCGAATCATGGC  
+HWI-EAS443:3:44:1332:830#0/1  
a\_aa^aaaa^aa\_aaa`a[¥`\_^`^^`^^a]^\_`\_^`^W  
@HWI-EAS443:3:44:1352:1025#0/1  
CACAACCTTGAGGGTTTTCGGCTGAATCGAGAAAATTGCT  
+HWI-EAS443:3:44:1352:1025#0/1  
a``aaabaaababa^baaa\_a``aaa`Z`\_`\_^`^^`^R`  
@HWI-EAS443:3:44:1531:952#0/1  
CATAAATACGGCCTTGCTCAATGCATCCTGTGCAGCCATG  
+HWI-EAS443:3:44:1531:952#0/1  
`Va\_a]a`\_]UYa\_`a¥\_^ZRRYVY^^¥\_\_V^WUY¥[[V¥  
@HWI-EAS443:3:44:1566:1881#0/1  
TGCAGTGGGACACTTCTGCTGTAAAATAGTTCCTCCTCAT  
+HWI-EAS443:3:44:1566:1881#0/1  
[^^^X¥¥WQR`abbbabZaaS^]a`¥aa\_a]SNYTS\_\_a\_

@HWI-EAS443:3:44:1571:67#0/1  
AATGCATCCTGTGCAGCCATGGATGACTTTCAGCTGATCC  
+HWI-EAS443:3:44:1571:67#0/1  
aa^^`^a[`¥Ua]\_YUUXY`^P¥]^S^^^¥aYU`¥[QT  
@HWI-EAS443:3:44:1585:119#0/1  
CTGAAAGTCATCCATGGCTGCACAGGATGCATTGAGCAAG  
+HWI-EAS443:3:44:1585:119#0/1  
aa` `babaab`aab¥^^aZa¥S\_V¥ZUQVZY\_ZT]OZ[L  
@HWI-EAS443:3:44:1593:1975#0/1  
GCCTTCTCCACTCCCCTGGGTGACTCTCCGATTGGCCAT  
+HWI-EAS443:3:44:1593:1975#0/1  
aZa`aVZ\_`^]\_` [RU¥S[VQJVSMRWULSVBBBBBBBBB  
@HWI-EAS443:3:44:159:1028#0/1  
CATGAAATGAGGCGCTGCCTTCTTCAGTCTTTCAGCAG  
+HWI-EAS443:3:44:159:1028#0/1  
aaabbaaaba[aa`a` `aa`^aa`aa^\_\_`aU`^[[\_  
@HWI-EAS443:3:44:1702:971#0/1  
GGGGCATGAAATGAGGCGCTGCCTTCTTCAGTCTTCA  
+HWI-EAS443:3:44:1702:971#0/1  
aXa`^UT\_TXTQ]`G\_¥^a¥W`W¥V¥VX[WM^TSSQWVMG  
@HWI-EAS443:3:44:1703:255#0/1  
GAGGGTTTTTCGGCTGAATCGAGAAAATTGCTTCTCATTG  
+HWI-EAS443:3:44:1703:255#0/1  
\_¥\_UUTRaa`Ga^`ab^TaXa]]]\_\_\_\_`\_U[NFY]]]]^  
@HWI-EAS443:3:44:269:293#0/1  
CTCCTCGATTGCTTCATATAGCCCCCAAGATCGAAGGTT  
+HWI-EAS443:3:44:269:293#0/1  
`a`ababaaaaaaa\_aaaaba`^]^` [a\_]ZV[\_aa`SY  
@HWI-EAS443:3:44:298:242#0/1  
GAATACCATATATGATGCAATCAAATGCATGAAGACATT  
+HWI-EAS443:3:44:298:242#0/1  
aaaaaaaa\_aaaaab`\_a\_a`\_aa^\_a`a\_aa\_a`\_`\_`\_  
@HWI-EAS443:3:44:319:395#0/1  
GTGGGAGACTTTGGTCGGCAAGCTTGCGCATAGTTCCTGT  
+HWI-EAS443:3:44:319:395#0/1  
a`ba`^b`^aaa`]¥`¥¥aa`\_\_\_\_`^a`\_`^\_W\_\_^^\_Y  
@HWI-EAS443:3:44:470:749#0/1  
AAAGAATTCCTTGGTCATGTCTTTCTTTTGACAGAAGAC  
+HWI-EAS443:3:44:470:749#0/1  
^\_\_aa\_baba`bab[`aaaP`aa\_a\_]`a`]¥\_\_`a`XDM  
@HWI-EAS443:3:44:495:355#0/1  
CAGATTTTGCAGTAAGGTCCTGCACACTTCCCAATAGA  
+HWI-EAS443:3:44:495:355#0/1  
abbbabaaabaaa\_babaTa`aaaaaaaa`aa`\_a`\_aa\_  
@HWI-EAS443:3:44:517:1276#0/1  
AAGAAATGGCCAGTAGGAGTCTATGGGATTCTTTTCGTCA  
+HWI-EAS443:3:44:517:1276#0/1  
`a^]^[b`bVTV^N\_]RRV\_a`T^\_¥]]]aY[Ya¥WZPQY  
@HWI-EAS443:3:44:537:201#0/1  
AATTCCTTGGTCATGTCTTTCTTTTGACAGAAGACTCGG

+HWI-EAS443:3:44:537:201#0/1  
aababababNb`bbaabbbab`bbab[a`b`aaaa`a^a  
@HWI-EAS443:3:44:563:1897#0/1  
GAATTCCTTGGTCATGTCTTTCTTTGACAGAAGACTCG  
+HWI-EAS443:3:44:563:1897#0/1  
aaaaa`aaa^a[aaa]`\_baaaa\_aaaa`\_aaa\_\_`^a]Z  
@HWI-EAS443:3:44:619:1931#0/1  
CAAAGAGAACCGGTTTCATTGAAATTGGAGTAACACGGAGG  
+HWI-EAS443:3:44:619:1931#0/1  
aaaaaaaa`\_aa\_a\_\_a`a\_aa\_^[U\_\_Z`Y\_Z`^^\_Q  
@HWI-EAS443:3:44:633:26#0/1  
GCCTTCCTCCACTCCCCTGGGTGACTCTCCGATTGGCCAT  
+HWI-EAS443:3:44:633:26#0/1  
a`\_a\_]Z]\_a`\_^`\_^¥¥\_\_\_W^¥V¥Y¥WWW¥VYY¥¥UVUW  
@HWI-EAS443:3:44:648:562#0/1  
AAAATAAAATCTGAGAAGACACACATTCACATCTTTTCAT  
+HWI-EAS443:3:44:648:562#0/1  
`aV¥^¥^a\_Z¥Ub¥bYaa`b`[YXa[[aX`aYb`^b¥¥¥  
@HWI-EAS443:3:44:699:983#0/1  
CCCTCCGTGTTACTCCAATTTCAATGAACCGTTCTCTTT  
+HWI-EAS443:3:44:699:983#0/1  
\_R][b`b`a^\_XSa]WYP^^\_KX`Q\_\_]WGa]O\_P`P^^\_  
@HWI-EAS443:3:44:69:970#0/1  
TTGGAAGCAGGTGCTAGCAGAGCTACAGGACATTGAAAAT  
+HWI-EAS443:3:44:69:970#0/1  
aaa`aaaaaa\_X^a^a\_^`\_\_`^^`\_`aT[\_^\_\_]\_\_^\_  
@HWI-EAS443:3:44:700:145#0/1  
GAAAGGCATAAATCCCAATTACCTCATGGCTTGAAGCAG  
+HWI-EAS443:3:44:700:145#0/1  
^aXaa`abbbbbbababbbb`a`\_`\_aaabaaa`^X[XNV]  
@HWI-EAS443:3:44:700:585#0/1  
ATGAAATGGAAATCCGAATACATGAAACAACTTCCAAAT  
+HWI-EAS443:3:44:700:585#0/1  
a\_b`[^bbaRa^a``aaa`baaaaa\_aaba\_\_aaa\_a\_]a  
@HWI-EAS443:3:44:708:412#0/1  
AAGAATTCCTTGGTCATGTCTTTCTTTGACAGAAGACT  
+HWI-EAS443:3:44:708:412#0/1  
aa`]^aaaY¥babYa`b`Taaa^T^^a``X^`aZaa^ZZ  
@HWI-EAS443:3:44:724:393#0/1  
GCCTTTCTCATGTGGTTTACTATGTTAGGCTCTTTCCAG  
+HWI-EAS443:3:44:724:393#0/1  
abaaaaa`^)`b^baX]YbY`\_]\_a[[[]]T[WX]`RX^X  
@HWI-EAS443:3:44:85:671#0/1  
GCCTTCCTCCACTCCCCTGGGTGACTCTCCGATTGGCCAT  
+HWI-EAS443:3:44:85:671#0/1  
abbabaaaabaabbbaaabaNa\_\_a¥`\_aZU^\_aU^\_^V  
@HWI-EAS443:3:44:914:1120#0/1  
TGGTGAACAGTATATGTAACACAACAGGGGTAGAGAAGCC  
+HWI-EAS443:3:44:914:1120#0/1  
a`a`aaa`aa]aaaa\_``aa``\_]\_^\_\_`^[\_`\_\_`¥`[S



@HWI-EAS443:3:44:926:843#0/1  
CCGAACTTCTCCAGCCTTGAAAACCTTTAGAGCCTATGTAG  
+HWI-EAS443:3:44:926:843#0/1  
aab\_aaaaabab\_aaaaab`a```aaa`aaa`¥aaaa^`a  
@HWI-EAS443:3:44:946:641#0/1  
CTTGGGGGCTATATGAAGCAATCGAGGAGTGCCTGATTA  
+HWI-EAS443:3:44:946:641#0/1  
\_\_¥N[aaba`a¥\_bbbb````\_a`a^\_aa`X`^`ba`aa\_  
@HWI-EAS443:3:45:1133:1630#0/1  
ACTCGGTGAAAATATGGCACCAGAAAAAGTAGACTTTGAT  
+HWI-EAS443:3:45:1133:1630#0/1  
\_\_baabW`\_aaaa\_aa\_Y`Z^^a¥¥ZVW\_0``Z]aZ\_`^\_  
@HWI-EAS443:3:45:1192:111#0/1  
AGAGACCGAATCATGGCCTGGACAGTGGTGAACAGTATAT  
+HWI-EAS443:3:45:1192:111#0/1  
\_bab^`aaVV][\_\_abaZabUVY[\_¥\_aU\_U¥[[XDT¥ZW  
@HWI-EAS443:3:45:1193:947#0/1  
AGAATATGGGGAAGATCCGAAAATCGAAACTAACAAGTTT  
+HWI-EAS443:3:45:1193:947#0/1  
a\_abababa¥a][`abbaa`abaa`a\_aa`aaaa`\_a)`\_  
@HWI-EAS443:3:45:120:870#0/1  
GGATCTTCTCTTCATTTTCAATGTCCTGTAGCTCTGCTAG  
+HWI-EAS443:3:45:120:870#0/1  
aaaa\_bbaaabbaabaaaaaa`\_\_\_\_[\_a`)]`\_VYZ^`\_  
@HWI-EAS443:3:45:1288:384#0/1  
CCTCGATTGCTTCATATAGCCCCCAAGATCGAAGGTTCC  
+HWI-EAS443:3:45:1288:384#0/1  
\_`bab\_RZ`¥abb\_a[`b`aR`bTXa[`a]^\_Z\_bZN^¥]  
@HWI-EAS443:3:45:1309:912#0/1  
CAGGCACTCCTCGATTGCTTCATATAGCCCCCAAGATCG  
+HWI-EAS443:3:45:1309:912#0/1  
Z¥`XTbbbZX`b`b\_]``bb`\_`b]]a^^`^^`a]aTPVa  
@HWI-EAS443:3:45:1328:1132#0/1  
TGAAGGAAGAGACCGAATCATGGCCTGGACAGTGGTGAAC  
+HWI-EAS443:3:45:1328:1132#0/1  
aa`aaZZ\_Y\_``¥YV¥T^a`aa\_YZ][\_YRXYT\_^U\_^S  
@HWI-EAS443:3:45:1334:962#0/1  
CATCCATCAGCAGGAACCTTTGACCGCTGATGGCAAAGAGG  
+HWI-EAS443:3:45:1334:962#0/1  
aa`[R]]XW`MT`\_H]Pa`¥aa]`\_PHX[XS[V[¥TPKKT  
@HWI-EAS443:3:45:1344:972#0/1  
AATATGGGGAAGATCCGAAAATCGAAACTAACAAGTTTGC  
+HWI-EAS443:3:45:1344:972#0/1  
VPHN[[a]W¥]UYa¥ZaZZU¥\_]bZZ\_`aX```^^\_Y]]a^  
@HWI-EAS443:3:45:1374:1336#0/1  
TGCCCCATTTTCATCTTGATCTTGGAGGTTCCATTGGTTCT  
+HWI-EAS443:3:45:1374:1336#0/1  
aaaa`aabbb\_ab^aaaaa\_aaba\_baX`\_\_`\_^]\_X]UU  
@HWI-EAS443:3:45:1395:78#0/1  
CAGTGATGAGCCAGAGCCCAGATCTCTAGCAAGCTGGGTC

+HWI-EAS443:3:45:1395:78#0/1  
`abababbbbaabaab`aa`baa\_a`aaa\_a^a[\_`ba^X  
@HWI-EAS443:3:45:1433:1253#0/1  
TCGAGCCGAACGGCTGCATTGAGGGCAAGCTTTCCCAAAT  
+HWI-EAS443:3:45:1433:1253#0/1  
[a[U\_a\_]\_b`¥\_^^DOV¥^S]]R]QVPN¥¥ZSVNV]W  
@HWI-EAS443:3:45:1444:19#0/1  
ATTGAATTCATTTTGGACCCAGCTTGCTAGAGATCTGGGC  
+HWI-EAS443:3:45:1444:19#0/1  
aaabaaaaa\_a]aaaa[\_UZ]T]^]LTZ^][VTTS^^ZS  
@HWI-EAS443:3:45:1465:638#0/1  
GGGGCATGGAAATGAGGCGCTGCCTTCTTCAGTCTCTTCA  
+HWI-EAS443:3:45:1465:638#0/1  
a`aaa`aa^\_]aa`a¥`aZ`a[\_a`Z`\_\_XXSWYW^[YY  
@HWI-EAS443:3:45:1478:1290#0/1  
ATGAAATGGAAATCCGAATACATGAAACAACTTCCCAAAT  
+HWI-EAS443:3:45:1478:1290#0/1  
a``aVaa`\_¥P]aU^^aaa^T^`^`a`aab]W\_aSVX\_X¥  
@HWI-EAS443:3:45:1504:526#0/1  
ACGGGGTGAATCAATAATTGTAGAATCTGGTGACCCGAAT  
+HWI-EAS443:3:45:1504:526#0/1  
]a^Zab\_b¥a^Y\_a`a]bab]Za`^¥`^aa[``]ZW^Y`Y  
@HWI-EAS443:3:45:1523:1490#0/1  
ATGAGAAGCAATTTTCTCGATTGAGCCGAAAACCCCTCAA  
+HWI-EAS443:3:45:1523:1490#0/1  
`a\_\_abba]\_ba`a`\_b`b\_aa\_a^aaba`\_a\_a^^\_]`]  
@HWI-EAS443:3:45:1526:1103#0/1  
GGGGGCTATATGAAGCAATCGAGGAGTGCCTGATTAATGA  
+HWI-EAS443:3:45:1526:1103#0/1  
V\_[Z]U¥TWU¥]PUUMQZ^Y\_X[YYXOUOLVY]¥YQUY`B  
@HWI-EAS443:3:45:1574:756#0/1  
CTCCCCTGGGTGACTCTCCGATTGGCCATGTTTCCGATTT  
+HWI-EAS443:3:45:1574:756#0/1  
ababaa`bba[ba\_aaaaa\_\_`aTT^Y[^a`V[`W^\_`  
@HWI-EAS443:3:45:1605:1597#0/1  
GGGGCATGGAAATGAGGCGCTGCCTTCTTCAGTCTCTTCA  
+HWI-EAS443:3:45:1605:1597#0/1  
aaabX`^\_aa`a]^a`\_`\_]YS¥\_^^\_ZYYYY\_V^YU[  
@HWI-EAS443:3:45:1644:1766#0/1  
AAAGAGCCTAACATAGTCAAACCACATGAGAAAGGCATAA  
+HWI-EAS443:3:45:1644:1766#0/1  
a^ba`b`bbbV[¥X``]¥b¥^V`aSa`a¥a^XX^[\_`\_`a  
@HWI-EAS443:3:45:1681:1336#0/1  
GCCATGTTTCCGATTTGTTTTCAAAGAATTCCTTGGTCAT  
+HWI-EAS443:3:45:1681:1336#0/1  
aa\_abaaab`\_a\_aabbaaba`\_a`aa\_aa^]aab``Zaa  
@HWI-EAS443:3:45:169:1620#0/1  
AGAAATGGCCAGTAGGAGTCTATGGGATTCCTTTCGTCAG  
+HWI-EAS443:3:45:169:1620#0/1  
a]]]a\_\_`aUY\_[aa]X\_LS\_]aa\_U`¥JT]`¥[ZODSQ

@HWI-EAS443:3:45:1714:117#0/1  
TGGGTCCAAAATGAATTCAATAAGGCATGTGAATTGACTG  
+HWI-EAS443:3:45:1714:117#0/1  
aaaa¥`\_`aa\_ab^]aa^`^`\_`aa^^\_a[\_^[\_]Y[^`  
@HWI-EAS443:3:45:1757:961#0/1  
AGAAATTTAGGCTTCTCTACCCCTGTTGTGTACATATAC  
+HWI-EAS443:3:45:1757:961#0/1  
XY\_R[\_¥a\_V`X\_\_[¥]aWW\_a[H]X]][¥U\_\_Z\_\_YT^\_  
@HWI-EAS443:3:45:1771:1901#0/1  
AGCTCTGCTAGCACCTGCTTCCAAGCCATGAGGTAATTGG  
+HWI-EAS443:3:45:1771:1901#0/1  
¥]`\_UW^[R\_\_Xa`XX\_\_\_`[^]]^XZS`a^`^R[VZZ\_U  
@HWI-EAS443:3:45:1791:83#0/1  
AAGTGCCTGAACAATGAGAAGCAATTTTCTCGATTCAGCC  
+HWI-EAS443:3:45:1791:83#0/1  
`^\_J\_TT`baW^]Hab`b``aa]I`aba`aXa\_aa\_Y\_SQ  
@HWI-EAS443:3:45:201:1603#0/1  
CAACAGTCTATATGCGTCTCCACAACCTTGAGGGGTTTTCG  
+HWI-EAS443:3:45:201:1603#0/1  
[U\_babaT^\_¥¥UW\_^\_U`XPP]]XV\_VRGRWQW¥`BBB  
@HWI-EAS443:3:45:216:260#0/1  
CAATGCAGCCGTTCCGCTCGAATCCATCTACATAGGCTCT  
+HWI-EAS443:3:45:216:260#0/1  
abbbbaabb\_\_a`\_\_a`]a]ZT^WV\_URU[¥PaUWBBBBBB  
@HWI-EAS443:3:45:234:75#0/1  
GGCATGGAAATGAGGCGCTGCCTTCTTCAGTCTCTTCAGC  
+HWI-EAS443:3:45:234:75#0/1  
aa]aaaaa``aaa`\_\_a\_\_aWW`\_V\_[MW`XU\_¥\_\_WW[U  
@HWI-EAS443:3:45:260:205#0/1  
GCAGGTGCTAGCAGAGCTACAGGACATTGAAAATGAAGAG  
+HWI-EAS443:3:45:260:205#0/1  
aabab^aaaaa`aa`aaa`aaa\_\_\_`aa]\_a`aa`````  
@HWI-EAS443:3:45:28:475#0/1  
CTTGAGGACTGCGATAGGCCAAGTGTGCGAGGCCCATGTTT  
+HWI-EAS443:3:45:28:475#0/1  
aabbaaaaa`\_`ba\_\_\_aa\_^T\_FRJ[^T¥\_] [¥ZRURNY  
@HWI-EAS443:3:45:32:240#0/1  
CTTGGGGGCTATATGAAGCAATCGAGGAGTGCCTGATTA  
+HWI-EAS443:3:45:32:240#0/1  
G]bb```b^Ta\_SXaba\_0\_Y\_¥W`¥a[S¥Q\_[abb^¥W`  
@HWI-EAS443:3:45:351:1891#0/1  
GGGGGCTATATGAAGCAATCGAGGAGTGCCTGATTAATGA  
+HWI-EAS443:3:45:351:1891#0/1  
Y`ZW`babbbba\_¥¥aba\_a`b`^aZ`a\_aa\_`aa^aa\_  
@HWI-EAS443:3:45:459:966#0/1  
TGAAGACCCGAGTCACGAGGGGAGGGAATACCACTATAT  
+HWI-EAS443:3:45:459:966#0/1  
ZbYWaZSZY`aaPJ`V``a]aa`\_a\_P`a`]0[ZR\_a]a]  
@HWI-EAS443:3:45:487:789#0/1  
AGGAACTTTGACCGCTGATGGCAAAGAGGCCCATCAGGCA

+HWI-EAS443:3:45:487:789#0/1  
^¥^aaabbbbaaaa`ba` `a¥aa`a`^a\_^^aa\_]YY`a  
@HWI-EAS443:3:45:576:705#0/1  
GGTGAACCTTTGTAAGTATGGAGTTCTCACTCACTGACCCG  
+HWI-EAS443:3:45:576:705#0/1  
\_a^a[aaabbb[ `aZX`a`^^aa]a\_a\_aYa^`b`UP`]  
@HWI-EAS443:3:45:656:1710#0/1  
GAGCCCAGATCTCTAGCAAGCTGGGTCCAAAATGAATTCA  
+HWI-EAS443:3:45:656:1710#0/1  
Z[aUK`¥bb\_¥b\_Xb\_a\_bX¥baVb\_¥abbbabbaba\_b  
@HWI-EAS443:3:45:743:2017#0/1  
AACTTTAGAGCCTATGTAGATGGATTTCGAGCCGAACGGCT  
+HWI-EAS443:3:45:743:2017#0/1  
Tb`Z¥QQ\_ZTHZbTbZQR¥`V¥`MT]UaMZMa`^YR\_aa  
@HWI-EAS443:3:45:773:988#0/1  
CCTTCATTATGTATTCAGTAGCCCTGCAGTGGGACACTTC  
+HWI-EAS443:3:45:773:988#0/1  
abb¥S\_^`V[bbaa`aa`[aaa^`^a`XZWaS`YTVUZSS  
@HWI-EAS443:3:45:800:845#0/1  
ATTCGATTTCCATTTTCATCGACGAACGGGTGAATCAAT  
+HWI-EAS443:3:45:800:845#0/1  
aaaaa`a\_aaa\_^a` `\_\_a\_a\_Xa[\_[]\_`\_Z\_^)]ZZ\_  
@HWI-EAS443:3:45:840:240#0/1  
GATTTGAGATAATTGAAGGAAGAGACCGAATCATGGCCTG  
+HWI-EAS443:3:45:840:240#0/1  
[SU\_TVN\_\_]WQW]ZYZ[RT[ZaR]T]USZ[RZ]VMMQQ  
@HWI-EAS443:3:45:919:1563#0/1  
AGAAGCAATTTTCTCGATTCAGCCGAAAACCCCTCAAGTT  
+HWI-EAS443:3:45:919:1563#0/1  
^ZZaaR^[\` `¥^\_N\_aa\_\_Y`M[a] []¥[YTXV¥UV]W]  
@HWI-EAS443:3:45:979:1275#0/1  
GGGGCATGGAATGAGGCGCTGCCTTCTTCAGTCTCTCA  
+HWI-EAS443:3:45:979:1275#0/1  
aaaaababa`abaaaaaaaaa\_\_aa\_aa]]a\_a`\_aU^\_  
@HWI-EAS443:3:46:1039:982#0/1  
AAGAGCGAAGAGACAATTGAAGAAAAATTTGAGATTACA  
+HWI-EAS443:3:46:1039:982#0/1  
aba]a`bbba`¥a^`\_`aaaZ¥¥[\`a`\_`aaa\_a` ` `¥\_  
@HWI-EAS443:3:46:1122:457#0/1  
CGTCTCCACAACCTTGAGGGTTTTTCGGCTGAATCGAGAAA  
+HWI-EAS443:3:46:1122:457#0/1  
abbbbbbbabbabbbbbbbb\_bbaabbabbbbaa\_bbbbbbb  
@HWI-EAS443:3:46:1140:363#0/1  
CGTCTCCACAACCTTGAGGGTTTTTCGGCTGAATCGAGAAA  
+HWI-EAS443:3:46:1140:363#0/1  
a`S`aabZ¥Z]\_W¥b[bbbb\_a]WHaaa\_a][X`a]a\_aY  
@HWI-EAS443:3:46:115:284#0/1  
GCAGGTGCTAGCAGAGCTACAGGACATTGAAAATGAAGAG  
+HWI-EAS443:3:46:115:284#0/1  
ab^`\_R^aaaa` `a\_aaaa\_aaa¥W`]aa\_[-¥` `^`[\` `

@HWI-EAS443:3:46:1223:1732#0/1  
CATTAAATCAGGCACTCCTCGATTGCTTCATATAGCCCCC  
+HWI-EAS443:3:46:1223:1732#0/1  
[\_`aa]bbbba\_b`b`bbb]bb\_baaabaabb\_`WY  
@HWI-EAS443:3:46:1279:1822#0/1  
CTTGGGGGCTATATGAAGCAATCGAGGAGTGCCTGATTA  
+HWI-EAS443:3:46:1279:1822#0/1  
\_ba\_V\_aZ[XWbb¥JV`^`Wab`^`abaaZXZX]aaaaT  
@HWI-EAS443:3:46:1296:1478#0/1  
GAGGGGTTTTCGGCTGAATCGAGAAAATTGCTTCTCATTG  
+HWI-EAS443:3:46:1296:1478#0/1  
a^`ab\_abaa\_\_\_abaa\_Za\_aaaa`a`a\_\_aZ`\_``\_a  
@HWI-EAS443:3:46:1320:41#0/1  
TCCACAACCTTGAGGGGTTTTCGGCTGAATCGAGAAAATTG  
+HWI-EAS443:3:46:1320:41#0/1  
[aa`abb`aa`]bb`b``¥b`bba`[[a\_TOYba`a`Y`¥  
@HWI-EAS443:3:46:1347:971#0/1  
GGGGCATGGAAATGAGGCGCTGCCTTCTCAGTCTCTTCA  
+HWI-EAS443:3:46:1347:971#0/1  
`[^`^`^`a`T]^`a`a`a`^`\_SZ`\_Y`[^`^`YP]T]^UX  
@HWI-EAS443:3:46:1373:302#0/1  
CATCACTGTCATACTGTTTAAGTCTCCAACATCTTTGCA  
+HWI-EAS443:3:46:1373:302#0/1  
a^b`babbaabba\_a`aabbabbaab\_aa\_W`b`aaab\_a  
@HWI-EAS443:3:46:1432:1136#0/1  
CTTGGGGGCTATATGAAGCAATCGAGGAGTGCCTGATTA  
+HWI-EAS443:3:46:1432:1136#0/1  
abbbb\_aaabaaaaab\_aa\_aaa`a]b`\_a^a\_\_aa]aa\_  
@HWI-EAS443:3:46:1444:1540#0/1  
CGCTGATGGCAAAGAGGCCCATCAGGCAATCTGAGGGGGC  
+HWI-EAS443:3:46:1444:1540#0/1  
aaa^VXaa]^a`^]V`\_Y]^Z¥]SGUX]^¥¥¥MSTU[^`BB  
@HWI-EAS443:3:46:1478:38#0/1  
GGGGTTTTCGGCTGAATCGAGAAAATTGCTTCTCATTGTT  
+HWI-EAS443:3:46:1478:38#0/1  
aa¥aI\_a¥`\_UV`U]LR¥T\_NQUV¥^ZR^¥¥ZUZV^^TZ  
@HWI-EAS443:3:46:1482:1012#0/1  
GAAAGGCATAAATCCCAATTACCTCATGGCTTGAAGCAG  
+HWI-EAS443:3:46:1482:1012#0/1  
\_X[]a\_WXXXZ]VYVSX[UV¥XNV^YV¥¥BBBBBBBBBB  
@HWI-EAS443:3:46:1543:68#0/1  
CATTAAATCAGGCACTCCTCGATTGCTTCATATAGCCCCC  
+HWI-EAS443:3:46:1543:68#0/1  
\_abb`abbabbbaaaa]a\_ba`aaaa`\_`a\_\_a`^\_ZZa¥  
@HWI-EAS443:3:46:1588:936#0/1  
GTAGATGGATTGAGCCGAACGGCTGCATTGAGGGCAAGC  
+HWI-EAS443:3:46:1588:936#0/1  
aW`\_\_b^¥`a\_aY¥^W\_W¥Y¥WYWYSPQFQVW¥NTUPU  
@HWI-EAS443:3:46:15:2033#0/1  
CTTCATTTTCAATGTCCTGTAGCTCTGCTAGCACCTGCTT

+HWI-EAS443:3:46:15:2033#0/1  
a^Z\_Z`Va`]GQWWW[W[XBBBBBBBBBBBBBBBBBBBB  
@HWI-EAS443:3:46:1647:681#0/1  
GAACAAGCCAATTGAAGTGGGCACTCGGTGAAAATATGGC  
+HWI-EAS443:3:46:1647:681#0/1  
aYVV`]]XXa`[¥¥[\_X\_ZRT[]\_L\_QQU^^U]VZP  
@HWI-EAS443:3:46:1655:167#0/1  
GGGGTTTTTCGGCTGAATCGAGAAAATTGCTTCTCATTGTT  
+HWI-EAS443:3:46:1655:167#0/1  
`N`^R`\_aW`¥V^Y`Y^W\_VYSQUW¥¥¥T¥WWWTNWWXVS  
@HWI-EAS443:3:46:1736:1497#0/1  
GAGAAATGATACTGATGTGGTGAAC TTTGTAAGTATGGAG  
+HWI-EAS443:3:46:1736:1497#0/1  
a`^`\_T`¥[\_TXR[]ZXETMQVUW]¥[TWL TEUGQ\_YZ  
@HWI-EAS443:3:46:1763:320#0/1  
GAGAAGATGTTGCCCGATTGAACATATCGCAAGCATGAG  
+HWI-EAS443:3:46:1763:320#0/1  
a`a`^``aa]`^^]¥^a¥\_\_`^aY`\_`^¥¥`YWY[VW¥¥W^  
@HWI-EAS443:3:46:211:1953#0/1  
GGACATTGAAAATGAAGAGAAGATCCCAAGGACAAAGAAC  
+HWI-EAS443:3:46:211:1953#0/1  
a`aaaaaa\_\_aaaaaaaa`^\_a\_\_[[aa`\_`^```\_`aZ  
@HWI-EAS443:3:46:236:1700#0/1  
AATCAAAACTAGGCTTTTCACTATAAGACAAGAAATGGCC  
+HWI-EAS443:3:46:236:1700#0/1  
a^¥a`a``XWba`^aa`^^R¥aa`a`[H``Q\_aaQQNUP  
@HWI-EAS443:3:46:296:237#0/1  
GCTGAAAGTCATCCATGGCTGCACAGGATGCATTGAGCAA  
+HWI-EAS443:3:46:296:237#0/1  
aaba\_aaaSaa¥`^`[\_baHa¥U^^^aPU\_NV^¥LSLTX¥  
@HWI-EAS443:3:46:299:1214#0/1  
GACAAGAAATGGCCAGTAGGAGTCTATGGGATTCCTTTTCG  
+HWI-EAS443:3:46:299:1214#0/1  
aaa]]ba`aaba`\_`a[]\_`0`\_\_^Z`\_Y`[\_a\_Y\_\_\_\_[[  
@HWI-EAS443:3:46:310:1191#0/1  
CCCGAATGCACTATTGAAGCACCGATTTGAGATAATTGAA  
+HWI-EAS443:3:46:310:1191#0/1  
\_]H[Z\_TZ]¥]]\_`^\_Z[¥`SW¥Y[TRa\_\_]\_`^`\_¥Y^a]Z  
@HWI-EAS443:3:46:311:237#0/1  
CGAAAATCGAACTAACAAGTTTCTGCAATATGCACACA  
+HWI-EAS443:3:46:311:237#0/1  
ababbbbabaaaab\_b^b`a`aaaaabaaaa`baaaaaa  
@HWI-EAS443:3:46:396:794#0/1  
ACATCTTCTCTATTTTCATCAAGTTCTATCCAGCTTGAAT  
+HWI-EAS443:3:46:396:794#0/1  
aabbb^aabbabbb`babbabbaabaaaaababbaaaa  
@HWI-EAS443:3:46:413:1933#0/1  
CAGTGATGAGCCAGAGCCCAGATCTCTAGCAAGCTGGGTC  
+HWI-EAS443:3:46:413:1933#0/1  
aUaJHP[ZQVR[aVFSTV\_[JVZ¥S^VTT^ZUMPWTSUGM

@HWI-EAS443:3:46:421:1413#0/1  
ACAGATTTTGCAGTAAGGTCCTGCACACTTCCCAATAG  
+HWI-EAS443:3:46:421:1413#0/1  
aXbb\_`a]]\_`aa\_J^a`^Y`Z]aa]`a`aa``¥¥]\_¥a\_  
@HWI-EAS443:3:46:436:357#0/1  
AAAGAGCCTAACATAGTCAAACCACATGAGAAAGGCATAA  
+HWI-EAS443:3:46:436:357#0/1  
a`bbaaaaaaaaabababababaa`aaaaba`aa\_\_aaaa  
@HWI-EAS443:3:46:476:2013#0/1  
CTTCTCCTATTTTCATCAAGTTCTATCCAGCTTGAATCAGT  
+HWI-EAS443:3:46:476:2013#0/1  
ab[OQ^TTa[a^`a\_]\_GX]]X^`a]^aaUV`a]WSQ¥aS  
@HWI-EAS443:3:46:500:1000#0/1  
TTGAGCCGAACGGCTGCATTGAGGGCAAGCTTCCCAA  
+HWI-EAS443:3:46:500:1000#0/1  
a`a`a``aaabaa``\_\_]]¥[R[Z^ [HX^YVW^X[^]`¥  
@HWI-EAS443:3:46:509:135#0/1  
CTTGGGGGGCTATATGAAGCAATCGAGGAGTGCCTGATTA  
+HWI-EAS443:3:46:509:135#0/1  
abbbbb\_babbbabbbababb`abbbaab^ba`aba\_\_a  
@HWI-EAS443:3:46:567:762#0/1  
CATGGAAATGAGGCGCTGCCTTCTTCAGTCTCTTCAGCAG  
+HWI-EAS443:3:46:567:762#0/1  
a\_bba`a`a\_^a`¥\_aa`]^aa`a\_Z[\_Z]X^^YXY\_SY`  
@HWI-EAS443:3:46:595:1832#0/1  
GGGGCATGGAAATGAGGCGCTGCCTTCTTCAGTCTCTTCA  
+HWI-EAS443:3:46:595:1832#0/1  
^JYT^`^`]ZW]Xa\_`^`a]`^MU¥`^Z^\_^]KU[QOZUT  
@HWI-EAS443:3:46:637:905#0/1  
GGGGCTATATGAAGCAATCGAGGAGTGCCTGATTAATGAT  
+HWI-EAS443:3:46:637:905#0/1  
`bbbbbbbbbbbaa^baabaaaaa^aa```\_aa``aa`\_  
@HWI-EAS443:3:46:696:1076#0/1  
GGGCACTCGGTGAAAATATGGCACCAGAAAAGTAGACTT  
+HWI-EAS443:3:46:696:1076#0/1  
a\_UXQXaaabKPNO[V]X[\_aZ\_ZU[[P\_PZU¥H¥]]V[]  
@HWI-EAS443:3:46:715:484#0/1  
GTTCTGGTGGGAGACTTTGGTGGCAAGCTTGCGCATAGTT  
+HWI-EAS443:3:46:715:484#0/1  
UZ^V\_aTabaXZM]aa`aa[`^][J[`a`^V[[^PT[Y]YY  
@HWI-EAS443:3:46:719:237#0/1  
CAGGAATATGCGCAAGCTTGCCGACCAAAGTCTCCCACC  
+HWI-EAS443:3:46:719:237#0/1  
a¥\_a`\_`Yaa\_`aaaa^Y^^a`ZY\_aa`^QVY¥Y]`XP  
@HWI-EAS443:3:46:744:765#0/1  
CAAAGAGGCCCATCAGGCAATCTGAGGGGGCGTGGTGTCTG  
+HWI-EAS443:3:46:744:765#0/1  
ab]bbabbaaa^aaaabaaaa^`^]`aaaaXa¥aaYYXN\_  
@HWI-EAS443:3:46:811:963#0/1  
GGGGCATGGAAATGAGGCGCTGCCTTCTTCAGTCTCTTCA

+HWI-EAS443:3:46:811:963#0/1  
^WXaaa¥bbaa¥` `aa`a`\_`V¥`^S^a]S\_P¥`^^XU[  
@HWI-EAS443:3:46:838:499#0/1  
CGGCTGAATCGAGAAAATTGCTTCTCATTGTTCAGGCACT  
+HWI-EAS443:3:46:838:499#0/1  
abb`bbbaa`baa`]aa`\_`aaaa`aaa`¥¥¥a[\_^¥X  
@HWI-EAS443:3:46:839:504#0/1  
GGCTTGGAAGCAGGTGCTAGCAGAGCTACAGGACATTGAA  
+HWI-EAS443:3:46:839:504#0/1  
`SSR]^a[`QFVX]UVXY][JX^RRLMKL\_SVYYLU[UNT  
@HWI-EAS443:3:46:926:248#0/1  
GAGGAAGGCTCTATTGGGAAAGTGTGCAGGACCTTACTGG  
+HWI-EAS443:3:46:926:248#0/1  
^V[VJS^]¥`\_aV\_Z¥\_^WQM¥TTS¥QQZ¥XTTY¥ZXKRV  
@HWI-EAS443:3:46:928:1365#0/1  
ATGAATTCAATAAGGCATGTGAATTGACTGATTCAAGCTG  
+HWI-EAS443:3:46:928:1365#0/1  
a`bSLSbaaab]I^¥S^a`Z]a^a`]ZR[\_\_\_Z\_a^aW` `^  
@HWI-EAS443:3:46:930:88#0/1  
GGGGGCTATATGAAGCAATCGAGGAGTGCCTGATTAATGA  
+HWI-EAS443:3:46:930:88#0/1  
abaaa[]\_a^aa`^aZ[Z\_\_\_]aa^\_X\_]`^\_ZRZ^]YS\_Y  
@HWI-EAS443:3:46:935:168#0/1  
CGTTTCGTCGATGAAATGGAAATCCGAATACATGAAACAAA  
+HWI-EAS443:3:46:935:168#0/1  
`abbbbabbbbbaaaabbaaaa`]aaaa`aaaa`\_aaa  
@HWI-EAS443:3:47:1040:974#0/1  
CAATGAGAAGCAATTTTCTCGATTTCAGCCGAAAACCCCTC  
+HWI-EAS443:3:47:1040:974#0/1  
Xaaaa¥]ZQ¥\_aabaabb¥b\_]baaJvX`RwLbaXT]]K  
@HWI-EAS443:3:47:1048:1233#0/1  
CAGCTTGCTAGAGATCTGGGCTCTGGCTCATCACTGTCAT  
+HWI-EAS443:3:47:1048:1233#0/1  
^`\_Zaba`\_aabbaa]bP\_[aa^abab^\_]`^`S`\_F\_ab  
@HWI-EAS443:3:47:1125:1229#0/1  
CATTAAATCAGGCACTCCTCGATTGCTTCATATAGCCCCC  
+HWI-EAS443:3:47:1125:1229#0/1  
^\_\_^\_Z\_^aaa`]\_[Y\_` `a\_\_X\_a`[ `baaab][XOU[  
@HWI-EAS443:3:47:1161:1748#0/1  
AGAGCCTAACATAGTCAAACCACATGAGAAAGGCATAAAT  
+HWI-EAS443:3:47:1161:1748#0/1  
aa` `aa`a\_aa`^^^`aa^¥\_\_\_[[¥`\_`^]\_X]^` `]\_`  
@HWI-EAS443:3:47:1192:927#0/1  
GAGAAAGGCATAAATCCCAATTACCTCATGGCTTGGAAGC  
+HWI-EAS443:3:47:1192:927#0/1  
aa\_]V^baabbaaba^` `aaa` `^`\_` `aa\_a\_TZLSTT  
@HWI-EAS443:3:47:1346:1281#0/1  
AGAAATTTAGGCTTCTCTACCCCTGTTGTGTTACATATAC  
+HWI-EAS443:3:47:1346:1281#0/1  
`ba`^bbabb`^aaa\_WY\_V]`^VVY`ZNW¥^`\_`\_¥¥¥[T



@HWI-EAS443:3:47:1388:160#0/1  
GGTTCTCTTTGTAATCATACAAATCAGGAAGAAATTTAGG  
+HWI-EAS443:3:47:1388:160#0/1  
a\_FT\_¥`a¥]aZ[`]Y\_]`W\_a`Y¥S]ZVSWLRY^Y]] [S  
@HWI-EAS443:3:47:1425:1064#0/1  
TTCCGATTTCCATTTTCATCGACGAACGGGGTGAATCAATA  
+HWI-EAS443:3:47:1425:1064#0/1  
\_¥^\_a^a\_V¥^\_^`\_UY\_]a[^a]] []¥` [Q[`¥]XS[^¥  
@HWI-EAS443:3:47:1425:1750#0/1  
GACCGAATCATGGCCTGGACAGTGGTGAACAGTATATGTA  
+HWI-EAS443:3:47:1425:1750#0/1  
a`\_^aa`\_]^`\_`[\_`\_^TX\_\_T^¥WZYQW¥\_T¥WWW^XWT  
@HWI-EAS443:3:47:1436:542#0/1  
GGGGGCTATATGAAGCAATCGAGGAGTGCCTGATTAATGA  
+HWI-EAS443:3:47:1436:542#0/1  
abaaaaaababa\_``\_a`a^\_aa]\_\_\_\_]Y\_aY\_\_Y\_\_`X  
@HWI-EAS443:3:47:1458:1615#0/1  
CATATAGCCCCCAAGATCGAAGTTCCAGTTCCAGGTT  
+HWI-EAS443:3:47:1458:1615#0/1  
abbbbbbbb``aaaaaa`aaaa^a^^¥\_a¥aWNU``W¥  
@HWI-EAS443:3:47:145:1429#0/1  
TCCACTCCCCTGGGTGACTCTCCGATTGGCCATGTTTCCG  
+HWI-EAS443:3:47:145:1429#0/1  
Kabab[H\_b[¥¥W\_W\_bYaIa]aUL¥aHYW\_V`WZa]TMG  
@HWI-EAS443:3:47:1464:468#0/1  
TATGTGGACTTCCCTCCGTGTTACTCCAATTTCAATGAAC  
+HWI-EAS443:3:47:1464:468#0/1  
a`aa]ba`\_aa`]`a\_\_a]aXZ¥^`ZZ^]\_\_\_\_]^`^`XXW  
@HWI-EAS443:3:47:1482:1383#0/1  
GTGGTGAAC TTTGTAAGTATGGAGTTCTCACTCACTGACC  
+HWI-EAS443:3:47:1482:1383#0/1  
aPVJ^¥OX¥` [P¥[`ZZS¥X^S]UTVMYZ¥US¥WS\_¥WWS  
@HWI-EAS443:3:47:1529:103#0/1  
GGCTTGGAAGCAGGTGCTAGCAGAGCTACAGGACATTGAA  
+HWI-EAS443:3:47:1529:103#0/1  
ababbab^ab^\_aa¥\_\_[^a\_¥`T\_Z¥¥W^^^WWWVUWT  
@HWI-EAS443:3:47:1535:896#0/1  
CACCCCGTTCGTCGATGAAATGGAAATCCGAATACATGAA  
+HWI-EAS443:3:47:1535:896#0/1  
[`b^^`^aX^I`bbabaa]R]``¥Z¥aa^]aa` [Za`]  
@HWI-EAS443:3:47:1540:1656#0/1  
CATGGAATGAGGCGCTGCCTTCTTCAGTCTCTTCAGCAG  
+HWI-EAS443:3:47:1540:1656#0/1  
a`a^`^Q\_\_UZVS^^XUX¥¥]Y\_WFV¥LV[PX`VU^QRU  
@HWI-EAS443:3:47:157:347#0/1  
CGGTCTCTTCTTCAATTATCTCAAATCGGTGCTTCAATA  
+HWI-EAS443:3:47:157:347#0/1  
`aa^bbbbbbbb\_bbbbbbababaab\_ba\_baabaa`aa  
@HWI-EAS443:3:47:1589:1683#0/1  
AGAATTCCTTGGTCATGTCTTTCTTTTGACAGAAGACTC

+HWI-EAS443:3:47:1589:1683#0/1  
aa\_WY`\_^a`[\_Y^^\_V\_a`\_]\_¥\_^\_]Y^XTLV\_XXX  
@HWI-EAS443:3:47:1681:1329#0/1  
TTTCCGATTTGTTTTCAAAGAATTCCTTGGTCATGTCTTT  
+HWI-EAS443:3:47:1681:1329#0/1  
abbaaa]abbb`aaba`^^`^aa\_\_aaaa^`aa\_\_a`  
@HWI-EAS443:3:47:1720:490#0/1  
CAAATCGGTGCTTCAATAGTGCATTCGGGTCACCAGATTC  
+HWI-EAS443:3:47:1720:490#0/1  
abbabbbb\_bbbbababa[[aabbaaaa^`a\_\_abaaa\_  
@HWI-EAS443:3:47:190:449#0/1  
CTCAAGTTGTGGAGACGCATATAGACTGTTGAATACAGAT  
+HWI-EAS443:3:47:190:449#0/1  
abba`Sba\_bbab\_\_baaaa^\_aa\_^aS[TUaR]\_`[GZ  
@HWI-EAS443:3:47:277:1152#0/1  
CCGAACTTCTCCAGCCTTGAAAACCTTAGAGCCTATGTAG  
+HWI-EAS443:3:47:277:1152#0/1  
ab\_VX`aaa`Z\_]Y]`b^`^Y`\_Y]]`R]aLXTa\_aa^Pa  
@HWI-EAS443:3:47:277:525#0/1  
GGGGCATGGAATGAGGCGCTGCCTTCTTCAGTCTCTTCA  
+HWI-EAS443:3:47:277:525#0/1  
aaaaaaaaa`a``aaaa\_a\_^a¥\_^a]\_^`\_[T^¥¥¥¥¥  
@HWI-EAS443:3:47:288:1754#0/1  
GGGCACTCGGTGAAAATATGGCACCAGAAAAAGTAGACTT  
+HWI-EAS443:3:47:288:1754#0/1  
\_ba^bbbabbZa`abaaaa`[aa\_\_a^¥`a\_\_aSaaa^`a  
@HWI-EAS443:3:47:336:629#0/1  
GGGGGCTATATGAAGCAATCGAGGAGTGCCTGATTAATGA  
+HWI-EAS443:3:47:336:629#0/1  
a`aaaa`a`a\_a\_`U^[\_U]`U`a[`V][V\_UY]^V`¥  
@HWI-EAS443:3:47:346:502#0/1  
AACCCATACAGTTTGTTCCTTCTTTGGTCC  
+HWI-EAS443:3:47:346:502#0/1  
aa\_aa\_¥¥[^`a\_`\_Yaa\_VW`OK¥\_YU\_RJ[\_\_\_PZOZS  
@HWI-EAS443:3:47:35:1666#0/1  
GATGGCCACCAAAGCGGACTACACCCTTGACGAAGAGAGC  
+HWI-EAS443:3:47:35:1666#0/1  
]`bbbaa`^^`bb`\_^\_^\_aaa`a]`^^`a[`]^`Z^^[¥]]  
@HWI-EAS443:3:47:440:1268#0/1  
CACACATTCACATCTTTTCATTCACTGGAGAGGAGATGGC  
+HWI-EAS443:3:47:440:1268#0/1  
]Vba`\_`\_bb\_abbbaba\_Ta`b^aUaX¥ZaYP¥a`[Z]`Q  
@HWI-EAS443:3:47:466:1686#0/1  
GGGGGCTATATGAAGCAATCGAGGAGTGCCTGATTAATGA  
+HWI-EAS443:3:47:466:1686#0/1  
Yababbbababb\_]babbb`b[ba\_a^UaZbbababaa\_^  
@HWI-EAS443:3:47:473:1790#0/1  
GAGAAAGGCATAAATCCCAATTACCTCATGGCTTGGGAAGC  
+HWI-EAS443:3:47:473:1790#0/1  
`bb`b¥`^`bbb`aaZ\_W`aaa]XR]Xa^aWU`¥T]\_]SQ

@HWI-EAS443:3:47:508:130#0/1  
TTTCGAGCCGAACGGCTGCATTGAGGGCAAGCTTTCCCAAA  
+HWI-EAS443:3:47:508:130#0/1  
a^aa`a\_aba`aa\_\_¥^RU[^¥¥S]\_TNY¥QUUQGTSSYS  
@HWI-EAS443:3:47:571:451#0/1  
CAAATCAGGAAGAAATTTAGGCTTCTCTACCCCTGTTGTG  
+HWI-EAS443:3:47:571:451#0/1  
¥bbbababbb`ba^bba^Yabaabb^aaaa]aZaba`  
@HWI-EAS443:3:47:595:1750#0/1  
CTTAAACAGTATGACAGTGATGAGCCAGAGCCCAGATCTC  
+HWI-EAS443:3:47:595:1750#0/1  
`ba\_RR[]Wababaa`aX¥V`\_PZT]a¥WXV][Y[Y\_U\_  
@HWI-EAS443:3:47:605:836#0/1  
CATGTTTCCGATTTGTTTTCAAAGAATTCCTTGTCATGT  
+HWI-EAS443:3:47:605:836#0/1  
aabaabbabbbbabbbbaabbb`bbb\_ababa^aabba  
@HWI-EAS443:3:47:674:100#0/1  
CTCCAACATCTTTGCAGTCATCAAAGTCTACTTTTTCTGG  
+HWI-EAS443:3:47:674:100#0/1  
ab[``babbab`aababaaba]aaabSTW¥^aaba^a`¥  
@HWI-EAS443:3:47:687:993#0/1  
GAAAAGATGTGAATGTGTGCTTCTCAGATTTTATTTGT  
+HWI-EAS443:3:47:687:993#0/1  
a^ba\_b`Vb\_baaba\_bYb\_\_aa]a\_`^R\_`aa[aaa`Z\_  
@HWI-EAS443:3:47:690:1245#0/1  
AGCTCTGCTAGCACCTGCTTCCAAGCCATGAGGTAATTGG  
+HWI-EAS443:3:47:690:1245#0/1  
\_ZZ`X`ba\_X¥ORT[``^`^\_WQUTV]\_ZXNUZ\_X¥`  
@HWI-EAS443:3:47:716:245#0/1  
GGGGCTATATGAAGCAATCGAGGAGTGCCTGATTAATGAT  
+HWI-EAS443:3:47:716:245#0/1  
ZGMZW¥`¥\_¥a`^[]\_ZY]a\_a`YU[``][`aZ]¥^U¥`^Z  
@HWI-EAS443:3:47:764:884#0/1  
GTCCTTGGGATCTTCTTTCATTTTCAATGTCCTGTAGCT  
+HWI-EAS443:3:47:764:884#0/1  
a`a``abaa¥a[a``aaaaUVaaaa``\_a`\_\_^`\_^\_\_\_\_  
@HWI-EAS443:3:47:840:630#0/1  
AGGGCAAGAATCAAAACTAGGCTTTTCACTATAAGACAAG  
+HWI-EAS443:3:47:840:630#0/1  
```b\_]\_`^VVSa`aa[Y¥b`YYaRPQQHPQQ\_JZ[Z¥][  
@HWI-EAS443:3:47:845:936#0/1  
CAGTGATGAGCCAGAGCCCAGATCTCTAGCAAGCTGGGTC  
+HWI-EAS443:3:47:845:936#0/1  
```^]¥aa\_^ab`^bba\_baaaaabaaaaX]b\_a[]`XY  
@HWI-EAS443:3:47:849:809#0/1  
GCGTCTCCAACTTGAGGGGTTTTCGGCTGAATCGAGAA  
+HWI-EAS443:3:47:849:809#0/1  
aab`aaaaa``\_aaaabaaaU\_`a^a`^```^Z\_]`]^  
@HWI-EAS443:3:47:85:1415#0/1  
AGCAGGTGCTAGCAGAGCTACAGGACATTGAAAATGAAGA

+HWI-EAS443:3:47:85:1415#0/1  
abaaab`^abba\_a`\_baaa\_a`\_`\_`aa\_`^`a`a`\_`\_`\_`  
@HWI-EAS443:3:47:930:571#0/1  
GTATTTCAGTAGCCCTGCAGTGGGACACTTCTGCTGTAAAA  
+HWI-EAS443:3:47:930:571#0/1  
`Z¥a`U\_`[\_`[QWUQR[Z`Y`[XUUSSS¥]^PUZ\_U¥^WN  
@HWI-EAS443:3:47:931:75#0/1  
CATTCTTTGGCTGGAAAGAGCCTAACATAGTCAAACCACA  
+HWI-EAS443:3:47:931:75#0/1  
Zabbabbbbbbbbbbbbbbb`^aabbbabababb`aa`a  
@HWI-EAS443:3:47:949:1196#0/1  
TGCTAGCAGAGCTACAGGACATTGAAAATGAAGAGAAGAT  
+HWI-EAS443:3:47:949:1196#0/1  
]M^^¥a]¥\_]baaaa¥\_a^M^aaa\_^^a\_^¥`aaa]]^¥\_  
@HWI-EAS443:3:47:97:1310#0/1  
GAAGATGTTGCCCGATTGAACATATCGCAAGCATGAGGA  
+HWI-EAS443:3:47:97:1310#0/1  
a\_aaba]a`a`\_aa\_aaa`a¥aaa\_`¥¥`[\_`\_`^]X¥^  
@HWI-EAS443:3:47:997:651#0/1  
GGGGGCTATATGAAGCAATCGAGGAGTGCCTGATTAATGA  
+HWI-EAS443:3:47:997:651#0/1  
abbababbbabbaaaaaa`a\_b`\_a\_a\_\_aa^aa``a``  
@HWI-EAS443:3:48:1021:214#0/1  
TGAAATTGGAGTAACACGGAGGGAAGTCCACATATATTAC  
+HWI-EAS443:3:48:1021:214#0/1  
\_``a\_aaa^^b^`\_\_a^a`^`\_`^^`WRQ¥]]\_\_\_\_]a)`V  
@HWI-EAS443:3:48:1041:599#0/1  
GTACATAAATACGGCCTTGCTCAATGCATCCTGTGCAGCC  
+HWI-EAS443:3:48:1041:599#0/1  
a`aaaaaaaaaa\_aa^`aa¥Y^]Z`\_`^\_\_XS¥\_UZV^\_W]  
@HWI-EAS443:3:48:1084:654#0/1  
CATATAGCCCCCAAGATCGAAGTTCCAGTTCCAGTT  
+HWI-EAS443:3:48:1084:654#0/1  
````\_aaaba`b`[\_aZ\_a\_]\_``R\_Z``[`Y[YQO``^\_  
@HWI-EAS443:3:48:1102:1468#0/1  
GGAGACTTTGGTCGGCAAGCTTGCGCATAGTTCCTGTAAT  
+HWI-EAS443:3:48:1102:1468#0/1  
aa^a¥abb^a``]Wbaaa\_[\_`\_YW]`Z[\_]\_XZ^[\_]\_Z]XW  
@HWI-EAS443:3:48:1246:92#0/1  
GCCGTATTTATGTACTCCCTTCATTATGTATTTCAGTAG  
+HWI-EAS443:3:48:1246:92#0/1  
aa¥b`abbaaaaaa^Wa\_\_aa]\_aa`aa\_\_a`X]a^`¥  
@HWI-EAS443:3:48:1274:1144#0/1  
GCAGGTGCTAGCAGAGCTACAGGACATTGAAAATGAAGAG  
+HWI-EAS443:3:48:1274:1144#0/1  
abbab`abbabaab^baaaaaaaaaaaaaaaaaaa`aa`aa``  
@HWI-EAS443:3:48:1314:257#0/1  
CATCTTGATCTTGGAGTTCCATTGGTTCTCACATATAGG  
+HWI-EAS443:3:48:1314:257#0/1  
aab^\_ab`\_aba`\_`^b¥G\_\_`^aUM]]THQW^WNKX\_ZYY

@HWI-EAS443:3:48:1355:1236#0/1  
GGTGACCCGAATGCACTATTGAAGCACCGATTTGAGATAA  
+HWI-EAS443:3:48:1355:1236#0/1  
aa\_b\_aaaa\_aa\_R¥Waaaa`¥`TX]]a^a`aY\_^`^]  
@HWI-EAS443:3:48:1364:429#0/1  
CACCCCGTTCGTCGATGAAATGGAAATCCGAATACATGAA  
+HWI-EAS443:3:48:1364:429#0/1  
aaba^bbbbb`^baababa`\_a`\_\_`^`\_baaa`^a`aaa  
@HWI-EAS443:3:48:1377:1426#0/1  
CAGTCATCAAAGTCTACTTTTTCTGGTGCCATATTTTCAC  
+HWI-EAS443:3:48:1377:1426#0/1  
abba`bb]bb`^`bb¥bbbaaab^U¥]`\_aa[bbaaPa`  
@HWI-EAS443:3:48:1382:1487#0/1  
CACTGTCATACTGTTAAGGTCTCCAACATCTTGCAGTC  
+HWI-EAS443:3:48:1382:1487#0/1  
ab]a```aa\_abba^bbaba`aaaabbaabab`^a\_ab`Z  
@HWI-EAS443:3:48:1399:15#0/1  
CGAAAGAGGCGAAGAGACAATTGAAGAAAAATTTGAGATT  
+HWI-EAS443:3:48:1399:15#0/1  
aa`aaaa`abb`\_a`aab\_a`ab`\_]`\_`a`\_Z\_`^`  
@HWI-EAS443:3:48:1420:1575#0/1  
ATTCTTTGGCTGGAAAGAGCCTAACATAGTCAAACCACAT  
+HWI-EAS443:3:48:1420:1575#0/1  
aab\_aa`\_a`aaa\_aa```^a`aZ\_\_\_`XT\_`XX]P^]  
@HWI-EAS443:3:48:1446:1634#0/1  
AAGAATTCCTTGGTCATGTCTTCTCTTTGACAGAAGACT  
+HWI-EAS443:3:48:1446:1634#0/1  
aaa\_¥aa¥\_abb`\_a[b\_\_aaa¥a[`\_`a^ZY`^V]]Z^  
@HWI-EAS443:3:48:1493:778#0/1  
CGAGGGGGAGGGAATACCACTATATGATGCAATCAAATGC  
+HWI-EAS443:3:48:1493:778#0/1  
ababbbbaabba[baaab`aababbaaaaaa^aaaaa^  
@HWI-EAS443:3:48:1511:540#0/1  
ATCCTGTGCAGCCATGGATGACTTTCAGCTGATCCCAATG  
+HWI-EAS443:3:48:1511:540#0/1  
aZ¥Z[bZ¥N\_b[[`]]\_a``]SY¥ZYVZU]`\_¥¥Z^Z\_SY¥  
@HWI-EAS443:3:48:1537:1684#0/1  
ATAGAGCCTTCCCTCCACTCCCCTGGGTGACTCTCCGATTG  
+HWI-EAS443:3:48:1537:1684#0/1  
a`b``abaaa```\_`\_`[aXNYaa[TY[¥^\_Z\_¥W^T[`¥  
@HWI-EAS443:3:48:1556:866#0/1  
GGGGGCTATATGAAGCAATCGAGGAGTGCCTGATTAATGA  
+HWI-EAS443:3:48:1556:866#0/1  
aaaa`]`aaaa`]\_]`^`a]aYa`T`U][¥\_aZ^`]^\_\_`^  
@HWI-EAS443:3:48:1560:716#0/1  
AATTGACTGATTCAAGCTGGATAGAACTTGATGAAATAGG  
+HWI-EAS443:3:48:1560:716#0/1  
TNbbbabbb``¥bb\_a\_U\_a`[`bba]`bba\_babbbab`  
@HWI-EAS443:3:48:1582:1747#0/1  
AATGAATTCAATAAGGCATGTGAATTGACTGATTCAAGCT

+HWI-EAS443:3:48:1582:1747#0/1  
aaba`aaa\_aaaa`aa`\_a\_]a`[aa\_\_[a`^]\_Y`[\_U^  
@HWI-EAS443:3:48:1583:1038#0/1  
GGTGAAC TTTGTAAGTATGGAGTTCTCACTCACTGACCCG  
+HWI-EAS443:3:48:1583:1038#0/1  
aa[a`\_]\_a\_ab\_\_\_a^[a]a\_]`\_`]^^a\_\_^]a\_WWY\_  
@HWI-EAS443:3:48:1615:145#0/1  
TGGCTCATCACTGTCATACTGTTTAAGGTCTCCAACATCT  
+HWI-EAS443:3:48:1615:145#0/1  
abaaa`aa¥`^a\_^^`^\_aa^aa\_\_`[Z^¥[[]U^[V¥  
@HWI-EAS443:3:48:1663:1232#0/1  
GGCTCATCACTGTCATACTGTTTAAGGTCTCCAACATCTT  
+HWI-EAS443:3:48:1663:1232#0/1  
a`^`^aaa`\_a^b]XZ`]¥``¥ZYX\_\_`TP]S]\_]Y]W`^  
@HWI-EAS443:3:48:1703:1795#0/1  
CACTGCAGGGCTACTGAATACATAATGAAGGGAGTGTACA  
+HWI-EAS443:3:48:1703:1795#0/1  
aa`^\_[\_ab\_aa``abaa`a¥aa`^aa`¥`aa\_a]a^a\_\_  
@HWI-EAS443:3:48:1708:267#0/1  
ATCAGGCACTCCTCGATTGCTTCATATAGCCCCCAAGAT  
+HWI-EAS443:3:48:1708:267#0/1  
`a\_a^`]baaaaaaba`aaQ\_\_`a\_aa```W\_\_¥[^WY^^  
@HWI-EAS443:3:48:1737:945#0/1  
CACTTCAATTGGCTTGTCTCTTCATGTTCTTTGTCCTTG  
+HWI-EAS443:3:48:1737:945#0/1  
aaaaba\_]aYaa^baSV¥V`Ia\_Z]\_¥R`Z¥abb¥¥]a^P  
@HWI-EAS443:3:48:1769:288#0/1  
TGTGAATTGACTGATTCAAGCTGGATAGAACTTGATGAAA  
+HWI-EAS443:3:48:1769:288#0/1  
\_bX\_JV``a¥^]R0````]aR\_\_^PZ`\_U\_Wa\_aVX^OX\_  
@HWI-EAS443:3:48:1785:1209#0/1  
CATGACCAAGGAATTCTTTGAAAACAAATCGGAAACATGG  
+HWI-EAS443:3:48:1785:1209#0/1  
\_bbbbbbbab`bbbabbbbba\_aabbbabaaaaaaaaa  
@HWI-EAS443:3:48:1788:1199#0/1  
GAAGATCCCAAGGACAAAGAACATGAAGAGAACAAGCCAA  
+HWI-EAS443:3:48:1788:1199#0/1  
aT`\_¥YaV¥[^^\_Y\_[\_]a¥]YSOT]W\_Z`^TVYU]OZ]Z  
@HWI-EAS443:3:48:188:459#0/1  
GCGTGGTGTCTCCTCAAGAATGGTTCAATTTTGGCGTTC  
+HWI-EAS443:3:48:188:459#0/1  
aaaa`^Yaa]aaaaa]aaaa\_U¥a\_] [`aaW]¥][[Z  
@HWI-EAS443:3:48:234:1109#0/1  
ATAAATACGGCCTTGCTCAATGCATCCTGTGCAGCCATGG  
+HWI-EAS443:3:48:234:1109#0/1  
aa\_^Zaa\_^`^`^\_^^]\_\_^]\_\_^Y[Z\_^Y¥]V]VV\_]Y\_  
@HWI-EAS443:3:48:278:804#0/1  
ATCATGGCCTGGACAGTGGTGAACAGTATATGTAACACAA  
+HWI-EAS443:3:48:278:804#0/1  
aa\_b^```aaa\_\_\_]a]`aX\_\_`V`aV\_^`^\_]\_a]\_```

@HWI-EAS443:3:48:288:178#0/1  
GGGGGCTATATGAAGCAATCGAGGAGTGCCTGATTAATGA  
+HWI-EAS443:3:48:288:178#0/1  
ab^bbabaaabbabbabbbaaba\_a^a¥]aa\_`a\_\_`^  
@HWI-EAS443:3:48:325:878#0/1  
GAAGATCCCAAGGACAAAGAACATGAAGAGAACAAGCCAA  
+HWI-EAS443:3:48:325:878#0/1  
aaU^[U]a]aa^Y^`\_aaaaV`aaa`\_]a^]a[\_US\_Z  
@HWI-EAS443:3:48:342:1014#0/1  
CTTCTGTCAAAGAGAAAGACATGACCAAGGAATTCTTTGA  
+HWI-EAS443:3:48:342:1014#0/1  
`bbbaabbb\_`b`abaabaaaab\_a\_aaaa^^`aYaaba`  
@HWI-EAS443:3:48:380:1290#0/1  
GGCCACCAAAGCGGACTACACCCTTGACGAAGAGAGCAGG  
+HWI-EAS443:3:48:380:1290#0/1  
Z`ZW\_Wb\_]\_WW\_\_\_\_\_`R[\_]R\_Y[[\_Y`a]aaa]X]Xaa  
@HWI-EAS443:3:48:417:116#0/1  
GAAAAAGTAGACTTTGATGACTGCAAAGATGTTGGAGACC  
+HWI-EAS443:3:48:417:116#0/1  
aaa^Z^a\_aaa^aaaa`aa\_`^a]\_\_\_\_`^ZV  
@HWI-EAS443:3:48:493:1577#0/1  
AGACTTTGGTCCGCAAGCTTGCGCATAGTTCCTGTAATCT  
+HWI-EAS443:3:48:493:1577#0/1  
`ba`aaa¥Mnb`[Yaaaa`\_V[¥¥a`a[\_RW\_aUXY`X[  
@HWI-EAS443:3:48:498:615#0/1  
CAGCTTGCTAGAGATCTGGGCTCTGGCTCATCACTGTCAT  
+HWI-EAS443:3:48:498:615#0/1  
`aa`a\_U]`aaabaaa\_]\_a^aaa\_aaa\_aa\_a`a\_N]\_a  
@HWI-EAS443:3:48:516:1746#0/1  
GAAGTTCGGTGGGAGACTTTGGTCCGCAAGCTTGCGCATA  
+HWI-EAS443:3:48:516:1746#0/1  
abaa^baa`¥\_a`\_a\_aaba\_¥^\_W`aa]O]^`[U¥ZZ`^  
@HWI-EAS443:3:48:604:1237#0/1  
CTCCCCTGGGTGACTCTCCGATTGGCCATGTTTCCGATTT  
+HWI-EAS443:3:48:604:1237#0/1  
abbb`b]bbb\_Yabbbbaab`[abaa`a]\_[abZZ\_\_\_\_aa  
@HWI-EAS443:3:48:66:924#0/1  
GCTAGCAGAGCTACAGGACATTGAAAATGAAGAGAAGATC  
+HWI-EAS443:3:48:66:924#0/1  
abab`bbaabbbbabbaaabb`\_ababaaaaaab`Y`\_  
@HWI-EAS443:3:48:688:627#0/1  
GGCTTGGAAGCAGGTGCTAGCAGAGCTACAGGACATTGAA  
+HWI-EAS443:3:48:688:627#0/1  
aaaZ^a`\_aa`U¥[FO`U[V]a`\_]`ZNY\_Y[R^\_¥X[`  
@HWI-EAS443:3:48:754:198#0/1  
GGGGCATGGAATGAGGCGCTGCCTTCTTCAGTCTCTTCA  
+HWI-EAS443:3:48:754:198#0/1  
abaa\_a\_``\_aaa¥`a``a`\_a¥Y^\_¥``ZW]TS¥V^WQV  
@HWI-EAS443:3:48:80:539#0/1  
CCCGTTTCGTCGATGAAATGGAATCCGAATACATGAAACA

+HWI-EAS443:3:48:80:539#0/1  
aaab`aab`ab`aa\_a`a\_aaa`a][\_`\_\_\_U\_\_a`aa\_a  
@HWI-EAS443:3:48:882:1602#0/1  
AGAGATCTGGGCTCTGGCTCATCACTGTCATACTGTTTAA  
+HWI-EAS443:3:48:882:1602#0/1  
`QZa`a[\_^]YTR\_aY[Y^\_]^\_Ra\_ZWS\_^X^^]\_ZWY  
@HWI-EAS443:3:48:906:118#0/1  
CGGTGGGAGACTTTGGTCGGCAAGCTTGCGCATAGTTCCT  
+HWI-EAS443:3:48:906:118#0/1  
`bbabbb^b\_\_aaaa\_aab``b^aaYb\_Xa^aW^\_]\_  
@HWI-EAS443:3:48:916:864#0/1  
GGAACTATTTTACAGCAGAAGTGTCCCACTGCAGGGCTAC  
+HWI-EAS443:3:48:916:864#0/1  
`a]Yaa^abZaa^^`Y\_aaa\_\_a\_] [X`U```\_b\_]N[UK  
@HWI-EAS443:3:48:91:1025#0/1  
ATCAAACTAGGCTTTTCACTATAAGACAAGAAATGGCCA  
+HWI-EAS443:3:48:91:1025#0/1  
``\_a`a\_abaaa\_ab`a`aaa`a\_aa]Za``\_aY\_^\_YVW  
@HWI-EAS443:3:48:932:1450#0/1  
CATAAATACGGCCTTGCTCAATGCATCCTGTGCAGCCATG  
+HWI-EAS443:3:48:932:1450#0/1  
aabbaabaabaa``aX`^`aa`a`a^aa````\_Zaa¥`\_^]  
@HWI-EAS443:3:48:942:566#0/1  
GCGTCTCCACAACCTTGAGGGGTTTTCGGCTGAATCGAGAA  
+HWI-EAS443:3:48:942:566#0/1  
a^][^^`a\_]^[Z^`UVaa`R]^WQW\_SXaXVR[VPY]R  
@HWI-EAS443:3:48:943:1007#0/1  
TCCGATTTGTTTTCAAAGAATTCCTTGTCATGTCTTTCT  
+HWI-EAS443:3:48:943:1007#0/1  
aaaa]T`b^F¥^aYOT\_a¥`\_`aW¥X`VX^]Y]\_]\_a`¥¥  
@HWI-EAS443:3:48:956:1197#0/1  
CTGAAATTAAGTATTGAAGACCCGAGTCACGAGGGGGAGG  
+HWI-EAS443:3:48:956:1197#0/1  
abbbbbbbbbbaaaaaabbbbaab\_babaab\_abaab`aa  
@HWI-EAS443:3:48:963:691#0/1  
CGGTGGGAGACTTTGGTCGGCAAGCTTGCGCATAGTTCCT  
+HWI-EAS443:3:48:963:691#0/1  
aab]abb`b^`bbbaaaa^b`aaa`a`a`aa\_a\_a^a`\_a  
@HWI-EAS443:3:48:974:1356#0/1  
GAGCAGGGCAAGAATCAAACTAGGCTTTTCACTATAAGA  
+HWI-EAS443:3:48:974:1356#0/1  
`a¥`\_WUS`IY]Z^aX0^]\_ZW^PI^\_YXX[aHVVH[L]LL  
@HWI-EAS443:3:48:990:258#0/1  
TAATCAGGCACTCCTCGATTGCTTCATATAGCCCCCAAG  
+HWI-EAS443:3:48:990:258#0/1  
^^¥S^b\_W[\_T`IQ\_`[aaaa^]a¥aa`a^YJQ]^V¥]^\_  
@HWI-EAS443:3:49:103:90#0/1  
CTTGCTCAATGCATCCTGTGCAGCCATGGATGACTTTTCAG  
+HWI-EAS443:3:49:103:90#0/1  
a`abbaababaaba`aaaa`a`a\_aaa`¥[\_`\_aaa\_aa



@HWI-EAS443:3:49:1047:1352#0/1  
CATGTTTCCGATTTGTTTTCAAAGAATTCCTTGGTCATGT  
+HWI-EAS443:3:49:1047:1352#0/1  
aa`baababb\_bbba`bbbbaabaaabababbb\_\_abbba  
@HWI-EAS443:3:49:1055:1491#0/1  
GGGGCATGGAATGAGGCGCTGCCTTCTTCAGTCTCTTCA  
+HWI-EAS443:3:49:1055:1491#0/1  
W\_aUb]``a`X`^\_bb^]b\_a¥I¥b^a```QG]UTbYaSa  
@HWI-EAS443:3:49:106:891#0/1  
CTTCTCTACCCCTGTTGTGTTACATATACTGTTCACT  
+HWI-EAS443:3:49:106:891#0/1  
^\_¥\_\_\_\_\_`\_Wa[¥X\_`a]`bb[Zab\_a\_0\_¥¥\_[[YZ^b\_  
@HWI-EAS443:3:49:1108:1316#0/1  
CACTGTCCAGGCCATGATTCGGTCTCTTCAATTATC  
+HWI-EAS443:3:49:1108:1316#0/1  
\_b`bbbabba`^abababba``]a`Z¥baaba¥\_aaaab\_  
@HWI-EAS443:3:49:1115:271#0/1  
AGAACTTGATGAAATAGGAGAAGATGTTGCCCGATTGAA  
+HWI-EAS443:3:49:1115:271#0/1  
abbbabbb\_b]a\_ba`bb\_baabaabaabY`\_aaa`\_aaa  
@HWI-EAS443:3:49:1187:838#0/1  
GGCATGGAATGAGGCGCTGCCTTCTTCAGTCTCTCAGC  
+HWI-EAS443:3:49:1187:838#0/1  
abaaabaababbZ[U`b`aa[^aaRaaQ^][[[Z\_¥H^[R  
@HWI-EAS443:3:49:1209:1411#0/1  
ATTTTTCCCATTTGTGTGGCTCCAGTCTCGGGTCAGTGAG  
+HWI-EAS443:3:49:1209:1411#0/1  
]ab\_babba\_a\_baab`^VN¥Za¥\_]W¥^[aYZ[XNMDW  
@HWI-EAS443:3:49:1209:424#0/1  
GTGGGCACTCGGTGAAAATATGGCACCAGAAAAAGTAGAC  
+HWI-EAS443:3:49:1209:424#0/1  
a]W^\_``\_aZa`VXTTa`^W]¥\_U]W[[Z¥^[Z^U[^^U  
@HWI-EAS443:3:49:1226:1111#0/1  
GTGCTAGCAGAGCTACAGGACATTGAAAATGAAGAGAAGA  
+HWI-EAS443:3:49:1226:1111#0/1  
`a`\_\_aaaaVa`\_^[\_a`]Y[`\_[X¥^\_[`^`^^^\_`^\_\_  
@HWI-EAS443:3:49:1227:1262#0/1  
TCCACTCCCCTGGGTGACTCTCCGATTGGCCATGTTTCCG  
+HWI-EAS443:3:49:1227:1262#0/1  
abab`ba\_`aaaa]T\_[XYa^`ZaW^^M`\_[P^UU\_]V[  
@HWI-EAS443:3:49:1269:1479#0/1  
GTGCTAGCAGAGCTACAGGACATTGAAAATGAAGAGAAGA  
+HWI-EAS443:3:49:1269:1479#0/1  
abbbbbbbbaabbbbbbbba`bbaaaaabbbbaabbaaaa  
@HWI-EAS443:3:49:1280:1298#0/1  
AGAAATTTAGGCTTCTCTACCCCTGTTGTGTTACATATAC  
+HWI-EAS443:3:49:1280:1298#0/1  
aba`bb`¥ab\_abb`b\_abY\_`]`a^aaaa`a\_\_a\_a``^  
@HWI-EAS443:3:49:1294:127#0/1  
GTGGGAGACTTTGGTCGGCAAGCTTGCGCATAGTTCCTGT

+HWI-EAS443:3:49:1294:127#0/1  
a]a]W[a^Waaa` `]^W`^]X]XZ^]O[WX\_YXX^ZU\_]X  
@HWI-EAS443:3:49:1298:1449#0/1  
GGGGCATGGAAATGAGGCGCTGCCTTCTTCAGTCTCTTCA  
+HWI-EAS443:3:49:1298:1449#0/1  
a`a][b`a]\_aaaa`aaa[``[\_aH[\_X^`ZH^V[\_U\_  
@HWI-EAS443:3:49:1317:11#0/1  
GGGGCATGGAAATGAGGCGCTGCCTTCTTCAGTCTCTTCA  
+HWI-EAS443:3:49:1317:11#0/1  
aaa`TZ`a]WY\_\_`\_aa[a[YV]SVVUZRRUUNPRUU^SR  
@HWI-EAS443:3:49:1411:422#0/1  
CCTTGGGATCTTCTTTCATTTCAATGTCCTGTAGCTCT  
+HWI-EAS443:3:49:1411:422#0/1  
abbbabb`a^aaaabbbbbbbbabab]aaabbaaa\_^\_  
@HWI-EAS443:3:49:1446:1484#0/1  
GGGGGCTATATGAAGCAATCGAGGAGTGCCTGATTAATGA  
+HWI-EAS443:3:49:1446:1484#0/1  
ab\_TWab`baaa[``\_aba`\_\_a`[a\_`][``^`aaaYa\_a  
@HWI-EAS443:3:49:1450:1309#0/1  
GGCCGAGTCTTCTGTCAAAGAGAAAGACATGACCAAGGAA  
+HWI-EAS443:3:49:1450:1309#0/1  
`bbb`ab^bbabbY]Z\_aa\_baaa\_]\_aaaa\_\_aaba\_\_  
@HWI-EAS443:3:49:1463:1754#0/1  
ATAAGACAAGAAATGGCCAGTAGGAGTCTATGGGATTCCT  
+HWI-EAS443:3:49:1463:1754#0/1  
abaaaa`aba`aaa`a`\_\_`¥`\_\_`WU\_¥`\_`^^¥\_V[`  
@HWI-EAS443:3:49:1465:1469#0/1  
ATGAAATGGAAATCCGAATACATGAAACAACTTCCAAAT  
+HWI-EAS443:3:49:1465:1469#0/1  
\_\_b`a¥`Z\_\_[\_\_babaaaa¥`a\_`T\_\_baYTYa\_Q\_^X`  
@HWI-EAS443:3:49:1534:799#0/1  
TGAACGCCAAAATTGAACCATTCTTGAGGACGACACCACG  
+HWI-EAS443:3:49:1534:799#0/1  
`\_aaZa\_\_]a\_abaa`a\_Qaaa^aa^]\_\_^Wa[U\_RV\_V\_  
@HWI-EAS443:3:49:1663:248#0/1  
CTTGGGGGGCTATATGAAGCAATCGAGGAGTGCCTGATTA  
+HWI-EAS443:3:49:1663:248#0/1  
Q¥\_a\_¥^a\_\_a`\_Z¥¥\_WY[b[[[\_]]\_¥R¥^0\_`]a\_\_  
@HWI-EAS443:3:49:1680:1217#0/1  
ATGGCTTGGAAAGCAGGTGCTAGCAGAGCTACAGGACATTG  
+HWI-EAS443:3:49:1680:1217#0/1  
T¥a\_¥a^OY[^^Y^a^RYV]^RYX]P[JS¥¥N¥¥H[UPYW  
@HWI-EAS443:3:49:1762:1054#0/1  
GCATGTGAATTGACTGATTCAAGCTGGATAGAACTTGATG  
+HWI-EAS443:3:49:1762:1054#0/1  
]W]a`^`Z¥abaa\_]\_a\_¥\_[T¥``bb`^a`S[D[\_``]-  
@HWI-EAS443:3:49:1775:133#0/1  
AGAGAAGCCTAAATTTCTTCTGATTTGTATGATTACAAA  
+HWI-EAS443:3:49:1775:133#0/1  
Z¥Z]] [PY\_VSW]b\_Z\_`^ZQa]X^\_[TY¥aa\_a\_]`\_¥]

@HWI-EAS443:3:49:180:1034#0/1  
TCCAATTTCAATGAACCGTTCTCTTTGTAATCATAAAA  
+HWI-EAS443:3:49:180:1034#0/1  
`[\_a[babaa` `abaaaa^^Ya\_aa` ¥¥` ``U^aa¥a\_\_  
@HWI-EAS443:3:49:192:1612#0/1  
ATGGCTTGAAGCAGGTGCTAGCAGAGCTACAGGACATTG  
+HWI-EAS443:3:49:192:1612#0/1  
`^bb^b\_S^¥` ¥Y\_a\_HT¥^^PUXTMXLW^\_^¥¥UJW]WF  
@HWI-EAS443:3:49:19:1102#0/1  
CACAACTTGAGGGTTTTCGGCTGAATCGAGAAAATTGCT  
+HWI-EAS443:3:49:19:1102#0/1  
a^bbZbbbbZa¥^aQ¥b\_QYa[\_\_\_`a]¥a\_^\_U]a¥\_ZW\_  
@HWI-EAS443:3:49:248:1983#0/1  
CGGGGTGAATCAATAATTGTAGAATCTGGTGACCCGAATG  
+HWI-EAS443:3:49:248:1983#0/1  
abbba[bbbbabab\_bbbbab`bab\_ab\_aaa`Z\_[aaaa  
@HWI-EAS443:3:49:279:1080#0/1  
CATCAGCAGGAACCTTGACCGCTGATGGCAAAGAGGCCCA  
+HWI-EAS443:3:49:279:1080#0/1  
`baabbbbaaab`bbbaa]a`aba`aa` `aaaa` ``\_\_a  
@HWI-EAS443:3:49:337:1110#0/1  
GAAAGGCATAAATCCCAATTACCTCATGGCTTGAAGCAG  
+HWI-EAS443:3:49:337:1110#0/1  
a^aa` \_\_`\_`\_]`aXTZ]`aa\_XY^\_a`a`aa^U`VXTTVV  
@HWI-EAS443:3:49:374:1258#0/1  
AGAATTCCTTGGTCATGTCTTTCTCTTTGACAGAAGACTC  
+HWI-EAS443:3:49:374:1258#0/1  
^YT[a` [¥`^`¥UV0¥\_`a][aH]P¥a]P\_`aa`Y` `\_ZK  
@HWI-EAS443:3:49:399:1764#0/1  
TAAGACAAGAAATGGCCAGTAGGAGTCTATGGGATTCCTT  
+HWI-EAS443:3:49:399:1764#0/1  
`aaaaaa\_W`aa`aaaa`a¥`a` \_\_RX\_\_a\_\_R\_\_YZ^\_  
@HWI-EAS443:3:49:407:1007#0/1  
GGGGCATGGAATGAGGCGCTGCCTTCTTCAGTCTCTTCA  
+HWI-EAS443:3:49:407:1007#0/1  
aba]\_baa`aaaaa\_`aaaZa` [ `\_\_\_¥^^ZWYYU^¥NW  
@HWI-EAS443:3:49:413:1553#0/1  
AGCCCCCAAGATCGAAGGTTCCAGGTTCCAGGTTGTCCC  
+HWI-EAS443:3:49:413:1553#0/1  
\_V]`aaaabaZ`UZ]]Xa` [YV\_[¥`U\_\_¥]` ^¥` ¥¥Z\_¥  
@HWI-EAS443:3:49:458:1273#0/1  
GGGGCATGGAATGAGGCGCTGCCTTCTTCAGTCTCTTCA  
+HWI-EAS443:3:49:458:1273#0/1  
a\_X[aaaba\_a\_aaba[abaa^V¥`a\_aa\_\_a[¥`T\_a`a  
@HWI-EAS443:3:49:492:457#0/1  
CTCCAACATCTTTGCAGTCATCAAAGTCTACTTTTTCTGG  
+HWI-EAS443:3:49:492:457#0/1  
`aTSab^bbba\_ba^bbV`a`a`]a\_R`a\_\_bbb`b`a`\_  
@HWI-EAS443:3:49:532:1768#0/1  
CACCGATTTGAGATAATTGAAGGAAGAGACCGAATCATGG

+HWI-EAS443:3:49:532:1768#0/1  
ab\_\_b[abaaab`^aab]JWabb\_a\_aXaaYa\_a^^`aba  
@HWI-EAS443:3:49:548:1207#0/1  
GAAATCCGAATACATGAAACAACTTCCAAATGTGTGCAT  
+HWI-EAS443:3:49:548:1207#0/1  
a\_`\_^\_ab^aaa`a`aaa`\_a\_\_\_a`Y`a``aa[\_SZ[\_`\_`  
@HWI-EAS443:3:49:577:167#0/1  
TGGGGCATGGAAATGAGGCGCTGCCTTCTTCAGTCTCTTC  
+HWI-EAS443:3:49:577:167#0/1  
ab`b``bbbbababaabaabaaa[]`\_X\_`^^[a[\_V`\_]`  
@HWI-EAS443:3:49:608:1262#0/1  
CACAACTTGAGGGTTTTTCGGCTGAATCGAGAAAATTGCT  
+HWI-EAS443:3:49:608:1262#0/1  
]`Q\_abb`abaababb]`bb`bbbaabbaa\_`]^abab  
@HWI-EAS443:3:49:645:665#0/1  
GCGCAAGCTTGCCGACCAAAGTCTCCCACCGAACTTCTCC  
+HWI-EAS443:3:49:645:665#0/1  
a\_QQ\_]a`a\_TXbW\_P¥ZXUP[^]aaa]X^WZ\_`]MK[T  
@HWI-EAS443:3:49:664:664#0/1  
CCCCGTTTCGTCGATGAAATGGAAATCCGAATACATGAAAC  
+HWI-EAS443:3:49:664:664#0/1  
abbbb`babaabbabbab`ba\_aa```baa`\_aaaaaa\_  
@HWI-EAS443:3:49:670:62#0/1  
GGGGAGGGAATACCACTATATGATGCAATCAAATGCATGA  
+HWI-EAS443:3:49:670:62#0/1  
`aa]\_b`Y[Zba¥S\_[a`a\_\_\_\_\_aR\_]a^\_\_`\_aU\_]\_\_`  
@HWI-EAS443:3:49:738:1438#0/1  
CAGCTTGCTAGAGATCTGGGCTCTGGCTCATCACTGTCAT  
+HWI-EAS443:3:49:738:1438#0/1  
a¥bUbbb\_bab¥¥aaab`Y^aaaaab\_a\_baaa^`b\_\_aa  
@HWI-EAS443:3:49:73:349#0/1  
GGGGGCTATATGAAGCAATCGAGGAGTGCCTGATTAATGA  
+HWI-EAS443:3:49:73:349#0/1  
a]]aaabbbbbaabaabaaa`aba^`^aa`ababaaaaaa  
@HWI-EAS443:3:49:757:424#0/1  
GGCATGTGAATTGACTGATTCAAGCTGGATAGAACTTGAT  
+HWI-EAS443:3:49:757:424#0/1  
aaaabbab]Z]aa^aab\_\_aa\_aa]aa]\_`aa\_a\_\_^\_[a  
@HWI-EAS443:3:49:781:157#0/1  
CTCATGCTTGCGATATGTTCAATCGGGGCAACATCTTCTC  
+HWI-EAS443:3:49:781:157#0/1  
aabbabbbabaaa`\_bb`babbaaab\_aY`a\_aa^`a\_a]  
@HWI-EAS443:3:49:835:563#0/1  
GAAAAAGTAGACTTTGATGACTGCAAAGATGTTGGAGACC  
+HWI-EAS443:3:49:835:563#0/1  
a`aa`ab\_ba` `abaaab`aaa\_aa`\_aaa^aZa]aa\_¥  
@HWI-EAS443:3:49:837:223#0/1  
CAAACTAGGCTTTTCACTATAAGACAAGAAATGGCCAGT  
+HWI-EAS443:3:49:837:223#0/1  
`abaaababbbbbaabb^bbbabba¥babbbbbbb\_aaa\_

@HWI-EAS443:3:49:84:853#0/1  
CAGCTTGCTAGAGATCTGGGCTCTGGCTCATCACTGTCAT  
+HWI-EAS443:3:49:84:853#0/1  
a\_U`b````ba]ba``aa`^ba`¥]`^ZTa`U\_`aa]S\_]  
@HWI-EAS443:3:49:861:57#0/1  
GACATTCTTTGGCTGGAAAGAGCCTAACATAGTCAAACCA  
+HWI-EAS443:3:49:861:57#0/1  
`¥a[bbbbbb`\_b¥`bbaa`]Za]Y`]a¥aaaa¥``^\_F[]  
@HWI-EAS443:3:49:884:1619#0/1  
GGGGCATGGAAATGAGGCGCTGCCTTCTTCAGTCTCTTCA  
+HWI-EAS443:3:49:884:1619#0/1  
abaaaaabb\_abbaabbabaaaaZab`aa]aa\_]a\_aaN\_  
@HWI-EAS443:3:49:895:163#0/1  
CTTCAATTGGCTTGTTCTTCTTCATGTTCTTTGTCCTTGGG  
+HWI-EAS443:3:49:895:163#0/1  
aba`abb`bb\_bb\_bb`\_R\_bVbaa[b]bbb\_b]¥ab¥`a  
@HWI-EAS443:3:49:970:1345#0/1  
GTTTGTTCCTCGTCTTCCTTCTTTGGTCCTACATTTGCTT  
+HWI-EAS443:3:49:970:1345#0/1  
aaaab`bbb\_[VVYaa`aaUaa\_a`X]\_`\_\_aa`a`]a`  
@HWI-EAS443:3:49:972:1961#0/1  
AAAGAGCCTAACATAGTCAAACCACATGAGAAAGGCATAA  
+HWI-EAS443:3:49:972:1961#0/1  
S^\_\_[YW\_aZY[a\_SZP¥baa^`]Y]a`^aa\_]aa`a^U  
@HWI-EAS443:3:49:976:961#0/1  
ACCCGAATGCACTATTGAAGCACCGATTTGAGATAATTGA  
+HWI-EAS443:3:49:976:961#0/1  
aa¥]aaa^a\_a^`¥aaaa¥]^`\_]a]a\_aa^a^`\_\_a\_a^  
@HWI-EAS443:3:4:1052:1978#0/1  
CAAAGAATTCCTTGGTCATGTCTTTCTCTTTGACAGAAGA  
+HWI-EAS443:3:4:1052:1978#0/1  
a`bbbaabaV\_b`bba]bbaabaab^baab\_babbbbbbba  
@HWI-EAS443:3:4:1082:294#0/1  
GTTCTGTAAATCTCAAATTTTTCTTCAATTGTCTCTTCGC  
+HWI-EAS443:3:4:1082:294#0/1  
a[]PZN[JJX\_UPLS]TU\_^^^X]PSV][X]VU\_VVSPBB  
@HWI-EAS443:3:4:1094:144#0/1  
CAAGCCATGAGGTAATTGGGATTTATGCCTTTCTCATGTG  
+HWI-EAS443:3:4:1094:144#0/1  
`aba`aab`aaZ`\_a`aa`]\_``a`\_Xa]\_Z^X¥\_`X`  
@HWI-EAS443:3:4:1112:1039#0/1  
GCTGGGTCCAAAATGAATTCATAAGGCATGTGAATTGAC  
+HWI-EAS443:3:4:1112:1039#0/1  
aa\_\_a`\_\_`\_]`U`]`[SPXY]]YW\_^]¥^^X[VXZW\_WZ  
@HWI-EAS443:3:4:1114:1106#0/1  
TAGGAGTCTATGGGATTCCTTTTCGTCAAGTCCGAAAGAGGC  
+HWI-EAS443:3:4:1114:1106#0/1  
aaabbb\_ababbaU]aaaaaaJ`]\_\_aZaYa^\_]a`\_]  
@HWI-EAS443:3:4:1180:652#0/1  
ACGGCCTTGCTCAATGCATCCTGTGCAGCCATGGATGACT

+HWI-EAS443:3:4:1180:652#0/1  
aaba`¥baYaa`aaa`^ba\_Z\_a¥`¥`\_¥^`\_aa^^]¥W¥  
@HWI-EAS443:3:4:1240:1836#0/1  
GATCTGGGCTCTGGCTCATCACTGTCATACTGTTTAAGGT  
+HWI-EAS443:3:4:1240:1836#0/1  
a^aa¥b\_]Zba[aX[a`baa``aa`aa\_aYXaXa\_\_X[aS  
@HWI-EAS443:3:4:1246:1650#0/1  
GCTTGTCTCTTCATGTTCTTTGTCCTTGGGATCTTCTCT  
+HWI-EAS443:3:4:1246:1650#0/1  
a^\_aT`aZUSaaXabbV[]aa\_a]`aa¥a\_^\_WO]a\_b^^  
@HWI-EAS443:3:4:1259:1016#0/1  
TAATCAGGCACTCCTCGATTGCTTCATATAGCCCCCAAG  
+HWI-EAS443:3:4:1259:1016#0/1  
`]abaabaab```]a]aab`a\_aa``aaaaR[[\_Za`[\_`  
@HWI-EAS443:3:4:1265:2027#0/1  
GAGCCTTCTCCACTCCCCTGGGTGACTCTCCGATTGGCC  
+HWI-EAS443:3:4:1265:2027#0/1  
aaaa\_aa\_aaa`a`a\_Za`aa`[\_`\_¥^a^`^^¥^`XTT  
@HWI-EAS443:3:4:1299:1653#0/1  
GAGACTTTGGTCGCAAGCTTGCGCATAGTTCCTGTAATC  
+HWI-EAS443:3:4:1299:1653#0/1  
¥XaLY^`b\_``^¥^a]^\_Y\_XY[]``aP[F¥XZ^\_NTNYG  
@HWI-EAS443:3:4:1331:233#0/1  
ATGCTCTTGAGGACTGCGATAGGCCAAGTGTCGAGGCCCA  
+HWI-EAS443:3:4:1331:233#0/1  
ab^U¥Q\_\_^Zab[JTaQa`¥`aa\_Y¥V`¥aX\_\_\_\_\_`UUBB  
@HWI-EAS443:3:4:1348:1192#0/1  
TAACACAACAGGGGTAGAGAAGCCTAAATTTCTTCCTGAT  
+HWI-EAS443:3:4:1348:1192#0/1  
a]aXY]```aa\_]L`a^ba`^[]`\_\_`Y^^`\_\_¥P[aS^  
@HWI-EAS443:3:4:1423:112#0/1  
GGGGCTATATGAAGCAATCGAGGAGTGCCTGATTAATGAT  
+HWI-EAS443:3:4:1423:112#0/1  
aa\_¥Z\_Z`Za`]`\_W\_\_\_W\_W\_`Y^T¥WW¥^S¥\_WWY¥WY  
@HWI-EAS443:3:4:1569:1077#0/1  
GTGGTGTCTCCTCAAGAATGGTTCAATTTTGGCGTTCAC  
+HWI-EAS443:3:4:1569:1077#0/1  
]JPPQZR`^N]\_YMTIP[[^\_TPZLTY]]¥[]WZMVMLZ  
@HWI-EAS443:3:4:1571:1427#0/1  
CATCAGGCAATCTGAGGGGCGTGGTGTCTCCTCAAGAA  
+HWI-EAS443:3:4:1571:1427#0/1  
ab`abbb`baaaa`aa\_ba[¥\_]a\_vLaVZ^¥N`U\_¥XaW  
@HWI-EAS443:3:4:1691:850#0/1  
TGGCCATGTTTCCGATTTGTTTTCAAAGAATTCCTTGGTC  
+HWI-EAS443:3:4:1691:850#0/1  
^^aX\_\_^^Ua`[\_`a\_aaab\_[a`\_^`\_]W\_]RR`X[¥T^  
@HWI-EAS443:3:4:1714:630#0/1  
GGGGCATGGAAATGAGGCGCTGCCTTCTTCAGTCTCTTCA  
+HWI-EAS443:3:4:1714:630#0/1  
a`aUKWa`\_`^VSZTXNS^^MPKTRPUW^WSSSNMPWBBBB

@HWI-EAS443:3:4:189:297#0/1  
GGGGTTTTTCGGCTGAATCGAGAAAATTGCTTCTCATTGTT  
+HWI-EAS443:3:4:189:297#0/1  
aa`YF[YV[]Y[]XPY¥Z`VYTU]]]]UW[ZVYVV]Z¥TB  
@HWI-EAS443:3:4:195:1317#0/1  
GTCCGCTTTGGTGGCCATCTCCTCTCCAGTGAATGAAAAG  
+HWI-EAS443:3:4:195:1317#0/1  
aa\_aaaaaYb[N\_\_`Y\_]`\_a\_]`^`a``Ua\_\_X\_]WKBB  
@HWI-EAS443:3:4:228:749#0/1  
GTGAATCAATAATTGTAGAATCTGGTGACCCGAATGCACT  
+HWI-EAS443:3:4:228:749#0/1  
a¥aaa`a\_aa^`\_a\_]a`a\_[\_`\_Xa\_¥\_\_aX\_]\_^]]  
@HWI-EAS443:3:4:233:988#0/1  
GGAGAAGTTCGGTGGGAGACTTTGGTCCGCAAGCTTGCGC  
+HWI-EAS443:3:4:233:988#0/1  
ab\_baaa^`\_`a¥a]aZa^P`\_aaa¥]¥`]Y]a^Y\_`^]¥  
@HWI-EAS443:3:4:243:1565#0/1  
GCCATGTTTCCGATTTGTTTTCAAAGAATTCCTTGGTCAT  
+HWI-EAS443:3:4:243:1565#0/1  
aX^ZaaY\_\_[aa[`\_aaP^^[\_[`]^[]]]`^`a\_SS\_\_  
@HWI-EAS443:3:4:272:991#0/1  
CGATGAAATGGAAATCCGAATACATGAAACAACTTCCAA  
+HWI-EAS443:3:4:272:991#0/1  
`¥Z¥bbb^]abaaa^¥Z\_`Y^abaa\_aaa`bb^aa`^H`]  
@HWI-EAS443:3:4:340:1375#0/1  
CCAAGGACAAAGAACATGAAGAGAACAAGCCAATTGAAGT  
+HWI-EAS443:3:4:340:1375#0/1  
aaabbaabaaabaa`abaabaaaa`aaaX\_`a``a\_aaS  
@HWI-EAS443:3:4:347:146#0/1  
ATATGCGTCTCCACAACCTTGAGGGGTTTTTCGGCTGAATCG  
+HWI-EAS443:3:4:347:146#0/1  
`aaab`b`\_a\_\_\_^¥`Xaaa\_aaaaY]\_\_X\_^X^\_^¥WVY  
@HWI-EAS443:3:4:424:1507#0/1  
CGTCTCCACAACCTTGAGGGGTTTTTCGGCTGAATCGAGAAA  
+HWI-EAS443:3:4:424:1507#0/1  
`b`bbaabaabZaaa\_aaa¥M^aa`aa\_`aa^]\_aa\_]a`  
@HWI-EAS443:3:4:471:883#0/1  
AACAAAATAAAATCTGAGAAGACACACATTCACATCTTTT  
+HWI-EAS443:3:4:471:883#0/1  
ab`aa]`bbbabaaab`aaaa\_a\_a\_aaaaa¥a\_¥a`\_`  
@HWI-EAS443:3:4:506:334#0/1  
GCACCAGAAAAAGTAGACTTTGATGACTGCAAAGATGTTG  
+HWI-EAS443:3:4:506:334#0/1  
a]WZOX^VZY]Xa^aaYW]^[\_[¥aYOY]ZRXY\_[V\_WBB  
@HWI-EAS443:3:4:539:415#0/1  
AAACCACATGAGAAAGGCATAAATCCCAATTACCTCATGG  
+HWI-EAS443:3:4:539:415#0/1  
¥¥¥^b\_babab`aYY^\_Rabaab]Q^Zaaba]LX¥Waaa¥  
@HWI-EAS443:3:4:585:1004#0/1  
GGCATGTGAATTGACTGATTCAAGCTGGATAGAACTTGAT

+HWI-EAS443:3:4:585:1004#0/1  
]ba`b^V^0`bVa`aa^aa^[`b0ab\_\_aaa]`Uaaa^\_  
@HWI-EAS443:3:4:588:1128#0/1  
CCTCGATTGCTTCATATAGCCCCCAAGATCGAAGGTTCC  
+HWI-EAS443:3:4:588:1128#0/1  
aYMX\_] ^Ha]\_a^a^[¥TYZOTU]ZfQ[[BBBBBBBBBBB  
@HWI-EAS443:3:4:625:753#0/1  
ATTTTCACCGAGTGCCCACTTCAATTGGCTTGTCTCTTC  
+HWI-EAS443:3:4:625:753#0/1  
]bbab]bbabaa]ba\_abaaa]`aa^b\_\_`M\_[HWX]]N  
@HWI-EAS443:3:4:685:1318#0/1  
CAGATTTTGCCAGTAAGTCTGCACACTTTCCAATAGA  
+HWI-EAS443:3:4:685:1318#0/1  
aaa]`bbaababb`ab`\_¥`aaabba\_a\_a^]abaaaa`  
@HWI-EAS443:3:4:715:151#0/1  
CGATTGCCATGTTTCCGATTTGTTTCAAAGAATTCCTT  
+HWI-EAS443:3:4:715:151#0/1  
abaaabaaaaab`aa`¥b]^\_`a^aaa^\_`a^X\_]X`\_  
@HWI-EAS443:3:4:744:1500#0/1  
ATTGCTTCATATAGCCCCCAAGATCGAAGGTTCCAGGTT  
+HWI-EAS443:3:4:744:1500#0/1  
a^¥¥T¥T\_^ab`¥XYSX]XP]`P[SGTP[aBBBBBBBBBBB  
@HWI-EAS443:3:4:770:1744#0/1  
GCCTGAACAATGAGAAGCAATTTTCTCGATTCAGCCGAAA  
+HWI-EAS443:3:4:770:1744#0/1  
aaaaaaaa`aa`a\_aaaaaa\_ba`a^a\_a\_\_a^`aR]`\_\_`  
@HWI-EAS443:3:4:770:883#0/1  
CAGTAGGAGTCTATGGGATTCCTTTCGTCTAGTCCGAAAGA  
+HWI-EAS443:3:4:770:883#0/1  
aabaa\_bab`\_aabbbaaaa`aaa`aba¥aa¥Z\_a`¥a^¥  
@HWI-EAS443:3:4:774:950#0/1  
GGCCATTTCTTGCTTATAGTGAAAAGCCTAGTTTTGATT  
+HWI-EAS443:3:4:774:950#0/1  
ab`\_`aaba`baaa\_baaaaa\_aaaaa\_`a`b^aaaa\_`\_  
@HWI-EAS443:3:4:822:34#0/1  
TGAGAAAGGCATAAATCCCAATTACCTCATGGCTTGAAG  
+HWI-EAS443:3:4:822:34#0/1  
ab^a\_`bZa`aaY\_QVX[[a`QHX]^`]WU\_WNX]]BBBB  
@HWI-EAS443:3:4:828:1550#0/1  
GGGCACTCGGTGAAAATATGGCACCAGAAAAAGTAGACTT  
+HWI-EAS443:3:4:828:1550#0/1  
aab\_b\_babbXba`aaaaaaa`^aaa`^`^]\_\_`Xa`  
@HWI-EAS443:3:4:875:712#0/1  
CATGATTCGGTCTCTTCTTCAATTATCTCAAATCGGTGC  
+HWI-EAS443:3:4:875:712#0/1  
a^Y`YZXZ\_]P\_XT`G`T]^aa`a\_^GZR[X]¥HVXY^S  
@HWI-EAS443:3:4:964:1483#0/1  
CTTCCCTCCGTGTTACTCCAATTTCAATGAACCGGTTCTC  
+HWI-EAS443:3:4:964:1483#0/1  
`W^a^VZ`YZ]TMY\_`aaY^^a]Y^Y¥U^Z\_]¥][QR^`^`



@HWI-EAS443:3:50:1018:672#0/1  
GGACAACCTGGAACCTGGAACCTTCGATCTTGGGGGGCTA  
+HWI-EAS443:3:50:1018:672#0/1  
abaaaaaabaaa`baa^a^a`\_a¥`^aaaa\_a`¥a^  
@HWI-EAS443:3:50:104:1464#0/1  
TTGAAGCACCGATTTGAGATAATTGAAGGAAGAGACCGAA  
+HWI-EAS443:3:50:104:1464#0/1  
abaa`a¥\_V]b`aaabaaab`aaa\_a]aa`aaXa]R]`  
@HWI-EAS443:3:50:1089:1345#0/1  
ATCATTAATCAGGCACTCCTCGATTGCTTCATATAGCCCC  
+HWI-EAS443:3:50:1089:1345#0/1  
¥\_Zbba`a\_aa`Y¥\_bbaa`¥bb]`¥a^Uabab\_Z]UWW  
@HWI-EAS443:3:50:1116:1597#0/1  
GAATTCCTTGGTCATGTCTTTCTTTGACAGAAGACTCG  
+HWI-EAS443:3:50:1116:1597#0/1  
a`abbaabbab`\_abaaaba]aaaaab\_aabaaa\_\_^`  
@HWI-EAS443:3:50:116:412#0/1  
ATCCTGTGCAGCCATGGATGACTTTCAGCTGATCCCAATG  
+HWI-EAS443:3:50:116:412#0/1  
ab`aZS^bbb\_ab]`Yaaaa`^]Ua`WJ[b]XUSN`ZUT  
@HWI-EAS443:3:50:1279:564#0/1  
AACCAATGGAACCTCCAAGATCAAGATGAAATGGGGCATG  
+HWI-EAS443:3:50:1279:564#0/1  
]\_babbbbbbb`a\_aba\_Xbaaaaa`aba\_a`a`ab\_\_V\_  
@HWI-EAS443:3:50:1312:1442#0/1  
CACTCCCCTGGGTGACTCTCCGATTGGCCATGTTTCCGAT  
+HWI-EAS443:3:50:1312:1442#0/1  
abaabbabaab`\_aa\_b`aaaa`\_`\_`a`^`b`][GX  
@HWI-EAS443:3:50:1328:1600#0/1  
GGCCTGGACAGTGGTGAACAGTATATGTAACACAACAGGG  
+HWI-EAS443:3:50:1328:1600#0/1  
aa`ba`\_aab\_¥ba`\_ba]`aZaa`a]Zaa\_a^]aU¥`Va  
@HWI-EAS443:3:50:1388:565#0/1  
ATGCTCTTGAGGACTGCGATAGGCCAAGTGTCGAGGCCCA  
+HWI-EAS443:3:50:1388:565#0/1  
`babaabaaaaaU\_aab`][aa¥]W\_aZa\_\_¥\_\_a\_WX\_  
@HWI-EAS443:3:50:1395:881#0/1  
ATTGTTCTCACATATAGGAACATGGGCCTCGACACTTGG  
+HWI-EAS443:3:50:1395:881#0/1  
aaaaa\_aa\_]\_`\_`\_a`a`\_]¥Z`\_Z`^¥`^\_¥^¥\_]`  
@HWI-EAS443:3:50:1408:98#0/1  
GGGCATGGAATGAGGCGCTGCCTTCTTCAGTCTCTTCA  
+HWI-EAS443:3:50:1408:98#0/1  
a\_a]a`bb`aa\_bbab`\_aaaa\_\_a`V`a`Za\_R`a`^¥  
@HWI-EAS443:3:50:1488:1094#0/1  
TGCATTGAGGGCAAGCTTCCCAAATGTCAAAGAAGTGA  
+HWI-EAS443:3:50:1488:1094#0/1  
aaabS\_aV`bbaaab\_bbYT`^\_]Z`^`Z\_\_`Zaa^a\_  
@HWI-EAS443:3:50:148:775#0/1  
GCAGGGCAAGAATCAAACACTAGGCTTTTCACTATAAGACA

+HWI-EAS443:3:50:148:775#0/1  
T^bb¥^bbab`abWabaWabWLW`]bXNWa[asSa``Y]Y]  
@HWI-EAS443:3:50:1492:1118#0/1  
ATCCTGTGCAGCCATGGATGACTTTCAGCTGATCCCAATG  
+HWI-EAS443:3:50:1492:1118#0/1  
a`U^`Z¥S\_a¥]^`a¥]\_\_Z[^a¥V^`[aa``XTTTU\_\_  
@HWI-EAS443:3:50:1509:1240#0/1  
CTGGGTGACTCTCCGATTGGCCATGTTTCCGATTTGTTTT  
+HWI-EAS443:3:50:1509:1240#0/1  
abbbbabbbbbbbabbbbbba^aa`ab`Y¥b`abb`¥ab`  
@HWI-EAS443:3:50:1559:1339#0/1  
ATGAAATGGAAATCCGAATACATGAAACAAACTTCCAAAT  
+HWI-EAS443:3:50:1559:1339#0/1  
aaaab¥`ab`a`aaZbabaa¥^aaaa`aaa\_aa`\_a`\_b  
@HWI-EAS443:3:50:1584:1559#0/1  
TGCCCTGCTCTTTCGTCAAGGGTGTAGTCCGCTTTGGTG  
+HWI-EAS443:3:50:1584:1559#0/1  
abbaabbabab`bb]bb^a``aa[a`a¥`Z¥a^abaaY[]  
@HWI-EAS443:3:50:159:126#0/1  
CAGTCATCAAAGTCTACTTTTTCTGGTGCCATATTTTCAC  
+HWI-EAS443:3:50:159:126#0/1  
\_[aababab^\_b]a¥\_aZbb`W\_`U`[b`U`^[b^b`aaa  
@HWI-EAS443:3:50:166:692#0/1  
GGGGGCTATATGAAGCAATCGAGGAGTGCCTGATTAATGA  
+HWI-EAS443:3:50:166:692#0/1  
]b\_a`^bbbabbbbabbaaaba^\_aa\_a[M\_aabab]a`a  
@HWI-EAS443:3:50:1686:1499#0/1  
GATGTTGCCCGATTGAACATATCGCAAGCATGAGGAGGA  
+HWI-EAS443:3:50:1686:1499#0/1  
^W\_a\_a\_T¥VSXX[Z]¥aU\_\_[VQVRXRRSZ[WMW^VRVT  
@HWI-EAS443:3:50:169:1603#0/1  
GGGAGTGACATAAATACGGCCTTGCTCAATGCATCCTGT  
+HWI-EAS443:3:50:169:1603#0/1  
`ba`¥U\_a`^b\_aa]aba`````\_`a]^`^Z\_[\_\_]^\_X]  
@HWI-EAS443:3:50:1708:1321#0/1  
TGTGAATTGACTGATTCAAGCTGGATAGAACTTGATGAAA  
+HWI-EAS443:3:50:1708:1321#0/1  
a`\_baabaa`\_aaaabaa`a\_aa]^aa`^a\_a`^^`a\_^\_  
@HWI-EAS443:3:50:171:66#0/1  
CATTAAATCAGGCACTCCTCGATTGCTTCATATAGCCCCC  
+HWI-EAS443:3:50:171:66#0/1  
`abb[\_`babaa\_^aabab`a`aaababbaabbabab`a  
@HWI-EAS443:3:50:1745:918#0/1  
CAAGAAATGGCCAGTAGGAGTCTATGGGATTCCTTTTCGTC  
+HWI-EAS443:3:50:1745:918#0/1  
Ubaabbbaba`aabbba\_``a\_babb`baKa[[bbaUb\_  
@HWI-EAS443:3:50:210:577#0/1  
GGGGGCTATATGAAGCAATCGAGGAGTGCCTGATTAATGA  
+HWI-EAS443:3:50:210:577#0/1  
^`bbbabbbbbbbbabaaabaaa`a`abaababaaaa

@HWI-EAS443:3:50:235:1541#0/1  
CTGAACAATGAGAAGCAATTTTCTCGATTGAGCCGAAAAC  
+HWI-EAS443:3:50:235:1541#0/1  
abbbbaabababb]aaa]]bbb`aaaaaa`aaa\_aa^`a^  
@HWI-EAS443:3:50:356:394#0/1  
TTCTCCTATTTTCATCAAGTTCTATCCAGCTTGAATCAGTC  
+HWI-EAS443:3:50:356:394#0/1  
ab\_baababbbbaabbaabaaba`Y`a]bbba\_a^`a`a  
@HWI-EAS443:3:50:379:904#0/1  
GCTTCCAAGCCATGAGGTAATTGGGATTTATGCCTTTCTC  
+HWI-EAS443:3:50:379:904#0/1  
K\_]bab`bb[bbbbabbIaabb`^`ab\_a^bbaaaYH]a  
@HWI-EAS443:3:50:394:1355#0/1  
GCCGAGTCTTCTGTCAAAGAGAAAGACATGACCAAGGAAT  
+HWI-EAS443:3:50:394:1355#0/1  
a^^aX`U[aa\_aX0¥a`XW^PTJTV\_U`\_^\_¥Y\_aa`^ZP  
@HWI-EAS443:3:50:443:1040#0/1  
TGTGAATTGACTGATTCAAGCTGGATAGAACTTGATGAAA  
+HWI-EAS443:3:50:443:1040#0/1  
abX¥a\_abba]`¥`ab\_a]`Raab`T¥a\_[Taaa^\_a]¥\_  
@HWI-EAS443:3:50:495:694#0/1  
GCTGTAAAATAGTTCCCTCCTCATGCTTGCGATATGTTCAA  
+HWI-EAS443:3:50:495:694#0/1  
aaababb``aaa\_a\_aaa\_a`a`a^\_aa`\_aaaa\_\_Z`\_  
@HWI-EAS443:3:50:529:772#0/1  
AGCTTGCTAGAGATCTGGGCTCTGGCTCATCACTGTCATA  
+HWI-EAS443:3:50:529:772#0/1  
`aaabbbabbb\_baaabbbbbbbaabababab^abab  
@HWI-EAS443:3:50:628:1472#0/1  
ATTGAAGCACCGATTTGAGATAATTGAAGGAAGAGACCGA  
+HWI-EAS443:3:50:628:1472#0/1  
`bbb`bbba[aba^bbbaa`baabaaaaba`abaaa^`a  
@HWI-EAS443:3:50:658:1868#0/1  
CACTATATGATGCAATCAAATGCATGAAGACATTCTTTGG  
+HWI-EAS443:3:50:658:1868#0/1  
a]H¥bb\_b\_\_\_\_SU¥`a`^abbaa``Waa`]G]aPV^]TY\_  
@HWI-EAS443:3:50:670:1267#0/1  
GGGGGGCTATATGAAGCAATCGAGGAGTGCCTGATTAATG  
+HWI-EAS443:3:50:670:1267#0/1  
a``aaa`bab\_^`a\_\_aa`a¥`\_`a\_\_]\_^\_a\_\_a^`\_`  
@HWI-EAS443:3:50:692:1655#0/1  
ATCGACGAACGGGGTGAATCAATAATTGTAGAATCTGGTG  
+HWI-EAS443:3:50:692:1655#0/1  
a¥`baabGWJWaaa]aa\_`¥WP[^]^XPLWa^\_]O\_ZVDT  
@HWI-EAS443:3:50:727:1035#0/1  
CTCCACAACCTGAGGGGTTTTCGGCTGAATCGAGAAAATT  
+HWI-EAS443:3:50:727:1035#0/1  
Z¥[`a\_[^\_\_abbbba^¥`¥^^¥`\_`¥a¥a\_aaa\_ab`  
@HWI-EAS443:3:50:734:1277#0/1  
CTCGATTGCTTCATATAGCCCCCAAGATCGAAGGTTCCA

+HWI-EAS443:3:50:734:1277#0/1  
a\_^b`b\_bab`\_^a\_bba\_aaab]a\_baaT`aaba[b\_[Z  
@HWI-EAS443:3:50:823:730#0/1  
TTGAGATAATTGAAGGAAGAGACCGAATCATGGCCTGGAC  
+HWI-EAS443:3:50:823:730#0/1  
aaa`b\_a^aaab\_\_aa\_a^``\_\_a\_\_a```a][X`a\_]`^  
@HWI-EAS443:3:50:841:1152#0/1  
CGATGAAATGGAAATCCGAATACATGAAACAAACTTCCAA  
+HWI-EAS443:3:50:841:1152#0/1  
ab`aa`\_a`aa\_^`\_a`aba^aaa````\_a``^\_\_V`\_`  
@HWI-EAS443:3:50:84:1617#0/1  
CCAGATTCTACAATTATTGATTCACCCCGTTCGTCGATGA  
+HWI-EAS443:3:50:84:1617#0/1  
]X`^T\_aaa]\_a\_\_aaaaaa][`RHY¥¥a^XSXXVT`^`\_  
@HWI-EAS443:3:50:901:779#0/1  
AACATCTTCTCCTATTTTCATCAAGTTCTATCCAGCTTGAA  
+HWI-EAS443:3:50:901:779#0/1  
]KYVabba¥ba`[U`ba^a`U`ab]a\_a`\_a`¥TYabbaa  
@HWI-EAS443:3:50:907:1364#0/1  
CATGAAATGAGGCGCTGCCTTCTTCAGTCTTTCAGCAG  
+HWI-EAS443:3:50:907:1364#0/1  
ab`^Xabbbabbaabbbba¥^b\_[ababaa`bbbaaaaaab  
@HWI-EAS443:3:51:1046:1764#0/1  
CACCACTGTCCAGGCCATGATTCGGTCTCTTCCTTCAATT  
+HWI-EAS443:3:51:1046:1764#0/1  
ab\_bbabaa\_aab\_]`a\_a`a¥^\_`]^¥a\_U]`aY^\_\_\_\_  
@HWI-EAS443:3:51:1192:1218#0/1  
CAACATCTTTGCAGTCATCAAAGTCTACTTTTTCTGGTGC  
+HWI-EAS443:3:51:1192:1218#0/1  
H]¥a`ZZ`a`^abbbbaaab`Z¥\_¥Z^¥a`X`a¥¥X`T  
@HWI-EAS443:3:51:1285:611#0/1  
GCGAAGAGACAATTGAAGAAAAATTTGAGATTACAGGAAC  
+HWI-EAS443:3:51:1285:611#0/1  
aaa[\_baa^\_aabaZ]aa`\_`\_`aaa^`\_aaa]`a[^\_[  
@HWI-EAS443:3:51:1290:2023#0/1  
CGATTGGCCATGTTTCCGATTTGTTTTCAAAGAATTCCCTT  
+HWI-EAS443:3:51:1290:2023#0/1  
abbb\_baaaa`a[ab[bb`\_aaaaaaa`aaa`aa`XWaa  
@HWI-EAS443:3:51:1298:1393#0/1  
AAGAATTCCTTGGTCATGTCTTTCTCTTTGACAGAAGACT  
+HWI-EAS443:3:51:1298:1393#0/1  
`abbR`aa]]`baX`\_a]`aab]Z`]L^`[U[`^a\_SY[`  
@HWI-EAS443:3:51:12:805#0/1  
AAGAATTCCTTGGTCATGTCTTTCTCTTTGACAGAAGACT  
+HWI-EAS443:3:51:12:805#0/1  
a`aXT\_\_]\_]a`aS\_]aaY\_a^¥^`\_aa`^RSZa]^a^^]  
@HWI-EAS443:3:51:1320:193#0/1  
CATTAATCAGGCACTCCTCGATTGCTTCATATAGCCCCC  
+HWI-EAS443:3:51:1320:193#0/1  
abbaVa\_]\_aaaa]\_^Ya\_b^]¥`\_abb````¥`\_aaa`X`

@HWI-EAS443:3:51:1359:1823#0/1  
ATTGGTTCTCACATATAGGAACATGGGCCTCGACTTGG  
+HWI-EAS443:3:51:1359:1823#0/1  
aab`a\_aa`\_\_[[a]b`a[\_Z`¥^^\_Z^[¥\_^]`Z\_\_\_Q  
@HWI-EAS443:3:51:1515:806#0/1  
GATGAAATGGAAATCCGAATACATGAAACAACTTCCAAA  
+HWI-EAS443:3:51:1515:806#0/1  
ababbbabbaababa¥baabba`abaabaaa``baaYa``  
@HWI-EAS443:3:51:153:1159#0/1  
ATCAGGCACTCCTCGATTGCTTCATATAGCCCCCAAGAT  
+HWI-EAS443:3:51:153:1159#0/1  
[\_``^a]baaaaa\_]\_¥aa`aa`aaaa]]X¥a)`V^`\_^  
@HWI-EAS443:3:51:1574:738#0/1  
AGAAGTTCGGTGGGAGACTTTGGTTCGCAAGCTTGCGCAT  
+HWI-EAS443:3:51:1574:738#0/1  
^`a\_¥V[]V]]¥aaZ[\_^]`¥P¥VZX¥`]]`¥`¥^Y\_U¥]  
@HWI-EAS443:3:51:1673:1760#0/1  
GGCATGGAAATGAGGCGCTGCCTTCTTCAGTCTTTCAGC  
+HWI-EAS443:3:51:1673:1760#0/1  
`\_[]\_b`^)`[][\_¥`VX\_Y¥¥N¥^[\_^\_W\_W`\_QVVG  
@HWI-EAS443:3:51:1705:1410#0/1  
TGCGTCTCCACAACCTTGAGGGGTTTTCGGCTGAATCGAGA  
+HWI-EAS443:3:51:1705:1410#0/1  
\_Z`aW`aab^`\_a]abaY^aba[\_a`Ta\_R\_a]\_[V`S`^  
@HWI-EAS443:3:51:1711:856#0/1  
GAATTCCTTGGTCATGTCTTTCTCTTTGACAGAAGACTCG  
+HWI-EAS443:3:51:1711:856#0/1  
^abab\_bbbYb`aabbaabbbabbbabb`baa`abba]aI  
@HWI-EAS443:3:51:172:572#0/1  
GGCTTCTCTACCCCTGTTGTGTTACATATACTGTTACCA  
+HWI-EAS443:3:51:172:572#0/1  
aaaa\_]aaa\_````a`[\_`^\_ZZ\_\_\_^^U^a^[U^W[¥  
@HWI-EAS443:3:51:22:395#0/1  
CCTCCTCATGCTTGCATATGTTCAATCGGGGCAACATCT  
+HWI-EAS443:3:51:22:395#0/1  
abaabbbbbb^bbb^bbba````aaaaaaa``]`a^^`Z`  
@HWI-EAS443:3:51:309:1753#0/1  
GTCCCCTGCAGGGCTACTGAATACATAATGAAGGGAGTG  
+HWI-EAS443:3:51:309:1753#0/1  
\_S\_Y¥]a]\_LZRQ[]]\_XN`[T¥^TZPTTWa`VZ^`QQJW  
@HWI-EAS443:3:51:324:1002#0/1  
GGGGTTTTCGGCTGAATCGAGAAAATTGCTTCTCATTGTT  
+HWI-EAS443:3:51:324:1002#0/1  
^¥`a\_aabbbbabbbabUbaa]abbbaba`\_aaba`a  
@HWI-EAS443:3:51:476:725#0/1  
ACATGGCCAATCGGAGAGTCACCCAGGGGAGTGGAGGAAG  
+HWI-EAS443:3:51:476:725#0/1  
a`aab]V`\_a\_a]VXY`¥^^`]^aa]T^Sa`^aaU¥¥  
@HWI-EAS443:3:51:494:1748#0/1  
CGTCTCCACAACCTTGAGGGGTTTTCGGCTGAATCGAGAAA

+HWI-EAS443:3:51:494:1748#0/1  
a]ababa^YUY\_aba\_a¥baU^]a^V^[[¥^`]]a\_\_]YZ  
@HWI-EAS443:3:51:501:347#0/1  
GGGCACTCGGTGAAAATATGGCACCCAGAAAAAGTAGACTT  
+HWI-EAS443:3:51:501:347#0/1  
]`\_`a]\_`¥\_X^0^`a^]]Z]WX^\_[X`a`\_]0^a`Z[`  
@HWI-EAS443:3:51:619:822#0/1  
CATGTTTCCGATTTGTTTTCAAAGAATTCCTTGGTCATGT  
+HWI-EAS443:3:51:619:822#0/1  
\_ba`bbbbbaabbbb`bbbbbaaa\_abbaabb`aab`ba  
@HWI-EAS443:3:51:678:370#0/1  
AGCCCCCAAGATCGAAGTTCCAGTTCCAGTTGTCCC  
+HWI-EAS443:3:51:678:370#0/1  
^\_]SPY\_a]R¥PWPa\_^a¥LOQLG\_\_G`STU^F[XG[¥¥  
@HWI-EAS443:3:51:697:161#0/1  
ATCATTAATCAGGCACTCCTCGATTGCTTCATATAGCCCC  
+HWI-EAS443:3:51:697:161#0/1  
`aa^bbbbba\_ba]b`b\_\_b]b`a\_a^bbaaaa`aa`TUa  
@HWI-EAS443:3:51:705:1002#0/1  
GTAAGTATGGAGTTCTCACTCACTGACCCGAGACTGGAGC  
+HWI-EAS443:3:51:705:1002#0/1  
^^bba`a`baa\_ab]aabab[\_\_aaaa`aaaa`ba`\_a`  
@HWI-EAS443:3:51:735:1954#0/1  
ATGTGGTGAACCTTTGTAAGTATGGAGTTCTCACTCACTGA  
+HWI-EAS443:3:51:735:1954#0/1  
^`Ya````a\_aaa``bba]aaaaa^\_\_\_^a\_`^\_]\_\_a  
@HWI-EAS443:3:51:810:1855#0/1  
GGGGGCTATATGAAGCAATCGAGGAGTGCCTGATTAATGA  
+HWI-EAS443:3:51:810:1855#0/1  
`a\_QN\_X¥^aa`a]YXa\_\_¥WZa\_Y¥V\_aY``¥^X`¥NZ^  
@HWI-EAS443:3:51:821:456#0/1  
GGGGTTTTCGGCTGAATCGAGAAAATTGCTTCTCATTGTT  
+HWI-EAS443:3:51:821:456#0/1  
a`[a\_`aaa^`aaaaab`a\_a\_\_```aa``\_\_a^^aaaV`  
@HWI-EAS443:3:51:85:1080#0/1  
AAGAGCCTAACATAGTCAAACCACATGAGAAAGGCATAAA  
+HWI-EAS443:3:51:85:1080#0/1  
aaaVNWaS[^GY\_T\_N`a`]\_\_YRZZa]LJV`V\_[]`BB  
@HWI-EAS443:3:51:85:507#0/1  
GAAGCCTAAATTTCTTCTGATTTGTATGATTACAAAGAG  
+HWI-EAS443:3:51:85:507#0/1  
aaWXGU`^PXa^¥\_aa`a`\_OZ]XX^[aa¥aY\_\_[Y\_\_SS  
@HWI-EAS443:3:51:88:1684#0/1  
GGGGGCTATATGAAGCAATCGAGGAGTGCCTGATTAATGA  
+HWI-EAS443:3:51:88:1684#0/1  
aaaaabaaaabaaaa`baaa]\_a`\_`]`\_^aa\_aaaaa\_\_  
@HWI-EAS443:3:51:924:1767#0/1  
GAGACTTTGGTCGGCAAGCTTGCGCATAGTTCCTGTAATC  
+HWI-EAS443:3:51:924:1767#0/1  
`baaZ^^a\_]FVSZZ¥]`aa]VM[KUaYaTXGY]]VWXZM

@HWI-EAS443:3:51:966:1475#0/1  
GGCTTGAAGCAGGTGCTAGCAGAGCTACAGGACATTGAA  
+HWI-EAS443:3:51:966:1475#0/1  
aa¥`\_aa`abZ\_]\_Q\_a``Y\_`X^¥VaZ`\_]¥\_[aYV]  
@HWI-EAS443:3:52:1106:1445#0/1  
ATTCATTTTGGACCCAGCTTGCTAGAGATCTGGGCTCTGG  
+HWI-EAS443:3:52:1106:1445#0/1  
\_ba\_aabbaa^aa¥W]\_a^`a`aaa\_¥YZUa`^]\_`Saaa  
@HWI-EAS443:3:52:1141:2035#0/1  
CTCGATTGCTTCATATAGCCCCCAAGATCGAAGGTTCCA  
+HWI-EAS443:3:52:1141:2035#0/1  
aaXR^a\_ab``¥\_b\_a`a`U`X`\_]Ya`^Z¥`]P]P[GU¥  
@HWI-EAS443:3:52:1204:647#0/1  
GCGAAGAGACAATTGAAGAAAAATTTGAGATTACAGGAAC  
+HWI-EAS443:3:52:1204:647#0/1  
`Z`a`a\_a]a`Z]]¥Rwa]\_^¥\_]\_a\_¥T¥^\_\_¥\_`\_W]U  
@HWI-EAS443:3:52:1227:95#0/1  
CATGGAAATGAGGCGCTGCCTTCTTCAGTCTCTTCAGCAG  
+HWI-EAS443:3:52:1227:95#0/1  
a]]``¥^abaaaa\_bX¥b[^``\_aa[\_\_¥¥`Qa^NUXJQa  
@HWI-EAS443:3:52:1270:1188#0/1  
CACATGCCTTATTGAATTCATTTTGGACCCAGCTTGCTAG  
+HWI-EAS443:3:52:1270:1188#0/1  
[aaab[bab`Z`bb`aaa\_abba`a^a\_ZZa`\_bb¥\_aaa  
@HWI-EAS443:3:52:1276:1309#0/1  
ACCAGATTCTACAATTATTGATTACCCCGTTCGTCGATG  
+HWI-EAS443:3:52:1276:1309#0/1  
a^aba\_aaaa`\_aaababaaa\_a`W][^a^\_Ya`\_a\_\_\_\_  
@HWI-EAS443:3:52:1306:368#0/1  
GGAGTCTATGGGATTCCTTTTCGTCAGTCCGAAAGAGGCGA  
+HWI-EAS443:3:52:1306:368#0/1  
]]\_`S]]``bbbaa``[Waaa\_b\_¥\_`¥]T[\_``]aaYaX  
@HWI-EAS443:3:52:1318:30#0/1  
TCATCGACGAACGGGGTGAATCAATAATTGTAGAATCTGG  
+HWI-EAS443:3:52:1318:30#0/1  
aaab]aa\_a`\_]a\_\_`Xa`\_`^`^a^a`¥¥\_a^`^]]\_\_  
@HWI-EAS443:3:52:1335:1211#0/1  
TACAGGAAGTATGCGCAAGCTTGCCGACCAAAGTCTCCCA  
+HWI-EAS443:3:52:1335:1211#0/1  
]ba]¥IS\_]`^ZX]XY\_STW`R`U]`¥YH]a[WRIX^UZU  
@HWI-EAS443:3:52:1401:72#0/1  
GGGGCATGGAATGAGGCGCTGCCTTCTTCAGTCTCTTCA  
+HWI-EAS443:3:52:1401:72#0/1  
\_bbbabbbbabbbbbaababb\_\_bb^bb``ab]b\_ba]a  
@HWI-EAS443:3:52:1431:646#0/1  
ACCCCTGTTGTGTACATATACTGTTCACTGTCCAGG  
+HWI-EAS443:3:52:1431:646#0/1  
a`a^`\_a\_a`\_\_a`\_`aa`\_]\_`^\_]\_ZY^]\_UZ]V]Y]  
@HWI-EAS443:3:52:1458:1540#0/1  
GAGGAAGTATTTTACAGCAGAAGTGTCCCACTGCAGGGCT

+HWI-EAS443:3:52:1458:1540#0/1  
`aaa\_a\_baaabbaZaa^aa` `]]` ` \_Y]Xa^` ` ]\_aa\_U`  
@HWI-EAS443:3:52:1503:835#0/1  
CTGGTGACCCGAATGCACTATTGAAGCACCGATTTGAGAT  
+HWI-EAS443:3:52:1503:835#0/1  
abba[abaa\_aab\_Yaaaaaab\_aa`aa]^ ^baaaa\_\_a  
@HWI-EAS443:3:52:1526:1317#0/1  
GGCGTTCACCTTCTTTTGACATTTGGGAAAGCTTGCCCTCA  
+HWI-EAS443:3:52:1526:1317#0/1  
aaab\_\_ba^abXbbbb\_a[aaa\_Ua¥\_\_^`Vaa]\_¥¥`^`\_  
@HWI-EAS443:3:52:1624:233#0/1  
CCTTGACGAAGAGAGCAGGGCAAGAATCAAACTAGGCTT  
+HWI-EAS443:3:52:1624:233#0/1  
]I`ba\_`baa]\_`aa\_^bX`X\_]R]\_a^]a\_`Xa`a]X]]  
@HWI-EAS443:3:52:1658:1184#0/1  
GGAGTGACATAAATACGGCCTTGCTCAATGCATCCTGTG  
+HWI-EAS443:3:52:1658:1184#0/1  
abab[a\_bbaa`aaaaZb`^]aa`\_a¥`^`\_Ya` `[\_R[¥  
@HWI-EAS443:3:52:1690:996#0/1  
CTCCACTCCCCTGGGTGACTCTCCGATTGGCCATGTTTCC  
+HWI-EAS443:3:52:1690:996#0/1  
\_\_bbabbb`\_\_`aaaabbaa]a^[\_`aaZ¥\_\_`^Z]b`¥]  
@HWI-EAS443:3:52:1760:446#0/1  
TCCGCTTTGGTGGCCATCTCCTCTCCAGTGAATGAAAAGA  
+HWI-EAS443:3:52:1760:446#0/1  
L\_abab\_a`]M¥bb^AJ\_RT`ab\_TO^WH¥^¥a`ZH[a`I^  
@HWI-EAS443:3:52:1783:439#0/1  
CGGTGGGAGACTTTGGTGGCAAGCTTGCGCATAGTTCCT  
+HWI-EAS443:3:52:1783:439#0/1  
`b^U^`aY` ` ]\_`a^RYXEP¥PXTXP][TTZZVLSS^WTW  
@HWI-EAS443:3:52:181:1885#0/1  
CATTGGGTCAACCAGATTCTACAATTATTGATTCACCCCG  
+HWI-EAS443:3:52:181:1885#0/1  
abbbb\_bb` ` \_abb\_bbbbaababaaabbaaaa`a\_`]a  
@HWI-EAS443:3:52:218:1700#0/1  
GGCCATGTTTCCGATTTGTTTTCAAAGAATTCCTTGGTCA  
+HWI-EAS443:3:52:218:1700#0/1  
aabbabb`aababaaaaba`aa\_aba` `aaaaabaa\_aa  
@HWI-EAS443:3:52:251:185#0/1  
GGGGGCTATATGAAGCAATCGAGGAGTGCCTGATTAATGA  
+HWI-EAS443:3:52:251:185#0/1  
a^]` ` ]\_`\_a`\_^¥[ ]^]R]¥`^W^WYRW¥\_Y]YUTQWW  
@HWI-EAS443:3:52:252:591#0/1  
GGGGCAACATCTTCTCCTATTTTCATCAAGTTCTATCCAGC  
+HWI-EAS443:3:52:252:591#0/1  
`¥aa`\_aa^a\_a`b`\_`a\_baa` `aa\_[\_\_` ` `a`a\_\_aa  
@HWI-EAS443:3:52:295:1658#0/1  
CACCAGAAAAAGTAGACTTTGATGACTGCAAAGATGTTGG  
+HWI-EAS443:3:52:295:1658#0/1  
aabbbb`bbbb`bb`aaba\_H]aabb\_bbaabbb\_aba



@HWI-EAS443:3:52:349:1757#0/1  
CATGGAATGAGGCGCTGCCTTCTTCAGTCTCTTCAGCAG  
+HWI-EAS443:3:52:349:1757#0/1  
abbababbabaaaaabbbaabaaaa\_\_aaa`a\_aa\_\_a  
@HWI-EAS443:3:52:354:163#0/1  
AGTGTACATAAATACGGCCTTGCTCAATGCATCCTGTGCA  
+HWI-EAS443:3:52:354:163#0/1  
\_`^aT¥baaZ^\_b`\_`a\_Z\_aa^``]aaa`]`¥]\_b` `[^  
@HWI-EAS443:3:52:354:2031#0/1  
ATGGCTTGAAGCAGGTGCTAGCAGAGCTACAGGACATTG  
+HWI-EAS443:3:52:354:2031#0/1  
a[^a^a`Y` [¥[PZY\_OLLQTVZZVHYNQVSVNSRVZVRX  
@HWI-EAS443:3:52:365:1040#0/1  
GGGGCTATATGAAGCAATCGAGGAGTGCCTGATTAATGAT  
+HWI-EAS443:3:52:365:1040#0/1  
ab`aYa]¥GXY]¥ZXXZQPYZ^`S`W`^^` [R[\_¥UZJV[  
@HWI-EAS443:3:52:374:1144#0/1  
GGGGGCTATATGAAGCAATCGAGGAGTGCCTGATTAATGA  
+HWI-EAS443:3:52:374:1144#0/1  
aaaa]a`a\_aaaa\_ZRS[YZ[\_¥W[TL[W[`Z^ZZX^]  
@HWI-EAS443:3:52:377:1287#0/1  
GAGGGTTTTTCGGCTGAATCGAGAAAATTGCTTCTCATTG  
+HWI-EAS443:3:52:377:1287#0/1  
\_ [``Ya0` ``aaZLY`ZL[\_a[aUZV^\_Z¥]X¥¥\_^[\_\_^  
@HWI-EAS443:3:52:403:1369#0/1  
CAAGAAATGGCCAGTAGGAGTCTATGGGATTCCTTTCGTC  
+HWI-EAS443:3:52:403:1369#0/1  
aa`\_aababba¥]a]aabVX]]a` `W¥`\_a]QX\_aaVGXX  
@HWI-EAS443:3:52:432:1870#0/1  
ACACCCTTGACGAAGAGAGCAGGGCAAGAATCAAACACTAG  
+HWI-EAS443:3:52:432:1870#0/1  
a`^ [¥¥a\_`\_\_^`\_ []`^`^XXY]]\_] ]^W\_WX\_¥W\_Z  
@HWI-EAS443:3:52:441:872#0/1  
TTTGTTCCTCAAGAATTCCTTGGTCATGTCTTTCTCTTTG  
+HWI-EAS443:3:52:441:872#0/1  
a^¥baaaa\_` ]]a\_\_aaaZ^a\_`SR`aa\_Za` [[a\_a` [P  
@HWI-EAS443:3:52:456:1658#0/1  
GAGATAATTGAAGGAAGAGACCGAATCATGGCCTGGACAG  
+HWI-EAS443:3:52:456:1658#0/1  
S¥^^]^bab¥bbba^bbba`K[a^bbbaba^[[ ] [¥T^Y  
@HWI-EAS443:3:52:485:1347#0/1  
GGGTTTTTCGGCTGAATCGAGAAAATTGCTTCTCATTGTTC  
+HWI-EAS443:3:52:485:1347#0/1  
ab`Ibaa\_b] [TaaXZYT` ]Y`RUYPZa`bT`aV\_]aR[U  
@HWI-EAS443:3:52:513:2002#0/1  
CCCTGCTCTCTTCGTCAAGGGTGTAGTCCGCTTTGGTGGC  
+HWI-EAS443:3:52:513:2002#0/1  
abaa¥Y]bba]a[^`aa]aaZT\_[^`KaT\_]Y` [[^PDR]  
@HWI-EAS443:3:52:515:820#0/1  
ATCCTGTGCAGCCATGGATGACTTTCAGCTGATCCCAATG

+HWI-EAS443:3:52:515:820#0/1  
X]\_`ab`bYaaa]^a^`aa[`aaZ`Z¥\_]W¥][Y^`  
@HWI-EAS443:3:52:553:1792#0/1  
AGGAGATGGCCACCAAAGCGGACTACACCCTTGACGAAGA  
+HWI-EAS443:3:52:553:1792#0/1  
a]^`aV`\_aa^`\_\_`\_UKVaVU¥U^YXRZ^¥W]NZU[  
@HWI-EAS443:3:52:576:830#0/1  
GTGTGGCTCCAGTCTCGGGTCAGTGAGTGAGAACTCCATA  
+HWI-EAS443:3:52:576:830#0/1  
`]aZZ^XaZ^\_YY[WU]]XVMDPS^X[DZY]P¥QNPBBBB  
@HWI-EAS443:3:52:581:822#0/1  
ACGGCCTTGCTCAATGCATCCTGTGCAGCCATGGATGACT  
+HWI-EAS443:3:52:581:822#0/1  
aYb`\_a\_aS`\_`^^^\_a\_¥U`\_Y`\_¥a¥]^`^^`YTW  
@HWI-EAS443:3:52:665:369#0/1  
GGCATGGAAATGAGGCGCTGCCTTCTTCAGTCTCTTCAGC  
+HWI-EAS443:3:52:665:369#0/1  
]X\_\_L`U^`ba]`Qa\_PZ]^]ZZ¥`X]a]]\_]a\_] [[[  
@HWI-EAS443:3:52:687:632#0/1  
AAAATTGAACCATTTCTTGAGGACGACACCACGCCCCCTCA  
+HWI-EAS443:3:52:687:632#0/1  
a¥S¥^`a\_aaa`]b`\_`a]`\_]a`^a`X^U¥`T`[[LY  
@HWI-EAS443:3:52:697:1579#0/1  
AAGCAATTTTCTCGATTGAGCGAAAACCCCTCAAGTTGT  
+HWI-EAS443:3:52:697:1579#0/1  
a`aa\_aaaaa`a\_a\_\_`\_\_`]]`a`Z]^`\_^^`Z`^^  
@HWI-EAS443:3:52:762:109#0/1  
GGGGCTATATGAAGCAATCGAGGAGTGCCTGATTAATGAT  
+HWI-EAS443:3:52:762:109#0/1  
a`aa]\_]a[Q\_U\_a^\_]T]N¥YPYTWU]^WVY]VZTX  
@HWI-EAS443:3:52:816:1749#0/1  
TGAACCCATACAGTTTGTTCCTTCCGTCTTCCTTCTTTGGT  
+HWI-EAS443:3:52:816:1749#0/1  
aba\_a`\_aZaaS\_aG`\_b\_\_aa^][[[¥`\_`^TVa^]¥aW  
@HWI-EAS443:3:52:84:238#0/1  
GGGGCATGGAAATGAGGCGCTGCCTTCTTCAGTCTCTTCA  
+HWI-EAS443:3:52:84:238#0/1  
aaa```Xab\_a`\_a\_a`\_`Z\_a¥\_Z^U^\_Z[\_U[[[[ZWS  
@HWI-EAS443:3:52:883:375#0/1  
CCCCTGTTGTGTTACATATACTGTTCCACTGTCCAGGC  
+HWI-EAS443:3:52:883:375#0/1  
abbb`aabb\_baaaa`aabbabb¥a[aa`\_aaa`]\_\_a\_Z  
@HWI-EAS443:3:52:907:338#0/1  
GCCCACTTCAATTGGCTTGTCTCTTCATGTTCTTTGTCC  
+HWI-EAS443:3:52:907:338#0/1  
`aba`\_ba`aaaaa\_\_a\_XYSTDW`^¥][Z`^a`\_XWVR  
@HWI-EAS443:3:52:942:710#0/1  
GGGCACTCGGTGAAAATATGGCACCAGAAAAAGTAGACTT  
+HWI-EAS443:3:52:942:710#0/1  
abaab`baababaaaabababaa\_[aba\_aa`b]aaa]aa

@HWI-EAS443:3:53:1040:955#0/1  
CAGTCATCAAAGTCTACTTTTTCTGGTGCCATATTTTCAC  
+HWI-EAS443:3:53:1040:955#0/1  
`bbaabbab`aaV`bbabbbbabab`\_`a`baabba]a`  
@HWI-EAS443:3:53:1083:1235#0/1  
CGTTTCGTCGATGAAATGGAAATCCGAATACATGAAACAAA  
+HWI-EAS443:3:53:1083:1235#0/1  
abababaab`baaaababaaaa`\_`a`  
@HWI-EAS443:3:53:1102:478#0/1  
CGGCTGAATCGAGAAAATTGCTTCTCATTGTTTCAGGCACT  
+HWI-EAS443:3:53:1102:478#0/1  
abb`bbbababaaaaabaa`ab`b``bbaa]]aa`^`\_`a  
@HWI-EAS443:3:53:1117:446#0/1  
CCCGAATGCACTATTGAAGCACCGATTTGAGATAATTGAA  
+HWI-EAS443:3:53:1117:446#0/1  
[b`¥`bbbabbbbbbabaabaaabbbbbbabbabbbba  
@HWI-EAS443:3:53:1190:1293#0/1  
GGGGGCTATATGAAGCAATCGAGGAGTGCCTGATTAATGA  
+HWI-EAS443:3:53:1190:1293#0/1  
a\_a[K^a`\_`baVaPX`\_^UbXa^¥`\_[[\_U^^RaYT`^]V  
@HWI-EAS443:3:53:1233:209#0/1  
ATTTCTTCTGATTTGTATGATTACAAAGAGAACCGGTTC  
+HWI-EAS443:3:53:1233:209#0/1  
\_bbb`NaYP[baa`\_`b`b¥Z¥^b`ab`^`V`\_aaa[JbVSZG  
@HWI-EAS443:3:53:1285:920#0/1  
ATCCGAAAATCGAAACTAACAAGTTTGCTGCAATATGCAC  
+HWI-EAS443:3:53:1285:920#0/1  
]¥W^`\_`abbaZa^a¥Wbb^H]a\_Xaa¥]^a^abbaa`Y`\_`\_`  
@HWI-EAS443:3:53:1348:521#0/1  
CACCAGAAAAAGTAGACTTTGATGACTGCAAAGATGTTGG  
+HWI-EAS443:3:53:1348:521#0/1  
ZZa^`b`^`^`^`a\_R[bbbb`ab`\_^¥^`baabbbbab`V  
@HWI-EAS443:3:53:1351:1994#0/1  
ATTGGTTCTCACATATAGGAACATGGGCCTCGACACTTGG  
+HWI-EAS443:3:53:1351:1994#0/1  
aba[\_Z]\_UQVZa`\_`a`\_aWaG`¥`\_¥^YUZQWZNS¥^R  
@HWI-EAS443:3:53:141:600#0/1  
AGAGACCGAATCATGGCCTGGACAGTGGTGAACAGTATAT  
+HWI-EAS443:3:53:141:600#0/1  
aa]a]aaaa`ba]aa`¥aS`^`aaUa\_Ya`SQYUX[\_¥  
@HWI-EAS443:3:53:1426:216#0/1  
AGAGCCTAACATAGTCAAACCACATGAGAAAGGCATAAAT  
+HWI-EAS443:3:53:1426:216#0/1  
]`W`^`aaa`^ab[aaa`\_`^GY¥`a`bU]aa`X`^`a`\_`a0  
@HWI-EAS443:3:53:1443:777#0/1  
ACCGATTTGAGATAATTGAAGGAAGAGACCGAATCATGGC  
+HWI-EAS443:3:53:1443:777#0/1  
aSSbabbbaab`aa\_a`^`[\_`aa`aaaa`\_Y`W`\_a^aa]VX  
@HWI-EAS443:3:53:1538:2002#0/1  
GAAATGGGGCATGGAAATGAGGCGCTGCCTTCTTCAGTCT

+HWI-EAS443:3:53:1538:2002#0/1  
a\_ZPRYV^Y[a\_^LLWTTbX¥`^`HX¥FR\_XP[DO[RPGR  
@HWI-EAS443:3:53:154:1338#0/1  
GTTCTTTGTCCTTGGGATCTTCTCTTCATTTTCAATGTCC  
+HWI-EAS443:3:53:154:1338#0/1  
a\_]a`aa]\_`\_]\_R\_U]^\_\_[\_]\_\_[^`\_¥`YY¥\_Z[Q  
@HWI-EAS443:3:53:158:1367#0/1  
AATTTAGGCTTCTCTACCCCTGTTGTGTACATATACTGT  
+HWI-EAS443:3:53:158:1367#0/1  
aabbbbbbb\_bb`a¥`babb[\_¥\_ab]aaaa\_^a`aa`a]  
@HWI-EAS443:3:53:166:475#0/1  
GCTTGTCTCTTCATGTTCTTTGTCCTTGGGATCTTCTCT  
+HWI-EAS443:3:53:166:475#0/1  
a]Yaa`aVa[bbaa\_]Y\_\_\_\_[aaYUH]\_b]^Va\_aa\_\_\_\_a  
@HWI-EAS443:3:53:1739:16#0/1  
ACCGTTCTCTTTGTAATCATACAAATCAGGAAGAAATTT  
+HWI-EAS443:3:53:1739:16#0/1  
a`VS\_aaab`ba`¥Y]`X[a\_\_aaaaU^`YX`V\_a\_`^`^  
@HWI-EAS443:3:53:1748:1145#0/1  
GGGCATGGAAATGAGGCGCTGCCTTCTTCAGTCTTTCAG  
+HWI-EAS443:3:53:1748:1145#0/1  
\_^TV[Z\_b`baa\_]\_¥RZ`a^ab\_]b^^^`^]aab`\_]`¥  
@HWI-EAS443:3:53:1751:1319#0/1  
GCAGGTGCTAGCAGAGCTACAGGACATTGAAAATGAAGAG  
+HWI-EAS443:3:53:1751:1319#0/1  
aa`bb\_aaa`a[abU^¥aaVaaa\_¥aaaa``\_aaa`\_a\_\_  
@HWI-EAS443:3:53:1770:319#0/1  
AGGGAGTGTACATAAATACGGCCTTGCTCAATGCATCCTG  
+HWI-EAS443:3:53:1770:319#0/1  
`W^aaNaabab`aaabaaVa¥\_¥`]^S\_b\_\_`a`X`VF  
@HWI-EAS443:3:53:202:224#0/1  
AGAATTCCTTGGTCATGTCTTTCTCTTTGACAGAAGACTC  
+HWI-EAS443:3:53:202:224#0/1  
¥\_b]`bbbbbbb`bbbb`aaabbbbbbbbaaab``baa`¥  
@HWI-EAS443:3:53:244:947#0/1  
CAAAGAATTCCTTGGTCATGTCTTTCTCTTTGACAGAAGA  
+HWI-EAS443:3:53:244:947#0/1  
abbbbbabbaababbababbabbaabaabaa`aaaaaa`  
@HWI-EAS443:3:53:260:43#0/1  
GAGGAGGAACTATTTTACAGCAGAAGTGTCCCACTGCAGG  
+HWI-EAS443:3:53:260:43#0/1  
aabb`ba]``aaaaaa\_[\_aa\_a^`a]a\_YYXY^`RU¥\_  
@HWI-EAS443:3:53:26:1897#0/1  
AGGGGTTTTCGGCTGAATCGAGAAAATTGCTTCTCATTGT  
+HWI-EAS443:3:53:26:1897#0/1  
ab`b\_a\_a\_ab`a\_abaab]WP\_[ab\_aa\_\_`a`\_aaZ\_X  
@HWI-EAS443:3:53:270:1137#0/1  
GTGCCATATTTTACCGAGTGCCCACTTCAATTGGCTTGT  
+HWI-EAS443:3:53:270:1137#0/1  
aaa]`a^`bab`¥ba]aa\_R\_a^\_``a`a]X[aU]`X`Z

@HWI-EAS443:3:53:273:1336#0/1  
CATTAATCAGGCACTCCTCGATTGCTTCATATAGCCCCC  
+HWI-EAS443:3:53:273:1336#0/1  
abbb`^abbbbabbbba\_aaba`aaabaa\_`a]a\_  
@HWI-EAS443:3:53:304:1113#0/1  
AGAACATGAAGAGAACAAGCCAATTGAAGTGGGCACTCGG  
+HWI-EAS443:3:53:304:1113#0/1  
abaaaabaabaa`Z`b`a]aa`aaa^`a\_a]```\_^\_\_\_\_  
@HWI-EAS443:3:53:359:104#0/1  
GGCGTGGTGTCTCCTCAAGAATGGTTCAATTTTGGCGTT  
+HWI-EAS443:3:53:359:104#0/1  
ab`b^bb\_a]\_a\_]\_\_\_\_^\_\_^\_`aZ^UU^\_`a`TZT]WW  
@HWI-EAS443:3:53:376:1994#0/1  
GAACAATGAGAAGCAATTTTCTCGATTCAGCCGAAAACCC  
+HWI-EAS443:3:53:376:1994#0/1  
Y`abbaba\_abbKb^baaba\_bbb[bb\_a[bYaab`\_a^  
@HWI-EAS443:3:53:394:707#0/1  
AGGGAGTGTACATAAATACGGCCTTGCTCAATGCATCCTG  
+HWI-EAS443:3:53:394:707#0/1  
`babababa`abaabbaabaa``aaa`aaaaa`aa\_\_aa  
@HWI-EAS443:3:53:404:618#0/1  
CGGCTGAATCGAGAAAATTGCTTCTCATTGTTCAAGCACT  
+HWI-EAS443:3:53:404:618#0/1  
a`bbbb`^a\_]a^aa]b\_]baaabaabb`aa`aa\_Y]a  
@HWI-EAS443:3:53:410:1129#0/1  
GGGGTTTTCGGCTGAATCGAGAAAATTGCTTCTCATTGTT  
+HWI-EAS443:3:53:410:1129#0/1  
ab`\_]aaaaa`a`]]`a\_a¥Z^``¥^a`Z\_\_`\_^aZ^  
@HWI-EAS443:3:53:471:1895#0/1  
ATTTGAGATTACAGGAAGCTATGCGCAAGCTTGCCGACCAA  
+HWI-EAS443:3:53:471:1895#0/1  
aabb`abaabaaabaa\_`aaa`a][a`\_\_aa\_a[a`\_Z\_¥  
@HWI-EAS443:3:53:51:1741#0/1  
GATCCGAAAATCGAACTAACAAGTTTGCTGCAATATGCA  
+HWI-EAS443:3:53:51:1741#0/1  
`V^a^^\_bTb]aa`]`aU]¥U¥aX``SaaZ[`a^LXUHZ  
@HWI-EAS443:3:53:529:550#0/1  
CCCTTGACGAAGAGAGCAGGGCAAGAATCAAACTAGGCT  
+HWI-EAS443:3:53:529:550#0/1  
ababaaaab`abaa`b`abaaa]abaaa`aa\_`\_``aaaa  
@HWI-EAS443:3:53:565:824#0/1  
AGGACATTGAAAATGAAGAGAAGATCCCAAGGACAAAGAA  
+HWI-EAS443:3:53:565:824#0/1  
^¥XR[YX]aYZQT)`\_\_\_\_YWVY`\_¥W\_X¥0[SZTL[^^WW  
@HWI-EAS443:3:53:589:780#0/1  
CGGGTACCAGATTCTACAATTATTGATTCACCCCGTTTCG  
+HWI-EAS443:3:53:589:780#0/1  
aa`Z`aaa\_S^Yaaa`WYQ\_aaaa`X\_]\_\_¥U¥^^^]]  
@HWI-EAS443:3:53:603:782#0/1  
AGGACATTGAAAATGAAGAGAAGATCCCAAGGACAAAGAA

+HWI-EAS443:3:53:603:782#0/1  
ab`aa\_a`b\_a\_aab`\_baaa^aaa`a^\_ab\_^^\_aaaa^  
@HWI-EAS443:3:53:625:264#0/1  
GTTACATATACTGTTCCACTGTCCAGCCATGATTCGG  
+HWI-EAS443:3:53:625:264#0/1  
¥\_`a`a\_UYaR`\_]\_`YZ`aaaa`a`aa`\_Z]T][¥]ZWR  
@HWI-EAS443:3:53:663:339#0/1  
CCCGAATGCACTATTGAAGCACCGATTTGAGATAATTGAA  
+HWI-EAS443:3:53:663:339#0/1  
¥ab¥H\_T`¥\_a`ab`bUU`X¥SWa`a¥¥\_b``\_Z]abaY[  
@HWI-EAS443:3:53:672:377#0/1  
AAGACAAGAAATGGCCAGTAGGAGTCTATGGGATTCCTTT  
+HWI-EAS443:3:53:672:377#0/1  
`abbb`a\_\_ab]`bb]]b^¥\_a]aZaaUabaa[[\_`¥`\_  
@HWI-EAS443:3:53:683:1224#0/1  
CGGCTGAATCGAGAAAATTGCTTCTCATTGTTCCAGGCACT  
+HWI-EAS443:3:53:683:1224#0/1  
abaa\_ba]X`[\_`\_a\_SZ\_aaaa\_`aab`[aaa\_]Z]  
@HWI-EAS443:3:53:725:973#0/1  
GGCATGGAAATGAGGCGCTGCCTTCTCAGTCTCTTCAGC  
+HWI-EAS443:3:53:725:973#0/1  
aaaaabbaaab`\_aabbba\_a\_ba\_bb`ab]^a`ab``a^  
@HWI-EAS443:3:53:735:1016#0/1  
AAAAGTAGACTTTGATGACTGCAAAGATGTTGGAGACCTT  
+HWI-EAS443:3:53:735:1016#0/1  
`^`bb^¥`aaababbbbaaaaaaaaaabaab`aaa\_a`\_\_a`  
@HWI-EAS443:3:53:738:1072#0/1  
TGCCTTTCTCATGTGGTTTACTATGTTAGGCTCTTTCCA  
+HWI-EAS443:3:53:738:1072#0/1  
ababbabba^ababaaba^a`b^abb[P]¥TX\_ba`[\_¥  
@HWI-EAS443:3:53:756:1416#0/1  
GGGGGCTATATGAAGCAATCGAGGAGTGCCTGATTAATGA  
+HWI-EAS443:3:53:756:1416#0/1  
abaab]`ba`a^`aYaa\_SJ\_\_aYV\_`^`\_]`\_R]]^`[\_aa  
@HWI-EAS443:3:53:939:347#0/1  
GTCACGAGGGGGAGGGAATACCACTATATGATGCAATCAA  
+HWI-EAS443:3:53:939:347#0/1  
^abbbbabbb`bbbabbaa^a`bababbb\_baaaa\_aa  
@HWI-EAS443:3:53:948:808#0/1  
GGGTTTTCGGCTGAATCGAGAAAATTGCTTCTCATTGTTCC  
+HWI-EAS443:3:53:948:808#0/1  
ab]aababab\_bab`aaa¥aaaaaabaaba`\_aaa\_\_`[  
@HWI-EAS443:3:53:968:604#0/1  
GAGAAAGGCATAAATCCCAATTACCTCATGGCTTGGAAAGC  
+HWI-EAS443:3:53:968:604#0/1  
aaabbbbaabbbbaa`\_aa`baba`a``abbZba\_aZ`ZQ  
@HWI-EAS443:3:53:986:1785#0/1  
AGCATCCATCAGCAGGAACCTTTGACCGCTGATGGCAAAGA  
+HWI-EAS443:3:53:986:1785#0/1  
TTQYTOYTQX\_¥FY\_`¥W`^`\_\_\_]\_[¥U¥WPTb`¥]W^ZX

@HWI-EAS443:3:54:1015:202#0/1  
GAGACTTTGGTCGGCAAGCTTGCGCATAGTTCCTGTAATC  
+HWI-EAS443:3:54:1015:202#0/1  
`bba`bbbb`a\_aa^a`````a^]UZ`^a]a[]`a]W^\_Z  
@HWI-EAS443:3:54:1017:998#0/1  
CAGTCATCAAAGTCTACTTTTTCTGGTGCCATATTTTCAC  
+HWI-EAS443:3:54:1017:998#0/1  
aababbbbbbbbabbbbabbbbbabb`Zbbbababbbaaba  
@HWI-EAS443:3:54:1047:1718#0/1  
ATGAGAAGCAATTTTCTCGATTGAGCCGAAAACCCCTCAA  
+HWI-EAS443:3:54:1047:1718#0/1  
aaa]aaba`aa\_`a`a¥a`\_a¥\_¥\_aa\_^UINIS]XXM  
@HWI-EAS443:3:54:105:1266#0/1  
AGCCAGAGCCCAGATCTCTAGCAAGCTGGGTCCAAAATGA  
+HWI-EAS443:3:54:105:1266#0/1  
¥DY\_X`\_b`aWW[^aZ^`a]X^]W`\_`\_WVUM[NRV\_N  
@HWI-EAS443:3:54:1094:1209#0/1  
AAAGAGCCTAACATAGTCAAACCACATGAGAAAGGCATAA  
+HWI-EAS443:3:54:1094:1209#0/1  
\_`^¥]\_Ya^\_aaT^`^)`a`X[`aaa`abaaa^`a]  
@HWI-EAS443:3:54:112:2042#0/1  
AACAAAATAAAAATCTGAGAAGACACACATTACATCTTTT  
+HWI-EAS443:3:54:112:2042#0/1  
J[`b`ZW`b`¥`\_P`b\_a\_aaaaaTa\_\_a`\_a\_aaZWZa\_  
@HWI-EAS443:3:54:1147:1890#0/1  
CTAGCAAGCTGGGTCCAAAATGAATTCAATAAGGCATGTG  
+HWI-EAS443:3:54:1147:1890#0/1  
abbaababbabba^\_\_babbbbbbbba`^`babbabbbbbb  
@HWI-EAS443:3:54:1219:521#0/1  
ACCAAAGCGGACTACACCCTTGACGAAGAGAGCAGGGCAA  
+HWI-EAS443:3:54:1219:521#0/1  
aaaa\_a`\_¥]¥\_][`\_ZV`aa\_Y\_\_¥\_[]]FZa`R]aa  
@HWI-EAS443:3:54:1221:155#0/1  
CATCAGTATCATTTCTCAAATGAGACCTTCTTTTATAAT  
+HWI-EAS443:3:54:1221:155#0/1  
`ba`bbabbbbbbbbaaaababbaba``baaabbbbbbbbaa  
@HWI-EAS443:3:54:1234:915#0/1  
TGCCTTTCTCATGTGTTTGGACTATGTTAGGCTCTTTCCA  
+HWI-EAS443:3:54:1234:915#0/1  
a\_]\_bab`Z`bb`aa\_a`a`ab`aaaa`¥aV\_R\_a`[^\_  
@HWI-EAS443:3:54:124:841#0/1  
CGATTGGCCATGTTTCCGATTTGTTTCAAAGAATTCCTT  
+HWI-EAS443:3:54:124:841#0/1  
abaaabbbbaa`^`aaa`Z^aaaZaaa^`a`\_¥¥]YW^`  
@HWI-EAS443:3:54:1296:1168#0/1  
TGCAAAGATGTTGGAGACCTTAACAGTATGACAGTGATG  
+HWI-EAS443:3:54:1296:1168#0/1  
SaY¥¥`¥a\_VVX^bbba[b\_WaT`U^\_Ibb`\_bbWIT\_`^`  
@HWI-EAS443:3:54:132:1248#0/1  
GGGGGCTATATGAAGCAATCGAGGAGTGCCTGATTAATGA

+HWI-EAS443:3:54:132:1248#0/1  
aaaaaababaaaa`[aaaa`a[aa`a]a`\_\_`^`\_Y]\_a\_  
@HWI-EAS443:3:54:1360:522#0/1  
AAGACATTCTTTGGCTGGAAAGAGCCTAACATAGTCAAAC  
+HWI-EAS443:3:54:1360:522#0/1  
`b\_]\_abbM)a[H¥I]X\_[Z^`\_W]^`a`aaa]Z`Yaa[  
@HWI-EAS443:3:54:1456:1534#0/1  
GGGGCATGGAAATGAGGCGCTGCCTTCTTCAGTCTCTTCA  
+HWI-EAS443:3:54:1456:1534#0/1  
`ZTZLX]]a`aXX^[`¥]^YY`¥W`\_¥^UZ^TSYWYSQ  
@HWI-EAS443:3:54:1496:453#0/1  
ATACTGTTCACTGTCCAGGCCATGATTCGGTCTCTTC  
+HWI-EAS443:3:54:1496:453#0/1  
\_baabbaba`baaab`a`[`a\_\_\_\_\_¥Y`\_`[`[¥PTFP]Q  
@HWI-EAS443:3:54:155:237#0/1  
CATGGAAATGAGGCGCTGCCTTCTTCAGTCTCTTCAGCAG  
+HWI-EAS443:3:54:155:237#0/1  
a\_`\_`]TTW`¥UR¥¥^Ua[`\_`[VKTY[ULQQO^^HS\_LT[  
@HWI-EAS443:3:54:1759:112#0/1  
CATTATGTATTAGTAGCCCTGCAGTGGGACACTTCTGCT  
+HWI-EAS443:3:54:1759:112#0/1  
abbbbbbaaabaabab\_a`^`¥]]¥ZQZ`\_^a]a`^aUW]  
@HWI-EAS443:3:54:239:1241#0/1  
CAATAAGGCATGTGAATTGACTGATTCAAGCTGGATAGAA  
+HWI-EAS443:3:54:239:1241#0/1  
`b¥baaba`abb\_baaaabaababa`bSa]^aa]``\_^^  
@HWI-EAS443:3:54:259:330#0/1  
CAGATTTTGCAGTAAGGTCCTGCACACTTCCCAATAGA  
+HWI-EAS443:3:54:259:330#0/1  
aa\_ababbabb`b`b`ba\_a`baaaaaaba\_aa`bTa^`a  
@HWI-EAS443:3:54:281:728#0/1  
CACCACGCCCCCTCAGATTGCCTGATGGCCTCTTTGCCA  
+HWI-EAS443:3:54:281:728#0/1  
abab`X]\_]Z`bVS]a]\_Z\_aaUHQUa¥VQ]THXZRSFXX  
@HWI-EAS443:3:54:282:1072#0/1  
ATTCGGATTTCCATTTTCATCGACGAACGGGGTGAATCAAT  
+HWI-EAS443:3:54:282:1072#0/1  
a`bbb`aa`]a\_aaaaabaaa¥`a`^[]\_aV¥XX\_VQY]  
@HWI-EAS443:3:54:315:1001#0/1  
CTCGGTGAAAATATGGCACCAGAAAAAGTAGACTTTGATG  
+HWI-EAS443:3:54:315:1001#0/1  
^R[]QN^U```¥¥¥aX¥[XPUXR][TVLXZUW\_S`¥UVOT  
@HWI-EAS443:3:54:316:605#0/1  
GAACCTTGACCGCTGATGGCAAAGAGGCCCATCAGGCAAT  
+HWI-EAS443:3:54:316:605#0/1  
a^a`aa^`\_`\_V\_a\_¥aa^\_\_\_YONY¥¥YUSQ¥TTPYX¥  
@HWI-EAS443:3:54:367:1084#0/1  
GAAAGGCATAAATCCCAATTACCTCATGGCTTGAAGCAG  
+HWI-EAS443:3:54:367:1084#0/1  
`]\_`a\_a`Y^[^W^`aZ\_^aUa\_`Saa\_[]`^\_BBBBBBB



@HWI-EAS443:3:54:369:1479#0/1  
AGACAATTGAAGAAAAATTTGAGATTACAGGAACTATGCG  
+HWI-EAS443:3:54:369:1479#0/1  
XT]\_UU¥\_¥YUJYWY\_\_a`]Y[]`]W]UOUVTXW[QBBB  
@HWI-EAS443:3:54:395:1205#0/1  
ATAAATCCCAATTACCTCATGGCTTGAAGCAGGTGCTAG  
+HWI-EAS443:3:54:395:1205#0/1  
abbb`babaaaaaa`aaaaaaa¥\_Y\_YWYQZQYY[]  
@HWI-EAS443:3:54:465:672#0/1  
CACTTTCCCAATAGAGCCTTCCCTCCACTCCCCTGGGTGAC  
+HWI-EAS443:3:54:465:672#0/1  
a``bbbbbabab\_\_aaaaaa`aa`aaa`a`aaaa\_`Y¥  
@HWI-EAS443:3:54:511:954#0/1  
TATGCGCAAGCTTGCCGACCAAAGTCTCCACCGAACTTC  
+HWI-EAS443:3:54:511:954#0/1  
aba`\_]aa`a\_^a^aaa\_\_aa`¥^^`¥``U¥\_\_`^\_¥Z  
@HWI-EAS443:3:54:604:679#0/1  
CTTGGGGGGCTATATGAAGCAATCGAGGAGTGCCTGATTA  
+HWI-EAS443:3:54:604:679#0/1  
aa`\_[abbb`\_bba`\_RSbabb]bbbbaaX`¥]a^Q^a`  
@HWI-EAS443:3:54:612:1145#0/1  
AAAGGAAGGTCTCATTTGAGAAATGATACTGATGTGGTGA  
+HWI-EAS443:3:54:612:1145#0/1  
aaaaaaaa^aa`\_aaaa\_a^`\_`a`a`\_aa\_aa^`\_]a^  
@HWI-EAS443:3:54:61:391#0/1  
GTGTCGTCTCAAGAATGGTTCAATTTTGGCGTTCCTTC  
+HWI-EAS443:3:54:61:391#0/1  
\_X]T`^¥`Y]X`¥]ZX]aaXYYY[^\_ZVYT\_ZOQQRUZQ  
@HWI-EAS443:3:54:639:1607#0/1  
GGCCAGTAGGAGTCTATGGGATTCCTTTCGTCAGTCCGAA  
+HWI-EAS443:3:54:639:1607#0/1  
abbaab^bbbTT]ba]aaa^`ab`]a``XW````a^H^a`  
@HWI-EAS443:3:54:719:1130#0/1  
GGGTTTTCGGCTGAATCGAGAAAATTGCTTCTCATTGTTC  
+HWI-EAS443:3:54:719:1130#0/1  
a¥Z]bbba`bababbaaba`aa`aa`aaba`aaaaa\_a^  
@HWI-EAS443:3:54:723:890#0/1  
GGAGGAACTATTTTACAGCAGAAGTGTCCCACTGCAGGGC  
+HWI-EAS443:3:54:723:890#0/1  
\_SZ^P]]\_T[a\_\_\_\_\_`\_^]¥Y¥VRK\_[]Z[W[]`SVZW\_P  
@HWI-EAS443:3:54:740:1669#0/1  
CTCTATTGGGAAAGTGTGCAGGACCTTACTGGCAAATCT  
+HWI-EAS443:3:54:740:1669#0/1  
abaabbbbbbbbb`b\_bba\_bb`abbbabaabbaab\_b  
@HWI-EAS443:3:54:744:1434#0/1  
AAGAATTCCTTGGTCATGTCTTTCTTTGACAGAAGACT  
+HWI-EAS443:3:54:744:1434#0/1  
`^aW\_\_abba^MZaaa`a`]Z`\_aaa`\_a`a\_\_`^`^  
@HWI-EAS443:3:54:796:1609#0/1  
TTGGAGACCTTAAACAGTATGACAGTGATGAGCCAGAGCC

+HWI-EAS443:3:54:796:1609#0/1  
aaaabaaaaabbaabb`baab`aa[`a[aa^a\_`a``S[  
@HWI-EAS443:3:54:815:486#0/1  
CATGTTTCCGATTTGTTTTCAAAGAATTCCTTGGTCATGT  
+HWI-EAS443:3:54:815:486#0/1  
^b`b\_`b^``\_`a`¥bZaa`ab`bbb`a\_¥aba^`¥V\_a^  
@HWI-EAS443:3:54:843:1897#0/1  
GGAGGAACTATTTTACAGCAGAAGTGTCCCACTGCAGGGC  
+HWI-EAS443:3:54:843:1897#0/1  
ab``¥b`Y^`aa^\_`abaa`^¥U¥SZ]XaI^`\_]T[Z  
@HWI-EAS443:3:54:881:680#0/1  
CTTGGGATCTTCTTTCATTTTCAATGTCCTGTAGCTCTG  
+HWI-EAS443:3:54:881:680#0/1  
`bbbbbb`b\_bbababbbbbbbbababbaabbabbbbaab  
@HWI-EAS443:3:54:982:450#0/1  
CAGTAGCCCTGCAGTGGGACACTTCTGCTGTAAAATAGTT  
+HWI-EAS443:3:54:982:450#0/1  
Za``aUa^^a\_J^bb`babaaKbaabbabb]K]\_a`a¥Y]  
@HWI-EAS443:3:54:98:909#0/1  
ACCGATTTGAGATAATTGAAGGAAGAGACCGAATCATGGC  
+HWI-EAS443:3:54:98:909#0/1  
aaa^[]\_aa]a¥aa`a]a¥X\_\_Y^``Z]\_\_a`\_\_`a\_^X\_  
@HWI-EAS443:3:55:1089:1217#0/1  
GGAGTCTATGGGATTCCTTTTCGTCAGTCCGAAAGAGGCGA  
+HWI-EAS443:3:55:1089:1217#0/1  
\_]¥aU^^R\_a]]VYV][¥[VY^STY[XNTT¥]]WU\_[YZ  
@HWI-EAS443:3:55:1176:187#0/1  
GTGGGAGACTTTGGTCCGCAAGCTTGCGCATAGTTCCTGT  
+HWI-EAS443:3:55:1176:187#0/1  
a\_aa```ZYa`\_`\_U]ZYJY^\_WZZ^X[XZYXZUWRRX]Y  
@HWI-EAS443:3:55:1177:198#0/1  
AAGAGCCTAACATAGTCAAACCACATGAGAAAGGCATAAA  
+HWI-EAS443:3:55:1177:198#0/1  
`baaaYZaaa[aaa`\_]aaa`^^`aa`a^\_\_a`^^a^\_a  
@HWI-EAS443:3:55:1179:185#0/1  
CGGCTGAATCGAGAAAATTGCTTCTCATTGTTTCAGGCACT  
+HWI-EAS443:3:55:1179:185#0/1  
abaaaabaab\_``bbbaabbaaa^abaa^]¥a\_aa`\_\_[a  
@HWI-EAS443:3:55:1205:12#0/1  
CAGGAACTTTGACCGCTGATGGCAAAGAGGCCCATCAGGC  
+HWI-EAS443:3:55:1205:12#0/1  
``aa\_a`aaaaa`a`aa`aaaa`a`]a``]¥^]```U  
@HWI-EAS443:3:55:1224:1209#0/1  
GGCTCATCACTGTCATACTGTTTAAGGTCTCCAACATCTT  
+HWI-EAS443:3:55:1224:1209#0/1  
^`a`R`bb]]ba`a]aa^^a]^aa`bX\_b`\_aa\_aa0a\_  
@HWI-EAS443:3:55:1237:180#0/1  
AGGGGTTTTCGGCTGAATCGAGAAAATTGCTTCTCATTGT  
+HWI-EAS443:3:55:1237:180#0/1  
I\_a¥¥Wa``\_\_a\_\_\_\_\_¥XWZb\_Z¥a\_ba^Z`\_RVX`]\_`

@HWI-EAS443:3:55:1266:1628#0/1  
CATAAATACGGCCTTGCTCAATGCATCCTGTGCAGCCATG  
+HWI-EAS443:3:55:1266:1628#0/1  
\_\_b]abb`Yaa¥YPa\_L\_XS\_YU[^R[UX\_`]^[[T^^VY  
@HWI-EAS443:3:55:130:1531#0/1  
GAGGAACTATTTTACAGCAGAAGTGTCCCCTGCAGGGCT  
+HWI-EAS443:3:55:130:1531#0/1  
Zaab¥a[]`aabaa`^^\_\_\_\_`]^aaa\_\_\_\_[[UX^  
@HWI-EAS443:3:55:1319:1050#0/1  
GAGATCTGGGCTCTGGCTCATCACTGTCATACTGTTTAAG  
+HWI-EAS443:3:55:1319:1050#0/1  
aab`Z\_b`a`a[aa\_aa`a\_[]\_a`¥Za\_`\_aa\_`a\_\_a  
@HWI-EAS443:3:55:1322:1190#0/1  
CATTGGGATCAGCTGAAAGTCATCCATGGCTGCACAGGAT  
+HWI-EAS443:3:55:1322:1190#0/1  
abb\_bba\_b`bbabbbbbb]abaaaabbaaa`X\_\_aaXa\_  
@HWI-EAS443:3:55:1403:1376#0/1  
TGTGAATTGACTGATTCAAGCTGGATAGAAGTTGATGAAA  
+HWI-EAS443:3:55:1403:1376#0/1  
aaY^¥Yaaa\_]^`W`^^][`[¥aa^\_\_`\_[N`^\_[-`YV¥  
@HWI-EAS443:3:55:1426:950#0/1  
CACTTTCCCAATAGAGCCTTCCTCCACTCCCCTGGGTGAC  
+HWI-EAS443:3:55:1426:950#0/1  
aZ\_W¥Z[[`aXaaZbS^`a¥¥`VESZQX]\_YW[¥YOXV[  
@HWI-EAS443:3:55:1443:779#0/1  
GCTCAATGCATCCTGTGCAGCCATGGATGACTTTCAGCTG  
+HWI-EAS443:3:55:1443:779#0/1  
abbabbb]ba\_¥]`ZZ`aa\_aabaa]^`X`a]J[YG\_  
@HWI-EAS443:3:55:1501:414#0/1  
GGGGGAGGGAATACCACTATATGATGCAATCAAATGCATG  
+HWI-EAS443:3:55:1501:414#0/1  
aa\_ba^b\_S]]`a[Y`\_aaaaaY\_a¥\_`XZ`\_\_[X]`\_a  
@HWI-EAS443:3:55:1513:915#0/1  
TCCAAAATGAATTCAATAAGGCATGTGAATTGACTGATTC  
+HWI-EAS443:3:55:1513:915#0/1  
YYSaYaa`X`a]W]`]\_\_VL¥aaaa\_WZ]¥I[FZ¥aaZX  
@HWI-EAS443:3:55:1530:1301#0/1  
AAACTTCCAAATGTGTGCATATTGCAGCAAACCTGTTAGT  
+HWI-EAS443:3:55:1530:1301#0/1  
aa[UX^^^\_aaba\_¥W]`¥\_`a[`R\_ZR`]UW]```¥\_Y\_  
@HWI-EAS443:3:55:1569:1366#0/1  
CAATGGAACCTCCAAGATCAAGATGAAATGGGGCATGGAA  
+HWI-EAS443:3:55:1569:1366#0/1  
aaab\_SUbV][NZaSaa\_\_\_\_P\_`^b\_]\_a`aa\_`a¥a¥\_  
@HWI-EAS443:3:55:15:1051#0/1  
GCATAAATCCCAATTACCTCATGGCTTGAAGCAGGTGCT  
+HWI-EAS443:3:55:15:1051#0/1  
`aaaaaaaaa\_a\_aa\_aaa`\_\_¥a\_¥\_¥]^ZUSUZVHPQY  
@HWI-EAS443:3:55:1606:199#0/1  
CATAAATACGGCCTTGCTCAATGCATCCTGTGCAGCCATG

+HWI-EAS443:3:55:1606:199#0/1  
abbba`bbZ\_^aa\_]R¥[\_a\_]`^`a\_]T]RZ`XZ^N^UBB  
@HWI-EAS443:3:55:1613:352#0/1  
AGTATATGTAACACAACAGGGGTAGAGAAGCCTAAATTC  
+HWI-EAS443:3:55:1613:352#0/1  
^\_X\_U`^^^a\_\_\_\_[W\_Z\_a`a]V^]W^X^]XM[\_\_\_`^Y¥^  
@HWI-EAS443:3:55:1714:875#0/1  
CATTAATCAGGCACTCCTCGATTGCTTCATATAGCCCCC  
+HWI-EAS443:3:55:1714:875#0/1  
[aabbbaaaZT\_ba]^bbb[Vb\_]bbab`[aabaabaabb  
@HWI-EAS443:3:55:176:792#0/1  
GCTTGCTAGAGATCTGGGCTCTGGCTCATCACTGTCATAC  
+HWI-EAS443:3:55:176:792#0/1  
abbbaabba^^a`a`a`aaaaa\_aa\_aa]`\_a`\_]X]`Y  
@HWI-EAS443:3:55:1778:1897#0/1  
GAGGAACTATTTTACAGCAGAAGTGTCCCACTGCAGGGCT  
+HWI-EAS443:3:55:1778:1897#0/1  
aaaaaaaaabaa`a\_aaaaaa^^`^\_^^``[^][¥Z[  
@HWI-EAS443:3:55:17:225#0/1  
CCATGATTGGTCTCTTCCCTTCAATTATCTCAAATCGGTG  
+HWI-EAS443:3:55:17:225#0/1  
aaWZ]P[Y\_OLKSRST¥V[^WORWV][YN[[[]]RLBBBB  
@HWI-EAS443:3:55:214:54#0/1  
TCCTCCTCATGCTTGCGATATGTTCAATCGGGGCAACATC  
+HWI-EAS443:3:55:214:54#0/1  
aa\_a`\_aaaab^aab^a`\_aa\_\_\_\_\_¥\_`\_`^]]Y]]V  
@HWI-EAS443:3:55:224:12#0/1  
ATTGAAGGAAGAGACCGAATCATGGCCTGGACAGTGGTGA  
+HWI-EAS443:3:55:224:12#0/1  
aaabaabb`]baa`\_a]0a`\_`aa\_]^`\_]`\_`^Y^¥N]]  
@HWI-EAS443:3:55:256:101#0/1  
GGGGTTTTCGGCTGAATCGAGAAAATTGCTTCTCATTGTT  
+HWI-EAS443:3:55:256:101#0/1  
aaSPN\_WFLW[U^\_WVNVVMZVKIMVUPMTUNURSTNRTR  
@HWI-EAS443:3:55:284:89#0/1  
GACCGAATCATGGCCTGGACAGTGGTGAACAGTATATGTA  
+HWI-EAS443:3:55:284:89#0/1  
aa[ZaYZaZ^a`aX^`\_\_\_U\_]T`GaU]UX\_U^UXYUYX  
@HWI-EAS443:3:55:302:571#0/1  
CATATTTTACCGAGTGGCCACTTCAATTGGCTTGTTC  
+HWI-EAS443:3:55:302:571#0/1  
ab`aa]baabbaa\_a\_aa\_]\_\_a`\_\_`\_\_`]`\_¥NNWM[P  
@HWI-EAS443:3:55:329:1005#0/1  
GCGAAGAGACAATTGAAGAAAAATTTGAGATTACAGGAAC  
+HWI-EAS443:3:55:329:1005#0/1  
aaa`aaa`¥`aaaa`\_a^[\_]\_\_a`]a\_\_`\_X^`\_^\_`^  
@HWI-EAS443:3:55:382:1875#0/1  
GTGAATTGACTGATTCAAGCTGGATAGAACTTGATGAAAT  
+HWI-EAS443:3:55:382:1875#0/1  
`]XVXa]\_ROUPSaa``[R¥¥XRXRUZ¥`N`\_R^\_QSVT[

@HWI-EAS443:3:55:401:1456#0/1  
GGGGTTTTTCGGCTGAATCGAGAAAATTGCTTCTCATTGTT  
+HWI-EAS443:3:55:401:1456#0/1  
¥¥Y¥H¥aWYb¥SWJ[]]aaY^XWY\_X\_bYX`HPXRVXW[\_  
@HWI-EAS443:3:55:43:1025#0/1  
CCCCGTTTCGTCGATGAAATGGAAATCCGAATACATGAAACA  
+HWI-EAS443:3:55:43:1025#0/1  
\_`bbbbabaabaa`ba^`aabaabaaaaa`aa`aab  
@HWI-EAS443:3:55:460:316#0/1  
CATGGAATGAGGCGCTGCCTTCTTCAGTCTTTCAGCAG  
+HWI-EAS443:3:55:460:316#0/1  
`a`b\_`a[aa``aa`a`^^XX[\_aZY]WY]\_\_\_]SXVQQZ  
@HWI-EAS443:3:55:498:1553#0/1  
CGTTCCTTCTTTTGACATTTGGGAAAGCTTGCCCTCAAT  
+HWI-EAS443:3:55:498:1553#0/1  
ab`bbbaabbbbb\_aabbab\_a`a`aa`abaa]¥aaaaa  
@HWI-EAS443:3:55:509:904#0/1  
GGGGCATGGAATGAGGCGCTGCCTTCTTCAGTCTTCA  
+HWI-EAS443:3:55:509:904#0/1  
aaaaa`aa\_`aaa``]aaaa\_``\_```\_a¥[\_`\_`\_^\_  
@HWI-EAS443:3:55:567:972#0/1  
CAAAGTCTACTTTTTCTGGTGCCATATTTTCACCGAGTGC  
+HWI-EAS443:3:55:567:972#0/1  
a`XN\_]a^[\_`¥ZYza^aR`a`[W`\_``abaaa]aUaa  
@HWI-EAS443:3:55:623:1062#0/1  
CATGGAATGAGGCGCTGCCTTCTTCAGTCTTTCAGCAG  
+HWI-EAS443:3:55:623:1062#0/1  
aaXW]aZ]^Z\_T[\_ZVR\_]^[^]¥XR¥TL¥TYZEO[PST  
@HWI-EAS443:3:55:625:679#0/1  
GAACTATTTTACAGCAGAAGTGTCCCACTGCAGGGCTACT  
+HWI-EAS443:3:55:625:679#0/1  
`aa\_\_ba^Z\_JRT]^`WSRX^\_\_Z]UXXRTSV`Y`U¥`^¥  
@HWI-EAS443:3:55:660:439#0/1  
TTGGGATCTTCTTTCATTTTCAATGTCCTGTAGCTCTGC  
+HWI-EAS443:3:55:660:439#0/1  
ababb]bbbbabaaaaabbabaaaab]aab`a`a]a^[\_  
@HWI-EAS443:3:55:720:1735#0/1  
GGGGGCTATATGAAGCAATCGAGGAGTGCCTGATTAATGA  
+HWI-EAS443:3:55:720:1735#0/1  
aaa`\_aaaaaba```\_aaaa`a]\_aY\_\_\_aa`aa`a```  
@HWI-EAS443:3:55:834:995#0/1  
CGATTGCTTCATATAGCCCCCAAGATCGAAGGTTCCAGG  
+HWI-EAS443:3:55:834:995#0/1  
`bbabbaabbababaaa\_aaaaaaa^a\_aaaW`\_`Z`\_  
@HWI-EAS443:3:55:860:950#0/1  
CTGGTGACCCGAATGCACTATTGAAGCACCGATTTGAGAT  
+HWI-EAS443:3:55:860:950#0/1  
a\_¥SZ]NZH[XX]Z¥W¥`a`\_`^MW\_ZWMXO¥[\_a[^V\_  
@HWI-EAS443:3:55:866:1222#0/1  
AAAGAACATGAAGAGAACAAGCCAATTGAAGTGGGCACTC

+HWI-EAS443:3:55:866:1222#0/1  
a``a^b``]\_baaaa`abaaY^aaaaba\_\_^a\_a\_a^`  
@HWI-EAS443:3:55:873:69#0/1  
GTTTGTTCATGTATTTCGGATTTCCATTTTCATCGACGAAC  
+HWI-EAS443:3:55:873:69#0/1  
a`aa^^^S[aaW]`Ya`\_]¥]X^^]PVVY]XX\_XWV  
@HWI-EAS443:3:55:887:1381#0/1  
GGGGGCTATATGAAGCAATCGAGGAGTGCCTGATTAATGA  
+HWI-EAS443:3:55:887:1381#0/1  
`aa`¥`a`baaaaa\_aaa\_^a`a`\_]a\_\_aa^a`\_``\_\_  
@HWI-EAS443:3:56:1010:589#0/1  
CCCCTGTTGTGTTACATATACTGTTCCACTGTCCAGGC  
+HWI-EAS443:3:56:1010:589#0/1  
a`Za¥WZ`N¥Y\_Y[a^Y]UQ]] [NLQTUXBBBBBBBBB  
@HWI-EAS443:3:56:1048:1159#0/1  
TTCGGATTTCCATTTTCATCGACGAACGGGGTGAATCAATA  
+HWI-EAS443:3:56:1048:1159#0/1  
aa`aa`\_\_N\_\_aaa`\_`^a\_X\_^]V`\_YY\_\_^\_WU^`\_  
@HWI-EAS443:3:56:1098:1097#0/1  
GCTTGAAGCAGGTGCTAGCAGAGCTACAGGACATTGAAA  
+HWI-EAS443:3:56:1098:1097#0/1  
aaaaab]aaa`aa¥]`\_`a]\_`\_\_a\_]a\_\_\_^`\_`[^\_]`  
@HWI-EAS443:3:56:1112:1861#0/1  
CATGTTTCCGATTTGTTTTCAAAGAATTCCTTGGTCATGT  
+HWI-EAS443:3:56:1112:1861#0/1  
abb`aabbbbabbbbaabbabaaba\_aa^\_babb\_^bbb`  
@HWI-EAS443:3:56:1132:618#0/1  
GAGGAGATGGCCACCAAAGCGGACTACACCCTTGACGAAG  
+HWI-EAS443:3:56:1132:618#0/1  
aaa`ba`aa`aa¥V`]Z\_[a`\_`^[\_[^a^¥^a^\_\_  
@HWI-EAS443:3:56:1137:498#0/1  
CGAAAATCGAACTAACAAGTTTGCTGCAATATGCACACA  
+HWI-EAS443:3:56:1137:498#0/1  
X\_bbbb\_\_b\_]¥^`a`^`\_`^¥abaabbabbaaaab  
@HWI-EAS443:3:56:1189:363#0/1  
GGGGTTTTTCGGCTGAATCGAGAAAATTGCTTCTCATTGTT  
+HWI-EAS443:3:56:1189:363#0/1  
\_baa[aa`^`a`\_abaa`\_`Xa`^`\_`\_]U[a]`R]^`a^`\_  
@HWI-EAS443:3:56:1295:1633#0/1  
TGCCTTATTGAATTCATTTTGGACCCAGCTTGCTAGAGAT  
+HWI-EAS443:3:56:1295:1633#0/1  
a[[aaaaaba]^ba`\_aaaa\_\_X[RRZV\_\_RaX^^YY[  
@HWI-EAS443:3:56:1298:1278#0/1  
GCCCCATTCAATTGGCTTGTCTCTTCATGTTCTTTGTCC  
+HWI-EAS443:3:56:1298:1278#0/1  
a\_\_a]W\_a`a^aa`^^`YHSUUX]]V]W[V]M^]]VFRY  
@HWI-EAS443:3:56:1381:416#0/1  
GGCTTGAAGCAGGTGCTAGCAGAGCTACAGGACATTGAA  
+HWI-EAS443:3:56:1381:416#0/1  
\_b`^\_SaabbaYU`W`aaYHZZa`X`a`¥SXQXXaaY]Q

@HWI-EAS443:3:56:1411:923#0/1  
ATTTTCTCGATTGAGCCGAAAACCCCTCAAGTTGTGGAGA  
+HWI-EAS443:3:56:1411:923#0/1  
abbbaab^baaa\_`a]U\_a``a]T¥^`\_`\_T`Zaa]`a\_\_^  
@HWI-EAS443:3:56:144:931#0/1  
CACACATTACATCTTTTCTTCACTGGAGAGGAGATGGC  
+HWI-EAS443:3:56:144:931#0/1  
`¥a`aba\_^Za[aaaab`ba``aaa^[``ba`Xaa`^`a\_  
@HWI-EAS443:3:56:1503:78#0/1  
CATGAAGACATTCTTTGGCTGGAAAGAGCCTAACATAGTC  
+HWI-EAS443:3:56:1503:78#0/1  
`bba\_b\_baabb^baa]`]bbb]a^a\_b¥[a\_]K¥\_`^WO  
@HWI-EAS443:3:56:1538:995#0/1  
GGGCACTCGGTGAAAATATGGCACCAGAAAAGTAGACTT  
+HWI-EAS443:3:56:1538:995#0/1  
a`Y]a``\_bbWb\_``\_S`aP¥^^WW]]\_^^`\_R\_[¥Z\_¥  
@HWI-EAS443:3:56:1542:963#0/1  
CATAAATACGGCCTTGCTCAATGCATCCTGTGCAGCCATG  
+HWI-EAS443:3:56:1542:963#0/1  
`a\_QRV\_b¥\_\_U[\_\_YN¥ZZ¥\_ZG^\_`^YO^MVX]VTQ\_]Y  
@HWI-EAS443:3:56:15:1042#0/1  
CAGATCTCTAGCAAGCTGGGTCCAAAATGAATTCAATAAG  
+HWI-EAS443:3:56:15:1042#0/1  
`aa^`aaaa\_aa[\_\_`aa\_^]\_^¥\_]^^\_]^\_]Y\_]\_^]¥  
@HWI-EAS443:3:56:1650:1725#0/1  
GACACACATTACATCTTTTCTTCACTGGAGAGGAGATG  
+HWI-EAS443:3:56:1650:1725#0/1  
`bab`babbbbab`b[^bb`abbbbbbbbabbbbbba\_b  
@HWI-EAS443:3:56:1650:229#0/1  
AGAGAACAAGCCAATTGAAGTGGGCACTCGGTGAAAATAT  
+HWI-EAS443:3:56:1650:229#0/1  
aaaa\_bab`b¥[a`aaaa^]][^Z`[a]\_a^a]^^`\_]U  
@HWI-EAS443:3:56:166:614#0/1  
ATAAATCCCAATTACCTCATGGCTTGAAGCAGGTGCTAG  
+HWI-EAS443:3:56:166:614#0/1  
aaaa\_a`\_``a`\_``\_``\_`a[[\_]LYS[SPSTUUUUNSU  
@HWI-EAS443:3:56:169:1141#0/1  
CACTGTCATACTGTTAAGGTCTCCAACATCTTTCAGTC  
+HWI-EAS443:3:56:169:1141#0/1  
`ba\_a[```¥U¥b^aW`¥LW^aY\_^`Zaaaaa\_a\_S]W]  
@HWI-EAS443:3:56:1770:1773#0/1  
CTGGGTCCAAAATGAATTCAATAAGGCATGTGAATTGACT  
+HWI-EAS443:3:56:1770:1773#0/1  
\_abbbabb`^bbbaabaabaaba`aba\_aaaa``a[b  
@HWI-EAS443:3:56:223:1509#0/1  
ATCTCCTCTCCAGTGAATGAAAAGATGTGAATGTGTGTCT  
+HWI-EAS443:3:56:223:1509#0/1  
`aa^`bbba\_^Yaab`aa`a`aba`\_Y¥]\_^TX[WZ^^a  
@HWI-EAS443:3:56:278:990#0/1  
CGATTGAACATATCGCAAGCATGAGGAGGAActATTTTAC

+HWI-EAS443:3:56:278:990#0/1  
\_`Zabbbbabba\_b``^`\_`a[a]Z`a`]]\_aaaa``¥  
@HWI-EAS443:3:56:289:677#0/1  
CCGCTTTGGTGGCCATCTCCTCTCCAGTGAATGAAAAGAT  
+HWI-EAS443:3:56:289:677#0/1  
`a\_¥]Y¥]YD]V\_YNQM¥V]Z`PU[PXFXQH`a`dWBBB  
@HWI-EAS443:3:56:329:1473#0/1  
CATGAAGACATTCTTTGGCTGGAAAGAGCCTAACATAGTC  
+HWI-EAS443:3:56:329:1473#0/1  
aa`a^¥^^`aaZPZ¥XU]^VZ]J¥PSO¥T\_VWZM[¥[TU[  
@HWI-EAS443:3:56:368:247#0/1  
AGCAAATGTAGGACCAAAGAAGGAAGACGGAAAACAAACC  
+HWI-EAS443:3:56:368:247#0/1  
\_bbb`bbbabbaaaaa^T\_aabb`^ba[Z¥]^`\_`^Z¥G¥]U  
@HWI-EAS443:3:56:369:701#0/1  
CATTAATCAGGCACTCCTCGATTGCTTCATATAGCCCCC  
+HWI-EAS443:3:56:369:701#0/1  
abbbb`babaabaaabaaabaaaa`a`aaaa\_a\_a\_\_\_\_[  
@HWI-EAS443:3:56:418:1321#0/1  
GGGGTTTTCGGCTGAATCGAGAAAATTGCTTCTCATTGTT  
+HWI-EAS443:3:56:418:1321#0/1  
R[RT^ZX\_UUTW\_[X¥aU¥^VR\_ZZaZZ\_WT`a[\_`\_\_QO  
@HWI-EAS443:3:56:441:471#0/1  
GAACAAGCCAATTGAAGTGGGCACTCGGTGAAAATATGGC  
+HWI-EAS443:3:56:441:471#0/1  
`W`^^T`a[[a¥UXWXG``a\_a`^^bbQ^V]YZ[X\_¥Z¥  
@HWI-EAS443:3:56:493:588#0/1  
AAAAGGAAGGTCTCATTTGAGAAATGATACTGATGTGGTG  
+HWI-EAS443:3:56:493:588#0/1  
\_VW\_b^Vba``Za`a``baabbaabaZaY`abbbbbbb`[a  
@HWI-EAS443:3:56:507:340#0/1  
ATCTGGTGACCCGAATGCACTATTGAAGCACCGATTTGAG  
+HWI-EAS443:3:56:507:340#0/1  
abaaaa`\_aaaaabaaaaabaaaa`a^[a\_\_b^a`aa\_a  
@HWI-EAS443:3:56:531:783#0/1  
GGGGCATGGAAATGAGGCGCTGCCTTCTTCAGTCTCTTCA  
+HWI-EAS443:3:56:531:783#0/1  
aaaa`a\_`a\_`¥`¥ZaU`a\_\_\_V^\_¥¥``^U[U¥\_\_\_^W^  
@HWI-EAS443:3:56:544:790#0/1  
CTCCCTTCATTATGTATTAGTAGCCCTGCAGTGGGACAC  
+HWI-EAS443:3:56:544:790#0/1  
^baa`bba^bbaa`^aaba\_b\_aa\_a`\_`VPX¥V¥^YY\_]`  
@HWI-EAS443:3:56:651:1216#0/1  
TGGTGAACCTTTGTAAGTATGGAGTTCTCACTCACTGACCC  
+HWI-EAS443:3:56:651:1216#0/1  
aaaP\_`WU\_Y^`QTYZR¥V]XZXT]^`b¥Z[Y]Z^PRVSU  
@HWI-EAS443:3:56:652:168#0/1  
GCTGGGTCCAAAATGAATTCAATAAGGCATGTGAATTGAC  
+HWI-EAS443:3:56:652:168#0/1  
a`aaaaXa``¥`\_aa¥Z[^\_\_\_\_`¥¥^[^]\_`]^`^]\_`^X





+HWI-EAS443:3:57:1228:340#0/1  
a\_abb`abYba\_`aaaaa\_\_\_\_`aaa¥aaaa`a¥`X`a]  
@HWI-EAS443:3:57:1247:1614#0/1  
TGCCTTATTGAATTCATTTTGGACCCAGCTTGCTAGAGAT  
+HWI-EAS443:3:57:1247:1614#0/1  
[a\_\_^]aaaaH[b\_U\_`]UWaaIUH[OTW]V^Za[]M`ZB  
@HWI-EAS443:3:57:1264:1206#0/1  
GCAGGTGCTAGCAGAGCTACAGGACATTGAAAATGAAGAG  
+HWI-EAS443:3:57:1264:1206#0/1  
a`aaa[`a\_\_¥a`a\_baaa`baa^^`aaa[`]^`aa\_\_a  
@HWI-EAS443:3:57:1298:1302#0/1  
CTCGGGTCTTCAATACTTAATTTTCAGAGCATCCATCAGCA  
+HWI-EAS443:3:57:1298:1302#0/1  
ababab`aabaabba`bbb`bba\_bbaaabaa`a`P\_a`a  
@HWI-EAS443:3:57:132:675#0/1  
CGATTGCTTCATATAGCCCCCAAGATCGAAGGTTCCAGG  
+HWI-EAS443:3:57:132:675#0/1  
abaaa`aaaaaaaaZ`aa`\_aZ^]a\_`\_`[\_a`V^[ZXQT  
@HWI-EAS443:3:57:1392:292#0/1  
AAGAGCCTAACATAGTCAAACCACATGAGAAAGGCATAAA  
+HWI-EAS443:3:57:1392:292#0/1  
aab¥[GYb`bX`bbaa\_`abY^a`a\_aaaaa]]Z^a`\_`\_  
@HWI-EAS443:3:57:1483:1517#0/1  
ATACTGTTCACTGTCCAGGCCATGATTCGGTCTCTTC  
+HWI-EAS443:3:57:1483:1517#0/1  
abb`^bSV`b^^a[`¥]^Z`¥][a`YTYVTHX]LQYY¥WB  
@HWI-EAS443:3:57:1570:561#0/1  
AGCCTAAATTTCTTCCTGATTTGTATGATTACAAAGAGAA  
+HWI-EAS443:3:57:1570:561#0/1  
aaaabab`bba`bb¥aabaaaa\_aba\_abbbaa\_aa\_aa\_  
@HWI-EAS443:3:57:1579:694#0/1  
GGTGAACCTTTGTAAGTATGGAGTTCTCACTCACTGACCCG  
+HWI-EAS443:3:57:1579:694#0/1  
aa¥`aa`baba[\_aa^aaaaa¥`\_a]a^a\_a`\_a\_U¥¥a  
@HWI-EAS443:3:57:1602:1896#0/1  
AATTTAGGCTTCTCTACCCCTGTTGTGTACATATACTGT  
+HWI-EAS443:3:57:1602:1896#0/1  
^ab`\_`\_`a^a[S[J[¥S¥T[\_\_\_¥GU0¥SZ`^¥W\_¥^SaB  
@HWI-EAS443:3:57:1638:1667#0/1  
CAGTAGGAGTCTATGGGATTCCTTTTCGTCAGTCCGAAAGA  
+HWI-EAS443:3:57:1638:1667#0/1  
^Xa[bbbb\_aaabbbba`[]aaaab`aabaa`b¥`aa`  
@HWI-EAS443:3:57:1709:126#0/1  
AGCCAATTGAAGTGGGCACTCGGTGAAAATATGGCACCAG  
+HWI-EAS443:3:57:1709:126#0/1  
````aababaaa`babaaV^^aa]a¥]\_`\_\_\_\_`\_XVSS[a  
@HWI-EAS443:3:57:1717:103#0/1  
GGGGTTTTCGGCTGAATCGAGAAAATTGCTTCTCATTGTT  
+HWI-EAS443:3:57:1717:103#0/1  
aaab[bbb¥bb[aaa`a¥`\_aa`\_\_aa\_Zaa[`R]`\_X[`

@HWI-EAS443:3:57:1786:1107#0/1  
GTGCTAGCAGAGCTACAGGACATTGAAAATGAAGAGAAGA  
+HWI-EAS443:3:57:1786:1107#0/1  
a\_Y\_aabaab`aaa`^\_]Y^aa````aaa`]Za%X][\_  
@HWI-EAS443:3:57:211:1241#0/1  
GCCGAAAACCCCTCAAGTTGTGGAGACGCATATAGACTGT  
+HWI-EAS443:3:57:211:1241#0/1  
aa^``Y`\_a^\_a`\_a]aaY``\_\_^\_\_\_^\_^^`\_^]\_B  
@HWI-EAS443:3:57:230:418#0/1  
GGAAACATGGCCAATCGGAGAGTCACCCAGGGGAGTGGAG  
+HWI-EAS443:3:57:230:418#0/1  
aa`a]]`a^`%^^`\_AY^U[^[[YV\_%]UU[U^YSY  
@HWI-EAS443:3:57:281:311#0/1  
GTCAATTCACATGCCTTATTGAATTCATTTTGGACCCAGC  
+HWI-EAS443:3:57:281:311#0/1  
aaaaaaaaabaaa`a`aaa`a][a\_\_\_a`\_\_`\_\_\_]\_\_]  
@HWI-EAS443:3:57:364:179#0/1  
CATAAATCCCAATTACCTCATGGCTTGGAAGCAGGTGCTA  
+HWI-EAS443:3:57:364:179#0/1  
aaaabaaa]``a`\_^Z`aaX`[R%QZYMZTNLBBB  
@HWI-EAS443:3:57:423:148#0/1  
CACTTTCCCAATAGAGCCTTCCCTCCACTCCCCTGGGTGAC  
+HWI-EAS443:3:57:423:148#0/1  
\_b`abbabb\_ab`bUaa]`^a\_a]``\_a]a^ZaZSa\_^  
@HWI-EAS443:3:57:431:1114#0/1  
AAATTTAGGCTTCTCTACCCCTGTTGTGTTACATATACTG  
+HWI-EAS443:3:57:431:1114#0/1  
a\_abaaab\_aba\_aaaaa`aaa`aY%W``^%\_a``[\_`  
@HWI-EAS443:3:57:457:26#0/1  
TGGGAAAGTGTGCAGGACCTTACTGGCAAATCTGTATTC  
+HWI-EAS443:3:57:457:26#0/1  
abba^`Wa\_b\_a^\_a`^^`\_\_\_]^\_\_]YU%^^]a`W]`^^  
@HWI-EAS443:3:57:48:395#0/1  
ACCGAACTTCTCCAGCCTTGAAAACCTTTAGAGCCTATGTA  
+HWI-EAS443:3:57:48:395#0/1  
aaaa[]aaaaa`a`]a`a``%J[\_\_\_a`a%aV\_\_`aZ%  
@HWI-EAS443:3:57:502:736#0/1  
CAAAGAATTCCTTGGTCATGTCTTTCTCTTTGACAGAAGA  
+HWI-EAS443:3:57:502:736#0/1  
aaabb]aaaaaabb`aabb`aaaa`aaaa\_aaaaaaa  
@HWI-EAS443:3:57:540:1665#0/1  
GGGGGCTATATGAAGCAATCGAGGAGTGCCTGATTAATGA  
+HWI-EAS443:3:57:540:1665#0/1  
M^ZSabbaaa\_\_\_bR[\_Y[[Vab\_b``baaZ^]abbbbYb  
@HWI-EAS443:3:57:542:923#0/1  
TCCAAAATGAATTCATAAGGCATGTGAATTGACTGATTC  
+HWI-EAS443:3:57:542:923#0/1  
Y%Y`\_`%b`[`[a`%b^`b\_Y\_\_N%\_`a`YT\_`]`%`  
@HWI-EAS443:3:57:563:1173#0/1  
CAATAATTGTAGAATCTGGTGACCCGAATGCACTATTGAA

+HWI-EAS443:3:57:563:1173#0/1  
abbbbbbbbabab\_bbbbbbaabbaababbbb`aabbbbbbab  
@HWI-EAS443:3:57:597:901#0/1  
ATCAGGAAGAAATTTAGGCTTCTCTACCCCTGTTGTGTTA  
+HWI-EAS443:3:57:597:901#0/1  
aaaaaa`aa^aaaaaaa`a\_\_\_^Y^\_aa\_]\_^\_[^\_  
@HWI-EAS443:3:57:602:1322#0/1  
GGGAGACTTTGGTCGGCAAGCTTGCGCATAGTTCCTGTAA  
+HWI-EAS443:3:57:602:1322#0/1  
\_YZY^^`\_`[^W¥S¥[^[[¥Z[]YZWWW]YV]VW[[VTU  
@HWI-EAS443:3:57:621:1663#0/1  
CTGAAATTAAGTATTGAAGACCCGAGTCACGAGGGGGAGG  
+HWI-EAS443:3:57:621:1663#0/1  
UV\_b\_KV\_QX\_Y\_V\_[\_\_XOT¥VXXWOWXXVXaa`X][¥]  
@HWI-EAS443:3:57:629:574#0/1  
GAGAAAGGCATAAATCCCAATTACCTCATGGCTTGGAAGC  
+HWI-EAS443:3:57:629:574#0/1  
aaba^Taaaabaaa``aaaaa`a\_\_\_`a\_``\_[ZT^VT  
@HWI-EAS443:3:57:65:111#0/1  
CGTCTCCACAACCTTGAGGGGTTTTCGGCTGAATCGAGAAA  
+HWI-EAS443:3:57:65:111#0/1  
[bbabbbb][b`abbabbbb\_abaXa`\_abba\_^aaa[\_a  
@HWI-EAS443:3:57:680:1111#0/1  
GGGTGAATCAATAATTGTAGAATCTGGTGACCCGAATGCA  
+HWI-EAS443:3:57:680:1111#0/1  
abbababbaa`bbbbbb`ababaabbb\_bbababa`bbaa  
@HWI-EAS443:3:57:701:945#0/1  
CATAAATCCCAATTACCTCATGGCTTGGAAGCAGGTGCTA  
+HWI-EAS443:3:57:701:945#0/1  
]\_b\_^\_bab\_\_bbbbbbababa^aab\_0\_¥¥¥Z^[[ROZ]Z  
@HWI-EAS443:3:57:705:191#0/1  
GGCAAGAATCAAAACTAGGCTTTTCACTATAAGACAAGAA  
+HWI-EAS443:3:57:705:191#0/1  
aaaaaa^aaaa`a\_aaa`\_\_`a^a`a`\_`\_]\_\_]\_^  
@HWI-EAS443:3:57:721:346#0/1  
AGCTCTGCTAGCACCTGCTTCCAAGCCATGAGGTAATTGG  
+HWI-EAS443:3:57:721:346#0/1  
aa`aaaaa`a`\_`aa`\_`\_\_aa\_`^^`^aaWW¥`^^^  
@HWI-EAS443:3:57:736:265#0/1  
GGGGCATGGAAATGAGGCGCTGCCTTCTTCACTCTTCA  
+HWI-EAS443:3:57:736:265#0/1  
aaaaaaaba``aaaaa`b^`aYS\_\_Y\_a][]YY][`^VU  
@HWI-EAS443:3:57:739:1404#0/1  
GGGGAGGGAATACCACTATATGATGCAATCAAATGCATGA  
+HWI-EAS443:3:57:739:1404#0/1  
`^\_^\_]`^^`^^`¥aaa^a¥^] ^S^^^\_a]\_Z\_Z`^Z\_  
@HWI-EAS443:3:57:821:1269#0/1  
CATGGAATGAGGCGCTGCCTTCTTCACTCTTCACTCAGCAG  
+HWI-EAS443:3:57:821:1269#0/1  
a\_ab`bX`\_ba[W\_[aa`]\_a\_] [a^`\_¥a\_\_a¥PTFNZ`

@HWI-EAS443:3:57:844:627#0/1  
GCAGTCATCAAAGTCTACTTTTTCTGGTGCCATATTTTCA  
+HWI-EAS443:3:57:844:627#0/1  
ab`b`babaaa\_\_abaababab^aba\_baaab`bbaaaa  
@HWI-EAS443:3:57:872:534#0/1  
TTGGGATCTTCTTCATTTTCAATGTCCTGTAGCTCTGC  
+HWI-EAS443:3:57:872:534#0/1  
aaaaa^aabaaa`baaabaaaa`aa\_\_[\`a`aaa``\_`^]  
@HWI-EAS443:3:57:945:828#0/1  
GTCCAGGCCATGATTCGGTCTCTTCCTTCAATTATCTCAA  
+HWI-EAS443:3:57:945:828#0/1  
aa`^^`aaaa\_V\_`aaa\_`Z`^^`\_\_```[\`^]]a  
@HWI-EAS443:3:57:953:113#0/1  
AAAGGCATAAATCCCAATTACCTCATGGCTTGAAGCAGG  
+HWI-EAS443:3:57:953:113#0/1  
a`bbaabbb`aaa\_a^^b]aa\_a`a`aa`aa]^^a`X^`B  
@HWI-EAS443:3:57:979:1580#0/1  
ACGGGGTGAATCAATAATTGTAGAATCTGGTGACCCGAAT  
+HWI-EAS443:3:57:979:1580#0/1  
X\_bV0\_¥¥¥\_`^Vabb^Z¥[Za^T`baa¥]\_TbbZa\_aab\_  
@HWI-EAS443:3:58:1039:389#0/1  
CAGAAAAAGTAGACTTTGATGACTGCAAAGATGTTGGAGA  
+HWI-EAS443:3:58:1039:389#0/1  
`bbab]abb^bb\_babbabbbUabba`baa\_ba\_bbaaaa  
@HWI-EAS443:3:58:107:283#0/1  
CTGGAAAGAGCCTAACATAGTCAAACCACATGAGAAAGGC  
+HWI-EAS443:3:58:107:283#0/1  
abbaa`¥abababbbbaaaaabababaabaa`a[\`aaa  
@HWI-EAS443:3:58:117:1252#0/1  
GATGAAATGGAAATCCGAATACATGAAACAACTTCCAAA  
+HWI-EAS443:3:58:117:1252#0/1  
¥[\`^\_aba`aX``aa^`]¥`a`a\_]Z`aaaa\_¥\_`^`^\_\_\_\_  
@HWI-EAS443:3:58:1248:459#0/1  
ATTGGTTCTCACATATAGGAACATGGGCCTCGACTTGG  
+HWI-EAS443:3:58:1248:459#0/1  
abbbba`a\_`U]¥^` [¥[aa\_ZR^`\_`\_¥\_`\_`\_`Y\_T[^]^  
@HWI-EAS443:3:58:1361:291#0/1  
CTTGGGGGCTATATGAAGCAATCGAGGAGTGCCTGATTA  
+HWI-EAS443:3:58:1361:291#0/1  
abbbbabbbabbbabba```aab\_a`ba\_b\_\_R\_abaaaa  
@HWI-EAS443:3:58:1438:840#0/1  
GTACATAAATACGGCCTTGCTCAATGCATCCTGTGCAGCC  
+HWI-EAS443:3:58:1438:840#0/1  
a]a\_\_baa`aaaa\_]Z`RZN^]Z\_\_]^\_¥^]`X\_NU^OX  
@HWI-EAS443:3:58:145:267#0/1  
GACATTCTTTGGCTGAAAGAGCCTAACATAGTCAAACCA  
+HWI-EAS443:3:58:145:267#0/1  
aa\_¥\_`aa^`\_\_` [a^Y[^P[XTO[UVWSSVVOKX]UUT  
@HWI-EAS443:3:58:1462:1941#0/1  
ATTCCTTGGTCATGTCTTTCTTTGACAGAAGACTCGGC

+HWI-EAS443:3:58:1462:1941#0/1  
\_]aa¥b`^Y^a[`a\_Waaa`a]aaX¥``Yaaa]\_a`\_WUS  
@HWI-EAS443:3:58:1479:1232#0/1  
AGACTTTGGTCGGCAAGCTTGCGCATAGTTCCTGTAATCT  
+HWI-EAS443:3:58:1479:1232#0/1  
]`M^Taa\_a\_a[``aa^]\_\_[XXa^\_Z`][\_^[Z¥\_Za  
@HWI-EAS443:3:58:1488:1734#0/1  
ATCAGGCACTCCTCGATTGCTTCATATAGCCCCCAAGAT  
+HWI-EAS443:3:58:1488:1734#0/1  
aaaaab`b\_a^aaaa``N````aaa\_\_`¥`¥\_\_`\_`^  
@HWI-EAS443:3:58:14:1387#0/1  
CTGCAGGGCTACTGAATACATAATGAAGGGAGGTACATA  
+HWI-EAS443:3:58:14:1387#0/1  
`\_]¥b]]aa`Y^Q¥]a^a`Z`aaa`]`XYQ^aR`¥[`\_¥^  
@HWI-EAS443:3:58:1540:423#0/1  
ATTGGGATCAGCTGAAAGTCATCCATGGCTGCACAGGATG  
+HWI-EAS443:3:58:1540:423#0/1  
`Z\_`W]¥¥a`a]¥¥`]\_a¥X[¥UW¥]ZJVYBBBBBBBBBB  
@HWI-EAS443:3:58:1617:909#0/1  
CTGGTGCCATATTTTCACCGAGTGCCCACTTCAATTGGCT  
+HWI-EAS443:3:58:1617:909#0/1  
`¥bbH¥^S¥V0¥`aaab`aaTaY`RJV`¥^\_\_`[`K]TX\_  
@HWI-EAS443:3:58:1638:1324#0/1  
CTCTTTGTAATCATACAAATCAGGAAGAAATTTAGGCTTC  
+HWI-EAS443:3:58:1638:1324#0/1  
ababbbaabababbb`bbba^bba`abaaabbaaaa`ba`  
@HWI-EAS443:3:58:1770:1027#0/1  
CTCCAACATCTTTGCAGTCATCAAAGTCTACTTTTTCTGG  
+HWI-EAS443:3:58:1770:1027#0/1  
a¥XUV¥^QWPOPY[ZTTKXYRLROUWHZRMWXY[YNXYV  
@HWI-EAS443:3:58:1777:545#0/1  
GCTAGCAGAGCTACAGGACATTGAAAATGAAGAGAAGATC  
+HWI-EAS443:3:58:1777:545#0/1  
^`baaa``aa`abbbbbbbba`\_aaaa`a`aabba`aa\_  
@HWI-EAS443:3:58:189:1735#0/1  
ATCCGAAAATCGAACTAACAAGTTTGCTGCAATATGCAC  
+HWI-EAS443:3:58:189:1735#0/1  
¥\_\_aZU`b¥YS¥Y^a\_aa``\_^\_Z`]WYV`\_aa^a]W[\_\_\_  
@HWI-EAS443:3:58:454:773#0/1  
GCCATATTTTCACCGAGTGCCCACTTCAATTGGCTTGTTTC  
+HWI-EAS443:3:58:454:773#0/1  
`^]aaZaa¥``aa\_a\_aYa\_\_\_\_^`^`\_^]\_\_¥ZXESVV  
@HWI-EAS443:3:58:477:1698#0/1  
CTAGTTTTGATTCTTGCCCTGCTCTCTTCGTCAAGGGTGT  
+HWI-EAS443:3:58:477:1698#0/1  
abbbabababbbbbbbbaabaaa]F]aaba`a^`a]Ya\_  
@HWI-EAS443:3:58:502:988#0/1  
ATCCCAATTACCTCATGGCTTGGAAGCAGGTGCTAGCAGA  
+HWI-EAS443:3:58:502:988#0/1  
aaa\_¥aW^aaa\_aaa`a`\_``[¥¥\_RXDOZRRXYOWQVQN

@HWI-EAS443:3:58:506:1687#0/1  
CATTAATCAGGCACTCCTCGATTGCTTCATATAGCCCCC  
+HWI-EAS443:3:58:506:1687#0/1  
a`XZ]OSU¥V\_Y]`¥U^\_RVWW`QFZ``aQY`][¥G¥VBB  
@HWI-EAS443:3:58:540:1097#0/1  
AATTCCTTGGTCATGTCTTTCTCTTTGACAGAAGACTCGG  
+HWI-EAS443:3:58:540:1097#0/1  
`YY\_^GPU\_bZRWZ[T[RRX\_\_``]TZ¥^\_PTYWH[VU[  
@HWI-EAS443:3:58:544:1365#0/1  
GTCAAACCACATGAGAAAGGCATAAATCCCAATTACCTCA  
+HWI-EAS443:3:58:544:1365#0/1  
^Xbabbbb¥^\_Z`^`¥]¥Z\_^aabbU``babab^`]Z\_ab  
@HWI-EAS443:3:58:60:1140#0/1  
CAGCAAACCTTGTAGTTTCGATTTTCGATCTTCCCATA  
+HWI-EAS443:3:58:60:1140#0/1  
aaa`\_Ya`aaaa`\_W`\_aR^[^\_UTZUZUSYUW]ZXVV  
@HWI-EAS443:3:58:621:1591#0/1  
CGGTGGGAGACTTTGGTCGGCAAGCTTGCGCATAGTTCCT  
+HWI-EAS443:3:58:621:1591#0/1  
a`MSa]X[a]]a`HRLVRZMP]UYPF¥TV\_QZPUEX¥YU  
@HWI-EAS443:3:58:691:1614#0/1  
GGTGAATCAATAATTGTAGAATCTGGTGACCCGAATGCAC  
+HWI-EAS443:3:58:691:1614#0/1  
`bJaab`\_\_bba`abaaaaaaaa]aaaa`a\_aaaa`\_  
@HWI-EAS443:3:58:790:1257#0/1  
GGGGGAGGGAATACCACTATATGATGCAATCAAATGCATG  
+HWI-EAS443:3:58:790:1257#0/1  
¥0\_\_\_\_[`a¥\_\_[X[^]`\_`Y¥X¥Z^¥XZ^U\_¥¥¥VZ\_Z¥  
@HWI-EAS443:3:58:790:823#0/1  
ATTGAAGCACCGATTTGAGATAATTGAAGGAAGAGACCGA  
+HWI-EAS443:3:58:790:823#0/1  
a`aaYaa`\_````aabaab`a`\_a`a`\_aa\_baa`\_^\_a  
@HWI-EAS443:3:58:791:1066#0/1  
ATCGACGAACGGGTGAATCAATAATTGTAGAATCTGGTG  
+HWI-EAS443:3:58:791:1066#0/1  
aa]aa]\_aWa[a`Raaa^\_^`\_`aaYa\_a\_\_\_\_TY¥aVa  
@HWI-EAS443:3:58:812:1995#0/1  
GAGAAAGGCATAAATCCCAATTACCTCATGGCTTGGAAAGC  
+HWI-EAS443:3:58:812:1995#0/1  
aI[NPS[]¥a¥Zaa`V¥0^NY\_YBBBBBBBBBBBBBBBBBB  
@HWI-EAS443:3:58:822:860#0/1  
CAATGAACCGTTCTCTTTGTAATCATACAAATCAGGAAG  
+HWI-EAS443:3:58:822:860#0/1  
a`a\_a`aaaa`U^`aaa`\_aZZ^a[\_a\_\_`a]\_]a¥Z[R\_  
@HWI-EAS443:3:58:889:14#0/1  
GGGTTTTCGGCTGAATCGAGAAAATTGCTTCTCATTGTTC  
+HWI-EAS443:3:58:889:14#0/1  
`a`W`aa]a`\_`]T\_[X^¥\_^^`^¥V¥X^]\_]W^^[^UVR  
@HWI-EAS443:3:58:897:1054#0/1  
CGAAAATCGAAACTAACAAGTTTGCTGCAATATGCACACA

+HWI-EAS443:3:58:897:1054#0/1  
aabbbbbababbabaaabba^abaabbaaaba\_a\_baa\_a  
@HWI-EAS443:3:58:903:805#0/1  
ATTTGTTTTCAAAGAATTCCTTGGTCATGTCTTTCTCTTT  
+HWI-EAS443:3:58:903:805#0/1  
`bb]b`aba\_aYaba\_aaaaa\_¥^¥X\_baaaa\_a[aa`  
@HWI-EAS443:3:58:913:821#0/1  
ACGGCCTTGCTCAATGCATCCTGTGCAGCCATGGATGACT  
+HWI-EAS443:3:58:913:821#0/1  
a`aaaaa`^a\_aaaa\_\_`Z¥aa^¥``aUa` `a¥[]X[^a  
@HWI-EAS443:3:59:1063:1483#0/1  
CATTAATCAGGCACTCCTCGATTGCTTCATATAGCCCCC  
+HWI-EAS443:3:59:1063:1483#0/1  
\_[b\_S\_ab¥¥a\_\_`ba[Yab¥bbb`bb\_b`aa]ZTGN\_Y  
@HWI-EAS443:3:59:1128:785#0/1  
GGCCAATCGGAGAGTCACCCAGGGGAGTGGAGGAAGGCTC  
+HWI-EAS443:3:59:1128:785#0/1  
abaaa`\_`aa^`^`\_`a`^`]aaaaXaUaa¥U^WZPST¥V  
@HWI-EAS443:3:59:1164:1075#0/1  
GCCGAGTCTTCTGTCAAAGAGAAAGACATGACCAAGGAAT  
+HWI-EAS443:3:59:1164:1075#0/1  
a`a`ab`aaba`b^\_a` `a`a`^`aa^` ` `X\_\_¥UW^¥T  
@HWI-EAS443:3:59:1243:321#0/1  
GGGGGGCTATATGAAGCAATCGAGGAGTGCCTGATTAATG  
+HWI-EAS443:3:59:1243:321#0/1  
a`RN`XabHaa`ZVZ`YYT\_\_[RX`TYFRTRHVPURUQGQU  
@HWI-EAS443:3:59:1284:259#0/1  
CACTTCTGCTGTAAAATAGTTCCTCCTCATGCTTGGGATA  
+HWI-EAS443:3:59:1284:259#0/1  
aaabaaaaabaabbaaaa`aa\_a\_\_aaaaXa`aYY]]]  
@HWI-EAS443:3:59:1313:77#0/1  
TCGGCCTCAATCATGCTCTCAATCTGCTGAAGAGACTGAA  
+HWI-EAS443:3:59:1313:77#0/1  
aaaa` `aZaaa^\_aa\_a\_\_\_\_\_` `¥\_a\_aa]MXZ[WWQ\_TT  
@HWI-EAS443:3:59:1335:206#0/1  
CAAGGACAAAGAACATGAAGAGAACAAGCCAATTGAAGTG  
+HWI-EAS443:3:59:1335:206#0/1  
`b`bba`babaabbbabaabbbbbbb`bbab\_ba^TM^[`  
@HWI-EAS443:3:59:1392:722#0/1  
ATTGCATCATATAGTGGTATTCCTCCCCCTCGTACTCG  
+HWI-EAS443:3:59:1392:722#0/1  
abaa`abaa`ab`a¥`a`\_`aaa]aabbb`a\_Za^^VX\_X`  
@HWI-EAS443:3:59:1409:1188#0/1  
CAATGGAACCTCCAAGATCAAGATGAAATGGGGCATGGAA  
+HWI-EAS443:3:59:1409:1188#0/1  
`bab\_¥`aa]aa\_baab\_ba`babaa\_babbXaa\_X¥`\_\_  
@HWI-EAS443:3:59:1414:1607#0/1  
CACTCCCCTGGGTGACTCTCCGATTGGCCATGTTTCCGAT  
+HWI-EAS443:3:59:1414:1607#0/1  
\_`]aV]`ab\_bbUba^b\_aPWS^aaX\_¥a¥YZTa`RTQSV



@HWI-EAS443:3:59:1478:321#0/1  
ATATGCACACATTTGGAAGTTTGTTCATGTATTCCGGATT  
+HWI-EAS443:3:59:1478:321#0/1  
aaabb¥`a\_^abaaaa`a\_aaa`aba^bbYTZa\_XZ\_`^  
@HWI-EAS443:3:59:1551:972#0/1  
CTGGAACCTTCGATCTTGGGGGGCTATATGAAGCAATCGA  
+HWI-EAS443:3:59:1551:972#0/1  
aaWaZ^`a`\_W\_RXX^Xa[aaaaY\_^¥a``M]Y]UQY¥S  
@HWI-EAS443:3:59:1595:1899#0/1  
ATCGAAACTAACAAGTTTGCTGCAATATGCACACATTTGG  
+HWI-EAS443:3:59:1595:1899#0/1  
a`ab^^ZR¥^\_a\_PY\_`aY^X]`Y`^baa\_aQ^XYYZaSO  
@HWI-EAS443:3:59:1616:618#0/1  
CAATTTTGGCGTTCACCTCTTTTGACATTTGGGAAAGCTT  
+HWI-EAS443:3:59:1616:618#0/1  
abbbbbbb``bba`a``aZabbb¥^a\_abbbTb\_aYNV^[  
@HWI-EAS443:3:59:1634:565#0/1  
GATTTGAGATAATTGAAGGAAGAGACCGAATCATGGCCTG  
+HWI-EAS443:3:59:1634:565#0/1  
``bbbb\_bbbbbabbbbabbaabababbbab^abb00^aI  
@HWI-EAS443:3:59:1783:795#0/1  
ACAGATTTTGCCAGTAAGGTCCTGCACACTTCCCAATAG  
+HWI-EAS443:3:59:1783:795#0/1  
``\_\_aaaa]baaaZ`aaUR\_aaa]Z¥]aa`¥a^\_YKYYP  
@HWI-EAS443:3:59:208:85#0/1  
ATTGAGGGCAAGCTTCCCAAATGTCAAAGAAGTGAACG  
+HWI-EAS443:3:59:208:85#0/1  
aaXWV\_¥b`aTaaXZZRLLQ`HVaZYJWHN^V]`WXQNTX  
@HWI-EAS443:3:59:22:924#0/1  
ATCAAACACTAGGCTTTTCACTATAAGACAAGAAATGGCCA  
+HWI-EAS443:3:59:22:924#0/1  
aabaaaba]^`aa^a\_a^b\_aa`aa`aaaa^\_^\_^]\_YQ  
@HWI-EAS443:3:59:269:1102#0/1  
GGGGGCTATATGAAGCAATCGAGGAGTGCCTGATTAATGA  
+HWI-EAS443:3:59:269:1102#0/1  
a¥`\_`aaa`aaa`¥`\_\_aW¥`¥\_a`^\_V\_\_``¥^`^WWW]V  
@HWI-EAS443:3:59:314:839#0/1  
CAACCTGGAACCTGGAACCTTCGATCTTGGGGGGCTATAT  
+HWI-EAS443:3:59:314:839#0/1  
aaaa\_\_a]`a`Qa`\_^\_\_`aaaW[`^VX[\_WWZSPUV¥W  
@HWI-EAS443:3:59:317:1143#0/1  
CATGGAATGAGGCGCTGCCTTCTTCAGTCTCTTCAGCAG  
+HWI-EAS443:3:59:317:1143#0/1  
`¥]\_\_0]ZY\_aRQZ]aaZT]]`[a\_\_¥^W¥XBBBBBBBBB  
@HWI-EAS443:3:59:346:1400#0/1  
TGCCCCGATTGAACATATCGCAAGCATGAGGAGGAACTAT  
+HWI-EAS443:3:59:346:1400#0/1  
\_]aabb\_X\_[``abaS`\_HUZRT[Z]a\_R¥\_YO[SJLQZY  
@HWI-EAS443:3:59:359:2008#0/1  
GAAATGGAATCCGAATACATGAAACAACTTCCAAATGT

+HWI-EAS443:3:59:359:2008#0/1  
aa`aa^\_aZa`\_\_aa^a\_\_`^`aaaa`aa\_Y`^\_HIU[Z  
@HWI-EAS443:3:59:408:1459#0/1  
CAAGCTTGCGCATAGTTCCTGTAATCTCAAATTTTTCTTC  
+HWI-EAS443:3:59:408:1459#0/1  
aa`aaa^``aaaa\_[^aY^a`^aa\_``baa\_```a^0\_^Z  
@HWI-EAS443:3:59:435:1425#0/1  
GAACGGGGTGAATCAATAATTGTAGAATCTGGTGACCCGA  
+HWI-EAS443:3:59:435:1425#0/1  
`abaa\_]aWaaa``aaba`baa^aa¥b`b`\_U\_\_IHRZU  
@HWI-EAS443:3:59:531:1109#0/1  
CCCCGTTTCGTCGATGAAATGGAAATCCGAATACATGAAAC  
+HWI-EAS443:3:59:531:1109#0/1  
aaaabaaaaYaaa\_\_a`a^`\_`^a`a`a`\_`\_a¥Z`^\_S  
@HWI-EAS443:3:59:583:1184#0/1  
GGCTTGTTCCTTCATGTTCTTTGTCCTTGGGATCTTCTC  
+HWI-EAS443:3:59:583:1184#0/1  
aa\_bb`¥a`\_\_`aaZXa[\_\_aa\_`Zaa\_aaa\_XXZZ^¥`Z  
@HWI-EAS443:3:59:613:644#0/1  
GGCCCATGTTCTATATGTGAGAACCAATGGAACCTCCAA  
+HWI-EAS443:3:59:613:644#0/1  
a\_\_[\_`YR\_baabaaaZ\_]a``aab`Uaaa```\_`PH`a`  
@HWI-EAS443:3:59:67:1074#0/1  
GAAGGAAGAGACCGAATCATGGCCTGGACAGTGGTGAACA  
+HWI-EAS443:3:59:67:1074#0/1  
`¥Waaaa]¥¥a]aaaa``a`aaaa¥]^Za]¥H\_TLUU^\_[  
@HWI-EAS443:3:59:688:1147#0/1  
ACGGCCTTGCTCAATGCATCCTGTGCAGCCATGGATGACT  
+HWI-EAS443:3:59:688:1147#0/1  
abaaaaaa]aaaaba\_aba]a`````^`\_`^¥\_`^¥SU`^^  
@HWI-EAS443:3:59:704:894#0/1  
CAGAGCCCAGATCTCTAGCAAGCTGGGTCCAAAATGAATT  
+HWI-EAS443:3:59:704:894#0/1  
aa\_T\_W¥bb¥QY]`bbbUY`Z`aa[P^^`^\_¥WVYJVaaY  
@HWI-EAS443:3:59:771:659#0/1  
GAGACCGAATCATGGCCTGGACAGTGGTGAACAGTATATG  
+HWI-EAS443:3:59:771:659#0/1  
a¥]Zaabaaaa`¥a`a\_a¥¥\_aYI[\_R\_[aW^^PNU\_ZN  
@HWI-EAS443:3:59:780:1310#0/1  
GAAAAGCCTAGTTTTGATTCTTGCCCTGCTCTTCGTCA  
+HWI-EAS443:3:59:780:1310#0/1  
aaa`^a^aaaa\_aaa`aaa`a\_aaa^aaa`a¥\_``UP[^X  
@HWI-EAS443:3:59:790:1547#0/1  
GACATTCTTTGGCTGGAAAGAGCCTAACATAGTCAAACCA  
+HWI-EAS443:3:59:790:1547#0/1  
ababbaababaaabaa`aa[aa\_ababaaab`^`\_`^ZZX\_  
@HWI-EAS443:3:59:863:1275#0/1  
CTCCAGTCTCGGTGAGTGAGTGAGAACTCCATACTTACA  
+HWI-EAS443:3:59:863:1275#0/1  
``\_`[\_`aUWVVaa^KWHYa\_XX]U[P]YH^aa[[TN]a`Y

@HWI-EAS443:3:59:962:550#0/1  
TGGGTCCAAAATGAATTCAATAAGGCATGTGAATTGACTG  
+HWI-EAS443:3:59:962:550#0/1  
abaa\_aaaaaaaaaa`a`aa`aa`aa\_a]^a`[Z`\_`\_  
@HWI-EAS443:3:5:1033:1610#0/1  
GAAGATCCCAAGGACAAAGAACATGAAGAGAACAAGCCAA  
+HWI-EAS443:3:5:1033:1610#0/1  
aab`aa\_\_aaaa\_`\_`a\_\_Zaaa^a`\_`\_0^\_a¥Y`\_  
@HWI-EAS443:3:5:1077:1693#0/1  
GAAGTTCGGTGGGAGACTTTGGTTCGCAAGCTTGCGCATA  
+HWI-EAS443:3:5:1077:1693#0/1  
]`b`]]`\_`\_b\_W`]Vaaa`[]]aa[[V`aa`WM`^`^B  
@HWI-EAS443:3:5:1133:556#0/1  
GAGTGACATAAATACGGCCTTGCTCAATGCATCCTGTGC  
+HWI-EAS443:3:5:1133:556#0/1  
a`^`^Za¥`a\_`][L^`Uaa¥¥Y`X^`¥¥V¥\_Z[Z`Y\_B  
@HWI-EAS443:3:5:1152:980#0/1  
CATTCTTTGGCTGGAAAGAGCCTAACATAGTCAAACCACA  
+HWI-EAS443:3:5:1152:980#0/1  
Y¥`X\_\_YZ^V0¥aZ]^Za\_[]`b`¥¥MVaabU[¥^ZV¥`a  
@HWI-EAS443:3:5:115:891#0/1  
GCCCCATTCAATTGGCTTGTCTCTTCATGTTCTTTGTCC  
+HWI-EAS443:3:5:115:891#0/1  
`abaaaaaaaaa`^[U\_YNR\_\_^`^`Ua\_NO\_W\_`\_]\_B  
@HWI-EAS443:3:5:1169:1357#0/1  
AGCAGGTGCTAGCAGAGCTACAGGACATTGAAAATGAAGA  
+HWI-EAS443:3:5:1169:1357#0/1  
a\_aaa`VS\_\_a[^a\_]a]\_a^`a\_¥W`\_`W]^`\_]B  
@HWI-EAS443:3:5:116:1112#0/1  
CAATTTTCTCGATTGAGCCGAAAACCCCTCAAGTTGTGGA  
+HWI-EAS443:3:5:116:1112#0/1  
ab\_bbbbababbababbaabaaaaaaaaa`b\_ab^baa  
@HWI-EAS443:3:5:1204:1463#0/1  
GGGCAAGCTTTCCCAAATGTCAAAGAAGTGAACGCCAAA  
+HWI-EAS443:3:5:1204:1463#0/1  
aaaabbbbbbaa¥abbbba`bababbaababba\_aaaaaa  
@HWI-EAS443:3:5:1227:979#0/1  
GGGATCTTCTTTCATTTTCAATGTCCTGTAGCTCTGCTA  
+HWI-EAS443:3:5:1227:979#0/1  
XabU\_abbZ]]\_bT¥`[bbb`aab¥X`babaaa\_b\_aab  
@HWI-EAS443:3:5:1246:288#0/1  
GGCCAGTAGGAGTCTATGGGATTCCTTTTCGTCAGTCCGAA  
+HWI-EAS443:3:5:1246:288#0/1  
`bb`bbababab^`aab\_`aa`Y\_aab]b`^¥Y¥]``^^  
@HWI-EAS443:3:5:1342:1868#0/1  
CATAGTCAAACCACATGAGAAAGGCATAAATCCCAATTAC  
+HWI-EAS443:3:5:1342:1868#0/1  
^babbbb\_bbS\_abba`aabaab^bbbbbbVHZ\_bbbbaa  
@HWI-EAS443:3:5:1342:1905#0/1  
CGATTGGCCATGTTTCCGATTTGTTTTCAAAGAATTCTT

+HWI-EAS443:3:5:1342:1905#0/1  
abbab^\_`baab\_bb^^bSbbbb^abb¥abbba\_b\_\_\_ab  
@HWI-EAS443:3:5:1350:739#0/1  
AGACAATTGAAGAAAAATTTGAGATTACAGGAACTATGCG  
+HWI-EAS443:3:5:1350:739#0/1  
a`a[ba`^^\_a`a\_a\_U\_abb[¥Xa\_a`a^RSa\_a\_`^M\_  
@HWI-EAS443:3:5:1394:648#0/1  
GAATTCCTTGGTCATGTCTTTCTCTTTGACAGAAGACTCG  
+HWI-EAS443:3:5:1394:648#0/1  
ab`aa\_\_aaba\_^aTa\_^aaa\_\_^a\_\_a\_[[a\_\_`\_\_[B  
@HWI-EAS443:3:5:1406:776#0/1  
GCCCATTCAATTGGCTTGTCTCTTCATGTTCTTTGTCC  
+HWI-EAS443:3:5:1406:776#0/1  
aaaa``ab\_aaaaa\_\_aaP[a[\_Xa`RP]\_``Ua`\_H[RO  
@HWI-EAS443:3:5:1421:876#0/1  
GAGAAAGGCATAAATCCCAATTACCTCATGGCTTGAAGC  
+HWI-EAS443:3:5:1421:876#0/1  
abaaaabbaabaaaaaa`aaa`a¥a\_Va\_\_\_NaBBBBBBB  
@HWI-EAS443:3:5:1466:1933#0/1  
AAATAGTTCCTCCTCATGCTTGCATATGTTCAATCGGGG  
+HWI-EAS443:3:5:1466:1933#0/1  
aa]HWSS[T]^N]\_L\_Ya[aaa¥a]^a]XRV¥T[^VaUBB  
@HWI-EAS443:3:5:1535:1617#0/1  
AAGCAGGTGCTAGCAGAGCTACAGGACATTGAAAATGAAG  
+HWI-EAS443:3:5:1535:1617#0/1  
U]bba[[\_Y`a`b^T\_bZb\_a\_T\_X]]aa[`^Ya```b]\_a  
@HWI-EAS443:3:5:161:1189#0/1  
ATTCATTTTGGACCCAGCTTGTAGAGATCTGGGCTCTGG  
+HWI-EAS443:3:5:161:1189#0/1  
`R¥``^b\_\_Q[^\_0¥W]]S¥¥`[JV^UV\_[FOLP]\_BB  
@HWI-EAS443:3:5:1741:1616#0/1  
GCCTAACATAGTCAAACCACATGAGAAAGGCATAAATCCC  
+HWI-EAS443:3:5:1741:1616#0/1  
a\_X¥aaaa[a`[^`^`X\_]Z\_¥Z^a\_`YY[¥Y\_\_a]BBBB  
@HWI-EAS443:3:5:232:963#0/1  
GGCATAAATCCCAATTACCTCATGGCTTGAAGCAGGTGC  
+HWI-EAS443:3:5:232:963#0/1  
abbbbbaba`\_^abaabaabaaaaaaa^a\_`\_\_\_ZaBBB  
@HWI-EAS443:3:5:235:118#0/1  
GGGGCATGGAATGAGGCGCTGCCTTCTCAGTCTCTTCA  
+HWI-EAS443:3:5:235:118#0/1  
a\_a`\_]`^`\_X¥^^`^a^^^\_Ya¥^^YSWWW¥WTP¥¥BBBB  
@HWI-EAS443:3:5:23:1764#0/1  
GTCCTGTAGCTCTGCTAGCACCTGCTTCCAAGCCATGAGG  
+HWI-EAS443:3:5:23:1764#0/1  
a`aV\_TW``[ULVS[U^XV\_]URUY[SQVBBBBBBBBBBB  
@HWI-EAS443:3:5:248:2037#0/1  
ATCCTGTGCAGCCATGGATGACTTTCAGCTGATCCCAATG  
+HWI-EAS443:3:5:248:2037#0/1  
a[0^\_\_¥a`Y[^V\_¥V^ZZ`^Y]¥\_Ua\_¥T\_¥¥^W¥WTBB

@HWI-EAS443:3:5:269:557#0/1  
ATGGCACCAGAAAAAGTAGACTTTGATGACTGCAAAGATG  
+HWI-EAS443:3:5:269:557#0/1  
ababbabaab]`\_¥`a¥\_baaaaab`aaaaab\_\_b^b\_ab  
@HWI-EAS443:3:5:270:710#0/1  
ACCGTTCTCTTTGTAATCATACAAATCAGGAAGAAATTT  
+HWI-EAS443:3:5:270:710#0/1  
a`^^a]aaa`aa¥aT`a\_`\_\_\_\_YPX^\_aa¥\_a^[]\_`B  
@HWI-EAS443:3:5:286:1430#0/1  
AGCTTTCCCAAATGTCAAAGAAGTGAACGCCAAAATTGA  
+HWI-EAS443:3:5:286:1430#0/1  
]P]W¥Y^NYa[[YaHHYSSRS\_\_Y]`a\_`WLJBBBBBBB  
@HWI-EAS443:3:5:288:220#0/1  
AGGGAGTGTACATAAATACGGCCTTGCTCAATGCATCCTG  
+HWI-EAS443:3:5:288:220#0/1  
abbbabaaaaa\_b`aabaa\_aW[a`Z\_a\_\_`a\_Za\_]W¥B  
@HWI-EAS443:3:5:413:1134#0/1  
TGGGGGGCTATATGAAGCAATCGAGGAGTGCCTGATTAAT  
+HWI-EAS443:3:5:413:1134#0/1  
aaaaa^aa`abaaa`aaaaa]a\_``\_a\_\_\_\_\_a\_\_\_\_`B  
@HWI-EAS443:3:5:432:435#0/1  
TGGGGGGCTATATGAAGCAATCGAGGAGTGCCTGATTAAT  
+HWI-EAS443:3:5:432:435#0/1  
abbabaaaabbaabaa`abab¥bab^`a^b^\_a`\_````\_`  
@HWI-EAS443:3:5:442:1612#0/1  
GTTACATATACTGTTCCACTGTCCAGGCCATGATTCGG  
+HWI-EAS443:3:5:442:1612#0/1  
^S^\_`ab`T¥H¥[\_aa[`S\_aaa\_`\_a^`[Ua`X¥]NV^\_  
@HWI-EAS443:3:5:442:620#0/1  
TGTTTTCAAAGAATTCCTTGGTCATGTCTTTCTTTGAC  
+HWI-EAS443:3:5:442:620#0/1  
ab^abaaaaaba\_ba`aabbY`aab\_^`aa\_a^aa\_\_\_Z  
@HWI-EAS443:3:5:443:680#0/1  
AGCAGGTGCTAGCAGAGCTACAGGACATTGAAAATGAAGA  
+HWI-EAS443:3:5:443:680#0/1  
a]aabb[a`aba[aaaaaaaaabaa``aaaa\_a`aa`aaa  
@HWI-EAS443:3:5:470:993#0/1  
CCCAAATGTCAAAGAAGTGAACGCCAAAATTGAACCATT  
+HWI-EAS443:3:5:470:993#0/1  
abbb`aa^ba\_X`aaa¥aaaaa\_a\_a`\_``\_`a`H`aB  
@HWI-EAS443:3:5:689:206#0/1  
GCTGAAAGTCATCCATGGCTGCACAGGATGCATTGAGCAA  
+HWI-EAS443:3:5:689:206#0/1  
a`aaaaaa\_\_a`\_\_`aa][X`V¥QY\_\_[UXLYRBBBBBBB  
@HWI-EAS443:3:5:690:1313#0/1  
TTTCCGATTTGTTTTCAAAGAATTCCTTGGTCATGTCTTT  
+HWI-EAS443:3:5:690:1313#0/1  
a]\_abbY]aQ\_J¥aX¥aZ]a^\_b`VPZ]aa¥W\_`aT\_a`B  
@HWI-EAS443:3:5:708:802#0/1  
CACTCCCCTGGGTGACTCTCCGATTGGCCATGTTCCGAT

+HWI-EAS443:3:5:708:802#0/1  
aa`Ya`WHU`bSaa[aa[`¥Y[a`\_¥`Y¥ZXVaSU\_`ZB  
@HWI-EAS443:3:5:716:662#0/1  
CATTCTTTGGCTGGAAAGAGCCTAACATAGTCAAACCACA  
+HWI-EAS443:3:5:716:662#0/1  
`bb`bababaa`aba`¥^ab^Z\_[bS`a\_b¥aaaa¥]aX^  
@HWI-EAS443:3:5:752:1659#0/1  
ATTAATCAGGCACTCCTCGATTGCTTCATATAGCCCCCA  
+HWI-EAS443:3:5:752:1659#0/1  
aab``b`aabY^a`\_Sa^`\_`ZHZWa`\_Sa\_^WTSQBB  
@HWI-EAS443:3:5:77:482#0/1  
GGGGGCTATATGAAGCAATCGAGGAGTGCCTGATTAATG  
+HWI-EAS443:3:5:77:482#0/1  
aaaaaaaaaaaaab`aa`baa`a`aa\_aYa\_\_aa\_\_a`¥`\_  
@HWI-EAS443:3:5:795:1692#0/1  
GGGGGCTATATGAAGCAATCGAGGAGTGCCTGATTAATGA  
+HWI-EAS443:3:5:795:1692#0/1  
a^a`¥]ab`\_aa]\_aaaaUaaQ\_\_aaZYMX\_aa\_\_Ya¥a\_  
@HWI-EAS443:3:5:868:955#0/1  
ATAATGAAGGGAGTGTACATAAATACGGCCTTGCTCAATG  
+HWI-EAS443:3:5:868:955#0/1  
aaababbbb\_a`aab\_]`bbabaabaab^YaaaaaX`aba  
@HWI-EAS443:3:5:956:860#0/1  
GCCCTGCTCTCTTCGTCAAGGGTGTAGTCCGCTTTGGTGG  
+HWI-EAS443:3:5:956:860#0/1  
a^a`\_`a`^`^`][a¥]¥Xaa`S`ZT¥SYX^S^¥Y]BBB  
@HWI-EAS443:3:5:958:1456#0/1  
GCCCTGCTCTCTTCGTCAAGGGTGTAGTCCGCTTTGGTGG  
+HWI-EAS443:3:5:958:1456#0/1  
`a`¥`^^\_a\_\_a`aa[TaW\_a¥^aS^``Z^`^XXUQ`  
@HWI-EAS443:3:60:1066:1325#0/1  
GGGGAGGGAATACCACTATATGATGCAATCAAATGCATGA  
+HWI-EAS443:3:60:1066:1325#0/1  
Y\_a^[a`bbba`^abbbb`a`a^bba``abbbaaa^aa`a  
@HWI-EAS443:3:60:1086:616#0/1  
ATATACTGTTCCACTGTCCAGCCATGATTCGGTCTCT  
+HWI-EAS443:3:60:1086:616#0/1  
abaaaabb``aaa`^aaa\_a]aa\_a`\_`\_`a^¥`][`]V  
@HWI-EAS443:3:60:1100:27#0/1  
GGCATGGAAATGAGGCGCTGCCTTCTTCAGTCTTTCAGC  
+HWI-EAS443:3:60:1100:27#0/1  
abb`a`baabab`a\_¥a`aa¥¥`\_`\_a[^\_^Z\_S\_^VZWW  
@HWI-EAS443:3:60:1103:1252#0/1  
CAAGCTTGCCGACCAAAGTCTCCCACCGAACTTCTCCAGC  
+HWI-EAS443:3:60:1103:1252#0/1  
\_X]\_¥aba¥\_W¥a\_^[b¥[XYXNY\_QVVYTXUSRXYZSOX  
@HWI-EAS443:3:60:1153:435#0/1  
GAACCTGGAACCTTCGATCTTGGGGGGCTATATGAAGCAA  
+HWI-EAS443:3:60:1153:435#0/1  
aaa\_\_aaa`a`\_a\_\_a\_\_Z`\_`\_`\_`\_`^`\_`[[¥^^VS]\_

@HWI-EAS443:3:60:1194:868#0/1  
GGGGTTTTTCGGCTGAATCGAGAAAATTGCTTCTCATTGTT  
+HWI-EAS443:3:60:1194:868#0/1  
^^[a¥bbbabaa`b]a^Xa`aaaaaaaa\_^]aaVaaaa\_a  
@HWI-EAS443:3:60:1289:998#0/1  
AGCAGGTGCTAGCAGAGCTACAGGACATTGAAAATGAAGA  
+HWI-EAS443:3:60:1289:998#0/1  
aZ\_aa^[`]^`^Z[X]¥]\_^`X\_aa]¥[\_a^^^[aa][ ]\_  
@HWI-EAS443:3:60:1303:1512#0/1  
GATTCAAGCTGGATAGAACTTGATGAAATAGGAGAAGATG  
+HWI-EAS443:3:60:1303:1512#0/1  
a¥Y`]^`^Waj\_]`GMZW`^^]`\_`\_`\_Z]`\_`^^W`^^Y^Y\_  
@HWI-EAS443:3:60:1390:535#0/1  
TTGGGGGGCTATATGAAGCAATCGAGGAGTGCCTGATTAA  
+HWI-EAS443:3:60:1390:535#0/1  
abbaaaaaaaaaabaaa`aa`a`^a\_aa\_]a^]`\_]\_\_\_\_  
@HWI-EAS443:3:60:1476:1071#0/1  
GCCTTATTGAATTCATTTTGGACCCAGCTTGCTAGAGATC  
+HWI-EAS443:3:60:1476:1071#0/1  
a]P^a`X`aa`bbRJU`[`T¥^VGXP]TX\_XWZRVXZFN  
@HWI-EAS443:3:60:1515:54#0/1  
GGGCATGGAAATGAGGCGCTGCCTTCTTCAGTCTCTTCAG  
+HWI-EAS443:3:60:1515:54#0/1  
aaZ`TUZ\_LQ`V^^a\_[]UY^SSZTFZVHN`PJQSQUUPT  
@HWI-EAS443:3:60:1528:629#0/1  
CACATTCACATCTTTTCACTTACTGGAGAGGAGATGGCCA  
+HWI-EAS443:3:60:1528:629#0/1  
ab`ab`bbaaaabbabaabaaa`a`aaaa\_\_a\_\_a\_RXa  
@HWI-EAS443:3:60:1532:149#0/1  
GGGGCATGGAAATGAGGCGCTGCCTTCTTCAGTCTCTTCA  
+HWI-EAS443:3:60:1532:149#0/1  
aa`^`^`aa`^a`aaa`\_a[\_`ZUZ\_Z`\_^`\_WT\_Z¥[W[  
@HWI-EAS443:3:60:1544:942#0/1  
ACAAAATAAAATCTGAGAAGACACACATTCACATCTTTTC  
+HWI-EAS443:3:60:1544:942#0/1  
aaaaaaaaaaaaa\_aaaa`a`\_`\_]`\_aa`\_\_\_\_¥a```¥  
@HWI-EAS443:3:60:1546:979#0/1  
AATTCCTTGGTCATGTCTTTCTCTTTGACAGAAGACTCGG  
+HWI-EAS443:3:60:1546:979#0/1  
a`ba^aab`]Zaaaa¥`aaa^a\_ab`a^`a`\_a\_a\_\_\_\_^`  
@HWI-EAS443:3:60:1575:928#0/1  
CCCTGCTCTCTTCGTCAAGGGTGTAGTCCGCTTTGGTGGC  
+HWI-EAS443:3:60:1575:928#0/1  
aaabbababbbb`b^aaaabb¥b^aa`a\_a¥aaaaa^]aZ  
@HWI-EAS443:3:60:1611:1602#0/1  
ATGATTGGTCTCTTCTTCAATTATCTCAAATCGGTGCT  
+HWI-EAS443:3:60:1611:1602#0/1  
aaaaaa``[¥\_a^`a`\_a`\_`\_a\_\_^Z\_]`^]ZS`aX¥VY  
@HWI-EAS443:3:60:1633:396#0/1  
GGAGTTCTCACTCACTGACCCGAGACTGGAGCCACACAAA

+HWI-EAS443:3:60:1633:396#0/1  
a^`a`a`a^a`a\_a\_aaa^^^a\_a`]aa\_`aU[Z\_^Y\_^`  
@HWI-EAS443:3:60:1677:1626#0/1  
CATTAATCAGGCACTCCTCGATTGCTTCATATAGCCCCC  
+HWI-EAS443:3:60:1677:1626#0/1  
aaabaab\_a\_\_[]`aZ)`\_aaaaa`^a`a[ZTUW\_ZZ  
@HWI-EAS443:3:60:1712:11#0/1  
GGAACTATTTTACAGCAGAAGTGTCCCACTGCAGGGCTAC  
+HWI-EAS443:3:60:1712:11#0/1  
aa`\_\_a[aaaa]\_\_\_`\_]\_\_Y`Y]Z]\_Y][U[VVZW]^X  
@HWI-EAS443:3:60:1753:1908#0/1  
CAAGAAATGGCCAGTAGGAGTCTATGGGATTCCTTCGTC  
+HWI-EAS443:3:60:1753:1908#0/1  
abb\_ababaaaa`ZVa\_a`¥ZXa¥[JUaX\_]UU[aaGXZN  
@HWI-EAS443:3:60:183:57#0/1  
CATAAATCCCAATTACCTCATGGCTTGAAGCAGGTGCTA  
+HWI-EAS443:3:60:183:57#0/1  
abbbb\_baaaa\_baaaaaaaaaaaa`[YOY^YV¥MXQVQ  
@HWI-EAS443:3:60:253:1582#0/1  
TGTGAATTGACTGATTCAAGCTGGATAGAATTGATGAAA  
+HWI-EAS443:3:60:253:1582#0/1  
]aXbaaa`¥0b^^a`\_aaaa`a`\_\_\_`\_`a\_\_a`\_^a^`S  
@HWI-EAS443:3:60:299:813#0/1  
GAGCCAGATCTCTAGCAAGCTGGGTCCAAAATGAATTCA  
+HWI-EAS443:3:60:299:813#0/1  
^b]`aaba[aaab\_X`^a`baaaaa\_`^`\_]\_`\_a`aa`a  
@HWI-EAS443:3:60:339:208#0/1  
CATAAATCCCAATTACCTCATGGCTTGAAGCAGGTGCTA  
+HWI-EAS443:3:60:339:208#0/1  
U`¥`\_S¥¥babbbbabaaa`^aaaa\_0\_HRZBBBBBBBBB  
@HWI-EAS443:3:60:363:283#0/1  
AATTCACATGCCTTATTGAATTCATTTTGGACCCAGCTTG  
+HWI-EAS443:3:60:363:283#0/1  
aa\_aaaa`\_aa`aa\_aa\_]aa\_]`\_`^\_]`[\_¥PTY]Z]Y  
@HWI-EAS443:3:60:421:1207#0/1  
AAAGAGCCTAACATAGTCAAACCACATGAGAAAGGCATAA  
+HWI-EAS443:3:60:421:1207#0/1  
abba`)]`aabbaaaaa\_baaaaa`a`a\_\_a`\_`\_\_\_`\_a`  
@HWI-EAS443:3:60:441:541#0/1  
CTTGAAGCAGGTGCTAGCAGAGCTACAGGACATTGAAAA  
+HWI-EAS443:3:60:441:541#0/1  
a\_abbaaaaa`]\_aaaaa`\_aa\_a\_aaa^\_\_\_\_a]\_\_\_\_  
@HWI-EAS443:3:60:474:946#0/1  
TGGTGACCCGAATGCACTATTGAAGCACCGATTTGAGATA  
+HWI-EAS443:3:60:474:946#0/1  
abaabbbbbbaababbab[bbbbaa^ba]a`aabba`aaa  
@HWI-EAS443:3:60:486:658#0/1  
TACGGCCTTGCTCAATGCATCCTGTGCAGCCATGGATGAC  
+HWI-EAS443:3:60:486:658#0/1  
abaaaaa\_Z]\_a\_[¥aaa\_\_`a`T]^a^]a¥\_`\_`[\_^Z



@HWI-EAS443:3:60:519:958#0/1  
CACCCCTTGACGAAGAGAGCAGGGCAAGAATCAAACTAGG  
+HWI-EAS443:3:60:519:958#0/1  
Y[¥Z^`ab\_`a¥[W`b\_T¥XZaYY`^`^b¥VY`bW]a`b  
@HWI-EAS443:3:60:556:1318#0/1  
ACCGAACTTCTCCAGCCTTGAAAACCTTTAGAGCCTATGTA  
+HWI-EAS443:3:60:556:1318#0/1  
]]ab]PH\_\_^XWSSaa]\_WWM\_^Z^NPWT][X\_Y]\_TLXZ  
@HWI-EAS443:3:60:610:1915#0/1  
GGCCTGGACAGTGGTGAACAGTATATGTAACACAACAGGG  
+HWI-EAS443:3:60:610:1915#0/1  
a\_a`a\_a`^a`X^\_V`aa\_^a]a\_\_\_^X\_a^a^`^^\_\_`  
@HWI-EAS443:3:60:64:351#0/1  
GGGGTTTTCGGCTGAATCGAGAAAATTGCTTCTCATTGTT  
+HWI-EAS443:3:60:64:351#0/1  
a)`R[[]]POLQZXNXJMNUT]SPNPX[RPRQZSVVWSM  
@HWI-EAS443:3:60:679:1308#0/1  
GAAAGGCATAAATCCCAATTACCTCATGGCTTGAAGCAG  
+HWI-EAS443:3:60:679:1308#0/1  
^a[^`babbbaaaaa^aaa]aa`a¥`]^a\_RL^ZLSKV  
@HWI-EAS443:3:60:680:221#0/1  
AGAAGCCTAAATTTCTTCCTGATTTGTATGATTACAAAAGA  
+HWI-EAS443:3:60:680:221#0/1  
`URWJU¥¥b¥¥[\_Z^aSR]\_R]^]Xa`a\_\_¥SUY`[W¥  
@HWI-EAS443:3:60:694:683#0/1  
TGAGAAAGGCATAAATCCCAATTACCTCATGGCTTGAAG  
+HWI-EAS443:3:60:694:683#0/1  
abaaabb\_aabaaabaa````aaaaaa\_```]^aQ\_\_^^  
@HWI-EAS443:3:60:773:1712#0/1  
GGCACCAGAAAAAGTAGACTTTGATGACTGCAAAGATGTT  
+HWI-EAS443:3:60:773:1712#0/1  
`aaa\_abaa\_a\_Wa0a`a^a\_````\_a\_`^`]^`\_]\_X^  
@HWI-EAS443:3:60:802:143#0/1  
ACTGTTTAAGGTCTCCAACATCTTTGCAGTCATCAAAGTC  
+HWI-EAS443:3:60:802:143#0/1  
aa`]a`aa`Z\_a`aa`\_a\_\_\_`\_\_\_\_Z\_^\_¥\_\_\_]]X^  
@HWI-EAS443:3:60:809:1731#0/1  
AACGCCAAAATTGAACCATTCTTGAGGACGACACCACGCC  
+HWI-EAS443:3:60:809:1731#0/1  
\_aaZ[UX]\_^[\`T]^]^Y\_a^¥\_\_YZX^[\`^¥¥T]`ZTSN  
@HWI-EAS443:3:60:815:745#0/1  
GGAAGATCCGAAAATCGAAACTAACAAGTTTGCTGCAATA  
+HWI-EAS443:3:60:815:745#0/1  
a`UZ[a`b¥^ab`aa`\_¥Ua`¥[a^V]\_aa`aa\_\_[a`  
@HWI-EAS443:3:60:830:522#0/1  
GTTCTCATATAGGAACATGGGCCTCGACACTTGGCCTA  
+HWI-EAS443:3:60:830:522#0/1  
aaaaaaaaaab`aa`baa`aa`\_```a\_¥a`\_\_a\_\_\_`a  
@HWI-EAS443:3:60:847:2024#0/1  
GTACATAAATACGGCCTTGCTCAATGCATCCTGTGCAGCC

+HWI-EAS443:3:60:847:2024#0/1  
a]]G]`aY\_\_a\_]URYUTXT\_]SPPYPVNNNVUTVWUL  
@HWI-EAS443:3:60:849:1293#0/1  
GGGGCATGGAAATGAGGCGCTGCCTTCTTCAGTCTCTTCA  
+HWI-EAS443:3:60:849:1293#0/1  
Y^`\_X^`bWX^¥`b`a\_]QZ`^a\_a\_S\_TUZ\_Z`\_X¥  
@HWI-EAS443:3:60:872:1459#0/1  
ATCAGGCACTCCTCGATTGCTTCATATAGCCCCCAAGAT  
+HWI-EAS443:3:60:872:1459#0/1  
aabaabababbb`[a]¥^[[aa`\_]W[[¥aX`TOVRP  
@HWI-EAS443:3:60:911:426#0/1  
ATTTTCACCGAGTGCCCACTTCAATTGGCTTGTCTCTTC  
+HWI-EAS443:3:60:911:426#0/1  
abbaa`a`\_a\_a]a\_\_aa`aa`a\_^\_^`^GR]N¥W\_aR  
@HWI-EAS443:3:60:934:524#0/1  
GTGCTAGCAGAGCTACAGGACATTGAAAATGAAGAGAAGA  
+HWI-EAS443:3:60:934:524#0/1  
aZV\_a¥¥`\_`[¥]]¥`aa]\_`aaa^]X[\_]Y\_^ZZ[\_]  
@HWI-EAS443:3:60:961:254#0/1  
AGAAGATGTTGCCCGATTGAACATATCGCAAGCATGAGG  
+HWI-EAS443:3:60:961:254#0/1  
aa]`aa\_a[aa\_]a`\_]`\_`^a^`\_`^^Z^WP[RXVZV[]  
@HWI-EAS443:3:61:1041:59#0/1  
ACGGCCTTGCTCAATGCATCCTGTGCAGCCATGGATGACT  
+HWI-EAS443:3:61:1041:59#0/1  
aaaaaa\_aa`a\_aa`a\_aa\_a\_a¥aaaa[[¥\_`^¥`¥VN¥  
@HWI-EAS443:3:61:1050:1095#0/1  
CCCGAATGCACTATTGAAGCACCGATTTGAGATAATTGAA  
+HWI-EAS443:3:61:1050:1095#0/1  
abba¥`\_\_``baa``XZ^aaba`\_aa\_U\_a^Y¥¥`[R  
@HWI-EAS443:3:61:105:1574#0/1  
CCCCTTCAATTGGCTTGTCTCTTCATGTTCTTTGTCCT  
+HWI-EAS443:3:61:105:1574#0/1  
abba`a^ZX^`U]\_`aa`^ZQFY\_]TRTHWZR`¥`SSPQO  
@HWI-EAS443:3:61:1068:231#0/1  
GCCGAGTCTTCTGTCAAAGAGAAAGACATGACCAAGGAAT  
+HWI-EAS443:3:61:1068:231#0/1  
a^\_]\_a]¥^\_`\_]`[]\_]Y]]X]U]Z^XWXWZWWZZX  
@HWI-EAS443:3:61:1121:225#0/1  
TGCGTCTCCACAACCTGAGGGGTTTTCGGCTGAATCGAGA  
+HWI-EAS443:3:61:1121:225#0/1  
abaaaaaaa`a`aXabbaaabaVa``a`\_`^^V^]`^]  
@HWI-EAS443:3:61:1184:1046#0/1  
GGGGCATGGAAATGAGGCGCTGCCTTCTTCAGTCTCTTCA  
+HWI-EAS443:3:61:1184:1046#0/1  
`¥X¥U\_[W[JY¥]a^PXZ][Z^YQJVNVUBBBBBBBBBB  
@HWI-EAS443:3:61:1187:945#0/1  
AATATGGGGAAGATCCGAAAATCGAACTAACAAGTTTGC  
+HWI-EAS443:3:61:1187:945#0/1  
ab`a`b¥ab`bb`^`babbaabaa`\_Yaa`\_]\_X\_]Y

@HWI-EAS443:3:61:124:38#0/1  
AGCAGGTGCTAGCAGAGCTACAGGACATTGAAAATGAAGA  
+HWI-EAS443:3:61:124:38#0/1  
\_abaab]aaa]``\_a\_a`\_\_\_\_]¥LXU^\_^Y]^^[^V^\_]  
@HWI-EAS443:3:61:1260:708#0/1  
CGTCTCCACAACCTTGAGGGGTTTTCGGCTGAATCGAGAAA  
+HWI-EAS443:3:61:1260:708#0/1  
a``b``¥b¥¥abbb\_bbab`baba\_aaaabb^Za\_a¥P^  
@HWI-EAS443:3:61:1338:1132#0/1  
ACGGCCTTGCTCAATGCATCCTGTGCAGCCATGGATGACT  
+HWI-EAS443:3:61:1338:1132#0/1  
aaba¥`bbaaa``aa`[`aa`aaaa`^`[^^Y\_¥[RUN¥  
@HWI-EAS443:3:61:1343:1117#0/1  
CAACAAAATAAAATCTGAGAAGACACACATTCACATCTTT  
+HWI-EAS443:3:61:1343:1117#0/1  
¥¥b¥bbbababb\_bb`babaabbbb`]Yba¥a`ab¥aaa  
@HWI-EAS443:3:61:1358:1085#0/1  
TCTTGATCTTGGAGGTTCCATTGGTTCTCACATATAGGAA  
+HWI-EAS443:3:61:1358:1085#0/1  
S\_a`ababXS¥T\_]`[R^a`QFP][XPTS¥X^YVLL  
@HWI-EAS443:3:61:135:748#0/1  
CAGCTTGCTAGAGATCTGGGCTCTGGCTCATCACTGTCAT  
+HWI-EAS443:3:61:135:748#0/1  
abbbbbbaa^abbbabaaa`b`baabaabaaa``a\_\_`  
@HWI-EAS443:3:61:1403:441#0/1  
GCGTGGTGTCTCCTCAAGAATGGTTCAATTTTGGCGTTC  
+HWI-EAS443:3:61:1403:441#0/1  
abb`b\_LW`^a\_a^\_¥^aaaa`a`\_a^aa`ZMZ]U^YO  
@HWI-EAS443:3:61:1409:176#0/1  
CAACTTGAGGGTTTTCGGCTGAATCGAGAAAATTGCTTC  
+HWI-EAS443:3:61:1409:176#0/1  
aaabbbbabbaa\_bbbbaabbbbab\_abaaaabaV\_]V  
@HWI-EAS443:3:61:1409:1914#0/1  
TTCCGATTTGTTTTCAAAGAATTCCTTGGTCATGCTTTTC  
+HWI-EAS443:3:61:1409:1914#0/1  
aaVa^U`^]a\_a^ZY][``\_`^`^`^`aUX\_]aXSU\_VQ  
@HWI-EAS443:3:61:1484:1662#0/1  
TTGGGATCTTCTTCATTTTCAATGTCCTGTAGCTCTGC  
+HWI-EAS443:3:61:1484:1662#0/1  
a\_a^]^^^W`^ba\_]aaabaabbaaa¥a`a`\_]\_^\_TWZX  
@HWI-EAS443:3:61:1541:1301#0/1  
GGGGCATGGAATGAGGCGCTGCCTTCTTCAGTCTCTTCA  
+HWI-EAS443:3:61:1541:1301#0/1  
aaa`Z`aaa\_a^a]`aaaa^\_a``aa`\_V[^UV[SWYUW  
@HWI-EAS443:3:61:1561:194#0/1  
CAGTGGTGAACAGTATATGTAACACAACAGGGGTAGAGAA  
+HWI-EAS443:3:61:1561:194#0/1  
abbbbbbbbbbbabbabbbbbbbbbbaabba]aa¥a\_\_  
@HWI-EAS443:3:61:1581:733#0/1  
CCCTGGGTGACTCTCCGATTGGCCATGTTCCGATTGTT

+HWI-EAS443:3:61:1581:733#0/1  
aabb\_bX\$aaaaa]ZZaa^[a^HYV[aaTU\$Z\$\_]RZ  
@HWI-EAS443:3:61:1600:184#0/1  
CCGAACTTCTCCAGCCTTGAAAACCTTAGAGCCTATGTAG  
+HWI-EAS443:3:61:1600:184#0/1  
\_bbbbbbbaabbababbbbbbbbbbbbabab`abba`\_a  
@HWI-EAS443:3:61:1672:1171#0/1  
AAATAGTTCCTCCTCATGCTTGCATATGTTCAATCGGGG  
+HWI-EAS443:3:61:1672:1171#0/1  
`b`X^]aa[aY`\_\_aaaaaaaa`Y\_U\_]W^ZU]^RQOYY  
@HWI-EAS443:3:61:1712:561#0/1  
ATAAATACGGCCTTGCTCAATGCATCCTGTGCAGCCATGG  
+HWI-EAS443:3:61:1712:561#0/1  
abbbaaaTaba`^`[]^`\_Z`\$`\_W\_]ZV]VQ^[YS^U  
@HWI-EAS443:3:61:1723:882#0/1  
TGTGGACTTCCCTCCGTGTTACTCCAATTTCAATGAACCG  
+HWI-EAS443:3:61:1723:882#0/1  
`aaa]`bba\_\_aaa]^\_baaaaaa`aaa`\_^T][^\_[OM  
@HWI-EAS443:3:61:1756:25#0/1  
GTCCTGTAGCTCTGCTAGCACCTGCTTCCAAGCCATGAGG  
+HWI-EAS443:3:61:1756:25#0/1  
aa````\$aa``^XPZ\_[]YY\$U]YX\_VXL\$XQRQWQJWY  
@HWI-EAS443:3:61:194:1125#0/1  
CATAAATCCCAATTACCTCATGGCTTGAAGCAGGTGCTA  
+HWI-EAS443:3:61:194:1125#0/1  
ab\_Sabb^a`bbabaabab`a`aa`X^YW][X\$SF[\_\_\_  
@HWI-EAS443:3:61:248:761#0/1  
GGGGCATGGAATGAGGCGCTGCCTTCTTCAGTCTCTCA  
+HWI-EAS443:3:61:248:761#0/1  
\_\_\_\_\_U[a^\$ZX`\_\_[\$[\$[\$[\$U\$`\$^[WZT\$WWWUWU  
@HWI-EAS443:3:61:254:70#0/1  
ATTGAATTCATTTTGGACCCAGCTTGCTAGAGATCTGGGC  
+HWI-EAS443:3:61:254:70#0/1  
`abb\_abbaabaaabaaaa`aa`]`\_\_\_^[`]^]YYY\$V  
@HWI-EAS443:3:61:283:622#0/1  
ATTCGATTTCCATTTTCATCGACGAACGGGTGAATCAAT  
+HWI-EAS443:3:61:283:622#0/1  
abbbbbaaaabbaababa`aa^a]S\_a\_a^ZW\_]][^\_^  
@HWI-EAS443:3:61:286:1137#0/1  
GGGGGCTATATGAAGCAATCGAGGAGTGCCTGATTAATGA  
+HWI-EAS443:3:61:286:1137#0/1  
aaa`]^aa]^aa[]\$]\_a\_]W[\_[`N\_\_\_Y]TU\$XVWP[  
@HWI-EAS443:3:61:286:117#0/1  
GCTTGTCTCTTCATGTTCTTTGTCCTTGGGATCTTCTCT  
+HWI-EAS443:3:61:286:117#0/1  
a]a\_\_\_^`^`^]]]]^^\_XYXXXZ^]]Z^X\_]U]ZZ  
@HWI-EAS443:3:61:288:881#0/1  
CTCCTATTTTCATCAAGTTCTATCCAGCTTGAATCAGTCAA  
+HWI-EAS443:3:61:288:881#0/1  
abb```bbababaaa\_aabab`aa]^a`\_a\_\_\_\_\_aaa]]]



+HWI-EAS443:3:61:512:270#0/1  
abaaaaa[aaaaab`aaa\_aYJ^^X^`a]\_\_]a\_^XX^X  
@HWI-EAS443:3:61:549:1453#0/1  
GGGGGCTATATGAAGCAATCGAGGAGTGCCTGATTAATGA  
+HWI-EAS443:3:61:549:1453#0/1  
]]][^]Z]\_`aaa`^\_]\_]HZ¥QYTV¥\_Z`SY]YZ]YV  
@HWI-EAS443:3:61:563:1062#0/1  
GAAAGGCATAAATCCCAATTACCTCATGGCTTGGAAAGCAG  
+HWI-EAS443:3:61:563:1062#0/1  
aT\_\_Z]a`a\_\_[a\_\_\_`a\_\_a`^]¥QZP¥U]]GVURUXYV  
@HWI-EAS443:3:61:573:1109#0/1  
AGCAGGTGCTAGCAGAGCTACAGGACATTGAAAATGAAGA  
+HWI-EAS443:3:61:573:1109#0/1  
a]a`¥]Vaa^]]`a`\_a`a`a`^`X]\_^YVYNV[TT]Y]  
@HWI-EAS443:3:61:585:556#0/1  
GGGGGCTATATGAAGCAATCGAGGAGTGCCTGATTAATGA  
+HWI-EAS443:3:61:585:556#0/1  
aaaaaaaa`aaa\_a`]`\_`a\_aa\_aVa`\_`^`\_^]YV  
@HWI-EAS443:3:61:586:395#0/1  
AGCAGGTGCTAGCAGAGCTACAGGACATTGAAAATGAAGA  
+HWI-EAS443:3:61:586:395#0/1  
a^`\_`aa\_aa`aa`\_a`aa\_a`a`T^`[^[[^^][¥[WVS  
@HWI-EAS443:3:61:645:1670#0/1  
TAATCAGGCACTCCTCGATTGCTTCATATAGCCCCCAAG  
+HWI-EAS443:3:61:645:1670#0/1  
aaaaaaaaabaaa\_\_aaa`ab\_aaaa`a\_aZW^ZV^VU  
@HWI-EAS443:3:61:682:409#0/1  
AAAGAAGTGAACGCCAAAATTGAACCATTCTTGAGGACGA  
+HWI-EAS443:3:61:682:409#0/1  
¥¥W\_\_aZ\_Z\_\_\_^^ZQZ\_]`bbbb\_¥aaaa`[ZZWY`^  
@HWI-EAS443:3:61:685:509#0/1  
TGGGGGCTATATGAAGCAATCGAGGAGTGCCTGATTAAT  
+HWI-EAS443:3:61:685:509#0/1  
`\_Z````aaaaa]a`a`]^\_V`\_V\_]a\_]`\_\_\_\_\_^WZ  
@HWI-EAS443:3:61:712:367#0/1  
ATTCGGGTCACCAGATTCTACAATTATTGATTCACCCCGT  
+HWI-EAS443:3:61:712:367#0/1  
a`aaa]bH\_aa`^`\_`aaa`¥`]a^`\_\_a^`\_U[]]WU]W  
@HWI-EAS443:3:61:755:718#0/1  
TTCGGTGGGAGACTTTGGTCGGCAAGCTTGCGCATAGTTC  
+HWI-EAS443:3:61:755:718#0/1  
aa\_UOTZNN`¥F[]ZKZMVNNQWWaBBBBBBBBBBBBBBB  
@HWI-EAS443:3:61:766:524#0/1  
CACATTCACATCTTTTCATTCCTGGAGAGGAGATGGCCA  
+HWI-EAS443:3:61:766:524#0/1  
aWaba`abab\_]bbaaa[b`ZH\_bb\_Z\_Tba`^`Q[`¥U¥¥  
@HWI-EAS443:3:61:792:375#0/1  
TACAGTTTGTTCCTTCCTTCCTTCCTTCCTTCCTTCCTTCATT  
+HWI-EAS443:3:61:792:375#0/1  
ababbb^aaa]baa`aaaaabbbaaaa`aa]¥Y`\_]`\_^

@HWI-EAS443:3:61:792:867#0/1  
ATAAAAGGAAGGTCTCATTTGAGAAATGATACTGATGTGG  
+HWI-EAS443:3:61:792:867#0/1  
]`\_ZZa]``a\_¥Y¥aab`a`aS\_XW¥\_]\_a¥\_a`a`]VLX  
@HWI-EAS443:3:61:793:1042#0/1  
ACATAATGAAGGGAGTGTACATAAATACGGCCTTGCTCAA  
+HWI-EAS443:3:61:793:1042#0/1  
abaaa\_aaa`aaa\_a]aXaaa]K`\_`a`\_\_\_\_\_]VQ]VYY]  
@HWI-EAS443:3:61:875:574#0/1  
TGCCCCATTTTCATCTTGATCTTGGAGGTTCCATTGGTTCT  
+HWI-EAS443:3:61:875:574#0/1  
abba`bbbbbbbaa`a\_baaaaaa¥S¥a^\_^[]`XTPYVDN  
@HWI-EAS443:3:61:926:422#0/1  
CCGATTCTACAATTATTGATTCACCCCGTTCGTCGATGA  
+HWI-EAS443:3:61:926:422#0/1  
abbbbbbbbbbbbbabbbbbbaabbbbaabaaaaa`a\_\_a`  
@HWI-EAS443:3:61:928:633#0/1  
GGCTTCTCTACCCCTGTTGTGTACATATACTGTTACCA  
+HWI-EAS443:3:61:928:633#0/1  
a]]``]X]¥\_[\_[X¥^LWZ^aVYW\_S¥a^`ZZVP¥ZUZVW  
@HWI-EAS443:3:61:939:360#0/1  
GCCGAACGGCTGCATTGAGGGCAAGCTTCCCAAATGTCA  
+HWI-EAS443:3:61:939:360#0/1  
\_`a\_U]\_aZ\_\_¥MZ¥ZMV\_\_QFR[^N^¥SW¥VVNRRPQS  
@HWI-EAS443:3:61:944:1570#0/1  
CTGTCATACTGTTAAGGTCTCCAACATCTTTCAGTCAT  
+HWI-EAS443:3:61:944:1570#0/1  
abba\_a` `ab`\_aab`aaYaabb¥ba¥^aa[ `ZU`\_W`UT  
@HWI-EAS443:3:61:963:2044#0/1  
AGCAGAGCTACAGGACATTGAAAATGAAGAGAAGATCCCA  
+HWI-EAS443:3:61:963:2044#0/1  
]`\_aaa^aa`aa\_aaaaaaaaa¥¥aaaaaaaa`a]^^]ZWXZ  
@HWI-EAS443:3:61:980:1496#0/1  
ATCATTAATCAGGCACTCCTCGATTGCTTCATATAGCCCC  
+HWI-EAS443:3:61:980:1496#0/1  
abba`ab¥babbaaabababaaY`aaba`aa`\_aa`\_\_UV  
@HWI-EAS443:3:62:1017:994#0/1  
GGGGGCTATATGAAGCAATCGAGGAGTGCCTGATTAATGA  
+HWI-EAS443:3:62:1017:994#0/1  
aaa`aaa`aaaaaa`a`a`aa\_a`\_]\_]\_^`\_]\_a^W^^\_  
@HWI-EAS443:3:62:1049:245#0/1  
GACATTCTTTGGCTGGAAAGAGCCTAACATAGTCAAACCA  
+HWI-EAS443:3:62:1049:245#0/1  
aYU^\_\_X]^]\_]\_^\_ZOP^]XXYXYXZZUYW]XYYZZZ]Z  
@HWI-EAS443:3:62:1081:1117#0/1  
TGGGGCATGGAAATGAGGCGCTGCCTTCTTCAGTCTCTTC  
+HWI-EAS443:3:62:1081:1117#0/1  
ab\_\_aaaZ^`a`\_`a`aa``aaaa`\_a¥^\_aa[a\_\_`¥`\_`a  
@HWI-EAS443:3:62:1122:110#0/1  
GTTTTCGGCTGAATCGAGAAAATTGCTTCTCATTGTTTCAG

+HWI-EAS443:3:62:1122:110#0/1  
a\_\_\_\_\_]\_W\_`^^]Y\_X`XXYZ]ZWQYZZXYXZZZZVWYW  
@HWI-EAS443:3:62:1320:755#0/1  
CTTGGGGGGCTATATGAAGCAATCGAGGAGTGCCTGATTA  
+HWI-EAS443:3:62:1320:755#0/1  
aabbbabaaabaabab`Z\_abaa\_a\_ab`a^a`\_aa\_a`a  
@HWI-EAS443:3:62:1326:1915#0/1  
GGCCACCAAAGCGGACTACACCCTTGACGAAGAGAGCAGG  
+HWI-EAS443:3:62:1326:1915#0/1  
abababbbbabbaabaaaaab^a`aaa\_baaaabaa\_ab\_  
@HWI-EAS443:3:62:1363:1529#0/1  
AAGAATTCCTTGGTCATGTCTTTCTTTGACAGAAGACT  
+HWI-EAS443:3:62:1363:1529#0/1  
`\_YS`a[JY`VWOS^a^`R]b^^a`R]aaaYX`Y[[`U`a  
@HWI-EAS443:3:62:1372:1243#0/1  
CGAGACTGGAGCCACACAAATGGGAAAAATACTGTGTTCT  
+HWI-EAS443:3:62:1372:1243#0/1  
aba`aaabaaaa\_\_`a`aaaa`a``aaaa\_a\_]a\_aaa  
@HWI-EAS443:3:62:1374:438#0/1  
AACAAAATAAAATCTGAGAAGACACACATTCACATCTTTT  
+HWI-EAS443:3:62:1374:438#0/1  
ababbabbabbababbaba\_aaaa`a`aaa`aaaa`aaa`  
@HWI-EAS443:3:62:1387:94#0/1  
CCCTCCGTGTTACTCCAATTTCAATGAACCGTTCTCTTT  
+HWI-EAS443:3:62:1387:94#0/1  
aaabaab`aab`Uaaa\_[aaa\_a``Z\_^\_Ya¥[\_[^X\_^`  
@HWI-EAS443:3:62:1469:1753#0/1  
CACCGATTTGAGATAATTGAAGGAAGAGACCGAATCATGG  
+HWI-EAS443:3:62:1469:1753#0/1  
aaa\_baa`bbaba]abbbaa\_aab`\_`a`a\_aa`\_Ia^aa  
@HWI-EAS443:3:62:1520:188#0/1  
CTTGGTCATGTCTTTCTTTGACAGAAGACTCGGCCTCA  
+HWI-EAS443:3:62:1520:188#0/1  
```¥]PV`[bb]\_Y\_aba¥]]Z`a]]``UZb\_VaBBBBBB  
@HWI-EAS443:3:62:1520:743#0/1  
TAGAGATCTGGGCTCTGGCTCATCACTGCATACTGTTTA  
+HWI-EAS443:3:62:1520:743#0/1  
aab`a`a`\_aa\_Y`\_`aaaa`\_`^`^a\_a\_]`\_]\_aa  
@HWI-EAS443:3:62:1532:892#0/1  
CGTCTCCACAACCTGAGGGTTTTTCGGCTGAATCGAGAAA  
+HWI-EAS443:3:62:1532:892#0/1  
ababbaaaaab`bbababbb`bab`ab`b`b^X]a¥a¥aa  
@HWI-EAS443:3:62:1641:1799#0/1  
GGGGTTTTTCGGCTGAATCGAGAAAATTGCTTCTCATTGTT  
+HWI-EAS443:3:62:1641:1799#0/1  
\_ab\_\_ab`\_V\_^bab[aabb\_a`\_aYI\_abTb\_aa`VW]  
@HWI-EAS443:3:62:1647:1626#0/1  
ACTTCTGCTGTAAAATAGTTCCCTCCTCATGCTTGCGATAT  
+HWI-EAS443:3:62:1647:1626#0/1  
^G]^FVa`a`ZabbY]\_ZO^a\_Y]`ZaVK¥[`¥ZR¥TN^Y



@HWI-EAS443:3:62:1709:341#0/1  
GGGGGGCTATATGAAGCAATCGAGGAGTGCCTGATTAATG  
+HWI-EAS443:3:62:1709:341#0/1  
aaaa`^aaaa^\_aaaa`\_a¥`\_[]W`Z^¥`[UY`\_\_`  
@HWI-EAS443:3:62:1747:530#0/1  
CCTTCATTATGTATTCAGTAGCCCTGCAGTGGGACACTTC  
+HWI-EAS443:3:62:1747:530#0/1  
aaba`bbaba`^bbaa]aa]a`aa\_aa^``ZW]S]^  
@HWI-EAS443:3:62:221:1403#0/1  
CATATTTTCACCGAGTGCCCACTTCAATTGGCTTGTCTC  
+HWI-EAS443:3:62:221:1403#0/1  
aaaaaaaaabaaa[Vaaa`V\_a`a\_]\_\_\_\_]\_^[PSYTWL  
@HWI-EAS443:3:62:279:1301#0/1  
CTTCTCTTCATTTCAATGTCCTGTAGCTCTGCTAGCACC  
+HWI-EAS443:3:62:279:1301#0/1  
aab`Sabaabaa`a`\_]^[Z^ZUQYVPLSVVSNFFU^  
@HWI-EAS443:3:62:285:526#0/1  
AATAGTTCCTCCTCATGCTTGCATATGTTCAATCGGGGC  
+HWI-EAS443:3:62:285:526#0/1  
a)`YVRYWQ^`\_YVY[X^^\_[WXX[XNW[XSSPZSQWU  
@HWI-EAS443:3:62:302:1266#0/1  
ATCAGGCACTCCTCGATTGCTTCATATAGCCCCCAAGAT  
+HWI-EAS443:3:62:302:1266#0/1  
T^\_Y^`^`\_Zab]a^bXRUW^`ab`^W\_X^XW]WX^^V`^  
@HWI-EAS443:3:62:397:2037#0/1  
GGACACTTCTGCTGTAAAATAGTTCCTCCTCATGCTTGCG  
+HWI-EAS443:3:62:397:2037#0/1  
]\_aaa`aaaabaaa`bbbabUU[R`\_aaabb\_\_]`a\_a\_  
@HWI-EAS443:3:62:464:168#0/1  
CAAATGCATGAAGACATTCTTTGGCTGGAAAGAGCCTAAC  
+HWI-EAS443:3:62:464:168#0/1  
a`b\_\_bb`]aa[ababaaaa```aaa\_V^][¥^¥Y¥^`a  
@HWI-EAS443:3:62:475:316#0/1  
GAAGTTCGGTGGGAGACTTTGGTTCGGCAAGCTTGCGCATA  
+HWI-EAS443:3:62:475:316#0/1  
¥`[aZa¥`^L^a`]a][`\_]`^R¥V¥``[^^^Z^VZ[^[W  
@HWI-EAS443:3:62:532:1138#0/1  
ATTCATCGACGAACGGGTGAATCAATAATTGTAGAATC  
+HWI-EAS443:3:62:532:1138#0/1  
\_bbbaabb]`bb`^a`aaa¥aaaaaba^Yaa`Xa\_[]aa  
@HWI-EAS443:3:62:535:1052#0/1  
GAAAGAGCCTAACATAGTCAAACCACATGAGAAAGGCATA  
+HWI-EAS443:3:62:535:1052#0/1  
`bbbabababbabbbaa`aa\_baab`aaa`]aY`a¥aaa`  
@HWI-EAS443:3:62:541:864#0/1  
CTGAACAATGAGAAGCAATTTTCTCGATTCAGCCGAAAAC  
+HWI-EAS443:3:62:541:864#0/1  
aaa]`¥aX]baa^T\_[]^\_\_aa`\_]`\_^[VZVWXXYZ  
@HWI-EAS443:3:62:578:1464#0/1  
ATACGGCCTTGCTCAATGCATCCTGTGCAGCCATGGATGA



@HWI-EAS443:3:62:978:995#0/1  
GTCACGAGGGGAGGGAATACCACTATATGATGCAATCAA  
+HWI-EAS443:3:62:978:995#0/1  
a`a]WX`a`aa`aaa\_Z^\_aa[a`aa`\_^`aa`Y`^  
@HWI-EAS443:3:63:1024:2010#0/1  
ATTCGATTTCCATTTTCATCGACGAACGGGGTGAATCAAT  
+HWI-EAS443:3:63:1024:2010#0/1  
aaaaaZW``\_[`a¥a[\_^Y\_`Z`^[[\_YTT¥Taa¥[\_R¥a  
@HWI-EAS443:3:63:1070:438#0/1  
GAGACCGAATCATGGCCTGGACAGTGGTGAACAGTATATG  
+HWI-EAS443:3:63:1070:438#0/1  
abaa`aa`a]\_\_\_\_aWa`[[a`\_¥\_aUa\_\_\_\_]\_`V^\_\_\_\_  
@HWI-EAS443:3:63:1073:716#0/1  
AGCAGAGCTACAGGACATTGAAAATGAAGAGAAGATCCCA  
+HWI-EAS443:3:63:1073:716#0/1  
XW¥V\_[a\_TY`N¥Q¥U^¥ZX]]JXY`HP\_YXWVU]VXRZN  
@HWI-EAS443:3:63:1074:1166#0/1  
GTTCAATCGGGCAACATCTTCTCCTATTTTCATCAAGTTC  
+HWI-EAS443:3:63:1074:1166#0/1  
^GP¥¥]]]YMWV[P```a)`aaa¥`^YZ`YXPR¥¥W[¥W^  
@HWI-EAS443:3:63:1116:730#0/1  
GGCGTGGTGTCTCCTCAAGAATGGTTCAATTTTGGCGTT  
+HWI-EAS443:3:63:1116:730#0/1  
a¥`\_^`a0\_]a^^a]^`\_`[]\_a\_a0\_]^X^\_\_`\_]\_\_\_\_]  
@HWI-EAS443:3:63:115:426#0/1  
ATCAAATGCATGAAGACATTCTTTGGCTGGAAAGAGCCTA  
+HWI-EAS443:3:63:115:426#0/1  
\_]a`^`U^`^^`^^^a]WY```[[X``]][^Z^][\_¥WS  
@HWI-EAS443:3:63:1189:511#0/1  
CAAGAATCAAACTAGGCTTTTCACTATAAGACAAGAAAT  
+HWI-EAS443:3:63:1189:511#0/1  
`babbbbbbbbbbbbbbbbbbbbabba`aaaaa`aaa  
@HWI-EAS443:3:63:1197:79#0/1  
GCTTGCGCATAGTTCTGTAATCTCAAATTTTCTTCAAT  
+HWI-EAS443:3:63:1197:79#0/1  
aabaaYbaaa`a\_a``ab^^^a]^`U¥aaaaa\_aa`\_`a  
@HWI-EAS443:3:63:1221:914#0/1  
TGGGGGCTATATGAAGCAATCGAGGAGTGCCTGATTAAT  
+HWI-EAS443:3:63:1221:914#0/1  
]Z^bQ`]¥^Xa¥W[a]b¥a\_Yb\_a]L]M`\_\_Z\_Q]PT^V  
@HWI-EAS443:3:63:1233:1910#0/1  
GGTGAACCTTTGTAAGTATGGAGTTCTCACTCACTGACCCG  
+HWI-EAS443:3:63:1233:1910#0/1  
`[VZabab^a`H`TaYaaaY[YTHOZaTLW^ZL\_`abUY]  
@HWI-EAS443:3:63:1280:847#0/1  
GAGAAGCCTAAATTTCTCCTGATTTGTATGATTACAAAG  
+HWI-EAS443:3:63:1280:847#0/1  
Yab\_I[b¥¥T\_\_[^ba\_b`ab\_R\_\_aba^aa^^Z`aaaaa  
@HWI-EAS443:3:63:1288:851#0/1  
GGCACTCGGTGAAAATATGGCACCAGAAAAAGTAGACTTT

+HWI-EAS443:3:63:1288:851#0/1  
Q\_\_V`¥Z`bb^¥\_\_Xabaa`b^][\_V]a`T\_[`Y\_aa`^  
@HWI-EAS443:3:63:1329:613#0/1  
CATATCGCAAGCATGAGGAGGAACATTTTACAGCAGAAG  
+HWI-EAS443:3:63:1329:613#0/1  
[aabb``babaabba]bbbZbabaababbbbUaaaaaaaa  
@HWI-EAS443:3:63:135:974#0/1  
GCAGGTGCTAGCAGAGCTACAGGACATTGAAAATGAAGAG  
+HWI-EAS443:3:63:135:974#0/1  
aaaaa]`ba\_aa\_a^aa\_a`aa^^¥`^^Z^]]`^^^\_  
@HWI-EAS443:3:63:1369:209#0/1  
ATAAATCCCAATTACCTCATGGCTTGGAAGCAGGTGCTAG  
+HWI-EAS443:3:63:1369:209#0/1  
aaab`a`a[^`aa`a`\_aa^`\_a`T`]YWQTTBBBBBBB  
@HWI-EAS443:3:63:1369:394#0/1  
TACATAAATACGGCCTTGCTCAATGCATCCTGTGCAGCCA  
+HWI-EAS443:3:63:1369:394#0/1  
aaaaaa`\_aaa^a`aaaa\_aaa`\_aa`QaZ\_\_a\_^`^a\_  
@HWI-EAS443:3:63:1372:726#0/1  
CCCAGTCACGAGGGGAGGGAATACCACTATATGATGCA  
+HWI-EAS443:3:63:1372:726#0/1  
`X^\_Q\_SY]G^]aYaab^XP[\_Y\_a`a\_[¥^]\_aa]a^a]  
@HWI-EAS443:3:63:1407:859#0/1  
ACAAATCAGGAAGAAATTTAGGCTTCTCTACCCCTGTTGT  
+HWI-EAS443:3:63:1407:859#0/1  
\_Y¥ZTYZ]V\_GS¥T]VZ\_Y^aa^`aa`¥]UZWa^PTJS¥K  
@HWI-EAS443:3:63:1419:938#0/1  
AAGTTGTGGAGACGCATATAGACTGTTGAATACAGATTTT  
+HWI-EAS443:3:63:1419:938#0/1  
a¥ba\_b`a`ab`aa`ba^`^^aa]G[`Z¥QNQ¥\_[[\_BB  
@HWI-EAS443:3:63:1446:1359#0/1  
TGGAAATCCGAATACATGAAACAAACTTCCAAATGTGTGC  
+HWI-EAS443:3:63:1446:1359#0/1  
aaaaa`aaabaaaa`aa`aaaaab\_aa`\_]`\_aaaX`¥aa  
@HWI-EAS443:3:63:1456:1831#0/1  
AAGTGCCTGAACAATGAGAAGCAATTTTCTCGATTCAGCC  
+HWI-EAS443:3:63:1456:1831#0/1  
VH\_aaVa`Ya^V`WYa¥S¥`^^`K[a\_SHbbJRS\_BBB  
@HWI-EAS443:3:63:1479:272#0/1  
CAAGAAATGGCCAGTAGGAGTCTATGGGATTCCTTTCGTC  
+HWI-EAS443:3:63:1479:272#0/1  
aaab^`aaaaa\_aa\_aa^[a¥``aaa`X^^Z[\_\_\_^U^[^  
@HWI-EAS443:3:63:1510:1446#0/1  
AGCAGAGCTACAGGACATTGAAAATGAAGAGAAGATCCCA  
+HWI-EAS443:3:63:1510:1446#0/1  
ab^]aabaaa[`]Z^aabaJX[ab`Y\_a¥aaaa`\_] [FZa  
@HWI-EAS443:3:63:151:1406#0/1  
CGGCTGAATCGAGAAAATTGCTTCTCATTGTTTCAGGCACT  
+HWI-EAS443:3:63:151:1406#0/1  
aabbbbaab^aababbab]abbaa\_aaba`aa`^aaa``

@HWI-EAS443:3:63:1529:542#0/1  
AGAATTCCTTGGTCATGTCTTTCTCTTTGACAGAAGACTC  
+HWI-EAS443:3:63:1529:542#0/1  
aa`aaaa`aba\_`aaa`aaaaa`aaa\_\_^`aaaa]a\_  
@HWI-EAS443:3:63:1558:1577#0/1  
GGGCACTCGGTGAAAATATGGCACCAGAAAAAGTAGACTT  
+HWI-EAS443:3:63:1558:1577#0/1  
\_^`bbaXaa[baabbbbaa¥b`U`\_aXa\_aa[aVZDZa  
@HWI-EAS443:3:63:1558:444#0/1  
CCAGCTTGCTAGAGATCTGGGCTCTGGCTCATCACTGTCA  
+HWI-EAS443:3:63:1558:444#0/1  
a`\_bbaabaabaabaaaa]abaaaa`a\_aaaaaa^aa  
@HWI-EAS443:3:63:1605:436#0/1  
CCTCGATTGCTTCATATAGCCCCCAAGATCGAAGGTTCC  
+HWI-EAS443:3:63:1605:436#0/1  
ababbab`a``abbbbbbbaabaaa¥aaaaaab\_5]`\_  
@HWI-EAS443:3:63:162:1358#0/1  
GGTTTGACTATGTTAGGCTCTTTCCAGCCAAAGAATGTCT  
+HWI-EAS443:3:63:162:1358#0/1  
`b]aaa`\_^a¥`\_a]^Y^aaa`a[[S¥a`aa^aa]]S[Y  
@HWI-EAS443:3:63:1630:1662#0/1  
AAGAATTCCTTGGTCATGTCTTTCTCTTTGACAGAAGACT  
+HWI-EAS443:3:63:1630:1662#0/1  
`¥`^a`¥]aaa¥¥\_aaWaaaa\_a`aa`\_W^aa[Z]^\_^\_  
@HWI-EAS443:3:63:1786:76#0/1  
GCATCCTGTGCAGCCATGGATGACTTTCAGCTGATCCCAA  
+HWI-EAS443:3:63:1786:76#0/1  
`abb`a`aaa`^`a`a`ab\_]aaa`\_a\_]^[^]]\_[^W  
@HWI-EAS443:3:63:20:522#0/1  
CACTGGAGAGGAGATGGCCACCAAAGCGGACTACACCCTT  
+HWI-EAS443:3:63:20:522#0/1  
aaabaa`aabaa]^`aa¥a`¥`\_`aY¥YYSV[^^[[V  
@HWI-EAS443:3:63:215:406#0/1  
AACTTTAGAGCCTATGTAGATGGATTCGAGCCGAACGGCT  
+HWI-EAS443:3:63:215:406#0/1  
\_¥a`a`[T¥\_\_^\_YK]LZ\_SZ\_^aZ]\_a]¥Z\_]BBBBBBB  
@HWI-EAS443:3:63:227:871#0/1  
GCCCACTTCAATTGGCTTGTCTCTTCATGTTCTTTGTCC  
+HWI-EAS443:3:63:227:871#0/1  
aaabaaaaab`aaa^`Y^XJU`\_^ZIQ\_Z`^UVY^  
@HWI-EAS443:3:63:263:1054#0/1  
TGGGGGGCTATATGAAGCAATCGAGGAGTGCCTGATTAAT  
+HWI-EAS443:3:63:263:1054#0/1  
aa\_a`a`ab`aaaaa`a^`a\_Z\_\_Y^T`\_`a^]\_a\_^  
@HWI-EAS443:3:63:324:659#0/1  
AGACATTCTTTGGCTGGAAAGAGCCTAACATAGTCAAACC  
+HWI-EAS443:3:63:324:659#0/1  
aabaaaaaaaaa`aaY^a`¥`\_a`aa\_\_\_\_`\_]a`\_`a  
@HWI-EAS443:3:63:337:178#0/1  
CTATTTTACAGCAGAAGTGCCCACTGCAGGGCTACTGAA

+HWI-EAS443:3:63:337:178#0/1  
ab\_bbabbababbbaba¥a`aaaa\_a`aa^\_\_`\_\_\_`\_]  
@HWI-EAS443:3:63:392:179#0/1  
CCAGAAAAAGTAGACTTTGATGACTGCAAAGATGTTGGAG  
+HWI-EAS443:3:63:392:179#0/1  
aaa^aa`a^Pa^`a`^`^[\_`\_`\_`\_]^\_X]\_[]\_ZS[  
@HWI-EAS443:3:63:39:1061#0/1  
GGGGGCTATATGAAGCAATCGAGGAGTGCCTGATTAATGA  
+HWI-EAS443:3:63:39:1061#0/1  
W`\_`ab¥Z]bba`bbbaababbab\_bb`bbaaa`Maa]  
@HWI-EAS443:3:63:408:1841#0/1  
GAGGGGAGGGAATACCACTATATGATGCAATCAAATGCA  
+HWI-EAS443:3:63:408:1841#0/1  
ab\_aaaaabaaaabaaaaaba`a`a`aaa`aaa\_Yaa  
@HWI-EAS443:3:63:496:601#0/1  
GCTGGGTCCAAATGAATTCAATAAGGCATGTGAATTGAC  
+HWI-EAS443:3:63:496:601#0/1  
aaaaaa0aaa`aaa`]`a`Sa`aa\_\_\_\_\_a`]\_\_\_\_\_`  
@HWI-EAS443:3:63:502:677#0/1  
TGGGATCTTCTCTTCATTTTCAATGTCCTGTAGCTCTGCT  
+HWI-EAS443:3:63:502:677#0/1  
abaYX\_^a[[W```]a````a```¥Z[^[WV\_¥\_]a]X[Y  
@HWI-EAS443:3:63:606:1408#0/1  
TGAAAATGAAGAGAAGATCCCAAGGACAAAGAACATGAAG  
+HWI-EAS443:3:63:606:1408#0/1  
aa¥Ya\_a`aa`a[`aaa[`aX]^¥[```a`^aXU^^]^`Z  
@HWI-EAS443:3:63:624:1544#0/1  
AATAGTTCCTCCTCATGCTTGCGATATGTTCAATCGGGGC  
+HWI-EAS443:3:63:624:1544#0/1  
a\_¥^XY^Y]XZZZ^^]V\_^ZXX]YY]WVZZ]ZYYXYXVV  
@HWI-EAS443:3:63:671:1215#0/1  
AGCGGACTACACCCTTGACGAAGAGAGCAGGGCAAGAATC  
+HWI-EAS443:3:63:671:1215#0/1  
`[b¥YWZZ`a^X[\_`abaaaaUJU][\_a]Uaa\_¥¥XZ\_  
@HWI-EAS443:3:63:675:1491#0/1  
AAGAATCAAACTAGGCTTTTCACTATAAGACAAGAAATG  
+HWI-EAS443:3:63:675:1491#0/1  
WT¥]^I^VZ¥bbba`YWY^ZUYaa\_S```¥`BBBBBBBBB  
@HWI-EAS443:3:63:708:468#0/1  
CGGGGTGAATCAATAATTGTAGAATCTGGTGACCCGAATG  
+HWI-EAS443:3:63:708:468#0/1  
\_^aaU^`ababbaabbb\_]b`^ababbQ\_[`Z\_aY]aa  
@HWI-EAS443:3:63:730:646#0/1  
GGAACCTTCGATCTTGGGGGCTATATGAAGCAATCGAGG  
+HWI-EAS443:3:63:730:646#0/1  
[aabb\_bb[b]a`ab]\_aaa]``bab```baaa`QZ]Vaa  
@HWI-EAS443:3:63:753:231#0/1  
AGAAGACACACATTCACATCTTTTCATTCCTGGAGAGGA  
+HWI-EAS443:3:63:753:231#0/1  
Z\_ZVa\_\_¥]b\_^\_b]\_^¥aY\_a\_a`a`WaVaa`a\_¥MZ

@HWI-EAS443:3:63:763:764#0/1  
ACACCCTTGACGAAGAGAGCAGGGCAAGAATCAAACCTAG  
+HWI-EAS443:3:63:763:764#0/1  
aabba`\_`aa`aaZ\_Z]^\_^^aa`\_Q`\_ [^^¥\_]W]\_\_\_\_\_

@HWI-EAS443:3:63:869:558#0/1  
CATGGAATGAGGCGCTGCCTTCTTCAGTCTCTTCAGCAG  
+HWI-EAS443:3:63:869:558#0/1  
a`bb`bbbab`¥\_abba`baabbaababXaaa`a`X`]]\_

@HWI-EAS443:3:63:941:1034#0/1  
ACTGAATACATAATGAAGGGAGTGTACATAAATACGGCCT  
+HWI-EAS443:3:63:941:1034#0/1  
a`baaaa`^a]`aa`aa`^a\_a[`aaaa`^^`Wa]

@HWI-EAS443:3:64:1009:1161#0/1  
GGGGGCTATATGAAGCAATCGAGGAGTGCCTGATTAATGA  
+HWI-EAS443:3:64:1009:1161#0/1  
¥\_bb`bb`bbb`ababbaaaa`aa\_b][abababa`a`

@HWI-EAS443:3:64:103:701#0/1  
CGATTGGCCATGTTTCCGATTTGTTTCAAAGAATTCCTT  
+HWI-EAS443:3:64:103:701#0/1  
a`LZabab\_U`a`[``]\_aa^¥aaa`^^`^]`Y^`\_`

@HWI-EAS443:3:64:1069:599#0/1  
GTTAGGCTCTTCCAGCCAAAGAATGTCTTCATGCATTTG  
+HWI-EAS443:3:64:1069:599#0/1  
aaaaaaaaa`a\_Wa\_\_\_a\_a`\_`a^\_aa^\_^[]^\_^^\_`

@HWI-EAS443:3:64:1103:549#0/1  
GTAGGAGTCTATGGGATTCCTTTCGTCAGTCCGAAAGAGG  
+HWI-EAS443:3:64:1103:549#0/1  
a`abaab`aaaaaaa\_a\_]aa\_]`\_^]a^`^^`Z\_`

@HWI-EAS443:3:64:1132:1575#0/1  
CAGCTTGCTAGAGATCTGGGCTCTGGCTCATCACTGTCAT  
+HWI-EAS443:3:64:1132:1575#0/1  
`abbbbabbbbaabbbb^U¥bbbbabbabba¥[[bbaab

@HWI-EAS443:3:64:1147:1009#0/1  
ACCACATGAGAAAGGCATAAATCCCAATTACCTCATGGCT  
+HWI-EAS443:3:64:1147:1009#0/1  
`a^a¥¥a^`\_`¥¥^W\_a`[]a`bbT`bbbaa¥NF¥a`Xa`

@HWI-EAS443:3:64:1155:298#0/1  
GTGGTGAACCTTTGTAAGTATGGAGTTCTCACTCACTGACC  
+HWI-EAS443:3:64:1155:298#0/1  
a]ab^baa¥aaaa`a^`^`Y`^]`^\_Z`U^¥\_a`\_`\_ZVZ

@HWI-EAS443:3:64:1156:1317#0/1  
CCCCTTCAATTGGCTTGTCTCTTCATGTTCTTTGTCCT  
+HWI-EAS443:3:64:1156:1317#0/1  
aa`\_a\_ab^aa`][\_]PW`XX¥[]XV`¥^[X\_]JVZ[Z

@HWI-EAS443:3:64:1187:2001#0/1  
AACATAGTCAAACCACATGAGAAAGGCATAAATCCCAATT  
+HWI-EAS443:3:64:1187:2001#0/1  
ab\_baba\_aaab^\_b]a```a`aaa`^`aaa`a[Z\_a`\_N

@HWI-EAS443:3:64:1201:906#0/1  
GCCATATTTTACCGAGTGGCCACTTCAATTGGCTTGTTTC





@HWI-EAS443:3:64:1687:1268#0/1  
GAACAATGAGAAGCAATTTTCTCGATTGAGCCGAAAACCC  
+HWI-EAS443:3:64:1687:1268#0/1  
\_]\_]a`abab`^`S\_a`^]ababa]XG]¥WT\_\_aaaW[L  
@HWI-EAS443:3:64:1727:810#0/1  
CAGGTGCTAGCAGAGCTACAGGACATTGAAAATGAAGAGA  
+HWI-EAS443:3:64:1727:810#0/1  
abbZabab`aabaab`^`^abaaaa]`¥UaaaaT`^^]a  
@HWI-EAS443:3:64:1753:50#0/1  
TACAAAGAGAACCGGTTTCATTGAAATTGGAGTAACACGGA  
+HWI-EAS443:3:64:1753:50#0/1  
]aY^\_bbYa\_V^`baV¥^]`[\_][[][\_^a[[\_^Z  
@HWI-EAS443:3:64:1761:1399#0/1  
CTTGAAGCAGGTGCTAGCAGAGCTACAGGACATTGAAAA  
+HWI-EAS443:3:64:1761:1399#0/1  
¥`¥[[\_V]\_\_\_Q[`¥¥^T[]HXOU¥^^a\_WHXZ]¥W`W¥  
@HWI-EAS443:3:64:1772:1792#0/1  
GATGTTGCCCGATTGAACATATCGCAAGCATGAGGAGGA  
+HWI-EAS443:3:64:1772:1792#0/1  
a\_a]]`^a`^`a`a[Va^]\_`\_WW]Z\_[I^`YR^[U^YW  
@HWI-EAS443:3:64:221:1457#0/1  
GGGGCATGGAAATGAGGCGCTGCCTTCTTCAGTCTCTTCA  
+HWI-EAS443:3:64:221:1457#0/1  
R\_^G[\_XYZ[\_`W\_ZQ\_Z]X\_Z¥¥Y\_X¥XXYVYZ¥Z`¥  
@HWI-EAS443:3:64:257:474#0/1  
AGCAGAGCTACAGGACATTGAAAATGAAGAGAAGATCCCA  
+HWI-EAS443:3:64:257:474#0/1  
aaaa`ab\_aaaaa\_a`aa\_\_a\_\_`\_]`\_`\_X\_]`^`^X  
@HWI-EAS443:3:64:306:205#0/1  
GTGAACCTTTGTAAGTATGGAGTTCTCACTCACTGACCCGA  
+HWI-EAS443:3:64:306:205#0/1  
`Xaaa\_aa\_b`aa\_a]aaaa[\_a\_]¥[Ya`\_`aa[YU¥[  
@HWI-EAS443:3:64:312:1958#0/1  
ACCAAAGAAGGAAGACGGAAAACAAACCTGTATGGGTTCA  
+HWI-EAS443:3:64:312:1958#0/1  
]Z]¥a\_TMR¥`Za[YUTVZY[\_¥\_]T[NZTLWOJP^YTZ]  
@HWI-EAS443:3:64:31:944#0/1  
AGAATTCCTTGGTCATGTCTTTCTCTTTGACAGAAGACTC  
+HWI-EAS443:3:64:31:944#0/1  
a`a`````\_]¥T[`]T[PON[SV^X^VZ^[YQX¥V[XY  
@HWI-EAS443:3:64:399:23#0/1  
TACATAAATACGGCCTTGCTCAATGCATCCTGTGCAGCCA  
+HWI-EAS443:3:64:399:23#0/1  
a^a^\_Raaaaa^¥\_]a[[\_¥``\_\_\_[a^ZYU[V`[RZQ¥]  
@HWI-EAS443:3:64:414:1510#0/1  
GAGAACAAGCCAATTGAAGTGGGCACTCGGTGAAAATATG  
+HWI-EAS443:3:64:414:1510#0/1  
abbaaba\_^bbaaaaaaaa\_aaaaa\_aaaa¥^```aaa\_R  
@HWI-EAS443:3:64:445:263#0/1  
GGGGCATGGAAATGAGGCGCTGCCTTCTTCAGTCTCTTCA

+HWI-EAS443:3:64:445:263#0/1  
ab\_`a¥`]aZW`aaY^`\_`Z[\_`\_`[\_Q¥^X¥U\_WW^¥UW  
@HWI-EAS443:3:64:474:1754#0/1  
GGGGCATGGAAATGAGGCGCTGCCTTCTTCAGTCTCTTCA  
+HWI-EAS443:3:64:474:1754#0/1  
`b`a`Xab``bbbbbaabaabbab`a^b`aab\_Saaaa\_a  
@HWI-EAS443:3:64:527:904#0/1  
GCGTCTCCACAACCTTGAGGGGTTTTCGGCTGAATCGAGAA  
+HWI-EAS443:3:64:527:904#0/1  
aa^abba\_`\_¥aVaaYa]]TU¥`aYYH^UaYX[`^LONQT  
@HWI-EAS443:3:64:528:244#0/1  
GTGGGCACTCGGTGAAAATATGGCACCAGAAAAAGTAGAC  
+HWI-EAS443:3:64:528:244#0/1  
aHP\_ZW[MPUYPL\_QVWMOQ[QTPRFKQNPXXZUUFGSBB  
@HWI-EAS443:3:64:535:291#0/1  
CTCTTCGTCAGGGTGTAGTCCGCTTTGGTGGCCATCTCC  
+HWI-EAS443:3:64:535:291#0/1  
``bbba¥abbbbbbVba\_¥\_¥`b`aba^a¥`\_`\_`Z[\_`\_`  
@HWI-EAS443:3:64:538:281#0/1  
GGGGCATGGAAATGAGGCGCTGCCTTCTTCAGTCTCTTCA  
+HWI-EAS443:3:64:538:281#0/1  
abaa\_a\_\_a`a```\_`\_`[\_`W^\_W\_¥\_W]\_^YSXTX[\_^TV  
@HWI-EAS443:3:64:562:992#0/1  
AGGACATTGAAAATGAAGAGAAGATCCCAAGGACAAAGAA  
+HWI-EAS443:3:64:562:992#0/1  
PUWUY[a[¥PJ[[Z\_XT\_^W\_`\_Y\_`\_`¥ZaYNH[\_]T^]\_  
@HWI-EAS443:3:64:572:1012#0/1  
GCTGGGTCCAAAATGAATTCATAAGGCATGTGAATTGAC  
+HWI-EAS443:3:64:572:1012#0/1  
abaa^XT`aaaa¥`]W\_a`[a]Z`Y^\_a\_`a[\_\_\_^`Y[\_`  
@HWI-EAS443:3:64:588:2043#0/1  
CTGCTGTAAAATAGTTCCTCCTCATGCTTGCGATATGTTC  
+HWI-EAS443:3:64:588:2043#0/1  
a\_ba^b]abbab]VXa`\_XaaYa`YNR\_]\_`aY^`^Z[\_^  
@HWI-EAS443:3:64:65:401#0/1  
AGACATTCTTTGGCTGGAAAGAGCCTAACATAGTCAAACC  
+HWI-EAS443:3:64:65:401#0/1  
aaaaaaaa`a]aa`a\_a`\_\_\_[^\_a¥¥YVY^\_\_\_\_\_¥\_  
@HWI-EAS443:3:64:681:1389#0/1  
GTATTCAGTAGCCCTGCAGTGGGACACTTCTGCTGTAAAA  
+HWI-EAS443:3:64:681:1389#0/1  
¥¥bbZ`b\_QRaa]`bZW¥QRbabbVb[[[b[ab\_b`bbab  
@HWI-EAS443:3:64:775:254#0/1  
CGAAGAGAGCAGGGCAAGAATCAAAACTAGGCTTTTCACT  
+HWI-EAS443:3:64:775:254#0/1  
\_]a¥a]]\_``][M¥RY`Z\_a^YP]YRU`YbR¥WY\_Y[ZQW  
@HWI-EAS443:3:64:77:215#0/1  
CCCGAATGCACTATTGAAGCACCGATTTGAGATAATTGAA  
+HWI-EAS443:3:64:77:215#0/1  
Z\_\_LQa\_R¥\_ba[\_`\_¥\_PR¥b^a\_] ^V\_\_X`a]¥`U`aWQ

@HWI-EAS443:3:64:787:1204#0/1  
TGGTTTGGACTATGTTAGGCTCTTTCCAGCCAAAGAATGTC  
+HWI-EAS443:3:64:787:1204#0/1  
]`U[baba\_a\_V\_^]\_b`JX^a^aa`\_Ia^`aa[¥^]Q^  
@HWI-EAS443:3:64:834:1331#0/1  
CTTCTGTCAAAGAGAAAGACATGACCAAGGAATTCTTTGA  
+HWI-EAS443:3:64:834:1331#0/1  
`bbaababbbabaaaaababaaba`aa\_aaaa\_]`aaaT  
@HWI-EAS443:3:64:834:1634#0/1  
GACGAAAGGAATCCCATAGACTCCTACTGGCCATTTCTTG  
+HWI-EAS443:3:64:834:1634#0/1  
Z^aa^ba¥¥¥`babaabbaabaaaa]¥]¥aaa]aaY\_`\_  
@HWI-EAS443:3:64:859:600#0/1  
CTTGGGGGGCTATATGAAGCAATCGAGGAGTGCCTGATTA  
+HWI-EAS443:3:64:859:600#0/1  
aabbbbaabbbbbabaaba\_aaa`a]aa\_b]aa\_aa`a``  
@HWI-EAS443:3:64:961:1368#0/1  
CTGGGTCCAAAATGAATTCAATAAGGCATGTGAATTGACT  
+HWI-EAS443:3:64:961:1368#0/1  
Ja¥]aab¥``\_babbaababbb`ba\_bababba``ab`¥  
@HWI-EAS443:3:64:984:544#0/1  
CTTTGGTCGGCAAGCTTGCGCATAGTTCCTGTAATCTCAA  
+HWI-EAS443:3:64:984:544#0/1  
abbbbaaaaaababaaa`aba\_baa^a¥\_aa\_^^aWaaa]  
@HWI-EAS443:3:65:1031:477#0/1  
AATTGACTGATTCAAGCTGGATAGAAGCTTGATGAAATAGG  
+HWI-EAS443:3:65:1031:477#0/1  
``aabaabbaba`babaabb\_abb`baaab`aba`aa\_`a  
@HWI-EAS443:3:65:104:512#0/1  
GCTGAAAGTCATCCATGGCTGCACAGGATGCATTGAGCAA  
+HWI-EAS443:3:65:104:512#0/1  
a`^aa\_U¥VZZ¥\_\_[\_a`a¥[¥VVY[XXN[NYZBBBBBBBB  
@HWI-EAS443:3:65:1054:90#0/1  
CATGAAGACATTCTTTGGCTGGAAAGAGCCTAACATAGTC  
+HWI-EAS443:3:65:1054:90#0/1  
abab`IZ``ababbb\_YZ^aa][Y`^[YW[a^`[X]``[^  
@HWI-EAS443:3:65:1071:874#0/1  
CGGTGCTTCAATAGTGCATTGGGTCACCAGATTCTACAA  
+HWI-EAS443:3:65:1071:874#0/1  
aab``baababa\_SYaa\_aaaaba[^]`aa\_\_`a\_aa[aZ  
@HWI-EAS443:3:65:1133:532#0/1  
CCTTGGGATCTTCTTTCATTTTCAATGTCCTGTAGCTCT  
+HWI-EAS443:3:65:1133:532#0/1  
aa\_bbbaaa\_bab`aba\_`baWxaZ\_aa`^M¥`Q\_\_`Y\_\_  
@HWI-EAS443:3:65:1149:749#0/1  
GGGGTTTTCGGCTGAATCGAGAAAATTGCTTCTCATTGTT  
+HWI-EAS443:3:65:1149:749#0/1  
ab`N]a¥¥\_¥\_a`aa\_¥¥[¥]```[^\_¥ZX\_WXZ`Z[  
@HWI-EAS443:3:65:1195:1435#0/1  
GGGGCATGGAATGAGGCGCTGCCTTCTTCAGTCTCTTCA

+HWI-EAS443:3:65:1195:1435#0/1  
a^\_ab\_[[aaaa^`a]\_`X`\_\_`a`¥\_a\_\_\_X^`¥`\_ZY  
@HWI-EAS443:3:65:1207:846#0/1  
ATTCATCGACGAACGGGTGAATCAATAATTGTAGAATC  
+HWI-EAS443:3:65:1207:846#0/1  
a^ba[abbb^`aa]¥\_¥[\_F\_[a`[]a`R`aab]RY\_`YR  
@HWI-EAS443:3:65:1246:98#0/1  
GTCCGCTTTGGTGGCCATCTCCTCTCCAGTGAATGAAAAG  
+HWI-EAS443:3:65:1246:98#0/1  
a[\_¥\_W\_`\_\_aX]SZBBBBBBBBBBBBBBBBBBBBBBBB  
@HWI-EAS443:3:65:1279:706#0/1  
AATTCATTTGGACCCAGCTTGCTAGAGATCTGGGCTCTG  
+HWI-EAS443:3:65:1279:706#0/1  
]Z[bb`aab]abaaa^[W\_b`b^a]b`a`]^`aa\_``a`\_Z  
@HWI-EAS443:3:65:1287:1123#0/1  
AGATGTTGCCCGATTGAACATATCGCAAGCATGAGGAGG  
+HWI-EAS443:3:65:1287:1123#0/1  
abbbaa`b`b`aaaaaaaaaaaa\_Y``^`a^`aa^a\_\_a`  
@HWI-EAS443:3:65:1296:24#0/1  
TTCCGATTTGTTTTCAAAGAATTCCTTGGTCATGTCTTTC  
+HWI-EAS443:3:65:1296:24#0/1  
aaaaa[`aabaaaa]a\_ab``baV\_aaba]\_aaa\_`a``U  
@HWI-EAS443:3:65:1346:352#0/1  
ATTAATCAGGCACTCCTCGATTGCTTCATATAGCCCCCA  
+HWI-EAS443:3:65:1346:352#0/1  
aaaaaa^aa`aa`a\_^^^a\_\_\_a¥\_a\_\_\_a¥`[[W¥]\_¥\_  
@HWI-EAS443:3:65:1376:890#0/1  
CTCTGGCTCATCACTGTCATACTGTTAAGGTCTCCAACA  
+HWI-EAS443:3:65:1376:890#0/1  
ab]bbbaaba`b]a]^`aaa`abaaaab`ba\_\_a`¥b`aa  
@HWI-EAS443:3:65:1411:616#0/1  
CATGGAAATGAGGCGCTGCCTTCTTCAGTCTCTCAGCAG  
+HWI-EAS443:3:65:1411:616#0/1  
abb`bbbbbabba^`aaaaaaaaaaaaa[``ab\_Z^`V`a  
@HWI-EAS443:3:65:1412:666#0/1  
CACTGTCATACTGTTAAGGTCTCCAACATCTTGCAGTC  
+HWI-EAS443:3:65:1412:666#0/1  
ababba`bababb\_abbaaa^`baaba`baaa`aa]aa^^  
@HWI-EAS443:3:65:1442:1585#0/1  
ACGGCCTTGCTCAATGCATCCTGTGCAGCCATGGATGACT  
+HWI-EAS443:3:65:1442:1585#0/1  
aa`^\_aaa¥^\_\_aa`a^a\_XU\_VX\_^[\_`¥\_`¥\_Z¥\_YW\_  
@HWI-EAS443:3:65:1448:96#0/1  
CACTTCAATTGGCTTGTTCTTTCATGTTCTTTGCCTTG  
+HWI-EAS443:3:65:1448:96#0/1  
]bJbb¥babba`a`^ZaK`Jba][abab``bb^aaabaa  
@HWI-EAS443:3:65:1467:1923#0/1  
ATAGTTCCTCCTCATGCTTGCGATATGTTCAATCGGGGCA  
+HWI-EAS443:3:65:1467:1923#0/1  
a^\_a]^`Ya^[`]a`a]0¥\_`^`a`X`a\_`X\_a`[X^]QNV

@HWI-EAS443:3:65:1632:1516#0/1  
CTTAAACAGTATGACAGTGATGAGCCAGAGCCCAGATCTC  
+HWI-EAS443:3:65:1632:1516#0/1  
`abbbbb\_0\_bbbbaabZ[\_\_\_¥\_babaa[aaaaa[\_\_\_aaa  
@HWI-EAS443:3:65:182:918#0/1  
CAGGCACTCCTCGATTGCTTCATATAGCCCCCAAGATCG  
+HWI-EAS443:3:65:182:918#0/1  
a`W`a`b^¥X\_aa\_`a^a\_a`V`aaa]a^]a^]]^^W¥Y  
@HWI-EAS443:3:65:187:1166#0/1  
CCCCGTTTCGTCGATGAAATGGAAATCCGAATACATGAAAC  
+HWI-EAS443:3:65:187:1166#0/1  
abbb`aa\_T\_aa\_`\_`aaa¥VT`a^]a`aa]aaa\_W``a\_  
@HWI-EAS443:3:65:225:1212#0/1  
GAATTCCTTGGTCATGTCTTTCTTTGACAGAAGACTCG  
+HWI-EAS443:3:65:225:1212#0/1  
^PLQU`XJZbbX]\_Z]R`]]]YP]]]a]W[a]ZRXXQYU¥`  
@HWI-EAS443:3:65:226:283#0/1  
CTCCAATTTCAATGAACCGTTCTCTTTGTAATCATACAA  
+HWI-EAS443:3:65:226:283#0/1  
abbb^^aaaaaaaaab`ba\_`aaaa`a^a[\_]`\_\_\_\_`\_  
@HWI-EAS443:3:65:277:1211#0/1  
GGCATGGAAATGAGGCGCTGCCTTCTTCAGTCTCTTCAGC  
+HWI-EAS443:3:65:277:1211#0/1  
`X`UPNZF[YS]MHJV]WKVP[MMRKYIDRN[UVRZYZL]  
@HWI-EAS443:3:65:395:1482#0/1  
AGCCCCCAAGATCGAAGTTCCAGTTCCAGTTGTCCTC  
+HWI-EAS443:3:65:395:1482#0/1  
aV```^a`VV[] [XU^^PUMYU¥¥QSKPOPY]QRUQVTVQ  
@HWI-EAS443:3:65:508:1785#0/1  
GACCCGAATGCACTATTGAAGCACCGATTTGAGATAATTG  
+HWI-EAS443:3:65:508:1785#0/1  
aaba\_a`^`\_aaaaa\_aaa]aa\_`[] [aa^Y\_\_¥Z^`\_  
@HWI-EAS443:3:65:515:911#0/1  
AAGAGGCGAAGAGACAATTGAAGAAAAATTTGAGATTACA  
+HWI-EAS443:3:65:515:911#0/1  
a`aaaa\_\_aa\_\_`\_\_`aa\_\_\_\_^Y^\_\_`a\_\_`^`^^`\_\_`  
@HWI-EAS443:3:65:522:573#0/1  
CTGGAGAGGAGATGGCCACCAAAGCGGACTACACCCTTGA  
+HWI-EAS443:3:65:522:573#0/1  
a\_^[]X`[U]abZT[`Waa[a`b¥Wbabb`^b` ]`a]aZ]  
@HWI-EAS443:3:65:543:850#0/1  
GAATACATAATGAAGGGAGTGTACATAAATACGGCCTTGC  
+HWI-EAS443:3:65:543:850#0/1  
`abb[b]aabb`a`aab`b\_Y\_aa[aaaabaa\_a\_\_`\_  
@HWI-EAS443:3:65:555:513#0/1  
GCTGGGTCCAAAATGAATTCAATAAGGCATGTGAATTGAC  
+HWI-EAS443:3:65:555:513#0/1  
abbaab¥bbbbbb`bbaaaaaaaaaabaaaab\_b\_Zaaaaa  
@HWI-EAS443:3:65:566:572#0/1  
GAAGTTCGGTGGGAGACTTTGGTTCGGCAAGCTTGCGCATA

+HWI-EAS443:3:65:566:572#0/1  
S`aa`abbb]WajYaabaab\_a]X`a]^^`aa]``[]\_  
@HWI-EAS443:3:65:578:233#0/1  
GGAAATCCGAATACATGAAACAACTTCCAAATGTGTGCA  
+HWI-EAS443:3:65:578:233#0/1  
\_`aa`aaaa\_aabaaaabaa`baa`aaaa\_`aa\_`W\_`  
@HWI-EAS443:3:65:599:532#0/1  
AAGAATTCCTTGGTCATGTCTTTCTTTGACAGAAGACT  
+HWI-EAS443:3:65:599:532#0/1  
abba\_aabaaaaa^`aaa`aaa`\_`a`^`a\_a\_\_\_\_`  
@HWI-EAS443:3:65:618:1403#0/1  
GGTGAACCTTGTAGTATGGAGTTCTCACTCACTGACCCG  
+HWI-EAS443:3:65:618:1403#0/1  
ZaH]\_X¥`\_^\_\_b\_babbVa]U^aaa\_bbabaaX`\_`[]\_  
@HWI-EAS443:3:65:623:1043#0/1  
CAGAGCTACAGGACATTGAAAATGAAGAGAAGATCCCAAG  
+HWI-EAS443:3:65:623:1043#0/1  
ab``abb`ab`aa`aba^^aaaaa`a`\_`a`¥¥a`]  
@HWI-EAS443:3:65:66:684#0/1  
CATTAATCAGGCACTCCTCGATTGCTTCATATAGCCCCC  
+HWI-EAS443:3:65:66:684#0/1  
^RR`]a^^aaXbaZ\_Q^UVaUUXOWUQF[Z\_]XSRPWR\_B  
@HWI-EAS443:3:65:698:743#0/1  
GGGGGCTATATGAAGCAATCGAGGAGTGCCTGATTAATGA  
+HWI-EAS443:3:65:698:743#0/1  
aaa`a]\_X\_abY`[aab]\_\_a[]^`]aZ[aa[a^]`\_^  
@HWI-EAS443:3:65:69:839#0/1  
TTTGGCTGGAAAGAGCCTAACATAGTCAAACCACATGAGA  
+HWI-EAS443:3:65:69:839#0/1  
ababababaZ`ba`a`a\_aaaaa`]^`\_`N^]^\_\_\_\_\_  
@HWI-EAS443:3:65:761:1349#0/1  
CATTCTTTGGCTGGAAAGAGCCTAACATAGTCAAACCACA  
+HWI-EAS443:3:65:761:1349#0/1  
`aaaaa\_`aa\_aaa^a\_¥WRaa`\_`[^]\_`a`\_^a^aa  
@HWI-EAS443:3:65:785:455#0/1  
GGAAATCCGAATACATGAAACAACTTCCAAATGTGTGCA  
+HWI-EAS443:3:65:785:455#0/1  
aabbbbbbbbbbbbbbaabbababababaabbab`bab  
@HWI-EAS443:3:65:788:22#0/1  
GCCAGAGCCCAGATCTCTAGCAAGCTGGGTCCAAAATGAA  
+HWI-EAS443:3:65:788:22#0/1  
aYaa^`\_]\_^Z[¥ZY^V^¥U^Y¥VXNX^Y^V[W^Z[V\_^VX  
@HWI-EAS443:3:65:791:309#0/1  
CAGCTTGAATCAGTCAATTCACATGCCTTATTGAATTCAT  
+HWI-EAS443:3:65:791:309#0/1  
[``a\_`bbabbb`aabbbabbaba]babbababaaab\_ab  
@HWI-EAS443:3:65:793:1895#0/1  
ACTCGGTGAAAATATGGCACCAGAAAAAGTAGACTTTGAT  
+HWI-EAS443:3:65:793:1895#0/1  
a`Y`\_`[Xa^```[\_\_UOW\_^\_^UT[[^^XaV\_X^^`Z^^

@HWI-EAS443:3:65:804:832#0/1  
CTTGGGATCTTCTTTCATTTTCAATGTCCTGTAGCTCTG  
+HWI-EAS443:3:65:804:832#0/1  
`^`aQ\_SOZaabb`^^W\$^aab`\$`aX^a\_a]^]XV\$W  
@HWI-EAS443:3:65:810:1354#0/1  
ATACTGTTCCACTGTCCAGGCCATGATTCGGTCTCTTC  
+HWI-EAS443:3:65:810:1354#0/1  
`aaaaa`aaa`aa`a\_`^aaa^^a`a[V^\_\_\_\_]Y]YY]^U  
@HWI-EAS443:3:65:841:507#0/1  
GGCCAATCGGAGAGTCACCCAGGGGAGTGGAGGAAGGCTC  
+HWI-EAS443:3:65:841:507#0/1  
[a]`a`a`aa`\_`Z`a\_`a\$```Z`Z\_`\$`\$T^YR\$`\$`\$ZZ  
@HWI-EAS443:3:65:873:535#0/1  
GCCAGTAGGAGTCTATGGGATTCCTTTCGTCAGTCCGAAA  
+HWI-EAS443:3:65:873:535#0/1  
a```aZ`]^`^Y\_a\$`\$aa`\$`\_aY\$^\$[]U\$^`PUY\_[ZZ  
@HWI-EAS443:3:65:884:974#0/1  
GGGGGCTATATGAAGCAATCGAGGAGTGCCTGATTAATGA  
+HWI-EAS443:3:65:884:974#0/1  
a^Z\_R^X`]^`\$`V]\$]\$]^]aQOKT\_\_\_\_\_ZUR\$^Z  
@HWI-EAS443:3:65:900:691#0/1  
GGGGGCTATATGAAGCAATCGAGGAGTGCCTGATTAATGA  
+HWI-EAS443:3:65:900:691#0/1  
a^\$aaaa`\_]aaaaaab^^\_a\_]\_^a^`\_[aaV\$W^^Y`\_  
@HWI-EAS443:3:65:908:2032#0/1  
ATTGAAGCACCGATTTGAGATAATTGAAGGAAGAGACCGA  
+HWI-EAS443:3:65:908:2032#0/1  
]\_ba]aa`]^aaZ\_YbU]\$W\_a\_a``baZ\$\_]a`\_a`\_\_a  
@HWI-EAS443:3:65:925:1248#0/1  
TGAAAATGAAGAGAAGATCCCAAGGACAAAGAACATGAAG  
+HWI-EAS443:3:65:925:1248#0/1  
aa`aa`aba^aa\_aa`^aaaaaaaaaaaaaaaa`\_b\_\_a  
@HWI-EAS443:3:65:93:975#0/1  
GGGGCATGGAATGAGGCGCTGCCTTCTTCAGTCTCTTCA  
+HWI-EAS443:3:65:93:975#0/1  
aba``bbab``Yaaaaabaaa``a\_a`````W`Z\_\_\_\_^`\_`\_  
@HWI-EAS443:3:65:96:1411#0/1  
CGAAAATCGAAACTAACAAGTTTGCTGCAATATGCACACA  
+HWI-EAS443:3:65:96:1411#0/1  
aa``bbaaa`\$aa`a`aa^]a`\_`^``````\_``````]`^  
@HWI-EAS443:3:65:974:398#0/1  
GCTTGCTAGAGATCTGGGCTCTGGCTCATCACTGTCATAC  
+HWI-EAS443:3:65:974:398#0/1  
aaabbabaaaa`aaaaaaaaaaa`\_aaa```\_aa\$^`\_\_^  
@HWI-EAS443:3:65:981:309#0/1  
AAAACCCCTCAAGTTGTGGAGACGCATATAGACTGTTGAA  
+HWI-EAS443:3:65:981:309#0/1  
aabaaa``````a^`a^a`aa`\_a^`a`aa`\_`^`\_Z\_PNY  
@HWI-EAS443:3:65:997:1034#0/1  
GGGGGAGGGAATACCACTATATGATGCAATCAAATGCATG

+HWI-EAS443:3:65:997:1034#0/1  
ab`\_`¥ba¥N\_^\_QN¥\_\_aa`[\_`\_0\_a¥aaa\_`Y^\_`^\_  
@HWI-EAS443:3:66:1003:1919#0/1  
TGAAAATGAAGAGAAGATCCCAAGGACAAAGAACATGAAG  
+HWI-EAS443:3:66:1003:1919#0/1  
a]]\_aaaaaaaa^`a¥\_a\_\_a`[a\_Y`a`\_^`^`^`^`\_  
@HWI-EAS443:3:66:1022:1701#0/1  
GAAAGGCATAAATCCCAATTACCTCATGGCTTGAAGCAG  
+HWI-EAS443:3:66:1022:1701#0/1  
abbbbbbbbbbbba^^]\_bbbba\_¥abaa\_aab^`UaXV^^  
@HWI-EAS443:3:66:1051:1913#0/1  
CCGATTGGCCATGTTTCCGATTTGTTTTCAAAGAATTCCT  
+HWI-EAS443:3:66:1051:1913#0/1  
ab`^)`a`\_\_[a^]\_^^^`\_\_\_\_`]U^a\_\_\_\_\_`]]]\_\_UW]  
@HWI-EAS443:3:66:1097:1113#0/1  
GGTGAATCAATAATTGTAGAATCTGGTGACCCGAATGCAC  
+HWI-EAS443:3:66:1097:1113#0/1  
aaWa```baab\_a`ab\_\_`aaaaa`\_ab``^a`\_aa\_^`  
@HWI-EAS443:3:66:109:1053#0/1  
GCTCATCACTGTCATACTGTTTAAGGTCTCCAACATCTTT  
+HWI-EAS443:3:66:109:1053#0/1  
aba\_R\_aaaaa¥baaaa\_a`\_a[a][T``a^a[`aa\_a^¥  
@HWI-EAS443:3:66:1158:1754#0/1  
CTTCCCAATAGAGCCTTCCTCCACTCCCCTGGGTGACTC  
+HWI-EAS443:3:66:1158:1754#0/1  
T^`W[`\_bba¥X¥]\_Z[aW[]Xabba^Q¥¥VaZXG\_a[JV  
@HWI-EAS443:3:66:1219:1168#0/1  
CAGTGATGAGCCAGAGCCCAGATCTCTAGCAAGCTGGGTC  
+HWI-EAS443:3:66:1219:1168#0/1  
abaabbbaaa`bbaaabaaaaaaaaaaaa`aaaa\_a``]]]  
@HWI-EAS443:3:66:1228:393#0/1  
CATTAAATCAGGCACTCCTCGATTGCTTCATATAGCCCCC  
+HWI-EAS443:3:66:1228:393#0/1  
abbb`abbba]WY`¥bX`XZR\_XNPaYFHXPQMX`\_a\_^X  
@HWI-EAS443:3:66:1280:1467#0/1  
ATCAGGCACTCCTCGATTGCTTCATATAGCCCCCAAGAT  
+HWI-EAS443:3:66:1280:1467#0/1  
WT\_`)`][`aab\_T[Ua]\_ba\_ab`bb\_X\_a`aaa`[¥Z\_  
@HWI-EAS443:3:66:1288:326#0/1  
CACAACCTGAGGGTTTTTCGGCTGAATCGAGAAAATTGCT  
+HWI-EAS443:3:66:1288:326#0/1  
ababaaabb]abab\_bbaaaaaabba`[baaaaa`a`Ya  
@HWI-EAS443:3:66:1338:523#0/1  
AGAAGATCCCAAGGACAAAGAACATGAAGAGAACAAGCCA  
+HWI-EAS443:3:66:1338:523#0/1  
aabbb`a`[a\_`aa\_aaaa`a`a`aa\_`aa`a\_\_a`a]^`  
@HWI-EAS443:3:66:134:1243#0/1  
CCATGATTGGTCTCTTCCCTTCAATTATCTCAAATCGGTG  
+HWI-EAS443:3:66:134:1243#0/1  
abaa`a`\_aa^X\_¥^`\_\_\_\_`^`\_\_\_\_a``\_\_\_\_`]WX\_]ZV^



@HWI-EAS443:3:66:1436:58#0/1  
CACTCCCCTGGGTGACTCTCCGATTGGCCATGTTTCCGAT  
+HWI-EAS443:3:66:1436:58#0/1  
aa[[b`bbba^XV\_\_Raab`abaaaaZPZaP¥[HJ[G]  
@HWI-EAS443:3:66:1438:978#0/1  
AAGAGCCTAACATAGTCAAACCACATGAGAAAGGCATAAA  
+HWI-EAS443:3:66:1438:978#0/1  
abaa\_aaaaa\_aa`aaaaaa`\_`\_aa`\_`\_a`\_`\_a`aaa`  
@HWI-EAS443:3:66:1470:323#0/1  
GAGTGGAGGAAGGCTCTATTGGGAAAGTGTGCAGGACCTT  
+HWI-EAS443:3:66:1470:323#0/1  
]`babb\_a`\_aaaaYa\_aaaabaaaaSbH`a¥aa`\_ab  
@HWI-EAS443:3:66:153:716#0/1  
GAAAGGCATAAATCCCAATTACCTCATGGCTTGAAGCAG  
+HWI-EAS443:3:66:153:716#0/1  
aa¥S`\_abaaaaaabaY[^a`\_aY\_[Ya`XZ^USJXOM  
@HWI-EAS443:3:66:1606:617#0/1  
AGAACAAGCCAATTGAAGTGGGCACTCGGTGAAAATATGG  
+HWI-EAS443:3:66:1606:617#0/1  
IPQ\_\_^`aa¥V\_¥`\_SQ\_\_^[^U`\_ab`aW^^URQLT\_M  
@HWI-EAS443:3:66:1627:1395#0/1  
GAGAAAGGCATAAATCCCAATTACCTCATGGCTTGAAGC  
+HWI-EAS443:3:66:1627:1395#0/1  
]ab^ZT\_baa\_ba\_a^[\_`aaa\_abaabbaaa``TFT[T  
@HWI-EAS443:3:66:1629:1688#0/1  
GGAAGATCCGAAAATCGAAACTAACAAGTTTGCTGCAATA  
+HWI-EAS443:3:66:1629:1688#0/1  
a`SSYZ`\_`a]aba\_Y]\_¥aQ^Y^L]ZNS\_YRYZaUW\_\_\_\_  
@HWI-EAS443:3:66:1661:1683#0/1  
CAGTGGGACACTTCTGCTGTAAAATAGTTCCTCCTCATGC  
+HWI-EAS443:3:66:1661:1683#0/1  
aba`bbbbaba`^^baab`abba`ba`a`[]ba`a\_aa\_^  
@HWI-EAS443:3:66:1699:891#0/1  
TGGGGCATGGAAATGAGGCGCTGCCTTCTTCAGTCTCTTC  
+HWI-EAS443:3:66:1699:891#0/1  
aa^Z^aaaaaaa`aa`\_`\_\_\_aU`\_`\_]aaU`\_[\_\_\_\_^`Y  
@HWI-EAS443:3:66:1740:77#0/1  
GAAGATCCCAAGGACAAAGAACATGAAGAGAACAAGCCAA  
+HWI-EAS443:3:66:1740:77#0/1  
a¥\_aX\_YJERYa¥UXT^]R^ZVY\_PR^¥YSPHRU^MNUU  
@HWI-EAS443:3:66:201:899#0/1  
TGGCCATGTTTCCGATTTGTTTTCAAAGAATTCCTTGGTC  
+HWI-EAS443:3:66:201:899#0/1  
aaabbab\_aabbbb`aab`\_`abaaabaabaaaa`aba]a  
@HWI-EAS443:3:66:210:1479#0/1  
GGGGGCTATATGAAGCAATCGAGGAGTGCCTGATTAATGA  
+HWI-EAS443:3:66:210:1479#0/1  
aa¥`\_aabaaa\_a\_]`aa\_a`^`Z\_\_Y`\_`\_`^`\_`\_`\_]¥\_  
@HWI-EAS443:3:66:240:1031#0/1  
CTTCAATTGGCTTGTCTCTTCATGTTCTTTGTCCTTGGG



@HWI-EAS443:3:66:501:1245#0/1  
CCATGTTTCCGATTTGTTTTCAAAGAATTCCTTGGTCATG  
+HWI-EAS443:3:66:501:1245#0/1  
aa¥T[```\_]\_^a^`[]\_X\_]ZUY¥\_R[YZ¥S^T\_Y\_]  
@HWI-EAS443:3:66:52:233#0/1  
AAATCCCAATTACCTCATGGCTTGAAGCAGGTGCTAGCA  
+HWI-EAS443:3:66:52:233#0/1  
ab`a`\_a^^a`\_a\_a\_]`\_^\_W^][TTYTWNJUWWSQS  
@HWI-EAS443:3:66:573:219#0/1  
AAACTTTAGAGCCTATGTAGATGGATTGAGCCGAACGGC  
+HWI-EAS443:3:66:573:219#0/1  
a\_\_H\_b``ba`SZaba\_\_abaaaaaaaa¥`\_aaaa\_\_\_`\_^  
@HWI-EAS443:3:66:615:449#0/1  
CACCGATTTGAGATAATTGAAGGAAGAGACCGAATCATGG  
+HWI-EAS443:3:66:615:449#0/1  
aaaab\_aaab^aaa`aaa^`aaa\_a`\_a`\_a\_\_\_`^`\_¥  
@HWI-EAS443:3:66:624:262#0/1  
TGGAAATCCGAATACATGAAACAACTTCCAAATGTGTGC  
+HWI-EAS443:3:66:624:262#0/1  
abbbabbaabbbbababbbabaaaaabaaaaaaaa^a]a\_  
@HWI-EAS443:3:66:625:1048#0/1  
GGTGAACTTTGTAAGTATGGAGTTCTCACTCACTGACCCG  
+HWI-EAS443:3:66:625:1048#0/1  
aa\_aaaaaaaa¥aaa\_aa`\_`]^aaaa`\_a\_\_aa`\_\_`a  
@HWI-EAS443:3:66:625:1245#0/1  
GGCATGGAAATGAGGCGCTGCCTTCTTCAGTCTTTCAGC  
+HWI-EAS443:3:66:625:1245#0/1  
a`bb`a``aaaaaRa`^`\_a`\_Ta\_]Z[\_]X]¥V`^R  
@HWI-EAS443:3:66:642:378#0/1  
GAGCTACAGGACATTGAAAATGAAGAGAAGATCCCAAGGA  
+HWI-EAS443:3:66:642:378#0/1  
aaaaaa`aaaa\_a\_\_`\_`^aa`\_\_aaa\_a`\_^X`¥W\_\_\_  
@HWI-EAS443:3:66:651:15#0/1  
CACTGTCATACTGTTAAGGTCTCCAACATCTTTGCAGTC  
+HWI-EAS443:3:66:651:15#0/1  
ab^`b```a¥W`\_Z^`X^WT^aaa`aa^a^¥````\_¥^  
@HWI-EAS443:3:66:657:829#0/1  
CATAAATACGGCCTTGCTCAATGCATCCTGTGCAGCCATG  
+HWI-EAS443:3:66:657:829#0/1  
aaaa`aaaabaaaVa^aaa`\_``aaJa``\_X]a`\_]\_W\_^  
@HWI-EAS443:3:66:709:310#0/1  
CCTCGATTGCTTCATATAGCCCCCAAGATCGAAGGTTCC  
+HWI-EAS443:3:66:709:310#0/1  
abaaaaa\_aaaaa^aaa````\_a`\_a[````^\_XU¥^U¥ZZ  
@HWI-EAS443:3:66:739:1809#0/1  
TACGGCCTTGCTCAATGCATCCTGTGCAGCCATGGATGAC  
+HWI-EAS443:3:66:739:1809#0/1  
¥`ba^\_\_`^Za[aY[TY\_b`^^a¥N¥]a]a`^X]\_XR\_[P  
@HWI-EAS443:3:66:794:1525#0/1  
GAAGATCCGAAAATCGAAACTAACAAGTTTGCTGCAATAT

+HWI-EAS443:3:66:794:1525#0/1  
`b`b`\_`abbbbaaaa` ``aababba\_aaaaab`aaaaa  
@HWI-EAS443:3:66:848:331#0/1  
GCTTCTCTACCCCTGTTGTGTACATATACTGTTCCACCAC  
+HWI-EAS443:3:66:848:331#0/1  
`a`\_aaba`]a`a¥QT¥0[W\_` `X`\_a`\_a` `Y`^`]R]\_  
@HWI-EAS443:3:66:856:1183#0/1  
ATCAGGCACTCCTCGATTGCTTCATATAGCCCCCAAGAT  
+HWI-EAS443:3:66:856:1183#0/1  
\_]X\_`Z` `[^a¥LVWTQ]¥\_a`\_]\_a]]]\_^` `a[^a[  
@HWI-EAS443:3:66:857:543#0/1  
TGATTCAAGCTGGATAGAACTTGATGAAATAGGAGAAGAT  
+HWI-EAS443:3:66:857:543#0/1  
a`aaaaab`aba^\_aa^b^a`aZ\_aa¥a`\_a`\_a\_]a^\_  
@HWI-EAS443:3:66:866:1484#0/1  
GGGGGCTATATGAAGCAATCGAGGAGTGCCTGATTAATGA  
+HWI-EAS443:3:66:866:1484#0/1  
aaa¥`b`aaaaaaabbaaaa`a\_\_a^aa`\_a` `a\_X`¥  
@HWI-EAS443:3:66:873:1003#0/1  
CATTTGTGTGGCTCCAGTCTCGGGTCAGTGAGTGAGAACT  
+HWI-EAS443:3:66:873:1003#0/1  
\_¥`abaa`\_a\_\_\_\_`\_¥YZZX` ``ZNXX¥[ `Y[USZXDUUV  
@HWI-EAS443:3:66:956:1065#0/1  
GTTTCCGATTTGTTTTCAAAGAATTCCTTGGTCATGTCTT  
+HWI-EAS443:3:66:956:1065#0/1  
aP^aaab`¥]` `^` `a]Ta` \_\_\_\_a]P^aa` ^UaX\_a^\_aa  
@HWI-EAS443:3:66:963:1578#0/1  
AATGCATCCTGTGCAGCCATGGATGACTTTCAGCTGATCC  
+HWI-EAS443:3:66:963:1578#0/1  
\_XYSZ]Vb\_` [DRb¥aba]Y`Q\_Y][T`aRV]WUV^YOOX  
@HWI-EAS443:3:66:963:540#0/1  
GCTCAATGCATCCTGTGCAGCCATGGATGACTTTCAGCTG  
+HWI-EAS443:3:66:963:540#0/1  
aaaa\_^aaaa`aaa`aaaa\_` `a`]¥a`¥[aa`\_^\_Y\_a  
@HWI-EAS443:3:66:963:809#0/1  
CTTGTCTCTTCATGTTCTTTGTCCTTGGGATCTTCTCTT  
+HWI-EAS443:3:66:963:809#0/1  
aba` `aababbbbaabbbbaaaaaa\_aabba`baba  
@HWI-EAS443:3:67:1002:1245#0/1  
GGGGGCTATATGAAGCAATCGAGGAGTGCCTGATTAATGA  
+HWI-EAS443:3:67:1002:1245#0/1  
aa` `abab`\_aa]` ``aaa\_a]`\_a\_aYa` `a\_aa` `^aa  
@HWI-EAS443:3:67:1015:992#0/1  
TATAAGACAAGAAATGGCCAGTAGGAGTCTATGGGATTCC  
+HWI-EAS443:3:67:1015:992#0/1  
\_bbaaY^`aa^X]`a^^aa\_UQX]\_WSR]¥`aU¥\_GZ^\_R  
@HWI-EAS443:3:67:1174:480#0/1  
GTGAACAGTATATGTAACACAACAGGGGTAGAGAAGCCTA  
+HWI-EAS443:3:67:1174:480#0/1  
]M]UDXZa]¥`\_^a¥^YY]T[[W[^\_\_XW[[YTSYYRMX]

@HWI-EAS443:3:67:1185:342#0/1  
CATCCATGGCTGCACAGGATGCATTGAGCAAGGCCGTATT  
+HWI-EAS443:3:67:1185:342#0/1  
abb\_`b`a\_aa`¥T¥aa]¥¥X¥aa]`a`aaa^W\_aYU^\_  
@HWI-EAS443:3:67:1210:254#0/1  
CAAGAAATGGCCAGTAGGAGTCTATGGGATTCCTTTCGTC  
+HWI-EAS443:3:67:1210:254#0/1  
abab`aa`ab`aba^^\_W\_U^a```aa\_\_a\_\_`aaZ^SP  
@HWI-EAS443:3:67:1226:188#0/1  
ATCAAAACTAGGCTTTTCACTATAAGACAAGAAATGGCCA  
+HWI-EAS443:3:67:1226:188#0/1  
aba`aaa`aaa`aaaa\_a\_\_`aa`]\_^a`\_`\_^\_^][R^  
@HWI-EAS443:3:67:1234:85#0/1  
GAGACCGAATCATGGCCTGGACAGTGGTGAACAGTATATG  
+HWI-EAS443:3:67:1234:85#0/1  
```\_^aa`\_]\_`a`\_V\_]\_]X^\_X]^Y]YXX^^XU^X\_\_  
@HWI-EAS443:3:67:1286:1638#0/1  
CCCCGTTCGTCGATGAAATGGAAATCCGAATACATGAAAC  
+HWI-EAS443:3:67:1286:1638#0/1  
ab`ba]a]\_``\_Xb`aba`ab`abaVaTa\_aa[aa`a`aY  
@HWI-EAS443:3:67:1340:1860#0/1  
GAACACAGTATTTTTCCCATTTGTGTGGCTCCAGTCTCGG  
+HWI-EAS443:3:67:1340:1860#0/1  
[abaZbbZVb^babb`\_abaaa`a`^\_aT\_\_[ZFWJTQFU  
@HWI-EAS443:3:67:1366:682#0/1  
GGGGGGCTATATGAAGCAATCGAGGAGTGCCTGATTAATG  
+HWI-EAS443:3:67:1366:682#0/1  
abaabaa`aaabaaaaa`a^b`aa]aT``VaaZ`^`]]a  
@HWI-EAS443:3:67:1442:1559#0/1  
GGGCACTCGGTGAAAATATGGCACCAGAAAAAGTAGACTT  
+HWI-EAS443:3:67:1442:1559#0/1  
ab`abbbb`\_aaaabbbb``\_ba^baaaaa`Wa\_a^aa  
@HWI-EAS443:3:67:1480:388#0/1  
CACTTTCCCAATAGAGCCTTCCCTCCACTCCCCTGGGTGAC  
+HWI-EAS443:3:67:1480:388#0/1  
a^T¥`a\_aaba^ab\_]a`]`Z`aa`aXaaY`^`^`aXZ^U  
@HWI-EAS443:3:67:1485:1874#0/1  
GCGTTCACCTTTTGGACATTTGGGAAAGCTTGCCCTCAA  
+HWI-EAS443:3:67:1485:1874#0/1  
aaaaa]a\_aa]aaaa^aW`a¥\_`Z\_a``¥U`¥^¥WU^U`\_  
@HWI-EAS443:3:67:1488:92#0/1  
CAAAGTCTACTTTTTCTGGTGCCATTTTTACCCGAGTGC  
+HWI-EAS443:3:67:1488:92#0/1  
aXZPWW^aW]aaaaa`\_¥TOLSPV[\_^¥]^]\_^U^X[U^U  
@HWI-EAS443:3:67:156:754#0/1  
GGGGGCTATATGAAGCAATCGAGGAGTGCCTGATTAATGA  
+HWI-EAS443:3:67:156:754#0/1  
aa\_\_[\_`aa]aa\_`]¥]\_^\_a[DWYaa\_[a[^`^^\_U  
@HWI-EAS443:3:67:1572:1587#0/1  
CGATTGGCCATGTTTCCGATTTGTTTCAAAGAATTCCTT

+HWI-EAS443:3:67:1572:1587#0/1  
a`a\_Z]ababb[ba][baaa^b`aa\_`aa^]]aa]X`a  
@HWI-EAS443:3:67:1673:1225#0/1  
ACTCGGTGAAAATATGGCACCAGAAAAAGTAGACTTTGAT  
+HWI-EAS443:3:67:1673:1225#0/1  
aa\_```abba^abaaaaU]^^^````^`Saa``aa\_aa`  
@HWI-EAS443:3:67:1691:1411#0/1  
GGAGGGAATACCACTATATGATGCAATCAAATGCATGAAG  
+HWI-EAS443:3:67:1691:1411#0/1  
¥\_^`a[¥bbbabbaa`aabaabaaa`baa\_Y\_aaaaa]  
@HWI-EAS443:3:67:170:257#0/1  
GTGGGCACTCGGTGAAAATATGGCACCAGAAAAAGTAGAC  
+HWI-EAS443:3:67:170:257#0/1  
ZYaaaa`a\_\_\_\_]P\_YO[`Y^^\_\_^^ZZGX\_Z\_] [SWTQY  
@HWI-EAS443:3:67:1727:1289#0/1  
CCGATTTGTTTTCAAAGAATTCCTTGGTCATGTCTTTCTC  
+HWI-EAS443:3:67:1727:1289#0/1  
`aa\_ab\_b^b\_babaaabbbbaababb`W`b¥a]abb¥b¥  
@HWI-EAS443:3:67:175:515#0/1  
AAACAACTTCAAATGTGTGCATATTGCAGCAAACCTTGT  
+HWI-EAS443:3:67:175:515#0/1  
`a]aaaW\_\_^a\_a`]\_`¥`W^a`^^\_]^^`]]^[]W^Y^Y  
@HWI-EAS443:3:67:229:873#0/1  
AAGCCAACAAAATAAAATCTGAGAAGACACACATTCACAT  
+HWI-EAS443:3:67:229:873#0/1  
aV\_ab`aa[a`\_`aaa^a\_a`\_a\_\_````^`^`\_`^`\_]`^  
@HWI-EAS443:3:67:274:1738#0/1  
GGGGGCTATATGAAGCAATCGAGGAGTGCCTGATTAATGA  
+HWI-EAS443:3:67:274:1738#0/1  
VYS`a\_S\_SSNL^ZTa` `[``]¥[[P¥b^YWTPTP`IT¥  
@HWI-EAS443:3:67:285:775#0/1  
CGAAAATCGAAACTAACAAGTTTGCTGCAATATGCACACA  
+HWI-EAS443:3:67:285:775#0/1  
aaa`baabba^aa\_aa\_a\_\_^`\_`a`a`^`\_\_`\_`a`aa`  
@HWI-EAS443:3:67:344:1964#0/1  
CCTGCTTCCAAGCCATGAGGTAATTGGGATTTATGCCTTT  
+HWI-EAS443:3:67:344:1964#0/1  
abaaa`aba][a\_a`])^X\_\_\_\_^[V\_]a]\_[UY]^  
@HWI-EAS443:3:67:557:821#0/1  
GGGGGCTATATGAAGCAATCGAGGAGTGCCTGATTAATGA  
+HWI-EAS443:3:67:557:821#0/1  
^[`XY\_aZaba`a`abb\_¥`\_a`a¥^a\_`[`a^`\_`^`\_  
@HWI-EAS443:3:67:709:873#0/1  
CATAAATCCCAATTACCTCATGGCTTGAAGCAGGTGCTA  
+HWI-EAS443:3:67:709:873#0/1  
ab`bbb\_babaab`[```aa\_`^`a\_]\_VZ¥UUX[JWS¥]  
@HWI-EAS443:3:67:725:904#0/1  
CTGGTGACCCGAATGCACTATTGAAGCACCGATTTGAGAT  
+HWI-EAS443:3:67:725:904#0/1  
aaaa\_aaaaaa`aa^a`a\_aa`\_aaaa`aZ`\_`\_`a\_\_

@HWI-EAS443:3:67:746:343#0/1  
GTGGGCACTCGGTGAAAATATGGCACCAGAAAAAGTAGAC  
+HWI-EAS443:3:67:746:343#0/1  
aabbaaaaa`aWaaaaaaaaaaaa`\_\_a\_]\_\_`Wa\_\_W  
@HWI-EAS443:3:67:769:1046#0/1  
CGGCTGAATCGAGAAAATTGCTTCTCATTGTTTCAGGCACT  
+HWI-EAS443:3:67:769:1046#0/1  
M``Y[]¥\_]¥VQZT¥X`Y\_^] ^Z`\_aZaab`a\_¥]¥Q¥¥b  
@HWI-EAS443:3:67:809:275#0/1  
AATACGGCCTTGCTCAATGCATCCTGTGCAGCCATGGATG  
+HWI-EAS443:3:67:809:275#0/1  
T^aa`bb\_bVa]]b`abaaaaa\_aaa¥a`b\_[`abaa`a  
@HWI-EAS443:3:67:868:1704#0/1  
AGCAGGGCAAGAATCAAACTAGGCTTTTCACTATAAGAC  
+HWI-EAS443:3:67:868:1704#0/1  
a`]aZ^^[`a`aa`aaa\_\_\_\_^FY`ZP\_a`a`\_\_a`SWD  
@HWI-EAS443:3:67:896:912#0/1  
CGGGGCAACATCTTCTCCTATTTTCATCAAGTTCTATCCAG  
+HWI-EAS443:3:67:896:912#0/1  
a`\_`abaaabbabb`baaabbbaabaababaaaaaa`ba  
@HWI-EAS443:3:67:89:614#0/1  
GGGCACTCGGTGAAAATATGGCACCAGAAAAAGTAGACTT  
+HWI-EAS443:3:67:89:614#0/1  
aaabaaabab[baabaa`a[^`Z`\_aa\_]\_T``Va^\_\_^^  
@HWI-EAS443:3:67:959:687#0/1  
GGGGCATGGAATGAGGCGCTGCCTTCTTCACTCTTCA  
+HWI-EAS443:3:67:959:687#0/1  
aa`aa[aa\_\_`^a^^]a\_`Z^¥`W\_`^\_a¥Z`^¥\_WV  
@HWI-EAS443:3:67:967:554#0/1  
AACAAAATAAAATCTGAGAAGACACACATTCACATCTTTT  
+HWI-EAS443:3:67:967:554#0/1  
aaabab`babaab`ba^aaaaa`aaaabaaa`a\_aaa`  
@HWI-EAS443:3:68:1037:869#0/1  
CGTCTCCACAACCTGAGGGGTTTTCGGCTGAATCGAGAAA  
+HWI-EAS443:3:68:1037:869#0/1  
Q\_```bbb`babbab```¥¥0\_bbba[aabbab`b\_`b`a  
@HWI-EAS443:3:68:1046:1716#0/1  
TTCTTGCCCTGCTCTTTCGTCAAGGGTGTAGTCCGCTTT  
+HWI-EAS443:3:68:1046:1716#0/1  
a`^X\_¥b`aaaab`a`a]a^ab`a`XX¥LZ`YT]`X\_`[  
@HWI-EAS443:3:68:1050:958#0/1  
ATGAAATGGAATCCGAATACATGAAACAACTTCCAAAT  
+HWI-EAS443:3:68:1050:958#0/1  
aaaa[a^a`Y\_]``\_a\_\_`\_\_]`a\_\_^`^]]`^\_[\_]W`  
@HWI-EAS443:3:68:1099:16#0/1  
ATTCCTTGGTCATGTCTTTCTTTTGACAGAAGACTCGGC  
+HWI-EAS443:3:68:1099:16#0/1  
aabaabbba[ababaabaa[b^bbab``aaaa``\_Yb\_Z  
@HWI-EAS443:3:68:1100:288#0/1  
TCGGAGAGTCACCCAGGGGAGTGGAGGAAGGCTCTATTGG





@HWI-EAS443:3:68:1704:559#0/1  
CTTTGGCTGGAAAGAGCCTAACATAGTCAAACCACATGAG  
+HWI-EAS443:3:68:1704:559#0/1  
aaaZabab`SS\_`TW^GVa`\_`^[^H^aab`^WR` `b^Y  
@HWI-EAS443:3:68:1709:51#0/1  
TAACATAGTCAAACCACATGAGAAAGGCATAAATCCCAAT  
+HWI-EAS443:3:68:1709:51#0/1  
aabababbaaaba`a`aba\_a`aaaaY`b`aa\_YWO`\_`\_  
@HWI-EAS443:3:68:1727:298#0/1  
TTTTACAGCAGAAGTGTCCCACTGCAGGGCTACTGAATAC  
+HWI-EAS443:3:68:1727:298#0/1  
]abY^bZaa` `[`R`ZS`XXZaa[Sa]`\_`[Y`Y`YX\_YN  
@HWI-EAS443:3:68:199:594#0/1  
TACATATACTGTTCACTGTCCAGGCCATGATTCGGTC  
+HWI-EAS443:3:68:199:594#0/1  
`[a`Yab`a`a`Wa` `\_YUaaX`Y`^\_a[V^RY^^RKTE  
@HWI-EAS443:3:68:216:1353#0/1  
CAGGTTTGTTCCTTCCGTCTTCTTTGGTCTTACATTTG  
+HWI-EAS443:3:68:216:1353#0/1  
aa`UFYaaP`\_]YH]OX\_a`]XR[SWVa`W`\_S^^[F  
@HWI-EAS443:3:68:252:1316#0/1  
TTCAAAGAATTCCTTGGTCATGTCTTCTTTGACAGAA  
+HWI-EAS443:3:68:252:1316#0/1  
aba^Y^ZZb`abaabaZ\_`aa\_a`\_`aba\_a`\_`a]aa\_a`  
@HWI-EAS443:3:68:256:112#0/1  
GGGGGCTATATGAAGCAATCGAGGAGTGCCTGATTAATGA  
+HWI-EAS443:3:68:256:112#0/1  
VV\_a`Y`Y`Y`a`Z]a]]`\_`UZZ`\_`V`SSUZaV[\_`OZUNS  
@HWI-EAS443:3:68:286:307#0/1  
TTAATCAGGCACTCCTCGATTGCTTCATATAGCCCCCAA  
+HWI-EAS443:3:68:286:307#0/1  
a^W^`^UUT\_Y\_a`]\_a[X^]XaZaZ]ZaUWWb]a^\_]TJ  
@HWI-EAS443:3:68:311:1079#0/1  
CATTAATCAGGCACTCCTCGATTGCTTCATATAGCCCCC  
+HWI-EAS443:3:68:311:1079#0/1  
a` `b`bbb\_]aaaaaaaa`abaaaaab`a`^a\_^\_]`  
@HWI-EAS443:3:68:329:1780#0/1  
GGGGGCTATATGAAGCAATCGAGGAGTGCCTGATTAATGA  
+HWI-EAS443:3:68:329:1780#0/1  
aa]]aaaaabaaaaabbaa\_`aaaa` `Y[]\_]`\_`\_`aa`\_`a  
@HWI-EAS443:3:68:32:1555#0/1  
CTGTATTCAACAGTCTATATGCGTCTCCACAACCTTGAGGG  
+HWI-EAS443:3:68:32:1555#0/1  
aaT[aaa\_`aa\_Y]a`aaa^V`^^a`\_`a`\_`^`]`\_`[]`^^^Y`  
@HWI-EAS443:3:68:32:894#0/1  
CGGCTGAATCGAGAAAATTGCTTCTCATTGTTTCAGGCACT  
+HWI-EAS443:3:68:32:894#0/1  
aaaaZ`V]]a]`a^X` `]^Y`Y`^^`\_`TV`^`ZZ`\_`\_`[`\_`Y`Y`  
@HWI-EAS443:3:68:364:925#0/1  
CGAATGCACTATTGAAGCACCGATTTGAGATAATTGAAGG

+HWI-EAS443:3:68:364:925#0/1  
a^0]\_``abbbaabaaaaaa[W]aaa\_``\_a`a`¥[``\_`  
@HWI-EAS443:3:68:418:290#0/1  
TGTAATCTCAAATTTTTCTTCAATTGTCTCTTCGCCTCTT  
+HWI-EAS443:3:68:418:290#0/1  
¥^^[\_ZJ\_Y^aabbab^b^[aX]W\_\_\_^a^]Y`]Z¥`  
@HWI-EAS443:3:68:472:911#0/1  
AGATGTTGCCCCGATTGAACATATCGCAAGCATGAGGAGG  
+HWI-EAS443:3:68:472:911#0/1  
[aaWb¥`\_aa`\_]\_^^a`abaa^\_Ya]a\_]YTW\_W[][\_^V  
@HWI-EAS443:3:68:482:1556#0/1  
GACCCGAATGCACTATTGAAGCACCGATTTGAGATAATTG  
+HWI-EAS443:3:68:482:1556#0/1  
abbbaa\_aabaa`aa`^\_Z^aa````a\_]a`\_a\_a\_`  
@HWI-EAS443:3:68:518:13#0/1  
GTTCCACTGTCCAGGCCATGATTCGGTCTCTTCCCTTCA  
+HWI-EAS443:3:68:518:13#0/1  
`Y][`````aa\_\_\_¥^`¥]W[^ZT[ZRW[UW[RSVVVW  
@HWI-EAS443:3:68:571:617#0/1  
AGATTCTACAATTATTGATTCACCCCGTTCGTCGATGAAA  
+HWI-EAS443:3:68:571:617#0/1  
abaaaa^aaaaaaaa`aaaaa\_]a^\_¥a\_aaaaa^``  
@HWI-EAS443:3:68:583:421#0/1  
AGATAATTGAAGGAAGAGACCGAATCATGGCCTGGACAGT  
+HWI-EAS443:3:68:583:421#0/1  
`aabababbabaaaaaaaa`a`^a\_`aa`a\_a`\_`¥a^^  
@HWI-EAS443:3:68:585:1672#0/1  
GGGAGTGACATAAATACGGCCTTGCTCAATGCATCCTGT  
+HWI-EAS443:3:68:585:1672#0/1  
^¥I¥aYU`V`a`[¥X¥`a^b`aY`S^\_]S^XSUX^HUH  
@HWI-EAS443:3:68:58:1277#0/1  
CAAGCCAATTGAAGTGGGCACTCGGTGAAAATATGGCACC  
+HWI-EAS443:3:68:58:1277#0/1  
aaY]\_aa`]aa`\_Z0]^\_`^`]^`^^RYU^\_\_Y[[X^[]S  
@HWI-EAS443:3:68:626:1159#0/1  
CTGAATACATAATGAAGGGAGTGTACATAAATACGGCCTT  
+HWI-EAS443:3:68:626:1159#0/1  
aa\_TXa^b`b¥Zab`[`Vb\_a`b`aaaa^`aaaab`¥Z`a  
@HWI-EAS443:3:68:718:872#0/1  
CCACTCCCCTGGGTGACTCTCCGATTGGCCATGTTTCCGA  
+HWI-EAS443:3:68:718:872#0/1  
a\_Waaab`U\_ZRNZ]¥a`\_`^]YU^]a^^[[UVa¥LXZN  
@HWI-EAS443:3:68:71:885#0/1  
GCCTTGCTCAATGCATCCTGTGCAGCCATGGATGACTTTC  
+HWI-EAS443:3:68:71:885#0/1  
abbabbbbaaXZabbaa`aZ\_abaaaaaa`aa\_R[a\_\_a  
@HWI-EAS443:3:68:781:744#0/1  
GAGAAGCAATTTTCTCGATTGAGCCGAAAACCCCTCAAGT  
+HWI-EAS443:3:68:781:744#0/1  
aaaabaabab`a`ababX`aaa```U`\_aa\_]W`a\_a]`W

@HWI-EAS443:3:68:795:2027#0/1  
TCCACTCCCCTGGGTGACTCTCCGATTGGCCATGTTTCCG  
+HWI-EAS443:3:68:795:2027#0/1  
abbbbaaba\_R^[NYaL¥]\_`^`YS\_GQUaaOFJ\_G\_ZD  
@HWI-EAS443:3:68:824:277#0/1  
GCATGGAAATGAGGCGCTGCCTTCTTCAGTCTCTTCAGCA  
+HWI-EAS443:3:68:824:277#0/1  
aa`\_a]\_a\_`^`a\_a`a\_\_¥¥\_\_\_\_`\_\_\_\_aY`\_\_¥\_[V^]\_  
@HWI-EAS443:3:68:855:1322#0/1  
GAAATAGGAGACATGCTCTTGAGGACTGCGATAGGCCAAG  
+HWI-EAS443:3:68:855:1322#0/1  
[baabaa¥]`bbbaabaaaaaaaaaaaaaaaaa^a\_a\_`\_]\_  
@HWI-EAS443:3:68:867:62#0/1  
CACACATTCACATCTTTTCATTCCTGGAGAGGAGATGGC  
+HWI-EAS443:3:68:867:62#0/1  
a]b`V[baUb^W\_¥`a[``bb`[b\_Z\_b]a]baaaSb^NV  
@HWI-EAS443:3:68:873:700#0/1  
CAAACCTCCAAATGTGTGCATATTGCAGCAAACCTGTTAG  
+HWI-EAS443:3:68:873:700#0/1  
abbaabbabbbbbb\_babbbb\_bbbbbabb`aabbbaaab  
@HWI-EAS443:3:68:933:1445#0/1  
GGGCAACATCTTCTCCTATTTTCATCAAGTTCTATCCAGCT  
+HWI-EAS443:3:68:933:1445#0/1  
aa`^bYU\_^\_aaaHLaWTYQ]SX^T¥¥Z]]Y\_dW]`IG\_^  
@HWI-EAS443:3:68:93:70#0/1  
CAAAGAGAACCGTTCATTGAAATTGGAGTAACACGGAGG  
+HWI-EAS443:3:68:93:70#0/1  
abaab]aaV`aaa^^\_S\_]aaaaaaaa^¥`W\_`a\_\_\_\_\_`]  
@HWI-EAS443:3:68:980:463#0/1  
GGCATGGAAATGAGGCGCTGCCTTCTTCAGTCTCTTCAGC  
+HWI-EAS443:3:68:980:463#0/1  
a`Za\_a`\_`X¥`\_¥^`\_\_\_\_^\_]\_Y^^^Y\_Z[\_^`^W¥X¥  
@HWI-EAS443:3:69:1037:1880#0/1  
AAGAGCCTAACATAGTCAAACCACATGAGAAAGGCATAAA  
+HWI-EAS443:3:69:1037:1880#0/1  
ab\_[T`\_\_abaaYaXXa`aaWX]^a`\_`XaaP[\_¥a^\_a\_  
@HWI-EAS443:3:69:1045:629#0/1  
ATTTTGGACCCAGCTTGCTAGAGATCTGGGCTCTGGCTCA  
+HWI-EAS443:3:69:1045:629#0/1  
[a^\_]Z¥aa`WD^^`X\_¥X]a\_] [[]a`ZP]]]]a¥Y]\_\_\_\_  
@HWI-EAS443:3:69:1072:505#0/1  
GGGGGCTATATGAAGCAATCGAGGAGTGCCTGATTAATGA  
+HWI-EAS443:3:69:1072:505#0/1  
ababbabbbbbbababaa`a`ba`a\_ba\_aaaaaaaa`a  
@HWI-EAS443:3:69:1081:275#0/1  
CGTCTCCACAACCTGAGGGTTTTCGGCTGAATCGAGAAA  
+HWI-EAS443:3:69:1081:275#0/1  
`abbbabbbabababbbbbb\_abbabaaa]baa\_a`a`aa  
@HWI-EAS443:3:69:1092:823#0/1  
TTTGAGATTACAGGAACCTATGCGCAAGCTTGCCGACCAAA



@HWI-EAS443:3:69:164:1353#0/1  
GAAAGAGCCTAACATAGTCAAACCACATGAGAAAGGCATA  
+HWI-EAS443:3:69:164:1353#0/1  
ab¥`abbbba^bab]b\_]abbb^aaaaa^a`aa\_\_aa`  
@HWI-EAS443:3:69:1658:242#0/1  
GTCCAGGCCATGATTCGGTCTCTTCCTTCAATTATCTCAA  
+HWI-EAS443:3:69:1658:242#0/1  
aa\_]ab`aaaba`aa`ba^¥\_W`\_ZYa`T^]aa\_\_Q[M¥`  
@HWI-EAS443:3:69:1662:926#0/1  
CATTCTTTGGCTGGAAAGAGCCTAACATAGTCAAACCACA  
+HWI-EAS443:3:69:1662:926#0/1  
aabbbbbbbbabbaabbabbaabbbabbbba`bab``aaa  
@HWI-EAS443:3:69:170:307#0/1  
CTGCACAGGATGCATTGAGCAAGCCGATTTATGTACAC  
+HWI-EAS443:3:69:170:307#0/1  
aaaba`aa]a\_¥a``\_[¥`\_`\_]\_`aWW¥a]^`V^Z[T  
@HWI-EAS443:3:69:197:798#0/1  
CGGCTGAATCGAGAAAATTGCTTCTCATTGTTTCAGGCACT  
+HWI-EAS443:3:69:197:798#0/1  
aZZa`^YNN\_[`a`Y\_\_[OV\_^]XFXW[IOY¥VX\_^V^  
@HWI-EAS443:3:69:229:787#0/1  
AAAGAGCCTAACATAGTCAAACCACATGAGAAAGGCATAA  
+HWI-EAS443:3:69:229:787#0/1  
S[Zaab^babababba]baba\_abbb`a`\_a\_a\_aaaaab  
@HWI-EAS443:3:69:287:415#0/1  
GGCAACATCTTCTCCTATTTTCATCAAGTTCTATCCAGCTT  
+HWI-EAS443:3:69:287:415#0/1  
aaaaaa\_aaaaaaaaaaaaaaaa`a\_ZZ^\_a\_a`\_`]a\_\_]  
@HWI-EAS443:3:69:302:853#0/1  
GGGCACTCGGTGAAAATATGGCACCAGAAAAAGTAGACTT  
+HWI-EAS443:3:69:302:853#0/1  
aaabbbbaab\_ab`bbaaaaaaaaaaaaaa`^^^aaa\_a`  
@HWI-EAS443:3:69:441:331#0/1  
CGAATGCACTATTGAAGCACCGATTTGAGATAATTGAAGG  
+HWI-EAS443:3:69:441:331#0/1  
a`\_`abb\_bbabbaaaaaabbbbaa]a`baa`aa`a`aaa  
@HWI-EAS443:3:69:46:905#0/1  
CGATTGCCATGTTTCCGATTTGTTTTCAAAGAATTCCTT  
+HWI-EAS443:3:69:46:905#0/1  
abaaaaabba`a[a`aba\_]aaaZa\_```X`\_XR`a`^`  
@HWI-EAS443:3:69:519:632#0/1  
GAGACATGCTCTTGAGGACTGCGATAGGCCAAGTGTGAG  
+HWI-EAS443:3:69:519:632#0/1  
^O¥\_]Z`TWP\_aaYVR\_\_NJ^Ya`UQYFWW]P[POGSX[U  
@HWI-EAS443:3:69:606:866#0/1  
CTGCACACTTTCCAATAGAGCCTTCCTCCACTCCCCTGG  
+HWI-EAS443:3:69:606:866#0/1  
abab]`b`][^a`^baa]^Q^a\_aaaa`W]]aab`b`\_`Z  
@HWI-EAS443:3:69:610:1540#0/1  
CGTCTCCACAACCTTGAGGGGTTTTCGGCTGAATCGAGAAA

+HWI-EAS443:3:69:610:1540#0/1  
a\_\_baaaY`Z\_`a¥`\_`\_`P`[¥a`^a\_`a`\_]`\_^\_^^a  
@HWI-EAS443:3:69:616:1295#0/1  
CACAACTTGAGGGGTTTTTCGGCTGAATCGAGAAAATTGCT  
+HWI-EAS443:3:69:616:1295#0/1  
`a`\_]`a\_\_\_RZTIR\_\_XOP\_^`\_]`^]V^G¥^\_]Y^VXY  
@HWI-EAS443:3:69:619:1320#0/1  
TTTTGGACCCAGCTTGCTAGAGATCTGGGCTCTGGCTCAT  
+HWI-EAS443:3:69:619:1320#0/1  
aa¥I¥\_¥aa\_`¥b`VY\_S`NX]XP`^Y¥^\_[a¥\_\_[V^ZP  
@HWI-EAS443:3:69:631:1571#0/1  
CACTCCCCTGGGTGACTCTCCGATTGGCCATGTTTCCGAT  
+HWI-EAS443:3:69:631:1571#0/1  
abbabbbb`aa]^aabab`aa`¥`\_VZ`^\_\_^P\_\_X][SX  
@HWI-EAS443:3:69:636:376#0/1  
CATTAATCAGGCACTCCTCGATTGCTTCATATAGCCCCC  
+HWI-EAS443:3:69:636:376#0/1  
`[abbbbbbb`bbbabaaaabbaaaaaaaaaabaa`\_¥aaaa  
@HWI-EAS443:3:69:695:618#0/1  
GGTCTCCAACATCTTTGCAGTCATCAAAGTCTACTTTTTTC  
+HWI-EAS443:3:69:695:618#0/1  
\_\_PZVS\_S\_\_aY`aKYbZ\_^Q^TaYQTT¥VY¥aRJaaTaa  
@HWI-EAS443:3:69:743:586#0/1  
GGCTTGAAGCAGGTGCTAGCAGAGCTACAGGACATTGAA  
+HWI-EAS443:3:69:743:586#0/1  
a^baabaaaaa^Waj]aaa`aaa^`a`a]aa¥Z[Z]a[`^  
@HWI-EAS443:3:69:768:1844#0/1  
GGTGAACCTTTGTAAGTATGGAGTTCTCACTCACTGACCCG  
+HWI-EAS443:3:69:768:1844#0/1  
aaXZ¥aaa`\_aZ`V`Qa¥[^`^¥^^aa```\_a`X¥aS\_`a  
@HWI-EAS443:3:69:787:450#0/1  
CACCTGCTTCCAAGCCATGAGGTAATTGGGATTTATGCCT  
+HWI-EAS443:3:69:787:450#0/1  
`V[X¥`aa```\_W]^[[`VXYJW\_aa¥\_aT¥\_[\_`a\_YX^  
@HWI-EAS443:3:69:924:976#0/1  
AGCATCCATCAGCAGGAACCTTTGACCGCTGATGGCAAAGA  
+HWI-EAS443:3:69:924:976#0/1  
aabbabbbbaaaaaaa```aaa`aaa`a```\_`^`a\_`\_^  
@HWI-EAS443:3:69:958:409#0/1  
TGAATACATAATGAAGGGAGGTACATAAATACGGCCTTG  
+HWI-EAS443:3:69:958:409#0/1  
aa`aaaaab`\_aba\_a`\_]aXa\_a\_aaaa`aa\_`]^^\_ZY  
@HWI-EAS443:3:6:1009:627#0/1  
CTGGTGCCATATTTTCACCGAGTGCCCACTTCAATTGGCT  
+HWI-EAS443:3:6:1009:627#0/1  
abbbabbbbbbabb`babbab`b`\_aaabbabbbabb\_b  
@HWI-EAS443:3:6:1010:363#0/1  
CGAACGGGGTGAATCAATAATTGTAGAATCTGGTGACCCG  
+HWI-EAS443:3:6:1010:363#0/1  
R^S`b\_bbaUaabb\_aW\_b\_\_¥b\_`¥aabbVabUbbaV\_b

@HWI-EAS443:3:6:1016:653#0/1  
GTTTTCGGCTGAATCGAGAAAATTGCTTCTCATTGTTTCAG  
+HWI-EAS443:3:6:1016:653#0/1  
aS^^QVY¥Y¥]\_^SM¥VLFOWYZRXSTTUYY]]^XYZRBB  
@HWI-EAS443:3:6:1025:375#0/1  
GGAGTGTACATAAATACGGCCTTGCTCAATGCATCCTGTG  
+HWI-EAS443:3:6:1025:375#0/1  
abU^Xb\_`aaaa`a`b¥[ZT[]\_\_\_\_\_¥`VYX¥\_¥Y\_¥Q\_  
@HWI-EAS443:3:6:1067:1067#0/1  
ACACCCTTGACGAAGAGAGCAGGGCAAGAATCAAACCTAG  
+HWI-EAS443:3:6:1067:1067#0/1  
\_aaS\_]aa¥aX^¥bbXYZbb]`bWGV¥WU]a\_a^^\_Raab  
@HWI-EAS443:3:6:1131:1164#0/1  
GGGAGACTTTGGTCGGCAAGCTTGCGCATAGTTCCTGTAA  
+HWI-EAS443:3:6:1131:1164#0/1  
X\_ba\_MYW`ab]¥`\_TYLWXBBBBBBBBBBBBBBBBBBB  
@HWI-EAS443:3:6:1213:1534#0/1  
GCCGAACGGCTGCATTGAGGGCAAGCTTTCCCAAATGTCA  
+HWI-EAS443:3:6:1213:1534#0/1  
abb^a`^b\_X\_\_ZZ^\_U^Q`aU[]]R[``^^\_\_\_\_\_¥]UV¥  
@HWI-EAS443:3:6:1263:1319#0/1  
GGGGGCTATATGAAGCAATCGAGGAGTGCCTGATTAATGA  
+HWI-EAS443:3:6:1263:1319#0/1  
YabbaJ\_bbabababbbW\_\_b\_ab[a`b`Y[a\_aaaaab^  
@HWI-EAS443:3:6:1309:998#0/1  
CGTCTCCACAACCTGAGGGTTTTTCGGCTGAATCGAGAAA  
+HWI-EAS443:3:6:1309:998#0/1  
abaaaabb\_aa`abaaaabaYaaa`a`aaaa\_a\_a```  
@HWI-EAS443:3:6:1390:696#0/1  
CACTTTCCCAATAGAGCCTTCCTCCACTCCCCTGGGTGAC  
+HWI-EAS443:3:6:1390:696#0/1  
^aa`^^`\_a````ab`^`¥Y`Z]]]a^aU]^baa[b[]  
@HWI-EAS443:3:6:1403:1042#0/1  
CAAAGATGTTGGAGACCTTAAACAGTATGACAGTGATGAG  
+HWI-EAS443:3:6:1403:1042#0/1  
abbbbXa``bab[ba``aa`a`a\_\_ab`a\_a`Z]``a\_B  
@HWI-EAS443:3:6:1413:1132#0/1  
GTGGTGTCTCCTCAAGAATGGTTCAATTTTGGCGTTCAC  
+HWI-EAS443:3:6:1413:1132#0/1  
a¥\_a]^¥\_] [W¥PXW^]ZN`a\_]OX^R\_a^¥[X]aXXYSB  
@HWI-EAS443:3:6:1464:658#0/1  
GTAAAATAGTTCCTCCTCATGCTTGCGATATGTTCAATCG  
+HWI-EAS443:3:6:1464:658#0/1  
`NWbaa^]b]``^\_OFYW^0`]XX\_Z`PX\_\_\_WWX]WBBB  
@HWI-EAS443:3:6:1499:480#0/1  
CATAATGAAGGGAGTGTACATAAATACGGCCTTGCTCAAT  
+HWI-EAS443:3:6:1499:480#0/1  
a¥\_babba\_b`b`aabTbabaa¥abbaaa^Ua`b^\_Ya\_a  
@HWI-EAS443:3:6:1501:1737#0/1  
CACTGCAGGGCTACTGAATACATAATGAAGGGAGTGTACA

+HWI-EAS443:3:6:1501:1737#0/1  
[bGbbWbbbb¥ab\_abbaa`\_[a` ``baaabZa\_a`aV`  
@HWI-EAS443:3:6:1564:1657#0/1  
CATGGAAATGAGGCGCTGCCTTCTTCAGTCTCTTCAGCAG  
+HWI-EAS443:3:6:1564:1657#0/1  
aab`baab`abba¥a\_aa\_`ab[^JZb]^a¥aa]\_aV^]  
@HWI-EAS443:3:6:156:403#0/1  
ATTTGAGAAATGATACTGATGTGGTGAACCTTGTAAAGTAT  
+HWI-EAS443:3:6:156:403#0/1  
aa`ab^a` ``\_` ``b^ab`aabW]aYa^aYa`aa^\_Wa^`^  
@HWI-EAS443:3:6:1579:1864#0/1  
AAATCCGAATACATGAAACAACTTCCAAATGTGTGCATA  
+HWI-EAS443:3:6:1579:1864#0/1  
aaaa\_`b`\_aa]ababa``aaa0¥\_`^a` ``^a^a`a¥¥^`  
@HWI-EAS443:3:6:1629:1210#0/1  
GGAGAGGAGATGGCCACCAAAGCGGACTACACCCTTGACG  
+HWI-EAS443:3:6:1629:1210#0/1  
`baaabbaaba\_V`Q^aaZaUa`aV`]PaMX\_X\_`RLU  
@HWI-EAS443:3:6:163:1127#0/1  
CTCATCACTGTCATACTGTTTAAGGTCTCCAACATCTTTG  
+HWI-EAS443:3:6:163:1127#0/1  
SSabQMZbabaT`XbbbXI\_abba`X¥aabX]ba` `a`¥b  
@HWI-EAS443:3:6:166:2007#0/1  
CCCCAAGATCGAAGGTTCCAGGTTCCAGGTTGTCCTAAG  
+HWI-EAS443:3:6:166:2007#0/1  
ab]bbbbbaaaaababXaaaa\_U]aa^aa`Wa[Y`¥`aaa^  
@HWI-EAS443:3:6:1695:1159#0/1  
ACCTTCGATCTTGGGGGCTATATGAAGCAATCGAGGAGT  
+HWI-EAS443:3:6:1695:1159#0/1  
a` `aab\_]Pabaaa` `Ra^\_\_\_[W\_VR¥\_YM[[\_\_^\_B  
@HWI-EAS443:3:6:1703:1239#0/1  
ATCTGTATTCAACAGTCTATATGCGTCTCCACAACCTTGAG  
+HWI-EAS443:3:6:1703:1239#0/1  
J¥\_ab¥bbbU^XPY[TU`a`[a^aa` `a` ``X[[R^`a\_]  
@HWI-EAS443:3:6:1708:87#0/1  
CATAAATCCCAATTACCTCATGGCTTGAAGCAGGTGCTA  
+HWI-EAS443:3:6:1708:87#0/1  
U^bbb\_] [[U] `ba¥U[Wab\_b`bbK`ZPDT^[W\_BBBB  
@HWI-EAS443:3:6:1725:821#0/1  
AGCAATTTTCTCGATTACGCCGAAAACCCCTCAAGTTGTG  
+HWI-EAS443:3:6:1725:821#0/1  
]a[ `\_W\_aa`¥[ `¥Wa` `ZN[Z\_\_T]WVDJYIH`S\_ZU]  
@HWI-EAS443:3:6:219:624#0/1  
CACTCGGTGAAAATATGGCACCAGAAAAAGTAGACTTTGA  
+HWI-EAS443:3:6:219:624#0/1  
S\_X[aXa]`ZZR^¥^IYa\_\_¥^Y]YVJ]Q\_Y[]aZWa[NB  
@HWI-EAS443:3:6:24:966#0/1  
TGCTTCAATAGTGCATTCGGGTCACCAGATTCTACAATTA  
+HWI-EAS443:3:6:24:966#0/1  
`b`baabaa]b[aabb^^bab^abaa\_aa\_a\_` `` `aa`



@HWI-EAS443:3:6:25:835#0/1  
GAGAAAGGCATAAATCCCAATTACCTCATGGCTTGGAAAGC  
+HWI-EAS443:3:6:25:835#0/1  
^\_\_^^]\_aa`\_\_\_\_\_^ZY¥`]`]¥\_]W¥Z]X\_¥YYBBBB  
@HWI-EAS443:3:6:291:261#0/1  
ATAAGACAAGAAATGGCCAGTAGGAGTCTATGGGATTCCT  
+HWI-EAS443:3:6:291:261#0/1  
aaaaa^¥aaa`\_¥`aa\_T]]L[Y`^a]\_`\_U\_\_\_\_^^^VW]  
@HWI-EAS443:3:6:325:277#0/1  
CTCCACAACCTTGAGGGGTTTTCGGCTGAATCGAGAAAATT  
+HWI-EAS443:3:6:325:277#0/1  
abaab`\_bYbbbaaaabRaaa\_a\_^`aaa^`a]a\_\_``\_\_  
@HWI-EAS443:3:6:336:1977#0/1  
CATTCTTTGGCTGGAAAGAGCCTAACATAGTCAAACCACA  
+HWI-EAS443:3:6:336:1977#0/1  
abbaabbabbaabbbaba`abbbbbbbaab`abbbbaaaa`b  
@HWI-EAS443:3:6:392:1148#0/1  
GGGATCTTCTTTCATTTTCAATGTCCTGTAGCTCTGCTA  
+HWI-EAS443:3:6:392:1148#0/1  
¥bb\_babbbba\_bbbbabbabb`aabaaaa`a\_a\_`a  
@HWI-EAS443:3:6:566:1879#0/1  
AGAAGACACACATTACATCTTTTCATTCACTGGAGAGGA  
+HWI-EAS443:3:6:566:1879#0/1  
^YSX\_]baZ¥^bZV^aPVaPbaTbbba[``N^^][¥¥bBB  
@HWI-EAS443:3:6:58:1044#0/1  
GCGCAAGCTTGCCGACCAAAGTCTCCCACCGAACTTCTCC  
+HWI-EAS443:3:6:58:1044#0/1  
`bbaaaaa``aaaa`aaaa^U``\_\_a`\_¥]]PZ^`^\_¥\_  
@HWI-EAS443:3:6:666:1683#0/1  
AACTTTAGAGCCTATGTAGATGGATTCGAGCCGAACGGCT  
+HWI-EAS443:3:6:666:1683#0/1  
aaIUbaVbU[P\_`aa`]Z`aOLX\_SV[`^BBBBBBBBBBBB  
@HWI-EAS443:3:6:692:1362#0/1  
AGAATGTCTTCATGCATTTGATTGCATCATATAGTGGTAT  
+HWI-EAS443:3:6:692:1362#0/1  
abaa`a\_aaaaa[\_\_ba```\_¥aa`^a`````a\_W\_]Z^\_  
@HWI-EAS443:3:6:705:1244#0/1  
GGGGGCTATATGAAGCAATCGAGGAGTGCCTGATTAATGA  
+HWI-EAS443:3:6:705:1244#0/1  
[HTU¥a\_aY`¥]MXU`]S\_00^ZUZZX]VE]Q¥`PRW\_HB  
@HWI-EAS443:3:6:711:85#0/1  
CAACAAAATAAAATCTGAGAAGACACACATTCACATCTTT  
+HWI-EAS443:3:6:711:85#0/1  
^abaaabbbbbbaabbaaaabaaa\_a\_aba^a\_aaaaaa  
@HWI-EAS443:3:6:712:114#0/1  
GCCAATTGAAGTGGGCACTCGGTGAAAATATGGCACCAGA  
+HWI-EAS443:3:6:712:114#0/1  
a\_^[\^aYX]`\_]\_[\_]\_XZP¥`V^OUOWXXZXNLPKUBBB  
@HWI-EAS443:3:6:765:837#0/1  
GGTGAACCTTTGTAAGTATGGAGTTCTCACTCACTGACCCG

+HWI-EAS443:3:6:765:837#0/1  
aaWaa`\_aaa`\_\_`a¥\_a`\_`¥\_[`\_\_`\_\_^¥`\_\_¥YUa  
@HWI-EAS443:3:6:856:324#0/1  
GGGTTTTCGGCTGAATCGAGAAAATTGCTTCTCATTGTTC  
+HWI-EAS443:3:6:856:324#0/1  
abaX`M¥[a\_Na`TXLL^V`^]V]]X]]\_`^¥]Q][¥a¥VB  
@HWI-EAS443:3:6:857:410#0/1  
GTTCAATCGGGCAACATCTTCTCCTATTTTCATCAAGTTC  
+HWI-EAS443:3:6:857:410#0/1  
]JOXY^^W\_YV¥Z¥WX^X]¥PYUS[^X][S¥XOXQ[WBB  
@HWI-EAS443:3:6:88:284#0/1  
CCCGAATGCACTATTGAAGCACCGATTTGAGATAATTGAA  
+HWI-EAS443:3:6:88:284#0/1  
abbbbabbbbabababa`a`a`a`aaa\_baaa`aaa`  
@HWI-EAS443:3:6:982:1076#0/1  
GACATTCTTTGGCTGGAAAGAGCCTAACATAGTCAAACCA  
+HWI-EAS443:3:6:982:1076#0/1  
ab\_abaaaaaaa`aaa`aa`]a¥]``^`\_a]^`UX\_  
@HWI-EAS443:3:6:98:1283#0/1  
TTTTCACCGAGTGCCCACTTCAATTGGCTTGTCTCTTCA  
+HWI-EAS443:3:6:98:1283#0/1  
aa\_\_baaa[]bXa`b`aa\_a\_]`aaYS[ZVW`^\_\_\_B  
@HWI-EAS443:3:70:1026:39#0/1  
TGGGGGGCTATATGAAGCAATCGAGGAGTGCCTGATTAAT  
+HWI-EAS443:3:70:1026:39#0/1  
\_bb`a\_aaa\_]`aba`a]aaa\_a\_aa^\_Ua\_]\_a^`a]\_\_  
@HWI-EAS443:3:70:1106:1759#0/1  
GAACGCCAAAATTGAACCATTCTTGAGGACGACACCACGC  
+HWI-EAS443:3:70:1106:1759#0/1  
H^ababbabba\_bbbbbabaabbbbbbbbabbbbababa`b  
@HWI-EAS443:3:70:1143:729#0/1  
GCACCAGAAAAAGTAGACTTTGATGACTGCAAAGATGTTG  
+HWI-EAS443:3:70:1143:729#0/1  
aaab`ba¥\_aa]`\_a`abbbabb`aa`aaaaYaa\_aZ`  
@HWI-EAS443:3:70:1177:588#0/1  
CTCGATTGCTTCATATAGCCCCCAAGATCGAAGGTTCCA  
+HWI-EAS443:3:70:1177:588#0/1  
\_WX`^]abaa\_UTaaZ\_R]\_HW\_]XVZV`]U\_BBBBBBBB  
@HWI-EAS443:3:70:1193:211#0/1  
ACCGATTTGAGATAATTGAAGGAAGAGACCGAATCATGGC  
+HWI-EAS443:3:70:1193:211#0/1  
\_TQZOX¥bb\_UQWU`a]aVQR\_W]`][¥UQXVT¥[¥a¥WF  
@HWI-EAS443:3:70:1226:1302#0/1  
GGGGGCTATATGAAGCAATCGAGGAGTGCCTGATTAATGA  
+HWI-EAS443:3:70:1226:1302#0/1  
a`UM^WaS]^VXYU\_]a`a`]NTQRQF¥]U[UPUX]XY[[  
@HWI-EAS443:3:70:1226:1876#0/1  
GCCTTGCTCAATGCATCCTGTGCAGCCATGGATGACTTTC  
+HWI-EAS443:3:70:1226:1876#0/1  
a¥`URI¥\_¥a`a\_aaRQ[[XH\_``^\_S]\_aN^VUQUZQ

@HWI-EAS443:3:70:1237:522#0/1  
GTCCAAAATGAATTCAATAAGGCATGTGAATTGACTGATT  
+HWI-EAS443:3:70:1237:522#0/1  
a`a`a\_\_[\`aaaa]a\_aa`a^^`a`Xa\_\_a^^]]W\_Y^]  
@HWI-EAS443:3:70:1250:457#0/1  
TCCAGCCTTGAAAACCTTTAGAGCCTATGTAGATGGATTCCG  
+HWI-EAS443:3:70:1250:457#0/1  
aaaaaaabbbbaa`a\_aaaba`aa\_a` `a^aa\_`aa\_\_^\_\_  
@HWI-EAS443:3:70:1252:250#0/1  
AGGCCGTATTTATGTACACTCCCTTCATTATGTATTCAGT  
+HWI-EAS443:3:70:1252:250#0/1  
abbaabaaabbbbabRb`a`aaaa^\_a\_aaa`aaa[\`a`  
@HWI-EAS443:3:70:127:1205#0/1  
TCCGATTTGTTTTCAAAGAATTCCTTGGTCATGTCTTTCT  
+HWI-EAS443:3:70:127:1205#0/1  
^a`Z`Z[ab^¥^` `Z^a` `ba`ba^^a\_aba`¥\_aa^aa  
@HWI-EAS443:3:70:138:806#0/1  
GGGGGCTATATGAAGCAATCGAGGAGTGCCTGATTAATGA  
+HWI-EAS443:3:70:138:806#0/1  
aaZ]WW`\_`a\_\_UUVR\_\_^^[Z[DZFYX[\`[\`^V¥^VV  
@HWI-EAS443:3:70:1433:361#0/1  
GTCAATTCACATGCCTTATTGAATTCATTTTGGACCCAGC  
+HWI-EAS443:3:70:1433:361#0/1  
^W^TX^SS\_ab]RPN¥X0\_Z\_RRUYNQ¥`^aXURX^`Z]Q  
@HWI-EAS443:3:70:1557:2024#0/1  
CTTCAGTCTCTTCAGCAGATTGAGAGCATGATTGAGGCCG  
+HWI-EAS443:3:70:1557:2024#0/1  
`\_^ZZ[F[ZW¥¥[^^¥W`^`\_`\_`¥TUX^]¥ZW`aV\_VRZ  
@HWI-EAS443:3:70:1603:843#0/1  
AGGGGTTTTCGGCTGAATCGAGAAAATTGCTTCTCATTGT  
+HWI-EAS443:3:70:1603:843#0/1  
abbbba]aaaa`Zaabaaaa\_b\_\_\_\_\_a`\_\_aa\_`]\_a`\_¥  
@HWI-EAS443:3:70:1637:1755#0/1  
AGACAATTGAAGAAAAATTTGAGATTACAGGAACTATGCG  
+HWI-EAS443:3:70:1637:1755#0/1  
aa¥` `abaW[aaaaaa`aaa\_aaa\_a`^`a]^a^\_aaV\_\_  
@HWI-EAS443:3:70:1734:1001#0/1  
GAACGCCAAAATTGAACCATTCTTGAGGACGACACCACGC  
+HWI-EAS443:3:70:1734:1001#0/1  
a]]U` `W\_a\_`\_`ZM`ZZ¥aaZa]YUY^[H]UY[Q¥aNVP  
@HWI-EAS443:3:70:1789:163#0/1  
GCCATGTTTCCGATTTGTTTTCAAAGAATTCCTTGGTCAT  
+HWI-EAS443:3:70:1789:163#0/1  
`a` `bbaab\_ab`aaaa^`a` ` `^`a`^a`WW\_` ` `¥U¥\_  
@HWI-EAS443:3:70:265:1317#0/1  
CTGGGTGACTCTCCGATTGGCCATGTTTCCGATTTGTTTT  
+HWI-EAS443:3:70:265:1317#0/1  
aab\_aWaaa^baaa\_]a`\_\_abYYX[\_a\_aZQ[`` `X` ``  
@HWI-EAS443:3:70:273:1377#0/1  
GAAAGAGCCTAACATAGTCAAACCACATGAGAAAGGCATA

+HWI-EAS443:3:70:273:1377#0/1  
aaX¥ababbabababa\_aa\_baa\_aaa\_]a^aa`Zaaaa  
@HWI-EAS443:3:70:327:1918#0/1  
ATCAGTCAATTCACATGCCTTATTGAATTCATTTTGGACC  
+HWI-EAS443:3:70:327:1918#0/1  
aab`^]aaa\_\_baa\_S¥aaa\_a^^U[T^\_a\_^XZSWS^\_Z  
@HWI-EAS443:3:70:407:1343#0/1  
GTTGGAGACCTTAAACAGTATGACAGTGATGAGCCAGAGC  
+HWI-EAS443:3:70:407:1343#0/1  
aa`\_]\_aWRXb[\_`YwbVaP`VUaZUSWP^WZPFG[a^a\_\_  
@HWI-EAS443:3:70:436:994#0/1  
GAGGGGTTTTCGGCTGAATCGAGAAAATTGCTTCTCATTG  
+HWI-EAS443:3:70:436:994#0/1  
aWXX¥\_Y```\_QQ^)`a`¥a[\_T\_W[[¥[WY[[YTNT[SY  
@HWI-EAS443:3:70:446:277#0/1  
CCGAACTTCTCCAGCCTTGAAAACCTTAGAGCCTATGTAG  
+HWI-EAS443:3:70:446:277#0/1  
`bbVbbba]abbbababb\_aaaaa`aaab`aaaaYbb  
@HWI-EAS443:3:70:479:1605#0/1  
GACCGAATCATGGCCTGGACAGTGGTGAACAGTATATGTA  
+HWI-EAS443:3:70:479:1605#0/1  
^abbba`bbbbbbbaaaab`[[bZabbaba\_abaa[[a  
@HWI-EAS443:3:70:548:54#0/1  
GGGCATGGAAATGAGGCGCTGCCTTCTCAGTCTCTCAG  
+HWI-EAS443:3:70:548:54#0/1  
\_W[YWSX`ZTTYXQ[\_YYYV^SSUJUYYYMXURVVNPQMRP  
@HWI-EAS443:3:70:569:1284#0/1  
GGGGTTTTCGGCTGAATCGAGAAAATTGCTTCTCATTGTT  
+HWI-EAS443:3:70:569:1284#0/1  
aa\_`P`Ua\_]`a`\_Y)`[Z\_]`X^`\_a``a`[¥\_[^ZZ  
@HWI-EAS443:3:70:56:515#0/1  
GTCGTCTCAAGAATGGTTCAATTTTGGCGTTCACCTCTT  
+HWI-EAS443:3:70:56:515#0/1  
`¥`b[aa\_a^aa`Z\_ba^`[`K[a\_aQV¥`¥¥¥DT]Q[^a  
@HWI-EAS443:3:70:598:732#0/1  
TTTCAAAGAATTCCTTGGTCATGTCTTTCTCTTTGACAGA  
+HWI-EAS443:3:70:598:732#0/1  
aa^[a`R`\_Ya]OY`\_aVX\_X\_aZ\_\_\_[\_^^Z\_a\_]\_^[^  
@HWI-EAS443:3:70:603:770#0/1  
GGGCACTCGGTGAAAATATGGCACCAGAAAAAGTAGACTT  
+HWI-EAS443:3:70:603:770#0/1  
Zaaaaa`¥a]a^U[a`[Y\_^\_\_\_`X¥X\_`a`]M^¥ZYa`  
@HWI-EAS443:3:70:604:1356#0/1  
ATGAGAAGCAATTTTCTCGATTGAGCCGAAAACCCCTCAA  
+HWI-EAS443:3:70:604:1356#0/1  
a`aa`abaa^aaaaaaaa`aaaa\_a\_``Z[aa\_`a^`\_]  
@HWI-EAS443:3:70:668:1170#0/1  
AAAGATGTTGGAGACCTTAAACAGTATGACAGTGATGAGC  
+HWI-EAS443:3:70:668:1170#0/1  
^ZW¥PMPL¥``S^`\_a[[TQVZ]^X[UUU\_]QUQPYNQL

@HWI-EAS443:3:70:740:967#0/1  
GGGGGCTATATGAAGCAATCGAGGAGTGCCTGATTAATGA  
+HWI-EAS443:3:70:740:967#0/1  
aba`ababaZ^aaa`aa\_a\_aaa`Z¥Q`]^`a\_\_`^a\_\_\_\_  
@HWI-EAS443:3:70:742:33#0/1  
GGCCATGTTTCCGATTTGTTTTCAAAGAATTCCTTGGTCA  
+HWI-EAS443:3:70:742:33#0/1  
abaaabb`^abab^abababaaaaaa`a\_baa\_aabb]aa  
@HWI-EAS443:3:70:752:1224#0/1  
ATTGCAGCAAACCTTGTAGTTTTCGATTTTCGGATCTTCCC  
+HWI-EAS443:3:70:752:1224#0/1  
\_abXab]`b`a]aaa`a]a]`a^`X^\_]XVYWDMI¥`G^]  
@HWI-EAS443:3:70:763:1244#0/1  
GCTCAATGCATCCTGTGCAGCCATGGATGACTTTCAGCTG  
+HWI-EAS443:3:70:763:1244#0/1  
aba^UW\_ZS¥R`b]RSaa`[`a]^\_a\_]a\_^YS[T]ZUP¥  
@HWI-EAS443:3:70:787:338#0/1  
GTATGGAGTTCTCACTCACTGACCCGAGACTGGAGCCACA  
+HWI-EAS443:3:70:787:338#0/1  
aaaaaaaaaaaaaaaa`aaaaaaaa\_a`^\_a``]^a]`^Y\_  
@HWI-EAS443:3:70:811:1285#0/1  
ATAAATACGGCCTTGCTCAATGCATCCTGTGCAGCCATGG  
+HWI-EAS443:3:70:811:1285#0/1  
VbU^]\_Y^][aa`\_a]aaaa¥bZSZ\_]¥N\_``]¥¥`Z`T  
@HWI-EAS443:3:70:829:25#0/1  
GGGGCATGGAAATGAGGCGCTGCCTTCTTCAGTCTCTTCA  
+HWI-EAS443:3:70:829:25#0/1  
^a^a^a`bbZ]Z]XVUV\_`\_`baa`[[```Z`RV\_¥[Y]W  
@HWI-EAS443:3:70:857:1234#0/1  
GCCCCATTTTCATCTTGATCTTGGAGTTCCATTGGTTCTC  
+HWI-EAS443:3:70:857:1234#0/1  
]abb`R^aabb`\_`b^babbbbbbbMab\_H\_`V^S`R]a  
@HWI-EAS443:3:70:888:220#0/1  
CAGATCTCTAGCAAGCTGGGTCCAAAATGAATTCATAAG  
+HWI-EAS443:3:70:888:220#0/1  
a\_bYa^aaabaaa```aaaaX`^^\_aa`a^`a\_][^a^a  
@HWI-EAS443:3:70:926:106#0/1  
TATAGGAACATGGGCCTCGACACTTGGCCTATCGCAGTCC  
+HWI-EAS443:3:70:926:106#0/1  
aaa`W`\_\_```]`¥F0aY\_aV\_\_\_^`\_`YN\_\_\_¥\_\_Y¥WYV  
@HWI-EAS443:3:70:93:2042#0/1  
GGGGTTTTCGGCTGAATCGAGAAAATTGCTTCTCATTGTT  
+HWI-EAS443:3:70:93:2042#0/1  
Z\_\_^H^aab]`ba]\_VS\_aa¥RWaa`aZ`^\_a¥`[^Y^LQ  
@HWI-EAS443:3:70:98:1040#0/1  
AGTAGGAGTCTATGGGATTCCTTTTCGTCAGTCCGAAAGAG  
+HWI-EAS443:3:70:98:1040#0/1  
aa^a^aaaa\_baaa`¥a\_a\_aa\_a`aa]`\_]`^a\_`^`[\_`\_\_^  
@HWI-EAS443:3:71:1021:308#0/1  
AGAAAAAGTAGACTTTGATGACTGCAAAGATGTTGGAGAC

+HWI-EAS443:3:71:1021:308#0/1  
\_`]]\_\_\_X]b`\_a^b¥ab`^a¥PQ[[S]aaY\_]UW^XF  
@HWI-EAS443:3:71:1070:380#0/1  
ATCATTAATCAGGCACTCCTCGATTGCTTCATATAGCCCC  
+HWI-EAS443:3:71:1070:380#0/1  
abaaaa`aaaba`aaaa\_`abaaabaaa\_aaaa``¥N\_]`  
@HWI-EAS443:3:71:1104:358#0/1  
TCCTCCTCATGCTTGCATATGTTCAATCGGGGCAACATC  
+HWI-EAS443:3:71:1104:358#0/1  
``aaaaVY^[OZ^YbbbaWK^^P\_Xa`Y[WXH`\_`\_aY^ZP  
@HWI-EAS443:3:71:114:1928#0/1  
ACCAGAAAAAGTAGACTTTGATGACTGCAAAGATGTTGGA  
+HWI-EAS443:3:71:114:1928#0/1  
¥`¥R\_T¥XYTDW]QZU]YR¥`P\_XYUJ[OGXVWTVTV\_Za  
@HWI-EAS443:3:71:1153:1559#0/1  
GCCTAACATAGTCAAACCACATGAGAAAGGCATAAATCCC  
+HWI-EAS443:3:71:1153:1559#0/1  
aaaaaa`¥`[ZX\_a`a^YY[SY[\_^`\_\_YRZ`\_\_a\_\_UOU  
@HWI-EAS443:3:71:1162:1577#0/1  
ATTGACTGATTCAAGCTGGATAGAACTTGATGAAATAGGA  
+HWI-EAS443:3:71:1162:1577#0/1  
``ZY^aaba¥S¥\_\_[\_a`b`Y\_]`a^a^`a\_`^`\_`\_]W  
@HWI-EAS443:3:71:117:861#0/1  
GGGAGACTTTGGTCGGCAAGCTTGCGCATAGTTCCTGTAA  
+HWI-EAS443:3:71:117:861#0/1  
\_\_ZZ]M^Z]]`aW^aa^aZ\_a\_]a\_aaWZU^QX^^^`^OSV  
@HWI-EAS443:3:71:1205:1373#0/1  
ATGAAATGGAAATCCGAATACATGAAACAACTTCCAAAT  
+HWI-EAS443:3:71:1205:1373#0/1  
aba`\_X`\_OS[Oaaaaa]Z[\_a]\_\_aY`\_a\_[^^\_]\_\_\_\_^  
@HWI-EAS443:3:71:1246:1314#0/1  
GCCTGAACAATGAGAAGCAATTTTCTCGATTGAGCCGAAA  
+HWI-EAS443:3:71:1246:1314#0/1  
\_W¥^]aaaa¥]\_[`\_aaaaYaa`\_a\_a`\_`W`aa[[\_UQW  
@HWI-EAS443:3:71:1247:1281#0/1  
AGAAATTTAGGCTTCTCTACCCCTGTTGTGTTACATATAC  
+HWI-EAS443:3:71:1247:1281#0/1  
`bababbabba`aa`aaaa\_aa`\_a^aa\_\_aa]\_aa\_aX  
@HWI-EAS443:3:71:1247:1790#0/1  
GATTGGCCATGTTTCCGATTTGTTTTCAAAGAATTCCTTG  
+HWI-EAS443:3:71:1247:1790#0/1  
Zabab`bb\_``abbab`X`bbbabbbabbb\_bbbabbaaa  
@HWI-EAS443:3:71:1266:333#0/1  
CATGGCCAATCGGAGAGTCACCCAGGGGAGTGGAGGAAGG  
+HWI-EAS443:3:71:1266:333#0/1  
aabb[Q`]a`a^DQ\_`¥aU\_\_`¥`\_X]E]Vaa\_a^SPIV  
@HWI-EAS443:3:71:1275:633#0/1  
GGGCGTGGTGTCTCGTCTCAAGAATGGTTCAATTTTGGCGT  
+HWI-EAS443:3:71:1275:633#0/1  
abaab`bb\_a\_\_a\_\_`a`a`¥aaa\_a\_``\_\_aaaa`Ya^

@HWI-EAS443:3:71:1306:276#0/1  
ATCGACGAACGGGGTGAATCAATAATTGTAGAATCTGGTG  
+HWI-EAS443:3:71:1306:276#0/1  
ababa`ba`X`a`Ma]]`\_`¥`W^a]SX\_\_¥]VR^\_]Q¥  
@HWI-EAS443:3:71:1307:190#0/1  
AAGAATTCCTTGGTCATGTCTTTCTTTGACAGAAGACT  
+HWI-EAS443:3:71:1307:190#0/1  
``ba\_aaa`aa]aTa`ab^aaaaYaabaa`Z^`a`\_a^^^  
@HWI-EAS443:3:71:1310:253#0/1  
CTGGGTCCAAAATGAATTCAATAAGGCATGTGAATTGACT  
+HWI-EAS443:3:71:1310:253#0/1  
`bbbb\_ababbbabbbba`bbbbbbbabbbbbbabbab  
@HWI-EAS443:3:71:1353:1994#0/1  
GGGGGCTATATGAAGCAATCGAGGAGTGCCTGATTAATGA  
+HWI-EAS443:3:71:1353:1994#0/1  
]FUX^TQ`T`RS^[^aa`]a^Pa`]^TU]]YZ]RG^G]N  
@HWI-EAS443:3:71:1375:610#0/1  
GAAATGGAAATCCGAATACATGAAACAAACTTCCAAATGT  
+HWI-EAS443:3:71:1375:610#0/1  
aba\_Z``LYa``[a`a\_a^a`aa^`a``\_``\_\_\_^`\_[Y  
@HWI-EAS443:3:71:1376:840#0/1  
GGCCTTGCTCAATGCATCCTGTGCAGCCATGGATGACTTT  
+HWI-EAS443:3:71:1376:840#0/1  
ababab`abbbabaabaab\_a`bbabaaaaaaaa\_aaa  
@HWI-EAS443:3:71:146:1828#0/1  
GATCCCAAGGACAAAGAACATGAAGAGAACAAGCCAATTG  
+HWI-EAS443:3:71:146:1828#0/1  
U^V[]\_XP\_Yb]^X\_[`\_bb]``bbb¥X\_b```¥`abaW]  
@HWI-EAS443:3:71:14:783#0/1  
CAAGAAATGGCCAGTAGGAGTCTATGGGATTCCTTTGTC  
+HWI-EAS443:3:71:14:783#0/1  
a`aaaZQ^]\_b^`[Y`a\_X`\_aa^`^`^T[^a\_\_`YSSN  
@HWI-EAS443:3:71:1513:1369#0/1  
TTTCATTCACTGGAGAGGAGATGGCCACCAAAGCGGACTA  
+HWI-EAS443:3:71:1513:1369#0/1  
aaa\_ababa^`ZV`a`aaX[\_\_\_^\_Y\_YV\_\_¥\_¥Y\_¥¥GZZ  
@HWI-EAS443:3:71:153:1672#0/1  
GGGGGCTATATGAAGCAATCGAGGAGTGCCTGATTAATGA  
+HWI-EAS443:3:71:153:1672#0/1  
aaaaaba¥[L[\_Wq]aa\_``¥N¥^X^Na^¥^¥NUR[TW^[  
@HWI-EAS443:3:71:1560:1721#0/1  
GGCCAATCGGAGAGTCACCCAGGGGAGTGGAGGAAGGCTC  
+HWI-EAS443:3:71:1560:1721#0/1  
aaSSa```X`\_OR]Ya]]VGP]Y]^XaUZRGUU^SW]SBB  
@HWI-EAS443:3:71:1584:1628#0/1  
GGTGAACCTTTGTAAGTATGGAGTTCTCACTCACTGACCCG  
+HWI-EAS443:3:71:1584:1628#0/1  
]YU\_¥S\_a^^`R`^R```[aa\_a`a`¥aaaaa^aa\_Ya  
@HWI-EAS443:3:71:1618:1489#0/1  
ACTCCCCTGGGTGACTCTCCGATTGGCCATGTTCCGATT

+HWI-EAS443:3:71:1618:1489#0/1  
URba`^b]Q^ZIb` `baaUJR`a` `YIN\_JDPbaHG]Gwa  
@HWI-EAS443:3:71:162:1486#0/1  
CATTAAATCAGGCACTCCTCGATTGCTTCATATAGCCCCC  
+HWI-EAS443:3:71:162:1486#0/1  
\_a^` `]¥aa`Z` `aaaa\_\_aa¥^\_` [VWa^]V` ]\_V[^\_\_  
@HWI-EAS443:3:71:1666:68#0/1  
GCTCATCACTGTCATACTGTTTAAGGTCTCCAACATCTTT  
+HWI-EAS443:3:71:1666:68#0/1  
abb^VR]a\_X]TV\_a\_[^` `a[\_]` aR^` ]X]\_SX\_N]^S  
@HWI-EAS443:3:71:1691:951#0/1  
GGAGTGTACATAAATACGGCCTTGCTCAATGCATCCTGTG  
+HWI-EAS443:3:71:1691:951#0/1  
\_`ab^b` `Zaaaa`aaaa`\_aa`^U^\_aa`^^aaZ[a\_[\_  
@HWI-EAS443:3:71:1714:1886#0/1  
GTCTCCAACATCTTTGCAGTCATCAAAGTCTACTTTTTCT  
+HWI-EAS443:3:71:1714:1886#0/1  
aPZ`Y`^MTYWYWQ\_\_\_\_][N[V`^^[U\_Z^YOP¥^` ]UUX  
@HWI-EAS443:3:71:1757:978#0/1  
CTGAAAGTCATCCATGGCTGCACAGGATGCATTGAGCAAG  
+HWI-EAS443:3:71:1757:978#0/1  
aab¥^` `T\_aa`aa\_\_\_\_` `]^`¥[Q[[]\_W]\_a\_UZPT]Z  
@HWI-EAS443:3:71:197:376#0/1  
CATTGTTCTCACATATAGGAACATGGGCCTCGACACTTG  
+HWI-EAS443:3:71:197:376#0/1  
ab`ab^S\_aa`X`aa]a¥Z¥0^\_` [ `[^\_¥`XV^aZ^\_\_  
@HWI-EAS443:3:71:206:288#0/1  
GGGTTTTCGGCTGAATCGAGAAAATTGCTTCTCATTGTTC  
+HWI-EAS443:3:71:206:288#0/1  
aaaX\_aaaa^aa]^a` `]^` `\_\_^^\_]]]]^]Y^]  
@HWI-EAS443:3:71:251:996#0/1  
GACGAAAGGAATCCCATAGACTCCTACTGGCCATTTCTTG  
+HWI-EAS443:3:71:251:996#0/1  
aabbbb\_`abbabba]^`^abaaaaaa¥H¥aZV^` ]` ]Y  
@HWI-EAS443:3:71:290:982#0/1  
CGATTGGCCATGTTTCCGATTTGTTTTCAAAGAATTCCTT  
+HWI-EAS443:3:71:290:982#0/1  
ab¥bbbbba\_aaSabab\_]Zbb¥aabb`^ba¥`a\_a]T`a  
@HWI-EAS443:3:71:297:173#0/1  
AAAGGAATCCCATAGACTCCTACTGGCCATTTCTTGCTT  
+HWI-EAS443:3:71:297:173#0/1  
a^Z`baa` `aaaa`aba\_\_`\_X` ^[[[\_[PY¥UZ¥XTQT^  
@HWI-EAS443:3:71:326:1806#0/1  
CGATTGGCCATGTTTCCGATTTGTTTTCAAAGAATTCCTT  
+HWI-EAS443:3:71:326:1806#0/1  
Z\_bba\_\_`a¥[[WY\_aa]`Q\_XZxa\_]`\_^a` `YX`a`^a  
@HWI-EAS443:3:71:340:269#0/1  
GGGGTTTTCGGCTGAATCGAGAAAATTGCTTCTCATTGTT  
+HWI-EAS443:3:71:340:269#0/1  
aba¥T]ab\_aa`b\_`][ab`aZZ^`a^Z^\_\_`aaaa`^¥\_



@HWI-EAS443:3:71:362:1684#0/1  
TGGCCACCAAAGCGGACTACACCCTTGACGAAGAGAGCAG  
+HWI-EAS443:3:71:362:1684#0/1  
`bbbbaabbaabba`\_a`baaaabaa^aa\_\_\_aa\_\_\_]`\_  
@HWI-EAS443:3:71:390:292#0/1  
GATTTGTTTTCAAAGAATTCCTTGGTCATGTCTTTCTCTT  
+HWI-EAS443:3:71:390:292#0/1  
a\_aaaa`aaaa\_aa`[]`\_\_a```Za`a^\_\_\_]\_\_\_^`\_  
@HWI-EAS443:3:71:427:648#0/1  
TGTAGCTCTGCTAGCACCTGCTTCCAAGCCATGAGGTAAT  
+HWI-EAS443:3:71:427:648#0/1  
abT`¥`aa`W¥GS\_\_`b\_TZYZZa\_R¥^`S[¥ZU[[00U`  
@HWI-EAS443:3:71:433:1608#0/1  
ATGCACTATTGAAGCACCGATTTGAGATAATTGAAGGAAG  
+HWI-EAS443:3:71:433:1608#0/1  
aVvVaa`WZaSS[¥T^\_a\_\_\_``\_WZa^`\_`^\_VVWX^[\_  
@HWI-EAS443:3:71:440:1381#0/1  
CGATTGGCCATGTTTCCGATTTGTTTTCAAAGAATTCCTT  
+HWI-EAS443:3:71:440:1381#0/1  
aaaa`\_`baa`Y^`aaa\_\_\_`^^^\_^\_\_\_\_^\_Z^\_`^`^\_  
@HWI-EAS443:3:71:488:1093#0/1  
GAGACCGAATCATGGCCTGGACAGTGGTGAACAGTATATG  
+HWI-EAS443:3:71:488:1093#0/1  
a¥YZba^¥Ya`aa`\_aa\_^`\_]a]N^\_N\_aa]V`W\_`\_ZS  
@HWI-EAS443:3:71:512:911#0/1  
GAGAAAGGCATAAATCCCAATTACCTCATGGCTTGGAAAGC  
+HWI-EAS443:3:71:512:911#0/1  
ab`^`]^abbbba]aa`aaba`baa¥aa`a\_aa`T¥X[S\_  
@HWI-EAS443:3:71:52:1093#0/1  
ACGGGGTGAATCAATAATTGTAGAATCTGGTGACCCGAAT  
+HWI-EAS443:3:71:52:1093#0/1  
aba`¥a^abaa`aaaaaaaa\_a`\_`\_]`\_\_\_X\_aa`Ua`\_  
@HWI-EAS443:3:71:531:1258#0/1  
GTTCCGGTGGGAGACTTTGGTCGGCAAGCTTGGCGCATAGTT  
+HWI-EAS443:3:71:531:1258#0/1  
\_Zbb^^^][NQXZ`aaaRY^aX¥aa¥aa\_^Va`\_]`a^U\_  
@HWI-EAS443:3:71:566:1180#0/1  
GAGAGGAGATGGCCACCAAAGCGGACTACACCCTTGACGA  
+HWI-EAS443:3:71:566:1180#0/1  
`ZZTZ^L^^`[`aaaa^T`a```]```aab]R\_`^¥`¥[Y  
@HWI-EAS443:3:71:56:1196#0/1  
GACATTCTTTGGCTGGAAAGAGCCTAACATAGTCAAACCA  
+HWI-EAS443:3:71:56:1196#0/1  
`baa`bbaaabbaab^T]ba````aaabaaba\_aX^ba^a  
@HWI-EAS443:3:71:585:682#0/1  
GGTGAACCTTTGTAAGTATGGAGTTCTCACTCACTGACCCG  
+HWI-EAS443:3:71:585:682#0/1  
`bU]X[¥`\_U\_Z\_S[ab[[\_P¥T¥aS`^`aab`X¥[¥¥a[  
@HWI-EAS443:3:71:59:801#0/1  
GGGGCTATATGAAGCAATCGAGGAGTGCCTGATTAATGAT



@HWI-EAS443:3:72:1048:481#0/1  
CGTCTCCACAACCTTGAGGGGTTTTCGGCTGAATCGAGAAA  
+HWI-EAS443:3:72:1048:481#0/1  
a`[T]`\_P]¥\_ZV¥`X^¥\_YU\_dW\_Q¥aNT\_]VJ¥Ra\_¥\_  
@HWI-EAS443:3:72:1067:687#0/1  
CATAAATACGGCCTTGCTCAATGCATCCTGTGCAGCCATG  
+HWI-EAS443:3:72:1067:687#0/1  
a`baa\_aaaba`aab[`a\_``\_a```a`\_a\_aa`a`¥a`a`  
@HWI-EAS443:3:72:1111:1156#0/1  
GTCTCTTCTTCAATTATCTCAAATCGGTGCTTCAATAGT  
+HWI-EAS443:3:72:1111:1156#0/1  
a\_ababbbbaaaaaabaa`aaaa``aaZaaaa]a\_`[]^  
@HWI-EAS443:3:72:1118:1178#0/1  
TCAAAGTCTACTTTTTCTGGTGCCATATTTTCACCGAGTG  
+HWI-EAS443:3:72:1118:1178#0/1  
abab]\_\_a`b`aaaaaaaa`aaaa`aaaa`a\_aa`\_\_a`  
@HWI-EAS443:3:72:1133:1052#0/1  
GCGCATAGTTCCTGTAATCTCAAATTTTTCTTCAATTGTC  
+HWI-EAS443:3:72:1133:1052#0/1  
abaaba`¥[aaaa`X]ab\_a`\_^Waabaaaa^`aaaa\_\_  
@HWI-EAS443:3:72:1152:1602#0/1  
ACTGTTTAAGGTCTCCAACATCTTTCAGTCATCAAAGTC  
+HWI-EAS443:3:72:1152:1602#0/1  
aaa\_\_a`aaa\_Ya``\_aa]a\_^`^\_\_a\_]\_a\_^`^`\_X\_  
@HWI-EAS443:3:72:1171:1230#0/1  
GAAAGGCATAAATCCCAATTACCTCATGGCTTGGGAAGCAG  
+HWI-EAS443:3:72:1171:1230#0/1  
a\_b^ababbbbaaaa`abbaa\_aaa``a`aa^N[Y^^PZZ  
@HWI-EAS443:3:72:1240:1251#0/1  
AGACTTTGGTCGGCAAGCTTGCATAGTTCCTGTAATCT  
+HWI-EAS443:3:72:1240:1251#0/1  
aaa`\_[]`\_\_Wa\_a]a`\_aX`\_\_\_\_\_`\_¥^\_]\_¥TWZ\_]`^  
@HWI-EAS443:3:72:1249:259#0/1  
GAGAAAGGCATAAATCCCAATTACCTCATGGCTTGGGAAGC  
+HWI-EAS443:3:72:1249:259#0/1  
a[baaaa\_\_aa`\_aaQ\_^`^aa`^`\_`\_]`^`^`^ZVU]ZM  
@HWI-EAS443:3:72:1259:1025#0/1  
TTCGGCTGAATCGAGAAAATTGCTTCTCATTGTTTCAGGCA  
+HWI-EAS443:3:72:1259:1025#0/1  
`a`bbX`\_PV``bYSSa^U]WDMYa\_\_`[I\_aZ¥\_M^^Y]  
@HWI-EAS443:3:72:1302:467#0/1  
ATAAATACGGCCTTGCTCAATGCATCCTGTGCAGCCATGG  
+HWI-EAS443:3:72:1302:467#0/1  
`aYaa¥]H[bWW\_\_XZ]aba`Z\_\_aaaa^G^[Zaa[``^`  
@HWI-EAS443:3:72:1422:1245#0/1  
CTGATTCAAGCTGGATAGAACTTGATGAAATAGGAGAAGA  
+HWI-EAS443:3:72:1422:1245#0/1  
a`bbabababaabb¥`b`¥b`aba¥a````aaab]aaaaaa  
@HWI-EAS443:3:72:1450:334#0/1  
CAATGAGAAGCAATTTTTCTCGATTGAGCCGAAAACCCCTC

+HWI-EAS443:3:72:1450:334#0/1  
`bba`ba`babbbbbb`bababb\_aa^`bbbb`\_Y\_Ya\_  
@HWI-EAS443:3:72:1454:793#0/1  
GGCATGGAAATGAGGCGCTGCCTTCTTCAGTCTCTTCAGC  
+HWI-EAS443:3:72:1454:793#0/1  
abaabbbabb^`aa`baaba`a`Va`Z^b\_Va^aaU^\_S  
@HWI-EAS443:3:72:1524:781#0/1  
GGCGAAGAGACAATTGAAGAAAAATTTGAGATTACAGGAA  
+HWI-EAS443:3:72:1524:781#0/1  
aa¥aZ¥\_QX`]]aY¥]Q`¥\_TNUSa[`]S]WVRK¥RPY  
@HWI-EAS443:3:72:1568:1291#0/1  
GTTTCCGATTTGTTTTCAAAGAATTCCTTGGTCATGTCTT  
+HWI-EAS443:3:72:1568:1291#0/1  
a\_\_a`aa`a`aX`a`aa`\_`\_^`\_]`[\_a`Y`^`^`]^\_\_  
@HWI-EAS443:3:72:1585:69#0/1  
GGGGGCTATATGAAGCAATCGAGGAGTGCCTGATTAATGA  
+HWI-EAS443:3:72:1585:69#0/1  
aaa`\_Ya`\_X`\_]`^\_]aa]Y[N¥`P^KTQS`aNT^WW\_\_R  
@HWI-EAS443:3:72:1589:250#0/1  
GGCCGAGTCTTCTGTCAAAGAGAAAGACATGACCAAGGAA  
+HWI-EAS443:3:72:1589:250#0/1  
abSYY[YTNaUFS`^Y[\_[aXZU]`[\_[\_Y\_¥UVV^WS]WU  
@HWI-EAS443:3:72:160:840#0/1  
CACTTGGCCTATCGCAGTCCTCAAGAGCATGTCTCCTATT  
+HWI-EAS443:3:72:160:840#0/1  
a`ZPGZX[Z]`V]^XY\_U][Z]]`a`\_Wa^]¥X[^TX[  
@HWI-EAS443:3:72:161:66#0/1  
TTGCGATATGTTCAATCGGGGCAACATCTTCTCCTATTTC  
+HWI-EAS443:3:72:161:66#0/1  
¥aaabaaabb\_Yaaa\_aa\_\_a]a`^^a0a\_¥a\_]`^a[`]  
@HWI-EAS443:3:72:163:577#0/1  
GTTTCCGATTTGTTTTCAAAGAATTCCTTGGTCATGTCTT  
+HWI-EAS443:3:72:163:577#0/1  
a`aaaa[`a`\_`a\_\_a\_a\_]X^a\_\_`\_\_^]`^`^`\_]`^`  
@HWI-EAS443:3:72:1678:1801#0/1  
CATTCTTTGGCTGGAAAGAGCCTAACATAGTCAAACCACA  
+HWI-EAS443:3:72:1678:1801#0/1  
ababbbbbb`bab`\_\_bbbbX[aaabbaa`^Y\_bbbaa\_a  
@HWI-EAS443:3:72:1722:194#0/1  
GGGGGCTATATGAAGCAATCGAGGAGTGCCTGATTAATGA  
+HWI-EAS443:3:72:1722:194#0/1  
]bab]`bbb\_bb`^`abba]b]a`Ra^aX`aa`\_\_`a\_aa  
@HWI-EAS443:3:72:1730:834#0/1  
CGATTGCCATGTTTCCGATTTGTTTTCAAAGAATTCCTT  
+HWI-EAS443:3:72:1730:834#0/1  
ababba`^`a`ZUbb\_b\_\_`aab`bbb`ab^^^`aba\_aa  
@HWI-EAS443:3:72:174:270#0/1  
CAAAGAGAACCGGTTTCATTGAAATTGGAGTAACACGGAGG  
+HWI-EAS443:3:72:174:270#0/1  
a]^`^`[\_]a`aa]^Z[```[\_\_\_Z]Z^\_W\_\_\_^]]^Z\_]

@HWI-EAS443:3:72:1773:1501#0/1  
GGGGGCTATATGAAGCAATCGAGGAGTGCCTGATTAATGA  
+HWI-EAS443:3:72:1773:1501#0/1  
a\_\_\_babbaaa^\_aaaa`[a`aa^a\_`\_\_aa\_`a\_\_`]a  
@HWI-EAS443:3:72:1780:1375#0/1  
ACCGAACTTCTCCAGCCTTGAAAACCTTTAGAGCCTATGTA  
+HWI-EAS443:3:72:1780:1375#0/1  
aaaaaaaaaaaaa\_a`aa`a`^^`\_a\_`a`a\_\_a\_a`V]  
@HWI-EAS443:3:72:205:1801#0/1  
TCTCATTTGAGAAATGATACTGATGTGGTGAACCTTTGTAA  
+HWI-EAS443:3:72:205:1801#0/1  
ababb`baaaab`aaababbaaa`a¥\_\_\_\_\_aa`a\_a\_^aY  
@HWI-EAS443:3:72:216:1962#0/1  
CACTTTCCCAATAGAGCCTTCCCTCCACTCCCCTGGGTGAC  
+HWI-EAS443:3:72:216:1962#0/1  
abaa`[baaba^aVaWaa]`a`^`a`¥]`^]S¥UWW^¥W  
@HWI-EAS443:3:72:234:1059#0/1  
GCCCTGCTCTTTCGTCAGGGTGTAGTCCGCTTTGGTGG  
+HWI-EAS443:3:72:234:1059#0/1  
abbbaaaabababaa¥`]aaaSa^^`^aaaa\_a\_a]W`^  
@HWI-EAS443:3:72:237:1135#0/1  
GAATTCATAAGGCATGTGAATTGACTGATTCAAGCTGGA  
+HWI-EAS443:3:72:237:1135#0/1  
^a`aa\_HY^aa^R^XaaTa\_aa\_aa\_a``\_¥¥]Y^Z[\_\_\_^  
@HWI-EAS443:3:72:266:616#0/1  
ATTGAATTCATTTGGACCCAGCTTGCTAGAGATCTGGGC  
+HWI-EAS443:3:72:266:616#0/1  
abbaaabaaabaaaa\_aa`a`^^`\_a`\_`Y\_`\_^\_^^]V\_  
@HWI-EAS443:3:72:338:1118#0/1  
ACTCCCTTCAATTATGTATTGAGCCTGCAGTGGGACA  
+HWI-EAS443:3:72:338:1118#0/1  
abR`aa`\_`a¥a`a`V^]W^^¥^`\_]a`^WZW¥W^]Y]]\_  
@HWI-EAS443:3:72:364:289#0/1  
CATCGACGAACGGGTGAATCAATAATTGTAGAATCTGGT  
+HWI-EAS443:3:72:364:289#0/1  
ababbaaa`bX^aaaGb]U[aaaa\_\_aa\_b`a`Z\_\_a\_V  
@HWI-EAS443:3:72:37:89#0/1  
ATGAAACAAACTTCCAAATGTGTGCATATTGCAGCAAAC  
+HWI-EAS443:3:72:37:89#0/1  
^¥bbYIZ¥YFORVYV^W\_aa[^YZYaXaa`aY[¥JOTSFR  
@HWI-EAS443:3:72:389:1090#0/1  
GGGGGCTATATGAAGCAATCGAGGAGTGCCTGATTAATGA  
+HWI-EAS443:3:72:389:1090#0/1  
aaababbabab\_a]`bbba`^^`a\_aa\_aaaaaaaaaaa\_aaa  
@HWI-EAS443:3:72:390:1810#0/1  
ATGAAATGGAAATCCGAATACATGAAACAAACTTCCAAAT  
+HWI-EAS443:3:72:390:1810#0/1  
\_a`a`[\_]`^]\_aa^\_a]`^a]]^\_a\_a\_\_]\_`[^U]^  
@HWI-EAS443:3:72:452:197#0/1  
CATGAAATGAGGCGCTGCCTTCTTCAGTCTCTTCAGCAG

+HWI-EAS443:3:72:452:197#0/1  
a]a]aX\_aaaa[Z^aaaaVXUa`\_`^\_¥Q\_\_\_\_\_YRRL\_¥¥  
@HWI-EAS443:3:72:472:387#0/1  
GGGGCATGGAAATGAGGCGCTGCCTTCTTCAGTCTCTTCA  
+HWI-EAS443:3:72:472:387#0/1  
aaa`aba`\_aaa`\_\_a\_`a¥`\_`\_aa\_`\_^[a\_\_^V^  
@HWI-EAS443:3:72:485:189#0/1  
GGCATGGAAATGAGGCGCTGCCTTCTTCAGTCTCTTCAGC  
+HWI-EAS443:3:72:485:189#0/1  
aaaa`bba`¥^a^`a`[]Z`\_\_Y\_T\_aZU]W[UY[[TR[¥  
@HWI-EAS443:3:72:494:1351#0/1  
GGCTCCAGTCTCGGTCAGTGAGTGAGAACTCCATACTTA  
+HWI-EAS443:3:72:494:1351#0/1  
`ab`b\_Waabaa]\_a\_`WWX\_a\_T[`^`aaaaaaaa`aaa  
@HWI-EAS443:3:72:538:237#0/1  
GGGGGCTATATGAAGCAATCGAGGAGTGCCTGATTAATGA  
+HWI-EAS443:3:72:538:237#0/1  
a\_Ra]^a\_]abaaaaaaaa\_a[] [X`¥^^^\_a]¥^`^ZV¥  
@HWI-EAS443:3:72:562:593#0/1  
TCACTTCTTTTGACATTTGGGAAAGCTTGCCCTCAATGCA  
+HWI-EAS443:3:72:562:593#0/1  
]bbba`\_`\_]\_Y``aab`aa]baabaaa\_aaa`a¥aa```a  
@HWI-EAS443:3:72:571:311#0/1  
CAGCTTGCTAGAGATCTGGGCTCTGGCTCATCACTGTCAT  
+HWI-EAS443:3:72:571:311#0/1  
abaXWROX\_Ta\_SXHPQQZNP]WS[`^[X\_SRX[ZYPV[V  
@HWI-EAS443:3:72:571:326#0/1  
GACCCGAGTCACGAGGGGAGGGAATACCACTATATGATG  
+HWI-EAS443:3:72:571:326#0/1  
`bbbabababbababab``abba\_aabaababbabaaaaa  
@HWI-EAS443:3:72:581:567#0/1  
CCTCCTCATGCTTGCATATGTTCAATCGGGCAACATCT  
+HWI-EAS443:3:72:581:567#0/1  
`a^R\_`a`^`a^aaW^`aa`^aaXaaaa]X`\_`\_]a^Z]]  
@HWI-EAS443:3:72:609:1985#0/1  
GTGAACCTTTGTAAGTATGGAGTTCTCACTCACTGACCCGA  
+HWI-EAS443:3:72:609:1985#0/1  
^`]bU`ba^`X`ba[¥a`X¥aV\_a`abaaaa`U`\_\_aa^  
@HWI-EAS443:3:72:644:592#0/1  
TATAGCCCCCAAGATCGAAGTTCCAGTTCCAGTTGT  
+HWI-EAS443:3:72:644:592#0/1  
ababaaaaaaaaa]`\_``aa\_`\_Q\_Z^[^\_W^[^¥`\_W^S[  
@HWI-EAS443:3:72:674:942#0/1  
GGTGAACCTTTGTAAGTATGGAGTTCTCACTCACTGACCCG  
+HWI-EAS443:3:72:674:942#0/1  
a`a`Ybabbbb\_bba\_baa`aaaabaabaaaaaaaa`aaa  
@HWI-EAS443:3:72:676:330#0/1  
GGCACTCCTCGATTGCTTCATATAGCCCCCAAGATCGAA  
+HWI-EAS443:3:72:676:330#0/1  
]^Z`Ka`^[XZMXa]QT`PYWZbR¥`aaaaaPZMPWXYP











@HWI-EAS443:3:73:951:17#0/1  
TAAATCCCAATTACCTCATGGCTTGGAAAGCAGGTGCTAGC  
+HWI-EAS443:3:73:951:17#0/1  
ababaa``\_aaaa\_\_````aa`aaZ`V[^PV[]NTQTQTO  
@HWI-EAS443:3:73:973:684#0/1  
AGCAGGTGCTAGCAGAGCTACAGGACATTGAAAATGAAGA  
+HWI-EAS443:3:73:973:684#0/1  
ZZXX`ZHV`ab¥\_\_¥¥¥a`YT¥b]a`]^`a]]`aa]Y]ZZ  
@HWI-EAS443:3:73:977:1104#0/1  
GACATTCTTTGGCTGGAAAGAGCCTAACATAGTCAAACCA  
+HWI-EAS443:3:73:977:1104#0/1  
PUUMY`¥abaa``bbaa]PXZ`\_a¥\_\_]aa]T^aaab]]a  
@HWI-EAS443:3:73:98:1124#0/1  
CCCCGATTGAACATATCGCAAGCATGAGGAGGAACTATTT  
+HWI-EAS443:3:73:98:1124#0/1  
abbb]M¥IOU`WZZS\_]R]RYS^U]]R]\_`WWW[WNPXTL  
@HWI-EAS443:3:73:994:227#0/1  
AGTGGGCACTCGGTGAAAATATGGCACCAAGAAAAGTAGA  
+HWI-EAS443:3:73:994:227#0/1  
aaabaaaa]a\_aa]a`aaaa\_aaa]\_R^\_`^\_`\_\_W\_YY  
@HWI-EAS443:3:74:1023:700#0/1  
GAAGATCCCAAGGACAAAGAACATGAAGAGAACAAGCCAA  
+HWI-EAS443:3:74:1023:700#0/1  
aaaaaab`a\_`aaa\_`aa^Y`^abaZ`a`aa\_\_a^a]¥`^  
@HWI-EAS443:3:74:106:1674#0/1  
CCCCGTTCGTCGATGAAATGGAAATCCGAATACATGAAAC  
+HWI-EAS443:3:74:106:1674#0/1  
a\_a`]P[a`Sa[[WZaZ]^T[`XY]`¥V^]Z`^¥T]^\_\_]  
@HWI-EAS443:3:74:1117:175#0/1  
ACCCCGTTTCGTCGATGAAATGGAAATCCGAATACATGAAA  
+HWI-EAS443:3:74:1117:175#0/1  
a]aa\_a`aaaV`a`\_aa`\_\_a\_]\_`YJ[a\_^\_\_^^]\_^  
@HWI-EAS443:3:74:1203:1299#0/1  
GGGGTTTTCGGCTGAATCGAGAAAATTGCTTCTCATTGTT  
+HWI-EAS443:3:74:1203:1299#0/1  
abbbT[`a\_Zaaaba\_aabaa`X`a\_a`\_`[`Y`a^`¥`U\_  
@HWI-EAS443:3:74:1206:1030#0/1  
ATTCGATTTCCATTTTCATCGACGAACGGGGTGAATCAAT  
+HWI-EAS443:3:74:1206:1030#0/1  
\_bb`b`bbbaabaaaaabaab^aaaaaba]aa\_a]\_\_`  
@HWI-EAS443:3:74:1215:1265#0/1  
GAAATGGCCAGTAGGAGTCTATGGGATTCCTTTCGTCAGT  
+HWI-EAS443:3:74:1215:1265#0/1  
aa¥a```a`a^RT]XS`VL¥\_\_`\_¥S^\_P[^`\_\_¥PUZZW  
@HWI-EAS443:3:74:1281:1405#0/1  
AGCAGGTGCTAGCAGAGCTACAGGACATTGAAAATGAAGA  
+HWI-EAS443:3:74:1281:1405#0/1  
abbaY^F[]^Y\_``aaaab`aaYTW`^a^``[a\_a\_\_^`  
@HWI-EAS443:3:74:1316:1665#0/1  
CATGTTTCCGATTTGTTTTCAAAGAATTCCTTGGTCATGT

+HWI-EAS443:3:74:1316:1665#0/1  
N`^a`abbabbbaabbbbbbbaa`bba`a\_aabbb\_¥aabb  
@HWI-EAS443:3:74:1388:400#0/1  
GGGGGGCTATATGAAGCAATCGAGGAGTGCCTGATTAATG  
+HWI-EAS443:3:74:1388:400#0/1  
a\_]T¥SXTaa\_\_a]YNR]\_^Z^^\_[WUNZ\_¥U`T[VVVQW  
@HWI-EAS443:3:74:145:1829#0/1  
CAAGGACAAAGAACATGAAGAGAACAAGCCAATTGAAGTG  
+HWI-EAS443:3:74:145:1829#0/1  
Z^\_a``bbb`bbbbbbZ\_b^Zbbb\_bbbb\_aababaWa  
@HWI-EAS443:3:74:1535:1790#0/1  
TGTGGTTGACTATGTTAGGCTCTTCCAGCCAAAGAATG  
+HWI-EAS443:3:74:1535:1790#0/1  
aa]a¥`a¥UY]`aa\_¥TzZa¥XZaa¥¥WYPO`a]]W\_¥X  
@HWI-EAS443:3:74:161:696#0/1  
AACTTTGTAAGTATGGAGTTCTCACTCACTGACCCGAGAC  
+HWI-EAS443:3:74:161:696#0/1  
WS\_``\_`U¥\_]T`¥X¥¥]WT]Ybaa``Za]RT^`[`Y`¥V  
@HWI-EAS443:3:74:1627:1401#0/1  
CAGCTTGCTAGAGATCTGGGCTCTGGCTCATCACTGTCAT  
+HWI-EAS443:3:74:1627:1401#0/1  
a\_\_`aabbb]babbaabb¥¥Za^a``Q^a\_[¥\_a\_aa\_aaa  
@HWI-EAS443:3:74:1680:1915#0/1  
AGTCAATTCACATGCCTTATTGAATTCATTTTGGACCCAG  
+HWI-EAS443:3:74:1680:1915#0/1  
¥`]¥ba`bbbaaa`\_¥abaaabaa`aa`aaa\_aa`¥XUZY  
@HWI-EAS443:3:74:1756:1310#0/1  
CATAAATCCCAATTACCTCATGGCTTGAAGCAGGTGCTA  
+HWI-EAS443:3:74:1756:1310#0/1  
abbbbabbabbbbbbabbbbbba`aaaT[¥ba¥`^`Y¥¥[^  
@HWI-EAS443:3:74:1770:711#0/1  
CAGGGCAAGAATCAAACTAGGCTTTTCACTATAAGACAA  
+HWI-EAS443:3:74:1770:711#0/1  
ab¥¥bbaaba`bbb`aa`baa`Iabbb^a¥bbaaa```ba  
@HWI-EAS443:3:74:198:164#0/1  
AGTCAATTCACATGCCTTATTGAATTCATTTTGGACCCAG  
+HWI-EAS443:3:74:198:164#0/1  
aaa\_H]bZ`bbZbb`aaZXaa\_YWa[\_aa\_\_a\_Z`^[ZZ  
@HWI-EAS443:3:74:259:1920#0/1  
CAGCAAACCTTGTAGTTTCGATTTTCGGATCTTCCCATA  
+HWI-EAS443:3:74:259:1920#0/1  
aaUaa¥U]\_a\_\_\_\_\_T[^^aXU]]^^\_POGUVV[VSZ[[Y[  
@HWI-EAS443:3:74:268:692#0/1  
GGGCAACATCTTCTCCTATTTTCATCAAGTTCTATCCAGCT  
+HWI-EAS443:3:74:268:692#0/1  
\_bbb`bbababbbbbb`baabbaba]b`aa`]aaaaaaa  
@HWI-EAS443:3:74:276:614#0/1  
GAGAAAGGCATAAATCCCAATTACCTCATGGCTTGAAGC  
+HWI-EAS443:3:74:276:614#0/1  
aaa`aaa`aaaa\_\_```\_aa`aa\_\_\_\_^`\_\_`\_]H]U^TW

@HWI-EAS443:3:74:276:775#0/1  
ACTCGGTGAAAATATGGCACCAGAAAAAGTAGACTTTGAT  
+HWI-EAS443:3:74:276:775#0/1  
Z¥Z`bTY^TabXMYW[a]a^V^`¥]R[Y^^[[^][^Z  
@HWI-EAS443:3:74:359:996#0/1  
GAGAAAGGCATAAATCCCAATTACCTCATGGCTTGGAAAGC  
+HWI-EAS443:3:74:359:996#0/1  
aa`aba\_a`babaa`a\_]aaa``\_]\_aaa¥¥a]\_WMU\_\_R  
@HWI-EAS443:3:74:385:394#0/1  
AATAATTGTAGAATCTGGTGACCCGAATGCACTATTGAAG  
+HWI-EAS443:3:74:385:394#0/1  
aabb`bbaabbbbaabba^baa`aaaaaaaa`baaa`a\_a  
@HWI-EAS443:3:74:397:1724#0/1  
CAGCTTGCTAGAGATCTGGGCTCTGGCTCATCACTGTCAT  
+HWI-EAS443:3:74:397:1724#0/1  
a`Z\_]a\_]VZ\_] [PW`b¥X^`]b¥¥[]`Y]V\_X]  
@HWI-EAS443:3:74:449:847#0/1  
ATAAGGCATGTGAATTGACTGATTCAAGCTGGATAGAAGT  
+HWI-EAS443:3:74:449:847#0/1  
a`^`aaa\_aa`aaa\_aaaaaa\_\_`\_a\_`a`^^\_a^a^`  
@HWI-EAS443:3:74:598:1237#0/1  
CTCATTTGAGAAATGATACTGATGTGGTGAACTTTGTAAG  
+HWI-EAS443:3:74:598:1237#0/1  
aa`¥`^b^aa`^`baaabaa`Z`b][FXa```a\_\_^\_]a`  
@HWI-EAS443:3:74:599:1207#0/1  
CAAGCCATGAGGTAATTGGGATTTATGCCTTTCTCATGTG  
+HWI-EAS443:3:74:599:1207#0/1  
`a^a][```\_\_QY[^``\_\_Z\_\_`Ya`\_``[^^^```]\_  
@HWI-EAS443:3:74:610:625#0/1  
GAATGGTTCAATTTTGGCGTTCACCTTCTTTTGACATTTGG  
+HWI-EAS443:3:74:610:625#0/1  
abbaba]bb`bbaa`aZ\_Z^G¥UYQ]abaaY[a``¥P[  
@HWI-EAS443:3:74:644:128#0/1  
TCCTGTAGCTCTGCTAGCACCTGCTTCCAAGCCATGAGGT  
+HWI-EAS443:3:74:644:128#0/1  
abb`\_`aa```\_] [[V`a\_]\_\_`^\_\_VUUXYPUQQ`X`^R  
@HWI-EAS443:3:74:738:1063#0/1  
GGCATGGAATGAGGCGCTGCCTTCTTCAGTCTCTTCAGC  
+HWI-EAS443:3:74:738:1063#0/1  
`abba\_Z\_`bbbaabbbbb`aaaaa`aa```baa`^]a  
@HWI-EAS443:3:74:774:671#0/1  
CAAAGAATTCCTTGGTCATGTCTTTCTTTGACAGAAGA  
+HWI-EAS443:3:74:774:671#0/1  
aa`abbaaababbba\_baabaababab`aaaa`aaaaaa  
@HWI-EAS443:3:74:790:619#0/1  
GGCCAGTAGGAGTCTATGGGATTCCTTTTCGTCAGTCCGAA  
+HWI-EAS443:3:74:790:619#0/1  
abb`ab`bba]a`ab`bbbb^`\_QZaba`b\_Xa`a¥X^aa  
@HWI-EAS443:3:74:818:462#0/1  
CATTCTTTGGCTGGAAAGAGCCTAACATAGTCAAACCACA

+HWI-EAS443:3:74:818:462#0/1  
abbbbbbaa`babbaaba`aabaa\_baaba`aaa`[]a  
@HWI-EAS443:3:74:822:1459#0/1  
GGCCAATCGGAGAGTCACCCAGGGGAGTGGAGGAAGGCTC  
+HWI-EAS443:3:74:822:1459#0/1  
a`aabbaa]Za\_a0]aaaaZXRW[SaW^a¥`\_^]^^¥¥W  
@HWI-EAS443:3:74:830:873#0/1  
TGGGGCATGGAAATGAGGCGCTGCCTTCTTCAGTCTCTTC  
+HWI-EAS443:3:74:830:873#0/1  
abab\_a`\_a[]`aaa`\_baa`a`aa\_a\_\_[a¥\_\_`\_\_\_\_  
@HWI-EAS443:3:74:895:676#0/1  
GAAGTTCGGTGGGAGACTTTGGTCGGCAAGCTTGCGCATA  
+HWI-EAS443:3:74:895:676#0/1  
aaab`Z`aUaa`]a[a```aaVa`a`a`\_`\_[\_^a¥¥¥^  
@HWI-EAS443:3:74:915:1195#0/1  
ATTGAAAATGAAGAGAAGATCCCAAGGACAAAGAACATGA  
+HWI-EAS443:3:74:915:1195#0/1  
aa`^W¥a]a`aaa^)`\_`[aa\_aa`Y^Z^aa`\_a[\_`]]  
@HWI-EAS443:3:74:923:1527#0/1  
GACTGATTCAAGCTGGATAGAACTTGATGAAATAGGAGAA  
+HWI-EAS443:3:74:923:1527#0/1  
abbbba[aabaabaaa\_Yaabababaaaaaaaaa`aaaaa  
@HWI-EAS443:3:74:937:696#0/1  
CCGATTTGTTTTCAAAGAATTCCTTGGTCATGTCTTTCTC  
+HWI-EAS443:3:74:937:696#0/1  
aabbbbbbb\_bbbabbbbbbabababbbbaabbbbbabbb\_b`  
@HWI-EAS443:3:74:970:492#0/1  
CGAACTTCTCCAGCCTTGAAAACCTTTAGAGCCTATGTAGA  
+HWI-EAS443:3:74:970:492#0/1  
ababaab`babbababbbabab`bbbaaaaa^babb\_aaa  
@HWI-EAS443:3:75:1116:802#0/1  
CAGGAATATGCGCAAGCTTGCCGACCAAAGTCTCCCACC  
+HWI-EAS443:3:75:1116:802#0/1  
abbab]Zbabbabaaabbbbbaaab\_a\_a\_ba`aa^aa^a  
@HWI-EAS443:3:75:1127:686#0/1  
ATTTTCACCGAGTGGCCACTTCAATTGGCTTGTCTCTTC  
+HWI-EAS443:3:75:1127:686#0/1  
\_bb\_[`b\_^bb`WbaabaRabab]a`ab\_a\_WYX]\_^aWP  
@HWI-EAS443:3:75:1408:843#0/1  
GCAAGAATCAAAACTAGGCTTTTCACTATAAGACAAGAAA  
+HWI-EAS443:3:75:1408:843#0/1  
`abbb`bbbbbabab`abbabbabaabb`abaabaaaab  
@HWI-EAS443:3:75:151:1663#0/1  
ATAAATCCCAATTACCTCATGGCTTGAAGCAGGTGCTAG  
+HWI-EAS443:3:75:151:1663#0/1  
aa¥Q\_aaa]Qa¥a`^¥`\_U^`^\_\_\_NZI[Z^]]¥OUUVVB  
@HWI-EAS443:3:75:1574:42#0/1  
GAATGCACTATTGAAGCACCGATTTGAGATAATTGAAGGA  
+HWI-EAS443:3:75:1574:42#0/1  
aababab\_b`a`^Ybb¥][a^bbbb¥aWbaaaabaabab

@HWI-EAS443:3:75:1602:574#0/1  
GGCATGGAAATGAGGCGCTGCCTTCTTCAGTCTCTTCAGC  
+HWI-EAS443:3:75:1602:574#0/1  
`b[QTab]``aa\_aYU\_\_\_\_\_¥a\_QY`\_]a`VYQ\_¥NYXP  
@HWI-EAS443:3:75:1605:798#0/1  
CCTGGGTGACTCTCCGATTGGCCATGTTTCCGATTTGTTT  
+HWI-EAS443:3:75:1605:798#0/1  
``]babIa`H\_SbaWa0SZZ0¥[¥`]\_^aUT\_H]]^\_NZ`  
@HWI-EAS443:3:75:1693:775#0/1  
GAACACAGTATTTTTCCCATTTGTGTGGCTCCAGTCTCGG  
+HWI-EAS443:3:75:1693:775#0/1  
[b\_bbabbabbabbba[aababba\_aa[\_b\_\_\_\_baS``\_b  
@HWI-EAS443:3:75:1695:176#0/1  
ATTTTCATCGACGAACGGGGTGAATCAATAATTGTAGAATC  
+HWI-EAS443:3:75:1695:176#0/1  
\_b\_bab`]]`Laa`aa`a\_S[Z]]G[\_a``baa^\_VV`\_Z  
@HWI-EAS443:3:75:1715:956#0/1  
GTTCTCACTCACTGACCCGAGACTGGAGCCACACAAATGG  
+HWI-EAS443:3:75:1715:956#0/1  
aPYXT`TJ\_LQH]UZ``a\_BBBBBBBBBBBBBBBBBBBB  
@HWI-EAS443:3:75:1718:277#0/1  
CTGCACACTTTCCCAATAGAGCCTTCTCCACTCCCCTGG  
+HWI-EAS443:3:75:1718:277#0/1  
]`a^a```bbb^ZZ^bbbbbb^Z\_\_b\_X\_a\_aa^\_^ZR[ab  
@HWI-EAS443:3:75:239:577#0/1  
TACATATACTGTTCACTGTCCAGCCATGATTCGGTC  
+HWI-EAS443:3:75:239:577#0/1  
`\_aaa¥XJ¥Za^aa`¥^YX]a)`a^QW\_`[¥YV]VVQNOY  
@HWI-EAS443:3:75:277:840#0/1  
AATCAGGCCTCCTCGATTGCTTCATATAGCCCCCAAGA  
+HWI-EAS443:3:75:277:840#0/1  
aZZaa[OZL]aUPT\_Y\_\_[\_a[\_\_\_\_[]\_¥Y¥[]RNU^¥YYU  
@HWI-EAS443:3:75:27:559#0/1  
CACTGTCATACTGTTAAGGTCTCCAACATCTTTGCAGTC  
+HWI-EAS443:3:75:27:559#0/1  
abbbbabbbaabb`ab¥¥^b`abbababb¥b`aaaab`a  
@HWI-EAS443:3:75:29:1813#0/1  
CCACTCCCCTGGGTGACTCTCCGATTGGCCATGTTTCCGA  
+HWI-EAS443:3:75:29:1813#0/1  
abaa\_aaaa]\_URFX¥`^a^\_\_WUW¥VW\_`VUSUSUTWUT  
@HWI-EAS443:3:75:31:1385#0/1  
GCTTGCATATGTTCAATCGGGCAACATCTTCTCCTATT  
+HWI-EAS443:3:75:31:1385#0/1  
aba`Y^baa`aa`aaa^a^¥``aa\_a``aaaa\_a`\_\_a  
@HWI-EAS443:3:75:389:583#0/1  
CATGTTTCCGATTTGTTTTCAAAGAATTCCTTGGTCATGT  
+HWI-EAS443:3:75:389:583#0/1  
abbabbabbabbabbabbabbabbabbabbabbabbabbabb`bbb`a  
@HWI-EAS443:3:75:393:1069#0/1  
TGGAGACCTTAAACAGTATGACAGTGATGAGCCAGAGCCC

+HWI-EAS443:3:75:393:1069#0/1  
`babaZabaW\_\_X\_aa¥baaa\_\_a\_a¥\_a` [¥\_aVIWJU`  
@HWI-EAS443:3:75:397:1049#0/1  
GCACACTTTCCCAATAGAGCCTTCCTCCACTCCCCTGGGT  
+HWI-EAS443:3:75:397:1049#0/1  
]bbba`L¥`bb^]aa\_`a`aX`a\_Z`]aa\_aR`\_\_G  
@HWI-EAS443:3:75:437:1142#0/1  
CAGCAGGAACCTTTGACCGCTGATGGCAAAGAGGCCATCA  
+HWI-EAS443:3:75:437:1142#0/1  
`aaaV`\_a`aa`aa`a^`^^`^a]`Y^¥]^`¥[Z  
@HWI-EAS443:3:75:496:1199#0/1  
GTCAAACCACATGAGAAAGGCATAAATCCCAATTACCTCA  
+HWI-EAS443:3:75:496:1199#0/1  
a]a^aa\_]aa^^\_VT^aabb`\_U^a`aaaa]aaa`a  
@HWI-EAS443:3:75:508:70#0/1  
TCCACAACCTTGAGGGTTTTCGGCTGAATCGAGAAAATTG  
+HWI-EAS443:3:75:508:70#0/1  
ab]Za`U`bb]SZbbbaa[baZb\_T`H][abY`aaa]X  
@HWI-EAS443:3:75:549:904#0/1  
GGGGCATGGAATGAGGCGCTGCCTTCTTCAGTCTCTTCA  
+HWI-EAS443:3:75:549:904#0/1  
a\_]aZVbbb¥X]Za¥0^aa`aaa\_\_`]\_a^\_`¥^]¥[  
@HWI-EAS443:3:75:583:500#0/1  
CATTCTTTGGCTGGAAGAGCCTAACATAGTCAAACCACA  
+HWI-EAS443:3:75:583:500#0/1  
a^bbabb]abbba^K\_b¥baZ]a]`a^baZbbbbb`aaab  
@HWI-EAS443:3:75:590:1007#0/1  
CTTGGGATCTTCTTTCATTTTCAATGTCCTGTAGCTCTG  
+HWI-EAS443:3:75:590:1007#0/1  
aaabab^]\_bbabbbb\_^\_baabbbb^bb`¥`\_abba`a  
@HWI-EAS443:3:75:636:1018#0/1  
CTCATTTGAGAAATGATACTGATGTGGTGAACCTTGTAAG  
+HWI-EAS443:3:75:636:1018#0/1  
aa\_a¥^\_]W\_\_X^a\_¥^\_ZaaX`a][a`][aaa¥¥`^]  
@HWI-EAS443:3:75:725:815#0/1  
GGGTTTTCGGCTGAATCGAGAAAATTGCTTCTCATTGTTC  
+HWI-EAS443:3:75:725:815#0/1  
a`bIbbaaaabbaababaa\_aaaaabaaaaaaaaa^`a  
@HWI-EAS443:3:75:764:1367#0/1  
GTTTCCGATTTGTTTTCAAAGAATTCCTTGGTCATGTCTT  
+HWI-EAS443:3:75:764:1367#0/1  
aaabaaba^bab`b`baabaa]\_aa\_]aaa¥^`a`\_W`a  
@HWI-EAS443:3:75:767:310#0/1  
AATTGAAGGAAGAGACCGAATCATGGCCTGGACAGTGGTG  
+HWI-EAS443:3:75:767:310#0/1  
a`bbab^V`Zaaaa]ab`^`^a`aa\_Za`Y`a^`\_Z`  
@HWI-EAS443:3:75:780:1064#0/1  
GGGGGCTATATGAAGCAATCGAGGAGTGCCTGATTAATGA  
+HWI-EAS443:3:75:780:1064#0/1  
][\_`a`a¥Z\_`bba^]`ba^]`W`R`X[\_`a`a]\_aa`^a^



@HWI-EAS443:3:75:803:524#0/1  
CAAGCCAATTGAAGTGGGCACTCGGTGAAAATATGGCACC  
+HWI-EAS443:3:75:803:524#0/1  
ab^b\_a^aaabaa]Sb\_\_¥b\_a`b]W`\_aaa][Ya`\_Y¥]  
@HWI-EAS443:3:75:863:1499#0/1  
CGATTGGCCATGTTTCCGATTTGTTTTCAAAGAATTCCTT  
+HWI-EAS443:3:75:863:1499#0/1  
Zaa¥^]¥a^b\_]a`^a`U`^`bba¥^`a`^`^YS¥aa  
@HWI-EAS443:3:75:967:1414#0/1  
AAAGAATTCCTTGGTCATGTCTTTCTCTTTGACAGAAGAC  
+HWI-EAS443:3:75:967:1414#0/1  
aX^`^a¥ZY^b`]aYaaaa\_`baaaa\_baaa\_`aaa\_aaa  
@HWI-EAS443:3:76:102:112#0/1  
TGGTGCCATATTTTCCCGAGTGCCCACTTCAATTGGCTT  
+HWI-EAS443:3:76:102:112#0/1  
¥Z`FZ]^ababb`aab`[a\_aZ`YU`\_`^`a^]`^`\_Z¥\_  
@HWI-EAS443:3:76:1042:1510#0/1  
AACTAACAAGTTTGCTGCAATATGCACACATTTGGAAGTT  
+HWI-EAS443:3:76:1042:1510#0/1  
`\_a¥b¥^`^WFXaab`W`^`aaaa¥\_a]`a`dWaY`¥aO\_  
@HWI-EAS443:3:76:1108:1734#0/1  
CGATTGGCCATGTTTCCGATTTGTTTTCAAAGAATTCCTT  
+HWI-EAS443:3:76:1108:1734#0/1  
ab^baaY[aa`XQZ`VD[¥]`\_]L[`VV¥aVZ\_[Y¥[\_N^  
@HWI-EAS443:3:76:1164:1442#0/1  
CTGGGTCCAAAATGAATTCAATAAGGCATGTGAATTGACT  
+HWI-EAS443:3:76:1164:1442#0/1  
^\_a`^RO^a^^a`\_`b\_b\_bbbb```^abbabababb¥ab  
@HWI-EAS443:3:76:1268:769#0/1  
TTGGGGGGCTATATGAAGCAATCGAGGAGTGCCTGATTAA  
+HWI-EAS443:3:76:1268:769#0/1  
Y`b\_^ZW`]b]a\_[`^]aab^`]`TSQW]UXVJTa¥\_GT[  
@HWI-EAS443:3:76:1276:884#0/1  
GAGGGGTTTTCGGCTGAATCGAGAAAATTGCTTCTCATTG  
+HWI-EAS443:3:76:1276:884#0/1  
ZQ[a``Y\_aa\_\_¥]a\_a\_]\_[[ZX^]\_\_\_\_]]X\_¥^X^^]]  
@HWI-EAS443:3:76:1283:1196#0/1  
CCTCCTCATGCTTGCGATATGTTCAATCGGGGCAACATCT  
+HWI-EAS443:3:76:1283:1196#0/1  
`\_Z`]S\_V\_a\_Y]]WYQHSX]QT]ZOMTW`WGY^YW¥UNM  
@HWI-EAS443:3:76:1283:1326#0/1  
AAGAATTCCTTGGTCATGTCTTTCTCTTTGACAGAAGACT  
+HWI-EAS443:3:76:1283:1326#0/1  
abba`aaaaaaaa^aaaa`aaaa`a\_aa`a`]aa`\_\_^\_`  
@HWI-EAS443:3:76:1288:1134#0/1  
TGGCCAATCGGAGAGTCACCCAGGGGAGTGGAGGAAGGCT  
+HWI-EAS443:3:76:1288:1134#0/1  
aa`a]aaaaaa[`^^^^`^a\_]\_¥^^`[`^V``¥^^YS[  
@HWI-EAS443:3:76:1352:369#0/1  
ACACCCTTGACGAAGAGAGCAGGGCAAGAATCAAACACTAG

+HWI-EAS443:3:76:1352:369#0/1  
a\_b]X]bbb\_\_ba`^ab`aa]a`a\_\_\_a^a`0^``\_Zaa\_  
@HWI-EAS443:3:76:1408:991#0/1  
ATTCAGTAGCCCTGCAGTGGGACACTTCTGCTGTAAAATA  
+HWI-EAS443:3:76:1408:991#0/1  
U`\_bbba`bY^¥TG\_b^bbba\_bb¥`Ua`aSb`bbba[\_  
@HWI-EAS443:3:76:143:1789#0/1  
ATCAGGCACTCCTCGATTGCTTCATATAGCCCCCAAGAT  
+HWI-EAS443:3:76:143:1789#0/1  
[]`ba]\_Z\_a`aa`^]`a\_aaa\_a\_\_U\_¥]`a\_^^¥YT  
@HWI-EAS443:3:76:1470:1546#0/1  
AGACAATTGAAGAAAAATTTGAGATTACAGGAACTATGCG  
+HWI-EAS443:3:76:1470:1546#0/1  
a[[`[I]aYZNKON[UZaa]aWYZaYVX\_\_XXZW[^XSG¥  
@HWI-EAS443:3:76:154:2014#0/1  
TTTGAGATTACAGGAACTATGCGCAAGCTTGCCGACCAAA  
+HWI-EAS443:3:76:154:2014#0/1  
aaaaa`a\_`aaba^aba\_`^a]`a^a^W]`\_]\_^\_\_\_\_  
@HWI-EAS443:3:76:1585:731#0/1  
GGGGGCTATATGAAGCAATCGAGGAGTGCCTGATTAATGA  
+HWI-EAS443:3:76:1585:731#0/1  
a\_\_^\_UTIY]¥]U^TN[ZWG\_]\_VQUU]RXX]N^XYXRU  
@HWI-EAS443:3:76:1590:1116#0/1  
AATGAATTCAATAAGGCATGTGAATTGACTGATTCAAGCT  
+HWI-EAS443:3:76:1590:1116#0/1  
abbba`bb^`aaaaaaaaab`a\_aaaa\_aa\_aa``]^¥`  
@HWI-EAS443:3:76:1601:1694#0/1  
ATCAAGTTCTATCCAGCTTGAATCAGTCAATTCACATGCC  
+HWI-EAS443:3:76:1601:1694#0/1  
a``baa`baabaW^aa`aabaaa\_aa^]\_\_\_\_\_a]a^T[  
@HWI-EAS443:3:76:1618:397#0/1  
GGGGTTTTCGGCTGAATCGAGAAAATTGCTTCTCATTGTT  
+HWI-EAS443:3:76:1618:397#0/1  
aaabZaaaX`aX`a^\_\_Ua]`]^\_\_^0\_ZV\_Z^\_^^^  
@HWI-EAS443:3:76:1665:568#0/1  
ATTCGATTTCCATTTTCATCGACGAACGGGGTGAATCAAT  
+HWI-EAS443:3:76:1665:568#0/1  
abbb`baba``aabaaaa`baaaa\_^\_\_aaXaa\_`\_\_\_\_\_  
@HWI-EAS443:3:76:1684:1560#0/1  
CTGGAACCTGGAACCTTCGATCTTGGGGGCTATATGAAG  
+HWI-EAS443:3:76:1684:1560#0/1  
`]¥]\_`]¥]`a`X]Za]`^UR\_] ]QHW^]Y¥^a]^X¥Z¥  
@HWI-EAS443:3:76:1684:599#0/1  
CTCCAGTCTCGGGTCAGTGAGTGAGAACTCCATACTTACA  
+HWI-EAS443:3:76:1684:599#0/1  
ab¥[\_bZab\_^T¥V`abbb\_`^¥\_¥XaM]Y`aaa[``a\_b  
@HWI-EAS443:3:76:179:1203#0/1  
GAAGAGACAATTGAAGAAAAATTTGAGATTACAGGAACTA  
+HWI-EAS443:3:76:179:1203#0/1  
\_a^^ZX]\_\_U^¥]U¥\_`] ^TUMLHMS^^BBBBBBBBBB

@HWI-EAS443:3:76:17:1194#0/1  
CTTTCCCAATAGAGCCTTCCTCCACTCCCCTGGGTGACTC  
+HWI-EAS443:3:76:17:1194#0/1  
`bbabbbbabbb^Za```]babbbb]aaaaV`[XE]a^¥]  
@HWI-EAS443:3:76:192:573#0/1  
AAAGGAATCCCATAGACTCCTACTGGCCATTTCTTGCTT  
+HWI-EAS443:3:76:192:573#0/1  
`a`b`¥^\_[^aa`\_aaa\_\_\_\_\_]\_¥\_^]\_[RRXXLUVTUUT  
@HWI-EAS443:3:76:233:52#0/1  
CCCAGATCTCTAGCAAGCTGGGTCCAAAATGAATCAATA  
+HWI-EAS443:3:76:233:52#0/1  
abbaa]aaaaa`Y`\_]`\_aa\_] ^Y¥^Y^^^Z]\_ZZ]W][  
@HWI-EAS443:3:76:234:751#0/1  
TAATTGTAGAATCTGGTGACCCGAATGCACTATTGAAGCA  
+HWI-EAS443:3:76:234:751#0/1  
aWI\_Z[Naaaa]\_\_aaMPYUY\_\_XNVXY]\_TUV¥]XPW^T  
@HWI-EAS443:3:76:28:1787#0/1  
ACGGCCTTGCTCAATGCATCCTGTGCAGCCATGGATGACT  
+HWI-EAS443:3:76:28:1787#0/1  
\_\_a`ab`\_[aZ`aa\_Yaa\_aa[VXRUIV`^OVUTY[U[W[  
@HWI-EAS443:3:76:29:1199#0/1  
GGGGCTATATGAAGCAATCGAGGAGTGCCTGATTAATGAT  
+HWI-EAS443:3:76:29:1199#0/1  
a\_\_`aY^]\_a```[Z¥\_]\_^VV^X^G]V\_]\_V[^[YRTVX  
@HWI-EAS443:3:76:322:1435#0/1  
CATTAATCAGGCACTCCTCGATTGCTTCATATAGCCCCC  
+HWI-EAS443:3:76:322:1435#0/1  
abbb\_U\_bba` `aaaa\_`^[]aaa` `aaa\_U]a` `\_] [Z^  
@HWI-EAS443:3:76:347:101#0/1  
CACTTTCCCAATAGAGCCTTCCTCCACTCCCCTGGGTGAC  
+HWI-EAS443:3:76:347:101#0/1  
abbbbab`b`abb\_a\_`^a\_`aa\_]X` ]^`XX]^UR^WS  
@HWI-EAS443:3:76:399:958#0/1  
TGGCCACCAAAGCGGACTACACCCTTGACGAAGAGAGCAG  
+HWI-EAS443:3:76:399:958#0/1  
X¥¥b`¥`¥bb\_V\_a]a` `a` `aaZWZ¥¥abYZaaa`a]` ¥  
@HWI-EAS443:3:76:420:351#0/1  
TTTCGACTGACGAAAGGAATCCCATAGACTCCTACTGGC  
+HWI-EAS443:3:76:420:351#0/1  
aabbaab`babbaabaaaa`a\_¥a` `a]\_aaR\_a\_`^`\_\_  
@HWI-EAS443:3:76:509:1961#0/1  
ATCCCAATTACCTCATGGCTTGAAGCAGGTGCTAGCAGA  
+HWI-EAS443:3:76:509:1961#0/1  
aaababaaaaaa\_aa\_U¥` \_\_]Z¥` TUQUZNR\_VYWZZW[  
@HWI-EAS443:3:76:51:1195#0/1  
GGGGCTATATGAAGCAATCGAGGAGTGCCTGATTAATGA  
+HWI-EAS443:3:76:51:1195#0/1  
a[`^a\_a\_b^XW\_¥aaa^\_\_^Z^^\_W]\_\_U]^]]\_^^RZ  
@HWI-EAS443:3:76:534:1501#0/1  
CCTCCTCATGCTTGCGATATGTTCAATCGGGCAACATCT

+HWI-EAS443:3:76:534:1501#0/1  
aaT`\_Z¥TabbaaaY`¥0^^TXZ^a\_a`a]]^\_^^`]N¥  
@HWI-EAS443:3:76:562:806#0/1  
AAGAATTCCTTGGTCATGTCTTTCTCTTTGACAGAAGACT  
+HWI-EAS443:3:76:562:806#0/1  
Q]\_`¥`bbbaaba\_aaab\_aabaaaaaa`aaaa\_a\_a^  
@HWI-EAS443:3:76:57:1711#0/1  
AGAGCCTAACATAGTCAAACCACATGAGAAAGGCATAAAT  
+HWI-EAS443:3:76:57:1711#0/1  
a^\_`]baabbaaaTzaaaaaaaaa\_^[K]\_]\_a`aa\_  
@HWI-EAS443:3:76:584:1912#0/1  
GGGTGAATCAATAATTGTAGAATCTGGTGACCCGAATGCA  
+HWI-EAS443:3:76:584:1912#0/1  
aaQK¥\_b`a\_aa\_`a`^¥a^^\_aa^\_QRUa\_\_`\_a`UWa  
@HWI-EAS443:3:76:615:1931#0/1  
CATTAATCAGGCACTCCTCGATTGCTTCATATAGCCCCC  
+HWI-EAS443:3:76:615:1931#0/1  
aaaaaW`ab^^aaa``]a`a][UY^^\_`^`]`U\_¥^]]U  
@HWI-EAS443:3:76:622:1403#0/1  
ATAAATCCCAATTACCTCATGGCTTGAAGCAGGTGCTAG  
+HWI-EAS443:3:76:622:1403#0/1  
aaa\_Zaaaaaaaa`a`a[YV\_a\_¥[W[SUY[TKXZV^V  
@HWI-EAS443:3:76:640:740#0/1  
GCCAGAGCCCAGATCTCTAGCAAGCTGGGTCCAAAATGAA  
+HWI-EAS443:3:76:640:740#0/1  
`W`PYVZ\_¥]YVPVGU^\_Y\_VYRSGVUZIIPU¥]VVTQVV  
@HWI-EAS443:3:76:658:959#0/1  
GGGGCATGGAATGAGGCGCTGCCTTCTTCAGTCTCTTCA  
+HWI-EAS443:3:76:658:959#0/1  
a`\_Z^Y¥a[R\_]\_\_[W`\_\_^TDR^^¥\_\_Z\_\_¥\_\_^XUV¥  
@HWI-EAS443:3:76:680:1781#0/1  
TCGACACTTGGCCTATCGCAGTCCTCAAGAGCATGTCTCC  
+HWI-EAS443:3:76:680:1781#0/1  
ab`bbbaa`a\_\_abaaaaaa\_aa`aaa\_a\_aa\_`\_¥```  
@HWI-EAS443:3:76:683:1446#0/1  
CCCCTTCAATTGGCTTGTCTTCTTCATGTTCTTTGTCCT  
+HWI-EAS443:3:76:683:1446#0/1  
abaaaaaba`aa\_baaJ\_`\_a\_a`a\_`X^^\_a^^\_a^  
@HWI-EAS443:3:76:711:1146#0/1  
CATGACCAAGGAATCCTTTGAAAACAAATCGGAAACATGG  
+HWI-EAS443:3:76:711:1146#0/1  
`abbbb`Y`aaaababbaabb\_`\_abaa`aba`]aa`aa\_  
@HWI-EAS443:3:76:727:1599#0/1  
GAAAATCGAAACTAACAAGTTTGCTGCAATATGCACACAT  
+HWI-EAS443:3:76:727:1599#0/1  
`^Yb\_W^¥V¥Ya``YXPXZY\_U[W¥U\_`¥S`[\_X\_W]\_\_  
@HWI-EAS443:3:76:784:1625#0/1  
CATGGAATGAGGCGCTGCCTTCTTCAGTCTCTTCAGCAG  
+HWI-EAS443:3:76:784:1625#0/1  
a`a\_Y\_^Z^R^¥Y^LZZ[[]W¥Y`X]WNPT\_^V¥ULNX^

@HWI-EAS443:3:76:818:96#0/1  
ACCGATTTGAGATAATTGAAGGAAGAGACCGAATCATGGC  
+HWI-EAS443:3:76:818:96#0/1  
a`^b`bbbaa]baaaaba`baa`b\_b`Z^a^`^`^\_\_a`]  
@HWI-EAS443:3:76:849:1465#0/1  
TGAAAATGAAGAGAAGATCCCAAGGACAAAGAACATGAAG  
+HWI-EAS443:3:76:849:1465#0/1  
a`^^`a`aaa`\_]Z\_]\_\_\_\_\_^^]\_]\_]^^]^^]]  
@HWI-EAS443:3:76:859:1883#0/1  
TTGTCCTTGGGATCTTCTCTTCATTTTCAATGTCCTGTAG  
+HWI-EAS443:3:76:859:1883#0/1  
`a]]aaaaaaaaX\_\_a```aa`aa`\_\_^aa\_\_\_\_^a`¥\_Za^  
@HWI-EAS443:3:76:85:1005#0/1  
CATGGAATGAGGCGCTGCCTTCTTCAGTCTCTTCAGCAG  
+HWI-EAS443:3:76:85:1005#0/1  
a]VaWIW¥]^`^\_V]^`¥`U^ZVa[\_`¥[R[¥\_TU¥U[QVY  
@HWI-EAS443:3:76:88:86#0/1  
GGGAGACTTTGGTCGGCAAGCTTGCGCATAGTTCCTGTAA  
+HWI-EAS443:3:76:88:86#0/1  
¥aaab\_OY¥aaaY\_aX]a]QZU]^U¥U[WQZXZU¥WZGGV  
@HWI-EAS443:3:76:894:1493#0/1  
GGGTTTTCGGCTGAATCGAGAAAATTGCTTCTCATTGTTC  
+HWI-EAS443:3:76:894:1493#0/1  
a]¥L¥^¥aaa\_T^a`TTVR`\_ZU\_LP^ZVLFJSSR¥SROR  
@HWI-EAS443:3:76:905:1189#0/1  
AGAATTCCTTGGTCATGTCTTTCTCTTTGACAGAAGACTC  
+HWI-EAS443:3:76:905:1189#0/1  
ab```aaaa`a`]^`a`aZaaa^`^Za`\_a\_V\_a\_¥WWW]]  
@HWI-EAS443:3:76:90:2001#0/1  
ATTTGAGATTACAGGAATGCGCAAGCTTGCCGACCAA  
+HWI-EAS443:3:76:90:2001#0/1  
W¥¥U^]]0]^`baa¥Zabb¥Z\_`a`b]RL]\_RL]\_XWY^`]  
@HWI-EAS443:3:76:926:1292#0/1  
AGCAGGGCAAGAATCAAACTAGGCTTTTCACTATAAGAC  
+HWI-EAS443:3:76:926:1292#0/1  
\_]`aaa`aaaa\_\_a`aa\_a`aa`\_a\_a`\_`\_a¥aa`a`\_`\_¥  
@HWI-EAS443:3:76:942:1415#0/1  
AGAAGACACACATTACATCTTTTCACTACTGGAGAGGA  
+HWI-EAS443:3:76:942:1415#0/1  
TT\_\_[bSbTbUb\_U]bab¥`Wa^`a^`a\_\_YLIRaa\_WW`  
@HWI-EAS443:3:76:949:578#0/1  
CATTAATCAGGCACTCCTCGATTGCTTCATATAGCCCCC  
+HWI-EAS443:3:76:949:578#0/1  
abbb\_bbab`bIba`[bbaba``]abaX\_ab`aa[VNPS`  
@HWI-EAS443:3:76:950:327#0/1  
CCTTGACGAAGAGAGCAGGGCAAGAATCAAACTAGGCTT  
+HWI-EAS443:3:76:950:327#0/1  
]aabbbbbb`bbbbaababbbbbaabbabbababba\_aa  
@HWI-EAS443:3:76:960:140#0/1  
GGCATGGAATGAGGCGCTGCCTTCTTCAGTCTCTTCAGC

+HWI-EAS443:3:76:960:140#0/1  
aUX^W^]¥U^Q^V\_¥S¥WQ¥UVWUWWWNWUVNUSVWGQGU  
@HWI-EAS443:3:76:990:1663#0/1  
CATTAAATCAGGCACTCCTCGATTGCTTCATATAGCCCCC  
+HWI-EAS443:3:76:990:1663#0/1  
abbbbbbb`abbaabbbabbaaaaaabbabaa`a`\_\_\_\_  
@HWI-EAS443:3:77:1000:1641#0/1  
ATCCGAAAATCGAACTAACAAGTTTGCTGCAATATGCAC  
+HWI-EAS443:3:77:1000:1641#0/1  
^a¥XZ`¥aa]¥`\_bba^W`]`¥`L`]UY[`¥a\_adW\_Ra\_  
@HWI-EAS443:3:77:1013:1261#0/1  
AGCAGGAACCTTGACCGCTGATGGCAAAGAGGCCCATCAG  
+HWI-EAS443:3:77:1013:1261#0/1  
aZ\_L\_WXaaaW`X`\_ba\_UT`aa`^^TX\_VG\_Y¥XZZ\_Z`  
@HWI-EAS443:3:77:1014:1209#0/1  
GAAGATCCCAAGGACAAAGAACATGAAGAGAACAAGCCAA  
+HWI-EAS443:3:77:1014:1209#0/1  
a]¥\_aa\_a\_XZ]V^aaaYb[aa]`a`\_ba`\_\_`aa\_Xaa  
@HWI-EAS443:3:77:1019:137#0/1  
CTGGGTGACTCTCCGATTGGCCATGTTTCCGATTTGTTTT  
+HWI-EAS443:3:77:1019:137#0/1  
abbbbaabbbbababbab¥^aaaabba\_aVUabbUaab  
@HWI-EAS443:3:77:1040:564#0/1  
GGGGCATGGAATGAGGCGCTGCCTTCTTCAGTCTCTTCA  
+HWI-EAS443:3:77:1040:564#0/1  
aabaabaa`aa^aaaaaaa\_a`^]aa`\_a\_aa`\_a`\_`\_`  
@HWI-EAS443:3:77:1059:888#0/1  
GCAGGTGCTAGCAGAGCTACAGGACATTGAAAATGAAGAG  
+HWI-EAS443:3:77:1059:888#0/1  
`bbba`ababbabaababa]babaaaabba`abaaaaaa  
@HWI-EAS443:3:77:105:295#0/1  
GTCCTGCACACTTTCCCAATAGAGCCTTCTCCACTCCCC  
+HWI-EAS443:3:77:105:295#0/1  
aRTZPUURGR¥T]YOZP`ZTXYPXRRTRTTTRPORRTRPB  
@HWI-EAS443:3:77:1264:1396#0/1  
TTCGAGCCGAACGGCTGCATTGAGGGCAAGCTTCCCAAA  
+HWI-EAS443:3:77:1264:1396#0/1  
`aab`ab]bab`b¥aaaaX]]WT¥\_VFHPXTU`Y^¥\_T`]  
@HWI-EAS443:3:77:1280:1596#0/1  
GGGGGCTATATGAAGCAATCGAGGAGTGCCTGATTAATGA  
+HWI-EAS443:3:77:1280:1596#0/1  
SW\_b]``\_babaa`aab`^^¥¥`^^]ba^babaab^`aa  
@HWI-EAS443:3:77:1374:1242#0/1  
CAGGCCATGATTCCGGTCTTCTTCAATTATCTCAAATC  
+HWI-EAS443:3:77:1374:1242#0/1  
abb`^`^bbabbb`babbaabbbb]bbbb`aaababa]  
@HWI-EAS443:3:77:1386:1658#0/1  
CCCCAAGATCGAAGGTTCCAGGTTCCAGGTTGCCCTAAG  
+HWI-EAS443:3:77:1386:1658#0/1  
¥bab`^^^]a\_^[¥\_Q`[]abbaTXUab¥DZ]H[\_b`ZaU

@HWI-EAS443:3:77:1405:398#0/1  
CATGACCAAGGAATTCTTTGAAAACAAATCGGAAACATGG  
+HWI-EAS443:3:77:1405:398#0/1  
`abba`bbaaabbbb¥bbbb`babaaabb`abbbbabbb`  
@HWI-EAS443:3:77:1435:1327#0/1  
CTGGGCTCTGGCTCATCACTGTCATACTGTTTAAGGTCTC  
+HWI-EAS443:3:77:1435:1327#0/1  
a`bbabb\_bababbbbababb^bbbbabbabbbabba\_ba  
@HWI-EAS443:3:77:1488:508#0/1  
ATTGCAGCAAACCTTGTAGTTTCGATTTTCGGATCTTCCC  
+HWI-EAS443:3:77:1488:508#0/1  
\_bbb`bbabb`ba`abababbabW`aba`^^^N^[a`Y[\_  
@HWI-EAS443:3:77:1508:1884#0/1  
AGAACACAGTATTTTTCCCATTTGTGTGGCTCCAGTCTCG  
+HWI-EAS443:3:77:1508:1884#0/1  
aa`b\_¥b]babbbb^W^`baa[`aaaVEUV^[aBBBBB  
@HWI-EAS443:3:77:1595:47#0/1  
GGTTTGTTCCTTCTTTGGTCTACATTTGCT  
+HWI-EAS443:3:77:1595:47#0/1  
]aIa`ba`b`\_aa`^aa[\_\_\_a`aaa\_\_`]^\_`Z]aaa\_V^  
@HWI-EAS443:3:77:1598:511#0/1  
GTCCAAAATGAATTCAATAAGGCATGTGAATTGACTGATT  
+HWI-EAS443:3:77:1598:511#0/1  
a\_a`aaaabbaab[\_b`a^^ba\_aaa\_a`aaaa`aa^a`  
@HWI-EAS443:3:77:1642:676#0/1  
GAGAAAGGCATAAATCCCAATTACCTCATGGCTTGAAGC  
+HWI-EAS443:3:77:1642:676#0/1  
ababbbab`bbbbb\_\_aa`bb`^a`aaba\_b`aa]]ZQ  
@HWI-EAS443:3:77:1655:1153#0/1  
TGTGGTTTACTATGTTAGGCTCTTCCAGCCAAAGAATG  
+HWI-EAS443:3:77:1655:1153#0/1  
abPbb¥a[bKa[abaaa¥`a[]a`^aXSW^]¥Z¥RI\_\_\_\_  
@HWI-EAS443:3:77:1660:1671#0/1  
ATAAAAGGAAGGTCTCATTTGAGAAATGATACTGATGTGG  
+HWI-EAS443:3:77:1660:1671#0/1  
¥^]a`^aab`baaa`\_aabb`baU`ba[aaTaaab¥`aa  
@HWI-EAS443:3:77:1667:1314#0/1  
CGGCCTTGCTCAATGCATCCTGTGCAGCCATGGATGACTT  
+HWI-EAS443:3:77:1667:1314#0/1  
Q\_b^bb[La`abbbT[ZZ\_\_TZ`\_\_b]Zabbb¥T¥b^]`a  
@HWI-EAS443:3:77:1678:936#0/1  
CAAGAAATGGCCAGTAGGAGTCTATGGGATTCCTTTCGTC  
+HWI-EAS443:3:77:1678:936#0/1  
Wabb`a`^a¥]UVb\_\_XU\_]Vab`a`^¥¥b\_RI`baH\_^]  
@HWI-EAS443:3:77:1708:994#0/1  
TAGCAGAGCTACAGGACATTGAAAATGAAGAGAAGATCCC  
+HWI-EAS443:3:77:1708:994#0/1  
aaa\_¥aaZQ\_^U\_¥\_^[\_^`¥Z`^\_aa\_\_a^^^Xa\_VGU¥  
@HWI-EAS443:3:77:1721:1259#0/1  
GGCATGGAATGAGGCGCTGCCTTCTTCAGTCTCTTCAGC

+HWI-EAS443:3:77:1721:1259#0/1  
abaaabb`aaaaaaaa`a`\_`aa\_aa^¥a\_Y`\_`\_]Z^^W  
@HWI-EAS443:3:77:1723:1262#0/1  
ATCTTCTCCTATTTTCATCAAGTTCTATCCAGCTTGAATCA  
+HWI-EAS443:3:77:1723:1262#0/1  
\_S\_Vaa¥]`¥]aaXW\_aYaGXa]`\_W\_`Xaa]`\_a]]\_V¥  
@HWI-EAS443:3:77:26:1520#0/1  
GCTCAATGCATCCTGTGCAGCCATGGATGACTTTCAGCTG  
+HWI-EAS443:3:77:26:1520#0/1  
[babbbabbbbaa\_[abb]`ab`\_`\_`\_]`\_`\_aa]aX]  
@HWI-EAS443:3:77:329:50#0/1  
GGGGGCTATATGAAGCAATCGAGGAGTGCCTGATTAATGA  
+HWI-EAS443:3:77:329:50#0/1  
aaa`a`\_`\_a^`a\_^\_Y¥^[^]U\_^R]W^VV^\_VZVV[U]Y  
@HWI-EAS443:3:77:330:713#0/1  
GGGCACTCGGTGAAAATATGGCACCAGAAAAAGTAGACTT  
+HWI-EAS443:3:77:330:713#0/1  
ababba\_b^`Gb`a^V`aa`ab`aaa\_Y\_\_\_`Ua`\_^`\_`  
@HWI-EAS443:3:77:375:663#0/1  
GGGCACTCGGTGAAAATATGGCACCAGAAAAAGTAGACTT  
+HWI-EAS443:3:77:375:663#0/1  
Z^`b`\_`\_abaa`aXZ[`baababba\_a]bbaaa[abaaaa  
@HWI-EAS443:3:77:37:1317#0/1  
GGGGCATGGAAATGAGGCGCTGCCTTCTTCAGTCTCTTCA  
+HWI-EAS443:3:77:37:1317#0/1  
abababa\_`\_`bba`bbabbaab`a`aaabaW`\_`a[UZa  
@HWI-EAS443:3:77:389:447#0/1  
GGTGTCTCCTCAAGAATGGTTCAATTTTGGCGTTCACCT  
+HWI-EAS443:3:77:389:447#0/1  
ab¥b`bbaa\_`\_`aa`^`^Z\_X\_\_WQ^Ya\_UW^`[USTR[]  
@HWI-EAS443:3:77:396:802#0/1  
GGACAACCTGGAACCTGGAACCTTCGATCTTGGGGGGCTA  
+HWI-EAS443:3:77:396:802#0/1  
aba`\_\_baa\_Waaaa`a]Xaaa\_aaa\_\_`\_`\_M¥Z\_\_^\_\_  
@HWI-EAS443:3:77:418:245#0/1  
ACTGTTTAAGGTCTCCAACATCTTTGCAGTCATCAAAGTC  
+HWI-EAS443:3:77:418:245#0/1  
[GW¥^¥]¥\_aYOM¥]X]^a`\_Z¥^`\_`\_aZGM¥U`]MRSV  
@HWI-EAS443:3:77:446:1651#0/1  
AGAGCCTTCCCTCCACTCCCCTGGGTGACTCTCCGATTGGC  
+HWI-EAS443:3:77:446:1651#0/1  
a`a`\_`a`^aa¥aaa`\_]`a^\_¥¥SWU`^W]\_¥^`^SS¥SWU  
@HWI-EAS443:3:77:494:1585#0/1  
GCTGGAAAGAGCCTAACATAGTCAAACCACATGAGAAAGG  
+HWI-EAS443:3:77:494:1585#0/1  
`ba`abbbaba`aa]abbbba`abbbbaaaba`a`a`aa`  
@HWI-EAS443:3:77:51:804#0/1  
AGAGACCGAATCATGGCCTGGACAGTGGTGAACAGTATAT  
+HWI-EAS443:3:77:51:804#0/1  
a\_a`\_\_\_\_[V`Z¥\_¥\_WW`¥\_Y¥^W\_QW¥N¥UW¥W¥SYWWU



@HWI-EAS443:3:77:528:613#0/1  
TGGGGCATGGAAATGAGGCGCTGCCTTCTTCAGTCTCTTC  
+HWI-EAS443:3:77:528:613#0/1  
`bbaa`bababb\_bbbbababa`baaaaaa`\_^`\_`aa  
@HWI-EAS443:3:77:605:1202#0/1  
AGACATTCTTTGGCTGGAAAGAGCCTAACATAGTCAAACC  
+HWI-EAS443:3:77:605:1202#0/1  
aabaaaabbaaa\_baaaa`a`aa\_\_aaa`\_a`a`\_aa`\_`\_`  
@HWI-EAS443:3:77:661:1821#0/1  
AGATGGCCACCAAAGCGGACTACACCCTTGACGAAGAGAG  
+HWI-EAS443:3:77:661:1821#0/1  
aaaaa`abbbbaaaba`aa`bbb`a`[\_b^\_a\_a\_\_Z  
@HWI-EAS443:3:77:665:26#0/1  
CCCGAATGCACTATTGAAGCACCGATTTGAGATAATTGAA  
+HWI-EAS443:3:77:665:26#0/1  
`bbbabbbbabbbbabbbabababbb`^baaaababab  
@HWI-EAS443:3:77:687:690#0/1  
ACATAATGAAGGGAGTGTACATAAATACGGCCTTGCTCAA  
+HWI-EAS443:3:77:687:690#0/1  
a^Ub\_W^T[XR\_Q]UJWZ^aab]aZU^aba\_aaa¥a\_Yaa  
@HWI-EAS443:3:77:732:1368#0/1  
ACACCCTTGACGAAGAGAGCAGGGCAAGAATCAAAACTAG  
+HWI-EAS443:3:77:732:1368#0/1  
aabaabaa`ba\_a`\_a`\_`\_a`\_¥a`\_`\_`\_^`\_`^a`aa]  
@HWI-EAS443:3:77:75:930#0/1  
GAACGGGGTGAATCAATAATTGTAGAATCTGGTGACCCGA  
+HWI-EAS443:3:77:75:930#0/1  
aa\_baaaa\_bb`aba`a^]`a`a`a^^`\_a]Y`a``a``  
@HWI-EAS443:3:77:763:265#0/1  
AAGAATTCCTTGGTCATGTCTTTCTTTGACAGAAGACT  
+HWI-EAS443:3:77:763:265#0/1  
a`aaabb^abab`T`aab\_baaaa^aaaa\_\_aaa`\_`^a  
@HWI-EAS443:3:77:772:673#0/1  
CGACGAACGGGGTGAATCAATAATTGTAGAATCTGGTGAC  
+HWI-EAS443:3:77:772:673#0/1  
a]bbbab``abb\_b\_bab`Za\_bbabaab]`U`bbbYb`b  
@HWI-EAS443:3:77:782:1853#0/1  
CTGGAGAAGTTCGGTGGGAGACTTTGGTCGGCAAGCTTGC  
+HWI-EAS443:3:77:782:1853#0/1  
a```bbaabbb`a`Y[Uaa`aabaab`W^]¥Xbb`]ZQS`  
@HWI-EAS443:3:77:813:139#0/1  
CTTGGGGGGCTATATGAAGCAATCGAGGAGTGCCTGATTA  
+HWI-EAS443:3:77:813:139#0/1  
ab`X0\_aY\_bba`aabSa^T[b`Xa\_bba\_XaaX\_a\_\_]\_`  
@HWI-EAS443:3:77:834:1694#0/1  
TTCGGATTTCCATTTTCATCGACGAACGGGGTGAATCAATA  
+HWI-EAS443:3:77:834:1694#0/1  
]¥X¥Zbbaab\_abXaabU¥Y]^J[bWM\_a`\_V`\_ZPaa``  
@HWI-EAS443:3:77:955:1740#0/1  
GCCGAAAACCCCTCAAGTTGTGGAGACGCATATAGACTGT

+HWI-EAS443:3:77:955:1740#0/1  
aaZ^X¥¥¥]G0a\_]aYb]]`\_]aa`]TY¥^`]^`\_]`^]G  
@HWI-EAS443:3:78:1036:1642#0/1  
ATCCCAATTACCTCATGGCTTGGAAGCAGGTGCTAGCAGA  
+HWI-EAS443:3:78:1036:1642#0/1  
`a`[a\_aaaa^a`a\_\_`a]00^`NX^ZUXTNZUVVXVU  
@HWI-EAS443:3:78:108:1867#0/1  
AAGAATTCCTTGGTCATGTCTTTCTCTTTGACAGAAGACT  
+HWI-EAS443:3:78:108:1867#0/1  
Y`]Z`aaaa`\_`XaaaaNa`\_\_a\_a\_^`]aa\_a`X`a^  
@HWI-EAS443:3:78:1090:966#0/1  
GCTTGCTAGAGATCTGGGCTCTGGCTCATCACTGTCATAC  
+HWI-EAS443:3:78:1090:966#0/1  
a^X[WMO¥`[ZXPQY`a^X]X]X]]VWU[R\_U]]UU^YZY  
@HWI-EAS443:3:78:1094:1571#0/1  
AATCCCAATTACCTCATGGCTTGGAAGCAGGTGCTAGCAG  
+HWI-EAS443:3:78:1094:1571#0/1  
aaa`[\_`a`a`\_`\_a`^^Za\_a\_WPU\_]MHWNUZUUVLXZ  
@HWI-EAS443:3:78:1135:1066#0/1  
GTCTCTTCAGCAGATTGAGAGCATGATTGAGGCCGAGTCT  
+HWI-EAS443:3:78:1135:1066#0/1  
``aa¥aa`a[aa^\_a\_a¥a^a`a\_^\_]a\_[GHRSSBB  
@HWI-EAS443:3:78:1214:649#0/1  
ATTCATTTTGGACCCAGCTTGCTAGAGATCTGGGCTCTGG  
+HWI-EAS443:3:78:1214:649#0/1  
aa^`]aaa``a[^`a\_aZVHPY¥T[\_^VV[[UY`][VY  
@HWI-EAS443:3:78:1235:1344#0/1  
CTCGATTGCTTCATATAGCCCCCAAGATCGAAGGTTCCA  
+HWI-EAS443:3:78:1235:1344#0/1  
abb\_R\_Za`a`abbaab`X`T^^\_`aaab¥aabaU]^]^`  
@HWI-EAS443:3:78:124:1143#0/1  
TCGGCTGAATCGAGAAAATTGCTTCTCATTGTTGAGCAC  
+HWI-EAS443:3:78:124:1143#0/1  
aa`a`aa``bZX\_¥aaaa`a`aaa`[aadW\_aa`\_X\_^  
@HWI-EAS443:3:78:1275:807#0/1  
AACAATGAGAAGCAATTTTCTCGATTGAGCCGAAAACCCC  
+HWI-EAS443:3:78:1275:807#0/1  
aa^TSbb\_bT^`¥0HR^X\_aa]]YX`OFVL^^[QYU[T[W  
@HWI-EAS443:3:78:134:989#0/1  
TGTGAATTGACTGATTCAAGCTGGATAGAACTTGATGAAA  
+HWI-EAS443:3:78:134:989#0/1  
abXa``aaaaaaaaaaaa^aaaa`^`a^a\_a`a`[[¥`\_  
@HWI-EAS443:3:78:1384:418#0/1  
TCCCAATTACCTCATGGCTTGGAAGCAGGTGCTAGCAGAG  
+HWI-EAS443:3:78:1384:418#0/1  
aZa^aaaaaa]`\_a`\_a\_aa]\_¥[YHSRRJUTR[QQBBBB  
@HWI-EAS443:3:78:1537:1591#0/1  
GAACAATGAGAAGCAATTTTCTCGATTGAGCCGAAAACCCC  
+HWI-EAS443:3:78:1537:1591#0/1  
J¥a]\_[bbbb`bUYbbbbbb`Ibab\_aaSb`T]`¥\_abZPP

@HWI-EAS443:3:78:154:1278#0/1  
TTCCGATTTGTTTTCAAAGAATTCCTTGGTCATGTCTTTC  
+HWI-EAS443:3:78:154:1278#0/1  
abab]0^aa^`aa`aaaa^Z`aa\_`aaa^]a\_aa^aa^U`  
@HWI-EAS443:3:78:1567:218#0/1  
ATCGGAGAGTCACCCAGGGGAGTGGAGGAAGGCTCTATTG  
+HWI-EAS443:3:78:1567:218#0/1  
a`Z`bab^aYYaMYTU`aaaG¥U][G^\_PW`TE[UUVXBB  
@HWI-EAS443:3:78:1570:1295#0/1  
CTGCTGTAATAAGTTCCTCCTCATGCTTGCATATGTTC  
+HWI-EAS443:3:78:1570:1295#0/1  
aabZZaaabbaaaaaZaaa\_aXTZ\_`a^a\_`\_a`[``]\_P^^  
@HWI-EAS443:3:78:1593:654#0/1  
ACATGACCAAGGAATTCTTTGAAAACAAATCGGAAACATG  
+HWI-EAS443:3:78:1593:654#0/1  
`ZbaaaGaaaaa`aa]a\_ba[[``^`]]]a``aaV\_`^`  
@HWI-EAS443:3:78:1614:806#0/1  
GGACTTCCCTCCGTGTTACTCCAATTTCAATGAACCGGTT  
+HWI-EAS443:3:78:1614:806#0/1  
aaa\_ab\_a`aaaa`baba]a\_Za¥aaa^`^aaaaVZ\_a¥`  
@HWI-EAS443:3:78:1639:1784#0/1  
AGCTGAAAGTCATCCATGGCTGCACAGGATGCATTGAGCA  
+HWI-EAS443:3:78:1639:1784#0/1  
\_ZZa]]aa`aaaa\_`a`a^¥^`N[OT¥Y[ZYNX\_ZU[TNS  
@HWI-EAS443:3:78:1645:1199#0/1  
GGCATGGAAATGAGGCGCTGCCTTCTTCAGTCTTTCAGC  
+HWI-EAS443:3:78:1645:1199#0/1  
aRF¥XXVQPZXaMR¥KX]UORTX`VPGRFZU¥¥^\_U¥SPG  
@HWI-EAS443:3:78:1659:965#0/1  
GCAGGGCAAGAATCAAACTAGGCTTTTCACTATAAGACA  
+HWI-EAS443:3:78:1659:965#0/1  
a`¥^¥^a]a`Ya`\_aaaaY]]aVZa\_``Y\_\_\_a\_\_\_YW^¥  
@HWI-EAS443:3:78:1780:1936#0/1  
AAAGAATTCCTTGGTCATGTCTTTCTCTTTGACAGAAGAC  
+HWI-EAS443:3:78:1780:1936#0/1  
aa¥b`K^]aW\_[]aX]W^^NX\_Y\_S[G[YT[WX^\_`^`QQZ  
@HWI-EAS443:3:78:216:804#0/1  
GGCCAATCGGAGAGTCACCCAGGGGAGTGGAGGAAGGCTC  
+HWI-EAS443:3:78:216:804#0/1  
a`a`¥¥`]a¥^`]¥S¥^^][E¥]`[RYR¥TPPYSPXXNBB  
@HWI-EAS443:3:78:219:1561#0/1  
GCCTGAACAATGAGAAGCAATTTTCTCGATTGAGCCGAAA  
+HWI-EAS443:3:78:219:1561#0/1  
abbZW]ZZ¥a¥N[QZ\_J][VV[a`a``¥[S\_b]I``\_a]  
@HWI-EAS443:3:78:237:1434#0/1  
ACATAATGAAGGGAGTGTACATAAATACGGCCTTGCTCAA  
+HWI-EAS443:3:78:237:1434#0/1  
`\_XXQ\_Z]]Q\_a^L\_Ra]W\_ZYU`ZUZ`Z^^UP]XZX`\_¥  
@HWI-EAS443:3:78:238:1835#0/1  
ATGAAATGGGGCATGGAAATGAGGCGCTGCCTTCTTCAGT

+HWI-EAS443:3:78:238:1835#0/1  
a¥Q]NZSOU]Z^`Z]OW\_¥`\_a\_Za[`Z^\_AP[b\_Z`¥LD  
@HWI-EAS443:3:78:275:14#0/1  
AAAGAGCCTAACATAGTCAAACCACATGAGAAAGGCATAA  
+HWI-EAS443:3:78:275:14#0/1  
X^ZaY^aa\_¥\_a]^\_M[¥S^`¥`\_a^`¥`\_Y\_\_Z\_\_`¥^  
@HWI-EAS443:3:78:294:338#0/1  
TAAATCCCAATTACCTCATGGCTTGAAGCAGGTGCTAGC  
+HWI-EAS443:3:78:294:338#0/1  
abbaaaaaaaaaaba\_aaaaaa`ab`^a[[^V^NUYWOV]  
@HWI-EAS443:3:78:295:1329#0/1  
GACAACCTGGAACCTGGAACCTTCGATCTTGGGGGGCTAT  
+HWI-EAS443:3:78:295:1329#0/1  
a`bab`a`]^`¥V\_`^`]]aa`\_a`\_\_\_\_`^^TZ[][\_  
@HWI-EAS443:3:78:323:1876#0/1  
GGGTTTTCGGCTGAATCGAGAAAATTGCTTCTCATTGTTC  
+HWI-EAS443:3:78:323:1876#0/1  
]\_`Xbbaaab`\_a`aR^a`a\_baa\_\_\_\_[a][aa`\_UORQ  
@HWI-EAS443:3:78:326:427#0/1  
GGTGAACCTTTGTAAGTATGGAGTTCTCACTCACTGACCCG  
+HWI-EAS443:3:78:326:427#0/1  
ab\_`ababb`^`aba`^`bbbbbb\_aaa^abaaabaaa`]Za  
@HWI-EAS443:3:78:350:515#0/1  
AAAATAGTTCCTCCTCATGCTTGCATATGTTCAATCGGG  
+HWI-EAS443:3:78:350:515#0/1  
ab`a`aa]a`\_`^`^\_a[\_`\_`\_`a^^^\_`XZ^`^^^\_Z]  
@HWI-EAS443:3:78:393:247#0/1  
AAAGAGCCTAACATAGTCAAACCACATGAGAAAGGCATAA  
+HWI-EAS443:3:78:393:247#0/1  
aabbabbbbbbaaaaaabab`\_a`aaa`^^`[a^aaaa`  
@HWI-EAS443:3:78:453:256#0/1  
AAATCCCAATTACCTCATGGCTTGAAGCAGGTGCTAGCA  
+HWI-EAS443:3:78:453:256#0/1  
aaaaa`\_aabaa`aaa`]^`\_]`[XR¥TYMU\_NZUWVZUV  
@HWI-EAS443:3:78:484:213#0/1  
ACTTTCCCAATAGAGCCTTCCTCCACTCCCCTGGGTGACT  
+HWI-EAS443:3:78:484:213#0/1  
T¥TMTGT\_b`ZTPP]VNZNWSR¥¥¥RT`¥RYEY\_RJYUXB  
@HWI-EAS443:3:78:509:114#0/1  
ATGCATCCTGTGCAGCCATGGATGACTTTCAGCTGATCCC  
+HWI-EAS443:3:78:509:114#0/1  
a`a^a`\_aab^a`\_a^`\_\_`\_\_\_\_]VY\_]\_]\_]\_Y]ZVZ  
@HWI-EAS443:3:78:524:318#0/1  
ATCGAAACTAACAAGTTTGCTGCAATATGCACACATTTGG  
+HWI-EAS443:3:78:524:318#0/1  
a`aa\_aa`aa]^`aaa\_\_a\_\_^a^^^\_`\_`\_`^\_]\_^\_  
@HWI-EAS443:3:78:590:1909#0/1  
CTTGGGGGGCTATATGAAGCAATCGAGGAGTGCCTGATTA  
+HWI-EAS443:3:78:590:1909#0/1  
aaa\_VSa¥^b^babab^]¥aa`¥ZU`a\_]aY`a`[\_^^^`^

@HWI-EAS443:3:78:620:661#0/1  
AACTTCTCCAGCCTTGAAAACCTTTAGAGCCTATGTAGATG  
+HWI-EAS443:3:78:620:661#0/1  
\_XZUPF[ ` []V¥XWYZ]aU]`[S\_[¥Za]Y^P]aVZaYT  
@HWI-EAS443:3:78:755:1144#0/1  
CAGATCTCTAGCAAGCTGGGTCCAAAATGAATTCAATAAG  
+HWI-EAS443:3:78:755:1144#0/1  
][[]]aba^]\_\_aa`\_XXUY`Y]]Y\_aVJ[X]\_Z[YYZ  
@HWI-EAS443:3:78:783:305#0/1  
TGCCCCGATTGAACATATCGCAAGCATGAGGAGGAACTAT  
+HWI-EAS443:3:78:783:305#0/1  
aa`aaaa\_`aabaa`b`a`\_\_a]\_\_`]]`\_a`\_\_]^\_`  
@HWI-EAS443:3:78:816:78#0/1  
AGCCAATTGAAGTGGGCACTCGGTGAAAATATGGCACCAG  
+HWI-EAS443:3:78:816:78#0/1  
ab`\_aabba`aaZ`ab`\_Xa^a`Wa]\_\_\_\_^^aaaWZRSV`  
@HWI-EAS443:3:78:818:579#0/1  
TTCCGATTTGTTTTCAAAGAATTCCTTGGTCATGTCTTTC  
+HWI-EAS443:3:78:818:579#0/1  
aaa`a^aaaa^aa\_]a^`\_[Z`a]]a`a`^¥^aa\_¥`\_]¥  
@HWI-EAS443:3:78:820:79#0/1  
CTGCACAGGATGCATTGAGCAAGCCGTATTTATGTACAC  
+HWI-EAS443:3:78:820:79#0/1  
a\_Y`\_aaaa[ `a¥` ``Y]\_`\_`XY]VU¥\_`\_`XYTVN  
@HWI-EAS443:3:78:852:1088#0/1  
ATCCGAAAATCGAAACTAACAAGTTTGCTGCAATATGCAC  
+HWI-EAS443:3:78:852:1088#0/1  
a`a`\_`aaa^aaa\_[ `]`a\_\_`^YU`\_\_` `a^]Z\_\_`^Z^^  
@HWI-EAS443:3:78:890:340#0/1  
CTTGGTCATGTCTTTCTCTTTGACAGAAGACTCGGCCTCA  
+HWI-EAS443:3:78:890:340#0/1  
` `bb\_T¥ba`X\_a\_aVa\_b`ba\_S^bbaba` `abbY]\_X`  
@HWI-EAS443:3:78:951:240#0/1  
GGGGTTTTCGGCTGAATCGAGAAAATTGCTTCTCATTGTT  
+HWI-EAS443:3:78:951:240#0/1  
aaabTaa`Y` `a`a\_\_Z]^`^^]\_\_[¥Z^\_\_\_\_^^\_\_Y^  
@HWI-EAS443:3:78:965:944#0/1  
CATGGAAATGAGGCGCTGCCTTCTTCAGTCTCTTCAGCAG  
+HWI-EAS443:3:78:965:944#0/1  
^aaaba[bbbbbbbaaab` `abaaa`bb\_\_a]ba]`aa`b  
@HWI-EAS443:3:78:999:461#0/1  
GGAGTCTATGGGATTCCTTTTCGTCAGTCCGAAAGAGGCGA  
+HWI-EAS443:3:78:999:461#0/1  
\_a]babb[a\_¥b¥` [V¥b^^U¥¥`aaWS\_\_W\_¥aZ`a]a]  
@HWI-EAS443:3:79:1036:1076#0/1  
AGCGGACTACACCCTTGACGAAGAGAGCAGGGCAAGAATC  
+HWI-EAS443:3:79:1036:1076#0/1  
a`aaa`\_`aaaaaaaa`aaaa`\_`aaaTaa` `^\_a\_  
@HWI-EAS443:3:79:1086:551#0/1  
GTTTCCGATTTGTTTTCAAAGAATTCCTTGGTCATGTCTT

+HWI-EAS443:3:79:1086:551#0/1  
a\_aa``\_Z`aa^aaa^aa``\_aa\_\_aaa^a\_a^Waa  
@HWI-EAS443:3:79:1172:945#0/1  
GCTTGCTAGAGATCTGGGCTCTGGCTCATCACTGTCATAC  
+HWI-EAS443:3:79:1172:945#0/1  
abbaa`^baa\_aaaaaaaaa`aaaaa`\_a^aa`Yaa`\_  
@HWI-EAS443:3:79:1237:987#0/1  
CGATTGGCCATGTTTCCGATTTGTTTCAAAGAATTCCTT  
+HWI-EAS443:3:79:1237:987#0/1  
abbbbbbbab`\_abbaa\_abbb`bbb\_H\_aab\_b`\_^bb  
@HWI-EAS443:3:79:1238:1630#0/1  
GAAAGGCATAAATCCCAATTACCTCATGGCTTGAAGCAG  
+HWI-EAS443:3:79:1238:1630#0/1  
aUY`babaab`¥baabab]ab`Y``aaa`V¥a``\_]V[\_\_\_\_  
@HWI-EAS443:3:79:1397:717#0/1  
ATCGAAACTAACAAGTTTGCTGCAATATGCACACATTTGG  
+HWI-EAS443:3:79:1397:717#0/1  
aa\_aaab^aa`Sa`Xa`\_\_Z`P\_\_`\_^¥^XYU^\_a`\_  
@HWI-EAS443:3:79:1409:980#0/1  
ACCGTTCTCTTTGTAATCATACAAATCAGGAAGAAATTT  
+HWI-EAS443:3:79:1409:980#0/1  
a``\_a\_\_Y^^]ab\_aaa`a¥Z]aaabV`\_WW^X^TX`a`  
@HWI-EAS443:3:79:141:613#0/1  
AAATGAATTCAATAAGGCATGTGAATTGACTGATTCAAGC  
+HWI-EAS443:3:79:141:613#0/1  
\_abaaa]aaaa`a`a\_a\_aa^a^Z``\_]`aY\_]¥```  
@HWI-EAS443:3:79:1428:1139#0/1  
AGAATATGGGAAGATCCGAAAATCGAAACTAACAAGTTT  
+HWI-EAS443:3:79:1428:1139#0/1  
¥a¥¥`aa`aba]V[a`Y`b``^aa`b[ZZY``][aYVSa`  
@HWI-EAS443:3:79:1557:1443#0/1  
GGCCATTTCTTGCTTATAGTGAAAAGCCTAGTTTTGATT  
+HWI-EAS443:3:79:1557:1443#0/1  
`]a\_a^aZ^a`[a^aZaaa\_¥\_\_`a¥]a\_a\_Z\_Xa[a`  
@HWI-EAS443:3:79:1579:314#0/1  
AATATGGGAAGATCCGAAAATCGAAACTAACAAGTTTGC  
+HWI-EAS443:3:79:1579:314#0/1  
abbb`baZ[aabb\_GZbbbbaaZa`aa\_aaa`b\_bZ`¥`^  
@HWI-EAS443:3:79:1660:858#0/1  
GAATTCAATAAGGCATGTGAATTGACTGATTCAAGCTGGA  
+HWI-EAS443:3:79:1660:858#0/1  
``bbbbbabbbab`abaaa\_abbaa\_baaba`b\_bPaaaa  
@HWI-EAS443:3:79:1662:1330#0/1  
TTTCGGCTGAATCGAGAAAATTGCTTCTCATTGTTTCAGGC  
+HWI-EAS443:3:79:1662:1330#0/1  
aba`aa\_a]ba\_[a^aZ`\_aa^`a\_¥`\_¥`^¥UaSVR\_U  
@HWI-EAS443:3:79:1702:1904#0/1  
ACCAGAAAAAGTAGACTTTGATGACTGCAAAGATGTTGGA  
+HWI-EAS443:3:79:1702:1904#0/1  
[Y^a^^baaabNaaa\_aaa\_\_¥¥`aaa\_aaWaa\_aW^aa\_

@HWI-EAS443:3:79:171:1643#0/1  
GATGAAATGGGGCATGGAAATGAGGCGCTGCCTTCTTCAG  
+HWI-EAS443:3:79:171:1643#0/1  
aaZ^ZQ\_¥a`aaba`^^]YX¥]`WN]¥a¥[`^[[^[^Y]Z  
@HWI-EAS443:3:79:1739:1691#0/1  
GGGGGCTATATGAAGCAATCGAGGAGTGCCTGATTAATGA  
+HWI-EAS443:3:79:1739:1691#0/1  
\_bbbbabaabbb``ab`a`baaaaa]aaU\_a\_aaa``\_`  
@HWI-EAS443:3:79:1758:168#0/1  
GGGGCATGGAAATGAGGCGCTGCCTTCTTCAGTCTCTTCA  
+HWI-EAS443:3:79:1758:168#0/1  
S\_PT[\_bbb\_aaaba`aa`Ua[]b^K\_bbU`bb^babaZ\_  
@HWI-EAS443:3:79:1780:588#0/1  
AATCAATAATTGTAGAATCTGGTGACCCGAATGCACTATT  
+HWI-EAS443:3:79:1780:588#0/1  
ab]aabb^abba¥baaaaa\_][[``\_a`^^^]Z\_\_a`  
@HWI-EAS443:3:79:205:306#0/1  
GGGCACTCGGTGAAAATATGGCACCAGAAAAAGTAGACTT  
+HWI-EAS443:3:79:205:306#0/1  
abbbbaab¥VaaaaaaaaaZ^]\_aa`]X`adW`\_`\_`  
@HWI-EAS443:3:79:318:1068#0/1  
GTTTCCGATTTGTTTTCAAAGAATTCCTTGGTCATGTCTT  
+HWI-EAS443:3:79:318:1068#0/1  
a[a`ab¥P¥¥`aU]a]aZT]VSZ^^¥`¥[``\_W`\_¥^YY¥W  
@HWI-EAS443:3:79:336:1457#0/1  
TGTGAATTGACTGATTCAAGCTGGATAGAACTTGATGAAA  
+HWI-EAS443:3:79:336:1457#0/1  
ab]a\_abaa`aaabaaaa`aa¥a[aa`aa\_aa``aa`\_`  
@HWI-EAS443:3:79:354:1766#0/1  
ATTTTCACCGAGTGCCCACTTCAATTGGCTTGTCTCTTC  
+HWI-EAS443:3:79:354:1766#0/1  
Z¥VWRZ`aa^Z[FYZ]U]\_\_^\_X]VRXZ`BBBBBBBBBBB  
@HWI-EAS443:3:79:409:1172#0/1  
TGTGGTTTACTATGTTAGGCTCTTTCCAGCCAAAGAATG  
+HWI-EAS443:3:79:409:1172#0/1  
ab`aa`aaaaabaa`a`[aaa\_`a`a`a`\_][0¥a`¥VXY  
@HWI-EAS443:3:79:409:1197#0/1  
GGGGCATGGAAATGAGGCGCTGCCTTCTTCAGTCTCTTCA  
+HWI-EAS443:3:79:409:1197#0/1  
`^]\_aW¥b[JTX[aa^T^¥\_\_a^¥]a`^YUXTWV^[]ZU]  
@HWI-EAS443:3:79:426:1600#0/1  
GAGAACCGGTTCAATTGAAATTGGAGTAACACGGAGGGAAG  
+HWI-EAS443:3:79:426:1600#0/1  
``aabbbbbb¥^bb`aaa`b```abYX\_baa``aaaaa`  
@HWI-EAS443:3:79:426:841#0/1  
CCACTCCCCTGGGTGACTCTCCGATTGGCCATGTTTCCGA  
+HWI-EAS443:3:79:426:841#0/1  
ab`a[aaaaXX`\_UaaZ[[^\_]`^¥^¥WR]VOM^V¥^TWXQ  
@HWI-EAS443:3:79:432:399#0/1  
CACCTTGACGAAGAGAGCAGGGCAAGAATCAAACTAGG

+HWI-EAS443:3:79:432:399#0/1  
abaaaaaaaaab`\_a`a`a`\_a\_]\_a`a`\_a^`\_`\_^`\_a]  
@HWI-EAS443:3:79:43:1904#0/1  
GGTTTGACTATGTTAGGCTCTTCCAGCCAAAGAATGTCT  
+HWI-EAS443:3:79:43:1904#0/1  
`¥L¥\_WM`aa]M[^\_]`\_]\_\_^aa^^[aaaaa`a`^QZ¥  
@HWI-EAS443:3:79:442:1282#0/1  
GGTTTTTCGGCTGAATCGAGAAAATTGCTTCTCATTGTTCA  
+HWI-EAS443:3:79:442:1282#0/1  
][Rbbba`a\_\_\_b\_aZQ^^a¥a`^aaaab\_X`^^`^`  
@HWI-EAS443:3:79:465:1483#0/1  
TGGTGCCATATTTTACCAGGTGCCACTTCAATTGGCTT  
+HWI-EAS443:3:79:465:1483#0/1  
a^PYb]H^¥R¥]`]]bb`¥]]V\_abaZa`b^YZZZ¥ZU  
@HWI-EAS443:3:79:522:1869#0/1  
ATAAAAGGAAGGTCTCATTGAGAAATGATACTGATGTGG  
+HWI-EAS443:3:79:522:1869#0/1  
\_VYZK^YOU¥W[Y^aa`a`\_`V¥X^`\_```a`Wa\_]UY  
@HWI-EAS443:3:79:56:758#0/1  
AAAGAATTCCTTGGTCATGTCTTTCTCTTTGACAGAAGAC  
+HWI-EAS443:3:79:56:758#0/1  
aY`\_TU`aa`aaa\_]aaa`Y```\_\_\_a`a`Sb]^ZZX[]  
@HWI-EAS443:3:79:596:1023#0/1  
TACTGTTTAAGGTCTCCAACATCTTTCAGTCATCAAAGT  
+HWI-EAS443:3:79:596:1023#0/1  
`¥`^a]aa]]¥^S]`\_]\_TX\_\_aa`\_`^aa`^^`^`\_aa[[¥  
@HWI-EAS443:3:79:640:1100#0/1  
GTCCTTGGGATCTTCTTTCATTTTCAATGTCCTGTAGCT  
+HWI-EAS443:3:79:640:1100#0/1  
aYa\_QW[OTRYa\_^[W[X[TTQYP^^[\_]Za^YXM^¥`R  
@HWI-EAS443:3:79:664:1343#0/1  
ATCATTAAATCAGGCACTCCTCGATTGCTTCATATAGCCCC  
+HWI-EAS443:3:79:664:1343#0/1  
]bbb]aaaabaaabaaabaaa\_aa^aa\_aaaa`a¥[`\_a  
@HWI-EAS443:3:79:664:854#0/1  
GGGGGCTATATGAAGCAATCGAGGAGTGCCTGATTAATGA  
+HWI-EAS443:3:79:664:854#0/1  
aa\_baaababaaaaabaa`aa`a\_a\_a\_`aaa^a\_`\_a\_  
@HWI-EAS443:3:79:677:1449#0/1  
CATGGCCTCGACTTGGCCTATCGCAGTCTCAAGAGC  
+HWI-EAS443:3:79:677:1449#0/1  
[a^¥]^ab\_`\_¥a¥\_]\_``ababababa]`aa]a``\_X\_b  
@HWI-EAS443:3:79:753:1913#0/1  
CACCACTGTCCAGCCATGATTCGGTCTCTTCTTCAATT  
+HWI-EAS443:3:79:753:1913#0/1  
a\_aaUaaa¥baa`aaba[NVS]\_[YGVLR[\_]]J]¥¥Y[¥  
@HWI-EAS443:3:79:861:868#0/1  
CCCCGTTTCGATGAAATGGAAATCCGAATACATGAAAC  
+HWI-EAS443:3:79:861:868#0/1  
aba`X\_]ZHY¥^\_[]^[\_Z\_\_^\_]¥\_]¥Q\_`[V[]^¥



@HWI-EAS443:3:79:865:1772#0/1  
CAAGGCCGTATTTATGTACTCCCTTCATTATGTATTCA  
+HWI-EAS443:3:79:865:1772#0/1  
Yb\_Q]`b[Rbb\_P`]YXS\_]^^\_aaR^X`a\_T]\_\_[\_^aU  
@HWI-EAS443:3:79:950:1340#0/1  
ACGAGGGGGAGGGAATACCACTATATGATGCAATCAAATG  
+HWI-EAS443:3:79:950:1340#0/1  
\_Y`\_UQVSV]X\_`aP¥\_a]\_P¥]`\_ZWU^¥¥^`\_\_X¥ZU  
@HWI-EAS443:3:79:968:1942#0/1  
AGAGCCTTCCCTCCACTCCCCTGGGTGACTCTCCGATTGGC  
+HWI-EAS443:3:79:968:1942#0/1  
aaaaaaaaaaaa¥`a\_`aaa\_`a^^[\_a¥``^[\_Y`¥¥¥W\_  
@HWI-EAS443:3:7:1006:765#0/1  
CATGGAATGAGGCGCTGCCTTCTTCAGTCTCTTCAGCAG  
+HWI-EAS443:3:7:1006:765#0/1  
abbabaaa`aaab^bbaa¥^a`Waa]``^\_]a\_WN\_Y\_a  
@HWI-EAS443:3:7:1020:1645#0/1  
GAATACCACTATATGATGCAATCAAATGCATGAAGACATT  
+HWI-EAS443:3:7:1020:1645#0/1  
a]a`ZP]\_]aaaa]``]a`aY^\_\_`¥aa\_\_^a`\_\_^¥\_]\_  
@HWI-EAS443:3:7:103:1939#0/1  
GGACACTTCTGCTGTAAAATAGTTCCTCCTCATGCTTGCG  
+HWI-EAS443:3:7:103:1939#0/1  
^a[`S[¥H¥\_`^¥b`b¥¥abab]Z¥`\_aa]W]a[\_]Ua]¥a  
@HWI-EAS443:3:7:104:823#0/1  
AGCCAACAAAATAAAATCTGAGAAGACACACATTCACATC  
+HWI-EAS443:3:7:104:823#0/1  
[abbabab^a\_ab`^\_aaaa\_`^\_a```\_aYU`aaaaaa`  
@HWI-EAS443:3:7:1222:1885#0/1  
CAATAATTGTAGAATCTGGTGACCCGAATGCACTATTGAA  
+HWI-EAS443:3:7:1222:1885#0/1  
abbbbaabbbSabb`\_babaWabaURaa`a`R^`ab\_`[aa  
@HWI-EAS443:3:7:1229:527#0/1  
CCTGGGTGACTCTCCGATTGGCCATGTTTCCGATTTGTTT  
+HWI-EAS443:3:7:1229:527#0/1  
Z\_[a\_¥`a\_¥¥^^^Va`Y[a\_\_a`^\_X\_a^[\_Uaa]\_H¥\_  
@HWI-EAS443:3:7:1333:1235#0/1  
TGGGGGGCTATATGAAGCAATCGAGGAGTGCCTGATTAAT  
+HWI-EAS443:3:7:1333:1235#0/1  
aaa`aa``aaaaa\_`\_`\_aaa]\_\_\_\_\_¥`SW\_\_¥\_`^\_`  
@HWI-EAS443:3:7:1356:700#0/1  
ATGTATTCAGTAGCCCTGCAGTGGGACACTTCTGCTGTAA  
+HWI-EAS443:3:7:1356:700#0/1  
ab\_Z\_b\_abbbaa]ZV`a\_aa¥^^`Ua\_a`V`aX\_a]aa  
@HWI-EAS443:3:7:1401:1050#0/1  
AATCAGGCACTCCTCGATTGCTTCATATAGCCCCCAAGA  
+HWI-EAS443:3:7:1401:1050#0/1  
aab`a`aba\_aaaa`ba\_aa\_aaUaaa`a\_YW[WV]\_`^\_`  
@HWI-EAS443:3:7:1402:1103#0/1  
GAAAAAGTAGACTTTGATGACTGCAAAGATGTTGGAGACC

+HWI-EAS443:3:7:1402:1103#0/1  
a`^a#b`a\_a\_aaa`a`\_^\_aYa]\_a\_\_a\_^`[W][ZT  
@HWI-EAS443:3:7:1403:323#0/1  
GGGGTTTTCGGCTGAATCGAGAAAATTGCTTCTCATTGTT  
+HWI-EAS443:3:7:1403:323#0/1  
^aab]]a[¥aa\_¥RZZXYN]^RVVZW[LHV]^YG^VBB  
@HWI-EAS443:3:7:1448:975#0/1  
AGTAGGAGTCTATGGGATTCCTTTCGTCAGTCCGAAAGAG  
+HWI-EAS443:3:7:1448:975#0/1  
a\_S\_bb\_^¥ZaU\_baa]ZZUU¥^a\_a[X^`RZX^VW\_`¥`  
@HWI-EAS443:3:7:1477:1352#0/1  
CATGGAATGAGGCGCTGCCTTCTTCAGTCTTTCAGCAG  
+HWI-EAS443:3:7:1477:1352#0/1  
abb`^a]^`aaba`bb\_Va\_^`aa^\_aU^`]aa¥aW\_a  
@HWI-EAS443:3:7:149:192#0/1  
CATGGAATGAGGCGCTGCCTTCTTCAGTCTTTCAGCAG  
+HWI-EAS443:3:7:149:192#0/1  
aa`a```a`aaaaaaab\_^a`\_`¥^¥¥¥\_`^\_UQ¥`Q¥\_  
@HWI-EAS443:3:7:1505:1009#0/1  
CAGATTTGCCAGTAAGGTCCTGCACACTTTCCCAATAGA  
+HWI-EAS443:3:7:1505:1009#0/1  
abbbbbbbbaabaabab`¥ba\_aaaaab`\_Y\_a^aaaa  
@HWI-EAS443:3:7:158:597#0/1  
ATTTGTGTGGCTCCAGTCTCGGGTCAGTGAGTGAGAACTC  
+HWI-EAS443:3:7:158:597#0/1  
ababa`b]aab`a]V\_L]TY^a`QUZUR]NVQ\_XVP`HSZ  
@HWI-EAS443:3:7:1742:442#0/1  
CTTGGGGGCTATATGAAGCAATCGAGGAGTGCCTGATTA  
+HWI-EAS443:3:7:1742:442#0/1  
Z\_^`bbbb[abbbba[baaaa[aa¥0Q]a[X^aVK[\_]a`\_  
@HWI-EAS443:3:7:1746:693#0/1  
GCATATTGCAGCAAACCTGTTAGTTTTCGATTTTCGGATCT  
+HWI-EAS443:3:7:1746:693#0/1  
aa\_`Z]\_\_QVTX[^[M]`\_Z`QVS[XQWL]WYWSMBBBBB  
@HWI-EAS443:3:7:1776:102#0/1  
GGGGGCTATATGAAGCAATCGAGGAGTGCCTGATTAATGA  
+HWI-EAS443:3:7:1776:102#0/1  
R\_bb\_T[a\_b]baVbabba¥b`b][bVb[]b`ab`]Z\_b`  
@HWI-EAS443:3:7:1788:965#0/1  
ACCGATTTGAGATAATTGAAGGAAGAGACCGAATCATGGC  
+HWI-EAS443:3:7:1788:965#0/1  
YVXZ\_aabb\_b\_b`]aaaa`a]\_a\_\_^\_Y]a]\_^G\_``BB  
@HWI-EAS443:3:7:189:774#0/1  
GGCATGGAATGAGGCGCTGCCTTCTTCAGTCTTTCAGC  
+HWI-EAS443:3:7:189:774#0/1  
abaaaa^aaabaaaaa]aa[aa\_aa`a`W`a¥a]¥\_^V  
@HWI-EAS443:3:7:196:680#0/1  
GGAAGATCCGAAAATCGAAACTAACAAGTTTGCTGCAATA  
+HWI-EAS443:3:7:196:680#0/1  
[[Y¥\_\_a`\_aY`bb\_aa`\_^aaa][`P\_[Z^`\_Xaaa]^]

@HWI-EAS443:3:7:252:1609#0/1  
TTTCACTATAAGACAAGAAATGGCCAGTAGGAGTCTATGG  
+HWI-EAS443:3:7:252:1609#0/1  
abbbbaabbabbaabaaa\_aaa\_0a`a¥a`aaa\_^\_\_aa^  
@HWI-EAS443:3:7:366:908#0/1  
AGAACACAGTATTTTTCCCATTTGTGTGGCTCCAGTCTCG  
+HWI-EAS443:3:7:366:908#0/1  
\_\_\_bab^a`Zaaaa]a`bbaaa^J\_W``\_]YXWVaaBB  
@HWI-EAS443:3:7:397:424#0/1  
CACATGCCTTATTGAATTCATTTTGGACCCAGCTTGCTAG  
+HWI-EAS443:3:7:397:424#0/1  
ab]\_`a`\_aa[aa^¥\_a`V^aW^a`\_\_Y`¥`aZ\_aa^a`a  
@HWI-EAS443:3:7:415:1599#0/1  
CCACAACCTTGAGGGGTTTTCGGCTGAATCGAGAAAATTGC  
+HWI-EAS443:3:7:415:1599#0/1  
S\_]b[KM`b^bbaaba`ab[b\_ababa`Va\_^^`SaW^^`  
@HWI-EAS443:3:7:433:1964#0/1  
CAATAATTGTAGAATCTGGTGACCCGAATGCACTATTGAA  
+HWI-EAS443:3:7:433:1964#0/1  
[`Xb^Va¥`ZJ\_a]VT\_b^]RTbaa`a]\_^\_^R\_\_aJIaa  
@HWI-EAS443:3:7:461:1286#0/1  
GAGTGACATAAATACGGCCTTGCTCAATGCATCCTGTGC  
+HWI-EAS443:3:7:461:1286#0/1  
ab[\_bUaabbbbbaaaaa^aaaa`baaaaaa]aZWT[  
@HWI-EAS443:3:7:521:1800#0/1  
TTTCACCGAGTGCCCACTTCAATTGGCTTGTCTCTTCAT  
+HWI-EAS443:3:7:521:1800#0/1  
a]aabaa\_[\_a\_Y`^`a`a^``[W\_QV\_TJF¥^]0]VFVV  
@HWI-EAS443:3:7:52:526#0/1  
GGCTTTTCACTATAAGACAAGAAATGGCCAGTAGGAGTCT  
+HWI-EAS443:3:7:52:526#0/1  
a`a\_a]`^`\_a\_\_\_a\_a\_\_`[\_^\_\_\_]TR[FU\_\_X^UR¥  
@HWI-EAS443:3:7:61:167#0/1  
ATCAGGCACTCCTCGATTGCTTCATATAGCCCCCAAGAT  
+HWI-EAS443:3:7:61:167#0/1  
`ab`a\_]aa^baaa`Y¥aa¥[¥Z^^U`\_¥`^^^ZRYZZ¥W  
@HWI-EAS443:3:7:65:226#0/1  
GGGGCATGGAATGAGGCGCTGCCTTCTTCAGTCTCTTCA  
+HWI-EAS443:3:7:65:226#0/1  
0\_\_^\_^\_b\_¥V]`ba`aa\_aab\_]`WT\_a``¥VT]¥^VL^  
@HWI-EAS443:3:7:70:584#0/1  
GTGTACATAAATACGGCCTTGCTCAATGCATCCTGTGCAG  
+HWI-EAS443:3:7:70:584#0/1  
aVa\_a`]`^a^a`\_`^]\_^¥UX]¥¥¥\_`^TSUVNZSY^  
@HWI-EAS443:3:7:713:736#0/1  
GTCCAAAATGAATTCAATAAGGCATGTGAATTGACTGATT  
+HWI-EAS443:3:7:713:736#0/1  
aY\_WT`aa``]Y]\_R]V\_R`\_TVU`Sa^0[J\_]`[\_^¥X  
@HWI-EAS443:3:7:754:1008#0/1  
GCTTGCTAGAGATCTGGGCTCTGGCTCATCACTGTCATAC

+HWI-EAS443:3:7:754:1008#0/1  
a\_aaa\_`\_aaa[^`aaa`a^`\_]\_¥`\_\_\_\_\_^U\_^\_X  
@HWI-EAS443:3:7:792:720#0/1  
GGCCAGTAGGAGTCTATGGGATTCCTTCGTCAGTCCGAA  
+HWI-EAS443:3:7:792:720#0/1  
abbabaabba`a\_\_aaabaa\_aa\_\_aaa]`¥¥`\_`NW¥a\_\_  
@HWI-EAS443:3:7:869:1958#0/1  
CGATAGGCCAAGTGTGCGAGGCCCATGTTCCCTATATGTGAG  
+HWI-EAS443:3:7:869:1958#0/1  
aaaab^babbbbaa[YZbbbaa\_^b\_\_^a¥[^`aaaZTKY¥B  
@HWI-EAS443:3:80:1015:96#0/1  
GTTCTCTTCATGTTCTTTGTCCTTGGGATCTTCTCTTCAT  
+HWI-EAS443:3:80:1015:96#0/1  
a¥a\_a\_aaaRb\_`a\_aaab¥`\_aaa]¥Y`\_`\_]a¥a^Q[a  
@HWI-EAS443:3:80:1016:1296#0/1  
TTGGGGGGCTATATGAAGCAATCGAGGAGTGCCTGATTAA  
+HWI-EAS443:3:80:1016:1296#0/1  
\_b^``abb\_ba\_`\_`a`a`aaZ`\_bXb[Q\_\_bbaabZ]ba]  
@HWI-EAS443:3:80:1079:1297#0/1  
TAATCAGGCACTCCTCGATTGCTTCATATAGCCCCCAAG  
+HWI-EAS443:3:80:1079:1297#0/1  
aab`b`\_aa`\_`^`\_a`\_\_\_a`\_```\_a^`\_]Z\_¥\_  
@HWI-EAS443:3:80:1126:698#0/1  
GGTGAATCAATAATTGTAGAATCTGGTGACCCGAATGCAC  
+HWI-EAS443:3:80:1126:698#0/1  
ab]a¥Y`¥]a^[^¥`XX`[\_\_\_]L]^W^¥ZXS][[T^]RL  
@HWI-EAS443:3:80:1170:1654#0/1  
GAAGATCCCAAGGACAAAGAACATGAAGAGAACAAGCCAA  
+HWI-EAS443:3:80:1170:1654#0/1  
abbba`[ [T]a\_b[Vbbbbba`^aabaVSbba\_H¥`]VZ\_\_  
@HWI-EAS443:3:80:1186:302#0/1  
ATGAGAAAGGCATAAATCCCAATTACCTCATGGCTTGAA  
+HWI-EAS443:3:80:1186:302#0/1  
abaabaa\_baaa`aab^RY^aa`\_]`````\_]aaZ[SS  
@HWI-EAS443:3:80:1246:422#0/1  
GGCATAAATCCCAATTACCTCATGGCTTGGAAGCAGGTGC  
+HWI-EAS443:3:80:1246:422#0/1  
abaababab^aaaabaa\_\_a\_aaa`]a\_L^Ma[P¥T`SLV  
@HWI-EAS443:3:80:1254:235#0/1  
GTTTGTTCATGTATTCCGATTTCATTTCATCGACGAAC  
+HWI-EAS443:3:80:1254:235#0/1  
aaaaa\_aa]aaa]\_aa\_aa^a`^^[^`aaY\_^^a\_Y\_\_\_V  
@HWI-EAS443:3:80:125:331#0/1  
CACTTTCCCAATAGAGCCTTCCCTCCACTCCCCTGGGTGAC  
+HWI-EAS443:3:80:125:331#0/1  
a^a`Vaaabaa`\_`\_`^^¥^^^^^^¥Z`^]a¥[S[UVVU  
@HWI-EAS443:3:80:1272:1087#0/1  
CTTCTTTTGACATTTGGGAAAGCTTGCCCTCAATGCAGCC  
+HWI-EAS443:3:80:1272:1087#0/1  
aaZ¥```]bYY¥\_b[`Taa`¥\_Y¥ZZOZKaOW]b]L]NDD

@HWI-EAS443:3:80:1309:1950#0/1  
CTGTAATCTCAAATTTTTCTTCAATTGTCTCTTCGCCTCT  
+HWI-EAS443:3:80:1309:1950#0/1  
a`b\_b\_baabbba`bbbaabbbaaabaabbbabba`\_aa  
@HWI-EAS443:3:80:1316:1453#0/1  
CCTTTCTCATGTGGTTTGACTATGTTAGGCTCTTTCCAGC  
+HWI-EAS443:3:80:1316:1453#0/1  
^\_ba¥^babb`>`baab[¥`a`¥`aaaa\_X\_[[a`¥^aZF  
@HWI-EAS443:3:80:1327:785#0/1  
CTTCAATAGTGCATTTCGGGTCACCAGATTCTACAATTATT  
+HWI-EAS443:3:80:1327:785#0/1  
`bbbbbbb`]b`baa^`bb\_bbaaaba^Z``aabaabb  
@HWI-EAS443:3:80:1341:1630#0/1  
ATCAGGCACTCCTCGATTGCTTCATATAGCCCCCAAGAT  
+HWI-EAS443:3:80:1341:1630#0/1  
J^[b`\_`aa^¥GXY^^a`Q]a\_aa`ba`ST\_[aSNY]RV]  
@HWI-EAS443:3:80:1493:239#0/1  
GCTGGAAAGAGCCTAACATAGTCAAACCACATGAGAAAGG  
+HWI-EAS443:3:80:1493:239#0/1  
aaa^\_a¥aaa`^X`\_a^\_a`a\_Z\_¥\_R`Z\_\_a]a^Z^]  
@HWI-EAS443:3:80:1506:955#0/1  
GAGAAAGGCATAAATCCCAATTACCTCATGGCTTGAAGC  
+HWI-EAS443:3:80:1506:955#0/1  
aZ`\_aaa`\_aaba\_a`\_aabbba[TWZ[a\_\_^b\_WX][UB  
@HWI-EAS443:3:80:1527:518#0/1  
GGGGTTTTCGGCTGAATCGAGAAAATTGCTTCTCATTGTT  
+HWI-EAS443:3:80:1527:518#0/1  
aaV¥DUbXU\_``[ ]^]T]a\_]aTa`\_aJ[\_aX`\_Z\_aV[]  
@HWI-EAS443:3:80:1543:1463#0/1  
ATTCGATTTCCATTTTCATCGACGAACGGGGTGAATCAAT  
+HWI-EAS443:3:80:1543:1463#0/1  
abbbbb\_aaaba`ba`\_a\_aabaa[UR\_aaa]a`aaXZ]a  
@HWI-EAS443:3:80:1672:1255#0/1  
CGATTGGCCATGTTTCCGATTTGTTTTCAAAGAATTCCTT  
+HWI-EAS443:3:80:1672:1255#0/1  
¥`\_a`ba\_abb`bbabbbbaaabbabbbbbb]ab  
@HWI-EAS443:3:80:190:106#0/1  
AATGGTTCAATTTTGGCGTTCACTTCTTTTGACATTTGGG  
+HWI-EAS443:3:80:190:106#0/1  
a^``\_V\_`\_\_`\_\_`\_X¥`Y¥[SX^ZT[\_\_\_]TWWUY]XMX]  
@HWI-EAS443:3:80:20:1760#0/1  
GGGGCATGGAATGAGGCGCTGCCTTCTTCAGTCTCTTCA  
+HWI-EAS443:3:80:20:1760#0/1  
\_S]X\_[`ZXU]\_]ZZY[```^]\_a\_YM[R[HLY]`^R[YL  
@HWI-EAS443:3:80:295:217#0/1  
ATCTACATAGGCTCTAAAGTTTTCAAGGCTGGAGAAGTTC  
+HWI-EAS443:3:80:295:217#0/1  
`ab^baaababa^a¥UUabS`^`¥[T[`Z^X\_V¥RZWMUL  
@HWI-EAS443:3:80:315:1018#0/1  
TGGGGCATGGAATGAGGCGCTGCCTTCTTCAGTCTCTTC

+HWI-EAS443:3:80:315:1018#0/1  
``a`aaW`¥`\_`a\_baaaabb`\_`Z\_]aaaa`\_]`a\_^`^`  
@HWI-EAS443:3:80:362:397#0/1  
AGGGGTTTTCGGCTGAATCGAGAAAATTGCTTCTCATTGT  
+HWI-EAS443:3:80:362:397#0/1  
ZabbbRUUSa\_X\_[`a^¥abb`\_V`KZ[`V\_` `aZYZ]¥\_  
@HWI-EAS443:3:80:379:657#0/1  
ATCAGGCAATCTGAGGGGGCGTGGTGTCGCCTCAAGAAT  
+HWI-EAS443:3:80:379:657#0/1  
``aa[ `\_][[aa`V]Y[``\_`\_\_^a\_UXU\_\_T¥¥^`^`\_`¥^`  
@HWI-EAS443:3:80:386:747#0/1  
CATTAATCAGGCACTCCTCGATTGCTTCATATAGCCCCC  
+HWI-EAS443:3:80:386:747#0/1  
¥\_b\_aa\_]ba\_]Z[ ]\_`\_¥U\_Z\_]aa^¥\_]ZYSWa``  
@HWI-EAS443:3:80:431:511#0/1  
AGGCAATCTGAGGGGGCGTGGTGTCGCCTCAAGAATGGT  
+HWI-EAS443:3:80:431:511#0/1  
aa`¥]]]¥X]U^\_Y]P\_aH\_\_W^T^TP\_¥W[XN]a[[ZUU  
@HWI-EAS443:3:80:43:946#0/1  
CAAATGTAGGACCAAAGAAGGAAGACGGAAAACAAACCTG  
+HWI-EAS443:3:80:43:946#0/1  
aaYaaa]aa\_aaaa`aa]]\_`^]`^a¥^`\_\_\_\_`\_\_`\_\_`^^]`  
@HWI-EAS443:3:80:440:661#0/1  
GCATCCTGTGCAGCCATGGATGACTTTTCAGCTGATCCCAA  
+HWI-EAS443:3:80:440:661#0/1  
a]UXba]0¥`]XZ¥¥`]Y\_US]YZ\_ZZV]\_\_¥]SRX^T`[  
@HWI-EAS443:3:80:486:1416#0/1  
CATCGACGAACGGGTGAATCAATAATTGTAGAATCTGGT  
+HWI-EAS443:3:80:486:1416#0/1  
]Q]a\_]\_¥¥`^XY\_]K¥\_ZV\_WV\_X]XW`K`XXZT\_WX[]  
@HWI-EAS443:3:80:565:52#0/1  
AGAAATTTAGGCTTCTCTACCCCTGTTGTGTTACATATAC  
+HWI-EAS443:3:80:565:52#0/1  
abaaaa`a`a`a`a¥a`a]\_`^\_[`X\_`]^]\_`ZX^\_\_^^  
@HWI-EAS443:3:80:577:1704#0/1  
AATTTAGGCTTCTCTACCCCTGTTGTGTTACATATACTGT  
+HWI-EAS443:3:80:577:1704#0/1  
X[Ya\_aaab\_aa`a`a`Za^]a0\_`I`]\_]a`\_XaU\_[[  
@HWI-EAS443:3:80:578:1040#0/1  
TCCGAAAATCGAACTAACAAGTTTGTGCAATATGCACA  
+HWI-EAS443:3:80:578:1040#0/1  
aaaa\_`bbaaa`\_`\_aa`aaaa`^`\_`\_`aaaa`aa\_aa``  
@HWI-EAS443:3:80:590:1492#0/1  
GGGGGCTATATGAAGCAATCGAGGAGTGCCTGATTAATGA  
+HWI-EAS443:3:80:590:1492#0/1  
a\_a``aaaabaa`a\_bba`a\_`\_`a\_aX\_`\_`aa\_a`a`a\_]`  
@HWI-EAS443:3:80:768:1658#0/1  
GGGGCATGGAATGAGGCGCTGCCTTCTTCAGTCTCTTCA  
+HWI-EAS443:3:80:768:1658#0/1  
aba\_bbab`\_babaa`\_`a`baaaaa`\_`\_`\_aZa\_a\_`\_`^`

@HWI-EAS443:3:80:794:133#0/1  
CATGTATTTCGATTTCCATTTTCATCGACGAACGGGGTGAA  
+HWI-EAS443:3:80:794:133#0/1  
a``bLZb\_\_aaU\_\_\_\_\_`\_`````\_^[a^Y`VS¥]^U\_X^^]  
@HWI-EAS443:3:80:814:912#0/1  
CCTTGGGATCTTCTTTCATTTTCAATGTCCTGTAGCTCT  
+HWI-EAS443:3:80:814:912#0/1  
K\_a]`a\_Naa`b^b]^`a`bbbaaaaa\_`b\_aaaa^aa``  
@HWI-EAS443:3:80:843:206#0/1  
AAATCCCAATTACCTCATGGCTTGAAGCAGGTGCTAGCA  
+HWI-EAS443:3:80:843:206#0/1  
aaZ\_aa^Z]a``][aa`^]Y]a^`\_[\_ZVU¥BBBBBBBB  
@HWI-EAS443:3:80:848:234#0/1  
CTCCACAACCTTGAGGGGTTTTCGGCTGAATCGAGAAAATT  
+HWI-EAS443:3:80:848:234#0/1  
aaaabaaaababaaaaa^aaaaa\_a`aa^Xa\_a\_a\_\_`[  
@HWI-EAS443:3:80:885:1309#0/1  
ATTCGAGCCGAACGGCTGCATTGAGGGCAAGCTTCCCAA  
+HWI-EAS443:3:80:885:1309#0/1  
aaaaa`ba\_a\_`Z^`\_a\_aZYG[\_^ZVZQRRZ\_ZXWZZ  
@HWI-EAS443:3:80:891:1213#0/1  
AGCAGGTGCTAGCAGAGCTACAGGACATTGAAAATGAAGA  
+HWI-EAS443:3:80:891:1213#0/1  
a`\_`aaVW\_aa¥`\_]`a`\_`\_`a^Z]¥a\_``^`[W[]Z¥[]\_  
@HWI-EAS443:3:80:955:1819#0/1  
CTCCCTTCATTATGTATTAGTAGCCCTGCAGTGGGACAC  
+HWI-EAS443:3:80:955:1819#0/1  
ab`babbaabba`abbaaa^ba\_`\_aa\_aa\_a`\_\_aa]  
@HWI-EAS443:3:81:1036:1499#0/1  
CATATTTTACCGAGTGCCCACTTCAATTGGCTTGTCTC  
+HWI-EAS443:3:81:1036:1499#0/1  
abbXabaaababb`a^baaa\_a`baa\_a`aa`a`S[[MRO  
@HWI-EAS443:3:81:1037:1151#0/1  
CCTTGGGATCTTCTTTCATTTTCAATGTCCTGTAGCTCT  
+HWI-EAS443:3:81:1037:1151#0/1  
abaa¥¥^a\_¥a\_[]`bbb¥^`\_a`aaaa`abbaa`^`ZaX  
@HWI-EAS443:3:81:1049:987#0/1  
GGTGAACCTTTGTAAGTATGGAGTTCTCACTCACTGACCCG  
+HWI-EAS443:3:81:1049:987#0/1  
\_]Z`aZG^^]^T[¥¥N`aaaaaa`[X`\_aaaa\_\_[R`a  
@HWI-EAS443:3:81:1060:1853#0/1  
CAGTATTTTTCCATTTGTGTGGCTCCAGTCTCGGGTCAG  
+HWI-EAS443:3:81:1060:1853#0/1  
`b`^ab]abaaaaaaaaa]`¥F\_```^^¥Y¥[YX^NV]T  
@HWI-EAS443:3:81:1062:973#0/1  
GGCTTGTCTCTTCATGTTCTTTGTCCTTGGGATCTTCTC  
+HWI-EAS443:3:81:1062:973#0/1  
aa\_aaa\_a\_a^aa\_aa^\_``aaa^Z¥^`aaa`Z\_\_aaWa^  
@HWI-EAS443:3:81:107:1452#0/1  
GGGCGATGGAAATGAGGCGCTGCCTTCTTCAGTCTCTCA

+HWI-EAS443:3:81:107:1452#0/1  
`X`\_`]]]\_^]\_[Q^`^`YXY^XU^^^`  
@HWI-EAS443:3:81:1093:1202#0/1  
CAGAAAAAGTAGACTTTGATGACTGCAAAGATGTTGGAGA  
+HWI-EAS443:3:81:1093:1202#0/1  
aabab\_`aa\_`aaaaabaaba`a`a`a`aaa`\_a\_a`a]  
@HWI-EAS443:3:81:1116:40#0/1  
CATTCTTTGGCTGGAAAGAGCCTAACATAGTCAAACCACA  
+HWI-EAS443:3:81:1116:40#0/1  
Z¥`Za`\_bbaab\_\_^a]`^XaW`]`a`U^aaZ]Y]^  
@HWI-EAS443:3:81:1133:1303#0/1  
AACCTGGAACCTTCGATCTTGGGGGGCTATATGAAGCAAT  
+HWI-EAS443:3:81:1133:1303#0/1  
\_\_¥\_Xa[^a[^baba`aab\_`a]\_\_a``aaaab^]YX]¥a  
@HWI-EAS443:3:81:113:87#0/1  
GTCCAGGCCATGATTCGGTCTCTTCCTTCAATTATCTCAA  
+HWI-EAS443:3:81:113:87#0/1  
a\_ab^aaaa`aa`\_\_¥[`W¥`YN^WV`]^^[^¥Y[Q]]ZZ  
@HWI-EAS443:3:81:1162:525#0/1  
ATTAATCAGGCACTCCTCGATTGCTTCATATAGCCCCCA  
+HWI-EAS443:3:81:1162:525#0/1  
[W`\_`ba`aR[\_aaaa\_aa`\_a\_a[S`aaaa`^XT^a¥a  
@HWI-EAS443:3:81:1216:1719#0/1  
CGAAAATCGAAACTAACAAGTTTGCTGCAATATGCACACA  
+HWI-EAS443:3:81:1216:1719#0/1  
^aa¥bbaYbab\_ZW`aY]a^T\_`V\_a^H]a\_`ab\_\_QRX]  
@HWI-EAS443:3:81:127:1829#0/1  
GGGGGCTATATGAAGCAATCGAGGAGTGCCTGATTAATGA  
+HWI-EAS443:3:81:127:1829#0/1  
^aaa```bbbbbbaa``aaa`\_aa`\_a\_a`ba\_`a  
@HWI-EAS443:3:81:1302:425#0/1  
ATTAATCAGGCACTCCTCGATTGCTTCATATAGCCCCCA  
+HWI-EAS443:3:81:1302:425#0/1  
abbbab\_baa`b`b^\_baaaaa`aa\_aaaaaZ`V\_V[a  
@HWI-EAS443:3:81:1311:180#0/1  
GGAAAGAGCCTAACATAGTCAAACCACATGAGAAAGGCAT  
+HWI-EAS443:3:81:1311:180#0/1  
a`¥a`^`^]a\_aV\_aaa^^`\_\_ZX\_W]\_\_^\_\_\_\_^\_U^]  
@HWI-EAS443:3:81:1406:1708#0/1  
AGGATGCATTGAGCAAGCCGTATTTATGTACTCCCTT  
+HWI-EAS443:3:81:1406:1708#0/1  
aa`\_a\_a]ab`^aaY`b``^[a\_\_```\_\_X\_\_R\_0`^Q]\_\_  
@HWI-EAS443:3:81:1440:1889#0/1  
CTGGGTCCAAAATGAATTCAATAAGGCATGTGAATTGACT  
+HWI-EAS443:3:81:1440:1889#0/1  
Ob\_b\_babbbbbb\_bbbbbbabbbaabbbb`bababa`a  
@HWI-EAS443:3:81:1503:1428#0/1  
GCAAGCTGGGTCCAAAATGAATTCAATAAGGCATGTGAAT  
+HWI-EAS443:3:81:1503:1428#0/1  
a\_\_``aaa\_a]][\_]\_\_aa\_\_a\_]^\_^`\_`QW\_`aZ\_]^^



@HWI-EAS443:3:81:151:694#0/1  
CAGTCATCAAAGTCTACTTTTTCTGGTGCCATATTTTCAC  
+HWI-EAS443:3:81:151:694#0/1  
aaa]`V`\_a`^PZ`aaX¥`]¥`[RXa\_ZJV^]\_\_aa  
@HWI-EAS443:3:81:1578:450#0/1  
ATCGAAACTAACAAGTTTGCTGCAATATGCACACATTTGG  
+HWI-EAS443:3:81:1578:450#0/1  
a]V¥^``ab\_ba`W^]baabaa¥`Ta`[aUa^a\_aaaSR`  
@HWI-EAS443:3:81:1629:412#0/1  
AGAACTTGATGAAATAGGAGAAGATGTTGCCCGATTGAA  
+HWI-EAS443:3:81:1629:412#0/1  
[aabX`ab`aba^¥b]^`a`a`b`aa\_a\_X¥\_X\_\_`a\_¥a  
@HWI-EAS443:3:81:1668:1455#0/1  
ATTCGGATTTCCATTTTCATCGACGAACGGGGTGAATCAAT  
+HWI-EAS443:3:81:1668:1455#0/1  
`abbbb]V\_ab]S\_Zaa``aY\_^X`Z`aa^Xa\_a\_Y^]\_  
@HWI-EAS443:3:81:1673:384#0/1  
AGCAATTTTCTCGATTGAGCCGAAAACCCCTCAAGTTGTG  
+HWI-EAS443:3:81:1673:384#0/1  
aVL`\_aaba¥[¥a`a^a^W\_a`^^\_XSJV\_^^[aS\_\_[\_  
@HWI-EAS443:3:81:170:513#0/1  
ACCGATTTGAGATAATTGAAGGAAGAGACCGAATCATGGC  
+HWI-EAS443:3:81:170:513#0/1  
\_aa`]a`ab^a^`aaa\_]aa\_aa\_a^`aa\_Y^\_¥^`\_`  
@HWI-EAS443:3:81:1711:774#0/1  
GACATTTCTTGCTGGAAAGAGCCTAACATAGTCAAACCA  
+HWI-EAS443:3:81:1711:774#0/1  
a]WX[ZO`VN`HOX[P]X`P]TOXT¥\_Y]aYLSKYPRGRU  
@HWI-EAS443:3:81:1726:767#0/1  
ATTCAGTAGCCCTGCAGTGGGACACTTCTGCTGTAAAATA  
+HWI-EAS443:3:81:1726:767#0/1  
^W]TXa^^QL[a^V`^[XFX[]W][`^`aM`\_\_\_^`¥\_`^  
@HWI-EAS443:3:81:199:946#0/1  
GGCATAAATCCCAATTACCTCATGGCTTGGAAAGCAGGTGC  
+HWI-EAS443:3:81:199:946#0/1  
abbabbU[babbbbabbbbab\_ababbbM]\_`YZP\_aN\_\_  
@HWI-EAS443:3:81:303:669#0/1  
AGCTTTCCCAAATGTCAAAGAAGTGAACGCCAAAATTGA  
+HWI-EAS443:3:81:303:669#0/1  
abaaaab`a^UY\_aZba[\_a`Z``V]aaaaa^]YPY[Z][  
@HWI-EAS443:3:81:315:1237#0/1  
TGGAGACCTTAAACAGTATGACAGTATGAGCCAGAGCCC  
+HWI-EAS443:3:81:315:1237#0/1  
aaaaa¥¥baabaaaaa[]a^aaa`[\_\_\_[^¥¥\_\_QRU\_\_`^  
@HWI-EAS443:3:81:415:750#0/1  
ACCGAACTTCTCCAGCCTTGAACCTTTAGAGCCTATGTA  
+HWI-EAS443:3:81:415:750#0/1  
`ba]aaZab``aa`\_`ba\_aX]`WZ\_aaaaaT]\_a`aa][  
@HWI-EAS443:3:81:426:1326#0/1  
GGCTTGTCTCTTCATGTTCTTTGTCCTTGGGATCTTCTC

+HWI-EAS443:3:81:426:1326#0/1  
a\_aaaa]ababbbaabaabaabaaaa`^Y]¥Y`^aaaa\_  
@HWI-EAS443:3:81:462:1059#0/1  
GAGGGGTTTTTCGGCTGAATCGAGAAAATTGCTTCTCATTG  
+HWI-EAS443:3:81:462:1059#0/1  
]QYa`ba\_b`]\_]`abaaaa]`Wa\_R`¥\_adW]\_ba]]V  
@HWI-EAS443:3:81:470:1742#0/1  
TGGGACACTTCTGCTGTAAAATAGTTCCTCCTCATGCTTG  
+HWI-EAS443:3:81:470:1742#0/1  
`^`\_abbbaabbaaaa\_bbbaa`]¥a`a`aaabaa`^^^^`  
@HWI-EAS443:3:81:477:1448#0/1  
GACCCGAATGCACTATTGAAGCACCGATTTGAGATAATTG  
+HWI-EAS443:3:81:477:1448#0/1  
¥`aa`aa\_[``\_`aaaa`\_abb`^aaa`\_`^]]]\_¥a`  
@HWI-EAS443:3:81:641:411#0/1  
ATGTCAAAGAAGTGAACGCCAAAATTGAACCATTCTTGA  
+HWI-EAS443:3:81:641:411#0/1  
`^aZY^\_bbaaa`[\_`bbaaaaaaaaa`a`^`^`^`aaa`¥a\_  
@HWI-EAS443:3:81:710:1652#0/1  
CATTAATCAGGCACTCCTCGATTGCTTCATATAGCCCCC  
+HWI-EAS443:3:81:710:1652#0/1  
\_bZ\_``\_VZ\_aY[a[[abaa`Qa^a`aaa^a\_a]]R]]b[  
@HWI-EAS443:3:81:718:554#0/1  
ATGAGAAAGGCATAAATCCCAATTACCTCATGGCTTGGAA  
+HWI-EAS443:3:81:718:554#0/1  
^\_a```^W¥¥\_\_ababbbaa^]Zabbab\_aaaaa\_a``a`\_  
@HWI-EAS443:3:81:727:770#0/1  
ATCACTGTCATACTGTTAAGGTCTCCAACATCTTTGCAG  
+HWI-EAS443:3:81:727:770#0/1  
X`]LTZ\_`b^]aa`b[aaa`ba\_a\_`[\_`a`V`aY\_Yb^]a  
@HWI-EAS443:3:81:779:53#0/1  
CACCCCGTTCGTCGATGAAATGGAAATCCGAATACATGAA  
+HWI-EAS443:3:81:779:53#0/1  
a\_a]aba¥a`\_`\_a^T^\_`ZX`V¥`\_`]\_\_Z^\_[]]]\_\_T  
@HWI-EAS443:3:81:841:385#0/1  
CACAACTTGAGGGGTTTTTCGGCTGAATCGAGAAAATTGCT  
+HWI-EAS443:3:81:841:385#0/1  
`b¥aa]ab`\_\_bbbWa`aaabaabaa`aaa\_aaaaaaXa  
@HWI-EAS443:3:81:844:744#0/1  
TGGAGACCTTAAACAGTATGACAGTGATGAGCCAGAGCCC  
+HWI-EAS443:3:81:844:744#0/1  
a`aaaaabb\_a[\_`ab`abaaaa^a`\_]aa^a`^`a^^\_  
@HWI-EAS443:3:81:856:1532#0/1  
ATCGACGAACGGGGTGAATCAATAATTGTAGAATCTGGTG  
+HWI-EAS443:3:81:856:1532#0/1  
a\_ab``a`a\_[\_`Vaa\_`\_\_`^^`]`Wa````\_]^^X¥  
@HWI-EAS443:3:81:884:1595#0/1  
GAACCGTTCATTGAAATTGGAGTAACACGGAGGGAAGTC  
+HWI-EAS443:3:81:884:1595#0/1  
\_`aa]]`]]]Zb]b\_aabaa`Z^`bba`\_aa`baaaa\_^W

@HWI-EAS443:3:81:915:1754#0/1  
ATCAAGTTCTATCCAGCTTGAATCAGTCAATTCACATGCC  
+HWI-EAS443:3:81:915:1754#0/1  
¥^[ ]¥UVUb`bbb`^VY\_a^\_[V[`aY\_]YaTaN¥¥^  
@HWI-EAS443:3:81:933:84#0/1  
CGTCTCCACAACCTTGAGGGGTTTTCGGCTGAATCGAGAAA  
+HWI-EAS443:3:81:933:84#0/1  
abbbb`a`aaa^bbaabbbb\_bbaaaaaaaaa`\_a\_a`\_\_  
@HWI-EAS443:3:82:1055:1491#0/1  
GGGATCTTCTTTCATTTTCAATGTCCTGTAGCTCTGCTA  
+HWI-EAS443:3:82:1055:1491#0/1  
UbbZWUba`bb^R¥bba` ``a`Y^\_\_abVbaa\_Va]`aa  
@HWI-EAS443:3:82:1100:1377#0/1  
TCCCAATTACCTCATGGCTTGAAGCAGGTGCTAGCAGAG  
+HWI-EAS443:3:82:1100:1377#0/1  
abbb`Waa\_[a¥XXXMU¥[Y[]]RJB B B B B B B B B B B B B  
@HWI-EAS443:3:82:1102:721#0/1  
CCGAACTTCTCCAGCCTTGAAAACCTTAGAGCCTATGTAG  
+HWI-EAS443:3:82:1102:721#0/1  
`babbabbbbaabababbbb`aaabbbbbaabbbb`aa  
@HWI-EAS443:3:82:1119:1073#0/1  
ATCGAAACTAACAAGTTTGCTGCAATATGCACACATTTGG  
+HWI-EAS443:3:82:1119:1073#0/1  
\_W[aZa`b` ]¥`a`a` ``ZZ]aa` ]]aaaa`a`¥Z]aa\_  
@HWI-EAS443:3:82:1119:1630#0/1  
AGGTAATTGGGATTTATGCCTTCTCATGTGGTTTACTA  
+HWI-EAS443:3:82:1119:1630#0/1  
aabRaabbbab`bbaabaabaabaabbaaaaaa`a`a  
@HWI-EAS443:3:82:1175:1744#0/1  
GGCCAGTAGGAGTCTATGGGATTCCTTTCGTCAGTCCGAA  
+HWI-EAS443:3:82:1175:1744#0/1  
S\_^W¥ZL[a]QW^ab^abba\_`P` `baVNaI\_WJU]RZYa  
@HWI-EAS443:3:82:1210:803#0/1  
GAAAACCTTAGAGCCTATGTAGATGGATTTCGAGCCGAACG  
+HWI-EAS443:3:82:1210:803#0/1  
a`ZX`¥baaaa^a` `a^ab\_[a`aaa` `X^aa¥N^¥^[[  
@HWI-EAS443:3:82:122:722#0/1  
GCGTCTCCACAACCTTGAGGGGTTTTCGGCTGAATCGAGAA  
+HWI-EAS443:3:82:122:722#0/1  
aabaabbb\_abaabababbab[aaabaaa`YaaaaWa`a  
@HWI-EAS443:3:82:1249:1577#0/1  
CATGGAATGAGGCGCTGCCTTCTCAGTCTCTTCAGCAG  
+HWI-EAS443:3:82:1249:1577#0/1  
aa`Yaab`aba`\_\_aaa`JZ`aS\_a^^]V¥aaa`]a¥a`^  
@HWI-EAS443:3:82:1251:1136#0/1  
ATTGAAGCACCGATTTGAGATAATTGAAGGAAGAGACCGA  
+HWI-EAS443:3:82:1251:1136#0/1  
aa^baabbaWWW\_aTUNW¥T¥aW^a]TR^]X]a`\_\_Ua^  
@HWI-EAS443:3:82:1259:203#0/1  
GCCATCTCTCTCCAGTGAATGAAAAGATGTGAATGTGTG

+HWI-EAS443:3:82:1259:203#0/1  
aa\_aa]a`]a^`¥]\_a]a`\_\_a\_\_^\_ZX\_]`^]a`Z^]a`  
@HWI-EAS443:3:82:1385:1109#0/1  
GCTGCACAGGATGCATTGAGCAAGGCCGTATTTATGTACA  
+HWI-EAS443:3:82:1385:1109#0/1  
]aa\_^\_aa^)`\_]Y\_\_`[\_¥R\_a`\_^VV^`aaYXYVYT]  
@HWI-EAS443:3:82:1454:169#0/1  
CACTTGGCCTATCGCAGTCCTCAAGAGCATGTCTCCTATT  
+HWI-EAS443:3:82:1454:169#0/1  
ab¥`````bbbba`\_`Vb`babab`b¥[`abbba¥^b\_ba  
@HWI-EAS443:3:82:1463:226#0/1  
GGGGGCTATATGAAGCAATCGAGGAGTGCCTGATTAATGA  
+HWI-EAS443:3:82:1463:226#0/1  
^\_¥Y\_]ab`S`¥`Ub\_S[[G¥YV[XUTUa`Q¥U¥UXa\_  
@HWI-EAS443:3:82:1525:1172#0/1  
CACACATTCACATCTTTTCATTCCTGGAGAGGAGATGGC  
+HWI-EAS443:3:82:1525:1172#0/1  
XYK\_PY]bbbb`a[abaabb\_]bb\_aaa\_a\_\_bba[b\_U  
@HWI-EAS443:3:82:1732:1933#0/1  
CAAACTAGGCTTTTCCTATAAGACAAGAAATGGCCAGT  
+HWI-EAS443:3:82:1732:1933#0/1  
¥b`\_`aabb`\_a\_b`baaa\_K¥bXa`\_¥[X\_¥aa\_RYWE  
@HWI-EAS443:3:82:216:1998#0/1  
CCACTCCCCTGGGTGACTCTCCGATTGGCCATGTTCCGA  
+HWI-EAS443:3:82:216:1998#0/1  
abbbababba¥^XRV\_aab`ab\_¥^^Z[a^L[PV\_\_^^QQ  
@HWI-EAS443:3:82:283:1074#0/1  
TCATCGACGAACGGGTGAATCAATAATTGTAGAATCTGG  
+HWI-EAS443:3:82:283:1074#0/1  
aaaaba`aa\_¥aaa\_a]aaaaa`aa`aaa\_aa\_````\_a`  
@HWI-EAS443:3:82:295:1034#0/1  
ACGGGGTGAATCAATAATTGTAGAATCTGGTGACCCGAAT  
+HWI-EAS443:3:82:295:1034#0/1  
`aZ\_ab`XX`ba^Z¥^[`aba`ababb\_aWa`aa`a`a`  
@HWI-EAS443:3:82:334:179#0/1  
GAAGGGAGTGTACATAAATACGGCCTTGCTCAATGCATCC  
+HWI-EAS443:3:82:334:179#0/1  
\_`a\_ab`a`¥`aa`aa\_ab^]]\_`[¥`\_`a`[UX¥\_[JY  
@HWI-EAS443:3:82:352:1861#0/1  
ACTTTCCCAATAGAGCCTTCCTCCACTCCCCTGGGTGACT  
+HWI-EAS443:3:82:352:1861#0/1  
abaa\_a`aba\_aZaXaa\_¥^a¥\_a`^a`aX¥]UWZY[W  
@HWI-EAS443:3:82:354:1704#0/1  
GGGGCATGGAAATGAGGCGCTGCCTTCTTCAGTCTCTTCA  
+HWI-EAS443:3:82:354:1704#0/1  
`baabbaabbbabb`\_abbaabaa\_baaaa`\_a`baaa`  
@HWI-EAS443:3:82:411:1677#0/1  
CATATAGCCCCCAAGATCGAAGGTTCCAGGTTCCAGGTT  
+HWI-EAS443:3:82:411:1677#0/1  
`babababbbbaaa\_`a`a`aa\_HV^¥`X^^T\_¥^aV[U\_

@HWI-EAS443:3:82:411:1940#0/1  
AGAAATTTAGGCTTCTCTACCCCTGTTGTGTTACATATAC  
+HWI-EAS443:3:82:411:1940#0/1  
a`¥U^a¥Va]X`a`b\_]Z`aaaaX`T¥]^\_`^aa`\_aZaa  
@HWI-EAS443:3:82:419:701#0/1  
GACATTCTTTGGCTGGAAAGAGCCTAACATAGTCAAACCA  
+HWI-EAS443:3:82:419:701#0/1  
abb¥`aba\_a\_aaaa\_VYYV^Yaa]Y`][`X`[\_`X``Y\_  
@HWI-EAS443:3:82:471:958#0/1  
ACCGATTTGAGATAATTGAAGGAAGAGACCGAATCATGGC  
+HWI-EAS443:3:82:471:958#0/1  
[U¥¥Ubb\_Zab^UaaaQ\_¥\_]aSY^\_aaaabaaRW^]a[^  
@HWI-EAS443:3:82:523:138#0/1  
ACGGCCTTGCTCAATGCATCCTGTGCAGCCATGGATGACT  
+HWI-EAS443:3:82:523:138#0/1  
`Waa^aaaaaZ]^]^a¥a^]XSVSU[XYUXNY`]TXUSST  
@HWI-EAS443:3:82:588:555#0/1  
GGGGCTATATGAAGCAATCGAGGAGTGCCTGATTAATGAT  
+HWI-EAS443:3:82:588:555#0/1  
aa\_\_\_\_`^\_aabaaaaaaa\_a`aa\_a^`][`a`a`^^`\_  
@HWI-EAS443:3:82:657:1803#0/1  
TGGGGCATGGAAATGAGGCGCTGCCTTCTCAGTCTCTTC  
+HWI-EAS443:3:82:657:1803#0/1  
```¥\_bba`aaaabab`\_\_baaaaaaaaaa\_`]^aaa``  
@HWI-EAS443:3:82:666:1559#0/1  
TTCGGCTGAATCGAGAAAATTGCTTCTCATTGTTCCAGGCA  
+HWI-EAS443:3:82:666:1559#0/1  
a`a`Tb¥W^\_`^V]YEEYa¥TYUY\_\_aaa\_a\_\_b`\_`\_a[Ia`  
@HWI-EAS443:3:82:673:1862#0/1  
GTCTCCAACATCTTTGCAGTCATCAAAGTCTACTTTTTCT  
+HWI-EAS443:3:82:673:1862#0/1  
aYaW`ba`aab]`\_[a[Z\_aa\_baZ`\_Ya\_a¥\_\_\_\_`¥^¥  
@HWI-EAS443:3:82:67:1651#0/1  
TAATCAGGCACTCCTCGATTGCTTCATATAGCCCCCAAG  
+HWI-EAS443:3:82:67:1651#0/1  
`[aaa\_H\_`aaSaa`aR0[^T^\_\_`a]a\_aZaaY\_``XZZ  
@HWI-EAS443:3:82:685:840#0/1  
TACATAATGAAGGGAGTGTACATAAATACGGCCTTGCTCA  
+HWI-EAS443:3:82:685:840#0/1  
aababaaabaa`X^aa\_a\_babab\_aaaaaaaa\_aaa`aa  
@HWI-EAS443:3:82:823:41#0/1  
AGCCCCCAAGATCGAAGGTTCCAGGTTCCAGGTTGTC  
+HWI-EAS443:3:82:823:41#0/1  
abaaaaaaaaaba`ab\_\_`aV\_`Y\_`a\_\_ZYQaaW`aVU¥W  
@HWI-EAS443:3:82:855:190#0/1  
CAAGAAATGGCCAGTAGGAGTCTATGGGATTCCTTTTCGTC  
+HWI-EAS443:3:82:855:190#0/1  
ab\_X\_Z\_bb`]RabZ`aab`H\_]`^\_Y`aa^VG^``\_\_]R  
@HWI-EAS443:3:82:883:1159#0/1  
TTTGATTCTTGCCCTGCTCTCTTCGTCAGGGTGTAGTCC

+HWI-EAS443:3:82:883:1159#0/1  
aa`baaaa`a^^a`a\_`a```aaa`Z\_a`a`\_Wa¥`a¥\_\_  
@HWI-EAS443:3:82:902:1444#0/1  
GCCACCAAAGCGGACTACACCCTTGACGAAGAGAGCAGGG  
+HWI-EAS443:3:82:902:1444#0/1  
aba^`bbaabbbabaaa^baab`abaaaWZ\_aaaaaa\_[]`  
@HWI-EAS443:3:82:91:465#0/1  
AATGCATCCTGTGCAGCCATGGATGACTTTTCAGCTGATCC  
+HWI-EAS443:3:82:91:465#0/1  
`ab```a]¥Z\_[]`[a]baa`\_XV^I\_`^]a^]`[a[GS^  
@HWI-EAS443:3:82:945:1509#0/1  
TAAAATCTGAGAAGACACATTCACATCTTTTCATTCAC  
+HWI-EAS443:3:82:945:1509#0/1  
aaaVa\_a\_\_`¥V`b^aa[aaa]a``Rab¥bba`\_aaaYba  
@HWI-EAS443:3:83:1025:846#0/1  
CTCATGGCTTGGAAGCAGGTGCTAGCAGAGCTACAGGACA  
+HWI-EAS443:3:83:1025:846#0/1  
]abbaa¥ba\_¥TM]\_`Z¥\_XM]\_¥\_Z^\_V\_]\_^\_]\_[]b¥R¥  
@HWI-EAS443:3:83:1089:818#0/1  
TTCATTTTGGACCCAGCTTGCTAGAGATCTGGGCTCTGGC  
+HWI-EAS443:3:83:1089:818#0/1  
aa`][aaaa`a```^`\_V\_`^UVVFYYSJUZVS[XLXLXQ^[]  
@HWI-EAS443:3:83:1118:1689#0/1  
CGATTGCTTCATATAGCCCCCAAGATCGAAGGTTCCAGG  
+HWI-EAS443:3:83:1118:1689#0/1  
aaaaa`aaaaabaa`aa\_]`aa`aa\_`a````]H\_UXX]]  
@HWI-EAS443:3:83:1138:359#0/1  
GGCATGGAAATGAGGCGCTGCCTTCTTCAGTCTCTTCAGC  
+HWI-EAS443:3:83:1138:359#0/1  
```WHI\_`P``T\_aa]S`UP`[^\_ZL¥XX`^IDQMYRPU`R  
@HWI-EAS443:3:83:113:1387#0/1  
GGGCATGGAAATGAGGCGCTGCCTTCTTCAGTCTCTTCAG  
+HWI-EAS443:3:83:113:1387#0/1  
```bb\_baa\_Taaba\_aa``aaa\_`aa\_\_ZU]RY]^\_`^\_Z  
@HWI-EAS443:3:83:1154:830#0/1  
ATTTTACAGCAGAAGTGTCCCACTGCAGGGCTACTGAATA  
+HWI-EAS443:3:83:1154:830#0/1  
abb`a\_`aaaa]YGYUa^¥^Z`Z^`^]`^SY^`\_`^a\_`^\_ZZ  
@HWI-EAS443:3:83:1163:1173#0/1  
GGCATGGAAATGAGGCGCTGCCTTCTTCAGTCTCTTCAGC  
+HWI-EAS443:3:83:1163:1173#0/1  
aaaa]`\_\_aaaaa\_a\_aaSVX\_]`^`\_`\_]NOXM`WTP]T  
@HWI-EAS443:3:83:1186:973#0/1  
ATGCATCCTGTGCAGCCATGGATGACTTTTCAGCTGATCCC  
+HWI-EAS443:3:83:1186:973#0/1  
aa`abbaaaba\_abba`babaaaa`abaa\_a````a\_`\_Y^  
@HWI-EAS443:3:83:1312:745#0/1  
GCAGGGCAAGAATCAAAACTAGGCTTTTCACTATAAGACA  
+HWI-EAS443:3:83:1312:745#0/1  
```bbaabbbabaaaabaab`aaa````\_\_aa]aa`aaaaa\_a

@HWI-EAS443:3:83:1364:288#0/1  
CATCAGGCAATCTGAGGGGGCGTGGTGTCTCCTCAAGAA  
+HWI-EAS443:3:83:1364:288#0/1  
abbZbbb^bab`b`bbbaa]ababa`ZH]aS[aa\_a`b\_  
@HWI-EAS443:3:83:1436:860#0/1  
CGAAAATCGAACTAACAAGTTTGTGCAATATGCACACA  
+HWI-EAS443:3:83:1436:860#0/1  
abbab`a`\_Xbaabbb^a`\_YbXXaGa^a]aUa`MOQY\_U  
@HWI-EAS443:3:83:1462:166#0/1  
CTTGGGGGGCTATATGAAGCAATCGAGGAGTGCCTGATTA  
+HWI-EAS443:3:83:1462:166#0/1  
aba¥¥baS`baa`aa\_aa`a`\_QaYaa\_a[a¥S`^¥`\_`  
@HWI-EAS443:3:83:1466:800#0/1  
TTTTACAGCAGAAGTGTCCCACTGCAGGGCTACTGAATAC  
+HWI-EAS443:3:83:1466:800#0/1  
SVVY`]baZ¥bS^L[bYb`[aS]X`\_]aW]a^\_\_aYL`\_V  
@HWI-EAS443:3:83:1483:123#0/1  
CGGAAACATGGCCAATCGGAGAGTCACCCAGGGGAGTGGA  
+HWI-EAS443:3:83:1483:123#0/1  
abbbbbbbbabXRYabZaZZX[LJR¥IRNWZbbZTUJYVJ  
@HWI-EAS443:3:83:1500:1263#0/1  
GCAGTGGGACACTTCTGCTGTAAAATAGTTCCTCCTCATG  
+HWI-EAS443:3:83:1500:1263#0/1  
a`bb\_abaaba`a`baaaa^a`baaa^^aX]a]¥YP`\_`\_  
@HWI-EAS443:3:83:1622:677#0/1  
AAGAGAACAAGCCAATTGAAGTGGGCACTCGGTGAAAATA  
+HWI-EAS443:3:83:1622:677#0/1  
[b\_a^[¥b[^babab`bYUZaaaaR^Z^^a`F¥QPRWR]  
@HWI-EAS443:3:83:1662:1154#0/1  
TGCACACATTTGGAAGTTTGTTCATGTATTCCGATTTC  
+HWI-EAS443:3:83:1662:1154#0/1  
aaX]\_aa[a^bbbJabIa]\_Saa]^Ta`\_a[Gb`\_^U\_ZW  
@HWI-EAS443:3:83:1703:1441#0/1  
GATTGGCCATGTTTCCGATTTGTTTTCAAAGAATTCCTTG  
+HWI-EAS443:3:83:1703:1441#0/1  
aaaaaaaa\_aaaaaaaaa\_VVaab^`a`¥`\_aa`^`a]\_aa`  
@HWI-EAS443:3:83:1730:1344#0/1  
GGCATGGAAATGAGGCGCTGCCTTCTTCAGTCTCTTCAGC  
+HWI-EAS443:3:83:1730:1344#0/1  
aba\_RZ`a[a]aab`]b\_]UNSXXX\_\_aaJZb\_aBBBBB  
@HWI-EAS443:3:83:1767:1791#0/1  
ATACTTAATTTAGAGCATCCATCAGCAGGAACTTTGACC  
+HWI-EAS443:3:83:1767:1791#0/1  
V]\_Y¥^a`\_b\_X`\_aaX^YH\_¥`QZOM¥`V¥U¥XZW]WKN  
@HWI-EAS443:3:83:1771:578#0/1  
GAATTCATTTTGGACCCAGCTTGCTAGAGATCTGGGCTCT  
+HWI-EAS443:3:83:1771:578#0/1  
aaaaaa`bbaaaaa`a`\_`¥^aW[^\_Z\_\_\_\_]]^]¥YV]^R  
@HWI-EAS443:3:83:209:1658#0/1  
GGGAATACCACTATATGATGCAATCAAATGCATGAAGACA

+HWI-EAS443:3:83:209:1658#0/1  
abaabaaab`abbaZab^aa`bab`ba^\_abba^Yaa`aa  
@HWI-EAS443:3:83:236:1458#0/1  
TGCCTTTCTCATGTGGTTTGGACTATGTTAGGCTCTTTCCA  
+HWI-EAS443:3:83:236:1458#0/1  
0\_bbbba`a\_U`XZ\_ZIY\_baba]ab`ZZ\_\_^\_Z`aaaa¥  
@HWI-EAS443:3:83:244:198#0/1  
GGACAAAGAACATGAAGAGAACAAGCCAATTGAAGTGGGC  
+HWI-EAS443:3:83:244:198#0/1  
aaa`aaaa`a``a`aa`\_`^`\_\_[Z\_]^[\_]\_]\_U\_^ZZ  
@HWI-EAS443:3:83:248:469#0/1  
AGCAAACCTGTTAGTTTCGATTTTCGGATCTTCCCATAT  
+HWI-EAS443:3:83:248:469#0/1  
a]ba\_\_aa`a`\_`\_\_^`aaZ]^\_\_^]ZGZX]XWZ\_SRVV\_  
@HWI-EAS443:3:83:266:15#0/1  
CAGGCACTCCTCGATTGCTTCATATAGCCCCCAAGATCG  
+HWI-EAS443:3:83:266:15#0/1  
\_^\_^]\_a`a`\_W\_\_a\_Z]]¥[¥\_[YVY¥Z^UV\_]SV^  
@HWI-EAS443:3:83:382:1869#0/1  
CAGCAAACCTGTTAGTTTCGATTTTCGGATCTTCCCATATA  
+HWI-EAS443:3:83:382:1869#0/1  
`^`^`\_`a]PQ\_ZOUHMTLQRRW¥LHNOWTL¥^[[GOJ  
@HWI-EAS443:3:83:431:178#0/1  
CTGGAGAGGAGATGGCCACCAAAGCGGACTACACCCTTGA  
+HWI-EAS443:3:83:431:178#0/1  
abab\_babb]baabb`a`aaaa`a`Y\_a`^S]¥^`^`  
@HWI-EAS443:3:83:450:1160#0/1  
GGTGAACCTTTGTAAGTATGGAGTTCTCACTCACTGACCCG  
+HWI-EAS443:3:83:450:1160#0/1  
TXT`babbbbb]¥V`\_abba\_aabab]bbabbbba]`aab  
@HWI-EAS443:3:83:532:1196#0/1  
GGGGCATGGAAATGAGGCGCTGCCTTCTCAGTCTCTTCA  
+HWI-EAS443:3:83:532:1196#0/1  
Z\_\_W`bbbbbaX^b`a`aaababaabaabba`baaaa`  
@HWI-EAS443:3:83:537:1569#0/1  
TACCCCTGTTGTGTTACATATACTGTTCACTCACTGTCCAG  
+HWI-EAS443:3:83:537:1569#0/1  
abbbbbb`^bbb^ab]bbbbbabbabbbbababa\_`a`^  
@HWI-EAS443:3:83:564:823#0/1  
AGCAATTTTCTCGATTGAGCCGAAAACCCCTCAAGTTGTG  
+HWI-EAS443:3:83:564:823#0/1  
¥¥V`^XS]]a^`bZUa¥^YYZ]^0[Y]aa[¥ZLGWU`aZ]  
@HWI-EAS443:3:83:577:342#0/1  
AGCCAGAGCCCAGATCTCTAGCAAGCTGGGTCCAAAATGA  
+HWI-EAS443:3:83:577:342#0/1  
^`^`aaa`baaa`baaaaaaaaa`¥`a`a`^Y\_`^J]\_`\_`  
@HWI-EAS443:3:83:66:1118#0/1  
AGGGGTTTTCGGCTGAATCGAGAAAATTGCTTCTCATTGT  
+HWI-EAS443:3:83:66:1118#0/1  
^a`\_aZ^\_R^X`\_`¥`aa`Z`a`[\_¥\_Z¥¥`a`\_``[



@HWI-EAS443:3:83:682:1166#0/1  
AATAATTGTAGAATCTGGTGACCCGAATGCACTATTGAAG  
+HWI-EAS443:3:83:682:1166#0/1  
a`ba`aaa`ab^^`aaa]\_aaaa`a``\_\_\_aa`aa^\_\_  
@HWI-EAS443:3:83:759:122#0/1  
CAATAATTGTAGAATCTGGTGACCCGAATGCACTATTGAA  
+HWI-EAS443:3:83:759:122#0/1  
abbbbabbbbbababaabba^bbba`bbbabbbbbbb`b\_b  
@HWI-EAS443:3:83:817:1649#0/1  
GCAGGTGCTAGCAGAGCTACAGGACATTGAAAATGAAGAG  
+HWI-EAS443:3:83:817:1649#0/1  
`aYa[¥]a¥\_]\_^Z¥`aNU]`aY\_aa\_\_\_\_\_a]`ZQVa[^]  
@HWI-EAS443:3:83:837:72#0/1  
GATGTGGTGAACCTTTGTAAGTATGGAGTTCTCACTCACTG  
+HWI-EAS443:3:83:837:72#0/1  
a]¥TZb]R^]H¥¥aaa`ZZ]T\_`\_]\_a^[Y\_X]W\_V]^\_\_  
@HWI-EAS443:3:83:87:693#0/1  
GGCCAGTAGGAGTCTATGGGATTCCTTTTCGTCAGTCCGAA  
+HWI-EAS443:3:83:87:693#0/1  
^\_bb\_b]^a\_J`^a```Zaa`a^^\_aa`XZWaW^`a`  
@HWI-EAS443:3:83:953:1153#0/1  
GAGGGGTTTTTCGGCTGAATCGAGAAAATTGCTTCTCATTG  
+HWI-EAS443:3:83:953:1153#0/1  
aa`aaaYaaaa`\_\_aab`^\_a\_U```aa\_¥]`\_V]V\_\_\_\_`  
@HWI-EAS443:3:83:959:67#0/1  
CTTGGTCATGTCTTTCTCTTTGACAGAAGACTCGGCCTCA  
+HWI-EAS443:3:83:959:67#0/1  
[^\_aaab\_bbbabbbbbYb¥S`b\_ab\_[babbR¥`]V  
@HWI-EAS443:3:83:963:1072#0/1  
GCGAAGAGACAATTGAAGAAAAATTTGAGATTACAGGAAC  
+HWI-EAS443:3:83:963:1072#0/1  
aa\_G^\_abaaa`aa`a][^W¥]T¥aaa\_a`]`a\_a\_`^aW  
@HWI-EAS443:3:83:963:1312#0/1  
AAGAATTCCTTGGTCATGTCTTTCTCTTTGACAGAAGACT  
+HWI-EAS443:3:83:963:1312#0/1  
YY\_SW`\_]R]\_^RMX¥TXYY[^Z\_wwwYY]SY^[a¥U`UW  
@HWI-EAS443:3:83:965:1688#0/1  
GGAGTCTATGGGATTCCTTTTCGTCAGTCCGAAAGAGGCGA  
+HWI-EAS443:3:83:965:1688#0/1  
ab`abbbbaabbbbaaabaabaabbaabaaaaa`  
@HWI-EAS443:3:84:1031:186#0/1  
GTCCTTGGGATCTTCTTTCATTTTCAATGCCTGTAGCT  
+HWI-EAS443:3:84:1031:186#0/1  
aY[\_`aaa][\_]a]UY[\_[¥^a^[a\_\_^\_`]XV]\_]\_]U  
@HWI-EAS443:3:84:1144:2040#0/1  
GGGCACTCGGTGAAAATATGGCACCAGAAAAAGTAGACTT  
+HWI-EAS443:3:84:1144:2040#0/1  
Wbb\_\_ab\_b\_V]U`aVa[¥H¥aL`aI\_aa]UNa`a]`  
@HWI-EAS443:3:84:1174:398#0/1  
ATTTGTTTTCAAAGAATTCCTTGGTCATGTCTTTCTCTT

+HWI-EAS443:3:84:1174:398#0/1  
abb\_baabba]^\_aa`aaaaaaZ]^`aab\_aaa`ab`aaa  
@HWI-EAS443:3:84:1193:537#0/1  
GATCCGAAAATCGAAACTAACAAAGTTTGCTGCAATATGCA  
+HWI-EAS443:3:84:1193:537#0/1  
a\_]`^`\_b`aa^`\_`][[`WZ\_\_\_\_]^`\_¥a\_a`\_]  
@HWI-EAS443:3:84:1206:1686#0/1  
ATGAGAAAGGCATAAATCCCAATTACCTCATGGCTTGAA  
+HWI-EAS443:3:84:1206:1686#0/1  
aZ[aa`aa\_\_\_\_a`\_\_`a\_VU\_\_\_\_\_]0^V\_V]^X\_YVYZ  
@HWI-EAS443:3:84:1211:361#0/1  
TTGCGATATGTTCAATCGGGCAACATCTTCTCCTATTTC  
+HWI-EAS443:3:84:1211:361#0/1  
`b`bbaabb`aaaa`aa`a`]^`a\_a`[a`\_aaaa\_  
@HWI-EAS443:3:84:124:1324#0/1  
GGTGGCCATCTCCTCTCCAGTGAATGAAAAGATGTGAATG  
+HWI-EAS443:3:84:124:1324#0/1  
aa^`\_aaa`a\_aa\_aWa`\_dWZ`^^\_^[\_`^^^\_W^]VY\_  
@HWI-EAS443:3:84:1284:886#0/1  
CACTGCAGGGCTACTGAATACATAATGAAGGGAGTGACA  
+HWI-EAS443:3:84:1284:886#0/1  
ababbbbbbaabbabbaaab`bbaabaabaaaaa`a]a  
@HWI-EAS443:3:84:1331:971#0/1  
GAGACCGAATCATGGCCTGGACAGTGGTGAACAGTATATG  
+HWI-EAS443:3:84:1331:971#0/1  
aaba`\_UTG[XTH¥bZP\_QXPW`¥TU¥P[RQVF]YX`V`  
@HWI-EAS443:3:84:1353:1555#0/1  
GTTCACCACTGTCCAGGCCATGATTCGGTCTCTTCCTTCA  
+HWI-EAS443:3:84:1353:1555#0/1  
a\_a]ZU[^`aa¥X`Ta¥XX\_a\_\_a\_[`X\_\_W`\_]V``[\_  
@HWI-EAS443:3:84:1376:1428#0/1  
CATTAACTCAGGCACTCCTCGATTGCTTCATATAGCCCCC  
+HWI-EAS443:3:84:1376:1428#0/1  
Y`Ybb\_babaW\_a]b]abNab]bb\_a\_aKbabbV[[aa¥¥  
@HWI-EAS443:3:84:1417:116#0/1  
AAACTTTAGAGCCTATGTAGATGGATTCGAGCCGAACGGC  
+HWI-EAS443:3:84:1417:116#0/1  
aa`Zbbaaa¥`\_Ya`ab^\_a]ab`^aaW`\_`¥¥`Y^U^U  
@HWI-EAS443:3:84:141:423#0/1  
GAAAACCTTTAGAGCCTATGTAGATGGATTCGAGCCGAACG  
+HWI-EAS443:3:84:141:423#0/1  
^XS^S^]^`a[]Zababaa`X]b¥H\_b]a`a`V]^UX]^`^  
@HWI-EAS443:3:84:1528:677#0/1  
CCTCCGTGTTACTCCAATTTCAATGAACCGTTCTCTTTG  
+HWI-EAS443:3:84:1528:677#0/1  
aab`bbabbbbb`aa`\_`abbbb`baba[bb^a\_babaaa  
@HWI-EAS443:3:84:1540:1135#0/1  
GTAATCTCAAATTTTTCTTCAATTGTCTCTTCGCTCTTT  
+HWI-EAS443:3:84:1540:1135#0/1  
^Y\_aaaaaaaaaaaaaaaa`abaaa\_a`a\_a`\_\_a]a``

@HWI-EAS443:3:84:1641:2015#0/1  
GAAAATGAAGAGAAGATCCCAAGGACAAAGAACATGAAGA  
+HWI-EAS443:3:84:1641:2015#0/1  
V[QYQ[^`]IaX\_\_Q][ ]VV`aa\_aaa\_``a¥]WZW\_\_\_Y  
@HWI-EAS443:3:84:167:1594#0/1  
CAAAGAATTCCTTGGTCATGTCTTTCTCTTTGACAGAAGA  
+HWI-EAS443:3:84:167:1594#0/1  
a^[a`]\_\_^^aaZ[VF^[`a[a\_a^`\_]`^\_\_[\_`\_`\_]`^  
@HWI-EAS443:3:84:1703:1245#0/1  
CACTTCTGCTGTAAAATAGTTCCTCCTCATGCTTGCGATA  
+HWI-EAS443:3:84:1703:1245#0/1  
ababbabbbbaabaaab^b`ba`baaaaaab]aaa`aaaa  
@HWI-EAS443:3:84:1739:1324#0/1  
CCGAAAATCGAAACTAACAAGTTTGCTGCAATATGCACAC  
+HWI-EAS443:3:84:1739:1324#0/1  
`^`¥bbb``\_TWU^b\_]`aa^^^HYZP\_]`^QZ`\_a\_\_`^L  
@HWI-EAS443:3:84:1757:1227#0/1  
GGGGCATGGAAATGAGGCGCTGCCTTCTCAGTCTCTTCA  
+HWI-EAS443:3:84:1757:1227#0/1  
¥aWV[``baZ\_bbb``¥ab`abUDU``ab`aa^Xa^```Q  
@HWI-EAS443:3:84:1783:116#0/1  
CCTGGAACCTTCGATCTTGGGGGGCTATATGAAGCAATCG  
+HWI-EAS443:3:84:1783:116#0/1  
aabbbbaaaaabbaa\_aaa]abaa\_a\_a`aX]``[```Z\_  
@HWI-EAS443:3:84:253:299#0/1  
CACTCCCCTGGGTGACTCTCCGATTGGCCATGTTCCGAT  
+HWI-EAS443:3:84:253:299#0/1  
a`bab^[^T`b¥¥YZ]a¥YaPRPJ¥\_^\_XDD]N[\_BBBB  
@HWI-EAS443:3:84:262:569#0/1  
ACTTGAGGGTTTTCGGCTGAATCGAGAAAATTGCTTCTC  
+HWI-EAS443:3:84:262:569#0/1  
]VI[RT^[XXY\_SZ\_[XY]`[VZ¥¥\_WYVY[[\_]ZZ^Y`  
@HWI-EAS443:3:84:289:722#0/1  
TGTTACTCCAATTTCAATGAACCGGTTCTCTTTGTAATCA  
+HWI-EAS443:3:84:289:722#0/1  
aaaabaaaaaaaaa\_aa¥```aa\_] [V`\_`\_\_a\_a]¥\_^`\_\_  
@HWI-EAS443:3:84:316:1054#0/1  
CCCCTGTTGTGTTACATATACTGTTACCCTGTCCAGGC  
+HWI-EAS443:3:84:316:1054#0/1  
aab`TPTQZYQVXZNXURO]UT]QL[``\_¥^^¥^RZQSINS  
@HWI-EAS443:3:84:319:1607#0/1  
GCCTTCTCCACTCCCCTGGGTGACTCTCCGATTGGCCAT  
+HWI-EAS443:3:84:319:1607#0/1  
\_bb]`bb]`Y]aaaaa]\_a¥^Q`ab\_X]`aSJJP\_a\_¥U^  
@HWI-EAS443:3:84:325:1091#0/1  
AAATCCCAATTACCTCATGGCTTGAAGCAGGTGCTAGCA  
+HWI-EAS443:3:84:325:1091#0/1  
a`\_aaaa¥^aaaa`aaaaaaaaaWYY^ZVGS^UNRRWRU[  
@HWI-EAS443:3:84:378:748#0/1  
GTCTCCACAACCTTGAGGGGTTTTCGGCTGAATCGAGAAAA

+HWI-EAS443:3:84:378:748#0/1  
a\_b¥baYba\_aaaaaaba`aa`\_a^aaaa`\_aa`a\_^^`  
@HWI-EAS443:3:84:381:827#0/1  
TGGCACCAGAAAAAGTAGACTTTGATGACTGCAAAGATGT  
+HWI-EAS443:3:84:381:827#0/1  
`a\_baa` ``aa`[`aYaa]`aaaYaa`V`\_a\_¥`]a\_\_a\_  
@HWI-EAS443:3:84:38:58#0/1  
TTGGGGGGCTATATGAAGCAATCGAGGAGTGCCTGATTAA  
+HWI-EAS443:3:84:38:58#0/1  
`aaWa^S^XZ[[SXaYR^`\_Q^\_]\_[F[X]UTX^UWVRV  
@HWI-EAS443:3:84:457:764#0/1  
GGCCACCAAAGCGACTACACCCTTGACGAAGAGAGCAGG  
+HWI-EAS443:3:84:457:764#0/1  
abbbb`bQW¥baaaY]aaaa\_aaa¥a¥\_ba[a^\_[a]``X  
@HWI-EAS443:3:84:488:1608#0/1  
GAAAGGCATAAATCCCAATTACCTCATGGCTTGGAAAGCAG  
+HWI-EAS443:3:84:488:1608#0/1  
a\_¥HY]V`aa`bZRa\_¥XXa¥W\_`Taa¥Qa¥]\_MFMLRLY  
@HWI-EAS443:3:84:48:1818#0/1  
GGGGCATGGAAATGAGGCGCTGCCTTCTTCAGTCTCTTCA  
+HWI-EAS443:3:84:48:1818#0/1  
^ZZ¥]V`\_a]bba\_a]a`aa\_¥a` ``a^`a\_\_^[``a\_a`  
@HWI-EAS443:3:84:495:1150#0/1  
ATTTTCACCGAGTGCCCACTTCAATTGGCTTGTCTCTTCA  
+HWI-EAS443:3:84:495:1150#0/1  
Y`aa]bbbbbb`XVbb`TYa\_aaaa`\_a\_\_a]¥\_a`a]\_\_R  
@HWI-EAS443:3:84:508:1198#0/1  
GTGGGCACTCGGTGAAAATATGGCACCAGAAAAAGTAGAC  
+HWI-EAS443:3:84:508:1198#0/1  
`[`b\_a`aW]a^X\_Qa`\_]\_a`a\_^Z`YP[P¥[NYQX\_0\_Z  
@HWI-EAS443:3:84:564:27#0/1  
CTTTGTAAGTATGGAGTTCTCACTCACTGACCCGAGACTG  
+HWI-EAS443:3:84:564:27#0/1  
abbbb`bbb¥aaba`aaaaaa` ``^`babaa`aa\_b` ``a  
@HWI-EAS443:3:84:588:772#0/1  
GAGACTTTGGTCGGCAAGCTTGCGCATAGTTCCTGTAATC  
+HWI-EAS443:3:84:588:772#0/1  
aaaaaaaaa]`b\_ab\_Y^a`\_a\_a`\_a\_\_Ya` ``a^^`\_`\_  
@HWI-EAS443:3:84:615:576#0/1  
CTTTGGTCGGCAAGCTTGCGCATAGTTCCTGTAATCTCAA  
+HWI-EAS443:3:84:615:576#0/1  
abbb^b\_a` ``aY\_aaa]`` `aa`\_\_`a`^a¥Y` `aaa^`  
@HWI-EAS443:3:84:617:554#0/1  
GAAGAGAGCAGGGCAAGAATCAAACTAGGCTTTTCACTA  
+HWI-EAS443:3:84:617:554#0/1  
aaa^aa\_aaa\_]\_aaaa`\_]aa`a^\_a\_\_[\_\_\_\_]b`\_`  
@HWI-EAS443:3:84:625:1696#0/1  
GAAATGGAAATCCGAATACATGAAACAACTTCCAAATGT  
+HWI-EAS443:3:84:625:1696#0/1  
abbaaa`abaabbabbabb`abb¥bbbba`a`ab`aaa]

@HWI-EAS443:3:84:675:1079#0/1  
CTCATGCTTGCATATGTTCAATCGGGGCAACATCTTCTC  
+HWI-EAS443:3:84:675:1079#0/1  
a\_aaa`aaaa]baaab\_aaaaaa`\_`\_]\_`\_`a`a`\_`\_`  
@HWI-EAS443:3:84:726:1200#0/1  
CATTAATCAGGCACTCCTCGATTGCTTCATATAGCCCCC  
+HWI-EAS443:3:84:726:1200#0/1  
``aa^``\_[]\_ba`aaaaaa\_\_aa`\_`a`a\_a\_`\_`\_]`aZ  
@HWI-EAS443:3:84:734:766#0/1  
GAACCGTTCCTTTGTAATCATACAAATCAGGAAGAAAT  
+HWI-EAS443:3:84:734:766#0/1  
aa\_¥^Y\_XYVaa¥aa\_`^a`a`]]aaa`WaV]]WR¥WZ  
@HWI-EAS443:3:84:756:1154#0/1  
CCTCCGTGTTACTCCAATTTCAATGAACCGTTCCTTTG  
+HWI-EAS443:3:84:756:1154#0/1  
`[^a`Z[^\_`]^`a\_U^[a\_`VZYN\_aa]aWRUaa^^¥\_  
@HWI-EAS443:3:84:791:787#0/1  
GCATGGAAATGAGGCGCTGCCTTCTTCAGTCTCTTCAGCA  
+HWI-EAS443:3:84:791:787#0/1  
a\_aaaa^[`\_a^a\_\_`\_aa¥\_`\_`a\_¥\_`S]\_`a¥MX^R^  
@HWI-EAS443:3:84:819:1594#0/1  
AATCGGGGCAACATCTTCTCCTATTTTCATCAAGTTCTATC  
+HWI-EAS443:3:84:819:1594#0/1  
a`aa[]`^^Y`\_``^\_\_`\_a^```\_\_a\_\_¥\_S\_Z^\_\_]  
@HWI-EAS443:3:84:872:1896#0/1  
AGCAGGAACCTTGACCGCTGATGGCAAAGAGGCCCATCAG  
+HWI-EAS443:3:84:872:1896#0/1  
XH]¥\_¥aa^`\_`^aa¥X\_`Y¥¥`X`a^a¥`¥Z`P^]`Z[K  
@HWI-EAS443:3:84:932:1880#0/1  
GGGATCTTCTTCATTTTCAATGTCCTGTAGCTCTGCTA  
+HWI-EAS443:3:84:932:1880#0/1  
`abaa`bbabbbbbbbabbbbbababbbbab`aa`b  
@HWI-EAS443:3:84:935:1615#0/1  
CATAAATACGGCCTTGCTCAATGCATCCTGTGCAGCCATG  
+HWI-EAS443:3:84:935:1615#0/1  
a`a^\_aaa[[[aa\_a]a`\_a`aa\_`\_]`XEM[`\_Z^`a`¥  
@HWI-EAS443:3:84:953:1932#0/1  
ATAAATCCCAATTACCTCATGGCTTGAAGCAGGTGCTAG  
+HWI-EAS443:3:84:953:1932#0/1  
aabbaaaba`a`a`a`\_`\_`aa`\_`\_`[XXTSW[KR[VYR  
@HWI-EAS443:3:84:997:1913#0/1  
AAGAATTCCTTGGTCATGTCTTTCTTTGACAGAAGACT  
+HWI-EAS443:3:84:997:1913#0/1  
UNU\_VXU\_¥ZXZWLZY[Za\_X[^Z]`TZ\_Y`a^¥\_\_\_ZT  
@HWI-EAS443:3:85:1038:1095#0/1  
AGCAATTTTCTCGATTGAGCCGAAAACCCCTCAAGTTGTG  
+HWI-EAS443:3:85:1038:1095#0/1  
\_]USZRW¥\_`]a[``S`]R]aPZ[XPTZ[]^ZS]N]^SV  
@HWI-EAS443:3:85:1049:1479#0/1  
CCTTGGGATCTTCTTCATTTTCAATGTCCTGTAGCTCT

+HWI-EAS443:3:85:1049:1479#0/1  
`abbb`bababbbbaaabbabababaaaaa`baa[a`  
@HWI-EAS443:3:85:1077:144#0/1  
AAAGAATTCCCTTGGTCATGTCTTTCTCTTTGACAGAAGAC  
+HWI-EAS443:3:85:1077:144#0/1  
a¥a^\_aab`]^Z^\_[a`aa^Z`W]^\_\_¥\_^`\_a[W^  
@HWI-EAS443:3:85:1091:35#0/1  
CTTCCTTCAATTATCTCAAATCGGTGCTTCAATAGTGCAT  
+HWI-EAS443:3:85:1091:35#0/1  
aabbb`bbaaa^`bab]^aa]^aa`b]^aa^[aab`\_]L[`  
@HWI-EAS443:3:85:1146:303#0/1  
GAATTCCTTGGTCATGTCTTTCTCTTTGACAGAAGACTCG  
+HWI-EAS443:3:85:1146:303#0/1  
`aa`````baaaY]¥Y`Yaa`aaaZ`\_aaa[[^`\_`a^^TN  
@HWI-EAS443:3:85:1186:1801#0/1  
ACCGAATCATGGCCTGGACAGTGGTGAACAGTATATGTAA  
+HWI-EAS443:3:85:1186:1801#0/1  
\_¥`W\_aaa`a]^a`¥^UaaYX`\_S`^Wa¥Ya^a^Y[``  
@HWI-EAS443:3:85:1187:1889#0/1  
GCCTGGACAGTGGTGAACAGTATATGTAACACAACAGGGG  
+HWI-EAS443:3:85:1187:1889#0/1  
Z\_bbb`bbb]^ab[``baba^bb`ba``aaaaa````a\_  
@HWI-EAS443:3:85:1209:575#0/1  
GTGGTTTGGACTATGTTAGGCTCTTTCCAGCCAAAGAATGT  
+HWI-EAS443:3:85:1209:575#0/1  
aXaa^aaa`^a`\_aX`\_\_[]^```YW]^``^\_\_\_\_\_]\_TX  
@HWI-EAS443:3:85:120:1427#0/1  
CTTGGGATCTTCTTTCATTTTCAATGTCCTGTAGCTCTG  
+HWI-EAS443:3:85:120:1427#0/1  
aababa]ababaabaab`aaaaa]aaa`a````Yaa]^a^^  
@HWI-EAS443:3:85:1210:60#0/1  
TGGGATCTTCTTTCATTTTCAATGTCCTGTAGCTCTGCT  
+HWI-EAS443:3:85:1210:60#0/1  
abba\_a`aa\_a`ba`\_aaaa`aa\_a\_\_\_\_aa`\_`¥a`^`\_]`  
@HWI-EAS443:3:85:1260:1826#0/1  
CTCAATGCATCCTGTGCAGCCATGGATGACTTTCAGCTGA  
+HWI-EAS443:3:85:1260:1826#0/1  
]^]a\_a]aaaaabb`b[\_aaV\_aabaaba`\_b^Wbb\_abZ  
@HWI-EAS443:3:85:1270:807#0/1  
TGAATACATAATGAAGGGAGTGACATAAATACGGCCTTG  
+HWI-EAS443:3:85:1270:807#0/1  
aa`a```^`a]aaa]^aa]^`^a`a`\_a`^aaa`\_`\_[\_`]  
@HWI-EAS443:3:85:128:992#0/1  
CACTGTCATACTGTTAAGGTCTCCAACATCTTTGAGTC  
+HWI-EAS443:3:85:128:992#0/1  
aTabaababb`\_`abba^a¥[aaaaaa``aaa`\_`a`Sa[a  
@HWI-EAS443:3:85:1352:1787#0/1  
GAGATCTGGGCTCTGGCTCATCACTGTCATACTGTTAAG  
+HWI-EAS443:3:85:1352:1787#0/1  
``aab`U`]^WaaY]^W]^\_\_\_\_aSaa\_¥a\_Y¥VYZ]L¥]^

@HWI-EAS443:3:85:1421:185#0/1  
CTGGGTCCAAAATGAATTCAATAAGGCATGTGAATTGACT  
+HWI-EAS443:3:85:1421:185#0/1  
``]¥PG^RWXY[a][[aX[a\_\_TZaUUU]]ZYJUa``]U[  
@HWI-EAS443:3:85:1463:81#0/1  
AACATCTTCTCCTATTTTCATCAAGTTCTATCCAGCTTGAA  
+HWI-EAS443:3:85:1463:81#0/1  
aa\_[b`abaa`\_babbb\_ab¥aa`aa`aaa`Zaa¥aaa\_^  
@HWI-EAS443:3:85:1477:912#0/1  
CATTAATCAGGCACTCCTCGATTGCTTCATATAGCCCCC  
+HWI-EAS443:3:85:1477:912#0/1  
`babbaaab`a^\_G`ab`Maaaa`^[N\_baa`Ua\_G`\_  
@HWI-EAS443:3:85:1518:39#0/1  
CACCGATTTGAGATAATTGAAGGAAGAGACCGAATCATGG  
+HWI-EAS443:3:85:1518:39#0/1  
U¥bbbbbababbbbbbababbb^bb`ba`aaab\_abba  
@HWI-EAS443:3:85:159:1410#0/1  
ATTGTAGAATCTGGTGACCCGAATGCACTATTGAAGCACC  
+HWI-EAS443:3:85:159:1410#0/1  
aaba\_]b^[`aaaa¥a^aaaa[`aaa```aa`\_a`a¥\_\_\_\_  
@HWI-EAS443:3:85:185:195#0/1  
GAACTTGATGAAATAGGAGAAGATGTTGCCCGATTGAAC  
+HWI-EAS443:3:85:185:195#0/1  
a`b\_aabaaa]\_\_a\_a`^a^\_a\_a`Z]]^\_X^\_W\_V\_^aZ  
@HWI-EAS443:3:85:212:940#0/1  
CAGTGGGACACTTCTGCTGTAAAATAGTTCCTCCTCATGC  
+HWI-EAS443:3:85:212:940#0/1  
aaaXS\_\_S]aaX`]XR]ZZ¥\_aaWVOZ¥[¥Y¥¥¥XQTZ^W  
@HWI-EAS443:3:85:23:1751#0/1  
AAGAATTCCTTGGTCATGTCTTTCTCTTTGACAGAAGACT  
+HWI-EAS443:3:85:23:1751#0/1  
a`0¥S¥aaaaa]X[```YTaa`\_aaa`\_]Z\_X¥¥\_`aW  
@HWI-EAS443:3:85:250:759#0/1  
GGGTTTTCGGCTGAATCGAGAAAATTGCTTCTCATTGTTC  
+HWI-EAS443:3:85:250:759#0/1  
aaa[aa`a`^aa]ZS¥ba`\_[V\_S]a`^[]a```¥Q\_V^`  
@HWI-EAS443:3:85:263:325#0/1  
CACTTTCCCAATAGAGCCTTCCCTCCACTCCCCTGGGTGAC  
+HWI-EAS443:3:85:263:325#0/1  
^aababbbbbb]b\_bbbb`b`baaabba\_abaaY`^`Ta`U  
@HWI-EAS443:3:85:318:1499#0/1  
AGGTTCCATTGGTTCTCACATATAGGAACATGGGCCTCGA  
+HWI-EAS443:3:85:318:1499#0/1  
\_]`]aab¥^a\_]\_aa`a[aaaaaa`¥]Z\_aY^Y^`a\_^V^  
@HWI-EAS443:3:85:342:1630#0/1  
GGGTTTTCGGCTGAATCGAGAAAATTGCTTCTCATTGTTC  
+HWI-EAS443:3:85:342:1630#0/1  
a`b\_bbbb`\_bbbbbaa`^abba``aaa`aaa`baaa]aa  
@HWI-EAS443:3:85:363:871#0/1  
CTCATTGAGAAATGATACTGATGTGGTGAACTTTGTAAAG

+HWI-EAS443:3:85:363:871#0/1  
aaaa`bab\_`a`b`)]abaaa`\_^W\_`0a\_`aa^\_a]^LY  
@HWI-EAS443:3:85:369:817#0/1  
GTGCCCACTTCAATTGGCTTGTCTCTTCATGTTCTTTGT  
+HWI-EAS443:3:85:369:817#0/1  
aaababa\_aab\_`[]\_U\_¥HUUPZH`Y[[GHP\_S]aZHV  
@HWI-EAS443:3:85:409:1642#0/1  
TTTTGGACCCAGCTTGCTAGAGATCTGGGCTCTGGCTCAT  
+HWI-EAS443:3:85:409:1642#0/1  
abbba`bbbaaaa\_a^aaa`aaa\_a\_Q\_]`^a\_`Za\_aa`  
@HWI-EAS443:3:85:542:132#0/1  
AAACTTTAGAGCCTATGTAGATGGATTTCGAGCCGAACGGC  
+HWI-EAS443:3:85:542:132#0/1  
a`aabaa\_a\_a\_aa\_aa]]a\_aa\_^\_X\_\_`]]\_^\_][]U  
@HWI-EAS443:3:85:574:326#0/1  
GGGCATGGAAATGAGGCGCTGCCTTCTTCAGTCTTTCAG  
+HWI-EAS443:3:85:574:326#0/1  
abaaaab\_aaaaaaaa`aa`aa\_`a`aaW\_a`\_`a`  
@HWI-EAS443:3:85:631:1934#0/1  
AAATACGGCCTTGCTCAATGCATCCTGTGCAGCCATGGAT  
+HWI-EAS443:3:85:631:1934#0/1  
a`Wabaa`[a`\_`\_`a`aa\_`a]\_U`\_¥V¥[\_U[[\_X  
@HWI-EAS443:3:85:66:1821#0/1  
GAACTATGCGCAAGCTTGCCGACCAAAGTCTCCCACCGAA  
+HWI-EAS443:3:85:66:1821#0/1  
`a`b[\_\_\_bbb]aW¥¥a\_`\_`Wbab\_T`aS[^baaaa\_ZZW  
@HWI-EAS443:3:85:673:164#0/1  
GTTTGTTCATGTATTCCGATTTCCATTCATCGACGAAC  
+HWI-EAS443:3:85:673:164#0/1  
a^`aa]\_[XZaa^\_a^`a^`\_XX^\_^]`^\_¥\_WZ\_\_^X  
@HWI-EAS443:3:85:676:173#0/1  
GTGCCATATTTTACCGAGTGCCCACTTCAATTGGCTTGT  
+HWI-EAS443:3:85:676:173#0/1  
^V`^aa]baaaaa^`\_Y\_^a`]¥ZY\_^a`]`¥¥¥]U\_XHL  
@HWI-EAS443:3:85:705:903#0/1  
CATATAGCCCCCAAGATCGAAGTTCCAGTTCCAGGTT  
+HWI-EAS443:3:85:705:903#0/1  
abbbbbbbbabbb`abba\_a^`aXaaX[`a^a]aZa`Za  
@HWI-EAS443:3:85:716:534#0/1  
GGTTTGACTATGTTAGGCTCTTCCAGCCAAAGAATGTCT  
+HWI-EAS443:3:85:716:534#0/1  
a`T`ba`aba\_V[aaa¥`^aaa\_a`a`^Z\_aaV``a[¥^  
@HWI-EAS443:3:85:719:1297#0/1  
GAGGGTTTTTCGGCTGAATCGAGAAAATTGCTTCTCATTG  
+HWI-EAS443:3:85:719:1297#0/1  
a\_`aa`]aaaaaaaaabaa`aaaaaaa`\_[a``aa``a`  
@HWI-EAS443:3:85:770:926#0/1  
CGGTGGGAGACTTTGGTCGGCAAGCTTGCGCATAGTTCCT  
+HWI-EAS443:3:85:770:926#0/1  
a`[Taaa`babb`abb¥\_FZWbaabaa[a\_a`\_`a\_a\_\_a



@HWI-EAS443:3:85:838:88#0/1  
CTCCCTTCATTATGTATTAGTAGCCCTGCAGTGGGACAC  
+HWI-EAS443:3:85:838:88#0/1  
`bbbabbbabbabbaaaba\_[a\_W]`aa`aa^ba`^Z]U  
@HWI-EAS443:3:85:971:110#0/1  
CTTATTGAATTCATTTTGGACCCAGCTTGCTAGAGATCTG  
+HWI-EAS443:3:85:971:110#0/1  
`aaWaaba\_\_ba[babbabbab`aa\_aaa`baa`baYP`\_  
@HWI-EAS443:3:86:1021:227#0/1  
GACCCAGCTTGCTAGAGATCTGGGCTCTGGCTCATCACTG  
+HWI-EAS443:3:86:1021:227#0/1  
VabbbZ[X[bbaab`bbb\_aa`aUbaaaa`a\_aa^a¥\_\_  
@HWI-EAS443:3:86:1074:870#0/1  
CACTGACCCGAGACTGGAGCCACACAAATGGGAAAAATAC  
+HWI-EAS443:3:86:1074:870#0/1  
`^[\_aZ\_Za`ab^W`ab¥^ab`b]W`Ubbbaa^`[[H`IV  
@HWI-EAS443:3:86:1079:1231#0/1  
TCCACTCCCCTGGGTGACTCTCCGATTGGCCATGTTTCCG  
+HWI-EAS443:3:86:1079:1231#0/1  
aaa\_`Xa`aaX``aQ\_\_^`0¥`¥RXKWZP``MYRZXNTY  
@HWI-EAS443:3:86:1083:1457#0/1  
AGAAGATGTTGCCCGATTGAACATATCGCAAGCATGAGG  
+HWI-EAS443:3:86:1083:1457#0/1  
ababbbbaa]aa^\_\_a``\_aab]a`aa\_\_\_\_[YV]a^]a`  
@HWI-EAS443:3:86:1239:783#0/1  
CAGCAAATTGTTAGTTTCGATTTTCGGATCTTCCCATA  
+HWI-EAS443:3:86:1239:783#0/1  
ababaababbabba`abb`\_Sbbba^¥ZEZGab¥¥`U\_aX  
@HWI-EAS443:3:86:1448:786#0/1  
CAAGAAATGGCCAGTAGGAGTCTATGGGATTCCTTTCGTC  
+HWI-EAS443:3:86:1448:786#0/1  
abVbbabbbbb`\_¥^abb\_b¥aba\_V\_a`a[]^a`H`a¥  
@HWI-EAS443:3:86:1505:334#0/1  
GATTGGCCATGTTTCCGATTTGTTTTCAAAGAATTCCTTG  
+HWI-EAS443:3:86:1505:334#0/1  
]abbb`b`bba]bbaabbbbbbabbYbabaaaaSJ^ba  
@HWI-EAS443:3:86:1558:1163#0/1  
CGGCCTTGCTCAATGCATCCTGTGCAGCCATGGATGACTT  
+HWI-EAS443:3:86:1558:1163#0/1  
`ab\_bbaabab\_bbbabbbbbbabab\_aRbab]aZb\_Zaa  
@HWI-EAS443:3:86:178:248#0/1  
TCCAATAGAGCCTTCTCCACTCCCCTGGGTGACTCTCC  
+HWI-EAS443:3:86:178:248#0/1  
``^aa```^Xa`^^Z`]`T¥¥`¥`]`RZNZR^RZSTPST  
@HWI-EAS443:3:86:190:1412#0/1  
TACATATACTGTTCACTGTCCAGGCCATGATTCGGTC  
+HWI-EAS443:3:86:190:1412#0/1  
abaaababa`a\_aaaaaaa`]a^\_]Y\_[a`]\_^`WYZ]  
@HWI-EAS443:3:86:195:390#0/1  
AGAGCCTAACATAGTCAAACCACATGAGAAAGGCATAAAT

+HWI-EAS443:3:86:195:390#0/1  
UZNW^\_b¥`a^\_¥ZV\_bX¥X`¥^Yq]aV\_GG^aa\_`a^  
@HWI-EAS443:3:86:205:1260#0/1  
GTGCTAGCAGAGCTACAGGACATTGAAAATGAAGAGAAGA  
+HWI-EAS443:3:86:205:1260#0/1  
\_YQ\_ab`ab]aaa`aZV```a^[Z[a[`YVV]]\_`\_a¥`  
@HWI-EAS443:3:86:223:1148#0/1  
TGGGGCATGGAAATGAGGCGCTGCCTTCTTCAGTCTCTTC  
+HWI-EAS443:3:86:223:1148#0/1  
`b¥b`¥b\_bbX`a\_b\_\_aaaa`a`a`aa^aaa\_VaXY[Q  
@HWI-EAS443:3:86:417:1837#0/1  
CATGGAATGAGGCGCTGCCTTCTTCAGTCTCTTCAGCAG  
+HWI-EAS443:3:86:417:1837#0/1  
S¥[b][`[Uba¥ZaSV`UR\_OY[X]X^YR\_X¥XUY`UGYX  
@HWI-EAS443:3:86:417:606#0/1  
CAGGCACTCCTCGATTGCTTCATATAGCCCCCAAGATCG  
+HWI-EAS443:3:86:417:606#0/1  
aabaa`abbabababaaaa`\_^a`aa`X\_X^aZO]W^R[  
@HWI-EAS443:3:86:444:332#0/1  
GGGGGCTATATGAAGCAATCGAGGAGTGCCTGATTAATGA  
+HWI-EAS443:3:86:444:332#0/1  
aaaab`baa]``aaaa`ba\_a]a`^`^a^`aa``\_\_\_\_\_`]  
@HWI-EAS443:3:86:488:1417#0/1  
GGGGCATGGAAATGAGGCGCTGCCTTCTTCAGTCTCTTCA  
+HWI-EAS443:3:86:488:1417#0/1  
a\_ab[baa`Z^aa`bYaa\_b^`Z\_]¥NWRZV`YXW¥\_¥[\_  
@HWI-EAS443:3:86:501:684#0/1  
ACCCGAATGCACTATTGAAGCACCGATTTGAGATAATTGA  
+HWI-EAS443:3:86:501:684#0/1  
S¥S¥\_Z]Zaa[```bb`\_a¥¥\_aaaa`\_Y\_Y\_a\_aZ]]bV  
@HWI-EAS443:3:86:530:77#0/1  
GGGGTTTTCGGCTGAATCGAGAAAATTGCTTCTCATTGTT  
+HWI-EAS443:3:86:530:77#0/1  
abbb`aaaaaaZaaa`^b\_a\_```a`a^\_\_Ya]\_\_^\_Y\_  
@HWI-EAS443:3:86:532:546#0/1  
CTTTGTAATCATACAAATCAGGAAGAAATTTAGGCTTCTC  
+HWI-EAS443:3:86:532:546#0/1  
aaa^^\_babVbabaaSY]aa\_a\_aaY`^`\_]`Za`]RLR  
@HWI-EAS443:3:86:561:333#0/1  
GGGGGCTATATGAAGCAATCGAGGAGTGCCTGATTAATGA  
+HWI-EAS443:3:86:561:333#0/1  
XX`b`Q\_^[U^aWZXT\_\_[\_`\_\_bYV^PZW[aaV[Z^XX`^  
@HWI-EAS443:3:86:568:1499#0/1  
GGCATGGAAATGAGGCGCTGCCTTCTTCAGTCTCTTCAGC  
+HWI-EAS443:3:86:568:1499#0/1  
`ab\_]`b^T`aaababaaa\_P¥`a`\_a\_aa``]aaa^a[Z  
@HWI-EAS443:3:86:650:859#0/1  
TTCCGATTTGTTTTCAAAGAATTCCTTGGTCATGTCTTTC  
+HWI-EAS443:3:86:650:859#0/1  
aaa\_b`aaa`\_`\_a`aa^a`\_a`\_`\_aaa\_Y`\_aa\_aaa`]

@HWI-EAS443:3:86:67:426#0/1  
CAATGAGAAGCAATTTTCTCGATTGAGCCGAAAACCCCTC  
+HWI-EAS443:3:86:67:426#0/1  
a``bbbaXa\_aVabbabbbbaa^^aaab``a`aW\_a`a  
@HWI-EAS443:3:86:716:1666#0/1  
GTGAACTTTGTAAGTATGGAGTTCTCACTCACTGACCCGA  
+HWI-EAS443:3:86:716:1666#0/1  
\_\_W\_bbbbbbabbbabb`aab^babbbbbbabaaXaa^  
@HWI-EAS443:3:86:721:326#0/1  
AAACTTTAGAGCCTATGTAGATGGATTGAGCCGAACGGC  
+HWI-EAS443:3:86:721:326#0/1  
aaa^aaaa\_a\_\_aaaY`\_`\_`\_^`aN[`\_UZ^Z\_W\_¥W  
@HWI-EAS443:3:86:721:548#0/1  
GGGGGCTATATGAAGCAATCGAGGAGTGCCTGATTAATGA  
+HWI-EAS443:3:86:721:548#0/1  
ababbbabbbbabaaabaab`baaa\_baaaaaaa\_aaaa  
@HWI-EAS443:3:86:746:1315#0/1  
GCAGGTGCTAGCAGAGCTACAGGACATTGAAAATGAAGAG  
+HWI-EAS443:3:86:746:1315#0/1  
aaa^a^\_aZ¥\_\_a\_\_a`aaa\_\_]^`^`^`^`\_^`]^`^`\_`^`  
@HWI-EAS443:3:86:761:86#0/1  
GAAAGGCATAAATCCCAATTACCTCATGGCTTGAAGCAG  
+HWI-EAS443:3:86:761:86#0/1  
abaabaaabbaabaaababaa\_Za`^a\_\_a`PXU¥VWZW  
@HWI-EAS443:3:86:805:1687#0/1  
TATGCGTCTCCACAACCTTGAGGGGTTTTCGGCTGAATCGA  
+HWI-EAS443:3:86:805:1687#0/1  
]a]a`aa`Z\_\_¥`aaabaV¥aYUb`a`J`Y`a`b`Z¥aa  
@HWI-EAS443:3:86:807:1161#0/1  
ATTGAATTCATTTTGGACCCAGCTTGCTAGAGATCTGGGC  
+HWI-EAS443:3:86:807:1161#0/1  
aaabaabaaaaaa`aaa`\_``aaa`\_aaaa\_a¥`ZX]¥  
@HWI-EAS443:3:86:811:1308#0/1  
CTGAAAGTCATCCATGGCTGCACAGGATGCATTGAGCAAG  
+HWI-EAS443:3:86:811:1308#0/1  
ababbbb`baaaabaaaaa[]\_X[aaa[\_\_\_aYa\_\_\_V`\_\_  
@HWI-EAS443:3:86:827:499#0/1  
CCCCTGGGTGACTCTCCGATTGGCCATGTTTCCGATTTGT  
+HWI-EAS443:3:86:827:499#0/1  
aaaa\_baa[a`aa`\_\_aa\_]a`\_¥Y`^`a^^¥RZa^¥T  
@HWI-EAS443:3:86:839:1129#0/1  
ATCCGAATACATGAAACAACTTCCAAATGTGTGCATATT  
+HWI-EAS443:3:86:839:1129#0/1  
abbbabbababa`b`bbbababbbab```a^b^aaaaba`  
@HWI-EAS443:3:86:928:720#0/1  
GAAGGAAGAGACCGAATCATGGCCTGGACAGTGGTGAACA  
+HWI-EAS443:3:86:928:720#0/1  
\_^XaaXM]^`^`\_aa]aa]\_`\_`[]`\_YS^`]a]Waa]\_Q  
@HWI-EAS443:3:86:933:1131#0/1  
CCCAGACTGGAGCCACACAAATGGGAAAAATACTGTGTT

+HWI-EAS443:3:86:933:1131#0/1  
^bbbbbbbbbabab\_bbb`aa`abb^\_ababaabaaaab  
@HWI-EAS443:3:86:955:207#0/1  
CTTGGTCATGTCTTTCTTTGACAGAAGACTCGGCCTCA  
+HWI-EAS443:3:86:955:207#0/1  
abbbbbbbbabba^aabbbbaabbbabb`baa`¥`a^\_  
@HWI-EAS443:3:86:963:1715#0/1  
GGGGGGCTATATGAAGCAATCGAGGAGTGCCTGATTAATG  
+HWI-EAS443:3:86:963:1715#0/1  
[`b\_G\_UZU[`a`b]abaKaNb`bbJ¥]^`a^`^aa^  
@HWI-EAS443:3:87:109:1446#0/1  
ATGGCTTGAAGCAGGTGCTAGCAGAGCTACAGGACATTG  
+HWI-EAS443:3:87:109:1446#0/1  
aa^`baaUbVS\_[]WYM]^Y¥XRP¥]^VDSR[U]VZZLSU  
@HWI-EAS443:3:87:1130:436#0/1  
GGGAATACCACTATATGATGCAATCAAATGCATGAAGACA  
+HWI-EAS443:3:87:1130:436#0/1  
abaaabbaaaaabbaabaaa\_baaaaaaaaaaaaaaaaa]a  
@HWI-EAS443:3:87:1199:925#0/1  
CTTCTGTCAAAGAGAAAGACATGACCAAGGAATTCTTTGA  
+HWI-EAS443:3:87:1199:925#0/1  
aa`a`aab¥^T`X]^`\_Y¥]a]Wb\_\_[]V[I\_a^baZUaY  
@HWI-EAS443:3:87:1202:901#0/1  
CCTGCTTCCAAGCCATGAGGTAATTGGGATTTATGCCTTT  
+HWI-EAS443:3:87:1202:901#0/1  
abb`bbbabbbbaaabab]^`babbbbabbb\_babaabaa  
@HWI-EAS443:3:87:1237:1037#0/1  
GCTCTCTTCGTCAGGGTGTAGTCCGCTTTGGTGGCCATC  
+HWI-EAS443:3:87:1237:1037#0/1  
aaa`a]]\_]b¥^a^aaa^a^\_Z\_[]Y`aa]^]¥YNQXN  
@HWI-EAS443:3:87:1297:1200#0/1  
ACATGCTCTTGAGGACTGCGATAGGCCAAGTGTGAGGCC  
+HWI-EAS443:3:87:1297:1200#0/1  
`baabaaabb`abaaa`a`a`a`U\_aaaZ\_ZZ`\_¥`¥U  
@HWI-EAS443:3:87:1322:770#0/1  
ATTCTTTGGCTGGAAAGAGCCTAACATAGTCAAACCACAT  
+HWI-EAS443:3:87:1322:770#0/1  
abbaabbbabba^aabaaa`^`[a]^`aa`\_¥`ba^Ma^aa  
@HWI-EAS443:3:87:1323:840#0/1  
CGAAACTAACAAGTTTGCTGCAATATGCACACATTTGGAA  
+HWI-EAS443:3:87:1323:840#0/1  
`a¥a^^Ya`^^`\_abb]\_b\_b¥bbaZSa\_b¥baaaaU`a  
@HWI-EAS443:3:87:1337:876#0/1  
ATCGACGAACGGGGTGAATCAATAATTGTAGAATCTGGTG  
+HWI-EAS443:3:87:1337:876#0/1  
\_OG^`a^\_a\_[]abH`^S\_`OR]UUV]aRP[VaZW^¥OT[  
@HWI-EAS443:3:87:1444:1673#0/1  
AAAGGAATCCCATAGACTCCTACTGGCCATTTCTTGTCTT  
+HWI-EAS443:3:87:1444:1673#0/1  
abU\_XaaT] []a\_\_a^K]]]aXSIV¥T\_\_P\_UFX¥QLJL\_

@HWI-EAS443:3:87:1454:1239#0/1  
CACGAGGGGGAGGGAATACCACTATATGATGCAATCAAAT  
+HWI-EAS443:3:87:1454:1239#0/1  
\_bababbbbbbbaaaaa`\_a¥baaaaaaab]aaa\_a`aa  
@HWI-EAS443:3:87:145:1020#0/1  
TGAAGGGAGTGTACATAAATACGGCCTTGCTCAATGCATC  
+HWI-EAS443:3:87:145:1020#0/1  
aa[M[`a^a¥aZaaa^Qa[]\_\_\_Sa¥¥UZRX^¥^¥\_\_W^  
@HWI-EAS443:3:87:1509:424#0/1  
CAGCTTGCTAGAGATCTGGGCTCTGGCTCATCACTGTCAT  
+HWI-EAS443:3:87:1509:424#0/1  
aaa`aa[abb`bbbaa\_aS]Ia``\_b\_b\_`bYba`b\_^`a  
@HWI-EAS443:3:87:1554:656#0/1  
CATGGGCCTCGACACTTGGCCTATCGCAGTCCTCAAGAGC  
+HWI-EAS443:3:87:1554:656#0/1  
abab^bb\_bbbb\_bababaaabbaaba``]Ya[aaa\_a`  
@HWI-EAS443:3:87:1600:526#0/1  
CATTAAATCAGGCACTCCTCGATTGCTTCATATAGCCCCC  
+HWI-EAS443:3:87:1600:526#0/1  
aabbabbba`[`bbbb`bb[bbabbbbbb[baZ\_KVa  
@HWI-EAS443:3:87:1617:1193#0/1  
ATCAGGCACTCCTCGATTGCTTCATATAGCCCCCAAGAT  
+HWI-EAS443:3:87:1617:1193#0/1  
L^a\_]X`bab\_baab^aaaab\_^Zbb^bb`QRWWbbbaXa  
@HWI-EAS443:3:87:1663:792#0/1  
GGGGTTTTCGGCTGAATCGAGAAAATTGCTTCTCATTGTT  
+HWI-EAS443:3:87:1663:792#0/1  
abaaHa`a¥b`M\_a``\_[a\_aZY\_]``aUa[PVN\_]ZaX`  
@HWI-EAS443:3:87:1685:91#0/1  
CATTGAGCAAGCCGTATTTATGTACTCCCTTCATTAT  
+HWI-EAS443:3:87:1685:91#0/1  
a```[bbaabb\_\_abWbaa]^]abb\_babaaab[WUabab  
@HWI-EAS443:3:87:171:411#0/1  
GGGGCATGGAATGAGGCGCTGCCTTCTCAGTCTCTTCA  
+HWI-EAS443:3:87:171:411#0/1  
ab`a`a`aa^^]\_^`\_\_a¥^\_¥¥\_`^¥¥W[ZZVUVU[WWW  
@HWI-EAS443:3:87:1791:472#0/1  
AGCAGGTGCTAGCAGAGCTACAGGACATTGAAAATGAAGA  
+HWI-EAS443:3:87:1791:472#0/1  
aaaaa`^\_aaa`\_aa`a`a`\_aaaa\_\_a`a^`a`a`````  
@HWI-EAS443:3:87:265:352#0/1  
ATAAAATCTGAGAAGACACACATTACATCTTTTCATTCA  
+HWI-EAS443:3:87:265:352#0/1  
a```[^aaab\_aW\_\_`\_]`]`a\_\_`\_\_`\_^^\_\_\_\_^^  
@HWI-EAS443:3:87:28:1430#0/1  
GGCATGTGAATTGACTGATTCAAGCTGGATAGAACTTGAT  
+HWI-EAS443:3:87:28:1430#0/1  
\_`ba¥\_TSS\_`^YYVYXRR^\_YGYZ^]USZZW]a^WQS¥¥  
@HWI-EAS443:3:87:294:770#0/1  
AGAATATGGGGAAGATCCGAAAATCGAAACTAACAAAGTTT

+HWI-EAS443:3:87:294:770#0/1  
a`V¥baaab`V¥b\_^abb¥ab\_\_^aa`a\_aaT`a`a\_^  
@HWI-EAS443:3:87:324:1865#0/1  
GGCCAATCGGAGAGTCACCCAGGGGAGTGGAGGAAGGCTC  
+HWI-EAS443:3:87:324:1865#0/1  
^\_a\_¥`^b` `[Saa\_aaaaX^`¥¥X¥]V`¥NNZ`X¥SXX^  
@HWI-EAS443:3:87:328:1931#0/1  
GATTTGTTTTCAAAGAATTCCTTGGTCATGTCTTTCTCTT  
+HWI-EAS443:3:87:328:1931#0/1  
Xb` `a¥^Xab` `ba¥a¥aaaaa\_J` `a`bYaabaa^abY  
@HWI-EAS443:3:87:339:413#0/1  
GGGGGCTATATGAAGCAATCGAGGAGTGCCTGATTAATGA  
+HWI-EAS443:3:87:339:413#0/1  
aaa]¥`^aa`^a\_a\_a\_a\_aa\_a\_] ]aa] ]`\_] ^\_\_^  
@HWI-EAS443:3:87:427:973#0/1  
ATGAGAAGCAATTTTCTCGATTGAGCCGAAAACCCCTCAA  
+HWI-EAS443:3:87:427:973#0/1  
abaa`abbaaRaaaaaaaaaaa\_a\_a\_ZR` ` \_Y` ` ` \_^Z  
@HWI-EAS443:3:87:463:1023#0/1  
AATGAATTCAATAAGGCATGTGAATTGACTGATTCAAGCT  
+HWI-EAS443:3:87:463:1023#0/1  
aaaaaaaa\_aa`a`\_aa\_aa]a`\_`\_`\_`\_aa\_\_` ` ` \_\_^  
@HWI-EAS443:3:87:483:938#0/1  
GGGGGAGGGAATACCACTATATGATGCAATCAAATGCATG  
+HWI-EAS443:3:87:483:938#0/1  
aba`b\_¥]\_`^a\_\_`aa`a\_aaa\_` ` `a`\_a\_ [[^`\_a`a  
@HWI-EAS443:3:87:558:184#0/1  
GGCATGGAAATGAGGCGCTGCCTTCTTCAGTCTCTTCAGC  
+HWI-EAS443:3:87:558:184#0/1  
a\_]aabba`aaa\_b[W]]\_Y\_a[`RXTX^RQR[UZ^XZTL  
@HWI-EAS443:3:87:572:856#0/1  
GAAATGGCCAGTAGGAGTCTATGGGATTCCTTTTCGTCAGT  
+HWI-EAS443:3:87:572:856#0/1  
ab\_\_abaa[\_a`Yab[SUHR[PZ\_a[XHY`¥Y]SZMW\_\_V  
@HWI-EAS443:3:87:596:771#0/1  
GCTTCATATAGCCCCCAAGATCGAAGGTTCCAGGTTCCA  
+HWI-EAS443:3:87:596:771#0/1  
aaaaaa`aaa^`^aaa\_` ]` ` \_a\_\_YY^PY[[R¥^UYV[V  
@HWI-EAS443:3:87:607:394#0/1  
CCTGGGTGACTCTCCGATTGGCCATGTTTCCGATTTGTTT  
+HWI-EAS443:3:87:607:394#0/1  
a`^^^ [\_[\_¥ZXaaT`\_^\_X¥` \_\_[JYSS¥`Y¥a^^Y\_\_  
@HWI-EAS443:3:87:633:709#0/1  
CACTCGGTGAAAATATGGCACCAGAAAAAGTAGACTTTGA  
+HWI-EAS443:3:87:633:709#0/1  
a\_a`aab^\_b\_]a^\_b\_`^^`a`aS]` ]\_\_[\_`ba^aaaa]  
@HWI-EAS443:3:87:649:257#0/1  
GTCTTCATGCATTTGATTGCATCATATAGTGGTATTCCCT  
+HWI-EAS443:3:87:649:257#0/1  
a\_\_ba]`ab`aaa`a`a\_a\_\_`a\_a\_` `aWa`W^`¥^W\_

@HWI-EAS443:3:87:69:1441#0/1  
CAAAGTCTACTTTTTCTGGTGCCATATTTTCACCGAGTGC  
+HWI-EAS443:3:87:69:1441#0/1  
a^Y]] [a`][ ]`a`aa`\_T`\_`a`\_`^^^`\_`a`[\_`\_]^^  
@HWI-EAS443:3:87:739:689#0/1  
TGGGGGCTATATGAAGCAATCGAGGAGTGCCTGATTAAT  
+HWI-EAS443:3:87:739:689#0/1  
aba[``\_`bbbaaaa]\_`baaaaa\_a^^aTa```a]aaaaa  
@HWI-EAS443:3:87:800:256#0/1  
GGGGGCTATATGAAGCAATCGAGGAGTGCCTGATTAATGA  
+HWI-EAS443:3:87:800:256#0/1  
aa\_aa`aa\_aa\_[^`\_]V`\_]`aW`Y`VU`\_X]]]]X^]  
@HWI-EAS443:3:87:803:1425#0/1  
ATTTTGGCGTTCACCTTCTTTTGACATTTGGGAAAGCTTGC  
+HWI-EAS443:3:87:803:1425#0/1  
aa]aba]]a`¥H]bUaST`a\_SRLVT[a[\_^ZaUaYF0\_¥  
@HWI-EAS443:3:87:817:1598#0/1  
GGGGGCTATATGAAGCAATCGAGGAGTGCCTGATTAATGA  
+HWI-EAS443:3:87:817:1598#0/1  
`QNW`XI[TQXaX]TVGW]]b^W][Q¥OLWZ[V¥`WLTQ  
@HWI-EAS443:3:87:821:850#0/1  
CACCACTGTCCAGGCCATGATTCGGTCTCTTCCTTCAATT  
+HWI-EAS443:3:87:821:850#0/1  
aaa`aa`b]aa`Sa\_a[Z`\_`\_`aR[XZV\_]\_\_ [ZU]\_\_  
@HWI-EAS443:3:87:832:1130#0/1  
GAAGCAGGTGCTAGCAGAGCTACAGGACATTGAAAATGAA  
+HWI-EAS443:3:87:832:1130#0/1  
aaaa¥\_Y^X]a^\_\_\_\_`[^\_¥a^`^ [¥\_\_`][ ] [S][ ] [ ]  
@HWI-EAS443:3:87:845:1810#0/1  
ACAGATTTTGCCAGTAAGGTCCTGCACACTTTCCCAATAG  
+HWI-EAS443:3:87:845:1810#0/1  
aa\_XOGZ]aR\_¥`¥PYQPNTa\_X[P^¥\_Y^`\_]¥b^ZTW  
@HWI-EAS443:3:87:86:1311#0/1  
CAGTCATCAAAGTCTACTTTTTCTGGTGCCATATTTTCAC  
+HWI-EAS443:3:87:86:1311#0/1  
aa¥F`\_\_b\_[`aV]`R`\_aaa\_a`\_]Ja\_a]a\_\_^`\_`^a]  
@HWI-EAS443:3:87:906:1688#0/1  
GGCATGTGAATTGACTGATTCAAGCTGGATAGAACTTGAT  
+HWI-EAS443:3:87:906:1688#0/1  
^bXbbbab^V`aabbabbbabb`babb^bbb`a¥b[a\_a  
@HWI-EAS443:3:87:923:241#0/1  
GCGGACTACACCCTTGACGAAGAGAGCAGGGCAAGAATCA  
+HWI-EAS443:3:87:923:241#0/1  
aaaL`^ZX]bZ`SN¥]]P^[\_`]Zb^[[`^aa^T^aWU`X\_  
@HWI-EAS443:3:87:930:481#0/1  
CACATTTGGAAGTTTGTTCATGTATTTCGATTTCCATTT  
+HWI-EAS443:3:87:930:481#0/1  
abaaabbbba\_aabab`abaaab\_aaaaaaa`\_`a\_aab`  
@HWI-EAS443:3:87:931:1799#0/1  
CCCCTGTTGTGTACATATACTGTTCCACTGTCCAGGC

+HWI-EAS443:3:87:931:1799#0/1  
aaabbaabbbbabbabbbbabbabbbbabb`\_\_a`b`aa  
@HWI-EAS443:3:88:1022:171#0/1  
CGTCTCCACAACCTTGAGGGGTTTTCGGCTGAATCGAGAAA  
+HWI-EAS443:3:88:1022:171#0/1  
]bbabba\_bb`abb`bbba[\_ba\_`aabbaa`U`aba\_a  
@HWI-EAS443:3:88:1041:14#0/1  
GTCCGAAAGAGGCGAAGAGACAATTGAAGAAAAATTTGAG  
+HWI-EAS443:3:88:1041:14#0/1  
a\_]W\_^\_Z`^\_YM^¥¥¥¥VRWYY]\_\_YYQYZSXUVWXS  
Y]@HWI-EAS443:3:88:1043:1494#0/1  
AGCCAATTGAAGTGGGCACTCGGTGAAAATATGGCACCAG  
+HWI-EAS443:3:88:1043:1494#0/1  
abYb`a`[a`aa^b\_V\_`aXaaZ[a\_]a^aaab`ZX\_X¥  
@HWI-EAS443:3:88:1048:1595#0/1  
GAATTCATTTTGGACCCAGCTTGCTAGAGATCTGGGCTCT  
+HWI-EAS443:3:88:1048:1595#0/1  
I\_U\_a[¥MNY\_VVWV^[¥\_W\_Z``ZI^VW\_HV`a]]O[\_a  
@HWI-EAS443:3:88:1068:1573#0/1  
GGGGGCTATATGAAGCAATCGAGGAGTGCCTGATTAATGA  
+HWI-EAS443:3:88:1068:1573#0/1  
a`U][UQQWTWTSVPN\_R[ITYRNL]Y]JGXXRX`¥RPO]  
@HWI-EAS443:3:88:1069:126#0/1  
ATTTGAGAAATGATACTGATGTGGTGAACCTTTGTAAGTAT  
+HWI-EAS443:3:88:1069:126#0/1  
]b`aba`YYabb`bbaab\_ab^bb^a]aT`aaa\_a\_a\_\_\_\_  
@HWI-EAS443:3:88:1097:396#0/1  
CAGCTTGCTAGAGATCTGGGCTCTGGCTCATCACTGTCAT  
+HWI-EAS443:3:88:1097:396#0/1  
¥W\_^]aa`]bbabbbb`^[\_abbb`^^bbbaW]Xbbaa`b  
@HWI-EAS443:3:88:1121:268#0/1  
CTGCAATATGCACACATTTGGAAGTTTGTTCATGTATTC  
+HWI-EAS443:3:88:1121:268#0/1  
`bbbbbbbbbbbbabbbbbbbbb`bbbabb`abbaabba  
@HWI-EAS443:3:88:1156:430#0/1  
AGAAGATGTTGCCCGATTGAACATATCGCAAGCATGAGG  
+HWI-EAS443:3:88:1156:430#0/1  
¥`\_S[¥aN¥HX¥^XWNYH^\_baab`[\_aTIWR]]]aZa`  
@HWI-EAS443:3:88:115:1670#0/1  
ATGTACACTCCCTTCATTATGTATTAGTAGCCCTGCAGT  
+HWI-EAS443:3:88:115:1670#0/1  
`¥I¥`aa¥]\_Z^`aaa^`aaa\_aa``a\_¥a\_]Y]X`\_SY  
@HWI-EAS443:3:88:1171:585#0/1  
ATCGACGAACGGGGTGAATCAATAATTGTAGAATCTGGTG  
+HWI-EAS443:3:88:1171:585#0/1  
ab`b^aba\_a`aa`]aaaa\_a\_]\_`a``Y^b^`\_]`a`0a  
@HWI-EAS443:3:88:1183:741#0/1  
GGCATGGAATGAGGCGCTGCCTTCTTCAGTCTTTCAGC  
+HWI-EAS443:3:88:1183:741#0/1  
aaab`a`aababaa\_abab`a`aaaaa\_aXZa¥`a\_aaY



@HWI-EAS443:3:88:1186:180#0/1  
TGAGAAAGGCATAAATCCCAATTACCTCATGGCTTGGAAG  
+HWI-EAS443:3:88:1186:180#0/1  
abaa\_aabbaabaaaa\_a`abaa`\_a`aaaa\_aa`\_0]X  
@HWI-EAS443:3:88:1217:361#0/1  
AGGCTCTTTCCAGCCAAAGAATGTCTTCATGCATTTGATT  
+HWI-EAS443:3:88:1217:361#0/1  
ab`aba^abaaa¥`WX`bb`aYJPaa]aa\_LXb^`]aV`  
@HWI-EAS443:3:88:1268:1711#0/1  
CATTAATCAGGCACTCCTCGATTGCTTCATATAGCCCCC  
+HWI-EAS443:3:88:1268:1711#0/1  
abbbbbbaabaabbaaababbabbbbbbb`aaQ\_^  
@HWI-EAS443:3:88:1335:951#0/1  
CAGAAAAAGTAGACTTTGATGACTGCAAAGATGTTGGAGA  
+HWI-EAS443:3:88:1335:951#0/1  
]bbbbbabbbbbbbaabbbbabbbbbbbaaa  
@HWI-EAS443:3:88:1362:448#0/1  
GAACTTTGTAAGTATGGAGTTCTCACTCACTGACCCGAGA  
+HWI-EAS443:3:88:1362:448#0/1  
`]b[baba\_baa\_b`ba\_a`\_b^aaa\_a\_aaaQQ^a\_a\_  
@HWI-EAS443:3:88:139:282#0/1  
GTTTGTTCCTTCCTTCTTTGGTCCTACATTTGCTT  
+HWI-EAS443:3:88:139:282#0/1  
\_P]V]¥[X`¥^F0¥XZa\_\_`\_[\_`YXQX^[[^[\_ZZZ^  
@HWI-EAS443:3:88:1460:945#0/1  
ATGAGAAGCAATTTTCTCGATTGAGCCGAAAACCCCTCAA  
+HWI-EAS443:3:88:1460:945#0/1  
abaabbbb`bababbababb^abY^babaaY¥^aa\_^`  
@HWI-EAS443:3:88:1533:127#0/1  
CGATTGCCATGTTTCCGATTTGTTTCAAAGAATTCCTT  
+HWI-EAS443:3:88:1533:127#0/1  
a¥V`abaZV`bbaaa¥`[P\_\_aaTa\_YTY^aa`````\_S\_a  
@HWI-EAS443:3:88:1566:659#0/1  
ATTTGTTTCAAAGAATTCCTTGGTCATGTCTTTCTCTT  
+HWI-EAS443:3:88:1566:659#0/1  
\_\_[abU[a`TXbab`b`P\_a[`SHWXaabaab¥^b`abb  
@HWI-EAS443:3:88:1572:1338#0/1  
CTGAAATTAAGTATTGAAGACCCGAGTCACGAGGGGGAGG  
+HWI-EAS443:3:88:1572:1338#0/1  
aba[bbbbbbbabbbabbaaa\_abb\_\_baabbaababb  
@HWI-EAS443:3:88:1582:603#0/1  
ATTGAATTCATTTTGGACCCAGCTTGCTAGAGATCTGGGC  
+HWI-EAS443:3:88:1582:603#0/1  
\_¥YbYa^`[bba]¥Z^OGU^`baa¥URa\_X`XI\_GO]FOF  
@HWI-EAS443:3:88:1731:782#0/1  
GAAAGGCATAAATCCCAATTACCTCATGGCTTGGAAGCAG  
+HWI-EAS443:3:88:1731:782#0/1  
`R`\_]`[]]aa`¥XX\_a`[S[^]S\_[TTX[]YYVL[TQBB  
@HWI-EAS443:3:88:1744:319#0/1  
TGGCTCATCACTGTCATACTGTTAAGGTCTCCAACATCT

+HWI-EAS443:3:88:1744:319#0/1  
SS^b\_X[a[\_`b`a]aaa]¥baaaaa¥` ``aUa`b\_aa[a  
@HWI-EAS443:3:88:1757:1145#0/1  
GGGGCATGGAAATGAGGCGCTGCCTTCTTCAGTCTCTTCA  
+HWI-EAS443:3:88:1757:1145#0/1  
aba]W\_Zbb]a\_\_`[`]aa^`Z^[^U^\_ZV\_VJUSZ^W[  
@HWI-EAS443:3:88:1779:420#0/1  
ATAGCCCCCAAGATCGAAGGTTCCAGGTTCCAGGTTGTC  
+HWI-EAS443:3:88:1779:420#0/1  
`ba^`a]]aa`^]``Y]``\_a¥¥S¥[Y^U\_ZTZ[YY^TP[  
@HWI-EAS443:3:88:228:821#0/1  
GGGGCATGGAAATGAGGCGCTGCCTTCTTCAGTCTCTTCA  
+HWI-EAS443:3:88:228:821#0/1  
aaaa\_Z^aa`X`a\_aa\_aa`a`\_^\_¥aa`^\_W[``\_\_¥Z  
@HWI-EAS443:3:88:431:760#0/1  
CGAAGAGAGCAGGGCAAGAATCAAACTAGGCTTTTCACT  
+HWI-EAS443:3:88:431:760#0/1  
a`X\_] [¥`^`aa`a\_\_aa`¥` `` `^`a^^^\_\_^\_a[^  
@HWI-EAS443:3:88:516:1194#0/1  
GGCACCAGAAAAAGTAGACTTTGATGACTGCAAAGATGTT  
+HWI-EAS443:3:88:516:1194#0/1  
Zabbbbbbb\_aT^`a[bb¥b^P`b`ab]bab^a[M^aab^¥  
@HWI-EAS443:3:88:525:1847#0/1  
GCCAGTAAGGTCCTGCACACTTTCCCAATAGAGCCTTCCT  
+HWI-EAS443:3:88:525:1847#0/1  
aa\_ab\_abbYUYbaa`a`\_^a\_^baaba]a^a`aWa^Z`¥  
@HWI-EAS443:3:88:565:382#0/1  
TTTGTAAATCATACAAATCAGGAAGAAATTTAGGCTTCTCT  
+HWI-EAS443:3:88:565:382#0/1  
aa`ZP¥baaaaaaa^`\_aaaaYR^^a`]TR^a^\_\_¥P¥[\_  
@HWI-EAS443:3:88:609:448#0/1  
GGGGCTATATGAAGCAATCGAGGAGTGCCTGATTAATGAT  
+HWI-EAS443:3:88:609:448#0/1  
abababbbaab\_aaabbaab`ba]`\_aa]aa\_aaa`aa`a  
@HWI-EAS443:3:88:677:920#0/1  
GAAAGGCATAAATCCCAATTACCTCATGGCTTGAAGCAG  
+HWI-EAS443:3:88:677:920#0/1  
aba` ``ab`Uba^bb[aaa`Uaaaaaa]aaaZ\_\_`YQR  
@HWI-EAS443:3:88:684:731#0/1  
CAAAGAATTCCTTGGTCATGTCTTTCTTTGACAGAAGA  
+HWI-EAS443:3:88:684:731#0/1  
Sa` [¥\_bbaZaaaa\_\_bbYbbb\_bb]ba¥`bbbbbbb`  
@HWI-EAS443:3:88:773:864#0/1  
CAGGGCAAGAATCAAACTAGGCTTTTCACTATAAGACAA  
+HWI-EAS443:3:88:773:864#0/1  
^Q¥^b`^`[\_Tabb\_H\_` `b`\_QXbaba\_\_Z\_ba`^^¥^a^  
@HWI-EAS443:3:88:809:918#0/1  
TACTGAATACATAATGAAGGGAGTGTACATAAATACGGCC  
+HWI-EAS443:3:88:809:918#0/1  
`b`]aaab^aaaaY\_aa^\_\_`¥¥0[GZ\_`X¥^\_aa]^`^\_

@HWI-EAS443:3:88:815:376#0/1  
GGCTCATCTGTCTACTGTTTAAGGTCTCCAACATCTT  
+HWI-EAS443:3:88:815:376#0/1  
ab\_`bbaababaaaa\_aa^abaa]\_a]`aaaaba`a`a]  
@HWI-EAS443:3:88:923:215#0/1  
CCGTTCTCTTTGTAATCATACAAATCAGGAAGAAATTTA  
+HWI-EAS443:3:88:923:215#0/1  
abbaabbbbbbaabababbbbababb\_bbaaabababbab  
@HWI-EAS443:3:88:934:429#0/1  
GGTTTGTTCCTTCCGTCTTCTTCTTTGGTCCTACATTTGCT  
+HWI-EAS443:3:88:934:429#0/1  
abI`Q`[\_b\_¥b]P\_]a\_]`aaaaa^\_`aaVa\_aaaQ¥  
@HWI-EAS443:3:88:951:1699#0/1  
GACACACATTCACATCTTTTCATTCCTGGAGAGGAGATG  
+HWI-EAS443:3:88:951:1699#0/1  
aaP`Zb\_`bbXbbb`b`aababba\_b[U`[ab`baa`  
@HWI-EAS443:3:88:995:1766#0/1  
CATTAATCAGGCACTCCTCGATTGCTTCATATAGCCCCC  
+HWI-EAS443:3:88:995:1766#0/1  
aaa`a`Z\_aa^`aabU`aab`Va^^]aaaa\_ab`a\_a^`  
@HWI-EAS443:3:88:997:1143#0/1  
GGCCTTGCTCAATGCATCCTGTGCAGCCATGGATGACTTT  
+HWI-EAS443:3:88:997:1143#0/1  
T``^W\_]RQM¥Ra``\_a`^`Q\_`^`b`abL¥[¥ba]]b``  
@HWI-EAS443:3:88:99:2007#0/1  
CGGCTGAATCGAGAAAATTGCTTCTCATTGTTTCAGGCACT  
+HWI-EAS443:3:88:99:2007#0/1  
aaaa\_a`\_^`\_Va[a\_`\_ZX\_\_\_\_\_`^`^`Y^X\_`^`^`[V]  
@HWI-EAS443:3:89:1012:1276#0/1  
TGGCCATCTCCTCTCCAGTGAATGAAAAGATGTGAATGTG  
+HWI-EAS443:3:89:1012:1276#0/1  
[I\_`Zbb\_0^aaaaaab^ba]^V]a`]]`ab]a\_\_aa\_a  
@HWI-EAS443:3:89:1076:1044#0/1  
GGGGCATGGAAATGAGGCGCTGCCTTCTTCAGTCTCTTCA  
+HWI-EAS443:3:89:1076:1044#0/1  
aaa[^\_\_a`aa^aaaa`aa^`aa`\_`\_aaa\_\_^`\_`a\_\_Z  
@HWI-EAS443:3:89:109:1605#0/1  
GCCGTATTTATGTACTCCCTTCATTATGTATTAGTAG  
+HWI-EAS443:3:89:109:1605#0/1  
^ab`a`abbbbb¥bbbbabbbbaa^aabab]aaaaaa]^`  
@HWI-EAS443:3:89:112:1205#0/1  
GCATAAATCCCAATTACCTCATGGCTTGAAGCAGGTGCT  
+HWI-EAS443:3:89:112:1205#0/1  
abaab`aaa^\_ba`abba\_aa^\_aa^Y\_\_`¥[ZZ^HHW¥  
@HWI-EAS443:3:89:116:526#0/1  
AAGATGTGAATGTGTCTTCTCAGATTTTATTTTGTGG  
+HWI-EAS443:3:89:116:526#0/1  
aaa`X\_`¥`U]]KUSbWT`]ZPZM[OY\_`LQ\_\_`PG\_[\_`  
@HWI-EAS443:3:89:1203:777#0/1  
GGGGTTTTCGGCTGAATCGAGAAAATTGCTTCTCATTGTT

+HWI-EAS443:3:89:1203:777#0/1  
a¥Q\_OZO^VbXRXX]SGWRTXaTRTTM]GLVU`HR\_SYUP  
@HWI-EAS443:3:89:1249:1156#0/1  
ACATAATGAAGGGAGTGACATAAATACGGCCTTGCTCAA  
+HWI-EAS443:3:89:1249:1156#0/1  
a¥Ub^bbb`]'a`Z`¥^baaaaWa`a\_0[¥aaa\_`Ua\_a`  
@HWI-EAS443:3:89:1275:72#0/1  
CATGGAATGAGGCGCTGCCTTCTTCAGTCTTTCAGCAG  
+HWI-EAS443:3:89:1275:72#0/1  
aa`abbbbbbbabbaa^\_ba]bb]abaabaaa¥aaVZ`XRa  
@HWI-EAS443:3:89:1417:1094#0/1  
AGCAGGTGCTAGCAGAGCTACAGGACATTGAAAATGAAGA  
+HWI-EAS443:3:89:1417:1094#0/1  
a`aa`^Xa]¥`Y¥`b`aV]\_a`a\_Z^Yaa\_V\_\_`^``[^Y  
@HWI-EAS443:3:89:1541:782#0/1  
GTTTTCAAAGAATTCCTTGGTCATGTCTTTCTTTGACA  
+HWI-EAS443:3:89:1541:782#0/1  
a`abaaaaab^¥aaa^aaa^\_a``]¥a`R]Za^\_\_^^  
@HWI-EAS443:3:89:1546:47#0/1  
ATCGACGAACGGGGTGAATCAATAATTGTAGAATCTGGTG  
+HWI-EAS443:3:89:1546:47#0/1  
aa\_^^aba¥V\_``X`aaR^aa`\_aaa\_a^\_a\_M\_]^Y[  
@HWI-EAS443:3:89:1592:1145#0/1  
GGCTGAAAGAGCCTAACATAGTCAAACCACATGAGAAAG  
+HWI-EAS443:3:89:1592:1145#0/1  
^Ta\_bb^^a`Zb¥SYa\_bb¥¥baV¥XaKI`b]S¥U\_Z^ZW  
@HWI-EAS443:3:89:1630:617#0/1  
AGCCAATTGAAGTGGGCACTCGGTGAAAATATGGCACCAG  
+HWI-EAS443:3:89:1630:617#0/1  
aa]\_aaabbaaaY\_aaa\_`X^a\_a\_`\_]`\_TY\_`V^\_  
@HWI-EAS443:3:89:1703:399#0/1  
GGGGTTTTCGGCTGAATCGAGAAAATTGCTTCTCATTGTT  
+HWI-EAS443:3:89:1703:399#0/1  
aaa`]aaa\_b`U\_a`a`Z`^`\_R`^`\_]a\_UaR]^\_ZLV  
@HWI-EAS443:3:89:1749:67#0/1  
GGGCACTCGGTGAAAATATGGCACCAGAAAAGTAGACTT  
+HWI-EAS443:3:89:1749:67#0/1  
\_`b\_`bbbbbaabbbbbbbbaa¥b[`baaba`ab\_aa`X`b  
@HWI-EAS443:3:89:1760:237#0/1  
ACACCCTTGACGAAGAGAGCAGGGCAAGAATCAAAACTAG  
+HWI-EAS443:3:89:1760:237#0/1  
aabaa`aaaa¥`¥`b^^]aTU`Y^a]a^\_\_Z\_\_^\_Za\_]`  
@HWI-EAS443:3:89:210:625#0/1  
ATGGCTTGAAGCAGGTGCTAGCAGAGCTACAGGACATTG  
+HWI-EAS443:3:89:210:625#0/1  
a]ab[aaTa`^L0a[UP`VSUQ\_P¥]^QGN`P[Y]SNY\_D  
@HWI-EAS443:3:89:228:1047#0/1  
CACACATTCACATCTTTTCATTCCTGGAGAGGAGATGGC  
+HWI-EAS443:3:89:228:1047#0/1  
aZ]a`[^`X`\_\_WZ¥[ ]\_\_`\_a`\_\_\_ZL[\_\_\_[^`W¥V[T

@HWI-EAS443:3:89:234:1836#0/1  
CAATTATCTCAAATCGGTGCTTCAATAGTGCATTGGGGTC  
+HWI-EAS443:3:89:234:1836#0/1  
a\_Ta¥aLT^`T\_T^bTV`bRYV`QZSa\_\_I¥a\_\_`P]XG`  
@HWI-EAS443:3:89:250:1882#0/1  
AATGGAACCTCCAAGATCAAGATGAAATGGGGCATGGAAA  
+HWI-EAS443:3:89:250:1882#0/1  
a`a\_`aaaa`aaa`a`aa``[^`a\_`\_][^[\_`^`^`^`^`  
@HWI-EAS443:3:89:250:983#0/1  
CGGCTGAATCGAGAAAATTGCTTCTCATTGTTTCAGGCACT  
+HWI-EAS443:3:89:250:983#0/1  
aaabbbbaab\_baaabbaabaaaaababa`aaaa`Z`^`  
@HWI-EAS443:3:89:285:1748#0/1  
GGGGCATGGAAATGAGGCGCTGCCTTCTTCAGTCTCTTCA  
+HWI-EAS443:3:89:285:1748#0/1  
]\_`\_`b`bbbbbb`b`bbbabb```aaabb`¥aaaaba]  
@HWI-EAS443:3:89:30:29#0/1  
GGGACACTTCTGCTGTAAAATAGTTCCTCCTCATGCTTGC  
+HWI-EAS443:3:89:30:29#0/1  
a[`¥`¥]`\_\_^^^`\_`[\_^b^^U`X\_YZY[[YZVV\_]UU]X  
@HWI-EAS443:3:89:314:1971#0/1  
GGGGCATGGAAATGAGGCGCTGCCTTCTTCAGTCTCTTCA  
+HWI-EAS443:3:89:314:1971#0/1  
`aa[`a\_`\_]``aaa\_\_a`\_^\_\_[\_¥\_S¥PPJ\_¥S\_N¥  
@HWI-EAS443:3:89:328:526#0/1  
CTATGTAGATGGATTGAGCCGAACGGCTGCATTGAGGGC  
+HWI-EAS443:3:89:328:526#0/1  
a\_¥\_\_`XXZ\_]ZZ¥X]ZW\_\_^]W^¥HX\_[TMDVYXV\_RD  
@HWI-EAS443:3:89:337:1693#0/1  
CACTGGAGAGGAGATGGCCACCAAAGCGGACTACACCCTT  
+HWI-EAS443:3:89:337:1693#0/1  
ab`aa`aaa¥]a¥a¥a]¥\_^`¥aW`¥W¥\_\_Pa¥\_\_Z]UU  
@HWI-EAS443:3:89:352:255#0/1  
AGCAGAGCTACAGGACATTGAAAATGAAGAGAAGATCCCA  
+HWI-EAS443:3:89:352:255#0/1  
a``aa`baaa\_aba`\_aaaa`Ya^aa`V]`a\_a``\_]W]\_  
@HWI-EAS443:3:89:567:208#0/1  
GATCCCAAGGACAAAGAACATGAAGAGAACAAGCCAATTG  
+HWI-EAS443:3:89:567:208#0/1  
abbaaaaabb`\_a\_aa`a\_`aaaaaaaa^`\_aaaZ^`\_`\_]`  
@HWI-EAS443:3:89:589:1706#0/1  
GAAGATCCCAAGGACAAAGAACATGAAGAGAACAAGCCAA  
+HWI-EAS443:3:89:589:1706#0/1  
abbZa`\_aaaa`aaa\_^aaaaaaaaaaaaa```adWFLY^^  
@HWI-EAS443:3:89:591:286#0/1  
TAAGACAAGAAATGGCCAGTAGGAGTCTATGGGATTCCTT  
+HWI-EAS443:3:89:591:286#0/1  
abbaaaa`a`]¥¥\_````a^a^W`V\_\_^\_\_YT^]YYY\_  
@HWI-EAS443:3:89:606:175#0/1  
CGAGGGGGGAGGGAATACCACTATATGATGCAATCAAATGC

+HWI-EAS443:3:89:606:175#0/1  
aba` `]¥^\_^] ` `U^]0¥` ` `a`aaaXaa`W\_]\_^\_\_  
@HWI-EAS443:3:89:614:716#0/1  
GAAAGGCATAAATCCCAATTACCTCATGGCTTGAAGCAG  
+HWI-EAS443:3:89:614:716#0/1  
aaaa`a`aaaa\_a` `^aa`a`]\_\_`¥\_`^`^U^WT[TV¥  
@HWI-EAS443:3:89:643:1683#0/1  
CGTTCGTCGATGAAATGGAAATCCGAATACATGAAACAAA  
+HWI-EAS443:3:89:643:1683#0/1  
aa^aaVYaaa` `a\_a\_^S` `^a^a\_` ` `a^\_[Q]\_\_Xa` `]  
@HWI-EAS443:3:89:646:561#0/1  
GGAGGAACTATTTTACAGCAGAAGTGTCCCACTGCAGGGC  
+HWI-EAS443:3:89:646:561#0/1  
ab`bbabbbbbabab`ababaa\_a\_a^a`abaabaaaa`  
@HWI-EAS443:3:89:727:551#0/1  
AGACAAGAAATGGCCAGTAGGAGTCTATGGGATTCCTTTC  
+HWI-EAS443:3:89:727:551#0/1  
aaaaabaaaaaaa`aaaX` ` \_U\_` `a` \_Z\_a` \_a^¥¥a` ¥  
@HWI-EAS443:3:89:748:910#0/1  
GCGTCTCCCAACTTGAGGGGTTTTCGGCTGAATCGAGAA  
+HWI-EAS443:3:89:748:910#0/1  
aa[^aa`aa` ` ` \_abaWa¥ab] `a\_aaY` ` ` ` ` \_a]\_`  
@HWI-EAS443:3:89:826:997#0/1  
CCCCGTTTCGTCGATGAAATGGAAATCCGAATACATGAAAC  
+HWI-EAS443:3:89:826:997#0/1  
R\_bab` `]b`bU\_ab\_` `^bb`¥^a^`^^^\_a^\_a¥aX\_Y\_T  
@HWI-EAS443:3:89:85:786#0/1  
GGGGCATGGAAATGAGGCGCTGCCTTCTTCAGTCTCTTCA  
+HWI-EAS443:3:89:85:786#0/1  
[ ` ` ` \_W¥a^QFYY\_Z` `a\_a]ba¥Z\_N^a¥¥]aZaa` ¥LV  
@HWI-EAS443:3:89:912:1204#0/1  
GGTGTTC AATAGTGCATTTCGGGTCACCAGATTCTACAAT  
+HWI-EAS443:3:89:912:1204#0/1  
aaYbabbaaaa¥^^aabaa\_\_b`^aaa\_abaab`ba\_` `a  
@HWI-EAS443:3:89:931:88#0/1  
TGCCATATTTTACCCGAGTGCCCACTTCAATTGGCTTGTT  
+HWI-EAS443:3:89:931:88#0/1  
aba^ab^aaba]a`\_bab¥b\_]a^\_a^` ` `a\_a`Ya`PZZ  
@HWI-EAS443:3:89:966:54#0/1  
AAACTTTAGAGCCTATGTAGATGGATTCGAGCCGAACGGC  
+HWI-EAS443:3:89:966:54#0/1  
`U`X`ab]b]b`\_K`bb\_Waa]b^\_aaJaabZTb\_`\_baT  
@HWI-EAS443:3:8:1007:402#0/1  
AGAGAAGATCCCAAGGACAAAGAACATGAAGAGAACAAGC  
+HWI-EAS443:3:8:1007:402#0/1  
abbaabb` `a`\_a\_a\_`\_aa`a`a¥\_\_` ` `a` \_\_\_UaadU  
@HWI-EAS443:3:8:1023:31#0/1  
CACGAGGGGGAGGGAATACCACTATATGATGCAATCAAAT  
+HWI-EAS443:3:8:1023:31#0/1  
aaababbaaa`aaa^`a`^]`X` `a^` \_\_^`V^]\_R^^\_\_

@HWI-EAS443:3:8:1132:1275#0/1  
GGCATGGAAATGAGGCGCTGCCTTCTTCAGTCTCTTCAGC  
+HWI-EAS443:3:8:1132:1275#0/1  
`b\_\_w\_b]babb`aa[`a\_`]¥\_aaaUSU¥NU\_P`^\_a]U  
@HWI-EAS443:3:8:1159:275#0/1  
GGGCACTCGGTGAAAATATGGCACCAGAAAAAGTAGACTT  
+HWI-EAS443:3:8:1159:275#0/1  
aa`b\_a]baZa\_\_a`a^`¥`\_^¥\_]a^]]^`R¥`^X\_[  
@HWI-EAS443:3:8:1175:158#0/1  
ATAGGCCAAGTGTGAGGCCCATGTTCCCTATATGTGAGAA  
+HWI-EAS443:3:8:1175:158#0/1  
aaaaa`aa¥b^aY\_a\_]a^]\_\_]`XYU]^]¥]\_U^UY]]  
@HWI-EAS443:3:8:1334:732#0/1  
GAAGATCCCAAGGACAAAGAACATGAAGAGAACAAGCCAA  
+HWI-EAS443:3:8:1334:732#0/1  
abbaaaaaV`\_aa\_Y`aaa`^^^aaZ\_a`a`\_Z`]`^0^]  
@HWI-EAS443:3:8:1342:814#0/1  
TGATGAAATAGGAGAAGATGTTGCCCGATTGAACATATC  
+HWI-EAS443:3:8:1342:814#0/1  
^^YWaY¥]V]aa`a\_\_a`¥aZ\_¥MOKMZ^ZZ¥U^V]`^BB  
@HWI-EAS443:3:8:1373:670#0/1  
AGCAGAGCTACAGGACATTGAAAATGAAGAGAAGATCCCA  
+HWI-EAS443:3:8:1373:670#0/1  
aaaababaab^aaa```aba`````aa`Sb```\_`\_\_^ZZW\_  
@HWI-EAS443:3:8:1442:1202#0/1  
AATCAGGAAGAAATTTAGGCTTCTCTACCCCTGTTGTGTT  
+HWI-EAS443:3:8:1442:1202#0/1  
``a]`¥bb¥¥X^Raab^`TQ^aa^Y^a¥XYF^`GZ\_]¥\_a  
@HWI-EAS443:3:8:1527:1155#0/1  
CGTCTCCACAACCTTGAGGGGTTTTCGGCTGAATCGAGAAA  
+HWI-EAS443:3:8:1527:1155#0/1  
^\_]bb`aWVab`bbbbabb\_abaa¥\_a]abbabZaaa[aW  
@HWI-EAS443:3:8:1559:1637#0/1  
TGCTTGCGATATGTTCAATCGGGGCAACATCTTCTCCTAT  
+HWI-EAS443:3:8:1559:1637#0/1  
a`Q`^Y]\_[`]`bXaS\_\_]W]FX\_TO`^aUPX`V[JF[\_\_\_  
@HWI-EAS443:3:8:1576:837#0/1  
CTTGGGGGCTATATGAAGCAATCGAGGAGTGCCTGATTA  
+HWI-EAS443:3:8:1576:837#0/1  
abbbbb`babbabbaababb`a\_baaa¥a\_Zaaaaa  
@HWI-EAS443:3:8:1595:300#0/1  
GGGGTTTTCGGCTGAATCGAGAAAATTGCTTCTCATTGTT  
+HWI-EAS443:3:8:1595:300#0/1  
aZZFJTS[WY¥Y]V[UZR¥VZLLF¥MWMROWJTPQXXBBB  
@HWI-EAS443:3:8:1614:515#0/1  
GGGGGCTATATGAAGCAATCGAGGAGTGCCTGATTAATGA  
+HWI-EAS443:3:8:1614:515#0/1  
aaUaa^XI\_\_\_\_`U]\_YXV¥YaW¥¥T^T\_WNW¥TWYYUW¥B  
@HWI-EAS443:3:8:1620:1265#0/1  
ATCGGGGCAACATCTTCTCCTATTTTCATCAAGTTCTATCC

+HWI-EAS443:3:8:1620:1265#0/1  
abbZHQPQ^bZ`a¥aaaa¥]aaa\_aX\_aS]\_X]R¥]a`RU  
@HWI-EAS443:3:8:1639:237#0/1  
CTTGGGGGGCTATATGAAGCAATCGAGGAGTGCCTGATTA  
+HWI-EAS443:3:8:1639:237#0/1  
`bbbabbba\_bababbaaa`aaa^b]a\_\_a¥aYYaa\_\_a\_  
@HWI-EAS443:3:8:1660:1878#0/1  
CGATTGGCCATGTTTCCGATTTGTTTTCAAAGAATTCCTT  
+HWI-EAS443:3:8:1660:1878#0/1  
abaaYbaY^aU¥TKYP^`\_]a`aSW\_]P¥WUHLPT[HS\_B  
@HWI-EAS443:3:8:1683:1537#0/1  
TGGGGGGCTATATGAAGCAATCGAGGAGTGCCTGATTAAT  
+HWI-EAS443:3:8:1683:1537#0/1  
aba]b\_X]a`]abXa^a\_b`G\_S\_]¥b^¥FJ^`Z[aNBB  
@HWI-EAS443:3:8:1721:1944#0/1  
AGCAGGTGCTAGCAGAGCTACAGGACATTGAAAATGAAGA  
+HWI-EAS443:3:8:1721:1944#0/1  
a¥FZb]OX`\_[a]\_aSaWaa]aa\_\_V^`aaSJ¥Ta\_^Y\_  
@HWI-EAS443:3:8:199:372#0/1  
GGGGCATGGAAATGAGGCGCTGCCTTCTTCAGTCTCTTCA  
+HWI-EAS443:3:8:199:372#0/1  
`b`]¥]Yaa`a]¥`a^Y[]^J¥NPNUXZY]XUZFMXNN  
@HWI-EAS443:3:8:257:802#0/1  
TTAGGCTTCTCTACCCCTGTTGTGTTACATATACTGTTCA  
+HWI-EAS443:3:8:257:802#0/1  
GZW\_aY[\_XUXT00`X`[\_]URS^`^R\_U][MZ¥RTXY  
@HWI-EAS443:3:8:258:368#0/1  
CATGGAAATGAGGCGCTGCCTTCTTCAGTCTCTTCAGCAG  
+HWI-EAS443:3:8:258:368#0/1  
a`¥`baabaZ¥a`aa`aa\_a\_a``\_¥\_a[M\_`Va¥`W\_\_  
@HWI-EAS443:3:8:259:472#0/1  
AGAAGATCCCAAGGACAAAGAACATGAAGAGAACAAGCCA  
+HWI-EAS443:3:8:259:472#0/1  
aa`aa``\_`aa```\_`aa\_\_\_`aa]^a\_`\_]Z^^\_XX^  
@HWI-EAS443:3:8:275:278#0/1  
AACGGGTGAATCAATAATTGTAGAATCTGGTGACCCGAA  
+HWI-EAS443:3:8:275:278#0/1  
aaaaaaaa¥aa\_a\_\_`aa\_aaa]\_a`\_a\_]a`Va\_]\_]\_]\_]`  
@HWI-EAS443:3:8:293:125#0/1  
GGTGAACCTTTGTAAGTATGGAGTTCTCACTCACTGACCCG  
+HWI-EAS443:3:8:293:125#0/1  
aa\_]aaaaaab^a`a^aaaa\_a\_a¥`\_]`\_a^\_a`¥QZ\_  
@HWI-EAS443:3:8:349:456#0/1  
GACAACCTGGAACCTGGAACCTTCGATCTTGGGGGGCTAT  
+HWI-EAS443:3:8:349:456#0/1  
^R¥QW]VZQVMYRQVZRX^J[S]V^TUVQQ[R\_¥\_^W¥\_¥  
@HWI-EAS443:3:8:357:1776#0/1  
GGGTGTAGTCCGCTTTGGTGGCCATCTCCTCTCCAGTGAA  
+HWI-EAS443:3:8:357:1776#0/1  
`ab[babbaaba^bbbZZ¥^b\_`aaHbb^a^`^`Z^WXaa



@HWI-EAS443:3:8:454:240#0/1  
GGGGGCTATATGAAGCAATCGAGGAGTGCCTGATTAATGA  
+HWI-EAS443:3:8:454:240#0/1  
aa`^X]a``]aa\_\_\_\_\_a`Z`[\_`¥`U\_YW^^¥VW^¥Y^^  
@HWI-EAS443:3:8:469:1180#0/1  
GAGCCAGAGCCCAGATCTCTAGCAAGCTGGGTCCAAAATG  
+HWI-EAS443:3:8:469:1180#0/1  
`abaaUU`aa\_\_[P]`\_`Z^]X\_\_^UQZ]RIKN]\_X¥`N  
@HWI-EAS443:3:8:470:427#0/1  
AAACTTTAGAGCCTATGTAGATGGATTGAGCCGAACGGC  
+HWI-EAS443:3:8:470:427#0/1  
\_V`Wab^S^]`[]a`a`UYa`aa\_\_a]¥`a^NN\_[¥Y``Y  
@HWI-EAS443:3:8:623:32#0/1  
ACCAGATTCTACAATTATTGATTCACCCCGTTCGTCGATG  
+HWI-EAS443:3:8:623:32#0/1  
aa^Xa]\_a`a`¥`\_\_\_\_`\_a`^WWV]\_\_]^`Z^Z^YY\_ZZ\_  
@HWI-EAS443:3:8:669:1448#0/1  
ATTTTCATCGACGAACGGGTGAATCAATAATTGTAGAATC  
+HWI-EAS443:3:8:669:1448#0/1  
`aba`b]^X^YX^¥V¥\_YL^¥T[PX[aYZ^U`W^a\_\_ZG  
@HWI-EAS443:3:8:68:846#0/1  
CATTAATCAGGCACTCCTCGATTGCTTCATATAGCCCCC  
+HWI-EAS443:3:8:68:846#0/1  
K\_ab\_]Y]bba[^[[[[ZU[[`baW[[YZ[]W^TTWDMP[  
@HWI-EAS443:3:8:703:491#0/1  
GAAGACATTCTTTGGCTGGAAAGAGCCTAACATAGTCAAA  
+HWI-EAS443:3:8:703:491#0/1  
a\_T`a`baaabaaaa`aab\_aaa\_aV^aSa^\_¥`a]``a\_  
@HWI-EAS443:3:8:718:1685#0/1  
AACTTTGACCGCTGATGGCAAAGAGGCCCATCAGGCAATC  
+HWI-EAS443:3:8:718:1685#0/1  
aaaa`^aba`a]`¥`¥aX\_a`\_^]U]^U`\_ZG^¥YMUZ¥W  
@HWI-EAS443:3:8:755:1713#0/1  
AAGGAAGGTCTCATTTGAGAAATGATACTGATGTGGTGAA  
+HWI-EAS443:3:8:755:1713#0/1  
abb`aba\_Uaa`aa`abaaba`a\_a\_a```a[]TKW\_a  
@HWI-EAS443:3:8:78:540#0/1  
GGGGCATGGAAATGAGGCGCTGCCTTCTTCAGTCTCTTCA  
+HWI-EAS443:3:8:78:540#0/1  
a\_a[`X¥^TGYWU]]\_aaa`]X¥M¥^ZYRVU^QYWQOVVZ  
@HWI-EAS443:3:8:820:1915#0/1  
CATAAATACGGCCTTGCTCAATGCATCCTGTGCAGCCATG  
+HWI-EAS443:3:8:820:1915#0/1  
aa]aaa`a[WP[``¥]R]`a`\_\_ZaNQ]¥\_TSUP^G\_ZUT  
@HWI-EAS443:3:8:83:62#0/1  
GTGCCATATTTTACCGAGTGCCCACTTCAATTGGCTTGT  
+HWI-EAS443:3:8:83:62#0/1  
`TaaaX\_W^```a`\_\_[^`^\_\_^^Z^\_]X\_]`Y]^UB  
@HWI-EAS443:3:8:903:907#0/1  
GAAATTAAGTATTGAAGACCCGAGTCACGAGGGGGAGGGA

+HWI-EAS443:3:8:903:907#0/1  
a]aa^`\_ZVY`a]U\_Y¥`\_]IZaXV[Ua^a]a^aa\_Y`¥]\_  
@HWI-EAS443:3:8:972:955#0/1  
GGGGGCTATATGAAGCAATCGAGGAGTGCCTGATTAATGA  
+HWI-EAS443:3:8:972:955#0/1  
aaa\_aaaaaaab`\_`aa`\_W`¥a`¥\_W\_W^`Y]\_¥¥^]`^  
@HWI-EAS443:3:8:974:1862#0/1  
GGCATGGAAATGAGGCGCTGCCTTCTTCAGTCTCTTCAGC  
+HWI-EAS443:3:8:974:1862#0/1  
`aKaYZSaaaa`aZ\_]ZQWaaU\_Y\_\_`^]XMM¥H¥ZaYZU  
@HWI-EAS443:3:90:1041:789#0/1  
CATAAATACGGCCTTGCTCAATGCATCCTGTGCAGCCATG  
+HWI-EAS443:3:90:1041:789#0/1  
aa`U\_Q[Za`ba`b^aZ[]\_\_bb`a`Y`aUab\_aY``a¥  
@HWI-EAS443:3:90:1104:1153#0/1  
ATCGCAAGCATGAGGAGGAACACTATTTTACAGCAGAAGTGT  
+HWI-EAS443:3:90:1104:1153#0/1  
aaTU^a`b`¥]`aaa`b`[a`a\_aa``a`a\_YaQa\_[QYG  
@HWI-EAS443:3:90:1133:462#0/1  
ATGCTTGCGATATGTTCAATCGGGGCAACATCTTCTCCTA  
+HWI-EAS443:3:90:1133:462#0/1  
aaa`bbaabaaaba[`\_aa``a`\_`¥\_\_``aZa\_Y`\_\_\_\_  
@HWI-EAS443:3:90:1158:212#0/1  
CTTGCCCTGCTCTTTCGTCAAGGGTGTAGTCCGCTTTGG  
+HWI-EAS443:3:90:1158:212#0/1  
`bbbbbaaaabaaaa`\_]\_^aaba`Sb^a^\_]\_a^``a¥Z  
@HWI-EAS443:3:90:1211:131#0/1  
GAAAATGAAGAGAAGATCCCAAGGACAAAGAACATGAAGA  
+HWI-EAS443:3:90:1211:131#0/1  
a\_\_^^`a\_\_a^`¥^^`\_W]Z]]a]ZZ^Z^`]]XZ]]XZ]Z  
@HWI-EAS443:3:90:1213:1237#0/1  
AGCCAACAAAATAAAATCTGAGAAGACACACATTCACATC  
+HWI-EAS443:3:90:1213:1237#0/1  
``\_aa¥aba^a`bba^b\_\_`a`\_Y]]`a]ba`ba0`aa\_¥  
@HWI-EAS443:3:90:1219:338#0/1  
ACATGGCCAATCGGAGAGTCACCCAGGGGAGTGGAGGAAG  
+HWI-EAS443:3:90:1219:338#0/1  
a^Z`\_\_a`\_¥SN¥\_TZ`\_RVXYZMT^¥\_QZ]N]TJ[¥PX¥  
@HWI-EAS443:3:90:1256:1167#0/1  
CTGAAAGTCATCCATGGCTGCACAGGATGCATTGAGCAAG  
+HWI-EAS443:3:90:1256:1167#0/1  
abaaabbabbbaabbbbabbaaaaaa^`^`aaVX`[\_`aa  
@HWI-EAS443:3:90:1278:683#0/1  
GCCGAACGGCTGCATTGAGGGCAAGCTTCCCAAATGTCA  
+HWI-EAS443:3:90:1278:683#0/1  
a`^aaaaa\_a\_YY]U\_N[[U\_Y¥`VQYZ]US\_`^`[\_QW\_  
@HWI-EAS443:3:90:1288:1114#0/1  
AAGAGACCGAATCATGGCCTGGACAGTGGTGAACAGTATA  
+HWI-EAS443:3:90:1288:1114#0/1  
Z\_X``¥a[aa``]IT\_\_Z]aa``\_aa^a\_T\_XZNZ\_¥`¥`

@HWI-EAS443:3:90:1322:1406#0/1  
CAGCTTGCTAGAGATCTGGGCTCTGGCTCATCACTGTCAT  
+HWI-EAS443:3:90:1322:1406#0/1  
``b¥a\_babba\_\_MU`a[aVabb]baaa[aaa\_¥baa`\_  
@HWI-EAS443:3:90:1380:454#0/1  
GCCCTGCTCTTTCGTCAAGGGTGTAGTCCGCTTTGGTGG  
+HWI-EAS443:3:90:1380:454#0/1  
aaaaabababaaaaa^^a`abbSa\_`a¥^QaUa``aa¥a`  
@HWI-EAS443:3:90:1398:1144#0/1  
GGCATGGAAATGAGGCGCTGCCTTCTTCAGTCTCTTCAGC  
+HWI-EAS443:3:90:1398:1144#0/1  
a`baabbaaaaa`a`\_b`aa\_[aa¥`a\_aa¥¥a¥\_`\_]\_\_N  
@HWI-EAS443:3:90:1421:1597#0/1  
GGGGGCTATATGAAGCAATCGAGGAGTGCCTGATTAATGA  
+HWI-EAS443:3:90:1421:1597#0/1  
`bbWWWZ]abU`bbbaba`abYVa\_``b\_b```L]ZY[ba  
@HWI-EAS443:3:90:144:375#0/1  
ACCAGAAAAAGTAGACTTTGATGACTGCAAAGATGTTGGA  
+HWI-EAS443:3:90:144:375#0/1  
V\_`[aYXVY^\_GX`^Y\_\_[Y[\_a¥]\_`\_PW\_`[V`W^]S]  
@HWI-EAS443:3:90:146:1114#0/1  
CTGTAGCTCTGCTAGCACCTGCTTCCAAGCCATGAGGTAA  
+HWI-EAS443:3:90:146:1114#0/1  
^U`Z``\_`Y¥bQ`Ub[]][baaT``aSI\_aaZ[X^baWUG  
@HWI-EAS443:3:90:1543:342#0/1  
TGGGCCTCGACACTTGGCCTATCGCAGTCCCTCAAGAGCAT  
+HWI-EAS443:3:90:1543:342#0/1  
a\_WIR\_aa\_XQ\_VbW^¥^Q^aa`bU`^Ra\_R\_\_aaa¥a^  
@HWI-EAS443:3:90:154:1844#0/1  
CTCTGGCTCATCACTGTCATACTGTTTAAGGTCTCCAACA  
+HWI-EAS443:3:90:154:1844#0/1  
aab[LT¥[aa`\_S]W]M`ZXUZZ¥YV\_¥HGKKWWW^]Y\_¥  
@HWI-EAS443:3:90:1563:676#0/1  
CGAAAACCCCTCAAGTTGTGGAGACGCATATAGACTGTTG  
+HWI-EAS443:3:90:1563:676#0/1  
abbbbbb¥\_ba^]aSbbbb\_aa]`\_U[Uaaabaa¥M¥ZM[I  
@HWI-EAS443:3:90:1572:1173#0/1  
AAATGGAAATCCGAATACATGAAACAACTTCCAAATGTG  
+HWI-EAS443:3:90:1572:1173#0/1  
aaa`aa`]`aa[aa]aa`aa\_`a`]a]PT`\_][]X]\_^Y\_  
@HWI-EAS443:3:90:1616:31#0/1  
CATGGAAATGAGGCGCTGCCTTCTTCAGTCTCTTCAGCAG  
+HWI-EAS443:3:90:1616:31#0/1  
abbbbbbabbbbaabbab\_abb`bb]aaa`b\_ba[aa[\_a  
@HWI-EAS443:3:90:1666:1012#0/1  
ACACCCTTGACGAAGAGAGCAGGGCAAGAATCAAACTAG  
+HWI-EAS443:3:90:1666:1012#0/1  
¥W`\_RWa\_U\_Y¥`bb\_`Z`a[a[YYZa`aadW]X[Z[\_aa  
@HWI-EAS443:3:90:1666:293#0/1  
CGTCTCCACAACCTTGAGGGGTTTTCGGCTGAATCGAGAAA

+HWI-EAS443:3:90:1666:293#0/1  
abbabaa^aab^bababbbb^bbaZa`]b`aabYbabaab  
@HWI-EAS443:3:90:1693:64#0/1  
CCAGTAAGGTCCTGCACACTTTCCCAATAGAGCCTTCCTC  
+HWI-EAS443:3:90:1693:64#0/1  
]W¥`a[ZbaNXQ`a^XXX\_Waa`Zb`]Y]\_XS]UQSXS  
@HWI-EAS443:3:90:1709:1921#0/1  
CAAAGAATTCCTTGGTCATGTCTTTCTCTTTGACAGAAGA  
+HWI-EAS443:3:90:1709:1921#0/1  
GYb`b`bb`Taa\_aa^\_baba[^b]ab`bbb\_b^`aaaaa  
@HWI-EAS443:3:90:199:1145#0/1  
CAGCTTGCTAGAGATCTGGGCTCTGGCTCATCACTGTCAT  
+HWI-EAS443:3:90:199:1145#0/1  
`bbbabbaa[ `b`a`a`[¥`\_aaa^Y`\_aaaZaU\_\_Y[aa  
@HWI-EAS443:3:90:289:1543#0/1  
TGGCCATGTTTCCGATTTGTTTTCAAAGAATTCCTTGGTC  
+HWI-EAS443:3:90:289:1543#0/1  
abbbbaababaab^T`abbaaaabaabb`aaa`a`a\_Va  
@HWI-EAS443:3:90:362:1893#0/1  
CATGCTTGCGATATGTTCAATCGGGGCAACATCTTCTCCT  
+HWI-EAS443:3:90:362:1893#0/1  
abbbbaab\_\_\_aaa\_]WT\_\_\_[ `Y¥¥aa`[a`a^\_aY`[[  
@HWI-EAS443:3:90:373:17#0/1  
GGGTTTTCGGCTGAATCGAGAAAATTGCTTCTCATTGTTC  
+HWI-EAS443:3:90:373:17#0/1  
aaaW`Za`a\_aa]`¥]^W`XRX¥]T^Q\_WQTOMUT[ZWV  
@HWI-EAS443:3:90:498:310#0/1  
CGGCTGAATCGAGAAAATTGCTTCTCATTGTTTCAGGCACT  
+HWI-EAS443:3:90:498:310#0/1  
aaW[b`a`a\_^]¥Y\_^U`b[ `\_]¥`a\_aa`¥`\_aabP`\_\_  
@HWI-EAS443:3:90:598:1169#0/1  
GTCATCAAAGTCTACTTTTTCTGGTGCCATATTTTCACCG  
+HWI-EAS443:3:90:598:1169#0/1  
[[aZaa\_XW^`aaUbaab`\_\_^\_Saaaaaaaaaabb^b  
@HWI-EAS443:3:90:632:396#0/1  
AGAGACCGAATCATGGCCTGGACAGTGGTGAACAGTATAT  
+HWI-EAS443:3:90:632:396#0/1  
abaaaa`aaaaaba\_aYaa¥\_\_a\_\_`a]aa` ``aWa\_aa  
@HWI-EAS443:3:90:661:657#0/1  
AGCCAATTGAAGTGGGCACTCGGTGAAAATATGGCACCAG  
+HWI-EAS443:3:90:661:657#0/1  
aaaaa`aaaa\_a^a\_aaa\_\_`b`W^\_a\_` `` `W^0¥\_\_  
@HWI-EAS443:3:90:663:1736#0/1  
GGGGGCTATATGAAGCAATCGAGGAGTGCCTGATTAATGA  
+HWI-EAS443:3:90:663:1736#0/1  
ab`aabbbbababbbaabaa`bab\_a\_\_abaaaaabaaaa  
@HWI-EAS443:3:90:701:729#0/1  
GGGGCATGGAATGAGGCGCTGCCTTCTTCACTCTTCA  
+HWI-EAS443:3:90:701:729#0/1  
ababbbaba^b]`aababbaabb` `` `a`aaaa`^aaaaG`

@HWI-EAS443:3:90:757:1927#0/1  
TGAAGGGAGTGACATAAATACGGCCTTGCTCAATGCATC  
+HWI-EAS443:3:90:757:1927#0/1  
a`\_bbbb`[\_YVab\_aaaaab\_T`\_\_a\_Y^]]aa\_Z]b]V  
@HWI-EAS443:3:90:832:1285#0/1  
AGGACATTGAAAATGAAGAGAAGATCCCAAGGACAAAGAA  
+HWI-EAS443:3:90:832:1285#0/1  
`b\_baa\_[`¥QWXab\_`U^a\_¥\_¥¥^Waa`R\_]aXa``\_  
@HWI-EAS443:3:90:846:354#0/1  
GTTTCCGATTTGTTTTCAAAGAATTCCTTGGTCATGTCTT  
+HWI-EAS443:3:90:846:354#0/1  
`Y]a^\_]W`\_\_\_R\_`\_¥¥X`TT\_YY[^¥¥]V`W^`VV[`  
@HWI-EAS443:3:90:855:1447#0/1  
GGGTGAATCAATAATTGTAGAATCTGGTGACCCGAATGCA  
+HWI-EAS443:3:90:855:1447#0/1  
[Y[YS^abbb`bbabaaababab`[\_`aa`]aaabaa^a  
@HWI-EAS443:3:90:863:1739#0/1  
GAAAGAGGCGAAGAGACAATTGAAGAAAAATTTGAGATTA  
+HWI-EAS443:3:90:863:1739#0/1  
ab\_a`bbbaabbabb`bbbbbaa^abbaba`aaa\_\_a\_a  
@HWI-EAS443:3:90:88:984#0/1  
ATTGGTTCTCACATATAGGAACATGGGCCTCGACTTGG  
+HWI-EAS443:3:90:88:984#0/1  
`\_\_[HY¥^¥^[¥¥¥YZWY\_WWYUYQWTQWNQWIIIVT  
@HWI-EAS443:3:90:929:998#0/1  
CAAGCTTGCGCATAGTTCCTGTAATCTCAAATTTTCTTC  
+HWI-EAS443:3:90:929:998#0/1  
Sab\_\_QW\_^[¥¥\_K[\_\_\_[]a`VK\_]a[^J]`^ab[N\_ZW  
@HWI-EAS443:3:90:932:71#0/1  
TTTCAAAGAATTCCTTGGTCATGTCTTTCTCTTTGACAGA  
+HWI-EAS443:3:90:932:71#0/1  
abbaa`ab`]aa\_^`aba\_^`ab]¥aaa]a]aa^`¥^\_aZ  
@HWI-EAS443:3:90:937:477#0/1  
ATCTCAAATTTTCTTCAATTGTCTTTCGCCTCTTTCCGG  
+HWI-EAS443:3:90:937:477#0/1  
U`bbab¥`aaabba`````b`a^aabbab``a^ab\_a`a  
@HWI-EAS443:3:90:984:1956#0/1  
CACTGGAGAGGAGATGGCCACCAAAGCGGACTACACCCTT  
+HWI-EAS443:3:90:984:1956#0/1  
aaab\_aabb^`\_T\_SV\_aab`aaa]^a\_\_`aaa\_a`aY\_a  
@HWI-EAS443:3:90:988:68#0/1  
CTTCAATAGTGCATTCCGGTCACCAGATTCTACAATTATT  
+HWI-EAS443:3:90:988:68#0/1  
abbbbbbabababbbabba^[baaab\_bbab\_`^]bbaba  
@HWI-EAS443:3:91:1008:1033#0/1  
CTCCTATTTTCATCAAGTTCTATCCAGCTTGAATCAGTCAA  
+HWI-EAS443:3:91:1008:1033#0/1  
`b\_T^bVbb\_XZbbb\_ZV\_abaa`ba`bbba\_aa`Yaa  
@HWI-EAS443:3:91:1009:802#0/1  
GGGATTTATGCCTTTCTCATGTGGTTTGACTATGTTAGGC

+HWI-EAS443:3:91:1009:802#0/1  
aWa[¥[Z^YIXP¥\_] ^XWW]TONWV^WUW\_]X]\_GGZ]QO  
@HWI-EAS443:3:91:1165:472#0/1  
GGGGGCTATATGAAGCAATCGAGGAGTGCCTGATTAATGA  
+HWI-EAS443:3:91:1165:472#0/1  
a]\_[Z\_¥T^[[Z\_¥P`^VU^[[^YYV[RZ^`YY^]]][UY  
@HWI-EAS443:3:91:1219:553#0/1  
GGCATGGAAATGAGGCGCTGCCTTCTTCAGTCTCTTCAGC  
+HWI-EAS443:3:91:1219:553#0/1  
][[¥^XaZ¥R\_RRU^YWTW^VWZN[¥¥WNXSQ¥NU¥USWU  
@HWI-EAS443:3:91:132:1500#0/1  
GAAGATCCCAAGGACAAAGAACATGAAGAGAACAAGCCAA  
+HWI-EAS443:3:91:132:1500#0/1  
a¥UZaYaa\_aa\_\_a`a`a`^`a`\_^`\_`\_^\_X\_] ^V^]  
@HWI-EAS443:3:91:1377:1585#0/1  
CTTTGGTCGGCAAGCTTGCGCATAGTTCCTGTAATCTCAA  
+HWI-EAS443:3:91:1377:1585#0/1  
K`bbaaaaa\_abb]\_bbbbbabbb`babbb`ba¥baba  
@HWI-EAS443:3:91:1519:1626#0/1  
AGGAACATGGGCCTCGACACTTGGCCTATCGCAGTCCTCA  
+HWI-EAS443:3:91:1519:1626#0/1  
abaabaaaa`VZa\_\_`aZa`aaZUaba\_\_¥a`\_\_Z\_W\_  
@HWI-EAS443:3:91:151:571#0/1  
GAGCTACAGGACATTGAAAATGAAGAGAAGATCCCAAGGA  
+HWI-EAS443:3:91:151:571#0/1  
`QVXU\_MWY[ZSWXSGXOZSPURSPTLMXPZWNXTRZRQX  
@HWI-EAS443:3:91:1535:1537#0/1  
CAACAGTCTATATGCGTCTCCACAATTGAGGGGTTTTCG  
+HWI-EAS443:3:91:1535:1537#0/1  
[`bb`aUH\_bb`bbab¥bbab`WbaTa`aUbbb`R¥¥Y]a  
@HWI-EAS443:3:91:1653:1376#0/1  
GAATACCACTATATGATGCAATCAAATGCATGAAGACATT  
+HWI-EAS443:3:91:1653:1376#0/1  
aa\_^\_]WF\_`^`a¥^¥\_a^[a\_] ^Y`a`SOXUM\_Z^  
@HWI-EAS443:3:91:1700:1213#0/1  
GGGGTTTTCGGCTGAATCGAGAAAATTGCTTCTCATTGTT  
+HWI-EAS443:3:91:1700:1213#0/1  
a^ZaW]b\_X`\_U`b``¥\_I\_]a`aa\_Y]aTa]\_\_a¥W`  
@HWI-EAS443:3:91:1756:1183#0/1  
AGAAATTTAGGCTTCTCTACCCCTGTTGTGTTACATATAC  
+HWI-EAS443:3:91:1756:1183#0/1  
aba]\_babababaa]aaaaaaaa`Y``aa^Z`a``X  
@HWI-EAS443:3:91:1757:648#0/1  
AAGAATTCCTTGGTCATGTCTTTCTTTTGACAGAAGACT  
+HWI-EAS443:3:91:1757:648#0/1  
abbaabbaabba``bbba\_bbb^b`abbb``aa`a`aW\_  
@HWI-EAS443:3:91:1790:900#0/1  
AATGCATCCTGTGCAGCCATGGATGACTTTTCAGCTGATCC  
+HWI-EAS443:3:91:1790:900#0/1  
abbaabbaaba^a`^\_aaa]]aabaa\_aba][aX`a`^YF

@HWI-EAS443:3:91:184:917#0/1  
GCCGAACGGCTGCATTGAGGGCAAGCTTTCCCAAATGTCA  
+HWI-EAS443:3:91:184:917#0/1  
aa¥a^a¥^U\_^aa^OYPRY\_\_YUM^Z]\_[GP]H]OZRORO  
@HWI-EAS443:3:91:206:423#0/1  
TCCGATTTGTTTTCAAAGAATTCCTTGTCATGTCTTTCT  
+HWI-EAS443:3:91:206:423#0/1  
YS]aa^a`bYaa\_\_WUPXX^a\_\_\_\_\_`\_\_TZR^`\_]\_^]V^\_  
@HWI-EAS443:3:91:228:762#0/1  
CGAGTCTTCTGTCAAAGAGAAAGACATGACCAAGGAATTC  
+HWI-EAS443:3:91:228:762#0/1  
Y`aY`bbbbab¥aabXbbab¥abba`abbbbaaba^J^a`  
@HWI-EAS443:3:91:236:1022#0/1  
ATTCGGATTTCCATTTTCATCGACGAACGGGGTGAATCAAT  
+HWI-EAS443:3:91:236:1022#0/1  
^QW\_`aXS]a^]RUZX^a]Y`\_`\_]Z\_Y]¥]V^^X^YUY¥  
@HWI-EAS443:3:91:297:537#0/1  
AAAGAAGTGAACGCCAAAATTGAACCATTCTTGAGGACGA  
+HWI-EAS443:3:91:297:537#0/1  
a]baaabVbbbaaa`aaaaababa]aaa`aaa`\_a^aa  
@HWI-EAS443:3:91:307:738#0/1  
GACCGAATCATGGCCTGGACAGTGGTGAACAGTATATGTA  
+HWI-EAS443:3:91:307:738#0/1  
a]N]Z[P^ZUZ]UWQYZTW[Z\_WW^N¥UURUZMVSWWUTV  
@HWI-EAS443:3:91:333:990#0/1  
GCTTGAAGCAGGTGCTAGCAGAGCTACAGGACATTGAAA  
+HWI-EAS443:3:91:333:990#0/1  
`^\_`aaS\_\_\_`P`LTYVXXDRZPN]U\_\_\_^TXY]¥]YT^U  
@HWI-EAS443:3:91:345:666#0/1  
GGGGGGCTATATGAAGCAATCGAGGAGTGCCTGATTAATG  
+HWI-EAS443:3:91:345:666#0/1  
a^^aa`P]¥`U\_`ZT\_Y¥a\_]X`Z[]`U]`R\_X[\_YU¥Y  
@HWI-EAS443:3:91:362:397#0/1  
ACGGGGTGAATCAATAATTGTAGAATCTGGTGACCCGAAT  
+HWI-EAS443:3:91:362:397#0/1  
[abbbb]b`bbaaa`[`a`^bbbaaabaYba\_¥V`a\_\_  
@HWI-EAS443:3:91:377:23#0/1  
TGGGGCATGAAATGAGGCGCTGCCTTCTTCAGTCTCTTC  
+HWI-EAS443:3:91:377:23#0/1  
abb¥a]aaaa]``aaaa`Wa^\_`\_¥[\_P[a\_[]¥W]\_ZZ\_S  
@HWI-EAS443:3:91:446:894#0/1  
CCACTGCAGGGCTACTGAATACATAATGAAGGGAGTGTAC  
+HWI-EAS443:3:91:446:894#0/1  
`KXZ¥¥Z^\_``¥RZSa^¥¥]YWXL¥ZRGZPYUZ`[ESN  
@HWI-EAS443:3:91:459:1522#0/1  
CGAAAATCGAAACTAACAAGTTTGCTGCAATATGCACACA  
+HWI-EAS443:3:91:459:1522#0/1  
aabb^bbbabababb`bababaabaabbbababba  
@HWI-EAS443:3:91:464:336#0/1  
CGGCTGAATCGAGAAAATTGCTTCTCATTGTTTCAGGCACT

+HWI-EAS443:3:91:464:336#0/1  
OXaa¥]¥¥a\_\_Xabb[``\_Xa\_`b`babbb^[bb`[\_Z\_  
@HWI-EAS443:3:91:492:827#0/1  
CAATGAGAAGCAATTTTCTCGATTGAGCCGAAAACCCCTC  
+HWI-EAS443:3:91:492:827#0/1  
I\_`abbbabb`ababVba`¥\_a`baabb]aba^abba  
@HWI-EAS443:3:91:522:515#0/1  
AGCAGGTGCTAGCAGAGCTACAGGACATTGAAAATGAAGA  
+HWI-EAS443:3:91:522:515#0/1  
ab``[a`bbbb^ba¥Za`b[ZabbIV]Tba¥`a\_N\_`[`  
@HWI-EAS443:3:91:523:198#0/1  
AGTCCGCTTTGGTGGCCATCTCCTCTCCAGTGAATGAAAA  
+HWI-EAS443:3:91:523:198#0/1  
`\_[aX\_aaabb\_\_b`XZ^aa`¥Wa\_Z]\_S¥Ua`\_aaYX\_U  
@HWI-EAS443:3:91:535:647#0/1  
CTCAAATTTTCTTCAATTGTCTCTTCGCCTTTTCGGAC  
+HWI-EAS443:3:91:535:647#0/1  
abbabbbbbbbbbbbbbbbbbbabababbaaaaaaaaa  
@HWI-EAS443:3:91:543:1163#0/1  
ATCCATCAGCAGGAACCTTGACCGCTGATGGCAAAGAGGC  
+HWI-EAS443:3:91:543:1163#0/1  
aaaaaaaa¥a``]`aa`\_aa`\_¥^`^^`U^^¥¥^¥WT  
@HWI-EAS443:3:91:617:543#0/1  
ATTCATCGACGAACGGGTGAATCAATAATTGTAGAATC  
+HWI-EAS443:3:91:617:543#0/1  
abaaaa`baab`aaaa`aWa\_aa`\_\_a\_\_aaa^aaa`^\_  
@HWI-EAS443:3:91:649:1297#0/1  
CTGGTGCCATATTTTCACCGAGTGCCCACTTCAATTGGCT  
+HWI-EAS443:3:91:649:1297#0/1  
`ba[U\_ba¥\_Saa`abbaa^ba`^`baaaa^Z\_a¥TW`^  
@HWI-EAS443:3:91:65:997#0/1  
ATCAGGCACTCCTCGATTGCTTCATATAGCCCCCAAGAT  
+HWI-EAS443:3:91:65:997#0/1  
abab^bbabaaaaa``\_`aaa\_a\_aa\_[\_\_\_Z\_\_^^¥  
@HWI-EAS443:3:91:668:443#0/1  
TGAGAAGCAATTTTCTCGATTGAGCCGAAAACCCCTCAAG  
+HWI-EAS443:3:91:668:443#0/1  
Y\_V\_\_aa¥ab\_bbabbbaab`[^]Yba\_^^^Z]`]V`¥b  
@HWI-EAS443:3:91:696:2005#0/1  
ATCTGGGCTCTGGCTCATCACTGTCATACTGTTTAAGGTC  
+HWI-EAS443:3:91:696:2005#0/1  
[`b\_baa\_Z^]UZ[aba`^`\_`][^^`^`\_aQ`aa``XYY  
@HWI-EAS443:3:91:764:1378#0/1  
CCAAAGAAGGAAGACGAAAACAAACCTGTATGGGTTCAT  
+HWI-EAS443:3:91:764:1378#0/1  
a^aY`^b¥`bb^VX]bbbabbaa`b^¥a\_aabba]aaab  
@HWI-EAS443:3:91:764:1976#0/1  
CAATAATTGTAGAATCTGGTGACCCGAATGCACTATTGAA  
+HWI-EAS443:3:91:764:1976#0/1  
]\_ab^`baaabb`bbbbba`abba`b`ab¥bbbaabab



@HWI-EAS443:3:91:811:216#0/1  
GCGTCTCCACAACCTTGAGGGGTTTTTCGGCTGAATCGAGAA  
+HWI-EAS443:3:91:811:216#0/1  
aa[[\_^\_]X]\_TS¥`^]V\_aXX`YX]^X]\_]UUR]X]YX  
@HWI-EAS443:3:91:844:512#0/1  
CTCTTCGTCAAGGGTGTAGTCCGCTTTGGTGGCCATCTCC  
+HWI-EAS443:3:91:844:512#0/1  
V¥bb\_Q[b`\_bZ\_aWZUab¥¥\_bab`baH\_abSaab`aa  
@HWI-EAS443:3:91:849:1525#0/1  
AGAAGTTCGGTGGGAGACTTTGGTCGGCAAGCTTGCGCAT  
+HWI-EAS443:3:91:849:1525#0/1  
``]baaba`[^a`aZ^a`aaa`aY`¥baa\_\_aWH¥`]  
@HWI-EAS443:3:91:89:140#0/1  
CGACGAACGGGGTGAATCAATAATTGTAGAATCTGGTGAC  
+HWI-EAS443:3:91:89:140#0/1  
ab¥Z`b^a]`aNaxHQZZaa[\_a\_Z`a\_\_`WR¥a\_a^L  
@HWI-EAS443:3:91:977:520#0/1  
ATTCATCGACGAACGGGGTGAATCAATAATTGTAGAATC  
+HWI-EAS443:3:91:977:520#0/1  
^`a`¥X\_bbabaaab^`aZbaba\_]`babbabab^`]V  
@HWI-EAS443:3:91:979:1452#0/1  
CACTGCAGGGCTACTGAATACATAATGAAGGGAGGTACA  
+HWI-EAS443:3:91:979:1452#0/1  
ab`T`aa¥aaba`]aaa¥a]Y\_Y`\_Ya\_aT^TQVQVW^  
@HWI-EAS443:3:91:997:1413#0/1  
CGGCTGAATCGAGAAAATTGCTTCTCATTGTTGAGGCACT  
+HWI-EAS443:3:91:997:1413#0/1  
\_¥a\_\_aa`\_aaa\_\_¥aaaab`bb`a`aab^a`bbab]\_a`  
@HWI-EAS443:3:91:998:1808#0/1  
CAAAGATGTTGGAGACCTTAAACAGTATGACAGTGATGAG  
+HWI-EAS443:3:91:998:1808#0/1  
X`Y]a`[bbb\_Z^M`X`b¥XT`a[ababbbbaV`¥Z\_aX  
@HWI-EAS443:3:92:1103:1033#0/1  
GGGGCTATATGAAGCAATCGAGGAGTGCCTGATTAATGAT  
+HWI-EAS443:3:92:1103:1033#0/1  
a`a`aa`a`\_aa`[\_^^]a¥]\_Y`\_]\_\_\_`^\_\_\_]Y  
@HWI-EAS443:3:92:1103:1856#0/1  
ATCATTAAATCAGGCACTCCTCGATTGCTTCATATAGCCCC  
+HWI-EAS443:3:92:1103:1856#0/1  
a]I\_[]Wa`UZW]b\_a[Ha\_`^^\_\_a^Ya\_a`\_R^\_RQ  
@HWI-EAS443:3:92:112:164#0/1  
CATGGAATGAGGCGCTGCCTTCTCAGTCTTTCAGCAG  
+HWI-EAS443:3:92:112:164#0/1  
GW\_VVbb[bb\_\_bba`ba[b[bbbNbb^baabba^bQZb  
@HWI-EAS443:3:92:1175:822#0/1  
TGGGGGGCTATATGAAGCAATCGAGGAGTGCCTGATTAAT  
+HWI-EAS443:3:92:1175:822#0/1  
abaaab`ababbbb`ba\_aaa\_b`aa`b[bZ`abaa`aa  
@HWI-EAS443:3:92:1178:1531#0/1  
AACAAAATAAAATCTGAGAAGACACACATTACATCTTTT

+HWI-EAS443:3:92:1178:1531#0/1  
aa^babaa`abaa^aa`\_aaa\_```bW\_a\_\_[\_aa\_``aa  
@HWI-EAS443:3:92:1190:416#0/1  
GCCCATCAGGCAATCTGAGGGGGCGTGGTGCCTCAA  
+HWI-EAS443:3:92:1190:416#0/1  
aa^`aa^`a`a`\_N^Y[[`^\_N\_[^aUaY[`YUPL0\_X  
@HWI-EAS443:3:92:123:1432#0/1  
AGCCCCCAAGATCGAAGTTCCAGTTCCAGTTGCCCC  
+HWI-EAS443:3:92:123:1432#0/1  
aaaaabaaaa]`a]a`]``Q[^^OY[PZY[¥Y\_U^\_NTS\_  
@HWI-EAS443:3:92:1268:618#0/1  
ATCAGGCACTCCTCGATTGCTTCATATAGCCCCCAAGAT  
+HWI-EAS443:3:92:1268:618#0/1  
aaaaba`a\_\_\_\_\_a[`\_a```a\_¥`aa\_a`TKWXS^`¥`\_`\_  
@HWI-EAS443:3:92:127:533#0/1  
CATAAATACGGCCTTGCTCAATGCATCCTGTGCAGCCATG  
+HWI-EAS443:3:92:127:533#0/1  
aabaabbbbaaaaaaa[aa`aaaaaaaa`b`a```a\_\_\_\_\_`  
@HWI-EAS443:3:92:1341:1272#0/1  
ATCTTTGCAGTCATCAAAGTCTACTTTTTCTGGTGCCATA  
+HWI-EAS443:3:92:1341:1272#0/1  
a^`aVZ[aZ\_Ua`\_Z\_¥`a[PW\_YZ`\_P\_aaba¥b[YZ`a  
@HWI-EAS443:3:92:1352:1239#0/1  
GAACTATTTTACAGCAGAAGTGTCCCACTGCAGGGCTACT  
+HWI-EAS443:3:92:1352:1239#0/1  
]abaaaa`aaba`a^ab`aa\_`^]¥¥a^\_\_\_\_TaU^\_^^\_\_  
@HWI-EAS443:3:92:1378:991#0/1  
GCCCTGCAGTGGGACACTTCTGCTGTAAAATAGTTCCTCC  
+HWI-EAS443:3:92:1378:991#0/1  
a`\_Xa`]ZaS`a\_U\_a\_a^\_adW\_a\_¥\_b^\_\_\_\_W\_¥S¥[N  
@HWI-EAS443:3:92:1402:1247#0/1  
CGAACGGCTGCATTGAGGGCAAGCTTTCCCAAATGTCAAA  
+HWI-EAS443:3:92:1402:1247#0/1  
abaa`b`aa`X^\_MZUa^WXa^Y]aYPN]`\_\_`¥P[\_\_\_`  
@HWI-EAS443:3:92:141:1899#0/1  
GGGTTTTCGGCTGAATCGAGAAAATTGCTTCTCATTGTTC  
+HWI-EAS443:3:92:141:1899#0/1  
aba\_\_aaa\_aaSabb^baa\_¥]a`[`\_¥\_¥a`ba¥W`X^`  
@HWI-EAS443:3:92:1440:1082#0/1  
CTCATTTGAGAAATGATACTGATGTGGTGAACTTTGTAAG  
+HWI-EAS443:3:92:1440:1082#0/1  
ababbbbbbbaabbbbbaabbbbbaab`\_ba^0]aaa`aa¥  
@HWI-EAS443:3:92:1468:118#0/1  
GAAAGTCATCCATGGCTGCACAGGATGCATTGAGCAAGGC  
+HWI-EAS443:3:92:1468:118#0/1  
aa\_a^HMaaZ`b\_aaY`^V¥J^]\_VRVXRY¥^[HUBBBBB  
@HWI-EAS443:3:92:1484:1114#0/1  
CACCTTGACGAAGAGAGCAGGGCAAGAATCAAACTAGG  
+HWI-EAS443:3:92:1484:1114#0/1  
a``]XQQ``Sba]`\_bab[]`abZ¥\_a`\_[a`a\_\_]\_`ZH

@HWI-EAS443:3:92:1536:546#0/1  
CAGCAAACCTGTTAGTTTCGATTTTCGGATCTTCCCCATA  
+HWI-EAS443:3:92:1536:546#0/1  
abaabaa\_baaab`aaaa\_aSaaa`\_`\_0]W^`WXXZ]`X  
@HWI-EAS443:3:92:1719:582#0/1  
TGTGAATTGACTGATTCAAGCTGGATAGAACTTGATGAAA  
+HWI-EAS443:3:92:1719:582#0/1  
ab\_aaa`[^\_\_a`]aa^\_\_\_T`X]Ua\_a\_aXaa`Xa\_]`^  
@HWI-EAS443:3:92:1728:933#0/1  
GGGGGCTATATGAAGCAATCGAGGAGTGCCTGATTAATGA  
+HWI-EAS443:3:92:1728:933#0/1  
aa[U`^\_] [Z\_`\_VWO[Y\_SYNYYVQVNGTYTTK[]VV^B  
@HWI-EAS443:3:92:1742:304#0/1  
ATAAGACAAGAAATGGCCAGTAGGAGTCTATGGGATTCCT  
+HWI-EAS443:3:92:1742:304#0/1  
a^a¥]Z\_Yaa`\_]`\_`RZU`TZ¥\_U\_OW`YY`a]W^]QGR  
@HWI-EAS443:3:92:1745:1240#0/1  
CGTCTCCACAACCTGAGGGGTTTTTCGGCTGAATCGAGAAA  
+HWI-EAS443:3:92:1745:1240#0/1  
ab\_aaa`[^\_a\_aa¥]baabVa`a[a\_`^aaa\_`¥^Za\_\_^  
@HWI-EAS443:3:92:1751:1026#0/1  
GGCTTGGAAGCAGGTGCTAGCAGAGCTACAGGACATTGAA  
+HWI-EAS443:3:92:1751:1026#0/1  
ab`abba`aaV¥`\_]`\_\_\_^Z^aYaZ`Waa\_]`^Y[^XZX  
@HWI-EAS443:3:92:24:777#0/1  
GAACAATGAGAAGCAATTTCTCGATTGAGCCGAAAACCC  
+HWI-EAS443:3:92:24:777#0/1  
`\_`\_]`\_\_b`^]Z`\_]Z]a`aa\_`a`^\_]`\_]Y\_¥¥Y¥]WR  
@HWI-EAS443:3:92:258:976#0/1  
AGAACATGAAGAGAACAAGCCAATTGAAGTGGGCACTCGG  
+HWI-EAS443:3:92:258:976#0/1  
aaa]aY^aaaa]V[VaZDVaa^a^a`RWW\_a\_]`\_¥Wa^  
@HWI-EAS443:3:92:318:1485#0/1  
ATTTTCATCGACGAACGGGGTGAATCAATAATTGTAGAATC  
+HWI-EAS443:3:92:318:1485#0/1  
aaa`aa\_`^a^`\_`^Y^`\_X\_`^¥\_`^`\_Z\_\_U\_[]\_WU  
@HWI-EAS443:3:92:321:1906#0/1  
ATCAGGCACTCCTCGATTGCTTCATATAGCCCCCAAGAT  
+HWI-EAS443:3:92:321:1906#0/1  
`bbabbb\_]H\_bYQ`Y\_`aaY`[XaaaYaaa\_]`\_XaZG  
@HWI-EAS443:3:92:327:1640#0/1  
CGGGGTGAATCAATAATTGTAGAATCTGGTGACCCGAATG  
+HWI-EAS443:3:92:327:1640#0/1  
a^`^`]`^`bbbbbbbabaaaabababaaa\_aabaaaaa\_`  
@HWI-EAS443:3:92:335:1085#0/1  
ATTCGGATTTCCATTTTCATCGACGAACGGGGTGAATCAAT  
+HWI-EAS443:3:92:335:1085#0/1  
^`b```JVZZ``]`aa\_¥`aab`aa[^`aa0a`aa\_\_a  
@HWI-EAS443:3:92:341:192#0/1  
ATCTTGATCTTGGAGGTTCCATTGGTTCTCACATATAGGA

+HWI-EAS443:3:92:341:192#0/1  
`babababaaaba`aa[aa`a`aa]\_\_`\_`Z`\_`\_\_^¥\_]`  
@HWI-EAS443:3:92:397:1448#0/1  
CAAAGAAGGAAGACGGAAAACAAACCTGTATGGGTTTCATT  
+HWI-EAS443:3:92:397:1448#0/1  
YJPM\_TY]ZWZZ¥]^`¥Z\_VLJRP¥XQSZ[[VIZNOMS]]  
@HWI-EAS443:3:92:440:120#0/1  
GCTCTATTGGGAAAGTGTGCAGGACCTTACTGGCAAAATC  
+HWI-EAS443:3:92:440:120#0/1  
aaa\_aX`aaba¥[aa]a]a```\_^^^\_^^]ZZ]^`\_`^^R  
@HWI-EAS443:3:92:476:387#0/1  
CATCGACGAACGGGTGAATCAATAATTGTAGAATCTGGT  
+HWI-EAS443:3:92:476:387#0/1  
``a¥¥\_]^[^SJ\_a^][b\_Z]Za]`UN[[\_T`a\_`YQY\_`V  
@HWI-EAS443:3:92:492:1280#0/1  
GGGTTTTCGGCTGAATCGAGAAAATTGCTTCTCATTGTTC  
+HWI-EAS443:3:92:492:1280#0/1  
\_bb^babb\_abaabb`K`\_bbabaaba^a`\_a\_baaaa\_a  
@HWI-EAS443:3:92:554:1220#0/1  
AGCAGGTGCTAGCAGAGCTACAGGACATTGAAAATGAAGA  
+HWI-EAS443:3:92:554:1220#0/1  
a]aRY]\_]a]a]a^MXaS\_Y\_`\_aV]]^`\_`^^^¥]^`¥^  
@HWI-EAS443:3:92:633:928#0/1  
ACGCCAAAATTGAACCATTCTTGAGGACGACACCACGCC  
+HWI-EAS443:3:92:633:928#0/1  
ab`H[Wa]\_`^`a\_aVYZaaa`I]^`\_`^aVW¥\_Qa\_N¥\_N  
@HWI-EAS443:3:92:640:670#0/1  
TCCACAACCTTGAGGGTTTTCGGCTGAATCGAGAAAATTG  
+HWI-EAS443:3:92:640:670#0/1  
abaa`)]`\_baa\_a`aa]`]HZ[`^aaa]\_a\_\_a`X`^`\_`\_`  
@HWI-EAS443:3:92:663:874#0/1  
AGAACACAGTATTTTTCCCATTGTGTGGCTCCAGTCTCG  
+HWI-EAS443:3:92:663:874#0/1  
``^baa\_ba\_aaaa`aa`\_aaaa\_a`aa`a\_aS`¥¥ZS^  
@HWI-EAS443:3:92:668:917#0/1  
AGAATTCCTTGGTCATGTCTTTCTTTGACAGAAGACTC  
+HWI-EAS443:3:92:668:917#0/1  
^VGRYaSa\_]b]ZQ\_]^R]PXZ[`¥]a`aI]]^`\_aY\_^^^  
@HWI-EAS443:3:92:775:477#0/1  
TTCCGATTTGTTTTCAAAGAATTCCTTGGTCATGTCTTTC  
+HWI-EAS443:3:92:775:477#0/1  
ab\_ab`abab`aaaa`a`)]aa`\_`aaa^`\_`aa\_\_a`\_`\_`  
@HWI-EAS443:3:92:815:284#0/1  
ATGGCTTGAAGCAGGTGCTAGCAGAGCTACAGGACATTG  
+HWI-EAS443:3:92:815:284#0/1  
aaaaaba^\_V]`¥``¥FZQRY\_T¥\_]NT[P[``ZVS^]P  
@HWI-EAS443:3:92:845:678#0/1  
GACGAAAGGAATCCCATAGACTCCTACTGGCCATTTCTTG  
+HWI-EAS443:3:92:845:678#0/1  
ab`b]aXbXWJ`aU`\_a¥a¥Y[a\_ZLY\_a\_]\_\_^MY`Z

@HWI-EAS443:3:92:897:130#0/1  
ATTCAACAGTCTATATGCGTCTCCACAACCTTGAGGGGTTT  
+HWI-EAS443:3:92:897:130#0/1  
abbaba`ab`abaaaba`a````\_a]\_`\_baa\_aaaaX`\_  
@HWI-EAS443:3:92:925:1219#0/1  
TATGTATTACAGTAGCCCTGCAGTGGGACACTTCTGCTGTA  
+HWI-EAS443:3:92:925:1219#0/1  
aaab[aaaaaa\_\_X`a`\_\_\_`[^\_\_]W]]`\_\_\_\_]a\_]\_  
@HWI-EAS443:3:92:950:1980#0/1  
TGGGATTTATGCCTTTCTCATGTGGTTTGACTATGTTAGG  
+HWI-EAS443:3:92:950:1980#0/1  
abaaa\_Z\_b`aa`aaa\_aaa\_\_aa^`\_aa`a\_\_`]\_a^G  
@HWI-EAS443:3:92:961:1201#0/1  
CGTCTCCACAACCTTGAGGGGTTTTCGGCTGAATCGAGAAA  
+HWI-EAS443:3:92:961:1201#0/1  
[\_aba`b]a`aab\_b^]abaYa`aa^]`bab\_`^a]a\_Q]  
@HWI-EAS443:3:92:978:895#0/1  
AAGAATTCCTTGGTCATGTCTTTCTCTTTGACAGAAGACT  
+HWI-EAS443:3:92:978:895#0/1  
aaa`a\_^`aaaa^aaaa]a`aa```\_`a\_\_`a\_\_`\_Z]  
@HWI-EAS443:3:93:1000:1017#0/1  
GAGTCTATGGGATTCCTTTTCGTCAGTCCGAAAGAGGCGAA  
+HWI-EAS443:3:93:1000:1017#0/1  
aZb\_\_aa¥\_¥^Ia`\_^`PaZ\_Y[F^\_R\_^^^PS^[N^  
@HWI-EAS443:3:93:1039:1622#0/1  
GGGATCTTCTTTCATTTTCAATGTCCTGTAGCTCTGCTA  
+HWI-EAS443:3:93:1039:1622#0/1  
aa\_Ra\_aaa`\_aa\_a^\_\_\_`a\_a`R\_]a`^\_a^a`^]\_\_\_\_  
@HWI-EAS443:3:93:1055:394#0/1  
AGTGTACATAAATACGGCCTTGCTCAATGCATCCTGTGCA  
+HWI-EAS443:3:93:1055:394#0/1  
ab^^`abbabaaaa`][a\_\_`aaY\_\_aa¥aa¥¥`aV`Ra  
@HWI-EAS443:3:93:1081:1091#0/1  
TTCATTTTCAATGTCCTGTAGCTCTGCTAGCACCTGCTTC  
+HWI-EAS443:3:93:1081:1091#0/1  
a]baa\_bbb]aa[aZaa\_a]aa[\_RUQa]V[HZ`GZYB  
@HWI-EAS443:3:93:1111:1530#0/1  
GTGCCATATTTTACCGAGTGGCCACTTCAATTGGCTTGT  
+HWI-EAS443:3:93:1111:1530#0/1  
\_R\_¥Qaabaaaa`b`X`aPa^`a^^UT[[][VYZ]]XZ  
@HWI-EAS443:3:93:1148:628#0/1  
GGGGCTATATGAAGCAATCGAGGAGTGCCTGATTAATGAT  
+HWI-EAS443:3:93:1148:628#0/1  
\_NNT]VR^P^a]Y[^`¥QV\_QZNR`PHSN¥QW^`Z\_]\_U^  
@HWI-EAS443:3:93:1327:666#0/1  
GTTCCATTGGTTCTCACATATAGGAACATGGGCCTCGACA  
+HWI-EAS443:3:93:1327:666#0/1  
a¥^VY\_T[aaP]^]U`GU]``\_U\_ZZJXTLMT00YJTBBB  
@HWI-EAS443:3:93:1364:1761#0/1  
AATGGAAATCCGAATACATGAAACAAACTTCCAAATGTGT



@HWI-EAS443:3:93:399:798#0/1  
AGTCATCAAAGTCTACTTTTTCTGGTGCCATATTTTCACC  
+HWI-EAS443:3:93:399:798#0/1  
aa\_aaaaWTV]\_a\_SZaa`a`aaa^U`Wa``\_``\_\_\_`]S  
@HWI-EAS443:3:93:411:454#0/1  
GACTTTGGTCGGCAAGCTTGCGCATAGTTCCTGTAATCTC  
+HWI-EAS443:3:93:411:454#0/1  
aa^`]a`WW\_^\_\_`]\_`^]\_[`\_`\_X\_W\_YUZ`TXXZW]X  
@HWI-EAS443:3:93:426:336#0/1  
GTTCAATCGGGCAACATCTTCTCCTATTTTCATCAAGTTC  
+HWI-EAS443:3:93:426:336#0/1  
a\_``[¥Z\_\_\_`\_\_]Z]\_\_[\_\_\_^^W^]\_\_]]^\_]Y^Z  
@HWI-EAS443:3:93:443:1158#0/1  
GAAGAAATTTAGGCTTCTTACCCCTGTTGTGTTACATAT  
+HWI-EAS443:3:93:443:1158#0/1  
a^^aZaabaaaaYaa^aa`^\_aa`]Y`aY\_`^`\_Z\_`^\_  
@HWI-EAS443:3:93:490:101#0/1  
GGCTGGAGAAGTTCGGTGGGAGACTTTGGTCGGCAAGCTT  
+HWI-EAS443:3:93:490:101#0/1  
aa\_aaa\_a`b^a¥abZa`aY^W^¥\_`]WWSYTYWUPUB  
@HWI-EAS443:3:93:496:1946#0/1  
GATTGGTCTCTTCCCTTCAATTATCTCAAATCGGTGCTTC  
+HWI-EAS443:3:93:496:1946#0/1  
W^ZX¥a¥`]\_X^`bb^a^`a^^a`¥\_`\_^b¥Zb[HZ^\_]Y  
@HWI-EAS443:3:93:563:484#0/1  
ATGGAGTTCTCACTCACTGACCCGAGACTGGAGCCACACA  
+HWI-EAS443:3:93:563:484#0/1  
^Y[a`\_]a^\_]\_]^]Yaaaa`a`a`a\_aaaa\_a[[`Y¥XX  
@HWI-EAS443:3:93:635:1638#0/1  
CATGAAATGAGGCGCTGCCTTCTTCTCAGTCTTTCAGCAG  
+HWI-EAS443:3:93:635:1638#0/1  
abab\_baba`bb[aab\_baaaaaaaaa`^\_a`a`Za\_N^a  
@HWI-EAS443:3:93:67:120#0/1  
GCCGTATTTATGTACTCCCTTATTATTATTATTAGTAG  
+HWI-EAS443:3:93:67:120#0/1  
a^a`L\_bZP^aa\_`a¥\_\_\_Y\_[^U^[[^\_V^^^UZ][RB  
@HWI-EAS443:3:93:680:38#0/1  
CATTAATCAGGCACTCCTCGATTGCTTCATATAGCCCCC  
+HWI-EAS443:3:93:680:38#0/1  
[aSXaa`a]aU]a[]^SXYaZQ[a\_\_`Z\_^]\_a\_\_¥[N[`  
@HWI-EAS443:3:93:715:863#0/1  
CAATTTCAATGAACCGTTCTTTGTAATCATACAAATC  
+HWI-EAS443:3:93:715:863#0/1  
a`¥baaabaaaa`a`aa`aaaaaaaa\_aa^\_aaa\_`]`^\_  
@HWI-EAS443:3:93:730:942#0/1  
CATATTTTACCGAGTGCCCACTTCAATTGGCTTGTCTC  
+HWI-EAS443:3:93:730:942#0/1  
abaabbaa`bbaa\_a^a\_`a`aaa````^]\_aa[]^0^^  
@HWI-EAS443:3:93:739:473#0/1  
GGCATGAAATGAGGCGCTGCCTTCTTCTCAGTCTTTCAGC

+HWI-EAS443:3:93:739:473#0/1  
aVa`H\_ZVXT[aXY¥\_a[\_MN¥V`Y]^FHHZXa\_\_¥\_ZHU  
@HWI-EAS443:3:93:820:1011#0/1  
CGTGTTACTCCAATTTCAATGAACCGTTCTCTTTGTAAT  
+HWI-EAS443:3:93:820:1011#0/1  
ab\_aa\_baaaab^aaaaa`aaa`a`[``]``a`a`a\_\_^a  
@HWI-EAS443:3:93:829:1484#0/1  
AGGACATTGAAAATGAAGAGAAGATCCCAAGGACAAAGAA  
+HWI-EAS443:3:93:829:1484#0/1  
\_aaYa`ba`aababb\_\_bba`aaa`a`a\_b`aaa\_\_a`  
@HWI-EAS443:3:93:865:578#0/1  
CGAAAATCGAAACTAACAAGTTTGCTGCAATATGCACACA  
+HWI-EAS443:3:93:865:578#0/1  
a`aba[]`a\_a`\_aaa`a`aZ`a\_\_\_a`\_a\_a`¥\_]\_]Z  
@HWI-EAS443:3:93:902:1330#0/1  
ATGCGCAAGCTTGCCGACCAAAGTCTCCCACCGAACTTCT  
+HWI-EAS443:3:93:902:1330#0/1  
`aabaa\_`a¥^`\_aaa^`Z]`¥Y]\_Y]\_¥a\_^^¥^¥S\_  
@HWI-EAS443:3:93:937:345#0/1  
GGCCAGTAGGAGTCTATGGGATTCCTTTTCGTCAGTCCGAA  
+HWI-EAS443:3:93:937:345#0/1  
¥\_aabbabbbbaa\_abbaabbab`bbbXaaXa`a`G][`  
@HWI-EAS443:3:93:942:110#0/1  
CAACTTGAGGGTTTTTCGGCTGAATCGAGAAAATTGCTTC  
+HWI-EAS443:3:93:942:110#0/1  
aaa`abbabaa\_[aba[^b\_aaaa\_\_a\_a]Xa]\_a`T]\_\_\_  
@HWI-EAS443:3:93:978:139#0/1  
CTTGGGGGGCTATATGAAGCAATCGAGGAGTGCCTGATTA  
+HWI-EAS443:3:93:978:139#0/1  
`\_aaabbababbabb`ab`bbbaa`b[aa]a[Sab¥`^a  
@HWI-EAS443:3:94:1117:413#0/1  
GGGCACTCGGTGAAAATATGGCACCAGAAAAAGTAGACTT  
+HWI-EAS443:3:94:1117:413#0/1  
aa\_\_^\_\_`aVa]Xa`\_^`a]Z\_ZW\_`Z`\_^^aW\_^^RX`  
@HWI-EAS443:3:94:1184:1411#0/1  
ATGAAACAAACTTCCAAATGTGTGCATATTGCAGCAAAC  
+HWI-EAS443:3:94:1184:1411#0/1  
\_abb`ab\_¥\_bbab`aa`ba`[aaaaaa\_Yb\_¥a\_\_^a  
@HWI-EAS443:3:94:1216:363#0/1  
GTGAACTTTGTAAGTATGGAGTTCTCACTCACTGACCCGA  
+HWI-EAS443:3:94:1216:363#0/1  
a\_aMQVb`ab\_a]b^aaa\_^a¥a¥\_¥]¥aU\_W\_`YN¥\_¥  
@HWI-EAS443:3:94:1412:217#0/1  
AGAATTCCTTGGTCATGTCTTTCTCTTTGACAGAAGACTC  
+HWI-EAS443:3:94:1412:217#0/1  
abaV`\_Q¥aba]TIbaab\_abb]`Zaa]aOIXa[`\_^U^X  
@HWI-EAS443:3:94:1421:734#0/1  
AGATCCCAAGGACAAAGAACATGAAGAGAACAAGCCAATT  
+HWI-EAS443:3:94:1421:734#0/1  
a^^^^]aUV]`PJPY¥SUa^a¥Y]aa`]VU¥^¥\_YGSRA^G



@HWI-EAS443:3:94:1502:1586#0/1  
ATCTTCTCCTATTTTCATCAAGTTCTATCCAGCTTGAATCA  
+HWI-EAS443:3:94:1502:1586#0/1  
ab^ab`ababbbaaba`\_b`a¥b\_\_ba\_^a]XWaa`aa^b  
@HWI-EAS443:3:94:1507:336#0/1  
GAGGCGAAGAGACAATTGAAGAAAAATTTGAGATTACAGG  
+HWI-EAS443:3:94:1507:336#0/1  
¥[ba^aa^a`b`^`^`a¥XYaaba`\_a\_aa\_^`\_\_`Z`\_`\_`  
@HWI-EAS443:3:94:1508:557#0/1  
AAGAATTCCTTGGTCATGTCTTTCTCTTTGACAGAAGACT  
+HWI-EAS443:3:94:1508:557#0/1  
``b`I`abJaaa`\_aaaa`b¥a`SSa```SR`\_\_]a\_\_^  
@HWI-EAS443:3:94:154:427#0/1  
ATCAGGCACTCCTCGATTGCTTCATATAGCCCCCAAGAT  
+HWI-EAS443:3:94:154:427#0/1  
aaa\_]`^`aa`a`a\_aa\_[SYa`a``\_`XR`Y^Y`Z^ZZXW  
@HWI-EAS443:3:94:1597:1024#0/1  
CGAAAATCGAAACTAACAAGTTTGCTGCAATATGCACACA  
+HWI-EAS443:3:94:1597:1024#0/1  
aabbabba\_a``Ybb`]aaV^`aXJZaRV^a^adM]\_X]`  
@HWI-EAS443:3:94:1642:800#0/1  
GGGAGACTTTGGTCGGCAAGCTTGCGCATAGTTCCTGTAA  
+HWI-EAS443:3:94:1642:800#0/1  
a\_a`a`\_baa`a^^\_[a]^`[^a`R`)]`^a^a\_Z`aXX]  
@HWI-EAS443:3:94:178:1050#0/1  
GATTTGTTTTCAAAGAATTCCTTGGTCATGTCTTTCTCTT  
+HWI-EAS443:3:94:178:1050#0/1  
a[\_^ab`\_X\_a\_[`]J^\_]\_\_\_^ZZ\_]¥\_XY¥]]^]U^^  
@HWI-EAS443:3:94:23:340#0/1  
AAAGAGCCTAACATAGTCAAACCACATGAGAAAGGCATAA  
+HWI-EAS443:3:94:23:340#0/1  
ab]`Wb`a]`a¥TJYaX]Tb^UQZ\_b[[¥N]¥^\_a0^\_Z[  
@HWI-EAS443:3:94:258:340#0/1  
CTGTTGTGTTACATATACTGTTCACTGTCCAGGCCAT  
+HWI-EAS443:3:94:258:340#0/1  
abaabbabaabababbbabbabbaabbaaaa\_\_aba`Z``  
@HWI-EAS443:3:94:277:1304#0/1  
GACGAAAGGAATCCCATAGACTCCTACTGGCCATTTCTTG  
+HWI-EAS443:3:94:277:1304#0/1  
aaa`aa`aaa[aa\_¥abaaaa`\_`\_`ZY\_\_\_]ZX\_W^ZZ  
@HWI-EAS443:3:94:302:65#0/1  
TCCGAAAATCGAAACTAACAAGTTTGCTGCAATATGCACA  
+HWI-EAS443:3:94:302:65#0/1  
``]b`^b^]Ya^^YY`\_Y\_\_WaYa`\_\_a\_]`^Y`[]]¥  
@HWI-EAS443:3:94:361:131#0/1  
CTCTAGCAAGCTGGGTCCAAAATGAATTCAATAAGGCATG  
+HWI-EAS443:3:94:361:131#0/1  
aVb^S\_Y\_Q`XXQPJ]OF]\_Y¥\_a^\_\_[^QF^]U^MUQ`]  
@HWI-EAS443:3:94:378:18#0/1  
ACCGAACTTCTCCAGCCTTGAAAACCTTAGAGCCTATGTA

+HWI-EAS443:3:94:378:18#0/1  
aa]b)`Q\_aab``\_`\_Ua`b]a`\_U\_a``a\_aY\_`\_\_a[\_  
@HWI-EAS443:3:94:447:729#0/1  
GGGGCATGGAAATGAGGCGCTGCCTTCTTCAGTCTCTTCA  
+HWI-EAS443:3:94:447:729#0/1  
a`¥`]aaa`\_a`a`\_\_\_\_^\_^^¥YQX][¥¥SOZ^¥\_UU  
@HWI-EAS443:3:94:52:1670#0/1  
GGGGAAGATCCGAAAATCGAACTAACAAAGTTTGCTGCAA  
+HWI-EAS443:3:94:52:1670#0/1  
V\_P\_``bbabbb`bbaba\_`baa\_b`^a`\_]aaaa\_ba  
@HWI-EAS443:3:94:535:1897#0/1  
GACCGAATCATGGCCTGGACAGTGGTGAACAGTATATGTA  
+HWI-EAS443:3:94:535:1897#0/1  
O\_bbabbababbabab\_a^\_abab\_XbabbbaYbbba[[b  
@HWI-EAS443:3:94:562:414#0/1  
CATAAATACGGCCTTGCTCAATGCATCCTGTGCAGCCATG  
+HWI-EAS443:3:94:562:414#0/1  
SZbbbb¥¥bbba`\_a`abb]bVbaaabbQ\_]`ba¥aab  
@HWI-EAS443:3:94:572:1717#0/1  
GAACCTTGTAAAGTATGGAGTTCTCACTCACTGACCCGAGA  
+HWI-EAS443:3:94:572:1717#0/1  
a]abaaaa[bb]]a\_aaba`aaaaaaaa`aaaa`a\_aaaa  
@HWI-EAS443:3:94:589:2036#0/1  
TTCTGCTGTAAAATAGTTCCTCCTCATGCTTGGCATATGT  
+HWI-EAS443:3:94:589:2036#0/1  
`W`WZW`bYYabYSYXUT\_a`b\_RV^^`WXU\_`[PVW]P  
@HWI-EAS443:3:94:591:314#0/1  
ATCCTGTGCAGCCATGGATGACTTTCAGCTGATCCCAATG  
+HWI-EAS443:3:94:591:314#0/1  
`Z`a]\_Y\_S]LQPW]X]\_\_\_¥`¥\_[Z^WZZWZ[^Y\_^¥`  
@HWI-EAS443:3:94:639:1188#0/1  
GGGGTTTTCGGCTGAATCGAGAAAATTGCTTCTCATTGTT  
+HWI-EAS443:3:94:639:1188#0/1  
ab`a¥aaa`MaaZP^YS[``^a`a\_^\_\_`\_¥^a``\_`\_`  
@HWI-EAS443:3:94:669:1606#0/1  
AAGAGCCTAACATAGTCAAACCACATGAGAAAGGCATAAA  
+HWI-EAS443:3:94:669:1606#0/1  
\_a^a`aaaa`a\_a\_aa]Z]`aa``aaaa`\_\_`\_a\_a^`  
@HWI-EAS443:3:94:707:1253#0/1  
GATCTTGGAGGTTCCATTGGTTCTCACATATAGGAACATG  
+HWI-EAS443:3:94:707:1253#0/1  
a\_\_\_\_]aaaSbQP¥^`¥a¥^^^\_]TZ\_`[[`OFM\_^U]T¥  
@HWI-EAS443:3:94:783:635#0/1  
GTATATGTAACACAACAGGGGTAGAGAAGCCTAAATTTCT  
+HWI-EAS443:3:94:783:635#0/1  
a^aaaab`aaaaaaaa\_aaaa^`a\_aa`a\_\_``\_``^`  
@HWI-EAS443:3:94:822:1270#0/1  
TAGCCCCCAAGATCGAAGGTTCCAGGTTCCAGGTTGTCC  
+HWI-EAS443:3:94:822:1270#0/1  
L\_VX]\_b\_`\_\_X¥]^`TT[TZWVRXQJMFYSY[YG^\_VDX

@HWI-EAS443:3:94:825:1797#0/1  
GGGGGCTATATGAAGCAATCGAGGAGTGCCTGATTAATGA  
+HWI-EAS443:3:94:825:1797#0/1  
^aabaaaabbababbabaaaaaba]a\_aa]aaa`a`a\_aa  
@HWI-EAS443:3:94:870:1817#0/1  
GGTGACCCGAATGCACTATTGAAGCACCGATTTGAGATAA  
+HWI-EAS443:3:94:870:1817#0/1  
`aXab]bbba` `aabbababaabaa\_\_ba`aaa\_a`Zaa  
@HWI-EAS443:3:94:898:177#0/1  
GGGCACTCGGTGAAAATATGGCACCAGAAAAAGTAGACTT  
+HWI-EAS443:3:94:898:177#0/1  
aaa\_\_`a[a]Xa]\_^\_^\_a\_`^\_YWW`^]XZZ`Z]^WY]V  
@HWI-EAS443:3:94:898:367#0/1  
GTTTCCGATTTGTTTTCAAAGAATTCCTTGGTCATGTCTT  
+HWI-EAS443:3:94:898:367#0/1  
a^a`\_^b^`a`a^`a`\_\_\_\_aa`^a^]]`\_a[XX]aa]Y\_\_  
@HWI-EAS443:3:94:931:1072#0/1  
GCATAAATCCCAATTACCTCATGGCTTGGAAGCAGGTGCT  
+HWI-EAS443:3:94:931:1072#0/1  
a`ba^` `baa`[ab\_]aa`]abbaaa`a\_XY^W\_\_U[Z[  
@HWI-EAS443:3:94:997:1208#0/1  
CACAACTTGAGGGTTTTTCGGCTGAATCGAGAAAATTGCT  
+HWI-EAS443:3:94:997:1208#0/1  
aaab`^baaaa^\_^]aaaaabab`aa`^ba`[``\_a\_W\_\_  
@HWI-EAS443:3:95:1037:1336#0/1  
GGGGGCTATATGAAGCAATCGAGGAGTGCCTGATTAATGA  
+HWI-EAS443:3:95:1037:1336#0/1  
abbab`bab\_aabbbaab`Pbabbabaa]` `b`abaaaa  
@HWI-EAS443:3:95:109:1485#0/1  
GATTCGAGCCGAACGGCTGCATTGAGGGCAAGCTTTCCCA  
+HWI-EAS443:3:95:109:1485#0/1  
a\_bbbbbbb\_aba[aaaa^a[ `[^S^T\_bSXZ`YW\_\_V\_¥U  
@HWI-EAS443:3:95:1116:1263#0/1  
GGCTCCAGTCTCGGGTCAAGTGAAGTGAAGTCCACTTA  
+HWI-EAS443:3:95:1116:1263#0/1  
aa]`]XZYWa\_¥]\_YMQY][aa[VZVX[]\_YNVa][SRUP  
@HWI-EAS443:3:95:1119:1384#0/1  
ACTATTTTACAGCAGAAGTGTCCCACTGCAGGGCTACTGA  
+HWI-EAS443:3:95:1119:1384#0/1  
aaaaaabaaaaaaaaa\_`]a\_\_\_^a^\_a^\_\_\_\_`\_`^Za`]  
@HWI-EAS443:3:95:117:1613#0/1  
GTGCTAGCAGAGCTACAGGACATTGAAAATGAAGAGAAGA  
+HWI-EAS443:3:95:117:1613#0/1  
`b`bbba¥bbbbbaba[aabbabaabb^aaaaab\_abaa  
@HWI-EAS443:3:95:1190:724#0/1  
ATGTATTCGGATTTCCATTTTCATCGACGAACGGGGTGAAT  
+HWI-EAS443:3:95:1190:724#0/1  
aab`bbaaba`aa\_aa`aa`aa`b\_`a`]Wa[aaY]a\_`  
@HWI-EAS443:3:95:1198:1209#0/1  
GTTCTATCCAGCTTGAATCAGTCAATTCACATGCCTTATT

+HWI-EAS443:3:95:1198:1209#0/1  
aabaaaa`ba^baaa\_a^`a]a`abaaa\_a\_\_\_¥a\_\_`a  
@HWI-EAS443:3:95:1245:1266#0/1  
TTCGAGCCGAACGGCTGCATTGAGGGCAAGCTTCCCAAA  
+HWI-EAS443:3:95:1245:1266#0/1  
`baa`ba`bbb`b`abaP¥a\_Y`\_a\_\_\_\_\_[-``[-^```  
@HWI-EAS443:3:95:1422:692#0/1  
CACCACTGTCCAGGCCATGATTCCGGTCTCTTCCTTCAATT  
+HWI-EAS443:3:95:1422:692#0/1  
aaY`a`b`ab\_bb``\_bba\_`Z\_\_\_a¥Z\_\_FNbb`ba`a  
@HWI-EAS443:3:95:1440:838#0/1  
GGGGAGTGGAGGAAGGCTCTATTGGGAAAGTGCAGGAC  
+HWI-EAS443:3:95:1440:838#0/1  
^bbbaa`b`abbaaaaVa^a`aa]aY\_aaa¥]Va\_\_a\_YN  
@HWI-EAS443:3:95:1487:854#0/1  
CACCACTGTCCAGGCCATGATTCCGGTCTCTTCCTTCAATT  
+HWI-EAS443:3:95:1487:854#0/1  
ab`\_aT`bbb\_babbbbbbabab\_\_\_babbaabbaa`bb  
@HWI-EAS443:3:95:1587:1421#0/1  
CAGGATGCATTGAGCAAGGCCGATTTTATGTACACTCCCT  
+HWI-EAS443:3:95:1587:1421#0/1  
`bbbaa¥\_bababa¥bb\_ba\_a\_abaab```aWbaa¥\_`^  
@HWI-EAS443:3:95:1657:58#0/1  
CAATAATTGTAGAATCTGGTGACCCGAATGCACTATTGAA  
+HWI-EAS443:3:95:1657:58#0/1  
abb`Laa`bbaabba]aaUPP¥aaab`ab`YbXbaaba`W  
@HWI-EAS443:3:95:1703:325#0/1  
TTCCGATTTGTTTTCAAAGAATTCCTTGGTCATGTCTTTC  
+HWI-EAS443:3:95:1703:325#0/1  
ab[D¥]XZO\_LYaU]aaa`TRa`T^^\_b\_`]J``XP¥\_XD  
@HWI-EAS443:3:95:239:1420#0/1  
ATTTTGGCGTTCACCTCTTTTGACATTTGGGAAAGCTTGC  
+HWI-EAS443:3:95:239:1420#0/1  
\_abbbbbbbbbb\_S\_abaab`aa`[aa``aa\_a``¥[``\_`  
@HWI-EAS443:3:95:366:1775#0/1  
GGAGTGTACATAAATACGGCCTTGCTCAATGCATCCTGTG  
+HWI-EAS443:3:95:366:1775#0/1  
]VUV\_UP¥\_]S`^Z¥`YZ¥Q\_X^`]\_]`[^YK[Y¥V[TT¥  
@HWI-EAS443:3:95:428:1096#0/1  
TGCATATTGCAGCAAACCTGTTAGTTTCGATTTTCGGATC  
+HWI-EAS443:3:95:428:1096#0/1  
`baU¥ab]RY`RJS\_HTbUaaa]bY][bYS]\_QTZHW^[^  
@HWI-EAS443:3:95:42:1241#0/1  
ACCGATTTGAGATAATTGAAGGAAGAGACCGAATCATGGC  
+HWI-EAS443:3:95:42:1241#0/1  
abbbbaaba]\_\_aa`a^`^]`][]a\_`V`aaa\_`a]`\_`^U  
@HWI-EAS443:3:95:455:553#0/1  
CACTGCAGGGCTACTGAATACATAATGAAGGGAGGTACA  
+HWI-EAS443:3:95:455:553#0/1  
aaabbbbbbbbbbbbbbbbabba^bbaabaabXa`^\_a

@HWI-EAS443:3:95:474:1370#0/1  
GCATGGAAATGAGGCGCTGCCTTCTTCAGTCTCTTCAGCA  
+HWI-EAS443:3:95:474:1370#0/1  
^aa^aa\_]a` `` `\_\_aaaa\_` `aQa^YY][` \_¥` `V\_[WZ  
@HWI-EAS443:3:95:487:62#0/1  
GAAATGGAAATCCGAATACATGAAACAACTTCCAAATGT  
+HWI-EAS443:3:95:487:62#0/1  
a\_aa`] ^a^b\_` a^P` aYaaa` a^a` \_]a\_\_¥\_\_]\_` Z  
@HWI-EAS443:3:95:512:652#0/1  
GGGTGAATCAATAATTGTAGAATCTGGTGACCCGAATGCA  
+HWI-EAS443:3:95:512:652#0/1  
abbababbababbbbaaaabbb` bbbabbaaa` baaa` a  
@HWI-EAS443:3:95:520:1303#0/1  
CAAGTTTGTCTGCAATATGCACACATTTGGAAGTTTGTTC  
+HWI-EAS443:3:95:520:1303#0/1  
abb` babbbbabbbbbbbaa\_` aabb\_abb`  
@HWI-EAS443:3:95:563:450#0/1  
AGAAAGGCATAAATCCCAATTACCTCATGGCTTGAAGCA  
+HWI-EAS443:3:95:563:450#0/1  
aaaababaaabba` a\_` aa` a` \_aa` `aa` baaaZ\_` 0V  
@HWI-EAS443:3:95:610:66#0/1  
ATTTTCATCGACGAACGGGTGAATCAATAATTGTAGAATC  
+HWI-EAS443:3:95:610:66#0/1  
abbbaaa\_aa\_baaVaa[aW\_]` ^\_` ^a^` `a]\_\_¥\_] ]  
@HWI-EAS443:3:95:611:1709#0/1  
CGTCTCCACAACCTTGAGGGTTTTTCGGCTGAATCGAGAAA  
+HWI-EAS443:3:95:611:1709#0/1  
`¥V` a\_bba]b\_aaa[aR¥aT[a^aa\_] ^]` \_\_` aRba[`  
@HWI-EAS443:3:95:647:1661#0/1  
TCTGAAATTAAGTATTGAAGACCCGAGTCACGAGGGGGAG  
+HWI-EAS443:3:95:647:1661#0/1  
abb` aaabbaab` aaaabbaaaa¥a` a¥` a^a^a\_\_^` ]`  
@HWI-EAS443:3:95:655:937#0/1  
AATTGAAGGAAGAGACCGAATCATGGCCTGGACAGTGGTG  
+HWI-EAS443:3:95:655:937#0/1  
abbbba` bbabaabaaabYaaaaaaaaaaaa\_a\_baZa\_` ^a  
@HWI-EAS443:3:95:657:39#0/1  
GGTTTTTCGGCTGAATCGAGAAAATTGCTTCTCATTGTTCA  
+HWI-EAS443:3:95:657:39#0/1  
a]Q[¥VDR¥QK\_SVRQ¥W\_]UTNNQQQUYYWVVV]]UYUY  
@HWI-EAS443:3:95:697:82#0/1  
GGCGAAGAGACAATTGAAGAAAAATTTGAGATTACAGGAA  
+HWI-EAS443:3:95:697:82#0/1  
aaT¥GSbYa]SN\_` `a]XaGY¥X^\_` ^]NS` ZNHRSSY]WU  
@HWI-EAS443:3:95:710:486#0/1  
GACGAAAGGAATCCCATAGACTCCTACTGGCCATTTCTTG  
+HWI-EAS443:3:95:710:486#0/1  
`aY` bab\_Ybaa\_aTbbbbaaba[a\_aaa\_aW]]a¥^Ra^  
@HWI-EAS443:3:95:755:1698#0/1  
CACCCCGTTCGTGATGAAATGGAAATCCGAATACATGAA

+HWI-EAS443:3:95:755:1698#0/1  
`X\_b`bbaba]`bbabbabb\_`^`bbba^abbababaaaa  
@HWI-EAS443:3:95:794:973#0/1  
GATTGGCCATGTTTCCGATTTGTTTTCAAAGAATTCCTTG  
+HWI-EAS443:3:95:794:973#0/1  
aa\_a` `a`\_a¥[aaRY\_aRU]a` `a`\_X¥`a]\_`^]\_\_`a  
@HWI-EAS443:3:95:802:290#0/1  
GATCCGAAAATCGAACTAACAAGTTTGCTGCAATATGCA  
+HWI-EAS443:3:95:802:290#0/1  
aaa\_aaaabb\_`ba\_aaaa`aa^VW¥`^`a\_aa\_\_`X\_  
@HWI-EAS443:3:95:905:460#0/1  
GAACCCATACAGTTTGTTCCTTCTTCTTTGGTC  
+HWI-EAS443:3:95:905:460#0/1  
a]aa` `aaaaaa¥aa]`aaa^Y¥`\_aaZYa]¥a\_\_`XUZ  
@HWI-EAS443:3:95:997:1428#0/1  
CACTGCAGGGCTACTGAATACATAATGAAGGGAGTGTACA  
+HWI-EAS443:3:95:997:1428#0/1  
aaabaaaabaabb`babbb` `abbbbbaabaab\_a^a\_a  
@HWI-EAS443:3:96:1034:1757#0/1  
AGAATGGTTCAATTTTGGCGTTCACTTCTTTTGACATTTG  
+HWI-EAS443:3:96:1034:1757#0/1  
aabbaaa\_\_a[\_aaab¥^`a[^]¥U\_`^\_\_a\_\_VNY^^`^  
@HWI-EAS443:3:96:1113:244#0/1  
ACATAATGAAGGGAGTGTACATAAATACGGCCTTGCTCAA  
+HWI-EAS443:3:96:1113:244#0/1  
`\_abaabaaabaab\_a`aV`aaaaa`]aaVYaa`V\_V\_\_  
@HWI-EAS443:3:96:1120:1211#0/1  
ATGCCCATTTTTCATCTTGATCTTGAGGTTCCATTGGTTTC  
+HWI-EAS443:3:96:1120:1211#0/1  
a¥GV\_Z[Yb` `M^a\_]\_\_\_\_][\_\_a]`MFQXLOTTOXO\_B  
@HWI-EAS443:3:96:1175:1459#0/1  
ATCCAGCTTGAATCAGTCAATTCACATGCCTTATTGAATT  
+HWI-EAS443:3:96:1175:1459#0/1  
aV\_Za][ ]abbabTba\_` `V`\_`b\_\_]`¥\_\_\_^aZ` ` `\_  
@HWI-EAS443:3:96:1202:490#0/1  
AGCTCTGCTAGCACCTGCTTCCAAGCCATGAGGTAATTGG  
+HWI-EAS443:3:96:1202:490#0/1  
`[Y\_`^`aW` \_\_\_^TX\_`^¥^]UWZaUV[\_^X`\_QX0]V^^  
@HWI-EAS443:3:96:131:1899#0/1  
CAAGGACAAAGAACATGAAGAGAACAAGCCAATTGAAGTG  
+HWI-EAS443:3:96:131:1899#0/1  
`a\_M]aa[WX[aaa[aa[aaaa\_\_`a`\_`^a[\_`\_\_a^X^  
@HWI-EAS443:3:96:1350:1609#0/1  
TTCTGCTGTAAAATAGTTCCCTCCTCATGCTTGCGATATGT  
+HWI-EAS443:3:96:1350:1609#0/1  
a`] ^aaa^\_abaaab\_[a`¥a¥`^\_aa`[a`a`b`aaaa¥  
@HWI-EAS443:3:96:1460:627#0/1  
CAAGTTGTGGAGACGCATATAGACTGTTGAATACAGATTT  
+HWI-EAS443:3:96:1460:627#0/1  
ab[baababb\_`bVaabb\_Wbab\_aaIJMZx` `¥aJKQYB

@HWI-EAS443:3:96:1506:1065#0/1  
GAGTGTACATAAATACGGCCTTGCTCAATGCATCCTGTGC  
+HWI-EAS443:3:96:1506:1065#0/1  
]Z`¥SZQ^`aabaaP]^TU]`aS¥T\_[WWa¥a¥]^XZRB  
@HWI-EAS443:3:96:1508:960#0/1  
GTTTGTGCAATATGCACACATTTGGAAGTTTGTTCATG  
+HWI-EAS443:3:96:1508:960#0/1  
a`a\_U\_aaaa\_ba`X¥aaaTaaa]^`^\_a\_aaa^^\_W[`a  
@HWI-EAS443:3:96:1522:801#0/1  
ATGCTCTGAAATTAAGTATTGAAGACCCGAGTCACGAGGG  
+HWI-EAS443:3:96:1522:801#0/1  
```aaNaba\_Yb`abbabbabaaaaQ\_¥aY[Ta`\_a]\_Z\_  
@HWI-EAS443:3:96:1625:113#0/1  
GGTAATTGGGATTTATGCCTTTCTCATGTGGTTTACTAT  
+HWI-EAS443:3:96:1625:113#0/1  
a¥\$^S^]X`a¥GIXXWWUGWZ^SPUMO]^XZZUBBBBBBB  
@HWI-EAS443:3:96:164:392#0/1  
AGATAATTGAAGGAAGAGACCGAATCATGGCCTGGACAGT  
+HWI-EAS443:3:96:164:392#0/1  
aaa\_LXT`^¥a^a]^`\_aP¥Y¥]^`^`\_\_\_\_[YXMDEa[FO  
@HWI-EAS443:3:96:1653:1113#0/1  
CACCACTGTCCAGCCATGATTCCGGTCTCTCCTTCAATT  
+HWI-EAS443:3:96:1653:1113#0/1  
abaababbaT¥bbb^^abb\_abaaaZ\_a]a\_V^ba[aaaa  
@HWI-EAS443:3:96:202:1431#0/1  
TTTAGGCTTCTCTACCCCTGTTGTGTTACATATACTGTTC  
+HWI-EAS443:3:96:202:1431#0/1  
^TZb[Y\_abb]aaba\_RaUa`^Ya^Z¥[ ]`\_][P^^0`a  
@HWI-EAS443:3:96:217:445#0/1  
CTTGGGGGCTATATGAAGCAATCGAGGAGTGCCTGATTA  
+HWI-EAS443:3:96:217:445#0/1  
aaaa[Zaaa`a`aaa^aa\_\_^`a`]\_\_Y¥S^\_Y`\_Y^T¥  
@HWI-EAS443:3:96:253:2003#0/1  
ATGAAATGGAATCCGAATACATGAAACAACTTCCAAAT  
+HWI-EAS443:3:96:253:2003#0/1  
aaaa\_a\_M`]^`\_aa`^^^\_]aXX\_\_¥[a\_\_Y]]X\_^^^  
@HWI-EAS443:3:96:346:286#0/1  
ATTGAGCAAGGCCGTATTTATGTACTCCCTTCATTATG  
+HWI-EAS443:3:96:346:286#0/1  
\_]aaa`a`aaa^]aY\_\_`^`\_Y^W^^W]XY^^X]^]^  
@HWI-EAS443:3:96:35:462#0/1  
GAAGATCCCAAGGACAAAGAACATGAAGAGAACAAGCCAA  
+HWI-EAS443:3:96:35:462#0/1  
a\_¥a¥^a]]`^`a\_`WWaa^\_¥`a]]`^Z¥¥\_a`aYV^¥  
@HWI-EAS443:3:96:382:415#0/1  
ACATGAGAAAGGCATAAATCCCAATTACCTCATGGCTTGG  
+HWI-EAS443:3:96:382:415#0/1  
aaaaaaaaa]a\_aa]]]a\_^¥`\_a\_\_Y[]X[]\_^V\_UPZ  
@HWI-EAS443:3:96:410:984#0/1  
TGTGAATTGACTGATTCAAGCTGGATAGAACTTGATGAAA

+HWI-EAS443:3:96:410:984#0/1  
aa\_aaaaa`a`aaaa`a`¥`a`\_]Za\_a`\_^`a`\_^  
@HWI-EAS443:3:96:415:1651#0/1  
GATGAAATGGAAATCCGAATACATGAAACAAACTTCCAAA  
+HWI-EAS443:3:96:415:1651#0/1  
a`[^````\_`\_`ab`]aaaa`a`aa`aa`````\_`^Y  
@HWI-EAS443:3:96:470:489#0/1  
CATGACCAAGGAATCTTTGAAAACAAATCGGAAACATGG  
+HWI-EAS443:3:96:470:489#0/1  
abaaaa`aa^bZZZa[aaba\_Y^\_a\_\_\_a`aa\_¥]a^aa`  
@HWI-EAS443:3:96:497:255#0/1  
GTTCCGGTGGGAGACTTTGGTCGGCAAGCTTGCGCATAGTT  
+HWI-EAS443:3:96:497:255#0/1  
a\_aaabQaaa`W^aa`a\_W\_\_\_Y`¥\_Z¥^\_U\_S[¥¥^W¥  
@HWI-EAS443:3:96:58:1850#0/1  
GGGGTTTTCGGCTGAATCGAGAAAATTGCTTCTCATTGTT  
+HWI-EAS443:3:96:58:1850#0/1  
]W\_aUaa`\_ZTLV¥b]\_aa^^aa^aaYa^X]V]a^N]\_WU  
@HWI-EAS443:3:96:648:2029#0/1  
GTGGGACACTTCTGCTGTAAAATAGTTCCTCCTCATGCTT  
+HWI-EAS443:3:96:648:2029#0/1  
a]aa`\_`a`baaaaaab\_bbb`aa]\_\_\_`\_]`\_a````  
@HWI-EAS443:3:96:660:1211#0/1  
AAAGAGCCTAACATAGTCAAACCACATGAGAAAGGCATAA  
+HWI-EAS443:3:96:660:1211#0/1  
abbbabb]b^babaaaaaaabaaaaaaa`aaaa\_aaaa  
@HWI-EAS443:3:96:664:816#0/1  
CACACATTCACATCTTTTCACTGAGAGGAGATGGC  
+HWI-EAS443:3:96:664:816#0/1  
a]\_`¥YT^XUTYXW\_PYLXS\_YU`UT¥`aV`[NQZBBBB  
@HWI-EAS443:3:96:690:1125#0/1  
TGGGAGACTTTGGTCGGCAAGCTTGCGCATAGTTCCTGTA  
+HWI-EAS443:3:96:690:1125#0/1  
aaaaabaaabbbbaa`\_\_`baaab\_[Za^````a`a^aaaX]  
@HWI-EAS443:3:96:707:1251#0/1  
AGATAATTGAAGGAAGAGACCGAATCATGGCCTGGACAGT  
+HWI-EAS443:3:96:707:1251#0/1  
ab`babaa[U]`ba[b]aa\_]b`\_b^ab\_[SM`a^a\_a]S  
@HWI-EAS443:3:96:754:351#0/1  
CTGGAAGAGCCTAACATAGTCAAACCACATGAGAAAGGC  
+HWI-EAS443:3:96:754:351#0/1  
Y`a```bbbbbbbbbbabbabbababababbbbabbb\_aab  
@HWI-EAS443:3:96:779:801#0/1  
GCAATATGCACACATTTGGAAGTTTGTTCATGTATTCCG  
+HWI-EAS443:3:96:779:801#0/1  
a`aaaaabaa```aaaaba`\_b\_aa]^aa\_\_ab\_^``]aa  
@HWI-EAS443:3:96:830:523#0/1  
AGAAATTTAGGCTTCTTACCCCTGTTGTGTTACATATAC  
+HWI-EAS443:3:96:830:523#0/1  
a\_[\_¥^a^`Z`\_]`RZW]]F[KV¥]WY[L]U\_\_\_]]]]YV



@HWI-EAS443:3:96:860:359#0/1  
TGTAATCTCAAATTTTTCTTCAATTGTCTCTTCGCCTCTT  
+HWI-EAS443:3:96:860:359#0/1  
aa\_`^¥`\_baa`¥aabaaaa`\_aaaa^¥a\_`\_`\_]`W`  
@HWI-EAS443:3:96:861:672#0/1  
GGGGCATGGAATGAGGCGCTGCCTTCTTCAGTCTCTTCA  
+HWI-EAS443:3:96:861:672#0/1  
aaaa]a\_abaaaa`a\_Ua]aa\_¥aa¥a\_\_\_a¥Y\_\_a`¥¥  
@HWI-EAS443:3:96:916:529#0/1  
ACAAATCAGGAAGAAATTTAGGCTTCTCTACCCCTGTTGT  
+HWI-EAS443:3:96:916:529#0/1  
a\_a`W``abb\_[b]V]a]]`b`Tq]LWS\_`^^a`]\_QZ\_0  
@HWI-EAS443:3:96:949:1432#0/1  
ATTAATCAGGCACTCCTCGATTGCTTCATATAGCCCCCA  
+HWI-EAS443:3:96:949:1432#0/1  
aaaa\_`VaX[U\_Z]aX`a]\_U`R`\_]`\_]`^Z[SRQVHZ  
@HWI-EAS443:3:96:950:524#0/1  
GGGGTTTTCGGCTGAATCGAGAAAATTGCTTCTCATTGTT  
+HWI-EAS443:3:96:950:524#0/1  
aaba[baaaa¥]aabaaaaZa\_\_\_a\_a\_¥a\_YaX]``^`\_  
@HWI-EAS443:3:96:95:940#0/1  
AGGGAGTGTACATAAATACGGCCTTGCTCAATGCATCCTG  
+HWI-EAS443:3:96:95:940#0/1  
^aaa¥a`^La`W¥aa`aa\_Z`^P¥WQ[^U¥¥^`¥¥Z¥¥  
@HWI-EAS443:3:96:984:1243#0/1  
ATTTTCATCGACGAACGGGTGAATCAATAATTGTAGAATC  
+HWI-EAS443:3:96:984:1243#0/1  
\_`[a\_\_YZ^]W\_\_V\_\_\_a^[a`\_`¥TSaX]`X^Z^`aa¥  
@HWI-EAS443:3:96:98:1643#0/1  
AGAGCCCAGATCTCTAGCAAGCTGGGTCCAAAATGAATTC  
+HWI-EAS443:3:96:98:1643#0/1  
Q\_b^aab¥Y]^`[`Z\_W^aW^Q¥\_S]DH[\_`P[¥a¥[[T`  
@HWI-EAS443:3:97:1074:477#0/1  
TAGGCCAAGTGTGAGGCCCATGTTCCCTATATGTGAGAAC  
+HWI-EAS443:3:97:1074:477#0/1  
aV`WH¥bbb`^]U]a^a`]a]`^`YaaUba\_baaUa``¥aQ  
@HWI-EAS443:3:97:1114:1902#0/1  
CTTCTCTTCATTTTCAATGTCCTGTAGCTCTGCTAGCACC  
+HWI-EAS443:3:97:1114:1902#0/1  
L\_b[\_^`[¥aaaab`aaba`\_b`bbbaabaabU\_bbaVWa  
@HWI-EAS443:3:97:1185:1321#0/1  
GGCATGGAATGAGGCGCTGCCTTCTTCAGTCTCTTCAGC  
+HWI-EAS443:3:97:1185:1321#0/1  
aa^babb`^`baaab[a`a\_R[ab]abU^a\_KX`abU¥\_U  
@HWI-EAS443:3:97:1196:1504#0/1  
GTTTCATGTATTCCGATTTCCATTTTCATCGACGAACGGGG  
+HWI-EAS443:3:97:1196:1504#0/1  
aW`[W]a[\_a`\_aaa\_\_aXW]a^\_]`Z^ZZa\_\_X^]X^  
@HWI-EAS443:3:97:1266:1586#0/1  
AATAGTTCCTCCTCATGCTTGCGATATGTTCAATCGGGGC

+HWI-EAS443:3:97:1266:1586#0/1  
a\$^YVYV[YYX^R^X^Y^X]Y\_YYXV^YVXXXRVVVXH  
@HWI-EAS443:3:97:130:533#0/1  
CAGTATTTTTCCCATTGTGTGGCTCCAGTCTCGGGTCAG  
+HWI-EAS443:3:97:130:533#0/1  
abbaabb`aaaaabbbb`b^b\_\_a\$Y\_Y\_\_W^aaSV\$]  
@HWI-EAS443:3:97:1349:436#0/1  
GGGGGCTATATGAAGCAATCGAGGAGTGCCTGATTAATGA  
+HWI-EAS443:3:97:1349:436#0/1  
`babbbbbbbb]bbaabbb\_baba\_a]aa\_aa`aaaaa`  
@HWI-EAS443:3:97:1433:1418#0/1  
TTCCGATTTGTTTTCAAAGAATTCCTTGGTCATGTCTTTC  
+HWI-EAS443:3:97:1433:1418#0/1  
a^`\_a^aa\_Haaaa\_aaa`W^aYVa^b\_^][`aZW`\_aG  
@HWI-EAS443:3:97:1436:426#0/1  
GGCTCCAGTCTCGGGTCAGTGAGTGAGAACTCCATACTTA  
+HWI-EAS443:3:97:1436:426#0/1  
aa`baa`baaa\_aaaL[`a]\_`N`\_a[\_\$Z\$`\_\_U^`  
@HWI-EAS443:3:97:1549:366#0/1  
ATTAATCAGGCACTCCTCGATTGCTTCATATAGCCCCCA  
+HWI-EAS443:3:97:1549:366#0/1  
abaa`a`a`\$a]aX^a\_a`\_\_a]`Q\_`a`\_[NGXYVX\_  
@HWI-EAS443:3:97:1602:1108#0/1  
CACTCACTGACCCGAGACTGGAGCCACACAAATGGGAAAA  
+HWI-EAS443:3:97:1602:1108#0/1  
ab\_bbaabbaaa^bbbbabbb`\_a`a\_a\_aa\_aaa[VX[Z  
@HWI-EAS443:3:97:1621:514#0/1  
CGGTCTCTCCTTCAATTATCTCAAATCGGTGCTTCAATA  
+HWI-EAS443:3:97:1621:514#0/1  
G]]b[^Z`baabbabba`aKa\_b\$abb\$XaVbb]`b`a  
@HWI-EAS443:3:97:229:1028#0/1  
GCTGGGTCCAAAATGAATTCAATAAGGCATGTGAATTGAC  
+HWI-EAS443:3:97:229:1028#0/1  
\_Z]aa[H\$aaaa`XZ`aa\_\_`Za\_]\_\_a[a\_\_`\$`V  
@HWI-EAS443:3:97:230:616#0/1  
TGCGTCTCCACAACCTTGAGGGTTTTTCGGCTGAATCGAGA  
+HWI-EAS443:3:97:230:616#0/1  
`b\_aaYTaa`a`\_\_aa`\_[aaa^aaaQaRU`\_`a^T`\$Z\$  
@HWI-EAS443:3:97:281:1442#0/1  
AGGAGGAACCTTTTTACAGCAGAAGTGTCCCACTGCAGGG  
+HWI-EAS443:3:97:281:1442#0/1  
a[a[\_aab`]U\_baa\_]aa\_]aa\$LR`\_`\_^\_a^]`^Pa  
@HWI-EAS443:3:97:286:201#0/1  
GGCCTTGCTCAATGCATCCTGTGCAGCCATGGATGACTTT  
+HWI-EAS443:3:97:286:201#0/1  
abaaaabaa^aaaa[a`\_`a\_a[`aY[Y^`Z\$`URU\$V  
@HWI-EAS443:3:97:321:1119#0/1  
CACTTCTGCTGTAATAAGTTCCTCCTCATGCTTGCATA  
+HWI-EAS443:3:97:321:1119#0/1  
`bbbbba`baaabbaba\$b`b^^aa`\_`\_abbaaaa]aa`a

@HWI-EAS443:3:97:342:1140#0/1  
GCCATATTTTCACCGAGTGCCCACTTCAATTGGCTTGTTTC  
+HWI-EAS443:3:97:342:1140#0/1  
aaaaaaaaaa`aa\_a\_a^aUY\_`]a\_]`^\_WZWZ\_VJVZB  
@HWI-EAS443:3:97:378:1616#0/1  
ATTAATCAGGCACTCCTCGATTGCTTCATATAGCCCCCA  
+HWI-EAS443:3:97:378:1616#0/1  
aab]RWSZQOT[aa\_a`^T^`¥\_Ya\_]\_]`\_]`][V^NZ`  
@HWI-EAS443:3:97:401:709#0/1  
GGGGGCTATATGAAGCAATCGAGGAGTGCCTGATTAATGA  
+HWI-EAS443:3:97:401:709#0/1  
abbbaababba`\_aabaaaaaaaa`aWa\_\_aa``a`a¥\_a  
@HWI-EAS443:3:97:448:1975#0/1  
CACACATTTGGAAGTTTGTTCATGTATTCGGATTTCCAT  
+HWI-EAS443:3:97:448:1975#0/1  
a`aaa`a`ab`bb`a^aa`bba^abaYbb`\_Yaana\_\_`  
@HWI-EAS443:3:97:479:1691#0/1  
CATATACTGTTCACTGTCCAGGCCATGATTCGGTCTC  
+HWI-EAS443:3:97:479:1691#0/1  
``\_W^a^ab\_]ab`¥\_]`^]\_Waa``^`\_a¥H^[JYWYX  
@HWI-EAS443:3:97:499:2008#0/1  
TTTCAAAGAATTCCTTGGTCATGTCTTCTCTTGACAGA  
+HWI-EAS443:3:97:499:2008#0/1  
`baa^`Zaa`a``¥`aaaY\_aab^aa^W\_\_^a``a`\_\_\_\_  
@HWI-EAS443:3:97:544:438#0/1  
GTTTGCTGCAATATGCACACATTTGGAAGTTTGTTCATG  
+HWI-EAS443:3:97:544:438#0/1  
a\_aa`\_`a\_a`a`a`a\_\_\_\_`[^aa`a\_\_a]`\_a\_`\_]`^`  
@HWI-EAS443:3:97:553:1212#0/1  
AAGGAAGAGACCGAATCATGGCCTGGACAGTGGTGAACAG  
+HWI-EAS443:3:97:553:1212#0/1  
aaab`a^aa\_a^a^aa``aaa\_Z`^`^a`^`X`]]`\_`  
@HWI-EAS443:3:97:570:1221#0/1  
GGCATGGAATGAGGCGCTGCCTTCTTCAGTCTTCAGC  
+HWI-EAS443:3:97:570:1221#0/1  
abaT``\_`¥`aa`bbbb`aaa`a^a\_X\_aU`aaa```a  
@HWI-EAS443:3:97:582:774#0/1  
ACAACCTTGAGGGGTTTTCGGCTGAATCGAGAAAATTGCTT  
+HWI-EAS443:3:97:582:774#0/1  
a`ab`bababaaa^aaaaa``abaaa`a`a\_\_aa`\_\_^`\_  
@HWI-EAS443:3:97:592:44#0/1  
CAGGCAATCTGAGGGGCGTGGTGTCTCCTCAAGAATGG  
+HWI-EAS443:3:97:592:44#0/1  
Z]`\_^][\_\_bbZbaaba``Gb\_NUV¥aZG^a]a[ab^aaa  
@HWI-EAS443:3:97:634:105#0/1  
GAAGAGAACAAGCCAATTGAAGTGGGCACTCGGTGAAAAT  
+HWI-EAS443:3:97:634:105#0/1  
aaaaaa`aaaaa^`\_`aaaa`\_a]a``U\_Y\_Y`\_0`¥]]`\_^  
@HWI-EAS443:3:97:656:1028#0/1  
GGGGCTATATGAAGCAATCGAGGAGTGCCTGATTAATGAT

+HWI-EAS443:3:97:656:1028#0/1  
aaa`\_a\_a`aa^\_¥`\_\_`¥aa^`U\_\_^`Y\_\_¥¥`\_\_\_\_  
@HWI-EAS443:3:97:703:922#0/1  
GCAGGTGCTAGCAGAGCTACAGGACATTGAAAATGAAGAG  
+HWI-EAS443:3:97:703:922#0/1  
a^]]ZN`\_a`¥NZXV\_\_\_\_TFV]TU¥VVV`MU^^[\_ZZ^ZU  
@HWI-EAS443:3:97:71:442#0/1  
AATAATTGTAGAATCTGGTGACCCGAATGCACTATTGAAG  
+HWI-EAS443:3:97:71:442#0/1  
[ `ba^bb`ab^¥\_¥VTU\_¥b¥\_]\_a`aaa`b`[\_`aaa^aa  
@HWI-EAS443:3:97:773:1442#0/1  
GAGCCCAGATCTCTAGCAAGCTGGGTCCAAAATGAATTCA  
+HWI-EAS443:3:97:773:1442#0/1  
a```aaaab`L``\_aa[\_`aJ]aaQ`NY`^^`\_a]a`a\_Na  
@HWI-EAS443:3:97:777:237#0/1  
CATAAATACGGCCTTGCTCAATGCATCCTGTGCAGCCATG  
+HWI-EAS443:3:97:777:237#0/1  
`ab]¥TU`\_¥aT\_[aa\_a]\_a¥a^a`W¥aZb\_\_aV\_\_`a  
@HWI-EAS443:3:97:781:104#0/1  
CGTCTCCACAACCTTGAGGGGTTTTCGGCTGAATCGAGAAA  
+HWI-EAS443:3:97:781:104#0/1  
aaa\_a\_ab`a\_]bbb`bbbbV\_ba``aW`b^\_a`\_\_\_\_]a  
@HWI-EAS443:3:97:802:1906#0/1  
ACTTGATGAAATAGGAGAAGATGTTGCCCGATTGAACAT  
+HWI-EAS443:3:97:802:1906#0/1  
a``¥b\_aYa]TTY]]aYU^[SXOQ\_¥]G]`S]X\_Ra]ZX  
@HWI-EAS443:3:97:834:1899#0/1  
ACCCAGCTTGCTAGAGATCTGGGCTCTGGCTCATCACTGT  
+HWI-EAS443:3:97:834:1899#0/1  
`¥G[]a`aaaZaa\_a`a\_\_\_\_¥W\_a\_[¥\_`^`Y^a[Q`XOUY  
@HWI-EAS443:3:97:97:870#0/1  
ATTTGAGAAATGATACTGATGTGGTGAACCTTTGTAAGTAT  
+HWI-EAS443:3:97:97:870#0/1  
abb`^]]\_\_^[^U``\_^^¥\_aYa`Y`^[[\_Q\_b^¥¥\_]\_]`  
@HWI-EAS443:3:98:1034:929#0/1  
ATACTGTTCCACCACTGTCCAGGCCATGATTCGGTCTCTTC  
+HWI-EAS443:3:98:1034:929#0/1  
\_WY`aa`abba^\_X\_`T^W]aa\_Va`ba]Z]TWVXV¥a` [   
@HWI-EAS443:3:98:1059:480#0/1  
ATGAAGACATTCTTTGGCTGGAAAGAGCCTAACATAGTCA  
+HWI-EAS443:3:98:1059:480#0/1  
aaabbaaabbbababba\_abb`aaa`a^Saab¥aaaa¥`a  
@HWI-EAS443:3:98:1165:1303#0/1  
AGAAGATCCCAAGGACAAAGAACATGAAGAGAACAAGCCA  
+HWI-EAS443:3:98:1165:1303#0/1  
aabbbbaaaaaabaa\_aa`a```\_`baaaaaa\_]` `aXW`  
@HWI-EAS443:3:98:126:420#0/1  
CATCTTTGCAGTCATCAAAGTCTACTTTTTCTGGTGCCAT  
+HWI-EAS443:3:98:126:420#0/1  
`bbaaaabaaba`aaaa`a]aa` `aaaaaa` `]a\_]\_a

@HWI-EAS443:3:98:1605:454#0/1  
GGCATGGAAATGAGGCGCTGCCTTCTTCAGTCTTTCAGC  
+HWI-EAS443:3:98:1605:454#0/1  
a¥YR^a`\_\_\_\_¥`¥[\_Ua¥Z`¥QW\_N^YU\_YS¥U\_¥YZLU  
@HWI-EAS443:3:98:1773:1420#0/1  
GAGAAAGGCATAAATCCCAATTACCTCATGGCTTGGAAAGC  
+HWI-EAS443:3:98:1773:1420#0/1  
J\_bbbab\_\_\_]Kbbb```bbbbb]\_T\_abbbbRb]aT[a`L  
@HWI-EAS443:3:98:179:695#0/1  
GGGGCTATATGAAGCAATCGAGGAGTGCCTGATTAATGAT  
+HWI-EAS443:3:98:179:695#0/1  
a^^a`a`]``\_\_\_]VT]S¥[X[RZ^W^^U[\_]X]XU^^VR  
@HWI-EAS443:3:98:268:1858#0/1  
ATCTGGTGACCCGAATGCACTATTGAAGCACCGATTTGAG  
+HWI-EAS443:3:98:268:1858#0/1  
a]a^\_\_\_\_a\_a\_aa`\_]\_Y]X]]XX`U\_]YXOW]OYZ]^^^  
@HWI-EAS443:3:98:317:1432#0/1  
GCCGAGTCTTCTGTCAAAGAGAAAGACATGACCAAGGAAT  
+HWI-EAS443:3:98:317:1432#0/1  
ab^Zab\_bbbaababbaaaaa]aba^baaa\_\_bbb`^aa  
@HWI-EAS443:3:98:321:317#0/1  
TGGGGGGCTATATGAAGCAATCGAGGAGTGCCTGATTAAT  
+HWI-EAS443:3:98:321:317#0/1  
aba`\_abaaaa`aaa`a`\_aa\_a^a`T\_W`\_Y\_a\_^^`\_\_\_  
@HWI-EAS443:3:98:361:525#0/1  
AAGCTGGATAGAACTTGATGAAATAGGAGAAGATGTTGCC  
+HWI-EAS443:3:98:361:525#0/1  
^U^`aa¥X`\_a^]Zaaa`^]¥a\_\_a`\_^\_a[a\_Y]\_Z¥  
@HWI-EAS443:3:98:402:1147#0/1  
CACCCAGGGGAGTGGAGGAAGGCTCTATTGGGAAAGTGTG  
+HWI-EAS443:3:98:402:1147#0/1  
R\_\_bb`ba\_\_\_[b^abbbbabba]\_ab^bbaaba\_b\_\_a\_  
@HWI-EAS443:3:98:444:404#0/1  
CATGGAAATGAGGCGCTGCCTTCTTCAGTCTTTCAGCAG  
+HWI-EAS443:3:98:444:404#0/1  
[¥`bbaaa\_bbb\_bb]bbZZ^^¥^R]^\_YR`Z``a``^`b  
@HWI-EAS443:3:98:495:576#0/1  
AGTTCTGTAAATCTCAAATTTTTCTTCAATTGTCTCTTCG  
+HWI-EAS443:3:98:495:576#0/1  
aaabbbbbbabb\_b`^X]`bbbaZaabbabba`a`ab`a  
@HWI-EAS443:3:98:502:222#0/1  
CATTAATCAGGCACTCCTCGATTGCTTCATATAGCCCCC  
+HWI-EAS443:3:98:502:222#0/1  
VT[\_\_\_¥\_b^TPU\_\_\_]\_]W¥X]N^]aXVJV¥TQYHPY[Z¥\_  
@HWI-EAS443:3:98:506:320#0/1  
ATCCGAAAATCGAAACTAACAAGTTTGCTGCAATATGCAC  
+HWI-EAS443:3:98:506:320#0/1  
Xa[abb\_b`bab[J¥a^a]`¥¥aTb`ba]`\_[\_baaa^ba  
@HWI-EAS443:3:98:528:879#0/1  
GGGGCATGGAAATGAGGCGCTGCCTTCTTCAGTCTTTCAG

+HWI-EAS443:3:98:528:879#0/1  
ab`a\_`aaa\_`aa^`^bZaa`]\_aW`¥`\_VN`^\_\_V^  
@HWI-EAS443:3:98:532:1980#0/1  
AGAGAAGATCCCAAGGACAAAGAACATGAAGAGAACAAGC  
+HWI-EAS443:3:98:532:1980#0/1  
aXa^[baa`T]P¥WP^aa`\_S¥\_\_a`^\_`a`[\_a`^ZS  
@HWI-EAS443:3:98:537:397#0/1  
ATGAAATGGGCATGGAAATGAGGCGCTGCCTTCTTCAGT  
+HWI-EAS443:3:98:537:397#0/1  
abbaaababaaaaaba`bba`aa`\_a¥[aa¥`a^¥a`  
@HWI-EAS443:3:98:547:1558#0/1  
ATCCAGCTTGAATCAGTCAATTCACATGCCTTATTGAATT  
+HWI-EAS443:3:98:547:1558#0/1  
a]H^^]\_UNW\_YYaaa`aZa]\_\_[YUWWZ\_\_[]\_]`^  
@HWI-EAS443:3:98:561:453#0/1  
GGAGTCTATGGGATTCCTTTTCGTCAGTCCGAAAGAGGCGA  
+HWI-EAS443:3:98:561:453#0/1  
a`[][\_aaa\_aa]\_\_^`a`^aZ\_] [V]]^VZ]\_X\_XX^Y  
@HWI-EAS443:3:98:566:793#0/1  
CAAGGACAAAGAACATGAAGAGAACAAGCCAATTGAAGTG  
+HWI-EAS443:3:98:566:793#0/1  
X`bbb`b`\_ba```bab[bbba`^^`baab\_baa\_]a¥a  
@HWI-EAS443:3:98:613:1301#0/1  
CTCGGGTCAGTGAGTGAGAACTCCATACTTACAAAGTTCA  
+HWI-EAS443:3:98:613:1301#0/1  
^^`a^\_bab^bba[b`U`abaa\_\_a`]¥bbaba`U`b  
@HWI-EAS443:3:98:614:643#0/1  
CACATATAGGAACATGGGCCTCGACACTTGGCCTATCGCA  
+HWI-EAS443:3:98:614:643#0/1  
aaabababbb`baa\_XQ`]^a`aa^a`ZaVFZbb`T[Wa  
@HWI-EAS443:3:98:629:1567#0/1  
CATATCGCAAGCATGAGGAGGAACTATTTTACAGCAGAAG  
+HWI-EAS443:3:98:629:1567#0/1  
abbbaa\_Saaaa`aabYaa`aa\_`^`aaaa\_a\_\_`a\_aS  
@HWI-EAS443:3:98:650:1425#0/1  
AGAATTCCTTGGTCATGTCTTTCTCTTTGACAGAAGACTC  
+HWI-EAS443:3:98:650:1425#0/1  
`aaabaa\_abbbWaab`\_aaba`aa`a`\_a`aa`\_\_a]  
@HWI-EAS443:3:98:653:357#0/1  
CCGATTTGAGATAATTGAAGGAAGAGACCGAATCATGGCC  
+HWI-EAS443:3:98:653:357#0/1  
aab`bbbaabbbbabbbbabbbbaa`baaaaabbaUa  
@HWI-EAS443:3:98:677:119#0/1  
GCAGTCATCAAAGTCTACTTTTTCTGGTGCCATATTTTCA  
+HWI-EAS443:3:98:677:119#0/1  
a\_aa\_aaa^`a`a\_]aa`aaaa^`a`^a^]\_a^a\_a`^\_  
@HWI-EAS443:3:98:742:1404#0/1  
GTCTTCTGTCAAAGAGAAAGACATGACCAAGGAATTCTTT  
+HWI-EAS443:3:98:742:1404#0/1  
a\_abbbbb`baa^aaaaaaaaaaa\_aaa`ba`\_a\_\_\_a`a

@HWI-EAS443:3:98:796:1258#0/1  
GGGGGCTATATGAAGCAATCGAGGAGTGCCTGATTAATGA  
+HWI-EAS443:3:98:796:1258#0/1  
aa^R]`ZHYVaaZTT`SV^WVZ¥\_WDYURS\_UFKQ^Y]]  
@HWI-EAS443:3:98:80:1006#0/1  
CACCGATTTGAGATAATTGAAGGAAGAGACCGAATCATGG  
+HWI-EAS443:3:98:80:1006#0/1  
]Mb\_\_aa`TW^a]ba[ba\_ZR]]\_SZ`ba\_\_][aa]`\_a\_  
@HWI-EAS443:3:98:820:1231#0/1  
GTTTCCGATTTGTTTTCAAAGAATTCCTTGGTCATGTCTT  
+HWI-EAS443:3:98:820:1231#0/1  
[J¥a\_a`XS¥ab\_[Za`\_]`aX¥Z^^^a\_\_]TQ\_`aTS[\_  
@HWI-EAS443:3:98:825:353#0/1  
CTTCCTTCAATTATCTCAAATCGGTGCTTCAATAGTGCAT  
+HWI-EAS443:3:98:825:353#0/1  
aabaabb]aabbabababaaa`a`Zaaa`\_`\_`aaZa¥\_a  
@HWI-EAS443:3:98:88:1603#0/1  
GGAACATGGGCCTCGACACTTGGCCTATCGCAGTCCTCAA  
+HWI-EAS443:3:98:88:1603#0/1  
a[abX]\_`]aa`aa\_`\_]`b]^\_ZZ[¥b]Z¥ZaRNR¥¥P^B  
@HWI-EAS443:3:98:959:474#0/1  
TGGGGGCTATATGAAGCAATCGAGGAGTGCCTGATTAAT  
+HWI-EAS443:3:98:959:474#0/1  
aaaa`b`baaaaba`aaa`a\_a`aa¥a¥`Z^aa^a\_a^`  
@HWI-EAS443:3:98:960:2024#0/1  
CATAGTCAAACCACATGAGAAAGGCATAAAATCCCAATTAC  
+HWI-EAS443:3:98:960:2024#0/1  
`bbbbbabbb¥\_bbbbbaa¥abbbbaabbaab¥a\_bbb`ba  
@HWI-EAS443:3:98:971:85#0/1  
TTCGGATTTCCATTTTCATCGACGAACGGGGTGAATCAATA  
+HWI-EAS443:3:98:971:85#0/1  
aXQ\_bXK¥THX]a^ZY\_`\_a\_[aZ`VX^`]IaYX^LTN^W  
@HWI-EAS443:3:98:981:1204#0/1  
ACCGAATCATGGCCTGGACAGTGGTGAACAGTATATGTAA  
+HWI-EAS443:3:98:981:1204#0/1  
aaaa`ababbba`aaa\_a`a`^aaZ`\_\_Y`aV`aa\_aXa`  
@HWI-EAS443:3:99:1024:1673#0/1  
ATTCTTTGGCTGGAAAGAGCCTAACATAGTCAAACCACAT  
+HWI-EAS443:3:99:1024:1673#0/1  
`¥a`a`ab`^aa]aaaa`\_`aaa\_`\_\_`\_Ya`\_[¥a]`a  
@HWI-EAS443:3:99:1068:1709#0/1  
ATCCGAAAATCGAAACTAACAAGTTTGCTGCAATATGCAC  
+HWI-EAS443:3:99:1068:1709#0/1  
a`a`^`ba¥\_Vab^aabaW]`[aUbbba\_aaa\_`^`\_a\_`¥  
@HWI-EAS443:3:99:1073:1249#0/1  
GGCAACATCTTCTCTATTTTCATCAAGTTCTATCCAGCTT  
+HWI-EAS443:3:99:1073:1249#0/1  
aaabbabbbbbbbbbbbbababaaabbbbaaabYba  
@HWI-EAS443:3:99:1088:1092#0/1  
GGGGTTTTTCGGCTGAATCGAGAAAATTGCTTCTCATTGTT

+HWI-EAS443:3:99:1088:1092#0/1  
\_b\_bS\_baba\_S\_]b`\_I\_]`]aaababU``V`aa`a`a`a`  
@HWI-EAS443:3:99:1100:1374#0/1  
AAACTTTAGAGCCTATGTAGATGGATTCGAGCCGAACGGC  
+HWI-EAS443:3:99:1100:1374#0/1  
a^ZU\_\_^Ya]``\_Z\_abYaa]^T\_a^UH]b`]]a]\_UZP]  
@HWI-EAS443:3:99:1198:1877#0/1  
TAAATCCCAATTACCTCATGGCTTGAAGCAGGTGCTAGC  
+HWI-EAS443:3:99:1198:1877#0/1  
aabbbUa\_b`aaba\_aTaaab\_bbaaSb^0a[^HVH[`XS  
@HWI-EAS443:3:99:1261:755#0/1  
TAACATAGTCAAACCACATGAGAAAGGCATAAATCCCAAT  
+HWI-EAS443:3:99:1261:755#0/1  
^a\_T]``aaaba`aba^abbbaabab`aabab`abR`aaa  
@HWI-EAS443:3:99:1304:1100#0/1  
ATAAATACGGCCTTGCTCAATGCATCCTGTGCAGCCATGG  
+HWI-EAS443:3:99:1304:1100#0/1  
^a^`ab\_SVVTQ[b[T`aba\_X^b`NSZX``^a]V[a]a  
@HWI-EAS443:3:99:1316:233#0/1  
TGGGTCCAAAATGAATTCATAAGGCATGTGAATTGACTG  
+HWI-EAS443:3:99:1316:233#0/1  
]ba\_YZ^\_X`abbaabaWaaba`ba`bb^ba`a\_a\_^\_b  
@HWI-EAS443:3:99:1329:929#0/1  
GGAGGAACTATTTTACAGCAGAAGTGTCCCACTGCAGGGC  
+HWI-EAS443:3:99:1329:929#0/1  
^\_ab`abababaabbaababaaaa^a`aZaa^aaZ[a`X\_  
@HWI-EAS443:3:99:1456:1556#0/1  
AGGAGTCTATGGGATTCCTTTCGTTCAGTCCGAAAGAGGCG  
+HWI-EAS443:3:99:1456:1556#0/1  
`b`aa^`ba^^a^Uaa][b`aRaa\_aa\_W[a\_a`[X[a\_a  
@HWI-EAS443:3:99:1460:1644#0/1  
GGCATGGAAATGAGGCGCTGCCTTCTTCAGTCTCTTCAGC  
+HWI-EAS443:3:99:1460:1644#0/1  
aba[abba`aabbb`]^ab\_F^a`[aa\_\_b^IaZ0^[`a\_  
@HWI-EAS443:3:99:1465:909#0/1  
GGGGCATGGAAATGAGGCGCTGCCTTCTTCAGTCTCTTCA  
+HWI-EAS443:3:99:1465:909#0/1  
ab]ba`ab\_a`abba`a]b[aaW[`aPaa^`aQY]¥a\_Va  
@HWI-EAS443:3:99:1476:358#0/1  
TGAAGAAAAATTTGAGATTACAGGAACTATGCGCAAGCTT  
+HWI-EAS443:3:99:1476:358#0/1  
abaab`baa\_baaaaabb`^aa\_``]baabXa\_^^aZ`B  
@HWI-EAS443:3:99:1483:1596#0/1  
CATAAATACGGCCTTGCTCAATGCATCCTGTGCAGCCATG  
+HWI-EAS443:3:99:1483:1596#0/1  
Jab`^bb`\_a`aabbaa\_ba`aaaab\_b[bababaXabab  
@HWI-EAS443:3:99:1517:645#0/1  
ATTTTCATCGACGAACGGGTGAATCAATAATTGTAGAATC  
+HWI-EAS443:3:99:1517:645#0/1  
abb\_\_b``ba`a\_a`\_aaaW`\_¥^\_a\_b`\_a``[aaSa\_U



@HWI-EAS443:3:99:157:1624#0/1  
TTGGGGGGCTATATGAAGCAATCGAGGAGTGCCTGATTAA  
+HWI-EAS443:3:99:157:1624#0/1  
a`^Ta\_Y]aba`abaaYWaa`]a]a\_\_[Y\_^SZ`aaZ`]P  
@HWI-EAS443:3:99:1592:138#0/1  
ATCCGAAAATCGAAACTAACAAGTTTGCTGCAATATGCAC  
+HWI-EAS443:3:99:1592:138#0/1  
`\_WOGZa`aaTST\_aSaa\_\_b[IZ]¥`^^\_U`¥`\_ZYW\_\_  
@HWI-EAS443:3:99:1601:1074#0/1  
GGCATGGAAATGAGGCGCTGCCTTCTTCAGTCTCTTCAGC  
+HWI-EAS443:3:99:1601:1074#0/1  
ab\_babbbbabbbab\_babb\_`a`bba`aaQa`baYYV\_  
@HWI-EAS443:3:99:1614:1457#0/1  
CAGCCTTGAAAACCTTAGAGCCTATGTAGATGGATTGAG  
+HWI-EAS443:3:99:1614:1457#0/1  
`ba[Nbbbbbb`^a`ababb`abbbbaa`abaaa`a`ba  
@HWI-EAS443:3:99:1685:1115#0/1  
ACATGGGCTCGACACTTGGCCTATCGCAGTCCTCAAGAG  
+HWI-EAS443:3:99:1685:1115#0/1  
a)``I\_\_abR^aXa\_`QIT\_Rbab\_]ZVa\_[¥a¥\_Xa]\_  
@HWI-EAS443:3:99:1692:869#0/1  
GAAAACCTTAGAGCCTATGTAGATGGATTGAGCCGAACG  
+HWI-EAS443:3:99:1692:869#0/1  
\_b\_aa[bbbbaaa`bbbaN`bbbabaab\_baa\_IaaZDW  
@HWI-EAS443:3:99:1741:997#0/1  
AGAAGTTCGGTGGGAGACTTTGGTCGGCAAGCTTGCGCAT  
+HWI-EAS443:3:99:1741:997#0/1  
VbaYZI[`]\_[a\_\_abUUW¥HZ^PQYOG^¥TVaaQD[RBB  
@HWI-EAS443:3:99:1744:1229#0/1  
ACCGAGTGCCCACTTCAATTGGCTTGTCTCTTCATGTTC  
+HWI-EAS443:3:99:1744:1229#0/1  
`aZa^\_^[\`H\_aI¥Z]a`Z\_a\_\_[HO]GRGU¥BBBBBBB  
@HWI-EAS443:3:99:214:1884#0/1  
CATAAATACGGCCTTGCTCAATGCATCCTGTGCAGCCATG  
+HWI-EAS443:3:99:214:1884#0/1  
\_bab]baa\_HZ0]baZ\_^b[b]^YXOLX^\_XY`UX]aY]  
@HWI-EAS443:3:99:219:1572#0/1  
GGTGAATCAATAATTGTAGAATCTGGTGACCCGAATGCAC  
+HWI-EAS443:3:99:219:1572#0/1  
`a]abbbabbbababababababab\_bbaaaabbababa  
@HWI-EAS443:3:99:229:1374#0/1  
CAACATCTTCTCTATTTTCATCAAGTTCTATCCAGCTTGA  
+HWI-EAS443:3:99:229:1374#0/1  
a^Ya`aaa`a`ba]R`ba\_\_][\_`a[ZTDPa`aS^UYa^`  
@HWI-EAS443:3:99:235:50#0/1  
AGGAACTATGCGCAAGCTTGCCGACCAAAGTCTCCCACCG  
+HWI-EAS443:3:99:235:50#0/1  
abbaa`abaaa[a^`\_a\_\_a¥^`\_U¥^^^`¥¥]UTW^TU\_  
@HWI-EAS443:3:99:237:460#0/1  
GGGGGGCTATATGAAGCAATCGAGGAGTGCCTGATTAATG

+HWI-EAS443:3:99:237:460#0/1  
abaa`aaaaaaaa`a`aa`]a``\_¥aWa\_¥\_a^a\_`\_\_`  
@HWI-EAS443:3:99:280:835#0/1  
AGCAGGTGCTAGCAGAGCTACAGGACATTGAAAATGAAGA  
+HWI-EAS443:3:99:280:835#0/1  
^U]FWbZYb[U]aZa]]a]\_ab[ba]IX]^OGUZ]ZH`Q  
@HWI-EAS443:3:99:300:981#0/1  
TTCGGATTTCCATTTTCATCGACGAACGGGGTGAATCAATA  
+HWI-EAS443:3:99:300:981#0/1  
aa`aaa\_`\_]\_^aa``\_\_a`¥\_a^\_¥\_]\_\_Va\_^]S\_^`]  
@HWI-EAS443:3:99:306:1343#0/1  
GGATTCGAGCCGAACGGCTGCATTGAGGGCAAGCTTTCCC  
+HWI-EAS443:3:99:306:1343#0/1  
`aY`\_U]aVQS\_\_¥¥a^`ZZ[WHUZMJPY^MDIBBBBBBB  
@HWI-EAS443:3:99:31:1274#0/1  
CTCTTCCTTCAATTATCTCAAATCGGTGCTTCAATAGTGC  
+HWI-EAS443:3:99:31:1274#0/1  
`[Y\_¥YZ¥^`b`baaa`aa\_a]`a]\_Za\_aaa^Vaaa]aa  
@HWI-EAS443:3:99:36:353#0/1  
GTTCGGTGGGAGACTTTGGTCGGCAAGCTTGCGCATAGTT  
+HWI-EAS443:3:99:36:353#0/1  
aaaabb\_baa`a[\_aaaa¥a^ZX``aaX^\_W\_\_\_Z¥ZNR  
@HWI-EAS443:3:99:378:406#0/1  
ATTGGTTCTCACATATAGGAACATGGGCCTCGACACTTGG  
+HWI-EAS443:3:99:378:406#0/1  
^]\_`X`^ZY[aaaaaaaaW^^Y^a¥\_W\_^``[^XZX^U  
@HWI-EAS443:3:99:38:467#0/1  
TCTCATTTGAGAAATGATACTGATGTGGTGAACCTTTGTAA  
+HWI-EAS443:3:99:38:467#0/1  
aaa¥Z\_aaa\_a`aa`b``a\_aaa\_a\_`\_V`]\_]`\_\_a^]V  
@HWI-EAS443:3:99:504:1556#0/1  
CGGAAACATGGCCAATCGGAGAGTCACCCAGGGGAGTGGA  
+HWI-EAS443:3:99:504:1556#0/1  
^a¥W¥bbbb^`[abb¥bbabababba]]b\_ZTa¥^JTba  
@HWI-EAS443:3:99:517:797#0/1  
ACATCAGTATCATTTCTCAAATGAGACCTTCTTTTATAA  
+HWI-EAS443:3:99:517:797#0/1  
]¥aa`^¥YV¥a^a`Z`^]\_¥^``\_V`][`a\_]aaaa\_\_`\_  
@HWI-EAS443:3:99:530:1010#0/1  
AGAGCCTAACATAGTCAAACCACATGAGAAAGGCATAAAT  
+HWI-EAS443:3:99:530:1010#0/1  
a`aaa`aZba^aaaaaaaaaaaa`aaaa\_aaa\_\_aaaa¥\_  
@HWI-EAS443:3:99:534:298#0/1  
ATGAGAAGCAATTTTCTCGATTGAGCCGAAAACCCCTCAA  
+HWI-EAS443:3:99:534:298#0/1  
aabY^V]a\_]ZWa`a``^W¥\_\_`\_\_^aZ^^]UQVVVV]X  
@HWI-EAS443:3:99:553:845#0/1  
CCACTCCCCTGGGTGACTCTCCGATTGGCCATGTTTCCGA  
+HWI-EAS443:3:99:553:845#0/1  
abbb`bbbaabb\_bbabbaaaaa`a^`]\_aaZaa¥^a¥

@HWI-EAS443:3:99:575:207#0/1  
GGGTTTTCGCTGAATCGAGAAAATTGCTTCTCATTGTTC  
+HWI-EAS443:3:99:575:207#0/1  
aba¥aaa`b`\_aaaa`\_a`a`\_\_`aa^`\_T^Y^\_`¥^X  
@HWI-EAS443:3:99:623:680#0/1  
GGTGAACCTTTGTAAGTATGGAGTTCTCACTCACTGACCCG  
+HWI-EAS443:3:99:623:680#0/1  
a\_RWS]aaa`a[`]a\_a`^VJZ\_Z[]\_a`\_\_\_^P`\_ZHSa  
@HWI-EAS443:3:99:667:1567#0/1  
GGGGGCTATATGAAGCAATCGAGGAGTGCCTGATTAATGA  
+HWI-EAS443:3:99:667:1567#0/1  
a[``T]U`\_\_a[aa\_\_\_RZ``Z]`X`W¥[Y\_`S\_\_\_[P¥\_  
@HWI-EAS443:3:99:684:1225#0/1  
GGCATGGAAATGAGGCGCTGCCTTCTTCAGTCTCTTCAGC  
+HWI-EAS443:3:99:684:1225#0/1  
a¥`b^`^`]^`^\_ab\_`aaa^P¥\_aVaaU^]^¥a``[¥W\_¥  
@HWI-EAS443:3:99:717:1138#0/1  
ATGTATTCGATTTCCATTTTCATCGACGAACGGGGTGAAT  
+HWI-EAS443:3:99:717:1138#0/1  
`bb\_`\_baaabbba\_aababa` `[`W[baa¥bZ`a^baaa  
@HWI-EAS443:3:99:730:251#0/1  
CAAGGACAAAGAACATGAAGAGAACAAGCCAATTGAAGTG  
+HWI-EAS443:3:99:730:251#0/1  
aaababbbbabaa¥abbaabbba\_aaab\_abaab`\_b\_b  
@HWI-EAS443:3:99:762:719#0/1  
GACCCGAATGCACTATTGAAGCACCGATTTGAGATAATTG  
+HWI-EAS443:3:99:762:719#0/1  
abababbbb`\_`Y`abbaa]\_\_¥Na]aaaa[Z`a`\_[aab  
@HWI-EAS443:3:99:773:2027#0/1  
GGGGCATGGAAATGAGGCGCTGCCTTCTTCAGTCTCTTCA  
+HWI-EAS443:3:99:773:2027#0/1  
ZbabZa]``Tbabbabbbb\_ab]a`¥WaZO]baabXab\_Z  
@HWI-EAS443:3:99:786:1432#0/1  
CGTCAAGGGTGTAGTCCGCTTTGGTGGCCATCTCCTCTCC  
+HWI-EAS443:3:99:786:1432#0/1  
ababaaabb^babbabaa^aaa`a\_aaa\_aa]`a]`^\_¥¥  
@HWI-EAS443:3:99:813:2014#0/1  
CATGTATTCGATTTCCATTTTCATCGACGAACGGGGTGAA  
+HWI-EAS443:3:99:813:2014#0/1  
abaaXabbabaaa```aaaa`b\_aaa\_`a``a``ZMV\_a  
@HWI-EAS443:3:99:815:479#0/1  
AGAAGTTCGGTGGGAGACTTTGGTCCGCAAGCTTGCGCAT  
+HWI-EAS443:3:99:815:479#0/1  
ab\_a\_]aabb^b\_a`aaaaab]Raaaa^`aa``a¥aV\_`  
@HWI-EAS443:3:99:844:1352#0/1  
GCTTGCTAGAGATCTGGGCTCTGGCTCATCACTGTCATAC  
+HWI-EAS443:3:99:844:1352#0/1  
a\_aabaaabab\_`Z\_aab`a`\_abaa\_a\_\_aa\_a\_]`a`]  
@HWI-EAS443:3:99:883:901#0/1  
GGGCACTCGGTGAAAATATGGCACCAGAAAAAGTAGACTT

+HWI-EAS443:3:99:883:901#0/1  
\_bbbab` `¥T[Z\_\_aba\_]Za`a`bX[``]aH`a`a\_a  
@HWI-EAS443:3:99:915:1033#0/1  
GCTGGGTCCAAAATGAATTCAATAAGGCATGTGAATTGAC  
+HWI-EAS443:3:99:915:1033#0/1  
`[U^ZYG\_]a\_Yaaa¥V\_`U]X^\_\_ZY^^`W\_`¥^Q\_^]  
@HWI-EAS443:3:99:973:1585#0/1  
CATTAATCAGGCACTCCTCGATTGCTTCATATAGCCCCC  
+HWI-EAS443:3:99:973:1585#0/1  
abbbabbabbabb`aa`ab`abbbabb\_bbbba[N\_`Za  
@HWI-EAS443:3:99:995:1012#0/1  
AAATGAATTCAATAAGGCATGTGAATTGACTGATTCAAGC  
+HWI-EAS443:3:99:995:1012#0/1  
aa^`aba`aaa`aa`\_SY[a^Y^`Ub\_`]Vaaaa`XaYaH  
@HWI-EAS443:3:9:1102:95#0/1  
CACCCAGGGGAGTGGAGGAAGGCTCTATTGGGAAAGTGTG  
+HWI-EAS443:3:9:1102:95#0/1  
^¥aY`\_bbbb^aab^P\_a¥b`bX¥PXSVa\_^]`\_aaV]Xa  
@HWI-EAS443:3:9:1105:388#0/1  
AAATAAAATCTGAGAAGACACATTCACATCTTTTCATT  
+HWI-EAS443:3:9:1105:388#0/1  
aaabaab`a\_aa` `\_a` `\_a[a]^` `^a^aa\_aaa\_]` `\_  
@HWI-EAS443:3:9:1111:727#0/1  
CACATCAGTATCATTTCTCAAATGAGACCTTCCTTTTATA  
+HWI-EAS443:3:9:1111:727#0/1  
\_b` `\_^` `]^a\_`bba^\_\_a`aabaaa\_\_\_b\_\_aabaaaZ  
@HWI-EAS443:3:9:1127:1410#0/1  
AGGGAGTGTACATAAATACGGCCTTGCTCAATGCATCCTG  
+HWI-EAS443:3:9:1127:1410#0/1  
Yb` `]b`\_R\_`ab^b` ` `bbYaaaaH[T\_aaa]ba^ZZZ  
@HWI-EAS443:3:9:1216:1558#0/1  
ATCCCAATTACCTCATGGCTTGGAAGCAGGTGCTAGCAGA  
+HWI-EAS443:3:9:1216:1558#0/1  
aabbab`abb^abb`\_aaaab[b\_ZON[`^WRVZ¥Y¥¥\_U  
@HWI-EAS443:3:9:123:723#0/1  
GGGGCATGGAAATGAGGCGCTGCCTTCTTCAGTCTCTTCA  
+HWI-EAS443:3:9:123:723#0/1  
ab`Y]\_VGUZVT^THIX¥a\_[`a]GYVBBBBBBBBBBBB  
@HWI-EAS443:3:9:1283:1252#0/1  
AGAGATCTGGGCTCTGGCTCATCACTGTCATACTGTTTAA  
+HWI-EAS443:3:9:1283:1252#0/1  
`bXHRLX^N`PYQQV\_RZaZSMOT¥UTQT[JXQFXYa]`¥  
@HWI-EAS443:3:9:1284:1550#0/1  
ATAGTCAAACCACATGAGAAAGGCATAAATCCCAATTACC  
+HWI-EAS443:3:9:1284:1550#0/1  
aa\_]\_aab^DEaI^a` `a`]a\_¥`aYaW`a\_BBBBBBBBB  
@HWI-EAS443:3:9:1468:57#0/1  
CGAAAATCGAAACTAACAAGTTTGCTGCAATATGCACACA  
+HWI-EAS443:3:9:1468:57#0/1  
aabbbbbb]aa`b\_`baabab\_bbaUabSaaaaab¥a^`^^

@HWI-EAS443:3:9:1495:1350#0/1  
GACCCGAGTCACGAGGGGAGGGAATACCACTATATGATG  
+HWI-EAS443:3:9:1495:1350#0/1  
aa\_a\_baa\_aaaaX\_aaaa\_a^`Y\_\_aUYXHX\_\_\_\_`\_^\_^  
@HWI-EAS443:3:9:1609:1764#0/1  
CAGTCATCAAAGTCTACTTTTTCTGGTGCCATATTTTCAC  
+HWI-EAS443:3:9:1609:1764#0/1  
aY^¥Z]\_`aa]ZNVa^W`aa`a^XVZR\_YY\_\_\_\_\_`\_\_U\_U  
@HWI-EAS443:3:9:1651:1785#0/1  
GGGGGCTATATGAAGCAATCGAGGAGTGCCTGATTAATGA  
+HWI-EAS443:3:9:1651:1785#0/1  
aa^`^abbbabaaa\_]`aaQaa``\_aZ`\_\_\_[a\_``a\_¥a`  
@HWI-EAS443:3:9:1682:1307#0/1  
AATTGAAGGAAGAGACCGAATCATGGCCTGGACAGTGGTG  
+HWI-EAS443:3:9:1682:1307#0/1  
^`bbabbbbaaa^abaU\_bbaY\_a```\_\_`\_^Y^`^]\_^0]  
@HWI-EAS443:3:9:1687:118#0/1  
AAGAATTCCTTGGTCATGTCTTTCTCTTTGACAGAAGACT  
+HWI-EAS443:3:9:1687:118#0/1  
a]`a\_bb¥^baab\_\_`aa`]aa`WaWaaaa^^\_a^\_\_^W^  
@HWI-EAS443:3:9:1694:1746#0/1  
ATTTTCATCGACGAACGGGGTGAATCAATAATTGTAGAATC  
+HWI-EAS443:3:9:1694:1746#0/1  
a`ab\_aXRb¥0\_\_^¥^`Z\_V``YTHX0\_¥\_¥^¥G\_]`^\_¥Z  
@HWI-EAS443:3:9:1718:984#0/1  
CTTCAATAGTGCATTTCGGGTCACCAGATTCTACAATTATT  
+HWI-EAS443:3:9:1718:984#0/1  
a\_^aaTa`S\_RZ^`Pa`\_¥U[[YX[W\_\_^\_]\_]\_\_`  
@HWI-EAS443:3:9:182:1810#0/1  
GGTGAACCTTTGTAAGTATGGAGTTCTCACTCACTGACCCG  
+HWI-EAS443:3:9:182:1810#0/1  
`aabbbbbbabaab`bababaa`abbbbbbbaabaabaabb  
@HWI-EAS443:3:9:209:1205#0/1  
ATGTAACACAACAGGGGTAGAGAAGCCTAAATTTCTTCCT  
+HWI-EAS443:3:9:209:1205#0/1  
\_aaa\_ba¥````a^`a^¥``aa^`^^abaa`aaa^`\_`[`  
@HWI-EAS443:3:9:263:1674#0/1  
ATCATTAATCAGGCACTCCTCGATTGCTTCATATAGCCCC  
+HWI-EAS443:3:9:263:1674#0/1  
a[`^\_X]a¥\_[Z]\_a¥^YaYUT\_GT\_]`[\_¥H¥S^]\_^]]  
@HWI-EAS443:3:9:351:1201#0/1  
GTTTCCGATTTGTTTTCAAAGAATTCCTTGGTCATGTCTT  
+HWI-EAS443:3:9:351:1201#0/1  
a``aabbaaaab`\_`aabaa^a\_\_`\_a\_a\_aa^^]`^aY\_\_`  
@HWI-EAS443:3:9:398:543#0/1  
TTGGGGGGCTATATGAAGCAATCGAGGAGTGCCTGATTAA  
+HWI-EAS443:3:9:398:543#0/1  
aabba`^aaaaaaaa]\_\_aaa\_`\_``^\_¥\_`¥`aW\_]¥  
@HWI-EAS443:3:9:425:60#0/1  
CGAAAATCGAAACTAACAAGTTTGCTGCAATATGCACACA

+HWI-EAS443:3:9:425:60#0/1  
`bbbbbbbabbbbababababa`babaaaabaaaaa  
@HWI-EAS443:3:9:515:983#0/1  
CAAGGAATTCTTTGAAAACAAATCGGAAACATGGCCAATC  
+HWI-EAS443:3:9:515:983#0/1  
aabaaaaab]bbaa\_baabaaaaa`\_aaaa\_\_\_a]a\_]¥  
@HWI-EAS443:3:9:517:699#0/1  
ACGGCCTTGCTCAATGCATCCTGTGCAGCCATGGATGACT  
+HWI-EAS443:3:9:517:699#0/1  
`ab\_ab[\_ZQ]aa\_V^[a]\_¥\_QU`X^`UZV\_\_`ZV[N^Q  
@HWI-EAS443:3:9:679:787#0/1  
CATGTTTCCGATTTGTTTTCAAAGAATTCCTTGGTCATGT  
+HWI-EAS443:3:9:679:787#0/1  
`abb\_UUPWb][P`b^`\_`TU`\_^[\_`WY\_``]0¥¥]¥P  
@HWI-EAS443:3:9:693:255#0/1  
GGGGGCTATATGAAGCAATCGAGGAGTGCCTGATTAATGA  
+HWI-EAS443:3:9:693:255#0/1  
aaY][X`aa`a`\_^W`\_^W^Z`\_X\_[Z¥V`TZ`\_X]]\_]  
@HWI-EAS443:3:9:708:62#0/1  
AGGGGTTTTCGGCTGAATCGAGAAAATTGCTTCTCATTGT  
+HWI-EAS443:3:9:708:62#0/1  
a`VabNaa`aaa]aaaa\_\_a^\_^¥^a\_¥\_^¥\_]\_]\_\_]aW  
@HWI-EAS443:3:9:724:259#0/1  
AGTTCCTCCTCATGCTTGCATATGTTCAATCGGGGCAAC  
+HWI-EAS443:3:9:724:259#0/1  
abaaaaab^a`baaaaaab`baaa`a^a^`a^]\_\_``¥V\_Y  
@HWI-EAS443:3:9:750:521#0/1  
CAACAAAATAAAATCTGAGAAGACACACATTCACATCTTT  
+HWI-EAS443:3:9:750:521#0/1  
P\_]\_Xb^`baaZ`a`a^ba¥a]a]Yaa^aaaVb\_¥b^bab  
@HWI-EAS443:3:9:809:740#0/1  
AGAAATTTAGGCTTCTCTACCCCTGTTGTGTTACATATAC  
+HWI-EAS443:3:9:809:740#0/1  
aaaaaaaaaaaaa\_```a\_\_\_^^`\_^\_S`X\_\_^\_\_`\_\_V  
@HWI-EAS443:3:9:911:874#0/1  
GGCGTGGTGTGCTCCTCAAGAATGGTTCAATTTTGGCGTT  
+HWI-EAS443:3:9:911:874#0/1  
ab```ba\_b`aba`]aaaaa`ab\_^`\_a`a`a`\_¥[a\_`  
@HWI-EAS443:3:9:916:1165#0/1  
CATGTTTCCGATTTGTTTTCAAAGAATTCCTTGGTCATGT  
+HWI-EAS443:3:9:916:1165#0/1  
aa^a^aab¥`G]`\_b\_a\_bba`\_b\_S`a]Z`aaa[a\_\_b^  
@HWI-EAS443:3:77:522:1148#0/1  
CGTCCCTCTTAGTTTGCATAGTTTCCCGTTATGCTTGTCT  
+HWI-EAS443:3:77:522:1148#0/1  
aaaabbbbbbbbaa`aaaabTbaaaaba\_V`a\_aa`aa`aa  
@HWI-EAS443:3:1:583:205#0/1  
GTTAAATACATATTCTACTGTAGAGACCCATTAGAGCA  
+HWI-EAS443:3:1:583:205#0/1  
`W]W^¥\_[ZZ\_[aZY]^][M[XQQ¥UXXMFTYWV][BBBB

@HWI-EAS443:3:25:696:360#0/1  
GCTGGCTGGATCCTGGGAAATCCAGAATGTGAATCACTCT  
+HWI-EAS443:3:25:696:360#0/1  
aY\_]\_a]N\_Ua]LVZY\_a`V¥Y[VVFF[G]\_`\_TX¥UN¥  
@HWI-EAS443:3:63:1192:95#0/1  
GTAAATACATATTCTACACTGTAGAGACCCATTAGAGCA  
+HWI-EAS443:3:63:1192:95#0/1  
aab``abaaabaa`\_`\_`\_`aa^^aW`[]^\_\_^^`\_\_\_\_]  
@HWI-EAS443:3:71:588:317#0/1  
GTAAATACATATTCTACACTGTAGAGACCCATTAGAGCA  
+HWI-EAS443:3:71:588:317#0/1  
a\_¥Z[]aXV`R[^`aYa\_VLI[QX[]Y\_\_^NNT¥`WWW¥Z  
@HWI-EAS443:3:71:870:1673#0/1  
GTAAATACATATTCTACACTGTAGAGACCCATTAGAGCA  
+HWI-EAS443:3:71:870:1673#0/1  
`aababbbbaaaaa\_babaaa\_aWa]^\_`aa`a`]^`^`^\_a  
@HWI-EAS443:3:87:1770:90#0/1  
GTAAATACATATTCTACACTGTAGAGACCCATTAGAGCA  
+HWI-EAS443:3:87:1770:90#0/1  
a`S\_QPaJNY\_aaaP`YT^Pa\_LPXR^]GRGWT[PM[XP^  
@HWI-EAS443:3:99:1136:937#0/1  
GTAAATACATATTCTACACTGTAGAGACCCATTAGAGCA  
+HWI-EAS443:3:99:1136:937#0/1  
aaaaaaaaa^a\_a`a\_[a^aa¥`\_`\_XX^\_`¥`W\_]S`  
@HWI-EAS443:3:52:81:200#0/1  
GATGGATCAAGTAAGAGAGAGTCGAAACCCAGGAAACGCT  
+HWI-EAS443:3:52:81:200#0/1  
aa\_aa`\_]\_Za]W\_a^`^`\_aZ^\_]`^0¥Z^]`R[[MTUZ  
@HWI-EAS443:3:86:791:1848#0/1  
ATATTAGCCCTCTTTGCGTGCGATTGGACCAGGCGGGCA  
+HWI-EAS443:3:86:791:1848#0/1  
abb`XZ]W\_[Za\_\_¥aa^\_0`YaaXLQU`aaW[BBBBBBBB  
@HWI-EAS443:3:88:1147:182#0/1  
GGCCCTCTTTGCGTGCGATTGGACCAGGCGGTCGTGGGGA  
+HWI-EAS443:3:88:1147:182#0/1  
¥\_¥Z`\_`^`^`^a\_Z`\_`b\_Z^^aYPW]aaBBBBBBBBBBBB  
@HWI-EAS443:3:22:1631:402#0/1  
AGGCCCTCTTTGCGTGCGATTGGACCAGGCGGNGATGGAA  
+HWI-EAS443:3:22:1631:402#0/1  
`a^Z¥Z¥^][`YYa¥X[bY]^a^]`U^`BBBBBBBBBBBB  
@HWI-EAS443:3:13:1081:1774#0/1  
ACCAGCGCGTCATGGAAAAGAACATAGTACTGAAAGCGA  
+HWI-EAS443:3:13:1081:1774#0/1  
a\_[W]VY[QV]Y¥PMJWWPSSUWSY^^U]BBBBBBBBBBBB  
@HWI-EAS443:3:18:698:648#0/1  
GATGGCCCTCTTTGCGTGCGATTGGACCAGGCGGTCATCG  
+HWI-EAS443:3:18:698:648#0/1  
aW`¥a[a\_UW``\_a]`Ra`aYNY\_a[^a^`ZaBBBBBBBB  
@HWI-EAS443:3:35:1026:1326#0/1  
CGCCCTCTTTGCGTGCGATTGGACCAGGCGGCATGGAAA

+HWI-EAS443:3:35:1026:1326#0/1  
abbbbabaaaabaabaab`a`aa¥a\_\_bbBBBBBBBBBBB  
@HWI-EAS443:3:19:903:2044#0/1  
GAGCTTTCTCGTTTCAGCTTATTTAATGATAAAAAAAAAA  
+HWI-EAS443:3:19:903:2044#0/1  
abaabb`bbab`aabbbaabbaaaaabaabbbabababa  
@HWI-EAS443:3:42:612:202#0/1  
GTGGTTTTTATCATTAAATAAGCTGAAACGAGAAAGCTCT  
+HWI-EAS443:3:42:612:202#0/1  
\_S[DP\_WaaUKa\_]\_]Z\_V^¥\_\_X\_\_a^\_a¥\_¥Y¥a¥]U]  
@HWI-EAS443:3:10:240:889#0/1  
GTTCTTTTCCATTACCGCCTGGTCCAATCGCACGCAAAGA  
+HWI-EAS443:3:10:240:889#0/1  
aWV[[\_RL\_`[\_V]NWLWF^BBBBBBBBBBBBBBBBBBBBB  
@HWI-EAS443:3:14:168:867#0/1  
GTGACAAAACATAATGGACTCCAACACCATGTCATGCTT  
+HWI-EAS443:3:14:168:867#0/1  
`¥\_S\_aa[¥aa`^Q]`aaaa\_aaa\_a^`a\_`aS\_\_^a\_`]  
@HWI-EAS443:3:27:1503:104#0/1  
GACCGCCTGGACCAATCGCACGCAAAGAGGGCCTATTATC  
+HWI-EAS443:3:27:1503:104#0/1  
ZW[\_Z\_\_ORFRT¥a]H[[aXbU\_Q\_Z[bZXDD¥RYOQOJ  
@HWI-EAS443:3:40:401:786#0/1  
TTTTTATCATTAAATAAGCTGAACCGAGAAAGCTCTTATC  
+HWI-EAS443:3:40:401:786#0/1  
\_a]\_a[```PXY^RY\_aW`\_ZGX`W`G^X^^QZXUVZU  
@HWI-EAS443:3:42:52:691#0/1  
GTTTTTTACCATTAAATAAGCTGAAACGAGAAAGCTCTTA  
+HWI-EAS443:3:42:52:691#0/1  
a\_]^[\_]X^W\_```\_\_[^¥a\_\_a^^`[^`PM[\_¥]¥\_\_X  
@HWI-EAS443:3:56:1463:1626#0/1  
GACAAAACATAATGGACTCCAACACCATGTAAAGCTTTC  
+HWI-EAS443:3:56:1463:1626#0/1  
ab\_`\_OUaP\_]Waab`P[`GNWa`\_ZK\_a\_UGQX`P¥XY\_  
@HWI-EAS443:3:5:1142:966#0/1  
GCGGGCATGGAAAAGAACATAGTACTGAAAGCGAACTTCA  
+HWI-EAS443:3:5:1142:966#0/1  
`\_]HWSU\_]R]XV]WX]V`Y`VWS¥]QU¥OT¥BBBBBBBB  
@HWI-EAS443:3:89:1200:1284#0/1  
TTCGCTTTCAGTACTATGTTCTTTTCCATGACCGTCTGGT  
+HWI-EAS443:3:89:1200:1284#0/1  
aa`aaa`b`aa\_\_`aaab\_aabaaa\_aaaa^¥`\_^]\_\_U  
@HWI-EAS443:3:99:849:1304#0/1  
GAAGGTCGCTTTCAGTACTATGTTCTTTTCCATGACCGCC  
+HWI-EAS443:3:99:849:1304#0/1  
[bT[Ia[`bbU^]Sbaaaba`b``\_a`\_HZU`ba]HY]`  
@HWI-EAS443:3:55:855:1022#0/1  
GGCGTTTTTATCATTAAATAAGCTGAAACGAGAAAGCTC  
+HWI-EAS443:3:55:855:1022#0/1  
aaG[^```[\_R`[\_NY]XQNSSa`YY\_a]aa`X[^¥UaXW]



@HWI-EAS443:3:88:633:1723#0/1  
TTTGCCTGCGATTGGACCAGGCGGTCATGGAAAAGAAAAT  
+HWI-EAS443:3:88:633:1723#0/1  
\_ ^a^]Y]abba`ababbbbaa^^aYDMRTYXLSBBBBBBBB  
@HWI-EAS443:3:37:1201:964#0/1  
CCGCCTGGTCCAATCGNACGCAAAGAGGGCCTATTATCTT  
+HWI-EAS443:3:37:1201:964#0/1  
`b`a`\_a^W[`aa`\_ZD[a\_a`a\_[\_`\_\_Gaf^a\_¥aa^`  
@HWI-EAS443:3:76:801:886#0/1  
ATTAAATAAGCTGAAACGAGAAAGCTCTTATCTCNTGTTC  
+HWI-EAS443:3:76:801:886#0/1  
^a[¥R`\_^YS^RW¥^\_V\_aa`V`]aba\_^¥a]D[aaa\_  
@HWI-EAS443:3:20:406:1853#0/1  
GCGTTTTTATCATTAAATAAGCTGAAACGAGAAAGCTCT  
+HWI-EAS443:3:20:406:1853#0/1  
¥IXSVP\_ZNOLYXXUXSQ^Z\_ZV^QX`XTXLMTQZZVVL  
@HWI-EAS443:3:28:1127:1248#0/1  
GCGTGACAAAAACATAATGGACTCCAACACCATGTCAAGC  
+HWI-EAS443:3:28:1127:1248#0/1  
^P\_SWZ¥][TL¥]^VU¥X`¥YQX\_OXRU\_UW[XaUZLX^Q  
@HWI-EAS443:3:65:1629:1121#0/1  
GGCAAAAACATAATGGACTCCAACACCATGTCAAGCTTTC  
+HWI-EAS443:3:65:1629:1121#0/1  
a`a`aa`baabaaaaabab`\_aa`aa\_aab^aa\_\_Va``\_  
@HWI-EAS443:3:39:1556:917#0/1  
TTTTTATCATTAAATAAGCTGAAACGAGAAAGCTCTTATN  
+HWI-EAS443:3:39:1556:917#0/1  
]bb]aXaab`bb¥\_[]¥0^a`W]Kaa`NH¥\_Wb¥`SH]D  
@HWI-EAS443:3:47:595:144#0/1  
GACCGCTGGTCCAATCGCACGCAAAGAGGGCCTATTATA  
+HWI-EAS443:3:47:595:144#0/1  
\_[aaU`a`^`[X^`\_\_ba\_¥a\_]\_^UY`¥`[[\_¥\_TZWG  
@HWI-EAS443:3:10:607:50#0/1  
CACTGAAGTTCGCTTTCAGTACTATGTTCTTTTCCATGAC  
+HWI-EAS443:3:10:607:50#0/1  
a^`aZaabaab^\_``[¥bTaaa\_^`R^V\_a`\_aZ\_¥U``  
@HWI-EAS443:3:11:566:864#0/1  
TGAAGTTCGCTTTCAGTACTATGTTCTTTTCCATGACCGC  
+HWI-EAS443:3:11:566:864#0/1  
aba`a\_\_ba^a^aaaaX`\_a\_aa]`\_\_\_\_\_a`¥\_\_`^^`X  
@HWI-EAS443:3:11:876:48#0/1  
GTTTTTATCATTAAATAAGCTGAAACGAGAAAGCTCTTA  
+HWI-EAS443:3:11:876:48#0/1  
a^`\_`\_][\_]\_^¥¥[^]^Z[^V[^[^[^XXY[Z[Z[[[  
@HWI-EAS443:3:12:211:322#0/1  
GTGTTTTTATCATTAAATAAGCTGAAACGAGAAAGCTCT  
+HWI-EAS443:3:12:211:322#0/1  
aabaabbaaabaababaaaaaaa`aaaaaaa\_[]a\_a^`  
@HWI-EAS443:3:12:719:756#0/1  
GTTCTTTTCCATGACCGCTGGTCCAATCGCACGCAAAGA

+HWI-EAS443:3:12:719:756#0/1  
a\_a`aaaaaaa`^U\_\_¥\_^U[\_`\_\_¥\_¥\_¥¥\_[PY^U  
@HWI-EAS443:3:13:104:1958#0/1  
CTTTCAGTACTATGTTCTTTTCCATGACCGCCTGGTCCAA  
+HWI-EAS443:3:13:104:1958#0/1  
a`\_^ZXGaa`aa[a^U]aaP`Y^a^`a^[\_PRZ¥``  
@HWI-EAS443:3:13:1180:549#0/1  
GGTGTTTTTTATCATTAAATAAGCTGAAACGAGAAAGCTC  
+HWI-EAS443:3:13:1180:549#0/1  
`YXa\_a`]^Y^`]^WZa]^\_Y`]^0[\_¥`¥^[\_^¥W  
@HWI-EAS443:3:13:82:303#0/1  
CAAAAACATAATGGACTCCAACACCATGTCAAGCTTTCAG  
+HWI-EAS443:3:13:82:303#0/1  
aaaaababaa`\_a\_aabaaaaaaaaaYaa`\_a`¥\_[]  
@HWI-EAS443:3:13:971:166#0/1  
CAAAAACATAATGGACTCCAACACCATGTCAAGCTTTCAG  
+HWI-EAS443:3:13:971:166#0/1  
abbbabaabaaab`a^a`^aaa`^\_`a\_Z`^`^`Z\_^`  
@HWI-EAS443:3:14:976:1106#0/1  
TTTTTATCATTAAATAAGCTGAAACGAGAAAGCTCTTATC  
+HWI-EAS443:3:14:976:1106#0/1  
`[Y[[Z¥¥SZ`ZS^`^V[]X¥V\_[0^ZZURY\_X\_[-¥[]\_  
@HWI-EAS443:3:15:1737:1093#0/1  
ATTAATAAGCTGAAACGAGAAAGCTCTTATCTCTTGTTTC  
+HWI-EAS443:3:15:1737:1093#0/1  
abbbbbbbbaabbbbaab\_ba`ab\_babaab`b\_bbbbaa\_  
@HWI-EAS443:3:15:429:601#0/1  
GACCGCCTGGTCCAATCGCACGCAAAGAGGGCCTATTATC  
+HWI-EAS443:3:15:429:601#0/1  
aaaabbb\_ba]aabaaaaa\_a`¥[`]\_\_`\_^`\_\_\_a\_¥  
@HWI-EAS443:3:15:589:1916#0/1  
CAAAAACATAATGGACTCCAACACCATGTCAAGCTTTCAG  
+HWI-EAS443:3:15:589:1916#0/1  
abZbbbbbbU]]b¥X¥`abb^`bV`a\_YP`b^Z[aY```a  
@HWI-EAS443:3:15:668:655#0/1  
TTTTTATCATTAAATAAGCTGAAACGAGAAAGCTCTTATCT  
+HWI-EAS443:3:15:668:655#0/1  
aba\_aabbbbaa¥ba`¥bab`baaaaaaZaaaaa¥PZ\_a  
@HWI-EAS443:3:15:769:634#0/1  
ATTAATAAGCTGAAACGAGAAAGCTCTTATCTCTTGTTTC  
+HWI-EAS443:3:15:769:634#0/1  
abbbabbbbaaba\_bbabaaaa`baaaaaaaabaa\_aa  
@HWI-EAS443:3:15:912:1315#0/1  
CATTAAATAAGCTGAAACGAGAAAGCTCTTATCTCTTGTT  
+HWI-EAS443:3:15:912:1315#0/1  
aabbbbaabbbbabbbbbb`babbb`abbb^babbaaa  
@HWI-EAS443:3:16:128:951#0/1  
GTACTATGTTCTTTTCCATGACCGCCTGGTCCAATCGCAC  
+HWI-EAS443:3:16:128:951#0/1  
a¥aa^`\_b\_aaaaa`aa`\_`a`\_a[\_a\_¥^¥^X[\_`\_V`[

@HWI-EAS443:3:16:1568:1707#0/1  
CCTGTCGCTTTCAATCTGTGCCGATTTCTTCAATTAACC  
+HWI-EAS443:3:16:1568:1707#0/1  
`bb`abbabb\_b`ZZb\_a`aaQ`^bbabaaaaaa`XY  
@HWI-EAS443:3:16:629:829#0/1  
CGGTCATGAAAAGAACATAGTACTGAAAGCGAACTTCAG  
+HWI-EAS443:3:16:629:829#0/1  
abb^ab`aaaaa`b`aaaaaa¥aaaa`\_aaaaa^a\_\_`  
@HWI-EAS443:3:17:1134:142#0/1  
TTTCAGTACTATGTTCTTTTCCATGACCGCCTGGTCCAAT  
+HWI-EAS443:3:17:1134:142#0/1  
^aaaa`XR`^^\_a[YV¥`]^`X`¥]^¥Z]U]^]aVYY\_\_]  
@HWI-EAS443:3:17:1189:232#0/1  
GGTGACAAAAACATAATGGACTCCAACACCATGTCAAGCT  
+HWI-EAS443:3:17:1189:232#0/1  
a\_R\_\_abaa`^`a^W]^a`¥]^\_`^`\_a`UZaaYS`U`]]  
@HWI-EAS443:3:17:1198:255#0/1  
GGTGTTTTTTATCATTAAATAAGCTGAAACGAGAAAGCTC  
+HWI-EAS443:3:17:1198:255#0/1  
^a\_\_Xab^bbbbX¥baZ¥K`a`¥baTXZ]^a^W\_a`^M  
@HWI-EAS443:3:17:1715:423#0/1  
ATTAAATAAGCTGAAACGAGAAAGCTCTTATCTCTTGTTTC  
+HWI-EAS443:3:17:1715:423#0/1  
a`b]aaa\_ab\_ab\_a`aa`b\_\_]a`\_\_aa\_a\_a[a\_a]`]  
@HWI-EAS443:3:17:452:122#0/1  
GAAGTTCGCTTTCAGTACTATGTTCTTTTCCATGACCGCC  
+HWI-EAS443:3:17:452:122#0/1  
aa`aYaaaa`^`[^\_X^\_U\_a]\_\_`\_`^`^`^`\_`\_`\_`]^`^  
@HWI-EAS443:3:17:486:1566#0/1  
GTTCTTTTCCATGACCGCCTGGTCCAATCGCACGCAAAGA  
+HWI-EAS443:3:17:486:1566#0/1  
a\_bbbbaaaaaab`]^`aa`aa`aZ]K¥a`a\_\_a]^`[`a¥`a  
@HWI-EAS443:3:18:880:324#0/1  
TTCAGTACTATGTTCTTTTCCATGACCGCCTGGTCCAATC  
+HWI-EAS443:3:18:880:324#0/1  
aaa]aS[aaaabZ\_\_aaa[\_\_aYS`N¥aUZ]¥¥VUMXS¥Y  
@HWI-EAS443:3:19:957:1330#0/1  
CAAAAACATAATGGACTCCAACACCATGTCAAGCTTTTCAG  
+HWI-EAS443:3:19:957:1330#0/1  
U`b\_babbbba`ababbab`ababba`][baaaa`\_aa^  
@HWI-EAS443:3:1:1383:776#0/1  
CAAAAACATAATGGACTCCAACACCATGTCAAGCTTTTCAG  
+HWI-EAS443:3:1:1383:776#0/1  
a`aa[\_]\_b[\_`^S[`YSX]^`W^[[aab]U``]]^BBBBB  
@HWI-EAS443:3:20:1263:236#0/1  
GACAAAAACATAATGGACTCCAACACCATGTCAAGCTTTC  
+HWI-EAS443:3:20:1263:236#0/1  
aa^aaa]a`aa`^`a`^`^`\_`]]a^a^\_`^`^^^V  
@HWI-EAS443:3:20:1290:1942#0/1  
TTCTTTTCCATGACCGCCTGGTCCAATCGCACGCAAAGAG



@HWI-EAS443:3:25:856:666#0/1  
ATTAAATAAGCTGAAACGAGAAAGCTCTTATCTCTTGTT  
+HWI-EAS443:3:25:856:666#0/1  
aab`ababaaaabZa\_ab\_aa\_^a^a`a^a^`¥a]a\_`\_  
@HWI-EAS443:3:26:1554:1161#0/1  
CATTAATAAGCTGAAACGAGAAAGCTCTTATCTCTTGTT  
+HWI-EAS443:3:26:1554:1161#0/1  
`Lbb`ab`ab`bbbb`bbba\_^aaaa¥b`ab`b`bbb\_a  
@HWI-EAS443:3:28:1260:1384#0/1  
CATTAATAAGCTGAAACGAGAAAGCTCTTATCTCTTGTT  
+HWI-EAS443:3:28:1260:1384#0/1  
```bbb`\_ba^R[^`aW`abXMUV¥]\_]a]X]\_aaa]\_  
@HWI-EAS443:3:28:603:734#0/1  
CCGCTGGTCCAATCGCACGCAAAGAGGGCCTATTATCTT  
+HWI-EAS443:3:28:603:734#0/1  
aa`aa`ba`a`aaaaab¥a^^a`^^^`a`^^`¥a\_  
@HWI-EAS443:3:29:1036:1458#0/1  
ACTGAAGTTCGCTTTCAGTACTATGTTCTTTTCCATGACC  
+HWI-EAS443:3:29:1036:1458#0/1  
`^aUW\_VSaa]Saaa\_\_aGLVZ¥Q\_\_^[ZYV]L[a]U\_^P  
@HWI-EAS443:3:29:645:1472#0/1  
TTTTATCATTAATAAGCTGAAACGAGAAAGCTCTTATCT  
+HWI-EAS443:3:29:645:1472#0/1  
aaa^\_Za``]\_aaa]\_¥`a`a`^YZ\_]Xa`\_\_`\_^`]\_\_  
@HWI-EAS443:3:2:320:251#0/1  
CATTAATAAGCTGAAACGAGAAAGCTCTTATCTCTTGTT  
+HWI-EAS443:3:2:320:251#0/1  
abbbbabbaabaab`aaaaaba`aaaa\_aa\_aYa^a\_\_aa  
@HWI-EAS443:3:30:188:835#0/1  
GTGACAAAAACATAATGGACTCCAACACCATGTCAAGCTT  
+HWI-EAS443:3:30:188:835#0/1  
a¥aaa`Y^¥¥bbb]baa`aaabaYa`aaaa^aa`\_\_\_\_  
@HWI-EAS443:3:30:525:797#0/1  
GACAAAAACATAATGGACTCCAACACCATGTCAAGCTTTC  
+HWI-EAS443:3:30:525:797#0/1  
][a`¥^a`a\_baba`\_¥``babb\_^\_aa``^bb^a^`\_Z\_  
@HWI-EAS443:3:31:1171:623#0/1  
CAAAAACATAATGGACTCCAACACCATGTCAAGCTTTCAG  
+HWI-EAS443:3:31:1171:623#0/1  
abb]Zaaa^\_aaaY\_aaa^a`b`aaa`a\_aab¥¥Ya`a\_  
@HWI-EAS443:3:31:1326:1009#0/1  
TGACAAAAACATAATGGACTCCAACACCATGTCAAGCTTT  
+HWI-EAS443:3:31:1326:1009#0/1  
`bbbbabaabb`ab`Z``aaaa\_aaaaa\_`a\_aaa`^  
@HWI-EAS443:3:31:318:1181#0/1  
CATTAATAAGCTGAAACGAGAAAGCTCTTATCTCTTGTT  
+HWI-EAS443:3:31:318:1181#0/1  
aa``^aaa\_a\_a\_Y]aaaX¥ZWJXP¥U`]\_W^[\_XN[S]  
@HWI-EAS443:3:31:672:1015#0/1  
GTGTTTTTTTATCATTAATAAGCTGAAACGAGAAAGCTCT



@HWI-EAS443:3:34:1413:27#0/1  
CATTAATAAGCTGAAACGAGAAAGCTCTTATCTCTTGTT  
+HWI-EAS443:3:34:1413:27#0/1  
K¥`bb^¥aa\_b`bba`\_XbbaaabV``aba][baa^a\_a  
@HWI-EAS443:3:34:588:612#0/1  
GTGTTTTTTATCATTAAATAAGCTGAAACGAGAAAGCTCT  
+HWI-EAS443:3:34:588:612#0/1  
a^a\_`\_^`\_`a]a\_]````\_`\_\_\_`\_a\_\_`Z`W^]\_¥^Y]  
@HWI-EAS443:3:36:293:1085#0/1  
ATTAAATAAGCTGAAACGAGAAAGCTCTTATCTCTTGTTTC  
+HWI-EAS443:3:36:293:1085#0/1  
aaaa`R`bV`a\_aa`aaa`\_aU\_\_^`a¥\_\_\_^`\_`^Y¥^  
@HWI-EAS443:3:37:1694:1509#0/1  
GTGTTTTTTATCATTAAATAAGCTGAAACGAGAAAGCTCT  
+HWI-EAS443:3:37:1694:1509#0/1  
a\_b^aaaaa``¥`a`a\_\_`\_^¥¥\_\_`\_]aX^Z``X]S`]]  
@HWI-EAS443:3:38:1069:914#0/1  
CAAAAACATAATGGACTCCAACACCATGTCAAGCTTTCAG  
+HWI-EAS443:3:38:1069:914#0/1  
a^aaa^ab`aba`¥¥aaa\_`]^aa\_aa`X[POW]W^\_¥\_`^  
@HWI-EAS443:3:38:63:1212#0/1  
CATTAATAAGCTGAAACGAGAAAGCTCTTATCTCTTGTT  
+HWI-EAS443:3:38:63:1212#0/1  
aU]W¥¥X[^¥Y\_\_`¥]¥``\_S¥XU^\_Y`X]Z^Y¥¥^[[VU  
@HWI-EAS443:3:38:893:52#0/1  
GTGTTTTTTATCATTAAATAAGCTGAAACGAGAAAGCTCT  
+HWI-EAS443:3:38:893:52#0/1  
aZa\_\_aaaa\_\_Z^aa\_]`^\_¥^\_¥]^\_¥X^]U]YV[XYYZZ  
@HWI-EAS443:3:39:1391:1435#0/1  
ACTATGTTCTTTTCCATGACCGCCTGGTCCAATCGCACGC  
+HWI-EAS443:3:39:1391:1435#0/1  
aa`aab`a\_baab\_ab[a^`\_b`[SXYI``aS^aXLUH^]  
@HWI-EAS443:3:39:756:375#0/1  
GTGTTTTTTATCATTAAATAAGCTGAAACGAGAAAGCTCT  
+HWI-EAS443:3:39:756:375#0/1  
a]b\_]aaaa`[^`\_`a]`\_a\_\_`\_]a`U¥`¥X¥UX\_¥\_XV  
@HWI-EAS443:3:3:1225:950#0/1  
GGTGTTTTTTATCATTAAATAAGCTGAAACGAGAAAGCTC  
+HWI-EAS443:3:3:1225:950#0/1  
aa[b[aa^baaa^aaa`aa^PW]`a\_``Z\_\_`^`\_`\_¥\_P  
@HWI-EAS443:3:3:1230:1699#0/1  
GGTGTTTTTTATCATTAAATAAGCTGAAACGAGAAAGCTC  
+HWI-EAS443:3:3:1230:1699#0/1  
^ZZ`^\_aa^aa¥Y[\_`\_\_\_a\_`\_[^\_]``\_]`]]]]^\_U  
@HWI-EAS443:3:3:723:780#0/1  
GTGTTTTTTATCATTAAATAAGCTGAAACGAGAAAGCTCT  
+HWI-EAS443:3:3:723:780#0/1  
`H]JMUOT[`]a]UU^]PWLWS¥a\_`^S[WYSX^\_XUTZ  
@HWI-EAS443:3:42:301:1738#0/1  
CAGTACTATGTTCTTTTCCATGACCGCCTGGTCCAATCGC

+HWI-EAS443:3:42:301:1738#0/1  
\_aXWbbb]\_V^UR\_aZ^^a^aaaa`^bb``[[[a`aa\_a\_a  
@HWI-EAS443:3:43:1184:1219#0/1  
GGTGTTTTTTATCATTAAATAAGCTGAAACGAGAAAGCTC  
+HWI-EAS443:3:43:1184:1219#0/1  
a`Vb]Z\_HXZa\_¥\_`YRZZ[MSYTV`WUVWYZS[NRPKPP  
@HWI-EAS443:3:43:1324:600#0/1  
TTTTTATCATTAAATAAGCTGAAACGAGAAAGCTCTTATC  
+HWI-EAS443:3:43:1324:600#0/1  
X^SYZYPS^Z]T¥[QW^\_S^Z^`]\_\_a`ZWSWM^Q¥Y¥¥T  
@HWI-EAS443:3:45:558:655#0/1  
CAAAAACATAATGGACTCCAACACCATGTCAAGCTTTCAG  
+HWI-EAS443:3:45:558:655#0/1  
aa\_a`baab\_^`aaa\_aa]aa]`\_`aa`[`a``\_a\_\_\_\_a  
@HWI-EAS443:3:45:940:682#0/1  
CATTAAATAAGCTGAAACGAGAAAGCTCTTATCTCTTGTT  
+HWI-EAS443:3:45:940:682#0/1  
\_bbbaabbaYa`aa`\_baaaba``baa\_aa`aab^aabaa  
@HWI-EAS443:3:46:117:743#0/1  
GTTCTTTTCCATGACCGCCTGGTCCAATCGCACGCAAAGA  
+HWI-EAS443:3:46:117:743#0/1  
^^a]aaa]\_aaaWa¥``^Y¥VNGZY]]]¥a¥`TVV][^YQ  
@HWI-EAS443:3:46:1722:1942#0/1  
CAAAAACATAATGGACTCCAACACCATGTCAAGCTTTCAG  
+HWI-EAS443:3:46:1722:1942#0/1  
abbbbaabbaa`b``aaaaa`abaaa\_b\_aaaaaa\_0¥`  
@HWI-EAS443:3:46:1744:1291#0/1  
TTATCATTAAATAAGCTGAAACGAGAAAGCTCTTATCTCT  
+HWI-EAS443:3:46:1744:1291#0/1  
a``aa^a`\_aaa]`\_``aaa^aa^\_\_^\_\_^\_]\_\_]a^\_Y^  
@HWI-EAS443:3:46:504:461#0/1  
ACCGCCTGGTCCAATCGCACGCAAAGAGGCCTATTATCT  
+HWI-EAS443:3:46:504:461#0/1  
`\_a\_Wa\_\_`U`\_`\_\_\_aW\_^a\_\_S\_\_^\_^¥^]\_W\_¥Z^W\_  
@HWI-EAS443:3:46:57:1643#0/1  
GGTGTTTTTTATCATTAAATAAGCTGAAACGAGAAAGCTC  
+HWI-EAS443:3:46:57:1643#0/1  
a]]b[aaaa\_a`a`\_`[`aa¥]`\_`aa`aa`^`\_\_^Z¥\_T  
@HWI-EAS443:3:46:693:479#0/1  
ATTAAATAAGCTGAAACGAGAAAGCTCTTATCTCTTGTT  
+HWI-EAS443:3:46:693:479#0/1  
¥`bab`bbbbbbbabbaa¥``aababbaaaaabbaaaa  
@HWI-EAS443:3:47:1759:197#0/1  
ACTGAAGTTCGCTTTCAGTACTATGTTCTTTTCCATGACC  
+HWI-EAS443:3:47:1759:197#0/1  
aaabHTTP[```\_\_`aaYaX¥Sa]a\_¥^Y``\_] ^NV]]R YR  
@HWI-EAS443:3:47:684:524#0/1  
TTTTTATCATTAAATAAGCTGAAACGAGAAAGCTCTTATC  
+HWI-EAS443:3:47:684:524#0/1  
[]\_a`¥b\_aba¥]Z]]¥Z¥`a\_a\_\_a]]][Z^\_]\_\_`UV^]



@HWI-EAS443:3:48:105:1377#0/1  
GGTGTTTTTTATCATTAAATAAGCTGAAACGAGAAAGCTC  
+HWI-EAS443:3:48:105:1377#0/1  
\_ZR`T`\_aa¥YYZaZ[U]a\_`\_`PRX[`Y]Z¥\_[WYY[UZ  
@HWI-EAS443:3:48:346:1224#0/1  
CGGTCATGGAAAAGAACATAGTACTGAAAGCGAACTTCAG  
+HWI-EAS443:3:48:346:1224#0/1  
[^VJQV^a¥X\_aYY^^Z`b`WS[a\_Y^^aY`\_`\_Xab`\_K  
@HWI-EAS443:3:49:148:1774#0/1  
CATTAAATAAGCTGAAACGAGAAAGCTCTTATCTCTTGTT  
+HWI-EAS443:3:49:148:1774#0/1  
HYaaba\_aa^a^¥`¥baS^`\_ba¥¥^b`a¥^bbbbbab]Y  
@HWI-EAS443:3:4:1592:198#0/1  
ATTAATAAGCTGAAACGAGAAAGCTCTTATCTCTTGTT  
+HWI-EAS443:3:4:1592:198#0/1  
Xbbaaa]^Z`X^[YYa^baa\_\_X\_Va\_`\_`]YF[[^\_\_W[B  
@HWI-EAS443:3:4:475:1369#0/1  
CATTAAATAAGCTGAAACGAGAAAGCTCTTATCTCTTGTT  
+HWI-EAS443:3:4:475:1369#0/1  
aaabbbba`abaabababbabaaaa`\_baab\_b\_babaa  
@HWI-EAS443:3:51:1262:1690#0/1  
CAAAAACATAATGGACTCCAACACCATGTCAAGCTTTCAG  
+HWI-EAS443:3:51:1262:1690#0/1  
\_aaaab]^`\_bbabbab\_Q\_bb¥aVbb^b\_]XabJb`bTbb  
@HWI-EAS443:3:51:1453:293#0/1  
CATTAAATAAGCTGAAACGAGAAAGCTCTTATCTCTTGTT  
+HWI-EAS443:3:51:1453:293#0/1  
]abbbbbbbbab\_bbbbbbbbab`bababbabbabb`b  
@HWI-EAS443:3:52:363:1009#0/1  
ATTAATAAGCTGAAACGAGAAAGCTCTTATCTCTTGTT  
+HWI-EAS443:3:52:363:1009#0/1  
aabaaaba`aa\_a`aa`a`aY`[^`\_a`a`\_``]a\_a[\_\_\_  
@HWI-EAS443:3:52:576:1723#0/1  
GTGTTTTTTATCATTAAATAAGCTGAAACGAGAAAGCTCT  
+HWI-EAS443:3:52:576:1723#0/1  
aOWGR¥VV[]]YX¥\_[]XX[[YVR¥]]XO[WXYSVZWYSY  
@HWI-EAS443:3:52:689:1758#0/1  
CATTAAATAAGCTGAAACGAGAAAGCTCTTATCTCTTGTT  
+HWI-EAS443:3:52:689:1758#0/1  
abbaaaba`aaaa^b`aaaaa]^`a\_a\_\_a\_a`a\_a`a]¥  
@HWI-EAS443:3:53:1783:808#0/1  
GTGTTTTTTATCATTAAATAAGCTGAAACGAGAAAGCTCT  
+HWI-EAS443:3:53:1783:808#0/1  
\_¥\_aaa]^`a\_WV\_aaaVaZ^X¥[a`a^WZZ[^T[]RVWQ  
@HWI-EAS443:3:54:216:865#0/1  
GTGTTTTTTATCATTAAATAAGCTGAAACGAGAAAGCTCT  
+HWI-EAS443:3:54:216:865#0/1  
a^a^aabbbaaaaaa`a\_aa\_a^aa]aa`a^`^^Z`Y[`\_  
@HWI-EAS443:3:54:805:1057#0/1  
GGTGACAAAAACATAATGGACTCCAACACCATGTCAAGCT

+HWI-EAS443:3:54:805:1057#0/1  
abIbaabbabb^abbaaaaa`ab\_aaaa`]aba^\_`^a`a  
@HWI-EAS443:3:55:1122:1139#0/1  
GACCGCCTGGTCCAATCGCACGCAAAGAGGGCCTATTATC  
+HWI-EAS443:3:55:1122:1139#0/1  
aabbabbabaZ\_aa`X]ba]ab``a`aaa`a\_`aaa`a`¥  
@HWI-EAS443:3:55:1439:1814#0/1  
TTTATCATTAATAAGCTGAAACGAGAAAGCTCTTATCTC  
+HWI-EAS443:3:55:1439:1814#0/1  
a^a^`U\_`\_\_\_^^a^aT¥`¥`V]^^\_YYVIWW^[[[Z[  
@HWI-EAS443:3:55:1505:426#0/1  
GTTTTTTATCATTAATAAGCTGAAACGAGAAAGCTCTTA  
+HWI-EAS443:3:55:1505:426#0/1  
a\_\_a`aa\_`\_`aa^\_\_a\_\_]\_\_^\_\_]\_\_^[]]\_W\_Z^]]  
@HWI-EAS443:3:55:1730:955#0/1  
GGTGACAAAAACATAATGGACTCCAACACCATGTCAAGCT  
+HWI-EAS443:3:55:1730:955#0/1  
[JR\_`S^Z\_a`aXbaa]ba\_\_a\_`Z¥a`\_`a\_\_T\_aYT\_  
@HWI-EAS443:3:55:1779:973#0/1  
GACCGCCTGGTCCAATCGCACGCAAAGAGGGCCTATTATC  
+HWI-EAS443:3:55:1779:973#0/1  
\_\_a\_T`b\_TO^W\_b\_]V``Zb^WZ\_TZ[\_]ZbW`abaaaa  
@HWI-EAS443:3:55:941:842#0/1  
CAAAAACATAATGGACTCCAACACCATGTCAAGCTTTTCAG  
+HWI-EAS443:3:55:941:842#0/1  
abbabb\_aaa\_bbb\_`bbabbabaabbbab`a\_ab\_Q`V  
@HWI-EAS443:3:56:1432:1175#0/1  
GTTCGCTTTTCAGTACTATGTTCTTTTCCATGACCGCCTGG  
+HWI-EAS443:3:56:1432:1175#0/1  
^^a`aabbb\_aa^]\_babba^]bab\_V]]aa`]Xa`]`a`  
@HWI-EAS443:3:56:821:1074#0/1  
ACCGCCTGGTCCAATCGCACGCAAAGAGGGCCTATTATCT  
+HWI-EAS443:3:56:821:1074#0/1  
a`aa\_aaaaW\_a``a`\_\_a^``^[\_[\_``\_XV`¥^Z^a\_\_  
@HWI-EAS443:3:57:1243:1487#0/1  
ATTAAATAAGCTGAAACGAGAAAGCTCTTATCTCTTGTC  
+HWI-EAS443:3:57:1243:1487#0/1  
abb`]IVa`aR¥a`]a\_¥Y\_\_`\_¥][P]``\_\_^^`\_\_X[R  
@HWI-EAS443:3:57:354:1168#0/1  
CACTGAAGTTTCGCTTTTCAGTACTATGTTCTTTTCCATGAC  
+HWI-EAS443:3:57:354:1168#0/1  
ab`b¥W]aabaaaabba[b\_aaaabb\_`abaaa\_]a```a  
@HWI-EAS443:3:57:911:666#0/1  
GGTGTTTTTTATCATTAATAAGCTGAAACGAGAAAGCTC  
+HWI-EAS443:3:57:911:666#0/1  
abX\_V`bbbbba^`aa`aaa`¥][`a]a\_aa[a\_[Za\_``  
@HWI-EAS443:3:58:1430:389#0/1  
CAAAAACATAATGGACTCCAACACCATGTCAAGCTTTTCAG  
+HWI-EAS443:3:58:1430:389#0/1  
abaaabaabaaababaaba```a``aaa``a\_a^``a\_`a

@HWI-EAS443:3:58:697:57#0/1  
AAAACATAATGGACTCCAACACCATGTCAAGCTTTCAGGT  
+HWI-EAS443:3:58:697:57#0/1  
a`¥`a[aS`a]PUYa¥`a`Z[\_aa]\_a^a[``Y[a\_0  
@HWI-EAS443:3:58:804:797#0/1  
ATTAATAAGCTGAAACGAGAAAGCTCTTATCTCTTGTTTC  
+HWI-EAS443:3:58:804:797#0/1  
a`baab\_¥aaaa`aaa\_\_b\_^W\_\_a^aa`a[`a\_`aYa`  
@HWI-EAS443:3:58:836:1720#0/1  
GTGTTTTTTATCATTAAATAAGCTGAAACGAGAAAGCTCT  
+HWI-EAS443:3:58:836:1720#0/1  
a¥`T\_¥Y[\_\_\_^`\_W]^]VTVV^^^ZVYV^[XXXXXZ]  
@HWI-EAS443:3:59:531:695#0/1  
GTGTTTTTTATCATTAAATAAGCTGAAACGAGAAAGCTCT  
+HWI-EAS443:3:59:531:695#0/1  
a\_a\_aaaa]X]SX\_``¥^`Y[Y[`]¥WX[^ZXUOULYV¥  
@HWI-EAS443:3:5:35:1254#0/1  
GGTGTTTTTTATCATTAAATAAGCTGAAACGAGAAAGCTC  
+HWI-EAS443:3:5:35:1254#0/1  
^^0SU\_aXaaaY`Ya^Yaa[a^Saa]]V[QZTHK¥¥\_B  
@HWI-EAS443:3:60:341:1918#0/1  
GTTTTTTATCATTAAATAAGCTGAAACGAGAAAGCTCTTA  
+HWI-EAS443:3:60:341:1918#0/1  
a]\_X^]Z¥Z\_`[UW^a\_^YU[¥U¥]OYSZ][]WY[WLSWU  
@HWI-EAS443:3:61:1162:638#0/1  
TTTTTATCATTAAATAAGCTGAAACGAGAAAGCTCTTATC  
+HWI-EAS443:3:61:1162:638#0/1  
abbbaaaaabaaaa\_aaabY`^aaaa\_a^a[`^a\_^\_U  
@HWI-EAS443:3:61:587:686#0/1  
TTTCAGTACTATGTTCTTTTCCATGACCGCCTGGTCCAAT  
+HWI-EAS443:3:61:587:686#0/1  
a`a`][\_]Uaa^a`a\_\_^`a\_]`¥`\_\_`^\_^]U\_X\_YY  
@HWI-EAS443:3:61:692:988#0/1  
GGTGTTTTTTATCATTAAATAAGCTGAAACGAGAAAGCTC  
+HWI-EAS443:3:61:692:988#0/1  
a`Y¥]`\_\_\_\_`\_\_^`^¥P¥\_\_TX\_WY]\_`\_]^[Z][^[[W  
@HWI-EAS443:3:62:145:1999#0/1  
GTTTTTTATCATTAAATAAGCTGAAACGAGAAAGCTCTTA  
+HWI-EAS443:3:62:145:1999#0/1  
\_NN[aTa[D[]V0`X[^RYVU[QX\_]X¥W^SQLP¥QGOMW  
@HWI-EAS443:3:62:798:1743#0/1  
AACATAATGGACTCCAACACCATGTCAAGCTTTCAGGTAG  
+HWI-EAS443:3:62:798:1743#0/1  
abaaaa`¥`aaaab¥b`aaaa`a¥aaaa``Z`Y\_`ZWa]  
@HWI-EAS443:3:63:58:138#0/1  
GTGTTTTTTATCATTAAATAAGCTGAAACGAGAAAGCTCT  
+HWI-EAS443:3:63:58:138#0/1  
aVaZSY\_\_^^][[aZORH¥XUT^Z\_^]Y]VY^UUUWWU[[  
@HWI-EAS443:3:64:1081:1185#0/1  
TTTTTATCATTAAATAAGCTGAAACGAGAAAGCTCTTATCT

+HWI-EAS443:3:64:1081:1185#0/1  
aaaa\_`^\_\_`a`a]a\_\_\_a]]aaa`aaYU]^Y^]Y``\_`X`  
@HWI-EAS443:3:64:1733:1031#0/1  
GTTTTTTTATCATTAAATAAGCTGAAACGAGAAAGCTCTTA  
+HWI-EAS443:3:64:1733:1031#0/1  
a`Z[[T]Y¥FJPRYJP^a`ZMZ¥UWFW`^W[ZRRDDSY]Q  
@HWI-EAS443:3:65:125:698#0/1  
GGTGTTTTTTATCATTAAATAAGCTGAAACGAGAAAGCTC  
+HWI-EAS443:3:65:125:698#0/1  
a]La[\_`\_TQ[[`[\_[¥VXTUY^^]^VXHXXRX\_WTZ[SZ  
@HWI-EAS443:3:65:504:1603#0/1  
ACATAATGGACTCCAACACCATGTCAAGCTTTCAGGTAGA  
+HWI-EAS443:3:65:504:1603#0/1  
a`^ab\_Wa]\_a^a`\_W`\_a`a^^Z^`\_]\_\_ZZ\_\_^^[G\_¥[  
@HWI-EAS443:3:65:749:384#0/1  
GGTGTTTTTTATCATTAAATAAGCTGAAACGAGAAAGCTC  
+HWI-EAS443:3:65:749:384#0/1  
abY`Vaabaaaa\_[aaa^`aa\_a^\_a`\_`\_a^`Z]Y`\_`\_]  
@HWI-EAS443:3:65:800:356#0/1  
ATCATTAAATAAGCTGAAACGAGAAAGCTCTTATCTCTTG  
+HWI-EAS443:3:65:800:356#0/1  
aa^`aa]\_\_\_\_[\_`¥`¥`¥`MYW¥¥]^`a¥]X^Y`^Y\_Y\_]`^  
@HWI-EAS443:3:66:1380:1256#0/1  
GTGTTTTTTATCATTAAATAAGCTGAAACGAGAAAGCTCT  
+HWI-EAS443:3:66:1380:1256#0/1  
YN^VZ^^^0^¥Za]X]VW[[¥aYP\_]Z]¥ZY^VNT^¥[]`  
@HWI-EAS443:3:66:269:2028#0/1  
GGTGTTTTTTATCATTAAATAAGCTGAAACGAGAAAGCTC  
+HWI-EAS443:3:66:269:2028#0/1  
^[[b]]ab`Y`aaV`aa^a`aaaa^b^aa\_aaYQZ`Z\_  
@HWI-EAS443:3:66:550:1282#0/1  
CATTAAATAAGCTGAAACGAGAAAGCTCTTATCTCTTGTT  
+HWI-EAS443:3:66:550:1282#0/1  
abab\_a¥`a\_aa\_\_`a`aa`^¥`^aa`\_`^Za]a\_a]^¥  
@HWI-EAS443:3:66:77:274#0/1  
TTTCCATGACCGCCTGGTCCAATCGCACGCAAAGAGGGCC  
+HWI-EAS443:3:66:77:274#0/1  
aaabbbba^[aa`aa`\_¥Z^`aa\_aaa\_[a^¥^[¥[^Z^]U  
@HWI-EAS443:3:67:1394:489#0/1  
CAAAAACATAATGGACTCCAACACCATGTCAAGCTTTCAG  
+HWI-EAS443:3:67:1394:489#0/1  
abb``abbbbbbaaababababaabbb`^baa\_a`\_]a`  
@HWI-EAS443:3:6:1300:537#0/1  
ATTAAATAAGCTGAAACGAGAAAGCTCTTATCTCTTGTT  
+HWI-EAS443:3:6:1300:537#0/1  
abbbbaba\_]\_a`a`a`aab`]^a]^Wb^aa]^Yaaa\_a`  
@HWI-EAS443:3:6:1614:650#0/1  
GGTGTTTTTTATCATTAAATAAGCTGAAACGAGAAAGCTC  
+HWI-EAS443:3:6:1614:650#0/1  
aaVa`abbab\_aaabbaa`bbab\_\_b`b`\_]aa\_\_`a`Y

@HWI-EAS443:3:6:1669:2018#0/1  
GTGTTTTTTATCATTAAATAAGCTGAAACGAGAAAGCTCT  
+HWI-EAS443:3:6:1669:2018#0/1  
]O\_W[`a\_Z]^\_Y]aZ]\_\_¥¥aa`a¥X]`a¥`PQQ^]\_T\_  
@HWI-EAS443:3:6:195:1856#0/1  
GACCGCTGGTCCAATCGCACGCAAAGAGGGCCTATTATC  
+HWI-EAS443:3:6:195:1856#0/1  
\_`bb\_ZabaZ]bTabZa`abZ`^Xaa\_`ab`¥]baaUa\_Z  
@HWI-EAS443:3:70:1551:117#0/1  
GTGTTTTTTATCATTAAATAAGCTGAAACGAGAAAGCTCT  
+HWI-EAS443:3:70:1551:117#0/1  
a`a`aaaaaaa\_`aaa\_aa`\_`\_`a\_\_¥Y`\_`^[Z\_]\_Z`  
@HWI-EAS443:3:70:858:1434#0/1  
ATTAATAAGCTGAAACGAGAAAGCTCTTATCTCTTGTTTC  
+HWI-EAS443:3:70:858:1434#0/1  
aaabbaabbabaaa``babaaa^\_aaaaaaaa`aaa\_\_a  
@HWI-EAS443:3:71:1348:1489#0/1  
GTGTTTTTTATCATTAAATAAGCTGAAACGAGAAAGCTCT  
+HWI-EAS443:3:71:1348:1489#0/1  
`^b\_`babaaa^aa`aa`aa\_\_¥aa`a```\_`\_`^\_¥\_¥\_  
@HWI-EAS443:3:72:347:1157#0/1  
GGTGTTTTTTATCATTAAATAAGCTGAAACGAGAAAGCTC  
+HWI-EAS443:3:72:347:1157#0/1  
T`Gb[a`abW\_a^bba¥b\_]X]b`b`ba\_baaaVVa]\_]\_  
@HWI-EAS443:3:72:646:820#0/1  
GTTTTTTATCATTAAATAAGCTGAAACGAGAAAGCTCTTA  
+HWI-EAS443:3:72:646:820#0/1  
a\_aaaaaa`\_``aaa\_`\_`a`\_\_\_a\_`\_`^\_]^^^`^\_`^Y  
@HWI-EAS443:3:72:864:918#0/1  
CAAAAACATAATGGACTCCAACACCATGTCAAGCTTTCAG  
+HWI-EAS443:3:72:864:918#0/1  
^]Z¥Y¥\_S`Z]`\_¥¥Y\_a\_W¥W^aa`^Waa^U]\_VZ^\_\_^  
@HWI-EAS443:3:73:1363:1630#0/1  
CATTAAATAAGCTGAAACGAGAAAGCTCTTATCTCTTGTT  
+HWI-EAS443:3:73:1363:1630#0/1  
`bbbbbbbababaa`a`\_`^`^W\_`^]\_`^^¥\_¥\_¥\_`^\_[^  
@HWI-EAS443:3:73:343:1302#0/1  
GTTTTTTATCATTAAATAAGCTGAAACGAGAAAGCTCTTA  
+HWI-EAS443:3:73:343:1302#0/1  
aaaaaaaaabaaaaaaaaa¥\_a`aaa\_`a```\_`^`^`a\_\_  
@HWI-EAS443:3:73:435:710#0/1  
CAAAAACATAATGGACTCCAACACCATGTCAAGCTTTCAG  
+HWI-EAS443:3:73:435:710#0/1  
`bbbb\_bbb\_bbbababbabbbbb`ab]bbaaaa`aaaa  
@HWI-EAS443:3:74:193:202#0/1  
ATCATTAAATAAGCTGAAACGAGAAAGCTCTTATCTCTTG  
+HWI-EAS443:3:74:193:202#0/1  
`bbabba\_ab`aaaaaaaaaba`a\_\_aa`a```^a^`\_`^\_  
@HWI-EAS443:3:75:1235:1081#0/1  
ACAAAACATAATGGACTCCAACACCATGTCAAGCTTTC

+HWI-EAS443:3:75:1235:1081#0/1  
`babab`^`bab`\_\_^aaaabb\_X`aa¥`\_\_`\_^`\_\_\_`S`  
@HWI-EAS443:3:75:1464:440#0/1  
GGTGACAAAAACATAATGGACTCCAACACCATGTCAAGCT  
+HWI-EAS443:3:75:1464:440#0/1  
aaY^bZbbab`Z`a`^`aR`]^MVaaaa`a`aQ]aTa\_a  
@HWI-EAS443:3:76:161:1068#0/1  
CATTAATAAGCTGAAACGAGAAAGCTCTTATCTCTTGTT  
+HWI-EAS443:3:76:161:1068#0/1  
aabbabba^`ababababbaa[a`aaaa\_aa`aaa`a`  
@HWI-EAS443:3:76:69:813#0/1  
TGACCGCCTGGTCCAATCGCACGCAAAGAGGGCCTATTAT  
+HWI-EAS443:3:76:69:813#0/1  
\_\_`a`aa\_[`aS`\_\_`\_¥\_a`\_\_`^0¥NW¥¥¥WV¥¥U^W  
@HWI-EAS443:3:77:315:1545#0/1  
GTGTTTTTTTATCATTAAATAAGCTGAAACGAGAAAGCTCT  
+HWI-EAS443:3:77:315:1545#0/1  
a\_a`a``aaaaaa`aa`^aX\_^[[`a``\_^`[¥\_`]\_\_  
@HWI-EAS443:3:77:680:1202#0/1  
CTGAAGTTTCGCTTTCAGTACTATGTTCTTTTCCATGACCG  
+HWI-EAS443:3:77:680:1202#0/1  
aa`bbaabbabbbabba\_aababbabbbbaaba¥bbaa  
@HWI-EAS443:3:79:1059:969#0/1  
GTTCGCTTTCAGTACTATGTTCTTTTCCATGACCGCCTGG  
+HWI-EAS443:3:79:1059:969#0/1  
`UV\_^`\_ba[X]aYW)`\_[\_`aaa\_]`a\_YYSQVJZVN  
@HWI-EAS443:3:79:1358:1581#0/1  
GGTGTTTTTTATCATTAAATAAGCTGAAACGAGAAAGCTC  
+HWI-EAS443:3:79:1358:1581#0/1  
`b\_aTY¥a]]¥`^]b¥`a\_a`^Z]¥Y`bbZW]]`¥^`]YT  
@HWI-EAS443:3:79:306:631#0/1  
TAGGCCCTCTTTGCGTGCATTGGACCAGCGGTCATGGA  
+HWI-EAS443:3:79:306:631#0/1  
aba``\_babbaabbabb\_aa`aab`bbbbba`JFUZVRR  
@HWI-EAS443:3:79:992:1589#0/1  
GTGACAAAAACATAATGGACTCCAACACCATGTCAAGCTT  
+HWI-EAS443:3:79:992:1589#0/1  
`]\_aaabbaaaa\_baa`YaZ\_a^aa^`\_`\_`\_YR`W^^¥Y  
@HWI-EAS443:3:80:1153:665#0/1  
GTTCGCTTTCAGTACTATGTTCTTTTCCATGACCGCCTGG  
+HWI-EAS443:3:80:1153:665#0/1  
a^a`a\_a\_\_\_\_\_T`Va`\_a`[^`\_`\_¥^`\_`[[Y^VW^`^  
@HWI-EAS443:3:80:527:1736#0/1  
GACCGCCTGGTCCAATCGCACGCAAAGAGGGCCTATTATC  
+HWI-EAS443:3:80:527:1736#0/1  
\_`bbabbb`\_R]bbbaa]`b\_a¥``\_a\_a\_a``\_baaaaa  
@HWI-EAS443:3:80:559:689#0/1  
GACCGCCTGGTCCAATCGCACGCAAAGAGGGCCTATTATC  
+HWI-EAS443:3:80:559:689#0/1  
¥]\_``^\_Z^XZ^\_\_\_\_`¥\_^]Z\_abaaaa¥\_XX]¥`bba`]

@HWI-EAS443:3:80:670:285#0/1  
AGATAATAGGCCCTCTTTGCGTGCGATTGGACCAGGCGGT  
+HWI-EAS443:3:80:670:285#0/1  
\_`a`Z`aaaaY`a`^`aZ]^a`X]a\_VQSZ^BBBBB  
@HWI-EAS443:3:81:1266:1578#0/1  
TTATCATTAATAAGCTGAAACGAGAAAGCTCTTATCTCT  
+HWI-EAS443:3:81:1266:1578#0/1  
aaaa\_`baaa`aa`\_S^a\_\_Y]¥`^Y\_]\_\_`\_`\_¥^]  
@HWI-EAS443:3:81:1339:1221#0/1  
TTTTTATCATTAATAAGCTGAAACGAGAAAGCTCTTATC  
+HWI-EAS443:3:81:1339:1221#0/1  
W^YX^ZP^Q^b\_] [¥^^X][a\_aKX¥```OG`]]^^`ZV¥  
@HWI-EAS443:3:83:538:1882#0/1  
GAAGTTCGCTTTCAGTACTATGTTCTTTTCCATGACCGCC  
+HWI-EAS443:3:83:538:1882#0/1  
^^\_XT]a\_abaaa`a\_baaba`]aabaaaa`a[a]b\_a\_  
@HWI-EAS443:3:83:921:575#0/1  
ACCGCCTGGTCCAATCGCACGCAAAGAGGGCCTATTATCT  
+HWI-EAS443:3:83:921:575#0/1  
T^`aabaabUaaaa\_ab`Vaba^Z`¥`^a\_[¥\_\_a\_``\_  
@HWI-EAS443:3:84:1742:1563#0/1  
CATTAATAAGCTGAAACGAGAAAGCTCTTATCTCTTGTT  
+HWI-EAS443:3:84:1742:1563#0/1  
P\_¥R]QQ^R[`¥bUUU¥Z^bb¥babb`¥\_Z`K`b[\_`\_\_a  
@HWI-EAS443:3:85:193:1858#0/1  
TGACCGCCTGGTCCAATCGCACGCAAAGAGGGCCTATTAT  
+HWI-EAS443:3:85:193:1858#0/1  
^abbbba^`\_OIQ`U`Xbaa`aaaVQVXXVa[[a¥RZX  
@HWI-EAS443:3:85:640:1534#0/1  
GTGTTTTTTATCATTAATAAGCTGAAACGAGAAAGCTCT  
+HWI-EAS443:3:85:640:1534#0/1  
aY^]aa`aaa\_aaaabaaa\_`\_`a`]a^`]\_\_^\_a`W`  
@HWI-EAS443:3:86:1262:392#0/1  
ACTGAAGTTCGCTTTCAGTACTATGTTCTTTTCCATGACC  
+HWI-EAS443:3:86:1262:392#0/1  
] ]ba¥Z\_N^¥`ZWW¥ZM\_Y]``^a]^a¥[[a^QSZ^a\_VS  
@HWI-EAS443:3:86:650:676#0/1  
CATTAATAAGCTGAAACGAGAAAGCTCTTATCTCTTGTT  
+HWI-EAS443:3:86:650:676#0/1  
aabbbbbbbbaaababab\_bb\_aab\_babbabababbbbaa  
@HWI-EAS443:3:86:672:80#0/1  
GTGTTTTTTATCATTAATAAGCTGAAACGAGAAAGCTCT  
+HWI-EAS443:3:86:672:80#0/1  
a^bV`^a]aa`¥aaa]W]aYL\_Y]aU`\_Y\_\_\_YNR\_U]Y`  
@HWI-EAS443:3:87:1339:183#0/1  
GGTGACAAAAACATAATGGACTCCAACACCATGTCAAGCT  
+HWI-EAS443:3:87:1339:183#0/1  
`ZL]`WOQO^]]YV^SV]`ZVYOD[¥S\_KN¥P¥QQPYVNS  
@HWI-EAS443:3:89:161:787#0/1  
CATTAATAAGCTGAAACGAGAAAGCTCTTATCTCTTGTT

+HWI-EAS443:3:89:161:787#0/1  
abaabbbb^babbbabbbbabaababbbbab`aab`bba  
@HWI-EAS443:3:89:970:2036#0/1  
ATTAAATAAGCTGAAACGAGAAAGCTCTTATCTCTTGTTTC  
+HWI-EAS443:3:89:970:2036#0/1  
`bbbaabbbaaa`aa`bbaaaa\_a^a¥aHa`\_aYa`QXW^  
@HWI-EAS443:3:90:220:605#0/1  
CAAAAACATAATGGACTCCAACACCATGTCAAGCTTTCAG  
+HWI-EAS443:3:90:220:605#0/1  
]`b`bbbbbbbababbbbbbbbbbbbabbbabbaaabab  
@HWI-EAS443:3:90:932:393#0/1  
CTTTTCCATGACCGCCTGGTCCAATCGCACGCAAAGAGGG  
+HWI-EAS443:3:90:932:393#0/1  
`bbbabbbbaYa`bbaabb`abaabab[bb\_a`a^bba^b  
@HWI-EAS443:3:91:1170:817#0/1  
ACTATGTTCTTTTCCATGACCGCCTGGTCCAATCGCACGC  
+HWI-EAS443:3:91:1170:817#0/1  
a`b`\_abaaaabaaa`aaa^aaa\_a\_aaT\_\_\_\_\_[-]`^`W  
@HWI-EAS443:3:91:467:1679#0/1  
TGTTCTTTTCCATGACCGCCTGGTCCAATCGCACGCAAAG  
+HWI-EAS443:3:91:467:1679#0/1  
a`aaaabbaabaa¥baaaa`abZa`aa`\_`a\_`¥\_`\_]  
@HWI-EAS443:3:91:566:1217#0/1  
TTTTATCATTAATAAGCTGAAACGAGAAAGCTCTTATCT  
+HWI-EAS443:3:91:566:1217#0/1  
abbb`ababaaaabaaaaaaaa`aa\_`\_^a\_a\_a`a\_`  
@HWI-EAS443:3:91:765:144#0/1  
GTTTTTTATCATTAATAAGCTGAAACGAGAAAGCTCTTA  
+HWI-EAS443:3:91:765:144#0/1  
aQJS^¥YTXYYXNXW[XXXNXW[MMTUYY[YWSXUYVXX  
@HWI-EAS443:3:92:1160:1605#0/1  
CAAAAACATAATGGACTCCAACACCATGTCAAGCTTTCAG  
+HWI-EAS443:3:92:1160:1605#0/1  
abbbbbbbbbbbbabbbbabbbbabba`bbba`bbaba  
@HWI-EAS443:3:94:675:766#0/1  
CACTGAAGTTCGCTTTCAGTACTATGTTCTTTTCCATGAC  
+HWI-EAS443:3:94:675:766#0/1  
a^`bb^^\_[bbaa`abaa`a`aba\_aabaaaaSaa\_a\_  
@HWI-EAS443:3:97:973:1847#0/1  
GACCGCCTGGTCCAATCGCACGCAAAGAGGGCCTATTATC  
+HWI-EAS443:3:97:973:1847#0/1  
a`aa¥a^^`ZS\_aa^]a\_a¥`X`\_a¥¥`\_¥MS¥Z¥`¥OB  
@HWI-EAS443:3:9:1579:897#0/1  
ATTAAATAAGCTGAAACGAGAAAGCTCTTATCTCTTGTTTC  
+HWI-EAS443:3:9:1579:897#0/1  
abb`aaaaaaaab`aab`a`\_`a[-]aa`aYa^a\_a\_a^  
@HWI-EAS443:3:9:770:764#0/1  
ATTAAATAAGCTGAAACGAGAAAGCTCTTATCTCTTGTTTC  
+HWI-EAS443:3:9:770:764#0/1  
a`TZa[Y\_¥X`baa`Z\_a\_a\_aa\_aYa[Y`S^Qaa\_[^0



@HWI-EAS443:3:8:220:374#0/1  
CGGTTACCACCATCAAAATGAGCAGGGGTCAGGATATGCA  
+HWI-EAS443:3:8:220:374#0/1  
^R]U¥YDV`^¥Q^`QQ]¥]Y[OZU]TVRTSSYJPSY¥[TB  
@HWI-EAS443:3:94:598:184#0/1  
GGGGCATTCAATTCGACTGATTTGACTATTTTTCCCTTTT  
+HWI-EAS443:3:94:598:184#0/1  
a\_XNX^[IMZ¥Q]QPHZO[OV`SWP[VPOFPS^GNYYWYB  
@HWI-EAS443:3:87:665:1536#0/1  
AACAAAGCCTCTATCAGAATGCAGATGCATATGTTTTTGT  
+HWI-EAS443:3:87:665:1536#0/1  
`\_RUZWHWDSYY\_\_T¥]^URV`[]PYWVUJ\_`a]`WVPF  
@HWI-EAS443:3:88:1540:1827#0/1  
CAAAATTAACAGAGAAGAGATAGATGGGGTAAAGCAGGA  
+HWI-EAS443:3:88:1540:1827#0/1  
aa\_QY\_bb¥`aZU^b[b\_]ZOaW[`bb\_JbIK\_¥aLaa^`  
@HWI-EAS443:3:12:697:410#0/1  
GCCTATGGCACCTATACGTGTATCTGTAGTCTTTGATGAA  
+HWI-EAS443:3:12:697:410#0/1  
S^\_¥aZaVa\_X\_^L]]Z\_]`\_VXbbba`\_S¥]Z^bb`\_HZ  
@HWI-EAS443:3:100:117:1925#0/1  
AATGGACATGAACTGAGCAATCTTGCAAAGGAGAGAAAG  
+HWI-EAS443:3:100:117:1925#0/1  
a`b^``aaa\_¥aa^^a`\_aa^`a`^^`\_`\_\_^^\_\_BB  
@HWI-EAS443:3:1:637:18#0/1  
ACGGCCCCCTTGCCCAATTAGCACATTAGCTTTCTCTCTT  
+HWI-EAS443:3:1:637:18#0/1  
a¥aaVOOX`\_R]MR]V`\_^\_O[UX^^^YLIV^XXBBBBBB  
@HWI-EAS443:3:1:792:1504#0/1  
GCAGACAAGAGAAAGCTAATGTGCTAATTGGGCAAGGGGA  
+HWI-EAS443:3:1:792:1504#0/1  
aa`[^YY`^^aa\_`¥a`ZDT\_\_`^^`\_`^NZ¥`¥aBB  
@HWI-EAS443:3:27:327:1749#0/1  
CCAGACAAGAGAAAGCTAATGTGCTAATTGGGCAAGGGGA  
+HWI-EAS443:3:27:327:1749#0/1  
S¥abbaba`abaSU[]bab¥XWbbababab¥^`baaa`a  
@HWI-EAS443:3:28:1265:1320#0/1  
GCAGACAAGAGAAAGCTAATGTGCTAATTGGGCAAGGGGA  
+HWI-EAS443:3:28:1265:1320#0/1  
]Y[a``]SZ]`VYU\_S\_\_`a[]\_]¥a`a``^X]]`YR  
@HWI-EAS443:3:36:799:778#0/1  
GCAGACAAGAGAAAGCTAATGTGCTAATTGGGCAAGGGGA  
+HWI-EAS443:3:36:799:778#0/1  
`a\_aa\_S^aaaaaaaa\_aa`\_a^a``[T]^`\_\_^^`\_\_`\_`\_  
@HWI-EAS443:3:45:202:176#0/1  
GCAGACAAGAGAAAGCTAATGTGCTAATTGGGCAAGGGGA  
+HWI-EAS443:3:45:202:176#0/1  
a`aaaaaaaaabaaaaaaaa`\_aa\_a\_aaaaaaaa\_\_aaaa]  
@HWI-EAS443:3:62:245:438#0/1  
GCAGACAAGAGAAAGCTAATGTGCTAATTGGGCAAGGGGA

+HWI-EAS443:3:62:245:438#0/1  
aaaa]aaaaaa`WX`a\_R`a]aa`Z`\_\_\_\_\_`[¥\_[Z^R  
@HWI-EAS443:3:71:54:520#0/1  
TCCCCTTGCCCAATTAGCACATTAGCTTTCTCTGTCTGC  
+HWI-EAS443:3:71:54:520#0/1  
`bbbaVT^ab`\_Y¥¥[¥[\_0`\_]`]`aa`a`¥]\_] ]  
@HWI-EAS443:3:89:860:351#0/1  
GCAGACAAGAGAAAAGCTAATGTGCTAATTGGGCAAGGGGA  
+HWI-EAS443:3:89:860:351#0/1  
`UX\_WTX][\_^^`^PPPVSYNLTYF¥V\_TB BBBB BBBB  
@HWI-EAS443:3:92:1688:517#0/1  
AAGAGATAAAAGGAGAGAAAAGCTAATGTGCTAATTGGGCA  
+HWI-EAS443:3:92:1688:517#0/1  
^K`^bab[`U¥^^\_b]a^YS`Sa\_VY]NZa`HV^[a\_]U^  
@HWI-EAS443:3:48:1096:1598#0/1  
GACAAGAGAAAAGCTAATGTGCTAATNGGGCAAGGGGACGT  
+HWI-EAS443:3:48:1096:1598#0/1  
aVU]]baaaXNT`QWTaa]]^[^]QDU¥`S[^\_Z`ZXH`Z  
@HWI-EAS443:3:100:1355:1612#0/1  
TACGTCCCCTTGCCCAATTAGCACATTAGGTTTCTCTTGT  
+HWI-EAS443:3:100:1355:1612#0/1  
aa\_]T¥JYa`\_\_USYU^¥YVUT¥a]^`OFU`X\_H^]]B  
@HWI-EAS443:3:23:1063:1963#0/1  
GAGAAAGCTAATGTGCTAATCGGGCAAGGGGACGTAGAGT  
+HWI-EAS443:3:23:1063:1963#0/1  
`a`\_b`]^`[aab`baIWb¥`a`\_aSa`JYTXaRZXDI^  
@HWI-EAS443:3:24:1140:1918#0/1  
GCTCCCTTGCCCAATTAGCACATTGCTTTCTCTCCTTTT  
+HWI-EAS443:3:24:1140:1918#0/1  
`HW`Z`PUU]a`baUXVS[`\_\_V\_[KZ\_[¥\_^¥aT\_¥¥TF  
@HWI-EAS443:3:38:1406:1755#0/1  
GTTCCCTTGCCCAATTAGCACATTAGCTTTCTCTCCTTTT  
+HWI-EAS443:3:38:1406:1755#0/1  
a`aaaaaaa`\_\_\_aaa`\_\_`a`\_\_\_a`^X^^`X]]`\_Z  
@HWI-EAS443:3:63:1158:1544#0/1  
AAAGGAGAGAAAAGCTAATGTGCTAATTGGNAAAGGGGACG  
+HWI-EAS443:3:63:1158:1544#0/1  
]`ab\_\_aX`a`\_¥\_¥\_¥¥0YZba^]NR¥DF[^Ya``Ya`  
@HWI-EAS443:3:94:286:1785#0/1  
CTTGCCCAATTAGCACATTAGCTTTCTCTCGTTTNGCAAG  
+HWI-EAS443:3:94:286:1785#0/1  
¥bb]ab^[`\_`URUa]¥Y¥]aaa]a]P¥¥HG`aYDY¥`aa  
@HWI-EAS443:3:19:20:1232#0/1  
GCATCAATGAAGTACTGAGCAATCTTGCAAAGGAGAGAAAAGCT  
+HWI-EAS443:3:19:20:1232#0/1  
a`abaa]baabaa\_aaaa`baaaaa`\_aa`aa`a]`a`  
@HWI-EAS443:3:29:1124:199#0/1  
CAATCTTGCAAAGGAGAGAAAAGCTAATGTGCTAATTGGGC  
+HWI-EAS443:3:29:1124:199#0/1  
`b¥`a`bab`bbaa`aabbaababb`abYbaaaabb`aa\_

@HWI-EAS443:3:35:1612:534#0/1  
CAAAAGGAGAGAAAGCTATGTGCTAATTGGGCAAGGGGAC  
+HWI-EAS443:3:35:1612:534#0/1  
a¥\_`\_]\_\_`\_]babba]a`aXaaa^ab\_baaa^bbb^^X^  
@HWI-EAS443:3:51:1373:985#0/1  
GAGAAAGCTAATGTGCTAATTGGGCAGGGGACGTAGTGTT  
+HWI-EAS443:3:51:1373:985#0/1  
SaW¥^I¥aab[[`Ua]bba\_b]aZa]¥\_I\_\_bba]b^^\_Y  
@HWI-EAS443:3:62:1050:1155#0/1  
GCATCAATGAAGTGAAGCAATCTTGCAAAGGAGAGAAAGCT  
+HWI-EAS443:3:62:1050:1155#0/1  
``aaaa`^a\_a\_aaaaaaaaa\_a`a``\_\_a`\_``[`]\_`a\_  
@HWI-EAS443:3:76:151:555#0/1  
AAAGGAGAGAAAGCTATGTGCTAATTGGGCAAGGGGACGT  
+HWI-EAS443:3:76:151:555#0/1  
\_XZabab`bbabaaaaab^baa\_aa`aa`a`\_a`a`]\_\_Z  
@HWI-EAS443:3:10:604:1159#0/1  
TGTCCCCTTGCCCAATTAGCACATTAGCTTTCTCTTGCTCT  
+HWI-EAS443:3:10:604:1159#0/1  
```aa`\_aaaa`]YY[V]a^]^^\_^]]^X\_]\_]\_X^¥Y^  
@HWI-EAS443:3:10:651:1547#0/1  
CAGACAAGAGAAAGCTAATGTGCTAATTGGGCAAGGGGAC  
+HWI-EAS443:3:10:651:1547#0/1  
ababbabababbaabaaaa\_aaaaabaaa``aaa`\_a`^  
@HWI-EAS443:3:12:1061:1880#0/1  
GAACTGAGCAATCTTGCAAAGGAGAGAAAGCTAGGAAGA  
+HWI-EAS443:3:12:1061:1880#0/1  
aaaa¥]aa^bba\_`\_a`X]a\_¥aa\_``aa\_Z``a^\_\_¥^  
@HWI-EAS443:3:13:579:775#0/1  
TGTCCCCTTGCCCAATTAGCACATTAGCTTTCTCTTGCTCT  
+HWI-EAS443:3:13:579:775#0/1  
aa\_aaaa\_`aY]a\_\_^^`a`\_\_]`\_`\_\_\_\_]^^`\_`Z^^  
@HWI-EAS443:3:15:141:987#0/1  
AGACAAGAGAAAGCTAATGTGCTAATTGGGCAAGGGGACA  
+HWI-EAS443:3:15:141:987#0/1  
\_Y¥aM^UYZ``VX`]¥`ZVNYZ^Z`\_`]\_¥^]ZR\_`a`Ya  
@HWI-EAS443:3:19:1265:702#0/1  
GTCCCCTTGCCCAATTAGCACATTAGCTTTCTCTTGCTCTG  
+HWI-EAS443:3:19:1265:702#0/1  
aabb^¥a```aabaaaa[baaaa]\_aa`\_a`a`a[¥aa  
@HWI-EAS443:3:21:18:27#0/1  
CAGACAAGAGAAAGCTAATGTGCTAATTGGGCAAGGGGAC  
+HWI-EAS443:3:21:18:27#0/1  
a`abbabbabbbabaaaaab^aa`\_a``aaaa`a`a`]  
@HWI-EAS443:3:22:570:1284#0/1  
GTCCCCTTGCCCAATTAGCACATTAGCTTTCTCTTGCTCTG  
+HWI-EAS443:3:22:570:1284#0/1  
a\_b`aaaabaabaa]¥`aaaa\_aa\_\_aaa\_`\_a[]]Ya`  
@HWI-EAS443:3:24:530:542#0/1  
AGTCCCCTTGCCCAATTAGCACATTAGCTTTCTCTTGCTCT

+HWI-EAS443:3:24:530:542#0/1  
aa`aaaa`aaaaaaa\_\_`aaa\_`aaaaaa`aaaa`aa^\_^  
@HWI-EAS443:3:24:729:1004#0/1  
GTCCCCTTGCCCAATTAGCACATTAGCTTTCTCTTGTCTG  
+HWI-EAS443:3:24:729:1004#0/1  
aaaa`a\_`a`X]\_Z\_`aZ\_\_a^a^\_\_aa[`\_^]]]¥  
@HWI-EAS443:3:26:1326:93#0/1  
GTCCCCTTGCCCAATTAGCACATTAGCTTTCTCTTGTCTG  
+HWI-EAS443:3:26:1326:93#0/1  
a`W`aa\_a\_¥\_\_`\_^`¥`V]a\_^\_V`a`V\_Vaa\_\_X\_\_  
@HWI-EAS443:3:29:1360:1595#0/1  
CAGACAAGAGAAAGCTAATGTGCTAATTGGGCAAGGGGAC  
+HWI-EAS443:3:29:1360:1595#0/1  
M`bbaaa`bbbab`ba]Uaabbb`bbaba\_a`W¥ab\_\_a  
@HWI-EAS443:3:32:680:255#0/1  
GTCCCCTTGCCCAATTAGCACATTAGCTTTCTCTTGTCTG  
+HWI-EAS443:3:32:680:255#0/1  
\_Q]T^aa`[aT¥\_QUNSV[\_YY`W¥YY^\_Z^Z\_ZVZR^^[  
@HWI-EAS443:3:34:299:280#0/1  
CAGACAAGAGAAAGCTAATGTGCTAATTGGGCAAGGGGAC  
+HWI-EAS443:3:34:299:280#0/1  
abbbbbbbabaaabbbbbaaa^aaaaa`aa`\_\_]`a`\_\_`\_^  
@HWI-EAS443:3:40:707:1931#0/1  
CAGACAAGAGAAAGCTAATGTGCTAATTGGGCAAGGGGAC  
+HWI-EAS443:3:40:707:1931#0/1  
abbbabbabbbb\_`aaaba`]aaaa`\_a\_]`^aaa`\_\_`V  
@HWI-EAS443:3:46:445:396#0/1  
CAGACAAGAGAAAGCTAATGTGCTAATTGGGCAAGGGGAC  
+HWI-EAS443:3:46:445:396#0/1  
¥\_\_`aZaabb`aMb\_Z^`\_babbabb^baXQ]`b`Q`  
@HWI-EAS443:3:47:592:558#0/1  
CAGACAAGAGAAAGCTAATGTGCTAATTGGGCAAGGGGAC  
+HWI-EAS443:3:47:592:558#0/1  
aab\_T]abbbaa^Y¥]^ba]¥\_a\_\_aaaZa\_RZ`\_]Y  
@HWI-EAS443:3:49:622:334#0/1  
GTCCCCTTGCCCAATTAGCACATTAGCTTTCTCTTGTCTG  
+HWI-EAS443:3:49:622:334#0/1  
aX[X^\_Uaa\_^\_^[]G`Z^\_\_^\_\_[]\_\_^\_\_[Z]\_^X][  
@HWI-EAS443:3:50:52:177#0/1  
GTCCCCTTGCCCAATTAGCACATTAGCTTTCTCTTGTCTG  
+HWI-EAS443:3:50:52:177#0/1  
^`]bbbbW¥\_ba`^Ua\_OV¥\_[aa]GVaa`¥`aaa[[`]Z  
@HWI-EAS443:3:51:1526:848#0/1  
GTCCCCTTGCCCAATTAGCACATTAGCTTTCTCTTGTCTG  
+HWI-EAS443:3:51:1526:848#0/1  
`][[\_`\_aa\_\_\_\_]^QY\_^`V^`\_^]`¥a]^`\_^X^]  
@HWI-EAS443:3:51:658:1900#0/1  
CAGACAAGAGAAAGCTAATGTGCTAATTGGGCAAGGGGAC  
+HWI-EAS443:3:51:658:1900#0/1  
a`abb`bba`^`b¥`¥`ba]babbaa¥¥\_V`aabbbaaa

@HWI-EAS443:3:52:257:728#0/1  
GTCCCCTTGCCCAATTAGCACATTAGCTTTCTCTTGTCTG  
+HWI-EAS443:3:52:257:728#0/1  
]SWO\_RYRXEOZSL[NZZV¥RMUURZOYQUSYPWUVYR[[  
@HWI-EAS443:3:59:1043:130#0/1  
CAGACAAGAGAAAGCTAATGTGCTAATTGGGCAAGGGGAC  
+HWI-EAS443:3:59:1043:130#0/1  
¥a^abbbbbbbaabb`b\_aaabbababbbb`aab[Wa\_  
@HWI-EAS443:3:5:184:765#0/1  
CAGACAAGAGAAAGCTAATGTGCTAATTGGGCAAGGGGAC  
+HWI-EAS443:3:5:184:765#0/1  
abbbabbbab`bbabaabba`ababbbba¥a`abab\_¥  
@HWI-EAS443:3:62:1390:93#0/1  
GTCCCCTTGCCCAATTAGCACATTAGCTTTCTCTTGTCTG  
+HWI-EAS443:3:62:1390:93#0/1  
aWWWVRUaNJSV^VOYUL^RWVX]]SQYZ¥^U¥V]WVUYVX  
@HWI-EAS443:3:70:304:1618#0/1  
GTCCCCTTGCCCAATTAGCACATTAGCTTTCTCTTGTCTG  
+HWI-EAS443:3:70:304:1618#0/1  
Y`bb\_baYW]bb\_a`¥W\_a`]]a¥0`^\_a\_a`\_aYTX\_  
@HWI-EAS443:3:72:1361:1714#0/1  
TGTCCCCTTGCCCAATTAGCACATTAGCTTTCTCTTGTCTG  
+HWI-EAS443:3:72:1361:1714#0/1  
aba`^`aaaa`aaa^b`a\_aa\_aa\_\_\_a^aXa`a[\_\_\_  
@HWI-EAS443:3:72:329:912#0/1  
GTCCCCTTGCCCAATTAGCACATTAGCTTTCTCTTGTCTG  
+HWI-EAS443:3:72:329:912#0/1  
Yabbbb\_¥¥bbba\_X]¥Z`b`abT\_]a`a]a`a^\_\_\_Y  
@HWI-EAS443:3:74:1735:109#0/1  
CAGACAAGAGAAAGCTAATGTGCTAATTGGGCAAGGGGAC  
+HWI-EAS443:3:74:1735:109#0/1  
aabaab`bb]`bYb[aababab]\_^abbb^\_Z]aa]TH  
@HWI-EAS443:3:78:148:2003#0/1  
CAGACAAGAGAAAGCTAATGTGCTAATTGGGCAAGGGGAC  
+HWI-EAS443:3:78:148:2003#0/1  
\_Y\_Xa]]aaaa^aUX]U^]¥L¥^¥]U[`]`Z``[Z[XNT\_  
@HWI-EAS443:3:79:622:876#0/1  
CAGACAAGAGAAAGCTAATGTGCTAATTGGGCAAGGGGAC  
+HWI-EAS443:3:79:622:876#0/1  
ababbbbbbab^]aaaaaa]¥aaaa`aaaa[^`baaaZ^  
@HWI-EAS443:3:81:1364:961#0/1  
AGGAGAGAAAGCTAATGTGCTAATTGGGCAAGGGGACGTAG  
+HWI-EAS443:3:81:1364:961#0/1  
\_``abbbbbbbaabaabaababbabaaaY[aaba]`a\_\_a  
@HWI-EAS443:3:84:990:1522#0/1  
CAGACAAGAGAAAGCTAATGTGCTAATTGGGCAAGGGGAC  
+HWI-EAS443:3:84:990:1522#0/1  
]Z\_T`\_`^bbbaa^UL`Z¥^baa]S¥P¥`aY]TZ`P¥S\_  
@HWI-EAS443:3:88:1595:158#0/1  
GTCCCCTTGCCCAATTAGCACATTAGCTTTCTCTTGTCTG

+HWI-EAS443:3:88:1595:158#0/1  
\_babbbbb`a\_a`aa`baab`abab\_Nbaaababbbba[aa  
@HWI-EAS443:3:88:1690:1854#0/1  
CTGACNAATTAGCACATTAGCTTTCTCTCCTTTTGAAGA  
+HWI-EAS443:3:88:1690:1854#0/1  
[^[]D]bbba`aabbbbaa`bbab`baa`bb`Y`\_a]b  
@HWI-EAS443:3:91:1433:1521#0/1  
GTCCCCTTGCCCAATTAGCACATTAGCTTTCTCTTGTCTG  
+HWI-EAS443:3:91:1433:1521#0/1  
]FZ\_`\_]`VS]``^`\_]\_^\_UYMZ`\_\_^VX\_`^YTYa\_^]\_\_  
@HWI-EAS443:3:97:1148:1695#0/1  
CAGACAAGAGAAAGCTAATGTGCTAATTGGGCAAGGGGAC  
+HWI-EAS443:3:97:1148:1695#0/1  
K```[ba`bbb`abbbabba\_babbbabbbbbaaa[btUY  
@HWI-EAS443:3:98:742:347#0/1  
GTCCCCTTGCCCAATTAGCACATTAGCTTTCTCTTGTCTG  
+HWI-EAS443:3:98:742:347#0/1  
`aa`[abab\_^`\_a`aa^`\_`\_`^\_]`V\_^`^^`a  
@HWI-EAS443:3:11:1340:1443#0/1  
AGCTAATGTGCTAATTGGGCAAGGGGCGTAGTGTGGGA  
+HWI-EAS443:3:11:1340:1443#0/1  
¥Z\_U\_[SbXX¥Ub\_Z`a[]aU`b[a[HMaUV\_Z\_U\_aZfV  
@HWI-EAS443:3:20:1362:956#0/1  
GAGCAATCTTGCAAAAGGAGAGAAAGCTAATGTCCTAAGG  
+HWI-EAS443:3:20:1362:956#0/1  
abb\_b`bba`b]bb¥abb`b^b\_a`a]aaabaas``\_aa`  
@HWI-EAS443:3:40:771:617#0/1  
AGCTAATGTGCTAATTGGGCAAGGGGCCGTAGTGTGGGA  
+HWI-EAS443:3:40:771:617#0/1  
W[ba^¥Q`\_`^Q\_¥¥`\_Y^U]¥Z]TF^`QX`]VZY]V`R  
@HWI-EAS443:3:52:499:1745#0/1  
GCATCAATGAAGTGAAGCAATCTTGAAAAAGGAGAGAAAAA  
+HWI-EAS443:3:52:499:1745#0/1  
abba`a`¥[L]a]]YaV`aa^aaa]VXa`^Y\_[]^UUUT  
@HWI-EAS443:3:92:666:1170#0/1  
AGCTAATGTGCTAATTGGGCAAGGGGAGGTAGTGTGGGA  
+HWI-EAS443:3:92:666:1170#0/1  
ab\_]GZP]¥aaaa`Y`\_a\_^`\_^\_WG\_RU^W\_^\_Z\_G^  
@HWI-EAS443:3:11:1015:920#0/1  
CGTCCCCTTGCCCAATTAGCACATTAGCTTTCTCTTGTCT  
+HWI-EAS443:3:11:1015:920#0/1  
\_\_Za\_Y\_aa`^aaa¥a\_a``]¥X]\_\_Z[^`\_[[Z\_¥`TNX  
@HWI-EAS443:3:12:842:1160#0/1  
AGACAAGAGAAAGCTAATGTGCTAATTGGGCAAGGGGACG  
+HWI-EAS443:3:12:842:1160#0/1  
a]a\_]Z^ab`ba`aa]¥ab\_\_a`a`a`\_]`^\_a]a\_^\_a  
@HWI-EAS443:3:35:1221:458#0/1  
GCAAAAGGAGAGAAAGCTAATGTGCTAATTGGGCAGGACG  
+HWI-EAS443:3:35:1221:458#0/1  
aa`[]`[aa[[]`aa`\_a¥a\_`^`aY\_\_`^]a\_a\_\_`\_a\_^W`

@HWI-EAS443:3:37:1029:643#0/1  
AAACAAGAGAAAGCTAATGTGCTAATTGGGCAAGGGGACG  
+HWI-EAS443:3:37:1029:643#0/1  
a^^]aabaa`\_Z¥a`Z`aa\_aaa\_¥^aaaVa\_Za``\_Z[a  
@HWI-EAS443:3:44:498:263#0/1  
AGACAAGAGAAAGCTAATGTGCTAATTGGGCAAGGGGACG  
+HWI-EAS443:3:44:498:263#0/1  
`ZS]]``Z]b`V`a]b¥bb\_ba]aQY\_aba`\_\_Xb`a\_¥a  
@HWI-EAS443:3:46:1309:1370#0/1  
CGTCCCCTTGCCCAATTAGCACATTAGCTTTCTCTTGCTCT  
+HWI-EAS443:3:46:1309:1370#0/1  
]\_\_aaaaabbbbaa`aaaa`aa\_b[\_a`aa``a\_aaa\_\_a  
@HWI-EAS443:3:50:647:417#0/1  
AGACAAGAGAAAGCTAATGTGCTAATTGGGCAAGGGGACG  
+HWI-EAS443:3:50:647:417#0/1  
aba`abba`bbbbabbab`ab]bbbbbbbaaa`bbaaab  
@HWI-EAS443:3:53:315:136#0/1  
AGACAAGAGAAAGCTAATGTGCTAATTGGGCAAGGGGACG  
+HWI-EAS443:3:53:315:136#0/1  
ab]aaababaaaaaaaa]ab\_b\_a\_aaa\_aa^^aa\_a^¥a  
@HWI-EAS443:3:57:289:1658#0/1  
AGACAAGAGAAAGCTAATGTGCTAATTGGGCAAGGGGACG  
+HWI-EAS443:3:57:289:1658#0/1  
¥¥[¥]^\_`Zaa`Z\_a\_a``]`^````[``]\_VY`^`^^YP]  
@HWI-EAS443:3:61:917:1756#0/1  
AGACAAGAGAAAGCTAATGTGCTAATTGGGCAAGGGGACG  
+HWI-EAS443:3:61:917:1756#0/1  
¥aa`a^¥bbba``a\_bbb\_bb`\_]aa^`¥[^T¥Y`^¥TZ  
@HWI-EAS443:3:71:857:1646#0/1  
AGACAAGAGAAAGCTAATGTGCTAATTGGGCAAGGGGACG  
+HWI-EAS443:3:71:857:1646#0/1  
^X\_TO¥`^0¥bTKZO\_V\_aG^a`Y[^\_]^[ZN^¥\_Z^^¥[  
@HWI-EAS443:3:72:1618:656#0/1  
AGACAAGAGAAAGCTAATGTGCTAATTGGGCAAGGGGACG  
+HWI-EAS443:3:72:1618:656#0/1  
abba`aab`ababZ^V`\_Z]`a`\_`aba\_[\_]a^Z^aXSZ  
@HWI-EAS443:3:76:836:1588#0/1  
AGACAAGAGAAAGCTAATGTGCTAATTGGGCAAGGGGACG  
+HWI-EAS443:3:76:836:1588#0/1  
U\_¥aaba\_a`^^]aaaa[¥`aa\_a`a`a\_\_`^a`\_`\_]`\_]  
@HWI-EAS443:3:77:855:108#0/1  
CTTGCAAAGGAGAGAAAGCTAATGTGCTAATTGGGCAAGG  
+HWI-EAS443:3:77:855:108#0/1  
abbabbabbbbbbabb`bbaa\_ab]aababbab``aaabb  
@HWI-EAS443:3:77:910:288#0/1  
CGTCCCCTTGCCCAATTAGCACATTAGCTTTCTCTTGCTCT  
+HWI-EAS443:3:77:910:288#0/1  
abbabbababbbbbbbaababaabbaabababaaaa  
@HWI-EAS443:3:7:1066:1066#0/1  
AGACAAGAGAAAGCTAATGTGCTAATTGGGCAAGGGGACG

+HWI-EAS443:3:7:1066:1066#0/1  
ababb`bbbbbbUbaaab¥a^abababab\_aaaaaYXb  
@HWI-EAS443:3:87:1654:264#0/1  
ACAAGAGAAAAGCTAATGTGCTAATTGGGCAAGGGGACGAA  
+HWI-EAS443:3:87:1654:264#0/1  
a`J[``a^bW^U`a¥¥`aaS]\_]¥aa`b^a`ababZY[DS  
@HWI-EAS443:3:92:1410:1914#0/1  
AGACAAGAGAAAAGCTAATGTGCTAATTGGGCAAGGGGACG  
+HWI-EAS443:3:92:1410:1914#0/1  
aVaabLU]\_Sa`bHRP\_b\_``ab^a^a`[b]a\_a`baZGa  
@HWI-EAS443:3:8:321:284#0/1  
AGCTAATGNGCTAATTGGGCAAGGGGACGTAGTGTGGGA  
+HWI-EAS443:3:8:321:284#0/1  
[`a]a]b]D[b`]`bYYaaaX]ba`Xaa]]b^aS^aaGa  
@HWI-EAS443:3:21:400:819#0/1  
CACGTTCCCTTGCCCAATTAGCACATTAGCTTTCTCCTCCT  
+HWI-EAS443:3:21:400:819#0/1  
a^^`[[aa]LW^Y``[\_¥^ZW]\_`a¥XZU[\_`\_Z¥\_^\_]Z  
@HWI-EAS443:3:90:179:1994#0/1  
GGTCCCCTTGCCCAATTAGCACATTAGCTTTCTGCCTTT  
+HWI-EAS443:3:90:179:1994#0/1  
R\_K[[`a]a\_baaabb]`^`aa\_¥^bbb```aaVV]ba[b  
@HWI-EAS443:3:92:147:1672#0/1  
GAAAGCTAATGTGCTAATTGGGCAAGGTGACGTAGTGTTN  
+HWI-EAS443:3:92:147:1672#0/1  
PXZZV^bZXaNJZXaVSZ[^`\_bY¥b[HOK\_b\_\_b\_`¥OD  
@HWI-EAS443:3:10:606:1848#0/1  
CAAGCTTGCAAAAAGGAGAGAAAGCTAATGTGCTAATTGGG  
+HWI-EAS443:3:10:606:1848#0/1  
W\_\_HV`[abb`bbbY^baabb\_baabb`a^a[bbaa`bbX  
@HWI-EAS443:3:12:1742:953#0/1  
GACAAGAGAAAAGCTAATGTGCTAATTGGGCAAGGGGACGT  
+HWI-EAS443:3:12:1742:953#0/1  
a[``a``\_a¥`P¥Z\_a\_T`Z`UW]\_]S^H[VXZ¥[YS[Y  
@HWI-EAS443:3:13:1236:804#0/1  
CAAACCTTGCAAAAAGGAGAGAAAGCTAATGTGCTAATTGGG  
+HWI-EAS443:3:13:1236:804#0/1  
aabaabaaba\_]ab\_a`ba\_]a\_]aXaa^```\_\_^`a\_`  
@HWI-EAS443:3:17:1311:377#0/1  
GACAAGAGAAAAGCTAATGTGCTAATTGGGCAAGGGGACGT  
+HWI-EAS443:3:17:1311:377#0/1  
\_0¥]ZXV¥ZTTaZ`W^\_\_R]W\_OTWZ`a`Y^)`[\_\_YO\_Z  
@HWI-EAS443:3:26:287:1559#0/1  
GACAAGAGAAAAGCTAATGTGCTAATTGGGCAAGGGGACGT  
+HWI-EAS443:3:26:287:1559#0/1  
H\_bZ[abb`\_a\_bb`¥\_`¥Yabb`aa``aa]a`ZUU]`b`  
@HWI-EAS443:3:30:1680:1179#0/1  
GACAAGAGAAAAGCTAATGTGCTAATTGGGCAAGGGGACGT  
+HWI-EAS443:3:30:1680:1179#0/1  
aaQ¥a\_\_`a`a]b^)`a^^]baaaba]U`]b\_UZTV]]



@HWI-EAS443:3:31:1153:1628#0/1  
GACAAGAGAAAGCTAATGTGCTAATTGGGCAAGGGGACGT  
+HWI-EAS443:3:31:1153:1628#0/1  
aabbabbb`bbaaaaaab`a^aaa`a`a[a`\_aa`a]`b]  
@HWI-EAS443:3:32:14:982#0/1  
TGCAAAAGGAGAGAAAGCTAATGTGCTAATTGGGCACGGG  
+HWI-EAS443:3:32:14:982#0/1  
a\_\_TWabbaab\_b\_[a`aa`aaa\_a`aa``aa`¥baJ^`a  
@HWI-EAS443:3:33:268:1842#0/1  
GCACCAATGAACTGAGCAATCTTGCAAAAGGAGAGAAAGC  
+HWI-EAS443:3:33:268:1842#0/1  
a^YNY`YZ``baYVSX[URW[]\_\_aaXaYSIES`PaZ[KF  
@HWI-EAS443:3:34:1294:262#0/1  
AATGAACTGAGCAATCTTGCAAAAGGAGAGAAAGCTGATG  
+HWI-EAS443:3:34:1294:262#0/1  
aRZ\_[ILWU\_]`a`\_J^aYWLFMP^ZGZS[GW\_ZZGZUB  
@HWI-EAS443:3:34:1353:783#0/1  
GAAAGCTAATGTGCTAATTGGGCAAGGGGACGTAGTTTTG  
+HWI-EAS443:3:34:1353:783#0/1  
a]]ZaIRNX\_[OZ[[XZ\_XWRPSFV\_^]`YL¥NN[BBBBB  
@HWI-EAS443:3:39:585:1248#0/1  
GACAAGAGAAAGCTAATGTGCTAATTGGGCAAGGGGACGT  
+HWI-EAS443:3:39:585:1248#0/1  
`b`T`baaZ¥`aa^aa`\_aaaaa\_¥aa`a\_\_`\_]  
@HWI-EAS443:3:54:375:787#0/1  
AGCTAATGTGCTAATTGGGCAAGGGGACGTAGTGTTCGAT  
+HWI-EAS443:3:54:375:787#0/1  
ababaU`a`aa\_Xabaaa`\_\_ba\_a¥^a¥\_a¥a`\_a]`  
@HWI-EAS443:3:54:9:298#0/1  
GACAAGAGAAAGCTAATGTGCTAATTGGGCAAGGGGACGT  
+HWI-EAS443:3:54:9:298#0/1  
a`a`\_aaaa`^a]\_aaZ`\_`R\_^`\_^]\_^X`\_\_ZZ\_X  
@HWI-EAS443:3:55:1507:767#0/1  
ACGTCCCCTTGCCCAATTAGCACATTAGCTTTCTCTTGTC  
+HWI-EAS443:3:55:1507:767#0/1  
a\_\_]\_`a`¥`a]]]aZ`\_ZZYU`^\_[\_Za`]V`Z¥]L[Y  
@HWI-EAS443:3:59:1196:1811#0/1  
GACAAGAGAAAGCTAATGTGCTAATTGGGCAAGGGGACGT  
+HWI-EAS443:3:59:1196:1811#0/1  
^bbab`bbbaaaaabaaabb`baabba``\_]W[aaVMIUI  
@HWI-EAS443:3:59:702:1534#0/1  
GACAAGAGAAAGCTAATGTGCTAATTGGGCAAGGGGACGT  
+HWI-EAS443:3:59:702:1534#0/1  
`a`aababbbbaaaab]abab¥`bbababaa]R¥\_\_LNVSX  
@HWI-EAS443:3:62:200:236#0/1  
GCACCAATGAACTGAGCAATCTTGCAAAAGGAGAGAAAGC  
+HWI-EAS443:3:62:200:236#0/1  
a]QG¥VVRXLNXXYYNWLT]]^V\_YRGGXYYVYUXUWYVX  
@HWI-EAS443:3:63:397:1171#0/1  
GACAAGAGAAAGCTAATGTGCTAATTGGGCAAGGGGACGT

+HWI-EAS443:3:63:397:1171#0/1  
a`b`bZa\_Y`\_aa\_¥]\_Tq]\_UZ`]]\_¥]Z`a\_UWZU  
@HWI-EAS443:3:67:800:1030#0/1  
GACAAGAGAAAGCTAATGTGCTAATTGGGCAAGGGGACGT  
+HWI-EAS443:3:67:800:1030#0/1  
aaa]ababb\_N`aabaaa\_a\_a]a`aaaaaaaa^aa`\_a^  
@HWI-EAS443:3:68:988:1586#0/1  
GACAAGAGAAAGCTAATGTGCTAATTGGGCAAGGGGACGT  
+HWI-EAS443:3:68:988:1586#0/1  
aaaZYXbabbaaaa`]^a^\_a`^¥`aaa]a`\_a``¥V^\_X  
@HWI-EAS443:3:70:722:1469#0/1  
TGCAAAAGGAGAGAAAGCTAATGTGCTAATTGGGCAAGGGC  
+HWI-EAS443:3:70:722:1469#0/1  
abb^baabaa\_baa^b`babaaaYaaa`a``a\_`aa`^[a  
@HWI-EAS443:3:80:1475:216#0/1  
TGCGAAAGGAGAGAAAGCTAATGTGCTAATTGGGCAAGGG  
+HWI-EAS443:3:80:1475:216#0/1  
ZaWF[`^^a]bbb]]a`X`a`abZ`U[\_aa`aa¥¥[[\_V]  
@HWI-EAS443:3:8:1192:565#0/1  
GCAGCAATGAAGTGAAGTCTTGCAAAAGGAGAGAAAGC  
+HWI-EAS443:3:8:1192:565#0/1  
`ONJPYS`]XWJTMVU`\_0\_NS^XZZRVUXZW¥¥XUG\_W  
@HWI-EAS443:3:8:839:790#0/1  
GACAAGAGAAAGCTAATGTGCTAATTGGGCAAGGGGACGT  
+HWI-EAS443:3:8:839:790#0/1  
]OR\_X]V¥ZYH]RY[]]XQVV^0¥XNQFTZ[U`U\_QQUBB  
@HWI-EAS443:3:8:918:1950#0/1  
GACAAGAGAAAGCTAATGTGCTAATTGGGCAAGGGGACGT  
+HWI-EAS443:3:8:918:1950#0/1  
^b[bbbbbbbaa\_abb`[U[aaaa`\_aa^a`a\_aZXLTB  
@HWI-EAS443:3:61:669:572#0/1  
GACGTCCCCTTGCAAAAGTAGAGAAAGCTAATGTGCTAATT  
+HWI-EAS443:3:61:669:572#0/1  
a[`a¥`^\_¥PYPDY\_a`^^ba`a¥`\_a`\_^^]`^¥]W^  
@HWI-EAS443:3:100:120:258#0/1  
AATGGACTGAGCAATCTTGCAAAAGGAGAGAAAGCTAATG  
+HWI-EAS443:3:100:120:258#0/1  
T\_\_bY¥\_bZY\_VW]bbab]^V]PabKY^bZGN[¥`a^BB  
@HWI-EAS443:3:100:145:1416#0/1  
GAGCAATCTTGCAAAAGTAGAGAAAGCTAATGTGCTAATT  
+HWI-EAS443:3:100:145:1416#0/1  
RY\_¥T[abb`\_bb\_XH]TU^[`\_bab¥baWaX[\_]baaBB  
@HWI-EAS443:3:100:1494:548#0/1  
AAGCTAATGTGCTAATTGGGCAAGGGGAGGTAGTGTGGT  
+HWI-EAS443:3:100:1494:548#0/1  
``[FUQQ]ZWR]Y`aSV]\_T`^I`]aaXH¥PW]L]SBBBB  
@HWI-EAS443:3:100:1585:64#0/1  
AGCTAATGTGATAATTGGGCAAGGGGACGTAGTGTGGTA  
+HWI-EAS443:3:100:1585:64#0/1  
`\_]¥a^\_babGa\_Yaaaa\_0\_\_`^aWTLU][^X\_Z¥YBBB

@HWI-EAS443:3:100:175:828#0/1  
CTTGCAAAAGGAGAGAAAGCTAATGTGATAATTGGGCAAG  
+HWI-EAS443:3:100:175:828#0/1  
abZb]\_J\_T\_`a^Z¥^a]\_JJXaaaaHwb¥bZ[N]aBBB  
@HWI-EAS443:3:100:460:242#0/1  
GAAAGCTAATGTGCTAATTGGGCAAGGGGAGGTAGTGTTG  
+HWI-EAS443:3:100:460:242#0/1  
[YXO]YU][Y[[`^Z`\_]TaX[\_PKZ]\_\_VG^WV\_ZBBBB  
@HWI-EAS443:3:100:65:1941#0/1  
GAAAGATAATGTGCTAATTGGGCAAGGGGACGTAGTGTTG  
+HWI-EAS443:3:100:65:1941#0/1  
`^`¥\_H^OYVS]\_IPa`^a[R`YZ`IZ[]`RU¥MBBBBBB  
@HWI-EAS443:3:10:1383:116#0/1  
AGCTAATGTGCTAATTGGGCAAGGGGAGGTAGTGTTGGTA  
+HWI-EAS443:3:10:1383:116#0/1  
`a¥]VVa\_0]Y[MZ`T`ZYM[ ]¥SRIZURZBBBBBBBB  
@HWI-EAS443:3:11:1550:1215#0/1  
GAAAGCTAATGTGCTAATTGGGCAAGGGGACGTAGGGTTG  
+HWI-EAS443:3:11:1550:1215#0/1  
`X\_]`¥`^`aX\_TX][`aa¥QXYW^XR[BBBBBBBBBB  
@HWI-EAS443:3:12:1026:958#0/1  
CAATGAAGTGAAGCAATCTTGCAAAAGGGAGAGAAAGCTAAT  
+HWI-EAS443:3:12:1026:958#0/1  
aa`\_a[M]Z¥¥aWX`aa`¥`[]`[L[[L`P¥[]¥`X]\_QB  
@HWI-EAS443:3:12:1761:1848#0/1  
AGCACATTAGCTTTCTCTCCTTTTGCAAGATTGCTAAGTT  
+HWI-EAS443:3:12:1761:1848#0/1  
ab`bba`\_]`a^¥`U`¥aa\_a\_`\_^aYXYX\_]VSaI`^]Z  
@HWI-EAS443:3:12:439:1418#0/1  
AGGAGAGAAAGCTAATGTGCTAATTGGGAAAGGGGACGTA  
+HWI-EAS443:3:12:439:1418#0/1  
ZbbUb^b]aYaa`aba]]`Ub``baaa\_FV]ba`a``[`Y  
@HWI-EAS443:3:13:285:711#0/1  
GAAAGCTAATGTGCGAATTGGGCAAGGGGACGTAGTGTTG  
+HWI-EAS443:3:13:285:711#0/1  
``V¥^aZY`Z[T¥HDXaTaa¥OXZ^aZ]^U]\_NU¥S^UUZ  
@HWI-EAS443:3:14:1619:1821#0/1  
GAGCAATCTTGCAAAAGGAGAGAAAGCTAATGTGGTAATT  
+HWI-EAS443:3:14:1619:1821#0/1  
^^\_HTbbK¥]\_ba\_b¥``\_W\_^bbb`a]aab`YRMO^aR]  
@HWI-EAS443:3:15:1563:1572#0/1  
GAAAGCTAATGTGATAATTGGGCAAGGGGACGTAGTGTTG  
+HWI-EAS443:3:15:1563:1572#0/1  
Y`ababbaXbb\_QHZ¥aXbaab¥¥^bbXVXa\_¥\_\_S\_JXa  
@HWI-EAS443:3:16:159:1346#0/1  
GAAAGCTAATGTGCTAATTGGGCAAGAGGACGTAGTGTTG  
+HWI-EAS443:3:16:159:1346#0/1  
]S[b^a^]\_\_a`baaabaa`a^aa`QDXa\_aU]`aUYT^]  
@HWI-EAS443:3:16:1648:1978#0/1  
CAAAAGGAGAGAAAGGTAATGTGCTAATTGGGCAAGGGGA

+HWI-EAS443:3:16:1648:1978#0/1  
abbaV\_\_\_babbaa`J`\_aaY[^Z\_\_aba\_`Q#a\_ZZ``a  
@HWI-EAS443:3:16:879:619#0/1  
GAGCAATCCTGCAAAAAGGAGAGAAAGCTAATGTGCTAATT  
+HWI-EAS443:3:16:879:619#0/1  
^[\`][[\_^0\_bba`\_abb]bbb\_Z\_b\_`[\`ab\_a#a#a`a`  
@HWI-EAS443:3:19:1482:1148#0/1  
GCATGAATGAACTGAGCAATCTTGCAAAAAGGAGAGAAAAGC  
+HWI-EAS443:3:19:1482:1148#0/1  
aaaZG[\_aa`a]RZ]a\_^\_\_`aWbS[ZXNa`Z\_^a\_J\_]Z  
@HWI-EAS443:3:1:1714:52#0/1  
ATTAGCTTTGTCTCCTTTTGCAAGATTGCTCAGTTCATTG  
+HWI-EAS443:3:1:1714:52#0/1  
`#`[\UVbV^^aU#Q[Y^UaYESZ``\_G#WL[\`\_^BBBBB  
@HWI-EAS443:3:1:540:219#0/1  
ATTAGCTTTCTCTCCTTTTGCAAGATTGGTCAGTTCATTG  
+HWI-EAS443:3:1:540:219#0/1  
abaa#aZKb\_#aYY#U]XaUXaa#``UG^\_aaSaYZ#`B  
@HWI-EAS443:3:1:88:1191#0/1  
TGCCCAATTAGCAGATTAGCTTTCTCTCCTTTTGCAAGAT  
+HWI-EAS443:3:1:88:1191#0/1  
`baW`#`\_bVV\_\_GYa\_baM#`b`aa`a]]``ITW\_BBB  
@HWI-EAS443:3:20:1014:39#0/1  
GAAAGCTAATGAGCTAATTGGGCAAGGGGACGTAGTGTTG  
+HWI-EAS443:3:20:1014:39#0/1  
a[[X^P^IP\$JWMOULZMZ^SZUUUZ#TQQ]XVSPYUY]  
@HWI-EAS443:3:20:89:249#0/1  
CAATCTTGCAAAAAGGAGAGAAAGCTAATGCGCTAATTGGG  
+HWI-EAS443:3:20:89:249#0/1  
aaaY`aa#Pa[XZ^XWXQ`#FL\_WTVU^SFS^ZTT]]^VW  
@HWI-EAS443:3:22:1530:1475#0/1  
GAAAGCTAATGTGCTAATTGGGCAAGGGGACGGAGTGTTG  
+HWI-EAS443:3:22:1530:1475#0/1  
aaa`]U\_[WWYPa^X]aa`aY`SV[`V]ZW^]BBBBBBBB  
@HWI-EAS443:3:23:236:602#0/1  
GAGAAAGCTAATGTGCTAATCGGGCAAGGGGACGTAGTGT  
+HWI-EAS443:3:23:236:602#0/1  
ZU`WO[#a\_YZQ^#a\_W[^]\_XUY]Z#ZUT]ZYUR^]R`U  
@HWI-EAS443:3:23:874:274#0/1  
GAGCAATCTTCCAAAAGGAGAGAAAGCTAATGTGCTAATT  
+HWI-EAS443:3:23:874:274#0/1  
\_S``#`\_`a^`[#UVQ#`R[YY\_]\_`S#[^#YV\_V]V[YX  
@HWI-EAS443:3:24:1463:589#0/1  
GAGCAATTTTGCAAAAAGGAGAGAAAGCTAATGTGCTAATT  
+HWI-EAS443:3:24:1463:589#0/1  
aaaaaab`abaa`\_a\_\_\_a\_b\_\_\_`a^a`\_aa]bXa\_\_\_\_  
@HWI-EAS443:3:24:1671:1855#0/1  
AGCTAATGTGCTAATTGGGCAAGGGGACGTAATGTTGGTA  
+HWI-EAS443:3:24:1671:1855#0/1  
`WF#ba``T#H\_a`W[TG^^UGa[\_\_\_[^\_ZW#\_VZ^#XZ

@HWI-EAS443:3:24:608:585#0/1  
GAGCAATCTTGCAAGAGGAGAGAAAGCTAATGTGCTAATT  
+HWI-EAS443:3:24:608:585#0/1  
abbbbabaab`baab`aaaaaa¥aa`aaaa^b\_a``aa  
@HWI-EAS443:3:25:168:314#0/1  
GAGCAATCTTGCAAAAGGCGAGAAAGCTAATGTGCTAATT  
+HWI-EAS443:3:25:168:314#0/1  
aaabaaabaabaa`\_aa`\_¥\_\_^][R[¥\_VZV\_¥W¥NT¥  
@HWI-EAS443:3:27:1530:105#0/1  
AGCTAATGCGCTAATTGGGCAAGGGGACGTAGTGTGGTA  
+HWI-EAS443:3:27:1530:105#0/1  
VaVbb`¥\_OZ\_b^^TXSa\_aZ`ZW\_S^D]Raa\_Va`b^QH  
@HWI-EAS443:3:27:190:671#0/1  
AATGAAGTGGGCAATCTTGCAAAAGGAGAGAAAGCTAATG  
+HWI-EAS443:3:27:190:671#0/1  
WW`b[\_`a\_Y^`baa`a¥\_\_Z\_a\_a`[baa]a\_a\_\_\_`\_a  
@HWI-EAS443:3:27:86:304#0/1  
GAGCAATCTTGCAAAAGGAGAGAAAGCTACTGTGCTAATT  
+HWI-EAS443:3:27:86:304#0/1  
W\_[[\_H\_bbbba\_`aa[00babbbbaZb\_H\_bYaa[`Y]`  
@HWI-EAS443:3:28:121:1560#0/1  
CATCAATGAAGTGGCAATCTTGCAAAAGGAGAGAAAGCT  
+HWI-EAS443:3:28:121:1560#0/1  
abaaaaa`aaa`]a\_aaZ]a`\_\_aa``a]^\_a\_`a\_\_a\_  
@HWI-EAS443:3:28:1311:13#0/1  
GAGCAATCTTGCAAAAGGAGAGAAAGATAATGTGCTAATT  
+HWI-EAS443:3:28:1311:13#0/1  
``\_U\_¥\_Y`[[J[`X`a\_ZV]aa¥¥¥FW^[Z\_T¥VV^X[\_  
@HWI-EAS443:3:28:428:1522#0/1  
CATCAATGAAGTGGCAATCTTGCAAACGGAGAGAAAGCT  
+HWI-EAS443:3:28:428:1522#0/1  
Y[Ua`XZ^\_\_aYUHQ^`¥¥`YWT`]R¥HZ[ZZ¥a¥L[`[^  
@HWI-EAS443:3:30:292:1466#0/1  
AGCTAATGTGCTAATTGGGCAAGGGGACGCAGTGTGGTA  
+HWI-EAS443:3:30:292:1466#0/1  
TSXV]a\_HNYa¥aYYVLN\_\_\_VNRSVWIXGQWFV^ZUX^  
@HWI-EAS443:3:30:417:171#0/1  
AGCAATCTTGCAAAAGGAGACAAAGCTAATGTGCTAATTG  
+HWI-EAS443:3:30:417:171#0/1  
aaabaaaaabaaaa^aa^aa`a]aaa`^W]a^a\_a\_\_\_`\_\_  
@HWI-EAS443:3:32:332:1507#0/1  
GAAAGCTAATGTGCCAATTGGGCAAGGGGACGTAGTGTG  
+HWI-EAS443:3:32:332:1507#0/1  
QY¥a`b\_W[^aX^`a`a`ba]aa`ZQVT\_b\_]aa^`[\_\_\_  
@HWI-EAS443:3:34:524:1076#0/1  
AGGAGATAAAGCTAATGTGCTAATTGGGCAAGGGGACGTA  
+HWI-EAS443:3:34:524:1076#0/1  
]¥TT)`K`M[b\_]U¥WabW^abX[ab`Xaaa``aS\_V^X`  
@HWI-EAS443:3:34:569:391#0/1  
GCATCAATGAAGTGGCAATCTTGCAAAAGGAGAGAAAGC

+HWI-EAS443:3:34:569:391#0/1  
^aa\_bbb`ab]\_XKa]Vaa^aa`b`a]VW]^\_`a`U^\_Z  
@HWI-EAS443:3:34:82:1638#0/1  
AAGCTAATGTGCTAACTGGGCAAGGGGACGTAGTGTGGT  
+HWI-EAS443:3:34:82:1638#0/1  
aaabaaa[a^`b`aa]`[¥\_`\_]QT]^`¥^\_XaV^^XX  
@HWI-EAS443:3:35:879:1214#0/1  
GAAAGCTAATGCGCTAATTGGGCAAGGGGACGTAGTGTGG  
+HWI-EAS443:3:35:879:1214#0/1  
VZb¥b\_b`b`bI\_b[bbb\_a\_¥]a``ab[J``TMbaa`b`  
@HWI-EAS443:3:37:1005:351#0/1  
ACTGAGCAATCTTGCAAAAGGAGAGAAAGTAATGTGCTA  
+HWI-EAS443:3:37:1005:351#0/1  
`\_`¥\_`Z`]¥[]`X`¥]]`aXa`a]QXNFVUQY`W`\_ZV  
@HWI-EAS443:3:38:129:1743#0/1  
GCATCAATGAACTGAGCAATCTTGCAAAAGGATAGAAAGC  
+HWI-EAS443:3:38:129:1743#0/1  
[^\_bbbb\_b\_b^^[[]JT`[a`a`bb``a`GYH^`aZHZW  
@HWI-EAS443:3:38:480:882#0/1  
GCAATCTTGCAAAAGGAGAGAAAGCTAATGAGCTAATTGG  
+HWI-EAS443:3:38:480:882#0/1  
a^RQ]]]RMX]^GR[VR¥V]V]^Q^RSK[MDIMJ][U[T[N  
@HWI-EAS443:3:39:1064:1215#0/1  
ATCTTGCAATAGGAGAGAAAGCTAATGTGCTAATTGGGCA  
+HWI-EAS443:3:39:1064:1215#0/1  
K^U^bb`WZ\_[`aK^Z[a\_YSWUY]aZSI¥aYY`W`[b`P  
@HWI-EAS443:3:39:1131:480#0/1  
AAGCTAATGTGCTAATTGGGCAAGGGGACGTAGGGTTGGT  
+HWI-EAS443:3:39:1131:480#0/1  
[ZI¥\_LPaa[]\_b\_\_b``OX]PJa]aUSS`U]SQaZZ`XP  
@HWI-EAS443:3:39:1144:1808#0/1  
AAAGCTAATGTGCTAATTGGGCAAGGGGACGAAGTGTGG  
+HWI-EAS443:3:39:1144:1808#0/1  
\_]`a`b\_b`YK¥¥aa¥a``UU\_`^`\_aXPZ\_YG[]V¥QV]W  
@HWI-EAS443:3:40:1266:1249#0/1  
GAAAGCTAATGTGTTAATTGGGCAAGGGGACGTAGTGTGG  
+HWI-EAS443:3:40:1266:1249#0/1  
aT^\_aaaYT`aM[Q]RV^Z^Z]\_ZZ\_]\_^UW\_QY]V\_OW^  
@HWI-EAS443:3:40:197:383#0/1  
CAATCTTGCAAAAGGAGAGAAAGCTACTGTGCTAATTGGG  
+HWI-EAS443:3:40:197:383#0/1  
\_````aabba^\_aSaa\_aaa^`aba^ZH[`¥aaaWSY¥a[a  
@HWI-EAS443:3:40:604:1460#0/1  
GAGAAAGCTAATGGGCTAATTGGGCAAGGGGACGTAGTGT  
+HWI-EAS443:3:40:604:1460#0/1  
a]Va¥G¥]^Ha¥YR]OWLT]^\_`Y[VFW\_R\_H]SBBBBBB  
@HWI-EAS443:3:40:644:687#0/1  
TGCAACAGGAGAGAAAGCTAATGTGCTAATTGGGCAAGGG  
+HWI-EAS443:3:40:644:687#0/1  
abaXZHM]RQaUWZ]TW[^UXZSNYSJQINXY¥ZULGMQV

@HWI-EAS443:3:40:70:1543#0/1  
CAATCTTGCAAAGGAGAGAAAGCTACTGTGCTAATTGGG  
+HWI-EAS443:3:40:70:1543#0/1  
a\_aab`a`^]aa\_\_Va^]`\_\_\_\_[HS[S`\_^WOZ^[TX  
@HWI-EAS443:3:40:937:721#0/1  
AGCTAATGTGCTAATTGGGCAAGGGCCGTAGTGTGGTA  
+HWI-EAS443:3:40:937:721#0/1  
W[]\_V\_¥`]Wa\_\_Z\_^`b^¥a\_\_abTG^aa]`^`\_VP\_[YM  
@HWI-EAS443:3:44:1194:1644#0/1  
TGAGCAATCTTGCAAAGGAGAGTAAGCTAATGTGCTAAT  
+HWI-EAS443:3:44:1194:1644#0/1  
a`aY]`[\_\_aaaa`aH\_\_\_aa\_Y^\_^\_a]\_\_Y\_V`\_]\_  
@HWI-EAS443:3:44:1203:1330#0/1  
GTCCCCTTGCCCAATTAGCACATTAGCTATCTCTCCTTTT  
+HWI-EAS443:3:44:1203:1330#0/1  
a\_aabaaaba\_abbbbaaaa`aaa`a\_aaa`a`\_\_\_\_aa`  
@HWI-EAS443:3:46:1106:120#0/1  
GAAAGCTAATGCGCTAATTGGGCAAGGGGACGTAGTGTG  
+HWI-EAS443:3:46:1106:120#0/1  
a^ZP`Q¥YQ^]`^YRV]V]a`[LVL]MQ[UFWNRSYBBBB  
@HWI-EAS443:3:47:326:329#0/1  
GAACTGAACAATCTTGCAAAGGAGAGAAAGCTAATGTGC  
+HWI-EAS443:3:47:326:329#0/1  
a`b\_]`]I¥aaa^[^`Wa\_\_aa[```aa\_``¥^¥```XXX  
@HWI-EAS443:3:47:392:819#0/1  
ATTAGCTTTATCTCCTTTTGCAAGATTGCTCAGTTCATTG  
+HWI-EAS443:3:47:392:819#0/1  
\_Ua`]Y`ZSMX`^XQ[]¥[aaa¥^Y^[¥¥[YWaYXU`aTZ  
@HWI-EAS443:3:47:700:664#0/1  
GAAAGCTAATGTGCTAATTGAGCAAGGGGACGTAGTGTG  
+HWI-EAS443:3:47:700:664#0/1  
aaaX`aa]aab\_^Ya^]aa^`]¥Z\_aa\_]`¥a¥Ya]\_YZ¥  
@HWI-EAS443:3:48:483:1251#0/1  
GAGCAATCTTGCAAAGGAGAGAAAGCTAATGTACTAATT  
+HWI-EAS443:3:48:483:1251#0/1  
aaaababaaa`aaaa[ba\_aaaaa`a\_a`aaa\_]`a`\_a\_  
@HWI-EAS443:3:49:632:421#0/1  
GAGCAATCTTGCAAAGGAGAGAAAGCTAATGTGGTAATT  
+HWI-EAS443:3:49:632:421#0/1  
Q\_Z\_I¥[\_U\_b\_[P^]X¥\_¥¥X^FZW`aUaW[QUFU\_KUW  
@HWI-EAS443:3:49:819:1751#0/1  
ATCTTGTAAGGAGAGAAAGCTAATGTGCTAATTGGGCA  
+HWI-EAS443:3:49:819:1751#0/1  
[bbX[`QN[ `[`[\_Z^bTWX¥[Za`aaSa\_aa^`aa]aUT  
@HWI-EAS443:3:4:137:1051#0/1  
GAGCAATCTTGCAAAGGAGAGAAAGCTAATGTGCTAATT  
+HWI-EAS443:3:4:137:1051#0/1  
^\_^NV]aaaaaRWRPJVXUQqP`\_\_ZR^`¥\_U[PPZ\_BB  
@HWI-EAS443:3:4:248:1987#0/1  
AGCTAATGTGCTAATTGGGCAAGGGGACGTAGCGTTGGTA

+HWI-EAS443:3:4:248:1987#0/1  
a`abba\_a^aa\_\_\_¥Y`a¥L¥\_a`a]]^]X^ZF`HZ`]GO  
@HWI-EAS443:3:4:531:158#0/1  
ATCAATGAACTGAGCAATCTTGCAAAGGGAGAGAAAGCTA  
+HWI-EAS443:3:4:531:158#0/1  
Z¥YU\_\_a¥aUWU[¥I^`\_\_V^a[]^WG\_`]aaaa\_`^M[[  
@HWI-EAS443:3:50:1719:471#0/1  
GAAAGCTAATGTGCTAATTGGGCAAGGGCACGTAGTGTTG  
+HWI-EAS443:3:50:1719:471#0/1  
abaa^^`¥a\_U¥aaaa`a`\_]¥\_U`]ORY\_X¥XT^T\_a  
@HWI-EAS443:3:50:938:456#0/1  
GTCCCCTTGCGCAATTAGCACATTAGCTTTCTCCTTTT  
+HWI-EAS443:3:50:938:456#0/1  
aXabaUPYaWG¥^[WR^a`Tα]]a`\_HK^RIR`\_IRZW[`  
@HWI-EAS443:3:52:380:1970#0/1  
AATGAACTGAGCAATCTTGCAAAGGGAGAGAAAGCTAATG  
+HWI-EAS443:3:52:380:1970#0/1  
ab`a]aaaa`a\_aa`aaaa^Z^`\_\_a`\_\_Y`\_\_\_\_  
@HWI-EAS443:3:52:505:1589#0/1  
AAGCATCAATGAACTGAGCAATCTTGCAATAAGGAGAGAAA  
+HWI-EAS443:3:52:505:1589#0/1  
\_aaaaaaaaaaaa\_a`\_a\_aaa\_aa`aa`^a``aa\_\_\_\_  
@HWI-EAS443:3:53:1580:1960#0/1  
GAAAGCTAATGGGCTAATTGGGCAAGGGGACGTAGTGTTG  
+HWI-EAS443:3:53:1580:1960#0/1  
VZ\_U[Z^aZW[G]U¥U\_]a`UY]`a]aaaa`aPP`]`H^\_  
@HWI-EAS443:3:54:121:1201#0/1  
AGCTAATGTGCTAATTGGGCAAGGGGACGTAGAGTTGGTA  
+HWI-EAS443:3:54:121:1201#0/1  
QX`Y\_b\_Q\_\_aV]]`bU\_UT]R\_a]baa]P\_\_M[R\_^YDU  
@HWI-EAS443:3:54:1278:1652#0/1  
ACTGAGCAATCTTGCAAAGGAGAGGAAGCTAATGTGCTA  
+HWI-EAS443:3:54:1278:1652#0/1  
`Tab\_\_YbbbUab`Xaababa\_aab\_\_ab\_[UaaSb`[]R  
@HWI-EAS443:3:55:557:1476#0/1  
TTTCTCTCTTTAGCAAGATTGCTCAGTTCATTGATGCTT  
+HWI-EAS443:3:55:557:1476#0/1  
abababbbabbaba`bbbab`a^aaaaaaaaaaaaaa]`a  
@HWI-EAS443:3:56:784:29#0/1  
AGCTAATGTGCTAATTGGGCGAGGGGACGTAGTGTTGGTA  
+HWI-EAS443:3:56:784:29#0/1  
^baa`bbb^baba`aaaaa[[[aaaa]]b]\_aYa]\_a`R]  
@HWI-EAS443:3:57:1109:1275#0/1  
AGCACATTAGCTTTCTCCTTCTGCAAGATTGCTCAGTT  
+HWI-EAS443:3:57:1109:1275#0/1  
aX^`\_aaaaa`aaa\_\_`a^a\_\_\_\_`]Z\_]¥\_\_^^[\_[YZ  
@HWI-EAS443:3:57:770:1322#0/1  
CTTGCAAAGGAGAGAAAGCTAATGTGGTAATTGGGCAAG  
+HWI-EAS443:3:57:770:1322#0/1  
aaa^Xa\_b\_``aUb]aa\_aaa]Zba]VG]]`YaJ\_R^X[\_



@HWI-EAS443:3:58:1275:692#0/1  
GAGCAATCTTGCAAAAGGAGAGACAGCTAATGTGCTAATT  
+HWI-EAS443:3:58:1275:692#0/1  
\_QZSWSW]Y#Z[R[SUZa\_^#aXDN`VURSX#[[U[PR#[  
@HWI-EAS443:3:58:216:806#0/1  
CAATGAACTGAGCAATCTTGCAAAAGGAGAGACAGCTAAT  
+HWI-EAS443:3:58:216:806#0/1  
V\_WVbZNZ`bab`U#b]aa`bbY^b#`S`\_`ZFM`ba[PX  
@HWI-EAS443:3:58:89:1154#0/1  
GCATCAATGAACTGAGCAATCTTGCAATAGGAGAGAAAGC  
+HWI-EAS443:3:58:89:1154#0/1  
aSU]^a]SaVI`[XPP]\_YZ^[^]QODDK#\_QQR^`\_PSY  
@HWI-EAS443:3:59:94:281#0/1  
CAATCTTGCGAAAGGAGAGAAAGCTAATGTGCTAATTGGG  
+HWI-EAS443:3:59:94:281#0/1  
aa\_baabba`[ZUbb\_a]]\_a`aaa^\_aa]aW^[^`U`^`^  
@HWI-EAS443:3:5:993:134#0/1  
CTGAGCAATCTTGCAAGAGGAGAGAAAGCTAATGTGCTAA  
+HWI-EAS443:3:5:993:134#0/1  
ab`S`[b[`a`a`SHH#a]W[L`SO^`^^`#abUG`#S^  
@HWI-EAS443:3:60:1535:79#0/1  
AGCACATTAGCTTTCTCTCCTTTTGTAAGATTGCTCAGTT  
+HWI-EAS443:3:60:1535:79#0/1  
ab`\_aa\_baaY^baabaaa[`aa#IPT#X[\_a#^U^]VR  
@HWI-EAS443:3:61:1112:183#0/1  
GTCCCCTCGCCCAATTAGCACATTAGCTTTCTCTCCTTTT  
+HWI-EAS443:3:61:1112:183#0/1  
a`YV\_\_PDW\_^\_XV\_Q#\_]\_]\_QU[XX#]V[RZU]XXYVVU  
@HWI-EAS443:3:61:1506:692#0/1  
CCCTTGCCCAATTAGCACATTAGCTTTCACTCCTTTTGCA  
+HWI-EAS443:3:61:1506:692#0/1  
\_bbbbbbbbbbbbbbbabbbbbbbbbba`K`abXaaa`aV\_  
@HWI-EAS443:3:62:1368:1915#0/1  
GAGCAATCTTGCAAAAGGAGAGAAAGCTAATGTGGTAATT  
+HWI-EAS443:3:62:1368:1915#0/1  
UTM#`bbb[aba\_aababb\_aba[baTbba\_aI\_LSZbba  
@HWI-EAS443:3:62:1668:928#0/1  
GAGAAAGCTAATGTGCCAATTGGGCAAGGGGACGTAGTGT  
+HWI-EAS443:3:62:1668:928#0/1  
`Z\_^a[`aa][`^#`a#`\_a`\_]\_]#TU`a^`Z``V#`[a#  
@HWI-EAS443:3:62:595:97#0/1  
GCAAAAGGAGAGGAAGCTAATGTGCTAATTGGGCAAGGGG  
+HWI-EAS443:3:62:595:97#0/1  
`TLZ]]\_\_Y\_]\_]\_MUY^VYXY#VVXY]QYVVVVUYXVYYU  
@HWI-EAS443:3:63:1047:840#0/1  
CAATCTTGCAAAAGGAGAGAAAGCTAATGGGCTAATTGGG  
+HWI-EAS443:3:63:1047:840#0/1  
]Y]]#aXSa\_X[W\_aYQ]a\_^L[\_SRGTPHXZ\_VQXGYJ]  
@HWI-EAS443:3:63:372:2031#0/1  
AAGGAGAGAAAGCAAATGTGCTAATTGGGCAAGGGGACGT

+HWI-EAS443:3:63:372:2031#0/1  
aaV`b`a`a`^U`aa\_aW`^^Y`\_VYY¥`aTT]^^]]Z  
@HWI-EAS443:3:63:437:1104#0/1  
TGCAAAAGGAGAGAAAGCTAATGTGCTCATTGGGCAAGGG  
+HWI-EAS443:3:63:437:1104#0/1  
aba0JZ[WZWX]X\_a^R]]][`Z`\_`OI¥¥\_¥0Ga^T^^X  
@HWI-EAS443:3:64:1519:1839#0/1  
GAAAGCTAATGGGCTAATTGGGCAAGGGGACGTAGTGTG  
+HWI-EAS443:3:64:1519:1839#0/1  
ab[a\_a[`\_b^H[aaaabS`YJa`aab`^H`\_RTPaRY¥  
@HWI-EAS443:3:64:942:252#0/1  
AGCTAATGTGCTAATTGGGCAAGGGGAAGTAGTGTGGTA  
+HWI-EAS443:3:64:942:252#0/1  
^\_GR^`\_[YbZUU[\_X[WTXS`U`UYJD¥R`ZF]0aa¥[S  
@HWI-EAS443:3:67:1126:495#0/1  
GCAAAAGGAGAGAAAGCTAATGTGCTATTTGGGCAAGGGG  
+HWI-EAS443:3:67:1126:495#0/1  
aab`b`b\_P¥\_aaa`b¥a]aaa[a^aa[a\_b`a]`a\_aa  
@HWI-EAS443:3:67:957:1835#0/1  
GAAAGCTAACGTGCTAATTGGGCAAGGGGACGTAGTGTG  
+HWI-EAS443:3:67:957:1835#0/1  
¥¥bXRZ`bb\_VR\_X¥aab`aa`bb\_]ab`RF\_[\_bQ`Waa  
@HWI-EAS443:3:69:1688:1642#0/1  
GTCCCCTTGCCCAATTAGCACATTAGCTTTCTATCCTTTT  
+HWI-EAS443:3:69:1688:1642#0/1  
^`W`]`babbb`aabababa^bbbbb¥a`b`I`a`bbbb  
@HWI-EAS443:3:70:1364:777#0/1  
GAGCAATCTTGCAAAGGGAGAGAAAGCTAATGTGCTAATT  
+HWI-EAS443:3:70:1364:777#0/1  
]bbabbbbbbabaa`bb`bbbabab\_babbbab]ab`aa  
@HWI-EAS443:3:70:659:874#0/1  
AGCTAATGAGCTAATTGGGCAAGGGGACGTAGTGTGGTA  
+HWI-EAS443:3:70:659:874#0/1  
\_`U\_]`baSY\_]\_Y¥`bbYaa\_Z]aaS`Ga`GaS`a^^W  
@HWI-EAS443:3:75:1655:1909#0/1  
ATGAACTGAGCAATCTTGCAAAGCAGAGAAAGCTAATGT  
+HWI-EAS443:3:75:1655:1909#0/1  
Ub\_\_^N`bX]0\_]^¥aYU]aXYUWI¥`ab]Yaa¥]aSPPP  
@HWI-EAS443:3:76:1147:25#0/1  
CAAAAGGAGAGAAAGCTAATGCGCTAATTGGGCAAGGGGA  
+HWI-EAS443:3:76:1147:25#0/1  
`baYYbbabba\_^b]ba`a[D¥\_a\_aa`aaP\_\_a`a[  
@HWI-EAS443:3:76:193:973#0/1  
ATCTTGCAAACGGAGAGAAAGCTAATGTGCTAATTGGGCA  
+HWI-EAS443:3:76:193:973#0/1  
a`aa`U^RZSRZ[`XTZT¥`^[T[[VU[R[OMVZYVYUX  
@HWI-EAS443:3:76:212:618#0/1  
CATCAATGAACTCAGCAATCTTGCAAAGGAGAGAAAGCT  
+HWI-EAS443:3:76:212:618#0/1  
\_`a^a]\_\_bbb\_K\_aaba^^aZaa¥Z¥]a`a`a`WWZ]`

@HWI-EAS443:3:76:337:437#0/1  
GCATCAATGAACTGAGCAATCTTGCAGAAGGAGAGAAAAGC  
+HWI-EAS443:3:76:337:437#0/1  
`RW\_\_R\_I¥`¥W`S`\_aW\_^]a¥PGQQU[RZU\_\_\_\_^\_]  
@HWI-EAS443:3:77:164:1365#0/1  
GAGAAAGCTAATGTGCTAATTGAGCAAGGGGACGTAGTGT  
+HWI-EAS443:3:77:164:1365#0/1  
aa^a¥YXT¥abZb¥¥b\_aa`\_H\_aaa\_\_\_\_`S`^a\_W`Q  
@HWI-EAS443:3:77:399:1707#0/1  
AAAGGAGAGAAAGCTAATGAGCTAATTGGGCAAGGGGACG  
+HWI-EAS443:3:77:399:1707#0/1  
Y^XVOXX^XZ`T¥¥YWRX]FZ][VSZV[\_KZGZ¥OP¥W[V  
@HWI-EAS443:3:78:442:174#0/1  
AGCTAATGTGGTAATTGGGCAAGGGGACGTAGTGTGGTA  
+HWI-EAS443:3:78:442:174#0/1  
Obba`\_bb`aaaabaabb`a`\_abba^ab¥`a0a\_aaaU^  
@HWI-EAS443:3:78:844:1433#0/1  
GAAAGCTAATGTGCTAATTGGGCAAGAGGACGTAGTGTG  
+HWI-EAS443:3:78:844:1433#0/1  
]a\_aa`Zab`]Zaaababa\_`b`Y`^aaa^^a\_b`a`  
@HWI-EAS443:3:79:1030:871#0/1  
AGCTAATGCGCTAATTGGGCAAGGGGACGTAGTGTGGTA  
+HWI-EAS443:3:79:1030:871#0/1  
]^YaX^U^F^PQVPUV]T`^HP[]RV[``OV`G`V\_^]G\_  
@HWI-EAS443:3:79:1297:399#0/1  
GAGCAATCTTGCAAAAGGAGAGAAAGCTAGTGTGCTAATT  
+HWI-EAS443:3:79:1297:399#0/1  
¥F¥U]\_`aa^^W¥\_V0^\_\_\_\_T¥[^]a\_Y]GX^RYUPUR^S  
@HWI-EAS443:3:79:248:793#0/1  
AGCTCATGTGCTAATTGGGCAAGGGGACGTAGTGTGGTA  
+HWI-EAS443:3:79:248:793#0/1  
]a^WJP[\_[W`\_TZ\_UZXW`YSZbaa]a]ML^]a\_\_U^VG  
@HWI-EAS443:3:79:641:1847#0/1  
GAACTGAGCAATCTTGCAAAAGGAGAGGAAGCTAATGTGC  
+HWI-EAS443:3:79:641:1847#0/1  
ZT^Z\_a^X¥\_^X[]W\_^¥X¥Y\_XO^`XZTZ]W]XVYMY`  
@HWI-EAS443:3:7:891:981#0/1  
CAATCTTGCAAAAGGAGGGAAAGCTAATGTGCTAATTGGG  
+HWI-EAS443:3:7:891:981#0/1  
a\_baaabbbbbb]bbaabbbbaabaaaaba\_baaaa`\_a`a  
@HWI-EAS443:3:80:621:1543#0/1  
GAAAGCTAATGTGCTAATTGGGCAAGGGGACGCAGTGTG  
+HWI-EAS443:3:80:621:1543#0/1  
`SSVPX¥SWZYQ]TRYX¥^T]]T¥[ZXV`PDRXZaBBB  
@HWI-EAS443:3:82:456:441#0/1  
GAAAGCTAATGTGCTAATTGGGCAAGGGGACGCAGTGTG  
+HWI-EAS443:3:82:456:441#0/1  
aa`^ba`]VaaXa\_a¥^`aaa`a]\_aa¥\_\_`a`Z¥R\_]Za  
@HWI-EAS443:3:83:1182:284#0/1  
GAAAGCTAATGTGCTAATTGGGCAAGGGGACGCAGTGTG

+HWI-EAS443:3:83:1182:284#0/1  
]a^\_]TWWX¥` [XDWROR[]]``Q^^XVWN\_FZ[R`T¥Q  
@HWI-EAS443:3:83:394:56#0/1  
GAAAGCTAATGTGCTAATTGAGCAAGGGACGTAGTGTG  
+HWI-EAS443:3:83:394:56#0/1  
P]XbbabXbbb\_baab[b¥\_`b`¥`^`abaabW\_babbaa  
@HWI-EAS443:3:83:692:1327#0/1  
ATCTTGCAAAAAGGAGAGAAAGCTAATGTGATAATTGGGCA  
+HWI-EAS443:3:83:692:1327#0/1  
W\_[a``` [VWG^`Wa^W¥XTQ^\_`]\_aZZFFPVV\_¥^XGF  
@HWI-EAS443:3:84:1207:725#0/1  
GAGAAAGCTAATGTGCTAATTGGGCAAGGTGACGTAGTGT  
+HWI-EAS443:3:84:1207:725#0/1  
aabbbabaaaaaa]`aaaaaa`a``^`Ya``a``^a^  
@HWI-EAS443:3:84:388:674#0/1  
ATTAGCTTTCTCTCTTTTGAAGATTTCTCAGTTCATTG  
+HWI-EAS443:3:84:388:674#0/1  
aaaaaaaaaaaaa```ab\_aaa`\_`¥\_\_`\_^\_^a\_\_a^`  
@HWI-EAS443:3:84:474:1951#0/1  
GAGAAAGCTAATGTGCTAATTGGGCAAGGGGACGCAGTGT  
+HWI-EAS443:3:84:474:1951#0/1  
\_`a\_U]X\_ba]¥¥]ab]]X`abaa]ab\_`X]^baG]aH]P  
@HWI-EAS443:3:85:488:819#0/1  
ACTGAGCAATCTTGCAAACGGAGAGAAAGCTAATGTGCTA  
+HWI-EAS443:3:85:488:819#0/1  
`W¥¥Za]Z¥L]¥¥aaQU[G]VR[U¥VVY]aY[VXZNSRSS  
@HWI-EAS443:3:85:546:1695#0/1  
ATCTTGCAAAAAGGAGAGAAAGCTAATGTGCTAGTTGGGCA  
+HWI-EAS443:3:85:546:1695#0/1  
aaba[(`a`aa\_[a`aaaaT`aaa[a\_\_a`aYFY\_a\_¥\_^  
@HWI-EAS443:3:86:1368:1954#0/1  
CATCAATGAACTGAGGAATCTTGCAAAAAGGAGAGAAAGCT  
+HWI-EAS443:3:86:1368:1954#0/1  
\_b\_¥b\_abb\_U¥bb\_SVaaJaabaW`aa`babaaa¥aZY`  
@HWI-EAS443:3:86:1368:713#0/1  
GAGCAATCTTGCAAAAAGGAGAGAAAGCTAATGTGATAATT  
+HWI-EAS443:3:86:1368:713#0/1  
`\_V`bb``abYM¥¥`U\_`^^¥bbaaa^babb^^b0babaa  
@HWI-EAS443:3:88:519:416#0/1  
GAGAAAGCTAATGTGCTACTTGGGCAAGGGGACGTAGTGT  
+HWI-EAS443:3:88:519:416#0/1  
aaa]]``ba[T\_]`^`a\_H\_X`¥Vaaa`]`YGab\_[aP`Z  
@HWI-EAS443:3:89:1289:860#0/1  
GAAAGCTAATGTGCTAATTGGGCAAGGGGACCTAGTGTG  
+HWI-EAS443:3:89:1289:860#0/1  
`b\_^aaba^bb`baba^ba`aa[aab`aa`[H[aa^a^aa  
@HWI-EAS443:3:89:990:1295#0/1  
GAAAGCTAATGTGCTAATTGGGCAAGGGGAGGTAGTGTG  
+HWI-EAS443:3:89:990:1295#0/1  
ab`¥bb\_IWb`W^`ba^[`¥X`^`abb`b[H`\_aaSa^aa

@HWI-EAS443:3:8:1270:678#0/1  
GAAAGCTAATGTGCTAATTGGGCAAGGGGACGTAGAGTTG  
+HWI-EAS443:3:8:1270:678#0/1  
^^aaba`^`\_aXaa`]``\_`\_aa\_]X`a\_GaSZ^F^N^a  
@HWI-EAS443:3:8:1471:1993#0/1  
GAGCAATCTTGCAAAGGAGAGAAAGCTAATGTGGTAATT  
+HWI-EAS443:3:8:1471:1993#0/1  
GZa[bV]ZZVbbaaaab[\_ababUb[[b`b[a\_[I[\_aVb  
@HWI-EAS443:3:8:1485:1581#0/1  
AGCTAATGGGCTAATTGGGCAAGGGGACGTAGTGTGGTA  
+HWI-EAS443:3:8:1485:1581#0/1  
V^J`a\_aaT^P`¥a`ZabG`a`aaWa`0\_\_T`]\_aVGW  
@HWI-EAS443:3:90:1301:442#0/1  
AGCAATCTTGCAAAGGAGAGAAAGCTAATGTGGTAATTG  
+HWI-EAS443:3:90:1301:442#0/1  
`abbb`a`Y`]`^bb\_¥a`abaXabab`¥^F¥abaa^  
@HWI-EAS443:3:90:923:1080#0/1  
CCCTTGCCCAATTAGCACATTAGCTTTCTCACCTTTTGCA  
+HWI-EAS443:3:90:923:1080#0/1  
aa^`Xabbab^aab`aaaabaaba]`^`^I`aa\_aaaa  
@HWI-EAS443:3:91:1702:466#0/1  
GAAAGCTGATGTGCTAATTGGGCAAGGGGACGTAGTGTG  
+HWI-EAS443:3:91:1702:466#0/1  
`ba\_a`]GZ]a`VYU\_[[XaUa0SKZ\_a^HS[HQaZ\_¥BB  
@HWI-EAS443:3:92:1608:1938#0/1  
GCATCAATGGACTGAGCAATCTTGCAAAGGAGAGAAAGC  
+HWI-EAS443:3:92:1608:1938#0/1  
ab\_a`aY`bK`P`\_U`Ja`aWYab\_]\_aaaa^a`a`G\_\_Z  
@HWI-EAS443:3:93:641:1136#0/1  
ATTAGCACATTAGCTTTCTCTCCTTTTGCAAGTTGCTCA  
+HWI-EAS443:3:93:641:1136#0/1  
aaW`]\_S[`aaaa\_ba\_YK[`a`\_^\_b`[¥\_]S]^\_^X\_  
@HWI-EAS443:3:94:1168:1450#0/1  
ACCAACTACGGCCCTTGCCCAATTAGCACATTAGCTT  
+HWI-EAS443:3:94:1168:1450#0/1  
aa\_a^`b[abb\_RJ]aa`¥^¥S^`\_[¥`R\_UaXM[aG\_\_  
@HWI-EAS443:3:94:1276:745#0/1  
AGGAGAGAAAGCTAATGTGATAATTGGGCAAGGGGACGTA  
+HWI-EAS443:3:94:1276:745#0/1  
aba\_]¥\_a^\_b````aa[ZJYRa\_] [[U^a\_]WQ]]X  
@HWI-EAS443:3:94:624:1853#0/1  
GAGAAAGCTAATGTGCTAATTGCGCAAGGGGACGTAGTGT  
+HWI-EAS443:3:94:624:1853#0/1  
`¥¥]\_¥Vaaaa¥TV`ab^aa¥XaW\_a]RSTZ`\_WY\_W\_Z  
@HWI-EAS443:3:95:1683:1445#0/1  
CAATGAAGTACTGAGCAATCTTGCAAAGGAGAGAAAGTTAAT  
+HWI-EAS443:3:95:1683:1445#0/1  
\_X\_[X¥ab¥aabb`\_aW^¥\_[bbSWZG]`a^abbYDO[a¥  
@HWI-EAS443:3:95:35:499#0/1  
CAACTACTACGTCCCTTGCCCAATTGGCACATTAGCTTTC

+HWI-EAS443:3:95:35:499#0/1  
abbbbbbbbab^aabbba`]ab^a`\_aaaa`aaaab¥[\_[  
@HWI-EAS443:3:96:1508:2044#0/1  
GAGCAATCTTGAAAAAGGAGAGAAAGCTAATGTGCTAATT  
+HWI-EAS443:3:96:1508:2044#0/1  
ZVabb\_¥S¥a\_RT`a`ab`aa\_ba\_aSYLX`a^a¥a\_R¥a  
@HWI-EAS443:3:96:1597:972#0/1  
AAGCTAATGTGGTAATTGGGCAAGGGGACGTAGTGTGGT  
+HWI-EAS443:3:96:1597:972#0/1  
aa\_L]Y¥¥a[\_TXT`Z`aaaY`S\_\_YZOSaY[b]\_\_a`aP  
@HWI-EAS443:3:96:1717:244#0/1  
GAGAAAGCTAATGTGCTAATTGGGCAAGGGAACGTAGTGT  
+HWI-EAS443:3:96:1717:244#0/1  
V\_aS]¥UPXbNUW`\_Yaa[RMF[^UUVNaTNJYa\_Q`BBB  
@HWI-EAS443:3:96:476:943#0/1  
ATCAATGAACCGAGCAATCTTGCAAAAGGAGAGAAAGCTA  
+HWI-EAS443:3:96:476:943#0/1  
abVbba\_ab\_b]\_K[aX`J` `S^`¥TWY\_V\_\_\_\_`^Z\_V\_\_  
@HWI-EAS443:3:97:1081:1374#0/1  
GAGAAAGCTAATGTGCTAATTGGGCAAGGGGAAGTAGTGT  
+HWI-EAS443:3:97:1081:1374#0/1  
`W]\_a^UZ\_\_\_\_\_aHY\_\_^SaRYNWW¥`^PS[\_GRU¥aVGQ  
@HWI-EAS443:3:97:1368:865#0/1  
AGCTAATGTGATAATTGGGCAAGGGGACGTAGTGTGGTA  
+HWI-EAS443:3:97:1368:865#0/1  
\_RQa^Z[a`^GZ]Xa\_\_a^QWWa`\_aT^^]Zb\_a]Y\_[SY  
@HWI-EAS443:3:97:1518:1176#0/1  
AATGAAGCTGAGCAATCTTGAAAAAGGAGAGAAAGCTAATG  
+HWI-EAS443:3:97:1518:1176#0/1  
abZbb`Q¥aa^TX]Va^a]\_`ba`¥¥ZK^a¥W\_V\_aK¥]P  
@HWI-EAS443:3:97:44:1039#0/1  
TAGCACATTAGCTCTCTCTCTTTTGCAGATTGCTCAGT  
+HWI-EAS443:3:97:44:1039#0/1  
aa`ab`abb^b`¥N\_\_a`\_^\_aa\_` `]\_\_a\_\_\_\_a¥W\_Z\_W  
@HWI-EAS443:3:97:998:443#0/1  
GAAAGCTAATGTGCTAATTGGGCAAGGGGGCGTAGTGTGGT  
+HWI-EAS443:3:97:998:443#0/1  
aaaaa\_aa`a` `a]aaabaaa^\_¥aaaXaZ\_¥\_\_\_\_a^a^  
@HWI-EAS443:3:98:109:1563#0/1  
CATCAATGAAGCTGAGCAATCTTGCAAGAGGAGAGAAAGCT  
+HWI-EAS443:3:98:109:1563#0/1  
aa^V`bbb\_QTQ^Saa\_HU]Y]`W][DW\_aYY` `a`VR\_a  
@HWI-EAS443:3:98:1285:17#0/1  
CAATCTTGCAAATGGAGAGAAAGCTAATGTGCTAATTGGG  
+HWI-EAS443:3:98:1285:17#0/1  
UW]¥UabbbbVaS`abba]ba]b`ababOEUI]bM\_S`bU  
@HWI-EAS443:3:98:1529:871#0/1  
AGCTAATGTGGTAATTGGGCAAGGGGACGTAGTGTGGTA  
+HWI-EAS443:3:98:1529:871#0/1  
a\_W^bbb` ` `L\_HVb\_[] [aY¥abbaa] `¥SbGbWa`aZI

@HWI-EAS443:3:98:1654:1739#0/1  
CAATCTTGCAAAGGAGAGAAAGGTAATGTGCTAATTGGG  
+HWI-EAS443:3:98:1654:1739#0/1  
]b^FYbbaa\_[abab\_[a\_\_b\_QbWbbbaWIU][a\_U^b  
@HWI-EAS443:3:98:627:51#0/1  
AATGAAGCTGAGCAATATTGCAAAGGAGAGAAAGCTAATG  
+HWI-EAS443:3:98:627:51#0/1  
X\_`bVURV`¥`ZXb^FYa`¥R`Z\_bb]baba\_aaP\_\_^ab  
@HWI-EAS443:3:99:1413:1938#0/1  
GAGCAATCTTGCGAAAGGAGAGAAAGCTAATGTGCTAATT  
+HWI-EAS443:3:99:1413:1938#0/1  
\_U\_[^b\_Ybaa]\_aa\_b]M]a\_b[IaNa\_^\_TEYD[a\_\_a  
@HWI-EAS443:3:99:1546:1031#0/1  
GAGAAAGCTAATGTGCTAATTGGGAAAGGGACGTAGTGT  
+HWI-EAS443:3:99:1546:1031#0/1  
abaabb`\_bbbabaaT`]Zbbb¥\_JYYTWbbGY]JYbGV`  
@HWI-EAS443:3:9:1151:1171#0/1  
TGAGCAATCTTGCAAAGGAGAGAAAGCTAATGTGCTAAT  
+HWI-EAS443:3:9:1151:1171#0/1  
aaaa[aabaabaaaaaba`b`]F^\_a^aa\_aa`]Y`^\_a  
@HWI-EAS443:3:9:1390:240#0/1  
GAGCAATCTTGCAAAGGAGAGAAAGGTAATGTGCTAATT  
+HWI-EAS443:3:9:1390:240#0/1  
a\_^X\_Y`X[^^WUV^]^aY\_^]YYVXGXVRY^V]XKMLNB  
@HWI-EAS443:3:9:489:1626#0/1  
GAAAGCTAATGTGCTAATTGGGCAAGGGACGTAGAGTTG  
+HWI-EAS443:3:9:489:1626#0/1  
aaa`a^ZY`^HP`¥`\_a¥^¥WRZ^¥a]^]]G\_W[YGPRUG  
@HWI-EAS443:3:14:1387:1254#0/1  
CATCAATGAAGCTGAGCAATCTTGCAAAGGAGAGAAACAT  
+HWI-EAS443:3:14:1387:1254#0/1  
aaaaabaaa\_ba`\_\_a`a`aaa`\_`\_`aa^a`\_`\_aU]KV  
@HWI-EAS443:3:18:1158:1167#0/1  
AGCTAATGTGCTAATTGGGCAAGGGACGTAGTGTGNGA  
+HWI-EAS443:3:18:1158:1167#0/1  
aaaWaY\_OJ`QY^U`[^aZQN`^¥b]Y`^X¥aVaT]]DFU  
@HWI-EAS443:3:19:716:400#0/1  
AGCTAATGTGCTAATTGGGCAAGGGACGTAGTGTGAAA  
+HWI-EAS443:3:19:716:400#0/1  
\_aabbbbaa^b`abbbaaa`ababa`ab`\_`aXb`a`^aa  
@HWI-EAS443:3:20:829:1141#0/1  
ACAAGAGAAAGCTAATGTGCTAATTGGGCAAGGGACGTA  
+HWI-EAS443:3:20:829:1141#0/1  
U`\_Z`aaaa`]``[^aa\_\_Za\_\_`a\_\_`\_`\_`a`\_`\_`^\_VW  
@HWI-EAS443:3:23:1152:346#0/1  
TGGCCCTTGCCCAATTAGCACATTAGCTTTCTCCTTT  
+HWI-EAS443:3:23:1152:346#0/1  
ZRG[\_Yaa`^a¥[aPYT^X]\_]\_a]WYY¥[\_[\_¥^\_]\_]`^  
@HWI-EAS443:3:23:52:1274#0/1  
AGCTAATGTGCTAATTGGGCAAGGGACGTAGTGTGAAA

+HWI-EAS443:3:23:52:1274#0/1  
Vaaaa\_ba[aabbaaa`abaaa[aa`adW`¥aaaa\_aa  
@HWI-EAS443:3:28:53:506#0/1  
GAGCAATGAACTGAGCAATCTTGCAAAAGGAGAGAAAGCT  
+HWI-EAS443:3:28:53:506#0/1  
a]P\_a^a`¥abZZ¥\_a\_V[`a\_aa`\_]Z]]aa`¥]RZ``  
@HWI-EAS443:3:2:860:959#0/1  
AATGAACTGAGCAATCTTGCAAAAGGAGAGAAAGCTAGTG  
+HWI-EAS443:3:2:860:959#0/1  
R\_¥¥abb`^^\_H\_b\_bYT^^Y¥00\_a¥`^`[`bXYKRYGTB  
@HWI-EAS443:3:46:1198:1618#0/1  
ACAAGAGAAAGCTAATGTGCTAATTGGGCAAGGGGACGTA  
+HWI-EAS443:3:46:1198:1618#0/1  
aab\_aaYaa`ZU]``aX]¥\_`aa`aaZ`^Ua`a\_WX¥UV  
@HWI-EAS443:3:4:1239:1581#0/1  
GAGAAAGCTAATGTGCTAATTGGGCAAGGGGACGTAGAGT  
+HWI-EAS443:3:4:1239:1581#0/1  
\_Z[IWUaSZU\_L^Z`\_\_UWW\_NT\_Z[Y\_YNZBBBBBBBBB  
@HWI-EAS443:3:4:1307:759#0/1  
ACAAGAGAAAGCTAATGTGCTAATTGGGCAAGGGGACGTA  
+HWI-EAS443:3:4:1307:759#0/1  
a`aTY[a`Ya`\_\_\_^\_a]`\_`\_¥][`]]V^V\_Z]^VX\_UY  
@HWI-EAS443:3:54:1627:1688#0/1  
GAACTGAGCAATCTTGCAAAAGGAGAGAAAGCTAATGCGC  
+HWI-EAS443:3:54:1627:1688#0/1  
a\_^`aaYaaa`a\_aa\_\_^^]¥aa]\_`a\_^\_^]\_\_\_]^V\_V  
@HWI-EAS443:3:58:565:471#0/1  
ACAAGAGAAAGCTAATGTGCTAATTGGGCAAGGGGACGTA  
+HWI-EAS443:3:58:565:471#0/1  
]^aZa]a¥QXa\_aZZab]a[`a¥a```a^aaa``aaa`¥]  
@HWI-EAS443:3:63:26:364#0/1  
GANCAATCTTGCAAAAGGAGAGAAAGCTAATGTGCTAATT  
+HWI-EAS443:3:63:26:364#0/1  
\_]D^\_babaab`aa]\_aab\_bUa`aaa¥S¥a]\_a`\_`\_Z  
@HWI-EAS443:3:67:1153:52#0/1  
AGCTAATGTGCTAATTGGGCAAGGGGACGTAGTGTTGAAA  
+HWI-EAS443:3:67:1153:52#0/1  
aUYbb^b`QS[aa`a¥ab`[a\_aaabZG\_`[aXb]a\_\_a`  
@HWI-EAS443:3:72:1290:1982#0/1  
GAGCAATCTTGCAAAAGGAGAGAAAGCTAATGTGCTATTG  
+HWI-EAS443:3:72:1290:1982#0/1  
\_¥`^`bbba\_a`b\_XW\_baababb]`a]aY¥^[`^bbab  
@HWI-EAS443:3:73:1128:1659#0/1  
ACAAGAGAAAGCTAATGTGCTAATTGGGCAAGGGGACGTA  
+HWI-EAS443:3:73:1128:1659#0/1  
aaa`bbbaa^aaaaa^a`aaaa\_a\_a`a\_]\_aX\_  
@HWI-EAS443:3:76:452:832#0/1  
ACAAGAGAAAGCTAATGTGCTAATTGGGCAAGGGGACGTA  
+HWI-EAS443:3:76:452:832#0/1  
^a]aaabb`aba^\_\_^¥`a`a`Z\_^aa`aaa\_a`[a^\_



@HWI-EAS443:3:78:475:1206#0/1  
GTCCCCTTGCCCAATTAGCACATTAGCTTTCTCTCCTCTT  
+HWI-EAS443:3:78:475:1206#0/1  
]^a^ab\_KW^bb[baabaa`W`a\_a[\_`\_¥¥b¥a\_^Y`G`\_  
@HWI-EAS443:3:84:979:1144#0/1  
GACAAAGCTAATGTGCTAATTGGGCAAGGGGACGTAGTGT  
+HWI-EAS443:3:84:979:1144#0/1  
`\_R`\_``\_a`aab\_aba`Y]a`^]\_a`aa`W\_aZ^aX`X  
@HWI-EAS443:3:88:1548:1566#0/1  
GANAGCTAATGTGCTAATTGGGCAAGGGGACGTAGTGTG  
+HWI-EAS443:3:88:1548:1566#0/1  
a^D]baababaa\_abbabbbaa]`\_b`\_a`\_ba`a`\_`ab  
@HWI-EAS443:3:89:1769:1778#0/1  
ACAAGAGAAAGCTAATGTGCTAATTGGGCAAGGGGACGTA  
+HWI-EAS443:3:89:1769:1778#0/1  
a\_abb\_ababaG`aa\_bXba`a\_a\_aaa`a`aaaa^\_[MS  
@HWI-EAS443:3:8:914:897#0/1  
AGCTAATGTGCTAATTGGGCAAGGGGACGTAGTGTGTTA  
+HWI-EAS443:3:8:914:897#0/1  
]OWMV[ ][FR`Z\_\_¥]]Z[Z]XU[¥XLRXPZYQTY¥PDNQ  
@HWI-EAS443:3:95:1454:1207#0/1  
GAAAGCTAATGTGCTAATTGGGCAAGGGGACGTAGTGTG  
+HWI-EAS443:3:95:1454:1207#0/1  
UX¥T`\_ba]`¥I¥[\_¥¥` ``¥ab\_baabbbK]`aX`\_[DZ`  
@HWI-EAS443:3:96:412:243#0/1  
CATCAATGAAGCAATCTTGCAAAAGGAGAGAAANCT  
+HWI-EAS443:3:96:412:243#0/1  
[aba` `bb¥babbbbb`R[babbabaaabb\_aabaa]DYa  
@HWI-EAS443:3:100:553:1177#0/1  
CCCTTNCCTAATTAGCACATTAGCTTTCTCTCCTTTTGCA  
+HWI-EAS443:3:100:553:1177#0/1  
a`b][D[HYaaa`a^XY^aaa\_bTaZb\_aa`TVJU\_\_\_`a  
@HWI-EAS443:3:10:854:687#0/1  
ATCAATGAAGCAATCTTGCAAAAGGNGAGAAAGCTA  
+HWI-EAS443:3:10:854:687#0/1  
a`b`Z[\_^a[ZTaaaaYaTaab\_UY^\_^][D^`aaYS\_OW\_  
@HWI-EAS443:3:12:1109:1376#0/1  
AGCTAATGTGCTANTTGGGCAAGGGGACGTAGTGTGGTA  
+HWI-EAS443:3:12:1109:1376#0/1  
SYX\_`\_\_`aba¥YD^`a`bb[ `bYba[\_a¥aaJ[aa[aHI  
@HWI-EAS443:3:13:629:668#0/1  
ATTAGCTTTCTCTCCTTTTGCAAGATTNCTCAGTTCATTG  
+HWI-EAS443:3:13:629:668#0/1  
aaaaaa\_a` `aaaa` `aaa` `a\_a\_]YDW\_\_^\_^\_^^\_^^\_`  
@HWI-EAS443:3:13:740:1239#0/1  
GAGCAATCTTGCAAAAGGAGAGAAAGCTAATGTGCTAATT  
+HWI-EAS443:3:13:740:1239#0/1  
\_`^`\_`a]b^a^D]]Xaa`aaaaZ` `aaX¥[T`\_`\_`\_`\_`  
@HWI-EAS443:3:16:1371:1500#0/1  
GAAGTGAAGCAATCTTGCAAAAGGAGAGAAAGCTAATGTGC

+HWI-EAS443:3:16:1371:1500#0/1  
a]a^]````a]]Y\_\_XDW¥WU\_\_Ya^`\_X^[ZW^]\_\_YYW  
@HWI-EAS443:3:17:1148:1637#0/1  
CATCAATGAAGTGGCAATCTTGCAAAAGGAGAGAAAGCT  
+HWI-EAS443:3:17:1148:1637#0/1  
a^[`YYbaX¥V]ZDYaa]aaa^\_aaZ¥^b``a`aa`^]`\_`  
@HWI-EAS443:3:19:1018:654#0/1  
AAAGCTAATGNGCTAATTGGGCAAGGGGACGTAGTGTTGG  
+HWI-EAS443:3:19:1018:654#0/1  
a`¥a\_\_^^^D^]``^`aa`^^Z\_]\_]¥a]Z\_ZaZ\_\_`  
@HWI-EAS443:3:1:1006:543#0/1  
GAAGTGAATCCTGCAAAAGGAGAGAAAGCTAATGTGC  
+HWI-EAS443:3:1:1006:543#0/1  
a¥^W]]YXZ\_a`XDS]Y¥\_¥X`XY^`a`\_¥\_Z`^^`YBB  
@HWI-EAS443:3:23:945:1633#0/1  
GAAGTGAATCCTGCAAAAGGAGAGAAAGCTAATNTGC  
+HWI-EAS443:3:23:945:1633#0/1  
``ba\_aa¥]aaaa\_a`a```^`a]a`a`\_]XDE^^  
@HWI-EAS443:3:26:640:1539#0/1  
GAGCAATCTTGCAAAAGGAGAGAAAGCTAATGTNCTAATT  
+HWI-EAS443:3:26:640:1539#0/1  
\_\_¥aZ`^ab`ba^`aa`aa\_ab^aa`aa]]DD[^¥\_]`  
@HWI-EAS443:3:30:1274:1061#0/1  
AGCAATCTTGCAAAAGGAGAGAAAGCTAANGTGCTAATTG  
+HWI-EAS443:3:30:1274:1061#0/1  
aaaa`aaa\_ab^a`aa]a`\_a]]a^aaUDPU\_T[\_U\_][  
@HWI-EAS443:3:30:1557:678#0/1  
GAAAGCTAATGTGCTAANTGGGCAAGGGGACGTAGTGTTG  
+HWI-EAS443:3:30:1557:678#0/1  
ababa`^a[ba\_a`a`¥D¥a^^^`W`^aa^\_]\_^YXMT`  
@HWI-EAS443:3:33:1679:1982#0/1  
GAGCAATCTTGCAAAAGGAGAGAAAGNTAATGTGCTAATT  
+HWI-EAS443:3:33:1679:1982#0/1  
[abaababb`Y`aaabaa^abbbba^D[abb\_Xbaa`aa\_  
@HWI-EAS443:3:43:1425:880#0/1  
ACGTCCCCTTGCCCAATTAGCNCATTAGCTTTCTCTCCTT  
+HWI-EAS443:3:43:1425:880#0/1  
a`aa\_\_aaa`\_^[``aaa`WDSaaa`\_]\_\_aa]a[a¥V\_a  
@HWI-EAS443:3:47:1378:1421#0/1  
CATCAATGAAGTGGCAATCTTGCAANAGGAGAGAAAGCT  
+HWI-EAS443:3:47:1378:1421#0/1  
TXaS`ZQYa`abbaba\_\_Z`aa`a^^D^`b^bbbaX^a^^  
@HWI-EAS443:3:49:917:1149#0/1  
GCATCAATGAAGTGGCAATCTTGCAAAAGGANAGAAAGC  
+HWI-EAS443:3:49:917:1149#0/1  
a`R`[\_aaab`^\_`J\_`a```aaaa^T¥H\_[[DXV^`¥`¥  
@HWI-EAS443:3:51:375:1619#0/1  
GAAGTGAATCCTGCAAAAGGNGAGAAAGCTAATGTGC  
+HWI-EAS443:3:51:375:1619#0/1  
^`baabaababbbbbbaba\_a`ZDUa]bbbbbaababa\_aa

@HWI-EAS443:3:57:591:1102#0/1  
GAGCAATCTTNCAAAAGGAGAGAAAGCTAATGTGCTAATT  
+HWI-EAS443:3:57:591:1102#0/1  
aa¥bbabb^DWaa^aaaaaaaa`\_`aa]abZa`a`\_aa  
@HWI-EAS443:3:60:551:1219#0/1  
CATCAATGAACTGAGCAATCTTGCAAAAGGAGNGAAAGCT  
+HWI-EAS443:3:60:551:1219#0/1  
]babbaa^a`aba\_`^a`ba`ab]]ba`a`a]D¥`ba`aa  
@HWI-EAS443:3:67:1051:1464#0/1  
AGCACATTAGCTTTCTCCTTTTGCAAGATTGCTNAGTT  
+HWI-EAS443:3:67:1051:1464#0/1  
aa`bb`a[[]a`a\_`aa`a^X`a[[]¥`\_`][RDY\_Z^  
@HWI-EAS443:3:69:1442:762#0/1  
CAATCTTGCAAAAGGAGNGAAAGCTAATGTGCTAATTGGG  
+HWI-EAS443:3:69:1442:762#0/1  
^¥`bb][a`]aaabba[D^aZaa¥aaa`aWaaaY`aaaa  
@HWI-EAS443:3:72:1040:1760#0/1  
GAAAGCTAATGTGCTAATTGGGCAAGGGGANGTAGTGTG  
+HWI-EAS443:3:72:1040:1760#0/1  
\_bababb\_\_bbQ`aaabba[Raa`a^XW[DZZSaVa\_`a  
@HWI-EAS443:3:77:596:1413#0/1  
AGCTAATGTGCTAATTGGGCAAGGGGACGTANTGTTGGTA  
+HWI-EAS443:3:77:596:1413#0/1  
a`baaaa[`aaaaaa\_aaaaa`aa`\_`\_XDP\_\_a`YS`  
@HWI-EAS443:3:79:1253:860#0/1  
GAGAAAGCTAATGTGCTAATTGGNCAAGGGGACGTAGTGT  
+HWI-EAS443:3:79:1253:860#0/1  
aW]UZN][U^]ST]^V]QS^XDW[[`TPUZQ^NN]V^X  
@HWI-EAS443:3:79:1435:1615#0/1  
AGCAATCTTNCAAAAGGAGAGAAAGCTAATGTGCTAATTG  
+HWI-EAS443:3:79:1435:1615#0/1  
\_\_aaa`Ya]D¥¥Y`\_bba]b`a`bWb[\_a`abW`\_W[\_  
@HWI-EAS443:3:80:1288:1634#0/1  
AGCACATTAGCTTTCTCNCCTTTTGCAAGATTGCTCAGTT  
+HWI-EAS443:3:80:1288:1634#0/1  
\_aa\_\_abaaa\_aba\_b[DW]abaa\_\_`a`a`\_a^\_`]  
@HWI-EAS443:3:81:90:1517#0/1  
ATCTTGCAAAAGGAGAGAAAGCTAATGTGCTAATTGNGCA  
+HWI-EAS443:3:81:90:1517#0/1  
a\_a```a`\_\_\_\_`a`V`\_\_^\_X^ZT\_^\_^^^]TDR\_^  
@HWI-EAS443:3:85:303:1241#0/1  
GTCCNCTTGCCCAATTAGCACATTAGCTTTCTCCTTTT  
+HWI-EAS443:3:85:303:1241#0/1  
^^b]D^ababb`]^abaabaZaaaaaaaaaaaaa]`aaa`^`  
@HWI-EAS443:3:87:71:1911#0/1  
GGAGAGAAAGCTAATGTGCTAATTGGGCNAGGGGACGTAG  
+HWI-EAS443:3:87:71:1911#0/1  
`baababaa]`a`aa\_Z`^a`\_^S^\_XDW¥S\_]X^VLUR  
@HWI-EAS443:3:88:497:1436#0/1  
CAATGANCTGAGCAATCTTGCAAAAGGAGAGAAAGCTAAT

+HWI-EAS443:3:88:497:1436#0/1  
\_``\_Y]D[Z\_¥\_aW^b¥VS`]QZU¥¥`a¥`^a`aa^QX  
@HWI-EAS443:3:88:531:619#0/1  
CAATGAACTGAGCNATCTTGCAAAAGGAGAGAAAGCTAAT  
+HWI-EAS443:3:88:531:619#0/1  
aZXa`aab`\_`[YDYabababaaVa\_Z^aaabX]baaaaa  
@HWI-EAS443:3:89:415:1127#0/1  
TTAGCTTTCTCCTTTTGCAGATTGCNCAGTTCATTGA  
+HWI-EAS443:3:89:415:1127#0/1  
abbaabbabbb`aaab`aa`ba]aaYa[D[`a\_aa`aaa`  
@HWI-EAS443:3:91:929:1976#0/1  
GCATCAATGAACTGANCAATCTTGCAAAAGGAGAGAAAGC  
+HWI-EAS443:3:91:929:1976#0/1  
a`XVT[QSUM[\_RDN^\_^\_]\_`Z]^^X[ ]^\_\_\_\_\_VL  
@HWI-EAS443:3:92:361:248#0/1  
TGCNCAATTAGCACATTAGCTTTCTCCTTTTGCAGAT  
+HWI-EAS443:3:92:361:248#0/1  
abWD]^Yaaaa`a\_\_`a\_`\_`aa\_`^`\_`\_`\_]`¥\_]`\_`  
@HWI-EAS443:3:93:761:1283#0/1  
CATCAATGAACTGAGCAATCTTGNAAGGAGAGAAAGCT  
+HWI-EAS443:3:93:761:1283#0/1  
TV[b^\_\_¥`b`\_`b`\_`ba^YODWa¥a¥X`abbb^a\_a  
@HWI-EAS443:3:96:642:599#0/1  
GAGAAAGCTAATGTGCTAATTGGGCANGGGGACGTAGTGT  
+HWI-EAS443:3:96:642:599#0/1  
aaaaa`aaaa`aa\_aaaa[\_`a`\_`ZDY`\_\_^`\_`Z][M¥Z  
@HWI-EAS443:3:9:1205:1381#0/1  
GAAAGCTAATGTGCTAATTNGGCAAGGGGACGTAGTGTG  
+HWI-EAS443:3:9:1205:1381#0/1  
abaaaaaaaaa\_a^aaba¥D¥a]``\_a`^^^a`a^a\_aa  
@HWI-EAS443:3:9:949:977#0/1  
GAGCAATCTTGCAAAAGGAGAGAAAGCTAATGTGCNAATT  
+HWI-EAS443:3:9:949:977#0/1  
a]aaS\_[Za[WXQTPP`Z¥\_Xa`U[U]]^`X\_IDK]]W  
@HWI-EAS443:3:100:1012:228#0/1  
CAAGAGAAAGCTAATGTGCTAATTGGGCAAGGGGACGTAG  
+HWI-EAS443:3:100:1012:228#0/1  
ab]aabbaabYaa`aaZ`\_aaabbbaa`^]aa\_\_\_¥aMBB  
@HWI-EAS443:3:17:1541:1962#0/1  
CATCAATGAACTGAGCAATCTTGCAAAAGGAGAGAAAGAT  
+HWI-EAS443:3:17:1541:1962#0/1  
`\_]\_\_\_aa`X\_XaP^a¥[\_^^^T]¥^`¥\_\_\_^[ ]LEU  
@HWI-EAS443:3:21:582:1739#0/1  
GNACTGAGCAATCTTGCAAAAGGAGAGAAAGCTAATGTGC  
+HWI-EAS443:3:21:582:1739#0/1  
[D[ba\_XW`aaa`aaaa`a\_a`^^`a\_]Y]\_`\_`\_`UOR  
@HWI-EAS443:3:2:1159:1991#0/1  
AGCTAATGTGCTAATTGGGCAAGGGGACGTAGTGTGGGA  
+HWI-EAS443:3:2:1159:1991#0/1  
WbM]bu[b`baa[`Tb`aa`b`aa^aX^\_^]aVb]\_b`G^

@HWI-EAS443:3:32:481:1010#0/1  
AGCTAATGTGCTAATTGGGCAAGGGGACGTAGTGTGGCA  
+HWI-EAS443:3:32:481:1010#0/1  
O¥Y]¥Z[V[TVWU]Z\_¥ZQ\_¥H¥VZNX`YMW^VTT]`ZFY  
@HWI-EAS443:3:34:1405:2043#0/1  
AGCTAATGTGCTAATTGGGCAAGGGGACGTAGTGTGGGA  
+HWI-EAS443:3:34:1405:2043#0/1  
a`^baa`\_Ya`abba`aa\_\_aaaaZ\_^UaBBBBBBBBBBB  
@HWI-EAS443:3:34:1529:1448#0/1  
AGCTAATGTGCTAATTGGGCAAGGGGACGTAGTGTGGGA  
+HWI-EAS443:3:34:1529:1448#0/1  
]¥`\_X\_¥`\_`\_`\_^aaba[X`]X[]aXaTa\_`YBBB  
@HWI-EAS443:3:3:688:1500#0/1  
AGCTAATGTGCTAATTGGGCAAGGGGACGTAGTGTGGGA  
+HWI-EAS443:3:3:688:1500#0/1  
aa`\_a]^U]X^\_a^\_]\_[aN`^WTFTW\_\_Q`aXaHGWB  
@HWI-EAS443:3:42:456:1513#0/1  
CAAGAGAAAGCTAATGTGCTAATTGGGCAAGGGGACGTAG  
+HWI-EAS443:3:42:456:1513#0/1  
`aZ¥\_ba^a\_TV^aYWUYY\_\_`\_aba`\_^\_Z````aaZ^`  
@HWI-EAS443:3:46:859:868#0/1  
CAATCTTGCAAAAGGAGAGAAAGCTAATGTGCTAATTGAG  
+HWI-EAS443:3:46:859:868#0/1  
a`W\_bbabaaa¥^bbabaab\_¥b¥aaaab`aba]aab`¥a  
@HWI-EAS443:3:48:219:162#0/1  
AGCTAATGTGCTAATTGGGCAAGGGGACGTAGTGTGGGA  
+HWI-EAS443:3:48:219:162#0/1  
\_bbb\_a`bXP\_aa\_ab\_aZX\_X\_Z\_^¥aX]aVa^`U\_HV  
@HWI-EAS443:3:49:1017:292#0/1  
CAAGAGAAAGCTAATGTGCTAATTGGGCAAGGGGACGTAG  
+HWI-EAS443:3:49:1017:292#0/1  
aabab`baab[bbabaababaaaabbbbaabbbb]\_a^aa  
@HWI-EAS443:3:54:1217:919#0/1  
ATCTTGCAAAAGGAGAGAAAGCTAATGTGCTAATTGGGTA  
+HWI-EAS443:3:54:1217:919#0/1  
S``¥a``Y\_[V^^T]a¥^¥\_¥^a][¥YR^¥aQP`a`b`]R¥  
@HWI-EAS443:3:57:1442:35#0/1  
AGCTAATGTGCTAATTGGGCAAGGGGACGTAGTGTGGGA  
+HWI-EAS443:3:57:1442:35#0/1  
VZab]]a^Wb`¥``baaaa`a[a`Y`[¥[JT[IPQW^aZB  
@HWI-EAS443:3:57:1489:2029#0/1  
AACTGAGCAATCTTGCAAAAGGAGAGAAAGCTAATGTGAT  
+HWI-EAS443:3:57:1489:2029#0/1  
aaa\_¥¥b\_babZM\_b`^M¥\_bbab\_bb¥bbba¥aaaWaGa  
@HWI-EAS443:3:59:1639:1472#0/1  
CCAAAGGAGAGAAAGCTAATGTGCTAATTGGGCAAGGGGA  
+HWI-EAS443:3:59:1639:1472#0/1  
aIQYT[]\_VU]^a¥¥ZaSGYZVaV[LVSV`¥BBBBBBBBB  
@HWI-EAS443:3:5:1403:1409#0/1  
CAAGAGAAAGCTAATGTGCTAATTGGGCAAGGGGACGTAG

+HWI-EAS443:3:5:1403:1409#0/1  
ababbbbbbba`aabbabb^baabbbbab\_aab`bba\_[VTb  
@HWI-EAS443:3:60:1175:1310#0/1  
AGCTAATGTGCTAATTGGGCAAGGGGACGTAGTGTGGAA  
+HWI-EAS443:3:60:1175:1310#0/1  
Z\_ZS¥`aVTW\_K`aaWXTT[a^T`bSSaSLUaRR[a\_UDP  
@HWI-EAS443:3:60:431:1212#0/1  
CAAGAGAAAGCTAATGTGCTAATTGGGCAAGGGGACGTAG  
+HWI-EAS443:3:60:431:1212#0/1  
`abaa\_aabbbbaabb\_aabaaba`aa`a\_\_]U]Z`¥]^  
@HWI-EAS443:3:61:244:332#0/1  
AGCTAATGTGCTAATTGGGCAAGGGGACGTAGTGTGGGA  
+HWI-EAS443:3:61:244:332#0/1  
`bbaaab]ZbabababbabaaZ`^`aa`bZ\_\_K`\_^`[HX  
@HWI-EAS443:3:63:1246:533#0/1  
GCCCCCTTGCCCAATTAGCACATTAGCTTTCTCTCCTTTT  
+HWI-EAS443:3:63:1246:533#0/1  
aH[`ZZRVTV[YOLO`¥`^¥\_^^ZS[PXY^BBBBBBBB  
@HWI-EAS443:3:63:69:1469#0/1  
ATTCCCCTTGCCCAATTAGCACATTAGCTTTCTCTCCTTT  
+HWI-EAS443:3:63:69:1469#0/1  
¥\_\_\_`bbaa`V`W¥\_WZ`]P\_X\_ZO\_aXa][¥[``\_[V  
@HWI-EAS443:3:66:556:1084#0/1  
CAAGAGAAAGCTAATGTGCTAATTGGGCAAGGGGACGTAG  
+HWI-EAS443:3:66:556:1084#0/1  
abaaa^ab`aaaa[``^`aaaaZaaaa`^¥\_\_`\_\_aY\_`  
@HWI-EAS443:3:68:282:1796#0/1  
AGCTAATGTGCTAATTGGGCAAGGGGACGTAGTGTGGGA  
+HWI-EAS443:3:68:282:1796#0/1  
aa`^aaX`X]^\_a\_\_`ZV]^a`]\_\_¥`¥T]XN\_R]SUG^  
@HWI-EAS443:3:69:1715:163#0/1  
CAAGAGAAAGCTAATGTGCTAATTGGGCAAGGGGACGTAG  
+HWI-EAS443:3:69:1715:163#0/1  
abbabba`abbabaabab`bbbaba`\_W]`¥``]aaa[a`  
@HWI-EAS443:3:6:455:168#0/1  
CAAGAGAAAGCTAATGTGCTAATTGGGCAAGGGGACGTAG  
+HWI-EAS443:3:6:455:168#0/1  
abbbbbbbbab`bbabbababaaaaaaa`aaaaa`a`\_a  
@HWI-EAS443:3:70:530:351#0/1  
AGCTAATGTGCTAATTGGGCAAGGGGACGTAGTGTGGNA  
+HWI-EAS443:3:70:530:351#0/1  
abaaaa`a\_aaaaaa`aa\_`\_`aa`a]\_\_]ZaUa]aaXDR  
@HWI-EAS443:3:73:1769:841#0/1  
TGTTGCAAAAGGAGAGAAAGCTAATGTGCTAATTGGGCAA  
+HWI-EAS443:3:73:1769:841#0/1  
]G^`aY[¥YY]R[]`ZR]^a^\_U\_`\_YXLa[[\_]RVWST  
@HWI-EAS443:3:78:1322:327#0/1  
TTAAAGGAGAGAAAGCTAATGTGCTAATTGGGCAAGGGGA  
+HWI-EAS443:3:78:1322:327#0/1  
WTLY```V¥0¥¥^M\_]`[]`Y]aU\_TMN]a\_TY[Z`^^\_]`

@HWI-EAS443:3:7:109:257#0/1  
AGCTAATGTGCTAATTGGGCAAGGGGACGTAGTGTGGGA  
+HWI-EAS443:3:7:109:257#0/1  
]ab¥¥W[¥¥`^\_aa]b^^LY[abb]aYab^`\_G\_]`\_P\_  
@HWI-EAS443:3:7:299:1072#0/1  
AGCTAATGTGCTAATTGGGCAAGGGGACGTAGTGTGGGA  
+HWI-EAS443:3:7:299:1072#0/1  
a]`\_aKaa¥^aa\_]TZ\_\_\_\_]aa`]a\_ab\_a`H`Y`aYDT  
@HWI-EAS443:3:80:334:1299#0/1  
GCTCCCCTTGCCCAATTAGCACATTAGCTTTCTCCTTT  
+HWI-EAS443:3:80:334:1299#0/1  
^YF^^WUL¥P`^\_VMWRY]^[^]¥]XV\_U¥RZ]XR¥SVNV  
@HWI-EAS443:3:82:1078:489#0/1  
CAAGAGAAAGCTAATGTGCTAATTGGGCAAGGGGACGTAG  
+HWI-EAS443:3:82:1078:489#0/1  
abOb\_^YZa¥XaZabbabaa\_\_ba]¥a\_]`ba\_]Jaba¥Y  
@HWI-EAS443:3:83:60:1269#0/1  
CAAGAGAAAGCTAATGTGCTAATTGGGCAAGGGGACGTAG  
+HWI-EAS443:3:83:60:1269#0/1  
aYaaaaaaaaa\_G]a\_a][\_aa`a`\_`\_^a`\_\_^`aZ\_^  
@HWI-EAS443:3:84:1123:238#0/1  
AGCTAATGTGCTAATTGGGCAAGGGGACGTAGTGTGGGA  
+HWI-EAS443:3:84:1123:238#0/1  
Zaa`babbQ^]aaba`a]Ta^aaaL¥^[XPR]ZYXTS]GY  
@HWI-EAS443:3:87:1153:147#0/1  
AGCAATCTTGCAAAAGGAGAGAAAGCTAATGTGCTAATCG  
+HWI-EAS443:3:87:1153:147#0/1  
`babbbabb``aaaabbaaab\_aa\_aaaaa\_b]aaaaWa  
@HWI-EAS443:3:88:1122:1043#0/1  
AGCTAATGTGCTAATTGGGCAAGGGGACGTAGTGTGGGA  
+HWI-EAS443:3:88:1122:1043#0/1  
Vb`^OIU\_SXa`\_X^b\_]b]V\_Zb``VabUaa\_b\_¥aaGW  
@HWI-EAS443:3:90:1241:870#0/1  
AGCTAATGTGCTAATTGGGCAAGGGGACGTAGTGTGGGA  
+HWI-EAS443:3:90:1241:870#0/1  
`bbbaa`aa``a]W\_aaa^[\_aaaaX\_b]XaU^\_\_a]H\_  
@HWI-EAS443:3:92:874:1692#0/1  
CAAGAGAAAGCTAATGTGCTAATTGGGCAAGGGGACGTAG  
+HWI-EAS443:3:92:874:1692#0/1  
ab[ba\_aaaa`a]`ab]a`bbabY^a`a`aaYba`Ob^[W  
@HWI-EAS443:3:96:1695:625#0/1  
TACAAAAGGAGAGAAAGCTAATGTGCTAATTGGGCAAGGG  
+HWI-EAS443:3:96:1695:625#0/1  
^`¥OQ¥RR\_V\_Z]ba]]`a^[¥`Y[U`[Ta]abWG^\_S`B  
@HWI-EAS443:3:96:993:959#0/1  
CAAGAGAAAGCTAATGTGCTAATTGGGCAAGGGGACGTAG  
+HWI-EAS443:3:96:993:959#0/1  
^b\_[K¥¥\_[\_abab`b\_ab]aab\_U¥^Y^\_`^aaa]\_b`aa  
@HWI-EAS443:3:97:529:1154#0/1  
ATCTTGCAAAAGGAGAGAAAGCTAATGTGCTAATTGGGTA

+HWI-EAS443:3:97:529:1154#0/1  
[baabab`0babb]ba¥aabaaa`baWa¥a[`]b^aW`  
@HWI-EAS443:3:98:1566:813#0/1  
AGCTAATGTGCTAATTGGGCAAGGGGACGTAGTGTGGGA  
+HWI-EAS443:3:98:1566:813#0/1  
a`Rabbba¥babb`¥`aab]]`b`ba[^a^R¥T\_\_[a¥GO  
@HWI-EAS443:3:99:170:469#0/1  
GAAAAAGGAGAGAAAGCTAATGTGCTAATTGGGCAAGGGG  
+HWI-EAS443:3:99:170:469#0/1  
a```\_\_ab`a\_aa\_\_a```]aa¥a`^```aa\_\_^^a^`\_  
@HWI-EAS443:3:9:1445:941#0/1  
AAGCTAATGTGCTAATTGGGCAAGGGGACGTAGTGTGAA  
+HWI-EAS443:3:9:1445:941#0/1  
]¥¥^aaaa`b]aa\_baa]]X^UW^aa^W\_Z\_\_R^\_aa\_[  
@HWI-EAS443:3:17:1253:2046#0/1  
NAGCAATCTTGCAAAGGAGAGAAAGCTAATGTGCTAATT  
+HWI-EAS443:3:17:1253:2046#0/1  
DKTLNWUSUTVWVNSTTSSVQTLQNPVWVWTPUUYTBBB  
@HWI-EAS443:3:19:725:338#0/1  
GCATCAATGAAGTGAATCTTGCAAAGGAGAGAAAGG  
+HWI-EAS443:3:19:725:338#0/1  
`HW¥NZ^]Z[\_Z\_TW`Z\_\_UTVMYTY^^\_Ya]XXRD  
@HWI-EAS443:3:20:1263:353#0/1  
GAATCTTGCAAAGGAGAGAAAGCTAATGTGCTAATTGGG  
+HWI-EAS443:3:20:1263:353#0/1  
V\_b`K`a`a]ONYa]WbbaWZI\_^ba]ab[aa^J`a\_a`[  
@HWI-EAS443:3:20:1425:1259#0/1  
TAAAGCTAATGTGCTAATTGGGCAAGGGGACGTAGTGTG  
+HWI-EAS443:3:20:1425:1259#0/1  
LXbbb\_bb[\_[\_[abXaabaa`¥`Ua`Vbb\_aa\_bM``ab  
@HWI-EAS443:3:23:1153:974#0/1  
TGCCCCCTTGCCCAATTAGCACATTAGCTTTCTCCTTT  
+HWI-EAS443:3:23:1153:974#0/1  
aa\_baaa`aaaa`aa`a``\_aaa`a\_a`\_aX``¥`\_\_  
@HWI-EAS443:3:24:1792:614#0/1  
NAGAAAGCTAATGTGCTAATTGGGCAAGGGGACGTAGTGT  
+HWI-EAS443:3:24:1792:614#0/1  
DHXVQPVSUUUYSMRROLXXVJQONTBBBBBBBBBBBBB  
@HWI-EAS443:3:25:433:1539#0/1  
AGCAAAGGAGAGAAAGCTAATGTGCTAATTGGGCAAGGG  
+HWI-EAS443:3:25:433:1539#0/1  
a[`[a\_X^baa]aa`^abaaaa[^aaaa```[Ya`\_aY\_  
@HWI-EAS443:3:28:1507:1397#0/1  
AAGCTAATGTGCTAATTGGGCAAGGGGACGTAGTGTGGG  
+HWI-EAS443:3:28:1507:1397#0/1  
aZ`b][a`aZ`ab`^`abaaaa`^^\_\_a]\_a¥aa]U\_G  
@HWI-EAS443:3:30:38:909#0/1  
CTCCCCTTGCCCAATTAGCACATTAGCTTTCTCCTTTT  
+HWI-EAS443:3:30:38:909#0/1  
aabbbba^`ba`aaaa`baaaaaa``a\_\_\_\_`aa\_Z`\_\_^



@HWI-EAS443:3:32:1243:1754#0/1  
CAGCAATCTTGCAAAGGAGAGAAAGCTAATGTGCTAATT  
+HWI-EAS443:3:32:1243:1754#0/1  
G[^b\_a\_a^b¥bZ\_UZWZ\_baY\_Z\_b\_bba`bX\_Z`\_`bb  
@HWI-EAS443:3:34:802:395#0/1  
CCCCCTTGCCCAATTAGCACATTAGCTTTCTCCTTTTG  
+HWI-EAS443:3:34:802:395#0/1  
abbbbaabbaab^b`baaaaaaab\_bbaaa]a\_Za^`\_`\_  
@HWI-EAS443:3:36:1379:176#0/1  
AAGCTAATGTGCTAATTGGGCAAGGGGACGTAGTGTTGGG  
+HWI-EAS443:3:36:1379:176#0/1  
^]¥a^R¥a\_0]X`\_`\_`baaaa`baa\_X`]FMaR][`aTI  
@HWI-EAS443:3:37:1793:2036#0/1  
NAGCAATCTTGCAAAGGAGAGAAAGCTAATGTGCTAATT  
+HWI-EAS443:3:37:1793:2036#0/1  
DMUUPWZWWUTHQSSSNYZXWYVWUWHUVTTSUWYUNUY  
@HWI-EAS443:3:39:1524:368#0/1  
TCGTCCCCTTGCCCAATTAGCACATTAGCTTTCTCCTT  
+HWI-EAS443:3:39:1524:368#0/1  
a]\_T][a^RQSZNLLHP\_XLSVSZ\_MYYH\_]YTU¥WQLQY  
@HWI-EAS443:3:42:1121:845#0/1  
GCAAAGGAGAGAAAGCTAATGTGCTAATTGGGCAAGGGN  
+HWI-EAS443:3:42:1121:845#0/1  
aa`[YX[]PVZ`\_`^a\_YUK¥UWZ^UTZ[^\_\_YSP\_\_WD  
@HWI-EAS443:3:43:1186:970#0/1  
AAGAGAAAGCTAATGTGCTAATTGGGCAAGGGGACGTAGT  
+HWI-EAS443:3:43:1186:970#0/1  
a`a``bbab`baaab`a`aaaa`aa`a^aa`\_`XaX¥`U  
@HWI-EAS443:3:44:512:706#0/1  
AGTCCCCTTGCCCAATTAGCACATTAGCTTTCTCCTTT  
+HWI-EAS443:3:44:512:706#0/1  
a`Lab\_baaba`a^bbbaaZ]ba\_``]aaaa`a[^^]a`^  
@HWI-EAS443:3:49:1755:1558#0/1  
TCGTCCCCTTGCCCAATTAGCACATTAGCTTTCTCCTT  
+HWI-EAS443:3:49:1755:1558#0/1  
`b¥Y[XUUG[a[[`a^W][[OMXa[Y[¥`\_aR\_G[^]aZ  
@HWI-EAS443:3:53:1641:1200#0/1  
CAGCAATCTTGCAAAGGAGAGAAAGCTAATGTGCTAATT  
+HWI-EAS443:3:53:1641:1200#0/1  
GPZ\_a\_b\_ababbUYaba¥Ta`abab]ababbab\_bVabb  
@HWI-EAS443:3:54:1708:469#0/1  
GATCAATGAAGTGAATCTTGCAAAGGAGAGAAAGCT  
+HWI-EAS443:3:54:1708:469#0/1  
S`[T^T^a`a`)\_`\_aaT^ORYN\_a^[^XW¥U\_ab^]\_[PF  
@HWI-EAS443:3:55:1085:1084#0/1  
AAAGCTAATGTGCTAATTGGGCAAGGGGACGTAGTGTTGA  
+HWI-EAS443:3:55:1085:1084#0/1  
aaaa¥a¥[]a^aTaaaa^¥[[\_aa\_^[^`a\_\_aY¥^`\_`\_  
@HWI-EAS443:3:55:1419:1977#0/1  
GATCAATGAAGTGAATCTTGCAAAGGAGAGAAAGCT



@HWI-EAS443:3:79:1024:184#0/1  
GTCCCCTTGCCCAATTAGCACATTAGCTTTCTCTCCTTTA  
+HWI-EAS443:3:79:1024:184#0/1  
\_b^bbbababa^bbb`aa`a`aabab¥ba`]ab``^aaaa  
@HWI-EAS443:3:79:602:113#0/1  
GGCACATTAGCTTTCTCTCCTTTTGCAAGATTGCTCAGTT  
+HWI-EAS443:3:79:602:113#0/1  
aa`babaaaaa`a`]a`]`aa\_`¥`\_a\_``^\_^^`\_^  
@HWI-EAS443:3:80:315:264#0/1  
AAGCTAATGTGCTAATTGGGCAAGGGGACGTAGTGTTGGG  
+HWI-EAS443:3:80:315:264#0/1  
a\_aabaaab`baaaaaa``\_a^a``\_]a[^aU`^a`TG  
@HWI-EAS443:3:83:757:1512#0/1  
TAAAAGGAGAGAAAGCTAATGTGCTAATTGGGCAAGGGGA  
+HWI-EAS443:3:83:757:1512#0/1  
aa[]\_aa\_baba]^aba\_[Za[a`aa`aaaaUa`U`^Y`\_  
@HWI-EAS443:3:87:534:2046#0/1  
NAGCAATCTTGCAAAAGGAGAGAAAGCTAATGTGCTAATT  
+HWI-EAS443:3:87:534:2046#0/1  
DKPLSUOWWWWWRPXWVZWZZXWUXZZXXUGWWWVVRZG  
@HWI-EAS443:3:88:1060:1579#0/1  
GACTACGTCCCCTTGCCCAATTAGCACATTAGCTTTCTCT  
+HWI-EAS443:3:88:1060:1579#0/1  
S¥RX\_¥a\_PO¥ZU[QQ\_SS^Z\_\_SGD]XXSab¥\_YFZZ¥  
@HWI-EAS443:3:89:1411:1279#0/1  
GAACTGAGCAATCTTGCAAAAGGAGAGAAAGCTAATGTGA  
+HWI-EAS443:3:89:1411:1279#0/1  
a`aa¥`^ba\_bbb`bbaaPaabb`baabaab¥`baaaOaH  
@HWI-EAS443:3:8:525:991#0/1  
TCGTCCCCTTGCCCAATTAGCACATTAGCTTTCTCTCCTT  
+HWI-EAS443:3:8:525:991#0/1  
aaa\_[baa``[aa`^b`aaaa\_`a``a\_\_\_\_\_````\_\_^\_^  
@HWI-EAS443:3:91:652:1779#0/1  
AAGCTAATGTGCTAATTGGGCAAGGGGACGTAGTGTTGGG  
+HWI-EAS443:3:91:652:1779#0/1  
aaY`¥\_]UTF^ZMOXRY\_UVa[¥\_[QPU[\_WJYQUU\_\_XF  
@HWI-EAS443:3:95:899:1089#0/1  
AAGCTAATGTGCTAATTGGGCAAGGGGACGTAGTGTTGGA  
+HWI-EAS443:3:95:899:1089#0/1  
ZV¥a\_aY[aJ\_ab¥P^Y\_¥SX`Uab]\_`Xa\_P\_Rb\_a\_QF  
@HWI-EAS443:3:99:791:1016#0/1  
GATCAATGAACTGAGCAATCTTGCAAAAGGAGAGAAAGCT  
+HWI-EAS443:3:99:791:1016#0/1  
G]¥a`R`aa]b\_``¥`V]^T^a``¥abaabbbbab\_a[b  
@HWI-EAS443:3:9:1277:308#0/1  
GGTCCCCTTGCCCAATTAGCACATTAGCTTTCTCTCCTTT  
+HWI-EAS443:3:9:1277:308#0/1  
aYMZZWZ[^YRV[^\_\_¥W[V\_ZUU\_V]Z^V¥P[YY]^R  
@HWI-EAS443:3:100:102:1121#0/1  
ATCTTGCAAAAGGAGAGAAAGCTAATGTGCTAATTGGGCA

+HWI-EAS443:3:100:102:1121#0/1  
aaa]\_\_[\_`a`a`a\_a\_aY^`\_¥a`XX``]Z\_^ZaBB  
@HWI-EAS443:3:100:1284:706#0/1  
AGCTAATGTGCTAATTGGGCAAGGGGACGTAGTGTGGTA  
+HWI-EAS443:3:100:1284:706#0/1  
aaabaabbaa\_aaaaa`a^`aaa`\_\_a]\_a^a^`a\_0^  
@HWI-EAS443:3:100:130:1794#0/1  
AAGCATCAATGAACTGAGCAATCTTGCAAAAGGAGAGAAA  
+HWI-EAS443:3:100:130:1794#0/1  
aa^`aa``a^\_\_\_`^\_\_\_a]\_W\_^]Z]^]Z^^^]^^B  
@HWI-EAS443:3:100:1353:1423#0/1  
CAATGAACTGAGCAATCTTGCAAAAGGAGAGAAAGCTAAT  
+HWI-EAS443:3:100:1353:1423#0/1  
Vb`abX`Xbbb\_ab¥a\_ab\_Xabab\_abaaa\_KaaG^¥^b  
@HWI-EAS443:3:100:147:883#0/1  
CTTGCAAAAGGAGAGAAAGCTAATGTGCTAATTGGGCAAG  
+HWI-EAS443:3:100:147:883#0/1  
aba[a`aaab\_[aaa¥T]aabaa\_a[a]a\_]aaa^a`\_¥a  
@HWI-EAS443:3:100:1519:994#0/1  
CATCAATGAACTGAGCAATCTTGCAAAAGGAGAGAAAGCT  
+HWI-EAS443:3:100:1519:994#0/1  
Y\_\_VZ`¥\_^`^^^`XX`b\_G\_aba\_^¥¥b]aa`aaW]WBB  
@HWI-EAS443:3:100:158:503#0/1  
GAGCAATCTTGCAAAAGGAGAGAAAGCTAATGTGCTAATT  
+HWI-EAS443:3:100:158:503#0/1  
a`bab`aaaaba``\_`a^a`a\_a\_`Za¥^aa\_a]\_]\_\_B  
@HWI-EAS443:3:100:283:391#0/1  
AGCAATCTTGCAAAAGGAGAGAAAGCTAATGTGCTAATTG  
+HWI-EAS443:3:100:283:391#0/1  
``b`b`¥`¥`TU¥H[¥\_aaa^aab`Y^JU]aT\_a``[^Y^  
@HWI-EAS443:3:100:433:905#0/1  
GAAAGCTAATGTGCTAATTGGGCAAGGGGACGTAGTGTG  
+HWI-EAS443:3:100:433:905#0/1  
aaaabaaaaab\_a\_a`aaaa`]^\_baa`\_^aZ^`ZBBBB  
@HWI-EAS443:3:100:568:59#0/1  
GAAAGCTAATGTGCTAATTGGGCAAGGGGACGTAGTGTG  
+HWI-EAS443:3:100:568:59#0/1  
a^]TaV]]¥¥a[aZ^[]\_]PY\_]]]UPXQW^OX]P]YBB  
@HWI-EAS443:3:100:620:1948#0/1  
CATCAATGAACTGAGCAATCTTGCAAAAGGAGAGAAAGCT  
+HWI-EAS443:3:100:620:1948#0/1  
abb`bbbbbbbaaaaabbaabab`baaaaaabbbbaa]B  
@HWI-EAS443:3:100:714:153#0/1  
GAGCAATCTTGCAAAAGGAGAGAAAGCTAATGTGCTAATT  
+HWI-EAS443:3:100:714:153#0/1  
]¥`\_bZY\_a`Xaaaa`[]aa``]aaY`U\_\_¥¥\_U\_\_`a`  
@HWI-EAS443:3:100:739:1522#0/1  
GCATCAATGAACTGAGCAATCTTGCAAAAGGAGAGAAAGC  
+HWI-EAS443:3:100:739:1522#0/1  
aa]]`\_`VLQYa[[a]`]`\_aaaa\_]\_\_aa^a\_]¥PY`B

@HWI-EAS443:3:100:740:1460#0/1  
GAGCAATCTTGCAAAGGAGAGAAAGCTAATGTGCTAATT  
+HWI-EAS443:3:100:740:1460#0/1  
a^bbb¥`a`aR`a\_\_b^`¥aabb\_aba]]\_¥a]\_\_a]a  
@HWI-EAS443:3:100:749:1947#0/1  
GCAAAGGAGAGAAAGCTAATGTGCTAATTGGGCAAGGGG  
+HWI-EAS443:3:100:749:1947#0/1  
abaaba\_X\_a`abM^`aWW`^M¥`a[\_a`\_b`Y\_Ha^BB  
@HWI-EAS443:3:100:790:1017#0/1  
CATCAATGAAGTCTTGCAAAGGAGAGAAAGCT  
+HWI-EAS443:3:100:790:1017#0/1  
`bbabbbbaaabab^b\_a]`abaaa`^b`abbaa\_a[a  
@HWI-EAS443:3:100:793:2016#0/1  
GAGAAAGCTAATGTGCTAATTGGGCAAGGGGACGTAGTGT  
+HWI-EAS443:3:100:793:2016#0/1  
[b`bNab\_a`aabZaaaWb^abaa^bb`\_^a]aVBBB  
@HWI-EAS443:3:100:854:966#0/1  
GAGCAATCTTGCAAAGGAGAGAAAGCTAATGTGCTAATT  
+HWI-EAS443:3:100:854:966#0/1  
^[aS\_Za\_aba`Z]`[\_UWba^]a]\_L\_U[a[Ya]a^RBB  
@HWI-EAS443:3:100:936:271#0/1  
GGAGAGAAAGCTAATGTGCTAATTGGGCAAGGGGACGTAG  
+HWI-EAS443:3:100:936:271#0/1  
aa]ba]`^U¥G¥U^\_]a[`¥`\_\_^XUWZZ`\_¥aSW[WNa  
@HWI-EAS443:3:100:965:227#0/1  
GAGCAATCTTGCAAAGGAGAGAAAGCTAATGTGCTAATT  
+HWI-EAS443:3:100:965:227#0/1  
aRaNTW]V^aa]\_`N]¥aGZ]aa0`^U^MMSXX`V\_R\_W]  
@HWI-EAS443:3:100:984:923#0/1  
AGCACATTAGCTTTCTCTCTTTTGCAAGATTGCTCAGTT  
+HWI-EAS443:3:100:984:923#0/1  
aa¥\_ab`aaa^aba^b`aa\_aa`a^¥a`\_aaaaWaW`¥\_`  
@HWI-EAS443:3:10:1033:258#0/1  
CATCAATGAAGTCTTGCAAAGGAGAGAAAGCT  
+HWI-EAS443:3:10:1033:258#0/1  
abbbbbbbbbbb`b`baa`a\_aaa[a]^¥a`\_aaba\_^a`  
@HWI-EAS443:3:10:1139:913#0/1  
CTTGCAAAGGAGAGAAAGCTAATGTGCTAATTGGGCAAG  
+HWI-EAS443:3:10:1139:913#0/1  
abba^bbbbbb\_bbbbbbaabbbbabbbbbbbbaa`bab  
@HWI-EAS443:3:10:1254:2019#0/1  
AAGCTAATGTGCTAATTGGGCAAGGGGACGTAGTGTGTTGGT  
+HWI-EAS443:3:10:1254:2019#0/1  
aaaYaaaba¥a^a`a`\_`¥^\_¥a^^RRT\_Z¥RLRZ]ZUI  
@HWI-EAS443:3:10:1257:820#0/1  
GAAAGCTAATGTGCTAATTGGGCAAGGGGACGTAGTGTGTTG  
+HWI-EAS443:3:10:1257:820#0/1  
aa`\_\_V\_\_`a^\_^]][\_WW^XZZ]^PKMUJXKITXZZ  
@HWI-EAS443:3:10:1370:1567#0/1  
TGCAAAGGAGAGAAAGCTAATGTGCTAATTGGGCAAGGG

+HWI-EAS443:3:10:1370:1567#0/1  
a`¥Ya^^^`¥`\_\_]]\_ZSZ¥^[YOWP`]a`a¥XOU\_a\_\_  
@HWI-EAS443:3:10:1396:957#0/1  
ATCTTGCAAAAAGGAGAGAAAGCTAATGTGCTAATTGGGCA  
+HWI-EAS443:3:10:1396:957#0/1  
`aa`Z`¥`bbb^T^`aaa]Y`a\_a^S\_Y\_\_a\_a^XYR`  
@HWI-EAS443:3:10:1400:967#0/1  
CACTACGTCCCCTTGCCCAATTAGCACATTAGCTTTCTCT  
+HWI-EAS443:3:10:1400:967#0/1  
aaabbabbaababba¥a`abbbbaabWbbaaa^baaN\_^b  
@HWI-EAS443:3:10:1456:1721#0/1  
TGCAAAAAGGAGAGAAAGCTAATGTGCTAATTGGGCAAGGG  
+HWI-EAS443:3:10:1456:1721#0/1  
ab[\_b\_NTbba]^ [WaZQVYbaVaaG`a`a^VaZ\_G^]a  
@HWI-EAS443:3:10:1465:982#0/1  
AGCTAATGTGCTAATTGGGCAAGGGGACGTAGTGTGGTA  
+HWI-EAS443:3:10:1465:982#0/1  
``abbbb¥^`b`aaab\_a\_`][\_\_Z]]a`\_`\_]a\_aaa]]  
@HWI-EAS443:3:10:1478:1140#0/1  
AAGCATCAATGAACTGAGCAATCTTGCAAAAAGGAGAGAAA  
+HWI-EAS443:3:10:1478:1140#0/1  
^aba]`aaaaaaa`b`\_]\_^a`\_\_a`a`^[\_`a`]a\_a\_^  
@HWI-EAS443:3:10:1495:914#0/1  
TCTTGCAAAAAGGAGAGAAAGCTAATGTGCTAATTGGGCAA  
+HWI-EAS443:3:10:1495:914#0/1  
aabba`aaaaba\_a\_aaaaa]``\_a`^a^a\_\_```[aX\_]`  
@HWI-EAS443:3:10:1514:86#0/1  
GAAAGCTAATGTGCTAATTGGGCAAGGGGACGTAGTGTG  
+HWI-EAS443:3:10:1514:86#0/1  
a`SR^]XPW\_^XYG^[Y]^S]WXV]QBBBBBBBBBBBB  
@HWI-EAS443:3:10:1571:423#0/1  
TGCAAAAAGGAGAGAAAGCTAATGTGCTAATTGGGCAAGGG  
+HWI-EAS443:3:10:1571:423#0/1  
a`a`aaa`a`\_a\_a`\_a^a`a`R`V`\_^\_^^\_^Z]]\_`\_`  
@HWI-EAS443:3:10:157:952#0/1  
GAAAGCTAATGTGCTAATTGGGCAAGGGGACGTAGTGTG  
+HWI-EAS443:3:10:157:952#0/1  
`\_S^\_AY^^`\_X]^RYV^¥[^SY[V\_0]`XXWHL¥V]XXY  
@HWI-EAS443:3:10:1609:1075#0/1  
AGCTAATGTGCTAATTGGGCAAGGGGACGTAGTGTGGTA  
+HWI-EAS443:3:10:1609:1075#0/1  
a\_bb`bb`aa`baaaabbb[aaaaab\_\_b\_\_Ya]`a\_SR  
@HWI-EAS443:3:10:1612:1288#0/1  
ATGAACTGAGCAATCTTGCAAAAAGGAGAGAAAGCTAATGT  
+HWI-EAS443:3:10:1612:1288#0/1  
aa¥`bbbbba`ababba\_Y¥aaba[aababaaV``\_ab\_  
@HWI-EAS443:3:10:1621:821#0/1  
CTTGCAAAAAGGAGAGAAAGCTAATGTGCTAATTGGGCAAG  
+HWI-EAS443:3:10:1621:821#0/1  
`\_`baa\_``abaabbbbb`bUabbab`\_`abaaR]\_Y^b

@HWI-EAS443:3:10:1644:1790#0/1  
GAGAAAGCTAATGTGCTAATTGGGCAAGGGGACGTAGTGT  
+HWI-EAS443:3:10:1644:1790#0/1  
Wb`bX][UU]\_a\_SaXa[aY[a^YRZ[RYBBBBBBBBBBB  
@HWI-EAS443:3:10:1675:52#0/1  
AGCTAATGTGCTAATTGGGCAAGGGGACGTAGTGTGGTA  
+HWI-EAS443:3:10:1675:52#0/1  
\_SZbbabb[b[aaa[\_]\_a^]\_aa\_a[G^^G\_VaW`UQT  
@HWI-EAS443:3:10:1706:637#0/1  
ATCTTGCAAAAGGAGAGAAAGCTAATGTGCTAATTGGGCA  
+HWI-EAS443:3:10:1706:637#0/1  
[V`VW\_Z¥¥\_`^Y^WT^`YH[]^`]¥KZ¥\_aa[`Z¥\_  
@HWI-EAS443:3:10:1718:823#0/1  
AGCAATCTTGCAAAAGGAGAGAAAGCTAATGTGCTAATTG  
+HWI-EAS443:3:10:1718:823#0/1  
aa`bbb`abbaa`aaaa`baaa`aaUa`\_ab\_a^`\_\_\_\_`a  
@HWI-EAS443:3:10:202:1530#0/1  
AGGAGAGAAAGCTAATGTGCTAATTGGGCAAGGGGACGTA  
+HWI-EAS443:3:10:202:1530#0/1  
ab\_H¥\_b^^\_bbaZa]¥Ta`\_ZUXW^\_W``aYa`\_UP`M¥  
@HWI-EAS443:3:10:204:29#0/1  
GCAATCTTGCAAAAGGAGAGAAAGCTAATGTGCTAATTGG  
+HWI-EAS443:3:10:204:29#0/1  
a\_aYN[`\_\_Z\_[Z]aaZ\_]\_X]^\_XWR^Z^QYYZZZZ¥ZV  
@HWI-EAS443:3:10:219:723#0/1  
CAATCTTGCAAAAGGAGAGAAAGCTAATGTGCTAATTGGG  
+HWI-EAS443:3:10:219:723#0/1  
^Ta\_b`¥`ab`Y^b`ab\_ba`a`\_W``aa`a``[\_]``a  
@HWI-EAS443:3:10:282:1102#0/1  
AAAGCTAATGTGCTAATTGGGCAAGGGGACGTAGTGTGG  
+HWI-EAS443:3:10:282:1102#0/1  
\_a`^ba`U¥a]aaa^aaaa`a]Y^a`\_^]U¥\_Ya]`aa  
@HWI-EAS443:3:10:308:798#0/1  
GAAAGCTAATGTGCTAATTGGGCAAGGGGACGTAGTGTGG  
+HWI-EAS443:3:10:308:798#0/1  
]X^Z]^`¥X\_WGR]^XHUTGV]¥\_aZ¥W`P[[]NLYU[M¥Y  
@HWI-EAS443:3:10:31:595#0/1  
AAGCTAATGTGCTAATTGGGCAAGGGGACGTAGTGTGGT  
+HWI-EAS443:3:10:31:595#0/1  
^Z\_bb`V`b¥b`baaaabbaaa`aaaa\_``]`aVa]\_a\_L  
@HWI-EAS443:3:10:352:546#0/1  
TGCAAAAGGAGAGAAAGCTAATGTGCTAATTGGGCAAGGG  
+HWI-EAS443:3:10:352:546#0/1  
aaaa^`S`b\_aaaaaa]aa`a¥```Q]````\_\_U]X`\_\_  
@HWI-EAS443:3:10:44:1827#0/1  
GAAAGCTAATGTGCTAATTGGGCAAGGGGACGTAGTGTGG  
+HWI-EAS443:3:10:44:1827#0/1  
a]\_Z`\_aYZ\_aY¥][`a\_\_`\_]¥Z`\_^X`\_S^YPYW]Z  
@HWI-EAS443:3:10:623:588#0/1  
ATCTTGCAAAAGGAGAGAAAGCTAATGTGCTAATTGGGCA

+HWI-EAS443:3:10:623:588#0/1  
]HYa\_aaYR¥P`aUZ^¥[WZ¥Z\_]N^\_G\_[UX¥UZXa^ZU  
@HWI-EAS443:3:10:640:195#0/1  
ATCAATGAACTGAGCAATCTTGCAAAAGGAGAGAAAGCTA  
+HWI-EAS443:3:10:640:195#0/1  
]ababbbababbababbaaa^a\_a[]]aa\_aaaa\_\_a]aa  
@HWI-EAS443:3:10:848:1520#0/1  
ATGAACTGAGCAATCTTGCAAAAGGAGAGAAAGCTAATGT  
+HWI-EAS443:3:10:848:1520#0/1  
Ybb`^`aabbaaaaaa\_a`[]]ba\_aaaaa\_a```\_a^R  
@HWI-EAS443:3:10:910:1300#0/1  
GAGCAATCTTGCAAAAGGAGAGAAAGCTAATGTGCTAATT  
+HWI-EAS443:3:10:910:1300#0/1  
`a\_aaa\_¥ba\_aa][a[[]^Z`U^YJ0Z]\_ZGTLQ^]RW  
@HWI-EAS443:3:11:1143:333#0/1  
AGCTAATGTGCTAATTGGGCAAGGGGACGTAGTGTGGTA  
+HWI-EAS443:3:11:1143:333#0/1  
aaab`aab¥b\_a\_[aaa\_a\_\_`a\_\_Z]`S\_aRaX\_`]OW  
@HWI-EAS443:3:11:1172:1989#0/1  
CATCAATGAACTGAGCAATCTTGCAAAAGGAGAGAAAGCT  
+HWI-EAS443:3:11:1172:1989#0/1  
`aaaaaaba[aa[^`b`aTYTq]bb`[^\_aa\_\_aa\_\_G[  
@HWI-EAS443:3:11:1182:740#0/1  
GAGCAATCTTGCAAAAGGAGAGAAAGCTAATGTGCTAATT  
+HWI-EAS443:3:11:1182:740#0/1  
^`W`K`T[P]\_`a\_]0^aaa]¥aS]S^`W\_]PL]H¥]^a`  
@HWI-EAS443:3:11:1205:319#0/1  
CTTGCAAAAGGAGAGAAAGCTAATGTGCTAATTGGGCAAG  
+HWI-EAS443:3:11:1205:319#0/1  
abab`aa`abbaaaaaa`\_ba\_aaVaaa\_\_a]`\_a¥]\_a  
@HWI-EAS443:3:11:1283:1259#0/1  
GAAAGCTAATGTGCTAATTGGGCAAGGGGACGTAGTGTG  
+HWI-EAS443:3:11:1283:1259#0/1  
a\_YUX¥\_[]]a`Y\_MLORMWXQWYVO\_]YVX\_YTHT^RVB  
@HWI-EAS443:3:11:1348:1979#0/1  
GAGCAATCTTGCAAAAGGAGAGAAAGCTAATGTGCTAATT  
+HWI-EAS443:3:11:1348:1979#0/1  
abbabbbabba\_babbbbaabbbba^ba[aaYaGa`^a`  
@HWI-EAS443:3:11:1369:1663#0/1  
GAGCAATCTTGCAAAAGGAGAGAAAGCTAATGTGCTAATT  
+HWI-EAS443:3:11:1369:1663#0/1  
aaa`bbaaab`^`aaaabababaaaaXaa\_aa^aZ\_`````  
@HWI-EAS443:3:11:1382:876#0/1  
CATCAATGAACTGAGCAATCTTGCAAAAGGAGAGAAAGCT  
+HWI-EAS443:3:11:1382:876#0/1  
`[]]HR\_b\_GTa][L\_RHZ^]`aY[QYYV]WY^XR[TPROU  
@HWI-EAS443:3:11:1396:673#0/1  
GAGCAATCTTGCAAAAGGAGAGAAAGCTAATGTGCTAATT  
+HWI-EAS443:3:11:1396:673#0/1  
a`[aaaa`aa`\_`\_]aa[a\_a\_`Xa^\_\_^\_\_^\_V\_]a\_



@HWI-EAS443:3:11:1452:783#0/1  
GAGCAATCTTGCAAAGGAGAGAAAGCTAATGTGCTAATT  
+HWI-EAS443:3:11:1452:783#0/1  
Z¥b`abaabbb`bb`abbbbabab]b\_b^[ba\_babaaba  
@HWI-EAS443:3:11:1477:817#0/1  
CATCAATGAACTGAGCAATCTTGCAAAGGAGAGAAAGCT  
+HWI-EAS443:3:11:1477:817#0/1  
aa`¥^\_`aaabaa]``]aaa`a¥YS\_¥aa[\_¥\_Y\_[¥R\_  
@HWI-EAS443:3:11:1496:1946#0/1  
GCAAAGGAGAGAAAGCTAATGTGCTAATTGGGCAAGGGG  
+HWI-EAS443:3:11:1496:1946#0/1  
a]\_aa[ab^a`aa`aR^`\_\_`XaY^\_^\_^]U^¥\_]BB  
@HWI-EAS443:3:11:1520:1589#0/1  
AGCAATCTTGCAAAGGAGAGAAAGCTAATGTGCTAATTG  
+HWI-EAS443:3:11:1520:1589#0/1  
¥]a`ab[bbaaaa\_aa\_aaaa`\_^`\_^\_^]\_]\_  
@HWI-EAS443:3:11:1590:143#0/1  
AAGCATCAATGAACTGAGCAATCTTGCAAAGGAGAGAAA  
+HWI-EAS443:3:11:1590:143#0/1  
aabaaa`aaaa`^\_\_a`^\_\_^`Z^]Z]\_\_Z^]^^XZ  
@HWI-EAS443:3:11:222:38#0/1  
AAGCTAATGTGCTAATTGGGCAAGGGGACGTAGTGTGGT  
+HWI-EAS443:3:11:222:38#0/1  
aXa\_a\_\_`a^aa¥`\_\_aa`a^^a`\_]X^aVW\_Y\_V]`¥T  
@HWI-EAS443:3:11:240:353#0/1  
AGCTAATGTGCTAATTGGGCAAGGGGACGTAGTGTGGTA  
+HWI-EAS443:3:11:240:353#0/1  
aaa`Z\_ab\_`V\_TV¥]a¥]Y\_\_`Va\_X`T\_XS^[[\_^KK  
@HWI-EAS443:3:11:266:1906#0/1  
GAGCAATCTTGCAAAGGAGAGAAAGCTAATGTGCTAATT  
+HWI-EAS443:3:11:266:1906#0/1  
^WRUR¥`a\_^]`¥WQP]]Z\_\_ZN]`^YZ[UF¥RSZ¥XT  
@HWI-EAS443:3:11:319:1518#0/1  
GAGCAATCTTGCAAAGGAGAGAAAGCTAATGTGCTAATT  
+HWI-EAS443:3:11:319:1518#0/1  
^OU^`^`aa]`ZNWYXR^\_a`a\_a\_[LV`TRVN^X]\_YYT  
@HWI-EAS443:3:11:340:650#0/1  
CATCAATGAACTGAGCAATCTTGCAAAGGAGAGAAAGCT  
+HWI-EAS443:3:11:340:650#0/1  
abba`baaaaaa\_aaaa\_aa`ab```^a``b`aa\_^`\_\_  
@HWI-EAS443:3:11:364:835#0/1  
AAGCATCAATGAACTGAGCAATCTTGCAAAGGAGAGAAA  
+HWI-EAS443:3:11:364:835#0/1  
aaaa\_Y`Z`aaa`a\_\_Yaa`]```\_\_`W^aY\_W]aaa`^[  
@HWI-EAS443:3:11:375:330#0/1  
CAATGAACTGAGCAATCTTGCAAAGGAGAGAAAGCTAAT  
+HWI-EAS443:3:11:375:330#0/1  
a^`bbabaaa]baaabaaaba][aaaaaaaa\_a]aa`a  
@HWI-EAS443:3:11:388:876#0/1  
GCATCAATGAACTGAGCAATCTTGCAAAGGAGAGAAAGC



@HWI-EAS443:3:12:1146:1799#0/1  
AATGAACTGAGCAATCTTGCAAAAGGAGAGAAAGCTAATG  
+HWI-EAS443:3:12:1146:1799#0/1  
¥`ab¥V¥\_][\_\_^`V[¥`a]a`a`ba\_\_baba`]]`¥\_\_  
@HWI-EAS443:3:12:114:1683#0/1  
GAAAGCTAATGTGCTAATTGGGCAAGGGGACGTAGTGTTG  
+HWI-EAS443:3:12:114:1683#0/1  
ab`a[\_aa[aa\_abaa`aa\_`abaV\_]a\_`aa]`a]a\_a\_  
@HWI-EAS443:3:12:117:702#0/1  
ATCTTGCAAAAGGAGAGAAAGCTAATGTGCTAATTGGGCA  
+HWI-EAS443:3:12:117:702#0/1  
aab`b`baa]¥\_aaa`\_aaa\_aaaaa`[aaaa^aa\_a^\_]`  
@HWI-EAS443:3:12:1203:2003#0/1  
AAGCATCAATGAACTGAGCAATCTTGCAAAAGGAGAGAAA  
+HWI-EAS443:3:12:1203:2003#0/1  
aaa`a`b]\_aa¥^`a\_]\_\_^\_]^^X¥^W\_`^^  
@HWI-EAS443:3:12:1246:130#0/1  
GAGCAATCTTGCAAAAGGAGAGAAAGCTAATGTGCTAATT  
+HWI-EAS443:3:12:1246:130#0/1  
aaa]a`a`a`HVY\_\_a^]¥`VXW\_Z]^UX¥Y\_XXVPBB  
@HWI-EAS443:3:12:1270:831#0/1  
GTCCCCTTGCCCAATTAGCACATTAGCTTTCTCTCCTTTT  
+HWI-EAS443:3:12:1270:831#0/1  
a\_`]`aa`baa\_a`a\_aY^a`a`a`\_`¥Z`\_]`\_`^`  
@HWI-EAS443:3:12:1358:245#0/1  
GAAAGCTAATGTGCTAATTGGGCAAGGGGACGTAGTGTTG  
+HWI-EAS443:3:12:1358:245#0/1  
aa¥\_b\_a`N`aYa¥`VUaaa`QYRa`^\_UT^QU\_Y¥ZZB  
@HWI-EAS443:3:12:1378:771#0/1  
CTTGCAAAAGGAGAGAAAGCTAATGTGCTAATTGGGCAAG  
+HWI-EAS443:3:12:1378:771#0/1  
UW¥\_J\_`^`¥b^`aa`][`]`ZV\_aaba]\_aa]`]\_`^S\_  
@HWI-EAS443:3:12:1479:1751#0/1  
CAATGAACTGAGCAATCTTGCAAAAGGAGAGAAAGCTAAT  
+HWI-EAS443:3:12:1479:1751#0/1  
aaa^\_aa`bab¥^ba`Ubab^a\_aXaaa`aaa\_aaGaaZ^  
@HWI-EAS443:3:12:1506:779#0/1  
AAAGCTAATGTGCTAATTGGGCAAGGGGACGTAGTGTTGG  
+HWI-EAS443:3:12:1506:779#0/1  
aaa[V`b`^b\_\_G¥^`aabVSQ]\_\_aa\_¥WaW¥`Xa\_\_\_V  
@HWI-EAS443:3:12:1533:677#0/1  
AGCTAATGTGCTAATTGGGCAAGGGGACGTAGTGTTGGTA  
+HWI-EAS443:3:12:1533:677#0/1  
`a`]`¥b`X`^`¥Va[TN[V\_X\_a`^]Xa[TZS^aa\_¥XY  
@HWI-EAS443:3:12:1548:306#0/1  
GAGCAATCTTGCAAAAGGAGAGAAAGCTAATGTGCTAATT  
+HWI-EAS443:3:12:1548:306#0/1  
\_VVW`aa\_\_bb]`UJ¥\_SWY]abY]ZaPX\_]JX]]ZZ\_a  
@HWI-EAS443:3:12:1570:48#0/1  
AAGCTAATGTGCTAATTGGGCAAGGGGACGTAGTGTTGGT

+HWI-EAS443:3:12:1570:48#0/1  
aabab\_ab\_[b\_aaaaaaba]^aa`aZZaWZ\_Ua[``\_H  
@HWI-EAS443:3:12:1709:236#0/1  
GCATCAATGAACTGAGCAATCTTGCAAAAAGGAGAGAAAGC  
+HWI-EAS443:3:12:1709:236#0/1  
aa¥aW]`bb\_Y`aa][U^``¥aaaV^^ZZ]\_^`]X]^N  
@HWI-EAS443:3:12:1751:407#0/1  
AGCTAATGTGCTAATTGGGCAAGGGGACGTAGTGTGGTA  
+HWI-EAS443:3:12:1751:407#0/1  
ababaaab\_a\_a\_`aaab`\_]a\_^Xa]]\_]a]\_\_^XU  
@HWI-EAS443:3:12:254:970#0/1  
GAAAGCTAATGTGCTAATTGGGCAAGGGGACGTAGTGTG  
+HWI-EAS443:3:12:254:970#0/1  
`^\_]aaZa]a\_[U`XNZY`]^\_aa\_`^^a^`T\_W\_]`  
@HWI-EAS443:3:12:294:1026#0/1  
CTGAGCAATCTTGCAAAAAGGAGAGAAAGCTAATGTGCTAA  
+HWI-EAS443:3:12:294:1026#0/1  
TXY\_\_aaW``Xaa¥\_Z^X`a`[^¥^]\_]\_bbb^a]\_V]  
@HWI-EAS443:3:12:302:670#0/1  
CATCAATGAACTGAGCAATCTTGCAAAAAGGAGAGAAAGCT  
+HWI-EAS443:3:12:302:670#0/1  
aaa]QXaaaa`aaa`a`aa^`aaa\_]¥`aa\_\_^`\_a\_\_\_\_  
@HWI-EAS443:3:12:359:635#0/1  
GAAAGCTAATGTGCTAATTGGGCAAGGGGACGTAGTGTG  
+HWI-EAS443:3:12:359:635#0/1  
aa^aa`aa\_aa]aaaa`\_a`\_a`\_`¥\_`]^a]^aZ\_X]\_`  
@HWI-EAS443:3:12:432:1705#0/1  
AAGCATCAATGAACTGAGCAATCTTGCAAAAAGGAGAGAAA  
+HWI-EAS443:3:12:432:1705#0/1  
Y]I^YY`[^][[Z``\_YHU]T\_\_U]^a^\_\_\_\_^]]`\_^S\_  
@HWI-EAS443:3:12:45:245#0/1  
CTTGCAAAAAGGAGAGAAAGCTAATGTGCTAATTGGGCAAG  
+HWI-EAS443:3:12:45:245#0/1  
`Z\_bab^V¥\_ZT\_Z`]Y`^a\_T^aU`\_`\_]`\_\_a\_^Xa  
@HWI-EAS443:3:12:46:718#0/1  
GAGAAAGCTAATGTGCTAATTGGGCAAGGGGACGTAGTGT  
+HWI-EAS443:3:12:46:718#0/1  
aaa`]V\_aaaaa[a\_\_S]``\_]¥^\_]a\_^]^aV[`U`]  
@HWI-EAS443:3:12:528:1341#0/1  
GCATCAATGAACTGAGCAATCTTGCAAAAAGGAGAGAAAGC  
+HWI-EAS443:3:12:528:1341#0/1  
aa\_ab`XY^^`Y¥aaaa^aaaa``a[`[\_aaaa^X`\_  
@HWI-EAS443:3:12:542:1883#0/1  
CATCAATGAACTGAGCAATCTTGCAAAAAGGAGAGAAAGCT  
+HWI-EAS443:3:12:542:1883#0/1  
ZZV0a\_Xb\_b\_bab¥Vbabb`Ub¥a`a\_aKaba0bbba\_\_  
@HWI-EAS443:3:12:574:415#0/1  
GAGCAATCTTGCAAAAAGGAGAGAAAGCTAATGTGCTAATT  
+HWI-EAS443:3:12:574:415#0/1  
aUFWa\_``a^aX\_a^¥a^]\_\_[\_¥^`[\_S\_a\_R\_W¥]]¥]

@HWI-EAS443:3:12:623:1527#0/1  
AGCTAATGTGCTAATTGGGCAAGGGGACGTAGTGTGGTA  
+HWI-EAS443:3:12:623:1527#0/1  
aaa`ba`a\_`aaaaa\_`]a]^\_a^`^`[^^^`]`W`\_¥XX  
@HWI-EAS443:3:12:758:1535#0/1  
GAGAAAGCTAATGTGCTAATTGGGCAAGGGGACGTAGTGT  
+HWI-EAS443:3:12:758:1535#0/1  
aa\_TaaZbb]aUPFZNY`XRYaV[XHWZZVXR\_aVHYN`B  
@HWI-EAS443:3:12:959:588#0/1  
GAGCAATCTTGCAAAAAGGAGAGAAAGCTAATGTGCTAATT  
+HWI-EAS443:3:12:959:588#0/1  
aa`a`abbbb`¥aaabb]a`bba`]¥a`]aa\_a[a`\_a[  
@HWI-EAS443:3:13:1133:637#0/1  
TGCAAAAAGGAGAGAAAGCTAATGTGCTAATTGGGCAAGGG  
+HWI-EAS443:3:13:1133:637#0/1  
aaaaa¥\_ab\_a`baaaa`aaaba]a`a`\_a`\_a[\_\_\_\_aa`  
@HWI-EAS443:3:13:1201:154#0/1  
ATCAATGAAGTGAAGCAATCTTGCAAAAAGGAGAGAAAGCTA  
+HWI-EAS443:3:13:1201:154#0/1  
a`\_`\_`aaab\_]¥\_[LZ]a^a\_a^\_`^¥`\_\_\_\_`a^\_UaX\_^  
@HWI-EAS443:3:13:1213:359#0/1  
GAGCAATCTTGCAAAAAGGAGAGAAAGCTAATGTGCTAATT  
+HWI-EAS443:3:13:1213:359#0/1  
a`\_`a`bUa``U^]\_`[Waaaa\_[aXZ^\_`V`X\_X\_^]  
@HWI-EAS443:3:13:1220:574#0/1  
GAAAGCTAATGTGCTAATTGGGCAAGGGGACGTAGTGTG  
+HWI-EAS443:3:13:1220:574#0/1  
aaaaaaa`aaa^a\_a\_aaaaa^\_\_aa\_]Za^\_\_Ya]`\_  
@HWI-EAS443:3:13:1230:1147#0/1  
GCATCAATGAAGTGAAGCAATCTTGCAAAAAGGAGAGAAAGC  
+HWI-EAS443:3:13:1230:1147#0/1  
aXaaYZX[a¥a]\_^^`[a\_a\_a\_\_^^¥^^¥^0]^\_¥¥¥I  
@HWI-EAS443:3:13:1353:1960#0/1  
GCAAAAAGGAGAGAAAGCTAATGTGCTAATTGGGCAAGGGG  
+HWI-EAS443:3:13:1353:1960#0/1  
a^\_]\_XWW^a^^Z¥^\_W\_]\_]\_Z\_Z¥]YW^]]ZVXZ^ZXU  
@HWI-EAS443:3:13:1425:857#0/1  
GAGCAATCTTGCAAAAAGGAGAGAAAGCTAATGTGCTAATT  
+HWI-EAS443:3:13:1425:857#0/1  
O\_bb¥S^Q[]aY`b[JXV^^^\_]\_OYQRYTaa\_¥F¥\_aba  
@HWI-EAS443:3:13:1516:1681#0/1  
CAATGAAGTGAAGCAATCTTGCAAAAAGGAGAGAAAGCTAAT  
+HWI-EAS443:3:13:1516:1681#0/1  
¥`b`b`¥aba\_b\_baaWabaaaaabba^`bab^aaVaa\_a  
@HWI-EAS443:3:13:1662:948#0/1  
AATGAAGTGAAGCAATCTTGCAAAAAGGAGAGAAAGCTAATG  
+HWI-EAS443:3:13:1662:948#0/1  
[Y[a¥aJb[IZ\_`aa\_aa`^\_```baa^`b\_]\_\_W\_]\_[]  
@HWI-EAS443:3:13:1682:129#0/1  
GAGCAATCTTGCAAAAAGGAGAGAAAGCTAATGTGCTAATT

+HWI-EAS443:3:13:1682:129#0/1  
[XX^`a\_[\_a[F\_a\_aY^[baba[¥bZ]Z`a]^\_VaZaa^  
@HWI-EAS443:3:13:265:1906#0/1  
AAGCTAATGTGCTAATTGGGCAAGGGGACGTAGTGTGGT  
+HWI-EAS443:3:13:265:1906#0/1  
a`\_aa^`aa[a`a`\_a\_aUSa`a`\_`\_Za\_W\_XXY^`\_¥R  
@HWI-EAS443:3:13:288:842#0/1  
CTTGCAAAAGGAGAGAAAGCTAATGTGCTAATTGGGCAAG  
+HWI-EAS443:3:13:288:842#0/1  
aabbb`aaaba\_aabaWaaaa`aa]RZ\_```aa`\_a\_\_\_a  
@HWI-EAS443:3:13:328:952#0/1  
AACTGAGCAATCTTGCAAAAGGAGAGAAAGCTAATGTGCT  
+HWI-EAS443:3:13:328:952#0/1  
aba^`a`\_aaaaa`aaaY`a`\_a`\_a`\_`\_`^Z\_\_^  
@HWI-EAS443:3:13:397:1901#0/1  
AAGCATCAATGAACTGAGCAATCTTGCAAAAGGAGAGAAA  
+HWI-EAS443:3:13:397:1901#0/1  
aa¥\_a`\_``a`\_`\_]\_^]]^a`\_a\_\_^`\_]\_`\_¥]\_`\_^]B  
@HWI-EAS443:3:13:464:445#0/1  
GAAAGCTAATGTGCTAATTGGGCAAGGGGACGTAGTGTG  
+HWI-EAS443:3:13:464:445#0/1  
a`I\_a\_]X\_a[a]^`^`a`a`\_`XZaY^WX`Y^`X`Y[\_  
@HWI-EAS443:3:13:604:633#0/1  
GCATCAATGAACTGAGCAATCTTGCAAAAGGAGAGAAAGC  
+HWI-EAS443:3:13:604:633#0/1  
\_`¥`b`\_```aababaa^`babaab`b[aab``b\_bb`Za[  
@HWI-EAS443:3:13:67:1771#0/1  
CAAAAGGAGAGAAAGCTAATGTGCTAATTGGGCAAGGGGA  
+HWI-EAS443:3:13:67:1771#0/1  
`Sa`[SU[]][^`\_L[^aX`\_`a`\_`\_¥¥]RN`\_`WBBBB  
@HWI-EAS443:3:13:769:887#0/1  
GAGCAATCTTGCAAAAGGAGAGAAAGCTAATGTGCTAATT  
+HWI-EAS443:3:13:769:887#0/1  
`UU\_UR\_]V`b¥K]Tbbaa\_ba]]a`\_U``b`aa]\_^a`  
@HWI-EAS443:3:13:770:83#0/1  
GAGCAATCTTGCAAAAGGAGAGAAAGCTAATGTGCTAATT  
+HWI-EAS443:3:13:770:83#0/1  
^Ybb\_[T``bb\_a`ZV^aa`a`\_`^`bZ\_^\_]bMa`\_`^¥XG  
@HWI-EAS443:3:14:1029:1268#0/1  
TGAGCAATCTTGCAAAAGGAGAGAAAGCTAATGTGCTAAT  
+HWI-EAS443:3:14:1029:1268#0/1  
aba`aaaaaaa]`Ya\_aa`\_aa\_a^a\_a`\_adW`^`^^`  
@HWI-EAS443:3:14:1151:428#0/1  
GAGCAATCTTGCAAAAGGAGAGAAAGCTAATGTGCTAATT  
+HWI-EAS443:3:14:1151:428#0/1  
aababba^bba\_\_`aa`b\_aabaa\_a¥a`\_`aa\_a]a^`\_`\_`  
@HWI-EAS443:3:14:1153:1652#0/1  
AGCTAATGTGCTAATTGGGCAAGGGGACGTAGTGTGGTA  
+HWI-EAS443:3:14:1153:1652#0/1  
abaaba`a`baaa\_aaaZa\_a\_\_aa^`Za]\_a\_a]\_a\_Z[

@HWI-EAS443:3:14:1157:1060#0/1  
GAGCAATCTTGCAAAGGAGAGAAAGCTAATGTGCTAATT  
+HWI-EAS443:3:14:1157:1060#0/1  
aa¥Q\_aa`aa`¥`aa^aa[a`aa\_\_aa\_\_\_`aX`^^`U^  
@HWI-EAS443:3:14:1166:924#0/1  
GAGCAATCTTGCAAAGGAGAGAAAGCTAATGTGCTAATT  
+HWI-EAS443:3:14:1166:924#0/1  
aab\_abb`bbY``]abaa`^baabaaa]bb\_``aa\_\_\_  
@HWI-EAS443:3:14:1186:263#0/1  
AGCATCAATGAACTGAGCAATCTTGCAAAGGAGAGAAAG  
+HWI-EAS443:3:14:1186:263#0/1  
a`Z``Qa[aa^aY`[Waa\_aaZ\_`bN\_Y[R`V^a`^\_WXa  
@HWI-EAS443:3:14:1197:569#0/1  
GAGAAAGCTAATGTGCTAATTGGGCAAGGGACGTAGTGT  
+HWI-EAS443:3:14:1197:569#0/1  
N]b^¥R\_0¥`^b`b¥RZbbab¥`^bbaba]aTWa`b]  
@HWI-EAS443:3:14:1207:797#0/1  
TTGCAAAGGAGAGAAAGCTAATGTGCTAATTGGGCAAGG  
+HWI-EAS443:3:14:1207:797#0/1  
aabaa`^abaaa`aa`aa`b^\_aa\_a`a`\_`a]]]aa  
@HWI-EAS443:3:14:1225:1327#0/1  
ATCTTGCAAAGGAGAGAAAGCTAATGTGCTAATTGGGCA  
+HWI-EAS443:3:14:1225:1327#0/1  
R]a¥VJ^T¥¥b[R[aa\_`V^`b[\_aaaP```WRWH[``\_¥\_  
@HWI-EAS443:3:14:1232:67#0/1  
CCCTTGCCCAATTAGCACATTAGCTTTCTCCTTTTGCA  
+HWI-EAS443:3:14:1232:67#0/1  
``b]a^¥UZ`babZQUWaababa¥aaa¥aaa]U]aaabZ¥  
@HWI-EAS443:3:14:1335:184#0/1  
GAGCAATCTTGCAAAGGAGAGAAAGCTAATGTGCTAATT  
+HWI-EAS443:3:14:1335:184#0/1  
abbbbb`aaaaa\_a\_a^\_baa`\_^a\_```aa^\_Y`]^\_`^`  
@HWI-EAS443:3:14:143:688#0/1  
GAGAAAGCTAATGTGCTAATTGGGCAAGGGACGTAGTGT  
+HWI-EAS443:3:14:143:688#0/1  
a\_Y\_HOZ``Q]`[0`\_[^Wa\_\_\_\_\_ZJ^Z\_WS^ZVWUMYB  
@HWI-EAS443:3:14:1586:75#0/1  
AATGAACTGAGCAATCTTGCAAAGGAGAGAAAGCTAATG  
+HWI-EAS443:3:14:1586:75#0/1  
aabaaa\_]``\_`\_a¥`\_a]\_]U^\_\_\_^W`\_^\_aX\_\_Z^\_  
@HWI-EAS443:3:14:344:1213#0/1  
AATGAACTGAGCAATCTTGCAAAGGAGAGAAAGCTAATG  
+HWI-EAS443:3:14:344:1213#0/1  
a]ZQVFRaQSQPa¥OP\_Q\_YPa[``[MV`XQaU[TN]`STT  
@HWI-EAS443:3:14:379:1950#0/1  
GAAAGCTAATGTGCTAATTGGGCAAGGGACGTAGTGTG  
+HWI-EAS443:3:14:379:1950#0/1  
abb[ababaaaZ]aabaa\_aa`baaaa`Ya]aZaa^`^`\_  
@HWI-EAS443:3:14:39:755#0/1  
GAACTGAGCAATCTTGCAAAGGAGAGAAAGCTAATGTGC

+HWI-EAS443:3:14:39:755#0/1  
aaa[a^aa`SD[^[Xa`T\_]\_aUQaaPXWa]P^`^]\_\_¥Y  
@HWI-EAS443:3:14:409:552#0/1  
GAGCAATCTTGCAAAAAGGAGAGAAAGCTAATGTGCTAATT  
+HWI-EAS443:3:14:409:552#0/1  
¥W¥[¥¥`¥¥abZXW\_`^`]^`bb\_`^`a\_`¥]b\_`]abMba  
@HWI-EAS443:3:14:418:718#0/1  
AATGAAGTCTTGCAAAAAGGAGAGAAAGCTAATG  
+HWI-EAS443:3:14:418:718#0/1  
aaaaaaaaaaaa`Z]a\_`aa`\_\_a`\_\_`^^`\_`\_`^`\_`^`  
@HWI-EAS443:3:14:437:1398#0/1  
TACCAACTACTGCTCCCTTGCCCAATTAGCACATTAGCT  
+HWI-EAS443:3:14:437:1398#0/1  
Z\_ba\_\_aU[^`aWS\_bbbbaaba`U¥]ZZ`^[¥\_]Y\_\_^  
@HWI-EAS443:3:14:463:338#0/1  
GAGAAAGCTAATGTGCTAATTGGGCAAGGGGACGTAGTGT  
+HWI-EAS443:3:14:463:338#0/1  
aaaaa`baaa`aa¥\_\_a\_aa`aa`\_\_`\_a`]]`Z^aZ`]  
@HWI-EAS443:3:14:520:1000#0/1  
TAGCTTTCTCCTTTTGCAAGATTGCTCAGTTCATTGAT  
+HWI-EAS443:3:14:520:1000#0/1  
aba`aaaaab`aa`a\_\_aaa^a^`\_`a\_\_\_aZ\_\_a`]aa]  
@HWI-EAS443:3:14:520:591#0/1  
CGTCCCCTTGCCCAATTAGCACATTAGCTTTCTCCTCTT  
+HWI-EAS443:3:14:520:591#0/1  
aa`]aa`[PX`¥\_`aa`a`¥¥^aa\_\_`\_`\_`^`¥X\_UW^]`^  
@HWI-EAS443:3:14:586:1321#0/1  
CAAAAGGAGAGAAAGCTAATGTGCTAATTGGGCAAGGGGA  
+HWI-EAS443:3:14:586:1321#0/1  
aba^`^^`b`bba`][aa`abTaaaa`a`a`^a^Sb`\_`\_`  
@HWI-EAS443:3:14:600:1088#0/1  
CATCAATGAAGTCTTGCAAAAAGGAGAGAAAGCT  
+HWI-EAS443:3:14:600:1088#0/1  
aaaaa\_aaaa`\_`aa\_a\_`aa\_`\_`^`[W[`^^`\_`\_`\_`\_`^`¥\_  
@HWI-EAS443:3:14:618:1861#0/1  
GAAGTCTTGCAAAAAGGAGAGAAAGCTAATGTGCT  
+HWI-EAS443:3:14:618:1861#0/1  
aabbaaWabbVbbb`\_`aab`^a^aaabba`\_`abaXUK¥^  
@HWI-EAS443:3:14:62:1691#0/1  
GTCCCCTTGCCCAATTAGCACATTAGCTTTCTCCTTTT  
+HWI-EAS443:3:14:62:1691#0/1  
XQ\_a`b]T]aa\_QWR^]V\_]¥¥Za[L]Z]]O]X[¥\_¥W\_`  
@HWI-EAS443:3:14:632:1032#0/1  
AATCTTGCAAAAAGGAGAGAAAGCTAATGTGCTAATTGGGC  
+HWI-EAS443:3:14:632:1032#0/1  
¥\_abaaaa`\_a\_aa\_aaaaZS\_]`^a`\_Xa^`\_`\_`^a¥]¥  
@HWI-EAS443:3:14:640:38#0/1  
GAGAAAGCTAATGTGCTAATTGGGCAAGGGGACGTAGTGT  
+HWI-EAS443:3:14:640:38#0/1  
a]a`Y¥`^`\_]Y\_R\_]`X]`X^]YXYX\_Z^^ZX^WX\_GZX



@HWI-EAS443:3:14:668:1832#0/1  
CATCAATGAACTGAGCAATCTTGCAAAAGGAGAGAAAGCT  
+HWI-EAS443:3:14:668:1832#0/1  
\_`Va¥[¥`S¥ba[U[XZ[\_Y\_Ua`ZWUVb^`^aba¥Z\_a`  
@HWI-EAS443:3:14:727:1012#0/1  
ATCTTGCAAAAGGAGAGAAAGCTAATGTGCTAATTGGGCA  
+HWI-EAS443:3:14:727:1012#0/1  
abbba`aa`a`aa\_aaaaa`^a\_\_aa`Z`^a^\_`^`^¥Z\_  
@HWI-EAS443:3:14:774:306#0/1  
GTCCCCTTGCCCAATTAGCACATTAGCTTTCTCTCCTTTT  
+HWI-EAS443:3:14:774:306#0/1  
a^a[`Z¥I]¥\_`\_[PLWZXP[¥Y¥Z`[NYYUUJYWW^UV¥  
@HWI-EAS443:3:14:798:1690#0/1  
CATCAATGAACTGAGCAATCTTGCAAAAGGAGAGAAAGCT  
+HWI-EAS443:3:14:798:1690#0/1  
aa`aaaa`^a^`[^aa`a\_]\_^`\_\_^`\_a]^`\_`a`^Y^  
@HWI-EAS443:3:14:917:1122#0/1  
GAAAGCTAATGTGCTAATTGGGCAAGGGGACGTAGTGTTG  
+HWI-EAS443:3:14:917:1122#0/1  
aaOR\_`\_T¥]`¥OZ]``aWR^[[GN]\_a¥WFGX]BBBBB  
@HWI-EAS443:3:14:998:1559#0/1  
ATCTTGCAAAAGGAGAGAAAGCTAATGTGCTAATTGGGCA  
+HWI-EAS443:3:14:998:1559#0/1  
Z`a^a[]^ZZ[^SYaV\_`````]Za¥a^a\_`\_\_^`]Z[TV  
@HWI-EAS443:3:15:1039:1325#0/1  
GCAAAAGGAGAGAAAGCTAATGTGCTAATTGGGCAAGGGG  
+HWI-EAS443:3:15:1039:1325#0/1  
aaaa`\_`^aaaaa`aUaaaa`Qb````\_`aaaaS`[\_`^\_  
@HWI-EAS443:3:15:1112:986#0/1  
GAGCAATCTTGCAAAAGGAGAGAAAGCTAATGTGCTAATT  
+HWI-EAS443:3:15:1112:986#0/1  
aa`]a``abbb``\_YZb¥¥[aba]^]L]^`aa\_a]\_\_aaa  
@HWI-EAS443:3:15:1142:1208#0/1  
GCATCAATGAACTGAGCAATCTTGCAAAAGGAGAGAAAGC  
+HWI-EAS443:3:15:1142:1208#0/1  
`[[[ZZW\_`]aYXX[a\_\_\_\_]K\_Q\_WVWW`a[Z`\_`]^\_a\_  
@HWI-EAS443:3:15:1165:1754#0/1  
GAAAGCTAATGTGCTAATTGGGCAAGGGGACGTAGTGTTG  
+HWI-EAS443:3:15:1165:1754#0/1  
`]R^\_a^Y\_\_`[]\_VWX¥Q¥\_W\_^W¥Z^VY^`U[`TZSY]  
@HWI-EAS443:3:15:1200:374#0/1  
ATGAACTGAGCAATCTTGCAAAAGGAGAGAAAGCTAATGT  
+HWI-EAS443:3:15:1200:374#0/1  
Z``aab\_Q^[abb`M`baaYQ[ab\_ababb¥\_`aa`Zab¥  
@HWI-EAS443:3:15:1395:1822#0/1  
AGAAAGCTAATGTGCTAATTGGGCAAGGGGACGTAGTGTT  
+HWI-EAS443:3:15:1395:1822#0/1  
a¥`a`¥bb¥a`\_G`0`abba^PZ\_\_^a\_\_b`SaSYa\_a\_a  
@HWI-EAS443:3:15:140:945#0/1  
GAACTGAGCAATCTTGCAAAAGGAGAGAAAGCTAATGTGC

+HWI-EAS443:3:15:140:945#0/1  
[ `ab\_]W\_bbba[aabb]ab\_a`]baaab\_aa`a`baX`a  
@HWI-EAS443:3:15:1481:1864#0/1  
GAACTGAGCAATCTTGCAAAAGGAGAGAAAGCTAATGTGC  
+HWI-EAS443:3:15:1481:1864#0/1  
aab``a`abbbbaaab]bbabbabaabb`ab`bbbbba\_\_  
@HWI-EAS443:3:15:1534:1765#0/1  
CGTCCCCTTGCCCAATTAGCACATTAGCTTTCTCCTTT  
+HWI-EAS443:3:15:1534:1765#0/1  
Ub`abaIS`JKaab`b]]UKb[YaUUababbaaaaa[`Ya  
@HWI-EAS443:3:15:1623:330#0/1  
AATGAACTGAGCAATCTTGCAAAAGGAGAGAAAGCTAATG  
+HWI-EAS443:3:15:1623:330#0/1  
a`ba\_¥G¥\_\_\_Y`a\_X\_a`YY¥^ZY[^a\_a`aXa0``^\_  
@HWI-EAS443:3:15:1641:410#0/1  
GAAAGCTAATGTGCTAATTGGGCAAGGGGACGTAGTGTG  
+HWI-EAS443:3:15:1641:410#0/1  
aab\_babaaab^b]baabaaab\_a\_baaa`^b^\_b]b`ab  
@HWI-EAS443:3:15:1782:592#0/1  
AATCTTGCAAAAGGAGAGAAAGCTAATGTGCTAATTGGGC  
+HWI-EAS443:3:15:1782:592#0/1  
]]\_RQb¥]\_^XbaY`¥\_ba`a\_bU\_aaZaZZaXT^`aaH  
@HWI-EAS443:3:15:1791:614#0/1  
CCTTGCCCAATTAGCACATTAGCTTTCTCCTTTTGCAA  
+HWI-EAS443:3:15:1791:614#0/1  
\_aa`a^]]T\_abab\_aWababa^^aaJaY^\_^\_aaa[UY¥  
@HWI-EAS443:3:15:266:386#0/1  
AGCTAATGTGCTAATTGGGCAAGGGGACGTAGTGTGGTA  
+HWI-EAS443:3:15:266:386#0/1  
^[aaZ[`^H`abbbba¥¥a^^aab^]WYaa]\_a]`USaaMX  
@HWI-EAS443:3:15:314:656#0/1  
CATCAATGAACTGAGCAATCTTGCAAAAGGAGAGAAAGCT  
+HWI-EAS443:3:15:314:656#0/1  
abaaabb\_\_baaa¥`aaaa\_aabaa^ab`\_baaaa\_a`  
@HWI-EAS443:3:15:383:201#0/1  
GAGAAAGCTAATGTGCTAATTGGGCAAGGGGACGTAGTGT  
+HWI-EAS443:3:15:383:201#0/1  
a]a]`[^aa`\_aa]a\_^TX`a`\_^\_Za\_¥TX^`Z^`X]Y  
@HWI-EAS443:3:15:457:1697#0/1  
GAGCAATCTTGCAAAAGGAGAGAAAGCTAATGTGCTAATT  
+HWI-EAS443:3:15:457:1697#0/1  
^Q^a^[V^a\_Y``\_URa^OVbbbbbaTaabY^^V]]\_NaaW  
@HWI-EAS443:3:15:503:1069#0/1  
ACACTACGTCCCCTTGCCCAATTAGCACATTAGCTTTCTC  
+HWI-EAS443:3:15:503:1069#0/1  
`^bb\_aba\_]`^]a\_a]aZXUO^XYWZ]¥^`YWU`¥a\_\_  
@HWI-EAS443:3:15:559:44#0/1  
GAAAGCTAATGTGCTAATTGGGCAAGGGGACGTAGTGTG  
+HWI-EAS443:3:15:559:44#0/1  
^^a`b`aaaab¥aaaaaaa^¥a\_aabaa\_^^a[^`Sa]\_a

@HWI-EAS443:3:15:569:360#0/1  
AATGAACTGAGCAATCTTGCAAAAGGAGAGAAAGCTAATG  
+HWI-EAS443:3:15:569:360#0/1  
abbbabbba]bbbabbbbabbaabaabaabaababbabb  
@HWI-EAS443:3:15:595:41#0/1  
TCTTGCAAAAGGAGAGAAAGCTAATGTGCTAATTGGGCAA  
+HWI-EAS443:3:15:595:41#0/1  
Ia¥¥a¥`a]a¥[Wbbbaaa]Y]]\_bWaa][\_]Ya`\_`^^  
@HWI-EAS443:3:15:613:213#0/1  
GAAAGCTAATGTGCTAATTGGGCAAGGGGACGTAGTGTTG  
+HWI-EAS443:3:15:613:213#0/1  
aa`W\_]a``]a0aab\_aa^^`\_a^aab\_¥^aR^aZa^`a  
@HWI-EAS443:3:15:701:1478#0/1  
GAACTGAGCAATCTTGCAAAAGGAGAGAAAGCTAATGTGC  
+HWI-EAS443:3:15:701:1478#0/1  
abbbabaabaabaaaaabbaaaaaabaaa`\_aaaa^a\_  
@HWI-EAS443:3:15:804:186#0/1  
TGCAAAAGGAGAGAAAGCTAATGTGCTAATTGGGCAAGGG  
+HWI-EAS443:3:15:804:186#0/1  
[bb\_``bb`^abbaa`baa\_`¥RZb``ba\_\_`\_¥T)`a\_  
@HWI-EAS443:3:15:81:91#0/1  
GAGCAATCTTGCAAAAGGAGAGAAAGCTAATGTGCTAATT  
+HWI-EAS443:3:15:81:91#0/1  
`XUZRSRV^WUV`[NYX¥QV^\_]TTZ^PZ]Y[VVQNN[WN  
@HWI-EAS443:3:16:1036:421#0/1  
GAAAGCTAATGTGCTAATTGGGCAAGGGGACGTAGTGTTG  
+HWI-EAS443:3:16:1036:421#0/1  
aaa`a`a\_\_abZa\_aa`a`aaa\_^\_aaaa]]aZ`Z`\_\_`  
@HWI-EAS443:3:16:131:1928#0/1  
CATCAATGAACTGAGCAATCTTGCAAAAGGAGAGAAAGCT  
+HWI-EAS443:3:16:131:1928#0/1  
abab```a`aaa^[[a^a`a```a^`¥\_^^`a`¥a\_U[¥\_  
@HWI-EAS443:3:16:1345:935#0/1  
AATCTTGCAAAAGGAGAGAAAGCTAATGTGCTAATTGGGC  
+HWI-EAS443:3:16:1345:935#0/1  
abb\_aaaXa¥baab[aa`baY¥Y^a¥ba\_b`aX`\_\_`aa  
@HWI-EAS443:3:16:1355:1524#0/1  
GAACTGAGCAATCTTGCAAAAGGAGAGAAAGCTAATGTGC  
+HWI-EAS443:3:16:1355:1524#0/1  
abbaba[babba`aaabaa`\_ba\_aaa`aaa\_b`\_aa]`^  
@HWI-EAS443:3:16:1384:1669#0/1  
GAACTGAGCAATCTTGCAAAAGGAGAGAAAGCTAATGTGC  
+HWI-EAS443:3:16:1384:1669#0/1  
]\_aaa¥``aaaa\_a``^a\_\_^\_\_^a\_aa\_\_a\_\_`\_\_`X]]  
@HWI-EAS443:3:16:139:500#0/1  
AGCTAATGTGCTAATTGGGCAAGGGGACGTAGTGTTGGTA  
+HWI-EAS443:3:16:139:500#0/1  
RR¥XaYY¥SV¥\_\_abYUZa[[]HP\_^ba\_bQU^R`Z\_``KO  
@HWI-EAS443:3:16:1472:571#0/1  
GCATCAATGAACTGAGCAATCTTGCAAAAGGAGAGAAAGC

+HWI-EAS443:3:16:1472:571#0/1  
` `[¥ZNZ`ba`Z^YaXaaaP`aa¥]WWX¥J¥]UT]V`a\_  
@HWI-EAS443:3:16:1486:671#0/1  
GAGAAAGCTAATGTGCTAATTGGGCAAGGGGACGTAGTGT  
+HWI-EAS443:3:16:1486:671#0/1  
\_¥S`[^aaaba`Za`YX^a^T]\_UX\_^`X\_aYWaTaX  
@HWI-EAS443:3:16:1509:919#0/1  
GCATCAATGAACTGAGCAATCTTGCAAAAGGAGAGAAAAGC  
+HWI-EAS443:3:16:1509:919#0/1  
abbb`abbb^^\_aaa`aaa^aab`a\_]aa\_a`aa`\_`]  
@HWI-EAS443:3:16:1519:973#0/1  
CAACACTACGTCCCCTTGCCCAATTAGCACATTAGCTTTC  
+HWI-EAS443:3:16:1519:973#0/1  
^`\_bZbb\_ab` `[aa\_\_aabbb\_bbbabb\_bbaa[ab`aa  
@HWI-EAS443:3:16:1658:1968#0/1  
AAAGGAGAGAAAGCTAATGTGCTAATTGGGCAAGGGGACG  
+HWI-EAS443:3:16:1658:1968#0/1  
a`aaaa`]^aaa`\_\_Za^aU]]a^`\_a`\_`\_X^a^]QUWa  
@HWI-EAS443:3:16:1666:154#0/1  
GAAAGCTAATGTGCTAATTGGGCAAGGGGACGTAGTGTG  
+HWI-EAS443:3:16:1666:154#0/1  
aa^H`]b[Z]]V][¥VV\_\_`\_VUTS[R][UU`UVRTUUVB  
@HWI-EAS443:3:16:1740:708#0/1  
ATCTTGCAAAAGGAGAGAAAGCTAATGTGCTAATTGGGCA  
+HWI-EAS443:3:16:1740:708#0/1  
aaaaaY^a``aaaYa\_aa]`a¥aX`^a^aYa\_\_`^X^^X\_  
@HWI-EAS443:3:16:1773:214#0/1  
AATGAACTGAGCAATCTTGCAAAAGGAGAGAAAGCTAATG  
+HWI-EAS443:3:16:1773:214#0/1  
aaabaa\_a`ab\_aaa^aaaX^^^a``a^\_a\_\_\_V^\_Z\_\_\_  
@HWI-EAS443:3:16:328:1474#0/1  
CATCAATGAACTGAGCAATCTTGCAAAAGGAGAGAAAGCT  
+HWI-EAS443:3:16:328:1474#0/1  
aa`\_\_^ab^aaa^`[[Y^\_]\_\_a^¥¥]X[^`\_^`\_`\_] ^Y  
@HWI-EAS443:3:16:360:1132#0/1  
GCAATCTTGCAAAAGGAGAGAAAGCTAATGTGCTAATTGG  
+HWI-EAS443:3:16:360:1132#0/1  
ab`X`bbaaaZbaab¥Y`aaaaV^\_Y`\_`\_a`\_`\_aa`dWa`  
@HWI-EAS443:3:16:544:241#0/1  
AATGAACTGAGCAATCTTGCAAAAGGAGAGAAAGCTAATG  
+HWI-EAS443:3:16:544:241#0/1  
^\_abbbbbbabababab`aba\_a\_bbabaabaaa]a```a  
@HWI-EAS443:3:16:593:713#0/1  
ATGAACTGAGCAATCTTGCAAAAGGAGAGAAAGCTAATGT  
+HWI-EAS443:3:16:593:713#0/1  
aaa^aaaa\_a` `[aaaa`\_`aaa\_aaaa`\_aa`\_`]`a]  
@HWI-EAS443:3:16:59:206#0/1  
CTGAGCAATCTTGCAAAAGGAGAGAAAGCTAATGTGCTAA  
+HWI-EAS443:3:16:59:206#0/1  
aababaaaab`aba`a`aba```aa`\_a\_\_a^aa]a`\_^`

@HWI-EAS443:3:16:655:356#0/1  
GAACTGAGCAATCTTGCAAAAGGAGAGAAAGCTAATGTGC  
+HWI-EAS443:3:16:655:356#0/1  
`\_\_Z]]¥`aZ^aa`ab\_] ^U`Y`]]`aa``a[`\_\_\_\_  
@HWI-EAS443:3:16:732:297#0/1  
AATTAGCACATTAGCTTTCTCTCTTTTGCAAGATTGCTC  
+HWI-EAS443:3:16:732:297#0/1  
\_aa`aa¥``aa`a[]a`a`]\_``a\_\_^^[\_\_\_`\_^\_\_^\_Y  
@HWI-EAS443:3:16:771:965#0/1  
CAAAAGGAGAGAAAGCTAATGTGCTAATTGGGCAAGGGGA  
+HWI-EAS443:3:16:771:965#0/1  
a`a`aaaaabaa\_\_`\_aaaa^a`a\_a\_\_\_\_`]^^`^^]]  
@HWI-EAS443:3:16:872:1165#0/1  
GAGCAATCTTGCAAAAGGAGAGAAAGCTAATGTGCTAATT  
+HWI-EAS443:3:16:872:1165#0/1  
``bababbbabb]a\_baaab\_babbaaaa`bb`\_aba]b^  
@HWI-EAS443:3:16:873:1152#0/1  
AAGCTAATGTGCTAATTGGGCAAGGGGACGTAGTGTGGT  
+HWI-EAS443:3:16:873:1152#0/1  
^`aa\_a`^aUaa\_]X`^a\_\_[\_^a\_\_¥Y\_a]^ZMU]]`SO  
@HWI-EAS443:3:16:888:909#0/1  
GCAAAAGGAGAGAAAGCTAATGTGCTAATTGGGCAAGGGG  
+HWI-EAS443:3:16:888:909#0/1  
abXY`a[a[a¥`aa\_aa\_¥\_\_a]a]\_\_]\_aa\_a`[]a^^`  
@HWI-EAS443:3:16:895:41#0/1  
GCATCAATGAACTGAGCAATCTTGCAAAAGGAGAGAAAGC  
+HWI-EAS443:3:16:895:41#0/1  
a^^^X]U`^`\_¥\_^YU^]\_^Z\_]aXYTVZ^Z¥^¥\_]XYRV  
@HWI-EAS443:3:17:1068:622#0/1  
TGCAAAAGGAGAGAAAGCTAATGTGCTAATTGGGCAAGGG  
+HWI-EAS443:3:17:1068:622#0/1  
^abba`Zaa``bbbab`bbabb\_baaaaabba`]]`aab  
@HWI-EAS443:3:17:1134:1719#0/1  
AATGAACTGAGCAATCTTGCAAAAGGAGAGAAAGCTAATG  
+HWI-EAS443:3:17:1134:1719#0/1  
abbba`[\_a`]bab^^aa\_¥aZ^]`^`\_aaaa`\_\_\_\_a`YY\_  
@HWI-EAS443:3:17:1328:743#0/1  
CATCAATGAACTGAGCAATCTTGCAAAAGGAGAGAAAGCT  
+HWI-EAS443:3:17:1328:743#0/1  
a]a`\_aaa¥\_a]Wta`¥[^]^`a\_^^^W\_YX`^aa\_0]Y]  
@HWI-EAS443:3:17:1384:445#0/1  
GAACTGAGCAATCTTGCAAAAGGAGAGAAAGCTAATGTGC  
+HWI-EAS443:3:17:1384:445#0/1  
a\_a\_XKQ\_[]aa^^^[]\_\_^Ta\_[``a\_\_^aX\_\_R^UZ\_Q  
@HWI-EAS443:3:17:139:189#0/1  
AGCATCAATGAACTGAGCAATCTTGCAAAAGGAGAGAAAG  
+HWI-EAS443:3:17:139:189#0/1  
Y\_\_XVW`¥\_XJ]\_]b¥Z\_\_XUa`[a\_XS[Z[YS^V¥^WP¥  
@HWI-EAS443:3:17:1400:531#0/1  
AACTGAGCAATCTTGCAAAAGGAGAGAAAGCTAATGTGCT

+HWI-EAS443:3:17:1400:531#0/1  
ababaabaaaaaab\_aa`^a\_baa`\_aa\_a`aa`^a  
@HWI-EAS443:3:17:1427:1958#0/1  
ATGAACTGAGCAATCTTGCAAAGGAGAGAAAGCTAATGT  
+HWI-EAS443:3:17:1427:1958#0/1  
aa^^`I¥aR]]\_Y\_^ZH]aXJX[aa]a\_^a\_\_aX[[W\_\_U  
@HWI-EAS443:3:17:1527:343#0/1  
GTCCCCTTGCCCAATTAGCACATTAGCTTTCTCTCCTTTT  
+HWI-EAS443:3:17:1527:343#0/1  
aZ]\_V[`^]XUXZ`[\_[\_^\_¥V[\_Z\_TV[N[SZ^[RV  
@HWI-EAS443:3:17:1572:1169#0/1  
CATCAATGAACTGAGCAATCTTGCAAAGGAGAGAAAGCT  
+HWI-EAS443:3:17:1572:1169#0/1  
aa`a\_abb¥ba\_^`\_`^`\_\_`a\_¥\_]`^a`]^`^`\_`W`W^  
@HWI-EAS443:3:17:1626:29#0/1  
CAATCTTGCAAAGGAGAGAAAGCTAATGTGCTAATTGGG  
+HWI-EAS443:3:17:1626:29#0/1  
Ma¥JJabbb\_bb`Vb`]b`bbbbbaabaUbbabbb`bbb  
@HWI-EAS443:3:17:1703:912#0/1  
GCAAAGGAGAGAAAGCTAATGTGCTAATTGGGCAAGGGG  
+HWI-EAS443:3:17:1703:912#0/1  
aaaa^aaa\_aaaaZV]Ya¥]a\_]\_]X]`R[[T]¥[YR[  
@HWI-EAS443:3:17:1766:85#0/1  
AAGCATCAATGAACTGAGCAATCTTGCAAAGGAGAGAAA  
+HWI-EAS443:3:17:1766:85#0/1  
aabaaaaa\_ba\_\_`aa]a]\_^`^`\_`\_]X[]a^¥`\_]ZZ  
@HWI-EAS443:3:17:251:334#0/1  
GTCCCCTTGCCCAATTAGCACATTAGCTTTCTCTCCTTTT  
+HWI-EAS443:3:17:251:334#0/1  
a\_aaabaabaa`b`aaaaaa\_aa`aa`a`\_aa^`]\_a^\_\_  
@HWI-EAS443:3:17:295:557#0/1  
AAAGCTAATGTGCTAATTGGGCAAGGGGACGTAGTGTGG  
+HWI-EAS443:3:17:295:557#0/1  
aNXa\_aa`ab\_aaa`\_aaa`\_`X`aa`a^^aZ^`WaZ`a`  
@HWI-EAS443:3:17:310:582#0/1  
GAACTGAGCAATCTTGCAAAGGAGAGAAAGCTAATGTGC  
+HWI-EAS443:3:17:310:582#0/1  
a`a`aa`aa`[`a`\_aaa\_Z\_a`¥a\_a`\_`a^`]`^`\_Z\_Z  
@HWI-EAS443:3:17:408:903#0/1  
GAGCAATCTTGCAAAGGAGAGAAAGCTAATGTGCTAATT  
+HWI-EAS443:3:17:408:903#0/1  
TQ\_aYL\_a`a¥^OM[^`^a^ZS\_X`b\_W\_\_a[T^]U[^  
@HWI-EAS443:3:17:415:100#0/1  
GAACTGAGCAATCTTGCAAAGGAGAGAAAGCTAATGTGC  
+HWI-EAS443:3:17:415:100#0/1  
aZZ]W\_SaYa``[\_`\_^[[^\_a^Wa^a]¥^\_U]Z[]`Z\_Z  
@HWI-EAS443:3:17:435:1439#0/1  
GAAAGCTAATGTGCTAATTGGGCAAGGGGACGTAGTGTGG  
+HWI-EAS443:3:17:435:1439#0/1  
]\_\_\_\_ab`]bb[F\_\_\_\_^`aab`\_Z^aaa^\_Z`aYaaVa^\_a

@HWI-EAS443:3:17:560:896#0/1  
GAAAGCTAATGTGCTAATTGGGCAAGGGGACGTAGTGTTG  
+HWI-EAS443:3:17:560:896#0/1  
a^Taabaaaa[aaaaaaa[a`¥^a\_aa]\_a^^aYa]a`  
@HWI-EAS443:3:17:569:1684#0/1  
AACTGAGCAATCTTGCAAAAGGAGAGAAAGCTAATGTGCT  
+HWI-EAS443:3:17:569:1684#0/1  
\_ZaZZMX\_[¥[\_I^U^`Q\_\_X\_a`aT]bSXJZVVYJ^VN¥  
@HWI-EAS443:3:17:677:1102#0/1  
AGCACATTAGCTTTCTCTCCTTTTGCAAGATTGCTCAGTT  
+HWI-EAS443:3:17:677:1102#0/1  
]ON\_P^S]aWQ^GS¥ZZ^Z`SN]UUX]T[\_ZU]OGN¥^UO  
@HWI-EAS443:3:17:679:441#0/1  
CAAAAGGAGAGAAAGCTAATGTGCTAATTGGGCAAGGGGA  
+HWI-EAS443:3:17:679:441#0/1  
\_\_`aab\_`baa]\_aa\_a`[aaWaa\_\_T\_\_`a\_\_\_\_\_aa]\_]  
@HWI-EAS443:3:17:819:1351#0/1  
GAACTGAGCAATCTTGCAAAAGGAGAGAAAGCTAATGTGC  
+HWI-EAS443:3:17:819:1351#0/1  
a`[`V]S¥aaa`\_]\_¥`[X]K]Y]a^a`\_`a\_`a\_\_aW\_¥  
@HWI-EAS443:3:17:829:815#0/1  
GCAAAAGGAGAGAAAGCTAATGTGCTAATTGGGCAAGGGG  
+HWI-EAS443:3:17:829:815#0/1  
\_`\_[XH[^`\_`aaXaI\_a]aSab¥^\_`^^`W``aW\_]\_] ]]  
@HWI-EAS443:3:17:900:1397#0/1  
ATCAATGAAGCTGAGCAATCTTGCAAAAGGAGAGAAAGCTA  
+HWI-EAS443:3:17:900:1397#0/1  
^Y`]VR¥b` `[Ua¥T\_aP`a^aV`¥]H\_a\_aba` `a\_P^]  
@HWI-EAS443:3:17:956:1004#0/1  
TAGCACATTAGCTTTCTCTCCTTTTGCAAGATTGCTCAGT  
+HWI-EAS443:3:17:956:1004#0/1  
aa`\_a\_ba\_aa\_]a\_aa^aa\_` `a\_a`\_a`a` `V\_\_\_\_\_^  
@HWI-EAS443:3:18:1073:775#0/1  
CATCAATGAAGCTGAGCAATCTTGCAAAAGGAGAGAAAGCT  
+HWI-EAS443:3:18:1073:775#0/1  
a^aa`aaa`a`\_`aaa`aa`\_`aaa\_\_`[ `a`^a`aa]^`^`  
@HWI-EAS443:3:18:1274:1221#0/1  
ATGAAGCTGAGCAATCTTGCAAAAGGAGAGAAAGCTAATGT  
+HWI-EAS443:3:18:1274:1221#0/1  
aa^a` `aaa^abaa`aaa` `Za\_a\_Wa` `a\_`\_¥\_\_[\_Z  
@HWI-EAS443:3:18:1300:41#0/1  
CCTTGCCCAATTAGCACATTAGCTTTCTCTCCTTTTGCAA  
+HWI-EAS443:3:18:1300:41#0/1  
`¥aab`a¥a`aaaa¥a\_`a]^a` `a\_Za¥aMW` `]^aW^Z  
@HWI-EAS443:3:18:1448:1707#0/1  
ATCAATGAAGCTGAGCAATCTTGCAAAAGGAGAGAAAGCTA  
+HWI-EAS443:3:18:1448:1707#0/1  
Y[T\_`ab` `a¥W` `a`0^[\_Z\_`[W[`]Ra\_aa\_[Qaa  
@HWI-EAS443:3:18:1600:94#0/1  
GCATCAATGAAGCTGAGCAATCTTGCAAAAGGAGAGAAAGC

+HWI-EAS443:3:18:1600:94#0/1  
aaaa`aabb`a\_aa`a`a\_aZa``^\_^\_]`[]a\_`\_]\_W  
@HWI-EAS443:3:18:1649:1606#0/1  
CAATCTTGCAAAAGGAGAGAAAGCTAATGTGCTAATTGGG  
+HWI-EAS443:3:18:1649:1606#0/1  
^^^bY^T^]YZ]S^^Pb`aaZ]\_RaS]\_a^`X\_]^^`\_]`  
@HWI-EAS443:3:18:1719:1767#0/1  
TCTTGCAAAAGGAGAGAAAGCTAATGTGCTAATTGGGCAA  
+HWI-EAS443:3:18:1719:1767#0/1  
Yabb\_XVXV[^SWa`ba\_]a\_bY``aU\_[]`a^`¥```Na^  
@HWI-EAS443:3:18:1747:1442#0/1  
GAACTGAGCAATCTTGCAAAAGGAGAGAAAGCTAATGTGC  
+HWI-EAS443:3:18:1747:1442#0/1  
a¥`a\_aab]aaa\_a`Y^`^\_¥[``\_]`a]`[]^^`UV]\_V\_V  
@HWI-EAS443:3:18:201:274#0/1  
AATGAACTGAGCAATCTTGCAAAAGGAGAGAAAGCTAATG  
+HWI-EAS443:3:18:201:274#0/1  
Vb\_X¥\_babaaba``a\_ba^W^`^a`aaaaba^a`a[a^b  
@HWI-EAS443:3:18:222:2009#0/1  
CATCAATGAACTGAGCAATCTTGCAAAAGGAGAGAAAGCT  
+HWI-EAS443:3:18:222:2009#0/1  
V[¥b\_aM^¥aa^[]`[bb\_`\_bbaa¥W¥`a^aV¥\_W\_^]Y`  
@HWI-EAS443:3:18:262:33#0/1  
GAGCAATCTTGCAAAAGGAGAGAAAGCTAATGTGCTAATT  
+HWI-EAS443:3:18:262:33#0/1  
`a¥``\_¥aaX`a``a^`^X[X``]H`\_`\_ZaW\_UTLUZT  
@HWI-EAS443:3:18:28:1019#0/1  
GAAAGCTAATGTGCTAATTGGGCAAGGGGACGTAGTGTTG  
+HWI-EAS443:3:18:28:1019#0/1  
```baaba\_bb]baaa`aa`aaaa[Zaaa]\_aZ\_aY¥Z`a  
@HWI-EAS443:3:18:384:683#0/1  
CATCAATGAACTGAGCAATCTTGCAAAAGGAGAGAAAGCT  
+HWI-EAS443:3:18:384:683#0/1  
`V\_baaaba^bba]babaaba```aaa¥baabaabaaa\_a  
@HWI-EAS443:3:18:391:1155#0/1  
GAGCAATCTTGCAAAAGGAGAGAAAGCTAATGTGCTAATT  
+HWI-EAS443:3:18:391:1155#0/1  
a\_`baaab`aba\_^`b`]a`¥^`\_`aa````a^`\_]`\_``\_`  
@HWI-EAS443:3:18:409:724#0/1  
CATCAATGAACTGAGCAATCTTGCAAAAGGAGAGAAAGCT  
+HWI-EAS443:3:18:409:724#0/1  
a\_`bWQY`Ta]^^^U`Z`a`S\_X\_]`]Y`\_^^^UZ¥\_  
@HWI-EAS443:3:18:427:1336#0/1  
GAAAGCTAATGTGCTAATTGGGCAAGGGGACGTAGTGTTG  
+HWI-EAS443:3:18:427:1336#0/1  
abaa`aa][aX\_`a\_a`a`\_`\_```Ja\_\_\_^^\_TL[H`Z]^  
@HWI-EAS443:3:18:454:1105#0/1  
ATCTTGCAAAAGGAGAGAAAGCTAATGTGCTAATTGGGCA  
+HWI-EAS443:3:18:454:1105#0/1  
\_b]R\_]baZaaa\_aaa`a\_aaa`a¥a]NY^JW[\_^^][\_V



@HWI-EAS443:3:18:481:113#0/1  
CAATCTTGCAAAAGGAGAGAAAGCTAATGTGCTAATTGGG  
+HWI-EAS443:3:18:481:113#0/1  
ababb\_abbabababab`bbb`b`abaabab\_abaaaaa\_  
@HWI-EAS443:3:18:529:543#0/1  
CCCTTGCCCAATTAGCACATTAGCTTTCTCTCCTTTTGCA  
+HWI-EAS443:3:18:529:543#0/1  
U`¥J\_b[R\_S`b`¥aab`[abbbU`0[WaW^^S^a[aT]  
@HWI-EAS443:3:18:56:908#0/1  
CAAAAGGAGAGAAAGCTAATGTGCTAATTGGGCAAGGGGA  
+HWI-EAS443:3:18:56:908#0/1  
`P\_^\_a\_U\_a\_a`\_\_\_a`W\_\_0\_\_¥\_^VR\_\_^\_]W^]]ZZ  
@HWI-EAS443:3:18:570:778#0/1  
GAGCAATCTTGCAAAAGGAGAGAAAGCTAATGTGCTAATT  
+HWI-EAS443:3:18:570:778#0/1  
aab\_]aabb`````Z\_aa```aa`aa`]`a`^a[\_\_\_\_`\_  
@HWI-EAS443:3:18:571:1492#0/1  
CAATTAGCACATTAGCTTTCTCTCCTTTTGCAAGATTGCT  
+HWI-EAS443:3:18:571:1492#0/1  
aaba`babaaaaaaaaa`a`a\_a\_a\_\_XM[a\_\_\_\_\_`]\_  
@HWI-EAS443:3:18:593:391#0/1  
ATCTTGCAAAAGGAGAGAAAGCTAATGTGCTAATTGGGCA  
+HWI-EAS443:3:18:593:391#0/1  
a]aaaaa`\_`Yaa[]aaa`^a`a[aa`[W]Z`\_\_^]\_\_\_\_  
@HWI-EAS443:3:18:622:400#0/1  
GAAAGCTAATGTGCTAATTGGGCAAGGGGACGTAGTGTG  
+HWI-EAS443:3:18:622:400#0/1  
aaZ[^`\_a[Xb\_a\_a`\_a\_]\_a``\_aaa^^^\_W¥`Y`V^a  
@HWI-EAS443:3:18:628:736#0/1  
GAGAAAGCTAATGTGCTAATTGGGCAAGGGGACGTAGTGT  
+HWI-EAS443:3:18:628:736#0/1  
abaaaaaaaaaaaWaaa`aaaa^a`\_`aa``^`aZ^aZa]  
@HWI-EAS443:3:18:62:1666#0/1  
GAGCAATCTTGCAAAAGGAGAGAAAGCTAATGTGCTAATT  
+HWI-EAS443:3:18:62:1666#0/1  
\_¥U\_UQOZ]YUOYQQ\_¥¥VY]V¥`R¥H]PP¥VR\_\_\_\_\_UXV  
@HWI-EAS443:3:18:643:554#0/1  
CATCAATGAAGTACTGAGCAATCTTGCAAAAGGAGAGAAAGCT  
+HWI-EAS443:3:18:643:554#0/1  
abaaabb\_]aaaaaaaaaaa`a`a`\_U`b`^a`aa^`\_`^`\_  
@HWI-EAS443:3:18:69:1157#0/1  
CATCAATGAAGTACTGAGCAATCTTGCAAAAGGAGAGAAAGCT  
+HWI-EAS443:3:18:69:1157#0/1  
abaaaaaaaaaaa]aaaaa\_a\_a``aaYa`\_`aaaa^`a``  
@HWI-EAS443:3:18:783:1636#0/1  
CATCAATGAAGTACTGAGCAATCTTGCAAAAGGAGAGAAAGCT  
+HWI-EAS443:3:18:783:1636#0/1  
Y``babababbabababb```Zbaaabaaa`abbaa`^`  
@HWI-EAS443:3:18:799:199#0/1  
CAAAAGGAGAGAAAGCTAATGTGCTAATTGGGCAAGGGGA

+HWI-EAS443:3:18:799:199#0/1  
a]V[Y`]^a]\_\_[P¥U¥FZ\_\_TXV^)^`\_ZWWYVUSUWW  
@HWI-EAS443:3:18:849:340#0/1  
AATGAACTGAGCAATCTTGCAAAAGGAGAGAAAGCTAATG  
+HWI-EAS443:3:18:849:340#0/1  
\_^ababaaa\_bababa`[aa][`\_aa`aaa`aa^`\_\_\_`  
@HWI-EAS443:3:18:859:1578#0/1  
GAGCAATCTTGCAAAAGGAGAGAAAGCTAATGTGCTAATT  
+HWI-EAS443:3:18:859:1578#0/1  
a[`a`¥^\_]`a`]]\_[^\_\_\_]¥a]\_\_\_][`V`Z^\_[  
@HWI-EAS443:3:19:1086:2006#0/1  
GCATCAATGAACTGAGCAATCTTGCAAAAGGAGAGAAAGC  
+HWI-EAS443:3:19:1086:2006#0/1  
¥FYOZ`T¥Q¥Z[`Xa¥UO]`YQN¥`ZYG[aX`\_]a]¥YB  
@HWI-EAS443:3:19:1139:1613#0/1  
GCATCAATGAACTGAGCAATCTTGCAAAAGGAGAGAAAGC  
+HWI-EAS443:3:19:1139:1613#0/1  
aaab\_\_\_baaaaa\_`[`aaa\_a\_\_\_a`^a\_\_a\_a\_`^\_\_  
@HWI-EAS443:3:19:1155:834#0/1  
GCATCAATGAACTGAGCAATCTTGCAAAAGGAGAGAAAGC  
+HWI-EAS443:3:19:1155:834#0/1  
a`aa`aa`a`aaa^\_aaa\_`a`a\_a\_`^a\_\_a```]^`0  
@HWI-EAS443:3:19:1170:1432#0/1  
AGCTAATGTGCTAATTGGGCAAGGGGACGTAGTGTTGGTA  
+HWI-EAS443:3:19:1170:1432#0/1  
aaa`aaab¥^`aaaaa`aa`aa`[^`\_`aV^aVa]`a]UW  
@HWI-EAS443:3:19:1181:1555#0/1  
GAAAGCTAATGTGCTAATTGGGCAAGGGGACGTAGTGTTG  
+HWI-EAS443:3:19:1181:1555#0/1  
S\_a``]b`^\_aZaabaa`¥[`]\_\_aa\_b¥^aa\_aa^`aa  
@HWI-EAS443:3:19:1201:413#0/1  
GAGAAAGCTAATGTGCTAATTGGGCAAGGGGACGTAGTGT  
+HWI-EAS443:3:19:1201:413#0/1  
X¥aUV\_R[ ]¥ZUVSV]^MRZBBBBBBBBBBBBBBBBBBB  
@HWI-EAS443:3:19:1205:89#0/1  
CATCAATGAACTGAGCAATCTTGCAAAAGGAGAGAAAGCT  
+HWI-EAS443:3:19:1205:89#0/1  
[QN]baaaa^a[a`b`Ta`b¥bbaVba^`bab`a\_`aaUa  
@HWI-EAS443:3:19:1215:783#0/1  
GAGCAATCTTGCAAAAGGAGAGAAAGCTAATGTGCTAATT  
+HWI-EAS443:3:19:1215:783#0/1  
a\_¥US`¥UXW`\_^`¥T`aaaaa[M]\_[ ]Z¥`a\_a]Z¥\_\_\_  
@HWI-EAS443:3:19:1221:1692#0/1  
CATCAATGAACTGAGCAATCTTGCAAAAGGAGAGAAAGCT  
+HWI-EAS443:3:19:1221:1692#0/1  
S`abPS\_bbbabaTY^a^^b`^ba`]aa`bababbbabSa  
@HWI-EAS443:3:19:1238:60#0/1  
AAGCATCAATGAACTGAGCAATCTTGCAAAAGGAGAGAAA  
+HWI-EAS443:3:19:1238:60#0/1  
]Q]aaYHQ`aZ¥XX`]QT``[[\_a\_PWZOQ\_\_\_\_\_RZ[[[X

@HWI-EAS443:3:19:1241:184#0/1  
AGCATCAATGAACTGAGCAATCTTGCAAAAGGAGAGAAAG  
+HWI-EAS443:3:19:1241:184#0/1  
aa[^^\_\_a`\_\_]`\_^`]\_\_`]`¥\_[^]X`^]`^\_]Z]^  
@HWI-EAS443:3:19:1307:62#0/1  
AATGAACTGAGCAATCTTGCAAAAGGAGAGAAAGCTAATG  
+HWI-EAS443:3:19:1307:62#0/1  
UY`b\_P\_bb¥b`VZ\_]\_aaa`XX`Uaaaa^`^X]]Z\_a  
@HWI-EAS443:3:19:1395:163#0/1  
GAACTGAGCAATCTTGCAAAAGGAGAGAAAGCTAATGTGC  
+HWI-EAS443:3:19:1395:163#0/1  
a\_a\_a\_\_a\_a`aXa^`¥Y^]\_`X`]a\_]Z\_UY\_Y\_]Y^P  
@HWI-EAS443:3:19:1401:1648#0/1  
AGCTAATGTGCTAATTGGGCAAGGGGACGTAGTGTGGTA  
+HWI-EAS443:3:19:1401:1648#0/1  
a]abbba\_Q\_\_bbbaW\_a\_ab^^a\_\_aaaa^aZ^ZbR\_  
@HWI-EAS443:3:19:1450:1397#0/1  
GAAAGCTAATGTGCTAATTGGGCAAGGGGACGTAGTGTG  
+HWI-EAS443:3:19:1450:1397#0/1  
`Y\_ZW¥WOQW[]a^YSON¥X\_]VYT¥X`\_TF[I0]XBBBB  
@HWI-EAS443:3:19:1452:552#0/1  
GAAAGCTAATGTGCTAATTGGGCAAGGGGACGTAGTGTG  
+HWI-EAS443:3:19:1452:552#0/1  
^¥baa`baaabaa\_baabb`b`\_]¥a^V`\_a^Za\_a`a  
@HWI-EAS443:3:19:1584:83#0/1  
AGCTAATGTGCTAATTGGGCAAGGGGACGTAGTGTGGTA  
+HWI-EAS443:3:19:1584:83#0/1  
^b\_bbbb`\_b[aabb`bab`abQaaZ\_aZUa0a\_aaKPG  
@HWI-EAS443:3:19:1590:1863#0/1  
AACTGAGCAATCTTGCAAAAGGAGAGAAAGCTAATGTGCT  
+HWI-EAS443:3:19:1590:1863#0/1  
]Y]aY[^`Va`\_a¥QY``[aa^\_aaa\_\_^N\_a`[`P\_XP  
@HWI-EAS443:3:19:1649:1920#0/1  
CTTGCAAAAGGAGAGAAAGCTAATGTGCTAATTGGGCAAG  
+HWI-EAS443:3:19:1649:1920#0/1  
aa^Za`\_\_U^SG¥UXQ`aS\_aWU]aNWP^Ta`\_]a[^GP^  
@HWI-EAS443:3:19:1670:412#0/1  
ACTGAGCAATCTTGCAAAAGGAGAGAAAGCTAATGTGCTA  
+HWI-EAS443:3:19:1670:412#0/1  
`X``\_\_¥``¥^b`WY\_¥`a\_\_^S[]a\_aX]aa`aOYV\_`  
@HWI-EAS443:3:19:1695:1358#0/1  
AAGCATCAATGAACTGAGCAATCTTGCAAAAGGAGAGAAA  
+HWI-EAS443:3:19:1695:1358#0/1  
a[^]`a[``aaa^Za\_]`\_`^\_Waa`T]\_^^a\_Xa\_\_\_\_^]  
@HWI-EAS443:3:19:181:826#0/1  
GAGCAATCTTGCAAAAGGAGAGAAAGCTAATGTGCTAATT  
+HWI-EAS443:3:19:181:826#0/1  
^S]\_U¥U\_ZUTROZOWHP[[QO[NXYLT^`^XDYXQQM[^  
@HWI-EAS443:3:19:208:677#0/1  
AGCACATTAGCTTTCTCTCCTTTTGCAAGATTGCTCAGTT

+HWI-EAS443:3:19:208:677#0/1  
a\_b]baa\_a`a\_aa]]a\_aa```aaaa`a\_]a``a\_`YZ  
@HWI-EAS443:3:19:293:295#0/1  
CATCAATGAACTGAGCAATCTTGCAAAAGGAGAGAAAGCT  
+HWI-EAS443:3:19:293:295#0/1  
abaabbaabba]ab`baaaaaba`\_\_aa]`aaaa`a¥a  
@HWI-EAS443:3:19:380:363#0/1  
CTTGCAAAAGGAGAGAAAGCTAATGTGCTAATTGGGCAAG  
+HWI-EAS443:3:19:380:363#0/1  
a`abaU`^X^aab\_aa]aa[aa`V^Ua\_[^\_\_`\_`\_]PZa  
@HWI-EAS443:3:19:380:539#0/1  
GAGCAATCTTGCAAAAGGAGAGAAAGCTAATGTGCTAATT  
+HWI-EAS443:3:19:380:539#0/1  
^a^abb]a`Z^a`bZbbba\_bbaY[ba`bbbbaaaaa`a  
@HWI-EAS443:3:19:471:659#0/1  
ATCTTGCAAAAGGAGAGAAAGCTAATGTGCTAATTGGGCA  
+HWI-EAS443:3:19:471:659#0/1  
a``a\_aa`a\_b`a`\_\_aa\_a```\_aVa^^`\_`a\_a`^  
@HWI-EAS443:3:19:664:1127#0/1  
CATCAATGAACTGAGCAATCTTGCAAAAGGAGAGAAAGCT  
+HWI-EAS443:3:19:664:1127#0/1  
SS^\_b`ba]IVb^\_ZZ¥[`abb^X[^¥baa^bab``aVLQ  
@HWI-EAS443:3:19:668:688#0/1  
CAATCTTGCAAAAGGAGAGAAAGCTAATGTGCTAATTGGG  
+HWI-EAS443:3:19:668:688#0/1  
abSWR]aaRLV¥Ua]HXT¥SPN\_GWUN`a0\_TTB BBBB  
@HWI-EAS443:3:19:792:1202#0/1  
CATCAATGAACTGAGCAATCTTGCAAAAGGAGAGAAAGCT  
+HWI-EAS443:3:19:792:1202#0/1  
abaaaabaaaa``a`aaaa\_a`aa```a]a`aa\_\_¥a  
@HWI-EAS443:3:19:807:607#0/1  
GTCCCCTTGCCCAATTAGCACATTAGCTTTCTCCTTTT  
+HWI-EAS443:3:19:807:607#0/1  
a\_aa`a¥\_a``\_aa`aa\_a^a`a``````\_a^a]\_`[U^  
@HWI-EAS443:3:19:89:1700#0/1  
TGCAAAAGGAGAGAAAGCTAATGTGCTAATTGGGCAAGGG  
+HWI-EAS443:3:19:89:1700#0/1  
\_\_a`bb`^abbbba^^aaabaa\_aba\_aaaa¥abaaaZ[  
@HWI-EAS443:3:19:946:58#0/1  
AAGCTAATGTGCTAATTGGGCAAGGGGACGTAGTGTGGT  
+HWI-EAS443:3:19:946:58#0/1  
aabaaa]bb\_a]a]^`aaba`\_¥a`a`¥`aX\_a¥`]\_a\_N  
@HWI-EAS443:3:19:955:1799#0/1  
GAACTGAGCAATCTTGCAAAAGGAGAGAAAGCTAATGTGC  
+HWI-EAS443:3:19:955:1799#0/1  
aaa`HSIX^bbaa[`a`\_a`a``aa\_\_a^\_aa\_¥^G¥\_  
@HWI-EAS443:3:1:1005:1348#0/1  
GAAAGCTAATGTGCTAATTGGGCAAGGGGACGTAGTGTG  
+HWI-EAS443:3:1:1005:1348#0/1  
\_abbbbb¥`bbababaabbbbb\_b\_babaa]a`b]b[aB

@HWI-EAS443:3:1:1009:1907#0/1  
CATCAATGAACTGAGCAATCTTGCAAAAGGAGAGAAAGCT  
+HWI-EAS443:3:1:1009:1907#0/1  
¥bbabb\_b\_bYWbWG[b\_aaT\_a¥bb^¥aXX]aaaaSbBB  
@HWI-EAS443:3:1:1223:1286#0/1  
GAGCAATCTTGCAAAAGGAGAGAAAGCTAATGTGCTAATT  
+HWI-EAS443:3:1:1223:1286#0/1  
a`a^ba`]bbba`aa`ab^a\_aaaaZG^\_aaa\_\_V`T`b\_  
@HWI-EAS443:3:1:1285:886#0/1  
AGCTAATGTGCTAATTGGGCAAGGGGACGTAGTGTGGTA  
+HWI-EAS443:3:1:1285:886#0/1  
Z^^abb\_¥`b]a]a\_]`a\_a[abb`XaY``b¥bW`BB  
@HWI-EAS443:3:1:142:1165#0/1  
CAATCTTGCAAAAGGAGAGAAAGCTAATGTGCTAATTGGG  
+HWI-EAS443:3:1:142:1165#0/1  
ababaaab`a\_¥ba^Z^\_bbabXbbaba`aba`aWV`B  
@HWI-EAS443:3:1:1435:1031#0/1  
AGCTAATGTGCTAATTGGGCAAGGGGACGTAGTGTGGTA  
+HWI-EAS443:3:1:1435:1031#0/1  
aaabbaab]]\_b`[aa`aa^`Xaaa\_¥F]W\_[Ra]`^bBB  
@HWI-EAS443:3:1:146:1255#0/1  
AATGAACTGAGCAATCTTGCAAAAGGAGAGAAAGCTAATG  
+HWI-EAS443:3:1:146:1255#0/1  
`^]¥H[OZ`¥Z¥\_] [ZY]Y[TKTa\_WZW\_`^R`ZQ]Z\_B  
@HWI-EAS443:3:1:165:601#0/1  
CATCAATGAACTGAGCAATCTTGCAAAAGGAGAGAAAGCT  
+HWI-EAS443:3:1:165:601#0/1  
aaa\_bbabbb\_aaaaaa`a^a`aaa\_aaaa`a`aa^aa\_B  
@HWI-EAS443:3:1:1712:1322#0/1  
GAGCAATCTTGCAAAAGGAGAGAAAGCTAATGTGCTAATT  
+HWI-EAS443:3:1:1712:1322#0/1  
a`a\_a``]aab`¥\_^^ba^a\_aa`\_aR`\_]`\_]aYKWK\_B  
@HWI-EAS443:3:1:1725:1777#0/1  
GAGAAAGCTAATGTGCTAATTGGGCAAGGGGACGTAGTGT  
+HWI-EAS443:3:1:1725:1777#0/1  
a`a`a^a^U\_a]aa`G`^`^\_aaSU`^^\_a]G\_BBBBBB  
@HWI-EAS443:3:1:1741:1238#0/1  
CAATTAGCACATTAGCTTTCTCTCTTTTGCAAGATTGCT  
+HWI-EAS443:3:1:1741:1238#0/1  
abaab`aab`\_bba`^b\_b\_b¥a¥abbbaaJa`aa`bb^B  
@HWI-EAS443:3:1:195:354#0/1  
CAATCTTGCAAAAGGAGAGAAAGCTAATGTGCTAATTGGG  
+HWI-EAS443:3:1:195:354#0/1  
abaaabaaaaa`baababaa\_a\_aa\_aa\_a¥a^\_a^aBB  
@HWI-EAS443:3:1:199:1603#0/1  
AATCTTGCAAAAGGAGAGAAAGCTAATGTGCTAATTGGGC  
+HWI-EAS443:3:1:199:1603#0/1  
a\_[^ba\_]\_\_`¥a[\_a\_a`VZ`¥\_a^aaXPLa`X[`\_X^B  
@HWI-EAS443:3:1:264:1454#0/1  
ATGAACTGAGCAATCTTGCAAAAGGAGAGAAAGCTAATGT

+HWI-EAS443:3:1:264:1454#0/1  
aab\_aaa`]aaaaa\_aa`^^\_[]` `[¥[` \_\_¥^S^`WBBB  
@HWI-EAS443:3:1:288:241#0/1  
GAGCAATCTTGCAAAAAGGAGAGAAAGCTAATGTGCTAATT  
+HWI-EAS443:3:1:288:241#0/1  
a^`G`aa^aYa`\_^Xaa^^\_a`\_aX`\_\_`\_XaX\_^\_BB  
@HWI-EAS443:3:1:316:50#0/1  
GAGCAATCTTGCAAAAAGGAGAGAAAGCTAATGTGCTAATT  
+HWI-EAS443:3:1:316:50#0/1  
aaaa\_b`aUbb`aUWabI\_a\_b^ab¥b`\_W^ab[`\_`aB  
@HWI-EAS443:3:1:459:65#0/1  
AGAGAAAGCTAATGTGCTAATTGGGCAAGGGGACGTAGTG  
+HWI-EAS443:3:1:459:65#0/1  
aaaa`a```aa\_aa\_b`aa¥``aa\_]`^¥a\_]`Y^a]XaBB  
@HWI-EAS443:3:1:496:1075#0/1  
CCAACACTACGTCCCCTTGCCCAATTAGCACATTAGCTTT  
+HWI-EAS443:3:1:496:1075#0/1  
aabb`babb\_aa\_XYYaab\_\_aabaabaYa\_aaa\_^`a\_B  
@HWI-EAS443:3:1:546:1327#0/1  
GAGCAATCTTGCAAAAAGGAGAGAAAGCTAATGTGCTAATT  
+HWI-EAS443:3:1:546:1327#0/1  
`¥¥U\_]aab[aaabbabba`aabbab`ba`bb\_a`aaa]B  
@HWI-EAS443:3:1:596:1134#0/1  
ATCTTGCAAAAAGGAGAGAAAGCTAATGTGCTAATTGGGCA  
+HWI-EAS443:3:1:596:1134#0/1  
aaaaab`aa`b`Za`baa`\_`\_`a^aa\_a\_a`^aa\_aaBB  
@HWI-EAS443:3:1:655:139#0/1  
AGCTAATGTGCTAATTGGGCAAGGGGACGTAGTGTTGGTA  
+HWI-EAS443:3:1:655:139#0/1  
ab¥ba¥abW\_^]\_N`^`a[SX]\_ba[Z`ZRaxa^S\_BBB  
@HWI-EAS443:3:1:659:1040#0/1  
GAAAGCTAATGTGCTAATTGGGCAAGGGGACGTAGTGTTG  
+HWI-EAS443:3:1:659:1040#0/1  
aa`aV`^`a^`\_`\_`\_`\_`\_¥`W`^`^`\_ZZ\_XW\_W^]\_B  
@HWI-EAS443:3:1:668:401#0/1  
GAGAAAGCTAATGTGCTAATTGGGCAAGGGGACGTAGTGT  
+HWI-EAS443:3:1:668:401#0/1  
^\_aab` `[aaaba¥a^b\_aa\_aab`\_^aaa^W`U¥`]BB  
@HWI-EAS443:3:1:732:1083#0/1  
AGAAAGCTAATGTGCTAATTGGGCAAGGGGACGTAGTGT  
+HWI-EAS443:3:1:732:1083#0/1  
abVJa^UYYaaa\_a\_aT\_aaaaa\_Y\_ZLZaGVa[Sa]WBB  
@HWI-EAS443:3:1:798:1603#0/1  
GAAGTGAAGCAATCTTGCAAAAAGGAGAGAAAGCTAATGTGC  
+HWI-EAS443:3:1:798:1603#0/1  
aaXIaa\_abbaaU¥^¥MbaM[Ob¥a`aaba¥¥¥bb]BBBB  
@HWI-EAS443:3:1:822:884#0/1  
GAGCAATCTTGCAAAAAGGAGAGAAAGCTAATGTGCTAATT  
+HWI-EAS443:3:1:822:884#0/1  
aYb]b]b\_baa¥]`¥\_aaa`aa`^`\_a\_aa\_aaaa\_aa`aB

@HWI-EAS443:3:1:868:655#0/1  
GCATCAATGAACTGAGCAATCTTGCAAAAGGAGAGAAAGC  
+HWI-EAS443:3:1:868:655#0/1  
aa`a\_`aa^`\_a^`\_aX`a]¥^]Xa]Z`^\_]UBBB  
@HWI-EAS443:3:1:872:599#0/1  
ACTGAGCAATCTTGCAAAAGGAGAGAAAGCTAATGTGCTA  
+HWI-EAS443:3:1:872:599#0/1  
M`a`Z^[b`]¥bbb`XR^abb^babaa\_aSa\_aabX[Iaa  
@HWI-EAS443:3:1:876:574#0/1  
CATCAATGAACTGAGCAATCTTGCAAAAGGAGAGAAAGCT  
+HWI-EAS443:3:1:876:574#0/1  
ab`^^bXV]aR\_b]aVR`¥]`ab\_`0¥]ba^aaa]`^a`B  
@HWI-EAS443:3:20:1012:466#0/1  
ATCTTGCAAAAGGAGAGAAAGCTAATGTGCTAATTGGGCA  
+HWI-EAS443:3:20:1012:466#0/1  
ababaa\_b`^I\_b\_aabbaab\_ba\_abaa\_aa\_a\_abaXX  
@HWI-EAS443:3:20:1128:293#0/1  
AGCTAATGTGCTAATTGGGCAAGGGGACGTAGTGTGGTA  
+HWI-EAS443:3:20:1128:293#0/1  
\_a^^`^\_ZZ\_]\_\_`aaa\_¥T\_W\_^a\_ZRW\_]\_ZSZ¥aaVP  
@HWI-EAS443:3:20:1172:973#0/1  
GAGAAAGCTAATGTGCTAATTGGGCAAGGGGACGTAGTGT  
+HWI-EAS443:3:20:1172:973#0/1  
aa\_Q]a\_\_a[M\_`\_b^`]\_\_aaa¥Ya\_`a`\_]\_[aU\_a]a]  
@HWI-EAS443:3:20:1211:580#0/1  
GAGCAATCTTGCAAAAGGAGAGAAAGCTAATGTGCTAATT  
+HWI-EAS443:3:20:1211:580#0/1  
[\_U[ZS¥^`aaZY[[]a\_Za^a`V^`Y¥[]`aNZQ[XY]^  
@HWI-EAS443:3:20:1228:1744#0/1  
GAACTGAGCAATCTTGCAAAAGGAGAGAAAGCTAATGTGC  
+HWI-EAS443:3:20:1228:1744#0/1  
aaaaa^Y¥\_a^^UaZX^[aY\_aa¥¥Z]aaa\_\_`\_`[`aR]U  
@HWI-EAS443:3:20:1361:1029#0/1  
CATCAATGAACTGAGCAATCTTGCAAAAGGAGAGAAAGCT  
+HWI-EAS443:3:20:1361:1029#0/1  
aaaababab`abbbbabbbabababaaabbababbaaa\_a  
@HWI-EAS443:3:20:1363:766#0/1  
TTGCAAAAGGAGAGAAAGCTAATGTGCTAATTGGGCAAGG  
+HWI-EAS443:3:20:1363:766#0/1  
aaaa\_\_\_Ya`\_a\_a`\_¥a\_`\_^`\_`[`WX]^`^a\_\_Z]]]W  
@HWI-EAS443:3:20:1389:1468#0/1  
AAGCTAATGTGCTAATTGGGCAAGGGGACGTAGTGTGGT  
+HWI-EAS443:3:20:1389:1468#0/1  
`YaZ`aa`\_`^]`^aaa`aaaa\_aa``^[a[]ZUa^[]UL  
@HWI-EAS443:3:20:1431:2041#0/1  
CCTTGCCCAATTAGCACATTAGCTTTCTCTCCTTTTGCAA  
+HWI-EAS443:3:20:1431:2041#0/1  
`b`aa`a^aabab`[\_W`aaaa\_aaYa`aa\_a\_\_\_aaa\_  
@HWI-EAS443:3:20:1495:269#0/1  
TTGCAAAAGGAGAGAAAGCTAATGTGCTAATTGGGCAAGG

+HWI-EAS443:3:20:1495:269#0/1  
aabb[XL\_¥\_\_aba[^a`¥[^\_a\_a^`\_^a^ZP`SSW\_^  
@HWI-EAS443:3:20:1588:16#0/1  
GAACTGAGCAATCTTGCAAAGGAGAGAAAGCTAATGTGC  
+HWI-EAS443:3:20:1588:16#0/1  
^W\_]\_^aaYaaa]`\_T\_a^`XWaYaYI`\_S\_W\_^]\_G\_V  
@HWI-EAS443:3:20:1721:539#0/1  
ATGAACTGAGCAATCTTGCAAAGGAGAGAAAGCTAATGT  
+HWI-EAS443:3:20:1721:539#0/1  
aaa\_Y^aaa]aa¥a\_a`b\_a\_\_\_aa\_a^`a^\_X^\_X]\_Z  
@HWI-EAS443:3:20:187:282#0/1  
CATCAATGAACTGAGCAATCTTGCAAAGGAGAGAAAGCT  
+HWI-EAS443:3:20:187:282#0/1  
`Kb]^a`aaaaYU¥`^aaZa\_aa`Y[^aa]`\_\_`\_V`PW  
@HWI-EAS443:3:20:194:656#0/1  
AGGAGAGAAAGCTAATGTGCTAATTGGGCAAGGGGACGTA  
+HWI-EAS443:3:20:194:656#0/1  
W\_\_V¥Z\_bb¥¥bb\_Z\_bMbb[V¥ba\_`bb`Q[baa`abRM  
@HWI-EAS443:3:20:221:1609#0/1  
CATCAATGAACTGAGCAATCTTGCAAAGGAGAGAAAGCT  
+HWI-EAS443:3:20:221:1609#0/1  
a`ab`a``aaaaU]\_`a``a¥^`\_Za`WVZ\_a\_`\_\_X^Y  
@HWI-EAS443:3:20:314:1429#0/1  
GTCCCCTTGCCCAATTAGCACATTAGCTTTCTCCTTTT  
+HWI-EAS443:3:20:314:1429#0/1  
a`baaaa`aaa`]`a\_aaa\_a^`aa^`]]`[^\_\_\_\_[\_\_\_\_  
@HWI-EAS443:3:20:327:591#0/1  
GAGCAATCTTGCAAAGGAGAGAAAGCTAATGTGCTAATT  
+HWI-EAS443:3:20:327:591#0/1  
^`YP\_¥`ba\_b`bZ`aab[^`^`aaaa]a\_```Z`[X\_¥\_`  
@HWI-EAS443:3:20:400:1734#0/1  
ATGAACTGAGCAATCTTGCAAAGGAGAGAAAGCTAATGT  
+HWI-EAS443:3:20:400:1734#0/1  
K\_]\_Q^¥GRWU`\_`^Z\_aS^`XVRW[^aa^R^UUZ[[  
@HWI-EAS443:3:20:503:735#0/1  
ACTGAGCAATCTTGCAAAGGAGAGAAAGCTAATGTGCTA  
+HWI-EAS443:3:20:503:735#0/1  
aabYUaZQ]XX^aa^a\_VVY`\_\_ba\_0Zb[^`\_\_a\_G]R^`  
@HWI-EAS443:3:20:517:601#0/1  
GAGCAATCTTGCAAAGGAGAGAAAGCTAATGTGCTAATT  
+HWI-EAS443:3:20:517:601#0/1  
aa`baabaabbaaaaaabbabaaaa`^a`\_ab^a`aa``a  
@HWI-EAS443:3:20:537:1210#0/1  
GAAAGCTAATGTGCTAATTGGGCAAGGGGACGTAGTGTG  
+HWI-EAS443:3:20:537:1210#0/1  
^\_]WaZaaTa`Ya[^`aaa¥YW\_a``^a`Z`^Y]`W\_V]a  
@HWI-EAS443:3:20:801:1360#0/1  
GAAAGCTAATGTGCTAATTGGGCAAGGGGACGTAGTGTG  
+HWI-EAS443:3:20:801:1360#0/1  
T^`[¥¥X[bbab`ba`\_a[^`ab`\_aaa`\_]NW\_\_aab



@HWI-EAS443:3:20:91:925#0/1  
AATGAACTGAGCAATCTTGCAAAAGGAGAGAAAGCTAATG  
+HWI-EAS443:3:20:91:925#0/1  
]aUIX]a[XY^SbaabaS^Z]Y^]]P\_[`PV[RK¥U`\_\_a  
@HWI-EAS443:3:20:923:1991#0/1  
GAACTGAGCAATCTTGCAAAAGGAGAGAAAGCTAATGTGC  
+HWI-EAS443:3:20:923:1991#0/1  
\_PaXYS[YZ[PNZ^Za]\_]`a\_]\_]`^¥]\_\_\_WG]]\_R^N  
@HWI-EAS443:3:20:924:1492#0/1  
ATGAACTGAGCAATCTTGCAAAAGGAGAGAAAGCTAATGT  
+HWI-EAS443:3:20:924:1492#0/1  
[YOQVa\_[\_`aa^a`Zaa```]\_`P^a`a]¥]\_]`\_\_`V  
@HWI-EAS443:3:20:98:402#0/1  
GCAAAAGGAGAGAAAGCTAATGTGCTAATTGGGCAAGGGG  
+HWI-EAS443:3:20:98:402#0/1  
`aa``]ba^baba`a\_a`aaY\_\_`]\_`¥Z]\_]`Y^`^]  
@HWI-EAS443:3:21:1020:1108#0/1  
ATCAATGAACTGAGCAATCTTGCAAAAGGAGAGAAAGCTA  
+HWI-EAS443:3:21:1020:1108#0/1  
\_abbbaba[[WR\_ba^aa^abaVH¥\_`^`\_`a`\_\_`^`^`  
@HWI-EAS443:3:21:104:1492#0/1  
GAAAGCTAATGTGCTAATTGGGCAAGGGGACGTAGTGTG  
+HWI-EAS443:3:21:104:1492#0/1  
[a¥Ywb\_]`aa¥¥baa\_aVTX]`aZY]\_[a`^U\_a\_a^]`  
@HWI-EAS443:3:21:1139:2045#0/1  
AAGCTAATGTGCTAATTGGGCAAGGGGACGTAGTGTGGT  
+HWI-EAS443:3:21:1139:2045#0/1  
a`a`\_]aZ]\_\_^`^`ZU[\_\_\_`^^^ZXKR¥X\_ZZ^WX  
@HWI-EAS443:3:21:1282:627#0/1  
GAGCAATCTTGCAAAAGGAGAGAAAGCTAATGTGCTAATT  
+HWI-EAS443:3:21:1282:627#0/1  
a`a\_]V[Za^a\_¥KKF]ZR¥T\_\_[H\_Y^\_XYbVa]¥¥^[X  
@HWI-EAS443:3:21:1283:667#0/1  
AGCTAATGTGCTAATTGGGCAAGGGGACGTAGTGTGGTA  
+HWI-EAS443:3:21:1283:667#0/1  
aa`aa`aa`aaaaaaaaa^a\_a\_\_\_X^aW¥YX\_\_\_a\_S^  
@HWI-EAS443:3:21:1302:530#0/1  
GAGCAATCTTGCAAAAGGAGAGAAAGCTAATGTGCTAATT  
+HWI-EAS443:3:21:1302:530#0/1  
`Q][W¥V\_^T^W\_NOXaa¥aYY\_X\_Y^aVV¥aVWW[[TYZ  
@HWI-EAS443:3:21:1385:1120#0/1  
GAGCAATCTTGCAAAAGGAGAGAAAGCTAATGTGCTAATT  
+HWI-EAS443:3:21:1385:1120#0/1  
`\_aV\_aa¥baaa\_WV\_\_a^]\_a\_\_^a^aV\_a`]`^]`\_`]  
@HWI-EAS443:3:21:1442:1313#0/1  
GAACTGAGCAATCTTGCAAAAGGAGAGAAAGCTAATGTGC  
+HWI-EAS443:3:21:1442:1313#0/1  
\_\_V]`aaaa]abaa^bbb^`\_aa\_aaaba```a`^aaS\_F  
@HWI-EAS443:3:21:1509:803#0/1  
CCCTTGCCCAATTAGCACATTAGCTTTCTCTCTTTTGCA

+HWI-EAS443:3:21:1509:803#0/1  
a\_]¥ba\_`\_^abbaaU^a`baab`a`aYb\_b\_]¥aa`^QK  
@HWI-EAS443:3:21:1695:227#0/1  
AAGCTAATGTGCTAATTGGGCAAGGGGACGTAGTGTGGT  
+HWI-EAS443:3:21:1695:227#0/1  
aa[ZZSa^ZaX\_¥M[Zaa`¥J]aaa]OQ\_]P¥LZWX`\_B  
@HWI-EAS443:3:21:1774:1263#0/1  
GAGCAATCTTGCAAAAGGAGAGAAAGCTAATGTGCTAATT  
+HWI-EAS443:3:21:1774:1263#0/1  
V¥WHR]\_V¥aa]b]^T`]bb\_¥`Y`^\_a^]^ [QTHZ]`aa  
@HWI-EAS443:3:21:198:1890#0/1  
GAACTGAGCAATCTTGCAAAAGGAGAGAAAGCTAATGTGC  
+HWI-EAS443:3:21:198:1890#0/1  
RT¥^ZR]^`a`¥S\_aaYS[a`\_\_¥`\_`¥bV\_aa\_V[`S  
@HWI-EAS443:3:21:34:1424#0/1  
GCATCAATGAACTGAGCAATCTTGCAAAAGGAGAGAAAGC  
+HWI-EAS443:3:21:34:1424#0/1  
aaYyb\_a\_T[\_\_\_SVS`\_`\_a]`][[^¥Y¥Y^X^`^ZWW  
@HWI-EAS443:3:21:432:1620#0/1  
AACTGAGCAATCTTGCAAAAGGAGAGAAAGCTAATGTGCT  
+HWI-EAS443:3:21:432:1620#0/1  
aa^`P^¥aaaaaa\_`\_`ZU\_`YaWS`][Z\_\_\_\_\_^ZX]^  
@HWI-EAS443:3:21:452:1874#0/1  
GAGCAATCTTGCAAAAGGAGAGAAAGCTAATGTGCTAATT  
+HWI-EAS443:3:21:452:1874#0/1  
`][^¥RFV¥`^T[P]W\_Ua]Y]^ [YZWVRVXFU¥RXBBB  
@HWI-EAS443:3:21:505:690#0/1  
CATCAATGAACTGAGCAATCTTGCAAAAGGAGAGAAAGCT  
+HWI-EAS443:3:21:505:690#0/1  
abaa``aaa`\_a\_\_aa`aaaaa`\_a^\_\_a`^aa`a\_^\_[\_`  
@HWI-EAS443:3:21:53:1109#0/1  
CTTGCAAAAGGAGAGAAAGCTAATGTGCTAATTGGGCAAG  
+HWI-EAS443:3:21:53:1109#0/1  
aaaaaaa`\_a`a[a`a\_aaaaaa`a0\_aa`\_`^`aYaa`\_`  
@HWI-EAS443:3:21:552:1878#0/1  
AGCAATCTTGCAAAAGGAGAGAAAGCTAATGTGCTAATTG  
+HWI-EAS443:3:21:552:1878#0/1  
a]bbbaabb`bbaaY]¥]aaabaaaaaaa`^`^`a`^¥^  
@HWI-EAS443:3:21:648:1421#0/1  
AAAGCTAATGTGCTAATTGGGCAAGGGGACGTAGTGTGG  
+HWI-EAS443:3:21:648:1421#0/1  
aa]^`^ [ZY\_NRW[`¥`ROXZ^X¥[Z[NY]XRTKDVP¥BB  
@HWI-EAS443:3:21:689:418#0/1  
TCCCCTTGCCCAATTAGCACATTAGCTTTCTCCTTTTG  
+HWI-EAS443:3:21:689:418#0/1  
`aba```ba\_\_\_\_[`YV^aa`R^`]ZZ[JQ]]`^W\_\_¥VXP  
@HWI-EAS443:3:21:827:206#0/1  
AAGCTAATGTGCTAATTGGGCAAGGGGACGTAGTGTGGT  
+HWI-EAS443:3:21:827:206#0/1  
YY¥[`RFY\_YW[\_^baa¥P¥a```a`]XN¥YV` [ZRYYB

@HWI-EAS443:3:21:897:1239#0/1  
AATGAACTGAGCAATCTTGCAAAAGGAGAGAAAGCTAATG  
+HWI-EAS443:3:21:897:1239#0/1  
a\_X^^X` [abbaaaa`\_a\_aab```aaaab[\_aa\_Y^aa  
@HWI-EAS443:3:22:1121:308#0/1  
AGGAGAGAAAGCTAATGTGCTAATTGGGCAAGGGGACGTA  
+HWI-EAS443:3:22:1121:308#0/1  
`bb]bbb`^bb\_ba`abL`^` [¥`Ua]a^¥\_` ]aaUXaP\_  
@HWI-EAS443:3:22:1230:1317#0/1  
CAATGAACTGAGCAATCTTGCAAAAGGAGAGAAAGCTAAT  
+HWI-EAS443:3:22:1230:1317#0/1  
^VX\_^QU¥VNWV`¥V\_US¥^] ]X¥SY]N\_H`a]]XMWSVO  
@HWI-EAS443:3:22:1316:1361#0/1  
GAGCAATCTTGCAAAAGGAGAGAAAGCTAATGTGCTAATT  
+HWI-EAS443:3:22:1316:1361#0/1  
Z\_baba[aa`U¥a]\_ZS\_`ba`a]^aaaaa`\_\_\_\_a``]a  
@HWI-EAS443:3:22:1343:2041#0/1  
GAGCAATCTTGCAAAAGGAGAGAAAGCTAATGTGCTAATT  
+HWI-EAS443:3:22:1343:2041#0/1  
^T\_` ]bb\_\_^`abb^^`babbbbbba`a` `b\_aabaaa  
@HWI-EAS443:3:22:1408:1858#0/1  
GAGCAATCTTGCAAAAGGAGAGAAAGCTAATGTGCTAATT  
+HWI-EAS443:3:22:1408:1858#0/1  
¥F[abb]U\_\_[]\_T\_^TWWZ\_UWZP^OZZ]\_WXLRL]^¥ab  
@HWI-EAS443:3:22:1457:1453#0/1  
CAATCTTGCAAAAGGAGAGAAAGCTAATGTGCTAATTGGG  
+HWI-EAS443:3:22:1457:1453#0/1  
Z¥` ``\_abba\_]T\_\_[^¥¥a`a^]^`¥[J¥\_ ^Z^^]aa]  
@HWI-EAS443:3:22:1558:250#0/1  
AAAGGAGAGAAAGCTAATGTGCTAATTGGGCAAGGGGACG  
+HWI-EAS443:3:22:1558:250#0/1  
^]X\_\_Z`Y]Y[aaaa[`^R^`\_¥W]ZX^¥T[T`^`XJJB  
@HWI-EAS443:3:22:1624:916#0/1  
AATGAACTGAGCAATCTTGCAAAAGGAGAGAAAGCTAATG  
+HWI-EAS443:3:22:1624:916#0/1  
abbbab¥baa`a`ab^bbbaaba\_\_\_\_`aaba`]a\_a` `aQ  
@HWI-EAS443:3:22:1673:23#0/1  
GAGCAATCTTGCAAAAGGAGAGAAAGCTAATGTGCTAATT  
+HWI-EAS443:3:22:1673:23#0/1  
a`^L[X`¥aa`]\_\_^\_a\_[a\_a]^ZPZUX¥¥V\_WVVY\_¥  
@HWI-EAS443:3:22:1674:415#0/1  
ATGAACTGAGCAATCTTGCAAAAGGAGAGAAAGCTAATGT  
+HWI-EAS443:3:22:1674:415#0/1  
YIOPYPa^]V¥a[bRTWaR]^`WXaaUaaa`¥]\_Ga¥aa¥[  
@HWI-EAS443:3:22:1721:205#0/1  
GAGCAATCTTGCAAAAGGAGAGAAAGCTAATGTGCTAATT  
+HWI-EAS443:3:22:1721:205#0/1  
aaa`baaabbb\_`aa`bb`baba\_`¥Va\_\_abWa\_a\_\_a\_  
@HWI-EAS443:3:22:1739:241#0/1  
GAAAGCTAATGTGCTAATTGGGCAAGGGGACGTAGTGTTG

+HWI-EAS443:3:22:1739:241#0/1  
a`a^[Z`aaaa]`\_]\_a`a\_dW^)``ZZVX`VR\_]\_Z]^  
@HWI-EAS443:3:22:403:443#0/1  
GAAAGCTAATGTGCTAATTGGGCAAGGGGACGTAGTGTG  
+HWI-EAS443:3:22:403:443#0/1  
ab\_¥aaaX`abUa]\_[aaa`W]])`a]aa\_\_aY^`Tbaa`  
@HWI-EAS443:3:22:423:196#0/1  
GAGCAATCTTGCAAAAGGAGAGAAAGCTAATGTGCTAATT  
+HWI-EAS443:3:22:423:196#0/1  
`ababbaababa`¥^abb`aaaa`a¥```aa]^`^`\_]^\_  
@HWI-EAS443:3:22:500:386#0/1  
GTCCCCTTGCCCAATTAGCACATTAGCTTTCTCCTTTTT  
+HWI-EAS443:3:22:500:386#0/1  
a^^aXT^Q`X[YTV`][\_\_\_\_S¥][ZOR]W¥¥Z]]X¥TU¥  
@HWI-EAS443:3:22:55:1698#0/1  
GCATCAATGAAGTGAAGCAATCTTGCAAAAGGAGAGAAAGC  
+HWI-EAS443:3:22:55:1698#0/1  
aaaa\_a`Y\_\_P][aTYTI\_``S`^Va\_aIQR\_a\_\_]a`S  
@HWI-EAS443:3:22:568:207#0/1  
TTGCAAAAGGAGAGAAAGCTAATGTGCTAATTGGGCAAGG  
+HWI-EAS443:3:22:568:207#0/1  
a`ba``aa`b^[\_b\_`a``a`aaa\_]aaa\_aa````\_`\_a\_  
@HWI-EAS443:3:22:591:1993#0/1  
AGCTAATGTGCTAATTGGGCAAGGGGACGTAGTGTGGTA  
+HWI-EAS443:3:22:591:1993#0/1  
aaaaaa`aZaa`aa`aaa\_a\_aa^^\_\_^WKW\_Z\_Z\_\_\_0^  
@HWI-EAS443:3:22:633:794#0/1  
GAGCAATCTTGCAAAAGGAGAGAAAGCTAATGTGCTAATT  
+HWI-EAS443:3:22:633:794#0/1  
abbbabbba`\_^aaaaababaab]¥b\_aaaaa^a\_`a^aa  
@HWI-EAS443:3:22:638:1082#0/1  
AAGCATCAATGAAGTGAAGCAATCTTGCAAAAGGAGAGAAA  
+HWI-EAS443:3:22:638:1082#0/1  
a`a``aa\_aa\_^a\_a``\_`a`\_\_^]\_`\_]\_\_\_\_]^``\_`\_^\_  
@HWI-EAS443:3:22:655:1390#0/1  
GAGCAATCTTGCAAAAGGAGAGAAAGCTAATGTGCTAATT  
+HWI-EAS443:3:22:655:1390#0/1  
aVZaTaW]a`a]¥P[^]\_¥][W`\_`\_]\_\_\_\_`aR`\_\_]] [¥  
@HWI-EAS443:3:22:724:1218#0/1  
GAGAAAGCTAATGTGCTAATTGGGCAAGGGGACGTAGTGT  
+HWI-EAS443:3:22:724:1218#0/1  
\_a^^aaaaa`ab[Y^ab`baaaa`\_aab\_aa]Xa¥\_aU`]  
@HWI-EAS443:3:22:76:966#0/1  
GAGAAAGCTAATGTGCTAATTGGGCAAGGGGACGTAGTGT  
+HWI-EAS443:3:22:76:966#0/1  
a\_PYXa¥bWaZRaGaba]`a^a\_\_^Y¥¥a\_Y]`YEZaRZX  
@HWI-EAS443:3:22:788:1140#0/1  
GTCCCCTTGCCCAATTAGCACATTAGCTTTCTCCTTTTT  
+HWI-EAS443:3:22:788:1140#0/1  
`^aZP\_\_\_\_][`\_a¥Y`U````\_`\_\_`\_`[``¥YXU]`¥]^]`^X`

@HWI-EAS443:3:22:789:116#0/1  
GAAGTGAAGCAATCTTGCAAAAGGAGAGAAAGCTAATGTGC  
+HWI-EAS443:3:22:789:116#0/1  
aab`a`\_b`b\_a`aaa[a`a\_aa\_a`a`^`\_`\_]`\_\_`\_Z]R  
@HWI-EAS443:3:22:929:1483#0/1  
CCTTGCCCAATTAGCACATTAGCTTTCTCTCCTTTTGCAA  
+HWI-EAS443:3:22:929:1483#0/1  
``]U¥a\_b\_\_bb^T]bbbaa]a``a]^baa]\_aaa\_Z  
@HWI-EAS443:3:23:1003:1597#0/1  
AGCTAATGTGCTAATTGGGCAAGGGACGTAGTGTGGTA  
+HWI-EAS443:3:23:1003:1597#0/1  
aaXJZ\_``Yab[a^Z\_TV\_a\_[`\_UZS^a`Z\_Z^T^a\_G¥  
@HWI-EAS443:3:23:1071:673#0/1  
CAATGAAGTGAAGCAATCTTGCAAAAGGAGAGAAAGCTAAT  
+HWI-EAS443:3:23:1071:673#0/1  
aZa¥b¥`a`^aa^Z^aabaaa`a\_I¥a\_bb`aa`b]a`\_a  
@HWI-EAS443:3:23:1182:1600#0/1  
AATTAGCACATTAGCTTTCTCTCCTTTTGCAAGATTGCTC  
+HWI-EAS443:3:23:1182:1600#0/1  
a`^Vbaa\_\_aaa[R\_a]`a[U¥Ja`\_aa`bW]\_[^]Q`V  
@HWI-EAS443:3:23:1213:1407#0/1  
GGAGAGAAAGCTAATGTGCTAATTGGGCAAGGGACGTAG  
+HWI-EAS443:3:23:1213:1407#0/1  
aaaaaaaaaaaa`aaa^aaa`aa`aa`\_]\_a\_\_`¥^dWZ`  
@HWI-EAS443:3:23:1259:604#0/1  
GCATCAATGAAGTGAAGCAATCTTGCAAAAGGAGAGAAAGC  
+HWI-EAS443:3:23:1259:604#0/1  
aaa^]a]^a`\_`\_a\_Y`^`\_\_HV\_\_]\_]\_^`\_`\_`\_`\_YXQ  
@HWI-EAS443:3:23:1331:699#0/1  
ATGAAGTGAAGCAATCTTGCAAAAGGAGAGAAAGCTAATGT  
+HWI-EAS443:3:23:1331:699#0/1  
`ba¥\_¥\_abbabbb^baaaba`[bb`abbbaa\_`^aa`aa]  
@HWI-EAS443:3:23:1335:112#0/1  
AGCTAATGTGCTAATTGGGCAAGGGACGTAGTGTGGTA  
+HWI-EAS443:3:23:1335:112#0/1  
ababbbbababababba```aaaa^¥a^\_aYa\_ba`SZ  
@HWI-EAS443:3:23:1435:228#0/1  
CATCAATGAAGTGAAGCAATCTTGCAAAAGGAGAGAAAGCT  
+HWI-EAS443:3:23:1435:228#0/1  
abaaaabbbb`baaa\_a`a`aaa]`a`\_aa\_aa`aa^\_Y`  
@HWI-EAS443:3:23:1472:1993#0/1  
GAGAAAGCTAATGTGCTAATTGGGCAAGGGACGTAGTGT  
+HWI-EAS443:3:23:1472:1993#0/1  
a\_\_\_\_V¥a]\_]\_a]\_``aaa`\_\_W]\_\_\_\_`YSaW^WY\_`UUU  
@HWI-EAS443:3:23:1516:845#0/1  
GAAAGCTAATGTGCTAATTGGGCAAGGGACGTAGTGTG  
+HWI-EAS443:3:23:1516:845#0/1  
abaaa\_a`bb^a\_a`aaa]`[\_`aa^a^Za^Y\_Wa]\_\_  
@HWI-EAS443:3:23:1759:1247#0/1  
AGCAATCTTGCAAAAGGAGAGAAAGCTAATGTGCTAATG

+HWI-EAS443:3:23:1759:1247#0/1  
`aZaabbabb\_]S\_b]baaaa\_a[a`bb^aX\_\_`\_a  
@HWI-EAS443:3:23:18:235#0/1  
AGCTAATGTGCTAATTGGGCAAGGGGACGTAGTGTGGTA  
+HWI-EAS443:3:23:18:235#0/1  
Xabb`Yab^bbb`\_ababaaababb`ab[]`Xa\_`aJX  
@HWI-EAS443:3:23:26:1795#0/1  
AAGCTAATGTGCTAATTGGGCAAGGGGACGTAGTGTGGT  
+HWI-EAS443:3:23:26:1795#0/1  
a`]`\_b¥^[Pa`aaaa`[`UT`a`^X]\_`V^aR`Z\_[YG  
@HWI-EAS443:3:23:434:286#0/1  
ATCTTGCAAAAGGAGAGAAAGCTAATGTGCTAATTGGGCA  
+HWI-EAS443:3:23:434:286#0/1  
aaabababbbabaaaabb`aaabaaa]a`aaaaaa`\_^  
@HWI-EAS443:3:23:502:1657#0/1  
GAACTGAGCAATCTTGCAAAAGGAGAGAAAGCTAATGTGC  
+HWI-EAS443:3:23:502:1657#0/1  
GT`b\_¥`a¥Zbaaabba^abbabaaabb¥ab¥aa¥`a  
@HWI-EAS443:3:23:555:42#0/1  
GAGCAATCTTGCAAAAGGAGAGAAAGCTAATGTGCTAATT  
+HWI-EAS443:3:23:555:42#0/1  
`bbbbbbaabbaabbb`babbb`aYaaaa\_  
@HWI-EAS443:3:23:563:1413#0/1  
GAAAGCTAATGTGCTAATTGGGCAAGGGGACGTAGTGTG  
+HWI-EAS443:3:23:563:1413#0/1  
abZ`]S\_¥W¥]FXV]`\_a\_[]Y`¥XU\_Q]aW¥^\_¥Y\_W\_`  
@HWI-EAS443:3:23:660:391#0/1  
GCATCAATGAACTGAGCAATCTTGCAAAAGGAGAGAAAGC  
+HWI-EAS443:3:23:660:391#0/1  
ab\_aaaaaaXaaa`aa¥\_]a\_a\_\_a^]aa\_a]a`V[aZ  
@HWI-EAS443:3:23:763:75#0/1  
GAACTGAGCAATCTTGCAAAAGGAGAGAAAGCTAATGTGC  
+HWI-EAS443:3:23:763:75#0/1  
[bbabbbb`bba]abb\_\_aaabb^babbbaa\_a]^ab^aV  
@HWI-EAS443:3:23:776:1669#0/1  
CTTGCAAAAGGAGAGAAAGCTAATGTGCTAATTGGGCAAG  
+HWI-EAS443:3:23:776:1669#0/1  
`ba`aaaaaa]a`]aaaa`\_a\_aa¥\_\_a`aa^a`\_X]\_  
@HWI-EAS443:3:23:77:1412#0/1  
GAAAGCTAATGTGCTAATTGGGCAAGGGGACGTAGTGTG  
+HWI-EAS443:3:23:77:1412#0/1  
ZIXUYa]]baaabbVZba`W`aY`\_N\_\_aaWaaY`T`  
@HWI-EAS443:3:23:854:1668#0/1  
AGGAGAGAAAGCTAATGTGCTAATTGGGCAAGGGGACGTA  
+HWI-EAS443:3:23:854:1668#0/1  
`a`^^b`ab`\_]aaaa^¥Z¥aaaa¥[Z]]¥`[a`[¥^X  
@HWI-EAS443:3:23:869:947#0/1  
TACCAACTACTCGTCCCCTTGCCCAATTAGCACATTAGCT  
+HWI-EAS443:3:23:869:947#0/1  
abaaaaaaaa`a\_^`\_`\_X^U^\_Z\_\_S\_^]¥¥^^V^

@HWI-EAS443:3:23:907:826#0/1  
TGCAAAAGGAGAGAAAGCTAATGTGCTAATTGGGCAAGGG  
+HWI-EAS443:3:23:907:826#0/1  
]bb`XHT¥¥^`bb\_\_bb`]\_\_M\_W\_^aaaaa`YZaaa  
@HWI-EAS443:3:23:93:1186#0/1  
ATTAGCACATTAGCTTTCTCCTTTTGGCAAGATTGCTCA  
+HWI-EAS443:3:23:93:1186#0/1  
a^`¥]`bbba`V^a`^abaa`aa\_`^^`^W\_a¥^`a\_``\_  
@HWI-EAS443:3:24:1013:191#0/1  
AGCAATCTTGCAAAAGGAGAGAAAGCTAATGTGCTAATTG  
+HWI-EAS443:3:24:1013:191#0/1  
\_`¥bbabbbb`[S^]b]bbbb\_b`Z^aabb\_a`a\_aaa  
@HWI-EAS443:3:24:1051:834#0/1  
GAAAGCTAATGTGCTAATTGGGCAAGGGACGTAGTGTG  
+HWI-EAS443:3:24:1051:834#0/1  
]\_a\_\_¥a\_a\_]baaaa`Y\_aa\_\_aaaaZ^]a[W`Q\_Z\_]`  
@HWI-EAS443:3:24:1054:253#0/1  
TTGCAAAAGGAGAGAAAGCTAATGTGCTAATTGGGCAAGG  
+HWI-EAS443:3:24:1054:253#0/1  
aabaaa`aab`aaa`\_a^a\_^\_]Ya¥`]\_`a^`^]X\_\_  
@HWI-EAS443:3:24:1129:889#0/1  
GAGAAAGCTAATGTGCTAATTGGGCAAGGGACGTAGTGT  
+HWI-EAS443:3:24:1129:889#0/1  
ab\_b\_`\_]aa\_^\_aa^^^aab^`\_`aa`a\_aa\_`a[YZ  
@HWI-EAS443:3:24:130:78#0/1  
TGCAAAAGGAGAGAAAGCTAATGTGCTAATTGGGCAAGGG  
+HWI-EAS443:3:24:130:78#0/1  
aaaba`abaababaaaaa¥`ab^b\_a\_\_aaa`a^]`^a`\_  
@HWI-EAS443:3:24:136:794#0/1  
GAGCAATCTTGCAAAAGGAGAGAAAGCTAATGTGCTAATT  
+HWI-EAS443:3:24:136:794#0/1  
a`bbaabaabbb¥V`baaaaa`[aaaaaab]aaaaa\_  
@HWI-EAS443:3:24:138:848#0/1  
ATCTTGCAAAAGGAGAGAAAGCTAATGTGCTAATTGGGCA  
+HWI-EAS443:3:24:138:848#0/1  
`abaabaZ\_]\_babaaba¥^`aa`]aZaa`^^`[\_T`aa  
@HWI-EAS443:3:24:1504:1784#0/1  
TGCAAAAGGAGAGAAAGCTAATGTGCTAATTGGGCAAGGG  
+HWI-EAS443:3:24:1504:1784#0/1  
`aV]WX\_`baaa`^^^RFRb`aaaaR^a]`\_aaa\_\_aaa  
@HWI-EAS443:3:24:1546:1738#0/1  
GAGAAAGCTAATGTGCTAATTGGGCAAGGGACGTAGTGT  
+HWI-EAS443:3:24:1546:1738#0/1  
`¥baa\$¥Y`aa¥aNS^b^`bSPRJ¥ab[HTQaaGQYI[F  
@HWI-EAS443:3:24:1551:1822#0/1  
ATCAATGAAGTGAATCTTGCAAAAGGAGAGAAAGCTA  
+HWI-EAS443:3:24:1551:1822#0/1  
``aaa¥Y\_I\_a¥b^Wa]a^a[aY]YY]`]Xbaaa\_`aGZ`  
@HWI-EAS443:3:24:1560:372#0/1  
CTTGCAAAAGGAGAGAAAGCTAATGTGCTAATTGGGCAAG

+HWI-EAS443:3:24:1560:372#0/1  
abbbabbbbbb\_baaa]baaab`baaaaaabab\_a`a  
@HWI-EAS443:3:24:1665:756#0/1  
ATCTTGCAAAAGGAGAGAAAGCTAATGTGCTAATTGGGCA  
+HWI-EAS443:3:24:1665:756#0/1  
^^^ZZ^XVO\_aaW]`Y\_a`YVKWX\_YYXXSR]\_UU`^a\_S  
@HWI-EAS443:3:24:1704:1693#0/1  
GAGAAAGCTAATGTGCTAATTGGGCAAGGGGACGTAGTGT  
+HWI-EAS443:3:24:1704:1693#0/1  
aab^bbbbbaba`aab`bb`b`b^aa\_aaa¥`aUG`0a]  
@HWI-EAS443:3:24:226:1229#0/1  
TGCAAAAGGAGAGAAAGCTAATGTGCTAATTGGGCAAGGG  
+HWI-EAS443:3:24:226:1229#0/1  
\_bba`a`b`b`bbbaY`aaaZa^Q¥a`aaa`^`a`^S[  
@HWI-EAS443:3:24:286:727#0/1  
AGCTAATGTGCTAATTGGGCAAGGGGACGTAGTGTGGTA  
+HWI-EAS443:3:24:286:727#0/1  
\_bab`babaaa\_bba`a\_\_Rwb```a^a]\_^Ob`^aGY  
@HWI-EAS443:3:24:426:1741#0/1  
ATCTTGCAAAAGGAGAGAAAGCTAATGTGCTAATTGGGCA  
+HWI-EAS443:3:24:426:1741#0/1  
a\_aQ`^`a`^a`¥a`^a`\_\_S`¥¥X`\_\_^Z[W^UX]]  
@HWI-EAS443:3:24:44:624#0/1  
GCATCAATGAAGTGAATCTTGCAAAAGGAGAGAAAGC  
+HWI-EAS443:3:24:44:624#0/1  
^a¥bbbbbb`abbbbbbbbbbb`[[```ababbaa`a  
@HWI-EAS443:3:24:53:524#0/1  
TTGCAAAAGGAGAGAAAGCTAATGTGCTAATTGGGCAAGG  
+HWI-EAS443:3:24:53:524#0/1  
aaaaa`aaa\_aababaa`aaaab\_aa`\_a`a`a`a`a`a`  
@HWI-EAS443:3:24:673:1847#0/1  
AATTAGCACATTAGCTTTCTCTCTTTTGCAGATTGCTC  
+HWI-EAS443:3:24:673:1847#0/1  
^¥bZ¥`bbbb\_a`aaa]a`ba`aaaaab\_]\_aa`\_`^  
@HWI-EAS443:3:24:789:407#0/1  
GCAATCTTGCAAAAGGAGAGAAAGCTAATGTGCTAATTGG  
+HWI-EAS443:3:24:789:407#0/1  
aa[Z]]\_YZ\_[a`V[\_`X`Z`\_`VMR^WYNV]X]XZU  
@HWI-EAS443:3:24:806:369#0/1  
GAACTGAGCAATCTTGCAAAAGGAGAGAAAGCTAATGTGC  
+HWI-EAS443:3:24:806:369#0/1  
a`\_`^¥b^¥`\_`\_`aab\_aaa`a`\_aa`a¥`a`^`[aa]`W  
@HWI-EAS443:3:24:903:1266#0/1  
GAAAGCTAATGTGCTAATTGGGCAAGGGGACGTAGTGTG  
+HWI-EAS443:3:24:903:1266#0/1  
[]V`a\_Q`a^aa¥aa`aaa^b¥aa¥YZX¥`^bbabS`\_`  
@HWI-EAS443:3:25:1070:1671#0/1  
GAGAAAGCTAATGTGCTAATTGGGCAAGGGGACGTAGTGT  
+HWI-EAS443:3:25:1070:1671#0/1  
aaaa`a`a`baa\_a`\_a^ba`\_\_Y`\_]\_YO¥¥LZ¥UOW



@HWI-EAS443:3:25:1081:70#0/1  
AATGAACTGAGCAATCTTGCAAAGGAGAGAAAGCTAATG  
+HWI-EAS443:3:25:1081:70#0/1  
abbbba`bbbabbbbbbb`bababbabbbb\_babb`bb  
@HWI-EAS443:3:25:1280:1590#0/1  
TGCAAAGGAGAGAAAGCTAATGTGCTAATTGGGCAAGGG  
+HWI-EAS443:3:25:1280:1590#0/1  
aa`aaaa\_aaaaa`a\_a`aaaXaUa\_```[R#^\_\_\_Y\_  
@HWI-EAS443:3:25:132:431#0/1  
AAGCATCAATGAACTGAGCAATCTTGCAAAGGAGAGAAA  
+HWI-EAS443:3:25:132:431#0/1  
`]V\_aaba]aaaaaa`aaaa\_`^^`a\_^TZ`\_\_`aaa\_  
@HWI-EAS443:3:25:1418:1948#0/1  
AGAAAGCTAATGTGCTAATTGGGCAAGGGGACGTAGTGTT  
+HWI-EAS443:3:25:1418:1948#0/1  
aaabbabbbabbab`babaabVa]a\_¥]`aa\_a]\_a^a^`  
@HWI-EAS443:3:25:1437:403#0/1  
ATCTTGCAAAGGAGAGAAAGCTAATGTGCTAATTGGGCA  
+HWI-EAS443:3:25:1437:403#0/1  
ababbbbabaabbabbbbaaa`aaaab`a`ba`baaaa^\_  
@HWI-EAS443:3:25:1456:614#0/1  
AATGAACTGAGCAATCTTGCAAAGGAGAGAAAGCTAATG  
+HWI-EAS443:3:25:1456:614#0/1  
PY^`^`[bbbb`\_`aab`^Zabbbbb`bbbbbb]bbaaa  
@HWI-EAS443:3:25:1503:320#0/1  
AGCTAATGTGCTAATTGGGCAAGGGGACGTAGTGTTGGTA  
+HWI-EAS443:3:25:1503:320#0/1  
``bababbababbbbaaaa`bbba`ab[\_b]a`aa^PX  
@HWI-EAS443:3:25:1578:1065#0/1  
AAGCATCAATGAACTGAGCAATCTTGCAAAGGAGAGAAA  
+HWI-EAS443:3:25:1578:1065#0/1  
ab[babbb`ab\_`ba`a]babaabb\_a\_a]a`\_aaa`a\_  
@HWI-EAS443:3:25:1713:745#0/1  
ACCAACTACGTCCCCTTGCCCAATTAGCACATTAGCTT  
+HWI-EAS443:3:25:1713:745#0/1  
[R\_\_bab`b`[aa^OWZ]\_aZ[Y`^`aa`T`^¥a`Y]¥  
@HWI-EAS443:3:25:1742:1002#0/1  
AGCTAATGTGCTAATTGGGCAAGGGGACGTAGTGTTGGTA  
+HWI-EAS443:3:25:1742:1002#0/1  
a^Z\_¥`b`b\_Q^ba¥`b``]XQQ\_`¥X\_^Ua]Z¥I`aZN^  
@HWI-EAS443:3:25:343:29#0/1  
TGAGCAATCTTGCAAAGGAGAGAAAGCTAATGTGCTAAT  
+HWI-EAS443:3:25:343:29#0/1  
]`Yba`\_^`babaa\_a`a`\_b\_a`a\_a\_aa\_aa^a\_\_\_\_`  
@HWI-EAS443:3:25:349:1230#0/1  
AGCTAATGTGCTAATTGGGCAAGGGGACGTAGTGTTGGTA  
+HWI-EAS443:3:25:349:1230#0/1  
a\_aaaaba[aaaa\_aaa\_abaaa`UO`Z``]\_]aaYG[  
@HWI-EAS443:3:25:359:471#0/1  
AAAGCTAATGTGCTAATTGGGCAAGGGGACGTAGTGTTGG

+HWI-EAS443:3:25:359:471#0/1  
aa^Z`¥Z`\_Za\_aaaaa`[\_]Z\_W^^`aZ\_\_Y`]^\_\_  
@HWI-EAS443:3:25:399:400#0/1  
GAAAGCTAATGTGCTAATTGGGCAAGGGGACGTAGTGTG  
+HWI-EAS443:3:25:399:400#0/1  
aaa^aa`aa`\_aX[^`\_][S^\_^`\_][¥ZXaUGaVaX^^  
@HWI-EAS443:3:25:881:89#0/1  
ATCTTGCAAAAAGGAGAGAAAGCTAATGTGCTAATTGGGCA  
+HWI-EAS443:3:25:881:89#0/1  
abababbbba\_ba`baba`aa\_baabb`b\_aa`aaaa¥\_  
@HWI-EAS443:3:25:885:1814#0/1  
GAGCAATCTTGCAAAAAGGAGAGAAAGCTAATGTGCTAATT  
+HWI-EAS443:3:25:885:1814#0/1  
`baaab\_baaaab`bbaaabbaab^a[ab[QVD[G¥XTYY  
@HWI-EAS443:3:26:1085:380#0/1  
TGCAAAAAGGAGAGAAAGCTAATGTGCTAATTGGGCAAGGG  
+HWI-EAS443:3:26:1085:380#0/1  
abaaaaaaaaabaa`¥`ba`^a`a[a^a`\_a`a`a\_\_\_a\_]`  
@HWI-EAS443:3:26:1143:490#0/1  
CCCTTGCCCAATTAGCACATTAGCTTTCTCCTTTTGCA  
+HWI-EAS443:3:26:1143:490#0/1  
aabbbbbbabbbbbbabbbaab]abaab\_aa`aaaaa[`  
@HWI-EAS443:3:26:1146:72#0/1  
AACTGAGCAATCTTGCAAAAAGGAGAGAAAGCTAATGTGCT  
+HWI-EAS443:3:26:1146:72#0/1  
aaaa]]`aaababa\_\_a\_\_]aa^a`a`^`Y`^`aV`V\_  
@HWI-EAS443:3:26:1176:770#0/1  
ATCTTGCAAAAAGGAGAGAAAGCTAATGTGCTAATTGGGCA  
+HWI-EAS443:3:26:1176:770#0/1  
aa]\_WTQIZU[Z¥Sb]\_\_aaVbaaRaaW^`aa¥[\_]PUH[  
@HWI-EAS443:3:26:1315:1852#0/1  
GAGCAATCTTGCAAAAAGGAGAGAAAGCTAATGTGCTAATT  
+HWI-EAS443:3:26:1315:1852#0/1  
^`baabbbbaabbbaba\_bbbbbbbbabbbb`a^`\_aba  
@HWI-EAS443:3:26:1318:898#0/1  
ATTAGCTTTCTCCTTTTGCAAGATTGCTCAGTTCATTG  
+HWI-EAS443:3:26:1318:898#0/1  
`abaaaa¥a[\_]aa`aa`aNaaa\_\_aa`¥Ya`a`\_]` [   
@HWI-EAS443:3:26:1470:738#0/1  
CATCAATGAACTGAGCAATCTTGCAAAAAGGAGAGAAAGCT  
+HWI-EAS443:3:26:1470:738#0/1  
G[a```a`a`\_¥X`a`a`baW\_Z`b`abb\_bbbb`a`  
@HWI-EAS443:3:26:1472:236#0/1  
ATCTTGCAAAAAGGAGAGAAAGCTAATGTGCTAATTGGGCA  
+HWI-EAS443:3:26:1472:236#0/1  
abaabbaaaaaa\_aabaa^a\_\_a`a`^a]a^`aaa`^[Z  
@HWI-EAS443:3:26:1479:472#0/1  
AGCTAATGTGCTAATTGGGCAAGGGGACGTAGTGTGGTA  
+HWI-EAS443:3:26:1479:472#0/1  
XTRaabaY`aa]aaaa\_]¥^\_¥Y]a]]bV¥aP]^a`^G]

@HWI-EAS443:3:26:1497:819#0/1  
ATTAGCTTTCTCCTTTTGAAGATTGCTCAGTTCATTG  
+HWI-EAS443:3:26:1497:819#0/1  
abbba`aababaaaabbaaa\_aab`a`aa]`a\_a]`a\_a  
@HWI-EAS443:3:26:1638:1803#0/1  
GAACTGAGCAATCTTGCAAAAGGAGAGAAAGCTAATGTGC  
+HWI-EAS443:3:26:1638:1803#0/1  
a`aabbaa\_bab\_abb`a`aab`\_aaaaaa\_a`\_`a[\_X  
@HWI-EAS443:3:26:211:1637#0/1  
GAGCAATCTTGCAAAAGGAGAGAAAGCTAATGTGCTAATT  
+HWI-EAS443:3:26:211:1637#0/1  
¥\_aabbbbbbbaaa`\_¥bbbaabbbbbbbaabbaabbaabb  
@HWI-EAS443:3:26:289:662#0/1  
TAGCACATTAGCTTTCTCCTTTTGAAGATTGCTCAGT  
+HWI-EAS443:3:26:289:662#0/1  
a`abaaaaa`aaaaaaaaaaaaaaaaaaaaaa\_\_aa`a`\_^  
@HWI-EAS443:3:26:436:687#0/1  
CCTTGCCCAATTAGCACATTAGCTTTCTCCTTTTGC  
+HWI-EAS443:3:26:436:687#0/1  
`ZRR[\_]a¥\_a\_]JX\_UY`a`aZ\_¥Y`\_`\_Z]]X\_]U^  
@HWI-EAS443:3:26:482:1235#0/1  
GAAAGCTAATGTGCTAATTGGGCAAGGGGACGTAGTGTG  
+HWI-EAS443:3:26:482:1235#0/1  
aba^[Za¥]\_\_[TaaZ`]Z`[]`¥`\_ZX`X`a\_\_\_FYQ\_]`  
@HWI-EAS443:3:26:503:382#0/1  
GAACTGAGCAATCTTGCAAAAGGAGAGAAAGCTAATGTGC  
+HWI-EAS443:3:26:503:382#0/1  
a`^`V¥\_aa`¥a`Vaaa^^^`\_\_\_a`a^a¥`U]\_\_\_a0]]  
@HWI-EAS443:3:26:530:788#0/1  
CAATGAACTGAGCAATCTTGCAAAAGGAGAGAAAGCTAAT  
+HWI-EAS443:3:26:530:788#0/1  
aaaaaaaaaaaaabaaaaaaaaa`a`aaa\_aaaaa`a\_\_\_`]  
@HWI-EAS443:3:26:574:1115#0/1  
CTGAGCAATCTTGCAAAAGGAGAGAAAGCTAATGTGCTAA  
+HWI-EAS443:3:26:574:1115#0/1  
aaa\_abaaaaaaaaa`Z`aa\_aa`aa\_]a\_aa`X\_\_`a^  
@HWI-EAS443:3:26:580:766#0/1  
GAGAAAGCTAATGTGCTAATTGGGCAAGGGGACGTAGTGT  
+HWI-EAS443:3:26:580:766#0/1  
aaa`\_]a`a\_\_aaWa[`[a`Y¥]\_\_\_¥a^^`^^a]U^0\_Z  
@HWI-EAS443:3:26:676:1484#0/1  
TGCAAAAGGAGAGAAAGCTAATGTGCTAATTGGGCAAGGG  
+HWI-EAS443:3:26:676:1484#0/1  
ZT\_¥\_bb``a\_[^¥a\_^Z^aaa`K]aab``Y`a\_ZUY]¥a  
@HWI-EAS443:3:26:783:617#0/1  
GAGCAATCTTGCAAAAGGAGAGAAAGCTAATGTGCTAATT  
+HWI-EAS443:3:26:783:617#0/1  
``abbbb``¥]\_¥ZU`a`aba`]]`ab^aabaa\_aaa]a  
@HWI-EAS443:3:26:850:642#0/1  
ATGAACTGAGCAATCTTGCAAAAGGAGAGAAAGCTAATGT

+HWI-EAS443:3:26:850:642#0/1  
¥b]NZaX\_bb\_¥]`a`a`¥YUYTZTa`]bVbab`aWU\_¥X  
@HWI-EAS443:3:26:87:470#0/1  
CATCAATGAACTGAGCAATCTTGCAAAAGGAGAGAAAGCT  
+HWI-EAS443:3:26:87:470#0/1  
^¥`b^]aYZ\_a]a`^\_Zaaaa]^`a`¥V`]X^`bb^LaZ^  
@HWI-EAS443:3:27:1156:318#0/1  
GAGAAAGCTAATGTGCTAATTGGGCAAGGGGACGTAGTGT  
+HWI-EAS443:3:27:1156:318#0/1  
ZSbb`]\_S`\_OXZQ^TVW^a]`¥`I]R`]`¥FFZJW\_T\_\_  
@HWI-EAS443:3:27:1303:1836#0/1  
ATCTTGCAAAAGGAGAGAAAGCTAATGTGCTAATTGGGCA  
+HWI-EAS443:3:27:1303:1836#0/1  
a]\_aa\_aaaaa`]`aa[a`a\_\_a`\_\_\_^a\_a\_\_\_a\_U`]]  
@HWI-EAS443:3:27:1339:1516#0/1  
CATCAATGAACTGAGCAATCTTGCAAAAGGAGAGAAAGCT  
+HWI-EAS443:3:27:1339:1516#0/1  
aa^b]aab`[`aa`a\_a`]aa\_`\_\_^V`a`````a`\_^`X\_  
@HWI-EAS443:3:27:1423:1540#0/1  
GAGCAATCTTGCAAAAGGAGAGAAAGCTAATGTGCTAATT  
+HWI-EAS443:3:27:1423:1540#0/1  
a``aab\_aab]`]`\_\_aVa`a`]`a]\_\_a`\_Xa^\_^]\_^  
@HWI-EAS443:3:27:1423:624#0/1  
CATCAATGAACTGAGCAATCTTGCAAAAGGAGAGAAAGCT  
+HWI-EAS443:3:27:1423:624#0/1  
abaaa`aba\_`bba` `[``^XQXULW`^a^V¥a`HRXQ]  
@HWI-EAS443:3:27:1425:1520#0/1  
GAGAGAAAGCTAATGTGCTAATTGGGCAAGGGGACGTAGT  
+HWI-EAS443:3:27:1425:1520#0/1  
a¥¥V`a¥ababbaaba\_aa`]a`a\_a]a^aaaa\_`aS\_\_]  
@HWI-EAS443:3:27:1468:1174#0/1  
CTTGCAAAAGGAGAGAAAGCTAATGTGCTAATTGGGCAAG  
+HWI-EAS443:3:27:1468:1174#0/1  
a`ab]\_^X\_b^aaab`]¥\_a`¥a]X[U][¥`\_aa``\_\_a  
@HWI-EAS443:3:27:166:179#0/1  
GAGCAATCTTGCAAAAGGAGAGAAAGCTAATGTGCTAATT  
+HWI-EAS443:3:27:166:179#0/1  
a`]Z\_Z]UZ^a`^YPZTQUTUWXX`]OJXRTR]¥VHTZ]  
@HWI-EAS443:3:27:172:708#0/1  
GAGCAATCTTGCAAAAGGAGAGAAAGCTAATGTGCTAATT  
+HWI-EAS443:3:27:172:708#0/1  
\_\_`a`aYb]\_aTR¥[[\_aZaaa`Q\_`b]SQVaV\_[`¥R^]  
@HWI-EAS443:3:27:172:408#0/1  
AATGAACTGAGCAATCTTGCAAAAGGAGAGAAAGCTAATG  
+HWI-EAS443:3:27:172:408#0/1  
aa`bbb\_bbbbaaaaa[aaa``abaaaaabaaa]\_`^a  
@HWI-EAS443:3:27:321:443#0/1  
CGTCCCCTTGCCCAATTAGCACATTAGCTTTCTCCTTT  
+HWI-EAS443:3:27:321:443#0/1  
ab```a`]Z`aaaaaaaa`a`aaaa``\_a\_\_aa\_a```\_`\_`

@HWI-EAS443:3:27:327:1883#0/1  
AATGAACTGAGCAATCTTGCAAAAGGAGAGAAAGCTAATG  
+HWI-EAS443:3:27:327:1883#0/1  
`baa]baa`\_`bba`ba\_`aa¥a`\_\_`\_aa`a`\_\_`\_^`  
@HWI-EAS443:3:27:341:97#0/1  
GAGAAAGCTAATGTGCTAATTGGGCAAGGGGACGTAGTGT  
+HWI-EAS443:3:27:341:97#0/1  
aa\_a\_\_a\_`^Y`aX\_]a\_]``\_]X]VV\_\_\_^XYaXYXY^X  
@HWI-EAS443:3:27:504:1035#0/1  
AATGAACTGAGCAATCTTGCAAAAGGAGAGAAAGCTAATG  
+HWI-EAS443:3:27:504:1035#0/1  
aa^aaabaQ\_a`Za\_a\_`¥`aa[XY\_^[\_]W[^`]]QX\_  
@HWI-EAS443:3:27:622:1251#0/1  
CAATGAACTGAGCAATCTTGCAAAAGGAGAGAAAGCTAAT  
+HWI-EAS443:3:27:622:1251#0/1  
^MWZ]\_Z]`S\_\_\_`]]Wa[WW`NZ]G¥HYHWW^X¥[¥[RNZ  
@HWI-EAS443:3:27:633:255#0/1  
AGCTAATGTGCTAATTGGGCAAGGGGACGTAGTGTGGTA  
+HWI-EAS443:3:27:633:255#0/1  
a`aa`[\_`a\_aaa\_`aa]aaaa`ba\_a¥]b]\_a\_\_^\_\_\_Z]  
@HWI-EAS443:3:27:732:627#0/1  
AAGCTAATGTGCTAATTGGGCAAGGGGACGTAGTGTGGT  
+HWI-EAS443:3:27:732:627#0/1  
aaaa]P\_b^Xa\_``[aaaa\_a\_aa\_a\_^bY\_aXaX\_\_\_S  
@HWI-EAS443:3:27:747:1320#0/1  
GCATCAATGAACTGAGCAATCTTGCAAAAGGAGAGAAAGC  
+HWI-EAS443:3:27:747:1320#0/1  
abaab`babbbaaaa`baaabaaaa[aaaaabaaaaaaa  
@HWI-EAS443:3:27:861:1512#0/1  
CATCAATGAACTGAGCAATCTTGCAAAAGGAGAGAAAGCT  
+HWI-EAS443:3:27:861:1512#0/1  
abaaaaaaabaaaa`abaaaaa\_a`a`a\_\_aaaa\_a\_^`  
@HWI-EAS443:3:27:874:1398#0/1  
GTCCCCTTGCCCAATTAGCACATTAGCTTTCTCCTTTT  
+HWI-EAS443:3:27:874:1398#0/1  
a]]`\_\_XTaaaaab¥V\_[¥\_aa¥\_`ZYT^)^`\_\_\_¥[^]^  
@HWI-EAS443:3:27:946:1104#0/1  
CAAAAGGAGAGAAAGCTAATGTGCTAATTGGGCAAGGGGA  
+HWI-EAS443:3:27:946:1104#0/1  
a`abba\_aa\_abbabbbbabba`abaababaaa`\_baba\_  
@HWI-EAS443:3:27:951:150#0/1  
AGCTAATGTGCTAATTGGGCAAGGGGACGTAGTGTGGTA  
+HWI-EAS443:3:27:951:150#0/1  
a^¥bbaab\_ba`a\_a```a^a^aaa\_`¥aU\_\_\_]a\_``\_V^  
@HWI-EAS443:3:27:953:1816#0/1  
GAAAGCTAATGTGCTAATTGGGCAAGGGGACGTAGTGTG  
+HWI-EAS443:3:27:953:1816#0/1  
abab^¥\_abaa^aaa`baa^`aaa\_aa\_a\_L`RaaWa¥[`  
@HWI-EAS443:3:28:1044:1612#0/1  
ACCAACACTACGTCCCCTTGCCCAATTAGCACATTAGCTT

+HWI-EAS443:3:28:1044:1612#0/1  
abb`^aaabba\_\_\_YT¥^`[¥a`^a\_]X`¥^`^`ZUZ`  
@HWI-EAS443:3:28:1067:1200#0/1  
CATCAATGAACTGAGCAATCTTGCAAAAGGAGAGAAAGCT  
+HWI-EAS443:3:28:1067:1200#0/1  
a\_aXVaaa`]W[\_SW`YT`^aa`W^^`RX[\_^][P¥`^  
@HWI-EAS443:3:28:1175:1487#0/1  
GCATCAATGAACTGAGCAATCTTGCAAAAGGAGAGAAAGC  
+HWI-EAS443:3:28:1175:1487#0/1  
abaabaabaab`ba`baa`aabaaaa```aa\_aaaa\_a^  
@HWI-EAS443:3:28:1214:358#0/1  
CAATCTTGCAAAAGGAGAGAAAGCTAATGTGCTAATTGGG  
+HWI-EAS443:3:28:1214:358#0/1  
abbbbbbbbbbbabbabbbbababaabb\_aababbbba`  
@HWI-EAS443:3:28:1303:698#0/1  
TGAGCAATCTTGCAAAAGGAGAGAAAGCTAATGTGCTAAT  
+HWI-EAS443:3:28:1303:698#0/1  
abaaaaaaaa`aaa\_aa\_bb`baaa`aa\_aaaa]a[a`^`a  
@HWI-EAS443:3:28:1324:1840#0/1  
GCATCAATGAACTGAGCAATCTTGCAAAAGGAGAGAAAGC  
+HWI-EAS443:3:28:1324:1840#0/1  
]`Y\_]\_UXR¥¥VVT`YG¥^¥^`¥¥^`\_`[]WZDXa`\_¥VZ[N  
@HWI-EAS443:3:28:1350:1381#0/1  
GAACTGAGCAATCTTGCAAAAGGAGAGAAAGCTAATGTGC  
+HWI-EAS443:3:28:1350:1381#0/1  
aab`baabbb`bbaabab`a\_a```\_\_aaa`^aaaa^\_^  
@HWI-EAS443:3:28:1351:706#0/1  
CCCTTGCCCAATTAGCACATTAGCTTTCTCTCCTTTTGCA  
+HWI-EAS443:3:28:1351:706#0/1  
a`^`bbbbbbbbbbbabbbbbbba\_abbab`baababba]b  
@HWI-EAS443:3:28:1371:720#0/1  
AAGGAGAGAAAGCTAATGTGCTAATTGGGCAAGGGGACGT  
+HWI-EAS443:3:28:1371:720#0/1  
abaaabbabaaabbaa`bababaababb`[\_aWa\_\_^`Z  
@HWI-EAS443:3:28:1417:510#0/1  
TGCAAAAGGAGAGAAAGCTAATGTGCTAATTGGGCAAGGG  
+HWI-EAS443:3:28:1417:510#0/1  
^aX^U```a`a[\_¥^^a¥`\_\_`aTOT]\_^\_]`\_\_]XR`^Z  
@HWI-EAS443:3:28:143:1127#0/1  
AAAGCTAATGTGCTAATTGGGCAAGGGGACGTAGTGTTGG  
+HWI-EAS443:3:28:143:1127#0/1  
a^aaaa^aaa^¥`a^`a^`¥`\_]`[[[Y\_\_ZWX¥^[[¥R  
@HWI-EAS443:3:28:1616:530#0/1  
GTCCCCTTGCCCAATTAGCACATTAGCTTTCTCTCCTTTT  
+HWI-EAS443:3:28:1616:530#0/1  
`X\_WZ`] [aZ]T``\_]` `[VX^a^^`WSZ^[^^[VSXY^V  
@HWI-EAS443:3:28:1653:977#0/1  
CATCAATGAACTGAGCAATCTTGCAAAAGGAGAGAAAGCT  
+HWI-EAS443:3:28:1653:977#0/1  
T`a\_X\_aaabb]bba¥bbbbbb`b^a\_b`b\_bbaabV\_b`b

@HWI-EAS443:3:28:1690:1113#0/1  
GAGCAATCTTGCAAAGGAGAGAAAGCTAATGTGCTAATT  
+HWI-EAS443:3:28:1690:1113#0/1  
a¥`P\_ab\_aabX\_\_\_\_\_a`\_aa\_``^a]a^\_aXY¥¥VY`\_  
@HWI-EAS443:3:28:1723:458#0/1  
CATCAATGAACTGAGCAATCTTGCAAAGGAGAGAAAGCT  
+HWI-EAS443:3:28:1723:458#0/1  
T[b^`^a\_H\_abaa^^`aaI``\_`a¥a`a`¥¥Z^^\_¥H^  
@HWI-EAS443:3:28:175:1532#0/1  
TTGCAAAGGAGAGAAAGCTAATGTGCTAATTGGGCAAGG  
+HWI-EAS443:3:28:175:1532#0/1  
`aabbabaa^aaa`bbbaaaaa^Za\_aaa`a\_Ua``a\_]  
@HWI-EAS443:3:28:277:870#0/1  
GAACTGAGCAATCTTGCAAAGGAGAGAAAGCTAATGTGC  
+HWI-EAS443:3:28:277:870#0/1  
ababaa`bbbbabaabaaaa`aa`aabSaa^a\_aaa[^^  
@HWI-EAS443:3:28:305:1560#0/1  
TGCAAAGGAGAGAAAGCTAATGTGCTAATTGGGCAAGGG  
+HWI-EAS443:3:28:305:1560#0/1  
^bbb\_¥^]a\_aa\_baaa`^`[aaHbbaa¥a\_\_[\_aa\_`VY  
@HWI-EAS443:3:28:415:246#0/1  
GAGCAATCTTGCAAAGGAGAGAAAGCTAATGTGCTAATT  
+HWI-EAS443:3:28:415:246#0/1  
abbbbbbabbabab`aabaaabaabaa`aaa\_a\_a[a`b  
@HWI-EAS443:3:28:439:364#0/1  
ATCTTGCAAAGGAGAGAAAGCTAATGTGCTAATTGGGCA  
+HWI-EAS443:3:28:439:364#0/1  
]KZa\_baZSYaab\_aaa\_Y^b\_a[R\_b\_\_\_a\_\_a]^Y\_a`  
@HWI-EAS443:3:28:537:1738#0/1  
AGCTAATGTGCTAATTGGGCAAGGGGACGTAGTGTGGTA  
+HWI-EAS443:3:28:537:1738#0/1  
a]ba`a`aUZaa\_]\_^Maaaa`]a`aa]\_^WXT]`]GW  
@HWI-EAS443:3:28:57:1443#0/1  
AGCTAATGTGCTAATTGGGCAAGGGGACGTAGTGTGGTA  
+HWI-EAS443:3:28:57:1443#0/1  
aaaaaaaaZaba]aaa``a`¥^`\_X`a^[a^a]\_^RZ  
@HWI-EAS443:3:28:590:1132#0/1  
ATCTTGCAAAGGAGAGAAAGCTAATGTGCTAATTGGGCA  
+HWI-EAS443:3:28:590:1132#0/1  
^`\_¥V`aT¥¥H\_]\_a]Y¥aZTS[`Y[TJZ``]^[\_`\_Y]Z  
@HWI-EAS443:3:28:602:1771#0/1  
ATGAACTGAGCAATCTTGCAAAGGAGAGAAAGCTAATGT  
+HWI-EAS443:3:28:602:1771#0/1  
^Y]¥aa\_\_a)`a^Wa`\_\_^aZP]X\_\_\_\_`[a^¥]`\_\_\_\_^\_U  
@HWI-EAS443:3:28:61:1881#0/1  
GAAAGCTAATGTGCTAATTGGGCAAGGGGACGTAGTGTG  
+HWI-EAS443:3:28:61:1881#0/1  
`aX`abaZbaa\_`babaa`^V^baa`\_[^aa¥\_\_^[Z`^  
@HWI-EAS443:3:28:643:1950#0/1  
GAGAAAGCTAATGTGCTAATTGGGCAAGGGGACGTAGTGT

+HWI-EAS443:3:28:643:1950#0/1  
ab[bba`baaabVTVa`aa`a^`a\_\_¥^`\_U\_YUPRI  
@HWI-EAS443:3:28:691:1512#0/1  
GCAAAAGGAGAGAAAAGCTAATGTGCTAATTGGGCAAGGGG  
+HWI-EAS443:3:28:691:1512#0/1  
]`aYWZ¥U^`¥\_`^S`aaa^SW]NX¥\_S\_`\_[Q[¥[aa[¥0  
@HWI-EAS443:3:28:739:850#0/1  
GAAAGCTAATGTGCTAATTGGGCAAGGGGACGTAGTGTG  
+HWI-EAS443:3:28:739:850#0/1  
aaa```Y`^a]\_P`aaaaa`a\_\_\_\_[]``U\_]TY][a  
@HWI-EAS443:3:28:767:1727#0/1  
GAACTGAGCAATCTTGCAAAAGGAGAGAAAAGCTAATGTGC  
+HWI-EAS443:3:28:767:1727#0/1  
abbab`^`^bbbaa`babaa]aYaaa\_baaaa`aaaa\_\_\_\_  
@HWI-EAS443:3:28:806:1076#0/1  
ATCTTGCAAAAGGAGAGAAAAGCTAATGTGCTAATTGGGCA  
+HWI-EAS443:3:28:806:1076#0/1  
U¥X`[b]Y\_`]V¥H\_aaa¥R]V`N\_]X^]Y\_a¥`^`\_]  
@HWI-EAS443:3:28:806:135#0/1  
GAGAAAGCTAATGTGCTAATTGGGCAAGGGGACGTAGTGT  
+HWI-EAS443:3:28:806:135#0/1  
^``\_¥V\_`^a\_]aaKZYaWaaZa[VZWWaZXSMW[^\_\_YXN  
@HWI-EAS443:3:28:981:611#0/1  
AGCTAATGTGCTAATTGGGCAAGGGGACGTAGTGTGGTA  
+HWI-EAS443:3:28:981:611#0/1  
aaaaaY\_a```aaaa`b]`[YWa]aa\_aa^\_a^a\_aaaOY  
@HWI-EAS443:3:28:999:1981#0/1  
AATGAAGCTGAGCAATCTTGCAAAAGGAGAGAAAAGCTAATG  
+HWI-EAS443:3:28:999:1981#0/1  
abbaabba`aa`bbaaaaabaaa`baaaaabaaa\_`a`aa  
@HWI-EAS443:3:29:1016:362#0/1  
AATCTTGCAAAAGGAGAGAAAAGCTAATGTGCTAATTGGGC  
+HWI-EAS443:3:29:1016:362#0/1  
`VUPaaU\_YQOH¥a]aPZaSL]]^T^Y[GSY]YN]^\_BB  
@HWI-EAS443:3:29:1017:982#0/1  
AATGAAGCTGAGCAATCTTGCAAAAGGAGAGAAAAGCTAATG  
+HWI-EAS443:3:29:1017:982#0/1  
abbaabbaaababaaaaab\_aaaaa`aaaaaaaaaaaaa  
@HWI-EAS443:3:29:1056:1152#0/1  
CATCAATGAAGCTGAGCAATCTTGCAAAAGGAGAGAAAAGCT  
+HWI-EAS443:3:29:1056:1152#0/1  
aaaaaaaaaaaa`\_``aaaaaaa`^`^`^\_\_aa\_aaa```  
@HWI-EAS443:3:29:1099:27#0/1  
AGCACATTAGCTTTCTCTCTTTTGCAAGATTGCTCAGTT  
+HWI-EAS443:3:29:1099:27#0/1  
aaab\_abaababaaaa\_a`[aaaa`\_^`a``aa\_a\_\_a\_a  
@HWI-EAS443:3:29:1168:1475#0/1  
GCATCAATGAAGCTGAGCAATCTTGCAAAAGGAGAGAAAAGC  
+HWI-EAS443:3:29:1168:1475#0/1  
¥a^X`\_`\_baaa\_]Zb[baaaaa\_S\_`a`Y`a]ba`a[







@HWI-EAS443:3:2:1281:1428#0/1  
GAACTGAGCAATCTTGCAAAAGGAGAGAAAGCTAATGTGC  
+HWI-EAS443:3:2:1281:1428#0/1  
a\_\_\_a`^a`\_aaaaa]]aa^^`^¥a`aa`^aW\_\_Z]`W`W  
@HWI-EAS443:3:2:1586:1742#0/1  
CAATCTTGCAAAAGGAGAGAAAGCTAATGTGCTAATTGGG  
+HWI-EAS443:3:2:1586:1742#0/1  
\_`bb`aababaa[`bababaaab[\_b\_a\_Qa\_a]\_\_aa`\_  
@HWI-EAS443:3:2:1742:622#0/1  
GAAAGCTAATGTGCTAATTGGGCAAGGGGACGTAGTGTTG  
+HWI-EAS443:3:2:1742:622#0/1  
a]\_\_a]aZ`abRaXa[GW^```]`]`Z\_\_XWaZO\_WXX^P  
@HWI-EAS443:3:2:247:357#0/1  
CATCAATGAACTGAGCAATCTTGCAAAAGGAGAGAAAGCT  
+HWI-EAS443:3:2:247:357#0/1  
a`^`^X^\_TXFPaZa[^WZVVS]\_]T[¥\_LSSV[`^^¥P[  
@HWI-EAS443:3:2:249:1489#0/1  
CATCAATGAACTGAGCAATCTTGCAAAAGGAGAGAAAGCT  
+HWI-EAS443:3:2:249:1489#0/1  
aab\_aaaaaaa\_\_a¥aaa`a\_a`aa\_`a`^aaaa\_\_`¥^  
@HWI-EAS443:3:2:295:422#0/1  
CCTTGCCCAATTAGCACATTAGCTTTCTCTCCTTTTGCAA  
+HWI-EAS443:3:2:295:422#0/1  
\_NTV¥PZ]¥[LLUWPQR[[W][OLRZ¥GNTWVP[WBBBB  
@HWI-EAS443:3:2:29:1406#0/1  
CAATCTTGCAAAAGGAGAGAAAGCTAATGTGCTAATTGGG  
+HWI-EAS443:3:2:29:1406#0/1  
a¥`aaXb¥R^aa[W`\_a`\_`aa``\_a\_\_aVa\_^\_Z\_YaW\_  
@HWI-EAS443:3:2:307:900#0/1  
GAAAGCTAATGTGCTAATTGGGCAAGGGGACGTAGTGTTG  
+HWI-EAS443:3:2:307:900#0/1  
]aabbbbb`bb\_b`ababbbbb`aaba¥aaaa\_aa\_\_\_aa  
@HWI-EAS443:3:2:320:900#0/1  
GAGCAATCTTGCAAAAGGAGAGAAAGCTAATGTGCTAATT  
+HWI-EAS443:3:2:320:900#0/1  
aabaaaa`aba`b¥¥aaaababaa`aYa\_]aa\_a\_`\_`a`  
@HWI-EAS443:3:2:347:875#0/1  
AGCTAATGTGCTAATTGGGCAAGGGGACGTAGTGTTGGTA  
+HWI-EAS443:3:2:347:875#0/1  
\_ba`\_Y\_aTa¥`aabaaaa^`aa\_``]b]\_aZ]^\_a\_T]  
@HWI-EAS443:3:2:351:495#0/1  
GCATCAATGAACTGAGCAATCTTGCAAAAGGAGAGAAAGC  
+HWI-EAS443:3:2:351:495#0/1  
a`aa`aaaaa`Za[^[[```a`aaV^^X¥`a^b^a\_^\_aQ  
@HWI-EAS443:3:2:404:801#0/1  
GCATCAATGAACTGAGCAATCTTGCAAAAGGAGAGAAAGC  
+HWI-EAS443:3:2:404:801#0/1  
aaaa`aabb\_baa`\_a\_baa`aaX^a`^aa^a`\_a^`a^  
@HWI-EAS443:3:2:422:871#0/1  
GAGCAATCTTGCAAAAGGAGAGAAAGCTAATGTGCTAATT

+HWI-EAS443:3:2:422:871#0/1  
U0aaa\_XWXR\_VUUY\_baXa]a\_aaZV]bK[a`\_\_KX`XW  
@HWI-EAS443:3:2:464:919#0/1  
GAGCAATCTTGCAAAAAGGAGAGAAAGCTAATGTGCTAATT  
+HWI-EAS443:3:2:464:919#0/1  
a^`baaaV`aa`\_]`\_`ab\_baaaaabUa^Xab\_aZa[Y`]  
@HWI-EAS443:3:2:508:389#0/1  
AGCAATCTTGCAAAAAGGAGAGAAAGCTAATGTGCTAATTG  
+HWI-EAS443:3:2:508:389#0/1  
abaabbabbbb```\_ababbba`ababbabbab`baaaab  
@HWI-EAS443:3:2:522:1621#0/1  
AGCAATCTTGCAAAAAGGAGAGAAAGCTAATGTGCTAATTG  
+HWI-EAS443:3:2:522:1621#0/1  
\_Y]b`]aaba\_`a`aabSbabba\_b``aaaa]¥Zaa]a]\_  
@HWI-EAS443:3:2:646:463#0/1  
ATGAACTGAGCAATCTTGCAAAAAGGAGAGAAAGCTAATGT  
+HWI-EAS443:3:2:646:463#0/1  
¥b^]\_a\_a^`]a`¥Yaab\_`W]b\_a`[a`\_\_aWaZ]abX  
@HWI-EAS443:3:2:646:617#0/1  
AAAGCTAATGTGCTAATTGGGCAAGGGACGTAGTGTGG  
+HWI-EAS443:3:2:646:617#0/1  
]]\_`\_\_SXSa\_bY\_SV`]¥]aX\_\_`Z`\_]aW^aX\_X\_a\_  
@HWI-EAS443:3:2:646:952#0/1  
CATCAATGAACTGAGCAATCTTGCAAAAAGGAGAGAAAGCT  
+HWI-EAS443:3:2:646:952#0/1  
a`a\_baY^^`¥[`W]G]\_a\_\_\_a`^`\_[aa\_aaab^`\_a\_  
@HWI-EAS443:3:2:707:1319#0/1  
AGCAATCTTGCAAAAAGGAGAGAAAGCTAATGTGCTAATTG  
+HWI-EAS443:3:2:707:1319#0/1  
`a``baaa\_U^a\_`[Z¥\_a`a^Y]^\_aa\_a`\_XH]^`^`^\_  
@HWI-EAS443:3:2:729:577#0/1  
GAGCAATCTTGCAAAAAGGAGAGAAAGCTAATGTGCTAATT  
+HWI-EAS443:3:2:729:577#0/1  
abbabbbabab]`\_a`abababbaabaaaaab\_a]a^```  
@HWI-EAS443:3:2:815:1148#0/1  
ATCTTGCAAAAAGGAGAGAAAGCTAATGTGCTAATTGGGCA  
+HWI-EAS443:3:2:815:1148#0/1  
`aaa`aaaaaaa`ba[S^a¥a\_\_a`Wa[a`\_aaaY\_\_\_  
@HWI-EAS443:3:2:880:442#0/1  
CAATGAACTGAGCAATCTTGCAAAAAGGAGAGAAAGCTAAT  
+HWI-EAS443:3:2:880:442#0/1  
aabba\_Xa`\_\_bb`W^^bab^\_]K`bbab`baaRaIZ\_`a  
@HWI-EAS443:3:2:885:927#0/1  
GCATCAATGAACTGAGCAATCTTGCAAAAAGGAGAGAAAGC  
+HWI-EAS443:3:2:885:927#0/1  
R`^¥^U¥`b\_bbbbaaa`^Y`aaba\_a\_\_ba`^]a]\_a`P  
@HWI-EAS443:3:30:1076:1878#0/1  
CCCTTGCCCAATTAGCACATTAGCTTTCTCCTTTTGCA  
+HWI-EAS443:3:30:1076:1878#0/1  
a¥`ZYba]a^XOH\_`\_aab`U`^aJ`Jb``Wbba¥^ZWKX

@HWI-EAS443:3:30:1077:1166#0/1  
ATCAATGAACTGAGCAATCTTGCAAAGGAGAGAAAGCTA  
+HWI-EAS443:3:30:1077:1166#0/1  
^¥` [¥¥a^^\_abaVzabbba\_`^¥aY]¥\_ [ `abaa\_aa\_a  
@HWI-EAS443:3:30:1125:1952#0/1  
ATGAACTGAGCAATCTTGCAAAGGAGAGAAAGCTAATGT  
+HWI-EAS443:3:30:1125:1952#0/1  
aaaa`^b`a\_aaaaaaaaa`aa` `] `aaaaa\_\_a`a\_W]  
@HWI-EAS443:3:30:115:974#0/1  
ATGAACTGAGCAATCTTGCAAAGGAGAGAAAGCTAATGT  
+HWI-EAS443:3:30:115:974#0/1  
]a]MYa¥a[¥babaaaaaaaa`a`\_a¥aaa`aaa`\_aa]  
@HWI-EAS443:3:30:1178:757#0/1  
CATCAATGAACTGAGCAATCTTGCAAAGGAGAGAAAGCT  
+HWI-EAS443:3:30:1178:757#0/1  
abbb\_abaaabb`Taaa¥`ab`\_aaa`]a^^bba\_[\_a\_a  
@HWI-EAS443:3:30:1248:1838#0/1  
AAAGGAGAGAAAGCTAATGTGCTAATTGGGCAAGGGGACG  
+HWI-EAS443:3:30:1248:1838#0/1  
` `aa^aaa\_aa^a`^`a`\_U] `\_\_¥\_] `^`\_¥a]V]ZU\_  
@HWI-EAS443:3:30:1316:1086#0/1  
AATGAACTGAGCAATCTTGCAAAGGAGAGAAAGCTAATG  
+HWI-EAS443:3:30:1316:1086#0/1  
¥SXa]VZa¥VYa]^]VaZ¥\_aa\_` `]a`]aY]Va\_`]]\_ [ `]  
@HWI-EAS443:3:30:1339:181#0/1  
GCATCAATGAACTGAGCAATCTTGCAAAGGAGAGAAAGC  
+HWI-EAS443:3:30:1339:181#0/1  
aaaa\_\_abb\_` `aa`a\_\_` `a`\_X^^^\_] `\_\_]]^^X  
@HWI-EAS443:3:30:1380:1791#0/1  
AGCTAATGTGCTAATTGGGCAAGGGGACGTAGTGTTGGTA  
+HWI-EAS443:3:30:1380:1791#0/1  
a` `aaabb\_`¥aa^a` `a\_] `a[\_a\_` `][aW\_] `a^NZ  
@HWI-EAS443:3:30:1423:547#0/1  
AGCATCAATGAACTGAGCAATCTTGCAAAGGAGAGAAAG  
+HWI-EAS443:3:30:1423:547#0/1  
aab]a^Wabaaaba\_aaaa`abaa\_a] ` \_aa\_aaa\_\_a  
@HWI-EAS443:3:30:1425:503#0/1  
GAGAAAGCTAATGTGCTAATTGGGCAAGGGGACGTAGTGT  
+HWI-EAS443:3:30:1425:503#0/1  
a¥a\_\_aaa\_a`a^¥aWa^\_`¥^¥aZW[a\_`^\_XaXZ]XXX  
@HWI-EAS443:3:30:1500:925#0/1  
AATGAACTGAGCAATCTTGCAAAGGAGAGAAAGCTAATG  
+HWI-EAS443:3:30:1500:925#0/1  
[a^VTQab^Q^X`^X\_XXZa]UaZa]XZ^bb^ZYUS`aa`  
@HWI-EAS443:3:30:1514:1592#0/1  
GAAAGCTAATGTGCTAATTGGGCAAGGGGACGTAGTGTG  
+HWI-EAS443:3:30:1514:1592#0/1  
`¥K`bba\_a\_b]0a]aba]a\_¥W^aabbay¥aa\_^]aY`a  
@HWI-EAS443:3:30:1637:1576#0/1  
GAACTGAGCAATCTTGCAAAGGAGAGAAAGCTAATGTGC

+HWI-EAS443:3:30:1637:1576#0/1  
Ybabbabbbbaababaa^]aaabababb`\_]\_`aaab\_a\_  
@HWI-EAS443:3:30:1723:1011#0/1  
AATGAACTGAGCAATCTTGCAAAAGGAGAGAAAGCTAATG  
+HWI-EAS443:3:30:1723:1011#0/1  
aaabab`\_W\_abbbbabbbbaa`abb\_aaaaaab^aa`^a  
@HWI-EAS443:3:30:180:1823#0/1  
GAGCAATCTTGCAAAAGGAGAGAAAGCTAATGTGCTAATT  
+HWI-EAS443:3:30:180:1823#0/1  
aaabbbabaaab\_`aa^Q\_ababb`aaa¥aa\_\_\_aa`a`^  
@HWI-EAS443:3:30:231:591#0/1  
CATCAATGAACTGAGCAATCTTGCAAAAGGAGAGAAAGCT  
+HWI-EAS443:3:30:231:591#0/1  
]Y`baaaaaaaaa\_aaa`TYaa\_aa\_¥\_Y]\_\_\_`\_`a`\_\_\_]^  
@HWI-EAS443:3:30:295:46#0/1  
GCATCAATGAACTGAGCAATCTTGCAAAAGGAGAGAAAGC  
+HWI-EAS443:3:30:295:46#0/1  
``][`[R]`\_¥Y¥T^[]`^XV¥[a]YYW]\_N][V[RW¥Y  
@HWI-EAS443:3:30:386:345#0/1  
TGCAAAAGGAGAGAAAGCTAATGTGCTAATTGGGCAAGGG  
+HWI-EAS443:3:30:386:345#0/1  
abaaa\_Yba\_aaaaa\_]aaa`aa]a`a`a\_a`\_\_\_`\_^`  
@HWI-EAS443:3:30:573:465#0/1  
AGCAATCTTGCAAAAGGAGAGAAAGCTAATGTGCTAATTG  
+HWI-EAS443:3:30:573:465#0/1  
`bb[]`aaabaaa`a]aaabbbaaa\_``]`a]a\_\_\_\_\_`^]  
@HWI-EAS443:3:30:643:358#0/1  
CCCTTGCCCAATTAGCACATTAGCTTTCTCTCCTTTTGCA  
+HWI-EAS443:3:30:643:358#0/1  
\_ab¥ZX¥abbaaa`^[]baa`]`a`abaa^ab\_`a`\_aW^  
@HWI-EAS443:3:30:80:961#0/1  
AGAAAGCTAATGTGCTAATTGGGCAAGGGGACGTAGTGTT  
+HWI-EAS443:3:30:80:961#0/1  
`\_WOHOZ\_SZVa]aa\_[X\_aZX¥a¥WZ^^P¥aaVV`W]WP  
@HWI-EAS443:3:30:818:542#0/1  
AGCTAATGTGCTAATTGGGCAAGGGGACGTAGTGTTGGTA  
+HWI-EAS443:3:30:818:542#0/1  
aY^a^[\_bXY`aa`a]`^QT\_\_a^`S`a¥\_bX`^aW\_G¥  
@HWI-EAS443:3:30:839:784#0/1  
AAGCTAATGTGCTAATTGGGCAAGGGGACGTAGTGTTGGT  
+HWI-EAS443:3:30:839:784#0/1  
]`aaVUWX^VW¥¥VX[]^ZZ¥aJ``\_[]\_aY[`UY^\_aWY  
@HWI-EAS443:3:30:863:467#0/1  
GAGAAAGCTAATGTGCTAATTGGGCAAGGGGACGTAGTGTT  
+HWI-EAS443:3:30:863:467#0/1  
aa`a`aa`\_\_U`a\_a`\_\_a`\_]`[\_^aZ\_^Z]a]Z]0^R  
@HWI-EAS443:3:30:945:1116#0/1  
TGCAAAAGGAGAGAAAGCTAATGTGCTAATTGGGCAAGGG  
+HWI-EAS443:3:30:945:1116#0/1  
ababaab\_\_^`\_ba`aaaaaaa[]`aa`a`aa]````\_a

@HWI-EAS443:3:31:1122:679#0/1  
GAGCAATCTTGCAAAAGGAGAGAAAGCTAATGTGCTAATT  
+HWI-EAS443:3:31:1122:679#0/1  
¥Q\_`a^¥\_`baaa^aXbb`b\_aR^^a\_aaY`\_]a\_a\_\_¥[  
@HWI-EAS443:3:31:1228:1060#0/1  
CCCTTGCCCAATTAGCACATTAGCTTTCTCTCCTTTTGCA  
+HWI-EAS443:3:31:1228:1060#0/1  
aaa`aaaaaba`aaabbaabaaaababaaaaaaa`a  
@HWI-EAS443:3:31:1297:831#0/1  
TTGCAAAAGGAGAGAAAGCTAATGTGCTAATTGGGCAAGG  
+HWI-EAS443:3:31:1297:831#0/1  
a`Y^`b^Waaab`]¥Q\_b`baaab]baa[\_``\_]¥`UaX  
@HWI-EAS443:3:31:1319:1799#0/1  
ATCTTGCAAAAGGAGAGAAAGCTAATGTGCTAATTGGGCA  
+HWI-EAS443:3:31:1319:1799#0/1  
]\_bbb`RXb]bbbb[\_]aa`0[S]]bPXQ\_X]a^SQIZ`  
@HWI-EAS443:3:31:1327:1082#0/1  
GAAAGCTAATGTGCTAATTGGGCAAGGGGACGTAGTGTG  
+HWI-EAS443:3:31:1327:1082#0/1  
`baababZNa]aaa`aaa`aaa\_aaab\_^\_a]\_]Z`^`\_  
@HWI-EAS443:3:31:1333:505#0/1  
AATGAACTGAGCAATCTTGCAAAAGGAGAGAAAGCTAATG  
+HWI-EAS443:3:31:1333:505#0/1  
aabbabaaaabaaaababaaa`aaaba`b]ab\_a[a\_a  
@HWI-EAS443:3:31:1390:743#0/1  
GAGCAATCTTGCAAAAGGAGAGAAAGCTAATGTGCTAATT  
+HWI-EAS443:3:31:1390:743#0/1  
^ababbbbbbbabbabbbb\_bbbbababbbbaa`aaaba  
@HWI-EAS443:3:31:1398:585#0/1  
CAATTAGCACATTAGCTTTCTCTCCTTTTGCAAGATTGCT  
+HWI-EAS443:3:31:1398:585#0/1  
aabbbba`babbbab\_bbbab`bbabbaaabbbabaa  
@HWI-EAS443:3:31:1468:1851#0/1  
GAGAAAGCTAATGTGCTAATTGGGCAAGGGGACGTAGTGT  
+HWI-EAS443:3:31:1468:1851#0/1  
aabaaaaaaaab¥aaYabaaaa¥`Z`]a[aa]^a]WaV`]  
@HWI-EAS443:3:31:1622:1620#0/1  
CATCAATGAACTGAGCAATCTTGCAAAAGGAGAGAAAGCT  
+HWI-EAS443:3:31:1622:1620#0/1  
abbbbaa\_abb`aabb`ba\_aaa\_aaaaaaaaab\_^  
@HWI-EAS443:3:31:1644:1490#0/1  
AAGCTAATGTGCTAATTGGGCAAGGGGACGTAGTGTGGT  
+HWI-EAS443:3:31:1644:1490#0/1  
T`]\_`bab` `[abaaba]\_]`ab\_W`\_a][`\_^bY^]\_0  
@HWI-EAS443:3:31:1716:492#0/1  
GAGAAAGCTAATGTGCTAATTGGGCAAGGGGACGTAGTGT  
+HWI-EAS443:3:31:1716:492#0/1  
aabbaa`aa`bWaq\_^\_a\_aaa[^^aa`^`Q]`XaZ  
@HWI-EAS443:3:31:268:738#0/1  
CATCAATGAACTGAGCAATCTTGCAAAAGGAGAGAAAGCT

+HWI-EAS443:3:31:268:738#0/1  
aT\_aaaba]^`aaaaa`a```aa`^Y]a\_`^`aaaa\_`]^  
@HWI-EAS443:3:31:358:666#0/1  
TGCAAAAGGAGAGAAAGCTAATGTGCTAATTGGGCAAGGG  
+HWI-EAS443:3:31:358:666#0/1  
aaa^aaabaaa`aa[^aa`Xaaa\_aaaaaaaa\_a`a]\_\_  
@HWI-EAS443:3:31:414:457#0/1  
GAGCAATCTTGCAAAAGGAGAGAAAGCTAATGTGCTAATT  
+HWI-EAS443:3:31:414:457#0/1  
^bbbbbbabbbbbbbabbbbbbbababbbbbbababbaa`  
@HWI-EAS443:3:31:48:494#0/1  
GAAAGCTAATGTGCTAATTGGGCAAGGGGACGTAGTGTTG  
+HWI-EAS443:3:31:48:494#0/1  
ab^TabaaZ]a]bbaaaaa`aba]aa`^W`aVW`X`[]¥  
@HWI-EAS443:3:31:726:531#0/1  
GCATCAATGAACTGAGCAATCTTGCAAAAGGAGAGAAAGC  
+HWI-EAS443:3:31:726:531#0/1  
`bbbbabba`bbabbbbbabbbabaabbbbbbbbabab]  
@HWI-EAS443:3:31:748:1063#0/1  
ACCAACTACTGCTCCCTTGCCCAATTAGCACATTAGCTT  
+HWI-EAS443:3:31:748:1063#0/1  
aaaaa`aa`aa`Y^`\_`VVZ^^`\_`^^[Z^\_]`^`¥]X]  
@HWI-EAS443:3:31:790:991#0/1  
GAGCAATCTTGCAAAAGGAGAGAAAGCTAATGTGCTAATT  
+HWI-EAS443:3:31:790:991#0/1  
`¥bbbbababbbbbbbbbbbbbbbbbbbababbabababba  
@HWI-EAS443:3:31:798:1648#0/1  
GAAAGCTAATGTGCTAATTGGGCAAGGGGACGTAGTGTTG  
+HWI-EAS443:3:31:798:1648#0/1  
\_ab`\_bbb]bba\_aab`\_`aa\_ababbaaaaa`^aa\_a]`\_  
@HWI-EAS443:3:31:837:187#0/1  
AGCAATCTTGCAAAAGGAGAGAAAGCTAATGTGCTAATTG  
+HWI-EAS443:3:31:837:187#0/1  
]T\_aab`a\_a\_aa`abaY```\_a`a`aa``¥Ya^a`\_]^^  
@HWI-EAS443:3:31:837:854#0/1  
ATCTTGCAAAAGGAGAGAAAGCTAATGTGCTAATTGGGCA  
+HWI-EAS443:3:31:837:854#0/1  
`abaa^\_\_W¥a]`aYaa``Z^\_]`aa\_a````\_`a^````  
@HWI-EAS443:3:31:848:2008#0/1  
GAGCAATCTTGCAAAAGGAGAGAAAGCTAATGTGCTAATT  
+HWI-EAS443:3:31:848:2008#0/1  
``[bbabbabbbbbba\_bbbbbSbbabbbbbba`aabbb  
@HWI-EAS443:3:31:881:1688#0/1  
AATTAGCACATTAGCTTTCTCTCCTTTTGCAAGATTGCTC  
+HWI-EAS443:3:31:881:1688#0/1  
abba`^`aab`bb`b^`]a`b\_\_aa`\_`aab`\_a\_\_aX`W  
@HWI-EAS443:3:31:980:1983#0/1  
GAACTGAGCAATCTTGCAAAAGGAGAGAAAGCTAATGTGC  
+HWI-EAS443:3:31:980:1983#0/1  
a`b`aaa\_aaaaa`aaa`\_\_aV\_\_aaaaa`\_W\_\_\_\_Y\_V



@HWI-EAS443:3:32:1101:1644#0/1  
GCAAAAGGAGAGAAAGCTAATGTGCTAATTGGGCAAGGGG  
+HWI-EAS443:3:32:1101:1644#0/1  
abaa`abaa`bbbaaaaaaaaa^a`aaaa\_a\_\_^a`aa`\_  
@HWI-EAS443:3:32:1107:1625#0/1  
GCATCAATGAACTGAGCAATCTTGCAAAAGGAGAGAAAGC  
+HWI-EAS443:3:32:1107:1625#0/1  
\_\_¥¥baaabbb[S\_`aX¥`bababbZ[`a`bab\_T`aa  
@HWI-EAS443:3:32:114:312#0/1  
CCCTTGCCCAATTAGCACATTAGCTTTCTCCTTTTGCA  
+HWI-EAS443:3:32:114:312#0/1  
aa`[\_]``ba`¥[a[aaaa\_`aa`]a\_a]\_\_\_\_`\_U\_VY]V  
@HWI-EAS443:3:32:1201:460#0/1  
AGAGAAAGCTAATGTGCTAATTGGGCAAGGGGACGTAGTG  
+HWI-EAS443:3:32:1201:460#0/1  
`b`bZbbbb`X`bb^Y^`a`¥abaZ````\_aa\_^a^Tb\_b  
@HWI-EAS443:3:32:1217:75#0/1  
GAAAGCTAATGTGCTAATTGGGCAAGGGGACGTAGTGTTG  
+HWI-EAS443:3:32:1217:75#0/1  
aaa`a`aa[aa\_a\_\_^`a^a\_WZ\_a\_a^X`ZX`Za^`a  
@HWI-EAS443:3:32:1389:1928#0/1  
AGCTAATGTGCTAATTGGGCAAGGGGACGTAGTGTTGGTA  
+HWI-EAS443:3:32:1389:1928#0/1  
Z]abbbba\_aabb\_aaaY`ababb]¥`bWJXaaa\_aa]Xa  
@HWI-EAS443:3:32:1419:582#0/1  
AGCTAATGTGCTAATTGGGCAAGGGGACGTAGTGTTGGTA  
+HWI-EAS443:3:32:1419:582#0/1  
`b\_b\_bbb]\_abb¥XYb` `[J^`^]`]¥0[a\_]`[`ZP¥  
@HWI-EAS443:3:32:1427:1071#0/1  
GCATCAATGAACTGAGCAATCTTGCAAAAGGAGAGAAAGC  
+HWI-EAS443:3:32:1427:1071#0/1  
aaaaaaaaaba\_a`aa^^`a\_[^a`a`\_`\_^`^Sa^a]`Zaa  
@HWI-EAS443:3:32:1447:1476#0/1  
GGAGAGAAAGCTAATGTGCTAATTGGGCAAGGGGACGTAG  
+HWI-EAS443:3:32:1447:1476#0/1  
aa\_aaa]]\_T]a`\_``]]``\_]]`\_\_X^`^]^[YU]YaRX\_  
@HWI-EAS443:3:32:1531:970#0/1  
GCATCAATGAACTGAGCAATCTTGCAAAAGGAGAGAAAGC  
+HWI-EAS443:3:32:1531:970#0/1  
U]¥[`ba`aa\_aa`^¥]U[bab\_^U^WY\_]LaZa\_aa^]  
@HWI-EAS443:3:32:1585:853#0/1  
ATCTTGCAAAAGGAGAGAAAGCTAATGTGCTAATTGGGCA  
+HWI-EAS443:3:32:1585:853#0/1  
a``^aaaa````^^aaaaaa`[aZ\_``¥^¥^U[]a\_a\_a`  
@HWI-EAS443:3:32:1652:930#0/1  
CAATGAACTGAGCAATCTTGCAAAAGGAGAGAAAGCTAAT  
+HWI-EAS443:3:32:1652:930#0/1  
`a`babbbbbb`aa[^aaabaa\_aXa`aa`baa`aRba`b  
@HWI-EAS443:3:32:1666:470#0/1  
GAACTGAGCAATCTTGCAAAAGGAGAGAAAGCTAATGTGC

+HWI-EAS443:3:32:1666:470#0/1  
aJ`T`\_YZT\_\_\_Z`¥YM¥]UU`[Y]^\_^]Z^MPR¥]`N\_b  
@HWI-EAS443:3:32:1728:475#0/1  
GAAAGCTAATGTGCTAATTGGGCAAGGGGACGTAGTGTTG  
+HWI-EAS443:3:32:1728:475#0/1  
a\_[\_]F]ab\_\_G\_RX¥RYaX[VMP]a]\_\_X]]GQaUaTZ`  
@HWI-EAS443:3:32:22:443#0/1  
GAGAAAGCTAATGTGCTAATTGGGCAAGGGGACGTAGTGT  
+HWI-EAS443:3:32:22:443#0/1  
aaaaaaaaa[aab\_``\_a`\_aZ\_aVV`\_\_\_^\_a^^\_V`X  
@HWI-EAS443:3:32:32:957#0/1  
GAAAGCTAATGTGCTAATTGGGCAAGGGGACGTAGTGTTG  
+HWI-EAS443:3:32:32:957#0/1  
aa]abaabaab\_aaa¥a`aaa`\_\_`a\_a\_]a`UW]X`^\_a  
@HWI-EAS443:3:32:344:585#0/1  
AAGCTAATGTGCTAATTGGGCAAGGGGACGTAGTGTTGGT  
+HWI-EAS443:3:32:344:585#0/1  
aaaabaaaa\_babaaaaaaaaa¥aW`\_``]\_`Z]Z]^^W  
@HWI-EAS443:3:32:348:1285#0/1  
GAAAGCTAATGTGCTAATTGGGCAAGGGGACGTAGTGTTG  
+HWI-EAS443:3:32:348:1285#0/1  
ab`baba\_abb`abab\_baa\_]b````\_``\_aa¥``]a``a  
@HWI-EAS443:3:32:508:1303#0/1  
TCCCCTTGCCCAATTAGCACATTAGCTTTCTCTCCTTTTG  
+HWI-EAS443:3:32:508:1303#0/1  
Z]V[a¥WZ]R\_¥Y\_[^UZY`b\_a^`\_aa¥ZRUWR][¥ZRU  
@HWI-EAS443:3:32:569:439#0/1  
AAGCTAATGTGCTAATTGGGCAAGGGGACGTAGTGTTGGT  
+HWI-EAS443:3:32:569:439#0/1  
Z^aaa\_^a\_]aaaaaaaaa\_``aa¥``]``]U¥]a]^^`V  
@HWI-EAS443:3:32:582:1841#0/1  
GAACTGAGCAATCTTGCAAAAGGAGAGAAAGCTAATGTGC  
+HWI-EAS443:3:32:582:1841#0/1  
aba^\_a\_a¥K¥baabbb`baa`aaa¥ba\_aa\_\_`Y\_¥\_`  
@HWI-EAS443:3:32:607:263#0/1  
CATCAATGAACTGAGCAATCTTGCAAAAGGAGAGAAAGCT  
+HWI-EAS443:3:32:607:263#0/1  
ababbaaa``aaaaaaaaaaaaa````\_a`\_aaaa\_^a\_^  
@HWI-EAS443:3:32:612:140#0/1  
CATCAATGAACTGAGCAATCTTGCAAAAGGAGAGAAAGCT  
+HWI-EAS443:3:32:612:140#0/1  
abbaabba`babaab`baa`baaa```aaaaaaaaaaaa`  
@HWI-EAS443:3:32:648:1823#0/1  
GCATCAATGAACTGAGCAATCTTGCAAAAGGAGAGAAAGC  
+HWI-EAS443:3:32:648:1823#0/1  
aba]]`a`NW`a¥¥XG¥]]Y`VX`^VKRN[V\_`\_\_\_PTX\_  
@HWI-EAS443:3:32:694:1768#0/1  
AATGAACTGAGCAATCTTGCAAAAGGAGAGAAAGCTAATG  
+HWI-EAS443:3:32:694:1768#0/1  
^a^X`baba`abba`bbaabaaaaaaaa`bb^VaVVa\_\_

@HWI-EAS443:3:32:793:36#0/1  
GAACTGAGCAATCTTGCAAAGGAGAGAAAGCTAATGTGC  
+HWI-EAS443:3:32:793:36#0/1  
`]baa`]``bba[aab\_\_a\_¥ba`aabaa\_b^a\_a`a^aa  
@HWI-EAS443:3:32:882:1907#0/1  
GAAAGCTAATGTGCTAATTGGGCAAGGGGACGTAGTGTTG  
+HWI-EAS443:3:32:882:1907#0/1  
`bbUYb\_aab\_Uaaaaa`G\_]a`\_]`Y]^QNUPKTNH[  
@HWI-EAS443:3:32:887:1313#0/1  
GAGAAAGCTAATGTGCTAATTGGGCAAGGGGACGTAGTGT  
+HWI-EAS443:3:32:887:1313#0/1  
a\_aaaabbaaaaa]\_aa^aa\_a`\_\_a\_`\_\_`\_`\_X\_\_R\_0  
@HWI-EAS443:3:33:1103:1497#0/1  
CAATCTTGCAAAGGAGAGAAAGCTAATGTGCTAATTGGG  
+HWI-EAS443:3:33:1103:1497#0/1  
^ba`bWZabbabaa`VZbVab``aab^[\_^]a[[ZL]aRY  
@HWI-EAS443:3:33:1108:447#0/1  
AGAAAGCTAATGTGCTAATTGGGCAAGGGGACGTAGTGTT  
+HWI-EAS443:3:33:1108:447#0/1  
ab`\_]`\_^`^^Ubaaaaa`[a`a]`[ZT^XVY\_]`\_]¥  
@HWI-EAS443:3:33:1313:514#0/1  
CATCAATGAACTGAGCAATCTTGCAAAGGAGAGAAAGCT  
+HWI-EAS443:3:33:1313:514#0/1  
ZX^WaZ`babbbaaaabab\_b^[[a`Iaba`YTW\_N^`a\_  
@HWI-EAS443:3:33:1332:1957#0/1  
AAGCTAATGTGCTAATTGGGCAAGGGGACGTAGTGTTGGT  
+HWI-EAS443:3:33:1332:1957#0/1  
``¥OWWU^L]^Q`TZabZH¥Y[Za^SN¥UNTV[G[\_\_\_V  
@HWI-EAS443:3:33:1393:578#0/1  
AATGAACTGAGCAATCTTGCAAAGGAGAGAAAGCTAATG  
+HWI-EAS443:3:33:1393:578#0/1  
U`a[ZaW¥RRa]Vbbbb^b]`a`\_\_RYa[b]\_YaR\_`^¥a  
@HWI-EAS443:3:33:159:1746#0/1  
AATGAACTGAGCAATCTTGCAAAGGAGAGAAAGCTAATG  
+HWI-EAS443:3:33:159:1746#0/1  
`^[\_Z\_U`b^¥T`]\_\_a\_a]^Y\_^LYY]¥`\_`[^VU\_\_[^Z[  
@HWI-EAS443:3:33:1665:1096#0/1  
AGAAAGCTAATGTGCTAATTGGGCAAGGGGACGTAGTGTT  
+HWI-EAS443:3:33:1665:1096#0/1  
`]\_\_aabaa`\_[a```\_\_\_[^¥`````\_XUUSUVV^Y^  
@HWI-EAS443:3:33:1672:449#0/1  
CATCAATGAACTGAGCAATCTTGCAAAGGAGAGAAAGCT  
+HWI-EAS443:3:33:1672:449#0/1  
a`baaa`T^babbab]]]a`aab^[b\_abb\_RPRaa^a\_`  
@HWI-EAS443:3:33:1700:1857#0/1  
ATCTTGCAAAGGAGAGAAAGCTAATGTGCTAATTGGGCA  
+HWI-EAS443:3:33:1700:1857#0/1  
]^Sa`b]]baaaaa`^`a\_\_\_\_a\_\_^]¥^\_0^Z]PYW^  
@HWI-EAS443:3:33:1758:1783#0/1  
GAACTGAGCAATCTTGCAAAGGAGAGAAAGCTAATGTGC



@HWI-EAS443:3:33:897:828#0/1  
TGCAAAAGGAGAGAAAGCTAATGTGCTAATTGGGCAAGGG  
+HWI-EAS443:3:33:897:828#0/1  
abaaa^]`a\_aaaaa`aaaaaaa\_aaa\_`\_\_`W]]^`\_`\_]  
@HWI-EAS443:3:33:96:1011#0/1  
AGCACATTAGCTTTCTCTCTTTTGCAAGATTGCTCAGTT  
+HWI-EAS443:3:33:96:1011#0/1  
a\_`[aa\_^^\_\_\_\_`a\_\_\_\_^^^\_^^\_`^]]WZ\_^^]U]Z  
@HWI-EAS443:3:33:979:197#0/1  
CATCAATGAAGTGAAGCAATCTTGCAAAAGGAGAGAAAGCT  
+HWI-EAS443:3:33:979:197#0/1  
^Y¥\_`SZabbaa^baa\_\_`bbbaa^aaba^\_Za`]a\_G`  
@HWI-EAS443:3:33:999:302#0/1  
CATCAATGAAGTGAAGCAATCTTGCAAAAGGAGAGAAAGCT  
+HWI-EAS443:3:33:999:302#0/1  
abbabba\_babaaa\_aab\_aaaaa`^`aa\_`Va``Z\_\_\_\_  
@HWI-EAS443:3:34:1123:623#0/1  
CATCAATGAAGTGAAGCAATCTTGCAAAAGGAGAGAAAGCT  
+HWI-EAS443:3:34:1123:623#0/1  
aa`abaa\_a\_`S`[\_^Ya]^a`^^[QWYb^^^[``]\_Q]  
@HWI-EAS443:3:34:1155:162#0/1  
GAGCAATCTTGCAAAAGGAGAGAAAGCTAATGTGCTAATT  
+HWI-EAS443:3:34:1155:162#0/1  
a\_Wabababb`ba``abaYaa\_a\_aa\_\_\_\_^a`¥\_S^YWYY  
@HWI-EAS443:3:34:1211:1932#0/1  
ATGAAGTGAAGCAATCTTGCAAAAGGAGAGAAAGCTAATGT  
+HWI-EAS443:3:34:1211:1932#0/1  
^ZY`YP[0]R^Z]^¥NRO\_\_a\_]`Sb]F]¥\_[[^^WWGB  
@HWI-EAS443:3:34:1213:1065#0/1  
GAGAAAGCTAATGTGCTAATTGGGCAAGGGGACGTAGTGT  
+HWI-EAS443:3:34:1213:1065#0/1  
TZa^\_¥`Z¥Z`[QI]0]aaa\_XYRYa[]BBBBBBBBBB  
@HWI-EAS443:3:34:1219:1020#0/1  
GAAAGCTAATGTGCTAATTGGGCAAGGGGACGTAGTGTG  
+HWI-EAS443:3:34:1219:1020#0/1  
aa]``Y```ab¥aaa\_aa`X^`\_\_W^^a\_\_^^X]\_U\_ZZ^  
@HWI-EAS443:3:34:1232:1137#0/1  
GAGCAATCTTGCAAAAGGAGAGAAAGCTAATGTGCTAATT  
+HWI-EAS443:3:34:1232:1137#0/1  
\_bbab`bab``a^``abaaabababba``]`aZ^M`^\_`\_]  
@HWI-EAS443:3:34:1232:571#0/1  
CAATCTTGCAAAAGGAGAGAAAGCTAATGTGCTAATTGGG  
+HWI-EAS443:3:34:1232:571#0/1  
a]VHHU¥]OZ]\_aba]b]Z]SNa]]Y¥]YH]YTRN\_R[WB  
@HWI-EAS443:3:34:1237:294#0/1  
GAGCAATCTTGCAAAAGGAGAGAAAGCTAATGTGCTAATT  
+HWI-EAS443:3:34:1237:294#0/1  
a\_```a\_a]^]\_a^Zb\_0`]\_[^\_]0¥]]^]V]Y^YXVY  
@HWI-EAS443:3:34:1314:1139#0/1  
CTTGCAAAAGGAGAGAAAGCTAATGTGCTAATTGGGCAAG



@HWI-EAS443:3:34:217:1380#0/1  
GAAAGCTAATGTGCTAATTGGGCAAGGGGACGTAGTGTG  
+HWI-EAS443:3:34:217:1380#0/1  
aaXT^aabbbaa`aaaa`ZVW`a`a`¥UP\_YZ`X^U¥V  
@HWI-EAS443:3:34:322:1884#0/1  
AAGCATCAATGAACTGAGCAATCTTGCAAAAGGAGAGAAA  
+HWI-EAS443:3:34:322:1884#0/1  
ab]baX\_aaa\_T`^^]T]aa`a\_\_WX^\_\_¥SXZ^^^a¥\_  
@HWI-EAS443:3:34:338:709#0/1  
AGCTAATGTGCTAATTGGGCAAGGGGACGTAGTGTGGTA  
+HWI-EAS443:3:34:338:709#0/1  
Zab^\_0[SQW^a¥`ab\_R\_a`\_X¥\_UL]¥R`^¥[[aWfY  
@HWI-EAS443:3:34:364:1633#0/1  
AGAAAGCTAATGTGCTAATTGGGCAAGGGGACGTAGTGT  
+HWI-EAS443:3:34:364:1633#0/1  
`Y¥\_¥Y`aaa`XR`\_]W\_\_P¥\_a`ZX[¥\_^Z0^V]U[  
@HWI-EAS443:3:34:409:1133#0/1  
ATCTTGCAAAAGGAGAGAAAGCTAATGTGCTAATTGGGCA  
+HWI-EAS443:3:34:409:1133#0/1  
\_[`XX¥^M¥a`\_]a\_`Z]GNU^a`^YL`a^RGU¥XUTU]  
@HWI-EAS443:3:34:433:933#0/1  
AAGCTAATGTGCTAATTGGGCAAGGGGACGTAGTGTGGT  
+HWI-EAS443:3:34:433:933#0/1  
]babbaaa\_YabbW\_a`aa^`aU`[aa\_aa^^aZaZ\_\_[Z  
@HWI-EAS443:3:34:441:1988#0/1  
GCAAAAGGAGAGAAAGCTAATGTGCTAATTGGGCAAGGGG  
+HWI-EAS443:3:34:441:1988#0/1  
ab`ba]aaaabab`abaaba`\_aabaa`]W\_a`a][[]]  
@HWI-EAS443:3:34:451:1543#0/1  
GAGAAAGCTAATGTGCTAATTGGGCAAGGGGACGTAGTGT  
+HWI-EAS443:3:34:451:1543#0/1  
¥a`ba¥bbb\_\_a[[aaa`^`a]]aY[W\_^`\_]a\_\_`XaZ  
@HWI-EAS443:3:34:486:2004#0/1  
ATCTTGCAAAAGGAGAGAAAGCTAATGTGCTAATTGGGCA  
+HWI-EAS443:3:34:486:2004#0/1  
aaba\_aaTV`^\_YZ^¥Zaa`a\_]\_\_]\_WV]]`¥^RIWBBB  
@HWI-EAS443:3:34:488:1266#0/1  
GGAGAGAAAGCTAATGTGCTAATTGGGCAAGGGGACGTAG  
+HWI-EAS443:3:34:488:1266#0/1  
\_`\_`b`[S\_\_ZSzaa\_a`^W\_b``aab`^a\_]a`a¥R[[  
@HWI-EAS443:3:34:545:37#0/1  
GAGAAAGCTAATGTGCTAATTGGGCAAGGGGACGTAGTGT  
+HWI-EAS443:3:34:545:37#0/1  
`Xaa]W\_\_[OSW`^URZXX\_]`\_Z^XYXV^^YY`PPUUUV  
@HWI-EAS443:3:34:554:649#0/1  
GCAAAAGGAGAGAAAGCTAATGTGCTAATTGGGCAAGGGG  
+HWI-EAS443:3:34:554:649#0/1  
`abaabbb`babaVQ\_aa`^ab\_abaabaaaa^`aa`\_\_  
@HWI-EAS443:3:34:597:279#0/1  
CGTCCCCTTGCCCAATTAGCACATTAGCTTTCTCTCCTT

+HWI-EAS443:3:34:597:279#0/1  
aaabbba^`aaabab`a^aabaaaa``\_aaa`a^\_\_^  
@HWI-EAS443:3:34:629:312#0/1  
CATCAATGAACTGAGCAATCTTGCAAAAGGAGAGAAAGCT  
+HWI-EAS443:3:34:629:312#0/1  
abaabbbaa`b`\_]baaaa`aa`a\_\_^a`\_a```\_`^`V]  
@HWI-EAS443:3:34:632:1415#0/1  
CAAAAGGAGAGAAAGCTAATGTGCTAATTGGGCAAGGGGA  
+HWI-EAS443:3:34:632:1415#0/1  
ab]baaaaabbbb]aaa]ab`\_aabaaa`a`\_aa\_\_[^`]^  
@HWI-EAS443:3:34:676:211#0/1  
AGAGAAAGCTAATGTGCTAATTGGGCAAGGGGACGTAGTG  
+HWI-EAS443:3:34:676:211#0/1  
WYWbbbaa`]J]aa[X`Ya^X[]^R^\_aXU^VN`BBBBB  
@HWI-EAS443:3:34:834:1079#0/1  
CAATCTTGCAAAAGGAGAGAAAGCTAATGTGCTAATTGGG  
+HWI-EAS443:3:34:834:1079#0/1  
ab^`^a^T^a\_`\_`^b]abWM]Z`a`]TaY^a]^`^WR  
@HWI-EAS443:3:34:864:528#0/1  
GAGCAATCTTGCAAAAGGAGAGAAAGCTAATGTGCTAATT  
+HWI-EAS443:3:34:864:528#0/1  
a[aba\_baaaaWa`\_`Ybabaa\_]`^]a`S\_]`^\_X\_  
@HWI-EAS443:3:34:95:106#0/1  
ATCTTGCAAAAGGAGAGAAAGCTAATGTGCTAATTGGGCA  
+HWI-EAS443:3:34:95:106#0/1  
¥aaaaa\_\_aaabbba`a[baaa`ZX`\_`^\_\_\_\_[]\_\_\_\_TSU  
@HWI-EAS443:3:34:976:262#0/1  
AAGCTAATGTGCTAATTGGGCAAGGGGACGTAGTGTGGT  
+HWI-EAS443:3:34:976:262#0/1  
^¥`^a^X`^Yaaa]aaa`a`a`\_`a`]¥Y\_aU[^`^\_WZ^ZR  
@HWI-EAS443:3:35:1141:704#0/1  
CATCAATGAACTGAGCAATCTTGCAAAAGGAGAGAAAGCT  
+HWI-EAS443:3:35:1141:704#0/1  
SSa]`¥^\_V¥¥¥babbbbbbbbb\_\_¥`^a\_a^`a^`baa  
@HWI-EAS443:3:35:1275:1214#0/1  
AAAAGGAGAGAAAGCTAATGTGCTAATTGGGCAAGGGGAC  
+HWI-EAS443:3:35:1275:1214#0/1  
¥[^`a`aab`abaabaa`[\_R^aa```aa`a¥a^][a]\_  
@HWI-EAS443:3:35:1303:260#0/1  
CATCAATGAACTGAGCAATCTTGCAAAAGGAGAGAAAGCT  
+HWI-EAS443:3:35:1303:260#0/1  
Z¥a`bbbb\_bbbababa^`bbb]`[FXbb]b`ab]¥`T¥  
@HWI-EAS443:3:35:1390:391#0/1  
GAAAGCTAATGTGCTAATTGGGCAAGGGGACGTAGTGTGG  
+HWI-EAS443:3:35:1390:391#0/1  
aaV]aaa]aab`b]aa\_b\_b`aaaR^a\_a[^`b`\_`aX^WU`  
@HWI-EAS443:3:35:1697:828#0/1  
GTCCCCTTGCCCAATTAGCACATTAGCTTTCTCTCCTTTT  
+HWI-EAS443:3:35:1697:828#0/1  
``\_S^bb[^`\_]¥`]a¥aZ¥`a^[Za^U^\_aa\_\_¥T[^SZ



@HWI-EAS443:3:35:176:1961#0/1  
ATCTTGCAAAAGGAGAGAAAGCTAATGTGCTAATTGGGCA  
+HWI-EAS443:3:35:176:1961#0/1  
a\_`a]Vb\_L\_¥YYYYa]a\_P[\_`\_]\_]G¥a[TJQHLLaX  
@HWI-EAS443:3:35:216:1576#0/1  
GTCCCCTTGCCCAATTAGCACATTAGCTTTCTCTCCTTTT  
+HWI-EAS443:3:35:216:1576#0/1  
aababbaaababbaaaaaababaaaaaba\_\_b`baaa`^`^  
@HWI-EAS443:3:35:261:347#0/1  
GAAAGCTAATGTGCTAATTGGGCAAGGGGACGTAGTGTTG  
+HWI-EAS443:3:35:261:347#0/1  
]\_YL^Z[XUZ^M]]RHTXVX¥\_[HUOM[ZU[YMDTS^VYY  
@HWI-EAS443:3:35:282:1572#0/1  
AACTGAGCAATCTTGCAAAAGGAGAGAAAGCTAATGTGCT  
+HWI-EAS443:3:35:282:1572#0/1  
abba``aa]aab\_`ab`a\_]`a^aa^aaR[a\_\_`\_\_R¥^^  
@HWI-EAS443:3:35:29:355#0/1  
GAGCAATCTTGCAAAAGGAGAGAAAGCTAATGTGCTAATT  
+HWI-EAS443:3:35:29:355#0/1  
`bbbab\_bbbbb`^¥`baabbbab]aaV¥\_ab^aaaaVa\_  
@HWI-EAS443:3:35:349:1342#0/1  
CAATCTTGCAAAAGGAGAGAAAGCTAATGTGCTAATTGGG  
+HWI-EAS443:3:35:349:1342#0/1  
\_X0^a`a`^¥HR\_]¥^]]Z]YW\_]TZWJXa¥X]¥^[[M  
@HWI-EAS443:3:35:433:1030#0/1  
AGGAGAGAAAGCTAATGTGCTAATTGGGCAAGGGGACGTA  
+HWI-EAS443:3:35:433:1030#0/1  
R¥WI¥\_^^`aa\_X`a`X^`b¥baaYYY`^QZ]\_^`WOT  
@HWI-EAS443:3:35:554:1387#0/1  
GTCCCCTTGCCCAATTAGCACATTAGCTTTCTCTCCTTTT  
+HWI-EAS443:3:35:554:1387#0/1  
a\_baab]`abbb[`aaaaaa`]ab^a`\_]a`a`aa\_]a]  
@HWI-EAS443:3:35:561:436#0/1  
TGCAAAAGGAGAGAAAGCTAATGTGCTAATTGGGCAAGGG  
+HWI-EAS443:3:35:561:436#0/1  
`bb\_]\_¥aa\_abaaa\_aaa[`aa[a\_a^\_`a`¥]^\_T\_  
@HWI-EAS443:3:35:568:1636#0/1  
GAGCAATCTTGCAAAAGGAGAGAAAGCTAATGTGCTAATT  
+HWI-EAS443:3:35:568:1636#0/1  
aaXaababa^`a\_b\_a`ab\_[bbbaab\_Vba^^aa\_a`\_  
@HWI-EAS443:3:35:56:1410#0/1  
GAAAGCTAATGTGCTAATTGGGCAAGGGGACGTAGTGTTG  
+HWI-EAS443:3:35:56:1410#0/1  
ab```b`aaaa^a`\_aaaa`a\_a`Z`a\_\_\_\_\_X][T\_^\_Z  
@HWI-EAS443:3:35:689:950#0/1  
AATGAAGCTGAGCAATCTTGCAAAAGGAGAGAAAGCTAATG  
+HWI-EAS443:3:35:689:950#0/1  
aa]]SXa[[¥[^X[[\_\_\_\_`\_\_ZUY`VP\_ZZ]U¥[[W\_^T]  
@HWI-EAS443:3:35:709:1286#0/1  
AGCTAATGTGCTAATTGGGCAAGGGGACGTAGTGTTGGTA

+HWI-EAS443:3:35:709:1286#0/1  
Z]\_`^^aSXa]^Uba^^^]aZ\_`\_aYRR`[S]L][`\_XPR  
@HWI-EAS443:3:35:738:1940#0/1  
CAATGAACTGAGCAATCTTGCAAAAGGAGAGAAAGCTAAT  
+HWI-EAS443:3:35:738:1940#0/1  
a`a][`\_`]W]^`]^`^]^\Z\_`Y\]]XVZ\_¥a^^ZY]]XX  
@HWI-EAS443:3:35:845:580#0/1  
GAGAAAGCTAATGTGCTAATTGGGCAAGGGGACGTAGTGT  
+HWI-EAS443:3:35:845:580#0/1  
aKaaa¥¥[a\_ZaaXa][^^\_^^Z¥`YR]U^\_`^`[W¥VWV  
@HWI-EAS443:3:35:877:561#0/1  
TCCCCTTGCCCAATTAGCACATTAGCTTTCTCCTCTTTTG  
+HWI-EAS443:3:35:877:561#0/1  
`abbbbaabbbbaabbbbaaaaa`aaa`aaaa\_aa\_``  
@HWI-EAS443:3:35:919:439#0/1  
CTTGCAAAAGGAGAGAAAGCTAATGTGCTAATTGGGCAAG  
+HWI-EAS443:3:35:919:439#0/1  
Z]b`[bbba`aSS¥`aYa^aa\_bb[]D¥ab`aa]a¥`]a  
@HWI-EAS443:3:35:926:855#0/1  
AATGAACTGAGCAATCTTGCAAAAGGAGAGAAAGCTAATG  
+HWI-EAS443:3:35:926:855#0/1  
]\_¥UYX[¥]\_a[¥RZOV^¥]Y^aaa`^`¥LO]\_]Y¥YU  
@HWI-EAS443:3:35:948:1069#0/1  
GAGAGAAAGCTAATGTGCTAATTGGGCAAGGGGACGTAGT  
+HWI-EAS443:3:35:948:1069#0/1  
a\_¥\_\_\_a[]^aZ¥ZVMa^\_\_\_\_Y^^]aQ]\_\_\_WNY\_RT^Z  
@HWI-EAS443:3:36:1007:770#0/1  
GAGCAATCTTGCAAAAGGAGAGAAAGCTAATGTGCTAATT  
+HWI-EAS443:3:36:1007:770#0/1  
aabb`\_bbbbbab`\_]baaa\_ab\_bbaaa]`b¥bbb[bba  
@HWI-EAS443:3:36:102:937#0/1  
GCAAAAGGAGAGAAAGCTAATGTGCTAATTGGGCAAGGGG  
+HWI-EAS443:3:36:102:937#0/1  
aa\_]Z]X]^a¥S\_`^\_]\_^\_U]``\_Y^^^¥^¥[LU\_Z  
@HWI-EAS443:3:36:1031:838#0/1  
TAGCACATTAGCTTTCTCCTTTTGCAAGATTGCTCAGT  
+HWI-EAS443:3:36:1031:838#0/1  
abbabbbbaabaabaabbbbaabbbbaabbaa`bab`a]  
@HWI-EAS443:3:36:1053:139#0/1  
ATCTTGCAAAAGGAGAGAAAGCTAATGTGCTAATTGGGCA  
+HWI-EAS443:3:36:1053:139#0/1  
abbabbbbaaaaa`b`ab`aa`a\_aaaZa\_a\_\_\_\_aa\_W^  
@HWI-EAS443:3:36:1113:1016#0/1  
GCAAAAGGAGAGAAAGCTAATGTGCTAATTGGGCAAGGGG  
+HWI-EAS443:3:36:1113:1016#0/1  
aaa^a\_aa\_^]aa[]aa`XQ`a^a\_`Y¥``a^^\_`^`[Y[  
@HWI-EAS443:3:36:1154:1954#0/1  
GAGCAATCTTGCAAAAGGAGAGAAAGCTAATGTGCTAATT  
+HWI-EAS443:3:36:1154:1954#0/1  
aabbbbaabb\_\_abaabaab`ba\_aa\_aaaWRW``aaa\_

@HWI-EAS443:3:36:1183:1437#0/1  
CTTGCCCAATTAGCACATTAGCTTTCTCCTTTTGCAAG  
+HWI-EAS443:3:36:1183:1437#0/1  
abbaabbbabbbaaa`baba`aaa`ba\_abb`aaa\_ba`a  
@HWI-EAS443:3:36:1250:1138#0/1  
GCACATTAGCTTTCTCCTTTTGCAAGATTGCTCAGTTC  
+HWI-EAS443:3:36:1250:1138#0/1  
ababbb\_Y^ababbbabaaba`aaaaaaaaaaaaab^`b  
@HWI-EAS443:3:36:1305:846#0/1  
ATGAACTGAGCAATCTTGCAAAGGAGAGAAAGCTAATGT  
+HWI-EAS443:3:36:1305:846#0/1  
¥a[Saba`ba`a]]abaa^`aaaab\_ba`^`[``\_\_`^  
@HWI-EAS443:3:36:1454:924#0/1  
CAAAAGGAGAGAAAGCTAATGTGCTAATTGGGCAAGGGGA  
+HWI-EAS443:3:36:1454:924#0/1  
aabbabbabbbbaab\_baabbabaaa`aaaa]\_\_aaab\_  
@HWI-EAS443:3:36:1546:1471#0/1  
GAGAAAGCTAATGTGCTAATTGGGCAAGGGGACGTAGTGT  
+HWI-EAS443:3:36:1546:1471#0/1  
abbba\_bbbabbb]aabaaaaba`\_\_a`ba]]a^Zb\_a]  
@HWI-EAS443:3:36:249:1999#0/1  
ATCTTGCAAAGGAGAGAAAGCTAATGTGCTAATTGGGCA  
+HWI-EAS443:3:36:249:1999#0/1  
aaa`\_`ba[a\_\_W]a^\_aYW`\_aa\_\_Z^`Y\_¥Y[ZXZ]  
@HWI-EAS443:3:36:327:1169#0/1  
GAGAGAAAGCTAATGTGCTAATTGGGCAAGGGGACGTAGT  
+HWI-EAS443:3:36:327:1169#0/1  
aa^`^aa]aaU`a\_baa^]\_aba`a\_Ta`^X`aY\_aV  
@HWI-EAS443:3:36:393:1496#0/1  
AGCTAATGTGCTAATTGGGCAAGGGGACGTAGTGTGGTA  
+HWI-EAS443:3:36:393:1496#0/1  
aXbaaaZ\_^aba^Zaaa`Ybaa`a¥`aaX\_YHYSaa^V[  
@HWI-EAS443:3:36:406:1494#0/1  
AGCTAATGTGCTAATTGGGCAAGGGGACGTAGTGTGGTA  
+HWI-EAS443:3:36:406:1494#0/1  
a\_¥`^a[[Raaaa]^`^a^aZRZZ\_\_UaZ¥ZS[QX^VU\_  
@HWI-EAS443:3:36:509:295#0/1  
GAGAAAGCTAATGTGCTAATTGGGCAAGGGGACGTAGTGT  
+HWI-EAS443:3:36:509:295#0/1  
a\_X`ZZ^aa`aa¥V`a¥]aa\_Y\_¥¥SX^`\_W^`Z¥XV¥V  
@HWI-EAS443:3:36:555:1990#0/1  
AGCTAATGTGCTAATTGGGCAAGGGGACGTAGTGTGGTA  
+HWI-EAS443:3:36:555:1990#0/1  
`aa\_aa`^`a\_\_a``\_\_\_\_\_a¥ZR^]V^V[\_UXS^^W0^  
@HWI-EAS443:3:36:556:471#0/1  
AATGAACTGAGCAATCTTGCAAAGGAGAGAAAGCTAATG  
+HWI-EAS443:3:36:556:471#0/1  
\_aa`^aaaaaaaaaaaa`^`a`ba\_¥`a\_a\_\_\_\_[\_`a  
@HWI-EAS443:3:36:576:369#0/1  
GAGCAATCTTGCAAAGGAGAGAAAGCTAATGTGCTAATT

+HWI-EAS443:3:36:576:369#0/1  
\_¥aa[W]`abbbbababa]aaab\_a`a]S\_aaSa`ZH¥a^  
@HWI-EAS443:3:36:638:465#0/1  
TAGCACATTAGCTTTCTCTCCTTTTGCAAGATTGCTCAGT  
+HWI-EAS443:3:36:638:465#0/1  
ab\_bbaaaaa`aba\_aabaaaa\_aaa`W`\_\_`\_aaa\_a]  
@HWI-EAS443:3:36:644:768#0/1  
GAACTGAGCAATCTTGCAAAGGAGAGAAAGCTAATGTGC  
+HWI-EAS443:3:36:644:768#0/1  
a`aa]¥`aa\_]a\_a\_a[]\_Y\_\_^^^\_VWZ¥^^]¥^X^Y  
@HWI-EAS443:3:36:749:639#0/1  
CCCCTTGCCCAATTAGCACATTAGCTTTCTCTCCTTTTGC  
+HWI-EAS443:3:36:749:639#0/1  
I\_b``Ub\_¥bbbb`bba`¥`a`baba^]abba]a^PYU`  
@HWI-EAS443:3:36:835:692#0/1  
GAGCAATCTTGCAAAGGAGAGAAAGCTAATGTGCTAATT  
+HWI-EAS443:3:36:835:692#0/1  
W\_R\_¥P]¥RRV`b]WUa\_0]V¥bUU\_a^W[\_ZX``XLZ[U  
@HWI-EAS443:3:36:886:309#0/1  
GAGCAATCTTGCAAAGGAGAGAAAGCTAATGTGCTAATT  
+HWI-EAS443:3:36:886:309#0/1  
a``baba`baa\_aa\_abbabaaaa]a`\_aa\_aY\_\_a^[^^  
@HWI-EAS443:3:36:906:1873#0/1  
GAAAGCTAATGTGCTAATTGGGCAAGGGGACGTAGTGTTG  
+HWI-EAS443:3:36:906:1873#0/1  
]ba\_\_ba¥`abZ¥]abbbba\_`aaaa\_^]ab`\_]\_[b\_``  
@HWI-EAS443:3:36:966:1003#0/1  
GAGCAATCTTGCAAAGGAGAGAAAGCTAATGTGCTAATT  
+HWI-EAS443:3:36:966:1003#0/1  
a\_ababbbbbb\_\_aaabbbba``ba\_\_\_bb[\_ba\_aaa^`a`  
@HWI-EAS443:3:36:990:1411#0/1  
GAAAGCTAATGTGCTAATTGGGCAAGGGGACGTAGTGTTG  
+HWI-EAS443:3:36:990:1411#0/1  
`bab]baaab`Xaaaa`aaa``\_`\_aa\_]`¥W^a]]^`  
@HWI-EAS443:3:37:1061:1194#0/1  
GAGAAAGCTAATGTGCTAATTGGGCAAGGGGACGTAGTGT  
+HWI-EAS443:3:37:1061:1194#0/1  
aaaaaaaa`ba`aaaa`aa```a\_[\_`Z\_a^X]`X^V  
@HWI-EAS443:3:37:1134:1695#0/1  
AAGCATCAATGAACTGAGCAATCTTGCAAAGGAGAGAAA  
+HWI-EAS443:3:37:1134:1695#0/1  
aa`^`aaaaa`\_]`\_¥\_`^`\_a\_a`\_YKTT\_`Z\_b`^  
@HWI-EAS443:3:37:1170:1422#0/1  
CACTACGTCCCCTTGCCCAATTAGCACATTAGCTTTCTCT  
+HWI-EAS443:3:37:1170:1422#0/1  
Yabaa^bbba`[abYa`b`bbaaa`b\_ab[b`aab^\_b`a  
@HWI-EAS443:3:37:1203:1955#0/1  
GAGCAATCTTGCAAAGGAGAGAAAGCTAATGTGCTAATT  
+HWI-EAS443:3:37:1203:1955#0/1  
[¥`Zabb`¥``[\_`ab`\_^¥abba`ba[^[Ub\_bbbaaa`

@HWI-EAS443:3:37:1423:1045#0/1  
GAAAGCTAATGTGCTAATTGGGCAAGGGGACGTAGTGTGG  
+HWI-EAS443:3:37:1423:1045#0/1  
`a`Z`abaUb`\_a^`aaa`\_`\_aaab`aaZaa]`aWa^\_a  
@HWI-EAS443:3:37:1425:515#0/1  
TGCAAAAGGAGAGAAAGCTAATGTGCTAATTGGGCAAGGG  
+HWI-EAS443:3:37:1425:515#0/1  
ab`\_aaaaa`\_aaa`\_a¥a^`aa\_aa`]\_Wa\_a[]^X`^Z  
@HWI-EAS443:3:37:1448:1291#0/1  
TCCCCTTGCCCAATTAGCACATTAGCTTTCTCTCCTTTTG  
+HWI-EAS443:3:37:1448:1291#0/1  
`^]`^ZS`\_]Z\_a`XRV]][]\_PT][^NYZU^V`a`Y¥WYY  
@HWI-EAS443:3:37:1449:1101#0/1  
AATGAACTGAGCAATCTTGCAAAAGGAGAGAAAGCTAATG  
+HWI-EAS443:3:37:1449:1101#0/1  
^`[K¥aaa^¥W`\_TX^a``]YJY`a`^VT]YX]a\_`^[a  
@HWI-EAS443:3:37:1693:1290#0/1  
GCATCAATGAACTGAGCAATCTTGCAAAAGGAGAGAAAGC  
+HWI-EAS443:3:37:1693:1290#0/1  
abaa^a^aaa\_Va]Za`\_\_^aa`\_`^TQMLWa``\_^^^S  
@HWI-EAS443:3:37:191:259#0/1  
ATCTTGCAAAAGGAGAGAAAGCTAATGTGCTAATTGGGCA  
+HWI-EAS443:3:37:191:259#0/1  
a`aaaa`a]`a`\_a^\_a\_\_\_`\_`^`^Y]XV\_HY]\_]X^Z  
@HWI-EAS443:3:37:224:1786#0/1  
GAGCAATCTTGCAAAAGGAGAGAAAGCTAATGTGCTAATT  
+HWI-EAS443:3:37:224:1786#0/1  
ababbbbbbb`bbbbba\_bb[b[bbbaba¥`a`^`babaaa  
@HWI-EAS443:3:37:247:432#0/1  
GAGAAAGCTAATGTGCTAATTGGGCAAGGGGACGTAGTGT  
+HWI-EAS443:3:37:247:432#0/1  
]]a`Z`aa`¥]¥X`\_YH¥\_]\_¥\_\_W¥`]YRV]\_US^RZV  
@HWI-EAS443:3:37:404:259#0/1  
AAAGCTAATGTGCTAATTGGGCAAGGGGACGTAGTGTGG  
+HWI-EAS443:3:37:404:259#0/1  
aa]\_aa`^aa^a`\_`aa`a`\_`^\_a\_\_^ZR^VX`Z`Z]\_X  
@HWI-EAS443:3:37:500:635#0/1  
CTTGCAAAAGGAGAGAAAGCTAATGTGCTAATTGGGCAAG  
+HWI-EAS443:3:37:500:635#0/1  
ab`ab`\_aWabaabbbbaaaba]aa\_YP\_\_a`]`U`a  
@HWI-EAS443:3:37:548:498#0/1  
AGCTAATGTGCTAATTGGGCAAGGGGACGTAGTGTGGTA  
+HWI-EAS443:3:37:548:498#0/1  
`aabb]bbabbabbabb]baa[abaa¥^bWRb]a\_abaX`  
@HWI-EAS443:3:37:578:1660#0/1  
CATCAATGAACTGAGCAATCTTGCAAAAGGAGAGAAAGCT  
+HWI-EAS443:3:37:578:1660#0/1  
U\_\_X`^][¥a`¥RX\_a^[\_`^Z`¥¥V¥`^aa¥S¥`^\_Z^]  
@HWI-EAS443:3:37:780:302#0/1  
GCAATCTTGCAAAAGGAGAGAAAGCTAATGTGCTAATTGG



@HWI-EAS443:3:38:287:1799#0/1  
CATCAATGAACTGAGCAATCTTGCAAAAGGAGAGAAAGCT  
+HWI-EAS443:3:38:287:1799#0/1  
aa`aaaa\_aa\_]^Waaa^\_`]aa¥YZ]XZZ^X^\_\_Z\_U  
@HWI-EAS443:3:38:328:318#0/1  
ATCTTGCAAAAGGAGAGAAAGCTAATGTGCTAATTGGGCA  
+HWI-EAS443:3:38:328:318#0/1  
^XV\_\_\_\_ZZY]^a\_Y¥XaaU]¥^ZJY\_VYRVUXH\_XRVZZ  
@HWI-EAS443:3:38:346:448#0/1  
ACTGAGCAATCTTGCAAAAGGAGAGAAAGCTAATGTGCTA  
+HWI-EAS443:3:38:346:448#0/1  
aaXa^WQUR¥JZ\_aaaa`^]``aaa¥YZQHOPYZY¥WDMQ  
@HWI-EAS443:3:38:439:995#0/1  
GCATCAATGAACTGAGCAATCTTGCAAAAGGAGAGAAAGC  
+HWI-EAS443:3:38:439:995#0/1  
a\_¥`aV\_\_¥\_aa`SSa`aZ]^¥^^]¥Q\_I¥Y\_`^W`a]YP  
@HWI-EAS443:3:38:565:1694#0/1  
CATCAATGAACTGAGCAATCTTGCAAAAGGAGAGAAAGCT  
+HWI-EAS443:3:38:565:1694#0/1  
\_bbb\_aaaa\_`a`aaaabb]aa]aaaa`0``aaba`\_aX  
@HWI-EAS443:3:38:632:1591#0/1  
GAGCAATCTTGCAAAAGGAGAGAAAGCTAATGTGCTAATT  
+HWI-EAS443:3:38:632:1591#0/1  
a\_Z[\_ZZa^WS^)^N¥YW[]Z[¥Q^a`P][Y`ZYPU^¥^L  
@HWI-EAS443:3:38:666:166#0/1  
GCATCAATGAACTGAGCAATCTTGCAAAAGGAGAGAAAGC  
+HWI-EAS443:3:38:666:166#0/1  
aaa`a`aa`a^\_^`\_[\_\_`^a^^^]Z\_ZZ^\_`^^Z\_W  
@HWI-EAS443:3:38:712:166#0/1  
GAGAAAGCTAATGTGCTAATTGGGCAAGGGGACGTAGTGT  
+HWI-EAS443:3:38:712:166#0/1  
aaaa\_\_`a\_]¥]\_X`\_\_¥\_^^^]\_]¥\_]ZZZZ^XZ^X]Z  
@HWI-EAS443:3:38:740:283#0/1  
AGCTAATGTGCTAATTGGGCAAGGGGACGTAGTGTGGTA  
+HWI-EAS443:3:38:740:283#0/1  
\_\_]`\_ZaZIT`aX`aaa^¥`\_`Z^U]]LUYQ[OYaZFN  
@HWI-EAS443:3:38:744:371#0/1  
CTTGCAAAAGGAGAGAAAGCTAATGTGCTAATTGGGCAAG  
+HWI-EAS443:3:38:744:371#0/1  
aaa`aba^aa`^a`aa`a\_`aaaa]]^`\_]\_^\_\_a\_\_\_\_]  
@HWI-EAS443:3:38:782:1349#0/1  
GCATCAATGAACTGAGCAATCTTGCAAAAGGAGAGAAAGC  
+HWI-EAS443:3:38:782:1349#0/1  
Yababb`^ba]`baZ^abbababbbb¥a`a^\_```a`a`X  
@HWI-EAS443:3:38:843:1859#0/1  
AGCTAATGTGCTAATTGGGCAAGGGGACGTAGTGTGGTA  
+HWI-EAS443:3:38:843:1859#0/1  
a\_baa]\_Z`]a`aYb^Zb`W`a`LQUV`XXWY]Z[YT]Q  
@HWI-EAS443:3:38:876:1690#0/1  
GAAAGCTAATGTGCTAATTGGGCAAGGGGACGTAGTGTG

+HWI-EAS443:3:38:876:1690#0/1  
a#baaaXVZb`a^\_aaZ`RJR¥`]a`a`RZaZ`a0\_0\_S  
@HWI-EAS443:3:38:969:647#0/1  
ATGAACTGAGCAATCTTGCAAAGGAGAGAAAGCTAATGT  
+HWI-EAS443:3:38:969:647#0/1  
abaX`aa¥[`aaaaaa^adW\_[]\_]aa[]]\_\_^ZRTM  
@HWI-EAS443:3:39:1008:1326#0/1  
AGCAATCTTGCAAAGGAGAGAAAGCTAATGTGCTAATTG  
+HWI-EAS443:3:39:1008:1326#0/1  
aabb`abaab`aaaaaaa`aaa^aa^`\_aR^^`\_^]V  
@HWI-EAS443:3:39:1017:1369#0/1  
TTGCAAAGGAGAGAAAGCTAATGTGCTAATTGGGCAAGG  
+HWI-EAS443:3:39:1017:1369#0/1  
aa`abaZ]baaaaaabaa`^a\_aa`[a]`aa`^^¥¥]\_^  
@HWI-EAS443:3:39:1114:1268#0/1  
GAGCAATCTTGCAAAGGAGAGAAAGCTAATGTGCTAATT  
+HWI-EAS443:3:39:1114:1268#0/1  
^\_\_`\_^`aY`a\_]a\_VZ\_aa^`b]`Xa]ZV¥aZ¥Z\_\_  
@HWI-EAS443:3:39:1165:315#0/1  
GAACTGAGCAATCTTGCAAAGGAGAGAAAGCTAATGTGC  
+HWI-EAS443:3:39:1165:315#0/1  
aabbbb`babaaaaaaaa`^baaaaa\_a\_R]a`a`]`V  
@HWI-EAS443:3:39:1194:351#0/1  
CTTGCAAAGGAGAGAAAGCTAATGTGCTAATTGGGCAAG  
+HWI-EAS443:3:39:1194:351#0/1  
ab]G]baa`a`baba[a`\_]ab\_aaa]`\_^`aa`\_\_^  
@HWI-EAS443:3:39:1208:1716#0/1  
GTCCCCTTGCCCAATTAGCACATTAGCTTTCTCCTTTT  
+HWI-EAS443:3:39:1208:1716#0/1  
aP`]\_]Y\_aa[[[\_VY\_[YJQ[Z^YU^`^XSSY]VZ¥`V  
@HWI-EAS443:3:39:1223:1052#0/1  
CAATCTTGCAAAGGAGAGAAAGCTAATGTGCTAATTGGG  
+HWI-EAS443:3:39:1223:1052#0/1  
abb`^aab`^aa]b]baba¥]a\_^`aabZ`Paa]\_aaa\_  
@HWI-EAS443:3:39:1231:1226#0/1  
CTTGCAAAGGAGAGAAAGCTAATGTGCTAATTGGGCAAG  
+HWI-EAS443:3:39:1231:1226#0/1  
aa`b`ZZ^^a[]`¥[`^V`\_XaUZa¥¥^`\_\_X\_[\_\_[XV\_  
@HWI-EAS443:3:39:1383:640#0/1  
ATGAACTGAGCAATCTTGCAAAGGAGAGAAAGCTAATGT  
+HWI-EAS443:3:39:1383:640#0/1  
U[\_J\_a\_a[`b\_]`^YZ`\_¥[X^Z^J[`a]S[UV\_¥T\_\_Q  
@HWI-EAS443:3:39:1409:1797#0/1  
AGCTAATGTGCTAATTGGGCAAGGGACGTAGTGTGGTA  
+HWI-EAS443:3:39:1409:1797#0/1  
a]¥¥`Y^ZZXaa`a\_`VZ[^[QQT^0`^PVTQ]^XUFS  
@HWI-EAS443:3:39:1431:586#0/1  
GCAATCTTGCAAAGGAGAGAAAGCTAATGTGCTAATTGG  
+HWI-EAS443:3:39:1431:586#0/1  
aabaaaa^^a`Z`aa^a`a\_\_\_\_\_Z\_^`RVZ\_]`\_]\_Y



@HWI-EAS443:3:39:1441:1975#0/1  
GAGAAAGCTAATGTGCTAATTGGGCAAGGGGACGTAGTGT  
+HWI-EAS443:3:39:1441:1975#0/1  
aaa^a^^V]\_`aY\_S]\_\_U`\_X^`[\_[\_LPHSUVVXTM  
@HWI-EAS443:3:39:1494:450#0/1  
AACTGAGCAATCTTGCAAAAGGAGAGAAAGCTAATGTGCT  
+HWI-EAS443:3:39:1494:450#0/1  
abb`VS]baaaa``baa`a`aa]`aa\_aYa`^Y\_`¥X¥Y]  
@HWI-EAS443:3:39:153:534#0/1  
ATCTTGCAAAAGGAGAGAAAGCTAATGTGCTAATTGGGCA  
+HWI-EAS443:3:39:153:534#0/1  
]`baaaba]``aa\_`\_`a\_a`a^Q`X`aa^\_a`a`\_a¥  
@HWI-EAS443:3:39:1580:1113#0/1  
AGCTAATGTGCTAATTGGGCAAGGGGACGTAGTGTGGTA  
+HWI-EAS443:3:39:1580:1113#0/1  
aa`bbabbab]b``bbbaaS]a[``[\_`\_RYaaab]ZY  
@HWI-EAS443:3:39:1618:454#0/1  
TAGCTTTCTCTCCTTTTGCAAGATTGCTCAGTTCATTGAT  
+HWI-EAS443:3:39:1618:454#0/1  
X`W`¥Y\_[^b`]^Yaa][P\_[ZaWU][Y[NX[VS`]¥]  
@HWI-EAS443:3:39:1667:269#0/1  
AGGAGAGAAAGCTAATGTGCTAATTGGGCAAGGGGACGTA  
+HWI-EAS443:3:39:1667:269#0/1  
\_aaab`ab`a`aaabbaaaaaabb`a`a`R`b^\_a]Y  
@HWI-EAS443:3:39:16:1123#0/1  
ATCTTGCAAAAGGAGAGAAAGCTAATGTGCTAATTGGGCA  
+HWI-EAS443:3:39:16:1123#0/1  
a\_baaaaWW^`aa[`]aa\_S`a]Z]``Uaa`RX\_¥a]\_a\_  
@HWI-EAS443:3:39:180:1566#0/1  
GAGCAATCTTGCAAAAGGAGAGAAAGCTAATGTGCTAATT  
+HWI-EAS443:3:39:180:1566#0/1  
`¥`ba¥abbbbaV\_Q\_aZ\_\_aaaaT\_aaab^^T^aaaaa]  
@HWI-EAS443:3:39:211:1415#0/1  
CATCAATGAAGTGAATCTTGCAAAAGGAGAGAAAGCT  
+HWI-EAS443:3:39:211:1415#0/1  
`QYa^][R^`]ZZW¥``¥¥[Z\_\_\_YJX\_\_\_]X]Z¥R^]^ZP  
@HWI-EAS443:3:39:236:594#0/1  
GAAAGCTAATGTGCTAATTGGGCAAGGGGACGTAGTGTG  
+HWI-EAS443:3:39:236:594#0/1  
¥Q^V]\_ZOGY\_V]`^[[[ZZUU¥UZ[]ZTN[VVXQ]UU[  
@HWI-EAS443:3:39:237:31#0/1  
ATCTTGCAAAAGGAGAGAAAGCTAATGTGCTAATTGGGCA  
+HWI-EAS443:3:39:237:31#0/1  
aabbabaZ]]`ba\_b¥`X]aa\_^^^\_]\_a[[ZZU`]^\_V  
@HWI-EAS443:3:39:23:1464#0/1  
GAAAGCTAATGTGCTAATTGGGCAAGGGGACGTAGTGTG  
+HWI-EAS443:3:39:23:1464#0/1  
aa^Z`a`\_]WQV[^`Y\_\_^\_U[a\_TZ^UY¥¥RRZ¥WYUUL  
@HWI-EAS443:3:39:309:1436#0/1  
GAACTGAGCAATCTTGCAAAAGGAGAGAAAGCTAATGTGCT



@HWI-EAS443:3:39:826:1303#0/1  
GAGCAATCTTGCAAAAGGAGAGAAAGCTAATGTGCTAATT  
+HWI-EAS443:3:39:826:1303#0/1  
[aabb`bbbbbbbabYbabbbbababababaaababaabb  
@HWI-EAS443:3:3:1034:1417#0/1  
GAAAGCTAATGTGCTAATTGGGCAAGGGGACGTAGTGTG  
+HWI-EAS443:3:3:1034:1417#0/1  
aaaa`a`a]a^`^b\_\_a`a\_\_\_^¥aaaaV^a0ZaH\_Y]\_  
@HWI-EAS443:3:3:1112:287#0/1  
ATCTTGCAAAAGGAGAGAAAGCTAATGTGCTAATTGGGCA  
+HWI-EAS443:3:3:1112:287#0/1  
ab\_aaaaaaa`ba\_a\_aa\_`aU`\_`aa]aX`\_^`\_`\_\_YZ  
@HWI-EAS443:3:3:1130:469#0/1  
CATCAATGAAGTGAATCTTGCAAAAGGAGAGAAAGCT  
+HWI-EAS443:3:3:1130:469#0/1  
`b^a^`b`¥ba^aa^Z\_a^^`\_`a[`bba`babaa]bVa  
@HWI-EAS443:3:3:1141:1122#0/1  
AATGAAGTGAATCTTGCAAAAGGAGAGAAAGCTAATG  
+HWI-EAS443:3:3:1141:1122#0/1  
¥b\_ZXPP^ba^\_¥UaSb[aa`]\_\_a`Za\_`a[QaQa\_\_a\_  
@HWI-EAS443:3:3:1185:1284#0/1  
GAGAAAGCTAATGTGCTAATTGGGCAAGGGGACGTAGTGT  
+HWI-EAS443:3:3:1185:1284#0/1  
`Z\_RWXa\_^SY`SYa\_`[[¥Ta¥RSWFS¥`ZHU\_YLPU]B  
@HWI-EAS443:3:3:1392:362#0/1  
AGGAGAGAAAGCTAATGTGCTAATTGGGCAAGGGGACGTA  
+HWI-EAS443:3:3:1392:362#0/1  
U¥VQ[ZaW¥\_TO[XW]WWVDTW]\_aVHNQYX]R`\_]BBBB  
@HWI-EAS443:3:3:1397:1388#0/1  
ACCAACTACGTCCCCTTGCCCAATTAGCACATTAGCTT  
+HWI-EAS443:3:3:1397:1388#0/1  
aaVa`aa\_b\_H\_\_a¥``US¥^^[¥a[U\_\_a][`^Y\_ZV\_\_  
@HWI-EAS443:3:3:1521:1387#0/1  
ATCTTGCAAAAGGAGAGAAAGCTAATGTGCTAATTGGGCA  
+HWI-EAS443:3:3:1521:1387#0/1  
[^`aa¥0]\_¥XZ\_^ZIa¥\_]\_NZ^aaa]a¥a\_\_`\_]`Y00[  
@HWI-EAS443:3:3:1573:1670#0/1  
GAGCAATCTTGCAAAAGGAGAGAAAGCTAATGTGCTAATT  
+HWI-EAS443:3:3:1573:1670#0/1  
]QH¥b¥bbbY`¥T00^0ZZba]`a\_b\_baaab]bS\_R¥`a  
@HWI-EAS443:3:3:1671:649#0/1  
CAATCTTGCAAAAGGAGAGAAAGCTAATGTGCTAATTGGG  
+HWI-EAS443:3:3:1671:649#0/1  
a`abbZabb`bVbb`\_bbbaab^baaa`Gb\_a¥Yab]ZP  
@HWI-EAS443:3:3:1701:1721#0/1  
AAGCTAATGTGCTAATTGGGCAAGGGGACGTAGTGTGTTGGT  
+HWI-EAS443:3:3:1701:1721#0/1  
a]`ab`aab```a^`aa]`X^\_\_`a[`\_]`XT\_^a\_\_a\_V  
@HWI-EAS443:3:3:1730:431#0/1  
AGCTAATGTGCTAATTGGGCAAGGGGACGTAGTGTGGTA

+HWI-EAS443:3:3:1730:431#0/1  
`baabU`\_P`Xa`YaZYa\_\_X`\_a\_aXX\_W^[]a^`aW]V  
@HWI-EAS443:3:3:1746:343#0/1  
AGCTAATGTGCTAATTGGGCAAGGGGACGTAGTGTGGTA  
+HWI-EAS443:3:3:1746:343#0/1  
aa[a`a]a[b\_aa\_\_`aba`\_^`a]a0TaXZ`R\_\_W\_[VB  
@HWI-EAS443:3:3:1789:724#0/1  
GAAAGCTAATGTGCTAATTGGGCAAGGGGACGTAGTGTG  
+HWI-EAS443:3:3:1789:724#0/1  
aaa¥U¥`aabb[a^)`aaa¥`¥)`[a[``\_N\_U]a[aUY]  
@HWI-EAS443:3:3:238:150#0/1  
GAACTGAGCAATCTTGCAAAAGGAGAGAAAGCTAATGTGC  
+HWI-EAS443:3:3:238:150#0/1  
aaTVY¥[b\_a`a^`\_a]^`\_]aa`aaa\_Y``^^^`\_Q`Z  
@HWI-EAS443:3:3:268:1062#0/1  
CTTGCCCAATTAGCACATTAGCTTTCTCCTTTTGCAAG  
+HWI-EAS443:3:3:268:1062#0/1  
aaabaaba`bbba`\_`abbaba`aaaa\_a^`aabaa^aaa  
@HWI-EAS443:3:3:294:1518#0/1  
AGCTAATGTGCTAATTGGGCAAGGGGACGTAGTGTGGTA  
+HWI-EAS443:3:3:294:1518#0/1  
¥Z^`^Y]bbab[aZ`aPa`aZ`¥aa`\_[^\_Q\_\_W`VYa`00  
@HWI-EAS443:3:3:300:859#0/1  
CATCAATGAACTGAGCAATCTTGCAAAAGGAGAGAAAGCT  
+HWI-EAS443:3:3:300:859#0/1  
a¥¥`YO\_NP\_SS\_aYFYVa\_UQ[`RVX`^Y][U[¥YY]X¥  
@HWI-EAS443:3:3:408:804#0/1  
AGAGAAAGCTAATGTGCTAATTGGGCAAGGGGACGTAGTG  
+HWI-EAS443:3:3:408:804#0/1  
abaYbbaba`a`a\_\_`ab¥]aaaaa`\_a\_a`¥]a^`^a  
@HWI-EAS443:3:3:416:1726#0/1  
AATGAACTGAGCAATCTTGCAAAAGGAGAGAAAGCTAATG  
+HWI-EAS443:3:3:416:1726#0/1  
abb`b`a`\_^a\_aa`^aaa`\_aaa\_a^aa`\_a``\_]\_]\_a  
@HWI-EAS443:3:3:506:1133#0/1  
CCCTTGCCCAATTAGCACATTAGCTTTCTCCTTTTGCA  
+HWI-EAS443:3:3:506:1133#0/1  
\_baaabbabbaab`a^abaabaaaaabab`aa]ba`aa\_a  
@HWI-EAS443:3:3:613:405#0/1  
TGAAGCTGAGCAATCTTGCAAAAGGAGAGAAAGCTAATGTG  
+HWI-EAS443:3:3:613:405#0/1  
\_a[\_aa^aaaV¥WR`aaa\_¥]aabYb`b`U^a^`]^`^aZa  
@HWI-EAS443:3:3:628:2013#0/1  
CATCAATGAACTGAGCAATCTTGCAAAAGGAGAGAAAGCT  
+HWI-EAS443:3:3:628:2013#0/1  
aaXP\_aaa\_a\_R`]]Q```Q`\_`aX]\_```a[a\_\_[Z`\_X\_  
@HWI-EAS443:3:3:645:545#0/1  
GAGCAATCTTGCAAAAGGAGAGAAAGCTAATGTGCTAATT  
+HWI-EAS443:3:3:645:545#0/1  
\_aa^bbaabbbba\_a\_abbbaaab``b\_aa\_bb]a`a`\_ba

@HWI-EAS443:3:3:739:750#0/1  
CATCAATGAACTGAGCAATCTTGCAAAAGGAGAGAAAGCT  
+HWI-EAS443:3:3:739:750#0/1  
a¥ZPY\_`aa`V\_a\_]Sa`[aaa`a`\_`\_^]^[Yaa`]aYa  
@HWI-EAS443:3:3:777:213#0/1  
GAGCAATCTTGCAAAAGGAGAGAAAGCTAATGTGCTAATT  
+HWI-EAS443:3:3:777:213#0/1  
^^`aaabaabb]babbbbbbb`abbab`aT\_aa]a^`\_]aa  
@HWI-EAS443:3:3:813:860#0/1  
GAAAGCTAATGTGCTAATTGGGCAAGGGGACGTAGTGTTG  
+HWI-EAS443:3:3:813:860#0/1  
Y`baaaba\_bbZbaa`aaabbaaa```a[Xa]Y]Y]^\_a  
@HWI-EAS443:3:3:83:275#0/1  
GCATCAATGAACTGAGCAATCTTGCAAAAGGAGAGAAAGC  
+HWI-EAS443:3:3:83:275#0/1  
aabababababaaa`a`aaaa`ab\_a`\_aa`\_aaaa`\_a]  
@HWI-EAS443:3:3:910:796#0/1  
GAACTGAGCAATCTTGCAAAAGGAGAGAAAGCTAATGTGC  
+HWI-EAS443:3:3:910:796#0/1  
a]``^[PWaV`¥S]]a\_a\_]Za\_Qa¥\_`UZaO\_WPZ¥[\_V  
@HWI-EAS443:3:3:935:835#0/1  
GAGAAAGCTAATGTGCTAATTGGGCAAGGGGACGTAGTGT  
+HWI-EAS443:3:3:935:835#0/1  
¥```^`a`^Yba`[[b\_a`\_a\_a`aH\_\_b¥a][Na^\_\_Va]  
@HWI-EAS443:3:3:992:763#0/1  
GAGAAAGCTAATGTGCTAATTGGGCAAGGGGACGTAGTGT  
+HWI-EAS443:3:3:992:763#0/1  
a`b\_\_\_aR^\_Y\_a¥`\_a`\_a`\_`]^\_a``XTRWPOXMV]  
@HWI-EAS443:3:40:1052:1380#0/1  
ATCTTGCAAAAGGAGAGAAAGCTAATGTGCTAATTGGGCA  
+HWI-EAS443:3:40:1052:1380#0/1  
aaaabbaaaaaa`\_]`aaa\_aaaa\_\_`^]\_`\_```\_\_a]a¥  
@HWI-EAS443:3:40:1054:1745#0/1  
GCCCAATTAGCACATTAGCTTTCTCTCCTTTTGCAAGATT  
+HWI-EAS443:3:40:1054:1745#0/1  
¥JS`RYY¥Q]¥^TTT\_PW^[¥R¥J^UadW[SXT\_XN[PPM  
@HWI-EAS443:3:40:1064:1678#0/1  
GAGCAATCTTGCAAAAGGAGAGAAAGCTAATGTGCTAATT  
+HWI-EAS443:3:40:1064:1678#0/1  
^aaaaa`aaba\_\_\_^^`[Za\_aa^Wa\_Y¥V\_^`\_\_\_^\_  
@HWI-EAS443:3:40:1352:509#0/1  
GTCCCCTTGCCAATTAGCACATTAGCTTTCTCTCCTTTT  
+HWI-EAS443:3:40:1352:509#0/1  
\_BBBBBBBBBBBBBBBBBBBBBBBBBBBBBBBBBBBBBBB  
@HWI-EAS443:3:40:1379:1042#0/1  
GAAAGCTAATGTGCTAATTGGGCAAGGGGACGTAGTGTTG  
+HWI-EAS443:3:40:1379:1042#0/1  
`¥[Y][ZVTZUV¥V[VU¥]]``^XQVQWYIEZLOXBBBBB  
@HWI-EAS443:3:40:1397:1101#0/1  
CATCAATGAACTGAGCAATCTTGCAAAAGGAGAGAAAGCT

+HWI-EAS443:3:40:1397:1101#0/1  
abbaaab`\_abaab`aaaaaaaa`\_]\_^\_a`^I\_`^  
@HWI-EAS443:3:40:1423:659#0/1  
AAAGGAGAGAAAGCTAATGTGCTAATTGGGCAAGGGGACG  
+HWI-EAS443:3:40:1423:659#0/1  
aba`baba`W¥baa\_aab`a\_a`\_a\_a\_a]aab¥Y`\_aa  
@HWI-EAS443:3:40:1533:1498#0/1  
AGCTAATGTGCTAATTGGGCAAGGGGACGTAGTGTGGTA  
+HWI-EAS443:3:40:1533:1498#0/1  
`\_]`aaaab\_a`aa`a`a\_aa]\_a`\_[Z`b^Y[Va[aa[FU  
@HWI-EAS443:3:40:1544:206#0/1  
ATCTTGCAAAAGGAGAGAAAGCTAATGTGCTAATTGGGCA  
+HWI-EAS443:3:40:1544:206#0/1  
aaaaa`^aaa\_aa`a`aaa\_a\_`^`\_Za^^^^`^]a]\_]`  
@HWI-EAS443:3:40:160:352#0/1  
GAAAGCTAATGTGCTAATTGGGCAAGGGGACGTAGTGTGGTA  
+HWI-EAS443:3:40:160:352#0/1  
abaaaa`a`aaQ]a^`\_`\_]`\_`\_`\_`V`YWZ\_YV\_Y^X]`  
@HWI-EAS443:3:40:1651:1849#0/1  
GCATCAATGAACTGAGCAATCTTGCAAAAGGAGAGAAAGC  
+HWI-EAS443:3:40:1651:1849#0/1  
^VPTR[`¥]PVSV`]\_Q\_¥¥QG^[XSRZ]]ZUVYW^^LSL  
@HWI-EAS443:3:40:1747:230#0/1  
AATGAACTGAGCAATCTTGCAAAAGGAGAGAAAGCTAATG  
+HWI-EAS443:3:40:1747:230#0/1  
```a`^b]]Za]b`a[^]]]PYZa]TaJ\_X^\_a[¥S]\_`  
@HWI-EAS443:3:40:1754:1307#0/1  
AGCTAATGTGCTAATTGGGCAAGGGGACGTAGTGTGGTA  
+HWI-EAS443:3:40:1754:1307#0/1  
ab`\_bbab\_aaaa\_bab`aaHaa^^YG^bRRaX`^aa\_XV  
@HWI-EAS443:3:40:1791:585#0/1  
AGCTAATGTGCTAATTGGGCAAGGGGACGTAGTGTGGTA  
+HWI-EAS443:3:40:1791:585#0/1  
`a`babbb`b`ba`bab`ba`aba`\_0¥b`^a]ba`b\_0Y  
@HWI-EAS443:3:40:268:1852#0/1  
CAAAAGGAGAGAAAGCTAATGTGCTAATTGGGCAAGGGGA  
+HWI-EAS443:3:40:268:1852#0/1  
abaab`¥Ya[Ryb`b^H`YWRGwa`\_IWNVGY\_W]\_`PaU  
@HWI-EAS443:3:40:334:1082#0/1  
AATGAACTGAGCAATCTTGCAAAAGGAGAGAAAGCTAATG  
+HWI-EAS443:3:40:334:1082#0/1  
abbabbbba\_aaaaaaaaaaaaa\_\_b]P`\_a`a`]a^a`\_a  
@HWI-EAS443:3:40:33:789#0/1  
CATCAATGAACTGAGCAATCTTGCAAAAGGAGAGAAAGCT  
+HWI-EAS443:3:40:33:789#0/1  
abbbaaba\_`aaa`^`aaabaaaa`¥GV]a]a``\_¥Y^`\_  
@HWI-EAS443:3:40:341:795#0/1  
ATCTTGCAAAAGGAGAGAAAGCTAATGTGCTAATTGGGCA  
+HWI-EAS443:3:40:341:795#0/1  
¥`a`\_a¥USW¥a\_U\_^]\_X^^a`H[]]Wa\_¥`TZ^\_\_aa\_

@HWI-EAS443:3:40:361:203#0/1  
AGCAATCTTGCAAAGGAGAGAAAGCTAATGTGCTAATTG  
+HWI-EAS443:3:40:361:203#0/1  
abbb[^ab[¥]`aaab]bbab\_`aa`XaY\_aX\_`]UH]]  
@HWI-EAS443:3:40:547:227#0/1  
GCATCAATGAACTGAGCAATCTTGCAAAGGAGAGAAAGC  
+HWI-EAS443:3:40:547:227#0/1  
a`a`a\_`\_a[^^\_`]^a\_\_]^`^`]XR¥V]\_Z\_\_\_^]]^¥  
@HWI-EAS443:3:40:886:1824#0/1  
AGCAATCTTGCAAAGGAGAGAAAGCTAATGTGCTAATTG  
+HWI-EAS443:3:40:886:1824#0/1  
Sab`I¥Y^[U]\_UUaaTTVbU`b^SJJ[MRXL]\_]¥aTQ\_  
@HWI-EAS443:3:40:994:1816#0/1  
AAGCTAATGTGCTAATTGGGCAAGGGGACGTAGTGTGGT  
+HWI-EAS443:3:40:994:1816#0/1  
a[baaaa¥aU]`a`\_`\_aa\_aaa`\_U0^\_a\_U\_¥X`]^ [ZG  
@HWI-EAS443:3:40:995:230#0/1  
GAGCAATCTTGCAAAGGAGAGAAAGCTAATGTGCTAATT  
+HWI-EAS443:3:40:995:230#0/1  
Sabbaabbbaabbbbabbababbaba`\_L\_aa^aaa^`  
@HWI-EAS443:3:42:1063:1804#0/1  
CAATCTTGCAAAGGAGAGAAAGCTAATGTGCTAATTGGG  
+HWI-EAS443:3:42:1063:1804#0/1  
X¥¥aMa`bbbbVTX¥\_WWaba`aabb`¥^`aba`bbb]a  
@HWI-EAS443:3:42:1222:1077#0/1  
CATCAATGAACTGAGCAATCTTGCAAAGGAGAGAAAGCT  
+HWI-EAS443:3:42:1222:1077#0/1  
aabbbbbbbabbbbabbbbabbab`bbbaababbbb\_a  
@HWI-EAS443:3:42:1315:657#0/1  
AGCTAATGTGCTAATTGGGCAAGGGGACGTAGTGTGGTA  
+HWI-EAS443:3:42:1315:657#0/1  
a¥b`¥[]b^`a[¥\_a`\_baaZbbabaab¥]a^b`Vb\_G¥  
@HWI-EAS443:3:42:1340:1591#0/1  
AGCTAATGTGCTAATTGGGCAAGGGGACGTAGTGTGGTA  
+HWI-EAS443:3:42:1340:1591#0/1  
aa`ababb`a`aaabaab\_`a`ba¥a`aa\_`a\_`aa`` []  
@HWI-EAS443:3:42:1385:1531#0/1  
ATGAACTGAGCAATCTTGCAAAGGAGAGAAAGCTAATGT  
+HWI-EAS443:3:42:1385:1531#0/1  
aaaa^^ba^``aaaaaa`\_`aaaaab`aa`\_aZ``^aa]  
@HWI-EAS443:3:42:1622:671#0/1  
GAAAGCTAATGTGCTAATTGGGCAAGGGGACGTAGTGTG  
+HWI-EAS443:3:42:1622:671#0/1  
abb`babaab\_b\_baaaab\_aa``baaa`^a]\_a]aZaa  
@HWI-EAS443:3:42:163:600#0/1  
AGCTAATGTGCTAATTGGGCAAGGGGACGTAGTGTGGTA  
+HWI-EAS443:3:42:163:600#0/1  
a\_b^b]`b\_Y`\_\_X\_aaa`aa` [V¥aQ^aX\_\_PZSZ\_^VS  
@HWI-EAS443:3:42:168:1729#0/1  
CATCAATGAACTGAGCAATCTTGCAAAGGAGAGAAAGCT

+HWI-EAS443:3:42:168:1729#0/1  
abbaba``bbaaa\_abbaab]`a^Y^ba`aaaaab`a\_  
@HWI-EAS443:3:42:1769:345#0/1  
GAGCAATCTTGCAAAAAGGAGAGAAAGCTAATGTGCTAATT  
+HWI-EAS443:3:42:1769:345#0/1  
a\_bababaabbaaa`¥ba`aaa`a\_aa``]aZ\_\_`\_\_  
@HWI-EAS443:3:42:1774:714#0/1  
CATCAATGAACTGAGCAATCTTGCAAAAAGGAGAGAAAGCT  
+HWI-EAS443:3:42:1774:714#0/1  
Y[bbba¥¥`aa`^Yabbababbbbaa]a``\_a``baSX^`a  
@HWI-EAS443:3:42:196:218#0/1  
GTCCCCTTGCCCAATTAGCACATTAGCTTTCTCCTTTT  
+HWI-EAS443:3:42:196:218#0/1  
YXbaaa¥P]^aaa\_\_\_\_]aa`]\_]\_VS]`TZ`]\_aa\_\_\_\_^`  
@HWI-EAS443:3:42:30:263#0/1  
GTCCCCTTGCCCAATTAGCACATTAGCTTTCTCCTTTT  
+HWI-EAS443:3:42:30:263#0/1  
a`baaaaaaaaaaaaa\_¥\_``\_`a```a\_``\_``\_``\_``\_`¥  
@HWI-EAS443:3:42:389:1797#0/1  
ATGAACTGAGCAATCTTGCAAAAAGGAGAGAAAGCTAATGT  
+HWI-EAS443:3:42:389:1797#0/1  
abaTaa[`aaaa\_aa`aaaa\_`a``]Yaaaa\_^^a^`\_`\_Z  
@HWI-EAS443:3:42:419:848#0/1  
GAAAGCTAATGTGCTAATTGGGCAAGGGGACGTAGTGTTG  
+HWI-EAS443:3:42:419:848#0/1  
a`RWaa\_PZa`U`aaXa]X\_^]¥ZL]``YJVTN][TYV^\_  
@HWI-EAS443:3:42:493:249#0/1  
AATTAGCACATTAGCTTTCTCCTTTTGAAGATTGCTC  
+HWI-EAS443:3:42:493:249#0/1  
aabaaba``aaa\_aa\_a`^a\_aa^a\_\_\_\_`\_`\_a\_`\_a\_]`^  
@HWI-EAS443:3:42:496:1435#0/1  
GCATCAATGAACTGAGCAATCTTGCAAAAAGGAGAGAAAGC  
+HWI-EAS443:3:42:496:1435#0/1  
aa^````\_aaaZY¥`aaaa`\_\_`a\_`]a\_Y\_a`a\_a`\_  
@HWI-EAS443:3:42:50:1226#0/1  
GAGCAATCTTGCAAAAAGGAGAGAAAGCTAATGTGCTAATT  
+HWI-EAS443:3:42:50:1226#0/1  
`J`bbb`bbbbbb\_b¥ba`abb`W\_b`bbbba`babbab`  
@HWI-EAS443:3:42:73:157#0/1  
AGAGAAAGCTAATGTGCTAATTGGGCAAGGGGACGTAGTG  
+HWI-EAS443:3:42:73:157#0/1  
`aabbaaaaa]^a¥T`\_]\_a`^\_]`^`\_`¥¥¥\_\_\_\_¥JQ¥RB  
@HWI-EAS443:3:42:776:1228#0/1  
GAAAGCTAATGTGCTAATTGGGCAAGGGGACGTAGTGTTG  
+HWI-EAS443:3:42:776:1228#0/1  
ab]bb`bbabbaabbbbaabbb`bbab`b`Uab^\_b`a\_\_a  
@HWI-EAS443:3:42:777:1335#0/1  
ATGAACTGAGCAATCTTGCAAAAAGGAGAGAAAGCTAATGT  
+HWI-EAS443:3:42:777:1335#0/1  
ab`]\_aaaaba`[X`aa`aaaZ]a`\_a\_a````aa^U]`^R



@HWI-EAS443:3:42:846:1011#0/1  
CATCAATGAACTGAGCAATCTTGCAAAGGAGAGAAAGCT  
+HWI-EAS443:3:42:846:1011#0/1  
abbbbbbbbaaaaaabaaaaba`aaaa`aaaaaba`  
@HWI-EAS443:3:42:920:1540#0/1  
GAACTGAGCAATCTTGCAAAGGAGAGAAAGCTAATGTGC  
+HWI-EAS443:3:42:920:1540#0/1  
aaaab``\_aba`aaabbaa`abaa`aaaaa^`\_`aa`a]  
@HWI-EAS443:3:43:1107:30#0/1  
GAAAGCTAATGTGCTAATTGGGCAAGGGGACGTAGTGTTG  
+HWI-EAS443:3:43:1107:30#0/1  
abbbbaaaZ\_baab`aabbbbbb\_\_`baaa`Yb\_Ua^a`\_a  
@HWI-EAS443:3:43:1236:608#0/1  
GCATCAATGAACTGAGCAATCTTGCAAAGGAGAGAAAGC  
+HWI-EAS443:3:43:1236:608#0/1  
aa\_a\_a`baa`aa`aa\_a`a\_aab\_\_\_\_]`ab\_a`b`\_\_a^  
@HWI-EAS443:3:43:1455:1254#0/1  
GAAAGCTAATGTGCTAATTGGGCAAGGGGACGTAGTGTTG  
+HWI-EAS443:3:43:1455:1254#0/1  
abaaa]ba`ba¥`¥a`b\_a`aY`\_`a^aV[a]\_]Wa0\_\_  
@HWI-EAS443:3:43:1515:425#0/1  
AATGAACTGAGCAATCTTGCAAAGGAGAGAAAGCTAATG  
+HWI-EAS443:3:43:1515:425#0/1  
aabbVbaaW^`bbabaaaa\_\_aabb`\_]¥`]Z\_Y^^\_aa  
@HWI-EAS443:3:43:151:1525#0/1  
GAGCAATCTTGCAAAGGAGAGAAAGCTAATGTGCTAATT  
+HWI-EAS443:3:43:151:1525#0/1  
Z[¥bbabbb\_\_Y^\_\_ba]abbbb`[bbaabba]bababba  
@HWI-EAS443:3:43:1582:444#0/1  
AGCAATCTTGCAAAGGAGAGAAAGCTAATGTGCTAATTG  
+HWI-EAS443:3:43:1582:444#0/1  
`baaaaR¥^][UYU¥a`Wa[^``YYV\_\_^\_a[¥V^RZ\_\_X  
@HWI-EAS443:3:43:1591:476#0/1  
AGCAATCTTGCAAAGGAGAGAAAGCTAATGTGCTAATTG  
+HWI-EAS443:3:43:1591:476#0/1  
W`GXbb[abb\_\_]a¥ba`a`aba¥a`\_bTbb^b[b^a\_aa  
@HWI-EAS443:3:43:1679:713#0/1  
GCATCAATGAACTGAGCAATCTTGCAAAGGAGAGAAAGC  
+HWI-EAS443:3:43:1679:713#0/1  
aaab`a`ba^aaaa\_aaaaaaaaaa``\_\_aa\_aaa`\_`\_\_[  
@HWI-EAS443:3:43:171:213#0/1  
CATCAATGAACTGAGCAATCTTGCAAAGGAGAGAAAGCT  
+HWI-EAS443:3:43:171:213#0/1  
aaabbabaaaaaaaaaaba¥aab`\_\_`abaaaaa`Ya`\_`  
@HWI-EAS443:3:43:1739:404#0/1  
AGCAATCTTGCAAAGGAGAGAAAGCTAATGTGCTAATTG  
+HWI-EAS443:3:43:1739:404#0/1  
abbaaaaa`¥`aa\_\_ba^aaaa`aa`a`\_aa^`^`\_`\_`aa  
@HWI-EAS443:3:43:1757:444#0/1  
AAGCTAATGTGCTAATTGGGCAAGGGGACGTAGTGTTGGT



@HWI-EAS443:3:43:443:1726#0/1  
CATCAATGAACTGAGCAATCTTGCAAAAGGAGAGAAAGCT  
+HWI-EAS443:3:43:443:1726#0/1  
aabaababaaa\_\_aabba`\_aaaa`aaaba`aaa\_aaaa  
@HWI-EAS443:3:43:55:194#0/1  
AGAGAAAGCTAATGTGCTAATTGGGCAAGGGGACGTAGTG  
+HWI-EAS443:3:43:55:194#0/1  
aaabaXabaaaaab^aaaa\_a`a`a`\_`aaa\_]a^^aZa  
@HWI-EAS443:3:43:750:1307#0/1  
AGCTTTCTCTCTTTTGCAGATTGCTCAGTTCATTGATG  
+HWI-EAS443:3:43:750:1307#0/1  
aa\_^\_\_a]]a`¥`¥`\_`^`^`\_`^^U`^VaZ^¥`\_X^^\_\_  
@HWI-EAS443:3:43:792:1128#0/1  
AGCTAATGTGCTAATTGGGCAAGGGGACGTAGTGTGGTA  
+HWI-EAS443:3:43:792:1128#0/1  
a`\_a`aaa\_aaa`\_aaa`\_]\_^a`a`^\_a¥^`Za^a``Z]  
@HWI-EAS443:3:44:1006:2032#0/1  
GAAAGCTAATGTGCTAATTGGGCAAGGGGACGTAGTGTG  
+HWI-EAS443:3:44:1006:2032#0/1  
T^R[``bWb\_\_]^`bYRZN\_aa^a]aba`aabLG]]`H¥b  
@HWI-EAS443:3:44:1051:395#0/1  
AAGCATCAATGAACTGAGCAATCTTGCAAAAGGAGAGAAA  
+HWI-EAS443:3:44:1051:395#0/1  
aaa^a]a]aa`]aYY[[^`\_\_a\_^\_\_M]^TR]^`a]a^\_Z  
@HWI-EAS443:3:44:1174:861#0/1  
GAAAGCTAATGTGCTAATTGGGCAAGGGGACGTAGTGTG  
+HWI-EAS443:3:44:1174:861#0/1  
aYS]b]\_NVaPNaU`X[Raa`]MZX[a]^RT`POYTX\_[  
@HWI-EAS443:3:44:1192:1352#0/1  
AAGCATCAATGAACTGAGCAATCTTGCAAAAGGAGAGAAA  
+HWI-EAS443:3:44:1192:1352#0/1  
aaa```a`aa```aaa`aaaa`T````\_Y\_^a\_]a`a^^]  
@HWI-EAS443:3:44:126:415#0/1  
GAACTGAGCAATCTTGCAAAAGGAGAGAAAGCTAATGTGC  
+HWI-EAS443:3:44:126:415#0/1  
aaaaaaaaaaaaaaaaa\_``\_`a`^a\_a`^`a\_\_\_\_\_a\_Y` [  
@HWI-EAS443:3:44:1373:539#0/1  
GAACTGAGCAATCTTGCAAAAGGAGAGAAAGCTAATGTGC  
+HWI-EAS443:3:44:1373:539#0/1  
a`a`a^]aaa\_aaa`a[`]V[a`]a```\_^a^`]^`\_]aV  
@HWI-EAS443:3:44:1402:708#0/1  
AAGCATCAATGAACTGAGCAATCTTGCAAAAGGAGAGAAA  
+HWI-EAS443:3:44:1402:708#0/1  
¥¥b]Zaa```aZ]]aaYa\_a]a\_a\_a`¥]^`ba^a`````]  
@HWI-EAS443:3:44:1691:200#0/1  
GAACTGAGCAATCTTGCAAAAGGAGAGAAAGCTAATGTGC  
+HWI-EAS443:3:44:1691:200#0/1  
aaaaaa[aaaabaaaaV`a]\_a\_\_a`aa`\_a]^`\_^`\_]\_Y  
@HWI-EAS443:3:44:1758:1065#0/1  
GAACTGAGCAATCTTGCAAAAGGAGAGAAAGCTAATGTGC

+HWI-EAS443:3:44:1758:1065#0/1  
]RT[^¥]¥\_[Y¥Z^b`Z\_ZZYa^S\_\_bb^^ba^NPU\_\_]U  
@HWI-EAS443:3:44:231:1382#0/1  
GCATCAATGAACTGAGCAATCTTGCAAAAGGAGAGAAAAGC  
+HWI-EAS443:3:44:231:1382#0/1  
^^`a]baaZ[abYW`aa\_V\_\_a`¥aY`\_W]^`^`a\_a\_`^J  
@HWI-EAS443:3:44:237:1480#0/1  
ATGAACTGAGCAATCTTGCAAAAGGAGAGAAAAGCTAATGT  
+HWI-EAS443:3:44:237:1480#0/1  
¥b`W``\_Z¥`]^`\_aaa^Z][``^b\_\_aaaa`¥`0\_a\_^^P  
@HWI-EAS443:3:44:370:361#0/1  
ATCTTGCAAAAGGAGAGAAAAGCTAATGTGCTAATTGGGCA  
+HWI-EAS443:3:44:370:361#0/1  
`^baa]]a]aaabY`¥aa]aa`]W\_aa`a`a``aY`a`\_^  
@HWI-EAS443:3:44:564:411#0/1  
CTTGCAAAAGGAGAGAAAAGCTAATGTGCTAATTGGGCAAG  
+HWI-EAS443:3:44:564:411#0/1  
abbbbbbb`bb`babb]abba`abb]aaba`aaaaba^]]  
@HWI-EAS443:3:44:743:465#0/1  
GAGAAAGCTAATGTGCTAATTGGGCAAGGGGACGTAGTGT  
+HWI-EAS443:3:44:743:465#0/1  
aaba`a``\_\_aa\_a^a^\_a`a`^¥^]aa`a[Ya^Xa]^`¥  
@HWI-EAS443:3:44:772:610#0/1  
TGCAAAAGGAGAGAAAAGCTAATGTGCTAATTGGGCAAGGG  
+HWI-EAS443:3:44:772:610#0/1  
a`aW`aab``aaba`aa`\_`\_aa^a[\_\_\_\_a`a``\_R\_\_a  
@HWI-EAS443:3:44:790:1054#0/1  
GAAAGCTAATGTGCTAATTGGGCAAGGGGACGTAGTGTG  
+HWI-EAS443:3:44:790:1054#0/1  
aa^YY\_Z¥\_a]T¥^aYW]\_YZPR`Y]a[¥P[a]RYTYW\_^  
@HWI-EAS443:3:44:825:67#0/1  
TGCAAAAGGAGAGAAAAGCTAATGTGCTAATTGGGCAAGGG  
+HWI-EAS443:3:44:825:67#0/1  
`ba\_\_]\_ba[aaa^`^`\_\_^^`X`^^]^`\_`^^ZZ^^^  
@HWI-EAS443:3:44:852:228#0/1  
AATGAACTGAGCAATCTTGCAAAAGGAGAGAAAAGCTAATG  
+HWI-EAS443:3:44:852:228#0/1  
aaaa\_a`aWY\_aa\_a\_aaa```\_`\_a`]a`a`^`\_`S[[[^``  
@HWI-EAS443:3:44:874:1589#0/1  
GAGCAATCTTGCAAAAGGAGAGAAAAGCTAATGTGCTAATT  
+HWI-EAS443:3:44:874:1589#0/1  
aaaaaaaaaaaaa````\_`^`a\_aa^aZaa`adW`\_a\_\_^Z  
@HWI-EAS443:3:44:94:1721#0/1  
GAGCAATCTTGCAAAAGGAGAGAAAAGCTAATGTGCTAATT  
+HWI-EAS443:3:44:94:1721#0/1  
WJ¥abbbbaa`ab\_a]aaa\_aa`a`^]\_b`aa`¥a\_^aZ``  
@HWI-EAS443:3:45:1171:700#0/1  
AGCACATTAGCTTTCTCTCCTTTTGCAAGATTGCTCAGTT  
+HWI-EAS443:3:45:1171:700#0/1  
aaababbab`a`]aa\_]aaaaaaaa````\_`\_aaa`\_`\_`^`\_`

@HWI-EAS443:3:45:1261:1614#0/1  
GAGCAATCTTGCAAAAGGAGAGAAAGCTAATGTGCTAATT  
+HWI-EAS443:3:45:1261:1614#0/1  
[a`\_``[`b¥`a[aaXZ¥^a^ab]a`P\_`XX``]a`````  
@HWI-EAS443:3:45:1265:1434#0/1  
AATGAAGTGAATCTTGCAAAAGGAGAGAAAGCTAATG  
+HWI-EAS443:3:45:1265:1434#0/1  
`Zba`bbb`]abbaa`baba\_b¥bab\_ba\_aba`abaabb  
@HWI-EAS443:3:45:1336:677#0/1  
GAGCAATCTTGCAAAAGGAGAGAAAGCTAATGTGCTAATT  
+HWI-EAS443:3:45:1336:677#0/1  
`\_baa]b`Y`b¥¥L^^]\_Xa[ `[VH`\_`Y¥]b\_a[a[[]^  
@HWI-EAS443:3:45:1542:1179#0/1  
AGCTAATGTGCTAATTGGGCAAGGGGACGTAGTGTGGTA  
+HWI-EAS443:3:45:1542:1179#0/1  
^bU`^^XWVba¥FRa`a`aa`Ua\_aUWa` `Zb^W\_a\_RFU  
@HWI-EAS443:3:45:1546:984#0/1  
ATCTTGCAAAAGGAGAGAAAGCTAATGTGCTAATTGGGCA  
+HWI-EAS443:3:45:1546:984#0/1  
aa]a`aYa\_\_\_^a]]`b\_a`a[\_Y`a\_QXX^`^\_```\_a`  
@HWI-EAS443:3:45:1556:1746#0/1  
GAAAGCTAATGTGCTAATTGGGCAAGGGGACGTAGTGTG  
+HWI-EAS443:3:45:1556:1746#0/1  
XY\_aaaabaa`0¥bbaabbaaa]aabbab\_abY`aZ`^a[  
@HWI-EAS443:3:45:156:768#0/1  
AAGCATCAATGAACTGAGCAATCTTGCAAAAGGAGAGAAA  
+HWI-EAS443:3:45:156:768#0/1  
aaaaa\_`aa` `a^`\_`a`a^`\_`a` ` `Z\_\_aa\_a\_aa[\_  
@HWI-EAS443:3:45:1606:1537#0/1  
GAGCAATCTTGCAAAAGGAGAGAAAGCTAATGTGCTAATT  
+HWI-EAS443:3:45:1606:1537#0/1  
^^b[ `bbb`bbaaab`bbababZQ`b`\_`T^b\_b]aa`aa  
@HWI-EAS443:3:45:1662:240#0/1  
GAGCAATCTTGCAAAAGGAGAGAAAGCTAATGTGCTAATT  
+HWI-EAS443:3:45:1662:240#0/1  
Z\_bbbbbbbbabbb^baaaabba`ab^babbbXb^aa`aa  
@HWI-EAS443:3:45:1689:134#0/1  
AACACTACGTCCCCTTGCCCAATTAGCACATTAGCTTTCT  
+HWI-EAS443:3:45:1689:134#0/1  
aaaa`a` `aZ]¥¥Y^`]]]Y¥[VYUZ[WYY^^]^UY]]Y¥  
@HWI-EAS443:3:45:1746:92#0/1  
GAAAGCTAATGTGCTAATTGGGCAAGGGGACGTAGTGTG  
+HWI-EAS443:3:45:1746:92#0/1  
aa^abaa`aab`b\_a\_\_aba\_]\_\_baa`YXa]X`Ya]\_`  
@HWI-EAS443:3:45:183:635#0/1  
AAGCATCAATGAACTGAGCAATCTTGCAAAAGGAGAGAAA  
+HWI-EAS443:3:45:183:635#0/1  
a`\_\_aaaZ` `^¥¥\_aa\_b\_a`aaaa\_` `a¥]S\_`^Z^V¥  
@HWI-EAS443:3:45:204:73#0/1  
GAACTGAGCAATCTTGCAAAAGGAGAGAAAGCTAATGTG

+HWI-EAS443:3:45:204:73#0/1  
`GZRU#P\_XY\_\_^\_`U[^UMX[U^\_]VU\_VUUWYZUVJ  
@HWI-EAS443:3:45:271:406#0/1  
AAGCTAATGTGCTAATTGGGCAAGGGGACGTAGTGTGGT  
+HWI-EAS443:3:45:271:406#0/1  
aabaa`abb`b`ababbbaaa`baaa\_\_b\_\_b\_b^aaaR  
@HWI-EAS443:3:45:279:13#0/1  
AAGCATCAATGAACTGAGCAATCTTGCAAAAGGAGAGAAA  
+HWI-EAS443:3:45:279:13#0/1  
^^\_`aa`¥`a^]a\_aa]`a`^aa\_\_`]VV^a`S`\_a][Z  
@HWI-EAS443:3:45:285:898#0/1  
ATGAACTGAGCAATCTTGCAAAAGGAGAGAAAAGCTAATGT  
+HWI-EAS443:3:45:285:898#0/1  
aaa`]bb`X`aa¥X^aabaaa\_\_b\_\_a`aa\_a\_a[W`a]  
@HWI-EAS443:3:45:332:1372#0/1  
CAATCTTGCAAAAGGAGAGAAAAGCTAATGTGCTAATTGGG  
+HWI-EAS443:3:45:332:1372#0/1  
\_\_^b^b^bba¥aWb`G`abaaab`Y`baZa\_a`a^^``[  
@HWI-EAS443:3:45:421:424#0/1  
GAAAGCTAATGTGCTAATTGGGCAAGGGGACGTAGTGTGG  
+HWI-EAS443:3:45:421:424#0/1  
ab\_^aa]`^ab\_a¥a`aa]a\_^`Wa\_TaRUaW]a]aW\_\_  
@HWI-EAS443:3:45:460:535#0/1  
AAAAGGAGAGAAAAGCTAATGTGCTAATTGGGCAAGGGGAC  
+HWI-EAS443:3:45:460:535#0/1  
a`^abbababba`aaab]aaa`aaaaa¥\_\_aa¥\_] ]  
@HWI-EAS443:3:45:469:1825#0/1  
GAGCAATCTTGCAAAAGGAGAGAAAAGCTAATGTGCTAATT  
+HWI-EAS443:3:45:469:1825#0/1  
¥`bab¥Mbbaaa`baaba`ab\_a`\_b^\_abba[^a^a`b`  
@HWI-EAS443:3:45:473:1154#0/1  
ATCTTGCAAAAGGAGAGAAAAGCTAATGTGCTAATTGGGCA  
+HWI-EAS443:3:45:473:1154#0/1  
aaababaaa`aaa\_aabaa`a\_aa`aa^a`a\_`a`\_`\_a\_\_  
@HWI-EAS443:3:45:482:441#0/1  
GAAAGCTAATGTGCTAATTGGGCAAGGGGACGTAGTGTGG  
+HWI-EAS443:3:45:482:441#0/1  
a`[[`[^`\_`WaPa[Y^\_a]ZUX]a`\_\_^)`XX`R^Z^^  
@HWI-EAS443:3:45:564:318#0/1  
GAAAGCTAATGTGCTAATTGGGCAAGGGGACGTAGTGTGG  
+HWI-EAS443:3:45:564:318#0/1  
abaaaaaaba\_a^aaaaaa`a\_aaaa`\_\_a^\_aYa\_\_a  
@HWI-EAS443:3:45:691:1886#0/1  
GAACTGAGCAATCTTGCAAAAGGAGAGAAAAGCTAATGTGC  
+HWI-EAS443:3:45:691:1886#0/1  
¥X`^^\_TV]b`b`X¥XQT\_\_`\_\_a^aaba^T¥`^YaVYU  
@HWI-EAS443:3:45:801:1573#0/1  
AGCTAATGTGCTAATTGGGCAAGGGGACGTAGTGTGGTA  
+HWI-EAS443:3:45:801:1573#0/1  
¥K\_Y¥ZZa`a`]aab`T¥U¥`\_a`]`\_aaY^\_]Xa`[VV

@HWI-EAS443:3:45:836:1559#0/1  
GAACTGAGCAATCTTGCAAAAGGAGAGAAAGCTAATGTGC  
+HWI-EAS443:3:45:836:1559#0/1  
aaba`aaaa`a`aaa\_aa]\_aa\_a`aaa`a`a`\_\_\_a0  
@HWI-EAS443:3:45:910:1257#0/1  
AGCACATTAGCTTTCTCCTTTTGCAAGATTGCTCAGTT  
+HWI-EAS443:3:45:910:1257#0/1  
`a`aW\_bb`a\_W^^]][]Z]`]Z\_X^]Z\_]\_X]¥`¥^\_Y]  
@HWI-EAS443:3:45:981:638#0/1  
CTTGCAAAAGGAGAGAAAGCTAATGTGCTAATTGGGCAAG  
+HWI-EAS443:3:45:981:638#0/1  
aaaa\_\_aX¥bb\_b`aa`ab\_`^aba¥`a`aaaYa``[a  
@HWI-EAS443:3:46:1018:2012#0/1  
CATCAATGAACTGAGCAATCTTGCAAAAGGAGAGAAAGCT  
+HWI-EAS443:3:46:1018:2012#0/1  
ababaaabaaaa\_\_abb`aaaa``\_^aaaaaaaa`aa^a  
@HWI-EAS443:3:46:1045:1069#0/1  
AGCTAATGTGCTAATTGGGCAAGGGACGTAGTGTGGTA  
+HWI-EAS443:3:46:1045:1069#0/1  
abab`^abab`a\_^abba`aa]aba``Za\_``Ua\_\_bXG]  
@HWI-EAS443:3:46:1052:1870#0/1  
GAGCAATCTTGCAAAAGGAGAGAAAGCTAATGTGCTAATT  
+HWI-EAS443:3:46:1052:1870#0/1  
`abbbbbbbbaabbb`\_abbbbbbaa`aaaa`a`aa`  
@HWI-EAS443:3:46:1150:1081#0/1  
AGCTAATGTGCTAATTGGGCAAGGGACGTAGTGTGGTA  
+HWI-EAS443:3:46:1150:1081#0/1  
XW\_SKU\_¥ZQ\_a\_]`Z[a^^`a¥\_\_YZ`¥Z^¥b]^a\_JJ  
@HWI-EAS443:3:46:1205:305#0/1  
CATCAATGAACTGAGCAATCTTGCAAAAGGAGAGAAAGCT  
+HWI-EAS443:3:46:1205:305#0/1  
^aa\_U¥abbaZ`b[`bb\_babab`\_ZZ]bb\_bbbbaab^a  
@HWI-EAS443:3:46:1270:2016#0/1  
ATCTTGCAAAAGGAGAGAAAGCTAATGTGCTAATTGGGCA  
+HWI-EAS443:3:46:1270:2016#0/1  
a\_aa]aaa`^a\_¥`\_^aa`\_`]aa`\_]^[^]\_\_\_Z^^\_Z¥\_  
@HWI-EAS443:3:46:1287:623#0/1  
CTTGCAAAAGGAGAGAAAGCTAATGTGCTAATTGGGCAAG  
+HWI-EAS443:3:46:1287:623#0/1  
``a\_V\_R\_W`aX`]^`^[\_X\_\_a\_^UaY\_``aaa\_ZW[Za  
@HWI-EAS443:3:46:1375:1369#0/1  
GCATCAATGAACTGAGCAATCTTGCAAAAGGAGAGAAAGC  
+HWI-EAS443:3:46:1375:1369#0/1  
`]Y[V]Y\_V¥]YT]]^[Y]YY[\_`¥YVXSXZZ\_^[SMWSF  
@HWI-EAS443:3:46:1393:1659#0/1  
CCCTTGCCCAATTAGCACATTAGCTTTCTCCTTTTGCA  
+HWI-EAS443:3:46:1393:1659#0/1  
`b`a]`aa`aaaa`\_aab`aba¥aba\_a`a\_\_`a`\_Sa  
@HWI-EAS443:3:46:145:50#0/1  
GAGCAATCTTGCAAAAGGAGAGAAAGCTAATGTGCTAATT

+HWI-EAS443:3:46:145:50#0/1  
aaabbYbbaabaa^aaba\_aabbaabaaa`ab\_aab\_\_b\_  
@HWI-EAS443:3:46:164:351#0/1  
GCATCAATGAACTGAGCAATCTTGCAAAGGAGAGAAAGC  
+HWI-EAS443:3:46:164:351#0/1  
a`aa`aabbaaaaaaba`aaaaa\_a\_]`^ba\_a\_aa\_\_a\_  
@HWI-EAS443:3:46:1748:490#0/1  
GTCCCCTTGCCCAATTAGCACATTAGCTTTCTCTCCTTTT  
+HWI-EAS443:3:46:1748:490#0/1  
a`aaa`aaaa`a`aaaa`a^aa`a\_aa`^a\_a]`a^  
@HWI-EAS443:3:46:189:113#0/1  
GTCCCCTTGCCCAATTAGCACATTAGCTTTCTCTCCTTTT  
+HWI-EAS443:3:46:189:113#0/1  
a`\_`\_`\_a\_a\_]`\_\_\_\_\_W\_]\_[U`^`^[\_X\_`T`^`^]  
@HWI-EAS443:3:46:443:233#0/1  
GCAAAGGAGAGAAAGCTAATGTGCTAATTGGGCAAGGGG  
+HWI-EAS443:3:46:443:233#0/1  
aaaYZ\_b\_Taa][\_\_bY`\_`\_a\_a^`[\_\_\_aaZ\_\_\_)`aa\_  
@HWI-EAS443:3:46:474:628#0/1  
GAACTGAGCAATCTTGCAAAGGAGAGAAAGCTAATGTGC  
+HWI-EAS443:3:46:474:628#0/1  
``aaaaab```aaaabaa\_]\_a]\_aaaa`a\_aa`a\_a`  
@HWI-EAS443:3:46:479:1360#0/1  
AAAGCTAATGTGCTAATTGGGCAAGGGGACGTAGTGTGG  
+HWI-EAS443:3:46:479:1360#0/1  
aaaa`aa¥^aU¥aa^aa\_a\_¥YWZa]`\_[^V^aTaUSaa  
@HWI-EAS443:3:46:585:1868#0/1  
TGCAAAGGAGAGAAAGCTAATGTGCTAATTGGGCAAGGG  
+HWI-EAS443:3:46:585:1868#0/1  
]R\_baZ¥a\_a]\_aY]a\_]X^ZZ]ZWaaX`R\_aa`aZa]a  
@HWI-EAS443:3:46:732:730#0/1  
GAAAGCTAATGTGCTAATTGGGCAAGGGGACGTAGTGTGG  
+HWI-EAS443:3:46:732:730#0/1  
aa\_]a`a`aa]a\_`a`a\_a`^^a`\_`^]a^^`U`W\_\_  
@HWI-EAS443:3:46:759:467#0/1  
AGCTAATGTGCTAATTGGGCAAGGGGACGTAGTGTGGTA  
+HWI-EAS443:3:46:759:467#0/1  
]`\_\_aV`\_`ba`RXaabbb`a]`aa]WS`\_XaSaaab`Y]  
@HWI-EAS443:3:46:785:626#0/1  
GTCCCCTTGCCCAATTAGCACATTAGCTTTCTCTCCTTTT  
+HWI-EAS443:3:46:785:626#0/1  
aaaa¥aa`[aaaa`a`[^\_Z\_`aa\_a^a`Z`¥`[^\_\_]  
@HWI-EAS443:3:46:870:801#0/1  
GTCCCCTTGCCCAATTAGCACATTAGCTTTCTCTCCTTTT  
+HWI-EAS443:3:46:870:801#0/1  
a`aaaa`aaYaa`]^`a^aaa^`Zaa`X`\_a`[aaa^  
@HWI-EAS443:3:46:921:1966#0/1  
CAATGAACTGAGCAATCTTGCAAAGGAGAGAAAGCTAAT  
+HWI-EAS443:3:46:921:1966#0/1  
^Mab\_]¥Z\_Za``T[Q¥aaaZ`a\_`\_`[^aa]UDV\_a\_\_



@HWI-EAS443:3:47:1030:143#0/1  
TTAGCACATTAGCTTTCTCTCCTTTTGCAAGATTGCTCAG  
+HWI-EAS443:3:47:1030:143#0/1  
\_X]]\_YOSZ[W`PY`aaXQ[VFYX[XSOTP\_XXT]SVQU^  
@HWI-EAS443:3:47:1073:593#0/1  
CAATGAAGTGAATCTTGCAAAAGGAGAGAAAGCTAAT  
+HWI-EAS443:3:47:1073:593#0/1  
abbbbaabbbb`a`abbabbb`\_]\_aba\_babaaaa^baaa  
@HWI-EAS443:3:47:1171:99#0/1  
GAAAGCTAATGTGCTAATTGGGCAAGGGGACGTAGTGTTG  
+HWI-EAS443:3:47:1171:99#0/1  
a`a\_a\_aa\_ab]a\_a\_\_`a``]]]Va\_\_\_YV\_YV\_Y\_Y^^  
@HWI-EAS443:3:47:122:1016#0/1  
ATCTTGCAAAAGGAGAGAAAGCTAATGTGCTAATTGGGCA  
+HWI-EAS443:3:47:122:1016#0/1  
aa^Y`^ZbaUab[b`[aa`JY#a`\_^]`\_a\_\_U]¥\_¥NN  
@HWI-EAS443:3:47:1236:1550#0/1  
ATCTTGCAAAAGGAGAGAAAGCTAATGTGCTAATTGGGCA  
+HWI-EAS443:3:47:1236:1550#0/1  
a\_bbaa`a`a`ba^aaaaa`\_a\_aaa\_a^¥\_`\_a\_a`¥W  
@HWI-EAS443:3:47:1256:1836#0/1  
GAGCAATCTTGCAAAAGGAGAGAAAGCTAATGTGCTAATT  
+HWI-EAS443:3:47:1256:1836#0/1  
`[^`^b^Z``aaa`\_`\_`abaaaa¥¥Y]`a`a^][`X^\_[  
@HWI-EAS443:3:47:1342:145#0/1  
AACTGAGCAATCTTGCAAAAGGAGAGAAAGCTAATGTGCT  
+HWI-EAS443:3:47:1342:145#0/1  
aaaab`aaa`aaaaa\_\_`\_]`a\_a\_a\_]b]\_\_¥\_aY`Y`  
@HWI-EAS443:3:47:136:1118#0/1  
GTCCCCTTGCCCAATTAGCACATTAGCTTTCTCTCCTTTT  
+HWI-EAS443:3:47:136:1118#0/1  
aaaaabaab`a`aabab``a]aaaa\_aaa`a\_a`\_aaa`  
@HWI-EAS443:3:47:1569:114#0/1  
AATGAAGTGAATCTTGCAAAAGGAGAGAAAGCTAATG  
+HWI-EAS443:3:47:1569:114#0/1  
abbb`\_\_bb`baa]aba`X``a`ba\_a`ba\_`a¥\_`¥\_a  
@HWI-EAS443:3:47:1647:1289#0/1  
ATGAAGTGAATCTTGCAAAAGGAGAGAAAGCTAATGT  
+HWI-EAS443:3:47:1647:1289#0/1  
ab\_^baaaabaaaa\_aab`\_V\_\_aa^`a``\_a^`\_]``Y  
@HWI-EAS443:3:47:165:877#0/1  
GAAAGCTAATGTGCTAATTGGGCAAGGGGACGTAGTGTTG  
+HWI-EAS443:3:47:165:877#0/1  
abbbbbbb`babbabbbbabbbbabbbbaaa`aaaa`abb  
@HWI-EAS443:3:47:1765:1084#0/1  
GCATCAATGAAGTGAATCTTGCAAAAGGAGAGAAAGC  
+HWI-EAS443:3:47:1765:1084#0/1  
a`][^`¥^a\_\_¥\_]a¥¥`^`^`YZY¥Y\_\_Y\_]\_]Y^W  
@HWI-EAS443:3:47:233:356#0/1  
CGTCCCCTTGCCCAATTAGCACATTAGCTTTCTCTCCTTT

+HWI-EAS443:3:47:233:356#0/1  
abaa`baa`aa]^^`bb]]M]]^aa^`^`\_V`T`[[a\_`  
@HWI-EAS443:3:47:255:318#0/1  
GCATCAATGAACTGAGCAATCTTGCAAAAGGAGAGAAAGC  
+HWI-EAS443:3:47:255:318#0/1  
`TLNOQa[ZUY]^YRRVX[\_[\_`^\_aR^a`Wa]^`^SZYN  
@HWI-EAS443:3:47:309:40#0/1  
GAGCAATCTTGCAAAAGGAGAGAAAGCTAATGTGCTAATT  
+HWI-EAS443:3:47:309:40#0/1  
abb`babbbabaa`baabaaaba`aa\_a``aa\_a^`a\_aa  
@HWI-EAS443:3:47:344:1713#0/1  
GAGAAAGCTAATGTGCTAATTGGGCAAGGGGACGTAGTGT  
+HWI-EAS443:3:47:344:1713#0/1  
]^YXa`TabbbbaIb``][a[`Q`]aaa¥X`Sab]^aR`U  
@HWI-EAS443:3:47:586:252#0/1  
AATGAACTGAGCAATCTTGCAAAAGGAGAGAAAGCTAATG  
+HWI-EAS443:3:47:586:252#0/1  
abbbKbbaabb\_`[`[bbbaaaaab``aaaaa`R[a`ab  
@HWI-EAS443:3:47:638:1489#0/1  
GAGCAATCTTGCAAAAGGAGAGAAAGCTAATGTGCTAATT  
+HWI-EAS443:3:47:638:1489#0/1  
aaaaaaaa`baa`\_]\_\_aV^\_\_`\_`\_]\_\_`a0\_\_\_\_\_^\_^  
@HWI-EAS443:3:47:755:914#0/1  
AGCTAATGTGCTAATTGGGCAAGGGGACGTAGTGTGGTA  
+HWI-EAS443:3:47:755:914#0/1  
\_X`aaaabWb\_aYY^¥aaY`\_a\_^XS\_a]ZYW\_]\_\_`UT  
@HWI-EAS443:3:47:78:291#0/1  
TTAGCACATTAGCTTTCTCTCCTTTTGCAAGATTGCTCAG  
+HWI-EAS443:3:47:78:291#0/1  
ababa¥`aba\_[`a`^`a\_\_¥Va]aYa[a^a\_\_\_\_^[`¥]\_  
@HWI-EAS443:3:47:993:1551#0/1  
ATCTTGCAAAAGGAGAGAAAGCTAATGTGCTAATTGGGCA  
+HWI-EAS443:3:47:993:1551#0/1  
`baabaaaa`U`ZJ]```````[\_XZ`^Y`\_\_¥\_[W``]U^  
@HWI-EAS443:3:48:1013:554#0/1  
CATCAATGAACTGAGCAATCTTGCAAAAGGAGAGAAAGCT  
+HWI-EAS443:3:48:1013:554#0/1  
abbaaabbbbaaaaabbaaab`aaaabb`babaaYa\_a  
@HWI-EAS443:3:48:1040:518#0/1  
GAACTGAGCAATCTTGCAAAAGGAGAGAAAGCTAATGTGC  
+HWI-EAS443:3:48:1040:518#0/1  
^aaabbabaaabaabbaa`a`ba\_aabaa`a\_a`\_aa]a^  
@HWI-EAS443:3:48:1111:426#0/1  
GCAAAAGGAGAGAAAGCTAATGTGCTAATTGGGCAAGGGG  
+HWI-EAS443:3:48:1111:426#0/1  
a\_aa\_`aa^a\_a\_]`a\_`\_\_\_\_]a]a\_`^```\_]]]`\_`\_  
@HWI-EAS443:3:48:1229:1311#0/1  
ATCTTGCAAAAGGAGAGAAAGCTAATGTGCTAATTGGGCA  
+HWI-EAS443:3:48:1229:1311#0/1  
`^b¥Z]^`^Y`¥\_¥X``aaZa\_Za`T`aW`aaa`^Yaa`\_`\_`

@HWI-EAS443:3:48:1254:1456#0/1  
GAGCAATCTTGCAAAGGAGAGAAAGCTAATGTGCTAATT  
+HWI-EAS443:3:48:1254:1456#0/1  
aababbbbabaaab\_bbababbaab`aa`ab^a`aa[a\_  
@HWI-EAS443:3:48:1300:1830#0/1  
GAGCAATCTTGCAAAGGAGAGAAAGCTAATGTGCTAATT  
+HWI-EAS443:3:48:1300:1830#0/1  
[^aaaba\_`aababa[b`bbbabWb\_bbaba`[\_abaab  
@HWI-EAS443:3:48:1422:194#0/1  
AGCAATCTTGCAAAGGAGAGAAAGCTAATGTGCTAATTG  
+HWI-EAS443:3:48:1422:194#0/1  
aa\_aabaa\_aaa`^aaa\_a\_aaaZa^a\_ZaaZa^a\_^\_]\_  
@HWI-EAS443:3:48:1444:1142#0/1  
GAAAGCTAATGTGCTAATTGGCAAGGGGACGTAGTGTTG  
+HWI-EAS443:3:48:1444:1142#0/1  
\_V][QWWZXS^`\_Z¥RU¥Q`Z]ZXZ^¥UUPTZX]¥L^NZR  
@HWI-EAS443:3:48:1470:776#0/1  
GCATCAATGAACTGAGCAATCTTGCAAAGGAGAGAAAGC  
+HWI-EAS443:3:48:1470:776#0/1  
\_\_`b\_aa`Xa`a\_]a¥a`\_aaa]`\_¥U\_`]a`a``\_]\_  
@HWI-EAS443:3:48:1558:1153#0/1  
GAGCAATCTTGCAAAGGAGAGAAAGCTAATGTGCTAATT  
+HWI-EAS443:3:48:1558:1153#0/1  
WVaWa\_`¥`\_\_V[QQ[^U[[]¥\_I^X¥\_UZ\_X\_dW]]^`  
@HWI-EAS443:3:48:1612:672#0/1  
TGCAAAGGAGAGAAAGCTAATGTGCTAATTGGGCAAGGG  
+HWI-EAS443:3:48:1612:672#0/1  
^\_WZ¥^¥¥¥X]W]\_b]\_WXZa\_XQX\_aYO]]]]aTRY` `a  
@HWI-EAS443:3:48:1614:737#0/1  
GAGCAATCTTGCAAAGGAGAGAAAGCTAATGTGCTAATT  
+HWI-EAS443:3:48:1614:737#0/1  
`^b[[aba[]bbUTQ\_]`\_aUWaa\_VaUb`\_a\_H¥`^R]  
@HWI-EAS443:3:48:1636:1117#0/1  
GAGCAATCTTGCAAAGGAGAGAAAGCTAATGTGCTAATT  
+HWI-EAS443:3:48:1636:1117#0/1  
¥K\_T¥Xbab¥`T`RWYa`b`[aa\_TbaaaabbYaIa]]a¥  
@HWI-EAS443:3:48:1639:252#0/1  
AATGAACTGAGCAATCTTGCAAAGGAGAGAAAGCTAATG  
+HWI-EAS443:3:48:1639:252#0/1  
aaaa`aba\_aaa`a^`aa\_\_W\_]`^a^a¥a\_¥Z\_V]^Z`\_  
@HWI-EAS443:3:48:1645:231#0/1  
GAACTGAGCAATCTTGCAAAGGAGAGAAAGCTAATGTGC  
+HWI-EAS443:3:48:1645:231#0/1  
a\_aaaaab`aaaa`aa^`^\_`aa]a^a\_¥a`[^]^`^`W\_X  
@HWI-EAS443:3:48:177:1540#0/1  
GAGCAATCTTGCAAAGGAGAGAAAGCTAATGTGCTAATT  
+HWI-EAS443:3:48:177:1540#0/1  
aab[b\_aa`bba` `a^` `baaaXaa\_`]aaa^aaa` `aa  
@HWI-EAS443:3:48:191:1892#0/1  
GAGCAATCTTGCAAAGGAGAGAAAGCTAATGTGCTAATT

+HWI-EAS443:3:48:191:1892#0/1  
aL\_IZ`YYZ`b\_bWTW^^\_a[aaaVa\_a]YX\_PRUZXa]X  
@HWI-EAS443:3:48:231:1537#0/1  
AATGAACTGAGCAATCTTGCAAAAGGAGAGAAAGCTAATG  
+HWI-EAS443:3:48:231:1537#0/1  
`[ab\_^¥a`\_`a\_\_Za\_\_\_¥ZZ`^\_a`aaaa¥aY\_aaaa  
@HWI-EAS443:3:48:559:19#0/1  
GTCCCCTTGCCCAATTAGCACATTAGCTTTCTCTCCTTTT  
+HWI-EAS443:3:48:559:19#0/1  
a¥X`[\_VRRXSQ]`¥YYZ^XV\_^SY[M^\_]TYPXQ¥SSSW  
@HWI-EAS443:3:48:572:1055#0/1  
GAGCAATCTTGCAAAAGGAGAGAAAGCTAATGTGCTAATT  
+HWI-EAS443:3:48:572:1055#0/1  
aaaYa`aaaa`a`a¥W`Wa\_`a¥aa]`^aaX`\_^]]`\_  
@HWI-EAS443:3:48:707:896#0/1  
CGTCCCCTTGCCCAATTAGCACATTAGCTTTCTCTCCTTT  
+HWI-EAS443:3:48:707:896#0/1  
aaab`bbaabbbbbbbbb`aaabaaZaabaabaa\_`bab  
@HWI-EAS443:3:48:796:1466#0/1  
AAGCATCAATGAACTGAGCAATCTTGCAAAAGGAGAGAAA  
+HWI-EAS443:3:48:796:1466#0/1  
a`^aaaaa``aaa`a````aaa\_aaa``^^^aa^a\_\_a\_^  
@HWI-EAS443:3:48:822:61#0/1  
GAAAGCTAATGTGCTAATTGGGCAAGGGGACGTAGTGTTG  
+HWI-EAS443:3:48:822:61#0/1  
^]Zab^Xa¥^b]\_S[¥Tb\_\_[VW¥Y\_`ZTV\_VZaW^S¥^  
@HWI-EAS443:3:48:91:761#0/1  
AAAGCTAATGTGCTAATTGGGCAAGGGGACGTAGTGTTGG  
+HWI-EAS443:3:48:91:761#0/1  
aa`a\_a``aa\_a\_`a\_aaa[Y¥`Za]YZ[\_a^^ZW`^\_¥^  
@HWI-EAS443:3:48:934:1638#0/1  
GAGAAAGCTAATGTGCTAATTGGGCAAGGGGACGTAGTGT  
+HWI-EAS443:3:48:934:1638#0/1  
a[LY`PWaa\_`\_]X`TUY^UR^[^V`¥^Y\_URQ]R¥\_TXZ  
@HWI-EAS443:3:48:971:1024#0/1  
GAAAGCTAATGTGCTAATTGGGCAAGGGGACGTAGTGTTG  
+HWI-EAS443:3:48:971:1024#0/1  
`WLZTP¥LMZ`^`^a\_`]Y^aX[\_]a\_`Z[\_]\_UR^U¥[[]  
@HWI-EAS443:3:48:988:1189#0/1  
CATCAATGAACTGAGCAATCTTGCAAAAGGAGAGAAAGCT  
+HWI-EAS443:3:48:988:1189#0/1  
^X`bbaa\_[^a]\_IXT[¥a\_ab`ZV\_VVbba`ab\_UO`\_\_  
@HWI-EAS443:3:49:1080:1687#0/1  
AATGAACTGAGCAATCTTGCAAAAGGAGAGAAAGCTAATG  
+HWI-EAS443:3:49:1080:1687#0/1  
^bbabab`\_`babbbabbbbaa`^]bb\_abba\_a`^aaaab  
@HWI-EAS443:3:49:1101:1608#0/1  
GTCCCCTTGCCCAATTAGCACATTAGCTTTCTCTCCTTTT  
+HWI-EAS443:3:49:1101:1608#0/1  
]b\_a]`R`a^\_a`^aaaba]^`aaaaZaa¥[]TRU\_VYa

@HWI-EAS443:3:49:1162:537#0/1  
AGCTAATGTGCTAATTGGGCAAGGGGACGTAGTGTGGTA  
+HWI-EAS443:3:49:1162:537#0/1  
abababbbabbbbbb`bb`abbab``abaabab`bbaX`  
@HWI-EAS443:3:49:1173:532#0/1  
GAGCAATCTTGCAAAGGAGAGAAAGCTAATGTGCTAATT  
+HWI-EAS443:3:49:1173:532#0/1  
`Y`ababab`\_`aa^^`¥¥b`aa`\_`W`\_`aX\_bYa```aa  
@HWI-EAS443:3:49:1247:1044#0/1  
AGCTAATGTGCTAATTGGGCAAGGGGACGTAGTGTGGTA  
+HWI-EAS443:3:49:1247:1044#0/1  
ababaab\_Vaabaabaabb`a\_aab^^\_b\_aa\_b^bbaZa  
@HWI-EAS443:3:49:1267:1112#0/1  
TGCAAAGGAGAGAAAGCTAATGTGCTAATTGGGCAAGGG  
+HWI-EAS443:3:49:1267:1112#0/1  
aaaaVa[ba`babaTaa\_a\_^aa\_a^a^\_aaa`]^]Yaa`  
@HWI-EAS443:3:49:1319:345#0/1  
AATGAAGTGTGCTAATCTTGCAAAGGAGAGAAAGCTAATG  
+HWI-EAS443:3:49:1319:345#0/1  
aabbbbabababbbabbbbaa\_ab¥abab```aUa\_aab  
@HWI-EAS443:3:49:1386:352#0/1  
CAATCTTGCAAAGGAGAGAAAGCTAATGTGCTAATTGGG  
+HWI-EAS443:3:49:1386:352#0/1  
aa^^^bab]ZaVY\_aab`bab[`Ibb\_baYa`aX¥Z\_```  
@HWI-EAS443:3:49:1422:224#0/1  
AGCTAATGTGCTAATTGGGCAAGGGGACGTAGTGTGGTA  
+HWI-EAS443:3:49:1422:224#0/1  
abab¥Z`\_aba^aYbb```aa^aa]b\_Xb]XaU¥¥[`¥QO  
@HWI-EAS443:3:49:1458:239#0/1  
ATCTTGCAAAGGAGAGAAAGCTAATGTGCTAATTGGGCA  
+HWI-EAS443:3:49:1458:239#0/1  
aa[abaaaa`a`a`ba`ab`a\_]\_`a`\_a\_a`\_a^a``V\_  
@HWI-EAS443:3:49:1470:1485#0/1  
TGAGCAATCTTGCAAAGGAGAGAAAGCTAATGTGCTAAT  
+HWI-EAS443:3:49:1470:1485#0/1  
\_b\_aaaab`aabaaaZa`Yaaaa`^a\_a`\_aa]\_X\_^`^  
@HWI-EAS443:3:49:1546:864#0/1  
AGCAATCTTGCAAAGGAGAGAAAGCTAATGTGCTAATTG  
+HWI-EAS443:3:49:1546:864#0/1  
^`Y`aU[YUbaYY^```aa`ab`]b^aa\_¥[[XR^LXa``  
@HWI-EAS443:3:49:1666:1142#0/1  
GTCCCCTTGCCCAATTAGCACATTAGCTTTCTCCTTTT  
+HWI-EAS443:3:49:1666:1142#0/1  
a`YgzunZaZL]\_Y\_ZSQN[N[XSMFY^QKUPMZPUULO  
@HWI-EAS443:3:49:1712:1909#0/1  
GAGAAAGCTAATGTGCTAATTGGGCAAGGGGACGTAGTGT  
+HWI-EAS443:3:49:1712:1909#0/1  
```aa``aaa^`a¥K[aa`a`^¥\_OWPM¥V\_WRKUUTPIYM  
@HWI-EAS443:3:49:1725:1552#0/1  
AATGAAGTGTGCTAATCTTGCAAAGGAGAGAAAGCTAATG

+HWI-EAS443:3:49:1725:1552#0/1  
aabbabaabaaabababab\_aaa`ba`baaa`\_]N]\_\_aa  
@HWI-EAS443:3:49:1778:1578#0/1  
GAGCAATCTTGCAAAAAGGAGAGAAAGCTAATGTGCTAATT  
+HWI-EAS443:3:49:1778:1578#0/1  
`^b]¥`baabbaa]a`aa]aba^`]b`bbabb[a0a`\_ab  
@HWI-EAS443:3:49:274:143#0/1  
GAGCAATCTTGCAAAAAGGAGAGAAAGCTAATGTGCTAATT  
+HWI-EAS443:3:49:274:143#0/1  
abbaZ¥XUXXb`aabaaa[baba`\_a\_aa]`YYa^^`[``  
@HWI-EAS443:3:49:321:460#0/1  
AGCTAATGTGCTAATTGGGCAAGGGGACGTAGTGTGGTA  
+HWI-EAS443:3:49:321:460#0/1  
aa¥\_]ba`a`aab\_bbb`\_]aa`\_ab\_[a`¥R`bababYS  
@HWI-EAS443:3:49:347:53#0/1  
GAACTGAGCAATCTTGCAAAAAGGAGAGAAAGCTAATGTGC  
+HWI-EAS443:3:49:347:53#0/1  
a`a¥]`¥a`aaa`aab\_]\_`^\_a^a\_a^XaV`^]aa]\_T  
@HWI-EAS443:3:49:371:1551#0/1  
CAAAAGGAGAGAAAGCTAATGTGCTAATTGGGCAAGGGGA  
+HWI-EAS443:3:49:371:1551#0/1  
\_`\_]¥a^b`Ybb^¥\_]\_0`T¥YSaUWXS`aNJ`\_Q\_S`X  
@HWI-EAS443:3:49:435:1686#0/1  
GCATCAATGAACTGAGCAATCTTGCAAAAAGGAGAGAAAGC  
+HWI-EAS443:3:49:435:1686#0/1  
abaa`bb\_aa]abaabaaaa`aba\_aaa`ba`aa`aaab`  
@HWI-EAS443:3:49:442:1840#0/1  
CATCAATGAACTGAGCAATCTTGCAAAAAGGAGAGAAAGCT  
+HWI-EAS443:3:49:442:1840#0/1  
aaabb`\_a^¥bbaabb`ab\_babbbbbb\_baabbbXb^\_b¥X  
@HWI-EAS443:3:49:455:355#0/1  
CATCAATGAACTGAGCAATCTTGCAAAAAGGAGAGAAAGCT  
+HWI-EAS443:3:49:455:355#0/1  
```]V^bbaba`\_b[bb\_]a]]^H¥TbbTbabbXVbSa  
@HWI-EAS443:3:49:505:318#0/1  
GAACTGAGCAATCTTGCAAAAAGGAGAGAAAGCTAATGTGC  
+HWI-EAS443:3:49:505:318#0/1  
aaa`aaaaaab`aaaaa`\_`a]aaaaaa\_a`^aaYa^  
@HWI-EAS443:3:49:507:408#0/1  
AGCAATCTTGCAAAAAGGAGAGAAAGCTAATGTGCTAATTG  
+HWI-EAS443:3:49:507:408#0/1  
`bb\_Zb]b[abab^`ababb\_\_a`]\_b`\_]Hb\_]aaa`a  
@HWI-EAS443:3:49:670:712#0/1  
CATCAATGAACTGAGCAATCTTGCAAAAAGGAGAGAAAGCT  
+HWI-EAS443:3:49:670:712#0/1  
aabbabbbbbbabbb\_bbbbbbbabaaabaabbbbbbb`b  
@HWI-EAS443:3:49:696:1257#0/1  
GAGAAAGCTAATGTGCTAATTGGGCAAGGGGACGTAGTGT  
+HWI-EAS443:3:49:696:1257#0/1  
aa`a]aZL¥XaXb`\_`\_aaa]V^a`^^`a\_PVSaY^\_UXU

@HWI-EAS443:3:49:751:1014#0/1  
CATCAATGAACTGAGCAATCTTGCAAAAGGAGAGAAAGCT  
+HWI-EAS443:3:49:751:1014#0/1  
abXY\_a^¥U`T^U```a\_bbb¥Zbb]aa`^]b`bb`aaT]  
@HWI-EAS443:3:49:786:359#0/1  
GCATCAATGAACTGAGCAATCTTGCAAAAGGAGAGAAAGC  
+HWI-EAS443:3:49:786:359#0/1  
aaabaaabbaaaba`baa`abaa```aa`a`aa`^aX  
@HWI-EAS443:3:49:922:71#0/1  
AATGAACTGAGCAATCTTGCAAAAGGAGAGAAAGCTAATG  
+HWI-EAS443:3:49:922:71#0/1  
abbbbaabab^ba`]abb\_aa\_abaabbbb`abXaaaba  
@HWI-EAS443:3:49:925:1112#0/1  
GAACTGAGCAATCTTGCAAAAGGAGAGAAAGCTAATGTGC  
+HWI-EAS443:3:49:925:1112#0/1  
`U`ZX`Ya\_Y][Ya\_a^\_]XXX\_YaY`^P\_\_Y\_\_Y\_aV\_]`  
@HWI-EAS443:3:49:955:823#0/1  
AGCTAATGTGCTAATTGGGCAAGGGGACGTAGTGTGGTA  
+HWI-EAS443:3:49:955:823#0/1  
X`a^]a^¥\_\_Y`abab^]aZ[\_abaU]aY`]^babb\_T^  
@HWI-EAS443:3:49:9:1991#0/1  
AATGAACTGAGCAATCTTGCAAAAGGAGAGAAAGCTAATG  
+HWI-EAS443:3:49:9:1991#0/1  
¥¥a``¥a`baa`b`\_aba`a\_aaaa\_¥a\_a¥aaa^a\_\_\_a  
@HWI-EAS443:3:4:1007:1775#0/1  
AGCTAATGTGCTAATTGGGCAAGGGGACGTAGTGTGGTA  
+HWI-EAS443:3:4:1007:1775#0/1  
aaaa¥YP`X\_]Y^`W`\_I]WX```\_WaZ[XIZ¥Y`¥BB  
@HWI-EAS443:3:4:1021:1304#0/1  
AAGCTAATGTGCTAATTGGGCAAGGGGACGTAGTGTGGT  
+HWI-EAS443:3:4:1021:1304#0/1  
`aa\_abaaa`a\_aa\_aaa`aaa\_a``Y`\_aZ`a]a]aaaR  
@HWI-EAS443:3:4:1064:1509#0/1  
GAAAGCTAATGTGCTAATTGGGCAAGGGGACGTAGTGTG  
+HWI-EAS443:3:4:1064:1509#0/1  
`aaabab^]ab`a^a`aa\_aba^aab]a[XUb^`\_Wb\_aa  
@HWI-EAS443:3:4:1176:1706#0/1  
ACTGAGCAATCTTGCAAAAGGAGAGAAAGCTAATGTGCTA  
+HWI-EAS443:3:4:1176:1706#0/1  
a][`aUS^`\_a\_a\_a^`^`a\_a\_\_`\_\_a\_`\_`\_]`^Y^^  
@HWI-EAS443:3:4:1227:1681#0/1  
GAACTGAGCAATCTTGCAAAAGGAGAGAAAGCTAATGTGC  
+HWI-EAS443:3:4:1227:1681#0/1  
aab\_aaaaaba`^aa`\_a``\_\_a```a`]`\_V\_\_`a`Z^¥  
@HWI-EAS443:3:4:1276:564#0/1  
AGCACATTAGCTTTCTCTCCTTTTGCAAGATTGCTCAGTT  
+HWI-EAS443:3:4:1276:564#0/1  
aaaa`aaa^^\_aaa\_a\_a¥Za``a\_\_\_`a\_\_\_`^`]\_\_Y\_  
@HWI-EAS443:3:4:1332:1713#0/1  
AATTAGCACATTAGCTTTCTCTCCTTTTGCAAGATTGCTC

+HWI-EAS443:3:4:1332:1713#0/1  
a^ab`aaabbbba`aaabaaaY\_\_baaaa`aaaa`ab^a`  
@HWI-EAS443:3:4:1341:198#0/1  
TTGCAAAAAGGAGAGAAAAGCTAATGTGCTAATTGGGCAAGG  
+HWI-EAS443:3:4:1341:198#0/1  
aaaaa\_`\_a\_a\_\_a\_\_a`\_`^]\_X\_]`X`]`\_Q\_^[Y]^^  
@HWI-EAS443:3:4:1362:1587#0/1  
CGTCCCCTTGCCCAATTAGCACATTAGCTTTCTCTCCTTT  
+HWI-EAS443:3:4:1362:1587#0/1  
abaaaab\_\_b^^`aaaaa]a]abaa`^`^^`\_aV^`\_`  
@HWI-EAS443:3:4:1498:1446#0/1  
GAAAGCTAATGTGCTAATTGGGCAAGGGGACGTAGTGTTG  
+HWI-EAS443:3:4:1498:1446#0/1  
^\_ZZ`VYP[aaXUPSS0aZ\_UGWWR^XWZR`WLITBBBB  
@HWI-EAS443:3:4:1614:1067#0/1  
ATGAACTGAGCAATCTTGCAAAAAGGAGAGAAAAGCTAATGT  
+HWI-EAS443:3:4:1614:1067#0/1  
SKa^a`\_`\_]aaaab\_aab`^a]Y`aa`aa\_^`aQ\_^\_a\_\_  
@HWI-EAS443:3:4:218:1652#0/1  
GAAAGCTAATGTGCTAATTGGGCAAGGGGACGTAGTGTTG  
+HWI-EAS443:3:4:218:1652#0/1  
\_bbaa^aaaaa0a¥`\_aaaa`\_X\_¥aa\_RZXa^\_[LU\_``  
@HWI-EAS443:3:4:271:582#0/1  
GAGCAATCTTGCAAAAAGGAGAGAAAAGCTAATGTGCTAATT  
+HWI-EAS443:3:4:271:582#0/1  
H\_[[WSaaY`\_aa`a\_XZ^\_\_U`[abbbababaa]a]Uab  
@HWI-EAS443:3:4:289:1358#0/1  
GAACTGAGCAATCTTGCAAAAAGGAGAGAAAAGCTAATGTGC  
+HWI-EAS443:3:4:289:1358#0/1  
ab`VK`aa[a\_\_]]a¥`ZZ`¥\_aaa]`a^XY\_]`a`G]G  
@HWI-EAS443:3:4:378:199#0/1  
GAGCAATCTTGCAAAAAGGAGAGAAAAGCTAATGTGCTAATT  
+HWI-EAS443:3:4:378:199#0/1  
aaX\_aaZ^`¥`X`OX\_\_U\_]¥X]\_YYXUX\_U\_UXNKP  
@HWI-EAS443:3:4:528:684#0/1  
CAACACTACGTCCCCTTGCCCAATTAGCACATTAGCTTTC  
+HWI-EAS443:3:4:528:684#0/1  
abbababbaa`a`\_\_aaaa\_[\_`\_\_`^\_¥^`a`\_`¥``Y  
@HWI-EAS443:3:4:594:878#0/1  
GAACTGAGCAATCTTGCAAAAAGGAGAGAAAAGCTAATGTGC  
+HWI-EAS443:3:4:594:878#0/1  
a`R`a\_a][^\_W`a¥YY¥¥^\_Ra\_`\_]\_W]^WU^Z]W  
@HWI-EAS443:3:4:603:958#0/1  
GAGCAATCTTGCAAAAAGGAGAGAAAAGCTAATGTGCTAATT  
+HWI-EAS443:3:4:603:958#0/1  
aababbbababaaaa`a\_aaaaaa`a`\_aaXa\_aX\_a]  
@HWI-EAS443:3:4:630:1355#0/1  
CCCTTGCCCAATTAGCACATTAGCTTTCTCTCCTTTTGCA  
+HWI-EAS443:3:4:630:1355#0/1  
aba]\_a\_]`]`aaa`aaaaaaaaaaaa`\_`\_\_Z`\_\_`a^`



@HWI-EAS443:3:4:630:868#0/1  
CATCAATGAACTGAGCAATCTTGCAAAAGGAGAGAAAGCT  
+HWI-EAS443:3:4:630:868#0/1  
abbbbabbab\_bbbaabababbbbaa\_aabaabaaaaa\_a  
@HWI-EAS443:3:4:720:421#0/1  
GAGCAATCTTGCAAAAGGAGAGAAAGCTAATGTGCTAATT  
+HWI-EAS443:3:4:720:421#0/1  
a^`a]Y\_¥a`a\_a\_a¥a`¥a`\_a\_Z]\_\_`^`QaW`¥W\_^  
@HWI-EAS443:3:4:736:1184#0/1  
AATGAACTGAGCAATCTTGCAAAAGGAGAGAAAGCTAATG  
+HWI-EAS443:3:4:736:1184#0/1  
aaa\_\_`^^¥\_\_a^aaa`[]\_aaaaa`]aaaaWa\_aaa  
@HWI-EAS443:3:4:741:1250#0/1  
GCATCAATGAACTGAGCAATCTTGCAAAAGGAGAGAAAGC  
+HWI-EAS443:3:4:741:1250#0/1  
`baaaaabaa\_\_\_\_\_`\_`^^`^`a\_\_¥`\_`^X\_\_`\_\_^a]  
@HWI-EAS443:3:4:791:807#0/1  
GAAAGCTAATGTGCTAATTGGGCAAGGGGACGTAGTGTTG  
+HWI-EAS443:3:4:791:807#0/1  
\_bab^E]aabbXb^ba^abaYV¥aaa`¥\_\_a]]VXa\_`a  
@HWI-EAS443:3:4:799:424#0/1  
GAAAGCTAATGTGCTAATTGGGCAAGGGGACGTAGTGTTG  
+HWI-EAS443:3:4:799:424#0/1  
`\_N\_aaUU^`aaa[Z0]\_[`aWXQa`XWV[¥aUaXPaa\_B  
@HWI-EAS443:3:4:813:179#0/1  
AACTGAGCAATCTTGCAAAAGGAGAGAAAGCTAATGTGCT  
+HWI-EAS443:3:4:813:179#0/1  
aaaaa`aaaaa\_aaa`a`\_\_a`\_a`a`^`aW^[^`Z\_]`^  
@HWI-EAS443:3:4:90:1366#0/1  
GAAAGCTAATGTGCTAATTGGGCAAGGGGACGTAGTGTTG  
+HWI-EAS443:3:4:90:1366#0/1  
aaa[Q^a\_a\_\_SY\_\_]UZ^Z¥\_`^Z]NR^TSGT]QQWUZ  
@HWI-EAS443:3:4:928:1641#0/1  
GCATCAATGAACTGAGCAATCTTGCAAAAGGAGAGAAAGC  
+HWI-EAS443:3:4:928:1641#0/1  
a\_aa`aaaa`a\_a\_`a^`a`\_`\_`\_`\_]\_\_\_\_^`\_`\_\_^^]  
@HWI-EAS443:3:4:963:214#0/1  
AGCTAATGTGCTAATTGGGCAAGGGGACGTAGTGTTGGTA  
+HWI-EAS443:3:4:963:214#0/1  
aa^aaaab\_a\_aY[\_a\_a\_]`^`\_`VWOaZZ\_W[RS\_WHB  
@HWI-EAS443:3:50:1180:1751#0/1  
GTCCCCTTGCCCAATTAGCACATTAGCTTTCTCTCCTTTT  
+HWI-EAS443:3:50:1180:1751#0/1  
aaa`abaaaa`baaaa^[a^¥a\_¥\_YaaaZ\_Y\_`\_a\_\_[  
@HWI-EAS443:3:50:1188:1849#0/1  
CTTGCAAAAGGAGAGAAAGCTAATGTGCTAATTGGGCAAG  
+HWI-EAS443:3:50:1188:1849#0/1  
aa`bbba]b\_baaaabbaaaaaaab`a\_aaaaaaZ`a`a  
@HWI-EAS443:3:50:1208:1690#0/1  
GAGAAAGCTAATGTGCTAATTGGGCAAGGGGACGTAGTGT

+HWI-EAS443:3:50:1208:1690#0/1  
abbbbbbaabbb`]bbb`aabbba\_aabbbbaaSa`aa^aa  
@HWI-EAS443:3:50:1209:676#0/1  
GAGCAATCTTGCAAAAGGAGAGAAAGCTAATGTGCTAATT  
+HWI-EAS443:3:50:1209:676#0/1  
\_abbabbbbaabbbabbabbbbbbbaa`bbbbbb  
@HWI-EAS443:3:50:1268:1239#0/1  
CAAAAGGAGAGAAAGCTAATGTGCTAATTGGGCAAGGGGA  
+HWI-EAS443:3:50:1268:1239#0/1  
aaRS]bb\_ba`][\_bbba\_ba\_`^`ba`]`\_baa`¥  
@HWI-EAS443:3:50:1335:1930#0/1  
GCATCAATGAACTGAGCAATCTTGCAAAAGGAGAGAAAGC  
+HWI-EAS443:3:50:1335:1930#0/1  
`aZabb`a[aa`\_b\_\_^`\_Z\_^]aa`aa\_abaa`bY  
@HWI-EAS443:3:50:1423:127#0/1  
AAAGCTAATGTGCTAATTGGGCAAGGGGACGTAGTGTGG  
+HWI-EAS443:3:50:1423:127#0/1  
aaa`baab`a[b`aba[a]\_\_a`a`\_a^a¥a`a`  
@HWI-EAS443:3:50:1516:1144#0/1  
AGCTAATGTGCTAATTGGGCAAGGGGACGTAGTGTGGTA  
+HWI-EAS443:3:50:1516:1144#0/1  
Y^`\_R`\_aSSaTWab¥]aba`¥`a`¥ba`b^baa`^QQ  
@HWI-EAS443:3:50:1535:312#0/1  
GCATCAATGAACTGAGCAATCTTGCAAAAGGAGAGAAAGC  
+HWI-EAS443:3:50:1535:312#0/1  
aaa`aaabbaa`a`ab\_aaa\_aba\_\_`\_aaa\_a]a\_\_\_a^  
@HWI-EAS443:3:50:1669:25#0/1  
CTTGCAAAAGGAGAGAAAGCTAATGTGCTAATTGGGCAAG  
+HWI-EAS443:3:50:1669:25#0/1  
aba`aaaa`\_^[\`ba`Z^\_aabb`aaaaaba¥W¥`^]^  
@HWI-EAS443:3:50:1739:1335#0/1  
GAACTGAGCAATCTTGCAAAAGGAGAGAAAGCTAATGTGC  
+HWI-EAS443:3:50:1739:1335#0/1  
a`baa`Z`babb`bab\_ZYWYba\_a`[a`a¥`aa`Z  
@HWI-EAS443:3:50:20:75#0/1  
AGCTAATGTGCTAATTGGGCAAGGGGACGTAGTGTGGTA  
+HWI-EAS443:3:50:20:75#0/1  
¥[\_¥^aW¥]\_\_bba¥``\_aaYX]Z¥\_^]a[] [aa[Y¥  
@HWI-EAS443:3:50:388:2045#0/1  
GAGCAATCTTGCAAAAGGAGAGAAAGCTAATGTGCTAATT  
+HWI-EAS443:3:50:388:2045#0/1  
a`X`[`] [bW` [Z]X^b`Z^\_baa`WU^aa`aSUVp[ZP`  
@HWI-EAS443:3:50:440:1485#0/1  
TGCAAAAGGAGAGAAAGCTAATGTGCTAATTGGGCAAGGG  
+HWI-EAS443:3:50:440:1485#0/1  
ab\_baaaa\_aaba`aa`aaaa\_a\_a`^a`a`\_Y\_\_a]a  
@HWI-EAS443:3:50:450:1051#0/1  
CTTGCAAAAGGAGAGAAAGCTAATGTGCTAATTGGGCAAG  
+HWI-EAS443:3:50:450:1051#0/1  
abbaa`abbbabbbabbb^b`abbab\_a`bbbb\_a`aab

@HWI-EAS443:3:50:681:505#0/1  
GAGCAATCTTGCAAAGGAGAGAAAGCTAATGTGCTAATT  
+HWI-EAS443:3:50:681:505#0/1  
aXSX\_]X^[]U\_\_^L^\_[a^P`\_¥OW[]R`ZNQQYVV[¥  
@HWI-EAS443:3:50:682:811#0/1  
CCTTGCCCAATTAGCACATTAGCTTTCTCTCCTTTTGCAA  
+HWI-EAS443:3:50:682:811#0/1  
abbabbaaabbbababbbbbbbbbbb`bXbbbbbbba  
@HWI-EAS443:3:50:687:528#0/1  
GAACTGAGCAATCTTGCAAAGGAGAGAAAGCTAATGTGC  
+HWI-EAS443:3:50:687:528#0/1  
aaa]abababababaa¥^aba`aabaaa`baaab`a\_  
@HWI-EAS443:3:50:705:1170#0/1  
AAAGCTAATGTGCTAATTGGGCAAGGGGACGTAGTGTGG  
+HWI-EAS443:3:50:705:1170#0/1  
`S\_aU`]`^\_Q^`]^\_[]aaX¥\_a`^aZ\_^JYaP\_T`a^  
@HWI-EAS443:3:50:90:2020#0/1  
ATCTTGCAAAGGAGAGAAAGCTAATGTGCTAATTGGGCA  
+HWI-EAS443:3:50:90:2020#0/1  
`UWaYR`[b\_\_aaaaaaaa\_aa`a^`X¥Wa^a\_a\_¥^\_\_  
@HWI-EAS443:3:50:918:1389#0/1  
GAGAAAGCTAATGTGCTAATTGGGCAAGGGGACGTAGTGT  
+HWI-EAS443:3:50:918:1389#0/1  
``aa`[a\_a\_\_aa[a\_a`]a]`\_\_^\_Y`\_a^^`[X[Q[U  
@HWI-EAS443:3:50:965:2031#0/1  
AAAGCTAATGTGCTAATTGGGCAAGGGGACGTAGTGTGG  
+HWI-EAS443:3:50:965:2031#0/1  
\_¥¥¥¥`¥¥`]baaaba`¥`]T`aZ\_X[a^`a¥a\_aa^  
@HWI-EAS443:3:50:968:1126#0/1  
GAGAAAGCTAATGTGCTAATTGGGCAAGGGGACGTAGTGT  
+HWI-EAS443:3:50:968:1126#0/1  
aa¥Z\_bb\_\_^aaaXaaa\_abaa]^\_^\_a```X]aU]aUYS  
@HWI-EAS443:3:50:974:1513#0/1  
ATCTTGCAAAGGAGAGAAAGCTAATGTGCTAATTGGGCA  
+HWI-EAS443:3:50:974:1513#0/1  
`baabbaa`aabbaabbaababaaab`aaa\_abaab\_^\_  
@HWI-EAS443:3:51:1076:1638#0/1  
CAATCTTGCAAAGGAGAGAAAGCTAATGTGCTAATTGGG  
+HWI-EAS443:3:51:1076:1638#0/1  
^aaYNW^abb^ZVaa\_b\_^]\_S^L]`^a`^aYaZ]```a\_  
@HWI-EAS443:3:51:11:1432#0/1  
GAGCAATCTTGCAAAGGAGAGAAAGCTAATGTGCTAATT  
+HWI-EAS443:3:51:11:1432#0/1  
aaabb]bbbb]ba]aabbabaaaZWa\_aaYba^aab`[\_a  
@HWI-EAS443:3:51:1595:152#0/1  
GAGCAATCTTGCAAAGGAGAGAAAGCTAATGTGCTAATT  
+HWI-EAS443:3:51:1595:152#0/1  
][^a`\_bb`a`babaabbabWH]aaY]baaa]]][ba\_\_a  
@HWI-EAS443:3:51:1598:1242#0/1  
ATCTTGCAAAGGAGAGAAAGCTAATGTGCTAATTGGGCA

+HWI-EAS443:3:51:1598:1242#0/1  
`b^bbbaaa`\_a¥ZXQ^aaa\_\_a`\_aYW^W¥]`aaa^¥^a  
@HWI-EAS443:3:51:1606:453#0/1  
GAGAAAGCTAATGTGCTAATTGGGCAAGGGACGTAGTGT  
+HWI-EAS443:3:51:1606:453#0/1  
abaa[`Xa`HKa`bSbabbba[]aa[MT^a^\_Sa¥Q[F[  
@HWI-EAS443:3:51:287:1185#0/1  
AATGAAGCTGAGCAATCTTGCAAAAGGAGAGAAAGCTAATG  
+HWI-EAS443:3:51:287:1185#0/1  
abaa`aba¥`bbbaabaaa\_Z\_abaaaaaaa`]a`a`a  
@HWI-EAS443:3:51:417:1008#0/1  
GAAAGCTAATGTGCTAATTGGGCAAGGGACGTAGTGTG  
+HWI-EAS443:3:51:417:1008#0/1  
aZW]a`\_]ba¥VPa]]a`\_Yaa`\_aUVa^aaVva¥¥S]`  
@HWI-EAS443:3:51:434:1663#0/1  
GAGCAATCTTGCAAAAGGAGAGAAAGCTAATGTGCTAATT  
+HWI-EAS443:3:51:434:1663#0/1  
a^a\_bbb¥aaaa`\_Y`\_Ya\_ab\_aa`aa^aaY\_\_`\_¥`\_`  
@HWI-EAS443:3:51:449:387#0/1  
GAGCAATCTTGCAAAAGGAGAGAAAGCTAATGTGCTAATT  
+HWI-EAS443:3:51:449:387#0/1  
aWa¥U`[VZ[\_¥[VZQ^\_[`[\_ZZ[[Y]YU¥]Q[W^UTYT  
@HWI-EAS443:3:51:45:211#0/1  
CAATCTTGCAAAAGGAGAGAAAGCTAATGTGCTAATTGGG  
+HWI-EAS443:3:51:45:211#0/1  
aa\_baabaabaa\_baababb\_aa^a`\_bb^aaa^\_aaaa`  
@HWI-EAS443:3:51:49:1715#0/1  
GAAAGCTAATGTGCTAATTGGGCAAGGGACGTAGTGTG  
+HWI-EAS443:3:51:49:1715#0/1  
W\_ab]b`abbbbbb¥`abb`¥`ba`b`\_`aba^¥]b^ba  
@HWI-EAS443:3:51:546:304#0/1  
AGCTAATGTGCTAATTGGGCAAGGGACGTAGTGTGGTA  
+HWI-EAS443:3:51:546:304#0/1  
`bab^bbb¥Z\_a`aaaba`\_a`aa`^ab\_ab`a\_a^`R\_  
@HWI-EAS443:3:51:552:1465#0/1  
GAGCAATCTTGCAAAAGGAGAGAAAGCTAATGTGCTAATT  
+HWI-EAS443:3:51:552:1465#0/1  
\_abaabbabbaa`aa]`baaaaaa`[ba\_bb\_a`aS]`a  
@HWI-EAS443:3:51:579:337#0/1  
AGCAATCTTGCAAAAGGAGAGAAAGCTAATGTGCTAATTG  
+HWI-EAS443:3:51:579:337#0/1  
ab`bbbbbbbbbbaabba`bbaaab\_a`]ab\_a\_baaaaa  
@HWI-EAS443:3:51:655:729#0/1  
CAATCTTGCAAAAGGAGAGAAAGCTAATGTGCTAATTGGG  
+HWI-EAS443:3:51:655:729#0/1  
`\_\_ab^^XS`aJ\_Y^bbb`¥\_¥b\_b\_M¥^T`ab\_abaX]X  
@HWI-EAS443:3:51:685:1038#0/1  
CAATGAAGCTGAGCAATCTTGCAAAAGGAGAGAAAGCTAAT  
+HWI-EAS443:3:51:685:1038#0/1  
`¥`bb\_bbba`\_a\_XYbbbaaab`aabbbaab```Y`baa

@HWI-EAS443:3:51:720:1081#0/1  
AAAAGGAGAGAAAGCTAATGTGCTAATTGGGCAAGGGGAC  
+HWI-EAS443:3:51:720:1081#0/1  
aaaabbabbbbbbbbaabb\_b`baabaaaaa`abba\_^  
@HWI-EAS443:3:51:739:741#0/1  
AGCTAATGTGCTAATTGGGCAAGGGGACGTAGTGTGGTA  
+HWI-EAS443:3:51:739:741#0/1  
`aab``bbbbabbabbbbbbaabbbb]bba`babaabaZ]  
@HWI-EAS443:3:51:73:893#0/1  
AGCTAATGTGCTAATTGGGCAAGGGGACGTAGTGTGGTA  
+HWI-EAS443:3:51:73:893#0/1  
abbab`bb\_baaa`abaaaaabaaa\_\_bZ\_aYa\_aa`PV  
@HWI-EAS443:3:51:884:1617#0/1  
GAGCAATCTTGCAAAAGGAGAGAAAGCTAATGTGCTAATT  
+HWI-EAS443:3:51:884:1617#0/1  
]V\_WO\_W\_R]a[a]WR`WQ\_abb\_\_]]\_aa^][^Z^^^]\_  
@HWI-EAS443:3:51:963:174#0/1  
GCAAAAGGAGAGAAAGCTAATGTGCTAATTGGGCAAGGGG  
+HWI-EAS443:3:51:963:174#0/1  
a`aa^```baba^\_a`a\_\_ab^a]a``a\_a\_]Z`\_a^`\_  
@HWI-EAS443:3:52:1034:1767#0/1  
AGCTAATGTGCTAATTGGGCAAGGGGACGTAGTGTGGTA  
+HWI-EAS443:3:52:1034:1767#0/1  
abb^]¥¥¥V`aaa\_aaab`\_`Z``b\_ab^¥^\_b^`b^S\_  
@HWI-EAS443:3:52:1075:1994#0/1  
GAGCAATCTTGCAAAAGGAGAGAAAGCTAATGTGCTAATT  
+HWI-EAS443:3:52:1075:1994#0/1  
aVY`\_[\_`¥X^\_a`[\_`a`a¥`aa[`]\_]a]\_[[^^][  
@HWI-EAS443:3:52:1098:1296#0/1  
AGCTAATGTGCTAATTGGGCAAGGGGACGTAGTGTGGTA  
+HWI-EAS443:3:52:1098:1296#0/1  
\_^Y`Y\_a`RZ]\_aaXa]a`^VY]S]WP¥b[Za]ZZY\_aVX  
@HWI-EAS443:3:52:1117:1406#0/1  
TGCAAAAGGAGAGAAAGCTAATGTGCTAATTGGGCAAGGG  
+HWI-EAS443:3:52:1117:1406#0/1  
abaY[ZV]a`a\_a`^\_a\_\_`\_baZaYa\_]a\_\_^`]`\_]\_  
@HWI-EAS443:3:52:1133:1159#0/1  
GCATCAATGAAGTACTGAGCAATCTTGCAAAAGGAGAGAAAGC  
+HWI-EAS443:3:52:1133:1159#0/1  
¥abbaabbbbbabbba^^^aabbaaaaabbababb\_]b\_  
@HWI-EAS443:3:52:1155:824#0/1  
ATCTTGCAAAAGGAGAGAAAGCTAATGTGCTAATTGGGCA  
+HWI-EAS443:3:52:1155:824#0/1  
^bbb`\_^W`aaY`abaab^)^ab```Z[a\_baaaa\_¥\_a  
@HWI-EAS443:3:52:1213:68#0/1  
GCATCAATGAAGTACTGAGCAATCTTGCAAAAGGAGAGAAAGC  
+HWI-EAS443:3:52:1213:68#0/1  
VaM¥X\_0\_^ZW]a¥\_\_]¥aa0a\_a[ ]\_]aa\_b[\_OU\_a[  
@HWI-EAS443:3:52:1287:211#0/1  
GCATCAATGAAGTACTGAGCAATCTTGCAAAAGGAGAGAAAGC

+HWI-EAS443:3:52:1287:211#0/1  
`aaa¥^aba\_a[a[]`Ra`aZa`aUPX`^a`^a\_a\_[]U  
@HWI-EAS443:3:52:1304:390#0/1  
AGCTAATGTGCTAATTGGGCAAGGGGACGTAGTGTGGTA  
+HWI-EAS443:3:52:1304:390#0/1  
`bab\_aaaPaR\_a`aa`ba^`\_aaaZ^`\_]UYV]^aa]R]  
@HWI-EAS443:3:52:1354:1468#0/1  
AGCTAATGTGCTAATTGGGCAAGGGGACGTAGTGTGGTA  
+HWI-EAS443:3:52:1354:1468#0/1  
`X00V\_aa\_Z]^`^T[S]Z¥\_]`baa`]RU\_G\_GX\_YUR  
@HWI-EAS443:3:52:1396:1399#0/1  
GAACTGAGCAATCTTGCAAAAGGAGAGAAAGCTAATGTGC  
+HWI-EAS443:3:52:1396:1399#0/1  
aabZa¥^^`baaP¥`bZ`\_KXaa`ba`b]a`V]aa^aUaU  
@HWI-EAS443:3:52:1514:1134#0/1  
CAATTAGCACATTAGCTTTCTCTCCTTTTGCAAGATTGCT  
+HWI-EAS443:3:52:1514:1134#0/1  
`\_abbaa`b\_bbbbaabbb`a\_b`\_aaa\_a`aaaaaa^a  
@HWI-EAS443:3:52:1606:317#0/1  
TCTTGCAAAAGGAGAGAAAGCTAATGTGCTAATTGGGCAA  
+HWI-EAS443:3:52:1606:317#0/1  
`ab`\_`\_aab``\_ba\_X]\_\_aabaaaaYaab`ababaa\_``  
@HWI-EAS443:3:52:1607:1320#0/1  
AATGAACTGAGCAATCTTGCAAAAGGAGAGAAAGCTAATG  
+HWI-EAS443:3:52:1607:1320#0/1  
Wbb`abbbaab`bbaab\_bbaaaab`aa\_b^`ab^``\_ba  
@HWI-EAS443:3:52:164:895#0/1  
GAGCAATCTTGCAAAAGGAGAGAAAGCTAATGTGCTAATT  
+HWI-EAS443:3:52:164:895#0/1  
a`baaabbaaaYa¥aba`bab`\_\_b]a``aa]a`\_`\_a\_  
@HWI-EAS443:3:52:1661:1060#0/1  
GAGCAATCTTGCAAAAGGAGAGAAAGCTAATGTGCTAATT  
+HWI-EAS443:3:52:1661:1060#0/1  
\_a`aba¥\_b\_T^aaba\_b¥[]\_¥aabababbbaW^`¥`^  
@HWI-EAS443:3:52:1761:1419#0/1  
AACTGAGCAATCTTGCAAAAGGAGAGAAAGCTAATGTGCT  
+HWI-EAS443:3:52:1761:1419#0/1  
abXa\_¥b`a`\_`aaa``[^`^]a`^`^`\_`\_a[^`[^Y^  
@HWI-EAS443:3:52:191:2022#0/1  
AGCACATTAGCTTTCTCTCCTTTTGCAAGATTGCTCAGTT  
+HWI-EAS443:3:52:191:2022#0/1  
Y[W]¥VZab`][a``Qaa]M[[a`Y`\_`\_[]SGXQ[``PXS  
@HWI-EAS443:3:52:234:367#0/1  
GAAAGCTAATGTGCTAATTGGGCAAGGGGACGTAGTGTG  
+HWI-EAS443:3:52:234:367#0/1  
a`aab\_aaaab\_babaaaaaaaaaaa\_aaa\_aaa^aaWa\_\_a  
@HWI-EAS443:3:52:240:1416#0/1  
CATCAATGAACTGAGCAATCTTGCAAAAGGAGAGAAAGCT  
+HWI-EAS443:3:52:240:1416#0/1  
`\_U`\_S]\_^`\_b¥ZZ]aa\_Y]]Y][¥``¥]^\_OZ¥¥Y

@HWI-EAS443:3:52:251:510#0/1  
AGCTAATGTGCTAATTGGGCAAGGGGACGTAGTGTGGTA  
+HWI-EAS443:3:52:251:510#0/1  
aabb^aba`aaaaabaab\_]aaaaZ`b^^a]a]a`aHU  
@HWI-EAS443:3:52:269:79#0/1  
AGCTAATGTGCTAATTGGGCAAGGGGACGTAGTGTGGTA  
+HWI-EAS443:3:52:269:79#0/1  
\_bbb\_ZaaXa`\_`a``baa`\_\_aaaaU\_a]]aWa¥`a\_TT  
@HWI-EAS443:3:52:291:134#0/1  
ACTGAGCAATCTTGCAAAAGGAGAGAAAGCTAATGTGCTA  
+HWI-EAS443:3:52:291:134#0/1  
abbaaaaa`babab`a`^\_ba`a`aa\_\_a]a\_\_aa^a^a\_  
@HWI-EAS443:3:52:292:736#0/1  
AGGAGAGAAAGCTAATGTGCTAATTGGGCAAGGGGACGTA  
+HWI-EAS443:3:52:292:736#0/1  
abbababaaaaa]^ab\_b`a\_\_`aaaa\_]¥a``aYWa^\_  
@HWI-EAS443:3:52:295:1161#0/1  
ATCTTGCAAAAGGAGAGAAAGCTAATGTGCTAATTGGGCA  
+HWI-EAS443:3:52:295:1161#0/1  
OWR\_[[`ZT^YV`]\_abbaWbaa``^TPZ\_`U¥¥b¥\_TY`  
@HWI-EAS443:3:52:295:1973#0/1  
AGCTAATGTGCTAATTGGGCAAGGGGACGTAGTGTGGTA  
+HWI-EAS443:3:52:295:1973#0/1  
aaaaaba`aaaa`a]``aaaa\_a`\_\_a^\_aZZ^a`\_W\_  
@HWI-EAS443:3:52:295:320#0/1  
GTCCCCTTGCCCAATTAGCACATTAGCTTTCTCCTTTT  
+HWI-EAS443:3:52:295:320#0/1  
a`a`\_]\_\_a\_`\_`aa\_`\_`]\_`\_\_\_^`\_^`\_]`¥X¥`^`  
@HWI-EAS443:3:52:366:1052#0/1  
AAGCTAATGTGCTAATTGGGCAAGGGGACGTAGTGTGGT  
+HWI-EAS443:3:52:366:1052#0/1  
JX]baabbb^b`a``ab]`a`^b^\_a`\_b^^]MZ\_aaaV  
@HWI-EAS443:3:52:398:735#0/1  
GAGCAATCTTGCAAAAGGAGAGAAAGCTAATGTGCTAATT  
+HWI-EAS443:3:52:398:735#0/1  
`¥`a`b\_a`aba\_aaba]aabaabaaa[a\_S]^aa^]`  
@HWI-EAS443:3:52:411:1097#0/1  
GAAAGCTAATGTGCTAATTGGGCAAGGGGACGTAGTGTGG  
+HWI-EAS443:3:52:411:1097#0/1  
abbabaa]ZaaW`aba\_aaaaa`Y`aaa\_aa\_Va^a`\_a  
@HWI-EAS443:3:52:462:419#0/1  
GAAAGCTAATGTGCTAATTGGGCAAGGGGACGTAGTGTGG  
+HWI-EAS443:3:52:462:419#0/1  
a]PUHR``^¥]G^L[ZY^`\_WV]RW¥V]]V]\_UVXDUVU]  
@HWI-EAS443:3:52:464:1012#0/1  
AGGAGAGAAAGCTAATGTGCTAATTGGGCAAGGGGACGTA  
+HWI-EAS443:3:52:464:1012#0/1  
abbababaaabaaaaab\_b\_`aaaa`aa``]a`a`^`a]]  
@HWI-EAS443:3:52:469:797#0/1  
ACCAACACTACGTCCCCTTGCCCAATTAGCACATTAGCTT





@HWI-EAS443:3:52:905:1720#0/1  
GTCCCCTTGCCCAATTAGCACATTAGCTTTCTCTCCTTTT  
+HWI-EAS443:3:52:905:1720#0/1  
a^a`aX^`\_\_`\_aa`\_\_^Y`[```\_a^\_^\_^[\_^^`\_`\_`  
@HWI-EAS443:3:52:944:40#0/1  
GCATCAATGAACTGAGCAATCTTGCAAAAGGAGAGAAAGC  
+HWI-EAS443:3:52:944:40#0/1  
aaaa\_`^`b\_^Xaa\_b^a\_a\_aaaR¥Y\_^a`[a`a^^]a^  
@HWI-EAS443:3:52:94:1335#0/1  
AATTAGCACATTAGCTTTCTCTCCTTTTGCAAGATTGCTC  
+HWI-EAS443:3:52:94:1335#0/1  
\_¥a¥Z)`UZ^a]^^^`aaa\_RZ^SY`a\_T¥]\_¥U[RXXPX  
@HWI-EAS443:3:53:1004:1443#0/1  
AGCTAATGTGCTAATTGGGCAAGGGACGTAGTGTGGTA  
+HWI-EAS443:3:53:1004:1443#0/1  
a`Pb`baba``aaaa``]aKaabab`V^b]aaaba`aaX¥  
@HWI-EAS443:3:53:1017:1342#0/1  
CTTGCAAAAGGAGAGAAAGCTAATGTGCTAATTGGGCAAG  
+HWI-EAS443:3:53:1017:1342#0/1  
ababa\_\_b\_aaWbbb\_bababa`baab\_b\_ab\_bbb`a`  
@HWI-EAS443:3:53:1099:595#0/1  
AGCTAATGTGCTAATTGGGCAAGGGACGTAGTGTGGTA  
+HWI-EAS443:3:53:1099:595#0/1  
`babbbbb[\_ababbb`ab`bbb`aababaababb`QS  
@HWI-EAS443:3:53:110:109#0/1  
GCATCAATGAACTGAGCAATCTTGCAAAAGGAGAGAAAGC  
+HWI-EAS443:3:53:110:109#0/1  
a``W``[ab^^Z\_\_\_a\_\_`]T]^`^\_UZaaX`)]]]aY  
@HWI-EAS443:3:53:1173:95#0/1  
CAATCTTGCAAAAGGAGAGAAAGCTAATGTGCTAATTGGG  
+HWI-EAS443:3:53:1173:95#0/1  
abbabb`b^b[b`^^Yb\_b]a\_aZabbb\_]aN¥a\_babba  
@HWI-EAS443:3:53:1256:249#0/1  
GAACTGAGCAATCTTGCAAAAGGAGAGAAAGCTAATGTGC  
+HWI-EAS443:3:53:1256:249#0/1  
`aa\_bbab`aab\_abb`\_a^`abab\_aaa\_bVa`\_aa\_aX  
@HWI-EAS443:3:53:1317:224#0/1  
GAGCAATCTTGCAAAAGGAGAGAAAGCTAATGTGCTAATT  
+HWI-EAS443:3:53:1317:224#0/1  
Vabababbbaabababb\_ab\_bbbbabbbbabaaabbb  
@HWI-EAS443:3:53:1386:383#0/1  
AGCAATCTTGCAAAAGGAGAGAAAGCTAATGTGCTAATTG  
+HWI-EAS443:3:53:1386:383#0/1  
aa``aaabbbbb]abbb`b`babbbab``aa`b`b`ab^]  
@HWI-EAS443:3:53:1544:263#0/1  
GAAAGCTAATGTGCTAATTGGGCAAGGGACGTAGTGTG  
+HWI-EAS443:3:53:1544:263#0/1  
`ab\_\_`a\_abbab`bbbaTaaaaabaZa`Y]\_aa¥a\_a`  
@HWI-EAS443:3:53:1634:887#0/1  
AGCTAATGTGCTAATTGGGCAAGGGACGTAGTGTGGTA

+HWI-EAS443:3:53:1634:887#0/1  
aUT\_abb[aaWbaabbb`[aaS\_FWa¥`aa\_[]`^bV][Y  
@HWI-EAS443:3:53:1671:1261#0/1  
GAACTGAGCAATCTTGCAAAAGGAGAGAAAGCTAATGTGC  
+HWI-EAS443:3:53:1671:1261#0/1  
`aa`bbaabb`baaabX\_aa`ab[Zabab[a\_a`aba\_a\_  
@HWI-EAS443:3:53:1781:1419#0/1  
CATCAATGAACTGAGCAATCTTGCAAAAGGAGAGAAAGCT  
+HWI-EAS443:3:53:1781:1419#0/1  
abaaaabaaa`a\_[aaaa^baa\_a[\_`a``aa]\_a\_`  
@HWI-EAS443:3:53:1789:1978#0/1  
CCCTTGCCCAATTAGCACATTAGCTTTCTCCTTTTGCA  
+HWI-EAS443:3:53:1789:1978#0/1  
a`a]\_aaabaaa`^^\_a`W\_¥¥\_aa\_aaa\_]\_\_¥\_] [  
@HWI-EAS443:3:53:180:1184#0/1  
AAGCTAATGTGCTAATTGGGCAAGGGGACGTAGTGTGGT  
+HWI-EAS443:3:53:180:1184#0/1  
abaaba`ba^a`b`aa`b\_`aa```a`^aa\_]a]aZab^O  
@HWI-EAS443:3:53:230:177#0/1  
GAAAGCTAATGTGCTAATTGGGCAAGGGGACGTAGTGTGG  
+HWI-EAS443:3:53:230:177#0/1  
aaaab`b``ab`aab\_\_ababa\_`\_ba\_a^`Y^bYa^]a  
@HWI-EAS443:3:53:239:214#0/1  
GAACTGAGCAATCTTGCAAAAGGAGAGAAAGCTAATGTGC  
+HWI-EAS443:3:53:239:214#0/1  
`[aaa`aaaa`aaa¥Z`\_\_aa[a]a`^\_a^\_aY\_`V^V  
@HWI-EAS443:3:53:250:1004#0/1  
CAATCTTGCAAAAGGAGAGAAAGCTAATGTGCTAATTGGG  
+HWI-EAS443:3:53:250:1004#0/1  
ab[\_`ba¥\_aZ[aZb]b`ba\_aaaZ¥aa^b\_ba\_a`^Xa  
@HWI-EAS443:3:53:273:344#0/1  
GAGCAATCTTGCAAAAGGAGAGAAAGCTAATGTGCTAATT  
+HWI-EAS443:3:53:273:344#0/1  
a^TOS^P[WUa\_[]\_JY^^[X[\_TUNV\_[U[U]UV[UZY  
@HWI-EAS443:3:53:33:550#0/1  
CGTCCCCTTGCCCAATTAGCACATTAGCTTTCTCCTTT  
+HWI-EAS443:3:53:33:550#0/1  
`aababbbbb`aaabaaaaaaaS`aaabaaa`aa^aba  
@HWI-EAS443:3:53:45:341#0/1  
CATCAATGAACTGAGCAATCTTGCAAAAGGAGAGAAAGCT  
+HWI-EAS443:3:53:45:341#0/1  
Ybbb``abbbbb``bbabbbbaZXabbababa[¥a`a  
@HWI-EAS443:3:53:525:759#0/1  
TGCAAAAGGAGAGAAAGCTAATGTGCTAATTGGGCAAGGG  
+HWI-EAS443:3:53:525:759#0/1  
aa`aaa`ba\_a`a]^aaaa\_aa`Wa\_aa\_a\_``a\_\_^aa\_  
@HWI-EAS443:3:53:540:882#0/1  
GCATCAATGAACTGAGCAATCTTGCAAAAGGAGAGAAAGC  
+HWI-EAS443:3:53:540:882#0/1  
`\_`aaaaabaaa\_a]b``\_\_a`aa\_] [Yaa[b\_a\_[R]\_

@HWI-EAS443:3:53:600:57#0/1  
CATCAATGAACTGAGCAATCTTGCAAAAAGGAGAGAAAGCT  
+HWI-EAS443:3:53:600:57#0/1  
abbabb`\_YYV\_`^aa¥` [H^aaa^`a^ab^bUabaSa^a  
@HWI-EAS443:3:53:80:1875#0/1  
AGCTAATGTGCTAATTGGGCAAGGGGACGTAGTGTGGTA  
+HWI-EAS443:3:53:80:1875#0/1  
aSUUZH¥MG` `¥¥a\_S]RV\_W]\_O^00]OH\_RW^V[]RGX  
@HWI-EAS443:3:53:89:1547#0/1  
GAGCAATCTTGCAAAAAGGAGAGAAAGCTAATGTGCTAATT  
+HWI-EAS443:3:53:89:1547#0/1  
aaaaa`¥aaab`a` []\_^aa]a`¥`a\_aa\_a`^a^` [\_`\_`  
@HWI-EAS443:3:54:1012:1508#0/1  
GAGCAATCTTGCAAAAAGGAGAGAAAGCTAATGTGCTAATT  
+HWI-EAS443:3:54:1012:1508#0/1  
Y]^b]bbabbaabaa[ababb`a]Z\_ab\_^a`\_a\_b]¥\_a  
@HWI-EAS443:3:54:1090:1774#0/1  
TCCCCTTGCCCAATTAGCACATTAGCTTTCTCCTTTTG  
+HWI-EAS443:3:54:1090:1774#0/1  
WXT¥S`YY]]^Z]X]PQK`RVR\_XGT]RPQUPUUR^X]WY  
@HWI-EAS443:3:54:1090:273#0/1  
AGCTAATGTGCTAATTGGGCAAGGGGACGTAGTGTGGTA  
+HWI-EAS443:3:54:1090:273#0/1  
\_bbbbbbbaabbbbaaabbbaa`a`ab\_baaaa\_[  
@HWI-EAS443:3:54:1094:713#0/1  
AGCACATTAGCTTTCTCCTTTTGCAAGATTGCTCAGTT  
+HWI-EAS443:3:54:1094:713#0/1  
a`¥Ybabbb\_Z^¥`Y\_a^X[bb`a` [[¥]¥^^VX[]^aa¥  
@HWI-EAS443:3:54:1167:704#0/1  
CATCAATGAACTGAGCAATCTTGCAAAAAGGAGAGAAAGCT  
+HWI-EAS443:3:54:1167:704#0/1  
\_¥bbbb`aa`ababbbba[abbaaab`bbaabbababab  
@HWI-EAS443:3:54:1173:1571#0/1  
ATTAGCTTTCTCCTTTTGCAAGATTGCTCAGTTCATTG  
+HWI-EAS443:3:54:1173:1571#0/1  
aaba`Q`ba\_b^a^`aaaa\_aa\_Y\_aa`]a`\_a\_```a`  
@HWI-EAS443:3:54:1210:988#0/1  
AGCTAATGTGCTAATTGGGCAAGGGGACGTAGTGTGGTA  
+HWI-EAS443:3:54:1210:988#0/1  
[`W`^`a`X\_X\_aa\_a`\_]V^``\_ZaZTa\_¥¥]^Y^a`SS  
@HWI-EAS443:3:54:1338:1015#0/1  
GTCCCCTTGCCCAATTAGCACATTAGCTTTCTCCTTTT  
+HWI-EAS443:3:54:1338:1015#0/1  
aaaaaa`^`a]aaaaa^W]`abaaa\_aaa\_a\_a¥` `¥`¥  
@HWI-EAS443:3:54:1441:1025#0/1  
CAATGAACTGAGCAATCTTGCAAAAAGGAGAGAAAGCTAAT  
+HWI-EAS443:3:54:1441:1025#0/1  
Zaabbbaa`Z`aaabbbb` `b\_b\_U\_bbbbbaba\_b\_a  
@HWI-EAS443:3:54:1550:1252#0/1  
GAAAGCTAATGTGCTAATTGGGCAAGGGGACGTAGTGTG



@HWI-EAS443:3:54:585:869#0/1  
AATGAACTGAGCAATCTTGCAAAAGGAGAGAAAGCTAATG  
+HWI-EAS443:3:54:585:869#0/1  
abaa`bbba`babababbbbaa`Zaba``]abaaa¥`][`b  
@HWI-EAS443:3:54:592:731#0/1  
AATGAACTGAGCAATCTTGCAAAAGGAGAGAAAGCTAATG  
+HWI-EAS443:3:54:592:731#0/1  
]aaa`¥abbYaY^^abb^`¥UWYa`aS`]b\_NZaaa¥S`b  
@HWI-EAS443:3:54:776:962#0/1  
AATGAACTGAGCAATCTTGCAAAAGGAGAGAAAGCTAATG  
+HWI-EAS443:3:54:776:962#0/1  
a^Xabbabbab`^`bab¥`Y`a\_^abababa]^baa\_\_aa  
@HWI-EAS443:3:54:835:1240#0/1  
GAGCAATCTTGCAAAAGGAGAGAAAGCTAATGTGCTAATT  
+HWI-EAS443:3:54:835:1240#0/1  
`]^a`¥`\_`\_]Y]``Z^]a```a`aYY\_a^a^a¥^a^  
@HWI-EAS443:3:54:929:974#0/1  
GTCCCCTTGCCCAATTAGCACATTAGCTTTCTCCTTTT  
+HWI-EAS443:3:54:929:974#0/1  
aaaa`]`bZa\_aaaaa`\_\_aaaa\_aaa`a\_a\_\_aaaa  
@HWI-EAS443:3:54:943:489#0/1  
GAGAAAGCTAATGTGCTAATTGGGCAAGGGGACGTAGTGT  
+HWI-EAS443:3:54:943:489#0/1  
\_XZ¥`a^aa¥`b``YWaZ`¥R`Z[]\_^aaY]\_MW]VX]  
@HWI-EAS443:3:54:968:863#0/1  
ATCTTGCAAAAGGAGAGAAAGCTAATGTGCTAATTGGGCA  
+HWI-EAS443:3:54:968:863#0/1  
]U[aabba`a`^Za`a`aaaUba`ab¥`\_`aaaaaba\_\_\_\_  
@HWI-EAS443:3:54:977:1830#0/1  
GAGCAATCTTGCAAAAGGAGAGAAAGCTAATGTGCTAATT  
+HWI-EAS443:3:54:977:1830#0/1  
`baaababbbbaab\_VMba^ab[b\_abbabbbba^b]b`aa`  
@HWI-EAS443:3:55:1017:236#0/1  
GAGAAAGCTAATGTGCTAATTGGGCAAGGGGACGTAGTGT  
+HWI-EAS443:3:55:1017:236#0/1  
aaa```a`a\_\_aaU`^`\_`aaa`\_¥\_]`\_]¥aX]aZ`X  
@HWI-EAS443:3:55:1074:1415#0/1  
AGGAGAGAAAGCTAATGTGCTAATTGGGCAAGGGGACGTA  
+HWI-EAS443:3:55:1074:1415#0/1  
ab`aabbbaaaaaabaaa\_a`aaaaaaa\_\_ba`a^\_a^\_  
@HWI-EAS443:3:55:1080:534#0/1  
CAAAAGGAGAGAAAGCTAATGTGCTAATTGGGCAAGGGGA  
+HWI-EAS443:3:55:1080:534#0/1  
^¥^`[ZZ\_^baa]bb]aaabbb`ZbX`bX^ba`T`^¥SaZ  
@HWI-EAS443:3:55:1112:543#0/1  
GAGCAATCTTGCAAAAGGAGAGAAAGCTAATGTGCTAATT  
+HWI-EAS443:3:55:1112:543#0/1  
aaa\_aa`aaa\_]`a\_a^`aa``^`Za`^`a^\_]\_\_¥`\_  
@HWI-EAS443:3:55:1189:1226#0/1  
ATGAACTGAGCAATCTTGCAAAAGGAGAGAAAGCTAATGT

+HWI-EAS443:3:55:1189:1226#0/1  
aabaabaa`aaaa\_a\_b^`a`aa`baaa\_``]a\_``b^  
@HWI-EAS443:3:55:1284:1652#0/1  
GAGAAAGCTAATGTGCTAATTGGGCAAGGGGACGTAGTGT  
+HWI-EAS443:3:55:1284:1652#0/1  
Y\_aaZ\_a^`bYa`W]\_aa`bbbb`Y^Zaaaa^]a[``X\_W  
@HWI-EAS443:3:55:1334:1942#0/1  
GAAAGCTAATGTGCTAATTGGGCAAGGGGACGTAGTGTG  
+HWI-EAS443:3:55:1334:1942#0/1  
W^aba\_¥a^a[aaabbbb`[¥^]aaZ`¥J]a^`VYa]a`  
@HWI-EAS443:3:55:1335:1099#0/1  
TGCAAAAGGAGAGAAAGCTAATGTGCTAATTGGGCAAGGG  
+HWI-EAS443:3:55:1335:1099#0/1  
S]ZS\_`a`a`]`a`UYaVa\_aabN¥SV¥`^\_¥a\_^]a`  
@HWI-EAS443:3:55:1344:1113#0/1  
GAGAAAGCTAATGTGCTAATTGGGCAAGGGGACGTAGTGT  
+HWI-EAS443:3:55:1344:1113#0/1  
abbVS\_\_G\_b]aRMWtb]aab`aa]¥J\_XRX`H\_a\_]``a  
@HWI-EAS443:3:55:1346:839#0/1  
AGCACATTAGCTTTCTCTCCTTTTGCAAGATTGCTCAGTT  
+HWI-EAS443:3:55:1346:839#0/1  
ZV\_Z¥Vb^aa]^b^T^X¥HL\_K``NT[R\_]K`^¥IWYaa  
@HWI-EAS443:3:55:1550:415#0/1  
GAGCAATCTTGCAAAAGGAGAGAAAGCTAATGTGCTAATT  
+HWI-EAS443:3:55:1550:415#0/1  
^baJabbbbabababa]^b^bbbbb`ab`ab`a`aa`aba  
@HWI-EAS443:3:55:1643:1581#0/1  
CCAATTAGCACATTAGCTTTCTCTCCTTTTGCAAGATTGC  
+HWI-EAS443:3:55:1643:1581#0/1  
a^ab`bb`\_Yaabab¥`\_]\_T¥XZ]aaaa[aaa`aab^  
@HWI-EAS443:3:55:169:594#0/1  
GAGCAATCTTGCAAAAGGAGAGAAAGCTAATGTGCTAATT  
+HWI-EAS443:3:55:169:594#0/1  
WW`\_¥``bbb`b^`^W`a\_Z\_ba^¥\_]`¥b\_aaa`[`\_  
@HWI-EAS443:3:55:170:547#0/1  
GAAAGCTAATGTGCTAATTGGGCAAGGGGACGTAGTGTG  
+HWI-EAS443:3:55:170:547#0/1  
abba`aaa¥bbababaaabbaaa`aaaa^]b^\_b^b\_ab  
@HWI-EAS443:3:55:1745:1032#0/1  
GAACTGAGCAATCTTGCAAAAGGAGAGAAAGCTAATGTGC  
+HWI-EAS443:3:55:1745:1032#0/1  
^`babb¥^abababaa`aaaa\_]aab`aZ`a``ab]a\_  
@HWI-EAS443:3:55:1754:1475#0/1  
GAGCAATCTTGCAAAAGGAGAGAAAGCTAATGTGCTAATT  
+HWI-EAS443:3:55:1754:1475#0/1  
abZbb]a0\_bab¥\_PVZ¥]`aa]]\_¥a[aaa]V]]a]]]\_  
@HWI-EAS443:3:55:1765:1057#0/1  
CATCAATGAACTGAGCAATCTTGCAAAAGGAGAGAAAGCT  
+HWI-EAS443:3:55:1765:1057#0/1  
abbbbaabbababS¥Jaaaaaba`\_b\_]a^\_[a`\_a`^a

@HWI-EAS443:3:55:178:1777#0/1  
CATCAATGAACTGAGCAATCTTGCAAAAGGAGAGAAAGCT  
+HWI-EAS443:3:55:178:1777#0/1  
aa¥a`a^`a]aa\_]\_aa`\_a`\_bQQ]W^]X]^W¥ZZ^Z^  
@HWI-EAS443:3:55:179:1592#0/1  
CCCTTGCCCAATTAGCACATTAGCTTTCTCTCCTTTTGCA  
+HWI-EAS443:3:55:179:1592#0/1  
abb`baab^ba`baabbbabbbaaa`baaa`a`aaab^aa  
@HWI-EAS443:3:55:306:1160#0/1  
GAGCAATCTTGCAAAAGGAGAGAAAGCTAATGTGCTAATT  
+HWI-EAS443:3:55:306:1160#0/1  
Z[a¥`¥\_¥a`T`]^`\_^^¥bba¥a\_\_\_Y\_^abbaaa\_W\_bb  
@HWI-EAS443:3:55:351:243#0/1  
TCCCCTTGCCCAATTAGCACATTAGCTTTCTCTCCTTTTG  
+HWI-EAS443:3:55:351:243#0/1  
Ya^\_]`\_Z¥V\_\_\_\_\_V`^ZT^`a`T`][a`\_[]UJ[Y]YV  
@HWI-EAS443:3:55:456:1290#0/1  
CATCAATGAACTGAGCAATCTTGCAAAAGGAGAGAAAGCT  
+HWI-EAS443:3:55:456:1290#0/1  
ababbbb]a\_aa\_a^a[aaaaabaaa`aa\_aaa`\_a`^a  
@HWI-EAS443:3:55:500:952#0/1  
CAATCTTGCAAAAGGAGAGAAAGCTAATGTGCTAATTGGG  
+HWI-EAS443:3:55:500:952#0/1  
aaaaaaaaURX]HR[a`\_ab][OTLbaa]a[¥XbZY\_a]YN  
@HWI-EAS443:3:55:516:1655#0/1  
GAACTGAGCAATCTTGCAAAAGGAGAGAAAGCTAATGTGC  
+HWI-EAS443:3:55:516:1655#0/1  
`¥U]^¥U^`\_T¥`^^\_]`\_U[Z^a`¥¥^`^]ZZ]XY\_  
@HWI-EAS443:3:55:547:834#0/1  
AGCTAATGTGCTAATTGGGCAAGGGGACGTAGTGTGGTA  
+HWI-EAS443:3:55:547:834#0/1  
^bbbUbb]abbba^bb¥bba]abbba\_ab`[a`baaa`M\_  
@HWI-EAS443:3:55:601:48#0/1  
GCATCAATGAACTGAGCAATCTTGCAAAAGGAGAGAAAGC  
+HWI-EAS443:3:55:601:48#0/1  
abaaaaabb^`aaa\_QZa\_\_`a]\_^¥\_a`\_a^`\_X]aW  
@HWI-EAS443:3:55:669:811#0/1  
CCAATTAGCACATTAGCTTTCTCTCCTTTTGCAAGATTGC  
+HWI-EAS443:3:55:669:811#0/1  
NaVR`b`UWNYZbab¥^ZbZ¥`Z^\_ba][aaab^a[a[`Y  
@HWI-EAS443:3:55:680:608#0/1  
GCATCAATGAACTGAGCAATCTTGCAAAAGGAGAGAAAGC  
+HWI-EAS443:3:55:680:608#0/1  
a`¥^][`¥[¥[¥Xa¥`\_a\_\_aZXUST]\_]`Y\_^¥¥`]  
@HWI-EAS443:3:55:734:1890#0/1  
GAGCAATCTTGCAAAAGGAGAGAAAGCTAATGTGCTAATT  
+HWI-EAS443:3:55:734:1890#0/1  
aaaa^\_RK`a`R[a\_aaaaa`aaa\_]ZZ`\_XTa`\_a`]  
@HWI-EAS443:3:55:855:860#0/1  
GAGCAATCTTGCAAAAGGAGAGAAAGCTAATGTGCTAATT

+HWI-EAS443:3:55:855:860#0/1  
` `baa\_X`]a¥WY]Z^` `]aa\_ZZaa]^[[aZaX]RR]\_  
@HWI-EAS443:3:55:864:797#0/1  
CGTCCCCTTGCCCAATTAGCACATTAGCTTTCTCTCCTTT  
+HWI-EAS443:3:55:864:797#0/1  
ab\_\_aaabbbbaabbbbab\_aabbaa\_bab\_b`b\_abaa  
@HWI-EAS443:3:55:905:683#0/1  
ATCAATGAACTGAGCAATCTTGCAAAGGAGAGAAAGCTA  
+HWI-EAS443:3:55:905:683#0/1  
U`R\_a\_MW\_U¥W\_[Q[aa]ZS]J`ZUabb`^abbZU`V`¥  
@HWI-EAS443:3:55:936:874#0/1  
GCAAAGGAGAGAAAGCTAATGTGCTAATTGGGCAAGGGG  
+HWI-EAS443:3:55:936:874#0/1  
`a`a\_R\_a\_baaaa\_a^a`[ab` `a^a` `a]¥\_a\_\_\_\_  
@HWI-EAS443:3:55:942:1707#0/1  
AATGAACTGAGCAATCTTGCAAAGGAGAGAAAGCTAATG  
+HWI-EAS443:3:55:942:1707#0/1  
]SSW`\_`WLRaTR`X]V`bb`a\_abb^aa` `]a\_\_b`Ybb  
@HWI-EAS443:3:56:1068:801#0/1  
CATCAATGAACTGAGCAATCTTGCAAAGGAGAGAAAGCT  
+HWI-EAS443:3:56:1068:801#0/1  
`babaa`ab]bbb`babbbabb`\_ab\_^`¥^babbbabb]b  
@HWI-EAS443:3:56:1089:93#0/1  
CAATTAGCACATTAGCTTTCTCTCCTTTTGCAAGATTGCT  
+HWI-EAS443:3:56:1089:93#0/1  
abbbbababababababb\_a]b^abaa\_` `baaaa¥a  
@HWI-EAS443:3:56:1107:605#0/1  
AAAGGAGAGAAAGCTAATGTGCTAATTGGGCAAGGGGACG  
+HWI-EAS443:3:56:1107:605#0/1  
aaaaa^a[a` `]a`b[]a\_[a]\_\_K¥\_\_\_\_`aaY`^`aS^a  
@HWI-EAS443:3:56:1217:694#0/1  
GCATCAATGAACTGAGCAATCTTGCAAAGGAGAGAAAGC  
+HWI-EAS443:3:56:1217:694#0/1  
U`\_]\_TT¥\_b`Vb¥V\_a[` `aaaaab`b[aXab`ba`]a\_  
@HWI-EAS443:3:56:1233:466#0/1  
GAGCAATCTTGCAAAGGAGAGAAAGCTAATGTGCTAATT  
+HWI-EAS443:3:56:1233:466#0/1  
a\_aaabbabbbbaaaaaa\_abbba`a`aaabb\_a\_aaaba  
@HWI-EAS443:3:56:1386:1480#0/1  
GAAAGCTAATGTGCTAATTGGGCAAGGGGACGTAGTGTTG  
+HWI-EAS443:3:56:1386:1480#0/1  
abbaa\_ab`\_`Z^]`b` `^`ZTRVH^aa\_[[\_GY`Ja\_^Z  
@HWI-EAS443:3:56:17:1268#0/1  
GAACTGAGCAATCTTGCAAAGGAGAGAAAGCTAATGTGC  
+HWI-EAS443:3:56:17:1268#0/1  
`bbbbbbbbb`abbbbab\_^Ya`aaaa`aaaaa`ab\_a\_  
@HWI-EAS443:3:56:235:573#0/1  
CATCAATGAACTGAGCAATCTTGCAAAGGAGAGAAAGCT  
+HWI-EAS443:3:56:235:573#0/1  
a\_aaa]a\_\_abaa\_a\_aa`\_aaa]^I`\_ZaaaaURa^`



@HWI-EAS443:3:56:331:1293#0/1  
AGGAGAGAAAGCTAATGTGCTAATTGGGCAAGGGGACGTA  
+HWI-EAS443:3:56:331:1293#0/1  
aa`abbababa[T¥`abIb`\_\_[baaaaaaaaaaZ^a¥^  
@HWI-EAS443:3:56:372:278#0/1  
GTCCCCTTGCCCAATTAGCACATTAGCTTTCTCCTTTT  
+HWI-EAS443:3:56:372:278#0/1  
``¥aa\_\_aa`aaaa`[a`\_\_`\_^``]^\_`\_\_\_\_`^\_\_  
@HWI-EAS443:3:56:433:1783#0/1  
GAGCAATCTTGCAAAAGGAGAGAAAGCTAATGTGCTAATT  
+HWI-EAS443:3:56:433:1783#0/1  
a\_XZ^WQXZ`baZWP\_abZW\_PW^RWOaWP\_XHb\_aaaaX  
@HWI-EAS443:3:56:582:1026#0/1  
ATCTTGCAAAAGGAGAGAAAGCTAATGTGCTAATTGGGCA  
+HWI-EAS443:3:56:582:1026#0/1  
a`baa`a``abaTa`aba\_a`a\_]aaYa\_``\_\_\_\_]a`^^  
@HWI-EAS443:3:56:60:183#0/1  
GAAAGCTAATGTGCTAATTGGGCAAGGGACGTAGTGTG  
+HWI-EAS443:3:56:60:183#0/1  
`baaaaaX^`a[a`a]`a`aaa^][`a\_R[aTP^V`Y^`  
@HWI-EAS443:3:56:650:914#0/1  
AAGCATCAATGAAGTACTGAGCAATCTTGCAAAAGGAGAGAAA  
+HWI-EAS443:3:56:650:914#0/1  
Y[S\_ZW]V¥[[ZZ`\_XQ¥Z\_WX0`Z^XZYUTP¥\_¥W^ [T  
@HWI-EAS443:3:56:739:1393#0/1  
GAGCAATCTTGCAAAAGGAGAGAAAGCTAATGTGCTAATT  
+HWI-EAS443:3:56:739:1393#0/1  
^X¥\_^[bbaaaa¥0Xa¥]R[`Ta[[\_`^`XaaU^]R¥\_¥]\_  
@HWI-EAS443:3:56:794:909#0/1  
GAACTGAGCAATCTTGCAAAAGGAGAGAAAGCTAATGTGC  
+HWI-EAS443:3:56:794:909#0/1  
aa\_X`bab``aa`aaa^aa¥\_adW```aX`a¥```]`a\_a¥  
@HWI-EAS443:3:56:833:1882#0/1  
ATCTTGCAAAAGGAGAGAAAGCTAATGTGCTAATTGGGCA  
+HWI-EAS443:3:56:833:1882#0/1  
T^Y[]`WbaaH`a]^a`ba\_a[``IJ\_\_ba`a\_aY\_a^X\_  
@HWI-EAS443:3:56:912:699#0/1  
GAAAGCTAATGTGCTAATTGGGCAAGGGGACGTAGTGTG  
+HWI-EAS443:3:56:912:699#0/1  
ab]aaab`TbbYa0aba`aaa\_U\_\_aaba\_ab]Q\_Va^aa  
@HWI-EAS443:3:56:92:499#0/1  
GAAAGCTAATGTGCTAATTGGGCAAGGGGACGTAGTGTG  
+HWI-EAS443:3:56:92:499#0/1  
aaaaaaaa`aa\_aaa\_`a`aa`a`\_aaa\_[^aY^`]`\_`^  
@HWI-EAS443:3:56:971:1999#0/1  
ATCTTGCAAAAGGAGAGAAAGCTAATGTGCTAATTGGGCA  
+HWI-EAS443:3:56:971:1999#0/1  
aUVWT\_YaWSb\_]U]^XRY[`Q\_^R\_`Y^\_\_S\_^X[aUGU  
@HWI-EAS443:3:56:971:734#0/1  
GCATCAATGAAGTACTGAGCAATCTTGCAAAAGGAGAGAAAGC

+HWI-EAS443:3:56:971:734#0/1  
a``a\_a\_``\_a\_aa\_aX^\_\_`a\_]\_\_^\_]a\_^^`^`\_`^`]  
@HWI-EAS443:3:57:100:1420#0/1  
AGCAATCTTGCAAAAGGAGAGAAAGCTAATGTGCTAATTG  
+HWI-EAS443:3:57:100:1420#0/1  
aa]\_Y[aaaaa`¥¥QW]``\_`aaa\_aa`V^^^U\_Z``\_a\_`  
@HWI-EAS443:3:57:1169:1239#0/1  
AAGCTAATGTGCTAATTGGGCAAGGGGACGTAGTGTGGT  
+HWI-EAS443:3:57:1169:1239#0/1  
aaaaaaaaaaaa`aa`aaa^\_\_\_\_a\_]\_a¥\_aZa^\_¥`U  
@HWI-EAS443:3:57:1234:449#0/1  
AGAGAAAGCTAATGTGCTAATTGGGCAAGGGGACGTAGTG  
+HWI-EAS443:3:57:1234:449#0/1  
abbb`a`babaabb`a^baaaaaab¥\_aabbaa¥a``b^b  
@HWI-EAS443:3:57:1244:664#0/1  
CAAAAGGAGAGAAAGCTAATGTGCTAATTGGGCAAGGGGA  
+HWI-EAS443:3:57:1244:664#0/1  
`bb`[aa`^\_a`Z`\_baaabab¥aaab`a`\_TZaba``^  
@HWI-EAS443:3:57:1318:1151#0/1  
GAACTGAGCAATCTTGCAAAAGGAGAGAAAGCTAATGTGC  
+HWI-EAS443:3:57:1318:1151#0/1  
\_O[U[a`a^baUQ]Z\_U]YVW\_ZH`W\_]GO^¥\_NU]]U\_¥  
@HWI-EAS443:3:57:1454:384#0/1  
GCAAAAGGAGAGAAAGCTAATGTGCTAATTGGGCAAGGGG  
+HWI-EAS443:3:57:1454:384#0/1  
a[``\_]a`]a^\_`^`\_]`^\_]aUUU]^^^`^\_Y]Y\_]XY  
@HWI-EAS443:3:57:150:1880#0/1  
GAAAGCTAATGTGCTAATTGGGCAAGGGGACGTAGTGTG  
+HWI-EAS443:3:57:150:1880#0/1  
Y[b¥MaZ^`¥]OQ\_U\_Z\_TLZQ]TXYBBBBBBBBBBBB  
@HWI-EAS443:3:57:1553:1528#0/1  
GAGCAATCTTGCAAAAGGAGAGAAAGCTAATGTGCTAATT  
+HWI-EAS443:3:57:1553:1528#0/1  
Y`aabbbbbbbbabbbba`bababbbabbbbababababb  
@HWI-EAS443:3:57:161:1891#0/1  
GAAAGCTAATGTGCTAATTGGGCAAGGGGACGTAGTGTG  
+HWI-EAS443:3:57:161:1891#0/1  
\_baa`aab`aa\_a\_aaaaa¥Vaa\_a^¥a[``^]`^aV`W``  
@HWI-EAS443:3:57:1635:1722#0/1  
GAACTGAGCAATCTTGCAAAAGGAGAGAAAGCTAATGTGC  
+HWI-EAS443:3:57:1635:1722#0/1  
a`b\_bb¥bbaabbbabXa`a\_¥babbaababa``baUba  
@HWI-EAS443:3:57:203:1578#0/1  
GAACTGAGCAATCTTGCAAAAGGAGAGAAAGCTAATGTGC  
+HWI-EAS443:3:57:203:1578#0/1  
aabba\_aabbaab``]a`aaaa\_aaaa`Z^\_aR`aa]`^  
@HWI-EAS443:3:57:206:69#0/1  
GAGCAATCTTGCAAAAGGAGAGAAAGCTAATGTGCTAATT  
+HWI-EAS443:3:57:206:69#0/1  
\_JZ\_ZY\_¥ab`YY]XVb][`PaXRaa\_¥^aY^U`\_Y\_]`[

@HWI-EAS443:3:57:237:592#0/1  
CCTTGCCCAATTAGCACATTAGCTTTCTCTCCTTTTGCAA  
+HWI-EAS443:3:57:237:592#0/1  
abbabbbbbbbaabbabbbbbbbaabababbabaaaaa]X  
@HWI-EAS443:3:57:375:1438#0/1  
CATCAATGAAGTGAATCTTGCAAAAGGAGAGAAAGCT  
+HWI-EAS443:3:57:375:1438#0/1  
`ababbbba\_bbbbaabb`babaabababaabbabbaa]b  
@HWI-EAS443:3:57:429:84#0/1  
GAAAGCTAATGTGCTAATTGGGCAAGGGGACGTAGTGTTG  
+HWI-EAS443:3:57:429:84#0/1  
``abbabaaab]a\_a\_`a`aaa[]Xabba]`aUR`Za]`a  
@HWI-EAS443:3:57:558:800#0/1  
AAGCATCAATGAAGTGAATCTTGCAAAAGGAGAGAAA  
+HWI-EAS443:3:57:558:800#0/1  
RZ\_\_\_¥]TR^\_\_a`\_[]VV¥¥]]S\_^[¥X]\_XV]]`a^`  
@HWI-EAS443:3:57:620:341#0/1  
CTTGCAAAAGGAGAGAAAGCTAATGTGCTAATTGGGCAAG  
+HWI-EAS443:3:57:620:341#0/1  
abbab\_bbabb`aabbb\_aabbabbab`bbababaaa\_ab  
@HWI-EAS443:3:57:621:1489#0/1  
CTTGCAAAAGGAGAGAAAGCTAATGTGCTAATTGGGCAAG  
+HWI-EAS443:3:57:621:1489#0/1  
ab]RZ¥]\_\_\_\_\_[]U¥ab`^`\_]aaa`\_[]\_a\_a\_^`\_]\_a`^VZ  
@HWI-EAS443:3:57:627:73#0/1  
CATCAATGAAGTGAATCTTGCAAAAGGAGAGAAAGCT  
+HWI-EAS443:3:57:627:73#0/1  
aa`aa[`bX¥`ababa^¥^\_\_Y]`\_`ZWaaU`Za`[Sa]^  
@HWI-EAS443:3:57:744:1301#0/1  
CATCAATGAAGTGAATCTTGCAAAAGGAGAGAAAGCT  
+HWI-EAS443:3:57:744:1301#0/1  
^^\_`ZUbb^b^`a\_`bbaa`b`\_a¥aa\_bbaaaaba`a`a  
@HWI-EAS443:3:57:750:1386#0/1  
AGCTAATGTGCTAATTGGGCAAGGGGACGTAGTGTTGGTA  
+HWI-EAS443:3:57:750:1386#0/1  
````^bbb]bbb`baabb\_aabbaaaaba^aa]`ab`bYa  
@HWI-EAS443:3:57:751:1757#0/1  
GTCCCCTTGCCCAATTAGCACATTAGCTTTCTCTCCTTTT  
+HWI-EAS443:3:57:751:1757#0/1  
a`U^`]a\_\_`[[^aaZWZ`b`a`¥¥V0[a\_aaYa\_SX`¥`  
@HWI-EAS443:3:57:853:1193#0/1  
GTCCCCTTGCCCAATTAGCACATTAGCTTTCTCTCCTTTT  
+HWI-EAS443:3:57:853:1193#0/1  
a`bbbabaaa``aabaaa\_\_`abaa\_abba\_aa`a^aaa`  
@HWI-EAS443:3:57:902:149#0/1  
GAAAGCTAATGTGCTAATTGGGCAAGGGGACGTAGTGTTG  
+HWI-EAS443:3:57:902:149#0/1  
a`bbbabaabaaaab`aaaa`a`^aaaa\_\_b`^b^a^aa  
@HWI-EAS443:3:58:1067:1804#0/1  
GAAAGCTAATGTGCTAATTGGGCAAGGGGACGTAGTGTTG

+HWI-EAS443:3:58:1067:1804#0/1  
ababaGbbba\_[PYab\_aaa\_`XM¥XYa\_[XP`WZ¥ETUT`  
@HWI-EAS443:3:58:1076:1663#0/1  
ATGAACTGAGCAATCTTGCAAAAGGAGAGAAAGCTAATGT  
+HWI-EAS443:3:58:1076:1663#0/1  
UVYWSZ^a[¥¥^\_Vabb`\_T^bbba]U`S`¥OYT^[^b¥Q  
@HWI-EAS443:3:58:1095:1527#0/1  
GAAAGCTAATGTGCTAATTGGGCAAGGGGACGTAGTGTG  
+HWI-EAS443:3:58:1095:1527#0/1  
Z[ba`bb\_abbWbabaaaa^\_a`\_baa`aa\_Q0b\_a]]a  
@HWI-EAS443:3:58:1178:1378#0/1  
GTCCCCTTGCCCAATTAGCACATTAGCTTTCTCTCCTTTT  
+HWI-EAS443:3:58:1178:1378#0/1  
`U]RZ\_¥a^QFYa^Y\_\_¥V^` `[X]a^[[a``]Z\_a\_a  
@HWI-EAS443:3:58:1186:13#0/1  
AATGAACTGAGCAATCTTGCAAAAGGAGAGAAAGCTAATG  
+HWI-EAS443:3:58:1186:13#0/1  
abbbabbbbababbbbabab]aaa]bb`baba`Ya]aa`ab  
@HWI-EAS443:3:58:1239:859#0/1  
ATGAACTGAGCAATCTTGCAAAAGGAGAGAAAGCTAATGT  
+HWI-EAS443:3:58:1239:859#0/1  
abaaaabbbb\_abaaaab`a`\_aaa\_aabaaab\_a`\_aaZ  
@HWI-EAS443:3:58:1313:1868#0/1  
AAGCTAATGTGCTAATTGGGCAAGGGGACGTAGTGTGGT  
+HWI-EAS443:3:58:1313:1868#0/1  
aab`babba``]baa[aaaa\_``[\_aa\_¥a]\_a[^`^`a\_X  
@HWI-EAS443:3:58:1411:1793#0/1  
AGCTAATGTGCTAATTGGGCAAGGGGACGTAGTGTGGTA  
+HWI-EAS443:3:58:1411:1793#0/1  
``]¥aaa`¥``aa`b]a`a]]\_a]YX^`aY[aTYZa^WUM  
@HWI-EAS443:3:58:1505:1756#0/1  
GAAAGCTAATGTGCTAATTGGGCAAGGGGACGTAGTGTG  
+HWI-EAS443:3:58:1505:1756#0/1  
aaa`\_\_aa\_aaZb¥``aa^`\_aRZ¥\_aa^UaZZaUa]^\_  
@HWI-EAS443:3:58:154:438#0/1  
GTCCCCTTGCCCAATTAGCACATTAGCTTTCTCTCCTTTT  
+HWI-EAS443:3:58:154:438#0/1  
a\_aa^\_\_\_\_\_`V^`\_]¥^¥]^\_\_\_\_^\_^[^\_Z\_]aZ^Z^W  
@HWI-EAS443:3:58:1679:797#0/1  
GAGAAAGCTAATGTGCTAATTGGGCAAGGGGACGTAGTGT  
+HWI-EAS443:3:58:1679:797#0/1  
a^aaa\_a¥aa`aa\_a^a`a^`^]]\_aU`^\_Z^U^\_a`^  
@HWI-EAS443:3:58:1683:705#0/1  
AAGCATCAATGAACTGAGCAATCTTGCAAAAGGAGAGAAA  
+HWI-EAS443:3:58:1683:705#0/1  
a`b]`aaaa`^a]aa`^a`^a\_a\_\_\_YV^^[a\_a`]Y  
@HWI-EAS443:3:58:1733:450#0/1  
CTTGCAAAAGGAGAGAAAGCTAATGTGCTAATTGGGCAAG  
+HWI-EAS443:3:58:1733:450#0/1  
abbbabbaabbababbbababaaaaab\_babaabaabb^\_a

@HWI-EAS443:3:58:1773:1551#0/1  
AATGAACTGAGCAATCTTGCAAAAGGAGAGAAAGCTAATG  
+HWI-EAS443:3:58:1773:1551#0/1  
aabb^¥]b`\_M\_Y^]¥abaSZ]\_TWa]a`¥abaaaa]WY  
@HWI-EAS443:3:58:20:472#0/1  
GCATCAATGAACTGAGCAATCTTGCAAAAGGAGAGAAAGC  
+HWI-EAS443:3:58:20:472#0/1  
abaab]`baaaaba`aaaaaaaba]¥Y\_ba\_aaa`^Ya^  
@HWI-EAS443:3:58:277:382#0/1  
AGCTAATGTGCTAATTGGGCAAGGGGACGTAGTGTGGTA  
+HWI-EAS443:3:58:277:382#0/1  
abaaaaab`aaaaaaaaabaaaa`a`^a^aa]`¥`a\_NY  
@HWI-EAS443:3:58:287:489#0/1  
GAACTGAGCAATCTTGCAAAAGGAGAGAAAGCTAATGTGC  
+HWI-EAS443:3:58:287:489#0/1  
`bbaaa[aabbbaabbbaaaabb^aaba`aaa`Y`a^a^  
@HWI-EAS443:3:58:318:916#0/1  
TAGCACATTAGCTTTCTCTCCTTTTGCAAGATTGCTCAGT  
+HWI-EAS443:3:58:318:916#0/1  
`b`]¥ZR`\_WWaV`baaa¥X``[`]a]ZW`\_\_\_aV\_¥\_aY  
@HWI-EAS443:3:58:324:1349#0/1  
AAAGGAGAGAAAGCTAATGTGCTAATTGGGCAAGGGGACG  
+HWI-EAS443:3:58:324:1349#0/1  
a\_OS^]aaaa^R^\_]Y`Y`a`^VQ``^`[[`^a`T^]`^a  
@HWI-EAS443:3:58:45:1766#0/1  
AGCAATCTTGCAAAAGGAGAGAAAGCTAATGTGCTAATTG  
+HWI-EAS443:3:58:45:1766#0/1  
[\_`^`^\_baaaa]V\_a^`^¥a```Z]\_```aaZX\_aa\_`^Z  
@HWI-EAS443:3:58:461:1565#0/1  
GAAAGCTAATGTGCTAATTGGGCAAGGGGACGTAGTGTGG  
+HWI-EAS443:3:58:461:1565#0/1  
\_a\_abababaa¥aaaaabaa[`a\_a¥]aaa\_a\_`a[`^`^`  
@HWI-EAS443:3:58:466:416#0/1  
GAGCAATCTTGCAAAAGGAGAGAAAGCTAATGTGCTAATT  
+HWI-EAS443:3:58:466:416#0/1  
aaba]aa]`ab\_aa`¥a^Y`Qa\_\_a]¥aaV^aP`]`\_^\_a  
@HWI-EAS443:3:58:467:679#0/1  
AGCTAATGTGCTAATTGGGCAAGGGGACGTAGTGTGGTA  
+HWI-EAS443:3:58:467:679#0/1  
T\_`a\_I\_ba```¥]\_bbaa`aa^aba``b[`^`[`¥^aaZ[  
@HWI-EAS443:3:58:468:1970#0/1  
GAAAGCTAATGTGCTAATTGGGCAAGGGGACGTAGTGTGG  
+HWI-EAS443:3:58:468:1970#0/1  
ab^a`aabbb`\_aa`aaaaaUX]aaaaaa\_`^Z\_`¥^^^^  
@HWI-EAS443:3:58:493:199#0/1  
AAAGGAGAGAAAGCTAATGTGCTAATTGGGCAAGGGGACG  
+HWI-EAS443:3:58:493:199#0/1  
aaY`bab`baaabaaaaab`a[a][^aaaaa\_`^aa\_a¥Za  
@HWI-EAS443:3:58:630:910#0/1  
GCATCAATGAACTGAGCAATCTTGCAAAAGGAGAGAAAGC

+HWI-EAS443:3:58:630:910#0/1  
ababab`bbababaaaababababaa]aaba`aaabaaa\_  
@HWI-EAS443:3:58:634:1489#0/1  
ATCTTGCAAAAGGAGAGAAAGCTAATGTGCTAATTGGGCA  
+HWI-EAS443:3:58:634:1489#0/1  
aab]][`ba¥^^\_¥`a\_ba\_\_\_a`aaa¥aa```aaaa\_`a  
@HWI-EAS443:3:58:771:722#0/1  
GAGAAAGCTAATGTGCTAATTGGGCAAGGGGACGTAGTGT  
+HWI-EAS443:3:58:771:722#0/1  
a`aaaaaaa`\_aaUa`a`\_a\_Z\_a[\_`^Ya^¥[[\_aXaZ  
@HWI-EAS443:3:58:786:369#0/1  
AAGCTAATGTGCTAATTGGGCAAGGGGACGTAGTGTGGT  
+HWI-EAS443:3:58:786:369#0/1  
Y\_a\_]¥]a\_ZZ\_]aa`aNb`[]aab`\_RbWaYVY[aaZK  
@HWI-EAS443:3:58:792:63#0/1  
AGCACATTAGCTTTCTCTCCTTTTGCAAGATTGCTCAGTT  
+HWI-EAS443:3:58:792:63#0/1  
aa`a`aaaaa\_aaa\_a\_a]\_a`\_`a\_^\_a^``a^`^\_aZ\_  
@HWI-EAS443:3:58:807:1780#0/1  
GAAAGCTAATGTGCTAATTGGGCAAGGGGACGTAGTGTGG  
+HWI-EAS443:3:58:807:1780#0/1  
^ababaabbbbaababbbbaa`baaa\_ab\_aaa\_a]\_a\_aa  
@HWI-EAS443:3:58:812:839#0/1  
GAGCAATCTTGCAAAAGGAGAGAAAGCTAATGTGCTAATT  
+HWI-EAS443:3:58:812:839#0/1  
aa¥ab]abbaa\_bb\_]aa`baa`ROZa[aa`b\_[aa`aa¥  
@HWI-EAS443:3:58:871:180#0/1  
CAAAAGGAGAGAAAGCTAATGTGCTAATTGGGCAAGGGGA  
+HWI-EAS443:3:58:871:180#0/1  
abbaabbabbbbab`baabbabaaaabbbba\_aabaa]  
@HWI-EAS443:3:58:884:1203#0/1  
CTTGCAAAAGGAGAGAAAGCTAATGTGCTAATTGGGCAAG  
+HWI-EAS443:3:58:884:1203#0/1  
abbbababaa`a^`baaaaa`abaa^a`a]^a``a`aaa`  
@HWI-EAS443:3:58:891:1383#0/1  
GCATCAATGAACTGAGCAATCTTGCAAAAGGAGAGAAAGC  
+HWI-EAS443:3:58:891:1383#0/1  
ZX\_]`ab\_a[aaa\_Z]`a`a\_a`]^]Y[[]a\_a¥``]XW`  
@HWI-EAS443:3:58:900:750#0/1  
GAGCAATCTTGCAAAAGGAGAGAAAGCTAATGTGCTAATT  
+HWI-EAS443:3:58:900:750#0/1  
aabaab`bab]`a\_\_ba`aaa^aaY\_`T`¥T`]a`[a`  
@HWI-EAS443:3:58:971:946#0/1  
ATCTTGCAAAAGGAGAGAAAGCTAATGTGCTAATTGGGCA  
+HWI-EAS443:3:58:971:946#0/1  
a]abba[aaabb]\_ab`\_`\_`\_a\_aab[b\_aaaa`baa``  
@HWI-EAS443:3:58:991:1861#0/1  
AAGCATCAATGAACTGAGCAATCTTGCAAAAGGAGAGAAA  
+HWI-EAS443:3:58:991:1861#0/1  
aaa]\_`^X\_YY`]Y`[VGU^^¥`\_VX¥\_^W¥\_^Z[]`[\_

@HWI-EAS443:3:59:1477:1554#0/1  
GAGCAATCTTGCAAAGGAGAGAAAGCTAATGTGCTAATT  
+HWI-EAS443:3:59:1477:1554#0/1  
abbababaab]abaaabbaaa^bab`abbabY\_aYXY``^  
@HWI-EAS443:3:59:1580:880#0/1  
GAACTGAGCAATCTTGCAAAGGAGAGAAAGCTAATGTGC  
+HWI-EAS443:3:59:1580:880#0/1  
a[`aab`b\_\_L^Ua`b`\_`V\_aa¥baaaaaRa^TINXVW  
@HWI-EAS443:3:59:1771:1520#0/1  
ATCAATGAACTGAGCAATCTTGCAAAGGAGAGAAAGCTA  
+HWI-EAS443:3:59:1771:1520#0/1  
abbbabbaa`baaaaabbabaaa`\_a]bbab^baa]\_^`]  
@HWI-EAS443:3:59:324:864#0/1  
GAAAGCTAATGTGCTAATTGGGCAAGGGGACGTAGTGTTG  
+HWI-EAS443:3:59:324:864#0/1  
``SV\_b[a\_baSabbaa`a[]\_`^¥`ab\_\_a`¥\_aW`\_`\_  
@HWI-EAS443:3:59:355:1266#0/1  
CCCTTGCCCAATTAGCACATTAGCTTTCTCCTTTTGCA  
+HWI-EAS443:3:59:355:1266#0/1  
`a^`aaabb`\_a``Z\_abaaaaabababaZaaa\_Ta[\_  
@HWI-EAS443:3:59:369:1959#0/1  
GAACTGAGCAATCTTGCAAAGGAGAGAAAGCTAATGTGC  
+HWI-EAS443:3:59:369:1959#0/1  
a^ba`a]T\_bbabbaaa\_aaaaa`\_bab[aaY``a]VU]\_  
@HWI-EAS443:3:59:376:318#0/1  
GAGAAAGCTAATGTGCTAATTGGGCAAGGGGACGTAGTGT  
+HWI-EAS443:3:59:376:318#0/1  
aab`\_aaaa¥^abZa[a\_Kaa\_aYa\_J¥[\_\_Xa\_PVPW\_T  
@HWI-EAS443:3:59:439:1921#0/1  
ATCAATGAACTGAGCAATCTTGCAAAGGAGAGAAAGCTA  
+HWI-EAS443:3:59:439:1921#0/1  
aaababaaa\_a`\_`aa`a\_aaaa`\_aaa]``^a\_Y]]^]  
@HWI-EAS443:3:59:43:767#0/1  
GAGCAATCTTGCAAAGGAGAGAAAGCTAATGTGCTAATT  
+HWI-EAS443:3:59:43:767#0/1  
aaaaaabaaaba``¥]bb\_aaa`Y^aa`a`a^a\_\_[[` [  
@HWI-EAS443:3:59:480:915#0/1  
GCATCAATGAACTGAGCAATCTTGCAAAGGAGAGAAAGC  
+HWI-EAS443:3:59:480:915#0/1  
ab]b`a`aaaa`aaaaJa\_baaaab\_\_aKa^R`\_\_W]\_` [  
@HWI-EAS443:3:59:498:908#0/1  
CGTCCCCTTGCCCAATTAGCACATTAGCTTTCTCCTTT  
+HWI-EAS443:3:59:498:908#0/1  
`YUabb`Z``\_¥^^a]¥X\_^\_U\_]\_[Z`ZWY^YaPU`¥X  
@HWI-EAS443:3:59:500:319#0/1  
GAGCAATCTTGCAAAGGAGAGAAAGCTAATGTGCTAATT  
+HWI-EAS443:3:59:500:319#0/1  
a]`a\_]a`[^a``\_XV`a^a\_aa``a[ZYZZZYa¥XU]\_^  
@HWI-EAS443:3:59:615:695#0/1  
GAAAGCTAATGTGCTAATTGGGCAAGGGGACGTAGTGTTG

+HWI-EAS443:3:59:615:695#0/1  
aa\_VY``X[aY][[YU]^U^\_]P][[aL]^UR]VPV]Y  
@HWI-EAS443:3:59:616:443#0/1  
TGCAAAAGGAGAGAAAGCTAATGTGCTAATTGGGCAAGGG  
+HWI-EAS443:3:59:616:443#0/1  
abab^`¥baababa`b\_aaab\_aaaaa`\_¥a\_]Xa`\_  
@HWI-EAS443:3:59:780:594#0/1  
CTTGCCCAATTAGCACATTAGCTTTCTCTCCTTTTGCAAG  
+HWI-EAS443:3:59:780:594#0/1  
aZ[\_¥[``R`V`a[Y^[aY^MLab][``a`PaXZaLFTTW  
@HWI-EAS443:3:59:805:942#0/1  
GTCCCCTTGCCCAATTAGCACATTAGCTTTCTCTCCTTTT  
+HWI-EAS443:3:59:805:942#0/1  
aa\_a\_bYRbab\_aaaa]\_aa`aaa``a`aaa\_\_a\_W\_\_`\_  
@HWI-EAS443:3:59:918:587#0/1  
CAATGAAGTGAATCTTGCAAAAGGAGAGAAAGCTAAT  
+HWI-EAS443:3:59:918:587#0/1  
YQI\_bZa]bb`b^\_bbba^\_¥baY[a\_N[b\_\_ba`RU`OZ  
@HWI-EAS443:3:59:988:749#0/1  
GAGAAAGCTAATGTGCTAATTGGGCAAGGGGACGTAGTGT  
+HWI-EAS443:3:59:988:749#0/1  
aZ^aaa`aaa`a]a`a`a\_a``\_\_\_aa\_aW\_\_\_]UPWZ]  
@HWI-EAS443:3:5:1102:39#0/1  
ATCTTGCAAAAGGAGAGAAAGCTAATGTGCTAATTGGGCA  
+HWI-EAS443:3:5:1102:39#0/1  
aaa\_aba¥^aaba\_babaa\_a¥a^aa`aZ\_\_\_\_\_a^aBB  
@HWI-EAS443:3:5:1149:368#0/1  
CGTCCCCTTGCCCAATTAGCACATTAGCTTTCTCTCCTTT  
+HWI-EAS443:3:5:1149:368#0/1  
abb[aVabbW\_bbbaaa]bb`bbb\_abbbbab\_babbbb  
@HWI-EAS443:3:5:1160:519#0/1  
GAAAGCTAATGTGCTAATTGGGCAAGGGGACGTAGTGTG  
+HWI-EAS443:3:5:1160:519#0/1  
aabab\_bbaab\_aabaabbbbaaaaaaaaaa\_`^ab]a`ab  
@HWI-EAS443:3:5:1167:1363#0/1  
AGAGAAAGCTAATGTGCTAATTGGGCAAGGGGACGTAGTG  
+HWI-EAS443:3:5:1167:1363#0/1  
Xb`]ab\_abababbWb^babbVbbaa[aa`[`]aI\_bSa  
@HWI-EAS443:3:5:1171:1069#0/1  
GAGAAAGCTAATGTGCTAATTGGGCAAGGGGACGTAGTGT  
+HWI-EAS443:3:5:1171:1069#0/1  
a\_aaa]a^\_a¥^aS\_]\_\_^a]``\_¥\_]a^\_\_W^aZZ`ZBB  
@HWI-EAS443:3:5:1207:516#0/1  
CAATTAGCACATTAGCTTTCTCTCCTTTTGCAAGATTGCT  
+HWI-EAS443:3:5:1207:516#0/1  
abbbbbbb¥aabbabbbbb`ba\_babbb^aaabaaba  
@HWI-EAS443:3:5:1227:1790#0/1  
CAATCTTGCAAAAGGAGAGAAAGCTAATGTGCTAATTGGG  
+HWI-EAS443:3:5:1227:1790#0/1  
]aU\_\_U\_¥YaU\_babb`abbb`b`bbb]aa`H¥aab`bYb



@HWI-EAS443:3:5:1243:978#0/1  
CAATGAACTGAGCAATCTTGCAAAAGGAGAGAAAGCTAAT  
+HWI-EAS443:3:5:1243:978#0/1  
^T`[\`aa`¥a^TV\_YbbaS\_ZVH¥[\_\_Y`\_b\_aabLaTaB  
@HWI-EAS443:3:5:1249:471#0/1  
AGCTAATGTGCTAATTGGGCAAGGGGACGTAGTGTGGTA  
+HWI-EAS443:3:5:1249:471#0/1  
\_`ba\_abaTZ\_a¥aaa\_aaaaabaaW\_a^\_aZa^aaaZB  
@HWI-EAS443:3:5:1279:1767#0/1  
GAGCAATCTTGCAAAAGGAGAGAAAGCTAATGTGCTAATT  
+HWI-EAS443:3:5:1279:1767#0/1  
`aa`bababb`]``aababaabaaa¥aaaaa\_a]a`aa\_  
@HWI-EAS443:3:5:1401:1310#0/1  
GAACTGAGCAATCTTGCAAAAGGAGAGAAAGCTAATGTGC  
+HWI-EAS443:3:5:1401:1310#0/1  
`¥¥\_\_XZ^`¥\_a\_Y¥^XXZa^`¥WY\_`¥^0[Z]`UBBB  
@HWI-EAS443:3:5:1435:1969#0/1  
GTCCCCTTGCCCAATTAGCACATTAGCTTTCTCCTTTT  
+HWI-EAS443:3:5:1435:1969#0/1  
aU\_[\_SZaa\_a^`^`\_a¥¥`¥\_\_\_\_\_¥[^ZY\_Z]TW¥YBB  
@HWI-EAS443:3:5:1457:1136#0/1  
GAAAGCTAATGTGCTAATTGGGCAAGGGGACGTAGTGTG  
+HWI-EAS443:3:5:1457:1136#0/1  
a[RMTVU^V\_aQFJ¥^W^UYaRLNNX]ZZUU[WVUBBBBB  
@HWI-EAS443:3:5:1509:123#0/1  
GAACTGAGCAATCTTGCAAAAGGAGAGAAAGCTAATGTGC  
+HWI-EAS443:3:5:1509:123#0/1  
`ba¥baab\_ba`\_baaa`aaaba\_baaa`aaXa`aabVaX  
@HWI-EAS443:3:5:1513:477#0/1  
TGCAAAAGGAGAGAAAGCTAATGTGCTAATTGGGCAAGGG  
+HWI-EAS443:3:5:1513:477#0/1  
^\_OYb]U\_aZ^`¥`^`\_W\_^aaaX^WT\_aa\_RWWV^Z^BB  
@HWI-EAS443:3:5:1517:1566#0/1  
GAGAAAGCTAATGTGCTAATTGGGCAAGGGGACGTAGTGT  
+HWI-EAS443:3:5:1517:1566#0/1  
aab`a`aaa\_\_aa`aYaa`aaYaa]\_]`aaaVT]W^^X^B  
@HWI-EAS443:3:5:1521:865#0/1  
AGAAAGCTAATGTGCTAATTGGGCAAGGGGACGTAGTGT  
+HWI-EAS443:3:5:1521:865#0/1  
aaaaa\_`ba``a`a\_a\_aaabaa¥`\_ba`]^Ra^[\_]a\_B  
@HWI-EAS443:3:5:1596:57#0/1  
ATCTTGCAAAAGGAGAGAAAGCTAATGTGCTAATTGGGCA  
+HWI-EAS443:3:5:1596:57#0/1  
aXabbb`abaaab\_aabb\_abZa\_`aa^a^a`\_aaaa`BB  
@HWI-EAS443:3:5:1714:1135#0/1  
AATCTTGCAAAAGGAGAGAAAGCTAATGTGCTAATTGGGC  
+HWI-EAS443:3:5:1714:1135#0/1  
\_bba¥\_^\_ba`abb`b`baaaaVaa\_aa\_¥0Z]\_a[Y\_XB  
@HWI-EAS443:3:5:1753:923#0/1  
GAGCAATCTTGCAAAAGGAGAGAAAGCTAATGTGCTAATT

+HWI-EAS443:3:5:1753:923#0/1  
X¥aa\_baKaba^YUYa^b¥b\_]baaaaabaaaa^b¥bb`  
@HWI-EAS443:3:5:209:717#0/1  
AAAGGAGAGAAAGCTAATGTGCTAATTGGGCAAGGGGACG  
+HWI-EAS443:3:5:209:717#0/1  
VW¥aa`aabba`baa]abb\_b`ba`aaaa`X[baaa]BB  
@HWI-EAS443:3:5:462:528#0/1  
GAGCAATCTTGCAAAAGGAGAGAAAGCTAATGTGCTAATT  
+HWI-EAS443:3:5:462:528#0/1  
a`\_aba`a`aa`aa`abaabaaaaab\_aaaa]a^aa\_\_`  
@HWI-EAS443:3:5:484:875#0/1  
CATCAATGAAGTGAATCTTGCAAAAGGAGAGAAAGCT  
+HWI-EAS443:3:5:484:875#0/1  
^ba`\_Xaa`aXbb`ababba`abaabbaabab\_bb`Taa¥  
@HWI-EAS443:3:5:507:203#0/1  
AAAGCTAATGTGCTAATTGGGCAAGGGGACGTAGTGTGG  
+HWI-EAS443:3:5:507:203#0/1  
a\_^a`aa`aa^aX\_\_`\_`\_`aV^]a\_\_[^XXNM^W\_Z^BB  
@HWI-EAS443:3:5:538:1535#0/1  
GAAGTGAAGTGAATCTTGCAAAAGGAGAGAAAGCTAATGTGC  
+HWI-EAS443:3:5:538:1535#0/1  
`aa]YVab^WQI\_`a^ZW\_\_[b`Iaa`\_V\_VaVJ]J¥BBB  
@HWI-EAS443:3:5:593:1602#0/1  
AATGAAGTGAATCTTGCAAAAGGAGAGAAAGCTAATG  
+HWI-EAS443:3:5:593:1602#0/1  
X\_a`\_bbbb\_Xa[a¥ba\_aaa¥bba`aabaaY^[aa\_aB  
@HWI-EAS443:3:5:608:738#0/1  
GAGAAAGCTAATGTGCTAATTGGGCAAGGGGACGTAGTGT  
+HWI-EAS443:3:5:608:738#0/1  
¥^`^`^`^`baa¥Za`aVaabaa]aabaabWD^Y\_b]aB  
@HWI-EAS443:3:5:60:822#0/1  
GCATCAATGAAGTGAATCTTGCAAAAGGAGAGAAAGC  
+HWI-EAS443:3:5:60:822#0/1  
aaa`X\_[^T^TX`aa]ZS[[]¥[^]WY[U]]Z`]a`XYBB  
@HWI-EAS443:3:5:647:715#0/1  
AGCTAATGTGCTAATTGGGCAAGGGGACGTAGTGTGGTA  
+HWI-EAS443:3:5:647:715#0/1  
^¥`^`^`^`aaXaa`^a`baaa^`\_\_`]ab\_\_aVaS¥aaBB  
@HWI-EAS443:3:5:670:662#0/1  
CCTTGCCCAATTAGCACATTAGCTTTCTCCTTTTGCAA  
+HWI-EAS443:3:5:670:662#0/1  
`aaY`[bbaabaaaa\_`aaaaabaaaa`\_a``aaaa\_  
@HWI-EAS443:3:5:788:562#0/1  
CTTGCAAAAGGAGAGAAAGCTAATGTGCTAATTGGGCAAG  
+HWI-EAS443:3:5:788:562#0/1  
ab^`U`bbabb]bbbbba[babb`\_a`b]`bababba]aBB  
@HWI-EAS443:3:5:909:510#0/1  
AAGCTAATGTGCTAATTGGGCAAGGGGACGTAGTGTGGT  
+HWI-EAS443:3:5:909:510#0/1  
ZXaWa`\_aaYa]Zaa^P`aa\_\_aaaa]¥`\_Xaaa^aWYB



+HWI-EAS443:3:60:1666:495#0/1  
]aaaJaa\_]aaaQUaY\_\_[TS¥a[aa^Y^aa^\_[G^\_¥]¥  
@HWI-EAS443:3:60:1673:590#0/1  
GAGCAATCTTGCAAAAGGAGAGAAAGCTAATGTGCTAATT  
+HWI-EAS443:3:60:1673:590#0/1  
aY`¥[`]\_\_aaaRRU[¥a\_V¥¥a\_VV`]X[]Y¥WU\_VZ^]  
@HWI-EAS443:3:60:337:294#0/1  
GAGCAATCTTGCAAAAGGAGAGAAAGCTAATGTGCTAATT  
+HWI-EAS443:3:60:337:294#0/1  
aaabb]a\_babaa\_X¥b`^a`^a^Va\_\_a`aa]`^\_U^\_\_  
@HWI-EAS443:3:60:427:382#0/1  
GAGAAAGCTAATGTGCTAATTGGGCAAGGGGACGTAGTGT  
+HWI-EAS443:3:60:427:382#0/1  
a`a`\_^`]Y[\_a^a^`a]a\_aa`^\_Wa``XZ]WW\_X`Z  
@HWI-EAS443:3:60:529:176#0/1  
GAGAAAGCTAATGTGCTAATTGGGCAAGGGGACGTAGTGT  
+HWI-EAS443:3:60:529:176#0/1  
aaaaaaaa\_a\_¥aa]a`a^^a\_a```\_Vaa`\_X\_a^^aY`Y  
@HWI-EAS443:3:60:553:1691#0/1  
GAACTGAGCAATCTTGCAAAAGGAGAGAAAGCTAATGTGC  
+HWI-EAS443:3:60:553:1691#0/1  
aa`bb][```baaaa`aaaaabaa\_aaba`aa\_\_`\_]``  
@HWI-EAS443:3:60:575:874#0/1  
ACGTCCCCTTGCCCAATTAGCACATTAGCTTTCTCCTCCTT  
+HWI-EAS443:3:60:575:874#0/1  
`a¥Iaaaa\_aVZaa¥b]^aa\_a\_a¥a]aabaa`\_[\_aab]  
@HWI-EAS443:3:60:642:578#0/1  
GAGAAAGCTAATGTGCTAATTGGGCAAGGGGACGTAGTGT  
+HWI-EAS443:3:60:642:578#0/1  
[[RY[Y]aaaa`Y``a¥aaaa`aa`aa`a\_\_b]`a[a]  
@HWI-EAS443:3:60:752:1099#0/1  
GAAAGCTAATGTGCTAATTGGGCAAGGGGACGTAGTGTG  
+HWI-EAS443:3:60:752:1099#0/1  
a`]]]\_a¥a^)`a[Z\_a`baXW]\_\_`]`aZ\_a¥TaV^]\_`  
@HWI-EAS443:3:60:794:35#0/1  
CGTCCCCTTGCCCAATTAGCACATTAGCTTTCTCCTCCTT  
+HWI-EAS443:3:60:794:35#0/1  
ababaaaaaaaaabaaaaaaaaaaaaaaaaaaaa\_a`¥aa`  
@HWI-EAS443:3:60:867:564#0/1  
ATCTTGCAAAAGGAGAGAAAGCTAATGTGCTAATTGGGCA  
+HWI-EAS443:3:60:867:564#0/1  
aa`aaaaaa`\_aa`aa`a^\_a\_aa]`a]\_^`\_]`\_`\_\_\_\_  
@HWI-EAS443:3:60:927:208#0/1  
CCCCTTGCCCAATTAGCACATTAGCTTTCTCCTTTTGC  
+HWI-EAS443:3:60:927:208#0/1  
abbbbbbbba``abbbbbbabbbba`aba`bab`^baaaa`  
@HWI-EAS443:3:60:945:989#0/1  
CCCTTGCCCAATTAGCACATTAGCTTTCTCCTTTTGC  
+HWI-EAS443:3:60:945:989#0/1  
^\_UQP\_[U^[\_[HTX[][^ba``¥UZH^ZGO]Z]RIZMR¥

@HWI-EAS443:3:60:949:1812#0/1  
ATCTTGCAAAAGGAGAGAAAGCTAATGTGCTAATTGGGCA  
+HWI-EAS443:3:60:949:1812#0/1  
Z`ZQ\_U``\_``aa]b\_aaa`\_^a`aLJO\_`aZU^T`Ya^¥  
@HWI-EAS443:3:60:965:86#0/1  
CAATCTTGCAAAAGGAGAGAAAGCTAATGTGCTAATTGGG  
+HWI-EAS443:3:60:965:86#0/1  
Z^W````b``b`]abababa]]b[^U`b`X`U^````\_````  
@HWI-EAS443:3:61:1023:894#0/1  
CAATCTTGCAAAAGGAGAGAAAGCTAATGTGCTAATTGGG  
+HWI-EAS443:3:61:1023:894#0/1  
]bbabab`bbbbbbbabbaXabb\_T``b[baaaaaa`\_  
@HWI-EAS443:3:61:1037:1779#0/1  
ATCTTGCAAAAGGAGAGAAAGCTAATGTGCTAATTGGGCA  
+HWI-EAS443:3:61:1037:1779#0/1  
a`a\_\_]a^`^a]T¥Z`````b`^^`\_X][^^XW]¥VTTW  
@HWI-EAS443:3:61:1066:970#0/1  
CAAAAGGAGAGAAAGCTAATGTGCTAATTGGGCAAGGGGA  
+HWI-EAS443:3:61:1066:970#0/1  
abbbbababbbbabbbbababZab``T`aa`a`a]a\_\_\_^  
@HWI-EAS443:3:61:1102:1669#0/1  
AAGCTAATGTGCTAATTGGGCAAGGGGACGTAGTGTGGT  
+HWI-EAS443:3:61:1102:1669#0/1  
aaaaaa`b\_\_a\_aa\_aaa`\_`b\_a\_\_\_]\_V\_YWZR]¥YU  
@HWI-EAS443:3:61:1137:165#0/1  
GAGAAAGCTAATGTGCTAATTGGGCAAGGGGACGTAGTGT  
+HWI-EAS443:3:61:1137:165#0/1  
¥R^]Y]a¥]]]]\_X`[\_][\_\_\_¥¥¥][XY]]XZ^WWZZXX  
@HWI-EAS443:3:61:1191:1780#0/1  
ATCAATGAAGTGAAGCAATCTTGCAAAAGGAGAGAAAGCTA  
+HWI-EAS443:3:61:1191:1780#0/1  
]RYKa`¥ZaaXa¥Ya]aa\_^T\_ba]`aa¥\_\_\_^\_]\_UVY  
@HWI-EAS443:3:61:1342:927#0/1  
TGCAAAAGGAGAGAAAGCTAATGTGCTAATTGGGCAAGGG  
+HWI-EAS443:3:61:1342:927#0/1  
abb`V^^\_bV\_¥aa`abaa^Y`\_V^a\_^[a¥¥SXP^G\_NW  
@HWI-EAS443:3:61:1415:1688#0/1  
CATCAATGAAGTGAAGCAATCTTGCAAAAGGAGAGAAAGCT  
+HWI-EAS443:3:61:1415:1688#0/1  
M\_b\_^a\_bab¥`]ababbababbbbaZ¥a¥Ya`a\_aS`  
@HWI-EAS443:3:61:1437:1684#0/1  
CATCAATGAAGTGAAGCAATCTTGCAAAAGGAGAGAAAGCT  
+HWI-EAS443:3:61:1437:1684#0/1  
XZaaabba\_abb`[bb\_Vbbbbbbabaaaa\_b\_¥]aNX  
@HWI-EAS443:3:61:1493:2012#0/1  
ATCTTGCAAAAGGAGAGAAAGCTAATGTGCTAATTGGGCA  
+HWI-EAS443:3:61:1493:2012#0/1  
a[^[^X^¥aaaa]YYH\_aaba^aaa¥a`^a\_]a]¥\_`Y[HU  
@HWI-EAS443:3:61:1512:564#0/1  
AAGCATCAATGAAGTGAAGCAATCTTGCAAAAGGAGAGAAA

+HWI-EAS443:3:61:1512:564#0/1  
aab`abaaaa`\_aa^`aaaaba`ba`a^R`^^a^`VY  
@HWI-EAS443:3:61:1559:579#0/1  
AGCTAATGTGCTAATTGGGCAAGGGGACGTAGTGTGGTA  
+HWI-EAS443:3:61:1559:579#0/1  
aa`baaba^baaa`aabab\_aaaaaa\_b`\_`Xa^`\_`XZ  
@HWI-EAS443:3:61:1665:454#0/1  
AGCTAATGTGCTAATTGGGCAAGGGGACGTAGTGTGGTA  
+HWI-EAS443:3:61:1665:454#0/1  
abaaaaaa]a\_aaabbbbaabbabba`b`\_aTa^aX`QT  
@HWI-EAS443:3:61:1695:757#0/1  
AGCAATCTTGCAAAGGAGAGAAAGCTAATGTGCTAATTG  
+HWI-EAS443:3:61:1695:757#0/1  
abaaabaaabaaa`baaaaba]¥baaaaa]^]a\_X\_Y]  
@HWI-EAS443:3:61:1713:1756#0/1  
GAGCAATCTTGCAAAGGAGAGAAAGCTAATGTGCTAATT  
+HWI-EAS443:3:61:1713:1756#0/1  
aUOUaabaab\_\_\_^\_aaa`abbabbTa\_aa¥KWR\_]a\_  
@HWI-EAS443:3:61:194:1790#0/1  
GAGCAATCTTGCAAAGGAGAGAAAGCTAATGTGCTAATT  
+HWI-EAS443:3:61:194:1790#0/1  
\_XW^^X[^`^QX^YQT^STZYSXRQX[V[TXQNQPXYVX  
@HWI-EAS443:3:61:209:1497#0/1  
AAGCATCAATGAACTGAGCAATCTTGCAAAGGAGAGAAA  
+HWI-EAS443:3:61:209:1497#0/1  
abaaaab`a`\_a`\_`¥`aaa\_a`\_a`^`\_¥UX[^X^ZY  
@HWI-EAS443:3:61:329:298#0/1  
AGCTAATGTGCTAATTGGGCAAGGGGACGTAGTGTGGTA  
+HWI-EAS443:3:61:329:298#0/1  
ababaaab]`a^aaaaaa^Raa\_\_`]a[W`RaZ\_]ZSY  
@HWI-EAS443:3:61:385:139#0/1  
GAGCAATCTTGCAAAGGAGAGAAAGCTAATGTGCTAATT  
+HWI-EAS443:3:61:385:139#0/1  
\_a\_^`]b`aa`^]Z[Z`\_Y¥W[JLQTXUUGOWT]SRTR[]  
@HWI-EAS443:3:61:389:682#0/1  
AGCTAATGTGCTAATTGGGCAAGGGGACGTAGTGTGGTA  
+HWI-EAS443:3:61:389:682#0/1  
abbba[aa\_baa]aaaaaa\_T¥aZ`^aa[Z[M[]\_[TMM  
@HWI-EAS443:3:61:401:1965#0/1  
GAACTGAGCAATCTTGCAAAGGAGAGAAAGCTAATGTGC  
+HWI-EAS443:3:61:401:1965#0/1  
aa\_[V\_`]¥\_a]¥\_^\_\_TY\_V[YU][^`Y\_VXVVXYIKMV  
@HWI-EAS443:3:61:508:847#0/1  
ATCTTGCAAAGGAGAGAAAGCTAATGTGCTAATTGGGCA  
+HWI-EAS443:3:61:508:847#0/1  
abab`baa`V`aa\_]abb]W`baa^`aYaaaa\_\_a`¥]]Y  
@HWI-EAS443:3:61:50:456#0/1  
GAAAGCTAATGTGCTAATTGGGCAAGGGGACGTAGTGTG  
+HWI-EAS443:3:61:50:456#0/1  
aaa\_\_a^[^`aU\_]a`^\_]\_Y\_]\_Q]^`WU]ZV]WWZXQ

@HWI-EAS443:3:61:523:1069#0/1  
GAGAAAGCTAATGTGCTAATTGGGCAAGGGGACGTAGTGT  
+HWI-EAS443:3:61:523:1069#0/1  
\_YZ\_^]]\_U¥^^LTZ\_¥X`]^Z^aXHV^^^QVVVYYXXU  
@HWI-EAS443:3:61:590:1374#0/1  
CAATCTTGCAAAAGGAGAGAAAGCTAATGTGCTAATTGGG  
+HWI-EAS443:3:61:590:1374#0/1  
aababbbbabbabb`baabbbbbaabbb`baaaba\_aW\_  
@HWI-EAS443:3:61:608:173#0/1  
GCATCAATGAACTGAGCAATCTTGCAAAAGGAGAGAAAGC  
+HWI-EAS443:3:61:608:173#0/1  
``]^`¥V^a]W[]Z\_^]]\_\_^¥`\_RPXP[ZTYX^[Y[ZR  
@HWI-EAS443:3:61:734:1356#0/1  
CAAAAGGAGAGAAAGCTAATGTGCTAATTGGGCAAGGGGA  
+HWI-EAS443:3:61:734:1356#0/1  
aaa`Z\_^]ab`aaV\_^[\`Z\_[F^a`ab`\_\_Z][\_^]]URR  
@HWI-EAS443:3:62:1066:1150#0/1  
GAGCAATCTTGCAAAAGGAGAGAAAGCTAATGTGCTAATT  
+HWI-EAS443:3:62:1066:1150#0/1  
^\_bbbbbaabba````aa`baba`aa\_b\_^]a`a`\_aa`  
@HWI-EAS443:3:62:1150:973#0/1  
GAAAGCTAATGTGCTAATTGGGCAAGGGGACGTAGTGTG  
+HWI-EAS443:3:62:1150:973#0/1  
`[[P[^`^\_]ZW````\_a^Z\_aa`XVUWXZ^`]0¥¥M[P^`  
@HWI-EAS443:3:62:115:897#0/1  
GTCCCCTTGCCCAATTAGCACATTAGCTTTCTCCTTTT  
+HWI-EAS443:3:62:115:897#0/1  
aY````[V^a`]U\_XYHW\_U`ZW`Z¥^^[^`^`\_`^SVY  
@HWI-EAS443:3:62:1305:942#0/1  
CAATGAACTGAGCAATCTTGCAAAAGGAGAGAAAGCTAAT  
+HWI-EAS443:3:62:1305:942#0/1  
abab\_¥baba`aabbaabbbbaaaa`ba`babbaaa\_aaaa  
@HWI-EAS443:3:62:1334:330#0/1  
GCATCAATGAACTGAGCAATCTTGCAAAAGGAGAGAAAGC  
+HWI-EAS443:3:62:1334:330#0/1  
aaa`U[aaU\_aa`¥aaa`\_a\_a`a`^\_Yaa^a``]\_`a^  
@HWI-EAS443:3:62:1352:279#0/1  
GAGCAATCTTGCAAAAGGAGAGAAAGCTAATGTGCTAATT  
+HWI-EAS443:3:62:1352:279#0/1  
aV^a\_Y\_\_`aa\_\_^\_\_aa[\_`\_]Y\_V\_]\_\_`X\_X\_V¥\_`^  
@HWI-EAS443:3:62:1403:1584#0/1  
ATCTTGCAAAAGGAGAGAAAGCTAATGTGCTAATTGGGCA  
+HWI-EAS443:3:62:1403:1584#0/1  
aa\_X]^[[\_[]X¥a[a]a]]\_a\_\_a[\`V\_a```Ua]I]`\_`  
@HWI-EAS443:3:62:1434:1196#0/1  
ATCTTGCAAAAGGAGAGAAAGCTAATGTGCTAATTGGGCA  
+HWI-EAS443:3:62:1434:1196#0/1  
ZVVaXZba`a`a\_UY^`a]\_^\_\_H¥\_SDU\_\_^NZ\_a¥W]U  
@HWI-EAS443:3:62:1524:828#0/1  
AGCTAATGTGCTAATTGGGCAAGGGGACGTAGTGTGGTA

+HWI-EAS443:3:62:1524:828#0/1  
abaaaaab\_aaaaaba\_baaa\_aaa`\_]\_b^`a]a]aaaNW  
@HWI-EAS443:3:62:1667:327#0/1  
AGCTAATGTGCTAATTGGGCAAGGGGACGTAGTGTGGTA  
+HWI-EAS443:3:62:1667:327#0/1  
abab]0^ZP]FXYa`^a` `^W^`]]ZLZ[]YPXS]UZUS  
@HWI-EAS443:3:62:1673:60#0/1  
CATCAATGAACTGAGCAATCTTGCAAAAAGGAGAGAAAGCT  
+HWI-EAS443:3:62:1673:60#0/1  
abababbbabbbbbb`bbaa`b¥`\_Z\_bb^aab`^\_a]a  
@HWI-EAS443:3:62:1683:724#0/1  
GAACTGAGCAATCTTGCAAAAAGGAGAGAAAGCTAATGTGC  
+HWI-EAS443:3:62:1683:724#0/1  
a]`^^a¥a\_\_\_^X\_^ba\_\_^`Z^^Z\_\_\_`^\_^^]]aX\_\_\_  
@HWI-EAS443:3:62:1691:1384#0/1  
GAGCAATCTTGCAAAAAGGAGAGAAAGCTAATGTGCTAATT  
+HWI-EAS443:3:62:1691:1384#0/1  
aa`bbbb`bbbaa`aabb`bbbb` `a\_baaba\_a¥a`abb  
@HWI-EAS443:3:62:1781:213#0/1  
CATCAATGAACTGAGCAATCTTGCAAAAAGGAGAGAAAGCT  
+HWI-EAS443:3:62:1781:213#0/1  
XabbYOXZ\_aSUZUaZa¥Ya`^`¥MMYX¥ZGXab`Z^`^V  
@HWI-EAS443:3:62:212:1152#0/1  
ACTGAGCAATCTTGCAAAAAGGAGAGAAAGCTAATGTGCTA  
+HWI-EAS443:3:62:212:1152#0/1  
Waaaaba` `a¥T`¥aaYF^aYb`\_aQ\_a^\_U]\_\_G^\_a`  
@HWI-EAS443:3:62:275:690#0/1  
CTTGCAAAAAGGAGAGAAAGCTAATGTGCTAATTGGGCAAG  
+HWI-EAS443:3:62:275:690#0/1  
aa`¥`^^`]]`a`XZa`^` `a]`\_\_\_T\_^\_]TT[  
@HWI-EAS443:3:62:276:1695#0/1  
AGCTAATGTGCTAATTGGGCAAGGGGACGTAGTGTGGTA  
+HWI-EAS443:3:62:276:1695#0/1  
a`aYa]\_^H\_a`¥`aY¥RZaZa[OYY^a`]ZVTHQZNQLR  
@HWI-EAS443:3:62:279:944#0/1  
ACTGAGCAATCTTGCAAAAAGGAGAGAAAGCTAATGTGCTA  
+HWI-EAS443:3:62:279:944#0/1  
a`baa`aaaaaaaa`¥^`aa^aa\_aa\_\_\_^`\_\_\_Y`^[T  
@HWI-EAS443:3:62:460:461#0/1  
TTGCAAAAAGGAGAGAAAGCTAATGTGCTAATTGGGCAAGG  
+HWI-EAS443:3:62:460:461#0/1  
[^[^]X\_abaaaaaa¥Y^\_]S\_a¥a[^^a]X¥\_\_WXW\_]`  
@HWI-EAS443:3:62:468:549#0/1  
ATCTTGCAAAAAGGAGAGAAAGCTAATGTGCTAATTGGGCA  
+HWI-EAS443:3:62:468:549#0/1  
aaaaab\_YVZV]bab` `^\_]\_a]^H[aZa`^` `[\_YWYG  
@HWI-EAS443:3:62:480:272#0/1  
ATCTTGCAAAAAGGAGAGAAAGCTAATGTGCTAATTGGGCA  
+HWI-EAS443:3:62:480:272#0/1  
aaaaaba\_`\_[aa`aaa`¥`a` ` `\_]\_^]]^\_^]]S



@HWI-EAS443:3:62:488:1719#0/1  
GAGCAATCTTGCAAAAGGAGAGAAAGCTAATGTGCTAATT  
+HWI-EAS443:3:62:488:1719#0/1  
\_U\_`^]¥Z^¥X\_]ZZ¥ba^a]Z\_[¥M¥WZR¥[[¥^X[^`P  
@HWI-EAS443:3:62:489:1480#0/1  
TCTTGCAAAAGGAGAGAAAGCTAATGTGCTAATTGGGCAA  
+HWI-EAS443:3:62:489:1480#0/1  
[b`bba[TWYaa]`¥T^`Z`aa`¥^`I`dWMY`\_a`\_a`\_  
@HWI-EAS443:3:62:513:697#0/1  
TTGCAAAAGGAGAGAAAGCTAATGTGCTAATTGGGCAAGG  
+HWI-EAS443:3:62:513:697#0/1  
aaaaa\_aaaaa`baa`aa``aa]a\_``[\_\_\_\_Y^YV\_\_  
@HWI-EAS443:3:62:652:1304#0/1  
CATCAATGAAGTGAAGCAATCTTGCAAAAGGAGAGAAAGCT  
+HWI-EAS443:3:62:652:1304#0/1  
aa`b\_aZ¥¥aa[\_`aab¥¥a`aaa\_¥[^¥¥a\_U^^\_Z¥¥  
@HWI-EAS443:3:62:652:1409#0/1  
CAATGAAGTGAAGCAATCTTGCAAAAGGAGAGAAAGCTAAT  
+HWI-EAS443:3:62:652:1409#0/1  
aaa`^`a`\_a`\_aaa\_aaaa\_a\_\_a\_\_a`\_a\_\_\_\_¥¥[^  
@HWI-EAS443:3:62:654:1591#0/1  
CATCAATGAAGTGAAGCAATCTTGCAAAAGGAGAGAAAGCT  
+HWI-EAS443:3:62:654:1591#0/1  
aaa\_Y]]aW^aa`Wa`^U`aa[Y\_`^]T]\_]aab]]``¥  
@HWI-EAS443:3:62:757:218#0/1  
GAAAGCTAATGTGCTAATTGGGCAAGGGGACGTAGTGTTG  
+HWI-EAS443:3:62:757:218#0/1  
a``\_`¥]\_`\_`T[ZW¥`\_\_`\_]QXVX¥[VZXFOXTYNS^  
@HWI-EAS443:3:62:79:751#0/1  
CATCAATGAAGTGAAGCAATCTTGCAAAAGGAGAGAAAGCT  
+HWI-EAS443:3:62:79:751#0/1  
aaaababbbababababab`a[`aaa`a`\_`a¥aa`aa^  
@HWI-EAS443:3:62:801:38#0/1  
AATGAAGTGAAGCAATCTTGCAAAAGGAGAGAAAGCTAATG  
+HWI-EAS443:3:62:801:38#0/1  
abbbaaaa\_¥baaa`aaaaa\_a`ba\_aaaaa\_`^^\_]\_`  
@HWI-EAS443:3:62:943:866#0/1  
GAAAGCTAATGTGCTAATTGGGCAAGGGGACGTAGTGTTG  
+HWI-EAS443:3:62:943:866#0/1  
abb`a`aaaab`b\_bbababa`aa\_aa\_``aa^^aYa^\_a  
@HWI-EAS443:3:63:1052:133#0/1  
CATCAATGAAGTGAAGCAATCTTGCAAAAGGAGAGAAAGCT  
+HWI-EAS443:3:63:1052:133#0/1  
Z¥¥baSaaS¥aba`ba^`a`\_`abaa`Paa\_b^ba]``\_a  
@HWI-EAS443:3:63:1266:908#0/1  
GAAAGTGAAGCAATCTTGCAAAAGGAGAGAAAGCTAATGTGC  
+HWI-EAS443:3:63:1266:908#0/1  
a`a^`a\_aaa`aa`]ba\_^Xaa`a]ba`^aZ``¥aaV``  
@HWI-EAS443:3:63:12:455#0/1  
GAGAAAGCTAATGTGCTAATTGGGCAAGGGGACGTAGTGT

+HWI-EAS443:3:63:12:455#0/1  
a\_abaa^X\_Z]aa¥]`]0Y]^\_[^a^S^¥a¥TM[YSYUSS  
@HWI-EAS443:3:63:1345:987#0/1  
ATCTTGCAAAAAGGAGAGAAAGCTAATGTGCTAATTGGGCA  
+HWI-EAS443:3:63:1345:987#0/1  
aaaYW^^UXNP\_a\_[a\_^R\_¥Y^L`\_^`ZT[aa]aW\_^  
@HWI-EAS443:3:63:1398:1297#0/1  
GAGCAATCTTGCAAAAAGGAGAGAAAGCTAATGTGCTAATT  
+HWI-EAS443:3:63:1398:1297#0/1  
aM`\_`\_`baa]a\_Yaa`\_aaaaaa[b^aU`a`Yaa[\_\_\_a\_  
@HWI-EAS443:3:63:1521:1087#0/1  
CATCAATGAACTGAGCAATCTTGCAAAAAGGAGAGAAAGCT  
+HWI-EAS443:3:63:1521:1087#0/1  
`bb`aaab`bRbbbbabbabbbba\_baaababbbbaa¥b  
@HWI-EAS443:3:63:158:1404#0/1  
GCAATCTTGCAAAAAGGAGAGAAAGCTAATGTGCTAATTGG  
+HWI-EAS443:3:63:158:1404#0/1  
^\_ZTQ\_\_WV\_`VXV\_¥]T]`¥¥\_`a¥T¥]a^aa`\_Q^XV]  
@HWI-EAS443:3:63:1699:1135#0/1  
GAAAGCTAATGTGCTAATTGGGCAAGGGGACGTAGTGTG  
+HWI-EAS443:3:63:1699:1135#0/1  
Z¥`^LIT^Z`bUJ¥¥Y\_b\_`]¥0WKa]abLOVUF\_[Q^]Y  
@HWI-EAS443:3:63:1734:1172#0/1  
AGCACATTAGCTTTCTCTCCTTTTGCAAGATTGCTCAGTT  
+HWI-EAS443:3:63:1734:1172#0/1  
aabaabba`abbb`babaaaaba\_aa`aa`aa^aa`a`a  
@HWI-EAS443:3:63:391:715#0/1  
ATGAACTGAGCAATCTTGCAAAAAGGAGAGAAAGCTAATGT  
+HWI-EAS443:3:63:391:715#0/1  
a`\_aabaa^`abaabaaa`\_TZ^aaa\_b`]`a`a`aaaU  
@HWI-EAS443:3:63:400:729#0/1  
GCATCAATGAACTGAGCAATCTTGCAAAAAGGAGAGAAAGC  
+HWI-EAS443:3:63:400:729#0/1  
abaa`aaaaa`a`aaaa`aa`a```\_\_a\_\_aaa`\_\_`\_  
@HWI-EAS443:3:63:467:613#0/1  
CATCAATGAACTGAGCAATCTTGCAAAAAGGAGAGAAAGCT  
+HWI-EAS443:3:63:467:613#0/1  
aaaa^aaaaaaaa`aa\_V\_a`]`a`\_`[[\_\_``aa\_^[[¥  
@HWI-EAS443:3:63:522:82#0/1  
GAGCAATCTTGCAAAAAGGAGAGAAAGCTAATGTGCTAATT  
+HWI-EAS443:3:63:522:82#0/1  
aabaab[aba]aa`^a\_b\_aaZ\_aa````a\_`[^¥^XY  
@HWI-EAS443:3:63:704:1980#0/1  
CAACACTACGTCCCCTTGCCCAATTAGCACATTAGCTTTC  
+HWI-EAS443:3:63:704:1980#0/1  
aaaabaaba`Qa\_aaVRV``\_]a\_^]`^`a^¥`^[SP^\_  
@HWI-EAS443:3:63:789:151#0/1  
AAAGGAGAGAAAGCTAATGTGCTAATTGGGCAAGGGGACG  
+HWI-EAS443:3:63:789:151#0/1  
a[`\_baab`b``aaaaabb\_baaa`ba^¥]a\_\_aaa^\_\_`

@HWI-EAS443:3:63:809:624#0/1  
AGCTAATGTGCTAATTGGGCAAGGGGACGTAGTGTGGTA  
+HWI-EAS443:3:63:809:624#0/1  
`\_a\_\_`^^\_a]^`^Z\_bbb\_a`\_¥\_]\_ZV\_[a¥¥`]Q[  
@HWI-EAS443:3:63:80:454#0/1  
GAGCAATCTTGCAAAGGAGAGAAAGCTAATGTGCTAATT  
+HWI-EAS443:3:63:80:454#0/1  
aabbabbabbaa\_\_baab]aba\_aaa`aa`[aa\_\_a\_]`  
@HWI-EAS443:3:63:898:365#0/1  
ACTGAGCAATCTTGCAAAGGAGAGAAAGCTAATGTGCTA  
+HWI-EAS443:3:63:898:365#0/1  
a`a^ab\_bbaaaba`^Waa`a\_aaa`a\_````a^a^a`  
@HWI-EAS443:3:63:915:763#0/1  
CTTGCAAAGGAGAGAAAGCTAATGTGCTAATTGGGCAAG  
+HWI-EAS443:3:63:915:763#0/1  
^abbbb`bb`bbb``^`aa`Uaaab`aaaaaaba`\_a  
@HWI-EAS443:3:64:1170:142#0/1  
GAACTGAGCAATCTTGCAAAGGAGAGAAAGCTAATGTGC  
+HWI-EAS443:3:64:1170:142#0/1  
]OQ¥\_\_`^`]^QY]^S[]JR]]][^¥OQ\_0ZVPXYT`¥  
@HWI-EAS443:3:64:1239:1392#0/1  
GAAAGCTAATGTGCTAATTGGGCAAGGGGACGTAGTGTG  
+HWI-EAS443:3:64:1239:1392#0/1  
ab`aaba`\_aaaa`b`b`a\_\_a\_[`\_\_a^^a`\_a^a\_a`  
@HWI-EAS443:3:64:1241:21#0/1  
GAGCAATCTTGCAAAGGAGAGAAAGCTAATGTGCTAATT  
+HWI-EAS443:3:64:1241:21#0/1  
]^a^W\_¥Z`a]G]^Y`abX`a^VUaa`\_\_a\_a[`U¥\_a  
@HWI-EAS443:3:64:1260:1543#0/1  
AGCAATCTTGCAAAGGAGAGAAAGCTAATGTGCTAATTG  
+HWI-EAS443:3:64:1260:1543#0/1  
a`abbbba`aaa\_a\_aaa`a\_aa`a\_aaY`^`\_`a\_^  
@HWI-EAS443:3:64:1294:597#0/1  
ATCTTGCAAAGGAGAGAAAGCTAATGTGCTAATTGGGCA  
+HWI-EAS443:3:64:1294:597#0/1  
aaabaa][b`^aaaaaaaaa]ba`aa]a^`aaaaaa[¥  
@HWI-EAS443:3:64:12:1986#0/1  
AAGCTAATGTGCTAATTGGGCAAGGGGACGTAGTGTGGT  
+HWI-EAS443:3:64:12:1986#0/1  
\_Z`babb\_Z[``b]^]XUa\_\_]^S]^¥PW[XVXYRN  
@HWI-EAS443:3:64:1334:305#0/1  
GAACTGAGCAATCTTGCAAAGGAGAGAAAGCTAATGTGC  
+HWI-EAS443:3:64:1334:305#0/1  
aaaaba`aabaabba]a`\_\_ab\_a`aa`a\_a\_`aa¥a\_  
@HWI-EAS443:3:64:1366:483#0/1  
AATGAACTGAGCAATCTTGCAAAGGAGAGAAAGCTAATG  
+HWI-EAS443:3:64:1366:483#0/1  
aaab`aaaa`b\_a`aaaa\_a\_aaa\_a`\_``X`]^\_\_`\_  
@HWI-EAS443:3:64:1413:642#0/1  
CAAAGGAGAGAAAGCTAATGTGCTAATTGGGCAAGGGGA

+HWI-EAS443:3:64:1413:642#0/1  
abbababbbbababbaaa`b`aabbababaaba^H`a  
@HWI-EAS443:3:64:1438:1483#0/1  
CATCAATGAACTGAGCAATCTTGCAAAAGGAGAGAAAGCT  
+HWI-EAS443:3:64:1438:1483#0/1  
`]^aabb\_[aaa^Za¥Z\_¥\_\_`a^¥]^`aa\_\_a\_a^¥^R`  
@HWI-EAS443:3:64:1446:607#0/1  
AAGCTAATGTGCTAATTGGGCAAGGGGACGTAGTGTGGT  
+HWI-EAS443:3:64:1446:607#0/1  
aaa`baaaa\_a`aa`aaa[^a^`a\_a\_^a]\_aYa]\_\_\_R  
@HWI-EAS443:3:64:1447:918#0/1  
AAAGGAGAGAAAGCTAATGTGCTAATTGGGCAAGGGGACG  
+HWI-EAS443:3:64:1447:918#0/1  
aaabba\_W\_`aaaa]YYabaaZa^\_aaaaX[\_\_\_\_]U^¥^`  
@HWI-EAS443:3:64:1509:1260#0/1  
GAAAGCTAATGTGCTAATTGGGCAAGGGGACGTAGTGTGGT  
+HWI-EAS443:3:64:1509:1260#0/1  
aaba¥]b`aabWa^a\_aa`^^\_\_\_\_a\_]\_`Za]Z`ZaZ\_`  
@HWI-EAS443:3:64:1593:1286#0/1  
GAGCAATCTTGCAAAAGGAGAGAAAGCTAATGTGCTAATT  
+HWI-EAS443:3:64:1593:1286#0/1  
`V\_`XW¥YQXZa\_XY]ZXa`Z[V`\_¥Z^`]QS[]WY]\_  
@HWI-EAS443:3:64:1602:1718#0/1  
GAAAGCTAATGTGCTAATTGGGCAAGGGGACGTAGTGTGGT  
+HWI-EAS443:3:64:1602:1718#0/1  
aaa``aba`aa^`a[\_a```Z^\_`^`\_\_\_\_^^a^X^Z`^`\_  
@HWI-EAS443:3:64:1606:67#0/1  
GCATCAATGAACTGAGCAATCTTGCAAAAGGAGAGAAAGC  
+HWI-EAS443:3:64:1606:67#0/1  
a^`]V[V\_YZa[¥\_\_a[YN\_\_\_\_aL]OKRa`[[V`¥PXZX  
@HWI-EAS443:3:64:1624:1842#0/1  
GAGCAATCTTGCAAAAGGAGAGAAAGCTAATGTGCTAATT  
+HWI-EAS443:3:64:1624:1842#0/1  
abba`bbbbbbbaaaabaab`baab¥aaaa]a¥aa`a`  
@HWI-EAS443:3:64:1641:1721#0/1  
AAGCTAATGTGCTAATTGGGCAAGGGGACGTAGTGTGGT  
+HWI-EAS443:3:64:1641:1721#0/1  
aaa]]]`baRaWba\_a`b`aY`aaa]RFTY``RX^T¥UYT  
@HWI-EAS443:3:64:1718:1180#0/1  
GTCCCCTTGCCCAATTAGCACATTAGCTTTCTCCTTTT  
+HWI-EAS443:3:64:1718:1180#0/1  
abbbbbbbbaabbbbab\_abbbb`babbaab`aaabaab  
@HWI-EAS443:3:64:178:1504#0/1  
GAACTGAGCAATCTTGCAAAAGGAGAGAAAGCTAATGTGC  
+HWI-EAS443:3:64:178:1504#0/1  
abbaa]Y^baaba`a]\_a]\_aaa\_aaaaaaa```aa[\_\_\_  
@HWI-EAS443:3:64:287:1691#0/1  
GAGCAATCTTGCAAAAGGAGAGAAAGCTAATGTGCTAATT  
+HWI-EAS443:3:64:287:1691#0/1  
aaaba¥`aa]Va`a`¥^Y\_ba\_a\_a\_Za\_\_aa]^a``^`\_`

@HWI-EAS443:3:64:301:1931#0/1  
AGCACATTAGCTTTCTCTCCTTTTGCAAGATTGCTCAGTT  
+HWI-EAS443:3:64:301:1931#0/1  
a¥aaaaaa`\_`\_`a`\_`a`\_`\_`a]\_\_a`\_`\_`^^`\_`\_`a^SY]  
@HWI-EAS443:3:64:353:592#0/1  
AGGAGAGAAAAGCTAATGTGCTAATTGGGCAAGGGGACGTA  
+HWI-EAS443:3:64:353:592#0/1  
R¥`\_`^`\_`VY]bbb¥bb`VVZ\_`^`a]abbb]a¥XW¥a^XTY  
@HWI-EAS443:3:64:365:402#0/1  
GAGCAATCTTGCAAAAAGGAGAGAAAAGCTAATGTGCTAATT  
+HWI-EAS443:3:64:365:402#0/1  
`]]^¥S¥Y`^`RX]R\_Za]]\_YZ`]UW`ZOUaSYT^`[[Z  
@HWI-EAS443:3:64:443:541#0/1  
AAGGAGAGAAAAGCTAATGTGCTAATTGGGCAAGGGGACGT  
+HWI-EAS443:3:64:443:541#0/1  
]abb^bbabbabaaaaa`\_`aaa`baaaaa`\_`¥\_`a`\_`a`\_`^`  
@HWI-EAS443:3:64:545:31#0/1  
GAACTGAGCAATCTTGCAAAAAGGAGAGAAAAGCTAATGTGC  
+HWI-EAS443:3:64:545:31#0/1  
aY\_`aa\_a`^`\_`\_`a`\_`\_]X\_`\_`^`\_]`^`^`\_]`YW]`V]Y  
@HWI-EAS443:3:64:563:723#0/1  
GTCCCCTTGCCCAATTAGCACATTAGCTTTCTCTCCTTTT  
+HWI-EAS443:3:64:563:723#0/1  
aaab`a¥Xabba[^bWZaaaa`\_`a[UZa`\_`\_`baa\_a`\_`\_`  
@HWI-EAS443:3:64:588:557#0/1  
GAACTGAGCAATCTTGCAAAAAGGAGAGAAAAGCTAATGTGC  
+HWI-EAS443:3:64:588:557#0/1  
aa`\_`\_`\_`^`bbbaaaaaa^`]^aa`Y^aa`\_`a`\_`^`\_`\_`aX`^`  
@HWI-EAS443:3:64:695:1511#0/1  
TCTTGCAAAAAGGAGAGAAAAGCTAATGTGCTAATTGGGCAA  
+HWI-EAS443:3:64:695:1511#0/1  
abbbbabbba\_abaaabb`]aa^aaa\_a\_\_a\_a`a`[^aa  
@HWI-EAS443:3:64:800:532#0/1  
GCAAAAAGGAGAGAAAAGCTAATGTGCTAATTGGGCAAGGGG  
+HWI-EAS443:3:64:800:532#0/1  
aaaa]]aa\_aaa`\_`^`\_`\_`\_`a\_Va[^^a]a\_\_[¥Z`]`\_`  
@HWI-EAS443:3:64:812:801#0/1  
ATGAACTGAGCAATCTTGCAAAAAGGAGAGAAAAGCTAATGT  
+HWI-EAS443:3:64:812:801#0/1  
`Y[[abaabaaaa`a`b`V¥a]`^Y]aaaaU\_¥`YUa\_V  
@HWI-EAS443:3:64:938:153#0/1  
GAGCAATCTTGCAAAAAGGAGAGAAAAGCTAATGTGCTAATT  
+HWI-EAS443:3:64:938:153#0/1  
¥W\_`^`¥[\_`[aa¥\_\_`^`P\_aN^]a\_Zaaa`\_`^`b[a]a[U`\_`  
@HWI-EAS443:3:65:1001:1129#0/1  
GAGAAAAGCTAATGTGCTAATTGGGCAAGGGGACGTAGTGT  
+HWI-EAS443:3:65:1001:1129#0/1  
YRZ^^`\_`W`^`S`\_`ZH]\_]T¥a]]Z\_X]`\_`\_`a¥S\_\_`YSYVB  
@HWI-EAS443:3:65:1131:353#0/1  
AAAGCTAATGTGCTAATTGGGCAAGGGGACGTAGTGTGG

+HWI-EAS443:3:65:1131:353#0/1  
aaaa]a^Yaa\_a`\_\_^`a\_\_`aa`\_\_a^\_\_Va]\_\_B  
@HWI-EAS443:3:65:113:1245#0/1  
CCCTTGCCCAATTAGCACATTAGCTTTCTCCTTTTGCA  
+HWI-EAS443:3:65:113:1245#0/1  
abba`\_baabbbaa`baaa``aaa``aa`\_aa\_a`^`\_`\_`  
@HWI-EAS443:3:65:1154:346#0/1  
AAAGCTAATGTGCTAATTGGGCAAGGGGACGTAGTGTGG  
+HWI-EAS443:3:65:1154:346#0/1  
`¥ab\_a^]a\_a\_a]¥[``\_^]a^`WZaX]\_XXW``\_`  
@HWI-EAS443:3:65:1204:898#0/1  
CTTGCAAAAGGAGAGAAAGCTAATGTGCTAATTGGGCAAG  
+HWI-EAS443:3:65:1204:898#0/1  
ababa`\_]ab\_aaaa`a`a`a`a\_a^a`aaa`a`\_`\_`  
@HWI-EAS443:3:65:121:893#0/1  
GCAATCTTGCAAAAGGAGAGAAAGCTAATGTGCTAATTGG  
+HWI-EAS443:3:65:121:893#0/1  
ab`U`\_``\_]a`]a^`\_V`^`\_```[R^a¥\_`\_P\_^\_]`  
@HWI-EAS443:3:65:1316:181#0/1  
GCATCAATGAAGTGAATCTTGCAAAAGGAGAGAAAGC  
+HWI-EAS443:3:65:1316:181#0/1  
aaaaZaabbaa`a``aaa`a\_baa\_a`\_`aa`a`aa^\_aY  
@HWI-EAS443:3:65:1757:1431#0/1  
GCATCAATGAAGTGAATCTTGCAAAAGGAGAGAAAGC  
+HWI-EAS443:3:65:1757:1431#0/1  
H\_[Ra\_¥\_`[^aYY\_\_¥\_`^Ta¥a^\_`[X^S¥^¥ababb  
@HWI-EAS443:3:65:195:859#0/1  
GAGCAATCTTGCAAAAGGAGAGAAAGCTAATGTGCTAATT  
+HWI-EAS443:3:65:195:859#0/1  
¥]Za``bbbbbabaaabbaaababaaaa`W`b^aaaba`\_`  
@HWI-EAS443:3:65:229:1597#0/1  
GAAAGCTAATGTGCTAATTGGGCAAGGGGACGTAGTGTGG  
+HWI-EAS443:3:65:229:1597#0/1  
abba¥aaaaaa\_a¥a`aaa]NTaaa\_]Z``][X`]]`^\_Z  
@HWI-EAS443:3:65:236:83#0/1  
GCAAAAGGAGAGAAAGCTAATGTGCTAATTGGGCAAGGGG  
+HWI-EAS443:3:65:236:83#0/1  
aYTPSUaaXaX`TWV^L¥XX^a]`S[ZUY^^YWTVV]WU¥  
@HWI-EAS443:3:65:383:102#0/1  
GAAAGCTAATGTGCTAATTGGGCAAGGGGACGTAGTGTGG  
+HWI-EAS443:3:65:383:102#0/1  
U]a^0^aWW`aZ^RZ¥J]`WTVVRSOWZBBBBBBBBBBBB  
@HWI-EAS443:3:65:465:1853#0/1  
GAAAGCTAATGTGCTAATTGGGCAAGGGGACGTAGTGTGG  
+HWI-EAS443:3:65:465:1853#0/1  
¥T¥\_¥\_\_\_\_]aa`aLUaa]N[]`baUHU^\_]a¥W\_QWaPX^  
@HWI-EAS443:3:65:503:93#0/1  
AGCTAATGTGCTAATTGGGCAAGGGGACGTAGTGTGGTA  
+HWI-EAS443:3:65:503:93#0/1  
abaa`abbaa``aaa`aab`\_abaaa^aa^\_aYaUa`aSZ



+HWI-EAS443:3:66:1724:891#0/1  
XI\_Y`babbaaaa]ab`ababaaaXaZYaaaa`a^\_a\_  
@HWI-EAS443:3:66:1726:1570#0/1  
AGCTAATGTGCTAATTGGGCAAGGGGACGTAGTGTGGTA  
+HWI-EAS443:3:66:1726:1570#0/1  
aa`ababb\_aaba\_aaaaa`a`^a\_YaZT\_]a^\_¥^LR  
@HWI-EAS443:3:66:217:132#0/1  
GAGCAATCTTGCAAAAGGAGAGAAAGCTAATGTGCTAATT  
+HWI-EAS443:3:66:217:132#0/1  
]H]`ZXX]ZZ`¥Z[VN¥VO\_^^^ZUUGVXXT¥M[VOXKRV  
@HWI-EAS443:3:66:245:930#0/1  
GAAAGCTAATGTGCTAATTGGGCAAGGGGACGTAGTGTG  
+HWI-EAS443:3:66:245:930#0/1  
abbaaa`aaaa\_a\_aa`a`\_aaaa\_YT^\_]a^VU^V^¥\_\_  
@HWI-EAS443:3:66:347:1036#0/1  
ACGTCCCCTTGCCCAATTAGCACATTAGCTTTCTCTCCTT  
+HWI-EAS443:3:66:347:1036#0/1  
a`\_V^aaa\_[]`\_\_¥`^aZY¥[Y[^`^Z\_]`[^]\_\_\_\_^  
@HWI-EAS443:3:66:360:875#0/1  
GAGAAAGCTAATGTGCTAATTGGGCAAGGGGACGTAGTGT  
+HWI-EAS443:3:66:360:875#0/1  
aaaaaaaaaaaaaa\_aa`aa`a^a`[aa]¥aWaa]\_aZa^  
@HWI-EAS443:3:66:400:1651#0/1  
GAGCAATCTTGCAAAAGGAGAGAAAGCTAATGTGCTAATT  
+HWI-EAS443:3:66:400:1651#0/1  
K^\_\_T\_U\_abVbb`b\_T\_ZT`a]`¥T`SaabbHbab]b\_`  
@HWI-EAS443:3:66:455:1072#0/1  
CAATCTTGCAAAAGGAGAGAAAGCTAATGTGCTAATTGGG  
+HWI-EAS443:3:66:455:1072#0/1  
aaaaaaaaaaa\_]`a`a\_aa]\_a]\_\_\_\_`W\_\_\_\_\_^`]^  
@HWI-EAS443:3:66:613:1893#0/1  
GAAAGCTAATGTGCTAATTGGGCAAGGGGACGTAGTGTG  
+HWI-EAS443:3:66:613:1893#0/1  
```[]YYaa¥`\_Q¥]P\_`X[[a^[^aU\_X\_aX\_YXZNY  
@HWI-EAS443:3:66:642:1350#0/1  
GAGCAATCTTGCAAAAGGAGAGAAAGCTAATGTGCTAATT  
+HWI-EAS443:3:66:642:1350#0/1  
aa[bbbaababababUa`aaaabab`aa[aaaaaaaaaaaa  
@HWI-EAS443:3:66:696:605#0/1  
GAGCAATCTTGCAAAAGGAGAGAAAGCTAATGTGCTAATT  
+HWI-EAS443:3:66:696:605#0/1  
^Z¥a]ababababaaa`bababbbbaa]a`a\_ba`ba\_a  
@HWI-EAS443:3:66:897:303#0/1  
GAACTGAGCAATCTTGCAAAAGGAGAGAAAGCTAATGTGC  
+HWI-EAS443:3:66:897:303#0/1  
aab`aa`a`aaaa`aaaa\_aa`a`a``\_a\_a`\_\_`X`]  
@HWI-EAS443:3:66:898:1071#0/1  
CATCAATGAACTGAGCAATCTTGCAAAAGGAGAGAAAGCT  
+HWI-EAS443:3:66:898:1071#0/1  
`\_\_]X¥¥MX¥aaXNV[a`\_aa``[^WV][\_Z`[Y`WWWY\_



@HWI-EAS443:3:66:916:1889#0/1  
AGCTAATGTGCTAATTGGGCAAGGGGACGTAGTGTTGGTA  
+HWI-EAS443:3:66:916:1889#0/1  
aaaaaaaaZ`aaa`a¥^a\_^`\_\_\_\_]\_aY^`Y\_YY`^VZ  
@HWI-EAS443:3:67:1072:1470#0/1  
AGCTTTCTCTCTTTTGCAAGATTGCTCAGTTCATTGATG  
+HWI-EAS443:3:67:1072:1470#0/1  
I\_b¥¥Z\_Y`a[XOPW]YX¥aS^Ya^^SVQSO[a[GY[Z  
@HWI-EAS443:3:67:1080:1570#0/1  
GAACTGAGCAATCTTGCAAAAGGAGAGAAAGCTAATGTGC  
+HWI-EAS443:3:67:1080:1570#0/1  
a`aaa\_¥abaaaaaaba`[\_``]`\_]b^Za``\_\_\_\_\_V\_X  
@HWI-EAS443:3:67:1083:25#0/1  
AGCATCAATGAACTGAGCAATCTTGCAAAAGGAGAGAAAG  
+HWI-EAS443:3:67:1083:25#0/1  
`bbV\_WZaa``a`[P`^a[``\_`a`Y¥¥ZY``[`¥`\_\_Ua  
@HWI-EAS443:3:67:1091:1274#0/1  
AATGAACTGAGCAATCTTGCAAAAGGAGAGAAAGCTAATG  
+HWI-EAS443:3:67:1091:1274#0/1  
aa\_b``^¥Za`¥\_a`ab`XXa]XZb¥W]aa`¥``X\_UZ^Z  
@HWI-EAS443:3:67:1197:1083#0/1  
AATGAACTGAGCAATCTTGCAAAAGGAGAGAAAGCTAATG  
+HWI-EAS443:3:67:1197:1083#0/1  
aabaaaabaaaaaaaaaaba`a`a\_\_`aaaaa\_``\_aa  
@HWI-EAS443:3:67:1214:629#0/1  
GAGCAATCTTGCAAAAGGAGAGAAAGCTAATGTGCTAATT  
+HWI-EAS443:3:67:1214:629#0/1  
aaababaa¥]bX]`][baVa^\_bZHX\_a`aaa\_``a\_\_ab  
@HWI-EAS443:3:67:1232:1427#0/1  
CATCAATGAACTGAGCAATCTTGCAAAAGGAGAGAAAGCT  
+HWI-EAS443:3:67:1232:1427#0/1  
aaabab`a`babaabaa`aabbaa\_aaa`aa\_aa\_a`\_  
@HWI-EAS443:3:67:1242:683#0/1  
GCAATCTTGCAAAAGGAGAGAAAGCTAATGTGCTAATTGG  
+HWI-EAS443:3:67:1242:683#0/1  
aababaaabaaba\_aa`]`aaaaaaaaabab`aaaa`b\_  
@HWI-EAS443:3:67:1262:1406#0/1  
CATCAATGAACTGAGCAATCTTGCAAAAGGAGAGAAAGCT  
+HWI-EAS443:3:67:1262:1406#0/1  
`]a``T\_SVZb¥babab`babbbabaaaaaabaabaaa\_\_  
@HWI-EAS443:3:67:129:1218#0/1  
GAAAGCTAATGTGCTAATTGGGCAAGGGGACGTAGTGTTG  
+HWI-EAS443:3:67:129:1218#0/1  
a`XT^baa^a\_Y\_aaaa`aa`^a\_\_]``\_\_a`Y\_]`Z``  
@HWI-EAS443:3:67:1318:1978#0/1  
CATCAATGAACTGAGCAATCTTGCAAAAGGAGAGAAAGCT  
+HWI-EAS443:3:67:1318:1978#0/1  
ab[abZ\_IQbV[aXaabbba\_abbXa`aV¥YF]aabb¥ba  
@HWI-EAS443:3:67:1449:1977#0/1  
GAGCAATCTTGCAAAAGGAGAGAAAGCTAATGTGCTAATT

+HWI-EAS443:3:67:1449:1977#0/1  
aa[abbaababba`aa````baba`aaa`a\_a\_`]`\_\_a`  
@HWI-EAS443:3:67:1468:948#0/1  
ATCTTGCAAAAAGGAGAGAAAGCTAATGTGCTAATTGGGCA  
+HWI-EAS443:3:67:1468:948#0/1  
Z\_TX¥\_a\_bb\_¥a[^Q]aa¥a[^\_abba``^]WR¥W[¥X¥  
@HWI-EAS443:3:67:1470:492#0/1  
AGCTTTCTCTCCTTTTGCAAGATTGCTCAGTTCATTGATG  
+HWI-EAS443:3:67:1470:492#0/1  
^b^bbb`b^^ab`a`a^aaa`a\_baa\_¥aX`\_\_a`a\_aa  
@HWI-EAS443:3:67:1483:177#0/1  
GCATCAATGAACTGAGCAATCTTGCAAAAAGGAGAGAAAAGC  
+HWI-EAS443:3:67:1483:177#0/1  
a`]aa``b```]\_`abaaa\_aab`a``^```a`aa\_\_`^  
@HWI-EAS443:3:67:149:1931#0/1  
CATCAATGAACTGAGCAATCTTGCAAAAAGGAGAGAAAAGCT  
+HWI-EAS443:3:67:149:1931#0/1  
a``aaaa\_P¥[ZQ0``ZZ\_XY^`a`\_^Z\_WY^[R\_XTZVZ  
@HWI-EAS443:3:67:1500:1869#0/1  
AAGCATCAATGAACTGAGCAATCTTGCAAAAAGGAGAGAAA  
+HWI-EAS443:3:67:1500:1869#0/1  
^``a\_VFW^XS[^aaa]^Y\_Y¥¥YWYa^VQTYS[a``X`¥  
@HWI-EAS443:3:67:1618:961#0/1  
GTCCCCTTGCCCAATTAGCACATTAGCTTTCTCTCCTTTT  
+HWI-EAS443:3:67:1618:961#0/1  
a`XR`^¥a\_XT^`[^¥`U^[\_\_\_\_]YV`YQ[L^]N[^\_\_  
@HWI-EAS443:3:67:1642:1853#0/1  
GAGAAAGCTAATGTGCTAATTGGGCAAGGGGACGTAGTGT  
+HWI-EAS443:3:67:1642:1853#0/1  
aaaaYa\_]aZZ`[[Y\_^]\_^Z\_a^W\_a]\_\_\_\_RZ\_VV[X¥W  
@HWI-EAS443:3:67:1758:1709#0/1  
AGCTAATGTGCTAATTGGGCAAGGGGACGTAGTGTGGTA  
+HWI-EAS443:3:67:1758:1709#0/1  
[\_ab[^aaWbaaa\_\_\_\_aa\_`]``]`\_`a]]]X`¥aa\_Y\_  
@HWI-EAS443:3:67:200:2033#0/1  
GAGCAATCTTGCAAAAAGGAGAGAAAAGCTAATGTGCTAATT  
+HWI-EAS443:3:67:200:2033#0/1  
``Yaba`aaa\_aaa\_\_`\_``aXa``\_a\_[a`Y^\_¥`\_^\_  
@HWI-EAS443:3:67:234:836#0/1  
GAGCAATCTTGCAAAAAGGAGAGAAAAGCTAATGTGCTAATT  
+HWI-EAS443:3:67:234:836#0/1  
a`abbaaaaaaaaa`aaa`aaa`0`\_a`\_`aX`\_a\_\_\_\_`  
@HWI-EAS443:3:67:287:1316#0/1  
GAGAAAGCTAATGTGCTAATTGGGCAAGGGGACGTAGTGT  
+HWI-EAS443:3:67:287:1316#0/1  
]R]]QXX\_\_¥\_]\_Y\_¥^^^^``¥a]]]```\_\_aZU[Y\_^  
@HWI-EAS443:3:67:294:94#0/1  
ATCTTGCAAAAAGGAGAGAAAAGCTAATGTGCTAATTGGGCA  
+HWI-EAS443:3:67:294:94#0/1  
abaaaab]]¥`ba\_a`\_a`]a`\_^\_\_a]\_\_\_\_Z^]^\_^]]

@HWI-EAS443:3:67:418:746#0/1  
GAGCAATCTTGCAAAGGAGAGAAAGCTAATGTGCTAATT  
+HWI-EAS443:3:67:418:746#0/1  
^W`ba``bb`aa\_Z`X`^bbba]Vaa`\_\_bbaaa\_`]\_b  
@HWI-EAS443:3:67:443:535#0/1  
GAGCAATCTTGCAAAGGAGAGAAAGCTAATGTGCTAATT  
+HWI-EAS443:3:67:443:535#0/1  
abbbbabbbabba^\_abb`aab``aaaaaa\_aaa^`^`  
@HWI-EAS443:3:67:473:131#0/1  
ATCAATGAAGTGAAGCAATCTTGCAAAGGAGAGAAAGCTA  
+HWI-EAS443:3:67:473:131#0/1  
`a``aaaa\_a`a`aaa\_\_``a]\_[``]a]\_`^^]`^\_  
@HWI-EAS443:3:67:485:563#0/1  
GAGCAATCTTGCAAAGGAGAGAAAGCTAATGTGCTAATT  
+HWI-EAS443:3:67:485:563#0/1  
[T`b`[`a^b^`ZaaaaY¥`\_abaYaa`aZZa\_¥^aY`¥^  
@HWI-EAS443:3:67:633:488#0/1  
GCATCAATGAAGTGAAGCAATCTTGCAAAGGAGAGAAAGC  
+HWI-EAS443:3:67:633:488#0/1  
]``Z]J\_aaaaa`W]\_\_\_VZ`]\_`¥`ZI`Y`\_[]^`^\_  
@HWI-EAS443:3:67:644:1567#0/1  
CAATCTTGCAAAGGAGAGAAAGCTAATGTGCTAATTGGG  
+HWI-EAS443:3:67:644:1567#0/1  
\_bba```abba¥a`a^\_]a^\_]ab`aaa\_a`aaaaaa[  
@HWI-EAS443:3:67:711:1278#0/1  
GCAAAGGAGAGAAAGCTAATGTGCTAATTGGGCAAGGGG  
+HWI-EAS443:3:67:711:1278#0/1  
a`WYYa¥][`]XY\_\_SP]^Y`\_[T]¥OUZ^ZPaUZ`YVY  
@HWI-EAS443:3:67:711:760#0/1  
ATCTTGCAAAGGAGAGAAAGCTAATGTGCTAATTGGGCA  
+HWI-EAS443:3:67:711:760#0/1  
aabaaa`^UY¥¥`]`\_¥a`a`^`U\_ZZ]]^X[`]¥T]¥W  
@HWI-EAS443:3:67:992:223#0/1  
ATCTTGCAAAGGAGAGAAAGCTAATGTGCTAATTGGGCA  
+HWI-EAS443:3:67:992:223#0/1  
aU^X`aVSJOLTTUTR]VWU¥TUOSW[UUT]NOVS¥[TOV  
@HWI-EAS443:3:67:995:1734#0/1  
GAGCAATCTTGCAAAGGAGAGAAAGCTAATGTGCTAATT  
+HWI-EAS443:3:67:995:1734#0/1  
aaaabbbbabbababab`\_aabbaaab\_a`ZZ[aaabaa  
@HWI-EAS443:3:68:1043:116#0/1  
AAGCATCAATGAAGTGAAGCAATCTTGCAAAGGAGAGAAA  
+HWI-EAS443:3:68:1043:116#0/1  
aXa`aaa\_baa`b\_aa\_b^`\_a\_aaa\_\_\_\_^`]\_\_`\_`\_\_]  
@HWI-EAS443:3:68:1072:1171#0/1  
AGCTAATGTGCTAATTGGGCAAGGGGACGTAGTGTGGTA  
+HWI-EAS443:3:68:1072:1171#0/1  
a\_[``aabXaaa`aaa`^a`a]^^`^a¥\_¥^`\_a\_\_YY  
@HWI-EAS443:3:68:1183:271#0/1  
CTTGCAAAGGAGAGAAAGCTAATGTGCTAATTGGGCAAG

+HWI-EAS443:3:68:1183:271#0/1  
a¥WZ`b\_aaab][\_aaZ[a`a`a]^b`aa\_¥DV`Z^a\_a  
@HWI-EAS443:3:68:1218:661#0/1  
AGCTAATGTGCTAATTGGGCAAGGGGACGTAGTGTGGTA  
+HWI-EAS443:3:68:1218:661#0/1  
`a[T[bab^)`aa¥abUa\_\_IX¥a`[F[a^\_`\_`\_\_aaRT  
@HWI-EAS443:3:68:1220:686#0/1  
AGCATCAATGAACTGAGCAATCTTGCAAAAGGAGAGAAAG  
+HWI-EAS443:3:68:1220:686#0/1  
^bb¥abT^^Z[`a`\_^aaTNYa``aa\_^S]a\_\_aaa\_Paa  
@HWI-EAS443:3:68:1222:1879#0/1  
GAGCAATCTTGCAAAAGGAGAGAAAGCTAATGTGCTAATT  
+HWI-EAS443:3:68:1222:1879#0/1  
\_```bbbb`^\_abaaabaab\_bba\_\_abaa^Zaaaa\_aa  
@HWI-EAS443:3:68:1293:1543#0/1  
GGAGAGAAAGCTAATGTGCTAATTGGGCAAGGGGACGTAG  
+HWI-EAS443:3:68:1293:1543#0/1  
\_a^ab`TQZa^^Yaa\_V]]KR^a[[]]``a`\_[a^OU`Z^^  
@HWI-EAS443:3:68:1386:1424#0/1  
GCATCAATGAACTGAGCAATCTTGCAAAAGGAGAGAAAGC  
+HWI-EAS443:3:68:1386:1424#0/1  
`bbbbbaabaa`aaaaaba`a`baaaaaYaa`\_\_`a`a```  
@HWI-EAS443:3:68:1470:23#0/1  
GAGCAATCTTGCAAAAGGAGAGAAAGCTAATGTGCTAATT  
+HWI-EAS443:3:68:1470:23#0/1  
`aa^bbbaba¥`a``\_b`\_ba\_b^¥a[``[`a\_a]\_\_]\_`  
@HWI-EAS443:3:68:1542:662#0/1  
AAAGGAGAGAAAGCTAATGTGCTAATTGGGCAAGGGGACG  
+HWI-EAS443:3:68:1542:662#0/1  
\_```baaaaab]aa`ba`aaXa\_a\_aaaa\_a\_a\_a¥a\_\_^a  
@HWI-EAS443:3:68:1547:1364#0/1  
GTCCCCTTGCCCAATTAGCACATTAGCTTTCTCCTTTT  
+HWI-EAS443:3:68:1547:1364#0/1  
a`aaabbbbabababbbabaaababbbaaaaaaaaaa\_aaaa  
@HWI-EAS443:3:68:1625:1212#0/1  
GCATCAATGAACTGAGCAATCTTGCAAAAGGAGAGAAAGC  
+HWI-EAS443:3:68:1625:1212#0/1  
aaabaaabaaa\_b^``aaaa\_aaa\_aaa`a`^`\_aa^\_a¥  
@HWI-EAS443:3:68:1636:492#0/1  
GCATCAATGAACTGAGCAATCTTGCAAAAGGAGAGAAAGC  
+HWI-EAS443:3:68:1636:492#0/1  
aaaa^`\_ba`\_`a`\_\_^`\_`^`a`\_`\_\_a\_Za^a\_X`]`  
@HWI-EAS443:3:68:1668:1897#0/1  
CAATCTTGCAAAAGGAGAGAAAGCTAATGTGCTAATTGGG  
+HWI-EAS443:3:68:1668:1897#0/1  
]R^\_VWQ\_¥`^`¥Z][`U^a`¥^a[TH^Y\_V]a\_¥L^WS  
@HWI-EAS443:3:68:1737:936#0/1  
GAAAGCTAATGTGCTAATTGGGCAAGGGGACGTAGTGTG  
+HWI-EAS443:3:68:1737:936#0/1  
abaaaaaaaaabb`a`baaaaa`\_a`aaa\_^a^^a`^aa

@HWI-EAS443:3:68:240:419#0/1  
GAGAAAGCTAATGTGCTAATTGGGCAAGGGGACGTAGTGT  
+HWI-EAS443:3:68:240:419#0/1  
^\_\_XXYY[]^Z¥\_R`YWYVX¥][[]`^^]Y[^PT¥S¥W  
@HWI-EAS443:3:68:253:322#0/1  
GAAAGCTAATGTGCTAATTGGGCAAGGGGACGTAGTGTG  
+HWI-EAS443:3:68:253:322#0/1  
\_b¥aabbVSaa^aba]aaaaa`aaV`\_`a^Y`Ya]\_[  
@HWI-EAS443:3:68:256:1926#0/1  
CATCAATGAACTGAGCAATCTTGCAAAAGGAGAGAAAGCT  
+HWI-EAS443:3:68:256:1926#0/1  
J]T`^¥`T¥b^¥b\_bbb`bYZbaaTZ`\_¥¥Va` `[Xba  
@HWI-EAS443:3:68:293:1594#0/1  
GAACTGAGCAATCTTGCAAAAGGAGAGAAAGCTAATGTGC  
+HWI-EAS443:3:68:293:1594#0/1  
a\_W\_^`]`bbb\_b`a\_b\_[babaaaba\_a`]a]aa^W\_  
@HWI-EAS443:3:68:311:535#0/1  
GAGAAAGCTAATGTGCTAATTGGGCAAGGGGACGTAGTGT  
+HWI-EAS443:3:68:311:535#0/1  
abbaaba`]`bb\_aaaaaaba`a^\_`aaa^^^U\_a^aV  
@HWI-EAS443:3:68:320:249#0/1  
CAATCTTGCAAAAGGAGAGAAAGCTAATGTGCTAATTGGG  
+HWI-EAS443:3:68:320:249#0/1  
`[\_`aaaba\_]Y`a\_L^\_aa`a`U^¥`a`[\_a^V\_\_\_[V  
@HWI-EAS443:3:68:343:1240#0/1  
GTCCCCTTGCCCAATTAGCACATTAGCTTTCTCCTTTT  
+HWI-EAS443:3:68:343:1240#0/1  
`^bbba`\_`ab\_bbabbabbbbaa\_]abaabaaba\_a`a  
@HWI-EAS443:3:68:435:554#0/1  
GAGCAATCTTGCAAAAGGAGAGAAAGCTAATGTGCTAATT  
+HWI-EAS443:3:68:435:554#0/1  
aaabababaabbaa^^ba`baabaaaa`aa¥aaa\_\_a`  
@HWI-EAS443:3:68:443:288#0/1  
CCTTGCCCAATTAGCACATTAGCTTTCTCCTTTTGCAA  
+HWI-EAS443:3:68:443:288#0/1  
^aaabb`aababaabbabaaba\_aaaaa\_aa\_aaaa\_aaa  
@HWI-EAS443:3:68:460:224#0/1  
ACTGAGCAATCTTGCAAAAGGAGAGAAAGCTAATGTGCTA  
+HWI-EAS443:3:68:460:224#0/1  
a`\_]ZaaaX`a`a]`\_]`\_]a`\_\_\_\_\_^\_[\_]`]^`^^\_  
@HWI-EAS443:3:68:553:480#0/1  
GAGCAATCTTGCAAAAGGAGAGAAAGCTAATGTGCTAATT  
+HWI-EAS443:3:68:553:480#0/1  
aabbabbabbaabaabaaaaababaa`aa\_baa`aaa  
@HWI-EAS443:3:68:578:1889#0/1  
ATCTTGCAAAAGGAGAGAAAGCTAATGTGCTAATTGGGCA  
+HWI-EAS443:3:68:578:1889#0/1  
Z`b`¥X`aab`aa`a]abUaaaaaaaa^\_aaa\_a]^`^Xa`  
@HWI-EAS443:3:68:592:1711#0/1  
GAGCAATCTTGCAAAAGGAGAGAAAGCTAATGTGCTAATT

+HWI-EAS443:3:68:592:1711#0/1  
aaaabbab`abaa`Z^^``\_aaaa]`aa`a`^`\_`a```^  
@HWI-EAS443:3:68:593:923#0/1  
ATCAATGAAGTGGCAATCTTGCAAAGGAGAGAAAGCTA  
+HWI-EAS443:3:68:593:923#0/1  
aba`aaa`b`a`baabaaaaaba`Y¥^a``aa^]a\_`\_`\_`  
@HWI-EAS443:3:68:609:276#0/1  
CGTCCCCTTGCCCAATTAGCACATTAGCTTTCTCCTTT  
+HWI-EAS443:3:68:609:276#0/1  
ababbbbaabbaababbabbaaaaaabaaaaaaaa`\_`\_a  
@HWI-EAS443:3:68:610:967#0/1  
GAGCAATCTTGCAAAGGAGAGAAAGCTAATGTGCTAATT  
+HWI-EAS443:3:68:610:967#0/1  
aY`\_W^aaa``aaa`Z\_U\_aaa``a`\_S¥```^]`^`^¥`\_`  
@HWI-EAS443:3:68:613:1709#0/1  
AGCTAATGTGCTAATTGGGCAAGGGACGTAGTGTGGTA  
+HWI-EAS443:3:68:613:1709#0/1  
¥]`aRWPXDYOT\_PXYa]\_WW¥Z[UUN¥P¥aT]]YXVDH  
@HWI-EAS443:3:68:774:2042#0/1  
GAGCAATCTTGCAAAGGAGAGAAAGCTAATGTGCTAATT  
+HWI-EAS443:3:68:774:2042#0/1  
`abbbabbab\_abbaaab]``bbaaaaaaaaa^aaaaaaaa  
@HWI-EAS443:3:68:788:843#0/1  
AACTGAGCAATCTTGCAAAGGAGAGAAAGCTAATGTGCT  
+HWI-EAS443:3:68:788:843#0/1  
aabbb\_\_ba]baaaba^Z]abaaaa`aaaaa``[`a]aa`  
@HWI-EAS443:3:68:803:1550#0/1  
TCTTGCAAAGGAGAGAAAGCTAATGTGCTAATTGGGCAA  
+HWI-EAS443:3:68:803:1550#0/1  
aaaaaaaaaaaaa^`\_`baaaa\_a`\_aZ````\_`\_`^¥\_`^  
@HWI-EAS443:3:68:80:122#0/1  
GCATCAATGAAGTGGCAATCTTGCAAAGGAGAGAAAGC  
+HWI-EAS443:3:68:80:122#0/1  
aa\_a\_a\_aa`a\_a``a``^a^a``]`^a\_Z\_X`\_]Z\_]`  
@HWI-EAS443:3:68:832:521#0/1  
CAATGAAGTGGCAATCTTGCAAAGGAGAGAAAGCTAAT  
+HWI-EAS443:3:68:832:521#0/1  
`]``\_Z`aaa`a¥TUa\_[aa`a`W]`\_`aaa```\_`^\_Y\_`  
@HWI-EAS443:3:68:88:1795#0/1  
ATCTTGCAAAGGAGAGAAAGCTAATGTGCTAATTGGGCA  
+HWI-EAS443:3:68:88:1795#0/1  
a[`XTYa]P]`RR]ZVYY`OZ]^XOVYX`\_ZU[VZ]WW\_`^  
@HWI-EAS443:3:69:1017:1198#0/1  
GAGAAAGCTAATGTGCTAATTGGGCAAGGGACGTAGTGT  
+HWI-EAS443:3:69:1017:1198#0/1  
a\_[]¥UYZ`]ZbNa`a^a[``]a[Wa]\_]OWa[U`]\_V`  
@HWI-EAS443:3:69:1050:323#0/1  
ATCTTGCAAAGGAGAGAAAGCTAATGTGCTAATTGGGCA  
+HWI-EAS443:3:69:1050:323#0/1  
aMa]Tb\_]XGXZKVa0^`TL¥0^^`\_aYaVYRZ][`^]PP

@HWI-EAS443:3:69:106:988#0/1  
GAGAAAGCTAATGTGCTAATTGGGCAAGGGGACGTAGTGT  
+HWI-EAS443:3:69:106:988#0/1  
a\_aba\_bba`aaa^aaaaa``aaaa`a`\_\_aa^\_\_X\_]`  
@HWI-EAS443:3:69:1090:1053#0/1  
GAGCAATCTTGCAAAGGAGAGAAAGCTAATGTGCTAATT  
+HWI-EAS443:3:69:1090:1053#0/1  
a\_babbbbbbabbbba^abbab\_Ybbabbbbababa`aa  
@HWI-EAS443:3:69:1298:1105#0/1  
ATCAATGAACTGAGCAATCTTGCAAAGGAGAGAAAGCTA  
+HWI-EAS443:3:69:1298:1105#0/1  
\_`ba`\_\_¥]bbb`ba`\_aa`aba¥a\_aa````b]a[S[a`  
@HWI-EAS443:3:69:1305:1565#0/1  
CATCAATGAACTGAGCAATCTTGCAAAGGAGAGAAAGCT  
+HWI-EAS443:3:69:1305:1565#0/1  
aaaaa`\_]`\_aWaa`^aa`^`a[```^```¥`\_`R¥\_\_\_  
@HWI-EAS443:3:69:1393:88#0/1  
ATCAATGAACTGAGCAATCTTGCAAAGGAGAGAAAGCTA  
+HWI-EAS443:3:69:1393:88#0/1  
ababbbaaaabbaabbbbaabbaa`a\_ba\_a`aa`a[```  
@HWI-EAS443:3:69:1401:35#0/1  
CATCAATGAACTGAGCAATCTTGCAAAGGAGAGAAAGCT  
+HWI-EAS443:3:69:1401:35#0/1  
\_\_\_Y`Ybaa¥Z]Xa\_a^a¥a\_\_Y\_]¥aa\_aa\_a^^¥FW  
@HWI-EAS443:3:69:1405:151#0/1  
GAACTGAGCAATCTTGCAAAGGAGAGAAAGCTAATGTGC  
+HWI-EAS443:3:69:1405:151#0/1  
a^```Z¥[\_^Y][aa`\_`\_`\_]`Ya[\_¥VY\_Z^^U[YRZL  
@HWI-EAS443:3:69:1408:608#0/1  
GAGCAATCTTGCAAAGGAGAGAAAGCTAATGTGCTAATT  
+HWI-EAS443:3:69:1408:608#0/1  
a^aa`^`\_`aa`aaaa`Ya`a\_Z]^```Q]T]^`\_\_  
@HWI-EAS443:3:69:142:771#0/1  
AGCAATCTTGCAAAGGAGAGAAAGCTAATGTGCTAATTG  
+HWI-EAS443:3:69:142:771#0/1  
]babbabb`]^`[\_a\_aaa`\_U\_a^P\_aaX`^`X[Y```  
@HWI-EAS443:3:69:1449:1230#0/1  
CAATGAACTGAGCAATCTTGCAAAGGAGAGAAAGCTAAT  
+HWI-EAS443:3:69:1449:1230#0/1  
aa^aZY[``^]Z¥`\_`a^```YX]Z\_\_ZV]a```aa`\_`a`  
@HWI-EAS443:3:69:146:677#0/1  
AATGAACTGAGCAATCTTGCAAAGGAGAGAAAGCTAATG  
+HWI-EAS443:3:69:146:677#0/1  
aaaba`]a^aaa`\_a\_aaaaa¥a\_¥\_aa]a^`^V[]X\_  
@HWI-EAS443:3:69:14:726#0/1  
GAGAAAGCTAATGTGCTAATTGGGCAAGGGGACGTAGTGT  
+HWI-EAS443:3:69:14:726#0/1  
aaa¥UTZ`\_V\_a\_]`a````]\_]X]\_\_^`\_Y`\_UXZW\_X  
@HWI-EAS443:3:69:1507:785#0/1  
TGCAAAGGAGAGAAAGCTAATGTGCTAATTGGGCAAGGG

+HWI-EAS443:3:69:1507:785#0/1  
\_ba`ab¥\_bab`a`^HZ]b\_^`b\_ba\_aaaaa`\_¥^Uaaa  
@HWI-EAS443:3:69:1598:1594#0/1  
CCCTTGCCCAATTAGCACATTAGCTTTCTCTCCTTTTGCA  
+HWI-EAS443:3:69:1598:1594#0/1  
a`aabb`aabbabbaaaaaaba`aaaaaaaa^aaaaaaaa  
@HWI-EAS443:3:69:167:784#0/1  
GCATCAATGAACTGAGCAATCTTGCAAAAGGAGAGAAAAGC  
+HWI-EAS443:3:69:167:784#0/1  
aQRT`]0^a¥a¥Z[]`YZW]aZZ>[]R]X]]\_¥R^^Y\_`T  
@HWI-EAS443:3:69:1685:715#0/1  
ATTAGCTTTCTCTCCTTTTGCAAGATTGCTCAGTTCATTG  
+HWI-EAS443:3:69:1685:715#0/1  
XbbabbabSTXa`R`a```^^[¥N^\_]Y^PZ`Ua[Y\_] ]  
@HWI-EAS443:3:69:1756:1153#0/1  
CATCAATGAACTGAGCAATCTTGCAAAAGGAGAGAAAAGCT  
+HWI-EAS443:3:69:1756:1153#0/1  
Z\_^``\_`a`¥ba^¥T¥b\_`bbb`V¥aa]`SI`\_[^^PRLZ  
@HWI-EAS443:3:69:1757:595#0/1  
GAAAGCTAATGTGCTAATTGGGCAAGGGGACGTAGTGTTG  
+HWI-EAS443:3:69:1757:595#0/1  
abaaaaaabaa`a`a`aaa`\_a``^a^a`^¥a¥]a^a]aa  
@HWI-EAS443:3:69:180:19#0/1  
AGCTAATGTGCTAATTGGGCAAGGGGACGTAGTGTTGGTA  
+HWI-EAS443:3:69:180:19#0/1  
^baZY\_¥aZ]a]]aba]ZZ^¥\_aWOV]¥¥VT^S^Ya^VDL  
@HWI-EAS443:3:69:183:1851#0/1  
AAGCTAATGTGCTAATTGGGCAAGGGGACGTAGTGTTGGT  
+HWI-EAS443:3:69:183:1851#0/1  
a]^b`aaaaZaaaaaaaa\_]a\_] ]][^^\_¥YZ¥Y\_Y`¥^G  
@HWI-EAS443:3:69:286:1555#0/1  
GAAAGCTAATGTGCTAATTGGGCAAGGGGACGTAGTGTTG  
+HWI-EAS443:3:69:286:1555#0/1  
aaY\_abaaaaaX`aaaaa``\_^ba`a^`\_^\_aY]\_Xa]\_\_  
@HWI-EAS443:3:69:287:1354#0/1  
CATCAATGAACTGAGCAATCTTGCAAAAGGAGAGAAAAGCT  
+HWI-EAS443:3:69:287:1354#0/1  
XQX```[]]Z^L^aa^WPNZZ`\_]\_SLJN[HMU[V]GUQN  
@HWI-EAS443:3:69:368:1622#0/1  
GCATCAATGAACTGAGCAATCTTGCAAAAGGAGAGAAAAGC  
+HWI-EAS443:3:69:368:1622#0/1  
aa[``]X¥aa\_]^^Yb\_V¥a`^^`\_TZ\_]^^X\_U^\_\_\_¥  
@HWI-EAS443:3:69:426:1190#0/1  
GTCCCCTTGCCCAATTAGCACATTAGCTTTCTCTCCTTTT  
+HWI-EAS443:3:69:426:1190#0/1  
aabbbaa]]aaaaaaaa`]aaaa```````````````\_^\_`  
@HWI-EAS443:3:69:478:1275#0/1  
AGCTAATGTGCTAATTGGGCAAGGGGACGTAGTGTTGGTA  
+HWI-EAS443:3:69:478:1275#0/1  
YZ`aa`\_`Yabaaaa^Yaa]¥]^`^^a[[]V\_[\_XVOT



@HWI-EAS443:3:69:683:1800#0/1  
GAGCAATCTTGCAAAAGGAGAGAAAGCTAATGTGCTAATT  
+HWI-EAS443:3:69:683:1800#0/1  
abYabb`ba`^^a\_b`aa\_bbbba\_a\_baaaZ\_a^`aaa  
@HWI-EAS443:3:69:769:1647#0/1  
AGCTAATGTGCTAATTGGGCAAGGGGACGTAGTGTGGTA  
+HWI-EAS443:3:69:769:1647#0/1  
`Y^]\_a]a]\_TGUaTRSJU`YQYYX\_] [XGN]G]GNTZPU  
@HWI-EAS443:3:69:792:963#0/1  
AATCTTGCAAAAGGAGAGAAAGCTAATGTGCTAATTGGGC  
+HWI-EAS443:3:69:792:963#0/1  
a\_Ubbaaa^` [W`aVaabaaaa\_`abb\_`\_\_]¥a^]aa`  
@HWI-EAS443:3:69:855:1343#0/1  
ACCAACACTACGTCCCCTTGCCCAATTAGCACATTAGCTT  
+HWI-EAS443:3:69:855:1343#0/1  
^bbb\_abaabaa\_aba\_\_Z`aaYa`a\_\_a\_\_Z\_aa`\_\_  
@HWI-EAS443:3:69:909:1000#0/1  
CATCAATGAACTGAGCAATCTTGCAAAAGGAGAGAAAGCT  
+HWI-EAS443:3:69:909:1000#0/1  
abbababaabbbbbbbbbbbbabbb`aabRaaaa^b\_a  
@HWI-EAS443:3:69:910:1309#0/1  
CATCAATGAACTGAGCAATCTTGCAAAAGGAGAGAAAGCT  
+HWI-EAS443:3:69:910:1309#0/1  
aaaaaaaaaaaa\_`¥aaa`a`\_`a`\_`\_`\_`^` `aX]\_\_\_\_  
@HWI-EAS443:3:69:920:965#0/1  
CCCTTGCCCAATTAGCACATTAGCTTTCTCTCCTTTTGCA  
+HWI-EAS443:3:69:920:965#0/1  
aba\_`abaabbaaa`bbabaaaaba`aaaaa`a`a`aaa  
@HWI-EAS443:3:69:95:1033#0/1  
GAGCAATCTTGCAAAAGGAGAGAAAGCTAATGTGCTAATT  
+HWI-EAS443:3:69:95:1033#0/1  
ZZa¥\_Z]`a\_[QXZ\_]\_TU`aaa`]\_]\_ZP\_] [^^aa`a`  
@HWI-EAS443:3:6:1116:1313#0/1  
GCAAAAGGAGAGAAAGCTAATGTGCTAATTGGGCAAGGGG  
+HWI-EAS443:3:6:1116:1313#0/1  
aaa^^bbaaababaab`a^ [ `bUaZa`\_`aaaa]\_aa` `  
@HWI-EAS443:3:6:1121:235#0/1  
GAAAGCTAATGTGCTAATTGGGCAAGGGGACGTAGTGTG  
+HWI-EAS443:3:6:1121:235#0/1  
abaab`baaab\_b`aa`a`a`a`a^\_\_aa` `]\_aZ^aVaX\_a  
@HWI-EAS443:3:6:1349:1402#0/1  
GAGAAAGCTAATGTGCTAATTGGGCAAGGGGACGTAGTGT  
+HWI-EAS443:3:6:1349:1402#0/1  
\_a`^a`\_LZ\_]`a¥^abX\_a`]V[Q¥\_aa^a]W`V` BBB  
@HWI-EAS443:3:6:1597:1097#0/1  
AGCTAATGTGCTAATTGGGCAAGGGGACGTAGTGTGGTA  
+HWI-EAS443:3:6:1597:1097#0/1  
aababbbba\_Vbabbbbaa\_a`abaaa^baaa\_baabaR\_  
@HWI-EAS443:3:6:1605:150#0/1  
AGCAATCTTGCAAAAGGAGAGAAAGCTAATGTGCTAATTG

+HWI-EAS443:3:6:1605:150#0/1  
\_]Ya]bV¥ba`YZ\_Ua^G`aa`Y¥aUa[^`Y^[GZ]X\_[X  
@HWI-EAS443:3:6:1630:376#0/1  
GAGCAATCTTGCAAAAAGGAGAGAAAGCTAATGTGCTAATT  
+HWI-EAS443:3:6:1630:376#0/1  
aY^Yb`a\_[bb`Iaa]UYXa\_baa^Y\_aa\_aaXaZ]^`^a\_  
@HWI-EAS443:3:6:1765:1082#0/1  
ACCAACACTACGTCCCCTTGCCCAATTAGCACATTAGCTT  
+HWI-EAS443:3:6:1765:1082#0/1  
a\_Yba\_baba¥b^^`U]^`a\_]`^`^`¥\_X\_\_\_\_\_X^^  
@HWI-EAS443:3:6:195:982#0/1  
ATGAACTGAGCAATCTTGCAAAAAGGAGAGAAAGCTAATGT  
+HWI-EAS443:3:6:195:982#0/1  
aaaaaaaa\_Y\_^\_Aa`bZaa]T`[Y¥^ba`^`Y^`^IW`B  
@HWI-EAS443:3:6:279:1400#0/1  
AAGCATCAATGAACTGAGCAATCTTGCAAAAAGGAGAGAAA  
+HWI-EAS443:3:6:279:1400#0/1  
`b\_aabb`b[\_aaaa`aaaa`¥¥D[```^`a`a`aaaa  
@HWI-EAS443:3:6:282:1206#0/1  
GAAAGCTAATGTGCTAATTGGGCAAGGGGACGTAGTGTG  
+HWI-EAS443:3:6:282:1206#0/1  
ab]abaaabbbU`]aa`aa`aaa^`aa`^`^`^SuaWa\_¥a  
@HWI-EAS443:3:6:430:946#0/1  
AATGAACTGAGCAATCTTGCAAAAAGGAGAGAAAGCTAATG  
+HWI-EAS443:3:6:430:946#0/1  
\_bab\_aaaa\_bZabX\_aYbaa`[aaaababa[ab`a`\_\_a  
@HWI-EAS443:3:6:459:242#0/1  
AGGAGAGAAAGCTAATGTGCTAATTGGGCAAGGGGACGTA  
+HWI-EAS443:3:6:459:242#0/1  
aaaX¥]\_bbX\_a[bab\_bbaaaSaa\_P\_Z\_Za¥U\_Ya\_T¥  
@HWI-EAS443:3:6:512:1865#0/1  
AAGCTAATGTGCTAATTGGGCAAGGGGACGTAGTGTGTTGGT  
+HWI-EAS443:3:6:512:1865#0/1  
aXV]\_`[JZUaa[a\_]a]a\_\_\_a[```^`ZSaYP[WR`G  
@HWI-EAS443:3:6:685:1611#0/1  
GAGCAATCTTGCAAAAAGGAGAGAAAGCTAATGTGCTAATT  
+HWI-EAS443:3:6:685:1611#0/1  
^]YYN^]\_[U¥`S^QYN[^V\_¥UX^YRZ`b^\_L\_X¥]^`ab  
@HWI-EAS443:3:6:68:1106#0/1  
AATGAACTGAGCAATCTTGCAAAAAGGAGAGAAAGCTAATG  
+HWI-EAS443:3:6:68:1106#0/1  
ab\_Tab\_¥V^aa`b¥Q¥\_[Yaa`JaXaaaa`]U]S`^]\_X  
@HWI-EAS443:3:6:719:1830#0/1  
ATGAACTGAGCAATCTTGCAAAAAGGAGAGAAAGCTAATGT  
+HWI-EAS443:3:6:719:1830#0/1  
`a[¥¥¥`X[¥IaXa\_`a^aX\_W`aI¥\_\_^`^\_J\_\_^`\_BB  
@HWI-EAS443:3:6:785:2037#0/1  
GAGAAAGCTAATGTGCTAATTGGGCAAGGGGACGTAGTGT  
+HWI-EAS443:3:6:785:2037#0/1  
aaabaaa`aa[`]Saaa```a\_\_\_\_\_^`a\_]aV`Z]aWBB

@HWI-EAS443:3:6:857:680#0/1  
ACGTCCCCTTGCCCAATTAGCACATTAGCTTTCTCTCCTT  
+HWI-EAS443:3:6:857:680#0/1  
\_`aaa[\_^b`a`a`^a`a^^`Saaa`a\_a`aZaYa\_]a\_  
@HWI-EAS443:3:6:89:1164#0/1  
GAACTGAGCAATCTTGCAAAAGGAGAGAAAGCTAATGTGC  
+HWI-EAS443:3:6:89:1164#0/1  
a¥a`aaaa\_aaaaaa\_```\_\_a^aa]aa\_a]aaa^\_0`]  
@HWI-EAS443:3:6:931:2014#0/1  
CATCAATGAACTGAGCAATCTTGCAAAAGGAGAGAAAGCT  
+HWI-EAS443:3:6:931:2014#0/1  
abbababbbbaa`ba`bbbbbab\_bbbbb`abbbba`b[a  
@HWI-EAS443:3:6:94:1201#0/1  
GCAAAAGGAGAGAAAGCTAATGTGCTAATTGGGCAAGGGG  
+HWI-EAS443:3:6:94:1201#0/1  
abaabbbba`baba`a`bbaab\_a`aaaaab[a``\_a`a\_  
@HWI-EAS443:3:6:961:20#0/1  
AGCTAATGTGCTAATTGGGCAAGGGGACGTAGTGTGGTA  
+HWI-EAS443:3:6:961:20#0/1  
`bbabaa`aa¥b]abbabYD[`baaa[^bZYaNbQ\_bBBB  
@HWI-EAS443:3:6:975:983#0/1  
CATCAATGAACTGAGCAATCTTGCAAAAGGAGAGAAAGCT  
+HWI-EAS443:3:6:975:983#0/1  
ab¥Uaa]`aa\_bb\_aa\_LW[aa`^¥a\_]a``aaa`a\_\_Z^  
@HWI-EAS443:3:70:1032:1913#0/1  
GCATCAATGAACTGAGCAATCTTGCAAAAGGAGAGAAAGC  
+HWI-EAS443:3:70:1032:1913#0/1  
ab¥R`^Y¥`^``]aaaZ¥V¥\_a[YR[[aaa[¥aaab`]]`W  
@HWI-EAS443:3:70:1067:729#0/1  
CATCAATGAACTGAGCAATCTTGCAAAAGGAGAGAAAGCT  
+HWI-EAS443:3:70:1067:729#0/1  
a\_^baabbb¥Zbbabbbbbbba\_]\_`aaabb`aa``a  
@HWI-EAS443:3:70:1100:124#0/1  
GCATCAATGAACTGAGCAATCTTGCAAAAGGAGAGAAAGC  
+HWI-EAS443:3:70:1100:124#0/1  
a[¥\_Y\_]aa]a^\_a^`W`^Z^`\_]^^]Z\_\_Ua^\_]^^^X  
@HWI-EAS443:3:70:117:567#0/1  
GTCCCCTTGCCCAATTAGCACATTAGCTTTCTCTCCTTTT  
+HWI-EAS443:3:70:117:567#0/1  
ZMRN\_\_QQR¥R\_PXS[L`^a`\_^LMT0a^X]ZUYSUUR¥  
@HWI-EAS443:3:70:1318:617#0/1  
TGAGCAATCTTGCAAAAGGAGAGAAAGCTAATGTGCTAAT  
+HWI-EAS443:3:70:1318:617#0/1  
^]Jab[Wabb`\_WX]^Xbb[aaaba]`¥`^Zab`a]a`aa  
@HWI-EAS443:3:70:1324:818#0/1  
GAACTGAGCAATCTTGCAAAAGGAGAGAAAGCTAATGTGC  
+HWI-EAS443:3:70:1324:818#0/1  
aab\_baabab`babaaa^aa\_baaaabb``aaa\_aba^aX  
@HWI-EAS443:3:70:1434:1924#0/1  
AGCACATTAGCTTTCTCTCCTTTTGAAGATTGCTCAGTT

+HWI-EAS443:3:70:1434:1924#0/1  
a`baabaa`bbbaa]`Y`aaaaaa`aa`\_a``ZZ^\_``¥`  
@HWI-EAS443:3:70:1586:291#0/1  
AAGGAGAGAAAAGCTAATGTGCTAATTGGGCAAGGGGACGT  
+HWI-EAS443:3:70:1586:291#0/1  
ab`bbbbbbbababbbbababbbba``^aaabbbba\_b^  
@HWI-EAS443:3:70:1587:1688#0/1  
AAGCATCAATGAACTGAGCAATCTTGCAAAAGGAGAGAAA  
+HWI-EAS443:3:70:1587:1688#0/1  
aa^a`a`a`aaa`a¥`\_aa`aaa``\_\_\_\_[a¥¥`^`\_\_^  
@HWI-EAS443:3:70:1614:1892#0/1  
ATCTTGCAAAAGGAGAGAAAAGCTAATGTGCTAATTGGGCA  
+HWI-EAS443:3:70:1614:1892#0/1  
aaaaabba^^aa`^aaaa\_a\_a\_a^Z`\_a``\_a`\_^^\_  
@HWI-EAS443:3:70:1691:664#0/1  
AGCTAATGTGCTAATTGGGCAAGGGGACGTAGTGTTGGTA  
+HWI-EAS443:3:70:1691:664#0/1  
\_ZS`b`bb`^`b]bbaa`a`\_]a[VZUZb\_W`Ra`ba`UE  
@HWI-EAS443:3:70:1772:337#0/1  
CTTGCAAAAGGAGAGAAAAGCTAATGTGCTAATTGGGCAAG  
+HWI-EAS443:3:70:1772:337#0/1  
ab`bbba\_baabbabbbb`bbbbbababbbbabbbbaaaa  
@HWI-EAS443:3:70:25:988#0/1  
AGCTAATGTGCTAATTGGGCAAGGGGACGTAGTGTTGGTA  
+HWI-EAS443:3:70:25:988#0/1  
`aaa^`^]Vaa]aa`\_aa`aX`¥`\_\_[\_V[ZQ]V[]ZRR  
@HWI-EAS443:3:70:434:1902#0/1  
AGCTAATGTGCTAATTGGGCAAGGGGACGTAGTGTTGGTA  
+HWI-EAS443:3:70:434:1902#0/1  
a¥b`abaW¥aaa\_W\_\_U]Ya¥0[UU\_\_`YP^\_RWZ\_¥SR]  
@HWI-EAS443:3:70:528:191#0/1  
CTTGCAAAAGGAGAGAAAAGCTAATGTGCTAATTGGGCAAG  
+HWI-EAS443:3:70:528:191#0/1  
aa`b`^M[Wa^^aZ`\_]Ub`]^a\_aY`a`a`aa`^`a^`\_  
@HWI-EAS443:3:70:584:1556#0/1  
ATCTTGCAAAAGGAGAGAAAAGCTAATGTGCTAATTGGGCA  
+HWI-EAS443:3:70:584:1556#0/1  
aaaa`aba`^`a\_aaaa`[aaaaa\_`[`aaa````\_\_\_\_`  
@HWI-EAS443:3:70:673:393#0/1  
CAATGAACTGAGCAATCTTGCAAAAGGAGAGAAAAGCTAAT  
+HWI-EAS443:3:70:673:393#0/1  
aZbbbabbbb`bbbbabbbbaaa\_abb`abbbbababaaa  
@HWI-EAS443:3:70:758:818#0/1  
GCATCAATGAACTGAGCAATCTTGCAAAAGGAGAGAAAAGC  
+HWI-EAS443:3:70:758:818#0/1  
V[WLY`\_UZ`Y\_a¥W[\_SZ``aaba¥TK`XX`\_b`^]AT  
@HWI-EAS443:3:70:888:1120#0/1  
AACTGAGCAATCTTGCAAAAGGAGAGAAAAGCTAATGTGCT  
+HWI-EAS443:3:70:888:1120#0/1  
abab]aaa`abaaaab`Q^]a]\_baab¥aaaaaabW`[a

@HWI-EAS443:3:70:925:1970#0/1  
GAGCAATCTTGCAAAAGGAGAGAAAGCTAATGTGCTAATT  
+HWI-EAS443:3:70:925:1970#0/1  
¥[`Y\_\_aaa[`ba\_aaa`ZabU¥U¥aa[]YZZXaa^aba^  
@HWI-EAS443:3:70:934:1830#0/1  
CATCAATGAACTGAGCAATCTTGCAAAAGGAGAGAAAGCT  
+HWI-EAS443:3:70:934:1830#0/1  
abaaaa`a`aa`aaaaaaaa`aa``\_`\_\_^\_a\_a`\_`[\_  
@HWI-EAS443:3:71:1300:728#0/1  
AATGAACTGAGCAATCTTGCAAAAGGAGAGAAAGCTAATG  
+HWI-EAS443:3:71:1300:728#0/1  
aaa`\_`aba`babbbabab\_aa^I^b\_`aaZ`a`S^b^`a  
@HWI-EAS443:3:71:1315:338#0/1  
CAAAAGGAGAGAAAGCTAATGTGCTAATTGGGCAAGGGGA  
+HWI-EAS443:3:71:1315:338#0/1  
`W¥Q\_[aZXX`Z]X\_`¥OWV```YURU¥R^[^a[[Y\_WYP  
@HWI-EAS443:3:71:1340:838#0/1  
CATCAATGAACTGAGCAATCTTGCAAAAGGAGAGAAAGCT  
+HWI-EAS443:3:71:1340:838#0/1  
^¥aba¥bbbbbbbababbbbaaab¥a\_[`bb`b`aba\_ba`  
@HWI-EAS443:3:71:1363:892#0/1  
AATTAGCACATTAGCTTTCTCTCCTTTTGCAAGATTGCTC  
+HWI-EAS443:3:71:1363:892#0/1  
`ba^ababbbbaaWba\_aba``\_aaba[aYa^a¥a¥\_\_U  
@HWI-EAS443:3:71:1376:1277#0/1  
AAGCTAATGTGCTAATTGGGCAAGGGGACGTAGTGTGGT  
+HWI-EAS443:3:71:1376:1277#0/1  
a``aaabbb^aaaaabaaaa\_aaaa`\_`a^`a]`Xaa]G  
@HWI-EAS443:3:71:1391:1579#0/1  
GAAAGCTAATGTGCTAATTGGGCAAGGGGACGTAGTGTGGT  
+HWI-EAS443:3:71:1391:1579#0/1  
a`baababaabWa\_b\_aaa`aaaa\_\_]]`\_aa\_`aU\_W[`  
@HWI-EAS443:3:71:1408:1288#0/1  
GCATCAATGAACTGAGCAATCTTGCAAAAGGAGAGAAAGC  
+HWI-EAS443:3:71:1408:1288#0/1  
Z\_¥`bb```¥`[a\_\_baabbb[¥\_]Z¥b^babbaa^\_`U  
@HWI-EAS443:3:71:1443:67#0/1  
GAGCAATCTTGCAAAAGGAGAGAAAGCTAATGTGCTAATT  
+HWI-EAS443:3:71:1443:67#0/1  
a\_bbbbbbbbbb]aaaabbababaaab`baabbab\_b``aa  
@HWI-EAS443:3:71:1652:1291#0/1  
CCCTTGCCCAATTAGCACATTAGCTTTCTCTCCTTTTGCA  
+HWI-EAS443:3:71:1652:1291#0/1  
`aaZS\_¥`[SY]aaab`aaa^a```b`aabaaaa\_bb`aa  
@HWI-EAS443:3:71:1657:1798#0/1  
GCATCAATGAACTGAGCAATCTTGCAAAAGGAGAGAAAGC  
+HWI-EAS443:3:71:1657:1798#0/1  
a`UZbaZQJOU]]XT``\_``^`]VTUZ[[a^W`\_a[000S  
@HWI-EAS443:3:71:1671:967#0/1  
AGCACATTAGCTTTCTCTCCTTTTGCAAGATTGCTCAGTT

+HWI-EAS443:3:71:1671:967#0/1  
^¥a^Rabbbab^¥b[¥aa\_a`\_b]baaZW`a`b`aaaaY`  
@HWI-EAS443:3:71:1697:814#0/1  
GAAAGCTAATGTGCTAATTGGGCAAGGGGACGTAGTGTG  
+HWI-EAS443:3:71:1697:814#0/1  
]VVS]S]YaaaNZ^b[Q\_Uaa]^¥\_bba`ZZaaYbXa\_]\_  
@HWI-EAS443:3:71:1752:946#0/1  
CTTGCAAAAAGGAGAGAAAGCTAATGTGCTAATTGGGCAAG  
+HWI-EAS443:3:71:1752:946#0/1  
[`bba\_\_^TV\_T¥U`````[`]aab]b^b[Z`b]^VW[`  
@HWI-EAS443:3:71:1772:1586#0/1  
GAGCAATCTTGCAAAAAGGAGAGAAAGCTAATGTGCTAATT  
+HWI-EAS443:3:71:1772:1586#0/1  
a`¥`b\_^b[b`b`ab]^S]aa\_aa^babaa`^`aa`a\_a\_  
@HWI-EAS443:3:71:233:858#0/1  
CTGAGCAATCTTGCAAAAAGGAGAGAAAGCTAATGTGCTAA  
+HWI-EAS443:3:71:233:858#0/1  
a\_YVY`Y\_`aaaa`W[WZ[X[`\_\_UY`^Z^¥`\_^]^`\_]  
@HWI-EAS443:3:71:249:1333#0/1  
AGCTAATGTGCTAATTGGGCAAGGGGACGTAGTGTGGTA  
+HWI-EAS443:3:71:249:1333#0/1  
aaaaaaaa`[`aaXaa`\_a\_a`\_a\_Y\_`^`\_W^`\_]\_^\_]U^  
@HWI-EAS443:3:71:263:820#0/1  
GAAAGCTAATGTGCTAATTGGGCAAGGGGACGTAGTGTG  
+HWI-EAS443:3:71:263:820#0/1  
ab`S^aaYQaa\_]aa\_¥a`^`^[`Y\_a``\_]`^a\_W`W\_`^`\_  
@HWI-EAS443:3:71:282:1580#0/1  
GAGCAATCTTGCAAAAAGGAGAGAAAGCTAATGTGCTAATT  
+HWI-EAS443:3:71:282:1580#0/1  
^Z¥\_WabbbbbbaXab]\_^`\_\_`b¥b`¥W^`^bbaaba`  
@HWI-EAS443:3:71:356:1440#0/1  
CATCAATGAAGTACTGAGCAATCTTGCAAAAAGGAGAGAAAGCT  
+HWI-EAS443:3:71:356:1440#0/1  
aaZ`Qab^^`\_]`¥J]a\_J^Y]`\_\_]TF\_[[]]Z]\_a¥Y^\_\_  
@HWI-EAS443:3:71:357:1555#0/1  
GCATCAATGAAGTACTGAGCAATCTTGCAAAAAGGAGAGAAAGCT  
+HWI-EAS443:3:71:357:1555#0/1  
aaY]a`]O¥RK\_aaabb`V`aXM[¥[\_]Z]\_a^\_¥`````  
@HWI-EAS443:3:71:430:1562#0/1  
AAGCATCAATGAAGTACTGAGCAATCTTGCAAAAAGGAGAGAAA  
+HWI-EAS443:3:71:430:1562#0/1  
`a\_baab[¥`^Z`a\_¥Z¥aa][a\_\_\_a[HW[P]^`\_]`T]  
@HWI-EAS443:3:71:432:1067#0/1  
AGGAGAGAAAGCTAATGTGCTAATTGGGCAAGGGGACGTA  
+HWI-EAS443:3:71:432:1067#0/1  
]^aURRaa[WZ\_^[b]NM¥``¥^]\_\_aaaa]a[]X^`¥ZZ  
@HWI-EAS443:3:71:452:1019#0/1  
GAGAAAGCTAATGTGCTAATTGGGCAAGGGGACGTAGTGT  
+HWI-EAS443:3:71:452:1019#0/1  
^^^Z]aba^]]`]]aaaa`a\_¥``^`\_]^^a`Q]^X^`

@HWI-EAS443:3:71:461:742#0/1  
GAGCAATCTTGCAAAGGAGAGAAAGCTAATGTGCTAATT  
+HWI-EAS443:3:71:461:742#0/1  
VVab`Ybbbaba\_`a[abababa¥Z^aa^T¥aUaaa``aZ  
@HWI-EAS443:3:71:463:1153#0/1  
AGCAATCTTGCAAAGGAGAGAAAGCTAATGTGCTAATTG  
+HWI-EAS443:3:71:463:1153#0/1  
\_]`bbaba\_¥`b^a^]a]S¥a`[`aba\_K\_a\_aaaaa`a]  
@HWI-EAS443:3:71:648:969#0/1  
AAAGCTAATGTGCTAATTGGGCAAGGGGACGTAGTGTTGG  
+HWI-EAS443:3:71:648:969#0/1  
a\_^a\_]SS`a]a`ZP\_a\_`¥Z`[\_a`\_]`a]`\_Y`Y^W  
@HWI-EAS443:3:71:64:436#0/1  
GAAAGCTAATGTGCTAATTGGGCAAGGGGACGTAGTGTTG  
+HWI-EAS443:3:71:64:436#0/1  
Y¥`Saba`[abY`baa]aaa¥Z\_a¥`Yaa\_aa[\_\_\_Rb]\_`  
@HWI-EAS443:3:72:1109:1880#0/1  
AACTGAGCAATCTTGCAAAGGAGAGAAAGCTAATGTGCT  
+HWI-EAS443:3:72:1109:1880#0/1  
]aaa`a`aaaaaa\_aaaaaaY^`a`a\_\_aa``\_^^Y\_]\_  
@HWI-EAS443:3:72:1163:846#0/1  
ATCTTGCAAAGGAGAGAAAGCTAATGTGCTAATTGGGCA  
+HWI-EAS443:3:72:1163:846#0/1  
¥Zaa\_a`a`^abababbbaaaaaa\_]a`bab``\_]\_\_^  
@HWI-EAS443:3:72:1188:922#0/1  
ATCTTGCAAAGGAGAGAAAGCTAATGTGCTAATTGGGCA  
+HWI-EAS443:3:72:1188:922#0/1  
\_¥baabb]b¥¥¥bXY¥bba`a`ababbGaba``aa`\_aU`  
@HWI-EAS443:3:72:1274:817#0/1  
GTCCCCTTGCCCAATTAGCACATTAGCTTTCTCTCCTTTT  
+HWI-EAS443:3:72:1274:817#0/1  
`a```aaaa\_H]aa`\_a\_\_a]`a`a``aaa`a^`\_]\_\_`\_  
@HWI-EAS443:3:72:1279:521#0/1  
AAGCATCAATGAACTGAGCAATCTTGCAAAGGAGAGAAA  
+HWI-EAS443:3:72:1279:521#0/1  
aaaaaaaa\_bb\_a^\_`b^]aa\_\_`a]`^\_Ya`^a`a\_S[  
@HWI-EAS443:3:72:1386:56#0/1  
AGCAATCTTGCAAAGGAGAGAAAGCTAATGTGCTAATTG  
+HWI-EAS443:3:72:1386:56#0/1  
]\_Z\_baabbbb`Maaabbaab\_baa\_b^`bb¥bVaaaaaa  
@HWI-EAS443:3:72:1470:928#0/1  
CTTGCAAAGGAGAGAAAGCTAATGTGCTAATTGGGCAAG  
+HWI-EAS443:3:72:1470:928#0/1  
]KabTV`bbaa^bba`bbbTbab`aab`bbbbba`b¥0\_\_  
@HWI-EAS443:3:72:1507:1954#0/1  
AAGCATCAATGAACTGAGCAATCTTGCAAAGGAGAGAAA  
+HWI-EAS443:3:72:1507:1954#0/1  
aYN¥`aaba`]`YXJY]aa`Q0][]RVY\_^U``^¥^a]`  
@HWI-EAS443:3:72:151:1973#0/1  
GAAAGCTAATGTGCTAATTGGGCAAGGGGACGTAGTGTTG

+HWI-EAS443:3:72:151:1973#0/1  
aabbabb`ba^]bb\_abaaaa\_bbaTaaa`a[]\_`¥[U¥\_  
@HWI-EAS443:3:72:1552:18#0/1  
GAGAAAGCTAATGTGCTAATTGGGCAAGGGGACGTAGTGT  
+HWI-EAS443:3:72:1552:18#0/1  
a¥`¥^[`¥]^Z¥]Z`¥a[Z^¥¥Q¥¥RUN]]^^SM^XX\_Y\_V  
@HWI-EAS443:3:72:1556:119#0/1  
CATCAATGAACTGAGCAATCTTGCAAAAAGGAGAGAAAGCT  
+HWI-EAS443:3:72:1556:119#0/1  
^b`aabbb`b¥aa`aab`bbb`aaa^aabb`babb`a^¥a  
@HWI-EAS443:3:72:1614:1055#0/1  
GTCCCCTTGCCCAATTAGCACATTAGCTTTCTCTCCTTTT  
+HWI-EAS443:3:72:1614:1055#0/1  
\_]Zaaab```¥`aaaaaaaaaaaa``[aaa`b]a`^]a`a  
@HWI-EAS443:3:72:167:265#0/1  
GAAAGCTAATGTGCTAATTGGGCAAGGGGACGTAGTGTTG  
+HWI-EAS443:3:72:167:265#0/1  
abaaaaaZ`aaZ`\_a\_``aa```\_]\_\_\_\_\_]^\_YY`Z`Z\_\_  
@HWI-EAS443:3:72:1713:1942#0/1  
CAATGAACTGAGCAATCTTGCAAAAAGGAGAGAAAGCTAAT  
+HWI-EAS443:3:72:1713:1942#0/1  
a¥W`ZX`[aaQF0b¥^ab¥a]VaVTPH\_HTVabXXJSaaa  
@HWI-EAS443:3:72:1752:1651#0/1  
AGCAATCTTGCAAAAAGGAGAGAAAGCTAATGTGCTAATTG  
+HWI-EAS443:3:72:1752:1651#0/1  
Sa`ba]^¥[]\_\_¥Q0^¥XQ]0¥[\_b`¥RV¥\_[VZYQ`[N^  
@HWI-EAS443:3:72:180:401#0/1  
GAAAGCTAATGTGCTAATTGGGCAAGGGGACGTAGTGTTG  
+HWI-EAS443:3:72:180:401#0/1  
abbbbaabaab^aaaa`a`a`aaa\_a```\_]``Z^aY\_X\_a  
@HWI-EAS443:3:72:447:1601#0/1  
GCATCAATGAACTGAGCAATCTTGCAAAAAGGAGAGAAAGC  
+HWI-EAS443:3:72:447:1601#0/1  
^^JWaaY^PX^aZX¥S^aaa\_[[aaZ[L\_^Z\_`a\_`ZZ¥a  
@HWI-EAS443:3:72:464:1573#0/1  
GCAATCTTGCAAAAAGGAGAGAAAGCTAATGTGCTAATTGG  
+HWI-EAS443:3:72:464:1573#0/1  
¥\_OW\_`a\_^aWZX^X`^¥^^\_RUX`]¥ZZTZ¥]`]¥^^^  
@HWI-EAS443:3:72:483:186#0/1  
GAGCAATCTTGCAAAAAGGAGAGAAAGCTAATGTGCTAATT  
+HWI-EAS443:3:72:483:186#0/1  
^abbbabbbbbbabb`bbbbaba`aaaa\_Z^aa``aa  
@HWI-EAS443:3:72:655:1026#0/1  
CATCAATGAACTGAGCAATCTTGCAAAAAGGAGAGAAAGCT  
+HWI-EAS443:3:72:655:1026#0/1  
a``aabaa``aaaaaaaaaaaaaba`a`aaaaaaaa```a  
@HWI-EAS443:3:72:724:1122#0/1  
GAGAAAGCTAATGTGCTAATTGGGCAAGGGGACGTAGTGT  
+HWI-EAS443:3:72:724:1122#0/1  
^¥`bbbb`bZ\_¥b]ba]]W]^`^baa`^`aa`R\_a]Z]Xa[



@HWI-EAS443:3:72:791:1451#0/1  
CATCAATGAACTGAGCAATCTTGCAAAAAGGAGAGAAAGCT  
+HWI-EAS443:3:72:791:1451#0/1  
aaZZN[RWGXaSQWR^Z`Z`ZWRZV¥U]JNQZ\_\_ZGVSUT  
@HWI-EAS443:3:72:805:1772#0/1  
CATCAATGAACTGAGCAATCTTGCAAAAAGGAGAGAAAGCT  
+HWI-EAS443:3:72:805:1772#0/1  
aa\_aaaa`\_]a¥Z¥`\_X]^`Z``a``a[````\_\_\_\_\_

@HWI-EAS443:3:72:841:1830#0/1  
AAAGCTAATGTGCTAATTGGGCAAGGGGACGTAGTGTTGG  
+HWI-EAS443:3:72:841:1830#0/1  
abb`aa\_a`]]¥aaa\_\_a][^`¥^]a\_\_a]]WTT\_U^\_W  
@HWI-EAS443:3:72:853:127#0/1  
GAAAGCTAATGTGCTAATTGGGCAAGGGGACGTAGTGTTG  
+HWI-EAS443:3:72:853:127#0/1  
Z``aa[a[b`RW]\_UZba`\_XQ]R`abaWYaTDY]a^\_b  
@HWI-EAS443:3:72:882:1801#0/1  
GAGCAATCTTGCAAAAAGGAGAGAAAGCTAATGTGCTAATT  
+HWI-EAS443:3:72:882:1801#0/1  
Z¥`[\_bbaa¥WbaaVbabYa`[ababbbbaaaaUQXaaU  
@HWI-EAS443:3:73:1028:884#0/1  
GAGCAATCTTGCAAAAAGGAGAGAAAGCTAATGTGCTAATT  
+HWI-EAS443:3:73:1028:884#0/1  
a^XaZY0\_¥Z¥Z`aaa`]Qb`b^]¥T^Ta`Y\_^\_aS][  
@HWI-EAS443:3:73:1095:1064#0/1  
ATCTTGCAAAAAGGAGAGAAAGCTAATGTGCTAATTGGGCA  
+HWI-EAS443:3:73:1095:1064#0/1  
abababbaabaaaabb`aZ`a`aaaa`a`ba^a`a`aa]  
@HWI-EAS443:3:73:1098:1880#0/1  
GAGCAATCTTGCAAAAAGGAGAGAAAGCTAATGTGCTAATT  
+HWI-EAS443:3:73:1098:1880#0/1  
Ua\_bbbabbaaa^aab`bUa`bbaa\_aaaaaa\_ba^aa`a  
@HWI-EAS443:3:73:1246:725#0/1  
CATCAATGAACTGAGCAATCTTGCAAAAAGGAGAGAAAGCT  
+HWI-EAS443:3:73:1246:725#0/1  
\_bab`aaabaa`[\_a`baa\_aaaaa]^aba\_aaaa`\_aZa  
@HWI-EAS443:3:73:1263:578#0/1  
GAGCAATCTTGCAAAAAGGAGAGAAAGCTAATGTGCTAATT  
+HWI-EAS443:3:73:1263:578#0/1  
`ZV`X[WS\_\_a`^T][^RUa^W]UZS\_Q[]TWTXR^ZU^G  
@HWI-EAS443:3:73:149:1803#0/1  
CATCAATGAACTGAGCAATCTTGCAAAAAGGAGAGAAAGCT  
+HWI-EAS443:3:73:149:1803#0/1  
aa`aa^]\_\_¥\_`^`\_aa`\_`^^^\_`]X][X]^`^^Z^Z]  
@HWI-EAS443:3:73:1541:1204#0/1  
GCATCAATGAACTGAGCAATCTTGCAAAAAGGAGAGAAAGC  
+HWI-EAS443:3:73:1541:1204#0/1  
aR\_aSX]^W`Y¥^^\_[[YY`]\_Xa^PSYTX]Z^[^]RT`W  
@HWI-EAS443:3:73:1687:1472#0/1  
GCAATCTTGCAAAAAGGAGAGAAAGCTAATGTGCTAATTGG

+HWI-EAS443:3:73:1687:1472#0/1  
a`b\_`aaaba[``aba^`X`a`\_a\_a\_\_`a]^\_``^a\_\_\_\_  
@HWI-EAS443:3:73:1693:331#0/1  
GAGAAAGCTAATGTGCTAATTGGGCAAGGGGACGTAGTGT  
+HWI-EAS443:3:73:1693:331#0/1  
^``a\_]``]aaaab\_`Y`a`aab^]``\_aa\_W]\_a`\_aRa]  
@HWI-EAS443:3:73:173:1673#0/1  
GAGCAATCTTGCAAAAGGAGAGAAAGCTAATGTGCTAATT  
+HWI-EAS443:3:73:173:1673#0/1  
\_`ab`[ab``aabb`b`a[````ba`b`bbbabbba`aa  
@HWI-EAS443:3:73:220:1554#0/1  
AAGCATCAATGAACTGAGCAATCTTGCAAAAGGAGAGAAA  
+HWI-EAS443:3:73:220:1554#0/1  
aa^YUTaaa`\_Z\_a\_]``a^W¥\_\_¥YQIU]X^S\_W[Ya^T  
@HWI-EAS443:3:73:281:381#0/1  
CATCAATGAACTGAGCAATCTTGCAAAAGGAGAGAAAGCT  
+HWI-EAS443:3:73:281:381#0/1  
aVb]TSZ]``]HYZ[``baa^`¥S\_`Z[``YLH``aa]XX\_RU  
@HWI-EAS443:3:73:301:1683#0/1  
GAAAGCTAATGTGCTAATTGGGCAAGGGGACGTAGTGTG  
+HWI-EAS443:3:73:301:1683#0/1  
Xba\_^\_abba\_U^aaa[Ya¥UWba\_a\_`\_\_\_\_`Q\_\_ZaY¥`  
@HWI-EAS443:3:73:338:1260#0/1  
ATCTTGCAAAAGGAGAGAAAGCTAATGTGCTAATTGGGCA  
+HWI-EAS443:3:73:338:1260#0/1  
`\_baa`[\_`¥`\_`XJaaaaYZ\_ZZ¥\_`^`0\_`\_Y\_Y\_\_\_\_\_^^  
@HWI-EAS443:3:73:381:435#0/1  
GTCCCCTTGCCCAATTAGCACATTAGCTTTCTCTCCTTTT  
+HWI-EAS443:3:73:381:435#0/1  
a`aa`^``^``^``aabaa\_a\_\_a`a`a`a`a`\_`aaa\_\_a```  
@HWI-EAS443:3:73:385:1434#0/1  
GAAAGCTAATGTGCTAATTGGGCAAGGGGACGTAGTGTG  
+HWI-EAS443:3:73:385:1434#0/1  
abba`\_ababbaaaabaaaa\_abb¥]\_a\_\_aa^`\_]``]``  
@HWI-EAS443:3:73:409:1385#0/1  
AGCTAATGTGCTAATTGGGCAAGGGGACGTAGTGTGGTA  
+HWI-EAS443:3:73:409:1385#0/1  
aaa\_aa^a\_aa`aaa`\_`¥`\_`[\_]^]aSY[``Ra]\_\_\_\_0^  
@HWI-EAS443:3:73:454:873#0/1  
GAGAAAGCTAATGTGCTAATTGGGCAAGGGGACGTAGTGT  
+HWI-EAS443:3:73:454:873#0/1  
]abb^`bbaabab]aaabaa`a]\_a`\_`\_`aXXaaX`\_Y\_]`  
@HWI-EAS443:3:73:540:1117#0/1  
CCCTTGCCCAATTAGCACATTAGCTTTCTCTCCTTTTGCA  
+HWI-EAS443:3:73:540:1117#0/1  
¥\_aXH¥bbbaba^¥`a]aaaaaaaaa^aaaa`aZ`a`Z  
@HWI-EAS443:3:73:715:443#0/1  
GCAAAAGGAGAGAAAGCTAATGTGCTAATTGGGCAAGGGG  
+HWI-EAS443:3:73:715:443#0/1  
ab`a`abaa]a[aa\_\_aaaZa`¥`aaZ`````]a\_`\_\_aZV

@HWI-EAS443:3:73:71:105#0/1  
CAATCTTGCAAAGGAGAGAAAGCTAATGTGCTAATTGGG  
+HWI-EAS443:3:73:71:105#0/1  
ab`]^aKP¥`a`aUb`]aXaba^aa¥aS``^aW`^]\_`^Z^  
@HWI-EAS443:3:73:784:1478#0/1  
GAGCAATCTTGCAAAGGAGAGAAAGCTAATGTGCTAATT  
+HWI-EAS443:3:73:784:1478#0/1  
abbaaZabbbbaaab^aba^bbbbbbabbaab`abbbba  
@HWI-EAS443:3:73:791:1293#0/1  
GAGCAATCTTGCAAAGGAGAGAAAGCTAATGTGCTAATT  
+HWI-EAS443:3:73:791:1293#0/1  
abaababaab^bbbabaaa`b`bbaaba`a`a`aaaaa  
@HWI-EAS443:3:73:82:1947#0/1  
CCCTTGCCCAATTAGCACATTAGCTTTCTCCTTTTGCA  
+HWI-EAS443:3:73:82:1947#0/1  
aZ[ZK[\_`OG`\_T[WaWW]SY]W\_XOLSV^Wa]¥MRWZ`X  
@HWI-EAS443:3:73:880:554#0/1  
AGCATCAATGAACTGAGCAATCTTGCAAAGGAGAGAAAG  
+HWI-EAS443:3:73:880:554#0/1  
a`aaaaab`aaaaaa`a\_\_aaa\_\_`\_aa`\_ba``^\_a  
@HWI-EAS443:3:74:1053:1713#0/1  
GAACTGAGCAATCTTGCAAAGGAGAGAAAGCTAATGTGC  
+HWI-EAS443:3:74:1053:1713#0/1  
`ababb`b\_baaabbaababaa`aabbaaa`bb\_aa]a¥  
@HWI-EAS443:3:74:1106:1030#0/1  
GAGAAAGCTAATGTGCTAATTGGGCAAGGGGACGTAGTGT  
+HWI-EAS443:3:74:1106:1030#0/1  
`ba]aa[[]^`a`aaaRaVab^QYW[`\_a[P``LZ`[¥S  
@HWI-EAS443:3:74:1137:667#0/1  
GAACTGAGCAATCTTGCAAAGGAGAGAAAGCTAATGTGC  
+HWI-EAS443:3:74:1137:667#0/1  
aaaaaa`baaab`abaaa\_a`a\_``aaaa^aa\_aa]aX  
@HWI-EAS443:3:74:117:85#0/1  
CAATCTTGCAAAGGAGAGAAAGCTAATGTGCTAATTGGG  
+HWI-EAS443:3:74:117:85#0/1  
aaa\_\_a`aaY\_^]XSaa\_\_J]aV`]Q]^Y^V]OV[[]]X  
@HWI-EAS443:3:74:1354:1085#0/1  
GAACTGAGCAATCTTGCAAAGGAGAGAAAGCTAATGTGC  
+HWI-EAS443:3:74:1354:1085#0/1  
a]``ba^^aa`]abbaaa]`]ba`]`aa`aaRa^¥`aYa\_  
@HWI-EAS443:3:74:1386:1250#0/1  
GTCCCCTTGCCCAATTAGCACATTAGCTTTCTCCTTTT  
+HWI-EAS443:3:74:1386:1250#0/1  
aa[`a\_aa\_aaaa`aa`Q]a\_a\_a`^`aa`\_^R`^\_Y\_\_\_\_  
@HWI-EAS443:3:74:1388:938#0/1  
CATCAATGAACTGAGCAATCTTGCAAAGGAGAGAAAGCT  
+HWI-EAS443:3:74:1388:938#0/1  
abb\_\_aababbabababbbbbbba`baaba`bbaaaaZa  
@HWI-EAS443:3:74:1408:329#0/1  
GAGAAAGCTAATGTGCTAATTGGGCAAGGGGACGTAGTGT

+HWI-EAS443:3:74:1408:329#0/1  
aZ`a`aY[a^\_aa¥[¥b`aaaa]`^^`^bXZ[b\_¥`V]]  
@HWI-EAS443:3:74:1473:807#0/1  
GAGCAATCTTGCAAAAAGGAGAGAAAGCTAATGTGCTAATT  
+HWI-EAS443:3:74:1473:807#0/1  
`bbbbabbbb`bbaabbaabbbbaabababbbbab\_baaba  
@HWI-EAS443:3:74:1594:944#0/1  
GAGCAATCTTGCAAAAAGGAGAGAAAGCTAATGTGCTAATT  
+HWI-EAS443:3:74:1594:944#0/1  
a`b[abb`bbaa]baaba\_ba`b`aaaa]abab\_aa^aa  
@HWI-EAS443:3:74:1696:1260#0/1  
GCAAAAAGGAGAGAAAGCTAATGTGCTAATTGGGCAAGGGG  
+HWI-EAS443:3:74:1696:1260#0/1  
a`\_`[\_`aa\_`a`a^`]a\_aaa\_a^^a^```\_`VY\_Z[]  
@HWI-EAS443:3:74:1714:995#0/1  
GAAAGCTAATGTGCTAATTGGGCAAGGGGACGTAGTGTTG  
+HWI-EAS443:3:74:1714:995#0/1  
``bababbbb`bababbbb`aaaababababaaaabaaa  
@HWI-EAS443:3:74:195:1533#0/1  
GAAAGCTAATGTGCTAATTGGGCAAGGGGACGTAGTGTTG  
+HWI-EAS443:3:74:195:1533#0/1  
^`V^`a`\_`U`b`aaWV]H\_a`[¥YRW^[^]\_R^`^`  
@HWI-EAS443:3:74:235:1086#0/1  
GAGCAATCTTGCAAAAAGGAGAGAAAGCTAATGTGCTAATT  
+HWI-EAS443:3:74:235:1086#0/1  
`a`b[a`aa^a^`\_Y[a^`aaaa^\_a`````RPQYYPSK  
@HWI-EAS443:3:74:282:825#0/1  
GCATCAATGAAGTGAAGCAATCTTGCAAAAAGGAGAGAAAGC  
+HWI-EAS443:3:74:282:825#0/1  
aa[[aab`baV\_`¥^a`aa]aaaa\_\_RYaa[^a\_aa\_\_`^`  
@HWI-EAS443:3:74:335:230#0/1  
CTTGCAAAAAGGAGAGAAAGCTAATGTGCTAATTGGGCAAG  
+HWI-EAS443:3:74:335:230#0/1  
ab`a^`\_`^bbaaba\_a\_a`a[X^YVaa`\_\_\_\_`\_\_\_\_^^`\_`  
@HWI-EAS443:3:74:409:1020#0/1  
AGCTAATGTGCTAATTGGGCAAGGGGACGTAGTGTTGGTA  
+HWI-EAS443:3:74:409:1020#0/1  
\_a`\_``baWa\_aaaaa\_`a`[]U[`]\_aZ`Z`^`\_]R[  
@HWI-EAS443:3:74:561:1287#0/1  
ATGAAGTGAAGCAATCTTGCAAAAAGGAGAGAAAGCTAATGT  
+HWI-EAS443:3:74:561:1287#0/1  
aaa]U`\_OY``\_\_aaaa]aa]SZ]^Y`a``\_aaYT^[Z  
@HWI-EAS443:3:74:594:1459#0/1  
GAGCAATCTTGCAAAAAGGAGAGAAAGCTAATGTGCTAATT  
+HWI-EAS443:3:74:594:1459#0/1  
^^^a`a\_`^`¥XZVXI[][\_aaa]XW^aa\_]Z^¥`Z`aY  
@HWI-EAS443:3:74:660:1312#0/1  
AGCTAATGTGCTAATTGGGCAAGGGGACGTAGTGTTGGTA  
+HWI-EAS443:3:74:660:1312#0/1  
aa`a]a`^`[\_a\_`]aa^Z\_```]a]\_\_aa]\_`Wa^aa`V[

@HWI-EAS443:3:74:675:591#0/1  
GAGCAATCTTGCAAAGGAGAGAAAGCTAATGTGCTAATT  
+HWI-EAS443:3:74:675:591#0/1  
a`abb`baa`bbaba¥baaaaabaab`aaaa`a`\_\_a`  
@HWI-EAS443:3:74:679:991#0/1  
AAGCTAATGTGCTAATTGGGCAAGGGGACGTAGTGTGGT  
+HWI-EAS443:3:74:679:991#0/1  
Y¥a`a¥abXaaX[^T^b`bb\_V`baYaa^NX^]b\_aaVH  
@HWI-EAS443:3:74:723:1677#0/1  
ATCTTGCAAAGGAGAGAAAGCTAATGTGCTAATTGGGCA  
+HWI-EAS443:3:74:723:1677#0/1  
\_Q¥b^Z^¥VWZVLYaa\_a]`aa`aaR]aa]W\_a]a`RZ  
@HWI-EAS443:3:74:730:393#0/1  
CATCAATGAAGTGAAGCAATCTTGCAAAGGAGAGAAAGCT  
+HWI-EAS443:3:74:730:393#0/1  
abaaabbaabbaa`aa\_aaababaa`a`aa`a\_baa`aZa  
@HWI-EAS443:3:74:799:513#0/1  
GCATCAATGAAGTGAAGCAATCTTGCAAAGGAGAGAAAGC  
+HWI-EAS443:3:74:799:513#0/1  
aaaaabbababaaa[aaaaabaa`a`aaa^baaa`^a\_  
@HWI-EAS443:3:74:846:1658#0/1  
AGCTAATGTGCTAATTGGGCAAGGGGACGTAGTGTGGTA  
+HWI-EAS443:3:74:846:1658#0/1  
aaaaaaaa[^\_a\_Z`a]\_a````[]^\_T]\_]a¥^^¥WZ  
@HWI-EAS443:3:74:877:340#0/1  
CATCAATGAAGTGAAGCAATCTTGCAAAGGAGAGAAAGCT  
+HWI-EAS443:3:74:877:340#0/1  
^\_¥baS`aaabb\_¥bba^b^R^aaYGY\_aU^abaaWa  
@HWI-EAS443:3:74:964:1407#0/1  
GCATCAATGAAGTGAAGCAATCTTGCAAAGGAGAGAAAGC  
+HWI-EAS443:3:74:964:1407#0/1  
aba`a`a^]aa\_a¥a^¥]`aaa¥`\_\_N][\_\_`\_`a^Z^Z  
@HWI-EAS443:3:75:1004:1355#0/1  
AGCTAATGTGCTAATTGGGCAAGGGGACGTAGTGTGGTA  
+HWI-EAS443:3:75:1004:1355#0/1  
\_`aaabaa`aaaa`\_a`aaa\_a`aa`\_`aZ\_VM¥`\_a\_Wa  
@HWI-EAS443:3:75:1008:584#0/1  
GAAAGCTAATGTGCTAATTGGGCAAGGGGACGTAGTGTGGT  
+HWI-EAS443:3:75:1008:584#0/1  
`YYaaL]Q¥HW[\_`\_RXb[PY]¥XUV^a[OL^\_aZJV\_¥B  
@HWI-EAS443:3:75:1073:896#0/1  
GAAGTGAAGTGAAGCAATCTTGCAAAGGAGAGAAAGCTAATGTGC  
+HWI-EAS443:3:75:1073:896#0/1  
a`WOWPPQN\_[Z\_U]a^\_a`aaV^^`[VU`\_]X[`aVY]  
@HWI-EAS443:3:75:1226:1095#0/1  
AGCAATCTTGCAAAGGAGAGAAAGCTAATGTGCTAATTG  
+HWI-EAS443:3:75:1226:1095#0/1  
abZa]`aaab]`a]\_a``aaa¥]\_`[a^[aaX\_¥b\_\_aa`  
@HWI-EAS443:3:75:1298:420#0/1  
CAATCTTGCAAAGGAGAGAAAGCTAATGTGCTAATTGGG

+HWI-EAS443:3:75:1298:420#0/1  
a^^`abbba^^¥a`ababbb\_V]\_a)`bb\_b`b^`aaa`b  
@HWI-EAS443:3:75:1515:765#0/1  
GAAAGCTAATGTGCTAATTGGGCAAGGGGACGTAGTGTG  
+HWI-EAS443:3:75:1515:765#0/1  
\_bbbb[b`b`b\_bbab[abb`ba\_ab`ab\_]a[abababa  
@HWI-EAS443:3:75:1558:528#0/1  
CAATCTTGCAAAAGGAGAGAAAGCTAATGTGCTAATTGGG  
+HWI-EAS443:3:75:1558:528#0/1  
aba¥`¥¥\_U¥Naab^aab\_V\_[b\_b\_Y`\_\_bW\_\_``aaba  
@HWI-EAS443:3:75:1617:488#0/1  
CATCAATGAACTGAGCAATCTTGCAAAAGGAGAGAAAGCT  
+HWI-EAS443:3:75:1617:488#0/1  
Ta\_b`-`a^aa`a\_Zaaa¥^S¥ab\_bba`-`a`b`-`abbb¥b  
@HWI-EAS443:3:75:171:243#0/1  
GAAAGCTAATGTGCTAATTGGGCAAGGGGACGTAGTGTG  
+HWI-EAS443:3:75:171:243#0/1  
G]^`^\_WS^Va`V\_\_`\_ababa^`V]bba`¥aND¥bSYWGa  
@HWI-EAS443:3:75:1790:214#0/1  
GAGCAATCTTGCAAAAGGAGAGAAAGCTAATGTGCTAATT  
+HWI-EAS443:3:75:1790:214#0/1  
a\_\_\_\_\_¥\_\_bbbaaaaa`-`b^aaaabaaaa`¥a]a`^a\_  
@HWI-EAS443:3:75:207:1091#0/1  
ATCTTGCAAAAGGAGAGAAAGCTAATGTGCTAATTGGGCA  
+HWI-EAS443:3:75:207:1091#0/1  
aa`]]aaa¥^aRYOYaa^]XW][¥\_aXF¥\_[S`\_WaZSQL  
@HWI-EAS443:3:75:355:912#0/1  
GAGCAATCTTGCAAAAGGAGAGAAAGCTAATGTGCTAATT  
+HWI-EAS443:3:75:355:912#0/1  
Zba`¥`b`a^`b`-`bb)`baba]]a`a`ab`Nababaaa  
@HWI-EAS443:3:75:477:189#0/1  
AAGCTAATGTGCTAATTGGGCAAGGGGACGTAGTGTGGT  
+HWI-EAS443:3:75:477:189#0/1  
¥RabaaaabXaaa\_aaaba\_a^X\_a`^WJXQG[FY]SaYH  
@HWI-EAS443:3:75:480:1594#0/1  
GAGCAATCTTGCAAAAGGAGAGAAAGCTAATGTGCTAATT  
+HWI-EAS443:3:75:480:1594#0/1  
Y```S[^`YaUa¥XOTLSa\_aS¥¥\_a\_bbyHUFsaWZSa^  
@HWI-EAS443:3:75:485:1772#0/1  
ATCTTGCAAAAGGAGAGAAAGCTAATGTGCTAATTGGGCA  
+HWI-EAS443:3:75:485:1772#0/1  
Z\_aa]¥\_a]\_`]VV`aa^S]WY\_RO^\_R]¥a]aaVO[¥W\_  
@HWI-EAS443:3:75:512:1191#0/1  
GAACTGAGCAATCTTGCAAAAGGAGAGAAAGCTAATGTGC  
+HWI-EAS443:3:75:512:1191#0/1  
\_[abbb`bbbabaaaaaZF^)`aaaa\_Z\_aaba]`a]a`  
@HWI-EAS443:3:75:54:697#0/1  
CTTGCAAAAGGAGAGAAAGCTAATGTGCTAATTGGGCAAG  
+HWI-EAS443:3:75:54:697#0/1  
abbab[]`^ba\_babaZVaaa\_`aa]a\_aaaa`a`a^`^a

@HWI-EAS443:3:75:56:1615#0/1  
AGCACATTAGCTTTCTCTCCTTTTGCAAGATTGCTCAGTT  
+HWI-EAS443:3:75:56:1615#0/1  
`a^aa`a^ba¥`aaaa`\_a``]aa`\_\_^\_^\_\_a`[]^  
@HWI-EAS443:3:75:56:59#0/1  
GGAGAGAAAGCTAATGTGCTAATTGGGCAAGGGGACGTAG  
+HWI-EAS443:3:75:56:59#0/1  
^aYbbbb^aaaa`¥\_¥\_a`[`aaa]a`\_\_aba\_[]aUZ^  
@HWI-EAS443:3:75:588:1382#0/1  
GCATCAATGAAGTGAAGCAATCTTGCAAAAGGAGAGAAAGC  
+HWI-EAS443:3:75:588:1382#0/1  
`Z^^^Y[aa]aa`aaaa[b¥`\_]T]\_Wa`aa`a^`\_Z`  
@HWI-EAS443:3:75:604:1366#0/1  
CCTTGCCCAATTAGCACATTAGCTTTCTCTCCTTTTGCAA  
+HWI-EAS443:3:75:604:1366#0/1  
Y\_R]RXZ^ZV¥Z¥XXS\_SaPS\_aQ\_LX¥[PYUa`aRVUJI  
@HWI-EAS443:3:75:763:1389#0/1  
GAGCAATCTTGCAAAAGGAGAGAAAGCTAATGTGCTAATT  
+HWI-EAS443:3:75:763:1389#0/1  
^bba`¥abbbabb` `bbabbb`bbbb`bba`baabaaa  
@HWI-EAS443:3:75:837:669#0/1  
GAGAAAGCTAATGTGCTAATTGGGCAAGGGGACGTAGTGT  
+HWI-EAS443:3:75:837:669#0/1  
aaabaaaabaabaVa`bbaabb`\_a`baaa^`b¥\_]a\_  
@HWI-EAS443:3:75:869:412#0/1  
AAAAGGAGAGAAAGCTAATGTGCTAATTGGGCAAGGGGAC  
+HWI-EAS443:3:75:869:412#0/1  
¥L¥[WF[`ZZa`V^X\_ZZY`Y^Z]W^a`aba`\_]aaa¥¥X  
@HWI-EAS443:3:75:99:741#0/1  
GCAATCTTGCAAAAGGAGAGAAAGCTAATGTGCTAATTGG  
+HWI-EAS443:3:75:99:741#0/1  
aa`X]aaaa`]a`\_aa]aa`XR`\_`\_[\_¥V`]\_Z`\_^\_\_  
@HWI-EAS443:3:76:1090:249#0/1  
AGCTAATGTGCTAATTGGGCAAGGGGACGTAGTGTGGTA  
+HWI-EAS443:3:76:1090:249#0/1  
aa^`aa^`Xb`aa\_a` `^¥]`aaaa`\_`Z^`Ga[aa\_GW  
@HWI-EAS443:3:76:1094:246#0/1  
CTTGCCCAATTAGCACATTAGCTTTCTCTCCTTTTGCAAG  
+HWI-EAS443:3:76:1094:246#0/1  
[bb`]VYa¥ba]a[aW[abab`babab]]a\_a\_`aa`a\_a  
@HWI-EAS443:3:76:109:1030#0/1  
ATCTTGCAAAAGGAGAGAAAGCTAATGTGCTAATTGGGCA  
+HWI-EAS443:3:76:109:1030#0/1  
abaabba\_Zab]aa`Y`aaY`aaa``a]aaa[`aaaa`\_`\_  
@HWI-EAS443:3:76:1388:1518#0/1  
CTTGCAAAAGGAGAGAAAGCTAATGTGCTAATTGGGCAAG  
+HWI-EAS443:3:76:1388:1518#0/1  
[aabMba\_TT^`] ^bbaY^Ybb[a\_aa`a\_Ya]^^]UHXa  
@HWI-EAS443:3:76:142:483#0/1  
CATCAATGAAGTGAAGCAATCTTGCAAAAGGAGAGAAAGCT

+HWI-EAS443:3:76:142:483#0/1  
^bba`Y^abbbbaabbbb`^¥aaaaVZX¥a\_aa^`X\_  
@HWI-EAS443:3:76:1495:237#0/1  
AGCACATTAGCTTTCTCCTTTTGCAAGATTGCTCAGTT  
+HWI-EAS443:3:76:1495:237#0/1  
\_^]¥a^bbababaa\_babaabbaaa\_abbaa`[b`\_a\_  
@HWI-EAS443:3:76:1501:1313#0/1  
AACTGAGCAATCTTGCAAAAGGAGAGAAAGCTAATGTGCT  
+HWI-EAS443:3:76:1501:1313#0/1  
W¥a¥W\_ba\_Iaaba`^[]^a`¥\_aXbb`aaZ¥]aa\_a\_a  
@HWI-EAS443:3:76:1696:270#0/1  
ATGAACTGAGCAATCTTGCAAAAGGAGAGAAAGCTAATGT  
+HWI-EAS443:3:76:1696:270#0/1  
¥Zab[I\_ba][aa`Q[`Uaaa[TSRbaXa`]aTaaYaa\_  
@HWI-EAS443:3:76:1720:1696#0/1  
CAAAAGGAGAGAAAGCTAATGTGCTAATTGGGCAAGGGGA  
+HWI-EAS443:3:76:1720:1696#0/1  
aa^`\_abbbabb`UWbbabaa`Va\_abbaa`\_aa`a`^`^`  
@HWI-EAS443:3:76:1738:696#0/1  
TGCAAAAGGAGAGAAAGCTAATGTGCTAATTGGGCAAGGG  
+HWI-EAS443:3:76:1738:696#0/1  
TV\_]WZYa`\_]\_^a^`\_X`\_a`^^¥PZ`\_`[^`^a]\_\_[¥`  
@HWI-EAS443:3:76:212:54#0/1  
ATCTTGCAAAAGGAGAGAAAGCTAATGTGCTAATTGGGCA  
+HWI-EAS443:3:76:212:54#0/1  
a\_]\_[`YZ]NYa`Z^^TZ^V]RX`UWL¥SMZ\_\_][XK  
@HWI-EAS443:3:76:239:696#0/1  
ATCTTGCAAAAGGAGAGAAAGCTAATGTGCTAATTGGGCA  
+HWI-EAS443:3:76:239:696#0/1  
aabbaabaaYYaaaaaaY]aaaaa`\_]a```\_`\_`\_Z¥  
@HWI-EAS443:3:76:268:1275#0/1  
TGCAAAAGGAGAGAAAGCTAATGTGCTAATTGGGCAAGGG  
+HWI-EAS443:3:76:268:1275#0/1  
\_X\_a¥^a^a]Xaa\_¥^a`[^`aa\_a`[[]a\_a¥¥aa\_\_\_\_  
@HWI-EAS443:3:76:271:1236#0/1  
AGGAGAGAAAGCTAATGTGCTAATTGGGCAAGGGGACGTA  
+HWI-EAS443:3:76:271:1236#0/1  
]VZ[aaS^\_Q]a`]YP]T`a^[T][aa]a`\_a]U`\_aW\_  
@HWI-EAS443:3:76:277:311#0/1  
GAAAGCTAATGTGCTAATTGGGCAAGGGGACGTAGTGTTG  
+HWI-EAS443:3:76:277:311#0/1  
ab]``¥`X`^0¥[¥^\_\_¥Z]\_^\_Z^^TY]XW\_W\_XYY  
@HWI-EAS443:3:76:318:547#0/1  
CAATGAACTGAGCAATCTTGCAAAAGGAGAGAAAGCTAAT  
+HWI-EAS443:3:76:318:547#0/1  
abbbbbbbbbbb`bbbbbabaaaaababa`aa^a`\_a  
@HWI-EAS443:3:76:328:1272#0/1  
CCTTGCCCAATTAGCACATTAGCTTTCTCCTTTTGCAA  
+HWI-EAS443:3:76:328:1272#0/1  
aaaa^`aa`baa`aab^^Z`[^`a\_a`\_a`\_`a\_a`\_]\_¥



@HWI-EAS443:3:76:341:572#0/1  
ATGAACTGAGCAATCTTGCAAAGGAGAGAAAGCTAATGT  
+HWI-EAS443:3:76:341:572#0/1  
R\_aQZH¥a^`\_\_^\_Z]`Z`^UP`NY¥aY^aa¥QHUZ]¥\_  
@HWI-EAS443:3:76:401:433#0/1  
AGCACATTAGCTTTCTCTCTTTTGCAAGATTGCTCAGTT  
+HWI-EAS443:3:76:401:433#0/1  
^^^AT`^a`Z\_b\_SS]YX``Y]Z`abbba^[T¥]bXa\_\_  
@HWI-EAS443:3:76:430:599#0/1  
GAGCAATCTTGCAAAGGAGAGAAAGCTAATGTGCTAATT  
+HWI-EAS443:3:76:430:599#0/1  
]G^[Y[PaTUa\_ZW\_X\_¥L`¥\_^\_RV^QU]UTNYX]]YY^  
@HWI-EAS443:3:76:450:657#0/1  
CAATTAGCACATTAGCTTTCTCTCTTTTGCAAGATTGCT  
+HWI-EAS443:3:76:450:657#0/1  
`^\_babbabb`bbbaabbabbbabababa\_a\_b`aaa\_a  
@HWI-EAS443:3:76:495:714#0/1  
AATGAACTGAGCAATCTTGCAAAGGAGAGAAAGCTAATG  
+HWI-EAS443:3:76:495:714#0/1  
a]\_``^`a^`aa^``\_aaa`[KXaa[aaa\_\_aa`a[T`a  
@HWI-EAS443:3:76:620:256#0/1  
TTGCAAAGGAGAGAAAGCTAATGTGCTAATTGGGCAAGG  
+HWI-EAS443:3:76:620:256#0/1  
¥¥\_[\_XY¥\_Y]]a]XW¥TZWT]^`]¥a¥]^`aZ¥^SW][  
@HWI-EAS443:3:76:645:836#0/1  
ATCAATGAACTGAGCAATCTTGCAAAGGAGAGAAAGCTA  
+HWI-EAS443:3:76:645:836#0/1  
aabaaaaaaa`aaaaaaaaaaa`\_`\_`a`\_`a`aaX`a\_\_`  
@HWI-EAS443:3:76:738:268#0/1  
GCTTTCTCTCTTTTGCAAGATTGCTCAGTTCATTGATGC  
+HWI-EAS443:3:76:738:268#0/1  
aaaa`aa]`a`a`\_\_Z\_\_a`\_`a¥\_\_a]`Y\_\_]`]^\_S  
@HWI-EAS443:3:76:742:867#0/1  
GAAAGCTAATGTGCTAATTGGGCAAGGGGACGTAGTGTG  
+HWI-EAS443:3:76:742:867#0/1  
]`b`aaaa¥\_a^a\_b\_baabaa`]^`aa`\_`\_`]^`aZ`¥aa  
@HWI-EAS443:3:76:790:1538#0/1  
GAAAGCTAATGTGCTAATTGGGCAAGGGGACGTAGTGTG  
+HWI-EAS443:3:76:790:1538#0/1  
\_aaS`aW\_]\_\_[^U]^\_\_a¥]I`]¥\_UX\_BBBBBBBBBBB  
@HWI-EAS443:3:76:909:397#0/1  
GAACTGAGCAATCTTGCAAAGGAGAGAAAGCTAATGTGC  
+HWI-EAS443:3:76:909:397#0/1  
\_X¥\_^USaa`^``[[X[QSY\_¥Z`\_`\_ZP[]Z\_Z]\_aZ`W  
@HWI-EAS443:3:76:931:1305#0/1  
CAAAGGAGAGAAAGCTAATGTGCTAATTGGGCAAGGGGA  
+HWI-EAS443:3:76:931:1305#0/1  
aab]MG\_U`^bb¥V`ab¥¥aa[aZ]a\_aX[aa`[\_`\_]a^  
@HWI-EAS443:3:76:949:290#0/1  
AATTAGCACATTAGCTTTCTCTCTTTTGCAAGATTGCTC

+HWI-EAS443:3:76:949:290#0/1  
abbbaaaa`aaa`a`a`a`\_a^a`aa`^^`\_\_a\_\_`a]\_^  
@HWI-EAS443:3:76:987:257#0/1  
TTGCCCAATTAGCACATTAGCTTTCTCTCCTTTTGCAAGA  
+HWI-EAS443:3:76:987:257#0/1  
^VV¥`Y`\_`[^`\_]`[\_`aa`aaa\_aS^Y]VNV¥`^USU[\_`^  
@HWI-EAS443:3:77:1088:96#0/1  
CATCAATGAACTGAGCAATCTTGCAAAAGGAGAGAAAGCT  
+HWI-EAS443:3:77:1088:96#0/1  
Y`aabb`\_`bbbbb`a`aab`bbb`bbabbbbbb`bab`\_`Xb  
@HWI-EAS443:3:77:1094:739#0/1  
CAATGAACTGAGCAATCTTGCAAAAGGAGAGAAAGCTAAT  
+HWI-EAS443:3:77:1094:739#0/1  
abbbbaaaaY`a`aabbabaa]`a\_b^b`aa`aa\_a`\_a  
@HWI-EAS443:3:77:1104:1713#0/1  
GAACTGAGCAATCTTGCAAAAGGAGAGAAAGCTAATGTGC  
+HWI-EAS443:3:77:1104:1713#0/1  
¥¥b]]`aK^bab^`\_aaa`S]aaabbab`a^P`b¥aT  
@HWI-EAS443:3:77:1119:1802#0/1  
CAATGAACTGAGCAATCTTGCAAAAGGAGAGAAAGCTAAT  
+HWI-EAS443:3:77:1119:1802#0/1  
`bbbab`bbababbbbaabab`ab`bbbaaaba\_aa`  
@HWI-EAS443:3:77:1139:431#0/1  
AGCTAATGTGCTAATTGGGCAAGGGGACGTAGTGTGGTA  
+HWI-EAS443:3:77:1139:431#0/1  
a`bababb^\_aaabb\_b`\_Xbababb\_ab`\_a\_a^ab\_I]  
@HWI-EAS443:3:77:1150:520#0/1  
AAGCTAATGTGCTAATTGGGCAAGGGGACGTAGTGTGGT  
+HWI-EAS443:3:77:1150:520#0/1  
aaa\_a\_aab¥a\_a`aaa`aa\_a\_aa`a\_WaZZ\_Za]\_aa0  
@HWI-EAS443:3:77:1238:869#0/1  
GAGCAATCTTGCAAAAGGAGAGAAAGCTAATGTGCTAATT  
+HWI-EAS443:3:77:1238:869#0/1  
]`bbbaKb^T[bba`babbababaaabbab`\_a^bab[a  
@HWI-EAS443:3:77:1300:1856#0/1  
GAAAGCTAATGTGCTAATTGGGCAAGGGGACGTAGTGTGGT  
+HWI-EAS443:3:77:1300:1856#0/1  
¥\_Zbb\_b\_b`ba`aabb¥KR¥`a[VS\_abbZaZ^aUb¥ba  
@HWI-EAS443:3:77:1423:331#0/1  
GCATCAATGAACTGAGCAATCTTGCAAAAGGAGAGAAAGC  
+HWI-EAS443:3:77:1423:331#0/1  
aa¥ba`b\_¥XV\_¥`\_`a`\_¥a`\_T]]][YZ^a^`^]]`Z  
@HWI-EAS443:3:77:1454:1467#0/1  
GAACTGAGCAATCTTGCAAAAGGAGAGAAAGCTAATGTGC  
+HWI-EAS443:3:77:1454:1467#0/1  
a\_]b]Z[a`\_Y\_\_ZW^\_[[\_S]Y`^`a`\_`H`\_`a`\_]`  
@HWI-EAS443:3:77:1487:1233#0/1  
CAATCTTGCAAAAGGAGAGAAAGCTAATGTGCTAATTGGG  
+HWI-EAS443:3:77:1487:1233#0/1  
\_`]\_I`aW`¥`babab`ba\_^bTbbba`Q`ba`aaa\_]`

@HWI-EAS443:3:77:1525:95#0/1  
AGCAATCTTGCAAAGGAGAGAAAGCTAATGTGCTAATTG  
+HWI-EAS443:3:77:1525:95#0/1  
Ta]]¥¥a[¥\_^]^\aaa`J`]a^WRbX`\_Z¥aV\_¥\_T[Z``  
@HWI-EAS443:3:77:1577:506#0/1  
CTTGCAAAGGAGAGAAAGCTAATGTGCTAATTGGGCAAG  
+HWI-EAS443:3:77:1577:506#0/1  
aab```bbba`a`abbbba[aa\_bba``bba`abaa^Zab  
@HWI-EAS443:3:77:1627:651#0/1  
GCATCAATGAACTGAGCAATCTTGCAAAGGAGAGAAAGC  
+HWI-EAS443:3:77:1627:651#0/1  
Yabb¥baabbbab`\_`bb\_abbab``^`bb`Zbabb`bb[  
@HWI-EAS443:3:77:1716:331#0/1  
TTGCAAAGGAGAGAAAGCTAATGTGCTAATTGGGCAAGG  
+HWI-EAS443:3:77:1716:331#0/1  
a`^`aaaabba``\_`aaaaabaaa`a`aa`aab\_a`a\_\_S  
@HWI-EAS443:3:77:286:1282#0/1  
CAATCTTGCAAAGGAGAGAAAGCTAATGTGCTAATTGGG  
+HWI-EAS443:3:77:286:1282#0/1  
`^V\_`¥W\_Xa`UaaYaYa\_`[\_^¥```[M^^]VZ\_]\_^  
@HWI-EAS443:3:77:286:516#0/1  
GCATCAATGAACTGAGCAATCTTGCAAAGGAGAGAAAGC  
+HWI-EAS443:3:77:286:516#0/1  
aa\_`b`Na`a¥aa\_\_aabaaa``a`aS`[b`]aaa\_`\_^`  
@HWI-EAS443:3:77:288:1133#0/1  
GCATCAATGAACTGAGCAATCTTGCAAAGGAGAGAAAGC  
+HWI-EAS443:3:77:288:1133#0/1  
abba``baaaaa^aabbaaaaaa`aa`a\_`aaaa`a`\_  
@HWI-EAS443:3:77:300:1034#0/1  
TGCAAAGGAGAGAAAGCTAATGTGCTAATTGGGCAAGGG  
+HWI-EAS443:3:77:300:1034#0/1  
aabb¥YXa^S`\_ab]\_bb`S`bb\_TX``a\_aa]`\_\_aa``  
@HWI-EAS443:3:77:398:299#0/1  
GCATCAATGAACTGAGCAATCTTGCAAAGGAGAGAAAGC  
+HWI-EAS443:3:77:398:299#0/1  
`\_¥`\_¥UZWOSYa^[] [¥R¥aYZ]^]¥WY`¥XZ]\_] [X]Y  
@HWI-EAS443:3:77:419:503#0/1  
CTGAGCAATCTTGCAAAGGAGAGAAAGCTAATGTGCTAA  
+HWI-EAS443:3:77:419:503#0/1  
aaW\_baT^abaa`aa^[Waa]a[a``^``\_]\_`\_Sa``^Z  
@HWI-EAS443:3:77:461:959#0/1  
AGCTAATGTGCTAATTGGGCAAGGGACGTAGTGTGGTA  
+HWI-EAS443:3:77:461:959#0/1  
a\_b^^\_]`Xaabbab^ba``^WY]\_UYSa¥a^G\_`aaXQZ  
@HWI-EAS443:3:77:520:163#0/1  
ATCAATGAACTGAGCAATCTTGCAAAGGAGAGAAAGCTA  
+HWI-EAS443:3:77:520:163#0/1  
abbaaababa^aba`a]a`aabaa\_]aa[``\_a[G^a^\_`  
@HWI-EAS443:3:77:562:1308#0/1  
ATCAATGAACTGAGCAATCTTGCAAAGGAGAGAAAGCTA

+HWI-EAS443:3:77:562:1308#0/1  
abababbbbbbba\_aabbbbaabbaaaaaaaaaaaaaabaaaa  
@HWI-EAS443:3:77:579:1301#0/1  
CATCAATGAACTGAGCAATCTTGCAAAAGGAGAGAAAGCT  
+HWI-EAS443:3:77:579:1301#0/1  
`\_^abaSQ]X]¥`aaaaVR¥ab[a^aab`\_\_a\_\_]\_a]^  
@HWI-EAS443:3:77:652:288#0/1  
GAACTGAGCAATCTTGCAAAAGGAGAGAAAGCTAATGTGC  
+HWI-EAS443:3:77:652:288#0/1  
`]U]^\_\_`^^`^\_\_a`ZV[V``]\_\_][^X\_] ^ZSY^VYS  
@HWI-EAS443:3:77:704:871#0/1  
GAGCAATCTTGCAAAAGGAGAGAAAGCTAATGTGCTAATT  
+HWI-EAS443:3:77:704:871#0/1  
`¥ba]aaaa`ba`\_`\_`a\_aabba]aaaaYaa^aaa` `a`  
@HWI-EAS443:3:77:734:63#0/1  
CAATGAACTGAGCAATCTTGCAAAAGGAGAGAAAGCTAAT  
+HWI-EAS443:3:77:734:63#0/1  
`bbbabaaa^\_^Ta[a`b`bbbaa`abZaaa\_ba]]`^aa  
@HWI-EAS443:3:77:748:1020#0/1  
AAAGCTAATGTGCTAATTGGGCAAGGGGACGTAGTGTGG  
+HWI-EAS443:3:77:748:1020#0/1  
a\_^aaabaaa]\_\_`\_`a\_a\_a`a`a`\_^\_a]^\_W`^`\_`\_`  
@HWI-EAS443:3:77:774:652#0/1  
CATCAATGAACTGAGCAATCTTGCAAAAGGAGAGAAAGCT  
+HWI-EAS443:3:77:774:652#0/1  
abbbbbbbbabbbbbba^abbbbababbbbaaab`b`  
@HWI-EAS443:3:77:814:1308#0/1  
GCATCAATGAACTGAGCAATCTTGCAAAAGGAGAGAAAGC  
+HWI-EAS443:3:77:814:1308#0/1  
a\_V][[^UWY]abMMUa^YJP^ZYM[UWV\_MG]\_a]UQ]T  
@HWI-EAS443:3:77:830:416#0/1  
ATCTTGCAAAAGGAGAGAAAGCTAATGTGCTAATTGGGCA  
+HWI-EAS443:3:77:830:416#0/1  
aabZbaa^0^a`^`aa\_b`Y`aaZ]aaZaa\_aa]¥aaa\_a  
@HWI-EAS443:3:77:863:1974#0/1  
GAGCAATCTTGCAAAAGGAGAGAAAGCTAATGTGCTAATT  
+HWI-EAS443:3:77:863:1974#0/1  
aa`bYb¥^aaaaa\_aa`\_\_aa\_a`^\_a`\_a`^R¥`\_`a\_\_]  
@HWI-EAS443:3:77:920:296#0/1  
GAAAGCTAATGTGCTAATTGGGCAAGGGGACGTAGTGTGG  
+HWI-EAS443:3:77:920:296#0/1  
aa` `a`\_`\_`a¥\_\_`^\_]\_\_\_\_^Y` ``ZZ\_ZZXY\_Z^]  
@HWI-EAS443:3:77:936:1970#0/1  
GAAAGCTAATGTGCTAATTGGGCAAGGGGACGTAGTGTGG  
+HWI-EAS443:3:77:936:1970#0/1  
a]J^]bb`babUaa^^[ `a]SYb]` `aaa`\_`\_Q`\_Ua]\_`  
@HWI-EAS443:3:77:946:1376#0/1  
GAGAAAGCTAATGTGCTAATTGGGCAAGGGGACGTAGTGT  
+HWI-EAS443:3:77:946:1376#0/1  
]\_¥`b`V]` `Ya\_X`^aaa]ab\_V]aaba` `U¥^V` [DZ^

@HWI-EAS443:3:77:991:516#0/1  
CAATCTTGCAAAAGGAGAGAAAGCTAATGTGCTAATTGGG  
+HWI-EAS443:3:77:991:516#0/1  
ab[abbbb\_bbabaa`abbaaa[aba\_`b]aa[aa`babb  
@HWI-EAS443:3:77:996:1588#0/1  
CATCAATGAACTGAGCAATCTTGCAAAAGGAGAGAAAGCT  
+HWI-EAS443:3:77:996:1588#0/1  
Z]\_a[\_ZJQ\_¥T]]ZZ^ZZ^b^`abb\_P\_]Z¥`\_Z\_T^aT  
@HWI-EAS443:3:78:1049:1688#0/1  
GAGAAAGCTAATGTGCTAATTGGGCAAGGGGACGTAGTGT  
+HWI-EAS443:3:78:1049:1688#0/1  
QTR¥b¥VY`¥¥XX[MTa`aZ^[\_`^a\_]T\_[\_]Z]HaOZU  
@HWI-EAS443:3:78:1055:413#0/1  
GAGCAATCTTGCAAAAGGAGAGAAAGCTAATGTGCTAATT  
+HWI-EAS443:3:78:1055:413#0/1  
a\_aa`a\_a[\_a\_X`^YPZ\_\_a^\_a^\_a^\_`\_U`Z^^Z]]  
@HWI-EAS443:3:78:1057:1248#0/1  
CATCAATGAACTGAGCAATCTTGCAAAAGGAGAGAAAGCT  
+HWI-EAS443:3:78:1057:1248#0/1  
ab`aaabbaaba\_aaaaababaaaa\_a^aa`a`ba\_a`\_`  
@HWI-EAS443:3:78:1212:808#0/1  
TTAGCACATTAGCTTTCTCTCCTTTTGCAAGATTGCTCAG  
+HWI-EAS443:3:78:1212:808#0/1  
aaaa^a\_aba\_baaa`a]bY\_aaaaa¥a`aa\_\_a`[^a  
@HWI-EAS443:3:78:1243:1810#0/1  
AATGAACTGAGCAATCTTGCAAAAGGAGAGAAAGCTAATG  
+HWI-EAS443:3:78:1243:1810#0/1  
¥[N]]¥\_P\_¥VZQMYaZYZaaVGPTT`^RVRR¥PUIOM^  
@HWI-EAS443:3:78:1263:1313#0/1  
GCATCAATGAACTGAGCAATCTTGCAAAAGGAGAGAAAGC  
+HWI-EAS443:3:78:1263:1313#0/1  
aV]`¥Y\_¥\_W\_`WYS¥`Xa]aWa]^\_Za\_[`^`\_¥]\_\_  
@HWI-EAS443:3:78:1377:971#0/1  
CTTGCAAAAGGAGAGAAAGCTAATGTGCTAATTGGGCAAG  
+HWI-EAS443:3:78:1377:971#0/1  
abba¥ba`\_abababaabbaaaabb^bWaabbaaaaa^\_b  
@HWI-EAS443:3:78:143:31#0/1  
GAGCAATCTTGCAAAAGGAGAGAAAGCTAATGTGCTAATT  
+HWI-EAS443:3:78:143:31#0/1  
^O\_`bab`bba]^ [V`¥a`a¥QY`V\_T^^¥Q^^\_ZX^[  
@HWI-EAS443:3:78:1497:727#0/1  
ATCTTGCAAAAGGAGAGAAAGCTAATGTGCTAATTGGGCA  
+HWI-EAS443:3:78:1497:727#0/1  
a¥\_aabZaV\_]\_\_`babba\_a^a`ab^a^aaaa\_aa\_Z^  
@HWI-EAS443:3:78:1643:1100#0/1  
GAAAGCTAATGTGCTAATTGGGCAAGGGGACGTAGTGTG  
+HWI-EAS443:3:78:1643:1100#0/1  
aaaa`a`a`aa\_]a^`a\_\_R¥U\_\_`\_\_Z\_\_]\_\_Y\_Z` [  
@HWI-EAS443:3:78:1669:190#0/1  
AAGCATCAATGAACTGAGCAATCTTGCAAAAGGAGAGAAA

+HWI-EAS443:3:78:1669:190#0/1  
a\_aQ` []\_\_a`\_]\_a`\_^a]aU`]]^^Y]a`^`^`^Y  
@HWI-EAS443:3:78:1670:1562#0/1  
GAGCAATCTTGCAAAAGGAGAGAAAGCTAATGTGCTAATT  
+HWI-EAS443:3:78:1670:1562#0/1  
aI`\_`\_YT]\_\_`^]`^\_NT\_^VW^^^U]S[`\_X\_G[WU^Z  
@HWI-EAS443:3:78:1679:1285#0/1  
ATCTTGCAAAAGGAGAGAAAGCTAATGTGCTAATTGGGCA  
+HWI-EAS443:3:78:1679:1285#0/1  
ab`\_W]\_¥aXFa`ab`aa\_T]U^Y0a¥X`^a`\_`\_¥Wa¥V]  
@HWI-EAS443:3:78:194:315#0/1  
GCATCAATGAACTGAGCAATCTTGCAAAAGGAGAGAAAGC  
+HWI-EAS443:3:78:194:315#0/1  
aa]aa`aaaa`a`a^aaaaaa`a\_a`\_^a\_\_a`\_^\_a\_  
@HWI-EAS443:3:78:23:308#0/1  
TGCAAAAGGAGAGAAAGCTAATGTGCTAATTGGGCAAGGG  
+HWI-EAS443:3:78:23:308#0/1  
R\_b¥a¥a`bb`YbbaT\_]\_¥^`b[`¥UT^a```a`Taa\_¥  
@HWI-EAS443:3:78:263:1509#0/1  
CAATCTTGCAAAAGGAGAGAAAGCTAATGTGCTAATTGGG  
+HWI-EAS443:3:78:263:1509#0/1  
\_abbbbbbbbbZaYaaa]ababaab`\_aZaa`]`a`\_^  
@HWI-EAS443:3:78:331:1022#0/1  
GAGCAATCTTGCAAAAGGAGAGAAAGCTAATGTGCTAATT  
+HWI-EAS443:3:78:331:1022#0/1  
\_I^W]Q\_aa]aSZV¥Z0TV``\_`YPaWa^[`^`[F0aXS`¥  
@HWI-EAS443:3:78:331:1477#0/1  
GCATCAATGAACTGAGCAATCTTGCAAAAGGAGAGAAAGC  
+HWI-EAS443:3:78:331:1477#0/1  
abbbbaabab`baaaabb`abaaaaba``a`\_`aa`a]````  
@HWI-EAS443:3:78:351:66#0/1  
ATCTTGCAAAAGGAGAGAAAGCTAATGTGCTAATTGGGCA  
+HWI-EAS443:3:78:351:66#0/1  
ab\_a`aaa\_\_aba\_a\_a\_\_[\_^\_\_[^aV\_]`^^`\_`[\_RV  
@HWI-EAS443:3:78:362:326#0/1  
AGCTAATGTGCTAATTGGGCAAGGGGACGTAGTGTGGTA  
+HWI-EAS443:3:78:362:326#0/1  
ababababZY]aaaa`aa`aa`aaa`\_`aZ\_aZa]`aaSY  
@HWI-EAS443:3:78:433:878#0/1  
ATCTTGCAAAAGGAGAGAAAGCTAATGTGCTAATTGGGCA  
+HWI-EAS443:3:78:433:878#0/1  
X\_¥`[`[¥^\_Z^\_T¥P]a`a]a`[Z^a\_aW]`¥\_]\_WPZT  
@HWI-EAS443:3:78:527:487#0/1  
CAATCTTGCAAAAGGAGAGAAAGCTAATGTGCTAATTGGG  
+HWI-EAS443:3:78:527:487#0/1  
``Yb`^a`¥ba\_a`]\_ba\_\_Q^aaaa^bUaa\_a\_a`aZ`  
@HWI-EAS443:3:78:645:1423#0/1  
GAGAAAGCTAATGTGCTAATTGGGCAAGGGGACGTAGTGT  
+HWI-EAS443:3:78:645:1423#0/1  
¥`\_Z^HW`WUW[\_G[^Y¥¥\_WUNMQFV[[U[WX\_BBBBBB

@HWI-EAS443:3:78:652:612#0/1  
ATCTTGCAAAAGGAGAGAAAGCTAATGTGCTAATTGGGCA  
+HWI-EAS443:3:78:652:612#0/1  
aU`OPJUJT]^VYQ[^ZXTZTXYZ¥¥SUO[ZZ^[VYWVU  
@HWI-EAS443:3:78:694:268#0/1  
CTTGCAAAAGGAGAGAAAGCTAATGTGCTAATTGGGCAAG  
+HWI-EAS443:3:78:694:268#0/1  
`Z`a\_¥X^`\_\_WaXY``[[XX^T]SF]R\_X`[ZZ`VWZWO  
@HWI-EAS443:3:78:845:1754#0/1  
GAGCAATCTTGCAAAAGGAGAGAAAGCTAATGTGCTAATT  
+HWI-EAS443:3:78:845:1754#0/1  
`b`bbbbbbba^b\_ZP`a`a`aa`aaaa`aa\_a`a^`\_`  
@HWI-EAS443:3:78:919:308#0/1  
ATCTTGCAAAAGGAGAGAAAGCTAATGTGCTAATTGGGCA  
+HWI-EAS443:3:78:919:308#0/1  
a`\_b\_b]baa`b`\_aabaaaaaaaa`a`\_a]a^aa\_\_aa\_]`  
@HWI-EAS443:3:79:1036:689#0/1  
AAGCTAATGTGCTAATTGGGCAAGGGGACGTAGTGTGGT  
+HWI-EAS443:3:79:1036:689#0/1  
aaaaba`abaaaaababba\_aaaaa^`a`\_bZa\_aa^L  
@HWI-EAS443:3:79:105:469#0/1  
TAGCACATTAGCTTTCTCTCTTTTGAAGATTGCTCAGT  
+HWI-EAS443:3:79:105:469#0/1  
\_aQ¥Ybab`^ba^¥baa`aab¥¥aQ]QOWa`^^[aaP  
@HWI-EAS443:3:79:1211:54#0/1  
GCATCAATGAAGTGAAGCAATCTTGCAAAAGGAGAGAAAGC  
+HWI-EAS443:3:79:1211:54#0/1  
a¥^aJY\_aa]RG`aWaXZ[]X\_a`JSMR¥\_]F]Wa[XX^U  
@HWI-EAS443:3:79:1222:1053#0/1  
AGCAATCTTGCAAAAGGAGAGAAAGCTAATGTGCTAATTG  
+HWI-EAS443:3:79:1222:1053#0/1  
aa\_aZ\_^aa`a\_a^a\_b`\_`bb\_^`Q\_^[ab\_`b`\_aaa`  
@HWI-EAS443:3:79:1240:1653#0/1  
AGCAATCTTGCAAAAGGAGAGAAAGCTAATGTGCTAATTG  
+HWI-EAS443:3:79:1240:1653#0/1  
V[a\_ZVX\_Z¥]`OVWZZXWV^\_H]RW`[W]^a`^^`^Ha  
@HWI-EAS443:3:79:1296:695#0/1  
ATCTTGCAAAAGGAGAGAAAGCTAATGTGCTAATTGGGCA  
+HWI-EAS443:3:79:1296:695#0/1  
aTaaab[]ZaZ\_`V`aaa\_`]Za]\_VX]aYa¥T[b`X¥X[  
@HWI-EAS443:3:79:1362:1312#0/1  
GAAGTGAAGCAATCTTGCAAAAGGAGAGAAAGCTAATGTGC  
+HWI-EAS443:3:79:1362:1312#0/1  
aaaYb`¥\_aaaX[a\_a^``[Sb`^aaaa\_Xa[a^^^\_G¥\_  
@HWI-EAS443:3:79:1428:1507#0/1  
GAAAGCTAATGTGCTAATTGGGCAAGGGGACGTAGTGTG  
+HWI-EAS443:3:79:1428:1507#0/1  
abba`aa`^ab[\_aaab`b`\_a\_bab^]b^S^^\_bQ]R]a  
@HWI-EAS443:3:79:1455:944#0/1  
GAGCAATCTTGCAAAAGGAGAGAAAGCTAATGTGCTAATT

+HWI-EAS443:3:79:1455:944#0/1  
` `` `bbabb]aba\_abbbbbbbbbb`bbababaaaa`ba  
@HWI-EAS443:3:79:150:331#0/1  
CCCCTTGCCCAATTAGCACATTAGCTTTCTCCTTTTGC  
+HWI-EAS443:3:79:150:331#0/1  
\_baVaab¥¥aaX`ababYYYa[b\_a^[a\_a\_aba^`Waab  
@HWI-EAS443:3:79:1520:1860#0/1  
GAGCAATCTTGCAAAAGGAGAGAAAGCTAATGTGCTAATT  
+HWI-EAS443:3:79:1520:1860#0/1  
]`Y[\_^^`¥`bY^T^Ubb\_aZabb^)`a^\_aQa\_]aUa`  
@HWI-EAS443:3:79:175:154#0/1  
GAGCAATCTTGCAAAAGGAGAGAAAGCTAATGTGCTAATT  
+HWI-EAS443:3:79:175:154#0/1  
`\_]\_V^\_a\_baa\_¥[ ]YV\_aYa\_a[ZYa\_\_¥[^aX`\_\_^^^`  
@HWI-EAS443:3:79:1761:1845#0/1  
GAGCAATCTTGCAAAAGGAGAGAAAGCTAATGTGCTAATT  
+HWI-EAS443:3:79:1761:1845#0/1  
abbbabaY`bb\_UU^^^babbaaaaaabaaaaaaa]aa  
@HWI-EAS443:3:79:202:382#0/1  
AGCTAATGTGCTAATTGGGCAAGGGGACGTAGTGTGGTA  
+HWI-EAS443:3:79:202:382#0/1  
aaaaab^`\_aaaaaa\_`¥\_\_aaa\_`a\_aY\_a\_]`a\_VV  
@HWI-EAS443:3:79:246:936#0/1  
ATCTTGCAAAAGGAGAGAAAGCTAATGTGCTAATTGGGCA  
+HWI-EAS443:3:79:246:936#0/1  
a\_`aa`a\_\_UU^\_\_a\_¥[[\_][UU]W[\_][UV]]^X^]S  
@HWI-EAS443:3:79:280:91#0/1  
GCAAAAGGAGAGAAAGCTAATGTGCTAATTGGGCAAGGGG  
+HWI-EAS443:3:79:280:91#0/1  
aaYN¥`aZS``aSa^ZG]]L¥`Ga¥FP^¥U[^ZTTUVMVZ  
@HWI-EAS443:3:79:287:1572#0/1  
GCATCAATGAAGTACTGAGCAATCTTGCAAAAGGAGAGAAAGC  
+HWI-EAS443:3:79:287:1572#0/1  
abbbbaabbbbab`aabb`aabbaaaa`aaaaaaba`a`  
@HWI-EAS443:3:79:43:1617#0/1  
CATCAATGAAGTACTGAGCAATCTTGCAAAAGGAGAGAAAGCT  
+HWI-EAS443:3:79:43:1617#0/1  
\_Y\_^0^a^WXa[[MW\_¥R^a\_ZX\_]]¥ZQ¥]Y\_H][T]¥  
@HWI-EAS443:3:79:502:489#0/1  
CAATTAGCACATTAGCTTTCTCCTTTTGCAGATTGCT  
+HWI-EAS443:3:79:502:489#0/1  
^^`^\_¥Xa`U\_\_ZYT[a^a^]X\_\_\_\_`Z^PZ\_\_VZR^^a`a  
@HWI-EAS443:3:79:609:1910#0/1  
GAAGTACTGAGCAATCTTGCAAAAGGAGAGAAAGCTAATGTGC  
+HWI-EAS443:3:79:609:1910#0/1  
¥¥]\_ZRR¥aabaaYab```aaa`U^\_XVXYV\_¥\_]`a  
@HWI-EAS443:3:79:631:1398#0/1  
GCATCAATGAAGTACTGAGCAATCTTGCAAAAGGAGAGAAAGC  
+HWI-EAS443:3:79:631:1398#0/1  
aa`a`\_Z^`ZV\_`[¥``¥Z`a`\_aa]]Z`YVY``aa[X^]



@HWI-EAS443:3:79:671:1319#0/1  
GAGCAATCTTGCAAAAGGAGAGAAAGCTAATGTGCTAATT  
+HWI-EAS443:3:79:671:1319#0/1  
]YT\_\_a^ab\_^`\_^[\_¥]bab^b]b`a`aab[aaa]¥aa  
@HWI-EAS443:3:79:729:1459#0/1  
GTCCCCTTGCCCAATTAGCACATTAGCTTTCTCTCCTTTT  
+HWI-EAS443:3:79:729:1459#0/1  
aV`bZ`W[W^`T¥[Z^ZDPS[^SGQX``X`^YZQZ\_\_\_^X  
@HWI-EAS443:3:79:740:1647#0/1  
GAAAGCTAATGTGCTAATTGGGCAAGGGGACGTAGTGTTG  
+HWI-EAS443:3:79:740:1647#0/1  
aabbTb`YVb^]baa]`a\_\_a`\_a\_]a]a^ab\_^b0`Yaa  
@HWI-EAS443:3:79:81:666#0/1  
GAGCAATCTTGCAAAAGGAGAGAAAGCTAATGTGCTAATT  
+HWI-EAS443:3:79:81:666#0/1  
aaaabaabaaaaa[a```\_aa`aYH^`a`YaaY[[]]]`\_a  
@HWI-EAS443:3:79:896:1626#0/1  
GAAAGCTAATGTGCTAATTGGGCAAGGGGACGTAGTGTTG  
+HWI-EAS443:3:79:896:1626#0/1  
¥¥^a\_ab\_¥¥^QN\_YZ¥``]baYaYHYWPW]¥SZ\_Y\_aa]  
@HWI-EAS443:3:79:988:898#0/1  
AAGCATCAATGAAGTACTGAGCAATCTTGCAAAAGGAGAGAAA  
+HWI-EAS443:3:79:988:898#0/1  
aaaaYaaa``aaa`aaaa```aaaaa\_`\_\_aa^a\_\_a`\_`  
@HWI-EAS443:3:79:995:1101#0/1  
TCTTGCAAAAGGAGAGAAAGCTAATGTGCTAATTGGGCAA  
+HWI-EAS443:3:79:995:1101#0/1  
aabbbbaababa\_baabbaa`aa^a^aaaaaaaa`^a`  
@HWI-EAS443:3:7:1022:1593#0/1  
GCAATCTTGCAAAAGGAGAGAAAGCTAATGTGCTAATTGG  
+HWI-EAS443:3:7:1022:1593#0/1  
a\_`^`aa`TZ`Z]`¥a`a`\_`\_`\_`\_X`W\_[X\_]\_\_  
@HWI-EAS443:3:7:1061:359#0/1  
CATCAATGAAGTACTGAGCAATCTTGCAAAAGGAGAGAAAGCT  
+HWI-EAS443:3:7:1061:359#0/1  
abbabbababaabaa^ba\_aaaa^aa\_^`[^aaa\_Y\_a^¥  
@HWI-EAS443:3:7:1109:952#0/1  
CTTGCAAAAGGAGAGAAAGCTAATGTGCTAATTGGGCAAG  
+HWI-EAS443:3:7:1109:952#0/1  
a\_\_`UbZV^`a\_aabbRTXWQR`\_XG\_Hbaaa]]]aa\_\_b  
@HWI-EAS443:3:7:1129:375#0/1  
CATCAATGAAGTACTGAGCAATCTTGCAAAAGGAGAGAAAGCT  
+HWI-EAS443:3:7:1129:375#0/1  
ababbbbab]bbababbb`bba\_`a`abbabbaaab^b  
@HWI-EAS443:3:7:1180:292#0/1  
GAGCAATCTTGCAAAAGGAGAGAAAGCTAATGTGCTAATT  
+HWI-EAS443:3:7:1180:292#0/1  
^`aX`aba`]¥aa¥P\_ba¥ba[a\_]a\_`aSa`R`NV\_^YX  
@HWI-EAS443:3:7:1221:170#0/1  
CAAAAGGAGAGAAAGCTAATGTGCTAATTGGGCAAGGGGA

+HWI-EAS443:3:7:1221:170#0/1  
aa¥^XU]Y[^aY]VVNW\_W`QYL[UV`¥[RVLPGVBBBB  
@HWI-EAS443:3:7:1271:1247#0/1  
GAGAAAGCTAATGTGCTAATTGGGCAAGGGGACGTAGTGT  
+HWI-EAS443:3:7:1271:1247#0/1  
`Z^Y\_Y\_baa]]\_RVV`S`^W^\_aTG¥¥`\_XKOYQ^]U¥X  
@HWI-EAS443:3:7:1293:1895#0/1  
AAAGCTAATGTGCTAATTGGGCAAGGGGACGTAGTGTGG  
+HWI-EAS443:3:7:1293:1895#0/1  
aa`a]Y`a`Z\_LS`¥\_\_a^\_G^[¥HR^^O\_TX[G¥V\_BB  
@HWI-EAS443:3:7:1299:325#0/1  
AAGCATCAATGAACTGAGCAATCTTGCAAAAGGAGAGAAA  
+HWI-EAS443:3:7:1299:325#0/1  
aaa\_aaaaaa`a\_a\_aa\_\_a`\_\_a`]^\_^a][a¥aa`W  
@HWI-EAS443:3:7:1309:369#0/1  
AGCAATCTTGCAAAAGGAGAGAAAGCTAATGTGCTAATTG  
+HWI-EAS443:3:7:1309:369#0/1  
`a^aaaYab\_H[a^\_`¥]QS[F¥^R]\_\_a[aVUXP`  
@HWI-EAS443:3:7:1416:601#0/1  
GCATCAATGAACTGAGCAATCTTGCAAAAGGAGAGAAAGC  
+HWI-EAS443:3:7:1416:601#0/1  
\_ZVSI]Y\_aa¥S`N\_V¥]]L\_`¥[^Z¥P^ZUa^¥^\_\_]R  
@HWI-EAS443:3:7:1462:817#0/1  
GCATCAATGAACTGAGCAATCTTGCAAAAGGAGAGAAAGC  
+HWI-EAS443:3:7:1462:817#0/1  
`Gwa]P[¥]^\_Q\_a]\_[`\_`M^YUWZYRS\_YW`^^]Z]\_U  
@HWI-EAS443:3:7:1703:1573#0/1  
ATCTTGCAAAAGGAGAGAAAGCTAATGTGCTAATTGGGCA  
+HWI-EAS443:3:7:1703:1573#0/1  
`aYTU0aT\_\_aZa[\_]U]SYaHUX]V`[[ZX]XNLP\_^RB  
@HWI-EAS443:3:7:171:581#0/1  
GCATCAATGAACTGAGCAATCTTGCAAAAGGAGAGAAAGC  
+HWI-EAS443:3:7:171:581#0/1  
`L¥aaa]a\_a`^`^\_\_a\_]a\_]\_^SMY\_a]]\_¥\_]N[^^  
@HWI-EAS443:3:7:1746:91#0/1  
GAGAAAGCTAATGTGCTAATTGGGCAAGGGGACGTAGTGT  
+HWI-EAS443:3:7:1746:91#0/1  
a]^Y[U`^`PGZaQaR]`Z`[`]ZGX`\_XDMQ]QNZWBB  
@HWI-EAS443:3:7:267:554#0/1  
CTTGCAAAAGGAGAGAAAGCTAATGTGCTAATTGGGCAAG  
+HWI-EAS443:3:7:267:554#0/1  
\_WTSTLR`^XTNZ]a`\_VPX`VPNXNaYYS]UXSL¥KNN¥  
@HWI-EAS443:3:7:310:422#0/1  
ATCTTGCAAAAGGAGAGAAAGCTAATGTGCTAATTGGGCA  
+HWI-EAS443:3:7:310:422#0/1  
aaaaa\_^a]MP`b\_baaa]\_a¥^^`¥\_`^`X[a\_\_\_\_`]  
@HWI-EAS443:3:7:311:275#0/1  
AGCTAATGTGCTAATTGGGCAAGGGGACGTAGTGTGGTA  
+HWI-EAS443:3:7:311:275#0/1  
¥abbaa¥¥Zaab\_`Zabb\_[`baa`\_YaYZ^L`U`][UV

@HWI-EAS443:3:7:316:1042#0/1  
AAAGGAGAGAAAGCTAATGTGCTAATTGGGCAAGGGGACG  
+HWI-EAS443:3:7:316:1042#0/1  
][\_S]Laaaa[\_a`a\_U\_abY`Y\_``[UGG\_aa\_¥VIK\_  
@HWI-EAS443:3:7:353:260#0/1  
CTTGCAAAAGGAGAGAAAGCTAATGTGCTAATTGGGCAAG  
+HWI-EAS443:3:7:353:260#0/1  
aaZZ]]RN]b¥YbabaY\_b\_a¥aaa^aUaa¥`a]P^\_[[  
@HWI-EAS443:3:7:502:1394#0/1  
ATCTTGCAAAAGGAGAGAAAGCTAATGTGCTAATTGGGCA  
+HWI-EAS443:3:7:502:1394#0/1  
[[`a`aa]]a¥¥`V^^a`]\_a\_`^Y\_a]\_Z[]]\_^a^]0]  
@HWI-EAS443:3:7:705:543#0/1  
GAGAAAGCTAATGTGCTAATTGGGCAAGGGGACGTAGTGT  
+HWI-EAS443:3:7:705:543#0/1  
^Z`\_a\_aaKZ¥aaNa\_b^W`^¥V`YXF\_[a[RZWPZaH\_B  
@HWI-EAS443:3:7:811:1095#0/1  
CAATGAACTGAGCAATCTTGCAAAAGGAGAGAAAGCTAAT  
+HWI-EAS443:3:7:811:1095#0/1  
aa\_abbbbbbaaababbbb`a`]bb`aabb\_\_a¥a`\_a  
@HWI-EAS443:3:7:907:1263#0/1  
AATGAACTGAGCAATCTTGCAAAAGGAGAGAAAGCTAATG  
+HWI-EAS443:3:7:907:1263#0/1  
ab¥aabaaaabbbbbaabbaa`\_`\_bbaaaba\_a]`a\_aa  
@HWI-EAS443:3:7:956:145#0/1  
GAGCAATCTTGCAAAAGGAGAGAAAGCTAATGTGCTAATT  
+HWI-EAS443:3:7:956:145#0/1  
`¥a^a^`\_`aa¥`a\_]a`V\_]\_\_¥]V`^W\_X^V\_]V^B  
@HWI-EAS443:3:7:989:603#0/1  
GTCCCCTTGCCCAATTAGCACATTAGCTTTCTCTCCTTTT  
+HWI-EAS443:3:7:989:603#0/1  
`NZYYU^Y[[V^`^^]PU[]¥SSVRUVOQSRVXVRY  
@HWI-EAS443:3:80:1217:375#0/1  
GAAAGCTAATGTGCTAATTGGGCAAGGGGACGTAGTGTG  
+HWI-EAS443:3:80:1217:375#0/1  
abbaa\_baabaaa\_baabbaa\_a\_a\_a^]b\_\_a^a`\_a  
@HWI-EAS443:3:80:1274:240#0/1  
GAGAAAGCTAATGTGCTAATTGGGCAAGGGGACGTAGTGT  
+HWI-EAS443:3:80:1274:240#0/1  
aaa\_\_[] [a``aaLR0¥\_`^`a\_U]^\_Yaa^\_V]a^W`Z\_]`  
@HWI-EAS443:3:80:131:732#0/1  
GAGAAAGCTAATGTGCTAATTGGGCAAGGGGACGTAGTGT  
+HWI-EAS443:3:80:131:732#0/1  
\_bba^X`a`]``aWaa`aaa`\_a\_a^V`a`^Z`aX\_aX\_Z  
@HWI-EAS443:3:80:1326:14#0/1  
CAATCTTGCAAAAGGAGAGAAAGCTAATGTGCTAATTGGG  
+HWI-EAS443:3:80:1326:14#0/1  
[¥a`bbbbbaababaabaabaab`ba\_a¥a`Yaa`abba^  
@HWI-EAS443:3:80:1346:349#0/1  
GAACTGAGCAATCTTGCAAAAGGAGAGAAAGCTAATGTGC

+HWI-EAS443:3:80:1346:349#0/1  
aabbbbbbba\_[aabb\_`[\`aba[baaba`bXa`aaa\_`Y  
@HWI-EAS443:3:80:1363:120#0/1  
GAGCAATCTTGCAAAAGGAGAGAAAGCTAATGTGCTAATT  
+HWI-EAS443:3:80:1363:120#0/1  
S[GN[\_aaT\_]¥\_a\_aX\_]\_bV\_]a[aY]aXbb\_¥ZaY`ZS  
@HWI-EAS443:3:80:1706:799#0/1  
AAGCATCAATGAACTGAGCAATCTTGCAAAAGGAGAGAAA  
+HWI-EAS443:3:80:1706:799#0/1  
a`)[`aaa`aaa`aa\_a[a\_a^aaaQ^\_^\_a\_^b`\_a¥\_  
@HWI-EAS443:3:80:194:586#0/1  
ATCTTGCAAAAGGAGAGAAAGCTAATGTGCTAATTGGGCA  
+HWI-EAS443:3:80:194:586#0/1  
`b\_^aaa^a^`a^`a`V¥`aa]]a\_FW^`aaY[¥NX¥¥  
@HWI-EAS443:3:80:195:952#0/1  
TTGCAAAAGGAGAGAAAGCTAATGTGCTAATTGGGCAAGG  
+HWI-EAS443:3:80:195:952#0/1  
abaa¥IXU^Z]b\_aaa`Xa¥]U]¥\_\_a`\_P`\_[IT¥\_`aZ  
@HWI-EAS443:3:80:275:1839#0/1  
CATCAATGAACTGAGCAATCTTGCAAAAGGAGAGAAAGCT  
+HWI-EAS443:3:80:275:1839#0/1  
^b`a^a^`^`\_aY`abba¥aa^aa`¥^`^`V\_aaaaa¥]U^  
@HWI-EAS443:3:80:35:747#0/1  
AAAGGAGAGAAAGCTAATGTGCTAATTGGGCAAGGGGACG  
+HWI-EAS443:3:80:35:747#0/1  
aYZaaY^SYaaPR^S[LUaQ[a¥WTS\_\_[[[OS]UYXS]^  
@HWI-EAS443:3:80:370:68#0/1  
AAAGCTAATGTGCTAATTGGGCAAGGGGACGTAGTGTGG  
+HWI-EAS443:3:80:370:68#0/1  
aaaaaa`[\`a]`\_a]\_`````\_\_`W`\_\_`ZZaZXZU\_Z\_\_Y  
@HWI-EAS443:3:80:489:569#0/1  
CTTGCAAAAGGAGAGAAAGCTAATGTGCTAATTGGGCAAG  
+HWI-EAS443:3:80:489:569#0/1  
abbb`bababaaabbbb`aa`aab`babaaaaa`````a  
@HWI-EAS443:3:80:530:1127#0/1  
CATCAATGAACTGAGCAATCTTGCAAAAGGAGAGAAAGCT  
+HWI-EAS443:3:80:530:1127#0/1  
a¥`^U^aa`^\_a````abaaa\_aaX¥¥`^^`\_aV]Z[Y\_[[  
@HWI-EAS443:3:80:566:1634#0/1  
GGAGAGAAAGCTAATGTGCTAATTGGGCAAGGGGACGTAG  
+HWI-EAS443:3:80:566:1634#0/1  
a`T]\_bb]ab¥Y`K\_bUaa¥Yaa¥b\_\_aa^a`Za]\_aX¥`  
@HWI-EAS443:3:80:583:1876#0/1  
GAGCAATCTTGCAAAAGGAGAGAAAGCTAATGTGCTAATT  
+HWI-EAS443:3:80:583:1876#0/1  
`¥aaabbbbaaaYU`^aba`[\`]b^`baab]Wbaababa  
@HWI-EAS443:3:80:702:544#0/1  
CTTGCAAAAGGAGAGAAAGCTAATGTGCTAATTGGGCAAG  
+HWI-EAS443:3:80:702:544#0/1  
a`baa]\_\_\_\_`aa]aaZab\_aaaaYa\_a`aa`aaa[¥^a

@HWI-EAS443:3:80:719:1932#0/1  
GAGCAATCTTGCAAAAGGAGAGAAAGCTAATGTGCTAATT  
+HWI-EAS443:3:80:719:1932#0/1  
a`VZbaaaa`aa\_a\_a`\_a\_``aa``]^`\_\_`V¥`\_aa¥\_  
@HWI-EAS443:3:80:771:716#0/1  
GAGCAATCTTGCAAAAGGAGAGAAAGCTAATGTGCTAATT  
+HWI-EAS443:3:80:771:716#0/1  
¥]]^^`b\_`b]WZaab``aaaa\_aY¥]\_\_^¥`\_Y]\_]a\_  
@HWI-EAS443:3:80:824:1864#0/1  
AGCAATCTTGCAAAAGGAGAGAAAGCTAATGTGCTAATTG  
+HWI-EAS443:3:80:824:1864#0/1  
a`b]```aa\_aabaa`^W\_baa^^a`^aa`\_`¥`\_a\_]S  
@HWI-EAS443:3:80:877:1085#0/1  
GAGCAATCTTGCAAAAGGAGAGAAAGCTAATGTGCTAATT  
+HWI-EAS443:3:80:877:1085#0/1  
``^ZW¥]\_a\_[`a^VZ`\_S]Z)`aZUV`¥XZZL\_`\_^]a  
@HWI-EAS443:3:80:922:1389#0/1  
GAGCAATCTTGCAAAAGGAGAGAAAGCTAATGTGCTAATT  
+HWI-EAS443:3:80:922:1389#0/1  
]aabba``bb`ba``]\_a]aab`aaaYaa\_aa\_aa\_a\_`a  
@HWI-EAS443:3:80:980:1325#0/1  
AATGAAGTGAATCTTGCAAAAGGAGAGAAAGCTAATG  
+HWI-EAS443:3:80:980:1325#0/1  
abb^Uabaaaabbaaaba`aaa`a]\_aaab\_`aaa```^  
@HWI-EAS443:3:81:1008:1067#0/1  
AGCTAATGTGCTAATTGGGCAAGGGGACGTAGTGTGGTA  
+HWI-EAS443:3:81:1008:1067#0/1  
¥aabaaaa`[\_aa`aaa`X`\_\_a¥a^\_\_a]\_]a]aa^]]  
@HWI-EAS443:3:81:1061:1906#0/1  
AAGCTAATGTGCTAATTGGGCAAGGGGACGTAGTGTGGT  
+HWI-EAS443:3:81:1061:1906#0/1  
[bXPPa\_a]K^¥`aT]\_PHZ`a][`]¥R\_\_]`\_W[JPUQG  
@HWI-EAS443:3:81:1118:412#0/1  
GAAAGCTAATGTGCTAATTGGGCAAGGGGACGTAGTGTGG  
+HWI-EAS443:3:81:1118:412#0/1  
aaZ¥^XFJNa`\_aRNW^ZS^W^^^SP]UUZU]GO\_SURP¥  
@HWI-EAS443:3:81:1147:453#0/1  
GAAAGCTAATGTGCTAATTGGGCAAGGGGACGTAGTGTGG  
+HWI-EAS443:3:81:1147:453#0/1  
a]`\_UU¥W``b^a¥TQVWYX\_a\_X¥a`\_¥T^\_NNaSaRFT  
@HWI-EAS443:3:81:1154:330#0/1  
GAAAGCTAATCTTGCAAAAGGAGAGAAAGCTAATGTGC  
+HWI-EAS443:3:81:1154:330#0/1  
a\_¥P¥a`\_\_]\_`[\_aa`\_[[\_a\_]^\_a^^UaN^\_\_]\_V^T  
@HWI-EAS443:3:81:1185:434#0/1  
AATGAAGTGAATCTTGCAAAAGGAGAGAAAGCTAATG  
+HWI-EAS443:3:81:1185:434#0/1  
aaa``aba\_baaaaabaaa``\_`aa`a`bbaaaa`a`a`  
@HWI-EAS443:3:81:1186:1338#0/1  
AATCTTGCAAAAGGAGAGAAAGCTAATGTGCTAATTGGGC

+HWI-EAS443:3:81:1186:1338#0/1  
aaaaa`a`a`\_^a\_\_aaaa`a`\_\_a`aZa\_a\_````\_\_^  
@HWI-EAS443:3:81:1287:734#0/1  
TACGTCCCCTTGCCCAATTAGCACATTAGCTTTCTCTCCT  
+HWI-EAS443:3:81:1287:734#0/1  
W\_VV\_Y[]X\_¥HS\_^`bb^¥a^^]b`ZX¥^¥Y` `[```\_  
@HWI-EAS443:3:81:1329:1328#0/1  
ATCAATGAACTGAGCAATCTTGCAAAAGGAGAGAAAGCTA  
+HWI-EAS443:3:81:1329:1328#0/1  
aa^aabaaaXa]X]^bab\_aab`a\_Y^a` `aaba`\_a]^\_  
@HWI-EAS443:3:81:1343:1455#0/1  
GAGAAAGCTAATGTGCTAATTGGGCAAGGGGACGTAGTGT  
+HWI-EAS443:3:81:1343:1455#0/1  
¥aaba\_b[ba`bbTa\_bb\_` `a\_a0`^\_YaaW^aaa^\_a^  
@HWI-EAS443:3:81:1389:733#0/1  
GTCCCCTTGCCCAATTAGCACATTAGCTTTCTCTCCTTTT  
+HWI-EAS443:3:81:1389:733#0/1  
ZGZa[\_[SYWUYLY]`\_`Z[LLW]¥XWY\_WY\_¥WSS]NUZ  
@HWI-EAS443:3:81:145:1982#0/1  
CATCAATGAACTGAGCAATCTTGCAAAAGGAGAGAAAGCT  
+HWI-EAS443:3:81:145:1982#0/1  
aa¥aa` `¥[^`^`\_`a\_^\_\_]^`\_`\_^[QXZ]X\_\_^`\_][  
@HWI-EAS443:3:81:1475:677#0/1  
AGCAATCTTGCAAAAGGAGAGAAAGCTAATGTGCTAATTG  
+HWI-EAS443:3:81:1475:677#0/1  
]N¥b`aaba¥Y^ZU\_baaaabbaYaaa` [bbYa[aa[Y¥Z  
@HWI-EAS443:3:81:1653:52#0/1  
CATCAATGAACTGAGCAATCTTGCAAAAGGAGAGAAAGCT  
+HWI-EAS443:3:81:1653:52#0/1  
a¥\_aaa`b\_baab]] [ab\_Jaab`\_¥`\_ab`aabba\_\_^b  
@HWI-EAS443:3:81:209:1956#0/1  
GAGCAATCTTGCAAAAGGAGAGAAAGCTAATGTGCTAATT  
+HWI-EAS443:3:81:209:1956#0/1  
a\_ZaZ^ababaaaba\_a`X`aaaa^aaa\_` [YX\_aa`a\_  
@HWI-EAS443:3:81:251:1957#0/1  
AGCACATTAGCTTTCTCTCCTTTTGCAAGATTGCTCAGTT  
+HWI-EAS443:3:81:251:1957#0/1  
aaaaXVR\_]`aOU¥`Sa\_aVL]`SS^¥^IV^]S]^]^ZS  
@HWI-EAS443:3:81:281:703#0/1  
GAGAGAAAGCTAATGTGCTAATTGGGCAAGGGGACGTAGT  
+HWI-EAS443:3:81:281:703#0/1  
aa`^aa\_V\_\_`OWaa¥a`^]^`\_`\_`\_a`^]]`aY^`]  
@HWI-EAS443:3:81:40:1456#0/1  
CATCAATGAACTGAGCAATCTTGCAAAAGGAGAGAAAGCT  
+HWI-EAS443:3:81:40:1456#0/1  
aaaa\_\_`\_¥[`a]\_\_a` ``\_^`\_`\_P\_\_^\_UW\_`\_]\_[Y]^ [  
@HWI-EAS443:3:81:472:581#0/1  
CATCAATGAACTGAGCAATCTTGCAAAAGGAGAGAAAGCT  
+HWI-EAS443:3:81:472:581#0/1  
a]Z`Z[]]]Z^¥ZX^`\_`\_`\_a\_\_`^ [SV][W\_ [¥WJY^¥¥

@HWI-EAS443:3:81:792:834#0/1  
GAGAAAGCTAATGTGCTAATTGGGCAAGGGGACGTAGTGT  
+HWI-EAS443:3:81:792:834#0/1  
aa`¥`\_\_`]a`aVa]a^\_\_\_\_\_`\_[N][^\_V^^Z\_\_Z\_^  
@HWI-EAS443:3:81:818:1104#0/1  
CCCTTGCCCAATTAGCACATTAGCTTTCTCTCCTTTTGCA  
+HWI-EAS443:3:81:818:1104#0/1  
aaaaaababbbbaabaabaaaaaaa`baaa^a```a  
@HWI-EAS443:3:81:81:1342#0/1  
GAGCAATCTTGCAAAAGGAGAGAAAGCTAATGTGCTAATT  
+HWI-EAS443:3:81:81:1342#0/1  
a\_]a```ba]``UUY[ab`]\_]aabaaaa\_aQ`aaa¥`Z  
@HWI-EAS443:3:81:852:1974#0/1  
GAACTGAGCAATCTTGCAAAAGGAGAGAAAGCTAATGTGC  
+HWI-EAS443:3:81:852:1974#0/1  
¥W¥\_OGV`b]b`baabbbab```aaa`bbaa\_aa\_aa`\_[Y  
@HWI-EAS443:3:82:1022:208#0/1  
CATCAATGAACTGAGCAATCTTGCAAAAGGAGAGAAAGCT  
+HWI-EAS443:3:82:1022:208#0/1  
]`a`¥bb`^`\_a`aa¥bb\_¥[bbba`¥Zb`^baba[`b`a  
@HWI-EAS443:3:82:1069:321#0/1  
GAACTGAGCAATCTTGCAAAAGGAGAGAAAGCTAATGTGC  
+HWI-EAS443:3:82:1069:321#0/1  
^``a`a```baaaaa[\_a\_[baab`aa]aaXa`]aaSZF  
@HWI-EAS443:3:82:1100:1622#0/1  
GAGCAATCTTGCAAAAGGAGAGAAAGCTAATGTGCTAATT  
+HWI-EAS443:3:82:1100:1622#0/1  
aVbbb\_V``][[aa]aa^Rba[a`\_a\_a\_[ab]a\_aa\_\_\_\_  
@HWI-EAS443:3:82:110:1429#0/1  
CAATTAGCACATTAGCTTTCTCTCCTTTTGCAAGATTGCT  
+HWI-EAS443:3:82:110:1429#0/1  
a`^[^a`a¥S[SZZ`b`]a]Va^^]R]]]aa^V\_Xaaa\_\_  
@HWI-EAS443:3:82:1180:349#0/1  
GGAGAGAAAGCTAATGTGCTAATTGGGCAAGGGGACGTAG  
+HWI-EAS443:3:82:1180:349#0/1  
ab`bZa`aa`¥``aaa\_a\_a]aaaaaS^\_baaaWZaZTa  
@HWI-EAS443:3:82:1344:662#0/1  
GAGCAATCTTGCAAAAGGAGAGAAAGCTAATGTGCTAATT  
+HWI-EAS443:3:82:1344:662#0/1  
¥`W`a\_bbbbbZbba\_ZX`a`b`b\_b\_aabab]b¥ba\_\_¥  
@HWI-EAS443:3:82:1371:1359#0/1  
AGAGAAAGCTAATGTGCTAATTGGGCAAGGGGACGTAGTGT  
+HWI-EAS443:3:82:1371:1359#0/1  
WQ\_\_a\_]\_QO\_bX\_[\_Z]T\_aa`^0]IYa`babb]^FRVFX  
@HWI-EAS443:3:82:1692:807#0/1  
CTGAGCAATCTTGCAAAAGGAGAGAAAGCTAATGTGCTAA  
+HWI-EAS443:3:82:1692:807#0/1  
]aaaaabbbabbbbabba``bbabbbb^bbbbbabaab`b  
@HWI-EAS443:3:82:209:303#0/1  
GAAAGCTAATGTGCTAATTGGGCAAGGGGACGTAGTGTG

+HWI-EAS443:3:82:209:303#0/1  
aaa`aaa`Waa]a`]]Y\_\_adW[ZRa``YW^aSM#W^^\_\_  
@HWI-EAS443:3:82:233:1194#0/1  
GCAAAAAGGAGAGAAAAGCTAATGTGCTAATTGGGCAAGGGG  
+HWI-EAS443:3:82:233:1194#0/1  
]]UQ\_aa\_U\_Y^]a\_aa`]a`\_Q^` `` `\_\_^a` `\_\_^XX`  
@HWI-EAS443:3:82:267:331#0/1  
AGCTAATGTGCTAATTGGGCAAGGGGACGTAGTGTGGTA  
+HWI-EAS443:3:82:267:331#0/1  
\_`bbb`b\_T]baa\_baba^`Y#^aaaa`^Z` `Za\_aabZ[  
@HWI-EAS443:3:82:336:1566#0/1  
TGCAAAAAGGAGAGAAAAGCTAATGTGCTAATTGGGCAAGGG  
+HWI-EAS443:3:82:336:1566#0/1  
aabaZ^Yaa[abba]V\_a` [ `a` ]\_ba`a` `]a`a`#a`]  
@HWI-EAS443:3:82:355:1102#0/1  
AACTGAGCAATCTTGCAAAAAGGAGAGAAAAGCTAATGTGCT  
+HWI-EAS443:3:82:355:1102#0/1  
W#QW#ba` `#`^Ya#aZQUa\_XU#\_ab]W\_]ULLaY` [ `  
@HWI-EAS443:3:82:398:1174#0/1  
GCAATCTTGCAAAAAGGAGAGAAAAGCTAATGTGCTAATTGG  
+HWI-EAS443:3:82:398:1174#0/1  
a`S#WSZ`Za^Z`]aX#QT]GRRWaI^]ZUFU\_[Q^XGJM  
@HWI-EAS443:3:82:438:1346#0/1  
CTTGCAAAAAGGAGAGAAAAGCTAATGTGCTAATTGGGCAAG  
+HWI-EAS443:3:82:438:1346#0/1  
aaaaaa`\_^aa^aaba\_aaYOZaa\_a` `]aa`^ [ ` \_\_\_ `  
@HWI-EAS443:3:82:453:1960#0/1  
AAGGAGAGAAAAGCTAATGTGCTAATTGGGCAAGGGGACGT  
+HWI-EAS443:3:82:453:1960#0/1  
^Y` `Y`#Z#`]Taaaaab\_aabb`aaH]]Va\_Y]aZ]aR  
@HWI-EAS443:3:82:484:32#0/1  
AGCTAATGTGCTAATTGGGCAAGGGGACGTAGTGTGGTA  
+HWI-EAS443:3:82:484:32#0/1  
abaa[\_bbabbbaZbbbbbaabb\_a` `b]\_a^b`aadWV  
@HWI-EAS443:3:82:507:1775#0/1  
CCCTTGCCCAATTAGCACATTAGCTTTCTCCTTTTGCA  
+HWI-EAS443:3:82:507:1775#0/1  
abaP\_`aX` `\_\_ab^\_VKaUV`]#XY`]UI\_\_V\_]QS]S]  
@HWI-EAS443:3:82:770:137#0/1  
AGCTAATGTGCTAATTGGGCAAGGGGACGTAGTGTGGTA  
+HWI-EAS443:3:82:770:137#0/1  
\_Z#^a`\_#\_H]]a`U]]ba[[\_Z^a`aa`bS\_aVaX`a\_H#  
@HWI-EAS443:3:82:849:40#0/1  
CATCAATGAACTGAGCAATCTTGCAAAAAGGAGAGAAAAGCT  
+HWI-EAS443:3:82:849:40#0/1  
]Ya` `abb\_^^bbWW\_^ba\_a`ba\_ZYW`a\_baa^^#`Z^  
@HWI-EAS443:3:82:884:1979#0/1  
CATCAATGAACTGAGCAATCTTGCAAAAAGGAGAGAAAAGCT  
+HWI-EAS443:3:82:884:1979#0/1  
aa^a[aZZ]aaZEZY` `aa` ` `aa\_aZ[[^\_a\_a\_]`]



@HWI-EAS443:3:82:990:1335#0/1  
GAGCAATCTTGCAAAGGAGAGAAAGCTAATGTGCTAATT  
+HWI-EAS443:3:82:990:1335#0/1  
a`\_aaaaaab`aaaa`a\_V^aaa`a^`^`^`\_aa  
@HWI-EAS443:3:83:1022:464#0/1  
GAGCAATCTTGCAAAGGAGAGAAAGCTAATGTGCTAATT  
+HWI-EAS443:3:83:1022:464#0/1  
aaa`a`babbb`baaWab\_b`\_baababaaaaab\_a]aa\_  
@HWI-EAS443:3:83:1046:1551#0/1  
AAGGAGAGAAAGCTAATGTGCTAATTGGGCAAGGGGACGT  
+HWI-EAS443:3:83:1046:1551#0/1  
aabaabbabb`\_ababbZa^a`aaaa]\_]`aa`\_^aV  
@HWI-EAS443:3:83:1212:300#0/1  
CATCAATGAAGTGAAGCAATCTTGCAAAGGAGAGAAAGCT  
+HWI-EAS443:3:83:1212:300#0/1  
\_\_a\_bbb`abaaa]aab`aT^aSYaa`abaaaa\_aaWa  
@HWI-EAS443:3:83:1227:1444#0/1  
AGAGAAAGCTAATGTGCTAATTGGGCAAGGGGACGTAGTG  
+HWI-EAS443:3:83:1227:1444#0/1  
[`^bVZ]b^b\_WQW[`b¥`abUb\_^^^`XVS`[aM\_]W^  
@HWI-EAS443:3:83:1240:1085#0/1  
GAAAGCTAATGTGCTAATTGGGCAAGGGGACGTAGTGTTG  
+HWI-EAS443:3:83:1240:1085#0/1  
`bba\_ab`aba\_aaaaaba`a\_U\_¥`[\_a]X`^\_aZa`\_  
@HWI-EAS443:3:83:1281:1083#0/1  
AGCTAATGTGCTAATTGGGCAAGGGGACGTAGTGTTGGTA  
+HWI-EAS443:3:83:1281:1083#0/1  
aa`X`\_X]`bbaa`¥b`XWaN\_]W[G\_OM]a``VY  
@HWI-EAS443:3:83:1665:1720#0/1  
GAGCAATCTTGCAAAGGAGAGAAAGCTAATGTGCTAATT  
+HWI-EAS443:3:83:1665:1720#0/1  
`bbbaabbbbVbbaabbabVbbabbZbaabbU`abaabb  
@HWI-EAS443:3:83:1698:1105#0/1  
CATCAATGAAGTGAAGCAATCTTGCAAAGGAGAGAAAGCT  
+HWI-EAS443:3:83:1698:1105#0/1  
a[]\_R^bba`a`\_a¥ab\_ab`^V`\_Y]aY[aaaa\_abU`  
@HWI-EAS443:3:83:307:100#0/1  
AAGCTAATGTGCTAATTGGGCAAGGGGACGTAGTGTTGGT  
+HWI-EAS443:3:83:307:100#0/1  
aaa`aaaa\_a`aa\_a`a`a^Xa`a`X]aZ`\_Za\_^`]G  
@HWI-EAS443:3:83:341:1569#0/1  
GAAAGCTAATGTGCTAATTGGGCAAGGGGACGTAGTGTTG  
+HWI-EAS443:3:83:341:1569#0/1  
^b`]bba[a\_\_\_\_`aabbbaa¥abaaa`\_]`a^\_a^a]``  
@HWI-EAS443:3:83:427:1759#0/1  
GCATCAATGAAGTGAAGCAATCTTGCAAAGGAGAGAAAGC  
+HWI-EAS443:3:83:427:1759#0/1  
a]aa\_YI^U]][]S]¥RW`aa`[\_`W[aa]Z\_a\_a]a\_  
@HWI-EAS443:3:83:511:918#0/1  
ACACTACGTCCCCTTGCCCAATTAGCACATTAGCTTTCTC

+HWI-EAS443:3:83:511:918#0/1  
`\_^LLT\_ZOF]^XSKPNTSLLYTWZ^\_] [NTZNMUWZV  
@HWI-EAS443:3:83:516:683#0/1  
CAATGAACTGAGCAATCTTGCAAAAGGAGAGAAAGCTAAT  
+HWI-EAS443:3:83:516:683#0/1  
aaab^[Q[aaVaa`^a`a\_a\_W\_] [X^¥aa`]Y]aZ\_\_Y\_  
@HWI-EAS443:3:83:554:121#0/1  
ATCTTGCAAAAGGAGAGAAAGCTAATGTGCTAATTGGGCA  
+HWI-EAS443:3:83:554:121#0/1  
a`a\_\_a\_\_\_\_\_`\_^Ua`\_]\_¥]^X\_[Z`^Z^]\_`W^Z]^Z  
@HWI-EAS443:3:83:577:28#0/1  
ATGAACTGAGCAATCTTGCAAAAGGAGAGAAAGCTAATGT  
+HWI-EAS443:3:83:577:28#0/1  
`¥a`baZ\_\_``[\_bZ`\_baaWLYba\_a\_aa`ab]a`Yaa]  
@HWI-EAS443:3:83:649:982#0/1  
AGCTAATGTGCTAATTGGGCAAGGGGACGTAGTGTGGTA  
+HWI-EAS443:3:83:649:982#0/1  
abb\_]X`ZQ]a¥NV]`X]\_a^]`^¥]MQ`^PXaU]J]a[LP  
@HWI-EAS443:3:83:671:408#0/1  
GCAAAAGGAGAGAAAGCTAATGTGCTAATTGGGCAAGGGG  
+HWI-EAS443:3:83:671:408#0/1  
aaaaa`a¥a¥aa]Zaaaa`ab\_a`aa]``aaa\_`\_aa]^  
@HWI-EAS443:3:83:686:1783#0/1  
AGCTAATGTGCTAATTGGGCAAGGGGACGTAGTGTGGTA  
+HWI-EAS443:3:83:686:1783#0/1  
[`aaaaa]XSaa\_Q]\_aZVWa`]^`¥Waa\_WYa0`¥^Z]SW  
@HWI-EAS443:3:83:784:468#0/1  
ATGAACTGAGCAATCTTGCAAAAGGAGAGAAAGCTAATGT  
+HWI-EAS443:3:83:784:468#0/1  
a\_Z]aaab¥^`^`^`\_\_\_\_M]]\_I¥Y`baaaaZ`[^Q`a`Y  
@HWI-EAS443:3:83:793:1756#0/1  
GAGAAAGCTAATGTGCTAATTGGGCAAGGGGACGTAGTGT  
+HWI-EAS443:3:83:793:1756#0/1  
``\_`aZ`Ya^Tab[bbab`ba\_]\_b[aaba\_\_aa[`\_^Xa  
@HWI-EAS443:3:83:832:61#0/1  
GAGCAATCTTGCAAAAGGAGAGAAAGCTAATGTGCTAATT  
+HWI-EAS443:3:83:832:61#0/1  
aababaa\_bab[\_\_\_\_`aab`b\_aa`^a\_a\_\_aa`a\_`aaa\_  
@HWI-EAS443:3:83:887:318#0/1  
ATGAACTGAGCAATCTTGCAAAAGGAGAGAAAGCTAATGT  
+HWI-EAS443:3:83:887:318#0/1  
a`\_V`¥ababa\_W\_aa`a]\_]`^`\_\_aaaa¥\_a]a[\_\_aX  
@HWI-EAS443:3:83:935:546#0/1  
GAAAGCTAATGTGCTAATTGGGCAAGGGGACGTAGTGTGG  
+HWI-EAS443:3:83:935:546#0/1  
a[^]`^]¥\_`Z]X`YU```]`\_RYX^]¥^T[aY]aYaZ[]  
@HWI-EAS443:3:84:1066:1128#0/1  
TTGCAAAAGGAGAGAAAGCTAATGTGCTAATTGGGCAAGG  
+HWI-EAS443:3:84:1066:1128#0/1  
^`aX[Zaa`¥\_a\_¥aaaa]a`aa`[``a\_`aaa^[`a^a^

@HWI-EAS443:3:84:1109:1178#0/1  
AGCTAATGTGCTAATTGGGCAAGGGGACGTAGTGTGGTA  
+HWI-EAS443:3:84:1109:1178#0/1  
a`a\_b¥L\_Ya^^[\_`a`a\_a\_Za\_ZY`]SbV`[``\_¥^  
@HWI-EAS443:3:84:1325:363#0/1  
AAAGGAGAGAAAGCTAATGTGCTAATTGGGCAAGGGGACG  
+HWI-EAS443:3:84:1325:363#0/1  
`ababXbaaZabb`a]ab\_¥b`babaabaa]`\_bWaa\_^a  
@HWI-EAS443:3:84:1415:1665#0/1  
ATCTTGCAAAAGGAGAGAAAGCTAATGTGCTAATTGGGCA  
+HWI-EAS443:3:84:1415:1665#0/1  
aa`aa]\_a\_\_aa`^\_aa`\_a`a\_a\_`^^¥`a`\_Y`^[X\_  
@HWI-EAS443:3:84:144:1049#0/1  
GCAAAAGGAGAGAAAGCTAATGTGCTAATTGGGCAAGGGG  
+HWI-EAS443:3:84:144:1049#0/1  
a[FX¥TY]Q]Za` `[a\_]¥]`¥`a` `[^\_^\_\_\_\_]^  
@HWI-EAS443:3:84:1687:634#0/1  
AAAGCTAATGTGCTAATTGGGCAAGGGGACGTAGTGTGG  
+HWI-EAS443:3:84:1687:634#0/1  
a^¥\_]ba]]`^a^bRV`WXW¥\_a`^\_¥OS\_baaY¥`¥^W[  
@HWI-EAS443:3:84:1696:927#0/1  
CTTGCAAAAGGAGAGAAAGCTAATGTGCTAATTGGGCAAG  
+HWI-EAS443:3:84:1696:927#0/1  
a`b\_\_ba`aababbaab]\_Yaaa]`aaaa`ba\_\_S\_`[\_  
@HWI-EAS443:3:84:246:716#0/1  
GAGAAAGCTAATGTGCTAATTGGGCAAGGGGACGTAGTGT  
+HWI-EAS443:3:84:246:716#0/1  
aaa\_]a^^a`a\_bN` `````aa\_aa\_RZa`\_\_^a[ZaGaY  
@HWI-EAS443:3:84:262:512#0/1  
AGCTAATGTGCTAATTGGGCAAGGGGACGTAGTGTGGTA  
+HWI-EAS443:3:84:262:512#0/1  
aZZaa^aaV`aa\_aa`\_a\_Ya\_[\_X`\_]V\_T]Y^]\_S]  
@HWI-EAS443:3:84:266:186#0/1  
AAGCTAATGTGCTAATTGGGCAAGGGGACGTAGTGTGGT  
+HWI-EAS443:3:84:266:186#0/1  
^\_¥a\_\_JUU0[XZb`a[\_X`^aR]]ZbVU\_FXZLZZ][YL  
@HWI-EAS443:3:84:291:1760#0/1  
CCCTTGCCCAATTAGCACATTAGCTTTCTCTCTTTTGGCA  
+HWI-EAS443:3:84:291:1760#0/1  
abb`ababaaaba`baaba`baaaaaabaaaa`\_aaa  
@HWI-EAS443:3:84:381:1680#0/1  
GAAAGCTAATGTGCTAATTGGGCAAGGGGACGTAGTGTGG  
+HWI-EAS443:3:84:381:1680#0/1  
aWS¥\_baa\_aa[]`aa`aa\_a\_b`a\_a\_a\_``\_X¥S¥U`\_`  
@HWI-EAS443:3:84:392:1725#0/1  
GAAAGCTAATGTGCTAATTGGGCAAGGGGACGTAGTGTGG  
+HWI-EAS443:3:84:392:1725#0/1  
abab]a[aaaaY]aa`ZZ]¥YZab]]]WZ`\_`Waa\_a\_`^  
@HWI-EAS443:3:84:408:378#0/1  
CATCAATGAACTGAGCAATCTTGCAAAAGGAGAGAAAGCT

+HWI-EAS443:3:84:408:378#0/1  
H\_^`a`[Z`Zaaba``abbb\_Ub`^[b\_\_QaXbbbaaT[  
@HWI-EAS443:3:84:414:1918#0/1  
GAAAGCTAATGTGCTAATTGGGCAAGGGGACGTAGTGTG  
+HWI-EAS443:3:84:414:1918#0/1  
\_`¥\_`aa]VZa\$ZX[[]]¥a`a^X]YVTQ^]TRZS]Y[¥  
@HWI-EAS443:3:84:495:63#0/1  
CTTGCAAAAGGAGAGAAAGCTAATGTGCTAATTGGGCAAG  
+HWI-EAS443:3:84:495:63#0/1  
`b\_bb```]bb^baaa\_`b\_aa`ab^aa``\_aa`\_a^`\_`  
@HWI-EAS443:3:84:571:114#0/1  
AGCTAATGTGCTAATTGGGCAAGGGGACGTAGTGTGGTA  
+HWI-EAS443:3:84:571:114#0/1  
[`QV[aba]a``aaba^aaa\_b`^`¥ab¥]b\_a`aa`[\_  
@HWI-EAS443:3:84:589:1131#0/1  
GAAAGCTAATGTGCTAATTGGGCAAGGGGACGTAGTGTG  
+HWI-EAS443:3:84:589:1131#0/1  
abbaba^`^`^U\_a`UZ`\_]Y[\_¥``XV\_[\_]aR[aYaVaa  
@HWI-EAS443:3:84:690:847#0/1  
AATGAAGTGAATCTTGCAAAAGGAGAGAAAGCTAATG  
+HWI-EAS443:3:84:690:847#0/1  
`[bb\_`b``[^baabbaaaa`]aa\_`b``a¥aaaa``a  
@HWI-EAS443:3:84:728:405#0/1  
GAGCAATCTTGCAAAAGGAGAGAAAGCTAATGTGCTAATT  
+HWI-EAS443:3:84:728:405#0/1  
a]a^¥^\_a`ba^Z¥UXa]^^`a`]`a]`^^`aSaZa][a^  
@HWI-EAS443:3:84:776:574#0/1  
AAGCATCAATGAAGTGAATCTTGCAAAAGGAGAGAAA  
+HWI-EAS443:3:84:776:574#0/1  
aa```a```a^]]`\_]aa`a`\_]aa\_`Z¥U^¥Z`a\_`\_\_  
@HWI-EAS443:3:84:857:200#0/1  
CAATGAAGTGAATCTTGCAAAAGGAGAGAAAGCTAAT  
+HWI-EAS443:3:84:857:200#0/1  
abbbbabbbbabbbabaabbaaa\_abbabbbb`ab\_aaaa  
@HWI-EAS443:3:84:870:1394#0/1  
GCTTTCTCTCTTTTGAAGATTGCTCAGTTCATTGATGC  
+HWI-EAS443:3:84:870:1394#0/1  
a[[^W]Y\_GT]]^YY]YSP]IHWPY^]OFJRMZYDSWFL]  
@HWI-EAS443:3:84:877:562#0/1  
GCAAAAGGAGAGAAAGCTAATGTGCTAATTGGGCAAGGGG  
+HWI-EAS443:3:84:877:562#0/1  
aaVP¥\_\_]]`a[PQ\_Ta^YP\_0`]TZ[`Y\_V\_VXV\_¥]]  
@HWI-EAS443:3:84:879:585#0/1  
GCATCAATGAAGTGAATCTTGCAAAAGGAGAGAAAGC  
+HWI-EAS443:3:84:879:585#0/1  
a`¥^aaaa``aa\_Waa\_aaa\_aa\_^a\_^a`]a\_`aY\_aO  
@HWI-EAS443:3:84:896:471#0/1  
GAAAGCTAATGTGCTAATTGGGCAAGGGGACGTAGTGTG  
+HWI-EAS443:3:84:896:471#0/1  
^bbaba`^aba]baaa`aaaa`\_Vaaba`\_bR]aXa]^`

@HWI-EAS443:3:84:897:1053#0/1  
ATGAACTGAGCAATCTTGCAAAGGAGAGAAAGCTAATGT  
+HWI-EAS443:3:84:897:1053#0/1  
\_a^`Y`b\_T¥bbababbbba`^`babaab`\_^abaaa`Y  
@HWI-EAS443:3:84:912:1573#0/1  
AAAGCTAATGTGCTAATTGGGCAAGGGGACGTAGTGTGG  
+HWI-EAS443:3:84:912:1573#0/1  
`^^V^aa]\_a]\_`a\_a`\_\_a^\_\_Z[^^^]\_`¥^\_]\_^]  
@HWI-EAS443:3:84:952:231#0/1  
AGGAGAGAAAGCTAATGTGCTAATTGGGCAAGGGGACGTA  
+HWI-EAS443:3:84:952:231#0/1  
abbabbbbaa`b`¥`a`aaaaaaaaaaaa`aaaa^\_a^\_  
@HWI-EAS443:3:84:972:1467#0/1  
CATCAATGAACTGAGCAATCTTGCAAAGGAGAGAAAGCT  
+HWI-EAS443:3:84:972:1467#0/1  
a```bbaaaaa\_Y`ab]aaaa^\_Z\_^`¥`]aaaa`YV\_  
@HWI-EAS443:3:84:995:583#0/1  
CATCAATGAACTGAGCAATCTTGCAAAGGAGAGAAAGCT  
+HWI-EAS443:3:84:995:583#0/1  
^Y^SMYbVaab[U^b\_a\_S`bbaaa^)`Y```]WY¥[¥  
@HWI-EAS443:3:85:1004:726#0/1  
GAGCAATCTTGCAAAGGAGAGAAAGCTAATGTGCTAATT  
+HWI-EAS443:3:85:1004:726#0/1  
aababbbbbbbaabababab`abb  
@HWI-EAS443:3:85:1244:1734#0/1  
ATCTTGCAAAGGAGAGAAAGCTAATGTGCTAATTGGGCA  
+HWI-EAS443:3:85:1244:1734#0/1  
`aaaa`Y`NZ\_bVI\_\_`a\_aaa\_`]PL[PV``^a^TUJ  
@HWI-EAS443:3:85:130:242#0/1  
ACATTAGCTTTCTCTCTTTTGCAAGATTGCTCAGTTCAT  
+HWI-EAS443:3:85:130:242#0/1  
`^`a\_aa\_\_aaa\_]ZQT\_a[\_\_\_\_[¥[¥W^X[`¥^XQWS]  
@HWI-EAS443:3:85:1333:344#0/1  
AGCTAATGTGCTAATTGGGCAAGGGGACGTAGTGTGGTA  
+HWI-EAS443:3:85:1333:344#0/1  
ab``\_aab`a\_aabaa\_b`ab[[baSYb^`\_]b\_aaa\_  
@HWI-EAS443:3:85:1472:802#0/1  
CTTGCAAAGGAGAGAAAGCTAATGTGCTAATTGGGCAAG  
+HWI-EAS443:3:85:1472:802#0/1  
abbbabbb`aaab`aab\_^bbbbb\_b^bb`bbbb`\_```  
@HWI-EAS443:3:85:1476:1325#0/1  
GAAAGCTAATGTGCTAATTGGGCAAGGGGACGTAGTGTGG  
+HWI-EAS443:3:85:1476:1325#0/1  
a^a`¥R[a^]R^J]ZXa¥`X`Ya\_a\_]aZP`GX¥U^^`\_  
@HWI-EAS443:3:85:1521:80#0/1  
ATGAACTGAGCAATCTTGCAAAGGAGAGAAAGCTAATGT  
+HWI-EAS443:3:85:1521:80#0/1  
aba`a^ab``\_a`a^aba]ZVU^aXUYV^`\_]a¥`^Z``Z  
@HWI-EAS443:3:85:1558:182#0/1  
GAAAGCTAATGTGCTAATTGGGCAAGGGGACGTAGTGTGG

+HWI-EAS443:3:85:1558:182#0/1  
`\_T]`[aa\_]aTZW^\_\_\_X\_]\_V^\_\_Y]^XZ]XZ`UXYYU  
@HWI-EAS443:3:85:162:1434#0/1  
GAGCAATCTTGCAAAAGGAGAGAAAGCTAATGTGCTAATT  
+HWI-EAS443:3:85:162:1434#0/1  
``\_aXVvaabaXabb`Z`\_Xaba¥TW`YZa^a^a^`a`a  
@HWI-EAS443:3:85:1774:1302#0/1  
ATCAATGAAGTGAATCTTGCAAAAGGAGAGAAAGCTA  
+HWI-EAS443:3:85:1774:1302#0/1  
aaa`b`bbb\_b`aa\_baaaaab^aaa`a`\_`aa`]aa\_\_\_\_  
@HWI-EAS443:3:85:183:345#0/1  
GAAAGCTAATGTGCTAATTGGGCAAGGGGACGTAGTGTG  
+HWI-EAS443:3:85:183:345#0/1  
aaa\_aaa`aa^a\_aYa`\_aa\_\_\_\_V^`\_a^[aW]\_Za]]  
@HWI-EAS443:3:85:21:794#0/1  
GAACTGAGCAATCTTGCAAAAGGAGAGAAAGCTAATGTG  
+HWI-EAS443:3:85:21:794#0/1  
abab[X]a`\_aabbabbabaa`a`baaaa\_aaaaX`a]\_\_\_\_  
@HWI-EAS443:3:85:222:1447#0/1  
AGCTAATGTGCTAATTGGGCAAGGGGACGTAGTGTGGTA  
+HWI-EAS443:3:85:222:1447#0/1  
aa^Z`U]¥XV¥a`[aa`\_a`\_]Y`^]\_`]R\_Z`SX\_]Q¥  
@HWI-EAS443:3:85:247:686#0/1  
GCATCAATGAAGTGAATCTTGCAAAAGGAGAGAAAGC  
+HWI-EAS443:3:85:247:686#0/1  
aaa\_abaaaVX`\_a^a`b^`]\_^`a[W\_Va`¥a``¥^\_]`^  
@HWI-EAS443:3:85:273:1365#0/1  
GAGAAAGCTAATGTGCTAATTGGGCAAGGGGACGTAGTGT  
+HWI-EAS443:3:85:273:1365#0/1  
XR`bb`U\_Y\_\_[aR`^\_KR`\_`baa``^[[¥\_]\_]U`MZG  
@HWI-EAS443:3:85:281:45#0/1  
CATCAATGAAGTGAATCTTGCAAAAGGAGAGAAAGC  
+HWI-EAS443:3:85:281:45#0/1  
a`bbbbbb`babbaabaababaa`a`\_`ba\_aaba\_\_a`a  
@HWI-EAS443:3:85:338:1948#0/1  
GCAAAAGGAGAGAAAGCTAATGTGCTAATTGGGCAAGGGG  
+HWI-EAS443:3:85:338:1948#0/1  
abbbb`b`aaa`baaaaaaaaa\_aaaaaaaV¥aaaaX\_\_  
@HWI-EAS443:3:85:383:1380#0/1  
ATCTTGCAAAAGGAGAGAAAGCTAATGTGCTAATTGGGCA  
+HWI-EAS443:3:85:383:1380#0/1  
aabaaba`^`[^]\_baa`\_a\_aaa^aa]``¥\_a\_\_]\_\_a]  
@HWI-EAS443:3:85:409:247#0/1  
GAGCAATCTTGCAAAAGGAGAGAAAGCTAATGTGCTAATT  
+HWI-EAS443:3:85:409:247#0/1  
a]aaaaa]`abaa`R[a`\_a`a\_a\_a^``ZaaXa]a]`\_\_  
@HWI-EAS443:3:85:411:1034#0/1  
AGAGAAAGCTAATGTGCTAATTGGGCAAGGGGACGTAGTG  
+HWI-EAS443:3:85:411:1034#0/1  
aba`aa]abbaaab\_a`a\_aa\_aaa\_\_\_\_aa``^^`U]]Z\_

@HWI-EAS443:3:85:422:1619#0/1  
CATCAATGAACTGAGCAATCTTGCAAAAGGAGAGAAAGCT  
+HWI-EAS443:3:85:422:1619#0/1  
`Y¥`\_ZQ\_aa^0[U]WZ\_\_dWW¥YYTY]YX\_`[\_R^\_\_R  
@HWI-EAS443:3:85:46:201#0/1  
CAATCTTGCAAAAGGAGAGAAAGCTAATGTGCTAATTGGG  
+HWI-EAS443:3:85:46:201#0/1  
a¥T¥W¥`^¥XV\_\_¥¥T¥ZMJW][TZa\_^Y[RPZZXWZ  
@HWI-EAS443:3:85:533:698#0/1  
AAGCATCAATGAACTGAGCAATCTTGCAAAAGGAGAGAAA  
+HWI-EAS443:3:85:533:698#0/1  
aaa\_[^]a`a]P]]Z¥¥`\_]a\_\_\_\_^]S^a\_¥a\_`^VY  
@HWI-EAS443:3:85:548:970#0/1  
GCATCAATGAACTGAGCAATCTTGCAAAAGGAGAGAAAGC  
+HWI-EAS443:3:85:548:970#0/1  
\_YS]]QV`aX^Ya]Y][¥X[a]RYOXSRSZYM¥\_[]BBBB  
@HWI-EAS443:3:85:619:515#0/1  
GAAAGCTAATGTGCTAATTGGGCAAGGGGACGTAGTGTG  
+HWI-EAS443:3:85:619:515#0/1  
`bbabbb`abbab`baaba`abbb`bbaaab`ab`a]b`  
@HWI-EAS443:3:85:674:1344#0/1  
ATCAATGAACTGAGCAATCTTGCAAAAGGAGAGAAAGCTA  
+HWI-EAS443:3:85:674:1344#0/1  
]\_\_`Z¥¥HZ`^[W\_]\_^`a]\_^M[ZXU¥W[]a``]]]P  
@HWI-EAS443:3:85:796:205#0/1  
AAGCATCAATGAACTGAGCAATCTTGCAAAAGGAGAGAAA  
+HWI-EAS443:3:85:796:205#0/1  
aaa`a\_\_\_\_`a`\_`¥a\_\_\_\_`^`^]\_]\_^]\_]\_]\_]\_]`\_[]  
@HWI-EAS443:3:85:909:670#0/1  
CATCAATGAACTGAGCAATCTTGCAAAAGGAGAGAAAGCT  
+HWI-EAS443:3:85:909:670#0/1  
YP\_ZWX\_\_P]S\_\_\_\_a¥`\_]a^\_a]]`\_\_a`W`[[aZ\_```  
@HWI-EAS443:3:86:1021:367#0/1  
CCTTGCCCAATTAGCACATTAGCTTTCTCTCCTTTTGCAA  
+HWI-EAS443:3:86:1021:367#0/1  
aabbabbbbbbabbabbbbbbabbab`babaabbaa`ba  
@HWI-EAS443:3:86:104:1106#0/1  
GAGAGAAAGCTAATGTGCTAATTGGGCAAGGGGACGTAGT  
+HWI-EAS443:3:86:104:1106#0/1  
`\_`]]`¥aaaW]aLZ\_^]U\_a^]`aW¥[XX^T^`R¥`G  
@HWI-EAS443:3:86:1063:1308#0/1  
GGAGAGAAAGCTAATGTGCTAATTGGGCAAGGGGACGTAG  
+HWI-EAS443:3:86:1063:1308#0/1  
`baab^b\_`aaaaaaaaaaaa`aa`a`\_`aa`X`a]]\_`  
@HWI-EAS443:3:86:1204:1927#0/1  
ATCAATGAACTGAGCAATCTTGCAAAAGGAGAGAAAGCTA  
+HWI-EAS443:3:86:1204:1927#0/1  
XV^¥a`b^aJa^bb^bbb[``a[``^a`a`baa^`\_NYa  
@HWI-EAS443:3:86:122:29#0/1  
GCATCAATGAACTGAGCAATCTTGCAAAAGGAGAGAAAGC





@HWI-EAS443:3:86:555:666#0/1  
TGCAAAGGAGAGAAAGCTAATGTGCTAATTGGGCAAGGG  
+HWI-EAS443:3:86:555:666#0/1  
aba`a\_aab\_aba\_`aaa`aa`\_\_\_aaaaa]a`a^a\_\_  
@HWI-EAS443:3:87:101:1200#0/1  
GAAAGCTAATGTGCTAATTGGGCAAGGGGACGTAGTGTG  
+HWI-EAS443:3:87:101:1200#0/1  
a\_`b`bbaKb`Ybbb^ababb``[ab\_^aaa^XP¥M^T[\_  
@HWI-EAS443:3:87:1052:154#0/1  
GCATCAATGAACTGAGCAATCTTGCAAAGGAGAGAAAGC  
+HWI-EAS443:3:87:1052:154#0/1  
`N`UNZWaa\_ZUW¥WXY^[]\_\_a]VXWZ^\_ZaX]]WY^X  
@HWI-EAS443:3:87:1100:382#0/1  
AGGAGAGAAAGCTAATGTGCTAATTGGGCAAGGGGACGTA  
+HWI-EAS443:3:87:1100:382#0/1  
abbab`bb`b`bbabbbaabbab\_bbbba\_bbbb`ab\_a  
@HWI-EAS443:3:87:115:1503#0/1  
CAATGAACTGAGCAATCTTGCAAAGGAGAGAAAGCTAAT  
+HWI-EAS443:3:87:115:1503#0/1  
`XK`]^`¥a\_[\_\_a]aa\_^`^`^X`^`\_`aaYW]^¥]ZM[  
@HWI-EAS443:3:87:119:580#0/1  
GAGAAAGCTAATGTGCTAATTGGGCAAGGGGACGTAGTGT  
+HWI-EAS443:3:87:119:580#0/1  
WWZSZXVaa`^¥[FZ`[]a`a¥\_U[`]a`\_Zaa^]`Z`N  
@HWI-EAS443:3:87:1205:1148#0/1  
TGCAAAGGAGAGAAAGCTAATGTGCTAATTGGGCAAGGG  
+HWI-EAS443:3:87:1205:1148#0/1  
ab\_a^`\_`\_ab`abaaaab^aa\_a`a`\_abZ¥\_S^Y`\_¥  
@HWI-EAS443:3:87:1216:1185#0/1  
GAAAGCTAATGTGCTAATTGGGCAAGGGGACGTAGTGTG  
+HWI-EAS443:3:87:1216:1185#0/1  
`a```]ba`ba\_b\_b^`baa`a`a\_a^^^\_U`^`^[Za\_\_`  
@HWI-EAS443:3:87:1270:1229#0/1  
GTCCCCTTGCCCAATTAGCACATTAGCTTTCTCCTTTT  
+HWI-EAS443:3:87:1270:1229#0/1  
aS\_\_a\_\_aaa^aaaa`a\_]a`aa\_]`a]a\_\_^¥aa`^  
@HWI-EAS443:3:87:1489:1035#0/1  
AAGCTAATGTGCTAATTGGGCAAGGGGACGTAGTGTGTTGGT  
+HWI-EAS443:3:87:1489:1035#0/1  
aaa`a`aa\_\_aWaaaaa\_\_Za\_aaaa\_]b^]`ZaW^a^X  
@HWI-EAS443:3:87:1522:635#0/1  
GAGCAATCTTGCAAAGGAGAGAAAGCTAATGTGCTAATT  
+HWI-EAS443:3:87:1522:635#0/1  
a`bbbabbbbaaab]ab]abbb`a]`b`b`ba^a^aaaaab  
@HWI-EAS443:3:87:1530:1508#0/1  
GGAGAGAAAGCTAATGTGCTAATTGGGCAAGGGGACGTAG  
+HWI-EAS443:3:87:1530:1508#0/1  
aaS`bba\_aQRa]aT\_a[]aaa`aZT¥`a`\_[YTbR\_a  
@HWI-EAS443:3:87:1538:531#0/1  
CATCAATGAACTGAGCAATCTTGCAAAGGAGAGAAAGCT

+HWI-EAS443:3:87:1538:531#0/1  
`^]S¥aWHXa\_``T\_R\_X\_``\_ba`UU\_]W`\_R[``^P`  
@HWI-EAS443:3:87:155:799#0/1  
AGGAGAGAAAAGCTAATGTGCTAATTGGGCAAGGGGACGTA  
+HWI-EAS443:3:87:155:799#0/1  
aa\_\_ababbb]baU`bb]abb`]bbabaa`\_ba]a[``^SP  
@HWI-EAS443:3:87:1676:769#0/1  
ACTGAGCAATCTTGCAAAAGGAGAGAAAAGCTAATGTGCTA  
+HWI-EAS443:3:87:1676:769#0/1  
aaa`\_aaabb`aaa[a[a\_`a\_`abaaaaYa\_`aa¥`]aa  
@HWI-EAS443:3:87:1679:888#0/1  
AAGCATCAATGAACTGAGCAATCTTGCAAAAGGAGAGAAA  
+HWI-EAS443:3:87:1679:888#0/1  
abQa\_aaaaba\_a`a\_ab`aab`]`a`^`\_a]\_a^baba¥\_  
@HWI-EAS443:3:87:1713:1021#0/1  
CATCAATGAACTGAGCAATCTTGCAAAAGGAGAGAAAAGCT  
+HWI-EAS443:3:87:1713:1021#0/1  
`a¥a`bb¥Y\_H\_Zabbbbbb¥bb^¥``Xabbababaa`a^a  
@HWI-EAS443:3:87:1776:762#0/1  
ATCTTGCAAAAGGAGAGAAAAGCTAATGTGCTAATTGGGCA  
+HWI-EAS443:3:87:1776:762#0/1  
TY^`b^a[V`W0]^`^`\_\_^WRU¥`a¥VYJ^a¥a]]aW`SZ  
@HWI-EAS443:3:87:232:366#0/1  
GCATCAATGAACTGAGCAATCTTGCAAAAGGAGAGAAAAGC  
+HWI-EAS443:3:87:232:366#0/1  
ab]^a^\_Ya``[a`]Y\_a]¥\_\_\_`\_^UXT`¥]a]``^Y\_]`  
@HWI-EAS443:3:87:242:1957#0/1  
GAAAGCTAATGTGCTAATTGGGCAAGGGGACGTAGTGTTG  
+HWI-EAS443:3:87:242:1957#0/1  
¥`bbba`b]YRH\_`b\_a`abaa`bba]ababa\_``U¥\_aa  
@HWI-EAS443:3:87:327:390#0/1  
GAGCAATCTTGCAAAAGGAGAGAAAAGCTAATGTGCTAATT  
+HWI-EAS443:3:87:327:390#0/1  
¥[Za\_T]\_``a\_]\_^``^`aa`^\_^\_]\_\_Y\_\_\_\_\_`^^  
@HWI-EAS443:3:87:34:1608#0/1  
GCAAAAGGAGAGAAAAGCTAATGTGCTAATTGGGCAAGGGG  
+HWI-EAS443:3:87:34:1608#0/1  
ab]YJYa`S`Z^]¥T¥aa`^¥a0``^V^V[\_\_\_Xa\_a`\_]`  
@HWI-EAS443:3:87:363:543#0/1  
CATCAATGAACTGAGCAATCTTGCAAAAGGAGAGAAAAGCT  
+HWI-EAS443:3:87:363:543#0/1  
aabababaYabaa¥]\_a¥aaaab`a`abaaaa``\_\_aaa  
@HWI-EAS443:3:87:412:624#0/1  
CATCAATGAACTGAGCAATCTTGCAAAAGGAGAGAAAAGCT  
+HWI-EAS443:3:87:412:624#0/1  
`\_]aab`a`[a]]Za`^`aaa\_\_aVRT¥^^]aa[`PZ`[\_  
@HWI-EAS443:3:87:429:298#0/1  
ATCTTGCAAAAGGAGAGAAAAGCTAATGTGCTAATTGGGCA  
+HWI-EAS443:3:87:429:298#0/1  
[\_`[\_`aaS`aY\_JQ\_aa\_\_`a^`\_]aX¥`¥]]\_`a\_`Z]



+HWI-EAS443:3:88:1271:1119#0/1  
¥bS¥VV`babVS]YT\_aa`T¥Pa\_adWPa^^b`\_][\_]^S  
@HWI-EAS443:3:88:1272:1837#0/1  
GAGCAATCTTGCAAAAAGGAGAGAAAGCTAATGTGCTAATT  
+HWI-EAS443:3:88:1272:1837#0/1  
a`XZ`aV\_a[a]a^[aa^YaabaZaaH\_`^[a^\_R\_\_a^Y  
@HWI-EAS443:3:88:1281:766#0/1  
AGGAGAGAAAGCTAATGTGCTAATTGGGCAAGGGGACGTA  
+HWI-EAS443:3:88:1281:766#0/1  
abbabbbb`Z`abbaabababa`abaaa`aab`ba\_a\_`  
@HWI-EAS443:3:88:1338:753#0/1  
AGCAATCTTGCAAAAAGGAGAGAAAGCTAATGTGCTAATTG  
+HWI-EAS443:3:88:1338:753#0/1  
abbbbbbbabbbbaa`\_babbbbaa\_bbXba¥babaabbb  
@HWI-EAS443:3:88:1424:1922#0/1  
GAACTGAGCAATCTTGCAAAAAGGAGAGAAAGCTAATGTGC  
+HWI-EAS443:3:88:1424:1922#0/1  
`aaabbbba\_`bb[b]`a][ab^\_bba`b^b\_Gbb[`YJa¥  
@HWI-EAS443:3:88:147:59#0/1  
GAAAGCTAATGTGCTAATTGGGCAAGGGGACGTAGTGTTG  
+HWI-EAS443:3:88:147:59#0/1  
```bbabaaab`aa`^aa\_abaaaa\_[]`a^\_aV^aX`X`\_  
@HWI-EAS443:3:88:1495:124#0/1  
GAGCAATCTTGCAAAAAGGAGAGAAAGCTAATGTGCTAATT  
+HWI-EAS443:3:88:1495:124#0/1  
`bab`bb`bba^bba\_b\_aaababbYbaabbaa\_bbaab  
@HWI-EAS443:3:88:1615:33#0/1  
GCATCAATGAACTGAGCAATCTTGCAAAAAGGAGAGAAAGC  
+HWI-EAS443:3:88:1615:33#0/1  
aaXSOW\_aa][VXTR]^`[¥^W[¥VRVZY`\_G^Z`^Z^[Z  
@HWI-EAS443:3:88:1751:376#0/1  
GAAAGCTAATGTGCTAATTGGGCAAGGGGACGTAGTGTTG  
+HWI-EAS443:3:88:1751:376#0/1  
\_]a\_ZMX]bY^^\_W¥aa]X`Z`]`\_[X`]\_¥a\_T\_Qa\_`b  
@HWI-EAS443:3:88:219:1216#0/1  
GAAAGCTAATGTGCTAATTGGGCAAGGGGACGTAGTGTTG  
+HWI-EAS443:3:88:219:1216#0/1  
a\_SVa`aaaab]\_`a`a`[^`a`U]`a`\_^^WZXU]X`^  
@HWI-EAS443:3:88:236:1738#0/1  
AATGAACTGAGCAATCTTGCAAAAAGGAGAGAAAGCTAATG  
+HWI-EAS443:3:88:236:1738#0/1  
^\_I`baaMab[b`W[a`[a\_ZZaa^UP\_aaa^aa\_\_a\_][  
@HWI-EAS443:3:88:340:1141#0/1  
GAGCAATCTTGCAAAAAGGAGAGAAAGCTAATGTGCTAATT  
+HWI-EAS443:3:88:340:1141#0/1  
`b]bbbaaaabaa]Z^b``aabb\_aaaaaaa]Ra^a`aaa  
@HWI-EAS443:3:88:340:1178#0/1  
GAAAGCTAATGTGCTAATTGGGCAAGGGGACGTAGTGTTG  
+HWI-EAS443:3:88:340:1178#0/1  
ab]]Q]]abVaQ`]aa`^`\_¥a\_\_\_^`R`\_\_][YY^\_Va^

@HWI-EAS443:3:88:396:1365#0/1  
CATCAATGAACTGAGCAATCTTGCAAAAGGAGAGAAAGCT  
+HWI-EAS443:3:88:396:1365#0/1  
YI¥bZ`a^¥¥aa¥]¥`¥P\_a`b\_bbbaVba`aaa¥I¥aba  
@HWI-EAS443:3:88:602:286#0/1  
ATGAACTGAGCAATCTTGCAAAAGGAGAGAAAGCTAATGT  
+HWI-EAS443:3:88:602:286#0/1  
aaaaaaaaU\_a\_\_aaaaaa\_\_]a\_\_aaaa\_a]^\_\_\_\_Z  
@HWI-EAS443:3:88:715:201#0/1  
AGCTAATGTGCTAATTGGGCAAGGGGACGTAGTGTGGTA  
+HWI-EAS443:3:88:715:201#0/1  
abaaab`a[`aaaabaaab\_a`aa` `[`b\_a`Wb`Z^]T^  
@HWI-EAS443:3:88:733:833#0/1  
GCAAAAGGAGAGAAAGCTAATGTGCTAATTGGGCAAGGGG  
+HWI-EAS443:3:88:733:833#0/1  
`aaaa\_a`abaaaaa`]a`^a\_aaaaaaa\_^Z`a\_a  
@HWI-EAS443:3:88:800:496#0/1  
CAAAAGGAGAGAAAGCTAATGTGCTAATTGGGCAAGGGGA  
+HWI-EAS443:3:88:800:496#0/1  
aaWV^b`Qa]bbb^ba\_`^`bab`aabbaa\_a^baa`]  
@HWI-EAS443:3:89:1000:788#0/1  
CCTTGCCCAATTAGCACATTAGCTTTCTCTCCTTTTGCAA  
+HWI-EAS443:3:89:1000:788#0/1  
ab¥a^a\_b`V^aa`bb`aa` `bb`aaababa[a^\_b`\_]\_  
@HWI-EAS443:3:89:1019:962#0/1  
ACGTCCCCTTGCCCAATTAGCACATTAGCTTTCTCTCCTT  
+HWI-EAS443:3:89:1019:962#0/1  
`aaWJYO` `[Ua^a\_`a^¥a\_\_\_^\_aZ[ ` \_`Za0`\_U^^  
@HWI-EAS443:3:89:1125:1057#0/1  
ATCTTGCAAAAGGAGAGAAAGCTAATGTGCTAATTGGGCA  
+HWI-EAS443:3:89:1125:1057#0/1  
abb`\_a`a^^W¥\_a`baZ]]aab`\_a`aa^S`a]^`aa]^  
@HWI-EAS443:3:89:1143:1262#0/1  
AGCACATTAGCTTTCTCTCCTTTTGCAAGATTGCTCAGTT  
+HWI-EAS443:3:89:1143:1262#0/1  
aa\_bbbaabbYabbbaaa\_\_`aaa\_[aa\_a`aa`\_\_^Sa  
@HWI-EAS443:3:89:1185:134#0/1  
AAAGGAGAGAAAGCTAATGTGCTAATTGGGCAAGGGGACG  
+HWI-EAS443:3:89:1185:134#0/1  
ab^^^`b`ab\_\_`P[]\_`Q\_]\_\_^\_^``YU\_\_\_^\_^X]  
@HWI-EAS443:3:89:1189:463#0/1  
GAAAGCTAATGTGCTAATTGGGCAAGGGGACGTAGTGTG  
+HWI-EAS443:3:89:1189:463#0/1  
aa`\_aaa\_aaaZa\_a\_\_`\_a^\_\_`]a\_\_`^Wa^]`XaZ`\_  
@HWI-EAS443:3:89:1207:1832#0/1  
GAGCAATCTTGCAAAAGGAGAGAAAGCTAATGTGCTAATT  
+HWI-EAS443:3:89:1207:1832#0/1  
a\_\_\_Z[aa\_\_\_Z\_]`baaaabaa`aVa` `ba[\_[aaa\_]\_  
@HWI-EAS443:3:89:1229:655#0/1  
ATGAACTGAGCAATCTTGCAAAAGGAGAGAAAGCTAATGT

+HWI-EAS443:3:89:1229:655#0/1  
a^^YaXa`\_a\_\_Q`aab`^a`\_`\_a`aa\_]a]`\_\_\_\_\_Z  
@HWI-EAS443:3:89:1370:538#0/1  
GAGCAATCTTGCAAAAGGAGAGAAAGCTAATGTGCTAATT  
+HWI-EAS443:3:89:1370:538#0/1  
aababbbbaaaV`ababa\_aab\_a\_`¥\_`````a[\_\_\_\_`\_  
@HWI-EAS443:3:89:1393:1794#0/1  
GAGCAATCTTGCAAAAGGAGAGAAAGCTAATGTGCTAATT  
+HWI-EAS443:3:89:1393:1794#0/1  
[a[abbb^bb\_`^aabaabbabbb^b`abYV^Sab^aa  
@HWI-EAS443:3:89:1435:876#0/1  
GAGAAAGCTAATGTGCTAATTGGGCAAGGGGACGTAGTGT  
+HWI-EAS443:3:89:1435:876#0/1  
a`\_aZ`\_]aYa]]a^\_X\_Z`U^]]^\_[U[ZXaUUXS]W  
@HWI-EAS443:3:89:1507:509#0/1  
CTGAGCAATCTTGCAAAAGGAGAGAAAGCTAATGTGCTAA  
+HWI-EAS443:3:89:1507:509#0/1  
aab^TWX\_¥^[aVR\_]aWabb`V]a[b\_ba[a\_Qba`S^  
@HWI-EAS443:3:89:1630:657#0/1  
AGCTAATGTGCTAATTGGGCAAGGGGACGTAGTGTGGTA  
+HWI-EAS443:3:89:1630:657#0/1  
^b`S`bbb`bbbaba][`][bZ^`]ab\_Iaaaa`aa]\_  
@HWI-EAS443:3:89:1698:349#0/1  
GAGCAATCTTGCAAAAGGAGAGAAAGCTAATGTGCTAATT  
+HWI-EAS443:3:89:1698:349#0/1  
a][G\_]babbb\_aab\_ba\_\_ab`a`\_F^Xabb]Y^ba^aa  
@HWI-EAS443:3:89:1751:367#0/1  
GCAAAAGGAGAGAAAGCTAATGTGCTAATTGGGCAAGGGG  
+HWI-EAS443:3:89:1751:367#0/1  
X\_^`a¥T`^]ba`aba^]a\_\_`G`]a`Ya\_YZQVY`aba  
@HWI-EAS443:3:89:186:414#0/1  
GAAAGCTAATGTGCTAATTGGGCAAGGGGACGTAGTGTG  
+HWI-EAS443:3:89:186:414#0/1  
`a`aaa]G`aU[[¥VW\_\_`^`a\_UW¥\_]Y]]Z]]G`V^]  
@HWI-EAS443:3:89:26:994#0/1  
CATCAATGAAGTACTGAGCAATCTTGCAAAAGGAGAGAAAGCT  
+HWI-EAS443:3:89:26:994#0/1  
a`b\_[a`U]aaWR\_aa]aa\_R[\_\_\_][V\_VU]\_^[PZ]\_Y  
@HWI-EAS443:3:89:356:1588#0/1  
CATCAATGAAGTACTGAGCAATCTTGCAAAAGGAGAGAAAGCT  
+HWI-EAS443:3:89:356:1588#0/1  
a`b¥X`\_a^Ja`Ya\_b\_b\_a`bbaIX\_\_`^`\_\_M`a`^S`  
@HWI-EAS443:3:89:405:822#0/1  
ATCTTGCAAAAGGAGAGAAAGCTAATGTGCTAATTGGGCA  
+HWI-EAS443:3:89:405:822#0/1  
^bb`bbab]\_S¥aab\_[`Y¥`Zb\_`a\_Vaa`^\_]Ya\_aaZ  
@HWI-EAS443:3:89:414:707#0/1  
ATCTTGCAAAAGGAGAGAAAGCTAATGTGCTAATTGGGCA  
+HWI-EAS443:3:89:414:707#0/1  
aaaaaaaa`¥a[a\_\_aaaa[`a`aa\_a`]`a`X`````\_```\_`

@HWI-EAS443:3:89:466:65#0/1  
GCTTTCTCTCTTTTGAAGATTGCTCAGTTCATTGATGC  
+HWI-EAS443:3:89:466:65#0/1  
a[^`\_\_]aZ^[`V¥\_\_\_aYVT]]X^S[^]¥PVNUPT]S  
@HWI-EAS443:3:89:469:1399#0/1  
GAGCAATCTTGCAAAGGAGAGAAAGCTAATGTGCTAATT  
+HWI-EAS443:3:89:469:1399#0/1  
\_V^bbbbabaaaa`baababaa\_b`aaaa[aaa`aaa  
@HWI-EAS443:3:89:541:161#0/1  
ATCTTGCAAAGGAGAGAAAGCTAATGTGCTAATTGGGCA  
+HWI-EAS443:3:89:541:161#0/1  
a`aaa[[]]`H^]aabY^aa\_a\_\_\_aVa\_[\_\_\_\_`]\_`S  
@HWI-EAS443:3:89:568:1725#0/1  
GCAAAGGAGAGAAAGCTAATGTGCTAATTGGGCAAGGGG  
+HWI-EAS443:3:89:568:1725#0/1  
a`bbaaaa]`¥b¥aa`a[`\_a[\_\_\_`aaaa`Z\_\_\_`a^YW  
@HWI-EAS443:3:89:59:647#0/1  
AGCAATCTTGCAAAGGAGAGAAAGCTAATGTGCTAATTG  
+HWI-EAS443:3:89:59:647#0/1  
a]abaaaa`bba]\_aa\_aaaa\_\_\_a`\_\_a`Y`¥`OU¥\_\_  
@HWI-EAS443:3:89:761:328#0/1  
CGTCCCCTTGCCCAATTAGCACATTAGCTTTCTCTCCTTT  
+HWI-EAS443:3:89:761:328#0/1  
aaabbbbaaba`abaaaaa`aba`a\_aa`\_a`a\_\_aa`  
@HWI-EAS443:3:89:762:368#0/1  
ATCTTGCAAAGGAGAGAAAGCTAATGTGCTAATTGGGCA  
+HWI-EAS443:3:89:762:368#0/1  
`\_]¥XWabaWQVTT`ZSTGWWaa`Z^b\_UZ\_R]¥`Z]\_`Q  
@HWI-EAS443:3:89:813:794#0/1  
GAGCAATCTTGCAAAGGAGAGAAAGCTAATGTGCTAATT  
+HWI-EAS443:3:89:813:794#0/1  
`^baabbbbaabbbbbbbab`bbbbbbb`bababbb`bb^bb  
@HWI-EAS443:3:89:833:1231#0/1  
GCATCAATGAAGTGAAGCAATCTTGCAAAGGAGAGAAAGC  
+HWI-EAS443:3:89:833:1231#0/1  
a[\_G¥VRO`a¥UTW]¥YQHNP][T[ZFH\_Y[NT¥Za[S¥Z  
@HWI-EAS443:3:89:872:1836#0/1  
CGTCCCCTTGCCCAATTAGCACATTAGCTTTCTCTCCTTT  
+HWI-EAS443:3:89:872:1836#0/1  
aaaabbbbabbbbbbbbaabbbbabaababab`ba\_bba  
@HWI-EAS443:3:89:884:199#0/1  
AGCTAATGTGCTAATTGGGCAAGGGGACGTAGTGTGGTA  
+HWI-EAS443:3:89:884:199#0/1  
abaabbb`\_baa`\_baa]LY\_\_]]a\_^\_a^\_aYaXaa[U¥  
@HWI-EAS443:3:89:947:321#0/1  
GAAAGCTAATGTGCTAATTGGGCAAGGGGACGTAGTGTG  
+HWI-EAS443:3:89:947:321#0/1  
aaa^\_\_aa`aa¥`\_a`\_a`aa\_\_¥a]`]Z^`ZX\_U`X`^  
@HWI-EAS443:3:89:952:1625#0/1  
GAACTGAGCAATCTTGCAAAGGAGAGAAAGCTAATGTGC

+HWI-EAS443:3:89:952:1625#0/1  
^¥\_a\_w]bbbaY]aYabaLW\_dWZ\_¥bZJa\_]\_aaa[\_`  
@HWI-EAS443:3:89:967:714#0/1  
GAAAGCTAATGTGCTAATTGGGCAAGGGGACGTAGTGTTG  
+HWI-EAS443:3:89:967:714#0/1  
aaYUa]aa\_a\_[aa`a\_aaa^`]\_]b^L^^\_a^¥a¥^¥Y`  
@HWI-EAS443:3:8:1105:614#0/1  
ATCTTGCAAAAAGGAGAGAAAGCTAATGTGCTAATTGGGCA  
+HWI-EAS443:3:8:1105:614#0/1  
`aab`bbaaa[bbabaaa¥aa\_\_aab\_b¥b`aaaaaZ[a  
@HWI-EAS443:3:8:1121:1099#0/1  
ACGTCCCCTTGCCCAATTAGCACATTAGCTTTCTCCTT  
+HWI-EAS443:3:8:1121:1099#0/1  
aa`[a`¥\_a\_`\_^`\_\_`^TZY\_[\_\_^]\_]^X\_V^WP^^  
@HWI-EAS443:3:8:1148:1799#0/1  
GAGCAATCTTGCAAAAAGGAGAGAAAGCTAATGTGCTAATT  
+HWI-EAS443:3:8:1148:1799#0/1  
aaaaaX`aaaaaaaa`aaaa`aa`a^\_a\_\_a^\_U`\_\_\_R  
@HWI-EAS443:3:8:1193:1372#0/1  
AATGAAGTGAAGCAATCTTGCAAAAAGGAGAGAAAGCTAATG  
+HWI-EAS443:3:8:1193:1372#0/1  
]bb`[a``ba`a`b`aaaa¥aa``b``abaa][a^aa`aa  
@HWI-EAS443:3:8:135:28#0/1  
ATTAGCACATTAGCTTTCTCCTTTTTGCAAGATTGCTCA  
+HWI-EAS443:3:8:135:28#0/1  
aa]H\_^¥aXaa\_`Ya``\_\_a¥YX`\_\_`XW[Z¥[]\_`X¥SZ  
@HWI-EAS443:3:8:1496:182#0/1  
CATCAATGAAGTGAAGCAATCTTGCAAAAAGGAGAGAAAGCT  
+HWI-EAS443:3:8:1496:182#0/1  
a`b^bbbaab]bbbbbb`babaaaa``ba\_a\_a`a\_^P¥  
@HWI-EAS443:3:8:1511:484#0/1  
GAGCAATCTTGCAAAAAGGAGAGAAAGCTAATGTGCTAATT  
+HWI-EAS443:3:8:1511:484#0/1  
aababbbbbbbbaaaabaabab`\_a`\_aa`aa^a\_a^]aa  
@HWI-EAS443:3:8:151:1066#0/1  
GAGCAATCTTGCAAAAAGGAGAGAAAGCTAATGTGCTAATT  
+HWI-EAS443:3:8:151:1066#0/1  
QHTabb^`^baab]a``aabbb```bUa\_abb`Z`aXaaa  
@HWI-EAS443:3:8:1551:1199#0/1  
GAAAGCTAATGTGCTAATTGGGCAAGGGGACGTAGTGTTG  
+HWI-EAS443:3:8:1551:1199#0/1  
aaaabaaa`aa\_]0[\_]aa`\_`\_]\_a\_[\_XWaz¥RY\_Z`\_  
@HWI-EAS443:3:8:1682:1079#0/1  
GCATCAATGAAGTGAAGCAATCTTGCAAAAAGGAGAGAAAGC  
+HWI-EAS443:3:8:1682:1079#0/1  
a`X]Y]^aa`W¥]LN[PX\_\_^YXZQYN^^[\_X\_V\_ZZWWR  
@HWI-EAS443:3:8:186:673#0/1  
GAAAGCTAATGTGCTAATTGGGCAAGGGGACGTAGTGTTG  
+HWI-EAS443:3:8:186:673#0/1  
aaTa\_a`a\_a`\_Saa¥aa`\_]\_^a^`\_\_V]SX]`Z`Z\_a



@HWI-EAS443:3:8:341:1471#0/1  
GCAATCTTGCAAAAGGAGAGAAAGCTAATGTGCTAATTGG  
+HWI-EAS443:3:8:341:1471#0/1  
aa`\_a\_\_aaa\_\_\_`^\_\_`R`^`\_`\_\_^\_\_\_Y\_U]^Z\_XZX  
@HWI-EAS443:3:8:346:1926#0/1  
GAGAAAGCTAATGTGCTAATTGGGCAAGGGGACGTAGTGT  
+HWI-EAS443:3:8:346:1926#0/1  
``ab`aab``aa`S¥aa`JaaaI\_X\_\_[^X`\_R^JWXIWH  
@HWI-EAS443:3:8:445:333#0/1  
GAAAGCTAATGTGCTAATTGGGCAAGGGGACGTAGTGTG  
+HWI-EAS443:3:8:445:333#0/1  
aba\_baaa\_ab\_a`a`aaaa`a\_[aY\_a^]aW^aY\_Ya]  
@HWI-EAS443:3:8:588:826#0/1  
GAAAGCTAATGTGCTAATTGGGCAAGGGGACGTAGTGTG  
+HWI-EAS443:3:8:588:826#0/1  
``a]b]aaZab`aaa]]aa`a^^\_\_\_a\_¥W`]^a0]^Y  
@HWI-EAS443:3:8:606:918#0/1  
AGCTAATGTGCTAATTGGGCAAGGGGACGTAGTGTGGTA  
+HWI-EAS443:3:8:606:918#0/1  
aba]abaaa`W`aabaabb\_aaba\_`^^`¥\_aZaYaaaG^  
@HWI-EAS443:3:8:66:258#0/1  
AATGAAGCTGAGCAATCTTGCAAAAGGAGAGAAAGCTAATG  
+HWI-EAS443:3:8:66:258#0/1  
[P\_bbbb\_RYZ]b[Ra``baa[SYaaab\_`]aRa`^YNT\_  
@HWI-EAS443:3:8:816:690#0/1  
AACTGAGCAATCTTGCAAAAGGAGAGAAAGCTAATGTGCT  
+HWI-EAS443:3:8:816:690#0/1  
ab]aba\_babbaaabaZG]```a`aTa`\_aH`a`\_[\_^0a  
@HWI-EAS443:3:8:926:195#0/1  
GAGAAAGCTAATGTGCTAATTGGGCAAGGGGACGTAGTGT  
+HWI-EAS443:3:8:926:195#0/1  
aabaaab`aaaba^a¥a\_`aaa`\_`]aaa`]X^X^\_V`Y  
@HWI-EAS443:3:8:971:1136#0/1  
GCAAAAGGAGAGAAAGCTAATGTGCTAATTGGGCAAGGGG  
+HWI-EAS443:3:8:971:1136#0/1  
aa`][^a^^a\_``\_\_`Y`\_\_\_`X\_U]^\_^^]^UYX^ZXZ  
@HWI-EAS443:3:90:1079:1197#0/1  
CATCAATGAAGCTGAGCAATCTTGCAAAAGGAGAGAAAGCT  
+HWI-EAS443:3:90:1079:1197#0/1  
a^b\_bbababbbaabaabbaabaaaa^^b`\_aaabaa\_aa  
@HWI-EAS443:3:90:1118:409#0/1  
CTTGCAAAAGGAGAGAAAGCTAATGTGCTAATTGGGCAAG  
+HWI-EAS443:3:90:1118:409#0/1  
\_bbb[`bb\_abaab`bb]abab`ab]bbbab``abba^Xa  
@HWI-EAS443:3:90:1126:378#0/1  
AAGCATCAATGAAGCTGAGCAATCTTGCAAAAGGAGAGAAA  
+HWI-EAS443:3:90:1126:378#0/1  
abbaaaabbabaa\_ab^b^aaaa\_a^X¥\_a\_\_aaaa\_\_  
@HWI-EAS443:3:90:1160:377#0/1  
GGAGAGAAAGCTAATGTGCTAATTGGGCAAGGGGACGTAG

+HWI-EAS443:3:90:1160:377#0/1  
ab\_baabaaaaba\_aa\_babaabb\_aa^^aba`a\_` [YX\$  
@HWI-EAS443:3:90:1233:208#0/1  
CAATTAGCACATTAGCTTTCTCCTTTTGCAAGATTGCT  
+HWI-EAS443:3:90:1233:208#0/1  
\_ab`a`a\_`abbbbab\_bbaa^a]ab`baaba`^abb``a  
@HWI-EAS443:3:90:1321:558#0/1  
CTTGCAAAAGGAGAGAAAGCTAATGTGCTAATTGGGCAAG  
+HWI-EAS443:3:90:1321:558#0/1  
Z[\_a^a\_`a^]T[\_b[UU\_U^\_b`aYVSQW^^aY\_`HZ]`  
@HWI-EAS443:3:90:1355:608#0/1  
CATCAATGAAGTGAATCTTGCAAAAGGAGAGAAAGCT  
+HWI-EAS443:3:90:1355:608#0/1  
^babaabbbb\_bbbbbbaabbbabb\_babbabbbbabbb  
@HWI-EAS443:3:90:1389:654#0/1  
CAAAAGGAGAGAAAGCTAATGTGCTAATTGGGCAAGGGGA  
+HWI-EAS443:3:90:1389:654#0/1  
abbbbbbb\_b`bbb`bbbabb`bababbbbbaa`bbbbba  
@HWI-EAS443:3:90:1417:754#0/1  
GAAAGCTAATGTGCTAATTGGGCAAGGGGACGTAGTGTTG  
+HWI-EAS443:3:90:1417:754#0/1  
aba`a^bb`bb\$babaaaaab`\_]ba`aaab^\_aPb`\_b  
@HWI-EAS443:3:90:1596:1358#0/1  
GAAAGCTAATGTGCTAATTGGGCAAGGGGACGTAGTGTTG  
+HWI-EAS443:3:90:1596:1358#0/1  
aaabb`aabba`bRb`bbabbaa\_YaKaaaOaYW\$Ya^a`  
@HWI-EAS443:3:90:1633:742#0/1  
CTGAGCAATCTTGCAAAAGGAGAGAAAGCTAATGTGCTAA  
+HWI-EAS443:3:90:1633:742#0/1  
abb[aabba\_b]abaabaabababa\_a`Sbbba\_`a\_a`^  
@HWI-EAS443:3:90:1699:471#0/1  
AAGCATCAATGAAGTGAATCTTGCAAAAGGAGAGAAA  
+HWI-EAS443:3:90:1699:471#0/1  
aaaaaaaa`a``\_``\_``\_a^a`a\_``\_V^Z^`\_Y]^a`\_]  
@HWI-EAS443:3:90:1722:1233#0/1  
GAGCAATCTTGCAAAAGGAGAGAAAGCTAATGTGCTAATT  
+HWI-EAS443:3:90:1722:1233#0/1  
U][\_^[abbbb`aVY`\_bbbabbaa[a\_b[`\$Pab\_\_`^  
@HWI-EAS443:3:90:1739:528#0/1  
GAGAAAGCTAATGTGCTAATTGGGCAAGGGGACGTAGTG  
+HWI-EAS443:3:90:1739:528#0/1  
a[a[]]VJ\$WNYa\$b[]YRaab^\_] ]^]VTW\$Y`VHaS^U  
@HWI-EAS443:3:90:185:141#0/1  
ATCTTGCAAAAGGAGAGAAAGCTAATGTGCTAATTGGGCA  
+HWI-EAS443:3:90:185:141#0/1  
a^a`aaaa`X\_aa\_aZ^a\_\_\_\_\_^^\_`Wa]]VNZY^^^X]  
@HWI-EAS443:3:90:400:1902#0/1  
AACTGAGCAATCTTGCAAAAGGAGAGAAAGCTAATGTGCT  
+HWI-EAS443:3:90:400:1902#0/1  
a\_`\$^WaZ\$ZWTZO\$aa\_a]]\_aaaaa[[ZaY^Z\$YR`\_Z

@HWI-EAS443:3:90:430:1985#0/1  
GAAAGCTAATGTGCTAATTGGGCAAGGGGACGTAGTGTTG  
+HWI-EAS443:3:90:430:1985#0/1  
a\_SZXY[^`¥Z^UUUW¥MX`¥UWL[^]WRTWOLQSW]  
@HWI-EAS443:3:90:492:1409#0/1  
AGGAGAGAAAGCTAATGTGCTAATTGGGCAAGGGGACGTA  
+HWI-EAS443:3:90:492:1409#0/1  
ab]\_aa`abaaaaaba]a\_aaa`a`[]a`\_ba`\_\_`\_]  
@HWI-EAS443:3:90:525:1119#0/1  
ACGTCCCCTTGCCCAATTAGCACATTAGCTTTCTCTCCTT  
+HWI-EAS443:3:90:525:1119#0/1  
SaSHVbbbWV]aaZZa\_SX¥a]aa[`b¥¥¥[\_ZZX`¥Q¥a  
@HWI-EAS443:3:90:601:354#0/1  
GCATCAATGAACTGAGCAATCTTGCAAAAGGAGAGAAAGC  
+HWI-EAS443:3:90:601:354#0/1  
aaba\_a`bb\_baaa¥b\_aaaaa\_a`\_`\_`a\_\_a`aa`\_a]  
@HWI-EAS443:3:90:75:199#0/1  
GAGCAATCTTGCAAAAGGAGAGAAAGCTAATGTGCTAATT  
+HWI-EAS443:3:90:75:199#0/1  
a`baZ``babba``[aba`baaa`a`^^U\_`aV`[\_`\_\_\_^  
@HWI-EAS443:3:90:77:1244#0/1  
GAAAGCTAATGTGCTAATTGGGCAAGGGGACGTAGTGTTG  
+HWI-EAS443:3:90:77:1244#0/1  
ab¥aabaaaa¥`aaa`aaaaa`\_\_`\_`\_^a]]\_R\_`^`  
@HWI-EAS443:3:90:78:1052#0/1  
GAGCAATCTTGCAAAAGGAGAGAAAGCTAATGTGCTAATT  
+HWI-EAS443:3:90:78:1052#0/1  
`bb\_[S`aabRRYb``¥]W]¥Y]aaY`S[aa`aaa\_Y^V  
@HWI-EAS443:3:90:807:453#0/1  
AGCTAATGTGCTAATTGGGCAAGGGGACGTAGTGTTGGTA  
+HWI-EAS443:3:90:807:453#0/1  
abababbbab`babaabaaaa`bbaa``b^`a\_aWbb^ZZ  
@HWI-EAS443:3:90:817:120#0/1  
GCATCAATGAACTGAGCAATCTTGCAAAAGGAGAGAAAGC  
+HWI-EAS443:3:90:817:120#0/1  
aabaa``bbaaa`a\_b¥`aa\_a\_a\_\_^\_\_``ab^a`a`\_]  
@HWI-EAS443:3:90:97:58#0/1  
GAGAAAGCTAATGTGCTAATTGGGCAAGGGGACGTAGTGT  
+HWI-EAS443:3:90:97:58#0/1  
a```\_\_\_`]^Y\_aW\_^\_WX\_]\_^\_]T0]^\_^XZ^ZZ^Z]Z  
@HWI-EAS443:3:91:1109:951#0/1  
AAGCTAATGTGCTAATTGGGCAAGGGGACGTAGTGTTGGT  
+HWI-EAS443:3:91:1109:951#0/1  
a[^W^abaa`baaaaa]aaaaaba`a\_\_b`\_`aXa\_aa`V  
@HWI-EAS443:3:91:1117:1729#0/1  
ATCTTGCAAAAGGAGAGAAAGCTAATGTGCTAATTGGGCA  
+HWI-EAS443:3:91:1117:1729#0/1  
ZS\_M`aa\_\_a`¥a¥`bbbb\_a`\_baa`TYIX`a\_aaa`a]  
@HWI-EAS443:3:91:1129:37#0/1  
GAGCAATCTTGCAAAAGGAGAGAAAGCTAATGTGCTAATT

+HWI-EAS443:3:91:1129:37#0/1  
a\_a[a\_^\_\_\_\_^\_U^\_[]a^\_\_Y]]V^W]aRZN]U]X^  
@HWI-EAS443:3:91:1145:615#0/1  
GAGCAATCTTGCAAAAAGGAGAGAAAGCTAATGTGCTAATT  
+HWI-EAS443:3:91:1145:615#0/1  
a`\_\_[^`^\_Y`\_V^S\_YaNKTZa`¥^ZKNY^]MDU¥YTUU]  
@HWI-EAS443:3:91:1161:1728#0/1  
GAGAAAGCTAATGTGCTAATTGGGCAAGGGGACGTAGTGT  
+HWI-EAS443:3:91:1161:1728#0/1  
aW]Sa`a[[Y]`[FZ`\_aR]a`T^`WX\_]`a]]OZ\_aY^Y  
@HWI-EAS443:3:91:129:701#0/1  
GAAAGCTAATGTGCTAATTGGGCAAGGGGACGTAGTGTG  
+HWI-EAS443:3:91:129:701#0/1  
^aaa\_`]NaYaJb\_Zabbab\_¥b\_Sa\_[VR`[KK[OWDO^  
@HWI-EAS443:3:91:1428:1588#0/1  
TAGCACATTAGCTTTCTCTCCTTTTGCAAGATTGCTCAGT  
+HWI-EAS443:3:91:1428:1588#0/1  
`aa^a`\_a\_aa^\_aaaa`^`aabaa\_\_a`a\_a`Za\_\_a\_  
@HWI-EAS443:3:91:1434:753#0/1  
CCAATTAGCACATTAGCTTTCTCTCCTTTTGCAAGATTGC  
+HWI-EAS443:3:91:1434:753#0/1  
ab`bbbab^bbabbababab`b`b[Zabbab[aabaa`a]  
@HWI-EAS443:3:91:1540:1822#0/1  
CAATCTTGCAAAAAGGAGAGAAAGCTAATGTGCTAATTGGG  
+HWI-EAS443:3:91:1540:1822#0/1  
\_ababbbb`aab]a`ababbbbbbab`bbabababaabba  
@HWI-EAS443:3:91:1591:455#0/1  
AATGAAGTGGCAATCTTGCAAAAAGGAGAGAAAGCTAATG  
+HWI-EAS443:3:91:1591:455#0/1  
abbbabbbbab`abbabababaaabb\_baabaaaYaaaab  
@HWI-EAS443:3:91:1611:1565#0/1  
CAACACTACGTCCCCTTGCCCAATTAGCACATTAGCTTTC  
+HWI-EAS443:3:91:1611:1565#0/1  
abb\_baabbbab[b`[aa[``aba`a`\_`¥aa`a^^a``U  
@HWI-EAS443:3:91:1611:241#0/1  
CAATTAGCACATTAGCTTTCTCTCCTTTTGCAAGATTGCT  
+HWI-EAS443:3:91:1611:241#0/1  
aabbbbaa\_WVbb¥`\_a`aQ[R¥\_X`\_b`aTa\_a^aXZQZ  
@HWI-EAS443:3:91:1620:867#0/1  
CTTGCAAAAAGGAGAGAAAGCTAATGTGCTAATTGGGCAAG  
+HWI-EAS443:3:91:1620:867#0/1  
^bVW\_b[\_L¥`U`bb`ab`aaY]b\_a[[]U``\_b`bU`¥]  
@HWI-EAS443:3:91:1683:1087#0/1  
GAGCAATCTTGCAAAAAGGAGAGAAAGCTAATGTGCTAATT  
+HWI-EAS443:3:91:1683:1087#0/1  
a]]`a^^]a\_^]Y¥^^^WZ\_\_^`^\_G\_\_^`\_]\_Y^`^^\_  
@HWI-EAS443:3:91:1757:1272#0/1  
GAGCAATCTTGCAAAAAGGAGAGAAAGCTAATGTGCTAATT  
+HWI-EAS443:3:91:1757:1272#0/1  
aaZRxaa`aaa]`a\_\_]\_¥^aaa`\_a¥^`\_a`X\_N``^Z\_

@HWI-EAS443:3:91:373:817#0/1  
GTCCCCTTGCCCAATTAGCACATTAGCTTTCTCTCCTTTT  
+HWI-EAS443:3:91:373:817#0/1  
\_\_a`aa`aaa`a`aa`a\_X][`^`\_`\_aa``]a^`a  
@HWI-EAS443:3:91:651:1664#0/1  
ATCTTGCAAAAGGAGAGAAAGCTAATGTGCTAATTGGGCA  
+HWI-EAS443:3:91:651:1664#0/1  
aa\_Xa`]YZVYa]b\_V\_]\_Ya^V[^a\_\_a[\_\_\_\_\_a¥Y\_  
@HWI-EAS443:3:91:703:1334#0/1  
AGCTAATGTGCTAATTGGGCAAGGGGACGTAGTGTGGTA  
+HWI-EAS443:3:91:703:1334#0/1  
``aa`¥abXaab`^`bbb¥aba`a\_\_aaa\_ab^aaba¥Q¥  
@HWI-EAS443:3:91:758:1544#0/1  
CATCAATGAACTGAGCAATCTTGCAAAAGGAGAGAAAGCT  
+HWI-EAS443:3:91:758:1544#0/1  
aaba`])`a]baab`abbXb`babaaba\_a^aabaa\_Xa^`  
@HWI-EAS443:3:91:771:1583#0/1  
AACTGAGCAATCTTGCAAAAGGAGAGAAAGCTAATGTGCT  
+HWI-EAS443:3:91:771:1583#0/1  
aa[aa\_V`]a¥a\_^[¥¥UU¥^`^]\_\_`^^V`a`¥aV[¥]  
@HWI-EAS443:3:91:814:89#0/1  
CAATTAGCACATTAGCTTTCTCTCCTTTTGCAAGATTGCT  
+HWI-EAS443:3:91:814:89#0/1  
abbbbbbbbbbbbbbbabb`babb`bbbbbabababab`a  
@HWI-EAS443:3:91:869:707#0/1  
GAACTGAGCAATCTTGCAAAAGGAGAGAAAGCTAATGTGC  
+HWI-EAS443:3:91:869:707#0/1  
aaa[abaa\_]a^baa^a`\_aa```a`^aZa\_\_aaX\_U  
@HWI-EAS443:3:91:886:751#0/1  
TGCAAAAGGAGAGAAAGCTAATGTGCTAATTGGGCAAGGG  
+HWI-EAS443:3:91:886:751#0/1  
ab`a[``bYabaab`^b`aaaa\_a¥a^\_baaa\_X^U^[a  
@HWI-EAS443:3:91:952:111#0/1  
AGCTAATGTGCTAATTGGGCAAGGGGACGTAGTGTGGTA  
+HWI-EAS443:3:91:952:111#0/1  
ababaabbab`baabbbba\_aabbaa`^b\_\_a^a``baV^  
@HWI-EAS443:3:91:95:847#0/1  
CCCTTGCCCAATTAGCACATTAGCTTTCTCTCCTTTTGCA  
+HWI-EAS443:3:91:95:847#0/1  
abbaaabaabZaaa`aaa\_a`aa`aa`^\_`a^^`]`]]]\_  
@HWI-EAS443:3:92:1002:84#0/1  
AGCTAATGTGCTAATTGGGCAAGGGGACGTAGTGTGGTA  
+HWI-EAS443:3:92:1002:84#0/1  
ababaabbababbabbbb]aabbba`\_b`\_a\_b`aaaZ^  
@HWI-EAS443:3:92:1157:891#0/1  
AATGAACTGAGCAATCTTGCAAAAGGAGAGAAAGCTAATG  
+HWI-EAS443:3:92:1157:891#0/1  
\_bbabb`abaa`bababaa`aa`ba`baaaaa^aa^aa  
@HWI-EAS443:3:92:1304:1033#0/1  
AAGGAGAGAAAGCTAATGTGCTAATTGGGCAAGGGGACGT

+HWI-EAS443:3:92:1304:1033#0/1  
OP\_¥\_\_QV\_OY¥[\_`[¥`U`\_W^ZZaW\_a]babb¥]\_ [`P  
@HWI-EAS443:3:92:1306:1270#0/1  
CAATGAACTGAGCAATCTTGCAAAGGAGAGAAAGCTAAT  
+HWI-EAS443:3:92:1306:1270#0/1  
Yaaabb\_\_a^abbbbaabaaXbbab\_`bbabaaa`aaaa  
@HWI-EAS443:3:92:1425:631#0/1  
GAAAGCTAATGTGCTAATTGGGCAAGGGGACGTAGTGTTG  
+HWI-EAS443:3:92:1425:631#0/1  
`XV\_aR¥\_ [`^¥F¥X\_Z¥¥V]¥^W]]^Y]]R^ZV\_X\_VW^  
@HWI-EAS443:3:92:1452:945#0/1  
CAAAGGAGAGAAAGCTAATGTGCTAATTGGGCAAGGGGA  
+HWI-EAS443:3:92:1452:945#0/1  
aaaa\_\_aU¥ababa`aaaabb\_a\_ba\_aaba` `` `abaaX  
@HWI-EAS443:3:92:1487:1361#0/1  
CTTGCAAAGGAGAGAAAGCTAATGTGCTAATTGGGCAAG  
+HWI-EAS443:3:92:1487:1361#0/1  
abbVbaa]a\_bbaa\_baabaU]bab`abb`\_aabY`^UWa  
@HWI-EAS443:3:92:1491:99#0/1  
CATCAATGAACTGAGCAATCTTGCAAAGGAGAGAAAGCT  
+HWI-EAS443:3:92:1491:99#0/1  
\_aaababaZ¥]\_baaabaaaaab`^`a`bb\_b\_bb`Ua^a  
@HWI-EAS443:3:92:156:1332#0/1  
TGCAAAGGAGAGAAAGCTAATGTGCTAATTGGGCAAGGG  
+HWI-EAS443:3:92:156:1332#0/1  
`a`bbabbb¥bbbbbbaba^`^ab\_ababba]\_Z\_`aa^[]  
@HWI-EAS443:3:92:163:1588#0/1  
GCATCAATGAACTGAGCAATCTTGCAAAGGAGAGAAAGC  
+HWI-EAS443:3:92:163:1588#0/1  
aa]XaIR\_`\_ [JOTYNZLWQ¥^T¥\_\_YWY[U[^MM[URQT  
@HWI-EAS443:3:92:1645:881#0/1  
GAGCAATCTTGCAAAGGAGAGAAAGCTAATGTGCTAATT  
+HWI-EAS443:3:92:1645:881#0/1  
`[``\_UIZ\_bb[TMOXYQRaa`QXa]DY¥RW`¥aQa^[\_V  
@HWI-EAS443:3:92:1660:458#0/1  
ATCTTGCAAAGGAGAGAAAGCTAATGTGCTAATTGGGCA  
+HWI-EAS443:3:92:1660:458#0/1  
a`])`bb\_aa\_aba\_baaa`a`¥a`^a^`a\_a`aa\_a[JS¥  
@HWI-EAS443:3:92:1707:953#0/1  
GAACTGAGCAATCTTGCAAAGGAGAGAAAGCTAATGTGC  
+HWI-EAS443:3:92:1707:953#0/1  
aaa\_bb`aa`aa\_aaa`\_`a`aa\_a` `a`aaXa\_`aa^aZ  
@HWI-EAS443:3:92:1761:1589#0/1  
CAATCTTGCAAAGGAGAGAAAGCTAATGTGCTAATTGGG  
+HWI-EAS443:3:92:1761:1589#0/1  
abbbabbb¥aababbaababaaa`a]`ab``^`aaa`aU]  
@HWI-EAS443:3:92:188:131#0/1  
CATCAATGAACTGAGCAATCTTGCAAAGGAGAGAAAGCT  
+HWI-EAS443:3:92:188:131#0/1  
ababaaba^babaa\_aa^aaa[b\_`^`\_\_`^a^a`\_\_Z^

@HWI-EAS443:3:92:196:481#0/1  
AACTGAGCAATCTTGCAAAAGGAGAGAAAGCTAATGTGCT  
+HWI-EAS443:3:92:196:481#0/1  
\_`a^[aaaa\_aaa`^Za¥ba\_baa]YFWW]TP`bZa\_  
@HWI-EAS443:3:92:209:1452#0/1  
GAAAGCTAATGTGCTAATTGGGCAAGGGGACGTAGTGTTG  
+HWI-EAS443:3:92:209:1452#0/1  
aaaaabbabab`aaaZaaaaaaaa`]]aa```^`aY\_^a\_  
@HWI-EAS443:3:92:258:1197#0/1  
AAGGAGAGAAAGCTAATGTGCTAATTGGGCAAGGGGACGT  
+HWI-EAS443:3:92:258:1197#0/1  
¥¥`a\_Y`a\_]abaabaaaa[Z^\_]`aaa`0^ZS]\_[a]  
@HWI-EAS443:3:92:358:44#0/1  
TCCCCTTGCCCAATTAGCACATTAGCTTTCTCCTTTTG  
+HWI-EAS443:3:92:358:44#0/1  
^R]Z`¥`[¥LR\_ZY`\_XX¥T\_a\_Y\_]```[]^VOZ]^Z`  
@HWI-EAS443:3:92:377:1728#0/1  
CATCAATGAACTGAGCAATCTTGCAAAAGGAGAGAAAGCT  
+HWI-EAS443:3:92:377:1728#0/1  
a^aa`[\_WWa[a]]V`aaa^S`]Wa¥\_`XU\_]\_¥\_`^^[¥  
@HWI-EAS443:3:92:416:1139#0/1  
AGCTAATGTGCTAATTGGGCAAGGGGACGTAGTGTTGGTA  
+HWI-EAS443:3:92:416:1139#0/1  
XTZbaUZXT`baa`\_`^`¥aaaa]]YY\_a^T`NY\_a]]T`  
@HWI-EAS443:3:92:432:468#0/1  
GAGCAATCTTGCAAAAGGAGAGAAAGCTAATGTGCTAATT  
+HWI-EAS443:3:92:432:468#0/1  
aab`\_`^`aabaaa^`ba\_aaaa]\_aV^\_aaa]a`a^\_a\_  
@HWI-EAS443:3:92:553:1668#0/1  
AACTGAGCAATCTTGCAAAAGGAGAGAAAGCTAATGTGCT  
+HWI-EAS443:3:92:553:1668#0/1  
``aU^YW`\_a`\_`aaa]^\_a`\_`aaaa\_a[a``aa^\_\_\_  
@HWI-EAS443:3:92:59:1155#0/1  
AGCTTTCTCCTTTTGCAAGATTGCTCAGTTCATTGATG  
+HWI-EAS443:3:92:59:1155#0/1  
I¥`U```aa^a`a`a`bb`W¥ba\_a``[[`\_baaaaa`b  
@HWI-EAS443:3:92:728:285#0/1  
GAGCAATCTTGCAAAAGGAGAGAAAGCTAATGTGCTAATT  
+HWI-EAS443:3:92:728:285#0/1  
aUb`babab`Za]Va[b`\_`Y\_\_[aUYYa¥^YWaP¥\_YMS  
@HWI-EAS443:3:92:749:794#0/1  
ATCTTGCAAAAGGAGAGAAAGCTAATGTGCTAATTGGGCA  
+HWI-EAS443:3:92:749:794#0/1  
a``baaa`a`abaabab`X[`aaaY^a^\_Y``]a\_a`\_`\_`  
@HWI-EAS443:3:92:762:524#0/1  
GAGAAAGCTAATGTGCTAATTGGGCAAGGGGACGTAGTGT  
+HWI-EAS443:3:92:762:524#0/1  
ab`aaaa\_aaaa^aab\_aabaaa\_aaaa]^a^aaZ`\_  
@HWI-EAS443:3:92:76:378#0/1  
GAGCAATCTTGCAAAAGGAGAGAAAGCTAATGTGCTAATT





@HWI-EAS443:3:93:1712:1245#0/1  
CCCTTGCCCAATTAGCACATTAGCTTTCTCCTTTTGCA  
+HWI-EAS443:3:93:1712:1245#0/1  
``aa]aa\_aabaa\_a`¥aaaaaaaaVaZaa^aaa^\_U`  
@HWI-EAS443:3:93:171:391#0/1  
AATGAACTGAGCAATCTTGCAAAAGGAGAGAAAGCTAATG  
+HWI-EAS443:3:93:171:391#0/1  
abb``\_\_`\_b^`\_]ab`aa^`Y\_`]ZZ]YV`aaaXa`\_Ya  
@HWI-EAS443:3:93:213:706#0/1  
GAAAGCTAATGTGCTAATTGGGCAAGGGGACGTAGTGTG  
+HWI-EAS443:3:93:213:706#0/1  
aaa\_a[``\_`a]a[a\_\_a`\_`\_Z\_X\_\_`^X^`Y\_\_WZU]\_  
@HWI-EAS443:3:93:375:1996#0/1  
ATCTTGCAAAAGGAGAGAAAGCTAATGTGCTAATTGGGCA  
+HWI-EAS443:3:93:375:1996#0/1  
Zaaaa^TZ]VLV[VRT[ZZ`T\_`^]OWV]X`WGXQYVBBB  
@HWI-EAS443:3:93:395:1006#0/1  
CAATTAGCACATTAGCTTTCTCCTTTTGCAAGATTGCT  
+HWI-EAS443:3:93:395:1006#0/1  
a\_aZ`aZa`[[`\_a`a]\_\_a][¥`\_\_\_\_[UX\_¥]\_^Z[]  
@HWI-EAS443:3:93:439:312#0/1  
GAGAAAGCTAATGTGCTAATTGGGCAAGGGGACGTAGTGT  
+HWI-EAS443:3:93:439:312#0/1  
a\_`aW¥a`\_\_\_\_^`W\_`^`]^`\_X[X^Z\_]`^ZZ^ZW^Z]X  
@HWI-EAS443:3:93:58:1742#0/1  
GCAATCTTGCAAAAGGAGAGAAAGCTAATGTGCTAATTGG  
+HWI-EAS443:3:93:58:1742#0/1  
a`^R\_Za\_aa[¥`aa\_]a\_¥V^`\_a\_T¥``VZ`^\_]U\_Z[  
@HWI-EAS443:3:93:600:1280#0/1  
CAATCTTGCAAAAGGAGAGAAAGCTAATGTGCTAATTGGG  
+HWI-EAS443:3:93:600:1280#0/1  
`]aa\_a\_]\_aZ`]a]\_a`^aYaaa\_a[``\_]\_\_\_\_\_`[¥[W  
@HWI-EAS443:3:93:678:1328#0/1  
AAAGCTAATGTGCTAATTGGGCAAGGGGACGTAGTGTG  
+HWI-EAS443:3:93:678:1328#0/1  
a]Ub`aZV\_a\_a^¥X[[[PX`YXGV^V]^RTQ^\_V\_U¥\_a  
@HWI-EAS443:3:93:678:1882#0/1  
AAAAGGAGAGAAAGCTAATGTGCTAATTGGGCAAGGGGAC  
+HWI-EAS443:3:93:678:1882#0/1  
^W]]XUQY[^^]]Z^¥T^ZYQQ]``\_``\_WS¥[\_\_TR]``  
@HWI-EAS443:3:93:764:1360#0/1  
AAGGAGAGAAAGCTAATGTGCTAATTGGGCAAGGGGACGT  
+HWI-EAS443:3:93:764:1360#0/1  
a\_aaaaaabaaaaaaa`a\_aaaaaaaa`aWa]\_\_\_\_a^\_a\_  
@HWI-EAS443:3:93:945:317#0/1  
ATCTTGCAAAAGGAGAGAAAGCTAATGTGCTAATTGGGCA  
+HWI-EAS443:3:93:945:317#0/1  
``\_aaa\_\_`X\_b`\_a````\_]`]^`^`aYaY^`^`\_^^\_X\_  
@HWI-EAS443:3:93:963:1335#0/1  
AAGCTAATGTGCTAATTGGGCAAGGGGACGTAGTGTGTTGGT

+HWI-EAS443:3:93:963:1335#0/1  
a]a^a\_Y`Ya\_a`\_aa`\_\_`\_]`\_`Z\_]^^`Z\_^\_]¥V  
@HWI-EAS443:3:94:1012:549#0/1  
AAAGCTAATGTGCTAATTGGGCAAGGGGACGTAGTGTGG  
+HWI-EAS443:3:94:1012:549#0/1  
aaabaa`]aaaa`[`aaaaa`\_aaaa\_]b^\_a^a^`a  
@HWI-EAS443:3:94:1141:1666#0/1  
GAGCAATCTTGCAAAAGGAGAGAAAGCTAATGTGCTAATT  
+HWI-EAS443:3:94:1141:1666#0/1  
abbbbbbbabbbbbbbbbbbbbbb^babbaab\_ba\_ba  
@HWI-EAS443:3:94:1282:1906#0/1  
AGCTAATGTGCTAATTGGGCAAGGGGACGTAGTGTGGTA  
+HWI-EAS443:3:94:1282:1906#0/1  
````a]aa[\_¥aaa`\_a^`YaX\_^\_XKK^MTaWXHT`\_OZ  
@HWI-EAS443:3:94:1337:1369#0/1  
AGCACATTAGCTTTCTCTCCTTTTGCAAGATTGCTCAGTT  
+HWI-EAS443:3:94:1337:1369#0/1  
¥RUa¥¥`b`Xa]bb\_b`^`abb]b^`]¥[aa¥Z[Z]Z\_U  
@HWI-EAS443:3:94:1353:425#0/1  
AATGAAGCTGAGCAATCTTGCAAAAGGAGAGAAAGCTAATG  
+HWI-EAS443:3:94:1353:425#0/1  
aabaaaaaab\_aaa\_aaa^a\_a\_aa\_a`aaa`a]`\_`]`a  
@HWI-EAS443:3:94:145:1350#0/1  
GAGCAATCTTGCAAAAGGAGAGAAAGCTAATGTGCTAATT  
+HWI-EAS443:3:94:145:1350#0/1  
aaaa^aaaaab`U]\_\_]`]]X`a`Z^^¥`]aaVa`^``\_\_  
@HWI-EAS443:3:94:1536:645#0/1  
ATCTTGCAAAAGGAGAGAAAGCTAATGTGCTAATTGGGCA  
+HWI-EAS443:3:94:1536:645#0/1  
`\_``\_a^`a`^`^`\_a\_\_a`]a]a`^`\_[aU`\_``^^\_aV\_  
@HWI-EAS443:3:94:1635:1200#0/1  
AGCACATTAGCTTTCTCTCCTTTTGCAAGATTGCTCAGTT  
+HWI-EAS443:3:94:1635:1200#0/1  
aaab\_Ybaaaaaa`aaba\_abbba`\_`b`a\_a[`]``]a  
@HWI-EAS443:3:94:194:149#0/1  
GAGAAAGCTAATGTGCTAATTGGGCAAGGGGACGTAGTGT  
+HWI-EAS443:3:94:194:149#0/1  
a`\_¥VY``\_]Z]aXa\_¥0`X`a\_\_]ZV^`]XY\_XW]X^X  
@HWI-EAS443:3:94:218:447#0/1  
AAGCATCAATGAACTGAGCAATCTTGCAAAAGGAGAGAAA  
+HWI-EAS443:3:94:218:447#0/1  
aa[^DUa`\_\_aX]\_`aSa\_\_X`\_\_\_\_\_^]aZa^W\_^^]aZ  
@HWI-EAS443:3:94:230:582#0/1  
GAAAGCTAATGTGCTAATTGGGCAAGGGGACGTAGTGTGG  
+HWI-EAS443:3:94:230:582#0/1  
^^WO^\_a\_]ab[a`aaaa`aaa\_`^`YSX]aYU[Y\_W^a  
@HWI-EAS443:3:94:319:1668#0/1  
CATCAATGAACTGAGCAATCTTGCAAAAGGAGAGAAAGCT  
+HWI-EAS443:3:94:319:1668#0/1  
`aab\_H\_babbbba`bbba[a`ba`\_a\_ba¥aaaba^¥P`

@HWI-EAS443:3:94:507:170#0/1  
GAGCAATCTTGCAAAAGGAGAGAAAGCTAATGTGCTAATT  
+HWI-EAS443:3:94:507:170#0/1  
Q[abb`baaaaaYa\_\_a[a`aa``¥[\_aa^`\_`R\_X]`^  
@HWI-EAS443:3:94:567:843#0/1  
GAAAGCTAATGTGCTAATTGGGCAAGGGGACGTAGTGTG  
+HWI-EAS443:3:94:567:843#0/1  
abbababba`a\_b]ab`aa\_baaaababa`aa^aWa`\_a  
@HWI-EAS443:3:94:667:1571#0/1  
ATCAATGAACTGAGCAATCTTGCAAAAGGAGAGAAAGCTA  
+HWI-EAS443:3:94:667:1571#0/1  
a^Va`bbabaaa`bbbab`babba`aaaaaab`abXaa  
@HWI-EAS443:3:94:688:1810#0/1  
ATCTTGCAAAAGGAGAGAAAGCTAATGTGCTAATTGGGCA  
+HWI-EAS443:3:94:688:1810#0/1  
aaa^`^^`]aabb]]ab`¥[]a\_YaZQ]¥a`]]RX`X[  
@HWI-EAS443:3:94:752:787#0/1  
GCAATCTTGCAAAAGGAGAGAAAGCTAATGTGCTAATTGG  
+HWI-EAS443:3:94:752:787#0/1  
V\_[[S[babbbb^\_IHb`a\_baVUaa]b\_aaaabab][\_  
@HWI-EAS443:3:94:759:174#0/1  
AAGCTAATGTGCTAATTGGGCAAGGGGACGTAGTGTGGT  
+HWI-EAS443:3:94:759:174#0/1  
aab]a`aa\_b^aa`a```\_`^a\_`^\_a]]aX`Wa\_\_U  
@HWI-EAS443:3:94:846:1959#0/1  
GAAAGCTAATGTGCTAATTGGGCAAGGGGACGTAGTGTG  
+HWI-EAS443:3:94:846:1959#0/1  
ab]aa\_aaabaYbaba`Z`¥`a^aa`R]a`a\_\_aa¥a`b  
@HWI-EAS443:3:94:879:912#0/1  
GAACTGAGCAATCTTGCAAAAGGAGAGAAAGCTAATGTGC  
+HWI-EAS443:3:94:879:912#0/1  
[¥S^ab\_ZaaV^b^abab`a`bb`^\_b[Z`baa`ZaaT]\_  
@HWI-EAS443:3:94:886:1392#0/1  
GAGCAATCTTGCAAAAGGAGAGAAAGCTAATGTGCTAATT  
+HWI-EAS443:3:94:886:1392#0/1  
aaaab```baaaaa`ab]abbabbbb^a`aba[\_\_b^`a\_  
@HWI-EAS443:3:94:900:362#0/1  
TGCAAAAGGAGAGAAAGCTAATGTGCTAATTGGGCAAGGG  
+HWI-EAS443:3:94:900:362#0/1  
[bTWaRV`]]`aSS`]V`\_baaabW¥Waa[\_[`¥`[FG\_^^  
@HWI-EAS443:3:94:914:1429#0/1  
GAGAAAGCTAATGTGCTAATTGGGCAAGGGGACGTAGTGT  
+HWI-EAS443:3:94:914:1429#0/1  
abbaaababa`aa`abaaaaaaa`aa`a``a\_\_aZa¥  
@HWI-EAS443:3:94:922:1526#0/1  
GAAAGCTAATGTGCTAATTGGGCAAGGGGACGTAGTGTG  
+HWI-EAS443:3:94:922:1526#0/1  
aaab`aaaabbaaaaaababaaaaaaa\_\_aa]^a^aZ`a  
@HWI-EAS443:3:94:939:1063#0/1  
CATCAATGAACTGAGCAATCTTGCAAAAGGAGAGAAAGCT

+HWI-EAS443:3:94:939:1063#0/1  
Y`babbbbababababababbb`baabbbbaabbb`\_`^a  
@HWI-EAS443:3:95:1206:1419#0/1  
CATCAATGAACTGAGCAATCTTGCAAAAGGAGAGAAAGCT  
+HWI-EAS443:3:95:1206:1419#0/1  
^a\_`¥¥¥^\_aabbbbababaabb]a`b¥abb`baa¥a]TT  
@HWI-EAS443:3:95:1345:1952#0/1  
CCCTTGCCCAATTAGCACATTAGCTTTCTCCTTTTGCA  
+HWI-EAS443:3:95:1345:1952#0/1  
a\_ZU]`[¥]babaa]baa`^`b]G¥aVba`b[aa\_]\_aSa  
@HWI-EAS443:3:95:1360:346#0/1  
CATCAATGAACTGAGCAATCTTGCAAAAGGAGAGAAAGCT  
+HWI-EAS443:3:95:1360:346#0/1  
Z`abbbbbXbaba¥a`b`bbbbbbabbbaba`aab`bb`b  
@HWI-EAS443:3:95:145:365#0/1  
GCAATCTTGCAAAAGGAGAGAAAGCTAATGTGCTAATTGG  
+HWI-EAS443:3:95:145:365#0/1  
a^\_\_`\_`a]]\_^^`\_`aU]\_^\_^^[RZ\_aV\_XXM[^]^[  
@HWI-EAS443:3:95:1490:1767#0/1  
GAGAAAGCTAATGTGCTAATTGGGCAAGGGGACGTAGTGT  
+HWI-EAS443:3:95:1490:1767#0/1  
`^\_\_\_bba\_b`a`^`b`a`abab\_bK\_b^\_\_ab^Ra¥a`  
@HWI-EAS443:3:95:1501:280#0/1  
GAGAAAGCTAATGTGCTAATTGGGCAAGGGGACGTAGTGT  
+HWI-EAS443:3:95:1501:280#0/1  
[S`^`\_X¥\_]X`WZ`[] [X\_aa[[\_GUNP]\_]WRU^X  
@HWI-EAS443:3:95:1624:309#0/1  
CATCAATGAACTGAGCAATCTTGCAAAAGGAGAGAAAGCT  
+HWI-EAS443:3:95:1624:309#0/1  
`bb\_babbab\_bbaababb`b`b`¥abb\_baabab`aa\_a  
@HWI-EAS443:3:95:249:36#0/1  
CATCAATGAACTGAGCAATCTTGCAAAAGGAGAGAAAGCT  
+HWI-EAS443:3:95:249:36#0/1  
abbbbbbabbbbababaaaaabab`a[\_U^b`bZba`\_a\_a  
@HWI-EAS443:3:95:284:21#0/1  
GAAAGCTAATGTGCTAATTGGGCAAGGGGACGTAGTGTGTA  
+HWI-EAS443:3:95:284:21#0/1  
aba`aabaabb`b\_aa\_aaaaa\_^[]\_a\_^ZaV^\_G\_]`\_  
@HWI-EAS443:3:95:359:1508#0/1  
AGCTAATGTGCTAATTGGGCAAGGGGACGTAGTGTGGTA  
+HWI-EAS443:3:95:359:1508#0/1  
\_\_aa¥`\_b]\_^Z^aa]V]^a`^`^`\_a`^`a`a^]a`Y\_  
@HWI-EAS443:3:95:375:580#0/1  
GAGCAATCTTGCAAAAGGAGAGAAAGCTAATGTGCTAATT  
+HWI-EAS443:3:95:375:580#0/1  
a^^G^a^\_a\_¥\_UTa\_`V[`\_aa]Z`^`\_^^`^a`\_\_^^^  
@HWI-EAS443:3:95:381:63#0/1  
GAAAGCTAATGTGCTAATTGGGCAAGGGGACGTAGTGTGTA  
+HWI-EAS443:3:95:381:63#0/1  
abaX`^YVaa^bM0[b`ab^b`aL\_`a`KWbXabObaaa

@HWI-EAS443:3:95:397:552#0/1  
CTTGCAAAAGGAGAGAAAGCTAATGTGCTAATTGGGCAAG  
+HWI-EAS443:3:95:397:552#0/1  
`abb\_`SSbP^[a`VXZ`bZ[abU`¥a`aaaa`\_aU[b  
@HWI-EAS443:3:95:40:1053#0/1  
ATCTTGCAAAAGGAGAGAAAGCTAATGTGCTAATTGGGCA  
+HWI-EAS443:3:95:40:1053#0/1  
aa`X]\_a`a^Z\_Y`aab`^\_\_a\_``]\_¥\_W\_RNZ¥\_\_XX[  
@HWI-EAS443:3:95:559:1693#0/1  
ATCAATGAAGTGAAGCAATCTTGCAAAAGGAGAGAAAGCTA  
+HWI-EAS443:3:95:559:1693#0/1  
aabbabb`aaaaY`aba`baa`\_aaab`aaabb^`a`a`  
@HWI-EAS443:3:95:616:1882#0/1  
CTTGCAAAAGGAGAGAAAGCTAATGTGCTAATTGGGCAAG  
+HWI-EAS443:3:95:616:1882#0/1  
abbbbab`aaabbb`baaaaab^baabbbbaabaaaa`¥bY  
@HWI-EAS443:3:95:681:923#0/1  
AAGCATCAATGAAGTGAAGCAATCTTGCAAAAGGAGAGAAA  
+HWI-EAS443:3:95:681:923#0/1  
a¥a`\_a`aaaa`¥`aaa`\_`aa`a`a`\_\_\_\_\_`\_aaa`a^`  
@HWI-EAS443:3:95:702:1881#0/1  
CATCAATGAAGTGAAGCAATCTTGCAAAAGGAGAGAAAGCT  
+HWI-EAS443:3:95:702:1881#0/1  
ababaababb`a¥ababa`^^ab\_a``aaY\_``aaaaaS`  
@HWI-EAS443:3:95:838:462#0/1  
ACGTCCCCTTGCCAATTAGCACATTAGCTTTCTCTCCTT  
+HWI-EAS443:3:95:838:462#0/1  
``aaa\_ab\_^b\_^a`^`[`a`¥`\_abaabaa```aaa\_Z\_\_  
@HWI-EAS443:3:95:885:1975#0/1  
GAAAGCTAATGTGCTAATTGGGCAAGGGGACGTAGTGTTG  
+HWI-EAS443:3:95:885:1975#0/1  
ab[¥¥PV\_abbP`b`aaba`a`aaaaa`\_aYb¥abRa\_\_a  
@HWI-EAS443:3:96:1016:742#0/1  
GAAAGCTAATGTGCTAATTGGGCAAGGGGACGTAGTGTTG  
+HWI-EAS443:3:96:1016:742#0/1  
]a``bababb^ab\_baab`bbbaaYbaaa\_\_aaa]¥a\_ab  
@HWI-EAS443:3:96:115:1502#0/1  
GAAAGCTAATGTGCTAATTGGGCAAGGGGACGTAGTGTTG  
+HWI-EAS443:3:96:115:1502#0/1  
¥\_]Q[QWZ^aa`\_XXX\_VZPUX\_aaZXQG¥NTLNNFU^BB  
@HWI-EAS443:3:96:1331:345#0/1  
AGCTAATGTGCTAATTGGGCAAGGGGACGTAGTGTTGGTA  
+HWI-EAS443:3:96:1331:345#0/1  
ababaababa¥b``aa\_ba^``aaa¥\_[a[\_a^a[aa\_WQ  
@HWI-EAS443:3:96:1529:792#0/1  
GAAAGCTAATGTGCTAATTGGGCAAGGGGACGTAGTGTTG  
+HWI-EAS443:3:96:1529:792#0/1  
aaa^aI\_\_^aaU`¥a`^aa`]YT[]\_a[^TG^WW^W\_W^\_  
@HWI-EAS443:3:96:251:446#0/1  
AAAGCTAATGTGCTAATTGGGCAAGGGGACGTAGTGTTGG



@HWI-EAS443:3:96:909:508#0/1  
GAGCAATCTTGCAAAGGAGAGAAAGCTAATGTGCTAATT  
+HWI-EAS443:3:96:909:508#0/1  
`abaaaaaaba`^`P`aaaaaba^`^a\_aa`Ya¥\_Y\_a`  
@HWI-EAS443:3:96:942:1571#0/1  
GCAAAGGAGAGAAAGCTAATGTGCTAATTGGGCAAGGGG  
+HWI-EAS443:3:96:942:1571#0/1  
\_NJXSQTLV[^\_URWLV¥U^\_UG¥WJW¥T¥\_HaUP¥Q\_BB  
@HWI-EAS443:3:97:103:820#0/1  
GAAAGCTAATGTGCTAATTGGGCAAGGGGACGTAGTGTTG  
+HWI-EAS443:3:97:103:820#0/1  
aaa^baa`^aa^baa^L\_a`a]]^aaa`WYab]\_b]aX\_\_  
@HWI-EAS443:3:97:1074:558#0/1  
AGCACATTAGCTTTCTCTCTTTTGAAGATTGCTCAGTT  
+HWI-EAS443:3:97:1074:558#0/1  
ab]b`bbbabTaba`a`a`RbababaaaaaaaWa^aa\_b  
@HWI-EAS443:3:97:115:645#0/1  
CATCAATGAAGTGAAGCAATCTTGCAAAGGAGAGAAAGCT  
+HWI-EAS443:3:97:115:645#0/1  
abbbbabb\_b\_bbaabb^bababaa`\_aaa\_`a`a\_`^`^`  
@HWI-EAS443:3:97:1209:719#0/1  
GAGCAATCTTGCAAAGGAGAGAAAGCTAATGTGCTAATT  
+HWI-EAS443:3:97:1209:719#0/1  
aaa[bbbbbab`bbaabbababbaa`\_bbaab`a\_aaa\_b  
@HWI-EAS443:3:97:1286:738#0/1  
TGCAAAGGAGAGAAAGCTAATGTGCTAATTGGGCAAGGG  
+HWI-EAS443:3:97:1286:738#0/1  
aaaU`\_abaab^bbaabaa`[^[HW\_a\_\_aa]YXR^`\_`\_`  
@HWI-EAS443:3:97:1394:988#0/1  
TGAGCAATCTTGCAAAGGAGAGAAAGCTAATGTGCTAAT  
+HWI-EAS443:3:97:1394:988#0/1  
aba`RabaaaaV\_a`aba\_b`ba`\_bWa^¥aa]aZ\_\_¥a  
@HWI-EAS443:3:97:1463:782#0/1  
ATCTTGCAAAGGAGAGAAAGCTAATGTGCTAATTGGGCA  
+HWI-EAS443:3:97:1463:782#0/1  
ab^Y¥a`a]\_]\_abaY¥`aX^`^`b[abHUQa^¥`abaUP`  
@HWI-EAS443:3:97:1526:1789#0/1  
CATCAATGAAGTGAAGCAATCTTGCAAAGGAGAGAAAGCT  
+HWI-EAS443:3:97:1526:1789#0/1  
abaabaVbYbSb¥bb¥aab¥bb^T]V`ba¥W[]]bOR]DY  
@HWI-EAS443:3:97:1586:1157#0/1  
AGAGAAAGCTAATGTGCTAATTGGGCAAGGGGACGTAGTG  
+HWI-EAS443:3:97:1586:1157#0/1  
¥T[ZZ^^`XXUYa]X¥H^\_\_]]`UJTH]a[Y[]][SSSSH  
@HWI-EAS443:3:97:1614:1619#0/1  
GCATCAATGAAGTGAAGCAATCTTGCAAAGGAGAGAAAGC  
+HWI-EAS443:3:97:1614:1619#0/1  
U^`^`Zb\_\_b`\_aaabb^a\_aS^¥b¥¥\_`Sa\_ababbb^b¥  
@HWI-EAS443:3:97:1741:194#0/1  
AAGGAGAGAAAGCTAATGTGCTAATTGGGCAAGGGGACGT

+HWI-EAS443:3:97:1741:194#0/1  
[a^\_\_abb`a`P`\_[ba`\_U^a`a^a^`\_]\_^]USUUD\_B  
@HWI-EAS443:3:97:1782:1600#0/1  
AGCTAATGTGCTAATTGGGCAAGGGGACGTAGTGTGGTA  
+HWI-EAS443:3:97:1782:1600#0/1  
aa\_aa\_a\_S^]b\_\_a\_`\_]Z^\_aY`RXVRU[W^O\_\_\_UG  
@HWI-EAS443:3:97:192:320#0/1  
GAGAAAGCTAATGTGCTAATTGGGCAAGGGGACGTAGTGT  
+HWI-EAS443:3:97:192:320#0/1  
\_bbab`ba]`aba`b^b`a\_a[a`\_¥WbaaaJF]\_]aXaX  
@HWI-EAS443:3:97:216:74#0/1  
GAGCAATCTTGCAAAAGGAGAGAAAGCTAATGTGCTAATT  
+HWI-EAS443:3:97:216:74#0/1  
a\_b]]\_a[aaa\_^\_]`\_Va]`\_¥\_]\_]X^^XaY^YYY^  
@HWI-EAS443:3:97:239:1834#0/1  
AGCTAATGTGCTAATTGGGCAAGGGGACGTAGTGTGGTA  
+HWI-EAS443:3:97:239:1834#0/1  
\_a\_bVR[`V\_Ga[^WVWVa`a`\_Z[GTaZ¥IXYBBBBBB  
@HWI-EAS443:3:97:254:1213#0/1  
TGCAAAAGGAGAGAAAGCTAATGTGCTAATTGGGCAAGGG  
+HWI-EAS443:3:97:254:1213#0/1  
M`\_`S`bb]U¥Ya^b`a]aYQ`baa\_aaa[`abaS``b¥X  
@HWI-EAS443:3:97:318:139#0/1  
GAGCAATCTTGCAAAAGGAGAGAAAGCTAATGTGCTAATT  
+HWI-EAS443:3:97:318:139#0/1  
R¥`a¥`bbb``aa]bbbbababb\_aaUbbaab^aYbYaaa  
@HWI-EAS443:3:97:340:1080#0/1  
CCTTGCCCAATTAGCACATTAGCTTTCTCTCCTTTTGCAA  
+HWI-EAS443:3:97:340:1080#0/1  
aa\_TQOYTa``STR^W\_]\_]^[`]TZ]XW¥UXa\_]TTZUI  
@HWI-EAS443:3:97:349:1180#0/1  
CAATCTTGCAAAAGGAGAGAAAGCTAATGTGCTAATTGGG  
+HWI-EAS443:3:97:349:1180#0/1  
]baX[`ZX`a`]\_]\_bXG]``a]V¥TELa`UaW¥aX\_``\_a  
@HWI-EAS443:3:97:441:1124#0/1  
CAATCTTGCAAAAGGAGAGAAAGCTAATGTGCTAATTGGG  
+HWI-EAS443:3:97:441:1124#0/1  
`bba[baba^`^][b\_aaabW^O`aaaa\_^`\_\_aa^`V  
@HWI-EAS443:3:97:453:1418#0/1  
GAGCAATCTTGCAAAAGGAGAGAAAGCTAATGTGCTAATT  
+HWI-EAS443:3:97:453:1418#0/1  
aaaab¥`aa]^`a\_\_a]¥aaba^[a]a[`a`R`P`^`\_\_R  
@HWI-EAS443:3:97:623:1914#0/1  
GAGCAATCTTGCAAAAGGAGAGAAAGCTAATGTGCTAATT  
+HWI-EAS443:3:97:623:1914#0/1  
`baababbbbababbabbbbababbb``b`aba\_aabaa\_  
@HWI-EAS443:3:97:67:618#0/1  
ATGAACTGAGCAATCTTGCAAAAGGAGAGAAAGCTAATGT  
+HWI-EAS443:3:97:67:618#0/1  
a¥V]aS¥ZT]aaaS[\_\_\_`^XWFTQXa^`Z^]\_^]VS\_I



@HWI-EAS443:3:97:680:1735#0/1  
AATGAACTGAGCAATCTTGCAAAAGGAGAGAAAGCTAATG  
+HWI-EAS443:3:97:680:1735#0/1  
[T^Y¥Xb¥abSZZba^\_T\_\_[RQ¥bbaTa¥FR\_¥aa\_`  
@HWI-EAS443:3:97:793:1863#0/1  
GCATCAATGAACTGAGCAATCTTGCAAAAGGAGAGAAAGC  
+HWI-EAS443:3:97:793:1863#0/1  
`aab^ba]aaaa\_`aaa\_`\_aa\_a^`ba\_`aaa^aa\_  
@HWI-EAS443:3:97:844:1966#0/1  
TTGCCCAATTAGCACATTAGCTTTCTCTCCTTTTGCAAGA  
+HWI-EAS443:3:97:844:1966#0/1  
aab¥HV`aa`S¥]`a\_`\_]aaa^]a¥a\_Xa\_[]`\_`aa`\_  
@HWI-EAS443:3:97:958:1960#0/1  
GAACTGAGCAATCTTGCAAAAGGAGAGAAAGCTAATGTGC  
+HWI-EAS443:3:97:958:1960#0/1  
\_`a\_ba\_X¥aba`^aaZ`aaaa^ba`bZaaYa\_aa^Q[Z  
@HWI-EAS443:3:97:978:725#0/1  
GAACTGAGCAATCTTGCAAAAGGAGAGAAAGCTAATGTGC  
+HWI-EAS443:3:97:978:725#0/1  
a]¥`a`baaaa^aaa[\_a`\_aa\_aa^`^XaXa]`a`N`S  
@HWI-EAS443:3:98:1006:516#0/1  
CGTCCCCTTGCCCAATTAGCACATTAGCTTTCTCTCCTTT  
+HWI-EAS443:3:98:1006:516#0/1  
a\_abVH\_Za`\_^`[a`a[baaUP```a\_\_JSa\_`b¥RV` [  
@HWI-EAS443:3:98:100:1774#0/1  
AGCATCAATGAACTGAGCAATCTTGCAAAAGGAGAGAAAG  
+HWI-EAS443:3:98:100:1774#0/1  
`aabaaba`]`Y\_aa`aa`a`a`a`XX^¥a````\_a¥\_\_  
@HWI-EAS443:3:98:110:108#0/1  
AAAAGGAGAGAAAGCTAATGTGCTAATTGGGCAAGGGGAC  
+HWI-EAS443:3:98:110:108#0/1  
a[aabb\_`^baa\_`aaa\_aa]a\_`^^\_\_^[V]Z`X`¥U]  
@HWI-EAS443:3:98:1178:1327#0/1  
GAACTGAGCAATCTTGCAAAAGGAGAGAAAGCTAATGTGC  
+HWI-EAS443:3:98:1178:1327#0/1  
`bbaa`ab`bbb]a`b`aa]UU^aa`aaSa\_`\_baabaa\_  
@HWI-EAS443:3:98:1279:247#0/1  
GAGCAATCTTGCAAAAGGAGAGAAAGCTAATGTGCTAATT  
+HWI-EAS443:3:98:1279:247#0/1  
`YV\_`b`^babTbbaabaa`aabb`]a^`a`abWa``ba  
@HWI-EAS443:3:98:1279:57#0/1  
AAGGAGAGAAAGCTAATGTGCTAATTGGGCAAGGGGACGT  
+HWI-EAS443:3:98:1279:57#0/1  
^ba`Kbbbb`K`U¥\_`abaZIZ`baaa]]IbMa\_OVUXUQ  
@HWI-EAS443:3:98:1333:994#0/1  
GAAAGCTAATGTGCTAATTGGGCAAGGGGACGTAGTGTG  
+HWI-EAS443:3:98:1333:994#0/1  
aaaa\_aa^ab^a`a]^aa`a`a\_aa`\_\_^aQ\_aY`[aa  
@HWI-EAS443:3:98:148:492#0/1  
AGAGAAAGCTAATGTGCTAATTGGGCAAGGGGACGTAGTG

+HWI-EAS443:3:98:148:492#0/1  
aaaba`ababZ]aaZaaa\_]a`aaa^]b`aa]\_b]XaU\_  
@HWI-EAS443:3:98:1503:1061#0/1  
GAGCAATCTTGCAAAAAGGAGAGAAAGCTAATGTGCTAATT  
+HWI-EAS443:3:98:1503:1061#0/1  
V`^`aaa`bba]UYI]a¥a\_abbaab[ba`aa`b\_a\_\_aa  
@HWI-EAS443:3:98:160:81#0/1  
CATCAATGAACTGAGCAATCTTGCAAAAAGGAGAGAAAGCT  
+HWI-EAS443:3:98:160:81#0/1  
aaa¥aaab`b\_aa¥a`a\_a¥aaaZ\_^P]a`[a]a\_U]\_Y`  
@HWI-EAS443:3:98:1766:983#0/1  
AGCTAATGTGCTAATTGGGCAAGGGGACGTAGTGTGGTA  
+HWI-EAS443:3:98:1766:983#0/1  
```Xa`a¥V^[^aaabb`aS\_\_ba^`¥UYX`^XX]`QFHN  
@HWI-EAS443:3:98:213:203#0/1  
GTCCCCTTGCCCAATTAGCACATTAGCTTTCTCTCCTTTT  
+HWI-EAS443:3:98:213:203#0/1  
a\_\_aaa\_`a```\_baaaa^^^aaa^`\_``aZaU`^Xa]\_^  
@HWI-EAS443:3:98:234:1106#0/1  
TCTTGCAAAAAGGAGAGAAAGCTAATGTGCTAATTGGGCAA  
+HWI-EAS443:3:98:234:1106#0/1  
a\_KW^[RV]]a]aaR^\_W¥a\_[`P^^LHNZ¥[Z]^U[\_]\_  
@HWI-EAS443:3:98:424:1379#0/1  
GCATCAATGAACTGAGCAATCTTGCAAAAAGGAGAGAAAGC  
+HWI-EAS443:3:98:424:1379#0/1  
][`^a¥¥¥a`aaa^^a`\_a\_]`aa]ZWab¥]aaa`N]\_`  
@HWI-EAS443:3:98:442:409#0/1  
AAAGCTAATGTGCTAATTGGGCAAGGGGACGTAGTGTGG  
+HWI-EAS443:3:98:442:409#0/1  
`b]^Y`b`]`¥bZaaY\_R\_]`aabaZa]^`V`b][X^]Z  
@HWI-EAS443:3:98:50:656#0/1  
GAACTGAGCAATCTTGCAAAAAGGAGAGAAAGCTAATGTGC  
+HWI-EAS443:3:98:50:656#0/1  
WSaWabUba`JaI¥`baa`a¥]bbabb\_bLaa]b\_aa\_a\_  
@HWI-EAS443:3:98:54:323#0/1  
ATCTTGCAAAAAGGAGAGAAAGCTAATGTGCTAATTGGGCA  
+HWI-EAS443:3:98:54:323#0/1  
]bba`aaa`^abb\_aVabXH`aZXUb`\_\_`\_`P^\_aa^a`  
@HWI-EAS443:3:98:550:1540#0/1  
GCATCAATGAACTGAGCAATCTTGCAAAAAGGAGAGAAAGC  
+HWI-EAS443:3:98:550:1540#0/1  
a`\_Sa`a]RYa[[\_^]U^¥\_\_YX¥^]ULHUZMZ\_]¥UU]\_  
@HWI-EAS443:3:98:602:699#0/1  
CAATGAACTGAGCAATCTTGCAAAAAGGAGAGAAAGCTAAT  
+HWI-EAS443:3:98:602:699#0/1  
a`^`^`^a\_`¥¥baaa`bbb^^ZLZa`\_¥a\_aa\_aa\_a\_\_a  
@HWI-EAS443:3:98:686:1205#0/1  
GAGCAATCTTGCAAAAAGGAGAGAAAGCTAATGTGCTAATT  
+HWI-EAS443:3:98:686:1205#0/1  
ZX^S\_S[baaa`UKWU^`bbbbbb]b`a\_I\_aab^b^0[a

@HWI-EAS443:3:98:732:1699#0/1  
TCTTGCAAAGGAGAGAAAGCTAATGTGCTAATTGGGCAA  
+HWI-EAS443:3:98:732:1699#0/1  
^H]X\_`[[[]bbbaa]aaU[``a`]aaX\_L\_[]^]XZ\_aa\_  
@HWI-EAS443:3:98:787:842#0/1  
GCATCAATGAACTGAGCAATCTTGCAAAGGAGAGAAAGC  
+HWI-EAS443:3:98:787:842#0/1  
aa]\_\_^NZ]Ya`aa\_aa````\_\_`a\_\_`\_a`\_`\_a\_]\_\_^  
@HWI-EAS443:3:98:802:1239#0/1  
CATCAATGAACTGAGCAATCTTGCAAAGGAGAGAAAGCT  
+HWI-EAS443:3:98:802:1239#0/1  
a`\_b`bba``Vabab\_bababaaa`a`\_aa`^aaa``a`a  
@HWI-EAS443:3:98:805:1265#0/1  
AGCTAATGTGCTAATTGGGCAAGGGGACGTAGTGTGGTA  
+HWI-EAS443:3:98:805:1265#0/1  
[`aabba``\_a\_Ybba````\_Zbbaa`\_b\_Z[H^`X]aOM  
@HWI-EAS443:3:98:808:2024#0/1  
ATCTTGCAAAGGAGAGAAAGCTAATGTGCTAATTGGGCA  
+HWI-EAS443:3:98:808:2024#0/1  
aa¥aa`aaaa`aaaa`aaa`\_0¥\_`^`X[\_a¥a]\_a`^\_Y  
@HWI-EAS443:3:98:818:557#0/1  
AGCTAATGTGCTAATTGGGCAAGGGGACGTAGTGTGGTA  
+HWI-EAS443:3:98:818:557#0/1  
`baU^Uab]]bbaaa][baUa`b¥bb\_Wa`\_WXb^]a[DK  
@HWI-EAS443:3:98:924:829#0/1  
GAGCAATCTTGCAAAGGAGAGAAAGCTAATGTGCTAATT  
+HWI-EAS443:3:98:924:829#0/1  
a``^bbbaaba`\_a[Xaaaa`baa`a¥a\_aab¥a^a`\_aa  
@HWI-EAS443:3:99:1020:243#0/1  
AAAGCTAATGTGCTAATTGGGCAAGGGGACGTAGTGTGG  
+HWI-EAS443:3:99:1020:243#0/1  
¥]P¥[ba[a^JX]ba\_abbba[aZ``^`\_RaU[``^b^\_\_`  
@HWI-EAS443:3:99:1282:711#0/1  
CTTGCAAAGGAGAGAAAGCTAATGTGCTAATTGGGCAAG  
+HWI-EAS443:3:99:1282:711#0/1  
abb`abbabbaabbbb\_b`bbbb`aabb`aa¥]b\_[^^  
@HWI-EAS443:3:99:1473:347#0/1  
GAGAAAGCTAATGTGCTAATTGGGCAAGGGGACGTAGTGT  
+HWI-EAS443:3:99:1473:347#0/1  
aabbaabY]¥S\_a¥baaaaaaabT``aab`¥RaZ`b[a\_  
@HWI-EAS443:3:99:1557:990#0/1  
AAGCATCAATGAACTGAGCAATCTTGCAAAGGAGAGAAA  
+HWI-EAS443:3:99:1557:990#0/1  
]Z`\_`YHW^^\_X¥P\_]I`[a`\_¥^`a¥NNWX`U]\_]\_aQ\_  
@HWI-EAS443:3:99:1656:1046#0/1  
CATCAATGAACTGAGCAATCTTGCAAAGGAGAGAAAGCT  
+HWI-EAS443:3:99:1656:1046#0/1  
aab`babbbb`abab`bab`bbaabaaaaa`abba\_aZa  
@HWI-EAS443:3:99:165:838#0/1  
AGCTAATGTGCTAATTGGGCAAGGGGACGTAGTGTGGTA

+HWI-EAS443:3:99:165:838#0/1  
aba¥HQ\_Za¥0Za[[\_^¥bVa[baabKU¥[\_^a¥[aBBB  
@HWI-EAS443:3:99:1746:1909#0/1  
GAACTGAGCAATCTTGCAAAGGAGAGAAAGCTAATGTGC  
+HWI-EAS443:3:99:1746:1909#0/1  
^¥^0Zaabbab`aabb]aaaabaSbbbb¥abSab^`aY]Z  
@HWI-EAS443:3:99:1774:1739#0/1  
GAACTGAGCAATCTTGCAAAGGAGAGAAAGCTAATGTGC  
+HWI-EAS443:3:99:1774:1739#0/1  
aVa^a`]baaaYaaa\_W`\_\_\_\_a`b\_``aa\_\_`a``S¥\_  
@HWI-EAS443:3:99:201:32#0/1  
GAGCAATCTTGCAAAGGAGAGAAAGCTAATGTGCTAATT  
+HWI-EAS443:3:99:201:32#0/1  
a``a\_``\_aa`^`\_a\_aa\_a\_a`^`Y^^`a]a^^^^\_  
@HWI-EAS443:3:99:208:777#0/1  
GAGCAATCTTGCAAAGGAGAGAAAGCTAATGTGCTAATT  
+HWI-EAS443:3:99:208:777#0/1  
a[b\_SZb^^\_P¥ZXaabb[aaaaaaT`^\_aaXa\_aZaaa  
@HWI-EAS443:3:99:224:125#0/1  
ATCTTGCAAAGGAGAGAAAGCTAATGTGCTAATTGGGCA  
+HWI-EAS443:3:99:224:125#0/1  
aaa``baaa\_Uaa]a\_aa`^bX\_]L\_\_^\_W^\_]`\_\_^]Z  
@HWI-EAS443:3:99:326:371#0/1  
AGCTAATGTGCTAATTGGGCAAGGGGACGTAGTGTGGTA  
+HWI-EAS443:3:99:326:371#0/1  
]`ba``a`Yaba¥abababa[bbbbbb\_[a^^bRb[abaZS  
@HWI-EAS443:3:99:328:261#0/1  
TTGCAAAGGAGAGAAAGCTAATGTGCTAATTGGGCAAGG  
+HWI-EAS443:3:99:328:261#0/1  
`Z]a\_]TYaaabUb]W¥^aaa\_] [Ra\_aX]\_`\_`[^a\_`]  
@HWI-EAS443:3:99:35:760#0/1  
ATCAATGAACTGAGCAATCTTGCAAAGGAGAGAAAGCTA  
+HWI-EAS443:3:99:35:760#0/1  
T`^^\_[^`\_]Za)`\_[YX]`a`\_X`^`\_b¥`\_P\_aYVT  
@HWI-EAS443:3:99:46:501#0/1  
CCCTTGCCCAATTAGCACATTAGCTTTCTCCTTTTGCA  
+HWI-EAS443:3:99:46:501#0/1  
a`¥OUaW¥aW[ ]VXLPV\_R`ZPZ`¥^W]YWXVTQX  
@HWI-EAS443:3:99:486:1021#0/1  
AATGAACTGAGCAATCTTGCAAAGGAGAGAAAGCTAATG  
+HWI-EAS443:3:99:486:1021#0/1  
abaaW` [ ]¥Va[XaZaVaaa\_bKab`\_aaaT[[YYaa\_]a  
@HWI-EAS443:3:99:511:885#0/1  
GAAAGCTAATGTGCTAATTGGGCAAGGGGACGTAGTGTG  
+HWI-EAS443:3:99:511:885#0/1  
abbababaabb`babaabaaba\_`aaaa]ab\_`b^b`\_a  
@HWI-EAS443:3:99:517:211#0/1  
GAGCAATCTTGCAAAGGAGAGAAAGCTAATGTGCTAATT  
+HWI-EAS443:3:99:517:211#0/1  
a[b\_a\_\_ab`b\_`\_\_aa`a`a`\_\_`\_]`^\_]X`]X`\_`

@HWI-EAS443:3:99:630:450#0/1  
CCCTTGCCCAATTAGCACATTAGCTTTCTCCTTTTGCA  
+HWI-EAS443:3:99:630:450#0/1  
abbbbaabbbbbb]b`abbbbababababaaaaabaa  
@HWI-EAS443:3:99:980:322#0/1  
TACGTCCCCTTGCCCAATTAGCACATTAGCTTTCTCCT  
+HWI-EAS443:3:99:980:322#0/1  
ab`VX``T`\_a\_a]¥b``^X]]`UYa`bb``¥YZ`\_`\_YJ^  
@HWI-EAS443:3:99:995:1965#0/1  
AGCTAATGTGCTAATTGGGCAAGGGACGTAGTGTGGTA  
+HWI-EAS443:3:99:995:1965#0/1  
`\_P\_bb`ba^\_aba\_`]]`aJ[`baa\_aXbZ\_\_\_\_a^\_]aXX  
@HWI-EAS443:3:9:1079:1526#0/1  
AAAGGAGAGAAAGCTAATGTGCTAATTGGGCAAGGGACG  
+HWI-EAS443:3:9:1079:1526#0/1  
\_[bY^]a`bb`aZPZabab]aY`aG\_aaWa`\_UUaaaR`b  
@HWI-EAS443:3:9:1092:1725#0/1  
GAGAAAGCTAATGTGCTAATTGGGCAAGGGACGTAGTGT  
+HWI-EAS443:3:9:1092:1725#0/1  
^aSa]¥¥RU\_Za]¥b¥aa^]T\_YX¥]Ra`a^¥X[[`^MaS  
@HWI-EAS443:3:9:1111:860#0/1  
AAAGGAGAGAAAGCTAATGTGCTAATTGGGCAAGGGACG  
+HWI-EAS443:3:9:1111:860#0/1  
¥¥Wa`U`bbaab`^a^^ba`T^`a]]`b\_X\_\_aa\_[V`b  
@HWI-EAS443:3:9:1142:899#0/1  
AGCAATCTTGCAAAAGGAGAGAAAGCTAATGTGCTAATTG  
+HWI-EAS443:3:9:1142:899#0/1  
a]ababababaa]\_abaaaaaa\_a\_a^\_aa\_a\_a\_\_a`a  
@HWI-EAS443:3:9:1230:1356#0/1  
AGCAATCTTGCAAAAGGAGAGAAAGCTAATGTGCTAATTG  
+HWI-EAS443:3:9:1230:1356#0/1  
a^`aababa]ab\_W\_a^`baaa`a`[a`a]`]\_\_a`\_`\_aa  
@HWI-EAS443:3:9:126:647#0/1  
GAAAGCTAATGTGCTAATTGGGCAAGGGACGTAGTGTG  
+HWI-EAS443:3:9:126:647#0/1  
a¥¥\_\_a`¥`¥`]a\_\_`]]`a`\_`\_^]`\_Z\_[WaWW`X\_X]`  
@HWI-EAS443:3:9:1505:1293#0/1  
CATCAATGAAGTGAATCTTGCAAAAGGAGAGAAAGCT  
+HWI-EAS443:3:9:1505:1293#0/1  
`bbababbbaabbbbaabbabab^X`aaab\_abaaaabW`  
@HWI-EAS443:3:9:1572:1180#0/1  
CAATGAAGTGAATCTTGCAAAAGGAGAGAAAGCTAAT  
+HWI-EAS443:3:9:1572:1180#0/1  
a^LJ]aa\_UPY`XZa¥`\_`[¥[U¥`^Xa¥H¥]KaU\_XX\_  
@HWI-EAS443:3:9:169:870#0/1  
GAAAGCTAATGTGCTAATTGGGCAAGGGACGTAGTGTG  
+HWI-EAS443:3:9:169:870#0/1  
a`\_`\_`\_a\_a`\_`\_a\_\_]\_a`Z^\_\_]^`\_\_`Z^aXX`X^X^`  
@HWI-EAS443:3:9:1719:701#0/1  
CAATCTTGCAAAAGGAGAGAAAGCTAATGTGCTAATTGGG

+HWI-EAS443:3:9:1719:701#0/1  
`bbaabbbabaaaba`abbbaaa`^aaa\_aYa\_\_`\_`a`  
@HWI-EAS443:3:9:228:20#0/1  
CAAAAGGAGAGAAAGCTAATGTGCTAATTGGGCAAGGGGA  
+HWI-EAS443:3:9:228:20#0/1  
`[¥SZb^N\_`Y]]\_a[QX[\_a\_`V`aU\_\_aYW`YU`MXa^  
@HWI-EAS443:3:9:361:108#0/1  
GCAATCTTGCAAAAGGAGAGAAAGCTAATGTGCTAATTGG  
+HWI-EAS443:3:9:361:108#0/1  
aUUTPM\_`\_T[]VKY¥]`U^NLUVPTPULZQ\_VUNSUHVU  
@HWI-EAS443:3:9:363:903#0/1  
CAATCTTGCAAAAGGAGAGAAAGCTAATGTGCTAATTGGG  
+HWI-EAS443:3:9:363:903#0/1  
R`^`\_¥abaaTaa\_bbb]bbX\_`¥`aaZVb\_SFa`¥`[\_Z¥  
@HWI-EAS443:3:9:465:131#0/1  
AGCTAATGTGCTAATTGGGCAAGGGGACGTAGTGTGGTA  
+HWI-EAS443:3:9:465:131#0/1  
abWYaabb\_b`b\_a``aab`^aaa\_]XUb^^`0`ZXa^OY  
@HWI-EAS443:3:9:592:778#0/1  
CATCAATGAAGTGAATCTTGCAAAAGGAGAGAAAGCT  
+HWI-EAS443:3:9:592:778#0/1  
abaaabbaaaabbaaaaaabaaa```aaa^aaba``a`\_  
@HWI-EAS443:3:9:637:1959#0/1  
AATCTTGCAAAAGGAGAGAAAGCTAATGTGCTAATTGGGC  
+HWI-EAS443:3:9:637:1959#0/1  
aaaa^SQZ\_\_\_\_T¥\_\_\_\_]`\_^^^SR`\_Y\_W\_Y^\_YO^^^]]  
@HWI-EAS443:3:9:702:1717#0/1  
GAGCAATCTTGCAAAAGGAGAGAAAGCTAATGTGCTAATT  
+HWI-EAS443:3:9:702:1717#0/1  
`]aaabbaaWabbKa¥V`bbbabbba`aaaa]`a[`Ya`a  
@HWI-EAS443:3:9:762:1015#0/1  
AAGCATCAATGAAGTGAATCTTGCAAAAGGAGAGAAA  
+HWI-EAS443:3:9:762:1015#0/1  
a]b`aaaaabaaa`aa\_aaaaaa`a`a\_\_`aa\_aaaa``  
@HWI-EAS443:3:9:800:350#0/1  
AGCACATTAGCTTTCTCTCCTTTTGCAAGATTGCTCAGTT  
+HWI-EAS443:3:9:800:350#0/1  
ZP\_a^aaaaa]XaaZ^V][YYa`W[¥^S^)`X\_OVTUaUT  
@HWI-EAS443:3:9:829:1650#0/1  
ACCAACACTACGTCCCCTTGCCCAATTAGCACATTAGCTT  
+HWI-EAS443:3:9:829:1650#0/1  
aaQ`aaaU^a[ZZ¥`^`Z`\_`S\_[U\_YX]\_[¥aU¥`[¥US  
@HWI-EAS443:3:9:889:132#0/1  
AAAGCTAATGTGCTAATTGGGCAAGGGGACGTAGTGTGG  
+HWI-EAS443:3:9:889:132#0/1  
a^^Z]]a`a`]¥[a`aaa`\_SXXa\_`ZRPZWP\_T\_¥Xa^  
@HWI-EAS443:3:9:993:1037#0/1  
ATCTTGCAAAAGGAGAGAAAGCTAATGTGCTAATTGGGCA  
+HWI-EAS443:3:9:993:1037#0/1  
ab^b`aaa]aaaba]\_a\_¥`a``\_\_`^Va]\_]\_`a\_\_U\_

@HWI-EAS443:3:18:245:1706#0/1  
CGCCTGAGTCCATGAGGGAAGAATACCAACAGGAACAGCA  
+HWI-EAS443:3:18:245:1706#0/1  
aba`^a\_``aabaab\_¥[`]N\_b¥a]aabQa¥USaS`^]a  
@HWI-EAS443:3:31:589:1254#0/1  
TGCCTGAGTCCATGAGGGAAGAATACCAACAGGAACAGCA  
+HWI-EAS443:3:31:589:1254#0/1  
aaabbaaba`baa``a¥`]a`^Ta`P\_a`Za```\_aa\_a¥  
@HWI-EAS443:3:89:1442:297#0/1  
GCCTGAGTCCATGAGGGAAGAATACCAACAGGAACAGCAG  
+HWI-EAS443:3:89:1442:297#0/1  
aZ`\_a``]X^^\_]Xaa¥^a\_\_\_[YS[\_W`\_\_GUU^\_WW¥  
@HWI-EAS443:3:8:504:1238#0/1  
GGTCCCCATTCCCATTTAGGGCATTGAAACAAAGCGTCT  
+HWI-EAS443:3:8:504:1238#0/1  
a\_OXT\_`¥\_b\_WX¥^\_[bb^^[\_a]``¥DUU`a\_^XXGTY  
@HWI-EAS443:3:60:427:47#0/1  
TGGGGGGTTTCGCTGCACTGAGAATGTAGGCTGCACACTG  
+HWI-EAS443:3:60:427:47#0/1  
aa\_a\_aaMaa`a`X^`[UXaU]QUZ`PSUYM^NNSPTS  
@HWI-EAS443:3:71:1127:1509#0/1  
AAATCTCCCTTTTGAAGAGCAACCGTTATGACAGCAATC  
+HWI-EAS443:3:71:1127:1509#0/1  
GTY\_\_W^¥RY[VTY¥U[MW\_\_ZQ^\_]Z`BBBBBBBBBBBB  
@HWI-EAS443:3:46:1053:427#0/1  
AGCGAAATCTCCCTTTTGAAGAGAAACNTTATGGCAGC  
+HWI-EAS443:3:46:1053:427#0/1  
]S\_aVa``a\_aUZWZ^aabbS\_SZIbaa^DQ\_`a^[\_`¥BB  
@HWI-EAS443:3:56:1707:1594#0/1  
AGTCAGTGTGAAGCCTACATTCTCAGTGCAGCGAAATCTC  
+HWI-EAS443:3:56:1707:1594#0/1  
¥VZ``]\_RRYVH[\_`\_a`^Wa^^`aX]NZVR[L\_```\_^^N  
@HWI-EAS443:3:6:23:1915#0/1  
GCGAAACCTCCCTTTTGAAGAGCAACCGTTATGGCAGGA  
+HWI-EAS443:3:6:23:1915#0/1  
`baa``aabaaaaa`abaaaabb¥aa\_aaaa]^a[BB  
@HWI-EAS443:3:71:458:249#0/1  
CGTGCAGCCTACATTCTCAGTGCAGCGAAATCTCCCATTT  
+HWI-EAS443:3:71:458:249#0/1  
Y]P[\_Z^ZT\_a`^`^a\_]\_¥UaT`aaa]QYa[\_`Z``aa^`  
@HWI-EAS443:3:100:1786:256#0/1  
AGCGAAATCTCCCTTTTGAAGAGCAACCGTATGGCAGG  
+HWI-EAS443:3:100:1786:256#0/1  
[a¥¥\_b][LRM[\_R]YFL`\_]L[a^GUBBBBBBBBBBBB  
@HWI-EAS443:3:65:304:1775#0/1  
GCAGTGTGCAGCCTACATTCTCAGTTCAGCGAAATCTCCC  
+HWI-EAS443:3:65:304:1775#0/1  
MaZ\_]WZ]XVTa\_Za\_bTTXOUa`\_HZ¥N\_R[^^W\_RO\_a  
@HWI-EAS443:3:19:1118:1785#0/1  
GAAATCTCCCTTTTGAAGAGCAACCGTTATGGCAGGATT

+HWI-EAS443:3:19:1118:1785#0/1  
aaab^Z[`aaaa`\_¥a\_]RPX\_aa\_QZ\_\_a``S]a¥BBBB  
@HWI-EAS443:3:19:1766:586#0/1  
NCTCAGTGCAGCGAAATCTCCCTTTTGAAGAGCAACAGG  
+HWI-EAS443:3:19:1766:586#0/1  
BBBBBBBBBBBBBBBBBBBBBBBBBBBBBBBBBBBB  
@HWI-EAS443:3:30:1035:773#0/1  
CAGATCAGTGTGCAGCCTACATTCTCAGTGCAGCGAGATC  
+HWI-EAS443:3:30:1035:773#0/1  
^Y[S¥^`]QYTOQFXOT]WXP]`¥VFU[U¥BBBBBBBBBB  
@HWI-EAS443:3:31:841:1947#0/1  
TCAGGCAGCCTACATTCTCAGTGCAGCGAAATCTCCCTTT  
+HWI-EAS443:3:31:841:1947#0/1  
Vba`[aW\_X¥UZ¥XP¥[`a\_RTPXZQX^`^a¥a\_N`X`  
@HWI-EAS443:3:61:1452:956#0/1  
GAAATCTCCCTTTTGAAGAGCAACCGTTATGGCAGGATT  
+HWI-EAS443:3:61:1452:956#0/1  
^`^¥`abaaWa`^`\_Z^a^aa\_]ab\_a`¥YFY[`LROR  
@HWI-EAS443:3:72:1555:514#0/1  
GAAATCTCCCTTTTGAAGAGCAACCGTTATGGCAGGATT  
+HWI-EAS443:3:72:1555:514#0/1  
aa\_]`a]aZ[¥a`Y\_]\_a[^Z]\_XG`Y^^X`aX\_\_LMRW  
@HWI-EAS443:3:92:685:1819#0/1  
GGCAGATCAGTGTGCAGCCTACATTCTCAGTGCAGCGAA  
+HWI-EAS443:3:92:685:1819#0/1  
aXQQ`Z¥aaSa`GP`^¥[\_a`^GRaNZZ\_XX^¥\_^NX¥\_  
@HWI-EAS443:3:56:1663:1008#0/1  
AAATCTCCNTTTTGAAGAGCAACCGTTATGGCAGCATTT  
+HWI-EAS443:3:56:1663:1008#0/1  
ab`aYa^`YD[aa\_Sa`]\_YY`\_XZ`]\_]X]^aWTPTB  
@HWI-EAS443:3:10:1312:426#0/1  
GTGCAGCCTACATTCTCAGTGCAGCGAAATATCCCTTTTG  
+HWI-EAS443:3:10:1312:426#0/1  
\_PTWL¥XXYZX\_[T[[SUSYTP¥V[^W¥PHWQHDKVZZ]  
@HWI-EAS443:3:10:606:236#0/1  
GTGCAGCGAAATCTCCCTTTTGAAGAGCAAACGTTATGG  
+HWI-EAS443:3:10:606:236#0/1  
aUWWW^U¥WWW¥SXQNYGWWTWNWTWWQUSGLWGWWT  
@HWI-EAS443:3:20:556:568#0/1  
GCAGCCTACATTCTCAGTGCAGCGAAATCACCTTTTGAA  
+HWI-EAS443:3:20:556:568#0/1  
a`¥ZXWZZ]J\_¥a\_\_a\_¥b[a`T^\_]¥BBBBBBBBBBBB  
@HWI-EAS443:3:21:521:1388#0/1  
GCTCTTTCAAATGGAGATTTGCTGCACTGAGAATGTAG  
+HWI-EAS443:3:21:521:1388#0/1  
\_`abbabbaa^K^\_aaa[a\_a\_````]aa`\_\_a`aZ\_\_  
@HWI-EAS443:3:22:1653:1586#0/1  
CAGTGTGCAGCCTACATTCTCAGTGCAGCGAAATGTCCCT  
+HWI-EAS443:3:22:1653:1586#0/1  
aY`QXPZ\_¥Y\_W\_`[aa^U¥^¥^]^L]]F[^\_\_[SRYJJ\_



@HWI-EAS443:3:25:342:173#0/1  
ATTCTCAGTGCAGCGAAAACCTCCCTTTTCAAAGAGCAACC  
+HWI-EAS443:3:25:342:173#0/1  
ab\_aaabXR\_abaabaabaaaa^aa`aaa[^`aaa`^YX  
@HWI-EAS443:3:2:1225:1598#0/1  
AAATCTCCCTTTTCAAAGAGCAACCGTTATGGCAGGATTC  
+HWI-EAS443:3:2:1225:1598#0/1  
aab\_aa`\_]a`a^a`\_\_^^\_[a`YYaY`^\_^]V`\_GYUBB  
@HWI-EAS443:3:3:1124:382#0/1  
GTGCAGCCTATATTCTCAGTGCAGCGAAATCTCCCTTTTG  
+HWI-EAS443:3:3:1124:382#0/1  
a^^QU[] [a\_QTU\_[`Y\_aX`V]`)]`^\_X]U]YGU^^V^\_  
@HWI-EAS443:3:54:1447:861#0/1  
AAATCTCCCTTTTCAAAGAGCAACCGTTATGGCAGGATTC  
+HWI-EAS443:3:54:1447:861#0/1  
^`b`\_aba`babba]abab``¥¥aRXbaaaabaa`¥GZTUG  
@HWI-EAS443:3:56:1268:1963#0/1  
CAGCGAAATCTCCGTTTTCAAAGAGCAACCGTTATGGCAG  
+HWI-EAS443:3:56:1268:1963#0/1  
\_Wa`^^`a`R`YRPU[aab\_a]]]]ab\_]J\_\_aaaabJ[B  
@HWI-EAS443:3:58:1141:1143#0/1  
CTGCCATAACGGTTGCTCTTTCAAAGGGGAGATTCGCTG  
+HWI-EAS443:3:58:1141:1143#0/1  
`^[RZ`a]YLP]T^¥MOPJVPBBBBBBBBBBBBBBBBBB  
@HWI-EAS443:3:5:216:130#0/1  
TCGCTGCACTGAGATTGTAGGCTGCACACTGATCTGGCCT  
+HWI-EAS443:3:5:216:130#0/1  
]\_bb`Z^R]aa``YFWZ`NW^^MNSFFZ^M¥[OBBBBBBB  
@HWI-EAS443:3:71:361:535#0/1  
TTCTCAGTGCAGCGAAATCTCCCTTTTGTAAAGAGCAACCG  
+HWI-EAS443:3:71:361:535#0/1  
a`aa`aa^aaa\_aa\_a``]Y^\_\_¥V¥¥[R\_\_\_^\_]\_\_ZU^  
@HWI-EAS443:3:78:1657:1495#0/1  
AGATTTGCTGCACTGAGAATGTAGGCTGGCACTGATCT  
+HWI-EAS443:3:78:1657:1495#0/1  
a)`aXQ`H]\_`X\_V[XP`^]UVKV¥\_VQ[G[N\_¥W[RURW  
@HWI-EAS443:3:79:158:612#0/1  
GCCTACCTTCTCAGTGCAGCGAAATCTCCCTTTTCAAAGA  
+HWI-EAS443:3:79:158:612#0/1  
`b``¥\_H^`a[`¥XY¥^S]`a\_RZaZ]^`a`\_VTX¥X]^  
@HWI-EAS443:3:86:631:443#0/1  
GTGCAGCCTACATTCTCAGTCCAGCGAAATCTCCCTTTTG  
+HWI-EAS443:3:86:631:443#0/1  
aTa` [[]Ja\_TZ``[Ya`aN^a^Y`^TUX[^a]\_XV[^\_  
@HWI-EAS443:3:36:1135:1514#0/1  
TGCTGCTCTTTCAAAGGGAGATTTGCTGCACTGAGAAT  
+HWI-EAS443:3:36:1135:1514#0/1  
T\_H\_¥bb\_XO\_QQWZU]\_XQ]ZX¥ZRUTT\_Z\_PHS[H¥\_Z[  
@HWI-EAS443:3:70:1474:1010#0/1  
ATCGCAGCGAAATCTCCCTTTTCAAAGAGCAACCGTTATG

+HWI-EAS443:3:70:1474:1010#0/1  
ab¥aX`a^`ba`XSZO`aa`a]W\_\_^VQX`[^ZaZ^¥VJ  
@HWI-EAS443:3:77:387:75#0/1  
CGAAATCTCCCTTTTCAAAGAGCAACCGTTATGGCAGGAT  
+HWI-EAS443:3:77:387:75#0/1  
^bbbbbba`a`\_aMa`aab\_bababa]¥b\_aaab\_\_\_aIQQ  
@HWI-EAS443:3:91:534:1677#0/1  
AGCGCAGCGAAATCTCCCTTTTCAAAGAGCAACCGTTATG  
+HWI-EAS443:3:91:534:1677#0/1  
][FVXZaZP`¥¥^b¥¥SYQ^UMWTZMY¥`XQH¥BBBBBBBB  
@HWI-EAS443:3:15:1237:1031#0/1  
AGCCTACATTCTCAGTGCAGCGAAATCTCCNNTTCAAAG  
+HWI-EAS443:3:15:1237:1031#0/1  
aaa`bb`abaaa`a`a\_aa`a\_a\_a^a\_\_UD[`aa`\_a  
@HWI-EAS443:3:26:1554:1263#0/1  
CTCAGTGCAGCGAAATCTCCCTTTTCAAANAGCAACCGTT  
+HWI-EAS443:3:26:1554:1263#0/1  
abaa`ba`ababba`a`X[a`\_`a¥D¥aa`[^`X\_  
@HWI-EAS443:3:52:632:1794#0/1  
AGCGAAATCTCCCTTTTCAAAGAGCAACCGTTNTGGCAGC  
+HWI-EAS443:3:52:632:1794#0/1  
`b`]^Z\_a^^0[V[]^aU\_\_[[WY¥YSU`^TDTYZ\_WVB  
@HWI-EAS443:3:56:635:473#0/1  
GGGAGANTTCGCTGCACTGAGAATGTAGGCTGCACACTGA  
+HWI-EAS443:3:56:635:473#0/1  
aaaa`TDM^\_`aZa`a[aa^aaWaa^X`aa]aX[\_OVQZK  
@HWI-EAS443:3:65:1202:1469#0/1  
CAGCGAAATCTCCCTTTTCAAAGAGCAACCGTTATNGCAG  
+HWI-EAS443:3:65:1202:1469#0/1  
aaabbbababab\_aaaa`aaaa`aaa¥a]`ZD[Ra^  
@HWI-EAS443:3:7:263:1719#0/1  
GCGAAATCTCCCTTTTCAAAGAGCAANCCTTATGGCAGCA  
+HWI-EAS443:3:7:263:1719#0/1  
aaXL\_aaaaaWFF\_`UU[\_U[LRQXDKVLGZZZ]BBBBB  
@HWI-EAS443:3:85:132:1901#0/1  
AGCGAAATCTNCCTTTTCAAAGAGCAACCGTTATGGCAGC  
+HWI-EAS443:3:85:132:1901#0/1  
a]SZY`\_a^D[a`X^Yaab^a¥aaa\_]a]\_a`\_a\_VU  
@HWI-EAS443:3:11:827:88#0/1  
GCGAAATCTCCCTTTTCAAAGAGCAACCGTTATGGCAGGA  
+HWI-EAS443:3:11:827:88#0/1  
aaba`ab`ab\_\_\_`aaaa\_a`\_aa]\_]aaX¥R\_\_^X\_]BB  
@HWI-EAS443:3:30:806:187#0/1  
GCGAAATCTCCCTTTTCAAAGAGCAACCGTTATGGCAGGC  
+HWI-EAS443:3:30:806:187#0/1  
I\_bZb\_bbbbb\_¥\_T`QY^a`Y]]¥]Ia^HZaU`b\_a¥HB  
@HWI-EAS443:3:50:1289:1820#0/1  
GCGAAATCTCCCTTTTCAAAGAGCAACCGTTATGGCAGGA  
+HWI-EAS443:3:50:1289:1820#0/1  
Z^YL[Y]UTVPUaWZ^\_UPXT]\_\_\_PUVU¥T]a\_\_XJ^VR

@HWI-EAS443:3:66:1631:691#0/1  
AGTCGCTGCACTGAGAATGTAGGCTGCACACTGATCTGGC  
+HWI-EAS443:3:66:1631:691#0/1  
`]aabbabaZa`]U]^aaa]a`a``aUQOV\_WSZPR`KXY  
@HWI-EAS443:3:12:410:754#0/1  
ATTGCTCTTTCAAAGGGAGATTTTCGCTGCACTGAGAATG  
+HWI-EAS443:3:12:410:754#0/1  
a]aaaabb[aaaa`a^aaaaUaa``aa`a`a\_ab`a]a^a  
@HWI-EAS443:3:22:1582:408#0/1  
CGCAGCTACATTCTCAGTGCAGCGAAATCTCCCTTTTGA  
+HWI-EAS443:3:22:1582:408#0/1  
^`ababbbababbababbaabbabbbbab\_bbbbbba  
@HWI-EAS443:3:36:1150:1460#0/1  
GGGTTGCTCTTTCAAAGGGAGATTTTCGCTGCACTGAGAA  
+HWI-EAS443:3:36:1150:1460#0/1  
Q\_Uab`¥^b]]^bV`ZZI]aba`^MZbYSXaVLa\_`V¥a  
@HWI-EAS443:3:36:905:500#0/1  
CTCGCTGCACTGAGAATGTAGGCTGCACACTGATCTGGCC  
+HWI-EAS443:3:36:905:500#0/1  
abaT\_aaaa`bRbX`ab`a\_bb]Q``Y¥VH^Z\_¥a`\_\_`  
@HWI-EAS443:3:38:1254:275#0/1  
AGCGAAATCTCCCTTTTCAAAGAGCAACCGTTATGGCAGG  
+HWI-EAS443:3:38:1254:275#0/1  
``VbabVabTUXZZ^``aZQabaZ^aaR]VLQV^J[[¥BB  
@HWI-EAS443:3:40:1264:1988#0/1  
CAAAGGGAGATTTTCGCTGCACTGAGAATGTAGGCTGCAA  
+HWI-EAS443:3:40:1264:1988#0/1  
\_b¥[abWQZ`¥`W`aa]`Xbb\_bbaXHW`X[^`b^YHRG  
@HWI-EAS443:3:42:1495:1230#0/1  
TTACATTCTCAGTGCAGCGAAATCTCCCTTTTCAAAGAGC  
+HWI-EAS443:3:42:1495:1230#0/1  
aX]¥¥^bab`ab\_a\_]¥`X]W^^a`Va`]W¥UR\_TZaZR  
@HWI-EAS443:3:48:474:1473#0/1  
AGCGAAATCTCCCTTTTCAAAGAGCAACCGTTATGGCAGG  
+HWI-EAS443:3:48:474:1473#0/1  
¥¥^`\_\_aaababab]baV`aa`\_¥\_adWTbXaa`]\_^aYF  
@HWI-EAS443:3:56:334:1621#0/1  
TAGTGTGCAGCCTACATTCTCAGTGCAGCGAAATCTCCCT  
+HWI-EAS443:3:56:334:1621#0/1  
a^NFUaX\_\_P[a``\_aa`a`X^X]Y`Z]]a`aaY^a]Z^]  
@HWI-EAS443:3:58:813:149#0/1  
GCGAAATCTCCCTTTTCAAAGAGCAACCGTTATGGCAGCG  
+HWI-EAS443:3:58:813:149#0/1  
aaaa``¥[^`WQX`^`[U^XYY¥R^^[KYNV[BBBBBBBB  
@HWI-EAS443:3:5:1501:1916#0/1  
AGCGAAATCTCCCTTTTCAAAGAGCAACCGTTATGGCAGG  
+HWI-EAS443:3:5:1501:1916#0/1  
\_`babW]^SRUY[`\_^a\_a\_^\_ab\_^YUG[\_¥a`^`BBBB  
@HWI-EAS443:3:79:1146:1251#0/1  
ATCGCTGCACTGAGAATGTAGGCTGCACACTGATCTGGCC

+HWI-EAS443:3:79:1146:1251#0/1  
`a`\_\_`]'`aa\_Za]a^¥V``aaa`S¥W\_]``¥\_\_^[`Z\_  
@HWI-EAS443:3:80:595:1899#0/1  
AGCTGCCATAACGGTTGCTCTTTCAAAGGGAGATTTTCGC  
+HWI-EAS443:3:80:595:1899#0/1  
a`a\_]aaa`aa`\_\_]'`^^\_`\_`[^`^\_`\_]`[N[]T^`\_`^W  
@HWI-EAS443:3:88:780:254#0/1  
AAATCTCCCTTTTCAAAGAGCAACCGTTATGGCAGCATTT  
+HWI-EAS443:3:88:780:254#0/1  
`bXOT``]bbba\_`^`Ya`^PX^¥`\_a`aVaaaUaaIDEOK  
@HWI-EAS443:3:8:1486:539#0/1  
AAATCTCCCTTTTCAAAGAGCAACCGTTATGGCAGCATTT  
+HWI-EAS443:3:8:1486:539#0/1  
`bbaaa^`\_aa`aa`\_`[\_`a`\_\_\_\_W\_]`\_`a^Y\_]QTBBB  
@HWI-EAS443:3:94:958:1375#0/1  
NAGCGAAATCTCCCTTTTCAAAGAGCAACCGTTATGGCAG  
+HWI-EAS443:3:94:958:1375#0/1  
DNXVWTXYXYXVTVXXYXYXXUXUYXYUXXUXXXXXXX  
@HWI-EAS443:3:100:721:689#0/1  
GCGAAATCTCCCTTTTCAAAGAGCAACCGTTATGGCAGCA  
+HWI-EAS443:3:100:721:689#0/1  
a`[Q[a\_\_X\_GY`¥¥^`¥`¥SX`ZQYN\_[T\_¥[^¥BBBBB  
@HWI-EAS443:3:100:895:1371#0/1  
AGCGAAATCTCCCTTTTCAAAGAGCAACCGTTATGGCAGC  
+HWI-EAS443:3:100:895:1371#0/1  
^a\_]aaa^a^a^][a\_a\_aa\_a`aTaa\_X`aa`Za]BBBB  
@HWI-EAS443:3:10:69:179#0/1  
CTCAGTGCAGCGAAATCTCCCTTTTCAAAGAGCAACCGTT  
+HWI-EAS443:3:10:69:179#0/1  
a\_aZa`baab`babaaaa[``]aaaaa[aa``¥¥VX[aY\_  
@HWI-EAS443:3:11:1489:714#0/1  
TCTCAGTGCAGCGAAATCTCCCTTTTCAAAGAGCAACCGT  
+HWI-EAS443:3:11:1489:714#0/1  
a\_a`aa\_b`ab\_a`aa`aa\_]`a`\_`\_\_\_\_^`\_]^^YY`]  
@HWI-EAS443:3:11:245:1364#0/1  
GCAGCGAAATCTCCCTTTTCAAAGAGCAACCGTTATGGCA  
+HWI-EAS443:3:11:245:1364#0/1  
[\_`¥\_WV[aZXa^W\_`]a^`Z`a^`^`]ZP`]FY`Z\_Z]\_  
@HWI-EAS443:3:12:1108:1648#0/1  
AGCGAAATCTCCCTTTTCAAAGAGCAACCGTTATGGCAGC  
+HWI-EAS443:3:12:1108:1648#0/1  
ab\_Z\_bb`ba]a`^`^`a`^`a^]aXZ]`YT\_[\_\_aa\_\_aYB  
@HWI-EAS443:3:12:515:140#0/1  
ATTCTCAGTGCAGCGAAATCTCCCTTTTCAAAGAGCAACC  
+HWI-EAS443:3:12:515:140#0/1  
[a^abaab^aaa^aaabaaa\_`^`\_\_a`\_`\_\_Xa`a0^a[Z  
@HWI-EAS443:3:13:395:246#0/1  
TTCGCTGCACTGAGAATGTAGGCTGCACACTGATCTGGCC  
+HWI-EAS443:3:13:395:246#0/1  
\_bbaaab]]aab\_aa`abR]^a^^a^]`Z^^]^U\_`^`\_T^

@HWI-EAS443:3:13:591:758#0/1  
CATTCTCAGTGCAGCGAAATCTCCCTTTTCAAAGAGCAAC  
+HWI-EAS443:3:13:591:758#0/1  
\_¥\_aaa]a\_H\_]`ZSY0[`¥[XVX`^Z^Z¥[\_a]¥TX  
@HWI-EAS443:3:14:1410:800#0/1  
GTGCAGCCTACATTCTCAGTGCAGCGAAATCTCCCTTTTG  
+HWI-EAS443:3:14:1410:800#0/1  
a¥baa^a`a`^^a`aa`aa\_a^^a^a`^^a\_\_[\_¥\_a\_a\_\_  
@HWI-EAS443:3:14:847:36#0/1  
AAATCTCCCTTTTCAAAGAGCAACCGTTATGGCAGCATTC  
+HWI-EAS443:3:14:847:36#0/1  
aaba\_a`\_\_`aaa\_a\_a^]\_\_`]]ZaX]^\_¥Z`]LRTXV  
@HWI-EAS443:3:15:1160:1335#0/1  
TACATTCTCAGTGCAGCGAAATCTCCCTTTTCAAAGAGCA  
+HWI-EAS443:3:15:1160:1335#0/1  
abaaba`baaa\_a`abaaaaa`a`^baaab\_\_`aaa^a  
@HWI-EAS443:3:15:1733:722#0/1  
CTCAGTGCAGCGAAATCTCCCTTTTCAAAGAGCAACCGTT  
+HWI-EAS443:3:15:1733:722#0/1  
¥[\_`^^XQ\_bbbb\_\_bab\_YUa\_\_bb]\_babbababZaUa  
@HWI-EAS443:3:15:999:852#0/1  
CAGTGTGCAGCCTACATTCTCAGTGCAGCGAAATCTCCCT  
+HWI-EAS443:3:15:999:852#0/1  
aabbb`babaabaabbb^baba\_baab\_abbba`aa`¥\_  
@HWI-EAS443:3:16:855:748#0/1  
CATTCTCAGTGCAGCGAAATCTCCCTTTTCAAAGAGCAAC  
+HWI-EAS443:3:16:855:748#0/1  
W¥`b\_]`¥aa`M¥Zbbb]ab[bV`^a\_\_abba]aaba`b\_  
@HWI-EAS443:3:17:1264:1838#0/1  
AAATCTCCCTTTTCAAAGAGCAACCGTTATGGCAGCATTC  
+HWI-EAS443:3:17:1264:1838#0/1  
\_]N\_[Q¥S^a\_VPT`\_\_R¥J]]^O¥YUV^]Y^R]BBBBBB  
@HWI-EAS443:3:17:1353:198#0/1  
GCCTACATTCTCAGTGCAGCGAAATCTCCCTTTTCAAAGA  
+HWI-EAS443:3:17:1353:198#0/1  
a\_aaaabab]aaaaNa]a\_\_a`\_`\_^`\_^X^`\_\_`\_^`\_Z  
@HWI-EAS443:3:17:1771:214#0/1  
GTTGCTCTTTCAAAGGGAGATTTGCTGCACTGAGAATG  
+HWI-EAS443:3:17:1771:214#0/1  
`GZ][V¥Y^\_UY^[Va\_[U]]^SPRVUY\_S]YY]X^PQWB  
@HWI-EAS443:3:17:639:483#0/1  
AAATCTCCCTTTTCAAAGAGCAACCGTTATGGCAGCATTC  
+HWI-EAS443:3:17:639:483#0/1  
`]a`a`\_U]abaaaaa]VR`\_¥^a¥[\_`^a``SNISR  
@HWI-EAS443:3:19:1235:1751#0/1  
TCTCAGTGCAGCGAAATCTCCCTTTTCAAAGAGCAACCGT  
+HWI-EAS443:3:19:1235:1751#0/1  
aabaaaPa[aaaaaaa`N\_````[``a]`a`a]`\_`YZ\_X  
@HWI-EAS443:3:19:288:268#0/1  
GTGCAGCGAAATCTCCCTTTTCAAAGAGCAACCGTTATGG

+HWI-EAS443:3:19:288:268#0/1  
^`b`ab`aXaa[\_`a^a`a`a^\_aUX`\_\_X`¥V¥¥]Z  
@HWI-EAS443:3:20:1093:844#0/1  
CTACATTCTCAGTGCAGCGAAATCTCCCTTTTCAAAGAGC  
+HWI-EAS443:3:20:1093:844#0/1  
aa\_OVbbbbabbabaabbabbbbaba^[aabbba^\_bab\_  
@HWI-EAS443:3:20:529:195#0/1  
AGCCTACATTCTCAGTGCAGCGAAATCTCCCTTTTCAAAG  
+HWI-EAS443:3:20:529:195#0/1  
a`abbb`bbbbbbbabbbabbbb`bbaaa`baaabaaaa  
@HWI-EAS443:3:20:736:900#0/1  
TCAGTGCAGCGAAATCTCCCTTTTCAAAGAGCAACCGTTA  
+HWI-EAS443:3:20:736:900#0/1  
a`\_aV\_a`a]a[aa\_\_\_\_`\_¥¥`\_`\_TNX\_¥[\_]^\_¥WPIT^  
@HWI-EAS443:3:20:991:1674#0/1  
GGAGATTTTCGCTGCACTGAGAATGTAGGCTGCACACTGAT  
+HWI-EAS443:3:20:991:1674#0/1  
¥XRR¥KZZ\_¥¥\_b\_]T¥\_Y\_a¥WY[a\_Z`YJZ[^\_ZRP[D  
@HWI-EAS443:3:21:112:193#0/1  
TGCAGCGAAATCTCCCTTTTCAAAGAGCAACCGTTATGGC  
+HWI-EAS443:3:21:112:193#0/1  
a`\_`aabba`aab`^a`a`a`\_`a]a¥\_\_\_\_^a^`]^\_]  
@HWI-EAS443:3:21:507:1519#0/1  
CCTACATTCTCAGTGCAGCGAAATCTCCCTTTTCAAAGAG  
+HWI-EAS443:3:21:507:1519#0/1  
ababba`\_`aabb]Za\_^aa`\_¥a\_a`\_`\_`a`aaYa]¥aa  
@HWI-EAS443:3:21:605:392#0/1  
GCCATAACGGTTGCTCTTTCAAAGGGAGATTTTCGCTGCA  
+HWI-EAS443:3:21:605:392#0/1  
aa`\_`a^[\_aaR`¥ZR]^`\_Y\_^TT`]G^¥YUXY]XVYV^  
@HWI-EAS443:3:21:610:1319#0/1  
AGCGAAATCTCCCTTTTCAAAGAGCAACCGTTATGGCAGC  
+HWI-EAS443:3:21:610:1319#0/1  
a\_aa`bba`aa`a`aa\_a`\_a\_\_\_\_`\_`aZ^aX`\_]`\_BBB  
@HWI-EAS443:3:22:1363:949#0/1  
GATCAGTGTGCAGCCTACATTCTCAGTGCAGCGAAATCTC  
+HWI-EAS443:3:22:1363:949#0/1  
aZ^\_]UVaXZQQ][M¥ZNOXS`\_\_\_\_WR[Q^]S[ZOTZ][U  
@HWI-EAS443:3:22:170:779#0/1  
AGCCTACATTCTCAGTGCAGCGAAATCTCCCTTTTCAAAG  
+HWI-EAS443:3:22:170:779#0/1  
abbbabbaa\_babb`[abaaaaaaaaaaaaaaaaaaaa^aa`  
@HWI-EAS443:3:22:363:1460#0/1  
TACATTCTCAGTGCAGCGAAATCTCCCTTTTCAAAGAGCA  
+HWI-EAS443:3:22:363:1460#0/1  
abaaaaa¥ba¥Ta`WQ`UN¥`\_a`\_a]\_]^[^XP`^^`^^\_  
@HWI-EAS443:3:22:789:160#0/1  
GATCAGTGTGCAGCCTACATTCTCAGTGCAGCGAAATCTC  
+HWI-EAS443:3:22:789:160#0/1  
XW[OU¥¥NL]aaa^L]\_]UXZ[¥VN[F]J[YFYXRSUBB

@HWI-EAS443:3:23:1131:684#0/1  
GTGTGCAGCCTACATTCTCAGTGCAGCGAAATCTCCCTTT  
+HWI-EAS443:3:23:1131:684#0/1  
a^aT`^^aaaa`][X`Y`]a¥Va]`\_W^^\_a`][WVM\_[¥  
@HWI-EAS443:3:23:491:125#0/1  
TACATTCTCAGTGCAGCGAAATCTCCCTTTTCAAAGAGCA  
+HWI-EAS443:3:23:491:125#0/1  
a[YW`aaaa]aa``PROW¥¥ZUW[`ZU]``\_]Z]aW¥¥^X  
@HWI-EAS443:3:24:1046:657#0/1  
CAGTGTGCAGCCTACATTCTCAGTGCAGCGAAATCTCCCT  
+HWI-EAS443:3:24:1046:657#0/1  
X¥GvbYW\_Z\_\_X]``¥`ZZ`\_ab\_baS]\_bWUWa¥``¥^\_  
@HWI-EAS443:3:24:1429:773#0/1  
GTGTGCAGCCTACATTCTCAGTGCAGCGAAATCTCCCTTT  
+HWI-EAS443:3:24:1429:773#0/1  
a`^S]R\_aa[[\_Xaaa`X^\_¥a^Z`^^¥\_\_`¥aU`¥\_\_¥  
@HWI-EAS443:3:24:1688:457#0/1  
GAAATCTCCCTTTTCAAAGAGCAACCGTTATGGCAGCATT  
+HWI-EAS443:3:24:1688:457#0/1  
¥\_¥ZG^`¥^¥Y^`^\_J\_ba`]Z\_^SaUZYa`\_BBBBBBB  
@HWI-EAS443:3:24:624:154#0/1  
TTTCGCTGCACTGAGAATGTAGGCTGCACACTGATCTGGC  
+HWI-EAS443:3:24:624:154#0/1  
T\_[\_a\_]`a¥]b^a]^aaaZ¥^Z``VM[V^Z^\_¥]Z^a[E  
@HWI-EAS443:3:24:891:1418#0/1  
CTCAGTGCAGCGAAATCTCCCTTTTCAAAGAGCAACCGTT  
+HWI-EAS443:3:24:891:1418#0/1  
¥Z\_\_XYW¥JO¥b\_RXW]`SXZ]\_baIS`^X]]P^a`PUDU  
@HWI-EAS443:3:25:250:1205#0/1  
CAGCCTACATTCTCAGTGCAGCGAAATCTCCCTTTTAAAA  
+HWI-EAS443:3:25:250:1205#0/1  
S\_[T[X\_a`b`\_U¥`\_T\_ab^a`^W¥[P[aR^Z]`^a[T^  
@HWI-EAS443:3:26:1306:873#0/1  
CCAGATCAGTGTGCAGCCTACATTCTCAGTGCAGCGAAAT  
+HWI-EAS443:3:26:1306:873#0/1  
`[ `b`babbab^]abbbbba`abaaa`ab`b^abaaabaa  
@HWI-EAS443:3:26:187:1422#0/1  
GCGAAATCTCCCTTTTCAAAGAGCAACCGTTATGGCAGCA  
+HWI-EAS443:3:26:187:1422#0/1  
``¥abba[abbaabaaaa]`a\_aaa`\_a\_abaa\_\_ba^]  
@HWI-EAS443:3:26:862:1718#0/1  
AGTGTGCAGCCTACATTCTCAGTGCAGCGAAATCTCCCTT  
+HWI-EAS443:3:26:862:1718#0/1  
[P¥¥MLZ``aZT\_Wa`[ZX]a¥]^P[S\_\_\_\_`a^\_Z]\_R\_Q  
@HWI-EAS443:3:27:1458:1533#0/1  
AGCCTACATTCTCAGTGCAGCGAAATCTCCCTTTTCAAAG  
+HWI-EAS443:3:27:1458:1533#0/1  
``^a`bbabaaaa\_M\_]a\_aa\_aa`aXZZa`baa\_[^a  
@HWI-EAS443:3:27:773:794#0/1  
CAGATCAGTGTGCAGCCTACATTCTCAGTGCAGCGAAATC

+HWI-EAS443:3:27:773:794#0/1  
`^b`a[aXU\_Sa\_a^\_a`aa\_aa`[aIbG[a][`YT`]  
@HWI-EAS443:3:28:258:2005#0/1  
AGCCTACATTCTCAGTGCAGCGAAATCTCCCTTTTCAAAG  
+HWI-EAS443:3:28:258:2005#0/1  
a\_ba`aaRZ\_a`aa\_V\_aa\_]`a`^\_]a\_]\_]X\_\_\_U  
@HWI-EAS443:3:29:1022:331#0/1  
TTCAAAGGGAGATTTTCGCTGCACTGAGAATGTAGGCTGC  
+HWI-EAS443:3:29:1022:331#0/1  
aa`aa\_`aaaaa^aa`^`a\_a^`a\_a^a`\_^`\_\_^\_\_X  
@HWI-EAS443:3:29:1524:1632#0/1  
GAATGCTGCCATAACGGTTGCTCTTTCAAAGGGAGATTT  
+HWI-EAS443:3:29:1524:1632#0/1  
aaaa`b]baab\_^Vb`aaXKPR`V\_]`^UY[]Y\_YZ\_B  
@HWI-EAS443:3:29:518:1306#0/1  
CAGTGTGCAGCCTACATTCTCAGTGCAGCGAAATCTCCCT  
+HWI-EAS443:3:29:518:1306#0/1  
aa`PX\_aaZVa`aa]WZ\_\_`^`P`a\_\_^[W^a^a[^`¥¥  
@HWI-EAS443:3:29:593:661#0/1  
TGTGCAGCCTACATTCTCAGTGCAGCGAAATCTCCCTTTT  
+HWI-EAS443:3:29:593:661#0/1  
aa`]b`abbabaaaaaaaaa\_aaaa\_aaaaa`aYa`a  
@HWI-EAS443:3:2:1148:887#0/1  
AGCGAAATCTCCCTTTTCAAAGAGCAACCGTTATGGCAGC  
+HWI-EAS443:3:2:1148:887#0/1  
ab\_Za`U`Y^YTWaab]WU^`ZG[]PV\_NYN]`UBBBB  
@HWI-EAS443:3:2:493:1482#0/1  
GCTCTTTCAAAGGGAGATTTTCGCTGCACTGAGAATGTAG  
+HWI-EAS443:3:2:493:1482#0/1  
a\_^]aa]LX`Xa][\_`a]a`¥aU]`M`T[^`^`¥]R`B  
@HWI-EAS443:3:30:1357:1302#0/1  
TTCGCTGCACTGAGAATGTAGGCTGCACACTGATCTGGCC  
+HWI-EAS443:3:30:1357:1302#0/1  
^YWXZ`^^`a^b`¥ba¥aaba`ZYUZ¥P`]QXT`XYU  
@HWI-EAS443:3:30:438:214#0/1  
GAAATCTCCCTTTTCAAAGAGCAACCGTTATGGCAGCATT  
+HWI-EAS443:3:30:438:214#0/1  
¥abbb\_aaa]`Q^aabUa\_b`aaa[0`X``\_`aaaSNTV  
@HWI-EAS443:3:31:1046:955#0/1  
GTGTGCAGCCTACATTCTCAGTGCAGCGAAATCTCCCTTT  
+HWI-EAS443:3:31:1046:955#0/1  
a\_`\_aaaaa`aaaaaaaaa^a\_`]aa]aa`a\_]\_a\_^  
@HWI-EAS443:3:31:369:1011#0/1  
CGAAATCTCCCTTTTCAAAGAGCAACCGTTATGGCAGCAT  
+HWI-EAS443:3:31:369:1011#0/1  
a`^RRZ`\_`^`\_Z`^^WX[\_`a¥[^`¥PZ\_¥Z^^\_[BBB  
@HWI-EAS443:3:31:771:1118#0/1  
CAGTGCAGCGAAATCTCCCTTTTCAAAGAGCAACCGTTAT  
+HWI-EAS443:3:31:771:1118#0/1  
ab\_]`b`baabbbba`ba`baaaa\_a^`aaba^a\_\_aa



@HWI-EAS443:3:32:1037:758#0/1  
CCTACATTCTCAGTGCAGCGAAATCTCCCTTTTGAAAGAG  
+HWI-EAS443:3:32:1037:758#0/1  
abbb`abbabbaa`aaaa\_aaaba\_aaaaaaaa`a`a`  
@HWI-EAS443:3:32:1576:1169#0/1  
CAGTGTGCAGCCTACATTCTCAGTGCAGCGAAATCTCCCT  
+HWI-EAS443:3:32:1576:1169#0/1  
aab¥b[aba^Z`b]a`baaa\_aa^`^`a\_\_aaaa`aa`a  
@HWI-EAS443:3:32:1662:1861#0/1  
CTGCCATAACGGTTGCTCTTTCAAAGGGAGATTCGCTG  
+HWI-EAS443:3:32:1662:1861#0/1  
a`a^ab`bbaaaPa`N]\_[aYX\_\_¥\_`a]^`¥]^\_GZ[\_R  
@HWI-EAS443:3:32:17:706#0/1  
GCGAAATCTCCCTTTTGAAAGAGCAACCGTTATGGCAGCA  
+HWI-EAS443:3:32:17:706#0/1  
aa\_U\_R¥```Z]^a`]XYOZRVPUV^¥¥WVYBBBBBBBB  
@HWI-EAS443:3:32:30:601#0/1  
AGTGCAGCGAAATCTCCCTTTTGAAAGAGCAACCGTTATG  
+HWI-EAS443:3:32:30:601#0/1  
aa\_aba[aa`]S\_`a\_a`\_]`\_`¥[`¥[\_[``a¥URT]  
@HWI-EAS443:3:32:608:397#0/1  
GATCAGTGTGCAGCCTACATTCTCAGTGCAGCGAAATCTC  
+HWI-EAS443:3:32:608:397#0/1  
aaa`ab\_aXaaaa`aa¥aaa]`\_`a^a`^U`\_``]\_^X  
@HWI-EAS443:3:32:95:709#0/1  
GCAGCCTACATTCTCAGTGCAGCGAAATCTCCCTTTTGAA  
+HWI-EAS443:3:32:95:709#0/1  
aababa`\_aa`aaaaaa]aa]aaaaa`a\_``a`\_a]\_] [  
@HWI-EAS443:3:33:1376:1749#0/1  
GCGAAATCTCCCTTTTGAAAGAGCAACCGTTATGGCAGCA  
+HWI-EAS443:3:33:1376:1749#0/1  
aa\_\_ba`aaU]\_aa[[a`a`aa`\_aaQ\_a¥^XPR¥W¥NKK  
@HWI-EAS443:3:34:1379:1072#0/1  
ATAACGGTTGCTCTTTCAAAGGGAGATTCGCTGCACTG  
+HWI-EAS443:3:34:1379:1072#0/1  
`bbbVb`[`baa`\_\_aa\_ba\_aa\_Ya`^b\_\_XMXW\_^¥RB  
@HWI-EAS443:3:34:1449:280#0/1  
AAATCTCCCTTTTGAAAGAGCAACCGTTATGGCAGCATTC  
+HWI-EAS443:3:34:1449:280#0/1  
\_^ZWYX`a¥¥Q`ab\_a]Y]]`UW]QV[[[U[BBBBBB  
@HWI-EAS443:3:34:1632:180#0/1  
TACATTCTCAGTGCAGCGAAATCTCCCTTTTGAAAGAGCA  
+HWI-EAS443:3:34:1632:180#0/1  
\_\_ab\_baba```a``\_Y``\_a^T\_^Y[[`a\_[Z^¥¥QBBB  
@HWI-EAS443:3:34:256:1854#0/1  
TACATTCTCAGTGCAGCGAAATCTCCCTTTTGAAAGAGCA  
+HWI-EAS443:3:34:256:1854#0/1  
abaZ`baba\_] [ab\_a`abaaaab`^a`aaMa`a]`ZH^  
@HWI-EAS443:3:35:1111:497#0/1  
AACGGTTGCTCTTTCAAAGGGAGATTCGCTGCACTGAG

+HWI-EAS443:3:35:1111:497#0/1  
ab\_aa`a\_ZY`aa]^\_\_W¥[^`\_^Z[VVWW¥V[  
@HWI-EAS443:3:35:1453:223#0/1  
GATCAGTGTGCAGCCTACATTCTCAGTGCAGCGAAATCTC  
+HWI-EAS443:3:35:1453:223#0/1  
`P[^a`N\_S¥\_aX`Y\_\_\_^T[\_¥YGY¥`\_^¥\_\_\_\_W\_WY  
@HWI-EAS443:3:35:612:247#0/1  
TCGCTGCACTGAGAATGTAGGCTGCACACTGATCTGGCCT  
+HWI-EAS443:3:35:612:247#0/1  
ZbQXZaba`a\_aa]a¥a¥`]X\_aa]Za^^GWDL\_MUZ]¥S  
@HWI-EAS443:3:35:92:1150#0/1  
CTACATTCTCAGTGCAGCGAAATCTCCCTTTTGAAGAGC  
+HWI-EAS443:3:35:92:1150#0/1  
aaa`]]`a\_a[\_X\_]P]a```a\_a^`^^YY^^¥XY^V¥]`  
@HWI-EAS443:3:35:976:616#0/1  
CAGTGTGCAGCCTACATTCTCAGTGCAGCGAAATCTCCCT  
+HWI-EAS443:3:35:976:616#0/1  
Ya[T\_WZ]\_a^a`\_\_¥\_aab\_¥S[V¥Za]XTWO\_X\_XXW  
@HWI-EAS443:3:36:1356:1942#0/1  
AGCGAAATCTCCCTTTTGAAGAGCAACCGTTATGGCAGC  
+HWI-EAS443:3:36:1356:1942#0/1  
a\_\_]¥J][aa\_a\_]¥aa`aaa`\_\_^[]Y]aUVX]^Z`\_V\_  
@HWI-EAS443:3:36:425:875#0/1  
GCAGCCTACATTCTCAGTGCAGCGAAATCTCCCTTTTGAA  
+HWI-EAS443:3:36:425:875#0/1  
aaa]baaabaa`aaaa\_aaa]a\_`]K¥a`a\_\_\_\_\_`^\_`[  
@HWI-EAS443:3:36:933:1514#0/1  
TAACGGTTGCTCTTTCAAAGGGAGATTTGCTGCACTGA  
+HWI-EAS443:3:36:933:1514#0/1  
a`a`\_aaa]¥\_`b^X`X¥`Y\_]`¥Z[aa``¥\_]a```¥Z  
@HWI-EAS443:3:37:1346:1050#0/1  
GGCCAGATCAGTGTGCAGCCTACATTCTCAGTGCAGCGAA  
+HWI-EAS443:3:37:1346:1050#0/1  
ab`Z\_\_^`a\_a[VV`^]^`P``aa`¥^^bW^YY`[¥\_ZYR  
@HWI-EAS443:3:37:1387:544#0/1  
CTTTCAAAGGGAGATTTGCTGCACTGAGAATGTAGGCT  
+HWI-EAS443:3:37:1387:544#0/1  
ZZ`baZ\_\_`¥\_\_K\_\_XW[YX\_]J^`ZZ¥I````]`¥]\_X  
@HWI-EAS443:3:37:1722:221#0/1  
AGCGAAATCTCCCTTTTGAAGAGCAACCGTTATGGCAGC  
+HWI-EAS443:3:37:1722:221#0/1  
ab\_¥bb¥]aZZ¥Y]Vaab]\_baaZa`^[aVOXG\_]`BBBB  
@HWI-EAS443:3:38:611:885#0/1  
GCAGCCTACATTCTCAGTGCAGCGAAATCTCCCTTTTGAA  
+HWI-EAS443:3:38:611:885#0/1  
`aaabaaa^[`aa`a]\_\_`^Zaa`^^]^a^T[T¥^^```\_¥  
@HWI-EAS443:3:39:1019:177#0/1  
CATAACGGTTGCTCTTTCAAAGGGAGATTTGCTGCACT  
+HWI-EAS443:3:39:1019:177#0/1  
a``bbb]aaba`aX]b`¥`a\_aaa]ab]\_a]R]VWHXUFZ

@HWI-EAS443:3:39:386:262#0/1  
CAGTGCAGCGAAATCTCCCTTTTCAAAGAGCAACCGTTAT  
+HWI-EAS443:3:39:386:262#0/1  
abbX`bb]`a^aabaaa`aa\_¥V\_\_`\_\_Wa\_]`^\_\_S  
@HWI-EAS443:3:39:553:1345#0/1  
ATTCTCAGTGCAGCGAAATCTCCCTTTTCAAAGAGCAACC  
+HWI-EAS443:3:39:553:1345#0/1  
^aabaa``]`a]aaaa`baa\_aa^\_\_aa`a`¥\_``\_\_`^W  
@HWI-EAS443:3:3:1674:1450#0/1  
GTTGCTCTTTCAAAGGGAGATTTGCTGCACTGAGAATG  
+HWI-EAS443:3:3:1674:1450#0/1  
]¥WSVT`][¥GWQT]]`^`NU]^SZVXPPUU[[V^PPSB  
@HWI-EAS443:3:3:1762:1259#0/1  
GCGAAATCTCCCTTTTCAAAGAGCAACCGTTATGGCAGCA  
+HWI-EAS443:3:3:1762:1259#0/1  
``baa\_b`a\_a\_aaaaa`aa\_a\_``V¥aU^\_\_aaQa[BB  
@HWI-EAS443:3:3:920:784#0/1  
GATCAGTGTGCAGCCTACATTCTCAGTGCAGCGAAATCTC  
+HWI-EAS443:3:3:920:784#0/1  
a`a]aZG\_`ba``\_S`a^a`a\_a\_`bXa\_\_a]a]^\_WZU  
@HWI-EAS443:3:3:948:1400#0/1  
AACGGTTGCTCTTTCAAAGGGAGATTTGCTGCACTGAG  
+HWI-EAS443:3:3:948:1400#0/1  
aaa``^aaVVRaba^^\_a`¥`a\_`W[`a[P[^]UYU^[]]  
@HWI-EAS443:3:40:1765:1902#0/1  
AGCCTACATTCTCAGTGCAGCGAAATCTCCCTTTTCAAAG  
+HWI-EAS443:3:40:1765:1902#0/1  
`aa`ab`a`a^\_¥^\_Uaa`\_]Yaa^¥a[bXY````\_a¥\_S  
@HWI-EAS443:3:40:788:1197#0/1  
GATCAGTGTGCAGCCTACATTCTCAGTGCAGCGAAATCTC  
+HWI-EAS443:3:40:788:1197#0/1  
aa\_aaa^\_V`\_`^\_]`\_`\_a\_`\_`^VT\_]`]^R[^VTM[Z  
@HWI-EAS443:3:40:991:1746#0/1  
ATCAGTGTGCAGCCTACATTCTCAGTGCAGCGAAATCTCC  
+HWI-EAS443:3:40:991:1746#0/1  
aaa]\_VS`¥¥aa[¥^aaaa``aaa\_V\_a\_[]\_]a^a\_dU  
@HWI-EAS443:3:42:1116:89#0/1  
AGCGAAATCTCCCTTTTCAAAGAGCAACCGTTATGGCAGC  
+HWI-EAS443:3:42:1116:89#0/1  
ababbbbbbbba`bbbb\_bbbabaaa[abaaaabb\_aaQ  
@HWI-EAS443:3:42:1297:1252#0/1  
CGGTTGCTCTTTCAAAGGGAGATTTGCTGCACTGAGAA  
+HWI-EAS443:3:42:1297:1252#0/1  
`a\_]ba^baaa^`WZZ\_¥W`\_UXVa[a^aa[X^aaaa``  
@HWI-EAS443:3:42:1489:899#0/1  
TCTCAGTGCAGCGAAATCTCCCTTTTCAAAGAGCAACCGT  
+HWI-EAS443:3:42:1489:899#0/1  
\_a\_\_aa¥\_`a]ZU`b]b^][UXa]Z]aTWUaV\_T\_`[^P  
@HWI-EAS443:3:42:675:399#0/1  
AGCGAAATCTCCCTTTTCAAAGAGCAACCGTTATGGCAGC



@HWI-EAS443:3:48:1359:1131#0/1  
ATCAGTGTGCAGCCTACATTCTCAGTGCAGCGAAATCTCC  
+HWI-EAS443:3:48:1359:1131#0/1  
aaaaaa`\_baa]\_]ba`\_aaU`[\_`Ua[\_a^a`P]¥U\_[[  
@HWI-EAS443:3:48:1556:1755#0/1  
TGCTGCCATAACGGTTGCTCTTTCAAAGGGAGATTTCCG  
+HWI-EAS443:3:48:1556:1755#0/1  
`a)`]aZa^WUab]ab]]X`a\_RVZ\_[\_\_¥J\_^^RQZS  
@HWI-EAS443:3:48:180:934#0/1  
CTTTCAAAGGGAGATTTCCGCTGCACTGAGAATGTAGGCT  
+HWI-EAS443:3:48:180:934#0/1  
`bbb`\_`aaabbaab[abaaa`\_b`\_aaa\_b]\_\_a\_`\_`\_\_\_\_  
@HWI-EAS443:3:48:980:1764#0/1  
CAGCCTACATTCTCAGTGCAGCGAAATCTCCCTTTTAAAA  
+HWI-EAS443:3:48:980:1764#0/1  
`]ab`ba`¥ab`\_`babab`ab]b`abb[aa\_^ab`a[]¥a  
@HWI-EAS443:3:49:1375:1910#0/1  
CAGCCTACATTCTCAGTGCAGCGAAATCTCCCTTTTAAAA  
+HWI-EAS443:3:49:1375:1910#0/1  
a\_babbbbbaaba]abaa¥ab`baa`\_^`YZ`abaa\_aa^  
@HWI-EAS443:3:49:1602:527#0/1  
CAGTGTGCAGCCTACATTCTCAGTGCAGCGAAATCTCCCT  
+HWI-EAS443:3:49:1602:527#0/1  
abbaaaaaabb\_ababbbbabbba\_b[b`bba[ab^a\_¥a`  
@HWI-EAS443:3:49:96:1255#0/1  
TTTCAAAGGGAGATTTCCGCTGCACTGAGAATGTAGGCTG  
+HWI-EAS443:3:49:96:1255#0/1  
aaaaaaaaaaaaa`aaa\_a\_aa\_`[aa\_a\_`aa\_`][^`  
@HWI-EAS443:3:4:1408:1153#0/1  
CAGCGAAATCTCCCTTTTAAAAGAGCAACCGTTATGGCAG  
+HWI-EAS443:3:4:1408:1153#0/1  
a]\_K\_a[abbb\_T`ab^bbaa]aaba\_aX[`U\_`a\_a[aa  
@HWI-EAS443:3:50:1135:584#0/1  
CAGTGTGCAGCCTACATTCTCAGTGCAGCGAAATCTCCCT  
+HWI-EAS443:3:50:1135:584#0/1  
abbabbbbbbbabababababababababababababab`b  
@HWI-EAS443:3:51:1032:1782#0/1  
GCAGCCTACATTCTCAGTGCAGCGAAATCTCCCTTTTAA  
+HWI-EAS443:3:51:1032:1782#0/1  
aaa`a`abaaab`a¥`b`aZ`a\_aaaaa\_a¥¥\_`a`a\_\_a  
@HWI-EAS443:3:51:1493:532#0/1  
TACATTCTCAGTGCAGCGAAATCTCCCTTTTAAAAGAGCA  
+HWI-EAS443:3:51:1493:532#0/1  
aaaa`baaaab^a`\_`\_`b`\_`\_a[\_\_\_\_\_a\_\_`^`\_a\_`\_`\_`  
@HWI-EAS443:3:51:1687:1110#0/1  
GCGAAATCTCCCTTTTAAAAGAGCAACCGTTATGGCAGCA  
+HWI-EAS443:3:51:1687:1110#0/1  
abbbabb`baaababbba`baab`aaa`a\_babbaZbaY[  
@HWI-EAS443:3:51:256:117#0/1  
ACATTCTCAGTGCAGCGAAATCTCCCTTTTAAAAGAGCAA

+HWI-EAS443:3:51:256:117#0/1  
aa`b`b`\_\_aU]\_a`MaY`aaY[¥]S`a\_a`ZaXa\_\_U[\_  
@HWI-EAS443:3:51:992:1270#0/1  
AAAAGGGAGATTTGCTGCACTGAGAATGTAGGCTGCACA  
+HWI-EAS443:3:51:992:1270#0/1  
a\_^\_b`bb]]abaP^Z`]Z^Xb¥Ta`abbabX]`a\_VWH[  
@HWI-EAS443:3:52:1017:1032#0/1  
GCTGCCATAACGGTTGCTCTTTCAAAGGGAGATTTGCT  
+HWI-EAS443:3:52:1017:1032#0/1  
a\_b`\_^abba`ba^aa]a]a\_a`[\_`\_ab\_a[ZHXaa``[a  
@HWI-EAS443:3:52:190:61#0/1  
TGCTGCCATAACGGTTGCTCTTTCAAAGGGAGATTTGCT  
+HWI-EAS443:3:52:190:61#0/1  
aa\_a\_\_]Wa¥¥Z`^U`^YWS¥T\_WYYWW¥\_\_S¥W¥¥ZVZY  
@HWI-EAS443:3:52:642:685#0/1  
GCCTACATTCTCAGTGCAGCGAAATCTCCCTTTTGAAAGA  
+HWI-EAS443:3:52:642:685#0/1  
^`abaaaba`aaa\_\_aaaaa]aaa\_\_\_\_\_a`a`a][ ]`\_`  
@HWI-EAS443:3:52:670:1936#0/1  
GCAGCCTACATTCTCAGTGCAGCGAAATCTCCCTTTTGAA  
+HWI-EAS443:3:52:670:1936#0/1  
aa`]GRR\_VS]]XX\_XNP]\_`PYU[¥XRWW]`^V]S[`US  
@HWI-EAS443:3:53:814:1356#0/1  
GCCAGATCAGTGTGCAGCCTACATTCTCAGTGCAGCGAAA  
+HWI-EAS443:3:53:814:1356#0/1  
aaaaa`aaaa¥`^a\_[\_\_\_\_aX]``a\_\_aa^`\_¥`\_a`^^  
@HWI-EAS443:3:54:770:56#0/1  
GATCAGTGTGCAGCCTACATTCTCAGTGCAGCGAAATCTC  
+HWI-EAS443:3:54:770:56#0/1  
aa`\_`b`b`aaaa\_aa^\_aaa\_a`a^a]\_a¥a^`a\_^\_U  
@HWI-EAS443:3:55:1702:1102#0/1  
GAAATCTCCCTTTTGAAAGAGCAACCGTTATGGCAGCATT  
+HWI-EAS443:3:55:1702:1102#0/1  
abbbaaa`^^baaaaaabaab\_aa^`¥a\_aaa\_aa]V``  
@HWI-EAS443:3:56:1165:878#0/1  
CTTTCAAAGGGAGATTTGCTGCACTGAGAATGTAGGCT  
+HWI-EAS443:3:56:1165:878#0/1  
aabbbbbababb`babbbababa`babbabaabb\_aabZa  
@HWI-EAS443:3:56:1176:245#0/1  
CAGCCTACATTCTCAGTGCAGCGAAATCTCCCTTTTGAAA  
+HWI-EAS443:3:56:1176:245#0/1  
abbb^abaab\_W\_aaa\_b]`a\_aaa`a\_aa[\_aaaaa``  
@HWI-EAS443:3:56:630:1242#0/1  
CCTACATTCTCAGTGCAGCGAAATCTCCCTTTTGAAAGAG  
+HWI-EAS443:3:56:630:1242#0/1  
^Y`M^[aY[Jba[Pa¥P]ab\_]aaa^[\_a\_a`V^`Y\_^a  
@HWI-EAS443:3:57:666:39#0/1  
TTTCGCTGCACTGAGAATGTAGGCTGCACACTGATCTGGC  
+HWI-EAS443:3:57:666:39#0/1  
^ab\_\_W]\_aaZ]^\_ZRGZ\_X\_\_^XT`X¥X¥BBBBBBBBBB

@HWI-EAS443:3:57:723:547#0/1  
GATCAGTGTGCAGCCTACATTCTCAGTGCAGCGAAATCTC  
+HWI-EAS443:3:57:723:547#0/1  
aaa]abZ`b^¥]V\_a^abb`a^¥]SSa¥^a`b¥aaaY`P  
@HWI-EAS443:3:57:907:534#0/1  
TACATTCTCAGTGCAGCGAAATCTCCCTTTTCAAAGAGCA  
+HWI-EAS443:3:57:907:534#0/1  
a`U`aba`]]`abaaa¥aXUPa[a`]]`aaaaa]^¥bSaRa  
@HWI-EAS443:3:58:114:31#0/1  
GTGCAGCGAAATCTCCCTTTTCAAAGAGCAACCGTTATGG  
+HWI-EAS443:3:58:114:31#0/1  
aSW[S]\_^LT¥YTYW[W^ZUZWRV¥TVWQSPR[XSSSWW  
@HWI-EAS443:3:58:1394:1357#0/1  
GTTGCTCTTTCAAAGGGAGATTTGCTGCACTGAGAATG  
+HWI-EAS443:3:58:1394:1357#0/1  
aXa[X\_\_aa¥[\_\_¥`\_\_V\_¥U\_\_U¥U¥RY¥W^\_¥UW¥¥¥  
@HWI-EAS443:3:58:374:1167#0/1  
GCGAAATCTCCCTTTTCAAAGAGCAACCGTTATGGCAGCA  
+HWI-EAS443:3:58:374:1167#0/1  
a¥PUUY^`VSU\_W]\_WV[\_`SJYSTSV¥YYWXZBBBBBB  
@HWI-EAS443:3:58:98:1818#0/1  
GGTTGCTCTTTCAAAGGGAGATTTGCTGCACTGAGAAT  
+HWI-EAS443:3:58:98:1818#0/1  
¥WW\_[¥]\_aaa`aaaa`^]¥a[a`a`\_][`^`a`]\_`  
@HWI-EAS443:3:59:1019:608#0/1  
TACATTCTCAGTGCAGCGAAATCTCCCTTTTCAAAGAGCA  
+HWI-EAS443:3:59:1019:608#0/1  
a``aaa`\_aab\_a^aaa`Ya`a`aa\_a``aa^`a\_XW\_V^  
@HWI-EAS443:3:59:1157:1884#0/1  
GCGAAATCTCCCTTTTCAAAGAGCAACCGTTATGGCAGCA  
+HWI-EAS443:3:59:1157:1884#0/1  
abbaabbbb]b`bbba\_aZbaa`Ubababa\_]a`WLZ^GV  
@HWI-EAS443:3:59:1366:210#0/1  
TGCTCTTTCAAAGGGAGATTTGCTGCACTGAGAATGTA  
+HWI-EAS443:3:59:1366:210#0/1  
Vabbb\_UVabaK[\_\_\_Q\_\_\_[^US\_KabaHSaXQ]aPPRWL[  
@HWI-EAS443:3:59:1559:1079#0/1  
CATTCTCAGTGCAGCGAAATCTCCCTTTTCAAAGAGCAAC  
+HWI-EAS443:3:59:1559:1079#0/1  
abbbabbbabb[baabaabbbbaabbbabab^baa`QabU  
@HWI-EAS443:3:59:816:1179#0/1  
GCGAAATCTCCCTTTTCAAAGAGCAACCGTTATGGCAGCA  
+HWI-EAS443:3:59:816:1179#0/1  
ab]abbbabb`abbbbbbbaababbbbababbaV`aX^  
@HWI-EAS443:3:5:104:1443#0/1  
CAGTGTGCAGCCTACATTCTCAGTGCAGCGAAATCTCCCT  
+HWI-EAS443:3:5:104:1443#0/1  
SX[U^ab¥[¥ab``\_bbb`\_ab¥^`bb]ba`U¥ab\_M\_Z`  
@HWI-EAS443:3:5:307:916#0/1  
GTGCAGCGAAATCTCCCTTTTCAAAGAGCAACCGTTATGG

+HWI-EAS443:3:5:307:916#0/1  
a\_a`\_a]a[\_Y\_]a^`]a[^^\_V`\_¥][U\_VY]XBB  
@HWI-EAS443:3:5:926:130#0/1  
CGAAATCTCCCTTTTCAAAGAGCAACCGTTATGGCAGCAT  
+HWI-EAS443:3:5:926:130#0/1  
`bbb\_ba^a`bbba`bbbb`\_aa\_aabbbb\_aaV][  
@HWI-EAS443:3:60:12:139#0/1  
TGCAGCTACATTCTCAGTGCAGCGAAATCTCCCTTTTGA  
+HWI-EAS443:3:60:12:139#0/1  
\_^\_Uaa`\_]abaaaaaSa\_a`aaaa`\_\_\_\_Z\_]^\_\_[  
@HWI-EAS443:3:60:1359:1867#0/1  
GTGCAGCGAAATCTCCCTTTTCAAAGAGCAACCGTTATGG  
+HWI-EAS443:3:60:1359:1867#0/1  
aHaPab]aaaaZQ]\_[QPa`\_a`^a`S`Xa`^T`HZ`R[`  
@HWI-EAS443:3:60:418:107#0/1  
AAGGGAGATTTTCGCTGCACTGAGAATGTAGGCTGCACACT  
+HWI-EAS443:3:60:418:107#0/1  
aaaaa`^aaa`a\_``aaaa\_a¥`^a¥\_a\_¥¥ZRRRWV¥  
@HWI-EAS443:3:61:1182:537#0/1  
CTTTCAAAGGGAGATTTTCGCTGCACTGAGAATGTAGGCT  
+HWI-EAS443:3:61:1182:537#0/1  
abbbabbbbbbbbbbbbbbbabb^H¥bbbbabab\_a`\_X\_  
@HWI-EAS443:3:61:610:1055#0/1  
CTTTCAAAGGGAGATTTTCGCTGCACTGAGAATGTAGGCT  
+HWI-EAS443:3:61:610:1055#0/1  
abbbba`¥abbbbaabb`\_aaabbbbaaa\_a`a\_`V^[[  
@HWI-EAS443:3:62:1459:1037#0/1  
GCGAAATCTCCCTTTTCAAAGAGCAACCGTTATGGCAGCA  
+HWI-EAS443:3:62:1459:1037#0/1  
Z\_`````¥¥¥]^Z^a\_\_Ua\_ab^`IXU\_aa\_a\_]T`ZO[  
@HWI-EAS443:3:62:814:1230#0/1  
AGCGAAATCTCCCTTTTCAAAGAGCAACCGTTATGGCAGC  
+HWI-EAS443:3:62:814:1230#0/1  
aaba^`Xaaa`Za^\_aaa`a^\_`\_`Z]\_`a^\_Za`W  
@HWI-EAS443:3:63:1183:1270#0/1  
GCGAAATCTCCCTTTTCAAAGAGCAACCGTTATGGCAGCA  
+HWI-EAS443:3:63:1183:1270#0/1  
`Q^aZU]¥QWRYZ`a]R`X^\_`a]a\_¥SV^^`\_`BBBBB  
@HWI-EAS443:3:63:1512:1290#0/1  
CTCAGTGCAGCGAAATCTCCCTTTTCAAAGAGCAACCGTT  
+HWI-EAS443:3:63:1512:1290#0/1  
`ab\_\_YZ¥babb`b\_]ab\_a\_aZ`bbZ]^abMab]\_aa`  
@HWI-EAS443:3:63:1556:223#0/1  
GAAATCTCCCTTTTCAAAGAGCAACCGTTATGGCAGCATT  
+HWI-EAS443:3:63:1556:223#0/1  
aaaaa]a\_`^``aaa\_aaa`a\_[\_^\_a^`^`a`\_]`TTUT  
@HWI-EAS443:3:63:192:1453#0/1  
TTCTCAGTGCAGCGAAATCTCCCTTTTCAAAGAGCAACCG  
+HWI-EAS443:3:63:192:1453#0/1  
ababbab\_bbbba`bbbaaababaaa\_aaa\_aaaa`a`a



@HWI-EAS443:3:63:405:1715#0/1  
CAGTGTGCAGCCTACATTCTCAGTGCAGCGAAATCTCCCT  
+HWI-EAS443:3:63:405:1715#0/1  
aaU\_\_R`¥aUaa\_aaa`aaaa^`Waaa]`]\_\_a````¥\_\_  
@HWI-EAS443:3:64:1273:906#0/1  
CATTCTCAGTGCAGCGAAATCTCCCTTTTGAAAGAGCAAC  
+HWI-EAS443:3:64:1273:906#0/1  
abbbabbbb\_baababbbbaabba`\_babb]aab¥aa\_`a`  
@HWI-EAS443:3:64:1528:95#0/1  
AGCCTACATTCTCAGTGCAGCGAAATCTCCCTTTTGAAAG  
+HWI-EAS443:3:64:1528:95#0/1  
aaa^baaabaaaa`\_[^U\_\_[\_`\_a\_^L¥Y]Q^aa\_WZWS[  
@HWI-EAS443:3:64:1712:437#0/1  
GATCAGTGTGCAGCCTACATTCTCAGTGCAGCGAAATCTC  
+HWI-EAS443:3:64:1712:437#0/1  
aaa`ab`a\_b]aaYX`aa`aa\_a\_aa\_a^`^^b\_`\_a\_¥T  
@HWI-EAS443:3:65:701:295#0/1  
GCGAAATCTCCCTTTTGAAAGAGCAACCGTTATGGCAGCA  
+HWI-EAS443:3:65:701:295#0/1  
Z\_¥[^ab\_b¥¥bb\_ba`^`baaba\_ba``[^`^a`WUa\_OR  
@HWI-EAS443:3:66:1135:513#0/1  
GTGCAGCGAAATCTCCCTTTTGAAAGAGCAACCGTTATGG  
+HWI-EAS443:3:66:1135:513#0/1  
aUa\_^a^aZa```\_]\_\_a\_\_a¥U\_]\_¥U]U\_VW^]\_Z  
@HWI-EAS443:3:66:489:628#0/1  
ATTCTCAGTGCAGCGAAATCTCCCTTTTGAAAGAGCAACC  
+HWI-EAS443:3:66:489:628#0/1  
a\_aba`a]N¥\_`a`^aa\_aaaa`aa`aa``Z^^a`[]`a\_  
@HWI-EAS443:3:66:742:642#0/1  
AACGGTTGCTCTTTCAAAGGGAGATTTGCTGCACTGAG  
+HWI-EAS443:3:66:742:642#0/1  
[[`b^a`a^a`b`a^`a`\_[]`a`¥\_¥]a\_`\_¥`a  
@HWI-EAS443:3:67:1054:128#0/1  
CAGCGAAATCTCCCTTTTGAAAGAGCAACCGTTATGGCAG  
+HWI-EAS443:3:67:1054:128#0/1  
abbababbaaaa`aaaaaa`aa`a`aa]]a]a^`a`\_a¥  
@HWI-EAS443:3:67:1318:1404#0/1  
GGCCAGATCAGTGTGCAGCCTACATTCTCAGTGCAGCGAA  
+HWI-EAS443:3:67:1318:1404#0/1  
`a^abb]\_aba`\_X¥aba^^bbabab^aa`^¥a\_\_\_\_\_`aa  
@HWI-EAS443:3:67:1570:1270#0/1  
AACGGTTGCTCTTTCAAAGGGAGATTTGCTGCACTGAG  
+HWI-EAS443:3:67:1570:1270#0/1  
`\_^X[]a`aXU`aXX`U¥P¥[¥`YY]^PSMM[MZTVSU¥  
@HWI-EAS443:3:67:684:1541#0/1  
TTTCGCTGCACTGAGAATGTAGGCTGCACACTGATCTGGC  
+HWI-EAS443:3:67:684:1541#0/1  
aZZb]`a^\_¥b`aaZX\_]\_T]`\_aZb^baaa\_\_ZM¥LYRa  
@HWI-EAS443:3:68:1293:850#0/1  
TGCTCTTTCAAAGGGAGATTTGCTGCACTGAGAATGTA

+HWI-EAS443:3:68:1293:850#0/1  
aaa^U¥abb]^V[^U0¥]]X\_WaQ[^RUU\_a`\_]Y``U[  
@HWI-EAS443:3:68:579:987#0/1  
CAGCCTACATTCTCAGTGCAGCGAAATCTCCCTTTTAAAA  
+HWI-EAS443:3:68:579:987#0/1  
¥Waa¥`a\_K¥bbbbba^`\_V^abaZ\_b`bW¥`\_a]U\_aa  
@HWI-EAS443:3:68:613:32#0/1  
GTGCAGCGAAATCTCCCTTTTAAAAGAGCAACCGTTATGG  
+HWI-EAS443:3:68:613:32#0/1  
a\_aa\_ba`aa\_\_`\_]`\_\_`^a\_`^\_Y\_^\_]X\_X]XX\_^  
@HWI-EAS443:3:69:1178:496#0/1  
GCTGCCATAACGGTTGCTCTTTCAAAGGGAGATTCGCT  
+HWI-EAS443:3:69:1178:496#0/1  
aa]^`^a¥a```Uaa`^\_\_\_\_YNSUNXXZS`^V^[XVRV  
@HWI-EAS443:3:69:1740:31#0/1  
GCGAAATCTCCCTTTTAAAAGAGCAACCGTTATGGCAGCA  
+HWI-EAS443:3:69:1740:31#0/1  
``^]``ZXQLTKR^L\_aRN\_]VVSRTZV\_TSRW^]RBBBB  
@HWI-EAS443:3:69:648:754#0/1  
CGAAATCTCCCTTTTAAAAGAGCAACCGTTATGGCAGCAT  
+HWI-EAS443:3:69:648:754#0/1  
aab]aba\_aabbababa]aaaa\_]aab^ba\_Y]\_aaVLV  
@HWI-EAS443:3:69:683:1614#0/1  
TGCAGCGAAATCTCCCTTTTAAAAGAGCAACCGTTATGGC  
+HWI-EAS443:3:69:683:1614#0/1  
a\_bbabbbbbbbbbbbbaaaabbaaabbaabaaaaa]a  
@HWI-EAS443:3:6:144:296#0/1  
CATTCTCAGTGCAGCGAAATCTCCCTTTTAAAAGAGCAAC  
+HWI-EAS443:3:6:144:296#0/1  
abbbbaaa`aa`aa`[a`a`S\_ab]aaaaaaaaYaaa  
@HWI-EAS443:3:6:607:1937#0/1  
CAGCGAAATCTCCCTTTTAAAAGAGCAACCGTTATGGCAG  
+HWI-EAS443:3:6:607:1937#0/1  
YW]S[[aa\_baUY¥a\_UYT^[^T^O[[RMQYWN]WWZZ]B  
@HWI-EAS443:3:6:889:269#0/1  
AAAAGGGAGATTCGCTGCACTGAGAATGTAGGCTGCACA  
+HWI-EAS443:3:6:889:269#0/1  
[ba\_b\_ba\_aaba``aaa[]Yba\_b`\_aa]aaZS[]V\_U]  
@HWI-EAS443:3:70:393:651#0/1  
CAGCGAAATCTCCCTTTTAAAAGAGCAACCGTTATGGCAG  
+HWI-EAS443:3:70:393:651#0/1  
\_^^XZa[\_]\_]\_aXaaa\_aa`P``aa`^`\_abYY`TT\_SZY  
@HWI-EAS443:3:70:580:1230#0/1  
AGTGTGCAGCCTACATTCTCAGTGCAGCGAAATCTCCCTT  
+HWI-EAS443:3:70:580:1230#0/1  
a`[aT]]X\_baa`aaaa`\_b`U^aa\_a¥aaaa`\_a]La\_  
@HWI-EAS443:3:71:1061:254#0/1  
AGCGAAATCTCCCTTTTAAAAGAGCAACCGTTATGGCAGC  
+HWI-EAS443:3:71:1061:254#0/1  
]]`^`\_\_ba\_VZ¥aaabb^]aaab^aaaa\_aaaaa\_\_ZN

@HWI-EAS443:3:71:1671:1756#0/1  
CGAAATCTCCCTTTTCAAAGAGCAACCGTTATGGCAGCAT  
+HWI-EAS443:3:71:1671:1756#0/1  
[¥b]]abbYY¥`bbb^[`bb`\_bab\_]\_\_a`Y`[abaPP\_  
@HWI-EAS443:3:71:758:877#0/1  
AGCCTACATTCTCAGTGCAGCGAAATCTCCCTTTTCAAAG  
+HWI-EAS443:3:71:758:877#0/1  
`R¥^\_]¥Q[`aXa]a``[`a^VX`aaaa\_a^Z`S^^Y^  
@HWI-EAS443:3:71:761:58#0/1  
AGTGCAGCGAAATCTCCCTTTTCAAAGAGCAACCGTTATG  
+HWI-EAS443:3:71:761:58#0/1  
abab`bbb`aU\_b]Y^babbb`bbb`bab[aba`bY\_a^Z  
@HWI-EAS443:3:72:1094:251#0/1  
GGCCAGATCAGTGTGCAGCCTACATTCTCAGTGCAGCGAA  
+HWI-EAS443:3:72:1094:251#0/1  
aaP]^`^]a`a¥aRa\_`a[Y]YSG[[U^V\_[U\_RU\_T¥¥¥  
@HWI-EAS443:3:72:293:435#0/1  
GCGAAATCTCCCTTTTCAAAGAGCAACCGTTATGGCAGCA  
+HWI-EAS443:3:72:293:435#0/1  
abb¥WVUbababaaba]abba]]YYaa]aHaaaaa¥aQN  
@HWI-EAS443:3:72:711:40#0/1  
CGAAATCTCCCTTTTCAAAGAGCAACCGTTATGGCAGCAT  
+HWI-EAS443:3:72:711:40#0/1  
ab`abb`b`]^`abbaaa\_aY][aa\_Za\_`\_`aaZ`\_SLT  
@HWI-EAS443:3:73:1358:2011#0/1  
TACATTCTCAGTGCAGCGAAATCTCCCTTTTCAAAGAGCA  
+HWI-EAS443:3:73:1358:2011#0/1  
`]S[[Ua^X`Sa]¥`a`]aa\_a¥]SNY]\_]a`\_a¥^\_\_\_\_  
@HWI-EAS443:3:73:1668:1790#0/1  
GCCATAACGGTTGCTCTTTCAAAGGGAGATTTGCTGCA  
+HWI-EAS443:3:73:1668:1790#0/1  
`bb\_bbba\_bUab]aZ¥\_Z`\_a``aa[`bYaaaVOJNVR`  
@HWI-EAS443:3:73:290:448#0/1  
AGTGTGCAGCCTACATTCTCAGTGCAGCGAAATCTCCCTT  
+HWI-EAS443:3:73:290:448#0/1  
a`U`^]`^a]ba^]`[¥aa`X[aa`^]XZ`a^[¥`MY]\_  
@HWI-EAS443:3:74:314:279#0/1  
AAATCTCCCTTTTCAAAGAGCAACCGTTATGGCAGCATTC  
+HWI-EAS443:3:74:314:279#0/1  
aaaaX`a`aaaa\_^^`]^`\_`\_]a^\_\_`^^Z\_]NWTOT  
@HWI-EAS443:3:75:445:1366#0/1  
AACGGTTGCTCTTTCAAAGGGAGATTTGCTGCACTGAG  
+HWI-EAS443:3:75:445:1366#0/1  
aaab^]a`aa¥Y]\_\_T\_\_`\_`^a\_ST]`\_`[\_a\_VXa\_\_^^Z  
@HWI-EAS443:3:75:804:1266#0/1  
CAGTGTGCAGCCTACATTCTCAGTGCAGCGAAATCTCCCT  
+HWI-EAS443:3:75:804:1266#0/1  
^`ZXZ\_a]\_`^¥`a¥\_a`aa^a`[`a^`aa^aa\_`aa`a  
@HWI-EAS443:3:76:1091:1797#0/1  
CAGCGAAATCTCCCTTTTCAAAGAGCAACCGTTATGGCAG

+HWI-EAS443:3:76:1091:1797#0/1  
aX¥\_¥babaaaaWKY^ZT^]a\_^[^`a\_Ya]\_`\_`\_U` [  
@HWI-EAS443:3:76:1371:24#0/1  
TTCTCAGTGCAGCGAAATCTCCCTTTTGAAAGAGCAACCG  
+HWI-EAS443:3:76:1371:24#0/1  
aaVaXa`]bWa\_Y`^a`\_^\_Y]X\_[^[[\_U\_XYSST]UUU\_  
@HWI-EAS443:3:76:573:1025#0/1  
AGCCTACATTCTCAGTGCAGCGAAATCTCCCTTTTGAAAG  
+HWI-EAS443:3:76:573:1025#0/1  
¥^`aabaT\_aaaa`]^\_aaaa`aa`\_\_`\_`^`\_`\_\_aa^  
@HWI-EAS443:3:77:1553:1159#0/1  
ATGCTGCCATAACGGTTGCTCTTTCAAAGGGAGATTTCG  
+HWI-EAS443:3:77:1553:1159#0/1  
aa][aaaXaaa`P`aZ`a][^aa^V`\_¥SZVY\_\_]¥X[^Y  
@HWI-EAS443:3:77:300:1968#0/1  
GCAGCCTACATTCTCAGTGCAGCGAAATCTCCCTTTTGAA  
+HWI-EAS443:3:77:300:1968#0/1  
ab\_Zaaa`aW`ababba^Xa]¥baaa]¥a^¥`]^`a`aa\_  
@HWI-EAS443:3:78:1612:1032#0/1  
GTGCAGCCTACATTCTCAGTGCAGCGAAATCTCCCTTTTG  
+HWI-EAS443:3:78:1612:1032#0/1  
a]\_N]`YHUaa\_aYN`aa¥Ga[X]X¥^Z\_]\_Z\_\_TXRY^\_  
@HWI-EAS443:3:79:1186:158#0/1  
GCGAAATCTCCCTTTTGAAAGAGCAACCGTTATGGCAGCA  
+HWI-EAS443:3:79:1186:158#0/1  
aabbabb`\_^L]aabaa\_\_\_`Z`aaa\_b\_`\_\_\_aT`XLS  
@HWI-EAS443:3:79:444:408#0/1  
AAATCTCCCTTTTGAAAGAGCAACCGTTATGGCAGCATTC  
+HWI-EAS443:3:79:444:408#0/1  
ab^aaaa¥`Zaaba\_\_\_[a`aa\_aaaaa`]aa\_TSFVZ  
@HWI-EAS443:3:80:77:457#0/1  
GGTTGCTCTTTCAAAGGGAGATTTTCGCTGCACTGAGAAT  
+HWI-EAS443:3:80:77:457#0/1  
]]Z\_¥`PZ¥]`aaaX]]a`W¥T¥]^a\_a^^ZY^`^aZWV  
@HWI-EAS443:3:80:866:893#0/1  
GCCAGATCAGTGTGCAGCCTACATTCTCAGTGCAGCGAAA  
+HWI-EAS443:3:80:866:893#0/1  
]bbbb[`¥\_a\_aa\_abbababbbbb`bba\_Yb\_`baaaa\_  
@HWI-EAS443:3:81:468:1341#0/1  
CTTTCAAAGGGAGATTTTCGCTGCACTGAGAATGTAGGCT  
+HWI-EAS443:3:81:468:1341#0/1  
aabaaaabbaaaaaXa\_a`\_aa\_a\_aaa``]`\_`¥]^`\_¥\_  
@HWI-EAS443:3:82:1095:434#0/1  
TACATTCTCAGTGCAGCGAAATCTCCCTTTTGAAAGAGCA  
+HWI-EAS443:3:82:1095:434#0/1  
ab`\_ba`abab`babbY`ababbaa]aaaaabbbbaaaa\_a  
@HWI-EAS443:3:82:767:378#0/1  
CAGCGAAATCTCCCTTTTGAAAGAGCAACCGTTATGGCAG  
+HWI-EAS443:3:82:767:378#0/1  
aa¥a\_abbbbb\_RU¥¥¥\_aa]`baaaaa[^``aaaaZX\_W

@HWI-EAS443:3:82:846:273#0/1  
TGCAGCGAAATCTCCCTTTTCAAAGAGCAACCGTTATGGC  
+HWI-EAS443:3:82:846:273#0/1  
[aabbbb]bbaba\_abaaaaa`aaa\_\_a` `aVb^aaa`  
@HWI-EAS443:3:83:1036:1444#0/1  
CAGTGTGCAGCCTACATTCTCAGTGCAGCGAAATCTCCCT  
+HWI-EAS443:3:83:1036:1444#0/1  
]abbbba`b`bbbaa\_bb`bbb`baaaabbbbabaaa`b  
@HWI-EAS443:3:83:1375:32#0/1  
CATAACGTTGCTCTTTCAAAGGGAGATTTGCTGCACT  
+HWI-EAS443:3:83:1375:32#0/1  
abbaaabaabbYa\_bbba`a]a`ab\_aa\_aaZ`Xa[¥`V\_  
@HWI-EAS443:3:83:458:1372#0/1  
GATCAGTGTGCAGCCTACATTCTCAGTGCAGCGAAATCTC  
+HWI-EAS443:3:83:458:1372#0/1  
a`PX^][aa]^^QHV]\_aa]Vaaaa^W`ZX`\_`¥KXZ^\_V  
@HWI-EAS443:3:83:485:289#0/1  
AGATCAGTGTGCAGCCTACATTCTCAGTGCAGCGAAATCT  
+HWI-EAS443:3:83:485:289#0/1  
aba\_aba`b\_a`aaaabaaaaaaaaa^`\_`a\_aa`]a\_\_  
@HWI-EAS443:3:85:762:283#0/1  
GCTCTTTCAAAGGGAGATTTGCTGCACTGAGAATGTAG  
+HWI-EAS443:3:85:762:283#0/1  
^\_\_XX`[^\_Z\_\_a¥a\_a[^][^``\_``\_``\_¥^`\_¥\_\_  
@HWI-EAS443:3:87:1467:297#0/1  
ATTCTCAGTGCAGCGAAATCTCCCTTTTCAAAGAGCAACC  
+HWI-EAS443:3:87:1467:297#0/1  
aba\_bb`b\_\_X[a`babaa`a`\_aaaaba¥aaa\_`\_a`Y\_  
@HWI-EAS443:3:87:997:1594#0/1  
TGCTGCCATAACGTTGCTCTTTCAAAGGGAGATTTGCTG  
+HWI-EAS443:3:87:997:1594#0/1  
\_ba`a`ab¥bb]ba]aaaWMS``X\_]`baa[¥``^`a\_a\_  
@HWI-EAS443:3:88:1433:493#0/1  
TTTCGCTGCACTGAGAATGTAGGCTGCACACTGATCTGGC  
+HWI-EAS443:3:88:1433:493#0/1  
aaaa`aaaab¥baabaaa^a`]¥aaV`Z`U^]¥\_]\_\_[¥  
@HWI-EAS443:3:89:1077:660#0/1  
ATCAGTGTGCAGCCTACATTCTCAGTGCAGCGAAATCTCC  
+HWI-EAS443:3:89:1077:660#0/1  
aTa^¥¥\_Y\_[S¥S]¥¥`b``\_aa^aP]]a`V\_]W\_aUZ^W  
@HWI-EAS443:3:89:924:862#0/1  
CTACATTCTCAGTGCAGCGAAATCTCCCTTTTCAAAGAGC  
+HWI-EAS443:3:89:924:862#0/1  
ab]`babbb¥UW`\_bbbbbbaabbbba`\_W\_bVbZaaaZ  
@HWI-EAS443:3:8:1428:291#0/1  
GTGCAGCGAAATCTCCCTTTTCAAAGAGCAACCGTTATGG  
+HWI-EAS443:3:8:1428:291#0/1  
a`\_H\_a\_\_a\_a¥`¥\_Y`a`a`¥¥\_UW¥¥¥^WNZW¥¥W¥B  
@HWI-EAS443:3:8:848:440#0/1  
AGCGAAATCTCCCTTTTCAAAGAGCAACCGTTATGGCAGC



@HWI-EAS443:3:96:295:1457#0/1  
CAGCCTACATTCTCAGTGCAGCGAAATCTCCCTTTTAAAA  
+HWI-EAS443:3:96:295:1457#0/1  
aa\_aaaaa^aa`aa\_a[`aa\_`a\_``\_¥\_`]U^`\_\_\_\_\_  
@HWI-EAS443:3:96:350:1149#0/1  
ATCAGTGTGCAGCCTACATTCTCAGTGCAGCGAAATCTCC  
+HWI-EAS443:3:96:350:1149#0/1  
^aaba¥b`baaaa`ab^a`aaaa\_a^a\_ab`a]aaa`a`\_  
@HWI-EAS443:3:97:1474:1216#0/1  
CGAAATCTCCCTTTTAAAAGAGCAACCGTTATGGCAGCAT  
+HWI-EAS443:3:97:1474:1216#0/1  
abbbbbbabb`]bbbbabaabab\_bb\_ZaabaabaXbaP\_\_\_  
@HWI-EAS443:3:97:745:1717#0/1  
GCTCTTTCAAAAAGGGAGATTTGCTGCACTGAGAATGTAG  
+HWI-EAS443:3:97:745:1717#0/1  
aa`a[bb`aaaabbaabaa`a`b\_aa`[\_ba``aaaa\_a\_  
@HWI-EAS443:3:97:912:1305#0/1  
CATTCTCAGTGCAGCGAAATCTCCCTTTTAAAAGAGCAAC  
+HWI-EAS443:3:97:912:1305#0/1  
^bababa\_\_W^`^[\_a\_a`b`]a]Y`R\_`aS`]``a\_¥\_S  
@HWI-EAS443:3:98:227:1105#0/1  
CGAAATCTCCCTTTTAAAAGAGCAACCGTTATGGCAGCAT  
+HWI-EAS443:3:98:227:1105#0/1  
aaI[`Ya]^a^)^a\_\_aba`baaa^\_Rb]\_b\_U\_ab]GY  
@HWI-EAS443:3:98:883:913#0/1  
TCAGTGTGCAGCCTACATTCTCAGTGCAGCGAAATCTCCC  
+HWI-EAS443:3:98:883:913#0/1  
``ab[a`[\_^a^X`aaabaX`^aa\_a`\_a\_`\_[a`Na[Y]  
@HWI-EAS443:3:99:542:949#0/1  
GCAGCCTACATTCTCAGTGCAGCGAAATCTCCCTTTTAAA  
+HWI-EAS443:3:99:542:949#0/1  
aaaa\_aabaaaa`a`aa]a^aa`a``a`\_\_\_^````\_`^  
@HWI-EAS443:3:9:824:703#0/1  
ATTCTCAGTGCAGCGAAATCTCCCTTTTAAAAGAGCAACC  
+HWI-EAS443:3:9:824:703#0/1  
`a`[a^aa\_a`ba`b\_aba\_aWSYaaa`aa^a\_a`\_\_aX\_  
@HWI-EAS443:3:25:774:319#0/1  
ATTCTGTGTCTCTTTAGGTGCGCTGCATATCCTGACCCC  
+HWI-EAS443:3:25:774:319#0/1  
abbaba\_a`b`aaaaaaaa\_aa``a`^`^a\_\_\_\_\_^\_UV\_¥  
@HWI-EAS443:3:70:1237:1015#0/1  
CTTTAACACAGCTACTGCCCATTTGTCTGGGCCAGAAATT  
+HWI-EAS443:3:70:1237:1015#0/1  
Ua`^[\_¥\_¥U]]a\_]YFM][¥\_VX\_\_W]XW]XXZQ^aaaXG  
@HWI-EAS443:3:67:114:520#0/1  
GCCGGCTTGCATAAATGTTATTTGTTGAAACTATTCTC  
+HWI-EAS443:3:67:114:520#0/1  
aaa[\_a``aaa`a`a]Z\_aaaaaZ\_aa\_^\_^````\_`a  
@HWI-EAS443:3:60:252:169#0/1  
CTCTTATCTCTTGTCTACTTCAAGCAGCAGTTGTAAGGC

+HWI-EAS443:3:60:252:169#0/1  
P\_bbYSTQVVY^`ba^`\_`^XUX\_`YVYFHW\_]\_TTX^a\_  
@HWI-EAS443:3:6:433:1604#0/1  
GGCTTGCATAAATGTTATTTGTTTCGAAACTATTCTCTGTC  
+HWI-EAS443:3:6:433:1604#0/1  
aabaa^H]\_a`aaa\_\_a^a]\_aaZ^`a[aaX\_\_\_\_]¥`]^  
@HWI-EAS443:3:85:196:947#0/1  
GCAGGCTTGCATAAATGTTATTTGTTTCGAAACTATTCTCT  
+HWI-EAS443:3:85:196:947#0/1  
aa[\_]a\_\_]`\_]¥¥`Z^XZ^]\_]\_[RY`\_]UXZ^^\_\_^^^  
@HWI-EAS443:3:97:121:146#0/1  
GCGCTTGCATAAATGTTATTTGTTTCGAAACTATTCTCTGT  
+HWI-EAS443:3:97:121:146#0/1  
a`]Q]ZTYUXMDIWWLVWYOSRRROQRYZSPLVUYWYXBB  
@HWI-EAS443:3:39:695:13#0/1  
GAGTAGTTGTAAGGCTTGCATAAATGTTATTTGTTTCGAAA  
+HWI-EAS443:3:39:695:13#0/1  
SS[ZN]\_¥ZP[]]L¥`ZT[XZ]]^Z`YYSW^[aYT¥`¥XT  
@HWI-EAS443:3:53:72:1758#0/1  
GTCTTATCTCTTGTCTACTTCAAGCAGTAGTTGTAAGGC  
+HWI-EAS443:3:53:72:1758#0/1  
Y\_H\_YY`bbbbbaXa`¥`aba^T\_\_SV^¥[X¥Z[YSYb^IM  
@HWI-EAS443:3:14:827:1998#0/1  
GCAGTAGTTGTAAGGCTTGCATAAATGTTATTTGTTTCGAA  
+HWI-EAS443:3:14:827:1998#0/1  
\_[\_b¥V`a^[]`^^^Y[]^`aaa]]`]^`\_`\_`V^YZX]  
@HWI-EAS443:3:16:614:983#0/1  
GGCTTGCATAAATGTTATTTGTTTCGAAACTATTCTCTGTC  
+HWI-EAS443:3:16:614:983#0/1  
a\_\_T¥WYFEXP`W]YS[]`\_QW]\_`S[\_¥¥U]`\_\_Z^`WX  
@HWI-EAS443:3:18:1099:1328#0/1  
GCTTGCATAAATGTTATTTGTTTCGAAACTATTCTCTGTGCG  
+HWI-EAS443:3:18:1099:1328#0/1  
aa\_`^`aaab`a]aa`aaaa^¥a]¥\_¥\_[a\_`a\_\_a\_Z]a  
@HWI-EAS443:3:18:402:1132#0/1  
GCTTGCATAAATGTTATTTGTTTCGAAACTATTCTCTGTGCG  
+HWI-EAS443:3:18:402:1132#0/1  
`bbV¥\_¥`a]ab\_aa^aSM^a¥a^`a`baa\_a`aaa`^a`  
@HWI-EAS443:3:1:1567:1157#0/1  
TGTAAGGCTTGCATAAATGTTATTTGTTTCGAAACTATTCT  
+HWI-EAS443:3:1:1567:1157#0/1  
VV\_OVabT\_`^¥¥`[\_b^Z\_¥^Sa\_[`[\_Q¥^¥¥Z`aa`]B  
@HWI-EAS443:3:23:1646:819#0/1  
CTTGCATAAATGTTATTTGTTTCGAAACTATTCTCTGTGCG  
+HWI-EAS443:3:23:1646:819#0/1  
abbbabbbbbbbbbabbbbaabbbbababbbbab^  
@HWI-EAS443:3:28:314:995#0/1  
CTCTTATCTCTTGTCTACTTCAAGCAGTAGTTGTAAGGC  
+HWI-EAS443:3:28:314:995#0/1  
abbbbabbaaaaaabbb\_aaabaaa\_a\_aa\_``\_a\_a`^



@HWI-EAS443:3:29:260:18#0/1  
GCAGTAGTTGTAAGGCTTGCATAAATGTTATTTGTTTCGAA  
+HWI-EAS443:3:29:260:18#0/1  
aa[aNY[LZaMOM¥\_ONS`XYYY[WW`XYRV¥^[XX]]BB  
@HWI-EAS443:3:29:268:383#0/1  
GGCTTGCATAAATGTTATTTGTTTCGAAACTATTCTCTGTC  
+HWI-EAS443:3:29:268:383#0/1  
aaa`aa^^]^^]a]a``a]`\_``aa\_]`^```\_\_\_[Y  
@HWI-EAS443:3:30:1173:1794#0/1  
CTTGCATAAATGTTATTTGTTTCGAAACTATTCTCTGTCGC  
+HWI-EAS443:3:30:1173:1794#0/1  
aabaabbb`aba\_abaaaa`aba`aaaaaaaaa`a]^`\_`  
@HWI-EAS443:3:30:294:180#0/1  
GGCTTGCATAAATGTTATTTGTTTCGAAACTATTCTCTGTC  
+HWI-EAS443:3:30:294:180#0/1  
abbbabbbbaab`abaaabbab\_aaaaabaaaaaaaa\_aa]a  
@HWI-EAS443:3:33:388:235#0/1  
CTCTTATCTCTTGTCTACTTCAAGCAGTAGTTGTAAGGC  
+HWI-EAS443:3:33:388:235#0/1  
aabab`abbaaab\_aabaaaaaaaaa`a]^`^````\_]`  
@HWI-EAS443:3:35:1271:206#0/1  
GGCTTGCATAAATGTTATTTGTTTCGAAACTATTCTCTGTC  
+HWI-EAS443:3:35:1271:206#0/1  
^baaa^a`\_]W\_a^^`\_aaa^\_[]YZS\_a``aaa`]`T`  
@HWI-EAS443:3:35:346:328#0/1  
GGCTTGCATAAATGTTATTTGTTTCGAAACTATTCTCTGTC  
+HWI-EAS443:3:35:346:328#0/1  
aaba`abaaa`Vaa\_\_a```^\_aa^]aa\_\_`\_\_\_a\_^X\_  
@HWI-EAS443:3:36:1202:1826#0/1  
CTTGCATAAATGTTATTTGTTTCGAAACTATTCTCTGTCGC  
+HWI-EAS443:3:36:1202:1826#0/1  
¥¥ZT`ab¥a`bbW`abbaba`bb`Lba^bZ]Y]aa\_\_b^b  
@HWI-EAS443:3:38:1358:1306#0/1  
CTTGCATAAATGTTATTTGTTTCGAAACTATTCTCTGTCGC  
+HWI-EAS443:3:38:1358:1306#0/1  
aaab`ab`aba]`aaaba\_a`aaaaaa\_^W\_\_`\_^]`Y  
@HWI-EAS443:3:38:435:251#0/1  
CTTGTCTACTTCAAGCAGTAGTTGTAAGGCTTGCATAAA  
+HWI-EAS443:3:38:435:251#0/1  
abbbabbbbbbbbbabab`aa`ab`aaa[`aaa`aaa`  
@HWI-EAS443:3:43:410:44#0/1  
CAGTAGTTGTAAGGCTTGCATAAATGTTATTTGTTTCGAAA  
+HWI-EAS443:3:43:410:44#0/1  
a]a\_`b\_ab[W\_ab`\_ab`\_aa^\_aa¥`[aa`]a`]a\_^\_  
@HWI-EAS443:3:48:1782:1018#0/1  
CTTGCATAAATGTTATTTGTTTCGAAACTATTCTCTGTCGC  
+HWI-EAS443:3:48:1782:1018#0/1  
\_Y¥`Z¥]\_0\_bbRa^¥^\_]¥ST¥[ZY]]Z\_V^\_``aWQXW  
@HWI-EAS443:3:4:913:895#0/1  
GGCTTGCATAAATGTTATTTGTTTCGAAACTATTCTCTGTC

+HWI-EAS443:3:4:913:895#0/1  
aaabbabbaaab`aabbbaa`aa`\_`a\_baba\_a\_``\_¥  
@HWI-EAS443:3:50:1436:122#0/1  
TCTTGTCTACTTCAAGCAGTAGTTGTAAGGCTTGCATAA  
+HWI-EAS443:3:50:1436:122#0/1  
\_¥¥Y[Ta[RXV¥]]^ZZIVPLR^YZBBBBBBBBBBBBBB  
@HWI-EAS443:3:52:440:1081#0/1  
GGCTTGCATAAATGTTATTTGTTTCGAACTATTCTCTGTC  
+HWI-EAS443:3:52:440:1081#0/1  
`baaaa`S]GR`^^VUX`a`a\_aYa¥Y¥[\_Ya^W]\_^]RY  
@HWI-EAS443:3:53:256:664#0/1  
GGCTTGCATAAATGTTATTTGTTTCGAACTATTCTCTGTC  
+HWI-EAS443:3:53:256:664#0/1  
aba``X\_^a\_```a\_aU`a\_]`\_\_\_\_]\_``aaa\_a\_a\_] ]  
@HWI-EAS443:3:56:797:118#0/1  
GGCTTGCATAAATGTTATTTGTTTCGAACTATTCTCTGTC  
+HWI-EAS443:3:56:797:118#0/1  
abbbbabbaaab`babbab\_aab``a`aaabab\_ab`\_  
@HWI-EAS443:3:56:963:1080#0/1  
CTCTTGTCTACTTCAAGCAGTAGTTGTAAGGCTTGCATA  
+HWI-EAS443:3:56:963:1080#0/1  
aaJYTVWVbb`aY[aN¥a\_T`aW[\_WS]abbb[\_`Xaab¥  
@HWI-EAS443:3:57:1531:1012#0/1  
GCTTGCATAAATGTTATTTGTTTCGAACTATTCTCTGTGCG  
+HWI-EAS443:3:57:1531:1012#0/1  
`a\_\_^^^`\_aa\_\_¥\_¥aa\_Y]] [V¥] [[a`]]`¥[¥\_YBB  
@HWI-EAS443:3:58:509:882#0/1  
GGCTTGCATAAATGTTATTTGTTTCGAACTATTCTCTGTC  
+HWI-EAS443:3:58:509:882#0/1  
¥bba^Y`abaabbaaa^abab`\_abaa`] `aabaa`b``a  
@HWI-EAS443:3:59:550:863#0/1  
TGTAAGGCTTGCATAAATGTTATTTGTTTCGAACTATTCT  
+HWI-EAS443:3:59:550:863#0/1  
aa]a\_aa\_aaa^^a\_\_a\_\_]^`\_a`\_]`aUZa^^ZZ]W^  
@HWI-EAS443:3:5:1499:34#0/1  
CTTGCATAAATGTTATTTGTTTCGAACTATTCTCTGTGCG  
+HWI-EAS443:3:5:1499:34#0/1  
abbbbbbbbbbbbbbbbabbb^bbbabababb¥b`bbbaaa  
@HWI-EAS443:3:60:1170:1604#0/1  
CTCTTATCTCTTGTCTACTTCAAGCAGTAGTTGTAAGGC  
+HWI-EAS443:3:60:1170:1604#0/1  
^aba`bb\_b¥ab\_]\_¥bbbb`bbaabb`ba\_]a[baa^R  
@HWI-EAS443:3:67:883:366#0/1  
GAGAATAGTTTCGAACAAATAACATTTATGCAAGCCTTAC  
+HWI-EAS443:3:67:883:366#0/1  
`bbb`a^¥G] []]^a]a^[aaaaa¥\_a\_aZaaa[S\_\_a`  
@HWI-EAS443:3:69:1561:1648#0/1  
CTCTTATCTCTTGTCTACTTCAAGCAGTAGTTGTAAGGC  
+HWI-EAS443:3:69:1561:1648#0/1  
abba¥`ba`aaab\_aaaaaa` [ `aaa\_a^X^N\_aS[Wa¥Y

@HWI-EAS443:3:69:1774:1898#0/1  
CTTGCATAAATGTTATTTGTTTCGAAACTATTCTCTGTCTGCG  
+HWI-EAS443:3:69:1774:1898#0/1  
¥^Y^abbb`^YW\_a`ab^a¥SJ]`Y]a`aa¥^Y\_]Z¥T  
@HWI-EAS443:3:72:613:1146#0/1  
GCTTGCATAAATGTTATTTGTTTCGAAACTATTCTCTGTCTGCG  
+HWI-EAS443:3:72:613:1146#0/1  
a`a\_a^aa^Saa^aaa``\_\_`b^`a^a`\_``a`\_`Y  
@HWI-EAS443:3:73:190:1456#0/1  
AAGCAGTAGTTGTAAGGCTTGCATAAATGTTATTTGTTTCG  
+HWI-EAS443:3:73:190:1456#0/1  
^Y]Z¥][X\_VXNEPT\_`aUMTYZZZY[Z¥PUZ]^ZTT^ZO  
@HWI-EAS443:3:75:606:1184#0/1  
TCTTGTCTACTTCAAGCAGTAGTTGTAAGGCTTGCATAA  
+HWI-EAS443:3:75:606:1184#0/1  
¥VZ¥\_\_Y`a`\_a\_aa\_G^R[^aa\_aaZa\_a[`a\_a`\_\_a  
@HWI-EAS443:3:83:1359:902#0/1  
GTAGTTGTAAGGCTTGCATAAATGTTATTTGTTTCGAAACT  
+HWI-EAS443:3:83:1359:902#0/1  
UMXVSYXM[]W0¥¥T\_Z]]JVTMUNZ]`YSTNSJQYa^\_a  
@HWI-EAS443:3:86:26:231#0/1  
GGCTTGCATAAATGTTATTTGTTTCGAAACTATTCTCTGTCTGTC  
+HWI-EAS443:3:86:26:231#0/1  
aaa`\_a`\_aa\_aaa^`^aa`a\_a\_a¥W^)`\_`\_`^`^`\_Y^  
@HWI-EAS443:3:86:718:1454#0/1  
AGCAGTAGTTGTAAGGCTTGCATAAATGTTATTTGTTTCGA  
+HWI-EAS443:3:86:718:1454#0/1  
``aabSa\_T`\_`a¥^[\_¥\_\_\_^`a¥[\_a]¥Z¥a`\_`\_[\_\_  
@HWI-EAS443:3:86:883:1993#0/1  
CTCTTGTCTACTTCAAGCAGTAGTTGTAAGGCTTGCATA  
+HWI-EAS443:3:86:883:1993#0/1  
a¥\_Y`YUR`bbabaaba[Wa`\_`aa\_b\_a\_Z^`¥\_X]Y`a  
@HWI-EAS443:3:87:233:1406#0/1  
GGCTTGCATAAATGTTATTTGTTTCGAAACTATTCTCTGTCTGTC  
+HWI-EAS443:3:87:233:1406#0/1  
aaaaa^]ZSW``\_\_RZON[¥]QZZa`\_`¥¥¥^^[]^^]U¥  
@HWI-EAS443:3:88:314:1224#0/1  
GGCTTGCATAAATGTTATTTGTTTCGAAACTATTCTCTGTCTGTC  
+HWI-EAS443:3:88:314:1224#0/1  
aaabbaaaa\_baab`aaaba`\_aa]^Ya\_aaaaa`\_\_a\_a  
@HWI-EAS443:3:93:1686:550#0/1  
CAGTAGTTGTAAGGCTTGCATAAATGTTATTTGTTTCGAAA  
+HWI-EAS443:3:93:1686:550#0/1  
`^a[V^^YbN`a`a^a¥WHXa`\_`[\_]`a`^^b[\_^^`W`  
@HWI-EAS443:3:93:1729:396#0/1  
AGCAGTAGTTGTAAGGCTTGCATAAATGTTATTTGTTTCGA  
+HWI-EAS443:3:93:1729:396#0/1  
abbba\_ababb¥aaaaaZaa\_baaYa`aZ`\_baa```]T^  
@HWI-EAS443:3:94:1671:78#0/1  
GGCTTGCATAAATGTTATTTGTTTCGAAACTATTCTCTGTCTGTC

+HWI-EAS443:3:94:1671:78#0/1  
\_R[^\WLHW\_X^^]\_U`W`\_]`^^ZUUW^Z^`TWT^ZVU  
@HWI-EAS443:3:95:1282:918#0/1  
CTCTTATCTCTTGTCTACTTCAAGCAGTAGTTGTAAGGC  
+HWI-EAS443:3:95:1282:918#0/1  
abbbb`a]bbbbba\_abab\_bb`babaab`bbabbbaaa]F  
@HWI-EAS443:3:98:496:1567#0/1  
GCTTGCATAAATGTTATTTGTTGAAACTATTCTCTGTCTCG  
+HWI-EAS443:3:98:496:1567#0/1  
a`a^^ab\_aY]aaX\_\_aa]`\_\_¥`MaL]a\_aV]\_^`\_V\_a  
@HWI-EAS443:3:95:1425:1863#0/1  
GGCATACCAGAAGCGAATGGGAGTGCAGATGCAGCGATTC  
+HWI-EAS443:3:95:1425:1863#0/1  
`b`I`bSb`b`bb\_bbabba^¥^Y¥aabaab^ab`^a^aP  
@HWI-EAS443:3:4:425:1106#0/1  
AGCCCATCCACCAACAGGGCAGAGAGGAATTGCCCGCT  
+HWI-EAS443:3:4:425:1106#0/1  
aa``a`aaa`Za`¥Y]]a`^Ya`^`\_`YU`^W\_TWP`W^  
@HWI-EAS443:3:54:691:416#0/1  
CAGAACTGATTGCCCCAGGGAGACTACGAGCACCAATG  
+HWI-EAS443:3:54:691:416#0/1  
^]Z^WX\_T`bb\_aWWaW^]V\_b]b``bbRP¥ZH^babaaa  
@HWI-EAS443:3:99:704:1366#0/1  
GGGGAATTCTTGAGGATGAACAGATGTACCAGAAGTGTG  
+HWI-EAS443:3:99:704:1366#0/1  
abbbbabbbbbbabaaaabababbabaaa\_abbaab]b``b  
@HWI-EAS443:3:56:1098:98#0/1  
AAGAATACTGACATCAGAGTCACAGCTGGCAATCACACCA  
+HWI-EAS443:3:56:1098:98#0/1  
aa\_`aaaOXb¥^^aT¥b^a]\_a]^a[¥^U^`^]Y\_0`OR\_  
@HWI-EAS443:3:61:144:827#0/1  
CGGCTGCTAGAAACATAGTAAGAAGAGCAGCAGTGGCAGG  
+HWI-EAS443:3:61:144:827#0/1  
abaabb\_b]bbb]Vbbbbaa`Y`a\_K¥Uabb]aIaGQY¥F  
@HWI-EAS443:3:98:1394:603#0/1  
GCAAGAATACTAACATCAGAGTCACAGCTGGCAATAAAAA  
+HWI-EAS443:3:98:1394:603#0/1  
a¥[\_`\_]`\_`aYSM`VW]XYR¥\_ZU^X^]SZTWWZZZVOG]¥  
@HWI-EAS443:3:55:666:179#0/1  
TGCTAGAAACATAGTAAGAAGNGCAGCAGGGTCAGCAGAC  
+HWI-EAS443:3:55:666:179#0/1  
¥U\_^\_bUZ¥`RW¥a¥``b^a^DW`aa^T[D^VU[WUVQMN  
@HWI-EAS443:3:90:1225:126#0/1  
GGGGGCAAGATACTGACATCAGAGTCACAGCTGGCAATAA  
+HWI-EAS443:3:90:1225:126#0/1  
aaZ^Z]^ab¥]^S^WW\_[^W][^]\_XP^¥^\_SZPXSOZYYP  
@HWI-EAS443:3:48:83:687#0/1  
GNGCAAGAATACTGACATCAGAGTCACAGCTGGCAAAAAC  
+HWI-EAS443:3:48:83:687#0/1  
[D¥\_\_a\_aa`a\_a\_```^a`a\_a]\_\_\_\_`Y¥a\_\_\_\_\_```\_`

@HWI-EAS443:3:88:495:1249#0/1  
GCTGTCTCTTTCTTCTTTTTGTTATTGCCAGCTGTGACT  
+HWI-EAS443:3:88:495:1249#0/1  
aa^H\_a]XZ`]X^][a]W`ab\_`SZa]W]¥Z\_Y]ZWIO[  
@HWI-EAS443:3:19:921:1691#0/1  
CTCTGCTAGAAACATAGTAAGAAGAGCAGCAGGGTCAGCA  
+HWI-EAS443:3:19:921:1691#0/1  
ZH^Y`b^RZWPRRVUUVW¥PP[HV\_]Y^BBBBBBBBBBBB  
@HWI-EAS443:3:53:1343:799#0/1  
CCGGGCTCTTCTTTCTTCTTTTTGTTATTGCCAGCTGT  
+HWI-EAS443:3:53:1343:799#0/1  
aaaaa^baabaabbbab]\_\_abab``aabba¥\_ababb\_  
@HWI-EAS443:3:94:1674:751#0/1  
NGCTGCTAGAAACATAGTAAGAAGAGCAGCAGTGGCAGCA  
+HWI-EAS443:3:94:1674:751#0/1  
BBBBBBBBBBBBBBBBBBBBBBBBBBBBBBBBBBBBBBBB  
@HWI-EAS443:3:22:873:858#0/1  
TGGGGCTCTTCTTTCTTCTTTTTGTTATTGCCAGCTGTG  
+HWI-EAS443:3:22:873:858#0/1  
``\_a``aa\_a`aaa\_aa``]aaa`]a^\_a\_^\_\_^Z\_\_]-  
@HWI-EAS443:3:25:95:1578#0/1  
ATGGGCTCTTCTTTCTTCTTTTTGTTATTGCCAGCTGTG  
+HWI-EAS443:3:25:95:1578#0/1  
a\_`0\_`a]IXaaaa`a\_PZXXaaa\_^Y`[R\_NWY¥WJVY  
@HWI-EAS443:3:42:1159:1000#0/1  
TACTGACATCAGAGTCACAGCTGGCAATAACAAAAGGGAA  
+HWI-EAS443:3:42:1159:1000#0/1  
PT\_\_b`QS`\_Y[SZT\_[Z^\_OG]^YGPVFPFU]Z\_```[Z  
@HWI-EAS443:3:42:1592:92#0/1  
AGGGTCTTCTTTCTTCTTTTTGTTATTGCCAGCTGTGAC  
+HWI-EAS443:3:42:1592:92#0/1  
a^a¥\_^bbabbbbbbbaaabbbbabbbbbb^`aa`aRa`^  
@HWI-EAS443:3:98:1356:927#0/1  
CTGGGCTCTTCTTTCTTCTTTTTGTTATTGCCAGCTGTG  
+HWI-EAS443:3:98:1356:927#0/1  
ab`baaaGab[bab`ab]\_`aaaa`aaaa\_[W\_a\_a\_Y^  
@HWI-EAS443:3:16:1691:2045#0/1  
CAAGAATACTGACATCAGAGTTACAGCTGGCAATAACAAA  
+HWI-EAS443:3:16:1691:2045#0/1  
Y`V^^`^a\_T`^b\_bb`a^[G[X\_a`JabbK^\_VWDSY\_  
@HWI-EAS443:3:28:857:1190#0/1  
GGGCAAGAATACTGACATCAGAGTCACAGCCGGCAATAAC  
+HWI-EAS443:3:28:857:1190#0/1  
]WOVFKLSTWR]MV^ZTSY`¥Z[G`\_TFMYFQ]SGSYUXS  
@HWI-EAS443:3:33:830:49#0/1  
GGCAAGAATACTGACATCAGAGTCACAGCTGGGAATAACA  
+HWI-EAS443:3:33:830:49#0/1  
^TZ`[] [W¥Z\_]XZ]XP\_XV[BBBBBBBBBBBBBBBBBBBB  
@HWI-EAS443:3:39:493:1078#0/1  
AAACATAGCAAGAAGAGCAGCAGTGTGACAGACCCATTA

+HWI-EAS443:3:39:493:1078#0/1  
\_Za^`ba\_]V`a\_¥S]aaa`aY]`NY¥X¥XN[T`\_WYVY  
@HWI-EAS443:3:43:581:431#0/1  
AACCTGGTCATGCAGATCTCAATGCCAAGGAGGCACAGG  
+HWI-EAS443:3:43:581:431#0/1  
¥aaZ^\_ababa\_`^ababa[`bXaaa\_]ba\_ba[a\_`b`  
@HWI-EAS443:3:64:1142:1191#0/1  
TAGAAACATAGTAAGAAGAGCAGCAGTGTTAGCAGACCA  
+HWI-EAS443:3:64:1142:1191#0/1  
]¥Z^\_ZV¥^\_ZYQ¥`[W\_Q^`^YV]\_VRMNTTSBBBBBBB  
@HWI-EAS443:3:69:1098:667#0/1  
GCTGGCAATAACAAAAGAGAAGAAAGCAGAGCTCCAGGAT  
+HWI-EAS443:3:69:1098:667#0/1  
`XONU¥YRPTRB BBBB BBBB BBBB BBBB BBBB BBBB  
@HWI-EAS443:3:84:1393:525#0/1  
CGCTGCTAGAAACATAGTAAGAAGAGCAGCAGTGTTAGCA  
+HWI-EAS443:3:84:1393:525#0/1  
\_L¥aZZ¥ab]ab¥¥a^\_b`]b`]`aWN\_a`a¥S]UEPSVW  
@HWI-EAS443:3:88:709:50#0/1  
CTTCTTTCTTCTGTTTTGTTATTGCCAGCTGTGACTCTGA  
+HWI-EAS443:3:88:709:50#0/1  
``aS\_\_`W^¥a[FV]aS`X¥`^QNZNX]^TORPGXaY^aY  
@HWI-EAS443:3:67:1308:368#0/1  
GCTGCTAGAAACATAGTAAGAAGAGCAGCAGTGTCAGGAG  
+HWI-EAS443:3:67:1308:368#0/1  
`aa^Ra\_\_MZ¥ZT]UaYU]aZVXP]V[[U^ZEXHVU¥KXP  
@HWI-EAS443:3:14:792:1396#0/1  
CGCTGCTAGAAACATAGTANGAAGAGCAGCAGTGTCAGCA  
+HWI-EAS443:3:14:792:1396#0/1  
aa`OSTaTTPRYXNY`ZYYDWYXTK^`VZ^UVYPYNZYB  
@HWI-EAS443:3:25:1644:1158#0/1  
AGCTGGCAATAACAAAAGAGAAGAAAGANGAGCTCCAGGA  
+HWI-EAS443:3:25:1644:1158#0/1  
ab^bababbbbabbbbaabaaaaab`^D]`a^b\_aaaa`  
@HWI-EAS443:3:94:1424:1774#0/1  
CTAGAAACATAGTAAGANGAGCAGCAGTGTCAGCAGACCC  
+HWI-EAS443:3:94:1424:1774#0/1  
a`aU\_`b\_a\_`\_a`a[DY`baaaY^bPb^\_]JZ``RRY  
@HWI-EAS443:3:18:1611:273#0/1  
GGTGGCAATAACAAAAGAGAAGAAAGAAGAGCTCCAGGAT  
+HWI-EAS443:3:18:1611:273#0/1  
^ESa`YW\_\_Xa\_aa`]`R[[O^NY¥WT^[XZGPLDO¥YWW  
@HWI-EAS443:3:50:1023:281#0/1  
CGGCTGCTAGAAACATAGTAAGAAGAGCAGCAGTGTCAGC  
+HWI-EAS443:3:50:1023:281#0/1  
\_bba^S\_`XZ`\_H\_¥Z\_T¥]bYaaZUVa]^^¥T]OEXaU  
@HWI-EAS443:3:54:1111:976#0/1  
GGAACATAGTAAGAAGAGCAGCAGTGTCAGCAGACCCATT  
+HWI-EAS443:3:54:1111:976#0/1  
YH¥VSbaa\_LO\_VV^^¥`]¥aaaaS`\_]\_W^¥Z\_¥I¥NYY`



+HWI-EAS443:3:54:1723:669#0/1  
`]T]\_Uba`¥aaaU`a\_a[baba]aa\_a[RSO^MR[P]Y  
@HWI-EAS443:3:55:92:1079#0/1  
CGTGGGGCAAGAATACTGACATCAGAGTCACAGCTGGCA  
+HWI-EAS443:3:55:92:1079#0/1  
ab`aabaaaaa`aa`aaa\_`\_aa]\_[V\_\_`\_YY\_]R  
@HWI-EAS443:3:57:1190:267#0/1  
CTGGGGCAAGAATACTGACATCAGAGTCACAGCTGGCAA  
+HWI-EAS443:3:57:1190:267#0/1  
abbbbababbaabbaaba`ab`aab\_aa`aa^ab\_^`  
@HWI-EAS443:3:57:1596:413#0/1  
GCAATAACAAAAGAGAAGAAAGAAGAGCTCCAGGATTGTC  
+HWI-EAS443:3:57:1596:413#0/1  
a]WTZ^RFXQXN[WaS\_b[MZaZT`TZZ]ZJGYMV`XVWB  
@HWI-EAS443:3:63:1047:487#0/1  
TGCTCTTCTTTCTTCTTTTTGTTATTGCCAGCTGTGACT  
+HWI-EAS443:3:63:1047:487#0/1  
Sa\_bY`babbababbbb`ab^]b`ba`\_^`bbb`b\_  
@HWI-EAS443:3:6:1775:1840#0/1  
TGCTGGCAATAACAAAAGAGAAGAAAGAAGAGCTCCAGGA  
+HWI-EAS443:3:6:1775:1840#0/1  
¥`a`a`\_`a`a`a`^aabbbaab^aaba^baaX`UXa¥UY  
@HWI-EAS443:3:70:1003:677#0/1  
GGCTGCTAGAAACATAGTAAGAAGAGCAGCAGTGTGAGCA  
+HWI-EAS443:3:70:1003:677#0/1  
aa[bab\_aabbaabbbbbbbbbbaabbbbaaPa\_`ba`]  
@HWI-EAS443:3:76:293:98#0/1  
TGCTCTTCTTTCTTCTTTTTGTTATTGCCAGCTGTGACT  
+HWI-EAS443:3:76:293:98#0/1  
ab`a]a`abaaa`a`a`aaaab`aaa\_`\_\_^\_\_\_`V\_VUY  
@HWI-EAS443:3:76:464:824#0/1  
TGCTAGAAACATAGTAAGAAGAGCAGCAGTGTGAGCA  
+HWI-EAS443:3:76:464:824#0/1  
ZXa`\_R[Z\_\_Q[¥a`^^\_a`^[\_a^]]HRZ\_`\_ZHRXD  
@HWI-EAS443:3:7:940:1652#0/1  
AGGGGGCAAGAATACTGACATCAGAGTCACAGCTGGCAAT  
+HWI-EAS443:3:7:940:1652#0/1  
aabb\_a\_b`babab\_abaSbba`¥\_a`\_a`aV^\_\_\_\_a^  
@HWI-EAS443:3:83:1120:336#0/1  
AAGCTGGCAATAACAAAAGAGAAGAAAGAAGAGCTCCAGG  
+HWI-EAS443:3:83:1120:336#0/1  
``\_`b\_`]``Ya]`b`\_^\_]D[ba`abbaaaaYb\_`aaa  
@HWI-EAS443:3:87:1501:1576#0/1  
GGGGGGCAAGAATACTGACATCAGAGTCACAGCTGGCAAT  
+HWI-EAS443:3:87:1501:1576#0/1  
a`^babaababbbb\_bbaa`aaabaa][aaaa¥a\_a\_a`  
@HWI-EAS443:3:88:382:711#0/1  
CGCTGGCAATAACAAAAGAGAAGAAAGAAGAGCTCCAGGA  
+HWI-EAS443:3:88:382:711#0/1  
aaaaabbaaaababaaab[a`aaa`aa`aa`a```\_aa`



@HWI-EAS443:3:94:1622:298#0/1  
CGCTGGCAATAACAAAAGAGAAGAAAGAAGAGCTCCAGGA  
+HWI-EAS443:3:94:1622:298#0/1  
`aSbaa`aabb^\_baa\_aaaa`\_aaaa\_\_a^HXSXV  
@HWI-EAS443:3:94:631:887#0/1  
GGCTGCTAGAAACATAGTAAGAAGAGCAGCAGTGTCAGCA  
+HWI-EAS443:3:94:631:887#0/1  
ab`a`aa^aabbbaaaa\_a`a\_X`aa]^`aa`M]^`^`R^  
@HWI-EAS443:3:100:538:1175#0/1  
CAAGAATACTGACATCAGAGTCACAGCTGGCAATAACAAA  
+HWI-EAS443:3:100:538:1175#0/1  
Oabbbb`\_a\_abbbabba`b\_b`bba[a\_¥]^a`bbab\_b  
@HWI-EAS443:3:10:1221:1049#0/1  
ATCAGAGTCACAGCTGGCAATAACAAAAGAGAAGAAAGAA  
+HWI-EAS443:3:10:1221:1049#0/1  
aaaa\_\_babba\_b¥ba]aaab`b^ababa0a\_\_a\_a\_`aa  
@HWI-EAS443:3:10:467:133#0/1  
CAGCTGGCAATAACAAAAGAGAAGAAAGAAGAGCTCCAGG  
+HWI-EAS443:3:10:467:133#0/1  
[abb\_abaabaabb¥Saab^b\_\_`a`b`ab¥ba^MSba  
@HWI-EAS443:3:10:565:936#0/1  
GAGTCACAGCTGGCAATAACAAAAGAGAAGAAAGAAGAGC  
+HWI-EAS443:3:10:565:936#0/1  
aWaS`\_a\_\_aaaa\_`^aaaT\_a^`aW¥\_Wa`]^`0^`^¥XS  
@HWI-EAS443:3:11:1134:1389#0/1  
TCGCTGCTAGAAACATAGTAAGAAGAGCAGCAGTGTCAGC  
+HWI-EAS443:3:11:1134:1389#0/1  
^b`ab¥aa`\_\_a`aaa`aa\_`aaa\_a]a^U`b`]^¥[aZ`  
@HWI-EAS443:3:11:1724:791#0/1  
GCTGGCAATAACAAAAGAGAAGAAAGAAGAGCTCCAGGAT  
+HWI-EAS443:3:11:1724:791#0/1  
RW`^`¥\_¥a¥\_T0^S^`^Xa]OX[¥]TYWUS[[PT`^Y\_  
@HWI-EAS443:3:11:330:694#0/1  
TAGAAACATAGTAAGAAGAGCAGCAGTGTCAGCAGACCCA  
+HWI-EAS443:3:11:330:694#0/1  
aaa]a`aaba\_`a`a\_a\_aaaa\_adWaZ¥`^X^\_]\_]\_\_  
@HWI-EAS443:3:11:67:964#0/1  
GGGCAAGAATACTGACATCAGAGTCACAGCTGGCAATAAC  
+HWI-EAS443:3:11:67:964#0/1  
aabb]aa[a`baaaaabbbbaaa\_aaaaaa\_\_a]X^`a]  
@HWI-EAS443:3:12:320:801#0/1  
AGCTGGCAATAACAAAAGAGAAGAAAGAAGAGCTCCAGGA  
+HWI-EAS443:3:12:320:801#0/1  
abbababb\_bbbbbba^aaaaababa`Za`aaa``aba`  
@HWI-EAS443:3:12:816:1232#0/1  
GGCAAGAATACTGACATCAGAGTCACAGCTGGCAATAACA  
+HWI-EAS443:3:12:816:1232#0/1  
`a¥Q]a¥0^a]^Y\_^YVS`WN[FUNTVPTRPRW[LMU[FW  
@HWI-EAS443:3:14:1502:1817#0/1  
GGGCAAGAATACTGACATCAGAGTCACAGCTGGCAATAA

+HWI-EAS443:3:14:1502:1817#0/1  
aa[^]^]aba\_a\_\_aaabaaa]`\_Y^aU\_a^\_\_\_\_^^`a\_\_  
@HWI-EAS443:3:14:520:62#0/1  
ATTGCCAGCTGTGACTCTGATGTCAGTATTCTTGCCCCCA  
+HWI-EAS443:3:14:520:62#0/1  
aaab\_^aZ¥Z`^a\_Xa]VLU]aUZ¥`V\_^ZVZX]VXVYUX  
@HWI-EAS443:3:14:996:800#0/1  
CTGGCAATAACAAAAGAGAAGAAAGAAGAGCTCCAGGATT  
+HWI-EAS443:3:14:996:800#0/1  
]ZZOTSa[ZaQ0\_^]aV`SLRPHQ^U¥¥M`JMWDT`^RPP  
@HWI-EAS443:3:15:1434:520#0/1  
GCTGGCAATAACAAAAGAGAAGAAAGAAGAGCTCCAGGAT  
+HWI-EAS443:3:15:1434:520#0/1  
`^X\_V]\_b`aaR`Y[\_`X][[a]``\_]`¥\_\_\_\_X\_Y^]\_\_  
@HWI-EAS443:3:15:452:1778#0/1  
AAGAATACTGACATCAGAGTCACAGCTGGCAATAACAAAA  
+HWI-EAS443:3:15:452:1778#0/1  
a¥SN¥]a`¥^¥][T¥P[]a[Z¥\_`XP^]Ia^ZT\_a^]UZ\_  
@HWI-EAS443:3:16:1124:905#0/1  
CAAGAATACTGACATCAGAGTCACAGCTGGCAATAACAAA  
+HWI-EAS443:3:16:1124:905#0/1  
abbbbabbbbaaaaaaaa\_a`a`a``aa`aa``a^a`\_  
@HWI-EAS443:3:16:412:565#0/1  
GCTGGCAATAACAAAAGAGAAGAAAGAAGAGCTCCAGGAT  
+HWI-EAS443:3:16:412:565#0/1  
aaYa`a[TU\_^`[W[U[U^RLW[UOX¥]^ZGT]`Y[^\_Y]  
@HWI-EAS443:3:17:962:1783#0/1  
TGGCAATAACAAAAGAGAAGAAAGAAGAGCTCCAGGATTG  
+HWI-EAS443:3:17:962:1783#0/1  
a`Va^NJVVQ^¥Z]XYOWaa]abV^[L]QV^XU]QU¥W`¥  
@HWI-EAS443:3:18:1522:1627#0/1  
GGCAAGAATACTGACATCAGAGTCACAGCTGGCAATAACA  
+HWI-EAS443:3:18:1522:1627#0/1  
Xbb\_bb\_\_K¥\_`b¥aab[XYa^aba\_bb\_]`\_^\_a\_a\_a  
@HWI-EAS443:3:18:779:1852#0/1  
AGAATACTGACATCAGAGTCACAGCTGGCAATAACAAAAG  
+HWI-EAS443:3:18:779:1852#0/1  
aaaa\_a``a]W`aZ\_^W`]^\_WT]]]]^U^\_\_Y\_]\_]X  
@HWI-EAS443:3:19:1292:1798#0/1  
GCTAGAAACATAGTAAGAAGAGCAGCAGTGTGAGCAGACC  
+HWI-EAS443:3:19:1292:1798#0/1  
\_a`a]aaabaa¥^]a`a`a`a``R`YYV]V]^JHH  
@HWI-EAS443:3:19:365:1269#0/1  
GGGGCAAGAATACTGACATCAGAGTCACAGCTGGCAATAA  
+HWI-EAS443:3:19:365:1269#0/1  
a\_GU^^`babX[`¥Z^ab\_aa[\_\_\_]\_[^\_aTU[^[SFQ`Q  
@HWI-EAS443:3:1:1540:943#0/1  
GAAACATAGTAAGAAGAGCAGCAGTGTGAGCAGACCCATT  
+HWI-EAS443:3:1:1540:943#0/1  
\_¥IZ`]Z]ZYaYZP`P`NZb`¥]NXY]ZTVU[BBBBBBBB

@HWI-EAS443:3:1:226:109#0/1  
GCAATAACAAAAGAGAAGAAAGAAGAGCTCCAGGATTGTA  
+HWI-EAS443:3:1:226:109#0/1  
a`\_¥OW][a\_\_\_\_]`[``[Y]W^]^[ ]][ ]YZ^[ [WYBBB  
@HWI-EAS443:3:20:300:781#0/1  
CAAGAATACTGACATCAGAGTCACAGCTGGCAATAACAAA  
+HWI-EAS443:3:20:300:781#0/1  
^¥b`a``bbbbbbbabbbb`aab\_¥] ]abaaaaaa`Ta  
@HWI-EAS443:3:20:979:535#0/1  
CTGGCAATAACAAAAGAGAAGAAAGAAGAGCTCCAGGATT  
+HWI-EAS443:3:20:979:535#0/1  
a`¥YUUY`ZZ\_V\_UWXP`aWI¥ZS^ZZS^[X][YO[`MPW  
@HWI-EAS443:3:21:591:910#0/1  
GCTGGCAATAACAAAAGAGAAGAAAGAAGAGCTCCAGGAT  
+HWI-EAS443:3:21:591:910#0/1  
aba`bbabbbbabbb`babbaaabbaab`aaa`abbba`a  
@HWI-EAS443:3:21:731:427#0/1  
CTGCTAGAAACATAGTAAGAAGAGCAGCAGTGTCAGCAGA  
+HWI-EAS443:3:21:731:427#0/1  
aaaaaaaa`aaa\_`^a]`a\_`¥`a^`a]` ]VZ^P^][  
@HWI-EAS443:3:22:1351:771#0/1  
TGCTAGAAACATAGTAAGAAGAGCAGCAGTGTCAGCAGAC  
+HWI-EAS443:3:22:1351:771#0/1  
abaaabaab`aaaa`aab^aaa\_\_aa\_`a]a\_Y^aU^\_UH  
@HWI-EAS443:3:23:1118:706#0/1  
GGGGCAAGAATACTGACATCAGAGTCACAGCTGGCAATAA  
+HWI-EAS443:3:23:1118:706#0/1  
ab]baba`abaa\_b\_`aaaaab]``aa`¥```\_`\_a`a``  
@HWI-EAS443:3:23:1418:1601#0/1  
ATCGCTGCTAGAAACATAGTAAGAAGAGCAGCAGTGTCAG  
+HWI-EAS443:3:23:1418:1601#0/1  
aa\_a\_aa`a`aaaW`a^aW]\_a\_\_` [aW`aX\_`W`WW]]  
@HWI-EAS443:3:23:803:834#0/1  
CGCTGCTAGAAACATAGTAAGAAGAGCAGCAGTGTCAGCA  
+HWI-EAS443:3:23:803:834#0/1  
abbab`aa`W¥abaa```baaZ`\_a`aaaa\_`Za\_`\_`R]  
@HWI-EAS443:3:25:1321:1360#0/1  
AAGAATACTGACATCAGAGTCACAGCTGGCAATAACAAAA  
+HWI-EAS443:3:25:1321:1360#0/1  
a`aabbbbabbbbab`a^abaa^`aa`¥`aaaaa` ]a  
@HWI-EAS443:3:25:189:456#0/1  
CTGGAGCTCTTCTTTCTTCTTTTGTATTGCCAGCTGT  
+HWI-EAS443:3:25:189:456#0/1  
aa`VS\_]ZT¥abbaXQ\_¥^aW]\_]U][a`¥Y` [ `a[]UTN  
@HWI-EAS443:3:25:734:604#0/1  
GCTGGCAATAACAAAAGAGAAGAAAGAAGAGCTCCAGGAT  
+HWI-EAS443:3:25:734:604#0/1  
aa`aa\_a^`aaaaaa` ]^` `a\_`^`^`\_`^`\_`^`\_`Z` [ ]^]  
@HWI-EAS443:3:25:75:911#0/1  
GCTGGCAATAACAAAAGAGAAGAAAGAAGAGCTCCAGGAT



@HWI-EAS443:3:35:1386:1604#0/1  
GATTATCGCTGCTAGAAACATAGTAAGAAGAGCAGCAGTG  
+HWI-EAS443:3:35:1386:1604#0/1  
a]bab]Y\_aaa\_a\_¥^aUa`a\_`^\_TaYa\_aaaaY`aaG`  
@HWI-EAS443:3:35:58:375#0/1  
GCTGGCAATAACAAAAGAGAAGAAAGAAGAGCTCCAGGAT  
+HWI-EAS443:3:35:58:375#0/1  
abbaab]aa`\_aba`aaaaa`\_aaa`\_Y`a\_aa```\_`^  
@HWI-EAS443:3:36:997:742#0/1  
CTTCTTTCTTCTTTTTGTTATTGCCAGCTGTGACTCTGA  
+HWI-EAS443:3:36:997:742#0/1  
abbabbbbbbbbbbbbabab`aaaab`\_`  
@HWI-EAS443:3:37:1175:371#0/1  
AGCTCTTCTTTCTTCTTTTTGTTATTGCCAGCTGTGACT  
+HWI-EAS443:3:37:1175:371#0/1  
aa\_a\_\_\_¥[`a`a]a[`aaa````a`]`U\_\_a\_\_Z\_\_]\_  
@HWI-EAS443:3:38:862:705#0/1  
TACAATCCTGGAGCTCTTCTTTCTTCTTTTTGTTATTGC  
+HWI-EAS443:3:38:862:705#0/1  
``a`\_]abaaaYa]aRaa^a`aaa[a`a`^`\_\_`^\_a`Y  
@HWI-EAS443:3:39:1302:984#0/1  
GCTGGCAATAACAAAAGAGAAGAAAGAAGAGCTCCAGGAT  
+HWI-EAS443:3:39:1302:984#0/1  
]0[]\_aaaaa[] [Y^¥Q]RP\_Y`Z]¥[^\_¥MV¥¥VVTUU  
@HWI-EAS443:3:42:292:516#0/1  
AGCTGGCAATAACAAAAGAGAAGAAAGAAGAGCTCCAGGA  
+HWI-EAS443:3:42:292:516#0/1  
Sabbas`bYK[`\_aSS`b[XX```ababa`ba`aa`b`b  
@HWI-EAS443:3:43:1153:1908#0/1  
GGGCAAGAATACTGACATCAGAGTCACAGCTGGCAATAAC  
+HWI-EAS443:3:43:1153:1908#0/1  
W[a`b`¥`\_a`ba`ab`Yaba`^`^`Ybaaaaa^Ua```a  
@HWI-EAS443:3:43:1291:1753#0/1  
GCTGGCAATAACAAAAGAGAAGAAAGAAGAGCTCCAGGAT  
+HWI-EAS443:3:43:1291:1753#0/1  
ababb`bbbb`bbbaab`aaaabaaaaa^`\_¥`aa`\_  
@HWI-EAS443:3:43:1692:1176#0/1  
GCTGACACTGCTCTTCTTACTATGTTTCTAGCAGCGA  
+HWI-EAS443:3:43:1692:1176#0/1  
a`aaaabaaa`a`\_`\_a]aa`^a\_aa]\_a^\_] [XZ`W^]  
@HWI-EAS443:3:44:174:1412#0/1  
GGGCAAGAATACTGACATCAGAGTCACAGCTGGCAATAAC  
+HWI-EAS443:3:44:174:1412#0/1  
aabbbbbbbbbbaaaaababaaaa`aa\_aba[`aaaa`  
@HWI-EAS443:3:46:1435:1391#0/1  
GGCAAGAATACTGACATCAGAGTCACAGCTGGCAATAACA  
+HWI-EAS443:3:46:1435:1391#0/1  
aaabbbbbbbabba\_aa\_aa\_b`aaaa\_aaa[\_aa\_aW\_  
@HWI-EAS443:3:46:39:680#0/1  
GGGGCAAGAATACTGACATCAGAGTCACAGCTGGCAATA

+HWI-EAS443:3:46:39:680#0/1  
abbaab`ab``b\_aaabaaa\_baaa``a\_aa\_``a\_[\_aa  
@HWI-EAS443:3:46:880:282#0/1  
GTGGGGGCAAGAATACTGACATCAGAGTCACAGCTGGCAA  
+HWI-EAS443:3:46:880:282#0/1  
a`b``aaa`aa`aa\_\_`a\_\_\_\_\_``a\_^W`\_]\_^Y]`\_UY]  
@HWI-EAS443:3:47:1592:702#0/1  
CTGCTAGAAACATAGTAAGAAGAGCAGCAGTGTCTCAGCAGA  
+HWI-EAS443:3:47:1592:702#0/1  
`bbabbbbbbbbabbaaabab`aa\_ba]b[[]adW¥`]  
@HWI-EAS443:3:48:46:1347#0/1  
GTTTGATTATCGCTGCTAGAAACATAGTAAGAAGAGCAGC  
+HWI-EAS443:3:48:46:1347#0/1  
^Za¥V`aaaaa`a`^`^`]]`\_`\_a]X]a\_WV¥^Z[0^¥G  
@HWI-EAS443:3:49:1042:567#0/1  
GGCAAGAATACTGACATCAGAGTCACAGCTGGCAATAACA  
+HWI-EAS443:3:49:1042:567#0/1  
X`U`abb\_bb]bbaaY\_a`¥¥b]\_aabb\_aa`abab]`I`  
@HWI-EAS443:3:49:1708:755#0/1  
GGCAAGAATACTGACATCAGAGTCACAGCTGGCAATAACA  
+HWI-EAS443:3:49:1708:755#0/1  
abaaaaaaaa\_aaa\_`a`^`a`a^\_a`\_`\_]\_`Z¥¥\_\_\_]TZ  
@HWI-EAS443:3:50:104:1236#0/1  
TGGGGCAAGAATACTGACATCAGAGTCACAGCTGGCAAT  
+HWI-EAS443:3:50:104:1236#0/1  
aaYZaaa``baba`R`b\_aba^aa`aSa]`^b]Yab\_PXa  
@HWI-EAS443:3:50:1107:207#0/1  
CAAGAATACTGACATCAGAGTCACAGCTGGCAATAACAAA  
+HWI-EAS443:3:50:1107:207#0/1  
`bbbbbbbabbbbabbbbababaaaaabb^`aaaa]aaa  
@HWI-EAS443:3:50:1585:1147#0/1  
CTGGCAATAACAAAAGAGAAGAAAGAAGAGCTCCAGGATT  
+HWI-EAS443:3:50:1585:1147#0/1  
abab]^^`\_b\_bba`bZYZ`[[¥\_aaaa\_a^aYKVaa\_a`  
@HWI-EAS443:3:50:1639:2038#0/1  
CTGGCAATAACAAAAGAGAAGAAAGAAGAGCTCCAGGATT  
+HWI-EAS443:3:50:1639:2038#0/1  
abbbbbbabbbbbbbaabaabaababbabbba]abbaaa  
@HWI-EAS443:3:51:259:1125#0/1  
GACATCAGAGTCACAGCTGGCAATAACAAAAGAGAAGAAA  
+HWI-EAS443:3:51:259:1125#0/1  
abbaaaaaaaaaababa\_`\_ab`^a]bbaabba\_abaaaaaaaa  
@HWI-EAS443:3:51:930:253#0/1  
CTGACATCAGAGTCACAGCTGGCAATAACAAAAGAGAAGA  
+HWI-EAS443:3:51:930:253#0/1  
abbbbbbabbbabb`ba`bb`\_abbabaababaabaaaa  
@HWI-EAS443:3:52:147:678#0/1  
CAGCTGGCAATAACAAAAGAGAAGAAAGAAGAGCTCCAGG  
+HWI-EAS443:3:52:147:678#0/1  
a^abaa^a``aa`aaaaabaa``a¥aaa`aa\_a\_`\_`\_\_

@HWI-EAS443:3:52:771:1626#0/1  
GGCAAGAATACTGACATCAGAGTCACAGCTGGCAATAACA  
+HWI-EAS443:3:52:771:1626#0/1  
abaaaaababaa``a`baa\_[]`\_\_adW``\_¥`a\_a`T`  
@HWI-EAS443:3:53:59:1668#0/1  
GAATACTGACATCAGAGTCACAGCTGGCAATAACAAAAGA  
+HWI-EAS443:3:53:59:1668#0/1  
aab\_bbbabbbbabab`aaaaaaa\_aaaaa`aaa`]a`\_  
@HWI-EAS443:3:53:956:1315#0/1  
CGCTGCTAGAAACATAGTAAGAAGAGCAGCAGTGTGAGCA  
+HWI-EAS443:3:53:956:1315#0/1  
aba`bb`bbbaa\_ab`ab\_abaababaaab`aaaW[Ra][  
@HWI-EAS443:3:54:971:1084#0/1  
CTTTTGTATTGCCAGCTGTGACTCTGATGTCAGTATTCT  
+HWI-EAS443:3:54:971:1084#0/1  
abbbbbbabbbba`\_ab`bbbaa\_\_b\_aa^a`]`^`¥aaa¥a  
@HWI-EAS443:3:55:1221:1501#0/1  
GCTGGCAATAACAAAAGAGAAGAAAGAAGAGCTCCAGGAT  
+HWI-EAS443:3:55:1221:1501#0/1  
a\_aaaa\_aaaaW`\_`Y[a\_a`^`\_]`Z[dW`YY^`\_]`\_  
@HWI-EAS443:3:55:1295:1709#0/1  
GGCAAGAATACTGACATCAGAGTCACAGCTGGCAATAACA  
+HWI-EAS443:3:55:1295:1709#0/1  
\_G¥¥W[¥aa]a¥[XMY^^¥a]ZO[OLV]R¥¥^Y[]\_\_ZGY  
@HWI-EAS443:3:55:84:1198#0/1  
CTAGAAACATAGTAAGAAGAGCAGCAGTGTGAGCAGACCC  
+HWI-EAS443:3:55:84:1198#0/1  
aa]\_]a[[]aa`aa^`]a\_\_\_\_\_`]``P`R¥Z[RX¥¥V¥Y  
@HWI-EAS443:3:56:406:987#0/1  
GCTGCTAGAAACATAGTAAGAAGAGCAGCAGTGTGAGCAG  
+HWI-EAS443:3:56:406:987#0/1  
a]ZUUXO¥QY¥XVUN^V^^`YR[^`[\_]`^¥OQKTP^ZZ^  
@HWI-EAS443:3:56:719:246#0/1  
CAGCTGGCAATAACAAAAGAGAAGAAAGAAGAGCTCCAGG  
+HWI-EAS443:3:56:719:246#0/1  
aab`bbbabbbbabbbabbaa`b\_aabaaaab^^¥^`aa  
@HWI-EAS443:3:58:341:1590#0/1  
CAATCCTGGAGCTCTTCTTTCTTCTTTTTGTTATTGCCA  
+HWI-EAS443:3:58:341:1590#0/1  
`¥U`[\_V^\_]U¥^OY]ab\_]RQ[a`¥[aa]aaaa^SZ¥  
@HWI-EAS443:3:58:797:63#0/1  
GGGGGCAAGAATACTGACATCAGAGTCACAGCTGGCAATA  
+HWI-EAS443:3:58:797:63#0/1  
abbbbaabababaaaaaaaab`aa`b`a\_``a`]`aa^^\_\_¥  
@HWI-EAS443:3:59:1232:1040#0/1  
GCCAGCTGTGACTCTGATGTCAGTATTCTTGCCCCACTT  
+HWI-EAS443:3:59:1232:1040#0/1  
aa`a`aa¥a][\_a¥]\_``a`a`aaaa]Na\_\_YX]\_^  
@HWI-EAS443:3:59:294:619#0/1  
GCCAGCTGTGACTCTGATGTCAGTATTCTTGCCCCACTT





@HWI-EAS443:3:67:980:1133#0/1  
GCTGGCAATAACAAAAGAGAAGAAAGAAGAGCTCCAGGAT  
+HWI-EAS443:3:67:980:1133#0/1  
aa\_\_ZVZ^^]`X`a`aaa\_a\_Z[b\_¥QS\_a\_W\_`R```¥  
@HWI-EAS443:3:67:990:1369#0/1  
ATCGCTGCTAGAAACATAGTAAGAAGAGCAGCAGTGTCAG  
+HWI-EAS443:3:67:990:1369#0/1  
a]¥X` `\_\_` `aa]\_\_]XU^\_\_\_\_] ^¥a\_\_\_\_^\_X^VT¥X  
@HWI-EAS443:3:68:1173:174#0/1  
GGGCAAGAATACTGACATCAGAGTCACAGCTGGCAATAA  
+HWI-EAS443:3:68:1173:174#0/1  
abaa]aaaa`\_\_aaa^\_aWaaa\_¥a^^\_]OV\_]OT^X]]  
@HWI-EAS443:3:69:1190:1456#0/1  
CTTCTTTCTTCTTTTTGTTATTGCCAGCTGTGACTCTGA  
+HWI-EAS443:3:69:1190:1456#0/1  
abbbbbbbbbbbbabbb`abbb`aab` `baa¥a`aaaa`  
@HWI-EAS443:3:69:1718:1055#0/1  
CTCTTCTTTCTTCTTTTTGTTATTGCCAGCTGTGACTCT  
+HWI-EAS443:3:69:1718:1055#0/1  
Q\_babbba\_0aab[a\_abaaa^`bbba`^aabZ`^aabab  
@HWI-EAS443:3:69:456:954#0/1  
CGCTGCTAGAAACATAGTAAGAAGAGCAGCAGTGTCAGCA  
+HWI-EAS443:3:69:456:954#0/1  
abb\_Z\_`[W`K¥a\_aY^]a`aaa\_\_a\_aaa` `U¥U\_\_Y`U  
@HWI-EAS443:3:6:1587:1914#0/1  
GCAAGAATACTGACATCAGAGTCACAGCTGGCAATAACAA  
+HWI-EAS443:3:6:1587:1914#0/1  
a¥aaa¥`\_`Y\_a0¥^¥]\_\_^XXX[W¥TUXV[Z]WZXYXWX  
@HWI-EAS443:3:6:684:170#0/1  
GCTGGCAATAACAAAAGAGAAGAAAGAAGAGCTCCAGGAT  
+HWI-EAS443:3:6:684:170#0/1  
aaS` `XZ` `¥aZJ\_`TaT`aU`\_^a` ¥ZYU`G]SK¥\_QBB  
@HWI-EAS443:3:71:139:632#0/1  
CGCTGCTAGAAACATAGTAAGAAGAGCAGCAGTGTCAGCA  
+HWI-EAS443:3:71:139:632#0/1  
\_U\_aaba\_aa`a`^`X\_^aa` `^a\_a\_aa`aa]`Z¥\_[VO  
@HWI-EAS443:3:71:1477:1962#0/1  
AGAATACTGACATCAGAGTCACAGCTGGCAATAACAAAAG  
+HWI-EAS443:3:71:1477:1962#0/1  
`a`ab`bb`baaa`b^a`]aaaaYW`aa` `aaaa^`aa`R  
@HWI-EAS443:3:72:1207:753#0/1  
GCTGGCAATAACAAAAGAGAAGAAAGAAGAGCTCCAGGAT  
+HWI-EAS443:3:72:1207:753#0/1  
X\_^R[^abbb`] `Vbbbb` ` ` \_bbbabbbXVTYX`] ` `ba  
@HWI-EAS443:3:72:96:1105#0/1  
GGCAAGAATACTGACATCAGAGTCACAGCTGGCAATAACA  
+HWI-EAS443:3:72:96:1105#0/1  
aab`b` `Y`aaaab`aaaa`\_]aaaaaY¥¥\_a`a^aa`\_  
@HWI-EAS443:3:73:410:367#0/1  
GCTGGCAATAACAAAAGAGAAGAAAGAAGAGCTCCAGGAT



@HWI-EAS443:3:78:166:576#0/1  
AGCTGGCAATAACAAAAGAGAAGAAAGAAGAGCTCCAGGA  
+HWI-EAS443:3:78:166:576#0/1  
K¥a`a¥``aYWRQ`b¥WWab]Z¥^`]]]Z]a]aa`\_KX`]  
@HWI-EAS443:3:78:344:925#0/1  
AGCTCTTCTTTCTTCTTTTTGTTATTGCCAGCTGTGACT  
+HWI-EAS443:3:78:344:925#0/1  
aaaa\_aa\_aa``aaa^aa\_```Z\_a\_]aZ\_]\_X]SX]WX  
@HWI-EAS443:3:78:793:1891#0/1  
GGCAAGAATACTGACATCAGAGTCACAGCTGGCAATAACA  
+HWI-EAS443:3:78:793:1891#0/1  
^¥[^bVZ^\_LV]aaZaW]PEWYN`\_\_W]RP[OU[`QY`X¥  
@HWI-EAS443:3:79:1410:113#0/1  
ACCAAAGTTTGATTATCGCTGCTAGAAACATAGTAAGAAG  
+HWI-EAS443:3:79:1410:113#0/1  
a`¥a`\_b¥a\_a\_```a\_a\_\_`W\_\_^X^XHZ\_\_`X]¥XW^]  
@HWI-EAS443:3:7:1421:158#0/1  
GGGGGCAAGAATACTGACATCAGAGTCACAGCTGGCAATA  
+HWI-EAS443:3:7:1421:158#0/1  
S\_^W\_R^baba\_[aa[0Ya¥SS`R^^`RYG\_RZ`URU]]Z  
@HWI-EAS443:3:80:1578:73#0/1  
GGCAAGAATACTGACATCAGAGTCACAGCTGGCAATAACA  
+HWI-EAS443:3:80:1578:73#0/1  
[^SbV`J^\_QaaaQa`b\_\_\_a]R]aWSaUYa[NN\_]GOPO  
@HWI-EAS443:3:81:1044:1937#0/1  
CTGGCAATAACAAAAGAGAAGAAAGAAGAGCTCCAGGATT  
+HWI-EAS443:3:81:1044:1937#0/1  
a¥]Z`^aY]\_baba^aUb[]ZM¥`^`\_a`a\_bZa]¥]][]  
@HWI-EAS443:3:82:1028:1661#0/1  
CCAGCTGTGACTCTGATGTCAGTATTCTTGCCCCACTTC  
+HWI-EAS443:3:82:1028:1661#0/1  
abb`abbabbabbaaab`a`b`a`baab```^X]a¥aa`  
@HWI-EAS443:3:82:1140:747#0/1  
GCTGGCAATAACAAAAGAGAAGAAAGAAGAGCTCCAGGAT  
+HWI-EAS443:3:82:1140:747#0/1  
abaaaababbb^baaaaab`\_baabaababWa[\_`a`a`  
@HWI-EAS443:3:82:1358:714#0/1  
CTGACACTGCTGCTTCTTACTATGTTTCTAGCAGCGAT  
+HWI-EAS443:3:82:1358:714#0/1  
abbbbbbb`bbb`aaabaabbabbbb`bbabbbbab`bba  
@HWI-EAS443:3:82:1517:778#0/1  
GGGGGCAAGAATACTGACATCAGAGTCACAGCTGGCAATA  
+HWI-EAS443:3:82:1517:778#0/1  
X\_YYaababbbbaYbaa`abXbba`[ababb\_aaaaa`a[  
@HWI-EAS443:3:83:1577:378#0/1  
TAGAAACATAGTAAGAAGAGCAGCAGTGTGACAGACCCA  
+HWI-EAS443:3:83:1577:378#0/1  
aab`aaaababaaaaaaa]\_^a]aa]`\_]^VJZWYS]XU  
@HWI-EAS443:3:83:412:439#0/1  
GGGGGCAAGAATACTGACATCAGAGTCACAGCTGGCAATA

+HWI-EAS443:3:83:412:439#0/1  
aYU^abbabbbbabab`aaaab`ab\_aaa\_a`a`]Ya``a  
@HWI-EAS443:3:84:1201:632#0/1  
TGCTGACACTGCTGCTCTTCTTACTATGTTTCTAGCAGCG  
+HWI-EAS443:3:84:1201:632#0/1  
aabbbabaabaaaba\_a\_aa]bba\_aaab`aa`a`a`\_a\_a  
@HWI-EAS443:3:84:462:335#0/1  
GGGCAAGAATACTGACATCAGAGTCACAGCTGGCAATAAC  
+HWI-EAS443:3:84:462:335#0/1  
aaaaaaaaaaaa`aa`aa`a`\_¥a`a`\_`\_^Z^\_¥\_\_X  
@HWI-EAS443:3:86:235:1220#0/1  
GGGGCAAGAATACTGACATCAGAGTCACAGCTGGCAATAA  
+HWI-EAS443:3:86:235:1220#0/1  
a`]b`abaabaX]]abaaa`Z`\_S`a`\_`XZ\_a\_\_a`\_`  
@HWI-EAS443:3:86:324:784#0/1  
GGCAAGAATACTGACATCAGAGTCACAGCTGGCAATAACA  
+HWI-EAS443:3:86:324:784#0/1  
`a\_`]^`^aXH\_aa¥[[a`a`[\_`b^^aaXYa`W^a]\_aGa  
@HWI-EAS443:3:87:611:1951#0/1  
GCTGGCAATAACAAAAGAGAAGAAAGAAGAGCTCCAGGAT  
+HWI-EAS443:3:87:611:1951#0/1  
aa\_`XJ¥babb`aaaZX\_````aa^[G\_a`Z]U\_\_a¥^S  
@HWI-EAS443:3:87:860:1808#0/1  
GCTGGCAATAACAAAAGAGAAGAAAGAAGAGCTCCAGGAT  
+HWI-EAS443:3:87:860:1808#0/1  
a`W`a`\_\_b`b`aaa`]]`]]`\_a`TYa```]]\_\_``\_R\_X  
@HWI-EAS443:3:89:1571:383#0/1  
TGTTGACCAAAGTTTGATTATCGCTGCTAGAAACATAGTA  
+HWI-EAS443:3:89:1571:383#0/1  
`bbbb¥bbbb`abbbbabb\_ZT\_b\_b`baaa`abba]a  
@HWI-EAS443:3:8:738:596#0/1  
ACTGCTGCTCTTCTTACTATGTTTCTAGCAGCGATAATCA  
+HWI-EAS443:3:8:738:596#0/1  
a^Y`a\_a`^X[¥R\_\_\_\_[\_a`aWZ\_\_]ZaNT\_^\_`\_\_^][\_  
@HWI-EAS443:3:90:1164:897#0/1  
AAGAATACTGACATCAGAGTCACAGCTGGCAATAACAAAA  
+HWI-EAS443:3:90:1164:897#0/1  
`¥babaababbabbababb\_\_baabaab`¥aababYbbaa  
@HWI-EAS443:3:90:636:1403#0/1  
CAGCTGGCAATAACAAAAGAGAAGAAAGAAGAGCTCCAGG  
+HWI-EAS443:3:90:636:1403#0/1  
ababababbbba`a^Z\_aab`\_baabaabaaa^aaaaa  
@HWI-EAS443:3:92:72:136#0/1  
AGCTGGCAATAACAAAAGAGAAGAAAGAAGAGCTCCAGGA  
+HWI-EAS443:3:92:72:136#0/1  
\_`bba`a`a^b\_Z]]Z^aa`\_]UQ^aaa^\_YZ\_^VV\_Y[  
@HWI-EAS443:3:93:1440:172#0/1  
GGGGCAAGAATACTGACATCAGAGTCACAGCTGGCAATAA  
+HWI-EAS443:3:93:1440:172#0/1  
a][`[\_a\_a\_a`W\_a]W\_`U\_aU`]VXW^WW[]ZUQVZW`

@HWI-EAS443:3:93:1651:863#0/1  
GGGCAAGAATACTGACATCAGAGTCACAGCTGGCAATAAC  
+HWI-EAS443:3:93:1651:863#0/1  
`Y[aaaa\_¥\_aa\_aa`\_\_¥`\_b]Q[X^¥GX`\_[-]]^S¥  
@HWI-EAS443:3:93:652:1832#0/1  
AGCTGGCAATAACAAAAGAGAAGAAAGAAGAGCTCCAGGA  
+HWI-EAS443:3:93:652:1832#0/1  
a`a\_a`aaa\_baaaa`a`aaaa`\_\_[a`\_\_¥Y[\_`a`^^  
@HWI-EAS443:3:93:994:1481#0/1  
GGGCAAGAATACTGACATCAGAGTCACAGCTGGCAATAAC  
+HWI-EAS443:3:93:994:1481#0/1  
aaababababb`bbaabaab`ba`a\_aa^`aa\_\_aaaa\_  
@HWI-EAS443:3:94:1599:1350#0/1  
GGAGCTCTTCTTTCTTCTTTTGTATTGCCAGCTGTGA  
+HWI-EAS443:3:94:1599:1350#0/1  
]`a]WWW]Z^aaVNaPU`Ya``a]`YNUadWGVaBBBBBB  
@HWI-EAS443:3:96:1470:1312#0/1  
GGCAAGAATACTGACATCAGAGTCACAGCTGGCAATAACA  
+HWI-EAS443:3:96:1470:1312#0/1  
\_babbbbaabb[`b`bbb]bbaY][a`a\_aa]aRa[aaaHb  
@HWI-EAS443:3:97:1151:759#0/1  
GCTGGCAATAACAAAAGAGAAGAAAGAAGAGCTCCAGGAT  
+HWI-EAS443:3:97:1151:759#0/1  
aaab]Zaaa\_aYU]^`a[a^[]]\_[\_]RUYV\_[UT\_Sta  
@HWI-EAS443:3:97:292:746#0/1  
GCTGGCAATAACAAAAGAGAAGAAAGAAGAGCTCCAGGAT  
+HWI-EAS443:3:97:292:746#0/1  
ZW]ZS¥W`a^\_R^a\_Z\_]NY\_¥¥aa`]`\_`WRRLFogwv`  
@HWI-EAS443:3:99:1163:477#0/1  
GGCAAGAATACTGACATCAGAGTCACAGCTGGCAATAACA  
+HWI-EAS443:3:99:1163:477#0/1  
`b`ba`X``aaa`aXaa^aa\_\_U\_^Z]a\_a``XZ¥\_\_`U\_  
@HWI-EAS443:3:99:991:953#0/1  
GGGCAAGAATACTGACATCAGAGTCACAGCTGGCAATAAC  
+HWI-EAS443:3:99:991:953#0/1  
`a`Ybab`bba^`bbb\_bab^bbabbba\_[abaab`a^a¥  
@HWI-EAS443:3:9:1078:744#0/1  
GAGCTCTTCTTTCTTCTTTTGTATTGCCAGCTGTGAC  
+HWI-EAS443:3:9:1078:744#0/1  
aab^a`baababaaa\_b`abbbb`aaa``\_^ab`\_a]^`^  
@HWI-EAS443:3:9:47:1763#0/1  
GCTGGCAATAACAAAAGAGAAGAAAGAAGAGCTCCAGGAT  
+HWI-EAS443:3:9:47:1763#0/1  
¥\_W`U\_a¥ZZ\_N`ZY¥aa`ZXZ\_\_`\_R[¥^`ZZa`]]`  
@HWI-EAS443:3:9:765:546#0/1  
AGCTGGCAATAACAAAAGAGAAGAAAGAAGAGCTCCAGGA  
+HWI-EAS443:3:9:765:546#0/1  
¥¥S\_babaZ^baabb\_Z`ab\_aab^aaba`aaaa`Yab`a  
@HWI-EAS443:3:42:1322:857#0/1  
AACACCCTTGGCCTCGATATCGAAACAGCCACTATTGGTG

+HWI-EAS443:3:42:1322:857#0/1  
``\_WZYQ`\_a¥]VS^[S[a^UV[VBBBBBBBBBBBBBBBB  
@HWI-EAS443:3:79:1199:422#0/1  
GAGAACTGATGAGAATGGGAGACCTTCACTACCTCCAGA  
+HWI-EAS443:3:79:1199:422#0/1  
`¥\_aaaababa¥\_\_`ab^`]^`^`aa`adNaYRZa\_  
@HWI-EAS443:3:80:936:703#0/1  
TCCGATTCTCATCACAGTTTCTCCAAGCGAATCTCTGGAT  
+HWI-EAS443:3:80:936:703#0/1  
aa]FW\_VT`aaXZXWaY]a]Ta`[BBBBBBBBBBBBBBBB  
@HWI-EAS443:3:100:927:996#0/1  
ACCTCGCGCTACCTTTCTGACATGACCATCGAGGAAATGT  
+HWI-EAS443:3:100:927:996#0/1  
[UPVZW^]¥^VELVU^`SIN[[^]]\_IG]IFVZN[^a^BB  
@HWI-EAS443:3:19:1604:295#0/1  
GAGAACTGTGATGAGAATGGGAGACCTTCAGTACCTAAA  
+HWI-EAS443:3:19:1604:295#0/1  
aYORV¥X\_^F[VUaN[WYBBBBBBBBBBBBBBBBBBBB  
@HWI-EAS443:3:25:1658:1023#0/1  
GAAACTGTGATGAGAATGGGAGACATTCACCTCCGGA  
+HWI-EAS443:3:25:1658:1023#0/1  
`^`\_[N¥V`\_]\_S\_Y\_0\_`¥¥¥VYBBBBBBBBBBBBBBBB  
@HWI-EAS443:3:26:574:934#0/1  
TGCCCCCTCTCAGTGAAAGCCCTTAGTAGCATCAAGGTCT  
+HWI-EAS443:3:26:574:934#0/1  
[abb]`abb¥b\_\_YaabaXba`a]U¥Zb`a`\_aaa\_\_V\_]`  
@HWI-EAS443:3:50:1023:1709#0/1  
GGCTGTTTCGATATCGCGCCAAGGGTGTGCCTCTTCT  
+HWI-EAS443:3:50:1023:1709#0/1  
`\_]bbVa`Z\_]\_YOT[aWWWU``VP]IS]bXN^VU\_aGZ\_  
@HWI-EAS443:3:62:1261:861#0/1  
AGCATCAAGGTCTCTAATCGGTTAAATATTACACTGAAGT  
+HWI-EAS443:3:62:1261:861#0/1  
^^bbbbbbbaabaaba^a\_bbaba\_\_aba^^]aa`^`\_  
@HWI-EAS443:3:84:1199:708#0/1  
GTTGCTTTCAATCTGTGCCGCTTTCTTCAATTAACCACC  
+HWI-EAS443:3:84:1199:708#0/1  
a\_a]aZUW`]]Ra\_[TSS\_YGTSX[[TY¥]ZM[X¥LWTW  
@HWI-EAS443:3:91:280:830#0/1  
GCCGCTTTCAATCTGTGCCGCTTTCTTCAATTAACCACA  
+HWI-EAS443:3:91:280:830#0/1  
`OW^W`[XXV\_W]U^0]SS^ZGZXZXZOZUUBBBBBBBB  
@HWI-EAS443:3:96:1178:1877#0/1  
TGAGGAGGGAGCAATAGCTGGAGAAATTCACCATTAGCT  
+HWI-EAS443:3:96:1178:1877#0/1  
Yb^[¥VY`a`UQWa]`]H\_^X\_b]`\_V[UQ^G\_\_^BBBBB  
@HWI-EAS443:3:15:1209:1342#0/1  
GAAAGCCNTTAGTAGCATCAAGGTCTCTAATCGGTTAAAG  
+HWI-EAS443:3:15:1209:1342#0/1  
abbb`a]D]a\_a`aabaab`^`\_`aYaaa`aaX\_aa^`

@HWI-EAS443:3:20:1467:1134#0/1  
CCTTGATGCTACTAAGGGCTNTCACTGAGGAGGGAGCAAT  
+HWI-EAS443:3:20:1467:1134#0/1  
a`ab\_babbbbbbba`a`[ZD^ababb`]babba¥a¥aa^  
@HWI-EAS443:3:37:1165:229#0/1  
GAAACTGTGATGAGAATGGGAGACCNTCAGTACCTCCAGA  
+HWI-EAS443:3:37:1165:229#0/1  
a`\_`\_abVb`ab]b`])`aa`Yb`aZD[``0`a^\_\_Y^¥aY  
@HWI-EAS443:3:48:955:739#0/1  
GCCCTTAGTAGCATCAAGGTCTCTAANCGTTAAAGATTA  
+HWI-EAS443:3:48:955:739#0/1  
a\_a`a`a`YaaYH[`a`NLa`a`PDVb¥N]\_^\_a\_`Q`  
@HWI-EAS443:3:5:1326:1042#0/1  
GCCGCANTTCTTAAATTAACCACCTTATTTCTCAAATTT  
+HWI-EAS443:3:5:1326:1042#0/1  
a\_b¥aYD]aaY[N[``¥^]HZ`baaa^\_baXa\_aa\_Yaaa  
@HWI-EAS443:3:64:1334:867#0/1  
CAGTAAAAGCCCTTAGTAGCATCAAGGTCTCNAATCGGTT  
+HWI-EAS443:3:64:1334:867#0/1  
aaaabba`aab`ba`[Z\_¥aaaaa^)^a`UD[`aXb]V\_  
@HWI-EAS443:3:65:52:877#0/1  
GAGAAACTGTGATGAGAATGGGAGACCATCACTNCCTCCA  
+HWI-EAS443:3:65:52:877#0/1  
Z¥]¥Ua^\_aX[a]ZbaaYW^[a]QP`aaXa^bVDP]Va``  
@HWI-EAS443:3:73:1414:1001#0/1  
TGAGAANGGGAGACCTTCACTACCTCCAGAGCGGAAATGA  
+HWI-EAS443:3:73:1414:1001#0/1  
\_`^ZY¥D[\_Y]baa]]XTa\_aa`\_`aaV]\_aRa\_\_R\_`aa  
@HWI-EAS443:3:84:368:1900#0/1  
TGGGAAACAAATCGTGAATGGATCTTGAAGNGGAATCC  
+HWI-EAS443:3:84:368:1900#0/1  
aX[S^^\_R^^a\_`W¥RZ¥LXX`aaUK^aLGD[\_^^^\_U  
@HWI-EAS443:3:97:976:860#0/1  
CTTGGAGANACTGTGATGAGAATGGGAGACCCTCACTACC  
+HWI-EAS443:3:97:976:860#0/1  
abbbbaab¥D[\_bb`babbaaa`ba`aa`\_]`a\_a`NN  
@HWI-EAS443:3:20:506:1435#0/1  
GAAACTGTGATGAGAATGGGAGACCTTCACTACCTCCAGAG  
+HWI-EAS443:3:20:506:1435#0/1  
a`^a`a`Vbaaaaa`aaa\_`\_aa\_]\_a`^^^\_]`])`X]  
@HWI-EAS443:3:76:384:69#0/1  
GCCGCATTTCTTCAATTAACCACCTTATTTCTCAAATTT  
+HWI-EAS443:3:76:384:69#0/1  
aXYMZ]\_XU[ZW]USXWUXYXVU]XQX]XTXZZYVYZZZ  
@HWI-EAS443:3:49:1528:952#0/1  
GATCAAAAAGTCCTTAAAAGGAAGAGGCAACACCCCCCCCC  
+HWI-EAS443:3:49:1528:952#0/1  
T¥T]VZRU[RT¥aaXaS^`Y\_] ^UYRa`\_QU]WBBBBBBBB  
@HWI-EAS443:3:50:1696:1532#0/1  
GAAGGCTCTTATCTCTTGTCTACTTCAAGCAGTAGTTTT

+HWI-EAS443:3:50:1696:1532#0/1  
aWXGUY[ZUaab\_UK[^\_L\_\_YXH`YZ^¥aX[a\_]U¥\_KG  
@HWI-EAS443:3:57:1700:99#0/1  
AAGAAATCGTGGAATGGATCTTGAAAGAGGAATCCAGGGA  
+HWI-EAS443:3:57:1700:99#0/1  
`¥¥L`WbX]]\_WN¥VVXZMYXWJ¥\_YSL¥H\_R\_BBBBBB  
@HWI-EAS443:3:76:131:739#0/1  
CTGAAAATATACAGAGATTCGCTTGAGAACTGATGAGA  
+HWI-EAS443:3:76:131:739#0/1  
aaa\_aaaba`a`bbab[`\_aaaa\_a\_SaY^\_W`a\_\_^^\_]`  
@HWI-EAS443:3:81:512:1171#0/1  
ATAGGCCTCTAATCGTTAAAGATTACACTGAAGTTCGCT  
+HWI-EAS443:3:81:512:1171#0/1  
JaWw[0¥\_a\_¥S]\_]\_WWYXZT¥ZX¥ZZSRY\_XT^`^VVY  
@HWI-EAS443:3:89:1425:190#0/1  
ACCCTTGGCCTCGATATCGAAACAGCCACTCTGGGGGGA  
+HWI-EAS443:3:89:1425:190#0/1  
a[\_\_\_`UZZ]¥^Zaa\_a\_P]\_RVPYWJNYFVZV^RRDPZ[T  
@HWI-EAS443:3:23:1758:370#0/1  
GGCTTGCAGATATGCCAAAGGAAAAAGTCTACCTGAAAGG  
+HWI-EAS443:3:23:1758:370#0/1  
^a`¥U`\_abaabaZTb`a\_U¥`aaH\_RUaQZGS^SVW` `G  
@HWI-EAS443:3:30:1326:1690#0/1  
GGAGAACTGTGCTGAGAATGGGAGACCTTCACTACCTGC  
+HWI-EAS443:3:30:1326:1690#0/1  
`b`\_a`V\_]USFYP\_a]^`\_^N[]aH\_VZ\_XMYUZUGH  
@HWI-EAS443:3:31:476:212#0/1  
CTTCAGTGAAAGCCCTTAGTAGCATCAAGTCTCTAATCG  
+HWI-EAS443:3:31:476:212#0/1  
abbaV\_`^b¥YH^aTaaa`Y]T\_a[`\_ZS]V`^^]^\_\_Z]  
@HWI-EAS443:3:40:589:1433#0/1  
TATCTTTTGCCTAGGCATGAGCATGAACCAGCCTCGTGCC  
+HWI-EAS443:3:40:589:1433#0/1  
aaaa]aa`¥a\_`^`\_`\_`\_a\_a`\_BBBBBBBBBBBBBBBB  
@HWI-EAS443:3:55:1074:1685#0/1  
TGGGCCTCGATATCGAAACAGCCACTCTTGGTGGGAAACA  
+HWI-EAS443:3:55:1074:1685#0/1  
a¥FL[bb\_aa`bb[a\_\_`TU^a]\_]`[a\_PZ¥aa^\_a^X\_  
@HWI-EAS443:3:63:1014:41#0/1  
TTCTAAGTGTCTCGCTGGGTTCTCTTTCAAGATCCATCC  
+HWI-EAS443:3:63:1014:41#0/1  
[`bb` `babYabaaa`\_^`]`\_`\_`\_aaba`a\_a` `¥¥` [IS  
@HWI-EAS443:3:66:26:1561#0/1  
GCAACTGTGATGAGAACGGGAGACCTTCACTACCTCCAGA  
+HWI-EAS443:3:66:26:1561#0/1  
aQMMXWQP]VWQPUU[FPU]^QZ]XOLQ^^S[FNUZZ¥ZN  
@HWI-EAS443:3:77:202:1468#0/1  
CACGGTTCGAGTCTCTGAAAATACACAGAGATTCGCTTCG  
+HWI-EAS443:3:77:202:1468#0/1  
\_WaUZS[`¥RWXZT]]\_U¥[QYT[[VYXTVLF5]XYEMDR



@HWI-EAS443:3:82:627:1944#0/1  
GCCGCTTTCATCTGTGCCGATTTCTTCCATTAACCACC  
+HWI-EAS443:3:82:627:1944#0/1  
]G\_ab\_bbaWW][Q\_WW\_a`\_¥Z\_[``]]H¥TZVa]Y\_aZ  
@HWI-EAS443:3:89:692:162#0/1  
AGGGCCTCGATATCGAAACAGCCACTCTTGGTGGGAAACA  
+HWI-EAS443:3:89:692:162#0/1  
[bZW¥^Xa\_]XZaa\_¥aaaa`¥X¥`Z^\_W]\_YaYNY[¥ZZ  
@HWI-EAS443:3:97:766:1349#0/1  
TGCTGCTCTGGAGGTAGTGAAGGGCTCCCATTCTCATCAC  
+HWI-EAS443:3:97:766:1349#0/1  
\_baZZ^`X^UaXaWZaa]XZXYZJHNNZIYSZ¥YLDZMW[  
@HWI-EAS443:3:98:1748:924#0/1  
GCGCCTCGATATCGAAACAGCCACTCTTGGTGGGAAACAA  
+HWI-EAS443:3:98:1748:924#0/1  
\_aaabbb\_bbbbab\_bbababbbbbb[[aZb]b]bab\_^bb  
@HWI-EAS443:3:13:1408:14#0/1  
AGAAACTGTGATGAGAATGGGAGACCTTCACTANCTNCAG  
+HWI-EAS443:3:13:1408:14#0/1  
aabaa`a\_0a`[aX\_X\_`a`^]`XYW\_[X\_YYTDMMDUZW  
@HWI-EAS443:3:26:442:619#0/1  
CAACACCCTTGGCCTCGATATCGAAACAGCCACTCATAGG  
+HWI-EAS443:3:26:442:619#0/1  
a`\_`\_`\_a`^^¥a^Z[`\_¥`\_`\_Z`\_W`\_¥]¥WUY¥UV\_N  
@HWI-EAS443:3:48:537:899#0/1  
CAAGCTTCAGGTAGACTGTTTCCTTTGGCATATCCGCAAG  
+HWI-EAS443:3:48:537:899#0/1  
`aUZ\_USSTUaRT`X\_a`[¥Z\_^¥[WVWQ^X¥¥]\_TTa\_Y  
@HWI-EAS443:3:4:239:134#0/1  
GAGAGACAATTGCATCTGTACCTACTTCGCGCTACCTTT  
+HWI-EAS443:3:4:239:134#0/1  
a\_a^aZ\_] [ ` ]Z^RZ^^^U]aXUG^^]UGG^UUXUXUYBB  
@HWI-EAS443:3:50:1751:1554#0/1  
ATCTGTGCCGATTTCTTCAATTAACCACCTTATTCCTCA  
+HWI-EAS443:3:50:1751:1554#0/1  
abbab[`aababbaaab`\_a`aaaa\_] ]\_aaaa`\_a`\_`  
@HWI-EAS443:3:54:515:93#0/1  
GTCGCTTCAATCTGTGCCGATTTCTTCAATTAACCACCT  
+HWI-EAS443:3:54:515:93#0/1  
a\_X\_^]¥Q]]Z^`G[]^`S^¥\_^W]W]ZW]]Z]X¥YXXZ  
@HWI-EAS443:3:63:1026:644#0/1  
AAATCGTGAATGGATCTTGAAAGAGGAATCCAGCATATC  
+HWI-EAS443:3:63:1026:644#0/1  
\_\_Vaa`Xabaaaaaaaaaaa`a`^a][`\_]\_^Z^`^]\_``]]  
@HWI-EAS443:3:74:678:1877#0/1  
AGTCTCTGAAAATATACAGAGATTCGCTTGGAGAACATGT  
+HWI-EAS443:3:74:678:1877#0/1  
a^N¥X`\_V\_`````\_T\_a`]````Z^`\_`WZ[ZQZZY]DHXR  
@HWI-EAS443:3:78:293:641#0/1  
GCACCCTTGGCCTCGATATCGAAACAGCCACTCTTGGTGG

+HWI-EAS443:3:78:293:641#0/1  
]`bbbbbaaa`aa\_a\_W`aaba`\_aa^a^`\_UaaU`\_  
@HWI-EAS443:3:81:919:1071#0/1  
TGACAATGGGAGACCTTCACTACCTCCAGAGCAGAAATGG  
+HWI-EAS443:3:81:919:1071#0/1  
]\_QHO¥`¥YRRU¥]XUU¥¥a¥Q[ba[[]¥\_`]L\_RXD[TG  
@HWI-EAS443:3:88:703:1476#0/1  
GAAGGTCTCCCATTCTCATCACAGTTTCTCCAAGCTGAGG  
+HWI-EAS443:3:88:703:1476#0/1  
ab`¥¥Zba`^`\_¥\_b`bbbb\_aa`\_abaabaa¥^aa¥  
@HWI-EAS443:3:16:1164:1788#0/1  
GTCTCTGAAAATANACAGAGATTTCGCTTGGAGAACTGNG  
+HWI-EAS443:3:16:1164:1788#0/1  
a\_aaaaba\_aaa¥D¥`aaaa^`^`\_`\_`^¥^Y`^^WDT  
@HWI-EAS443:3:60:1194:1390#0/1  
CAACACCCTTGGCCTCGATATCGAAACAGCNACTCTTGGT  
+HWI-EAS443:3:60:1194:1390#0/1  
abaabaa\_aaa`a`ba`a`]a¥\_\_^`\_XDTP¥W]\_^ZW  
@HWI-EAS443:3:10:853:321#0/1  
AGCGCTACCTTTCTGACATGACCCTCGAAGAAATGTCACG  
+HWI-EAS443:3:10:853:321#0/1  
abaaaa\_aaa`a`a`a`¥^`\_¥N`^¥\_U^¥U\_¥\_  
@HWI-EAS443:3:11:851:1617#0/1  
GGCCACTCTTGGTGGGAAACAAATCGTGAATGGATCTTG  
+HWI-EAS443:3:11:851:1617#0/1  
^bb`abaaba¥\_Vbbaaab¥`aaX`]^aa`ba`\_0aaa  
@HWI-EAS443:3:13:157:1536#0/1  
CATCAAGGTCTCTAATTGGTTAAAGATTACACTGAAGTTC  
+HWI-EAS443:3:13:157:1536#0/1  
a^]a`Y`\_Ua`a^ZY`\_X\_X`\_\_`\_\_`\_]\_a^^^¥[  
@HWI-EAS443:3:16:305:1834#0/1  
GGTGTCTCGCTGGATTCTCTTTCAAGAACCATTCCACGA  
+HWI-EAS443:3:16:305:1834#0/1  
W\_H[Xbb`\_URPO\_ZP^aW[Z\_¥SaQHF¥YX^JWZ^XBB  
@HWI-EAS443:3:16:715:218#0/1  
AGCGCTACCTTTCTGACATGACCCTCGAGGAAATGGCACG  
+HWI-EAS443:3:16:715:218#0/1  
Ya`WTZ[OXWZQ^T`aaaU]¥^^XK¥ZHW[XTQ¥EYWBB  
@HWI-EAS443:3:1:859:105#0/1  
GTGGGAAACTAATCGTGAATGGATCTTCAAAGAGGAATC  
+HWI-EAS443:3:1:859:105#0/1  
a`baa`\_`^\_aYaQa\_aa\_¥`a]^aRa\_a^YU\_\_\_^BBBB  
@HWI-EAS443:3:23:347:385#0/1  
CGGAGGGAACAATAGTTGGAGAAATTTACCATTACCTTC  
+HWI-EAS443:3:23:347:385#0/1  
a\_^`[]¥`aa\_]Za^`^^a`aa[a`a`\_`^a\_]^[^]  
@HWI-EAS443:3:33:559:1554#0/1  
CAAAGTGTGATGAGAATGGGAGACCTTCACTAGCTCCAGA  
+HWI-EAS443:3:33:559:1554#0/1  
G[[]Xa¥\_\_a¥`b`Xa\_U\_S\_b`a^[^bab[DYaa`ba`

@HWI-EAS443:3:33:834:1058#0/1  
GGCCGCATTTCTTCAATTAACCACCTTATTTTCATCAAATT  
+HWI-EAS443:3:33:834:1058#0/1  
aaYaba^SaJ[KR]\_a`\_\_]SJ\_WY`SXVa`MV]YS`[U  
@HWI-EAS443:3:39:1060:1166#0/1  
GTCGCTCTCAATCTGTGCCGCATTTCTTCAATTAACCACA  
+HWI-EAS443:3:39:1060:1166#0/1  
`bbaa¥I`Y`¥aaUV0``¥¥^a[\_\_aWQ]U¥PPT[P]¥KD  
@HWI-EAS443:3:4:891:547#0/1  
GAAACTGTGATGAGAATGGGAGACCTTCACTACTTCCAGG  
+HWI-EAS443:3:4:891:547#0/1  
aXaa^]b[`Y`^F^\_\_aa^`\_]\_[S[BBBBBBBBBBBBBB  
@HWI-EAS443:3:54:1153:779#0/1  
TGCCCTTAGTAGCATCAAGGTCTCTAATCGGTAAAGATT  
+HWI-EAS443:3:54:1153:779#0/1  
abaa`abb\_\_baaab`aba¥^baba`a\_aa¥a\_\_a`a\_  
@HWI-EAS443:3:5:223:1194#0/1  
GAAACTGCGATGAGAATGGGAGACCTTCACTACCTCCAGC  
+HWI-EAS443:3:5:223:1194#0/1  
\_SXbW`XFQSY]U\_NQN¥a^\_aa¥[ZZ]RJZ^GR¥ZBBBB  
@HWI-EAS443:3:61:253:281#0/1  
GCTTGGAGAACTGTGATGAGCATGGGAGACCTTCACTAA  
+HWI-EAS443:3:61:253:281#0/1  
a\_]\_\_a]`¥^\_]\_X\_WW[V]HRUVX]UZNNVWWWTLTWG  
@HWI-EAS443:3:66:1237:1285#0/1  
GGTCGCTTTCAATCTGTGCCGCATTTCTTCAATTTACCAC  
+HWI-EAS443:3:66:1237:1285#0/1  
J\_ZWaVYb`\_U\_`^UU¥VZ^`bab`\_UWUb^\_b`[`ZV^`  
@HWI-EAS443:3:78:822:1000#0/1  
CCCTTAGTAGCATCAAGGTCTCTAATCGGTAAAGATTAA  
+HWI-EAS443:3:78:822:1000#0/1  
a]`bab^abb^]Y\_`^Ra^a`a]bbaWa`F\_`]T`a`YWG  
@HWI-EAS443:3:83:1013:1088#0/1  
CGGCCTCGATATCGAAACAGCCACTTTGGTGGGAAACAA  
+HWI-EAS443:3:83:1013:1088#0/1  
¥babbb`aabbb[a`]`a]`aa\_]`^a`\_XRa]b]R]]V\_  
@HWI-EAS443:3:86:1542:436#0/1  
ATCGCTGGATTCTCTTTCAAGATCAATTCACGATTTGT  
+HWI-EAS443:3:86:1542:436#0/1  
XYHHRW[WWb¥LJZRV]V]aabZU]GQ`TPLRZbOGZUQ^  
@HWI-EAS443:3:99:1196:1677#0/1  
CGAGAATGGGAGACCTTCACTACGTCCAGAGCAGAAATGA  
+HWI-EAS443:3:99:1196:1677#0/1  
`b]b]¥\_ab[^a]W¥abbaU`bXT¥]Vaa`^¥aba`baa\_  
@HWI-EAS443:3:99:1220:230#0/1  
GTGGGAAACAAATCGTGAATGGATTTTGAAGAGGAATC  
+HWI-EAS443:3:99:1220:230#0/1  
]0¥aaZGXT^^¥¥[aYaa[¥YYaZZLU^]Z¥^\_]WUY[aB  
@HWI-EAS443:3:12:851:1653#0/1  
AGAAACTGTGATGAGAATGGGAGACCTTCACTACCTGCAG

+HWI-EAS443:3:12:851:1653#0/1  
`bb[a^\_a]a¥Z¥]RY[]aYJL[\_U^\_¥\_`^\_]¥^QJ[ZU  
@HWI-EAS443:3:15:409:219#0/1  
AGACTGTTTCCTTTGGCATATCCGCAAGCGATTTGCCGAC  
+HWI-EAS443:3:15:409:219#0/1  
`aR\_aaaaa`Z]\_a^`aaa\_`a]`W\_`Y¥¥[¥¥\_H[XXM  
@HWI-EAS443:3:16:562:1345#0/1  
GCCCCATTTCTTCAATTAACCACCTTATTTCTCAAATTT  
+HWI-EAS443:3:16:562:1345#0/1  
ab\_0¥¥\_UW`a`a\_]aaaZVa^WaWZ\_^`Y^[\_aaX¥`¥U  
@HWI-EAS443:3:22:1180:1351#0/1  
CTTCAGTGTAATCTTTAACCGATTAGAGACCTTGATGCTA  
+HWI-EAS443:3:22:1180:1351#0/1  
aaa\_\_a^^a^aa^`aaa\_aaa``^`\_a]``a\_``a\_`^`¥  
@HWI-EAS443:3:22:635:1740#0/1  
TGCTTTTCTTCAATTAACCACCTTATTTCTCAAATTTCT  
+HWI-EAS443:3:22:635:1740#0/1  
aaaabaabaabaababaaaaaaaaabaa\_\_`aaa]a\_``a  
@HWI-EAS443:3:23:933:787#0/1  
GGCCCCATTGTCTGCAAATCGCTTGCGGATATGCCAAAGG  
+HWI-EAS443:3:23:933:787#0/1  
aaaa`bbaa\_\_aa\_aaa`[a]T`\_^`^`\_\_`¥\_¥YP[^S[  
@HWI-EAS443:3:24:362:296#0/1  
GCCACATTTCTTCAATTAACCACCTTATTTCTCAAATTT  
+HWI-EAS443:3:24:362:296#0/1  
]baa^^aba^Ya]\_`baaQZaa\_a^[Za¥\_¥aaa\_aY^LZ  
@HWI-EAS443:3:25:190:493#0/1  
GCCCCATTTCTTCAATTAACCACCTTATTTCTCAAATTT  
+HWI-EAS443:3:25:190:493#0/1  
a\_WD[``^]\_\_][\_`^\_\_\_\_Xa\_\_`^`^`\_`¥\_\_]`T^X¥  
@HWI-EAS443:3:25:337:369#0/1  
GCGGTGTGCCGATTTCTTCAATTAACCACCTTATTTCT  
+HWI-EAS443:3:25:337:369#0/1  
a\_ZYLXR`M[U\_]Y[] [OXXUX[Z^¥Z\_VZXZ]]W]OTPS  
@HWI-EAS443:3:29:148:410#0/1  
CCTTTTAAGGACTTTTGATCTCGGCGGAGCCGATCACGGA  
+HWI-EAS443:3:29:148:410#0/1  
a\_V[TRWQW]UY\_SY`VZ[aRaRV]]ZBBBBBBBBBBBBB  
@HWI-EAS443:3:32:212:1003#0/1  
TGAGAATGGGAGACCTTCACTACCTCCAGAGCAGAACTGA  
+HWI-EAS443:3:32:212:1003#0/1  
ab\_a\_a`aaa\_`aaa\_\_aba\_`a\_`\_\_`a\_\_aa]¥HV\_V  
@HWI-EAS443:3:32:658:1243#0/1  
GCCGCATTTCTTCAATTAACCACCTTATTTCTCAAATTT  
+HWI-EAS443:3:32:658:1243#0/1  
a`abb\_S]a`NZ^aZbba]aZabaa¥a[aaaaaa]^GZ\_^  
@HWI-EAS443:3:34:1355:1128#0/1  
GCCGCATTTCTTCAATTAACCACCTTATTTCTCAAATTT  
+HWI-EAS443:3:34:1355:1128#0/1  
aaab¥aba`¥aa\_aaaa`a\_`a\_Wa^\_```\_Saa\_]^^M

@HWI-EAS443:3:35:908:2040#0/1  
CACGGTTCGAGTCTCTGAAAATATACAGAGATTCGCCTGG  
+HWI-EAS443:3:35:908:2040#0/1  
TXaPQH[\_V\_b¥bbbW` [ `bbaab]Pa\_`b^a¥b^ZF]\_a  
@HWI-EAS443:3:3:280:2007#0/1  
AGAGATTCGCTTGGAGAACTGTGATGAGAATGGGATACA  
+HWI-EAS443:3:3:280:2007#0/1  
aa]aa^aab][a]X`\_\_aaZ\_^G`¥Q]^\_Z^\_ZS\_]GXBB  
@HWI-EAS443:3:3:927:1911#0/1  
GGAGAACTGTGATGAGAATGGGAGACCTTCACTACGTCC  
+HWI-EAS443:3:3:927:1911#0/1  
aa]Z]¥XLV]VW[L YLRGPPUVUVWBBBBBBBBBBBBBB  
@HWI-EAS443:3:40:186:468#0/1  
GCCGCATTTCTTCAATTAACCACCTTATTTCTCAACTTT  
+HWI-EAS443:3:40:186:468#0/1  
a^\_`M[^X\_T]RRW^^^\_X[FSUYMGTY^SX\_PGHWY]  
@HWI-EAS443:3:40:228:1557#0/1  
GAAAGCTCTTATCTCTTGTCTACTTCAAGCAGTAGCTGT  
+HWI-EAS443:3:40:228:1557#0/1  
\_N[W^RaYPZYQVMW\_]\_W\_]\_]`[EN^S[T^XDHYN  
@HWI-EAS443:3:40:24:425#0/1  
ACACCCTTGGCCTCGATATCGAAACAGCCACTCTTGGTGG  
+HWI-EAS443:3:40:24:425#0/1  
`a`aabaa]U`a`a¥`[^[]X][\_W[¥YYS\_¥[WTWZW  
@HWI-EAS443:3:40:341:1337#0/1  
GCCCCATTTCTTCAATTAACCACCTTATTTCTCAAATTT  
+HWI-EAS443:3:40:341:1337#0/1  
V`ZPW^a\_] ^P\_W\_WVWQX]\_\_\_\_[\_S\_J[NV]`S`]KR]TT  
@HWI-EAS443:3:45:136:1097#0/1  
AACGAATCGTGAATGGATCTTGAAGAGGAATCCAGCGA  
+HWI-EAS443:3:45:136:1097#0/1  
aa`J[baaaSY`RXOZ`\_\_\_\_YSU^VWY]\_\_YTVVNZPVW  
@HWI-EAS443:3:45:331:256#0/1  
GCCGCATTTCTTCAATTAACCACCTTATTTCTCAACTTT  
+HWI-EAS443:3:45:331:256#0/1  
\_\_bbba`abaab\_Z¥aa`a`^aaa`a]a`aa`aa]NV]  
@HWI-EAS443:3:45:952:866#0/1  
CGCNGCACAGATTGAAAGCGACAGAGAATAGTTTCGAACA  
+HWI-EAS443:3:45:952:866#0/1  
aa¥D¥`ababa`a`a\_a`aa\_^\_a`a`a`\_`[¥aa\_\_\_\_a\_\_  
@HWI-EAS443:3:4:1198:118#0/1  
TGAAAATATACAGAGATTCGCTTGGAGAACTGTGACGAG  
+HWI-EAS443:3:4:1198:118#0/1  
aa][\_\_a\_a\_U\_`\_]`Wq]^^W]X^]Z^ZWXWZZZZWZ^ZZ  
@HWI-EAS443:3:50:1603:1094#0/1  
AAACTGTGATGAGAATGGGAGACCTTCACTACCTCCGGAG  
+HWI-EAS443:3:50:1603:1094#0/1  
abbabbababaab]\_baa]]aa`aa\_aaa`a`a`^`^`[]  
@HWI-EAS443:3:50:1670:450#0/1  
ACACCCTTGGCCTCGATATCGAAACAGCCACTCTTGGTGG

+HWI-EAS443:3:50:1670:450#0/1  
aa¥`X`aaaa`a^X]VZ¥Z¥ZNRU^[US¥[YU[¥U¥U^  
@HWI-EAS443:3:50:815:526#0/1  
TGCCGCATTTCTTCAATTAACCACCTTATTTCTCACATT  
+HWI-EAS443:3:50:815:526#0/1  
\_]bababbbabbabbbbaa\_a`^bbabab`ab`¥¥Ya\_  
@HWI-EAS443:3:52:1509:283#0/1  
CGCTTTCAATCTGTGCCGCATTTCTTCAATTAACCAACTT  
+HWI-EAS443:3:52:1509:283#0/1  
abbbbbbbbbbb\_a[Z^b\_aabb[baaa\_bbba\_^\_J[ab  
@HWI-EAS443:3:52:331:1729#0/1  
CCCCTTCTCATCACAGTTTCTCCAAGCGAATCTCTGTATA  
+HWI-EAS443:3:52:331:1729#0/1  
aab[LV`ba]``\_^]U\_a`X¥]Z¥\_\_`[UWY]VZa\_^[X  
@HWI-EAS443:3:54:1662:1583#0/1  
ATCTGTGCCGCATTTCTTCAATTAACCACCTTATTTTCTC  
+HWI-EAS443:3:54:1662:1583#0/1  
\_a^X`\_aaR^``aaV`V¥]a]`\_ZY`^Q\_]a`UVJ\_Y  
@HWI-EAS443:3:57:926:377#0/1  
GCCACATTTCTTCAATTAACCACCTTATTTCTCAAATTT  
+HWI-EAS443:3:57:926:377#0/1  
``R[`aaa\_aa\_]Xaa\_aZ]a`Z^`¥`\_\_\_Z`][a`\_  
@HWI-EAS443:3:58:1392:1122#0/1  
GTCGCTTTCAATCTGTGCCGCATTTCTTCAATTAACAACC  
+HWI-EAS443:3:58:1392:1122#0/1  
`V`¥T¥\_¥LW]\_T^HUYP¥Y]Sa\_a¥`OPX`[QRWFVXN  
@HWI-EAS443:3:58:1587:1173#0/1  
AGCCTCTTCTTTAAGGACTTTTGATCTCGCGGAGGCG  
+HWI-EAS443:3:58:1587:1173#0/1  
aQZ[a`b`\_]bbb\_RUMWTKaY^aa]b]a¥a\_¥\_\_UTBBB  
@HWI-EAS443:3:58:266:819#0/1  
GGCTGCATTTCTTCAATTAACCACCTTATTTCTCAAATT  
+HWI-EAS443:3:58:266:819#0/1  
^aa¥Z¥YUW[FY[^VWaaYXXX[```][W^`YZ\_^PPQ^a  
@HWI-EAS443:3:59:1012:42#0/1  
AGAACTGTGATGAGAATGGGAGACCTTCACTACCTGCAG  
+HWI-EAS443:3:59:1012:42#0/1  
Vaab^]aa`\_W\_a]aU^Z\_bbXbV`a\_`\_^¥\_YVKDX^W  
@HWI-EAS443:3:59:102:1728#0/1  
GTCGCTTTCAATCTGTGCCGCATTTCTTCAATTAACAACG  
+HWI-EAS443:3:59:102:1728#0/1  
a\_YP^aa\_VZa`[NN^a\_R]G[JMLYBBBBBBBBBBBBBB  
@HWI-EAS443:3:59:561:519#0/1  
GAAACTGTGATGAGAATGGGAGACCTTCACTACCTCGAGA  
+HWI-EAS443:3:59:561:519#0/1  
`[SXQVFZV¥JWLN]U]NPNYVBBBBBBBBBBBBBB  
@HWI-EAS443:3:60:805:1472#0/1  
ACCCCATTTCTTCAATTAACCACCTTATTTCTCAAATTT  
+HWI-EAS443:3:60:805:1472#0/1  
`]XH¥Xaa\_\_`aaSaaaa¥[\_¥\_[\_]\_aa^a\_a\_`WP¥\_]\_

@HWI-EAS443:3:62:1710:1066#0/1  
CTTCAGTGTAACTTTAACCGATTAGAGACCTTGATGCTA  
+HWI-EAS443:3:62:1710:1066#0/1  
abbbababbbbabbbbababbaabb`aabbaabaab  
@HWI-EAS443:3:66:1406:859#0/1  
GTGATGAGAATGGGAGACCTTCACTACCTCCAGAGCTGAA  
+HWI-EAS443:3:66:1406:859#0/1  
aVa^aa`S[UaaYQa[^`[]`WT[LN[X`XaR\_JJVWW  
@HWI-EAS443:3:66:215:1547#0/1  
CACCATTCTGTGCTTTCAATCTGTGCCGATTTCTTC  
+HWI-EAS443:3:66:215:1547#0/1  
U[`X¥^a`X`PPY]PYHQ^`VQJUSMMO\_SMRQLY¥ZPX[  
@HWI-EAS443:3:68:1782:1050#0/1  
CGCTGCATTTCTTCAATTAACCACCTTATTTCTCAAATT  
+HWI-EAS443:3:68:1782:1050#0/1  
¥ab]a\_`bab`bba¥L`aababbaa\_aabbb\_`aba^`a`  
@HWI-EAS443:3:6:679:1667#0/1  
GGGGGTTGCCTCTTCTTTTAAGGACTTTTGATCTCGGCG  
+HWI-EAS443:3:6:679:1667#0/1  
abHP]a`bY]`WTQR`S]aaY\_\_WMF]]`PYa]Z]VBBBB  
@HWI-EAS443:3:70:185:2014#0/1  
GGATCTTGAAAGAGGAATCCAGCGAGACACTTAGAACGAC  
+HWI-EAS443:3:70:185:2014#0/1  
a]Z\_b¥aa¥UR¥`][`\_`aa\_a\_a]\_`[a^][\_\_a`\_`  
@HWI-EAS443:3:77:729:1212#0/1  
GGCTGTTTCGATATCGAGGCCAAGGGTGTGCCTCTACCT  
+HWI-EAS443:3:77:729:1212#0/1  
aabbbaba^^^Z\_[PWZQ[^[\_0¥\_G]^`J¥`]aXTSZa  
@HWI-EAS443:3:79:1217:63#0/1  
GCCGCATTTCTTCAATTAACCACCTTATTTCTCAAATTT  
+HWI-EAS443:3:79:1217:63#0/1  
a\_^ba`aaa\_aa¥`^aaa^Y]^`^^aa\_`a]Ya^aVG¥aW  
@HWI-EAS443:3:7:1140:1617#0/1  
TTCGCTTGGAGAACTGTGATGAGAATGGGAGACCTACAC  
+HWI-EAS443:3:7:1140:1617#0/1  
\_\_Y¥HW]\_\_LOY]aX`abaR``]Q¥`X\_¥[¥¥XUBBBBB  
@HWI-EAS443:3:7:255:626#0/1  
GGCTTTTCAGGTAGACTGTTTCTTTGGCATATCCGCAAG  
+HWI-EAS443:3:7:255:626#0/1  
aaaaaaaa`baU¥``\_a¥¥``\_\_V^\_AY^\_^]\_A¥\_]^^]  
@HWI-EAS443:3:83:1303:1014#0/1  
ACACCCTTGGCCTCGATATCGAAACAGCCACTCTTGGTGG  
+HWI-EAS443:3:83:1303:1014#0/1  
a\_a^a^a\_\_^`^\_\_aa[a^U\_\_Z^\_[\_¥¥^SUSY¥Y¥V¥S  
@HWI-EAS443:3:83:255:1150#0/1  
CTGTAATATACAGAGATTCGCTTGGAGAACTGTGATGA  
+HWI-EAS443:3:83:255:1150#0/1  
`¥MGVOS\_]ZUJZP¥ZQ`\_SW][]R¥KUNQ`\_ZYJ¥^]ZR  
@HWI-EAS443:3:88:606:782#0/1  
GATCAGAATGGGAGACCTTCACTACCTCCAGAGCAGAAAT

+HWI-EAS443:3:88:606:782#0/1  
a`[GW\_S\_¥[a\_S`Y\_`[XRaYZ\_¥]U]Q^]X^X]^U]^U  
@HWI-EAS443:3:89:34:1016#0/1  
GTCGGCATTCTTCAATTAACCACCTTATTCCTCAAATT  
+HWI-EAS443:3:89:34:1016#0/1  
a`a\_`\_`^a^`\_`]]aaJ\_¥`^^^\_S^`\_`^`\_`\_`¥H]\_`  
@HWI-EAS443:3:94:161:1931#0/1  
TGCTGCATTCTTCAATTAACCACCTTATTCCTCAAATT  
+HWI-EAS443:3:94:161:1931#0/1  
\_T`URaS¥[`\_`\_`aab]SYbbX\_`]ab]aYa``\_`a¥[Xaa  
@HWI-EAS443:3:94:369:2000#0/1  
GAAAATACAGAGATTCGCTTGGAGAACTGTGATGAGAAT  
+HWI-EAS443:3:94:369:2000#0/1  
`a¥b`¥aWZR[YY`ZK^Y`^a\_ZR^]]T\_TYH\_\_`XVFL  
@HWI-EAS443:3:96:1619:1622#0/1  
AGGCAACACCCTTGGCCTCGATATCGAAACAGCCACAGAT  
+HWI-EAS443:3:96:1619:1622#0/1  
`]Q]ab`\_Z\_VY`^a`]a\_`aa]ZK\_X`^Y[¥M]^TUX][  
@HWI-EAS443:3:99:641:956#0/1  
CTGGGCCGCATTCTTCAATTAACCACCTTATTCCTCAA  
+HWI-EAS443:3:99:641:956#0/1  
aa^KVabbaV¥aaaa]`abWbaa^U[YR\_]SaRKVV]L^a  
@HWI-EAS443:3:9:65:656#0/1  
GGGGCATGTGAGAAAGGTAGCGCGAAGTAGGTACAGATGC  
+HWI-EAS443:3:9:65:656#0/1  
abWD[X¥aQa[b\_aa`a\_Y\_a\_`a\_X`Va\_][[a`\_`\_`\_`a\_`  
@HWI-EAS443:3:9:994:1781#0/1  
AAAAGTCCTTAAAAGGAAGAGGCAACACCCTTGGCCACGA  
+HWI-EAS443:3:9:994:1781#0/1  
a`aa\_aXaaaaa\_\_a`a]a\_`^a`^Xa]RKRP][YXBBBB  
@HWI-EAS443:3:100:941:1878#0/1  
AGCCGCATTCTTCAATTAACCACCTNATTCCTCAAATT  
+HWI-EAS443:3:100:941:1878#0/1  
``GWaY\_¥^\_`a\_`¥][[a]\_\_\_\_[DP`S`YG`^Y`Z``  
@HWI-EAS443:3:15:1257:1235#0/1  
CGGGCCTATTATCTTTTGNCTAGGCATGAGCATGAACCAG  
+HWI-EAS443:3:15:1257:1235#0/1  
^^¥[^`^``bb]aa`T[]]DR\_[a[S\_a^aaVabaaa¥N`a  
@HWI-EAS443:3:15:1654:119#0/1  
GGCCGCATTCTTCAATTAACCACCTTATNTCCTCAAATT  
+HWI-EAS443:3:15:1654:119#0/1  
`bbbb`bbbbabbaabbbbbbbaba`bba^D^`\_bab`abb  
@HWI-EAS443:3:25:1723:324#0/1  
CGCCNCATTCTTCAATTAACCACCTTATTCCTCAAATT  
+HWI-EAS443:3:25:1723:324#0/1  
abbYD^bbba\_bb]aaababaaa¥Yb`bbaa]\_aZa`^aa  
@HWI-EAS443:3:61:1091:1953#0/1  
AGCCGCATTCTTCAATTAACCANCTTATTCCTCAAATT  
+HWI-EAS443:3:61:1091:1953#0/1  
aa\_\_\_\_^abaa\_a`V]\_aaaa`b^D^aaaa`a`0\_\_`Z^^^



@HWI-EAS443:3:100:1106:493#0/1  
GGCACAGATTGAAAGCGACAGAGAATAGTTTAGAACAAAT  
+HWI-EAS443:3:100:1106:493#0/1  
`TO¥`¥`X`aaY^Z[^\_TXTQV\_\_S^YWX]VFQXWUUVBB  
@HWI-EAS443:3:100:1205:253#0/1  
GCCGCATTTCTTCAATTAACCACCTTATTTTCGTCAAATTT  
+HWI-EAS443:3:100:1205:253#0/1  
a\_Pa\_`Y\_aGaZS^^a\_Q]ZPaWPXW^\_\_`IN\_GWX^\_BB  
@HWI-EAS443:3:100:1689:1172#0/1  
GAAAGAGGAATCCAGCGAGACAATTAGAATGACAATTGCA  
+HWI-EAS443:3:100:1689:1172#0/1  
\_UW¥\_aaaKUSVTR^NY][Y\_¥F[ONY\_UX]ZLY¥BBBBB  
@HWI-EAS443:3:100:1693:656#0/1  
CACGGTTCGAGTGTCTGAAAATATACAGAGATTCGCTTGG  
+HWI-EAS443:3:100:1693:656#0/1  
Sa`R]¥Zbab`baU`b\_[H\_bbbaaa[baa\_S``\_Z¥`[b  
@HWI-EAS443:3:100:196:1941#0/1  
AGGCAACACCCTTTGCCTCGATATCGAAACAGCCACTCTT  
+HWI-EAS443:3:100:196:1941#0/1  
]WYGTWVZZZQW^HRa`[]\_XJ`\_\_HRXZBBBBBBBBBB  
@HWI-EAS443:3:100:26:79#0/1  
TGATGCTACTAAGGGCTTTCAGTACTGAGGAGGGAGCAATAGT  
+HWI-EAS443:3:100:26:79#0/1  
aa`\_a\_^`\_`\_\_aa`¥^`^^\_X`a^`\_Y`^^Y^YXX¥V]B  
@HWI-EAS443:3:100:301:444#0/1  
AGAAACTGTGATGAGAATGGGAGGCCTTCACTACCTCCAG  
+HWI-EAS443:3:100:301:444#0/1  
aYUb]aaSN¥`[PTb\_\_XJ`a^bUZHZZNZ\_a\_SDK^`B  
@HWI-EAS443:3:100:374:1792#0/1  
AGAAACTGTGATGAGAATGAGAGACCTTCACTACCTCCAG  
+HWI-EAS443:3:100:374:1792#0/1  
a]Za`^\_aR¥\_\_a\_X`\_`a`¥`\_`\_RO]\_^`M^]RVOXWBB  
@HWI-EAS443:3:100:473:1876#0/1  
AGAAAGTGTGATGAGAATGGGAGACCTTCACTACCTCCAG  
+HWI-EAS443:3:100:473:1876#0/1  
aa^^SRX]Q`YQKX`^b^bXURa``Y\_^]a`Y^GZa`J`\_  
@HWI-EAS443:3:100:753:1956#0/1  
GCCGCATTTATTCAATTAACCACCTTATTTTCCTCAAATTT  
+HWI-EAS443:3:100:753:1956#0/1  
aaaaT\_XSVNa\_a\_^]Ua`URaSK\_IUa``WJ]Waa`BBB  
@HWI-EAS443:3:100:905:1928#0/1  
GAAACTGTGATGAGAATGGGAGAGCTTCACTACCTCCAGA  
+HWI-EAS443:3:100:905:1928#0/1  
\_`a^aa`N`aT`ab]\_^aba`\_0FG`\_^YF¥^^¥]RBBBB  
@HWI-EAS443:3:10:1126:432#0/1  
CGATATCGAAACAGCCACTCTTGGTGGGAAACAAATCGTG  
+HWI-EAS443:3:10:1126:432#0/1  
abbbbbbba``¥[abb`\_T]\_`bba\_bbbX¥\_¥aaaX¥aS`  
@HWI-EAS443:3:10:1271:1185#0/1  
CGATATCGAAACAGCCACTCTTGGTGGGAAACAAATCGTG



@HWI-EAS443:3:13:1067:1605#0/1  
GAAAGCCCTTAGTAGCATCAAGGTCTCTAATCGGTTAAAG  
+HWI-EAS443:3:13:1067:1605#0/1  
a`a^`\_TQ\_\_W\_\_\_NI¥`\_aaRYM0]Z`aa[UMRP]HX]\_  
@HWI-EAS443:3:13:1197:655#0/1  
CCTCAGTGAAAGCCCTTAGTAGCATCAAGGTCTCTAATCG  
+HWI-EAS443:3:13:1197:655#0/1  
abbaab`aaabaaaaaaaa\_aba\_a``\_aa^`aaaa\_a^a  
@HWI-EAS443:3:13:1693:1616#0/1  
CGCTTGGAGAAACTGTGATGAGGATGGGAGACCTTCACTA  
+HWI-EAS443:3:13:1693:1616#0/1  
L`\_\_b\_b\_\_b\_ababUaab^`bU^baZ`\_ab]aG\_VI\_\_\_\_  
@HWI-EAS443:3:13:246:1257#0/1  
GCGGCACAGATTGAAGGCGACAGAGAATAGTTTCGAACAA  
+HWI-EAS443:3:13:246:1257#0/1  
VbaaJVIURL¥X`PSSa`^\_QQSVYV`YP\_\_]]GZ¥FPJa  
@HWI-EAS443:3:13:510:621#0/1  
GTTGCCTCTTCCTTTTAAGGACTCTTGATCTCGGCGGAGC  
+HWI-EAS443:3:13:510:621#0/1  
^Q``abaV[Z[a\_a`\_[a\_aUU¥][ZRZN[ZTP^`\_\_BB  
@HWI-EAS443:3:14:1240:1475#0/1  
GGAGAAACTGTGATGAGAATGGCAGACCTTCACTACCTCC  
+HWI-EAS443:3:14:1240:1475#0/1  
a[TUUUPV\_ZVa[QYZU[]\_ZVFR^P[WTLJSYXYVQRVV  
@HWI-EAS443:3:14:1730:2004#0/1  
TGGAGAAACTGTGATGAGAATGGGAGAACTTCACTACCTC  
+HWI-EAS443:3:14:1730:2004#0/1  
Sa`¥a]aVaab`¥`SaPaaY\_U`^YaVFFWTF¥IUaI[Z\_  
@HWI-EAS443:3:14:189:640#0/1  
GCGCGAAGTGGGTACAGATGCAATTGTCATTCTAAGTGTC  
+HWI-EAS443:3:14:189:640#0/1  
aaba`a]YRDYaU^[Z¥\_^¥\_\_^`¥`W¥`\_`¥¥`\_`\_W¥W^  
@HWI-EAS443:3:14:221:1369#0/1  
CTTGGAGAAACTGTGATGAGAATGGGGGACCTTCACTACC  
+HWI-EAS443:3:14:221:1369#0/1  
abQHW\_[\_]b`\_baa``\_\_Yaa\_ZSZHH[X\_a^¥]aaTKU¥  
@HWI-EAS443:3:14:236:1347#0/1  
GCCGCATTTCTTCGATTAACCACCTTATTTCTCAAATTT  
+HWI-EAS443:3:14:236:1347#0/1  
aa\_]aa¥]VSX][I^Y\_S¥aa¥[`]a`aZZ¥¥a\_`[a\_Y  
@HWI-EAS443:3:14:390:1231#0/1  
GGAGAAACTATGATGAGAATGGGAGACCTTCACTACCTCC  
+HWI-EAS443:3:14:390:1231#0/1  
¥\_`^`\_``aab``]¥¥a\_X¥[a¥MN`[\_aa`¥¥Y`a¥S^[\_  
@HWI-EAS443:3:14:522:1792#0/1  
AAACTGGGATGAGAATGGGAGACCTTCACTACCTCCAGAG  
+HWI-EAS443:3:14:522:1792#0/1  
^a`Q^bIa]aa\_]M\_[M[\_]]\_`\_``TS\_aTZP\_\_^\_^\_  
@HWI-EAS443:3:14:567:1364#0/1  
AAGCGATTTGCAGACAATGGATTGCGTGATGCCCCATTCC

+HWI-EAS443:3:14:567:1364#0/1  
\_¥VRYTXNQaa]\_Va\_X]\_ZaS[XGPG`\_¥MHU`ba¥R¥`  
@HWI-EAS443:3:14:78:1579#0/1  
GAGAAACTGTGATGAAAATGGGAGACCTTCACTACCTCCA  
+HWI-EAS443:3:14:78:1579#0/1  
a¥\_\_`aaaaSaaaa`^a\_a^^Za]\_a`aaaa^W`\_Y``\_  
@HWI-EAS443:3:15:1043:1047#0/1  
GCCTCGATATCGAAACAGCCACTCTTGGTGGGAAACAAAT  
+HWI-EAS443:3:15:1043:1047#0/1  
abbbbbbabbbabaab`ab``aaaaaaaa]`¥`\_`a\_aaa`  
@HWI-EAS443:3:15:148:468#0/1  
TGAGAACGGGAGACCTTCACTACCTCCAGAGCAGAAATGA  
+HWI-EAS443:3:15:148:468#0/1  
aaa]P¥Ta`\_TZP\_\_\_`\_`\_`aZ[``aa^a`a[aX\_Va\_¥  
@HWI-EAS443:3:15:1563:1963#0/1  
TGATGAGAATGGGGACCTTCACTACCTCCAGAGCAGAAA  
+HWI-EAS443:3:15:1563:1963#0/1  
ababbab[`X`baGaQ\_Y\_GN\_]\_^WQXY`\_a]\_NG`Q¥¥  
@HWI-EAS443:3:15:1771:1015#0/1  
CAGAAAGGCAGCGAAGTAGGTACAGATGCAATTGTCAT  
+HWI-EAS443:3:15:1771:1015#0/1  
YN¥S]`]aS[\_TWZ`S\_b[¥]XW\_^aZ^^ROY`]TQZYR[  
@HWI-EAS443:3:15:438:422#0/1  
CACGGTTCGAGTCTCTGAAAATATACAGAGATTCGATTGG  
+HWI-EAS443:3:15:438:422#0/1  
ababb^`b^bb`ba\_ab\_aaaaaa`aaa\_``\_\_^UDR\_\_\_  
@HWI-EAS443:3:15:560:1202#0/1  
AACACGGTTCGAGCCTCTGAAAATATACAGAGATTCGCTT  
+HWI-EAS443:3:15:560:1202#0/1  
`a`\_a\_Va\_^TX]FQW\_a]SXY`\_^\_\_Y\_]`][UG\_S][U  
@HWI-EAS443:3:16:1122:715#0/1  
GAAAATATACAGAGATTCGCTTGGGAGAACTATGATGAGA  
+HWI-EAS443:3:16:1122:715#0/1  
YZ¥^]Z\_a\_]a\_\_\_aa¥a`^aa]Z]WZ¥`]`a\_^[ZaT  
@HWI-EAS443:3:16:1147:1948#0/1  
GATATCGAAACAGCCACTCTTGGTGGGAAACAAATCGTGG  
+HWI-EAS443:3:16:1147:1948#0/1  
abbbbaa`aaaa`¥a^`\_^SSK`¥`\_\_\_\_\_^^X`R^Z  
@HWI-EAS443:3:16:1510:1549#0/1  
GGAGAACTGTGATGGGAATGGGAGACCTTCACTACCTCC  
+HWI-EAS443:3:16:1510:1549#0/1  
^`SXaYRMR]W0¥¥HSFQT]TRU`BBBBBBBBBBBBBBB  
@HWI-EAS443:3:16:1521:1118#0/1  
GAGAACTGTGATGAGAATGGGAGACCTTCACTAACTCCA  
+HWI-EAS443:3:16:1521:1118#0/1  
^aaa¥[aa\_\_b\_a`\_¥\_]PLT]a¥XWa¥W`R^]GU\_W[^  
@HWI-EAS443:3:16:739:453#0/1  
GCCCTTAGTAGCATCAAGGTCTCTAATCGTTAAAGATTA  
+HWI-EAS443:3:16:739:453#0/1  
aaaababb^a`aaa\_aaba]\_aa`a`aaaa`\_^\_aa\_\_a

@HWI-EAS443:3:16:739:845#0/1  
GCCGCATTTCTCAATTAACCACCTTATTTCTCAAATTT  
+HWI-EAS443:3:16:739:845#0/1  
ababbabbba\_\_\_aaaaa`^`\_]aaaaa\_\_aa^`^`\_`\_`  
@HWI-EAS443:3:16:775:523#0/1  
ATTATCTTTTGCCTAGGCATGAGGATGAACCGTCTCGTG  
+HWI-EAS443:3:16:775:523#0/1  
abaa`abaaaaa`aaa\_aaa`[a\_aa\_a\_X`a¥U`[\_Ua  
@HWI-EAS443:3:16:866:594#0/1  
AGAACTGTGATGAGAATGGGAGACCTTCACTAGCTCCAG  
+HWI-EAS443:3:16:866:594#0/1  
a`[YaabbYb^¥aYZ]¥T`aa[a`\_]Q\_^aX\_XFL\_\_VQ\_  
@HWI-EAS443:3:17:1072:1816#0/1  
TAATCGGTAAATATTACTGAAGTTCGCTTTCAGTACT  
+HWI-EAS443:3:17:1072:1816#0/1  
aaaa\_baYaaaaa`abaaaa`\_`¥`\_a`\_\_`\_\_a[\_]`  
@HWI-EAS443:3:17:1388:1806#0/1  
AAGCCCTTAGTAGCATCAAGTCTCTAATCGGTAAAGAT  
+HWI-EAS443:3:17:1388:1806#0/1  
aaa\_\_aaa\_^ba`b`\_`^TWTW^Za`VaX\_UVZ^Z\_\_ZV  
@HWI-EAS443:3:17:1676:1972#0/1  
GTCGCTTTCAATCTGTGCCGATTTATTCAATTAACCACC  
+HWI-EAS443:3:17:1676:1972#0/1  
a^U]XT¥QF¥QNVXKWKV^OF`YXGX\_XR^YXBBBBBBBB  
@HWI-EAS443:3:17:1678:1214#0/1  
GCCGGATTTCTCAATTAACCACCTTATTTCTCAAATTT  
+HWI-EAS443:3:17:1678:1214#0/1  
a\_L]DU^PMXVVV¥ZUSU``WNR0aa`Q¥a]UaR]LNX]`  
@HWI-EAS443:3:17:1788:379#0/1  
GATGAGAATGGGAGACCTTCACTACATCCAGAGCAGAAAT  
+HWI-EAS443:3:17:1788:379#0/1  
a\_\_[X]ZS`\_\_aU\_^PWYUUUUVSUFVXOYZMRVX\_XORV  
@HWI-EAS443:3:17:317:580#0/1  
CGCACGCAAAGAGGGCCTATTATCCTTTGCCTAGGCATGA  
+HWI-EAS443:3:17:317:580#0/1  
aaaa¥aaa`X`\_^]Z^aaa`\_`\_\_\_\_\_¥¥`\_`\_¥¥\_`^  
@HWI-EAS443:3:17:930:77#0/1  
GAAACAGTGATGAGAATGGGAGACCTTCACTACCTCCAGA  
+HWI-EAS443:3:17:930:77#0/1  
a\_b`QPaiB]\_b\_b`[abaaYa]\_`[\_]\_X\_]¥0\_ZPS\_  
@HWI-EAS443:3:18:341:1681#0/1  
TGGTAACACGGTTCGAGTCTCTGAAGATATACAGAGATTC  
+HWI-EAS443:3:18:341:1681#0/1  
^^aYa^a`aSZ]X\_]\_Va`^aJYa[\_a`aa\_a`\_\_\_\_¥]¥  
@HWI-EAS443:3:18:485:250#0/1  
GGAGAACTGTGATGAGAATGGGGACCTTCACTACCTCC  
+HWI-EAS443:3:18:485:250#0/1  
a[[XXX¥a\_] [QY\_`PRMRPL[H[[NPG¥TTQQWVNHVN  
@HWI-EAS443:3:18:668:1337#0/1  
CGGCACAGATTGAAGGCGACAGAGAATAGTTTCGAACAA

+HWI-EAS443:3:18:668:1337#0/1  
a¥]S¥ba\_\_\_ZZQ]FX`a]NaaQ`¥\_]`\_ZSQF¥`]X]\_  
@HWI-EAS443:3:18:750:1627#0/1  
GTCATGTCAGAAAGGTAGCGCGAAGTGGGTACAGATGCAA  
+HWI-EAS443:3:18:750:1627#0/1  
a\_¥aa`\_a^]a]a\_Y\_a\_\_^\_^\_¥VQ\_]Z\_]\_[^]X]^  
@HWI-EAS443:3:18:801:1341#0/1  
CTTGGAGAAACTGCGATGAGAATGGGAGACCTTCACTACC  
+HWI-EAS443:3:18:801:1341#0/1  
aa`a^a\_`aa\_\_a`\_`^`\_`\_\_\_\_\_]`\_`U]\_]`UW\_]U  
@HWI-EAS443:3:19:1279:121#0/1  
CTCCCTCCTCAGTGAAAGCCCTTAGTAGCATCAAGGTCTC  
+HWI-EAS443:3:19:1279:121#0/1  
ab`^^bb¥^XaaX`\_a\_XZQX]aV\_\_b`\_[[LYX``RY^V  
@HWI-EAS443:3:19:343:1723#0/1  
GCCCTTAGTAGCATCAAGGTCTCTAATCGGTTAAAGATTA  
+HWI-EAS443:3:19:343:1723#0/1  
[`bbabb]\_abbb[\_b¥bb\_bbbb\_bbb\_a\_`aa`\_a`aa  
@HWI-EAS443:3:19:440:1033#0/1  
GCCGCCTTCTTCAATTAACCACCTTATTTCTCAAATTT  
+HWI-EAS443:3:19:440:1033#0/1  
a`\_P]NR\_]¥a`\_a\_b\_aa\_bYaa`a][\_\_aaa\_]\_NY[^  
@HWI-EAS443:3:19:725:1336#0/1  
CACGAGACTGGTTCATGCTCAGGCCTAGGCAAAAGATAAT  
+HWI-EAS443:3:19:725:1336#0/1  
a\_]aVUQ\_WVXPP`¥LL[\_[HJRVa¥\_N[XLQ\_¥Y[V\_[V  
@HWI-EAS443:3:1:117:293#0/1  
GAAACTGTGATGAGAATGGGAGACCTTCACTAGCTCCAGA  
+HWI-EAS443:3:1:117:293#0/1  
a`¥\_H[U]`bbba\_N]WW¥`X^VOST[\_ZQX¥H]OF[BBB  
@HWI-EAS443:3:1:1418:1447#0/1  
CTCCCCTTCTCATCACAGTTTCTCCAAGCGAATCTCTGTA  
+HWI-EAS443:3:1:1418:1447#0/1  
`aa\_abXbbbbbb[b`aaa\_aTbaabababa`a\_`]abaa  
@HWI-EAS443:3:1:590:84#0/1  
ACAATTGCATCTGTACCTACTTCGCGTTACCTTTCTGACA  
+HWI-EAS443:3:1:590:84#0/1  
aZ\_]a^aa0\_[0aaZ¥^W`\_X^aV\_^aZ^^WO\_^\_V]\_BBB  
@HWI-EAS443:3:1:704:817#0/1  
CAGAGATTCGCTTGGAGAAAGTGTGATGAGAATGGGAGAC  
+HWI-EAS443:3:1:704:817#0/1  
a^a¥aW\_baa¥a]b¥abaaYD^`a`ZXX\_¥QaabaBBBB  
@HWI-EAS443:3:1:723:161#0/1  
ATGAGAACGGGAGACCTTCACTACCTCCAGAGCAGAAATG  
+HWI-EAS443:3:1:723:161#0/1  
\_bb\_b`\_VZ^aaa[GQV`\_aX`\_Y[\_O`\_RR^R^^UXBBB  
@HWI-EAS443:3:20:1100:1143#0/1  
GCGCTACCTTCTGACATGACCCTCGAGCAAATGTCACGA  
+HWI-EAS443:3:20:1100:1143#0/1  
aaaaaaaa`aa`\_aa\_`aa\_\_^\_^aU\_WTWZ¥^VWV[W

@HWI-EAS443:3:20:1316:843#0/1  
CAGTCAAAGCCCTTAGTAGCATCAAGGTCTCTAATCGGTT  
+HWI-EAS443:3:20:1316:843#0/1  
abbbbabbbaabbbbbbbb^bbaabaa^\_babbba`aa[b  
@HWI-EAS443:3:20:811:426#0/1  
CGATATCGAAACAGCCACTCTTGGTGGGAAACAAATCGTG  
+HWI-EAS443:3:20:811:426#0/1  
abZS\_]`]]^aa[U^^¥HTaaaV`a`UYRaa^[TYW[  
@HWI-EAS443:3:21:1337:816#0/1  
GAATGGGCGACCTTCACTACCTCCAGAGCAGAAATGAAAA  
+HWI-EAS443:3:21:1337:816#0/1  
`XX[]YEX]U¥\_\_^\_\_\_\_^`[[RU^[`S[`WPZZ\_U¥¥Y  
@HWI-EAS443:3:21:1348:1221#0/1  
ATCGAAACAGCCACTCTTGGTGGGAAACAAATCGTGGAAT  
+HWI-EAS443:3:21:1348:1221#0/1  
a`aa`ab\_[^\_\_\_\_\_]S]]OSZ[\_`U\_]V\_]^SP^Y`\_]RH  
@HWI-EAS443:3:21:156:20#0/1  
AGAATGGGCGACCTTCACTACCTCCAGAGCAGAAATGAAA  
+HWI-EAS443:3:21:156:20#0/1  
ab`X¥bb`K¥`b^YRaZab\_`\_]`a¥[aX^aa[MG¥YYYYY  
@HWI-EAS443:3:21:1658:1855#0/1  
GAGAAACTGTGATGAGAATGGGAGACCTTCACTACCTCCA  
+HWI-EAS443:3:21:1658:1855#0/1  
a[aaaa¥Z`[ba[\_[`]¥a[TR^G[WFZRW]H]SSVYJX]  
@HWI-EAS443:3:21:388:1654#0/1  
CCGCATTTCTTCAATTAACCACATTATTTCCCTCAAATTTCT  
+HWI-EAS443:3:21:388:1654#0/1  
ab]]¥a¥¥¥^YY^aaaab[U^UGYaaa\_Y^`¥V\_M^`^a  
@HWI-EAS443:3:21:574:896#0/1  
CGCATTTCTTCAATTAACCACCCTATTTCCCTCAAATTTCT  
+HWI-EAS443:3:21:574:896#0/1  
^`bb\_bba^bba^b`]`babbaaabbaaa`aaa]\_aa`a`  
@HWI-EAS443:3:22:1657:1038#0/1  
ATCGAAACAGCCACTCTTGGTGGGAAACAAATCGTGGAAT  
+HWI-EAS443:3:22:1657:1038#0/1  
aa\_`\_`a\_\_b`Xa\_]W`\_`[X\_\_[[^^Z^^\_XZ\_W\_U]Z^  
@HWI-EAS443:3:22:913:359#0/1  
GTCGCATTCAATCTGTGCCGATTTCTTCAATTAACCACC  
+HWI-EAS443:3:22:913:359#0/1  
¥``]`GY`]aZZTSaSaVRRWRY^Y¥\_QJWS\_^\_\_[^]T  
@HWI-EAS443:3:23:132:438#0/1  
GGCCTCGATATCGAAACAGCCACTCTTGGTGGGAAACAAA  
+HWI-EAS443:3:23:132:438#0/1  
¥T\_a`aW^b]\_`\_Y`XR¥aabaa¥^`][Q\_a¥Z¥HGQV¥  
@HWI-EAS443:3:23:433:238#0/1  
GGCTGTTTCGATATCGAGGCCAAGGGAGTTGCCTCTTCCT  
+HWI-EAS443:3:23:433:238#0/1  
abba]P[b^ZW^`]S]ZX`Z]\_\_V`\_`[¥FWP[[U\_]PY`  
@HWI-EAS443:3:24:411:780#0/1  
CTTTAACCGATTAGAGACCTTGATGCTACTAAGGGCTTTC

+HWI-EAS443:3:24:411:780#0/1  
`[[[]`b^]bbb¥^W]a\_Ya`aa^`\_Z\_\_aa[[[[[YRU]\_]`  
@HWI-EAS443:3:24:752:676#0/1  
CTTGGAGAACTGTGACGAGAATGGGAGACCTTCACTACC  
+HWI-EAS443:3:24:752:676#0/1  
aa`[bbaa\_b`aa\_a[a^^a\_`aa`]X\_Z^¥TUaaZ[\_¥]  
@HWI-EAS443:3:24:769:1700#0/1  
GCCCTTAGTAGCATCAAGGTCTCTAATCGTTAAAGATTA  
+HWI-EAS443:3:24:769:1700#0/1  
abbaaaa`\_baaa`aaa¥\_^\_aaaa`a`^`[\_`\_^`\_\_¥^\_  
@HWI-EAS443:3:24:81:338#0/1  
GACCTTGATGCTACTAAGGGCTTTCCTGAGGAGGGAGCA  
+HWI-EAS443:3:24:81:338#0/1  
ab]baaa[abaaa^a`\_\_aa\_aa``]^aa`a`\_aaa^a\_`  
@HWI-EAS443:3:24:877:1116#0/1  
GAAAGCCCTTAGTAGCATCAAGGTCTCTAATCGTTAAAG  
+HWI-EAS443:3:24:877:1116#0/1  
abbbb[`bbaab\_abaabaaab`¥aabaab`b`abX``````  
@HWI-EAS443:3:25:157:1885#0/1  
CAGAAAGGCAGCGAAGTAGGTACAGATGCAATTGTCAT  
+HWI-EAS443:3:25:157:1885#0/1  
abbbYabba`bbbabba^bba\_bbbaaa`baa`aa[a``  
@HWI-EAS443:3:26:1016:1761#0/1  
GAAAGCCCTTAGTAGCATCAAGGTCTCTAATCGTTAAAG  
+HWI-EAS443:3:26:1016:1761#0/1  
aaaa[^aa`aa[b^aa^aa`\_U^aaaa``¥Z[X`\_Z`Y  
@HWI-EAS443:3:26:1738:1410#0/1  
GCCGCATTTGTTCAATTAACCACCTTATTTCCCTCAAATTT  
+HWI-EAS443:3:26:1738:1410#0/1  
aYR`WW`YF]``TY\_\_\_RNYW[]]YT`a¥T\_`T[]¥]^  
@HWI-EAS443:3:26:37:488#0/1  
GCCCTTAGTAGCATCAAGGTCTCTAATCGTTAAAGATTA  
+HWI-EAS443:3:26:37:488#0/1  
aabba`]a\_bbbaabb`a`¥aabaY\_a^\_a\_]`^Z``````\_  
@HWI-EAS443:3:26:648:527#0/1  
GAAACTGTGCTGAGAATGGGAGACCTTCACTACCTCCAGA  
+HWI-EAS443:3:26:648:527#0/1  
aaa`aaa¥a\_`a`a````a`a\_`\_Y][^^a\_`^`\_\_^]`^¥a`  
@HWI-EAS443:3:26:706:576#0/1  
GAGAATGGGAGGCCTTCACTACCTCCAGAGCAGAAATGAA  
+HWI-EAS443:3:26:706:576#0/1  
aaa[^`a\_YYa\_Y]\_\_`aW[\_VZZ]\_[\_^^VZ\_¥W¥¥¥[Z  
@HWI-EAS443:3:26:810:1532#0/1  
GCTTGGAGAACTATGATGAGAATGGGAGACCTTCACTAC  
+HWI-EAS443:3:26:810:1532#0/1  
]¥a\_[]¥ZU]ab]aW^Za`^`]\_a]b]aaaaa]a]`a\_a¥  
@HWI-EAS443:3:27:1069:952#0/1  
ATGGTGAAATTTCTCCAATTTGCTCCCTCCTCAATGAA  
+HWI-EAS443:3:27:1069:952#0/1  
]`S¥Y\_bb\_bbb`[\_`^`b`ab\_a`a`\_`\_\_]ab`\_aaa



@HWI-EAS443:3:27:1118:401#0/1  
ATCCGCAAGCGATTTGCAGACAATGGATTGGGCGATGCCC  
+HWI-EAS443:3:27:1118:401#0/1  
Z\_^a[N][ZX]¥XTZa\_]BBBBBBBBBBBBBBBBBBBB  
@HWI-EAS443:3:27:1229:528#0/1  
AGAAACTGTGATGAGAATGGGAGGCCTTCACTACCTCCAG  
+HWI-EAS443:3:27:1229:528#0/1  
\_]\_^b\_^¥W¥ZW¥][X0^aa\_TZFFM]^\_TGTGX¥ST`a  
@HWI-EAS443:3:27:1730:531#0/1  
ACTTAGAATGACAATTGCATCTGTAGCTACTTCGCGCTAC  
+HWI-EAS443:3:27:1730:531#0/1  
^`¥¥¥\_aSa\_QT]^\_V\_QZaS¥^H[FU^aa`¥G]Xa`a¥N  
@HWI-EAS443:3:27:304:257#0/1  
GAAACTGTGATGAGAATGGGAGACCTTCACTACCTCCAGA  
+HWI-EAS443:3:27:304:257#0/1  
^abbaab\_baab`a`aaa``aa]a`a``¥JZ¥\_^[\_^\_^  
@HWI-EAS443:3:27:485:206#0/1  
TGTCTGCAAATCGCTTTCGGATATGCCAAAGGAAAAAGTC  
+HWI-EAS443:3:27:485:206#0/1  
]a^¥Vbbb¥\_¥]\_YZ^a]X[`]]]a`a]]X]SZ`HUXQX  
@HWI-EAS443:3:27:60:312#0/1  
CCGCATTTCTTCAATTAACCACCTTATTTCTCAGATTTCT  
+HWI-EAS443:3:27:60:312#0/1  
aba\_[Z\_]a]^Z\_Za\_QZ]\_[\_[YU\_YO¥¥UY\_XGP]YT^  
@HWI-EAS443:3:27:75:878#0/1  
GAAACTGTGATAAGAATGGGAGACCTTCACTACCTCCAGA  
+HWI-EAS443:3:27:75:878#0/1  
^a¥`bbaabbbbbbb^bbaa^``abaabbbaba`ab``aa  
@HWI-EAS443:3:28:1025:344#0/1  
GGAGAACTGGGATGAGAATGGGAGACCTTCACTACCTCC  
+HWI-EAS443:3:28:1025:344#0/1  
a]R^^[ZQNWL\_ZV[S\_WVv[\_SBBBBBBBBBBBBBBBB  
@HWI-EAS443:3:28:13:434#0/1  
CTTAGTAGCATCAAGGTCTCTAATCGGTAAAGATTACAC  
+HWI-EAS443:3:28:13:434#0/1  
aa]TW^aXa`^\_]WX]V``aaa`a`a`U\_\_YY¥]]^^YLV  
@HWI-EAS443:3:28:1508:175#0/1  
AGTGAAAGCCCTTAGTAGCATCAAGGTCTCTAATCGGTAA  
+HWI-EAS443:3:28:1508:175#0/1  
a`\_^`]`^YW^aaa^WZ\_S[XEY]QZVPZ\_`\_\_[W]`WWW  
@HWI-EAS443:3:28:432:800#0/1  
CGCATTTCTTCAATTAACCACCTTACTTCCTCAAATTTCT  
+HWI-EAS443:3:28:432:800#0/1  
ab`X`aV\_aaaaaa`a`a`Z``aaa\_`\_`aaZR^`W``\_  
@HWI-EAS443:3:28:450:396#0/1  
TGAGAATGGGAGACCTTCACTACCTCCAGAGAAGAAATGA  
+HWI-EAS443:3:28:450:396#0/1  
OIY\_¥¥U¥W^b\_U\_a]`[T`XZ\_PXUaa[`HV\_SX\_GZ[  
@HWI-EAS443:3:28:623:47#0/1  
GCCGCATTTCTTCAATTTACCACCTTATTTCTCAAATTT

+HWI-EAS443:3:28:623:47#0/1  
aaaa\_`^¥^aaaaa\_\_`a`a^X`a\_\_\_^a]^^[`\_\_^^`^`  
@HWI-EAS443:3:28:769:172#0/1  
TGATGCTACTAAGGGCTTTCAGTACTGAGGAGGGAGCAATAGT  
+HWI-EAS443:3:28:769:172#0/1  
¥bbbb`a`^bbbaa\_`abaa`^]\_baa`aa\_aX`^aa\_]`  
@HWI-EAS443:3:28:930:291#0/1  
GAAACTGTGATGAGAATGGGAAACCTTCACTACCTCCAGA  
+HWI-EAS443:3:28:930:291#0/1  
R\_\_TT`aS^aS[U¥N`\_\_\_NRF]000GM\_WRZHZZXS\_a[  
@HWI-EAS443:3:29:920:689#0/1  
GAAAGCCCTTAGTAGCATCAAGTCTCTAATCGGTTAAAG  
+HWI-EAS443:3:29:920:689#0/1  
a\_]\_XNTZW]aVXWVQ[\_¥¥[U^WFQWX^[\_WW`[OQBBBB  
@HWI-EAS443:3:2:1161:1514#0/1  
GCCGCATTTCTTCAATTAACCACATTATTTCCCTCAAATTT  
+HWI-EAS443:3:2:1161:1514#0/1  
aY]Y\_\_ZQ\_^ZWZU[a`YKZWaVLP\_[a`\_Z]`^`W^^^\_  
@HWI-EAS443:3:2:1167:1897#0/1  
GCCGCATTTGTTCAATTAACCACCTTATTTCCCTCAAATTT  
+HWI-EAS443:3:2:1167:1897#0/1  
^]aa`\_bbaG`^\_a^a`XaS¥\_aaaSa`a]^Za\_\_\_^\_]B  
@HWI-EAS443:3:2:143:1365#0/1  
TGAGAATGGGAGACCTTCACGACCTCCAGAGCAGAAATGA  
+HWI-EAS443:3:2:143:1365#0/1  
\_a^baa`Ua`Y[ ]N\_\_JabUG`R`Z^]U\_aU`\_U^X``Z  
@HWI-EAS443:3:2:1602:876#0/1  
GTGCGTTTCAATCTGTGCCGCATTTCTTCAATTAACACC  
+HWI-EAS443:3:2:1602:876#0/1  
a\_YQ00X[\_\_\_¥TY[\_0QaYU`\_SV[^]V^\_]QPVHZXZ  
@HWI-EAS443:3:2:187:307#0/1  
CTCGTGACATTTCTCGAGGGTCATGTCAGAAAGGAAGCG  
+HWI-EAS443:3:2:187:307#0/1  
ababa]aUa\_bbb\_aa]Xba`VPXZa`\_\_aaa]`bGaaRb  
@HWI-EAS443:3:2:463:665#0/1  
TGCCGCATTTCTTCAATTAACCACCTTATTTCCCTCAAATT  
+HWI-EAS443:3:2:463:665#0/1  
Z\_VbaMabbaaaTSG]aba\_b`a^b`\_a\_a[TaaaS^a\_  
@HWI-EAS443:3:2:576:559#0/1  
CAAAGAGGGCCTATTATCTTTTGCCTAGGCAAGAGCATGA  
+HWI-EAS443:3:2:576:559#0/1  
aabbbabaaaabaaaaaaabaaa\_aa```a``\_a`\_aaa  
@HWI-EAS443:3:2:758:103#0/1  
GAGAACTATGATGAGAATGGGAGACCTTCACTACCTCCA  
+HWI-EAS443:3:2:758:103#0/1  
a`aX``^aaa\_\_\_\_\_]^\_^]`^^UVVXV]]Y[Y^^VIYYYY  
@HWI-EAS443:3:2:786:422#0/1  
CAGTAAAAGCCCTTAGTAGCATCAAGTCTCTAATCGGTT  
+HWI-EAS443:3:2:786:422#0/1  
abb`a`bbb\_\_\_bbaa`baaab^aaaaa`babaaaSaa\_a

@HWI-EAS443:3:2:886:168#0/1  
GAAACTGTGATGAGAATGGGAGACCTTCAGTACCTCCAGA  
+HWI-EAS443:3:2:886:168#0/1  
`a[MYW`¥a`a`V`YV^a`\_Va]YNVZVVDTUMPQPTU]B  
@HWI-EAS443:3:2:937:1323#0/1  
GCGCCACCTTTCTGACATGACCCTCGAGGAAATGTCACGA  
+HWI-EAS443:3:2:937:1323#0/1  
aaa`M¥¥^¥]MGW^^¥Va\_¥aZVZORP^SWLTRPUUPTQ  
@HWI-EAS443:3:2:987:1181#0/1  
AGAAACTGTGATGAGAATGGGAGACCTTCACTACCACCAG  
+HWI-EAS443:3:2:987:1181#0/1  
^`]b[``\_T¥aa`]a[ababaa`[]aaaTa[aa^ZaPGRY  
@HWI-EAS443:3:30:108:801#0/1  
GAAACTATGATGAGAATGGGAGACCTTCACTACCTCCAGA  
+HWI-EAS443:3:30:108:801#0/1  
a\_Y¥aabbba\_baa\_aabbaaaaaaabaaaaaa\_a`\_\_^  
@HWI-EAS443:3:30:1180:540#0/1  
GATGAGAACGGGAGACCTTCACTACCTCCAGAGCAGAAAT  
+HWI-EAS443:3:30:1180:540#0/1  
aaa`aa`a`aa\_aa`[a`¥a`^¥`^`^`\_\_`V`\_Y^¥^  
@HWI-EAS443:3:30:1663:1066#0/1  
AGAAACTGTGATGAGAATGGGAGACCTTCACTACATCCAG  
+HWI-EAS443:3:30:1663:1066#0/1  
^^`\_]`\_`\_¥a`V]a`a[[^\_WX]a\_]YX]UGQOFZ¥  
@HWI-EAS443:3:30:1759:571#0/1  
GCCGCAGTTCTTCAATTAACCACCTTATTTCTCAAATTT  
+HWI-EAS443:3:30:1759:571#0/1  
`¥XX¥¥IM¥[`aXZ]VYZPXQW^[\_]a^TT]\_\_]^R^Y¥  
@HWI-EAS443:3:31:1565:774#0/1  
ATGAGAATGGGCGACCTTCACTACCTCCAGAGCAGAAATG  
+HWI-EAS443:3:31:1565:774#0/1  
RUaW¥\_a\_W\_¥I\_`^V¥]\_X^bY]aZ\_a`YSaZb[[PQa  
@HWI-EAS443:3:31:1591:1698#0/1  
TACAGAGATTGCTTGGAGAAACTGGGATGAGAATGGGAG  
+HWI-EAS443:3:31:1591:1698#0/1  
V\_\_`^`¥```S]RP]]M^Z\_]^YYZJPWdWHT]X[]^R^  
@HWI-EAS443:3:31:1701:1437#0/1  
GAAACTGTGATGAGAATGGGAGACGTTCACTACCTCCAGA  
+HWI-EAS443:3:31:1701:1437#0/1  
aX]¥JYZSTOZ^NGYYP[BBBBBBBBBBBBBBBBBBBB  
@HWI-EAS443:3:31:529:1918#0/1  
GCCGCATTTCTTCAATTCACCACCTTATTTCTCAAATTT  
+HWI-EAS443:3:31:529:1918#0/1  
`bbba`a\_bbbabbabb\_bbabbaaa]baabaabbbaa``  
@HWI-EAS443:3:31:793:1648#0/1  
CCTCGATATCGAAACAGCCACTCTTGGTGGGAAACAAATC  
+HWI-EAS443:3:31:793:1648#0/1  
ab`b``Yaa\_a\_aa`aaa`\_]^^¥WIZ^^^`\_[]`Y\_V¥  
@HWI-EAS443:3:31:976:1128#0/1  
ATCGAGGCCAAGGGTGGTGCCTCTTCTTTTAAGGACTTT

+HWI-EAS443:3:31:976:1128#0/1  
ab\_Raaa`a`a`\_UD¥G[\_`a`^`^`\_a`aaa\_]`^¥]^`\_`\_`  
@HWI-EAS443:3:32:1265:12#0/1  
GTCGCTTTC AATCTGGGCCGCATTTCTTCAATTAACCACC  
+HWI-EAS443:3:32:1265:12#0/1  
\_WX`]TZ\_\_^¥¥¥Y\_H]]^ [P^`\_XTU000[PVQXFX[^X  
@HWI-EAS443:3:32:143:444#0/1  
CCTCTTTC AAGATCCATTCCACGATTTGTTTCCCACCAAG  
+HWI-EAS443:3:32:143:444#0/1  
\_]Y]]]]¥PU]]U]]V]][]^`\_`^`^`¥U]][\_U]^`¥YNV  
@HWI-EAS443:3:32:1473:67#0/1  
CGTGGAATGGATCTTGAAAGAGGAATCCAGCGAGAACTT  
+HWI-EAS443:3:32:1473:67#0/1  
`aTa`¥`abb`b\_a``]]]aa]VY\_\_SU¥[\_a¥\_ODXX`a  
@HWI-EAS443:3:32:1615:1999#0/1  
TGGCTGTTTCGATATCGAGGCCAAGGGGGTTGCCTCTTCC  
+HWI-EAS443:3:32:1615:1999#0/1  
]baabaVa`LIXP]TFPXS`VTQa[\_[FXGZHLFRPW`YY  
@HWI-EAS443:3:32:1753:1367#0/1  
CCAGTCTCGTGACATTTCTCGAGGGTCATGGCAGAAAGG  
+HWI-EAS443:3:32:1753:1367#0/1  
`b\_¥TQ\_Z¥P¥0Qq[\_T0^W]]VZR[a`\_NXHaPaU\_[  
@HWI-EAS443:3:32:405:564#0/1  
AGCCACTCTTGGTGGGAAACAAATCGTGGAATGGATCTTG  
+HWI-EAS443:3:32:405:564#0/1  
`\_a``aa`^a`aUVY¥Taa^a\_\_[[aUaUUZX\_U^U\_]\_X  
@HWI-EAS443:3:32:843:550#0/1  
GGCTGTTTCGATATCGAGGCCAAGGGGGTTGCCTCTTCCT  
+HWI-EAS443:3:32:843:550#0/1  
`[```N[\_T]XTUVRVDPWU[[YOYTNPDRPRXZXUPU^B  
@HWI-EAS443:3:32:856:1605#0/1  
CTGTGATGTGAATGGGAGACCTTCACTACCTCCAGAGCAG  
+HWI-EAS443:3:32:856:1605#0/1  
aa\_`^`]^`PX`a`\_T¥`\_a`^¥`\_UX\_VUVa¥RQXS`]W  
@HWI-EAS443:3:32:856:1948#0/1  
GAAACTGTGATGAGAATGGGAGACCTTCACTACATCCAGA  
+HWI-EAS443:3:32:856:1948#0/1  
UT]^`^`Y^`a^U]¥\_RRXWT\_b]Y¥^`T\_MR\_\_G[¥a`]Y  
@HWI-EAS443:3:32:918:1015#0/1  
GTGATGAGACTGGGAGACCTTCACTACCTCCAGAGCAGAA  
+HWI-EAS443:3:32:918:1015#0/1  
`\_XNX^`a^GZa`^¥`^Y^^a\_XKP[]PQP\_`^^¥^U\_TLP  
@HWI-EAS443:3:33:1041:1092#0/1  
CGCTTGGAGAACTGTGATGAGAATGGGAGACATTCAC TA  
+HWI-EAS443:3:33:1041:1092#0/1  
abbba````^a\_aabX\_\_a^[\_`\_a\_\_XXVWLXU`\_L]Y\_a  
@HWI-EAS443:3:33:1098:435#0/1  
ATGAGAATGGGAGACCTTCACTACCTCCAGAGAAGAAATG  
+HWI-EAS443:3:33:1098:435#0/1  
`baa`V¥a^¥\_\_`Z]`aa\_`^`\_0[aVa`a`ZKX``^Z[\_

@HWI-EAS443:3:33:1099:501#0/1  
GCTTGGAGAACTGTGATGAGAATGGGAGACCTTCTCTAC  
+HWI-EAS443:3:33:1099:501#0/1  
aabbbaa`a`aaQ]a`a\_\_\_\_a`a`a\_\_XY^VNVX\_U  
@HWI-EAS443:3:33:1327:1001#0/1  
GAAACTGTGATGAGAATGGGAGACCTTCACTAACTCCAGA  
+HWI-EAS443:3:33:1327:1001#0/1  
¥Zbbabbbabb]\_]bba`[aaa\_ba\_abaaa0`a`a^[a\_  
@HWI-EAS443:3:33:1331:1384#0/1  
CATTCTCATCACAGTTTCTTCAAGCGAATCTCTGTATATT  
+HWI-EAS443:3:33:1331:1384#0/1  
a¥babbbaabbbbaabb\_H\_abbba`a`a^]a]\_a`a`  
@HWI-EAS443:3:33:1685:1299#0/1  
GCCGCATTTCTTCAATTAACAACCTTATTTCTCAAATTT  
+HWI-EAS443:3:33:1685:1299#0/1  
aYTYWXY`ZY\_RMW^[WNMDORSZUQYYUYWIPQQWZS  
@HWI-EAS443:3:33:250:289#0/1  
GCCCTTAGTAGCATCAAGTCTCTAATCGGTAAAGATTA  
+HWI-EAS443:3:33:250:289#0/1  
abbbaa\_\_Waaa`a`¥¥[`a`a¥a`Z^TXUTW\_]W^`  
@HWI-EAS443:3:33:471:1010#0/1  
CCTCCTCAGTGAAAGCCCTTAGTAGCATCAAGTCTCTAA  
+HWI-EAS443:3:33:471:1010#0/1  
aa^bb`aaa\_`a`a`aa`\_`Ra¥`a`a\_\_ZWV\_^¥\_^  
@HWI-EAS443:3:33:47:621#0/1  
CTTTAACCGATTAGAGACCTTGATGCTACTAAGGGCTTTC  
+HWI-EAS443:3:33:47:621#0/1  
abbbba^abbabbaabUbbba`baaa^X]`Ya\_aaa```a  
@HWI-EAS443:3:33:620:1968#0/1  
AAGCCCTTAGTAGCATCAAGTCTCTAATCGGTAAAGAT  
+HWI-EAS443:3:33:620:1968#0/1  
a¥]bbaa\_\_Ob\_b^Zaa`^SXa`^`[V^¥WGTX¥]SSX  
@HWI-EAS443:3:33:940:1162#0/1  
CTTGATGCTACTAAGGGCTTTCCTGAGGAGGGAGCAATA  
+HWI-EAS443:3:33:940:1162#0/1  
aa`\_a`aaa\_`a`a`a`a`\_`^Z^\_¥Y^\_^]XZX^^^^\_  
@HWI-EAS443:3:33:973:1867#0/1  
GTGCCGCATTTCTTCAATTAACCACCTTATTTACTCAAAT  
+HWI-EAS443:3:33:973:1867#0/1  
^Y¥XT`^^^^]b]VZa]]`a\_]aVPaa\_a`aGF\_¥b\_a\_  
@HWI-EAS443:3:33:97:1180#0/1  
CACCTTGGCCTCGATATCGAAACAGCCACTCTTGGTGGG  
+HWI-EAS443:3:33:97:1180#0/1  
`Z\_aa^]Z[aa\_``¥]a\_a\_`^T^[ZS\_W]ZXLXNQYRR  
@HWI-EAS443:3:34:1067:1948#0/1  
AAACTGTGATGAGAATGGGAGACCCTCACTACCTCCAGAG  
+HWI-EAS443:3:34:1067:1948#0/1  
a[QXbT\_aa\_\_URJb]\_T^X\_Y\_OFQ]aaX\_^VXSX^^]Y  
@HWI-EAS443:3:34:1562:1936#0/1  
GCCGCATTTCTTCAATTAACCGCCTTATTTCTCAAATTT

+HWI-EAS443:3:34:1562:1936#0/1  
a`aaXTV¥K^TYWYRBBBBBBBBBBBBBBBBBBBBBBBB  
@HWI-EAS443:3:34:20:1249#0/1  
CAGTGAAAGCCCTTAGTAGCATCAAGGTCTCTAATCGGTT  
+HWI-EAS443:3:34:20:1249#0/1  
]V`^`^bbba^^`T`\_\_aa`aa`]¥aa`Z^`XBBBBB  
@HWI-EAS443:3:34:599:721#0/1  
CGATTAGAGACCTTGATGCTACTAAGGGCTTTCCTGAGG  
+HWI-EAS443:3:34:599:721#0/1  
a\_ZY\_]Xaa^a`a`[[a``][^\_Z]YX^[^[[^^Z^Z[U  
@HWI-EAS443:3:34:719:229#0/1  
CCTCAGTGAAAGCCCTTAGTAGCATCAAGGTCTCTAATCG  
+HWI-EAS443:3:34:719:229#0/1  
aaW`aZXUZSXX¥Y^XYWUXYZPWWZ¥UYPLVP[]]QBB  
@HWI-EAS443:3:34:897:1026#0/1  
GCCACTCTTGGTGGGAAACAAATCGTGAATGGATCTTGA  
+HWI-EAS443:3:34:897:1026#0/1  
`a[a\_S\_T[T]V]YWVaYQS]U¥]P]RNUYUVURXBBBB  
@HWI-EAS443:3:35:1057:1906#0/1  
GCTTGGAGAAACTGTGATGAGAATGGGAAACCTTCACTAC  
+HWI-EAS443:3:35:1057:1906#0/1  
^bYa`^^`^`bb`aV`aa`baaa¥aaUM\_aaaaaU`  
@HWI-EAS443:3:35:1092:1080#0/1  
TGAGAATGGGAGACCTACACTACCTCCAGAGCAGAAATGA  
+HWI-EAS443:3:35:1092:1080#0/1  
aaa`aaaaa]`a`\_`aaaa`a^\_a¥`\_\_\_\_\_^^`^Z\_  
@HWI-EAS443:3:35:12:907#0/1  
GCCTCGATATCGAAACAGCCACTCTTGGTGGGAAACAAAT  
+HWI-EAS443:3:35:12:907#0/1  
`bbbbbbbbbbbaYa`bbaYa^`a\_aaZaa`^Z\_a`]  
@HWI-EAS443:3:35:1533:1331#0/1  
GCCGATTCTTCAATTAACCACCTTATTTCTCAAATTT  
+HWI-EAS443:3:35:1533:1331#0/1  
a`XORZ]^`\_\_]Z]^a\_ZaWX]¥[\_a`a`a\_Y]Z]]\_aT`  
@HWI-EAS443:3:35:337:1234#0/1  
CCTTGATGCTACTAAGGGCTTTCCTGAGGAGGGAGCAAT  
+HWI-EAS443:3:35:337:1234#0/1  
abaa`U[^]aa]¥]]T¥Za\_^Ua\_\_^^UZZU^¥]]¥VRZ]  
@HWI-EAS443:3:35:376:1933#0/1  
CTTGGAGAAACTGTGATGAGAATGGGAGCCCTTCACTACC  
+HWI-EAS443:3:35:376:1933#0/1  
]FF]\_V[¥ZQa¥XP¥`PPLU¥^URMRHQFYaLF^^^UUU\_  
@HWI-EAS443:3:35:43:1631#0/1  
GCGGCACAGATTGAACGCGACAGAGAATAGTTTGAACAA  
+HWI-EAS443:3:35:43:1631#0/1  
a\_¥¥a^a[¥\_¥¥¥\_\_H[bb\_aa`aa¥Y]¥FV\_`]T\_ba^  
@HWI-EAS443:3:35:666:1479#0/1  
TATTCTCTGGCGCTTTCATCTGTGCCGCATTTCTTCAAT  
+HWI-EAS443:3:35:666:1479#0/1  
aa\_b`aba\_F^aaS\_\_X]aXJY[Z`ab^`^^`aY\_SHU^

@HWI-EAS443:3:36:113:1749#0/1  
CGATATCGAAACAGCCACTCTTGGTGGGAAACAAATCGTG  
+HWI-EAS443:3:36:113:1749#0/1  
a]UX]`\_TYX\_a`\_a^T\_`]JRKXRONLNTGL`V¥R[BBB  
@HWI-EAS443:3:36:1647:276#0/1  
CGCATTCTTCGATTAACCACCTTATTTCCCTCAAATTTCT  
+HWI-EAS443:3:36:1647:276#0/1  
\_ab\_bbab`b\_0babbab`bbabbbbbbbaababaYabb^b  
@HWI-EAS443:3:36:1703:739#0/1  
GCCGCATTCTTCAATTAACCACCTTATTTTCATCAAATTT  
+HWI-EAS443:3:36:1703:739#0/1  
Y\_\_^U`b`b]baabYb]^`[aaK]]\_N]YJWG\_LaaZ\_Sa  
@HWI-EAS443:3:36:1716:674#0/1  
CCTCGATATCGAAACAGCCACTCTTGGTGGGAAACAAATC  
+HWI-EAS443:3:36:1716:674#0/1  
ab]a^^abb`¥]a\_^¥a`[Y^Z¥U\_`XTJX]YVVJVZ]WZ  
@HWI-EAS443:3:36:1777:1758#0/1  
CCCTCCTCAGTGAAAGCCCTTAGTAGCATCAAGGTCTCTA  
+HWI-EAS443:3:36:1777:1758#0/1  
aa`NFMWaZ¥KUZ[\_^S^^XU¥]MXX]L[\_^FQLLQVXW[  
@HWI-EAS443:3:36:349:838#0/1  
GAGAAACTGTGATGAGAATGGGAGCCCTTCACTACCTCCA  
+HWI-EAS443:3:36:349:838#0/1  
X[[OXI\_a¥Y^\_0^¥V`¥QUZWUZOS`[V]HJSW¥]MV¥L  
@HWI-EAS443:3:36:46:463#0/1  
CGATATCGAAACAGCCACTCTTGGTGGGAAACAAATCGTG  
+HWI-EAS443:3:36:46:463#0/1  
aabbbbaa\_]b\_bbb][bbbaba`baaabaY[bY^ab\_a  
@HWI-EAS443:3:36:538:705#0/1  
CAGTCTCGGGACATTTCTCGAGGGTCATGTCAGAAAGGT  
+HWI-EAS443:3:36:538:705#0/1  
aa]`aaa]F¥\_a][`QY`^]]]a]\_WYVPQ[UR^^¥TY`M  
@HWI-EAS443:3:37:1165:1942#0/1  
GAAAGCCCTTAGTAGCATCAAGGTCTCTAATCGGTTAAAG  
+HWI-EAS443:3:37:1165:1942#0/1  
\_ab\_abaaa`baaa^aa[W`bbaYb`aa[E[b\_aV\_`aa\_  
@HWI-EAS443:3:37:1280:1843#0/1  
ATTATCTTTTGCCTAGGCATGAGCATGAAACAGTCTCGTG  
+HWI-EAS443:3:37:1280:1843#0/1  
`aa`a\_aa`aY\_Y\_\_^]\_]aa``aa`\_ZGb`a^`\_]^S]  
@HWI-EAS443:3:37:152:696#0/1  
GCCCCATTCTTGATCGGCTCCGCCGAGATCACAAGTCCT  
+HWI-EAS443:3:37:152:696#0/1  
Uabbb`abaab`a]ab^¥b\_ba^aa¥][G[^¥GNZ^U\_`X  
@HWI-EAS443:3:37:1584:468#0/1  
GAAACTGTGATGAGAATGGGAGACCTTCAATACCTCCAGA  
+HWI-EAS443:3:37:1584:468#0/1  
aaa\_\_aa^a`aa\_a]\_`^^\_a^\_\_Y[YG][`\_]SWYW  
@HWI-EAS443:3:37:1723:866#0/1  
CTCTTCCAGGACATACTTATGAGGATGTCAAACATGCAGT

+HWI-EAS443:3:37:1723:866#0/1  
¥RRG\_a\_PZMWKNSXZ[]ULQU[`Z]P¥\_BBBBBBBBBBBB  
@HWI-EAS443:3:37:321:1112#0/1  
GAAACTGTGATGAGAATGGGAGACCTTCAATACCTCCAGA  
+HWI-EAS443:3:37:321:1112#0/1  
aa`^baa]Y]a`]aYTWa[`aaaa`\_[SF\_aa^W`\_U^\_  
@HWI-EAS443:3:37:357:1477#0/1  
CAGATGCAATTGTCATTCTAAGTGTCTCGATGGATTCCCTC  
+HWI-EAS443:3:37:357:1477#0/1  
]V¥X`^`WZ\_aZR`\_WZ[]VZXSZVaa\_PFMVPFPRV`¥X  
@HWI-EAS443:3:37:460:970#0/1  
CAAGATCCATTCCACGATTTGTTTCCCACCAAGAGTGGCT  
+HWI-EAS443:3:37:460:970#0/1  
`aaa`aabbaaaaa`aaaaa`^`\_baaabU[Za¥aW`¥BB  
@HWI-EAS443:3:37:68:227#0/1  
GAGAATGGGAGACCTTCACTACCTCCAGCGCAGAAATGAA  
+HWI-EAS443:3:37:68:227#0/1  
aXaa`aa]a^¥[``\_]`a\_\_[``Za``\_GUZ[UGS^¥¥ZV  
@HWI-EAS443:3:38:1087:1699#0/1  
GAGAATGGGAGACCTTCACTACCTCCAGAGGAGAAATGAA  
+HWI-EAS443:3:38:1087:1699#0/1  
^\_bab`bb[bbSUR`\_Xabaabbaaab`][GZba`ab`YP  
@HWI-EAS443:3:38:1354:2009#0/1  
AGAAACTGTGATGAGAATGGGAGATCTTCACTACCTCCAG  
+HWI-EAS443:3:38:1354:2009#0/1  
aaX^ZT]b\_\_KWZG`a`^aUO`ZRV\_¥YYXTKIGW]H]G  
@HWI-EAS443:3:38:1577:1222#0/1  
CTTTAACCGATTAGAGACCTTGATGCTACTAAGGGCTTTC  
+HWI-EAS443:3:38:1577:1222#0/1  
a`bbaaaaaaaaa`a\_a`^X`\_a`aa\_a]aXXWU]]TTU\_N  
@HWI-EAS443:3:38:1733:553#0/1  
CTGTGATGAGAATGGGAGACCTTCACTACGTCCAGAGCAG  
+HWI-EAS443:3:38:1733:553#0/1  
`XaK^aa\_X¥bZ`^`bb`\_\_]\_WUaa¥`^`]L¥JUIUZ\_TJ[Q  
@HWI-EAS443:3:38:1784:1497#0/1  
CGCTTTCAATCTGTGCCGATTTCTTCAATGAACACCTT  
+HWI-EAS443:3:38:1784:1497#0/1  
Ob`b`^`a`bbbbab\_\_a`babb[abbbaZFZaab`aab\_  
@HWI-EAS443:3:38:451:1070#0/1  
AGAAACTGTGATGAGAATGGGAGTCCTTCACTACCTCCAG  
+HWI-EAS443:3:38:451:1070#0/1  
X¥R¥abab`^`\_][b`^`aZ^]\_P¥a`\_a\_T¥\_a`^`a`\_a`  
@HWI-EAS443:3:38:51:232#0/1  
GAGCAATTGGCACAGAAATTTGAGGAAATAAGGTGGTTAA  
+HWI-EAS443:3:38:51:232#0/1  
a`a`I¥aaaaaa`aa`a`aaaa`a\_YLYa`^`^`Za`V^]\_  
@HWI-EAS443:3:38:870:797#0/1  
GTGCCGATTCCTTCAATTAACACCTTATTTCTCAAAT  
+HWI-EAS443:3:38:870:797#0/1  
aY`abba^`aa¥aaaa]aaaa]baaa`S\_`^`^`a¥aQ`\_`



@HWI-EAS443:3:39:1158:819#0/1  
CCGCAAGCGATTTGCAGACAATGGATTGGGTGAGGCCCA  
+HWI-EAS443:3:39:1158:819#0/1  
``U`XT\_]ZVLFUVQ[a[¥¥0`BBBBBBBBBBBBBBBB  
@HWI-EAS443:3:39:1280:1329#0/1  
CTTTCAAGATCCATTCCACGATTTGTTTCCCACCAAGAGT  
+HWI-EAS443:3:39:1280:1329#0/1  
ababba[`bababbbbbbabaabaaaWaaba]\_aaX¥\_aT  
@HWI-EAS443:3:39:545:1249#0/1  
TGAGAATGGGAGACCTTCACTACCTCCGGAGCAGAAATGA  
+HWI-EAS443:3:39:545:1249#0/1  
]]bb`b\_\_\_\_aaa`baababVSa`[`WDXU`U\_`\_X^\_\_¥  
@HWI-EAS443:3:39:710:1209#0/1  
ATCGAAACAGCCACTTGGTGGGAAACAAATCGTGGAAT  
+HWI-EAS443:3:39:710:1209#0/1  
a`baa\_aa^aa`\_\_\_\_a`V^Va^[^a`\_`\_\_X^^X`T^]Y  
@HWI-EAS443:3:39:787:316#0/1  
CCTTGATGCTACTAAGGGCTTCACTGAGGAGGGAGCAAT  
+HWI-EAS443:3:39:787:316#0/1  
a`bba\_aaaaa` `[¥a\_]^`\_^`a`\_a]¥[a\_Y^\_\_\_\_[  
@HWI-EAS443:3:3:1033:1790#0/1  
TGAGAATGGGAGACCTTCACTACCTCGAGAGCAGAAATGA  
+HWI-EAS443:3:3:1033:1790#0/1  
a[ ]^¥`ba[Q\_\_ZZ^R`\_W\_\_RZ`\_H]YWW]]ZNB BBBB  
@HWI-EAS443:3:3:1057:77#0/1  
TGAGAATGGGAGAGCTTCACTACCTCCAGAGCAGAAATGA  
+HWI-EAS443:3:3:1057:77#0/1  
aa`a^[Sb`a\_b\_NN¥\_YaWaRWW\_MH`\_U`WUaWUY^\_B  
@HWI-EAS443:3:3:1216:1027#0/1  
AACAAATCGTGGAATGGATCTTGAAGGAGGAATCCAGCGA  
+HWI-EAS443:3:3:1216:1027#0/1  
\_WZZ\_a`aaSbaVLX]`Y\_\_¥VY]¥G^¥^X\_GO[DL]SY¥  
@HWI-EAS443:3:3:1392:1416#0/1  
CGATATCGAAACAGCCACTTGGTGGGAAACAAATCGTG  
+HWI-EAS443:3:3:1392:1416#0/1  
aZaabaa]aab]aba]aa`]aaaa]aabZ¥\_\_¥a¥\_U^Va  
@HWI-EAS443:3:3:1781:175#0/1  
GCCGCATTTATTCAATTAACCACCTTATTTCCCTCAAATTT  
+HWI-EAS443:3:3:1781:175#0/1  
a\_Y`Y[a`[H\_\_SPU^^]]Z[YYV¥\_Y^]]ZZ[W[VW]BB  
@HWI-EAS443:3:3:184:762#0/1  
GTGCTTTCAATCTGTTCCGCATTTCTTCAATTAACCACC  
+HWI-EAS443:3:3:184:762#0/1  
^R`aaaa¥bb\_aaba`a\_aa`\_aT`Y`a\_\_`a`^aX`\_W^  
@HWI-EAS443:3:3:447:694#0/1  
CGCATTTCTTCAATTAGCCACCTTATTTCCCTCAAATTTCT  
+HWI-EAS443:3:3:447:694#0/1  
ababbbbabbbbababaaabaa`aab`aabaaaabba`a  
@HWI-EAS443:3:3:496:609#0/1  
CAGTGAAGCCCTTAGTAGCATCAAGGTCTCTAATCGGTT

+HWI-EAS443:3:3:496:609#0/1  
aab\_bababababbba^aabaaaaaba\_`a`aaa`b\_^a  
@HWI-EAS443:3:3:672:1557#0/1  
GCCGCATTTGTTCAATTAACCACCTTATTTCTCAAATTT  
+HWI-EAS443:3:3:672:1557#0/1  
V¥bba`aaRR[Xa^V[M\_bab¥[H^¥\_aJa\_\_aaJI\_a^]  
@HWI-EAS443:3:3:68:706#0/1  
GCCACTCTTGGTGGGAAACAAATCGTGAATGGATCTTGA  
+HWI-EAS443:3:3:68:706#0/1  
a\_\_\_^`\_UHUW\_Y\_^\_]X\_¥^\_W`ZW]\_`\_UZVW[BB  
@HWI-EAS443:3:3:79:1986#0/1  
GAAACTGCGATGAGAATGGGAGACCTTCACTACCTCCAGA  
+HWI-EAS443:3:3:79:1986#0/1  
aabbbbWHa^W[^ZaUa]WaaaZba^)]`a\_Wa]aXBB  
@HWI-EAS443:3:3:948:475#0/1  
AGAAACTGGGATGAGAATGGGAGACCTTCACTACCTCCAG  
+HWI-EAS443:3:3:948:475#0/1  
]a][[aa`H¥Y¥aP]U]]`\_T]^U^`TGWFZ\_VTZZV¥\_  
@HWI-EAS443:3:40:1287:1223#0/1  
ATCGAAACAGCCACTCTTGGTGGGAAACAAATCGTGAAT  
+HWI-EAS443:3:40:1287:1223#0/1  
[bbbXJZ^\_WYZV\_\_a`a`VX]^ZTGXX[`XO[NP¥T]^  
@HWI-EAS443:3:40:1329:190#0/1  
GAGAACTGTGATGAGAATGGGAGAGCTTCACTACCTCCA  
+HWI-EAS443:3:40:1329:190#0/1  
a\_a\_]ZLX\_W^RW¥W`ZVW\_\_VN¥RDMVUTYVWWWUVVVY  
@HWI-EAS443:3:40:1571:894#0/1  
AGAAACTGTGATGAGAATGGGAGACCTACCTACCTCCAG  
+HWI-EAS443:3:40:1571:894#0/1  
abbabbbbab`bbab\_aabaaaba]]XD¥a^aaaa^a[\_`  
@HWI-EAS443:3:40:456:1593#0/1  
CAGTAAAAGCCCTTAGTAGCATCAAGTCTCTAATCGGTT  
+HWI-EAS443:3:40:456:1593#0/1  
aba`abbbaaaaaaba]baaaaa`¥WM]^`aaa`a\_\_V\_  
@HWI-EAS443:3:40:49:1004#0/1  
GAGAATGGGAGACCTTCACTACCTCCCGAGCAGAAATGAA  
+HWI-EAS443:3:40:49:1004#0/1  
a[]Y\_\_a`\_]\_\_[YTT[\_^^^^W[RL\_S¥PX¥FKVU^UU  
@HWI-EAS443:3:40:929:1257#0/1  
GCCGCATTTCTTCAATTAACCACCTTCTTTCTCAAATTT  
+HWI-EAS443:3:40:929:1257#0/1  
```a\_Waa\_^`a^[\`a\_a\_[`\_a\_UGYV^]\_`\_PVV[X\_  
@HWI-EAS443:3:42:120:217#0/1  
AGAAACTGTGATGACAATGGGAGACCTTCACTACCTCCAG  
+HWI-EAS443:3:42:120:217#0/1  
aa`aXaaaXa]\_\_YU\_W[\_`R`^^\_]\_¥]V^^^^^UGY  
@HWI-EAS443:3:42:159:1219#0/1  
CTTTAACCGATTAGAGACCTTGATGCTACTAAGGGCTTTC  
+HWI-EAS443:3:42:159:1219#0/1  
a`\_]Z]¥Z]T¥a¥ZP[¥`aaZ[^Za¥Z]a]``¥W¥][\_W]



+HWI-EAS443:3:44:1501:2043#0/1  
a`\_^`PW\$S`\_a\_\_aXaa\_KS]^XGQ^UJ\_]GXLS\_STYQ  
@HWI-EAS443:3:44:1504:1283#0/1  
CCCTTAGTAGCATCAAGGTCTCTAATCGGTAAAGATTAC  
+HWI-EAS443:3:44:1504:1283#0/1  
Y`a\$aa^^`^^`\_¥YW[Rbbbab\_a\$b\_X]`ZZRZ[`ZD  
@HWI-EAS443:3:44:1654:479#0/1  
AATTTCCACCATTACCTTCTCTCCAGGACATAATTATGAG  
+HWI-EAS443:3:44:1654:479#0/1  
]V¥\_aY[a`\_]b¥UI¥a]R]aa`[V]`[`¥ZaRFMO\_H][Y  
@HWI-EAS443:3:44:779:22#0/1  
TGAGAATGGGAGACCTTCACTACCTACAGAGCAGAAATGA  
+HWI-EAS443:3:44:779:22#0/1  
abX\_[aaaab\_a`¥¥a^`a`\_]TYXM]\_aX`\_^`]^X]`X  
@HWI-EAS443:3:45:1057:326#0/1  
GCCGCATTTCTTCAATTAACCACCCTATTTCCCTCAAATTT  
+HWI-EAS443:3:45:1057:326#0/1  
aa^b`aaaa\_aa``\_aaa`^]\_^]`^a``\_^`\_]^a`\_`  
@HWI-EAS443:3:46:1005:123#0/1  
GAAACAGCCACTCTTGGTGGGAAACAAATCGTGGAAATGGA  
+HWI-EAS443:3:46:1005:123#0/1  
aabaab`[a`\_\_aaa`S`ba]\_`¥\_\_\_]\_\_Za^U]^`\_Y  
@HWI-EAS443:3:46:10:607#0/1  
CGCGGAGTAGGTACAGATGCAATTGTCATTCTAAGTGTCT  
+HWI-EAS443:3:46:10:607#0/1  
^`````b¥Z¥`T^]\_Z\_\_^Z\_\_\_`a[T\_`]^`Q[M]XX¥  
@HWI-EAS443:3:46:1498:1201#0/1  
CACCTTGGCCTCGATATCGAAACAGCCACTCTTGGTGGG  
+HWI-EAS443:3:46:1498:1201#0/1  
abbbbaQaaaa\_`¥aaa^ZLXZ^LZ`¥GQ[W\_SP¥WN¥\_  
@HWI-EAS443:3:46:1700:191#0/1  
GCCGCATTTCTTCAATTAACCACCTTATTTCCCTAAATTT  
+HWI-EAS443:3:46:1700:191#0/1  
a\_aa[0``¥a`]`\_[\_]\_`^^X^^^[\_`W^]PYVV\_^^  
@HWI-EAS443:3:46:222:323#0/1  
ATCGAAACAGCCACTCTTGGTGGGAAACAAATCGTGGAAAT  
+HWI-EAS443:3:46:222:323#0/1  
aa`a\_aa`\_a]VY]\_]\_Vaa]¥^[V[\_^WW`X`\_X[Z  
@HWI-EAS443:3:46:650:773#0/1  
GCGGCACAGATTGAAAGCGACAGAGAATAGTTTGAACAA  
+HWI-EAS443:3:46:650:773#0/1  
aab`¥`XVa¥Y^a[^¥^`\_\_^`b^a`^WTUZ\_PDZO[U¥^  
@HWI-EAS443:3:47:1108:237#0/1  
GCTGGTTCTCTTTCAAGATCCATTCCACGATTTGTTTC  
+HWI-EAS443:3:47:1108:237#0/1  
aabbbb\_aaaa`aaaaaa`\_\_``a\_\_¥`^`¥`\_``^\_^U  
@HWI-EAS443:3:47:1235:134#0/1  
CCGCGTTTCTTCAATTAACCACCTTATTTCCCTCAAATTTTC  
+HWI-EAS443:3:47:1235:134#0/1  
a[bYYY\_\_\_\_\_^`QJ^]X\_Z^^Z^\_Z`\_`^WZ^]]ZZ\_Z^O

@HWI-EAS443:3:47:1715:1725#0/1  
GCGCTACCTTTCTGACATGACCCTCGAGGAAATGCCACGA  
+HWI-EAS443:3:47:1715:1725#0/1  
a\_YZ]\_WY[S^\_XYQM^GUTPYQQSYMMTYBBBBBBBBBB  
@HWI-EAS443:3:47:375:55#0/1  
CTGTGATGAGAATGGGAGACCTTCACTACGTCCAGAGCAG  
+HWI-EAS443:3:47:375:55#0/1  
abbabbbabab`bbba`ba\_\_aaaa^aa¥]`¥\_^b\_a]\_a  
@HWI-EAS443:3:47:396:21#0/1  
GGAGAACTGTGATGAGAATGGGAGAGCTTCACTACCTCC  
+HWI-EAS443:3:47:396:21#0/1  
ab`ZVY¥ab^]Z]QaUSV]BBBBBBBBBBBBBBBBBB  
@HWI-EAS443:3:47:653:1181#0/1  
GAAACTGTGATGAGAATGGGGACCTTCACTACCTCCAGA  
+HWI-EAS443:3:47:653:1181#0/1  
ZUTOMXaZaPTXZQLH[`WNLZ[JL¥VBBBBBBBBBBBBBB  
@HWI-EAS443:3:47:927:293#0/1  
GAAACTATGATGAGAATGGGAGACCTTCACTACCTCCAGA  
+HWI-EAS443:3:47:927:293#0/1  
ab`UUab`^a`OXZ]]b^YT\_a\_aVJ[Ga\_VSYLMYZZ^\_  
@HWI-EAS443:3:48:1359:863#0/1  
GGCTGTTTCGATATCGAGCCAAGGGGGTTCCTCTTCCT  
+HWI-EAS443:3:48:1359:863#0/1  
aaabb`abX`^]`^¥PXaa\_T\_¥`0aaH]UaYV\_UVa\_F[[  
@HWI-EAS443:3:48:151:2034#0/1  
CGCATTCTTCAATTAACCACCTTATTTTCGCAAATTTCT  
+HWI-EAS443:3:48:151:2034#0/1  
abK¥b`a`¥\_b\_ab^bab¥V\_a^\_bbaTWG^^^\_abbVbb  
@HWI-EAS443:3:48:1760:338#0/1  
AGAACTGTGATGAGGATGGGAGACCTTCACTACCTCCAG  
+HWI-EAS443:3:48:1760:338#0/1  
aa]Z]]XaV\_ZWaP¥EJUY\_`¥\_BBBBBBBBBBBBBBBBBB  
@HWI-EAS443:3:48:450:300#0/1  
ATTCGCTTGGAGAACTATGATGAGAATGGGAGACCTTCA  
+HWI-EAS443:3:48:450:300#0/1  
`bbbaaabababa`\_aaaa`aaaa`aaa\_a\_^\_\_\_^`  
@HWI-EAS443:3:48:538:1513#0/1  
AAACTGTGATGAGGATGGGAGACCTTCACTACCTCCAGAG  
+HWI-EAS443:3:48:538:1513#0/1  
aaaabbYba[aa^0^`[aQU`\_aa\_aa^`^\_\_\_`\_]\_aYa  
@HWI-EAS443:3:48:688:1338#0/1  
CTCTGAAAATATACAGAGATTCGCTTGGAGAACTATGAT  
+HWI-EAS443:3:48:688:1338#0/1  
aSLW]a\_OT^`X¥X]^\_XS\_`^`^\_`]]`P`TZ]aI]\_a  
@HWI-EAS443:3:48:78:696#0/1  
TGGAAGAGAAGGTAATTGTGAAATTTCTCCAATATTGCT  
+HWI-EAS443:3:48:78:696#0/1  
aaa\_^`^b^[[`¥aYaa\_^\_Y^`a``WaY[0^\_[`]\_\_^\_  
@HWI-EAS443:3:48:796:1787#0/1  
GAAACTGTGATGAGAATGGGAGACCTTCACTACCTCCAGA

+HWI-EAS443:3:48:796:1787#0/1  
a[WST]]WO¥PWUWL¥^\_TQ]YBBBBBBBBBBBBBBBBBBB  
@HWI-EAS443:3:49:1068:1216#0/1  
TGTCGCATTCAATCTGTGCCGATTTCTTCAATTAACCAC  
+HWI-EAS443:3:49:1068:1216#0/1  
\_b\_a^ZSba][a]UIbabaaaaQaa`aab\_`aa\_]Z[¥a^  
@HWI-EAS443:3:49:439:69#0/1  
AAACTGTGATGAGAATGGGAGACGTTCACTACCTCCAGAG  
+HWI-EAS443:3:49:439:69#0/1  
`ababbabbabaaab\_bba\_aaPEUaS]Va`\_`a\_\_[a\_`  
@HWI-EAS443:3:49:495:1311#0/1  
TCTTGGTGGGAAACAAATCGTGGAATGGATCTTGAAAGAG  
+HWI-EAS443:3:49:495:1311#0/1  
aaaaaaXaba`aaaa`^a`a]a`^^\_a\_Y^]a`\_^]]^^\_  
@HWI-EAS443:3:49:75:1705#0/1  
GCCCTTAGTAGCATCAAGGTCTCTAATCGGTTAAAGATTA  
+HWI-EAS443:3:49:75:1705#0/1  
`aa]`aa\_Z`\_Za`\_\_Z\_¥V]\_Z\_`Za`\_[ZZ^Z]^\_\_]Y  
@HWI-EAS443:3:4:136:909#0/1  
AGCCCTTAGTAGCATCAAGGTCTCTAATCGGTTAAAGATT  
+HWI-EAS443:3:4:136:909#0/1  
aabbbabab^bbaaaaaaa]aaaa\_`^`a]`^]`a^^^  
@HWI-EAS443:3:4:634:1887#0/1  
AGAAACTGTGATGAGAATGGGAGACTTTCACTACCTCCAG  
+HWI-EAS443:3:4:634:1887#0/1  
``[\_FV`X^[\_aIa\_`Ya^`a\_\_PHZT¥`Z\_a]Z0`G\_Z  
@HWI-EAS443:3:4:733:1395#0/1  
GATGAGAATGGGAGGCCTTCACTACCTCCAGAGCAGAAAT  
+HWI-EAS443:3:4:733:1395#0/1  
aaaa\_a``aaaa^\_IZL\_a^aa]XHZaXV\_\_U^`Y`XBBB  
@HWI-EAS443:3:4:924:1594#0/1  
TGCCGCATTTCTTCAATTAACCACCCTATTTCTCAAATT  
+HWI-EAS443:3:4:924:1594#0/1  
Vb\_W[\_X`aa`aa\_U¥`b`VaZ^aW`¥a\_``SX`]^`^]]^  
@HWI-EAS443:3:50:1531:1504#0/1  
GAATGTGAGACCTTCACTACCTCCAGAGCAGAAATGAAAA  
+HWI-EAS443:3:50:1531:1504#0/1  
aaaba\_a`aaa\_a`aaaa`a^\_\_`\_`^aWa`\_\_aa^\_\_^  
@HWI-EAS443:3:50:1711:1416#0/1  
GCTTGGAGAAACTGTGATGAGAATGGGAGATCTTCACTAC  
+HWI-EAS443:3:50:1711:1416#0/1  
`W\_\_XVS¥`aW[\_WZ^]]QXa\_\_[ULMJ^THTZ`BBBBBB  
@HWI-EAS443:3:50:706:726#0/1  
CAGCCACTCTTGGTGGGAAACAAATCGTGGAATGGATCTT  
+HWI-EAS443:3:50:706:726#0/1  
aNa]`bZ]bVZ]bH]ba^^]`WaaUQUV\_RS`OS^IXGHR  
@HWI-EAS443:3:50:849:384#0/1  
AAAGCCCTTAGTAGCATCAAGGTCTCTAATCGGTTAAAGA  
+HWI-EAS443:3:50:849:384#0/1  
abbbab`bbb`\_baabaa\_a\_a^`bab`aa\_bb\_`a^Z^`

@HWI-EAS443:3:50:962:331#0/1  
CTCAGTCAAAGCCCTTAGTAGCATCAAGGTCTCTAATCGG  
+HWI-EAS443:3:50:962:331#0/1  
a` `` `aba`aaa\_\_bba^abb\_ababa`\_] ^ `abbaa\_ab  
@HWI-EAS443:3:51:1016:840#0/1  
AAAATATCCAGAGATTGCTTGGAGAACTGTGATGAGAA  
+HWI-EAS443:3:51:1016:840#0/1  
aaa`bab`aabab\_aaab`aaaa\_a`aa^\_bV`\_aa^\_^\_  
@HWI-EAS443:3:51:1080:1228#0/1  
GTGGGATGGATCTTGAAAGAGGAATCCAGCGAGACACTTA  
+HWI-EAS443:3:51:1080:1228#0/1  
a\_baa`aaa\_aaba` `` `aaa`aa`\_^ [aa^a`a^^\_^a\_\_  
@HWI-EAS443:3:51:1209:188#0/1  
GCTTAGAGAACTGTGATGAGAATGGGAGACCTTCACTAC  
+HWI-EAS443:3:51:1209:188#0/1  
aaba[[`\_aaabaZNQ\_aa` \_\_\_\_VX\_\_aU[Za0[¥\_\_UU\_R  
@HWI-EAS443:3:51:1273:670#0/1  
GCCGCATTTCTTCAATTAACAACCTTATTTCTCAAATTT  
+HWI-EAS443:3:51:1273:670#0/1  
Z^ba¥\_` `¥¥baabbbbaabYM] `S`b\_bbb\_aababbbba  
@HWI-EAS443:3:51:952:1146#0/1  
GAAACTATGATGAGAATGGGAGACCTTCACTACCTCCAGA  
+HWI-EAS443:3:51:952:1146#0/1  
` `W[FNY¥` ¥ZZY\_^OW\_ZYQZLQXZ`YXVZXLO]GJV¥W  
@HWI-EAS443:3:52:1098:1261#0/1  
AATCGCACGCGAAGAGGGCCTATTATCTTTTGCCTAGGCA  
+HWI-EAS443:3:52:1098:1261#0/1  
a^Y]aY\_W]SY¥a^Y`aZZ`\_[YY\_]a`\_ZT]TT]aXMP  
@HWI-EAS443:3:52:110:824#0/1  
ATTTCTCGAGGCTCATGTCAGAAAGGTAGCGCGAAGTAG  
+HWI-EAS443:3:52:110:824#0/1  
aaaa¥P^`a`\_^QQ^W^^VVU^WVY]]XWRZ\_YWVSYOSX  
@HWI-EAS443:3:52:114:1940#0/1  
GGAGAACTGTGATGGGAATGGGAGACCTTCACTACCTCC  
+HWI-EAS443:3:52:114:1940#0/1  
abb\_\_\_bbbbaaba`bbaaaaa[a`a\_aa` `a\_\_` `\_\_\_Y  
@HWI-EAS443:3:52:114:56#0/1  
CCGCATTTCTTCAATTAACCACCTTATTTCTCCAATTT  
+HWI-EAS443:3:52:114:56#0/1  
`aba\_bab`bbaa`ba`a`\_` `aa\_aaa`\_bU`^`\_`\_`\_`  
@HWI-EAS443:3:52:1169:562#0/1  
GAGAATGGGAGACCTTCACTACCTCCAGCGCAGAAATGAA  
+HWI-EAS443:3:52:1169:562#0/1  
`Tb[ `a]b^Sa`U`baabYa\_ [[ ` \_HNODN]^`\_U[SQQ[  
@HWI-EAS443:3:52:193:922#0/1  
TGCGGCACAGATTGAAAGCGACAGAGAATAGATTGGAACA  
+HWI-EAS443:3:52:193:922#0/1  
Xaa^¥\_\_]\_bYQVaa[¥\_U\_` `` `Y]^XZZYDY`]ZF][\_  
@HWI-EAS443:3:52:363:1218#0/1  
CAGTCAAAGCCCTTAGTAGCATCAAGGTCTCTAATCGGTT

+HWI-EAS443:3:52:363:1218#0/1  
aabaa`b\_aaaabba`aaaaa`aba^`aabXaaaa\_a  
@HWI-EAS443:3:52:542:119#0/1  
TGCCGCATTTCTTCAATTAACCACCCTATTCCTCAAATT  
+HWI-EAS443:3:52:542:119#0/1  
aaaaa\_\_bbaaaaa¥abaa\_¥a\_`\_aaaa\_^`^a`^a`  
@HWI-EAS443:3:52:582:1532#0/1  
GGCTGTTTCGATATCGAGGCCAAGGGGTTGCCTCTTCCT  
+HWI-EAS443:3:52:582:1532#0/1  
abbbX\_a^VIRXbaX``Xb¥aab\_aaG\_UVS`a`\_ZaQ\_`  
@HWI-EAS443:3:52:814:1322#0/1  
GCGGCGCAGATTGAAAGCGACAGAGAATAGTTTCGAACAA  
+HWI-EAS443:3:52:814:1322#0/1  
a\_Ya^`\_`^`\_`a^^a\_a\_`a`a`a`a`¥aa`a¥]0]\_  
@HWI-EAS443:3:52:834:1090#0/1  
CAGCCACTCTTGGTGGGAAACAAATCGTGAATGGATCTT  
+HWI-EAS443:3:52:834:1090#0/1  
a¥Y`RWT`][Y]ZPZ\_¥VQTNX^U[VYPZ`\_^W`WPYJZ]  
@HWI-EAS443:3:53:1580:1308#0/1  
CTTAGTAGCATCAAGGTCTCTAATCGGTTAAAGATTACAC  
+HWI-EAS443:3:53:1580:1308#0/1  
abbbbbbbbbbbabb`\_ab¥bbbbabbababaaaaabaZaY  
@HWI-EAS443:3:53:465:334#0/1  
GTCTCGCTGGATTCTCTTTAAAGATCCATCCACGATTT  
+HWI-EAS443:3:53:465:334#0/1  
`[\_`\_ZV^b¥aXVX\_^Y¥RWNJ¥UUU\_V\_aVHW]HV^RLPV  
@HWI-EAS443:3:54:282:531#0/1  
ATGGAATGGTAACACGGTTCGAGTCTCTGAAAATAGACAG  
+HWI-EAS443:3:54:282:531#0/1  
abbbba\_b]baaaaaaab\_a`¥ab^^aaaa\_Y^`\_Xa]W\_`  
@HWI-EAS443:3:54:314:1844#0/1  
AGAAACTGGGATGAGAATGGGAGACCTTCACTACCTCCAG  
+HWI-EAS443:3:54:314:1844#0/1  
ZZZ`aaa¥DY^]SX\_VSaa¥a¥]TZP]Y\_a\_]a\_\_^]VZU  
@HWI-EAS443:3:54:415:1720#0/1  
CGATATCGAAACAGCCACTCTTGGTGGGAAACAAATCGTG  
+HWI-EAS443:3:54:415:1720#0/1  
aabbaaa^aab`a\_a\_^`]^\_a`W\_a\_`\_`^a\_Y^X\_U\_  
@HWI-EAS443:3:54:496:2017#0/1  
GTGATGAGAATGGGAGACCTTACCACCTCCAGAGCAGAA  
+HWI-EAS443:3:54:496:2017#0/1  
¥\_\_bb[[abb`aba\_``bbabaXa\_Z^^a^aa\_\_aaa^  
@HWI-EAS443:3:54:534:1916#0/1  
AGAAACTGTGATGAGAATGGGAGATCTTCACTACCTCCAG  
+HWI-EAS443:3:54:534:1916#0/1  
`]\_aa]`b¥`a`a^`\_aa`aa\_aZ]Xa`\_a`\_a\_Z^^]Y  
@HWI-EAS443:3:55:1101:874#0/1  
TGAAAGCCCTTAGTAGCATCAAGGTCTCTAATCGGTTAAA  
+HWI-EAS443:3:55:1101:874#0/1  
VSZa[IS]]b[U\_]ba`^RU\_\_¥b`\_baba\_a`a`^[Y]a



@HWI-EAS443:3:55:1126:541#0/1  
GATGAGAATGGGAGACCTTCACTCCCTCCAGAGCAGAAAT  
+HWI-EAS443:3:55:1126:541#0/1  
[\_b\_]bS`\_aaW¥^QYab`\_a\_XR[UEX\_RWUaZW¥QG]]  
@HWI-EAS443:3:55:1261:1598#0/1  
TGAAAATATACTGAGATTGCTTGGAGAACTGTGATGAG  
+HWI-EAS443:3:55:1261:1598#0/1  
a`¥]¥aaaXa]^`a`^^P\_\_b\_a\_\_a]^`W`aYa¥`S¥`  
@HWI-EAS443:3:55:1302:131#0/1  
CCGCGTTTCTTCAATTAACCACCTTATTTCCCTCAAATTC  
+HWI-EAS443:3:55:1302:131#0/1  
`b`YFWabVbaa`\_bbaa`\_`\_]b\_b`aa[aa`XZbaa^  
@HWI-EAS443:3:55:1604:1630#0/1  
CGAAACAGCCACTCTTGGTGGGAAACAAATCGTGAATGG  
+HWI-EAS443:3:55:1604:1630#0/1  
abV`a`\_`baaS`^ab`YmbaaX`\_`baVa`a]a\_^\_\_a¥  
@HWI-EAS443:3:55:1709:1468#0/1  
GGAGAACTGTGATGAGAATGGGAGACCTCCACTACCTCC  
+HWI-EAS443:3:55:1709:1468#0/1  
aa\_a`a`¥aa`\_`^`^a`\_`aa\_U^¥WS\_UR\_S]¥RLYQV  
@HWI-EAS443:3:55:23:1167#0/1  
AGAACTGTGATGAGAATGGGAGACCTTCACTAACTCCAG  
+HWI-EAS443:3:55:23:1167#0/1  
Zb^[Ua^ZWZSa\_U`a]Q\_aaaaYSV`\_`¥`IaPFIOW]^U  
@HWI-EAS443:3:55:364:770#0/1  
CTGTGATAAGAATGGGAGACCTTCACTACCTCCAGAGCAG  
+HWI-EAS443:3:55:364:770#0/1  
abbabbabbbaabbbb`bbbaba\_baaaaabaab`a\_ab  
@HWI-EAS443:3:55:88:1684#0/1  
TTTGCCATATCAGCAAGCGATTTGCAGACAATGGATTGGG  
+HWI-EAS443:3:55:88:1684#0/1  
\_^]WW^abaa¥HW¥YVTWZY`\_`¥[X^PSZ\_aaUU¥¥ZSUW  
@HWI-EAS443:3:56:1493:988#0/1  
CAGTGAAGCCCTTAGTAGCATCAAGGTCTCTAATCGGTT  
+HWI-EAS443:3:56:1493:988#0/1  
aaa)`\_`aa`aa]bb`aL^a[a^Z`\_a\_ZYaa`\_`aXaa¥^  
@HWI-EAS443:3:56:211:1298#0/1  
CAGAGATTGCTTGGAGAACTGTGATGAGCATGGGAGAC  
+HWI-EAS443:3:56:211:1298#0/1  
M\_Jab[\_]ab`aab\_Y\_U^`aaa\_a\_a¥TWDZa`\_]`¥]YU  
@HWI-EAS443:3:56:581:301#0/1  
CGCATTCTTCAATTAACCACCTTATTTCCCTCGAATTTCT  
+HWI-EAS443:3:56:581:301#0/1  
a`])`Zaaaaa[[aa`\_`\_`^`^aa\_aa`\_`a^a`\_`\_`^`\_`  
@HWI-EAS443:3:57:375:1845#0/1  
CCTCGATATCGAAACAGCCACTCTTGGTGGGAAACAAATC  
+HWI-EAS443:3:57:375:1845#0/1  
a`\_`abb\_aaba`aa]aaY^R`\_a[XaX]]a^a\_^\_a`Z¥  
@HWI-EAS443:3:57:593:766#0/1  
GAAAGCCCTTAGTAGCATCAAGGTCTCTAATCGGTAAAG

+HWI-EAS443:3:57:593:766#0/1  
`\_]\_X\_a¥]\_\_`\_V^baZ[`]YXaQ`^`\_]G][ ]TV^YOYB  
@HWI-EAS443:3:57:59:393#0/1  
GAAACTGTGATGAGACTGGGAGACCTTCACTACCTCCAGA  
+HWI-EAS443:3:57:59:393#0/1  
a` `][^¥V¥^[a` [HJS^a^XUWU^]]Z]\_PPPRSGLM¥X  
@HWI-EAS443:3:58:116:965#0/1  
CAGAGATTGCTTGGAGCAACTGTGATGAGAATGGGAGAC  
+HWI-EAS443:3:58:116:965#0/1  
a]babaa\_`a`ab[XXZG¥`]aa[^VV^]aV[`\_`\_`WYW[  
@HWI-EAS443:3:58:128:1623#0/1  
GGCAACACCCTTGGCCTCGATATCGAAACAGCCAATCTTG  
+HWI-EAS443:3:58:128:1623#0/1  
`aaaaabaaa\_`]¥\_\_`^`¥aa]^Z\_`a\_\_¥VPFW¥¥\_U  
@HWI-EAS443:3:58:1663:826#0/1  
GCTGGTTCTCTTTCAAGATCCATTCCACGATTTGTTTC  
+HWI-EAS443:3:58:1663:826#0/1  
a`aab`T[ ]Y^\_aa` [ `^]^^Y[\_\_`^]\_[a¥`^^QW\_Y[  
@HWI-EAS443:3:58:254:1339#0/1  
ATCCGCAAGCGATTTGCAGACAATGGATTGCGTGATGCCC  
+HWI-EAS443:3:58:254:1339#0/1  
¥U`P] ]aaaYH¥`]R0`WZZ`] ]BBBBBBBBBBBBBBBB  
@HWI-EAS443:3:58:34:1447#0/1  
AAGCCCTTAGTAGCATCAAGTCTCTAATCGGTTAAAGAT  
+HWI-EAS443:3:58:34:1447#0/1  
a`\_^aa\_a\_^]``Ya`a\_] [ `]`aa\_aZUUWPV[\_^WYNL  
@HWI-EAS443:3:58:743:599#0/1  
GAAACAGCCACTCTTGGTGGGAAACAAATCGTGAATGGA  
+HWI-EAS443:3:58:743:599#0/1  
`Z[Yaa`Z`a\_`¥^]]]OTX]P]aX\_WZX¥` [aa¥T]ZWO  
@HWI-EAS443:3:59:1406:1511#0/1  
GCCGCATTTCTTCAATTAACCACCTTATTTTCGTCAAATTT  
+HWI-EAS443:3:59:1406:1511#0/1  
a`ab^b^[\_N`]L\_Y`¥X]¥\_aXL]`aa\_a\_Ga]`ZUa\_\_  
@HWI-EAS443:3:59:1478:859#0/1  
GAGATTGCTTGGAGAAACTGTGATGAGAATTGGAGACCT  
+HWI-EAS443:3:59:1478:859#0/1  
^T`XaM^ZY\_0\_^]aX[MW\_\_G¥`¥]Qa¥][FP]VJFTRN  
@HWI-EAS443:3:59:389:367#0/1  
TGGAGAAACTGTGATGAGAATGGGAGACCTGCACTACCTC  
+HWI-EAS443:3:59:389:367#0/1  
ab]Y[T]aaZ^Xb\_ZX[[Pa]XV]V^F^\_TET^\_¥UW[XH  
@HWI-EAS443:3:59:694:1427#0/1  
TCAAGATCCATTCCACGATTTGTTTCCCACCAAGAGTGGC  
+HWI-EAS443:3:59:694:1427#0/1  
\_aaaaa\_a` `aaa`Zaaa`aa\_a\_aaaa`a]¥¥`^ZBBBB  
@HWI-EAS443:3:5:1353:558#0/1  
GCCACTCTTGGTGGGAAACAAATCGTGAATGGATCTTGA  
+HWI-EAS443:3:5:1353:558#0/1  
aa^aaaaa\_a`]aa\_]aa]aa` `Z]T]a\_`\_`^^ZF¥^BB

@HWI-EAS443:3:5:1570:864#0/1  
ACAGCCACTCTTGGTGGGAAACAAATCGTGAATGGATCT  
+HWI-EAS443:3:5:1570:864#0/1  
a`abb]a¥a¥aa^0]aaaR`aY``\_\_[a^\_a[^`\_X`Ga  
@HWI-EAS443:3:5:312:364#0/1  
AAGGGTGTGCCACTTCTTTTAAGGACTTTTGATCTCGG  
+HWI-EAS443:3:5:312:364#0/1  
aaa]aYb`\_a`a`T^\_]Y`\_\_\_T^`^Y^^^`\_^]\_\_^]B  
@HWI-EAS443:3:5:363:927#0/1  
TGCCGCATTTCTTCAATTAAGCACCTTATTCCTCAAATT  
+HWI-EAS443:3:5:363:927#0/1  
[a^^`VR¥QLR^aa`T``bUHXTYNZ`aZWov¥QKUJ¥^B  
@HWI-EAS443:3:5:490:997#0/1  
GTGAAAGCCCTTAGTAGCATCAAGGTCTCTAATCGGTAA  
+HWI-EAS443:3:5:490:997#0/1  
aX\_[]]X¥`[X^X^^^\_XW\_ZYSRT[]\_]\_¥\_^BBBB  
@HWI-EAS443:3:5:905:124#0/1  
TGAGACTGGGAGACCTTCACTACCTCCAGAGCAGAAATGA  
+HWI-EAS443:3:5:905:124#0/1  
aaa^\_I\_a`aN`USY¥^WWW\_¥KKMNITMTYYBBBBBBB  
@HWI-EAS443:3:60:1075:1992#0/1  
TGAGAATGGGAGACCTTCACTACCTCCAGGCAGAAATGA  
+HWI-EAS443:3:60:1075:1992#0/1  
aaba`ab`aaa\_a`a`aaaaa\_¥aa[a\_a¥``\_^`\_\_^^  
@HWI-EAS443:3:60:1269:698#0/1  
AGCCCTTAGTAGCATCAAGGTCTCTAATCGGTAAAGATT  
+HWI-EAS443:3:60:1269:698#0/1  
`a`a^baaaXba`abaab`aXaa`ba\_a``XX^]\_]\_[`a  
@HWI-EAS443:3:60:1332:247#0/1  
GCTTGGAGAACTGCGATGAGAATGGGAGACCTTCACTAC  
+HWI-EAS443:3:60:1332:247#0/1  
a¥^`\_^`^[a`X]aVaY\_^LWVU]a`¥Va\_V]`^V[]W  
@HWI-EAS443:3:60:1432:19#0/1  
AGAAACTGTGATGAGAATGGGAGACCTTCACTAGCTCCAG  
+HWI-EAS443:3:60:1432:19#0/1  
a`]Z^Z\_\_U¥Xa`Y`\_`b¥`[`[RP^]R¥VRTDSYVUS\_  
@HWI-EAS443:3:60:1765:264#0/1  
CTGTGCCGATTTCTTCAATTAACCACCTTATTCCTCAA  
+HWI-EAS443:3:60:1765:264#0/1  
abbaaaabaaaa`baa¥G^aaa\_]``aaaa`\_¥¥\_\_`^  
@HWI-EAS443:3:60:305:741#0/1  
CAGAAAGGCAGCGGAAGTAGGTACAGATGCAATTGTCAT  
+HWI-EAS443:3:60:305:741#0/1  
aa\_^\_[Y]FZ`[^abZR]Waaa^a``^]a[¥W\_^]Z^[¥  
@HWI-EAS443:3:60:367:1959#0/1  
GAAACTGCGATGAGAATGGGAGACCTTCACTACCTCCAGA  
+HWI-EAS443:3:60:367:1959#0/1  
``a\_]XXQaa`a``aba`aaHT]¥I^Zaa\_VPZNN[Y^\_¥  
@HWI-EAS443:3:60:665:1485#0/1  
CTGTGATGAGAACGGGAGACCTTCACTACCTCCAGAGCAG

+HWI-EAS443:3:60:665:1485#0/1  
aa]Zaa`¥^^`[^¥]\_^X¥[¥`¥`\_¥`V\_``ZU\_]\_¥¥Y  
@HWI-EAS443:3:60:724:1311#0/1  
CACTCTTGGTGGGAAACAAATCGTGGAAATGGATCTTGAAA  
+HWI-EAS443:3:60:724:1311#0/1  
aaaaabbaa^baa`abaaaaaa\_a`^R\_``][a\_\_\_\_\_]  
@HWI-EAS443:3:61:1582:660#0/1  
CTTGAATGGGATGGTAACACGGTTTCGAGTCTCTGAAAATA  
+HWI-EAS443:3:61:1582:660#0/1  
ab`bYX`¥aWY^Y[\_\_\_W^XSY^\_aaaYa^SaHX[P`^^YH  
@HWI-EAS443:3:61:15:1927#0/1  
CTTTCAAGATCCATTCCACGATTTGTTTCCCACCAAGAGT  
+HWI-EAS443:3:61:15:1927#0/1  
abbbb][`ababaabb[baaa`a`\_a\_a]aa`^¥^^^BB  
@HWI-EAS443:3:61:1635:346#0/1  
CGATATCGAAACAGCCACTCTTGGTGGGAAACAAATCGTG  
+HWI-EAS443:3:61:1635:346#0/1  
\_`abababbbbaaaX]aaaba`aa^baa\_aaaa\_\_^UaWZ  
@HWI-EAS443:3:61:945:1926#0/1  
GAAACTGTGATGAGAATGGGAGACCTTCACTAACTCCAGA  
+HWI-EAS443:3:61:945:1926#0/1  
``aa¥V\_RYaV`S`PSaa``\_a^aaX]\_a\_]\_JF[¥VVVK  
@HWI-EAS443:3:62:256:1760#0/1  
GCCTCGATATCGAAACAGCCACTCTTGGTGGGAAACAAAT  
+HWI-EAS443:3:62:256:1760#0/1  
aa`¥U\_]MUTUU[^][^¥RUEU[UF[RQQTXSJOOZSTU  
@HWI-EAS443:3:62:701:399#0/1  
GCTGTTTCGATATCGAGCCAAGGGGTTGCCTCTTCCTT  
+HWI-EAS443:3:62:701:399#0/1  
aa^]abbab]^Y^Z\_W\_aaaZaa`YDW]a`¥XVRY[Q¥\_`  
@HWI-EAS443:3:62:873:742#0/1  
GCATTTTTTCAATTAACCACCTTATTTTCTCAAATTTCTG  
+HWI-EAS443:3:62:873:742#0/1  
```aaaaaa¥TU¥][0Ya`]aa\_]L\_``aa]PT]\_aa``  
@HWI-EAS443:3:63:1533:1423#0/1  
GTGATGAGAATGGGAGACCTCCACTACCTCCAGAGCAGAA  
+HWI-EAS443:3:63:1533:1423#0/1  
aXSaa\_Y¥`[aY¥[aZY¥aYDWa¥^X\_`]ZYU`Za¥\_`[\_  
@HWI-EAS443:3:63:19:1290#0/1  
GGGAGCAATAGCTGGAGAAATTTACCATTACCTTCTCTT  
+HWI-EAS443:3:63:19:1290#0/1  
ZSWOT[^ZUVHTYW^\_Z\_¥`Y¥\_XV]a\_\_`YZ``[\_¥]Z  
@HWI-EAS443:3:63:233:954#0/1  
GACCTTGATGCTACTAAGGGCTTTCACTGAGGAGGGAGCA  
+HWI-EAS443:3:63:233:954#0/1  
aS]]ZVa\_]\_PP¥NX]\_]TZ\_¥X[[R[RVT¥^TQX^Z]^]  
@HWI-EAS443:3:63:346:1524#0/1  
GATTAGAGACCTTGATGCTACTAAGGGCTTTCACTGAGGA  
+HWI-EAS443:3:63:346:1524#0/1  
aaZI¥]\_Z\_aZRWZ`¥\_\_XaY`[\_P¥UQZ`\_a[\_UFYYLU



+HWI-EAS443:3:65:812:1626#0/1  
abVa¥¥0aIPNba]P^FYaX\_] [NLLTGRPa`[\_XHYU¥^  
@HWI-EAS443:3:65:864:66#0/1  
CGCTTGGAGAACTGTGATGAGCATGGGAGACCTTCACTA  
+HWI-EAS443:3:65:864:66#0/1  
abbbabb\_b`^bb¥b`ab`aJYWU`]YU¥YU¥WWUNWU  
@HWI-EAS443:3:66:1394:1421#0/1  
AGAATGGGAGACCTTCACTACCTGCAGAGCAGAAATGAAA  
+HWI-EAS443:3:66:1394:1421#0/1  
a^MZZ]aa\_aZXWY[Z^¥]\_NPYFY`TKUVN\_\_UZUVBBB  
@HWI-EAS443:3:66:36:284#0/1  
GCTCCCTCCTCAGTGAAAGCCCTTAGTAGCATCAAGGTCT  
+HWI-EAS443:3:66:36:284#0/1  
ababab^`^`aTZ[\_ZXV\_V\_]`^\_MY^^^ZaXGNOOY^  
@HWI-EAS443:3:66:693:706#0/1  
AGAAACTGAGATGAGAATGGGAGACCTTCACTACCTCCAG  
+HWI-EAS443:3:66:693:706#0/1  
`^U\_Zab[I]aWOZ`U^`Z¥X[RQ\_`\_a¥¥TTa][`]WXX  
@HWI-EAS443:3:66:69:995#0/1  
CCTCGATATCGAAACAGCCACTCTTGGTGGGAAACAAATC  
+HWI-EAS443:3:66:69:995#0/1  
aa\_aa`\_a^aa`aa`\_]XNYZ`^^ZUNY\_YS[ZW¥^[WY  
@HWI-EAS443:3:66:773:220#0/1  
TAGAGACCTTGATGCTACTAAGGGCTTTCCTGAGGAGGG  
+HWI-EAS443:3:66:773:220#0/1  
aab^`aaaaaaaa`a`aaaa`aaa```\_aa\_\_`^`\_S]\_]`  
@HWI-EAS443:3:66:987:1127#0/1  
AGAAACTGTGATGAGAATGGGAGAACTTCACTACCTCCAG  
+HWI-EAS443:3:66:987:1127#0/1  
a`b\_\_a¥^Z`V`aY````aa```X`ZX\_a][\_`[^]^YW  
@HWI-EAS443:3:67:1130:914#0/1  
GCCGCATTTCTTCAATTAACCACCTTATTTCCTCACATTT  
+HWI-EAS443:3:67:1130:914#0/1  
^\_bbabaa¥0`bbbabbb]WZ\_abbab`^^aa\_I¥bba  
@HWI-EAS443:3:67:1138:721#0/1  
ATCGGTAAAGATTACACTGAAGCTCGTTTCAGTACTAT  
+HWI-EAS443:3:67:1138:721#0/1  
`abbbabaa```abaaab]Y[aaa`a```a`^]Y]\_\_\_\_][  
@HWI-EAS443:3:67:141:1179#0/1  
CAAAGAGGCCCTATTATCTTTTGCCTAGGCATGAGCATGA  
+HWI-EAS443:3:67:141:1179#0/1  
¥ZVZI]VUN[X\_]00^U¥\_ZW¥\_^TXH[R`Z\_]Y]\_RVX  
@HWI-EAS443:3:67:1601:766#0/1  
GGAGGAAGTGTGATGAGAATGGGAGACCTTCACTACCTCC  
+HWI-EAS443:3:67:1601:766#0/1  
a[\_XFZ[TZ^R^U¥\_\_aS[UPZ\_N\_[NNPTT\_¥^Z[TTMR  
@HWI-EAS443:3:67:812:220#0/1  
CCTCGATATCGAAACAGCCACTCTTGGTGGGAAACAAATC  
+HWI-EAS443:3:67:812:220#0/1  
aa`aa``\_a\_\_¥¥\_a`a\_SZX)`¥]]YOS[\_UX[U]ZZ[N

@HWI-EAS443:3:68:349:123#0/1  
AGTGAAAGCCCTTAGTAGCATCAAGGTCTCTAATCGGTTA  
+HWI-EAS443:3:68:349:123#0/1  
X`abX`b\_aabaa`¥aa¥a`a^a\_Ga`\_ab`aaa]LXH  
@HWI-EAS443:3:68:979:524#0/1  
GCGGCCAGATTGAAAGCGACAGAGAATAGTTTCGAACAA  
+HWI-EAS443:3:68:979:524#0/1  
aaa`bbabbbba`aaaaabaabaabbbabbabba^\_a¥aa  
@HWI-EAS443:3:69:1238:1299#0/1  
CGGCACAGATTGAAAGCGACAGAGAATAGTTTAGAACAAA  
+HWI-EAS443:3:69:1238:1299#0/1  
abbbbaab\_bbbab`bXab`aa`¥abab`\_P]F^a\_X¥bb  
@HWI-EAS443:3:69:1610:1432#0/1  
GCCCTTAGTAGCATCAAGGTCTCTAATCGGTAAAGATTA  
+HWI-EAS443:3:69:1610:1432#0/1  
abY\_aaaaaa`a^`YKtA^aaaa`^`\_\_\_\_^¥W`^  
@HWI-EAS443:3:69:1676:223#0/1  
CACCCCTTGGCCTCGATATCGAAACAGCCACTCTTGGTGGG  
+HWI-EAS443:3:69:1676:223#0/1  
abaaabbaba`a\_aaaab^a`\_`^a\_¥\_Z`^\_a`\_U\_[]  
@HWI-EAS443:3:69:21:1626#0/1  
CGCATTCTTCAATTAACCACCTTATTCCTCAACTTTCT  
+HWI-EAS443:3:69:21:1626#0/1  
a\_^T¥babab`^abababbbba`\_[baaabbabaZ`a^`  
@HWI-EAS443:3:69:426:1523#0/1  
GCCGCCTTCTTCAATTAACCACCTTATTCCTCAAATTT  
+HWI-EAS443:3:69:426:1523#0/1  
Sa`\_H\_¥`b`ZT^`X`[\_baa`a`^¥aXaaaa]Q`\_Q`  
@HWI-EAS443:3:69:557:1833#0/1  
ATCGAAACAGCCACTCTTGGTGGGAAACAAATCGTGAAT  
+HWI-EAS443:3:69:557:1833#0/1  
aa`]^abb`^aaaa\_a\_\_[YG[¥a]Z\_\_\_\_]`^a\_Y]Y\_]`  
@HWI-EAS443:3:6:1038:235#0/1  
AAACTGTGATGAGAATGGGAGACCTTCACTACCACCAGAG  
+HWI-EAS443:3:6:1038:235#0/1  
aaaaabWb\_aa]^a`b`V``\_RY\_US`J`\_V^HXSX^Z\_  
@HWI-EAS443:3:6:1078:1718#0/1  
GAAAGCCCTTAGTAGCATCAAGGTCTCTAATCGGTAAAG  
+HWI-EAS443:3:6:1078:1718#0/1  
abbab`a\_bbbb^bbaaaaab]]\_bWbbba\_baZaaaa\_  
@HWI-EAS443:3:6:1191:1367#0/1  
GTGCTTCCAATCTGTGCCGATTTCTTCAATTAACCACC  
+HWI-EAS443:3:6:1191:1367#0/1  
`a^`aa\_]`^`a]a¥T¥`]aa`a]T\_\_V¥]aa^]Q]]UR  
@HWI-EAS443:3:6:1264:1778#0/1  
GAAACTGTGATGAGAATGGGAGACATTCCTACTACCTCCAGA  
+HWI-EAS443:3:6:1264:1778#0/1  
]b`T`abbb`]\_Z]]]baa]aa^J0aaYWO¥a^\_[Ga\_a^  
@HWI-EAS443:3:6:1429:1083#0/1  
CTGTGGTGAAGTGGGAGACCTTCACTACCTCCAGAGCAG

+HWI-EAS443:3:6:1429:1083#0/1  
Kbb\_Z\_^bbbYa`^W¥[ba[`aa^[b`a`NZ\_a[`]\_b  
@HWI-EAS443:3:6:1654:261#0/1  
TGCCGCATTTATTCAATTAACCACCTTATTCCTCAAATT  
+HWI-EAS443:3:6:1654:261#0/1  
`ba^a`ab¥F`aQa^aa^¥XX`NYa\_\_a`aIDZ¥`\_\_`]  
@HWI-EAS443:3:6:222:1969#0/1  
GGTTAATTGAAGAAATGCGGCACAGATTGACAGCGACAGA  
+HWI-EAS443:3:6:222:1969#0/1  
aaaKb¥[^XIZ\_a[Y\_`aaaVR\_Y`^`ZFL\_\_\_I\_R]a  
@HWI-EAS443:3:6:406:77#0/1  
AACAGCCACTCTTGGTGGGAAACAAATCGTGAATGGATC  
+HWI-EAS443:3:6:406:77#0/1  
aa`aa\_\_`\_Ya`T^Va\_\_]^XX^]]\_Y`^X^]^\_YXV  
@HWI-EAS443:3:6:429:198#0/1  
GCCGCATTTCTTCAACTAACCACCTTATTCCTCAAATTT  
+HWI-EAS443:3:6:429:198#0/1  
aa\_`\_^[\_a`a`\_\_^\_]\_^]^`¥^]V^Y]^`Z^  
@HWI-EAS443:3:6:566:1434#0/1  
GTCGCTGTCAATCTGTGCCGCATTTCTTCAATTAACCACC  
+HWI-EAS443:3:6:566:1434#0/1  
a^`^MIVO\_\_\_^]a[\_W\_\_^`]VMQQWR\_0`^`OKBBBB  
@HWI-EAS443:3:6:765:720#0/1  
GTCGCTTTCAATCTGTGCCGCATTTCTTCAATTAACCACC  
+HWI-EAS443:3:6:765:720#0/1  
`GZ]VY]¥LZ[U¥]RLYVR^ZUTZX]]^^Z]^`¥UXWXVS  
@HWI-EAS443:3:6:861:1860#0/1  
GAGAATGGGAGACCTTCACTACCTCCAGAGTAGAAATGAA  
+HWI-EAS443:3:6:861:1860#0/1  
VQaa`bYbUb]a\_`[\_`abV`L[ab[HIRb`aaaaBB  
@HWI-EAS443:3:70:1202:601#0/1  
CAGTGAAGCCCTTAGTAGCATCAAGTCTCTAATCGGTT  
+HWI-EAS443:3:70:1202:601#0/1  
abbaba^abbabbbb\_bb`aabbaaa`aabba`b\_aa\_a  
@HWI-EAS443:3:70:1300:909#0/1  
GCCGCATTTCTTCAATTAACCTTATTCCTCAAATTT  
+HWI-EAS443:3:70:1300:909#0/1  
¥¥`a`¥`aab`[ab`¥`]F]a`^aXa\_abbbbb[^`aa  
@HWI-EAS443:3:70:1325:172#0/1  
CCTCGATATCGAAACAGCCACTCTTGGTGGGAAACAAATC  
+HWI-EAS443:3:70:1325:172#0/1  
K\_\_bb`¥¥¥Sa\_`\_bb¥RXRYaP^V\_N^^[HV]VZaa[Y  
@HWI-EAS443:3:70:1705:684#0/1  
CCTCGATATCGAAACAGCCACTCTTGGTGGGAAACAAATC  
+HWI-EAS443:3:70:1705:684#0/1  
abbababaaabaa`aaaaZ¥W\_`a`¥\_Uaa^[[\_¥^^Z\_R  
@HWI-EAS443:3:70:1756:316#0/1  
CACCTTGGCCTCGATATCGAAACAGCCACTCTTGGTGGG  
+HWI-EAS443:3:70:1756:316#0/1  
\_\_\_\_\_bb\_ZZ`^^^\_ab\_`¥`\_`^\_]\_^Y[X\_a]H¥¥Y]



@HWI-EAS443:3:70:411:138#0/1  
GTGAAAGCCCTTAGTAGCATCAAGGTCTCTAATCGGTAA  
+HWI-EAS443:3:70:411:138#0/1  
aa`aaaaaa`aaaa\_aa`a^Xa\_a^Z]`\_`^a]\_`^`YX  
@HWI-EAS443:3:70:534:892#0/1  
TTTAAGGACTTTTGTCTCGGCGGAGCCGATCAGGGAATG  
+HWI-EAS443:3:70:534:892#0/1  
¥^WXUX^a^W\_WW¥]`ab]a``¥ZRT^ZWHKRD[QVZN[  
@HWI-EAS443:3:70:910:700#0/1  
TATCCGCAAGCGATTTGCAGACAATGGATTGGGTGGTGCC  
+HWI-EAS443:3:70:910:700#0/1  
abaaaabaaaaaaaaaaaa\_a\_a`]a`a]^XX^UXU[]\_`^  
@HWI-EAS443:3:71:1281:1270#0/1  
CCTCAGTGAAAGCCCTTAGTAGCATCAAGGTCTCTAATCG  
+HWI-EAS443:3:71:1281:1270#0/1  
a``babab\_`\_]¥abb`b^a\_aab``b\_`Q^^`aXaa[]  
@HWI-EAS443:3:71:1293:513#0/1  
CTCGATATCGAAACAGCCACTTTGGTGGGAAACAAATCG  
+HWI-EAS443:3:71:1293:513#0/1  
`b``baab`a`a^a\_a\_a^\_Wa\_Y`[ab``ab\_`aa¥PU  
@HWI-EAS443:3:71:1490:599#0/1  
TGAGAATGGGAGACCTTCACTACATCCAGAGCAGAAATGA  
+HWI-EAS443:3:71:1490:599#0/1  
\_ZU`Q`\_`U`[\_TNP¥]¥ZM[X[FTN]^WVW^WYNW\_R  
@HWI-EAS443:3:71:1691:1297#0/1  
CGAAACAGCCACTTTGGTGGGAAACAAATCGTGAATGG  
+HWI-EAS443:3:71:1691:1297#0/1  
abbbbab¥baa`bbbaab^ba``aaab]bb\_b¥\_a\_a`a^  
@HWI-EAS443:3:71:43:37#0/1  
TGTCGCTTTCAATCTGTGCCGATTTCTTCAATTTACCAC  
+HWI-EAS443:3:71:43:37#0/1  
a][`¥^\_[¥ZQRVYYJFMUTTVXLVFYSQWX[]LDKZGNU  
@HWI-EAS443:3:71:708:584#0/1  
CCGCATTTCTTCAATTCACCACCTTATTTCCCTCAAATTTCT  
+HWI-EAS443:3:71:708:584#0/1  
`bb`UY`ZR]\_]`[[GW¥ZS`baba\_\_b`aab^S`baa\_  
@HWI-EAS443:3:71:991:399#0/1  
GAGAACTGTGATGAGAATGGGAGACCTTCACTACATCCA  
+HWI-EAS443:3:71:991:399#0/1  
``aaaa\_ab]a`aa[a\_`aa[`[a\_Y`[aY\_\_\_\_\_G[ZS\_  
@HWI-EAS443:3:72:1181:773#0/1  
CTTCGCGCTACCTTTCTAACATGACCCTCGAGGAAATGTC  
+HWI-EAS443:3:72:1181:773#0/1  
abbbbbaaa`¥b]bbb\_aba`ab`bb`\_`aaab`aa\_aaaU  
@HWI-EAS443:3:72:1248:1479#0/1  
CCTTGGCCTCGATATCGAAACAGCCACTTTGGTGGGAAA  
+HWI-EAS443:3:72:1248:1479#0/1  
`T`^PZab`[[U\_``Z\_J`\_Q\_\_I¥T\_YVS`Z\_N]^\_QZ¥  
@HWI-EAS443:3:72:252:658#0/1  
CGCATTTCTTCAATTAACCACATTATTTCCCTCAAATTTCT

+HWI-EAS443:3:72:252:658#0/1  
`a`^^^`bbaaYUXV¥\_\_aVZH][`aaaa^a[RYUY]RZ  
@HWI-EAS443:3:72:713:515#0/1  
AGCCCTTAGTAGCATCAAGGTCTCTAATCGGTAAAGATT  
+HWI-EAS443:3:72:713:515#0/1  
aa`aaaabaZa\_aa\_`aaa\_^]a^a\_^a`aa]a\_\_]\_^`  
@HWI-EAS443:3:73:1346:918#0/1  
GAAAATACACAGAGATTTCGCTTGGAGAACTGTGATGAGA  
+HWI-EAS443:3:73:1346:918#0/1  
aaaabbbbaa`\_a`]`aaa\_`a`a¥\_a`a¥aa`a^Z[  
@HWI-EAS443:3:73:1568:746#0/1  
CTCCCTCCTCAGTGAAAGCCCTTAGTAGCATCAAGGTCTC  
+HWI-EAS443:3:73:1568:746#0/1  
a]aU\_b``[^QZ\_WS¥`¥KY[aa\_`YaX\_]U\_\_UZRPWL  
@HWI-EAS443:3:73:196:357#0/1  
GAAACAGCCACTCTTGGTGGGAAACAAATCGTGGAAATGGA  
+HWI-EAS443:3:73:196:357#0/1  
a`^`aZba\_\_\_\_\_¥\_`aaY]Z¥WW]\_¥0¥^\_\_T`\_ZW¥]\_X  
@HWI-EAS443:3:73:225:1955#0/1  
CTGTGATGAAAATGGGAGACCTTCACTACCTCCAGAGCAG  
+HWI-EAS443:3:73:225:1955#0/1  
a]a][\_^TJ\_aaa^\_a`¥b]¥]Za^]R]aa`\_`a\_\_\_\_\_`\_  
@HWI-EAS443:3:73:401:726#0/1  
GAAACTGCGATGAGAATGGGAGACCTTCACTACCTCCAGA  
+HWI-EAS443:3:73:401:726#0/1  
^\_bbb\_]U\_] [R^[]\_T\_a^JRMZ`¥Zaa\_]R`aU[a\_a[  
@HWI-EAS443:3:73:414:1337#0/1  
TGCCGCATTTCTTCAATTAACCACCTTATTTCCCAAATT  
+HWI-EAS443:3:73:414:1337#0/1  
a[bbabaaaaaba`\_`aa\_aabbaa`a\_a`aa\_\_baa`aa  
@HWI-EAS443:3:73:549:851#0/1  
TGAAAATATACAGAGTTTCGCTTGGAGAACTGTGATGAG  
+HWI-EAS443:3:73:549:851#0/1  
a`XH]`ab¥[\_\_aa¥J]aaaa`\_a]N\_ZY`\_a\_L^\_^Z\_  
@HWI-EAS443:3:74:1265:1350#0/1  
GGCCTCGATATCGAAACAGCCACTCTTGGTGGGAAACAAA  
+HWI-EAS443:3:74:1265:1350#0/1  
`aabbbbbbbbbbbbbbbbaabaa`bbaa[aa`a\_a\_aa\_  
@HWI-EAS443:3:74:1646:1220#0/1  
ATGGTAACACGTTTCGAGTCTCTGAAAATATACAGAGATT  
+HWI-EAS443:3:74:1646:1220#0/1  
XaaaZZZaa`\_`J\_a^^[`a`bab]LRUP¥a`ZRV`]YDHX  
@HWI-EAS443:3:74:342:1471#0/1  
CTTGGAGAACTGTGATGAGAATGGGAGACCTTTACTACC  
+HWI-EAS443:3:74:342:1471#0/1  
aaaaaa`\_`aaaa\_\_aX`a`\_\_`\_`\_[PYZ^`\_\_\_\_^a\_]Z^  
@HWI-EAS443:3:74:578:83#0/1  
GTGATGAGAATGGGGACCTTCACTACCTCCAGAGCAGAA  
+HWI-EAS443:3:74:578:83#0/1  
aQ^^\_a¥a^¥\_`\_`WDZU¥W¥¥¥¥^VWXUVV¥WWW^WUWW^WV

@HWI-EAS443:3:74:938:1951#0/1  
GATGAGGACCCCAACTGCATATTTGACATCCTCATAAGTA  
+HWI-EAS443:3:74:938:1951#0/1  
``abbb`b[aabbb`W^bb^]\_[bWaabXb]`a[¥]aa0a  
@HWI-EAS443:3:75:1029:1182#0/1  
CTGTGATGAGAATGGGAGACCTTCACTACATCCAGAGCAG  
+HWI-EAS443:3:75:1029:1182#0/1  
a\_I[b`S^WTZZSU`SXa\_]PSR]^[\`W¥H¥S^QY^NSUX  
@HWI-EAS443:3:75:1036:684#0/1  
GTCAGATAGGTAGCGGAAGTAGGTACAGATGCAATTGTC  
+HWI-EAS443:3:75:1036:684#0/1  
aHZW\_V\_YZ]RY]^X\_V¥ZNUa¥Y[\`Y^X¥\_\_YR]]`V\_  
@HWI-EAS443:3:75:1612:201#0/1  
GAAACTGTGATGAGAATGGCAGACCTTCACTACCTCCAGA  
+HWI-EAS443:3:75:1612:201#0/1  
aaaaSb`S`]^a¥a\_\_ab¥¥T\_YQFQYPVUS]TFUJQSVY  
@HWI-EAS443:3:75:723:1119#0/1  
ATATCCGCAAGCGATTTGCAGACAATGGATTGGCGATGC  
+HWI-EAS443:3:75:723:1119#0/1  
]¥GPZ\_]a`aaa[\`]b^b`a]`]\`\_`a`\_`\_XDDNHSY  
@HWI-EAS443:3:75:94:817#0/1  
GCCGCTTTTCTTCAATTAACCACCTTATTTCTCAAATTT  
+HWI-EAS443:3:75:94:817#0/1  
`bbbbabbabbbba`bbabbbbb^baaababaabba]ba`  
@HWI-EAS443:3:75:97:1614#0/1  
GCCGCATTTCTTCAATTAACCACCTTATTTCTCACATTT  
+HWI-EAS443:3:75:97:1614#0/1  
aa\_^a]]U]\`VP`XZSHZRaaa]bINDZ^Y\_\_W\_PJNY\_]`  
@HWI-EAS443:3:76:130:585#0/1  
ATCGAAACAGCCACTCTTGGTGGGAAACAAATCGTGAAT  
+HWI-EAS443:3:76:130:585#0/1  
\_a^X¥][TXabVM¥G]RDZ]Y`^aWV\_UY`Z¥OUFOZ\_VL  
@HWI-EAS443:3:76:1483:332#0/1  
GGAGAAACTGTGATGAGAATGGGAGACCTTAACTACCTCC  
+HWI-EAS443:3:76:1483:332#0/1  
aa`\_`\_^\_]a]\_\_Z^¥\_^^QN]WVWRQQRHMO]VUMSMV  
@HWI-EAS443:3:76:166:1234#0/1  
GACCTTGATGCTACTAAGGGCTTTCACTGAGGAGGGAGCA  
+HWI-EAS443:3:76:166:1234#0/1  
aa`^MYS\_ZW]R[LT[^\_WY¥P^]¥P\_^^Q¥RY\_\_]UVNS  
@HWI-EAS443:3:76:1723:2045#0/1  
GAGAATGGGAGACCTTCACTACATCCAGAGCAGAAATGAA  
+HWI-EAS443:3:76:1723:2045#0/1  
VUHW]aa[Y\_`UL]a]NZHXZQF^HW¥^Ya^Wa`SaRQS\_  
@HWI-EAS443:3:76:205:911#0/1  
TCGATATCGAAACAGCCACTCTTGGTGGGAAACAAATCGT  
+HWI-EAS443:3:76:205:911#0/1  
ab`aaabbbabb\_aa^aaaa\_Z``XYYaa¥¥aZ`aaXZaZ  
@HWI-EAS443:3:77:1500:895#0/1  
GAAACATATCGTGAATGGATCTTGAAAGAGGAATCCAGC

+HWI-EAS443:3:77:1500:895#0/1  
[\_abaababbaaaaa]bbbbba`bbbabbba\_abaaaa`bX  
@HWI-EAS443:3:77:1549:254#0/1  
TGAGAATGGGAGACCTTCACTACCTACAGAGCAGAAATGA  
+HWI-EAS443:3:77:1549:254#0/1  
]]\_SZbba¥WGWZHa\_]a`Ga`L^H`\_a[^NY¥aa\_`a^  
@HWI-EAS443:3:77:1589:1375#0/1  
CATATCCGCAAGCGATTTGCAGACAATGGACTGGGTGATG  
+HWI-EAS443:3:77:1589:1375#0/1  
`\_^b\_babbabbUaaabbb¥VX`aa\_]UXF¥`U^\_\_XLN  
@HWI-EAS443:3:78:1126:564#0/1  
CAGAGATTGCTTGGAGAACTGTGATGGGAATGGGAGAC  
+HWI-EAS443:3:78:1126:564#0/1  
aX¥^\_TV`a\_bb^OTR\_U¥]]XaP]JU\_HZU]QTa¥T][¥  
@HWI-EAS443:3:79:1326:312#0/1  
CGCATTCTTCAATTAACCACCTTATTTGCTCAAATTTCT  
+HWI-EAS443:3:79:1326:312#0/1  
¥bbbb`Z`bbbab`b\_aZ[Va`bbbaQbaaa`¥aabab  
@HWI-EAS443:3:79:312:875#0/1  
TGAGAATGGGAGACCTTCACTACTTCCAGAGCAGAAATGA  
+HWI-EAS443:3:79:312:875#0/1  
Wa¥VTQW\_V\_¥UW¥Z¥¥¥¥I\_\_X\_Y[\_^`UWUZ[LU¥^^]  
@HWI-EAS443:3:79:925:175#0/1  
CGATATCGAAACAGCCACTCTTGGTGGGAAACAAATCGTG  
+HWI-EAS443:3:79:925:175#0/1  
abaa[aab`[]`^`¥\_XX`X¥`a¥M^¥a\_[UR¥`]ST^RZ  
@HWI-EAS443:3:7:1007:799#0/1  
GGTTAATTGAAGAAATGCGGCACAGATTGAAAGCGCCAGA  
+HWI-EAS443:3:7:1007:799#0/1  
aa\_aaaaaa`\_ba^^\_a`aa¥^]\_a`^a^^^`^¥HT^`^  
@HWI-EAS443:3:7:108:966#0/1  
CCGCATTACTTCAATTAACCACCTTATTTCTCAAATTTCT  
+HWI-EAS443:3:7:108:966#0/1  
aa`baa`Z^a]]T)`aV\_]a^YTZ``\_a`aR[a\_\_[\_]YZ  
@HWI-EAS443:3:7:1436:1336#0/1  
GCCCTTAGTAGCATCAAGGTCTCTAATCGTTAAAGATTA  
+HWI-EAS443:3:7:1436:1336#0/1  
a¥\_]X¥a^aa`a¥L]^¥YL\_^Z\_\_^^Xa\_Z]^YUJFVPS  
@HWI-EAS443:3:7:507:1735#0/1  
CCAAGTGCATTTTTGACATCCTCATAAGTATGTCATGGAA  
+HWI-EAS443:3:7:507:1735#0/1  
aaVa\_bab0aba`aaKa`bT\_a^`bJbGH¥aUYMG]S`[]  
@HWI-EAS443:3:7:667:2014#0/1  
GAAACTGTGATGAGAATGGGAGACCTTCACTACCTACAGA  
+HWI-EAS443:3:7:667:2014#0/1  
Jabbbba`bZbbbb\_b\_bb^TRSIZb]bb[¥a¥Z¥F]`aa  
@HWI-EAS443:3:7:676:850#0/1  
GCTCCCTCCTCAGTGAAGCCCTTAGTAGCATCAAGGTCT  
+HWI-EAS443:3:7:676:850#0/1  
^abbbbbb\_abab]U\_b[bbZSabaab\_bbaa`Yba]aMHb

@HWI-EAS443:3:7:876:20#0/1  
AGAACTGTGATGAGAATGGGAGAGCTTCACTACCTCCAG  
+HWI-EAS443:3:7:876:20#0/1  
a\_ba¥QaaaTUbaa\_^]abb`^a]GGYINSG^FQNVVV]B  
@HWI-EAS443:3:80:310:928#0/1  
CATTTCTTCAATTAACCACCTTATTCCTCAAATTTCTGT  
+HWI-EAS443:3:80:310:928#0/1  
abbbbbbbbbbbabba` `aba\_a]\_Za`aa\_aa]aaaa]  
@HWI-EAS443:3:81:400:1143#0/1  
TGCCGCATTTCTTCAATTAACCACCTTGTTCCTCAAATT  
+HWI-EAS443:3:81:400:1143#0/1  
aabbabbabaababaaaaabbbaaaaa`\_a`aba\_aa`  
@HWI-EAS443:3:82:1241:778#0/1  
CGAAACAGCCACTCTTGGTGGGAAACAAATCGTGAATGG  
+HWI-EAS443:3:82:1241:778#0/1  
a`W^W` [a`bbSbaa]aYYba]Y]a\_Z^ab^a`aZJ[baX  
@HWI-EAS443:3:82:1294:1756#0/1  
AAATAAGCTGAAACGAGAAAGCTTATCTATTGTTCTAC  
+HWI-EAS443:3:82:1294:1756#0/1  
Wb]\_W`b\_XbW¥aaabb\_^`]aaaabaTaI¥]b\_a]a]R  
@HWI-EAS443:3:82:1648:1572#0/1  
GGAGGAAGCTGTGATGAGAATGGGAGACCTTCACTACCTCC  
+HWI-EAS443:3:82:1648:1572#0/1  
\_a\_XH^\_Z\_] []Y^`^aaab\_Q][PHTZ¥WMXPYLXPK  
@HWI-EAS443:3:82:1729:822#0/1  
ATTATCTTTTGCCTAGGCATGATCATGAACCAGTCTCGTG  
+HWI-EAS443:3:82:1729:822#0/1  
`bab\_YabbaaQa\_aa\_\_\_a`a` `` ¥¥`UW`a\_Wa][ZZ  
@HWI-EAS443:3:82:31:52#0/1  
AATTTACCATTACCTTCTCTTCCAGGACATCCTTATGAG  
+HWI-EAS443:3:82:31:52#0/1  
^¥\_Z^VXSIZ]PQT[a`\_PWQU¥Z^VMS]XBBBBBBBBBB  
@HWI-EAS443:3:82:52:60#0/1  
GCTCCCTCCTCAGTGAAAGCCCTTAGTAGCATCAAGGTCT  
+HWI-EAS443:3:82:52:60#0/1  
aaaaaa\_aaaaa\_Xa[W]`\_\_]\_\_^`W\_^UW]\_¥PZ^T]Y  
@HWI-EAS443:3:82:653:556#0/1  
CTCAGTGAAAGCCCTTAGTAGCATCAAGGTCTCTAATCGG  
+HWI-EAS443:3:82:653:556#0/1  
aaabaX` `bbaab¥`b\_Y]bbaaaab`ba\_b^]abaaaa`  
@HWI-EAS443:3:82:778:232#0/1  
GTGACGAGAATGGGAGACCTTCACTACCTCCAGAGCAGAA  
+HWI-EAS443:3:82:778:232#0/1  
a\_a`^`aa`\_aaaa^a`¥\_\_¥[`\_\_\_\_[T[¥¥`a^`^¥`¥¥  
@HWI-EAS443:3:82:865:1587#0/1  
GAACCAGTCTCGTGACATTTCCCTCGGGGTCATGTCAGAA  
+HWI-EAS443:3:82:865:1587#0/1  
\_Z\_b`T^WZ¥¥K`I¥WW\_bI¥]aRFMX[LR`XO\_X\_a`W  
@HWI-EAS443:3:83:1187:1086#0/1  
CGAGAGCAATTGGGACAGAAATTTGAGGTAATAAGGTGGT

+HWI-EAS443:3:83:1187:1086#0/1  
a\_N¥aY¥¥bb\_abXXaaa[bbbb^^[\_QQ^bbYQI\_YZYG  
@HWI-EAS443:3:83:1402:223#0/1  
GTACCTACTTCGCGCTACCTTTCTGACATGACCCTGGAGG  
+HWI-EAS443:3:83:1402:223#0/1  
a]a`¥^a[aa`\_`\_`X\_Za`\_U[\_Y\_\_\_\_]\_SWN\_N\_W\_W  
@HWI-EAS443:3:83:582:1160#0/1  
AGAAACTGTGATGACAATGGGAGACCTTCACTACCTCCAG  
+HWI-EAS443:3:83:582:1160#0/1  
aZX¥^¥]^OZSY¥YVBBBBBBBBBBBBBBBBBBBBBBBB  
@HWI-EAS443:3:83:79:777#0/1  
GTGAAAGCCCTTAGTAGCATCAAGTCTCTAATCGGTAA  
+HWI-EAS443:3:83:79:777#0/1  
a`aa`Z`abbaaa`aaa`ab`aa]\_a`aa\_`^`a`\_a  
@HWI-EAS443:3:84:127:1611#0/1  
ATCACGGAATGGGCATCACCCAATCCATTGTCTGCAAAT  
+HWI-EAS443:3:84:127:1611#0/1  
¥¥b[H[a`^^aX\_\_¥V\_^aaaa\_ZUaaa]]^[a`\_ZW]Z  
@HWI-EAS443:3:84:1513:916#0/1  
GTCGCTTTCAATCTGTGCCGATTTCTTCAATTAACACC  
+HWI-EAS443:3:84:1513:916#0/1  
aZVSaRa[RRUTMZTVaV[YG\_¥¥RR\_`W`Y`\_]SFRWGO  
@HWI-EAS443:3:84:289:1255#0/1  
GCTCTGGAGGTAGTGAAGGTCTCCCAATCTCATCACAGTT  
+HWI-EAS443:3:84:289:1255#0/1  
\_bab^`\_]`L¥UNa]b\_^Gaab\_bYGUaaMZ]abaaP\_  
@HWI-EAS443:3:84:332:712#0/1  
CAAATCGCCTGCGGATATGCCAAAGGAAACAGTCTACCTG  
+HWI-EAS443:3:84:332:712#0/1  
a````aaaa`Za\_Z^^[]`a]¥P]``ZM[^[^¥¥`[¥X[  
@HWI-EAS443:3:84:641:933#0/1  
GAGACACTGTGATGAGAATGGGAGACCTTCACTACCTCCA  
+HWI-EAS443:3:84:641:933#0/1  
^]\_TI¥a`a[\_Z\_a^UR]¥NY\_Y[YJX`¥a\_ZUZ`VVQFJ  
@HWI-EAS443:3:84:844:1482#0/1  
AGAAACTGTGATGAGAATGGGCGACCTTCACTACCTCCAG  
+HWI-EAS443:3:84:844:1482#0/1  
\_VTWWZ`\_Q[TOZO\_U\_^a¥WGLR`\_]Z¥WTZYNYP[Z][  
@HWI-EAS443:3:85:1185:368#0/1  
ACGAGAAAGCTCTTATCTCTTGTCTACTTCAGGCAGTAG  
+HWI-EAS443:3:85:1185:368#0/1  
a\_aaba\_aaYa\_a`aa`\_aaaX`aaa\_aa\_\_K¥`aZ`\_  
@HWI-EAS443:3:85:1366:1536#0/1  
AGAAACTGTGATGAGAATGGGGGACCTTCACTACCTCCAG  
+HWI-EAS443:3:85:1366:1536#0/1  
ab^ab^\_`YYa]aY\_Ub`````a¥GVZ][¥\_`VIPaZXa  
@HWI-EAS443:3:85:727:1381#0/1  
GCCGCATTTCTTCAATTAACGACCTTATTTCCCTCAAATTT  
+HWI-EAS443:3:85:727:1381#0/1  
aa`Z`TWaa\_a^a^b\_aaaUDT]\_a\_`\_`\_aaa`TXaY]

@HWI-EAS443:3:86:1697:42#0/1  
ATCGCACGCAAAGAGGGCCTATTATCCTTTGCCTAGGCAT  
+HWI-EAS443:3:86:1697:42#0/1  
`Y`aY`¥V^aaR[]ab^]X^]a`\_`X`a^^JP\_^¥\_S¥Y  
@HWI-EAS443:3:86:238:1314#0/1  
TTTCGATATCGAGGCAAGGGAGTTGCCTCTTCCTTTTAA  
+HWI-EAS443:3:86:238:1314#0/1  
\_b\_ba[a`[¥¥ZYR\_¥aa\_¥PE]W¥TZ\_XW\_\_aa¥^)`XW  
@HWI-EAS443:3:86:529:203#0/1  
CAGCCACTCTTGGTGGGAAACAAATCGTGAATGGATCTT  
+HWI-EAS443:3:86:529:203#0/1  
U\_`a\_ZMRUab\_\_[]`bb¥\_`¥¥\_aWb]a[FU]Z\_PVTT[  
@HWI-EAS443:3:86:887:876#0/1  
AGACCTTGATGCTACTAAGGGCTTTCAGTGGAGGGAGC  
+HWI-EAS443:3:86:887:876#0/1  
``[abaa`¥a^]\_ba\_¥]\_X\_^baaa[ab¥^^aa`UWX  
@HWI-EAS443:3:86:911:1635#0/1  
GAGAACTGTGATGAGAATGGGAGACCTTCACTAACTCCA  
+HWI-EAS443:3:86:911:1635#0/1  
`S\_^`a\_¥G\_]\_b\_a]¥Xaa\_V[VPQTX`¥\_[YH¥]]U]  
@HWI-EAS443:3:87:1033:2021#0/1  
GCGCGAAGTAGGTACAGATGGAATTGTCATTCTAAGTGTC  
+HWI-EAS443:3:87:1033:2021#0/1  
a`\_]a`a^ZaaYX`^`\_`\_ZP`\_`\_YSV`\_^W`\_^W\_Z^  
@HWI-EAS443:3:87:728:1548#0/1  
ATTATCTTTTGCCTAGGCATGAGCATGAACCAGACTCGTG  
+HWI-EAS443:3:87:728:1548#0/1  
aa^]X¥VYG^UP]]][VV¥]\_WS[\_WQPH]YZOYDPX`QFW  
@HWI-EAS443:3:88:1315:851#0/1  
AGAAACTGTGATGACAATGGGAGACCTTCACTACCTCCAG  
+HWI-EAS443:3:88:1315:851#0/1  
^``aaaa`^W`]R]a`a\_^V]]\_\_ab`\_]a`]]\_`^`b  
@HWI-EAS443:3:88:1631:268#0/1  
CGTGCAATGGATCTTGAAAGAGGAATCCAGCGAGACACTT  
+HWI-EAS443:3:88:1631:268#0/1  
XaY[GY`\_`\_Y¥¥`b]a]ab\_babZWZYWbaVbbb\_V[`\_b  
@HWI-EAS443:3:88:1652:1141#0/1  
GGCCTCGATATCGAAACAGCCACTCTTGGTGGGAAACAAA  
+HWI-EAS443:3:88:1652:1141#0/1  
abaaabbaabbaabbaabba\_a`^aa``\_baba`aS\_ab  
@HWI-EAS443:3:88:1736:408#0/1  
GAATGGGAGACCTTCACTACCTCGAGAGCAGAAATGAAAA  
+HWI-EAS443:3:88:1736:408#0/1  
a¥`H\_\_O¥\_YVQaa`¥^aXLG\_YT`\_XOGXPY[\_a`\_\_¥[  
@HWI-EAS443:3:88:796:1322#0/1  
AGAAACTGTGAGGAGAATGGGAGACCTTCACTACCTCCAG  
+HWI-EAS443:3:88:796:1322#0/1  
aa\_baaa`]a\_^`a]a\_aa````\_\_`\_\_a`a^X]\_]`a  
@HWI-EAS443:3:89:1207:1059#0/1  
TGTCGCTTTCAATCTGTGACGCATTTCTTCAATTAACCAC

+HWI-EAS443:3:89:1207:1059#0/1  
`aYT\_b]baXaR]]Pa\_SHIV[\_`RMGS¥`N]]]¥RGJ[\_  
@HWI-EAS443:3:89:1214:1897#0/1  
ATTCTCTGTTGCTTTCAATCTGTGCCGATTTCTTCAATT  
+HWI-EAS443:3:89:1214:1897#0/1  
`a`a[`aFD[U\_VYaa`X`^[X^[\_SY\_a``T`^^^`a^  
@HWI-EAS443:3:89:130:1623#0/1  
CGATATCGAAACAGCCACTCTTGGTGGGAAACAAATCGTG  
+HWI-EAS443:3:89:130:1623#0/1  
aaaababaa]aaaa`¥Q¥]\_a`[VZ]`\_``¥[^VYZPUX  
@HWI-EAS443:3:89:1404:2023#0/1  
AGAAACTGTGATGAGAATGGGAGACCTTCACTAACTCCAG  
+HWI-EAS443:3:89:1404:2023#0/1  
V`bbb`b`H¥\_Wbabb`]abaaaZYVbXF\_ZTbGS]VL\_]`  
@HWI-EAS443:3:89:1468:1842#0/1  
CATTTCTTCAATTAACACCTTATTTCTCAAATTTCTGT  
+HWI-EAS443:3:89:1468:1842#0/1  
UZb¥b¥b`babb¥Xb¥bbWJa¥a`baL`bb¥b`abb]b`a  
@HWI-EAS443:3:89:250:1834#0/1  
GAATGGGCGACCTTCACTACCTCCAGAGCAGAAATGAAAA  
+HWI-EAS443:3:89:250:1834#0/1  
``QP\_XZR^VS[\_`ZZ\_Z\_YP\_WROTVXHPW^¥XSWNYBBB  
@HWI-EAS443:3:89:776:308#0/1  
CCTCGATATCGAAACAGCCACTCTTGGTGGGAAACAAATC  
+HWI-EAS443:3:89:776:308#0/1  
abaa\_aab\_ab`aaaaba\_a¥\_¥`]¥P¥a`[V\_^a\_¥ZR  
@HWI-EAS443:3:89:857:435#0/1  
GAAAGCCCTTAGTAGCATCAAGGTCTCTAATCGGTTAAAG  
+HWI-EAS443:3:89:857:435#0/1  
aabaaaa`babb`abaaaaaaa[¥`\_baab\_aa]a`\_\_a  
@HWI-EAS443:3:89:881:1815#0/1  
CACGGTTCGAGTCTCTGAAAATATACAGATATTCGCTTGG  
+HWI-EAS443:3:89:881:1815#0/1  
abaT¥\_aabb\_aababbaaaabbaa¥¥`a`aa`^[\_`aa\_  
@HWI-EAS443:3:89:937:1809#0/1  
GAACAGTCTCGTGACATTTCTCGAGGGGCATGTCAGAA  
+HWI-EAS443:3:89:937:1809#0/1  
Tabb`bbTaaba]¥Z`Mb`aZba]aa`aaGabaaa`X`\_`  
@HWI-EAS443:3:8:1218:627#0/1  
AGGTCTCTAATCGGTTAAATATTACACTGAAGTTCGCTTT  
+HWI-EAS443:3:8:1218:627#0/1  
aaa`ab\_bVL`aaba`a^aaaa^`\_`a^]a[\_\_\_a^`\_`a  
@HWI-EAS443:3:8:1553:1051#0/1  
AGCCCTTAGTAGCATCAAGGTCTCTAATCGGTTAAAGATT  
+HWI-EAS443:3:8:1553:1051#0/1  
aY]\_`[a\_\_Y\_]WQ]G[\_QOO\_0^^T^RPPW^ZRSUPGY  
@HWI-EAS443:3:8:1678:292#0/1  
AGAAACTGTGATGAGAATGGGAGACCTTCACTACATCCAG  
+HWI-EAS443:3:8:1678:292#0/1  
Vaaa^Za\_\_aU`[\_`b]X`aba\_aaYTa^\_\_Y[]VHGJDV¥



@HWI-EAS443:3:8:288:232#0/1  
CACTCTTGGTGGGAAACAAATCGTGGAATGGATCTTGAAA  
+HWI-EAS443:3:8:288:232#0/1  
a\_bbabbab]aba`ababaaa]a\_baa\_aaa]``\_ab\_aY  
@HWI-EAS443:3:8:574:265#0/1  
CCTTGATGCTACTAAGGGCTTTCCTGAGGAGGGAGCAAT  
+HWI-EAS443:3:8:574:265#0/1  
abaa]a^^W[aU`NO][¥¥¥\_]NVRUV]``N^\_WR]UXY]  
@HWI-EAS443:3:8:85:1019#0/1  
GGAGACACTGTGATGAGAATGGGAGACCTTCACTACCTCC  
+HWI-EAS443:3:8:85:1019#0/1  
abaaabaaa`\_b`aa^aU\_aaYaSa``\_^Y¥\_^\_a¥]^\_`  
@HWI-EAS443:3:90:1345:591#0/1  
AGAAACTGTGATGAGAATGGGAGACCTTCACTAGCTCCAG  
+HWI-EAS443:3:90:1345:591#0/1  
``a`]Sa\_V^]Y¥W\_Zab``aY^a`[aaabVb¥FLTXU]`  
@HWI-EAS443:3:90:1545:839#0/1  
TGGCTGTTTCGATATCGAGCCAAGGGGGTTGCCTCTTCC  
+HWI-EAS443:3:90:1545:839#0/1  
a]`\_aaL`\_LVVV`TT\_Y`a\_\_a`YW`L^PZK[GYOY^WM  
@HWI-EAS443:3:90:338:76#0/1  
GAAAGCCCTTAGTAGCATCAAGTCTCTAATCGGTAAAG  
+HWI-EAS443:3:90:338:76#0/1  
aa`aaaa`aaaa\_aa`aa`a]`\_W`\_`\_a`X`^a`Z`\_]\_]  
@HWI-EAS443:3:90:452:700#0/1  
GAAACTGTGATGAGAATGGGAGACCTTCACTACCACCAGA  
+HWI-EAS443:3:90:452:700#0/1  
``Z]]`aWa^][Wa^W¥`[^aX[^\_aXa\_[^ZYFY``¥Q  
@HWI-EAS443:3:91:1447:686#0/1  
GCCGCATTTCTTCAATTAACCACCTTATTTCTAAAATTT  
+HWI-EAS443:3:91:1447:686#0/1  
a\_]\_]^\_``\_aaZ[X`¥`[P¥\_^^a^]\_a^W[TDR]^]W  
@HWI-EAS443:3:91:253:398#0/1  
GAATGGCAACACGGTTCGAGTCTCTGAAAATATACAGAGA  
+HWI-EAS443:3:91:253:398#0/1  
a``Z^VFW¥\_VV]\_Z^Z`VWNYV]¥SYUZZXZVUSPW[ZUZ  
@HWI-EAS443:3:91:520:1916#0/1  
CCGACTCGTGACATTTCTCGAGGGTCATGTCAGAAAGG  
+HWI-EAS443:3:91:520:1916#0/1  
abb^F[bb^0\_aQZWab\_¥aa^X\_\_`\_\_\_aa\_a`[Z`\_^`  
@HWI-EAS443:3:91:668:89#0/1  
CACCTTGGCCTCGATATCGAAACAGCCACTCTTGGTGGG  
+HWI-EAS443:3:91:668:89#0/1  
Vb\_^\_bb[P\_Ra¥^`¥a\_``a`a`ab`S`¥¥[YR^bT[\_Z  
@HWI-EAS443:3:91:882:925#0/1  
GAGAAACTGTGATGAGAATGGGAGAGCTTCACTACCTCCA  
+HWI-EAS443:3:91:882:925#0/1  
a`\_L`\_Y`\_U`Q`\_]\_W][\_]`OFVY``]U^¥^XX]XY  
@HWI-EAS443:3:91:900:503#0/1  
CCCTTGGCCTCGATATCGAAACAGCCACTCTTGGTGGGAA

+HWI-EAS443:3:91:900:503#0/1  
¥\_b`¥WQ¥\_ab`¥\_¥ZZ\_V\_`bWTW]XT\_[T[D^b¥U\_  
@HWI-EAS443:3:92:1007:750#0/1  
ATTGCTCCCTCCTCAGTGAAAGCCCTTAGTAGCATCAAGG  
+HWI-EAS443:3:92:1007:750#0/1  
][ZS]b`aa`^]Y^]U¥X¥`][`a\_U]b]a[`^\_^\_[\_\_  
@HWI-EAS443:3:92:1438:708#0/1  
GAGAAAATGTGATGAGAATGGGAGACCTTCACTACCTCCA  
+HWI-EAS443:3:92:1438:708#0/1  
]¥bZXT^`baa`aab[S¥` `abZLN]aa¥G`a`X]W^\_  
@HWI-EAS443:3:92:1569:992#0/1  
TGAGAATGGGAGACGTTCACTACCTCCAGAGCAGAAATGA  
+HWI-EAS443:3:92:1569:992#0/1  
abI\_aa^]Za^]`FF^\_a\_\_aTSRYXW\_baa]^`a\_U`a¥  
@HWI-EAS443:3:92:639:729#0/1  
GCCCTTAGTAGCATCAAGGTCTCTAATCGGTTAAAGATTA  
+HWI-EAS443:3:92:639:729#0/1  
aaZaab^^^bbaaa`aaaaP\_a^]`][b`L]¥¥RaY\_`¥  
@HWI-EAS443:3:93:1430:593#0/1  
GCCGCATTTCTTCAATTAACCAGCTTATTTCTCAAATTT  
+HWI-EAS443:3:93:1430:593#0/1  
]O[WDY][`[\_UOG\_[\_a\_VNZNV^`\_a]]MT]P¥WPZ^B  
@HWI-EAS443:3:93:1535:1112#0/1  
AGAAACTGTGATGAGAATGGGAGACCTTCACTACGTCCAG  
+HWI-EAS443:3:93:1535:1112#0/1  
`^WZ[QZ`N\_K]a^`RX^]`^Z^WZ`\_Q\_Z[\_HDRV¥B  
@HWI-EAS443:3:93:658:1068#0/1  
AGAAACTGTGATGAGAATGGGAGAGCTTCACTACCTCCAG  
+HWI-EAS443:3:93:658:1068#0/1  
\_US]Y]ab\_bWP¥]baa¥bbaUaUFL\_a\_]UY`]J[QNXQ  
@HWI-EAS443:3:94:335:469#0/1  
GCGCTACCTTTCTTACATGACCCTCGAGAAATGTCACGA  
+HWI-EAS443:3:94:335:469#0/1  
aaaYR[[aaWZa]GRa[\_]UI\_\_][U]X^]]][X\_Y^^ZWTZ  
@HWI-EAS443:3:94:337:1058#0/1  
CCTCTTTCAAGATCCATTCCACGATTTGTTTCCCACCAAG  
+HWI-EAS443:3:94:337:1058#0/1  
a^aabb`]WXba\_\_aaa\_]`Ya]aaaa`^^a`\_^^\_¥  
@HWI-EAS443:3:94:97:1247#0/1  
CGAGAACGCTTATCTCTTGTCTACTTCAAGCAGTAGT  
+HWI-EAS443:3:94:97:1247#0/1  
aX^RMWH^aa\_`PUU[[]IZa]S^^T`^\_]X\_O\_UPUT  
@HWI-EAS443:3:95:1425:1923#0/1  
CGCATTTCTTAAATTAACCACCTTATTTCTCAAATTTCT  
+HWI-EAS443:3:95:1425:1923#0/1  
N]Yaa¥a\_a`Pb`b`bbaN]NIaababY^Uaa`b`a`RJW  
@HWI-EAS443:3:95:166:492#0/1  
CCTTGATGCTACTAAGGGCTTTCACTGAGGAGGGAGCAAT  
+HWI-EAS443:3:95:166:492#0/1  
aababbbbabbaaaaaabaabaa`]`abaabYaaa\_b\_a`a

@HWI-EAS443:3:95:1737:542#0/1  
GAAAATATACAGAGATTCGCTTGGAGAAAATGTGATGAGA  
+HWI-EAS443:3:95:1737:542#0/1  
[R^Ua¥RZaa^b^aV`¥0\_]¥VUJ`VK^aI^UENROSFYB  
@HWI-EAS443:3:95:290:1027#0/1  
TTGCTCCCTCCTCAGTGAAAGCCCTTAGTAGCATCAAGGT  
+HWI-EAS443:3:95:290:1027#0/1  
aaabaa`\_b`abaa`ab`aaa`aabaaa`aa\_\_a[`\_^S  
@HWI-EAS443:3:95:390:1604#0/1  
GCCGCATTTCTTCAATTAACCACCTTATTTTCATCAAATTT  
+HWI-EAS443:3:95:390:1604#0/1  
a¥a\_\_H\_XP\_PS¥X`XYU\_QY]UPVVU`a[ZFFT¥¥S][M  
@HWI-EAS443:3:95:406:1790#0/1  
AAACTGCGATGAGAATGGGAGACCTTCACTACCTCCAGAG  
+HWI-EAS443:3:95:406:1790#0/1  
^¥a[¥YDNWSa]]bb[W^`UVY`\_baaaZ]UO`aaYXV]]  
@HWI-EAS443:3:96:106:1149#0/1  
GCCGCGTTTCTTCAATTAACCACCTTATTTCCCTCAAATTT  
+HWI-EAS443:3:96:106:1149#0/1  
S\_^\_\_`X^abb]R¥baZGP\_¥¥\_XU\_0^abZ`XX^¥YVa[  
@HWI-EAS443:3:96:1252:1066#0/1  
TGCCGCATTTCTTCAATTAACCACCTTATTTGCTCAAATT  
+HWI-EAS443:3:96:1252:1066#0/1  
]aLb`a`bba\_`\_^V`LaaVTbVaaaa^abaGYI` `aUa  
@HWI-EAS443:3:96:149:685#0/1  
GGAGAACTGTGACGAGAATGGGAGACCTTCACTACCTCC  
+HWI-EAS443:3:96:149:685#0/1  
` `X[[]`U`a^[^X`^aXYa\_¥TYPMMWURZ^MSUZRBB  
@HWI-EAS443:3:96:410:1829#0/1  
GAAACTGTGATGAGAATGGGAGACCTTAACTACCTCCAGA  
+HWI-EAS443:3:96:410:1829#0/1  
a\_` `bb]aa`aaaa^`aaQ`]]a\_XGYXXX]YQYT^BB  
@HWI-EAS443:3:96:447:787#0/1  
CCGCATTTCTTCAATTAACCACCCTATTTCCCTCAAATTT  
+HWI-EAS443:3:96:447:787#0/1  
aa]aaaaa`aaa\_\_a`a^`^\_\_\_\_]a\_aa\_^]\_aa`^` ` ` \_  
@HWI-EAS443:3:97:1119:1541#0/1  
AGAAACTGTGATGAGAATGGGAGACCTTAACTACCTCCAG  
+HWI-EAS443:3:97:1119:1541#0/1  
`]X\_a\_a`Ta\_\_`Yaaa\_`a\_\_a[TZ^XF¥QV^RQWWUJa  
@HWI-EAS443:3:97:1164:1325#0/1  
AGAAACTGGGATGAGAATGGGAGACCTTCACTACCTCCAG  
+HWI-EAS443:3:97:1164:1325#0/1  
`b`]bYb^DV[]aa`\_a^b`¥¥^[[\_\_a\_`aa]¥WZH^]Y  
@HWI-EAS443:3:97:1331:1348#0/1  
GCCGCATTTATTCAATTAACCACCTTATTTCCCTCAAATTT  
+HWI-EAS443:3:97:1331:1348#0/1  
][K¥YS]aUF]Y[¥a\_\_Z`YaaTM`\_Raaa[Ga\_WT]\_S[  
@HWI-EAS443:3:97:1470:1273#0/1  
GTTAATTGAAGAAATGCGGCAAAGATTGAAAGCGACAGAG

+HWI-EAS443:3:97:1470:1273#0/1  
]b`ZXaa`aa`QRa\_Z`\_PZHQ¥`\_[X]aQYJZMXQXW[  
@HWI-EAS443:3:97:520:1281#0/1  
GATTGAAAGCGACAGAGAATAGTTTCGAACAAAAACATT  
+HWI-EAS443:3:97:520:1281#0/1  
`Vbba\_aba^ab\_\_aab¥`\_T^aa¥^`a^a\_a`aa¥aaa  
@HWI-EAS443:3:97:759:364#0/1  
CTCTGAAAATATACAGAGCTTCGCTTGGAGAACTGTGAT  
+HWI-EAS443:3:97:759:364#0/1  
a]W`¥^TU[\_`bb^abb`J]]bbb`a`b\_ba^b\_b\_\_aa\_  
@HWI-EAS443:3:97:883:314#0/1  
GAGAACTGTGATGAGAATGGGAGACATTCACTACCTCCA  
+HWI-EAS443:3:97:883:314#0/1  
a\_TUVNL\_\_PVL[QZP¥Y¥SBBBBBBBBBBBBBBBBBBB  
@HWI-EAS443:3:98:1186:733#0/1  
GTCGCTTTCATCTGTGCCGATTTCTTCAATTAGCCACC  
+HWI-EAS443:3:98:1186:733#0/1  
aV¥a^[a^¥[`] `aZ`TFR][\_\_^V]\_W]\_Y]]]Z]ZV]  
@HWI-EAS443:3:98:1656:314#0/1  
ATTGGGACAGAAATTTGAGGAAATAAGGAGGTTAATTGAA  
+HWI-EAS443:3:98:1656:314#0/1  
aba`ZYaVbb\_babbaaXb`¥a^ab\_a^Pb`\_\_\_W]W]`W  
@HWI-EAS443:3:98:216:1610#0/1  
AGAAACTGGGATGAGAATGGGAGACCTTCACTACCTCCAG  
+HWI-EAS443:3:98:216:1610#0/1  
UTYbabU¥¥aa]XaKJWWP^a¥S\_YaH[H\_TFSHXGG¥ZR  
@HWI-EAS443:3:98:599:1969#0/1  
GAGAACTGTGATGAGAATGGGAGAACTTCACTACCTCCA  
+HWI-EAS443:3:98:599:1969#0/1  
TZaW\_^`\_]ONP¥`\_b`]X\_¥[^`WNYWP[\_]`^HDMZaU  
@HWI-EAS443:3:99:1324:1325#0/1  
ATGTTATTTGTTGGAACTATTCTCTGTGCTTTCAATCT  
+HWI-EAS443:3:99:1324:1325#0/1  
Y^b\_]ZaV`\_X\_Z^\_bbbWZ^b\_]b``NG\_P]bPS\_\_aW^  
@HWI-EAS443:3:99:1667:129#0/1  
CCGCATTTCTTCAATTAACAACCTTATTTCTCAAATTC  
+HWI-EAS443:3:99:1667:129#0/1  
`aa`K]a\_a^V`a`abaaaKba`Vb^bab[a^IRU]a`b\_  
@HWI-EAS443:3:99:219:860#0/1  
AGCCACTCTTGGTGGGAAACAAATCGTGGAATGGATCTTG  
+HWI-EAS443:3:99:219:860#0/1  
`a`UY`a[\_\_\_¥`]UZb¥``\_`baaZ`M`aTRTPNHX\_aa`  
@HWI-EAS443:3:99:519:1811#0/1  
AGTAGCATCAAGGTCTCTAATCGGTTAAAGATTACACTGA  
+HWI-EAS443:3:99:519:1811#0/1  
aaXb\_aa`ba`\_]a`ab`\_Yaa\_a\_aaY\_¥¥`^\_I^`\_  
@HWI-EAS443:3:99:57:272#0/1  
CAAATCGAGGAATGGATCTTGAAGAGGAATCCAGCGAGA  
+HWI-EAS443:3:99:57:272#0/1  
Z`\_¥a`YJ^XS\_Xa`RQUS\_a¥TPW\_]\_T\_Taaa`]ZJWB

@HWI-EAS443:3:99:694:35#0/1  
GAATGGGAGACCTTCACTACCTCCAGAGCAGAGATGAAAA  
+HWI-EAS443:3:99:694:35#0/1  
aV¥Z\_baHbXP[W]S]¥\_]PMVUMZaU\_S¥aVGV\_\_VMRB  
@HWI-EAS443:3:99:803:1090#0/1  
GAAAATCTACAGAGATTGCGTTGGAGAACTGTGATGAGA  
+HWI-EAS443:3:99:803:1090#0/1  
``baabbbbaabbaabaabababbab`aaaab]a`aa]a\_  
@HWI-EAS443:3:9:1225:1994#0/1  
ATTGCTCCCTCCTCAGTGAAAGCCCTTAGTAGCATCAAGG  
+HWI-EAS443:3:9:1225:1994#0/1  
aa`\_^a\_]a^]¥\_Wa\_Y\_``a\_]U`X\_\_X\_\_N\_^N^]BB  
@HWI-EAS443:3:9:1348:640#0/1  
GAAAGCCCTTAGTAGCATCAAGGTCTCTAATCGGTTAAAG  
+HWI-EAS443:3:9:1348:640#0/1  
a^ZaaY`K]aab^^RN]]a`\_a¥^]]W\_\_Ya^a¥^Z^Y\_]`  
@HWI-EAS443:3:9:1448:195#0/1  
GGTAGACTGTTTCATTTGGCATATCCGCAAGCGATTTGCA  
+HWI-EAS443:3:9:1448:195#0/1  
a^ZX`OSPXY]XXGVXRZXZZUZLMOMVBBBBBBBBBBBB  
@HWI-EAS443:3:9:1619:143#0/1  
CTTGGAGAACTGTGATGAGAATGGGGGACCTTCACTACC  
+HWI-EAS443:3:9:1619:143#0/1  
ab\_SS]b`b^a\_S\_baabS[FTY``]BBBBBBBBBBBBBB  
@HWI-EAS443:3:9:1669:187#0/1  
GAAACTGTGATGAGAATGGGAGAGCTTCACTACCTCCAGA  
+HWI-EAS443:3:9:1669:187#0/1  
a\_YYN\_]XaV\_aY\_OGUa\_RVRMKGY]GXXVXWVXVBBBB  
@HWI-EAS443:3:9:1713:1098#0/1  
AAGGTCTCTAATCGGTTAAAGATTACACTGAAGTTAGCTT  
+HWI-EAS443:3:9:1713:1098#0/1  
¥a[`[¥\_T\_aa^Y\_`K[aa\_bYX\_¥GTY^]Xa]\_TF¥U\_a  
@HWI-EAS443:3:9:1782:485#0/1  
GCCCTTAGTAGCATCAAGGTCTCTAATCGGTTAAAGATTA  
+HWI-EAS443:3:9:1782:485#0/1  
a¥]XNZ^VPUXQX]]^Xa\_TT[X^ZH[G¥\_W\_TUU]WWBB  
@HWI-EAS443:3:9:208:1100#0/1  
CCCTTGGCCTCGATATCGAAACAGCCACTCTTGGTGGGAA  
+HWI-EAS443:3:9:208:1100#0/1  
abaXZW]aaa\_]ZP\_]`SW[X[^\_^^¥\_][¥¥\_W`Z\_¥\_  
@HWI-EAS443:3:9:513:1173#0/1  
GCCGCATTTCTTCAATTAATCACCTTATTTCTCAAATTT  
+HWI-EAS443:3:9:513:1173#0/1  
abbba^baaababaaabaabaaaaaaaa`\_aaaaaaaa`  
@HWI-EAS443:3:10:659:653#0/1  
CTGTGATGAGAATGGGAGACCTTCACTACCTCCAGAGGAG  
+HWI-EAS443:3:10:659:653#0/1  
]¥PW\_ZTZW\_¥UZ¥^QWZTR¥^a`S]¥YOZ¥¥¥Z^]GNa  
@HWI-EAS443:3:11:1759:831#0/1  
GGCTGTTTCGATATCGAGGCCAAGGGTGTGCTCTTCT

+HWI-EAS443:3:11:1759:831#0/1  
aaaab¥aa[XZ]]XM\_Q`]FX\_\_\_Y¥GXU¥QPSTK[RDM]  
@HWI-EAS443:3:11:364:161#0/1  
TGCGAATGGGAGACCTTCACTACCTCCAGAGCAGAAATGA  
+HWI-EAS443:3:11:364:161#0/1  
Q\_W`^[\_R¥XXVH^U\_OYM\_SS^KUTMJO]¥\_TO¥BBB  
@HWI-EAS443:3:15:203:138#0/1  
TGCCGCTTTCAATCTGTGCCGATTTCTTCAATTAACCAC  
+HWI-EAS443:3:15:203:138#0/1  
a\_N[\_¥`a`b¥aYPD^^^b][`[^[aaa`\_a[YaPX¥\_  
@HWI-EAS443:3:1:827:1928#0/1  
AGAAACTGTGATGAGAATGGGAGACCTTCACTACCTCAAG  
+HWI-EAS443:3:1:827:1928#0/1  
aaa`a`aa^a`aa\_a\_`^````a]XX\_`]¥LQ`UZXB BBB  
@HWI-EAS443:3:20:1137:1635#0/1  
GTGGCTTTCAATCTGTGCCGATTTCTTCAATTAACCACC  
+HWI-EAS443:3:20:1137:1635#0/1  
aYF¥aWa`aa`\_WLLY\_¥^]Sa\_X]^WX\_]`WUZ[WZ  
@HWI-EAS443:3:21:1642:1199#0/1  
GCTGCATTTCTTCAATTAACCACCTTATTTCTCAAATTT  
+HWI-EAS443:3:21:1642:1199#0/1  
aaYb\_bba¥R`a\_\_`aba[\_a`^Zaa\_a`aV¥a[aa\_a\_a  
@HWI-EAS443:3:22:1071:1476#0/1  
AGCAACTGTGATGAGAATGGGAGACCTTCACTACCTCCAG  
+HWI-EAS443:3:22:1071:1476#0/1  
]\_H^RU^baaaaaVUOUZ^SYP¥VaYSTX^aUWX]ZVNZY  
@HWI-EAS443:3:23:1720:808#0/1  
ATTGTCTGCAAATCGCTTGGCGATATGCCAAAGGAAAAAG  
+HWI-EAS443:3:23:1720:808#0/1  
abba`\_bb[bbb`\_aZ`a^U`a\_¥`\_`HP`a^^[¥\_`G\_S  
@HWI-EAS443:3:23:586:1827#0/1  
AANGTCTCTAATCGGTTAAAGATTACACTGAAGTTCGCTT  
+HWI-EAS443:3:23:586:1827#0/1  
`RDQXb`aabaa¥^`¥\_`Wa[`]\_aa\_aXY[¥XX¥a^][  
@HWI-EAS443:3:24:1291:1569#0/1  
CGCTTGGAGAACTGTGATGAGAATGGGAGACCTTCATTA  
+HWI-EAS443:3:24:1291:1569#0/1  
U\_[W\_\_a[\_\_\_Z`M`VO¥K[U]USbb\_`a[QZHXYb\_GH[a  
@HWI-EAS443:3:25:1131:685#0/1  
TGGGAATGGGAGACCTTCACTACCTCCAGAGCAGAAATGA  
+HWI-EAS443:3:25:1131:685#0/1  
\_aaa¥¥]b^[Zb\_a¥a^^a^`a[FY`\_U]Z[X`XZQ¥a`a  
@HWI-EAS443:3:26:354:2031#0/1  
AAATAAGCTGAAACGAGAAAGCTTTATCTCTTGTTCNAC  
+HWI-EAS443:3:26:354:2031#0/1  
aa`a^aaa`[]ba\_[a[¥`\_¥Y\_\_ZXa`a`]Q^\_U¥WDY]  
@HWI-EAS443:3:28:343:1376#0/1  
GGGTGTTTCGATATCGAGGCCAAGGGTGTTCCTTCTCCT  
+HWI-EAS443:3:28:343:1376#0/1  
aaRPaN`\_b[GV]V\_XV`]^`a`][PLXW]TY[Xa`]]]]

@HWI-EAS443:3:2:702:657#0/1  
AATTTCTCCAATTGCTCCCTCCTCAGTGAAAGCCTTT  
+HWI-EAS443:3:2:702:657#0/1  
[]\_IYa\_Y\_TZ`aV`aaa^a^VY`bTWV`¥F¥`\_NDXa  
@HWI-EAS443:3:30:1584:910#0/1  
GCACGCATTTCTTCAATTAACCACCTTATTTCCCTCAAATT  
+HWI-EAS443:3:30:1584:910#0/1  
\_Z\_U`U^WYN`NPP^X`Z\_UOM]a`a]^\_a^SQT\_^  
@HWI-EAS443:3:31:1514:863#0/1  
CGCTTGGAGAACTGTGATGAGAATGGGAGACCTTCAATA  
+HWI-EAS443:3:31:1514:863#0/1  
¥\_\_\_aaaa¥a`\_¥]`Z\_a\_¥V¥^\_aabaY^]TL^`U[DYT  
@HWI-EAS443:3:32:65:285#0/1  
GTGCCGCATTTCTTCAATTAACCACCTTATTTCCCTCACAT  
+HWI-EAS443:3:32:65:285#0/1  
`a`abbbabbbabba`bbaababbaa`abab`aYHHHX  
@HWI-EAS443:3:34:1022:498#0/1  
TGGTGGGAAACAAATCGTGGAATGGATCTTGAAAGAGGAA  
+HWI-EAS443:3:34:1022:498#0/1  
`b]Vaaabbb]b`abab\_ba`\_abb\_a`a\_a`\_`¥\_]\_¥  
@HWI-EAS443:3:36:1134:1101#0/1  
CTGTGATGAGAATGGGAGACCTTCACTACCTCCAGAGNAG  
+HWI-EAS443:3:36:1134:1101#0/1  
abbabba`a`abbbaaa^`aaaaaaa`a`a\_]aa\_VD[a  
@HWI-EAS443:3:38:1593:1789#0/1  
GAGATTCGCTTGGAGAACTGTGATGAGAATGGGAGAGCT  
+HWI-EAS443:3:38:1593:1789#0/1  
a`][\_`a`a\_]\_]\_\_`\_X\_^V\_^X`\_X¥TNVWXX]NJPN  
@HWI-EAS443:3:40:226:1404#0/1  
AGCAACTGTGATGAGAATGGGAGACCTTCACTACCTCCAG  
+HWI-EAS443:3:40:226:1404#0/1  
W]IV\_UN[`WZR^X¥¥^[`^UOVS[]LP\_^WT`\_[VaVN\_  
@HWI-EAS443:3:42:949:850#0/1  
ACTTCAGTGTAATCTTTAACCATTAGAGACCTTGATGCT  
+HWI-EAS443:3:42:949:850#0/1  
Y]a\_Z`[V\_^a`aaa\_bbbbbbaaa`a`^a`^`\_]`a\_ba\_  
@HWI-EAS443:3:44:802:772#0/1  
TGCTGCCGCATTTCTTCAATTAACCACCTTATTTCCCTCAA  
+HWI-EAS443:3:44:802:772#0/1  
a`a]`aabaabaaba\_^]ba^]`\_`Zaa\_Xaa\_U]]\_a\_  
@HWI-EAS443:3:46:1250:1891#0/1  
CTGTGATGAGAATGGGAGACCTTCACTACCTCCAGAGAAG  
+HWI-EAS443:3:46:1250:1891#0/1  
aWOH]VT\_]WZ\_[S¥[XTaX]OVX[\_YNJPDR]\_¥ZGSV  
@HWI-EAS443:3:46:205:212#0/1  
ACTTCAGTGTAATCTTTAACCATTAGAGACCTTGATGCT  
+HWI-EAS443:3:46:205:212#0/1  
aaabaab[``a[aaaba`aab]ba`a\_aaaW\_aa````\_`  
@HWI-EAS443:3:46:870:203#0/1  
GGGATGGGGCATCACCCAATCCATTGTCTGCAAATCGCTT

+HWI-EAS443:3:46:870:203#0/1  
aa]XY^a\_a\_\_`^^^XZ`^\_^^ZX[^ST[^UZU^VNQRUV  
@HWI-EAS443:3:47:1293:1424#0/1  
CGGTGGGAAACAAATCGTGAATGGATCTTGAAAGAGGAA  
+HWI-EAS443:3:47:1293:1424#0/1  
`b\_S\_aaa`baba\_a[a`ba]ab\_¥[\_X`abaaaa`````  
@HWI-EAS443:3:48:1497:1962#0/1  
GCCGCATTTCTTCAATTAACCACCTTATTTCTCAAANTT  
+HWI-EAS443:3:48:1497:1962#0/1  
aaaa\_aaba\_aaaa`a\_a`[\_`¥a)`aa`\_¥\_\_`\_VDU^  
@HWI-EAS443:3:4:391:959#0/1  
GCGGCACAGATTGAAAGCGACAGAGAATAGTTTCGAAAAA  
+HWI-EAS443:3:4:391:959#0/1  
a\_\_``]RT`OV¥]UZXQTaZ[[\_¥\_\_XR[[UP[OVZ^TSB  
@HWI-EAS443:3:50:1057:528#0/1  
AANATACAGAGATTGCTTGGAGAACTGTGATGAGAA  
+HWI-EAS443:3:50:1057:528#0/1  
a^D^bbbbbabaaabbaababa`aaaa\_ba`a\_a`a[\_`  
@HWI-EAS443:3:51:1178:1793#0/1  
ATGACCCAATCCATTGTCTGCAAATCGCTTGGCGATATGC  
+HWI-EAS443:3:51:1178:1793#0/1  
\_aP\_YVabaa¥[[\_¥\_T\_\_a\_aaaa[¥^````[Z]^VZLV^  
@HWI-EAS443:3:54:1015:1857#0/1  
AACAAATCGTGAATGGATCTTGAAAGAGGAATCCAGAGC  
+HWI-EAS443:3:54:1015:1857#0/1  
`a\_aaaaaa]a\_aaa\_a^\_]\_```\_`¥\_\_^\_^ZV`^]]X  
@HWI-EAS443:3:57:755:835#0/1  
CGGTGGGAAACAAATCGTGAATGGATCTTGAAAGAGGAA  
+HWI-EAS443:3:57:755:835#0/1  
abb\_bbbbbbbbbbbbabbaabbb`b¥bb¥`bab\_aaaa  
@HWI-EAS443:3:61:1101:17#0/1  
GCGGGGACAGAAATTTGAGGAAATAAGGTGGTTAATTGAA  
+HWI-EAS443:3:61:1101:17#0/1  
a\_a`aaTV\_a^^]\_\_`X`YPX\_¥Y`\_X\_\_VWWTWVVPV  
@HWI-EAS443:3:61:484:448#0/1  
CGGTGGGAAACAAATCGTGAATGGATCTTGAAAGAGGAA  
+HWI-EAS443:3:61:484:448#0/1  
abbabbbbbbbbabbbabb¥Yabaaabbbbaaabbbbaa  
@HWI-EAS443:3:61:983:1848#0/1  
GGCGGCACAGATTGAAAGCGACAGAGAATAGTTTCGAAGA  
+HWI-EAS443:3:61:983:1848#0/1  
\_U]W\_¥YUYIVVQVZVSZ\_Y]ZOUVBBBBBBBBBBBBBB  
@HWI-EAS443:3:65:1288:616#0/1  
GGNGTTGCCTCTTCCTTTTAAGGACTTTTGATCTCGGCGG  
+HWI-EAS443:3:65:1288:616#0/1  
`[DWaa\_babbbbaaabbaaaaa`[baaabaaa`aa\_a\_  
@HWI-EAS443:3:65:236:964#0/1  
CGGTGGGAAACAAATCGTGAATGGATCTTGAAAGAGGAA  
+HWI-EAS443:3:65:236:964#0/1  
aaa¥\_\_`a`aaa^\_\_a`]^`^`\_\_a\_X]V\_^^\_]¥^VVZZ



@HWI-EAS443:3:68:576:1834#0/1  
AATCTCTGTATATTTTCAGAGACTCGAACCGTGTACGAT  
+HWI-EAS443:3:68:576:1834#0/1  
]HT`¥Ya]b]0[bb^\_Y0\_`^`^baa^^\_a[^TVYRJYZ  
@HWI-EAS443:3:70:20:338#0/1  
CACTTGGGACAGAAATTTGAGGAAATAAGGTGGTTAATTG  
+HWI-EAS443:3:70:20:338#0/1  
a`NY^¥[[\_`a`aY``aaba]aa[\_aY]a^WQa\_]\_\_^`\_`Q  
@HWI-EAS443:3:73:617:840#0/1  
GTNGCTTTCAATCTGTGCCGATTTCTTCAATTAACCACC  
+HWI-EAS443:3:73:617:840#0/1  
aTD[aaaab```aaaXaaaa\_]aaa`a`a\_\_a`aa\_[^``  
@HWI-EAS443:3:74:309:738#0/1  
AGCATCAAGGTCTCTAATCGGTTAAAGATTACTGAAGT  
+HWI-EAS443:3:74:309:738#0/1  
aa``XY`TYXN\_\_^`¥GY]XX[Y]ZX[[aXMDWX¥[¥\_\_P  
@HWI-EAS443:3:79:590:470#0/1  
ACGATACAGAGATTGCTTGGAGAACTGTGATGAGAATG  
+HWI-EAS443:3:79:590:470#0/1  
a`bbaaaababaaaaba`ab``Za\_\_a^[^`¥Y`a\_\_^T  
@HWI-EAS443:3:81:1361:916#0/1  
GCGGCATTTCTTCAATTAACCACCTTATTTCTCAAATTT  
+HWI-EAS443:3:81:1361:916#0/1  
a[M]L¥YMOW]VX\_¥TVT\_WT¥X^[YS[NZTDQ¥\_^ZYZX  
@HWI-EAS443:3:81:1716:186#0/1  
CGCTTGGAGAACTGTGATGAGAATGGGAGACCTTCAATA  
+HWI-EAS443:3:81:1716:186#0/1  
\_`Z¥`¥¥^¥[KY]a]ba¥\_\_P\_SZ`^^bXa[TS^`XUDS¥  
@HWI-EAS443:3:81:807:405#0/1  
ACCGCCTCTTCTTTTAAGGACTTTTGATCTCGGCGGAGC  
+HWI-EAS443:3:81:807:405#0/1  
a`^`¥a`\_`\_¥¥\_aaa\_¥\_Z[R\_a\_\_^^]`Z\_¥\_W\_SSW  
@HWI-EAS443:3:82:1374:1583#0/1  
AGGCTGTTTCGATATCGAGGCCAAGGGTGTTCCTTTTC  
+HWI-EAS443:3:82:1374:1583#0/1  
\_\_bbbaabaS`TS\_a`a`SaR^``b¥LWab[a]aZ`YFX  
@HWI-EAS443:3:82:379:469#0/1  
CACGGGCTTTCCTGAGGAGGGAGCAATAGTTGGAGAAAT  
+HWI-EAS443:3:82:379:469#0/1  
``aba\_aaaaa`\_aa[a]aU^^aa``aaa]a\_``a\_`a`  
@HWI-EAS443:3:83:125:1142#0/1  
CGCCGCTTTCAATCTGTGCCGATTTCTTCAATTAACCAC  
+HWI-EAS443:3:83:125:1142#0/1  
a]FZ¥]]\_¥a\_\_[]OZW\_^\_\_`¥^]W]]XUZ\_YOYX\_\_Z  
@HWI-EAS443:3:8:1556:637#0/1  
AGCGGCACAGATTGAAAGCGACAGAGAATAGTTTCGAAAA  
+HWI-EAS443:3:8:1556:637#0/1  
ab`\_UWXRQWW¥]XUZXSJUS][P[UVVS]XLSTMKXVJY  
@HWI-EAS443:3:8:546:498#0/1  
TGGTGGGAAACAAATCGTGAATGGATCTTCAAAGAGGAA

+HWI-EAS443:3:8:546:498#0/1  
a`]Wa]a`a^`\_]`a\_a\_aa^[`a`]`Ya`a\_^\_\_\_a[^^  
@HWI-EAS443:3:90:1564:789#0/1  
TTGGAGAACTGTGATGAGAATGGGAGACCTTCACTAACT  
+HWI-EAS443:3:90:1564:789#0/1  
][`\_Tba¥X0^`XK\_b]abRV¥aa`ZbVG^``]a^a0FQY  
@HWI-EAS443:3:90:1603:278#0/1  
GANAATGGGAGACCTTCACTACCTCCAGAGCAGAAATGAA  
+HWI-EAS443:3:90:1603:278#0/1  
aXDWaaaaaaaa[\_Z\_`^a`\_^[ZT]Za\_`U`aY][\_a^^  
@HWI-EAS443:3:90:382:1982#0/1  
CGGGACACTTAGAATGACAATTGCATCTGTACCTACTTCG  
+HWI-EAS443:3:90:382:1982#0/1  
`^`a`aaaaab`aa`aaaa\_\_aa\_\_`]`^^`a\_\_^\_]^^]  
@HWI-EAS443:3:93:911:399#0/1  
CTCTGGAGGTAGTGAAGGTCTCCATTCTCATCACAGCTT  
+HWI-EAS443:3:93:911:399#0/1  
aaaa`a`ba\_aaTaaaaW\_`X]a\_`aYa¥`a]\_]\_\_W\_a  
@HWI-EAS443:3:95:297:745#0/1  
AGTAACTGTGATGAGAATGGGAGACCTTCACTACCTCCAG  
+HWI-EAS443:3:95:297:745#0/1  
a`X^¥aaaT\_]\_]a`Z`a^a^^ZZ[ ]`^^^]aZ`]]][`  
@HWI-EAS443:3:96:1208:1731#0/1  
AGAAACTGTGATGAGAATGGGAGACCTTCACTACCTCAAG  
+HWI-EAS443:3:96:1208:1731#0/1  
\_bb]YXWRD[¥aa`^YTX\_[WTQX¥SGW\_XKW\_TFWPG`S  
@HWI-EAS443:3:96:1690:1729#0/1  
GAGAACTGTGATGAGAATGGGAGACCTTCACTACCTACA  
+HWI-EAS443:3:96:1690:1729#0/1  
a\_ZV[aR`a]a^`b¥US]Y\_\_aX`SWW\_[N¥L¥^MMPGWB  
@HWI-EAS443:3:97:555:990#0/1  
GAGAACTGTGATGAGAATGGGAGACCTTCACTACCTCCAG  
+HWI-EAS443:3:97:555:990#0/1  
a`Ya\_aaXb\_aaaa`aaa`\_a\_\_^\_a^aY^`]\_\_\_X^`  
@HWI-EAS443:3:98:317:611#0/1  
CACGGCTTTCCTGAGGAGGGAGCAATAGTTGGAGAAAT  
+HWI-EAS443:3:98:317:611#0/1  
aaaVbab`\_a^`\_a¥¥a`\_aaa\_``Y\_]aR\_a\_\_\_]`Y]  
@HWI-EAS443:3:98:566:1833#0/1  
ACATTTCTGACATGACCCTCGAGGAAATGTCACGAGACTG  
+HWI-EAS443:3:98:566:1833#0/1  
a¥FWbbabab\_a\_[]b[aa^a]bb\_`aa]``a`aa\_aGa`  
@HWI-EAS443:3:99:1374:94#0/1  
ATGAGAATGGGAGACCTTCACTACCTCCAGAGCAGAAGTG  
+HWI-EAS443:3:99:1374:94#0/1  
abba^X¥bbab\_b^[Zaa\_a\_aaW\_a]```]aT\_a¥¥^T\_  
@HWI-EAS443:3:9:1219:975#0/1  
GGGTAATTGAAGAAATGCGGCACAGATTGAAAGCGACAGA  
+HWI-EAS443:3:9:1219:975#0/1  
Z`J`ba`aa]aaa`a]baa`aa\_`b`Wabaa\_`Xba¥\_a^

@HWI-EAS443:3:9:1545:885#0/1  
ATTTCTCGAGGGTCATGTCAGAAAGGTAGCGCGAAGNAG  
+HWI-EAS443:3:9:1545:885#0/1  
abba`\_a\_a]baa]aaa\_\_\_a\_a]``UaaUaV]^\_XDXa  
@HWI-EAS443:3:9:80:426#0/1  
CGGGGATCTTCAAAGAGGAATCCAGCGAGACACTTAGAAT  
+HWI-EAS443:3:9:80:426#0/1  
abbbbaaabbbbabaaa]aba\_aaa`^aa^aYaabbaa`  
@HWI-EAS443:3:100:1410:885#0/1  
CCGCATTTCTTCAATTAACCACCTTATTTNCTCAAATTC  
+HWI-EAS443:3:100:1410:885#0/1  
a\_`\_bbba\_bbaaabbaa^^a\_\_b`abaZD¥b^a``aa`B  
@HWI-EAS443:3:10:1287:1353#0/1  
CATTCTCATCACAGTTTNTCCAAGCGAATCTCTGTATATT  
+HWI-EAS443:3:10:1287:1353#0/1  
U¥bb^bZZ^^`aba]b]D¥`abbbba`VZYa]aaabbb]a  
@HWI-EAS443:3:10:1749:951#0/1  
AGANACTGTGATGAGAATGGGAGACCTTCACTACCTCCAG  
+HWI-EAS443:3:10:1749:951#0/1  
`a¥D[\_ba¥babb^a]`ab^¥Y`^ZZa`\_]\_]TN[RY\_\_  
@HWI-EAS443:3:13:281:445#0/1  
CCGCATTTCTTCAATTAACCACCTTATTTCTCAAANTTC  
+HWI-EAS443:3:13:281:445#0/1  
abbY¥`aaba\_V]a^]UZ¥Yb][^[\_V[X[ZFJDZY¥  
@HWI-EAS443:3:15:670:1218#0/1  
AAATAAGCTGAAACGAGAAAGCNCCTTATCTCTTGTCTAC  
+HWI-EAS443:3:15:670:1218#0/1  
aababa\_a`a`baaaab`a\_a[D¥aa\_a`aaaa\_````\_  
@HWI-EAS443:3:16:343:829#0/1  
CGCATTTCTTCAATTAACCACCTTATTNCCTCAAATTTCT  
+HWI-EAS443:3:16:343:829#0/1  
a`a^^bbb\_`bbaaaaaabaaaa]b^D]bab`¥]^a^b`  
@HWI-EAS443:3:16:695:668#0/1  
TGCCGNATTTCTTCAATTAACCACCTTATTTCTCAAATT  
+HWI-EAS443:3:16:695:668#0/1  
`\_]^[DWaaaaba`baa^T`a\_b`aa\_a`aa\_a]\_\_\_a\_  
@HWI-EAS443:3:19:1421:1383#0/1  
GGTTAATTGAAGAAATGCGGCACAGATNGAAAGCGACAGA  
+HWI-EAS443:3:19:1421:1383#0/1  
`ZM[ZSaX^VSW]Zaa\_\_`a`^`^`]YDUS¥QZXaYL¥`\_  
@HWI-EAS443:3:19:1782:684#0/1  
GGCTGTTTCGNATCGAGGCCAAGGGTGTTCCTCTTCCT  
+HWI-EAS443:3:19:1782:684#0/1  
abbbbaab^XDX``[\_a`aQ`aa]aaI\_Z`\_UTVN`\_NYY  
@HWI-EAS443:3:19:702:1469#0/1  
GAATNGGAGACCTTCACTACCTCCAGAGCAGAAATGAAAA  
+HWI-EAS443:3:19:702:1469#0/1  
X``[D]b`bbbaU\_bab[aa`aaa¥RY`[aaa]baa`ba  
@HWI-EAS443:3:21:1738:1307#0/1  
GCCGCATTTCTNCAATTAACCACCTTATTTCTCAAATTT

+HWI-EAS443:3:21:1738:1307#0/1  
a]]YX\_YYa\_[DV¥R¥Ya[NZVRK]V]Y[XGPY]\_^WYZU  
@HWI-EAS443:3:21:849:1638#0/1  
GGCACAGATTGAAAGCGACAGAGAATAGTTTNGAACAAAT  
+HWI-EAS443:3:21:849:1638#0/1  
a\_aaabaaaaa]\_¥`a\_\_\_a[a``^T\_XDX¥a[`aa\_  
@HWI-EAS443:3:23:781:1079#0/1  
GCCGCATTTCTTCAATTAACCACCTTATTTCTCAANTTT  
+HWI-EAS443:3:23:781:1079#0/1  
abaaaaaaaaaba`b`abaa`a\_`aaaaa\_aa\_a¥DY\_a  
@HWI-EAS443:3:25:856:633#0/1  
GCCGCATTTCTTCAATTAACCANCTTATTTCTCAAATTT  
+HWI-EAS443:3:25:856:633#0/1  
aa\_aaaaaa^aaa\_`aa\_\_\_^ZDT`a`a``\_Y``]`¥\_`^`  
@HWI-EAS443:3:26:1441:846#0/1  
ATCGCACGCAAAGAGGNCCTATTATCTTTTGCCTAGGCAT  
+HWI-EAS443:3:26:1441:846#0/1  
aaababaaa`aa^`¥YDZZa]a`aa```a\_a\_^a\_`aW]`  
@HWI-EAS443:3:26:173:1649#0/1  
GCCGCATTTCTTCAANTTAACCACCTTATTTCTCAAATTT  
+HWI-EAS443:3:26:173:1649#0/1  
X`^\_`^`ab¥bZ¥]DTa¥aab`^`aaa^Mb^LXa¥T`[ZF  
@HWI-EAS443:3:27:1255:556#0/1  
AGAAACTGTGATGAGAATGGGAGACCNTCACTACCTCCAG  
+HWI-EAS443:3:27:1255:556#0/1  
aaaaa\_bb`[^b`\_a¥a\_baa¥`^`^DY`b^a`\_\_\_\_aR^`  
@HWI-EAS443:3:27:323:90#0/1  
ATGAGAATGGNAGACCTTCACTACCTCCAGAGCAGAAATG  
+HWI-EAS443:3:27:323:90#0/1  
aabaa\_Yaa[DNU`a`a````\_`\_RMZ]\_]`\_\_U]aW¥^`\_\_  
@HWI-EAS443:3:28:1543:519#0/1  
GTTTCCTTTGGCATATCCGCAAGGATTTGCAGACAATGG  
+HWI-EAS443:3:28:1543:519#0/1  
a`aa\_`aaaa^Z]a\_`]a\_^ZVDX\_\_\_^`Y^\_ZU^^^]U  
@HWI-EAS443:3:29:1431:1161#0/1  
CTGCAAATCGCTTGCGGATATGCCAAAGGNAACAGTCTAC  
+HWI-EAS443:3:29:1431:1161#0/1  
aa¥\_bbbab`ba^aababa\_^^XWa`aYDR`]a`OWY`Z  
@HWI-EAS443:3:29:926:1055#0/1  
CAAGGAATGGGCATCACCCAATNCATTGTCTGCAAATCG  
+HWI-EAS443:3:29:926:1055#0/1  
a`\_babbbb`baaababaa`a`YD^aaba`aa`\_a`a\_a`  
@HWI-EAS443:3:30:409:894#0/1  
TCTGCTGNAGGTAGTGAAGGTCTCCATTCTCATCACA  
+HWI-EAS443:3:30:409:894#0/1  
abaa`aba[DZa`]Z\_U^\_a^¥N]R\_\_`NY`\_^`\_VYTU¥  
@HWI-EAS443:3:32:1186:676#0/1  
AGAAACTGTGATNAGAATGGGAGACCTTCACTACCTCCAG  
+HWI-EAS443:3:32:1186:676#0/1  
abaaaabb`a^^DX`^`a`aa\_a\_\_\_``^\_V``X\_^a[\_`

@HWI-EAS443:3:32:1310:1554#0/1  
GAAACTGTGATGAGAATGGGAGACCTTCACTANCTCCAGA  
+HWI-EAS443:3:32:1310:1554#0/1  
aa`a\_a`L^Z¥a`\_[U`aa]aWU¥\_\_\_`XYODKXU``]Z  
@HWI-EAS443:3:33:1174:1465#0/1  
CACAGATTGAAAGCGACAGAGAATAGTTTCGAANAAATAA  
+HWI-EAS443:3:33:1174:1465#0/1  
\_V`bb`Y`bb¥WWaUY\_aSa`bba`¥a`aVbaSDV`a¥bb  
@HWI-EAS443:3:33:310:1341#0/1  
GATNCGCTTGGAGAACTGTGATGAGAATGGGAGACCTTC  
+HWI-EAS443:3:33:310:1341#0/1  
aaYD[ab`\_aaaa\_U\_a`]Sa`ZZ\_\_P\_\_\_\_\_R^YU^V¥Q  
@HWI-EAS443:3:33:313:1313#0/1  
GAGAATGGGAGACCTTCACTACCTCCAGAGCNGAAATGAA  
+HWI-EAS443:3:33:313:1313#0/1  
a¥OV^a`[`\_\_aa`\_\_baa\_X\_\_a`a``aaTDW`[`````Q  
@HWI-EAS443:3:34:1653:661#0/1  
TGAGAATGNGAGACCTTCACTACCTCCAGAGCAGAAATGA  
+HWI-EAS443:3:34:1653:661#0/1  
aba`aaa¥D]`ba\_aaaa\_aa\_^`]\_\_a^\_RX\_X]V^]Y  
@HWI-EAS443:3:34:303:609#0/1  
ATCAAGGNATGGGGCATCACCCAATCCATTGTCTGCAAAT  
+HWI-EAS443:3:34:303:609#0/1  
abbbbb¥D[`]\_a`baa`\_`aaX]`\_a\_a`^W`^^`R^^  
@HWI-EAS443:3:36:1276:1148#0/1  
GCCGCATTTCNTCAATTAACCACCTTATTTCTCAAATTT  
+HWI-EAS443:3:36:1276:1148#0/1  
`^bbbbbab[D^baaba]b`aaa`aabaab^a\_a\_U\_``  
@HWI-EAS443:3:37:1572:603#0/1  
CCGCAAGCGATTTGCAGACAATGGATTGGNTGATGCCCA  
+HWI-EAS443:3:37:1572:603#0/1  
`bb¥aaa`ba`aaa]ab^¥^\_``^`\_SXDLY\_YXU^a^¥  
@HWI-EAS443:3:38:1314:1408#0/1  
GAGCAATTGGNACAGAAATTTGAGGAAATAAGGTGGTTAA  
+HWI-EAS443:3:38:1314:1408#0/1  
`a`P`]a¥HJDXP[`^YX]NUaSRPYF`\_VP]WFJX^OXS  
@HWI-EAS443:3:42:1152:370#0/1  
TGGNCTCCAACACCATGTCAAGCTTTCAGGTAGACTGTTT  
+HWI-EAS443:3:42:1152:370#0/1  
abYDZababbaabbbb`abaaaabaabaUaba\_\_a`a\_  
@HWI-EAS443:3:42:1340:677#0/1  
GCCGCATTTCTTCAATTAACCACCTTATTTCTCAAATTT  
+HWI-EAS443:3:42:1340:677#0/1  
`\_^`^^Y^¥]Z^Xaa\_Z\_\_R[V\_KVT¥`]`PDZ\_``¥`^^  
@HWI-EAS443:3:43:1073:1514#0/1  
GCCGCATNTCTTCAATTAACCACCTTATTTCTCAAATTT  
+HWI-EAS443:3:43:1073:1514#0/1  
^^`Z^ZDZabb`^`aaaa`Wa\_¥aaa\_¥¥\_\_^`a`aaa  
@HWI-EAS443:3:43:1737:1359#0/1  
TAAGCTGAAACGAGAAAGCTCTTATCTCTTGNTCTACTTC

+HWI-EAS443:3:43:1737:1359#0/1  
¥`a`^a`a`\_bab¥]T]]`¥aa`a`a`aaPDXW]^\_\_\_\_^  
@HWI-EAS443:3:43:442:1456#0/1  
GCCGCATTTCTTCAATTAACCACCTTATTNCTCAAATTT  
+HWI-EAS443:3:43:442:1456#0/1  
`aabW[P`aa^S]00YQTO¥UWaa[]]^OUDHIZX]R[Q]  
@HWI-EAS443:3:44:84:1373#0/1  
ATCGTGGAATGGATCTTGAAAGAGGAATCCNGCGAGACAC  
+HWI-EAS443:3:44:84:1373#0/1  
a[a`V[\_¥`¥0\_Y^^]HS\_\_Vva``^ [HDZ^`\_aZLXT  
@HWI-EAS443:3:44:870:1171#0/1  
TCTGCTCTGGAGGTNGTGAAGTCTCCCATTCTCATCACA  
+HWI-EAS443:3:44:870:1171#0/1  
aabaaaaabb`baSDZV^`\_]LRVUZ`W`V`[[¥RXY^  
@HWI-EAS443:3:46:1009:1318#0/1  
GATTGCTTGGAGAACTGTNATGAGAATGGGAGACCTTC  
+HWI-EAS443:3:46:1009:1318#0/1  
aaaaaaaaa`a`\_a`aaTDZ\_`¥\_\_\_\_\_`\_]^[V^]^W  
@HWI-EAS443:3:48:924:759#0/1  
GTTCGAAACNATTCTCTGTCGCTTTCAATCTGTGCCGCAT  
+HWI-EAS443:3:48:924:759#0/1  
a`a`^`\_`ODZaa\_\_\_aaX\_`]^a\_X¥P^][VY^[Z]ZSX  
@HWI-EAS443:3:49:1555:1553#0/1  
CTGTGCCGCATTTCTTCAATTAACCNCCTTATTTCCCTCAA  
+HWI-EAS443:3:49:1555:1553#0/1  
a]aaWWWaN\_aaa`ba\_¥]\_S\_a]JDW]aa`aaaZZbW[`  
@HWI-EAS443:3:49:1621:194#0/1  
AGAATGGGAGACCTTCACTACCTNCAGAGCAGAAATGAAA  
+HWI-EAS443:3:49:1621:194#0/1  
abaaaa\_baba`aa]a\_aa]N[DRaa\_a\_`a¥`^aa`\_\_  
@HWI-EAS443:3:49:201:1336#0/1  
GAAACTGTGATGAGAATGGNGACCTTCACTACCTCCAGA  
+HWI-EAS443:3:49:201:1336#0/1  
]¥[\_bbabbbbb`^b`b`b`b`YD¥baba]ab]baX^b]Ubbba  
@HWI-EAS443:3:50:1363:2012#0/1  
GAGAACTGTGATGAGAATGGNAGACCTTCACTACCTCCA  
+HWI-EAS443:3:50:1363:2012#0/1  
aaa\_aaaba\_a\_aa\_a`\_\_b¥DWa\_\_a`[\_\_\_\_\_N\_^UW[  
@HWI-EAS443:3:52:1453:1800#0/1  
GCCGCATTTCTTCAATTAACCACCTTATTTCNTCAAATTT  
+HWI-EAS443:3:52:1453:1800#0/1  
```ba^SZ\_\_ba¥]¥a¥^`\_\_ZRa\_¥a^`LD[aa^Za\_\_  
@HWI-EAS443:3:52:297:613#0/1  
AGAACTGTGATGAGANTGGGAGACCTTCACTACCTCCAG  
+HWI-EAS443:3:52:297:613#0/1  
aa^`a[]^R`\_a\_bSD¥baaaa^¥¥X\_`[a\_\_W\_\_`]Ua  
@HWI-EAS443:3:53:1165:1090#0/1  
CACAGATTGAAAGCGACAGAGAATAGTTTTCGAANAAATAA  
+HWI-EAS443:3:53:1165:1090#0/1  
a`¥abbbbbbbaabbbba^baaababbabbbb`]D]bbbb`

@HWI-EAS443:3:53:1479:837#0/1  
AAGAGGGCCTATTATCNTTTGCCTAGGCATGAGCATGAAC  
+HWI-EAS443:3:53:1479:837#0/1  
[`Za\_aab`\_`a`\_b[DZbaa`b`b\_bbabZPZ\_^b\_a[H  
@HWI-EAS443:3:53:627:275#0/1  
GAAACTGTGATGAGAATGGGAGACCTTCNCTACCTCCAGA  
+HWI-EAS443:3:53:627:275#0/1  
aaaa`bb]b\_aaab]`aab\_`a^]`a`WDP``Y¥\_`¥`aY  
@HWI-EAS443:3:56:1228:647#0/1  
GCGGCACAGANTGAAAGCGACAGAGAATAGTTTCGAACAA  
+HWI-EAS443:3:56:1228:647#0/1  
`bbbab`bb[D]aaaa`baa`aaa`\_a`a\_aa^a\_`\_`  
@HWI-EAS443:3:56:581:667#0/1  
GCTGANACGAGAAAGCTTCTTATCTCTTGTCTACTTCAAG  
+HWI-EAS443:3:56:581:667#0/1  
abab]D]ab`baa¥aaa`^aaa`aa`a``aa`a\_`\_\_a`  
@HWI-EAS443:3:57:1370:600#0/1  
GGACTCCAACACCATGTCAAGCTTTCAGGTAGANTGTTTC  
+HWI-EAS443:3:57:1370:600#0/1  
aaa\_`b`aaaa`aab¥\_`aa```a`\_b`]`\_VD¥a\_\_\_R  
@HWI-EAS443:3:57:775:861#0/1  
AGTCTCTGAAAATATACAGAGATTCNCTTGGAGAACTGT  
+HWI-EAS443:3:57:775:861#0/1  
`b`bbbb````bbbaabbaaaa^WD[a^aa¥aaa`\_aa`  
@HWI-EAS443:3:57:935:1730#0/1  
ATCCAGCGAGACACTTAGAATGACANTTGCATCTGTACCT  
+HWI-EAS443:3:57:935:1730#0/1  
a\_X\_b]]`b]a^Pb]babaa^`^¥DU\_\_`aa`aa[\_\_\_b  
@HWI-EAS443:3:58:613:1523#0/1  
ATTTCTGCNCTGGAGGTAGTGAAGTCTCCCATTCTCATC  
+HWI-EAS443:3:58:613:1523#0/1  
aabaaaaXDVaaa\_aaWa¥YZ\_a\_^V]]S^`^^^Z\_\_^Z[  
@HWI-EAS443:3:59:72:544#0/1  
CATNTCCGCAAGCGATTTGCAGACAATGGATTGGGTGATG  
+HWI-EAS443:3:59:72:544#0/1  
YMUDUX\_a^ZTTTa^`W\_]XZ^\_WYX`\_ZYZ]BBBBBBBB  
@HWI-EAS443:3:5:1082:120#0/1  
GCCGCATTTNTTCAATTAACCACCTTATTTCCCTCAAATTT  
+HWI-EAS443:3:5:1082:120#0/1  
`aaa`aab^D^aWa`bbaa`]Y\_]a`aaaa\_Wa]\_\_`aa`  
@HWI-EAS443:3:5:554:1969#0/1  
GAGCAATTGGGACAGAAATTTGAGGANATAAGGTGGTTAA  
+HWI-EAS443:3:5:554:1969#0/1  
aaaabbabb`\_\_b`a`abaa\_`baWD^\_aba`^aa[a\_\_  
@HWI-EAS443:3:60:1326:1058#0/1  
GTGGAATGGATCTTGAAAGAGNAATCCAGCGAGACACTTA  
+HWI-EAS443:3:60:1326:1058#0/1  
``^\_W\_````]\_\_X]Y^YWMDU[]\_V^¥V]WY[VZQSSY  
@HWI-EAS443:3:61:1443:604#0/1  
GAGAATGGGAGACCTTCACTACCTCCAGAGCAGAAAANGAA

+HWI-EAS443:3:61:1443:604#0/1  
aUa^Z]a\_¥L\_^Z\_¥¥]XW¥]\_[W`^^\_V[[T[WWTDRVW  
@HWI-EAS443:3:64:1187:707#0/1  
TGCNGCATTTCTTCAATTAACCACCTTATTTCTCAAATT  
+HWI-EAS443:3:64:1187:707#0/1  
[a^D[b`ba\_X]\_X¥^ab`ab^`L[`bbaa\_T¥a`aaaab  
@HWI-EAS443:3:65:1400:667#0/1  
GGAGAACTGTGATGAGNATGGGAGACCTTCACTACCTCC  
+HWI-EAS443:3:65:1400:667#0/1  
aaaa]UX\_aaZa\_\_a\_[DX` `` `W\_¥^Z¥^^^¥¥^T¥W¥V  
@HWI-EAS443:3:65:1676:224#0/1  
GAAAGCTCTTATCTCNTGTTCTACTTCAAGCAGTAGTTGT  
+HWI-EAS443:3:65:1676:224#0/1  
aaa\_a`a`ab^a]aRD^aaa¥aa\_aaZa`a`a`\_a^aa\_  
@HWI-EAS443:3:66:1654:275#0/1  
CCGCATTTCTTCAATTAACCNCCTTATTTCTCAAATTTCT  
+HWI-EAS443:3:66:1654:275#0/1  
a^`\_bbba^ab`bbbbba[WD[\_bbbbbb\_^aY`aababa  
@HWI-EAS443:3:67:1683:312#0/1  
CTTTCTGACATGACCCTNGAGGAAATGTCACGAGACTGGT  
+HWI-EAS443:3:67:1683:312#0/1  
a^^^aab¥abaaa]Y\_ZDZ`aaaa^aa^¥`Z`a\_^\_^`]R  
@HWI-EAS443:3:68:1680:533#0/1  
TGAGAATGGGAGACCTTCACTNCCTCCAGAGCAGAAATGA  
+HWI-EAS443:3:68:1680:533#0/1  
``abaabbabaaaa¥aa\_ba[D¥`aaa`aXa`\_a\_\_Y`a`  
@HWI-EAS443:3:69:1123:805#0/1  
GAATGGGANACCTTCACTACCTCCAGAGCAGAAATGAAAA  
+HWI-EAS443:3:69:1123:805#0/1  
a\_]`\_]UWDZ^^a^`a\_`^^^\_^]]V^^\_\_[^[]`[¥U[  
@HWI-EAS443:3:69:1132:1849#0/1  
AGTCTCTGAAAATATACAGANATTCGCTTGAGAACTGT  
+HWI-EAS443:3:69:1132:1849#0/1  
ZOR\_[U]a\_X\_]\_¥Z\_WU\_LDZYTUYNYO[^`^QZJV]J  
@HWI-EAS443:3:69:1305:1482#0/1  
GCTGAAACGNGAAAGCTTATCTCTTGTCTACTTCAAG  
+HWI-EAS443:3:69:1305:1482#0/1  
abbbbbbb]D]aaababaaaabaaba`baaaabaaa`  
@HWI-EAS443:3:69:871:983#0/1  
CGCATTTCTTCAATTAACCACCTTATTTCTNAAATTTCT  
+HWI-EAS443:3:69:871:983#0/1  
abbab`aaaabaabaaaabaaba`bbaa`[DX\_aaaaab  
@HWI-EAS443:3:69:98:1932#0/1  
AATCCATTGTCTGCAAATCGCTTGCGNATATGCCAAAGGA  
+HWI-EAS443:3:69:98:1932#0/1  
aa`aa]\_`ZXa^\_aaa^`]^`]^`UDMY]VWV]ZW[WWY  
@HWI-EAS443:3:6:527:1764#0/1  
GAAACTGTGATGAGNATGGGAGACCTTCACTACCTCCAGA  
+HWI-EAS443:3:6:527:1764#0/1  
aa]^b\_b¥baTYK[DNab[Z`\_\_SLTY[^GZTKL\_a¥S[B



@HWI-EAS443:3:70:1043:1231#0/1  
AAACAAATCGTGGAANGGATCTTGAAAGAGGAATCCAGCG  
+HWI-EAS443:3:70:1043:1231#0/1  
¥\_\_aZY]\_[`\_\_aU¥D[aa[XX^a\_\_ZY\_UZ[`¥[OLV¥V  
@HWI-EAS443:3:70:1110:1177#0/1  
GCCGCNTTCTTCAATTAACCACCTTATTTCCCTCAAATTT  
+HWI-EAS443:3:70:1110:1177#0/1  
Yabb]D]a¥a]a\_Z¥baYSYab[`aaab]aaab`aSzb^]  
@HWI-EAS443:3:70:1195:799#0/1  
GAAATATACAGAGATTTCGCTTGGAGAACTGTNATGAGA  
+HWI-EAS443:3:70:1195:799#0/1  
abbabbaababbabUbaaaaaa\_a^a\_^`\_`aRDX\_a^`^  
@HWI-EAS443:3:71:259:1997#0/1  
GCCGCATTTCTTCAATTAACCACCTNATTTCCCTCAAATTT  
+HWI-EAS443:3:71:259:1997#0/1  
abbab`\_bbbbabbbbabb`bb^D]babbaabaaabaa  
@HWI-EAS443:3:72:54:629#0/1  
TGAGAATGGGAGACCTTCANTACCTCCAGAGCAGAAATGA  
+HWI-EAS443:3:72:54:629#0/1  
aa]aaa\_aa`a\_`\_`\_`ZDZ\_\_\_\_Y\_^\_\_\_\_^a¥\_]\_^\_Z  
@HWI-EAS443:3:72:858:1588#0/1  
GGGAAACAAATCGTGGAATGGATCTTGAAAGANGAATCCA  
+HWI-EAS443:3:72:858:1588#0/1  
RZYabb`\_`bbb`a^aXaab`\_bb\_baabYDZab`b`b  
@HWI-EAS443:3:73:1323:1571#0/1  
CAACTGCATTTTTGACATCCTCATAAGTATGTCNTGGAAG  
+HWI-EAS443:3:73:1323:1571#0/1  
a]a]a`XW¥]]]^\_W]aaXWV\_`\_]`^`X\_\_\_\_^XDYZ^XX]  
@HWI-EAS443:3:73:1549:1602#0/1  
TGCAAANCGCTTGGGATATGCCAAAGGAAACAGTCTACC  
+HWI-EAS443:3:73:1549:1602#0/1  
]baab[D]bab[a]ba`a\_Z\_]`R`[\_a\_`TTaa]]]^`^V  
@HWI-EAS443:3:73:344:1570#0/1  
ATGAGAATGGGAGACCTTCACTACCTCCAGAGNAGAAATG  
+HWI-EAS443:3:73:344:1570#0/1  
aaa`\_]aYa^X\_[a\_]S\_\_a\_a`^Y\_^`^VODV\_Q[]^Y  
@HWI-EAS443:3:74:1655:239#0/1  
GTCTCTGAAAATATACAGAGATTTCGNTTGGAGAACTGTG  
+HWI-EAS443:3:74:1655:239#0/1  
¥HT]^`^`[\_]a¥^`][[^]a\_\_]ZVDXT\_aY[TSTTZ[XX  
@HWI-EAS443:3:76:587:1378#0/1  
CTGTGCCGCATTTCTTCAATTAANCACCTTATTTCCCTCAA  
+HWI-EAS443:3:76:587:1378#0/1  
ab\_^bbbbbbbaabaababaab^D^aa`aaaaaab\_a`aa  
@HWI-EAS443:3:77:1014:1998#0/1  
CAGAAAGGTNGCGGAAGTAGGTACAGATGCAATTGTCAT  
+HWI-EAS443:3:77:1014:1998#0/1  
X`b\_]Y\_ULD[``¥aa^a¥aS]X¥ba`\_`b`Z`a\_ab`aYb  
@HWI-EAS443:3:77:353:1033#0/1  
CTGTGATGAGAATGGGAGANCTTCACTACCTCCAGAGCAG

+HWI-EAS443:3:77:353:1033#0/1  
a^baababbbbaabbaZbYD¥aa`aaaa`aaaa\_a\_`a  
@HWI-EAS443:3:79:1496:615#0/1  
AGAATGGGAGACCTTCANTACCTCCAGAGCAGAAATGAAA  
+HWI-EAS443:3:79:1496:615#0/1  
aa[abbbabb`\_]aaa[DYa\_^`]]baa\_`aaY\_aa[\_`  
@HWI-EAS443:3:79:670:770#0/1  
CGGNTCCGCCGAGATCAAAAGTCCTTAAAAGGAAGAGGCA  
+HWI-EAS443:3:79:670:770#0/1  
ab^D[aaaa\_Z[^Ya]ba`^\_^\_T\_\_ZX^`\_a\_\_^a`  
@HWI-EAS443:3:80:242:1023#0/1  
GAATGGGAGACCTTCACTACCTCCAGAGCAGAAAANGAAAA  
+HWI-EAS443:3:80:242:1023#0/1  
WZTRZ¥`OX]abb]Z]aW` [YU¥TV^\_ZR^S\_QPDPX\_a]  
@HWI-EAS443:3:81:289:1351#0/1  
AGAGGGCCTATTATCTTTTGCCTANGCATGAGCATGAACC  
+HWI-EAS443:3:81:289:1351#0/1  
\_a]`¥Zaa\_¥a^aaa\_aa[¥^a¥XDX\_\_\_\_]XV\_`V^\_[^^  
@HWI-EAS443:3:81:840:1270#0/1  
GCCGCATTTCTTCAATTAACCACCTTATTTCCCTCANATTT  
+HWI-EAS443:3:81:840:1270#0/1  
a\_]``^aaa^^`\_X\_a¥ZY¥X\_\_aaa\_aa\_\_a`WDW`X¥  
@HWI-EAS443:3:82:1237:1098#0/1  
TGAGAATGGGAGACCTTCACTACCTCCAGAGCNGAAATGA  
+HWI-EAS443:3:82:1237:1098#0/1  
¥YT^ZW0[``Y]R[`abZQ]YTXZaWVXVU¥VD¥[¥R]ZN  
@HWI-EAS443:3:85:685:366#0/1  
CTTNGAGAAACTGTGATGAGAATGGGAGACCTTCACTACC  
+HWI-EAS443:3:85:685:366#0/1  
a\_^D[bbb`bbab^`\_a``bab`bababaa¥aaab`aa[Z  
@HWI-EAS443:3:86:1653:791#0/1  
CTTTTCATTTCTGCTCTGGAGGTAGTGNAGGTCTCCCATT  
+HWI-EAS443:3:86:1653:791#0/1  
aaaaababb`abbaab`aa\_b\_]bbb]DY`XF\_`\_L^^ab  
@HWI-EAS443:3:86:921:1422#0/1  
ACACGGTTTCGAGTCTCTGNAAATATACAGAGATTCGCTTG  
+HWI-EAS443:3:86:921:1422#0/1  
aab\_Za]^ZY^\_a`aa¥DUZ```\_`\_`^SW¥\_¥`Y\_X]¥Y  
@HWI-EAS443:3:87:1148:1191#0/1  
AGAGATTCGCTTGGAGAACTGTGNTGAGAATGGGAGACC  
+HWI-EAS443:3:87:1148:1191#0/1  
aaabaa`b[aa¥a\_abaZa``aSUDU`W\_^\_a`aX\_ZSN  
@HWI-EAS443:3:87:1529:223#0/1  
GCCGNATTTCTTCAATTAACCACCTTATTTCCCTCAAATTT  
+HWI-EAS443:3:87:1529:223#0/1  
aa\_]D^abbaaa\_aabaa`Ya\_`aa`bab\_RbZa\_aa`a  
@HWI-EAS443:3:88:560:1325#0/1  
ATTACACTGAAGTTCGCTTTCAGTNCATGTTCTTTTCCA  
+HWI-EAS443:3:88:560:1325#0/1  
`Z]``a^`aaaaXaa``abaaYaIDV^`\_aZa\_]\_a\_`]a

@HWI-EAS443:3:8:1369:734#0/1  
GATGAGAATGGGAGACCTTCACTACCTCCAGANCAGAAAT  
+HWI-EAS443:3:8:1369:734#0/1  
a]\_a\_b]a`a]`\_`SRRX\_U\_U^¥VR^V]]XHDDZWONY^  
@HWI-EAS443:3:8:795:620#0/1  
TGAAAATATACAGAGATTGCTTGGAGAACTGTNATGAG  
+HWI-EAS443:3:8:795:620#0/1  
````\_aaa``\_YaaaZa¥\_^^\_] [N[\_a\_^U^¥DDY[][\_  
@HWI-EAS443:3:90:73:1580#0/1  
GGGAAACAAATCGTGGAATGNATCTTGAAAGAGGAATCCA  
+HWI-EAS443:3:90:73:1580#0/1  
`^[^aaa`aa[V]^V`a]]¥DZ[^\_¥SUZHV]Z][¥Y[\_`  
@HWI-EAS443:3:91:883:805#0/1  
GCCGCATTTNTTCAATTAACCACCTTATTTCTCAAATTT  
+HWI-EAS443:3:91:883:805#0/1  
aa\_b]\_[a¥D[aX`^a`P^Y\_a[\_aa`aa[UO\_[]`\_a`  
@HWI-EAS443:3:92:810:2016#0/1  
GCCGCATTTCNTCAATTAACCACCTTATTTCTCAAATTT  
+HWI-EAS443:3:92:810:2016#0/1  
[\_b\_Z¥bbbRD]`\_b¥b`abbbaababbabb\_bab\_baba  
@HWI-EAS443:3:93:1201:613#0/1  
GCCGCATTTNTTCAATTAACCACCTTATTTCTCAAATTT  
+HWI-EAS443:3:93:1201:613#0/1  
a`\_a\_aaa[D^aa`\_aaa`Wa`aaaa`baa`\_a`\_`^baa  
@HWI-EAS443:3:93:507:580#0/1  
AGAAACTGTGATGAGAATGGGAGACCTTCACTACCTNCAG  
+HWI-EAS443:3:93:507:580#0/1  
a\_]aa]`¥Vaaab`W`\_aaaT`^X\_aa]``\_\_\_\_]UDX\_a  
@HWI-EAS443:3:96:287:525#0/1  
GATGAGAATGGGAGACCTTCACTACCTCCAGAGCANAAAT  
+HWI-EAS443:3:96:287:525#0/1  
a^aa`aY`\_a`aZ`ZV^\_AY^Z`[VVY]]^\_V[YKDMXY]  
@HWI-EAS443:3:96:428:1327#0/1  
GCCGCATTTCTTCAATTANCCACCTTATTTCTCAAATTT  
+HWI-EAS443:3:96:428:1327#0/1  
abaa`^^baba^aaba]DZUaaa]abaa¥aaa``^`a¥  
@HWI-EAS443:3:97:161:1353#0/1  
GTGATNGAATGGGAGACCTTCACTACCTCCAGAGCAGAA  
+HWI-EAS443:3:97:161:1353#0/1  
\_U]]\_YDX^`aQV^^^a^X¥^Y\_¥\_\_Z[^^^Z\_WZZ\_YZW  
@HWI-EAS443:3:98:407:1474#0/1  
GAGGCAACACCCTTGGCCTCGATATCGAAANAGCCACTCT  
+HWI-EAS443:3:98:407:1474#0/1  
a`\_aaaa`baY`aa\_a`a`a``aa`\_a`\_¥DVaZWaSXD  
@HWI-EAS443:3:98:700:847#0/1  
CGCTTNGAGAACTGTGATGAGAATGGGAGACCTTCACTA  
+HWI-EAS443:3:98:700:847#0/1  
abbb[DZb`baaaba^b``bab[aa``b]b`a^aa`a[`a  
@HWI-EAS443:3:98:749:1166#0/1  
CGCATTTCTTCAATTAACCACCTTATTTCTCNAATTTCT

+HWI-EAS443:3:98:749:1166#0/1  
a\$\_\_`bbPbaSabaaX`aab\_^aa\_aa\_N\$#bND]ababaa  
@HWI-EAS443:3:98:849:1593#0/1  
CTTGGAGAACTGTGATGAGAATGGGAGACCTTNACTACC  
+HWI-EAS443:3:98:849:1593#0/1  
abbbbb]b\_X]a^]a]aXb\_ba\_baaVaXWa[D[QZbXQ  
@HWI-EAS443:3:99:1010:681#0/1  
GAAACTGTGATGAGAATGGGAGACCTTCACTACCNCAGAA  
+HWI-EAS443:3:99:1010:681#0/1  
\$#\$`\_a\_Paabb`baabbba\$#b`aab`\$]aaaVXDV]\_a\_  
@HWI-EAS443:3:99:1312:316#0/1  
ATCAAGGAATGGGCATCACCAATNCATTGTCTGCAAAT  
+HWI-EAS443:3:99:1312:316#0/1  
a`N\_\_aaa`aa[T\_Yaa]a\$Y\$#]YDQ]^^]U\_\_U]^\_]  
@HWI-EAS443:3:99:1686:428#0/1  
CCGCATTTCTTCAATTNACCACCTTATTTCCCTCAAATTTCT  
+HWI-EAS443:3:99:1686:428#0/1  
aa\_bbbbbbaabSbbb^D^`b`^bbabbb`\_b\_ba\_bbba  
@HWI-EAS443:3:99:954:1634#0/1  
TGCCGCATTTCTTCAATNAACCACCTTATTTCCCTCAAATT  
+HWI-EAS443:3:99:954:1634#0/1  
^b`aaababbabbaaa^DYb`ab`\_`aabbba\_\_a`a`aa`  
@HWI-EAS443:3:9:1084:320#0/1  
TGCCGCATTTCTTCAATTAACCACCTTNTTTCCCTCAAATT  
+HWI-EAS443:3:9:1084:320#0/1  
Va````Taa]^`^\$#L]b^a^bZ[ZSR`[DYaXZW`\_SVU`B  
@HWI-EAS443:3:100:1017:271#0/1  
GTCCGCTTTCAATCTGTGCCGATTTCTTCAATTAACCAAC  
+HWI-EAS443:3:100:1017:271#0/1  
\_ZQXY[aa[a[XL[[R]\_]YXa`\_]\_]S[a\_WPOBBB  
@HWI-EAS443:3:100:514:246#0/1  
CCCATTTCTTCAATTAACCACCTTATTTCCCTCAAATTTCT  
+HWI-EAS443:3:100:514:246#0/1  
abba\$#bbbb`abbbba\$#aba`bbaabaYab`baabaa\_b  
@HWI-EAS443:3:11:483:802#0/1  
TCAGAATGGGAGACCTTCACTACCTCCAGAGCAGAAATGA  
+HWI-EAS443:3:11:483:802#0/1  
[IZa\_Q0aQXX\_SQ\$#aa`IaS`aU`]LP^``\$#\_\$\_a^a\_  
@HWI-EAS443:3:11:641:1363#0/1  
AGAGATTCGCTTGGAGAACTGTGATGAGAATGGGAGAAC  
+HWI-EAS443:3:11:641:1363#0/1  
[Y]a`Uaaa`\$`Ua]\_]\_[[Na0a`\$#a`^V\_V\_]OW^YHB  
@HWI-EAS443:3:11:979:2005#0/1  
TCCCCATTCTCATCACAGTTTCTCCAAGCGAATCTCTGTA  
+HWI-EAS443:3:11:979:2005#0/1  
a``\_aaaaaa\_aa\_a\_ab^`a\_a`\_a\_^]]ZZ^X^[^\_Z\_  
@HWI-EAS443:3:12:671:1564#0/1  
CAGTGCCGATTTCTTCAATTAACCACCTTATTTCCCTCAA  
+HWI-EAS443:3:12:671:1564#0/1  
\_WWGa`aa`aab\_LVaa^`aa^`a\$#R^`]aaaa\_\_Y`^\_

@HWI-EAS443:3:13:593:839#0/1  
TGCTACTAAGGGCTTTCCTACTGAGGAGGGAGCAATAGTTGG  
+HWI-EAS443:3:13:593:839#0/1  
a```aaabM`aaa\_a\_aaa`ab`\_`R]^aZ``a`^^a\_¥  
@HWI-EAS443:3:14:1586:112#0/1  
AGAAACTGTGATGAGAATGGGAGACCTTCACTACCTCCNG  
+HWI-EAS443:3:14:1586:112#0/1  
[`aabZba]a`\_a\_aQ^a``aRa\_XXZX\_^RX]SZ^WDDW  
@HWI-EAS443:3:15:1511:719#0/1  
GGGCCGCATTTCTCAATTAACCACCTTATTTCTCAAAT  
+HWI-EAS443:3:15:1511:719#0/1  
^aa]^`^`\_S\_]ab\_]`^a]a]^Z``VV]abaa¥`a\_aa`\_  
@HWI-EAS443:3:15:428:499#0/1  
GCCGCATTTCTCAATTAACCACCTTATTTCTCAAATNT  
+HWI-EAS443:3:15:428:499#0/1  
aa\_a`X¥\_a`^a\_]a`\_\_\_^`^^`^^^]Z]\_^\_[]VDX  
@HWI-EAS443:3:15:884:341#0/1  
CAACACCCTTGGCCTCGATATCGAAACAGCCACTCTTGGT  
+HWI-EAS443:3:15:884:341#0/1  
abaaaaaaabaaaaab`abaaaa`^^a`\_\_`W\_^`^Z\_N  
@HWI-EAS443:3:15:902:139#0/1  
TGCCGCATTTCTCAATTAACCACCTTATTTCTCAA  
+HWI-EAS443:3:15:902:139#0/1  
S`ba`¥[a`^V\_^a[X¥Z\_baa^Z`^^`a]a`[^ba`a\_a  
@HWI-EAS443:3:17:1712:1677#0/1  
CTTGGAGAAACTGTGATGAGAATGGGAGACCTTCACTAGC  
+HWI-EAS443:3:17:1712:1677#0/1  
^\_baXa`[Ybbba^]^`ab\_bbab^a]aXXab\_]`\_[KF  
@HWI-EAS443:3:17:655:580#0/1  
GGCGTGAATGGATCTTGAAAGAGGAATCCAGCGAGACAC  
+HWI-EAS443:3:17:655:580#0/1  
a``a\_bab`bbaa\_\_bba`aaaa\_a`\_]a`\_\_a`]\_^  
@HWI-EAS443:3:18:1229:1697#0/1  
AATCGGTTAAAGATTACTGAAGTTTCGCTTTCAGTACNA  
+HWI-EAS443:3:18:1229:1697#0/1  
ZV`\_`\_]Z^^¥X[]VWSV\_RY[]^VJV[Y[^\_XWXSSMDU  
@HWI-EAS443:3:18:1524:1125#0/1  
ATCCATTGTCTGCAAATCGCTTTCGGATATGCCAAAGGGA  
+HWI-EAS443:3:18:1524:1125#0/1  
W¥SWW`¥\_`aT[]\_^TY\_OYX]ZY^aY¥¥T[GUYXGZUD[  
@HWI-EAS443:3:1:733:646#0/1  
GAGAACTGTGATGAGAATGGGAGACCTTCACTACCTCAA  
+HWI-EAS443:3:1:733:646#0/1  
a\_aSLYZ[¥MYZ¥XTTQTV]XTR¥NLN]YV^Y^BBBBBBB  
@HWI-EAS443:3:20:370:1153#0/1  
TNAGAATGGGAGACCTTCACTACCTCCAGAGCAGAAATGA  
+HWI-EAS443:3:20:370:1153#0/1  
[DUa`\_abaa]babaa`aa`aaa`aaa`aaaaa\_\_```\_  
@HWI-EAS443:3:21:529:659#0/1  
GATGAGAATGGGAGACCTTCACTACCTCCAGAGCAGAAGT

+HWI-EAS443:3:21:529:659#0/1  
a[`a]a\_\_¥^[\_\_¥a\_]\_\_`^]¥^¥Y]^\_W\_¥¥\_WU^W  
@HWI-EAS443:3:22:1693:1491#0/1  
CAGCCGCATTTCTTCAATTAACCACCTTATTTCTCAAAT  
+HWI-EAS443:3:22:1693:1491#0/1  
ab`\_Q\_]``a\_ZZaX[]a`Za^`\_[^]^`\_^¥U`^\_Z^]  
@HWI-EAS443:3:22:936:896#0/1  
CAGCCGCATTTCTTCAATTAACCACCTTATTTCTCAAAT  
+HWI-EAS443:3:22:936:896#0/1  
\_]`a^\_]a`aZ^b^``]`a]\_P[a`a`aaa]X``]V\_a  
@HWI-EAS443:3:25:781:1669#0/1  
CACGCATTTCTTCAATTAACCACCTTATTTCTCAAATTT  
+HWI-EAS443:3:25:781:1669#0/1  
abbbbab`baaabaabaabaabaaa`aaa`a\_`a`a[``^  
@HWI-EAS443:3:26:506:410#0/1  
GCCGCTTTCAATCTGTGCCGCATTTCTTCAATTAACCACC  
+HWI-EAS443:3:26:506:410#0/1  
XHT\_^Z]]X¥^b\_NLNR¥^^UP\_Y¥aa`¥IR¥][W\_W\_Q\_  
@HWI-EAS443:3:26:623:922#0/1  
TCGCCGCATTTCTTCAATTAACCACCTTATTTCTCAAAT  
+HWI-EAS443:3:26:623:922#0/1  
aaabaababa`aaaaaaaaaaaa```aab`aa`aaa^`a  
@HWI-EAS443:3:28:1299:1943#0/1  
GCCGCTTTCAATCTGTGCCGCATTTCTTCAATTAACCACC  
+HWI-EAS443:3:28:1299:1943#0/1  
[F[`aWX]^`\_¥]\_¥[XX]¥[R`[¥[\_\_\_\_^Z]YYW\_^\_^WN  
@HWI-EAS443:3:28:599:2037#0/1  
ATGAGATTTCGCTTGGAGAACTGTGATGAGAATGGGAGAC  
+HWI-EAS443:3:28:599:2037#0/1  
\_ab\_b`aaaaba`aaaa`aa`aX`\_a`^a\_`\_\_\_\_`\_^\_^  
@HWI-EAS443:3:2:1479:357#0/1  
ACCGCGTACCTTTCTGACATGACCCTCGAGGAAATGTCA  
+HWI-EAS443:3:2:1479:357#0/1  
]Y¥\_WZ¥]WLO[Z[aa\_U]Z^[^]VWOY]^\_Z^VWYY^ZOMR  
@HWI-EAS443:3:30:187:636#0/1  
CAACACCCTTGGCCTCGATATCGAAACAGCCACTCTTGGC  
+HWI-EAS443:3:30:187:636#0/1  
]\_\_R\_\_ab\_¥]¥`[^`a\_WX¥^\_Z\_Z¥V^¥VVMZ^TUXBB  
@HWI-EAS443:3:31:1198:1878#0/1  
GCATCAAGGTCTCTAATCGGTAAAGATTACACTGAAGTT  
+HWI-EAS443:3:31:1198:1878#0/1  
^bbbbbbbb`bbbbbbbbb`bbbb`aababaa``aa\_a  
@HWI-EAS443:3:31:1773:352#0/1  
GTCGCTTTCAATCTGTGCCGCATTTCTTCAATTAACCANC  
+HWI-EAS443:3:31:1773:352#0/1  
a\_`b`aaa`aaa]\_¥J``Xb^\_aa\_Wa`\_\_\_\_aa`\_Y[ZDM  
@HWI-EAS443:3:34:909:526#0/1  
ACGGGCTTTCACTGAGGAGGGAGCAATAGTTGGAGAAATT  
+HWI-EAS443:3:34:909:526#0/1  
UY\_SaQV¥¥]\_YQTR¥aX^\_]NZ^S¥X]U^]UX\_b]]`Y]

@HWI-EAS443:3:35:588:1609#0/1  
CGCATTCTTCAATTAACCACCTTATTTCTCAAATTTAT  
+HWI-EAS443:3:35:588:1609#0/1  
abZWYYV`XS]ONV`U\_YXY\_^Y][`VM`ZBBBBBBBBBB  
@HWI-EAS443:3:36:1580:1853#0/1  
GAGAACTGTGATGAGAATGGGAGACCTTCACTACCTCAA  
+HWI-EAS443:3:36:1580:1853#0/1  
U¥`a`aZ\_`a`[^\_P[abb\_\_bT`GZPaY[HPa`XRUF\_  
@HWI-EAS443:3:37:1480:1610#0/1  
GACGCATTCTTCAATTAACCACCTTATTTCTCAAATTT  
+HWI-EAS443:3:37:1480:1610#0/1  
\_\_\_\_UZ^Yb`J]``Yaa^¥IWaa^`a]baVbW[`\_¥P`a`  
@HWI-EAS443:3:3:808:457#0/1  
ATCTGTACTACTTCGCGCTACCTTTCTGACATGACCCAC  
+HWI-EAS443:3:3:808:457#0/1  
abb`\_XWabb]\_b`[Y^b]baZa``]a`a`\_bba`QXNHH  
@HWI-EAS443:3:40:96:950#0/1  
TCCCGCATTCTTCAATTAACCACCTTATTTCTCAAATT  
+HWI-EAS443:3:40:96:950#0/1  
abbba`a`\_\_\_\_\_^Y[^^[OY\_[\_\_^L¥X^^]TT\_XGUX^  
@HWI-EAS443:3:42:538:576#0/1  
GCGATGAGAATGGGAGACCTTCACTACCTCCAGAGCAGAA  
+HWI-EAS443:3:42:538:576#0/1  
]IVZ^W^^WY]aaa¥¥VY^`VaaUNTS]Y[¥RYPV]\_\_^¥  
@HWI-EAS443:3:43:106:1597#0/1  
GGGCCGCATTCTTCAATTAACCACCTTATTTCTCAAAT  
+HWI-EAS443:3:43:106:1597#0/1  
aaa`babbbbaaaaa\_bbbbbbaaabbbbabbbaba`Z`b  
@HWI-EAS443:3:43:1331:1418#0/1  
CGATACAGAGATTCGCTTGGAGAACTGTGATGAGAATGG  
+HWI-EAS443:3:43:1331:1418#0/1  
a`bbabbbbb\_abbabaab`bbabab\_aaaaa\_b[aaaa  
@HWI-EAS443:3:46:853:534#0/1  
GGGTCTCGCTGGATTCTTCAAGATCCATTCCACGAT  
+HWI-EAS443:3:46:853:534#0/1  
aaa`\_aa\_\_baW^a\_\_`X\_a\_\_\_\_¥\_^\_[[\_a^¥¥¥\_`^¥  
@HWI-EAS443:3:49:675:1539#0/1  
AATTTCTCCAATATTGCTCCCTCCTCAGTAAAGCCCAT  
+HWI-EAS443:3:49:675:1539#0/1  
a`aaaaa`aab`a`aa`a\_]\_`YZ`]\_`¥```\_^^^]\_^  
@HWI-EAS443:3:4:1185:737#0/1  
TGGCATTCTTCAATTAACCACCTTATTTCTCAAATTT  
+HWI-EAS443:3:4:1185:737#0/1  
¥bbbb`bbbbbaa]bb¥baba\_abb`bbbb]babbbabb^  
@HWI-EAS443:3:50:1665:1223#0/1  
GCATCAAGGTCTCTAATCGTTAAAGATTACACTGAAGTT  
+HWI-EAS443:3:50:1665:1223#0/1  
aaa`a`a`Yab\_aaa¥\_a`\_\_\_\_\_Z`[]\_^U`]`¥ZU`[]  
@HWI-EAS443:3:51:855:439#0/1  
GNGAACTGTGATGAGAATGGGAGACCTTCACTACCTCCA

+HWI-EAS443:3:51:855:439#0/1  
[D¥a]`^ab^a`aaZa`\_aZaZ`^[Za\_^^[`^[[^T¥¥  
@HWI-EAS443:3:52:179:1095#0/1  
TGCGGCACAGATTGAAAGCGACAGAGAATAGTTTCGAATA  
+HWI-EAS443:3:52:179:1095#0/1  
`WW``\_aa\_¥\_¥^\_a`\_\_\_`\_]P`\_`^QWG^[W]SUHX  
@HWI-EAS443:3:55:108:120#0/1  
GGCGCATTCTTCAATTAACCACCTTATTTCTCAAATTT  
+HWI-EAS443:3:55:108:120#0/1  
`NZaY[a\_^^`a\_\_Zaa][WXTVZ\_\_][\_]^^\_^]X^^^  
@HWI-EAS443:3:55:1250:407#0/1  
GACGCTTCAATCTGTGCCGATTCTTCAATTAACCACC  
+HWI-EAS443:3:55:1250:407#0/1  
aI^SRYYZ]S]XL]]S[a\_\_NZa\_[G^aa]a`a\_\_¥\_`RG  
@HWI-EAS443:3:56:466:1687#0/1  
AAGAGAATGGGAGACCTTCACTACCTCCAGAGCAGAAATG  
+HWI-EAS443:3:56:466:1687#0/1  
]YJ\_a¥aa]]Y¥UZ\_a`a[\_U^aJOZ\_\_[```Z¥JU\_\_`\_  
@HWI-EAS443:3:56:993:1014#0/1  
GTGCATTCTTCAATTAACCACCTTATTTCTCAAATTT  
+HWI-EAS443:3:56:993:1014#0/1  
a]aa\_aaaaaa`a\_aa`a\_\_a\_Yaa\_aaa^^a^``\_```  
@HWI-EAS443:3:59:1082:1502#0/1  
CAACACCCTTGGCCTCGATATCGAAACAGCCACTCTTGGT  
+HWI-EAS443:3:59:1082:1502#0/1  
abb^ba\_^[]NU\_\_\_^bba]^W^ZX\_a\_VSQGS]]G]X¥Y  
@HWI-EAS443:3:5:1371:744#0/1  
GNATATTTTCAGAGACTCGAACCGTGTACCATTCCATTC  
+HWI-EAS443:3:5:1371:744#0/1  
WD^`[ab]a`aa`\_aa¥¥T`Y^Y``Zaa¥\_\_`]SQ[\_^]  
@HWI-EAS443:3:66:1239:560#0/1  
CAACACCCTTGGCCTCGATATCGAAACAGCCACTCTTGGT  
+HWI-EAS443:3:66:1239:560#0/1  
abaabaaaa¥a]a`aaaa`\_a\_]`^\_baN`\_\_a\_\_`\_T  
@HWI-EAS443:3:67:879:575#0/1  
CGGCCGATTCTTCAATTAACCACCTTATTTCTCAAAT  
+HWI-EAS443:3:67:879:575#0/1  
aabbbbbbbaaaaaaaabaaaaa\_aaa`a`aa\_a``\_aa  
@HWI-EAS443:3:71:1519:483#0/1  
GNGAACTGTGATGAGAATGGGAGACCTTCACTACCTCCA  
+HWI-EAS443:3:71:1519:483#0/1  
UD[^W]bb`P`X\_`aYOZZW]aZT[]a[X`¥ZaaZRV5]¥  
@HWI-EAS443:3:71:431:1135#0/1  
GGCGGAGACTTAGAATGACAATTGCATCTGTACCTACT  
+HWI-EAS443:3:71:431:1135#0/1  
`aabbabaaabaabbaabaab`aaaaaba\_\_aaa`\_`  
@HWI-EAS443:3:73:1372:547#0/1  
CCGCCGATTCTTCAATTAACCACCTTATTTCTCAAAT  
+HWI-EAS443:3:73:1372:547#0/1  
abababbbbbbbabbabbaba\_`b``bbbbabbabaaaab



@HWI-EAS443:3:74:692:1002#0/1  
CACGTGGAATGGATCTTGAAAGAGGAATCCAGCGAGACAC  
+HWI-EAS443:3:74:692:1002#0/1  
\_aaa]bbVa\_b`bS]a`YVb^X^TaaZ[`a¥aZ`¥[\_]^G  
@HWI-EAS443:3:76:1211:26#0/1  
AGCCAATCCATTGTCTGCAAATCGCTTGCGGATATGCCAA  
+HWI-EAS443:3:76:1211:26#0/1  
ZGR]V\_]`\_\_aab¥NX`][aaZV]T]WJV]\_0¥^BBBBBB  
@HWI-EAS443:3:7:271:15#0/1  
ATAGGGCTTTCCTGAGGAGGGAGCAATAGTTGGAGAAAT  
+HWI-EAS443:3:7:271:15#0/1  
a`]``aa\_a]aY^[aaba\_aa\_LSY\_`^`YLTy]^VW^`\_  
@HWI-EAS443:3:80:1308:148#0/1  
GCCGCTTTCATCTGTGCCGATTTCTTCAATTAACCACC  
+HWI-EAS443:3:80:1308:148#0/1  
a\_aaZaaa`a\_aZ^W`a\_X^Z]a`aY`^YZ\_aa`\_ZS`ZO  
@HWI-EAS443:3:80:1589:1673#0/1  
CTTTGGCATATCCGCAAGCGATTTGCAGACAATGGATTTG  
+HWI-EAS443:3:80:1589:1673#0/1  
aab\_¥]bXb]]^a^` `J[][\_]U\_YG\_]SH^a]G` `GG  
@HWI-EAS443:3:82:1512:694#0/1  
GTCATTCTCATCACAGTTTCTCCAAGCGAATCTCTGTATA  
+HWI-EAS443:3:82:1512:694#0/1  
aa\_bbaababa[baaa\_aaa`a`a` `¥`\_ [0]]\_`]]]V  
@HWI-EAS443:3:83:1303:1421#0/1  
GCCGCTTTCATCTTCAATTAACCACCTTATTTCTCAAATNT  
+HWI-EAS443:3:83:1303:1421#0/1  
`\_\_`^ [^aba`Y¥¥\_a^^S]aa\_\_`^\_\_Y][P¥Ra\_a¥D¥  
@HWI-EAS443:3:85:1481:1259#0/1  
CGGCCGCTTTCATCTTCAATTAACCACCTTATTTCTCAAAT  
+HWI-EAS443:3:85:1481:1259#0/1  
abab``Zabbbabb`abbbbaa````\_ababbb`abaaabb  
@HWI-EAS443:3:87:1568:1716#0/1  
GAGAACTGTGATGAGAATGGGAGACCTTCACTACCTCTA  
+HWI-EAS443:3:87:1568:1716#0/1  
a\_\_¥`\_ [aaZaXa\_]`^¥^¥]`Y\_]XX\_[W]V]]SNUQG]  
@HWI-EAS443:3:87:41:1693#0/1  
GTTGCCTCTTCTTTTAAGGACTTTTGATCTCGGCGGANC  
+HWI-EAS443:3:87:41:1693#0/1  
`L`\_\_ [G]YT¥]\_PXSq]`R\_`^Z]RX^P]¥Z^ZYBBBBB  
@HWI-EAS443:3:89:1052:1884#0/1  
GGGCCGCTTTCATCTTCAATTAACCACCTTATTTCTCAAAT  
+HWI-EAS443:3:89:1052:1884#0/1  
a```a``a\_a]GYZb`\_a]\_aZVY`a`W¥`X[¥[aZ`\_]a  
@HWI-EAS443:3:8:1093:522#0/1  
GTCGCTTTCATCTTCAATTAACCACCTTATTTCTCAAATTT  
+HWI-EAS443:3:8:1093:522#0/1  
^Y]YS]aaa`aa\_a\_a`aa^V¥XU````\_`a\_Z^`ST]^\_\_`  
@HWI-EAS443:3:8:1197:1392#0/1  
GAAATTTGAGGAAATAAGGTGGTTAATTGAAGAAATGCAG

+HWI-EAS443:3:8:1197:1392#0/1  
aa`a`bab\_`^`T¥a[^\_[]a]V\_¥G]ZZ\_`a`a[W]Z^B  
@HWI-EAS443:3:90:1326:902#0/1  
GTCGCATTTCTTCAATTAACCACCTTATTTCTCAAATTT  
+HWI-EAS443:3:90:1326:902#0/1  
\_`aa\_abbbaab`aa`aa\_aa\_\_aa`aa\_Sa^\_\_aa`  
@HWI-EAS443:3:91:639:372#0/1  
GTCGCATTTCTTCAATTAACCACCTTATTTCTCAAATTT  
+HWI-EAS443:3:91:639:372#0/1  
a¥\_`][`\_\_[\_`^^Z`\_\_S^[\_^\_`\_^\_VU]]^^]^  
@HWI-EAS443:3:93:1680:417#0/1  
CAGCCGCATTTCTTCAATTAACCACCTTATTTCTCAAAT  
+HWI-EAS443:3:93:1680:417#0/1  
ab`a^aZ^\_bbaaa`bbbaaa]b`^baa\_bb\_\_a\_¥IYb  
@HWI-EAS443:3:93:62:1036#0/1  
GGGGTCTCTAATCGGTTAAAGATTACACTGAAGTTCGCTT  
+HWI-EAS443:3:93:62:1036#0/1  
aaba]b`aaaaaaaa\_a`\_`Q`aa\_a]^`\_\_`^`\_`^^]  
@HWI-EAS443:3:95:277:760#0/1  
GCGCCGCATTTCTTCAATTAACCACCTTATTTCTCAAAT  
+HWI-EAS443:3:95:277:760#0/1  
a\_ba`ba`abbaa`^bababbbaabbabbabaab^`a\_b  
@HWI-EAS443:3:97:1540:404#0/1  
CACTTTCAATCTGTGCCGCATTTCTTCAATTAACCACCTT  
+HWI-EAS443:3:97:1540:404#0/1  
J`^^`^¥Ua¥[`bb`Ua¥``bbbKab`ab`a\_`VNbH`bb  
@HWI-EAS443:3:97:292:789#0/1  
CGGGAGGGGAGCAATAGTTGGAGAAATTTACCATTACCTT  
+HWI-EAS443:3:97:292:789#0/1  
abbaaaaaab`aaaba\_aa^abaaaaaa\_aa`aa`a\_a`  
@HWI-EAS443:3:98:222:419#0/1  
GGGCCGCATTTCTTCAATTAACCACCTTATTTCTCAAAT  
+HWI-EAS443:3:98:222:419#0/1  
ab]a\_b\_^aaa`aaa][Va`¥\_VWa`a`a`¥a`aaa`a^a  
@HWI-EAS443:3:9:1186:1727#0/1  
GGGATGAGAATGGGAGACCTTCACTACCTCCAGAGCAGAA  
+HWI-EAS443:3:9:1186:1727#0/1  
¥PbM`^WbaaU^\_]aV^\_XQXQT[^WQQWY\_Z`Z\_¥[N  
@HWI-EAS443:3:9:462:1138#0/1  
GAATGGGAGACCTTCACTACCTCCAGAGCAGAAATGAAGA  
+HWI-EAS443:3:9:462:1138#0/1  
\_T\_`]]\_aaa`aa`aaaaZ^a`a`aZ`a\_\_a``[YS\_  
@HWI-EAS443:3:9:56:395#0/1  
CAGCCGCATTTCTTCAATTAACCACCTTATTTCTCAAAT  
+HWI-EAS443:3:9:56:395#0/1  
aXP]`^^`^]¥Z\_aaaXaaaaVa\_[¥`\_`a\_]`a\_ZSSZ  
@HWI-EAS443:3:100:169:1168#0/1  
GTGGGAAACAAATCGTGGAATGGATCTTAAAAGAGGAATC  
+HWI-EAS443:3:100:169:1168#0/1  
aVXY\_XY`U`\_aa\_]baXT¥\_^LO\_\_`Y]ZnQ[atrBBB

@HWI-EAS443:3:100:211:1927#0/1  
CGCCGCATTTCTTCAATTAACCACCTTATTTCTCAAATT  
+HWI-EAS443:3:100:211:1927#0/1  
\_`bVbb`bbbab\_bbabbbbab\_bbbbb\_bTTa`abaaa  
@HWI-EAS443:3:100:355:1052#0/1  
ATCGCTTTCAATCTGTGCCGATTTCTTCAATTAACCACC  
+HWI-EAS443:3:100:355:1052#0/1  
a^bb^a\_¥\_^]H`W¥VWYZ`^aYa¥X]^a`\_XSVBB  
@HWI-EAS443:3:100:769:1174#0/1  
GTGGGAAACAAATCGTGAATGGATCTTGAAAGAGGAATC  
+HWI-EAS443:3:100:769:1174#0/1  
a^\_]Z``Z\_¥]\_VaY\_]V^\_^U[Z`\_^]U^`\_ZR[B  
@HWI-EAS443:3:100:789:1434#0/1  
AATTTGCAGACAATGGATTGGGTGATGCCCCATTCCTTGA  
+HWI-EAS443:3:100:789:1434#0/1  
abaaaaaaaa`aaa\_\_\_\_\_`W``\_`¥^`]]`\_`^¥\_`^¥B  
@HWI-EAS443:3:10:1464:251#0/1  
CGTGCCGCATTTCTTCAATTAACCACCTTATTTCTCAA  
+HWI-EAS443:3:10:1464:251#0/1  
K`[aaaaGab¥aab\_`¥`aa^aXZaWZbOUbYRMDXHX\_R  
@HWI-EAS443:3:10:1606:191#0/1  
CGAGGAAATAAGGTGGTTAATTGAAGAAATGCGGCACAGA  
+HWI-EAS443:3:10:1606:191#0/1  
`bXbbSIZ`V^bbab\_[bKXSVa\_`Y`¥^S^P¥XGUGP]W  
@HWI-EAS443:3:10:445:1792#0/1  
AGCGTACCTTTCTGACATGACCCTCGAGGAAATGTCACG  
+HWI-EAS443:3:10:445:1792#0/1  
Z]\_^^`aVaa\_`a\_\_`[\_[M^V`[^[\_\_\_YX\_`\_`\_UU\_NW  
@HWI-EAS443:3:10:592:1434#0/1  
CGCGGCACAGATTGAAAGCGACAGAGAATAGTTTCGAACA  
+HWI-EAS443:3:10:592:1434#0/1  
ababYbbYa^]AT`a[T`]aV^Y\_a\_a¥[Y\_Z`\_\_\_\_[¥X^  
@HWI-EAS443:3:11:1421:55#0/1  
AGCTTGGAGAACTGTGATGAGAATGGGAGACCTTCACTA  
+HWI-EAS443:3:11:1421:55#0/1  
aba`aaa¥b^]\_a\_`WaWZ[Sa]W\_Z\_ZF[]QSVPPBBBB  
@HWI-EAS443:3:11:348:1148#0/1  
AGCGGCACAGATTGAAAGCGACAGAGAATAGTTTCGAACA  
+HWI-EAS443:3:11:348:1148#0/1  
^[baX¥]a^\_WX\_^^¥`aa^a¥[^aaa`^P]]aaY`\_]W\_  
@HWI-EAS443:3:11:638:1565#0/1  
CATCAAGGTCTCTAATCGGTTAAAGATTACACTGAAGTTC  
+HWI-EAS443:3:11:638:1565#0/1  
aa^]b`]Va]a\_a^^`\_]U`\_`\_`\_]aU^OZ\_^]XZYZ  
@HWI-EAS443:3:12:41:1482#0/1  
CGCCGCATTTCTTCAATTAACCACCTTATTTCTCAAATT  
+HWI-EAS443:3:12:41:1482#0/1  
aaab\_a`a`aaaa\_aa`aa[OW^Ua\_¥`^\_][T``\_aZ\_\_  
@HWI-EAS443:3:12:657:252#0/1  
CTTGGAGAACTGTGATGAGAATGGGAGACCTTCACTACA



@HWI-EAS443:3:19:514:2046#0/1  
NCCGCATTTCTTCAATTAACCACCTTATTTCTCAAATTT  
+HWI-EAS443:3:19:514:2046#0/1  
DNZXXXZZZZXZZZZZZZZZZXZXZZZXVZXZZZX  
@HWI-EAS443:3:19:575:984#0/1  
CGCCGCATTTCTTCAATTAACCACCTTATTTCTCAAATT  
+HWI-EAS443:3:19:575:984#0/1  
a`aaab\_aaa`a`\_a\_aaaa^a``\_`\_`a``\_\_a^^\_\_a\_  
@HWI-EAS443:3:19:695:1515#0/1  
GTGGGAAACAAATCGTGGAATGGATCTTGAAAGAGGAATC  
+HWI-EAS443:3:19:695:1515#0/1  
¥`¥Y^`\_Wa`ab\_^[\`ab`U^aa]a`X`\_aZa]^a``  
@HWI-EAS443:3:19:977:853#0/1  
GGTCGCTTCAATCTGTGCCGATTTCTTCAATTAACCAC  
+HWI-EAS443:3:19:977:853#0/1  
aa[\_`aa^Z`a`X^[Y\_]\_a]\_\_a\_Y^`[\_[\_``^VP¥¥  
@HWI-EAS443:3:1:1376:543#0/1  
GTCCCATTCTCATCACAGTTTCTCCAAGCGAATCTCTGTA  
+HWI-EAS443:3:1:1376:543#0/1  
Taa`abb^[baYb][bbbbU^\_bbab]aaabS\_F\_bba  
@HWI-EAS443:3:1:839:791#0/1  
GACTGTGATGAGAATGGGAGACCTTCACTACCTCCAGAGC  
+HWI-EAS443:3:1:839:791#0/1  
`bbbbba`bbabbabaab\_V[WRab\_baab^\_b[`aaaa]  
@HWI-EAS443:3:1:962:1456#0/1  
ACTGGTTCATGCTCATGCCTAGGCAAAAGATAATAGGCCG  
+HWI-EAS443:3:1:962:1456#0/1  
^^`a`^`abT\_\_b]]`a`X`\_]aa\_S^[^aXa\_BBBBB  
@HWI-EAS443:3:20:1522:1744#0/1  
CGCCGCATTTCTTCAATTAACCACCTTATTTCTCAAATT  
+HWI-EAS443:3:20:1522:1744#0/1  
aba`a`bb`bbab`[abbab``\_TZabababa¥a]a^a`  
@HWI-EAS443:3:20:986:1952#0/1  
TTGCCGCATTTCTTCAATTAACCACCTTATTTCTCAAATT  
+HWI-EAS443:3:20:986:1952#0/1  
a`a^^`bbababb`b`aaaa\_bbXXa`aaaa\_aa\_aaba  
@HWI-EAS443:3:21:1696:1352#0/1  
CGCCGCATTTCTTCAATTAACCACCTTATTTCTCAAATT  
+HWI-EAS443:3:21:1696:1352#0/1  
\_bbabb\_bbbbbbbabbbbaaaaa`bbbbbb\_aa\_b`bbb  
@HWI-EAS443:3:21:502:810#0/1  
GGCATTCTTCAATTAACCACCTTATTTCTCAAATTTCT  
+HWI-EAS443:3:21:502:810#0/1  
J]`L^¥¥\_Ya`^bab¥¥b`^aU\_¥UWV[UaaZ^ba`b\_R\_  
@HWI-EAS443:3:21:801:213#0/1  
GTGGGAAACAAATCGTGGAATGGATCTTGAAAGAGGAATC  
+HWI-EAS443:3:21:801:213#0/1  
aY^^^^`\_\_`^Y\_X^^]Y]\_^XYX\_Y]]VY]^VXYXW  
@HWI-EAS443:3:21:988:178#0/1  
GGCCGCATTTCTTCAATTAACCACCTTATTTCTCAAATT

+HWI-EAS443:3:21:988:178#0/1  
\_bbabaabbaaab`aaaaaaa\_a\_\_aa\_`aa^\_\_\_a\_\_`  
@HWI-EAS443:3:23:1117:909#0/1  
GAACCACCTTATTTCTCAAATTTCTGTCCCAATTGCTCT  
+HWI-EAS443:3:23:1117:909#0/1  
a¥aaaabVabbaa`bb\_¥aababaaJbb\_bab`bbba\_  
@HWI-EAS443:3:23:890:1757#0/1  
ACGCAAGCGATTTGCAGACAATGGATTGGGTGATGCCCA  
+HWI-EAS443:3:23:890:1757#0/1  
U^\_abbbbb\_aba`^aaa`]aaaUaVRW^VQT`\_ZNa\_[b  
@HWI-EAS443:3:24:1096:262#0/1  
CTCTCTGAAAATATACAGAGATTCGCTTGGAGAACTGTG  
+HWI-EAS443:3:24:1096:262#0/1  
ababbbbbbbabbbbabbbbaaabababb`a^babb\_a  
@HWI-EAS443:3:24:1502:1503#0/1  
GTGAAAATATACAGAGATTCGCTTGGAGAACTGTGATGA  
+HWI-EAS443:3:24:1502:1503#0/1  
H\_\_\_a`aa`^abb\_]`ZX¥Yababaab¥bbbb]YH\_a^  
@HWI-EAS443:3:26:1157:1880#0/1  
GTGGGAAACAAATCGTGAATGGATCTTGAAGAGGAATC  
+HWI-EAS443:3:26:1157:1880#0/1  
aX^`\_aaaaaaaa\_a]a\_a`^\_^`UT`\_a`a^[^\_\_\_\_^Y  
@HWI-EAS443:3:26:1640:214#0/1  
CAGAAATTTGAGGAAATAAGGTGGTTAATTGAAGAAATGA  
+HWI-EAS443:3:26:1640:214#0/1  
aba`SI]bbb¥bbY¥Y¥Z`b\_bbaaabbb^b]bb\_bbaJ  
@HWI-EAS443:3:26:432:1310#0/1  
TGTGGAATGGATCTTGAAGAGGAATCCAGCGAGACTT  
+HWI-EAS443:3:26:432:1310#0/1  
ab`\_a]aaaa^a`aaaaaaa\_a`\_[aaa\_\_\_X`^\_a^`  
@HWI-EAS443:3:26:818:1122#0/1  
ACGCGCTACCTTTCTGACATGACCCTCGAGGAAATGTCAC  
+HWI-EAS443:3:26:818:1122#0/1  
`Xa`\_]aa\_QWZ¥¥a`aZX¥P\_a`U^`X^^SO[\_`QX¥^  
@HWI-EAS443:3:27:1078:595#0/1  
GGGGCTTTCACTGAGGAGGGAGCAATAGTTGGAGAAATTT  
+HWI-EAS443:3:27:1078:595#0/1  
aba`aaaaba`a\_aa]baa\_^]\_a``^\_a\_\_`a\_]\_^]  
@HWI-EAS443:3:27:1139:1149#0/1  
CAGAGATTCGCTTGGAGAACTGTGATGAGAATGGGAGAT  
+HWI-EAS443:3:27:1139:1149#0/1  
aa`baaab`aaba`a`^baaa]a`a`\_^\_Ya\_a\_\_^^  
@HWI-EAS443:3:27:1671:1663#0/1  
CGCCGATTTCTTCAATTAACCACCTTATTTCTCAAATT  
+HWI-EAS443:3:27:1671:1663#0/1  
aa\_]aabb`aba\_\_\_aa`a``^`aaaaaa¥\_a\_\_\_]`  
@HWI-EAS443:3:27:1793:260#0/1  
NGAAACTGTGATGAGAATGGGAGACCTTCACTACCTCCAG  
+HWI-EAS443:3:27:1793:260#0/1  
DKRRTXXVVVVVWYXRVXVYXXRYXYXUOVWRGVVTRY

@HWI-EAS443:3:27:635:877#0/1  
GTGGGAAACAAATCGTGGAATGGATCTTGAAAGAGGAATC  
+HWI-EAS443:3:27:635:877#0/1  
a^aaa¥]a\_`a`\_[]aa`\_^a^]XP\_`\_^\_\_\_\_`^\_]]  
@HWI-EAS443:3:28:112:241#0/1  
AGGCATCACCAATCCATTGTCTGCAAATCGCTTGCGGAT  
+HWI-EAS443:3:28:112:241#0/1  
`¥0Va¥aaa\_¥]YZXQ^¥RPQ`UUUY¥QPSUYUZZSSU  
@HWI-EAS443:3:28:1422:1894#0/1  
GTGGGAAACAAATCGTGGAATGGATCTTGAAAGAGGAATC  
+HWI-EAS443:3:28:1422:1894#0/1  
^P^aa[ba`\_a`ZJ¥¥\_V\_a\_]a¥U¥\_`^`¥]``\_YZZ  
@HWI-EAS443:3:28:693:858#0/1  
ACGCGCTACCTTTCTGACATGACCCTCGAGGAAATGTCAC  
+HWI-EAS443:3:28:693:858#0/1  
aaaaba`aaaa\_`\_[QYa\_`^K]aV]\_\_\_\_[\_^`\_¥ZPK\_¥  
@HWI-EAS443:3:29:1185:160#0/1  
CGCCGCATTTCTTCAATTAACCACCTTATTTCTCAAATT  
+HWI-EAS443:3:29:1185:160#0/1  
aaaabaZab`¥`a\_\_\_aaa`\_\_`\_a^\_a\_]a\_`\_^\_]  
@HWI-EAS443:3:29:825:1934#0/1  
CGTGCCGCATTTCTTCAATTAACCACCTTATTTCTCAA  
+HWI-EAS443:3:29:825:1934#0/1  
¥ZK^]Z[W\_WJZZYRTRVNP¥\_\_^\_W[PW[^NOZ\_] ^ZBB  
@HWI-EAS443:3:29:892:1994#0/1  
TGCGCTACCTTTCTGACATGACCCTCGAGGAAATGTCACG  
+HWI-EAS443:3:29:892:1994#0/1  
a`a\_a`[aaaaaa`baa]`a`\_`\_a\_UZ\_\_`aa\_a^]aa[  
@HWI-EAS443:3:2:1320:286#0/1  
CGCCGCATTTCTTCAATTAACCACCTTATTTCTCAAATT  
+HWI-EAS443:3:2:1320:286#0/1  
¥¥aXTOZTQX[a\_\_Z^X]ZPTQX\_0`^]\_VH[a[[TS]Y  
@HWI-EAS443:3:2:1343:165#0/1  
AGCCGCATTTCTTCAATTAACCACCTTATTTCTCAAATT  
+HWI-EAS443:3:2:1343:165#0/1  
a^a`^X]^a`^^^]`Ta`\_aRT[^\_¥[\_\_\_Z[WTZ]\_ZX^^  
@HWI-EAS443:3:30:1017:1459#0/1  
GGGCTATTATCTTTTGCCTAGGCATGAGCATGAACCAGA  
+HWI-EAS443:3:30:1017:1459#0/1  
aa^baZ]Ub`¥\_baaba]aHWUM]ab^M`\_bX\_U`BBBBB  
@HWI-EAS443:3:30:1186:241#0/1  
CCTCTGCTCGCTTTCAATCTGTGCCGCATTTCTTCAATTAA  
+HWI-EAS443:3:30:1186:241#0/1  
`bababbabbbbbbbaaba`Ha`\_`baa`ba¥bb\_``aa`a  
@HWI-EAS443:3:30:1584:1933#0/1  
GTGGGAAACAAATCGTGGAATGGATCTTGAAAGAGGAATC  
+HWI-EAS443:3:30:1584:1933#0/1  
a[\_aaa`a`\_a`\_`a]aa]aVZ`^0V\_\_¥\_X]``X^YUY  
@HWI-EAS443:3:30:407:447#0/1  
GGGCTGTTTCGATATCGAGGCCAAGGGTGTGCTCTTCC

+HWI-EAS443:3:30:407:447#0/1  
]bbb`bbaababbbbab`\_`aabaaa^DY^a[bbbaab`\_  
@HWI-EAS443:3:30:47:1154#0/1  
GTGGGAAACAAATCGTGGAATGGATCTTGAAAGAGGAATC  
+HWI-EAS443:3:30:47:1154#0/1  
a¥]^`^^a\_^X`aa^a¥¥\_`Z\_Z\_¥V0[VX`¥TXZW^  
@HWI-EAS443:3:30:727:417#0/1  
CCCCATTCTCATCACAGTTTCTCCAAGCGAATCTCTGTAT  
+HWI-EAS443:3:30:727:417#0/1  
a`a`aaa`^`a`aa`¥[aa\_a\_]`\_`[^`^]X]XY[\_  
@HWI-EAS443:3:31:1023:1882#0/1  
CGCCGCATTTCTTCAATTAACCACCTTATTTCCCTCAAATT  
+HWI-EAS443:3:31:1023:1882#0/1  
abbbbbabbbbbbaabbbbbbbbbabbabbaababb`b`\_  
@HWI-EAS443:3:31:1793:617#0/1  
NAACTGTGATGAGAATGGGAGACCTTCACTACCTCCAGAG  
+HWI-EAS443:3:31:1793:617#0/1  
DNXYXXXYXUYWXYYYYYXUXWXXYXYXXXYUYXYXW  
@HWI-EAS443:3:31:19:1460#0/1  
AGCGGCACAGATTGAAAGCGACAGAGAATAGTTTCGAACA  
+HWI-EAS443:3:31:19:1460#0/1  
[`bbYa`^b`^\_baa\_Z¥abaaaaa^^^[\`YV]^`^¥X\_¥]  
@HWI-EAS443:3:31:231:1575#0/1  
CGCCGCATTTCTTCAATTAACCACCTTATTTCCCTCAAATT  
+HWI-EAS443:3:31:231:1575#0/1  
a`aa^]YHS]XX0¥W[^X`Z\_]T]^]QT^ZX`Z]]\_LTUP  
@HWI-EAS443:3:31:237:494#0/1  
CTGCCGCATTTCTTCAATTAACCACCTTATTTCCCTCAAAT  
+HWI-EAS443:3:31:237:494#0/1  
ababbba`abbbba[aab^babbabbaabaaaaabb^`a  
@HWI-EAS443:3:32:1397:887#0/1  
GTGGGAAACAAATCGTGGAATGGATCTTGAAAGAGGAATC  
+HWI-EAS443:3:32:1397:887#0/1  
aYa`\_\_`\_^`a`aYa\_\_^\_a^YYW\_\_^Y^Y]Y`^^^]X  
@HWI-EAS443:3:32:309:395#0/1  
GTGGGAAACAAATCGTGGAATGGATCTTGAAAGAGGAATC  
+HWI-EAS443:3:32:309:395#0/1  
a^aaa[ ]` ` ]\_a^R\_\_V¥^\_\_RW¥\_\_UYS¥XTYN[R^  
@HWI-EAS443:3:32:870:183#0/1  
CAATGGGAGACCTTCACTACCTCCAGAGCAGAAATGAAAA  
+HWI-EAS443:3:32:870:183#0/1  
ZQYWbbb^`U`a^Z`[aa\_\_a\_\_Va\_\_]\_\_[]\_`^UY\_  
@HWI-EAS443:3:33:1177:826#0/1  
CGCCGCATTTCTTCAATTAACCACCTTATTTCCCTCAAATT  
+HWI-EAS443:3:33:1177:826#0/1  
abaabbbbaa`bbbaabaaa`aaa`baaaaa\_G`¥a\_aa`  
@HWI-EAS443:3:33:123:1524#0/1  
CAGGGCTTTCAGGAGGGAGCAATAGTTGGAGAAATT  
+HWI-EAS443:3:33:123:1524#0/1  
aaa¥^b`\_`a`aa\_a\_\_a\_[Y[\_^aV¥\_\_Z^VV\_^Z\_¥[W



@HWI-EAS443:3:33:1489:505#0/1  
GTGGGAAACAAATCGTGGAATGGATCTTGAAAGAGGAATC  
+HWI-EAS443:3:33:1489:505#0/1  
`Z`\_^\_¥I¥U\_b]^]Q`Z]VS[PPXG¥^a]PRN^]`XWXX  
@HWI-EAS443:3:33:516:1699#0/1  
GTGGGAAACAAATCGTGGAATGGATCTTGAAAGAGGAATC  
+HWI-EAS443:3:33:516:1699#0/1  
`SW`\_`aaaaba\_aa`\_]\_``\_``[^¥^a^]\_`^]\_]\_]\_]X  
@HWI-EAS443:3:34:1297:1532#0/1  
GTGGGAAACAAATCGTGGAATGGATCTTGAAAGAGGAATC  
+HWI-EAS443:3:34:1297:1532#0/1  
^XZR\_SUY\_ORLXa]`aa\_\_XaaY\_ST[]X^NH[YZU^XB  
@HWI-EAS443:3:34:261:1393#0/1  
CGTGCCGCATTTCTTCAATTAACCACCTTATTTCTCAAAT  
+HWI-EAS443:3:34:261:1393#0/1  
aZI`a`a\_ZWSZa^\_]`^ZZZaaa\_Z\_\_[X]aZ\_\_¥^^[V  
@HWI-EAS443:3:34:534:1766#0/1  
CCGGCACAGATTGAAAGCGACAGAGAATAGTTTCGAACAA  
+HWI-EAS443:3:34:534:1766#0/1  
G^aa^abb`a^Zabbbbbb\_a`S`ba¥`b]bb^[¥`\_`\_`  
@HWI-EAS443:3:34:550:1339#0/1  
CTGCCGCATTTCTTCAATTAACCACCTTATTTCTCAAAT  
+HWI-EAS443:3:34:550:1339#0/1  
\_aab`\_`bbbb`bbbb¥bb`bbbaab`bbabbaa¥V¥a  
@HWI-EAS443:3:35:1152:581#0/1  
TGGTGGTTAATTGAAGAAATGCGGCACAGATTGAAAGCGA  
+HWI-EAS443:3:35:1152:581#0/1  
abbWb`Uaaaaaa^aa\_\_```[aa]\_]¥\_aa\_`^]\_]\_]`\_`\_`  
@HWI-EAS443:3:35:1368:311#0/1  
CGGTGGTTAATTGAAGAAATGCGGCACAGATTGAAAGCGA  
+HWI-EAS443:3:35:1368:311#0/1  
abb`bb^a`baa\_[\_abaaa\_aa\_`a^aZ`a`a`\_]`[Y  
@HWI-EAS443:3:36:1248:499#0/1  
GGCCGCATTTCTTCAATTAACCACCTTATTTCTCAAATT  
+HWI-EAS443:3:36:1248:499#0/1  
aabbabbabbbaabbbbaaaaa\_baaaa\_\_aa\_K¥a\_  
@HWI-EAS443:3:36:1461:672#0/1  
ACCATTCTCATCACAGTTTCTCCAAGCGAATCTCTGTATA  
+HWI-EAS443:3:36:1461:672#0/1  
a`aa\_bbaa`aaa`b]ba\_aa`\_``a¥¥\_[GXX`^^a\_`  
@HWI-EAS443:3:36:192:298#0/1  
CACAGATTGAAAGCGACAGAGAATAGTTTCGAACAAATAC  
+HWI-EAS443:3:36:192:298#0/1  
a`aXa\_aaaaa`abaa\_a`aaa`\_a`Y`aa\_\_\_\_\_Ya]`]H  
@HWI-EAS443:3:36:672:1870#0/1  
CGCCGCATTTCTTCAATTAACCACCTTATTTCTCAAATT  
+HWI-EAS443:3:36:672:1870#0/1  
aabbbaa\_ababbbbaaaaaabaaaaaaaaaaaaa`\_`bbaaa\_  
@HWI-EAS443:3:37:488:90#0/1  
NGAGGGAGCAATAGTTGGAGAAATTTACCATTACCTTCT

+HWI-EAS443:3:37:488:90#0/1  
DPZZYXWZZZZZXZXXXZVPWZZZXZFNUYXYXZZZ  
@HWI-EAS443:3:38:1726:1103#0/1  
CCGCATTTCTTCAATTAACCACCTTATTTCTCAAATTA  
+HWI-EAS443:3:38:1726:1103#0/1  
aabVZbY`¥Y\_\_^a[RTa^`QX][\_b[agWUX0^WaZHD  
@HWI-EAS443:3:38:1792:660#0/1  
NCCGCATTTCTTCAATTAACCACCTTATTTCTCAAATTT  
+HWI-EAS443:3:38:1792:660#0/1  
DNRUXUXXTSVUSXUZUVWYZZVUVZZXWYZYXXYYY  
@HWI-EAS443:3:38:24:1331#0/1  
GGCCGCATTTCTTCAATTAACCACCTTATTTCTCAAATT  
+HWI-EAS443:3:38:24:1331#0/1  
\_W]\_¥ZZV¥Za[X¥QY]UaY]¥TRY[Q[ZUUTTUZ[^Z  
@HWI-EAS443:3:39:1050:456#0/1  
CGCCGCATTTCTTCAATTAACCACCTTATTTCTCAAATT  
+HWI-EAS443:3:39:1050:456#0/1  
aaaab\_bbababb^Zaba\_`\_aa\_\_baaaaW\_aba¥aa`  
@HWI-EAS443:3:39:1206:802#0/1  
AGAGAAGGTAATGGTGAATTTCTCCAAGGATTTGCTCCCC  
+HWI-EAS443:3:39:1206:802#0/1  
`aaaa`aa]`aW¥UUa```¥Za`a\_a^\_\_\_^Y]^\_YYW  
@HWI-EAS443:3:39:1671:828#0/1  
GTGGGAAACAAATCGTGAATGGATCTTGAAAGAGGAATC  
+HWI-EAS443:3:39:1671:828#0/1  
`\_bb`aabab]aa`baa\_`^`ba\_\_`\_aa\_`Za\_a\_]\_X  
@HWI-EAS443:3:39:786:1215#0/1  
GCCCATTTCTCATCACAGTTTCTCCAAGCGAATCTCTGTAT  
+HWI-EAS443:3:39:786:1215#0/1  
\_aa¥¥]Wa````aa\_\_¥S\_\_Z¥]T[^Y`]^Y^Za``0QY^  
@HWI-EAS443:3:39:926:991#0/1  
CGCGGCACAGATTGAAAGCGACAGAGAATAGTTTGAACA  
+HWI-EAS443:3:39:926:991#0/1  
aab^a`aaaaa`a\_¥`YP\_\_\_\_aa`\_\_Y\_Z`\_^ZZ]]^  
@HWI-EAS443:3:3:1095:204#0/1  
CGCGGCACAGATTGAAAGCGACAGAGAATAGTTTGAACA  
+HWI-EAS443:3:3:1095:204#0/1  
]`bbb\_]¥`Z`aaaa¥a``YNW`a`Z^^a]`¥V\_XSHW  
@HWI-EAS443:3:3:1615:1815#0/1  
GGGCTGTTTCGATATCGAGCCAAGGTGTTGCCTCTTCC  
+HWI-EAS443:3:3:1615:1815#0/1  
abaaaa`ab¥a`a`U`a^ZZa`\_\_NaZ[ZNSSOM]PS  
@HWI-EAS443:3:40:1098:877#0/1  
TGTGGAATGGATCTTGAAAGAGGAATCCAGCGAGACTT  
+HWI-EAS443:3:40:1098:877#0/1  
ab\_ba`abbaaaaabbaa`aabaaa\_a`aa[a\_`[`aa`  
@HWI-EAS443:3:40:415:623#0/1  
GTGGGAAACAAATCGTGAATGGATCTTGAAAGAGGAATC  
+HWI-EAS443:3:40:415:623#0/1  
aY`aa^aaZ\_\_a`a`[aa\_^¥\_^¥Z\_\_^W^\_\_Z\_^ZZ

@HWI-EAS443:3:40:924:665#0/1  
GTGGGAAACAAATCGTGGAATGGATCTTGAAAGAGGAATC  
+HWI-EAS443:3:40:924:665#0/1  
\_]aY\_^]^[^]\_^]\_Z\_ZWZR\_\_RZZW^URZXZ]ZO^VGR  
@HWI-EAS443:3:40:995:237#0/1  
TACCACCTTATTTCTCAAATTTCTGTCCCAATTGCTCTC  
+HWI-EAS443:3:40:995:237#0/1  
abaaaa[`aaa]a``aaa``a\_\_`\_¥Xa``[Y[0[\_]^Z]  
@HWI-EAS443:3:42:1084:1866#0/1  
CGCCGCATTTCTTCAATTAACCACCTTATTTCTCAAATT  
+HWI-EAS443:3:42:1084:1866#0/1  
abb\_\_a^b]\_Xaaa]`b[^`YT[aI\_aa\_a¥HP`\_`T[aa  
@HWI-EAS443:3:42:132:709#0/1  
GCTCTGTCGCTTTCAATCTGTGCCGCATTTCTTCAATTAA  
+HWI-EAS443:3:42:132:709#0/1  
aababbababaaaaa]aaaa\_`a`a`]aa`a`\_``\_a\_``  
@HWI-EAS443:3:42:904:1467#0/1  
GCAACACCCTTGGCCTCGATATCGAAACAGCCACTCTTGG  
+HWI-EAS443:3:42:904:1467#0/1  
a`UZ¥^a`aaaYT``¥^a\_¥a¥`^`\_aa¥a\_^^U¥^^\_X]  
@HWI-EAS443:3:43:678:464#0/1  
GTTGAATGGAATGGTAACACGGTTCGAGTCTCTGAAAATA  
+HWI-EAS443:3:43:678:464#0/1  
V¥\_¥\_b[¥\_V\_b\_^b0bb`aa\_ba\_a[bV\_a\_aba^Zabb  
@HWI-EAS443:3:44:1675:654#0/1  
TCCGCATTTCTTCAATTAACCACCTTATTTCTCAAATTT  
+HWI-EAS443:3:44:1675:654#0/1  
aY\_aYXaaa[a\_\_\_\_`a[M`\_Ya¥Waa]a`aYQ`Y\_\_^a^^  
@HWI-EAS443:3:44:887:1781#0/1  
GCTTGAGAAACTGTGATGAGAATGGGAGACCTTCACTAA  
+HWI-EAS443:3:44:887:1781#0/1  
\_]ZVXZ^]Y^\_W]¥SZZ\_Y¥\_\_\_\_VQ^WW]NTO]WQ\_X]^G  
@HWI-EAS443:3:46:531:570#0/1  
GTGGGAAACAAATCGTGGAATGGATCTTGAAAGAGGAATC  
+HWI-EAS443:3:46:531:570#0/1  
a\_baa``b\_aaaa\_`\_aaaaaba`\_\_a````¥[\_a`^\_¥Y  
@HWI-EAS443:3:46:671:937#0/1  
AGCGCTACCTTTCTGACATGACCCTCGAGGAAATGTCACG  
+HWI-EAS443:3:46:671:937#0/1  
ab[^`^`a`^aa`U¥Q¥a`^U`\_WZZU^Z¥\_¥`[¥YS[\_UW  
@HWI-EAS443:3:46:747:763#0/1  
CTGCCGCATTTCTTCAATTAACCACCTTATTTCTCAAAT  
+HWI-EAS443:3:46:747:763#0/1  
abbaabbabababbaaab`^`\_aa`ba`bbbaaa`a`ab  
@HWI-EAS443:3:46:970:1032#0/1  
TCCTACTTCCGCTACCTTTCTGACATGACCCTCGAGGAA  
+HWI-EAS443:3:46:970:1032#0/1  
aabababb`baaaaa`]aaa\_`a``aaa`a`\_``\_a\_``\_`\_`  
@HWI-EAS443:3:48:174:359#0/1  
GTGGGAAACAAATCGTGGAATGGATCTTGAAAGAGGAATC

+HWI-EAS443:3:48:174:359#0/1  
a\_``\_`aW\_a`^^X\_R[``\_]ZUZ\_\_]]VXTXW¥YVQ  
@HWI-EAS443:3:48:654:67#0/1  
GTGGGAAACAAATCGTGGAATGGATCTTGAAAGAGGAATC  
+HWI-EAS443:3:48:654:67#0/1  
a\_bba`a``aVva\_¥Pa`\_[ZaaXYW[X]W]Z\_^\_]WYN  
@HWI-EAS443:3:48:836:1015#0/1  
AGCCGCATTTCTTCAATTAACCACCTTATTCCTCAAATT  
+HWI-EAS443:3:48:836:1015#0/1  
aa\_a`\_`\_a\_a^aaaaa\_a]^Ya^^a\_Za`\_Z]a`^R^a`  
@HWI-EAS443:3:49:1094:245#0/1  
CGCCGCATTTCTTCAATTAACCACCTTATTCCTCAAATT  
+HWI-EAS443:3:49:1094:245#0/1  
aaUZUa0Z^`]ab]^Y`][FLaX¥^\_Xa\_a]L\_^YY^a\_  
@HWI-EAS443:3:4:1520:1566#0/1  
CGCCGCATTTCTTCAATTAACCACCTTATTCCTCAAATT  
+HWI-EAS443:3:4:1520:1566#0/1  
QVV¥XTZR\_J[`¥U[U[`b`]]`b^``abaSF[aaab^ba  
@HWI-EAS443:3:50:479:768#0/1  
CGTGCCGCATTTCTTCAATTAACCACCTTATTCCTCAAA  
+HWI-EAS443:3:50:479:768#0/1  
ab^`a\_b```bbabbbababbbbaaaaba`bab`[aaa\_\_  
@HWI-EAS443:3:51:526:708#0/1  
TCCTACTTCGCGCTACCTTTCTGACATGACCCTCGAGGAA  
+HWI-EAS443:3:51:526:708#0/1  
aZOU¥V`¥XZRS¥]Q[]V`R¥`ZU^aVYXYUP\_[¥TYYUN  
@HWI-EAS443:3:52:1098:384#0/1  
CGCCGCATTTCTTCAATTAACCACCTTATTCCTCAAATT  
+HWI-EAS443:3:52:1098:384#0/1  
ababbab`bbZbbba`abbaa[baababbbb[^baa``bb  
@HWI-EAS443:3:52:603:647#0/1  
GTGATGAGAATGGGAGACCTTCACTACCTCCAGAGCAGAC  
+HWI-EAS443:3:52:603:647#0/1  
aa\_^\_`^aaaab```a¥\_¥a^a`UXaP\_\_aX^]Z^Y\_`RG  
@HWI-EAS443:3:52:871:1724#0/1  
CGCCGCATTTCTTCAATTAACCACCTTATTCCTCAAATT  
+HWI-EAS443:3:52:871:1724#0/1  
^`bbZV``bbabbaaabbbbaaaaabababa``bab`aaa  
@HWI-EAS443:3:54:1308:129#0/1  
GGCGGAAGTAGGTACAGATGCAATTGTCATTCTAAGTGT  
+HWI-EAS443:3:54:1308:129#0/1  
`[[Y]a[YUS]\_\_V^NW`\_^\_¥^Z^\_[U^\_YVTQQXS[W  
@HWI-EAS443:3:54:473:831#0/1  
GGCCGCATTTCTTCAATTAACCACCTTATTCCTCAAATT  
+HWI-EAS443:3:54:473:831#0/1  
ababba[abaaabba`ababaaaaaabbbbaaab]aba  
@HWI-EAS443:3:55:1327:73#0/1  
GTGGGAAACAAATCGTGGAATGGATCTTGAAAGAGGAATC  
+HWI-EAS443:3:55:1327:73#0/1  
a\_\_S\_^`VP]¥PYR\_TVYTLY^]OWXXS^MKKZT^]WUUV

@HWI-EAS443:3:55:1665:88#0/1  
GTGGGAAACAAATCGTGGAATGGATCTTGAAAGAGGAATC  
+HWI-EAS443:3:55:1665:88#0/1  
]\_a^\_ba\_Yaaa`ZZP\_b\_`ba[]\_]aa`]\_\_a[\_a¥]]T  
@HWI-EAS443:3:55:769:103#0/1  
GTGGGAAACAAATCGTGGAATGGATCTTGAAAGAGGAATC  
+HWI-EAS443:3:55:769:103#0/1  
a`bbb`\_a\_aa`a`a]aa\_\_aa`Q^Z`a`XX¥aYa\_]XW  
@HWI-EAS443:3:56:104:1052#0/1  
GCACGGTTCGAGTCTCTGAAAATATACAGAGATTCGCTTG  
+HWI-EAS443:3:56:104:1052#0/1  
abbabaabbaba`aaaaba`aaa`aa\_aaaa\_`a\_aa\_^`  
@HWI-EAS443:3:56:1201:429#0/1  
CGCCGCATTTCTTCAATTAACCACCTTATTCCTCAAATT  
+HWI-EAS443:3:56:1201:429#0/1  
abaab`abbbabba``bbaa\_`^`Yaaab`a`\_b\_aa^ba  
@HWI-EAS443:3:56:130:1447#0/1  
CTGCCGCATTTCTTCAATTAACCACCTTATTCCTCAAAT  
+HWI-EAS443:3:56:130:1447#0/1  
aa`babbbbaaabba`bb`a`a`a\_aaaaaa`aaa``a  
@HWI-EAS443:3:56:409:1203#0/1  
CGCCGCATTTCTTCAATTAACCACCTTATTCCTCAAATT  
+HWI-EAS443:3:56:409:1203#0/1  
UaZaaa^`b\_`\_¥`Y¥^[`Z`\_\_aaaa`^aaaaa\_P]aU  
@HWI-EAS443:3:56:494:2042#0/1  
ATCGCTTTCAATCTGTGCCGCATTTCTTCAATTAACCACC  
+HWI-EAS443:3:56:494:2042#0/1  
aa\_a]aaa`\_`a\_] [Va\_\_R^`\_`\_T\_]\_\_^^]\_W¥]ZS  
@HWI-EAS443:3:56:626:594#0/1  
TACCACCTTATTCCTCAAATTTCTGTCCCAATTGCTCTC  
+HWI-EAS443:3:56:626:594#0/1  
ZJa\_H¥ZZ\_[X`bb¥WW[R¥aaa¥Z^Y\_[ZTR¥\_[YaWZ\_  
@HWI-EAS443:3:57:1458:98#0/1  
CGCGGCACAGATTGAAAGCGACAGAGAATAGTTTCGAACA  
+HWI-EAS443:3:57:1458:98#0/1  
abaabbabbbabbbbaa`baaa`aaabaaaab^aa]a\_aZa  
@HWI-EAS443:3:57:1698:1574#0/1  
AGTCGCTTTCAATCTGTGCCGCATTTCTTCAATTAACCAC  
+HWI-EAS443:3:57:1698:1574#0/1  
aa``aaaaa¥aaa\_aa`a^X\_`a`a]a`\_a\_a\_`\_YQ^]  
@HWI-EAS443:3:57:370:1061#0/1  
GTGGGAAACAAATCGTGGAATGGATCTTGAAAGAGGAATC  
+HWI-EAS443:3:57:370:1061#0/1  
a\_WN\_aR]QXXR`Wa]a[Q`\_`aU¥PV]`\_[U^]X`]]]S  
@HWI-EAS443:3:57:541:249#0/1  
GTGGGAAACAAATCGTGGAATGGATCTTGAAAGAGGAATC  
+HWI-EAS443:3:57:541:249#0/1  
aV``aa\_]¥¥`\_`a\_^][\_\_a\_]X\_`][ZWV^\_¥]SU]  
@HWI-EAS443:3:57:57:1193#0/1  
CGCGGCACAGATTGAAAGCGACAGAGAATAGTTTCGAACA

+HWI-EAS443:3:57:57:1193#0/1  
]b^^]^^^bb^`bbabaa^aaa`^`b`a\_Y¥¥aa`aXX¥a  
@HWI-EAS443:3:57:969:1118#0/1  
AGCGCTACCTTTCTGACATGACCCTCGAGGAAATGTCACG  
+HWI-EAS443:3:57:969:1118#0/1  
WZ\_bb\_baGSVWSa`Ya\_U¥X]Z]^Z`\_\_\_`XXPLI\_BB  
@HWI-EAS443:3:58:1361:1365#0/1  
GTGGGAAACAAATCGTGGAATGGATCTTCAAAGAGGAATC  
+HWI-EAS443:3:58:1361:1365#0/1  
\_Va]^¥Z[aa`aa`]G\_XW[^]Z[\_N]a\_aa`T]\_aa^\_Y  
@HWI-EAS443:3:58:1368:1410#0/1  
ACTCTGCTCGCTTCAATCTGTGCCGATTTCTTCAATTAA  
+HWI-EAS443:3:58:1368:1410#0/1  
]Xa\_ab`aZ]Z\_Y\_WaaaZ]¥ZYV[¥`a\_aaTW]¥^\_\_  
@HWI-EAS443:3:58:147:187#0/1  
GTCTCGCTGGATTCTCTTTCAAGATCCATCCACGATTG  
+HWI-EAS443:3:58:147:187#0/1  
a¥`a\_a`aaa`\_^[^`^`\_`\_\_^¥\_^]¥¥TZ[^BBBBB  
@HWI-EAS443:3:58:235:935#0/1  
CGCGAGACACTTAGAATGACAATTGCATCTGTACTACTT  
+HWI-EAS443:3:58:235:935#0/1  
aaabaaaa`aa^aaaaa`aa\_aaaa`\_`¥`^`^`^`\_¥  
@HWI-EAS443:3:59:1358:372#0/1  
GCTTGAGAACTGTGATGAGAATGGGAGACCTTCACTAA  
+HWI-EAS443:3:59:1358:372#0/1  
a`abbb`b\_a`abb]aaa`]aaaabaaa\_TTQ\_a\_ZUa]G  
@HWI-EAS443:3:59:1665:1625#0/1  
GTGGGAAACAAATCGTGGAATGGATCTTCAAAGAGGAATC  
+HWI-EAS443:3:59:1665:1625#0/1  
`aaaaaa`^abab¥]W`\_\_aa\_b`UG`a`^]\_]\_ZYTQW  
@HWI-EAS443:3:59:475:1229#0/1  
CCGCATTTCTTCAATTAACCACCTTATTTCTCAAATTTA  
+HWI-EAS443:3:59:475:1229#0/1  
a\_Y\_MS¥WS\_Z^^[\_\_R]ZWS]`aRHXaRZ[[]]]KTOPRD  
@HWI-EAS443:3:59:504:1067#0/1  
CATCAAGGTCTCTAATCGGTTAAAGATTACACTGAAGTTC  
+HWI-EAS443:3:59:504:1067#0/1  
abb`baHS]ababaaab`^Y\_a`¥]^aa[`b]`\_ZXTR\_Z  
@HWI-EAS443:3:59:676:837#0/1  
GTGGGAAACAAATCGTGGAATGGATCTTCAAAGAGGAATC  
+HWI-EAS443:3:59:676:837#0/1  
a\_aa\_aaaa`aaaab]aa^\_aaa`\_\_aaaaXaa`Z]]]V  
@HWI-EAS443:3:60:11:1861#0/1  
CTGCCGATTTCTTCAATTAACCACCTTATTTCTCAAAT  
+HWI-EAS443:3:60:11:1861#0/1  
aa`\_aaabbaa`aaaaaaaa`a`a`aa`W\_a`a`\_a`\_`  
@HWI-EAS443:3:61:289:308#0/1  
CGCGGAAGTAGGTACAGATGCAATTGTCTTAAAGTGT  
+HWI-EAS443:3:61:289:308#0/1  
ababbb\_Va]^bbY`abb`a\_Y^^[a^Y\_Z¥N`\_\_`]]T



+HWI-EAS443:3:66:156:858#0/1  
abbab¥SUOX[X[\_V[\_[a¥X`^`XX¥\_]a]]PPYYS  
@HWI-EAS443:3:66:218:629#0/1  
CGCGGCACAGATTGAAAGCGACAGAGAATAGTTTCGAACA  
+HWI-EAS443:3:66:218:629#0/1  
[L¥NV¥]a\_[LXVUPWW[[\_]WZ^S[SZ¥ZTDV SZTRWWS  
@HWI-EAS443:3:66:650:402#0/1  
GATCCATTGTCTGCAAATCGCTTGCGGATATGCCAAAGGA  
+HWI-EAS443:3:66:650:402#0/1  
`a`aabba^a\_b`[`a¥`WT][[TXa`\_`]^W^[[a\_\_Y  
@HWI-EAS443:3:66:879:561#0/1  
CGCCGCATTTCTTCAATTAACCACCTTATTCCTCAAATT  
+HWI-EAS443:3:66:879:561#0/1  
abaaa]V\_aaaaaaab\_\_a¥aaaaa\_\_a`a^W\_a`Y`aa  
@HWI-EAS443:3:67:1517:457#0/1  
GTGGGAAACAAATCGTGGAATGGATCTTGAAAGAGGAATC  
+HWI-EAS443:3:67:1517:457#0/1  
a^abaaaa\_``a]a\_a\_\_\_\_\_a`]^¥``^\_]a`\_]XX  
@HWI-EAS443:3:67:1527:1551#0/1  
AGCGAAGTAGGTACAGATGCAATTGTCATTCTAAGTGTCT  
+HWI-EAS443:3:67:1527:1551#0/1  
aa`WZV\_] [TY[[F[a``[S¥``a^VU]Z``a`¥]OZR^R  
@HWI-EAS443:3:67:449:332#0/1  
GTGGGAAACAAATCGTGGAATGGATCTTGAAAGAGGAATC  
+HWI-EAS443:3:67:449:332#0/1  
aT`]LMXZ¥]a`\_]WYa^][[UQ[]]^¥¥¥WY\_^Z^]XT  
@HWI-EAS443:3:67:89:1797#0/1  
TTGCCGCATTTCTTCAATTAACCACCTTATTCCTCAAAT  
+HWI-EAS443:3:67:89:1797#0/1  
`abbabaaa\_baaaaaa`a\_aaaaaa`aaa``aaaa`a`  
@HWI-EAS443:3:67:956:1091#0/1  
AGCTTTCAATCTGTGCCGCATTTCTTCAATTAACCACCTT  
+HWI-EAS443:3:67:956:1091#0/1  
aaaa`abaaaa[Xaa`aaaa`a^aa\_`a`a\_\_[\_]\_Wa`  
@HWI-EAS443:3:68:219:279#0/1  
CGCCGCATTTCTTCAATTAACCACCTTATTCCTCAAATT  
+HWI-EAS443:3:68:219:279#0/1  
abbbbbbbbbbaabbbbaabaaaaabaaaaaaa\_aba  
@HWI-EAS443:3:68:586:265#0/1  
AGCCGCATTTCTTCAATTAACCACCTTATTCCTCAAATT  
+HWI-EAS443:3:68:586:265#0/1  
a^aaaa]aaaaaaaaaaaaa`\_\_a^a`a^`a`\_`a`  
@HWI-EAS443:3:68:678:1501#0/1  
GTGGGAAACAAATCGTGGAATGGATCTTGAAAGAGGAATC  
+HWI-EAS443:3:68:678:1501#0/1  
`Q\_aZW\_a¥`^aa\_H`Y¥a¥`a[[aa]a\_UW[XY[[UW`  
@HWI-EAS443:3:68:957:1225#0/1  
GAGAGATTGCTTGGAGAACTGTGATGAGAATGGGAGAC  
+HWI-EAS443:3:68:957:1225#0/1  
¥U\_R\_WRZX]\_OV^][ZNR[^[RNPVVTXHRSLQ]UR]BB



@HWI-EAS443:3:69:1053:253#0/1  
GGACTGTTTCCTTTGGCATATCCGCAAGCGATTTGCAGAC  
+HWI-EAS443:3:69:1053:253#0/1  
`b^\_abaab`aaaa`aaaaaX^a\_a`a\_aa\_aaa\_^[VY  
@HWI-EAS443:3:69:202:128#0/1  
TGGAGGGAGCAATAGTTGGAGAAATTTACCATTACCTTC  
+HWI-EAS443:3:69:202:128#0/1  
aaaa\_a\_\_aa``aaa\_^^`\_`\_^^`\_`\_`X]\_\_^\_`Z`]^  
@HWI-EAS443:3:69:406:1309#0/1  
CGCGGCACAGATTGAAAGCGACAGAGAATAGTTTCGAACA  
+HWI-EAS443:3:69:406:1309#0/1  
abb`ababbbb`aa\_YZ]ab]b`bbba`abaQaabaab``  
@HWI-EAS443:3:6:1592:283#0/1  
GGCGGCACAGATTGAAAGCGACAGAGAATAGTTTCGAACA  
+HWI-EAS443:3:6:1592:283#0/1  
a\_K\_b\_`¥a¥ZVTXZ\_\_[SZZQY`XX]\_] []L[¥P^X^SB  
@HWI-EAS443:3:70:1793:1513#0/1  
NCCGCATTTCTTCAATTAACCACCTTATTTCTCAAATTT  
+HWI-EAS443:3:70:1793:1513#0/1  
DPXXXVXVWVXVVOQWWWYXYXUXYZZZYWYVSVYY  
@HWI-EAS443:3:70:95:1845#0/1  
GTGGGAAACAAATCGTGAATGGATCTTGAAGAGGAATC  
+HWI-EAS443:3:70:95:1845#0/1  
a`a\_\_[¥`b¥SSZbaV^^aa`````aa`aaaa\_aa\_\_a]\_  
@HWI-EAS443:3:71:1472:777#0/1  
CGTGGTTAATTGAAGAAATGCGGCACAGATTGAAAGCGAC  
+HWI-EAS443:3:71:1472:777#0/1  
aabbabbbbbbbbbbbbbbbbbbb\_bbbbbbbbaaba\_ba^  
@HWI-EAS443:3:71:1612:2047#0/1  
NTGTGCCGATTTCTTCAATTAACCACCTTATTTCTCAA  
+HWI-EAS443:3:71:1612:2047#0/1  
DNVRVXWWWXVSTYYXXXXWSQTYXYZYWYXXWYS  
@HWI-EAS443:3:71:214:1761#0/1  
CGGTGGTTAATTGAAGAAATGCGGCACAGATTGAAAGCGA  
+HWI-EAS443:3:71:214:1761#0/1  
^`RX\_RV^[\_[¥U]ZU[J[OJX^]¥\_[[TUX\_UU[^T`]^  
@HWI-EAS443:3:71:256:1854#0/1  
CGCCGCATTTCTTCAATTAACCACCTTATTTCTCAAAT  
+HWI-EAS443:3:71:256:1854#0/1  
`X\_]L^UV[Z`¥U¥Z[W[\_¥Y`aa\_POZWTO]]T[WNXTU  
@HWI-EAS443:3:72:805:285#0/1  
ACTCTGTCGCTTTCAATCTGTGCCGATTTCTTCAATTAA  
+HWI-EAS443:3:72:805:285#0/1  
ab\_a\_baa``]`aaaaaa`aU\_¥]\_]aaa`aa]¥^\_aa`\_  
@HWI-EAS443:3:72:922:1228#0/1  
CTGCCGATTTCTTCAATTAACCACCTTATTTCTCAAAT  
+HWI-EAS443:3:72:922:1228#0/1  
a\_`a\_`a^a\_`a^Z^^¥`^`\_`¥Y`\_\_^a`\_\_`Z\_\_`Y^\_  
@HWI-EAS443:3:73:1017:1325#0/1  
TGATGAGAATGGGAGACCTTCACTACCTCCAGAGCAGAAC

+HWI-EAS443:3:73:1017:1325#0/1  
aaa]]aaaaaaZaa`]V`\_\_aaa\_]`\_a\_a`\_\_\_\_\_a^  
@HWI-EAS443:3:73:419:593#0/1  
GGCATTCTTCAATTAACCACCTTATTTCTCAAATTTCT  
+HWI-EAS443:3:73:419:593#0/1  
a`aaaaaaaaaaaaa`^^`^\_aaaa`\_a`^`]^a`\_a  
@HWI-EAS443:3:73:526:104#0/1  
GTGGGAAACAAATCGTGAATGGATCTTGAAGAGGAATC  
+HWI-EAS443:3:73:526:104#0/1  
¥Vab¥X]]]aZX^V`\_`SU`\_a¥X\_]a¥a\_\_¥VXa`\_]WQ  
@HWI-EAS443:3:74:196:2047#0/1  
NCGCATTCTTCAATTAACCACCTTATTTCTCAAATTTCT  
+HWI-EAS443:3:74:196:2047#0/1  
DOTTMTUXZZZWSWPVTVYYZYYYRYXXZZZZYSYYW  
@HWI-EAS443:3:74:766:1727#0/1  
CGCCGCATTTCTTCAATTAACCACCTTATTTCTCAAATT  
+HWI-EAS443:3:74:766:1727#0/1  
aY\_¥a`aaa`]]]^`RWZ¥aa]Oa\_U][P[`^^aXYO]S  
@HWI-EAS443:3:74:874:756#0/1  
CGGTGGTTAATTGAAGAAATGCGGCACAGATTGAAAGCGA  
+HWI-EAS443:3:74:874:756#0/1  
abaH\_]a`[ab`^a\_a\_a]^Za\_aaa\_W\_a`^`V^\_a\_  
@HWI-EAS443:3:74:912:1745#0/1  
CGCCGCATTTCTTCAATTAACCACCTTATTTCTCAAATT  
+HWI-EAS443:3:74:912:1745#0/1  
aaaaaabbabbabbbaabaabaaaa`babaaaaa`a``aa  
@HWI-EAS443:3:75:1210:1132#0/1  
CGGGCTTTCACTGAGGAGGGAGCAATAGTTGGAGAAATTT  
+HWI-EAS443:3:75:1210:1132#0/1  
ab¥ba¥[M^b^bb]abWb`[¥Sa¥N`^¥Xaaa`ba]¥Yaa  
@HWI-EAS443:3:75:909:1312#0/1  
GTATATTTTCAGAGACTCGAACCGTGTACCATTCCATTN  
+HWI-EAS443:3:75:909:1312#0/1  
a\_ba`aaaa\_a`\_\_\_\_`\_\_\_\_\_]¥WXV\_\_^[Y¥Y\_^]]TD  
@HWI-EAS443:3:77:1282:487#0/1  
GGCCGCATTTCTTCAATTAACCACCTTATTTCTCAAATT  
+HWI-EAS443:3:77:1282:487#0/1  
ab`b`ab`bbabaa`bab[`\_¥aa\_aaaa\_aaa]\_aaa  
@HWI-EAS443:3:77:208:1345#0/1  
AGGCAACACCCTTGGCCTCGATATCGAAACAGCCACTCTA  
+HWI-EAS443:3:77:208:1345#0/1  
aa[a]V\_a`a\_\_\_TR\_a\_\_^\_¥\_¥`Z^\_\_WPQ¥V\_\_YYLH  
@HWI-EAS443:3:77:291:969#0/1  
CGCCGCATTTCTTCAATTAACCACCTTATTTCTCAAATT  
+HWI-EAS443:3:77:291:969#0/1  
abb`Z`b^X`b^X\_[J¥a`a¥^\_a`^]Z`\_`a`aaZIY]^  
@HWI-EAS443:3:77:773:961#0/1  
TCCGCATTTCTTCAATTAACCACCTTATTTCTCAAATTT  
+HWI-EAS443:3:77:773:961#0/1  
X\_a`\_bXbb¥bba`^`abbbbbbaba``bba¥b¥aSaab

@HWI-EAS443:3:78:1791:1463#0/1  
CAGAGATTGCTTGGAGAACTGTGATGAGAATGGGAGAG  
+HWI-EAS443:3:78:1791:1463#0/1  
¥\_`^ba`baR]`aYaVR`abW]OU`\_WN^N\_`^V¥PNNRID  
@HWI-EAS443:3:78:365:2047#0/1  
NAAACGAGAAAGCTCTTATCTCTTGTCTACTTCAAGCAG  
+HWI-EAS443:3:78:365:2047#0/1  
DNXYYZXZSZUZXXZYUZZZWZYZYYZZZZZZXZWX  
@HWI-EAS443:3:79:1793:269#0/1  
NAATGGGAGACCTTCACTACCTCCAGAGCAGAAATGAAAA  
+HWI-EAS443:3:79:1793:269#0/1  
DHMRUVQULUWUWVTUNUWYXVWWWYVUTTRUWWWUWU  
@HWI-EAS443:3:79:572:1792#0/1  
GGCCGCATTTCTTCAATTAACCACCTTATTCCTCAAATT  
+HWI-EAS443:3:79:572:1792#0/1  
abbbab\_bbbaabbbbabbabbbbaababbbbbbabb  
@HWI-EAS443:3:7:1117:704#0/1  
CGCCGCATTTCTTCAATTAACCACCTTATTCCTCAAATT  
+HWI-EAS443:3:7:1117:704#0/1  
aba\_b]aabb`bb`aabaaa\_`^aaaabaaa\_a\_aa\_aa  
@HWI-EAS443:3:7:1232:297#0/1  
CGTGCCGCATTTCTTCAATTAACCACCTTATTCCTCAAAA  
+HWI-EAS443:3:7:1232:297#0/1  
ababaZ`aabbbabbaaabba]b^¥aaabbbXZaa\_aa  
@HWI-EAS443:3:7:696:260#0/1  
CGCGGCACAGATTGAAAGCGACAGAGAATAGTTTCGAACA  
+HWI-EAS443:3:7:696:260#0/1  
ababbababbaabbaa`b\_ba^aa`aa`aaZ\_aWa^a^`  
@HWI-EAS443:3:80:1374:884#0/1  
CTGCCGCATTTCTTCAATTAACCACCTTATTCCTCAAAT  
+HWI-EAS443:3:80:1374:884#0/1  
¥bbbbbbbbbbabb`abbbab\_aaa]aa`aaa\_`a]``aa  
@HWI-EAS443:3:80:60:1368#0/1  
CGCCGCATTTCTTCAATTAACCACCTTATTCCTCAAATT  
+HWI-EAS443:3:80:60:1368#0/1  
aaaaa`R\_`a`aabaaa`[a``baa```aaaa``^JWa\_  
@HWI-EAS443:3:81:601:838#0/1  
GGCGCGAAGTAGGTACAGATGCAATTGTCATTCTAAGTGT  
+HWI-EAS443:3:81:601:838#0/1  
a^¥X]aZPYYY[[]`VZV]`\_]¥V]`^UVU^^^\_QQ[V]X  
@HWI-EAS443:3:81:603:49#0/1  
CGGGCCTATTATCTTTTGCCTAGGCATGAGCATGAACCAG  
+HWI-EAS443:3:81:603:49#0/1  
abbb`b`abab¥aaaa`Zaa`aa\_`Za\_a`aaa``]R[\_  
@HWI-EAS443:3:81:745:1572#0/1  
GATTCCTCTTCAAGATCCATTCCACGATTTGTTTCCCAC  
+HWI-EAS443:3:81:745:1572#0/1  
`\_aaabbabaa`bbaabbabaa\_Xaaabaa]a^aaaaYaa  
@HWI-EAS443:3:83:1140:563#0/1  
GTGGGAAACAAATCGTGAATGGATCTTGAAAGAGGAATC

+HWI-EAS443:3:83:1140:563#0/1  
a`\_a`\_`\_]aa`^a\_a`]\_\_`^`]W\_¥Y^`\_]\_W¥Y^W  
@HWI-EAS443:3:84:147:1965#0/1  
GCCGCATTTCTTCAATTAACCACCTTATTTCTCAAATTN  
+HWI-EAS443:3:84:147:1965#0/1  
abbababaabbabb`a`baa`aaa`aaaaaaaa`a`Yb[D  
@HWI-EAS443:3:84:1684:679#0/1  
TGGGAGCAATAGTTGGAGAAATTTACCATTACCTTCTCT  
+HWI-EAS443:3:84:1684:679#0/1  
\_¥Yaa\_I¥U\_aYSaaaYR[aabaa`¥[`aa\_UK¥]\_\_G]  
@HWI-EAS443:3:84:451:523#0/1  
CATCAAGGTCTCTAATCGGTTAAAGATTACACTGAAGTTC  
+HWI-EAS443:3:84:451:523#0/1  
YUab¥RIYR¥[¥¥XT\_a`[KPF¥ZUH[Y^a\_R]]XWVKYL  
@HWI-EAS443:3:84:833:427#0/1  
ATGCATCTGTACCTACTTCGCGCTACCTTTCTGACATGAC  
+HWI-EAS443:3:84:833:427#0/1  
`aa`ba`\_a\_abaaa\_a\_aa`]\_`¥\_a\_a^`[¥`\_a\_\_\_\_  
@HWI-EAS443:3:85:1538:1244#0/1  
CAGATGCAATTGTCATTCTAAGTGTCTCGCTGGATTCCCTT  
+HWI-EAS443:3:85:1538:1244#0/1  
aaaabbaV`¥a^`^`aaaa`¥^a`\_a`[Waaa^aa`XWD  
@HWI-EAS443:3:85:724:1521#0/1  
AGCCGCATTTCTTCAATTAACCACCTTATTTCTCAAATT  
+HWI-EAS443:3:85:724:1521#0/1  
a]b`^aaba`abb\_aaaaa\_a\_`\_a\_\_a`aa`aaaaa\_  
@HWI-EAS443:3:85:777:384#0/1  
GATTTCTTCAATTAACCACCTTATTTCTCAAATTTCTGT  
+HWI-EAS443:3:85:777:384#0/1  
aaaa`aaa¥aaa`aa^^`a`a\_aaa`^\_a\_`\_`a\_`¥`a^  
@HWI-EAS443:3:85:975:1075#0/1  
GTGGGAAACAAATCGTGAATGGATCTTGAAAGAGGAATC  
+HWI-EAS443:3:85:975:1075#0/1  
aa`[aaa\_X]]`aaaWaa`aaa]\_\_Oa`\_a`Yaa`\_^^`]  
@HWI-EAS443:3:86:463:1938#0/1  
AGCCGCATTTCTTCAATTAACCACCTTATTTCTCAAATT  
+HWI-EAS443:3:86:463:1938#0/1  
a)`a`\_`^\_`\_¥\_aa^\_\_a^]\_][^^^]\_^^W^^^\_\_^Z  
@HWI-EAS443:3:88:735:722#0/1  
AGCCGCATTTCTTCAATTAACCACCTTATTTCTCAAATT  
+HWI-EAS443:3:88:735:722#0/1  
aaabbaabba`baaaaaa`aaa`baaaaa`\_aaaaaa  
@HWI-EAS443:3:89:628:243#0/1  
CGCCGCATTTCTTCAATTAACCACCTTATTTCTCAAATT  
+HWI-EAS443:3:89:628:243#0/1  
abbbbbbaaaaabaa`^bbaaaaa`\_aabba`aa`a`aba  
@HWI-EAS443:3:8:257:85#0/1  
CGGTGGTTAATTGAAGAAATGCGGCACAGATTGAAAGCGA  
+HWI-EAS443:3:8:257:85#0/1  
aba¥ab\_aa\_\_aaXaa`\_a\_\_TQ]a[¥]¥IR`\_[]^T]W

@HWI-EAS443:3:8:434:515#0/1  
CGCGGCACAGATTGAAAGCGACAGAGAATAGTTTCGAACA  
+HWI-EAS443:3:8:434:515#0/1  
aaabbb\_ab`^a`ba`b`\_¥aab[baaaa\_Pa\_^aXZMa  
@HWI-EAS443:3:90:1010:1165#0/1  
CGGGCTTTCAGTACTGAGGAGGGAGCAATAGTTGGAGAAATTT  
+HWI-EAS443:3:90:1010:1165#0/1  
abba`bbbabb`b[^R^bb`]`bbabba`b[^^\_\_`a\_\_  
@HWI-EAS443:3:90:1338:934#0/1  
CAGGGCTTTCAGTACTGAGGAGGGAGCAATAGTTGGAGAAATT  
+HWI-EAS443:3:90:1338:934#0/1  
a\_aZS^abaaa\_aa\_aa`aa\_\_`\_\_a`]`^`^a`\_`aa  
@HWI-EAS443:3:90:374:195#0/1  
CGCGGCACAGATTGAAAGCGACAGAGAATAGTTTCGAACA  
+HWI-EAS443:3:90:374:195#0/1  
aaabbb^`bbababaaaa^aaaabaaaaaaa]a\_Xa`a^a  
@HWI-EAS443:3:90:53:319#0/1  
AGCGGCACAGATTGAAAGCGACAGAGAATAGTTTCGAACA  
+HWI-EAS443:3:90:53:319#0/1  
a^aaa^^a^`\_\_`\_^`\_\_`\_Z`\_¥P¥Z^^XX^¥]O[VZ  
@HWI-EAS443:3:90:915:1453#0/1  
GTGGGAAACAAATCGTGAATGGATCTTGAAAGAGGAATC  
+HWI-EAS443:3:90:915:1453#0/1  
aabba\_bbabbaaaa`aa`aaa\_a`aaaa\_\_aaa\_aa`Z  
@HWI-EAS443:3:91:1322:280#0/1  
GTGGGAAACAAATCGTGAATGGATCTTGAAAGAGGAATC  
+HWI-EAS443:3:91:1322:280#0/1  
Z]][[OVUUXLYZKTGY^FXa]XUWGY`\_]XXaZRLYZZ¥  
@HWI-EAS443:3:91:269:2046#0/1  
NACTCCAACACCATGTCAAGCTTTCAGGTAGACTGTTTCC  
+HWI-EAS443:3:91:269:2046#0/1  
DNWVWPVYUVZXWUNSYRYTPTWWWUWZWWWUWWSV  
@HWI-EAS443:3:91:515:1210#0/1  
CGCGGCACAGATTGAAAGCGACAGAGAATAGTTTCGAACA  
+HWI-EAS443:3:91:515:1210#0/1  
aaY¥`]bbMa]^\_a`aH\_Y^PU\_XPDUZRZLOa[FUZ[FJ  
@HWI-EAS443:3:92:916:598#0/1  
TGCGAGACACTTAGAATGACAATTGCATCTGTACCTACTT  
+HWI-EAS443:3:92:916:598#0/1  
a`[ZO\_ZaaWaaaa`a\_a^S]`a^X\_aa^^[\_\_Y\_¥W`\_  
@HWI-EAS443:3:93:1152:1740#0/1  
AGTCGCTTTCATCTGTGCCGATTTCTTCAATTAACCAC  
+HWI-EAS443:3:93:1152:1740#0/1  
aO^`TW\_a[Uaa^¥a\_¥`ZGY]a`^\_NWZIR\_a\_]KHNU  
@HWI-EAS443:3:93:1355:1340#0/1  
GTGGGAAACAAATCGTGAATGGATCTTGAAAGAGGAATC  
+HWI-EAS443:3:93:1355:1340#0/1  
a]aaa]a\_]\_\_`]a`YS]\_a]UX^\_\_R\_^\_^RVXWX  
@HWI-EAS443:3:93:1548:317#0/1  
TTGCCGATTTCTTCAATTAACCACCTTATTTCTCAAAT

+HWI-EAS443:3:93:1548:317#0/1  
`aaaSba\_bbbaba`babb[a^Yb]^aaa`ab`Va\_^\_a  
@HWI-EAS443:3:93:1793:441#0/1  
NCGCATTCTTCAATTAACCACCTTATTTCTCAAATTC  
+HWI-EAS443:3:93:1793:441#0/1  
DMXY[[[YY[XY[Y[V[Y[Y[Y[[[YZU[[[[[YY[[[Z  
@HWI-EAS443:3:94:1742:717#0/1  
CGCCGCATTTCTTCAATTAACCACCTTATTTCTCAAATT  
+HWI-EAS443:3:94:1742:717#0/1  
a`Z¥aa`b^aaaaa]a`abaaaaa[a]`baa\_`^^^`Y`  
@HWI-EAS443:3:94:275:1306#0/1  
CAGACTGTTTCTTTGGCATATCCGCAAGCGATTTGCAGA  
+HWI-EAS443:3:94:275:1306#0/1  
YQNZ\_\_UZ\_[^¥¥YHS¥a\_`\_b`^`aP]X`^`JRSQ]W¥a¥  
@HWI-EAS443:3:94:284:682#0/1  
AGGGCATCACCCAATCCATTGTCTGCAAATCGCTTGCGGA  
+HWI-EAS443:3:94:284:682#0/1  
aa\_`aaaa¥a`^^`\_`\_a\_]X\_\_\_\_\_^a^\_]^^]Z\_]T  
@HWI-EAS443:3:94:690:1290#0/1  
CGCCGCATTTCTTCAATTAACCACCTTATTTCTCAAATT  
+HWI-EAS443:3:94:690:1290#0/1  
ab^aa`Y^aa\_]^aaaaa^\_]^^^¥]a¥a\_\_a`a¥Z^aa]  
@HWI-EAS443:3:95:279:525#0/1  
CGCCGCATTTCTTCAATTAACCACCTTATTTCTCAAATT  
+HWI-EAS443:3:95:279:525#0/1  
aabb`a\_b`aa`\_aba`a`aa\_aaa¥b`a^\_a\_aa`aa  
@HWI-EAS443:3:96:443:1106#0/1  
GTGGGAAACAAATCGTGAATGGATCTTAAAAGAGGAATC  
+HWI-EAS443:3:96:443:1106#0/1  
a^aa^Xaaaa`\_`^^`]`¥^a`\_]\_^\_\_\_\_^]\_\_\_\_`]\_^]  
@HWI-EAS443:3:97:231:1201#0/1  
CAGTCTCGTGACATTTCTCGAGGGTCATGTCAGAAAGGA  
+HWI-EAS443:3:97:231:1201#0/1  
YWYP^^aWZW\_\_ZQ¥b`¥ba]UY^TMW\_`\_RL¥\_R]XaaB  
@HWI-EAS443:3:97:435:1852#0/1  
CGGGCTTTCACTGAGGAGGGAGCAATAGTTGGAGAAATTT  
+HWI-EAS443:3:97:435:1852#0/1  
]b\_QULTXU]P`aa]bT`¥[V`¥\_¥`]\_Qa¥Y\_Z`a\_][¥  
@HWI-EAS443:3:97:540:764#0/1  
GTGGGAAACAAATCGTGAATGGATCTTAAAAGAGGAATC  
+HWI-EAS443:3:97:540:764#0/1  
`N]]Y¥ZNNXVOUXYLVTU\_V[XRV[\_Z^PWP\_R]\_UPRT  
@HWI-EAS443:3:97:823:1634#0/1  
AGCCGCATTTCTTCAATTAACCACCTTATTTCTCAAATT  
+HWI-EAS443:3:97:823:1634#0/1  
aaab\_P^aa^WaaSaaaYa`]Wa^Ra`aa^a[Sa\_aa[a\_  
@HWI-EAS443:3:97:982:1119#0/1  
CGCCGCATTTCTTCAATTAACCACCTTATTTCTCAAATT  
+HWI-EAS443:3:97:982:1119#0/1  
ab\_bbbbbba^aba`bbb`baaa`abaabba]VaUa\_aba

@HWI-EAS443:3:98:1169:1497#0/1  
ACTGTTTCGATATCGAGGCCAAGGGTGTTCCTCTTCCTT  
+HWI-EAS443:3:98:1169:1497#0/1  
aabb[]b`bb`b\_abbaa\_a\_ZRYb`b\_`bY^^`bZZbb  
@HWI-EAS443:3:9:1037:1042#0/1  
GGGAAACAAATCGTGAATGGATCTTAAAAGAGGAATCCT  
+HWI-EAS443:3:9:1037:1042#0/1  
aZY`^a\_`a^`bXa\_\_^aaa]^Z`^a]^`\_\_]^\_]W^  
@HWI-EAS443:3:9:202:89#0/1  
TTTGGAGAACTGTGATGAGAATGGGAGACCTTCACTACC  
+HWI-EAS443:3:9:202:89#0/1  
H\_a`^Zba`aYb`X`babZbbb`b^`abRGW]baaT\_`US  
@HWI-EAS443:3:9:605:1816#0/1  
GCAACACCCTTGGCCTCGATATCGAAACAGCCACTCTTGG  
+HWI-EAS443:3:9:605:1816#0/1  
ab^^aaabba`V`a`aa`\_ba\_a`a]aaZ\_\_`\_Y]\_^]  
@HWI-EAS443:3:100:1018:1581#0/1  
GAAACTGTGATGAGAATGGGAGACCTTCACTACCTCCAGA  
+HWI-EAS443:3:100:1018:1581#0/1  
aa`a\_aaSa`aab\_a\_a^a\_aa^`\_]a]aa^GaU^¥\_\_  
@HWI-EAS443:3:100:1068:944#0/1  
GCCGCATTTCTTCAATTAACCACCTTATTTCTCAAATTT  
+HWI-EAS443:3:100:1068:944#0/1  
a\_^\_W\_aa[Y`\_[]`\_`^ZRU^U¥a`^`\_\_YS`^]]`\_B  
@HWI-EAS443:3:100:1092:628#0/1  
GTGATGAGAATGGGAGACCTTCACTACCTCCAGAGCAGAA  
+HWI-EAS443:3:100:1092:628#0/1  
aSa\_a`^`\_`\_`W`U`]]Sa`]]V¥^OFQZX][Y^WZ\_WB  
@HWI-EAS443:3:100:1102:609#0/1  
GGAGAACTGTGATGAGAATGGGAGACCTTCACTACCTCC  
+HWI-EAS443:3:100:1102:609#0/1  
a`¥aY[VZaaU¥^]^¥a^]VZT¥U]¥UU^`ZXS¥^TW¥BB  
@HWI-EAS443:3:100:1115:628#0/1  
AATTAACCACCTTATTTCTCAAATTTCTGTCCCAATTGC  
+HWI-EAS443:3:100:1115:628#0/1  
abbbbbaa^b`¥bb`bbb[a\_^aaabaa^bb\_^\_aa`aabB  
@HWI-EAS443:3:100:1186:223#0/1  
GAAACTGTGATGAGAATGGGAGACCTTCACTACCTCCAGA  
+HWI-EAS443:3:100:1186:223#0/1  
a\_YTZaa^\_]\_a[VRQ^[`¥[STRV]^`^\_Q[]XPWPWY]B  
@HWI-EAS443:3:100:1225:631#0/1  
GGTTCGAGTCTCTGAAAATATACAGAGATTCGCTTGGAGA  
+HWI-EAS443:3:100:1225:631#0/1  
`aababbb\_\_babb^b`aaaba`aa\_a\_aa\_a\_a`aa¥a`  
@HWI-EAS443:3:100:125:123#0/1  
TCTCTGAAAATATACAGAGATTCGCTTGGAGAACTGTGA  
+HWI-EAS443:3:100:125:123#0/1  
aaba`aRaa`\_`aaaaba`]a\_\_a\_]¥a\_^a]VSUX^LYB  
@HWI-EAS443:3:100:1267:537#0/1  
CCGCATTTCTTCAATTAACCACCTTATTTCTCAAATTTCT

+HWI-EAS443:3:100:1267:537#0/1  
 abbaa\_\_¥0\_ba^aaa\_a^M`a\_a`b`^ZU]aUaa^bab\_  
 @HWI-EAS443:3:100:157:1031#0/1  
 CTGTGATGAGAATGGGAGACCTTCACTACCTCCAGAGCAG  
 +HWI-EAS443:3:100:157:1031#0/1  
 aa^Ja`\_bQa[``a``¥a¥^Z\_]`\_`\_aX\_XHU]]X\_0^\_  
 @HWI-EAS443:3:100:1655:906#0/1  
 GGAATGGGGCATCACCCAATCCATTGTCTGCAAATCGCTT  
 +HWI-EAS443:3:100:1655:906#0/1  
 X`\_[VababaaRZba[Nab`\_G\_aba]SabR¥¥aQFYBBB  
 @HWI-EAS443:3:100:1757:606#0/1  
 AGAGAAGGTAATGGTGAATTTCTCCAATTTGCTCCCT  
 +HWI-EAS443:3:100:1757:606#0/1  
 `a`^`[M^Q¥]W\_¥[a`ab]\_a\_\_WYaa¥¥^Y`UBBBBBB  
 @HWI-EAS443:3:100:184:519#0/1  
 GAAACTGTGATGAGAATGGGAGACCTTCACTACCTCCAGA  
 +HWI-EAS443:3:100:184:519#0/1  
 a\_`V[\_a\_¥``¥UaXXU\_\_RUW¥]^^^QU[WWWUXVUBBB  
 @HWI-EAS443:3:100:200:1071#0/1  
 AGAAACTGTGATGAGAATGGGAGACCTTCACTACCTCCAG  
 +HWI-EAS443:3:100:200:1071#0/1  
 `aa`a\_aa`aa^`¥`¥`a\_a^\_\_]¥^Z]\_\_0^`]H[VU\_B  
 @HWI-EAS443:3:100:257:604#0/1  
 GCCGCATTTCTTCAATTAACCACCTTATTTCTCAAATTT  
 +HWI-EAS443:3:100:257:604#0/1  
 aaaa`\_``\_]XX^`\_`\_Z¥\_ZZ\_]`\_`\_NX^S\_¥Z\_]B  
 @HWI-EAS443:3:100:281:1785#0/1  
 TGAGAATGGGAGACCTTCACTACCTCCAGAGCAGAAATGA  
 +HWI-EAS443:3:100:281:1785#0/1  
 abbbbaabb`aaaa]aaa`b[aa^`\_U``\_¥\_][aa`\_aaa`  
 @HWI-EAS443:3:100:348:1065#0/1  
 GGAGAAACTGTGATGAGAATGGGAGACCTTCACTACCTCC  
 +HWI-EAS443:3:100:348:1065#0/1  
 ^\_aa`ba^aa`aaaa]ba`ab^¥a`\_^aaaYa\_aa`\_`\_`\_  
 @HWI-EAS443:3:100:407:1370#0/1  
 AATTTCTCCAATTTGCTCCCTCCTCAGTAAAGCCCTT  
 +HWI-EAS443:3:100:407:1370#0/1  
 aba`\_]`b`abaXaaba¥a`\_]a^^\_]Y[aY\_[\_XXW¥B  
 @HWI-EAS443:3:100:429:1217#0/1  
 GCCGCATTTCTTCAATTAACCACCTTATTTCTCAAATTT  
 +HWI-EAS443:3:100:429:1217#0/1  
 WF]b`X\_Ua]a][VY``ba\_^`aYa\_b`b\_aaab``]a`B  
 @HWI-EAS443:3:100:473:607#0/1  
 GATGAGAATGGGAGACCTTCACTACCTCCAGAGCAGAAAT  
 +HWI-EAS443:3:100:473:607#0/1  
 a\_\_a]a^`aaa]\_a]^\_YY`^`VW]]W\_^]]Y^`ZZ]^  
 @HWI-EAS443:3:100:501:877#0/1  
 GCCGCATTTCTTCAATTAACCACCTTATTTCTCAAATTT  
 +HWI-EAS443:3:100:501:877#0/1  
 aaZaa\_a`]Q[]a\_\_a\_a\_``SP\_``]a^\_UQ[^^^]]\_\_



@HWI-EAS443:3:100:549:229#0/1  
GAAAATATACAGAGATTCGCTTGGAGAACTGTGATGAGA  
+HWI-EAS443:3:100:549:229#0/1  
`Za`````a`a`b]a^]\_``\_aa\_a]\_\_Z``X\_W]\_V\_B  
@HWI-EAS443:3:100:604:449#0/1  
AGCAATAGTTGGAGAAATTTACCATTACCTTCTCTCCA  
+HWI-EAS443:3:100:604:449#0/1  
abaaabbb\_abaababaaaa`\_`aaaa^a`\_a`\_aZ^`  
@HWI-EAS443:3:100:671:504#0/1  
ATGAGAATGGGAGACCTTCACTACCTCCAGAGCAGAAATG  
+HWI-EAS443:3:100:671:504#0/1  
a`Y[a`a`aab\_``^`¥^aYa`¥Y^^a`\_[a\_\_`]¥\_aB  
@HWI-EAS443:3:100:757:1142#0/1  
CTGTGATGAGAATGGGAGACCTTCACTACCTCCAGAGCAG  
+HWI-EAS443:3:100:757:1142#0/1  
`¥a\_¥U\_bY`U`Ua\_a\_bUbbbbbYZbaXT\_R^b``b`\_a  
@HWI-EAS443:3:100:797:306#0/1  
ATGAGAATGGGAGACCTTCACTACCTCCAGAGCAGAAATG  
+HWI-EAS443:3:100:797:306#0/1  
^^^a`V`Zaa`[N]¥`aa\_Z¥VK^VY¥Y¥`]^]^¥[B  
@HWI-EAS443:3:100:816:640#0/1  
AACAAATCGTGAATGGATCTTGAAAGAGGAATCCAGCGA  
+HWI-EAS443:3:100:816:640#0/1  
`aab`Z`ababaa`bba]b^\_bbaababa\_a`]]`aNaa  
@HWI-EAS443:3:100:817:117#0/1  
AGAAACTGTGATGAGAATGGGAGACCTTCACTACCTCCAG  
+HWI-EAS443:3:100:817:117#0/1  
]`]b`ZZ^a`\_`aab\_X`aa^FX\_YY\_aVSU`\_HLWB  
@HWI-EAS443:3:100:909:63#0/1  
AGAAACTGTGATGAGAATGGGAGACCTTCACTACCTCCAG  
+HWI-EAS443:3:100:909:63#0/1  
`WX`aXaa`aIa`^aR¥aa\_]S[QNU`\_`¥¥M¥\_UGUN[ZB  
@HWI-EAS443:3:100:923:1202#0/1  
GTGATGAGAATGGGAGACCTTCACTACCTCCAGAGCAGAA  
+HWI-EAS443:3:100:923:1202#0/1  
\_NUT`]P\_aP`\_]NT`X^\_WZ^`\_`^`QJYZQ¥YW\_WU\_BB  
@HWI-EAS443:3:100:941:650#0/1  
CTCTGAAAATATACAGAGATTCGCTTGGAGAACTGTGAT  
+HWI-EAS443:3:100:941:650#0/1  
ababbaaa`a`\_a`a`aa^`aabRX[aa``\_`^`G`aS\_]`^  
@HWI-EAS443:3:100:948:81#0/1  
AAACTGTGATGAGAATGGGAGACCTTCACTACCTCCAGAG  
+HWI-EAS443:3:100:948:81#0/1  
`b`R` `[aaabXb\_Y^bbb`b`MS^WO[WaVFQ`¥SSaWa  
@HWI-EAS443:3:10:1020:32#0/1  
AACTGTGATGAGAATGGGAGACCTTCACTACCTCCAGAGC  
+HWI-EAS443:3:10:1020:32#0/1  
`b^ab`b`\_b`a`\_ab\_ZXa\_XY]YR]X\_[[U[NY]^Z`0  
@HWI-EAS443:3:10:1030:296#0/1  
TGCCGCATTTCTTCAATTAACCACCTTATTTCTCAAATT

+HWI-EAS443:3:10:1030:296#0/1  
a`aaa`\_`aa\_aa^\_`aa`^^W\_XW`\_`a`^¥]\_W\_Z^`^  
@HWI-EAS443:3:10:103:690#0/1  
CTTGGAGAACTGTGATGAGAATGGGAGACCTTCACTACC  
+HWI-EAS443:3:10:103:690#0/1  
abbababaaabab`a^abaaaaaa`\_`\_`\_`^`a`\_`\_`^`^  
@HWI-EAS443:3:10:1042:1480#0/1  
TGCCGCATTTCTTCAATTAACCACCTTATTTCTCAAATT  
+HWI-EAS443:3:10:1042:1480#0/1  
]b\_\_X¥aa\_aaaaVZaba`\_`Y\_a]]a`\_`aa\_aaa^`a`\_`\_`  
@HWI-EAS443:3:10:1096:622#0/1  
CGCTTGGAGAACTGTGATGAGAATGGGAGACCTTCACTA  
+HWI-EAS443:3:10:1096:622#0/1  
abbbbbbbbbbbabbababbabbbbbbaaa\_\_aa\_b^aa  
@HWI-EAS443:3:10:1100:1114#0/1  
TGAGAATGGGAGACCTTCACTACCTCCAGAGCAGAAATGA  
+HWI-EAS443:3:10:1100:1114#0/1  
a\_aa`\_`aa`a`\_`^`[\_`\_`a`^`X]`Y^Y`\_`\_`^`\_]`^`^`^`  
@HWI-EAS443:3:10:110:1560#0/1  
AGAACTGTGATGAGAATGGGAGACCTTCACTACCTCCAG  
+HWI-EAS443:3:10:110:1560#0/1  
aaaa`aa\_0a`a\_a`\_`\_`XRW[¥]^`^`Y`\_`\_]`^`¥Y[`]`^`  
@HWI-EAS443:3:10:1130:1531#0/1  
CGGCACAGATTGAAAGCGACAGAGAATAGTTTCGAACAAA  
+HWI-EAS443:3:10:1130:1531#0/1  
abbbbbbbbabbbabababb`ababbaba`^aa`aaa^]aa  
@HWI-EAS443:3:10:1214:379#0/1  
CGCTTGGAGAACTGTGATGAGAATGGGAGACCTTCACTA  
+HWI-EAS443:3:10:1214:379#0/1  
`\_`¥b[bbZ¥Z`^V`YFYab`abaa]aa`\_`a[JS`SRRR^V  
@HWI-EAS443:3:10:1218:470#0/1  
TGCCGCATTTCTTCAATTAACCACCTTATTTCTCAAATT  
+HWI-EAS443:3:10:1218:470#0/1  
aba`\_`\_`b\_\_a`\_`\_`\_`^`aYa`\_`\_`R[¥a[\_`X]W]U\_0^`\_`  
@HWI-EAS443:3:10:1239:1987#0/1  
GATGAGAATGGGAGACCTTCACTACCTCCAGAGCAGAAAT  
+HWI-EAS443:3:10:1239:1987#0/1  
aa^GXa¥aaaa^Wa\_HO`\_`\_`^`aYNaOSVV`\_`\_`W]^`^`\_`KRM¥  
@HWI-EAS443:3:10:1247:1735#0/1  
ATCGTGGAATGGATCTTGAAGAGGAATCCAGCGAGACAC  
+HWI-EAS443:3:10:1247:1735#0/1  
`ba`aaabbbb\_\_b\_babaa\_aaaaaba]Sba[aa`aX`Z  
@HWI-EAS443:3:10:1279:2008#0/1  
CTTGGAGAACTGTGATGAGAATGGGAGACCTTCACTACC  
+HWI-EAS443:3:10:1279:2008#0/1  
`[U[b[ba`\_`\_`ab\_]`\_`\_`a]\_`a\_aZYa]SMU`\_`\_`\_`^`\_`PF  
@HWI-EAS443:3:10:1310:1174#0/1  
TGAGAATGGGAGACCTTCACTACCTCCAGAGCAGAAATGA  
+HWI-EAS443:3:10:1310:1174#0/1  
a\_aa`aaaaa\_a`\_`\_`\_`^`\_`\_`aVa^]]\_]`¥`X^`X[Y^`Y

@HWI-EAS443:3:10:1310:665#0/1  
TGCCGCATTTCTTCAATTAACCACCTTATTTCCCTCAAATT  
+HWI-EAS443:3:10:1310:665#0/1  
`¥]Ybaaab`a`^\_^^aa`¥W]]^a¥`a`\_]\_]\_\_^\_  
@HWI-EAS443:3:10:1312:971#0/1  
CGCACGCAAAGAGGGCCTATTATCTTTTGCCTAGGCATGA  
+HWI-EAS443:3:10:1312:971#0/1  
aaa¥a`a\_a^aYa`aZZ\_b¥¥^bZab[[`]X)`a]QYaa`  
@HWI-EAS443:3:10:1329:1362#0/1  
ATAAGCTGAAACGAGAAAGCTCTTATCTCTTGTCTACTT  
+HWI-EAS443:3:10:1329:1362#0/1  
[aba\_¥^`bbVV¥U\_b`aIU\_ba\_]Wq]abb`aWaa^`a  
@HWI-EAS443:3:10:1354:870#0/1  
AGAAACTGTGATGAGAATGGGAGACCTTCACTACCTCCAG  
+HWI-EAS443:3:10:1354:870#0/1  
abbab`bb`baba`a``abab\_aa¥`aa¥a^\_\_]V`]Y^\_  
@HWI-EAS443:3:10:1357:694#0/1  
AGAAACTGTGATGAGAATGGGAGACCTTCACTACCTCCAG  
+HWI-EAS443:3:10:1357:694#0/1  
abb`abaQ`a^^\_]¥Y```aYP^ZPU]]\_^\_ZVX\_]V^`  
@HWI-EAS443:3:10:1371:379#0/1  
AGAAACTGTGATGAGAATGGGAGACCTTCACTACCTCCAG  
+HWI-EAS443:3:10:1371:379#0/1  
abbbaabb\_b`abaa]`\_bba\_a\_XZaaX\_X^XV^XV[`  
@HWI-EAS443:3:10:1391:139#0/1  
GAAAATATACAGAGATTCGCTTGGAGAAACTGTGATGAGA  
+HWI-EAS443:3:10:1391:139#0/1  
a¥]^\_^\_ZXR[^WYNXSW\_UXZWZZZXWZXWYSYVVSBB  
@HWI-EAS443:3:10:1401:1834#0/1  
TGGAGAAACTGTGATGAGAATGGGAGACCTTCACTACCTC  
+HWI-EAS443:3:10:1401:1834#0/1  
`\_b¥Z\_baabb\_``\_baaaaaaaaa\_aaa[[\_\_a¥`^Y`^  
@HWI-EAS443:3:10:1439:352#0/1  
AAACTGTGATGAGAATGGGAGACCTTCACTACCTCCAGAG  
+HWI-EAS443:3:10:1439:352#0/1  
aab`bbabaabaaa``baa\_a\_¥¥```\_Ya\_V¥\_¥U[\_Z`  
@HWI-EAS443:3:10:1564:246#0/1  
AAGGTCTCTAATCGGTTAAAGATTACACTGAAGTTCGCTT  
+HWI-EAS443:3:10:1564:246#0/1  
a`a`\_aa^baaa^a`[a\_`\_`Z`a^[aS`X[W\_] [W\_U\_^  
@HWI-EAS443:3:10:1647:1808#0/1  
ATTATCTTTTGCCTAGGCATGAGCATGAACCAGTCTCGTG  
+HWI-EAS443:3:10:1647:1808#0/1  
abbbbabaaabXW)`aa]`aa\_\_^`aa`aQ\_\_a\_¥\_U^W\_  
@HWI-EAS443:3:10:1692:1069#0/1  
TTTCAATCTGTGCCGATTTCTTCAATTAACCACCTTATT  
+HWI-EAS443:3:10:1692:1069#0/1  
]a¥DUNYUa`¥ZSUPV\_¥UYPX\_U^S]]XZTXXZXWZSZW  
@HWI-EAS443:3:10:177:1438#0/1  
CAGAGATTCGCTTGGAGAAACTGTGATGAGAATGGGAGAC

+HWI-EAS443:3:10:177:1438#0/1  
aa\_a^[Y\_a]aZ]\_`Ua^T`V[\_R\_YZUUZ]]]¥NYZ]SO  
@HWI-EAS443:3:10:204:603#0/1  
AAACTGTGATGAGAATGGGAGACCTTCACTACCTCCAGAG  
+HWI-EAS443:3:10:204:603#0/1  
a¥\_]]]M]Z][`]a\_R\_QVJWLSPPXX\_NV^0JYZ^]VQX  
@HWI-EAS443:3:10:211:629#0/1  
CGCTGGATTCTCTTTCAAGATCCATTCCACGATTTGTTT  
+HWI-EAS443:3:10:211:629#0/1  
abbbbaabbbbababbbababaababbaba]`b`\_aaa^\_`  
@HWI-EAS443:3:10:227:1725#0/1  
GAGAATGGGAGACCTTCACTACCTCCAGAGCAGAAATGAA  
+HWI-EAS443:3:10:227:1725#0/1  
`aa`a\_¥H¥NU\_aa\_\_aa\_`\_\_a^`\_YQ\_^¥W¥¥\_\_¥\_\_\_\_  
@HWI-EAS443:3:10:245:1486#0/1  
GAAACTGTGATGAGAATGGGAGACCTTCACTACCTCCAGA  
+HWI-EAS443:3:10:245:1486#0/1  
`ba]a]\_¥bTJaab\_¥aab`^^`X`]`\_a^Y\_XK`SMXYP  
@HWI-EAS443:3:10:264:549#0/1  
ATGCGGCACAGATTGAAAGCGACAGAGAATAGTTTCGAAC  
+HWI-EAS443:3:10:264:549#0/1  
``a^a]`\_a``]\_`a^aa`[a`a\_¥`\_^Z`Z`[¥]Y^]  
@HWI-EAS443:3:10:288:1669#0/1  
CTCCAACACCATGTCAAGCTTTCAGGTAGACTGTTTCCTT  
+HWI-EAS443:3:10:288:1669#0/1  
aaaa`\_`baZZXN[aZM^R`[NZU]XQ\_aY[Z^\_ZL]JV¥  
@HWI-EAS443:3:10:304:704#0/1  
GCCGCATTTCTTCAATTAACCACCTTATTTCCCTCAAATTT  
+HWI-EAS443:3:10:304:704#0/1  
a\_\_Z[SHQZVS]VNLRTQKKLXRRQ[Z^RSSRVZZNSZSS  
@HWI-EAS443:3:10:317:64#0/1  
CGCATTTCTTCAATTAACCACCTTATTTCCCTCAAATTTCT  
+HWI-EAS443:3:10:317:64#0/1  
¥ab¥¥b`¥^b\_babb]ba\_a\_]bba`ab`\_a\_a\_\_a`a\_a  
@HWI-EAS443:3:10:439:1118#0/1  
GAATGGGAGACCTTCACTACCTCCAGAGCAGAAATGAAAA  
+HWI-EAS443:3:10:439:1118#0/1  
a```a\_¥¥^\_\_a`^\_a\_aa^\_]WNY\_\_¥X\_aY¥¥`^```\_  
@HWI-EAS443:3:10:480:1224#0/1  
TGCCGCATTTCTTCAATTAACCACCTTATTTCCCTCAAATT  
+HWI-EAS443:3:10:480:1224#0/1  
[]a`Z`\_]a\_bbaba]`baaa`V[a^¥\_a\_\_``aaa^````  
@HWI-EAS443:3:10:49:524#0/1  
AGAAACTGTGATGAGAATGGGAGACCTTCACTACCTCCAG  
+HWI-EAS443:3:10:49:524#0/1  
aaaaaaab^baaaaa\_]aaba\_a`\_[^\_\_`\_^[[[\_^\_a  
@HWI-EAS443:3:10:519:1421#0/1  
TGCCGCATTTCTTCAATTAACCACCTTATTTCCCTCAAATT  
+HWI-EAS443:3:10:519:1421#0/1  
a``bb`\_`aaaa```aaaaa\_a``aaa`\_a^^a\_a\_aa`

@HWI-EAS443:3:10:529:235#0/1  
TGAGAATGGGAGACCTTCACTACCTCCAGAGCAGAAATGA  
+HWI-EAS443:3:10:529:235#0/1  
aZVa¥\_aaaaGY^R]`\_Z^U^^UVXVXXVY[VV]WPPV]X  
@HWI-EAS443:3:10:541:912#0/1  
AGAAACTGTGATGAGAATGGGAGACCTTCACTACCTCCAG  
+HWI-EAS443:3:10:541:912#0/1  
aaa^aaaa¥aa`aaa\_\_aa¥\_\_`\_\_\_\_^\_aY\_^]T]U]^  
@HWI-EAS443:3:10:545:1358#0/1  
CTGTTTCTTTGGCATATCCGCAAGCGATTTGCAGACAAT  
+HWI-EAS443:3:10:545:1358#0/1  
abbbbbbbbbbb`bbabbbbaaa`aa`aaa`a\_aa`¥```  
@HWI-EAS443:3:10:583:1349#0/1  
AAACTGTGATGAGAATGGGAGACCTTCACTACCTCCAGAG  
+HWI-EAS443:3:10:583:1349#0/1  
aab`aa^aaa``````[\_¥\_\_^¥\_\_\_\_\_¥W¥\_¥Y¥]^¥  
@HWI-EAS443:3:10:593:737#0/1  
GCCGCATTTCTTCAATTAACCACCTTATTTCTCAAATTT  
+HWI-EAS443:3:10:593:737#0/1  
aaa`^aa`\_`a\_]\_a\_aWVZ^`\_`\_\_WU\_[^¥^`^`  
@HWI-EAS443:3:10:599:1617#0/1  
GCCGCATTTCTTCAATTAACCACCTTATTTCTCAAATTT  
+HWI-EAS443:3:10:599:1617#0/1  
`\_a¥R`¥XM`^^`\_][[\_V^^W\_¥\_\_`\_Z`^¥\_]^\_`  
@HWI-EAS443:3:10:607:2022#0/1  
TTGGAGAACTGTGATGAGAATGGGAGACCTTCACTACCT  
+HWI-EAS443:3:10:607:2022#0/1  
aS\_X\_b¥¥`\_aa]`aa`[U\_\_\_\_^`^[F^]Y`Y^MY]  
@HWI-EAS443:3:10:612:147#0/1  
GAATGGGAGACCTTCACTACCTCCAGAGCAGAAATGAAAA  
+HWI-EAS443:3:10:612:147#0/1  
aaaaaabUa¥¥¥\_¥]\_[Z¥WY^U¥\_\_¥¥U]¥¥QZWMLM  
@HWI-EAS443:3:10:624:237#0/1  
GCCGCATTTCTTCAATTAACCACCTTATTTCTCAAATTT  
+HWI-EAS443:3:10:624:237#0/1  
aa\_Va^[IS\_]a[[PY[¥]PW[]]]Y\_^W^XIY¥S^Z^Y[  
@HWI-EAS443:3:10:63:1903#0/1  
CGCATTTCTTCAATTAACCACCTTATTTCTCAAATTTCT  
+HWI-EAS443:3:10:63:1903#0/1  
aaa`aYabab`^`^`bbbbbbababbbabaa`bbabbaaa\_  
@HWI-EAS443:3:10:707:1517#0/1  
CATAAATGTTATTTGTTGAAACTATTCTCTGTGCTTTC  
+HWI-EAS443:3:10:707:1517#0/1  
`b\_abbbb^¥bbaba^aaa^baabaaaabYaa\_aa\_]`a\_  
@HWI-EAS443:3:10:736:302#0/1  
CTTGGAGAACTGTGATGAGAATGGGAGACCTTCACTACC  
+HWI-EAS443:3:10:736:302#0/1  
^HWbb]a`b\_bbb]SZbaabG\_```a\_a¥ZX``\_^Z¥`ZV  
@HWI-EAS443:3:10:737:1091#0/1  
ATTTCTCGAGGGTCATGTCAGAAAGGTAGCGCAAGTAG

+HWI-EAS443:3:10:737:1091#0/1  
aabaaaa`a\_aaaZ^\_aa]\_\_`^\_^`X\_\_Z\_V`X]`XV`  
@HWI-EAS443:3:10:782:451#0/1  
CTGTGATGAGAATGGGAGACCTTCACTACCTCCAGAGCAG  
+HWI-EAS443:3:10:782:451#0/1  
aab\_bbaabbab[abb`aa`\_aaa`a`\_`\_U\_\_`\_\_X\_^¥a  
@HWI-EAS443:3:10:811:391#0/1  
AAACTGTGATGAGAATGGGAGACCTTCACTACCTCCAGAG  
+HWI-EAS443:3:10:811:391#0/1  
ab¥`\_UV[aY^a`QYa`Z`a[VU`[\_]R^^JPVZ[\_\_\_\_`  
@HWI-EAS443:3:10:854:838#0/1  
GCCGCATTTCTTCAATTAACCACCTTATTTCTCAAATTT  
+HWI-EAS443:3:10:854:838#0/1  
a`\_¥\_Z\_\_\_a^^]^^\_a]Z¥ZZZZ\_U^^^ZV^ZXXZ]Z^  
@HWI-EAS443:3:10:855:1644#0/1  
AGCGCGAAGTAGGTACAGATGCAATTGTCATTCTAAGTGT  
+HWI-EAS443:3:10:855:1644#0/1  
`a\_aaaaaa]a`[WaW`\_a\_a]`a\_^a]\_\_\_\_]V\_\_a\_V¥W  
@HWI-EAS443:3:10:870:1242#0/1  
AAAATATACAGAGATTTCGCTTGGAGAAACTGTGATGAGAA  
+HWI-EAS443:3:10:870:1242#0/1  
`^`bab`aa`¥a`bba`\_`aba^aZ`aW`a]a`a`\_`  
@HWI-EAS443:3:10:947:1141#0/1  
CGCGAAGTAGGTACAGATGCAATTGTCATTCTAAGTGTCT  
+HWI-EAS443:3:10:947:1141#0/1  
ab]b\_b\_abb`ba]Uabab\_^a`aRa^a\_]\_]\_aVa^¥\_  
@HWI-EAS443:3:10:954:898#0/1  
ATGAGAATGGGAGACCTTCACTACCTCCAGAGCAGAAATG  
+HWI-EAS443:3:10:954:898#0/1  
\_U`W`\_¥Pab[^b^HL\_\_bb]\_ba]^¥Qab\_a[ab\_]Uaa  
@HWI-EAS443:3:10:99:530#0/1  
GTCGCTTTCAATCTGTGCCGATTTCTTCAATTAACCACC  
+HWI-EAS443:3:10:99:530#0/1  
a¥[¥]\_UV[[X]X[¥PVXO^WVX^WWZ]XYY]¥YYWSWUX  
@HWI-EAS443:3:11:1003:1936#0/1  
AGAAACTGTGATGAGAATGGGAGACCTTCACTACCTCCAG  
+HWI-EAS443:3:11:1003:1936#0/1  
aaaa`\_a`[\_`\_`\_^\_^\_\_\_\_\_]\_^\_YV^]\_XV^VWYXO^Y  
@HWI-EAS443:3:11:1057:714#0/1  
TGGAGAAACTGTGATGAGAATGGGAGACCTTCACTACCTC  
+HWI-EAS443:3:11:1057:714#0/1  
aba^a]`abbb]b`aa]b\_aaabaXa\_Z\_a\_]ZY\_[X[]H  
@HWI-EAS443:3:11:1058:1367#0/1  
ATCCGCAAGCGATTTGCAGACAATGGATTGGGTGATGCCC  
+HWI-EAS443:3:11:1058:1367#0/1  
`aaaba`ab\_aaa`b¥a`\_\_`]a`\_\_^]YY\_QVVZ]W¥^  
@HWI-EAS443:3:11:1088:355#0/1  
GCGGCACAGATTGAAAGCGACAGAGAATAGTTTCGAACAA  
+HWI-EAS443:3:11:1088:355#0/1  
a¥a`]¥]^]\_`[^^U`\_`[]\_a\_a^¥¥^\_PP^^\_]¥0\_\_

@HWI-EAS443:3:11:1101:221#0/1  
GCCGCATTTCTTCAATTAACCACCTTATTTCCCTCAAATTT  
+HWI-EAS443:3:11:1101:221#0/1  
aa`XOYaaaaa\_\_^`a`^XU]^Z\_\_^`]^SM^X^\_^\_^^  
@HWI-EAS443:3:11:1159:1222#0/1  
CGCATTTCTTCAATTAACCACCTTATTTCCCTCAAATTTCT  
+HWI-EAS443:3:11:1159:1222#0/1  
\_ba]URaaa`¥`a`Xa\_\_`\_[^\_a\_aXa`\_U]^`a\_U`  
@HWI-EAS443:3:11:1212:1416#0/1  
CCGCATTTCTTCAATTAACCACCTTATTTCCCTCAAATTTCT  
+HWI-EAS443:3:11:1212:1416#0/1  
abbababaaabb`aVbabbaaa]aa`aa`T]^`b`^aaaX  
@HWI-EAS443:3:11:1219:1520#0/1  
GCTTGGAGAACTGTGATGAGAATGGGAGACCTTCACTAC  
+HWI-EAS443:3:11:1219:1520#0/1  
¥¥]Z`b]]¥¥X`aH`X`b\_\_\_\_^Z]S``ZVLNV]TXX[XN  
@HWI-EAS443:3:11:1227:163#0/1  
GTGATGAGAATGGGAGACCTTCACTACCTCCAGAGCAGAA  
+HWI-EAS443:3:11:1227:163#0/1  
a¥a`bb`]aaaaa\_a`````\_\_¥`\_^[\_ZT[\_¥\_V\_\_U¥  
@HWI-EAS443:3:11:1252:949#0/1  
GCCGCATTTCTTCAATTAACCACCTTATTTCCCTCAAATTT  
+HWI-EAS443:3:11:1252:949#0/1  
`aaaa^`]^Z\_baaaaaaa```^\_a^aa\_YZ^a\_\_\_\_Z\_\_\_\_  
@HWI-EAS443:3:11:1275:1437#0/1  
GAGAATGGGAGACCTTCACTACCTCCAGAGCAGAAATGAA  
+HWI-EAS443:3:11:1275:1437#0/1  
aaa\_aaaaa```\_a\_aaaa]¥]^`^aa¥a¥¥a]¥Wa\_Y`  
@HWI-EAS443:3:11:1323:475#0/1  
GTGATGAGAATGGGAGACCTTCACTACCTCCAGAGCAGAA  
+HWI-EAS443:3:11:1323:475#0/1  
a]b¥aa^a^\_a`\_[[\_¥\_\_WW\_\_Q]\_^^WW^Y`YYTY¥WW  
@HWI-EAS443:3:11:1421:35#0/1  
GAGAATGGGAGACCTTCACTACCTCCAGAGCAGAAATGAA  
+HWI-EAS443:3:11:1421:35#0/1  
a\_a[Pa\_\_a^a^WV¥\_¥^V^RTTWWVW¥U¥QWYWWYBBB  
@HWI-EAS443:3:11:1440:491#0/1  
GGCACAGATTGAAAGCGACAGAGAATAGTTTTCGAACAAAT  
+HWI-EAS443:3:11:1440:491#0/1  
abba`baaaZb\_aabaabaab`aaaa\_a]^`a\_a^a]^`a\_a  
@HWI-EAS443:3:11:1451:416#0/1  
TGAGAATGGGAGACCTTCACTACCTCCAGAGCAGAAATGA  
+HWI-EAS443:3:11:1451:416#0/1  
T`abaaaabb\_b¥\_b`[Sa]Z\_\_^]UU\_`Xa]UaX[X\_]B  
@HWI-EAS443:3:11:145:555#0/1  
GAAACTGTGATGAGAATGGGAGACCTTCACTACCTCCAGA  
+HWI-EAS443:3:11:145:555#0/1  
a]Z``^aa]Z]\_`][a\_¥OYY`V`\_`Z¥`W¥[`Z^]]\_`\_  
@HWI-EAS443:3:11:148:949#0/1  
GCCGCATTTCTTCAATTAACCACCTTATTTCCCTCAAATTT

+HWI-EAS443:3:11:148:949#0/1  
`abaa`babbbaababababaaaaaabaaaaaabaa]a`\_  
@HWI-EAS443:3:11:1492:1120#0/1  
GAATGGGAGACCTTCACTACCTCCAGAGCAGAAATGAAAA  
+HWI-EAS443:3:11:1492:1120#0/1  
`)]`\_ba¥`R`\_[Y`¥\_ZFU^Z`\_]TaN^^VYPV[^Z]]  
@HWI-EAS443:3:11:1498:56#0/1  
AGAAACTGTGATGAGAATGGGAGACCTTCACTACCTCCAG  
+HWI-EAS443:3:11:1498:56#0/1  
\_`Y^^Ta`P`X`R`UTOUabZ`a¥LXSZXWHNGSYXNLMW  
@HWI-EAS443:3:11:1504:469#0/1  
CAATCGCACGCAAAGAGGGCCTATTATCTTTTGCCTAGGC  
+HWI-EAS443:3:11:1504:469#0/1  
abbb\_aa^^b^baabaaa^`\_babbb\_aaaa^]`\_`aa`  
@HWI-EAS443:3:11:1507:514#0/1  
TGCCGCATTTCTTCAATTAACCACCTTATTTCCCTCAAATT  
+HWI-EAS443:3:11:1507:514#0/1  
aaa`[]aaba\_ba`\_`abb`ZZ`\_Ubaabaa\_¥a\_\_[]`a`  
@HWI-EAS443:3:11:1569:1318#0/1  
AATGGGAGACCTTCACTACCTCCAGAGCAGAAATGAAAAG  
+HWI-EAS443:3:11:1569:1318#0/1  
^\_]a^bb\_^abb`\_]^ab\_M^Z¥ba`b\_]a\_\_\_\_\_a\_a]^a  
@HWI-EAS443:3:11:1580:701#0/1  
GCCGCATTTCTTCAATTAACCACCTTATTTCCCTCAAATTT  
+HWI-EAS443:3:11:1580:701#0/1  
aa`^^`aa`aaZ^`a]\_`W]^Z`^^`a`\_[Ta`¥[\_aX[  
@HWI-EAS443:3:11:1646:1848#0/1  
GAGAAACTGTGATGAGAATGGGAGACCTTCACTACCTCCA  
+HWI-EAS443:3:11:1646:1848#0/1  
U\_b`[aabb\_bba\_aaabbbbb`ba^IabHb\_UaWG[\_]`  
@HWI-EAS443:3:11:1676:113#0/1  
TGTCAGAAAGGTAGCGCGAAGTAGGTACAGATGCAATTGT  
+HWI-EAS443:3:11:1676:113#0/1  
ab`\_`b`]^ab\_aaR^Wb`\_`ZSa`Z\_]`a]]`]UZ`^^^  
@HWI-EAS443:3:11:1694:163#0/1  
CAATTAACCACCTTATTTCCCTCAAATTTCTGTCCCAATTG  
+HWI-EAS443:3:11:1694:163#0/1  
\_]Y¥K¥bb\_¥ZV¥Z¥aaba¥\_`^`a\_abaG^aWG[TX^Z`B  
@HWI-EAS443:3:11:233:1158#0/1  
AGAAACTGTGATGAGAATGGGAGACCTTCACTACCTCCAG  
+HWI-EAS443:3:11:233:1158#0/1  
ZaS\_Zaab`a¥a`\_]`a`Raa[Z]¥\_aaX`¥YWaZT¥[`\_`  
@HWI-EAS443:3:11:254:42#0/1  
TGAAAATATACAGAGATTTCGCTTGGAGAAACTGTGATGAG  
+HWI-EAS443:3:11:254:42#0/1  
aa\_`a¥`^a^W`a\_b]\_Xa\_]`\_`Y\_\_^^\_Z`Z]]^\_\_]  
@HWI-EAS443:3:11:266:1114#0/1  
GAGAATGGGAGACCTTCACTACCTCCAGAGCAGAAATGAA  
+HWI-EAS443:3:11:266:1114#0/1  
ZU[K[\_]¥Q\_\_\_\_ZW\_aaa^^a^a`]¥Z¥aa``YV¥`a\_X







@HWI-EAS443:3:12:1033:884#0/1  
GTGATGAGAATGGGAGACCTTCACTACCTCCAGAGCAGAA  
+HWI-EAS443:3:12:1033:884#0/1  
`]b\_`^\_a]```\_a[[^\_\_a`^`\_\_\_\_\_^^¥S[\_^a]\_\_^^  
@HWI-EAS443:3:12:1050:979#0/1  
CTGTGATGAGAATGGGAGACCTTCACTACCTCCAGAGCAG  
+HWI-EAS443:3:12:1050:979#0/1  
aaTG^XU`\_WTS\_\_Z\_Y`]XZ\_¥U¥^\_\_URST^[VP`V\_^  
@HWI-EAS443:3:12:106:221#0/1  
GTGCGTTTCAATCTGTGCCGATTTCTTCAATTAACCACC  
+HWI-EAS443:3:12:106:221#0/1  
]PX`[NTD¥XZP`Z[Za¥]]W]]Y[[YWURW^OPY[TY[[  
@HWI-EAS443:3:12:1071:891#0/1  
AGTTTCTCCAAGCGAATCTCTGTATATTTTCAGAGACTCG  
+HWI-EAS443:3:12:1071:891#0/1  
¥aabbaabbbbaa¥`X^aaaR``aab`bbaaYa^`aa¥Y`  
@HWI-EAS443:3:12:1085:1487#0/1  
ACCCAATCCATTGTCTGCAAATCGCTTGCGGATATGCCAA  
+HWI-EAS443:3:12:1085:1487#0/1  
\_^ZX¥aba^^^\_P¥H]^aa`a[S]U¥a^F]a`\_Z¥SIPWB  
@HWI-EAS443:3:12:1129:1482#0/1  
ATGAGGACCCCAACTGCATTTTTGACATCCTCATAAGTAT  
+HWI-EAS443:3:12:1129:1482#0/1  
aaa``aa`a`aaa`a]¥``\_`^`\_¥`\_`\_a`\_`W``  
@HWI-EAS443:3:12:1137:1634#0/1  
GGCATCACCCAATCCATTGTCTGCAAATCGCTTGCGGATA  
+HWI-EAS443:3:12:1137:1634#0/1  
abba][aKa]]a`[bbbaS[\_a[a`a\_RVPa\_¥\_aaa\_\_  
@HWI-EAS443:3:12:1137:791#0/1  
GTGCGTTTCAATCTGTGCCGATTTCTTCAATTAACCACC  
+HWI-EAS443:3:12:1137:791#0/1  
a[\_a¥TV````[`[¥`YMUT[KQ`¥¥W`^ZMXY\_X^YUXWV  
@HWI-EAS443:3:12:1162:1560#0/1  
TGAGAATGGGAGACCTTCACTACCTCCAGAGCAGAAATGA  
+HWI-EAS443:3:12:1162:1560#0/1  
ab\_a\_\_ab`^`aY`\_`aaa]\_aQ[[Z]\_]a]```\_]\_\_\_\_  
@HWI-EAS443:3:12:1169:1028#0/1  
GAGAATGGGAGACCTTCACTACCTCCAGAGCAGAAATGAA  
+HWI-EAS443:3:12:1169:1028#0/1  
a`[V[]a\_a[aT^\_\_\_``aZXTT]XN]\_¥`T¥SSY¥\_^PB  
@HWI-EAS443:3:12:1193:239#0/1  
GCCGATTTCTTCAATTAACCACCTTATTTCTCAAATTT  
+HWI-EAS443:3:12:1193:239#0/1  
aaababbbbaaaaaaaaaa\_\_a^\_aaabaa^^`\_a``a`a  
@HWI-EAS443:3:12:1194:318#0/1  
CGCTTGGAGAAACTGTGATGAGAATGGGAGACCTTCACTA  
+HWI-EAS443:3:12:1194:318#0/1  
ab\_``bb^b\_Z\_]ab^a\_`X`R][aaZR^ZSZ^^ZP¥B  
@HWI-EAS443:3:12:1194:431#0/1  
GCTGTTTCGATATCGAGGCCAAGGGTGTGCCTCTCCTT

+HWI-EAS443:3:12:1194:431#0/1  
a\_aa\_a`^`^^`\_`\_`^`YYV]]P[`V`]\_]XU\_T\_\_NV^\_  
@HWI-EAS443:3:12:1196:366#0/1  
TGAGAATGGGAGACCTTCACTACCTCCAGAGCAGAAATGA  
+HWI-EAS443:3:12:1196:366#0/1  
a¥Zaaa`a^a]baX^^aaa\_a`^XZ^`\_\_[a]\_a¥¥^`a^  
@HWI-EAS443:3:12:1199:1150#0/1  
GGAGAAACTGTGATGAGAATGGGAGACCTTCACTACCTCC  
+HWI-EAS443:3:12:1199:1150#0/1  
aaaaaaaa`ab^`Wa^\_a¥\_a```Y¥^^\_\_W\_Y\_\_Q¥^UW  
@HWI-EAS443:3:12:1259:1918#0/1  
AACGAGAAAGCTTATCTCTTGTCTACTTCAAGCAGTA  
+HWI-EAS443:3:12:1259:1918#0/1  
a`\_^^`YX]a\_Z00WZ\_`X[^\_0^X\_U^^XS^^]U][ZT  
@HWI-EAS443:3:12:1279:1291#0/1  
GAAAGCTTCTTCTTGTCTACTTCAAGCAGTAGTTGT  
+HWI-EAS443:3:12:1279:1291#0/1  
a`aab\_bbbaabTbaabbaaaba`aaa^aa\_[a[aa]aa¥  
@HWI-EAS443:3:12:1291:260#0/1  
GCCGCATTTCTTCAATTAACCACCTTATTTCTCAAATTT  
+HWI-EAS443:3:12:1291:260#0/1  
aabaaabbbabaa`\_baaa`aa``aa\_aaaZ^a`a^`a``  
@HWI-EAS443:3:12:1302:1485#0/1  
GAATGGGAGACCTTCACTACCTCCAGAGCAGAAATGAAAA  
+HWI-EAS443:3:12:1302:1485#0/1  
a`ba`a^`^aa\_a`a``bbbJ`^`\_a^aa[`[R\_`^`Y`^`\_  
@HWI-EAS443:3:12:1316:1619#0/1  
TGCCGCATTTCTTCAATTAACCACCTTATTTCTCAAATT  
+HWI-EAS443:3:12:1316:1619#0/1  
\_`bab`S\_bbabbabbbb`SRa`Wbaabbb¥F]abaaba  
@HWI-EAS443:3:12:1423:1316#0/1  
GGAGAAATTTACCATTACCTTCTTCTTCCAGGACATACTT  
+HWI-EAS443:3:12:1423:1316#0/1  
^a`b`X]b\_aaa\_abbb`\_aab`a\_[^Y[a^]W``QXNa\_  
@HWI-EAS443:3:12:143:1294#0/1  
GAAACTGTGATGAGAATGGGAGACCTTCACTACCTCCAGA  
+HWI-EAS443:3:12:143:1294#0/1  
abbbaba\_baa`b\_aa\_¥aaaa`a``a``a]\_^a\_a`\_  
@HWI-EAS443:3:12:1451:1076#0/1  
CTCCCATTCTCATCACAGTTTCTCCAAGCGAATCTCTGTA  
+HWI-EAS443:3:12:1451:1076#0/1  
aabaXbb\_abaab^a`babaaaaaaaa`Wa`\_a\_\_W`a^]  
@HWI-EAS443:3:12:1454:1121#0/1  
TGAGAATGGGAGACCTTCACTACCTCCAGAGCAGAAATGA  
+HWI-EAS443:3:12:1454:1121#0/1  
ababY\_\_Ya`Xb`\_V[aab^aa`a^PRa[XaVYa\_Y`b\_\_  
@HWI-EAS443:3:12:1470:993#0/1  
AATCGTTAAAGATTACACTGAAGTTTCGCTTTCAGTACTA  
+HWI-EAS443:3:12:1470:993#0/1  
aaaaba\_aaa\_a`\_\_\_\_aZ]¥¥S^P`YX]^^`W[^X\_Z\_\_

@HWI-EAS443:3:12:1555:653#0/1  
AGAAACTGTGATGAGAATGGGAGACCTTCACTACCTCCAG  
+HWI-EAS443:3:12:1555:653#0/1  
][a`a\_bbaa\_aa¥a¥\_aa\_\_^`]^a\_0\_U^^OH¥XU]]  
@HWI-EAS443:3:12:160:1266#0/1  
GAGAATGGGAGACCTTCACTACCTCCAGAGCAGAAATGAA  
+HWI-EAS443:3:12:160:1266#0/1  
]S]`ba^^\_aS`aaaaaa`aa`ab`Z^]]aa\_`¥^`  
@HWI-EAS443:3:12:1622:2003#0/1  
CGCATTCTTCAATTAACCACCTTATTTCTCAAATTTCT  
+HWI-EAS443:3:12:1622:2003#0/1  
aaaUQVWVW^R^JYQRWazRT]WXY]\_¥PFMXV¥^^\_VBB  
@HWI-EAS443:3:12:1644:1483#0/1  
CGCATTCTTCAATTAACCACCTTATTTCTCAAATTTCT  
+HWI-EAS443:3:12:1644:1483#0/1  
aaaaaa^ab`a\_\_a\_a`[``\_\_\_\_a`aa`¥]\_\_`````\_aV`  
@HWI-EAS443:3:12:1686:1636#0/1  
CTTTGGCATATCCGCAAGCGATTTGCAGACAATGGATTGG  
+HWI-EAS443:3:12:1686:1636#0/1  
U]bbbabbb^`bZWa^aaaaW`H]bX[\_a[\_]\_aXaYB  
@HWI-EAS443:3:12:1747:1064#0/1  
GCCGCATTTCTTCAATTAACCACCTTATTTCTCAAATTT  
+HWI-EAS443:3:12:1747:1064#0/1  
a`aaa\_aabaab\_\_aaa`[U`]\_aaaa\_aW¥\_\_`^`aa\_  
@HWI-EAS443:3:12:191:669#0/1  
GGGTGTTGCCTCTTCCTTTAAGGACTTTTGATCTCGGCG  
+HWI-EAS443:3:12:191:669#0/1  
Zab\_bZ^\_a`^`\_]\_^Za^]^```[TTaaZYRXa^``B  
@HWI-EAS443:3:12:237:820#0/1  
AGAAACTGTGATGAGAATGGGAGACCTTCACTACCTCCAG  
+HWI-EAS443:3:12:237:820#0/1  
abaT`ba`\_a¥aX\_aa^aaa]V`¥a`^a`a\_`^\_`Z^^^  
@HWI-EAS443:3:12:244:61#0/1  
ATTATCTTTTGCCTAGGCATGAGCATGAACCGTCTCGTG  
+HWI-EAS443:3:12:244:61#0/1  
abb]aaaaaabYaa¥Y¥^]\_a^a```\_R]]W^a]^`[BBB  
@HWI-EAS443:3:12:24:490#0/1  
TGCCGCATTTCTTCAATTAACCACCTTATTTCTCAAATT  
+HWI-EAS443:3:12:24:490#0/1  
`bbababbababb`Z`baa`aaaaaaaaaaaaa^^aaa  
@HWI-EAS443:3:12:291:377#0/1  
ATCAAGGAATGGGCATCACCCAATCCATTGTCTGCAAAT  
+HWI-EAS443:3:12:291:377#0/1  
a`[^]\_`WW^a^a`a\_U^a]¥^`a`aa^¥a]¥¥a\_^^]\_  
@HWI-EAS443:3:12:293:1489#0/1  
TGAGAATGGGAGACCTTCACTACCTCCAGAGCAGAAATGA  
+HWI-EAS443:3:12:293:1489#0/1  
Y[SaVa\_a`a\_a`^a`\_aaa\_¥FXR0a^a^\_`\_^Y^[Z^B  
@HWI-EAS443:3:12:403:236#0/1  
GTCGCTTTCAATCTGTGCCGATTTCTTCAATTAACCACC

+HWI-EAS443:3:12:403:236#0/1  
a^[aa\_aa\_\_\_\_\_a`)]`^``[^\_`^`¥W¥¥]^`^S]\_X]  
@HWI-EAS443:3:12:403:578#0/1  
GATGAGAATGGGAGACCTTCACTACCTCCAGAGCAGAAAT  
+HWI-EAS443:3:12:403:578#0/1  
aT`[aba`)]a`aQV¥0aPP\_\_a\_TRQ\_ZP^[Qa``\_]`^]  
@HWI-EAS443:3:12:427:310#0/1  
AAATCGTGGGAATGGATCTTGAAAGAGGAATCCAGCGAGAC  
+HWI-EAS443:3:12:427:310#0/1  
aa\_aaaabb``aaa[Y]`Z]¥```aa``\_]`\_\_`^\_Y]WY  
@HWI-EAS443:3:12:473:100#0/1  
ATGAGAATGGGAGACCTTCACTACCTCCAGAGCAGAAATG  
+HWI-EAS443:3:12:473:100#0/1  
aab`b]aaaaa\_a``\_`a``\_]`\_Z\_^]¥`^^X^\_XYX]\_  
@HWI-EAS443:3:12:576:1045#0/1  
GAATGGGAGACCTTCACTACCTCCAGAGCAGAAATGAAAA  
+HWI-EAS443:3:12:576:1045#0/1  
\_¥`b0YS\_R[¥XU`\_\_J¥PZ]Y\_[\_]\_VaZYa\_`\_V]^ZX`  
@HWI-EAS443:3:12:595:1980#0/1  
CAATTGCATCTGTACCTACTTCGCGCTACCTTTCTGACAT  
+HWI-EAS443:3:12:595:1980#0/1  
aaaX]W^ba``U^a]a\_Ua^\_aaHXaaN[¥U`^^Z\_]`^B  
@HWI-EAS443:3:12:599:1025#0/1  
TCTCGCTGGATTCTCTTTCAAGATCCATTCCACGATTTG  
+HWI-EAS443:3:12:599:1025#0/1  
abbb`b\_b]V¥\_P¥Qa]\_[b`KHa^^`\_`aYMQ[^]UQaa  
@HWI-EAS443:3:12:599:691#0/1  
GAGAAACTGTGATGAGAATGGGAGACCTTCACTACCTCCA  
+HWI-EAS443:3:12:599:691#0/1  
aaa¥¥a`aa[a`aa```\_aa\_[[a¥^\_\_\_\_]`\_\_\_\_`^^^XX\_  
@HWI-EAS443:3:12:66:729#0/1  
TGAGAATGGGAGACCTTCACTACCTCCAGAGCAGAAATGA  
+HWI-EAS443:3:12:66:729#0/1  
ab]baaaaa`]aaa^`]bbaaaaa\_a^¥a\_aa`a^[\_`\_aa  
@HWI-EAS443:3:12:699:1264#0/1  
GTGATGAGAATGGGAGACCTTCACTACCTCCAGAGCAGAA  
+HWI-EAS443:3:12:699:1264#0/1  
a``Y]¥XSLTRN¥[[[Z[UUPP[QT[W^YLHM^RSTLBBB  
@HWI-EAS443:3:12:700:168#0/1  
GTCGCTTTCAATCTGTGCCGATTTCTTCAATTAACCACC  
+HWI-EAS443:3:12:700:168#0/1  
aW`^]`^```\_\_\_\_\_]\_]\_]`X¥^^^W\_^Z^Z^]`^][U¥YX  
@HWI-EAS443:3:12:723:1152#0/1  
GCCGATTTCTTCAATTAACCACCTTATTTCTCAAATTT  
+HWI-EAS443:3:12:723:1152#0/1  
aaababbbbbbaaaaabbaaab\_aaaaa`\_\_`\_a`\_a`\_  
@HWI-EAS443:3:12:728:1520#0/1  
TGAGAATGGGAGACCTTCACTACCTCCAGAGCAGAAATGA  
+HWI-EAS443:3:12:728:1520#0/1  
\_TXY``\_b`Xa`R]KX]U]aa¥[]^aXV[V]`SbTTa`\_a

@HWI-EAS443:3:12:773:392#0/1  
CTTGGAGAACTGTGATGAGAATGGGAGACCTTCACTACC  
+HWI-EAS443:3:12:773:392#0/1  
a`aab``\_b\_XZa\_XZ`]S][^]aaa[ZYGJW\_\_X¥]\_XR  
@HWI-EAS443:3:12:775:823#0/1  
GAGATTGCTTGGAGAACTGTGATGAGAATGGGAGACCT  
+HWI-EAS443:3:12:775:823#0/1  
aab]aabb`bbba¥a`a`aaa^a\_``\_a^``\_``^a^X]\_  
@HWI-EAS443:3:12:804:971#0/1  
AGATTACACTGAAGTTCGCTTTCAGTACTATGTTCTTTTC  
+HWI-EAS443:3:12:804:971#0/1  
\_a^X^a^abbbba`a]a`b`^\_\_¥]a\_YP]``a[`X````Y  
@HWI-EAS443:3:12:812:124#0/1  
GAAACGAGAAAGCTCTTATCTCTTGTCTACTTCAAGCAG  
+HWI-EAS443:3:12:812:124#0/1  
aabbab¥b^aaaaaaaa`a\_a^\_``\_a\_`\_]\_\_]\_]a]\_a  
@HWI-EAS443:3:12:820:1489#0/1  
TGCGGCACAGATTGAAAGCGACAGAGAATAGTTTCGAACA  
+HWI-EAS443:3:12:820:1489#0/1  
XZT]a[`bVb`\_ab\_bababa`¥a`aa\_`\_aS^\_\_\_\_^^\_  
@HWI-EAS443:3:12:834:623#0/1  
ACTGGTTCATGCTCATGCCTAGGCAAAAGATAATAGGCC  
+HWI-EAS443:3:12:834:623#0/1  
Ka`b\_Z^¥¥¥aZba`]baaa[Q^aXQY]a^aa`Y[PV]^U  
@HWI-EAS443:3:12:897:985#0/1  
GTCGCTTCAATCTGTGCCGATTCTTCAATTAACCACC  
+HWI-EAS443:3:12:897:985#0/1  
aabb`]``aT]QTV`X`\_aaa\_¥a\_[Z][¥\_]`\_¥VW]`¥  
@HWI-EAS443:3:12:916:92#0/1  
GCCGATTCTTCAATTAACCACCTTATTCCTCAAATTT  
+HWI-EAS443:3:12:916:92#0/1  
aaabaaaaaaaa\_a`aaa\_\_\_\_\_Wa[`a`\_]`^a^^`\_`\_a  
@HWI-EAS443:3:12:922:1288#0/1  
GGAATGGTAACACGGTTCGAGTCTCTGAAAATATACAGAG  
+HWI-EAS443:3:12:922:1288#0/1  
``]``\_PY\_aaa¥[`S¥¥``Z[WWW[¥Za\_]\_]`X^YU`  
@HWI-EAS443:3:12:932:1681#0/1  
CGAGAAAGCTCTTATCTCTTGTCTACTTCAAGCAGTAGT  
+HWI-EAS443:3:12:932:1681#0/1  
a\_\_baa¥a^aa`\_aa`\_aa\_\_\_\_\_`a\_``\_a\_\_`\_Z`aX  
@HWI-EAS443:3:12:945:1053#0/1  
GTTCGAAACTATTCTCTGTCGCTTCAATCTGTGCCGCAT  
+HWI-EAS443:3:12:945:1053#0/1  
a\_^Z\_VYVOK`^ZYN^LS\_TNTX`[VWNYPP`UM`G`B  
@HWI-EAS443:3:13:1020:1727#0/1  
GCCGATTCTTCAATTAACCACCTTATTCCTCAAATTT  
+HWI-EAS443:3:13:1020:1727#0/1  
a`abb\_Zaa¥a^S^[`a`a^Z``^``\_\_\_\_\_XQ[\_a]```\_`  
@HWI-EAS443:3:13:1023:798#0/1  
AGTCTCTGAAAATATACAGAGATTGCTTGGAGAACTGT

+HWI-EAS443:3:13:1023:798#0/1  
aa\_baaaaa`aaa`^^`\_a\_`a`\_`^a^`\_`\_`^`[\_`X  
@HWI-EAS443:3:13:1024:144#0/1  
GGACATACTTATGAGGATGTCAAAAATGCAGTTGGGGTCC  
+HWI-EAS443:3:13:1024:144#0/1  
`TTV`RJGOPRT`QVTI`\_[VGSQ`^XWVQLUBBBBBBBBBB  
@HWI-EAS443:3:13:1125:1576#0/1  
AAACTGTGATGAGAATGGGAGACCTTCACTACCTCCAGAG  
+HWI-EAS443:3:13:1125:1576#0/1  
]¥abaaXaabbabZaabYaab\_aaa\_aa]aa\_X``^a```  
@HWI-EAS443:3:13:1125:349#0/1  
AAGGTAATGGTCAAATTTCTCCAATTGCTCCCTCCTC  
+HWI-EAS443:3:13:1125:349#0/1  
`¥bb[Q^aR[^¥Q¥SQ[\_Z`YLSYLQT[\_SS¥SURVRW  
@HWI-EAS443:3:13:1167:572#0/1  
GTCGCTTTCAATCTGTGCCGATTTCTTCAATTAACCACC  
+HWI-EAS443:3:13:1167:572#0/1  
a`aaaaaaaa`^a`]`\_`aaa\_a`\_`\_a`\_`ZX\_YX  
@HWI-EAS443:3:13:1197:1390#0/1  
TGCCGATTTCTTCAATTAACCACCTTATTTCCCTCAAATT  
+HWI-EAS443:3:13:1197:1390#0/1  
\_`\_¥b\_baa\_]`^aUbbaa^U\_\_a\_¥b\_ba[¥^aPaa\_  
@HWI-EAS443:3:13:1222:1869#0/1  
GAAACTGTGATGAGAATGGGAGACCTTCACTACCTCCAGA  
+HWI-EAS443:3:13:1222:1869#0/1  
aaaaaaaYbaaa\_¥Y`Yb\_aY``[QV[T`\_`[[EM\_\_]]a¥  
@HWI-EAS443:3:13:1230:171#0/1  
GCTGTTTCGATATCGAGCCAAGGTTGCCTCTTCCTT  
+HWI-EAS443:3:13:1230:171#0/1  
aVU`QX^M¥^[]¥UP[S\_QXZRY]]VUVBBBBBBBBBBBBB  
@HWI-EAS443:3:13:1239:1084#0/1  
GATGAGAATGGGAGACCTTCACTACCTCCAGAGCAGAAAT  
+HWI-EAS443:3:13:1239:1084#0/1  
Z¥`\_X\_ZZV]KUV\_`U^XaaRQZ[\_ZZRxa^WSWPZn¥^Y  
@HWI-EAS443:3:13:1280:459#0/1  
TGCCGATTTCTTCAATTAACCACCTTATTTCCCTCAAATT  
+HWI-EAS443:3:13:1280:459#0/1  
aa^[\_`aaaab\_aaa`\_a`\_`a`a\_]`\_`a`aa¥\_`^a`\_`\_`\_`]  
@HWI-EAS443:3:13:1282:300#0/1  
TGGGAAACAAATCGTGAATGGATCTTGAAAGAGGAATCC  
+HWI-EAS443:3:13:1282:300#0/1  
ab`\_`\_aaY\_aa\_[\_^bb]\_aba[\_`aaa¥`¥`\_`\_`\_`\_`^]UN  
@HWI-EAS443:3:13:1295:400#0/1  
GCCGATTTCTTCAATTAACCACCTTATTTCCCTCAAATTT  
+HWI-EAS443:3:13:1295:400#0/1  
aa`baaaaa`aa`^`aaa`^`\_`\_`¥aaa`aa^\_a`\_`^¥a`\_`\_`  
@HWI-EAS443:3:13:1304:358#0/1  
ATCCGCAAGCGATTTGCAGACAATGGATTGGGTGATGCCC  
+HWI-EAS443:3:13:1304:358#0/1  
aaa\_a]^YaWVYQZ[GM¥`SRMYWUNBBBBBBBBBBBBBBB





+HWI-EAS443:3:13:1607:776#0/1  
aaaaaaaYab`aa\_a^a`a^^Z\_^aa`aUa^\_\_a]\_Za^Z  
@HWI-EAS443:3:13:1608:264#0/1  
GAGAATGGGAGACCTTCACTACCTCCAGAGCAGAAATGAA  
+HWI-EAS443:3:13:1608:264#0/1  
a¥a¥Y`a\_a¥XUG[W\_ZY^^UPWWW¥¥YVWU¥YUUU^YW  
@HWI-EAS443:3:13:1620:993#0/1  
GAAAATATACAGAGATTGCTTGGAGAACTGTGATGAGA  
+HWI-EAS443:3:13:1620:993#0/1  
aaaaabaaaaaa`a]aa\_a`a`aa\_`a`\_]`W`W^a^\_]`  
@HWI-EAS443:3:13:162:781#0/1  
GCCGCATTTCTTCAATTAACCACCTTATTTCTCAAATTT  
+HWI-EAS443:3:13:162:781#0/1  
aabbbbaaaaaaaaaaabbaaa\_`aa^aaa\_\_a`aab`\_  
@HWI-EAS443:3:13:1630:187#0/1  
GCCGCATTTCTTCAATTAACCACCTTATTTCTCAAATTT  
+HWI-EAS443:3:13:1630:187#0/1  
`aabaabbaabaaa`aaaaWN]U[`aaa`a]X`\_\_\_^a`\_  
@HWI-EAS443:3:13:1681:1792#0/1  
CGCTTGGAGAACTGTGATGAGAATGGGAGACCTTCACTA  
+HWI-EAS443:3:13:1681:1792#0/1  
]bbb`aaabbbb\_ba\_\_\_\_baa`a`aaa\_a]TSZ`Z\_V\_\_  
@HWI-EAS443:3:13:169:566#0/1  
AAACTGTGATGAGAATGGGAGACCTTCACTACCTCCAGAG  
+HWI-EAS443:3:13:169:566#0/1  
a]\_`ZJ^aYVY]Z\_\_`a[\_]\_`\_\_T¥0^[WYS\_WY]U^  
@HWI-EAS443:3:13:1776:1020#0/1  
GGAGAACTGTGATGAGAATGGGAGACCTTCACTACCTCC  
+HWI-EAS443:3:13:1776:1020#0/1  
ababa\_XO^]U\_^]a[a¥^]`V]U\_BBBBBBBBBBBBBBB  
@HWI-EAS443:3:13:1786:407#0/1  
AGAACTGTGATGAGAATGGGAGACCTTCACTACCTCCAG  
+HWI-EAS443:3:13:1786:407#0/1  
abaa\_^aa\_a`a\_aY\_a`a\_]`^YY^\_X\_V]¥STYYVVV  
@HWI-EAS443:3:13:199:782#0/1  
CACGGTTCGAGTCTCTGAAAATATACAGAGATTGCTTGG  
+HWI-EAS443:3:13:199:782#0/1  
aaaaa]aaa`^aa`aaZ`\_a\_a```\_a]a^\_\_`\_\_^[`  
@HWI-EAS443:3:13:210:412#0/1  
GCCGCATTTCTTCAATTAACCACCTTATTTCTCAAATTT  
+HWI-EAS443:3:13:210:412#0/1  
aabaaaa`aaa`aaaaaaaa`\_aaa`\_a\_a`````\_`a  
@HWI-EAS443:3:13:212:1594#0/1  
CTGTGATGAGAATGGGAGACCTTCACTACCTCCAGAGCAG  
+HWI-EAS443:3:13:212:1594#0/1  
aba`bba\_aabbaab[abaaaaabbbaaa`\_aaba\_aaa`  
@HWI-EAS443:3:13:239:1180#0/1  
GCCGCATTTCTTCAATTAACCACCTTATTTCTCAAATTT  
+HWI-EAS443:3:13:239:1180#0/1  
abaababbbbaabb`abaabaaba\_aa`baabaa¥aaa





@HWI-EAS443:3:13:873:1329#0/1  
TCGCTTTCAATCTGTGCCGATTTCTTCAATTAACCCACCT  
+HWI-EAS443:3:13:873:1329#0/1  
aabba\_`^^aaa\_]P^^a^aaa\_`a`a``a]aaaS` [M¥  
@HWI-EAS443:3:13:894:96#0/1  
CCGCATTTCTTCAATTAACCCACCTTATTTCCCTCAAATTTTC  
+HWI-EAS443:3:13:894:96#0/1  
Xb`abbbb]^^V^Xbbaa^]b^¥babba`RTbaXY\_b^aY  
@HWI-EAS443:3:13:903:785#0/1  
CTCTGGAGGTAGTGAAGGTCTCCCATTTCTCATCACAGTTT  
+HWI-EAS443:3:13:903:785#0/1  
aabbaaabaM\_aaa]Za\_VZ`aaUU¥]M`S`]PX^\_aU^`  
@HWI-EAS443:3:13:908:1603#0/1  
GGTTAATTGAAGAAATGCGGCACAGATTGAAAGCGACAGA  
+HWI-EAS443:3:13:908:1603#0/1  
aX`]`X`aba^V]`aa¥V\_`abaaaa]`aaa`^a[\_aY¥  
@HWI-EAS443:3:13:908:833#0/1  
GCCGCATTTCTTCAATTAACCCACCTTATTTCCCTCAAATTT  
+HWI-EAS443:3:13:908:833#0/1  
^b\_¥aa^`[\_``^baaa^\_aTa¥]^aa\_YV`ba\_aaa`  
@HWI-EAS443:3:13:911:324#0/1  
GCCGCATTTCTTCAATTAACCCACCTTATTTCCCTCAAATTT  
+HWI-EAS443:3:13:911:324#0/1  
aVa]Zaa[`X\_[]^ZZT[]TY[X]^^`\_^\_X^]^^Z^]W  
@HWI-EAS443:3:13:939:1974#0/1  
AGAATGGGAGACCTTCACTACCTCCAGAGCAGAAATGAAA  
+HWI-EAS443:3:13:939:1974#0/1  
aba`aaa`aa`a[\_\_\_aa`a\_\_\_]`aa\_^^`]`]T`a[]\_  
@HWI-EAS443:3:13:989:1040#0/1  
TGAGAATGGGAGACCTTCACTACCTCCAGAGCAGAAATGA  
+HWI-EAS443:3:13:989:1040#0/1  
aa\_]SQ`a`]a[\_[\_\_\_\_^\_\_Y\_¥]V¥]IXRZ\_V^U^`\_  
@HWI-EAS443:3:13:991:577#0/1  
TGAGAATGGGAGACCTTCACTACCTCCAGAGCAGAAATGA  
+HWI-EAS443:3:13:991:577#0/1  
a`\_a`aaa`a`a^]Y\_a`^^`]\_\_`\_a^\_Y]a\_¥\_`^¥  
@HWI-EAS443:3:14:1050:1096#0/1  
GTCGCTTTCAATCTGTGCCGATTTCTTCAATTAACCCACC  
+HWI-EAS443:3:14:1050:1096#0/1  
a``a\_\_\_a`a``\_`a]\_`\_`\_a`^\_\_\_\_a^\_`^\_`Z\_Z]  
@HWI-EAS443:3:14:105:197#0/1  
GGTTCATGCTCATGCCTAGGCAAAAGATAATAGGCCCTCT  
+HWI-EAS443:3:14:105:197#0/1  
a]NYaa`a^^^NXaaVXNTaa]NW]`\_]`[\_^]] [T]U[  
@HWI-EAS443:3:14:1069:567#0/1  
GGAGAAACTGTGATGAGAATGGGAGACCTTCACTACCTCC  
+HWI-EAS443:3:14:1069:567#0/1  
aa`baaa`ab^a\_aa`a`\_`a`a^a[\_Z\_`^aW\_`] ]^S^  
@HWI-EAS443:3:14:1070:622#0/1  
GAAACTGTGATGAGAATGGGAGACCTTCACTACCTCCAGA

+HWI-EAS443:3:14:1070:622#0/1  
a\_\_`aa[b^`\_a¥]` `[\_^`^VY^]Y\_Z^RV]ZVX^X  
@HWI-EAS443:3:14:1094:981#0/1  
TGCCGCATTTCTTCAATTAACCACCTTATTTCTCAAATT  
+HWI-EAS443:3:14:1094:981#0/1  
^Y¥X][I]`bY¥baba\_aa^WHVYT^a`a`aa\_a\_\_\_^\_Z  
@HWI-EAS443:3:14:1146:1246#0/1  
AAACTGTGATGAGAATGGGAGACCTTCACTACCTCCAGAG  
+HWI-EAS443:3:14:1146:1246#0/1  
a]b`bbS\_aaa`ba``aaaa`\_\_a`aa\_a\_^[\_X\_` ]`  
@HWI-EAS443:3:14:1172:430#0/1  
GAGAATGGGAGACCTTCACTACCTCCAGAGCAGAAATGAA  
+HWI-EAS443:3:14:1172:430#0/1  
UL`aZaabbZ`a`\_]a^WaT`\_VaS^`a`a[\_aZS¥\_aR[  
@HWI-EAS443:3:14:1185:45#0/1  
AGAAACTGTGATGAGAATGGGAGACCTTCACTACCTCCAG  
+HWI-EAS443:3:14:1185:45#0/1  
aaaba` `` `a^^b]b` ]aa`a\_]YSH\_UL]T[]GYOQVZT  
@HWI-EAS443:3:14:1198:713#0/1  
GAGAATGGGAGACCTTCACTACCTCCAGAGCAGAAATGAA  
+HWI-EAS443:3:14:1198:713#0/1  
`ba]`^¥^W[aTS`aa[a]HU` ]]^\_aa^XXZa`SY[\_VV  
@HWI-EAS443:3:14:1209:907#0/1  
GTCGCTTTCAATCTGTGCCGCATTTCTTCAATTAACCACC  
+HWI-EAS443:3:14:1209:907#0/1  
a]Wa` \_\_\_¥`a]` \_\_[X\_^a]^` ¥^\_^]X]\_` ]UX^XZ  
@HWI-EAS443:3:14:1247:533#0/1  
TGCCGCATTTCTTCAATTAACCACCTTATTTCTCAAATT  
+HWI-EAS443:3:14:1247:533#0/1  
aaa`aR¥` ]a¥]a\_¥^^a\_\_\_\_\_`aUaa`aa\_^Za\_aXaa`  
@HWI-EAS443:3:14:128:1951#0/1  
AGAAACTGTGATGAGAATGGGAGACCTTCACTACCTCCAG  
+HWI-EAS443:3:14:128:1951#0/1  
¥` `\_\_a[ TG`XX[[aT^SM`aaY[ `XEH` \_\_KT¥ZRZR X]  
@HWI-EAS443:3:14:1315:567#0/1  
AGCGAATCTCTGTATATTTTCAGAGACTCGAACCGTGTTA  
+HWI-EAS443:3:14:1315:567#0/1  
XR\_V]¥SN^]M\_OXZ\_¥[WZQGVWa`Z\_aTJMZTJSHYF  
@HWI-EAS443:3:14:1336:1935#0/1  
GCCGCATTTCTTCAATTAACCACCTTATTTCTCAAATTT  
+HWI-EAS443:3:14:1336:1935#0/1  
aa]R^\_YZUV]^¥\_XPX`ZY¥\_` ][]]¥]\_VW^[\_\_X^W^  
@HWI-EAS443:3:14:1352:1604#0/1  
GAAAATATACAGAGATTCGCTTGGAGAACTGTGATGAGA  
+HWI-EAS443:3:14:1352:1604#0/1  
a` `` \_aaaa`a` ¥Y[]\_VUS` ]¥\_] ^\_X\_X\_\_SZYV^¥OW  
@HWI-EAS443:3:14:1382:1966#0/1  
CGAGAAAGCTTATCTCTTGTCTACTTCAAGCAGTAGT  
+HWI-EAS443:3:14:1382:1966#0/1  
Zabb\_¥¥a¥^^abab\_bbba^a`^a^bbbab`babbYaba

@HWI-EAS443:3:14:1382:463#0/1  
CTGTGCTTTCAATCTGTGCCGATTTCTTCAATTAACCA  
+HWI-EAS443:3:14:1382:463#0/1  
abb]ababbb\_aaa`ab`^ab^aaaaa`\_`\_a`a`]]\_  
@HWI-EAS443:3:14:1389:1683#0/1  
CTTTTCATTTCTGCTCTGGAGGTAGTGAAGGTCTCCCATT  
+HWI-EAS443:3:14:1389:1683#0/1  
aaaaaX\_a`[^]]RX`]U`^M`SN][X\_NHDKU^QYW¥  
@HWI-EAS443:3:14:1424:1887#0/1  
GAGCAATTGGGACAGAAATTTGAGGAAATAAGGTGGTTAA  
+HWI-EAS443:3:14:1424:1887#0/1  
``]]UWZaba^V\_^a\_OZ¥a]`XZXXR`ZWYa]¥`ZLV]B  
@HWI-EAS443:3:14:1466:1011#0/1  
GTGATGAGAATGGGAGACCTTCACTACCTCCAGAGCAGAA  
+HWI-EAS443:3:14:1466:1011#0/1  
^¥\_W^ZW^\_¥\_aaZ]\_QYUTYT^XX]UIS¥N[aZ^PT]^S  
@HWI-EAS443:3:14:1499:603#0/1  
GTGATGAGAATGGGAGACCTTCACTACCTCCAGAGCAGAA  
+HWI-EAS443:3:14:1499:603#0/1  
`^b¥\_X¥UWY\_¥][[ZY[XU¥[^Z¥^U¥^ZYYS]SW¥QX  
@HWI-EAS443:3:14:1515:595#0/1  
AGAATGGGAGACCTTCACTACCTCCAGAGCAGAAATGAAA  
+HWI-EAS443:3:14:1515:595#0/1  
ab`abbb\_XZ\_a`aa\_\_`a`[\_a\_Z`b¥a[Wa¥[\_`a`TZ  
@HWI-EAS443:3:14:1566:1526#0/1  
GCATCACCCAATCCATTGTCTGCAAATCGCTTGCGGATAT  
+HWI-EAS443:3:14:1566:1526#0/1  
abaa\_a`\_`aa\_``aaaa^¥\_aXV\_^WU¥ZR]YSY]WYQU  
@HWI-EAS443:3:14:1581:48#0/1  
GCCGCATTTCTTCAATTAACCACCTTATTTCTCAAATTT  
+HWI-EAS443:3:14:1581:48#0/1  
aUZ`[Y\_]T¥\_TVU¥U¥ZGTSJMV¥VV]^UY[Y]Y]\_XZ  
@HWI-EAS443:3:14:1599:228#0/1  
GGTTAATTGAAGAAATGCGGCACAGATTGAAAGCGACAGA  
+HWI-EAS443:3:14:1599:228#0/1  
aSTU\_^R`¥]]a]X^]WS\_] [ZZXaX^^^XVS^H^^Z^ZX  
@HWI-EAS443:3:14:1649:475#0/1  
AAACTGTGATGAGAATGGGAGACCTTCACTACCTCCAGAG  
+HWI-EAS443:3:14:1649:475#0/1  
aab`ba^`aab\_b^`baaa^a\_]¥`a``Za\_^Z\_Y]^aZa  
@HWI-EAS443:3:14:1672:261#0/1  
CCGCATTTCTTCAATTAACCACCTTATTTCTCAAATTT  
+HWI-EAS443:3:14:1672:261#0/1  
abbbbbbbabababbbbabaaaaabaabaa`\_a¥a``aaa^  
@HWI-EAS443:3:14:1698:172#0/1  
GCGGCACAGATTGAAAGCGACAGAGAATAGTTTCGAACAA  
+HWI-EAS443:3:14:1698:172#0/1  
a]aa^aQaa]\_``\_\_^\_[`^W^\_]`Y]W^]ZZ]W]XZVZW  
@HWI-EAS443:3:14:1699:1046#0/1  
GAAACTGTGATGAGAATGGGAGACCTTCACTACCTCCAGA

+HWI-EAS443:3:14:1699:1046#0/1  
aaaXaZV^U]a\_aU\_\_aVYV\_]Y]\_XV^WI^XY]]X#VV  
@HWI-EAS443:3:14:171:486#0/1  
TTGTCATTCTAAGTGTCTCGCTGGATTCCCTTTCAAGAT  
+HWI-EAS443:3:14:171:486#0/1  
a`aZa^aaaa`^a`\_a\_\_\_\_\_Ya\_\_\_\_\_`]a\_aXS\_\_\_\_]  
@HWI-EAS443:3:14:1721:933#0/1  
GAAACTGTGATGAGAATGGGAGACCTTCACTACCTCCAGA  
+HWI-EAS443:3:14:1721:933#0/1  
a`\_\_aa#a\_`\_]\_]\_a\_^W`^WW#\_Z^Z]ZTQTXZZZZ  
@HWI-EAS443:3:14:1722:325#0/1  
AGAAACTGTGATGAGAATGGGAGACCTTCACTACCTCCAG  
+HWI-EAS443:3:14:1722:325#0/1  
``\_a``ZZY]`URXQXaaa\_UTUUT[¥V[QZ¥RKSRRV]  
@HWI-EAS443:3:14:1731:174#0/1  
GCCGCATTTCTTCAATTAACCACCTTATTTCCCTCAAATTT  
+HWI-EAS443:3:14:1731:174#0/1  
aXW#OUY]ZJ#P^#PYVZOLR^WP[\_Z`^]KMPLTZZ^SV  
@HWI-EAS443:3:14:1739:322#0/1  
AGAAACTGTGATGAGAATGGGAGACCTTCACTACCTCCAG  
+HWI-EAS443:3:14:1739:322#0/1  
aa`bT^^[a][Z]]T^a`[``^TZUUXPX[¥[YWTTX  
@HWI-EAS443:3:14:186:1433#0/1  
TGCCGCATTTCTTCAATTAACCACCTTATTTCCCTCAAATT  
+HWI-EAS443:3:14:186:1433#0/1  
^`bba`^ababbbbabaaabbaab`aa#baaaaaaaaa`aa  
@HWI-EAS443:3:14:233:1342#0/1  
CACAGATTGAAAGCGACAGAGAATAGTTTCGAACAAATAA  
+HWI-EAS443:3:14:233:1342#0/1  
a`bbaa]ababaabaa`V]aaaa`a`[aa```\_``^a`aa  
@HWI-EAS443:3:14:241:704#0/1  
CGCGCTACCTTTCTGACATGACCCTCGAGGAAATGTCACG  
+HWI-EAS443:3:14:241:704#0/1  
a#bba\_aabaa\_`X``aa[ZXa\_a]^aWX[\_^VZ\_VZ\_W`  
@HWI-EAS443:3:14:245:2040#0/1  
AATGACAATTGCATCTGTACCTACTTCGCGCTACCTTTCT  
+HWI-EAS443:3:14:245:2040#0/1  
`¥Z\_``]aa\_``[`aV[[aaa`a```\_U[[\_TU^Z\_]]]  
@HWI-EAS443:3:14:247:1362#0/1  
GGAGAAACTGTGATGAGAATGGGAGACCTTCACTACCTCC  
+HWI-EAS443:3:14:247:1362#0/1  
aaaa^a`a`\_WaZ\_a`\_\_`]^^T¥]^\_^X]\_Z^\_\_ZXU]  
@HWI-EAS443:3:14:255:782#0/1  
GCCGCATTTCTTCAATTAACCACCTTATTTCCCTCAAATTT  
+HWI-EAS443:3:14:255:782#0/1  
`baaa]J^`a^`a`G]SV\_a]^\_``\_W\_¥]¥Z\_]X\_Z`¥\_  
@HWI-EAS443:3:14:267:1441#0/1  
CGAGAAAGCTCTTATCTCTTGTCTACTTCAAGCAGTAGT  
+HWI-EAS443:3:14:267:1441#0/1  
aa`a`a`X``\_`\_^][a]^aa^`\_]\_]\_\_^][`Z\_WNU\_X





+HWI-EAS443:3:14:667:1675#0/1  
Xbab¥^b^T`Y¥Y`¥b^b¥H\_URb`VTZ^baWL[\_aab0I  
@HWI-EAS443:3:14:679:1520#0/1  
TGCCGCATTTCTTCAATTAACCACCTTATTTCTCAAATT  
+HWI-EAS443:3:14:679:1520#0/1  
abb¥`\_]Yaaaa^T]]ab`NX\_W\_aa\_aa\_X\_a`0`a\_  
@HWI-EAS443:3:14:681:549#0/1  
GAATGGGAGACCTTCACTACCTCCAGAGCAGAAATGAAAA  
+HWI-EAS443:3:14:681:549#0/1  
aVWO\_^]Z¥U\_aXYZaVWV`XZXa]Z¥a]L\_SNPR]\_ZNV  
@HWI-EAS443:3:14:681:838#0/1  
GCCGCATTTCTTCAATTAACCACCTTATTTCTCAAATTT  
+HWI-EAS443:3:14:681:838#0/1  
aaW`b]aa^^a^UZ`a`[Za\_\_\_\_\_^\_aa\_]a`\_`a]]^  
@HWI-EAS443:3:14:686:1242#0/1  
GAGAATGGGAGACCTTCACTACCTCCAGAGCAGAAATGAA  
+HWI-EAS443:3:14:686:1242#0/1  
]¥\_`aaabLbbaaba[Saba`[aa\_aba\_`\_a\_\_`^\_[`  
@HWI-EAS443:3:14:691:824#0/1  
CCCATTCTCATCACAGTTTCTCCAAGCGAATCTCTGTATA  
+HWI-EAS443:3:14:691:824#0/1  
aa```baaaaaaaaa`]`aaaa`aa\_``\_\_`]\_``\_]`^^  
@HWI-EAS443:3:14:692:167#0/1  
GGAGAACTGTGATGAGAATGGGAGACCTTCACTACCTCC  
+HWI-EAS443:3:14:692:167#0/1  
ab`aaaa\_aaV`\_`a^a`\_\_[aaX\_]QV^Y^\_YX]UXUXU  
@HWI-EAS443:3:14:699:756#0/1  
GAGAACTGTGATGAGAATGGGAGACCTTCACTACCTCCA  
+HWI-EAS443:3:14:699:756#0/1  
`]a`a``ab\_aaaaab^a`aa`Ya^U^a`Y`Y^a\_X^Y^]  
@HWI-EAS443:3:14:747:950#0/1  
GAAACTGTGATGAGAATGGGAGACCTTCACTACCTCCAGA  
+HWI-EAS443:3:14:747:950#0/1  
`aaaaaa]b`aaaa\_``aa\_`^]a\_`^`]^`\_\_^`^¥^[^  
@HWI-EAS443:3:14:794:427#0/1  
GCCGCATTTCTTCAATTAACCACCTTATTTCTCAAATTT  
+HWI-EAS443:3:14:794:427#0/1  
aaaaa^Z^aaaa\_[]a\_``¥¥¥^¥a\_aa`\_``^\_\_¥`\_`  
@HWI-EAS443:3:14:81:1912#0/1  
GCCGCATTTCTTCAATTAACCACCTTATTTCTCAAATTT  
+HWI-EAS443:3:14:81:1912#0/1  
`baaa`aaabaaa\_a\_]aaaa\_]`aaaa``aaa^aa\_\_  
@HWI-EAS443:3:14:867:1571#0/1  
AGAACTGTGATGAGAATGGGAGACCTTCACTACCTCCAG  
+HWI-EAS443:3:14:867:1571#0/1  
UX¥\_^Z]`V``]PT\_UV]¥aVNZDX¥\_\_\_W]\_YUYU\_[]  
@HWI-EAS443:3:14:86:1382#0/1  
GCCGCATTTCTTCAATTAACCACCTTATTTCTCAAATTT  
+HWI-EAS443:3:14:86:1382#0/1  
aaaaaSOXU^`aW\_aa\_a\_aaa``^a]Y[a`[\_``¥\_XX

@HWI-EAS443:3:14:879:1656#0/1  
AATGGGAGACCTTCACTACCTCCAGAGCAGAAATGAAAAG  
+HWI-EAS443:3:14:879:1656#0/1  
WIQ`\_aV^Z`b`^`aT¥]PaXSaaS]\_Ra`\_Z`^P¥\_`[\_  
@HWI-EAS443:3:14:895:1479#0/1  
AGAAACTGTGATGAGAATGGGAGACCTTCACTACCTCCAG  
+HWI-EAS443:3:14:895:1479#0/1  
ab[X`a`a`a`a`a`a`^`aa`^`^`^`\_]a]^¥]V^V`^`  
@HWI-EAS443:3:14:896:1576#0/1  
TGTTTTCGATATCGAGGCCAAGGGTGTTCCTCCTCCTTT  
+HWI-EAS443:3:14:896:1576#0/1  
aY¥aaabaaaXa`aaZaaa`a\_0\_Z`\_`X]^]\_W]`\_`  
@HWI-EAS443:3:14:928:939#0/1  
TGCCGCATTTCTTCAATTAACCACCTTATTTCCCTCAAATT  
+HWI-EAS443:3:14:928:939#0/1  
a``abaX]aaaaaa^abab^V```aaaaaa^[\_`a`¥aa  
@HWI-EAS443:3:14:998:1211#0/1  
GTCGCTTTCAATCTGTGCCGATTTCTTCAATTAACCACC  
+HWI-EAS443:3:14:998:1211#0/1  
a]a`aa`^`a]`^`\_Y\_]`\_¥W[^`]^`^^]`\_`^`\_WY^WU  
@HWI-EAS443:3:15:1002:36#0/1  
AGAAACTGTGATGAGAATGGGAGACCTTCACTACCTCCAG  
+HWI-EAS443:3:15:1002:36#0/1  
a`WYa¥a\_¥`a¥bXa[F^`^`a¥`^Q[a^^\_FZZ]X]X`^`  
@HWI-EAS443:3:15:1010:1531#0/1  
ACTGCATTTTTGACATCCTCATAAGTATGCCTGGAAGAG  
+HWI-EAS443:3:15:1010:1531#0/1  
\_a^a`Y\_b`WPY^FV[N]^OZWZZSzaa`¥T¥a\_]YZ\_P  
@HWI-EAS443:3:15:1015:834#0/1  
GGCTTTCCTGAGGAGGGAGCAATAGTTGGAGAAATTTCA  
+HWI-EAS443:3:15:1015:834#0/1  
\_Y```][`aba`^`aaaVTV`]]`a^[]^`\_a`\_aYSZP[  
@HWI-EAS443:3:15:1042:1533#0/1  
GCCGCATTTCTTCAATTAACCACCTTATTTCCCTCAAATTT  
+HWI-EAS443:3:15:1042:1533#0/1  
ab^QY`\_a`a]`\_`^`^XY^RQ]Y]0[\_`[[`\_a`^^P¥0¥  
@HWI-EAS443:3:15:1112:1018#0/1  
CTGTGATGAGAATGGGAGACCTTCACTACCTCCAGAGCAG  
+HWI-EAS443:3:15:1112:1018#0/1  
`ababbab¥b]aaabaaba```\_a`a`\_aa`aaa`a``a  
@HWI-EAS443:3:15:111:1033#0/1  
GCGGCACAGATTGAAAGCGACAGAGAATAGTTTCGAACAA  
+HWI-EAS443:3:15:111:1033#0/1  
`aY]b\_a`a¥ab`^`b]`a```\_V¥`]]J^`\_a[]¥]Z  
@HWI-EAS443:3:15:1129:431#0/1  
CACGGTTCGAGTCTCTGAAAATATACAGAGATTCGCTTGG  
+HWI-EAS443:3:15:1129:431#0/1  
aaabV]]aT`aa`\_`\_a]VUa``aS¥a¥^bTa`\_`\_`\_a`a  
@HWI-EAS443:3:15:1140:1781#0/1  
GAAACTGTGATGAGAATGGGAGACCTTCACTACCTCCAGA

+HWI-EAS443:3:15:1140:1781#0/1  
`abbabbbbbbababbaababaaba^baab`^a\_abaa  
@HWI-EAS443:3:15:1164:1862#0/1  
GAGAATGGGAGACCTTCACTACCTCCAGAGCAGAAATGAA  
+HWI-EAS443:3:15:1164:1862#0/1  
ababbbabb\_bb`Ub\_abaab[[]Y`bVbb\_aaabbabba  
@HWI-EAS443:3:15:1220:956#0/1  
ATGAGAATGGGAGACCTTCACTACCTCCAGAGCAGAAATG  
+HWI-EAS443:3:15:1220:956#0/1  
a`b\_^`bab^`b\_`a\_aaa\_aa\_``\_b^a\_\_a]Y]aa  
@HWI-EAS443:3:15:1221:509#0/1  
GTGATGAGAATGGGAGACCTTCACTACCTCCAGAGCAGAA  
+HWI-EAS443:3:15:1221:509#0/1  
a¥ba`a\_a[[]¥`\_XUaU`X`\_Y^Y¥\_NXZHR\_GNWMP\_] ]  
@HWI-EAS443:3:15:1228:837#0/1  
TGCCGCATTTCTTCAATTAACCACCTTATTTCTCAAATT  
+HWI-EAS443:3:15:1228:837#0/1  
`b`a\_babaaaabaaaa`baaaaSaa[bba[aa\_aaaa^  
@HWI-EAS443:3:15:1231:1082#0/1  
ATGAGAATGGGAGACCTTCACTACCTCCAGAGCAGAAATG  
+HWI-EAS443:3:15:1231:1082#0/1  
`bbbbba`b[`aZ``]``b[b\_aaa[baa\_aYaaaa[\_aaa  
@HWI-EAS443:3:15:1257:1820#0/1  
GCCGCATTTCTTCAATTAACCACCTTATTTCTCAAATTT  
+HWI-EAS443:3:15:1257:1820#0/1  
aaabbbba`\_aaaaYb\_aa\_]a\_\_a[aaaaa\_^\_ba\_aa]  
@HWI-EAS443:3:15:1282:1107#0/1  
GCGCGAAGTAGGTACAGATGCAATTGTCATTCTAAGTGTC  
+HWI-EAS443:3:15:1282:1107#0/1  
Zbb`a]]b`b\_`Y[`bbbabSZ[ba]a]abaY``abP^`]  
@HWI-EAS443:3:15:1314:482#0/1  
GCCGCATTTCTTCAATTAACCACCTTATTTCTCAAATTT  
+HWI-EAS443:3:15:1314:482#0/1  
``[¥SX`^VZb¥aZV^`[X\_a\_a]baa\_a`UaZ\_Q^a\_\_  
@HWI-EAS443:3:15:1347:1540#0/1  
AGAAACTGTGATGAGAATGGGAGACCTTCACTACCTCCAG  
+HWI-EAS443:3:15:1347:1540#0/1  
^`^a\_baaU^`]b````\_a`OZS¥Yaa^`a^¥TXaa\_[\_`  
@HWI-EAS443:3:15:1348:516#0/1  
CCGCATTTCTTCAATTAACCACCTTATTTCTCAAATTT  
+HWI-EAS443:3:15:1348:516#0/1  
aababbbbabbbabbbaba`baabaabbbb`b`aaaba\_  
@HWI-EAS443:3:15:1373:1304#0/1  
TGAGAATGGGAGACCTTCACTACCTCCAGAGCAGAAATGA  
+HWI-EAS443:3:15:1373:1304#0/1  
a]`aaa\_ba]aa\_XR¥[`aWF`[W^`^`\_`^S^`\_\_\_\_`]  
@HWI-EAS443:3:15:1420:1898#0/1  
ACCTTTCTGACATGACCCTCGAGGAAATGTCACGAGACTG  
+HWI-EAS443:3:15:1420:1898#0/1  
``aaa\_b``\_\_[]M]`aa]¥`¥`aW`¥Z[YQ\_Y`¥\_¥U\_¥

@HWI-EAS443:3:15:1439:1670#0/1  
ACGGTTCGAGTCTCTGAAAATATACAGAGATTCGCTTGGA  
+HWI-EAS443:3:15:1439:1670#0/1  
abaa\_a^[\`¥X¥\_Vaa¥a¥^W]¥`^]\`a^^ZYR^[TWJX[  
@HWI-EAS443:3:15:1488:1088#0/1  
CTGTGATGAGAATGGGAGACCTTCACTACCTCCAGAGCAG  
+HWI-EAS443:3:15:1488:1088#0/1  
a`b`bbbbbbbaaaX[babb]¥^b``ba\_^b`abbababb  
@HWI-EAS443:3:15:1529:1591#0/1  
GAAACTGTGATGAGAATGGGAGACCTTCACTACCTCCAGA  
+HWI-EAS443:3:15:1529:1591#0/1  
\_`aS[\`a]TT[VOYVaab[a]\`Y¥Wa\_\_`\_^aU\_[HHW[U  
@HWI-EAS443:3:15:1581:624#0/1  
AGCTTTCAGGTAGACTGTTTCCTTTGGCATATCCGCAAGC  
+HWI-EAS443:3:15:1581:624#0/1  
ababb`baba\_baaa\_a```¥[\`^\_\_\_a\_[W]S``^]  
@HWI-EAS443:3:15:158:1453#0/1  
GCCGCATTTCTTCAATTAACCACCTTATTTCTCAAATTT  
+HWI-EAS443:3:15:158:1453#0/1  
\_abbbabbbbbbbbababb`bbbabbbbbbababb\_bbb  
@HWI-EAS443:3:15:1609:94#0/1  
CGCATTTCTTCAATTAACCACCTTATTTCTCAAATTTCT  
+HWI-EAS443:3:15:1609:94#0/1  
\_T¥b`VZ\_Za\_NWb\_W¥[T^`a`^Zab[X[[`T\_aaa`\_a  
@HWI-EAS443:3:15:1613:1374#0/1  
TGAGAATGGGAGACCTTCACTACCTCCAGAGCAGAAATGA  
+HWI-EAS443:3:15:1613:1374#0/1  
abab`b¥a``ba\_\_`baa^aaWaa[\`aa¥`]\_a¥[\`aa\_  
@HWI-EAS443:3:15:1668:825#0/1  
GTCGCTTTCAATCTGTGCCGATTTCTTCAATTAACCACC  
+HWI-EAS443:3:15:1668:825#0/1  
aJ[aa][b``¥^^\_^]X¥T\_]\_]\_Z^]ZVX]ZZ]Y]^]  
@HWI-EAS443:3:15:166:80#0/1  
CGAGAAAGCTTATCTCTTGTCTACTTCAAGCAGTAGT  
+HWI-EAS443:3:15:166:80#0/1  
ababOWababYba\_aaa\_a^b```a`S\_a\_`\_a`\_\_^\_a\_  
@HWI-EAS443:3:15:1715:835#0/1  
CGCATTTCTTCAATTAACCACCTTATTTCTCAAATTTCT  
+HWI-EAS443:3:15:1715:835#0/1  
X`V¥¥ZabX`aJ^babaa`Tba¥bbaab`^`bbb\_bba¥b  
@HWI-EAS443:3:15:173:112#0/1  
CTGTGCTTTCAATCTGTGCCGATTTCTTCAATTAACCA  
+HWI-EAS443:3:15:173:112#0/1  
abaabaab\_K\_aa[\`¥aaaWVa\_¥a\_^T^`RYY\_a\_R[^]  
@HWI-EAS443:3:15:1761:1070#0/1  
ATGGACTCCAACCATGTCAAGCTTTCAGGTAGACTGTT  
+HWI-EAS443:3:15:1761:1070#0/1  
^^bUUU][Taab`bUMaaZ`P\_]S`a\_`\_\_¥aY`Y`TT\_S^  
@HWI-EAS443:3:15:176:1516#0/1  
TGAGAATGGGAGACCTTCACTACCTCCAGAGCAGAAATGA

+HWI-EAS443:3:15:176:1516#0/1  
a^W[aa`W]`aU\_\_\_\_]\_baa]P\_]aa`^Z\_aa`V`\_a\_¥  
@HWI-EAS443:3:15:184:1949#0/1  
CACGGTTCGAGTCTCTGAAAATATACAGAGATTCGCTTGG  
+HWI-EAS443:3:15:184:1949#0/1  
abbba^abaa`¥a`a`X`\_aaa`\_aa`\_`\_\_\_\_^`\_`\_]\_\_  
@HWI-EAS443:3:15:222:654#0/1  
CGCATTCTTCAATTAACCACCTTATTTCTCAAATTTCT  
+HWI-EAS443:3:15:222:654#0/1  
abaabbbbbbb`baaXbbabbbbaabbababbbbaaaaaa  
@HWI-EAS443:3:15:240:2042#0/1  
TGAGAAATGGGAGACCTTCACTACCTCCAGAGCAGAAATGA  
+HWI-EAS443:3:15:240:2042#0/1  
Y]XQ\_¥[\_aaWX\_`b^Ta[bWZ\_aba\_ZGXa`aaa`aRR  
@HWI-EAS443:3:15:249:1816#0/1  
GCCGCATTTCTTCAATTAACCACCTTATTTCTCAAATTT  
+HWI-EAS443:3:15:249:1816#0/1  
aaaaaaXaaaa`aaV¥[0\_aa`aa`\_a`^`\_`\_\_aaa\_]\_¥  
@HWI-EAS443:3:15:267:624#0/1  
CCGCATTTCTTCAATTAACCACCTTATTTCTCAAATTTCT  
+HWI-EAS443:3:15:267:624#0/1  
aaab¥bbbbbaabaaabbaa`aaaaaba`aabaa`aa`aa  
@HWI-EAS443:3:15:286:1824#0/1  
GAGCAATTGGGACAGAAATTTGAGGAAATAAGGTGGTTAA  
+HWI-EAS443:3:15:286:1824#0/1  
]`\_R¥^¥`bX¥babb`abbbbaaa`abaab^]Saa`\_ab  
@HWI-EAS443:3:15:328:777#0/1  
GATGAGAATGGGAGACCTTCACTACCTCCAGAGCAGAAAT  
+HWI-EAS443:3:15:328:777#0/1  
a\_bbaababbbbaaa`aaaaaa\_aa[\_````\_`aa\_aa`\_]\_  
@HWI-EAS443:3:15:415:2016#0/1  
CGCTTGGAGAAACTGTGATGAGAATGGGAGACCTTCACTA  
+HWI-EAS443:3:15:415:2016#0/1  
abbRP^UKY`TTbU[F[ZU¥J]XQ]bM`Ha]FMXH^`¥R^  
@HWI-EAS443:3:15:424:1227#0/1  
GAAACTGTGATGAGAATGGGAGACCTTCACTACCTCCAGA  
+HWI-EAS443:3:15:424:1227#0/1  
\_a`^`aaV[Wabab]Q\_a`Z```\_Ya^Z^\_aa\_a`b^Za\_  
@HWI-EAS443:3:15:429:906#0/1  
GCCGCATTTCTTCAATTAACCACCTTATTTCTCAAATTT  
+HWI-EAS443:3:15:429:906#0/1  
aabbaabbaaaabb^aaaaaa\_\_ba\_aaaa`a`aaaaa^  
@HWI-EAS443:3:15:467:1925#0/1  
GAGAAACTGTGATGAGAATGGGAGACCTTCACTACCTCCA  
+HWI-EAS443:3:15:467:1925#0/1  
aa[WZXaN[Xa`\_]`¥aY[[W[SQV¥[]]U`\_TW\_^\_W\_¥]  
@HWI-EAS443:3:15:523:622#0/1  
GCGGCACAGATTGAAAGCGACAGAGAATAGTTTCGAACAA  
+HWI-EAS443:3:15:523:622#0/1  
`Z`X\_b¥`^¥[\_^¥[PV¥aa[\_aaa\_[VR[U\_\_`L\_X\_^

@HWI-EAS443:3:15:542:24#0/1  
AATATACAGAGATTGCTTGGAGAACTGTGATGAGAATG  
+HWI-EAS443:3:15:542:24#0/1  
\_bb`baaabababa\_a`aaba]bYa\_\_\_a0a][aZ[N¥W^  
@HWI-EAS443:3:15:545:1110#0/1  
CGCATTCTTCAATTAACCACCTTATTTCCCTCAAATTTCT  
+HWI-EAS443:3:15:545:1110#0/1  
aaZM^`\_^^[Ua[¥Z`aaa[``\_a\_\_]`a\_]a^R]\_\_\_\_`  
@HWI-EAS443:3:15:558:1058#0/1  
GATGAGAATGGGAGACCTTCACTACCTCCAGAGCAGAAAT  
+HWI-EAS443:3:15:558:1058#0/1  
`JZT¥a]]Xaa\_aa^]YY[\_aZZ]]\_NFS\_\_\_]\_QX\_[NT\_  
@HWI-EAS443:3:15:56:392#0/1  
TGCCGCATTTCTTCAATTAACCACCTTATTTCCCTCAAATT  
+HWI-EAS443:3:15:56:392#0/1  
a`abbb`baa\_aa```ba]b^a`\_`aaaa`a``aa`¥Za\_  
@HWI-EAS443:3:15:58:437#0/1  
GAATGGGAGACCTTCACTACCTCCAGAGCAGAAATGAAAA  
+HWI-EAS443:3:15:58:437#0/1  
aaa¥aaXWa)`a\_a`a[¥`¥^`aXZ^¥TVTXT[TU]YHU^  
@HWI-EAS443:3:15:598:1736#0/1  
GCCGCATTTCTTCAATTAACCACCTTATTTCCCTCAAATTT  
+HWI-EAS443:3:15:598:1736#0/1  
abaS][`a\_\_bY]VZa]\_\_\_\_a[^`\_]a][HXaaZa[Q\_  
@HWI-EAS443:3:15:59:1927#0/1  
GCCGCATTTCTTCAATTAACCACCTTATTTCCCTCAAATTT  
+HWI-EAS443:3:15:59:1927#0/1  
\_abbbbbaabaabaabaaaaabbbbaaaa`bbaba¥`aaa  
@HWI-EAS443:3:15:612:417#0/1  
GCCGCATTTCTTCAATTAACCACCTTATTTCCCTCAAATTT  
+HWI-EAS443:3:15:612:417#0/1  
a[\_Z]]VSZW¥YX^`ZT^a[J¥V^Z[W¥[``^`\_SP]V]W  
@HWI-EAS443:3:15:638:284#0/1  
AGAAACTGTGATGAGAATGGGAGACCTTCACTACCTCCAG  
+HWI-EAS443:3:15:638:284#0/1  
^`\_`baab\_b``]S\_aaaaZ]\_^YY]XU``W]^\_YY\_`]  
@HWI-EAS443:3:15:641:1760#0/1  
TGAGAATGGGAGACCTTCACTACCTCCAGAGCAGAAATGA  
+HWI-EAS443:3:15:641:1760#0/1  
\_b\_U\_Ya[RXUaaabba`ba`VN¥ba[aaa\_\_aaa`aa`a  
@HWI-EAS443:3:15:642:898#0/1  
GAGAATGGGAGACCTTCACTACCTCCAGAGCAGAAATGAA  
+HWI-EAS443:3:15:642:898#0/1  
¥UU¥ZZ]aPUV\_b\_SIZaa[`Za\_¥^QT[\_a]a[aa``¥X  
@HWI-EAS443:3:15:653:625#0/1  
GTCGCTTTCAATCTGTGCCGCATTTCTTCAATTAACCACC  
+HWI-EAS443:3:15:653:625#0/1  
`Ha^aY\_^a^]^^X\_X`Y`a\_`]aa\_a`W\_\_`\_a`¥\_]MZ  
@HWI-EAS443:3:15:654:1679#0/1  
AGAAACTGTGATGAGAATGGGAGACCTTCACTACCTCCAG

+HWI-EAS443:3:15:654:1679#0/1  
¥Y^Z¥\_bX`S¥^b)`]bab`YWRVbYU`a^RO¥\_`IY[[V  
@HWI-EAS443:3:15:66:175#0/1  
GCCGCATTTCTTCAATTAACCACCTTATTTCTCAAATTT  
+HWI-EAS443:3:15:66:175#0/1  
¥aabb\_ba[a^aa[Xaa[[`ab`bbbaaa¥a`a\_¥a`  
@HWI-EAS443:3:15:671:194#0/1  
GATGAGAATGGGAGACCTTCACTACCTCCAGAGCAGAAAT  
+HWI-EAS443:3:15:671:194#0/1  
ZW^T\_T\_Y\_0][0\_``aaaa\_QXY\_`aW¥Z[^`aVLX[  
@HWI-EAS443:3:15:679:1308#0/1  
GCCGCATTTCTTCAATTAACCACCTTATTTCTCAAATTT  
+HWI-EAS443:3:15:679:1308#0/1  
aaZMYUTFFL¥YYT`Xa`ZYQW[\_WI¥PS]]X[\_^SU]¥  
@HWI-EAS443:3:15:696:1134#0/1  
GAAAGCTCTTATCTCTTGTCTACTTCAAGCAGTAGTTGT  
+HWI-EAS443:3:15:696:1134#0/1  
aaa]a\_^a`a\_a\_a^\_aa[`\_a¥^`^`¥`0\_`[Y^Y¥¥[  
@HWI-EAS443:3:15:711:1479#0/1  
CTCTGTGCTTTCAATCTGTGCCGCATTTCTTCAATTAAC  
+HWI-EAS443:3:15:711:1479#0/1  
T^a^aSR^]P\_TPYZ`]¥\_¥T^\_VZ\_`VZ^a`Y[W^``VT  
@HWI-EAS443:3:15:793:1782#0/1  
GTCTCTGAAAATATACAGAGATTCGCTTGGAGAACTGTG  
+HWI-EAS443:3:15:793:1782#0/1  
``\_J\_S]NU\_aaa`]\_a`aa`Y\_aaaWW\_``a\_`¥T[^P¥  
@HWI-EAS443:3:15:795:1415#0/1  
GCCGCATTTCTTCAATTAACCACCTTATTTCTCAAATTT  
+HWI-EAS443:3:15:795:1415#0/1  
U`\_bbb^\_Zbb\_¥`ab^`YZa^[ab¥bbaXbab``baa^a  
@HWI-EAS443:3:15:817:237#0/1  
GAAACTGTGATGAGAATGGGAGACCTTCACTACCTCCAGA  
+HWI-EAS443:3:15:817:237#0/1  
a¥bb\_abYa]aaaaab\_`^¥^\_TNV`aS`¥aXIMYZDR`V  
@HWI-EAS443:3:15:81:646#0/1  
GTCGCTTTCAATCTGTGCCGCATTTCTTCAATTAACCACC  
+HWI-EAS443:3:15:81:646#0/1  
a`bb]`aab`a\_a`a]aaaaaaaa`a`aaaa\_a\_aa\_`a``  
@HWI-EAS443:3:15:897:1641#0/1  
AATGGGAGACCTTCACTACCTCCAGAGCAGAAATGAAAAG  
+HWI-EAS443:3:15:897:1641#0/1  
^TYbabba```aabb`ab\_aabbab\_a\_a^ab`a^\_^V  
@HWI-EAS443:3:15:949:1078#0/1  
TGAGAATGGGAGACCTTCACTACCTCCAGAGCAGAAATGA  
+HWI-EAS443:3:15:949:1078#0/1  
¥¥SZUZ\_`\_X]VZMJXRMUU]\_TZZUO]^H[QM]VT^Z^O  
@HWI-EAS443:3:15:952:196#0/1  
CTTGGAGAACTGTGATGAGAATGGGAGACCTTCACTACC  
+HWI-EAS443:3:15:952:196#0/1  
abbbbababb^bb]baabab^aab`\_`a`^^\_\_a^\_\_Y^



@HWI-EAS443:3:15:997:304#0/1  
GATGAGAATGGGAGACCTTCACTACCTCCAGAGCAGAAAT  
+HWI-EAS443:3:15:997:304#0/1  
aaaaaaaa[X^\_V^\_\_`\_]`\_`a[W^[\_a^`W#a¥[^Y  
@HWI-EAS443:3:16:1010:1517#0/1  
GAAACTGTGATGAGAATGGGAGACCTTCACTACCTCCAGA  
+HWI-EAS443:3:16:1010:1517#0/1  
\_Za[SYPPY[a`IZZM]`R][a\_[X^aa\_X\_\_T\_ZYXZ^]  
@HWI-EAS443:3:16:1017:833#0/1  
AGAACTGTGATGAGAATGGGAGACCTTCACTACCTCCAG  
+HWI-EAS443:3:16:1017:833#0/1  
ab`[\_abb`baaaaa`aaa\_\_a\_`]a````\_``U`¥^^\_  
@HWI-EAS443:3:16:1027:422#0/1  
CCGATTTCTTCAATTAACCACCTTATTTCTCAAATTC  
+HWI-EAS443:3:16:1027:422#0/1  
abbb`^bbabbbaabbbba`baaaa`babaaaabaaba`a  
@HWI-EAS443:3:16:1027:671#0/1  
GAATGGGAGACCTTCACTACCTCCAGAGCAGAAATGAAAA  
+HWI-EAS443:3:16:1027:671#0/1  
a`Y\_bbaZ`aaaaaaaaaba^`\_^[b]a\_\_a[^`aaS`^\_  
@HWI-EAS443:3:16:1072:1365#0/1  
AAGCGAATCTGTATATTTTCAGAGACTCGAACCGTGTT  
+HWI-EAS443:3:16:1072:1365#0/1  
aababa`aaaa\_ZZa`aaa\_``\_]\_a\_^\_\_``\_^]`YZZ^  
@HWI-EAS443:3:16:1081:1582#0/1  
CGCATTCTTCAATTAACCACCTTATTTCTCAAATTTCT  
+HWI-EAS443:3:16:1081:1582#0/1  
abb`a`Y`baa\_aaaabaaa\_]a\_\_abaaYbaaaa``\_aa  
@HWI-EAS443:3:16:1088:1014#0/1  
ATGAGAATGGGAGACCTTCACTACCTCCAGAGCAGAAATG  
+HWI-EAS443:3:16:1088:1014#0/1  
abaab`aab\_^aa`\_`a`a¥`\_]`]a`^\_]`^`^aU]`^\_  
@HWI-EAS443:3:16:1114:50#0/1  
AAGGTCTCTAATCGGTTAAAGATTACACTGAAGTTCGCTT  
+HWI-EAS443:3:16:1114:50#0/1  
¥U^V\_Ua¥T\_[aaa\_]`S\_UQ[Y``TS\_\_\_WUZRT`WZ\_  
@HWI-EAS443:3:16:1152:1840#0/1  
AGAACTGTGATGAGAATGGGAGACCTTCACTACCTCCAG  
+HWI-EAS443:3:16:1152:1840#0/1  
]b^\_]a]b¥b^`aaaP][`aUH¥[[DU^W`R¥`\_[Z\_`^^  
@HWI-EAS443:3:16:1160:1828#0/1  
ATATTTTCAGAGACTCGAACCGTGTTACCATTCCATTCAA  
+HWI-EAS443:3:16:1160:1828#0/1  
`bbbbaa`aaaaaaaa]a`bSX\_a\_TT¥^S`a`¥0\_a\_W\_B  
@HWI-EAS443:3:16:1171:1070#0/1  
CGCATTCTTCAATTAACCACCTTATTTCTCAAATTTCT  
+HWI-EAS443:3:16:1171:1070#0/1  
I\_[¥[aTaZ`^a\_`QZ¥SUXS`[W^^``VJ\_b\_TT`W[a\_  
@HWI-EAS443:3:16:1233:1451#0/1  
GAATGGGAGACCTTCACTACCTCCAGAGCAGAAATGAAAA

+HWI-EAS443:3:16:1233:1451#0/1  
ZZ\_S\_¥\_0]`[R]^`U`WQZ```ZX\_[a`Z^aaSVT[  
@HWI-EAS443:3:16:1241:1243#0/1  
AGAAACTGTGATGAGAATGGGAGACCTTCACTACCTCCAG  
+HWI-EAS443:3:16:1241:1243#0/1  
ab`aa`ab]a\_[baa\_a`a][`U\_\_`\_]^^ZY^^  
@HWI-EAS443:3:16:1253:1679#0/1  
TGAGAATGGGAGACCTTCACTACCTCCAGAGCAGAAATGA  
+HWI-EAS443:3:16:1253:1679#0/1  
\_b`^b`babbbaa^`^^^aaa^]`\_aa¥^aa¥a¥¥\_^^\_  
@HWI-EAS443:3:16:1258:1606#0/1  
GCCGCATTTCTTCAATTAACCACCTTATTTCTCAAATTT  
+HWI-EAS443:3:16:1258:1606#0/1  
`a]\_¥a]`Xaaa\_`\_\_aYYSX¥\_YY`aW\_^WO]YYYY\_X  
@HWI-EAS443:3:16:1293:295#0/1  
GCCGCATTTCTTCAATTAACCACCTTATTTCTCAAATTT  
+HWI-EAS443:3:16:1293:295#0/1  
TZ`aaY`ba\_[b^Saa[X¥a]\_Vxb```ba\_T]b[V[a]a  
@HWI-EAS443:3:16:1316:129#0/1  
ATCGGTTAAAGATTACACTGAAGTTCGCTTTTCAGTACTAT  
+HWI-EAS443:3:16:1316:129#0/1  
abaab`a`\_aa\_[aRSaY\_a^]a\_a\_b\_\_\_a\_^aU]V]^a  
@HWI-EAS443:3:16:1342:1462#0/1  
GTCGCTTTCAATCTGTGCCGCATTTCTTCAATTAACCACC  
+HWI-EAS443:3:16:1342:1462#0/1  
a`\_`aaa]````^`[\_a][```\_[`a`^Va\_`¥ZZ^ZW  
@HWI-EAS443:3:16:1362:750#0/1  
CGCTTGGAGAAACTGTGATGAGAATGGGAGACCTTACTA  
+HWI-EAS443:3:16:1362:750#0/1  
abba`ba^^]T\_[`aPa`Yaaaa`\_]V\_a\_ZPZY]`\_][  
@HWI-EAS443:3:16:1394:354#0/1  
AATCGCACGCAAAGAGGGCCTATTATCTTTTGCCTAGGCA  
+HWI-EAS443:3:16:1394:354#0/1  
]W^Wa^\_Ubb[I^¥ZX`a\_PO`b`\_`¥^aaaa^`a\_[HJ\_  
@HWI-EAS443:3:16:1423:1814#0/1  
TGAGAATGGGAGACCTTCACTACCTCCAGAGCAGAAATGA  
+HWI-EAS443:3:16:1423:1814#0/1  
aa\_^[`a¥`¥]¥[\_]`Xa\_SZWV[N`^]Y[¥[YW^Y]]X  
@HWI-EAS443:3:16:1535:145#0/1  
GTCGCTTTCAATCTGTGCCGCATTTCTTCAATTAACCACC  
+HWI-EAS443:3:16:1535:145#0/1  
^P^]^\_a`\_a`\_]a`X`\_\_\_¥]\_\_^^a^^]`\_\_[ZRZOW  
@HWI-EAS443:3:16:1538:1850#0/1  
CAAATCGTGAATGGATCTTGAAAGAGGAATCCAGCGAGA  
+HWI-EAS443:3:16:1538:1850#0/1  
abbaaaa\_abaa`ba\_\_^bbaaa`\_aaa`\_Qa\_\_\_\_\_`  
@HWI-EAS443:3:16:1556:1142#0/1  
GAAACTGTGATGAGAATGGGAGACCTTCACTACCTCCAGA  
+HWI-EAS443:3:16:1556:1142#0/1  
aaa\_a`b^b\_aa[a^\_a`a\_W`\_[\_XZTTR`^NNUUSX]Y

@HWI-EAS443:3:16:1566:1934#0/1  
CCGCATTTCTTCAATTAACCACCTTATTTCTCAAATTT  
+HWI-EAS443:3:16:1566:1934#0/1  
`bbbbbbbabbbbab`aaabba`bbb[ab\_baab`ba  
@HWI-EAS443:3:16:160:910#0/1  
GGCAACACCCTTGGCCTCGATATCGAAACAGCCACTCTTG  
+HWI-EAS443:3:16:160:910#0/1  
a`aababaabaaa`a```\_a`a\_\_aaaa`a`^^^`^`\_¥\_\_  
@HWI-EAS443:3:16:1611:646#0/1  
TGGAGAAACTGTGATGAGAATGGGAGACCTTCACTACCTC  
+HWI-EAS443:3:16:1611:646#0/1  
aaa`^^)`aab`\_Y)``a^a``N¥\_\_[^[W\_\_\_\_]]¥N[U^  
@HWI-EAS443:3:16:1624:1916#0/1  
AATGGGAGACCTTCACTACCTCCAGAGCAGAAATGAAAAG  
+HWI-EAS443:3:16:1624:1916#0/1  
a``aaa`aaaZa`a\_Z\_a¥Y\_V¥``W`W^)[\_\_\_\_TWXWZ\_  
@HWI-EAS443:3:16:1633:480#0/1  
GAAACTGTGATGAGAATGGGAGACCTTCACTACCTCCAGA  
+HWI-EAS443:3:16:1633:480#0/1  
a`[Z\_aa\_a`[`¥`Y]`\_`\_`][TQX\_[TLXVTRUPSU]V  
@HWI-EAS443:3:16:1768:854#0/1  
GAATGGGAGACCTTCACTACCTCCAGAGCAGAAATGAAAA  
+HWI-EAS443:3:16:1768:854#0/1  
`\_Y¥bba`bb¥¥V`R^^a\_[T^`\_`GZa\_\_]Y[R[a[¥Z¥  
@HWI-EAS443:3:16:1773:145#0/1  
GCCGCATTTCTTCAATTAACCACCTTATTTCTCAAATTT  
+HWI-EAS443:3:16:1773:145#0/1  
aaabaabba\_aa`a\_aa\_a¥U\_\_Xa`\_a\_aXYa`[)]`^\_  
@HWI-EAS443:3:16:23:293#0/1  
GCCGCATTTCTTCAATTAACCACCTTATTTCTCAAATTT  
+HWI-EAS443:3:16:23:293#0/1  
`abaa`abbbbbbba`babbaaabababbabbbb^S\_aaa  
@HWI-EAS443:3:16:300:1038#0/1  
CTTGGAGAAACTGTGATGAGAATGGGAGACCTTCACTACC  
+HWI-EAS443:3:16:300:1038#0/1  
abbabaaab`bba``aab\_baa\_a`aaaa\_\_aaaaaaa^\_  
@HWI-EAS443:3:16:309:1766#0/1  
GCCGCATTTCTTCAATTAACCACCTTATTTCTCAAATTT  
+HWI-EAS443:3:16:309:1766#0/1  
`bbbbbbabbabba^[`abaabbaaaaab`baaaa^aaa\_  
@HWI-EAS443:3:16:322:1735#0/1  
AGAAACTGTGATGAGAATGGGAGACCTTCACTACCTCCAG  
+HWI-EAS443:3:16:322:1735#0/1  
aaa^a`aaU```\_\_^¥``a¥¥¥U\_Y^[^^`\_]XXV^]RUX  
@HWI-EAS443:3:16:342:2013#0/1  
CGGCACAGATTGAAAGCGACAGAGAATAGTTTGAACAAA  
+HWI-EAS443:3:16:342:2013#0/1  
¥b`a`^aab`aba¥`Q[`]^`\_a^a\_\_b¥IU\_[\_]a[`ab  
@HWI-EAS443:3:16:362:536#0/1  
CTGAAAATATACAGAGATTCGCTTGGAGAAACTGTGATGA

+HWI-EAS443:3:16:362:536#0/1  
XZ`baX[\_`NYb^U`aX^T¥ZY[`¥^^`abRUaFPRSa\_  
@HWI-EAS443:3:16:390:49#0/1  
GAATGGGAGACCTTCACTACCTCCAGAGCAGAAATGAAAA  
+HWI-EAS443:3:16:390:49#0/1  
¥`^\_ba\_SZ]a\_¥]a^WWW[X^\_K¥ZQa[V]LL[R]QPR¥  
@HWI-EAS443:3:16:393:167#0/1  
TGCCGCATTTCTTCAATTAACCACCTTATTTCTCAAATT  
+HWI-EAS443:3:16:393:167#0/1  
abbbba[aaaab\_b^^abbb`ba\_aaa`ab`a\_aa`\_aa  
@HWI-EAS443:3:16:401:1090#0/1  
GATGAGAATGGGAGACCTTCACTACCTCCAGAGCAGAAAT  
+HWI-EAS443:3:16:401:1090#0/1  
aa`aa`Y^`aaa`a^\_a`\_`````^Y`\_`\_aW`\_^\_]X]\_  
@HWI-EAS443:3:16:403:1165#0/1  
GAAACTGTGATGAGAATGGGAGACCTTCACTACCTCCAGA  
+HWI-EAS443:3:16:403:1165#0/1  
aa[aaaa\_aa\_a]`YYSZ`¥PaYU\_\_]`a\_TU`]S\_]U]Z  
@HWI-EAS443:3:16:40:1250#0/1  
TGATGAGAATGGGAGACCTTCACTACCTCCAGAGCAGAAA  
+HWI-EAS443:3:16:40:1250#0/1  
abaa`aa]\_ab]```[`a``aaa`]a\_aa``^``\_`\_\_\_\_  
@HWI-EAS443:3:16:418:457#0/1  
GAATGGGAGACCTTCACTACCTCCAGAGCAGAAATGAAAA  
+HWI-EAS443:3:16:418:457#0/1  
aXaQ¥\_a^ba`\_\_\_\_\_a`a^\_\_`^]a\_\_\_\_\_¥]]\_\_¥WX\_  
@HWI-EAS443:3:16:42:1241#0/1  
CGCTTGGAGAAACTGTGATGAGAATGGGAGACCTTACTA  
+HWI-EAS443:3:16:42:1241#0/1  
abaabbaa]Q\_bbbb[^abaaa]aaa`aZ\_a`¥\_`aaa]`  
@HWI-EAS443:3:16:437:308#0/1  
CGCATTTCTTCAATTAACCACCTTATTTCTCAAATTTCT  
+HWI-EAS443:3:16:437:308#0/1  
abbbba`ba`aa^]aabaZ¥]\_aaa`a`aaaaba`aaaaXa  
@HWI-EAS443:3:16:452:1296#0/1  
ATCGCTTGCGGATATGCCAAAGGAAACAGTCTACCTGAAA  
+HWI-EAS443:3:16:452:1296#0/1  
`]]]]U¥^a^[^\_]W[\_\_\_J`WW[QGVZRRU¥W[RYHSXZY  
@HWI-EAS443:3:16:462:1100#0/1  
GAATGGGAGACCTTCACTACCTCCAGAGCAGAAATGAAAA  
+HWI-EAS443:3:16:462:1100#0/1  
^QRU[arS]`\_^¥WUT\_^V^\_YY[UUUXZW^RUWV¥WS¥U  
@HWI-EAS443:3:16:469:1885#0/1  
AGCGCGAAGTAGGTACAGATGCAATTGTCATTCTAAGTGT  
+HWI-EAS443:3:16:469:1885#0/1  
`Za\_a`aaa[aa¥[a`a\_\_a¥\_\_\_aYa^\_\_a`\_\_\_\_\_¥¥^]  
@HWI-EAS443:3:16:476:1259#0/1  
GGAGAAACTGTGATGAGAATGGGAGACCTTCACTACCTCC  
+HWI-EAS443:3:16:476:1259#0/1  
aaa\_¥S`bZ`Q^W[X`a^]]a``[`]`¥S\_^]`^Q]\_¥¥^N

@HWI-EAS443:3:16:491:65#0/1  
GCCGCATTTCTTCAATTAACCACCTTATTTCTCAAATTT  
+HWI-EAS443:3:16:491:65#0/1  
aa`baaaabaaa\_a\_\_aaa`\_\_^`\_`\_a`^]`\_\_[K\_`\_\_  
@HWI-EAS443:3:16:500:521#0/1  
AGAAACTGTGATGAGAATGGGAGACCTTCACTACCTCCAG  
+HWI-EAS443:3:16:500:521#0/1  
``aaaaaaG\_aZ`V`^`\_a`^`^V¥YY]XNZGY]VM]^R[R  
@HWI-EAS443:3:16:514:1575#0/1  
GAAAGCTCTTATCTCTTGTCTACTTCAAGCAGTAGTTGT  
+HWI-EAS443:3:16:514:1575#0/1  
aa\_aa`abbabaaa]^`^`[abaaaabbabaaa\_Z``]^`\_X  
@HWI-EAS443:3:16:535:154#0/1  
AGAAACTGTGATGAGAATGGGAGACCTTCACTACCTCCAG  
+HWI-EAS443:3:16:535:154#0/1  
]^`^Q^\_ba`^`Taa]Z¥a`a`[Y]W`X]\_\_\_\_^V^¥UY\_V]\_  
@HWI-EAS443:3:16:540:1019#0/1  
TGCCGCATTTCTTCAATTAACCACCTTATTTCTCAAATT  
+HWI-EAS443:3:16:540:1019#0/1  
`aV\_aa\_^H\_a\_^ab^baaa[0[]a`^`a`^`a\_bYb]aa\_  
@HWI-EAS443:3:16:54:525#0/1  
GATGAGAATGGGAGACCTTCACTACCTCCAGAGCAGAAAT  
+HWI-EAS443:3:16:54:525#0/1  
a¥^`^T]RL]aY^`\_S^\_Y[aa`^`\_YPaXX^S[¥[aT]XH  
@HWI-EAS443:3:16:59:635#0/1  
GTCGCTTTCAATCTGTGCCGCATTTCTTCAATTAACCACC  
+HWI-EAS443:3:16:59:635#0/1  
a\_\_aaa`aaabaa`aaZaa`a^^`^`a`a`^`\_`aaa`\_aa^`  
@HWI-EAS443:3:16:634:471#0/1  
CATTCTAAGTGTCTCGCTGGATTCTCTTTCAAGATCCAT  
+HWI-EAS443:3:16:634:471#0/1  
a¥bbbb`abWa]\_bbaaabb`abaa`babbbVaaaaa^a\_  
@HWI-EAS443:3:16:658:615#0/1  
GCCGCATTTCTTCAATTAACCACCTTATTTCTCAAATTT  
+HWI-EAS443:3:16:658:615#0/1  
`ab`a\_a`\_aa\_ba\_a`aa^\_aa\_\_aaa`a`^`a`^`\_a`\_  
@HWI-EAS443:3:16:683:643#0/1  
TGCCGCATTTCTTCAATTAACCACCTTATTTCTCAAATT  
+HWI-EAS443:3:16:683:643#0/1  
^\_a¥^\_S]¥\_a^^`Y\_\_a^^`^`\_S```[a¥¥aa\_]U]^X  
@HWI-EAS443:3:16:686:1362#0/1  
AGAAACTGTGATGAGAATGGGAGACCTTCACTACCTCCAG  
+HWI-EAS443:3:16:686:1362#0/1  
aabaabab\_`baaaa[a\_aa`\_a`[U`\_\_a]\_`^¥^\_X\_\_  
@HWI-EAS443:3:16:754:140#0/1  
GCCGCATTTCTTCAATTAACCACCTTATTTCTCAAATTT  
+HWI-EAS443:3:16:754:140#0/1  
aaaaaaaaaaaaa\_a`aaaa`\_a\_]a`aaa`\_\_`\_¥¥\_`^a  
@HWI-EAS443:3:16:761:437#0/1  
CCGCATTTCTTCAATTAACCACCTTATTTCTCAAATTT

+HWI-EAS443:3:16:761:437#0/1  
aaa`\_a^aaa`a[a`a`a`\_a^`\_`^\_\_a\_\_a`^`  
@HWI-EAS443:3:16:804:72#0/1  
GAGAACTGTGATGAGAATGGGAGACCTTCACTACCTCCA  
+HWI-EAS443:3:16:804:72#0/1  
Z\_bXVa^`^Q\_I]`Z`^aa]aWa\_ZGY]H]\_\_aTPQTFW  
@HWI-EAS443:3:16:80:1521#0/1  
GAGAATGGGAGACCTTCACTACCTCCAGAGCAGAAATGAA  
+HWI-EAS443:3:16:80:1521#0/1  
`\_aaab¥^I]^ab`\_b\_b`a\_aaaaaaa`\_aaZP^a^a  
@HWI-EAS443:3:16:815:1708#0/1  
AGAATGGGAGACCTTCACTACCTCCAGAGCAGAAATGAAA  
+HWI-EAS443:3:16:815:1708#0/1  
abaa`ZX¥a`aXW]\_aa^\_a\_\_a`\_aX`V^aa`\_`\_`  
@HWI-EAS443:3:16:826:880#0/1  
GGCTGTTTCGATATCGAGGCCAAGGGTGTTCCTCTTCCT  
+HWI-EAS443:3:16:826:880#0/1  
aaabb`a]XUOP[YR[TZ]ZZUWS¥\_G\_Y]U\_[ZUS\_Z^¥  
@HWI-EAS443:3:16:829:785#0/1  
GGAGAACTGTGATGAGAATGGGAGACCTTCACTACCTCC  
+HWI-EAS443:3:16:829:785#0/1  
abaaaaaabbaaaaaab^aa`aa\_a\_]`````^a\_¥[^^\_  
@HWI-EAS443:3:16:840:1246#0/1  
GCTGTTTCGATATCGAGGCCAAGGGTGTTCCTCTTCCT  
+HWI-EAS443:3:16:840:1246#0/1  
`bP]W`aaRV]XT^`P`]Q¥ROXZ^GKKXRRVVBBBBB  
@HWI-EAS443:3:16:841:1173#0/1  
CTGTGATGAGAATGGGAGACCTTCACTACCTCCAGAGCAG  
+HWI-EAS443:3:16:841:1173#0/1  
abba`abbabb`bbaa`aaaa`\_b`a`\_\_aa`aa`\_`\_`  
@HWI-EAS443:3:16:844:758#0/1  
TGAGAATGGGAGACCTTCACTACCTCCAGAGCAGAAATGA  
+HWI-EAS443:3:16:844:758#0/1  
abaa`aaaa\_a`\_`a`a\_a`\_\_\_]\_\_a]^`^`\_]`\_`^\_  
@HWI-EAS443:3:16:855:1703#0/1  
GGTAATGGTGAATTTCTCCAATTGCTCCCTCCTCAG  
+HWI-EAS443:3:16:855:1703#0/1  
^\_Ua¥`X]NY``a]\_a`^`aa\_\_b\_]¥a[ba\_\_\_]`\_`\_`  
@HWI-EAS443:3:16:892:1357#0/1  
AGAACTGTGATGAGAATGGGAGACCTTCACTACCTCCAG  
+HWI-EAS443:3:16:892:1357#0/1  
¥¥]¥¥^\_\_T]`aaaZ^^`aa`a\_\_`a`\_]\_\_ZRFXTTW^  
@HWI-EAS443:3:16:898:631#0/1  
CAGAAAGGTAGCGGAAGTAGGTACAGATGCAATTGTCAT  
+HWI-EAS443:3:16:898:631#0/1  
^¥]¥XX\_bS[a`bbS¥Y¥]aa¥¥^^]`\_b]aaaab[\_a`  
@HWI-EAS443:3:16:907:1534#0/1  
AGGGCCTATTATCTTTTGCCTAGGCATGAGCATGAACCAG  
+HWI-EAS443:3:16:907:1534#0/1  
[¥¥\_bab\_bbbbbbaabaa\_aaaa]aaa`aaaa`\_[aa

@HWI-EAS443:3:16:920:1183#0/1  
CTTGGAGAACTGTGATGAGAATGGGAGACCTTCACTACC  
+HWI-EAS443:3:16:920:1183#0/1  
ab¥baabbbbaaab\_a` `a\_\_`aab`^a\_`aa^a\_`^`^U  
@HWI-EAS443:3:16:925:1884#0/1  
AGAAACTGTGATGAGAATGGGAGACCTTCACTACCTCCAG  
+HWI-EAS443:3:16:925:1884#0/1  
aa`aa\_aa\_`^`a\_a`^`a]^^]``]U^\_\_\_\_\_`\_V^ZX^[  
@HWI-EAS443:3:16:950:231#0/1  
GAGAACTGTGATGAGAATGGGAGACCTTCACTACCTCCA  
+HWI-EAS443:3:16:950:231#0/1  
aab^` `aa]aa`a\_a`aaa\_`\_a^Y^^]]a^\_[VVYV^Y  
@HWI-EAS443:3:16:952:167#0/1  
GCCGCATTTCTTCAATTAACCACCTTATTTCTCAAATTT  
+HWI-EAS443:3:16:952:167#0/1  
aaaa\_`aaa\_aa`\_` `a`a\_`^`\_¥a\_`a` `\_\_`a\_Z`\_`\_`  
@HWI-EAS443:3:16:983:870#0/1  
AGAAACTGTGATGAGAATGGGAGACCTTCACTACCTCCAG  
+HWI-EAS443:3:16:983:870#0/1  
aaaaaab\_a\_aa\_a]`aaa\_`a\_]\_\_\_\_\_a^`\_`\_X^V]^  
@HWI-EAS443:3:16:991:1368#0/1  
ATCGCACGCAAAGAGGGCCTATTATCTTTTGCCTAGGCAT  
+HWI-EAS443:3:16:991:1368#0/1  
` `aX][a]THLXVPZ¥Y][[\_YZ^\_NX¥\_YX]YSTS¥]  
@HWI-EAS443:3:17:1051:1244#0/1  
CGCTTGGAGAACTGTGATGAGAATGGGAGACCTTCACTA  
+HWI-EAS443:3:17:1051:1244#0/1  
` `bbbbaabbbbaab`aababa\_aaaaaaaaa`aa^aa  
@HWI-EAS443:3:17:1079:124#0/1  
CATCTGTACCTACTTCGCGCTACCTTTCTGACATGACCCT  
+HWI-EAS443:3:17:1079:124#0/1  
Va¥^^baa]ba` `bbaaU\_[a]VVZ`aa` `a`aa`a\_\_Z\_  
@HWI-EAS443:3:17:1083:1133#0/1  
AGAAACTGTGATGAGAATGGGAGACCTTCACTACCTCCAG  
+HWI-EAS443:3:17:1083:1133#0/1  
Sa¥a[ba¥R¥TaVZ]T]]¥aa\_[Wa\_YTV^\_aa\_RY]^\_a  
@HWI-EAS443:3:17:109:575#0/1  
AGAAACTGTGATGAGAATGGGAGACCTTCACTACCTCCAG  
+HWI-EAS443:3:17:109:575#0/1  
aa[aaaa\_` `aa\_a`¥`Y[\_`\_]`^]\_X\_]\_]Y¥W^\_\_^  
@HWI-EAS443:3:17:1119:834#0/1  
CAGAAAGGTAGCGGAAGTAGGTACAGATGCAATTGTCAT  
+HWI-EAS443:3:17:1119:834#0/1  
\_U`WTWa`Ga¥ab\_aa[a]a` `X^aa\_]`^a\_aa` [aWa\_\_  
@HWI-EAS443:3:17:1119:849#0/1  
GCCGCATTTCTTCAATTAACCACCTTATTTCTCAAATTT  
+HWI-EAS443:3:17:1119:849#0/1  
a^0\_`^ [S^\_`^YZR\_\_\_¥SW^a\_`^I`a`^`\_WU[[\_]`^  
@HWI-EAS443:3:17:1155:1383#0/1  
GACAGAAATTTGAGGAAATAAGGTGGTTAATTGAAGAAAT

+HWI-EAS443:3:17:1155:1383#0/1  
abaababa\_H\_babb\_aaaaabaZaa^a`aaa\_`a```\_  
@HWI-EAS443:3:17:1164:1136#0/1  
GATGAGAATGGGAGACCTTCACTACCTCCAGAGCAGAAAT  
+HWI-EAS443:3:17:1164:1136#0/1  
\_][^L[]\_^]a^^]U`¥a\_\_^TX[XZ^ZaZ[NEUWQ\_`  
@HWI-EAS443:3:17:1167:1464#0/1  
TGTCGCTTTCAATCTGTGCCGATTTCTTCAATTAACCAC  
+HWI-EAS443:3:17:1167:1464#0/1  
aaUaba`aaUVX``\_a\_aa``\_J`]W`a`]`^a\_`\_a5]]  
@HWI-EAS443:3:17:1205:826#0/1  
TGAGAATGGGAGACCTTCACTACCTCCAGAGCAGAAATGA  
+HWI-EAS443:3:17:1205:826#0/1  
ab\_b`aabaa`aV]^a`\_^[]Ua`]`\_\_\_\_\_U]\_\_`Z  
@HWI-EAS443:3:17:1221:585#0/1  
TGAGAATGGGAGACCTTCACTACCTCCAGAGCAGAAATGA  
+HWI-EAS443:3:17:1221:585#0/1  
^\_`aZ^^`a``a^^UW[RT[]aZU]`[Q]^a`¥aU]P`a[  
@HWI-EAS443:3:17:1273:949#0/1  
AGAATGGGAGACCTTCACTACCTCCAGAGCAGAAATGAAA  
+HWI-EAS443:3:17:1273:949#0/1  
¥a\_`\_``a¥\_¥¥a[\_`^Q]¥T`aa`\_\_\_W\_WW[YW^a\_ZS  
@HWI-EAS443:3:17:1274:1392#0/1  
TGAGAATGGGAGACCTTCACTACCTCCAGAGCAGAAATGA  
+HWI-EAS443:3:17:1274:1392#0/1  
``\_]`ab\_`aa`a[\_```a``a¥VaZa]a^a\_P\_WZa\_`V  
@HWI-EAS443:3:17:1313:938#0/1  
GAAACTGTGATGAGAATGGGAGACCTTCACTACCTCCAGA  
+HWI-EAS443:3:17:1313:938#0/1  
abaa\_ab\_a\_ab^a^\_aaa\_¥a^Y\_a``aZaa\_U¥^[]\_]`  
@HWI-EAS443:3:17:1319:2044#0/1  
TTCGCTTGGAGAAACTGTGATGAGAATGGGAGACCTTCAC  
+HWI-EAS443:3:17:1319:2044#0/1  
Zb`H¥aa[`bbaa`a^JW][][]\_aU`]U``\_\_`UZ[RRaV  
@HWI-EAS443:3:17:1327:242#0/1  
CCGCATTTCTTCAATTAACCACCTTATTTCTCAAATTT  
+HWI-EAS443:3:17:1327:242#0/1  
abbb`bbb`baa\_`a`\_a\_\_```aa]a\_a\_^a``Z\_a\_\_^  
@HWI-EAS443:3:17:1337:57#0/1  
AGACTGTTTCTTTGGCATATCCGCAAGCGATTTGCAGAC  
+HWI-EAS443:3:17:1337:57#0/1  
abaaaa]ba^`aaa``\_a`\_¥Y`^^`]\_]\_^\_^[[^YP  
@HWI-EAS443:3:17:1342:576#0/1  
GCCGCATTTCTTCAATTAACCACCTTATTTCTCAAATTT  
+HWI-EAS443:3:17:1342:576#0/1  
Ta`]]]`bbb^b`aaabaa`[\_a]Ua`^`aaZ\_a\_[W^a``  
@HWI-EAS443:3:17:1362:1335#0/1  
GGAGAAACTGTGATGAGAATGGGAGACCTTCACTACCTCC  
+HWI-EAS443:3:17:1362:1335#0/1  
ab\_ba\_baa\_L^[\_b^aaaaaaa\_a]a^aa^a\_`\_^Q\_Z¥



@HWI-EAS443:3:17:137:1526#0/1  
ATGAGAATGGGAGACCTTCACTACCTCCAGAGCAGAAATG  
+HWI-EAS443:3:17:137:1526#0/1  
aX^a`a]Y0¥a¥U¥a`aaa`Xa`aaaa`¥`[\_]\_\_^\_  
@HWI-EAS443:3:17:142:473#0/1  
TGAGAATGGGAGACCTTCACTACCTCCAGAGCAGAAATGA  
+HWI-EAS443:3:17:142:473#0/1  
ababaaaa¥Q\_aaba\_bb`````aa`aa\_a`aa`\_\_aa`  
@HWI-EAS443:3:17:1445:1098#0/1  
CACTGAGGAGGGAGCAATAGTTGGAGAAATTTACCATTA  
+HWI-EAS443:3:17:1445:1098#0/1  
aa\_bb¥bb`a`a\_a\_\_`a]aX``\_aa\_a`a`a`\_X^`\_`\_  
@HWI-EAS443:3:17:146:249#0/1  
ATTGTCTGCAAATCGCTTGGCGATATGCCAAAGGAAACAG  
+HWI-EAS443:3:17:146:249#0/1  
abaa\_aaaa[aa`a\_\_^`\_`\_a]\_]^^^WW`^T]R]\_Z¥U  
@HWI-EAS443:3:17:1475:77#0/1  
TGAGAATGGGAGACCTTCACTACCTCCAGAGCAGAAATGA  
+HWI-EAS443:3:17:1475:77#0/1  
ab\_a^^abU\_ZaUS^^\_Y`U\_]RY\_RY¥\_Y^XUXKNU]MN  
@HWI-EAS443:3:17:1501:174#0/1  
CGCATTTCTTCAATTAACCACCTTATTTCTCAAATTTCT  
+HWI-EAS443:3:17:1501:174#0/1  
Z``\_Z¥a¥¥^]¥^]\_b¥Q\_`^`a]W```\_Wa^`¥^aa]L\_  
@HWI-EAS443:3:17:1506:1685#0/1  
CGCATTTCTTCAATTAACCACCTTATTTCTCAAATTTCT  
+HWI-EAS443:3:17:1506:1685#0/1  
]bbb\_bab¥\_ab]babbXbbaabaabaaZ\_baa\_`ba\_Ya  
@HWI-EAS443:3:17:1518:274#0/1  
CGAGAAAGCTCTTATCTCTTGTCTACTTCAAGCAGTAGT  
+HWI-EAS443:3:17:1518:274#0/1  
\_aa^\_Sa\_\_\_\_`a\_[OZX\_\_`W``[baaaa^```]aUaa\_  
@HWI-EAS443:3:17:1542:1380#0/1  
TCTGAAAATATACAGAGATTCGCTTGGAGAAACTGTGATG  
+HWI-EAS443:3:17:1542:1380#0/1  
\_`^`\_[a`a`a`aba`bQU`[ZXa\_ZFU^T`WP]SX`X[NNX  
@HWI-EAS443:3:17:1588:389#0/1  
AACACGGTTCGAGTCTCTGAAAATATACAGAGATTCGCTT  
+HWI-EAS443:3:17:1588:389#0/1  
a\_M[U``[a^^[`^aa\_[^UU\_\_a\_YX¥aa¥]¥]YVRT[Z  
@HWI-EAS443:3:17:1613:445#0/1  
AGAAACTGTGATGAGAATGGGAGACCTTCACTACCTCCAG  
+HWI-EAS443:3:17:1613:445#0/1  
aaaaabb`baaaaa`aba`a]a\_¥¥a`\_`W\_\_UW\_¥V`\_  
@HWI-EAS443:3:17:1619:1161#0/1  
TGAAAATATACAGAGATTCGCTTGGAGAAACTGTGATGAG  
+HWI-EAS443:3:17:1619:1161#0/1  
aa\_```aaaa\_`]`a]\_\_\_\_`¥\_S\_RYa^]`W``TXSUTGV  
@HWI-EAS443:3:17:1644:777#0/1  
TGAGAATGGGAGACCTTCACTACCTCCAGAGCAGAAATGA

+HWI-EAS443:3:17:1644:777#0/1  
ababa\_bbb`b`Z`]]aW`\_N\_¥¥`aW`¥\_XWM¥``]  
@HWI-EAS443:3:17:1662:336#0/1  
GATGAGAATGGGAGACCTTCACTACCTCCAGAGCAGAAAT  
+HWI-EAS443:3:17:1662:336#0/1  
aa`babaaaaa`a^Z\_^^`\_]X\_^Z\_^V\_WY\_YYY^  
@HWI-EAS443:3:17:1765:541#0/1  
CTGTGATGAGAATGGGAGACCTTCACTACCTCCAGAGCAG  
+HWI-EAS443:3:17:1765:541#0/1  
abb¥aa`b`\_a`aa`a`\_\_a`^`^b`\_U`^^`a`XUX  
@HWI-EAS443:3:17:1766:1319#0/1  
AGAAACTGTGATGAGAATGGGAGACCTTCACTACCTCCAG  
+HWI-EAS443:3:17:1766:1319#0/1  
aaaaa\_ab^a`a\_\_\_Zaaa\_a]\_^WZ\_^ZWZZ^ZU^WZX^  
@HWI-EAS443:3:17:188:1082#0/1  
GGAGAACTGTGATGAGAATGGGAGACCTTCACTACCTCC  
+HWI-EAS443:3:17:188:1082#0/1  
^[U]\_Wab``SUY`R`aZYXZVRN\_Y[\_YZ`a`ZZYHW`]  
@HWI-EAS443:3:17:193:586#0/1  
GAGAACTGTGATGAGAATGGGAGACCTTCACTACCTCCA  
+HWI-EAS443:3:17:193:586#0/1  
\_\_\_J\_aaaaQb`¥a[a\_\_\_`\_ZY`ZT`^^^[\_VR[WZ¥  
@HWI-EAS443:3:17:210:21#0/1  
GAAAATATACAGAGATTCGCTTGGAGAACTGTGATGAGA  
+HWI-EAS443:3:17:210:21#0/1  
a`X^[`YQ]a^^P]P¥][Z¥XTX]TVUM^ZZ[PWWUUXWX  
@HWI-EAS443:3:17:222:137#0/1  
AGAACTGTGATGAGAATGGGAGACCTTCACTACCTCCAG  
+HWI-EAS443:3:17:222:137#0/1  
aba`aa`a]a`a]a^a^^`\_V[UW`^^^\_\_\_]\_\_¥ZZ^X^  
@HWI-EAS443:3:17:239:1534#0/1  
GCCGCATTTCTTCAATTAACCACCTTATTTCCCTCAAATTT  
+HWI-EAS443:3:17:239:1534#0/1  
aba`]ZV[]^Q0`Q^[WZiaa`^`ROY`^^^\_\_\_`Y[S[  
@HWI-EAS443:3:17:296:1021#0/1  
CATCCTCATAAGTATGCCTGGAAGAGAAGGTAATGGTGA  
+HWI-EAS443:3:17:296:1021#0/1  
¥b\_bbb\_0\_¥ab]bbbaW¥abbaabZ`[^`^¥N¥a¥¥^N\_^  
@HWI-EAS443:3:17:321:1057#0/1  
TGAGAATGGGAGACCTTCACTACCTCCAGAGCAGAAATGA  
+HWI-EAS443:3:17:321:1057#0/1  
`b`[^`aaaa^[U\_\_a`^a]`PSZ]\_a]\_X[\_SX`][`[\_^  
@HWI-EAS443:3:17:329:556#0/1  
GAAACTGTGATGAGAATGGGAGACCTTCACTACCTCCAGA  
+HWI-EAS443:3:17:329:556#0/1  
ZTJW^\_WY\_¥\_`^¥Y`^^`\_`a^\_XaVZV¥WSY¥^Y¥[  
@HWI-EAS443:3:17:333:498#0/1  
CCGCATTTCTTCAATTAACCACCTTATTTCCCTCAAATTT  
+HWI-EAS443:3:17:333:498#0/1  
a`]a`a^abaaa^aaaaaaaa`\_aaaa^`aa````\_a

@HWI-EAS443:3:17:33:768#0/1  
GAGAACTGTGATGAGAATGGGAGACCTTCACTACCTCCA  
+HWI-EAS443:3:17:33:768#0/1  
`\_a\_a\_\_\_\_\_Va`\_a^`W^aa\_^^^U^]`X]^`V^Y[V^R]  
@HWI-EAS443:3:17:370:1015#0/1  
GGAGAACTGTGATGAGAATGGGAGACCTTCACTACCTCC  
+HWI-EAS443:3:17:370:1015#0/1  
[a\_S\_¥Z\_b\_aabb\_aba`b`baaaVa`Xaa\_aa\_aV`\_^]  
@HWI-EAS443:3:17:406:905#0/1  
TGGAAAAGAACATAGTACTGAAAGCGAACTTCAGTGTAAAT  
+HWI-EAS443:3:17:406:905#0/1  
a`[[aa]aa`aaaV[\_baaaaa]aaaaaaaa\_aaa^a[`a\_  
@HWI-EAS443:3:17:435:519#0/1  
TGAGAATGGGAGACCTTCACTACCTCCAGAGCAGAAATGA  
+HWI-EAS443:3:17:435:519#0/1  
aaab¥¥\_a`^\_aaaa\_abaa`UV\_a`\_`\_\_aaV\_\_^`[  
@HWI-EAS443:3:17:456:1529#0/1  
GAAACTGTGATGAGAATGGGAGACCTTCACTACCTCCAGA  
+HWI-EAS443:3:17:456:1529#0/1  
]abaa`R`b\_ba]^baa`\_a\_aa`aaa`a[WY[`]`\_  
@HWI-EAS443:3:17:457:1003#0/1  
TGCCGCATTTCTTCAATTAACCACCTTATTTCTCAAATT  
+HWI-EAS443:3:17:457:1003#0/1  
a`babaaaaaaa`aaa`a`a\_aa]^`aa`\_\_\_`\_\_\_`^`^  
@HWI-EAS443:3:17:461:1060#0/1  
CCGCATTTCTTCAATTAACCACCTTATTTCTCAAATTTTC  
+HWI-EAS443:3:17:461:1060#0/1  
a`^`Q0¥aa^^a])`¥aa]PZ^b\_]R]¥X]U^]\_TGX[[`  
@HWI-EAS443:3:17:508:397#0/1  
AGAACTGTGATGAGAATGGGAGACCTTCACTACCTCCAG  
+HWI-EAS443:3:17:508:397#0/1  
\_ZJ`^`aS\_]a¥abaYW`aabbSTaH`R][Z[`]J\_Y`  
@HWI-EAS443:3:17:519:1937#0/1  
GGCACAGATTGAAAGCGACAGAGAATAGTTTCGAACAAAT  
+HWI-EAS443:3:17:519:1937#0/1  
^`b`SV]¥b`babb[aabaY[aYabb\_SNY`aVab\_a`¥]  
@HWI-EAS443:3:17:521:1999#0/1  
AGTCTCTGAAAATATACAGAGATTCGCTTGGAGAACTGT  
+HWI-EAS443:3:17:521:1999#0/1  
`\_`a`a`a\_aaaaa`a`aa`\_\_¥]\_a¥X[|^]`\_^]\_W  
@HWI-EAS443:3:17:546:1525#0/1  
TGCGGCACAGATTGAAAGCGACAGAGAATAGTTTCGAACA  
+HWI-EAS443:3:17:546:1525#0/1  
¥Ybbb^^\_b[SZZ[[aab\_\_aV]\_a`^UH\_\_TaX[]W[\_a  
@HWI-EAS443:3:17:549:423#0/1  
CTTGAATGGAATGGTAACACGGTTCGAGTCTCTGAAAATA  
+HWI-EAS443:3:17:549:423#0/1  
`¥`\_^S`bbI``ab[aa^\_aaa][`R`¥[\_¥aXV\_\_U]  
@HWI-EAS443:3:17:566:1236#0/1  
GCCGCATTTCTTCAATTAACCACCTTATTTCTCAAATTT

+HWI-EAS443:3:17:566:1236#0/1  
]bbX`¥abbba`bbbbba\_b\_bbVba`b`b^bbbb^abaa  
@HWI-EAS443:3:17:568:1349#0/1  
CACAGATTGAAAGCGACAGAGAATAGTTTCGAACAAATAA  
+HWI-EAS443:3:17:568:1349#0/1  
a^bb`aaaaaaaba``aaaa`aa^a`aa`a^`\_a`a¥  
@HWI-EAS443:3:17:56:1858#0/1  
GTCGCTTTCAATCTGTGCCGATTTCTTCAATTAACCACC  
+HWI-EAS443:3:17:56:1858#0/1  
a^aaaa[]^\_[`a\_\_X^[X[]Q]\_]\_[\_a`\_\_\_\_\_^W  
@HWI-EAS443:3:17:583:1494#0/1  
GTGATGAGAATGGGAGACCTTCACTACCTCCAGAGCAGAA  
+HWI-EAS443:3:17:583:1494#0/1  
a^a)[^abaaZ^^b]aa[aa\_`a\_`a[\_`P[`[V[Na`\_\_  
@HWI-EAS443:3:17:610:669#0/1  
CGCGCTACCTTTCTGACATGACCCTCGAGGAAATGTCACG  
+HWI-EAS443:3:17:610:669#0/1  
V\_bbabbbbaababbbaab]bbbaababbb\_bbb`Xbbab  
@HWI-EAS443:3:17:611:956#0/1  
GCCGCATTTCTTCAATTAACCACCTTATTTCTCAAATTT  
+HWI-EAS443:3:17:611:956#0/1  
abab\_Zaaaaaaa`aaaaa`aa\_`\_\_a`a`\_a]`X\_a\_`  
@HWI-EAS443:3:17:613:707#0/1  
GAGAATGGGAGACCTTCACTACCTCCAGAGCAGAAATGAA  
+HWI-EAS443:3:17:613:707#0/1  
aaa\_aaaa`^`a\_`\_`a`\_`\_`\_`\_`\_]aa[\_\_\_\_a^\_]\_\_\_\_^  
@HWI-EAS443:3:17:635:553#0/1  
GCCGCATTTCTTCAATTAACCACCTTATTTCTCAAATTT  
+HWI-EAS443:3:17:635:553#0/1  
`aS\_`bbbbbbbbbbbbbabaaaabaaabaaaa`a[aaaa  
@HWI-EAS443:3:17:638:658#0/1  
GCATCACCCAATCCATTGTCTGCAAATCGCTTGCGGATAT  
+HWI-EAS443:3:17:638:658#0/1  
aaaa¥aaaa¥aa`aaa^`\_]\_^\_\_a\_\_\_Y^]`¥^^U]ZR  
@HWI-EAS443:3:17:672:1661#0/1  
TGGAGAACTGTGATGAGAATGGGAGACCTTCACTACCTC  
+HWI-EAS443:3:17:672:1661#0/1  
Va`]^a\_\_\_Z)`\_]\_¥`QV]b```\_]UH]V`\_ML]GN[S  
@HWI-EAS443:3:17:694:1681#0/1  
GAGAAAGCTCTTATCTCTTGTCTACTTCAAGCAGTAGTT  
+HWI-EAS443:3:17:694:1681#0/1  
ab^a`a`\_`^a`a\_a\_a`\_aa\_a\_\_a\_a`\_a`\_]\_`\_Z\_SS\_  
@HWI-EAS443:3:17:737:1053#0/1  
GCTTGGAGAACTGTGATGAGAATGGGAGACCTTCACTAC  
+HWI-EAS443:3:17:737:1053#0/1  
aa[]a`aa]S^\_a^NaU¥a\_\_ZNGQ\_¥Q^PRNWZVUT¥\_¥  
@HWI-EAS443:3:17:745:1790#0/1  
CCGCATTTCTTCAATTAACCACCTTATTTCTCAAATTT  
+HWI-EAS443:3:17:745:1790#0/1  
abV`Y^`a`a`a`aaa\_`\_\_\_\_\_^\_\_\_\_\_]`^`\_`\_]`\_]`^X



+HWI-EAS443:3:18:1050:624#0/1  
aa\_b\_aaaa^aaZ\_\_\_aa`\_Z`\_]a`\_a`\_^Y\_^\_\_^\_^`  
@HWI-EAS443:3:18:1092:1426#0/1  
GAAGGTAATGGTGAAATTTCTCCAACCTATTGCTCCCTCCT  
+HWI-EAS443:3:18:1092:1426#0/1  
aa\_a`Xaa`¥^`\_^aa\_\_\_`^`\_`\_`a``\_\_`V\_]\_] ]  
@HWI-EAS443:3:18:1124:1592#0/1  
CCGCATTTCTTCAATTAACCACCTTATTTCTCAAATTT  
+HWI-EAS443:3:18:1124:1592#0/1  
abXPNUY`X¥]a`a`^\_aXV¥^aa\_[RPV¥Y¥^Y]a[ZGV  
@HWI-EAS443:3:18:1134:953#0/1  
GCCGCATTTCTTCAATTAACCACCTTATTTCTCAAATTT  
+HWI-EAS443:3:18:1134:953#0/1  
aaW\_a\_\_\_a]Z]^`H\_Z]W`[¥\_[a[Qa\_\_\_[G\_X[P¥^]\_`  
@HWI-EAS443:3:18:1170:1139#0/1  
TCTCGCTGGATTCTCTTTCAAGATCCATTCCACGATTTG  
+HWI-EAS443:3:18:1170:1139#0/1  
U\_S\_] ]abaa^baZW^]bab`Z]Sa`¥a]^¥^a]]WaaaU  
@HWI-EAS443:3:18:1198:926#0/1  
GCCGCATTTCTTCAATTAACCACCTTATTTCTCAAATTT  
+HWI-EAS443:3:18:1198:926#0/1  
a^\_aVU[aZ]a\_[\_\_\_`^`^`][S^\_\_\_`^^X¥^X^]]^WZ  
@HWI-EAS443:3:18:1210:1964#0/1  
GCCGCATTTCTTCAATTAACCACCTTATTTCTCAAATTT  
+HWI-EAS443:3:18:1210:1964#0/1  
a``]W\_]\_] ]`\_¥``\_V]^SFV¥RXV][¥\_W[¥Z¥YZ^ZZ  
@HWI-EAS443:3:18:121:603#0/1  
GGAGAACTGTGATGAGAATGGGAGACCTTCACTACCTCC  
+HWI-EAS443:3:18:121:603#0/1  
`baaab`aabSaaaa`b`¥a```Va``aaa]a``a`a\_a^  
@HWI-EAS443:3:18:1221:284#0/1  
GCCGCATTTCTTCAATTAACCACCTTATTTCTCAAATTT  
+HWI-EAS443:3:18:1221:284#0/1  
^XOY]\_a]]YaZXPYXa\_[WTWY]Z¥Y¥`¥V¥^RY\_WV[^  
@HWI-EAS443:3:18:1311:1847#0/1  
GAAAGCTCTTATCTCTTGTCTACTTCAAGCAGTAGTTGT  
+HWI-EAS443:3:18:1311:1847#0/1  
a^`\_Y]b`abY`^a\_¥aaXa\_adW``\_aa]SYaW\_\_Y\_\_Y  
@HWI-EAS443:3:18:1341:426#0/1  
ATGAGAATGGGAGACCTTCACTACCTCCAGAGCAGAAATG  
+HWI-EAS443:3:18:1341:426#0/1  
ZWWWZZ¥`¥]` [XZ^^ZQX]^DF^ZLRWW` `^`Y^a]^  
@HWI-EAS443:3:18:1376:618#0/1  
GCAAATCGCTTGCGGATATGCCAAAGGAAACAGTCTACCT  
+HWI-EAS443:3:18:1376:618#0/1  
`]`^`LJ[RYVaV]WP[aX]QT]]]^G[]VV^VWTRFNV  
@HWI-EAS443:3:18:1384:1716#0/1  
AACACGGTTCGAGTCTCTGAAAATATACAGAGATTCGCTT  
+HWI-EAS443:3:18:1384:1716#0/1  
ab\_a]aa^\_aa\_a\_\_\_^`\_V]^\_X\_^Z^]]\_`^`[\_X^^

@HWI-EAS443:3:18:143:1430#0/1  
CATATCCGCAAGCGATTTGCAGACAATGGATTGGGTGATG  
+HWI-EAS443:3:18:143:1430#0/1  
aaaaaaa`a`]¥¥\_aTQNR[Z\_[OURYZ[[QQ¥TWNJRMV  
@HWI-EAS443:3:18:1444:1693#0/1  
TGCCGCATTTCTTCAATTAACCACCTTATTTCCCTCAAATT  
+HWI-EAS443:3:18:1444:1693#0/1  
[SS\_ab¥^^`aZYU¥aZ¥abV¥`VY`aab\_a\_V¥^Za`ba  
@HWI-EAS443:3:18:1482:1349#0/1  
GAAAGCTCTTATCTCTTGTCTACTTCAAGCAGTAGTTGT  
+HWI-EAS443:3:18:1482:1349#0/1  
[T\_YYbU^`]T^]\_\_a`Z`¥Z]a`¥T^]a\_X^^Z[TY`[R  
@HWI-EAS443:3:18:1484:427#0/1  
ACTGGTTCATGCTCATGCCTAGGCAAAAGATAATAGGCCC  
+HWI-EAS443:3:18:1484:427#0/1  
a[\_bba`\_\_aa[^\_\_^b^UYW\_¥W\_abaaa``¥`¥N¥X]`  
@HWI-EAS443:3:18:1489:612#0/1  
TGGTAACACGGTTCGAGTCTCTGAAAATATACAGAGATTC  
+HWI-EAS443:3:18:1489:612#0/1  
a``]aaaa\_baY`ab`a¥a[\_`a]\_\_\_^]\_¥W`a\_`]¥Y¥  
@HWI-EAS443:3:18:1502:483#0/1  
GAAACTGTGATGAGAATGGGAGACCTTCACTACCTCCAGA  
+HWI-EAS443:3:18:1502:483#0/1  
a\_\_a^ab\_ba`b`^^aaa\_VV\_UT\_]`X¥`VOVUJLaU  
@HWI-EAS443:3:18:1522:1579#0/1  
GAATGGGAGACCTTCACTACCTCCAGAGCAGAAAATGAAAA  
+HWI-EAS443:3:18:1522:1579#0/1  
\_U[aTS]Z0¥JRXXPX^``¥Q\_^YVNQOQ[X¥`SVVYX¥V  
@HWI-EAS443:3:18:1535:559#0/1  
CGCTTGGAGAAACTGTGATGAGAATGGGAGACCTTCACTA  
+HWI-EAS443:3:18:1535:559#0/1  
`aba``[]aaaaXa\_V]a[[Xa\_`R^a`\_^UUY\_`ZVNYT  
@HWI-EAS443:3:18:153:28#0/1  
CGCATTCTTCAATTAACCACCTTATTTCCCTCAAATTTCT  
+HWI-EAS443:3:18:153:28#0/1  
aaa`aa```aa``aa``a`a\_^a`^a``\_\_\_\_\_Z\_`^\_^\_  
@HWI-EAS443:3:18:1542:49#0/1  
TGCCGCATTTCTTCAATTAACCACCTTATTTCCCTCAAATT  
+HWI-EAS443:3:18:1542:49#0/1  
Xb¥]FY]``bV¥a`\_abb\_aSRZU]\_XH`a\_^X`\_\_\_Yaa  
@HWI-EAS443:3:18:1602:1359#0/1  
GCGGCACAGATTGAAAGCGACAGAGAATAGTTTCGAACAA  
+HWI-EAS443:3:18:1602:1359#0/1  
aa`b\_bbaaaabaaaaaaa``\_a`aaa\_a\_]abXa\_aX``  
@HWI-EAS443:3:18:160:800#0/1  
GCCGCATTTCTTCAATTAACCACCTTATTTCCCTCAAATTT  
+HWI-EAS443:3:18:160:800#0/1  
`a\_\_ab^\_]\_]\_aaa]`^aa`\_Z\_a`^W`aaa`aa``\_a\_]`  
@HWI-EAS443:3:18:1626:137#0/1  
GCCGCATTTCTTCAATTAACCACCTTATTTCCCTCAAATTT

+HWI-EAS443:3:18:1626:137#0/1  
\_T^[X\_ZYW\_] [Y[[^¥]XXXXZUZ\_Z]ZZ^ZZVZZ]Z  
@HWI-EAS443:3:18:1636:591#0/1  
GAAACTGTGATGAGAATGGGAGACCTTCACTACCTCCAGA  
+HWI-EAS443:3:18:1636:591#0/1  
aaa`¥ab`a`aa`a^`aaa\_]a^]W^^[`V\_\_WV[^X]\_Y  
@HWI-EAS443:3:18:1677:1302#0/1  
AAAATATACAGAGATTTCGCTTGGAGAACTGTGATGAGAA  
+HWI-EAS443:3:18:1677:1302#0/1  
`^aa\_babaabaaaa\_`b`a^aa^a`\_X\_¥¥¥^]a]\_] [  
@HWI-EAS443:3:18:1698:48#0/1  
GGTTAATTGAAGAAATGCGGCACAGATTGAAAGCGACAGA  
+HWI-EAS443:3:18:1698:48#0/1  
\_baab^bab`^b^`a]\_K\_`SXT^a\_a\_b^^\_dW]\_XX`^  
@HWI-EAS443:3:18:1702:1940#0/1  
TGGTAACACGGTTCGAGTCTCTGAAAATATACAGAGATTC  
+HWI-EAS443:3:18:1702:1940#0/1  
[b`IbT^babb^abb\_a^ab`^\_\_`^`\_^a\_^a]aS]^  
@HWI-EAS443:3:18:1758:408#0/1  
GGAGAACTGTGATGAGAATGGGAGACCTTCACTACCTCC  
+HWI-EAS443:3:18:1758:408#0/1  
aY^a[[\_]¥^PaR¥VKTPY[W^WSWUWV^YYYYVWZULNQU  
@HWI-EAS443:3:18:201:345#0/1  
GCGAGACACTTAGAATGACAATTGCATCTGTACCTACTTC  
+HWI-EAS443:3:18:201:345#0/1  
aabab`abbabbaaabab`a\_aa^`aaaab[a`aaa`a\_\_  
@HWI-EAS443:3:18:244:1046#0/1  
TCGCTGGATTCTCTTTCAAGATCCATTCCACGATTTGTT  
+HWI-EAS443:3:18:244:1046#0/1  
T\_X\_ZW[\_¥^a\_a\_\_^T\_\_XXYX\_OTYS\_X¥`]Z^\_]\_^`  
@HWI-EAS443:3:18:255:512#0/1  
GAGCAATTGGGACAGAAATTTGAGGAAATAAGGTGGTTAA  
+HWI-EAS443:3:18:255:512#0/1  
aXY]aaY¥`USaTaaMJN¥\_a]X][Y[]`V]ZOSRQ\_\_W  
@HWI-EAS443:3:18:273:390#0/1  
GAATGGGAGACCTTCACTACCTCCAGAGCAGAAATGAAAA  
+HWI-EAS443:3:18:273:390#0/1  
`^ZZ\_[]W`baba`aa^X`\_[]]¥]P[`Z`Y^]\_\_\_ZUW  
@HWI-EAS443:3:18:284:1054#0/1  
TGAGAATGGGAGACCTTCACTACCTCCAGAGCAGAAATGA  
+HWI-EAS443:3:18:284:1054#0/1  
`bababbbb`aaaabaabba¥aa]]b`aa``aa`[V¥aa\_  
@HWI-EAS443:3:18:326:2015#0/1  
GCCGCATTTCTTCAATTAACCACCTTATTTCTCAAATTT  
+HWI-EAS443:3:18:326:2015#0/1  
Yb^HR^a[U\_Z`\_`bY¥\_]GUb`[W[ZUIORVaa¥XPV^Z  
@HWI-EAS443:3:18:331:1583#0/1  
GAGGACCCCACTGCATTTTTGACATCCTCATAAGTATGT  
+HWI-EAS443:3:18:331:1583#0/1  
a`R`abbbbaabbba`\_\_a`aaaaaa`````a[RY``^`



@HWI-EAS443:3:18:351:1379#0/1  
CTGTGCCGATTTCTTCAATTAACCACCTTATTTCTCAA  
+HWI-EAS443:3:18:351:1379#0/1  
aaa`aaa`aaaaaaaaaaaaaa]`aa]a^`aa`a`\_]a`  
@HWI-EAS443:3:18:376:1471#0/1  
GAAAGCTTCTTCTTGTCTACTTCAAGCAGTAGTTGT  
+HWI-EAS443:3:18:376:1471#0/1  
aaaaaaaaabaabaaaaa]a`aaaa`a`a\_a\_\_a`^`\_]\_  
@HWI-EAS443:3:18:392:213#0/1  
GCCGCATTTCTTCAATTAACCACCTTATTTCTCAAATTT  
+HWI-EAS443:3:18:392:213#0/1  
]ba`W]aaa`\_aaa]a]a^¥X\_`Y`aaa`]``\_`\_¥`\_\_\_\_  
@HWI-EAS443:3:18:436:441#0/1  
AAACGAGAAAGCTTCTTCTTGTCTACTTCAAGCAGT  
+HWI-EAS443:3:18:436:441#0/1  
aa`a`\_¥]Q]aaaa`\_]aa````a^\_\_`\_]`\_^\_\_\_\_Y\_`X  
@HWI-EAS443:3:18:443:594#0/1  
AATTTCTCCAATTTGCTCCCTCCTCAGTGAAAGCCCTT  
+HWI-EAS443:3:18:443:594#0/1  
aababaaabbaaaa`aaa`aa`aa\_`aaa]^^\_`a\_] ]^  
@HWI-EAS443:3:18:446:697#0/1  
CGCTTGGAGAACTGTGATGAGAATGGGAGACCTTCACTA  
+HWI-EAS443:3:18:446:697#0/1  
`b`ab\_\_`a`¥aba]\_ab[b`a`\_`\_`V`]^P[[aT[a  
@HWI-EAS443:3:18:479:478#0/1  
GTCGCTTTCAATCTGTGCCGATTTCTTCAATTAACCACC  
+HWI-EAS443:3:18:479:478#0/1  
a`abaaaa`a`^^\_\_a\_aa`\_`aa\_\_`aa`\_`\_^`^^  
@HWI-EAS443:3:18:488:1282#0/1  
AGAAACTGTGATGAGAATGGGAGACCTTCACTACCTCCAG  
+HWI-EAS443:3:18:488:1282#0/1  
^\_aaXXbbaa]a[OX]\_aaX[[][¥\_\_^a\_^SX`^ZX[\_\_\_\_  
@HWI-EAS443:3:18:505:346#0/1  
GAATGGGAGACCTTCACTACCTCCAGAGCAGAAATGAAAA  
+HWI-EAS443:3:18:505:346#0/1  
a`abaaaaba\_aa\_\_a`a¥¥```\_a```\_`^\_\_`a\_^\_\_  
@HWI-EAS443:3:18:519:1040#0/1  
GCCGCATTTCTTCAATTAACCACCTTATTTCTCAAATTT  
+HWI-EAS443:3:18:519:1040#0/1  
^bb^`bbabbbbaaaaa¥babaa[b`baaa`a`a`aaa^  
@HWI-EAS443:3:18:530:1566#0/1  
ATCAAGGAATGGGCATCACCCAATCCATTGTCTGCAAAT  
+HWI-EAS443:3:18:530:1566#0/1  
abb[]ba`\_[a[^`^\_a`a^S\_a`^`^`^`\_X`]\_Na`a]  
@HWI-EAS443:3:18:53:1653#0/1  
GCGCGAAGTAGGTACAGATGCAATTGTCATTCTAAGTGTC  
+HWI-EAS443:3:18:53:1653#0/1  
aa¥\_¥KXX^a^\_V^`]`a`a\_aH]^^[a[WH^W]\_aUaTX  
@HWI-EAS443:3:18:61:737#0/1  
AGAAACTGTGATGAGAATGGGAGACCTTCACTACCTCCAG



@HWI-EAS443:3:19:1053:485#0/1  
CCGCATTTCTTCAATTAACCACCTTATTTCTCAAATTT  
+HWI-EAS443:3:19:1053:485#0/1  
abb\_^bababbabaaa`aaba`abb\_baaaa`ba`b]a\_  
@HWI-EAS443:3:19:1084:1403#0/1  
GAATGGAATGGTAACACGGTTCGAGTCTCTGAAAATATAC  
+HWI-EAS443:3:19:1084:1403#0/1  
ababba[a`ba¥bb\_bb`a^aaaaa^]aaaa`a`aa``aZ  
@HWI-EAS443:3:19:1090:1629#0/1  
GAGAATGGGAGACCTTCACTACCTCCAGAGCAGAAATGAA  
+HWI-EAS443:3:19:1090:1629#0/1  
aaa]`aaaaa`V][aabaaa\_``\_aaaa\_Xaa\_``\_`\_\_  
@HWI-EAS443:3:19:1129:61#0/1  
GCCGCATTTCTTCAATTAACCACCTTATTTCTCAAATTT  
+HWI-EAS443:3:19:1129:61#0/1  
]VG¥\_¥\_¥¥¥\_¥R]TZ``a\_]a`^[]`ZJRaZXZSXBB  
@HWI-EAS443:3:19:1148:727#0/1  
GCCGCATTTCTTCAATTAACCACCTTATTTCTCAAATTT  
+HWI-EAS443:3:19:1148:727#0/1  
aaababbba`bbab`bb`aaaa`bbabbaaaa`baaa`a  
@HWI-EAS443:3:19:115:733#0/1  
CAGAAAGGTAGCGGAAGTAGGTACAGATGCAATTGTCAT  
+HWI-EAS443:3:19:115:733#0/1  
a^S\_aaabSbbb^^aaaa[\_^T``aaaabaa\_aaa^^a`  
@HWI-EAS443:3:19:1164:790#0/1  
GCCGCATTTCTTCAATTAACCACCTTATTTCTCAAATTT  
+HWI-EAS443:3:19:1164:790#0/1  
\_¥\_ba\_aaa`bb`a`aaa\_^\_a¥[a`^a\_a\_]a^a\_X`a`  
@HWI-EAS443:3:19:1169:1530#0/1  
GTGATGAGAATGGGAGACCTTCACTACCTCCAGAGCAGAA  
+HWI-EAS443:3:19:1169:1530#0/1  
VU[WV^¥a[\_\_\_Z[R[\_¥`TX\_\_\_a]a\_]Z[¥[RW][[]]VZ  
@HWI-EAS443:3:19:1169:231#0/1  
GATGAGAATGGGAGACCTTCACTACCTCCAGAGCAGAAAT  
+HWI-EAS443:3:19:1169:231#0/1  
`aabab`aabaa\_ba\_`^aaa\_a\_\_Z`]]\_\_Xa^]a]R]]  
@HWI-EAS443:3:19:1188:312#0/1  
CACAGATTGAAAGCGACAGAGAATAGTTTTCGAACAAATAA  
+HWI-EAS443:3:19:1188:312#0/1  
[`bbaabab¥ba\_aa`a``]¥\_`]^a]aba`]a`^bUaa  
@HWI-EAS443:3:19:120:763#0/1  
GAGAATGGGAGACCTTCACTACCTCCAGAGCAGAAATGAA  
+HWI-EAS443:3:19:120:763#0/1  
````]a`^a```\_``\_`a^a\_Y]a`a`\_Z\_\_a`TYSa`¥¥  
@HWI-EAS443:3:19:1214:1512#0/1  
TACAGAGATTTCGCTTGGAGAACTGTGATGAGAATGGGAG  
+HWI-EAS443:3:19:1214:1512#0/1  
a`\_]a`\_Wa\_`]aa`\_`\_^`\_`\_\_aY]]\_[]\_][]\_¥\_]¥  
@HWI-EAS443:3:19:1216:1284#0/1  
CCGCATTTCTTCAATTAACCACCTTATTTCTCAAATTT

+HWI-EAS443:3:19:1216:1284#0/1  
aabbbbbb`bbbbbbbbbb`^`babbbbaabba``baba  
@HWI-EAS443:3:19:1222:1133#0/1  
AGAAACTGTGATGAGAATGGGAGACCTTCACTACCTCCAG  
+HWI-EAS443:3:19:1222:1133#0/1  
\_[W\$`a`[\_U\_W\_a`\$`W`\$`a`\_]`\$`Z`W`Z]^`^`^`X`]a`W`a  
@HWI-EAS443:3:19:1247:1558#0/1  
TGATGAGAATGGGAGACCTTCACTACCTCCAGAGCAGAAA  
+HWI-EAS443:3:19:1247:1558#0/1  
aa]ab`Z```\_UT```\_`a]\_\_\_\_\_a`^```^`X`^S`\$`a`^`^`\_  
@HWI-EAS443:3:19:1248:312#0/1  
GCGGCACAGATTGAAAGCGACAGAGAATAGTTTCGAACAA  
+HWI-EAS443:3:19:1248:312#0/1  
a]```[\_`Ya]Z`\_Y][T`\$`\_XXW`[\_`\$`\$`[R`\$`Y`\$`U`\$`Z`W`Y`U`Y`Q`X`B  
@HWI-EAS443:3:19:1251:1656#0/1  
CTGTGATGAGAATGGGAGACCTTCACTACCTCCAGAGCAG  
+HWI-EAS443:3:19:1251:1656#0/1  
abbababbababaaa`aaa\_aaaab`ab`\_`aQaa`]`aa  
@HWI-EAS443:3:19:1266:898#0/1  
GTCGCTTTCAATCTGTGCCGATTTCTTCAATTAACCACC  
+HWI-EAS443:3:19:1266:898#0/1  
a`\_`a`aaa`a`a`aa`^`\_`a`^`aaa`a`\_`\_]```\_`^`W`Z]  
@HWI-EAS443:3:19:1306:1184#0/1  
TGAGAATGGGAGACCTTCACTACCTCCAGAGCAGAAATGA  
+HWI-EAS443:3:19:1306:1184#0/1  
aaaaaaaa`a`^`aa`\_```\_`a`\_```VU`]```\_`^`^`^`]\_\_\_\_`\$`  
@HWI-EAS443:3:19:1322:1860#0/1  
AGAAACTGTGATGAGAATGGGAGACCTTCACTACCTCCAG  
+HWI-EAS443:3:19:1322:1860#0/1  
aaa`a`\_`aa`a`\_```a`^`^`]a`\_```^`]LY`\_`]Y`\_`XU]WX^^  
@HWI-EAS443:3:19:1327:1117#0/1  
GCCGATTTCTTCAATTAACCACCTTATTTCCCTCAAATTT  
+HWI-EAS443:3:19:1327:1117#0/1  
a`\$`U```HT]a`\_`aa`^`^`a`\_`^`XW`^`Z`^`\_]`\_`^`ZW`\_`X`]]][`\_`]  
@HWI-EAS443:3:19:1363:1894#0/1  
GAGCAATTGGGACAGAAATTTGAGGAAATAAGGTGGTTAA  
+HWI-EAS443:3:19:1363:1894#0/1  
`aabba`aaabb`aaabaaaa`[aaa`a`b`aa[aaY`\_`\_`  
@HWI-EAS443:3:19:1371:1396#0/1  
CATATCCGCAAGCGATTTGCAGACAATGGATTGGGTGATG  
+HWI-EAS443:3:19:1371:1396#0/1  
[[WZX`U`\$`][TOZS`[W`^`Z`\$`N`Z`Q`Z`W`^``TPPKW[XaQQZI`\$`  
@HWI-EAS443:3:19:1380:277#0/1  
GGCAACACCCTTGGCCTCGATATCGAAACAGCCACTCTTG  
+HWI-EAS443:3:19:1380:277#0/1  
abaaaa`H[aa`a]\_`\_`^`aa`a`W`\_`\_`\_`Z`\_`aT`\$`Y`\$`\_`T`\$`\_]`\_`  
@HWI-EAS443:3:19:138:578#0/1  
GTGATGAGAATGGGAGACCTTCACTACCTCCAGAGCAGAA  
+HWI-EAS443:3:19:138:578#0/1  
aSZGS]U]RN`\$`ZXZSOR]]X`^`W`[]]^]VQVMYVWUN[TY

@HWI-EAS443:3:19:142:194#0/1  
AGCGCGAAGTAGGTACAGATGCAATTGTCATTCTAAGTGT  
+HWI-EAS443:3:19:142:194#0/1  
aa`a\_aP]TZW^]Va¥H`X]]S[\_¥VR]^]\_¥VP`TV[B  
@HWI-EAS443:3:19:1438:954#0/1  
CATTGTCTGCAAATCGCTTGCGGATATGCCAAAGGAAACA  
+HWI-EAS443:3:19:1438:954#0/1  
ab\_^[^¥¥\_W^aba\_a[a`]^aa`a`]QOLO\_]\_aTZTX[  
@HWI-EAS443:3:19:1498:1419#0/1  
AAACGAGAAAGCTCTTATCTCTTGTCTACTTCAAGCAGT  
+HWI-EAS443:3:19:1498:1419#0/1  
ab^^Zbb]\_[bababbabbaaba¥Z`^ab^`a¥`\_b]aa^  
@HWI-EAS443:3:19:1510:94#0/1  
CAGGTAGACTGTTTCCTTTGGCATATCCGCAAGCGATTTG  
+HWI-EAS443:3:19:1510:94#0/1  
V`aa[bb`bba^ababbaaabUaabba`bS`\_bUb\_a\_``  
@HWI-EAS443:3:19:1532:1823#0/1  
GATGAGAATGGGAGACCTTCACTACCTCCAGAGCAGAAAT  
+HWI-EAS443:3:19:1532:1823#0/1  
a[]^P``ZY^a[P[^GJLVVZRX[VUYWUZV[M¥UVSBBB  
@HWI-EAS443:3:19:1571:39#0/1  
GAAACGAGAAAGCTCTTATCTCTTGTCTACTTCAAGCAG  
+HWI-EAS443:3:19:1571:39#0/1  
aab`abab\_a[aR¥I\_a\_aUbT^a]ZaVa¥Wa]LZ][M]Z  
@HWI-EAS443:3:19:1596:1828#0/1  
GAAACTGTGATGAGAATGGGAGACCTTCACTACCTCCAGA  
+HWI-EAS443:3:19:1596:1828#0/1  
a`^W^^\_U\_R\_]\_V]^[\_[¥RHV]XW^UZ]VXYXXOWZ  
@HWI-EAS443:3:19:1687:1021#0/1  
GAAAATATACAGAGATTCGCTTGGAGAACTGTGATGAGA  
+HWI-EAS443:3:19:1687:1021#0/1  
`\_ZZ`aaa`V]Y`\_PV^V`¥Z]a^Z[TY[LW^UZTZZ¥BB  
@HWI-EAS443:3:19:1690:1060#0/1  
GAGAATGGGAGACCTTCACTACCTCCAGAGCAGAAATGAA  
+HWI-EAS443:3:19:1690:1060#0/1  
a`\_\_^`\_a]¥a^MTX`\_`¥`]PT^ZXQ]^\_Z^]ZQVZ[TU  
@HWI-EAS443:3:19:1734:345#0/1  
ATCGCACGCAAAGAGGGCCTATTATCTTTTTGCCTAGGCAT  
+HWI-EAS443:3:19:1734:345#0/1  
a\_G\_Va\_ba``aaaa`TT`¥aa`a\_aa`]YYRa`aa[[`  
@HWI-EAS443:3:19:173:1542#0/1  
GTTAATTGAAGAAATGCGGCACAGATTGAAAGCGACAGAG  
+HWI-EAS443:3:19:173:1542#0/1  
`\_b\_a\_a]`b^0\_`^^]]`¥`aaY\_R^`^Za]¥T\_`XLR  
@HWI-EAS443:3:19:1753:243#0/1  
AAACGAGAAAGCTCTTATCTCTTGTCTACTTCAAGCAGT  
+HWI-EAS443:3:19:1753:243#0/1  
¥`^^]V^]¥a`]\_QY``aaaabba¥a[\_¥U¥\_Ya^UG\_\_W  
@HWI-EAS443:3:19:184:777#0/1  
GAATGGGAGACCTTCACTACCTCCAGAGCAGAAATGAAAA

+HWI-EAS443:3:19:184:777#0/1  
aaaaa]aaaa^baa\_baa`a\_aaaa]aa`aa\_\_aa\_\_`\_  
@HWI-EAS443:3:19:200:2003#0/1  
GGAGAACTGTGATGAGAATGGGAGACCTTCACTACCTCC  
+HWI-EAS443:3:19:200:2003#0/1  
]]^bbaZa¥aZ[S[^^^Va\_a^^¥`\_\_\_¥\_]\_\_¥\_`[Z^\_  
@HWI-EAS443:3:19:206:382#0/1  
AGAAACTGTGATGAGAATGGGAGACCTTCACTACCTCCAG  
+HWI-EAS443:3:19:206:382#0/1  
a^^^R`aa]\_`\_a^aZW¥```¥a[\_^\_^^`ZU^Z^]]  
@HWI-EAS443:3:19:249:969#0/1  
GATGAGAATGGGAGACCTTCACTACCTCCAGAGCAGAAAT  
+HWI-EAS443:3:19:249:969#0/1  
a`aaaa\_\_aaaa\_`\_a\_]`a]^\_[X`a\_\_[Z`Z\_aZ^^^  
@HWI-EAS443:3:19:282:195#0/1  
GGAGAACTGTGATGAGAATGGGAGACCTTCACTACCTCC  
+HWI-EAS443:3:19:282:195#0/1  
aaaa\_]`aa\_a``a\_a\_``aa`^a\_[^Z\_^\_¥¥\_T¥¥^W  
@HWI-EAS443:3:19:283:245#0/1  
GAGAAGGTAATGGTGAATTTCTCCAATATTGCTCCCTC  
+HWI-EAS443:3:19:283:245#0/1  
a\_\_\_aadWa^a\_^]\_\_\_\_\_a`\_\_^`\_^`\_`\_\_\_\_]UV]^Z  
@HWI-EAS443:3:19:29:1277#0/1  
GAACCAGTCTCGTGACATTTCTCGAGGGTCATGTCAGAA  
+HWI-EAS443:3:19:29:1277#0/1  
V¥\_bab\_T``aaYbWZLbbbbbbWW`\_]WU\_\_PFYa```Z  
@HWI-EAS443:3:19:31:1423#0/1  
GAAAATATACAGAGATTCGCTTGGAGAACTGTGATGAGA  
+HWI-EAS443:3:19:31:1423#0/1  
a^)`a\_aa]aaa[]Q^``¥aY\_`^¥[[SW\_^`Z`ZZ\_U¥R  
@HWI-EAS443:3:19:337:1188#0/1  
CTAAGGGCTTTCACTGAGGAGGGAGCAATAGTTGGAGAAA  
+HWI-EAS443:3:19:337:1188#0/1  
abb``Ybabbbbabaaa]ba[]aaaaaaaa`Z\_a`aa`b\_  
@HWI-EAS443:3:19:375:1411#0/1  
GACTCCAACACCATGTCAAGCTTTCAGGTAGACTGTTTCC  
+HWI-EAS443:3:19:375:1411#0/1  
`aa`bbba[aaba\_a\_aa`^aa\_\_\_\_\_]R[aY`a\_a¥`aYa  
@HWI-EAS443:3:19:404:1038#0/1  
CTTGGAGAACTGTGATGAGAATGGGAGACCTTCACTACC  
+HWI-EAS443:3:19:404:1038#0/1  
a``aaaabbabab]baaab\_aaaa`\_aZaa`\_aa\_`¥¥  
@HWI-EAS443:3:19:442:1270#0/1  
CCGCATTTCTTCAATTAACCACCTTATTTCTCAAATTTTC  
+HWI-EAS443:3:19:442:1270#0/1  
abababbaabaaaaaa`aaaaabaaa`aa`aaa\_`a`\_a  
@HWI-EAS443:3:19:460:1872#0/1  
GATGAGAATGGGAGACCTTCACTACCTCCAGAGCAGAAAT  
+HWI-EAS443:3:19:460:1872#0/1  
\_ [b[\_bb¥Q¥aS[aH]aa`]^¥¥aaa]a``\_\_VXX[]][`

@HWI-EAS443:3:19:509:694#0/1  
GAAACTGTGATGAGAATGGGAGACCTTCACTACCTCCAGA  
+HWI-EAS443:3:19:509:694#0/1  
]ZW^a\_QN\_`W^P[^Q\_^\\$L[aYV]`\_ULQ]`][^\$[ZR  
@HWI-EAS443:3:19:560:1762#0/1  
GCCGCATTTCTTCAATTAACCACCTTATTTCTCAAATTT  
+HWI-EAS443:3:19:560:1762#0/1  
`aZ`^b`UYN\_]\_^Wabbba`^W\_aa````\_abbaaaaa]]  
@HWI-EAS443:3:19:592:1248#0/1  
GTAACACGGTTCGAGTCTCTGAAAATATACAGAGATTTCGC  
+HWI-EAS443:3:19:592:1248#0/1  
aaab^aaaaX^aaaaWa\_]aa\_\_`\_\_`^`]^\_^\_^\_^]\_^  
@HWI-EAS443:3:19:612:1702#0/1  
CGCGAAGTAGGTACAGATGCAATTGTCATTCTAAGTGTCT  
+HWI-EAS443:3:19:612:1702#0/1  
aaaaabaVa\_a]`\_`a```aa\_a\_a]`a``a`a^]VRKW\_  
@HWI-EAS443:3:19:61:1072#0/1  
GAAACTGTGATGAGAATGGGAGACCTTCACTACCTCCAGA  
+HWI-EAS443:3:19:61:1072#0/1  
`[\$aa\$`aaaa\_L`X^ab]XYa`\$aaabaaaa`a[\$`\_a^  
@HWI-EAS443:3:19:631:1728#0/1  
TGATGAGAATGGGAGACCTTCACTACCTCCAGAGCAGAAA  
+HWI-EAS443:3:19:631:1728#0/1  
abb^a`]Kb`````aa`a`\_`Y`YMa^a\_\_a\_\_\_\_U\_\_\_\_  
@HWI-EAS443:3:19:638:1726#0/1  
GAGAAACTGTGATGAGAATGGGAGACCTTCACTACCTCCA  
+HWI-EAS443:3:19:638:1726#0/1  
aaababbba\_aba`a`b\_a]\_a`V`\_a\_a`aa`\_aY`  
@HWI-EAS443:3:19:642:1030#0/1  
GTCTCGCTGGATTCTCTTTCAAGATCCATTCCACGATTT  
+HWI-EAS443:3:19:642:1030#0/1  
`Zaa\_X\_[]ZXaaaaaa\_aaa`\_]`[aa`\_a```^`]Z`]  
@HWI-EAS443:3:19:642:474#0/1  
AGAAACTGTGATGAGAATGGGAGACCTTCACTACCTCCAG  
+HWI-EAS443:3:19:642:474#0/1  
^^^`\_`a^T\_]`^a^\_[aZT[]\_a`VQ\_\_`]F[WT[\_UVa`  
@HWI-EAS443:3:19:657:1005#0/1  
TGAGAATGGGAGACCTTCACTACCTCCAGAGCAGAAATGA  
+HWI-EAS443:3:19:657:1005#0/1  
aaaaS^a`aZa]V^a`^\_a```\_`]\_\_^\_^a\_[a]`Y^\_`  
@HWI-EAS443:3:19:661:470#0/1  
CGCACGCAAAGAGGGCCTATTATCTTTTGCCTAGGCATGA  
+HWI-EAS443:3:19:661:470#0/1  
abab`bbabbaababaabbabbabbaaaaaaaaabaa\_a`  
@HWI-EAS443:3:19:687:182#0/1  
GCCGCATTTCTTCAATTAACCACCTTATTTCTCAAATTT  
+HWI-EAS443:3:19:687:182#0/1  
aabb\_abaa`bb`aaaaaaaaba\_aaaaaa\_\_a\_a````\_a  
@HWI-EAS443:3:19:691:1055#0/1  
TGAGAATGGGAGACCTTCACTACCTCCAGAGCAGAAATGA

+HWI-EAS443:3:19:691:1055#0/1  
abba]X\_abaab` `aaa`ba^b\_Za`aa\_aSaQW\_\_\_aaa  
@HWI-EAS443:3:19:730:1543#0/1  
GAGAAACTGTGATGAGAATGGGAGACCTTCACTACCTCCA  
+HWI-EAS443:3:19:730:1543#0/1  
\_`^`aaa^a\_a`abaa]`¥¥P`T`aabXL^` ` `aaPRV0]  
@HWI-EAS443:3:19:740:594#0/1  
AGAAACTGTGATGAGAATGGGAGACCTTCACTACCTCCAG  
+HWI-EAS443:3:19:740:594#0/1  
aa`UGK¥`U^XXa` ]QT\_]¥\_]N]^RS^[[V¥TJQX¥YXY  
@HWI-EAS443:3:19:754:386#0/1  
CAGCGAGACACTTAGAATGACAATTGCATCTGTACCTACT  
+HWI-EAS443:3:19:754:386#0/1  
abbbba`ab`bbababbbbaaaaaabaaa`aaaa\_\_aa^a  
@HWI-EAS443:3:19:789:478#0/1  
CGCATTCTTCAATTAACCACCTTATTTCCCTCAAATTTCT  
+HWI-EAS443:3:19:789:478#0/1  
`\_aWYaa\_ba\_a^ba\_` `a\_a\_aa` ]^a^Y`aa\_\_aaa¥[  
@HWI-EAS443:3:19:803:1431#0/1  
GAGAATGGGAGACCTTCACTACCTCCAGAGCAGAAATGAA  
+HWI-EAS443:3:19:803:1431#0/1  
^X]U^YRUbb[J`b¥SZQ¥ZUaaaaa¥aS\_a\_a]a¥0` `X  
@HWI-EAS443:3:19:808:1448#0/1  
TGAGAATGGGAGACCTTCACTACCTCCAGAGCAGAAATGA  
+HWI-EAS443:3:19:808:1448#0/1  
WTT\_SaZ][HP]VZ^¥[ ]a[W]X^ZYOPVSZX^^¥Y]\_\_[  
@HWI-EAS443:3:19:851:1239#0/1  
ATCTTTTGCCTAGGCATGAGCATGAACCAGTCTCGTGACA  
+HWI-EAS443:3:19:851:1239#0/1  
QX^¥[\_RX\_]K][` `a]` `ZZ]` ` `\_\_aaPQ\_\_a\_a`S^  
@HWI-EAS443:3:19:897:592#0/1  
AGAAACTGTGATGAGAATGGGAGACCTTCACTACCTCCAG  
+HWI-EAS443:3:19:897:592#0/1  
`]¥Z¥]b` `aaK^`a`]YaaZWaXDH\_\_^Z^WZV\_]\_ZXR  
@HWI-EAS443:3:19:916:627#0/1  
CGCTTGGAGAACTGTGATGAGAATGGGAGACCTTCACTA  
+HWI-EAS443:3:19:916:627#0/1  
V\_0\_\_[XZb^T[abaaa^^^`Zaaa^W¥\_UaaZR^`RWBB  
@HWI-EAS443:3:1:1001:1216#0/1  
GTCGCTTTCAATCTGTGCCGATTTCTTCAATTAACCACC  
+HWI-EAS443:3:1:1001:1216#0/1  
`U[\_a¥S]]\_YZX`\_]\_UWXXW^XaXMU¥SW\_]ZYBBBB  
@HWI-EAS443:3:1:102:539#0/1  
GATGAGAATGGGAGACCTTCACTACCTCCAGAGCAGAAAT  
+HWI-EAS443:3:1:102:539#0/1  
THYUT[K]baS¥` [OI\_ab]a[Ua\_HX]\_L`\_T¥IS¥bBB  
@HWI-EAS443:3:1:1042:264#0/1  
CAGAGATTGCTTGGAGAACTGTGATGAGAATGGGAGAC  
+HWI-EAS443:3:1:1042:264#0/1  
a`b`baaa\_`V^]`aabaaa[a`¥` `]b`aa`ZTY]^BBB



@HWI-EAS443:3:1:1069:513#0/1  
GCCGCATTTCTTCAATTAACCACCTTATTTCTCAAATTT  
+HWI-EAS443:3:1:1069:513#0/1  
aZ[\_`¥a`G`^Xa\_aa``Q][Uaa\_``aSN¥\_\_\_\_]a`B  
@HWI-EAS443:3:1:1131:380#0/1  
GCCGCATTTCTTCAATTAACCACCTTATTTCTCAAATTT  
+HWI-EAS443:3:1:1131:380#0/1  
Y¥abaab`bX^[I^]\_VQ`a`b0QXaab^Xa^bYa\_\_`aB  
@HWI-EAS443:3:1:118:1157#0/1  
GTGATGAGAATGGGAGACCTTCACTACCTCCAGAGCAGAA  
+HWI-EAS443:3:1:118:1157#0/1  
a`aaab\_ba`aa^`a\_`¥[\_]`\_\_`VV]VV]a)`X]^BB  
@HWI-EAS443:3:1:1190:881#0/1  
GGGTGTTGCCTCTTCTTTAAGGACTTTTGATCTCGGCG  
+HWI-EAS443:3:1:1190:881#0/1  
aab\_babaa`babb\_abbbbaabb^aaa¥V[aa]a]aa\_B  
@HWI-EAS443:3:1:1197:1619#0/1  
AGAAACTGTGATGAGAATGGGAGACCTTCACTACCTCCAG  
+HWI-EAS443:3:1:1197:1619#0/1  
abaXa^\_a\_aZ\_aYa^\_]a\_^[aZU¥^\_V\_ZX\_RU]WBBB  
@HWI-EAS443:3:1:1205:191#0/1  
GAAACTGTGATGAGAATGGGAGACCTTCACTACCTCCAGA  
+HWI-EAS443:3:1:1205:191#0/1  
aa`\_`a`\_a\_aa^`^¥[XXZ[ZYW]¥T\_T^ZLSYMBBBB  
@HWI-EAS443:3:1:1213:190#0/1  
GCCGCATTTCTTCAATTAACCACCTTATTTCTCAAATTT  
+HWI-EAS443:3:1:1213:190#0/1  
aRYX]WW¥XT]aWUU[ZZaSUUGRV`^ZXX]SS]OSBBBB  
@HWI-EAS443:3:1:1214:833#0/1  
GCCGCATTTCTTCAATTAACCACCTTATTTCTCAAATTT  
+HWI-EAS443:3:1:1214:833#0/1  
a][^a¥N¥ST`P¥IZSLN[PXTVU^ZT^^WPY^^W[ZBBBB  
@HWI-EAS443:3:1:121:1792#0/1  
AGAAACTGTGATGAGAATGGGAGACCTTCACTACCTCCAG  
+HWI-EAS443:3:1:121:1792#0/1  
a\_J`\_G\_aNHFU`GNMW]^R¥W^[GG¥\_]WXBBBBBBBBB  
@HWI-EAS443:3:1:1220:459#0/1  
GCCGCATTTCTTCAATTAACCACCTTATTTCTCAAATTT  
+HWI-EAS443:3:1:1220:459#0/1  
`U]\_^^^`P`\_X]^`VS][¥^XI]\_]\_]TRXW]RBBBB  
@HWI-EAS443:3:1:124:1442#0/1  
GATGAGAATGGGAGACCTTCACTACCTCCAGAGCAGAAAT  
+HWI-EAS443:3:1:124:1442#0/1  
aYT`\_aU\_\_b\_`]^`TLY\_¥S\_XW`OOSVM[\_PLTY\_X\_BB  
@HWI-EAS443:3:1:1265:1348#0/1  
ACAAATCGTGGAAATGGATCTTGAAAGAGGAATCCAGCGAG  
+HWI-EAS443:3:1:1265:1348#0/1  
]ab\_ab\_b`^b`]aaaab]]a^¥^`ba`aaaa[^]`Yaab  
@HWI-EAS443:3:1:1358:729#0/1  
CTTCGCGCTACCTTTCTGACATGACCCTCGAGGAAATGTC

+HWI-EAS443:3:1:1358:729#0/1  
`bb`b`Z``aR`ba`Vaaa`^aab`Ua`^a\_a`aa\_\_BBB  
@HWI-EAS443:3:1:137:392#0/1  
AGAAACTGTGATGAGAATGGGAGACCTTCACTACCTCCAG  
+HWI-EAS443:3:1:137:392#0/1  
]]]a^NVZZ`VXa`¥MX^[\_`XSLUGRYS[]\_^BBBBBBB  
@HWI-EAS443:3:1:1382:703#0/1  
ATTTCTCGAGGGTCATGTCAGAAAGGTAGCGCGAAGTAG  
+HWI-EAS443:3:1:1382:703#0/1  
aaaa^V¥ZaaaaaSS]\_a]\_Za^¥``\_N)`R`¥a^ZaW\_B  
@HWI-EAS443:3:1:1411:1737#0/1  
TGCCGCATTTCTTCAATTAACCACCTTATTTCTCAAATT  
+HWI-EAS443:3:1:1411:1737#0/1  
aba]b`abb`\_aaZbaaabaY\_a]]abaaaa\_Ga^a^`aB  
@HWI-EAS443:3:1:1434:1398#0/1  
AGAAACTGTGATGAGAATGGGAGACCTTCACTACCTCCAG  
+HWI-EAS443:3:1:1434:1398#0/1  
abaabaabYaaabaa\_aaa\_a¥a`¥[\_`¥a^\_]¥aBBBB  
@HWI-EAS443:3:1:1448:718#0/1  
GTGATGAGAATGGGAGACCTTCACTACCTCCAGAGCAGAA  
+HWI-EAS443:3:1:1448:718#0/1  
aababb`aaaaaba`a`¥[\_`^`^aa^^`[]\_a\_`X^aBB  
@HWI-EAS443:3:1:1459:1445#0/1  
GAAACTGTGATGAGAATGGGAGACCTTCACTACCTCCAGA  
+HWI-EAS443:3:1:1459:1445#0/1  
aQ]`\_a¥La\_aa[aa\_\_aaXTaZZ¥VUP\_QZ¥RR¥BBBBB  
@HWI-EAS443:3:1:1463:1112#0/1  
AAACTGTGATGAGAATGGGAGACCTTCACTACCTCCAGAG  
+HWI-EAS443:3:1:1463:1112#0/1  
a]b]bb`babaaa`abaa\_a`Y^aa\_a\_a`[]\_¥Z^a\_B  
@HWI-EAS443:3:1:1481:1030#0/1  
GCCGCATTTCTTCAATTAACCACCTTATTTCTCAAATTT  
+HWI-EAS443:3:1:1481:1030#0/1  
¥F^VWQU]^WX\_ZTR^^]¥HLOOPVX¥]UKYLPBBBBBBB  
@HWI-EAS443:3:1:1524:887#0/1  
AGAAACTGTGATGAGAATGGGAGACCTTCACTACCTCCAG  
+HWI-EAS443:3:1:1524:887#0/1  
a`aab`^Y`Jaa`aYYaaY^Xa]WX[Z[^W]PWYBBBBB  
@HWI-EAS443:3:1:1527:1218#0/1  
GCCGCATTTCTTCAATTAACCACCTTATTTCTCAAATTT  
+HWI-EAS443:3:1:1527:1218#0/1  
\_ROH^Z\_X¥S^`¥QV¥¥OVUQYM]\_\_¥^]XPX\_\_\_Y\_aBB  
@HWI-EAS443:3:1:1612:868#0/1  
TGAAAATATACAGAGATTGCTTGGAGAACTGTGATGAG  
+HWI-EAS443:3:1:1612:868#0/1  
aa`\_aaa`aa[aaaa[a\_\_`¥`a`^`\_]Y\_\_S\_WY\_BB  
@HWI-EAS443:3:1:1729:1446#0/1  
ATTATCTTTTGCCTAGGCATGAGCATGAACCAGTCTCGTG  
+HWI-EAS443:3:1:1729:1446#0/1  
aaaa`a\_a`aa`\_]aaaP``\_adW¥`\_\_a\_^`\_]O\_]BBB

@HWI-EAS443:3:1:1784:1273#0/1  
TGAGAATGGGAGACCTTCACTACCTCCAGAGCAGAAATGA  
+HWI-EAS443:3:1:1784:1273#0/1  
`baa`^`^aaaab]RY]Z\_[FX`\_U^^X]\_¥\_U]\_]R\_aaB  
@HWI-EAS443:3:1:190:618#0/1  
GAAAATATACAGAGATTTCGCTTGGAGAACTGTGATGAGA  
+HWI-EAS443:3:1:190:618#0/1  
a`a\_aa`^a^aa\_a^\_\_\_a\_\_\_\_\_^`\_\_^X`\_X\_]¥^BB  
@HWI-EAS443:3:1:236:442#0/1  
GGGAAACAAATCGTGAATGGATCTTGAAAGAGGAATCCA  
+HWI-EAS443:3:1:236:442#0/1  
aaa^a\_U¥H`\_]`Xa\_R^¥^U]\_Y^¥`W^]\_^\_Y]YYBBB  
@HWI-EAS443:3:1:263:642#0/1  
TGAGAATGGGAGACCTTCACTACCTCCAGAGCAGAAATGA  
+HWI-EAS443:3:1:263:642#0/1  
``[P][`ba`YZZ[\_\_\_^ZaT^`YP¥\_T`\_¥¥W¥\_^Y¥BBB  
@HWI-EAS443:3:1:266:1622#0/1  
TGAGAATGGGAGACCTTCACTACCTCCAGAGCAGAAATGA  
+HWI-EAS443:3:1:266:1622#0/1  
ab\_a`ababa^`aUN^a\_aG\_aVa\_¥GaWU¥S[\_¥BBBBB  
@HWI-EAS443:3:1:294:1726#0/1  
ATGAGAATGGGAGACCTTCACTACCTCCAGAGCAGAAATG  
+HWI-EAS443:3:1:294:1726#0/1  
aab\_aa\_^`\_U`b\_\_\_a\_^a\_aa`RRFU`\_^aGa\_\_SBBB  
@HWI-EAS443:3:1:332:653#0/1  
CGCTTGGAGAACTGTGATGAGAATGGGAGACCTTCACTA  
+HWI-EAS443:3:1:332:653#0/1  
UbaNaba\_baba[bbYa^^a\_aU^aaa`Kb`\_`H\_BBBBBB  
@HWI-EAS443:3:1:401:446#0/1  
CTGAAAATATACAGAGATTTCGCTTGGAGAACTGTGATGA  
+HWI-EAS443:3:1:401:446#0/1  
aaba\_bababaa^`b\_a`^b`aaa`b`\_\_S`\_¥\_\_BB  
@HWI-EAS443:3:1:401:558#0/1  
GCCGCATTTCTTCAATTAACCACCTTATTTCTCAAATTT  
+HWI-EAS443:3:1:401:558#0/1  
a[``T]`aa\_\_^¥`^`\_\_YU[^XS\_]\_a`\_[``]\_\_^`BB  
@HWI-EAS443:3:1:406:1852#0/1  
GATGAGAATGGGAGACCTTCACTACCTCCAGAGCAGAAAT  
+HWI-EAS443:3:1:406:1852#0/1  
YHb`¥b\_\_XVZ`KaaX^¥abWSab^HQ¥YUa^`¥\_b^\_aB  
@HWI-EAS443:3:1:443:255#0/1  
TGAGAATGGGAGACCTTCACTACCTCCAGAGCAGAAATGA  
+HWI-EAS443:3:1:443:255#0/1  
a^\_a\_\_^^aa]a`V[^\_¥\_W^`UW\_ZU^`¥\_W¥]¥WWW^BB  
@HWI-EAS443:3:1:44:270#0/1  
GTGATGAGAATGGGAGACCTTCACTACCTCCAGAGCAGAA  
+HWI-EAS443:3:1:44:270#0/1  
^U`aa`\_\_\_a`^a\_ZZ\_^`\_\_\_]^\_Y^]\_^V]¥BB  
@HWI-EAS443:3:1:458:55#0/1  
GCCGCATTTCTTCAATTAACCACCTTATTTCTCAAATTT

+HWI-EAS443:3:1:458:55#0/1  
a\_[a`\_\_^a`\_`^]`^\_\_\_\_Y¥\_Y[a\_]\_^\_[Y^[^[\_BB  
@HWI-EAS443:3:1:475:1301#0/1  
GAATGGGAGACCTTCACTACCTCCAGAGCAGAAATGAAAA  
+HWI-EAS443:3:1:475:1301#0/1  
a\_XUa¥HW¥NFS\_VLZUZYWPUFRM]TUUL^VGVVBBBBB  
@HWI-EAS443:3:1:482:579#0/1  
ATTCTAAGTGTCTCGCTGGATTCTCTTTCAAGATCCATT  
+HWI-EAS443:3:1:482:579#0/1  
aaa[baaa\_\_\_\_a^\_V\_aa\_aaZ\_a]a\_dWa`\_`aY¥^aB  
@HWI-EAS443:3:1:530:1006#0/1  
AGAAACTGTGATGAGAATGGGAGACCTTCACTACCTCCAG  
+HWI-EAS443:3:1:530:1006#0/1  
abaa`\_`aa`[a`\_`aI\_^ba^\_aaaWa[`\_W\_aR`aBBBB  
@HWI-EAS443:3:1:558:719#0/1  
TGCGGCACAGATTGAAAGCGACAGAGAATAGTTTCGAACA  
+HWI-EAS443:3:1:558:719#0/1  
aaaaa\_\_\_\_ab]aaaaa]a\_a\_`^a\_ba\_`\_`\_U`aS\_\_\_\_]B  
@HWI-EAS443:3:1:594:1248#0/1  
AGAAACTGTGATGAGAATGGGAGACCTTCACTACCTCCAG  
+HWI-EAS443:3:1:594:1248#0/1  
]baUGX¥aYbZ^aYbS^\_aV¥X`ZGYS^\_^\_R`YU]WBBB  
@HWI-EAS443:3:1:655:1734#0/1  
GTTAATTGAAGAAATGCGGCACAGATTGAAAGCGACAGAG  
+HWI-EAS443:3:1:655:1734#0/1  
aYa^a^X][^`S[`¥\_0`^]\_W`a^^]X]XW\_0\_]T]BBB  
@HWI-EAS443:3:1:662:321#0/1  
TGCCGCATTTCTTCAATTAACCACCTTATTTCTCAAAAT  
+HWI-EAS443:3:1:662:321#0/1  
ab\_Ybaaabb\_bb\_aababaa\_aa]b\_aaaaWR\_¥a`aaB  
@HWI-EAS443:3:1:668:653#0/1  
GTCGCTTTCAATCTGTGCCGATTTCTTCAATTAACCACC  
+HWI-EAS443:3:1:668:653#0/1  
`¥Z`\_aaaaa`\_`\_\_\_\_]`\_^aU\_`a`Z`\_`]^`^\_\_\_\_^ZW\_BB  
@HWI-EAS443:3:1:675:971#0/1  
AGAAACTGTGATGAGAATGGGAGACCTTCACTACCTCCAG  
+HWI-EAS443:3:1:675:971#0/1  
aaa`a`aa`^`a`^aV^]aa^^\_]])^`VaW\_^VU^]XBB  
@HWI-EAS443:3:1:684:1534#0/1  
AGAAACTGTGATGAGAATGGGAGACCTTCACTACCTCCAG  
+HWI-EAS443:3:1:684:1534#0/1  
\_b`\_`baaa^b¥Q^¥`\_aW`a\_^XWKD\_WOZO`BBBBBBB  
@HWI-EAS443:3:1:716:1592#0/1  
TGAGAATGGGAGACCTTCACTACCTCCAGAGCAGAAATGA  
+HWI-EAS443:3:1:716:1592#0/1  
a`ab[bab`aab\_Z`ba\_b]abXTY\_Zaa`\_`[\_b`Z[`aB  
@HWI-EAS443:3:1:763:793#0/1  
ATCGTGGAATGGATCTTGAAAGAGGAATCCAGCGAGACAC  
+HWI-EAS443:3:1:763:793#0/1  
aa`^]ba`\_aba^Z`aa\_`\_^]U^a\_`\_`UF[`]aO\_WBBB

@HWI-EAS443:3:1:830:946#0/1  
AGGGCCTATTATCTTTTGCCTAGGCATGAGCATGAACCAG  
+HWI-EAS443:3:1:830:946#0/1  
aaab`a\_`bb`aabba\_Z`\_a\_baL¥abaa[\_\_\_a`aBBBB  
@HWI-EAS443:3:1:852:1225#0/1  
GAATGGGAGACCTTCACTACCTCCAGAGCAGAAATGAAAA  
+HWI-EAS443:3:1:852:1225#0/1  
aa`aa`^¥\_\_¥\_``\_QR`\_]Va\_X`[^\_^`X¥]`aBBBB  
@HWI-EAS443:3:1:876:141#0/1  
GGAGGGAGCAATAGTTGGAGAAATTTACCATTACCTTCT  
+HWI-EAS443:3:1:876:141#0/1  
aa[`]\_^]NLGTR]GXa^R^X[X]^XZSW]ZN[XBBBBB  
@HWI-EAS443:3:1:904:1319#0/1  
TGTGATGAGAATGGGAGACCTTCACTACCTCCAGAGCAGA  
+HWI-EAS443:3:1:904:1319#0/1  
ab[ba`babI\_`ba[[`aa\_\_aW[\_a`YG[\_G[¥`\_W`aB  
@HWI-EAS443:3:1:905:133#0/1  
TGTCGCTTTCAATCTGTGCCGATTTCTTCAATTAACCAC  
+HWI-EAS443:3:1:905:133#0/1  
^a^T\_b`]a\_aaaY¥V[`¥XW\_]aW[UM\_\_XWXXBBBB  
@HWI-EAS443:3:1:919:1934#0/1  
GGGAAACAAATCGTGGAATGGATCTTGAAAGAGGAATCCA  
+HWI-EAS443:3:1:919:1934#0/1  
`a`^b[]aba¥[`b^^\_Ma\_aVX\_¥a`^^¥`a\_¥\_\_BBB  
@HWI-EAS443:3:1:974:800#0/1  
ATCGGTAAAGATTACTGAAGTTCGCTTTCAGTACTAT  
+HWI-EAS443:3:1:974:800#0/1  
aa\_aaa`\_a`a^aa`S`¥`OW\_`^aV\_Z\_aa[\_aY^U\_BB  
@HWI-EAS443:3:1:978:1006#0/1  
AGAAACTGTGATGAGAATGGGAGACCTTCACTACCTCCAG  
+HWI-EAS443:3:1:978:1006#0/1  
Zb]a\_[X`U`¥`\_^Q¥\_\_SZL\_aY`^a[^^]WN\_BBBB  
@HWI-EAS443:3:1:979:23#0/1  
CTTGAATGGAATGGTAACACGGTTCGAGTCTCTGAAAATA  
+HWI-EAS443:3:1:979:23#0/1  
abbaabbbb`abbbabaaa\_bb\_b^baaX\_a^ab`^a\_aB  
@HWI-EAS443:3:1:990:1276#0/1  
TGTCGCTTTCAATCTGTGCCGATTTCTTCAATTAACCAC  
+HWI-EAS443:3:1:990:1276#0/1  
ab\_ab\_`¥bR\_Za0`a`b\_Xa\_\_aaa¥`a^T[`a\_aMKBB  
@HWI-EAS443:3:20:1008:449#0/1  
AAAAGGAAGAGGCAACACCCTTGGCCTCGATATCGAAACA  
+HWI-EAS443:3:20:1008:449#0/1  
[\_\_\_¥b\_ZU[X``^¥]aaa^`aX][X`[\_a\_a`XDX^XNY  
@HWI-EAS443:3:20:1047:185#0/1  
GAGCAATTGGGACAGAAATTTGAGGAAATAAGGTGGTTAA  
+HWI-EAS443:3:20:1047:185#0/1  
`R¥a¥VbbVbb[aa[X\_b`aaaXaa^[Yb^`^\_X\_WX`\_V  
@HWI-EAS443:3:20:1053:399#0/1  
AAAGCTCTTATCTCTTGTCTACTTCAAGCAGTAGTTGTA

+HWI-EAS443:3:20:1053:399#0/1  
abaaaa\_ab`aaa]a^\_[a\_aa]Z`0]aaa\_a^\_a]aaZa  
@HWI-EAS443:3:20:1070:1602#0/1  
AACGAGAAAGCTCTTATCTCTTGTCTACTTCAAGCAGTA  
+HWI-EAS443:3:20:1070:1602#0/1  
aaa^aa]¥`^a^`a`\_a`\_Z[`a\_\_[````\_`a`\_]\_\_V^  
@HWI-EAS443:3:20:1138:1800#0/1  
GATGAGAATGGGAGACCTTCACTACCTCCAGAGCAGAAAT  
+HWI-EAS443:3:20:1138:1800#0/1  
`Yab``^[a``\_a`^XT\_[¥aY[^ZT```^QX]\_``]\_]  
@HWI-EAS443:3:20:1176:1283#0/1  
ATGAGGACCCCAACTGCATTTTTGACATCCTCATAAGTAT  
+HWI-EAS443:3:20:1176:1283#0/1  
aa`aa`a`a^aaa\_`aaaa\_\_\_\_\_`a`¥a``\_\_^`Z`\_`  
@HWI-EAS443:3:20:1195:1338#0/1  
AGAAACTGTGATGAGAATGGGAGACCTTCACTACCTCCAG  
+HWI-EAS443:3:20:1195:1338#0/1  
a`QJ\_aZ\_Waba`]`\_a`a`a`b`a\_\_^`a\_\_a^^`]\_\_^  
@HWI-EAS443:3:20:1195:2014#0/1  
TGAGAATGGGAGACCTTCACTACCTCCAGAGCAGAAATGA  
+HWI-EAS443:3:20:1195:2014#0/1  
\_babbb^`aaaaaa`aaaaV`a[¥aa\_] [`\_YW````\_`\_¥  
@HWI-EAS443:3:20:1208:2025#0/1  
CAGAGATTGCTTGGAGAAACTGTGATGAGAATGGGAGAC  
+HWI-EAS443:3:20:1208:2025#0/1  
\_\_\_\_`[U^^TZ\_UZOWRZ^]ZSPXU¥VSVYTX]P¥Z`\_BBB  
@HWI-EAS443:3:20:125:1183#0/1  
TGGTTCATGCTCATGCCTAGGCAAAAGATAATAGGCCCTC  
+HWI-EAS443:3:20:125:1183#0/1  
[[]abb`ab`a¥a\_a`a]aa\_\_R]T`\_`aa`\_Z^aaa\_]  
@HWI-EAS443:3:20:1277:1443#0/1  
AGAAACTGTGATGAGAATGGGAGACCTTCACTACCTCCAG  
+HWI-EAS443:3:20:1277:1443#0/1  
a`aa\_Y]b]aaa`aY``a`a\_aVRU\_`\_^^\_]PWXVY]  
@HWI-EAS443:3:20:1309:301#0/1  
GCCGCATTTCTTCAATTAACCACCTTATTTCTCAAATTT  
+HWI-EAS443:3:20:1309:301#0/1  
a\_^`X^`aXa`\_^`a`\_XOX]^\_]^[Z]\_]\_XZ^ZZ  
@HWI-EAS443:3:20:1325:1641#0/1  
GCCGCATTTCTTCAATTAACCACCTTATTTCTCAAATTT  
+HWI-EAS443:3:20:1325:1641#0/1  
aaaaRRY\_[LVYS^T`Yaa¥UZYTZUXaZV\_Z]UYSNU]M  
@HWI-EAS443:3:20:1400:613#0/1  
TGGAGAAACTGTGATGAGAATGGGAGACCTTCACTACCTC  
+HWI-EAS443:3:20:1400:613#0/1  
abbbaa``aab`aaaa`b\_aaaa`\_\_^Z`\_`Z``VY]Y  
@HWI-EAS443:3:20:1422:1095#0/1  
GCTGTTTCGATATCGAGCCAAGGGTGTTCCTCTTCTT  
+HWI-EAS443:3:20:1422:1095#0/1  
a`aa`]a[baaa^^^\_VR\_`\_¥U`S\_¥\_ZW^YLYRLX¥]

@HWI-EAS443:3:20:1426:423#0/1  
CTATTCTGTGCTTTCAATCTGTGCCGATTTCTTCAA  
+HWI-EAS443:3:20:1426:423#0/1  
aaba`baabb`a¥N\_aaaa`¥aa¥`aT]``aa\_[R[^a[  
@HWI-EAS443:3:20:1473:1758#0/1  
GTGATGAGAATGGGAGACCTTCACTACCTCCAGAGCAGAA  
+HWI-EAS443:3:20:1473:1758#0/1  
`T^JV]¥a^UU]] [UYZWXXTN[VWVVU]X]VZR¥XI]YX  
@HWI-EAS443:3:20:1551:269#0/1  
CTGTGCCGATTTCTTCAATTAACCACCTTATTTCTTCAA  
+HWI-EAS443:3:20:1551:269#0/1  
a^^]a[¥]\_¥aa[`aa¥a\_aa`\_[¥]\_`a^`aa\_\_\_a\_]\_  
@HWI-EAS443:3:20:1598:1884#0/1  
GAAACTGTGATGAGAATGGGAGACCTTCACTACCTCCAGA  
+HWI-EAS443:3:20:1598:1884#0/1  
`abbabbababbbbabaaaa``aabaaa\_^a``a``  
@HWI-EAS443:3:20:1612:1398#0/1  
GCCGATTTCTTCAATTAACCACCTTATTTCTTCAAATTT  
+HWI-EAS443:3:20:1612:1398#0/1  
a¥`N] []^FRYL^S^Z[PGWTUZ\_YT\_]\_GWWWVRW\_Z^  
@HWI-EAS443:3:20:1625:1793#0/1  
GTCGCTTTCAATCTGTGCCGATTTCTTCAATTAACCACC  
+HWI-EAS443:3:20:1625:1793#0/1  
a¥GS`\_aaS\_\_\_`XWVa\_\_^W]``][^\_``^]Y\_]Z]U]  
@HWI-EAS443:3:20:1785:193#0/1  
GAAACTGTGATGAGAATGGGAGACCTTCACTACCTCCAGA  
+HWI-EAS443:3:20:1785:193#0/1  
aaa``bb^b\_abZa\_\_aaaaZa]UU\_^X¥W^\_UG^XGXXX  
@HWI-EAS443:3:20:182:1883#0/1  
GAGAACTGTGATGAGAATGGGAGACCTTCACTACCTCCA  
+HWI-EAS443:3:20:182:1883#0/1  
\_abbbaabaa\_\_bba^a`babbaaabaaaabaaa`b\_aa`  
@HWI-EAS443:3:20:248:840#0/1  
GAATGGGAGACCTTCACTACCTCCAGAGCAGAAATGAAAA  
+HWI-EAS443:3:20:248:840#0/1  
a\_abbaa^aabbaab\_aaa`aaa`a`\_aaa\_\_\_`a`\_^\_  
@HWI-EAS443:3:20:259:1767#0/1  
GGAGAACTGTGATGAGAATGGGAGACCTTCACTACCTCC  
+HWI-EAS443:3:20:259:1767#0/1  
`\_\_a[abba`aaabaaaZaaaX¥\_a\_aaab\_\_a\_¥\_\_\_  
@HWI-EAS443:3:20:262:1743#0/1  
ACCTACTTCGCGCTACCTTTCTGACATGACCCTCGAGGAA  
+HWI-EAS443:3:20:262:1743#0/1  
``b]T`Xbabbb^abaa\_0\_¥Xbba]Xa\_^bZH``¥¥`aa  
@HWI-EAS443:3:20:268:1656#0/1  
GAAACTGTGATGAGAATGGGAGACCTTCACTACCTCCAGA  
+HWI-EAS443:3:20:268:1656#0/1  
^a`abb[\_aaababba]\_Z¥``aaa\_\_aaaa`\_\_aa\_YX  
@HWI-EAS443:3:20:26:1499#0/1  
GGGTGTTGCCTCTTCTTTAAGGACTTTTGATCTCGGCG

+HWI-EAS443:3:20:26:1499#0/1  
`V`Ua\_`[`aabaa`aaaa¥¥`^]\_`\_aa`aaa`a`Q¥¥  
@HWI-EAS443:3:20:271:1845#0/1  
GAGAACTGTGATGAGAATGGGAGACCTTCACTACCTCCA  
+HWI-EAS443:3:20:271:1845#0/1  
]\_b`U\_aab]\_ab^aaaaaa`\_aaa]\_\_ab`\_a``\_\_]  
@HWI-EAS443:3:20:299:1859#0/1  
TGAGAATGGGAGACCTTCACTACCTCCAGAGCAGAAATGA  
+HWI-EAS443:3:20:299:1859#0/1  
aY`aba`U]a¥X[SaaX`]Y`b`SaY`\_\_\_\_aU]¥]Z^`  
@HWI-EAS443:3:20:314:1131#0/1  
GCCGCATTTCTTCAATTAACCACCTTATTTCTCAAATTT  
+HWI-EAS443:3:20:314:1131#0/1  
`aba`]aababa\_abbababaaa`aab\_aaaa\_a`aa`\_  
@HWI-EAS443:3:20:320:1128#0/1  
GCCGCATTTCTTCAATTAACCACCTTATTTCTCAAATTT  
+HWI-EAS443:3:20:320:1128#0/1  
aa^^a``]aabbba`b`bb^\_ab`a`ab]ab`]\_]aa^[a  
@HWI-EAS443:3:20:342:1835#0/1  
GCCGCATTTCTTCAATTAACCACCTTATTTCTCAAATTT  
+HWI-EAS443:3:20:342:1835#0/1  
YJ]\_WZa¥T¥]\_]\_X\_b`]ababa`^]VZ[]`[^a`W]`Z\_  
@HWI-EAS443:3:20:366:1897#0/1  
TCTCTGTCGCTTTCAATCTGTGCCGATTTCTTCAATTAA  
+HWI-EAS443:3:20:366:1897#0/1  
ab]ba`[^`aV`babY`^a]R^aa^]X\_`^`a`aa\_U^  
@HWI-EAS443:3:20:36:973#0/1  
GCAAAATCGCTTGCGGATATGCCAAAGGAAACAGTCTACCT  
+HWI-EAS443:3:20:36:973#0/1  
`abbaaab]Y`ab]aa\_a`Z[¥R[ZW¥¥I¥^YZQa`¥Q[^  
@HWI-EAS443:3:20:373:557#0/1  
GCCGCATTTCTTCAATTAACCACCTTATTTCTCAAATTT  
+HWI-EAS443:3:20:373:557#0/1  
]ba^]aaaa`a]aa]b]\_\_a`a`a`aYa]\_`a]Za^a`\_\_  
@HWI-EAS443:3:20:378:1092#0/1  
GAAACGAGAAAGCTTATCTTGTCTACTTCAAGCAG  
+HWI-EAS443:3:20:378:1092#0/1  
aabaa`^aW`^aaa`a\_\_a\_a`a`^`^`^`^`¥[`\_`^`  
@HWI-EAS443:3:20:389:1007#0/1  
CAAAGAGGGCCTATTATCTTTTGCCTAGGCATGAGCATGA  
+HWI-EAS443:3:20:389:1007#0/1  
\_\_ababbaabbbabb`]`aaaa`aaa`aaa`bbabb  
@HWI-EAS443:3:20:432:106#0/1  
GCGGCACAGATTGAAAGCGACAGAGAATAGTTTGAACAA  
+HWI-EAS443:3:20:432:106#0/1  
`\_^ZPVaaZF¥][\_]Ja`a][`\_Waa¥R`X¥\_[\_]`  
@HWI-EAS443:3:20:463:645#0/1  
GAGAATGGGAGACCTTCACTACCTCCAGAGCAGAAATGAA  
+HWI-EAS443:3:20:463:645#0/1  
aaaaRababaaa`aa`\_X`aW[`\_\_a^aW[`\_XYWSWY



@HWI-EAS443:3:20:525:622#0/1  
GTGCTTTCAATCTGTGCCGATTTCTTCAATTAACCACC  
+HWI-EAS443:3:20:525:622#0/1  
a^aa\_`¥`aa`aab¥¥`baa]aba\_\_aaaa`baa``\_a^^  
@HWI-EAS443:3:20:637:150#0/1  
GAAACTGTGATGAGAATGGGAGACCTTCACTACCTCCAGA  
+HWI-EAS443:3:20:637:150#0/1  
abbbabb`babbab\_aab`\_`a`\_\_\_aaaa``\_]`\_^\_\_Y  
@HWI-EAS443:3:20:652:351#0/1  
GTGATGAGAATGGGAGACCTTCACTACCTCCAGAGCAGAA  
+HWI-EAS443:3:20:652:351#0/1  
aQb\_]a\_`a`aaa\_aa``\_X]a¥\_X]Z^]\_^]`UY`X^  
@HWI-EAS443:3:20:685:30#0/1  
GTCATTCTAAGTGTCTCGCTGGATTCTTCTTTCAAGATCC  
+HWI-EAS443:3:20:685:30#0/1  
`L¥ZX\_aaZ^`YZV]¥¥RNS[SSZXTZXVWVZWSWZUW  
@HWI-EAS443:3:20:709:411#0/1  
GCCGCATTTCTTCAATTAACCACCTTATTTCTCAAATTT  
+HWI-EAS443:3:20:709:411#0/1  
a`abaabb\_bba`abba`aaaabaab\_a\_aa\_`[aaaa  
@HWI-EAS443:3:20:749:381#0/1  
CTCCCATTCTCATCACAGTTTCTCCAAGCGAATCTCTGTA  
+HWI-EAS443:3:20:749:381#0/1  
aba`bbabbbbababbaba`aaaaY```^^a^a`aa`a  
@HWI-EAS443:3:20:755:557#0/1  
GAAACTGTGATGAGAATGGGAGACCTTCACTACCTCCAGA  
+HWI-EAS443:3:20:755:557#0/1  
aa`aaaaXa]`a^a]\_\_a`]Y]^W^\_]X\_]^XYUXXXY  
@HWI-EAS443:3:20:780:855#0/1  
CGCATTTCTTCAATTAACCACCTTATTTCTCAAATTTCT  
+HWI-EAS443:3:20:780:855#0/1  
abaaa`aaaabaaaaaaaa`aaaa`\_aaa¥`a\_`a  
@HWI-EAS443:3:20:782:2014#0/1  
TCTCCCATTCTCATCACAGTTTCTCCAAGCGAATCTCTGT  
+HWI-EAS443:3:20:782:2014#0/1  
`¥^X`¥][\_bbaW\_ab]^\_\_VYS^a\_]W^\_GGQ^a\_]FT  
@HWI-EAS443:3:20:795:1674#0/1  
GAGCCAAGGGTGTTCCTCTTCTTTTAAGGACTTTTGA  
+HWI-EAS443:3:20:795:1674#0/1  
^```\_`bb`X^MaUa]`bZbbabaaaaabaaa]Xa`S]a`  
@HWI-EAS443:3:20:804:420#0/1  
GCCGCATTTCTTCAATTAACCACCTTATTTCTCAAATTT  
+HWI-EAS443:3:20:804:420#0/1  
a`a`Y`Ua`U\_bba`ba\_a¥[[aUba\_a\_]aa\_`XVa^\_  
@HWI-EAS443:3:20:80:1286#0/1  
GTTATTTGTTGAAACTATTCTCTGTGCTTTCAATCTGT  
+HWI-EAS443:3:20:80:1286#0/1  
a^]¥Y\_a\_\_\_aa`VV\_[Z\_[\_]aaaZ\_V`^^\_`^]]UOQ  
@HWI-EAS443:3:20:817:1914#0/1  
GAGAACTGTGATGAGAATGGGAGACCTTCACTACCTCCA

+HWI-EAS443:3:20:817:1914#0/1  
a\_V\_b^`aYX\_a^aSa^]XY\_`Q]a`X`\_]a¥`^ZRY^a  
@HWI-EAS443:3:20:829:212#0/1  
AGAATGGGAGACCTTCACTACCTCCAGAGCAGAAATGAAA  
+HWI-EAS443:3:20:829:212#0/1  
a`abaaaa[R]RaXS^``\_\_^U\_\_W\_\_^¥\_S\_W¥W¥\_ZWU  
@HWI-EAS443:3:20:858:937#0/1  
GTCGCTTTCAATCTGTGCCGATTTCTTCAATTAACCACC  
+HWI-EAS443:3:20:858:937#0/1  
^ZIU\_YWWS]U]aWSU`TX[UNVQVTX¥WVRTYY\_WQYRS  
@HWI-EAS443:3:20:864:206#0/1  
CGCTTGGAGAACTGTGATGAGAATGGGAGACCTTCACTA  
+HWI-EAS443:3:20:864:206#0/1  
abaaab`aa`b\_U]a^ZYY^Q\_WP^a\_\_[a][TW]^]^Z  
@HWI-EAS443:3:20:880:1923#0/1  
GAGAATGGGAGACCTTCACTACCTCCAGAGCAGAAATGAA  
+HWI-EAS443:3:20:880:1923#0/1  
abba]a^ZV`Zb^a`aabaabXXXa`baaY^\_a\_aa\_aaa  
@HWI-EAS443:3:20:88:954#0/1  
GAATGGGAGACCTTCACTACCTCCAGAGCAGAAATGAAAA  
+HWI-EAS443:3:20:88:954#0/1  
a^^\_aaaabaaaa\_aaaa`a\_`]`aZ```a\_\_\_a`Z^`^  
@HWI-EAS443:3:20:901:1932#0/1  
GGAGGGAGCAATAGTTGGAGAAATTTACCATTACCTTCT  
+HWI-EAS443:3:20:901:1932#0/1  
Y`Saba\_Xaa]aba\_b`b`\_\_V\_`ab\_ba`abab`Z\_``a  
@HWI-EAS443:3:20:903:102#0/1  
GTGACATTTCTCGAGGGTCATGTCAGAAAGGTAGCGCGA  
+HWI-EAS443:3:20:903:102#0/1  
a]b``\_a\_a\_`a^a]]`aX]]`aX]Y\_Y^¥\_^X]`X\_X^X  
@HWI-EAS443:3:20:904:894#0/1  
ATCAAGGTCTCTAATCGGTTAAAGATTACACTGAAGTTCG  
+HWI-EAS443:3:20:904:894#0/1  
a\_\_V\_Z¥¥`aaa[aa`¥QNaWV\_YR¥\_a\_\_W¥YVN\_T¥YV  
@HWI-EAS443:3:20:927:927#0/1  
AGAAACTGTGATGAGAATGGGAGACCTTCACTACCTCCAG  
+HWI-EAS443:3:20:927:927#0/1  
Z¥XOY`Za^^^^XaU\_aaUYOZRVX^]aa][ZTU\_^^^]  
@HWI-EAS443:3:20:944:206#0/1  
ATGAGAATGGGAGACCTTCACTACCTCCAGAGCAGAAATG  
+HWI-EAS443:3:20:944:206#0/1  
\_bb\_Q¥a]aaa\_`][\_`\_SZ¥a]VV^`^W\_Z^`^VVWV  
@HWI-EAS443:3:20:944:533#0/1  
CTGTGATGAGAATGGGAGACCTTCACTACCTCCAGAGCAG  
+HWI-EAS443:3:20:944:533#0/1  
aa`¥\_]a\_Y]abbba]^b^DT`\_ab]`a``W[[aa\_a`[a  
@HWI-EAS443:3:20:946:854#0/1  
GCCGCATTTCTTCAATTAACCACCTTATTTCTCAAATTT  
+HWI-EAS443:3:20:946:854#0/1  
`]^[ZZa`^\_Z]]XT\_YYZ\_a`¥`a¥¥\_\_¥`\_^Z``¥ZX

@HWI-EAS443:3:20:953:1040#0/1  
GATGAGAATGGGAGACCTTCACTACCTCCAGAGCAGAAAT  
+HWI-EAS443:3:20:953:1040#0/1  
^a^a]ZYW]^\_[\_]Z^a\_^a\_\_aZGUPTW`UXYU`¥WV[  
@HWI-EAS443:3:20:958:33#0/1  
GGTACAGATGCAATTGTCATTCTAAGTGTCTCGCTGGATT  
+HWI-EAS443:3:20:958:33#0/1  
a[¥[\_Y`\_[]^`aZ]^`[]a`XaY\_]YYUYXW]¥ZZR  
@HWI-EAS443:3:20:965:163#0/1  
GCCGCATTTCTTCAATTAACCACCTTATTTCCCTCAAATTT  
+HWI-EAS443:3:20:965:163#0/1  
`\_¥\_OWW]]SV\_Q¥Z^Z^]¥QNO]\_T\_a`WGQZXXV¥SZY  
@HWI-EAS443:3:20:972:923#0/1  
GCCGCATTTCTTCAATTAACCACCTTATTTCCCTCAAATTT  
+HWI-EAS443:3:20:972:923#0/1  
a`aaabbbbabbabbbbbaaaa\_aaabaaa\_bab\_\_aaa  
@HWI-EAS443:3:20:980:1196#0/1  
CTGGAAGAGAAGGTAATGGTGAATTTCTCCAATTTGCT  
+HWI-EAS443:3:20:980:1196#0/1  
\_bb`\_abaaZ`aa¥aa\_W]¥aa\_]aa]WYa`X][\_a\_\_^S  
@HWI-EAS443:3:21:1034:596#0/1  
GTCGCTTTCAATCTGTGCCGCATTTCTTCAATTAACCACC  
+HWI-EAS443:3:21:1034:596#0/1  
a\_``\_\_^a\_aaa\_^]a\_^\_¥`\_`\_¥`\_]^\_]\_\_XU[ZS  
@HWI-EAS443:3:21:1059:1467#0/1  
GGTTAATTGAAGAAATGCGGCACAGATTGAAAGCGACAGA  
+HWI-EAS443:3:21:1059:1467#0/1  
a`^aa``[^\_a\_\_```a\_]```\_\_\_\_\_]\_\_^^\_Z\_\_Z\_\_^  
@HWI-EAS443:3:21:1075:1415#0/1  
CGAGGGTCATGTCAGAAAGGTAGCGCGAAGTAGGTACAGA  
+HWI-EAS443:3:21:1075:1415#0/1  
aaUX^XTaaa``aaaWU]]XRb¥\_a`a`aU\_``Wa^a\_a  
@HWI-EAS443:3:21:1128:208#0/1  
CTTGGAGAACTGTGATGAGAATGGGAGACCTTCACTACC  
+HWI-EAS443:3:21:1128:208#0/1  
abaaaaba^a`ba¥baab\_a`^a`a]`a]X]\_\_]^\_\_\_\_^]  
@HWI-EAS443:3:21:1196:951#0/1  
GAATGGGAGACCTTCACTACCTCCAGAGCAGAAATGAAAA  
+HWI-EAS443:3:21:1196:951#0/1  
`^aa`\_YN]¥]Za`\_`\_a`\_`\_a`\_`[[S\_\_\_\_Z^\_\_\_\_^^¥  
@HWI-EAS443:3:21:1199:1802#0/1  
GCCGCATTTCTTCAATTAACCACCTTATTTCCCTCAAATTT  
+HWI-EAS443:3:21:1199:1802#0/1  
^^ab]bbbb^abab]abaaaaba`babaaa`abbba`aaa  
@HWI-EAS443:3:21:1205:339#0/1  
GAATGGGAGACCTTCACTACCTCCAGAGCAGAAATGAAAA  
+HWI-EAS443:3:21:1205:339#0/1  
a``aaaa¥a^¥¥\_]\_\_W\_^W¥¥^VZ\_Y\_W¥\_Y¥U\_UZ¥Y¥  
@HWI-EAS443:3:21:124:486#0/1  
CTTGAAAGAGGAATCCAGCGAGACACTTAGAATGACAATT

+HWI-EAS443:3:21:124:486#0/1  
aa\_b^[[abaa`Y`baabba`a`a` ``aaaa`aa\_a\_\_\_\_  
@HWI-EAS443:3:21:1253:406#0/1  
CGCTTGGAGAACTGTGATGAGAATGGGAGACCTTCACTA  
+HWI-EAS443:3:21:1253:406#0/1  
abaaabaabaaaPS`\_a¥\_a^a][X\_¥SYVPL\_YSHNY\_  
@HWI-EAS443:3:21:1294:1311#0/1  
GGAGAACTGTGATGAGAATGGGAGACCTTCACTACCTCC  
+HWI-EAS443:3:21:1294:1311#0/1  
\_X¥` `abaaa`aaaa\_a\_a` `a`\_a\_]`\_`\_`\_`\_Z\_Z^  
@HWI-EAS443:3:21:1330:83#0/1  
TGAGAACTGGGAGACCTTCACTACCTCCAGAGCAGAAATGA  
+HWI-EAS443:3:21:1330:83#0/1  
ab`Wa]abaaVaZ^SV^O[U]YFORUX\_ZZ\_\_X\_WHWZZV  
@HWI-EAS443:3:21:1373:903#0/1  
AGAACTGTGATGAGAATGGGAGACCTTCACTACCTCCAG  
+HWI-EAS443:3:21:1373:903#0/1  
abaaa\_ab\_aaa` `a[^aa`^¥a]OT\_^]\_^N^RYU]  
@HWI-EAS443:3:21:1379:1788#0/1  
GTCGCTTTCAATCTGTGCCGATTTCTTCAATTAACCACC  
+HWI-EAS443:3:21:1379:1788#0/1  
\_XZOWWX^Z^Z]U]]¥0\_\_\_ZY[¥ZZ^^ZX¥[\_\_\_`^¥V]  
@HWI-EAS443:3:21:1432:1117#0/1  
GAACTGTGATGAGAATGGGAGACCTTCACTACCTCCAGA  
+HWI-EAS443:3:21:1432:1117#0/1  
aabaabb\_b`ab`a`aaba`^b[¥\_a\_^\_]a^WWa\_W^aX  
@HWI-EAS443:3:21:155:1023#0/1  
GCCGATTTCTTCAATTAACCACCTTATTTCTCAAATTT  
+HWI-EAS443:3:21:155:1023#0/1  
abab`aaaaaaa`a]a`aaaaaa`aaaaa\_aYa\_a`\_a`]  
@HWI-EAS443:3:21:1596:351#0/1  
GCTGTTTCGATATCGAGCCAAGGGTGTGCCTCTTCCTT  
+HWI-EAS443:3:21:1596:351#0/1  
aa`Y]aaaaaaaaYY^Z`¥\_a\_^]\_YaW\_¥VZ\_Y`\_YY\_\_\_  
@HWI-EAS443:3:21:160:1348#0/1  
GCCGATTTCTTCAATTAACCACCTTATTTCTCAAATTT  
+HWI-EAS443:3:21:160:1348#0/1  
\_a\_]ZRPZX`\_baXVYY¥aSL[[¥^Ta`X¥^a`\_I\_H`]Y  
@HWI-EAS443:3:21:163:1769#0/1  
TGAAAATATACAGAGATTCGCTTGGAGAACTGTGATGAG  
+HWI-EAS443:3:21:163:1769#0/1  
a^aaaaa`\_aaa^aX^a^a^a`^\_\_\_¥a`\_Z^¥W\_U]WZZ  
@HWI-EAS443:3:21:1674:268#0/1  
ACTGTGATGAGAATGGGAGACCTTCACTACCTCCAGAGCA  
+HWI-EAS443:3:21:1674:268#0/1  
a[abW^^`a^aY]\_\_\_Z]aYWW\_]Z^Z^]OV\_HOZ^W^UR  
@HWI-EAS443:3:21:1782:1818#0/1  
TTTCTCGAGGGTCATGTGAGAAAGGTAGCGGAAGTAGG  
+HWI-EAS443:3:21:1782:1818#0/1  
aa` ` `a`aa`¥Y`\_a` `]\_a^[\_` `Y\_\_\_]aX`\_]\_\_X\_] ]

@HWI-EAS443:3:21:213:343#0/1  
CGCTTGGAGAACTGTGATGAGAATGGGAGACCTTCACTA  
+HWI-EAS443:3:21:213:343#0/1  
abbSSa]UWOXSaZ]M[NUaW\_SYT\_^\_U^ZYQTQUS¥SW  
@HWI-EAS443:3:21:221:203#0/1  
GTGCCGATTTCTTCAATTAACCACCTTATTTCTCAAAT  
+HWI-EAS443:3:21:221:203#0/1  
aaaaaaaaa^a^^]a`aa`]^\_aaa``\_a`\_\_a^a`\_^\_\_  
@HWI-EAS443:3:21:252:1307#0/1  
GGAGAACTGTGATGAGAATGGGAGACCTTCACTACCTCC  
+HWI-EAS443:3:21:252:1307#0/1  
¥bb\_U\_WaZU`WW¥[a\_ZZL[`]X¥QRRaR¥aX`0¥^[VV  
@HWI-EAS443:3:21:258:1613#0/1  
AAGGTCTCTAATCGGTTAAAGATTACACTGAAGTTCGCTT  
+HWI-EAS443:3:21:258:1613#0/1  
`X\_¥a^VbZ`^a^V[aX`TMPYZV\_T\_¥H¥IIO\_aSSP  
@HWI-EAS443:3:21:297:27#0/1  
TGGAGGTAGTGAAGGTCTCCCATTCTCATCACAGTTTCTC  
+HWI-EAS443:3:21:297:27#0/1  
abaaabG`¥DZ\_YX`M[U]\_a]]\_T\_\_OXR^\_¥`X\_[Y^Y  
@HWI-EAS443:3:21:312:186#0/1  
AGAATGGGAGACCTTCACTACCTCCAGAGCAGAAATGAAA  
+HWI-EAS443:3:21:312:186#0/1  
abababaa[aZabaaa`aa[]aaa\_a^\_aW``[\_\_\_]\_`Z¥  
@HWI-EAS443:3:21:331:866#0/1  
ACCTTCTCTTCCAGGACATACTTATGAGGATGTCAAAAAT  
+HWI-EAS443:3:21:331:866#0/1  
ab`\_a`^a`\_aaa`a`\_a`Y`a`^`\_¥`\_]`X]W\_Z^]`^  
@HWI-EAS443:3:21:339:444#0/1  
GAGAATGGGAGACCTTCACTACCTCCAGAGCAGAAATGAA  
+HWI-EAS443:3:21:339:444#0/1  
`X`ZOZa\_Q[UU[^¥S¥¥HOX[UWZQQXa[[\_a¥Z^[\_`\_`  
@HWI-EAS443:3:21:344:198#0/1  
CGCTTTCAATCTGTGCCGATTTCTTCAATTAACCACCTT  
+HWI-EAS443:3:21:344:198#0/1  
aba`babab`\_a\_\_a`aa\_aaa`a`\_a`]a`\_a`\_^`^^`\_  
@HWI-EAS443:3:21:354:586#0/1  
GCCGATTTCTTCAATTAACCACCTTATTTCTCAAATTT  
+HWI-EAS443:3:21:354:586#0/1  
abaaaaaaaa`\_a\_aaaa\_aaaa\_\_^aa^`\_`a^`\_`\_]`  
@HWI-EAS443:3:21:369:696#0/1  
GATGAGAATGGGAGACCTTCACTACCTCCAGAGCAGAAAT  
+HWI-EAS443:3:21:369:696#0/1  
aa]`\_]`\_R\_\_Y\_\_TZ`\_a\_X][`ZYZY\_``]a[aa`\_a[  
@HWI-EAS443:3:21:444:590#0/1  
GAGAATGGGAGACCTTCACTACCTCCAGAGCAGAAATGAA  
+HWI-EAS443:3:21:444:590#0/1  
a\_a```bb`]a¥aa`ab`\_`\_a`\_\_aY\_a\_\_a`\_\_a\_\_  
@HWI-EAS443:3:21:492:465#0/1  
CCGATTTCTTCAATTAACCACCTTATTTCTCAAATTTTC

+HWI-EAS443:3:21:492:465#0/1  
\_XU]L¥^W]^LTU`VYY\_V\_PTUYWX[\_][NR`[[S^S^S  
@HWI-EAS443:3:21:500:966#0/1  
GTCGCTTTCAATCTGTGCCGCATTTCTTCAATTAACCACC  
+HWI-EAS443:3:21:500:966#0/1  
a^`b`^Z^`ZFU^V`K\_a^¥\_YU[UX\_^Y[[¥U`TXT`ZS  
@HWI-EAS443:3:21:509:1759#0/1  
GCCGCATTTCTTCAATTAACCACCTTATTTCTCAAATTT  
+HWI-EAS443:3:21:509:1759#0/1  
abb¥PPN`\_^a\_]`\_Ta\_IaaaG^]`^YFX\_\_\_UFT\_¥S  
@HWI-EAS443:3:21:533:773#0/1  
ATGAGAATGGGAGACCTTCACTACCTCCAGAGCAGAAATG  
+HWI-EAS443:3:21:533:773#0/1  
`^^`[MZU\_baa`^^Z\_`a`a`ZX¥a``[a^^`^\_\_`\_  
@HWI-EAS443:3:21:537:1705#0/1  
GAATGGGAGACCTTCACTACCTCCAGAGCAGAAATGAAAA  
+HWI-EAS443:3:21:537:1705#0/1  
aaV[S`^a¥UUFY`[aaR\_N`WZRQ¥aS\_¥S\_]W`¥Q^W  
@HWI-EAS443:3:21:53:1945#0/1  
GTCGCTTTCAATCTGTGCCGCATTTCTTCAATTAACCACC  
+HWI-EAS443:3:21:53:1945#0/1  
[EWba``\_aab\_¥QXRW`\_\_¥a\_\_\_GXRT^XHU\_`^SRLT  
@HWI-EAS443:3:21:57:76#0/1  
AGAAACTGTGATGAGAATGGGAGACCTTCACTACCTCCAG  
+HWI-EAS443:3:21:57:76#0/1  
\_bT]`a\_bNaW[a\_bYSW`aa]`GZ¥\_QW\_]XUQSV]]NU  
@HWI-EAS443:3:21:583:115#0/1  
AAACTGTGATGAGAATGGGAGACCTTCACTACCTCCAGAG  
+HWI-EAS443:3:21:583:115#0/1  
a`a^`a\_a`\_a\_a^`\_aa\_]`\_^^^][^^^]UV\_^XZ\_Z^  
@HWI-EAS443:3:21:588:745#0/1  
ACTGTGATGAGAATGGGAGACCTTCACTACCTCCAGAGCA  
+HWI-EAS443:3:21:588:745#0/1  
aaba\_aaaa`a\_a\_a`a\_\_`a`\_]\_a^``]\_\_^]\_aZ`^^  
@HWI-EAS443:3:21:590:969#0/1  
TGCCGCATTTCTTCAATTAACCACCTTATTTCTCAAATT  
+HWI-EAS443:3:21:590:969#0/1  
`a`Z\_TT`\_`aaZ^¥[a\_a^\_a¥`\_\_\_\_\_]`\_¥[^\_Z]^  
@HWI-EAS443:3:21:610:1140#0/1  
GAGAATGGGAGACCTTCACTACCTCCAGAGCAGAAATGAA  
+HWI-EAS443:3:21:610:1140#0/1  
a\_`[aabaa\_a`\_a``aa`\_`\_\_\_\_`aW`\_\_\_\_]^`\_a\_^  
@HWI-EAS443:3:21:615:232#0/1  
GCCGCATTTCTTCAATTAACCACCTTATTTCTCAAATTT  
+HWI-EAS443:3:21:615:232#0/1  
abaaaaaab`baa`a`aa`aaa^a\_`aa]`\_a^`\_a`^\_  
@HWI-EAS443:3:21:616:1919#0/1  
AGGGAGCAATAGTTGGAGAAATTTACCATTACCTTCTCT  
+HWI-EAS443:3:21:616:1919#0/1  
aaa\_T`\_]`Ya`OXa^baV\_[Y\_`a`]\_\_]`\_`aXZUXVV

@HWI-EAS443:3:21:622:351#0/1  
ATTATCTTTTGCCTAGGCATGAGCATGAACCCAGTCTCGTG  
+HWI-EAS443:3:21:622:351#0/1  
aabaa`aa]aaaa`a`a\_\_a\_\_]\_^\_\_aQ]¥\_W]\_¥WZ]  
@HWI-EAS443:3:21:628:881#0/1  
GCCGCATTTCTTCAATTAACCCACCTTATTTCCCTCAAATTT  
+HWI-EAS443:3:21:628:881#0/1  
Yabb`\_bbbbabb^ababaaaaaaaa`b`a^aaaaa`aaa  
@HWI-EAS443:3:21:701:588#0/1  
TGGAGAACTGTGATGAGAATGGGAGACCTTCACTACCTC  
+HWI-EAS443:3:21:701:588#0/1  
abbbbbabbbb\_babb`b`aaaa\_a\_a\_a\_\_a\_aa]\_\_`  
@HWI-EAS443:3:21:705:615#0/1  
GAGCAATTGGGACAGAAATTTGAGGAAATAAGGTGGTTAA  
+HWI-EAS443:3:21:705:615#0/1  
`^abaaaaabaaaaaaaa`aaaa\_aa¥Z`a^\_aZaa]\_`  
@HWI-EAS443:3:21:73:1501#0/1  
GCCGCATTTCTTCAATTAACCCACCTTATTTCCCTCAAATTT  
+HWI-EAS443:3:21:73:1501#0/1  
a\_[\_^]¥]¥]Z¥\_YT[UY¥`\_\_`ZO¥\_\_[Y¥¥\_]S¥`V\_  
@HWI-EAS443:3:21:824:1915#0/1  
TGAGAATGGGAGACCTTCACTACCTCCAGAGCAGAAATGA  
+HWI-EAS443:3:21:824:1915#0/1  
YZRNW[\_]Z^]\_]\_[WZaVPa`[IZ`R[Y]^ [SZS^]\_^  
@HWI-EAS443:3:21:850:1017#0/1  
CCCCATTCCTTGATCGGCTCCGCCGAGATCAAAAAGTCCTT  
+HWI-EAS443:3:21:850:1017#0/1  
aaaa¥`aaa`\_]\_]\_^`Z``\_¥PTZZRR[[[V¥ZUW[[[  
@HWI-EAS443:3:21:862:2027#0/1  
GATGAGAATGGGAGACCTTCACTACCTCCAGAGCAGAAAT  
+HWI-EAS443:3:21:862:2027#0/1  
aaab`\_[]^Sa`\_\_`¥ZUUaS`aUJLPU\_^T[N^] []\_Z  
@HWI-EAS443:3:21:867:1635#0/1  
ATTACACTGAAGTTTCGCTTTCAGTACTATGTTCTTTTCCA  
+HWI-EAS443:3:21:867:1635#0/1  
S¥W]a`^Y^¥NYMW]]][\_XVVQT\_¥\_^]¥S] []] ^Z^  
@HWI-EAS443:3:21:86:609#0/1  
AGAACTGTGATGAGAATGGGAGACCTTCACTACCTCCAG  
+HWI-EAS443:3:21:86:609#0/1  
]aYaaaaaZa¥¥a\_aXNX]\_^¥Y^]^[\_`\_]¥W\_^\_YR¥  
@HWI-EAS443:3:21:896:432#0/1  
GTCGCTTTCAATCTGTGCCGATTTCTTCAATTAACCACC  
+HWI-EAS443:3:21:896:432#0/1  
aaa\_aa`aa`aa\_a^a`a\_\_\_\_aa^a\_\_\_\_aa`^^¥\_^Z  
@HWI-EAS443:3:21:906:871#0/1  
GAAACTGTGATGAGAATGGGAGACCTTCACTACCTCCAGA  
+HWI-EAS443:3:21:906:871#0/1  
\_R\_\_abb`a`ZZZ[aa^][\_^ [Y^X^a\_\_a`^^^Ua\_]`  
@HWI-EAS443:3:21:933:1966#0/1  
GCCGCATTTCTTCAATTAACCCACCTTATTTCCCTCAAATTT

+HWI-EAS443:3:21:933:1966#0/1  
a]OSa`]\`aWZYa`V[\`aWWW¥S^\_^\_\_\_\_X¥`]\\_`^`SR  
@HWI-EAS443:3:21:963:576#0/1  
AGATTTCGCTTGGAGAACTGTGATGAGAATGGGAGACCTT  
+HWI-EAS443:3:21:963:576#0/1  
ab`a`a`¥`aaaa\_¥XaZ¥\_N\_Z[¥\_\_ZZL]X`R¥[SY]^  
@HWI-EAS443:3:21:969:1313#0/1  
TGAGAATGGGAGACCTTCACTACCTCCAGAGCAGAAATGA  
+HWI-EAS443:3:21:969:1313#0/1  
\_\_U¥XZS`Wa^\_aV]¥I^`aa^W\_¥]]][Z¥WJaa[LU\_a\_  
@HWI-EAS443:3:21:983:74#0/1  
GCGAGACACTTAGAATGACAATTGCATCTGTACCTACTTC  
+HWI-EAS443:3:21:983:74#0/1  
^W`\_aV\_\_aba[aY\_aaaQa`a\_a][aU`\_ZX[TZ`S[\_X  
@HWI-EAS443:3:22:1019:1341#0/1  
TGAGAATGGGAGACCTTCACTACCTCCAGAGCAGAAATGA  
+HWI-EAS443:3:22:1019:1341#0/1  
\_`PWYZ¥TWZY]^¥[\_aa\_]¥^ZZ`V[¥`ZZU]`\_^Z  
@HWI-EAS443:3:22:1046:385#0/1  
CTCCCATTCTCATCACAGTTTCTCCAAGCGAATCTCTGTA  
+HWI-EAS443:3:22:1046:385#0/1  
¥a\_^`ba`ba`a^a`bbYbbbb`U\_`\_abaa]¥a]abYb  
@HWI-EAS443:3:22:104:150#0/1  
CCGCATTTCTTCAATTAACCACCTTATTTCTCAAATTTTC  
+HWI-EAS443:3:22:104:150#0/1  
aaY[Z^\_IY\_^^a`U`^a`a`\_aaa\_a\_]`\_^^ZP¥^`^  
@HWI-EAS443:3:22:1080:1751#0/1  
CCGCATTTCTTCAATTAACCACCTTATTTCTCAAATTTTC  
+HWI-EAS443:3:22:1080:1751#0/1  
]TY`XNQZa`¥`WG[¥WPX[X\_V]YQ\_^[Q[\_]WXT^VZ\_  
@HWI-EAS443:3:22:1104:203#0/1  
GAGAATGGGAGACCTTCACTACCTCCAGAGCAGAAATGAA  
+HWI-EAS443:3:22:1104:203#0/1  
a\_a\_a\_a\_[`a`]\_\_^UaY`[UG^]UY\_X^Y^[UX^[\_UX  
@HWI-EAS443:3:22:121:59#0/1  
TAAGGTGGTTAATTGAAGAAATGCGGCACAGATTGAAAGC  
+HWI-EAS443:3:22:121:59#0/1  
`[aa¥Ma\_TY`aa`a¥aY[aaV`^`\_`a`\_a^Z^][¥]^  
@HWI-EAS443:3:22:1251:558#0/1  
GAGGACCCCAACTGCATTTTTGACATCCTCATAAGTATGT  
+HWI-EAS443:3:22:1251:558#0/1  
a`\_a\_N\_\_aP^M^a]\_a`aZ[\_]^a`^]^]\_`SS]Z\_^^U  
@HWI-EAS443:3:22:1311:1594#0/1  
CTTGGAGAACTGTGATGAGAATGGGAGACCTTCACTACC  
+HWI-EAS443:3:22:1311:1594#0/1  
aaaaaaaaaa`aa]aa`a`\_\_a\_a\_\_\_\_]Z]\_]X\_XX`U]  
@HWI-EAS443:3:22:1334:641#0/1  
ATTTCTCCAATTTGCTCCCTCCTCAGTGAAAGCCCTTA  
+HWI-EAS443:3:22:1334:641#0/1  
\_aaa`b`b`aababba`aZ\_\_a`^a\_a][a]X¥]ZXX^\_^



@HWI-EAS443:3:22:133:866#0/1  
AAACTGTGATGAGAATGGGAGACCTTCACTACCTCCAGAG  
+HWI-EAS443:3:22:133:866#0/1  
aZ]aa^P^a¥`¥a`\_]`Y\_\_]\_\_\_\_\_V^^X]]^X\_\_Y\_  
@HWI-EAS443:3:22:1343:824#0/1  
TGAGAATGGGAGACCTTCACTACCTCCAGAGCAGAAATGA  
+HWI-EAS443:3:22:1343:824#0/1  
aaa\_Jaa`[^`^b`[[a\_\_aY\_aV\_`¥^SVY\_W^a]X\_aa[  
@HWI-EAS443:3:22:1375:758#0/1  
GCCGCATTTCTTCAATTAACCACCTTATTTCTCAAATTT  
+HWI-EAS443:3:22:1375:758#0/1  
[]abaabba`bba`ababbaaba\_bbbabb`\_aaaaaba`  
@HWI-EAS443:3:22:138:1144#0/1  
GTGATGAGAATGGGAGACCTTCACTACCTCCAGAGCAGAA  
+HWI-EAS443:3:22:138:1144#0/1  
aZaaaa`\_[`aaa^[`]\_\_\_`\_a\_\_`[Y`^`^^^WZZ^^V  
@HWI-EAS443:3:22:1390:1041#0/1  
AGAAACTGTGATGAGAATGGGAGACCTTCACTACCTCCAG  
+HWI-EAS443:3:22:1390:1041#0/1  
a`^`\_]a[H¥]]aaa^Waa`¥Z\_]Z¥¥J[]Y[XTWZ]]\_  
@HWI-EAS443:3:22:1403:1341#0/1  
GGTTTCGAGTCTCTGAAAATATACAGAGATTCGCTTGGAGA  
+HWI-EAS443:3:22:1403:1341#0/1  
aa]aY^`aSU\_\_a`\_\_\_a\_a^^Y`\_\_\_^MUW`ZX¥\_^]WV  
@HWI-EAS443:3:22:1425:953#0/1  
GTCGCTTTCAATCTGTGCCGCATTTCTTCAATTAACCACC  
+HWI-EAS443:3:22:1425:953#0/1  
a`\_a\_a`aa`¥``a¥¥]\_a]\_``¥``]\_\_`\_\_^]]\_ZW  
@HWI-EAS443:3:22:147:651#0/1  
GCCGAGATCAAAAGTCCTTAAAAGGAAGAGGCAACACCCT  
+HWI-EAS443:3:22:147:651#0/1  
`aab^a\_aa`\_a\_aW\_`a`a\_^Z^`\_\_\_Y`aa`\_^\_\_\_W^  
@HWI-EAS443:3:22:1507:609#0/1  
CTGTGATGAGAATGGGAGACCTTCACTACCTCCAGAGCAG  
+HWI-EAS443:3:22:1507:609#0/1  
a\_b\_aa]]V`])`abaa\_b`\_]a\_\_\_Y\_\_\_[`TNZaXa[Ya  
@HWI-EAS443:3:22:1523:255#0/1  
GAGCAATTGGGACAGAAATTTGAGGAAATAAGGTGGTTAA  
+HWI-EAS443:3:22:1523:255#0/1  
¥ZY]]abbb\_X^[a\_WU]\_\_ab`a\_]Q]aXa¥QXa`^a\_W  
@HWI-EAS443:3:22:1544:527#0/1  
GCCGCATTTCTTCAATTAACCACCTTATTTCTCAAATTT  
+HWI-EAS443:3:22:1544:527#0/1  
aYNZR]]`NTa`[Z^`[]`^^ZTXZ]\_a¥^YX^^]^\_[Y  
@HWI-EAS443:3:22:1567:357#0/1  
CGCTTGGAGAAACTGTGATGAGAATGGGAGACCTTCACTA  
+HWI-EAS443:3:22:1567:357#0/1  
^aaa^]\_aaaa`\_aa[a^`a[aY\_\_aa^Xa¥VRY\_]^Z^\_  
@HWI-EAS443:3:22:160:132#0/1  
TGAGAATGGGAGACCTTCACTACCTCCAGAGCAGAAATGA

+HWI-EAS443:3:22:160:132#0/1  
`¥W`]aa\_b`]\_\_U\_\_\_bZa[[\_S]`^YNaYXGQXZW`U  
@HWI-EAS443:3:22:1611:679#0/1  
GAGAATGGGAGACCTTCACTACCTCCAGAGCAGAAATGAA  
+HWI-EAS443:3:22:1611:679#0/1  
¥`a``Z^¥Ta¥U¥^`Ya`a\_YOY¥P^¥¥YVZZ^Z^^^¥¥  
@HWI-EAS443:3:22:1616:192#0/1  
AGAAACTGTGATGAGAATGGGAGACCTTCACTACCTCCAG  
+HWI-EAS443:3:22:1616:192#0/1  
aaa^\_aa^^¥`ZU\_^\_a`\_\_Z\_^ZR\_^X]UZZVVZMFQZ  
@HWI-EAS443:3:22:1622:484#0/1  
GAAACTGTGATGAGAATGGGAGACCTTCACTACCTCCAGA  
+HWI-EAS443:3:22:1622:484#0/1  
a`] [V`^`]^X^a¥]Y\_aa^`ZaXTX^XV]Y\_^VV[PVT]Y  
@HWI-EAS443:3:22:1624:430#0/1  
GAAAATATACAGAGATTCGCTTGGAGAACTGTGATGAGA  
+HWI-EAS443:3:22:1624:430#0/1  
aaa^\_aaaa]aa`b\_aa\_a\_aaaa]`]^`^a`¥a]]]Y\_]`  
@HWI-EAS443:3:22:163:1512#0/1  
GAATGGGAGACCTTCACTACCTCCAGAGCAGAAATGAAAA  
+HWI-EAS443:3:22:163:1512#0/1  
`TW`\_¥`\_aaba][baa\_a`UW\_aa^a\_aaa^Q[¥\_`^`a]  
@HWI-EAS443:3:22:1648:2043#0/1  
CCGCATTTCTTCAATTAACCACCTTATTTCTCAAATTTTC  
+HWI-EAS443:3:22:1648:2043#0/1  
`bbbbabbabbababbbb`a```aaaaba`aaaaaaaa`a^  
@HWI-EAS443:3:22:1653:658#0/1  
ATGAGAATGGGAGACCTTCACTACCTCCAGAGCAGAAATG  
+HWI-EAS443:3:22:1653:658#0/1  
\_bb\_bb\_abaaYY^OT¥a`^`aa\_\_RW[[X`UaVVXUO]T\_  
@HWI-EAS443:3:22:166:1686#0/1  
GTCGCTTTCAATCTGTGCCGATTTCTTCAATTAACCACC  
+HWI-EAS443:3:22:166:1686#0/1  
\_R`^`a\_aa`]^ [b`]U¥a]`aa` `` `` `^`][`\_`^`^`\_]X  
@HWI-EAS443:3:22:1670:854#0/1  
TGAGAATGGGAGACCTTCACTACCTCCAGAGCAGAAATGA  
+HWI-EAS443:3:22:1670:854#0/1  
aa^XZ\_]bWZWZ[RS\_\_a`\_`a¥PTRN]^`URP]a[^^\_]\_  
@HWI-EAS443:3:22:1678:996#0/1  
CTTGAATGGAATGGTAACACGGTTTCGAGTCTCTGAAAATA  
+HWI-EAS443:3:22:1678:996#0/1  
aaaaa¥a`aaaa`a`\_bababba\_X¥]\_^]`^`]```aa\_a  
@HWI-EAS443:3:22:1720:1495#0/1  
GGAGAACTGTGATGAGAATGGGAGACCTTCACTACCTCC  
+HWI-EAS443:3:22:1720:1495#0/1  
a`S`a¥aQ[a^`W\_\_\_\_][XNXW¥^aZSMW[V^SX[QNLQT  
@HWI-EAS443:3:22:1737:1402#0/1  
GCTTGGAGAACTGTGATGAGAATGGGAGACCTTCACTAC  
+HWI-EAS443:3:22:1737:1402#0/1  
aaa\_\_\_\_]\_]\_] [ ]aY¥¥^`V¥¥YU]^¥WZ[WUWXMVUXZN

@HWI-EAS443:3:22:1743:780#0/1  
GAGAACTGTGATGAGAATGGGAGACCTTCACTACCTCCA  
+HWI-EAS443:3:22:1743:780#0/1  
a¥\_Y\_^V\_aV\_X^`R[[V]^Y]S]YTPWYRSSQXYVXPSW  
@HWI-EAS443:3:22:188:66#0/1  
GAGAATGGGAGACCTTCACTACCTCCAGAGCAGAAATGAA  
+HWI-EAS443:3:22:188:66#0/1  
a``\_\_aaaa¥\_^\_¥\_^Z\_¥¥\_Y¥¥¥¥VZW\_WU^SW¥¥]W¥  
@HWI-EAS443:3:22:197:1632#0/1  
AGACTGTTTCCTTTGGCATATCCGCAAGCGATTTGCAGAC  
+HWI-EAS443:3:22:197:1632#0/1  
a^[aaa[``Xa^ZZ]\_a`U\_X`]`a\_YWUUXZ\_RWYX]]V  
@HWI-EAS443:3:22:211:1024#0/1  
GCCGCATTTCTTCAATTAACCACCTTATTTCTCAAATTT  
+HWI-EAS443:3:22:211:1024#0/1  
abbbbababbbbaabbbbaabaabbbbabaaab]abaa  
@HWI-EAS443:3:22:259:582#0/1  
GAAACAAATCGTGGAATGGATCTTGAAAGGAATCCAGC  
+HWI-EAS443:3:22:259:582#0/1  
aaaaab¥^`a`\_aa^a`a`\_[`\_ZS^S¥]^YZ¥^ZY[\_¥^  
@HWI-EAS443:3:22:25:1330#0/1  
GCCGCATTTCTTCAATTAACCACCTTATTTCTCAAATTT  
+HWI-EAS443:3:22:25:1330#0/1  
aaaaaaaa\_aaaaaa`aaaa`\_`¥`\_\_a`\_```V^`^  
@HWI-EAS443:3:22:260:1056#0/1  
AAACTGTGATGAGAATGGGAGACCTTCACTACCTCCAGAG  
+HWI-EAS443:3:22:260:1056#0/1  
\_ZZaaaZ`a`a`aa¥^a`a`[^\_^\_\_\_\_`\_a`\_^\_]\_^V\_  
@HWI-EAS443:3:22:261:1251#0/1  
GCCGCATTTCTTCAATTAACCACCTTATTTCTCAAATTT  
+HWI-EAS443:3:22:261:1251#0/1  
`W\_abaab`baaaabb\_aaaa```a\_a\_a`Zba[aaa``  
@HWI-EAS443:3:22:27:889#0/1  
CGCATTTCTTCAATTAACCACCTTATTTCTCAAATTTCT  
+HWI-EAS443:3:22:27:889#0/1  
aaba][a\_aa][^¥a[ZZSzaaa]T]\_\_]``X¥P\_^T^a  
@HWI-EAS443:3:22:28:251#0/1  
GCCGCATTTCTTCAATTAACCACCTTATTTCTCAAATTT  
+HWI-EAS443:3:22:28:251#0/1  
aba`Y`]aa`a`^`aa^\_aa`aa^````\_``\_`]Z^]`  
@HWI-EAS443:3:22:297:1446#0/1  
GCGGCACAGATTGAAAGCGACAGAGAATAGTTTCGAACAA  
+HWI-EAS443:3:22:297:1446#0/1  
\_`baaab\_`b`ba]aaa`¥\_Y]]`Va\_a^Uaaaa[`]a  
@HWI-EAS443:3:22:302:114#0/1  
GGTTAATTGAAGAAATGCGGCACAGATTGAAAGCGACAGA  
+HWI-EAS443:3:22:302:114#0/1  
aa`aaaaaba\_aaaaa\_a\_aa\_aaa^\_a`````^`\_\_a\_  
@HWI-EAS443:3:22:306:397#0/1  
TGCGGCACAGATTGAAAGCGACAGAGAATAGTTTCGAACA

+HWI-EAS443:3:22:306:397#0/1  
a¥aa`a^^\_a[a\_`]X¥a[`a\_`]^a`YaYOV\_`\_Q\_LP  
@HWI-EAS443:3:22:352:1993#0/1  
GGAGAACTGTGATGAGAATGGGAGACCTTCACTACCTCC  
+HWI-EAS443:3:22:352:1993#0/1  
]bb`baaab\_[a`]aa`aaaa`aa^\_aaaa^\_a\_a``a  
@HWI-EAS443:3:22:382:1723#0/1  
GTGCCGATTTCTTCAATTAACCACCTTATTTCTCAAAT  
+HWI-EAS443:3:22:382:1723#0/1  
`abaabbaabbbbbbabbbbbabab`babaaaaabbbab  
@HWI-EAS443:3:22:409:1493#0/1  
GAAACTGTGATGAGAATGGGAGACCTTCACTACCTCCAGA  
+HWI-EAS443:3:22:409:1493#0/1  
aba¥N¥a\_`aaaa`aa\_a`\_\_a\_`aa\_aa`\_a\_a\_aa`]a  
@HWI-EAS443:3:22:412:460#0/1  
GAGAGCAATTGGGACAGAAATTTGAGGAAATAAGGTGGTT  
+HWI-EAS443:3:22:412:460#0/1  
aababa\_aaaaa^`aaaa````a\_aa\_W\_\_\_^aQIX^Y^  
@HWI-EAS443:3:22:425:457#0/1  
GAGCAATTGGGACAGAAATTTGAGGAAATAAGGTGGTTAA  
+HWI-EAS443:3:22:425:457#0/1  
`ba\_]aaaa`aa\_a\_`a`aa`a`]`]a`\_`\_Y`a[`^\_  
@HWI-EAS443:3:22:435:1120#0/1  
AGAATGGGAGACCTTCACTACCTCCAGAGCAGAAATGAAA  
+HWI-EAS443:3:22:435:1120#0/1  
a\_a\_`a`¥^aa[ ]\_\_bba^aa`\_a\_\_\_^\_[``YY\_\_\_\_\_]-  
@HWI-EAS443:3:22:471:598#0/1  
CGAAGTAGGTACAGATGCAATTGTCTTCTAAGTGTCTCG  
+HWI-EAS443:3:22:471:598#0/1  
a`¥^b`bb^\_babbaaba`aaa\_aaaaa^]a`^a`a`a\_  
@HWI-EAS443:3:22:492:120#0/1  
ATGAGAATGGGAGACCTTCACTACCTCCAGAGCAGAAATG  
+HWI-EAS443:3:22:492:120#0/1  
abaabaaaaa`a\_\_`^`^a\_\_`\_a¥\_`Y\_X`^]\_XV]]\_  
@HWI-EAS443:3:22:572:522#0/1  
ATGAGAATGGGAGACCTTCACTACCTCCAGAGCAGAAATG  
+HWI-EAS443:3:22:572:522#0/1  
aaa\_a\_`\_`aaa\_a^^\_a\_`aY\_^\_[^^Y^`]\_V\_]\_U\_X  
@HWI-EAS443:3:22:582:73#0/1  
GTCGCTTTCAATCTGTGCCGATTTCTTCAATTAACCACC  
+HWI-EAS443:3:22:582:73#0/1  
a\_aa\_\_\_aa`\_`\_V\_aS`¥`\_]\_\_^^^\_\_^^[\_[^][^\_[]  
@HWI-EAS443:3:22:602:142#0/1  
TGCCGATTTCTTCAATTAACCACCTTATTTCTCAAATT  
+HWI-EAS443:3:22:602:142#0/1  
¥¥XGWRYaZZ^^W^S[ZYZQ\_a]U][\_a`]Z¥]a[¥^\_\_  
@HWI-EAS443:3:22:610:102#0/1  
AGAACTGTGATGAGAATGGGAGACCTTCACTACCTCCAG  
+HWI-EAS443:3:22:610:102#0/1  
aba^a\_`aZ`S¥[Z\_S`TZ]\_]\_^P`]Y^]\_[UPZZUZ]

@HWI-EAS443:3:22:679:1902#0/1  
AGAATGGGAGACCTTCACTACCTCCAGAGCAGAAATGAAA  
+HWI-EAS443:3:22:679:1902#0/1  
`]]ZS`[GY¥`aY[\_aaa\_aa\_`[bRR\_U]aWQa\_`[UVa  
@HWI-EAS443:3:22:69:562#0/1  
GTGTCTCGCTGGATTCTCTTTCAAGATCCATTCCACGAT  
+HWI-EAS443:3:22:69:562#0/1  
^\_bYbb\_QYQU`]^\_`^`\_aa]N^`[``aaa`a[QX^QY  
@HWI-EAS443:3:22:702:1406#0/1  
GTGCGTTTCAATCTGTGCCGATTTCTTCAATTAACCACC  
+HWI-EAS443:3:22:702:1406#0/1  
aa\_\_\_a`aa`\_^¥\_]``^Z^`^`\_¥`Y^`\_`]]`]^  
@HWI-EAS443:3:22:712:359#0/1  
GTCTCGTGACATTTCTCGAGGGTCATGTCAGAAAGGTAG  
+HWI-EAS443:3:22:712:359#0/1  
`Z`aaa\_a^aa`\_]\_\_\_\_\_¥^\_aPGU¥\_T[Z]UWTa¥N^¥  
@HWI-EAS443:3:22:71:1749#0/1  
GAAACTGTGATGAGAATGGGAGACCTTCACTACCTCCAGA  
+HWI-EAS443:3:22:71:1749#0/1  
abaaT]a\_aa\_[¥Y`a`a\_^W[Y¥`a`aa`\_a¥]\_aa`\_^  
@HWI-EAS443:3:22:765:1446#0/1  
TGAGAATGGGAGACCTTCACTACCTCCAGAGCAGAAATGA  
+HWI-EAS443:3:22:765:1446#0/1  
`b]ZZ]b[UTbSYbWbaa`ab\_T\_a``J]a\_Ta\_\_ba[Sa  
@HWI-EAS443:3:22:767:1654#0/1  
GCGGCACAGATTGAAAGCGACAGAGAATAGTTTCGAACAA  
+HWI-EAS443:3:22:767:1654#0/1  
a\_[Za[]\_``^`]^`\_a[^[^X]]\_\_`YN\_]U[X\_^[RH`]  
@HWI-EAS443:3:22:786:2036#0/1  
GCCGATTTCTTCAATTAACCACCTTATTTCTCAAATTT  
+HWI-EAS443:3:22:786:2036#0/1  
a``a]Z`[````X\_a`a¥b¥a\_[¥aZ`a\_aa^aXa^ab[\_  
@HWI-EAS443:3:22:819:1383#0/1  
CAATCGCACGCAAAGAGGGCCTATTATCTTTTGCCTAGGC  
+HWI-EAS443:3:22:819:1383#0/1  
abaaab\_aabbabaa`\_¥Zaa`aaa^`]a``]^`\_`\_aY\_  
@HWI-EAS443:3:22:842:1956#0/1  
CCGCATTTCTTCAATTAACCACCTTATTTCTCAAATTT  
+HWI-EAS443:3:22:842:1956#0/1  
¥``bb^¥babbbaab\_baabbb\_abbbbbab\_aa^ab\_Xa  
@HWI-EAS443:3:22:849:316#0/1  
GAAACTGTGATGAGAATGGGAGACCTTCACTACCTCCAGA  
+HWI-EAS443:3:22:849:316#0/1  
W\_b^`¥S\_``a`b\_[aaab`a\_a[X]aY\_aa^Z^Z`\_`a  
@HWI-EAS443:3:22:87:1020#0/1  
AGAAACTGTGATGAGAATGGGAGACCTTCACTACCTCCAG  
+HWI-EAS443:3:22:87:1020#0/1  
aaaaba]\_U`X`aaaX`aaa`\_]\_````\_aa\_\_W\_^¥T¥\_  
@HWI-EAS443:3:22:881:461#0/1  
CTGTGATGAGAATGGGAGACCTTCACTACCTCCAGAGCAG

+HWI-EAS443:3:22:881:461#0/1  
abaa`ba¥\_baaabbaabaaaa`bbaaa]a`\_]\_`b\_aa\_b  
@HWI-EAS443:3:22:892:1317#0/1  
GCCGCATTTCTTCAATTAACCACCTTATTTCTCAAATTT  
+HWI-EAS443:3:22:892:1317#0/1  
`a¥FQ`^W]Y¥]]QOY]¥[^[YQ[TZ[a¥QY`^]YQT]^\_  
@HWI-EAS443:3:22:940:1314#0/1  
GTGCGTTTCAATCTGTGCCGCATTTCTTCAATTAACCACC  
+HWI-EAS443:3:22:940:1314#0/1  
`Xa]a`\_\_aa\_\_`a^``a`\_a\_^`\_\_\_\_[\_\_\_\_^a^]  
@HWI-EAS443:3:22:941:628#0/1  
CTGTCGTTTCAATCTGTGCCGCATTTCTTCAATTAACCA  
+HWI-EAS443:3:22:941:628#0/1  
\_babZa`a`Y\_ba\_YY\_aba`a^`abaaaa^``Vb¥¥a]  
@HWI-EAS443:3:23:1048:637#0/1  
GTGCGTTTCAATCTGTGCCGCATTTCTTCAATTAACCACC  
+HWI-EAS443:3:23:1048:637#0/1  
\_\_abaaaa```baa\_a`\_Z]aa`aX`a\_\_`a`W`X\_^  
@HWI-EAS443:3:23:1083:1787#0/1  
TGTCGTTTCAATCTGTGCCGCATTTCTTCAATTAACCAC  
+HWI-EAS443:3:23:1083:1787#0/1  
aa`aaaa`abaaa\_]\_a`\_]\_`aa`\_`\_a[a\_\_^`a[[`]  
@HWI-EAS443:3:23:1087:686#0/1  
TGAGAATGGGAGACCTTCACTACCTCCAGAGCAGAAATGA  
+HWI-EAS443:3:23:1087:686#0/1  
a¥G`P]\_]XPa\_[^`\_\_`Y\_\_VLXLV\_aV^S[\_VRN]\_]\_  
@HWI-EAS443:3:23:108:830#0/1  
CTGAAAATATACAGAGATTCGCTTGGAGAACTGTGATGA  
+HWI-EAS443:3:23:108:830#0/1  
aab\_ab]b`aaaabab^a`\_aa`\_^aY`aa```^¥`\_^Y  
@HWI-EAS443:3:23:1114:1589#0/1  
ATCCGCAAGCGATTTGCAGACAATGGATTGGGTGATGCCC  
+HWI-EAS443:3:23:1114:1589#0/1  
aaaaabbaaaa```¥[^`VZ\_\_^a\_]\_¥NQSUNWUJZST^  
@HWI-EAS443:3:23:1135:1503#0/1  
TGAGAATGGGAGACCTTCACTACCTCCAGAGCAGAAATGA  
+HWI-EAS443:3:23:1135:1503#0/1  
ab^W¥Yab`][ba`X`\_b`¥bb`Qba^`\_S^Haaa``aH]  
@HWI-EAS443:3:23:1146:98#0/1  
GAGAATGGGAGACCTTCACTACCTCCAGAGCAGAAATGAA  
+HWI-EAS443:3:23:1146:98#0/1  
abbaabbbba`b`]aaa`b`a`Xaa]^aa^aX\_`]X^`\_^]  
@HWI-EAS443:3:23:1153:1690#0/1  
GCCGCATTTCTTCAATTAACCACCTTATTTCTCAAATTT  
+HWI-EAS443:3:23:1153:1690#0/1  
\_bbbbbbbbbbbbbbabbabb`babbbbb\_bbbbbbbb  
@HWI-EAS443:3:23:1184:456#0/1  
CTTGGAGAACTGTGATGAGAATGGGAGACCTTCACTACC  
+HWI-EAS443:3:23:1184:456#0/1  
abZb¥aYZVSS\_`P¥V]aW\_V]XS]]]`]^RU[^[W[USJ

@HWI-EAS443:3:23:1204:1158#0/1  
TTCTAAGTGTCTCGCTGGATTCTCTTTCAAGATCCATTC  
+HWI-EAS443:3:23:1204:1158#0/1  
ab[aaV^S^]baZXT^Ja\_]TY`M`a]]`^\_\_]`a`^^  
@HWI-EAS443:3:23:1225:1365#0/1  
CTGTGATGAGAATGGGAGACCTTCACTACCTCCAGAGCAG  
+HWI-EAS443:3:23:1225:1365#0/1  
aba\_b`baabbbabababb`aababa`b\_a\_\_aa``b\_^a  
@HWI-EAS443:3:23:126:1740#0/1  
GTGCTTTCAATCTGTGCCGATTTCTTCAATTAACCACC  
+HWI-EAS443:3:23:126:1740#0/1  
^`Y[^a^a^aR`P`WOXZ^b^a^[]LXT]]]Y^`Z[a]W]  
@HWI-EAS443:3:23:1271:1637#0/1  
GCCGCATTTCTTCAATTAACCACCTTATTTCTCAAATTT  
+HWI-EAS443:3:23:1271:1637#0/1  
abaaXQOX[\_][Y`\_\_aP`[\_RUQ]G[T]YRW`S`\_][\_]  
@HWI-EAS443:3:23:1282:1777#0/1  
CGCTTTCAATCTGTGCCGATTTCTTCAATTAACCACCTT  
+HWI-EAS443:3:23:1282:1777#0/1  
ababbbabbabb^aaabaaaaaaaaaaaa`aaa\_\_aa^a\_  
@HWI-EAS443:3:23:1286:1834#0/1  
CTTGGAGAACTGTGATGAGAATGGGAGACCTTCACTACC  
+HWI-EAS443:3:23:1286:1834#0/1  
`ba^`a\_\_Y[`b\_\_\_\_aa\_\_Ya^Ia\_aaQ[^XaV\_[YV  
@HWI-EAS443:3:23:1315:1861#0/1  
GCCGCATTTCTTCAATTAACCACCTTATTTCTCAAATTT  
+HWI-EAS443:3:23:1315:1861#0/1  
`a`QP^VX[^\_PK\_^][ZZ\_\_MMSY^UOZX^RSPY^TM  
@HWI-EAS443:3:23:1319:299#0/1  
GCCGCATTTCTTCAATTAACCACCTTATTTCTCAAATTT  
+HWI-EAS443:3:23:1319:299#0/1  
aa\_a`aaab\_aa`a`aa\_[S^Uaa\_a`a\_Xa]`^^`]  
@HWI-EAS443:3:23:1333:625#0/1  
AAGAGGCAACACCCTTGGCCTCGATATCGAAACAGCCACT  
+HWI-EAS443:3:23:1333:625#0/1  
aYW]S\_aZ^Vaa]T]ZL^a^MYWZVW[U[N`PXT^ITV  
@HWI-EAS443:3:23:1338:1657#0/1  
GAAACTGTGATGAGAATGGGAGACCTTCACTACCTCCAGA  
+HWI-EAS443:3:23:1338:1657#0/1  
abbbabbabbbbabaaa`aaab`Z]aaaaaaaa`U`\_a^a^^  
@HWI-EAS443:3:23:1370:1786#0/1  
CAGAGATTGCTTGGAGAACTGTGATGAGAATGGGAGAC  
+HWI-EAS443:3:23:1370:1786#0/1  
aaaab`aab`a^^a\_\_a]Y[R`^]a^\_[^a[\_]]`^T\_YT  
@HWI-EAS443:3:23:1372:738#0/1  
CCGCATTTCTTCAATTAACCACCTTATTTCTCAAATTT  
+HWI-EAS443:3:23:1372:738#0/1  
abaabbbbaabbababaabaaa`bbbbbbbaaaaaabaa`  
@HWI-EAS443:3:23:1402:680#0/1  
GAGAACTGTGATGAGAATGGGAGACCTTCACTACCTCCA

+HWI-EAS443:3:23:1402:680#0/1  
aaaaaaabbababb`a[aa¥`a\_a\_^`\_a`aV`XS]aVP¥  
@HWI-EAS443:3:23:1403:1113#0/1  
CACGGTTCGAGTCTCTGAAAATATACAGAGATTCGCTTGG  
+HWI-EAS443:3:23:1403:1113#0/1  
]\_aaa¥U`¥[\_[VVPab¥¥\_W\_`OY][`Q`Y^O[QIP\_`U  
@HWI-EAS443:3:23:1405:1771#0/1  
CCGCATTTCTTCAATTAACCACCTTATTTCCCTCAAATTT  
+HWI-EAS443:3:23:1405:1771#0/1  
^a`bVVYU`aa`¥aaaXaaI]bXb`aaaaX¥\_L^b¥a^a\_  
@HWI-EAS443:3:23:1412:379#0/1  
GATGAGAATGGGAGACCTTCACTACCTCCAGAGCAGAAAT  
+HWI-EAS443:3:23:1412:379#0/1  
aabbab`aabb`\_a`\_¥^¥\_`\_`\_^S\_V^]aV`R]\_X^^`  
@HWI-EAS443:3:23:1429:1858#0/1  
GAACAGTCTCGTGACATTTCCCTCGAGGGTCATGTCAGAA  
+HWI-EAS443:3:23:1429:1858#0/1  
aa\_PSSRV[\_Y]S¥V^[VXLTWPPPZTYPJVOFMWGSQV  
@HWI-EAS443:3:23:1431:178#0/1  
GCCGCATTTCTTCAATTAACCACCTTATTTCCCTCAAATTT  
+HWI-EAS443:3:23:1431:178#0/1  
aa`b`\_`aab^aa`a^\_\_\_a]U`\_V`\_`aaaYQ`\_\_\_]^`^]  
@HWI-EAS443:3:23:1444:230#0/1  
CTTGGAGAAACTGTGATGAGAATGGGAGACCTTCACTACC  
+HWI-EAS443:3:23:1444:230#0/1  
ZIJ`[W[b¥WW\_`U`\_`XQXSaaaaSW[X]HQORUG`SFJ  
@HWI-EAS443:3:23:1470:569#0/1  
GGAGAAACTGTGATGAGAATGGGAGACCTTCACTACCTCC  
+HWI-EAS443:3:23:1470:569#0/1  
abaaaaa`bb\_\_\_aaaa\_aa`aaYa^VT¥a^\_`^X¥\_RX  
@HWI-EAS443:3:23:1561:43#0/1  
CGCGAAGTAGGTACAGATGCAATTGTCATTCTAAGTGTCT  
+HWI-EAS443:3:23:1561:43#0/1  
]ba`\_`a0^b\_Yb`aa`bb\_aaaab\_\_aaa[aa\_a[a^Wa  
@HWI-EAS443:3:23:1575:890#0/1  
CTCGCTGGATTCCTCTTTCAAGATCCATTCCACGATTTGT  
+HWI-EAS443:3:23:1575:890#0/1  
a\_`^a[bbaaa`Y`S`aa\_¥\_a`\_`X\_^\_T`\_`\_^]`a`a]  
@HWI-EAS443:3:23:1602:1347#0/1  
ATATTTTCAGAGACTCGAACCGTGTACCATTCCATTCAA  
+HWI-EAS443:3:23:1602:1347#0/1  
ababbbaaaaaaaab]a\_aWG^^aW`\_^]\_`^¥R\_\_^U^]  
@HWI-EAS443:3:23:162:90#0/1  
AGAAACTGTGATGAGAATGGGAGACCTTCACTACCTCCAG  
+HWI-EAS443:3:23:162:90#0/1  
aaa`a\_aa^\_^^`\_a]^\_¥`\_`Z\_VV\_]`^Z^O][WZ]WV^  
@HWI-EAS443:3:23:1701:1174#0/1  
GCCGCATTTCTTCAATTAACCACCTTATTTCCCTCAAATTT  
+HWI-EAS443:3:23:1701:1174#0/1  
aaa`G¥aba¥aaaaX\_a¥\_TVZWS`\_`\_aa\_X\_]`^^`\_`^`



@HWI-EAS443:3:23:1705:1302#0/1  
GTGGAATGGATCTTGAAAGAGGAATCCAGCGAGACACTTA  
+HWI-EAS443:3:23:1705:1302#0/1  
a\_b`Y]aaa\_[S^a`^Y[]^`¥X]YX[¥U\_Y\_TMVWY]]  
@HWI-EAS443:3:23:17:1520#0/1  
GCCGCATTTCTTCAATTAACCACCTTATTTCTCAAATTT  
+HWI-EAS443:3:23:17:1520#0/1  
`bba`Z`babaabbabaabaabaaaaaaaaaaaaaba^a``\_  
@HWI-EAS443:3:23:211:1534#0/1  
TGAGAATGGGAGACCTTCACTACCTCCAGAGCAGAAATGA  
+HWI-EAS443:3:23:211:1534#0/1  
\_a]IR`\_ZZ\_\_^baaa`Z\_`\_`\_`\_Z]]Zaa^ZZaaa\_^  
@HWI-EAS443:3:23:228:1888#0/1  
TGAGAATGGGAGACCTTCACTACCTCCAGAGCAGAAATGA  
+HWI-EAS443:3:23:228:1888#0/1  
Z\_\_[^X^a\_a\_UZa^aabaabZOR\_a\_]`Y]aaaa¥^  
@HWI-EAS443:3:23:252:646#0/1  
GAAACTGTGATGAGAATGGGAGACCTTCACTACCTCCAGA  
+HWI-EAS443:3:23:252:646#0/1  
`T^[¥X]J]]`a¥Y]V```YJW[RTW[V`]ULXLSUT^ZV  
@HWI-EAS443:3:23:277:745#0/1  
CGCGCTACCTTTCTGACATGACCCTCGAGGAAATGTCACG  
+HWI-EAS443:3:23:277:745#0/1  
aaabab^aaaaabaaaaa\_\_aaa\_\_a\_aa\_aa\_aN```\_  
@HWI-EAS443:3:23:284:1986#0/1  
ATTCTCTGTCGCTTTCAATCTGTGCCGCATTTCTTCAATT  
+HWI-EAS443:3:23:284:1986#0/1  
Uababbb¥YZ`^^aaa`W]]^^\_aU¥`[\_^\_Wa¥\_¥Z¥]  
@HWI-EAS443:3:23:291:1050#0/1  
CGCATTTCTTCAATTAACCACCTTATTTCTCAAATTTCT  
+HWI-EAS443:3:23:291:1050#0/1  
abbbb`abaababbaaaaaa`baaa\_aaa\_abba\_`a\_\_`  
@HWI-EAS443:3:23:292:462#0/1  
AGAAACTGTGATGAGAATGGGAGACCTTCACTACCTCCAG  
+HWI-EAS443:3:23:292:462#0/1  
`bbabbbab`Z]aaZY`]`\_TTaa`\_aa\_aa\_aV[]`W]a  
@HWI-EAS443:3:23:311:50#0/1  
ATCGCACGCAAAGAGGGCCTATTATCTTTTGCCTAGGCAT  
+HWI-EAS443:3:23:311:50#0/1  
`a]aa\_a]`W`S]U`a```\_]\_\_\_\_\_`^\_Z¥\_\_^¥V  
@HWI-EAS443:3:23:385:1629#0/1  
CGCATTTCTTCAATTAACCACCTTATTTCTCAAATTTCT  
+HWI-EAS443:3:23:385:1629#0/1  
aaabaaabaaaaaaaaaaaaa\_aa`a`^a\_aaaa`a`\_^`  
@HWI-EAS443:3:23:399:1633#0/1  
GCCGCATTTCTTCAATTAACCACCTTATTTCTCAAATTT  
+HWI-EAS443:3:23:399:1633#0/1  
aa`Y\_S[`¥QU]]\_VZZSZ\_VZ`aXEUP`^[V^`a\_\_XFN  
@HWI-EAS443:3:23:39:1726#0/1  
GAAACTGTGATGAGAATGGGAGACCTTCACTACCTCCAGA

+HWI-EAS443:3:23:39:1726#0/1  
`ababa`^baaa\_a\_aaaaa\_a`abaa\_aaaa\_\_`a`Y^  
@HWI-EAS443:3:23:456:947#0/1  
TGCCGCATTTCTTCAATTAACCACCTTATTCCTCAAATT  
+HWI-EAS443:3:23:456:947#0/1  
¥aaa\_aaaaa`abaaa`aa`\_aa`^aa`\_`a\_a¥^a^  
@HWI-EAS443:3:23:457:447#0/1  
GCTTGGAGAACTGTGATGAGAATGGGAGACCTTCACTAC  
+HWI-EAS443:3:23:457:447#0/1  
aaaa[XXa`a`Za`a\_]`\_`[^`Y[\_\_\_\_XG¥\_\_]^[[`\_`  
@HWI-EAS443:3:23:517:562#0/1  
TCGCTTTCAATCTGTGCCGCATTTCTTCAATTAACCACCT  
+HWI-EAS443:3:23:517:562#0/1  
`abaa`¥IYaa^WQ`\_TVZ]\_aa¥aY`XUa`[a\_\_\_\_]W\_  
@HWI-EAS443:3:23:520:1800#0/1  
TATCCGCAAGCGATTTGCAGACAATGGATTGGGTGATGCC  
+HWI-EAS443:3:23:520:1800#0/1  
]bb`¥Q`Y`a`Y[`X\_¥^]]¥\_VWZaVHZ[^WZU¥UV]PH  
@HWI-EAS443:3:23:522:1059#0/1  
AGAATGGGAGACCTTCACTACCTCCAGAGCAGAAATGAAA  
+HWI-EAS443:3:23:522:1059#0/1  
a\_bba`aa^a[aa`aaa`a`\_aa]aa`a`\_`a`aa\_a`a\_  
@HWI-EAS443:3:23:547:324#0/1  
AGAGAAGGTAATGGTGAAATTTCTCCAATTTGCTCCCT  
+HWI-EAS443:3:23:547:324#0/1  
a`aaa\_baSaa`^`T[````]aaa`^¥`a^`a`\_`[V¥]WU\_  
@HWI-EAS443:3:23:561:2045#0/1  
AATCCAGCGAGACACTTAGAATGACAATTGCATCTGTACC  
+HWI-EAS443:3:23:561:2045#0/1  
`[]a`aaa`a`\_`\_\_\_\_`\_a`a`\_`\_`^`^`^`^`^W^X]]^  
@HWI-EAS443:3:23:579:636#0/1  
GCCTCTTCTTTTAAGGACTTTTGATCTCGCGGAGCCGA  
+HWI-EAS443:3:23:579:636#0/1  
ababbbbaaaaa`aaa\_aaaaa`\_`aaaa`a`\_`\_\_\_\_`^ZZ  
@HWI-EAS443:3:23:64:544#0/1  
GTCGCTTTCAATCTGTGCCGCATTTCTTCAATTAACCACC  
+HWI-EAS443:3:23:64:544#0/1  
abbbbbbb`baa`^aaabaaaa`aa¥a\_aaa`\_`^a`a`  
@HWI-EAS443:3:23:650:774#0/1  
TGCCGCATTTCTTCAATTAACCACCTTATTCCTCAAATT  
+HWI-EAS443:3:23:650:774#0/1  
RU\_X¥^¥`\_`baaV[[^]¥Za]]Y¥^aaV]WP``S`]`aa  
@HWI-EAS443:3:23:660:1766#0/1  
AGGACATACTTATGAGGATGTCAAAAATGCAGTTGGGGTC  
+HWI-EAS443:3:23:660:1766#0/1  
``Tabaaba`Ta^Y]aa`aQ`\_`a\_aaR\_Z[T^^0`\_`U¥Z  
@HWI-EAS443:3:23:662:1808#0/1  
CGCACGCAAAGAGGGCCTATTATCTTTTGCCTAGGCATGA  
+HWI-EAS443:3:23:662:1808#0/1  
ab`\_^\_]`\_`RYY`\_a`Z][`\_`\_a¥a[^]`Ua]X`a]^

@HWI-EAS443:3:23:663:469#0/1  
ATGAGAATGGGAGACCTTCACTACCTCCAGAGCAGAAATG  
+HWI-EAS443:3:23:663:469#0/1  
`ba`\_]\_bba\_ab`\_abaaa]aa`[aa\_ab]`\_aaa\_`aa  
@HWI-EAS443:3:23:679:925#0/1  
CTCTTCCAGGACATACTTATGAGGATGTCAAAAATGCAGT  
+HWI-EAS443:3:23:679:925#0/1  
\_K\_¥X\_a^Yaa]aZY^aa`aaaaZY[`Y[Z¥^U^`[Q]^`  
@HWI-EAS443:3:23:690:782#0/1  
GCCGCATTTCTTCAATTAACCACCTTATTTCTCAAATTT  
+HWI-EAS443:3:23:690:782#0/1  
abbbbbbbbabbbbabbaaaabbabbba`baaaaaa  
@HWI-EAS443:3:23:782:1003#0/1  
CCGCATTTCTTCAATTAACCACCTTATTTCTCAAATTT  
+HWI-EAS443:3:23:782:1003#0/1  
aabaabbabaaaabab`aabaabaabaaaa\_a\_\_aa`a  
@HWI-EAS443:3:23:799:1965#0/1  
GAGAAACTGTGATGAGAATGGGAGACCTTCACTACCTCCA  
+HWI-EAS443:3:23:799:1965#0/1  
abaabbbba^\_a```\_aa`¥¥\_\_`X\_]`^Z`Z[`W¥ZVU\_  
@HWI-EAS443:3:23:820:1714#0/1  
GAGAATGGGAGACCTTCACTACCTCCAGAGCAGAAATGAA  
+HWI-EAS443:3:23:820:1714#0/1  
aa`¥\_]UTN]\_^a¥\_^`\_YZRZUU]\_QYSS]VT\_^]]U  
@HWI-EAS443:3:23:822:1577#0/1  
CCGCATTTCTTCAATTAACCACCTTATTTCTCAAATTT  
+HWI-EAS443:3:23:822:1577#0/1  
a\_Y\_a^`\_aa\_¥Z]Z¥^`\_Sa^^Z[]¥aa^X\_¥P^`\_a\_  
@HWI-EAS443:3:23:895:297#0/1  
GGAGAACTGTGATGAGAATGGGAGACCTTCACTACCTCC  
+HWI-EAS443:3:23:895:297#0/1  
abababbabb`baaa`aaaaa`]a\_\_\_`\_`^\_^]Y^X]  
@HWI-EAS443:3:23:934:1727#0/1  
GTCGCTTTCAATCTGTGCCGATTTCTTCAATTAACCACC  
+HWI-EAS443:3:23:934:1727#0/1  
aZ`\_`\_TYa]WX\_UUL\_0\_\_W¥^\_\_W[^SXX^]O[ZX^ZZ  
@HWI-EAS443:3:23:961:32#0/1  
GAGAATGGGAGACCTTCACTACCTCCAGAGCAGAAATGAA  
+HWI-EAS443:3:23:961:32#0/1  
a`b\_aabba\_a`]``]a^^^[[[UW\_`Wq]U\_W]^`\_U^  
@HWI-EAS443:3:23:961:938#0/1  
AATGGGAGACCTTCACTACCTCCAGAGCAGAAATGAAAAG  
+HWI-EAS443:3:23:961:938#0/1  
aNU`\_aSaaY^`]\_]`\_`\_`^W\_]`^Y\_aYY]^`]\_^]YW  
@HWI-EAS443:3:23:984:1443#0/1  
GAATGGGAGACCTTCACTACCTCCAGAGCAGAAATGAAAA  
+HWI-EAS443:3:23:984:1443#0/1  
]abbaaaabaabaabaaba[`abbaaaabaa``aa`\_`  
@HWI-EAS443:3:23:996:1985#0/1  
AGAAACTGTGATGAGAATGGGAGACCTTCACTACCTCCAG

+HWI-EAS443:3:23:996:1985#0/1  
¥YI\_¥a\_TGR¥¥`\_Ya[UU``\_]¥V[TTNNXVFNRHY]  
@HWI-EAS443:3:24:1000:1480#0/1  
AGAAACTGTGATGAGAATGGGAGACCTTCACTACCTCCAG  
+HWI-EAS443:3:24:1000:1480#0/1  
¥`aa`ab`¥Z]`^baaababaaa^aa\_aa`aa`[\_]^`a  
@HWI-EAS443:3:24:1010:928#0/1  
GCATTTCTTCAATTAACCACCTTATTTCTCAAATTTCTG  
+HWI-EAS443:3:24:1010:928#0/1  
aaabbbabaaaabaaaaaaaaabaa\_\_aaaa`a`a`aa  
@HWI-EAS443:3:24:1029:1094#0/1  
TGCCGCATTTCTTCAATTAACCACCTTATTTCTCAAATT  
+HWI-EAS443:3:24:1029:1094#0/1  
\_b¥[Z¥]`Zba[aaaab\_¥Wa¥^]\_Xa`a]b`\_`a¥MX^¥  
@HWI-EAS443:3:24:1066:243#0/1  
CTTTTGCCTAGGCATGAGCATGAACCAGTCTCGTGACATT  
+HWI-EAS443:3:24:1066:243#0/1  
abbbaba`aabbababbaabbbbbbbabb`b^ba`a\_\_  
@HWI-EAS443:3:24:1088:810#0/1  
TGGGAAACAAATCGTGGAATGGATCTTGAAAGAGGAATCC  
+HWI-EAS443:3:24:1088:810#0/1  
abbbaba``baaab\_aaaaaba``aa\_a^``aaa]]a\_¥\_  
@HWI-EAS443:3:24:1135:402#0/1  
GCCGCATTTCTTCAATTAACCACCTTATTTCTCAAATTT  
+HWI-EAS443:3:24:1135:402#0/1  
a^``Z\_\_aaXbba^aa`a\_a`aZS\_``a\_\_TX\_¥aWZ`\_]\_  
@HWI-EAS443:3:24:1141:536#0/1  
AGAAACTGTGATGAGAATGGGAGACCTTCACTACCTCCAG  
+HWI-EAS443:3:24:1141:536#0/1  
\_`^`aaabb`b^aba\_TVbaaa\_b\_[^`\_`aaa^^¥\_\_^a`  
@HWI-EAS443:3:24:1164:257#0/1  
CGTGGAATGGATCTTGAAAGAGGAATCCAGCGAGACACTT  
+HWI-EAS443:3:24:1164:257#0/1  
ababb`\_]`a`a\_]a`aaaa¥]^`a`a`\_]`\_U¥`aZ^]Y]\_  
@HWI-EAS443:3:24:1175:242#0/1  
GAATGGGAGACCTTCACTACCTCCAGAGCAGAAATGAAAA  
+HWI-EAS443:3:24:1175:242#0/1  
``¥]a`aaaWE[a^N^¥`]VNWXW]]Z[TY\_[¥WR^¥ZZZ  
@HWI-EAS443:3:24:1178:1933#0/1  
GAATGGGAGACCTTCACTACCTCCAGAGCAGAAATGAAAA  
+HWI-EAS443:3:24:1178:1933#0/1  
a`aaababba`ab``a^aa`\_a`a`\_]aa¥\_``\_\_a\_  
@HWI-EAS443:3:24:1194:961#0/1  
GACATTTCTCGAGGGTCATGTCAGAAAGGTAGCGGAAG  
+HWI-EAS443:3:24:1194:961#0/1  
aa]^`ba^^aWaaaa[PS^aaTRW][\_\_^J^]`]]^`]^  
@HWI-EAS443:3:24:1222:586#0/1  
CTATTCTCTGTCGCTTTCAATCTGTGCCGCATTTCTTCAA  
+HWI-EAS443:3:24:1222:586#0/1  
abbb]babbb][aVaa^\_aa^a]b\_a`bUaa`\_`^`\_\_

@HWI-EAS443:3:24:1236:1779#0/1  
GTCGCTTTCAATCTGTGCCGATTTCTTCAATTAACCACC  
+HWI-EAS443:3:24:1236:1779#0/1  
aabb\_aa`aa`aaaa\_\_`a^\_a`\_a`a`a`a`\_\_`  
@HWI-EAS443:3:24:1290:105#0/1  
CAGAGATTGCTTGGAGAACTGTGATGAGAATGGGAGAC  
+HWI-EAS443:3:24:1290:105#0/1  
abaabbbbabaabaabbbbabb\_abb`babbbbaba\_  
@HWI-EAS443:3:24:129:1387#0/1  
GAGAACTGTGATGAGAATGGGAGACCTTCACTACCTCCA  
+HWI-EAS443:3:24:129:1387#0/1  
a`aa[^ba`0]a¥]V^`a`^SUaa`^\_aa\_^`aa`  
@HWI-EAS443:3:24:1304:208#0/1  
ATGAGAATGGGAGACCTTCACTACCTCCAGAGCAGAAATG  
+HWI-EAS443:3:24:1304:208#0/1  
^b]aaa\_a`aaabZJV`Va`\_W`\_Y[¥`[\_¥`ZY^`\_  
@HWI-EAS443:3:24:1345:922#0/1  
CCGCATTTCTTCAATTAACCACCTTATTTCTCAAATTC  
+HWI-EAS443:3:24:1345:922#0/1  
]`^aaXV\_aaVY^[baa¥]\_^`^a`Z]]aZ]¥[a`a  
@HWI-EAS443:3:24:1359:834#0/1  
CAGAGATTGCTTGGAGAACTGTGATGAGAATGGGAGAC  
+HWI-EAS443:3:24:1359:834#0/1  
U^`\_[a`]Xa[^baW[Z\_a`Z^Ya^YaW^a`a^b]a  
@HWI-EAS443:3:24:1368:1121#0/1  
GAGAATGGGAGACCTTCACTACCTCCAGAGCAGAAATGAA  
+HWI-EAS443:3:24:1368:1121#0/1  
`[bba]a`baa]a\_U`P`T`b`\_`]NXLT]]a^\_Y`\_`]]  
@HWI-EAS443:3:24:1387:615#0/1  
GTGATGAGAATGGGAGACCTTCACTACCTCCAGAGCAGAA  
+HWI-EAS443:3:24:1387:615#0/1  
aaaaab\_aaaaab`a\_Z\_]J]`ZN[aa`\_`X`  
@HWI-EAS443:3:24:1394:1016#0/1  
CATCTGTACCTACTTCGCGCTACCTTCTGACATGACCCT  
+HWI-EAS443:3:24:1394:1016#0/1  
ababab¥ababbbbaaaaaaa\_\_aa^`aaZaa`\_W`\_  
@HWI-EAS443:3:24:1445:1281#0/1  
CCGCATTTCTTCAATTAACCACCTTATTTCTCAAATTC  
+HWI-EAS443:3:24:1445:1281#0/1  
abbaababaaaa\_aaaaaa\_aa^aa`aaa`aa`a`a`a`a`\_`  
@HWI-EAS443:3:24:1493:600#0/1  
GTCAGAAAGGTAGCGGAAGTAGGTACAGATGCAATTGTC  
+HWI-EAS443:3:24:1493:600#0/1  
a`ba`^XaaXabaa\_aa\_aY\_aaXa^a`\_`^`\_`Y]  
@HWI-EAS443:3:24:1522:1457#0/1  
CTCTGAAAATATACAGAGATTCGCTTGGAGAACTGTGAT  
+HWI-EAS443:3:24:1522:1457#0/1  
ababbbbabbbb\_bbbbbbaabbbbabbbbb`bab  
@HWI-EAS443:3:24:1531:89#0/1  
CGCTTGGAGAACTGTGATGAGAATGGGAGACCTTCACTA

+HWI-EAS443:3:24:1531:89#0/1  
a\_ab^bbbabab^bb\_aIabab^abbabab\_XZbaZ¥HYZ  
@HWI-EAS443:3:24:1569:1102#0/1  
GAAACTGTGATGAGAATGGGAGACCTTCACTACCTCCAGA  
+HWI-EAS443:3:24:1569:1102#0/1  
abababbab`bb`aWaaaa\_a^\_\_a`Za\_aa¥^¥^^\_^^  
@HWI-EAS443:3:24:1575:896#0/1  
GCGGCACAGATTGAAAGCGACAGAGAATAGTTTTCGAACAA  
+HWI-EAS443:3:24:1575:896#0/1  
abbbbbb`bbaa`^^`aba^¥P¥aa`\_a`^^aba¥`aQ`a  
@HWI-EAS443:3:24:1595:1783#0/1  
GAGAATGGGAGACCTTCACTACCTCCAGAGCAGAAATGAA  
+HWI-EAS443:3:24:1595:1783#0/1  
a[^\_bbbb\_aa`a\_a`¥\_Zaa¥a\_\_a^aRaL]^`]a\_a\_\_  
@HWI-EAS443:3:24:1631:314#0/1  
CGCTTTCAATCTGTGCCGATTTCTTCAATTAACCCACCTT  
+HWI-EAS443:3:24:1631:314#0/1  
ab^bbbabbbbab`a`abbbbab`\_`abbba^Wa[¥ba  
@HWI-EAS443:3:24:1662:139#0/1  
TGTCTCGCTGGATTCTTCTTCAAGATCCATTCCACGATT  
+HWI-EAS443:3:24:1662:139#0/1  
aaZNaZYF\_VT¥\_¥X\_VZa^WovQ]¥XX]^ZNNUR\_VV]  
@HWI-EAS443:3:24:1673:1329#0/1  
GAAACTGTGATGAGAATGGGAGACCTTCACTACCTCCAGA  
+HWI-EAS443:3:24:1673:1329#0/1  
ab`a^ba^baab`\_Ya`aaaY`\_^\_`^[\_Y^U\_^\_^]\_V  
@HWI-EAS443:3:24:1674:177#0/1  
CAGAGATTGCTGGAGAACTGTGATGAGAATGGGAGAC  
+HWI-EAS443:3:24:1674:177#0/1  
abb]bbb`ba``bbbabba\_U[b`b``aVb`^]aba¥aOG  
@HWI-EAS443:3:24:171:1351#0/1  
CTCCAACACCATGTCAAGCTTTCAGGTAGACTGTTTCCTT  
+HWI-EAS443:3:24:171:1351#0/1  
aab\_Z¥bbb\_Z\_aZaaaaaaaa`aa]U\_aaaa`Z\_\_a¥^S  
@HWI-EAS443:3:24:232:1338#0/1  
CTTCGCGCTACCTTCTGACATGACCCTCGAGGAAATGTC  
+HWI-EAS443:3:24:232:1338#0/1  
abbbab\_bab`bababaabbba\_Uaba\_^`aa`\_aa\_a¥¥  
@HWI-EAS443:3:24:237:61#0/1  
GCTTGGAGAACTGTGATGAGAATGGGAGACCTTCACTAC  
+HWI-EAS443:3:24:237:61#0/1  
`aXGT`U\_SRP`M¥N[UW¥WZWTPrWDMWTQNTSWYUWWW  
@HWI-EAS443:3:24:239:1480#0/1  
CGCATTCTTCAATTAACCCACCTTATTTCCCTCAAATTTCT  
+HWI-EAS443:3:24:239:1480#0/1  
aabaaaaaaaaabaa`a^a`aa\_aaa`aaa[`aaa\_`\_\_^`  
@HWI-EAS443:3:24:260:496#0/1  
GCCGATTTCTTCAATTAACCCACCTTATTTCCCTCAAATTT  
+HWI-EAS443:3:24:260:496#0/1  
aabba]aaaaa`aaaa\_a`aaa]`a``\_\_`^`\_\_\_\_]\_\_a

@HWI-EAS443:3:24:302:529#0/1  
CTTGGAGAACTGTGATGAGAATGGGAGACCTTCACTACC  
+HWI-EAS443:3:24:302:529#0/1  
aaababaaaaab`aaaa\_b`aaa\_X`a\_\_aa^`a\_^  
@HWI-EAS443:3:24:314:121#0/1  
CTGTGATGAGAATGGGAGACCTTCACTACCTCCAGAGCAG  
+HWI-EAS443:3:24:314:121#0/1  
abbbbaab]baaabababb\_\_aaaaaa`a\_``\_a\_a^``  
@HWI-EAS443:3:24:369:1521#0/1  
GGAGAACTGTGATGAGAATGGGAGACCTTCACTACCTCC  
+HWI-EAS443:3:24:369:1521#0/1  
`VNVUMWY\_ZF[]^`VMR[]NZ[WTL LPMU]\_^XURMWW^  
@HWI-EAS443:3:24:391:994#0/1  
CTTGGAGAACTGTGATGAGAATGGGAGACCTTCACTACC  
+HWI-EAS443:3:24:391:994#0/1  
^`b¥^^ababbbb`a`ab`a]aXZab¥]\_\_`aa\_P`a`  
@HWI-EAS443:3:24:435:653#0/1  
ATGAGAATGGGAGACCTTCACTACCTCCAGAGCAGAAATG  
+HWI-EAS443:3:24:435:653#0/1  
abbbbaabbbbaabbabaaaa\_abaa`a`ab^a`ab`\_aaa  
@HWI-EAS443:3:24:452:20#0/1  
AGAAACTGTGATGAGAATGGGAGACCTTCACTACCTCCAG  
+HWI-EAS443:3:24:452:20#0/1  
ab^[`aab`b\_aaaaR`aaaZa\_```]`\_^\_ZZ]^X]^  
@HWI-EAS443:3:24:516:1038#0/1  
TGTCGCTTTCAATCTGTGCCGATTTCTTCAATTAACCAC  
+HWI-EAS443:3:24:516:1038#0/1  
ab^a\_ba`a```\_]\_a`Z`a¥a]\_\_```aa`\_`\_a[F^\_  
@HWI-EAS443:3:24:542:1840#0/1  
CCCAATCCATTGTCTGCAAATCGCTTGCGGATATGCCAAA  
+HWI-EAS443:3:24:542:1840#0/1  
aaabbb\_bb[^Yababababa\_]`^a]`a\_a¥b\_]a\_\_aa  
@HWI-EAS443:3:24:562:619#0/1  
GCCGATTTCTTCAATTAACCACCTTATTTCTCAAATTT  
+HWI-EAS443:3:24:562:619#0/1  
a`aaZ^a`\_]`^`a^aa¥\_a^`a[a\_`\_\_\_\_`\_aa`a`\_\_\_\_  
@HWI-EAS443:3:24:588:1397#0/1  
CCGATTTCTTCAATTAACCACCTTATTTCTCAAATTTCT  
+HWI-EAS443:3:24:588:1397#0/1  
abbaXabbaa`b]`aaaabbba\_aa]baa\_aaaa`Y`a\_\_  
@HWI-EAS443:3:24:588:95#0/1  
ATCCGCAAGCGATTTGCAGACAATGGATTGGGTGATGCCC  
+HWI-EAS443:3:24:588:95#0/1  
aaaaaaaab`a\_\_a]¥Y^[¥TY\_``^Z^WUJWW¥¥YWYYW  
@HWI-EAS443:3:24:611:272#0/1  
AGAAACTGTGATGAGAATGGGAGACCTTCACTACCTCCAG  
+HWI-EAS443:3:24:611:272#0/1  
aa^aa^`a[b]aa`aaa\_Z\_a\_aZYU]^`a\_\_\_\_\_^^¥S]a  
@HWI-EAS443:3:24:637:220#0/1  
CGCATTTCTTCAATTAACCACCTTATTTCTCAAATTTCT

+HWI-EAS443:3:24:637:220#0/1  
aabbbbbabb\_aababb`aa`babbab^Xaabaaaa\_^a  
@HWI-EAS443:3:24:671:1053#0/1  
AATTAACCACCTTATTTCTCAAATTTCTGTCCCAATTGC  
+HWI-EAS443:3:24:671:1053#0/1  
^`a^aba`[`abbabbaba`a\_aaaaa\_aaa`aa`a  
@HWI-EAS443:3:24:698:528#0/1  
GATGAGAATGGGAGACCTTCACTACCTCCAGAGCAGAAAT  
+HWI-EAS443:3:24:698:528#0/1  
`aaba`ZaYb\_b\_a`aaYa\_aa]\_]\_^]\_a]]`  
@HWI-EAS443:3:24:739:981#0/1  
GAAAGCTCTTATCTCTTGTCTACTTCAAGCAGTAGTTGT  
+HWI-EAS443:3:24:739:981#0/1  
aababaaaaabbbbaaaabaaaaaaaaaaaaa\_ab\_aa\_  
@HWI-EAS443:3:24:795:1795#0/1  
GAAACTGTGATGAGAATGGGAGACCTTCACTACCTCCAGA  
+HWI-EAS443:3:24:795:1795#0/1  
`ZaZH\_aXaVR¥]aXW^[`a[[V\_]\_\_`SX`S[^`[WP  
@HWI-EAS443:3:24:827:1433#0/1  
TTCCTGAGGAGGGAGCAATAGTTGGAGAAATTTACCCAT  
+HWI-EAS443:3:24:827:1433#0/1  
`bbbab`R`baba]abaaaab]^`aabaaaa`a`a`a\_  
@HWI-EAS443:3:24:830:810#0/1  
CTGTGCGTTTCAATCTGTGCCGATTTCTTCAATTAACCA  
+HWI-EAS443:3:24:830:810#0/1  
a`a[b`^\_aa`bb\_\_ab[aaaa`NZ`aa`\_]`^Q[`^a`aa  
@HWI-EAS443:3:24:835:606#0/1  
AGAAACTGTGATGAGAATGGGAGACCTTCACTACCTCCAG  
+HWI-EAS443:3:24:835:606#0/1  
^`¥W`aaaK¥]^WW]WXXbaRSVa\_[X]]\_¥`USW`[XX\_  
@HWI-EAS443:3:24:882:751#0/1  
AGAAACTGTGATGAGAATGGGAGACCTTCACTACCTCCAG  
+HWI-EAS443:3:24:882:751#0/1  
\_]aYa)`b^WY\_\_Z]\_aa`^¥a¥PY][aJYVZV^[]aI``  
@HWI-EAS443:3:24:884:946#0/1  
AGAAACTGTGATGAGAATGGGAGACCTTCACTACCTCCAG  
+HWI-EAS443:3:24:884:946#0/1  
`]]`bbb`baababa\_[aaaa`a`a`a`a`\_]`\_`  
@HWI-EAS443:3:24:891:1149#0/1  
GCCGCATTTCTTCAATTAACCACCTTATTTCTCAAATTT  
+HWI-EAS443:3:24:891:1149#0/1  
abbb`¥`ZYZ^aa`aaaa`[``Uaaa\_a`aaaRY\_a\_  
@HWI-EAS443:3:24:894:480#0/1  
GAGAATGGGAGACCTTCACTACCTCCAGAGCAGAAATGAA  
+HWI-EAS443:3:24:894:480#0/1  
ZZWT¥^¥¥\_]aZ^^WPPY[]`^\_X]^¥Z¥`\_]¥^[^[]X  
@HWI-EAS443:3:24:935:974#0/1  
GATGAGAATGGGAGACCTTCACTACCTCCAGAGCAGAAAT  
+HWI-EAS443:3:24:935:974#0/1  
aY`^Z\_W^[Z[[SWVZX[R\_\_^`]XJY`W]a]\_\_ZZZ^`Z



@HWI-EAS443:3:24:990:1411#0/1  
GTGCTTTCAATCTGTGCCGATTTCTTCAATTAACCACC  
+HWI-EAS443:3:24:990:1411#0/1  
\_RYSL¥X`YQUY`^] ^U^UZ[L]WY^]\_XY]XX]] [Y¥¥U  
@HWI-EAS443:3:25:1020:1781#0/1  
ATGAGAATGGGAGACCTTCACTACCTCCAGAGCAGAAATG  
+HWI-EAS443:3:25:1020:1781#0/1  
a`bb\_bba`baa`^¥]a`\_a\_¥` ``¥^^^]]\_a\_`\_\_`Y  
@HWI-EAS443:3:25:1069:1627#0/1  
ATTTCTCGAGGGTCATGTCAGAAAGGTAGCGCGAAGTAG  
+HWI-EAS443:3:25:1069:1627#0/1  
\_`¥` `baZX\_`U¥VX^^\_`^aaa` ``S^`a\_aa`]¥[^\_  
@HWI-EAS443:3:25:1121:186#0/1  
GAAACTGTGATGAGAATGGGAGACCTTCACTACCTCCAGA  
+HWI-EAS443:3:25:1121:186#0/1  
[¥ab^[[^\_OUXUaP\_P[^`^PaZSVY[LZ]] [[[^URVWU  
@HWI-EAS443:3:25:115:1598#0/1  
ATCAAGGAATGGGGCATCACCCAATCCATTGTCTGCAAAT  
+HWI-EAS443:3:25:115:1598#0/1  
a\_bba[aaa`\_`Xaaaaaaaa] ^a\_\_\_\_\_^\_Y]aa[a]  
@HWI-EAS443:3:25:117:437#0/1  
GCCGCATTTCTTCAATTAACCACCTTATTTCTCAAATTT  
+HWI-EAS443:3:25:117:437#0/1  
aaaba^^^`aa`aa^a`a¥` `` `` `` `` `` `` `\_\_XL^`W\_  
@HWI-EAS443:3:25:1180:329#0/1  
GCCGCATTTCTTCAATTAACCACCTTATTTCTCAAATTT  
+HWI-EAS443:3:25:1180:329#0/1  
aaW]G¥Y\_^GTT[TSVW¥V^YZX¥ZU]X^XSXVWNXWYO  
@HWI-EAS443:3:25:1219:1707#0/1  
TGAGAATGGGAGACCTTCACTACCTCCAGAGCAGAAATGA  
+HWI-EAS443:3:25:1219:1707#0/1  
\_^a^`abb^^]a`^aaaab¥a`T][Z\_` [Q]\_V\_\_ [Y¥  
@HWI-EAS443:3:25:1231:904#0/1  
CGCTTTCAATCTGTGCCGATTTCTTCAATTAACCACCTT  
+HWI-EAS443:3:25:1231:904#0/1  
aaaa\_a`Z`\_ba`M`aa`aX¥`a\_b^aWW[]UVUU^[L[a  
@HWI-EAS443:3:25:1273:1733#0/1  
AATGGGAGACCTTCACTACCTCCAGAGCAGAAATGAAAAG  
+HWI-EAS443:3:25:1273:1733#0/1  
a]baaZbab\_a\_aa^\_aa\_a^^^`a\_\_^`]\_^\_` `` `]\_a  
@HWI-EAS443:3:25:1275:578#0/1  
CTGTGATGAGAATGGGAGACCTTCACTACCTCCAGAGCAG  
+HWI-EAS443:3:25:1275:578#0/1  
\_]bbbaa¥bbbbbbbaa¥bbb\_babb`abYa\_` `¥abaY¥b  
@HWI-EAS443:3:25:1283:2002#0/1  
TGTGATGAGAATGGGAGACCTTCACTACCTCCAGAGCAGA  
+HWI-EAS443:3:25:1283:2002#0/1  
`b[b\_aaa`bbbbbbWb¥abbabbaaYUaaZ`baaaa`]  
@HWI-EAS443:3:25:1289:1968#0/1  
AGCGAATCTCTGTATATTTTCAGAGACTCGAACCGTGTTA

+HWI-EAS443:3:25:1289:1968#0/1  
a`bbaaa¥aaaa\_b`aaaa\_]a`\_`\_]`W\_]`^HU^Z\_Z^\_  
@HWI-EAS443:3:25:1343:977#0/1  
ATTATCTTTTGCCTAGGCATGAGCATGAACCAGTCTCGTG  
+HWI-EAS443:3:25:1343:977#0/1  
`bb`abbbbabaab\_ababb`ab]a`a^Yaa^¥a[a¥\_  
@HWI-EAS443:3:25:1436:149#0/1  
GCCGCATTTCTTCAATTAACCACCTTATTTCTCAAATTT  
+HWI-EAS443:3:25:1436:149#0/1  
a¥\_ba`aaaaaaaaa`][\_]`^a]^a`\_]Ya]YZ^^]]  
@HWI-EAS443:3:25:1465:222#0/1  
CACAGATTGAAAGCGACAGAGAATAGTTTCGAACAAATAA  
+HWI-EAS443:3:25:1465:222#0/1  
a\_bWabbb`bbb^J^bbbbbbaab`a¥`aaaabbW\_bbbaa  
@HWI-EAS443:3:25:1472:820#0/1  
AGAAACTGTGATGAGAATGGGAGACCTTCACTACCTCCAG  
+HWI-EAS443:3:25:1472:820#0/1  
`^`^`^a`Xaab`\_a`a]`\_¥Y`Y¥\_a`^`\_`\_]X\_]`^`  
@HWI-EAS443:3:25:1476:1659#0/1  
CAAGGGTGTTCCTCTTCTTTAAGGACTTTTGATCTCG  
+HWI-EAS443:3:25:1476:1659#0/1  
Kabaa[^aa[b\_\_a`b[abbababab[^abaa\_b\_]\_^Y^  
@HWI-EAS443:3:25:1486:679#0/1  
GCTGGATTCTTCTTTCAAGATCCATTCCACGATTTGTTTC  
+HWI-EAS443:3:25:1486:679#0/1  
aa`ab]bbbabbbbabaaa`a^abaa`aXb^`aaa`aa\_  
@HWI-EAS443:3:25:1562:1365#0/1  
TGGGAAACAAATCGTGAATGGATCTTGAAAGAGGAATCC  
+HWI-EAS443:3:25:1562:1365#0/1  
a`¥`aab]aaaaaY`][\_]`a]^]V\_\_a\_\_\_a`\_`\_]`¥TY  
@HWI-EAS443:3:25:1604:189#0/1  
ATTATCTTTTGCCTAGGCATGAGCATGAACCAGTCTCGTG  
+HWI-EAS443:3:25:1604:189#0/1  
abbbbabbbabb`bbbb`aaa`aaaaaa[\_\_\_`\_^aX^][  
@HWI-EAS443:3:25:1683:338#0/1  
TTTCGATATCGAGGCCAAGGGTGTTCCTCTTCTTTTAA  
+HWI-EAS443:3:25:1683:338#0/1  
aaaaba`aW^a`\_a¥`aa\_aTV\_Qa\_ZZ¥^`¥WWW\_`^UV  
@HWI-EAS443:3:25:1719:1621#0/1  
TGAAAATATACAGAGATTTCGCTTGGAGAAACTGTGATGAG  
+HWI-EAS443:3:25:1719:1621#0/1  
`a`\_a`\_a\_a]aaa\_W\_\_^`\_\_Z\_¥\_]`^^XZXW¥Z¥^X^  
@HWI-EAS443:3:25:1742:890#0/1  
AAAATATACAGAGATTTCGCTTGGAGAAACTGTGATGAGAA  
+HWI-EAS443:3:25:1742:890#0/1  
`bbbbbbbabbbbaa`aa`\_aa`a`a`[`aZ`\_`\_a\_\_^`  
@HWI-EAS443:3:25:1774:1275#0/1  
AAACTGTGATGAGAATGGGAGACCTTCACTACCTCCAGAG  
+HWI-EAS443:3:25:1774:1275#0/1  
`baabbababbabaaaabbbbaa`aa`\_a^`a]`^\_a\_a

@HWI-EAS443:3:25:184:1417#0/1  
CGTGGAAATGGATCTTGAAAGAGGAATCCAGCGAGACTT  
+HWI-EAS443:3:25:184:1417#0/1  
abaa¥Zaab¥\_aa^abbbb`abbW`Z`[bb\_a\_]a]aa]  
@HWI-EAS443:3:25:239:378#0/1  
CGCATTCTTCAATTAACCACCTTATTTCTCAAATTTCT  
+HWI-EAS443:3:25:239:378#0/1  
abbbbbbbbaaa^abbbb`bbbbbbbbbaa¥ababaa  
@HWI-EAS443:3:25:249:958#0/1  
GGACCCCAACTGCATTTTTGACATCCTCATAAGTATGTCC  
+HWI-EAS443:3:25:249:958#0/1  
`W]UWP`ISNT[]YLRVZQX\_XUPW^W]UWXVOYZOFS  
@HWI-EAS443:3:25:280:697#0/1  
GCCGCATTTCTTCAATTAACCACCTTATTTCTCAAATTT  
+HWI-EAS443:3:25:280:697#0/1  
a`aX]X^^`[\_¥WU\_\_XX¥^`X^^^`^]ZT\_X\_]VPUZ  
@HWI-EAS443:3:25:291:2043#0/1  
CCGCATTTCTTCAATTAACCACCTTATTTCTCAAATTTCT  
+HWI-EAS443:3:25:291:2043#0/1  
abbbabbaaZa`a`^ababaaabbY¥a\_aaaaa`¥]\_`a  
@HWI-EAS443:3:25:303:1228#0/1  
ATTCGCTTGGAGAACTGTGATGAGAATGGGAGACCTTCA  
+HWI-EAS443:3:25:303:1228#0/1  
`aabaabaaaaa¥a`aaZ\_\_`^\_a\_^`\_a`\_`^\_\_`  
@HWI-EAS443:3:25:338:1445#0/1  
GAATGGGAGACCTTCACTACCTCCAGAGCAGAAATGAAAA  
+HWI-EAS443:3:25:338:1445#0/1  
`Z0]¥`a]aaa]SX`\_¥]a^]¥`^]Z^[\_a^S^\_\_¥¥]X  
@HWI-EAS443:3:25:340:97#0/1  
GAGAATGGGAGACCTTCACTACCTCCAGAGCAGAAATGAA  
+HWI-EAS443:3:25:340:97#0/1  
a\_bG]\_RX\_]a\_\_\_[Ya]NY¥PUMW\_Z¥U¥QNaWWYU\_W¥  
@HWI-EAS443:3:25:348:1063#0/1  
GAATGGGAGACCTTCACTACCTCCAGAGCAGAAATGAAAA  
+HWI-EAS443:3:25:348:1063#0/1  
^\_`\_a¥X^¥¥a]¥]`aaRZSa[a`\_U^aZ\_¥a`][U\_  
@HWI-EAS443:3:25:374:303#0/1  
GAGAACTGTGATGAGAATGGGAGACCTTCACTACCTCCA  
+HWI-EAS443:3:25:374:303#0/1  
`Y^WY[USUYRQ^I\_UMDVV[S]W¥YPTZZVRV[NGLTU  
@HWI-EAS443:3:25:403:546#0/1  
GAAACTGTGATGAGAATGGGAGACCTTCACTACCTCCAGA  
+HWI-EAS443:3:25:403:546#0/1  
`\_`\_¥\_]V]XU]V\_UW]VZ¥Z¥YPWZ[ZXZ¥¥ULQ^VPUU  
@HWI-EAS443:3:25:418:72#0/1  
TGAGAATGGGAGACCTTCACTACCTCCAGAGCAGAAATGA  
+HWI-EAS443:3:25:418:72#0/1  
ababaaaa\_aa]`a`a``\_\_\_\_¥\_`¥`^]\_¥[\_\_`\_  
@HWI-EAS443:3:25:430:1071#0/1  
CGCATTCTTCAATTAACCACCTTATTTCTCAAATTTCT

+HWI-EAS443:3:25:430:1071#0/1  
abbbabbbbbbbaabbababbbba`bbW`baa\_b  
@HWI-EAS443:3:25:439:1255#0/1  
ATCAAGGAATGGGGCATCACCCAATCCATTGTCTGCAAAT  
+HWI-EAS443:3:25:439:1255#0/1  
^\_bbbaa`b`ba\_]bbabbbbaaaa`X\_aaa^a\_\_aa`a\_  
@HWI-EAS443:3:25:507:1203#0/1  
AGAATGGGAGACCTTCACTACCTCCAGAGCAGAAATGAAA  
+HWI-EAS443:3:25:507:1203#0/1  
aaabba]a]\_\_\_\_]\_a`abaa`ba`[a\_\_b`Y]VU``\_aa[  
@HWI-EAS443:3:25:507:428#0/1  
TGCCGCATTTCTTCAATTAACCACCTTATTTCTCAAATT  
+HWI-EAS443:3:25:507:428#0/1  
abaabaaaabaaaaabaaa\_\_a\_aa`aaaa\_`aa[`a\_  
@HWI-EAS443:3:25:541:738#0/1  
GCCGCATTTCTTCAATTAACCACCTTATTTCTCAAATTT  
+HWI-EAS443:3:25:541:738#0/1  
a]LP\_\_\_\_`[JJ[[WW\_¥¥^RUVWWZ[U`¥RMXXWZOPYX^  
@HWI-EAS443:3:25:605:648#0/1  
GCTTGGAGAACTGTGATGAGAATGGGAGACCTTCACTAC  
+HWI-EAS443:3:25:605:648#0/1  
a\_aa¥]PR¥a`\_aVZU^^TDYV\_^]X`^\_]]][W^GU`G  
@HWI-EAS443:3:25:621:1353#0/1  
ATCCGCAAGCGATTTGCAGACAATGGATTGGGTGATGCCC  
+HWI-EAS443:3:25:621:1353#0/1  
aabbba\_`baaaaaa]a```a`a^^)`^¥YK^PY^UY^X\_  
@HWI-EAS443:3:25:633:534#0/1  
CGCATTTCTTCAATTAACCACCTTATTTCTCAAATTTCT  
+HWI-EAS443:3:25:633:534#0/1  
`bbbbbbbbbbba^bbababba`babbba`aSaaaaaaaa  
@HWI-EAS443:3:25:639:1655#0/1  
TGCGGCACAGATTGAAAGCGACAGAGAATAGTTTCGAACA  
+HWI-EAS443:3:25:639:1655#0/1  
a`aaaabbaa`aaaaa`\_]aa]```a`^a\_W\_\_]\_`^`\_\_  
@HWI-EAS443:3:25:653:424#0/1  
GTTGCCTCTTCTTTTAAGGACTTTTGATCTCGCGGAGC  
+HWI-EAS443:3:25:653:424#0/1  
`¥aa`aa`a¥``b\_aa[\_\_WSYZ\_`^[[\_\_¥\_UX¥\_^T¥Q  
@HWI-EAS443:3:25:654:1204#0/1  
ATCGTGGAATGGATCTTGAAAGAGGAATCCAGCGAGACAC  
+HWI-EAS443:3:25:654:1204#0/1  
Ubbbb`S`]bb\_babbb`aaa[baaVbba`[N]ab`baba  
@HWI-EAS443:3:25:711:1405#0/1  
ATTATCTTTTGCCTAGGCATGAGCATGAACCAGTCTCGTG  
+HWI-EAS443:3:25:711:1405#0/1  
a^W]]XX]UR[baV¥OW\_\_[¥GSV^VW^PQY¥¥G]PBBBB  
@HWI-EAS443:3:25:714:1765#0/1  
ATTGCATCTGTACCTACTTCGCGCTACCTTTCTGACATGA  
+HWI-EAS443:3:25:714:1765#0/1  
aa``aa`a`\_[\_a`^a\_\_^`U^¥`¥`^\_Y¥¥¥¥¥`]YU^

@HWI-EAS443:3:25:715:664#0/1  
CTTGGAGAACTGTGATGAGAATGGGAGACCTTCACTACC  
+HWI-EAS443:3:25:715:664#0/1  
abbbbbbb\_babb\_aaaba`\_aaaa\_a^a`\_a`\_a[`a^\_  
@HWI-EAS443:3:25:745:1395#0/1  
GGAGAACTGTGATGAGAATGGGAGACCTTCACTACCTCC  
+HWI-EAS443:3:25:745:1395#0/1  
aaNa¥^\_\_QZW^\_W^SX\_VTH\_Z[TYR¥SY^N[TSU¥BBB  
@HWI-EAS443:3:25:756:1303#0/1  
GCCGCATTTCTTCAATTAACCACCTTATTTCTCAAATTT  
+HWI-EAS443:3:25:756:1303#0/1  
aaabba`a`[``aa`aa]U]aaWa`\_`a\_\_W\_`^a^\_`^`  
@HWI-EAS443:3:25:78:467#0/1  
GCAAAGAGGGCCTATTATCTTTTGCCTAGGCATGAGCATG  
+HWI-EAS443:3:25:78:467#0/1  
aaaVaaT`Xa^a\_a[\_a]a`\_\_\_\_\_^T\_[`[S]`]^VOW^  
@HWI-EAS443:3:25:855:159#0/1  
ATCCGCAAGCGATTTGCAGACAATGGATTGGGTGATGCCC  
+HWI-EAS443:3:25:855:159#0/1  
aaabbSb`aaa]`aaa`a^]X^[^`^MYZ¥¥^SVQEVWOM  
@HWI-EAS443:3:25:869:1765#0/1  
TGAGAATGGGAGACCTTCACTACCTCCAGAGCAGAAATGA  
+HWI-EAS443:3:25:869:1765#0/1  
aaababaaaa`aabaaaaba`a`\_`a`\_`¥a\_^a\_\_[\_`\_\_  
@HWI-EAS443:3:25:919:382#0/1  
GGAATGGATCTTGAAAGAGGAATCCAGCGAGACACTTAGA  
+HWI-EAS443:3:25:919:382#0/1  
\_bbabaa`\_`aba]b^`aa`^aW^^aa`aa^^[R[a\_^\_  
@HWI-EAS443:3:25:91:1398#0/1  
TGAGAATGGGAGACCTTCACTACCTCCAGAGCAGAAATGA  
+HWI-EAS443:3:25:91:1398#0/1  
ababZ\_aa\_aT^a]aaaa\_]¥^X^`a`^\_]`^`[\_`\_\_^`  
@HWI-EAS443:3:25:931:207#0/1  
AAGAACATAGTACTGAAAGCGAACTTCAGTGAATCTTTA  
+HWI-EAS443:3:25:931:207#0/1  
abaaaaaaaaabaaaabbaaaaaaaaa\_aaab¥b\_a`a`aaaa  
@HWI-EAS443:3:25:938:1494#0/1  
GCCGCATTTCTTCAATTAACCACCTTATTTCTCAAATTT  
+HWI-EAS443:3:25:938:1494#0/1  
a\_W\_`R\_[\_XX\_TWN]^]^ZZ]OW\_W[UXWXVYZWXU]XZ  
@HWI-EAS443:3:25:976:270#0/1  
ATGAGAATGGGAGACCTTCACTACCTCCAGAGCAGAAATG  
+HWI-EAS443:3:25:976:270#0/1  
a¥\_S\_UO[\_\_\_\_aZa\_TXTW\_`^`¥P[XX[X]ZOxVS]``  
@HWI-EAS443:3:26:1002:1183#0/1  
GGCCTATTATCTTTTGCCTAGGCATGAGCATGAACCAGTC  
+HWI-EAS443:3:26:1002:1183#0/1  
^aab[SX\_aabb]Y^WW[]a¥\_]b`\_b`^YaW\_`PS`aZH  
@HWI-EAS443:3:26:1025:312#0/1  
ATCCGCAAGCGATTTGCAGACAATGGATTGGGTGATGCCC

+HWI-EAS443:3:26:1025:312#0/1  
]ZU^a\_]W][aa\_a^VTW\_RR^]a`aUW]¥YQFRPJRSSQ  
@HWI-EAS443:3:26:1043:988#0/1  
GTGGAATGGATCTTGAAAGAGGAATCCAGCGAGACACTTA  
+HWI-EAS443:3:26:1043:988#0/1  
a[^]TXX`aa`X]^ORT`]¥X`YZJ¥MV^ZZ¥OPXXU]]V  
@HWI-EAS443:3:26:1058:1785#0/1  
GAGAATGGGAGACCTTCACTACCTCCAGAGCAGAAATGAA  
+HWI-EAS443:3:26:1058:1785#0/1  
aaba`a\_b^bbaaabaV`\_`b]\_aab`aaYa`]aa`````  
@HWI-EAS443:3:26:109:318#0/1  
ATCGCACGCAAAGAGGGCCTATTATCTTTTGCCTAGGCAT  
+HWI-EAS443:3:26:109:318#0/1  
ababaabbabba`bXNXa[[\_aaLa\_baba[aW\_bbaa\_a  
@HWI-EAS443:3:26:111:915#0/1  
TGAGAATGGGAGACCTTCACTACCTCCAGAGCAGAAATGA  
+HWI-EAS443:3:26:111:915#0/1  
`bZZ¥XUaRLa][`WYTbb`]\_V¥P\_aVaV¥TV^a¥aPX¥  
@HWI-EAS443:3:26:1152:1633#0/1  
GCATTTTTGACATCCTCATAAGTATGTCCTGGAAGAGAAG  
+HWI-EAS443:3:26:1152:1633#0/1  
aTXV`a\_NPZ]`[YFY¥UNUXPQ[[[\_]J\_Q\_YY\_^VZSFQ  
@HWI-EAS443:3:26:1163:653#0/1  
GCCGCATTTCTTCAATTAACCACCTTATTTTCTCAAATTT  
+HWI-EAS443:3:26:1163:653#0/1  
\_\_abaaa`\_ba``aaaa`a`\_\_aaaaaa]`a`aa`\_\_  
@HWI-EAS443:3:26:1174:1437#0/1  
GGTTAATTGAAGAAATGCGGCACAGATTGAAAGCGACAGA  
+HWI-EAS443:3:26:1174:1437#0/1  
a`[abbaaab^aa\_aaa\_aaa`b`aaaaaaaa\_a\_\_`a  
@HWI-EAS443:3:26:1193:569#0/1  
GCCGCATTTCTTCAATTAACCACCTTATTTTCTCAAATTT  
+HWI-EAS443:3:26:1193:569#0/1  
aabba^aaaabbaabaab`aaa`bbaaa\_P\_aaaa\_aaa  
@HWI-EAS443:3:26:1209:1010#0/1  
GGAGAAACTGTGATGAGAATGGGAGACCTTCACTACCTCC  
+HWI-EAS443:3:26:1209:1010#0/1  
a\_X\_XRTZa`[`]Xa`\_`\_\_`[`¥XY[WUW\_¥^WSUYRZWUV  
@HWI-EAS443:3:26:1268:393#0/1  
CGCTTGGAGAACTGTGATGAGAATGGGAGACCTTCACTA  
+HWI-EAS443:3:26:1268:393#0/1  
`bababbabbaa`bbababbabaaabbbaba`^ba^aZaa  
@HWI-EAS443:3:26:1309:1693#0/1  
AATGGGAGACCTTCACTACCTCCAGAGCAGAAATGAAAAG  
+HWI-EAS443:3:26:1309:1693#0/1  
¥[^[aW`b\_abN]`b`R`R]aVa`a\_\_^\_a[a`aaaa\_\_  
@HWI-EAS443:3:26:1316:304#0/1  
GCAATTGGGACAGAAATTTGAGGAAATAAGGTGGTTAATT  
+HWI-EAS443:3:26:1316:304#0/1  
aaaabbbbaaabbaaabbbb\_ba\_\_`a`\_aa]aa]\_^`\_`

@HWI-EAS443:3:26:1350:1201#0/1  
GGGAGCAATAGTTGGAGAAATTTACCATTACCTTCTCTT  
+HWI-EAS443:3:26:1350:1201#0/1  
aab]aa`aaa\_a]a\_aaaa`a`\_`^[\_]`\_\_]`]^`^\_\_^^  
@HWI-EAS443:3:26:1352:1155#0/1  
GCGCGAAGTAGGTACAGATGCAATTGTCATTCTAAGTGTC  
+HWI-EAS443:3:26:1352:1155#0/1  
OYbaba]bb`baabbbbabababbbabbbbababab`\_  
@HWI-EAS443:3:26:1376:954#0/1  
GAATGGGAGACCTTCACTACCTCCAGAGCAGAAATGAAAA  
+HWI-EAS443:3:26:1376:954#0/1  
Z`\_bbbabZ`\_ba`aaaaYaa`a]ZU`[`b`[a`a\_^\_]`  
@HWI-EAS443:3:26:1382:1301#0/1  
TGAGAATGGGAGACCTTCACTACCTCCAGAGCAGAAATGA  
+HWI-EAS443:3:26:1382:1301#0/1  
aaISXbX\_Z[U`aXa^]`^a¥Y\_ZRPSWSSVH[Z[U\_]¥\_a  
@HWI-EAS443:3:26:1388:849#0/1  
GGAGAACTGTGATGAGAATGGGAGACCTTCACTACCTCC  
+HWI-EAS443:3:26:1388:849#0/1  
abaaaaaab`aa`a`a^aaaa`a`\_a`\_]`Za^^]`^]T  
@HWI-EAS443:3:26:1396:667#0/1  
CGCACGCAAAGAGGGCCTATTATCTTTTGCCTAGGCATGA  
+HWI-EAS443:3:26:1396:667#0/1  
^b\_a\_b\_bbababbbXbbbbbbbabbbba¥abbbb`abba  
@HWI-EAS443:3:26:1414:656#0/1  
ATCGGTAAAGATTACTGAAGTTCGCTTTCAGTACTAT  
+HWI-EAS443:3:26:1414:656#0/1  
aaaaa`\_`aaaa]aa\_a^ZVTSa]a`a¥V`\_[aZ]^\_]`\_  
@HWI-EAS443:3:26:1417:395#0/1  
AACTGTGATGAGAATGGGAGACCTTCACTACCTCCAGAGC  
+HWI-EAS443:3:26:1417:395#0/1  
a`]baU`\_ba\_bZS]a]H[a^]aa`aa`aNY]]^]a¥¥R  
@HWI-EAS443:3:26:1433:242#0/1  
GAATGGGAGACCTTCACTACCTCCAGAGCAGAAATGAAAA  
+HWI-EAS443:3:26:1433:242#0/1  
a[aaa`^T¥`]V`\_a]a\_TR\_¥Z]\_¥\_¥Y`VSVZZWW¥Z  
@HWI-EAS443:3:26:1486:129#0/1  
CTCATAAGTATGTCCTGGAAGAGAAGGTAATGGTGAAATT  
+HWI-EAS443:3:26:1486:129#0/1  
^abbbabbaabbbabbbba]baab¥`ba[aaOb]\_\_`\_`  
@HWI-EAS443:3:26:1490:496#0/1  
GCCGATTTCTTCAATTAACCACCTTATTTCTCAAATTT  
+HWI-EAS443:3:26:1490:496#0/1  
aaab[aaaa`^^`aabaa]XX^\_aaaaa`\_a\_\_\_\_\_a\_a  
@HWI-EAS443:3:26:1525:782#0/1  
GGCTTTCCTGAGGAGGAGCAATAGTTGGAGAAATTTCA  
+HWI-EAS443:3:26:1525:782#0/1  
`^`^aaaa]WY`\_aaW^]\_Y\_]ZZ\_^\_V`\_[P]^\_]WVZRY  
@HWI-EAS443:3:26:1579:1209#0/1  
ATCAAGGTCTCTAATCGGTAAAGATTACTGAAGTTCG

+HWI-EAS443:3:26:1579:1209#0/1  
aa^\_UbbSbbbbba`bb`bX^]aa]\_aba^aRaaa\_\_`a^[  
@HWI-EAS443:3:26:157:595#0/1  
CTCTGTCGCTTTCAATCTGTGCCGCATTTCTTCAATTAAC  
+HWI-EAS443:3:26:157:595#0/1  
a]bab[a^aaaaa\_Z\_a`[\_aaa]W]a\_\_a`aa\_`\_\_a^  
@HWI-EAS443:3:26:1721:295#0/1  
GCCGCATTTCTTCAATTAACCACCTTATTTCTCAAATTT  
+HWI-EAS443:3:26:1721:295#0/1  
¥P¥aY`]^b]a`Y```a\_]QYZ[Y[\_¥\_]GX`^\_\_Q^¥^  
@HWI-EAS443:3:26:1730:671#0/1  
CTCCCATTCTCATCACAGTTTCTCCAAGCGAATCTCTGTA  
+HWI-EAS443:3:26:1730:671#0/1  
ZYa`\_Za^^aaabbb^`^abb¥babab`^bX`baa\_a¥ab  
@HWI-EAS443:3:26:205:791#0/1  
GGAGAACTGTGATGAGAATGGGAGACCTTCACTACCTCC  
+HWI-EAS443:3:26:205:791#0/1  
a`^¥V]baaa\_a[\_ON\_\_Yaa\_a`[\_`aU[^Ya¥Y]`R`\_  
@HWI-EAS443:3:26:208:329#0/1  
AGAATGGGAGACCTTCACTACCTCCAGAGCAGAAATGAAA  
+HWI-EAS443:3:26:208:329#0/1  
aaabbbbabb`babaabaaaa\_aaa`aV`a`a`a`abX`\_  
@HWI-EAS443:3:26:228:723#0/1  
GAGAATGGGAGACCTTCACTACCTCCAGAGCAGAAATGAA  
+HWI-EAS443:3:26:228:723#0/1  
]\_bb[b\_]\_abbaaaa`a```a`baab\_`a`a]¥aa`a\_  
@HWI-EAS443:3:26:234:1357#0/1  
CTCATGCCTAGGCAAAAGATAATAGGCCCTCTTTGCGTGC  
+HWI-EAS443:3:26:234:1357#0/1  
a\_\_aaaabaaWT`aa`aa^`aa[aV¥a\_]\_\_]\_]Xa^Wq]  
@HWI-EAS443:3:26:243:1444#0/1  
GCCGCATTTCTTCAATTAACCACCTTATTTCTCAAATTT  
+HWI-EAS443:3:26:243:1444#0/1  
`aa^a^aaabbbba\_`aa¥baaa`aa^baaaaaab`aaa^a  
@HWI-EAS443:3:26:246:1421#0/1  
GTGATGAGAATGGGAGACCTTCACTACCTCCAGAGCAGAA  
+HWI-EAS443:3:26:246:1421#0/1  
aZabaaaaa`aaa\_`aba`\_aaa`aaa\_aaa`a`a`a\_\_  
@HWI-EAS443:3:26:255:360#0/1  
CTGTGATGAGAATGGGAGACCTTCACTACCTCCAGAGCAG  
+HWI-EAS443:3:26:255:360#0/1  
aabYb`aa¥b`¥aaa\_\_a]\_a^```\_^]\_\_]`\_`V\_^^`  
@HWI-EAS443:3:26:26:1934#0/1  
GCCGCATTTCTTCAATTAACCACCTTATTTCTCAAATTT  
+HWI-EAS443:3:26:26:1934#0/1  
aabba\_baabaabaaaabbaabaaaaaaaaaaaaaaaaaaa`a  
@HWI-EAS443:3:26:296:1245#0/1  
GAAACTGTGATGAGAATGGGAGACCTTCACTACCTCCAGA  
+HWI-EAS443:3:26:296:1245#0/1  
aVZba\_^]]]a^U¥¥]`aZ]``````aa`````\_a`a`\_`^X^



@HWI-EAS443:3:26:29:1101#0/1  
GAGAATGGGAGACCTTCACTACCTCCAGAGCAGAAATGAA  
+HWI-EAS443:3:26:29:1101#0/1  
¥QX\_]ZYX[\_XX^¥Z¥\_Za]U\_¥X\_^XOZ]a¥JRS¥\_W\_  
@HWI-EAS443:3:26:301:1780#0/1  
CCGCATTTCTTCAATTAACCACCTTATTTCCCTCAAATTT  
+HWI-EAS443:3:26:301:1780#0/1  
abaaaaaaaa`aa``a\_aaa`aa`\_\_\_\_``\_`a\_\_^\_\_^  
@HWI-EAS443:3:26:319:923#0/1  
TGATGAGAATGGGAGACCTTCACTACCTCCAGAGCAGAAA  
+HWI-EAS443:3:26:319:923#0/1  
ab]ab`b^^`aa`^aaa^`aaa``a\_\_\_\_`^W¥\_a`\_`¥``  
@HWI-EAS443:3:26:325:316#0/1  
GCCGCATTTCTTCAATTAACCACCTTATTTCCCTCAAATTT  
+HWI-EAS443:3:26:325:316#0/1  
a\_``a\_abaaaabaa`aba`aa`\_aaaaa`\_`aaaa\_aa\_  
@HWI-EAS443:3:26:329:735#0/1  
GAATGGGAGACCTTCACTACCTCCAGAGCAGAAATGAAAA  
+HWI-EAS443:3:26:329:735#0/1  
`¥]abaa\_a`aaa`aaaa¥\_a`\_\_`\_`\_`^a[\_\_\_`\_`^[[^  
@HWI-EAS443:3:26:332:1349#0/1  
GCCGCATTTCTTCAATTAACCACCTTATTTCCCTCAAATTT  
+HWI-EAS443:3:26:332:1349#0/1  
\_`aabbbaa\_\_aRa^aaababaaaa\_`¥a`a`\_aa\_L\_a\_^  
@HWI-EAS443:3:26:406:986#0/1  
GCCGCATTTCTTCAATTAACCACCTTATTTCCCTCAAATTT  
+HWI-EAS443:3:26:406:986#0/1  
^bbab\_aabbbb`abbbbbaaaabaabaabbabaaYaab  
@HWI-EAS443:3:26:409:1342#0/1  
ATCTTTTGCCTAGGCATGAGCATGAACCAGTCTCGTGACA  
+HWI-EAS443:3:26:409:1342#0/1  
aaa`aaaaa\_^a`aaaaaY^aa`\_`a\_a``¥¥aa`VX¥`\_  
@HWI-EAS443:3:26:423:200#0/1  
TATCCGCAAGCGATTTGCAGACAATGGATTGGGTGATGCC  
+HWI-EAS443:3:26:423:200#0/1  
\_aaa`ab^aaaa\_`aa`^^^a\_\_\_U]^UX]R¥NZ]]XUX  
@HWI-EAS443:3:26:434:1084#0/1  
GCCGCATTTCTTCAATTAACCACCTTATTTCCCTCAAATTT  
+HWI-EAS443:3:26:434:1084#0/1  
abb`b`bbbbabaaabaaa`aaaaa`aaaaaaa`a\_aaa  
@HWI-EAS443:3:26:435:1295#0/1  
GCCGCATTTCTTCAATTAACCACCTTATTTCCCTCAAATTT  
+HWI-EAS443:3:26:435:1295#0/1  
abaaa¥abaababa^aaaaaaaaaaaa\_a\_aa\_aaaa\_a^`  
@HWI-EAS443:3:26:450:1833#0/1  
CAGATGCAATTGTCATTCTAAGTGTCTCGCTGGATTCCCTC  
+HWI-EAS443:3:26:450:1833#0/1  
a¥b^Kaaa`\_b]b^aaaaa\_]aX`\_a]\_¥\_\_XQ]\_]Z`  
@HWI-EAS443:3:26:485:501#0/1  
GAGAATGGGAGACCTTCACTACCTCCAGAGCAGAAATGAA

+HWI-EAS443:3:26:485:501#0/1  
aaa\_aaa`a`a^`aa\_]a`aV\_\_^\_\_`]\_\_`¥Y¥^\_¥^  
@HWI-EAS443:3:26:487:1797#0/1  
AACACGGTTCGAGTCTCTGAAAATATACAGAGATTCGCTT  
+HWI-EAS443:3:26:487:1797#0/1  
aba```]Y\_a\_XRU`[a`]YZ¥^[Z\_a`\_^PT[XR]UV  
@HWI-EAS443:3:26:518:807#0/1  
GAAACTGTGATGAGAATGGGAGACCTTCACTACCTCCAGA  
+HWI-EAS443:3:26:518:807#0/1  
Z¥bb]``[^Z`a`VRV\_\_ZW¥X`\_`¥\_¥`a`Z^\_¥^\_¥  
@HWI-EAS443:3:26:53:1084#0/1  
AGAAACTGTGATGAGAATGGGAGACCTTCACTACCTCCAG  
+HWI-EAS443:3:26:53:1084#0/1  
aaabaaaa¥aa`a[]Ya]¥Z`^`¥`\_`^`^¥`\_`^¥¥[[  
@HWI-EAS443:3:26:58:432#0/1  
GTGATGAGAATGGGAGACCTTCACTACCTCCAGAGCAGAA  
+HWI-EAS443:3:26:58:432#0/1  
aZ]abaaaaaab\_T`aa`a`a`a`a\_a\_aa\_a\_a\_aa`\_  
@HWI-EAS443:3:26:614:1800#0/1  
GTCGCTTTCAATCTGTGCCGATTTCTTCAATTAACCACC  
+HWI-EAS443:3:26:614:1800#0/1  
a\_b¥\_\_\_aab`\_b¥a]^ZaaaaTa`a`aa`aa`\_]W`W¥  
@HWI-EAS443:3:26:630:424#0/1  
ATGAGAATGGGAGACCTTCACTACCTCCAGAGCAGAAATG  
+HWI-EAS443:3:26:630:424#0/1  
aaa\_\_T^[aaa`aaaa\_\_a^]a\_\_]Q``]a\_\_aZWV^\_  
@HWI-EAS443:3:26:687:257#0/1  
TGAGAATGGGAGACCTTCACTACCTCCAGAGCAGAAATGA  
+HWI-EAS443:3:26:687:257#0/1  
ab`aaa`aaa`a`\_[]`a\_\_\_\_\_^`\_]\_X^`^^Y]U^^G  
@HWI-EAS443:3:26:740:2036#0/1  
AGATTACACTGAAGTTCGCTTTTCAGTACTATGTTCTTTTC  
+HWI-EAS443:3:26:740:2036#0/1  
[`a\_\_bbbaaa\_S]T`aaab\_`a`aa`a`\_^Za`\_`^  
@HWI-EAS443:3:26:767:1049#0/1  
GAGCAATTGGGACAGAAATTTGAGGAAATAAGGTGGTTAA  
+HWI-EAS443:3:26:767:1049#0/1  
\_abba^bbbaba`bbaX`babaaaa\_aaaaa`TaaYa`\_  
@HWI-EAS443:3:26:768:201#0/1  
GTGATGAGAATGGGAGACCTTCACTACCTCCAGAGCAGAA  
+HWI-EAS443:3:26:768:201#0/1  
a]baab[[\_ab\_`[`a\_V\_]\_]`XW[UU\_^]U\_]`^  
@HWI-EAS443:3:26:775:1665#0/1  
TGAGAATGGGAGACCTTCACTACCTCCAGAGCAGAAATGA  
+HWI-EAS443:3:26:775:1665#0/1  
]\_\_a]H]^ZZNVY\_aa^`Z¥aQUT`RXU¥UGYL]aS\_]`  
@HWI-EAS443:3:26:797:333#0/1  
GCGCGAAGTAGGTACAGATGCAATTGTCATTCTAAGTGTC  
+HWI-EAS443:3:26:797:333#0/1  
`\_¥a¥\_aa`aa]a]a`R`V`¥aa\_Z^Y\_a\_\_\_\_\_ [NaWP



+HWI-EAS443:3:27:1200:843#0/1  
aZ¥Z\_aV`Sa[`a\_Y\_\_UWGR¥^ST[^\_X\_VRZY\_WR]XW  
@HWI-EAS443:3:27:1212:1508#0/1  
TGAGAATGGGAGACCTTCACTACCTCCAGAGCAGAAATGA  
+HWI-EAS443:3:27:1212:1508#0/1  
ZaUaS¥^\_X^a¥HPR``YTWaZR\_XNGV[[\_`]KNPWa]  
@HWI-EAS443:3:27:121:1289#0/1  
GAGAATGGGAGACCTTCACTACCTCCAGAGCAGAAATGAA  
+HWI-EAS443:3:27:121:1289#0/1  
a[NX\_aaa]U`ab\_[XaUNZ[^Y^a]U]Y\_\_\_^T]¥\_`TK  
@HWI-EAS443:3:27:1270:541#0/1  
GAAACGAGAAAGCTTATCTCTTGTCTACTTCAAGCAG  
+HWI-EAS443:3:27:1270:541#0/1  
a`^a^aaa\_a`a]\_Xa`aa^a\_`^a\_a]`a]a^\_`]^Z^a  
@HWI-EAS443:3:27:1274:1799#0/1  
GAATGGGAGACCTTCACTACCTCCAGAGCAGAAATGAAAA  
+HWI-EAS443:3:27:1274:1799#0/1  
^^bbbbbbabb]0Q`]`[^aaaa¥\_aaaa\_ab¥X`aa\_\_aa  
@HWI-EAS443:3:27:1300:1899#0/1  
GTCGCTTTCAATCTGTGCCGATTTCTTCAATTAACCACC  
+HWI-EAS443:3:27:1300:1899#0/1  
a]`\_]ZP¥aa`¥`¥^OR`X]V^]`^¥`^`\_a^\_\_aR`\_Z[  
@HWI-EAS443:3:27:1301:47#0/1  
AGAAACTGTGATGAGAATGGGAGACCTTCACTACCTCCAG  
+HWI-EAS443:3:27:1301:47#0/1  
\_\_]Vab\_`¥aS`b¥`¥`\_`\_`\_`\_XYZY``a]Z¥Y\_VUF^a  
@HWI-EAS443:3:27:1326:693#0/1  
CAAGGTCTCTAATCGTTAAAGATTACACTGAAGTTCGCT  
+HWI-EAS443:3:27:1326:693#0/1  
`ab`^abbbbabba``baa^adW^\_]\_R`¥`^`a]\_V[  
@HWI-EAS443:3:27:1374:1003#0/1  
TTGGAGAAACTGTGATGAGAATGGGAGACCTTCACTACCT  
+HWI-EAS443:3:27:1374:1003#0/1  
aa`a\_a\_\_a`a]Q`a][¥a[^Z[\_^X[]¥YT^Y]]R]X  
@HWI-EAS443:3:27:1390:842#0/1  
TCTCCATTCTCATCACAGTTTCTCCAAGCGAATCTCTGT  
+HWI-EAS443:3:27:1390:842#0/1  
aaaa\_]aaa[a^a\_¥`]\_a]`^^\_¥\_\_^]`^¥Z]]VZ]Z  
@HWI-EAS443:3:27:1433:1070#0/1  
GGAGAAACTGTGATGAGAATGGGAGACCTTCACTACCTCC  
+HWI-EAS443:3:27:1433:1070#0/1  
a`\_\_¥``¥[a[a]^\_W\_[Q\_`a]]\_[Y^VVR[VV]VVVYT  
@HWI-EAS443:3:27:1449:855#0/1  
GCCGATTTCTTCAATTAACCACCTTATTTCTCAAATTT  
+HWI-EAS443:3:27:1449:855#0/1  
aaabaabbb^bb`aabaaaaa\_^aaabaa`\_a``\_ab``  
@HWI-EAS443:3:27:1451:1310#0/1  
AAACTATTCTGTGCTTTCAATCTGTGCCGATTTCTT  
+HWI-EAS443:3:27:1451:1310#0/1  
abbbbbbbbababaa\_\_\_abbab`a[a^`a¥X^\_aab`T`a



+HWI-EAS443:3:27:1652:1844#0/1  
aaa\_Y`b^bb`\_]a`a`\_a\_a^RX^\_[[W[`RX^T]]\_Z  
@HWI-EAS443:3:27:1653:665#0/1  
TGCCGCATTTCTTCAATTAACCACCTTATTTCTCAAATT  
+HWI-EAS443:3:27:1653:665#0/1  
aa^`b\_abbababab`a`a`\_]aZ\_aabaa^\_a\_a`\_aa  
@HWI-EAS443:3:27:1735:1992#0/1  
TCTGTGCTTTCAATCTGTGCCGCATTTCTTCAATTAACC  
+HWI-EAS443:3:27:1735:1992#0/1  
a\_a`^\_a\_\_aa^`\_]\_a[XYW\_Z`\_a\_Sa\_[\_`^`\_]UGX  
@HWI-EAS443:3:27:1749:222#0/1  
GCCGCATTTCTTCAATTAACCACCTTATTTCTCAAATTT  
+HWI-EAS443:3:27:1749:222#0/1  
`abbbbbbbbabbb^`abbaa^Z`\_`aa`aaa^[a`a^\_aaa  
@HWI-EAS443:3:27:1769:800#0/1  
AGCGCGAAGTAGGTACAGATGCAATTGTCATTCTAAGTGT  
+HWI-EAS443:3:27:1769:800#0/1  
V]\_b]ababaaba^a`a``aaa\_\_a]a]`aaa]aa^aY`^  
@HWI-EAS443:3:27:189:319#0/1  
AGAATGGGAGACCTTCACTACCTCCAGAGCAGAAATGAAA  
+HWI-EAS443:3:27:189:319#0/1  
aT[XV^]aTTLW`\_\_\_\_`SP]\_WPZ^¥[Z[[VVLMYZ[XRR  
@HWI-EAS443:3:27:237:775#0/1  
AGAAACTGTGATGAGAATGGGAGACCTTCACTACCTCCAG  
+HWI-EAS443:3:27:237:775#0/1  
a\_``bba`W`aaaa]aa`]Xa`¥a`\_aa`aaa``\_aa`  
@HWI-EAS443:3:27:369:151#0/1  
GCCGCATTTCTTCAATTAACCACCTTATTTCTCAAATTT  
+HWI-EAS443:3:27:369:151#0/1  
aaab`[aba`aaa`aaa\_a`a`^aa\_a`a\_\_a`\_X\_^\_  
@HWI-EAS443:3:27:375:542#0/1  
ACGAGAAAGCTTATCTCTTGTCTACTTCAAGCAGTAG  
+HWI-EAS443:3:27:375:542#0/1  
aaaa`\_]YU`aaaa\_a\_a``aa`\_[\_aaa\_\_XZ`\_`\_¥[^  
@HWI-EAS443:3:27:380:2006#0/1  
GCTTGGGAGAACTGTGATGAGAATGGGAGACCTTCACTAC  
+HWI-EAS443:3:27:380:2006#0/1  
Ubb`a]babbbba`^]`aaa`\_aa\_]```a\_a`^^b\_Na`  
@HWI-EAS443:3:27:380:34#0/1  
TGAGAATGGGAGACCTTCACTACCTCCAGAGCAGAAATGA  
+HWI-EAS443:3:27:380:34#0/1  
aaXaa\_aa]`\_a\_\_Y`¥a\_\_aa¥[ZZZY^U\_XW`]W\_¥^Y  
@HWI-EAS443:3:27:410:392#0/1  
GAATGGGAGACCTTCACTACCTCCAGAGCAGAAATGAAAA  
+HWI-EAS443:3:27:410:392#0/1  
aV^^a^^[¥¥¥^¥Z^\_¥Y¥ZX¥¥ZZ[PVLV\_Q[X¥\_WW^W  
@HWI-EAS443:3:27:428:701#0/1  
GAATGGGAGACCTTCACTACCTCCAGAGCAGAAATGAAAA  
+HWI-EAS443:3:27:428:701#0/1  
`aaaaaaaaaaaaaaaa`Z^a\_]aa`\_a`aaZ\_aaa`a`a

@HWI-EAS443:3:27:441:1994#0/1  
CAGCGAGACTTAGAATGACAATTGCATCTGTACTACT  
+HWI-EAS443:3:27:441:1994#0/1  
a`Zaaa[bb\_`a`aaba`a`aa\_]\_aa`a\_^Ta`a^a\_V  
@HWI-EAS443:3:27:498:1611#0/1  
GGAGAACTGTGATGAGAATGGGAGACCTTCACTACCTCC  
+HWI-EAS443:3:27:498:1611#0/1  
^¥\_`bab]VUJL[Y]V\_\_\_^aZYPZU`\_YU\_\_^V[QTNNQ  
@HWI-EAS443:3:27:502:258#0/1  
CAAGGTCTTAATCGTTAAAGATTACACTGAAGTTCGCT  
+HWI-EAS443:3:27:502:258#0/1  
abbbbabbbbababb`aaa`aaaa`aaaa\_`\_]\_\_a]a  
@HWI-EAS443:3:27:516:275#0/1  
GCCGCATTTCTCAATTAACCACCTTATTTCTCAAATTT  
+HWI-EAS443:3:27:516:275#0/1  
aaabaaaa`aaa`aaaaaaa^\_aaaa````aa\_`a`\_`  
@HWI-EAS443:3:27:528:1992#0/1  
GAAACTGTGATGAGAATGGGAGACCTTCACTACCTCCAGA  
+HWI-EAS443:3:27:528:1992#0/1  
abaa`aaXYa`a[¥`^¥Y^`]]``\_`^````\_]\_]\_\_[]\_  
@HWI-EAS443:3:27:597:82#0/1  
GACATTTCTCGAGGGTCATGTCAGAAAGGTAGCGGAAG  
+HWI-EAS443:3:27:597:82#0/1  
Uab\_\_bab`abb^aaaVa`aWaY\_b\_`\_bbU`\_ab]a]^a  
@HWI-EAS443:3:27:618:1092#0/1  
GCCGCATTTCTCAATTAACCACCTTATTTCTCAAATTT  
+HWI-EAS443:3:27:618:1092#0/1  
aaaaa`a`abaaaa]a\_Z`aaaa` ``````````\_aa`\_]]  
@HWI-EAS443:3:27:62:1809#0/1  
CTCTGAAAATATACAGAGATTCGCTTGGAGAACTGTGAT  
+HWI-EAS443:3:27:62:1809#0/1  
¥^\_W\_U\_]Z]``baZOW¥XZZ\_¥`ZU¥TMYJY\_aRWF[VT  
@HWI-EAS443:3:27:641:1635#0/1  
GGACTCCAACCATGTCAAGCTTTCAGGTAGACTGTTTC  
+HWI-EAS443:3:27:641:1635#0/1  
]T\_a`ba^aabaaa`Uaa`aaaa[\_a`\_NaU\_^¥aWa\_\_  
@HWI-EAS443:3:27:662:1370#0/1  
GTTAAAGATTACACTGAAGTTCGCTTTCAGTACTATGTTC  
+HWI-EAS443:3:27:662:1370#0/1  
a[\_¥¥aa]ba\_bb`aa`^V^¥a\_a`a\_a\_\_X\_a\_]Y`[^a  
@HWI-EAS443:3:27:697:1806#0/1  
TGAGAATGGGAGACCTTCACTACCTCCAGAGCAGAAATGA  
+HWI-EAS443:3:27:697:1806#0/1  
aa\_`a]aa\_^]a\_\_ba\_aaa\_aUV^`a\_ZU````]\_\_a]Z\_  
@HWI-EAS443:3:27:709:566#0/1  
AATAAGCTGAAACGAGAAAGCTTATCTCTTGTCTACT  
+HWI-EAS443:3:27:709:566#0/1  
aabaabbaaaaa\_aa`\_a`aaa`aa``\_aaaa`\_]`a^`  
@HWI-EAS443:3:27:70:744#0/1  
GCCGCATTTCTCAATTAACCACCTTATTTCTCAAATTT

+HWI-EAS443:3:27:70:744#0/1  
abbbbaabbbb`W[\_\_\_`b¥aaa\_aaa¥^baabb``a`\_  
@HWI-EAS443:3:27:713:1258#0/1  
GTCTCTGAAAATATACAGAGATTCGCTTGGAGAACTGTG  
+HWI-EAS443:3:27:713:1258#0/1  
^abbaaaa[aba`abbababaa`aaa`baaaa`aa`Z\_  
@HWI-EAS443:3:27:72:148#0/1  
GTCTCTGAAAATATACAGAGATTCGCTTGGAGAACTGTG  
+HWI-EAS443:3:27:72:148#0/1  
aabab``¥``aaaaa\_`^J]\_`a\_\_¥`^^TR]^^¥OX  
@HWI-EAS443:3:27:750:799#0/1  
CACGCAAAGAGGGCCTATTATCTTTGCCTAGGCATGAGC  
+HWI-EAS443:3:27:750:799#0/1  
a`^^`\_¥P\_aa]]Y\_a¥S^a]```\_]\_YN¥Z[QX¥¥Z[]aa  
@HWI-EAS443:3:27:769:586#0/1  
AACAAATCGTGAATGGATCTTGAAAGAGGAATCCAGCGA  
+HWI-EAS443:3:27:769:586#0/1  
¥aYa^U]Va[\_VLTX\_TYGX[ZYQ¥VRZ\_UIXZUMVSXXZ  
@HWI-EAS443:3:27:794:532#0/1  
GAAATTTGAGGAAATAAGGTGGTTAATTGAAGAAATGCCG  
+HWI-EAS443:3:27:794:532#0/1  
aa`aaaa`ab\_a^aX`aaNa]]\_\_`\_\_`^]\_\_\_\_^[UWY  
@HWI-EAS443:3:27:821:1576#0/1  
GCCGCATTTCTTCAATTAACCACCTTATTTCTCAAATTT  
+HWI-EAS443:3:27:821:1576#0/1  
abb`bbbbbabbbbabbbbabaabaabab`abbaabaa  
@HWI-EAS443:3:27:825:1107#0/1  
GAGAACTGTGATGAGAATGGGAGACCTTCACTACCTCCA  
+HWI-EAS443:3:27:825:1107#0/1  
`b``aaaabX]XX]X^`Ua¥aa[VUR\_]\_`[[V^Z]]RU  
@HWI-EAS443:3:27:839:1443#0/1  
CTCTGAAAATATACAGAGATTCGCTTGGAGAACTGTGAT  
+HWI-EAS443:3:27:839:1443#0/1  
a¥¥`YZNVY]`\_aZ`^YKX]J\_\_WP^]W¥WYVPXS¥HWQS  
@HWI-EAS443:3:27:851:370#0/1  
GCCGCATTTCTTCAATTAACCACCTTATTTCTCAAATTT  
+HWI-EAS443:3:27:851:370#0/1  
aabbaabbaaa`aabaaa`\_a`\_baabaa`aa``a`  
@HWI-EAS443:3:27:880:505#0/1  
GCCGCATTTCTTCAATTAACCACCTTATTTCTCAAATTT  
+HWI-EAS443:3:27:880:505#0/1  
a\_\_¥¥^a`a`aa]\_^a\_\_`^^Z]```\_`\_`^a\_`^`^^\_  
@HWI-EAS443:3:27:889:1775#0/1  
CGAAACTATTCTCTGTCGCTTCAATCTGTGCCGCATTT  
+HWI-EAS443:3:27:889:1775#0/1  
aabbbababbbbaba`a`\_aaa\_aaaa`a^a\_aaaa\_^  
@HWI-EAS443:3:27:905:1170#0/1  
TGAGAATGGGAGACCTTCACTACCTCCAGAGCAGAAATGA  
+HWI-EAS443:3:27:905:1170#0/1  
a`^`\_\_aaba``]Zaaabbaa`\_[[Xaaa`aa\_b\_`aa\_



@HWI-EAS443:3:27:90:2042#0/1  
GCCGCATTTCTTCAATTAACCACCTTATTTCTCAAATTT  
+HWI-EAS443:3:27:90:2042#0/1  
abaWZ[¥UT\_[Za\_¥VYa¥Ya]^]Y]Y¥\_\_`^a]WX[¥M  
@HWI-EAS443:3:27:913:328#0/1  
TGAGAATGGGAGACCTTCACTACCTCCAGAGCAGAAATGA  
+HWI-EAS443:3:27:913:328#0/1  
^`XbnQQa`¥UVP\_X^aa`\_XYXFZ^\_¥a[`¥^bY^Ta\_\_  
@HWI-EAS443:3:27:925:1495#0/1  
GAGAAACTGTGATGAGAATGGGAGACCTTCACTACCTCCA  
+HWI-EAS443:3:27:925:1495#0/1  
`bb]a\_baa[ba```baaaaa\_`\_\_aaaaa\_``R^`^`  
@HWI-EAS443:3:27:980:1917#0/1  
CAAGGTCTTAATCGGTTAAAGATTACACTGAAGTTCGCT  
+HWI-EAS443:3:27:980:1917#0/1  
aaa`aUaa^`baaa]^W]\_a`\_]\_[\_a¥\_WZN]]XWV\_\_^W  
@HWI-EAS443:3:27:988:439#0/1  
CTGAAAATATACAGAGATTCGCTTGGAGAACTGTGATGA  
+HWI-EAS443:3:27:988:439#0/1  
ab\_XZ¥\_Z`WY^`YY\_\_Z```^X]a`^Y¥]]PV]]]X  
@HWI-EAS443:3:28:1015:642#0/1  
GCCGCATTTCTTCAATTAACCACCTTATTTCTCAAATTT  
+HWI-EAS443:3:28:1015:642#0/1  
\_abba^^\_¥\_bb\_abb[b^Z^aab\_\_bbaabb`\_V^aaa  
@HWI-EAS443:3:28:1033:656#0/1  
TGAGAATGGGAGACCTTCACTACCTCCAGAGCAGAAATGA  
+HWI-EAS443:3:28:1033:656#0/1  
ab[a]T\_aa`V`\_Qaa```\_Y[]^[RX`[]V^\_`¥\_¥\_]  
@HWI-EAS443:3:28:1039:830#0/1  
CGCATTTCTTCAATTAACCACCTTATTTCTCAAATTTCT  
+HWI-EAS443:3:28:1039:830#0/1  
G]``a[[ab``aa`a````¥X[ab`bb`babb```bbaab  
@HWI-EAS443:3:28:104:160#0/1  
CAGGTAGACTGTTTCTTTGGCATATCCGCAAGCGATTTG  
+HWI-EAS443:3:28:104:160#0/1  
aa`\_Uba\_aa\_[a\_\_`\_^P[\_UZ\_¥\_\_^[UURUTSSWWU  
@HWI-EAS443:3:28:105:436#0/1  
CCGCATTTCTTCAATTAACCACCTTATTTCTCAAATTTCT  
+HWI-EAS443:3:28:105:436#0/1  
abb`¥`aaaaaaaaaaaaaba`aa`aa``aa`aa^\_a`\_a  
@HWI-EAS443:3:28:1074:828#0/1  
CTGTGATGAGAATGGGAGACCTTCACTACCTCCAGAGCAG  
+HWI-EAS443:3:28:1074:828#0/1  
a`bX¥\_b`abX\_aaaY]aa¥X\_aaa\_aa\_a¥[Y`a]a^`a  
@HWI-EAS443:3:28:1122:1062#0/1  
TGTACCTACTTCGCGCTACCTTTCTGACATGACCCTCGAG  
+HWI-EAS443:3:28:1122:1062#0/1  
XRT`bb`bb`bbbaba]\_aa`]]]\_aa``a`aaa`¥a`^a  
@HWI-EAS443:3:28:112:158#0/1  
GAAACTGTGATGAGAATGGGAGACCTTCACTACCTCCAGA

+HWI-EAS443:3:28:112:158#0/1  
a`Waaaa^^aaa¥a^aaa`a`a¥a`\_^\_a`^`^` [``¥YY  
@HWI-EAS443:3:28:118:584#0/1  
CTTGGAGAACTGTGATGAGAATGGGAGACCTTCACTACC  
+HWI-EAS443:3:28:118:584#0/1  
aa```aaa¥aa`a]a```\_aaa`a\_a``X[a\_\_`a\_^`^¥  
@HWI-EAS443:3:28:119:1612#0/1  
CTGTGCCGATTTCTTCAATTAACCACCTTATTTCTCAA  
+HWI-EAS443:3:28:119:1612#0/1  
a]\_GT```]OX\_ZaQ^^^]^^]VW\_]\_\_^`\_^ZZ¥^^[  
@HWI-EAS443:3:28:1214:458#0/1  
AATGTTATTTGTTGAACTATTCTGTGCGCTTCAATC  
+HWI-EAS443:3:28:1214:458#0/1  
abbbabbabbbab^`aa`bbaabaab`\_`a`aaa`aaa]  
@HWI-EAS443:3:28:1236:1348#0/1  
GTCGCTTCAATCTGTGCCGATTTCTTCAATTAACCACC  
+HWI-EAS443:3:28:1236:1348#0/1  
¥Vbbb[`ab`TN¥aa\_T\_a^`ab¥^`\_a^`\_``]`^a\_a]]Y  
@HWI-EAS443:3:28:1267:1427#0/1  
ATGAGAATGGGAGACCTTCACTACCTCCAGAGCAGAAATG  
+HWI-EAS443:3:28:1267:1427#0/1  
`ba]ba\_bbbbbbaabababb`abUa`\_aY¥a^aba\_aaa  
@HWI-EAS443:3:28:1312:805#0/1  
GAATGGGAGACCTTCACTACCTCCAGAGCAGAAATGAAAA  
+HWI-EAS443:3:28:1312:805#0/1  
aaaaa]\_aa`\_\_aa[a\_aa`Z\_\_^\_a\_\_\_\_\_a\_^\_a`]\_\_\_\_  
@HWI-EAS443:3:28:1323:575#0/1  
GAAACTGTGATGAGAATGGGAGACCTTCACTACCTCCAGA  
+HWI-EAS443:3:28:1323:575#0/1  
aa\_XY\_\_\_ba`aV\_LS]]a`VaT]X`¥S[Y\_VWPZRYV\_Y  
@HWI-EAS443:3:28:1356:1356#0/1  
TGAGAATGGGAGACCTTCACTACCTCCAGAGCAGAAATGA  
+HWI-EAS443:3:28:1356:1356#0/1  
aa^a`baa\_¥[¥\_R`[^`\_`\_]\_]W[RZ\_]RVW^^\_]`  
@HWI-EAS443:3:28:1443:555#0/1  
GTGCCGATTTCTTCAATTAACCACCTTATTTCTCAAAT  
+HWI-EAS443:3:28:1443:555#0/1  
^T^]Zaa^`ZYPaaPZ\_aWMXWV^SFYa\_a\_\_TH\_[ZZ[^`  
@HWI-EAS443:3:28:1444:1309#0/1  
CTCCCATTCTCATCACAGTTTCTCCAAGCGAATCTCTGTA  
+HWI-EAS443:3:28:1444:1309#0/1  
abbbbaba\_bbbbbbbbabbbabbbbaa[bbaab^babaab  
@HWI-EAS443:3:28:1449:835#0/1  
GAGAATGGGAGACCTTCACTACCTCCAGAGCAGAAATGAA  
+HWI-EAS443:3:28:1449:835#0/1  
aab`aabba\_a\_¥W`^`a\_\_\_\_\_]^`\_Z`¥a]^aX^]aa^]  
@HWI-EAS443:3:28:1465:1338#0/1  
GAAAGCTCTTATCTCTTGTCTACTTCAAGCAGTAGTTGT  
+HWI-EAS443:3:28:1465:1338#0/1  
aa`¥a]]`\_aa\_W¥Paaaa¥\_aaaa\_a`\_`[^`a`\_a\_¥V^`

@HWI-EAS443:3:28:1473:1716#0/1  
AGAAACTGTGATGAGAATGGGAGACCTTCACTACCTCCAG  
+HWI-EAS443:3:28:1473:1716#0/1  
aaaaa]aa]`a¥`^`Ua`[a`a^YZZ`^`V[`Y\_]YU[S  
@HWI-EAS443:3:28:1484:481#0/1  
GTCGCTTTCAATCTGTGCCGATTTCTTCAATTAACCACC  
+HWI-EAS443:3:28:1484:481#0/1  
aJ`a^aa^aa`^^aYb\_\_a\_]\_^`\_\_`^¥\_\_\_\_`^]\_\_X  
@HWI-EAS443:3:28:1510:1538#0/1  
GAAACTGTGATGAGAATGGGAGACCTTCACTACCTCCAGA  
+HWI-EAS443:3:28:1510:1538#0/1  
aaa\_S^a^]`\_ZXTX`^^^]TZ\_PRXYZYZ¥NT\_]\_SRS  
@HWI-EAS443:3:28:1510:769#0/1  
GTCGCTTTCAATCTGTGCCGATTTCTTCAATTAACCACC  
+HWI-EAS443:3:28:1510:769#0/1  
aaaa]aba`aaaa^a\_\_a`aaaa^aa\_\_\_\_a`\_a^U\_^]  
@HWI-EAS443:3:28:1537:583#0/1  
GCCGATTTCTTCAATTAACCACCTTATTTCTCAAATTT  
+HWI-EAS443:3:28:1537:583#0/1  
a`^a[abba]aaZaabaaa¥[^`ba`aaa\_\_a[a\_]a[\_  
@HWI-EAS443:3:28:153:1572#0/1  
GAATGGGAGACCTTCACTACCTCCAGAGCAGAAATGAAAA  
+HWI-EAS443:3:28:153:1572#0/1  
]bb`a[\_W^\_b`aRab\_abaa]abX¥¥`]aa[`¥aXS`aY  
@HWI-EAS443:3:28:1549:1628#0/1  
TGAGAATGGGAGACCTTCACTACCTCCAGAGCAGAAATGA  
+HWI-EAS443:3:28:1549:1628#0/1  
`baa`U`b[^Xb\_Z\_\_`a`^]``\_]\_[a\_a\_Ua^ZZ`\_\_  
@HWI-EAS443:3:28:1619:580#0/1  
TGCCGATTTCTTCAATTAACCACCTTATTTCTCAAATT  
+HWI-EAS443:3:28:1619:580#0/1  
aa`]b`ba`aTaaWY^`aaaVZaaY`^`aa`VWa^`a]aS  
@HWI-EAS443:3:28:1701:721#0/1  
CAGAGATTGCTTGGAGAACTGTGATGAGAATGGGAGAC  
+HWI-EAS443:3:28:1701:721#0/1  
K`^\_Yb^bb\_bb[babbabbaabaabb`]VW`bab`U\_bI  
@HWI-EAS443:3:28:170:272#0/1  
CCGATTTCTTCAATTAACCACCTTATTTCTCAAATTTCT  
+HWI-EAS443:3:28:170:272#0/1  
a^Q^UZWaa\_[Y]Y\_aa\_\_YJQ¥a[`[ZY]L¥U[TLXZFN  
@HWI-EAS443:3:28:1719:1817#0/1  
AGAAACTGTGATGAGAATGGGAGACCTTCACTACCTCCAG  
+HWI-EAS443:3:28:1719:1817#0/1  
a`a`a\_bb\_aa`a^a^`aba`[^\_0`]\_Y\_ZZ\_WT\_\_W^\_  
@HWI-EAS443:3:28:1766:664#0/1  
CGCATTTCTTCAATTAACCACCTTATTTCTCAAATTTCT  
+HWI-EAS443:3:28:1766:664#0/1  
abaaabb`bbabbb`bb]^ab^baabbb]ababbbba`b  
@HWI-EAS443:3:28:19:553#0/1  
GCCGATTTCTTCAATTAACCACCTTATTTCTCAAATTT

+HWI-EAS443:3:28:19:553#0/1  
]\_\_^a[bbaaaV[YUa^`^`SLT[ba\_ba`a]¥\_U]H\_R`  
@HWI-EAS443:3:28:200:1317#0/1  
CGCTTTCAATCTGTGCCGCATTTCTTCAATTAACCACCTT  
+HWI-EAS443:3:28:200:1317#0/1  
aab` `abbaaba`^aa`aabaa`a`a^]aaaa\_[a`Z^\_  
@HWI-EAS443:3:28:200:332#0/1  
GAAACTGTGATGAGAATGGGAGACCTTCACTACCTCCAGA  
+HWI-EAS443:3:28:200:332#0/1  
abaaaa`\_a\_a` `a^aaaa^`\_\_`\_`\_a` ``\_\_`^` `\_]`  
@HWI-EAS443:3:28:209:1389#0/1  
AGAAACTGTGATGAGAATGGGAGACCTTCACTACCTCCAG  
+HWI-EAS443:3:28:209:1389#0/1  
aa`b]baa^a`a]\_X`aaaa`[aaaa`^a`^`\_a]`\_`^\_  
@HWI-EAS443:3:28:219:411#0/1  
TGGTAACACGGTTCGAGTCTCTGAAAATATACAGAGATTC  
+HWI-EAS443:3:28:219:411#0/1  
aba]`bbaaba\_a`a`a[aa`a`\_a` `\_\_a]YYZFXZ^  
@HWI-EAS443:3:28:236:113#0/1  
ATGAGAATGGGAGACCTTCACTACCTCCAGAGCAGAAATG  
+HWI-EAS443:3:28:236:113#0/1  
a[ZI¥^¥ab\_[]\_bSLYbabb¥b[a[aaR`QaP¥aXFYV[  
@HWI-EAS443:3:28:245:917#0/1  
GTCGCTTTCAATCTGTGCCGCATTTCTTCAATTAACCACC  
+HWI-EAS443:3:28:245:917#0/1  
a`abaaaaabaabaa^aaaaa]aaaaaaaa\_Ya`aa\_aaa\_  
@HWI-EAS443:3:28:24:78#0/1  
GGTTAATTGAAGAAATGCGGCACAGATTGAAAGCGACAGA  
+HWI-EAS443:3:28:24:78#0/1  
aa`aaaa\_a` `a]a\_aaaa` ` `aa`^a`^Z` ` `^^^\_]`  
@HWI-EAS443:3:28:26:60#0/1  
TGAGAATGGGAGACCTTCACTACCTCCAGAGCAGAAATGA  
+HWI-EAS443:3:28:26:60#0/1  
aa`aa¥aaa^`¥[ `\_\_` `\_\_`\_]`\_`^\_]`]]`\_RWW]^V  
@HWI-EAS443:3:28:283:1408#0/1  
CACGGTTCGAGTCTCTGAAAATATACAGAGATTCGCTTGG  
+HWI-EAS443:3:28:283:1408#0/1  
abaa`ZiA\_b[Ybab\_]aaa` `a`aa\_RJZYWWZZUG]R[  
@HWI-EAS443:3:28:284:1193#0/1  
GCCGCATTTCTTCAATTAACCACCTTATTTCTCAAATTT  
+HWI-EAS443:3:28:284:1193#0/1  
abaa\_¥]aaa`aa` `baaabbaa]a`\_a\_aa\_\_a`S` `^`  
@HWI-EAS443:3:28:328:833#0/1  
GAAACAAATCGTGAATGGATCTTGAAAGAGGAATCCAGC  
+HWI-EAS443:3:28:328:833#0/1  
aT^a[HX[S` `Wb^`\_aaa`T]\_aXWIX¥X¥a¥R[R`\_X\_I  
@HWI-EAS443:3:28:333:1984#0/1  
TGCCAAAGGAAACAGTCTACCTGAAAGCTTGACATGGTGT  
+HWI-EAS443:3:28:333:1984#0/1  
a\_a` `^^` `a`ZabbZb¥^a^Zaaaaaaaa`Ya`a\_a]P`U

@HWI-EAS443:3:28:346:1674#0/1  
GCGGCACAGATTGAAAGCGACAGAGAATAGTTTCGAACAA  
+HWI-EAS443:3:28:346:1674#0/1  
`aVY\_¥`a\_\_b\_]`aa`a]VRYa]`\_¥b\_^ba^a^Q¥`  
@HWI-EAS443:3:28:348:1505#0/1  
CAATTAACCACCTTATTTCTCAAATTTCTGTCCCAATTG  
+HWI-EAS443:3:28:348:1505#0/1  
^Ya¥QY`¥\_]`TTNWV^X]W] []RT]`Y`X\_aaZZ]`\_a  
@HWI-EAS443:3:28:378:1095#0/1  
GAATGGGAGACCTTCACTACCTCCAGAGCAGAAATGAAAA  
+HWI-EAS443:3:28:378:1095#0/1  
a`[`aa[V]`a`[\_a^\_a[Z^^[\_^Z\_\_\_\_^ZWW^\_]`WW  
@HWI-EAS443:3:28:383:440#0/1  
CAATCGCACGCAAAGAGGGCCTATTATCTTTGCCTAGGC  
+HWI-EAS443:3:28:383:440#0/1  
abbaababbbaaaaa\_ababaaabaaaa`aaaa`aa\_a\_  
@HWI-EAS443:3:28:441:227#0/1  
GTGATGAGAATGGGAGACCTTCACTACCTCCAGAGCAGAA  
+HWI-EAS443:3:28:441:227#0/1  
a`aaab`a]a`aaa\_a¥\_aaa`aaaa`\_\_\_\_^\_¥a[]\_Y\_  
@HWI-EAS443:3:28:452:1534#0/1  
CTGTGATGAGAATGGGAGACCTTCACTACCTCCAGAGCAG  
+HWI-EAS443:3:28:452:1534#0/1  
aaa`^\_`a`[Ya`]^aa]`aR`¥`a\_aa\_]a``XFW\_\_\_\_  
@HWI-EAS443:3:28:462:484#0/1  
AGAAACTGTGATGAGAATGGGAGACCTTCACTACCTCCAG  
+HWI-EAS443:3:28:462:484#0/1  
abaaaaaba`abab`a\_a\_`Z`a`\_]`^`[[[\_^\_\_`  
@HWI-EAS443:3:28:488:393#0/1  
CGCTTGGAGAACTGTGATGAGAATGGGAGACCTTCACTA  
+HWI-EAS443:3:28:488:393#0/1  
`abbabbbbabb`baa`ababaababa\_a`a\_b`aa\_\_a  
@HWI-EAS443:3:28:519:1487#0/1  
CTTGAATGGAATGGTAACACGGTTTCGAGTCTCTGAAAATA  
+HWI-EAS443:3:28:519:1487#0/1  
abbaa`babbbbaa`¥ab`aaaa^Ya^\_Saa^a[]\_a\_aa  
@HWI-EAS443:3:28:546:1848#0/1  
AAATAAGCTGAAACGAGAAAGCTTTATCTCTTGTCTAC  
+HWI-EAS443:3:28:546:1848#0/1  
aaabb`Uaaabaa`\_aaa`\_`aaa`\_`a\_a`a`a`a\_aa  
@HWI-EAS443:3:28:54:954#0/1  
GTGATGAGAATGGGAGACCTTCACTACCTCCAGAGCAGAA  
+HWI-EAS443:3:28:54:954#0/1  
aVI`\_]S]`bV^Z[OWW]Z\_X]a`V¥VRY`Z]¥Y¥UXLX  
@HWI-EAS443:3:28:561:314#0/1  
AGAAACTGTGATGAGAATGGGAGACCTTCACTACCTCCAG  
+HWI-EAS443:3:28:561:314#0/1  
abaaaaab\_aa`b`a\_\_\_\_aa^`\_^¥\_\_\_\_`^`^`^`W`  
@HWI-EAS443:3:28:570:808#0/1  
AGAATGGGAGACCTTCACTACCTCCAGAGCAGAAATGAAA

+HWI-EAS443:3:28:570:808#0/1  
^a\_]bbb`bba`^`^]bbaaa¥¥]b`a`^a`aa`\_]a`^X  
@HWI-EAS443:3:28:57:232#0/1  
AGAAACTGTGATGAGAATGGGAGACCTTCACTACCTCCAG  
+HWI-EAS443:3:28:57:232#0/1  
aa\_a\_aab^a\_`^`^\_\_aa\_\_^a]\_^\_Y\_WZ[V¥^\_Z^]  
@HWI-EAS443:3:28:582:290#0/1  
GAAAATATACAGAGATTCGCTTGGAGAACTGTGATGAGA  
+HWI-EAS443:3:28:582:290#0/1  
aaaaa`aaaaaaa``\_aaaa\_aa\_a\_``[\_V\_\_Z^^^\_  
@HWI-EAS443:3:28:596:636#0/1  
AGAAACTGTGATGAGAATGGGAGACCTTCACTACCTCCAG  
+HWI-EAS443:3:28:596:636#0/1  
aaa]aa`G^\_\_a^a[\_\_\_\_`\_]\_\_¥^\_¥``]¥\_¥W]^¥^^  
@HWI-EAS443:3:28:619:384#0/1  
GGGAAACAAATCGTGAATGGATCTTGAAAGAGGAATCCA  
+HWI-EAS443:3:28:619:384#0/1  
`babbbbaabbbab\_bbaaaaaa`ba[`aa`aaaa`^Ya  
@HWI-EAS443:3:28:634:1929#0/1  
CTGTGATGAGAATGGGAGACCTTCACTACCTCCAGAGCAG  
+HWI-EAS443:3:28:634:1929#0/1  
`a`[\_a^]Y\_\_a^¥[[^X`^[Z\_`X]^]UX\_^ZX]^¥U  
@HWI-EAS443:3:28:657:305#0/1  
AGAAACTGTGATGAGAATGGGAGACCTTCACTACCTCCAG  
+HWI-EAS443:3:28:657:305#0/1  
abbb`aabaaa`a`a]a]a^a^\_\_^^^`^`\_`^¥]Z^\_]`  
@HWI-EAS443:3:28:686:1966#0/1  
GAGAATGGGAGACCTTCACTACCTCCAGAGCAGAAATGAA  
+HWI-EAS443:3:28:686:1966#0/1  
`b```OX\_bUZ¥X¥[MaaaU]\_]`^`b\_aYaQaa`a``aa`  
@HWI-EAS443:3:28:692:625#0/1  
GCCGCATTTCTTCAATTAACCACCTTATTTCTCAAATTT  
+HWI-EAS443:3:28:692:625#0/1  
abaaababa`a`aaa`aaa`\_a\_`a`aa```\_a`a`\_a``  
@HWI-EAS443:3:28:705:149#0/1  
GAAAATATACAGAGATTCGCTTGGAGAACTGTGATGAGA  
+HWI-EAS443:3:28:705:149#0/1  
`K^b^T`J^aaaa^aaZ^a\_a]b^b\_\_`W\_] [XYZUU]\_  
@HWI-EAS443:3:28:72:1346#0/1  
AGAAACTGTGATGAGAATGGGAGACCTTCACTACCTCCAG  
+HWI-EAS443:3:28:72:1346#0/1  
Wa[\_W\_a`¥a[`¥`\_Y\_a^^]X¥^]a]\_]Z^U¥\_YW  
@HWI-EAS443:3:28:734:167#0/1  
TGAGAATGGGAGACCTTCACTACCTCCAGAGCAGAAATGA  
+HWI-EAS443:3:28:734:167#0/1  
\_¥Q\_^Wa¥¥\_]a]TXXX¥`Z^]¥UX` [W¥VTNRZUW¥UYW  
@HWI-EAS443:3:28:746:742#0/1  
CTGAAAATATACAGAGATTCGCTTGGAGAACTGTGATGA  
+HWI-EAS443:3:28:746:742#0/1  
ab\_\_[\_a`¥¥]\_a\_ab`aa\_\_^`\_`a\_]Ta^[]] [\_¥RY¥

@HWI-EAS443:3:28:793:117#0/1  
CGCAAGCGATTTGCAGACAATGGATTGGGTGATGCCCCAT  
+HWI-EAS443:3:28:793:117#0/1  
abbbababbaabb`aaaaaa`bbaaa]ba¥a` `]^`^a^`^  
@HWI-EAS443:3:28:79:1457#0/1  
TGCCGCATTTCTTCAATTAACCACCTTATTTCCCTCAAATT  
+HWI-EAS443:3:28:79:1457#0/1  
a\_bb`baa\_aaaaaaa]a\_baaaaaa`]aaaaaaaa`a\_  
@HWI-EAS443:3:28:845:834#0/1  
CCGCATTTCTTCAATTAACCACCTTATTTCCCTCAAATTC  
+HWI-EAS443:3:28:845:834#0/1  
aaaaY`bbabb`babbbaaabaabbbaaa`aaa^W`ab`^  
@HWI-EAS443:3:28:846:1077#0/1  
AGAAACTGTGATGAGAATGGGAGACCTTCACTACCTCCAG  
+HWI-EAS443:3:28:846:1077#0/1  
[\_b]b\_a]aa]]Y0^a\_aaXWRa^^aTYa¥M`aPH[[S^\_  
@HWI-EAS443:3:28:863:2026#0/1  
GAAACTGTGATGAGAATGGGAGACCTTCACTACCTCCAGA  
+HWI-EAS443:3:28:863:2026#0/1  
`¥Sa[a¥G¥b`a`a[a\_aa]`a\_b` ` \_`aa^`W¥` `U` ` \_  
@HWI-EAS443:3:28:895:586#0/1  
GCTTGGGAGAACTGTGATGAGAATGGGAGACCTTCACTAC  
+HWI-EAS443:3:28:895:586#0/1  
aaaab^W]aaa`aa[aaaaaa`\_aaa\_`\_`^[\_a^`\_`\_  
@HWI-EAS443:3:28:96:988#0/1  
TGAGAATGGGAGACCTTCACTACCTCCAGAGCAGAAATGA  
+HWI-EAS443:3:28:96:988#0/1  
a\_aabaabaa\_`[`a]]`^`[^aa`b\_Z`Z\_aaaZW\_\_a\_  
@HWI-EAS443:3:28:971:824#0/1  
GTCGCTTTCAATCTGTGCCGATTTCTTCAATTAACCACC  
+HWI-EAS443:3:28:971:824#0/1  
aaaa`aabaababa^aa\_a`abaa\_abaaaa`aa\_\_a\_^  
@HWI-EAS443:3:28:993:1314#0/1  
TGGAGAACTGTGATGAGAATGGGAGACCTTCACTACCTC  
+HWI-EAS443:3:28:993:1314#0/1  
a` `ab¥S` `a`Yaaaa`aaa`\_a`V`\_\_a` `aa\_` `\_\_Z^  
@HWI-EAS443:3:29:1011:1833#0/1  
AAATCGTGAATGGATCTTGAAAGAGGAATCCAGCGAGAC  
+HWI-EAS443:3:29:1011:1833#0/1  
aaa`ZOQY]^`]a\_[MWOZKY^]QNRMY`S¥\_YQQZVBBB  
@HWI-EAS443:3:29:101:1789#0/1  
GCTGAAACGAGAAAGCTTATCTCTTGTCTACTTCAAG  
+HWI-EAS443:3:29:101:1789#0/1  
ababb` ` `abbaab`aababaaaab`aaaabaabaabaaZ  
@HWI-EAS443:3:29:1027:819#0/1  
GCCGCATTTCTTCAATTAACCACCTTATTTCCCTCAAATTT  
+HWI-EAS443:3:29:1027:819#0/1  
a\_a`]abbbaaaaab`aXY`a`aa`a\_aaa\_a\_a^]a`a  
@HWI-EAS443:3:29:1029:1322#0/1  
GCCGCATTTCTTCAATTAACCACCTTATTTCCCTCAAATTT

+HWI-EAS443:3:29:1029:1322#0/1  
`aba`bbbbabbabbbabbaabb`bbbbbaaaabbaabaa  
@HWI-EAS443:3:29:1034:1609#0/1  
TGCCGCATTTCTTCAATTAACCACCTTATTTCTCAAATT  
+HWI-EAS443:3:29:1034:1609#0/1  
`X\_b`^abaaaa`a\_baaa`aaaa``aaa\_aaaa``U`\_  
@HWI-EAS443:3:29:1044:1274#0/1  
AGAAACTGTGATGAGAATGGGAGACCTTCACTACCTCCAG  
+HWI-EAS443:3:29:1044:1274#0/1  
aaa\_\_T[b\_`aaa[^R`T¥\_`^a]V]^`\_^`\_]\_\_\_\_\_]V\_^[  
@HWI-EAS443:3:29:1132:1148#0/1  
CAAAAGATAATAGGCCCTCTTTGCGTGCGATTGGACCAGG  
+HWI-EAS443:3:29:1132:1148#0/1  
aaba` `abbaaa\_a]a[aaa\_aa`a\_a\_a` ` \_a\_\_aZ`BB  
@HWI-EAS443:3:29:113:590#0/1  
GAAACTGTGATGAGAATGGGAGACCTTCACTACCTCCAGA  
+HWI-EAS443:3:29:113:590#0/1  
abbbbbbaaaWaaaaaaaa\_Z]aaa`a`a`\_aa¥\_a^[W]  
@HWI-EAS443:3:29:1142:1937#0/1  
CAGAGATTGCGTTGGAGAACTGTGATGAGAATGGGAGAC  
+HWI-EAS443:3:29:1142:1937#0/1  
abab^`a`aaa`^`^]aa\_aa`\_\_V\_a¥\_TRU``^`^`¥XU  
@HWI-EAS443:3:29:1165:388#0/1  
GCCGCATTTCTTCAATTAACCACCTTATTTCTCAAATTT  
+HWI-EAS443:3:29:1165:388#0/1  
aaa`¥^baaaba^a`a\_aa`^a`]aaaaa`\_\_`\_a]aa\_\_  
@HWI-EAS443:3:29:1217:1431#0/1  
GAAACTGTGATGAGAATGGGAGACCTTCACTACCTCCAGA  
+HWI-EAS443:3:29:1217:1431#0/1  
aaaa]\_a[a\_¥a^^`^^]Y]\_\_UU\_Y]^^]\_`^`^XYX[V  
@HWI-EAS443:3:29:123:528#0/1  
CGCATTTCTTCAATTAACCACCTTATTTCTCAAATTTCT  
+HWI-EAS443:3:29:123:528#0/1  
aaa[``]`[V\_TUZZZZWY\_¥T^¥Y¥WV`\_X^[RY^[T[^  
@HWI-EAS443:3:29:1290:1571#0/1  
GTCGCTTTCAATCTGTGCCGCATTTCTTCAATTAACCACC  
+HWI-EAS443:3:29:1290:1571#0/1  
¥SabaX`\_aVV¥b^TNZZU`Sa`W`YZ]XXYXS]ZY\_T^^  
@HWI-EAS443:3:29:1292:1878#0/1  
AGAAACTGTGATGAGAATGGGAGACCTTCACTACCTCCAG  
+HWI-EAS443:3:29:1292:1878#0/1  
``abb[^`\_[aa`Q`aaaa\_]`\_aYZaa¥FZ¥Zaa]V¥^\_\_  
@HWI-EAS443:3:29:1292:785#0/1  
GGTCTCCATTCTCATCACAGTTTCTCCAAGCGAATCTCT  
+HWI-EAS443:3:29:1292:785#0/1  
¥^¥Y`\_YS\_^^¥M¥a^abaa[OX`WJY]OZZ^¥JTPWBBB  
@HWI-EAS443:3:29:1296:657#0/1  
GGAGAACTGTGATGAGAATGGGAGACCTTCACTACCTCC  
+HWI-EAS443:3:29:1296:657#0/1  
\_aS^X` `Xa¥DZX[``^`Q¥ZZW\_YXV[SY]X`S¥[NUZBB



@HWI-EAS443:3:29:1298:743#0/1  
CTCCCATTCTCATCACAGTTTCTCCAAGCGAATCTCTGTA  
+HWI-EAS443:3:29:1298:743#0/1  
]`b`babbbbbbba\_bab`aa\_ba\_[\_\_\_\_`[bba^  
@HWI-EAS443:3:29:1328:1007#0/1  
GCCGCATTTCTTCAATTAACCACCTTATTTCTCAAATTT  
+HWI-EAS443:3:29:1328:1007#0/1  
a^Z[GYZaa\_VRUYX]¥^^[\_Z`ZSZ¥TZ¥Z[SSH]WW  
@HWI-EAS443:3:29:1336:310#0/1  
GTGCGTTTCAATCTGTGCCGATTTCTTCAATTAACCACC  
+HWI-EAS443:3:29:1336:310#0/1  
a`a[\_a`a`\_]\_\_^X]\_]\_a`\_]`YZYa``WG¥ZO  
@HWI-EAS443:3:29:1337:918#0/1  
GTGATGAGAATGGGAGACCTTCACTACCTCCAGAGCAGAA  
+HWI-EAS443:3:29:1337:918#0/1  
^`b]Y`a\_aabaY[a\_^\_\_a]\_]`X\_\_Y^\_\_]\_ZZ^^V  
@HWI-EAS443:3:29:133:663#0/1  
CGCGAAGTAGGTACAGATGCAATTGTCATTCTAAGTGTCT  
+HWI-EAS443:3:29:133:663#0/1  
aba`[a`W`]`Ua`aa`^`a`\_]`\_\_`^`\_V\_Y\_]`  
@HWI-EAS443:3:29:1410:1266#0/1  
GGAGAACTGTGATGAGAATGGGAGACCTTCACTACCTCC  
+HWI-EAS443:3:29:1410:1266#0/1  
aa`a\_\_a¥aa[\_`a¥`Z\_Z^Z^]VYV¥[W^UZ\_VTWUB  
@HWI-EAS443:3:29:1431:760#0/1  
CCCAACTGCATTTTTGACATCCTCATAAGTATGCCTGGA  
+HWI-EAS443:3:29:1431:760#0/1  
abbbbabab`bbbbbaabbaaba`baabaabaaa`ab`a  
@HWI-EAS443:3:29:1528:1590#0/1  
ATGAGAATGGGAGACCTTCACTACCTCCAGAGCAGAAATG  
+HWI-EAS443:3:29:1528:1590#0/1  
a]a`]Yaa]bbaa`P¥\_\_a[ab^U\_\_\_\_`¥U`\_a^T\_\_\_\_  
@HWI-EAS443:3:29:1533:1443#0/1  
AGAACTGTGATGAGAATGGGAGACCTTCACTACCTCCAG  
+HWI-EAS443:3:29:1533:1443#0/1  
abab`^bb`baaa]``a`aa^a`W¥\_\_Y`^^\_Y^^\_Y^\_  
@HWI-EAS443:3:29:1536:1989#0/1  
GCCGCATTTCTTCAATTAACCACCTTATTTCTCAAATTT  
+HWI-EAS443:3:29:1536:1989#0/1  
ababbabaaaabaa`aaaa\_\_a`^aaaaaa`a`aa`a`\_  
@HWI-EAS443:3:29:1539:830#0/1  
TGCCGCATTTCTTCAATTAACCACCTTATTTCTCAAATT  
+HWI-EAS443:3:29:1539:830#0/1  
aaaabaabaaaa\_]``a`a`\_``\_\_a\_aa``\_]aaa\_^aa  
@HWI-EAS443:3:29:1600:730#0/1  
TTCGATATCGAGGCCAAGGGTGTGCCTCTTCCTTTAAG  
+HWI-EAS443:3:29:1600:730#0/1  
aaabaaa`aa`a\_U¥`^^`\_W\_]`[]Y\_V`V¥`V¥`¥]V  
@HWI-EAS443:3:29:1602:456#0/1  
GAATGGATCTTGAAAGAGGAATCCAGCGAGACACTTAGAA

+HWI-EAS443:3:29:1602:456#0/1  
aaaaa][[ab][aa\_abW\_V[¥Q\_X\_Y`REUTZZ\_^]R  
@HWI-EAS443:3:29:1604:914#0/1  
TGAAACGAGAAAAGCTCTTATCTCTTGTCTACTTCAAGCA  
+HWI-EAS443:3:29:1604:914#0/1  
aaaaa]b\_b¥\_S`^W\_a^\_Z`\_a\_a¥`\_a\_[a\_`^\_I¥  
@HWI-EAS443:3:29:1636:528#0/1  
GAAACTGTGATGAGAATGGGAGACCTTCACTACCTCCAGA  
+HWI-EAS443:3:29:1636:528#0/1  
aaaa\_ab¥b\_ab]a\_`\_`\_]a\_VX`\_]`\_]\_]\_X^]\_X  
@HWI-EAS443:3:29:1643:967#0/1  
ATGAGAATGGGAGACCTTCACTACCTCCAGAGCAGAAATG  
+HWI-EAS443:3:29:1643:967#0/1  
^abbbabbbbbbbaabbbbaaba¥aaaababaab`\_aaa  
@HWI-EAS443:3:29:166:809#0/1  
AGAAACTGTGATGAGAATGGGAGACCTTCACTACCTCCAG  
+HWI-EAS443:3:29:166:809#0/1  
a\_`JXaab]a`b^b`a]``aaa^`aa^^`a`\_\_VS[W`  
@HWI-EAS443:3:29:1694:888#0/1  
GAATGGGAGACCTTCACTACCTCCAGAGCAGAAATGAAAA  
+HWI-EAS443:3:29:1694:888#0/1  
``\_baXa\_b[``\_¥\_NMMKSYNS[TSKRQLKXBBBBBBBBB  
@HWI-EAS443:3:29:1753:88#0/1  
TGCCGCATTTCTTCAATTAACCACCTTATTTCTCAAATT  
+HWI-EAS443:3:29:1753:88#0/1  
ab`R¥aaabb`bWa\_aaaaVP`PMa\_^aaW\_a\_a\_\_aa  
@HWI-EAS443:3:29:176:729#0/1  
GAAACTGTGATGAGAATGGGAGACCTTCACTACCTCCAGA  
+HWI-EAS443:3:29:176:729#0/1  
a\_bUaa\_^baabba`\_aa`aa`aa^`aaaaa\_aab`\_a\_  
@HWI-EAS443:3:29:247:748#0/1  
GCCGCATTTCTTCAATTAACCACCTTATTTCTCAAATTT  
+HWI-EAS443:3:29:247:748#0/1  
abbbbabaaabbaaaaaab`aaaaaaaaaaaaaaaa`a`\_  
@HWI-EAS443:3:29:262:600#0/1  
GCGGCACAGATTGAAAGCGACAGAGAATAGTTTCGAACAA  
+HWI-EAS443:3:29:262:600#0/1  
YP\_[`a`\_aa^ZZV¥]\_\_Z`¥^P]aU`PP¥X^`\_`XMX[^  
@HWI-EAS443:3:29:268:15#0/1  
AATTTCTCCAATTTGCTCCCTCCTCAGTGAAAGCCCTT  
+HWI-EAS443:3:29:268:15#0/1  
[aaaa`aa`\_`aa`aaaaa\_aa`\_a`aaaY\_¥^¥Z[[S[B  
@HWI-EAS443:3:29:295:1293#0/1  
TGAGAATGGGAGACCTTCACTACCTCCAGAGCAGAAATGA  
+HWI-EAS443:3:29:295:1293#0/1  
aaabaa`^a`\_a¥]aaaaaaaa`aaaa`\_a`aWaa¥`\_`  
@HWI-EAS443:3:29:330:1449#0/1  
GCCGCATTTCTTCAATTAACCACCTTATTTCTCAAATTT  
+HWI-EAS443:3:29:330:1449#0/1  
`\_aWb\_aaba`ab`X`aaaaabaa`]a`\_bb``]^R\_\_^

@HWI-EAS443:3:29:395:381#0/1  
GCCGCATTTCTTCAATTAACCACCTTATTTCTCAAATTT  
+HWI-EAS443:3:29:395:381#0/1  
^aaaa`aaaaa^a`aa\_a`aaaaaa\_\_`aaaa[\_`a  
@HWI-EAS443:3:29:407:744#0/1  
GGTTAATTGAAGAAATGCGGCACAGATTGAAAGCGACAGA  
+HWI-EAS443:3:29:407:744#0/1  
P\_]`^`YY`¥^\_SZ¥\_\_\_`bb\_b^X^aab`\_LYa^[\_`aa  
@HWI-EAS443:3:29:422:1105#0/1  
GGAGAACTGTGATGAGAATGGGAGACCTTCACTACCTCC  
+HWI-EAS443:3:29:422:1105#0/1  
V¥¥`a`¥Yaa`a]a]\_`aaaaaa\_a``aaa\_aaa¥a`  
@HWI-EAS443:3:29:434:1871#0/1  
TGCCGCATTTCTTCAATTAACCACCTTATTTCTCAAATT  
+HWI-EAS443:3:29:434:1871#0/1  
aabbaaab]abaaaabaabba\_ba^`a`\_`aa\_baa\_a`  
@HWI-EAS443:3:29:448:562#0/1  
GAATGGGAGACCTTCACTACCTCCAGAGCAGAAATGAAAA  
+HWI-EAS443:3:29:448:562#0/1  
aaa`aaa\_aaaaa`aa`a¥a`\_\_`\_\_^`\_\_\_\_\_¥\_\_¥  
@HWI-EAS443:3:29:465:1647#0/1  
TGAGAATGGGAGACCTTCACTACCTCCAGAGCAGAAATGA  
+HWI-EAS443:3:29:465:1647#0/1  
[a[\_`^`\_XY`\_WaWa`a[\_`^abba\_]\_`\_aaaZO\_PZ[a  
@HWI-EAS443:3:29:471:621#0/1  
AGAACTGTGATGAGAATGGGAGACCTTCACTACCTCCAG  
+HWI-EAS443:3:29:471:621#0/1  
a\_S`\_`\_baYaa`\_`a`aa^[]a]\_a\_]aa^\_\_`]\_\_\_¥  
@HWI-EAS443:3:29:487:952#0/1  
TTCCTTTGGCATATCCGCAAGCGATTTGCAGACAATGGAT  
+HWI-EAS443:3:29:487:952#0/1  
`b\_\_aTH`¥bbaaa`\_[aaa¥Z`a\_\_aa`\_`^`\_¥UV]QZX  
@HWI-EAS443:3:29:500:475#0/1  
GAAACTGTGATGAGAATGGGAGACCTTCACTACCTCCAGA  
+HWI-EAS443:3:29:500:475#0/1  
ab`\_`aab\_aaababa]aa`a`aaa\_a\_\_a`aa`^`^a`\_`\_`  
@HWI-EAS443:3:29:504:1012#0/1  
GAAACTGTGATGAGAATGGGAGACCTTCACTACCTCCAGA  
+HWI-EAS443:3:29:504:1012#0/1  
aabVaaa\_bbaa]\_Ra\_aa`[aaaa^`aaa`a`^`^a`V]  
@HWI-EAS443:3:29:518:1524#0/1  
GCCGCATTTCTTCAATTAACCACCTTATTTCTCAAATTT  
+HWI-EAS443:3:29:518:1524#0/1  
a\_a[][\_Y\_YZ`aY`V¥]\_]\_^`¥baY\_KZ]aYa\_\_\_]OHYR¥  
@HWI-EAS443:3:29:542:641#0/1  
GCCGCATTTCTTCAATTAACCACCTTATTTCTCAAATTT  
+HWI-EAS443:3:29:542:641#0/1  
aabb¥^`a^VaT^`WaW\_Y]a`a^^¥^¥\_\_\_]`Ya`\_S]Y[  
@HWI-EAS443:3:29:558:269#0/1  
GATGAGAATGGGAGACCTTCACTACCTCCAGAGCAGAAAT

+HWI-EAS443:3:29:558:269#0/1  
aaa`ab`abbaa`aa^^\_\_Za\_\_a]^\_\_U\_`\_`¥\_`^]\_^  
@HWI-EAS443:3:29:566:903#0/1  
GAAACTGTGATGAGAATGGGAGACCTTCACTACCTCCAGA  
+HWI-EAS443:3:29:566:903#0/1  
a`babb\_`bbaba`abaaaa`aa\_aaaaaabaaaaa``  
@HWI-EAS443:3:29:602:1066#0/1  
CTAAGGGCTTTCACTGAGGAGGGAGCAATAGTTGGAGAAA  
+HWI-EAS443:3:29:602:1066#0/1  
Y¥X¥W\_aYU`^bbb]¥R¥^a`a[Y[aaba^`S`\_J]`S\_]`  
@HWI-EAS443:3:29:610:147#0/1  
CGCTTGGAGAACTGTGATGAGAATGGGAGACCTTCACTA  
+HWI-EAS443:3:29:610:147#0/1  
ababa`^aba` `aab\_a`aa`a\_`aa`a\_`\_¥YWZ[`UZB  
@HWI-EAS443:3:29:764:1165#0/1  
GAGAATGGGAGACCTTCACTACCTCCAGAGCAGAAATGAA  
+HWI-EAS443:3:29:764:1165#0/1  
^W\_aaaaa¥]] [V¥` `aaa\_` [ `aa`aU` \_\_`¥¥\_\_` [\_  
@HWI-EAS443:3:29:76:1084#0/1  
CGCTTGGAGAACTGTGATGAGAATGGGAGACCTTCACTA  
+HWI-EAS443:3:29:76:1084#0/1  
aaa` `a`aaQZa\_aa¥`a^`¥`\_¥\_\_` `¥\_¥^`¥\_\_`^¥\_  
@HWI-EAS443:3:29:76:860#0/1  
ACCATTACCTTCTCTTCCAGGACATACTTATGAGGATGTC  
+HWI-EAS443:3:29:76:860#0/1  
^aa]aa[aaaaaaaa`aaaa\_aaa` `a\_¥\_[TX`^\_\_XZ  
@HWI-EAS443:3:29:783:927#0/1  
GCCGCATTTCTTCAATTAACCACCTTATTTCTCAAATTT  
+HWI-EAS443:3:29:783:927#0/1  
a\_a`P]RR^YY]YSS\_UV¥]^]RQTX]^]S]] ` [VSX[Z]  
@HWI-EAS443:3:29:790:1225#0/1  
GTCAGAAAGGTAGCGGAAGTAGGTACAGATGCAATTGTC  
+HWI-EAS443:3:29:790:1225#0/1  
aYaabab^bYK^`a`aa`\_a[a\_\_]\_\_`\_\_\_\_\_^\_`^` [Z  
@HWI-EAS443:3:29:824:1453#0/1  
GCCGCATTTCTTCAATTAACCACCTTATTTCTCAAATTT  
+HWI-EAS443:3:29:824:1453#0/1  
aV[X`\_V\_SSZb^`a¥U[ `T` `]WSHOX[P^XY¥I\_Y¥aB  
@HWI-EAS443:3:29:854:563#0/1  
TAAATAAGCTGAAACGAGAAAGCTCTTATCTCTTGTCTA  
+HWI-EAS443:3:29:854:563#0/1  
\_YRRYISabbaTYOH`a`RV^Y^]]R\_S`QUPZY`WXN\_B  
@HWI-EAS443:3:29:873:418#0/1  
GCCGCATTTCTTCAATTAACCACCTTATTTCTCAAATTT  
+HWI-EAS443:3:29:873:418#0/1  
aaaa\_aa\_\_a` ` `a\_aa\_a\_`\_`a`\_^`\_`\_\_a\_\_  
@HWI-EAS443:3:29:902:41#0/1  
GCGCGAAGTAGGTACAGATGCAATTGTCATTCTAAGTGTC  
+HWI-EAS443:3:29:902:41#0/1  
aaaYaYT` [ `a`X^^]]V\_\_YV^`]]V]^\_YU]\_^YWZYB

@HWI-EAS443:3:29:910:542#0/1  
GCCGCATTTCTTCAATTAACCACCTTATTTCTCAAATTT  
+HWI-EAS443:3:29:910:542#0/1  
aaaa`abaaa`\_\_`aaa\_¥a]^a\_`a`\_^a\_`^aa`\_  
@HWI-EAS443:3:29:933:1106#0/1  
AGAAACTGTGATGAGAATGGGAGACCTTCACTACCTCCAG  
+HWI-EAS443:3:29:933:1106#0/1  
Y\_¥WW\_¥\_\_Y`X`]aYT^aY[]aZ[U¥]R¥`^X[b¥[LO¥  
@HWI-EAS443:3:29:935:120#0/1  
TGAGAATGGGAGACCTTCACTACCTCCAGAGCAGAAATGA  
+HWI-EAS443:3:29:935:120#0/1  
ababaaaab\_\_a`^`\_¥`Q`^^R\_¥Z^a¥`\_]`WY¥^\_¥  
@HWI-EAS443:3:29:957:711#0/1  
CCGCATTTCTTCAATTAACCACCTTATTTCTCAAATTT  
+HWI-EAS443:3:29:957:711#0/1  
aaba`aaaabaaaaaa`^^^\_a`a`a`[aaaa\_aa\_\_  
@HWI-EAS443:3:29:970:195#0/1  
TTCTGACATGACCCTCGAGGAAATGTCACGAGACTGGTTC  
+HWI-EAS443:3:29:970:195#0/1  
a`a`\_`X]T0]ZVVU`QTZ¥\_]VZVR]V[]VXUW^^BBB  
@HWI-EAS443:3:2:1001:1104#0/1  
GAGAAACTGTGATGAGAATGGGAGACCTTCACTACCTCCA  
+HWI-EAS443:3:2:1001:1104#0/1  
a^aY\_a]\_`G]]`\_\_VQ]`¥]R^XYV\_WR]Y\_V00^YYY  
@HWI-EAS443:3:2:1053:680#0/1  
GCCGCATTTCTTCAATTAACCACCTTATTTCTCAAATTT  
+HWI-EAS443:3:2:1053:680#0/1  
aaab\_aaaa\_ba^`[a`a`Z`TR`a^aa`ZX`\_`¥]`\_`  
@HWI-EAS443:3:2:1064:1204#0/1  
GTCTCTGAAAATATACAGAGATTCGCTTGGGAGAACTGTG  
+HWI-EAS443:3:2:1064:1204#0/1  
\_PT`S\_¥X¥\_a^[ZLYYV\_X[MRaWZ^RZTULP¥W^BBB  
@HWI-EAS443:3:2:1091:1788#0/1  
ATTACACTGAAGTTTCGCTTTCAGTACTATGTTCTTTTCCA  
+HWI-EAS443:3:2:1091:1788#0/1  
]Z\_a]`][`¥]¥Y`\_¥]X\_`^\_]`\_`Y`P`^\_]`[R]  
@HWI-EAS443:3:2:1174:949#0/1  
AGAAACTGTGATGAGAATGGGAGACCTTCACTACCTCCAG  
+HWI-EAS443:3:2:1174:949#0/1  
aaaa¥Q\_a^a`ab][]^aaaa^a\_VY^\_\_`\_]\_T]]W]^`  
@HWI-EAS443:3:2:1177:704#0/1  
TGGGAAACAAATCGTGAATGGATCTTGAAGAGGAATCC  
+HWI-EAS443:3:2:1177:704#0/1  
abaaaaa`aaa\_a^aaa`aa```\_aaa\_\_^a`\_`\_^]U  
@HWI-EAS443:3:2:1188:1721#0/1  
GAGAAACTGTGATGAGAATGGGAGACCTTCACTACCTCCA  
+HWI-EAS443:3:2:1188:1721#0/1  
^^bbbbbabbaabbbbaaaaabaa`a``]aaa]a`][[]Z`  
@HWI-EAS443:3:2:128:569#0/1  
GCCGCATTTCTTCAATTAACCACCTTATTTCTCAAATTT

+HWI-EAS443:3:2:128:569#0/1  
a\_]UY]XNZXZT[YMKPZL[S^MPTQPTW\_WSTXIIHTUPZ  
@HWI-EAS443:3:2:1329:544#0/1  
AGATTACACTGAAGTTCGCTTTTCAGTACTATGTTCTTTTC  
+HWI-EAS443:3:2:1329:544#0/1  
ab^VZZZ\_¥^¥[Y^¥`Za`]^`^b\_¥JZYVb¥Q¥aaaaa[  
@HWI-EAS443:3:2:1333:762#0/1  
TGAGAATGGGAGACCTTCACTACCTCCAGAGCAGAAATGA  
+HWI-EAS443:3:2:1333:762#0/1  
aaa`\_\_`aa`\_a\_VX]]^`U¥\_X][ZR]^U\_NU\_VWY¥][  
@HWI-EAS443:3:2:1358:1800#0/1  
ACTGGTTCATGCTCATGCCTAGGCAAAAGATAATAGGCC  
+HWI-EAS443:3:2:1358:1800#0/1  
`ZaYSY]^aM`H]R^¥a[[]\_aY LX\_\_\_\_``]RZJ]aZ]SUU  
@HWI-EAS443:3:2:1369:1739#0/1  
GAAACTGTGATGAGAATGGGAGACCTTCACTACCTCCAGA  
+HWI-EAS443:3:2:1369:1739#0/1  
a\_`aab^Xba`[][^^^baaVX]\_R]^W`V^`GY\_GR¥PT  
@HWI-EAS443:3:2:136:940#0/1  
GTGATGAGAATGGGAGACCTTCACTACCTCCAGAGCAGAA  
+HWI-EAS443:3:2:136:940#0/1  
a\_aa`¥]a¥`Zb\_`¥^^a¥TZ]a¥[`YRXPPU\_TYQS^[U  
@HWI-EAS443:3:2:1370:256#0/1  
GAATGGGAGACCTTCACTACCTCCAGAGCAGAAATGAAAA  
+HWI-EAS443:3:2:1370:256#0/1  
aa]`bUa`a¥WS`¥^\_Ya\_WU^¥¥¥\_S\_WY^¥YU¥¥SWWY  
@HWI-EAS443:3:2:1371:403#0/1  
TGCCGCATTTCTTCAATTAACCACCTTATTTCTCAAATT  
+HWI-EAS443:3:2:1371:403#0/1  
aa\_\_babbbbaaa`aaaaa\_\_\_\_\_aaaaa^Wa^`]\_a\_  
@HWI-EAS443:3:2:137:191#0/1  
CGCATTTCTTCAATTAACCACCTTATTTCTCAAATTTCT  
+HWI-EAS443:3:2:137:191#0/1  
abbbbabababaaa`^a`baa`aaaa`a`^a\_aa`a\_a]`  
@HWI-EAS443:3:2:1422:1128#0/1  
GCCGCATTTCTTCAATTAACCACCTTATTTCTCAAATTT  
+HWI-EAS443:3:2:1422:1128#0/1  
abbb\_\_b`abb\_aaabbaa\_a^`\_`¥ab```\_aaa`abaa  
@HWI-EAS443:3:2:1438:1954#0/1  
GCCGCATTTCTTCAATTAACCACCTTATTTCTCAAATTT  
+HWI-EAS443:3:2:1438:1954#0/1  
a`¥a`aaaa\_aa^\_aa^a`^`\_ZW``\_a`]XUa]\_^^`^^  
@HWI-EAS443:3:2:1468:577#0/1  
GAAACTGTGATGAGAATGGGAGACCTTCACTACCTCCAGA  
+HWI-EAS443:3:2:1468:577#0/1  
`a`\_`aa^a]a`Z^W^\_`\_X`]]S^]\_V\_YYYYXV^X  
@HWI-EAS443:3:2:1516:283#0/1  
CTGTGCCGCATTTCTTCAATTAACCACCTTATTTCTCAA  
+HWI-EAS443:3:2:1516:283#0/1  
^\_[[`¥U¥]]\_`^aH^`]]`aaa\_]TY[Q\_`Y`][TRZ[\_\_\_

@HWI-EAS443:3:2:1549:749#0/1  
TGGGAAACAAATCGTGGAATGGATCTTGAAAGAGGAATCC  
+HWI-EAS443:3:2:1549:749#0/1  
aaaaaaaaVaa`\_\_a]`\_`\_aa[W^W`\_`\_¥V]^\_]^U^TQ  
@HWI-EAS443:3:2:1552:240#0/1  
CGCATTCTTCAATTAACCACCTTATTTCCCTCAAATTTCT  
+HWI-EAS443:3:2:1552:240#0/1  
`babbbb\_bbaabbabaab``bbbbabaab\_aa`bab¥a  
@HWI-EAS443:3:2:1660:911#0/1  
AGGCAACACCCTTGGCCTCGATATCGAAACAGCCACTCTT  
+HWI-EAS443:3:2:1660:911#0/1  
V`aaaaX`a`[¥a`]PZ[Ya\_a`a^^S`\_¥\_`SKRKPN^^  
@HWI-EAS443:3:2:1703:777#0/1  
GATTTCGCTTGGAGAACTGTGATGAGAATGGGAGACCTTC  
+HWI-EAS443:3:2:1703:777#0/1  
a^\_\_\_\_aa\_` `[¥\_[V^Z^`X\_R]]X^\_]Y¥TSWTGMWBB  
@HWI-EAS443:3:2:1707:1580#0/1  
ATGGTGAATTTCTCCAATTTGCTCCCTCCTCAGTGAA  
+HWI-EAS443:3:2:1707:1580#0/1  
[TYaYYbXT\_\_aRa]G]S\_a`aa^\_`S\_G>[]a\_^aR` `^  
@HWI-EAS443:3:2:1764:1112#0/1  
TGCCGCATTTCTTCAATTAACCACCTTATTTCCCTCAAATT  
+HWI-EAS443:3:2:1764:1112#0/1  
aa`\_aY`aaa^aaX`]aa`\_]\_]Sa`\_` `RW`Y]Y\_a^  
@HWI-EAS443:3:2:214:1083#0/1  
ACACTTAGAATGACAATTGCATCTGTACCTACTTCGCGCT  
+HWI-EAS443:3:2:214:1083#0/1  
``a]``aV¥\_Za]baba]bba`¥V[VY¥^a[[`aaa^a¥  
@HWI-EAS443:3:2:271:1928#0/1  
GCCGCATTTCTTCAATTAACCACCTTATTTCCCTCAAATTT  
+HWI-EAS443:3:2:271:1928#0/1  
``Q\_aaaa`\_baa^`aaaa\_\_aa`aaaaa\_`a`a\_aaa`  
@HWI-EAS443:3:2:288:272#0/1  
CTTGGAGAACTGTGATGAGAATGGGAGACCTTCACTACC  
+HWI-EAS443:3:2:288:272#0/1  
``aaa`a]\_\_¥`UPV^a\_aW`\_\_\_\_¥¥¥WWWUY^WW¥BB  
@HWI-EAS443:3:2:32:343#0/1  
GAAACTGTGATGAGAATGGGAGACCTTCACTACCTCCAGA  
+HWI-EAS443:3:2:32:343#0/1  
ababab`Tbaaa`¥F`ab¥R\_ba^Z[\_\_a^R\_UX]]]`a`  
@HWI-EAS443:3:2:379:1141#0/1  
GATGAGAATGGGAGACCTTCACTACCTCCAGAGCAGAAAT  
+HWI-EAS443:3:2:379:1141#0/1  
a^¥b`aYZ\_\_a¥U]LPUR\_U\_S`PG\_]S]`R\_]a^T¥U  
@HWI-EAS443:3:2:388:827#0/1  
AGAACTGTGATGAGAATGGGAGACCTTCACTACCTCCAG  
+HWI-EAS443:3:2:388:827#0/1  
a\_ZZXabbWa[`a^Saaa]a\_a`]a\_Z\_\_]¥aX]X]UU`  
@HWI-EAS443:3:2:406:1231#0/1  
GAAACTGTGATGAGAATGGGAGACCTTCACTACCTCCAGA

+HWI-EAS443:3:2:406:1231#0/1  
a`\_^VYaZa[aa]a[^`^a\_aY]X]]^]X\_[^]PUWVU]]Y  
@HWI-EAS443:3:2:465:591#0/1  
GAGATTCGCTTGGAGAACTGTGATGAGAATGGGAGACCT  
+HWI-EAS443:3:2:465:591#0/1  
\_a^aa`aba^abaa¥R`aaaP`\_`a]a]\_\_`\_]\_^N^  
@HWI-EAS443:3:2:499:1428#0/1  
CACGGTTCGAGTCTCTGAAAATATACAGAGATTCGCTTGG  
+HWI-EAS443:3:2:499:1428#0/1  
abT\_bWb`aaaa`^XZaa\_[]a`a\_[\_aa`a\_ZQaZR]]a  
@HWI-EAS443:3:2:518:1873#0/1  
GAAACTGTGATGAGAATGGGAGACCTTCACTACCTCCAGA  
+HWI-EAS443:3:2:518:1873#0/1  
Z`\_babaab¥bb\_baaa`aa]ab`\_a\_aba\_bG\_a^X`aa  
@HWI-EAS443:3:2:519:198#0/1  
GAATGGGAGACCTTCACTACCTCCAGAGCAGAAATGAAAA  
+HWI-EAS443:3:2:519:198#0/1  
aQ^a`^Ua¥WW^WZ¥WZ[TUUUYUWUUUV¥SWY¥WY¥WB  
@HWI-EAS443:3:2:565:1256#0/1  
GAATGGGAGACCTTCACTACCTCCAGAGCAGAAATGAAAA  
+HWI-EAS443:3:2:565:1256#0/1  
aaaaaa`^a`^]aa`]`aa¥¥a\_\_a`[`¥Za¥¥\_a¥¥^]¥  
@HWI-EAS443:3:2:566:431#0/1  
CAAATCGTGAATGGATCTTGAAAGAGGAATCCAGCGAGA  
+HWI-EAS443:3:2:566:431#0/1  
`a`Z`ababa]aaba`aabab`\_a]ab\_a``[U`a\_aa``  
@HWI-EAS443:3:2:584:742#0/1  
CCGCATTTCTTCAATTAACCACCTTATTTCTCAAATTC  
+HWI-EAS443:3:2:584:742#0/1  
¥T][SY\_YZH]PVPW^GWOYX]^`^\_¥\_^W¥\_]`^WW^¥¥Y  
@HWI-EAS443:3:2:595:1605#0/1  
AGAACTGTGATGAGAATGGGAGACCTTCACTACCTCCAG  
+HWI-EAS443:3:2:595:1605#0/1  
^`Y]\_]ba[aab`a```\_a`a\_a`]U\_a[]U]aXW\_\_V^`  
@HWI-EAS443:3:2:60:691#0/1  
TGAGAATGGGAGACCTTCACTACCTCCAGAGCAGAAATGA  
+HWI-EAS443:3:2:60:691#0/1  
a^aaaa\_aa`\_a]S```^a\_a\_\_^]^[`\_`\_a]\_\_\_^`\_a¥  
@HWI-EAS443:3:2:683:1476#0/1  
ATCGGTTAAAGATTACTGAAGTTCGCTTTCAGTACTAT  
+HWI-EAS443:3:2:683:1476#0/1  
a]``b\_b^`aa\_Z`H`a^\_Z]aY\_\_a^^a`P^^[^]\_`  
@HWI-EAS443:3:2:685:810#0/1  
GAAACTGTGATGAGAATGGGAGACCTTCACTACCTCCAGA  
+HWI-EAS443:3:2:685:810#0/1  
H\_bbaba`b`bbbabab]abaa\_ba`a\_abVVa\_X\_ba  
@HWI-EAS443:3:2:687:1030#0/1  
CAGAAAGGTAGCGGAAGTAGGTACAGATGCAATTGTCAT  
+HWI-EAS443:3:2:687:1030#0/1  
ab`aab`^aaabaa`\_a]`aa]a^aaa`\_\_`\_aaaX\_\_



@HWI-EAS443:3:2:690:1638#0/1  
CTTGGAGAACTGTGATGAGAATGGGAGACCTTCACTACC  
+HWI-EAS443:3:2:690:1638#0/1  
]bbbb[[]W]\_aYX\_\_`bbba]a\_`] `ba[ `a][aVabSL  
@HWI-EAS443:3:2:701:287#0/1  
GAAACTGTGATGAGAATGGGAGACCTTCACTACCTCCAGA  
+HWI-EAS443:3:2:701:287#0/1  
aaa]^]a^a`a`^aY]` `a\_X\_X]V\_\_^^V]]YXXRXYXY  
@HWI-EAS443:3:2:733:1996#0/1  
TGTCGCTTTCAATCTGTGCCGATTTCTTCAATTAACCAC  
+HWI-EAS443:3:2:733:1996#0/1  
aaY\_a]a\_aW^\_aW^`¥aU\_bYa`\_a^aaX]\_`\_`aWU`Z  
@HWI-EAS443:3:2:802:1856#0/1  
GGAGGGAGCAATAGTTGGAGAAATTTCACTACCTTCT  
+HWI-EAS443:3:2:802:1856#0/1  
aaW`aaH]baYa]a^Ta\_^a[a\_L¥\_GZFQaSRaZHZRJW  
@HWI-EAS443:3:2:836:748#0/1  
AGAAACTGTGATGAGAATGGGAGACCTTCACTACCTCCAG  
+HWI-EAS443:3:2:836:748#0/1  
^` `^aaa^]b¥^¥]ba`aba]]a`Y]`a\_a\_\_`S¥aP^^`  
@HWI-EAS443:3:2:86:496#0/1  
GCCGCTTTCTTCAATTAACCACCTTATTTCTCAAATTT  
+HWI-EAS443:3:2:86:496#0/1  
abbababbbababbab`aaa`bbaaabbba^abaa`\_` [ `  
@HWI-EAS443:3:2:876:1371#0/1  
GAGAATGGGAGACCTTCACTACCTCCAGAGCAGAAATGAA  
+HWI-EAS443:3:2:876:1371#0/1  
aa¥L`a]aR^`a]U¥\_\_aaa` `[ \_WY`\_W\_¥[]\_TUWa¥\_  
@HWI-EAS443:3:2:886:1007#0/1  
GAATGGGAGACCTTCACTACCTCCAGAGCAGAAATGAAAA  
+HWI-EAS443:3:2:886:1007#0/1  
a\_V\_`VOJYPW^`¥¥XRQXZMX¥¥YYYZQ^^YUP^UUURG  
@HWI-EAS443:3:2:908:391#0/1  
AGAAACTGTGATGAGAATGGGAGACCTTCACTACCTCCAG  
+HWI-EAS443:3:2:908:391#0/1  
abY]¥]b\_X¥X` [^b\_` `baa\_b^U^` `[a\_`aY^\_¥aZ\_  
@HWI-EAS443:3:30:1075:370#0/1  
AGAGATTCGCTTGGAGAACTGTGATGAGAATGGGAGACC  
+HWI-EAS443:3:30:1075:370#0/1  
abab`^a`aaa`ba\_`\_aa]`a]a`\_`\_]\_Y\_^\_^]X\_^N^  
@HWI-EAS443:3:30:1087:1602#0/1  
GAAACTGTGATGAGAATGGGAGACCTTCACTACCTCCAGA  
+HWI-EAS443:3:30:1087:1602#0/1  
GZVa\_`abbbbaaab`¥a^aVY`¥^b`bbbbbbaab`b  
@HWI-EAS443:3:30:1110:734#0/1  
CTCTGAAAATATACAGAGATTCGCTTGGAGAACTGTGAT  
+HWI-EAS443:3:30:1110:734#0/1  
ababaabbbbbbabbbbbbba`bbabaaaabaaaaaY]\_a  
@HWI-EAS443:3:30:1113:770#0/1  
GTCGCTTTCAATCTGTGCCGATTTCTTCAATTAACCACC





+HWI-EAS443:3:30:1744:1083#0/1  
^^`aa`¥`¥a[aW[Zzb` `bVb`a`\_`ZV`aa]HUaIHRaa  
@HWI-EAS443:3:30:1760:1670#0/1  
GAGAATGGGAGACCTTCACTACCTCCAGAGCAGAAATGAA  
+HWI-EAS443:3:30:1760:1670#0/1  
aaa^a` `b`aaaZ[ZZ\_aXa[[T^¥] ` \_V\_Z` `S¥\_U\_W[  
@HWI-EAS443:3:30:177:310#0/1  
ACACGGTTTCGAGTCTCTGAAAATATACAGAGATTCGCTTG  
+HWI-EAS443:3:30:177:310#0/1  
abaaaa] `[^]a`aa\_]Z^W^[[ ` \_ ` \_SP^SZ\_]T^ZZ¥  
@HWI-EAS443:3:30:1784:1945#0/1  
TGCCGCATTTCTTCAATTAACCACCTTATTTCCCTCAAATT  
+HWI-EAS443:3:30:1784:1945#0/1  
a` ` \_^^^X])aa¥bZaZ\_b[aaZP\_\_[^[a\_\_a^` \_\_¥Z  
@HWI-EAS443:3:30:187:1948#0/1  
CTTGAGAAACTGTGATGAGAATGGGAGACCTTCACTACC  
+HWI-EAS443:3:30:187:1948#0/1  
a\_\_^]WW¥][ ` \_\_W[[[YY[GUYRTTY^` \_ZV^[ZUZ]U  
@HWI-EAS443:3:30:226:558#0/1  
AGAAACTGTGATGAGAATGGGAGACCTTCACTACCTCCAG  
+HWI-EAS443:3:30:226:558#0/1  
a[YZO¥`ZW^^][S^[[ ` [¥LUQY] ]^^^YY¥VYS]TY  
@HWI-EAS443:3:30:235:1364#0/1  
TCTCGCTGGATTCTCTTTCAAGATCCATTCCACGATTTG  
+HWI-EAS443:3:30:235:1364#0/1  
Z\_baZa¥ZW¥U[bbaa^`abbb]^T\_[X]^^[J]UZ` ` ` \_  
@HWI-EAS443:3:30:279:1758#0/1  
GAATGGGAGACCTTCACTACCTCCAGAGCAGAAATGAAAA  
+HWI-EAS443:3:30:279:1758#0/1  
a^` ` `a[aaaab¥a^^a`¥`ba` ` ` `U] ` ^ ` ` ¥S ` ` ` [^\_  
@HWI-EAS443:3:30:298:386#0/1  
AGATTACACTGAAGTTCGCTTTTCAGTACTATGTTCTTTTC  
+HWI-EAS443:3:30:298:386#0/1  
a¥Sabb` `aab` ` `a`abbab\_aa`¥`\_a`a]abaaa\_b\_\_a  
@HWI-EAS443:3:30:308:1617#0/1  
CAACTGCATTTTTGACATCCTCATAAGTATGTCCTGGAAG  
+HWI-EAS443:3:30:308:1617#0/1  
aaab`¥ba`aa\_\_YWa^^`a\_a\_^`\_[X` \_\_Ua`^^]^]¥  
@HWI-EAS443:3:30:30:1641#0/1  
GTCAGAAAGGTAGCGGAAGTAGGTACAGATGCAATTGTC  
+HWI-EAS443:3:30:30:1641#0/1  
a`\_]V¥YU¥ZR]^ba`a^Y`^` `a])` [ `a[ `aZ] ` ]^ [^  
@HWI-EAS443:3:30:333:1437#0/1  
AGGCAACACCCTTGGCCTCGATATCGAAACAGCCACTCTT  
+HWI-EAS443:3:30:333:1437#0/1  
aaaaaa^[aa` [\_ [] \_a\_a\_^`a\_` \_[\_[[Z^aXU¥UNBB  
@HWI-EAS443:3:30:334:1958#0/1  
GCCGCATTTCTTCAATTAACCACCTTATTTCCCTCAAATTT  
+HWI-EAS443:3:30:334:1958#0/1  
aba¥bbV]SWFRb¥`RVX\_b^bbaa¥b¥J`aaTb^VbaSF

@HWI-EAS443:3:30:342:1090#0/1  
ATCGGTAAAGATTACACTGAAGTTCGCTTTCAGTACTAT  
+HWI-EAS443:3:30:342:1090#0/1  
^\_aa^[aa¥[^]^\_aYaa\_\_Z\_Z^Z¥`\_a`[\_Y^]]\_  
@HWI-EAS443:3:30:350:1617#0/1  
CAGAGATTGCTTGGAGAACTGTGATGAGAATGGGAGAC  
+HWI-EAS443:3:30:350:1617#0/1  
aa[```a\_a\_a\_] [W````]`\_^\_V^¥UV[\_^\_]PZ[XRUV  
@HWI-EAS443:3:30:352:864#0/1  
GCCGCATTTCTTCAATTAACCACCTTATTTCCCTCAAATTT  
+HWI-EAS443:3:30:352:864#0/1  
abaaaaaaaaa`\_]aaaa`aaaaaaaa`aaaba^`a\_^  
@HWI-EAS443:3:30:356:48#0/1  
TGAGAATGGGAGACCTTCACTACCTCCAGAGCAGAAATGA  
+HWI-EAS443:3:30:356:48#0/1  
ab¥b`a`a`^^\_aaa`a\_[\_`a`\_]\_a[TT[`XSYZ[Z\_^  
@HWI-EAS443:3:30:375:591#0/1  
ATGAGAATGGGAGACCTTCACTACCTCCAGAGCAGAAATG  
+HWI-EAS443:3:30:375:591#0/1  
aaaaba`aba`a`aa¥aaa`a`a`aaa`[X`\_]\_U^]`  
@HWI-EAS443:3:30:376:213#0/1  
GAGAACTGTGATGAGAATGGGAGACCTTCACTACCTCCA  
+HWI-EAS443:3:30:376:213#0/1  
aa`^¥`a`\_]a\_``\_Ya\_a`\_¥\_`^`^]`^`^V]X]^YYX  
@HWI-EAS443:3:30:388:50#0/1  
TGCCGCATTTCTTCAATTAACCACCTTATTTCCCTCAAATT  
+HWI-EAS443:3:30:388:50#0/1  
¥``^a^XX¥a\_X^b^`b\_KYYW\_¥aa`aaaaaaZ[[]]  
@HWI-EAS443:3:30:405:192#0/1  
GAAACTGTGATGAGAATGGGAGACCTTCACTACCTCCAGA  
+HWI-EAS443:3:30:405:192#0/1  
\_aTab`b``[aa`a\_\_a`a\_S]`]a`^W^^X¥^VU]] [YS  
@HWI-EAS443:3:30:426:693#0/1  
GAATGGAATGGTAACACGGTTCGAGTCTCTGAAAATATAC  
+HWI-EAS443:3:30:426:693#0/1  
aa`aaa\_`aba[abaaa`R]aa``]T`]``^¥]`\_ [¥^\_^  
@HWI-EAS443:3:30:429:1743#0/1  
GCCGCATTTCTTCAATTAACCACCTTATTTCCCTCAAATTT  
+HWI-EAS443:3:30:429:1743#0/1  
abbaba`aababbbba`bbbbbaaaabbaaababbaa\_`  
@HWI-EAS443:3:30:489:49#0/1  
GCCGCATTTCTTCAATTAACCACCTTATTTCCCTCAAATTT  
+HWI-EAS443:3:30:489:49#0/1  
a`\_aaabaaaba¥a`aaaaaa``\_aab`\_`a`\_`\_a``]  
@HWI-EAS443:3:30:490:642#0/1  
GTCGCTTTCAATCTGTGCCGCATTTCTTCAATTAACCACC  
+HWI-EAS443:3:30:490:642#0/1  
a]¥HY\_aa^SVXWTYOP¥XX^¥[P][VZ`XZWXV[Y\_]X[  
@HWI-EAS443:3:30:514:771#0/1  
GGTTAATTGAAGAAATGCCGCACAGATTGAAAGCGACAGA

+HWI-EAS443:3:30:514:771#0/1  
\_b\_` `[a\_aaaaT^` [a`aa¥aaaaa\_aa` `¥a` `\_] ^\_`  
@HWI-EAS443:3:30:535:958#0/1  
CTTTTGCCTAGGCATGAGCATGAACCACTCTCGTGACATT  
+HWI-EAS443:3:30:535:958#0/1  
aZabab` aZ` b] a] Zaaa` ^aX^a\_S] a\_aa` [] `U\_Z] H  
@HWI-EAS443:3:30:574:1440#0/1  
GAGAATGGGAGACCTTCACTACCTCCAGAGCAGAAATGAA  
+HWI-EAS443:3:30:574:1440#0/1  
Za¥aaabaaaaaab\_\_aba` aaaXa\_^^ [a\_^a` ¥] ` \_\_\_\_  
@HWI-EAS443:3:30:588:1194#0/1  
CTGTGATGAGAATGGGAGACCTTCACTACCTCCAGAGCAG  
+HWI-EAS443:3:30:588:1194#0/1  
a` `aaabb^bT\_aaaaa` a` `aaaa\_a] \_\_ `a` \_X\_\_ ^^  
@HWI-EAS443:3:30:638:1804#0/1  
GTCGCTTCAATCTGTGCCGATTTCTTCAATTAACCACC  
+HWI-EAS443:3:30:638:1804#0/1  
aabab` aabab` b^ [Z [ba\_aaa\_aa` aaaaa^\_a^^aY [  
@HWI-EAS443:3:30:648:146#0/1  
CTCTGAAAATATACAGAGATTCGCTTGGAGAACTGTGAT  
+HWI-EAS443:3:30:648:146#0/1  
aaaaaaaaaaaaabab` a` a\_ ` ` \_a\_\_ ] \_\_ [ \_ ] Z\_ ^^ \_X^XZ  
@HWI-EAS443:3:30:687:402#0/1  
TGAGAATGGGAGACCTTCACTACCTCCAGAGCAGAAATGA  
+HWI-EAS443:3:30:687:402#0/1  
abaaaabbbbaaaaaaa` a` aa\_] ^\_^` a\_ ` ` \_a^^ ` ` \_`  
@HWI-EAS443:3:30:694:536#0/1  
GGAGAACTGTGATGAGAATGGGAGACCTTCACTACCTCC  
+HWI-EAS443:3:30:694:536#0/1  
aaaa` \_a` ab^` aa\_ ^a¥` `a\_` `R¥\_ ^\_ ^a^ [ ^XZ^U ]  
@HWI-EAS443:3:30:715:158#0/1  
GAAAGCTCTTATCTCTTGTCTACTTCAAGCAGTAGTTGT  
+HWI-EAS443:3:30:715:158#0/1  
aaaabaaaababaaaabb` aaaa` aaaaaYaa] \_ ` ^a\_ ]  
@HWI-EAS443:3:30:740:1131#0/1  
CGCATTTCTTCAATTAACCACCTTATTTCTCAAATTTCT  
+HWI-EAS443:3:30:740:1131#0/1  
aab` ababbbabbbabb` ` abbbbaabaabbaaaaWa  
@HWI-EAS443:3:30:740:350#0/1  
AGAAACTGTGATGAGAATGGGAGACCTTCACTACCTCCAG  
+HWI-EAS443:3:30:740:350#0/1  
aaaaa` aa\_b` aaaa\_a` a` a] ` ¥U\_ ` \_\_a^\_ ` ^¥^ ] ¥^\_  
@HWI-EAS443:3:30:741:1040#0/1  
GAATGGGAGACCTTCACTACCTCCAGAGCAGAAATGAAAA  
+HWI-EAS443:3:30:741:1040#0/1  
\_a` [aa\_U\_ ` \_a\_\_aa\_\_a\_ [ ] ^ ` \_a\_a\_ ` ` \_^ ` \_\_\_\_ ^^Z  
@HWI-EAS443:3:30:748:267#0/1  
TGGGAAACAAATCGTGGAATGGATCTTGAAAGAGGAATCC  
+HWI-EAS443:3:30:748:267#0/1  
abbaabbbbabbbb` abaaaba\_a` bbbbaababba` aW]

@HWI-EAS443:3:30:760:95#0/1  
TGATGAGAATGGGAGACCTTCACTACCTCCAGAGCAGAAA  
+HWI-EAS443:3:30:760:95#0/1  
aa\_`aa`aaaa^a\_\_]\_\_^\_X\_]^X]YX¥` ]`XX\_UYX  
@HWI-EAS443:3:30:782:464#0/1  
AGAAACTGTGATGAGAATGGGAGACCTTCACTACCTCCAG  
+HWI-EAS443:3:30:782:464#0/1  
\_bba^b¥`ZWZaa\_Z\_]\_a^\_V[VU]¥¥¥TYaaMF¥LJ[]  
@HWI-EAS443:3:30:838:1762#0/1  
AAAATATACAGAGATTGCTTGGAGAACTGTGATGAGAA  
+HWI-EAS443:3:30:838:1762#0/1  
W\_bb`¥S^baabbbbaa\_bWba\_¥`b]b]abM^ba`baaa  
@HWI-EAS443:3:30:857:1676#0/1  
GCCGCATTTCTTCAATTAACCACCTTATTTCTCAAATTT  
+HWI-EAS443:3:30:857:1676#0/1  
ZaaTaYXXY\_^]ba^^Y^`^aa`a`ba\_]a`aaa\_aa]  
@HWI-EAS443:3:30:888:356#0/1  
CGCATTTCTTCAATTAACCACCTTATTTCTCAAATTTCT  
+HWI-EAS443:3:30:888:356#0/1  
L[S\_bbbbaX`bbb\_bbb\_bab^bbb`\_aabbbbbbbaa[`  
@HWI-EAS443:3:30:890:1226#0/1  
AGAAACTGTGATGAGAATGGGAGACCTTCACTACCTCCAG  
+HWI-EAS443:3:30:890:1226#0/1  
Xaabaa`bVZXaa`aa\_aaaa\_a\_aaa`\_a\_a^[Y\_Z¥]  
@HWI-EAS443:3:30:964:780#0/1  
AGAAACTGTGATGAGAATGGGAGACCTTCACTACCTCCAG  
+HWI-EAS443:3:30:964:780#0/1  
aaa`a`aa[`\_\_\_\_]¥W¥Z^VWU\_NY^\_X¥YMW\_]V]XY]  
@HWI-EAS443:3:30:976:1306#0/1  
TGAGAATGGGAGACCTTCACTACCTCCAGAGCAGAAATGA  
+HWI-EAS443:3:30:976:1306#0/1  
]bba`^a^^¥]^aaa`]aa`V]aa\_aX\_a`baa\_\_\_\_`\_`  
@HWI-EAS443:3:31:1012:961#0/1  
GTCGCTTTCAATCTGTGCCGCATTTCTTCAATTAACCACC  
+HWI-EAS443:3:31:1012:961#0/1  
`^^X\_\_\_\_`a`^`\_]W¥¥¥`XX^`^^^W`¥Y¥[^[X\_`^U  
@HWI-EAS443:3:31:1019:434#0/1  
GAAACTGTGATGAGAATGGGAGACCTTCACTACCTCCAGA  
+HWI-EAS443:3:31:1019:434#0/1  
aaW^¥ba]ba]ZZ`\_aab`[ZaaZR\_\_aa\_aZN¥`[Y`a^  
@HWI-EAS443:3:31:1021:244#0/1  
CATAAATGTTATTTGTTGAAACTATTCTCTGTGCTTTC  
+HWI-EAS443:3:31:1021:244#0/1  
`bbbbabbbbabbbbabbbbababbbbaabbabababab\_  
@HWI-EAS443:3:31:1047:1549#0/1  
GAAACTGTGATGAGAATGGGAGACCTTCACTACCTCCAGA  
+HWI-EAS443:3:31:1047:1549#0/1  
[^bba`^]`a`¥ZZ`^Z`aZZ\_R]Z]\_ab]Xa]\_X]baa]  
@HWI-EAS443:3:31:1059:560#0/1  
GAAACTGTGATGAGAATGGGAGACCTTCACTACCTCCAGA

+HWI-EAS443:3:31:1059:560#0/1  
``bab^¥babbbaaaaa`Z\_aa\_aaaa`a\_\_`aaaaX  
@HWI-EAS443:3:31:1105:226#0/1  
GAGAACTGTGATGAGAATGGGAGACCTTCACTACCTCCA  
+HWI-EAS443:3:31:1105:226#0/1  
abbbab`bb`aabb]aa\_ab]a\_aaW`a`a¥a`USa][Z  
@HWI-EAS443:3:31:1105:866#0/1  
CTTGGAGAACTGTGATGAGAATGGGAGACCTTCACTACC  
+HWI-EAS443:3:31:1105:866#0/1  
aabaabb`[`abb`babaabaaaa`\_ba\_aaaa`^aa\_^  
@HWI-EAS443:3:31:1139:1256#0/1  
TGCCGCATTTCTTCAATTAACCACCTTATTTCTCAAATT  
+HWI-EAS443:3:31:1139:1256#0/1  
``]Y]bbaX`b¥b\_Q¥S¥^bY\_ba\_¥W¥^a\_a`[b```[^  
@HWI-EAS443:3:31:1181:790#0/1  
AGAACTGTGATGAGAATGGGAGACCTTCACTACCTCCAG  
+HWI-EAS443:3:31:1181:790#0/1  
^^^aa`abY\_N¥aYa`\_aaa\_Wa``\_a``\_\_]\_]`[Y\_\_  
@HWI-EAS443:3:31:1204:340#0/1  
TGAGAATGGGAGACCTTCACTACCTCCAGCAGAAATGA  
+HWI-EAS443:3:31:1204:340#0/1  
a^aaaaabaa`a^^\_aa`aa^`YY`\_`\_a`\_]a\_\_]a`Z  
@HWI-EAS443:3:31:1233:660#0/1  
GCGCGAAGTAGGTACAGATGCAATTGTCATTCTAAGTGTC  
+HWI-EAS443:3:31:1233:660#0/1  
a\_aP`WHUZ^Ya^a`\_]UYVUVX`^XU[[ZUV][V¥Y\_VU  
@HWI-EAS443:3:31:1292:1150#0/1  
AGAACTGTGATGAGAATGGGAGACCTTCACTACCTCCAG  
+HWI-EAS443:3:31:1292:1150#0/1  
ababbaabVaaaa`a\_\_aaa`\_aa]]^`a[^`\_\_^^[KX  
@HWI-EAS443:3:31:1327:1050#0/1  
GTCGCTTTCAATCTGTGCCGATTTCTTCAATTAACCACC  
+HWI-EAS443:3:31:1327:1050#0/1  
V\_^`aZR`^aa¥`^YU\_\_^Z]Yaa¥a\_T¥b\_^\_a^RU^`  
@HWI-EAS443:3:31:1347:238#0/1  
GAAACTGTGATGAGAATGGGAGACCTTCACTACCTCCAGA  
+HWI-EAS443:3:31:1347:238#0/1  
]ababababababbaabaa`b\_a^`a¥a\_\_a¥`\_\_`U  
@HWI-EAS443:3:31:1373:215#0/1  
TGTCGCTTTCAATCTGTGCCGATTTCTTCAATTAACCAC  
+HWI-EAS443:3:31:1373:215#0/1  
aaWaa^[aa\_a``aa]^`^T\_a\_a]aZY\_]a\_\_\_\_]Y\_Y  
@HWI-EAS443:3:31:1401:518#0/1  
AGAGAAGGTAATGGTGAAATTTCTCCAATATTGCTCCCT  
+HWI-EAS443:3:31:1401:518#0/1  
``abbabb`aa`[Z¥a]aa^abaa\_a`aWaaaa^[X\_aa`  
@HWI-EAS443:3:31:1410:609#0/1  
CGCTTGGAGAACTGTGATGAGAATGGGAGACCTTCACTA  
+HWI-EAS443:3:31:1410:609#0/1  
aba\_aba`\_`baabb\_a`aa\_a^`\_a^Y\_`V[a^\_a]^`^



@HWI-EAS443:3:31:1413:419#0/1  
AGAAACTGTGATGAGAATGGGAGACCTTCACTACCTCCAG  
+HWI-EAS443:3:31:1413:419#0/1  
abbbb`ab`a`ab`aaaa`aa[`ZW\_aaYa\_aa`]\_a[a\_  
@HWI-EAS443:3:31:1428:666#0/1  
AGAAACTGTGATGAGAATGGGAGACCTTCACTACCTCCAG  
+HWI-EAS443:3:31:1428:666#0/1  
ab^Z\_a\_W]ba]bXbaaa\_baaa^LY`S^]ZaTNLZ]SY\_  
@HWI-EAS443:3:31:1463:1897#0/1  
GAAAATATACAGAGATTCGCTTGGAGAACTGTGATGAGA  
+HWI-EAS443:3:31:1463:1897#0/1  
abaabbb`baaaaaa`abba`^\_]`aaaaXa^\_a\_a^  
@HWI-EAS443:3:31:1486:1501#0/1  
AATAAGCTGAAACGAGAAAGCTTATCTCTTGTCTACT  
+HWI-EAS443:3:31:1486:1501#0/1  
abbabbbabbbbababbaa`babaababaaaaaaaaa\_  
@HWI-EAS443:3:31:1488:1931#0/1  
AAACTGTGATGAGAATGGGAGACCTTCACTACCTCCAGAG  
+HWI-EAS443:3:31:1488:1931#0/1  
aaa\_aaZ`a`\_`a`¥]\_]Y\_^]a]\_`YY]UX^^][  
@HWI-EAS443:3:31:1491:1026#0/1  
GATGAGAATGGGAGACCTTCACTACCTCCAGAGCAGAAAT  
+HWI-EAS443:3:31:1491:1026#0/1  
aaabab\_\_baXZT\_]a[\_YVZ\_\_aXW¥Z[¥`W¥¥\_\_U[\_X  
@HWI-EAS443:3:31:1520:927#0/1  
TGAGAATGGGAGACCTTCACTACCTCCAGAGCAGAAATGA  
+HWI-EAS443:3:31:1520:927#0/1  
[a]baaabbaT[W`Y\_aaa`a`\_JZYXaa¥a\_Z`R[\_a`G  
@HWI-EAS443:3:31:1522:19#0/1  
GAGAGCAATTGGGACAGAAATTTGAGGAAATAAGGTGGTT  
+HWI-EAS443:3:31:1522:19#0/1  
`abab^]]^bb`a^`\_a^¥abaa]ba¥a\_a\_\_aaV``]]  
@HWI-EAS443:3:31:1523:1868#0/1  
GTCGCTTTCAATCTGTGCCGATTTCTTCAATTAACCCACC  
+HWI-EAS443:3:31:1523:1868#0/1  
aS`J^\_SaWO^P]00W`^X[PVX¥U]Z]\_V¥Z]^XZ^¥^W  
@HWI-EAS443:3:31:1534:1326#0/1  
GCCGCATTTCTTCAATTAACCCACCTTATTTCTCAAATTT  
+HWI-EAS443:3:31:1534:1326#0/1  
S\_bbb`bb^^ababbbbbb\_]^^`bbaba^XZbbbabaa  
@HWI-EAS443:3:31:1540:1504#0/1  
GGAGAACTGTGATGAGAATGGGAGACCTTCACTACCTCC  
+HWI-EAS443:3:31:1540:1504#0/1  
\_\_YTX]bWJQ[\_[\_UROUa^]ZXL]NVZROXNT\_¥VV]G  
@HWI-EAS443:3:31:1584:501#0/1  
GCCGCATTTCTTCAATTAACCCACCTTATTTCTCAAATTT  
+HWI-EAS443:3:31:1584:501#0/1  
a\_aa¥aaaa^aa\_\_a\_\_a\_\_[\_`\_``aaaaZ^`]VX``^]  
@HWI-EAS443:3:31:1603:1105#0/1  
AGAAACTGTGATGAGAATGGGAGACCTTCACTACCTCCAG

+HWI-EAS443:3:31:1603:1105#0/1  
]]Va\_`abLb^`b\_b\_aab``Y`]]a\_`\_aSW^YW[ZU\_]  
@HWI-EAS443:3:31:1639:114#0/1  
TGTGATGAGAATGGGAGACCTTCACTACCTCCAGAGCAGA  
+HWI-EAS443:3:31:1639:114#0/1  
`bababb`b\_`abbb``ZZ¥``aPV]ZR^UU]`X]U^`U  
@HWI-EAS443:3:31:1643:331#0/1  
CGCATTCTTCAATTAACCACCTTATTTCTCAAATTTCT  
+HWI-EAS443:3:31:1643:331#0/1  
ab^^babaaa\_aabaaba`a\_\_ba\_aaa`^a]aa`aaa^^  
@HWI-EAS443:3:31:1646:1497#0/1  
GTTTCGAACTATTCTCTGTCGCTTCAATCTGTGCCGCAT  
+HWI-EAS443:3:31:1646:1497#0/1  
Kb\_\_baaaVabab]babb^bba^bbbaaba\_aaaZa\_K¥`  
@HWI-EAS443:3:31:1659:1798#0/1  
ATGAGAATGGGAGACCTTCACTACCTCCAGAGCAGAAATG  
+HWI-EAS443:3:31:1659:1798#0/1  
a\_Y\_`ababa]bbaaaa`ab\_\_`]Q]^\_]`[\_`U\_a^\_\_^W  
@HWI-EAS443:3:31:166:2005#0/1  
GAAACTGTGATGAGAATGGGAGACCTTCACTACCTCCAGA  
+HWI-EAS443:3:31:166:2005#0/1  
¥W\_¥abTUabaaUba¥\_[ZVa]a`]a\_bQb]a``PaaaW\_  
@HWI-EAS443:3:31:168:1172#0/1  
TGCCGCATTTCTTCAATTAACCACCTTATTTCTCAAATT  
+HWI-EAS443:3:31:168:1172#0/1  
aab`\_aZ¥ababbba^aa\_V`bbbbba^`aabbabb`[aa  
@HWI-EAS443:3:31:1741:1190#0/1  
GAAACTGTGATGAGAATGGGAGACCTTCACTACCTCCAGA  
+HWI-EAS443:3:31:1741:1190#0/1  
]A¥abb`a`abbaaaa`b`b]]\_[]aaaa^Y\_^]aa[  
@HWI-EAS443:3:31:189:1655#0/1  
CTGTGATGAGAATGGGAGACCTTCACTACCTCCAGAGCAG  
+HWI-EAS443:3:31:189:1655#0/1  
abaa`Wabbaabaaaa[\_\_baaabbba`abaaab`aaaaa  
@HWI-EAS443:3:31:18:606#0/1  
GTCTCTGAAAATATACAGAGATTCGCTTGAGAACTGTG  
+HWI-EAS443:3:31:18:606#0/1  
a`aW\_\_`MTX[XYT[YVVOVZ[U^`^UZNQXZMZ[VODI  
@HWI-EAS443:3:31:194:120#0/1  
TGCCGCATTTCTTCAATTAACCACCTTATTTCTCAAATT  
+HWI-EAS443:3:31:194:120#0/1  
aaabbba`aaab`aaaaa\_`aa`aa\_aa``a`\_a\_`a\_\_  
@HWI-EAS443:3:31:217:96#0/1  
GCCGCATTTCTTCAATTAACCACCTTATTTCTCAAATTT  
+HWI-EAS443:3:31:217:96#0/1  
aTbab`bbaabbaaaaa`a``\_a\_aa`aa``\_a`a``a`a  
@HWI-EAS443:3:31:370:926#0/1  
CCGCATTTCTTCAATTAACCACCTTATTTCTCAAATTT  
+HWI-EAS443:3:31:370:926#0/1  
aa````\_]a`a]^`a`aW`^^`a[``\_][^`a`\_]Q]ZY]\_



+HWI-EAS443:3:31:726:1957#0/1  
S`W00[UX]^XZ\_X\_Vba^]¥]\_T^\_WU]]¥XLTTYL¥a  
@HWI-EAS443:3:31:732:1552#0/1  
AGAATGGGAGACCTTCACTACCTCCAGAGCAGAAATGAAA  
+HWI-EAS443:3:31:732:1552#0/1  
aaa`a`a]^]aaaaabaaaa`\_`a`\_\_a`a\_[`\_`\_`\_`  
@HWI-EAS443:3:31:732:1845#0/1  
GATGAGAATGGGAGACCTTCACTACCTCCAGAGCAGAAAT  
+HWI-EAS443:3:31:732:1845#0/1  
]bb]]abb`\_aaabbaba`bbbab`b^bbaaa\_bb]\_\_aa  
@HWI-EAS443:3:31:738:1275#0/1  
GCATCTGTACCTACTTCGCGCTACCTTTCTGACATGACCC  
+HWI-EAS443:3:31:738:1275#0/1  
`aZI¥ZIKZaaaa^S]R\_R`^W\_I¥Y[aZ`^PS¥`^ZJS  
@HWI-EAS443:3:31:785:465#0/1  
CTCTGAAAATATACAGAGATTCGCTTGGAGAACTGTGAT  
+HWI-EAS443:3:31:785:465#0/1  
aaaaba`\_abaaaaaaaa\_aa\_aa`\_aa\_a]\_^W^aR^[Z  
@HWI-EAS443:3:31:798:953#0/1  
GGTTAATTGAAGAAATGCGGCACAGATTGAAAGCGACAGA  
+HWI-EAS443:3:31:798:953#0/1  
``YVa[¥^\_TXaL`^\_babaaabab`aaa^\_V]]aaaa\_  
@HWI-EAS443:3:31:814:1146#0/1  
GCCGCATTTCTTCAATTAACCACCTTATTTCTCAAATTT  
+HWI-EAS443:3:31:814:1146#0/1  
`a\_W¥ZZQXY¥0^W]ST^S```aW\_X¥]]\_]]T¥RWMP  
@HWI-EAS443:3:31:828:209#0/1  
GCCGCATTTCTTCAATTAACCACCTTATTTCTCAAATTT  
+HWI-EAS443:3:31:828:209#0/1  
a]X]¥¥¥Z¥a]`¥aX]`\_\_]J``\_a][XY\_]\_]\_^Y¥\_\_^  
@HWI-EAS443:3:31:834:77#0/1  
ACTGTGATGAGAATGGGAGACCTTCACTACCTCCAGAGCA  
+HWI-EAS443:3:31:834:77#0/1  
aa`^\_baU``b\_aaaaab\_U^`a\_]a\_aXQ¥\_Q]aYa\_\_  
@HWI-EAS443:3:31:855:1748#0/1  
TGAGAATGGGAGACCTTCACTACCTCCAGAGCAGAAATGA  
+HWI-EAS443:3:31:855:1748#0/1  
abb]¥Uaa`abbb`a\_\_baaabababaaa¥\_aaa`\_a``\_  
@HWI-EAS443:3:31:869:511#0/1  
ATGAGAATGGGAGACCTTCACTACCTCCAGAGCAGAAATG  
+HWI-EAS443:3:31:869:511#0/1  
]`b`Z¥aaaaabaaaX^`aabaT\_ba`\_aI`\_aa[a\_]\_\_\_\_  
@HWI-EAS443:3:31:923:341#0/1  
GAGAACTGTGATGAGAATGGGAGACCTTCACTACCTCCA  
+HWI-EAS443:3:31:923:341#0/1  
R¥]baS`\_b\_¥^^`¥\_b]Z^`ZRU`bS``aaXa]HRYP^]  
@HWI-EAS443:3:31:937:1462#0/1  
TAACACGTTTCGAGTCTCTGAAAATATACAGAGATTCGCT  
+HWI-EAS443:3:31:937:1462#0/1  
abb`bb]baabb]]abaaa][aaaaa^]aa`\_`^`a\_\_N

@HWI-EAS443:3:31:955:1409#0/1  
GAGAACTGTGATGAGAATGGGAGACCTTCACTACCTCCA  
+HWI-EAS443:3:31:955:1409#0/1  
a]`b\_\_bb`Pa^ab`a`]abaa]aa`a``a\_`[\_`\_aaa`  
@HWI-EAS443:3:31:963:1509#0/1  
GCCGCATTTCTTCAATTAACCACCTTATTTCTCAAATTT  
+HWI-EAS443:3:31:963:1509#0/1  
ab`\_\_[\_babbbaaabbbaa`bXW\_aabaaaababa]aab  
@HWI-EAS443:3:31:966:545#0/1  
TCGCTTTCAATCTGTGCCGATTTCTTCAATTAACCACCT  
+HWI-EAS443:3:31:966:545#0/1  
abbbbaVaba^[`a^[a[XU¥LX``a``\_a^\_[X]PS\_PXY  
@HWI-EAS443:3:31:987:297#0/1  
TGAGAATGGGAGACCTTCACTACCTCCAGAGCAGAAATGA  
+HWI-EAS443:3:31:987:297#0/1  
abaa\_a`aa\_\_a^^`\_`^a\_\_`^]\_^`^`^aV]a]^^^Y  
@HWI-EAS443:3:31:988:1897#0/1  
AGAAACTGTGATGAGAATGGGAGACCTTCACTACCTCCAG  
+HWI-EAS443:3:31:988:1897#0/1  
a\_abbbbaa^aaa`a`aa`aaaa\_aaa^WY]a¥¥```\_Q  
@HWI-EAS443:3:32:1008:1418#0/1  
GCCGCATTTCTTCAATTAACCACCTTATTTCTCAAATTT  
+HWI-EAS443:3:32:1008:1418#0/1  
aba[\_ZV^]a^Z\_[KZ]X[`a[W`¥XSa`Za`\_^QYN¥OW  
@HWI-EAS443:3:32:1015:510#0/1  
TTACTGAAGTTCGCTTTCAGTACTATGTTCTTTTCCAT  
+HWI-EAS443:3:32:1015:510#0/1  
aaa]^`aa¥\_a``a^^]`a\_a]^V¥\_aaV\_]`\_`^`[\_`  
@HWI-EAS443:3:32:1019:1714#0/1  
CTCCGATGAGGACCCCAACTGCATTTTTGACATCCTCATA  
+HWI-EAS443:3:32:1019:1714#0/1  
a\_```a]`\_]Zaa`aaa^^aa```\_¥V]^`¥S`[a\_`a  
@HWI-EAS443:3:32:1050:1808#0/1  
GAAACTGTGATGAGAATGGGAGACCTTCACTACCTCCAGA  
+HWI-EAS443:3:32:1050:1808#0/1  
\_aaaaaaY\_aaaaa\_]a`\_]`Xa`\_[a]```X^Ya\_\_\_\_  
@HWI-EAS443:3:32:1053:1454#0/1  
TCAGAAAGGTAGCGCGAAGTAGGTACAGATGCAATTGTCA  
+HWI-EAS443:3:32:1053:1454#0/1  
a`a`¥W^`aUa\_\_^]a[\_Zaa\_]a[`a`\_a\_`¥¥a\_[^`  
@HWI-EAS443:3:32:1073:51#0/1  
TGCGGCACAGATTGAAAGCGACAGAGAATAGTTTCGAACA  
+HWI-EAS443:3:32:1073:51#0/1  
ab`aaababbabbbaaaaaaba`ab`baaa\_a]a\_[]\_a\_a  
@HWI-EAS443:3:32:1078:296#0/1  
TGAGAATGGGAGACCTTCACTACCTCCAGAGCAGAAATGA  
+HWI-EAS443:3:32:1078:296#0/1  
`aaa``aab^`^Z^\_\_\_\_ZaZX`VY[W^]VQ^[\_ZTW\_\_\_\_¥  
@HWI-EAS443:3:32:1115:1389#0/1  
AGAAACTGTGATGAGAATGGGAGACCTTCACTACCTCCAG

+HWI-EAS443:3:32:1115:1389#0/1  
aaa\_aaaa`a`\_]a\_a^a\_a\_\_\_^^^`\_a^\_YQ\_]`^\_\_  
@HWI-EAS443:3:32:1115:225#0/1  
GGAGGGAGCAATAGTTGGAGAAATTTACCATTACCTTCT  
+HWI-EAS443:3:32:1115:225#0/1  
`aWa\_YXa`TY`\_aP`a`Waa`\_^ZYGV^T[]VZ[U¥W]¥  
@HWI-EAS443:3:32:1121:1485#0/1  
GAATGGGAGACCTTCACTACCTCCAGAGCAGAAATGAAAA  
+HWI-EAS443:3:32:1121:1485#0/1  
]Z¥Z\_^ZZZ`a]^G¥X[\_a\_]T[¥]¥Za][WUY¥¥]^ZT  
@HWI-EAS443:3:32:1125:844#0/1  
TGAGAAATGGGAGACCTTCACTACCTCCAGAGCAGAAATGA  
+HWI-EAS443:3:32:1125:844#0/1  
abaaaaab`aaSa^[\_`^¥\_YV[[]][SP]S\_ZVWX]a\_  
@HWI-EAS443:3:32:1126:1244#0/1  
GCCGCATTTCTTCAATTAACCACCTTATTTCTCAAATTT  
+HWI-EAS443:3:32:1126:1244#0/1  
aababbbabbbbababbbbabababbbbab`bab^Ma`a  
@HWI-EAS443:3:32:1126:186#0/1  
GCCGCATTTCTTCAATTAACCACCTTATTTCTCAAATTT  
+HWI-EAS443:3:32:1126:186#0/1  
Z¥abb\_b\_Za^a]S[ba`a]````\_aba^Y[^Z`ZL`¥\_  
@HWI-EAS443:3:32:113:1775#0/1  
GTCGCTTTCAATCTGTGCCGCATTTCTTCAATTAACCACC  
+HWI-EAS443:3:32:113:1775#0/1  
abbbbbbbbbbbbab`\_bbbbbbbabaa`baaabaabbbb  
@HWI-EAS443:3:32:1148:1818#0/1  
GCGGCACAGATTGAAAGCGACAGAGAATAGTTTCGAACAA  
+HWI-EAS443:3:32:1148:1818#0/1  
U¥a\_a\_ba`\_Yb\_ba^Xbba`¥`babb^¥]Ja`Va[`ba`  
@HWI-EAS443:3:32:1175:50#0/1  
CTGTGCCGCATTTCTTCAATTAACCACCTTATTTCTCAA  
+HWI-EAS443:3:32:1175:50#0/1  
abbbbbbbbbbbbabababbbaba`aabbbbabSba``  
@HWI-EAS443:3:32:1179:378#0/1  
TGGAGAAACTGTGATGAGAATGGGAGACCTTCACTACCTC  
+HWI-EAS443:3:32:1179:378#0/1  
aZaa^L`aaab\_a\_a\_]\_XZaaa`X\_]Y]]`R^X\_]\_\_  
@HWI-EAS443:3:32:1190:1290#0/1  
AGAAACTGTGATGAGAATGGGAGACCTTCACTACCTCCAG  
+HWI-EAS443:3:32:1190:1290#0/1  
ab]Z]]aa`Wa\_P^U]\_`W\_SJY\_U^YY`\_\_XWWa]R]  
@HWI-EAS443:3:32:1196:1073#0/1  
GCTACCTTTCTGACATGACCCTCGAGGAAATGTCACGAGA  
+HWI-EAS443:3:32:1196:1073#0/1  
a`aaa^ba`¥aa^`[\_\_\_\_^S\_Y`^UUVNRRXLQ^Z  
@HWI-EAS443:3:32:1271:1356#0/1  
CTCGCTGGATTCTTCTTTCAAGATCCATTCCACGATTTGT  
+HWI-EAS443:3:32:1271:1356#0/1  
abb\_bbabaabb`bXbaabaaaa\_\_aa`\_a`\_`a`aaa`

@HWI-EAS443:3:32:1323:1139#0/1  
CGCATTCTTCAATTAACCACCTTATTTCTCAAATTTCT  
+HWI-EAS443:3:32:1323:1139#0/1  
¥a]¥b)`[^Z¥^Zba]aaLZa`^a\_^XZ¥¥a\_]`V^[]]b  
@HWI-EAS443:3:32:1378:443#0/1  
GAAACTGTGATGAGAATGGGAGACCTTCACTACCTCCAGA  
+HWI-EAS443:3:32:1378:443#0/1  
`aaaaa`[a`ab\_aZ^aaaa`a]X\_`a\_`U`a`W\_Y\_\_a\_  
@HWI-EAS443:3:32:1387:70#0/1  
CGAGAAAGCTCTTATCTCTTGTCTACTTCAAGCAGTAGT  
+HWI-EAS443:3:32:1387:70#0/1  
`bbaaaab`b\_bbab¥a^bbbabWaaabb]aab¥ab\_ab`  
@HWI-EAS443:3:32:1417:1425#0/1  
GAAAATATACAGAGATTCGCTTGGAGAACTGTGATGAGA  
+HWI-EAS443:3:32:1417:1425#0/1  
`NXTQZ`\_OWZZZ`WWZEZBBBBBBBBBBBBBBBBBBBB  
@HWI-EAS443:3:32:143:189#0/1  
TTGGCATATCCGCAAGCGATTTGCAGACAATGGATTGGGT  
+HWI-EAS443:3:32:143:189#0/1  
`]a\_bbbbabbb`Y^babY`aa^bU]a`]a`V`¥\_`][R  
@HWI-EAS443:3:32:1446:776#0/1  
TGCATTTTTGACATCCTCATAAGTATGTCCTGGAAGAGAA  
+HWI-EAS443:3:32:1446:776#0/1  
aa`¥`aaaaa^`\_a]^`^S`\_[\_W\_^\_\_WW]``¥W^]`[]  
@HWI-EAS443:3:32:1452:709#0/1  
GGTTAATTGAAGAAATGCGGCACAGATTGAAAGCGACAGA  
+HWI-EAS443:3:32:1452:709#0/1  
\_b``bbbb``ab`baba`T^```ab`\_`aaaa\_b[b^bba`  
@HWI-EAS443:3:32:1453:837#0/1  
CAGAGATTCGCTTGGAGAACTGTGATGAGAATGGGAGAC  
+HWI-EAS443:3:32:1453:837#0/1  
a`]`\_aababa``S¥[X`\_aaa`Z`¥`a¥`¥]aaaaXb`\_  
@HWI-EAS443:3:32:1546:1978#0/1  
GCCTCTTCTTTTAAGGACTTTTGATCTCGGCGGAGCCGA  
+HWI-EAS443:3:32:1546:1978#0/1  
a`bbbbbababbaaaa\_abbaaaaaaaa\_]\_a\_a`a`aa  
@HWI-EAS443:3:32:1582:1157#0/1  
GAGAATGGGAGACCTTCACTACCTCCAGAGCAGAAATGAA  
+HWI-EAS443:3:32:1582:1157#0/1  
aX¥Y¥¥a\_aVa[W^aT^\_Y`¥Y¥T¥T¥\_YZ\_U`W¥U`\_\_¥  
@HWI-EAS443:3:32:1594:1460#0/1  
GAATGGGAGACCTTCACTACCTCCAGAGCAGAAATGAAAA  
+HWI-EAS443:3:32:1594:1460#0/1  
a\_a\_\_\_a`Ra^^R]U\_SH]R[]XR]ZRR]Y`UUQ`UZ]Z]  
@HWI-EAS443:3:32:1646:986#0/1  
GAGGGAGCAATAGTTGGAGAAATTTACCATTACCTTCTC  
+HWI-EAS443:3:32:1646:986#0/1  
\_bbba\_a\_aaba`\_aa]]`aa\_aa\_``\_[``\_aU`\_a`\_a  
@HWI-EAS443:3:32:1648:1412#0/1  
GCCGCATTTCTTCAATTAACCACCTTATTTCTCAAATTT

+HWI-EAS443:3:32:1648:1412#0/1  
]`¥Saa`^\_ba`a^abaa\_`^U¥aa¥a`\_YUZ]a^^\_Wa  
@HWI-EAS443:3:32:1677:1154#0/1  
CTTGGAGAACTGTGATGAGAATGGGAGACCTTCACTACC  
+HWI-EAS443:3:32:1677:1154#0/1  
`bb`M^`b¥b[aaSa]abS[]babaaX`TV\_\_[b\_\_U]b  
@HWI-EAS443:3:32:1687:1481#0/1  
AGAATGGGAGACCTTCACTACCTCCAGAGCAGAAATGAAA  
+HWI-EAS443:3:32:1687:1481#0/1  
Z\_^aZPNYa^Q[^\_`VX]¥X[TZOZZW¥]OU\_\_Y\_RG^U\_  
@HWI-EAS443:3:32:1711:980#0/1  
GGAGAACTGTGATGAGAATGGGAGACCTTCACTACCTCC  
+HWI-EAS443:3:32:1711:980#0/1  
aba^`aa\_aa^a]aaZa^\_\_`\_\_VSWX]^X]^XURH[^^]  
@HWI-EAS443:3:32:1713:1111#0/1  
AGAACTGTGATGAGAATGGGAGACCTTCACTACCTCCAG  
+HWI-EAS443:3:32:1713:1111#0/1  
`a`a]^ab`Z]a`\_a^`a`aU\_ZXO[aUZ]]^U¥Va[Y\_  
@HWI-EAS443:3:32:1723:1399#0/1  
AGACTGTTTCCTTTGGCATATCCGCAAGCGATTTGCAGAC  
+HWI-EAS443:3:32:1723:1399#0/1  
ab^RWaY]Z[^`^^a`^¥]`\_\_`\_X\_\_]`\_]V[[LXY^Q  
@HWI-EAS443:3:32:1735:110#0/1  
CGCATTCTTCAATTAACCACCTTATTTCCCTCAAATTTCT  
+HWI-EAS443:3:32:1735:110#0/1  
Z^\_XY`\_T]VY`aaYa^XX¥L`\_`b`\_`VH^^]W\_]aa\_a  
@HWI-EAS443:3:32:1741:993#0/1  
CGCATTCTTCAATTAACCACCTTATTTCCCTCAAATTTCT  
+HWI-EAS443:3:32:1741:993#0/1  
abbb\_`Z`ab^`a[¥\_S\_U`X\_Y]`a\_YL]aa]a[``aa  
@HWI-EAS443:3:32:1760:411#0/1  
GGCACAGATTGAAAGCGACAGAGAATAGTTTCGAACAAAT  
+HWI-EAS443:3:32:1760:411#0/1  
`\_MXVY\_]b^`\_`¥00`\_0¥a`a\_¥Y^X[\_aR]TVR¥UZ`  
@HWI-EAS443:3:32:1777:388#0/1  
AGAACTGTGATGAGAATGGGAGACCTTCACTACCTCCAG  
+HWI-EAS443:3:32:1777:388#0/1  
ab`aa`ab\_baaaa]a\_aaa^a^Z]a`^`\_\_aV]]a^`a  
@HWI-EAS443:3:32:178:1581#0/1  
GAACCAGTCTCGTGACATTTCCCTCGAGGGTCATGTCAGAA  
+HWI-EAS443:3:32:178:1581#0/1  
a)`ab[¥[b]\_SUZ`WZ]\_aabX`ZY\_U¥Q[`]ISTTNVX  
@HWI-EAS443:3:32:204:1811#0/1  
AATTTCTCCAATTTGCTCCCTCCTCAGTGAAAGCCCTT  
+HWI-EAS443:3:32:204:1811#0/1  
a^aa\_aabb^Ta\_a[\_\_a\_`aa^`\_a`]T0`S^]a``]Y  
@HWI-EAS443:3:32:215:1186#0/1  
TGAGAATGGGAGACCTTCACTACCTCCAGAGCAGAAATGA  
+HWI-EAS443:3:32:215:1186#0/1  
abbbbbb`\_abb`aabbbaabaa`baaaaba`MaRa`]



@HWI-EAS443:3:32:251:841#0/1  
GGAGAACTGTGATGAGAATGGGAGACCTTCACTACCTCC  
+HWI-EAS443:3:32:251:841#0/1  
^`[a]XX`¥WQaUV^\_`¥UYU¥]HX]^]S\_]^\_QX]¥U^a  
@HWI-EAS443:3:32:27:1634#0/1  
TTCGCTTGGAGAACTGTGATGAGAATGGGAGACCTTCCAC  
+HWI-EAS443:3:32:27:1634#0/1  
aababa`]a\_]T`^`aaV`Z]U`\_`\_`^^^TT]\_`^V`X^  
@HWI-EAS443:3:32:284:1832#0/1  
ATGAGAATGGGAGACCTTCACTACCTCCAGAGCAGAAATG  
+HWI-EAS443:3:32:284:1832#0/1  
`ab\_a\_R\_a^^^]a[]\_\_aZb`a]a\_]a`Z\_]a`[[T]]\_`  
@HWI-EAS443:3:32:327:1546#0/1  
GTCGCTTTCAATCTGTGCCGATTTCTTCAATTAACCACC  
+HWI-EAS443:3:32:327:1546#0/1  
^`baaaa`b`b`\_`a]\_baaaaa\_\_a\_a`^`a^aa]ba`a  
@HWI-EAS443:3:32:331:1868#0/1  
TGAGAATGGGAGACCTTCACTACCTCCAGAGCAGAAATGA  
+HWI-EAS443:3:32:331:1868#0/1  
aaa^aaaVXWaa`\_`a^aba^a\_[]`\_`V^Z`¥S`\_`^¥^U  
@HWI-EAS443:3:32:394:504#0/1  
GGAGAACTGTGATGAGAATGGGAGACCTTCACTACCTCC  
+HWI-EAS443:3:32:394:504#0/1  
aaaaaR`baaYaZaa`\_`a\_a`\_`[]`\_`Z^`\_`^X^X\_X\_\_`  
@HWI-EAS443:3:32:405:33#0/1  
GAATGGGAGACCTTCACTACCTCCAGAGCAGAAATGAAAA  
+HWI-EAS443:3:32:405:33#0/1  
a`aabaa`b`\_`\_`\_`aa`a\_^[]`\_`\_`¥a`^a^W¥`\_`Q^ZR  
@HWI-EAS443:3:32:411:1335#0/1  
AGGGTGTTCCTTCTTCTTTAAGGACTTTTGATCTCGGC  
+HWI-EAS443:3:32:411:1335#0/1  
UZa¥F¥¥¥U`a\_Z\_aaa`a\_aa`]`\_`aa]`\_`a\_\_¥`VZ\_  
@HWI-EAS443:3:32:452:1886#0/1  
GGTTAATTGAAGAAATGCGGCACAGATTGAAAGCGACAGA  
+HWI-EAS443:3:32:452:1886#0/1  
aaWbaba¥]^¥^[]b`[]`\_`aa^aaaa`\_`^`aaY\_U`aa\_W  
@HWI-EAS443:3:32:503:1391#0/1  
GTCGCTTTCAATCTGTGCCGATTTCTTCAATTAACCACC  
+HWI-EAS443:3:32:503:1391#0/1  
a\_aabababababaa]Yaaaaaaaa\_aaa`]a`aa]baaa  
@HWI-EAS443:3:32:52:1862#0/1  
GAAAATATACAGAGATTCGCTTGGAGAACTGTGATGAGA  
+HWI-EAS443:3:32:52:1862#0/1  
aa\_[]X^`aa\_[XYF\_]`[W¥[[]¥OYT[[]ZTWXSOXPJ  
@HWI-EAS443:3:32:532:510#0/1  
TTGGCATATCCGCAAGCGATTTGCAGACAATGGATTGGGT  
+HWI-EAS443:3:32:532:510#0/1  
a`b`baabababa`a`aaaaa`baaa`¥^a][]`\_`¥W¥MK  
@HWI-EAS443:3:32:542:700#0/1  
AAACTGTGATGAGAATGGGAGACCTTCACTACCTCCAGAG

+HWI-EAS443:3:32:542:700#0/1  
abbaab\_`ba`aba\_a¥a\_aa`\_\_a`aa^`\_`^\_a¥W^\_^  
@HWI-EAS443:3:32:54:739#0/1  
GTCGCTTTCAATCTGTGCCGATTTCTTCAATTAACCACC  
+HWI-EAS443:3:32:54:739#0/1  
a\_bab`aaa`aa`\_Y`\_aa\_Y^^`\_`\_]Y\_\_\_YZa`a`  
@HWI-EAS443:3:32:611:80#0/1  
TGAGAATGGGAGACCTTCACTACCTCCAGAGCAGAAATGA  
+HWI-EAS443:3:32:611:80#0/1  
abaaaaa\_a`a`\_Z^^\_a¥`\_^¥^^¥\_\_Y¥¥\_¥WY¥`Z  
@HWI-EAS443:3:32:679:636#0/1  
GCCGATTTCTTCAATTAACCACCTTATTTCTCAAATTT  
+HWI-EAS443:3:32:679:636#0/1  
ababaaaa¥`]`abaaaa`\_]aa`aaaaaa`^`^`[aWS` `a  
@HWI-EAS443:3:32:707:367#0/1  
GTCAGAAAGGTAGCGGAAGTAGGTACAGATGCAATTGTC  
+HWI-EAS443:3:32:707:367#0/1  
a\_a`aa]`aaZaaaa\_\_Waa^aa`]a^aa^`\_`¥^\_^\_V`  
@HWI-EAS443:3:32:726:157#0/1  
GGGTGTTGCCTCTTCCTTTAAGGACTTTTGATCTCGGCG  
+HWI-EAS443:3:32:726:157#0/1  
aaaUa[aaa`aaa\_\_\_a`\_a\_\_\_\_\_^a^`\_`^`[\_V\_¥\_\_  
@HWI-EAS443:3:32:745:886#0/1  
GTCGCTTTCAATCTGTGCCGATTTCTTCAATTAACCACC  
+HWI-EAS443:3:32:745:886#0/1  
aZSO¥I[ `a\_XW[[WZ¥\_`RTRV`[\_^\_\_X`]WPXNZW`R  
@HWI-EAS443:3:32:749:1017#0/1  
GCGCGAAGTAGGTACAGATGCAATTGTCATTCTAAGTGTC  
+HWI-EAS443:3:32:749:1017#0/1  
abaaa^R][aa\_]aaa\_\_`aa`\_[^^\_a`\_\_`\_]^Q\_]a  
@HWI-EAS443:3:32:759:1900#0/1  
AGAAACTGTGATGAGAATGGGAGACCTTCACTACCTCCAG  
+HWI-EAS443:3:32:759:1900#0/1  
aX`a¥baa^)`]a`\_]`]]]\_\_\_\_^^^Ya\_\_\_\_\_0¥Ya\_0S  
@HWI-EAS443:3:32:762:54#0/1  
GAGAATGGGAGACCTTCACTACCTCCAGAGCAGAAATGAA  
+HWI-EAS443:3:32:762:54#0/1  
a^a\_]aaaa[\_[\_`W\_\_\_¥V^^^¥Y\_W[ZWZWUW[NHK  
@HWI-EAS443:3:32:763:1323#0/1  
AATATACAGAGATTCGCTTGGAGAACTGTGATGAGAATG  
+HWI-EAS443:3:32:763:1323#0/1  
aabaaaab\_`b]Z]a`a`a`a`W]WZ]a`0`X[\_¥^S^^]  
@HWI-EAS443:3:32:786:990#0/1  
CTCCCATTCTCATCACAGTTTCTCCAAGCGAATCTCTGTA  
+HWI-EAS443:3:32:786:990#0/1  
ab]bbabb`baabbb`W`aaa`\_]`\_aa[b^T[Y\_`^aa]a  
@HWI-EAS443:3:32:868:814#0/1  
AGAAACTGTGATGAGAATGGGAGACCTTCACTACCTCCAG  
+HWI-EAS443:3:32:868:814#0/1  
^aX^`ba\_P\_\_\_aababaaa`[Y^V`]X]aa\_`¥`]a^R]

@HWI-EAS443:3:32:916:318#0/1  
GCTTGGAGAACTGTGATGAGAATGGGAGACCTTCACTAC  
+HWI-EAS443:3:32:916:318#0/1  
aa`[X[]UaXUT[¥UJXVX^aUNSZS¥OXZ¥UQ[UN^TXV  
@HWI-EAS443:3:32:91:573#0/1  
AGAAACTGTGATGAGAATGGGAGACCTTCACTACCTCCAG  
+HWI-EAS443:3:32:91:573#0/1  
\_a\_ZQaa\_¥`V¥a[\_\_\_`aa`Z[\_\_\_a\_[a\_`^`[a]a`T]  
@HWI-EAS443:3:32:923:936#0/1  
GTGATGAGAATGGGAGACCTTCACTACCTCCAGAGCAGAA  
+HWI-EAS443:3:32:923:936#0/1  
O\_\_^\_¥¥\_V¥a[\_UR0\_]a\_a\_aaa]]V\_aa`Q[\_V¥aWW  
@HWI-EAS443:3:32:945:943#0/1  
GGTTAATTGAAGAAATGCGGCACAGATTGAAAGCGACAGA  
+HWI-EAS443:3:32:945:943#0/1  
S]W\_abba^a^]]``[ZRPN]bb\_PP¥]]abaa]b`V``a  
@HWI-EAS443:3:32:94:112#0/1  
TGAAAATATACAGAGATTGCTTGGAGAACTGTGATGAG  
+HWI-EAS443:3:32:94:112#0/1  
S`^T^Xb\_Z`YY``aQY¥^`a[¥¥YQ^RMW[V][[WQWW[  
@HWI-EAS443:3:32:950:1722#0/1  
GCGGCACAGATTGAAAGCGACAGAGAATAGTTTCGAACAA  
+HWI-EAS443:3:32:950:1722#0/1  
`b`babbbbaa^a^aa\_aaa`a\_^^¥aaa\_^ZZ`dWXVV\_a`  
@HWI-EAS443:3:33:1075:1204#0/1  
AGTCTCTGAAAATATACAGAGATTGCTTGGAGAACTGT  
+HWI-EAS443:3:33:1075:1204#0/1  
aZ0aa\_baY`\_a]aa^bab\_b\_a\_\_a^`a]a``a[\_\_\_aU  
@HWI-EAS443:3:33:1114:1669#0/1  
GCCGCATTTCTTCAATTAACCACCTTATTTCTCAAATTT  
+HWI-EAS443:3:33:1114:1669#0/1  
abb`Y\_]Z``]a]aaYaZ`\_SZaP]]¥a`\_a\_X^YYS^]Y  
@HWI-EAS443:3:33:111:805#0/1  
GGAAGAGAAGGTAATGGTGAATTTCTCCAATTATTGCTC  
+HWI-EAS443:3:33:111:805#0/1  
aaabbbbaabaYa]`\_`Uaab¥aaaa``aaa]\_aa^\_\_\_a  
@HWI-EAS443:3:33:1132:1112#0/1  
GCCGCATTTCTTCAATTAACCACCTTATTTCTCAAATTT  
+HWI-EAS443:3:33:1132:1112#0/1  
aa`aaaa`bbbaaaaa`bba`\_^\_\_\_^a\_``^V\_Z\_^`a^  
@HWI-EAS443:3:33:1159:520#0/1  
AGCTTTCAGGTAGACTGTTTCCTTTGGCATATCCGCAAGC  
+HWI-EAS443:3:33:1159:520#0/1  
]aa```aabb[]]babaZaaa^aa\_[XaaaaaNNZ[^^^W  
@HWI-EAS443:3:33:1185:1565#0/1  
AGAAACTGTGATGAGAATGGGAGACCTTCACTACCTCCAG  
+HWI-EAS443:3:33:1185:1565#0/1  
aa^WYa`]Wa\_``Y`RU[[]ZLHX`^G[X`PVGISIVXD  
@HWI-EAS443:3:33:1197:92#0/1  
TTTCACCATTACCTTCTTCTCCAGGACATACTTATGAGGA



@HWI-EAS443:3:33:1431:416#0/1  
GCCGCATTTCTTCAATTAACCACCTTATTTCTCAAATTT  
+HWI-EAS443:3:33:1431:416#0/1  
a`aaW\_aa^]``^`[[``\_\_\_`YN\_[]a`WSSYTRV\_¥¥  
@HWI-EAS443:3:33:1563:736#0/1  
GCCGCATTTCTTCAATTAACCACCTTATTTCTCAAATTT  
+HWI-EAS443:3:33:1563:736#0/1  
aZ`a^aaaa`aa[\_`aa\_aZV¥[Y`Y]```ZSYZZYY^`\_  
@HWI-EAS443:3:33:1575:184#0/1  
CAGAGATTTCGCTTGGAGAACTGTGATGAGAATGGGAGAC  
+HWI-EAS443:3:33:1575:184#0/1  
aabbabb^aaaa]a¥a`\_`]aa[\_]Z`[a]^S¥X\_VWWU  
@HWI-EAS443:3:33:15:1184#0/1  
TGAGAATGGGAGACCTTCACTACCTCCAGAGCAGAAATGA  
+HWI-EAS443:3:33:15:1184#0/1  
ab`a\_aaaaaXa\_aa`^aa`[``a^a\_XUS¥\_¥¥N¥ZW[Z  
@HWI-EAS443:3:33:1602:2035#0/1  
CTCTGAAAATATACAGAGATTTCGCTTGGAGAACTGTGAT  
+HWI-EAS443:3:33:1602:2035#0/1  
S^\_aaab\_baabb]`bababYZaa\_Y]¥XY`\_Z¥\_a]\_Y`  
@HWI-EAS443:3:33:1651:972#0/1  
ATTTCTCGAGGGTCATGTCAGAAAGGTAGCGCGAAGTAG  
+HWI-EAS443:3:33:1651:972#0/1  
^b]bab`a\_Y`ba[¥¥aaRQYa\_]`\_`UPaaX[U\_QP[Y`\_  
@HWI-EAS443:3:33:1661:746#0/1  
CCAGCGAGACACTTAGAATGACAATTGCATCTGTACCTAC  
+HWI-EAS443:3:33:1661:746#0/1  
H[``aabb\_U``a`XabbbbYJ`aaaT`\_\_MZ¥H\_QU^^`  
@HWI-EAS443:3:33:1664:1730#0/1  
GTGATGAGAATGGGAGACCTTCACTACCTCCAGAGCAGAA  
+HWI-EAS443:3:33:1664:1730#0/1  
`\_[``aa\_a`a\_a`ZUT\_ZP¥^XaOUXHoyVVVYRHLYYX  
@HWI-EAS443:3:33:169:1498#0/1  
CCGCATTTCTTCAATTAACCACCTTATTTCTCAAATTT  
+HWI-EAS443:3:33:169:1498#0/1  
aba\_Yaabaab\_^aabaaaaaa`Z`\_`ba\_`a`]\_¥¥`  
@HWI-EAS443:3:33:16:1568#0/1  
AAATCGTGAATGGATCTTGAAAGAGGAATCCAGCGAGAC  
+HWI-EAS443:3:33:16:1568#0/1  
]``]aa]aa¥`aa^\_`^Y]WW]YJVTP\_]W[^PT¥TORRW  
@HWI-EAS443:3:33:1777:1121#0/1  
GCCGCATTTCTTCAATTAACCACCTTATTTCTCAAATTT  
+HWI-EAS443:3:33:1777:1121#0/1  
¥¥\_`U[Ubb\_bT`M`ZbbW`] `ba][¥a]W[V]`\_¥W  
@HWI-EAS443:3:33:182:65#0/1  
GAATGGGAGACCTTCACTACCTCCAGAGCAGAAATGAAAA  
+HWI-EAS443:3:33:182:65#0/1  
a`aaaa`\_\_a``aaa\_`\_`^`^Z]S\_\_^`QUT^^¥[[^  
@HWI-EAS443:3:33:20:1682#0/1  
GAGAACTGTGATGAGAATGGGAGACCTTCACTACCTCCA

+HWI-EAS443:3:33:20:1682#0/1  
`¥`b]bbaaZ`Z`aaaaabaa¥]`]]`aaabb\_a`\_`\_`\_  
@HWI-EAS443:3:33:216:696#0/1  
TGAGAATGGGAGACCTTCACTACCTCCAGAGCAGAAATGA  
+HWI-EAS443:3:33:216:696#0/1  
K`a¥SX^bYabaM\_U]]aZ\_a`baaba\_^XVa[\_aZ``aa  
@HWI-EAS443:3:33:250:310#0/1  
GGCAACACCCTTGGCCTCGATATCGAAACAGCCACTCTTG  
+HWI-EAS443:3:33:250:310#0/1  
aa^X]aWX`¥W¥[Q[a^^¥V^`[\_YYOLQ^¥VOJOSZUSV  
@HWI-EAS443:3:33:299:1250#0/1  
GCCGCATTTCTTCAATTAACCACCTTATTTCTCAAATTT  
+HWI-EAS443:3:33:299:1250#0/1  
abbb\_U`bbbaaa¥\_bbbaabba^\_aaaaa\_ab`Z\_b`a  
@HWI-EAS443:3:33:30:1275#0/1  
GCCGCATTTCTTCAATTAACCACCTTATTTCTCAAATTT  
+HWI-EAS443:3:33:30:1275#0/1  
abbb`Taaabbbbbbababaaaaabaaaaaab`[[`aa  
@HWI-EAS443:3:33:326:1044#0/1  
GCCGCATTTCTTCAATTAACCACCTTATTTCTCAAATTT  
+HWI-EAS443:3:33:326:1044#0/1  
`bbaaZ`¥`¥`aZHYZXZ``\_\_\_a\_[\_a`UT]\_\_Y\_`\_^  
@HWI-EAS443:3:33:329:440#0/1  
AACCACCTTATTTCTCAAATTTCTGTCCCAATTGCTCTC  
+HWI-EAS443:3:33:329:440#0/1  
¥\_U\_\_`\_Z¥Y]S]]`[^JX`aS^`]]`[\_Y]]ZY\_\_\_a`  
@HWI-EAS443:3:33:340:494#0/1  
GCCGCATTTCTTCAATTAACCACCTTATTTCTCAAATTT  
+HWI-EAS443:3:33:340:494#0/1  
aaa^a^`a`a`\_`^a\_¥`\_`^`^`\_`\_`[¥]\_\_Z\_]V[]]]  
@HWI-EAS443:3:33:370:486#0/1  
GAATGGGAGACCTTCACTACCTCCAGAGCAGAAATGAAAA  
+HWI-EAS443:3:33:370:486#0/1  
]][^X`a^a^bZ¥]P]VP`¥GSR`ZV\_^^\_\_`TX¥¥`Y¥¥  
@HWI-EAS443:3:33:382:258#0/1  
AGAAACTGTGATGAGAATGGGAGACCTTCACTACCTCCAG  
+HWI-EAS443:3:33:382:258#0/1  
aa\_`````Xa`a```\_`a\_^V`^^[\_]X\_Y^YYYYXXYX  
@HWI-EAS443:3:33:419:1255#0/1  
CGAAGTAGGTACAGATGCAATTGTCATTCTAAGTGTCTCG  
+HWI-EAS443:3:33:419:1255#0/1  
aa`\_]MLSUY[aXUZST`Z^TTQWLO¥[USWVOKQRXURV  
@HWI-EAS443:3:33:456:93#0/1  
CCGCATTTCTTCAATTAACCACCTTATTTCTCAAATTT  
+HWI-EAS443:3:33:456:93#0/1  
aabb\_bbababbba\_abaabab¥aTabbbbbbababbb^a  
@HWI-EAS443:3:33:464:874#0/1  
CTCTGGAGGTAGTGAAGGTCTCCATTCTCATCACAGTTT  
+HWI-EAS443:3:33:464:874#0/1  
aZ`]¥aU`a]a\_[a\_\_\_^Q^[P`SV]^[]ZFNG^V^]VVV

@HWI-EAS443:3:33:475:991#0/1  
AATGGGAGACCTTCACTACCTCCAGAGCAGAAATGAAAAG  
+HWI-EAS443:3:33:475:991#0/1  
XV]b¥aS`\_\_¥^`a\_]aa^`aaV^aaaa`X`Vaaa]`^\_  
@HWI-EAS443:3:33:555:1719#0/1  
GCCGCATTTCTTCAATTAACCACCTTATTTCTCAAATTT  
+HWI-EAS443:3:33:555:1719#0/1  
abb`a`X`ab\_aa`^`abb[XV`abbb^a\_bY`[Y`aaaa  
@HWI-EAS443:3:33:561:1393#0/1  
TGCCGCATTTCTTCAATTAACCACCTTATTTCTCAAATT  
+HWI-EAS443:3:33:561:1393#0/1  
¥R`baa^aaa^Za`ba^a`^`^b``a]]a]`\_`G]]\_U`^  
@HWI-EAS443:3:33:581:1717#0/1  
GCGCGAAGTAGGTACAGATGCAATTGTCATTCTAAGTGTC  
+HWI-EAS443:3:33:581:1717#0/1  
^\_```¥`[Y`¥X¥¥aa`ab^bbbb`[`a^\_aa```\_`[YR¥^  
@HWI-EAS443:3:33:605:178#0/1  
CAGAGATTGCTTGGAGAACTGTGATGAGAATGGGAGAC  
+HWI-EAS443:3:33:605:178#0/1  
abaabaaa`^aX`aa\_a\_aa]`aW`^]¥V¥XVVPY]TVVT  
@HWI-EAS443:3:33:608:1272#0/1  
CTGTGATGAGAATGGGAGACCTTCACTACCTCCAGAGCAG  
+HWI-EAS443:3:33:608:1272#0/1  
a\_UYU\_ab\_WTZaXPXGYRXP[[[¥Y¥\_PR[WSQMV^¥ZU  
@HWI-EAS443:3:33:651:563#0/1  
TGAGAATGGGAGACCTTCACTACCTCCAGAGCAGAAATGA  
+HWI-EAS443:3:33:651:563#0/1  
a\_W\_aaabba\_]`^\_a`\_a`[a\_``aWJ]¥\_\_Q`¥]`\_`a]  
@HWI-EAS443:3:33:669:966#0/1  
CAGAGATTGCTTGGAGAACTGTGATGAGAATGGGAGAC  
+HWI-EAS443:3:33:669:966#0/1  
\_¥Z`aUX``abaa\_]\_a^^``¥`Q]XZYQ¥WYJV\_[Q[T^  
@HWI-EAS443:3:33:676:824#0/1  
GTCTCTGAAAATATACAGAGATTGCTTGGAGAACTGTG  
+HWI-EAS443:3:33:676:824#0/1  
aYaX[T`T`]``aUa]WaX¥Z^X\_\_a\_X\_a]\_GRLJOYZZ  
@HWI-EAS443:3:33:687:950#0/1  
CGCATTTCTTCAATTAACCACCTTATTTCTCAAATTTCT  
+HWI-EAS443:3:33:687:950#0/1  
aaa\_aaabaaaa^a\_T¥aaaa`a`a\_\_\_\_\_```[Y\_`^\_\_\_\_  
@HWI-EAS443:3:33:71:319#0/1  
TCTCTGCTCGTTTCAATCTGTGCCGCATTTCTTCAATTAA  
+HWI-EAS443:3:33:71:319#0/1  
ababaa\_bbaa`aaaa`a`a]`a\_\_a`````Za\_T]\_a\_  
@HWI-EAS443:3:33:737:2014#0/1  
GAAACTGTGATGAGAATGGGAGACCTTCACTACCTCCAGA  
+HWI-EAS443:3:33:737:2014#0/1  
^¥a¥a`[`bbaaaa\_aa\_[\_a`a`^`\_aaaa`Q0]^`^\_]`  
@HWI-EAS443:3:33:815:361#0/1  
CTGAAAATATACAGAGATTGCTTGGAGAACTGTGATGA

+HWI-EAS443:3:33:815:361#0/1  
aabaabbbbbbaabab\_a`abaa`aa\_a\_aa^]aZ`\_[¥Z  
@HWI-EAS443:3:33:815:428#0/1  
GATGAGAATGGGAGACCTTCACTACCTCCAGAGCAGAAAT  
+HWI-EAS443:3:33:815:428#0/1  
`Z`a[a`\_\_\_\_]^`\_¥`¥^`\_^¥^W^¥W\_YWWY\_WWWY  
@HWI-EAS443:3:33:863:1375#0/1  
TGAGAATGGGAGACCTTCACTACCTCCAGAGCAGAAATGA  
+HWI-EAS443:3:33:863:1375#0/1  
^``[I\_\_baZYZ^`]aa\_abaaa`^^^a\_T`W\_X`X[\_[\_  
@HWI-EAS443:3:33:871:783#0/1  
TGAGAATGGGAGACCTTCACTACCTCCAGAGCAGAAATGA  
+HWI-EAS443:3:33:871:783#0/1  
a`]PZMU]a`ab[W^QUZ¥DP[PXNWDLPL\_QXYXX^`B  
@HWI-EAS443:3:33:938:122#0/1  
GCCGCATTTCTTCAATTAACCACCTTATTTCCCTCAAATTT  
+HWI-EAS443:3:33:938:122#0/1  
a^S`T\_\_\_aN[`\_\_[YaUIOZ`Q^a¥Waa^OVRRXRO]\_\_\_  
@HWI-EAS443:3:33:941:70#0/1  
GCCGCATTTCTTCAATTAACCACCTTATTTCCCTCAAATTT  
+HWI-EAS443:3:33:941:70#0/1  
a`\_a\_GZaa\_\_a^ZXY`\_\_\_\_^]\_^Z`\_`^XZU]W[^\_Z  
@HWI-EAS443:3:33:953:885#0/1  
GTCGCTTTCAATCTGTGCCGCATTTCTTCAATTAACCACC  
+HWI-EAS443:3:33:953:885#0/1  
aabbaaaabbaaaaaabaaaaabaaaababaa`aa`]a\_\_\_  
@HWI-EAS443:3:33:974:1593#0/1  
GAAACTGTGATGAGAATGGGAGACCTTCACTACCTCCAGA  
+HWI-EAS443:3:33:974:1593#0/1  
\_¥`a]\_b¥bbb]\_]a¥ababab]`Y^Y\_aba\_R[Ta`\_`]  
@HWI-EAS443:3:33:975:1187#0/1  
AGAAACTGTGATGAGAATGGGAGACCTTCACTACCTCCAG  
+HWI-EAS443:3:33:975:1187#0/1  
\_\_\_\_Z^aaWZZZ]¥Z[\_Z\_\_S¥]PW\_^)`\_]¥U\_VWLJ[\_  
@HWI-EAS443:3:33:977:818#0/1  
GAAACGAGAAAGCTTTATCTTGTCTACTTCAAGCAG  
+HWI-EAS443:3:33:977:818#0/1  
aabbaa\_aa\_\_aaaaa\_a`\_`a`]`a`a``[[]WL[V]]\_`  
@HWI-EAS443:3:34:1005:1233#0/1  
AAATCGTGAATGGATCTTGAAAGAGGAATCCAGCGAGAC  
+HWI-EAS443:3:34:1005:1233#0/1  
`¥¥bUVUbb\_`b^[Z^`aa]Z[```a¥a^aZQX\_M¥W[^S  
@HWI-EAS443:3:34:1006:405#0/1  
GAAACAAATCGTGAATGGATCTTGAAAGAGGAATCCAGC  
+HWI-EAS443:3:34:1006:405#0/1  
aa`aa`aaa\_b\_aaa`\_ba]]\_a`a\_aX^¥`[Y]X¥VZWB  
@HWI-EAS443:3:34:1034:341#0/1  
GCCGCATTTCTTCAATTAACCACCTTATTTCCCTCAAATTT  
+HWI-EAS443:3:34:1034:341#0/1  
aaab^Za\_\_aaaaabaaa`\_a^a`\_aaa`]a\_W^W`\_^



@HWI-EAS443:3:34:1049:1578#0/1  
GGTTAATTGAAGAAATGCGGCACAGATTGAAAGCGACAGA  
+HWI-EAS443:3:34:1049:1578#0/1  
aa`bbbaabbbbabbaab`^`aaaaa`aaa\_a\_``]`\_\_  
@HWI-EAS443:3:34:1054:197#0/1  
GAAACTGTGATGAGAATGGGAGACCTTCACTACCTCCAGA  
+HWI-EAS443:3:34:1054:197#0/1  
aaU`Tab\_aYabaaZ¥`aa\_¥\_]`^Y^]¥`]YXYVVUNRYB  
@HWI-EAS443:3:34:1055:631#0/1  
CTTGAATGGAATGGTAACACGGTTCGAGTCTCTGAAAATA  
+HWI-EAS443:3:34:1055:631#0/1  
Xbbbab`a`J¥a[LY`TR^bQSUY^TR`]Saa`aWYY`S\_  
@HWI-EAS443:3:34:1106:1995#0/1  
GTCGCTTTCAATCTGTGCCGATTTCTTCAATTAACCACC  
+HWI-EAS443:3:34:1106:1995#0/1  
a¥TSTW\_a¥Z`^bTaS[a¥^`][`\_]\_X`\_W\_S`\_YU^JF  
@HWI-EAS443:3:34:1129:1595#0/1  
GAATGGGAGACCTTCACTACCTCCAGAGCAGAAATGAAAA  
+HWI-EAS443:3:34:1129:1595#0/1  
WO\_]][U][¥^a^``^\_ZZ^U]]PSW]Z[]MZ[V[[BB  
@HWI-EAS443:3:34:1147:127#0/1  
CGCTTGGAGAACTGTGATGAGAATGGGAGACCTTCACTA  
+HWI-EAS443:3:34:1147:127#0/1  
abaaa`]a`a\_`^¥`X[\_]Z`X`a`S`\_RVXVWRUUB  
@HWI-EAS443:3:34:1151:1573#0/1  
GCCGCATTTCTTCAATTAACCACCTTATTTCTCAAATTT  
+HWI-EAS443:3:34:1151:1573#0/1  
``abZYaY\_]`b^`¥W¥\_ab\_]baZaaaa[a`ZW]`XT  
@HWI-EAS443:3:34:1156:789#0/1  
GAAACTGTGATGAGAATGGGAGACCTTCACTACCTCCAGA  
+HWI-EAS443:3:34:1156:789#0/1  
`aaaaba`babaab`aaa]]`a````\_aa\_`\_]X\_\_X\_\_¥  
@HWI-EAS443:3:34:117:428#0/1  
GATGAGAATGGGAGACCTTCACTACCTCCAGAGCAGAAAT  
+HWI-EAS443:3:34:117:428#0/1  
^`ab\_aSX\_a^U¥¥^¥Z`ba`aaaa`aaa^`\_`^a\_\_a¥  
@HWI-EAS443:3:34:1180:281#0/1  
GCCGCATTTCTTCAATTAACCACCTTATTTCTCAAATTT  
+HWI-EAS443:3:34:1180:281#0/1  
]`]Z¥PPSSOZa\_ZS\_SWU`PZT[WIX^^WFYU¥U^BB  
@HWI-EAS443:3:34:1185:1756#0/1  
GGAATGGTAACACGGTTCGAGTCTCTGAAAATATACAGAG  
+HWI-EAS443:3:34:1185:1756#0/1  
abaaaabTbb`ba]aaaaba]\_aa\_``]\_a^aa^aW^`^\_  
@HWI-EAS443:3:34:118:30#0/1  
ATTGCATCTGTACCTACTTCGCGCTACCTTTCTGACATGA  
+HWI-EAS443:3:34:118:30#0/1  
aa`b`Z`aa[[ab`aaa[aa`a`^`\_\_^Z^U^RZTB  
@HWI-EAS443:3:34:1191:839#0/1  
AGAAACTGTGATGAGAATGGGAGACCTTCACTACCTCCAG

+HWI-EAS443:3:34:1191:839#0/1  
`Z]]aaaa¥b`a\_a`¥\_aaaa[aaaT\_`a`\_]\_^ZV]ZV]Z  
@HWI-EAS443:3:34:1208:1490#0/1  
CATAAATGTTATTTGTTCTGAAACTATTCTCTGTCGCTTTC  
+HWI-EAS443:3:34:1208:1490#0/1  
abbbbYbbYbbabbb`bbaaaaa`bb`aaaa\_[\_^¥\_a^  
@HWI-EAS443:3:34:1220:266#0/1  
GAGAATGGGAGACCTTCACTACCTCCAGAGCAGAAATGAA  
+HWI-EAS443:3:34:1220:266#0/1  
aaa\_``aa\_Y`\_]\_a`\_\_a\_a\_^[\_^W^\_Wa^¥`WW¥X[TW  
@HWI-EAS443:3:34:1222:679#0/1  
TGAGAATGGGAGACCTTCACTACCTCCAGAGCAGAAATGA  
+HWI-EAS443:3:34:1222:679#0/1  
¥Z[a]X]¥¥\_`ZOX\_`]^a``a^S^X¥`][`¥U]¥VT^]X  
@HWI-EAS443:3:34:1235:1700#0/1  
GCCGCATTTCTTCAATTAACCACCTTATTTCTCAAATTT  
+HWI-EAS443:3:34:1235:1700#0/1  
^ab`bbbbbabbbbabbb¥aaabaaaa`ab`aa\_aYY  
@HWI-EAS443:3:34:1251:212#0/1  
GTCTCTGAAAATATACAGAGATTCGCTTGGAGAACTGTG  
+HWI-EAS443:3:34:1251:212#0/1  
``aa``aYa^aaaa`¥`a\_`¥^`[]Z^^`^^`]XZXX]X^  
@HWI-EAS443:3:34:1258:980#0/1  
AGCGAATCTCTGTATATTTTCAGAGACTCGAACCGTGTTA  
+HWI-EAS443:3:34:1258:980#0/1  
`bbbZ[\_`b`ab\_ba`aaaa\_aa\_a\_\_\_a\_^\_X¥ZVVUZ]  
@HWI-EAS443:3:34:1267:1690#0/1  
TCGCTTGGAGAACTGTGATGAGAATGGGAGACCTTCACT  
+HWI-EAS443:3:34:1267:1690#0/1  
a^a[\_ab^\_¥\_^^aaa\_¥VWR^SWa\_a``\_\_USKV]PZUT  
@HWI-EAS443:3:34:1286:1318#0/1  
CTGAAAATATACAGAGATTCGCTTGGAGAACTGTGATGA  
+HWI-EAS443:3:34:1286:1318#0/1  
aa\_\_PT^a]aaa`abaJ\_\_\_a`\_\_`¥\_`VTRR^\_X\_XBBB  
@HWI-EAS443:3:34:1323:874#0/1  
GCCGCATTTCTTCAATTAACCACCTTATTTCTCAAATTT  
+HWI-EAS443:3:34:1323:874#0/1  
aaabaaaaaaa`aaaa]a`\_`\_¥aa\_aa``^`\_Z¥X\_] ]  
@HWI-EAS443:3:34:1339:455#0/1  
GATGAGAATGGGAGACCTTCACTACCTCCAGAGCAGAAAT  
+HWI-EAS443:3:34:1339:455#0/1  
a\_`b`\_`aaaa[a]X`¥TX`Y\_a]Q\_]\_\_`\_]`OV\_UVRV  
@HWI-EAS443:3:34:1412:1004#0/1  
GCCGCATTTCTTCAATTAACCACCTTATTTCTCAAATTT  
+HWI-EAS443:3:34:1412:1004#0/1  
a\_aaa`ab\_aa^\_\_Yaaa\_^^`\_`^a\_aa`\_^\_]X]V`\_]\_`  
@HWI-EAS443:3:34:1447:926#0/1  
GCCGCATTTCTTCAATTAACCACCTTATTTCTCAAATTT  
+HWI-EAS443:3:34:1447:926#0/1  
``aYSQ`a\_a```Va``\_] [a^¥\_` [Z`\_¥\_`^`¥ZPS^UX

@HWI-EAS443:3:34:1637:1074#0/1  
GAACATAGTACTGAAAGCGAACTTCAGTGTAACTTTAAC  
+HWI-EAS443:3:34:1637:1074#0/1  
```aabba`aab`a`a`baU\_````a\_a`a\_`U`\_]^^M  
@HWI-EAS443:3:34:1638:534#0/1  
CCGCATTTCTTCAATTAACCACCTTATTTCCCTCAAATTTTC  
+HWI-EAS443:3:34:1638:534#0/1  
ab`]\_N`aUa]YVb^X`]RR]U\_^Uaba^ZT^\_bXV]^RG  
@HWI-EAS443:3:34:1675:253#0/1  
GAGAAACTGTGATGAGAATGGGAGACCTTCACTACCTCCA  
+HWI-EAS443:3:34:1675:253#0/1  
a`b`a`\_Ya\_a\_aa`a\_\_[[\_]Y`VUM^\_TSRVXOVWTNB  
@HWI-EAS443:3:34:169:536#0/1  
GAAACTGTGATGAGAATGGGAGACCTTCACTACCTCCAGA  
+HWI-EAS443:3:34:169:536#0/1  
[aa\_aab`a]\_aaa`Z\_baY^[aa\_\_aa`^aYS`^U`¥`  
@HWI-EAS443:3:34:169:910#0/1  
GCCGCATTTCTTCAATTAACCACCTTATTTCCCTCAAATTT  
+HWI-EAS443:3:34:169:910#0/1  
`bb\_ba``^baaaP]\_`[a¥]a\_`a¥\_`^a\_a¥]^T^[^\_¥  
@HWI-EAS443:3:34:1703:718#0/1  
GAAACTGTGATGAGAATGGGAGACCTTCACTACCTCCAGA  
+HWI-EAS443:3:34:1703:718#0/1  
aa`ba\_`Q\_`]a^a]`^^^¥`^VNS][Q\_U^]VTVYOYBB  
@HWI-EAS443:3:34:1729:1169#0/1  
GCCGCATTTCTTCAATTAACCACCTTATTTCCCTCAAATTT  
+HWI-EAS443:3:34:1729:1169#0/1  
`aabZ[\_ba\_bb^`aabaa`]a`^ba\_aba¥W`Z\_ZZ`^^  
@HWI-EAS443:3:34:1748:796#0/1  
TCTGCTCTGGAGGTAGTGAAGGTCTCCATTCTCATCACA  
+HWI-EAS443:3:34:1748:796#0/1  
aaa\_^bb`\_WP\_\_^`¥TT]\_\_]Y\_TP¥T^[YBBBBBBBBB  
@HWI-EAS443:3:34:1765:1143#0/1  
GTGATGAGAATGGGAGACCTTCACTACCTCCAGAGCAGAA  
+HWI-EAS443:3:34:1765:1143#0/1  
aaaaab`^\_aaaaYa\_\_\_a\_`a^a]^`^^^WV\_X]YY\_VU  
@HWI-EAS443:3:34:1791:58#0/1  
GAGAAACTGTGATGAGAATGGGAGACCTTCACTACCTCCA  
+HWI-EAS443:3:34:1791:58#0/1  
abbbbaaab¥baab\_a\_aabaa\_a^XY\_aZ\_X^]RYYRXY  
@HWI-EAS443:3:34:18:1597#0/1  
TGAGAATGGGAGACCTTCACTACCTCCAGAGCAGAAATGA  
+HWI-EAS443:3:34:18:1597#0/1  
aba^]`baab`b^^aaaab`aa^aU\_`]XPa¥\_[N^`RZ  
@HWI-EAS443:3:34:232:1452#0/1  
TGATGAGAATGGGAGACCTTCACTACCTCCAGAGCAGAAA  
+HWI-EAS443:3:34:232:1452#0/1  
\_aU[`Y``¥\_aa^]^abbaabbabaa`ba^QR\_aaa\_]V  
@HWI-EAS443:3:34:257:1624#0/1  
GTATATTTTCAGAGACTCGAACCGTGTACCATTCCATTC

+HWI-EAS443:3:34:257:1624#0/1  
[ `a\_v]ab`^bZZ`¥V\_^\_\_\_\_[ `WSU[OR^SFQVTZGWWB  
@HWI-EAS443:3:34:26:619#0/1  
AGAAACTGTGATGAGAATGGGAGACCTTCACTACCTCCAG  
+HWI-EAS443:3:34:26:619#0/1  
[ba][ ]a`^aa`b`aaZ^aa][ `\_\_\_\_^aaa[ `\_\_^XUZ  
@HWI-EAS443:3:34:292:1233#0/1  
TGAGAATGGGAGACCTTCACTACCTCCAGAGCAGAAATGA  
+HWI-EAS443:3:34:292:1233#0/1  
abaa\_aaaYa[ `abaaa` ]a`aaa`a\_` [ \_ ]^^`Y]U` ]]  
@HWI-EAS443:3:34:328:84#0/1  
GCCGCATTTCTTCAATTAACCACCTTATTTCTCAAATTT  
+HWI-EAS443:3:34:328:84#0/1  
`b]MWPXZRT\_Y[W¥Y`¥Q¥`ZYXaa\_` ` [Z\_U¥FY^[^  
@HWI-EAS443:3:34:343:1515#0/1  
GAAACTGTGATGAGAATGGGAGACCTTCACTACCTCCAGA  
+HWI-EAS443:3:34:343:1515#0/1  
`a\_abb^]\_\_a` `` `ba]a]^b^`abba`b¥`^aZ^TV  
@HWI-EAS443:3:34:361:940#0/1  
GGAGAACTGTGATGAGAATGGGAGACCTTCACTACCTCC  
+HWI-EAS443:3:34:361:940#0/1  
¥[Zaa`Y]\_aQ` [¥a\_a^\_XT`a\_` \_\_^` \_\_^¥]\_¥YWWY  
@HWI-EAS443:3:34:38:1869#0/1  
GTGAAATTTCTCCAATTTGCTCCCTCCTCAGTGAAAGC  
+HWI-EAS443:3:34:38:1869#0/1  
]` `b`]bba`bbbbbbbaa[babbaabbaba\_^X]\_aZ\_  
@HWI-EAS443:3:34:393:219#0/1  
GCGGCACAGATTGAAAGCGACAGAGAATAGTTTCGAACAA  
+HWI-EAS443:3:34:393:219#0/1  
aaaaa\_a]\_a`^` ]\_\_^^a^^^`^a\_^YY^Z]^Z]Z¥ZZZ  
@HWI-EAS443:3:34:423:254#0/1  
CCGCATTTCTTCAATTAACCACCTTATTTCTCAAATTT  
+HWI-EAS443:3:34:423:254#0/1  
`a^W^` ]`\_S\_]S[\_\_[ [Z`Z`]¥WZYaa` ]][[\_WTW  
@HWI-EAS443:3:34:440:651#0/1  
CTTGGAGAACTGTGATGAGAATGGGAGACCTTCACTACC  
+HWI-EAS443:3:34:440:651#0/1  
aa`aaa`^S]`YaU` `a^`\_a\_a` ]][ ` \_ ]QS¥\_US  
@HWI-EAS443:3:34:450:144#0/1  
CGCAAGCGATTTGCAGACAATGGATTGGGTGATGCCCCAT  
+HWI-EAS443:3:34:450:144#0/1  
\_T\_X^a\_]\_a\_aa[ `¥`Y[¥[\_YZV[ ]NKPZU[QOGQBB  
@HWI-EAS443:3:34:464:361#0/1  
CCGCATTTCTTCAATTAACCACCTTATTTCTCAAATTT  
+HWI-EAS443:3:34:464:361#0/1  
aaXaUXY¥b`Vb¥[a[\_a\_VYU`^]^aW[^YY\_[\_`^` [ ]]  
@HWI-EAS443:3:34:499:227#0/1  
AGAAACTGTGATGAGAATGGGAGACCTTCACTACCTCCAG  
+HWI-EAS443:3:34:499:227#0/1  
YRXbb]`¥TaaYWZb\_¥\_Z]Z^b\_\_Y`U`aaa\_\_^aW]\_W

@HWI-EAS443:3:34:50:388#0/1  
GAAACTGTGATGAGAATGGGAGACCTTCACTACCTCCAGA  
+HWI-EAS443:3:34:50:388#0/1  
aaV`ba`aa`a`aU^aa`^\_Waa\_]`a`a`\_`[R]X  
@HWI-EAS443:3:34:549:1409#0/1  
GCCGCATTTCTTCAATTAACCACCTTATTTCTCAAATTT  
+HWI-EAS443:3:34:549:1409#0/1  
abbaa`^aa`\_aaWZ`Yb`\_aa`a\_]a`aa\_aa]S^^¥  
@HWI-EAS443:3:34:550:453#0/1  
GCCGCATTTCTTCAATTAACCACCTTATTTCTCAAATTT  
+HWI-EAS443:3:34:550:453#0/1  
``aaYTGv¥QVR][^Z[TTVV[\_\_\_ZQ]Z¥¥¥YWYQQQ\_BB  
@HWI-EAS443:3:34:560:368#0/1  
CTGTGATGAGAATGGGAGACCTTCACTACCTCCAGAGCAG  
+HWI-EAS443:3:34:560:368#0/1  
a¥]PZZUZJWUUUZRYUXUUTQR\_\_XV¥¥ERQVRVRLYLYB  
@HWI-EAS443:3:34:570:1979#0/1  
CTCCCATTCTCATCACAGTTTCTCCAAGCGAATCTCTGTA  
+HWI-EAS443:3:34:570:1979#0/1  
a`ab]aaaaa^aaba\_V]]a¥\_baX]a\_]^]\_W\_^WB  
@HWI-EAS443:3:34:572:1204#0/1  
ATTTCTCGAGGGTCATGTCAGAAAGGTAGCGCGAAGTAG  
+HWI-EAS443:3:34:572:1204#0/1  
ab\_aabbabb\_^`J`][SXWYQS`a]Xa^]aa^[¥\_X]a  
@HWI-EAS443:3:34:577:392#0/1  
AGAAACTGTGATGAGAATGGGAGACCTTCACTACCTCCAG  
+HWI-EAS443:3:34:577:392#0/1  
\_a\_]b^bbs`]aaaa]]a\_ab`a]a\_a\_aaa`\_XV`]^\_\_  
@HWI-EAS443:3:34:58:1368#0/1  
GCCGCATTTCTTCAATTAACCACCTTATTTCTCAAATTT  
+HWI-EAS443:3:34:58:1368#0/1  
^abbbbabbbbbbb`bbabbbbbba`bbbbbbb¥`baa  
@HWI-EAS443:3:34:639:1528#0/1  
GTGCTTTCAATCTGTGCCGCATTTCTTCAATTAACCACC  
+HWI-EAS443:3:34:639:1528#0/1  
^Za\_]Y]¥a¥``]Y[VU\_`a^J[]WY¥aaaa`aa]XMZZZ  
@HWI-EAS443:3:34:647:754#0/1  
ATCCGCAAGCGATTTGCAGACAATGGATTGGGTGATGCCC  
+HWI-EAS443:3:34:647:754#0/1  
\_`aaa`WQ\_aa\_`¥`^`[^¥^¥X\_`¥W¥^XVVSWTXUBBB  
@HWI-EAS443:3:34:670:1283#0/1  
GTGATGAGAATGGGAGACCTTCACTACCTCCAGAGCAGAA  
+HWI-EAS443:3:34:670:1283#0/1  
W]``\_aZGY`Sa\_\_[OQLa\_Xa\_N][¥]]``\_]WVXV^VV  
@HWI-EAS443:3:34:670:507#0/1  
TCGCGCTACCTTTCTGACATGACCCTCGAGGAAATGTCAC  
+HWI-EAS443:3:34:670:507#0/1  
L\_`ZW\_Z`¥`X\_¥`Q¥Wb\_bbab\_ZJ^aW]b^WXH¥FV`B  
@HWI-EAS443:3:34:705:149#0/1  
GCCGCATTTCTTCAATTAACCACCTTATTTCTCAAATTT

+HWI-EAS443:3:34:705:149#0/1  
a`¥aV0\_\_\_]^`)\`\_`a[\_\_\_ZZ`Z\_^\_[][^[SRVZXZ  
@HWI-EAS443:3:34:773:230#0/1  
GCCGCATTTCTTCAATTAACCACCTTATTTCTCAAATTT  
+HWI-EAS443:3:34:773:230#0/1  
aa`^[WR]^W`YZ`aW]]a`\_\_\_a\_`a`\_]T^\_^¥¥^XZ  
@HWI-EAS443:3:34:783:1487#0/1  
GAGAACTGTGATGAGAATGGGAGACCTTCACTACCTCCA  
+HWI-EAS443:3:34:783:1487#0/1  
aa^a]\_`]a]aa`a`a`\_\_XTR`¥S^[U]VLI\_VZVNFS  
@HWI-EAS443:3:34:78:1540#0/1  
CCGCATTTCTTCAATTAACCACCTTATTTCTCAAATTTCT  
+HWI-EAS443:3:34:78:1540#0/1  
aa`a]```a`\_aa\_\_`a]^a`aa\_\_`\_\_\_a\_\_aaR`^^^\_  
@HWI-EAS443:3:34:79:597#0/1  
CTCCCATTCTCATCACAGTTTCTCCAAGCGAATCTCTGTA  
+HWI-EAS443:3:34:79:597#0/1  
ab\_b\_T¥Z`^^Z][U\_\_Y¥MVY^bYFPS[WTGZ]XXZ]]B  
@HWI-EAS443:3:34:844:198#0/1  
GAAACTGTGATGAGAATGGGAGACCTTCACTACCTCCAGA  
+HWI-EAS443:3:34:844:198#0/1  
aa^a`\_\_R`aaa`)]\_Z\_\_\_^`^^\_ZUW^\_Y\_XRY[VYYX  
@HWI-EAS443:3:34:887:1253#0/1  
CGCATTTCTTCAATTAACCACCTTATTTCTCAAATTTCT  
+HWI-EAS443:3:34:887:1253#0/1  
ab[WQVZ`\_TaPNQ]ZW¥\_[\_\_`\_^\_]\_\_\_`^¥VU\_^VUZ  
@HWI-EAS443:3:34:892:1520#0/1  
AATAAGCTGAAACGAGAAAGCTTATCTCTTGTCTACT  
+HWI-EAS443:3:34:892:1520#0/1  
aba\_b\_babaa`aaaa^`^aaaaa`^aaaaa`\_Z`^\_\_W]  
@HWI-EAS443:3:34:894:1042#0/1  
GAGAATGGGAGACCTTCACTACCTCCAGAGCAGAAATGAA  
+HWI-EAS443:3:34:894:1042#0/1  
Z[`a`a`a¥[]Sab`aaaabb^abaaaaab\_aa\_```a`^  
@HWI-EAS443:3:34:906:1855#0/1  
TGAGAATGGGAGACCTTCACTACCTCCAGAGCAGAAATGA  
+HWI-EAS443:3:34:906:1855#0/1  
aaaaaaaa`aa\_aaaaa`\_[W`\_]¥\_^\_^U]]X]^UX  
@HWI-EAS443:3:34:958:954#0/1  
GGCTGTTTCGATATCGAGGCCAAGGGTGTGCCTCTTCCT  
+HWI-EAS443:3:34:958:954#0/1  
aaa``[abb]Sa`^¥NZ¥`¥baa\_aWEZRZHX\_QQ^XLBB  
@HWI-EAS443:3:35:1013:1505#0/1  
GTGATGAGAATGGGAGACCTTCACTACCTCCAGAGCAGAA  
+HWI-EAS443:3:35:1013:1505#0/1  
aaaaaaaaaaaaaaaaa```a`aaa`aaaZ\_`\_`Z^\_\_\_X\_  
@HWI-EAS443:3:35:1062:1969#0/1  
GAGAATGGGAGACCTTCACTACCTCCAGAGCAGAAATGAA  
+HWI-EAS443:3:35:1062:1969#0/1  
¥ZP¥RXUWT^^ba¥`]UXZSZYY[T[`VNYU`¥]^¥[W]^

@HWI-EAS443:3:35:1107:1875#0/1  
GCCGCATTTCTTCAATTAACCACCTTATTTCTCAAATTT  
+HWI-EAS443:3:35:1107:1875#0/1  
aaaaabYZ#a`aaaa`\_]b`\_aaa\_a#a]a]\_`aa`\_`\_Z  
@HWI-EAS443:3:35:1152:1591#0/1  
CACAGATTGAAAGCGACAGAGAATAGTTTCGAACAAATAA  
+HWI-EAS443:3:35:1152:1591#0/1  
ab`aYYaa\_aL`YPXZ\_]b`#aXa`][X`a\_\_\_#\_[``[  
@HWI-EAS443:3:35:1227:353#0/1  
GCTTGAGAAACTGTGATGAGAATGGGAGACCTTCACTAC  
+HWI-EAS443:3:35:1227:353#0/1  
\_W]a`VPXXVLY]U[]TWFW[\_Z#X^M^RMKTQL^Y^X[  
@HWI-EAS443:3:35:1261:453#0/1  
GTGCTTTCAATCTGTGCCGCATTTCTTCAATTAACCACC  
+HWI-EAS443:3:35:1261:453#0/1  
a`^b`aa`#^\_aaa#a^a^]a`#Za]a^#a^a``#\_U\_  
@HWI-EAS443:3:35:1270:65#0/1  
GAAAGAGGAATCCAGCGAGACACTTAGAATGACAATTGCA  
+HWI-EAS443:3:35:1270:65#0/1  
a\_aababa\_aa`aa\_a`a\_[\_`^]\_aZ^`aa^`^^]aV\_  
@HWI-EAS443:3:35:1291:1663#0/1  
TGAGAATGGGAGACCTTCACTACCTCCAGAGCAGAAATGA  
+HWI-EAS443:3:35:1291:1663#0/1  
aaTQWb^NYNL#ORWY[a#Y`ZS^XS]TPDPXLRXVSWN[  
@HWI-EAS443:3:35:1312:763#0/1  
ATGAGAATGGGAGACCTTCACTACCTCCAGAGCAGAAATG  
+HWI-EAS443:3:35:1312:763#0/1  
ab#abababa`Vaaaabaaaaa`\_`b#a`\_aaaa]#\_\_a  
@HWI-EAS443:3:35:1324:1099#0/1  
TGATGAGAATGGGAGACCTTCACTACCTCCAGAGCAGAAA  
+HWI-EAS443:3:35:1324:1099#0/1  
a\_Y^bXa\_`abb\_V`\_]\_a[a\_\_\_ZTZ[^#`\_`\_]X[\_]a  
@HWI-EAS443:3:35:1342:786#0/1  
AAACTGTGATGAGAATGGGAGACCTTCACTACCTCCAGAG  
+HWI-EAS443:3:35:1342:786#0/1  
^#`^a`^bab`\_`\_]\_aba\_\_[\_a\_[^`aaa`aaa`a[Z  
@HWI-EAS443:3:35:1408:140#0/1  
AGAAACTGTGATGAGAATGGGAGACCTTCACTACCTCCAG  
+HWI-EAS443:3:35:1408:140#0/1  
a`^aa[\_WZ]T`b\_\_XWX\_]a#`#[UP[`\_XY#WTVQYRX  
@HWI-EAS443:3:35:1429:1006#0/1  
GTGCTTTCAATCTGTGCCGCATTTCTTCAATTAACCACC  
+HWI-EAS443:3:35:1429:1006#0/1  
a`\_]`^aba]\_`aa````a]`^`\_a^Wa`aY[\_`a`]\_\_Ya  
@HWI-EAS443:3:35:1487:925#0/1  
GATGAGAATGGGAGACCTTCACTACCTCCAGAGCAGAAAT  
+HWI-EAS443:3:35:1487:925#0/1  
aaaaaa\_abaaaX\_^\_\_a`\_`#a\_VFYQaa`[\_`\_`Y`V\_  
@HWI-EAS443:3:35:1556:117#0/1  
CGAGAGCAATTGGGACAGAAATTTGAGGAAATAAGGTGGT

+HWI-EAS443:3:35:1556:117#0/1  
abbabbaaabbbbbb`abbababbbb\_baaaab`abbWba`  
@HWI-EAS443:3:35:1566:1988#0/1  
CGCTTTCAATCTGTGCCGATTTCTTCAATTAACCACCTT  
+HWI-EAS443:3:35:1566:1988#0/1  
a`¥RV\_`a^¥\_WT`XabZ[a`WYV``[\_[[a]\_V][[]]`  
@HWI-EAS443:3:35:1572:360#0/1  
ACTGTTTCCTTTGGCATATCCGCAAGCGATTTGCAGACAA  
+HWI-EAS443:3:35:1572:360#0/1  
a[[aa[\_aa\_`^`\_`^`\_`^`\_`TZNY`^`Z`\_Y[^`W^W¥  
@HWI-EAS443:3:35:1655:1271#0/1  
CCGCATTTCTTCAATTAACCACCTTATTTCTCAAATTTTC  
+HWI-EAS443:3:35:1655:1271#0/1  
abb`\_bbbbbbbababbbbaabaabaababbabbaaaab\_a  
@HWI-EAS443:3:35:171:1117#0/1  
GAGAATGGGAGACCTTCACTACCTCCAGAGCAGAAATGAA  
+HWI-EAS443:3:35:171:1117#0/1  
aabaa\_aaa]\_\_aa`aa]a\_aaa\_`aa`^`a`\_Q`a\_\_VJ  
@HWI-EAS443:3:35:210:1992#0/1  
CTGTGATGAGAATGGGAGACCTTCACTACCTCCAGAGCAG  
+HWI-EAS443:3:35:210:1992#0/1  
a`XQaa\_a]W\_a`ZZ^¥a`\_\_\_ZaYU\_aa¥a^XU\_^\_Z^  
@HWI-EAS443:3:35:264:1267#0/1  
CGCATTTCTTCAATTAACCACCTTATTTCTCAAATTTCT  
+HWI-EAS443:3:35:264:1267#0/1  
a]\_X`a`\_]a`aa^]XZ]]\_]`[aZIU]`Y[FJUXXS\_\_  
@HWI-EAS443:3:35:295:81#0/1  
GAAACTGTGATGAGAATGGGAGACCTTCACTACCTCCAGA  
+HWI-EAS443:3:35:295:81#0/1  
]a]aa`\_b`aa\_a``aa`a^a^\_]a]`^a^^`¥aY^H  
@HWI-EAS443:3:35:308:1701#0/1  
GCCGCATTTCTTCAATTAACCACCTTATTTCTCAAATTT  
+HWI-EAS443:3:35:308:1701#0/1  
abbba`abbbbabbbbbbbbabbbbaa`abbbba¥aba`  
@HWI-EAS443:3:35:343:1755#0/1  
AGAATGGGAGACCTTCACTACCTCCAGAGCAGAAATGAAA  
+HWI-EAS443:3:35:343:1755#0/1  
]Xa[YX\_RW^^\_Y]]b¥\_W\_Xa[aa]]aa^\_RHX[WFXX  
@HWI-EAS443:3:35:354:1016#0/1  
GAGAATGGGAGACCTTCACTACCTCCAGAGCAGAAATGAA  
+HWI-EAS443:3:35:354:1016#0/1  
`a`IX¥^\_]abbaaabbaaaa`a`\_`S^a]``\_`a``W  
@HWI-EAS443:3:35:362:777#0/1  
AAACTGTGATGAGAATGGGAGACCTTCACTACCTCCAGAG  
+HWI-EAS443:3:35:362:777#0/1  
^\_¥]`a¥[WZ^Ya\_Y`\_\_Y`^^a`\_aaa[``\_`[a¥¥[^  
@HWI-EAS443:3:35:371:1350#0/1  
CCGCATTTCTTCAATTAACCACCTTATTTCTCAAATTTTC  
+HWI-EAS443:3:35:371:1350#0/1  
ab]a^`aabaaaS`aaaaa]R\_a``aa\_`^`a\_a`\_]a]\_\_



@HWI-EAS443:3:35:380:806#0/1  
GAAACTGTGATGAGAATGGGAGACCTTCACTACCTCCAGA  
+HWI-EAS443:3:35:380:806#0/1  
a`¥`ab[aa[^IaYR`b]aX]aaa`\_^U¥UL\_\_]\_^Z^W  
@HWI-EAS443:3:35:411:562#0/1  
TGAGAATGGGAGACCTTCACTACCTCCAGAGCAGAAATGA  
+HWI-EAS443:3:35:411:562#0/1  
TZX^Yaa^[Y^]Z\_^aba\_^Z\_^¥\_a[¥I¥^H¥¥Y[\_\_\_P  
@HWI-EAS443:3:35:442:364#0/1  
GAGAACTGTGATGAGAATGGGAGACCTTCACTACCTCCA  
+HWI-EAS443:3:35:442:364#0/1  
^`¥[[]`bbbabaa]baab^a`a`a`^`a\_a`a`aaaaa\_]`  
@HWI-EAS443:3:35:456:214#0/1  
GCCGCATTTCTTCAATTAACCACCTTATTTCTCAAATTT  
+HWI-EAS443:3:35:456:214#0/1  
abaaaaaaaa`a`aa`aa\_Za\_\_\_a\_a^^a`a^¥^a`Y  
@HWI-EAS443:3:35:490:1329#0/1  
ACTGTGATGAGAATGGGAGACCTTCACTACCTCCAGAGCA  
+HWI-EAS443:3:35:490:1329#0/1  
^a^`Z¥W\_`a`\_aa¥aa]Z\_a`\_aaa]X`b^aa\_¥\_^^¥  
@HWI-EAS443:3:35:490:1494#0/1  
GCCGCATTTCTTCAATTAACCACCTTATTTCTCAAATTT  
+HWI-EAS443:3:35:490:1494#0/1  
`bb`a]aa`aa`b`\_aba\_b`aaa\_T\_[\_aa`b\_Z\_\_`^  
@HWI-EAS443:3:35:534:850#0/1  
AGACTGTTTCCTTTGGCATATCCGCAAGCGATTTGCAGAC  
+HWI-EAS443:3:35:534:850#0/1  
Yaaaa`baaba[\_N]^a^[\_a\_]`\_`aa\_\_\_ZV]\_¥\_a  
@HWI-EAS443:3:35:537:1994#0/1  
GAAACTGTGATGAGAATGGGAGACCTTCACTACCTCCAGA  
+HWI-EAS443:3:35:537:1994#0/1  
\_abUVI¥QaarTR]\_^U^QHAY`¥Pa¥aabUa¥Y[aaaaY  
@HWI-EAS443:3:35:556:772#0/1  
TGCCGCATTTCTTCAATTAACCACCTTATTTCTCAAATT  
+HWI-EAS443:3:35:556:772#0/1  
abaZZ^WYaY`aaaZ¥I`aa\_aaa\_^[]`YYaa]\_ZL[ay  
@HWI-EAS443:3:35:564:687#0/1  
AGAACTGTGATGAGAATGGGAGACCTTCACTACCTCCAG  
+HWI-EAS443:3:35:564:687#0/1  
[]`Z^`aa[]X¥¥^^Z`Taa\_]`XWV[\_a¥\_[\_\_^^`^VY  
@HWI-EAS443:3:35:567:153#0/1  
GCCGCATTTCTTCAATTAACCACCTTATTTCTCAAATTT  
+HWI-EAS443:3:35:567:153#0/1  
`]¥P^LG]VYWaYRWW[[]ZY]XMUS[¥YT]\_Z^[[QZ¥¥  
@HWI-EAS443:3:35:570:1948#0/1  
GGCAACACCCTTGGCCTCGATATCGAAACAGCCACTCTTG  
+HWI-EAS443:3:35:570:1948#0/1  
Iabbb^^ab`b^bUaMaab\_aabbaabab\_U¥bab\_a]^`  
@HWI-EAS443:3:35:576:1470#0/1  
GAAACTGTGATGAGAATGGGAGACCTTCACTACCTCCAGA

+HWI-EAS443:3:35:576:1470#0/1  
`bbb`aa\_aabb`\_Saba`\_\_aaa`aaTb\_\_`^`aZ^  
@HWI-EAS443:3:35:576:355#0/1  
GCCGCATTTCTTCAATTAACCACCTTATTTCTCAAATTT  
+HWI-EAS443:3:35:576:355#0/1  
Z¥\_a`¥`ZbbX\_a]abb\_\_`UaVa\_\_LSX¥\_aaaa`¥  
@HWI-EAS443:3:35:577:1659#0/1  
TGTCATTCTAAGTGTCTCGCTGGATTCTTCTTCAAGATC  
+HWI-EAS443:3:35:577:1659#0/1  
T^aSZ[ba`\_b\_¥MWZa\_GR^^`aZbZWaV[^a`]R\_Wa  
@HWI-EAS443:3:35:601:1097#0/1  
GAGAATGGGAGACCTTCACTACCTCCAGAGCAGAAATGAA  
+HWI-EAS443:3:35:601:1097#0/1  
aa\_X]a^a^Vaaa`\_abaNaa`\_¥`\_\_aa\_Y\_]Z¥¥^  
@HWI-EAS443:3:35:662:230#0/1  
GAGAATGGGAGACCTTCACTACCTCCAGAGCAGAAATGAA  
+HWI-EAS443:3:35:662:230#0/1  
aaa\_\_aa`aV]`a\_`a\_¥\_`¥¥¥¥^J[\_X[[\_¥¥¥WWU  
@HWI-EAS443:3:35:682:1442#0/1  
GGAAGAGAAGGTAATGGTGAATTTCTCCAATTTGCTC  
+HWI-EAS443:3:35:682:1442#0/1  
Sabbabbbbbb[aba[\_U\_a`bWab[\_b\_bb\_bbbbaabb[b  
@HWI-EAS443:3:35:689:1635#0/1  
CTTGGAGAAACTGTGATGAGAATGGGAGACCTTCACTACC  
+HWI-EAS443:3:35:689:1635#0/1  
Y^\_abaaZa`aa]`^[\_]WXZ¥PU][STa`U``\_[GSGa  
@HWI-EAS443:3:35:692:560#0/1  
GGGAAACAAATCGTGAATGGATCTTGAAGAGGAATCCA  
+HWI-EAS443:3:35:692:560#0/1  
aa\_aabba]baab\_ba`aaa\_a`aaa`^TZ`aa`]a\_`U`  
@HWI-EAS443:3:35:720:1626#0/1  
TGCCGCATTTCTTCAATTAACCACCTTATTTCTCAAATT  
+HWI-EAS443:3:35:720:1626#0/1  
VV^\_VZ\_a`UY``\_]¥`U\_^^]\_`^ZW\_ZV¥\_a`]YWZ\_0  
@HWI-EAS443:3:35:720:1825#0/1  
AAACTGTGATGAGAATGGGAGACCTTCACTACCTCCAGAG  
+HWI-EAS443:3:35:720:1825#0/1  
\_\_a[WLQ[T`X[YZ\_Z][ZX¥^[\_Ya\_a[a`]ZX^[[[O  
@HWI-EAS443:3:35:734:140#0/1  
CGCTTGGAGAAACTGTGATGAGAATGGGAGACCTTCACTA  
+HWI-EAS443:3:35:734:140#0/1  
abaaaab`\_a``aaa¥aa`a`\_\_V\_\_X\_]VZV`]\_YZ]  
@HWI-EAS443:3:35:748:896#0/1  
CTCTGAAAATATACAGAGATTCGCTTGGAGAACTGTGAT  
+HWI-EAS443:3:35:748:896#0/1  
aaaaa`Waaaaabba`\_a\_ba``\_\_`\_[\_\_`\_\_W^]`^  
@HWI-EAS443:3:35:828:1608#0/1  
GTCGCTTTCAATCTGTGCCGCATTTCTTCAATTAACCACC  
+HWI-EAS443:3:35:828:1608#0/1  
`aaaaaa`abbaaM]\_`aa`aaa\_\_aa\_baaaaaa\_\_a[a

@HWI-EAS443:3:35:861:1221#0/1  
CGCTTGGAGAACTGTGATGAGAATGGGAGACCTTCACTA  
+HWI-EAS443:3:35:861:1221#0/1  
aa]ZZSUJabY]V\_[^X^\_]^\`a¥LYXRGQ¥^\\_LRNZTUY  
@HWI-EAS443:3:35:866:1453#0/1  
TGTCGCTTTCAATCTGTGCCGATTTCTTCAATTAACCAC  
+HWI-EAS443:3:35:866:1453#0/1  
ab\_aaa\_aa\_]a\_`Z^a`\_a¥a^^a\_\_a`a\_\_`\_^a^`  
@HWI-EAS443:3:35:867:546#0/1  
AGAAACTGTGATGAGAATGGGAGACCTTCACTACCTCCAG  
+HWI-EAS443:3:35:867:546#0/1  
aa`a``aa]aaaa\_`^`\_aa`\_aYZ\_\_\_aa\_^a^`\_X\_]\_  
@HWI-EAS443:3:35:893:982#0/1  
AAAATATACAGAGATTGCTTGGAGAACTGTGATGAGAA  
+HWI-EAS443:3:35:893:982#0/1  
a`¥`abaaaa`¥`XYaa`a¥\_\_`\_\_]U`a`\_W¥]]]W]Z`  
@HWI-EAS443:3:35:901:231#0/1  
GAAACTGTGATGAGAATGGGAGACCTTCACTACCTCCAGA  
+HWI-EAS443:3:35:901:231#0/1  
\_`ababb^^`aa\_``aaaaU\_`a\_`aS]^a``^^\_]a^\_  
@HWI-EAS443:3:35:923:1831#0/1  
GCCGCATTTCTTCAATTAACCACCTTATTTCTCAAATTT  
+HWI-EAS443:3:35:923:1831#0/1  
aVT`YWW¥]\_\_\_YaW\_Y]SP¥^`\_`T¥HYb`]a^][[N]  
@HWI-EAS443:3:35:935:860#0/1  
CGCATTTCTTCAATTAACCACCTTATTTCTCAAATTTCT  
+HWI-EAS443:3:35:935:860#0/1  
aaa[`bb`bbbbababaaaabaabababb`abbaba`aaa  
@HWI-EAS443:3:35:945:1822#0/1  
GAGAACTGTGATGAGAATGGGAGACCTTCACTACCTCCA  
+HWI-EAS443:3:35:945:1822#0/1  
S¥W`W`¥bZ^Y\_abaab`OP\_a[^ab]^aba^a^]QaF]  
@HWI-EAS443:3:36:1011:2002#0/1  
GAAACTGTGATGAGAATGGGAGACCTTCACTACCTCCAGA  
+HWI-EAS443:3:36:1011:2002#0/1  
aabaab`\_aaaa`\_aaaa`a`a`^`aXaaa\_Y]]^a^\_[  
@HWI-EAS443:3:36:1011:793#0/1  
GCCGCATTTCTTCAATTAACCACCTTATTTCTCAAATTT  
+HWI-EAS443:3:36:1011:793#0/1  
`\_\_b`T`aaa¥W\_a\_]¥ba\_bM\_a`\_`aaa`^]aY]Y``¥  
@HWI-EAS443:3:36:1017:1362#0/1  
TGCCGCATTTCTTCAATTAACCACCTTATTTCTCAAATT  
+HWI-EAS443:3:36:1017:1362#0/1  
`b¥bYb\_]b`aZYZa]ZQ^ab[][\_a`\_^U][\_Ya]S\_`P  
@HWI-EAS443:3:36:1023:781#0/1  
GTTGCCTCTTCCTTTTAAGGACTTTTGATCTCGCGGAGC  
+HWI-EAS443:3:36:1023:781#0/1  
\_S]¥a\_\_aa`YT^X]^OBBBBBBBBBBBBBBBBBBBBBBB  
@HWI-EAS443:3:36:1027:598#0/1  
GTAGGTACAGATGCAATTGTCATTCTAAGTGTCTCGCTGG

+HWI-EAS443:3:36:1027:598#0/1  
VYWa¥[S\_TZ`\_^[^\_bb`a`K^¥NZW[S¥]WVU\_VYY]V  
@HWI-EAS443:3:36:1058:341#0/1  
GTCGCTTTCAATCTGTGCCGATTTCTTCAATTAACCACC  
+HWI-EAS443:3:36:1058:341#0/1  
a`aaa`aaaa`\_\_\_\_a`\_\_\_\_^^]`Y¥\_\_\_\_]\_^Z`  
@HWI-EAS443:3:36:106:288#0/1  
AGTCTCTGAAAATATACAGAGATTCGCTTGGAGAACTGT  
+HWI-EAS443:3:36:106:288#0/1  
a\_\_b\_aaa\_````aa`aa````[^\_`\_`\_^`\_^`\_]\_^WM  
@HWI-EAS443:3:36:1135:691#0/1  
GAGAATGGGAGACCTTCACTACCTCCAGAGCAGAAATGAA  
+HWI-EAS443:3:36:1135:691#0/1  
a\_a]a\_aa`^`¥\_Z^Y\_a\_\_\_YV^`¥\_^`\_`^Y¥YW¥^¥¥V  
@HWI-EAS443:3:36:1136:1361#0/1  
ATCTGTACTACTTCGCGCTACCTTTCTGACATGACCCTC  
+HWI-EAS443:3:36:1136:1361#0/1  
`aaaa[abb\_aaa\_\_abaa`\_`a^\_a\_\_\_b``[^`[aa\_a  
@HWI-EAS443:3:36:1184:466#0/1  
CAAGGAATGGGGCATCACCCAATCCATTGTCTGCAAATCG  
+HWI-EAS443:3:36:1184:466#0/1  
`aabaW[^`aYaY^Ua`aa`aa`\_\_\_\_a`^TaZ\_W`\_`^V^  
@HWI-EAS443:3:36:1237:665#0/1  
GCCGCTTTCTTCAATTAACCACCTTATTTCTCAAATTT  
+HWI-EAS443:3:36:1237:665#0/1  
\_abababaaabaaa`baaa`aa`aaaa`^aa]`\_aa\_a`  
@HWI-EAS443:3:36:1248:1618#0/1  
ATTTCTCGAGGGTCATGTCAGAAAGGTAGCGCGAAGTAG  
+HWI-EAS443:3:36:1248:1618#0/1  
]\_X^aaa^W\_^^][^`a`\_]`Zb^a`baZaa`V SX]^Y\_[  
@HWI-EAS443:3:36:1250:1532#0/1  
AGAAACTGTGATGAGAATGGGAGACCTTCACTACCTCCAG  
+HWI-EAS443:3:36:1250:1532#0/1  
^HWY`\_`aaZa\_\_a\_aY`\_`aaa[¥V[[`]]`[QTVaXa\_]\_  
@HWI-EAS443:3:36:1259:114#0/1  
GCCGCTTTCTTCAATTAACCACCTTATTTCTCAAATTT  
+HWI-EAS443:3:36:1259:114#0/1  
aabababbbabba^abba`\_aa`\_`aa`\_`\_`aa\_a^\_\_a`^a  
@HWI-EAS443:3:36:1262:1455#0/1  
GCCGCTTTCTTCAATTAACCACCTTATTTCTCAAATTT  
+HWI-EAS443:3:36:1262:1455#0/1  
aaa\_a¥`aa\_aabaaabaa\_ab\_aaaa`aab]a]a]aa`a  
@HWI-EAS443:3:36:1266:108#0/1  
GTCGCTTTCAATCTGTGCCGATTTCTTCAATTAACCACC  
+HWI-EAS443:3:36:1266:108#0/1  
a`\_`aaa`¥Y`¥aR[]Y\_T^[XN][YV`\_]W\_]\_]W]X]^Z\_  
@HWI-EAS443:3:36:1273:180#0/1  
CCGCTTTCTTCAATTAACCACCTTATTTCTCAAATTT  
+HWI-EAS443:3:36:1273:180#0/1  
aabaabbbabbaaaabbaa`aa\_aaaa`\_`a`\_`\_`aa`\_`\_`

@HWI-EAS443:3:36:127:1565#0/1  
CTTTCAATCTGTGCCGATTTCTTCAATTAACCACCTTAT  
+HWI-EAS443:3:36:127:1565#0/1  
a`\_aa`a\_a^`^]````[\_a\_a\_^a]W¥`\_¥^]\_^a[]\_]  
@HWI-EAS443:3:36:1346:283#0/1  
CTCCCATTCTCATCACAGTTTCTCCAAGCGAATCTCTGTA  
+HWI-EAS443:3:36:1346:283#0/1  
ab\_baa]abbbbbbbbababa\_ZU\_Va¥OL¥D[`b\_]W  
@HWI-EAS443:3:36:1374:1136#0/1  
CTTGAATGGAATGGTAACACGGTTCGAGTCTCTGAAAATA  
+HWI-EAS443:3:36:1374:1136#0/1  
`bbbbbaabbbbbabbabbabb]``baababa\_\_R¥aa  
@HWI-EAS443:3:36:1379:1920#0/1  
GAGAATGGGAGACCTTCACTACCTCCAGAGCAGAAATGAA  
+HWI-EAS443:3:36:1379:1920#0/1  
aab]babba^aa`\_aa`a`aa```aa`\_`aaS^¥`\_`aYa  
@HWI-EAS443:3:36:1427:1038#0/1  
CGAGAAAGCTCTTATCTCTTGTCTACTTCAAGCAGTAGT  
+HWI-EAS443:3:36:1427:1038#0/1  
\_\_\_\_`aaaabb¥abb`bbbbba`bbbaba]^J]\_`ba  
@HWI-EAS443:3:36:1440:826#0/1  
AGATTACACTGAAGTTCGCTTTCAGTACTATGTTCTTTTC  
+HWI-EAS443:3:36:1440:826#0/1  
abbbbbbaabbaaa`abbaaaaa`a`aWaaaa`\_aaaa`  
@HWI-EAS443:3:36:1460:1040#0/1  
GAGAAACTGTGATGAGAATGGGAGACCTTCACTACCTCCA  
+HWI-EAS443:3:36:1460:1040#0/1  
abbbbbbb`b`aabaaaaaa`a```\_aaa]]`^Z`\_U\_  
@HWI-EAS443:3:36:1485:45#0/1  
ATCGGTTAAAGATTACACTGAAGTTCGCTTTCAGTACTAT  
+HWI-EAS443:3:36:1485:45#0/1  
aaabb\_b`a\_[]\_`¥Y`¥]]¥\_\_YYP¥Y]a¥MQ\_YPY\_R\_  
@HWI-EAS443:3:36:1486:1031#0/1  
TCCCATTCTCATCACAGTTTCTCCAAGCGAATCTCTGTAT  
+HWI-EAS443:3:36:1486:1031#0/1  
aaaaaaaaaaaa^a`ba```````\_a]V\_U¥¥YV^^`W¥[  
@HWI-EAS443:3:36:1486:857#0/1  
AATGGTAACACGGTTCGAGTCTCTGAAAATATACAGAGAT  
+HWI-EAS443:3:36:1486:857#0/1  
abbbb\_baaaaaa\_a\_baa\_\_a^\_\_\_`]a`a\_\_X\_\_¥`^\_  
@HWI-EAS443:3:36:1490:1485#0/1  
TTCTAAGTGTCTCGCTGGATTCTCTTTCAAGATCCATTC  
+HWI-EAS443:3:36:1490:1485#0/1  
`^b`bY`H`TaXWX[`Y`ZY^]Q¥Y¥aY]\_ZZ\_Z]Y^^Z`  
@HWI-EAS443:3:36:1512:758#0/1  
GTCGCTTTCAATCTGTGCCGATTTCTTCAATTAACCACC  
+HWI-EAS443:3:36:1512:758#0/1  
aaab```aaaaa\_aa\_b`\_a`\_a`a[a^Z\_V\_\_`\_V`aV]  
@HWI-EAS443:3:36:1518:1595#0/1  
GCCGATTTCTTCAATTAACCACCTTATTTCTCAAATTT

+HWI-EAS443:3:36:1518:1595#0/1  
abbb`a`bb`bbaabbaba\_a`aaaa`bab]a\_a]Xaaa  
@HWI-EAS443:3:36:1527:547#0/1  
CGCATTCTTCAATTAACCACCTTATTTCTCAAATTTCT  
+HWI-EAS443:3:36:1527:547#0/1  
a`WHQ^bXa\_¥\_b`^abaaa\_T`a\_^`[\_a¥`\_[SY`Z\_\_  
@HWI-EAS443:3:36:1543:367#0/1  
ACCATGTCAAGCTTTCAGGTAGACTGTTTCCTTTGGCATA  
+HWI-EAS443:3:36:1543:367#0/1  
a^baba\_aaaa\_a`\_aaaZ\_a]\_`\_^\_a]^ZX]a\_]^  
@HWI-EAS443:3:36:1545:1586#0/1  
TGATGAGAATGGGAGACCTTCACTACCTCCAGAGCAGAAA  
+HWI-EAS443:3:36:1545:1586#0/1  
a^a`aa`\_`aaaa\_a\_aaa`ab\_a`^aT\_^a^^`\_`a^Y`  
@HWI-EAS443:3:36:1570:471#0/1  
CGCTTGGAGAACTGTGATGAGAATGGGAGACCTTCACTA  
+HWI-EAS443:3:36:1570:471#0/1  
abbaa`baa^[\_aaa\_a\_a`a^\_]`\_^a`UT]`\_a]^Z  
@HWI-EAS443:3:36:158:404#0/1  
TTTGGCATATCCGCAAGCGATTTGCAGACAATGGATTGGG  
+HWI-EAS443:3:36:158:404#0/1  
````bba\_W``\_aa`^a`aaaaa]¥[\_aa`\_a\_a`XHX¥I  
@HWI-EAS443:3:36:161:625#0/1  
GGAGAACTGTGATGAGAATGGGAGACCTTCACTACCTCC  
+HWI-EAS443:3:36:161:625#0/1  
aa`ba`]``a]aa`\_\_a`aaaa`^^^a`\_\_\_a`\_\_\_a\_]\_\_  
@HWI-EAS443:3:36:1624:102#0/1  
CCGCATTTCTTCAATTAACCACCTTATTTCTCAAATTTCT  
+HWI-EAS443:3:36:1624:102#0/1  
`abbabbbbb`Za^bbbaabaab\_aabaaba]\_¥baaa  
@HWI-EAS443:3:36:1647:341#0/1  
GTCGCTTCAATCTGTGCCGATTTCTTCAATTAACCACC  
+HWI-EAS443:3:36:1647:341#0/1  
a\_ab\_\_a`a^\_]`^T^]\_]\_\_^¥X¥\_]\_YV][[]X^Y\_]TZ  
@HWI-EAS443:3:36:1665:1362#0/1  
GTCGCTTCAATCTGTGCCGATTTCTTCAATTAACCACC  
+HWI-EAS443:3:36:1665:1362#0/1  
`[¥¥¥a`````]X¥V]X¥¥XYUV[¥]Z]XXVUVYWYQ^XS¥  
@HWI-EAS443:3:36:166:459#0/1  
AAACTGTGATGAGAATGGGAGACCTTCACTACCTCCAGAG  
+HWI-EAS443:3:36:166:459#0/1  
ZS`T`LW[[M¥WHPW¥PQ]Y\_Y\_[R\_\_VGYFPX[[^]PP  
@HWI-EAS443:3:36:168:1663#0/1  
GAAAGCTTCTTCTTCTTCTTCTTCAAGCAGTAGTTGT  
+HWI-EAS443:3:36:168:1663#0/1  
^^[NN`bb```aabb`V`abb^b`ababaa¥\_\_^\_P`\_`  
@HWI-EAS443:3:36:1704:157#0/1  
AACACGGTTCGAGTCTCTGAAAATATACAGAGATTCGCTT  
+HWI-EAS443:3:36:1704:157#0/1  
abbbbbbb^b`bab`\_a`aa]\_`\_a^\_`TZa\_\_Z^¥Z\_^ZZ

@HWI-EAS443:3:36:1704:1868#0/1  
TGCCGCATTTCTTCAATTAACCACCTTATTTCCCTCAAATT  
+HWI-EAS443:3:36:1704:1868#0/1  
`babbbbbbba\_baaaaabaa`aa\_¥aa`baa^]aa\_S^aa  
@HWI-EAS443:3:36:1756:200#0/1  
GAAACTGTGATGAGAATGGGAGACCTTCACTACCTCCAGA  
+HWI-EAS443:3:36:1756:200#0/1  
a\_]\_`a`ba^]Va][\_`^a¥`[XJX`V][¥TJMWYZZZY  
@HWI-EAS443:3:36:1769:138#0/1  
TGAGAATGGGAGACCTTCACTACCTCCAGAGCAGAAATGA  
+HWI-EAS443:3:36:1769:138#0/1  
Va\_b`[`a\_ba`a`]Xa\_aWa`\_SV`[Z[Y¥HSRRP¥YYY  
@HWI-EAS443:3:36:186:1121#0/1  
CTGTGATGAGAATGGGAGACCTTCACTACCTCCAGAGCAG  
+HWI-EAS443:3:36:186:1121#0/1  
a`b`bbabaaa]aaU^Zaaa`aaZaVaba\_a¥a\_``baa  
@HWI-EAS443:3:36:240:196#0/1  
GCCGCATTTCTTCAATTAACCACCTTATTTCCCTCAAATTT  
+HWI-EAS443:3:36:240:196#0/1  
aabbbaaaaaaaaaa```aY`a`Ra`a`a`a\_¥0\_\_^  
@HWI-EAS443:3:36:277:1433#0/1  
TGAAAATATACAGAGATTTCGCTTGGAGAACTGTGATGAG  
+HWI-EAS443:3:36:277:1433#0/1  
abb\_aabbab`a\_baa\_ab`a`a[a]`T`aaa\_`]]Z`  
@HWI-EAS443:3:36:297:68#0/1  
GAAAATATACAGAGATTTCGCTTGGAGAACTGTGATGAGA  
+HWI-EAS443:3:36:297:68#0/1  
a\_[`\_\_[\_\_\_`aa`a\_\_\_\_`\_\_\_\_^`^]\_N¥^`^^X[ZWZZZY  
@HWI-EAS443:3:36:317:1044#0/1  
GTCGCTTTCAATCTGTGCCGCATTTCTTCAATTAACCACC  
+HWI-EAS443:3:36:317:1044#0/1  
`bbbaabbbbbbaa^`baab\_aaaaaaab]aaaabba^a  
@HWI-EAS443:3:36:320:470#0/1  
GAAACTGTGATGAGAATGGGAGACCTTCACTACCTCCAGA  
+HWI-EAS443:3:36:320:470#0/1  
a\_^baba[`aaaa`aaaa\_\_\_\_]aaaa\_aa\_a^W\_aa``\_  
@HWI-EAS443:3:36:402:1008#0/1  
GAAACTGTGATGAGAATGGGAGACCTTCACTACCTCCAGA  
+HWI-EAS443:3:36:402:1008#0/1  
a`¥Q^^[aWW\_aaUW\_¥`aUZa^^X`Xa`^a`XU^`a\_]`  
@HWI-EAS443:3:36:447:1921#0/1  
GAGAACTGTGATGAGAATGGGAGACCTTCACTACCTCCA  
+HWI-EAS443:3:36:447:1921#0/1  
aba¥`bbaa^]baaaaaabaa\_aa`abb\_`aX\_\_aab^a\_`  
@HWI-EAS443:3:36:469:561#0/1  
GCCGCATTTCTTCAATTAACCACCTTATTTCCCTCAAATTT  
+HWI-EAS443:3:36:469:561#0/1  
aabbba`aaa`aaaa^aaT```aaaa`W`\_\_a`\_\_a¥GX\_]`  
@HWI-EAS443:3:36:499:349#0/1  
GCCGCATTTCTTCAATTAACCACCTTATTTCCCTCAAATTT

+HWI-EAS443:3:36:499:349#0/1  
a]\_\_^]]¥`aa\_[]`a^^^\_]aXT[\_\_a¥\_W\_TWZ\_V  
@HWI-EAS443:3:36:555:1335#0/1  
CAGAAAGGTAGCGCGAAGTAGGTACAGATGCAATTGTCAT  
+HWI-EAS443:3:36:555:1335#0/1  
aba\_`baaY``aaaa`a^`a^W]^a``\_\_a`\_a\_^Xa\_\_  
@HWI-EAS443:3:36:576:105#0/1  
TGAGAATGGGAGACCTTCACTACCTCCAGAGCAGAAATGA  
+HWI-EAS443:3:36:576:105#0/1  
aa`a^¥a`aaaaa`\_\_\_\_\_^^^`^^`¥¥\_Y\_ZXYW^¥  
@HWI-EAS443:3:36:598:48#0/1  
CTTTTGCCTAGGCATGAGCATGAACCAGTCTCGTGACATT  
+HWI-EAS443:3:36:598:48#0/1  
aa`aa`aa]]a`^`[]a¥^`\_\_`^`\_\_Z¥[`Q\_W\_YWXSVTWY  
@HWI-EAS443:3:36:610:983#0/1  
TGAGAATGGGAGACCTTCACTACCTCCAGAGCAGAAATGA  
+HWI-EAS443:3:36:610:983#0/1  
W[aa^Wa^\_a^`U\_b```V`aa```bb\_¥\_\_\_\_[¥Z¥U\_¥Q  
@HWI-EAS443:3:36:635:1596#0/1  
CTCTGTGCTTTCAATCTGTGCCGATTCTTCAATTAAC  
+HWI-EAS443:3:36:635:1596#0/1  
`a[^X[VaXFLZY[]\_[^XW]¥QUQUNX¥UXZ]^X]ZZ  
@HWI-EAS443:3:36:659:570#0/1  
ATGGAATGGTAACACGGTTCGAGTCTCTGAAAATATACAG  
+HWI-EAS443:3:36:659:570#0/1  
MabaJTUab`\_bV`YaUa]aRUT^a]`a^YIWT¥a]Qaa]  
@HWI-EAS443:3:36:663:730#0/1  
AATAGTTGGAGAAATTTCACTTACCTTCTCTTCCAGGA  
+HWI-EAS443:3:36:663:730#0/1  
a¥b`a`bba`babaaaab`aaaaaaaaa\_`a``aaaa\_Y  
@HWI-EAS443:3:36:738:1081#0/1  
GGTTAATTGAAGAAATGCGGCACAGATTGAAAGCGACAGA  
+HWI-EAS443:3:36:738:1081#0/1  
aaababbabbbaaabbbaabbbaaaaaabaa`aaabaa`  
@HWI-EAS443:3:36:743:2042#0/1  
AAACTGTGATGAGAATGGGAGACCTTCACTACCTCCAGAG  
+HWI-EAS443:3:36:743:2042#0/1  
]``\_a`SYa\_a¥bPZaa`X[a¥¥V[^a\_SY\_UVZ\_M^S¥\_  
@HWI-EAS443:3:36:767:1034#0/1  
GCGCGAAGTAGGTACAGATGCAATTGTCATTCTAAGTGTC  
+HWI-EAS443:3:36:767:1034#0/1  
\_b`b`aX^]\_^aUabbbYa]```baaYZY¥Z¥a]`^T``a  
@HWI-EAS443:3:36:785:861#0/1  
GAAACTGTGATGAGAATGGGAGACCTTCACTACCTCCAGA  
+HWI-EAS443:3:36:785:861#0/1  
¥`a`bbaPab``b\_^aab`a\_a]aaa\_]b`\_a]`aaaaaX  
@HWI-EAS443:3:36:801:1739#0/1  
GAGAATGGGAGACCTTCACTACCTCCAGAGCAGAAATGAA  
+HWI-EAS443:3:36:801:1739#0/1  
¥[aI\_bb`ba[bbabaabbbab[a\_baa`aba`\_a`aa¥M



@HWI-EAS443:3:36:808:362#0/1  
CGTGGAATGGATCTTGAAAGAGGAATCCAGCGAGACTT  
+HWI-EAS443:3:36:808:362#0/1  
`ba`aZ¥abaaaaabXY\_a^Z\_`aaa\_aaa`]a\_[a]`\_  
@HWI-EAS443:3:36:82:270#0/1  
GAAACTGTGATGAGAATGGGAGACCTTCACTACCTCCAGA  
+HWI-EAS443:3:36:82:270#0/1  
aabaaa`Oaaa\_W\_\_\_`aa`Y\_Ka^^]aa^^`\_Z`^^\_N  
@HWI-EAS443:3:36:876:933#0/1  
CGCTTTCAATCTGTGCCGATTTCTTCAATTAACCACCTT  
+HWI-EAS443:3:36:876:933#0/1  
aababbb¥bbbaa\_\_a\_ab¥bbaabaaa`ba`a\_a`aaa`  
@HWI-EAS443:3:36:87:1017#0/1  
GTGATGAGAATGGGAGACCTTCACTACCTCCAGAGCAGAA  
+HWI-EAS443:3:36:87:1017#0/1  
a\_XDM^\_UIPS`NMOUV`¥\_¥`\_^U[[\_¥`\_VOQV¥MZWT  
@HWI-EAS443:3:36:903:1928#0/1  
GCGGCACAGATTGAAAGCGACAGAGAATAGTTTCGAACAA  
+HWI-EAS443:3:36:903:1928#0/1  
aaZY\_b\_PN[^0]YZYR[UHKTR^\_¥PFZTOX¥FWXUVT[  
@HWI-EAS443:3:36:919:290#0/1  
CAGAAAGGTAGCGGAAGTAGGTACAGATGCAATTGTCAT  
+HWI-EAS443:3:36:919:290#0/1  
`W`a\_abb]bbababaaa`abb0b\_aa\_aaa]`aaa]a`a  
@HWI-EAS443:3:36:931:715#0/1  
TGCCGCATTTCTTCAATTAACCACCTTATTCCTCAAATT  
+HWI-EAS443:3:36:931:715#0/1  
`abab`\_aY`baaaa]aYZ`aa¥a\_aaaa\_aa\_aa`WR[S  
@HWI-EAS443:3:36:965:403#0/1  
GAGAACTGTGATGAGAATGGGAGACCTTCACTACCTCCA  
+HWI-EAS443:3:36:965:403#0/1  
aaZaU¥abbabaaa\_baX\_aa\_\_b`]`\_\_`\_^\_\_WYZaX\_  
@HWI-EAS443:3:36:970:378#0/1  
ATTTCTCGAGGGTCATGTCAGAAAGGTAGCGGAAGTAG  
+HWI-EAS443:3:36:970:378#0/1  
a[QQaa¥]ba¥[ST]aTYL`a`\_`\_a[P`\_^aR\_\_\_\_Uaa  
@HWI-EAS443:3:36:990:2041#0/1  
GTCGCTTTCAATCTGTGCCGATTTCTTCAATTAACCACC  
+HWI-EAS443:3:36:990:2041#0/1  
a^\_P`S`\_`\_a][Z^X\_¥KTRV¥\_Z^^X^TZ]YW]W^¥X\_  
@HWI-EAS443:3:36:993:1082#0/1  
CTGTGATGAGAATGGGAGACCTTCACTACCTCCAGAGCAG  
+HWI-EAS443:3:36:993:1082#0/1  
aa\_\_aaaaaaaaa^^`^aX¥a]Y\_`\_\_`^ZXU\_^[\_¥T¥  
@HWI-EAS443:3:37:1017:50#0/1  
TGAGAATGGGAGACCTTCACTACCTCCAGAGCAGAAATGA  
+HWI-EAS443:3:37:1017:50#0/1  
ab`a`aaaba\_aa`\_`\_`\_¥`\_¥`\_¥[WDTZ^`WV¥^`V  
@HWI-EAS443:3:37:1092:570#0/1  
GAATGGGAGACCTTCACTACCTCCAGAGCAGAAATGAAAA

+HWI-EAS443:3:37:1092:570#0/1  
abaaab``^Q`a`a¥V`\_a`\_aaaH]\_SUZQ^a]`¥X^  
@HWI-EAS443:3:37:1111:262#0/1  
TGCCGCATTTCTTCAATTAACCACCTTATTTCTCAAATT  
+HWI-EAS443:3:37:1111:262#0/1  
`abaaababa`baaaaaaaaaaaaaaaaa]aaa`aa`a`  
@HWI-EAS443:3:37:1123:1475#0/1  
GAAACAAATCGTGAATGGATCTTGAAAGAGGAATCCAGC  
+HWI-EAS443:3:37:1123:1475#0/1  
^`\_`bbb`bbb¥b`¥ba`\_`aaabaaa`^GWab^Y[^ba^  
@HWI-EAS443:3:37:1126:1008#0/1  
TGAGAATGGGAGACCTTCACTACCTCCAGAGCAGAAATGA  
+HWI-EAS443:3:37:1126:1008#0/1  
`\_V[^`ab`aa[ba]baa`^aZ``bbaa[Lmb¥Ya\_\_`aaa  
@HWI-EAS443:3:37:1144:114#0/1  
GAAACTGTGATGAGAATGGGAGACCTTCACTACCTCCAGA  
+HWI-EAS443:3:37:1144:114#0/1  
abaa`bbabaab`a`\_abaa`ba``a`\_aT^aa`\_[-¥`]  
@HWI-EAS443:3:37:1146:539#0/1  
GAGATTCGCTTGGAGAACTGTGATGAGAATGGGAGACCT  
+HWI-EAS443:3:37:1146:539#0/1  
a\_b\_a\_aa``Z``U^Y\_\_a`Xa¥\_a\_XSGVa\_¥R[V\_T\_  
@HWI-EAS443:3:37:1157:226#0/1  
ATACTTATGAGGATGTCAAAAATGCAGTTGGGGTCCCTCAT  
+HWI-EAS443:3:37:1157:226#0/1  
aa`a]`ababa`a\_X[``a]`a`\_a\_\_G[^S[YV`\_R  
@HWI-EAS443:3:37:1161:991#0/1  
TTGTCAATTCTAAGTGTCTCGCTGGATTCTTCTTTCAAGAT  
+HWI-EAS443:3:37:1161:991#0/1  
^a\_I\_abaab`Z^`a`\_X`^`ab`baa[G\_]`a\_aaa\_\_  
@HWI-EAS443:3:37:1162:660#0/1  
GCCGCATTTCTTCAATTAACCACCTTATTTCTCAAATTT  
+HWI-EAS443:3:37:1162:660#0/1  
abbba^`abaa^[FT]X]`a^P`Za`aaYP]]\_`^KU`Z`\_  
@HWI-EAS443:3:37:1186:1083#0/1  
GCCGCATTTCTTCAATTAACCACCTTATTTCTCAAATTT  
+HWI-EAS443:3:37:1186:1083#0/1  
`\_`aWZ^aaa`a]aa`^^`aVa`a\_\_\_\_Za\_\_a`\_]^^^  
@HWI-EAS443:3:37:1189:1143#0/1  
TAACACGGTTCGAGTCTCTGAAAATATACAGAGATTCGCT  
+HWI-EAS443:3:37:1189:1143#0/1  
aab^bbba`aaaab^bbbaaYaaaaaaaaZa`^U]\_`\_\_\_\_  
@HWI-EAS443:3:37:1196:1361#0/1  
GAGAAATTTACCATTACCTTCTCTTCCAGGACATACTTA  
+HWI-EAS443:3:37:1196:1361#0/1  
abbabbaabbbaababbbababbaaaa\_]\_abaa`a^\_\_  
@HWI-EAS443:3:37:1238:604#0/1  
ATGAGAATGGGAGACCTTCACTACCTCCAGAGCAGAAATG  
+HWI-EAS443:3:37:1238:604#0/1  
abaabaaaa`aaaaaaaa\_aab]\_a\_\_\_\_VZaa`a`^\_a`\_

@HWI-EAS443:3:37:1384:375#0/1  
TGCCGCATTTCTTCAATTAACCACCTTATTTCCCTCAAATT  
+HWI-EAS443:3:37:1384:375#0/1  
aaa`ba``aa\_aaa^Yaa\_¥^`^\_aa\_aU\_`aaa`\_Wa\_  
@HWI-EAS443:3:37:1386:1418#0/1  
GCCGCATTTCTTCAATTAACCACCTTATTTCCCTCAAATTT  
+HWI-EAS443:3:37:1386:1418#0/1  
ab\_Z\_abaaaaa```baaa^aa``aaaaYaY\_aaZ`aa`  
@HWI-EAS443:3:37:1421:1704#0/1  
CAGAAAGGTAGCGGAAGTAGGTACAGATGCAATTGTCAT  
+HWI-EAS443:3:37:1421:1704#0/1  
]WYGYXS¥L\_b`XZY[XQUR¥QN\_ba^R`Sa[]a^¥Z```]  
@HWI-EAS443:3:37:1421:2045#0/1  
GTGGTTAATTGAAGAAATGCGGCACAGATTGAAAGCGACA  
+HWI-EAS443:3:37:1421:2045#0/1  
aSYQ``T[OTbR\_XQ`]aWGW`\_]TX¥RSLQ^YOYYXDUU  
@HWI-EAS443:3:37:1435:1662#0/1  
GAATGGGAGACCTTCACTACCTCCAGAGCAGAAATGAAAA  
+HWI-EAS443:3:37:1435:1662#0/1  
aaa\_¥aa```¥^`^aX`aQ]\_\_`]¥^^aRW]^¥]\_¥``¥  
@HWI-EAS443:3:37:1467:911#0/1  
GAATGGGAGACCTTCACTACCTCCAGAGCAGAAATGAAAA  
+HWI-EAS443:3:37:1467:911#0/1  
\_aaaaaaaa[\_Va`^aabaa[bb[aabVbGababbbbaa  
@HWI-EAS443:3:37:1515:1542#0/1  
AGAAACTGTGATGAGAATGGGAGACCTTCACTACCTCCAG  
+HWI-EAS443:3:37:1515:1542#0/1  
ab]^`abbTaa¥]]`YY[[`Y\_]N]\_\_`G]\_[\_a]\_`\_]  
@HWI-EAS443:3:37:1522:1010#0/1  
GAAACTGTGATGAGAATGGGAGACCTTCACTACCTCCAGA  
+HWI-EAS443:3:37:1522:1010#0/1  
`\_\_aab`[\_`aaa\_b\_`aaaa\_b\_`aaa\_¥DU`\_\_`Z^a`]  
@HWI-EAS443:3:37:1523:1092#0/1  
GCCGCATTTCTTCAATTAACCACCTTATTTCCCTCAAATTT  
+HWI-EAS443:3:37:1523:1092#0/1  
ab]^aaabbaba`a`baa`^aaa\_baaabXa\_aa`Zaaa\_  
@HWI-EAS443:3:37:1528:392#0/1  
GCCGCATTTCTTCAATTAACCACCTTATTTCCCTCAAATTT  
+HWI-EAS443:3:37:1528:392#0/1  
]Y]¥UWUR\_a^VPXaa`aa]YIPZVH^TXUX[X\_^SZ[]S  
@HWI-EAS443:3:37:1546:1717#0/1  
CCGCATTTCTTCAATTAACCACCTTATTTCCCTCAAATTT  
+HWI-EAS443:3:37:1546:1717#0/1  
^bV[Q\_`SI¥]TZ\_]``]FM\_VV\_ZSa¥QOb\_]W]^a^`]  
@HWI-EAS443:3:37:1558:573#0/1  
ATGAGAATGGGAGACCTTCACTACCTCCAGAGCAGAAATG  
+HWI-EAS443:3:37:1558:573#0/1  
ab`¥baabbbaaa^[\_`aa\_a\_aa\_`a^SSPL`baa`\_Xa^  
@HWI-EAS443:3:37:1614:1364#0/1  
GCCGCATTTCTTCAATTAACCACCTTATTTCCCTCAAATTT

+HWI-EAS443:3:37:1614:1364#0/1  
a\_QX\_a`UR\_a]P]SW^\_\_V][PW\_¥KV`M[FT[WNXa\_P  
@HWI-EAS443:3:37:1622:1453#0/1  
AGAAACTGTGATGAGAATGGGAGACCTTCACTACCTCCAG  
+HWI-EAS443:3:37:1622:1453#0/1  
abaaabba`baaaaa`aa`ba\_aaa`^bYb\_a`ZZ\_a^^  
@HWI-EAS443:3:37:1629:1263#0/1  
CGCTTTCAATCTGTGCCGATTTCTTCAATTAACCACCTT  
+HWI-EAS443:3:37:1629:1263#0/1  
abba`bb``baababb\_aaabbaabba\_bSbbbbbbaa\_baa  
@HWI-EAS443:3:37:1644:772#0/1  
AGAAACTGTGATGAGAATGGGAGACCTTCACTACCTCCAG  
+HWI-EAS443:3:37:1644:772#0/1  
`ba\_babb\_\_\_aa[aa\_aa`aaa^`^\_\_][IZ^a`\_]`\_[Z  
@HWI-EAS443:3:37:1693:1028#0/1  
CGCATTTCTTCAATTAACCACCTTATTTCTCAAATTTCT  
+HWI-EAS443:3:37:1693:1028#0/1  
`b``bbbabbbaabaaaaaaa`babbaabPb\_Y^aabb`b  
@HWI-EAS443:3:37:1696:848#0/1  
GCCGCATTTCTTCAATTAACCACCTTATTTCTCAAATTT  
+HWI-EAS443:3:37:1696:848#0/1  
^bababb]a\_bbabWababZZ\_¥``]]baRbabaa\_[`a]  
@HWI-EAS443:3:37:1747:653#0/1  
GAAACTGTGATGAGAATGGGAGACCTTCACTACCTCCAGA  
+HWI-EAS443:3:37:1747:653#0/1  
aa[¥\_bbbaabb\_a\_aabX`]a`\_]a]V[IY¥a\_\_ZN[\_Y  
@HWI-EAS443:3:37:1783:377#0/1  
CCAAGTGCATTTTTGACATCCTCATAAGTATGCCTGGAA  
+HWI-EAS443:3:37:1783:377#0/1  
^b¥bab\_bbbbb`bababbbbababbbba]bbabbbbaba  
@HWI-EAS443:3:37:203:1044#0/1  
TCGCGCTACCTTTCTGACATGACCCTCGAGGAAATGTCAC  
+HWI-EAS443:3:37:203:1044#0/1  
abba`ba^`bb`\_baa[aaaa`baa\_`XHZ[¥HT]\_\_a^^  
@HWI-EAS443:3:37:250:1173#0/1  
CGCTTGGAGAACTGTGATGAGAATGGGAGACCTTCACTA  
+HWI-EAS443:3:37:250:1173#0/1  
\_`aa^`^`^Z\_aaa\_¥`\_]Z^YZ)`YMMJ¥`VX\_`aZ\_  
@HWI-EAS443:3:37:265:656#0/1  
GTTTCGAGTCTCTGAAAATATACAGAGATTCGCTTGGAGAA  
+HWI-EAS443:3:37:265:656#0/1  
`\_a\_Y`babbbab¥`L^babaab\_`b`a\_\_]a[\_\_\_^`aa^  
@HWI-EAS443:3:37:276:504#0/1  
GTGATGAGAATGGGAGACCTTCACTACCTCCAGAGCAGAA  
+HWI-EAS443:3:37:276:504#0/1  
a\_\_N\_\_P\_\_a¥]]a[\_[aZ^¥`X`[\_]Z^Q¥P[X\_]\_W^  
@HWI-EAS443:3:37:282:251#0/1  
GAATGGGAGACCTTCACTACCTCCAGAGCAGAAATGAAAA  
+HWI-EAS443:3:37:282:251#0/1  
a^aaabaaa`bba]\_ba`aaa`aaaaV\_a¥¥\_\_[\_a\_V\_^

@HWI-EAS443:3:37:342:372#0/1  
ATGAGAATGGGAGACCTTCACTACCTCCAGAGCAGAAATG  
+HWI-EAS443:3:37:342:372#0/1  
aab^\_aa`baa\_a`aaa\_aaaa`a\_\_`\_VJ```a^X]\_`  
@HWI-EAS443:3:37:343:969#0/1  
GAGGGTCATGTCAGAAAGGTAGCGCGAAGTAGGTACAGAT  
+HWI-EAS443:3:37:343:969#0/1  
`abaaOb\_aaaaa`aaaYMYbbaaaa`YU\_aXUYaa\_`a  
@HWI-EAS443:3:37:352:261#0/1  
GGTTAATTGAAGAAATGCGGCACAGATTGAAAGCGACAGA  
+HWI-EAS443:3:37:352:261#0/1  
abababbab\_bb^V^`aab`\_abaa``aaXGX`aa`\_Ya`  
@HWI-EAS443:3:37:355:1717#0/1  
TGCCGCATTTCTTCAATTAACCACCTTATTCCTCAAATT  
+HWI-EAS443:3:37:355:1717#0/1  
a]b`Y`\_``aabab`aaabaabXbaa`a\_Z¥bb`a\_S^a`  
@HWI-EAS443:3:37:375:103#0/1  
GAAACTGTGATGAGAATGGGAGACCTTCACTACCTCCAGA  
+HWI-EAS443:3:37:375:103#0/1  
aRWX\_\_a]`S]a]a\_^`a\_^]a^^\_]X[QFNX¥UWU^UWR  
@HWI-EAS443:3:37:417:603#0/1  
ATTACACTGAAGTTCGCTTTCAGTACTATGTTCTTTTCCA  
+HWI-EAS443:3:37:417:603#0/1  
¥SYR\_bb\_XYT\_H¥X¥Zbabbbbaaa]Y`\_Q[a[WJT`P^  
@HWI-EAS443:3:37:425:762#0/1  
CGCATTCTTCAATTAACCACCTTATTCCTCAAATTTCT  
+HWI-EAS443:3:37:425:762#0/1  
ab`aaa```aaaa`^aa\_`aaa^aaabS`b\_S\_aa`aa  
@HWI-EAS443:3:37:45:746#0/1  
TTATGAGGATGTCAAAAATGCAGTTGGGGTCCTCATCGGA  
+HWI-EAS443:3:37:45:746#0/1  
aaaab`bb\_ab\_aa`]`aaa^L^Za¥aa\_0^\_]`[\_a\_`]  
@HWI-EAS443:3:37:480:902#0/1  
GGTTAATTGAAGAAATGCGGCACAGATTGAAAGCGACAGA  
+HWI-EAS443:3:37:480:902#0/1  
aaTVV]aW`X][VV¥`\_\_a^\_a¥M^TU^^LFOV\_\_[\_`K^]  
@HWI-EAS443:3:37:504:1093#0/1  
GCGGCACAGATTGAAAGCGACAGAGAATAGTTTCGAACAA  
+HWI-EAS443:3:37:504:1093#0/1  
abbabbbZbbbabbbabbaa`aaa`a`[SUJa\_a]`aaa`  
@HWI-EAS443:3:37:512:991#0/1  
GTAGACTGTTTCTTTGGCATATCCGCAAGCGATTTGCAG  
+HWI-EAS443:3:37:512:991#0/1  
a[^`aa\_`^a`]`\_\_]N¥]Y¥]Y`a¥^]RS`¥UY^^Z`^U  
@HWI-EAS443:3:37:575:90#0/1  
CAATCGCACGCAAAGAGGGCCTATTATCTTTTGCCTAGGC  
+HWI-EAS443:3:37:575:90#0/1  
\_bab^X^^[\_`a^abab¥aaa`^^]a\_U`NW[X`¥]VZ]  
@HWI-EAS443:3:37:578:1174#0/1  
TGCCGCATTTCTTCAATTAACCACCTTATTCCTCAAATT

+HWI-EAS443:3:37:578:1174#0/1  
]¥Ka`XZ^b`¥\_`U]Xa]UU[\_]¥^aaZ^aaaa^ZG[N  
@HWI-EAS443:3:37:625:1137#0/1  
CCGCATTTCTTCAATTAACCACCTTATTTCTCAAATTC  
+HWI-EAS443:3:37:625:1137#0/1  
aa¥PS\_X]a^¥Y\_[PS\_a\_P\_b\_`T\_baYJ^X]RSWZYUa  
@HWI-EAS443:3:37:657:1376#0/1  
AACAAATCGTGGAATGGATCTTGAAAGAGGAATCCAGCGA  
+HWI-EAS443:3:37:657:1376#0/1  
a\_b¥R^aaaaa[```aZ]aa\_aa[`U`IGQH\_Waaa]a]Y  
@HWI-EAS443:3:37:706:602#0/1  
CGCTTGGAGAACTGTGATGAGAATGGGAGACCTTCACTA  
+HWI-EAS443:3:37:706:602#0/1  
abaaaaaba\_\_`\_a[^][P\_[^]aaXHNZ^`WT^`\_WX  
@HWI-EAS443:3:37:714:1459#0/1  
CCGCATTTCTTCAATTAACCACCTTATTTCTCAAATTC  
+HWI-EAS443:3:37:714:1459#0/1  
ab\_bbaabbbbb`^abbbbbbb`^bbaZbabbbab\_aa  
@HWI-EAS443:3:37:779:1519#0/1  
CTGTGATGAGAATGGGAGACCTTCACTACCTCCAGAGCAG  
+HWI-EAS443:3:37:779:1519#0/1  
a\_ZOS¥a¥a¥^`\_`]ZJ0`\_Va\_YZ\_b[abNG]aR[Z^a]\_  
@HWI-EAS443:3:37:831:1266#0/1  
GCCGCATTTCTTCAATTAACCACCTTATTTCTCAAATTT  
+HWI-EAS443:3:37:831:1266#0/1  
abb]abaa`aaa`aaabab\_aaaaaa\_a[¥b^\_ba\_`\_\_\_  
@HWI-EAS443:3:37:848:247#0/1  
CGCATTTCTTCAATTAACCACCTTATTTCTCAAATTTCT  
+HWI-EAS443:3:37:848:247#0/1  
aabaaba\_bba`]aab`baaa`b`ab`abNWWaa`abaa`  
@HWI-EAS443:3:37:855:1866#0/1  
TGAAAATATACAGAGATTTCGCTTGGAGAACTGTGATGAG  
+HWI-EAS443:3:37:855:1866#0/1  
aa\_aa`]baaaaab`]aa\_a\_`^\_`a\_¥SVa\_]W^\_]\_\_^  
@HWI-EAS443:3:37:867:899#0/1  
GAAACTGTGATGAGAATGGGAGACCTTCACTACCTCCAGA  
+HWI-EAS443:3:37:867:899#0/1  
^`\_aa`ababab`babbabb`aWba\_abbVabbbbaab^a`  
@HWI-EAS443:3:37:885:1973#0/1  
AATGGGAGACCTTCACTACCTCCAGAGCAGAAATGAAAAG  
+HWI-EAS443:3:37:885:1973#0/1  
a`[Za\_\_¥[`a\_\_aabZa```a\_`a\_\_\_]YSZaZ\_[`\_¥\_  
@HWI-EAS443:3:37:935:1294#0/1  
ACGAGAAAGCTTATCTCTTGTCTACTTCAAGCAGTAG  
+HWI-EAS443:3:37:935:1294#0/1  
aaZaa\_]P]a\_aaa``aaa`aa^a`\_`\_]b]FWa^¥S\_X  
@HWI-EAS443:3:37:939:355#0/1  
GAGCAATTGGGACAGAAATTTGAGGAAATAAGGTGGTTAA  
+HWI-EAS443:3:37:939:355#0/1  
Y^\_OV```aabaa`bbb``abbbaba]YabR]^^]bbZ```¥

@HWI-EAS443:3:37:940:1299#0/1  
TGAGAATGGGAGACCTTCACTACCTCCAGAGCAGAAATGA  
+HWI-EAS443:3:37:940:1299#0/1  
\_baa^[]`aaaaaaYaaaaaaaaaaaa\_`WX[MY`\_aZ` [  
@HWI-EAS443:3:37:945:1203#0/1  
AGAAACTGTGATGAGAATGGGAGACCTTCACTACCTCCAG  
+HWI-EAS443:3:37:945:1203#0/1  
`Y\_a^b]bTV^¥XaaYaaabVX`¥¥aaab]b\_Sab``aaR  
@HWI-EAS443:3:38:1008:211#0/1  
GAAACTGTGATGAGAATGGGAGACCTTCACTACCTCCAGA  
+HWI-EAS443:3:38:1008:211#0/1  
aaaa`ab^a`aa\_a`aaa`\_\_Z^^`]]\_XX]RUYT]]^Y  
@HWI-EAS443:3:38:1036:1163#0/1  
AGCGCGAAGTAGGTACAGATGCAATTGTCATTCTAAGTGT  
+HWI-EAS443:3:38:1036:1163#0/1  
`bbbba]\_a\_ab\_]aaaaaaaa`aaa]a]\_\_Z```aV`V  
@HWI-EAS443:3:38:1053:215#0/1  
GTCGCTTTCAATCTGTGCCGATTTCTTCAATTAACCACC  
+HWI-EAS443:3:38:1053:215#0/1  
a[aa`aa]RW`Za\_aU\_[^^\_[^U`^^XS^^¥WXXSZW  
@HWI-EAS443:3:38:1099:1710#0/1  
GAAGAGAAGGTAATGGTGAAATTTCTCCAATATTGCTCC  
+HWI-EAS443:3:38:1099:1710#0/1  
aa\_Z\_\_\_`[XG]`T\_YW`\_`aa\_X``TYS0[Z¥NUONJ  
@HWI-EAS443:3:38:1168:1216#0/1  
GCCGCATTTCTTCAATTAACCACCTTATTTCTCAAATTT  
+HWI-EAS443:3:38:1168:1216#0/1  
a\_a`\_`a`\_`aZ^VX`\_^YW`\_aa`\_`a`^VRVZ^¥]¥^^Z  
@HWI-EAS443:3:38:1242:803#0/1  
GAAACTGTGATGAGAATGGGAGACCTTCACTACCTCCAGA  
+HWI-EAS443:3:38:1242:803#0/1  
aWYUS`aSa\_^a\_^Z\_]YX[^PUXV¥S¥RRVUVU[]VZU  
@HWI-EAS443:3:38:1257:1642#0/1  
TCTCTGTCGCTTTCAATCTGTGCCGATTTCTTCAATTA  
+HWI-EAS443:3:38:1257:1642#0/1  
`a````¥a`a`\_][aaa¥^]Y\_\_\_`¥^]`¥T^^¥^^a^\_Z  
@HWI-EAS443:3:38:1259:1188#0/1  
CGCACGCAAAGAGGGCCTATTATCTTTTGCCTAGGCATGA  
+HWI-EAS443:3:38:1259:1188#0/1  
`aaaaaaaa`¥\_]aa`\_\_a`a`\_\_`\_`NUGQ\_\_V[¥¥Q  
@HWI-EAS443:3:38:1291:1468#0/1  
GCGGCACAGATTGAAAGCGACAGAGAATAGTTTCGAACAA  
+HWI-EAS443:3:38:1291:1468#0/1  
a`YZY[]]S^VNNXW¥0[aZ[[^SVX]S^YPYONVTPXW  
@HWI-EAS443:3:38:1351:823#0/1  
GTCGCTTTCAATCTGTGCCGATTTCTTCAATTAACCACC  
+HWI-EAS443:3:38:1351:823#0/1  
a]]`X[[V`\_LRJWJF[`]`ZV[^¥\_\_[\_WR^Z^XXUXXG  
@HWI-EAS443:3:38:1365:1010#0/1  
GCCGCATTTCTTCAATTAACCACCTTATTTCTCAAATTT

+HWI-EAS443:3:38:1365:1010#0/1  
abbbababbbbaabbbbaaa]]^ba`ab^JQ`aa\_`a\_Y  
@HWI-EAS443:3:38:1366:655#0/1  
CTTGAATGGAATGGTAACACGGTTCGAGTCTCTGAAAATA  
+HWI-EAS443:3:38:1366:655#0/1  
`XXa[U\_`aa`¥PZNNWS[LNXP][ZS^HKRX\_TP¥WN[F  
@HWI-EAS443:3:38:1391:1442#0/1  
GCCGCATTTCTTCAATTAACCACCTTATTTCCCTCAAATTT  
+HWI-EAS443:3:38:1391:1442#0/1  
a`aa`^`Z\_a`Y^Yaa¥[Y]a^^aaaa\_¥Y¥TQZ¥[^`U  
@HWI-EAS443:3:38:1394:1249#0/1  
ATGCAATTGTCATTCTAAGTGTCTCGCTGGATTCCCTCTTT  
+HWI-EAS443:3:38:1394:1249#0/1  
`^¥aaababXQWa^¥aa`a^`[^a]Z]\_aXP¥[SNZ\_\_`T  
@HWI-EAS443:3:38:139:1269#0/1  
CGCTTGGAGAACTGTGATGAGAATGGGAGACCTTCACTA  
+HWI-EAS443:3:38:139:1269#0/1  
\_bb^`^VXZ^aZaaa[`a¥aaVFRT\_]X`^`a^V¥VT¥\_  
@HWI-EAS443:3:38:1419:755#0/1  
GCCGCATTTCTTCAATTAACCACCTTATTTCCCTCAAATTT  
+HWI-EAS443:3:38:1419:755#0/1  
aaaaaabbababa\_aabaaa^aa\_`aaaaaX\_a\_`\_`aa]  
@HWI-EAS443:3:38:1438:418#0/1  
CGCTTCAATCTGTGCCGCATTTCTTCAATTAACCACCTT  
+HWI-EAS443:3:38:1438:418#0/1  
abaabbbabaaaa[baa`a`aaaabaaaa]^`\_\_Y]^W`X  
@HWI-EAS443:3:38:1446:166#0/1  
GCCGCATTTCTTCAATTAACCACCTTATTTCCCTCAAATTT  
+HWI-EAS443:3:38:1446:166#0/1  
a`T]¥a]T]¥[VNUa\_XR^ZUUTQ[\_`^\_XVTWWQY][YV  
@HWI-EAS443:3:38:1495:417#0/1  
GCCGCATTTCTTCAATTAACCACCTTATTTCCCTCAAATTT  
+HWI-EAS443:3:38:1495:417#0/1  
aaab]Ya`a\_\_\_R[`a`a¥Z^^)`\_\_a`\_^YN¥]\_^\_]\_Z  
@HWI-EAS443:3:38:1516:305#0/1  
CGCATTTCTTCAATTAACCACCTTATTTCCCTCAAATTTCT  
+HWI-EAS443:3:38:1516:305#0/1  
`¥^[`^b^bb`a\_aaba`ba`aa`abaa\_¥^¥[PYaa\_^  
@HWI-EAS443:3:38:1520:716#0/1  
GAGAATGGGAGACCTTCACTACCTCCAGAGCAGAAATGAA  
+HWI-EAS443:3:38:1520:716#0/1  
a]`U``aab]a\_`^`^`\_`\_`^[]`\_`[XZTW]YRV\_]X  
@HWI-EAS443:3:38:1524:958#0/1  
TGCCGCATTTCTTCAATTAACCACCTTATTTCCCTCAAATT  
+HWI-EAS443:3:38:1524:958#0/1  
`aa``\_[abbbaaaaabbaab`a`abbab`\_XUa\_^a\_aZ  
@HWI-EAS443:3:38:1573:1170#0/1  
CCGCATTTCTTCAATTAACCACCTTATTTCCCTCAAATTTCT  
+HWI-EAS443:3:38:1573:1170#0/1  
a¥ZVabbabbaYbbbaab\_aabba`baaQSa\_aa\_a`a0



@HWI-EAS443:3:38:1583:1757#0/1  
AAACTGTGATGAGAATGGGAGACCTTCACTACCTCCAGAG  
+HWI-EAS443:3:38:1583:1757#0/1  
aaaaaa[baaa^^V`aaaaVa\_\_^\_\_`\_`XXLDOHN^YVX  
@HWI-EAS443:3:38:1596:47#0/1  
TGGAGAACTGTGATGAGAATGGGAGACCTTCACTACCTC  
+HWI-EAS443:3:38:1596:47#0/1  
aab`aaaa\_\_b^^^`a¥`^]\_a`Va\_W]ZZOUROOMGLH  
@HWI-EAS443:3:38:1651:159#0/1  
GCTTGGAGAACTGTGATGAGAATGGGAGACCTTCACTAC  
+HWI-EAS443:3:38:1651:159#0/1  
^a]`bXP\_W¥]T^\_U¥`\_X^`\_]]^U^KDTRUWQRUWW  
@HWI-EAS443:3:38:1651:848#0/1  
AAACTGTGATGAGAATGGGAGACCTTCACTACCTCCAGAG  
+HWI-EAS443:3:38:1651:848#0/1  
a[a`bb[a`aa`a\_aaaaa]a\_\_\_\_\_a\_\_XYW0]VY^^^V  
@HWI-EAS443:3:38:1667:634#0/1  
GTCGCTTTCAATCTGTGCCGATTTCTTCAATTAACCACC  
+HWI-EAS443:3:38:1667:634#0/1  
ababbbbbbbaa\_ababaaa\_abbbabba^Za`a\_\_\_a`J  
@HWI-EAS443:3:38:1673:686#0/1  
TGAAAATATACAGAGATTCGCTTGGAGAACTGTGATGAG  
+HWI-EAS443:3:38:1673:686#0/1  
aa\_aaYaTa`Ya\_a¥a^a]Ra\_[\_^a]`ZU[] []W[X  
@HWI-EAS443:3:38:1782:593#0/1  
GCCGCATTTCTTCAATTAACCACCTTATTTCTCAAATTT  
+HWI-EAS443:3:38:1782:593#0/1  
^IRMQ¥GUOQSWYPNBBBBBBBBBBBBBBBBBBBBBBBB  
@HWI-EAS443:3:38:184:455#0/1  
GAAACTGTGATGAGAATGGGAGACCTTCACTACCTCCAGA  
+HWI-EAS443:3:38:184:455#0/1  
aaaXaa]a`a`U`]aaa]\_\_`[\_`\_^`X`[P^\_^`ZX\_V  
@HWI-EAS443:3:38:232:1699#0/1  
GAAACTGTGATGAGAATGGGAGACCTTCACTACCTCCAGA  
+HWI-EAS443:3:38:232:1699#0/1  
\_Z¥`aTa]¥`QRYQ\_aaZ`]WSYZa[XV\_YW\_[GXUXWSZ  
@HWI-EAS443:3:38:235:558#0/1  
AAACGAGAAAGCTTATCTCTTGTCTACTTCAAGCAGT  
+HWI-EAS443:3:38:235:558#0/1  
abaa`^^`\_\_L^a`a\_\_a\_a^a\_a]\_\_`\_Z^^`\_`\_^\_T  
@HWI-EAS443:3:38:241:1376#0/1  
CACGGTTCGAGTCTCTGAAAATATACAGAGATTCGCTTGG  
+HWI-EAS443:3:38:241:1376#0/1  
aab]b`abbba\_baab\_^aba`aaabbaa`U`^^^^`\_¥X  
@HWI-EAS443:3:38:299:1429#0/1  
CTGTGATGAGAATGGGAGACCTTCACTACCTCCAGAGCAG  
+HWI-EAS443:3:38:299:1429#0/1  
aaa^aaaa\_a`a`¥^^aa][aa`aaaa`¥W¥\_\_¥\_\_¥¥  
@HWI-EAS443:3:38:301:749#0/1  
TGAGAATGGGAGACCTTCACTACCTCCAGAGCAGAAATGA

+HWI-EAS443:3:38:301:749#0/1  
abaaaaaaaa]aaaaa` `]`\_aaa`aa`\_^Z^^`\_\_`a`^  
@HWI-EAS443:3:38:31:1700#0/1  
AGAAACTGTGATGAGAATGGGAGACCTTCACTACCTCCAG  
+HWI-EAS443:3:38:31:1700#0/1  
aabaabaaW`\_a^a` `\_\_^\_TY`aa¥\_a\_YUY^\_Va]UN  
@HWI-EAS443:3:38:322:110#0/1  
GATGAGAATGGGAGACCTTCACTACCTCCAGAGCAGAAAT  
+HWI-EAS443:3:38:322:110#0/1  
M\_Kaab`\_ababaaX]Ua`a`\_`\_Va`¥X`\_XQ`GR`VQ^X  
@HWI-EAS443:3:38:32:1275#0/1  
GCCGCATTTCTTCAATTAACCACCTTATTTCTCAAATTT  
+HWI-EAS443:3:38:32:1275#0/1  
`a`U]RRY`UOQa]a[JUZ`\_`¥ZZVZ`¥]¥]` `¥¥ZWY  
@HWI-EAS443:3:38:341:943#0/1  
GCCGCATTTCTTCAATTAACCACCTTATTTCTCAAATTT  
+HWI-EAS443:3:38:341:943#0/1  
`bbbbbbbabaaaaabb\_bb^aaaa^baa^`abb\_\_a`a  
@HWI-EAS443:3:38:346:18#0/1  
GAAACTGTGATGAGAATGGGAGACCTTCACTACCTCCAGA  
+HWI-EAS443:3:38:346:18#0/1  
a`^`aaa[aa\_[LX^[^a`\_¥`P]YZY]]YY^YUXV^Y]X  
@HWI-EAS443:3:38:350:56#0/1  
GAAAATATACAGAGATTCGCTTGGAGAACTGTGATGAGA  
+HWI-EAS443:3:38:350:56#0/1  
a`a^a`R^`aaa`aX^]a`\_Z[\_^^`WZXRW^W`XX^X^U  
@HWI-EAS443:3:38:351:1776#0/1  
GCCGCATTTCTTCAATTAACCACCTTATTTCTCAAATTT  
+HWI-EAS443:3:38:351:1776#0/1  
^bb`^L^aba\_\_S]`ba` `a`aaa\_[a` `Z`aa\_\_a\_  
@HWI-EAS443:3:38:356:1484#0/1  
GTGCCGCATTTCTTCAATTAACCACCTTATTTCTCAAAT  
+HWI-EAS443:3:38:356:1484#0/1  
Z]¥`\_R`Saa^^bbbbbaabbbabab`X^]Y]X]]aaa`  
@HWI-EAS443:3:38:357:1295#0/1  
ATCCGCAAGCGATTTGCAGACAATGGATTGGGTGATGCCC  
+HWI-EAS443:3:38:357:1295#0/1  
JX`b]` `^¥0¥Va`XVPXYXVUQZ[U¥DPGN¥USTGYNY[  
@HWI-EAS443:3:38:369:143#0/1  
TTCGCTTGGAGAACTGTGATGAGAATGGGAGACCTTCACT  
+HWI-EAS443:3:38:369:143#0/1  
a][`\_`\_aZF¥VT`a¥\_TNV\_aU`¥]]X]]NWLPXXUXPK  
@HWI-EAS443:3:38:402:860#0/1  
CCGCATTTCTTCAATTAACCACCTTATTTCTCAAATTT  
+HWI-EAS443:3:38:402:860#0/1  
abbbbbbbabbbbaababbbbaaaba^aaaa\_aaaZ`\_a\_a\_  
@HWI-EAS443:3:38:440:749#0/1  
GTGATGAGAATGGGAGACCTTCACTACCTCCAGAGCAGAA  
+HWI-EAS443:3:38:440:749#0/1  
a^a`^`aaaaaaa\_\_a`\_a`[aa`\_aa\_\_]U^^]`\_\_a]]

@HWI-EAS443:3:38:484:1903#0/1  
GAAAATATACAGAGATTGCTTGGAGAACTGTGATGAGA  
+HWI-EAS443:3:38:484:1903#0/1  
¥aaaaaa^`ab¥\_^^^`^W\_W\_]BBBBBBBBBBBBBBB  
@HWI-EAS443:3:38:486:558#0/1  
ATGCGGCACAGATTGAAAGCGACAGAGAATAGTTTCGAAC  
+HWI-EAS443:3:38:486:558#0/1  
`bab\_aa\_ab^)`ab`aaaba`aa`\_a^^V\_`\_`Y\_]  
@HWI-EAS443:3:38:491:594#0/1  
GCCGCATTTCTCAATTAACCACCTTATTTCTCAAATTT  
+HWI-EAS443:3:38:491:594#0/1  
ababbabbaaabaaba`baaaa`aaaaaXXaaa`aa\_  
@HWI-EAS443:3:38:494:587#0/1  
GCCGCATTTCTCAATTAACCACCTTATTTCTCAAATTT  
+HWI-EAS443:3:38:494:587#0/1  
aaa`a[XaX¥]^R[H¥XZQ^U¥\_]N]Q]\_\_^QI[XW  
@HWI-EAS443:3:38:525:94#0/1  
GAATGGGAGACCTTCACTACCTCCAGAGCAGAAATGAAAA  
+HWI-EAS443:3:38:525:94#0/1  
aaaabaa\_b[\_`^`\_a^`\_`^`W]a¥WV¥¥¥`¥¥¥W  
@HWI-EAS443:3:38:526:910#0/1  
GAGAATGGGAGACCTTCACTACCTCCAGAGCAGAAATGAA  
+HWI-EAS443:3:38:526:910#0/1  
aa`aaabaa\_a`^`\_a\_a`^`\_a`\_aYKWRZR^\_Y^WZ^`Z  
@HWI-EAS443:3:38:528:1340#0/1  
GATGAGAATGGGAGACCTTCACTACCTCCAGAGCAGAAAT  
+HWI-EAS443:3:38:528:1340#0/1  
`bb]]]aaaa`\_`^`b`aaab`\_aaaa`a`¥^`\_`¥`\_`  
@HWI-EAS443:3:38:650:251#0/1  
GAAACGAGAAAGCTTCTTCTTCTTCTTCTTCAAGCAG  
+HWI-EAS443:3:38:650:251#0/1  
a`a\_a\_\_a\_]^[`\_¥^\_]`Y^^^`\_^^^`¥X^]W]^]W]Z  
@HWI-EAS443:3:38:66:63#0/1  
AGAACTGTGATGAGAATGGGAGACCTTCACTACCTCCAG  
+HWI-EAS443:3:38:66:63#0/1  
abaaaaab\_a`a`^aV[\_aaYT^`\_^]¥Y]^]^Y]ZP  
@HWI-EAS443:3:38:717:1932#0/1  
GAGAATGGGAGACCTTCACTACCTCCAGAGCAGAAATGAA  
+HWI-EAS443:3:38:717:1932#0/1  
[]b\_bTZJZaa^PVa^baaaQa[\_`b\_a`¥¥YLP\_\_`\_S  
@HWI-EAS443:3:38:763:1501#0/1  
CAGAGATTGCTTGGAGAACTGTGATGAGAATGGGAGAC  
+HWI-EAS443:3:38:763:1501#0/1  
]^a]OGOPabSP\_UQPU`JHTWZNRDTZZ^USHVJVPQSV  
@HWI-EAS443:3:38:76:1116#0/1  
GATGAGAATGGGAGACCTTCACTACCTCCAGAGCAGAAAT  
+HWI-EAS443:3:38:76:1116#0/1  
]\_aabbabba^ba`[abbbbbbaaaabb`\_Uaaaa]a`  
@HWI-EAS443:3:38:776:43#0/1  
CACCCAATCCATTGTCTGCAAATCGCTTGGGATATGCCA

+HWI-EAS443:3:38:776:43#0/1  
abab`\_b`aaaaa\_\_`^a`a\_a\_\_\_`W\_\_W]X¥]^\_^\_YTP  
@HWI-EAS443:3:38:812:154#0/1  
AGAATGGGAGACCTTCACTACCTCCAGAGCAGAAATGAAA  
+HWI-EAS443:3:38:812:154#0/1  
`b\_b^baa[a\_a^a]aaaa`]aaa`aa`Z]^XXUaa[X]  
@HWI-EAS443:3:38:929:631#0/1  
GGCTTTCCTGAGGAGGGAGCAATAGTTGGAGAAATTTCA  
+HWI-EAS443:3:38:929:631#0/1  
abbbbabbbbab`bbaY`aaaaa^a`[^a\_aaaa``]  
@HWI-EAS443:3:38:979:826#0/1  
GAGAACTGTGATGAGAATGGGAGACCTTCACTACCTCCA  
+HWI-EAS443:3:38:979:826#0/1  
abba`abb`a^aaaaaaaa`¥`^\_aa`]\_^\_dW]\_Y\_W  
@HWI-EAS443:3:39:1141:966#0/1  
AATGGATCTTGAAAGAGGAATCCAGCGAGACACTTAGAAT  
+HWI-EAS443:3:39:1141:966#0/1  
abb`aaaabb^aaaababaa\_`a`aa`a`a\_`Wa\_````Z  
@HWI-EAS443:3:39:1150:1170#0/1  
AGAAACTGTGATGAGAATGGGAGACCTTCACTACCTCCAG  
+HWI-EAS443:3:39:1150:1170#0/1  
aab¥ba``^`]¥SR]X]]UV¥T¥SZ`\_]`ZZ`Y^Z[VVU  
@HWI-EAS443:3:39:1178:1043#0/1  
AAACTGTGATGAGAATGGGAGACCTTCACTACCTCCAGAG  
+HWI-EAS443:3:39:1178:1043#0/1  
aabaaa\_aabaaa``a`[^``\_a\_]a`\_YZ\_a\_\_\_\_\_]  
@HWI-EAS443:3:39:118:1282#0/1  
GCCGCATTTCTTCAATTAACCACCTTATTTCTCAAATTT  
+HWI-EAS443:3:39:118:1282#0/1  
abbaaY\_aaba\_b¥]a\_a`aaaaa`aaaa`^`a\_a`a^`  
@HWI-EAS443:3:39:1213:1556#0/1  
TGCCGCATTTCTTCAATTAACCACCTTATTTCTCAAATT  
+HWI-EAS443:3:39:1213:1556#0/1  
``^`bb`baaaa`ab`aaa¥a^aa]aaa`V^abaa\_\_U  
@HWI-EAS443:3:39:1300:627#0/1  
GTCGCTTTCAATCTGTGCCGCATTTCTTCAATTAACCACC  
+HWI-EAS443:3:39:1300:627#0/1  
a\_aaa`aaa`aa`^^`ZZaX`\_`^`^`\_Y^^X¥WW]ZO  
@HWI-EAS443:3:39:1384:1110#0/1  
GCGGCACAGATTGAAAGCGACAGAGAATAGTTTCGAACAA  
+HWI-EAS443:3:39:1384:1110#0/1  
aa^`aa\_aa`a`^`a`\_]Z¥`^^`]^^\_Z^^[^Z]Z^X  
@HWI-EAS443:3:39:1435:315#0/1  
GAAACTGTGATGAGAATGGGAGACCTTCACTACCTCCAGA  
+HWI-EAS443:3:39:1435:315#0/1  
a``a``^`O\_ZZ^P`UU]\_^XY]XXUXYYUYXXVVXXXYYX  
@HWI-EAS443:3:39:1438:1620#0/1  
CAGAGATTGCTTGGAGAACTGTGATGAGAATGGGAGAC  
+HWI-EAS443:3:39:1438:1620#0/1  
\_bb`¥\_aa`[\_V`^`^RVY`XPZ`¥S\_YGY\_]\_V[ZL

@HWI-EAS443:3:39:1486:481#0/1  
TCGCTTTCAATCTGTGCCGATTTCTTCAATTAACCCACT  
+HWI-EAS443:3:39:1486:481#0/1  
aaaa`aa\_``\_``\_a\_]`\_Z`\_^\_]`^`\_Z\_]ZW¥XSZ  
@HWI-EAS443:3:39:1594:1253#0/1  
CACAGATTGAAAGCGACAGAGAATAGTTTCGAACAAATAA  
+HWI-EAS443:3:39:1594:1253#0/1  
abbbbabbbabababaa`aaaa`aaYaaaW`]a``¥a`  
@HWI-EAS443:3:39:1600:58#0/1  
AAACTGTGATGAGAATGGGAGACCTTCACTACCTCCAGAG  
+HWI-EAS443:3:39:1600:58#0/1  
aababbabbbbab`abba``a`\_^`\_X`]`^XX`]`XY]YX  
@HWI-EAS443:3:39:1642:1147#0/1  
GCCGCATTTCTTCAATTAACCCACTTATTTCTCAAATTT  
+HWI-EAS443:3:39:1642:1147#0/1  
a``aa`aaa`aa\_aaaa`^\_Y`^^``^\_a`]W`^`^`]\_\_X  
@HWI-EAS443:3:39:1682:1133#0/1  
GAAACTGTGATGAGAATGGGAGACCTTCACTACCTCCAGA  
+HWI-EAS443:3:39:1682:1133#0/1  
ab\_baaaMbaaaaaa`V`Va`^\_a`^`a`XX¥`]XZ[U  
@HWI-EAS443:3:39:1690:1512#0/1  
GAGAAACTGTGATGAGAATGGGAGACCTTCACTACCTCCA  
+HWI-EAS443:3:39:1690:1512#0/1  
a`ba`¥aaaZ`P0`Z¥LT`\_V`\_V]^VRXWYBBBBBBBBBB  
@HWI-EAS443:3:39:1691:1357#0/1  
GTCGCTTTCAATCTGTGCCGATTTCTTCAATTAACCCACC  
+HWI-EAS443:3:39:1691:1357#0/1  
a\_a]Z`aa`\_`[¥a`[[R]WZ[]`\_`\_]aYYY^\_WX¥TX  
@HWI-EAS443:3:39:1719:618#0/1  
GTGACATTTCTCGAGGGTCATGTCAGAAAGGTAGCGCGA  
+HWI-EAS443:3:39:1719:618#0/1  
aabaaaa^¥¥^\_U`\_aaYU`T`¥¥¥`\_ZYVVV`V^¥\_Y  
@HWI-EAS443:3:39:1790:131#0/1  
TGTCATTCTAAGTGTCTCGCTGGATTCTTCAAGATC  
+HWI-EAS443:3:39:1790:131#0/1  
aa[[\_`\_`\_a`^\_Z`^`\_XXX]Y]YZ^W]YYZZYYRYU  
@HWI-EAS443:3:39:181:1655#0/1  
CTTGGAGAAACTGTGATGAGAATGGGAGACCTTCACTACC  
+HWI-EAS443:3:39:181:1655#0/1  
`UU`Tab^]V¥^NXSMXN`T]\_\_Q[VMG\_bRH]S\_\_¥^]  
@HWI-EAS443:3:39:222:675#0/1  
CGAGAGCAATTGGGACAGAAATTTGAGGAAATAAGGTGGT  
+HWI-EAS443:3:39:222:675#0/1  
ab`\_M`\_`\_Xbaa^^]a¥a^aa`^`b`a\_]\_a\_]X\_YOb`[  
@HWI-EAS443:3:39:267:105#0/1  
TGAGAATGGGAGACCTTCACTACCTCCAGAGCAGAAATGA  
+HWI-EAS443:3:39:267:105#0/1  
aa`¥`^]¥]ZLa\_a\_a\_X\_¥[^\_¥TQS[¥LWMRVNS¥¥VW  
@HWI-EAS443:3:39:32:981#0/1  
AGCGAATCTCTGTATATTTTCAGAGACTCGAACCGTGTTA

+HWI-EAS443:3:39:32:981#0/1  
aaba`^aa`ab\_aaaa`a^]W\_\_`\_\_\_a\_YYV]TTXZ#Z  
@HWI-EAS443:3:39:446:266#0/1  
GTCGCTTTCAATCTGTGCCGATTTCTTCAATTAACCACC  
+HWI-EAS443:3:39:446:266#0/1  
]HQ\_P\_[[`]\_^\_Z`X^^[UTMX]UV#ZZXTTZ]]^XZ^V  
@HWI-EAS443:3:39:490:729#0/1  
GCTTGGAGAACTGTGATGAGAATGGGAGACCTTCACTAC  
+HWI-EAS443:3:39:490:729#0/1  
abaab`ab\_QU`aa\_a[`aa\_a`^^^\_^]PWVa^[\_`Y  
@HWI-EAS443:3:39:527:1198#0/1  
CGCTTGGAGAACTGTGATGAGAATGGGAGACCTTCACTA  
+HWI-EAS443:3:39:527:1198#0/1  
abaaabaYa]]`a`a]a\_\_Z\_a`X^`^^]V[]]X\_^]]  
@HWI-EAS443:3:39:542:970#0/1  
CTGAAAATATACAGAGATTCGCTTGGAGAACTGTGATGA  
+HWI-EAS443:3:39:542:970#0/1  
aaa`#X\_[`aaaa^]R[ab[`[X[N[NZGXV]VQQMRPF  
@HWI-EAS443:3:39:552:100#0/1  
AGAATGGGAGACCTTCACTACCTCCAGAGCAGAAATGAAA  
+HWI-EAS443:3:39:552:100#0/1  
ababaabaab]\_\_a`a`\_\_a#`\_#`a^``\_#WZU`\_X#  
@HWI-EAS443:3:39:555:415#0/1  
GTCGCTTTCAATCTGTGCCGATTTCTTCAATTAACCACC  
+HWI-EAS443:3:39:555:415#0/1  
aaabaaaaaaaa`aa`\_a`\_a]^`a`\_]\_\_\_`\_^\_a`]\_\_X  
@HWI-EAS443:3:39:561:452#0/1  
GCCGATTTCTTCAATTAACCACCTTATTTCTCAAATTT  
+HWI-EAS443:3:39:561:452#0/1  
aabbabababbbbbbbaabaabaababbabbaa  
@HWI-EAS443:3:39:562:1216#0/1  
GCCGATTTCTTCAATTAACCACCTTATTTCTCAAATTT  
+HWI-EAS443:3:39:562:1216#0/1  
aa`\_]aaaZ^aaaaaaaaaP#^Q^[^]\_\_\_T][WY[^UT  
@HWI-EAS443:3:39:590:61#0/1  
ATCGGTAAAGATTACACTGAAGTTCGCTTTCAGTACTAT  
+HWI-EAS443:3:39:590:61#0/1  
abbab`bXT`]Y]#aUVW#PV#X`\_a`\_aN]aWZW^\_S  
@HWI-EAS443:3:39:595:806#0/1  
ATGCGGCACAGATTGAAAGCGACAGAGAATAGTTTCGAAC  
+HWI-EAS443:3:39:595:806#0/1  
a^Z\_^`b`a`a`\_YabbZ`aaaaaaaaXZ]R]WJ#Z#\_Y`Q  
@HWI-EAS443:3:39:60:610#0/1  
CCAGTCTCGTGACATTTCTCGAGGGTCATGTCAGAAAGG  
+HWI-EAS443:3:39:60:610#0/1  
aa`babaaaV`]`aa`aaaa`^`aaP^`[a\_^#^XS[\_^  
@HWI-EAS443:3:39:620:1333#0/1  
CTGAAAATATACAGAGATTCGCTTGGAGAACTGTGATGA  
+HWI-EAS443:3:39:620:1333#0/1  
aaa\_\_P]]a`a\_a`aa#]a`[\_]\_\_Z\_^\_XKZ^X^X^OM

@HWI-EAS443:3:39:639:887#0/1  
GGAGAACTGTGATGAGAATGGGAGACCTTCACTACCTCC  
+HWI-EAS443:3:39:639:887#0/1  
`a\_baaaaa\_a`aaa`\_\_\_\_`\_SU\_^]\_\_^^YX[TY]]YV  
@HWI-EAS443:3:39:647:175#0/1  
CGCTTGGAGAACTGTGATGAGAATGGGAGACCTTCACTA  
+HWI-EAS443:3:39:647:175#0/1  
abbbbbbbbaaaa`ab]aa\_a`a[```a`\_a`U\_]Y¥`^Y\_  
@HWI-EAS443:3:39:702:1821#0/1  
GTGCGTTTCAATCTGTGCCGATTTCTTCAATTAACCACC  
+HWI-EAS443:3:39:702:1821#0/1  
^[aa`bb``bbbb]aaaa^bababa` `b^ba\_abbaaba¥  
@HWI-EAS443:3:39:760:143#0/1  
GTGCGTTTCAATCTGTGCCGATTTCTTCAATTAACCACC  
+HWI-EAS443:3:39:760:143#0/1  
a]^aaG]W^¥Y]U^XWXZ^VOZX]^Z]XWZZZZWYSYRH  
@HWI-EAS443:3:39:773:553#0/1  
TGAGAATGGGAGACCTTCACTACCTCCAGAGCAGAAATGA  
+HWI-EAS443:3:39:773:553#0/1  
`aU^[¥¥a`\_¥\_¥^`aa\_a]M)`¥`[^a\_^P[`WXT¥`\_  
@HWI-EAS443:3:39:787:1517#0/1  
ATTACACTGAAGTTCGCTTTCAGTACTATGTTCTTTTCCA  
+HWI-EAS443:3:39:787:1517#0/1  
```bba```aaa`^Z`\_]\_[[aa^b\_aa`VY`\_]a``\_\_  
@HWI-EAS443:3:39:883:1447#0/1  
TGAGAATGGGAGACCTTCACTACCTCCAGAGCAGAAATGA  
+HWI-EAS443:3:39:883:1447#0/1  
Y\_LZ\_]Wba\_U`¥[\_a¥Z\_Z\_^]YV\_Y\_X`TY\_]¥ZXX]  
@HWI-EAS443:3:39:885:1698#0/1  
GAGAATGGGAGACCTTCACTACCTCCAGAGCAGAAATGAA  
+HWI-EAS443:3:39:885:1698#0/1  
aZXOX\_ZHN`\_^aaa¥` [¥[` [[^aYQ[[^VYQY^¥TVYS  
@HWI-EAS443:3:39:888:677#0/1  
GAAACTGTGATGAGAATGGGAGACCTTCACTACCTCCAGA  
+HWI-EAS443:3:39:888:677#0/1  
a¥^a`aa^a]\_a`a^\_\_a]` `]T\_^X^`^^XVU^]Y]\_Y  
@HWI-EAS443:3:39:902:520#0/1  
GCCGATTTCTTCAATTAACCACCTTATTTCTCAAATTT  
+HWI-EAS443:3:39:902:520#0/1  
a`aaaYaa`aaa`a[a`\_`\_]\_[^`\_\_`\_`^X`^a^]\_^]  
@HWI-EAS443:3:39:924:118#0/1  
GTCAGAAAGGTAGCGGAAGTAGGTACAGATGCAATTGTC  
+HWI-EAS443:3:39:924:118#0/1  
a^[`WTT`\_aV[]\_aXa[V`RZ^¥PUQ]¥U^TPP`OPUMP  
@HWI-EAS443:3:39:941:1803#0/1  
GCCGATTTCTTCAATTAACCACCTTATTTCTCAAATTT  
+HWI-EAS443:3:39:941:1803#0/1  
`bbabbabbabbbbabaaaa`aa\_abab``\_Raaa``a`\_  
@HWI-EAS443:3:39:942:329#0/1  
GCCGATTTCTTCAATTAACCACCTTATTTCTCAAATTT

+HWI-EAS443:3:39:942:329#0/1  
a`aa`[a`aaaa``aaaa\_]P^^a\_\_aaa\_W`\_aa\_\_`]  
@HWI-EAS443:3:39:96:1269#0/1  
GAAACTGTGATGAGAATGGGAGACCTTCACTACCTCCAGA  
+HWI-EAS443:3:39:96:1269#0/1  
aabbbab\_baa]aaa]aa`a¥`aaa\_\_aa`\_a\_`\_aaa`]  
@HWI-EAS443:3:39:972:1822#0/1  
AGAAACTGTGATGAGAATGGGAGACCTTCACTACCTCCAG  
+HWI-EAS443:3:39:972:1822#0/1  
aTaba^¥aZ^aaa\_\_ba\_¥^]a^VS\_]`XaGV]U\_]UU^0  
@HWI-EAS443:3:39:994:423#0/1  
AGAAACTGTGATGAGAATGGGAGACCTTCACTACCTCCAG  
+HWI-EAS443:3:39:994:423#0/1  
a`baaaab`a\_a]Ya`aaa]\_\_aP`Z¥\_\_^WU^X]]^VYY  
@HWI-EAS443:3:3:1065:1495#0/1  
GAAAGCTCTTATCTCTTGTCTACTTCAAGCAGTAGTTGT  
+HWI-EAS443:3:3:1065:1495#0/1  
ab\_`aababbabaa`babaa`abaaaa\_\_aa\_\_aa^ab^aa\_  
@HWI-EAS443:3:3:1153:1523#0/1  
ATGAGAATGGGAGACCTTCACTACCTCCAGAGCAGAAATG  
+HWI-EAS443:3:3:1153:1523#0/1  
aZaabYaabaa¥a]\_Y`a^a¥aa\_\_\_\_V\_a^a]`b¥^^`\_  
@HWI-EAS443:3:3:1157:1069#0/1  
GCGCGAAGTAGGTACAGATGCAATTGTCATTCTAAGTGTC  
+HWI-EAS443:3:3:1157:1069#0/1  
a\_`^[¥SVW\_^VT`GM\_]N\_XTP[^\_YUZ]VSVUUXFZYB  
@HWI-EAS443:3:3:1161:1411#0/1  
GTCGCTTTCAATCTGTGCCGATTTCTTCAATTAACCACC  
+HWI-EAS443:3:3:1161:1411#0/1  
a^`\_`aa\_aa`a[[a\_a^^a`aa\_a\_`a¥`]]`a^]X\_]Q  
@HWI-EAS443:3:3:1187:371#0/1  
GAAACTGTGATGAGAATGGGAGACCTTCACTACCTCCAGA  
+HWI-EAS443:3:3:1187:371#0/1  
ZJ]^Sa`V\_aab`b]Xab^Ya`U]P^`Ya¥`\_V[^UV^\_]`  
@HWI-EAS443:3:3:1217:1595#0/1  
GCTGAAACGAGAAAGCTCTTATCTCTTGTCTACTTCAAG  
+HWI-EAS443:3:3:1217:1595#0/1  
^`abaaa\_aa`^^`a\_aaaa\_a`aWaaa\_`Za`[\_`^`^a  
@HWI-EAS443:3:3:1227:1889#0/1  
TGATGAGAATGGGAGACCTTCACTACCTCCAGAGCAGAAA  
+HWI-EAS443:3:3:1227:1889#0/1  
abaaaab`babaaaaaaaVa`abYRa^`\_`a``Wab^`\_  
@HWI-EAS443:3:3:1240:1142#0/1  
AGAGAAGGTAATGGTGAATTTCTCCAATTTGCTCCCT  
+HWI-EAS443:3:3:1240:1142#0/1  
aaaaaabbb`bb`¥]¥a`aaaab`a`aa`]aaa^^W¥]\_\_`  
@HWI-EAS443:3:3:1240:2026#0/1  
TGGGAAACAAATCGTGAATGGATCTTGAAAGAGGAATCC  
+HWI-EAS443:3:3:1240:2026#0/1  
ababSabSaa^`abXaa\_a`aa^UF^]]\_`Qa^\_a[Q\_JB



@HWI-EAS443:3:3:1324:1135#0/1  
CAATCGCACGCAAAGAGGGCCTATTATCTTTTGCCTAGGC  
+HWI-EAS443:3:3:1324:1135#0/1  
`babaaabab]aaab`Va\_]abbbaababaab^`VabaaZ  
@HWI-EAS443:3:3:1343:611#0/1  
CGCATTCTTCAATTAACCACCTTATTTCCCTCAAATTTCT  
+HWI-EAS443:3:3:1343:611#0/1  
abbabbb`bbbaabbaababa`bbabbba\_b`baabaa\_b  
@HWI-EAS443:3:3:1357:737#0/1  
CACGCAAAGAGGGCCTATTATCTTTTGCCTAGGCATGAGC  
+HWI-EAS443:3:3:1357:737#0/1  
abbb`baab\_a]Z\_`aa]ba]aaa\_a`a]aaaa``\_Y]aR  
@HWI-EAS443:3:3:1431:1350#0/1  
GCCGCATTTCTTCAATTAACCACCTTATTTCCCTCAAATTT  
+HWI-EAS443:3:3:1431:1350#0/1  
a]a^\_NYWQUTR\_]\_[\_Y\_a][MZU^JU\_HY[JJV[W]BB  
@HWI-EAS443:3:3:1440:1600#0/1  
CGCATTCTTCAATTAACCACCTTATTTCCCTCAAATTTCT  
+HWI-EAS443:3:3:1440:1600#0/1  
ababbbbabbaaabbaabaa`^bb`bbbX¥aa`aabaaaa  
@HWI-EAS443:3:3:1468:1592#0/1  
TGAGAATGGGAGACCTTCACTACCTCCAGAGCAGAAATGA  
+HWI-EAS443:3:3:1468:1592#0/1  
¥a^aTVZa\_¥U[a`U^]bbaabbbRI¥]\_aa\_`XPV`¥aB  
@HWI-EAS443:3:3:1470:840#0/1  
GTCGCTTTCAATCTGTGCCGCATTTCTTCAATTAACCACC  
+HWI-EAS443:3:3:1470:840#0/1  
¥````a^XQ]R]\_\_\_\_]aa\_\_Y\_`a```a\_^`\_a\_[Y[\_ZX  
@HWI-EAS443:3:3:1490:1348#0/1  
CAGTTTCTCCAAGCGAATCTCTGTATATTTTCAGAGACTC  
+HWI-EAS443:3:3:1490:1348#0/1  
aab`abbbaababaa^]a`a`abaaa\_ba\_a\_`\_]a]U`Z  
@HWI-EAS443:3:3:1526:479#0/1  
GATTTGCAGACAATGGATTGGGTGATGCCCATTCCTTGA  
+HWI-EAS443:3:3:1526:479#0/1  
a\_aaa^^aa\_^¥¥\_^ZZ[W¥¥ZF]W¥ZVVWUWW¥VQWW¥B  
@HWI-EAS443:3:3:1572:1378#0/1  
GTCAGAAAGGTAGCGGAAGTAGGTACAGATGCAATTGTC  
+HWI-EAS443:3:3:1572:1378#0/1  
¥R¥XZJT]^N]]PULYPT]TVZ\_STKWWQFTHKYSWZBB  
@HWI-EAS443:3:3:1627:1106#0/1  
GGAGAACTGTGATGAGAATGGGAGACCTTCACTACCTCC  
+HWI-EAS443:3:3:1627:1106#0/1  
ab\_ba\_`Z^aXa¥a\_RaZX\_`\_`S`^MM`ZNZU^XXX[BB  
@HWI-EAS443:3:3:1700:1258#0/1  
AATCCAGCGAGACACTTAGAATGACAATTGCATCTGTACC  
+HWI-EAS443:3:3:1700:1258#0/1  
aaaa`aa[aaa\_\_¥`a\_a\_]aa`V`[^^aW`\_¥`\_WTW]  
@HWI-EAS443:3:3:1720:408#0/1  
GCCGCATTTCTTCAATTAACCACCTTATTTCCCTCAAATTT

+HWI-EAS443:3:3:1720:408#0/1  
a^`YS\_\_aYaWLV\_\_YWYXX]WPY\_W`ZZTRXN¥XZ^BB  
@HWI-EAS443:3:3:1738:92#0/1  
AGAAACTGTGATGAGAATGGGAGACCTTCACTACCTCCAG  
+HWI-EAS443:3:3:1738:92#0/1  
abaaa\_a]N]]aa\_b^¥```\_¥aXFN^\_X^X\_XRX]V VX\_  
@HWI-EAS443:3:3:229:960#0/1  
TGAGAATGGGAGACCTTCACTACCTCCAGAGCAGAAATGA  
+HWI-EAS443:3:3:229:960#0/1  
aaVa]a\_aaRG\_\_a¥aYaa¥a\_\_U^`N`NY¥Z`¥YV^`U  
@HWI-EAS443:3:3:245:910#0/1  
GAAACTGTGATGAGAATGGGAGACCTTCACTACCTCCAGA  
+HWI-EAS443:3:3:245:910#0/1  
`U\_aU0]P\_YN`Y`ZVY^aQNYGLPR^^]SYP^VVTVP^¥  
@HWI-EAS443:3:3:257:35#0/1  
CAATAGTTGGAGAAATTTACCATTACCTTCTCTTCCAGG  
+HWI-EAS443:3:3:257:35#0/1  
aaYYVS`0Ya]^aZU[YYY`\_`R^^[N`U[`^XQ[XQY^  
@HWI-EAS443:3:3:278:421#0/1  
CCGCATTTCTTCAATTAACCACCTTATTTCCCTCAAATTTTC  
+HWI-EAS443:3:3:278:421#0/1  
aab`abaabaaa`aa\_aa^a\_`a`a`\_]a\_\_\_¥`\_\_\_  
@HWI-EAS443:3:3:31:1595#0/1  
TGAGAATGGGAGACCTTCACTACCTCCAGAGCAGAAATGA  
+HWI-EAS443:3:3:31:1595#0/1  
`a^Z^baa`\_]`[[\_\_a`b^[\_U`[^]]\_a`^a]\_[ba[  
@HWI-EAS443:3:3:31:1950#0/1  
GTCGCTTTCAATCTGTGCCGATTTCTTCAATTAACCACC  
+HWI-EAS443:3:3:31:1950#0/1  
`GFURTYYZ\_aV`a\_X^)^^[``[S\_^X\_[]¥T^XSOX^T  
@HWI-EAS443:3:3:339:33#0/1  
GCGGCACAGATTGAAAGCGACAGAGAATAGTTTCGAACAA  
+HWI-EAS443:3:3:339:33#0/1  
a[LJFOI¥a]U]\_W]WWSTSWU`S]UPRZVVVXLQB BBBB  
@HWI-EAS443:3:3:344:478#0/1  
GTGATGAGAATGGGAGACCTTCACTACCTCCAGAGCAGAA  
+HWI-EAS443:3:3:344:478#0/1  
aabaaaaaaaaa^]Wa¥ZZ^\_\_a\_Z]TY[RN]a^a\_\_`]]  
@HWI-EAS443:3:3:403:998#0/1  
GAAAGCTCTTATCTCTTGTCTACTTCAAGCAGTAGTTGT  
+HWI-EAS443:3:3:403:998#0/1  
aUNRSYT\_Y[TWWW¥[XZRLWQ[[WWW\_ZP]S[^][BBB  
@HWI-EAS443:3:3:419:1521#0/1  
CGCTGGATTCTCTTTCAAGATCCATTCCACGATTTGTTT  
+HWI-EAS443:3:3:419:1521#0/1  
^Z¥Z¥\_aa\_WTW\_a\_[aa^Y`[a\_aa`[]\_X\_^\_a\_\_BB  
@HWI-EAS443:3:3:431:1096#0/1  
ATGGTGAAATTTCTCCAATTTGCTCCCTCCTCAGTGAA  
+HWI-EAS443:3:3:431:1096#0/1  
aa\_a`aa^aaa\_aXaaaZabaaa]`\_\_\_`[]a]`\_Za\_]

@HWI-EAS443:3:3:434:1809#0/1  
GAAACTGTGATGAGAATGGGAGACCTTCACTACCTCCAGA  
+HWI-EAS443:3:3:434:1809#0/1  
a¥a`aab^b`^baa[^aa\_aabba`^a`bX^a\_^\_Y\_`a¥  
@HWI-EAS443:3:3:44:1033#0/1  
TGCCGCATTTCTTCAATTAACCACCTTATTTCCCTCAAATT  
+HWI-EAS443:3:3:44:1033#0/1  
a`aab\_baabaabaa\_baba\_^a` `a`aa`a¥\_aa` `aa^  
@HWI-EAS443:3:3:455:64#0/1  
GAAACTGTGATGAGAATGGGAGACCTTCACTACCTCCAGA  
+HWI-EAS443:3:3:455:64#0/1  
aa\_a^a[P^\_aa\_\_\_^`baaXa^]Y\_\_^¥Y`^XG^UBBBB  
@HWI-EAS443:3:3:536:877#0/1  
GGAGAACTGTGATGAGAATGGGAGACCTTCACTACCTCC  
+HWI-EAS443:3:3:536:877#0/1  
`aPPLa^V]aPa`aaU^Y`aaa`Z`a]YSa[]G^LDEUQX  
@HWI-EAS443:3:3:537:1208#0/1  
AGAAACTGTGATGAGAATGGGAGACCTTCACTACCTCCAG  
+HWI-EAS443:3:3:537:1208#0/1  
`\_\_]aa`Q\_¥^bbb^Z^^`aY^[]aYT\_[``YFVQ¥^\_  
@HWI-EAS443:3:3:546:1359#0/1  
GAGAACTGTGATGAGAATGGGAGACCTTCACTACCTCCA  
+HWI-EAS443:3:3:546:1359#0/1  
a`aa]a` `a^b\_aa\_`\_^a\_]\_^\_]\_^]W]`¥\_`^YY]Y]  
@HWI-EAS443:3:3:647:795#0/1  
TGTGATGAGAATGGGAGACCTTCACTACCTCCAGAGCAGA  
+HWI-EAS443:3:3:647:795#0/1  
]¥^baaaaa^a` `a^`\_^\_\_\_\_` `]`VU¥^V\_`\_]\_^`]  
@HWI-EAS443:3:3:694:627#0/1  
CACGCAAAGAGGCCTATTATCTTTTGCCTAGGCATGAGC  
+HWI-EAS443:3:3:694:627#0/1  
ab\_[b]Y^`bb`^bba`baab`baaab[Z]^abaaab\_`a  
@HWI-EAS443:3:3:704:369#0/1  
CAAAGAGGCCTATTATCTTTTGCCTAGGCATGAGCATGA  
+HWI-EAS443:3:3:704:369#0/1  
abbbbabaaa`babaaaabaa`a\_¥aaa`\_`aa\_aZ\_aa`  
@HWI-EAS443:3:3:74:398#0/1  
GTTCGAGTCTCTGAAAATATACAGAGATTCGCTTGGAGAA  
+HWI-EAS443:3:3:74:398#0/1  
aP\_X]ab[X\_RWq]`aYYT]¥¥\_a^bX¥ZYW¥\_Y^\_X\_Z]  
@HWI-EAS443:3:3:855:81#0/1  
CAACACCATGTCAAGCTTTCAGGTAGACTGTTTCCTTTGG  
+HWI-EAS443:3:3:855:81#0/1  
ab[aaaU`b\_P¥^\_aVUa\_\_\_`^Z\_a^^^aY`[[V^RVNY  
@HWI-EAS443:3:3:888:883#0/1  
CTGTGCTTTCAATCTGTGCCGATTTCTTCAATTAACCA  
+HWI-EAS443:3:3:888:883#0/1  
aabaababaaaaaa\_aa\_a` `a\_`aa`\_`a\_` `a` ` `^S`  
@HWI-EAS443:3:3:90:1521#0/1  
TACAGATGCAATTGTCATTCTAAGTGTCTCGCTGGATTCC

+HWI-EAS443:3:3:90:1521#0/1  
aabaa\_]`a\_a^GZa\_b^S`a]aZa\_TQXU^^a\_V^^ZZ  
@HWI-EAS443:3:3:919:1115#0/1  
GCCGCATTTCTTCAATTAACCACCTTATTTCTCAAATTT  
+HWI-EAS443:3:3:919:1115#0/1  
`][¥aQXU[U[V[\_`X`V^[YNR¥[Z^]X^\_T]Z[\_`\_`  
@HWI-EAS443:3:3:937:1254#0/1  
GAAACGAGAAAGCTCTTATCTCTTGTCTACTTCAAGCAG  
+HWI-EAS443:3:3:937:1254#0/1  
^abbbbb\_^`Vb^]a`^L^Y[U`\_¥Va^`\_^aa¥`^¥G]^  
@HWI-EAS443:3:3:948:535#0/1  
AGACTGTTTCCTTTGGCATATCCGCAAGCGATTTGCAGAC  
+HWI-EAS443:3:3:948:535#0/1  
abYQaa`a\_\_a`YXaa` ``¥¥¥\_aYWN\_NY[]Y]YGR¥\_X  
@HWI-EAS443:3:3:960:1526#0/1  
CTTGGAGAAACTGTGATGAGAATGGGAGACCTTCACTACC  
+HWI-EAS443:3:3:960:1526#0/1  
`bba\_ab\_bbabb\_`baabaabba\_abaababbb`aab[Z  
@HWI-EAS443:3:40:1006:396#0/1  
TATCCGCAAGCGATTTGCAGACAATGGATTGGGTGATGCC  
+HWI-EAS443:3:40:1006:396#0/1  
abbaabaaaa`b`^aa`a`\_]` `a^W^W¥UUSW¥¥WS¥W  
@HWI-EAS443:3:40:1023:1629#0/1  
GCCGCATTTCTTCAATTAACCACCTTATTTCTCAAATTT  
+HWI-EAS443:3:40:1023:1629#0/1  
aXK[X]¥]\_\_\_a^Z¥]`\_]\_]Z^WZUJTYZKKT\_\_¥XSXZ  
@HWI-EAS443:3:40:1025:1174#0/1  
AGAAACTGTGATGAGAATGGGAGACCTTCACTACCTCCAG  
+HWI-EAS443:3:40:1025:1174#0/1  
ab`babab`aaaa\_a]a`ba\_\_a`\_]aaa[Y`aa^aZ0Z  
@HWI-EAS443:3:40:1027:1493#0/1  
CCGCAAGCGATTTGCAGACAATGGATTGGGTGATGCCCA  
+HWI-EAS443:3:40:1027:1493#0/1  
abbbabbbbbbbaab` `bbbabbaa`¥Z^]W`]Y`aa\_bX  
@HWI-EAS443:3:40:1038:942#0/1  
TGCCGCATTTCTTCAATTAACCACCTTATTTCTCAAATT  
+HWI-EAS443:3:40:1038:942#0/1  
abbbbb`Y[aXX^L` `]aaba`a^OYOUW`\_`X\_\_`\_W]X  
@HWI-EAS443:3:40:1087:1364#0/1  
TGAGAATGGGAGACCTTCACTACCTCCAGAGCAGAAATGA  
+HWI-EAS443:3:40:1087:1364#0/1  
aa\_`]Y]a`Y]`\_^\_a` ``^`^`¥T`^^^Z]¥\_U^\_\_¥[  
@HWI-EAS443:3:40:1155:1838#0/1  
AAGCTTTTCAGGTAGACTGTTTCCTTTGGCATATCCGCAAG  
+HWI-EAS443:3:40:1155:1838#0/1  
a\_\_`aaa\_\_`aYaa\_Vaa^`\_\_¥`^¥^Za`^a\_a\_\_a` `\_  
@HWI-EAS443:3:40:1206:837#0/1  
AATCGCTTGCAGATATGCCAAAGGAAACAGTCTACCTGAA  
+HWI-EAS443:3:40:1206:837#0/1  
ab`a`aa\_]`\_a\_\_` ``\_]Z¥a`a¥UHXIYV` [0^a¥^QV

@HWI-EAS443:3:40:1221:1954#0/1  
TGAGAATGGGAGACCTTCACTACCTCCAGAGCAGAAATGA  
+HWI-EAS443:3:40:1221:1954#0/1  
a¥]aaaaaa^a^ZU`aa`\_YUYSaa`¥\_\_¥`]Z^]]Y  
@HWI-EAS443:3:40:1238:1362#0/1  
ATTACACTGAAGTTCGCTTTCAGTACTATGTTCTTTTCCA  
+HWI-EAS443:3:40:1238:1362#0/1  
aaababaaa`a`aa`aaa`\_]\_^aa`]``a\_a`a`  
@HWI-EAS443:3:40:1242:964#0/1  
GAAAGCTCTTATCTCTTGTCTACTTCAAGCAGTAGTTGT  
+HWI-EAS443:3:40:1242:964#0/1  
`\_^¥Y^^`\_^]]`\_]\_^\_]PY^]¥LTY]YW]\_Y^Y]  
@HWI-EAS443:3:40:1307:387#0/1  
ATTACCTTCTTCCAGGACATACTTATGAGGATGTCAAA  
+HWI-EAS443:3:40:1307:387#0/1  
`baaab`Wa`aa`^`aaa`aaZa]Jaa`\_\_Q\_]Z^  
@HWI-EAS443:3:40:1329:1140#0/1  
TGAGAATGGGAGACCTTCACTACCTCCAGAGCAGAAATGA  
+HWI-EAS443:3:40:1329:1140#0/1  
aa`a`aaa`\_[a[^\_\_\_\_`\_`YZ[V^X^S^ZZ`X^^¥\_Y  
@HWI-EAS443:3:40:133:1245#0/1  
GCGGCACAGATTGAAAGCGACAGAGAATAGTTTCGAACAA  
+HWI-EAS443:3:40:133:1245#0/1  
`a`aaaaaaaa`aaa]Y\_a`\_a`^GST[Y\_a`\_^`\_ZP  
@HWI-EAS443:3:40:136:1105#0/1  
AGAAACTGTGATGAGAATGGGAGACCTTCACTACCTCCAG  
+HWI-EAS443:3:40:136:1105#0/1  
aa]]`aaa]aa\_Z`\_]a`\_`\_\_`\_^\_Y]a`^^a`]V]]NT  
@HWI-EAS443:3:40:1390:1770#0/1  
CTTGGAGAACTGTGATGAGAATGGGAGACCTTCACTACC  
+HWI-EAS443:3:40:1390:1770#0/1  
^]a`bbabbbbaa`\_\_`baaabab`^^`aba]abaaaba¥  
@HWI-EAS443:3:40:1391:71#0/1  
GAAACTGTGATGAGAATGGGAGACCTTCACTACCTCCAGA  
+HWI-EAS443:3:40:1391:71#0/1  
a`\_`^aaR`][^Z`WY`\_[^RZUUUVVZSUTVL[YU]Y]Y  
@HWI-EAS443:3:40:1452:1375#0/1  
GCCGCATTTCTTCAATTAACCACCTTATTTCTCAAATTT  
+HWI-EAS443:3:40:1452:1375#0/1  
a¥a`[aa`]¥]VMTQZa`¥XU¥YV[PO[VYZT^aYLX]TX  
@HWI-EAS443:3:40:1458:1160#0/1  
CAGAGATTGCTTGGAGAACTGTGATGAGAATGGGAGAC  
+HWI-EAS443:3:40:1458:1160#0/1  
abbbbbbbabbbbbbbbbbbbabbaa`^\_\_abbbbb\_UX  
@HWI-EAS443:3:40:1522:1649#0/1  
CGCGAAGTAGGTACAGATGCAATTGTCATTCTAAGTGTCT  
+HWI-EAS443:3:40:1522:1649#0/1  
aaaaabb`bba\_b`\_aaa\_a`aba\_Ybaaa]a^WZ^b^`]  
@HWI-EAS443:3:40:1532:785#0/1  
AACAAATCGTGAATGGATCTTGAAGAGGAATCCAGCGA

+HWI-EAS443:3:40:1532:785#0/1  
`aabbbbababaaaaba^`a`¥\_`]Z^`a`[]a\_``Y`Z  
@HWI-EAS443:3:40:1539:1874#0/1  
GCCGCATTTCTTCAATTAACCACCTTATTTCTCAAATTT  
+HWI-EAS443:3:40:1539:1874#0/1  
aYY]aa^[a]\_`]¥\_`^]\_\_XH]ZQZOVZ\_]SS[`¥¥][\_W  
@HWI-EAS443:3:40:1573:675#0/1  
GAATGGGAGACCTTCACTACCTCCAGAGCAGAAATGAAAA  
+HWI-EAS443:3:40:1573:675#0/1  
`P`Y[\_`Z\_XLRSUQXT^^YUV¥SWQF[UQZUPLUZZUTS  
@HWI-EAS443:3:40:1587:183#0/1  
GGTTAATTGAAGAAATGCGGCACAGATTGAAAGCGACAGA  
+HWI-EAS443:3:40:1587:183#0/1  
abab\_bbab\_ab`a`aaY]a^aa`\_QT\_`¥¥`¥^]SXVa[  
@HWI-EAS443:3:40:1605:1462#0/1  
TGAGAATGGGAGACCTTCACTACCTCCAGAGCAGAAATGA  
+HWI-EAS443:3:40:1605:1462#0/1  
T]]]ORQV\_]PNVJQO^QVLYa[USW`^\_YVMP¥KHS^ZL  
@HWI-EAS443:3:40:1618:733#0/1  
AATGGTAACACGGTTCGAGTCTCTGAAAATATACAGAGAT  
+HWI-EAS443:3:40:1618:733#0/1  
^¥aa\_W¥aYaZab]\_^bbaW^¥Y^\_ZYZaa``\_\_Z\_``[]  
@HWI-EAS443:3:40:1642:1073#0/1  
TGAGAATGGGAGACCTTCACTACCTCCAGAGCAGAAATGA  
+HWI-EAS443:3:40:1642:1073#0/1  
\_^\_b\_aaaa^S\_\_U[`]a\_\_^^^UVaZYJWYY]XQNVX[  
@HWI-EAS443:3:40:1656:223#0/1  
AATTTACCATTACCTTCTTCTCCAGGACATACTTATGAG  
+HWI-EAS443:3:40:1656:223#0/1  
``bbaaa```aaa\_[aa\_a\_\_\_\_\_Z\_[¥^\_\_\_\_^\_a^a`^`  
@HWI-EAS443:3:40:1660:74#0/1  
CGCATTTCTTCAATTAACCACCTTATTTCTCAAATTTCT  
+HWI-EAS443:3:40:1660:74#0/1  
`bababbabbaabbbbaaabaabb\_b`babab`M\_a\_aba  
@HWI-EAS443:3:40:1758:1171#0/1  
GAGAAACTGTGATGAGAATGGGAGACCTTCACTACCTCCA  
+HWI-EAS443:3:40:1758:1171#0/1  
¥Z``a¥X^a`X^`b\_¥\_aaa\_ZR¥XS\_^Y^QVZZZ^[XXS  
@HWI-EAS443:3:40:1759:1274#0/1  
ATTACACTGAAGTTCGCTTTCAGTACTATGTTCTTTTCCA  
+HWI-EAS443:3:40:1759:1274#0/1  
abbb`a¥\_a\_aaba\_aabbaba\_]aaaa\_aabaaaa`  
@HWI-EAS443:3:40:1770:903#0/1  
CGCGCTACCTTTCTGACATGACCCTCGAGGAAATGTCACG  
+HWI-EAS443:3:40:1770:903#0/1  
`baaabbb\_\_bb]]]aX¥¥bbabb^baVaabaZ`T`a¥a`]Y  
@HWI-EAS443:3:40:20:1921#0/1  
AAACGAGAAAGCTTCTTCTTCTTCTTCTTCTTCAAGCAGT  
+HWI-EAS443:3:40:20:1921#0/1  
`aba`aY\_aaaaaaaaaabaabaaa\_\_aa¥a`aa`^W```\_`[

@HWI-EAS443:3:40:22:598#0/1  
GAAACTGTGATGAGAATGGGAGACCTTCACTACCTCCAGA  
+HWI-EAS443:3:40:22:598#0/1  
a`XV]\_\_NRVZXTRV]X[S[H¥V]^VV^U[VUV]YW^XXR  
@HWI-EAS443:3:40:282:220#0/1  
TGAGAATGGGAGACCTTCACTACCTCCAGAGCAGAAATGA  
+HWI-EAS443:3:40:282:220#0/1  
ab]\_Waab`\_¥ba`aa[a]a`U`Y`\_¥[VY[¥Y^[QGY^S  
@HWI-EAS443:3:40:357:1781#0/1  
CCGCATTTCTTCAATTAACCACCTTATTTCTCAAATTTCT  
+HWI-EAS443:3:40:357:1781#0/1  
`a\_baaabab`a`aab]aaaaa`aV\_Ya`^a\_XFUaU\_  
@HWI-EAS443:3:40:369:1396#0/1  
TGAGAATGGGAGACCTTCACTACCTCCAGAGCAGAAATGA  
+HWI-EAS443:3:40:369:1396#0/1  
aa]VVT\_aa^aabaa`]ba`X\_\_a^^aaZ]Xa]`YJOW[^  
@HWI-EAS443:3:40:379:1328#0/1  
GAATGGGAGACCTTCACTACCTCCAGAGCAGAAATGAAAA  
+HWI-EAS443:3:40:379:1328#0/1  
`HXXTVXYRV[\_^Q[\_UWVY^VXUP[HZ¥Z¥QJPTTUZTX  
@HWI-EAS443:3:40:390:1904#0/1  
TGAGAATGGGAGACCTTCACTACCTCCAGAGCAGAAATGA  
+HWI-EAS443:3:40:390:1904#0/1  
U[[`[VMRaaa¥0JW[^baRF^`aQ\_aZQW^a^`¥^]^[  
@HWI-EAS443:3:40:406:1269#0/1  
GAAACTGTGATGAGAATGGGAGACCTTCACTACCTCCAGA  
+HWI-EAS443:3:40:406:1269#0/1  
a^\_S`^`V\_^[\_S^]\_^\_]U]XXGQGVURU¥YX`USXV  
@HWI-EAS443:3:40:448:1149#0/1  
CGCATTTCTTCAATTAACCACCTTATTTCTCAAATTTCT  
+HWI-EAS443:3:40:448:1149#0/1  
a```aaaaaa\_`aaabb\_aaaaa`X`baab^JZ\_\_\_a\_  
@HWI-EAS443:3:40:516:155#0/1  
TGCCGCATTTCTTCAATTAACCACCTTATTTCTCAAATT  
+HWI-EAS443:3:40:516:155#0/1  
abbbbaa^a\_`aa`aaa^`aaa`\_`U¥[[^\_\_\_a[LO\_`  
@HWI-EAS443:3:40:522:1683#0/1  
TGCCGCATTTCTTCAATTAACCACCTTATTTCTCAAATT  
+HWI-EAS443:3:40:522:1683#0/1  
abbbab`bbbaaaaa^aabaabbaa`Y`^aa`aab^L^aa  
@HWI-EAS443:3:40:535:1809#0/1  
GAGATTGCTTGGAGAAACTGTGATGAGAATGGGAGACCT  
+HWI-EAS443:3:40:535:1809#0/1  
aa\_\_\_\_[\_`\_]\_\_\_\_\_`\_`\_]\_a]\_\_0]H¥Y¥VZ^ZUZWV^X  
@HWI-EAS443:3:40:545:823#0/1  
AAACGAGAAAGCTTCTTCTTCTTCTTCTTCAAGCAGT  
+HWI-EAS443:3:40:545:823#0/1  
abbbbabab\_]aaaaa`aaa`a`aaa`X`a\_a`Z\_a`a]  
@HWI-EAS443:3:40:568:81#0/1  
AACTATTCTCTGTCGCTTTCAATCTGTGCCGCATTTCTTC

+HWI-EAS443:3:40:568:81#0/1  
^aaaaab`bXabaaa¥W¥[[]^[\`S]Wa\_\_a¥¥W\_X]`\_W  
@HWI-EAS443:3:40:60:2034#0/1  
CACAGATTGAAAGCGACAGAGAATAGTTTCGAACAAATAA  
+HWI-EAS443:3:40:60:2034#0/1  
aabbababba`bbbbabaab`baaaaZa^a\_```]Raaaa  
@HWI-EAS443:3:40:637:1903#0/1  
CAGAGATTTCGCTTGGAGAACTGTGATGAGAATGGGAGAC  
+HWI-EAS443:3:40:637:1903#0/1  
`baaaaa`ba`\_`a\_a^aaa`\_a¥\_`T^¥\_¥`]^VZZ\_T  
@HWI-EAS443:3:40:640:511#0/1  
GCCGCATTTCTTCAATTAACCACCTTATTTCTCAAATTT  
+HWI-EAS443:3:40:640:511#0/1  
H]aaa^`bb``abab`]a`\_`bbb\_0`[aYaab\_RQWaa  
@HWI-EAS443:3:40:68:1328#0/1  
TGAGAATGGGAGACCTTCACTACCTCCAGAGCAGAAATGA  
+HWI-EAS443:3:40:68:1328#0/1  
aaaa]aaaa`¥```aa`aaa^`a\_```\_\_\_\_[TZXQV^\_]`  
@HWI-EAS443:3:40:691:745#0/1  
ATGAGAATGGGAGACCTTCACTACCTCCAGAGCAGAAATG  
+HWI-EAS443:3:40:691:745#0/1  
aaaabaabaa`aa``aa`a\_a`\_`\_`QGx^a`\_\_YS]^\_  
@HWI-EAS443:3:40:738:355#0/1  
GAGGGAGCAATAGTTGGAGAAATTTACCATTACCTTCTC  
+HWI-EAS443:3:40:738:355#0/1  
a\_\_^`^`^`^`\_]¥]^`^Y\_`^^^UPU^]`ZV]ZZZZZW  
@HWI-EAS443:3:40:739:1475#0/1  
CACCCAATCCATTGTCTGCAAATCGCTTGGCGATATGCCA  
+HWI-EAS443:3:40:739:1475#0/1  
¥Y`\_¥¥U]b``b\_[E¥Q[^a`]Q[`ZRUPaWWPMTDRBBB  
@HWI-EAS443:3:40:754:944#0/1  
AACACGGTTCGAGTCTCTGAAAATATACAGAGATTCGCTT  
+HWI-EAS443:3:40:754:944#0/1  
a`abaa`]aaa`\_a``aaa`X^```P[\_a^YPNY`^^¥\_  
@HWI-EAS443:3:40:77:577#0/1  
TAGGCAAAAAGATAATAGGCCCTCTTTGCGTGCGATTGGAC  
+HWI-EAS443:3:40:77:577#0/1  
`a¥¥bbb\_abbaba````aa`^a\_aa]`[[a`¥JU[`Y[`  
@HWI-EAS443:3:40:786:441#0/1  
TGAGAATGGGAGACCTTCACTACCTCCAGAGCAGAAATGA  
+HWI-EAS443:3:40:786:441#0/1  
``ab¥UZ^¥^T\_[DPPQT¥\_YZ^]NR]HTLX[X¥SVZ[`]`  
@HWI-EAS443:3:40:799:461#0/1  
GCTGTTTCGATATCGAGGCCAAGGGTGTTCCTCTTCCTT  
+HWI-EAS443:3:40:799:461#0/1  
a^OX]aZQ]WU^aXIVS\_^VORVR]GTHF]YSTSJV^^ZR  
@HWI-EAS443:3:40:825:527#0/1  
GCCGCATTTCTTCAATTAACCACCTTATTTCTCAAATTT  
+HWI-EAS443:3:40:825:527#0/1  
aa\_^a^[¥`Z\_\_^ZS^]OY]RFUY]UNVZ]]X^XTUZ^]



@HWI-EAS443:3:40:886:923#0/1  
ATGAGAATGGGAGACCTTCACTACCTCCAGAGCAGAAATG  
+HWI-EAS443:3:40:886:923#0/1  
O\_a\_a¥^^^aa`]^\_\_¥\_¥]^]a`^]S]V]¥R\_W]Z]Z  
@HWI-EAS443:3:40:900:874#0/1  
TGCCGCATTTCTTCAATTAACCACCTTATTTCCCTCAAATT  
+HWI-EAS443:3:40:900:874#0/1  
^aaTaa\_] ^¥b`\_¥Za`b^¥`^`\_Y`OT[¥`a^¥`]Q5X¥  
@HWI-EAS443:3:40:922:400#0/1  
TGCCGCATTTCTTCAATTAACCACCTTATTTCCCTCAAATT  
+HWI-EAS443:3:40:922:400#0/1  
\_aYa`[baab`ba`aaa\_`^Za[TbZWaaa¥`aa`Za\_  
@HWI-EAS443:3:40:944:1072#0/1  
GAAAGCTCTTATCTCTTGTCTACTTCAAGCAGTAGTTGT  
+HWI-EAS443:3:40:944:1072#0/1  
a¥a`bb\_]ZM^aUaaXaa^`\_W^¥R[UTW¥\_W^\_S\_]W  
@HWI-EAS443:3:40:976:1236#0/1  
TCGCTGGATTCTTCTTTCAAGATCCATTCCACGATTTGTT  
+HWI-EAS443:3:40:976:1236#0/1  
aa\_a`\_b\_ab\_\_a`aaaaa`aa`\_]`\_`^a\_a\_a\_]`  
@HWI-EAS443:3:40:982:1893#0/1  
TGCCGCATTTCTTCAATTAACCACCTTATTTCCCTCAAATT  
+HWI-EAS443:3:40:982:1893#0/1  
Y\_[R\_`\_]YT[]^`^\_`W]^V^`Y\_¥^WZWZZ]]\_]X  
@HWI-EAS443:3:40:98:1028#0/1  
GTCGCTTTCAATCTGTGCCGCATTTCTTCAATTAACCACC  
+HWI-EAS443:3:40:98:1028#0/1  
a\_`^\_a\_```\_a^WV¥a`\_]¥^\_]TR]`ZZ\_UL[a\_\_\_N  
@HWI-EAS443:3:42:1034:1966#0/1  
AGAAACTGTGATGAGAATGGGAGACCTTCACTACCTCCAG  
+HWI-EAS443:3:42:1034:1966#0/1  
aba\_`^a`U^aaa`a`a\_aa\_\_`\_`^`¥a^^`^R^U]^\_  
@HWI-EAS443:3:42:1062:672#0/1  
GAATGGGAGACCTTCACTACCTCCAGAGCAGAAATGAAAA  
+HWI-EAS443:3:42:1062:672#0/1  
aaaabba¥a`a`aa`a`^`^Y\_`\_\_a\_a[`a^`\_aa^]^\_  
@HWI-EAS443:3:42:1083:1319#0/1  
GCCGCATTTCTTCAATTAACCACCTTATTTCCCTCAAATTT  
+HWI-EAS443:3:42:1083:1319#0/1  
`aaabbbbbbbbbbababb`bbbbbbbb`\_bbbbabbb  
@HWI-EAS443:3:42:1117:1173#0/1  
CACGGTTCGAGTCTCTGAAAATATACAGAGATTTCGCTTGG  
+HWI-EAS443:3:42:1117:1173#0/1  
ab\_aa]WaYZ¥ab`a^^^`a]¥T¥VP\_`a¥\_`\_`^[\_a\_]`  
@HWI-EAS443:3:42:1125:56#0/1  
GCCGCATTTCTTCAATTAACCACCTTATTTCCCTCAAATTT  
+HWI-EAS443:3:42:1125:56#0/1  
`bbbbbbbababbabababaabaabbbbbbba\_bbbabbb  
@HWI-EAS443:3:42:1128:1835#0/1  
AAGAACATAGTACTGAAAGCGAACTTCAGTGAATCTTTA

+HWI-EAS443:3:42:1128:1835#0/1  
^aa`XV]aaa\_b\_a`]b[]Sa\_\_[a¥a^Za] []a`a`]-  
@HWI-EAS443:3:42:1140:1505#0/1  
GAAAATATACAGAGATTTCGCTTGGAGAACTGTGATGAGA  
+HWI-EAS443:3:42:1140:1505#0/1  
a\_\_\_T`]\_\_¥`a]`]]`]]`]]`\_¥X\_] ^YX^^TUXYYVVV  
@HWI-EAS443:3:42:1147:467#0/1  
GCCGCATTTCTTCAATTAACCACCTTATTTCTCAAATTT  
+HWI-EAS443:3:42:1147:467#0/1  
a\_\_a\_`^aa\_\_a`a`a`^\_^\_Xa\_\_`a\_]`^^^`^`^]  
@HWI-EAS443:3:42:1164:1558#0/1  
CACCCAATCCATTGTCTGCAAATCGCTTGC GGATATGCCA  
+HWI-EAS443:3:42:1164:1558#0/1  
aYWQ¥`¥Za\_\_a\_\_[a\_a¥¥aaUXS[^\_[GPK¥Y¥RYTM  
@HWI-EAS443:3:42:1168:868#0/1  
GCCGCATTTCTTCAATTAACCACCTTATTTCTCAAATTT  
+HWI-EAS443:3:42:1168:868#0/1  
aba`P`aa^^[^KY`a]a\_a[`V``[\_aaa\_`^]VY[``a  
@HWI-EAS443:3:42:1207:30#0/1  
GGGTGTTGCCTCTTCCTTTTAAGGACTTTTGATCTCGGCG  
+HWI-EAS443:3:42:1207:30#0/1  
abb[baaba^aaaa`^aaba\_^aaW\_a`^aa\_a``\_a`\_a  
@HWI-EAS443:3:42:1222:106#0/1  
CTGTGATGAGAATGGGAGACCTTCACTACCTCCAGAGCAG  
+HWI-EAS443:3:42:1222:106#0/1  
`b\_b\_U\_bbb]\_bbV\_a`US`abXa`ba¥baba\_^I`\_`a  
@HWI-EAS443:3:42:1235:1605#0/1  
AGAATGGGAGACCTTCACTACCTCCAGAGCAGAAATGAAA  
+HWI-EAS443:3:42:1235:1605#0/1  
aaaabbbbabba\_ba^b\_aba[a[\_bbaaaa\_aaabaa`  
@HWI-EAS443:3:42:1238:1989#0/1  
GAGAATGGGAGACCTTCACTACCTCCAGAGCAGAAATGAA  
+HWI-EAS443:3:42:1238:1989#0/1  
W[b]b\_]\_¥babS[baaaa]`U`\_L\_¥]¥YM[a[a`]ba`  
@HWI-EAS443:3:42:1239:982#0/1  
AGAGATTCGCTTGGAGAACTGTGATGAGAATGGGAGACC  
+HWI-EAS443:3:42:1239:982#0/1  
`babaaaa\_aa^\_I]T^] ^aa[\_\_\_a\_aM^\_\_`ZV`\_¥¥  
@HWI-EAS443:3:42:124:819#0/1  
GAGAACTGTGATGAGAATGGGAGACCTTCACTACCTCCA  
+HWI-EAS443:3:42:124:819#0/1  
`^`Z^WY`Z]\_`aa[a¥¥\_a`a^`\_]\_a¥]]¥¥][^]Y[]`  
@HWI-EAS443:3:42:1258:430#0/1  
GCCGCATTTCTTCAATTAACCACCTTATTTCTCAAATTT  
+HWI-EAS443:3:42:1258:430#0/1  
`aabaabbaabbaa`bbaaa`aa^ababaa` `a`aaaaa  
@HWI-EAS443:3:42:1267:38#0/1  
GAATCCAGCGAGACACTTAGAATGACAATTGCATCTGTAC  
+HWI-EAS443:3:42:1267:38#0/1  
a]bb¥bbbababaaa`baabaabbaa`aaaa\_a`\_aaY`\_`

@HWI-EAS443:3:42:1278:1556#0/1  
GGAGAACTGTGATGAGAATGGGAGACCTTCACTACCTCC  
+HWI-EAS443:3:42:1278:1556#0/1  
Vb^ZXQX`aaV]aa\_\_ba]a[aa\_``aa\_]U]aa]a\_`\_  
@HWI-EAS443:3:42:1281:1365#0/1  
GCCGCATTTCTTCAATTAACCACCTTATTTCTCAAATTT  
+HWI-EAS443:3:42:1281:1365#0/1  
aaa^V`abb]ba]]Xab¥XJ`]\_N\_aaba`XQ^¥`]W^`]`  
@HWI-EAS443:3:42:1284:1887#0/1  
GGAGAACTGTGATGAGAATGGGAGACCTTCACTACCTCC  
+HWI-EAS443:3:42:1284:1887#0/1  
aaZ\_\_``\_]\_aI]``]`U`R]X^]\_H]X¥Y¥]]^^]YYX^X  
@HWI-EAS443:3:42:1319:1608#0/1  
GCCGCATTTCTTCAATTAACCACCTTATTTCTCAAATTT  
+HWI-EAS443:3:42:1319:1608#0/1  
aaaa\_`baa]bb\_aaaaaa^a`a]aaaaa]`a¥`aaa\_a  
@HWI-EAS443:3:42:1326:1869#0/1  
GAAAATATACAGAGATTCGCTTGGAGAACTGTGATGAGA  
+HWI-EAS443:3:42:1326:1869#0/1  
a`Za]\_aaa`b\_]NYaa\_Y]`a`YWY\_\_Q\_a[`T^`[aU  
@HWI-EAS443:3:42:1372:719#0/1  
TTTAAGGACTTTTGATCTCGGCGGAGCCGATCAAGGAATG  
+HWI-EAS443:3:42:1372:719#0/1  
^^^[Q]^`a]T]\_^XYaXY[NW^XZ[[RY[[LJZ`VFVR  
@HWI-EAS443:3:42:1377:284#0/1  
GCCGCATTTCTTCAATTAACCACCTTATTTCTCAAATTT  
+HWI-EAS443:3:42:1377:284#0/1  
`abaSQ`baYab`aab]a`\_V`X\_ZV`aaZV[^`^`]]V^  
@HWI-EAS443:3:42:1410:1416#0/1  
GTGATGAGAATGGGAGACCTTCACTACCTCCAGAGCAGAA  
+HWI-EAS443:3:42:1410:1416#0/1  
a\_a\_`b`^^`\_a`¥`UM[[^U\_LZ`UY[^^^\_V[¥Y¥UY  
@HWI-EAS443:3:42:1520:695#0/1  
TGAGAATGGGAGACCTTCACTACCTCCAGAGCAGAAATGA  
+HWI-EAS443:3:42:1520:695#0/1  
\_babab`¥a\_`\_`]]aaaa\_aaa`a`aa`a\_\_a^`\_a``  
@HWI-EAS443:3:42:1523:1209#0/1  
AAGAGGGCCTATTATCTTTTGCCTAGGCATGAGCATGAAC  
+HWI-EAS443:3:42:1523:1209#0/1  
aabaUa`bbbbbb^a`bba`^^\_a^aba`aaab^ab`\_aa  
@HWI-EAS443:3:42:155:1196#0/1  
GCGCGAAGTAGGTACAGATGCAATTGTCATTCTAAGTGTC  
+HWI-EAS443:3:42:155:1196#0/1  
`aRZZYYYYYPXaP¥\_T¥Z\_¥XV¥^¥¥S[¥[¥VZ^^^VLZ¥  
@HWI-EAS443:3:42:1562:199#0/1  
GGTTAATTGAAGAAATGCGGCACAGATTGAAAGCGACAGA  
+HWI-EAS443:3:42:1562:199#0/1  
ab\_aaaaabaab`aaa\_b`^`\_`a\_a\_`]\_^a[`][]a[  
@HWI-EAS443:3:42:1579:607#0/1  
AGAAACTGTGATGAGAATGGGAGACCTTCACTACCTCCAG

+HWI-EAS443:3:42:1579:607#0/1  
ab`babb`baaaaa`baaaa^a\_Z^a\_aa^\_\_]\_a\_`^\_  
@HWI-EAS443:3:42:1588:380#0/1  
CTCTAATCGGTAAAGATTACACTGAAGTCGCTTTCAGT  
+HWI-EAS443:3:42:1588:380#0/1  
abbbbbba\_\_\_X¥``\_aba[`^a`]¥¥W\_V^][\_`QY\_]`  
@HWI-EAS443:3:42:1610:1663#0/1  
AACCAGTCTCGTGACATTTCTCGAGGGTCATGTCAGAAA  
+HWI-EAS443:3:42:1610:1663#0/1  
ab\_a^bY^a)]\_a\_Y`[a`¥\_^\_Z\_^`TWU\_[VXZYV¥W`  
@HWI-EAS443:3:42:1647:1143#0/1  
TGCCGCATTTCTTCAATTAACCACCTTATTTCTCAAATT  
+HWI-EAS443:3:42:1647:1143#0/1  
aba^\_\_a]^aaaa`aaa`]¥``¥`a^ba`YYa^`[`a`  
@HWI-EAS443:3:42:1648:1129#0/1  
GCCGCATTTCTTCAATTAACCACCTTATTTCTCAAATTT  
+HWI-EAS443:3:42:1648:1129#0/1  
abaa]S]baaa\_`[GZa¥]\_XX[W[aYaa`V[^QNTZ¥¥`  
@HWI-EAS443:3:42:1699:302#0/1  
CCGCATTTCTTCAATTAACCACCTTATTTCTCAAATTT  
+HWI-EAS443:3:42:1699:302#0/1  
`ZTYZUaaa^^[`aaaa\_XR\_^^Y][[RUJ[ZS^^[\_]  
@HWI-EAS443:3:42:1715:1637#0/1  
TGAGAATGGGAGACCTTCACTACCTCCAGAGCAGAAATGA  
+HWI-EAS443:3:42:1715:1637#0/1  
aaa\_`aaa^XYa\_[\_\_`Y`Z`^\_]\_^]\_Z^\_]^^U^]\_Z`  
@HWI-EAS443:3:42:1726:226#0/1  
AGAAACTGTGATGAGAATGGGAGACCTTCACTACCTCCAG  
+HWI-EAS443:3:42:1726:226#0/1  
aa\_aa`ab^``a^a\_`aa`\_a]SY\_^^]VX]VW[]^Y]  
@HWI-EAS443:3:42:1745:1004#0/1  
GAGAACTGTGATGAGAATGGGAGACCTTCACTACCTCCA  
+HWI-EAS443:3:42:1745:1004#0/1  
aab`aaaab`baabaYTZ`a]a\_a``\_`a\_a\_\_`^``\_\_\_\_  
@HWI-EAS443:3:42:199:676#0/1  
TGAGAATGGGAGACCTTCACTACCTCCAGAGCAGAAATGA  
+HWI-EAS443:3:42:199:676#0/1  
abab]\_aaaa`[a`a\_`aa`¥a``^X\_W]aaaa\_\_a````  
@HWI-EAS443:3:42:19:281#0/1  
GTAGACTGTTTCTTTGGCATATCCGCAAGCGATTTGCAG  
+HWI-EAS443:3:42:19:281#0/1  
aQ¥`^`\_]X\_^MUR¥¥¥THVVTRVVWWP[PTTTT\_BB BBB  
@HWI-EAS443:3:42:229:1798#0/1  
GCCGCATTTCTTCAATTAACCACCTTATTTCTCAAATTT  
+HWI-EAS443:3:42:229:1798#0/1  
a`^`aaab`abbbaaaaaaba^babaaaaaaa]`aa\_  
@HWI-EAS443:3:42:238:962#0/1  
GCCGCATTTCTTCAATTAACCACCTTATTTCTCAAATTT  
+HWI-EAS443:3:42:238:962#0/1  
`bb`\_\_\_babbbba\_bba`aX]baaababb\_aba[aaaa

@HWI-EAS443:3:42:278:977#0/1  
TGTCGCTTTCAATCTGTGCCGATTTCTTCAATTAACCAC  
+HWI-EAS443:3:42:278:977#0/1  
`^Ua^a`aa[]aa]^aY\_aaa`^a\_^`aaaa`\_\_``]``\_  
@HWI-EAS443:3:42:300:1074#0/1  
ATGAGAATGGGAGACCTTCACTACCTCCAGAGCAGAAATG  
+HWI-EAS443:3:42:300:1074#0/1  
Taa[a^^a`bUaaaaY]\_Vbb\_ba^`baa\_]b`aa[```a  
@HWI-EAS443:3:42:310:1822#0/1  
TGCCGCATTTCTTCAATTAACCACCTTATTTCTCAAATT  
+HWI-EAS443:3:42:310:1822#0/1  
aababbbbbaaaaaaaaaaab`]baaaabbaa`aaabbaaa  
@HWI-EAS443:3:42:311:1682#0/1  
GTTTCGAGTCTCTGAAAATATACAGAGATTCGCTTGGAGAA  
+HWI-EAS443:3:42:311:1682#0/1  
a^\_ZU¥aP¥a\_K\_\_`S`\_NTaXa]`a\_X\_]UY^`QYX[`\_  
@HWI-EAS443:3:42:326:589#0/1  
CCGCATTTCTTCAATTAACCACCTTATTTCTCAAATTT  
+HWI-EAS443:3:42:326:589#0/1  
abbabbbbba`bbaaaaaabbaaabbbaaa^\_aaaa  
@HWI-EAS443:3:42:331:379#0/1  
ACCCAATCCATTGTCTGCAAATCGCTTGGCGATATGCCAA  
+HWI-EAS443:3:42:331:379#0/1  
aa`aba`]`a`\_\_`¥`aa`\_\_`T```]\_\_V]XZ^\_  
@HWI-EAS443:3:42:332:1809#0/1  
GGAAGAGGCAACACCCTTGGCCTCGATATCGAAACAGCCA  
+HWI-EAS443:3:42:332:1809#0/1  
\_aa`aaaVaa`a`R`\_`\_\_¥[a[\_`X`a\_\_a[\_`^aP`[X  
@HWI-EAS443:3:42:339:1884#0/1  
GCCGCATTTCTTCAATTAACCACCTTATTTCTCAAATTT  
+HWI-EAS443:3:42:339:1884#0/1  
[bbbabbbbbaabbbbbaabbbbbaabbbbba`baa^aaaa  
@HWI-EAS443:3:42:340:1445#0/1  
GCTTGGAGAACTGTGATGAGAATGGGAGACCTTCACTAC  
+HWI-EAS443:3:42:340:1445#0/1  
ab`U`ab`[ababaaa`aa`b`\_`V\_a`\_`VN\_\_\_a\_]\_]`  
@HWI-EAS443:3:42:369:1645#0/1  
AACAAATCGTGAATGGATCTTGAAAGAGGAATCCAGCGA  
+HWI-EAS443:3:42:369:1645#0/1  
\_`^Z`bab`aaaab^a]\_a^`a`¥`\_`]````a^\_SZ[`¥X  
@HWI-EAS443:3:42:389:1255#0/1  
GAATGGGAGACCTTCACTACCTCCAGAGCAGAAATGAAAA  
+HWI-EAS443:3:42:389:1255#0/1  
a]aab[ba^``aa\_aa\_aa¥[aa\_^]¥\_aa\_``S]`¥Xa\_  
@HWI-EAS443:3:42:438:457#0/1  
GAATGGGAGACCTTCACTACCTCCAGAGCAGAAATGAAAA  
+HWI-EAS443:3:42:438:457#0/1  
a^`\_aaaV^Qa\_aa\_`\_[\_[X¥a^`¥Y\_\_`aZM^\_aXFV¥  
@HWI-EAS443:3:42:443:992#0/1  
TGCCGCATTTCTTCAATTAACCACCTTATTTCTCAAATT

+HWI-EAS443:3:42:443:992#0/1  
`b`\_\_aTTabbaaa[Ya\_`a`b`b^bZY^a\_ab`ab`Ua^  
@HWI-EAS443:3:42:468:978#0/1  
CAACTGCATTTTTGACATCCTCATAAGTATGTCCTGGAAG  
+HWI-EAS443:3:42:468:978#0/1  
a`b^ba`aZT^aXaa`a`a[V[VS]X`\_aX¥\_\_^]`V[  
@HWI-EAS443:3:42:490:452#0/1  
AAACTGTGATGAGAATGGGAGACCTTCACTACCTCCAGAG  
+HWI-EAS443:3:42:490:452#0/1  
aabbbbababbabbaaba\_a]aaaa\_a\_aba]a]`\_a\_a  
@HWI-EAS443:3:42:491:1738#0/1  
GAAACTGTGATGAGAATGGGAGACCTTCACTACCTCCAGA  
+HWI-EAS443:3:42:491:1738#0/1  
abbabab`bbbbaaaabbaabaaaaabaaba`abaaa`  
@HWI-EAS443:3:42:49:1831#0/1  
GAGAACTGTGATGAGAATGGGAGACCTTCACTACCTCCA  
+HWI-EAS443:3:42:49:1831#0/1  
[bba\_aabbaaabbba\_abb`]`aaabababbaaaaa`aba  
@HWI-EAS443:3:42:526:1194#0/1  
AGCTCTTATCTCTTGTCTACTTCAAGCAGTAGTTGTAAG  
+HWI-EAS443:3:42:526:1194#0/1  
¥bba`bb¥\_aab`b`YbaaababV^aab¥aaabb`^Y¥  
@HWI-EAS443:3:42:529:1213#0/1  
CTGTGATGAGAATGGGAGACCTTCACTACCTCCAGAGCAG  
+HWI-EAS443:3:42:529:1213#0/1  
UW`[^`^a¥[^`a^¥WVZ\_WYVT\_[b]aYa`aba`baa\_IY  
@HWI-EAS443:3:42:592:56#0/1  
TGCCGCATTTCTTCAATTAACCACCTTATTTCCCTCAAATT  
+HWI-EAS443:3:42:592:56#0/1  
abbaa\_IY\_a]aaaa[Yaaa`\_a^aa[a`a]\_a\_aa\_aX  
@HWI-EAS443:3:42:659:1585#0/1  
GCCGCATTTCTTCAATTAACCACCTTATTTCCCTCAAATTT  
+HWI-EAS443:3:42:659:1585#0/1  
abaa[]`]PK[`]\_YPQ]]RW\_TPTU^a\_Y\_^]XZT¥YLYX  
@HWI-EAS443:3:42:680:1859#0/1  
CGGTTGAGTCTCTGAAAATATACAGAGATTCGCTTGGAG  
+HWI-EAS443:3:42:680:1859#0/1  
a`a\_^b`a]N\_]`ab`aa`^aa][aaa`¥a`a[]^UZZa\_  
@HWI-EAS443:3:42:684:1507#0/1  
GCGGCACAGATTGAAAGCGACAGAGAATAGTTTCGAACAA  
+HWI-EAS443:3:42:684:1507#0/1  
abaaa]b¥baaaaaaa`aa`\_aaaa`\_aXL¥\_\_\_\_\_`\_aa  
@HWI-EAS443:3:42:699:961#0/1  
GCTTTCAATCTGTGCCGCATTTCTTCAATTAACCACCTTA  
+HWI-EAS443:3:42:699:961#0/1  
`baaabbbbaaa`aaab`aaaabaaaa`aa`aSaaa\_`a  
@HWI-EAS443:3:42:703:736#0/1  
ATGAGAATGGGAGACCTTCACTACCTCCAGAGCAGAAATG  
+HWI-EAS443:3:42:703:736#0/1  
UO¥RF¥bTX¥R[¥PY\_WZX\_a^Wq]`baRXTOOM]RZ¥\_W

@HWI-EAS443:3:42:705:599#0/1  
TTGGAGAACTGTGATGAGAATGGGAGACCTTCACTACCT  
+HWI-EAS443:3:42:705:599#0/1  
a\_ba^aa\_[``T`a\_]V\_]¥][W¥¥`````¥^\_a\_\_]  
@HWI-EAS443:3:42:705:617#0/1  
CTTGGAGAACTGTGATGAGAATGGGAGACCTTCACTACC  
+HWI-EAS443:3:42:705:617#0/1  
\_abaaaa\_Y\_bbbaaba^aa\_\_`b\_ab``baabaaa`baa  
@HWI-EAS443:3:42:740:349#0/1  
GCGCGAAGTAGGTACAGATGCAATTGTCATTCTAAGTGTC  
+HWI-EAS443:3:42:740:349#0/1  
aaaaba\_aXaaa]a\_\_aa`a`a\_aaa]^^a`^a\_\_a]aY^  
@HWI-EAS443:3:42:761:1853#0/1  
GAAACTGTGATGAGAATGGGAGACCTTCACTACCTCCAGA  
+HWI-EAS443:3:42:761:1853#0/1  
`b`\_\_\_\_Z[ab[bYUUaa]T]Z]\_[X¥HXaXY]ZTT`\_`^`  
@HWI-EAS443:3:42:763:668#0/1  
TGAGAATGGGAGACCTTCACTACCTCCAGAGCAGAAATGA  
+HWI-EAS443:3:42:763:668#0/1  
a\_aa[YSaaX`a\_[\_XTBBBBBBBBBBBBBBBBBBBBBBB  
@HWI-EAS443:3:42:778:373#0/1  
AGAAACTGTGATGAGAATGGGAGACCTTCACTACCTCCAG  
+HWI-EAS443:3:42:778:373#0/1  
`¥Z\_\_aa\_a`¥b[^W[[a[^W\_^ZW[Z`\_^`[^TPXVRO  
@HWI-EAS443:3:42:806:1661#0/1  
GTCCTGGAAGAGAAGGTAATGGTGAAATTTCTCCAATAT  
+HWI-EAS443:3:42:806:1661#0/1  
a]\_b\_ba`[bb^¥`aaOX\_NQ`Xaa\_aaaa\_a^a\_a]`a\_  
@HWI-EAS443:3:42:820:608#0/1  
TTCTAAGTGTCTCGCTGGATTCTCTTTCAAGATCCATTC  
+HWI-EAS443:3:42:820:608#0/1  
\_`ba^¥^[\_P[FGX[`aaV]^U[`TT^^¥[¥a\_[X¥ZUVY  
@HWI-EAS443:3:42:827:232#0/1  
CTCCCATTCTCATCACAGTTTCTCCAAGCGAATCTCTGTA  
+HWI-EAS443:3:42:827:232#0/1  
^¥U^ZXa]^b^ba`a¥\_bX¥a]a\_[M^^R\_[Z]Y][^\_L]  
@HWI-EAS443:3:42:841:453#0/1  
CATAAATGTTATTTGTTGAAACTATTCTCTGTCGCTTTC  
+HWI-EAS443:3:42:841:453#0/1  
abb`[abbaaaabaa`aaa`]aaaaaaaaaaaa`aa``]\_a  
@HWI-EAS443:3:42:854:1068#0/1  
GCGCGAAGTAGGTACAGATGCAATTGTCATTCTAAGTGTC  
+HWI-EAS443:3:42:854:1068#0/1  
abVZa]Y`Taab^\_Y\_aY[`Y]a\_WXTPV\_]PS`HZGaLN  
@HWI-EAS443:3:42:873:592#0/1  
GCCGCATTTCTTCAATTAACCACCTTATTTCTCAAATTT  
+HWI-EAS443:3:42:873:592#0/1  
ab`bbabbbabaa`aaa\_aaa`a\_aa`bbaa`aa\_Q\_aaa  
@HWI-EAS443:3:42:895:1845#0/1  
GTCGCTTTCAATCTGTGCCGATTTCTTCAATTAACCACC

+HWI-EAS443:3:42:895:1845#0/1  
aaabaZP\_V\_\_`T`\_^a¥¥]¥Y`¥¥aa¥`\_^]\_`\_]\_\_^  
@HWI-EAS443:3:42:907:1458#0/1  
GTCAGAAAGGTAGCGCGAAGTAGGTACAGATGCAATTGTC  
+HWI-EAS443:3:42:907:1458#0/1  
`\_aaaa`abaSa`\_a\_aaaa\_aaZ¥a`aaa\_aYa\_aa[\_¥  
@HWI-EAS443:3:42:915:1562#0/1  
AATGGGAGACCTTCACTACCTCCAGAGCAGAAATGAAAAG  
+HWI-EAS443:3:42:915:1562#0/1  
abbbbbbb\_aaab`bbbba`\_]abba`aaaaabbbaaa`  
@HWI-EAS443:3:42:91:1391#0/1  
TGAGAATGGGAGACCTTCACTACCTCCAGAGCAGAAATGA  
+HWI-EAS443:3:42:91:1391#0/1  
abaa``abb[abaaabaabaa`a`aaaa```aaa]`aaaa  
@HWI-EAS443:3:42:93:220#0/1  
CTGTGATGAGAATGGGAGACCTTCACTACCTCCAGAGCAG  
+HWI-EAS443:3:42:93:220#0/1  
a`\_Zbaab`baa`aab¥a`aaaa\_a`^`a`\_¥¥^Za^^`  
@HWI-EAS443:3:42:976:405#0/1  
GTGCCGATTTCTTCAATTAACCACCTTATTTCTCAAAT  
+HWI-EAS443:3:42:976:405#0/1  
aaaaabaabbbbbbaaaabaaaaaaaaaaaaaaaa\_\_aba]aa  
@HWI-EAS443:3:42:996:1608#0/1  
GTCGCTTTCAATCTGTGCCGATTTCTTCAATTAACCACC  
+HWI-EAS443:3:42:996:1608#0/1  
a[UQR\_¥YVL YWXXVZYURVTPWTMX\_¥]XU¥Z¥V]RY¥U  
@HWI-EAS443:3:43:1026:2014#0/1  
CGCTTGGAGAAACTGTGATGAGAATGGGAGACCTTCACTA  
+HWI-EAS443:3:43:1026:2014#0/1  
^\_ababa`bbbbabbabbab\_\_`b`ababbYLZ]]`U`b  
@HWI-EAS443:3:43:1030:617#0/1  
GAGAACTGTGATGAGAATGGGAGACCTTCACTACCTCCA  
+HWI-EAS443:3:43:1030:617#0/1  
aabbababbabaaa^a`b`aaaXaa[\_`a\_a^a`¥\_\_^¥\_  
@HWI-EAS443:3:43:1062:460#0/1  
CTGTGCCGATTTCTTCAATTAACCACCTTATTTCTCAA  
+HWI-EAS443:3:43:1062:460#0/1  
abaP`¥`a``abaaaa]`¥aaY[[aa\_N^Y`^^ZSTZ`\_Y  
@HWI-EAS443:3:43:1065:39#0/1  
TGGTAACACGGTTCGAGTCTCTGAAAATATACAGAGATTC  
+HWI-EAS443:3:43:1065:39#0/1  
`b^Xaaaaaaaa¥`bab¥a`]Ya`\_ZY`^a^R^a^aZ`[S  
@HWI-EAS443:3:43:1067:729#0/1  
GAAATTTGAGGAAATAAGGTGGTTAATTGAAGAAATGCGG  
+HWI-EAS443:3:43:1067:729#0/1  
\_Z\_aaaab`baa`\_aaaa^baZaa`a^\_\_a^a^`\_]a`  
@HWI-EAS443:3:43:1102:1374#0/1  
GTCGCTTTCAATCTGTGCCGATTTCTTCAATTAACCACC  
+HWI-EAS443:3:43:1102:1374#0/1  
`Y``¥V`b]]\_`U¥WZ]YVX`\_]Z][]¥¥ZXOYRMPWM





+HWI-EAS443:3:43:1329:1184#0/1  
^¥¥\_YR\_` `[MZT]ZRY¥XS^]WPTTJ][¥^\_ST\_]¥[RX  
@HWI-EAS443:3:43:1332:1239#0/1  
TTTCAATCTGTGCCGATTTCTTCAATTAACCACCTTATT  
+HWI-EAS443:3:43:1332:1239#0/1  
¥`ba]^ba`a`ZZa\_aY[^a`aaaa^V¥`X]]W\_aaaa  
@HWI-EAS443:3:43:1345:159#0/1  
CTGTGATGAGAATGGGAGACCTTCACTACCTCCAGAGCAG  
+HWI-EAS443:3:43:1345:159#0/1  
Q¥\_Sab`b\_a¥¥¥\_bbVbY\_Y\_¥^]Y[aaaaZH\_Z[aU\_`  
@HWI-EAS443:3:43:1397:1314#0/1  
GTTTCGAGTCTCTGAAAATATACAGAGATTTCGCTTGGAGAA  
+HWI-EAS443:3:43:1397:1314#0/1  
aa`babaab`]^a¥\_aaaa\_`[^Xa`a\_\_`\_aX`\_`aY`  
@HWI-EAS443:3:43:1407:834#0/1  
GAGAACTGTGATGAGAATGGGAGACCTTCACTACCTCCA  
+HWI-EAS443:3:43:1407:834#0/1  
¥`a¥\_bbbb`b[Z]X`^ab\_[X\_`^XZ`]a]^]UW¥^Z  
@HWI-EAS443:3:43:1410:507#0/1  
CGCATTTCTTCAATTAACCACCTTATTTCTCAAATTTCT  
+HWI-EAS443:3:43:1410:507#0/1  
`a^WX`\_¥¥¥Y`b^UR¥]SY`Za^[¥a]]\_\_]]abaZR[Z  
@HWI-EAS443:3:43:1423:284#0/1  
GCCGATTTCTTCAATTAACCACCTTATTTCTCAAATTT  
+HWI-EAS443:3:43:1423:284#0/1  
aa\_`aa`abbbbabaaa^]^`aaabaabaaa¥^^[X\_aaa  
@HWI-EAS443:3:43:1444:48#0/1  
GGAGAACTGTGATGAGAATGGGAGACCTTCACTACCTCC  
+HWI-EAS443:3:43:1444:48#0/1  
`b`b]]aab`^a]]`\_`\_a\_aS\_]]^¥\_]]][X]YU\_UT  
@HWI-EAS443:3:43:1506:419#0/1  
GTCGCTTTCAATCTGTGCCGATTTCTTCAATTAACCACC  
+HWI-EAS443:3:43:1506:419#0/1  
^X`\_]aa\_Z\_`PU`\_Y0[J[\_]VT¥`UY^^^[^UQXTR  
@HWI-EAS443:3:43:1509:773#0/1  
GGGTGTTGCCTCTTCCTTTTAAGGACTTTTGATCTCGGCG  
+HWI-EAS443:3:43:1509:773#0/1  
abb`bbbbbbbaabbbbaabbaaabbbaaaaaaa`a  
@HWI-EAS443:3:43:1535:688#0/1  
GCCGATTTCTTCAATTAACCACCTTATTTCTCAAATTT  
+HWI-EAS443:3:43:1535:688#0/1  
a[^X`[X]V]\_[[R``[^UY¥^`\_]\_[\_]Z\_\_\_\_\_]WY  
@HWI-EAS443:3:43:1539:1404#0/1  
GAGAACTGTGATGAGAATGGGAGACCTTCACTACCTCCA  
+HWI-EAS443:3:43:1539:1404#0/1  
Sab^^X]b¥Z\_a^Q]a]a`][a\_aUUX¥a\_a]XZ\_\_\_\_^R^  
@HWI-EAS443:3:43:1599:1809#0/1  
TAATGGTGAATTTCTCCAATTGCTCCCTCCTCAGTG  
+HWI-EAS443:3:43:1599:1809#0/1  
[Z[^a\_`\_a[^`\_a\_aaaaabbaa]XT`\_a\_]`[R`Z`

@HWI-EAS443:3:43:1604:533#0/1  
GTCGCTTTCAATCTGTGCCGATTTCTTCAATTAACCACC  
+HWI-EAS443:3:43:1604:533#0/1  
aa`b`aba\_aaa\_aa`\_ ]aZ\_aa`\_a`¥[]aa\_a¥¥\_X[  
@HWI-EAS443:3:43:1619:1145#0/1  
CGCTTTCAATCTGTGCCGATTTCTTCAATTAACCACCTT  
+HWI-EAS443:3:43:1619:1145#0/1  
a`a\_Z^aa^ba`Y`\_^Y]^\_[Y¥\_a`[a\_\_Z]Y[¥\_^  
@HWI-EAS443:3:43:1661:448#0/1  
GCCGATTTCTTCAATTAACCACCTTATTTCTCAAATTT  
+HWI-EAS443:3:43:1661:448#0/1  
aaab`aa`aaabaaaaa^\_\_`\_\_aaaa`a]\_a[aa¥`a\_  
@HWI-EAS443:3:43:1674:265#0/1  
CTTGAATGGAATGGTAACACGTTTCGAGTCTCTGAAAATA  
+HWI-EAS443:3:43:1674:265#0/1  
aba¥[a^`^S¥`bb]aaaaaba`^¥XS`abZ[^\_ [¥]^V  
@HWI-EAS443:3:43:1707:1869#0/1  
GAAACTGTGATGAGAATGGGAGACCTTCACTACCTCCAGA  
+HWI-EAS443:3:43:1707:1869#0/1  
I\_bbb``¥``XX^`bW[b]]abb`b`]¥`b``XH[¥U[\_]  
@HWI-EAS443:3:43:1719:2026#0/1  
TGCCGATTTCTTCAATTAACCACCTTATTTCTCAAATT  
+HWI-EAS443:3:43:1719:2026#0/1  
H]`aaJabb¥I``\_V`bbbbbaXaabbbbb]``Vaaba  
@HWI-EAS443:3:43:1732:1551#0/1  
GTCGCTTTCAATCTGTGCCGATTTCTTCAATTAACCACC  
+HWI-EAS443:3:43:1732:1551#0/1  
a^``\_\_aa\_aaa]a\_Z`]V`]]\_\_``\_]`[\_`\_\_¥WZ[UU  
@HWI-EAS443:3:43:1732:548#0/1  
GAGAATGGGAGACCTTCACTACCTCCAGAGCAGAAATGAA  
+HWI-EAS443:3:43:1732:548#0/1  
aabaabb\_\_R^]Ua`aa[W`]ZYWDZP¥[Q]TX^¥XPZ]  
@HWI-EAS443:3:43:1733:895#0/1  
GAAACTGTGATGAGAATGGGAGACCTTCACTACCTCCAGA  
+HWI-EAS443:3:43:1733:895#0/1  
¥`TaabbTababab`aaa]SZ^S`[``Ua`\_a¥[Z]`PLR  
@HWI-EAS443:3:43:1734:232#0/1  
AACTGTGATGAGAATGGGAGACCTTCACTACCTCCAGAGC  
+HWI-EAS443:3:43:1734:232#0/1  
aaabb`baababaaaa`\_a\_^]\_`^\_]`^`]]ZUZ\_Y\_U  
@HWI-EAS443:3:43:1746:1835#0/1  
GACCCCAACTGCATTTTTGACATCCTCATAAGTATGTCCT  
+HWI-EAS443:3:43:1746:1835#0/1  
aaaa`\_`aa^b^aaaa\_a``a]aa^\_\_¥\_aa\_\_Xaa\_^]]\_  
@HWI-EAS443:3:43:1767:438#0/1  
TGCCGATTTCTTCAATTAACCACCTTATTTCTCAAATT  
+HWI-EAS443:3:43:1767:438#0/1  
`babaa`abbaaa\_aYaaa`a`a`aaaaa`X`b\_aS`ba  
@HWI-EAS443:3:43:1770:959#0/1  
TGCCGATTTCTTCAATTAACCACCTTATTTCTCAAATT

+HWI-EAS443:3:43:1770:959#0/1  
abaaa\_aaba\_aa]`\_ba^\_\_¥a\_^aa]aa`V]aW\_^\_a\_  
@HWI-EAS443:3:43:1774:2012#0/1  
ATGAGAATGGGAGACCTTCACTACCTCCAGAGCAGAAATG  
+HWI-EAS443:3:43:1774:2012#0/1  
aZa[a]abbaa[`a^Z[a`aX`^]aNTYa\_VU\_`^\_U]Z  
@HWI-EAS443:3:43:180:85#0/1  
GTGATGAGAATGGGAGACCTTCACTACCTCCAGAGCAGAA  
+HWI-EAS443:3:43:180:85#0/1  
a\_baaa`a\_`a\_\_^`^]]^R^]]\_\_]V]TY]^Y^Y]\_XY  
@HWI-EAS443:3:43:195:44#0/1  
GGAAGAGGCAACACCCTTGGCCTCGATATCGAAACAGCCA  
+HWI-EAS443:3:43:195:44#0/1  
aaaaa`\_b`aaaaaaaaaV\_aaY\_a[\_aa[`W\_ZRT^\_^^  
@HWI-EAS443:3:43:217:1676#0/1  
GAAACTGTGATGAGAATGGGAGACCTTCACTACCTCCAGA  
+HWI-EAS443:3:43:217:1676#0/1  
`bab]a]abb]]ZZJ``V¥¥\_`Zaa`]aW^`aGFG`\_aa  
@HWI-EAS443:3:43:261:47#0/1  
ATGAGAATGGGAGACCTTCACTACCTCCAGAGCAGAAATG  
+HWI-EAS443:3:43:261:47#0/1  
aab]\_Z¥\_bbbab``\_]]]aaaabZ^^\_a^a\_\_`XU]\_a  
@HWI-EAS443:3:43:264:1573#0/1  
TTGGGACAGAAATTTGAGGAAATAAGGTGGTTAATTGAAG  
+HWI-EAS443:3:43:264:1573#0/1  
a`^aVabbbbaaaa``]ba\_aaaa^^a[bV^`aa\_\_¥]^V  
@HWI-EAS443:3:43:300:263#0/1  
GAAACTGTGATGAGAATGGGAGACCTTCACTACCTCCAGA  
+HWI-EAS443:3:43:300:263#0/1  
aa\_]a^aa]a\_]aY\_^\_\_a`^`^]a\_]^[^^[^\_]V^W[[`X  
@HWI-EAS443:3:43:311:1038#0/1  
AAACTGTGATGAGAATGGGAGACCTTCACTACCTCCAGAG  
+HWI-EAS443:3:43:311:1038#0/1  
`M]¥¥\_[\_X\_aY]\_YVb\_`aY¥a^aUaa\_\_a^\_a[```aX  
@HWI-EAS443:3:43:319:1200#0/1  
TGAGAATGGGAGACCTTCACTACCTCCAGAGCAGAAATGA  
+HWI-EAS443:3:43:319:1200#0/1  
abaa[abbaaababaaabbaaa\_aaa`aa`a\_aa``^aa`  
@HWI-EAS443:3:43:322:633#0/1  
GATTACTGAAGTTCGCTTTCAGTACTATGTTCTTTTCC  
+HWI-EAS443:3:43:322:633#0/1  
[SU`VLaIaa`abIa]\_a]Y`\_]`^W``\_aa\_`\_^aYa\_^  
@HWI-EAS443:3:43:354:1635#0/1  
CGCGAAGTAGGTACAGATGCAATTGTCATTCTAAGTGTCT  
+HWI-EAS443:3:43:354:1635#0/1  
Y\_aTabaabb`bb`ab\_¥^bb`aTabbbbaabbbabaaa  
@HWI-EAS443:3:43:369:30#0/1  
GTCGCTTTCATCTGTGCCGATTTCTTCAATTAACCACC  
+HWI-EAS443:3:43:369:30#0/1  
a^^]Z`Q``YR\_`^[Wa^X\_YV¥W\_] [ZX¥X\_Z^]ZW]ZX

@HWI-EAS443:3:43:378:1111#0/1  
AGAACTGTGATGAGAATGGGAGACCTTCACTACCTCCAG  
+HWI-EAS443:3:43:378:1111#0/1  
aa^a]aaa`aaaa`a\_a`\_] [ ]a```\_\_\_a]\_\_\_]^`]]\_`  
@HWI-EAS443:3:43:385:1583#0/1  
GAAACTGTGATGAGAATGGGAGACCTTCACTACCTCCAGA  
+HWI-EAS443:3:43:385:1583#0/1  
¥`^HUZb`^a\_¥^\_^]\_aS\_]`]]`^]U¥X]Q[N\_¥\_\_`]  
@HWI-EAS443:3:43:509:524#0/1  
GCCGCATTTCTTCAATTAACCACCTTATTTCTCAAATTT  
+HWI-EAS443:3:43:509:524#0/1  
aaabaaabaaaaaaaaaaaa`\_\_`\_\_aaaaaa`\_a`a`a`aa`  
@HWI-EAS443:3:43:513:840#0/1  
GAGAACTGTGATGAGAATGGGAGACCTTCACTACCTCCA  
+HWI-EAS443:3:43:513:840#0/1  
a`aa`\_`G]Va[\_\_\_]\_¥^¥`^WZWPZV[\_Y¥WWW¥WWWUWWY  
@HWI-EAS443:3:43:522:335#0/1  
GCCGCATTTCTTCAATTAACCACCTTATTTCTCAAATTT  
+HWI-EAS443:3:43:522:335#0/1  
``\_a`a`¥Y`\_RY¥a`a`a`\_`^`\_`aY`Y[TT`\_\_`aa\_]`  
@HWI-EAS443:3:43:532:341#0/1  
CGCTTGGAGAACTGTGATGAGAATGGGAGACCTTCACTA  
+HWI-EAS443:3:43:532:341#0/1  
`baaaab¥baaaaba^b^^a`a`aaa`\_`a\_]`^\_\_\_`^\_`  
@HWI-EAS443:3:43:565:742#0/1  
ATGAGAATGGGAGACCTTCACTACCTCCAGAGCAGAAATG  
+HWI-EAS443:3:43:565:742#0/1  
U\_\_UVQ¥UWWV¥aTQQ[[U\_^][USS^¥WWIG\_ZU`ZV¥aW  
@HWI-EAS443:3:43:56:1167#0/1  
AGAACTGTGATGAGAATGGGAGACCTTCACTACCTCCAG  
+HWI-EAS443:3:43:56:1167#0/1  
a^^`aa`V[`a]X[Y^`Z\_[^a`\_`\_a¥¥`ZYN[Y[^a¥  
@HWI-EAS443:3:43:628:458#0/1  
GCCGCATTTCTTCAATTAACCACCTTATTTCTCAAATTT  
+HWI-EAS443:3:43:628:458#0/1  
a¥¥^^[VZ\_YW¥¥Q¥a^\_WZP]aVZ`a^Y]ZNZYXW[`\_S]  
@HWI-EAS443:3:43:659:763#0/1  
CGCTTGGAGAACTGTGATGAGAATGGGAGACCTTCACTA  
+HWI-EAS443:3:43:659:763#0/1  
`bbbababVab\_ab\_a`\_b[b\_`a`bYR¥a[\_\_\_`]a[[\_`  
@HWI-EAS443:3:43:667:1688#0/1  
TGCCGCATTTCTTCAATTAACCACCTTATTTCTCAAATT  
+HWI-EAS443:3:43:667:1688#0/1  
aZ^\_aaabab¥a\_]a]a`\_]Waa]]aa\_aaaTR\_]aa`a\_  
@HWI-EAS443:3:43:715:1459#0/1  
AGAACTGTGATGAGAATGGGAGACCTTCACTACCTCCAG  
+HWI-EAS443:3:43:715:1459#0/1  
abbaaab\_a`a`\_^^¥aaaa\_a`\_Z^`aa^^a\_]`\_]`^Z  
@HWI-EAS443:3:43:719:1169#0/1  
CAGAGATTGCTTGGAGAACTGTGATGAGAATGGGAGAC

+HWI-EAS443:3:43:719:1169#0/1  
\_aaZ`abb[b`\_`\_]Z]S^P`bLY^]bY]]]a`a^XRVF  
@HWI-EAS443:3:43:730:439#0/1  
CTGTGATGAGAATGGGAGACCTTCACTACCTCCAGAGCAG  
+HWI-EAS443:3:43:730:439#0/1  
abbabbbbaabbababaabaababba`ba`abaa``b  
@HWI-EAS443:3:43:733:104#0/1  
GAGAACTGTGATGAGAATGGGAGACCTTCACTACCTCCA  
+HWI-EAS443:3:43:733:104#0/1  
a\_\_[S\_]\_ZY`^\_]aV\_Y^]¥0^YGYVXXYXUOUVXY  
@HWI-EAS443:3:43:747:1282#0/1  
CCGCATTTCTTCAATTAACCACCTTATTTCTCAAATTT  
+HWI-EAS443:3:43:747:1282#0/1  
abbabbaab`bbaabaa`^aaaa¥baabaaba`aaa\_  
@HWI-EAS443:3:43:798:227#0/1  
GCGCTACCTTTCTGACATGACCCTCGAGGAAATGTCACGA  
+HWI-EAS443:3:43:798:227#0/1  
a]U^][ZYZ]¥NZaU[JT[¥¥¥\_XP¥Z^YT[UWSWQSM[S  
@HWI-EAS443:3:43:815:503#0/1  
AAAGAACATAGTACTGAAAGCGAACTTCAGTGAATCTTT  
+HWI-EAS443:3:43:815:503#0/1  
aaN^]¥babab\_ba\_aa^Y]aaX[]`^`Ya[a\_^U`S\_a\_  
@HWI-EAS443:3:43:830:646#0/1  
CGCTTTCAATCTGTGCCGATTTCTTCAATTAACCACCTT  
+HWI-EAS443:3:43:830:646#0/1  
ababbbbaabbabbabaabaabbbabaaaaabaaa`\_aa[aa  
@HWI-EAS443:3:43:864:1627#0/1  
GAAATTTACCATTACCTTCTTCCAGGACATACTTATG  
+HWI-EAS443:3:43:864:1627#0/1  
abbbbbbbbaaaaaabaaaaaa`aaaaaa\_a\_aaa\_``a`\_  
@HWI-EAS443:3:43:896:465#0/1  
GAAAGCTCTTATCTCTTGTCTACTTCAAGCAGTAGTTGT  
+HWI-EAS443:3:43:896:465#0/1  
^QWx^]a^]`X`]]\_a\_a\_\_[W\_[¥a^][YXU¥^Y[¥Y  
@HWI-EAS443:3:43:8:1340#0/1  
GTCGCTTTCAATCTGTGCCGATTTCTTCAATTAACCACC  
+HWI-EAS443:3:43:8:1340#0/1  
a\_aa`^bbaa``\_]a\_a¥\_]\_^aaa`a``^aaaa]a``X  
@HWI-EAS443:3:43:913:998#0/1  
ATCCGCAAGCGATTTGCAGACAATGGATTGGGTGATGCCC  
+HWI-EAS443:3:43:913:998#0/1  
abbb\_ab`ba`aaaab`\_a`\_`aa]Z^``YKPNP]NZ^  
@HWI-EAS443:3:44:1029:1460#0/1  
GCCGCATTTCTTCAATTAACCACCTTATTTCTCAAATTT  
+HWI-EAS443:3:44:1029:1460#0/1  
a^aaa]aaa\_aab`a`aaa^\_a¥^a\_\_aa`]^a\_\_a\_a`\_  
@HWI-EAS443:3:44:1082:573#0/1  
CACAGATTGAAAGCGACAGAGAATAGTTTTCGAACAAATAA  
+HWI-EAS443:3:44:1082:573#0/1  
abbbbaaab^aaaaaa`ababaa`aa]aab^\_T]aaaaa

@HWI-EAS443:3:44:1088:1735#0/1  
GGCCTATTATCTTTTGCCTAGGCATGAGCATGAACCAGTC  
+HWI-EAS443:3:44:1088:1735#0/1  
aa^]aaabba]aa\_a`Q^]a\_\_X]a\_]`^a`\_`\_]U]TNM  
@HWI-EAS443:3:44:1111:522#0/1  
GAATGGGAGACCTTCACTACCTCCAGAGCAGAAATGAAAA  
+HWI-EAS443:3:44:1111:522#0/1  
a`aabb`S`\_\_aa`aa¥`a\_¥a\_\_^[a\_\_a[R¥\_\_]Y¥[  
@HWI-EAS443:3:44:1130:458#0/1  
GAAACTGTGATGAGAATGGGAGACCTTCACTACCTCCAGA  
+HWI-EAS443:3:44:1130:458#0/1  
a`V\_aaaWa`ab`aaa\_bab\_a^`^\_^^`^^aY\_\_]Y\_\_^  
@HWI-EAS443:3:44:114:1494#0/1  
TGCCGCATTTCTTCAATTAACCACCTTATTTCTCAAATT  
+HWI-EAS443:3:44:114:1494#0/1  
^\_^^¥`aaaa`]b¥b¥`Z\_a¥Xa`ab`abbaa\_aa\_`^Z`  
@HWI-EAS443:3:44:1204:1256#0/1  
GTCGCTTTCAATCTGTGCCGATTTCTTCAATTAACCACC  
+HWI-EAS443:3:44:1204:1256#0/1  
a`aa\_aaa`[]^`XWZ^`]^[\_^\_a]¥]¥^`^\_]Y`ZT  
@HWI-EAS443:3:44:120:1452#0/1  
TGAGAATGGGAGACCTTCACTACCTCCAGAGCAGAAATGA  
+HWI-EAS443:3:44:120:1452#0/1  
^ZMaQXR]aa`b`^]WP¥ZZ¥a`\_Z]\_Xaa^P`\_]\_a]Z  
@HWI-EAS443:3:44:1216:122#0/1  
CTTGGAGAAACTGTGATGAGAATGGGAGACCTTCACTACC  
+HWI-EAS443:3:44:1216:122#0/1  
aaa]b\_baa`\_a[bXYb`a`\_\_aa^¥RYW`\_`SYV`^RP  
@HWI-EAS443:3:44:1220:1326#0/1  
CTTCAATTAACCACCTTATTTCTCAAATTTCTGTCCCAA  
+HWI-EAS443:3:44:1220:1326#0/1  
aa¥[R[`\_a[aa`Ya^T^a\_b\_]a^MMUaa\_aa^\_\_\_\_^W  
@HWI-EAS443:3:44:1225:1939#0/1  
TGCCGCATTTCTTCAATTAACCACCTTATTTCTCAAATT  
+HWI-EAS443:3:44:1225:1939#0/1  
aaa```\_aa``aaaa`aaaaZ^`URa`a`\_\_\_\_Z\_]\_``\_U  
@HWI-EAS443:3:44:1230:1386#0/1  
GAATGGGAGACCTTCACTACCTCCAGAGCAGAAATGAAAA  
+HWI-EAS443:3:44:1230:1386#0/1  
aaaaaaaa¥a`¥`````\_aa]V`XY]a[aYY`\_]`^`\_]\_X  
@HWI-EAS443:3:44:1237:1361#0/1  
GAATGGGAGACCTTCACTACCTCCAGAGCAGAAATGAAAA  
+HWI-EAS443:3:44:1237:1361#0/1  
a¥¥aaa\_G\_`P[\_`V`U][URYHV¥[VVVU]Z]]`a\_UWW  
@HWI-EAS443:3:44:1273:505#0/1  
GAAACTGTGATGAGAATGGGAGACCTTCACTACCTCCAGA  
+HWI-EAS443:3:44:1273:505#0/1  
\_bbb\_ba[b^abTa]Z`ab```\_^^`\_`a^\_a\_`^`Y\_a\_  
@HWI-EAS443:3:44:1274:897#0/1  
GATGAGAATGGGAGACCTTCACTACCTCCAGAGCAGAAAT

+HWI-EAS443:3:44:1274:897#0/1  
a`abSaU\_aa^\_U`^`\_¥WK\_\_WP]U\_¥U¥Q¥P^GW\_V¥WV  
@HWI-EAS443:3:44:1295:255#0/1  
GAAACTGTGATGAGAATGGGAGACCTTCACTACCTCCAGA  
+HWI-EAS443:3:44:1295:255#0/1  
^ZS\_aaa\_a)`a)`\_^]aa`^a^ZZ\_\_\_\_\_[-[XV[Z[V`X  
@HWI-EAS443:3:44:1308:1554#0/1  
GTCAGAAAGGTAGCGGAAGTAGGTACAGATGCAATTGTC  
+HWI-EAS443:3:44:1308:1554#0/1  
aUa]ZV][\_^T`Z`^`¥¥`SX^¥R[P[^[P]VUT]W[VW  
@HWI-EAS443:3:44:1318:739#0/1  
GCCGCATTTCTTCAATTAACCACCTTATTTCCCTCAAATTT  
+HWI-EAS443:3:44:1318:739#0/1  
a\_aa`aaaa\_aaaaba`a`[a]^aa\_aa`\_\_a^`\_[a\_\_  
@HWI-EAS443:3:44:1333:932#0/1  
CGCGAAGTAGGTACAGATGCAATTGTCATTCTAAGTGTCT  
+HWI-EAS443:3:44:1333:932#0/1  
`abbV]a\_baa]bba\_\_]^ZZa]\_^W^`^`b]a`¥a  
@HWI-EAS443:3:44:1335:909#0/1  
CATATCCGCAAGCGATTTGCAGACAATGGATTGGGTGATG  
+HWI-EAS443:3:44:1335:909#0/1  
aabaa`ab¥aaa\_a]¥\_]a]V`\_\_Z`\_Y¥U[^V¥R[¥UY  
@HWI-EAS443:3:44:141:1785#0/1  
GCTGAAACGAGAAAGCTTCTTCTTGTCTACTTCAAG  
+HWI-EAS443:3:44:141:1785#0/1  
a]aaVUU\_a`ZLPW¥^ZY]]^a¥USSW¥V]YVT]UWT[W^  
@HWI-EAS443:3:44:1459:1199#0/1  
CCGCATTTCTTCAATTAACCACCTTATTTCCCTCAAATTT  
+HWI-EAS443:3:44:1459:1199#0/1  
^\_W¥FZ^`b`aZ\_baaa`a]¥P¥^aaa^)`a\_a]¥`aa¥  
@HWI-EAS443:3:44:1475:324#0/1  
CTGTGATGAGAATGGGAGACCTTCACTACCTCCAGAGCAG  
+HWI-EAS443:3:44:1475:324#0/1  
aba\_baaa`b\_a\_a`aU`YZ^a\_\_\_\_\_^`¥]^\_\_^\_¥\_^V\_  
@HWI-EAS443:3:44:147:942#0/1  
AGAATGGGAGACCTTCACTACCTCCAGAGCAGAAATGAAA  
+HWI-EAS443:3:44:147:942#0/1  
\_aaa`ba`U]a`aaa`a)`a\_\_aaa\_a\_a`\_a¥[\_aa\_\_^  
@HWI-EAS443:3:44:1567:1770#0/1  
GAATGGGAGACCTTCACTACCTCCAGAGCAGAAATGAAAA  
+HWI-EAS443:3:44:1567:1770#0/1  
Za[\_`ORZ^b\_bba``bbab\_WX\_baa\_[^ba]]b`a`a]  
@HWI-EAS443:3:44:1618:267#0/1  
GAAACTGTGATGAGAATGGGAGACCTTCACTACCTCCAGA  
+HWI-EAS443:3:44:1618:267#0/1  
aa``\_ab]a`\_\_`[a\_^`a\_[a^]Y]^]¥][VY]YUW[X  
@HWI-EAS443:3:44:1636:276#0/1  
GCCGCATTTCTTCAATTAACCACCTTATTTCCCTCAAATTT  
+HWI-EAS443:3:44:1636:276#0/1  
aab`a]aaaaaa``aaa`\_^`^aa\_aaa^``\_\_\_\_a^`



@HWI-EAS443:3:44:1706:1284#0/1  
AACAAATCGTGAATGGATCTTGAAAGAGGAATCCAGCGA  
+HWI-EAS443:3:44:1706:1284#0/1  
aaaa]ab\_a\_aa[aaa`\_`\_aa\_a\_a^\_````]\_U`]]^]  
@HWI-EAS443:3:44:1779:643#0/1  
TGAGAATGGGAGACCTTCACTACCTCCAGAGCAGAAATGA  
+HWI-EAS443:3:44:1779:643#0/1  
aa^a```aa\_Q`YU[[YY]^^[ZSVVUR[W`UW`VYU[ZV  
@HWI-EAS443:3:44:191:1158#0/1  
CTCTGTCGCTTTCAATCTGTGCCGATTTCTTCAATTAAC  
+HWI-EAS443:3:44:191:1158#0/1  
a`^abYaU```aabbbaa\_XX¥a`Y[]WYaa¥`aa\_\_`a\_¥0  
@HWI-EAS443:3:44:198:1491#0/1  
CACAGATTGAAAGCGACAGAGAATAGTTTCGAACAAATAA  
+HWI-EAS443:3:44:198:1491#0/1  
\_aaabab`^`^]\_a]a]\_\_a`¥aa`^a^aa[[¥a[\_¥a`a\_  
@HWI-EAS443:3:44:203:1435#0/1  
AGAAACTGTGATGAGAATGGGAGACCTTCACTACCTCCAG  
+HWI-EAS443:3:44:203:1435#0/1  
aa`¥`aab[^`^aa`a^¥\_\_`]¥^`\_\_a\_```\_`\_`[XY^^^¥  
@HWI-EAS443:3:44:205:124#0/1  
GAAACTGTGATGAGAATGGGAGACCTTCACTACCTCCAGA  
+HWI-EAS443:3:44:205:124#0/1  
aaab^`a\_a[\_b`aa`a\_`^a^\_`a``\_\_\_\_`^\_\_\_\_^\_]`  
@HWI-EAS443:3:44:224:1974#0/1  
AGAAACTGTGATGAGAATGGGAGACCTTCACTACCTCCAG  
+HWI-EAS443:3:44:224:1974#0/1  
aa]a^^Ua^`\_``VaYUQ^aa^\_UNYY\_X`\_\_XZZ[SSXQ  
@HWI-EAS443:3:44:235:80#0/1  
GCCGCATTTCTTCAATTAACCACCTTATTTCTCAAATTT  
+HWI-EAS443:3:44:235:80#0/1  
a``a`\_aa`\_aa^^\_aa`\_^^\_^^`a^a\_a^a\_][]a\_^  
@HWI-EAS443:3:44:279:1698#0/1  
GGGGCATCACCCAATCCATTGTCTGCAAATCGCTTGCGGA  
+HWI-EAS443:3:44:279:1698#0/1  
a`baabbabb`bb`ba`bbbb`\_`a`abb\_\_a\_aa\_X`a\_  
@HWI-EAS443:3:44:310:405#0/1  
CTTGGAGAAACTGTGATGAGAATGGGAGACCTTCACTACC  
+HWI-EAS443:3:44:310:405#0/1  
aba\_\_bbbb`bbabaabababbbbbabaaaaabbaaaX`  
@HWI-EAS443:3:44:325:1150#0/1  
GCCGCATTTCTTCAATTAACCACCTTATTTCTCAAATTT  
+HWI-EAS443:3:44:325:1150#0/1  
aZ]X^aaa`aaa`aab`aaa`a\_\_a\_abaaa]aaaa`\_a  
@HWI-EAS443:3:44:327:817#0/1  
TTGGCATATCCGCAAGCGATTTGCAGACAATGGATTGGGT  
+HWI-EAS443:3:44:327:817#0/1  
^¥abbbbbbababbbbababbaabbaab`bbaabaaaa^¥`W  
@HWI-EAS443:3:44:339:1501#0/1  
GAGAATGGGAGACCTTCACTACCTCCAGAGCAGAAATGAA

+HWI-EAS443:3:44:339:1501#0/1  
`\_b`\_ab[^U\_\_ab\_] [bbb^\_\_]a\_aa\_a\_aa\_¥] `\_\_  
@HWI-EAS443:3:44:345:1164#0/1  
GCCGCATTTCTTCAATTAACCACCTTATTTCTCAAATTT  
+HWI-EAS443:3:44:345:1164#0/1  
abbb`Yabbbbaa`baaaaa\_a¥baaa`aaabbbbabaa  
@HWI-EAS443:3:44:358:1195#0/1  
GGGAAACAAATCGTGGAATGGATCTTGAAAGAGGAATCCA  
+HWI-EAS443:3:44:358:1195#0/1  
\_SRGS` `UXS`\_N]\_ST^Z][NY¥XZ[WY^V]\_\_^WSTY  
@HWI-EAS443:3:44:364:739#0/1  
GAAACTGTGATGAGAATGGGAGACCTTCACTACCTCCAGA  
+HWI-EAS443:3:44:364:739#0/1  
¥]Y\_aaa]\_\_S\_U`RG\_WZ]aaYaa`aa\_aa`]a`¥¥[[  
@HWI-EAS443:3:44:375:839#0/1  
AGAAACTGTGATGAGAATGGGAGACCTTCACTACCTCCAG  
+HWI-EAS443:3:44:375:839#0/1  
aZ[^^^]\_NUa`ZRR`ba\_XZa\_^ZR]`a`\_[aS\_[W  
@HWI-EAS443:3:44:399:509#0/1  
CTGAAACGAGAAAGCTTATCTCTTGTCTACTTCAAGC  
+HWI-EAS443:3:44:399:509#0/1  
\_Xa]¥`\_X\_WKV\_a\_¥]`Z¥Z]\_Y]¥]UX¥^UT\_]WNNM  
@HWI-EAS443:3:44:433:1421#0/1  
TGATGAGAATGGGAGACCTTCACTACCTCCAGAGCAGAAA  
+HWI-EAS443:3:44:433:1421#0/1  
a`Z\_b` ``a`\_`\_Za`aaa`]b\_aa`a`\_]` `[\_`\_a^]\_  
@HWI-EAS443:3:44:442:831#0/1  
TGAGAATGGGAGACCTTCACTACCTCCAGAGCAGAAATGA  
+HWI-EAS443:3:44:442:831#0/1  
ab`a]\_]aaa^a` `a^a`aa¥¥] ]^ [¥`\_\_^[^`\_\_^  
@HWI-EAS443:3:44:49:2010#0/1  
GCCGCATTTCTTCAATTAACCACCTTATTTCTCAAATTT  
+HWI-EAS443:3:44:49:2010#0/1  
^VbaVXbaa\_abaaaaaaaa^Q[]Xa\_a]\_[VW`aa`Q\_\_[  
@HWI-EAS443:3:44:534:717#0/1  
GCCGCATTTCTTCAATTAACCACCTTATTTCTCAAATTT  
+HWI-EAS443:3:44:534:717#0/1  
aaaaa\_baaaaaa]aaa^]\_[a\_a` `Yaa\_]a`^`\_aa\_  
@HWI-EAS443:3:44:545:374#0/1  
CAGAGATTCGCTTGGAGAACTGTGATGAGAATGGGAGAC  
+HWI-EAS443:3:44:545:374#0/1  
abbbbababbabb`baaaaaa¥b`aa\_a^a\_aba\_a\_¥  
@HWI-EAS443:3:44:547:1184#0/1  
TGAGAATGGGAGACCTTCACTACCTCCAGAGCAGAAATGA  
+HWI-EAS443:3:44:547:1184#0/1  
aaab`aa^a\_Xaa\_a`\_\_`\_\_`^^^[\_a[\_[\_^¥^^^  
@HWI-EAS443:3:44:555:145#0/1  
AGAAACTGTGATGAGAATGGGAGACCTTCACTACCTCCAG  
+HWI-EAS443:3:44:555:145#0/1  
¥]a\_Va`^` `^] ^aaba` `Za`¥]Z¥V[Va][R[¥¥Y^

@HWI-EAS443:3:44:598:1472#0/1  
GAAACTGTGATGAGAATGGGAGACCTTCACTACCTCCAGA  
+HWI-EAS443:3:44:598:1472#0/1  
aa`a]ab`baba``\_aaa`\_\_a^\_\_\_\_\_a^``]X`\_\_`\_^  
@HWI-EAS443:3:44:637:959#0/1  
CTTGGAGAACTGTGATGAGAATGGGAGACCTTCACTACC  
+HWI-EAS443:3:44:637:959#0/1  
ab\_ab]UVY\_U^`ZaZ[a\_`\_`T[]XZ^`]Y]S\_]\_]aNL  
@HWI-EAS443:3:44:653:1329#0/1  
GTGATGAGAATGGGAGACCTTCACTACCTCCAGAGCAGAA  
+HWI-EAS443:3:44:653:1329#0/1  
a\_`T]`¥]\_``a]\_\_`S\_]\_\_`\_¥¥¥V^[]¥[[[WV^V`UW  
@HWI-EAS443:3:44:667:573#0/1  
GAAAATATACAGAGATTCGCTTGGAGAACTGTGATGAGA  
+HWI-EAS443:3:44:667:573#0/1  
a\_[]`aaaaa\_\_``a`a\_a`\_\_^\_\_^a[Q]\_`\_]`]]\_Z\_Z  
@HWI-EAS443:3:44:675:947#0/1  
GAAACTGTGATGAGAATGGGAGACCTTCACTACCTCCAGA  
+HWI-EAS443:3:44:675:947#0/1  
aaZ\_a\_a`a\_aaaaa[aa\_]\_U]\_^`\_\_[]`W]\_\_^\_\_]  
@HWI-EAS443:3:44:682:492#0/1  
GAATGGGAGACCTTCACTACCTCCAGAGCAGAAATGAAAA  
+HWI-EAS443:3:44:682:492#0/1  
`V^\_a¥`\_`S]]YNa\_]a^[\_`¥]\_Ha¥Q\_NRW[\_WVW  
@HWI-EAS443:3:44:718:1678#0/1  
AGAAACTGTGATGAGAATGGGAGACCTTCACTACCTCCAG  
+HWI-EAS443:3:44:718:1678#0/1  
`^\_aa\_aaZ]\_\_`¥a\_^^]]^V¥`[Q[^U^U^\_TUWRW¥S  
@HWI-EAS443:3:44:789:827#0/1  
GGTTAATTGAAGAAATGCGGCACAGATTGAAAGCGACAGA  
+HWI-EAS443:3:44:789:827#0/1  
aa`aaabbaaabZaaaaaa`a`ab\_`\_a`a``\_a\_`^`a\_  
@HWI-EAS443:3:44:842:26#0/1  
AGAAACTGTGATGAGAATGGGAGACCTTCACTACCTCCAG  
+HWI-EAS443:3:44:842:26#0/1  
aa`aaaabW\_R`b\_b`Zaaaa\_a`]^`\_\_`]]¥^¥\_¥\_W¥\_  
@HWI-EAS443:3:44:847:2035#0/1  
GATGAGAATGGGAGACCTTCACTACCTCCAGAGCAGAAAT  
+HWI-EAS443:3:44:847:2035#0/1  
a]`aab\_a\_a¥[\_a¥`ZfV\_`Y¥]MYX^R]¥[^Y^Z`YYU  
@HWI-EAS443:3:44:860:754#0/1  
GCCGCATTTCTTCAATTAACCACCTTATTTCTCAAATTT  
+HWI-EAS443:3:44:860:754#0/1  
aabbaabb`aaa`Z`a¥aaaa]]`aaaa`\_a\_a]^b`a  
@HWI-EAS443:3:44:861:680#0/1  
GAGAATGGGAGACCTTCACTACCTCCAGAGCAGAAATGAA  
+HWI-EAS443:3:44:861:680#0/1  
a^aWWabaa¥\_a\_\_a`^`¥\_^[]W[W¥^`Z\_¥^\_W^Z^\_UU  
@HWI-EAS443:3:44:873:523#0/1  
TGAGAATGGGAGACCTTCACTACCTCCAGAGCAGAAATGA

+HWI-EAS443:3:44:873:523#0/1  
`^`\_N¥^aaa\_\_VX`\_\_Ya¥[XR[\_Z¥¥`Z^[V^[TZ\_aX  
@HWI-EAS443:3:44:882:2009#0/1  
GAGAACTGTGATGAGAATGGGAGACCTTCACTACCTCCA  
+HWI-EAS443:3:44:882:2009#0/1  
aaabbaa`baabbabb\_a`a¥\_aaaXQaa`aYabS¥`Z]^  
@HWI-EAS443:3:44:883:175#0/1  
AAGAACATAGTACTGAAAGCGAACTTCAGTGTAATCTTTA  
+HWI-EAS443:3:44:883:175#0/1  
\_YaSaaa\_bba^\_a`\_]`¥¥¥\_`a`]a\_^\_]¥a^`\_] ]  
@HWI-EAS443:3:44:93:976#0/1  
CTGTGATGAGAATGGGAGACCTTCACTACCTCCAGAGCAG  
+HWI-EAS443:3:44:93:976#0/1  
aba\_abb\_aba`b]aa¥\_U`\_a[`aXaa`[````¥\_a\_\_a  
@HWI-EAS443:3:44:957:983#0/1  
CAGAGATTGCTTGGAGAACTGTGATGAGAATGGGAGAC  
+HWI-EAS443:3:44:957:983#0/1  
\_`¥Z^TZaa^aaab[Z`a^¥[\_\_N[¥aX¥ZUa\_WZZW]QN  
@HWI-EAS443:3:44:95:1682#0/1  
CTGTGCCGATTTCTTCAATTAACCACCTTATTTCTCAA  
+HWI-EAS443:3:44:95:1682#0/1  
a`aaa\_\_`bbbbbabbaabba\_aaaaaabaabaaaa`a`  
@HWI-EAS443:3:44:966:970#0/1  
CTCTGAAAATATACAGAGATTCGCTTGGAGAACTGTGAT  
+HWI-EAS443:3:44:966:970#0/1  
abbbbabaabaab`aaabaa`aa`aa`aZaa`aZa`^  
@HWI-EAS443:3:44:967:49#0/1  
AGAAACTGTGATGAGAATGGGAGACCTTCACTACCTCCAG  
+HWI-EAS443:3:44:967:49#0/1  
aaabb`bb\_a`ababaa`aaaYa]^[\_]Z\_\_\_¥SX\_] [Z]  
@HWI-EAS443:3:44:96:1074#0/1  
GCCGATTTCTTCAATTAACCACCTTATTTCTCAAATTT  
+HWI-EAS443:3:44:96:1074#0/1  
a[a]^ba`a¥¥Z[Y¥ZQZ[¥`Y\_UTVa`W\_]\_\_Q^a`\_  
@HWI-EAS443:3:44:977:601#0/1  
AGAAACTGTGATGAGAATGGGAGACCTTCACTACCTCCAG  
+HWI-EAS443:3:44:977:601#0/1  
a```]`ab]a^a`^b\_`\_`^`^`^`[¥`\_¥\_Y`\_¥Y\_\_¥\_\_  
@HWI-EAS443:3:44:983:655#0/1  
GAAACTGTGATGAGAATGGGAGACCTTCACTACCTCCAGA  
+HWI-EAS443:3:44:983:655#0/1  
aa^NP\_]W`WbV`XHL\_YZW¥QMTYRUU]UNLN\_^]TPW  
@HWI-EAS443:3:44:986:1182#0/1  
GCGCGAAGTAGGTACAGATGCAATTGTCATTCTAAGTGTC  
+HWI-EAS443:3:44:986:1182#0/1  
`aa`aaaaXbba¥`aaaaaa\_a\_a```^aaa\_a`a]`\_] ]  
@HWI-EAS443:3:44:997:938#0/1  
AGAAACTGTGATGAGAATGGGAGACCTTCACTACCTCCAG  
+HWI-EAS443:3:44:997:938#0/1  
\_¥baZH^\_Yb¥ab^a[]S^`aZZPLR]^aY¥\_¥RNV`WLS





@HWI-EAS443:3:45:1482:745#0/1  
CCGCATTTCTTCAATTAACCACCTTATTTCCCTCAAATTTTC  
+HWI-EAS443:3:45:1482:745#0/1  
\_b`a\_bab`bb]NV^ba``\_baabaabb^babaabaa\_  
@HWI-EAS443:3:45:1482:917#0/1  
AAACTGTGATGAGAATGGGAGACCTTCACTACCTCCAGAG  
+HWI-EAS443:3:45:1482:917#0/1  
^`a\_aaa`aa[b\_`¥^Z\_Q]]YP[\_W^\_^]]UVWU^\_¥\_  
@HWI-EAS443:3:45:1509:644#0/1  
ATTATCTTTTGCCTAGGCATGAGCATGAACCAGTCTCGTG  
+HWI-EAS443:3:45:1509:644#0/1  
a\_bb¥X\_a]]b¥]]`abbaa[aXaV`\_``]V`Y]¥`^^[T¥  
@HWI-EAS443:3:45:1544:1597#0/1  
GCCGCATTTCTTCAATTAACCACCTTATTTCCCTCAAATTT  
+HWI-EAS443:3:45:1544:1597#0/1  
U\_bb\_¥bbabbba\_abbababba\_ba\_bbb``ab`Vab`b  
@HWI-EAS443:3:45:1547:626#0/1  
AGAAACTGTGATGAGAATGGGAGACCTTCACTACCTCCAG  
+HWI-EAS443:3:45:1547:626#0/1  
Z\_W\_¥Za[F^Wb\_P[]SaaY¥U^RUJZ\_X[\_^RV[MSVW¥  
@HWI-EAS443:3:45:1581:117#0/1  
TGCGGCACAGATTGAAAGCGACAGAGAATAGTTTCGAACA  
+HWI-EAS443:3:45:1581:117#0/1  
a\_0^aXY¥abX`bV\_]\_Ua^Z]^¥a]^SPXT^\_0^WUWX  
@HWI-EAS443:3:45:1624:954#0/1  
GAGAAACTGTGATGAGAATGGGAGACCTTCACTACCTCCA  
+HWI-EAS443:3:45:1624:954#0/1  
\_ab`\_b^bbabaabab`aaaa\_b``\_aU¥aU``^V^W\_\_  
@HWI-EAS443:3:45:1708:394#0/1  
CACTGAGGAGGGAGCAATAGTTGGAGAAATTTACCATTA  
+HWI-EAS443:3:45:1708:394#0/1  
¥`\_\_a[Q^¥\_a¥]\_\_^\_¥¥\_\_`¥XUTTY¥`\_\_¥¥UXY`a\_  
@HWI-EAS443:3:45:1710:569#0/1  
TGAGAATGGGAGACCTTCACTACCTCCAGAGCAGAAATGA  
+HWI-EAS443:3:45:1710:569#0/1  
aa0¥TZabba]YNR`YN\_T`^PTT`YU[L`NY]SZS\_XP  
@HWI-EAS443:3:45:1731:65#0/1  
ATGAGAATGGGAGACCTTCACTACCTCCAGAGCAGAAATG  
+HWI-EAS443:3:45:1731:65#0/1  
abbabaaabbb\_b`\_\_aa`\_`\_`[[`¥\_`a¥[V\_`VZ^\_a  
@HWI-EAS443:3:45:1760:658#0/1  
GAGAAACTGTGATGAGAATGGGAGACCTTCACTACCTCCA  
+HWI-EAS443:3:45:1760:658#0/1  
U\_`TT^a\_`^XWW]Ia]WQab^HX^[]`a\_\_`a`X][VXW  
@HWI-EAS443:3:45:1765:623#0/1  
ATGCAATTGTCATTCTAAGTGTCTCGCTGGATTCCTCTTT  
+HWI-EAS443:3:45:1765:623#0/1  
aba¥S\_aaaIQYa]W]^aa`¥\_aGRLIaa^^\_aG]^`X  
@HWI-EAS443:3:45:189:12#0/1  
GGTTAATTGAAGAAATGCGGCACAGATTGAAAGCGACAGA

+HWI-EAS443:3:45:189:12#0/1  
aYYa\_\_\_X`^\_a\_\_\_[^^^Z^Z^^^W¥¥XXXV]ZY]\_Z  
@HWI-EAS443:3:45:18:325#0/1  
CAACTGCATTTTTGACATCCTCATAAGTATGTCCTGGAAG  
+HWI-EAS443:3:45:18:325#0/1  
aaaabb`baaabaabab`a`¥^`aaa^`aa\_`a]ZV]\_¥  
@HWI-EAS443:3:45:235:2029#0/1  
GTGATGAGAATGGGAGACCTTCACTACCTCCAGAGCAGAA  
+HWI-EAS443:3:45:235:2029#0/1  
]LUWZ]Y`P\_X``[[ZYN]]LYa\_RLQXZZ\_W¥P]TN¥V]  
@HWI-EAS443:3:45:272:1573#0/1  
GAGAACTGTGATGAGAATGGGAGACCTTCACTACCTCCA  
+HWI-EAS443:3:45:272:1573#0/1  
abbbababa]`a`\_`a\_a`\_U^`\_U]aa]a]a\_]\_\_\_\_]`  
@HWI-EAS443:3:45:277:365#0/1  
AGAACTGTGATGAGAATGGGAGACCTTCACTACCTCCAG  
+HWI-EAS443:3:45:277:365#0/1  
a\_bababbab\_aa\_bYaaaQa`a`\_aa\_\_`\_aa\_\_¥\_\_^  
@HWI-EAS443:3:45:297:1786#0/1  
ATGAGAATGGGAGACCTTCACTACCTCCAGAGCAGAAATG  
+HWI-EAS443:3:45:297:1786#0/1  
aa]^]\_aaa\_\_b[L]\_\_^a^a\_] [a[^^a\_a\_XUZ\_\_  
@HWI-EAS443:3:45:307:435#0/1  
CGCATTTCTTCAATTAACCACCTTATTTCTCAAATTTCT  
+HWI-EAS443:3:45:307:435#0/1  
a\_YW^S`bbaab`a]Z]abYV^\_aa``QQ\_\_ZRZ````\_a  
@HWI-EAS443:3:45:358:1517#0/1  
TGAGAATGGGAGACCTTCACTACCTCCAGAGCAGAAATGA  
+HWI-EAS443:3:45:358:1517#0/1  
`aRPN`aaa`^a]WP[]Ta¥[\_^PZ`NXLUN]Y[SQN^SU  
@HWI-EAS443:3:45:359:1121#0/1  
GTGCCGATTTCTTCAATTAACCACCTTATTTCTCAAAT  
+HWI-EAS443:3:45:359:1121#0/1  
aS`Z\_a\_H^WW\_aPOWQ][[\_RWX^STDR]W]TT^YXXW^  
@HWI-EAS443:3:45:368:1282#0/1  
AAAGAGGAATCCAGCGAGACACTTAGAATGACAATTGCAT  
+HWI-EAS443:3:45:368:1282#0/1  
`^aaaaaaaa]`aa``aa\_\_`\_a\_aa`a\_a^\_aa\_W\_`a^  
@HWI-EAS443:3:45:371:1500#0/1  
GAGAATGGGAGACCTTCACTACCTCCAGAGCAGAAATGAA  
+HWI-EAS443:3:45:371:1500#0/1  
a\_]aaab\_aaa^a^`\_]a`a`\_a\_\_^¥VaVa``a\_a``]  
@HWI-EAS443:3:45:379:824#0/1  
GCCGATTTCTTCAATTAACCACCTTATTTCTCAAATTT  
+HWI-EAS443:3:45:379:824#0/1  
^T[Z^\_ULMYXV[¥SNV00\_\_X\_\_[YUMVWQNPPYW]]QG  
@HWI-EAS443:3:45:400:1632#0/1  
GATGAGAATGGGAGACCTTCACTACCTCCAGAGCAGAAAT  
+HWI-EAS443:3:45:400:1632#0/1  
aaaa`aabab[a`a\_a\_aaZaZa`YX`\_Qaa\_]N\_\_`a`\_`



@HWI-EAS443:3:45:410:1546#0/1  
CGCTTGGAGAACTGTGATGAGAATGGGAGACCTTCACTA  
+HWI-EAS443:3:45:410:1546#0/1  
aaaaaaaaaba`a\_aa`\_aa`aa\_\_a\_\_^¥^QT^`YaX`]  
@HWI-EAS443:3:45:470:1470#0/1  
GAGAATGGGAGACCTTCACTACCTCCAGAGCAGAAATGAA  
+HWI-EAS443:3:45:470:1470#0/1  
aab`babYLaa\_\_aba\_b`ab¥]aV`\_a`\_aa\_\_\_a^`\_  
@HWI-EAS443:3:45:503:1266#0/1  
GCCGCATTTCTTCAATTAACCACCTTATTTCTCAAATTT  
+HWI-EAS443:3:45:503:1266#0/1  
a\_ab]``a`aaaa\_a\_\_`^`\_`^aa`a`a¥^`aaV]a\_^  
@HWI-EAS443:3:45:514:357#0/1  
GCCGCATTTCTTCAATTAACCACCTTATTTCTCAAATTT  
+HWI-EAS443:3:45:514:357#0/1  
a`ab`aaa`\_a`\_\_\_aa`YZ`^^a\_\_\_a\_\_^a¥\_]\_^\_  
@HWI-EAS443:3:45:553:1251#0/1  
GACATTTCTCGAGGGTCATGTCAGAAAGGTAGCGCGAAG  
+HWI-EAS443:3:45:553:1251#0/1  
WYa¥J¥`\_a`S`¥V¥abaTY]^X\_ZU¥`aP`^KU]\_S`a  
@HWI-EAS443:3:45:622:1030#0/1  
CCGCATTTCTTCAATTAACCACCTTATTTCTCAAATTT  
+HWI-EAS443:3:45:622:1030#0/1  
a¥Z]^abbabb^aaaa\_]aa^¥baab`a`¥aaa`aa`aY  
@HWI-EAS443:3:45:652:1142#0/1  
GAAACAAATCGTGAATGGATCTTGAAAGAGGAATCCAGC  
+HWI-EAS443:3:45:652:1142#0/1  
aabbaaaaa`^a`ZLWa`¥]V]\_Z`^^]Ya`^]SV`YV  
@HWI-EAS443:3:45:658:22#0/1  
GAACTGTGATGAGAATGGGAGACCTTCACTACCTCCAGA  
+HWI-EAS443:3:45:658:22#0/1  
WW[bb`b`¥H]Za\_HNX`^\_W[OR¥UVZWXUZ[X]a^\_L  
@HWI-EAS443:3:45:686:310#0/1  
GTCGCTTTCAATCTGTGCCGCATTTCTTCAATTAACCACC  
+HWI-EAS443:3:45:686:310#0/1  
a`aa`\_\_a\_\_\_a¥\_a¥\_]`^`\_\_```]\_a\_\_\_\_\_^\_\_WW]Y¥  
@HWI-EAS443:3:45:728:241#0/1  
GTCGCTTTCAATCTGTGCCGCATTTCTTCAATTAACCACC  
+HWI-EAS443:3:45:728:241#0/1  
a[\_`\_a`\_]\_\_^¥^`[¥VT`¥Z^^YV¥WSWX]`]]UM¥]Z  
@HWI-EAS443:3:45:733:205#0/1  
AGAATGGGAGACCTTCACTACCTCCAGAGCAGAAATGAAA  
+HWI-EAS443:3:45:733:205#0/1  
ababbbba`aa`aa`aaaa`a`\_`aa\_a`\_a`\_`\_a`\_¥^  
@HWI-EAS443:3:45:739:878#0/1  
TGCCGCATTTCTTCAATTAACCACCTTATTTCTCAAATT  
+HWI-EAS443:3:45:739:878#0/1  
a``Z^\_U¥]^P]¥[R`V`\_aS^TN\_a]aaPU[VG\_[X`¥  
@HWI-EAS443:3:45:747:1666#0/1  
CGGCACAGATTGAAAGCGACAGAGAATAGTTTCGAACAAA

+HWI-EAS443:3:45:747:1666#0/1  
ab`b]`aY¥baabb^a\_a`\_`a`a`aaaX`a\_\_]`Waaa  
@HWI-EAS443:3:45:761:737#0/1  
CACAGATTGAAAGCGACAGAGAATAGTTTCGAACAAATAA  
+HWI-EAS443:3:45:761:737#0/1  
abbbbabbbbaabaab\_`bab`aaaa[abaa`aZaaa`aa  
@HWI-EAS443:3:45:780:646#0/1  
GAAACGAGAAAGCTCTTATCTCTTGTCTACTTCAAGCAG  
+HWI-EAS443:3:45:780:646#0/1  
aaa`aaaa`^a¥a^aa]a`a[aaa\_a¥`[¥a`\_`\_a¥\_a  
@HWI-EAS443:3:45:781:1489#0/1  
AGAATGGGAGACCTTCACTACCTCCAGAGCAGAAATGAAA  
+HWI-EAS443:3:45:781:1489#0/1  
aba``abJa\_\_aaa\_`[Yab^\_aaaV\_\_`¥\_a`\_`a`a]a\_  
@HWI-EAS443:3:45:788:1176#0/1  
GAAACTGTGATGAGAATGGGAGACCTTCACTACCTCCAGA  
+HWI-EAS443:3:45:788:1176#0/1  
`WU¥\_aaHW]ba`^`\_]TY^R]]\_\_\_a\_[]\_`¥¥¥`\_`a[  
@HWI-EAS443:3:45:795:243#0/1  
CCGCATTTCTTCAATTAACCACCTTATTTCTCAAATTTTC  
+HWI-EAS443:3:45:795:243#0/1  
\_a`\_¥`\_`bbba\_ba¥`\_aX^aa\_¥SZbbX\_a[a`\_]`a^[  
@HWI-EAS443:3:45:811:47#0/1  
TGATGAGAATGGGAGACCTTCACTACCTCCAGAGCAGAAA  
+HWI-EAS443:3:45:811:47#0/1  
ab`aa\_a^]aa\_]a\_¥^`\_`^¥^Z^XSWV¥^^V`YWYUWW  
@HWI-EAS443:3:45:817:688#0/1  
GCCGCATTTCTTCAATTAACCACCTTATTTCTCAAATTT  
+HWI-EAS443:3:45:817:688#0/1  
aaab`\_aaa\_aaaa\_aa`\_\_`^^\_aa`\_aa]^a`\_`\_a`a  
@HWI-EAS443:3:45:853:177#0/1  
TGAGAATGGGAGACCTTCACTACCTCCAGAGCAGAAATGA  
+HWI-EAS443:3:45:853:177#0/1  
abab\_aabbb`aa\_\_`\_aa\_\_^\_\_¥^\_W`^^a^W¥\_]`^  
@HWI-EAS443:3:45:855:1031#0/1  
GTCGCTTTCAATCTGTGCCGATTTCTTCAATTAACCACC  
+HWI-EAS443:3:45:855:1031#0/1  
a\_aa`^aaa`\_`\_a`\_aXZa^\_aaa^a\_\_^`\_`\_]\_\_Z¥  
@HWI-EAS443:3:45:876:1957#0/1  
ACCACCTTATTTCTCAAATTTCTGTCCAATTGCTCTCG  
+HWI-EAS443:3:45:876:1957#0/1  
^`aa[¥ba`aba^RF¥]a\_a\_\_\_^aZ]^G¥^\_\_^Y^]^\_  
@HWI-EAS443:3:45:905:586#0/1  
CTTACAACTACTGCTTGAAGTAGAACAAGAGATAAGAGCT  
+HWI-EAS443:3:45:905:586#0/1  
`bbaabbabaabbabbaab\_aba\_aaab`baabaa\_aaa  
@HWI-EAS443:3:45:910:832#0/1  
AATGGATCTTGAAGAGGAATCCAGCGAGACACTTAGAAT  
+HWI-EAS443:3:45:910:832#0/1  
a\_a`a^Y\_Va]X[¥a`aa]`a`[Y]Z\_\_aV]U]^a`\_YX¥

@HWI-EAS443:3:45:95:1276#0/1  
CTTGGAGAACTGTGATGAGAATGGGAGACCTTCACTACC  
+HWI-EAS443:3:45:95:1276#0/1  
abbbba`baaaba\_aaaaabaaaaa`ba\_\_aa`b\_aa\_  
@HWI-EAS443:3:45:999:1267#0/1  
GAATGGGAGACCTTCACTACCTCCAGAGCAGAAATGAAAA  
+HWI-EAS443:3:45:999:1267#0/1  
aUa\_Za\_U\_RQN\_a\_] [\_\_VK^[` [ `aXT\_¥XKTaV[\_\_¥  
@HWI-EAS443:3:46:1048:1558#0/1  
CGCATTCTTCAATTAACCACCTTATTTCTCAAATTTCT  
+HWI-EAS443:3:46:1048:1558#0/1  
abbbbbbabb]bbbbbaaaaa`bbabbbbbb^bb`bbb\_b  
@HWI-EAS443:3:46:1049:867#0/1  
GCCGCATTTCTTCAATTAACCACCTTATTTCTCAAATTT  
+HWI-EAS443:3:46:1049:867#0/1  
aaaaa`baaabaa\_`a` [ `R`aab`^`aa\_\_ZS][L]a^  
@HWI-EAS443:3:46:1053:1910#0/1  
GCCGCATTTCTTCAATTAACCACCTTATTTCTCAAATTT  
+HWI-EAS443:3:46:1053:1910#0/1  
`^`VV^a]YU[]\_W]^\_YP^W][SVa]XFX^¥XTYX`¥  
@HWI-EAS443:3:46:1081:655#0/1  
ATGCAATTGTCATTCTAAGTGTCTCGCTGGATTCCTCTTT  
+HWI-EAS443:3:46:1081:655#0/1  
abba`\_abba`\_ab]a`\_a^` [ ]a^` `a`¥`a\_Y]Z]a[  
@HWI-EAS443:3:46:1139:1212#0/1  
TGCCGCATTTCTTCAATTAACCACCTTATTTCTCAAATT  
+HWI-EAS443:3:46:1139:1212#0/1  
ab]aba]Yaaaaa]`aba`a`\_a\_aa` `aa`^^a`\_X`aa  
@HWI-EAS443:3:46:1140:522#0/1  
GCCGCATTTCTTCAATTAACCACCTTATTTCTCAAATTT  
+HWI-EAS443:3:46:1140:522#0/1  
a\_a`a\_aaa\_aaaXW^`XPYa^\_]a\_^`\_^`\_`\_¥]\_^`  
@HWI-EAS443:3:46:1190:660#0/1  
GGAGAACTGTGATGAGAATGGGAGACCTTCACTACCTCC  
+HWI-EAS443:3:46:1190:660#0/1  
a`^]a^`aa\_L\_Z\_X¥¥¥`\_]TR`Y[ZYRXSUY^RUUT^  
@HWI-EAS443:3:46:1221:1276#0/1  
CAAGGTCTAATCGGTTAAAGATTACACTGAAGTTCGCT  
+HWI-EAS443:3:46:1221:1276#0/1  
¥Y\_]\_LY\_a^aX[S[^Z`V¥]RW`^TM^]\_¥YW\_\_^`ZVZ  
@HWI-EAS443:3:46:1231:1588#0/1  
GAAACTGTGATGAGAATGGGAGACCTTCACTACCTCCAGA  
+HWI-EAS443:3:46:1231:1588#0/1  
a[a[ `bUaa`\_T^[U`]a`Y\_\_^X\_Y^\_^] ^TV\_^ZZTY  
@HWI-EAS443:3:46:1240:566#0/1  
GCCGCATTTCTTCAATTAACCACCTTATTTCTCAAATTT  
+HWI-EAS443:3:46:1240:566#0/1  
aa`a`a\_[YW\_` [ `][ `^a\_[\_^¥` `a`\_WR\_\_\_\_^\_\_\_\_  
@HWI-EAS443:3:46:1259:1076#0/1  
GTAATGGTAAAATTTCTCCAACCTATTGCTCCCTCCTCAGT

+HWI-EAS443:3:46:1259:1076#0/1  
aRST\_RO[\_\_\_]Y^`a`USWXVaY`X^BBBBBBBBBBBB  
@HWI-EAS443:3:46:1279:2014#0/1  
GTCGCTTTCAATCTGTGCCGATTTCTTCAATTAACCACC  
+HWI-EAS443:3:46:1279:2014#0/1  
^Y\_b]]aa`aaa¥^^aaaa¥a`^\_`a`a[``aaV[[Z[  
@HWI-EAS443:3:46:1315:825#0/1  
GTCGCTTTCAATCTGTGCCGATTTCTTCAATTAACCACC  
+HWI-EAS443:3:46:1315:825#0/1  
aaab`baa]aaa\_`^a\_\_a]\_aaa[aa\_\_`aa`aY]]\_X  
@HWI-EAS443:3:46:1354:624#0/1  
TGCCGATTTCTTCAATTAACCACCTTATTCCTCAAATT  
+HWI-EAS443:3:46:1354:624#0/1  
abbbb`^abbaaaaaabaaba\_a`aba`aaaa^aaaa`a`  
@HWI-EAS443:3:46:1362:1223#0/1  
CTGAAAATATACAGAGATTCGCTTGGAGAACTGTGATGA  
+HWI-EAS443:3:46:1362:1223#0/1  
ab\_\_bbaabb`aa`a`^`aaaabZba\_]a\_YY^`T  
@HWI-EAS443:3:46:1366:287#0/1  
TCAGAAAGGTAGCGCAAGTAGGTACAGATGCAATTGTCA  
+HWI-EAS443:3:46:1366:287#0/1  
a^\_a\_\_`]W^aWa[aZZ`Z^a\_Z]^\_\_Z]]XX\_^\_YYW  
@HWI-EAS443:3:46:1376:794#0/1  
GTCGCTTTCAATCTGTGCCGATTTCTTCAATTAACCACC  
+HWI-EAS443:3:46:1376:794#0/1  
]FMYZ]aaQQ`XOQTOS[P`\_\_XRTL`SNV][YWX[MSPO  
@HWI-EAS443:3:46:1387:444#0/1  
TGAGAATGGGAGACCTTCACTACCTCCAGAGCAGAAATGA  
+HWI-EAS443:3:46:1387:444#0/1  
abaa`aaaaa^]JS\_`\_`¥a`[XZ\_^]P\_]aZW[^`^  
@HWI-EAS443:3:46:144:1521#0/1  
ACTGTGATGAGAATGGGAGACCTTCACTACCTCCAGAGCA  
+HWI-EAS443:3:46:144:1521#0/1  
aXa\_`aaaa\_aZ[aa[a\_\_`Y`\_\_aaaaSY``P¥]\_NX[  
@HWI-EAS443:3:46:1450:1579#0/1  
TGAGAATGGGAGACCTTCACTACCTCCAGAGCAGAAATGA  
+HWI-EAS443:3:46:1450:1579#0/1  
a`\_]U]]aV^]¥\_\_PVU\_aQ\_`]\_R^^¥]U]XVRW^Y^`Y  
@HWI-EAS443:3:46:1461:614#0/1  
CAGAGATTCGCTTGGAGAACTGTGATGAGAATGGGAGAC  
+HWI-EAS443:3:46:1461:614#0/1  
Z\_aW\_Z¥W]\_aabb`^^¥Z]a[\_T`X\_]`a^ZY^X[ZGW  
@HWI-EAS443:3:46:1485:24#0/1  
AATGGGAGACCTTCACTACCTCCAGAGCAGAAATGAAAAG  
+HWI-EAS443:3:46:1485:24#0/1  
a]bbabaa^`]`Y^`aba\_`aaa]a]a`bZXX`aZU[\_Z  
@HWI-EAS443:3:46:1490:237#0/1  
CCGATTTCTTCAATTAACCACCTTATTCCTCAAATTC  
+HWI-EAS443:3:46:1490:237#0/1  
^^bbbabb`ba\_\_a`aa\_aaaabbbabbbab`aabaaa

@HWI-EAS443:3:46:1493:1469#0/1  
CGCATTCTTCAATTAACCACCTTATTTCTCAAATTTCT  
+HWI-EAS443:3:46:1493:1469#0/1  
aaa`aab\_bbaa^aaaa\_a\_aba\_baa\_\_a```aaaa\_a  
@HWI-EAS443:3:46:1496:2014#0/1  
AGAAACTGTGATGAGAATGGGAGACCTTCACTACCTCCAG  
+HWI-EAS443:3:46:1496:2014#0/1  
a¥]aa\_`a^a\_\_\_\_\_])`\_¥`X\_]\_V¥\_[T[V\_\_XV]YY]Y  
@HWI-EAS443:3:46:1511:224#0/1  
GAAACTGTGATGAGAATGGGAGACCTTCACTACCTCCAGA  
+HWI-EAS443:3:46:1511:224#0/1  
aa`a¥ab\_a`b\_aY`b\_a¥a]\_X^^^X]^V^^RYY^V  
@HWI-EAS443:3:46:1530:1256#0/1  
GTCGCTTTCATCTGTGCCGATTTCTTCAATTAACCACC  
+HWI-EAS443:3:46:1530:1256#0/1  
a\_a\_¥]abaa`a\_`\_\_`\_\_`\_\_`\_\_Z`\_\_\_\_¥aa`\_]ZZX¥  
@HWI-EAS443:3:46:1542:1653#0/1  
TAGACTGTTTCCTTTGGCATATCCGCAAGCGATTTGCAGA  
+HWI-EAS443:3:46:1542:1653#0/1  
aab`\_ab]a`¥\_^\_\_\_\_Z[`\_`\_`\_¥¥\_URYY^¥\_XWUQV  
@HWI-EAS443:3:46:1665:1328#0/1  
GAAACTGTGATGAGAATGGGAGACCTTCACTACCTCCAGA  
+HWI-EAS443:3:46:1665:1328#0/1  
^\_¥a[^\_V\_W^b]^RT\_a`Z\_Ua\_^\_a\_\_[V\_V]\_]`Q  
@HWI-EAS443:3:46:1672:999#0/1  
GAATGGGAGACCTTCACTACCTCCAGAGCAGAAATGAAAA  
+HWI-EAS443:3:46:1672:999#0/1  
a`aaaa`Ya`\_\_`\_a\_aa\_]\_¥]^\_Y`^^`]]^`\_]`]]`  
@HWI-EAS443:3:46:1704:327#0/1  
GCCGCATTTCTTCAATTAACCACCTTATTTCTCAAATTT  
+HWI-EAS443:3:46:1704:327#0/1  
a`aa\_\_a\_\_Y`\_`\_\_`\_\_\_\_[ ]^][\_ ]^ ]^W]]]\_^Z  
@HWI-EAS443:3:46:1714:283#0/1  
GCCGCATTTCTTCAATTAACCACCTTATTTCTCAAATTT  
+HWI-EAS443:3:46:1714:283#0/1  
\_Y\_b\_¥\_]\_]aa]Z0]\_\_\_\_\_Zaa¥a`T\_a`\_WZ¥]\_  
@HWI-EAS443:3:46:1739:850#0/1  
ATTATCTTTTGCCTAGGCATGAGCATGAACCAGTCTCGTG  
+HWI-EAS443:3:46:1739:850#0/1  
\_\_^Zb¥^]aa^Y[ `b`\_W\_`¥]\_]`aaa]^0\_`¥`W]V^  
@HWI-EAS443:3:46:1773:162#0/1  
CTGTGATGAGAATGGGAGACCTTCACTACCTCCAGAGCAG  
+HWI-EAS443:3:46:1773:162#0/1  
\_^XT]X¥aYXQ^\_YZZQTUHR[XZ[QVMVRWRQVP[TXB  
@HWI-EAS443:3:46:272:941#0/1  
AGAAACTGTGATGAGAATGGGAGACCTTCACTACCTCCAG  
+HWI-EAS443:3:46:272:941#0/1  
ab`\_]\_[aa]b```\_a\_\_a\_\_WV\_^ ]\_^^]]\_`^\_W\_]\_  
@HWI-EAS443:3:46:289:1959#0/1  
GCCGCATTTCTTCAATTAACCACCTTATTTCTCAAATTT

+HWI-EAS443:3:46:289:1959#0/1  
Y`bbabaaa\_aaa`bVa`aaWbaaaa]baaabbbbaaaba  
@HWI-EAS443:3:46:386:140#0/1  
AGAAACTGTGATGAGAATGGGAGACCTTCACTACCTCCAG  
+HWI-EAS443:3:46:386:140#0/1  
abWaa`bb^\_\_aa\_a]\_abaaZa^U[\_[\_V^^]]\_\_YV`  
@HWI-EAS443:3:46:40:1242#0/1  
CGCTTGGAGAACTGTGATGAGAATGGGAGACCTTCACTA  
+HWI-EAS443:3:46:40:1242#0/1  
ababbbbaaa\_aaabaaaababaaaaaaaaa\_aaaaa^aa  
@HWI-EAS443:3:46:414:967#0/1  
CGCGAAGTAGGTACAGATGCAATTGTCATTCTAAGTGTCT  
+HWI-EAS443:3:46:414:967#0/1  
aaaa\_`b0aa\_Qa\_abIa`\_`\_aYaa]aa\_\_\_a`P`Z\_0]^  
@HWI-EAS443:3:46:434:532#0/1  
CCCAACTGCATTTTTGACATCCTCATAAGTATGCCTGGA  
+HWI-EAS443:3:46:434:532#0/1  
aabababbaabba`abaabb`aa\_aaa`a]aaa``\_aaa`  
@HWI-EAS443:3:46:447:1337#0/1  
AGAAACTGTGATGAGAATGGGAGACCTTCACTACCTCCAG  
+HWI-EAS443:3:46:447:1337#0/1  
aaa][]ba]MRaaaHJR`V\_`¥RVTaa^TVTaa^RTTVY\_]  
@HWI-EAS443:3:46:481:1130#0/1  
GTGCGTTTCAATCTGTGCCGATTTCTTCAATTAACCACC  
+HWI-EAS443:3:46:481:1130#0/1  
aaaaaabb\_\_aaaa`a`\_a`\_aaa^aa`]\_aaaa\_\_\_^X  
@HWI-EAS443:3:46:487:983#0/1  
TGAGAATGGGAGACCTTCACTACCTCCAGAGCAGAAATGA  
+HWI-EAS443:3:46:487:983#0/1  
aa`^V[aa`a`\_[\_`^`\_¥`a`^`\_]`\_\_Z^`¥Z`\_`\_¥  
@HWI-EAS443:3:46:492:1516#0/1  
GCCGCATTTCTTCAATTAACCACCTTATTTCTCAAATTT  
+HWI-EAS443:3:46:492:1516#0/1  
`b][SWXbb¥aaZ]XW`YaPG`^XZ\_]TGXJT]BBBBBBB  
@HWI-EAS443:3:46:492:838#0/1  
GAGAACTGTGATGAGAATGGGAGACCTTCACTACCTCCA  
+HWI-EAS443:3:46:492:838#0/1  
`a`a`^aaaWa^aa¥a¥`\_a\_\_Va\_Z\_¥`\_`\_^]ZYWWW¥  
@HWI-EAS443:3:46:49:1137#0/1  
GAGCAATTGGGACAGAAATTTGAGGAAATAAGGTGGTTAA  
+HWI-EAS443:3:46:49:1137#0/1  
a¥aa`aaa`\_^[\_`aaa`aaa`a\_a`\_\_\_a\_\_aaWa`Y]¥¥  
@HWI-EAS443:3:46:50:571#0/1  
GAAACTGTGATGAGAATGGGAGACCTTCACTACCTCCAGA  
+HWI-EAS443:3:46:50:571#0/1  
aXR`][a[a`]`\_aQNY`\_]N]XVY¥S][Y^^VJV\_¥YYW  
@HWI-EAS443:3:46:59:214#0/1  
GAGAATGGGAGACCTTCACTACCTCCAGAGCAGAAATGAA  
+HWI-EAS443:3:46:59:214#0/1  
a`\_X^aaaaaZVV\_\_^TUT`\_Z`\_¥^[]GW[N]Z^[\_^^^

@HWI-EAS443:3:46:631:150#0/1  
AGAACTGTGATGAGAATGGGAGACCTTCACTACCTCCAG  
+HWI-EAS443:3:46:631:150#0/1  
^`aba\_aVHa`aZ`a`]]`YUYa`[VT`^S\_[]a\_]\_a  
@HWI-EAS443:3:46:637:861#0/1  
GCCGCATTTCTTCAATTAACCACCTTATTTCTCAAATTT  
+HWI-EAS443:3:46:637:861#0/1  
aabaa`baaa\_aa]Yaa`a`aaa^aabaa`aaaa`\_aaa  
@HWI-EAS443:3:46:644:551#0/1  
TCGCTTTCAATCTGTGCCGATTTCTTCAATTAACCACCT  
+HWI-EAS443:3:46:644:551#0/1  
a^baabbaaaa`\_a]a[`a\_aa`\_``\_`\_¥`aa¥`\_Xa\_^\_  
@HWI-EAS443:3:46:653:952#0/1  
GCCGCATTTCTTCAATTAACCACCTTATTTCTCAAATTT  
+HWI-EAS443:3:46:653:952#0/1  
R`a¥]ab`[`a[\_^a\_¥Z^a]U\_a[T`\_WTRbb^^\_a`\_  
@HWI-EAS443:3:46:692:1332#0/1  
ATGAGAATGGGAGACCTTCACTACCTCCAGAGCAGAAATG  
+HWI-EAS443:3:46:692:1332#0/1  
^¥a^aZ[aaaaS[Waabaaaba`aa`[`a`\_`¥a`\_`\_`\_`  
@HWI-EAS443:3:46:756:1320#0/1  
GGAGAACTGTGATGAGAATGGGAGACCTTCACTACCTCC  
+HWI-EAS443:3:46:756:1320#0/1  
\_`bbba`aab[aaaa`^X\_aa\_a]\_`Z^`\_¥a¥`\_UZ\_YV  
@HWI-EAS443:3:46:768:273#0/1  
GAAAATATACAGAGATTCGCTTGGAGAACTGTGATGAGA  
+HWI-EAS443:3:46:768:273#0/1  
a`U`aa\_baaab`W`aa`\_\_aa^a¥^[^`U]¥^`V`W  
@HWI-EAS443:3:46:771:870#0/1  
ATGAGAATGGGAGACCTTCACTACCTCCAGAGCAGAAATG  
+HWI-EAS443:3:46:771:870#0/1  
^a^`¥]\_\_b[TSZ\_SZ\_0¥\_R]UU]J\_YXQR]WX\_ZS^T`  
@HWI-EAS443:3:46:788:87#0/1  
GAGAATGGGAGACCTTCACTACCTCCAGAGCAGAAATGAA  
+HWI-EAS443:3:46:788:87#0/1  
XRbaaabbb]b^`\_`\_aa`\_TVa[aa[0^Zb\_ZbX[aaaW[  
@HWI-EAS443:3:46:855:1481#0/1  
GCCGCATTTCTTCAATTAACCACCTTATTTCTCAAATTT  
+HWI-EAS443:3:46:855:1481#0/1  
aaa`a\_\_`a\_aaa`aa\_^\_a`\_\_a\_a`\_`^\_\_]Y]a\_`  
@HWI-EAS443:3:46:879:1247#0/1  
GCCGCATTTCTTCAATTAACCACCTTATTTCTCAAATTT  
+HWI-EAS443:3:46:879:1247#0/1  
\_W`b`\_`\_`^^[Y\_NRYa0[GV^`^`VPRY`SV¥U][]¥TO  
@HWI-EAS443:3:46:909:1820#0/1  
AGAACTGTGATGAGAATGGGAGACCTTCACTACCTCCAG  
+HWI-EAS443:3:46:909:1820#0/1  
^0]\_\_W\_b`\_a\_a\_a`\_`]X]\_\_\_a`\_a\_^VYU^T[`  
@HWI-EAS443:3:46:90:1073#0/1  
GAATGGGAGACCTTCACTACCTCCAGAGCAGAAATGAAAA

+HWI-EAS443:3:46:90:1073#0/1  
aaa`aaaaaa`ba\_b\_a^¥`\_`[X¥¥Xa\_a]``]\_\_Z  
@HWI-EAS443:3:46:911:1883#0/1  
GAAAATATACAGAGATTTCGCTTGGAGAACTGTGATGAGA  
+HWI-EAS443:3:46:911:1883#0/1  
\_\_aabbb`bbbb\_b¥aaa\_a]^^]aa`a\_V\_`RZ\_]^Wa\_  
@HWI-EAS443:3:46:919:2041#0/1  
GGAGAACTGTGATGAGAATGGGAGACCTTCACTACCTCC  
+HWI-EAS443:3:46:919:2041#0/1  
aaa\_aab`\_a\_\_\_`a`a\_a\_\_`¥\_\_\_[\_\_\_]¥`W¥^Y¥YWU  
@HWI-EAS443:3:46:94:626#0/1  
GCCGCATTTCTTCAATTAACCACCTTATTTCTCAAATTT  
+HWI-EAS443:3:46:94:626#0/1  
aaab`bb`baaaaaabaaaYZaaaaaaaa`]a`a^]aaa  
@HWI-EAS443:3:46:956:1548#0/1  
AAACTGTGATGAGAATGGGAGACCTTCACTACCTCCAGAG  
+HWI-EAS443:3:46:956:1548#0/1  
]Ua\_]b\_baaa`a\_\_a\_a`¥aa]P`¥\_\_[\_\_\_]\_\_\_^a`\_`\_  
@HWI-EAS443:3:46:95:660#0/1  
ATTTACCATTACCTTCTTCCAGGACATACTTATGAGG  
+HWI-EAS443:3:46:95:660#0/1  
WTQ\_aZX`WT\_`]YV[T\_Y`Y^^W^\_^TDY[¥\_\_H^[UZa  
@HWI-EAS443:3:46:960:1122#0/1  
CTGTGCCGCATTTCTTCAATTAACCACCTTATTTCTCAA  
+HWI-EAS443:3:46:960:1122#0/1  
a¥\_]bbY\_`b`a]TaaVa\_baaaa^X`Raaaaab\_ab\_aa  
@HWI-EAS443:3:46:96:397#0/1  
CTTGGAGAACTGTGATGAGAATGGGAGACCTTCACTACC  
+HWI-EAS443:3:46:96:397#0/1  
\_X`b]a\_W¥\_]`\_`¥\_X`ZZ¥\_a]^`\_OZ¥]]W\_Z¥U[[V[  
@HWI-EAS443:3:46:973:225#0/1  
GAAACTGTGATGAGAATGGGAGACCTTCACTACCTCCAGA  
+HWI-EAS443:3:46:973:225#0/1  
a\_]ZX\_a¥b\_]`\_`\_SP\_a`TPa[SPX0]Z[]YYXVXYOYS  
@HWI-EAS443:3:46:977:1382#0/1  
GTCGCTTTCAATCTGTGCCGCATTTCTTCAATTAACCACC  
+HWI-EAS443:3:46:977:1382#0/1  
```baa^ab[Z¥^^]Xaabaab``aaaaab]aaa``\_\_`]  
@HWI-EAS443:3:47:1025:445#0/1  
CACAGATTGAAAGCGACAGAGAATAGTTTTCGAACAAATAA  
+HWI-EAS443:3:47:1025:445#0/1  
abba`Y¥aa`^`\_]Zbaabaab`aa`Za``a\_aYaaaaaa  
@HWI-EAS443:3:47:1076:430#0/1  
GCCGCATTTCTTCAATTAACCACCTTATTTCTCAAATTT  
+HWI-EAS443:3:47:1076:430#0/1  
aaaa\_a`a`\_a]bY^\_\_S`WVP¥R]ZW]]XR¥`^]ZX¥^Z  
@HWI-EAS443:3:47:1106:781#0/1  
TATCTTTTGCCTAGGCATGAGCATGAACAGTCTCGTGAC  
+HWI-EAS443:3:47:1106:781#0/1  
`a`a\_bbba]babbaaaa]a[abbba[Xaa`\_a[aY][P



@HWI-EAS443:3:47:1140:1652#0/1  
CCGCATTTCTTCAATTAACCACCTTATTTCTCAAATTTTC  
+HWI-EAS443:3:47:1140:1652#0/1  
^¥\_XZ\_bYF]a^SR¥Y^¥¥]W^Y\_bbb\_^\_aa`a`abbb`  
@HWI-EAS443:3:47:117:1531#0/1  
GAATGGGAGACCTTCACTACCTCCAGAGCAGAAATGAAAA  
+HWI-EAS443:3:47:117:1531#0/1  
aaabb^Y]]ababa`aabb^\_aaaaaaaa`aabaa`a  
@HWI-EAS443:3:47:1182:330#0/1  
AATTTGAGGAAATAAGGTGGTTAATTGAAGAAATGCGGCA  
+HWI-EAS443:3:47:1182:330#0/1  
]U^bab`bba`bb^\_^`aabaa]`Z`aV^aJa¥V\_N`a[\_  
@HWI-EAS443:3:47:1183:981#0/1  
ATTCTCTGTGCTTTCAATCTGTGCCGATTTCTTCAATT  
+HWI-EAS443:3:47:1183:981#0/1  
^bbabbbbaab`aaba`a\_\_a^^`a\_\_aaa```¥^`a`  
@HWI-EAS443:3:47:1191:496#0/1  
GTCGCTTTCAATCTGTGCCGATTTCTTCAATTAACCACC  
+HWI-EAS443:3:47:1191:496#0/1  
a`aa\_aa```aa\_a`¥a\_]a[\_a\_a^\_]^^`¥X¥VP  
@HWI-EAS443:3:47:1232:879#0/1  
GCGGCACAGATTGAAAGCGACAGAGAATAGTTTCGAACAA  
+HWI-EAS443:3:47:1232:879#0/1  
aaaaaaaa`[`aa¥[¥a\_\_\_]`a^\_\_\_`^[X`W¥Y`Y^^  
@HWI-EAS443:3:47:1262:995#0/1  
ATGAGAATGGGAGACCTTCACTACCTCCAGAGCAGAAATG  
+HWI-EAS443:3:47:1262:995#0/1  
abaab¥bbab`b\_a\_b`ab`ba`aab]ab\_aaab\_a`aa  
@HWI-EAS443:3:47:127:200#0/1  
GAGAATGGGAGACCTTCACTACCTCCAGAGCAGAAATGAA  
+HWI-EAS443:3:47:127:200#0/1  
`]aa`Z\_GL]`\_\_`ZZP¥\_\_[[U`Z`T^ZW\_ZWVV]ZW  
@HWI-EAS443:3:47:1320:151#0/1  
AGAAACTGTGATGAGAATGGGAGACCTTCACTACCTCCAG  
+HWI-EAS443:3:47:1320:151#0/1  
`b]aaaab\_baaaYa\_`a\_`]a[Z]]^X]Y]]UVXXXX]  
@HWI-EAS443:3:47:1337:1901#0/1  
TCCTGGAAGAGAAGGTAATGGTGAAATTTCTCCAATATT  
+HWI-EAS443:3:47:1337:1901#0/1  
a`V^b\_aababa\_aaXa`YaZ]\_\_`a\_\_\_`[a^\_Sa`^]  
@HWI-EAS443:3:47:133:1322#0/1  
CGCTTGGAGAACTGTGATGAGAATGGGAGACCTTCACTA  
+HWI-EAS443:3:47:133:1322#0/1  
aa\_a`\_I\_`Ua]`b^aa^Y`ab\_`a`¥a\_[V\_aaa\_a[  
@HWI-EAS443:3:47:134:2030#0/1  
CTTGGAGAACTGTGATGAGAATGGGAGACCTTCACTACC  
+HWI-EAS443:3:47:134:2030#0/1  
ab\_`abbb]aa\_ab[aa]WH`\_`\_aa`a`a[]a^\_YFT  
@HWI-EAS443:3:47:1368:574#0/1  
GTGCCGATTTCTTCAATTAACCACCTTATTTCTCAAAT

+HWI-EAS443:3:47:1368:574#0/1  
aaaa`aa\_]\_\_\_aaa`aa`\_¥^¥\_a```\_a\_\_a\_aY^`  
@HWI-EAS443:3:47:1381:921#0/1  
ATGAGAATGGGAGACCTTCACTACCTCCAGAGCAGAAATG  
+HWI-EAS443:3:47:1381:921#0/1  
¥``Sa`¥`bbaQ\_a\_L\_X^`a`a]a^\_XWaUa]\_b\_a\_a^  
@HWI-EAS443:3:47:1435:1791#0/1  
GATGAGAATGGGAGACCTTCACTACCTCCAGAGCAGAAAT  
+HWI-EAS443:3:47:1435:1791#0/1  
aaba\_ba`aa¥]\_^\_^^\_^]\_Y\_]^^^¥\_]^]\_^]Y]]  
@HWI-EAS443:3:47:1443:183#0/1  
CGCTTGGAGAACTGTGATGAGAATGGGAGACCTTCACTA  
+HWI-EAS443:3:47:1443:183#0/1  
abbaabb\_bba\_ab\_b`aa\_`^\_a`a`^a\_XUX^]\_UZY  
@HWI-EAS443:3:47:1443:745#0/1  
GCCGCATTTCTTCAATTAACCACCTTATTTCTCAAATTT  
+HWI-EAS443:3:47:1443:745#0/1  
aaa^`aa\_a¥aa`]`aaa¥\_X\_^]a`Z\_``^U\_\_^]\_^^  
@HWI-EAS443:3:47:1469:1422#0/1  
ATGAGAATGGGAGACCTTCACTACCTCCAGAGCAGAAATG  
+HWI-EAS443:3:47:1469:1422#0/1  
]bb`\_`Z`a`Z```[aa^WZ`Y`\_a\_\_]aXY¥U]0^]]U  
@HWI-EAS443:3:47:1475:713#0/1  
GGAGAACTGTGATGAGAATGGGAGACCTTCACTACCTCC  
+HWI-EAS443:3:47:1475:713#0/1  
``bbabaaa^`babba\_`aaaab`ZXZa`a`a```¥[]\_[]  
@HWI-EAS443:3:47:1516:759#0/1  
TGAGAATGGGAGACCTTCACTACCTCCAGAGCAGAAATGA  
+HWI-EAS443:3:47:1516:759#0/1  
aa^a`a^aX¥\_a\_Uaa\_]aY`\_¥\_\_VP^`[\_S^^[U`¥\_a^  
@HWI-EAS443:3:47:1519:608#0/1  
GAGAACTGTGATGAGAATGGGAGACCTTCACTACCTCCA  
+HWI-EAS443:3:47:1519:608#0/1  
aaa[`a\_bb`b`aa`a¥`a`a`^`\_a^^V`\_V\_Y\_\_UV`^V\_  
@HWI-EAS443:3:47:1526:174#0/1  
ACTGGTTCATGCTCATGCCTAGGCAAAGATAATAGGCCC  
+HWI-EAS443:3:47:1526:174#0/1  
a^[bY[X[UU\_Y[]]W\_ZGYVQW^XLYU]X\_`]LRYXXT[  
@HWI-EAS443:3:47:1555:102#0/1  
TGAGAATGGGAGACCTTCACTACCTCCAGAGCAGAAATGA  
+HWI-EAS443:3:47:1555:102#0/1  
abab`aabbb\_a\_\_[]`¥\_¥\_\_VZ^^V[\_W^UW^XWV[\_Y  
@HWI-EAS443:3:47:1557:2030#0/1  
GAGAACTGTGATGAGAATGGGAGACCTTCACTACCTCCA  
+HWI-EAS443:3:47:1557:2030#0/1  
`¥V^bbbbbabbab`aaabbbaX\_a`Y`VP`]aP¥`^\_\_  
@HWI-EAS443:3:47:1584:1504#0/1  
ATTACACTGAAGTTCGCTTTCAGTACTATGTTCTTTTCCA  
+HWI-EAS443:3:47:1584:1504#0/1  
\_`b`]b`abaaa\_a\_a`ab]`¥^^X`\_]`\_]F^\_a\_GP\_

@HWI-EAS443:3:47:1628:535#0/1  
GCCGCATTTCTTCAATTAACCACCTTATTTCTCAAATTT  
+HWI-EAS443:3:47:1628:535#0/1  
aa`baabbbabb`a`aaaa\_``]aaaaa\_¥aaa\_aa``  
@HWI-EAS443:3:47:1630:264#0/1  
GAAATGCGGCACAGATTGAAAGCGACAGAGAATAGTTTCG  
+HWI-EAS443:3:47:1630:264#0/1  
a\_a`ab`ab\_a\_\_\_\_\_a\_]`^\_]^[^`]\_^]]^]Z\_ZTY  
@HWI-EAS443:3:47:1636:863#0/1  
GTGGTTAATTGAAGAAATGCGGCACAGATTGAAAGCGACA  
+HWI-EAS443:3:47:1636:863#0/1  
`]aaabbaaaaaab`a`ba]`aYa\_`a^aaa\_`\_`^a`U^  
@HWI-EAS443:3:47:1647:875#0/1  
GAAACTGTGATGAGAATGGGAGACCTTCACTACCTCCAGA  
+HWI-EAS443:3:47:1647:875#0/1  
a`a``aa`aaba\_a`aaba\_]a]]V\_\_\_\_\_]^\_]`^^[]Y]  
@HWI-EAS443:3:47:1649:1431#0/1  
GCCGCATTTCTTCAATTAACCACCTTATTTCTCAAATTT  
+HWI-EAS443:3:47:1649:1431#0/1  
a`aaabbb`\_bbaa``aaaa`a`aa`aa`\_\_a]`\_aaa`  
@HWI-EAS443:3:47:1687:252#0/1  
GAGAACTGTGATGAGAATGGGAGACCTTCACTACCTCCA  
+HWI-EAS443:3:47:1687:252#0/1  
abbaab`bb`baab`a``aa`\_^a^^^\_\_\_\_\_V`\_]H\_¥¥¥  
@HWI-EAS443:3:47:1754:1798#0/1  
GCTTGGAGAACTGTGATGAGAATGGGAGACCTTCACTAC  
+HWI-EAS443:3:47:1754:1798#0/1  
aaaaaa`aa`\_U]aXYZ]^[\_^[[^^[W^ZLTYVWZVYYT  
@HWI-EAS443:3:47:1776:572#0/1  
GCCGCATTTCTTCAATTAACCACCTTATTTCTCAAATTT  
+HWI-EAS443:3:47:1776:572#0/1  
aZ`baYZR\_]\_Z¥[[`a]^MYa\_\_`a\_\_`SZa\_]Z^^\_]`  
@HWI-EAS443:3:47:1777:521#0/1  
GCCGCATTTCTTCAATTAACCACCTTATTTCTCAAATTT  
+HWI-EAS443:3:47:1777:521#0/1  
ababaabbbaba\_aabaa\_\_aa`baaaaa`aa]U`aaa  
@HWI-EAS443:3:47:1782:588#0/1  
GTCGCTTCAATCTGTGCCGATTTCTTCAATTAACCACC  
+HWI-EAS443:3:47:1782:588#0/1  
aa\_baaaa`\_Y[\_]a`\_[Ya[[`a^R\_`[^¥aa]]S\_\_WP  
@HWI-EAS443:3:47:211:328#0/1  
TGCCGCATTTCTTCAATTAACCACCTTATTTCTCAAATT  
+HWI-EAS443:3:47:211:328#0/1  
abb`bbbbbbab````baa``\_a\_\_aaaaa\_`a^`[aa`  
@HWI-EAS443:3:47:223:1103#0/1  
CGCTTGGAGAACTGTGATGAGAATGGGAGACCTTACTA  
+HWI-EAS443:3:47:223:1103#0/1  
abbb^bab`a[\_babH`YU^^a`\_\_Wa`^ba^```^a¥\_`  
@HWI-EAS443:3:47:252:101#0/1  
GTGATGAGAATGGGAGACCTTCACTACCTCCAGAGCAGAA

+HWI-EAS443:3:47:252:101#0/1  
aVa\_aa\_`U¥`a`¥`¥^^`Y^^W^\_WYWY¥Y^WYSY¥YU  
@HWI-EAS443:3:47:274:1432#0/1  
ATGAGAATGGGAGACCTTCACTACCTCCAGAGCAGAAATG  
+HWI-EAS443:3:47:274:1432#0/1  
a`aZa\_¥\_a`aK\_a^\_]a¥¥]b\_[`aZQbb`a[`aaa\_ab  
@HWI-EAS443:3:47:323:1374#0/1  
CAAATCGTGAATGGATCTTGAAAGAGGAATCCAGCGAGA  
+HWI-EAS443:3:47:323:1374#0/1  
aabbabb\_bbababaa`a`a\_aaX`aa]a\_Z[``\_aZ[X  
@HWI-EAS443:3:47:323:462#0/1  
GAATGGGAGACCTTCACTACCTCCAGAGCAGAAATGAAAA  
+HWI-EAS443:3:47:323:462#0/1  
aaaaaaaa`aa`\_\_\_aa\_`¥¥\_¥U[a¥`[[aW\_^`a¥¥^U  
@HWI-EAS443:3:47:371:1403#0/1  
GCGGCACAGATTGAAAGCGACAGAGAATAGTTTCGAACAA  
+HWI-EAS443:3:47:371:1403#0/1  
aa\_\_\_a[``\_¥a\_\_\_]Z¥\_X\_`\_]`]^\_Z`X]W\_V^]  
@HWI-EAS443:3:47:380:426#0/1  
GCGGCACAGATTGAAAGCGACAGAGAATAGTTTCGAACAA  
+HWI-EAS443:3:47:380:426#0/1  
a`aaaaaaaaaaaa`a`a\_]a\_aa`^`X``\_]\_Y\_]\_\_  
@HWI-EAS443:3:47:399:493#0/1  
CTTGGAGAACTGTGATGAGAATGGGAGACCTTCACTACC  
+HWI-EAS443:3:47:399:493#0/1  
ababb[baabbbb\_aabbab`[aaabbbba\_abababaSU  
@HWI-EAS443:3:47:406:475#0/1  
CCGCATTTCTTCAATTAACCACCTTATTTCCCTCAAATTC  
+HWI-EAS443:3:47:406:475#0/1  
a`b^abbaabbaaababb\_abaabaabba`abaa\_[aaa]  
@HWI-EAS443:3:47:40:277#0/1  
GTCGCTTTCAATCTGTGCCGATTTCTTCAATTAACCACC  
+HWI-EAS443:3:47:40:277#0/1  
^^b`\_¥aaa\_aa^`\_[\_a^^¥^`\_a¥Z]UZ[a^^\_X]\_VX  
@HWI-EAS443:3:47:507:402#0/1  
GTCGCTTTCAATCTGTGCCGATTTCTTCAATTAACCACC  
+HWI-EAS443:3:47:507:402#0/1  
a^`a\_`aa^Sa]QQOYZU^[[[\_^]^[S[^`¥YWWXRX  
@HWI-EAS443:3:47:562:1531#0/1  
GCCGCATTTCTTCAATTAACCACCTTATTTCCCTCAAATTT  
+HWI-EAS443:3:47:562:1531#0/1  
S``bV``a`a\_\_U^U^U]ZRZ¥VL\_b``a]```¥`aba^R  
@HWI-EAS443:3:47:572:508#0/1  
AGAAACTGTGATGAGAATGGGAGACCTTCACTACCTCCAG  
+HWI-EAS443:3:47:572:508#0/1  
abbbab`^Zabababa\_Zaba\_a^[[b^¥a^`a^S`^^\_a  
@HWI-EAS443:3:47:590:890#0/1  
GTCGCTTTCAATCTGTGCCGATTTCTTCAATTAACCACC  
+HWI-EAS443:3:47:590:890#0/1  
a`]U]`¥a`\_Y\_Y¥a]\_¥\_\_Y\_]\_\_\_^]]]]^\_[PS^Z¥]

@HWI-EAS443:3:47:621:347#0/1  
GTCGCTTTCAATCTGTGCCGCATTTCTTCAATTAACCACC  
+HWI-EAS443:3:47:621:347#0/1  
a`a^aaa`]W\_Z^]Y^^[`X¥^^^`]X\_]^^VWX^XW  
@HWI-EAS443:3:47:667:331#0/1  
GATGAGAATGGGAGACCTTCACTACCTCCAGAGCAGAAAT  
+HWI-EAS443:3:47:667:331#0/1  
aa`a\_b\_\_\_a\_a`\_\_X\_a`\_a[\_`\_^`^[\_]V\_XX`VVY\_  
@HWI-EAS443:3:47:728:834#0/1  
GCTCTTATCTCTTGTCTACTTCAAGCAGTAGTTGTAAGG  
+HWI-EAS443:3:47:728:834#0/1  
ab\_`aa[baa\_aa^`a\_aa\_\_a^a`\_^`a^I^\_YZS[[[\_  
@HWI-EAS443:3:47:742:29#0/1  
GAGAATGGGAGACCTTCACTACCTCCAGAGCAGAAATGAA  
+HWI-EAS443:3:47:742:29#0/1  
aaa\_aabbb\_b\_¥\_a`^a\_¥]Y^`¥Z^`W`Y¥aYYW\_`¥¥  
@HWI-EAS443:3:47:76:500#0/1  
AAATGTTATTTGTTGAACTATTCTCTGTCGCTTTCAAT  
+HWI-EAS443:3:47:76:500#0/1  
`bba`aabbbbb`babaabababaab^ab¥`\_Z]baaaaa  
@HWI-EAS443:3:47:790:2025#0/1  
TGAGAATGGGAGACCTTCACTACCTCCAGAGCAGAAATGA  
+HWI-EAS443:3:47:790:2025#0/1  
^^ZVZbXNUX]a]Vaa]W¥ZZ`NMURR^^YPL^[[UZXQZ  
@HWI-EAS443:3:47:802:322#0/1  
TGCCGCATTTCTTCAATTAACCACCTTATTCCTCAAATT  
+HWI-EAS443:3:47:802:322#0/1  
`b`Z`ab`\_Y¥V[YbZ^`\_aaUO`^a`\_]aaaaaSOVa`  
@HWI-EAS443:3:47:815:122#0/1  
ATGAGAATGGGAGACCTTCACTACCTCCAGAGCAGAAATG  
+HWI-EAS443:3:47:815:122#0/1  
aa]RXXXzb^\_S\_YS[YGW[Y¥¥]Y]LQ`R`¥V¥RV][[  
@HWI-EAS443:3:47:850:727#0/1  
AATGGAATGGTAACACGGTTCGAGTCTCTGAAAATATACA  
+HWI-EAS443:3:47:850:727#0/1  
aabbaababb^aa`a`aa^a`aa`\_]a^aa]^`\_aa`Z\_  
@HWI-EAS443:3:47:852:134#0/1  
CCGCATTTCTTCAATTAACCACCTTATTCCTCAAATTC  
+HWI-EAS443:3:47:852:134#0/1  
aaababbbbaaa\_abaaaaa\_a`a`abbba^a`\_`G\_a]U  
@HWI-EAS443:3:47:864:406#0/1  
CGCTTTCAATCTGTGCCGCATTTCTTCAATTAACCACCTT  
+HWI-EAS443:3:47:864:406#0/1  
abbab`a`X`ba`^baaba]aaa\_baa\_aaaTSQ\_Z]]a`  
@HWI-EAS443:3:47:878:1429#0/1  
AGAGAAGGTAATGGTGAATTTCTCCAATATTGCTCCCT  
+HWI-EAS443:3:47:878:1429#0/1  
abb\_HPV`YURXPQTXZXW\_\_ZXZX¥¥QU[X]ZXXZT¥Z  
@HWI-EAS443:3:47:880:24#0/1  
GGAGAACTGTGATGAGAATGGGAGACCTTCACTACCTCC

+HWI-EAS443:3:47:880:24#0/1  
ab\_a]W]\_\_^N^VY\_]aX^^`WW^]YV]YY^W]YVUYQY  
@HWI-EAS443:3:47:897:467#0/1  
GGCACAGATTGAAAGCGACAGAGAATAGTTTCGAACAAAT  
+HWI-EAS443:3:47:897:467#0/1  
^b`\_^¥¥`a¥a`ab¥b\_a\_^aaaa`^ba\_`R`]`^`a  
@HWI-EAS443:3:47:901:1285#0/1  
GAGCAATTGGGACAGAAATTTGAGGAAATAAGGTGGTTAA  
+HWI-EAS443:3:47:901:1285#0/1  
`V]Z]aaabb\_X`abYYP^\_aa¥a^^S`aWU`aZb`X`UU  
@HWI-EAS443:3:47:939:322#0/1  
GCGGCACAGATTGAAAGCGACAGAGAATAGTTTCGAACAA  
+HWI-EAS443:3:47:939:322#0/1  
aa`]W`aa\_]a`^\_Z`Z`]X\_\_¥\_^]]^]Za\_UUVZTYT  
@HWI-EAS443:3:48:1001:758#0/1  
TAACACGGTTCGAGTCTCTGAAAATATACAGAGATTCGCT  
+HWI-EAS443:3:48:1001:758#0/1  
aa`aaaab]aab`a^`a`aa¥\_`\_`a\_]a\_]\_^]]W¥  
@HWI-EAS443:3:48:1032:1446#0/1  
CAGTCTCGTGACATTTCTCGAGGGTCATGTCAGAAAGGT  
+HWI-EAS443:3:48:1032:1446#0/1  
\_^`\_[\_ZaN\_`¥\_Q¥[\_\_QV¥V][¥Q¥UG¥UWN¥SQS¥ZG  
@HWI-EAS443:3:48:1040:1813#0/1  
AAACTGTGATGAGAATGGGAGACCTTCACTACCTCCAGAG  
+HWI-EAS443:3:48:1040:1813#0/1  
X\_ba^¥¥`XZVXa\_^\_\_X¥`\_^W¥ZX]\_]Z\_ZOVJL[Z`¥  
@HWI-EAS443:3:48:1079:678#0/1  
AAAATATACAGAGATTCGCTTGGAGAAACTGTGATGAGAA  
+HWI-EAS443:3:48:1079:678#0/1  
a`aaa`bba`a`a`abaa`a`a`\_\_\_\_`\_`aaQa\_\_\_\_^X\_  
@HWI-EAS443:3:48:1082:1293#0/1  
TGAGAATGGGAGACCTTCACTACCTCCAGAGCAGAAATGA  
+HWI-EAS443:3:48:1082:1293#0/1  
`YZa^¥)`[[¥`]]a\_``[[^^^YY[¥Z]OV\_[^ZUZ[SV  
@HWI-EAS443:3:48:1084:128#0/1  
GAATGGGAGACCTTCACTACCTCCAGAGCAGAAATGAAAA  
+HWI-EAS443:3:48:1084:128#0/1  
aaaa`bb`b\_]`a\_\_a\_aa^¥^^^`\_^`W\_aY¥\_\_^^W¥  
@HWI-EAS443:3:48:1099:742#0/1  
AGAAACTGTGATGAGAATGGGAGACCTTCACTACCTCCAG  
+HWI-EAS443:3:48:1099:742#0/1  
^\_aababb\_bbbbaaV\_abbaab\_a[a```\_a``\_a[\_\_a  
@HWI-EAS443:3:48:1100:445#0/1  
GCCGCATTTCTTCAATTAACCACCTTATTTCTCAAATTT  
+HWI-EAS443:3:48:1100:445#0/1  
aaaa`aba\_baaaaaaaa\_\_a`\_a`aaaa\_\_a^`\_`\_`a\_  
@HWI-EAS443:3:48:1130:926#0/1  
AGAAACTGTGATGAGAATGGGAGACCTTCACTACCTCCAG  
+HWI-EAS443:3:48:1130:926#0/1  
¥Z]¥YU¥\_Z¥Y^U]]S¥Z]aa]]WTUZUTWO]¥ZaXX¥NZ

@HWI-EAS443:3:48:1141:582#0/1  
GCCGCATTTCTTCAATTAACCACCTTATTTCTCAAATTT  
+HWI-EAS443:3:48:1141:582#0/1  
a`\_a\_aabaaba\_a\_baaa\_\_\_\_\_aa\_aaa^¥a\_`^`aa\_  
@HWI-EAS443:3:48:115:1367#0/1  
GTCGCTTTCAATCTGTGCCGCATTTCTTCAATTAACCACC  
+HWI-EAS443:3:48:115:1367#0/1  
aaaa^a`aaaaa`a¥^`a\_a\_^aaaYaa\_a`aa\_`^^\_\_¥  
@HWI-EAS443:3:48:1160:1272#0/1  
CATCCTCATAAGTATGTCCTGGAAGAGAAGGTAATGGTGA  
+HWI-EAS443:3:48:1160:1272#0/1  
aaaa\_aa`aaab`abbab]`aaaab`aa`aa\_\_`\_[[¥a]  
@HWI-EAS443:3:48:1191:1159#0/1  
GATGAGAATGGGAGACCTTCACTACCTCCAGAGCAGAAAT  
+HWI-EAS443:3:48:1191:1159#0/1  
a`aa\_a`a`aa`a^\_ ]`^\_ ]^ ]`W^`VZTZ^ ]^\_  
@HWI-EAS443:3:48:1221:1553#0/1  
CGCTTGGAGAACTGTGATGAGAATGGGAGACCTTCACTA  
+HWI-EAS443:3:48:1221:1553#0/1  
abbbabbb`b\_baababaaaab\_aaa`\_`ba\_\_a\_\_a\_\_`  
@HWI-EAS443:3:48:1252:1448#0/1  
GTCGCTTTCAATCTGTGCCGCATTTCTTCAATTAACCACC  
+HWI-EAS443:3:48:1252:1448#0/1  
abX\_¥`bb]`^a`a`NbaZa`aaaa` ]`aa\_`^X\_^U  
@HWI-EAS443:3:48:1263:15#0/1  
GAAACTGTGATGAGAATGGGAGACCTTCACTACCTCCAGA  
+HWI-EAS443:3:48:1263:15#0/1  
a\_a`aaZaaabaa¥^aaa`¥a`X^`Y]]`\_XY\_\_UYQV  
@HWI-EAS443:3:48:1276:603#0/1  
GTCGCTTTCAATCTGTGCCGCATTTCTTCAATTAACCACC  
+HWI-EAS443:3:48:1276:603#0/1  
a\_`aaaaaZ`aa\_a]a`\_a^```` ]a`\_\_\_``\_]XW^^[  
@HWI-EAS443:3:48:1286:1226#0/1  
GAGAATGGGAGACCTTCACTACCTCCAGAGCAGAAATGAA  
+HWI-EAS443:3:48:1286:1226#0/1  
¥\_b]Z¥¥bababa`abababbaVaaaab[bX`ba[`ab` [  
@HWI-EAS443:3:48:1305:122#0/1  
TGCCGCATTTCTTCAATTAACCACCTTATTTCTCAAATT  
+HWI-EAS443:3:48:1305:122#0/1  
 ]\_\_a```a`^Za`a\_bb`ba¥a]`b``bbb``baa\_¥`a  
@HWI-EAS443:3:48:1338:1043#0/1  
TGCCGCATTTCTTCAATTAACCACCTTATTTCTCAAATT  
+HWI-EAS443:3:48:1338:1043#0/1  
a\_aaa`aa\_aabaaa`aaaaa`\_`\_`aaaaa``^a\_^aa\_  
@HWI-EAS443:3:48:1371:451#0/1  
CTGTGATGAGAATGGGAGACCTTCACTACCTCCAGAGCAG  
+HWI-EAS443:3:48:1371:451#0/1  
¥abbbabababbbbbb]bbabbaabaabb`baaabab```  
@HWI-EAS443:3:48:1386:1044#0/1  
AAGATTACACTGAAGTTCGCTTTCAGTACTATGTTCTTTT

+HWI-EAS443:3:48:1386:1044#0/1  
a`a^baa`\_aV`ISa\_\_0\_[\_T`\_aYa\_aabba`¥```a  
@HWI-EAS443:3:48:1410:1566#0/1  
CTTGAATGGAATGGTAACACGGTTCGAGTCTCTGAAAATA  
+HWI-EAS443:3:48:1410:1566#0/1  
abab``abbabbba\_aaaaaa\_\_bbaa````^¥¥aaa`\_  
@HWI-EAS443:3:48:1467:1879#0/1  
CTGTGATGAGAATGGGAGACCTTCACTACCTCCAGAGCAG  
+HWI-EAS443:3:48:1467:1879#0/1  
`¥a]\_a``\_]bbaZ¥U\_a`W][^^¥Z[^Ya\_X``Z`]Z[  
@HWI-EAS443:3:48:1501:748#0/1  
GAGAATGGGAGACCTTCACTACCTCCAGAGCAAATGAA  
+HWI-EAS443:3:48:1501:748#0/1  
a\_aU¥```UV]\_]a\_¥`\_\_`XW^¥]\_\_X[RW`YX]^TVX  
@HWI-EAS443:3:48:1537:447#0/1  
CTGTGATGAGAATGGGAGACCTTCACTACCTCCAGAGCAG  
+HWI-EAS443:3:48:1537:447#0/1  
\_¥X`\_\_`^`\_[SYZ\_[WVOIN[OLXX][JLX[VLVQ[QJT  
@HWI-EAS443:3:48:1588:1652#0/1  
TGGGAAACAAATCGTGAATGGATCTTGAAAGAGGAATCC  
+HWI-EAS443:3:48:1588:1652#0/1  
aa`aaa`¥T]a\_]bYab`\_`a```\_aa`^^^\_¥`\_AZ^ZZ  
@HWI-EAS443:3:48:158:71#0/1  
TTGAATGGAATGGTAACACGGTTCGAGTCTCTGAAAATAT  
+HWI-EAS443:3:48:158:71#0/1  
aa\_`U`aa]\_a``YWUX\_]\_]W^X^V[XY\_U]^RXY¥]X^  
@HWI-EAS443:3:48:1648:937#0/1  
CGCATTCTTCAATTAACCACCTTATTTCTCAAATTTCT  
+HWI-EAS443:3:48:1648:937#0/1  
abb\_babaabaa`baaaa¥aa`baaaaa``aa`\_[a`a¥`  
@HWI-EAS443:3:48:1651:141#0/1  
GCCGCATTCTTCAATTAACCACCTTATTTCTCAAATTT  
+HWI-EAS443:3:48:1651:141#0/1  
``a\_HY\_¥a\_\_\_^[]```ZMQ^UU\_\_\_``\_Z]`[UTZ`\_^  
@HWI-EAS443:3:48:1670:820#0/1  
GAAACTGTGATGAGAATGGGAGACCTTCACTACCTCCAGA  
+HWI-EAS443:3:48:1670:820#0/1  
aa\_a^ab]a¥aa`a\_\_`a\_a^a\_]`]X\_]^^YX^YUY^X  
@HWI-EAS443:3:48:1673:1346#0/1  
CGCATTCTTCAATTAACCACCTTATTTCTCAAATTTCT  
+HWI-EAS443:3:48:1673:1346#0/1  
abbbbbbabbbb`bba\_a`ba`bbabbb``babbabbbab  
@HWI-EAS443:3:48:1676:755#0/1  
AGGCAACACCCTTGGCCTCGATATCGAAACAGCCACTCTT  
+HWI-EAS443:3:48:1676:755#0/1  
a\_aaaaa¥```\_ZU^^]\_`¥^a]¥\_W¥V¥¥YYYYWWWUUV  
@HWI-EAS443:3:48:169:783#0/1  
GCGCGAAGTAGGTACAGATGCAATTGTCATTCTAAGTGTC  
+HWI-EAS443:3:48:169:783#0/1  
a]¥^\_aYYRaaa\_Ya``aa`^Z\_a`a`[\_aa^a\_\_\_V\_^[



@HWI-EAS443:3:48:1702:1901#0/1  
GCCGCATTTCTTCAATTAACCACCTTATTTCCCTCAAATTT  
+HWI-EAS443:3:48:1702:1901#0/1  
\_ZW`YR`a`\_a[V¥]U]\_Y^]US`^\_ZYXOX^ZUXY¥[W  
@HWI-EAS443:3:48:1754:785#0/1  
GCGCGAAGTAGGTACAGATGCAATTGTCATTCTAAGTGTC  
+HWI-EAS443:3:48:1754:785#0/1  
a[L[]UX`^Za[^[^]`UP¥SNV[]`NUUZVW¥VY[Y\_[V  
@HWI-EAS443:3:48:1767:119#0/1  
AGTCTCTGAAAATATACAGAGATTCGCTTGGAGAACTGT  
+HWI-EAS443:3:48:1767:119#0/1  
aaRSSQVOV[aNY]^PSY`W^Ga\_XaYNWX^LTGWONZQF  
@HWI-EAS443:3:48:1784:1840#0/1  
AAACTGTGATGAGAATGGGAGACCTTCACTACCTCCAGAG  
+HWI-EAS443:3:48:1784:1840#0/1  
]`〕`Ya`aaa`aaa^[^Z^`\_a^`\_]VVXP]]S]  
@HWI-EAS443:3:48:1787:445#0/1  
AGCGCGAAGTAGGTACAGATGCAATTGTCATTCTAAGTGT  
+HWI-EAS443:3:48:1787:445#0/1  
`aab¥b\_V\_\_Sab^aaa`aaa]¥〕`^\_¥]]a]aXUYUa]  
@HWI-EAS443:3:48:20:666#0/1  
ATGAGAATGGGAGACCTTCACTACCTCCAGAGCAGAAATG  
+HWI-EAS443:3:48:20:666#0/1  
aa^R\_]`〕`^b`[\_baa`X`aa\_aU0]aZa\_aa\_\_U^a  
@HWI-EAS443:3:48:218:399#0/1  
GCCGCATTTCTTCAATTAACCACCTTATTTCCCTCAAATTT  
+HWI-EAS443:3:48:218:399#0/1  
aa^aaaab\_aaaaaabaaa`〕`a\_aaaaa`^aaa\_\_aa`  
@HWI-EAS443:3:48:221:1057#0/1  
CGCAAGCGATTTGCAGACAATGGATTGGGTGATGCCCAT  
+HWI-EAS443:3:48:221:1057#0/1  
aaaa`aababbbZa`a`aabaa`\_`UZ`Sa`\_¥¥a]`aa  
@HWI-EAS443:3:48:23:400#0/1  
TGAGAATGGGAGACCTTCACTACCTCCAGAGCAGAAATGA  
+HWI-EAS443:3:48:23:400#0/1  
[`aa`a`Y¥aYa\_]`aa`¥Sxa\_\_a`^`a\_\_\_\_\_aYU]a`〕`  
@HWI-EAS443:3:48:299:809#0/1  
CAATTGGGACAGAAATTTGAGGAAATAAGGTGGTTAATTG  
+HWI-EAS443:3:48:299:809#0/1  
]`〕`a¥a\_bba`〕`\_][bbbaYabbabbaaaa]b^bbb]a\_[  
@HWI-EAS443:3:48:32:404#0/1  
GAGATTGCTTGGAGAACTGTGATGAGAATGGGAGACCT  
+HWI-EAS443:3:48:32:404#0/1  
aaa`\_aaa\_a`aa^a`\_a`\_`Va`^a\_aY`\_a`^Y\_V]XY  
@HWI-EAS443:3:48:377:1098#0/1  
CCGCATTTCTTCAATTAACCACCTTATTTCCCTCAAATTT  
+HWI-EAS443:3:48:377:1098#0/1  
aaba¥`ab\_babb\_bab\_baaabbbabba`[baba\_baa]  
@HWI-EAS443:3:48:417:1951#0/1  
GGCCTATTATCTTTTGCCTAGGCATGAGCATGAACCGATC

+HWI-EAS443:3:48:417:1951#0/1  
aa\_aa`bbaa`a`\_a][`aa\_a`aa¥^XZaaa]aWta\_^Z  
@HWI-EAS443:3:48:417:451#0/1  
TGAGAATGGGAGACCTTCACTACCTCCAGAGCAGAAATGA  
+HWI-EAS443:3:48:417:451#0/1  
ab`^Pa^W^S`aPXYa`aaX¥^^)`\_\_\_\_[^^[a\_[X\_aZ  
@HWI-EAS443:3:48:427:1805#0/1  
GTGATGAGAATGGGAGACCTTCACTACCTCCAGAGCAGAA  
+HWI-EAS443:3:48:427:1805#0/1  
`Q¥[\_```aZ`[`¥Ya\_^[[[W]]^]RP^]]]\_\_\_X\_\_\_]V  
@HWI-EAS443:3:48:462:880#0/1  
ATGAGAATGGGAGACCTTCACTACCTCCAGAGCAGAAATG  
+HWI-EAS443:3:48:462:880#0/1  
abbaaaabaabaa`aab\_a^aa`]a\_]`a\_\_`\_a^^`\_`  
@HWI-EAS443:3:48:467:1089#0/1  
GCCGCATTTCTTCAATTAACCACCTTATTTCCCTCAAATTT  
+HWI-EAS443:3:48:467:1089#0/1  
a\_aa`aaaaaaaa`\_aaa`^`Z`aaa`\_`\_`^`\_`\_`\_\_\_\_  
@HWI-EAS443:3:48:469:1132#0/1  
CGCTGGATTCCTCTTTCAAGATCCATTCCACGATTTGTTT  
+HWI-EAS443:3:48:469:1132#0/1  
aababbabba`aaabaababaa`aaaa`aaaa^aa`a`\_`\_  
@HWI-EAS443:3:48:502:1577#0/1  
CTGTGCTTTCAATCTGTGCCGATTTCTTCAATTAACCA  
+HWI-EAS443:3:48:502:1577#0/1  
aaVGLP¥S`ZYzaY\_\_¥[OR\_Q`\_UUV0¥X¥[]`^]MQF[  
@HWI-EAS443:3:48:544:1101#0/1  
GGAGAACTGTGATGAGAATGGGAGACCTTCACTACCTCC  
+HWI-EAS443:3:48:544:1101#0/1  
\_\_X\_UX]aaa[``¥\_VZZ[¥`aZ¥^^^^[Z]ZX]¥U¥[¥  
@HWI-EAS443:3:48:548:1868#0/1  
GAAACTGTGATGAGAATGGGAGACCTTCACTACCTCCAGA  
+HWI-EAS443:3:48:548:1868#0/1  
abbb`ba[aab`^\_aaaba`\_a`[\_a\_aa]a`\_\_\_\_^[^\_  
@HWI-EAS443:3:48:552:601#0/1  
GCCGCATTTCTTCAATTAACCACCTTATTTCCCTCAAATTT  
+HWI-EAS443:3:48:552:601#0/1  
abbaa]b[a^ba`WOZaaa^\_¥[]`aaaa^^V^`Z]```  
@HWI-EAS443:3:48:552:804#0/1  
GAGAACTGTGATGAGAATGGGAGACCTTCACTACCTCCA  
+HWI-EAS443:3:48:552:804#0/1  
a]aUZYY\_a]Z\_aa`X]]]a`UM[[Za`\_\_\_\_V]\_Q^]  
@HWI-EAS443:3:48:568:1198#0/1  
GTTTCGAGTCTGAAAATATACAGAGATTCGCTTGGAGAA  
+HWI-EAS443:3:48:568:1198#0/1  
aZ\_^\_\_a]^W`\_VW¥`a`\_\_SX^[\_] []]a¥`\_^W^U¥¥  
@HWI-EAS443:3:48:573:251#0/1  
GAGAACTGTGATGAGAATGGGAGACCTTCACTACCTCCA  
+HWI-EAS443:3:48:573:251#0/1  
\_Uba[baaa`\_`b]¥a`aaa`\_`^]]`]]aY\_\_SZ^]]¥

@HWI-EAS443:3:48:589:1128#0/1  
TGAGAATGGGAGACCTTCACTACCTCCAGAGCAGAAATGA  
+HWI-EAS443:3:48:589:1128#0/1  
a^aa`aa\_]a\_\_aaa\_\_`a`U\_`^`a\_`^^a^Xa\_YU  
@HWI-EAS443:3:48:59:474#0/1  
GTTTCGAGTCTCTGAAAATATACAGAGATTTCGCTTGGAGAA  
+HWI-EAS443:3:48:59:474#0/1  
U`¥aa\_XZa¥YTRFR\_]\_a]Z\_¥¥`¥YYYW¥\_U`YS^]VV  
@HWI-EAS443:3:48:614:924#0/1  
GCCGCATTTCTTCAATTAACCACCTTATTTCTCAAATTT  
+HWI-EAS443:3:48:614:924#0/1  
ZXIY^ab\_b\_a`YSab`Z\_b`ZQX\_\_Ya^aQY`UaabaZY  
@HWI-EAS443:3:48:630:1730#0/1  
GCCGCATTTCTTCAATTAACCACCTTATTTCTCAAATTT  
+HWI-EAS443:3:48:630:1730#0/1  
^OHU\_aba]`\_`````a]a^`R[aaa\_\_a[``\_a\_\_`\_Y  
@HWI-EAS443:3:48:634:1558#0/1  
GCTTTCAGGTAGACTGTTTCCTTTGGCATATCCGCAAGCG  
+HWI-EAS443:3:48:634:1558#0/1  
aaYa`\_\_ba¥\_aYSba`\_[\_\_aa\_^]Q\_aY\_W]\_Y^\_]R`  
@HWI-EAS443:3:48:63:1316#0/1  
AGAAACTGTGATGAGAATGGGAGACCTTCACTACCTCCAG  
+HWI-EAS443:3:48:63:1316#0/1  
a^WQ\_]a\_P[a``]aaaaa`\_a^\_\_a\_^a^`\_]\_\_^\_]`  
@HWI-EAS443:3:48:656:319#0/1  
TGAGAATGGGAGACCTTCACTACCTCCAGAGCAGAAATGA  
+HWI-EAS443:3:48:656:319#0/1  
^]`\_`]S\_ba\_`\_`\_\_\_\_W¥\_`\_[Ya^\_]`U[^WW¥\_\_]  
@HWI-EAS443:3:48:691:1967#0/1  
TTCAATTAACCACCTTATTTCTCAAATTTCTGTCCCAAT  
+HWI-EAS443:3:48:691:1967#0/1  
aaaaaaaaaaaa`aaabaa¥\_aaaaa``¥aa^\_^]`\_\_  
@HWI-EAS443:3:48:723:580#0/1  
AACTGTGATGAGAATGGGAGACCTTCACTACCTCCAGAGC  
+HWI-EAS443:3:48:723:580#0/1  
aaaaa^baabaaaaaaa`a`]\_aa`a]`a^\_a\_\_\_a\_a\_  
@HWI-EAS443:3:48:729:806#0/1  
CTTTGGCATATCCGCAAGCGATTTGCAGACAATGGATTGG  
+HWI-EAS443:3:48:729:806#0/1  
aab`ab\_aabaaba\_a`babWR\_aa¥ab\_XaZ^`VY[[VX  
@HWI-EAS443:3:48:745:1313#0/1  
GGAGAACTGTGATGAGAATGGGAGACCTTCACTACCTCC  
+HWI-EAS443:3:48:745:1313#0/1  
¥a^¥^YR\_[\_`Zaaa`¥`aZaa]Y^XYT`\_U¥VaaVS¥X[  
@HWI-EAS443:3:48:784:1776#0/1  
GAGAATGGGAGACCTTCACTACCTCCAGAGCAGAAATGAA  
+HWI-EAS443:3:48:784:1776#0/1  
abaaaabaa\_abaabbababa\_^\_aa^`a`aabaabaaa  
@HWI-EAS443:3:48:790:698#0/1  
GCTTGGAGAACTGTGATGAGAATGGGAGACCTTCACTAC

+HWI-EAS443:3:48:790:698#0/1  
a¥[bU\_a\_aa]¥¥^a\_SZNaXR\_`a\_VYZYLS]QPL[]Y  
@HWI-EAS443:3:48:811:1856#0/1  
AGAATGGGAGACCTTCACTACCTCCAGAGCAGAAATGAAA  
+HWI-EAS443:3:48:811:1856#0/1  
aa[`abaa`aa\_Z\_TYa``]]`]U\_\_]\_\_\_\_\_X]\_\_U^^  
@HWI-EAS443:3:48:832:1704#0/1  
GAAACTGTGATGAGAATGGGAGACCTTCACTACCTCCAGA  
+HWI-EAS443:3:48:832:1704#0/1  
a``aUSZNHZ\_``\_``a¥]Y[]P¥]\_\_a]`[GV¥LUYXR  
@HWI-EAS443:3:48:838:1017#0/1  
ATCGCACGCAAAGAGGCCTATTATCTTTTGCCTAGGCAT  
+HWI-EAS443:3:48:838:1017#0/1  
a^a`abbbY[abb\_\_^b`baaaaaa``]Z`aZQZYZ][[]  
@HWI-EAS443:3:48:842:1394#0/1  
CTCTGAAAATATACAGAGATTCGCTTGGAGAACTGTGAT  
+HWI-EAS443:3:48:842:1394#0/1  
ITPTbT^`bbaZbab`b``b^``U[aS`[]LbaaL¥YY  
@HWI-EAS443:3:48:870:393#0/1  
GCCGCATTTCTTCAATTAACCACCTTATTTCTCAAATTT  
+HWI-EAS443:3:48:870:393#0/1  
]NV\_^aaa`aaaa`aa`aa\_\_\_`\_aa\_a\_a^]\_¥`\_]\_\_Y  
@HWI-EAS443:3:48:903:1580#0/1  
AGAAACTGTGATGAGAATGGGAGACCTTCACTACCTCCAG  
+HWI-EAS443:3:48:903:1580#0/1  
abaaaaaa\_baaaabaab`\_^a`\_[]`\_a\_a\_\_\_]\_X^`  
@HWI-EAS443:3:48:929:1168#0/1  
GAGCAATTGGGACAGAAATTTGAGGAAATAAGGTGGTTAA  
+HWI-EAS443:3:48:929:1168#0/1  
aaaaaaaaaaaa`aaaa`abbb\_ba`[\_aa\_\_^]a```^^  
@HWI-EAS443:3:48:92:1347#0/1  
GGAGAACTGTGATGAGAATGGGAGACCTTCACTACCTCC  
+HWI-EAS443:3:48:92:1347#0/1  
aY^a`[aV\_``\_`^\_`¥\_]¥\_W\_\_\_Z\_\_\_aW¥\_SZ¥Z^  
@HWI-EAS443:3:48:978:1714#0/1  
GCCGCATTTCTTCAATTAACCACCTTATTTCTCAAATTT  
+HWI-EAS443:3:48:978:1714#0/1  
ab`b`bbbbbab`abb\_bba`aaabbbbaba^aaaaaaaa  
@HWI-EAS443:3:48:988:313#0/1  
TGAGAATGGGAGACCTTCACTACCTCCAGAGCAGAAATGA  
+HWI-EAS443:3:48:988:313#0/1  
ab\_a]\_aaaa[a`\_^`a^`\_]^^]\_\_^\_\_X\_U)`Y^Y`\_Y  
@HWI-EAS443:3:48:999:1704#0/1  
AAAATATACAGAGATTCGCTTGGAGAACTGTGATGAGAA  
+HWI-EAS443:3:48:999:1704#0/1  
aa`\_Z`ab^`a^`[\_`Sa\_^]^baaZ^`\_`\_H¥TR^¥ZYW  
@HWI-EAS443:3:49:1002:1307#0/1  
GTCTCTGAAAATATACAGAGATTCGCTTGGAGAACTGTG  
+HWI-EAS443:3:49:1002:1307#0/1  
aa`aabaaaaa`aaa\_aa`b``\_`a\_a\_\_\_^`\_\_\_^`aYW

@HWI-EAS443:3:49:1093:1810#0/1  
ATCACCCAATCCATTGTCTGCAAATCGCTTGCGGATATGC  
+HWI-EAS443:3:49:1093:1810#0/1  
a`Yb^a\_baaaa`a¥^\_`^`a\_^[\_X^`^HY\_^^^VVV  
@HWI-EAS443:3:49:1137:137#0/1  
GCCGCATTTCTTCAATTAACCACCTTATTTCCCTCAAATTT  
+HWI-EAS443:3:49:1137:137#0/1  
`b]Z`Tbbaaaa]^abbWb```aSababab\_S`[aa`aa`  
@HWI-EAS443:3:49:1153:948#0/1  
AGAAACTGTGATGAGAATGGGAGACCTTCACTACCTCCAG  
+HWI-EAS443:3:49:1153:948#0/1  
abaaa`a^\_baabYaTaaaa\_V\_[^aaa^a\_``\_Z`]]\_`  
@HWI-EAS443:3:49:1192:454#0/1  
CGCATTTCTTCAATTAACCACCTTATTTCCCTCAAATTTCT  
+HWI-EAS443:3:49:1192:454#0/1  
ababbbbbbbbababbbbbbaaaa`babbbbaababaabba\_b  
@HWI-EAS443:3:49:122:1632#0/1  
GTCGCTTTCAATCTGTGCCGCATTTCTTCAATTAACCACC  
+HWI-EAS443:3:49:122:1632#0/1  
ab\_a`aa\_a`¥a\_ab\_aY`a\_aa``aaaa\_[a`a\_^[a\_`  
@HWI-EAS443:3:49:1248:1806#0/1  
GAGAATGGGAGACCTTCACTACCTCCAGAGCAGAAATGAA  
+HWI-EAS443:3:49:1248:1806#0/1  
aaa\_`a\_\_\_Ya\_`Xaa\_a[[\_¥\_¥¥^\_W\_T¥\_^Y^\_\_^^  
@HWI-EAS443:3:49:1258:1783#0/1  
GCGCGAAGTAGGTACAGATGCAATTGTCATTCTAAGTGTC  
+HWI-EAS443:3:49:1258:1783#0/1  
]a]U^aa`Yaaa[aaaaabaa\_aaa^¥aa`^aaaa`ZW  
@HWI-EAS443:3:49:1263:592#0/1  
CACGGTTCGAGTCTCTGAAAATATACAGAGATTCGCTTGG  
+HWI-EAS443:3:49:1263:592#0/1  
\_``¥[`a`bbbUaaabb¥]]\_aaa^Za^¥a]¥aZaT[Za`  
@HWI-EAS443:3:49:1277:714#0/1  
AGCAATTGGGACAGAAATTTGAGGAAATAAGGTGGTTAAT  
+HWI-EAS443:3:49:1277:714#0/1  
\_b`V`b\_b\_T]Y```ba`bb\_b^aXVL`\_ab¥`ba[baaa  
@HWI-EAS443:3:49:1323:366#0/1  
GCCGCATTTCTTCAATTAACCACCTTATTTCCCTCAAATTT  
+HWI-EAS443:3:49:1323:366#0/1  
aX\_`[\_`\_baX\_XT`aaabZX]\_^Zbaa`a\_X¥a^RY]a\_`  
@HWI-EAS443:3:49:1365:1742#0/1  
GAGAACTGTGATGAGAATGGGAGACCTTCACTACCTCCA  
+HWI-EAS443:3:49:1365:1742#0/1  
a]]^aa`bb^b^a^^\_aaabaa\_a\_\_`^^\_a¥`^¥T\_]SZ  
@HWI-EAS443:3:49:1399:1581#0/1  
CACGGTTCGAGTCTCTGAAAATATACAGAGATTCGCTTGG  
+HWI-EAS443:3:49:1399:1581#0/1  
OaZa\_aabbab`abaXa]aaabbaaa`b`aaaa`^\_a^^[  
@HWI-EAS443:3:49:1408:1627#0/1  
GCCGCATTTCTTCAATTAACCACCTTATTTCCCTCAAATTT

+HWI-EAS443:3:49:1408:1627#0/1  
`¥T`U)`aVT`VW¥Y¥QS[JVaX¥\_`AP\_[^XL]W^TSX` [  
@HWI-EAS443:3:49:1411:1737#0/1  
GCCGCATTTCTTCAATTAACCACCTTATTTCCCTCAAATTT  
+HWI-EAS443:3:49:1411:1737#0/1  
a]S]\_T`^Y^\_^\_a]a^`]V[`[W\_`^]OZKH^[]``\_`^W  
@HWI-EAS443:3:49:1435:988#0/1  
GAAACTGTGATGAGAATGGGAGACCTTCACTACCTCCAGA  
+HWI-EAS443:3:49:1435:988#0/1  
aaaa\_aa\_b\_aa\_¥^`aaa\_[`\_UXaZV\_¥^\_US^¥¥^\_[  
@HWI-EAS443:3:49:1438:716#0/1  
AAATAAGCTGAAACGAGAAAGCTCTTATCTCTTGTCTAC  
+HWI-EAS443:3:49:1438:716#0/1  
`a`baa]aab`baaaaaaaaa`a^baaa`b\_aaa\_a\_a\_`  
@HWI-EAS443:3:49:1438:893#0/1  
CCGCATTTCTTCAATTAACCACCTTATTTCCCTCAAATTT  
+HWI-EAS443:3:49:1438:893#0/1  
a``b`bbaab\_baabbbaa`a`Z`b^baaaaaaaaaabbaa  
@HWI-EAS443:3:49:1484:1887#0/1  
CCGCATTTCTTCAATTAACCACCTTATTTCCCTCAAATTT  
+HWI-EAS443:3:49:1484:1887#0/1  
abaaba¥aaaa^aabbbaaba\_\_¥\_`a^`X``aaaaaa\_U  
@HWI-EAS443:3:49:1493:1902#0/1  
AATTTACCATTACCTTCTCTTCCAGGACATACTTATGAG  
+HWI-EAS443:3:49:1493:1902#0/1  
aabaaaaaaaaaaaa¥`\_a\_]\_^[[a\_\_\_\_]\_¥\_\_`\_\_  
@HWI-EAS443:3:49:1500:420#0/1  
GCCGCATTTCTTCAATTAACCACCTTATTTCCCTCAAATTT  
+HWI-EAS443:3:49:1500:420#0/1  
aaabaaaba`abaaabaaa\_[\_\_^aaaaaaa\_aaa``aaa  
@HWI-EAS443:3:49:1510:210#0/1  
TATCTTTTGCCTAGGCATGAGCATGAACCAGTCTCGTGAC  
+HWI-EAS443:3:49:1510:210#0/1  
\_U\_^`a^TZ¥]R\_Q\_TQ[]X[QPXZ¥WFWUOQPTSTLKNW  
@HWI-EAS443:3:49:1526:2014#0/1  
TGCCGCATTTCTTCAATTAACCACCTTATTTCCCTCAAATT  
+HWI-EAS443:3:49:1526:2014#0/1  
aba^a`abba`aa`baabaa\_\_aa`bbab`a[`a`a`aaa  
@HWI-EAS443:3:49:1533:1592#0/1  
AATCCAGCGAGACACTTAGAATGACAATTGCATCTGTACC  
+HWI-EAS443:3:49:1533:1592#0/1  
[\_aa\_b``ba]]]a\_abaVaaa]U`aa\_a\_T\_\_Y`\_X\_UU  
@HWI-EAS443:3:49:1554:1235#0/1  
AGAAACTGTGATGAGAATGGGAGACCTTCACTACCTCCAG  
+HWI-EAS443:3:49:1554:1235#0/1  
[`¥¥\_abb¥b\_V\_a¥Z^^`a`W`\_aY\_U]ba``^^`a¥]a  
@HWI-EAS443:3:49:1592:1699#0/1  
AGAAACTGTGATGAGAATGGGAGACCTTCACTACCTCCAG  
+HWI-EAS443:3:49:1592:1699#0/1  
¥\_^b]abb\_bbabaa`aV]\_aZa\_^^aa\_a``a`]^[`\_a

@HWI-EAS443:3:49:160:987#0/1  
GAGATTCGCTTGGAGAACTGTGATGAGAATGGGAGACCT  
+HWI-EAS443:3:49:160:987#0/1  
abb`V`abaaabaaba]a`aa]\_^¥Y` `aU`a`Y\_Y^^`  
@HWI-EAS443:3:49:1616:1284#0/1  
GTCGCTTTCAATCTGTGCCGCATTTCTTCAATTAACCACC  
+HWI-EAS443:3:49:1616:1284#0/1  
a\_ab`^aa` `a¥^^Zb` `a\_\_a\_a\_\_^^`\_\_\_\_`^^`^^Z  
@HWI-EAS443:3:49:1624:1351#0/1  
CTTGGAGAACTGTGATGAGAATGGGAGACCTTCACTACC  
+HWI-EAS443:3:49:1624:1351#0/1  
GT`¥^ZX`¥Y\_b^bb¥ZU\_¥a` `a]H\_ab`\_`a`]Y]]^  
@HWI-EAS443:3:49:1656:1806#0/1  
TATCTTTTGCCTAGGCATGAGCATGAACCAGTCTCGTGAC  
+HWI-EAS443:3:49:1656:1806#0/1  
`W^]U¥Z^[MZ`T¥\_]¥]¥VZVUZQU^P]a`L¥`TYRUOJ  
@HWI-EAS443:3:49:1674:1675#0/1  
GGTTAATTGAAGAAATGCGGCACAGATTGAAAGCGACAGA  
+HWI-EAS443:3:49:1674:1675#0/1  
¥`aabba`b`\_aabbbb]babbb]baaabbaaaaa` `]`aa  
@HWI-EAS443:3:49:1681:1164#0/1  
ACGAGAAAGCTCTTATCTCTTGTCTACTTCAAGCAGTAG  
+HWI-EAS443:3:49:1681:1164#0/1  
aab`baaab`a`aaabaabaaa`\_a`\_aa\_a`a^^^^aa  
@HWI-EAS443:3:49:168:1421#0/1  
GTGATGAGAATGGGAGACCTTCACTACCTCCAGAGCAGAA  
+HWI-EAS443:3:49:168:1421#0/1  
aaaa`bb\_aa\_ba\_]a`\_aa`\_a`a`Y`\_a\_aa`a^a`¥]  
@HWI-EAS443:3:49:168:482#0/1  
TGAGAATGGGAGACCTTCACTACCTCCAGAGCAGAAATGA  
+HWI-EAS443:3:49:168:482#0/1  
aaab`aabba]ba\_ba`^`[ `\_] [ZY^aa[a\_aa\_\_\_aa`  
@HWI-EAS443:3:49:1693:931#0/1  
TGAGAATGGGAGACCTTCACTACCTCCAGAGCAGAAATGA  
+HWI-EAS443:3:49:1693:931#0/1  
`b\_baaab` ` `b^M[ `a^[U^`ZW`\_¥[\_Z`^a^¥¥` `X  
@HWI-EAS443:3:49:1755:216#0/1  
GCTTGGAGAACTGTGATGAGAATGGGAGACCTTCACTAC  
+HWI-EAS443:3:49:1755:216#0/1  
a\_aa`bRaa`V]a]W`^\_a\_]\_^`\_]\_Y[YXYYXX]VYYM  
@HWI-EAS443:3:49:1762:611#0/1  
CACGGTTCGAGTCTCTGAAAATATACAGAGATTGCTTGG  
+HWI-EAS443:3:49:1762:611#0/1  
ababb\_b`Uabaaa`a[RY^`aa]aaa`¥ULXaV¥\_aYaa  
@HWI-EAS443:3:49:182:981#0/1  
TGAGAATGGGAGACCTTCACTACCTCCAGAGCAGAAATGA  
+HWI-EAS443:3:49:182:981#0/1  
ab\_a`abbaaa]\_\_aaa`a\_a`^]a`\_`aWa]` `^`\_\_aa\_  
@HWI-EAS443:3:49:200:954#0/1  
GAATGGGAGACCTTCACTACCTCCAGAGCAGAAATGAAAA

+HWI-EAS443:3:49:200:954#0/1  
a^ZZ[`a]SZU^YGQa¥\_^]a¥Z]\_ZULVVWYXXab]SDD  
@HWI-EAS443:3:49:243:1924#0/1  
TGAAGGTCTCCATTCTCATCACAGTTTCTCCAAGCGAAT  
+HWI-EAS443:3:49:243:1924#0/1  
abab\_a`b`aaaab^aaabaaaa\_aaYa^\_`a\_a``aa  
@HWI-EAS443:3:49:291:368#0/1  
CTGAAAATATACAGAGATTTCGCTTGGAGAACTGTGATGA  
+HWI-EAS443:3:49:291:368#0/1  
abbbbbbbbababbbbbbaa`bababaaaa`a`aa\_ba```  
@HWI-EAS443:3:49:31:326#0/1  
GCCGCATTTCTTCAATTAACCACCTTATTTCTCAAATTT  
+HWI-EAS443:3:49:31:326#0/1  
abab`^^b`abb`bbabbaaaaaaaaaaaaaaaaaaaaaa  
@HWI-EAS443:3:49:343:654#0/1  
CCGCATTTCTTCAATTAACCACCTTATTTCTCAAATTT  
+HWI-EAS443:3:49:343:654#0/1  
abb``abbbbbbabbbbbabbbbbbbbbb`abbbbabbba  
@HWI-EAS443:3:49:349:135#0/1  
ATTACTGAAGTTCGCTTTCAGTACTATGTTCTTTTCCA  
+HWI-EAS443:3:49:349:135#0/1  
\_baaaaaaa^[a\_aab`aa^\_\_`¥^aa\_^a¥a^a`aa`^\_  
@HWI-EAS443:3:49:349:560#0/1  
GAGAATGGGAGACCTTCACTACCTCCAGAGCAGAAATGAA  
+HWI-EAS443:3:49:349:560#0/1  
\_abUabb\_\_\_a]S^ab`b\_\_U^aa[a\_`a`\_a`\_\_\_a\_\_  
@HWI-EAS443:3:49:403:1448#0/1  
GCCGCATTTCTTCAATTAACCACCTTATTTCTCAAATTT  
+HWI-EAS443:3:49:403:1448#0/1  
aaU`aa`a`\_b``\_\_a¥`ba`a\_Raa\_a`¥Wa]W¥^a`\_  
@HWI-EAS443:3:49:408:1690#0/1  
GAACCAGTCTCGTGACATTTCTCGAGGGTCATGTCAGAA  
+HWI-EAS443:3:49:408:1690#0/1  
W`\_I[b\_PZbba\_`]GXbbaaaa`\_bbaYHYaXM[a^[Y`  
@HWI-EAS443:3:49:410:1019#0/1  
GCCGCATTTCTTCAATTAACCACCTTATTTCTCAAATTT  
+HWI-EAS443:3:49:410:1019#0/1  
abaaaaabb`aa`aababaa`aa\_aaaaaa\_a`aaaaa  
@HWI-EAS443:3:49:417:391#0/1  
CGCTTGGAGAACTGTGATGAGAATGGGAGACCTTCACTA  
+HWI-EAS443:3:49:417:391#0/1  
ababbbbbbbbbbbbabbbbababbbbababbaabb`babb  
@HWI-EAS443:3:49:434:262#0/1  
CCGCATTTCTTCAATTAACCACCTTATTTCTCAAATTT  
+HWI-EAS443:3:49:434:262#0/1  
aaabba`b`babbabbabaabaabbbbbbaababaaabb\_  
@HWI-EAS443:3:49:499:438#0/1  
GGGAAACAAATCGTGAATGGATCTTAAAAGAGGAATCCA  
+HWI-EAS443:3:49:499:438#0/1  
\_`aaabaa`aa\_aWbaaa`a`]^`^aaa\_a`\_``]\_\_]VU\_



@HWI-EAS443:3:49:500:2028#0/1  
GAATGGGAGACCTTCACTACCTCCAGAGCAGAAATGAAAA  
+HWI-EAS443:3:49:500:2028#0/1  
]aU\_bbbbababa^a]]`aaa^Z\_WZab\_¥Y\_aaaVV`aab`  
@HWI-EAS443:3:49:568:449#0/1  
GAGAATGGGAGACCTTCACTACCTCCAGAGCAGAAATGAA  
+HWI-EAS443:3:49:568:449#0/1  
^)`[Waaaaab`¥¥`aaa[a`XX\_`^`^^^a^`[a^`\_\_\_\_¥[  
@HWI-EAS443:3:49:579:1118#0/1  
AACAAATCGTGGAATGGATCTTGAAAGAGGAATCCAGCGA  
+HWI-EAS443:3:49:579:1118#0/1  
`b`\_`\_`a\_b\_baaaaZa^R`a^^aaY\_aa\_\_\_\_[^`^LXK  
@HWI-EAS443:3:49:624:1417#0/1  
GCCGCATTTCTTCAATTAACCACCTTATTTCCCTCAAATTT  
+HWI-EAS443:3:49:624:1417#0/1  
]a`^a[^`a`ab\_bab`b`bbb^Kab`bbaa]aba^bbbb  
@HWI-EAS443:3:49:631:590#0/1  
AGAAACTGTGATGAGAATGGGAGACCTTCACTACCTCCAG  
+HWI-EAS443:3:49:631:590#0/1  
`ba\_babaV^)`^^bab`a^^`X¥]`WRZaa\_\_`a^a¥  
@HWI-EAS443:3:49:728:634#0/1  
GAAACGAGAAAGCTTTATCTCTTGTCTACTTCAAGCAG  
+HWI-EAS443:3:49:728:634#0/1  
aaba`aab`\_`a`\_`ba\_b^a\_`aaa^a`aa^aa`\_`\_`\_`  
@HWI-EAS443:3:49:736:1486#0/1  
CCGCATTTCTTCAATTAACCACCTTATTTCCCTCAAATTTCT  
+HWI-EAS443:3:49:736:1486#0/1  
a\_\_Sbbba`baab¥bb`\_aaa[Ya]\_aba¥`aaa`]ba]]  
@HWI-EAS443:3:49:751:55#0/1  
GAGAAACTGTGATGAGAATGGGAGACCTTCACTACCTCCA  
+HWI-EAS443:3:49:751:55#0/1  
`^\_]baa`aZ\_`aaIaaaabbb]a]UUbaQb`b`OUa`^a  
@HWI-EAS443:3:49:764:1957#0/1  
TGCCGCATTTCTTCAATTAACCACCTTATTTCCCTCAAATT  
+HWI-EAS443:3:49:764:1957#0/1  
`b`\_`abaa`\_`aa\_aabab\_]`b^Z`a`aaaY^aaaYaaa  
@HWI-EAS443:3:49:79:692#0/1  
CGCATTTCTTCAATTAACCACCTTATTTCCCTCAAATTTCT  
+HWI-EAS443:3:49:79:692#0/1  
Zaa\_aaVa`]]b`Z¥`^`¥Y[b`bbb`^b`aa^¥a^`b\_  
@HWI-EAS443:3:49:820:417#0/1  
GCCGCATTTCTTCAATTAACCACCTTATTTCCCTCAAATTT  
+HWI-EAS443:3:49:820:417#0/1  
aaabaabababbbaabbaaa`aa\_baabbb`\_`aaaaabaa  
@HWI-EAS443:3:49:864:1101#0/1  
TCGCTTTCAATCTGTGCCGCATTTCTTCAATTAACCACCT  
+HWI-EAS443:3:49:864:1101#0/1  
aaa]aaa`a\_`aaa\_¥a`\_`aaaa`\_a`Z^Ya\_a\_Z]^Y\_  
@HWI-EAS443:3:49:883:240#0/1  
CGCATTTCTTCAATTAACCACCTTATTTCCCTCAAATTTCT

+HWI-EAS443:3:49:883:240#0/1  
\_abbbbbbbbabbbbbbbbabbbbbbbbab  
@HWI-EAS443:3:49:888:672#0/1  
GAAACTGTGATGAGAATGGGAGACCTTCACTACCTCCAGA  
+HWI-EAS443:3:49:888:672#0/1  
\_W\_ZR¥\_G\_\_YXVX`PY\_XX¥XFIJS[\_ZSYXNOYVWL]M  
@HWI-EAS443:3:49:892:962#0/1  
GTTCGAGTCTCTGAAAATATACAGAGATTCGCTTGAGAA  
+HWI-EAS443:3:49:892:962#0/1  
^¥\_\_bbbaX^a]b]Z`baaaaS`^baaa\_b¥VXXa\_]U¥  
@HWI-EAS443:3:49:919:739#0/1  
TGTGCCGCATTTCTTCAATTAACCACCTTATTCCTCAAA  
+HWI-EAS443:3:49:919:739#0/1  
¥b\_b\_Z`^\_bb`[^bbZ^a¥¥a\_[a^bbabbaabaa]^  
@HWI-EAS443:3:49:921:1472#0/1  
GAAACTGTGATGAGAATGGGAGACCTTCACTACCTCCAGA  
+HWI-EAS443:3:49:921:1472#0/1  
aba`abaSa`baaaabbbba`^`aa`aaa`ba\_aaa`\_`  
@HWI-EAS443:3:49:980:1615#0/1  
TGATGAGAATGGGAGACCTTCACTACCTCCAGAGCAGAAA  
+HWI-EAS443:3:49:980:1615#0/1  
abaaaaaaaa`a\_^a\_\_\_aa\_`````U]\_\_\_`X`W^a^^\_  
@HWI-EAS443:3:49:981:148#0/1  
GCGGCACAGATTGAAAGCGACAGAGAATAGTTTCGAACAA  
+HWI-EAS443:3:49:981:148#0/1  
a\_aa[\_`aba`^\_\_a`bU`[\_`a¥a\_Y]`aT`\_X`[[P`]  
@HWI-EAS443:3:4:1022:1826#0/1  
TGAGAATGGGAGACCTTCACTACCTCCAGAGCAGAAATGA  
+HWI-EAS443:3:4:1022:1826#0/1  
abaa`aaaa^aa[[]]Z\_aZ]`[Ya¥¥\_\_¥][\_`¥\_^\_\_]  
@HWI-EAS443:3:4:1069:1083#0/1  
CGGTAAAGATTACTGAAGTTCGCTTTCAGTACTATGT  
+HWI-EAS443:3:4:1069:1083#0/1  
abaab\_\_abbaabaaaab`\_a`aab\_aaa`\_a\_aZ`aaa^  
@HWI-EAS443:3:4:1079:224#0/1  
ACTCCAACACCATGTCAAGCTTTCAGGTAGACTGTTTCCT  
+HWI-EAS443:3:4:1079:224#0/1  
a^`^^\_a0a\_X\_\_aX]^`\_]Z^Z]]VZ\_ZZ]`XZ^U0]  
@HWI-EAS443:3:4:1099:619#0/1  
GGGAAACAAATCGTGGAATGGATCTTGAAAGAGGAATCCA  
+HWI-EAS443:3:4:1099:619#0/1  
abaR¥^¥ZW¥^`\_V\_]OW¥`^Z`\_aaaaZ[\_\_\_aa]\_`U]  
@HWI-EAS443:3:4:1151:1300#0/1  
GGACTCCAACACCATGTCAAGCTTTCAGGTAGACTGTTTC  
+HWI-EAS443:3:4:1151:1300#0/1  
aa`^aaaaaaa`\_aab]^a\_a^a`]]\_a\_X`aX^\_\_X\_\_^  
@HWI-EAS443:3:4:1167:270#0/1  
CTGTGCCGCATTTCTTCAATTAACCACCTTATTCCTCAA  
+HWI-EAS443:3:4:1167:270#0/1  
aa`^b``baaaaa\_aa^aaaaaa^[\_¥X``\_a``XVa^\_\_

@HWI-EAS443:3:4:1168:1384#0/1  
CTTGGAGAACTGTGATGAGAATGGGAGACCTTCACTACC  
+HWI-EAS443:3:4:1168:1384#0/1  
a`bba]ba\_bZbb\_ba^baa`aa`\_\_a`U[``^``aa][  
@HWI-EAS443:3:4:1179:1153#0/1  
AGCAATTGGGACAGAAATTTGAGGAAATAAGGTGGTTAAT  
+HWI-EAS443:3:4:1179:1153#0/1  
Y`bbb\_bbbb]bba`^`bbbab\_\_abbaabIbbaa]Xa  
@HWI-EAS443:3:4:1226:1659#0/1  
CGCATTCTTCAATTAACCACCTTATTTCTCAAATTTCT  
+HWI-EAS443:3:4:1226:1659#0/1  
``bbb]bb`aR\_bb`b¥a]^a^ba`\_`bb^b\_\_`P\_ba^a  
@HWI-EAS443:3:4:122:272#0/1  
AACAAATCGTGAATGGATCTTGAAGAGGAATCCAGCGA  
+HWI-EAS443:3:4:122:272#0/1  
aaaabbaabXa`UPS^a``[^aVY¥¥a\_aa\_TSWQ\_`]^¥  
@HWI-EAS443:3:4:1235:631#0/1  
GCGGCACAGATTGAAAGCGACAGAGAATAGTTTCGAACAA  
+HWI-EAS443:3:4:1235:631#0/1  
a¥aa]^a`\_\_\_`Z[^[Z\_]¥¥¥\_]^Y]]WZW^T]^  
@HWI-EAS443:3:4:1264:531#0/1  
GCGGCACAGATTGAAAGCGACAGAGAATAGTTTCGAACAA  
+HWI-EAS443:3:4:1264:531#0/1  
aab\_]Y][a¥\_\_`YODUa¥[]`^]\_\_[XU\_]^[[P^Z  
@HWI-EAS443:3:4:1275:724#0/1  
AGAAACTGTGATGAGAATGGGAGACCTTCACTACCTCCAG  
+HWI-EAS443:3:4:1275:724#0/1  
abb`\_abb[b\_bbYa[^ba`\_¥b`[^aa]\_Ya`\_Ra`Y\_a  
@HWI-EAS443:3:4:1285:374#0/1  
AGAAACTGTGATGAGAATGGGAGACCTTCACTACCTCCAG  
+HWI-EAS443:3:4:1285:374#0/1  
aba`aaabSb`aa\_bXabbab\_bTHXa`^ZMQXH¥\_`RT[  
@HWI-EAS443:3:4:1330:615#0/1  
AGGTAGTGAAGGTCTCCATTCTCATCACAGTTTCTCCAA  
+HWI-EAS443:3:4:1330:615#0/1  
aTa\_\_¥D¥\_\_aa][^XV`W[`V\_[Y\_X^UU`V¥\_X]]VWB  
@HWI-EAS443:3:4:134:1066#0/1  
AGGTAATGGTGAATTTCTCCAATTTGCTCCCTCCTCA  
+HWI-EAS443:3:4:134:1066#0/1  
aab\_aaa`]^baaaaaaaaaaaaa\_aaa\_a^`^¥aa[``^a  
@HWI-EAS443:3:4:1391:1085#0/1  
GGAGAACTGTGATGAGAATGGGAGACCTTCACTACCTCC  
+HWI-EAS443:3:4:1391:1085#0/1  
a^[^UXXY`aRW][a^a\_¥Ta[[QX]]RYRP^^^UWTVUB  
@HWI-EAS443:3:4:1420:1442#0/1  
TGAAAATATACAGAGATTGCTTGGAGAACTGTGATGAG  
+HWI-EAS443:3:4:1420:1442#0/1  
aba`a`aaab`aaaa\_aa^a^\_a`\_a^\_[X`\_Z`]\_\_YZ  
@HWI-EAS443:3:4:1450:1710#0/1  
CTTAGAATGACAATTGCATCTGTACCTACTTCGCGCTACC

+HWI-EAS443:3:4:1450:1710#0/1  
abbb`bbbabYbabba`ab`abbba¥bb\_baaaYba¥aQU  
@HWI-EAS443:3:4:1452:522#0/1  
CACGGTTCGAGTCTCTGAAAATATACAGAGATTCGCTTGG  
+HWI-EAS443:3:4:1452:522#0/1  
]bbbbab^bbaU^bababaabbbba]ab`baabaa¥baab  
@HWI-EAS443:3:4:1457:480#0/1  
TGAGAATGGGAGACCTTCACTACCTCCAGAGCAGAAATGA  
+HWI-EAS443:3:4:1457:480#0/1  
``^OWO`bbb]¥X\_V`]QQQI^\_IZPX\_`^]XaGR^aa^  
@HWI-EAS443:3:4:1483:181#0/1  
TGAGAATGGGAGACCTTCACTACCTCCAGAGCAGAAATGA  
+HWI-EAS443:3:4:1483:181#0/1  
ab]b``abaa^a`]¥]\_\_Y^^XWXY`\_^]XXaUU]^`X  
@HWI-EAS443:3:4:1499:211#0/1  
AGTCTCTGAAAATATACAGAGATTCGCTTGGAGAACTGT  
+HWI-EAS443:3:4:1499:211#0/1  
^aZ¥a`\_¥\_a^`a\_¥U\_b]]Y[]U\_[^H[[[\_]]Z¥^B  
@HWI-EAS443:3:4:152:441#0/1  
GTGATGAGAATGGGAGACCTTCACTACCTCCAGAGCAGAA  
+HWI-EAS443:3:4:152:441#0/1  
a\_aV`Y`YYX\_¥[Q]U]U[ZU[[YWPPVUUU^U^TTZBB  
@HWI-EAS443:3:4:1542:1128#0/1  
GAGAAAGCTCTTATCTCTTGTCTACTTCAAGCAGTAGTT  
+HWI-EAS443:3:4:1542:1128#0/1  
`YYKPMUWS[^aU`U`[``T]Y][W]]YWXJJ¥¥US\_QV  
@HWI-EAS443:3:4:1596:1715#0/1  
AGAAACTGTGATGAGAATGGGAGACCTTCACTACCTCCAG  
+HWI-EAS443:3:4:1596:1715#0/1  
a]^a\_Ja`Qaaabaa``abaa`b\_\_\_\_a[Ua]aOGT\_WJX^  
@HWI-EAS443:3:4:1603:766#0/1  
AGTCTCGTGACATTTCTCGAGGGTCATGTCAGAAAGGTA  
+HWI-EAS443:3:4:1603:766#0/1  
abaabababaa^aa^\_a`\_b\_abaY````^W\_a]UR^UBB  
@HWI-EAS443:3:4:1616:1349#0/1  
AGAAACTGTGATGAGAATGGGAGACCTTCACTACCTCCAG  
+HWI-EAS443:3:4:1616:1349#0/1  
ab\_`\_VVbabY^b\_bX]baWovYVVQ]W^¥K^`]NVTTB  
@HWI-EAS443:3:4:1624:348#0/1  
TGAGAATGGGAGACCTTCACTACCTCCAGAGCAGAAATGA  
+HWI-EAS443:3:4:1624:348#0/1  
`b```\_`\_aa\_[\_\_XX^W\_a]\_`YU\_X^^^U^RU\_X]XXXB  
@HWI-EAS443:3:4:1639:852#0/1  
CATCCTCATAAGTATGTCCTGGAAGAGAAGGTAATGGTGA  
+HWI-EAS443:3:4:1639:852#0/1  
abbbbbbbabbbYbbb`b`bbaaaba\_aaab^aa``a^a`  
@HWI-EAS443:3:4:1646:169#0/1  
GCGGCACAGATTGAAAGCGACAGAGAATAGTTTCGAACAA  
+HWI-EAS443:3:4:1646:169#0/1  
a`baaa`ab`a`a`\_`\_`^b]X^`\_\_^^\_`^Z\_\_S\_X]W]]

@HWI-EAS443:3:4:1661:294#0/1  
AGAAACTGTGATGAGAATGGGAGACCTTCACTACCTCCAG  
+HWI-EAS443:3:4:1661:294#0/1  
^]Z\_a[ `[DY]W\_T`W`a[]`ZOF0^RWWBBBBBBBBBB  
@HWI-EAS443:3:4:1700:1476#0/1  
GAAAGCTCTTATCTCTTGTCTACTTCAAGCAGTAGTTGT  
+HWI-EAS443:3:4:1700:1476#0/1  
a``a^a^ab\_a^`\_a`b`a^a\_]a`[\_^`W\_\_]]\_[^\_Z  
@HWI-EAS443:3:4:171:105#0/1  
CCGATGAGGACCCCAACTGCATTTTTGACATCCTCATAAG  
+HWI-EAS443:3:4:171:105#0/1  
`a^YM\_VbY^ZS\_U`a][bRL^SX\_[[TNT¥¥]`\_\_`S`  
@HWI-EAS443:3:4:1745:1482#0/1  
CTTGGAGAACTGTGATGAGAATGGGAGACCTTCACTACC  
+HWI-EAS443:3:4:1745:1482#0/1  
ab\_a\_`^RXPX`bYa]`b[ZXZ¥^a\_]`\_VGZ]\_VLV]UW  
@HWI-EAS443:3:4:1756:1961#0/1  
CGCATTTCTTCAATTAACCACCTTATTTCTCAAATTTCT  
+HWI-EAS443:3:4:1756:1961#0/1  
ab`Uabbb\_bYbaabbaa¥abaaaaba`^\_baa^aabaSb  
@HWI-EAS443:3:4:305:796#0/1  
GCCGCATTTCTTCAATTAACCACCTTATTTCTCAAATTT  
+HWI-EAS443:3:4:305:796#0/1  
`\_Yaaa^¥][`aa\_Xa^\_a]aT`Y^a^\_Z\_Y`Y¥T]`Z  
@HWI-EAS443:3:4:343:1195#0/1  
GCCGCATTTCTTCAATTAACCACCTTATTTCTCAAATTT  
+HWI-EAS443:3:4:343:1195#0/1  
`b``aab^^ab]V`\_\_¥`\_\_\_\_\_^^`\_`\_`\_¥`a`\_^a]  
@HWI-EAS443:3:4:372:56#0/1  
AGAAACTGTGATGAGAATGGGAGACCTTCACTACCTCCAG  
+HWI-EAS443:3:4:372:56#0/1  
\_bU`Xaab¥a`[`Q\_^\_]b`S`\_N\_[]\_\_^^`][\_V^^  
@HWI-EAS443:3:4:391:717#0/1  
ATTATCTTTTGCCTAGGCATGAGCATGAACCGTCTCGTG  
+HWI-EAS443:3:4:391:717#0/1  
abb``abababa\_aabbbbaabab`aaba`]Sa`¥V`[\_a  
@HWI-EAS443:3:4:447:996#0/1  
GAATGGGAGACCTTCACTACCTCCAGAGCAGAAATGAAAA  
+HWI-EAS443:3:4:447:996#0/1  
aaaV[Va`aa][Q`\_[]]N```\_YZQU\_^]]Z\_^R`QB  
@HWI-EAS443:3:4:451:1583#0/1  
GCGCGAAGTAGGTACAGATGCAATTGTCATTCTAAGTGTC  
+HWI-EAS443:3:4:451:1583#0/1  
a`b]baaa]a\_aXa¥aaa][^`]aXUYS``W``\_X]YU  
@HWI-EAS443:3:4:531:1728#0/1  
GGATCTTGAAAGAGGAATCCAGCGAGACACTTAGAATGAC  
+HWI-EAS443:3:4:531:1728#0/1  
aa``aa\_aaaaa`\_a`a`X\_[]\_]``Z\_^a\_\_\_\_^a\_a`]  
@HWI-EAS443:3:4:547:790#0/1  
AGAAACTGTGATGAGAATGGGAGACCTTCACTACCTCCAG

+HWI-EAS443:3:4:547:790#0/1  
aababbbbYbaaaab\_aba`^`aa]`a`\_a^\_a^a`W\_a  
@HWI-EAS443:3:4:556:2034#0/1  
GTCGCTTTCAATCTGTGCCGATTTCTTCAATTAACCACC  
+HWI-EAS443:3:4:556:2034#0/1  
aWG^a\_X\_X` `[S`¥]¥a]^Z\_¥\_\_I]V\_]^^ZX\_]X  
@HWI-EAS443:3:4:649:1609#0/1  
GCCGATTTCTTCAATTAACCACCTTATTTCTCAAATTT  
+HWI-EAS443:3:4:649:1609#0/1  
a[ ]\_`ZPaa`^aZ^`V[^[^\_^\_]^\_P]SW`¥[]^\_  
@HWI-EAS443:3:4:691:1505#0/1  
GAAACTGTGATGAGAATGGGAGACCTTCACTACCTCCAGA  
+HWI-EAS443:3:4:691:1505#0/1  
^W\_b`abab`\_baaVb`aaa\_a` [M`a]aXa\_]¥\_]\_\_`  
@HWI-EAS443:3:4:757:112#0/1  
ATGAGAATGGGAGACCTTCACTACCTCCAGAGCAGAAATG  
+HWI-EAS443:3:4:757:112#0/1  
a\_baba\_`aa`\_a`¥Q`\_\_\_YW`YWWWYBBBBBBBBBBB  
@HWI-EAS443:3:4:757:808#0/1  
AGAACTGTGATGAGAATGGGAGACCTTCACTACCTCCAG  
+HWI-EAS443:3:4:757:808#0/1  
aba\_a\_aa^a`a]a`^aa` [aVV]\_]\_U\_\_^V\_^X^^  
@HWI-EAS443:3:4:777:1035#0/1  
GTCAGAAAGGTAGCGGAAGTAGGTACAGATGCAATTGTC  
+HWI-EAS443:3:4:777:1035#0/1  
`\_a`aSVU\_YL]\_Z[^\_X^TUY\_aR]^]\_U`][SY]]BB  
@HWI-EAS443:3:4:808:447#0/1  
GAAACTGTGATGAGAATGGGAGACCTTCACTACCTCCAGA  
+HWI-EAS443:3:4:808:447#0/1  
a`aa`abZa`aa^a\_\_`aa`]`\_¥]`^^\_X^\_SU]X[]^^  
@HWI-EAS443:3:4:813:468#0/1  
GCCGATTTCTTCAATTAACCACCTTATTTCTCAAATTT  
+HWI-EAS443:3:4:813:468#0/1  
a^]a`a`a\_\_a`¥^]a\_aa¥\_^`a\_\_a^` [V\_\_^]^^`  
@HWI-EAS443:3:4:821:737#0/1  
GAGATTGCTTGGAGAACTGTGATGAGAATGGGAGACCT  
+HWI-EAS443:3:4:821:737#0/1  
abbXaaaaaaaaa\_b\_\_a\_\_aXa`\_a]\_]`^a^\_^NZ^  
@HWI-EAS443:3:4:831:317#0/1  
TCTGTATATTTTTCAGAGACTCGAACCGTGTACCATTCCA  
+HWI-EAS443:3:4:831:317#0/1  
aabb\_a`aaaa¥````a`a`\_aZZ`^a^^\_Z\_\_¥]WW\_  
@HWI-EAS443:3:4:835:90#0/1  
CGCACGCAAAGAGGGCCTATTATCTTTTGCCTAGGCATGA  
+HWI-EAS443:3:4:835:90#0/1  
abaY\_aVUS]aZa\_^SU]Z\_a]\_U\_U]X]TGX]ZHNUR]B  
@HWI-EAS443:3:4:848:583#0/1  
TGAGAATGGGAGACCTTCACTACCTCCAGAGCAGAAATGA  
+HWI-EAS443:3:4:848:583#0/1  
aa`aa\_]YQ^WaUU[\_\_a\_N^\_GU^¥X\_¥Z`]Na]UX[\_\_

@HWI-EAS443:3:4:851:884#0/1  
GCCGCATTTCTTCAATTAACCACCTTATTTCCCTCAAATTT  
+HWI-EAS443:3:4:851:884#0/1  
`\_[^X^Z[V¥[U^X]VZ\_]T¥`Q\_\_`W¥0]]\_\_a\_UV  
@HWI-EAS443:3:4:885:413#0/1  
GTGCGTTTCAATCTGTGCCGCATTTCTTCAATTAACCACC  
+HWI-EAS443:3:4:885:413#0/1  
``aa[Z`baVYYZ\_¥^a\_baTaaaa^aa\_\_\_a`Sa]aS`Y  
@HWI-EAS443:3:4:91:1308#0/1  
GAAACTGTGATGAGAATGGGAGACCTTCACTACCTCCAGA  
+HWI-EAS443:3:4:91:1308#0/1  
^Ybaaa\_ab[aa^b`\_`ba\_\_a`^\_\_`\_a]a^LV[^¥\_`¥  
@HWI-EAS443:3:4:950:403#0/1  
TGCCGCATTTCTTCAATTAACCACCTTATTTCCCTCAAATT  
+HWI-EAS443:3:4:950:403#0/1  
a\_aaaa\_a`a\_\_a^^¥`aL^¥¥¥a[a`aa`\_\_]a\_[]`a\_  
@HWI-EAS443:3:50:1031:873#0/1  
GTGCCGCATTTCTTCAATTAACCACCTTATTTCCCTCAAAT  
+HWI-EAS443:3:50:1031:873#0/1  
`J^]\_a`a`]``\_Z\_\_aa`ZUT^W]aaaba`\_U]¥][Za  
@HWI-EAS443:3:50:1133:978#0/1  
GAAACTGTGATGAGAATGGGAGACCTTCACTACCTCCAGA  
+HWI-EAS443:3:50:1133:978#0/1  
^VT\_¥Z¥¥¥¥aWP\_b^a\_R0¥LSYX[L[VY^RUY[TYXZ  
@HWI-EAS443:3:50:1187:1778#0/1  
GAAACTGTGATGAGAATGGGAGACCTTCACTACCTCCAGA  
+HWI-EAS443:3:50:1187:1778#0/1  
W`X\_\_`¥ZZY\_\_\_`a````^R^¥LW\_[`a``[YN[X[]a`  
@HWI-EAS443:3:50:1260:1133#0/1  
GTGCGTTTCAATCTGTGCCGCATTTCTTCAATTAACCACC  
+HWI-EAS443:3:50:1260:1133#0/1  
aa]baSbaa`aU¥]¥aa^[a\_]aa\_[^`a\_]a\_\_ZZS\_Z¥  
@HWI-EAS443:3:50:1267:1711#0/1  
GCTTGGAGAACTGTGATGAGAATGGGAGACCTTCACTAC  
+HWI-EAS443:3:50:1267:1711#0/1  
][XYHX[YUU¥Ra^K¥S[VOQQ¥VY]`P[WV[XTBBBBBB  
@HWI-EAS443:3:50:1300:861#0/1  
TGTCGTTTCAATCTGTGCCGCATTTCTTCAATTAACCAC  
+HWI-EAS443:3:50:1300:861#0/1  
ab``aaaaa`aa\_aa^]Z`\_aa\_a^aa\_a\_a``\_Y]]]  
@HWI-EAS443:3:50:1315:908#0/1  
ATGAGGACCCCAACTGCATTTTTGACATCCTCATAAGTAT  
+HWI-EAS443:3:50:1315:908#0/1  
abaabb`aaaaa`bb`abaaaa``aba`baabaab\_aa  
@HWI-EAS443:3:50:1322:1794#0/1  
TGAGAATGGGAGACCTTCACTACCTCCAGAGCAGAAATGA  
+HWI-EAS443:3:50:1322:1794#0/1  
abaa]baaabab\_[Rab`aa`U]aY^`a`\_]\_\_]\_\_^\_\_  
@HWI-EAS443:3:50:1325:185#0/1  
CAATTAACCACCTTATTTCCCTCAAATTTCTGTCCCAATTG

+HWI-EAS443:3:50:1325:185#0/1  
Y\_baabbbbbba`abbbbbbaabbbbbbbbabbbbaa  
@HWI-EAS443:3:50:1325:567#0/1  
GTCGCTTTCAATCTGTGCCGATTTCTTCAATTAACCACC  
+HWI-EAS443:3:50:1325:567#0/1  
abbbabbbbbbb\_Z`aaab`abba\_bbbbbbbbaa`a`a  
@HWI-EAS443:3:50:1334:1306#0/1  
AACAAATCGTGGAATGGATCTTGAAAGAGGAATCCAGCGA  
+HWI-EAS443:3:50:1334:1306#0/1  
\_b`bb^bbbabbbbaa\_aa`¥¥aaa^ab`aa^a\_`[]\_  
@HWI-EAS443:3:50:1340:1148#0/1  
CGAGACACTTAGAATGACAATTGCATCTGTACCTACTTCG  
+HWI-EAS443:3:50:1340:1148#0/1  
a^a``aaaab`bbbb\_ba``bbaaaZaba]X¥`aab\_[]  
@HWI-EAS443:3:50:1390:1238#0/1  
TGAGAATGGGAGACCTTCACTACCTCCAGAGCAGAAATGA  
+HWI-EAS443:3:50:1390:1238#0/1  
abab\_^baba`aa`aa\_\_`a``\_^`\_]`^a`\_`[\_`¥`^^a^  
@HWI-EAS443:3:50:1452:884#0/1  
TGGGAAACAAATCGTGGAATGGATCTTGAAAGAGGAATCC  
+HWI-EAS443:3:50:1452:884#0/1  
]aaVZ^Zabba`\_¥SZ^T`aSaaZYWaaSUYZa`ZaW[N\_  
@HWI-EAS443:3:50:1469:1885#0/1  
AGCAATTGGGACAGAAATTTGAGGAAATAAGGTGGTTAAT  
+HWI-EAS443:3:50:1469:1885#0/1  
abbbbbbaab\_\_bbbabbbbaab`bb`abbaabbObb^ab`a  
@HWI-EAS443:3:50:1471:945#0/1  
TGTCGCTTTCAATCTGTGCCGATTTCTTCAATTAACCAC  
+HWI-EAS443:3:50:1471:945#0/1  
aaa`babaa]aaa`aa[\_^\_\_`[]`aa\_aa\_`\_aa``][\_\_  
@HWI-EAS443:3:50:1487:59#0/1  
CACAGATTGAAAGCGACAGAGAATAGTTTCGAACAAATAA  
+HWI-EAS443:3:50:1487:59#0/1  
U[]\_\_S^Z`baY\_Z`¥PG]SX`^b[N[\_Z\_HVJY¥`¥b¥  
@HWI-EAS443:3:50:1492:928#0/1  
GAGAATGGGAGACCTTCACTACCTCCAGAGCAGAAATGAA  
+HWI-EAS443:3:50:1492:928#0/1  
a\_a\_`aa^a\_a\_\_\_`a\_aWa\_[[\_WZZa¥`W¥aUZ[\_\_[U  
@HWI-EAS443:3:50:1568:1416#0/1  
GTCTCTGAAAATATACAGAGATTCGCTTGGAGAACTGTG  
+HWI-EAS443:3:50:1568:1416#0/1  
`X\_S]\_ZN^`^`XVYRW[]YTPY¥XYV]¥U]VRZPPYQU  
@HWI-EAS443:3:50:1571:450#0/1  
GGAGAACTGTGATGAGAATGGGAGACCTTCACTACCTCC  
+HWI-EAS443:3:50:1571:450#0/1  
ab`bbababb`b\_babbbbababWa¥¥`bb]^aaaZYaU]  
@HWI-EAS443:3:50:1586:757#0/1  
GGCTGTTTCGATATCGAGGCCAAGGGTGTTCCTCTTCCT  
+HWI-EAS443:3:50:1586:757#0/1  
abba`YaaZ^ZWXXM[VTXIX[^OY^S`PaVOYVZ[ZFX^



@HWI-EAS443:3:50:1587:1183#0/1  
GAGAATGGGAGACCTTCACTACCTCCAGAGCAGAAATGAA  
+HWI-EAS443:3:50:1587:1183#0/1  
a¥¥N`aa`[a`RRXSP]Y]]\_ZPL[XVYaY`¥NVLY`W¥  
@HWI-EAS443:3:50:161:1693#0/1  
CGCATTCTTCAATTAACCACCTTATTTCTCAAATTTCT  
+HWI-EAS443:3:50:161:1693#0/1  
aabab``\_ab^\_abbbbbTaa¥bbab``\_aaabbab`^`a  
@HWI-EAS443:3:50:1679:490#0/1  
GCCGCATTTCTTCAATTAACCACCTTATTTCTCAAATTT  
+HWI-EAS443:3:50:1679:490#0/1  
¥\_W\_^¥ab`¥abaa`b`a`W`a^\_Z\_bbb\_M]YV]^¥Z¥`  
@HWI-EAS443:3:50:1734:1554#0/1  
GCCGCATTTCTTCAATTAACCACCTTATTTCTCAAATTT  
+HWI-EAS443:3:50:1734:1554#0/1  
\_Q¥YKVZ]ZV^]Y¥[]]\_¥PW¥RQ]¥R¥Z¥XQXU\_]P]WW  
@HWI-EAS443:3:50:196:262#0/1  
GCCGCATTTCTTCAATTAACCACCTTATTTCTCAAATTT  
+HWI-EAS443:3:50:196:262#0/1  
`bb`Zbbabab\_Z\_abbbb`X[\_U\_babbbbYb`baabaa  
@HWI-EAS443:3:50:261:2000#0/1  
AGAAACTGTGATGAGAATGGGAGACCTTCACTACCTCCAG  
+HWI-EAS443:3:50:261:2000#0/1  
WTXaa\_a^T`^[]G\_]Z\_\_UOaa\_a^a[T`Q[TNWZa[W  
@HWI-EAS443:3:50:270:1246#0/1  
GGAGAACTGTGATGAGAATGGGAGACCTTCACTACCTCC  
+HWI-EAS443:3:50:270:1246#0/1  
abbbabb\_]aab^baab`\_abba\_a`\_`aaaa¥ZVZ\_a  
@HWI-EAS443:3:50:281:1378#0/1  
CTCCCATTCTCATCACAGTTTCTCCAAGCGAATCTCTGTA  
+HWI-EAS443:3:50:281:1378#0/1  
ZY^^[[\_V[a`aaWaaa`TRY¥W\_\_`\_`¥¥]X\_RU\_\_`  
@HWI-EAS443:3:50:349:976#0/1  
GAATGGGAGACCTTCACTACCTCCAGAGCAGAAATGAAAA  
+HWI-EAS443:3:50:349:976#0/1  
aaa\_aabab`\_aba¥aaab\_X^a\_aaaaT`a``aaa`\_^Y  
@HWI-EAS443:3:50:34:1848#0/1  
CGCTTGGAGAACTGTGATGAGAATGGGAGACCTTCACTA  
+HWI-EAS443:3:50:34:1848#0/1  
`ba]b\_Y]JU¥^^]`\_TSX[\_Q¥^[¥P¥¥\_TX^QUT`\_¥Q  
@HWI-EAS443:3:50:362:801#0/1  
GAATGGGAGACCTTCACTACCTCCAGAGCAGAAATGAAAA  
+HWI-EAS443:3:50:362:801#0/1  
a¥¥a^a^`]aWWZX\_M^a]VaRU[a^aRZa¥]\_aaX[aZ  
@HWI-EAS443:3:50:365:563#0/1  
GTGAAGGTCTCCCATTCTCATCACAGTTTCTCCAAGCGAA  
+HWI-EAS443:3:50:365:563#0/1  
a`^`abba`a`\_^]aa\_a`^a\_a``a¥aa[b\_``^\_`\_`  
@HWI-EAS443:3:50:370:1127#0/1  
GAATGGGAGACCTTCACTACCTCCAGAGCAGAAATGAAAA

+HWI-EAS443:3:50:370:1127#0/1  
a[aaaaa¥U^`a¥\_\_`]aa\_^`T\_a¥[P\_a¥SYY`^¥\_\_  
@HWI-EAS443:3:50:380:74#0/1  
GCTCTTATCTCTTGTCTACTTCAAGCAGTAGTTGTAAGG  
+HWI-EAS443:3:50:380:74#0/1  
aaaa`a`bXQaVaab\_\_\_\_\_bS[[]VI¥`Zb`\_X]NTQ\_  
@HWI-EAS443:3:50:421:1078#0/1  
CGCATTCTTCAATTAACCACCTTATTTCTCAAATTTCT  
+HWI-EAS443:3:50:421:1078#0/1  
\_a\_abaaa`a`ab`a`a`[a`^`X`bYY`^bbaa]a^  
@HWI-EAS443:3:50:472:1310#0/1  
TGATGAGAATGGGAGACCTTCACTACCTCCAGAGCAGAAA  
+HWI-EAS443:3:50:472:1310#0/1  
¥^\_U`]a¥^\_]¥`Y\_SXSXbaaQ`b[XZNOQ]`Z`]aVaY  
@HWI-EAS443:3:50:473:1012#0/1  
TGCCGCATTTCTTCAATTAACCACCTTATTTCTCAAATT  
+HWI-EAS443:3:50:473:1012#0/1  
abbb`b`bbbbbaa`abbaaa`[aaabbaaaaaaba  
@HWI-EAS443:3:50:479:840#0/1  
GTGCCGCATTTCTTCAATTAACCACCTTATTTCTCAAAT  
+HWI-EAS443:3:50:479:840#0/1  
aJaRJT]\_ba]Y\_XF¥`aa^YNNYYP¥^aYYW[^`\_\_`^  
@HWI-EAS443:3:50:488:567#0/1  
GAGAACTGTGATGAGAATGGGAGACCTTCACTACCTCCA  
+HWI-EAS443:3:50:488:567#0/1  
¥^^a\_aa`b]^`\_aU\_\_`ab[Y\_]YV¥^a``¥b\_¥¥^NW^  
@HWI-EAS443:3:50:505:433#0/1  
GCCGCATTTCTTCAATTAACCACCTTATTTCTCAAATTT  
+HWI-EAS443:3:50:505:433#0/1  
^[]¥Y]bbaY`a¥Zabaa`\_\_a¥`baaaaa`aa^]W`a`  
@HWI-EAS443:3:50:514:864#0/1  
AGAAACTGTGATGAGAATGGGAGACCTTCACTACCTCCAG  
+HWI-EAS443:3:50:514:864#0/1  
aa]`¥`b^Qb[¥a\_a^^aaa[\_`X`\_\_a¥U]^a^X¥]\_]\_  
@HWI-EAS443:3:50:547:1849#0/1  
CCGCATTTCTTCAATTAACCACCTTATTTCTCAAATTTCT  
+HWI-EAS443:3:50:547:1849#0/1  
aa`^abbaabba]`b`¥F\_a\_]ba`aaa\_\_a\_\_`aaaa¥  
@HWI-EAS443:3:50:592:349#0/1  
TTCCTTTTAAGGACTTTTGATCTCGCGGAGCCGATCAAG  
+HWI-EAS443:3:50:592:349#0/1  
ababbbbabbbbaababaaba`a`aaabaa```aaQ¥`\_\_  
@HWI-EAS443:3:50:643:760#0/1  
GCCGCATTTCTTCAATTAACCACCTTATTTCTCAAATTT  
+HWI-EAS443:3:50:643:760#0/1  
abababbbbabbaabbaaaaaa`baabbaab\_baabaa  
@HWI-EAS443:3:50:645:1359#0/1  
AGAAACTGTGATGAGAATGGGAGACCTTCACTACCTCCAG  
+HWI-EAS443:3:50:645:1359#0/1  
aaabaabbaaaaa[aba`abaab¥\_RbaXa^a^\_a\_`^`

@HWI-EAS443:3:50:651:44#0/1  
GTGATGAGAATGGGAGACCTTCACTACCTCCAGAGCAGAA  
+HWI-EAS443:3:50:651:44#0/1  
a`\_a`a]``Yaab]Z^RN^^ZM[PU]NU^RQV`\_\_U`a\_Y  
@HWI-EAS443:3:50:689:1092#0/1  
AGAAACTGTGATGAGAATGGGAGACCTTCACTACCTCCAG  
+HWI-EAS443:3:50:689:1092#0/1  
abaaa^ba]\_`ba`baabbab`\_a\_aba``]aa^^`a`aa  
@HWI-EAS443:3:50:708:98#0/1  
CGCATTCTTCAATTAACCACCTTATTTCTCAAATTTCT  
+HWI-EAS443:3:50:708:98#0/1  
abbabbbabb``abbbba`aaabbaabS¥a`b`abaa\_\_  
@HWI-EAS443:3:50:721:1260#0/1  
AAACAAATCGTGAATGGATCTTGAAAGAGGAATCCAGCG  
+HWI-EAS443:3:50:721:1260#0/1  
]¥\_I¥\_\_^ZbU`a`¥`ab\_Z¥a\_\_Wa^`^¥H`\_aaYS\_X`  
@HWI-EAS443:3:50:767:1711#0/1  
GCCGCATTTCTTCAATTAACCACCTTATTTCTCAAATTT  
+HWI-EAS443:3:50:767:1711#0/1  
a\_^ZU\_aaa\_\_a`\_N^a\_YZP``\_\_Y\_\_aadW\_XXT^\_W^  
@HWI-EAS443:3:50:776:1432#0/1  
GAGAAACTGTGATGAGAATGGGAGACCTTCACTACCTCCA  
+HWI-EAS443:3:50:776:1432#0/1  
abb`\_`babY`¥a\_S^``bbaa\_[Ra`aaa`\_a\_[\_`HH\_  
@HWI-EAS443:3:50:777:887#0/1  
CTTGGAGAAACTGTGATGAGAATGGGAGACCTTCACTACC  
+HWI-EAS443:3:50:777:887#0/1  
abbbbabaab\_bb^abaa`b\_abab\_\_`a``a```aaa`S  
@HWI-EAS443:3:50:782:693#0/1  
GCCGCATTTCTTCAATTAACCACCTTATTTCTCAAATTT  
+HWI-EAS443:3:50:782:693#0/1  
S\_Z]X]\_bbabb[aba`a^]aa^Xaa]aa`a]ba[a\_a^[  
@HWI-EAS443:3:50:844:1033#0/1  
TACCTTTCTGACATGACCCTCGAGGAAATGTCACGAGACT  
+HWI-EAS443:3:50:844:1033#0/1  
`b`bbbaabbabb`[\_a\_a\_\_a\_a¥`]`aa\_]a[\_\_\_a\_WQ  
@HWI-EAS443:3:50:856:1882#0/1  
AAACGAGAAAGCTCTTATCTCTTGTCTACTTCAAGCAGT  
+HWI-EAS443:3:50:856:1882#0/1  
`bbbbaba`\_aa`Yaa`aaa^aaa^aY\_aaa`\_aaa\_^aY  
@HWI-EAS443:3:50:887:1659#0/1  
GTGATGAGAATGGGAGACCTTCACTACCTCCAGAGCAGAA  
+HWI-EAS443:3:50:887:1659#0/1  
`G`^\_YNUYWUZS¥¥`GQLYUOUUMMLX¥VVVYQWXWVSY  
@HWI-EAS443:3:50:897:1269#0/1  
AGAAACTGTGATGAGAATGGGAGACCTTCACTACCTCCAG  
+HWI-EAS443:3:50:897:1269#0/1  
aaaaa\_aa]\_Z¥b^baab\_aa[b^]\_\_aaa`\_ZU^\_X`  
@HWI-EAS443:3:50:992:554#0/1  
AGAAACTGTGATGAGAATGGGAGACCTTCACTACCTCCAG

+HWI-EAS443:3:50:992:554#0/1  
]ababab`Zabb¥Za`bbbbb^a[Yabbabab\_[aa^[ab  
@HWI-EAS443:3:51:1002:1591#0/1  
GAGAACTGTGATGAGAATGGGAGACCTTCACTACCTCCA  
+HWI-EAS443:3:51:1002:1591#0/1  
aaaT\_a`a`N]X]a^a[P[R¥`\_\_[[aa¥\_\_\_\_\_ZX[[NY  
@HWI-EAS443:3:51:1003:464#0/1  
AAATAAGCTGAAACGAGAAAGCTTTATCTCTTGTCTAC  
+HWI-EAS443:3:51:1003:464#0/1  
]`b`abbbb`bbbaabba]b]babbababbbbbbbabaY  
@HWI-EAS443:3:51:1006:1570#0/1  
GAAACTGTGATGAGAATGGGAGACCTTCACTACCTCCAGA  
+HWI-EAS443:3:51:1006:1570#0/1  
aaaa[ab^b\_abaaa`aaaa\_aa^`a\_aa[U]¥ZPXW^^\_  
@HWI-EAS443:3:51:1048:109#0/1  
GCTCTTATCTCTTGTCTACTTCAAGCAGTAGTTGTAAGG  
+HWI-EAS443:3:51:1048:109#0/1  
aab`bbabbb\_bbbbbabbbbaabb`bb`ababaabaab  
@HWI-EAS443:3:51:1080:305#0/1  
GCCGCATTTCTTCAATTAACCACCTTATTTCTCAAATTT  
+HWI-EAS443:3:51:1080:305#0/1  
aaa`[abaa`ba\_aabbaaa\_a`\_ba`baa^\_b\_aaaa`a  
@HWI-EAS443:3:51:1118:1723#0/1  
ATATTTTCAGAGACTCGAACCGTGTACCATTCCATTCAA  
+HWI-EAS443:3:51:1118:1723#0/1  
ababaaaaaa`aa`aaaa`WS¥Y\_`^``[\_`a]^`\_`^a\_  
@HWI-EAS443:3:51:1127:659#0/1  
GTCGCTTTCAATCTGTGCCGCATTTCTTCAATTAACCACC  
+HWI-EAS443:3:51:1127:659#0/1  
a`bababbb``aaaa\_bbaa\_V`ba`a`XZabbaaa``\_`  
@HWI-EAS443:3:51:1146:845#0/1  
AGAAACTGTGATGAGAATGGGAGACCTTCACTACCTCCAG  
+HWI-EAS443:3:51:1146:845#0/1  
abaaaaba``aba``aa`aba\_aaa``aaa``a\_\_a¥¥^`  
@HWI-EAS443:3:51:1152:127#0/1  
ATCGTGGAAATGGATCTTGAAAGAGGAATCCAGCGAGACAC  
+HWI-EAS443:3:51:1152:127#0/1  
ab\_b^ba\_aabb`a]bba\_aY`Saa\_`b[X``Za\_\_^U^]  
@HWI-EAS443:3:51:1155:374#0/1  
TGAGAATGGGAGACCTTCACTACCTCCAGAGAGAAATGA  
+HWI-EAS443:3:51:1155:374#0/1  
ab^]^aaaa`ba\_\_aaaa]aaYW`\_V\_a^V]a`^`\_`a\_  
@HWI-EAS443:3:51:1181:1424#0/1  
GCCGCATTTCTTCAATTAACCACCTTATTTCTCAAATTT  
+HWI-EAS443:3:51:1181:1424#0/1  
``a^aXbba\_ab\_\_Yaaa\_TZ^[¥aaabaa]Va\_a[Zaaa  
@HWI-EAS443:3:51:1187:234#0/1  
AGAAACTGTGATGAGAATGGGAGACCTTCACTACCTCCAG  
+HWI-EAS443:3:51:1187:234#0/1  
`bbbaabbaabaa`aaabaaa`a`^`\_`a\_a`aa\_Wa\_\_aa

@HWI-EAS443:3:51:1216:736#0/1  
TGAAAATATACAGAGATTGCTTGGAGAACTGTGATGAG  
+HWI-EAS443:3:51:1216:736#0/1  
ab¥[\_bbaba`]]`a\_a`abSa]PU^`Z]`W`YYa\_aX[\_  
@HWI-EAS443:3:51:1232:1332#0/1  
CAGAAAGGTAGCGGAAGTAGGTACAGATGCAATTGTCAT  
+HWI-EAS443:3:51:1232:1332#0/1  
aaa]aabb`ababababb\_aaX]a`aaaaa]\_baa\_]\_a  
@HWI-EAS443:3:51:1233:493#0/1  
GCCGCATTTCTTCAATTAACCACCTTATTTCTCAAATTT  
+HWI-EAS443:3:51:1233:493#0/1  
a`babbbbbb\_bbabbbabba^b``bbbbbaabbbbbbbb  
@HWI-EAS443:3:51:1237:1046#0/1  
AAACTGTGATGAGAATGGGAGACCTTCACTACCTCCAGAG  
+HWI-EAS443:3:51:1237:1046#0/1  
]aaabbb`abbabaab]\_T`a\_\_Wa\_aa``a^U^a`\_Z¥`  
@HWI-EAS443:3:51:1276:1895#0/1  
CAGAAAGGTAGCGGAAGTAGGTACAGATGCAATTGTCAT  
+HWI-EAS443:3:51:1276:1895#0/1  
`b``\_¥abI\_a`bVb][YK[aa¥]\_aaaba^\_aY\_[DK`\_  
@HWI-EAS443:3:51:1299:1470#0/1  
GAAATTTCTCCAATTTGCTCCCTCCTCAGTGAAAGCCC  
+HWI-EAS443:3:51:1299:1470#0/1  
aa`[abbaaaa^\_\_aaab``a¥\_\_a^^`\_`a\_b\_``aV\_\_  
@HWI-EAS443:3:51:1310:877#0/1  
GCCGCATTTCTTCAATTAACCACCTTATTTCTCAAATTT  
+HWI-EAS443:3:51:1310:877#0/1  
a``¥a^a`\_aX````^aa]]^^`\_[a`\_a\_]`a¥]\_W\_^^  
@HWI-EAS443:3:51:1358:1474#0/1  
ATTACACTGAAGTTCGCTTTCAGTACTATGTTCTTTTCCA  
+HWI-EAS443:3:51:1358:1474#0/1  
aaaaab``ba\_`ababa\_`a]\_a[`Waaba\_a\_bbb\_]0a  
@HWI-EAS443:3:51:1416:1708#0/1  
AGGGCTTTCAGTACTGAGGAGGAGCAATAGTTGGAGAAATTT  
+HWI-EAS443:3:51:1416:1708#0/1  
\_^`¥aa`a]a\_a`^aa^abb\_`N`a``^bb\_^^b]\_W¥aY  
@HWI-EAS443:3:51:1417:731#0/1  
AGAACTGTGATGAGAATGGGAGACCTTCACTACCTCCAG  
+HWI-EAS443:3:51:1417:731#0/1  
abbaaabbaaaaab^]\_aaa^`]a`]¥aaaaV`aZ[`¥Y\_`  
@HWI-EAS443:3:51:1443:72#0/1  
GAAACTGTGATGAGAATGGGAGACCTTCACTACCTCCAGA  
+HWI-EAS443:3:51:1443:72#0/1  
abbbTbb[b^bb\_bK`bbaa`[`YZ\_aaaYaaaTa[\_¥\_a  
@HWI-EAS443:3:51:1455:645#0/1  
GCCGCATTTCTTCAATTAACCACCTTATTTCTCAAATTT  
+HWI-EAS443:3:51:1455:645#0/1  
aU¥OFQ]T]\_\_]\_RP]`WW^OOM^Y]UX^R^]\_¥[WX^¥Z  
@HWI-EAS443:3:51:1465:1321#0/1  
GAATGGGAGACCTTCACTACCTCCAGAGCAGAAATGAAAA

+HWI-EAS443:3:51:1465:1321#0/1  
a\_\_aaaa^a\_\_][\_\_Y\_^\_^YW^YY][\_^\_VX\_VV^^^]XXU  
@HWI-EAS443:3:51:1470:36#0/1  
GAGAAACTGTGATGAGAATGGGAGACCTTCACTACCTCCA  
+HWI-EAS443:3:51:1470:36#0/1  
]bbb`aabba`\_bb`[^aab^¥U]a`[b\_ab`ba`Sb^`a  
@HWI-EAS443:3:51:1477:932#0/1  
GCGGCACAGATTGAAAGCGACAGAGAATAGTTTCGAACAA  
+HWI-EAS443:3:51:1477:932#0/1  
a`a]a`a`baba¥`aababa`abab`aaaa]ab`b^ZJWa  
@HWI-EAS443:3:51:1504:1909#0/1  
ATGAGAATGGGAGACCTTCACTACCTCCAGAGCAGAAATG  
+HWI-EAS443:3:51:1504:1909#0/1  
aba[aba^¥aa`ab¥W`\_^\_]G\_^OR^Zaab\_^]T\_Z]Waa  
@HWI-EAS443:3:51:150:1701#0/1  
GAAAGCTCTTATCTCTTGTCTACTTCAAGCAGTAGTTGT  
+HWI-EAS443:3:51:150:1701#0/1  
[[Ua¥^Z`bbVa`bbba¥^b¥`\_Xb``\_ab\_a¥T\_VY`\_`  
@HWI-EAS443:3:51:1515:1064#0/1  
TGCGGCACAGATTGAAAGCGACAGAGAATAGTTTCGAACA  
+HWI-EAS443:3:51:1515:1064#0/1  
`V\_aa`aabaab`aabYb`\_XSVa``\_`a\_a\_\_a\_YU^  
@HWI-EAS443:3:51:1536:144#0/1  
AAATCGTGAATGGATCTTGAAAGAGGAATCCAGCGAGAC  
+HWI-EAS443:3:51:1536:144#0/1  
\_baaababaab`ba\_Y\_`¥YUaYSQ`\_Y^XL¥ZYV]SYYL  
@HWI-EAS443:3:51:1593:1486#0/1  
CTGAAAATATACAGAGATTCGCTTGGAGAACTGTGATGA  
+HWI-EAS443:3:51:1593:1486#0/1  
abba\_S\_^aab`^aa`\_aaaaa][Z¥Z`\_a^aa]a[UT]  
@HWI-EAS443:3:51:1620:318#0/1  
GTCGCTTCAATCTGTGCCGATTTCTTCAATTAACCACC  
+HWI-EAS443:3:51:1620:318#0/1  
`¥[[X[^`¥^a¥XXNQSTW^WUW]^¥^\_NLY^a^YKDV¥Y  
@HWI-EAS443:3:51:1660:339#0/1  
GCCGCATTTCTTCAATTAACCACCTTATTTCTCAAATTT  
+HWI-EAS443:3:51:1660:339#0/1  
`[bbabbbabb^babbbaa`aa¥bbbbbaaab`baaaaa  
@HWI-EAS443:3:51:1672:1065#0/1  
GCCGCATTTCTTCAATTAACCACCTTATTTCTCAAATTT  
+HWI-EAS443:3:51:1672:1065#0/1  
a¥U^UZ\_\_VR`]Q]abaa`P]UL[bZ¥aaYZW^Y\_Y\_`a[  
@HWI-EAS443:3:51:1676:1003#0/1  
GATGAGAATGGGAGACCTTCACTACCTCCAGAGCAGAAAT  
+HWI-EAS443:3:51:1676:1003#0/1  
^`\_ZY\_[a\_W]a[a[^\_]a]a`^`^\_VW]]]NVaaUKW[`  
@HWI-EAS443:3:51:1709:588#0/1  
GCCGCATTTCTTCAATTAACCACCTTATTTCTCAAATTT  
+HWI-EAS443:3:51:1709:588#0/1  
Xa`S\_L]a`ab^b¥abXabb`ba\_bb^`^aa`baabb`\_]\_

@HWI-EAS443:3:51:1736:1599#0/1  
CCGCATTTCTTCAATTAACCACCTTATTTCTCAAATTTTC  
+HWI-EAS443:3:51:1736:1599#0/1  
Zab¥a¥aa[a`b0`bbbV`bbJ`\_`¥a¥`babab`a`ba  
@HWI-EAS443:3:51:1762:78#0/1  
TGTCGCTTTCAATCTGTGCCGATTTCTTCAATTAACCAC  
+HWI-EAS443:3:51:1762:78#0/1  
aa`\_X`ba\_a\_ba\_ZVa\_YI\_`abbabaWX^aaba¥¥aX  
@HWI-EAS443:3:51:179:1033#0/1  
GGAGAACTGTGATGAGAATGGGAGACCTTCACTACCTCC  
+HWI-EAS443:3:51:179:1033#0/1  
a^`a¥Waa`¥VaYT`^^[V^\_\_VTRYUTX^ZXRU^YWYV[  
@HWI-EAS443:3:51:232:1107#0/1  
GAAACTGTGATGAGAATGGGAGACCTTCACTACCTCCAGA  
+HWI-EAS443:3:51:232:1107#0/1  
a`a¥abb`baabaa`baa`\_a^^`\_aa^`a\_^\_\_\_\_\_`]  
@HWI-EAS443:3:51:270:750#0/1  
GGCCTATTATCTTTTGCCTAGGCATGAGCATGAACCAGTC  
+HWI-EAS443:3:51:270:750#0/1  
]^\X[ ]`b\_]Tabb`a`\_]\_\_bXPZb``]Zb[\_bSaaaaZ  
@HWI-EAS443:3:51:271:1113#0/1  
TATCTTTTGCCTAGGCATGAGCATGAACCAGTCTCGTGAC  
+HWI-EAS443:3:51:271:1113#0/1  
aa`aaaaaa`Xa[aa`\_\_a¥a]`a¥^`ZY\_aZZ¥Y^PZ[ ]  
@HWI-EAS443:3:51:281:745#0/1  
AATGGATCTTCAAAGAGGAATCCAGCGAGACACTTAGAAT  
+HWI-EAS443:3:51:281:745#0/1  
aabb`\_`aabbbaaaaabbaaa`[aa`a\_b``a\_aa\_a\_aa  
@HWI-EAS443:3:51:305:195#0/1  
GCCGCATTTCTTCAATTAACCACCTTATTTCTCAAATTT  
+HWI-EAS443:3:51:305:195#0/1  
```a`bbba`a`^aaabaaaaa]aaba¥Za^aa`a\_a  
@HWI-EAS443:3:51:306:1416#0/1  
GAGAACTGTGATGAGAATGGGAGACCTTCACTACCTCCA  
+HWI-EAS443:3:51:306:1416#0/1  
¥bXabbabbaabbba`babb\_]\_aa[\_aa\_a]a\_^\_aX\_\_  
@HWI-EAS443:3:51:307:1966#0/1  
GCGCGAAGTAGGTACAGATGCAATTGTCATTCTAAGTGTC  
+HWI-EAS443:3:51:307:1966#0/1  
^`\_]`^K`]a^aT]^a]a¥^XZR]]XY\_]`]Qa`]`V`VU  
@HWI-EAS443:3:51:309:1571#0/1  
GTGCGTTTCAATCTGTGCCGATTTCTTCAATTAACCACC  
+HWI-EAS443:3:51:309:1571#0/1  
aaaa`a`aaaa^a`]a`^a\_]`a`aa``\_aa``\_Z\_^  
@HWI-EAS443:3:51:329:735#0/1  
ATCGTGGAATGGATCTTCAAAGAGGAATCCAGCGAGACAC  
+HWI-EAS443:3:51:329:735#0/1  
ab`aQ`YWW\_]HTabbaaaUabaa^`Z]]]aabRUXO  
@HWI-EAS443:3:51:33:880#0/1  
GCTTGGAGAACTGTGATGAGAATGGGAGACCTTCACTAC

+HWI-EAS443:3:51:33:880#0/1  
abaab`a^aaaab\_aaaa\_a`\_a`a\_a^\_\_\_a`\_^\_X  
@HWI-EAS443:3:51:362:1767#0/1  
GAATGGGAGACCTTCACTACCTCCAGAGCAGAAATGAAAA  
+HWI-EAS443:3:51:362:1767#0/1  
``a`a`¥]bbaaaaabaaa^]^[aa\_a`^`\_^aa^\_^\_  
@HWI-EAS443:3:51:378:1425#0/1  
GTCTCTGAAAATATACAGAGATTCGCTTGGAGAACTGTG  
+HWI-EAS443:3:51:378:1425#0/1  
YY¥0Z[¥VQU¥a\_¥UW¥V^]P\_[ZY^SOYIGSQUUI[V[T  
@HWI-EAS443:3:51:402:1205#0/1  
TGAGAATGGGAGACCTTCACTACCTCCAGAGCAGAAATGA  
+HWI-EAS443:3:51:402:1205#0/1  
aa`b`aaba\_]ba\_aaaaa`aa¥]a\_a`a`\_¥\_a^V^a\_^  
@HWI-EAS443:3:51:417:63#0/1  
GCCGCATTTCTTCAATTAACCACCTTATTTCTCAAATTT  
+HWI-EAS443:3:51:417:63#0/1  
a`abaabbaab`\_`abba`a\_a\_^aaabaa\_\_a`aaaaaa  
@HWI-EAS443:3:51:423:1695#0/1  
CCGCATTTCTTCAATTAACCACCTTATTTCTCAAATTT  
+HWI-EAS443:3:51:423:1695#0/1  
aab`baabaaaaaaaaaaaa\_a\_babaa`^`aa``\_aa`\_  
@HWI-EAS443:3:51:467:184#0/1  
AGAAACTGTGATGAGAATGGGAGACCTTCACTACCTCCAG  
+HWI-EAS443:3:51:467:184#0/1  
\_aaa`^bb\_a^ab\_a^aaa`a^^RQZ`\_\_\_`]\_\_\_]Z^X]^\_  
@HWI-EAS443:3:51:515:1227#0/1  
GTGATGAGAATGGGAGACCTTCACTACCTCCAGAGCAGAA  
+HWI-EAS443:3:51:515:1227#0/1  
`¥a`aa^b`¥ba`WUXY^X`\_\_`Z``V\_^ZW^a¥`^^`QZ  
@HWI-EAS443:3:51:548:1659#0/1  
GCGCGAAGTAGGTACAGATGCAATTGTCATTCTAAGTGTC  
+HWI-EAS443:3:51:548:1659#0/1  
a`\_`Y`\_\_T]aaW¥¥\_a^\_¥a`\_\_\_\_Z^X\_XQY]]YTBBB  
@HWI-EAS443:3:51:57:244#0/1  
GAAACTGTGATGAGAATGGGAGACCTTCACTACCTCCAGA  
+HWI-EAS443:3:51:57:244#0/1  
a]aaL^[U`aW`U`PT¥`]aR^Y`I\_a[a\_GZ^SW\_[ZY¥  
@HWI-EAS443:3:51:57:935#0/1  
CAGAGATTCGCTTGGAGAACTGTGATGAGAATGGGAGAC  
+HWI-EAS443:3:51:57:935#0/1  
`]¥T[[\_`a^abaaa\_]^[^b]\_\_`a^aT\_Xa`aG]GG  
@HWI-EAS443:3:51:589:908#0/1  
GAAAATATACAGAGATTCGCTTGGAGAACTGTGATGAGA  
+HWI-EAS443:3:51:589:908#0/1  
aa`^`aab`\_`b`aX\_a^a\_\_`a`^a`\_]\_aX`\_\_Y\_Y  
@HWI-EAS443:3:51:60:361#0/1  
TGTGATGAGAATGGGAGACCTTCACTACCTCCAGAGCAGA  
+HWI-EAS443:3:51:60:361#0/1  
abX^]`bY^`[a]`ZX\_TP\_]a\_\_\_aa^[^`\_^a^a\_Z\_[



@HWI-EAS443:3:51:639:1476#0/1  
GATTTCGCTTGGAGAACTGTGATGAGAATGGGAGACCTTC  
+HWI-EAS443:3:51:639:1476#0/1  
a`aa^aaaa`a`\_``]aaY`\_`\_]\_^Z`^`^Z`^`\_]^[  
@HWI-EAS443:3:51:639:552#0/1  
GAAAATATACAGAGATTTCGCTTGGAGAACTGTGATGAGA  
+HWI-EAS443:3:51:639:552#0/1  
¥^b[^aa`\_]`bbbab`^`aabbaaa`\_]Y^a¥\_Ra`]a]  
@HWI-EAS443:3:51:640:1374#0/1  
GTCGCTTTCAATCTGTGCCGATTTCTTCAATTAACCACC  
+HWI-EAS443:3:51:640:1374#0/1  
a`\_b\_aabaaaaaa`ba\_]¥aaaa]aa\_``abaa````\_W  
@HWI-EAS443:3:51:654:834#0/1  
TGAAAATATACAGAGATTTCGCTTGGAGAACTGTGATGAG  
+HWI-EAS443:3:51:654:834#0/1  
]a¥`¥`a`aa\_abaa`ZY^\_a[a[L[¥Z¥W^b]^S[^RY  
@HWI-EAS443:3:51:657:1032#0/1  
AGAAACTGTGATGAGAATGGGAGACCTTCACTACCTCCAG  
+HWI-EAS443:3:51:657:1032#0/1  
]aSaV\_T¥RR[]W[XZQZ`ZQS^WZ\_UGWX\_]XY^\_Y]¥  
@HWI-EAS443:3:51:690:432#0/1  
GCGGCACAGATTGAAAGCGACAGAGAATAGTTTCGAACAA  
+HWI-EAS443:3:51:690:432#0/1  
aaabWV¥\_b¥aa`]a`aR^`S\_`¥X`]a`\_YZa]a]\_Y`\_  
@HWI-EAS443:3:51:738:875#0/1  
TGAGAATGGGAGACCTTCACTACCTCCAGAGCAGAAATGA  
+HWI-EAS443:3:51:738:875#0/1  
`\_a``aba`a^`Z`¥\_]`a``[``a[¥\_Y\_\_````]`a]  
@HWI-EAS443:3:51:759:773#0/1  
CGCTTGGAGAACTGTGATGAGAATGGGAGACCTTCACTA  
+HWI-EAS443:3:51:759:773#0/1  
abaaabb[babbaba`b`\_aaaa`aaba\_a]\_`aa\_a^`a  
@HWI-EAS443:3:51:763:1438#0/1  
GCCGCATTTCTTCAATTAACCACCTTATTTCTCAAATTT  
+HWI-EAS443:3:51:763:1438#0/1  
¥]\_b\_X¥b`]ab`Yaabaa]X`Y`aaa``aZab^``]a\_a  
@HWI-EAS443:3:51:842:1208#0/1  
GCCGCATTTCTTCAATTAACCACCTTATTTCTCAAATTT  
+HWI-EAS443:3:51:842:1208#0/1  
a`ba^abb\_R\_b`[¥b]`\_T`YVSaaabaa¥]\_UZ`aaaZ  
@HWI-EAS443:3:51:842:973#0/1  
CCGCATTTCTTCAATTAACCACCTTATTTCTCAAATTT  
+HWI-EAS443:3:51:842:973#0/1  
`bbbaaabbbbaaabababbaabbabbbaababb]baaa  
@HWI-EAS443:3:51:845:1372#0/1  
ATGGTAACACGGTTCGAGTCTCTGAAAATATACAGAGATT  
+HWI-EAS443:3:51:845:1372#0/1  
abbb`bbab`b``a]bbb`aaaa\_a\_U\_aaa`aaaa¥aa  
@HWI-EAS443:3:51:84:1353#0/1  
CGAGAAAGCTTATCTCTTGTCTACTTCAAGCAGTAGT

+HWI-EAS443:3:51:84:1353#0/1  
abbaaaaa`babba`babaabaaaaaba`aaabb]abS  
@HWI-EAS443:3:51:872:214#0/1  
GTGATGAGAATGGGAGACCTTCACTACCTCCAGAGCAGAA  
+HWI-EAS443:3:51:872:214#0/1  
aa\_Paa¥`¥aabb`a`\_\_`ZZ\_\_[P]UYQ]Ma¥\_\_Y¥  
@HWI-EAS443:3:51:95:1481#0/1  
AGAAACTGTGATGAGAATGGGAGACCTTCACTACCTCCAG  
+HWI-EAS443:3:51:95:1481#0/1  
`V\_`^aaa[aa]`aa^`a\_]\_]S[[WR]`a\_aX\_^X^]  
@HWI-EAS443:3:51:964:427#0/1  
GGTTAATTGAAGAAATGCGGCACAGATTGAAAGCGACAGA  
+HWI-EAS443:3:51:964:427#0/1  
abababbbbaabaaabbaaa\_a`abaabbaaaa\_b`\_aaa  
@HWI-EAS443:3:51:979:679#0/1  
GAGCAATTGGGACAGAAATTTGAGGAAATAAGGTGGTTAA  
+HWI-EAS443:3:51:979:679#0/1  
a\_¥[\_`bbabba]\_`aaabaaa]aa]`ab^\_a`Uab]\_^\_  
@HWI-EAS443:3:52:1064:446#0/1  
GTCGCTTTCAATCTGTGCCGATTTCTTCAATTAACCACC  
+HWI-EAS443:3:52:1064:446#0/1  
a`aa`aa`a`\_`^Z\_\_^\_¥[]^`\_]\_]`a^\_^]Y^  
@HWI-EAS443:3:52:1065:924#0/1  
CGCATTCTTCAATTAACCACCTTATTTCTCAAATTTCT  
+HWI-EAS443:3:52:1065:924#0/1  
abbabbbbbbabbbaab`aa`bbabba`abaaaab`aab  
@HWI-EAS443:3:52:1093:730#0/1  
GCGCTACCTTTCTGACATGACCCTCGAGGAAATGTCACGA  
+HWI-EAS443:3:52:1093:730#0/1  
`X[\_a^^R`\_Z^VYaZOUX`[PUHS][PBBBBBBBBBB  
@HWI-EAS443:3:52:1108:225#0/1  
GCTTGGAGAACTGTGATGAGAATGGGAGACCTTCACTAC  
+HWI-EAS443:3:52:1108:225#0/1  
a``baabaaa¥abaa^aa`a````a^a][[``¥^Y\_\_Y  
@HWI-EAS443:3:52:1128:912#0/1  
AGAAACTGTGATGAGAATGGGAGACCTTCACTACCTCCAG  
+HWI-EAS443:3:52:1128:912#0/1  
Y`X[[^]T\_Z¥]XTR]`]`¥[X\_¥L\_Y^\_^\_]S\_`^YZa  
@HWI-EAS443:3:52:1137:745#0/1  
CGCTTGGAGAACTGTGATGAGAATGGGAGACCTTCACTA  
+HWI-EAS443:3:52:1137:745#0/1  
aaba\_bbabaaa\_ab\_a\_`aYb[`aaa^^^\_U¥^ZXa][V  
@HWI-EAS443:3:52:1158:1455#0/1  
GCCGATTTCTTCAATTAACCACCTTATTTCTCAAATTT  
+HWI-EAS443:3:52:1158:1455#0/1  
[a`ab`baaabb`[]\_ababa^\_aa¥\_bbbb\_baaaaaab  
@HWI-EAS443:3:52:1169:1225#0/1  
TGCCGATTTCTTCAATTAACCACCTTATTTCTCAAATT  
+HWI-EAS443:3:52:1169:1225#0/1  
aba`ababaa\_a`aaaaaa`aa\_\_baaaaa`aaaa]Xaa

@HWI-EAS443:3:52:1176:171#0/1  
GCCGCATTTCTTCAATTAACCACCTTATTTCTCAAATTT  
+HWI-EAS443:3:52:1176:171#0/1  
``^[T^]`YV]¥[^NX\_`^SR[VOY[¥\_`^ZUZ^X¥WP[]]  
@HWI-EAS443:3:52:1184:1486#0/1  
CTCTGAAAATATACAGAGATTTCGCTTGGAGAACTGTGAT  
+HWI-EAS443:3:52:1184:1486#0/1  
ab``abb^aabbbab``b\_bb[^PXb]``\_aaaZaa`\_^`  
@HWI-EAS443:3:52:1229:1027#0/1  
GCCGCATTTCTTCAATTAACCACCTTATTTCTCAAATTT  
+HWI-EAS443:3:52:1229:1027#0/1  
a\_¥¥TP\_baWb``UUa`a`V\_]VJ¥a[a`aSXa`\_Z``\_`  
@HWI-EAS443:3:52:1234:989#0/1  
GAAACTGTGATGAGAATGGGAGACCTTCACTACCTCCAGA  
+HWI-EAS443:3:52:1234:989#0/1  
``aabbabaa\_Xb\_a\_a`\_a]``\_`^a]aa\_\_\_\_``\_]X  
@HWI-EAS443:3:52:1258:1052#0/1  
AGAAACTGTGATGAGAATGGGAGACCTTCACTACCTCCAG  
+HWI-EAS443:3:52:1258:1052#0/1  
\_``ba^aa`aaaaa`^aaaaRYZV[a`^a]`a\_\_a^Y\_\_  
@HWI-EAS443:3:52:12:145#0/1  
GATATGCCAAAGGAAACAGTCTACCTGAAAGCTTGACATG  
+HWI-EAS443:3:52:12:145#0/1  
\_`^)`a^ZZZ[^YUXV[^SW[]]V¥\_RXY^SV[VQXURX  
@HWI-EAS443:3:52:1311:1391#0/1  
GCCGCATTTCTTCAATTAACCACCTTATTTCTCAAATTT  
+HWI-EAS443:3:52:1311:1391#0/1  
aaab\_aaaa`a`\_aaaaa`^a\_Za`b\_a\_Xa`\_a\_a`a  
@HWI-EAS443:3:52:1313:2006#0/1  
CTGTGCCGCATTTCTTCAATTAACCACCTTATTTCTCAA  
+HWI-EAS443:3:52:1313:2006#0/1  
I\_\_\_\_aW^\_W¥Zb\_0\_\_`b^^`\_aa`¥SW[a^Z[JY¥`V^  
@HWI-EAS443:3:52:1332:39#0/1  
TGAGAATGGGAGACCTTCACTACCTCCAGAGCAGAAATGA  
+HWI-EAS443:3:52:1332:39#0/1  
Yba`PYba^ZaY`¥PX]\_¥MW[]PYXXRHK\_XY]GY^]VV  
@HWI-EAS443:3:52:1357:604#0/1  
AGAAACTGTGATGAGAATGGGAGACCTTCACTACCTCCAG  
+HWI-EAS443:3:52:1357:604#0/1  
\_``\_aaababba`ab¥bbabaab\_\_aaa\_a\_\_\_\_TZa[`\_a  
@HWI-EAS443:3:52:1358:352#0/1  
GCCGCATTTCTTCAATTAACCACCTTATTTCTCAAATTT  
+HWI-EAS443:3:52:1358:352#0/1  
^`^bbbbbbaaabbaababb\_abaabbbbaabaabaaa`aab  
@HWI-EAS443:3:52:1371:1068#0/1  
TATCTTTTGCCTAGGCATGAGCATGAACCAGTCTCGTGAC  
+HWI-EAS443:3:52:1371:1068#0/1  
^^ba^bbbb\_Z`]\_]\_0\_ab\_Q[`a`a\_[`a`Sa\_a\_XUN  
@HWI-EAS443:3:52:1379:413#0/1  
GAAACTGTGATGAGAATGGGAGACCTTCACTACCTCCAGA

+HWI-EAS443:3:52:1379:413#0/1  
`[\_P`a`][aa\_aZYaa^)`a`S[U\_H^^UUX\_\_V¥\_^  
@HWI-EAS443:3:52:1440:1247#0/1  
GAAACTGTGATGAGAATGGGAGACCTTCACTACCTCCAGA  
+HWI-EAS443:3:52:1440:1247#0/1  
aaba\_aaaaabbaa\_aabaa\_a\_X`aa\_a^aa\_^^`^]a^  
@HWI-EAS443:3:52:1474:496#0/1  
AGAAAGCTCTTATCTCTTGTCTACTTCAAGCAGTAGTTG  
+HWI-EAS443:3:52:1474:496#0/1  
aaX¥a^¥[`aaaa]^`ab`^aaa]`aa[`a\_V^a`]b]\_a  
@HWI-EAS443:3:52:151:1250#0/1  
GCCGCATTTCTTCAATTAACCACCTTATTTCTCAAATTT  
+HWI-EAS443:3:52:151:1250#0/1  
aaabRP¥[[]WU]]XY`a\_YTX^Z]^W]\_\_ZR^\_[XX`\_X  
@HWI-EAS443:3:52:1536:909#0/1  
GCCGCATTTCTTCAATTAACCACCTTATTTCTCAAATTT  
+HWI-EAS443:3:52:1536:909#0/1  
aaab`\_baaabaaa\_aaa`\_^aZ\_aaaaa`¥^a\_[I\_aaa  
@HWI-EAS443:3:52:1558:837#0/1  
TGAGAATGGGAGACCTTCACTACCTCCAGAGCAGAAATGA  
+HWI-EAS443:3:52:1558:837#0/1  
`b`a^][\_]FQ]a`\_\_Y^ZRYSOHZS¥\_^[VN``¥\_\_Z^V  
@HWI-EAS443:3:52:155:1101#0/1  
GGAGAACTGTGATGAGAATGGGAGACCTTCACTACCTCC  
+HWI-EAS443:3:52:155:1101#0/1  
`a^\_a^`\_]aa`\_]\_[`¥a`\_U]]N]^`^`¥]^¥]^¥Y  
@HWI-EAS443:3:52:1575:567#0/1  
TGAGAATGGGAGACCTTCACTACCTCCAGAGCAGAAATGA  
+HWI-EAS443:3:52:1575:567#0/1  
¥a`\_]`bYaa\_]¥Y`X````aSQ]`\_QP¥`¥\_aN\_Z¥Y¥  
@HWI-EAS443:3:52:1576:1401#0/1  
GAGAACTGTGATGAGAATGGGAGACCTTCACTACCTCCA  
+HWI-EAS443:3:52:1576:1401#0/1  
]¥aa`^`¥`V`aaTW]ZKaaaabUUL]¥Y^Wa\_\_¥a¥X¥  
@HWI-EAS443:3:52:1605:1451#0/1  
GCCGCATTTCTTCAATTAACCACCTTATTTCTCAAATTT  
+HWI-EAS443:3:52:1605:1451#0/1  
a\_[b\_\_aaaXa`\_^a`]^W]]YY\_\_a^a][\_]\_^`]-  
@HWI-EAS443:3:52:1663:815#0/1  
ATGAGAATGGGAGACCTTCACTACCTCCAGAGCAGAAATG  
+HWI-EAS443:3:52:1663:815#0/1  
aab`a\_aaaX^]aZ]\_\_a`\_[a\_ZU^\_]W\_]¥XZ[[\_]\_^  
@HWI-EAS443:3:52:1680:2027#0/1  
ATGAGAATGGGAGACCTTCACTACCTCCAGAGCAGAAATG  
+HWI-EAS443:3:52:1680:2027#0/1  
a\_b`\_GZaba\_\_a\_¥¥`a\_\_¥\_\_MFXU[Q`¥\_\_Na[PT`^  
@HWI-EAS443:3:52:1684:1555#0/1  
CACGGTTCGAGTCTCTGAAAATATACAGAGATTTCGCTTGG  
+HWI-EAS443:3:52:1684:1555#0/1  
ab`^]¥b¥Z]a`a`W`aa¥aaa\_Y[N¥a]\_¥Y`[`¥`[Y`

@HWI-EAS443:3:52:175:578#0/1  
GTAGGTACAGATGCAATTGTCATTCTAAGTGTCTCGCTGG  
+HWI-EAS443:3:52:175:578#0/1  
a\_`a\_¥`\_]^[a\_[]aa`]^]\_^R\_^\_Y\_YW^WU¥X¥^  
@HWI-EAS443:3:52:1765:934#0/1  
GAGAACTGTGATGAGAATGGGAGACCTTCACTACCTCCA  
+HWI-EAS443:3:52:1765:934#0/1  
]]]aaa]a¥Ya`b]YZ[M^^]][\_^^^[\^^Z`\_`Y^XXP  
@HWI-EAS443:3:52:191:230#0/1  
AGAACTGTGATGAGAATGGGAGACCTTCACTACCTCCAG  
+HWI-EAS443:3:52:191:230#0/1  
ab`aa``]`babbaa¥\_\_aa`Ua`^¥`^^`X\_\_Z^\_W[^]  
@HWI-EAS443:3:52:193:975#0/1  
TGAAAATATACAGAGATTCGCTTGGAGAACTGTGATGAG  
+HWI-EAS443:3:52:193:975#0/1  
^ZHY[Y¥Za\_s\_]Y[RYW^\_WTV[TN]ZUTR[^¥^KKZ¥N  
@HWI-EAS443:3:52:200:534#0/1  
GTCGCTTCAATCTGTGCCGATTTCTTCAATTAACCACC  
+HWI-EAS443:3:52:200:534#0/1  
^S]baJ`]]`a]Yaa^````^]X^^`XQ¥W]]]S\_`\_\_VT  
@HWI-EAS443:3:52:210:1762#0/1  
GAGAATGGGAGACCTTCACTACCTCCAGAGCAGAAATGAA  
+HWI-EAS443:3:52:210:1762#0/1  
Ya\_\_V^\_]TLZ\_aa^]`][a\_[Pa\_\_U^¥]^\_X]¥][X  
@HWI-EAS443:3:52:218:1883#0/1  
CACGGTTCGAGTCTCTGAAAATATACAGAGATTCGCTTGG  
+HWI-EAS443:3:52:218:1883#0/1  
aab````aa``\_`a`aa`[^```a]aaa`]^`\_¥¥Z\_WY\_^  
@HWI-EAS443:3:52:226:26#0/1  
GCCGATTTCTTCAATTAACCACCTTATTTCTCAAATTT  
+HWI-EAS443:3:52:226:26#0/1  
a\_`a`\_a`a^a`^`\_aa¥`\_¥\_Z]\_\_\_`\_^]a`\_^ZP^`^  
@HWI-EAS443:3:52:245:1275#0/1  
AGAACTGTGATGAGAATGGGAGACCTTCACTACCTCCAG  
+HWI-EAS443:3:52:245:1275#0/1  
\_\_¥`\_¥abX`^^^]Y]a^\_a^`YXU[]][a^Z\_[T]YVV^  
@HWI-EAS443:3:52:267:1069#0/1  
TGAGAATGGGAGACCTTCACTACCTCCAGAGCAGAAATGA  
+HWI-EAS443:3:52:267:1069#0/1  
abab]ab^baab`a^aaaa`aa^]`\_`\_aY\_Z\_`^\_\_``¥  
@HWI-EAS443:3:52:273:616#0/1  
GAGAACTGTGATGAGAATGGGAGACCTTCACTACCTCCA  
+HWI-EAS443:3:52:273:616#0/1  
aaaa\_aaab¥a\_aa\_b^^aa`\_[a^^\_\_\_\_\_a^^\_¥Z^¥^¥  
@HWI-EAS443:3:52:335:781#0/1  
GAGAATGGGAGACCTTCACTACCTCCAGAGCAGAAATGAA  
+HWI-EAS443:3:52:335:781#0/1  
a`aZX`aaa]\_][\_\_`\_`\_^\_]Y¥V]Y^^]`U]Y``¥Y  
@HWI-EAS443:3:52:368:25#0/1  
GTGATGAGAATGGGAGACCTTCACTACCTCCAGAGCAGAA

+HWI-EAS443:3:52:368:25#0/1  
a\_b¥`b]a`\_a` `X`WXZY\_] ^Z^]ZW^ZZZ\_Z\_XX\_ZX  
@HWI-EAS443:3:52:368:734#0/1  
TGAGAATGGGAGACCTTCACTACCTCCAGAGCAGAAATGA  
+HWI-EAS443:3:52:368:734#0/1  
ab]a^a^bbaW`aa`a\_aa`a]`\_]\_a^`^\_aZ^a]V]aa\_  
@HWI-EAS443:3:52:419:1080#0/1  
AACAAATCGTGAATGGATCTTGAAAGAGGAATCCAGCGA  
+HWI-EAS443:3:52:419:1080#0/1  
abb]babbb\_aaa`aaaa`^aaa`\_`a¥`\_`^a^S]] [N\_ [N\_  
@HWI-EAS443:3:52:439:1172#0/1  
GTGCCGATTTCTTCAATTAACCACCTTATTTCTCAAAT  
+HWI-EAS443:3:52:439:1172#0/1  
a\_aa`baabb\_baaaaaa`\_a` `aa`aaaa^aaa`\_a`  
@HWI-EAS443:3:52:475:244#0/1  
GTGATGAGAATGGGAGACCTTCACTACCTCCAGAGCAGAA  
+HWI-EAS443:3:52:475:244#0/1  
a^b`aaX` ``aaa`\_\_Z^U^\_`X^\_VPWSVW`X\_]W\_Y]  
@HWI-EAS443:3:52:517:506#0/1  
CTCTGAAAATATACAGAGATTCGCTTGGAGAACTGTGAT  
+HWI-EAS443:3:52:517:506#0/1  
aaaa¥WWIWWT]^XZ¥^bS\_WP¥XJMX\_\_a\_R^V[aUSTX  
@HWI-EAS443:3:52:52:62#0/1  
TGAGAATGGGAGACCTTCACTACCTCCAGAGCAGAAATGA  
+HWI-EAS443:3:52:52:62#0/1  
ab`a\_\_aba`\_S[Z¥[^\_¥\_\_UW¥ZVZ\_V`WX\_VUVW\_V  
@HWI-EAS443:3:52:551:1236#0/1  
AAAGGAAGAGGCAACACCCTTGGCCTCGATATCGAAACAG  
+HWI-EAS443:3:52:551:1236#0/1  
\_[ON\_a^\_Q^¥`¥\_YZZ`\_`a¥[]X¥[Z[`]\_]¥ZX`U\_U  
@HWI-EAS443:3:52:560:1547#0/1  
TGCCGCATTTCTTCAATTAACCACCTTATTTCTCAAATT  
+HWI-EAS443:3:52:560:1547#0/1  
aba]b^`baaa]ab[bb\_] ^W]a` `abbaaaabaaa\_aa  
@HWI-EAS443:3:52:568:1618#0/1  
TACAGATGCAATTGTCATTCTAAGTGTCTCGCTGGATTCC  
+HWI-EAS443:3:52:568:1618#0/1  
abba][aUaa`ba]^a\_aa\_b` `a^b)`a\_aX`\_V[[aTD  
@HWI-EAS443:3:52:57:674#0/1  
AGAAACTGTGATGAGAATGGGAGACCTTCACTACCTCCAG  
+HWI-EAS443:3:52:57:674#0/1  
aa\_] ]\_a` ]a\_ZaUZV]\_a¥QR¥^UU\_XWZVZ]RMVWUU`  
@HWI-EAS443:3:52:612:1412#0/1  
CGCTTGGAGAACTGTGATGAGAATGGGAGACCTTCACTA  
+HWI-EAS443:3:52:612:1412#0/1  
Va`¥\_Ya`TYaXZbb`\_^aaW¥X¥`aWX^\_PT`Yba\_PY]  
@HWI-EAS443:3:52:732:1266#0/1  
TGTCATTCTAAGTGTCTCGCTGGATTCTTCAAGATC  
+HWI-EAS443:3:52:732:1266#0/1  
]b[aYab\_a]X¥\_[] [ `a¥QXaa¥a`ZY\_\_a` `WTY[¥`\_`

@HWI-EAS443:3:52:744:399#0/1  
GCCGCATTTCTTCAATTAACCACCTTATTTCCCTCAAATTT  
+HWI-EAS443:3:52:744:399#0/1  
[`¥bYb`Z`^bVbb[aaS\_IZ^]\_ababb`a^aVVaaaYa  
@HWI-EAS443:3:52:765:656#0/1  
CTCCCATTCTCATCACAGTTTCTCCAAGCGAATCTCTGTA  
+HWI-EAS443:3:52:765:656#0/1  
ababbbbbbabaabbbbb`ababb`bbbbbaababababab  
@HWI-EAS443:3:52:766:744#0/1  
GCCGCATTTCTTCAATTAACCACCTTATTTCCCTCAAATTT  
+HWI-EAS443:3:52:766:744#0/1  
`bbb``bbb]bb`^`abb`a]a^aab`baa`Rbab]`baa  
@HWI-EAS443:3:52:76:609#0/1  
GGAGAACTGTGATGAGAATGGGAGACCTTCACTACCTCC  
+HWI-EAS443:3:52:76:609#0/1  
`\_[^ZTaaabV`aa`a\_Vaaa[¥]\_[\_`\_\_\_\_^^Z^\_¥WX  
@HWI-EAS443:3:52:780:1563#0/1  
GAAACTGTGATGAGAATGGGAGACCTTCACTACCTCCAGA  
+HWI-EAS443:3:52:780:1563#0/1  
a\_aa\_aa]\_]b[Ya\_\_ba\_¥aZRY`\_\_¥¥\_\_Ra`^\_\_¥  
@HWI-EAS443:3:52:797:383#0/1  
CTGTGATGAGAATGGGAGACCTTCACTACCTCCAGAGCAG  
+HWI-EAS443:3:52:797:383#0/1  
abb]bbbbba`aabbbb`bababbaaaaba¥aaaab`a\_ab  
@HWI-EAS443:3:52:79:73#0/1  
GAGAACTGTGATGAGAATGGGAGACCTTCACTACCTCCA  
+HWI-EAS443:3:52:79:73#0/1  
`abYa\_Yaa¥a[\_b¥`¥^\_aaa¥a¥TW\_VXZW\_W^QWUXU  
@HWI-EAS443:3:52:828:855#0/1  
TGCCGCATTTCTTCAATTAACCACCTTATTTCCCTCAAATT  
+HWI-EAS443:3:52:828:855#0/1  
SXZ\_\_U[\_OR\_`\_S\_a`^¥ZZF¥W^¥Ta]ZOTZU\_¥]a]Y  
@HWI-EAS443:3:52:82:1377#0/1  
ATGAGAATGGGAGACCTTCACTACCTCCAGAGCAGAAATG  
+HWI-EAS443:3:52:82:1377#0/1  
aabaaa`aaa`Z^^a`\_\_\_\_aY``Z\_\_`¥X\_V^`¥\_UU\_¥\_  
@HWI-EAS443:3:52:844:1706#0/1  
GAGAACTGTGATGAGAATGGGAGACCTTCACTACCTCCA  
+HWI-EAS443:3:52:844:1706#0/1  
`a\_aZ`bbaR¥aa\_`]a`\_X\_\_a\_[¥]````\_aaY\_\_\_\_\_`  
@HWI-EAS443:3:52:861:434#0/1  
GAAACTGTGATGAGAATGGGAGACCTTCACTACCTCCAGA  
+HWI-EAS443:3:52:861:434#0/1  
aa`XabXa\_aa\_a[V]aaaXa\_Y]^R]V^\_\_¥\_Z]]¥]  
@HWI-EAS443:3:52:86:1032#0/1  
ATGAGAATGGGAGACCTTCACTACCTCCAGAGCAGAAATG  
+HWI-EAS443:3:52:86:1032#0/1  
abb\_a^\_abaa^b\_^`aa\_a\_\_a\_]``\_YaYa]^a\_^U^\_  
@HWI-EAS443:3:52:878:238#0/1  
AGAAACTGTGATGAGAATGGGAGACCTTCACTACCTCCAG

+HWI-EAS443:3:52:878:238#0/1  
aU]¥¥`baaa`a^N\_`\_`ba\_^a]^a\_]Z^aWX]¥]Y`  
@HWI-EAS443:3:52:894:766#0/1  
TGTCGCTTTCAATCTGTGCCGATTTCTTCAATTAACCAC  
+HWI-EAS443:3:52:894:766#0/1  
ab`aaa`a`\_a`a\_\_^^`¥¥`aa^`a^]\_`¥\_\_\_\_]]Z  
@HWI-EAS443:3:52:93:586#0/1  
ATTGTCTGCAAATCGCTTGCGGATATGCCAAAGGAAACAG  
+HWI-EAS443:3:52:93:586#0/1  
¥`a`Z¥TXN\_b`T\_\_`ZV^`\_ZTTQIQ¥SMX^^¥OYYOWP  
@HWI-EAS443:3:53:1006:645#0/1  
GTGATGAGAATGGGAGACCTTCACTACCTCCAGAGCAGAA  
+HWI-EAS443:3:53:1006:645#0/1  
a\_a`\_a\_a\_\_\_\_a`Wa]¥VYYY\_`^`\_]X^¥^V\_X`^`\_]X  
@HWI-EAS443:3:53:1011:1422#0/1  
GGCTTTCCTACTGAGGAGGGAGCAATAGTTGGAGAAATTTCA  
+HWI-EAS443:3:53:1011:1422#0/1  
ab\_aaaaa\_aaaaaaaaa\_aa`a`a\_VZa\_aa`a\_aa`\_\_  
@HWI-EAS443:3:53:1027:1043#0/1  
GAGAACTGTGATGAGAATGGGAGACCTTCACTACCTCCA  
+HWI-EAS443:3:53:1027:1043#0/1  
`ba\_YX`bb\_baaaa]`a]^]¥V`\_a^a¥`Naa]^`^\_  
@HWI-EAS443:3:53:1045:1610#0/1  
TCCCATTTCTCATCACAGTTTCTCCAAGCGAATCTCTGTAT  
+HWI-EAS443:3:53:1045:1610#0/1  
a\_T`bbaabbb`aaYabab`]`\_W`baR^aa^0a\_b`aa\_  
@HWI-EAS443:3:53:1053:1477#0/1  
ATCCGCAAGCGATTTGCAGACAATGGATTGGGTGATGCCC  
+HWI-EAS443:3:53:1053:1477#0/1  
ab```S`YYYbba]aaa]b]]```aabZ¥XSSY``¥00TN  
@HWI-EAS443:3:53:1058:703#0/1  
GAAACTGTGATGAGAATGGGAGACCTTCACTACCTCCAGA  
+HWI-EAS443:3:53:1058:703#0/1  
¥a¥b`bbU[\_`bababbabbbbab\_b\_aaa``bb`aaa`  
@HWI-EAS443:3:53:105:1975#0/1  
GAAACTGTGATGAGAATGGGAGACCTTCACTACCTCCAGA  
+HWI-EAS443:3:53:105:1975#0/1  
abbbbaabaabaaaaa`P`aaa`aab```^U^a`a`^  
@HWI-EAS443:3:53:105:554#0/1  
CTATTCTCTGTCGCTTTCAATCTGTGCCGATTTCTTCAA  
+HWI-EAS443:3:53:105:554#0/1  
abbb^]aaaa]a`\_]\_a`^aX]]`Zb`aaa]`aa[aa\_V\_  
@HWI-EAS443:3:53:1066:593#0/1  
AGAACTGTGATGAGAATGGGAGACCTTCACTACCTCCAG  
+HWI-EAS443:3:53:1066:593#0/1  
ab]a`aab]\_]a`[\_`\_]\_TW`YZ]^\_a`aa`a\_\_Ya¥[a\_  
@HWI-EAS443:3:53:1076:372#0/1  
CAGAGATTGCTTGGAGAACTGTGATGAGAATGGGAGAC  
+HWI-EAS443:3:53:1076:372#0/1  
abbabbbbabbbaabab\_]\_aabababaabaaba\_\_\_\_aY



@HWI-EAS443:3:53:1077:598#0/1  
ATTCGCTTGGAGAACTGTGATGAGAATGGGAGACCTTCA  
+HWI-EAS443:3:53:1077:598#0/1  
`a`W`ZW`\_bVV`a\_[b`^]`^baaa\_aaabbZba^a\_b\_\_  
@HWI-EAS443:3:53:1085:1758#0/1  
GCCGCATTTCTTCAATTAACCACCTTATTTCTCAAATTT  
+HWI-EAS443:3:53:1085:1758#0/1  
`^a`V`[\_aaTQaY`^^aQaaYU\_¥`]`YZ`^^]XaVR  
@HWI-EAS443:3:53:1107:980#0/1  
GTCGCTTTCAATCTGTGCCGATTTCTTCAATTAACCACC  
+HWI-EAS443:3:53:1107:980#0/1  
a`aaa^a`\_\_`[\_`X]¥]UY^aa`a\_\_`]`^`\_\_`¥^\_X  
@HWI-EAS443:3:53:1212:1143#0/1  
GATGAGAATGGGAGACCTTCACTACCTCCAGAGCAGAAAT  
+HWI-EAS443:3:53:1212:1143#0/1  
aabaa`bbaa^Sba`aaH`¥`\_\_^aYYaa\_a\_\_aW\_\_\_\_  
@HWI-EAS443:3:53:1216:1949#0/1  
ATTACACTGAAGTTCGCTTTCAGTACTATGTTCTTTTCCA  
+HWI-EAS443:3:53:1216:1949#0/1  
`b`b`ba\_b]S`\_abaa`a`XDYRY\_b^aa\_ZS\_aaaIR¥  
@HWI-EAS443:3:53:1248:396#0/1  
GGTTAATTGAAGAAATGCGGCACAGATTGAAAGCGACAGA  
+HWI-EAS443:3:53:1248:396#0/1  
¥bYbabbbbaaa`aabb`b^aa\_bbaaabaa\_a[a`\_aa`  
@HWI-EAS443:3:53:1297:1312#0/1  
GCCGCATTTCTTCAATTAACCACCTTATTTCTCAAATTT  
+HWI-EAS443:3:53:1297:1312#0/1  
aa[aaaaaaba¥]\_baaa^¥^`\_aaaaaa¥aa``¥aa\_  
@HWI-EAS443:3:53:1317:999#0/1  
TGAGAATGGGAGACCTTCACTACCTCCAGAGCAGAAATGA  
+HWI-EAS443:3:53:1317:999#0/1  
aab\_]baabNa`S\_\_bb`\_[aaHVa\_`^`[bZ¥a[`^`a¥  
@HWI-EAS443:3:53:1340:1220#0/1  
GATGAGAATGGGAGACCTTCACTACCTCCAGAGCAGAAAT  
+HWI-EAS443:3:53:1340:1220#0/1  
ab\_\_\_\_abbaba`aab`a`a\_aa\_aaa`aa`b\_\_b``a`  
@HWI-EAS443:3:53:1349:1884#0/1  
CTTGCGGATATGCCAAAGGAAACAGTCTACCTGAAAGCTT  
+HWI-EAS443:3:53:1349:1884#0/1  
aaab`ab`bbab\_^aaa]aabb^aa]aa`]`\_\_aaaaZa`  
@HWI-EAS443:3:53:1400:1608#0/1  
GAAACTGTGATGAGAATGGGAGACCTTCACTACCTCCAGA  
+HWI-EAS443:3:53:1400:1608#0/1  
a¥V\_X^b`a`]`S`[^aaa¥]^¥V¥\_^W\_^a]WNMUTXaW  
@HWI-EAS443:3:53:1463:813#0/1  
GGGACAGAAATTTGAGGAAATAAGGTGGTTAATTGAAGAA  
+HWI-EAS443:3:53:1463:813#0/1  
G]ZUZabaa`bZ¥^abXXXXbba`a^b`bbbX\_^TJ^aba  
@HWI-EAS443:3:53:1475:1976#0/1  
GTCGCTTTCAATCTGTGCCGATTTCTTCAATTAACCACC

+HWI-EAS443:3:53:1475:1976#0/1  
a\_aa`aab\_aaaU`a`a^\_\_^¥aa`\_`\_X¥\_\_`^^^W^^Z  
@HWI-EAS443:3:53:1520:895#0/1  
CAGAGATTCGCTTGGAGAACTGTGATGAGAATGGGAGAC  
+HWI-EAS443:3:53:1520:895#0/1  
abaab\_bbababbba\_bbaVbbbbababbbYZ^bab`a^T  
@HWI-EAS443:3:53:1563:924#0/1  
GAATGGGAGACCTTCACTACCTCCAGAGCAGAAATGAAAA  
+HWI-EAS443:3:53:1563:924#0/1  
`^aa\_\_S\_¥`Y\_`aW\_¥a`\_aaaaa^a\_`\_`\_¥`a[¥^  
@HWI-EAS443:3:53:1593:1983#0/1  
TGCCGCATTTCTTCAATTAACCACCTTATTTCTCAAATT  
+HWI-EAS443:3:53:1593:1983#0/1  
aaWabW`bab^`a\_`¥`aa\_\_\_a\_Yb`abaa[\_b^`\_\_aa  
@HWI-EAS443:3:53:1603:1323#0/1  
GGAGAACTGTGATGAGAATGGGAGACCTTCACTACCTCC  
+HWI-EAS443:3:53:1603:1323#0/1  
ab^ba^`abb\_babb\_b`aabbaabaa[baV^\_b\_\_Ua[N  
@HWI-EAS443:3:53:1616:1983#0/1  
GAAACTGTGATGAGAATGGGAGACCTTCACTACCTCCAGA  
+HWI-EAS443:3:53:1616:1983#0/1  
^aS\_\_`a]^`ab]ZU`aaaQT``aT`\_W```^]Q^`U¥]X  
@HWI-EAS443:3:53:1661:1205#0/1  
GGTTAATTGAAGAAATGCGGCACAGATTGAAAGCGACAGA  
+HWI-EAS443:3:53:1661:1205#0/1  
aa]baabba]]b\_a`ba^b^`\_`babaaaa^b\_aa^`aZ  
@HWI-EAS443:3:53:1753:1221#0/1  
CTTGGAGAACTGTGATGAGAATGGGAGACCTTCACTACC  
+HWI-EAS443:3:53:1753:1221#0/1  
V\_¥a`baWW`\_abaa¥\_QZ\_`¥``bbaaaa`[aUZbaa\_G  
@HWI-EAS443:3:53:1771:1244#0/1  
GTCGCTTTCAATCTGTGCCGATTTCTTCAATTAACCACC  
+HWI-EAS443:3:53:1771:1244#0/1  
^SSbZSRy[a^`]YP\_NG[RL0aaaT[WOSP^^^UPWFQQ  
@HWI-EAS443:3:53:271:685#0/1  
CAATTAACCACCTTATTTCTCAAATTTCTGTCCCAATTG  
+HWI-EAS443:3:53:271:685#0/1  
`aabaabbab`aba`aaaa`a`\_S]baa\_ba`a`aa`a``  
@HWI-EAS443:3:53:273:734#0/1  
GAGAAAGCTCTTATCTCTTGTCTACTTCAAGCAGTAGTT  
+HWI-EAS443:3:53:273:734#0/1  
^`bZQ\_bbaba]``aaaYba``¥Z¥a`b`^`\_a\_[`b\_`  
@HWI-EAS443:3:53:306:1751#0/1  
CTTGAATGGAATGGTAACACGGTTCGAGTCTCTGAAAATA  
+HWI-EAS443:3:53:306:1751#0/1  
`^b]\_\_`aRI\_XX\_Y```\_]`\_ab^aVZZ````¥]`[bab  
@HWI-EAS443:3:53:30:1458#0/1  
ATTACACTGAAGTTTCGCTTTTCAGTACTATGTTCTTTTCCA  
+HWI-EAS443:3:53:30:1458#0/1  
ab``aa]]¥¥[]`aaaaaaba]V\_aaaa\_`^aaa^XZ

@HWI-EAS443:3:53:321:2005#0/1  
GCCGCATTTCTTCAATTAACCACCTTATTTCCCTCAAATTT  
+HWI-EAS443:3:53:321:2005#0/1  
a\_¥a]aY\_UZa¥X^\_`^S^ZXZXT[^]\_^MUM^XQT]ZYU  
@HWI-EAS443:3:53:324:1048#0/1  
GGGAAACAAATCGTGAATGGATCTTAAAAGAGGAATCCA  
+HWI-EAS443:3:53:324:1048#0/1  
¥bZH¥bbbaabbb\_baaaab]]^Yb`baaaaaa[`]a[Za  
@HWI-EAS443:3:53:354:515#0/1  
GCGCGAAGTAGGTACAGATGCAATTGTCATTCTAAGTGTC  
+HWI-EAS443:3:53:354:515#0/1  
aa]a`P`a\_\_`\_Va`^`[]Q]^\_\_`¥WY^`[¥`¥Y]]^^V  
@HWI-EAS443:3:53:359:305#0/1  
GCCGCATTTCTTCAATTAACCACCTTATTTCCCTCAAATTT  
+HWI-EAS443:3:53:359:305#0/1  
L\_Z\_a[ba\_X]]TYW¥\_UUSZWQOYabbaaW]aX\_W```]  
@HWI-EAS443:3:53:367:1067#0/1  
CGCTTTCAATCTGTGCCGCATTTCTTCAATTAACCACCTT  
+HWI-EAS443:3:53:367:1067#0/1  
`baaabbbababa^abbbbaab`aab\_aYbb`[aaa¥abb  
@HWI-EAS443:3:53:367:1328#0/1  
GCCGCATTTCTTCAATTAACCACCTTATTTCCCTCAAATTT  
+HWI-EAS443:3:53:367:1328#0/1  
a]V\_a]\_W^P^Y[\_a^Va`\_`Y^WX]]K[^UR]X¥Z¥YQU  
@HWI-EAS443:3:53:412:1369#0/1  
GTCTCCCATTCTCATCACAGTTTCTCCAAGCGAATCTCTG  
+HWI-EAS443:3:53:412:1369#0/1  
^X¥Z`¥YRXaa\_RT^a¥X[RTUV[Z¥\_TRY[YOUZYOWZ  
@HWI-EAS443:3:53:429:1772#0/1  
AGAAACTGTGATGAGAATGGGAGACCTTCACTACCTCCAG  
+HWI-EAS443:3:53:429:1772#0/1  
`\_a\_H\_ba^V[abaY`aaba`\_ba\_``a\_b`\_a\_\_a[a`\_  
@HWI-EAS443:3:53:453:1759#0/1  
TGCCGCATTTCTTCAATTAACCACCTTATTTCCCTCAAATT  
+HWI-EAS443:3:53:453:1759#0/1  
Q\_a\_b[Y¥ba[Z`a`R\_[aaWX\_XZ\_``\_`baZ]PU````bb  
@HWI-EAS443:3:53:453:765#0/1  
TGAGAATGGGAGACCTTCACTACCTCCAGAGCAGAAATGA  
+HWI-EAS443:3:53:453:765#0/1  
S\_aWQIVa`aWa`\_]Z\_\_\_TaZ\_¥`\_OZ^a[`[^PH[bbX  
@HWI-EAS443:3:53:457:77#0/1  
GAAACTGTGATGAGAATGGGAGACCTTCACTACCTCCAGA  
+HWI-EAS443:3:53:457:77#0/1  
a`b`aab\_a]ababbaabba\_aaQSa`\_]Y[\_][[ZZYa`  
@HWI-EAS443:3:53:472:834#0/1  
GGTTAATTGAAGAAATGCGGCACAGATTGAAAGCGACAGA  
+HWI-EAS443:3:53:472:834#0/1  
`\_¥\_XS]`\_]X[Wa¥`\_`ZY\_Y]``]^¥\_¥YU¥V¥VM^`¥  
@HWI-EAS443:3:53:480:353#0/1  
GGAGAAACTGTGATGAGAATGGGAGACCTTCACTACCTCC

+HWI-EAS443:3:53:480:353#0/1  
aa\_a[X^a`a^bY^`]Z[¥Ya`aT^ZUTTUZ]W¥[YVYKK  
@HWI-EAS443:3:53:486:713#0/1  
CGCCGAGATCAAAAGTCCTTAAAAGGAAGAGGCAACACCC  
+HWI-EAS443:3:53:486:713#0/1  
a\_U^\_Z\_aaa\_TI^`M[LX` `\_aa¥` `\_aabaa\_Sa`a0T  
@HWI-EAS443:3:53:491:1028#0/1  
GTGCCGCATTTCTTCAATTAACCACCTTATTTCTCAAAT  
+HWI-EAS443:3:53:491:1028#0/1  
]HYTZSVa`aaX`XQ00Z]WXST¥Y^Ka\_baa\_aaa`\_a]  
@HWI-EAS443:3:53:49:1748#0/1  
GCCGCATTTCTTCAATTAACCACCTTATTTCTCAAATTT  
+HWI-EAS443:3:53:49:1748#0/1  
`¥]ab\_RUVMYEXP¥¥ZV\_a`^Xaa[baYYYGZa\_]\_\_\_\_  
@HWI-EAS443:3:53:539:470#0/1  
GGGAAACAAATCGTGGAATGGATCTTGAAAGAGGAATCCA  
+HWI-EAS443:3:53:539:470#0/1  
`ababb^`Y¥¥b`]b\_]ab`Y`]abbb^a\_¥\_bb\_]aWH¥  
@HWI-EAS443:3:53:541:804#0/1  
GCGGCACAGATTGAAAGCGACAGAGAATAGTTTCGAACAA  
+HWI-EAS443:3:53:541:804#0/1  
aWU\_QX\_a¥TV^aa\_V\_\_a\_Y¥^W[Z^Z`a\_][¥XW`aU[Z  
@HWI-EAS443:3:53:552:1470#0/1  
GAAACTGTGATGAGAATGGGAGACCTTCACTACCTCCAGA  
+HWI-EAS443:3:53:552:1470#0/1  
\_aR[aaba\_` `a\_bZZaa\_ZP^W`]\_]SKRP\_]\_`]V[XT  
@HWI-EAS443:3:53:566:1670#0/1  
GAGAACTGTGATGAGAATGGGAGACCTTCACTACCTCCA  
+HWI-EAS443:3:53:566:1670#0/1  
aZZ[URP]^`^^`[a[`VYPJQW^HFZUX][`WFT^]NF  
@HWI-EAS443:3:53:567:1685#0/1  
AGAATGGGAGACCTTCACTACCTCCAGAGCAGAAATGAAA  
+HWI-EAS443:3:53:567:1685#0/1  
aaaaab¥P\_a`aaa`bbaa`a\_a`a^a][aa`\_aaaa\_¥  
@HWI-EAS443:3:53:600:1373#0/1  
GAAAATATACAGAGATTCGCTTGGAGAACTGTGATGAGA  
+HWI-EAS443:3:53:600:1373#0/1  
aaa` `^`b^X\_¥0¥`aa¥a`\_`¥L0¥`^HUX]SWVV¥LRQ  
@HWI-EAS443:3:53:637:407#0/1  
GAGAATGGGAGACCTTCACTACCTCCAGAGCAGAAATGAA  
+HWI-EAS443:3:53:637:407#0/1  
\_¥\_[aa¥\_WR^]0]^baaab`a` `a`\_aa\_`]]`a`]^  
@HWI-EAS443:3:53:655:1342#0/1  
ATTATCTTTTGCCTAGGCATGAGCATGAACAGTCTCGTG  
+HWI-EAS443:3:53:655:1342#0/1  
W`\_0\_^]¥aWV\_U]X¥^^aWM[babb\_`\_RQ[^^aaRNJU  
@HWI-EAS443:3:53:662:1734#0/1  
CTCTGAAAATATACAGAGATTCGCTTGGAGAACTGTGAT  
+HWI-EAS443:3:53:662:1734#0/1  
Y\_a`^a¥\_X\_[a`S\_¥\_a¥aS\_ZY`a`TO\_TZQSS¥YUFP

@HWI-EAS443:3:53:693:1271#0/1  
GAATGGGAGACCTTCACTACCTCCAGAGCAGAAATGAAAA  
+HWI-EAS443:3:53:693:1271#0/1  
aZ¥a` `` ` \_Z` `a^Za\_\_`V\_aa] `^]a\_\_a^`¥¥a¥` ^X  
@HWI-EAS443:3:53:727:232#0/1  
AAATCGTGAATGGATCTTGAAAGAGGAATCCAGCGAGAC  
+HWI-EAS443:3:53:727:232#0/1  
aaabababbaabaa`aabaaa\_aaaabaaaa[aa\_a\_`^W  
@HWI-EAS443:3:53:73:180#0/1  
GAAACTGTGATGAGAATGGGAGACCTTCACTACCTCCAGA  
+HWI-EAS443:3:53:73:180#0/1  
¥Z¥]abb`\_U\_bab¥a]bb[V\_^]\_[]\_a\_\_ZO¥UWUa^  
@HWI-EAS443:3:53:747:943#0/1  
CTCCCATTCTCATCACAGTTTCTCCAAGCGAATCTCTGTA  
+HWI-EAS443:3:53:747:943#0/1  
Q\_a¥a\_aabbb`\_\_aa` ` \_X\_\_`aa` ` `b`aa`\_[^\_W]  
@HWI-EAS443:3:53:751:1962#0/1  
GCCGCATTTCTTCAATTAACCACCTTATTTCTCAAATTT  
+HWI-EAS443:3:53:751:1962#0/1  
G]\_^a\_\_aaW\_a^`^`a`\_Q]\_ [¥^[[\_\_`WXY\_\_X\_a`¥  
@HWI-EAS443:3:53:757:594#0/1  
CGCAAGCGATTTGCAGACAATGGATTGGGTGATGCCCCAT  
+HWI-EAS443:3:53:757:594#0/1  
a^XVa` ` \_ab` `]`aRba`]XZZZXYUGLPT]S\_UG[GWT]  
@HWI-EAS443:3:53:784:62#0/1  
CCAGCGAGACACTTAGAATGACAATTGCATCTGTACCTAC  
+HWI-EAS443:3:53:784:62#0/1  
aaa`V`Za¥Yb`bbb`Zabb]\_`babbY^`aaaa\_V¥ZT  
@HWI-EAS443:3:53:792:411#0/1  
TGAAAATATACAGAGATTCGCTTGGAGAACTGTGATGAG  
+HWI-EAS443:3:53:792:411#0/1  
U` []^\_baba]a¥Xa`bb\_\_a^\_^ZS\_\_a` `]^W\_Y[[Za  
@HWI-EAS443:3:53:795:1328#0/1  
GCCGCATTTCTTCAATTAACCACCTTATTTCTCAAATTT  
+HWI-EAS443:3:53:795:1328#0/1  
a][[^a\_abaa^¥\_Z\_aaaSY` [ ` `babab\_[aaaa^aa\_  
@HWI-EAS443:3:53:812:1298#0/1  
CAAATCGTGAATGGATCTTGAAAGAGGAATCCAGCGAGA  
+HWI-EAS443:3:53:812:1298#0/1  
a`\_a\_T^abbabb\_a`aabab]baaab`bbb\_a[W^a\_¥\_  
@HWI-EAS443:3:53:843:130#0/1  
GCCGCATTTCTTCAATTAACCACCTTATTTCTCAAATTT  
+HWI-EAS443:3:53:843:130#0/1  
a`ab`aabb\_bb`a`baa\_^` ` `aaaaa¥]a¥a^aa`  
@HWI-EAS443:3:53:858:315#0/1  
AGAACTGTGATGAGAATGGGAGACCTTCACTACCTCCAG  
+HWI-EAS443:3:53:858:315#0/1  
ababbbbb`babbabaaabababaa`aaab`aa`\_a\_¥^a  
@HWI-EAS443:3:53:91:968#0/1  
TGGAATGGTAACACGGTTCGAGTCTCTGAAAATATACAGA

+HWI-EAS443:3:53:91:968#0/1  
`bbaY^aaTa[ab\_aaZ^`Y`\_\_aaaa\_`````[[W\_V¥  
@HWI-EAS443:3:53:937:701#0/1  
GAAGGTAATGGTGAAATTTCTCCAACCTATTGCTCCCTCCT  
+HWI-EAS443:3:53:937:701#0/1  
aaabb\_bab``\_`aa`bab^b`aaaabaaaa^aa^\_a\_]a  
@HWI-EAS443:3:53:978:109#0/1  
GAAACTGTGATGAGAATGGGAGACCTTCACTACCTCCAGA  
+HWI-EAS443:3:53:978:109#0/1  
aaaaabbaaab[b\_abbb`\_a^\_aaU`\_a^U[`\_U]aU  
@HWI-EAS443:3:53:99:401#0/1  
GAATGGAATGGTAACACGGTTCGAGTCTCTGAAAATATAC  
+HWI-EAS443:3:53:99:401#0/1  
aa^aba\_aaba^`a`a`a`\_]`^a\_a^\_a`]]`\_Z^^\_X  
@HWI-EAS443:3:54:1033:1798#0/1  
GAATGGGAGACCTTCACTACCTCCAGAGCAGAAATGAAAA  
+HWI-EAS443:3:54:1033:1798#0/1  
abbbbbbaaaa]aaba`aa\_\_a\_a\_]a^ab`\_aaaa`aa  
@HWI-EAS443:3:54:1063:1149#0/1  
GATGAGAATGGGAGACCTTCACTACCTCCAGAGCAGAAAT  
+HWI-EAS443:3:54:1063:1149#0/1  
aaaaaaR)`^\_a\_[aPZab\_a¥\_¥\_`^\_\_\_\_a¥aW^a¥^\_`  
@HWI-EAS443:3:54:1075:1107#0/1  
GCCGCATTTCTCAATTAACCACCTTATTTCTCAAATTT  
+HWI-EAS443:3:54:1075:1107#0/1  
aa\_U]`ba`aaaZX`b`\_a\_¥aa^bb`aVaYX^^Ya`^UZ  
@HWI-EAS443:3:54:1094:975#0/1  
GAAGGTAATGGTGAAATTTCTCCAACCTATTGCTCCCTCCT  
+HWI-EAS443:3:54:1094:975#0/1  
aaaaa\_aa\_a`]b`aaaba`aaaa^aaaa\_a\_\_`\_]\_\_  
@HWI-EAS443:3:54:1115:1309#0/1  
AGCAATTGGGACAGAAATTTGAGGAAATAAGGTGGTTAAT  
+HWI-EAS443:3:54:1115:1309#0/1  
¥W\_Y\_¥`b`aab`a\_V]\_\_b`^]\_X^b`¥]ZKa[Z]^`^  
@HWI-EAS443:3:54:1133:1503#0/1  
GAGAATGGGAGACCTTCACTACCTCCAGAGCAGAAATGAA  
+HWI-EAS443:3:54:1133:1503#0/1  
aXZZa^`]ZPa¥T¥a^R[Z]\_ZU[\_X\_\_YZS[`Z¥\_[[¥Y  
@HWI-EAS443:3:54:113:1512#0/1  
CGCTTGGAGAACTGTGATGAGAATGGGAGACCTTCACTA  
+HWI-EAS443:3:54:113:1512#0/1  
aababa\_^]Z\_aaab\_aaaa\_a^aaa\_``^\_¥]]¥]]`\_`  
@HWI-EAS443:3:54:1168:517#0/1  
GGAGAACTGTGATGAGAATGGGAGACCTTCACTACCTCC  
+HWI-EAS443:3:54:1168:517#0/1  
aa\_a¥^`\_aa¥X¥^][aW`\_a^\_Z^YWV¥^V\_]\_^]T]U^  
@HWI-EAS443:3:54:118:1539#0/1  
GTGATGAGAATGGGAGACCTTCACTACCTCCAGAGCAGAA  
+HWI-EAS443:3:54:118:1539#0/1  
aZa`ab[a\_\_\_\_`a\_V¥^Z\_\_\_\_¥\_]\_X^[¥`¥T¥TUU[¥ZW

@HWI-EAS443:3:54:1201:653#0/1  
TGAGAATGGGAGACCTTCACTACCTCCAGAGCAGAAATGA  
+HWI-EAS443:3:54:1201:653#0/1  
aaabaaaba`a`a]\_a`a\_aa\_`^`\_a`\_`U\_a¥`\_aa\_  
@HWI-EAS443:3:54:1296:576#0/1  
GAGAATGGGAGACCTTCACTACCTCCAGAGCAGAAATGAA  
+HWI-EAS443:3:54:1296:576#0/1  
`^b¥]a\_aaa`YXVZ`a\_ZZaa]ZX]]\_[^X]`^X¥V^`\_  
@HWI-EAS443:3:54:1298:849#0/1  
GAAACTGTGATGAGAATGGGAGACCTTCACTACCTCCAGA  
+HWI-EAS443:3:54:1298:849#0/1  
a[^]Wa\_W\_¥]\_^ZXQ¥`QT^]¥U]\_\_\_\_`Z^X[[^]L¥aX  
@HWI-EAS443:3:54:1306:1594#0/1  
AGAAACTGTGATGAGAATGGGAGACCTTCACTACCTCCAG  
+HWI-EAS443:3:54:1306:1594#0/1  
abaab`bbababbab`abWaaa^00¥aYbXab`GbP^a`  
@HWI-EAS443:3:54:1310:1166#0/1  
AGAAACTGTGATGAGAATGGGAGACCTTCACTACCTCCAG  
+HWI-EAS443:3:54:1310:1166#0/1  
aba\_aaba`aaaa[a]aaaaaab]a`aa\_a`\_a^`X\_\_a  
@HWI-EAS443:3:54:1318:1078#0/1  
CGAGAAAGCTTCTTATCTCTTGTCTACTTCAAGCAGTAGT  
+HWI-EAS443:3:54:1318:1078#0/1  
¥XR[a`]OT[[^\_aa`^`\_V`^^Y\_[Pa`^ZZZYaXV[W  
@HWI-EAS443:3:54:1334:310#0/1  
GATGAGAATGGGAGACCTTCACTACCTCCAGAGCAGAAAT  
+HWI-EAS443:3:54:1334:310#0/1  
¥VaaZabaa]Z^^b^UL\_\_UaX\_^][¥WU^a^\_LY\_TTS^  
@HWI-EAS443:3:54:133:1834#0/1  
TATTTTCAGAGACTCGAACCGTGTACCATTCCATTCAAG  
+HWI-EAS443:3:54:133:1834#0/1  
^^^bbb^\_a`¥`a`\_]a^aa`a¥`]a\_a¥`^`\_aa\_^^aa^  
@HWI-EAS443:3:54:1351:1858#0/1  
AAATATACAGAGATTGCTTGGAGAACTGTGATGAGAAT  
+HWI-EAS443:3:54:1351:1858#0/1  
K`bbbbZ]b\_bbabaYT`ba`a¥bab`\_`bYaaaaVaXa  
@HWI-EAS443:3:54:141:791#0/1  
GCGATTTGCAGACAATGGATTGGGTGATGCCCCATTCCCTT  
+HWI-EAS443:3:54:141:791#0/1  
``aaaa^^`aa]\_¥\_```\_^\_]Z^W\_Y]YY\_¥¥]¥XX[^X  
@HWI-EAS443:3:54:1421:966#0/1  
GTGCTTTCAATCTGTGCCGATTTCTTCAATTAACCACC  
+HWI-EAS443:3:54:1421:966#0/1  
abababbb\_abbaabaa\_```\_aaa\_ba\_aaaba`a]\_^\_  
@HWI-EAS443:3:54:1459:655#0/1  
CAAGCGATTTGCAGACAATGGATTGGGTGATGCCCCATTC  
+HWI-EAS443:3:54:1459:655#0/1  
\_ba\_\_b\_¥Wb`U`bbaaZ¥WWaa`aYaU`bYR¥HT\_a^`Y  
@HWI-EAS443:3:54:1487:1786#0/1  
ACTTCGCGCTACCTTTCTGACATGACCCTCGAGGAAATGT

+HWI-EAS443:3:54:1487:1786#0/1  
a^bbbaab`ab`^ba``aaaa`b\_a]\_X`¥a\_a`Z^`\_aW  
@HWI-EAS443:3:54:1495:1549#0/1  
GGAGAACTGTGATGAGAATGGGAGACCTTCACTACCTCC  
+HWI-EAS443:3:54:1495:1549#0/1  
aa]X\_a`]]`Ya]aaY\_N¥`]]`\_^^^RU^^\_^R]SPJYLQ  
@HWI-EAS443:3:54:149:599#0/1  
GAACCAGTCTCGTGACATTTCTCGAGGGTCATGTCAGAA  
+HWI-EAS443:3:54:149:599#0/1  
a`````]`\_a`aZ^[^[\_^Z[¥¥^T\_\_\_U[WW^W[W[RT  
@HWI-EAS443:3:54:1510:1007#0/1  
CCGCATTTCTTCAATTAACCACCTTATTTCTCAAATTTT  
+HWI-EAS443:3:54:1510:1007#0/1  
aa\_a^abb\_ba^¥aabbba`babbbabababbaaabbab`  
@HWI-EAS443:3:54:1570:972#0/1  
GAGAATGGGAGACCTTCACTACCTCCAGAGCAGAAATGAA  
+HWI-EAS443:3:54:1570:972#0/1  
aW\_VP^]]\_W\_XNZYZ]\_`\_]VS]UXTPV]T[RPPTNQ  
@HWI-EAS443:3:54:1610:590#0/1  
AGTCTCGTGACATTTCTCGAGGGTCATGTCAGAAAGGTA  
+HWI-EAS443:3:54:1610:590#0/1  
ab`bbbb`a\_\_`aa\_a^¥][\_`X]Z^aa`\_`X¥ZVY^QN¥  
@HWI-EAS443:3:54:1619:1267#0/1  
GCTTGGAGAACTGTGATGAGAATGGGAGACCTTCACTAC  
+HWI-EAS443:3:54:1619:1267#0/1  
W\_\_b\_b]b]`aab[Z\_X^`^^\_abb^\_\_a^\_YaaTa¥]`Y  
@HWI-EAS443:3:54:1634:933#0/1  
CACGGTTCGAGTCTCTGAAAATATACAGAGATTCGCTTGG  
+HWI-EAS443:3:54:1634:933#0/1  
]aabbbb^\_aba`aZa\_[babaabba`aZS¥ab¥^aab¥S  
@HWI-EAS443:3:54:1639:495#0/1  
GAAACTGTGATGAGAATGGGAGACCTTCACTACCTCCAGA  
+HWI-EAS443:3:54:1639:495#0/1  
aaaa[abaa]`aRa\_ZHZa]Za[^\_\_`Z`\_\_`VM^¥VT\_]`  
@HWI-EAS443:3:54:1644:328#0/1  
CTGTGATGAGAATGGGAGACCTTCACTACCTCCAGAGCAG  
+HWI-EAS443:3:54:1644:328#0/1  
Waa¥`^bbbYbababb`¥YY``ba\_a¥¥a¥aaba`UK^a`  
@HWI-EAS443:3:54:1647:903#0/1  
ATGAGAATGGGAGACCTTCACTACCTCCAGAGCAGAAATG  
+HWI-EAS443:3:54:1647:903#0/1  
aaa`aabbbY^aaa\_\_ab\_a`aaZW`\_U`\_ZZ`\_\_^[a`  
@HWI-EAS443:3:54:1660:1593#0/1  
TGGGAAACAAATCGTGGAATGGATCTTGAAAGAGGAATCC  
+HWI-EAS443:3:54:1660:1593#0/1  
aa^\_\_a]WXaaaIa`a`a`aba[\_]aa^`\_`\_]Z\_\_YRRW  
@HWI-EAS443:3:54:1667:1274#0/1  
GCCGCATTTCTTCAATTAACCACCTTATTTCTCAAATTT  
+HWI-EAS443:3:54:1667:1274#0/1  
aaabbbbbbb[bbaa[`aab]`^UV\_a\_aa]aaba]]`aaa



@HWI-EAS443:3:54:1746:1759#0/1  
GCCGCATTTCTTCAATTAACCACCTTATTTCTCAAATTT  
+HWI-EAS443:3:54:1746:1759#0/1  
^MQ^V[XYTT\_ ^MR¥XTIZQMM[PY\_ ^^XROLXMOSS[Z]  
@HWI-EAS443:3:54:176:1845#0/1  
AACTGTGATGAGAATGGGAGACCTTCACTACCTCCAGAGC  
+HWI-EAS443:3:54:176:1845#0/1  
aaaaa\_babaaaaab`]¥a` `a` `a\_`a\_` ]]\_\_`XZZ  
@HWI-EAS443:3:54:1777:215#0/1  
CGCATTTCTTCAATTAACCACCTTATTTCTCAAATTTCT  
+HWI-EAS443:3:54:1777:215#0/1  
^H\_[a¥ZZ\_W\_W^^^a]UJZ\_^] `^]a\_`aa\_a¥^`¥XY\_  
@HWI-EAS443:3:54:1779:1078#0/1  
GAGAAAGCTCTTATCTCTTGTCTACTTCAAGCAGTAGTT  
+HWI-EAS443:3:54:1779:1078#0/1  
a` `Vaa\_aaUa` \_\_SWTa\_QZ` ^` `V` `Y^[] ^X[¥^^XX  
@HWI-EAS443:3:54:188:1290#0/1  
AGGCAACACCTTGGCCTCGATATCGAAACAGCCACTCTT  
+HWI-EAS443:3:54:188:1290#0/1  
\_[] `a`a\_`a\_TQ^Va\_a`a` \_a`Z` ^[\_WQU\_[MYVV  
@HWI-EAS443:3:54:188:306#0/1  
AAAGATAATAGGCCCTTTGCGTGCATTGGACCAGGCG  
+HWI-EAS443:3:54:188:306#0/1  
a] `bba` \_^bab`a^b\_baaaab`b\_b` \_aa` \_\_a\_aBB  
@HWI-EAS443:3:54:189:921#0/1  
CAAATCGTGAATGGATCTTCAAAGAGGAATCCAGCGAGA  
+HWI-EAS443:3:54:189:921#0/1  
aa¥\_]¥b¥ba]bbbaa\_]a\_aTH^[\_W`UZZa` `` `RX^  
@HWI-EAS443:3:54:208:1054#0/1  
GGAGAACTGTGATGAGAATGGGAGACCTTCACTACCTCC  
+HWI-EAS443:3:54:208:1054#0/1  
¥aXW¥\_` `¥\_I^ZZaa\_Z^a^^`S]PR` `` ^a]V][[ZX¥  
@HWI-EAS443:3:54:218:171#0/1  
GCCGCATTTCTTCAATTAACCACCTTATTTCTCAAATTT  
+HWI-EAS443:3:54:218:171#0/1  
aaaa¥\_^]\_W\_` \_[[a`]X¥L[^X\_YW^\_]\_] [UZZZ^^X  
@HWI-EAS443:3:54:21:857#0/1  
TGCATCTGTACCTACTTCGCGCTACCTTTCTGACATGACC  
+HWI-EAS443:3:54:21:857#0/1  
ZX]N\_\_^¥H` ^baXT\_]aaP¥WZ\_ZS\_` ^`a]] `a\_XX\_U  
@HWI-EAS443:3:54:221:112#0/1  
GCCGCATTTCTTCAATTAACCACCTTATTTCTCAAATTT  
+HWI-EAS443:3:54:221:112#0/1  
`a\_^b^Iabbaa\_b¥¥VW[Ya\_SSR\_¥[] \_\_a` ^NWW^^Y  
@HWI-EAS443:3:54:237:142#0/1  
CTCTGAAAATATACAGAGATTCGCTTGGAGAACTGTGAT  
+HWI-EAS443:3:54:237:142#0/1  
\_a\_\_bba^bbbbbabb`bb^]a[b\_aabba` `` `` [¥a[a]a  
@HWI-EAS443:3:54:260:321#0/1  
GCCGCATTTCTTCAATTAACCACCTTATTTCTCAAATTT

+HWI-EAS443:3:54:260:321#0/1  
aa\_`ab[b`aa`¥^aaba`\_aa`aaabba\_aaa^I\_a`a  
@HWI-EAS443:3:54:270:824#0/1  
AATGGAATGGTAACACGGTTCGAGTCTCTGAAAATATACA  
+HWI-EAS443:3:54:270:824#0/1  
[¥`baaaaba\_b\_aaaaYaaa`a\_a\_`aa^`YV\_```¥\_  
@HWI-EAS443:3:54:295:1307#0/1  
CAGAGATTTCGCTTGGAGAACTGTGATGAGAATGGGAGAC  
+HWI-EAS443:3:54:295:1307#0/1  
aababIbaab`abaa\_b``a\_\_bUZ\_\_b\_a¥````W[]\_V  
@HWI-EAS443:3:54:363:1351#0/1  
ATGAGAATGGGAGACCTTCACTACCTCCAGAGCAGAAATG  
+HWI-EAS443:3:54:363:1351#0/1  
abbbbabbbba`a\_abbb^`baaaab`bb`aaab¥\_aaa  
@HWI-EAS443:3:54:403:783#0/1  
GGAGAACTGTGATGAGAATGGGAGACCTTCACTACCTCC  
+HWI-EAS443:3:54:403:783#0/1  
aa\_a\_`^\_a`^a\_`a^`]\_\_`a\_]`^X]^¥^\_X^\_XY]YX  
@HWI-EAS443:3:54:433:820#0/1  
GCCGCATTTCTTCAATTAACCACCTTATTTCTCAAATTT  
+HWI-EAS443:3:54:433:820#0/1  
[\_¥\_a¥¥`\_bbaQ¥b`bb`]aa`aaV¥`aaaba`a¥^`aa  
@HWI-EAS443:3:54:474:1542#0/1  
ATGAGAATGGGAGACCTTCACTACCTCCAGAGCAGAAATG  
+HWI-EAS443:3:54:474:1542#0/1  
abb```aab`¥W\_`a\_`aa`aaa^`^[¥[]`a^\_\_^)`a  
@HWI-EAS443:3:54:490:1250#0/1  
ATTATCTTTTGCCTAGGCATGAGCATGAACCAGTCTCGTG  
+HWI-EAS443:3:54:490:1250#0/1  
ababbaba`abW\_ababaaabab]a`baaa`aa¥``[aZ]  
@HWI-EAS443:3:54:491:790#0/1  
GTCGCTTTCAATCTGTGCCGATTTCTTCAATTAACCACC  
+HWI-EAS443:3:54:491:790#0/1  
`\_T`aabababa`aa^`aaa`\_baa[aaa`¥aa\_a`^`a\_  
@HWI-EAS443:3:54:492:1443#0/1  
GAAAGCTCTTATCTCTTGTCTACTTCAAGCAGTAGTTGT  
+HWI-EAS443:3:54:492:1443#0/1  
\_`^\_[a`b\_\_`]^`^a`^]aaa]aa`\_]\_`^`Y¥a[\_`[  
@HWI-EAS443:3:54:504:541#0/1  
GAGAATGGGAGACCTTCACTACCTCCAGAGCAGAAATGAA  
+HWI-EAS443:3:54:504:541#0/1  
a[^]`aa`^^a[\_^a`¥`\_aa^[^^\_a¥aZZa¥]\_`^`^`  
@HWI-EAS443:3:54:513:171#0/1  
GAAACTGTGATGAGAATGGGAGACCTTCACTACCTCCAGA  
+HWI-EAS443:3:54:513:171#0/1  
aXPV\_aaP]U\_XTaSY[]`YSZVUWURV^X^TWUXRN¥X  
@HWI-EAS443:3:54:532:1333#0/1  
GGCTGTTTCGATATCGAGGCCAAGGGTGTTCCTCTTCCT  
+HWI-EAS443:3:54:532:1333#0/1  
a]aab¥`^QSY[] [WUQUWEUU]SX]G[QYUQY¥ZZ^SZZ

@HWI-EAS443:3:54:533:730#0/1  
GCCGCATTTCTTCAATTAACCACCTTATTTCTCAAATTT  
+HWI-EAS443:3:54:533:730#0/1  
\_PN\_]^[^]S[\_[`\_\_`\_aYZ[^¥`\_]`¥\_\_`\_¥WU]^[^]  
@HWI-EAS443:3:54:54:1303#0/1  
GGTTAATTGAAGAAATGCGGCACAGATTGAAAGCGACAGA  
+HWI-EAS443:3:54:54:1303#0/1  
aaUaaa`ab`[a\_a`aaa``\_aaaaaaaa`\_`\_`a`Z[^`^`  
@HWI-EAS443:3:54:620:1548#0/1  
AGCGCGAAGTAGGTACAGATGCAATTGTCATTCTAAGTGT  
+HWI-EAS443:3:54:620:1548#0/1  
aa^]\_[SabSa`a\_\_X`aa\_`^`a0\_¥]T0^YX\_\_Y]`V^^  
@HWI-EAS443:3:54:63:1020#0/1  
AGAGGCAACACCCTTGGCCTCGATATCGAAACAGCCACTC  
+HWI-EAS443:3:54:63:1020#0/1  
aaaaaaaa\_\_¥\_¥\_]\_[¥\_¥^^`^[^[¥^¥]\_TYYYYWW  
@HWI-EAS443:3:54:644:1255#0/1  
GGAAGAGGCAACACCCTTGGCCTCGATATCGAAACAGCCA  
+HWI-EAS443:3:54:644:1255#0/1  
aaaaba`aabaa`aaaa]`a`aab`a`^`^`a`\_`\_`^`\_`  
@HWI-EAS443:3:54:669:532#0/1  
AGCGCGAAGTAGGTACAGATGCAATTGTCATTCTAAGTGT  
+HWI-EAS443:3:54:669:532#0/1  
abbaba\_ab]aba`aabaaaaaaaaaaaa`aa\_a`aa\_a`\_`  
@HWI-EAS443:3:54:747:705#0/1  
GAGAATGGGAGACCTTCACTACCTCCAGAGCAGAAATGAA  
+HWI-EAS443:3:54:747:705#0/1  
\_\_a`\_\_[^^^a]X`\_Z\_a^^a^`a\_\_a^aaa^¥`aa`Y`  
@HWI-EAS443:3:54:758:1725#0/1  
ACTGTGATGAGAATGGGAGACCTTCACTACCTCCAGAGCA  
+HWI-EAS443:3:54:758:1725#0/1  
a^``[aaaa`a`aaaa``ZYX`a`a^aa\_`\_`^`T\_Y\_`  
@HWI-EAS443:3:54:759:590#0/1  
AGAAACTGTGATGAGAATGGGAGACCTTCACTACCTCCAG  
+HWI-EAS443:3:54:759:590#0/1  
aa\_b\_abb\_b\_b^V`^abbab`aZaaaa\_a\_a`0`aX^a`  
@HWI-EAS443:3:54:790:1889#0/1  
GAGAACTGTGATGAGAATGGGAGACCTTCACTACCTCCA  
+HWI-EAS443:3:54:790:1889#0/1  
aT¥Q^`\_[¥PZ`\_``a^[\_UZZV[XQU]^¥RW¥]Y]UUR  
@HWI-EAS443:3:54:813:876#0/1  
CGAGAGCAATTGGGACAGAAATTTGAGGAAATAAGGTGGT  
+HWI-EAS443:3:54:813:876#0/1  
aa]aabVP¥`\_¥a\_UZaaa¥`b¥¥ZT\_ZRTQ[UaY`G\_`^`  
@HWI-EAS443:3:54:81:1212#0/1  
GTGATGAGAATGGGAGACCTTCACTACCTCCAGAGCAGAA  
+HWI-EAS443:3:54:81:1212#0/1  
a]aa¥b\_ZZX\_aa`ba\_`^`[\_a¥Y`X¥¥]¥X[`]R]Y[  
@HWI-EAS443:3:54:857:95#0/1  
GTCGCTTTCAATCTGTGCCGATTTCTTCAATTAACCACC

+HWI-EAS443:3:54:857:95#0/1  
aa\_b\_aaa^a` `]aa^`\_^aY` `aa]aa]]]aa\_^ [UZZZ  
@HWI-EAS443:3:54:874:732#0/1  
ATCTTGAAAGAGGAATCCAGCGAGACACTTAGAATGACAA  
+HWI-EAS443:3:54:874:732#0/1  
a\_U\_bbaa`\_baaba\_a]b]abaa\_[aaaa`aaaba\_`a  
@HWI-EAS443:3:54:880:1370#0/1  
TCTGTGCTTTCAATCTGTGCCGATTTCTTCAATTAACC  
+HWI-EAS443:3:54:880:1370#0/1  
aV]\_^\_aaS\_R^TOGM]ZJZH\_NQHZLaR\_YNFG\_`O\_FF  
@HWI-EAS443:3:54:896:461#0/1  
CTGTGCTTTCAATCTGTGCCGATTTCTTCAATTAACCA  
+HWI-EAS443:3:54:896:461#0/1  
^Z]^bb` `Za\_baabbbGSa`bb\_bb`aaaaYbaab\_`a  
@HWI-EAS443:3:54:931:1629#0/1  
TGCCGATTTCTTCAATTAACCACCTTATTTCCCTCAAATT  
+HWI-EAS443:3:54:931:1629#0/1  
abb`b\_abba^a`abbbbbaaaaa[aaabbaabaa`aaa  
@HWI-EAS443:3:54:968:404#0/1  
GCGGCACAGATTGAAAGCGACAGAGAATAGTTTCGAACAA  
+HWI-EAS443:3:54:968:404#0/1  
aaba]a` `aYb\_a\_\_\_\_\_a`Z^YaX` `]W¥^^P\_` ` [¥[^¥\_  
@HWI-EAS443:3:54:993:1079#0/1  
GAAACTGTGATGAGAATGGGAGACCTTCACTACCTCCAGA  
+HWI-EAS443:3:54:993:1079#0/1  
aa[ `aaa^`^b`aa^a\_aa\_` `]X\_` `N]aa`YZ\_^\_]aX  
@HWI-EAS443:3:55:1031:1888#0/1  
GAATGGGAGACCTTCACTACCTCCAGAGCAGAAATGAAAA  
+HWI-EAS443:3:55:1031:1888#0/1  
aa]aaa^]` `]a\_`^¥a¥W0[[Y¥a`aWT\_U`X\_a` `][  
@HWI-EAS443:3:55:1082:1189#0/1  
GCTTGAGAAACTGTGATGAGAATGGGAGACCTTCACTAC  
+HWI-EAS443:3:55:1082:1189#0/1  
aaSa` [V`XZTX]\_¥`RX]R`WP]ZYWQ\_]X]¥YZ\_¥VZ]  
@HWI-EAS443:3:55:1093:282#0/1  
ACTGTGATGAGAATGGGAGACCTTCACTACCTCCAGAGCA  
+HWI-EAS443:3:55:1093:282#0/1  
ab]bX\_Wabbb[^aZ\_^Uaa¥`a]]aW]] [ `aaZ¥a\_aY[  
@HWI-EAS443:3:55:1119:374#0/1  
GTCGCTTTCAATCTGTGCCGATTTCTTCAATTAACCACC  
+HWI-EAS443:3:55:1119:374#0/1  
`bababbb\_aaba\_\_` [a`baabba^baa`\_bb`a\_]a\_¥  
@HWI-EAS443:3:55:1152:1336#0/1  
CGCTTGGAGAAACTGTGATGAGAATGGGAGACCTTCACTA  
+HWI-EAS443:3:55:1152:1336#0/1  
ababbb`baaababba`aba\_aaaaba` `]`\_a\_aa\_a¥\_a  
@HWI-EAS443:3:55:1180:1024#0/1  
GCCTAGGCAAAAGATAATAGGCCCTTTGCGTGCGATTG  
+HWI-EAS443:3:55:1180:1024#0/1  
aZOU`Z` ¥V¥[[V[V\_]` `]YUXV¥Ua¥]¥[\_Z^P`UUVZ

@HWI-EAS443:3:55:1189:1519#0/1  
AGAACTGTGATGAGAATGGGAGACCTTCACTACCTCCAG  
+HWI-EAS443:3:55:1189:1519#0/1  
abYaaaaa^aa`a¥`a`baa\_^`\_]Yaa`a\_\_`VR\_¥0\_\_  
@HWI-EAS443:3:55:1195:162#0/1  
TGAGAATGGGAGACCTTCACTACCTCCAGAGCAGAAATGA  
+HWI-EAS443:3:55:1195:162#0/1  
abab`bbbbbabaP`aa^a\_ba\_a`U`^`[\_]\_a]\_\_`a^  
@HWI-EAS443:3:55:1249:504#0/1  
GAAATATACAGAGATTCGCTTGGAGAACTGTGATGAGA  
+HWI-EAS443:3:55:1249:504#0/1  
\_YL[\_]a\_\_¥bYSJ[\_]^[^UZVa`[\_]\_USRK^^RYFS]G¥B  
@HWI-EAS443:3:55:125:459#0/1  
CGCATTTCTTCAATTAACCACCTTATTTCTCAAATTTCT  
+HWI-EAS443:3:55:125:459#0/1  
^a^`[\_]\_^`^[\_]`¥Z^a`a`Qa]a`^`¥¥\_a^\_¥\_  
@HWI-EAS443:3:55:1267:1340#0/1  
GCCGCATTTCTTCAATTAACCACCTTATTTCTCAAATTT  
+HWI-EAS443:3:55:1267:1340#0/1  
aa`\_aaa`abba`a¥bbbbbaa]bbbbbb^babaaaaaba  
@HWI-EAS443:3:55:1304:1459#0/1  
GAACTGTGATGAGAATGGGAGACCTTCACTACCTCCAGA  
+HWI-EAS443:3:55:1304:1459#0/1  
aaa\_Y\_]V`]a]Z`\_\_`\_]`^a\_[\_`\_V[\_\_\_]QT[R¥]¥]  
@HWI-EAS443:3:55:1352:497#0/1  
GAACTGTGATGAGAATGGGAGACCTTCACTACCTCCAGA  
+HWI-EAS443:3:55:1352:497#0/1  
Zaababb\_babba\_aaabba`baa`a`]a\_aa`]a`\_aa  
@HWI-EAS443:3:55:1383:350#0/1  
AGAATGGGAGACCTTCACTACCTCCAGAGCAGAAATGAAA  
+HWI-EAS443:3:55:1383:350#0/1  
abaabbbbabbbaaaaababb[`aaaab`b\_aaa\_aaa`a  
@HWI-EAS443:3:55:1404:1394#0/1  
CTCCCATTCTCATCACAGTTTCTCCAAGCGAATCTCTGTA  
+HWI-EAS443:3:55:1404:1394#0/1  
\_aV\_[abbbbbabb`b]ba\_bbaa\_VY`ZZaKbab\_\_a  
@HWI-EAS443:3:55:1414:1479#0/1  
TTCTGACATGACCCTCGAGGAAATGTCACGAGACTGGTTC  
+HWI-EAS443:3:55:1414:1479#0/1  
aa¥a^`\_b`b\_aaWQ¥ORaa\_aa`a]Y\_[[\_]a\_V]aaU^]  
@HWI-EAS443:3:55:1499:60#0/1  
CGAGAAAGCTTCTTCTTCTTCTTCTTCAAGCAGTAGT  
+HWI-EAS443:3:55:1499:60#0/1  
abababab`babbabababbbb\_ba\_bb`ab^aba\_aa  
@HWI-EAS443:3:55:1550:1157#0/1  
AGAACTGTGATGAGAATGGGAGACCTTCACTACCTCCAG  
+HWI-EAS443:3:55:1550:1157#0/1  
abaaa\_bb^baa^`a`abbaa\_a[\_]a`aa`aa¥X`\_^¥a  
@HWI-EAS443:3:55:1585:160#0/1  
GGAGAACTGTGATGAGAATGGGAGACCTTCACTACCTCC

+HWI-EAS443:3:55:1585:160#0/1  
ab`a\_aa\_ab^a\_a`\_`\_\_`aaZ^\_¥W¥^]U^Y¥WUUWWW  
@HWI-EAS443:3:55:1612:1973#0/1  
CGCTTTCAATCTGTGCCGATTTCTTCAATTAACCACCTT  
+HWI-EAS443:3:55:1612:1973#0/1  
^aabaabaababb\_\_`J\_bab\_bb\_a`][\_aZUX\_Iba  
@HWI-EAS443:3:55:179:1692#0/1  
GAGAACTGTGATGAGAATGGGAGACCTTCACTACCTCCA  
+HWI-EAS443:3:55:179:1692#0/1  
`^Wa\_]\_¥]\_a\_\_X¥[[`\_`\_`\_][U^¥Za\_`\_`\_VV^¥P^  
@HWI-EAS443:3:55:18:1339#0/1  
GATGAGAATGGGAGACCTTCACTACCTCCAGAGCAGAAAT  
+HWI-EAS443:3:55:18:1339#0/1  
XTYNO\_[¥¥aWMZOXPYRVY]S]]XNZ\_U¥¥XYFRPJWY  
@HWI-EAS443:3:55:209:1460#0/1  
CGCACGCAAAGAGGGCCTATTATCTTTTGCCTAGGCATGA  
+HWI-EAS443:3:55:209:1460#0/1  
\_a\_W¥b\_X[]WZZ]\_\_`]\_baa^^a`^Z[]UX\_X\_Z\_\_W  
@HWI-EAS443:3:55:212:1703#0/1  
GAAACTGTGATGAGAATGGGAGACCTTCACTACCTCCAGA  
+HWI-EAS443:3:55:212:1703#0/1  
`bbb\_bb¥bbbbabb]^b\_[]aaaab^abaaba¥aa^\_Y`  
@HWI-EAS443:3:55:213:56#0/1  
GTGCTTTCAATCTGTGCCGATTTCTTCAATTAACCACC  
+HWI-EAS443:3:55:213:56#0/1  
a\_N`]a^¥^^¥`YW\_YL[X\_Z]ZX^U[PQMS]MFRVRVXS  
@HWI-EAS443:3:55:241:744#0/1  
AACTGCATTTTTGACATCCTCATAAGTATGCCTGGAAGA  
+HWI-EAS443:3:55:241:744#0/1  
PW[]\_\_`bb^`aa^W\_Z^^a\_HZW¥WUZ`a`]aa\_aS^\_Z  
@HWI-EAS443:3:55:292:1424#0/1  
ATGAGAATGGGAGACCTTCACTACCTCCAGAGCAGAAATG  
+HWI-EAS443:3:55:292:1424#0/1  
\_aZ¥¥]a`[¥a\_U\_[a`^aa^]]aa^¥`R`W¥^^[`a  
@HWI-EAS443:3:55:302:461#0/1  
CGCATTTCTTCAATTAACCACCTTATTTCTCAAATTTCT  
+HWI-EAS443:3:55:302:461#0/1  
Sa[^b\_^\_bbbabbaba[La¥bbaaba`bbbaVbaabb  
@HWI-EAS443:3:55:392:746#0/1  
GATGAGAATGGGAGACCTTCACTACCTCCAGAGCAGAAAT  
+HWI-EAS443:3:55:392:746#0/1  
aaaaaa`aaaaa`a\_\_\_a`a\_`\_]`\_\_\_\_`^a]\_]`^`\_`  
@HWI-EAS443:3:55:399:1209#0/1  
GCCGATTTCTTCAATTAACCACCTTATTTCTCAAATTT  
+HWI-EAS443:3:55:399:1209#0/1  
a\_`^^U\_`\_\_`^LWWZ`Y]W[`]^\_^\_]`^`U\_\_^YTZZ]\_  
@HWI-EAS443:3:55:414:1614#0/1  
AGAACTGTGATGAGAATGGGAGACCTTCACTACCTCCAG  
+HWI-EAS443:3:55:414:1614#0/1  
``aa`baa\_\_aaa`a```a¥`Y`a\_\_````^\_\_^Y\_^Z[`

@HWI-EAS443:3:55:427:417#0/1  
TGCGGCACAGATTGAAAGCGACAGAGAATAGTTTCGAACA  
+HWI-EAS443:3:55:427:417#0/1  
ab`\_aaa`a`[abaa\_aa`^`\_`]a`^\_aa\_``[a]`^\_  
@HWI-EAS443:3:55:452:943#0/1  
TTACTACTGAAGTTCGCTTTCAGTACTATGTTCTTTTCCAT  
+HWI-EAS443:3:55:452:943#0/1  
aaa`^a`a`a^^^a^`\_a^¥^X`^a^`a^`^`\_][VU]  
@HWI-EAS443:3:55:453:1150#0/1  
GGAGAACTGTGATGAGAATGGGAGACCTTCACTACCTCC  
+HWI-EAS443:3:55:453:1150#0/1  
a\_0\_WZU`a]X\_]aaXZZ\_[aW\_\_¥NS[`]Q`YOP[V]Z  
@HWI-EAS443:3:55:489:1464#0/1  
TGAGAATGGGAGACCTTCACTACCTCCAGAGCAGAAATGA  
+HWI-EAS443:3:55:489:1464#0/1  
ab`b`aa\_]b]``a`aa`a^`a\_\_`a]a\_`a\_\_\_a`\_  
@HWI-EAS443:3:55:503:1924#0/1  
CTTTTGCCTAGGCATGAGCATGAACCAGTCTCGTGACATT  
+HWI-EAS443:3:55:503:1924#0/1  
\_V]\_[aaUZbba^\_Ta]]HXUJU]NM[\_HXZ¥MNTLMJ\_B  
@HWI-EAS443:3:55:587:1633#0/1  
GTGCTTTCAATCTGTGCCGATTTCTTCAATTAACCACC  
+HWI-EAS443:3:55:587:1633#0/1  
`\_bbaab\_\_bbbbbaabaabba\_`aab`bbbbba`ab\_  
@HWI-EAS443:3:55:598:614#0/1  
CTGTCGCTTTCAATCTGTGCCGATTTCTTCAATTAACCA  
+HWI-EAS443:3:55:598:614#0/1  
aa`Y`aaba`a¥ba^aab`Za[X\_¥Y¥a`[^Yab¥Y¥[]  
@HWI-EAS443:3:55:636:79#0/1  
CCGCATTTCTTCAATTAACCACCTTATTTCTCAAATTTCT  
+HWI-EAS443:3:55:636:79#0/1  
abbaabbb`bbaaabbbbaaaaabbababa`baaaabba`  
@HWI-EAS443:3:55:637:840#0/1  
GCCGCATTTCTTCAATTAACCACCTTATTTCTCAAATTT  
+HWI-EAS443:3:55:637:840#0/1  
abaaabab`abaa\_\_abaa`aa`aaaab`aa`aa\_\_\_a`a  
@HWI-EAS443:3:55:641:868#0/1  
CGCATTTCTTCAATTAACCACCTTATTTCTCAAATTTCT  
+HWI-EAS443:3:55:641:868#0/1  
abaaabbabbaa¥abaaa`a`\_baaaaaaaaaaaa`aaa`a`a  
@HWI-EAS443:3:55:659:591#0/1  
GTGCTTTCAATCTGTGCCGATTTCTTCAATTAACCACC  
+HWI-EAS443:3:55:659:591#0/1  
`\_aa^`aZNa`\_\_Z\_\_`a^`a\_]`]]][^]\_^\_]W  
@HWI-EAS443:3:55:682:1614#0/1  
GGAGAACTGTGATGAGAATGGGAGACCTTCACTACCTCC  
+HWI-EAS443:3:55:682:1614#0/1  
^aUU]TTZW`R¥KT¥^a\_Q^`UUaSHH\_b]bbZF^U\_`LZ  
@HWI-EAS443:3:55:687:1446#0/1  
AGGTAGTGAAGGTCTCCATTCTCATCACAGTTTCTCCAA

+HWI-EAS443:3:55:687:1446#0/1  
[\_a¥aaaba`ZZSUUV\_T]b\_`aa]ZV]\_`[]a^`\_^] ^  
@HWI-EAS443:3:55:743:1683#0/1  
CACGGTTCGAGTCTCTGAAAATATACAGAGATTCGCTTGG  
+HWI-EAS443:3:55:743:1683#0/1  
`babaaaaabba`babaaaabbaba`baba]aaa`\_a`aa  
@HWI-EAS443:3:55:797:1141#0/1  
GAGAAACTGTGATGAGAATGGGAGACCTTCACTACCTCCA  
+HWI-EAS443:3:55:797:1141#0/1  
\_\_¥^a¥\_abR\_`¥\_RXV\_VabY]¥]TJ¥`H\_^`aIVaTSW  
@HWI-EAS443:3:55:800:146#0/1  
CTGTGCTTTCAATCTGTGCCGATTCTTCAATTAACCA  
+HWI-EAS443:3:55:800:146#0/1  
abbbabbaabaaaaabbabaabaaaaabaaaa`baa`^^a  
@HWI-EAS443:3:55:842:997#0/1  
TGCCGCATTTCTTCAATTAACCACCTTATTTCCCTCAAATT  
+HWI-EAS443:3:55:842:997#0/1  
ab\_aI`Xabaabbb`aa`baVab\_¥aaUabW\_aaa\_YZba  
@HWI-EAS443:3:55:859:1697#0/1  
AGAAACTGTGATGAGAATGGGAGACCTTCACTACCTCCAG  
+HWI-EAS443:3:55:859:1697#0/1  
a`aaaaaa\_aaa`a\_`\_\_\_Z^`^Y^a`^`^aaV^`\_Y``  
@HWI-EAS443:3:55:860:420#0/1  
GCCGCATTTCTTCAATTAACCACCTTATTTCCCTCAAATTT  
+HWI-EAS443:3:55:860:420#0/1  
a\_aa^TUL[Y\_UTTZR\_[¥QPX^\_aWRY]VT^YZ[XT¥[W  
@HWI-EAS443:3:55:903:307#0/1  
GAATGGGAGACCTTCACTACCTCCAGAGCAGAAATGAAAA  
+HWI-EAS443:3:55:903:307#0/1  
a`\_aab`\_a]^U`\_]aU`\_U[\_^ZZaY`]¥a]]V`\_ZU¥]  
@HWI-EAS443:3:55:905:1258#0/1  
GCTTGGAGAAACTGTGATGAGAATGGGAGACCTTCACTAC  
+HWI-EAS443:3:55:905:1258#0/1  
aaaaabaa\_\_a\_aaXa]aa^\_\_\_`a\_]a\_^\_^]W\_]^^]  
@HWI-EAS443:3:55:908:1092#0/1  
GGAGAAACTGTGATGAGAATGGGAGACCTTCACTACCTCC  
+HWI-EAS443:3:55:908:1092#0/1  
aa]``aa\_a`[aY\_`[^[\_`\_Z^] ^UV[[V\_¥^^TTZXW  
@HWI-EAS443:3:55:952:952#0/1  
GAGAAACTGTGATGAGAATGGGAGACCTTCACTACCTCCA  
+HWI-EAS443:3:55:952:952#0/1  
aabaaaaab`a`aa\_b\_aaaa^`a`^Yaa``\_a\_[^`^]\_`  
@HWI-EAS443:3:55:977:1988#0/1  
TGAGAATGGGAGACCTTCACTACCTCCAGAGCAGAAATGA  
+HWI-EAS443:3:55:977:1988#0/1  
aa`bYaaaaa]¥\_a`\_]\_]`aWXa\_T\_^\_Z`\_ZU^^[W  
@HWI-EAS443:3:55:983:323#0/1  
ATTATCTTTTGCCTAGGCATGAGCATGAACCGTCTCGTG  
+HWI-EAS443:3:55:983:323#0/1  
aba\_^`bbbbbaa\_abbaabb^``aaaa\_Y]`b^[a`aY]



@HWI-EAS443:3:56:100:821#0/1  
CCGCATTTCTTCAATTAACCACCTTATTTCCCTCAAATTTTC  
+HWI-EAS443:3:56:100:821#0/1  
a\_Z¥^^\_\_\_\_\_]¥U`aa\_]¥Y[]`¥T^\_\_Z]]\_T¥[Z[\_^  
@HWI-EAS443:3:56:1016:1269#0/1  
GAAACTGTGATGAGAATGGGAGACCTTCACTACCTCCAGA  
+HWI-EAS443:3:56:1016:1269#0/1  
aaaa`bbabaabaa`aaaa`a^\_a`\_a\_a`^^`¥\_\_`\_  
@HWI-EAS443:3:56:101:1716#0/1  
TGTCGCTTTCAATCTGTGCCGATTTCTTCAATTAACCAC  
+HWI-EAS443:3:56:101:1716#0/1  
a`\_Y`a`aaaa`aa[^\_a`a`]]\_`a``a``a]¥\_]`  
@HWI-EAS443:3:56:1035:884#0/1  
GCTTGC GGATATGCCAAAGGAAACAGTCTACCTGAAAGCT  
+HWI-EAS443:3:56:1035:884#0/1  
`\_Z^\_]Y¥S[]^LVYZ¥`[X]ZRU[NTQZPMTVQVXPHV  
@HWI-EAS443:3:56:1057:1728#0/1  
ACCCAATCCATTGTCTGCAAATCGCTTGC GGATATGCCAA  
+HWI-EAS443:3:56:1057:1728#0/1  
abaU\_baa`\_aaU\_a`^^`a\_\_G\_]YYa`\_`\_S]V` [  
@HWI-EAS443:3:56:1082:750#0/1  
GTGATGAGAATGGGAGACCTTCACTACCTCCAGAGCAGAA  
+HWI-EAS443:3:56:1082:750#0/1  
a\_¥Q[]SYVXU^`\_`T\_^ZT\_\_[\_TNR]RRRPVNUaNR  
@HWI-EAS443:3:56:1102:103#0/1  
CGCATTTCTTCAATTAACCACCTTATTTCCCTCAAATTTCT  
+HWI-EAS443:3:56:1102:103#0/1  
ab\_Y`babbbab`bbbbaaa\_Wababba\_ab\_ab\_aab`a  
@HWI-EAS443:3:56:1122:114#0/1  
GTGATGAGAATGGGAGACCTTCACTACCTCCAGAGCAGAA  
+HWI-EAS443:3:56:1122:114#0/1  
a\_a\_aa\_b\_^`aa`Z\_Y¥¥\_^W^¥\_^YY^¥¥Y\_W\_WW\_YY  
@HWI-EAS443:3:56:1125:1384#0/1  
ATGTTATTTGTTCGAAACTATTCTCTGTGCTTTCAATCT  
+HWI-EAS443:3:56:1125:1384#0/1  
V\_Z\_ab\_b¥baaaba\_\_\_a\_aa]^Yba`Yb`\_baZaa`\_a  
@HWI-EAS443:3:56:1158:605#0/1  
CAGAAATTTGAGGAAATAAGGTGGTTAATTGAAGAAATGC  
+HWI-EAS443:3:56:1158:605#0/1  
aTZZ`UXabb\_XVZ^]UMWaG^\_aQGW^¥RH\_\_aaWZ\_H  
@HWI-EAS443:3:56:1168:1238#0/1  
AGAAACTGTGATGAGAATGGGAGACCTTCACTACCTCCAG  
+HWI-EAS443:3:56:1168:1238#0/1  
aaaaaaaaaYaa]b^aa`][\_Z\_X`\_]`\_Y[\_`¥^`  
@HWI-EAS443:3:56:1192:82#0/1  
GCCGCATTTCTTCAATTAACCACCTTATTTCCCTCAAATTT  
+HWI-EAS443:3:56:1192:82#0/1  
a\_Z]\_U^a`a^]]^`^^\_[[YX0^^Z[U¥SU]¥]URX[Y  
@HWI-EAS443:3:56:120:1190#0/1  
CCGCATTTCTTCAATTAACCACCTTATTTCCCTCAAATTTTC

+HWI-EAS443:3:56:120:1190#0/1  
aaV¥JV`V]Z\_]^[^YSN^QM\_TX`Z`Xa[Z\_TYNST  
@HWI-EAS443:3:56:1216:1436#0/1  
GGAGAAACTGTGATGAGAATGGGAGACCTTCACTACCTCC  
+HWI-EAS443:3:56:1216:1436#0/1  
a[^`U)`Z`\_L]T)`VVU\_V`WT¥[QWW^]W¥UZ¥TKLKY  
@HWI-EAS443:3:56:1224:811#0/1  
TGCCGCATTTCTTCAATTAACCACCTTATTTCTCAAATT  
+HWI-EAS443:3:56:1224:811#0/1  
aaaa]aaaaaaaa\_a`^a`\_¥a^aaaa\_a\_\_a`\_`\_`a`  
@HWI-EAS443:3:56:1236:920#0/1  
AGCTGAAACGAGAAAGCTCTTATCTCTTGTCTACTTCAA  
+HWI-EAS443:3:56:1236:920#0/1  
aaa`^`ba`bab]`\_`]a\_aaaaYa^aaa^a^b\_^ab\_\_\_\_  
@HWI-EAS443:3:56:1260:179#0/1  
ACCTACTTCGCGCTACCTTTCTGACATGACCCTCGAGGAA  
+HWI-EAS443:3:56:1260:179#0/1  
aaba\_a`b^a^`\_`\_`\_[aaa\_`\_^W^Y¥¥\_ZY[W\_V\_^¥Z  
@HWI-EAS443:3:56:1288:178#0/1  
GCCGCATTTCTTCAATTAACCACCTTATTTCTCAAATTT  
+HWI-EAS443:3:56:1288:178#0/1  
a\_aa\_^aaa¥a]^^\_a`\_`a¥]^ZT`\_\_`\_\_^]\_¥^^]\_Y^  
@HWI-EAS443:3:56:129:98#0/1  
GTGATGAGAATGGGAGACCTTCACTACCTCCAGAGCAGAA  
+HWI-EAS443:3:56:129:98#0/1  
a¥\_\_a¥a¥¥\_\_^S`WWU\_UQ¥W¥WWWWWV^WWSVWWU  
@HWI-EAS443:3:56:1311:258#0/1  
AGAAATTTACCATTACCTTCTTCCAGGACATACTTAT  
+HWI-EAS443:3:56:1311:258#0/1  
abb^Y`a`ZYPPO\_XVXUba`aTaaSNV]QY¥NZ]R^[NV  
@HWI-EAS443:3:56:1379:1900#0/1  
GAAAATATACAGAGATTCGCTTGGAGAACTGTGATGAGA  
+HWI-EAS443:3:56:1379:1900#0/1  
a]\_bYaR`b¥[b[a\_U)`aY`\_]`\_]\_b`Ra\_^VWJ]\_\_]  
@HWI-EAS443:3:56:137:147#0/1  
GCCGCATTTCTTCAATTAACCACCTTATTTCTCAAATTT  
+HWI-EAS443:3:56:137:147#0/1  
`aaa^a¥N`Ya]S\_]^[^]`\_`^`Xa^`Y\_aQ\_\_a\_\_ZYa\_S  
@HWI-EAS443:3:56:137:489#0/1  
GAATGGGAGACCTTCACTACCTCCAGAGCAGAAATGAAAA  
+HWI-EAS443:3:56:137:489#0/1  
aaaabaaabY`\_`a]^\_aY\_^\_a\_\_a¥a\_\_a\_¥`\_`a¥^¥^  
@HWI-EAS443:3:56:144:873#0/1  
CTCTGAAAATATACAGAGATTCGCTTGGAGAACTGTGAT  
+HWI-EAS443:3:56:144:873#0/1  
YZ¥\_]\_UJ]^a`¥`ZXP\_Q^`\_¥Va\_Y\_R\_Y¥`X\_\_R[R]  
@HWI-EAS443:3:56:1454:1365#0/1  
CGCACGCAAAGAGGGCCTATTATCTTTTGCCTAGGCATGA  
+HWI-EAS443:3:56:1454:1365#0/1  
aa\_a¥^^b¥`b]bbb\_]b`aabba`]b[b`N^b[SVb`b[

@HWI-EAS443:3:56:1468:1237#0/1  
CCGCATTTCTTCAATTAACCACCTTATTTCCCTCAAATTTTC  
+HWI-EAS443:3:56:1468:1237#0/1  
a\_aZ\_\_`ba\_bab]b\_SaV\_`aa^`a`b]S\_a¥Y¥baa[  
@HWI-EAS443:3:56:1474:1539#0/1  
AGCTCTTATCTCTTGTCTACTTCAAGCAGTAGTTGTAAG  
+HWI-EAS443:3:56:1474:1539#0/1  
ab``^ab`a`aabaa\_aaba]bbaaab\_`b\_[b\_aa^`\_a  
@HWI-EAS443:3:56:1573:984#0/1  
GCCGCATTTCTTCAATTAACCACCTTATTTCCCTCAAATTT  
+HWI-EAS443:3:56:1573:984#0/1  
a^J\_`Yb`b`bb\_aaba¥b\_P[^`aa`baa]\_aa\_`aaa`  
@HWI-EAS443:3:56:1625:201#0/1  
AGAAACTGTGATGAGAATGGGAGACCTTCACTACCTCCAG  
+HWI-EAS443:3:56:1625:201#0/1  
aba```abbaa^aaQT]]ba¥a\_V^NWYaZ\_]a\_XVaYY¥¥  
@HWI-EAS443:3:56:1643:221#0/1  
GAGCAATTGGGACAGAAATTTGAGGAAATAAGGTGGTTAA  
+HWI-EAS443:3:56:1643:221#0/1  
\_Xa¥\_\_ba`\_]`]TZZYb`a^T`TZZ`a\_`^`aYa\_[-]W  
@HWI-EAS443:3:56:1647:1093#0/1  
TAATCGGTAAAGATTACACTGAAGTTCGCTTTCAGTACT  
+HWI-EAS443:3:56:1647:1093#0/1  
abaaaa`b^a[WYaaa\_\_H\_^TWR[a`VS^aaUVYT^]]  
@HWI-EAS443:3:56:1729:855#0/1  
TGAGAACTGGGAGACCTTCACTACCTCCAGAGCAGAAATGA  
+HWI-EAS443:3:56:1729:855#0/1  
aa\_¥¥aabba\_a\_\_U\_\_[a¥a¥N¥]¥¥\_a¥aW\_a[T\_]`¥  
@HWI-EAS443:3:56:1767:665#0/1  
GCCGCATTTCTTCAATTAACCACCTTATTTCCCTCAAATTT  
+HWI-EAS443:3:56:1767:665#0/1  
a`[^`abb\_`a^babaa\_]b\_a`a\_a`aa]a\_aaaa\_PZa¥  
@HWI-EAS443:3:56:176:730#0/1  
GAGAACTGTGATGAGAATGGGAGACCTTCACTACCTCCA  
+HWI-EAS443:3:56:176:730#0/1  
a`^ZH¥`^aVa```¥¥^[\_\_^¥U¥¥¥¥^[[\_^\_^^URX^Z]  
@HWI-EAS443:3:56:1783:1443#0/1  
CCGCATTTCTTCAATTAACCACCTTATTTCCCTCAAATTTTC  
+HWI-EAS443:3:56:1783:1443#0/1  
a``]¥Xa^a¥NZaQ¥YOX[Q[]Y^`W`]OUYY\_¥TOUXVS  
@HWI-EAS443:3:56:216:796#0/1  
GGAGAACTGTGATGAGAATGGGAGACCTTCACTACCTCC  
+HWI-EAS443:3:56:216:796#0/1  
a^\_]TXZ`\_aYXY[^`X[X^\_a[UX[YZ^]Y]VZWYYVZP^  
@HWI-EAS443:3:56:21:1515#0/1  
ATTTGTTCGAACTATTCTCTGTCTGCTTTCAATCTGTGCC  
+HWI-EAS443:3:56:21:1515#0/1  
aaa`^X\_a^]V`^`^`[^`[]^¥`]X]W\_\_[XNXYOSWW  
@HWI-EAS443:3:56:23:362#0/1  
CACGGTTCGAGTCTCTGAAAATATACAGAGATTCGCTTGG

+HWI-EAS443:3:56:23:362#0/1  
``ba\_aa`baaa`aa]V^Yaa`a^]\_Z\_Z\_¥¥`\_]\_\_`  
@HWI-EAS443:3:56:256:1262#0/1  
GCCGCATTTCTTCAATTAACCACCTTATTTCTCAAATTT  
+HWI-EAS443:3:56:256:1262#0/1  
aaaaaaaaaaa^aaaa¥\_aaa\_aa\_aaa\_\_a`\_\_aa\_  
@HWI-EAS443:3:56:258:952#0/1  
CACGGTTCGAGTCTCTGAAAATATACAGAGATTCGCTTGG  
+HWI-EAS443:3:56:258:952#0/1  
aaaaaZ`a`V]^a`a\_a^`¥]``aZZ^¥\_[^\_^¥¥^Z\_¥  
@HWI-EAS443:3:56:264:656#0/1  
TGATGAGAATGGGAGACCTTCACTACCTCCAGAGCAGAAA  
+HWI-EAS443:3:56:264:656#0/1  
`ba`baa`aa¥`a`\_HT^YZ^]\_[\_Z\_U`ZZ^R\_[[aZWU  
@HWI-EAS443:3:56:27:493#0/1  
GTCGCTTTCAATCTGTGCCGCATTTCTTCAATTAACCACC  
+HWI-EAS443:3:56:27:493#0/1  
a`aba`aa]X]aaa`^aaaa¥`a\_\_a^\_¥U^\_\_^^`[[  
@HWI-EAS443:3:56:302:990#0/1  
TGAGAATGGGAGACCTTCACTACCTCCAGAGCAGAAATGA  
+HWI-EAS443:3:56:302:990#0/1  
a^^^]^ab¥R```aaa\_a\_\_XY\_\_\_¥^a\_a\_[`QN]`a¥  
@HWI-EAS443:3:56:356:384#0/1  
AAATAAGCTGAAACGAGAAAGCTTTATCTCTTGTCTAC  
+HWI-EAS443:3:56:356:384#0/1  
a`\_bbaa`aaaaaaaa`b]WYaaa`a`b\_a\_aaa]]]aa`  
@HWI-EAS443:3:56:361:2041#0/1  
CTTGGAGAAACTGTGATGAGAATGGGAGACCTTCACTACC  
+HWI-EAS443:3:56:361:2041#0/1  
a^RUB]^LDZ]\_UaNN¥WZWW¥¥W]N[RWZX¥VRQRTL  
@HWI-EAS443:3:56:381:1556#0/1  
CGCTACCTTTCTGACATGACCCTCGAGGAAATGTCACGAG  
+HWI-EAS443:3:56:381:1556#0/1  
a`bbbaaaaaa`baa`\_```a]\_\_a`a`\_`^`\_\_`[`  
@HWI-EAS443:3:56:387:1346#0/1  
CTGTGATGAGAATGGGAGACCTTCACTACCTCCAGAGCAG  
+HWI-EAS443:3:56:387:1346#0/1  
abbababbbbaabaa]baababaaaa\_aabaa``\_aa  
@HWI-EAS443:3:56:42:1797#0/1  
TGATGAGAATGGGAGACCTTCACTACCTCCAGAGCAGAAA  
+HWI-EAS443:3:56:42:1797#0/1  
aaab^\_a^a`Y^a\_T\_\_a`\_a\_\_\_\_]UY]UVURRWW`X^^  
@HWI-EAS443:3:56:456:196#0/1  
GCCGCATTTCTTCAATTAACCACCTTATTTCTCAAATTT  
+HWI-EAS443:3:56:456:196#0/1  
a`aa`aaaa\_aa`\_`aaa^\_^^^\_\_\_`\_`^\_a^\_^^\_\_^  
@HWI-EAS443:3:56:459:841#0/1  
ATAAGCTGAAACGAGAAAGCTTTATCTCTTGTCTACTT  
+HWI-EAS443:3:56:459:841#0/1  
aa\_aaaaa]`a`baa^¥`a`\_aaaRa`\_`a`^¥`]`a^a\_

@HWI-EAS443:3:56:484:1305#0/1  
AGAAACTGTGATGAGAATGGGAGACCTTCACTACCTCCAG  
+HWI-EAS443:3:56:484:1305#0/1  
ab`aabaahbaaaUaaa\_aaa`a]\_^aU\_\_a\_]\_\_\_\_\_^]  
@HWI-EAS443:3:56:494:514#0/1  
TGAGAATGGGAGACCTTCACTACCTCCAGAGCAGAAATGA  
+HWI-EAS443:3:56:494:514#0/1  
ab^a^aabaanaa`^^`\_`a[\_a\_`^`\_\_a\_a¥^a¥^^\_a`  
@HWI-EAS443:3:56:517:339#0/1  
AGAAACTGTGATGAGAATGGGAGACCTTCACTACCTCCAG  
+HWI-EAS443:3:56:517:339#0/1  
abaaaaab\_baa`R`a^aaaa\_a`\_`a`\_`\_`a\_[\_\_\_\_\_`  
@HWI-EAS443:3:56:51:177#0/1  
GCCGCATTTCTTCAATTAACCACCTTATTTCTCAAATTT  
+HWI-EAS443:3:56:51:177#0/1  
aa\_aaY`aa\_\_\_`[^Z¥YYYYVYW\_a\_W\_\_\_\_¥Y]]YVP]\_\_\_  
@HWI-EAS443:3:56:535:899#0/1  
GAAACTGTGATGAGAATGGGAGACCTTCACTACCTCCAGA  
+HWI-EAS443:3:56:535:899#0/1  
aa¥aaa^I[W¥a\_a¥YM^a[R][[^\_X[[[^[[Z[V[URR  
@HWI-EAS443:3:56:562:1087#0/1  
GTCTCGCTGGATTCTCTTTCAAGATCCATTCCACGATTT  
+HWI-EAS443:3:56:562:1087#0/1  
a`aaa`aaaa`a`\_]a\_aa^a`\_]`^^]`]^`a``¥¥\_`^  
@HWI-EAS443:3:56:597:892#0/1  
TGTGCCGCATTTCTTCAATTAACCACCTTATTTCTCAAAA  
+HWI-EAS443:3:56:597:892#0/1  
^`aabaanaSZ`\_Y^`^`\_YYV\_[^`\_`baa\_a^a\_\_`b`^Z  
@HWI-EAS443:3:56:609:1194#0/1  
CACGGTTCGAGTCTCTGAAAATATACAGAGATTCGCTTGG  
+HWI-EAS443:3:56:609:1194#0/1  
aa]]Y\_aa`^`Z^\_\_^a\_I\_\_Ya``\_RaW^S¥`\_]\_WZP¥S  
@HWI-EAS443:3:56:664:514#0/1  
GAGGCAACACCCTTGGCCTCGATATCGAAACAGCCACTCT  
+HWI-EAS443:3:56:664:514#0/1  
a\_baa\_\_\_aa`abbb¥ab]bb`a^a`\_`Zabba\_aaaa\_a  
@HWI-EAS443:3:56:678:79#0/1  
AGAAACTGTGATGAGAATGGGAGACCTTCACTACCTCCAG  
+HWI-EAS443:3:56:678:79#0/1  
abaa``ab\_b\_aa^a^`aaaa]a^]¥\_^[\_]^\_`Z^^[\_]  
@HWI-EAS443:3:56:693:1117#0/1  
GCCGCATTTCTTCAATTAACCACCTTATTTCTCAAATTT  
+HWI-EAS443:3:56:693:1117#0/1  
abab\_^bbb`bbaaabaanaaaaaabaaaaaa`b\_aa\_baa  
@HWI-EAS443:3:56:724:1225#0/1  
CGCATTTCTTCAATTAACCACCTTATTTCTCAAATTTCT  
+HWI-EAS443:3:56:724:1225#0/1  
abbabbbbbbbbabbaa`aaa`baabbb\_abababbabaa  
@HWI-EAS443:3:56:741:759#0/1  
TGAGAATGGGAGACCTTCACTACCTCCAGAGCAGAAATGA

+HWI-EAS443:3:56:741:759#0/1  
aa\_b\_abbbaZba\_Z`aa¥a`^a\_[\_a\_a[\_`WW¥aa\_  
@HWI-EAS443:3:56:745:1725#0/1  
ATCGCACGCAAAGAGGGCCTATTATCTTTTGCCTAGGCAT  
+HWI-EAS443:3:56:745:1725#0/1  
``aaababaaa`aa`a]ab`Y```a\_`aa]\_\_aa`a`a]  
@HWI-EAS443:3:56:78:177#0/1  
TGAGAATGGGAGACCTTCACTACCTCCAGAGCAGAAATGA  
+HWI-EAS443:3:56:78:177#0/1  
ababababba\_b`]Y\_```\_^Y¥\_\_\_\_a`ZP^VZVZ\_^  
@HWI-EAS443:3:56:796:442#0/1  
TGCCGCATTTCTTCAATTAACCACCTTATTTCTCAAATT  
+HWI-EAS443:3:56:796:442#0/1  
abb`aaa¥aaa`a\_a`a`aa\_a`\_`b^`aaa]`aaa¥\_aa  
@HWI-EAS443:3:56:808:1559#0/1  
ACCCAATCCATTGTCTGCAAATCGCTTGCGGATATGCCAA  
+HWI-EAS443:3:56:808:1559#0/1  
``aaaaaa\_aaaa^^]\_\_aaaaU\_^a`[Z\_\_[\_]UUZW]^  
@HWI-EAS443:3:56:820:552#0/1  
AAACGAGAAAGCTTCTTCTTCTTCTTCTTCAAGCAGT  
+HWI-EAS443:3:56:820:552#0/1  
abb`abb¥ZYaaaXU[`abXU]aa\_aa]^`aaa\_\_a`^`¥  
@HWI-EAS443:3:56:820:579#0/1  
GCCGCATTTCTTCAATTAACCACCTTATTTCTCAAATTT  
+HWI-EAS443:3:56:820:579#0/1  
a```\_aaba`aa\_a`a`a`][^`\_`a\_\_a`a]^`\_``\_`\_a  
@HWI-EAS443:3:56:829:971#0/1  
GAATGGGAGACCTTCACTACCTCCAGAGCAGAAATGAAAA  
+HWI-EAS443:3:56:829:971#0/1  
a`\_`Z`Saa\_\_aa`^PZ\_a]\_\_`N`Y¥^^`¥HU¥\_¥\_¥T  
@HWI-EAS443:3:56:840:1333#0/1  
GCCGCATTTCTTCAATTAACCACCTTATTTCTCAAATTT  
+HWI-EAS443:3:56:840:1333#0/1  
Ya[bY¥bbbabZ^`\_babaa`aaa\_\_Ya`aaaabaI`^Va  
@HWI-EAS443:3:56:859:125#0/1  
GCCGCATTTCTTCAATTAACCACCTTATTTCTCAAATTT  
+HWI-EAS443:3:56:859:125#0/1  
a^^`YZa]ITVZJLT][SRQJ][Z\_`]XR]OT¥Y¥YZ]ZZ  
@HWI-EAS443:3:56:866:58#0/1  
TCGCTGGATTCTTCTTTCAAGATCCATTCCACGATTTGTT  
+HWI-EAS443:3:56:866:58#0/1  
a[\_`aba\_aa`Za¥aa]Ya\_a\_aW\_`a`^^`\_b¥``\_a\_\_  
@HWI-EAS443:3:56:908:1294#0/1  
GCGGCACAGATTGAAAGCGACAGAGAATAGTTTGAACAA  
+HWI-EAS443:3:56:908:1294#0/1  
a¥]^`^^`a`\_aZ[a¥RU^]QRZ[^`\_`a^[P[]SaW`UPT  
@HWI-EAS443:3:56:914:867#0/1  
GCCGCATTTCTTCAATTAACCACCTTATTTCTCAAATTT  
+HWI-EAS443:3:56:914:867#0/1  
\_`a`\_aaa`bbbaaaaa\_a\_aa``aaabaaa`baa^Y`a`

@HWI-EAS443:3:56:933:980#0/1  
AGAAACTGTGATGAGAATGGGAGACCTTCACTACCTCCAG  
+HWI-EAS443:3:56:933:980#0/1  
a]^\_[aaGa\_^^U\_UYaa`[P[]\_Y¥]VY^]]VVV[YV]  
@HWI-EAS443:3:56:945:492#0/1  
GAGCAATTGGGACAGAAATTTGAGGAAATAAGGTGGTTAA  
+HWI-EAS443:3:56:945:492#0/1  
aTaa\_`^\_b`a\_\_aaa\_`a`aaXa`^^]``^aSa^S\_] ]  
@HWI-EAS443:3:56:962:1507#0/1  
AGAAACTGTGATGAGAATGGGAGACCTTCACTACCTCCAG  
+HWI-EAS443:3:56:962:1507#0/1  
ZZ]Za`a^P\_ab\_\_a\_a¥H¥X[¥a`L[TYb`P]a[L`\_`]  
@HWI-EAS443:3:57:1012:789#0/1  
GGAGAACTGTGATGAGAATGGGAGACCTTCACTACCTCC  
+HWI-EAS443:3:57:1012:789#0/1  
aaa)`a`ab\_a)`a\_a[a\_aaaL`^^]^\_\_\_\_^`^R^XZ  
@HWI-EAS443:3:57:1020:251#0/1  
GTCGCTTTCAATCTGTGCCGATTTCTTCAATTAACCACC  
+HWI-EAS443:3:57:1020:251#0/1  
a\_abaaab\_`\_a\_]a`\_a`\_`aa]\_\_\_\_`a`\_`WZ^]^  
@HWI-EAS443:3:57:1060:591#0/1  
GCCGCATTTCTTCAATTAACCACCTTATTTCTCAAATTT  
+HWI-EAS443:3:57:1060:591#0/1  
a`abaaaab\_b`Yaaaaa^^\_a`^a`aa\_a`\_`a`\_]W\_`a  
@HWI-EAS443:3:57:1075:1294#0/1  
GAGAACTGTGATGAGAATGGGAGACCTTCACTACCTCCA  
+HWI-EAS443:3:57:1075:1294#0/1  
a`aa\_b`\_`¥X]Xa`RbUaWaY`\_\_\_\_]aa`\_`\_a]UG^VZ\_  
@HWI-EAS443:3:57:1079:74#0/1  
GAACTGTGATGAGAATGGGAGACCTTCACTACCTCCAGA  
+HWI-EAS443:3:57:1079:74#0/1  
aa]a`bbab\_ab`b^\_abba`b`[]aa¥\_Ya\_Z0a¥]¥a¥  
@HWI-EAS443:3:57:1083:1114#0/1  
ATGAGAATGGGAGACCTTCACTACCTCCAGAGCAGAAATG  
+HWI-EAS443:3:57:1083:1114#0/1  
]W^QX¥aTa]\_¥ZQZ`[Yaaa^XOW]]^]aab^[VWSY]¥  
@HWI-EAS443:3:57:1089:875#0/1  
AGAGATTCGCTTGGAGAACTGTGATGAGAATGGGAGACC  
+HWI-EAS443:3:57:1089:875#0/1  
ab^bVbaaaa\_`^`[\_XX][aa[^V^\_P]R\_]¥a]\_TT\_  
@HWI-EAS443:3:57:109:1148#0/1  
GGAGAACTGTGATGAGAATGGGAGACCTTCACTACCTCC  
+HWI-EAS443:3:57:109:1148#0/1  
`a`b¥[T^bbZYR`XQ]\_a\_a`[DWX\_\_`\_`\_\_\_\_X`¥N^]Z  
@HWI-EAS443:3:57:1139:1541#0/1  
GAACCAGTCTCGTGACATTTCTCGAGGGTCATGTCAGAA  
+HWI-EAS443:3:57:1139:1541#0/1  
Z`baZabbab]b`\_baabb\_b^b`bbbaZ¥`abaaNabab  
@HWI-EAS443:3:57:1171:571#0/1  
GCCGCATTTCTTCAATTAACCACCTTATTTCTCAAATTT

+HWI-EAS443:3:57:1171:571#0/1  
V¥J^b`a`a`baUababb[PS[aaabbba[^`a\_^`abb  
@HWI-EAS443:3:57:1182:543#0/1  
TCTCGCTGGATTCTCTTTCAAGATCCATTCCACGATTTG  
+HWI-EAS443:3:57:1182:543#0/1  
a`aa]abba\_aaa`aaaaa````\_aaa^\_ZU\_`a`  
@HWI-EAS443:3:57:1188:1858#0/1  
GAATGGGGCATCACCCAATCCATTGTCTGCAAATCGCTTG  
+HWI-EAS443:3:57:1188:1858#0/1  
]\_\_X\_XSZZa¥a]¥¥`a]XRU[^XaXQ]a]aa]VVVLJ^B  
@HWI-EAS443:3:57:1218:1423#0/1  
AGAAACTGTGATGAGAATGGGAGACCTTCACTACCTCCAG  
+HWI-EAS443:3:57:1218:1423#0/1  
a`aZa``]b]aa\_]Y``aa`bVXR`\_\_aZ[]]\_`Z\_\_`  
@HWI-EAS443:3:57:1228:726#0/1  
GAAACTGTGATGAGAATGGGAGACCTTCACTACCTCCAGA  
+HWI-EAS443:3:57:1228:726#0/1  
]]aa^ba]baaa[a`bbaaa\_a`^\_b^Za^aa^GbUY]aa  
@HWI-EAS443:3:57:1261:323#0/1  
GAGAATGGGAGACCTTCACTACCTCCAGAGCAGAAATGAA  
+HWI-EAS443:3:57:1261:323#0/1  
\_P`\_[a`^^a¥\_\_\_`\_a^\_\_¥V^ZS[\_U^ZV^WQS\_\_¥V  
@HWI-EAS443:3:57:1263:1093#0/1  
TGCCGCATTTCTTCAATTAACCACCTTATTTCTCAAATT  
+HWI-EAS443:3:57:1263:1093#0/1  
aa`a\_aabababb`a`baaa\_\_a`aa`bab]Y\_\_^X^aa  
@HWI-EAS443:3:57:1277:1166#0/1  
GAGAAACTGTGATGAGAATGGGAGACCTTCACTACCTCCA  
+HWI-EAS443:3:57:1277:1166#0/1  
]]babbZbb\_\_\_\_\_b^`aaaaa`^^`\_a`bbaa\_[[``\_a  
@HWI-EAS443:3:57:1302:31#0/1  
GAGAATGGGAGACCTTCACTACCTCCAGAGCAGAAATGAA  
+HWI-EAS443:3:57:1302:31#0/1  
aR[MP¥`aV¥Y^¥Z\_¥]NX]SYQWYW^UWM¥\_BBBBBBB  
@HWI-EAS443:3:57:1303:769#0/1  
GCCGCATTTCTTCAATTAACCACCTTATTTCTCAAATTT  
+HWI-EAS443:3:57:1303:769#0/1  
ab¥^`]bba`a`U^^a¥a[ZZ^¥Ya\_\_a`a`^aXa[[\_\_`  
@HWI-EAS443:3:57:1307:729#0/1  
CTGTGATGAGAATGGGAGACCTTCACTACCTCCAGAGCAG  
+HWI-EAS443:3:57:1307:729#0/1  
`bbabbbbabaababa`a`aaaabaaa`aaa`b\_a\_aa  
@HWI-EAS443:3:57:1312:1592#0/1  
GAGAATGGGAGACCTTCACTACCTCCAGAGCAGAAATGAA  
+HWI-EAS443:3:57:1312:1592#0/1  
a\_a[aaaa`\_a^G\_]`Q`Z¥aUT^T¥XLQ^¥^aU^Q\_\_^^  
@HWI-EAS443:3:57:1340:1123#0/1  
GTCGCTTTCAATCTGTGCCGCATTTCTTCAATTAACCACC  
+HWI-EAS443:3:57:1340:1123#0/1  
aaaa]aaa\_a`\_a\_^b`^^^aa`a`aa¥\_aa`\_a]^\_]]



@HWI-EAS443:3:57:1367:96#0/1  
GAAACTGTGATGAGAATGGGAGACCTTCACTACCTCCAGA  
+HWI-EAS443:3:57:1367:96#0/1  
a¥`^Q¥^U`X\_\_U\_VXaaYRY^NS[\_YPUSZ^XTXMMM\_B  
@HWI-EAS443:3:57:1374:1252#0/1  
CTCGCTGGATTCTCTTTCAAGATCCATTCCACGATTTGT  
+HWI-EAS443:3:57:1374:1252#0/1  
ab\_N¥bbbabb`S`]bab\_baaa[aaaaaaPaXaa`aa`  
@HWI-EAS443:3:57:1384:180#0/1  
CTGGTCCAATCGCACGCAAAGAGGGCCTATTATCTTTTGC  
+HWI-EAS443:3:57:1384:180#0/1  
abbb\_bbabb`aabababaaaaaa`ab`baab[bbbaS\_  
@HWI-EAS443:3:57:1412:321#0/1  
GATGAGAATGGGAGACCTTCACTACCTCCAGAGCAGAAAT  
+HWI-EAS443:3:57:1412:321#0/1  
T]`aX\_M\_`[ZSza`^Z\_U^^QU¥LXaZ``\_R\_^]¥YTV]  
@HWI-EAS443:3:57:1412:679#0/1  
GGCTTTCCTGAGGAGGGAGCAATAGTTGGAGAAATTTCA  
+HWI-EAS443:3:57:1412:679#0/1  
`bbbbbbbabbbbab`aaaababaaabaa^`aa¥a  
@HWI-EAS443:3:57:141:1337#0/1  
GAGAATGGGAGACCTTCACTACCTCCAGAGCAGAAATGAA  
+HWI-EAS443:3:57:141:1337#0/1  
a¥a`aaba\_U\_````\_a`````\_aZ^\_a¥````\_YV¥[^[^  
@HWI-EAS443:3:57:1479:206#0/1  
CGAGAAAGCTTATCTCTTGTCTACTTCAAGCAGTAGT  
+HWI-EAS443:3:57:1479:206#0/1  
^\_P\_UYUX]aY^a[a`a`a]]^`\_\_[¥\_a^`UVXZ]W^BB  
@HWI-EAS443:3:57:1499:33#0/1  
AGAAACTGTGATGAGAATGGGAGACCTTCACTACCTCCAG  
+HWI-EAS443:3:57:1499:33#0/1  
\_aaa`abaSa\_ab[^Za`baa\_a[UOY\_]P]`ROYUR]\_  
@HWI-EAS443:3:57:1551:599#0/1  
CCGCATTTCTTCAATTAACCACCTTATTTCCCTCAAATTTTC  
+HWI-EAS443:3:57:1551:599#0/1  
Y[a\_aa`\_Z\_b¥^^ab`a^VW[aaa^baa]¥`aaa`aaa`  
@HWI-EAS443:3:57:1629:568#0/1  
AATGGGAGACCTTCACTACCTCCAGAGCAGAAATGAAAAG  
+HWI-EAS443:3:57:1629:568#0/1  
abbbbbbabbbbababaaba\_ba\_aaaaaaba`aaba`aab  
@HWI-EAS443:3:57:1641:1171#0/1  
GAAACTGTGATGAGAATGGGAGACCTTCACTACCTCCAGA  
+HWI-EAS443:3:57:1641:1171#0/1  
[ab\_babX¥Mba``]b\_b[Z\_0\_¥SaaHVO^WFF`TLR\_X  
@HWI-EAS443:3:57:166:66#0/1  
CACGGTTCGAGTCTCTGAAAATATACAGAGATTCGCTTGG  
+HWI-EAS443:3:57:166:66#0/1  
a\_bba]bb`b\_aa]ab\_\_^aa\_a`[`a¥aYZZU`[Y\_`\_  
@HWI-EAS443:3:57:1693:530#0/1  
GCGGCACAGATTGAAAGCGACAGAGAATAGTTTCGAACAA



@HWI-EAS443:3:57:479:1043#0/1  
GCCGCATTTCTTCAATTAACCACCTTATTTCTCAAATTT  
+HWI-EAS443:3:57:479:1043#0/1  
abab[]¥aa`^a`a`^a^¥¥\_[]QW`\_]\_`\_`a^[]¥\_¥[]`\_`  
@HWI-EAS443:3:57:566:1505#0/1  
CCGCATTTCTTCAATTAACCACCTTATTTCTCAAATTT  
+HWI-EAS443:3:57:566:1505#0/1  
aa`babbabbaa`abaa`a^aaaaaaaaaaaaaaaaaaaa`a  
@HWI-EAS443:3:57:573:151#0/1  
TGCCGCATTTCTTCAATTAACCACCTTATTTCTCAAATT  
+HWI-EAS443:3:57:573:151#0/1  
¥a```¥KY`¥`bba`a\_aa```^`aab¥aa``aaa\_`P]aa  
@HWI-EAS443:3:57:599:1348#0/1  
GCCGCATTTCTTCAATTAACCACCTTATTTCTCAAATTT  
+HWI-EAS443:3:57:599:1348#0/1  
ab`ba`abbbbbbabbab```aaaaab`aab\_`Z\_aaa  
@HWI-EAS443:3:57:622:1572#0/1  
GAAAATATACAGAGATTCGCTTGGAGAACTGTGATGAGA  
+HWI-EAS443:3:57:622:1572#0/1  
a[a`aa`baa`[]X`aaa`\_a\_\_Vsa```^[a^\_`[]\_\_aX  
@HWI-EAS443:3:57:627:626#0/1  
CTTGGAGAACTGTGATGAGAATGGGAGACCTTCACTACC  
+HWI-EAS443:3:57:627:626#0/1  
`bbUTX[]]TXa`Y`Y¥\_P]RRQ``^W[HVZ\_¥[a]T¥^Z  
@HWI-EAS443:3:57:688:2012#0/1  
GCCGCATTTCTTCAATTAACCACCTTATTTCTCAAATTT  
+HWI-EAS443:3:57:688:2012#0/1  
a]\_T\_S\_a]XU`\_`\_`[a`UT^YPaZX`^\_]¥[UX¥¥\_\_W  
@HWI-EAS443:3:57:714:719#0/1  
GCCGCATTTCTTCAATTAACCACCTTATTTCTCAAATTT  
+HWI-EAS443:3:57:714:719#0/1  
[]]\_`bba]]aba\_\_ba]^`^]`a\_aaaba`aaa¥```[]`aa  
@HWI-EAS443:3:57:746:348#0/1  
AACAAATCGTGAATGGATCTTGAAGAGGAATCCAGCGA  
+HWI-EAS443:3:57:746:348#0/1  
a]0\_aa\_T\_\_a`¥``ba¥YP[]]¥`^Z`a`aU[V\_`WV][  
@HWI-EAS443:3:57:755:1196#0/1  
AGAAACTGTGATGAGAATGGGAGACCTTCACTACCTCCAG  
+HWI-EAS443:3:57:755:1196#0/1  
abaaabababab`ab``ab`a\_aa\_\_a`aa```\_\_`^¥^]a  
@HWI-EAS443:3:57:782:1153#0/1  
CTTGGAGAACTGTGATGAGAATGGGAGACCTTCACTACC  
+HWI-EAS443:3:57:782:1153#0/1  
a]^`Y`ZWT\_ba]GX[`¥U^PW¥\_`bQ\_T^VVN\_`Ytz[V  
@HWI-EAS443:3:57:795:182#0/1  
GCCGCATTTCTTCAATTAACCACCTTATTTCTCAAATTT  
+HWI-EAS443:3:57:795:182#0/1  
aaabaabbbabbaabba\_`aaa`aa\_baa`aa\_a\_`a`a  
@HWI-EAS443:3:57:798:196#0/1  
TCTCCATTCTCATCACAGTTTCTCCAAGCGAATCTCTGT



@HWI-EAS443:3:57:989:690#0/1  
CACGGTTCGAGTCTCTGAAAATATACAGAGATTCGCTTGG  
+HWI-EAS443:3:57:989:690#0/1  
\_WF^\_Y\_Z[¥]WY\_Y`YOWV[[TW^ ^]¥\_¥` [T]]]Z¥  
@HWI-EAS443:3:57:998:1001#0/1  
AGAAACTGTGATGAGAATGGGAGACCTTCACTACCTCCAG  
+HWI-EAS443:3:57:998:1001#0/1  
a`\_aabab\_a`a\_aa\_aaaaa`a\_\_\_a`a`a`\_Z]\_\_`a  
@HWI-EAS443:3:58:1022:1508#0/1  
AGGGCCTATTATCTTTTGCCTAGGCATGAGCATGAACCAG  
+HWI-EAS443:3:58:1022:1508#0/1  
a¥^\_aabbbbbbabba`aaXZ]`aaa`a`aaaa`^a`  
@HWI-EAS443:3:58:1102:1889#0/1  
GCCGCATTTCTTCAATTAACCACCTTATTTCTCAAATTT  
+HWI-EAS443:3:58:1102:1889#0/1  
TYabb`ba]^\_b`bbba\_H\_a^b`bbba\_\_\_`b`abbb  
@HWI-EAS443:3:58:1127:1426#0/1  
AACTGTGATGAGAATGGGAGACCTTCACTACCTCCAGAGC  
+HWI-EAS443:3:58:1127:1426#0/1  
aaaaaUb`ab]aaa\_aaa^`G^Y\_\_R\_Sa\_X`^`^]\_`\_`\_  
@HWI-EAS443:3:58:1130:1415#0/1  
AGAAACTGTGATGAGAATGGGAGACCTTCACTACCTCCAG  
+HWI-EAS443:3:58:1130:1415#0/1  
a`aaa`aaZY]aa\_a^`\_`a^]a^YV\_\_0`^`\_R]\_VX\_\_  
@HWI-EAS443:3:58:1156:1484#0/1  
CTTGGAGAACTGTGATGAGAATGGGAGACCTTCACTACC  
+HWI-EAS443:3:58:1156:1484#0/1  
`aaaaabaaa\_bba`aa`a`\_`a`aa\_a\_\_^a`^a``UQ  
@HWI-EAS443:3:58:1191:1309#0/1  
CACGGTTCGAGTCTCTGAAAATATACAGAGATTCGCTTGG  
+HWI-EAS443:3:58:1191:1309#0/1  
]ababRaVxa\_a^]¥`WXT\_¥YaaaUaaaVY¥XRTUXWUN  
@HWI-EAS443:3:58:1202:735#0/1  
CGCTTTCAATCTGTGCCGCATTTCTTCAATTAACCACCTT  
+HWI-EAS443:3:58:1202:735#0/1  
a`^W[^a\_XZO\_VWYSabW[aZY\_[a¥¥^`RZRRT`VF^\_  
@HWI-EAS443:3:58:1264:504#0/1  
GCACGCAAAGAGGGCCTATTATCTTTTGCCTAGGCATGAG  
+HWI-EAS443:3:58:1264:504#0/1  
aaa\_a`¥\_\_a\_aa`^[\_`a`\_\_`\_\_`^^¥`\_`a`\_\_\_`]a  
@HWI-EAS443:3:58:1277:834#0/1  
ATTTCTCGAGGGTCATGTCAGAAAGGTAGCGGAAGTAG  
+HWI-EAS443:3:58:1277:834#0/1  
abbabaaabaa\_a^aab`\_`a`\_`baWaa\_aaa`a]`a  
@HWI-EAS443:3:58:1278:1100#0/1  
CGCTACCTTTCTGACATGACCCTCGAGGAAATGTCACGAG  
+HWI-EAS443:3:58:1278:1100#0/1  
aaa`a`\_a[aaa`\_`[\_`\_V¥`]UX\_UYNY[\_`\_VWY[[XV  
@HWI-EAS443:3:58:1283:531#0/1  
CTGTGATGAGAATGGGAGACCTTCACTACCTCCAGAGCAG

+HWI-EAS443:3:58:1283:531#0/1  
^^YZ^]b\_X^`¥^]`X`a\_\_^aZa`a`]`aa\_¥¥W`P¥a  
@HWI-EAS443:3:58:1306:1052#0/1  
ACCTACTTCGCGCTACCTTTCTGACATGACCCTCGAGGAA  
+HWI-EAS443:3:58:1306:1052#0/1  
aaaaaaaaa`aaa\_\_a`\_\_`^^`\_`\_^ZZ`¥\_¥[\_  
@HWI-EAS443:3:58:131:713#0/1  
AGAAACTGTGATGAGAATGGGAGACCTTCACTACCTCCAG  
+HWI-EAS443:3:58:131:713#0/1  
aaaa\_ZaZ0```[^a`R``[UROYTX[Z[[WU¥VZ^\_^]¥  
@HWI-EAS443:3:58:1340:879#0/1  
GCCGCATTTCTTCAATTAACCACCTTATTTCTCAAATTT  
+HWI-EAS443:3:58:1340:879#0/1  
a`^baaa\_a[¥`]\_¥[``\_]`^\_\_Xa\_\_aa``^\_U^[^a`\_  
@HWI-EAS443:3:58:1345:1548#0/1  
AAACTGTGATGAGAATGGGAGACCTTCACTACCTCCAGAG  
+HWI-EAS443:3:58:1345:1548#0/1  
aaa\_aa]a```\_a^\_\_a`a`\_][Z^\_] [EW\_^Y^WX`\_X\_  
@HWI-EAS443:3:58:1366:896#0/1  
CTAATCGTTAAAGATTACACTGAAGTTTCGCTTTTCAGTAC  
+HWI-EAS443:3:58:1366:896#0/1  
`b`b`b`b`\_Qaabb\_]`bbaa¥ab\_ab\_b``^`ba`\_a`a`  
@HWI-EAS443:3:58:1372:1604#0/1  
GTGCTTTCAATCTGTGCCGATTTCTTCAATTAACCACC  
+HWI-EAS443:3:58:1372:1604#0/1  
\_[^\_MI[[aWSVLYXV]YMTZ[RNRTVPI[ZX]QVW¥NP  
@HWI-EAS443:3:58:1377:1691#0/1  
TGAGAATGGGAGACCTTCACTACCTCCAGAGCAGAAATGA  
+HWI-EAS443:3:58:1377:1691#0/1  
aa\_YU¥aXSXSZ\_W¥Q[L[NTNLFLWZZXSYLQ]XH^H[Y  
@HWI-EAS443:3:58:1398:216#0/1  
GCCGCATTTCTTCAATTAACCACCTTATTTCTCAAATTT  
+HWI-EAS443:3:58:1398:216#0/1  
`YS00]\_ZQQ\_SY[WZYTZ[QUOX¥[``]UZTU\_ZW¥YY[X  
@HWI-EAS443:3:58:1410:1184#0/1  
TGTCGCTTTCAATCTGTGCCGATTTCTTCAATTAACCAC  
+HWI-EAS443:3:58:1410:1184#0/1  
a^^aa` `a\_]TYU\_\_^a^Z\_] [^\_¥a\_]¥¥` [ `ZXX^]  
@HWI-EAS443:3:58:1411:730#0/1  
GAGAATGGGAGACCTTCACTACCTCCAGAGCAGAAATGAA  
+HWI-EAS443:3:58:1411:730#0/1  
aaa`aa`Xa`ba^]a\_]a]``]¥`Z^`a\_aN\_a^[]`\_``  
@HWI-EAS443:3:58:1428:684#0/1  
GTGATGAGAATGGGAGACCTTCACTACCTCCAGAGCAGAA  
+HWI-EAS443:3:58:1428:684#0/1  
¥DVQUSU¥T^a`a\_ZY[YHT[[^^¥VUNY[LWJQLYU\_RR  
@HWI-EAS443:3:58:1430:378#0/1  
AAATCGTGAATGGATCTTGAAAGAGGAATCCAGCGAGAC  
+HWI-EAS443:3:58:1430:378#0/1  
a`X0¥` ]`¥\_]``\_ZQ^\_Z¥`Z\_Y¥¥SZXW]^\_UTO`P¥

@HWI-EAS443:3:58:1452:357#0/1  
ATGAAAAGAACATAGTACTGAAAGCGAACTTCAGTGTA  
+HWI-EAS443:3:58:1452:357#0/1  
aba\_a`a`a`\_`aa```a`aa```aaa`\_W`\_`a`a^a¥  
@HWI-EAS443:3:58:1462:344#0/1  
GCCGCATTTCTTCAATTAACCACCTTATTTCTCAAATTT  
+HWI-EAS443:3:58:1462:344#0/1  
aaa\_0]ba\_X¥^Xaab`aa]WYUU`^`a`[¥¥`^Z^[``¥  
@HWI-EAS443:3:58:1506:559#0/1  
CGCAAGCGATTTGCAGACAATGGATTGGGTGATGCCCCAT  
+HWI-EAS443:3:58:1506:559#0/1  
abbbab`ba`abbaaaaa`a\_baaZ\_¥]aZa\_¥aTQR`\_`\_`  
@HWI-EAS443:3:58:1512:1059#0/1  
TGAAAATATACAGAGATTCGCTTGGAGAACTGTGATGAG  
+HWI-EAS443:3:58:1512:1059#0/1  
aabb`abbbba\_aaaa\_ba\_a\_aaaa`a`\_`^aa[a\_\_\_\_\_`  
@HWI-EAS443:3:58:1567:684#0/1  
CTCTGTGCTTTCAATCTGTGCCGCATTTCTTCAATTAAC  
+HWI-EAS443:3:58:1567:684#0/1  
abbbbaabaaaa`abaaa`]b\_aa[aaaa`aaaa`aaaaZ  
@HWI-EAS443:3:58:1743:943#0/1  
TGATGAGAATGGGAGACCTTCACTACCTCCAGAGCAGAAA  
+HWI-EAS443:3:58:1743:943#0/1  
abaababaa¥a]aaa[WR`Y¥^`\_¥T]\_]`\_¥a`^a`WR  
@HWI-EAS443:3:58:1766:1461#0/1  
TCTCCCATTCTCATCACAGTTTCTCCAAGCGAATCTCTGT  
+HWI-EAS443:3:58:1766:1461#0/1  
V^][YJV]b]a`X^`¥ZV]Sa`\_[Z`]]¥WXFLXN[P[\_¥  
@HWI-EAS443:3:58:1774:1105#0/1  
GGAGAACTGTGATGAGAATGGGAGACCTTCACTACCTCC  
+HWI-EAS443:3:58:1774:1105#0/1  
`b`a\_ab]`aa`^b]`a`^`aaa`\_aZ`a`\_`a`\_`X`^¥^  
@HWI-EAS443:3:58:1788:402#0/1  
CCGCATTTCTTCAATTAACCACCTTATTTCTCAAATTTTC  
+HWI-EAS443:3:58:1788:402#0/1  
abbbbbbbbabbaaabb`baaaa`babbbbaaaaaa`baaa  
@HWI-EAS443:3:58:239:1954#0/1  
CGATGAGGACCCCAACTGCATTTTTGACATCCTCATAAGT  
+HWI-EAS443:3:58:239:1954#0/1  
abaaaab```]`ab`aaa``aaaa`^aa`a\_W]`\_`aa\_]0  
@HWI-EAS443:3:58:259:911#0/1  
TGAGAATGGGAGACCTTCACTACCTCCAGAGCAGAAATGA  
+HWI-EAS443:3:58:259:911#0/1  
abaaababb`aaa`aaaaaaaa`\_`\_`a`a`\_`\_`^`\_`a`\_`  
@HWI-EAS443:3:58:290:498#0/1  
AGAAACTGTGATGAGAATGGGAGACCTTCACTACCTCCAG  
+HWI-EAS443:3:58:290:498#0/1  
ZU¥^^]aa[``¥b]aaa¥```]Q^`\_`Y][a`\_`¥YVQ[\_`^X^  
@HWI-EAS443:3:58:299:1417#0/1  
GGAGAACTGTGATGAGAATGGGAGACCTTCACTACCTCC

+HWI-EAS443:3:58:299:1417#0/1  
^]^^^[X`a^a^\_]^a`a`^[XYa^XU¥`\_[]Z]Y¥\_  
@HWI-EAS443:3:58:300:524#0/1  
GCCGCATTTCTTCAATTAACCACCTTATTTCTCAAATTT  
+HWI-EAS443:3:58:300:524#0/1  
a\_\_a^Y\_WX`\_^UX]¥H^U^YZU^]]]]SZSZX[]YWX]  
@HWI-EAS443:3:58:313:1578#0/1  
AAACGAGAAAGCTCTTATCTCTTGTCTACTTCAAGCAGT  
+HWI-EAS443:3:58:313:1578#0/1  
abbbbbbabbbabababab^babbaababbabbaba`aab\_  
@HWI-EAS443:3:58:321:852#0/1  
TGAGAAATGGGAGACCTTCACTACCTCCAGAGCAGAAATGA  
+HWI-EAS443:3:58:321:852#0/1  
a\_]aaaab^[[`a\_`^^`^^`]^\_`^[[^^\_aXNX]\_^  
@HWI-EAS443:3:58:32:210#0/1  
TGCATTTTTGACATCCTCATAAGTATGTCCTGGAAGAGAA  
+HWI-EAS443:3:58:32:210#0/1  
aa]OLSaYTT`]MMSXSWL¥RN\_PR`]OMPX`\_XWWWTNS  
@HWI-EAS443:3:58:334:191#0/1  
GCCGCATTTCTTCAATTAACCACCTTATTTCTCAAATTT  
+HWI-EAS443:3:58:334:191#0/1  
a`T`P^`\_XS¥SPX\_]^^\_X^QSW^\_\_`^R¥\_]TLX`XZ  
@HWI-EAS443:3:58:340:1008#0/1  
AGTGAAGGTCTCCATTCTCATCACAGTTTCTCCAAGCGA  
+HWI-EAS443:3:58:340:1008#0/1  
\_a]aaaa`X\_a\_aa]`a^S^\_\_X[TaW\_\_Y\_^\_]^^WYS  
@HWI-EAS443:3:58:417:406#0/1  
GTCGCTTTCAATCTGTGCCGCATTTCTTCAATTAACCACC  
+HWI-EAS443:3:58:417:406#0/1  
a^SVPSLW]T[XUSZN^XLVYVRSZ]¥^UNX]WQMEIV^T  
@HWI-EAS443:3:58:422:1666#0/1  
GAGGAATCCAGCGAGACACTTAGAATGACAATTGCATCTG  
+HWI-EAS443:3:58:422:1666#0/1  
abaabaaaaa`aa¥\_aaY]Y]a\_`[X^R^\_ZVY]aZTVU  
@HWI-EAS443:3:58:435:238#0/1  
TTTCAATCTGTGCCGCATTTCTTCAATTAACCACCTTATT  
+HWI-EAS443:3:58:435:238#0/1  
abbaa\_aaab`aa`b`\_aaa\_aa^`a`^^`\_\_\_\_]a`\_a`  
@HWI-EAS443:3:58:46:1582#0/1  
CCGCATTTCTTCAATTAACCACCTTATTTCTCAAATTT  
+HWI-EAS443:3:58:46:1582#0/1  
aa]a]a]a]`a]`a`\_ZQX`]Y^\_^`^\_\_\_\_\_^][  
@HWI-EAS443:3:58:520:517#0/1  
GAATGGGAGACCTTCACTACCTCCAGAGCAGAAATGAAAA  
+HWI-EAS443:3:58:520:517#0/1  
a^¥ZWZSZ`\_^U[X¥]^\_Z[^\_Z]]`¥V\_SNT`\_XYTY  
@HWI-EAS443:3:58:544:317#0/1  
GCCGCATTTCTTCAATTAACCACCTTATTTCTCAAATTT  
+HWI-EAS443:3:58:544:317#0/1  
aa^XVVYMHQVSXa]¥RK[^ZPVQZXQVUVZSII[M[Y[



@HWI-EAS443:3:58:546:1315#0/1  
GTCTGCTTTCAATCTGTGCCGATTTCTTCAATTAACCACC  
+HWI-EAS443:3:58:546:1315#0/1  
a\_`a^a\_Ya\_a\_] ^Z¥¥[a¥\_a^Y`^^^¥a`\_a\_¥¥^\_  
@HWI-EAS443:3:58:548:868#0/1  
GCCGCATTTCTTCAATTAACCACCTTATTTCTCAAATTT  
+HWI-EAS443:3:58:548:868#0/1  
aXW `[WUa\_^aa] `R¥`^^]^^^]a^`\_\_\_`¥`\_`YU\_\_]  
@HWI-EAS443:3:58:551:843#0/1  
AAGCTGAAACGAGAAAGCTCTTATCTCTTGTCTACTTCA  
+HWI-EAS443:3:58:551:843#0/1  
aabaa\_`baa`aa`\_a\_`\_a`\_a\_a\_`aa[```\_]`aaa  
@HWI-EAS443:3:58:597:153#0/1  
GTGATGAGAATGGGAGACCTTCACTACCTCCAGAGCAGAA  
+HWI-EAS443:3:58:597:153#0/1  
a^`^^` [a[```aa[a\_[U¥WV¥¥^^UW[¥¥¥\_U¥SS\_UW  
@HWI-EAS443:3:58:641:1909#0/1  
GCCGCATTTCTTCAATTAACCACCTTATTTCTCAAATTT  
+HWI-EAS443:3:58:641:1909#0/1  
H[[b`bb\_bbbb\_babbbaaaY]a\_Y^baaWbb`\_`ba\_a  
@HWI-EAS443:3:58:666:177#0/1  
CTGTGATGAGAATGGGAGACCTTCACTACCTCCAGAGCAG  
+HWI-EAS443:3:58:666:177#0/1  
Zaa[b]bb^][`aaaaQa`a\_\_[aa`[a¥`^\_aV`\_`VZ`  
@HWI-EAS443:3:58:700:524#0/1  
GCCGCATTTCTTCAATTAACCACCTTATTTCTCAAATTT  
+HWI-EAS443:3:58:700:524#0/1  
aabba\_bbbbbaaaa`babaab`aababbaa\_baaa]aaa  
@HWI-EAS443:3:58:70:1180#0/1  
GCCGCATTTCTTCAATTAACCACCTTATTTCTCAAATTT  
+HWI-EAS443:3:58:70:1180#0/1  
aaaba`abaaabaaaa`aaaa`aa`aaa`\_a^X\_\_a`a  
@HWI-EAS443:3:58:726:1105#0/1  
CGAGGGTCATGTCAGAAAGGTAGCGCGAAGTAGGTACAGA  
+HWI-EAS443:3:58:726:1105#0/1  
`b`^^aP`\_`baab]aaabbb\_aYab¥bb^bI`¥`aa`^aa  
@HWI-EAS443:3:58:738:1737#0/1  
AGAAACTGTGATGAGAATGGGAGACCTTCACTACCTCCAG  
+HWI-EAS443:3:58:738:1737#0/1  
ab^bbbab^bb¥aZ\_]\_\_]a`]aY^^`\_^^¥Ua`aRYS\_^  
@HWI-EAS443:3:58:756:1697#0/1  
TGAGAATGGGAGACCTTCACTACCTCCAGAGCAGAAATGA  
+HWI-EAS443:3:58:756:1697#0/1  
aa```aabaa]\_`^`a¥Va\_a\_`^`^`\_`¥`^`\_`Y\_\_`a  
@HWI-EAS443:3:58:813:791#0/1  
TGAGAATGGGAGACCTTCACTACCTCCAGAGCAGAAATGA  
+HWI-EAS443:3:58:813:791#0/1  
abSa^^aa`RZaa`\_a\_`\_]`Z\_]\_\_`[\_`\_]`Z^\_a\_`  
@HWI-EAS443:3:58:829:150#0/1  
AGAAACTGTGATGAGAATGGGAGACCTTCACTACCTCCAG

+HWI-EAS443:3:58:829:150#0/1  
aaa`aaab\_a\_\_b^b\_\_\_`\_aa\_`^Y\_^\_\_[]\_RW]]Y^\_  
@HWI-EAS443:3:58:839:846#0/1  
GTGATGAGAATGGGAGACCTTCACTACCTCCAGAGCAGAA  
+HWI-EAS443:3:58:839:846#0/1  
]R]¥\_a]^U¥Va`[RY\_`\_^Y[T][\_]PZ¥XVRDRFT]PH  
@HWI-EAS443:3:58:870:1664#0/1  
GTGATGAGAATGGGAGACCTTCACTACCTCCAGAGCAGAA  
+HWI-EAS443:3:58:870:1664#0/1  
aYa\_`\_`\_\_UZ`^Y^\_]\_[¥UP^XYU^U[^X\_]`^WW^WW  
@HWI-EAS443:3:58:874:1648#0/1  
GAATGGGAGACCTTCACTACCTCCAGAGCAGAAAATGAAAA  
+HWI-EAS443:3:58:874:1648#0/1  
¥a\_]```\_b]aa\_a`a¥a`YX)`a^\_[a\_\_a¥V\_\_a`\_aa  
@HWI-EAS443:3:58:888:196#0/1  
TGAGAATGGGAGACCTTCACTACCTCCAGAGCAGAAAATGA  
+HWI-EAS443:3:58:888:196#0/1  
`b[a^Sabaa\_\_V`^aZX\_N\_YWXZUZZa\_aYV`N]^`^\_W  
@HWI-EAS443:3:58:913:1240#0/1  
GTGCCGCATTTCTTCAATTAACCACCTTATTTCTCAAAT  
+HWI-EAS443:3:58:913:1240#0/1  
a[Y\_aaaY^^)`aa^¥aaa^\_aa\_\_^aaaaa``^a\_a\_\_a  
@HWI-EAS443:3:58:917:306#0/1  
AGAAACTGTGATGAGAATGGGAGACCTTCACTACCTCCAG  
+HWI-EAS443:3:58:917:306#0/1  
abTRNF\_aZ]`]]N`aa]a¥TXa\_]``aQ[¥a`]U][NZ\_  
@HWI-EAS443:3:58:917:827#0/1  
CGCTTTCAATCTGTGCCGCATTTCTTCAATTAACCACCTT  
+HWI-EAS443:3:58:917:827#0/1  
abbaaabbb\_a`bbaaaa`^`bbaaa\_a`aaaaaa]aa]aa  
@HWI-EAS443:3:58:938:868#0/1  
TGCCGCATTTCTTCAATTAACCACCTTATTTCTCAAATT  
+HWI-EAS443:3:58:938:868#0/1  
aaa```aaab\_abaa`baa`a\_`^aaaa`a\_aa`\_[-`a  
@HWI-EAS443:3:58:963:1055#0/1  
CCGCATTTCTTCAATTAACCACCTTATTTCTCAAATTTTC  
+HWI-EAS443:3:58:963:1055#0/1  
aabbabbabbbaaababaaaa`bbabbba`aa`a^baa\_  
@HWI-EAS443:3:58:963:530#0/1  
GGAGAACTGTGATGAGAATGGGAGACCTTCACTACCTCC  
+HWI-EAS443:3:58:963:530#0/1  
ab`a\_a\_`abY]Yaa\_a]``a`^¥a¥\_\_`¥`]^\_YZ^¥W  
@HWI-EAS443:3:59:1013:1408#0/1  
TGAGAATGGGAGACCTTCACTACCTCCAGAGCAGAAAATGA  
+HWI-EAS443:3:59:1013:1408#0/1  
`ba`abba\_]a`\_a```]`aaa`a`aa`aQaU`a[NU\_a¥  
@HWI-EAS443:3:59:1026:273#0/1  
CACGGTTCGAGTCTCTGAAAATATACAGAGATTTCGCTTGG  
+HWI-EAS443:3:59:1026:273#0/1  
^aaba\_abbaa\_aaaa`[`]ZZ¥aaaaa\_b^^`\_aRZ]`^

@HWI-EAS443:3:59:1028:1634#0/1  
TGAGAATGGGAGACCTTCACTACCTCCAGAGCAGAAATGA  
+HWI-EAS443:3:59:1028:1634#0/1  
\_NKPZVP^Q\_`aTNSUU^aTUX[Y[[YPRQRVQLPSYNUU  
@HWI-EAS443:3:59:1035:749#0/1  
GAAACTGTGATGAGAATGGGAGACCTTCACTACCTCCAGA  
+HWI-EAS443:3:59:1035:749#0/1  
aa`\_U]¥^\_^abPaX\_a]aaVTaaaa¥Zaa`R`O\_MH\_aR  
@HWI-EAS443:3:59:1040:92#0/1  
TGATGAGAATGGGAGACCTTCACTACCTCCAGAGCAGAAA  
+HWI-EAS443:3:59:1040:92#0/1  
^baaa`b\_abbbaab^]¥`a^a`aa]¥\_aaZRY`[H[^ZV  
@HWI-EAS443:3:59:1045:577#0/1  
GGAGAACTGTGATGAGAATGGGAGACCTTCACTACCTCC  
+HWI-EAS443:3:59:1045:577#0/1  
```abaaa`ba^`aabab`ab]b``baa\_aaa\_\_`aTW\_ZU  
@HWI-EAS443:3:59:1056:691#0/1  
ATGGTAACACGGTTCGAGTCTCTGAAAATATACAGAGATT  
+HWI-EAS443:3:59:1056:691#0/1  
abbb\_bbab``aaaab]b`aa`aa\_]aaaa\_]\_aaYU\_``  
@HWI-EAS443:3:59:1061:1657#0/1  
GAAACTGTGATGAGAATGGGAGACCTTCACTACCTCCAGA  
+HWI-EAS443:3:59:1061:1657#0/1  
aaaaabb]V`bbbbaabba`[[bbabaabab¥X`aVYa^  
@HWI-EAS443:3:59:1070:1157#0/1  
GCCGCATTTCTTCAATTAACCACCTTATTTCTCAAATTT  
+HWI-EAS443:3:59:1070:1157#0/1  
`a`[EY`aa¥``Za\_aba\_a]a[¥¥[aaa``UWGSZa^X  
@HWI-EAS443:3:59:1113:1791#0/1  
GTCGCTTTCAATCTGTGCCGATTTCTTCAATTAACCACC  
+HWI-EAS443:3:59:1113:1791#0/1  
a`aa\_`aaabbaaaa\_a^\_b\_\_abbaabbb`Ua\_ZIH`XO  
@HWI-EAS443:3:59:1158:1066#0/1  
TGAGAATGGGAGACCTTCACTACCTCCAGAGCAGAAATGA  
+HWI-EAS443:3:59:1158:1066#0/1  
ab]b]Ka\_`¥¥bb\_Q\_`aa]aa\_b`baaaSa^aaYYU[`W  
@HWI-EAS443:3:59:1195:1452#0/1  
AACAAATCGTGAATGGATCTTGAAAGAGGAATCCAGCGA  
+HWI-EAS443:3:59:1195:1452#0/1  
a`aa`Z`^^YaZS\_\_`][Y\_[LW\_¥\_Z\_`¥SU[FPSQUJ  
@HWI-EAS443:3:59:1223:1315#0/1  
GAGAACTGTGATGAGAATGGGAGACCTTCACTACCTCCA  
+HWI-EAS443:3:59:1223:1315#0/1  
aaaaaa\_a`^aaaaaa\_`\_a`a\_\_\_\_\_`aa`aU\_`YRXXYX  
@HWI-EAS443:3:59:1229:1597#0/1  
CGCATTTCTTCAATTAACCACCTTATTTCTCAAATTTCT  
+HWI-EAS443:3:59:1229:1597#0/1  
ababbZ]a\_^\_¥¥LZ\_]aYaP\_bb\_abaabbXaY^]\_R\_\_  
@HWI-EAS443:3:59:123:1576#0/1  
GTATATTTTCAGAGACTCGAACCGTGTACCATTCCATTC

+HWI-EAS443:3:59:123:1576#0/1  
a\_a]VR]\_\_\_\_\_ `X\_]XRURYW¥^U\_Y\_]\_YO\_WWRR^YX  
@HWI-EAS443:3:59:126:47#0/1  
TGAGAATGGGAGACCTTCACTACCTCCAGAGCAGAAATGA  
+HWI-EAS443:3:59:126:47#0/1  
a` [ `\_\_aaa\_a¥¥]\_\_\_\_`¥^¥Y¥¥\_\_Q[Q^YW\_QYWY¥W  
@HWI-EAS443:3:59:1300:929#0/1  
CAAATCGTGAATGGATCTTGAAAGAGGAATCCAGCGAGA  
+HWI-EAS443:3:59:1300:929#0/1  
\_^¥bbbbbbb\_^bbba^abaa`Ta`]b]b`^Z\_\_XO[]H]  
@HWI-EAS443:3:59:1320:1059#0/1  
GAGAATGGGAGACCTTCACTACCTCCAGAGCAGAAATGAA  
+HWI-EAS443:3:59:1320:1059#0/1  
a`b[ `baba^`a` `aaaa\_aa\_aa`a`a`b`U[]\_WYa]W  
@HWI-EAS443:3:59:1340:903#0/1  
GCCGCATTTCTTCAATTAACCACCTTATTTCCCTCAAATTT  
+HWI-EAS443:3:59:1340:903#0/1  
`^`\_Z]^]a^aaaXUZa^[]W\_Z]\_a` `^]ZL\_ZZNU\_OJ  
@HWI-EAS443:3:59:1382:801#0/1  
GTGATGAGAATGGGAGACCTTCACTACCTCCAGAGCAGAA  
+HWI-EAS443:3:59:1382:801#0/1  
aaa]aa^baabb\_`\_aa`\_a\_`a` `X]aa` `Y`]\_UTaT]  
@HWI-EAS443:3:59:138:922#0/1  
GAAACTGTGATGAGAATGGGAGACCTTCACTACCTCCAGA  
+HWI-EAS443:3:59:138:922#0/1  
aa\_aaaaL]P]a[\_U]`a]`XX^\_`a^a`\_YU]Z[SFV\_N  
@HWI-EAS443:3:59:1412:957#0/1  
TGAAAATATACAGAGATTGCTTGGAGAAACTGTGATGAG  
+HWI-EAS443:3:59:1412:957#0/1  
abVa^¥a[]¥ZV`IZZba^b`ab¥¥a\_¥RZ\_`a`]TX^FL  
@HWI-EAS443:3:59:1455:833#0/1  
CGCTTGGAGAAACTGTGATGAGAATGGGAGACCTTCACTA  
+HWI-EAS443:3:59:1455:833#0/1  
ab\_XW]Z[aT]\_ZY\_NZUZ`X¥VZ`¥XRZ`ZX]^ODKX]N  
@HWI-EAS443:3:59:1472:1187#0/1  
GCCGCATTTCTTCAATTAACCACCTTATTTCCCTCAAATTT  
+HWI-EAS443:3:59:1472:1187#0/1  
^a\_a^`bbbabbaabbbba`baabbabbb`^baaXZba^  
@HWI-EAS443:3:59:147:176#0/1  
GTCGCTTTCAATCTGTGCCGCATTTCTTCAATTAACCACC  
+HWI-EAS443:3:59:147:176#0/1  
a\_\_a\_\_\_\_\_ `W\_^^^\_^]Z\_YX]]]^]Z^VY^Z^ZXVYXZ  
@HWI-EAS443:3:59:147:703#0/1  
GCCGCATTTCTTCAATTAACCACCTTATTTCCCTCAAATTT  
+HWI-EAS443:3:59:147:703#0/1  
\_`bb`abbbbbbaba`ba\_aaaaaaabaaaa^aaa\_^aa\_  
@HWI-EAS443:3:59:1486:873#0/1  
GCCGCATTTCTTCAATTAACCACCTTATTTCCCTCAAATTT  
+HWI-EAS443:3:59:1486:873#0/1  
aaabY` `baaaa\_a\_baaa^^\_]b`Ybaa`S\_Z\_UXa\_^

@HWI-EAS443:3:59:1511:2033#0/1  
AGAACTGTGATGAGAATGGGAGACCTTCACTACCTCCAG  
+HWI-EAS443:3:59:1511:2033#0/1  
ab]a\_U\_¥Z`[^^]\_X\_¥a]]\_``aaaaZU\_QMSNPWU  
@HWI-EAS443:3:59:1542:966#0/1  
TGAGAATGGGAGACCTTCACTACCTCCAGAGCAGAAATGA  
+HWI-EAS443:3:59:1542:966#0/1  
aba^`X\_^aaZ]¥aaab\_`¥baaaaa`ababU`a[QL¥`Z  
@HWI-EAS443:3:59:1555:1617#0/1  
AGAACTGTGATGAGAATGGGAGACCTTCACTACCTCCAG  
+HWI-EAS443:3:59:1555:1617#0/1  
abba\_I`a¥^\_\_a[`\_¥ZO^]Za\_\_\_aaaaa]\_PZSNV^0  
@HWI-EAS443:3:59:1608:199#0/1  
GCCGATTTCTTCAATTAACCACCTTATTTCTCAAATTT  
+HWI-EAS443:3:59:1608:199#0/1  
aa\_b`abba[ab\_aaabaa\_aaa\_bb`bbb`Pa\_aZZaa\_  
@HWI-EAS443:3:59:1611:512#0/1  
CACAGATTGAAAGCGACAGAGAATAGTTTCGAACAAATAA  
+HWI-EAS443:3:59:1611:512#0/1  
`bbbbbbbbbbbb\_bbbbbbbbbbbbbbbbb]b]bY[baa  
@HWI-EAS443:3:59:1627:440#0/1  
GCTGTTTCGATATCGAGCCAAGGGTGTGCCTCTTCCTT  
+HWI-EAS443:3:59:1627:440#0/1  
^aa]\_aa`aabb\_aa`aa]\_a``a[aVb`¥N^T]UW\_`\_  
@HWI-EAS443:3:59:1702:555#0/1  
CCGCATTTCTTCAATTAACCACCTTATTTCTCAAATTT  
+HWI-EAS443:3:59:1702:555#0/1  
abbabbbbbbbbbbbbbabbabbbbbbbbaab`aZ`aa\_  
@HWI-EAS443:3:59:1706:671#0/1  
GAGATTCGCTTGGAGAACTGTGATGAGAATGGGAGACCT  
+HWI-EAS443:3:59:1706:671#0/1  
aa\_]aaa]]`a`aZ^`Z`a^`]^`¥a`\_Q[`HRLVVU  
@HWI-EAS443:3:59:1776:1518#0/1  
GAACTGTGATGAGAATGGGAGACCTTCACTACCTCCAGA  
+HWI-EAS443:3:59:1776:1518#0/1  
`\_YV]abab`abab`aaa`X]`\_aaaa\_aY\_]¥YYU]T  
@HWI-EAS443:3:59:207:1501#0/1  
GCGAGACACTTAGAATGACAATTGCATCTGTACCTACTTC  
+HWI-EAS443:3:59:207:1501#0/1  
`\_b\_b`aa]abbb\_\_bab\_aba¥bbbaaa`aaabb¥]ba`  
@HWI-EAS443:3:59:23:713#0/1  
GCCGATTTCTTCAATTAACCACCTTATTTCTCAAATTT  
+HWI-EAS443:3:59:23:713#0/1  
abb`]0^`¥¥aa\_¥`Y^`^¥`a`\_`a\_\_a\_`a^]ZaZ^  
@HWI-EAS443:3:59:272:631#0/1  
GCCGATTTCTTCAATTAACCACCTTATTTCTCAAATTT  
+HWI-EAS443:3:59:272:631#0/1  
abbbbaaba`aa`\_\_aa`a`aababaaaaaa]aa^^aa\_  
@HWI-EAS443:3:59:276:1450#0/1  
ATTGTCTGCAAATCGCTTGGCGATATGCCAAAGGAAACAG

+HWI-EAS443:3:59:276:1450#0/1  
aba]``\_a\_a]aa`a`\_a]aa\_\_\_Y[¥]\_ZRLTOVWG^U  
@HWI-EAS443:3:59:278:1156#0/1  
AGAAACTGTGATGAGAATGGGAGACCTTCACTACCTCCAG  
+HWI-EAS443:3:59:278:1156#0/1  
aaaa\_baa`]^\_bXb¥Ya\_X`\_¥PTaa\_a``\_\_¥aUG\_W^  
@HWI-EAS443:3:59:281:951#0/1  
GAAACTGTGATGAGAATGGGAGACCTTCACTACCTCCAGA  
+HWI-EAS443:3:59:281:951#0/1  
a\_\_`Xaa^`^`\_a`^`^`^Y^]\_\_^Y]\_\_]XXXUYUV]YY  
@HWI-EAS443:3:59:285:155#0/1  
GAGAAACTGTGATGAGAATGGGAGACCTTCACTACCTCCA  
+HWI-EAS443:3:59:285:155#0/1  
aaaaa`\_`b\_b\_\_a\_a^^`a`\_]a]\_]^^^T]^XXXXUX  
@HWI-EAS443:3:59:286:849#0/1  
GAAACTGTGATGAGAATGGGAGACCTTCACTACCTCCAGA  
+HWI-EAS443:3:59:286:849#0/1  
a`TZ^`¥Rb`\_`¥a]WR\_ZDW^^`\_[^\_U[NYS^\_OOS\_S  
@HWI-EAS443:3:59:293:2025#0/1  
GTCTCGCTGGATTCTCTTTCAAGATCCATTCCACGATTT  
+HWI-EAS443:3:59:293:2025#0/1  
\_aba`a]NOYX[\_]UZaaa\_[[\_`\_\_¥aaV\_[GV\_ZRRWPU  
@HWI-EAS443:3:59:336:1061#0/1  
AACAAATCGTGAATGGATCTTGAAAGAGGAATCCAGCGA  
+HWI-EAS443:3:59:336:1061#0/1  
`b]\_\_U\_]\_Yaba¥]\_\_`TW¥^¥^T^Y]U¥YWTZTUPWPZ  
@HWI-EAS443:3:59:362:361#0/1  
CTCCCATTCTCATCACAGTTTCTCCAAGCGAATCTCTGTA  
+HWI-EAS443:3:59:362:361#0/1  
aba`ababbbababbbbabbb`bbbbabba`^a`aU]a^]  
@HWI-EAS443:3:59:407:534#0/1  
CCGCATTTCTTCAATTAACCACCTTATTTCTCAAATTT  
+HWI-EAS443:3:59:407:534#0/1  
¥a`^Wa`\_`a\_X]\_VZaababbbb`\_b`^aab`\_^\_YT`^]  
@HWI-EAS443:3:59:413:1913#0/1  
GCCGCATTTCTTCAATTAACCACCTTATTTCTCAAATTT  
+HWI-EAS443:3:59:413:1913#0/1  
abbaabbab`bb`aabbbabbabbbbbbI`Vaaa``ba`  
@HWI-EAS443:3:59:417:304#0/1  
CTTATGAGGATGTCAAAAATGCAGTTGGGGTCCTCATCGG  
+HWI-EAS443:3:59:417:304#0/1  
\_`a`ab]bba``ab````a`ab``````¥Z\_aUYZ`aUV]Z]  
@HWI-EAS443:3:59:457:77#0/1  
AGGTCTCCCATTCTCATCACAGTTTCTCCAAGCGAATCTC  
+HWI-EAS443:3:59:457:77#0/1  
`bbaa`aba\_]X`^^a]^aaa\_]`^`\_¥¥R]]a]O]XWO  
@HWI-EAS443:3:59:460:312#0/1  
AGAAACTGTGATGAGAATGGGAGACCTTCACTACCTCCAG  
+HWI-EAS443:3:59:460:312#0/1  
ab[^`babaaaab¥a`aa`\_]b`\_aa`\_`a`^^\_Y[Y\_\_^

@HWI-EAS443:3:59:53:446#0/1  
GAGAATGGGAGACCTTCACTACCTCCAGAGCAGAAATGAA  
+HWI-EAS443:3:59:53:446#0/1  
ZS`Ua`\_VYUaK]aY0]XP¥V\_a`\_`]aLaa`aUWZP`a^  
@HWI-EAS443:3:59:579:1076#0/1  
TGAGAATGGGAGACCTTCACTACCTCCAGAGCAGAAATGA  
+HWI-EAS443:3:59:579:1076#0/1  
`X`[a\_a^`^`aX[\_^aaa`^`^]\_aR```G\_\_[WU^¥W  
@HWI-EAS443:3:59:600:1123#0/1  
CGAGAAAGCTCTTATCTCTTGTCTACTTCAAGCAGTAGT  
+HWI-EAS443:3:59:600:1123#0/1  
aba\_YSG\_aaba\_Q\_a[^abaaaaabaaa[[X^]RVT]V  
@HWI-EAS443:3:59:614:520#0/1  
CTCTGAAAATATACAGAGATTCGCTTGGAGAACTGTGAT  
+HWI-EAS443:3:59:614:520#0/1  
a`PWRVZTOTS]a^`\_a`^VY^ZVTRPHUJXZ^`PULFJ  
@HWI-EAS443:3:59:619:1418#0/1  
AGAAACTGTGATGAGAATGGGAGACCTTCACTACCTCCAG  
+HWI-EAS443:3:59:619:1418#0/1  
]a^¥`[Z`Z[¥¥¥[\_Z`X[YPR^[[a¥]aaaUZ^¥NMYZZ  
@HWI-EAS443:3:59:663:1730#0/1  
CGCATTCTTCAATTAACCACCTTATTCCTCAAATTTCT  
+HWI-EAS443:3:59:663:1730#0/1  
a`[aaaaaaaa\_\_aa\_a^`^`ba\_aaaaaX\_\_^Z]^]^  
@HWI-EAS443:3:59:66:95#0/1  
GCCGCATTCTTCAATTAACCACCTTATTCCTCAAATTT  
+HWI-EAS443:3:59:66:95#0/1  
a\_\_aa[aaa`aa`\_`aaa`^a\_\_`^¥\_\_a^X`\_^ZZ`\_^  
@HWI-EAS443:3:59:680:751#0/1  
GCGCGAAGTAGGTACAGATGCAATTGTCATTCTAAGTGTC  
+HWI-EAS443:3:59:680:751#0/1  
aa]]^^ZaX¥¥a]\_Z`Z¥RYV`^\_Y[Z[]V\_XFSWWV  
@HWI-EAS443:3:59:710:1345#0/1  
GCGCGAAGTAGGTACAGATGCAATTGTCATTCTAAGTGTC  
+HWI-EAS443:3:59:710:1345#0/1  
aaa`¥^[`^aa]\_a\_aa`^Y]`a`]X^`^aZa]^RS[WV  
@HWI-EAS443:3:59:726:1898#0/1  
AGACACTTAGAATGACAATTGCATCTGTACCTACTTCGCG  
+HWI-EAS443:3:59:726:1898#0/1  
]T\_ZY0``SU`aaaYLaa`][WZ\_\_P^NU]aV`]SYU]LZ  
@HWI-EAS443:3:59:747:163#0/1  
GAATGGGAGACCTTCACTACCTCCAGAGCAGAAATGAAAA  
+HWI-EAS443:3:59:747:163#0/1  
a\_aabaa\_a[\_`a`\_a^`^`^¥^\_¥[`T`^`YZV^WRUW  
@HWI-EAS443:3:59:776:369#0/1  
ATGAGAATGGGAGACCTTCACTACCTCCAGAGCAGAAATG  
+HWI-EAS443:3:59:776:369#0/1  
aaaabaaabab\_ba\_aaaabaaa[aabaaa\_[\_`a]N`^  
@HWI-EAS443:3:59:789:642#0/1  
CCAGTCTCGTGACATTCCTCGAGGGTCATGTCAGAAAAGG

+HWI-EAS443:3:59:789:642#0/1  
`\_]`[^ab\_U`\_ZW\_a`a^Z`\_X\_]\_L^N\_¥]\_¥XKS]\_¥  
@HWI-EAS443:3:59:793:210#0/1  
GCCGCATTTCTTCAATTAACCACCTTATTTCTCAAATTT  
+HWI-EAS443:3:59:793:210#0/1  
aaaaabbba`bbaaabbba`a`abaabaaa^a`\_]Za`a  
@HWI-EAS443:3:59:812:1304#0/1  
CGCGAAGTAGGTACAGATGCAATTGTCATTCTAAGTGCT  
+HWI-EAS443:3:59:812:1304#0/1  
\_^`aa¥`abab]baba^a`¥aabaa`aXa``¥`aXP[\_Z  
@HWI-EAS443:3:59:876:454#0/1  
GCGCGAAGTAGGTACAGATGCAATTGTCATTCTAAGTGCT  
+HWI-EAS443:3:59:876:454#0/1  
aaa\_a]ZaW^aa]``a\_aa\_]``aZ^^`V\_\_UUU^XY  
@HWI-EAS443:3:59:907:336#0/1  
TGAGAATGGGAGACCTTCACTACCTCCAGAGCAGAAATGA  
+HWI-EAS443:3:59:907:336#0/1  
aa`b`aaaa`aaa\_aaaaa`aa`aaa`a`\_Q\_a^UW`^[  
@HWI-EAS443:3:59:949:565#0/1  
AAATAAGCTGAAACGAGAAAGCTTATCTCTTGTCTAC  
+HWI-EAS443:3:59:949:565#0/1  
aabbabaabaabaa`ab`aaaaabb\_bab`\_aa\_]Wa\_W  
@HWI-EAS443:3:59:983:1438#0/1  
AATGGGAGACCTTCACTACCTCCAGAGCAGAAATGAAAAG  
+HWI-EAS443:3:59:983:1438#0/1  
WR`¥¥`]a`\_[VNWWW[``\_aaZb\_b^aaU`^]NSQ`T  
@HWI-EAS443:3:59:999:1375#0/1  
TGAGAATGGGAGACCTTCACTACCTCCAGAGCAGAAATGA  
+HWI-EAS443:3:59:999:1375#0/1  
U\_aY]b[[\_XZ[¥UXS¥¥T\_aaa\_aZa`YNR^VZPVSZYWO  
@HWI-EAS443:3:5:1014:1676#0/1  
CTTTCAGGTAGACTGTTTCTTTGGCATATCCGCAAGCGA  
+HWI-EAS443:3:5:1014:1676#0/1  
abbbbbbaab\_bbbbbbababbabbabababababababab  
@HWI-EAS443:3:5:1182:592#0/1  
CGCTTTCATCTGTGCCGCATTTCTTCAATTAACCACCTT  
+HWI-EAS443:3:5:1182:592#0/1  
ababaaaabb]bbababb\_abba^ba\_b`bbb`a`b^Lbb  
@HWI-EAS443:3:5:1189:284#0/1  
GCCGCATTTCTTCAATTAACCACCTTATTTCTCAAATTT  
+HWI-EAS443:3:5:1189:284#0/1  
\_`Y\_aYa]a`aa\_U[\_YV¥W[0^R^a]X\_\_QS¥]`\_`aaB  
@HWI-EAS443:3:5:1247:651#0/1  
AGGGCCTATTATCTTTTGCCTAGGCATGAGCATGAACCAG  
+HWI-EAS443:3:5:1247:651#0/1  
\_MW¥W¥b\_]\_X`XSSZZaaaa\_Y]X]\_b]a]R[SHS[B  
@HWI-EAS443:3:5:1294:276#0/1  
TGCCGCATTTCTTCAATTAACCACCTTATTTCTCAAATT  
+HWI-EAS443:3:5:1294:276#0/1  
a`aa\_FXaab\_aaY^a`\_]aUY`\_\_aaaaaaTH\_\_\_\_\_aB



@HWI-EAS443:3:5:1349:1423#0/1  
AGAACTGTGATGAGAATGGGAGACCTTCACTACCTCCAG  
+HWI-EAS443:3:5:1349:1423#0/1  
abaababbab`a`b]aaabbZ`]^\_aa[^`\_`W`X\_a  
@HWI-EAS443:3:5:1353:173#0/1  
TGAGAATGGGAGACCTTCACTACCTCCAGAGCAGAAATGA  
+HWI-EAS443:3:5:1353:173#0/1  
\_bXa^¥¥\_b]\_b`Y`aa^^aWYXa`H`Z^SZa`\_aR\_  
@HWI-EAS443:3:5:1369:167#0/1  
GGAAAAGAACATAGTACTGAAAGCGAACTTCAGTGTAAATC  
+HWI-EAS443:3:5:1369:167#0/1  
abb\_aaab¥Zba¥a^bQbbba\_`]^¥aRa[N\_a]^\_aaaY  
@HWI-EAS443:3:5:1380:1864#0/1  
GGAGAACTGTGATGAGAATGGGAGACCTTCACTACCTCC  
+HWI-EAS443:3:5:1380:1864#0/1  
KbUb]`Za`baaababababb`ba[HVHT]]]b[^]aa  
@HWI-EAS443:3:5:1392:2043#0/1  
TGATGAGAATGGGAGACCTTCACTACCTCCAGAGCAGAAA  
+HWI-EAS443:3:5:1392:2043#0/1  
Mabab`baZb[^]a[S`]]^baaa¥\_ZT\_[bZa\_¥P]QU  
@HWI-EAS443:3:5:1413:183#0/1  
ATTATCTTTTGCCTAGGCATGAGCATGAACAGTCTCGTG  
+HWI-EAS443:3:5:1413:183#0/1  
abbabH`\_aLaaaa\_^^T`RX¥^R\_a]a^TFYVT]YZVBB  
@HWI-EAS443:3:5:1494:1110#0/1  
TGTGATGAGAATGGGAGACCTTCACTACCTCCAGAGCAGA  
+HWI-EAS443:3:5:1494:1110#0/1  
ab`Za`¥]bab```]`a¥Y\_]`bTaa^RV]^`b\_a¥Ub`  
@HWI-EAS443:3:5:1497:1232#0/1  
CAGAGATTGCTTGGAGAACTGTGATGAGAATGGGAGAC  
+HWI-EAS443:3:5:1497:1232#0/1  
\_a]aabbbb\_U\_\_`bbabbaa`b\_baa`a]aab`a`a`\_  
@HWI-EAS443:3:5:1502:1720#0/1  
GAGAACTGTGATGAGAATGGGAGACCTTCACTACCTCCA  
+HWI-EAS443:3:5:1502:1720#0/1  
aaaaaa`aa\_a`a\_\_a```\_`[\_`\_V¥`^]a^][SN\_UU^  
@HWI-EAS443:3:5:1540:1665#0/1  
CAGAAAGGTAGCGGAAGTAGGTACAGATGCAATTGTCAT  
+HWI-EAS443:3:5:1540:1665#0/1  
aZZaaabb\_a`^\_OU\_Xaaab\_aaa^ZaaaWaI`aa^S`B  
@HWI-EAS443:3:5:1555:367#0/1  
AACAAATCGTGAATGGATCTTGAAGAGGAATCCAGCGA  
+HWI-EAS443:3:5:1555:367#0/1  
ab\_ababaa^`a\_aaaa\_``aaa```aaa\_a\_`T[\_`[``  
@HWI-EAS443:3:5:156:658#0/1  
GCCGCATTTCTTCAATTAACCACCTTATTTCTCAAATTT  
+HWI-EAS443:3:5:156:658#0/1  
aaaaaaaa`aa`\_aa`a`a\_\_^aa\_aa``^aa`\_\_a\_\_  
@HWI-EAS443:3:5:1580:880#0/1  
TGAGAATGGGAGACCTTCACTACCTCCAGAGCAGAAATGA

+HWI-EAS443:3:5:1580:880#0/1  
ab]a]aabaZXaURaabX¥`a^P`\_`aaaaM¥`]X]aa]  
@HWI-EAS443:3:5:1666:1688#0/1  
GCCGCATTTCTTCAATTAACCACCTTATTTCTCAAATTT  
+HWI-EAS443:3:5:1666:1688#0/1  
a^[^`abbaaa`aabaaa`]¥aJ`\_abUa\_[aM¥`\_a]a  
@HWI-EAS443:3:5:198:1681#0/1  
GAAAATATACAGAGATTCGCTTGGAGAACTGTGATGAGA  
+HWI-EAS443:3:5:198:1681#0/1  
¥Ya^^aa`aZVa]\_Xa^Y¥]¥`a`][\_a\_X\_ZVW]\_\_YaB  
@HWI-EAS443:3:5:214:1185#0/1  
GAATGGGAGACCTTCACTACCTCCAGAGCAGAAATGAAAA  
+HWI-EAS443:3:5:214:1185#0/1  
ab\_babbbbaababbbbbb\_abaabaa]a\_\_abaa`a\_  
@HWI-EAS443:3:5:239:1226#0/1  
GCCGCATTTCTTCAATTAACCACCTTATTTCTCAAATTT  
+HWI-EAS443:3:5:239:1226#0/1  
\_abbb\_bbb\_babbabbababbbababbbbaababaabaa  
@HWI-EAS443:3:5:275:2007#0/1  
AACTGTGATGAGAATGGGAGACCTTCACTACCTCCAGAGC  
+HWI-EAS443:3:5:275:2007#0/1  
abVa\_Sa\_^a^`\_a\_\_\_`^\_¥^a`Y^`\_¥\_^¥YV]\_`\_]\_B  
@HWI-EAS443:3:5:284:1245#0/1  
GTGATGAGAATGGGAGACCTTCACTACCTCCAGAGCAGAA  
+HWI-EAS443:3:5:284:1245#0/1  
a^b`abaaa`bbba`b`\_^b``a```\_\_a^\_\_a\_a[aa`]  
@HWI-EAS443:3:5:284:442#0/1  
CACGGTTCGAGTCTCTGAAAATATACAGAGATTCGCTTGG  
+HWI-EAS443:3:5:284:442#0/1  
`bb\_b`]bbaa¥]^¥\_`]\_T`\_aa`Z^a`a`\_]a^\_¥^B  
@HWI-EAS443:3:5:287:1673#0/1  
GAGAATGGGAGACCTTCACTACCTCCAGAGCAGAAATGAA  
+HWI-EAS443:3:5:287:1673#0/1  
]\_aa\_bb]aZbab[`aVbaaaKT[\_`Vbaa\_aabVabbbB  
@HWI-EAS443:3:5:333:153#0/1  
TGCCGCATTTCTTCAATTAACCACCTTATTTCTCAAATT  
+HWI-EAS443:3:5:333:153#0/1  
abaab\_]aaa`a`aa`a`\_a`\_`\_a`aa^aW]aZ\_\_^\_\_  
@HWI-EAS443:3:5:346:984#0/1  
GCCGCATTTCTTCAATTAACCACCTTATTTCTCAAATTT  
+HWI-EAS443:3:5:346:984#0/1  
a¥^[JY\_VPLS[X¥¥^Wa^\_SXO^WSU]^`\_^WY^¥V¥BB  
@HWI-EAS443:3:5:369:909#0/1  
GCCGCATTTCTTCAATTAACCACCTTATTTCTCAAATTT  
+HWI-EAS443:3:5:369:909#0/1  
aa`\_a`a^`\_`\_^]a`\_a`\_S^^^\_\_\_\_]a]a`\_^W`^^  
@HWI-EAS443:3:5:381:1943#0/1  
AGAACTGTGATGAGAATGGGAGACCTTCACTACCTCCAG  
+HWI-EAS443:3:5:381:1943#0/1  
abZbb^0[a\_\_OQHWM]ZPTVZZS`aY\_a`^`PaTB BBB

@HWI-EAS443:3:5:386:1599#0/1  
GGCACAGATTGAAAGCGACAGAGAATAGTTTCGAACAAAT  
+HWI-EAS443:3:5:386:1599#0/1  
a`bbbb¥`a`aa`b¥abaabbabaabaa¥ba\_a`a`baaa  
@HWI-EAS443:3:5:392:631#0/1  
GAGAACTGTGATGAGAATGGGAGACCTTCACTACCTCCA  
+HWI-EAS443:3:5:392:631#0/1  
a\_aZVZ]a`Ya]\_a]a[]a\_\_\_\_\_X\_\_¥\_¥¥XNGN]\_UB  
@HWI-EAS443:3:5:395:774#0/1  
CAAAGAGGGCCTATTATCTTTTGCCTAGGCATGAGCATGA  
+HWI-EAS443:3:5:395:774#0/1  
a^[\_b]U¥^Xaaaa`ab`bb¥]`]]\_aT¥G\_aaaa\_\_a\_B  
@HWI-EAS443:3:5:415:1635#0/1  
ATGCAATTGTCATTCTAAGTGTCTCGCTGGATTCCCTCTTT  
+HWI-EAS443:3:5:415:1635#0/1  
aaaaaabbbaWaba`bba`^¥`\_a^\_^`aa^`a[M` `a`\_  
@HWI-EAS443:3:5:416:80#0/1  
GCCGCATTTCTTCAATTAACCACCTTATTTCTCAAATTT  
+HWI-EAS443:3:5:416:80#0/1  
`ZOUWaaaa]`\_Z]Xaa\_\_UX\_^a]\_^\_UQ\_¥\_0\_BBB  
@HWI-EAS443:3:5:446:517#0/1  
GAAACTGTGATGAGAATGGGAGACCTTCACTACCTCCAGA  
+HWI-EAS443:3:5:446:517#0/1  
\_]¥]^`b\_a`^a[`]Y\_ba`^a` `a` `aa\_aa` `[L]\_\_\_\_  
@HWI-EAS443:3:5:459:399#0/1  
GTAACACGGTTCGAGTCTCTGAAAATATACAGAGATTTCGC  
+HWI-EAS443:3:5:459:399#0/1  
aaW]`^Zb`G` `WO[U`\_PV]^\_]^[aR`Wa\_[]]X[^XB  
@HWI-EAS443:3:5:47:987#0/1  
TGAGAATGGGAGACCTTCACTACCTCCAGAGCAGAAATGA  
+HWI-EAS443:3:5:47:987#0/1  
S\_Y[P\_JYbaa\_a\_Za\_ZXZVQ¥WU[IS`\_QWaJ\_T\_BB  
@HWI-EAS443:3:5:481:96#0/1  
TGGAGAACTGTGATGAGAATGGGAGACCTTCACTACCTC  
+HWI-EAS443:3:5:481:96#0/1  
abaabaaa\_bbZa\_ababaaaa\_\_a` `X`\_X\_X^^YUBB  
@HWI-EAS443:3:5:491:417#0/1  
CAGATGCAATTGTCATTCTAAGTGTCTCGCTGGATTCCCTC  
+HWI-EAS443:3:5:491:417#0/1  
[ `babbbbaab]HPbbabbaaaabaab`^I`aabaak¥S  
@HWI-EAS443:3:5:520:485#0/1  
GTAACACGGTTCGAGTCTCTGAAAATATACAGAGATTTCGC  
+HWI-EAS443:3:5:520:485#0/1  
a]\_Z` `a`\_a^` `b`aXa]a\_\_\_\_a\_¥a`\_ `a^b\_^\_a`T  
@HWI-EAS443:3:5:539:684#0/1  
GCCGCATTTCTTCAATTAACCACCTTATTTCTCAAATTT  
+HWI-EAS443:3:5:539:684#0/1  
[aba` `ba¥`babbbb`bbbababbbbaabaababab  
@HWI-EAS443:3:5:568:216#0/1  
TGAGAATGGGAGACCTTCACTACCTCCAGAGCAGAAATGA

+HWI-EAS443:3:5:568:216#0/1  
abY\_FZ`b\_\_¥aPPMV¥PaG^`\_TZ[V]\_¥VU¥¥YW^BBB  
@HWI-EAS443:3:5:596:862#0/1  
GCCGCATTTCTTCAATTAACCACCTTATTTCTCAAATTT  
+HWI-EAS443:3:5:596:862#0/1  
aW`aaaabb\_ba`a\_a`a^a`a]V^`Yaa\_\_\_aa`\_Za`a  
@HWI-EAS443:3:5:600:1691#0/1  
GGAGAACTGTGATGAGAATGGGAGACCTTCACTACCTCC  
+HWI-EAS443:3:5:600:1691#0/1  
a\_`b]^[^`Ta[a\_`a`aa`¥X^VFX\_[¥aX\_`M¥\_`^\_  
@HWI-EAS443:3:5:70:1420#0/1  
AACAAATCGTGAATGGATCTTGAAGAGGAATCCAGCGA  
+HWI-EAS443:3:5:70:1420#0/1  
abYa`aa`b]\_^`\_aa]^aa^^Z\_\_aa^[^aY¥W`\_\_YB  
@HWI-EAS443:3:5:711:990#0/1  
GAGAACTGTGATGAGAATGGGAGACCTTCACTACCTCCA  
+HWI-EAS443:3:5:711:990#0/1  
]]aVZ]]aa`a\_QYa`KXV^^^IZ^XMWHZ]GX]XNQJUB  
@HWI-EAS443:3:5:767:453#0/1  
GTGATGAGAATGGGAGACCTTCACTACCTCCAGAGCAGAA  
+HWI-EAS443:3:5:767:453#0/1  
a\_baaa`b¥a`aa`]a^\_\_aa\_]a`V¥`V`\_\_\_\_X\_a^^  
@HWI-EAS443:3:5:785:1072#0/1  
ATCTTTTGCCTAGGCATGAGCATGAACCAAGTCTCGTGACA  
+HWI-EAS443:3:5:785:1072#0/1  
abbYbbb]b`[`ab`aa`ba^\_bbabQ\_aaaaXa``\_`B  
@HWI-EAS443:3:5:815:888#0/1  
ATGAGAATGGGAGACCTTCACTACCTCCAGAGCAGAAATG  
+HWI-EAS443:3:5:815:888#0/1  
VbbR`¥^`]^S[\_`[Xaa\_baX¥[\_`a`aVa^aXNZ[a`  
@HWI-EAS443:3:5:82:526#0/1  
GCGCGAAGTAGGTACAGATGCAATTGTCATTCTAAGTGTC  
+HWI-EAS443:3:5:82:526#0/1  
aababaaa[a^`^a^aaaab`\_`aa¥a\_a`\_a\_]a`B  
@HWI-EAS443:3:5:856:1106#0/1  
CCGCATTTCTTCAATTAACCACCTTATTTCTCAAATTTTC  
+HWI-EAS443:3:5:856:1106#0/1  
abbabb\_`YaX^a`bbbb`a[`bb`b¥bbaaa^\_XaabB  
@HWI-EAS443:3:5:858:1083#0/1  
CGCTTGGAGAACTGTGATGAGAATGGGAGACCTTCACTA  
+HWI-EAS443:3:5:858:1083#0/1  
`baaTXb`\_]^[Y]`baaa`a¥`aab`^`KNZ\_\_^¥`a  
@HWI-EAS443:3:5:876:987#0/1  
ATGCAATTGTCATTCTAAGTGTCTCGCTGGATTCTCTTT  
+HWI-EAS443:3:5:876:987#0/1  
a`Q\_aa¥aaaa^a\_Tba`aWa\_a`VTN¥a[`\_\_^\_\_\_\_a`  
@HWI-EAS443:3:5:897:1069#0/1  
CGCTTGGAGAACTGTGATGAGAATGGGAGACCTTCACTA  
+HWI-EAS443:3:5:897:1069#0/1  
a`X^`]]]aW\_]U\_\_ZTaab``¥\_`Z`a]Za^\_ZXP]Z`a

@HWI-EAS443:3:5:955:668#0/1  
AGAAACTGTGATGAGAATGGGAGACCTTCACTACCTCCAG  
+HWI-EAS443:3:5:955:668#0/1  
a\_Y`aUa`^\_[`baYaaaaa^PY[^V` [JXYQ]]\_aYR\_a  
@HWI-EAS443:3:5:992:831#0/1  
CGCTTGGAGAACTGTGATGAGAATGGGAGACCTTCACTA  
+HWI-EAS443:3:5:992:831#0/1  
`babababaabbabbaabbbbaabbbbaaba^^baabaab  
@HWI-EAS443:3:60:1016:1378#0/1  
GCCGCATTTCTTCAATTAACCACCTTATTTCTCAAATTT  
+HWI-EAS443:3:60:1016:1378#0/1  
``\_W[T^Z\_\_Y\_[T[^a` [VWa] []X[^Y]T[]U]YTZZ]  
@HWI-EAS443:3:60:1019:1094#0/1  
TAAATGTTATTTGTTGAAACTATTCTCTGTCGCTTTCAA  
+HWI-EAS443:3:60:1019:1094#0/1  
]a`ZU\_Q`aa`^`^a`^a^U[^`\_`W^S\_a¥[YSWXZW]Y  
@HWI-EAS443:3:60:1113:130#0/1  
AGAAACTGTGATGAGAATGGGAGACCTTCACTACCTCCAG  
+HWI-EAS443:3:60:1113:130#0/1  
WXZZa\_\_]R[b^a^\_X^b`baUa\_P]aK¥WQX¥JW]X]¥^  
@HWI-EAS443:3:60:1134:1239#0/1  
AGAAACTGTGATGAGAATGGGAGACCTTCACTACCTCCAG  
+HWI-EAS443:3:60:1134:1239#0/1  
aa``^aa[aaaa\_a\_a`\_a]\_a\_\_X\_]`^`\_VZ[UQM[  
@HWI-EAS443:3:60:1139:594#0/1  
CGCATTTCTTCAATTAACCACCTTATTTCTCAAATTTCT  
+HWI-EAS443:3:60:1139:594#0/1  
a]WPWZX\_]SG]S\_]WSP00SV`¥]XX]YVPWUY^^WUZ^  
@HWI-EAS443:3:60:1189:224#0/1  
ACCCAATCCATTGTCTGCAAATCGCTTGCGGATATGCCAA  
+HWI-EAS443:3:60:1189:224#0/1  
``^a^^]a`a\_Z\_\_\_^a\_`Y`^`\_aV\_aRO]VYVO\_W  
@HWI-EAS443:3:60:1236:966#0/1  
GCCGCATTTCTTCAATTAACCACCTTATTTCTCAAATTT  
+HWI-EAS443:3:60:1236:966#0/1  
a`b^aaaa`aa`a\_aaaa`\_\_\_^a\_\_a`a`^a\_a\_^`^\_  
@HWI-EAS443:3:60:1264:577#0/1  
GCGGCACAGATTGAAAGCGACAGAGAATAGTTTCGAACAA  
+HWI-EAS443:3:60:1264:577#0/1  
aaaaaaaaabaab`\_^aa`a`^`[\_a\_`a``T``V^^ZT\_¥  
@HWI-EAS443:3:60:1295:1257#0/1  
TGAGAATGGGAGACCTTCACTACCTCCAGAGCAGAAATGA  
+HWI-EAS443:3:60:1295:1257#0/1  
aa`aaabbbbaa^^\_aa]b``a`\_a`a]a`^`^`\_Y`a`  
@HWI-EAS443:3:60:1363:265#0/1  
GAATGGGAGACCTTCACTACCTCCAGAGCAGAAATGAAAA  
+HWI-EAS443:3:60:1363:265#0/1  
a\_aaa^^R`Q\_\_\_`\_\_^a` [RZ`VN^]\_G\_`VQ¥¥][U[Z  
@HWI-EAS443:3:60:1420:1041#0/1  
GTGATGAGAATGGGAGACCTTCACTACCTCCAGAGCAGAA

+HWI-EAS443:3:60:1420:1041#0/1  
aHaZaaM¥UTTXZWN\_aUR\_MM\_X[\_]WVRK[UZPW]X]  
@HWI-EAS443:3:60:1446:521#0/1  
GCCGCATTTCTTCAATTAACCACCTTATTTCTCAAATTT  
+HWI-EAS443:3:60:1446:521#0/1  
a`\_a\_a\_ba\_aba\_Xaaa\_`TSXSaaXbaaXV]M`]0`` [  
@HWI-EAS443:3:60:1455:1393#0/1  
GCCGCATTTCTTCAATTAACCACCTTATTTCTCAAATTT  
+HWI-EAS443:3:60:1455:1393#0/1  
aaaa\_a`ab`ba\_aabba`^Za\_¥aaab`a\_\_a^a\_\_a^\_  
@HWI-EAS443:3:60:1489:1668#0/1  
GTCGCTTTCAATCTGTGCCGCATTTCTTCAATTAACCACC  
+HWI-EAS443:3:60:1489:1668#0/1  
a\_aa^aa[a`^`X^a``[\_`\_]\_a^a^`^^`\_a\_^WVT\_^  
@HWI-EAS443:3:60:1502:118#0/1  
TGAGAATGGGAGACCTTCACTACCTCCAGAGCAGAAATGA  
+HWI-EAS443:3:60:1502:118#0/1  
aaaa]^ab`a`a¥¥\_\_^\_a\_\_¥[T\_YYZ`X^\_^`TW]¥aW  
@HWI-EAS443:3:60:1533:445#0/1  
GTCAGAAAGGTAGCGGAAGTAGGTACAGATGCAATTGTC  
+HWI-EAS443:3:60:1533:445#0/1  
a\_aaaa\_\_aaT¥a\_a\_[¥`a[\_a\_[\_`^`\_\_aRX^`\_]\_¥Y  
@HWI-EAS443:3:60:1560:861#0/1  
GCCGCATTTCTTCAATTAACCACCTTATTTCTCAAATTT  
+HWI-EAS443:3:60:1560:861#0/1  
a`aaX`a\_a^¥a^aaa\_`\_`[\_`\_V\_`\_a^\_a¥`Y]^`\_\_  
@HWI-EAS443:3:60:1566:398#0/1  
GCTTGGAGAAACTGTGATGAGAATGGGAGACCTTCACTAC  
+HWI-EAS443:3:60:1566:398#0/1  
`aaaba`a\_a`^ab¥a\_[a^^Z\_\_aa^ZY\_X^\_W]^`X\_^Z  
@HWI-EAS443:3:60:1575:842#0/1  
GAAAATATACAGAGATTCGCTTGGAGAAACTGTGATGAGA  
+HWI-EAS443:3:60:1575:842#0/1  
a[\_`^a``\_[^[[`^]`^`VWZ`WY`¥\_]\_\_W[WYWUZT  
@HWI-EAS443:3:60:1583:347#0/1  
GCCGCATTTCTTCAATTAACCACCTTATTTCTCAAATTT  
+HWI-EAS443:3:60:1583:347#0/1  
a`aa\_aaaa\_b`\_a`aaa^]`^^a\_\_b`a\_^`]\_`\_\_  
@HWI-EAS443:3:60:1597:513#0/1  
AAAAGGAAGAGGCAACACCCTTGGCCTCGATATCGAAACA  
+HWI-EAS443:3:60:1597:513#0/1  
aaaaaba`b`aba\_a`a][\_`^aa\_a^\_a\_\_a`¥\_\_\_\_¥\_  
@HWI-EAS443:3:60:1662:873#0/1  
TGCGGCACAGATTGAAAGCGACAGAGAATAGTTTCGAACA  
+HWI-EAS443:3:60:1662:873#0/1  
^a^\_V```aba[Y\_^a^^VaT\_PYX]^a^X\_[Z¥YY[]T\_  
@HWI-EAS443:3:60:1706:662#0/1  
TGCCGCATTTCTTCAATTAACCACCTTATTTCTCAAATT  
+HWI-EAS443:3:60:1706:662#0/1  
aaa^baabbb\_b¥FYabbaa\_a\_P`aaaaaaa\_a\_a\_aaa

@HWI-EAS443:3:60:1778:1314#0/1  
CTCTGTGCTTTCAATCTGTGCCGATTTCTTCAATTAAC  
+HWI-EAS443:3:60:1778:1314#0/1  
aa^^]a`\_`a`\_`\_`VU¥^]Y]Z\_\_\_\_]`^X¥]^]]\_¥  
@HWI-EAS443:3:60:177:276#0/1  
GAGGAATCCAGCGAGACACTTAGAATGACAATTGCATCTG  
+HWI-EAS443:3:60:177:276#0/1  
aa\_`a`a`aa\_a\_a`a``\_`\_]``\_\_\_\_`^W^Z^^U^]  
@HWI-EAS443:3:60:1780:1084#0/1  
CATATCCGCAAGCGATTTGCAGACAATGGATTGGGTGATG  
+HWI-EAS443:3:60:1780:1084#0/1  
W`\_Q\_[\_`ZR`W¥^UVa`¥Wa¥VUTUba[a^OZ`YKPFgz  
@HWI-EAS443:3:60:242:1159#0/1  
GGCCTATTATCTTTTGCCTAGGCATGAGCATGAACCAGTC  
+HWI-EAS443:3:60:242:1159#0/1  
a```aaaaa`\_a`\_aa\_aaa\_\_[\_`\_`¥`\_`Z[^`\_`Y]  
@HWI-EAS443:3:60:264:27#0/1  
GTTAAAGATTACACTGAAGTTCGCTTTCAGTACTATGTTC  
+HWI-EAS443:3:60:264:27#0/1  
a`a`^Ta]`a]]]]`XVaW]]a^\_]]]Z`ZXX^X^\_YYY  
@HWI-EAS443:3:60:308:117#0/1  
ACTGTGATGAGAATGGGAGACCTTCACTACCTCCAGAGCA  
+HWI-EAS443:3:60:308:117#0/1  
aaab]b\_\_b]aa[\_aaa]b^^¥\_\_\_X`\_]^[U]^X^XX  
@HWI-EAS443:3:60:311:1975#0/1  
GCCGCATTTCTTCAATTAACCACCTTATTTCTCAAATTT  
+HWI-EAS443:3:60:311:1975#0/1  
a\_\_R\_a`Ua[V]aa`]^`Ta\_Sa\_¥[\_`^Z^\_Y^^G^^WZ  
@HWI-EAS443:3:60:323:867#0/1  
GATGAGAATGGGAGACCTTCACTACCTCCAGAGCAGAAAT  
+HWI-EAS443:3:60:323:867#0/1  
aaaaaaaaa`aa`aa`\_`\_`aa```\_`\_`\_`\_`X`\_]¥\_\_  
@HWI-EAS443:3:60:341:670#0/1  
GTGATGAGAATGGGAGACCTTCACTACCTCCAGAGCAGAA  
+HWI-EAS443:3:60:341:670#0/1  
a`\_[\_`\_a`^aa`^\_a\_[a``\_`\_`^`\_`\_`\_`¥YY[\_`^]\_ZW  
@HWI-EAS443:3:60:354:41#0/1  
GATGAGAATGGGAGACCTTCACTACCTCCAGAGCAGAAAT  
+HWI-EAS443:3:60:354:41#0/1  
`abbaa[`abb`^`^`aa`\_a``¥¥Y¥]¥¥`[a]\_`SRT]  
@HWI-EAS443:3:60:412:155#0/1  
GAAACTGTGATGAGAATGGGAGACCTTCACTACCTCCAGA  
+HWI-EAS443:3:60:412:155#0/1  
a`\_X`\_aVa]\_`\_^^Q```\_^^S]XU]X^^]VVYXY]YXX  
@HWI-EAS443:3:60:445:82#0/1  
AGTCTCTGAAAATATACAGAGATTCGCTTGGAGAACTGT  
+HWI-EAS443:3:60:445:82#0/1  
ab\_baabb\_a\_abaa`aaa`b\_aa`a\_\_\_\_\_`^`UUZ]]\_]\_  
@HWI-EAS443:3:60:447:98#0/1  
AACAAATCGTGAATGGATCTTGAAAGAGGAATCCAGCGA

+HWI-EAS443:3:60:447:98#0/1  
ababbbaab[bb`abbaaa\_aaaa\_aaaba\_``^\_aa\_`]  
@HWI-EAS443:3:60:480:800#0/1  
GCCGCATTTCTTCAATTAACCACCTTATTTCTCAAATTT  
+HWI-EAS443:3:60:480:800#0/1  
aa`aaZaaaaa\_a\_a\_aa^\_`\_]\_a\_\_aa`\_¥``aX^a`^  
@HWI-EAS443:3:60:488:774#0/1  
ATGAGAATGGGAGACCTTCACTACCTCCAGAGCAGAAATG  
+HWI-EAS443:3:60:488:774#0/1  
a^^baaa\_bbb[]Ta^\_]\_ab`X[a\_U`^\_Ja`Z` [HRXa  
@HWI-EAS443:3:60:508:841#0/1  
GCTTGGAGAACTGTGATGAGAATGGGAGACCTTCACTAC  
+HWI-EAS443:3:60:508:841#0/1  
aaaabbaa]\_aaaa^aa`a`a`\_`\_`^a\_\_\_a\_]\_^\_`^  
@HWI-EAS443:3:60:540:112#0/1  
GTGCCGCATTTCTTCAATTAACCACCTTATTTCTCAAAT  
+HWI-EAS443:3:60:540:112#0/1  
aQX\_`a^\_]Z\_^\_\_WR\_^]WW\_]ZW^\_SZUSYR]]YYY¥  
@HWI-EAS443:3:60:587:958#0/1  
GGGTGTTGCCTCTTCCTTTAAGGACTTTTGATCTCGGCG  
+HWI-EAS443:3:60:587:958#0/1  
I\_^Ubb\_Q\_^bbab[`TWaZb`aaab]`a`babUbbba^a  
@HWI-EAS443:3:60:599:114#0/1  
GTCGCTTTCAATCTGTGCCGCATTTCTTCAATTAACCACC  
+HWI-EAS443:3:60:599:114#0/1  
aYW¥WZ]a\_\_¥^X]`\_]\_[V\_]Y\_\_]V`\_Z^[\_]`^TT[SZ  
@HWI-EAS443:3:60:601:1302#0/1  
GACACTTAGAATGACAATTGCATCTGTACCTACTTCGCGC  
+HWI-EAS443:3:60:601:1302#0/1  
aaaa\_aaaaaaaaaaaaaa`aaa\_a\_]a\_]^^^\_\_` [[]¥  
@HWI-EAS443:3:60:606:901#0/1  
AGAAACTGTGATGAGAATGGGAGACCTTCACTACCTCCAG  
+HWI-EAS443:3:60:606:901#0/1  
^SYT`Z`\_Z[^\_VV\_Z¥ZVNRXZT^MVWUJ¥UVRUVVSPT  
@HWI-EAS443:3:60:616:540#0/1  
AGAAACTGTGATGAGAATGGGAGACCTTCACTACCTCCAG  
+HWI-EAS443:3:60:616:540#0/1  
\_\_]\_]V\_`^W]a^\_]`\_aa¥^Z\_]a]a]ZWL VYUXVY  
@HWI-EAS443:3:60:634:44#0/1  
GTCGCTTTCAATCTGTGCCGCATTTCTTCAATTAACCACC  
+HWI-EAS443:3:60:634:44#0/1  
a[\_]ZQSSZOWY[Q]LWPQTUZXWTS[RWUOVYTVVTPWT  
@HWI-EAS443:3:60:653:371#0/1  
GTTAATTGAAGAAATGCGGCACAGATTGAAAGCGACAGAG  
+HWI-EAS443:3:60:653:371#0/1  
\_`abb\_`^`abaYabb`b\_Ya¥`a`a\_aaaaa`bX\_Y¥^`  
@HWI-EAS443:3:60:657:1345#0/1  
CTGTGATGAGAATGGGAGACCTTCACTACCTCCAGAGCAG  
+HWI-EAS443:3:60:657:1345#0/1  
aVH0a`W\_Q`ZaSa\_TP[^U[^V^SYXR\_\_HXUVQZUKGZ



@HWI-EAS443:3:60:705:1787#0/1  
CTTGGAGAACTGTGATGAGAATGGGAGACCTTCACTACC  
+HWI-EAS443:3:60:705:1787#0/1  
`aaaaaa\_\_a\_]\_a`\_]a\_aaa`Y`\_^`a\_^^`^X^\_\_  
@HWI-EAS443:3:60:748:1953#0/1  
CAGAAAGGTAGCGGAAGTAGGTACAGATGCAATTGTCAT  
+HWI-EAS443:3:60:748:1953#0/1  
abb`aa`a\_b`bb`a\_bb^b¥`\_aaaabaa\_aa\_¥`[\_`\_`  
@HWI-EAS443:3:60:774:1070#0/1  
CGCATTCTTCAATTAACCACCTTATTTCTCAAATTTCT  
+HWI-EAS443:3:60:774:1070#0/1  
aa[aab\_aa^ba\_bb^`a]b\_^aa\_aaa¥`]]`XY`\_\_aa  
@HWI-EAS443:3:60:800:1508#0/1  
GCCGCATTCTTCAATTAACCACCTTATTTCTCAAATTT  
+HWI-EAS443:3:60:800:1508#0/1  
aXMDRYU¥PS`[XU^Y^\_WYKOOPO`QU^\_QW^W[FOFZ  
@HWI-EAS443:3:60:810:47#0/1  
GACATTCTCGAGGGTCATGTCAGAAAGGTAGCGGAAG  
+HWI-EAS443:3:60:810:47#0/1  
aZUFY]\_]^^^Y[N[NUQX]UVV¥KXQTXRX[RZQZVVX  
@HWI-EAS443:3:60:817:52#0/1  
AGGTAGCGGAAGTAGGTACAGATGCAATTGTCATTCTAA  
+HWI-EAS443:3:60:817:52#0/1  
abb\_abbbbba`b\_abbaaaba\_a`a\_aaa\_\_aaa]aa`  
@HWI-EAS443:3:60:830:440#0/1  
CTGTGCCGCATTCTTCAATTAACCACCTTATTTCTCAA  
+HWI-EAS443:3:60:830:440#0/1  
aaa`aaaa`abaa`baaaabaaa\_aa`aaaab`a`\_aaa\_  
@HWI-EAS443:3:60:893:333#0/1  
GTCGCTTCAATCTGTGCCGCATTCTTCAATTAACCACC  
+HWI-EAS443:3:60:893:333#0/1  
a\_aa`\_`a\_\_`^`a^a\_\_\_\_\_a\_\_^`\_]`^a^^]]X]^^  
@HWI-EAS443:3:60:955:129#0/1  
AGAACTGTGATGAGAATGGGAGACCTTCACTACCTCCAG  
+HWI-EAS443:3:60:955:129#0/1  
aba`a`aa^0[aXaX]^\_\_\_\_¥`YRRXY^XXYXYUYYY  
@HWI-EAS443:3:60:983:1590#0/1  
GGAGAACTGTGATGAGAATGGGAGACCTTCACTACCTCC  
+HWI-EAS443:3:60:983:1590#0/1  
abaaa^a`aa^a`abaaa\_a``¥`\_\_[\_`\_\_\_\_a^Z`V^^[\_`  
@HWI-EAS443:3:61:1063:1181#0/1  
GTGATGAGAATGGGAGACCTTCACTACCTCCAGAGCAGAA  
+HWI-EAS443:3:61:1063:1181#0/1  
a]U]^\_XXZ\_aa\_[[a]Y]````^¥R¥¥[VSPWU\_]V]VV  
@HWI-EAS443:3:61:1071:1352#0/1  
TCTCTGCTGCTTCAATCTGTGCCGCATTCTTCAATTAA  
+HWI-EAS443:3:61:1071:1352#0/1  
aaa`a\_a`\_a[\_`aa`^`a`aaa`^`\_]Y^^]ZWW  
@HWI-EAS443:3:61:1092:1569#0/1  
ATTTCTCGAGGGTCATGTCAGAAAGGTAGCGGAAGTAG

+HWI-EAS443:3:61:1092:1569#0/1  
` ` ¥ [ ` ` TYJ ^ ` \_UZ] U ¥ SWUXNOW ` ` P ^ ] Z\_RYTTOS ^ P  
@HWI-EAS443:3:61:1219:183#0/1  
CTGTGCCGCATTTCTTCAATTAACCACCTTATTTCTCAA  
+HWI-EAS443:3:61:1219:183#0/1  
aab^bbbb`\_abbbb`abb`bb`baababb\_a¥\_a`\_\_  
@HWI-EAS443:3:61:121:294#0/1  
CGCTTGGAGAACTGTGATGAGAATGGGAGACCTTCACTA  
+HWI-EAS443:3:61:121:294#0/1  
`bbaabab^XR\_` `aaaYR\_Q¥FW[a^`V¥Y[PV`[\_Q]Y  
@HWI-EAS443:3:61:1246:1458#0/1  
GCCGCATTTCTTCAATTAACCACCTTATTTCTCAAATTT  
+HWI-EAS443:3:61:1246:1458#0/1  
aa^¥\_\_^aa\_\_`^\_Ya`\_a`\_aa\_\_\_\_`^]Z¥^Z]ZXZX]  
@HWI-EAS443:3:61:1252:967#0/1  
AGAACTGTGATGAGAATGGGAGACCTTCACTACCTCCAG  
+HWI-EAS443:3:61:1252:967#0/1  
` ` ^ ` aabb\_`¥aa^`\_[aaaaYaaaa` ` [^^^ZUZ]Y[WW  
@HWI-EAS443:3:61:1264:1037#0/1  
GAGAATGGGAGACCTTCACTACCTCCAGAGCAGAAATGAA  
+HWI-EAS443:3:61:1264:1037#0/1  
a`a\_]aY`a\_aZW[RKSZ[[]Y[Y\_\_\_ZSVXUVHQ^TUXV  
@HWI-EAS443:3:61:126:1969#0/1  
GCCGCATTTCTTCAATTAACCACCTTATTTCTCAAATTT  
+HWI-EAS443:3:61:126:1969#0/1  
`aURIVaS]a^`¥[Y^`TaY¥\_aaZO`\_\_\_\_XZX^^XZZXW  
@HWI-EAS443:3:61:1286:31#0/1  
TGAGAATGGGAGACCTTCACTACCTCCAGAGCAGAAATGA  
+HWI-EAS443:3:61:1286:31#0/1  
ab`aaabbaa`a^\_a`aa`aU`\_` ` ` ` ^a\_W\_¥S¥^UM  
@HWI-EAS443:3:61:1342:2039#0/1  
TATACAGAGATTGCTTGGAGAACTGTGATGAGAATGGG  
+HWI-EAS443:3:61:1342:2039#0/1  
`a]a]a`Z]]`W¥aW\_a]L¥aa` ` ^ ` ` \_\_`U]TZWYY^[Z  
@HWI-EAS443:3:61:1479:185#0/1  
AACAAATCGTGGAATGGATCTTGAAAGAGGAATCCAGCGA  
+HWI-EAS443:3:61:1479:185#0/1  
abaaaabab\_ba\_`ab`]\_`¥`^]` ` ` ` a ` ` \_ZTQ[¥X]U  
@HWI-EAS443:3:61:1500:1726#0/1  
CCGCATTTCTTCAATTAACCACCTTATTTCTCAAATTTCT  
+HWI-EAS443:3:61:1500:1726#0/1  
^Xab`bZYaa`S` ` \_aaaRQ]bb¥` ` ` ^]WG¥OY\_\_\_\_]]R  
@HWI-EAS443:3:61:1524:1305#0/1  
CGCATTTCTTCAATTAACCACCTTATTTCTCAAATTTCT  
+HWI-EAS443:3:61:1524:1305#0/1  
aabbbaa`bbbbbbbbbbbbbbbabbaabbaaabaaba¥a  
@HWI-EAS443:3:61:1525:709#0/1  
CTGAAAATATACAGAGATTGCTTGGAGAACTGTGATGA  
+HWI-EAS443:3:61:1525:709#0/1  
abaabbbbbbbbbbbbbbbbabbaabababbaaa^a`\_`\_`

@HWI-EAS443:3:61:1563:458#0/1  
TGATGAGAATGGGAGACCTTCACTACCTCCAGAGCAGAAA  
+HWI-EAS443:3:61:1563:458#0/1  
abaabaa\_aaaa`\_`aaa`aaaa\_\_^\_aX\_V^]YXX  
@HWI-EAS443:3:61:1637:264#0/1  
ATGAGAATGGGAGACCTTCACTACCTCCAGAGCAGAAATG  
+HWI-EAS443:3:61:1637:264#0/1  
abb`¥S`\_]a^b\_aab\_]\_abb\_Wa[a`aU`XH]R[\_^L  
@HWI-EAS443:3:61:1679:1020#0/1  
AATGGGAGACCTTCACTACCTCCAGAGCAGAAATGAAAAG  
+HWI-EAS443:3:61:1679:1020#0/1  
^X^a`Q\_Z]a`a^\_]^^`¥`bba\_Wa[^`X][\_``Z¥RU  
@HWI-EAS443:3:61:1701:66#0/1  
AGAAACTGTGATGAGAATGGGAGACCTTCACTACCTCCAG  
+HWI-EAS443:3:61:1701:66#0/1  
ab\_aa\_ab\_b\_a`b\_a`aaa\_aY^`^`]\_V]YVUYUVVY  
@HWI-EAS443:3:61:1716:1874#0/1  
GAGAATGGGAGACCTTCACTACCTCCAGAGCAGAAATGAA  
+HWI-EAS443:3:61:1716:1874#0/1  
aab`a¥aa[\_`SQZ[]b\_]abbaa^a`Y[\_`HTRRO[OP  
@HWI-EAS443:3:61:1721:1360#0/1  
CATTTCTTCAATTAACCACCTTATTTCTCAAATTTCTGT  
+HWI-EAS443:3:61:1721:1360#0/1  
abbbbabbbababb`^baa^bbabbbbaab`ab][\_a``]R  
@HWI-EAS443:3:61:1748:311#0/1  
TGAGAATGGGAGACCTTCACTACCTCCAGAGCAGAAATGA  
+HWI-EAS443:3:61:1748:311#0/1  
ZaZ]^`¥\_\_¥\_]UQY^ab^^^b`\_^\_^[\_a[V`¥TYY[Z  
@HWI-EAS443:3:61:195:1180#0/1  
GATTCGCTTGGAGAACTGTGATGAGAATGGGAGACCTTC  
+HWI-EAS443:3:61:195:1180#0/1  
aaa\_aaa`^`a^\_] [aY¥\_W\_PU¥S¥[V¥]^ [SUN¥GWWT  
@HWI-EAS443:3:61:218:1222#0/1  
AGCAATAGTTGGAGAAATTTACCATTACCTTCTCTCCA  
+HWI-EAS443:3:61:218:1222#0/1  
aaa^QXZ`]W00X0SLJRTRYZ[MYUVUU]ZYOVXXQNTX  
@HWI-EAS443:3:61:219:688#0/1  
GAAACTGTGATGAGAATGGGAGACCTTCACTACCTCCAGA  
+HWI-EAS443:3:61:219:688#0/1  
`aaa\_\_\_VaX`\_`\_] []\_`¥¥Z¥WY^]\_¥Z^N¥WWTQWW  
@HWI-EAS443:3:61:227:285#0/1  
AGAAACTGTGATGAGAATGGGAGACCTTCACTACCTCCAG  
+HWI-EAS443:3:61:227:285#0/1  
aba`^aaa\_a`aa\_a\_^`a`^TZ\_]Z^[]^UWUUTN  
@HWI-EAS443:3:61:230:1625#0/1  
TGCCGCATTTCTTCAATTAACCACCTTATTTCTCAAATT  
+HWI-EAS443:3:61:230:1625#0/1  
aabbaaaaaaa`a]`a`\_ab\_aaa\_aaa`X^\_\_^^\_Z  
@HWI-EAS443:3:61:243:1499#0/1  
TGCCGCATTTCTTCAATTAACCACCTTATTTCTCAAATT

+HWI-EAS443:3:61:243:1499#0/1  
aaaabaabaaaaa`\_aa[aaaaab``aaa\_\_X\_\_\_^^\_Z  
@HWI-EAS443:3:61:247:262#0/1  
GCCGCATTTCTTCAATTAACCACCTTATTTCTCAAATTT  
+HWI-EAS443:3:61:247:262#0/1  
``Y^L^`^a\_]ZN]]OVX^[¥¥YX[\_^ZZZVX]ZZXZ  
@HWI-EAS443:3:61:250:224#0/1  
AGAATGGGAGACCTTCACTACCTCCAGAGCAGAAATGAAA  
+HWI-EAS443:3:61:250:224#0/1  
`babbbbb`X`aaaa^aa`a\_W`Q^M^\_¥a¥¥¥`^¥¥¥  
@HWI-EAS443:3:61:318:1173#0/1  
TGTCGCTTCAATCTGTGCCGCATTTCTTCAATTAACCAC  
+HWI-EAS443:3:61:318:1173#0/1  
abababaababbba`ZUUaa^aYa^^^\_`ZQ[^`^^¥X  
@HWI-EAS443:3:61:319:1083#0/1  
CGCATTTCTTCAATTAACCACCTTATTTCTCAAATTTCT  
+HWI-EAS443:3:61:319:1083#0/1  
aba`abbbabbbbbbababab\_`aaa`babb`Za`\_¥`  
@HWI-EAS443:3:61:336:973#0/1  
GCCGCATTTCTTCAATTAACCACCTTATTTCTCAAATTT  
+HWI-EAS443:3:61:336:973#0/1  
a\_]`^^^¥]`^^^Y\_XP\_]]]^]SZ^^]]]]^]\_Z^XZ  
@HWI-EAS443:3:61:401:664#0/1  
ATCAAGGAATGGGCATCACCCAATCCATTGTCTGCAAAT  
+HWI-EAS443:3:61:401:664#0/1  
ababbaaabaab¥a`baa]aa`P`a`aaaa¥\_\_`\_\_\_\_`U  
@HWI-EAS443:3:61:438:1549#0/1  
CTGTGATGAGAATGGGAGACCTTCACTACCTCCAGAGCAG  
+HWI-EAS443:3:61:438:1549#0/1  
aa`bb\_b`\_]Ya^^^ba```]`Sa`a`[]RZQZVFV[  
@HWI-EAS443:3:61:471:1724#0/1  
GATGCAATTGTCATTCTAAGTGTCTCGTGGATTCCCTCTT  
+HWI-EAS443:3:61:471:1724#0/1  
^^\_¥^\_\_\_\_\_ababa`b`^Z`\_ba\_]X`XN`\_\_X[WZ  
@HWI-EAS443:3:61:483:1223#0/1  
GAGGAGGGGAGCAATAGTTGGAGAAATTTACCATTACCTT  
+HWI-EAS443:3:61:483:1223#0/1  
^^^`^abb``\_aaa`[\_\_\_\_\_¥X]\_`^^`^X`^^aT¥Y^  
@HWI-EAS443:3:61:502:484#0/1  
CGCTTGGAGAACTGTGATGAGAATGGGAGACCTTCACTA  
+HWI-EAS443:3:61:502:484#0/1  
a\_\_\_baa^abYbabbV`\_^bab\_baabbabaa\_\_\_`aaZ\_\_\_  
@HWI-EAS443:3:61:505:829#0/1  
TGAGAATGGGAGACCTTCACTACCTCCAGAGCAGAAATGA  
+HWI-EAS443:3:61:505:829#0/1  
\_SZ]`\_abb`aa`^baabba\_Z^a`aaaa\_a`\_`\_[Z^\_^  
@HWI-EAS443:3:61:509:1046#0/1  
GCCGCATTTCTTCAATTAACCACCTTATTTCTCAAATTT  
+HWI-EAS443:3:61:509:1046#0/1  
abaa`Z]aaaaa```\_]a\_]X^[V¥`\_]^[^¥WY^^Z^

@HWI-EAS443:3:61:530:1781#0/1  
GCCGCATTTCTTCAATTAACCACCTTATTTCCCTCAAATTT  
+HWI-EAS443:3:61:530:1781#0/1  
aba\_aa`a^W\_\_\_^a^`aaVTb\_\_\_¥a^`Z\_Z\_]^^`]U  
@HWI-EAS443:3:61:548:291#0/1  
GAGATTGCTTGGAGAACTGTGATGAGAATGGGAGACCT  
+HWI-EAS443:3:61:548:291#0/1  
a`a^¥Za\_]QWa`¥\_Y`¥¥`S\_UY\_W^UVZWNWWWNSWW  
@HWI-EAS443:3:61:560:186#0/1  
GCCGCATTTCTTCAATTAACCACCTTATTTCCCTCAAATTT  
+HWI-EAS443:3:61:560:186#0/1  
a\_Ya`[XZ\_[`\_¥Y]\_^YJV[RRRS[ZZ¥¥XUXYQOM¥XY  
@HWI-EAS443:3:61:560:727#0/1  
CAAGGTCTCTAATCGTTAAAGATTACACTGAAGTTCGCT  
+HWI-EAS443:3:61:560:727#0/1  
abab^^abba`Vbaba\_¥Z\_[SQ\_YZ``]aa``]SZ]\_[Z  
@HWI-EAS443:3:61:606:734#0/1  
AAGCTCTTATCTCTTGTCTACTTCAAGCAGTAGTTGTAA  
+HWI-EAS443:3:61:606:734#0/1  
a¥YZab\_QT`^aU`a\_N]a]Y]\_`a\_YZV¥a¥¥^N]¥VYS  
@HWI-EAS443:3:61:607:427#0/1  
TGAGAATGGGAGACCTTCACTACCTCCAGAGCAGAAATGA  
+HWI-EAS443:3:61:607:427#0/1  
aba\_a`abSaaa`YK[aba\_aU\_¥U\_\_\_`\_`^¥\_¥¥PY¥Y  
@HWI-EAS443:3:61:616:1078#0/1  
GAGAATGGGAGACCTTCACTACCTCCAGAGCAGAAATGAA  
+HWI-EAS443:3:61:616:1078#0/1  
¥S\_TWZa`YQL¥V]Y\_``¥V¥T\_¥[ ]UHVS¥[PSZYW^PW  
@HWI-EAS443:3:61:664:473#0/1  
ATGAGAATGGGAGACCTTCACTACCTCCAGAGCAGAAATG  
+HWI-EAS443:3:61:664:473#0/1  
abbbb`abbaaaaaababba`aaaa\_aa\_`^^aX\_Y`\_  
@HWI-EAS443:3:61:707:229#0/1  
TGCGGCACAGATTGAAAGCGACAGAGAATAGTTTCGAACA  
+HWI-EAS443:3:61:707:229#0/1  
a``a[\_b`aa\_\_[aaa\_ba`[\_^a]\_]\_``Z^¥U\_Y^ZX  
@HWI-EAS443:3:61:721:1110#0/1  
CCGCATTTCTTCAATTAACCACCTTATTTCCCTCAAATTT  
+HWI-EAS443:3:61:721:1110#0/1  
a`a`¥a[aab`aaaa¥U`\_^baaaa`aa[\_a\_`[a¥^a^I  
@HWI-EAS443:3:61:765:135#0/1  
GATGAGAATGGGAGACCTTCACTACCTCCAGAGCAGAAAT  
+HWI-EAS443:3:61:765:135#0/1  
a\_]L[N\_^T0`¥VR^\_]ZBBBBBBBBBBBBBBBBBBBB  
@HWI-EAS443:3:61:794:430#0/1  
CGCGAAGTAGGTACAGATGCAATTGTCATTCTAAGTGTCT  
+HWI-EAS443:3:61:794:430#0/1  
ababb\_bbbbbbbbbbbbbbb\_bbbababbabaabaaaa  
@HWI-EAS443:3:61:804:705#0/1  
GAGAATGGGAGACCTTCACTACCTCCAGAGCAGAAATGAA

+HWI-EAS443:3:61:804:705#0/1  
a\_a\_¥\_a`w`¥\_^[¥^V[^U\_`¥^\_XZUJWWUWYWYU  
@HWI-EAS443:3:61:873:337#0/1  
GCCGATTTCTTCAATTAACCACCTTATTTCTCAAATTT  
+HWI-EAS443:3:61:873:337#0/1  
¥[]a`[Z`¥][`XVZ]^Y¥`¥P]a^¥¥^a\_W^U¥UV¥ZW  
@HWI-EAS443:3:61:977:1436#0/1  
CCGCATTTCTTCAATTAACCACCTTATTTCTCAAATTT  
+HWI-EAS443:3:61:977:1436#0/1  
abaabbaababaa`bbbb`ababaXaaaa`b¥aa^`\_]G  
@HWI-EAS443:3:62:1006:1577#0/1  
GTCGCTTTCAATCTGTGCCGATTTCTTCAATTAACCACC  
+HWI-EAS443:3:62:1006:1577#0/1  
`Ra`]T¥aZZ`¥T¥SU`Z]^]^a^\_\_\_\_`a```[QS\_\_`  
@HWI-EAS443:3:62:1012:2013#0/1  
GTCGCTTTCAATCTGTGCCGATTTCTTCAATTAACCACC  
+HWI-EAS443:3:62:1012:2013#0/1  
aaaaaV\_`a^¥aXWGY`¥b`aa`VM\_]¥]aYZ^[VX]^  
@HWI-EAS443:3:62:1031:264#0/1  
AGAAACTGTGATGAGAATGGGAGACCTTCACTACCTCCAG  
+HWI-EAS443:3:62:1031:264#0/1  
aaaaaab`aaaa\_a¥aaaa\_a\_^^`¥`Z¥`WZ^¥\_\_^  
@HWI-EAS443:3:62:1036:847#0/1  
GTGCCGATTTCTTCAATTAACCACCTTATTTCTCAAAT  
+HWI-EAS443:3:62:1036:847#0/1  
a`bbabbabbbababaaabbbbaaaaaab`aaaa`\_b\_aaaa  
@HWI-EAS443:3:62:1060:293#0/1  
CAAGGGTGTGCTTCTTCTTTAAGGACTTTTGATCTCG  
+HWI-EAS443:3:62:1060:293#0/1  
a`\_aaa`b`bb`\_aaaaaaaa`\_aa\_\_````aa\_^\_\_\_\_  
@HWI-EAS443:3:62:1096:950#0/1  
GTGATGAGAATGGGAGACCTTCACTACCTCCAGAGCAGAA  
+HWI-EAS443:3:62:1096:950#0/1  
aZaaaa\_a`aa`^`\_`aaaa`a¥`^`\_`¥`\_`^`¥`\_¥`\_\_\_\_  
@HWI-EAS443:3:62:1120:249#0/1  
GAATGGGAGACCTTCACTACCTCCAGAGCAGAAATGAAAA  
+HWI-EAS443:3:62:1120:249#0/1  
a¥^a[``¥\_W[Q\_¥WZ¥\_¥SZZSOORPWZYZTVW]¥WVVU  
@HWI-EAS443:3:62:1191:538#0/1  
GCGCGAAGTAGGTACAGATGCAATTGCATTCTAAGTGTC  
+HWI-EAS443:3:62:1191:538#0/1  
aabbb^ab[aba]baaaaaa`aaa^`aba]aa\_]a`a  
@HWI-EAS443:3:62:1197:1233#0/1  
AGAAACTGTGATGAGAATGGGAGACCTTCACTACCTCCAG  
+HWI-EAS443:3:62:1197:1233#0/1  
aa`ba\_aa\_a`aa\_a`^a]```\_]\_[X^`\_`\_aa\_aV]^^```  
@HWI-EAS443:3:62:1213:446#0/1  
ATGTTATTTGTTGAAACTATTCTCTGTGCTTTCAATCT  
+HWI-EAS443:3:62:1213:446#0/1  
a\_`TYX¥ba`b^^`QHYb\_V\_aZa`a\_[\_¥WX`PTZKV]U

@HWI-EAS443:3:62:1213:89#0/1  
ATCCGCAAGCGATTTGCAGACAATGGATTGGGTGATGCCC  
+HWI-EAS443:3:62:1213:89#0/1  
abaab`¥`ab\_\_aaa]Y`\_\_\_\_`a\_¥\_U^^MS[WTU¥[  
@HWI-EAS443:3:62:1223:1169#0/1  
AGAAACTGTGATGAGAATGGGAGACCTTCACTACCTCCAG  
+HWI-EAS443:3:62:1223:1169#0/1  
T`\_Z\_aZ¥UZ`^aVZI`^XZP0\_a^^`a\_¥ZV`UXSZaWL  
@HWI-EAS443:3:62:1235:587#0/1  
CTTGGAGAAACTGTGATGAGAATGGGAGACCTTCACTACC  
+HWI-EAS443:3:62:1235:587#0/1  
`^aba`aaSa[abWaa`a\_a\_\_`a\_\_\_a\_`]\_\_`X\_]¥  
@HWI-EAS443:3:62:126:219#0/1  
GCGGCACAGATTGAAAGCGACAGAGAATAGTTTCGAACAA  
+HWI-EAS443:3:62:126:219#0/1  
aabaa]a\_\_V¥`bY]^`a`^`aa¥a`\_\_^^Y\_]Z^R^Z¥¥  
@HWI-EAS443:3:62:1324:489#0/1  
TGCCGCATTTCTTCAATTAACCACCTTATTTCTCAAATT  
+HWI-EAS443:3:62:1324:489#0/1  
aaaaa`bbaaaaaa`aa`a`YaaaaaZ\_a\_`aab\_  
@HWI-EAS443:3:62:1354:1626#0/1  
GCTTGGAGAAACTGTGATGAGAATGGGAGACCTTCACTAC  
+HWI-EAS443:3:62:1354:1626#0/1  
aaT\_bb\_`a`\_¥Z^¥WY`P]R[Q[`WD[ZPLGQOGSHY[  
@HWI-EAS443:3:62:1356:1319#0/1  
GCCGCATTTCTTCAATTAACCACCTTATTTCTCAAATTT  
+HWI-EAS443:3:62:1356:1319#0/1  
a`a`\_abb`a¥aab`b`b\_a\_`a\_baaabbaaaY\_`abba  
@HWI-EAS443:3:62:1361:107#0/1  
TGAGAATGGGAGACCTTCACTACCTCCAGAGCAGAAATGA  
+HWI-EAS443:3:62:1361:107#0/1  
abab]aabab\_b\_^\_aa\_a\_a`U\_\_¥]a^`\_`]]]\_\_]  
@HWI-EAS443:3:62:1390:423#0/1  
GCCGCATTTCTTCAATTAACCACCTTATTTCTCAAATTT  
+HWI-EAS443:3:62:1390:423#0/1  
a¥aaa`aa`¥¥\_¥\_\_baaaa¥`\_\_^`^`a\_`\_]`^¥`\_]  
@HWI-EAS443:3:62:1401:1803#0/1  
GGCAACACCCTTGGCCTCGATATCGAAACAGCCACTCTTG  
+HWI-EAS443:3:62:1401:1803#0/1  
aa]a\_\_`a\_U[^¥¥¥]¥a`\_UQX\_ZZ\_\_X`R[¥¥VNTPP  
@HWI-EAS443:3:62:1404:1144#0/1  
TTCGCTTGGAGAAACTGTGATGAGAATGGGAGACCTTCACTAC  
+HWI-EAS443:3:62:1404:1144#0/1  
^``baabab\_`^``\_bbab`aZ^b\_\_a^^¥W]^]U\_`^`a\_  
@HWI-EAS443:3:62:1452:1055#0/1  
GGAGAAACTGTGATGAGAATGGGAGACCTTCACTACCTCC  
+HWI-EAS443:3:62:1452:1055#0/1  
¥]bbaa]^ba\_b^ba]¥a`b^`¥aX¥\_[aba[`]`^]`\_a  
@HWI-EAS443:3:62:1513:312#0/1  
GCCGCATTTCTTCAATTAACCACCTTATTTCTCAAATTT

+HWI-EAS443:3:62:1513:312#0/1  
a\_\_^W¥`Y¥`ZQZ¥`]X^^^ZY¥ZU\_[¥[V\_X¥XY\_V^  
@HWI-EAS443:3:62:1513:641#0/1  
GATGAGAATGGGAGACCTTCACTACCTCCAGAGCAGAAAT  
+HWI-EAS443:3:62:1513:641#0/1  
¥V`aR¥WH[^W\_X^Ta`^R)``\_]`[]V¥\_\_[a\_¥`RUVa  
@HWI-EAS443:3:62:1539:985#0/1  
CTCGCTGGATTCTCTTTCAAGATCCATTCCACGATTTGT  
+HWI-EAS443:3:62:1539:985#0/1  
ab\_QQ]bb[H¥Y\_]\_`aab]aaa`VFUa`aaaa\_[a\_\_]P  
@HWI-EAS443:3:62:1552:646#0/1  
GTCGCTTTCAATCTGTGCCGATTCTTCAATTAACCACC  
+HWI-EAS443:3:62:1552:646#0/1  
aW[\_[Z^`[^a]XOVLY¥^^¥\_Y¥¥W\_]`\_\_[\_YXP¥Z\_  
@HWI-EAS443:3:62:1569:139#0/1  
CGAGAAAGCTCTTATCTCTTGTCTACTTCAAGCAGTAGT  
+HWI-EAS443:3:62:1569:139#0/1  
a^T¥YUY`V¥\_^baabb`baaWZZ]OQ^`YZ[a[^`RH[L  
@HWI-EAS443:3:62:1586:950#0/1  
CAAGGTCTCTAATCGTTAAAGATTACACTGAAGTTCGCT  
+HWI-EAS443:3:62:1586:950#0/1  
abbbb`bbbbbbbab\_abbbbbbbbabbbbaaba\_Y`ab  
@HWI-EAS443:3:62:158:186#0/1  
GCCGCATTTCTTCAATTAACCACCTTATTTCTCAAATTT  
+HWI-EAS443:3:62:158:186#0/1  
^] ^V]]¥GUX^TORW[[]ZZYV`]VLXQX^¥SY[QOUP[W  
@HWI-EAS443:3:62:158:1945#0/1  
TTCCTTTGGCATATCCGCAAGCGATTTGCAGACAATGGAT  
+HWI-EAS443:3:62:158:1945#0/1  
aaaa\_aaa[baaa`b\_aaaaa\_`Za^^^a¥`a\_^¥\_`^¥¥  
@HWI-EAS443:3:62:1597:443#0/1  
AGAAACTGTGATGAGAATGGGAGACCTTCACTACCTCCAG  
+HWI-EAS443:3:62:1597:443#0/1  
`bY[bUa\_\_WU``\_b^\_aba\_NYWUX```\_`\_aYZS¥^`\_`a  
@HWI-EAS443:3:62:15:822#0/1  
CAGAAATTTGAGGAAATAAGGTGGTTAATTGAAGAAATGC  
+HWI-EAS443:3:62:15:822#0/1  
aaba`Yabba`bba\_`a[aaa\_ba^aaa`a]`aa`a`a`a`a  
@HWI-EAS443:3:62:1610:226#0/1  
GCTTGGAGAACTGTGATGAGAATGGGAGACCTTCACTAC  
+HWI-EAS443:3:62:1610:226#0/1  
aPH[I`R\_] ^`ZY^U\_RZZWWUWRYVWVZWRUUVRUULN  
@HWI-EAS443:3:62:1617:1828#0/1  
GCCGCATTTCTTCAATTAACCACCTTATTTCTCAAATTT  
+HWI-EAS443:3:62:1617:1828#0/1  
aa^]]\_a\_a¥aaQaaaaba]O¥aR^a^^aaa\_^[]\_\_b``  
@HWI-EAS443:3:62:1652:560#0/1  
CGCGCTACCTTTCTGACATGACCCTCGAGGAAATGTCACG  
+HWI-EAS443:3:62:1652:560#0/1  
abaaa``^`ba``aaa`aaaa`a¥`^aVaa^\_a\_aUZ````



@HWI-EAS443:3:62:1655:1621#0/1  
GAAACTGTGATGAGAATGGGAGACCTTCACTACCTCCAGA  
+HWI-EAS443:3:62:1655:1621#0/1  
^QU`^X^TVYQ¥^V¥\_W[^`^\_\_SNV¥WWW\_[\_ZTW^UWX^S  
@HWI-EAS443:3:62:1706:1446#0/1  
GAAACTGTGATGAGAATGGGAGACCTTCACTACCTCCAGA  
+HWI-EAS443:3:62:1706:1446#0/1  
aaaa`^^¥\_a\_]\_]\_aa`aaa\_Z^`\_]a\_a\_[S]ZWY``  
@HWI-EAS443:3:62:1722:630#0/1  
GATTGCGTTGGAGAACTGTGATGAGAATGGGAGACCTTC  
+HWI-EAS443:3:62:1722:630#0/1  
```a]aa`aaa][Z`\_\_aa[a]`\_^[R\_\_\_Y]\_\_XXYW]Z  
@HWI-EAS443:3:62:1738:691#0/1  
GCCGCATTTCTTCAATTAACCACCTTATTTCTCAAATTT  
+HWI-EAS443:3:62:1738:691#0/1  
a`\_a\_aaaa]aa^^^aaa```\_]`\_\_`a`^`a\_]`^aaa  
@HWI-EAS443:3:62:185:974#0/1  
GAGAATGGGAGACCTTCACTACCTCCAGAGCAGAAATGAA  
+HWI-EAS443:3:62:185:974#0/1  
a]\_Wa\_]a`aa[\_`\_`a¥\_a[^¥`¥\_\_V\_\_^^ZW[^ZY  
@HWI-EAS443:3:62:214:1817#0/1  
CTGTGCCGCATTTCTTCAATTAACCACCTTATTTCTCAA  
+HWI-EAS443:3:62:214:1817#0/1  
a`YHYZ]]YTUOY\_ZSZZ]^a]W]ZWWW`¥WUTXO]\_[Y  
@HWI-EAS443:3:62:276:78#0/1  
GCCGCATTTCTTCAATTAACCACCTTATTTCTCAAATTT  
+HWI-EAS443:3:62:276:78#0/1  
a\_\_aVJaaa\_\_aaRPX`\_aQX`^\_aW]\_\_`\_X^WWUGX]X  
@HWI-EAS443:3:62:319:77#0/1  
GCCGCATTTCTTCAATTAACCACCTTATTTCTCAAATTT  
+HWI-EAS443:3:62:319:77#0/1  
a¥^`\_X`\_^]\_^\_X]\_\_WZV^ZXU^^^\_^]WU]ZXXZ^ZZ  
@HWI-EAS443:3:62:328:1504#0/1  
CACGGTTCGAGTCTCTGAAAATATACAGAGATTCGCTTGG  
+HWI-EAS443:3:62:328:1504#0/1  
abaa`aabaaa\_aaaa`aaaaabaa\_aXaa]]\_YP[]YXU  
@HWI-EAS443:3:62:336:1800#0/1  
ACCCAATCCATTGTCTGCAAATCGCTTGCGGATATGCCAA  
+HWI-EAS443:3:62:336:1800#0/1  
\_]baababS^a\_^]aaUabbbYXMT\_^¥]QPU¥VQJJW¥N  
@HWI-EAS443:3:62:349:805#0/1  
TGAGAATGGGAGACCTTCACTACCTCCAGAGCAGAAATGA  
+HWI-EAS443:3:62:349:805#0/1  
aaM`\_`a[bbbaaaa^a`\_a]]^\_Y]`\_\_a\_a`\_`¥^a\_a\_  
@HWI-EAS443:3:62:363:1297#0/1  
GAAACTGTGATGAGAATGGGAGACCTTCACTACCTCCAGA  
+HWI-EAS443:3:62:363:1297#0/1  
][W]aaba`\_ab```aaa¥MUS^a\_\_aa]Z]VYYRXR[  
@HWI-EAS443:3:62:456:1482#0/1  
AACTGTGATGAGAATGGGAGACCTTCACTACCTCCAGAGC

+HWI-EAS443:3:62:456:1482#0/1  
aa``Ya`a¥\_`^YYZ^Y\_a\_Y^`\_\_`^UW]^V]  
@HWI-EAS443:3:62:45:255#0/1  
TGAGAATGGGAGACCTTCACTACCTCCAGAGCAGAAATGA  
+HWI-EAS443:3:62:45:255#0/1  
abYbaaZ\_ZW`aSa\_a[aa[]^TR¥VW¥]PTSYZTQVV¥N  
@HWI-EAS443:3:62:468:328#0/1  
GTCGCTTTCAATCTGTGCCGATTTCTTCAATTAACCACC  
+HWI-EAS443:3:62:468:328#0/1  
a[\_a\_```^a`\_\_`Z\_\_^``]\_^^Z^^^]\_^ZZWZ]^  
@HWI-EAS443:3:62:509:1909#0/1  
TGCGGCACAGATTGAAAGCGACAGAGAATAGTTTCGAACA  
+HWI-EAS443:3:62:509:1909#0/1  
aVa0^b`aaT\_[aa``¥]a`\_]^\_aYa]J[Y`¥]^Z  
@HWI-EAS443:3:62:513:900#0/1  
CAAATCGTGAATGGATCTTGAAAGAGGAATCCAGCGAGA  
+HWI-EAS443:3:62:513:900#0/1  
aaa`\_aa¥a\_¥\_¥`^M[[ZZN]TZ[[ORVYSYWZLYTUN  
@HWI-EAS443:3:62:584:988#0/1  
GGACTCCAACACCATGTCAAGCTTTCAGGTAGACTGTTTC  
+HWI-EAS443:3:62:584:988#0/1  
aaaaa`b`[a`a^ab`ba\_^\_a`aaaa]Ta``aa][]a  
@HWI-EAS443:3:62:597:1289#0/1  
AGAAACTGTGATGAGAATGGGAGACCTTCACTACCTCCAG  
+HWI-EAS443:3:62:597:1289#0/1  
[a^b\_P\_aU`X]a\_]aaWY\_XQ]^`aPR`a`M`^XUW\_UN  
@HWI-EAS443:3:62:607:679#0/1  
CCGCATTTCTTCAATTAACCACCTTATTTCTCAAATTT  
+HWI-EAS443:3:62:607:679#0/1  
a\_Y¥^VT`¥^`ZY]\_^^^\_\_^a\_\_^\_]^^`]^\_X\_ZZ\_  
@HWI-EAS443:3:62:630:648#0/1  
GCTTGGAGAAACTGTGATGAGAATGGGAGACCTTCACTAC  
+HWI-EAS443:3:62:630:648#0/1  
``^]]ZQ[X[X[`\_TaW`¥^`¥`TV\_¥U¥V`\_^^`XVV^a  
@HWI-EAS443:3:62:652:1939#0/1  
GCCGCATTTCTTCAATTAACCACCTTATTTCTCAAATTT  
+HWI-EAS443:3:62:652:1939#0/1  
`abbbbbbbbbbbbbbbbbbbbbbbabb\_b`baab`b  
@HWI-EAS443:3:62:658:362#0/1  
GTGATGAGAATGGGAGACCTTCACTACCTCCAGAGCAGAA  
+HWI-EAS443:3:62:658:362#0/1  
a\_b`^a]a^\_aa\_`\_a`a``\_a]\_]`\_\_^\_^\_]\_X]^\_  
@HWI-EAS443:3:62:65:146#0/1  
AGAAACTGTGATGAGAATGGGAGACCTTCACTACCTCCAG  
+HWI-EAS443:3:62:65:146#0/1  
aa^P¥Xa]NWR^]Z^SZ¥[] [W^VYVRT[MWVVVUTWBBB  
@HWI-EAS443:3:62:66:32#0/1  
CATAAATGTTATTTGTTCGAAACTATTCTCTGTGCGCTTTC  
+HWI-EAS443:3:62:66:32#0/1  
abbbbbbbbab^bbababaa\_SVaaaaaaaaa\_\_a^\_[[X

@HWI-EAS443:3:62:672:1138#0/1  
GCTTGGAGAACTGTGATGAGAATGGGAGACCTTCACTAC  
+HWI-EAS443:3:62:672:1138#0/1  
aa`a]a`aaab`aa¥aa`Xa`a``aa¥aaR^`^Z``\_¥a  
@HWI-EAS443:3:62:721:602#0/1  
GAGGGAGCAATAGTTGGAGAAATTTACCATTACCTTCTC  
+HWI-EAS443:3:62:721:602#0/1  
aabaaaaaaaaa]aabaaaaa``a\_aa`\_a\_``\_a\_a  
@HWI-EAS443:3:62:727:597#0/1  
GTGCGTTTCAATCTGTGCCGATTTCTTCAATTAACCACC  
+HWI-EAS443:3:62:727:597#0/1  
aaa\_Z[]U]X\_aa]NT`aX`a\_\_aaYZ\_\_`]^ZTT[YU]W  
@HWI-EAS443:3:62:740:298#0/1  
GCCGCATTTCTTCAATTAACCACCTTATTTCTCAAATTT  
+HWI-EAS443:3:62:740:298#0/1  
a`aaa`aaaaa`a^aaab`aa\_a`aaaa\_^a^`\_]a\_^  
@HWI-EAS443:3:62:745:326#0/1  
AGAAACTGTGATGAGAATGGGAGACCTTCACTACCTCCAG  
+HWI-EAS443:3:62:745:326#0/1  
ab\_Zab\_[\_ba`^^Ya`aba^^`^`\_\_`a\_`a¥Y^Z`Y¥  
@HWI-EAS443:3:62:803:1883#0/1  
AGAAACTGTGATGAGAATGGGAGACCTTCACTACCTCCAG  
+HWI-EAS443:3:62:803:1883#0/1  
a`aba`aaYa\_\_a\_\_aa`XW^`\_`^^`^`Wa]U]^`^`^  
@HWI-EAS443:3:62:817:1800#0/1  
GCCGCATTTCTTCAATTAACCACCTTATTTCTCAAATTT  
+HWI-EAS443:3:62:817:1800#0/1  
a`\_`aNa^a^]a[\_\_\_aabaaa`]]`aa\_`^\_VaWZV¥a`\_  
@HWI-EAS443:3:62:831:319#0/1  
CTCCAACACCATGTCAAGCTTTCAGGTAGACTGTTTCCTT  
+HWI-EAS443:3:62:831:319#0/1  
W\_aa`a`a`aVW`UZa`¥NIW[\_¥\_[OT\_[a]b]a^TUY`  
@HWI-EAS443:3:62:84:44#0/1  
TGCGGCACAGATTGAAAGCGACAGAGAATAGTTTCGAACA  
+HWI-EAS443:3:62:84:44#0/1  
abbbbb\_b`baa`b]Z[``a\_\_\_\_\_a¥]^V^X\_\_^^VWVW  
@HWI-EAS443:3:62:86:316#0/1  
TGAGAATGGGAGACCTTCACTACCTCCAGAGCAGAAATGA  
+HWI-EAS443:3:62:86:316#0/1  
`\_¥baa¥\_]aa\_aa\_aaa]\_\_Z\_^`\_]¥QX`Z\_[RTVU^  
@HWI-EAS443:3:62:887:1034#0/1  
TCTGAAAATATACAGAGATTGCTTGGAGAACTGTGATG  
+HWI-EAS443:3:62:887:1034#0/1  
^]a\_\_X^^ab¥aaa`U^¥[Ya`V^X]\_YRW^[]]QKS¥[`  
@HWI-EAS443:3:62:888:1069#0/1  
GAATGGGAGACCTTCACTACCTCCAGAGCAGAAATGAAAA  
+HWI-EAS443:3:62:888:1069#0/1  
```aaaaaaa`````b`aaaaaaaTa\_ZZ[[]``^[^[  
@HWI-EAS443:3:62:890:1651#0/1  
CGCATTTCTTCAATTAACCACCTTATTTCTCAAATTTCT

+HWI-EAS443:3:62:890:1651#0/1  
abbabaaaa``\_a\_aaabbbbaaba\_abbbbaaaaa`b`  
@HWI-EAS443:3:62:892:850#0/1  
CTTGAATGGAATGGTAACACGGTTCGAGTCTCTGAAAATA  
+HWI-EAS443:3:62:892:850#0/1  
abba`bbbbba`ba\_aaaabbaYabbbbaaaaaa``\_aaa  
@HWI-EAS443:3:62:907:1317#0/1  
GAAACTGTGATGAGAATGGGAGACCTTCACTACCTCCAGA  
+HWI-EAS443:3:62:907:1317#0/1  
a¥]ZFX]J[a]PX\_aaV¥a`a¥XSTNST[ZX\_NU]VV^Z^  
@HWI-EAS443:3:62:907:273#0/1  
CTGGTTCATGCTCATGCCTAGGCAAAAGATAATAGGCCCT  
+HWI-EAS443:3:62:907:273#0/1  
abbb\_\_aa]aaaa``\_`a\_T]`a^`^^aa`a\_\_\_\_[YXXZ^  
@HWI-EAS443:3:62:93:374#0/1  
GAGAATGGGAGACCTTCACTACCTCCAGAGCAGAAATGAA  
+HWI-EAS443:3:62:93:374#0/1  
S¥\_XabPO\_a`bb`aabbaa]a^ba`ZR]a`a\_[\_\_\_\_Z[  
@HWI-EAS443:3:62:984:34#0/1  
GTCGCTTTCAATCTGTGCCGATTTCTTCAATTAACCACC  
+HWI-EAS443:3:62:984:34#0/1  
aVZ`\_a]XT^ZSU]¥VSWWaPRG^PPYQOQLW[MTNVRWW  
@HWI-EAS443:3:63:1029:1380#0/1  
GTCGCTTTCAATCTGTGCCGATTTCTTCAATTAACCACC  
+HWI-EAS443:3:63:1029:1380#0/1  
a[\_]]``]]``V]\_^U^`\_\_¥[``\_\_\_\_`^¥Y\_\_`WIV¥¥]X  
@HWI-EAS443:3:63:1057:356#0/1  
TGAGAATGGGAGACCTTCACTACCTCCAGAGCAGAAATGA  
+HWI-EAS443:3:63:1057:356#0/1  
aaab`a`aaa`a^]`a`aa\_\_\_\_\_^\_\_X^]\_\_^]\_^\_^\_  
@HWI-EAS443:3:63:1068:66#0/1  
AGTCTCTGAAAATATACAGAGATTCGCTTGAGAAACTGT  
+HWI-EAS443:3:63:1068:66#0/1  
ab\_abaaa\_aa`baaa\_aba`]`Y`a^a`aa]\_Z\_\_Z^`^  
@HWI-EAS443:3:63:109:194#0/1  
GTCGCTTTCAATCTGTGCCGATTTCTTCAATTAACCACC  
+HWI-EAS443:3:63:109:194#0/1  
a`a]\_^aa`[^`\_\_]a\_\_`\_\_^\_YX[\_\_^¥¥W]^XX[]Y  
@HWI-EAS443:3:63:1101:711#0/1  
GCCGATTTCTTCAATTAACCACCTTATTTCTCAAATTT  
+HWI-EAS443:3:63:1101:711#0/1  
aa\_a```aabbaa`Yaaaaaa`aaba`aa`\_aaa\_\_aaa`  
@HWI-EAS443:3:63:1104:1950#0/1  
GTGATGAGAATGGGAGACCTTCACTACCTCCAGAGCAGAA  
+HWI-EAS443:3:63:1104:1950#0/1  
a^aZ\_a¥a\_aaa\_\_[^`\_\_\_\_^RXaVR`WMX\_Q\_a^`^^^US  
@HWI-EAS443:3:63:1158:909#0/1  
GATGAGAATGGGAGACCTTCACTACCTCCAGAGCAGAAAT  
+HWI-EAS443:3:63:1158:909#0/1  
aab`abSbbbaa\_b`bbbbbbaba\_aa`aaa\_aba\_a\_``

@HWI-EAS443:3:63:1166:145#0/1  
GCCTGGTCCAATCGCACGCAAAGAGGGCCTATTATCTTTT  
+HWI-EAS443:3:63:1166:145#0/1  
`bbbbabbaabbbbbabbaabbabbbba]aabbbbbabbbba  
@HWI-EAS443:3:63:1178:1738#0/1  
AGAAACTGTGATGAGAATGGGAGACCTTCACTACCTCCAG  
+HWI-EAS443:3:63:1178:1738#0/1  
`RWYaVI[0aWSa]`R^W\_]NTXMT\_XUO\_NNW[^UHXVW  
@HWI-EAS443:3:63:117:1464#0/1  
CCGCATTTCTTCAATTAACCACCTTATTTCTCAAATTT  
+HWI-EAS443:3:63:117:1464#0/1  
aa^`]\_aaaa\_a^`a\_Y\_a\_``a\_`\_``\_``\_`a`[¥^\_]\_  
@HWI-EAS443:3:63:1196:810#0/1  
GAAACTGTGATGAGAATGGGAGACCTTCACTACCTCCAGA  
+HWI-EAS443:3:63:1196:810#0/1  
aaaa`ab\_b\_aa\_a\_`aaa``[¥``\_`a]^]V]^¥\_`[  
@HWI-EAS443:3:63:1253:1622#0/1  
CAGATGCAATTGTCATTCTAAGTGTCTCGCTGGATTCCCTC  
+HWI-EAS443:3:63:1253:1622#0/1  
a`Z]Z0[[]`a^\_H¥aaaa`a][^[^UZZV\_]X¥XOKX^  
@HWI-EAS443:3:63:1310:1237#0/1  
GCCGCATTTCTTCAATTAACCACCTTATTTCTCAAATTT  
+HWI-EAS443:3:63:1310:1237#0/1  
H\_\_aba\_bbbbb``abbbbbbabbbbabbb¥[[bbb  
@HWI-EAS443:3:63:1342:806#0/1  
GCCGCATTTCTTCAATTAACCACCTTATTTCTCAAATTT  
+HWI-EAS443:3:63:1342:806#0/1  
aabbaabba`bbaaabaaaaaaaaTaaa^\_ba`a^aaa  
@HWI-EAS443:3:63:1355:1706#0/1  
GCCGCATTTCTTCAATTAACCACCTTATTTCTCAAATTT  
+HWI-EAS443:3:63:1355:1706#0/1  
\_`Z`baa^a^Z^b^a\_a^`Va`]`bababa\_aa\_bb¥aaa  
@HWI-EAS443:3:63:1385:1407#0/1  
GAATGGGAGACCTTCACTACCTCCAGAGCAGAAATGAAAA  
+HWI-EAS443:3:63:1385:1407#0/1  
aa^bbb``aaaababbbb`[bb[¥baa]V`¥\_aaa`Y[]  
@HWI-EAS443:3:63:1482:1007#0/1  
CAGAGATTGCTTGGAGAACTGTGATGAGAATGGGAGAC  
+HWI-EAS443:3:63:1482:1007#0/1  
`aaba`\_baa`ba\_]bbaba`abb[bWb`baa¥\_bb`\_^b  
@HWI-EAS443:3:63:1487:1500#0/1  
AGAAACTGTGATGAGAATGGGAGACCTTCACTACCTCCAG  
+HWI-EAS443:3:63:1487:1500#0/1  
a`b`ba`\_[aaaa\_aaaa]a`ab``aa\_^\_Z^a]X^\_N[a  
@HWI-EAS443:3:63:1496:1472#0/1  
AGATTACACTGAAGTTCGCTTTCAGTACTATGTTCTTTTC  
+HWI-EAS443:3:63:1496:1472#0/1  
¥\_¥a`a\_`¥abbV]X\_`bbbb\_[aa\_P\_b^bb\_a`]Yb]  
@HWI-EAS443:3:63:1528:549#0/1  
GCCGCATTTCTTCAATTAACCACCTTATTTCTCAAATTT



@HWI-EAS443:3:63:1738:1245#0/1  
GAAACTGTGATGAGAATGGGAGACCTTCACTACCTCCAGA  
+HWI-EAS443:3:63:1738:1245#0/1  
ab\_babbabaab^`aabbaa`ba``aa[aaa\_`^`\_`\_a^  
@HWI-EAS443:3:63:1770:309#0/1  
AGGCAACACCCTTGGCCTCGATATCGAAACAGCCACTCTT  
+HWI-EAS443:3:63:1770:309#0/1  
aaV\_`b\_`ZXZ^`]Z[R[`¥Taa¥PUT¥SY¥]TVZRVSTY  
@HWI-EAS443:3:63:183:1731#0/1  
TGCCGCATTTCTTCAATTAACCACCTTATTTCTCAAATT  
+HWI-EAS443:3:63:183:1731#0/1  
`bab^baa^)^¥^`aa`aV`]a\_aa`[a`aa``a¥P¥aS  
@HWI-EAS443:3:63:190:395#0/1  
GAGAATGGGAGACCTTCACTACCTCCAGAGCAGAAATGAA  
+HWI-EAS443:3:63:190:395#0/1  
`\_a^]aa`a`a\_a`a\_\_[^`]a\_`^`\_\_¥\_`\_VY^^¥YG  
@HWI-EAS443:3:63:196:1746#0/1  
AGCTTTCAGGTAGACTGTTTCCTTTGGCATATCCGCAAGC  
+HWI-EAS443:3:63:196:1746#0/1  
^P])^`[ZWKYaY\_R]NO[XKOUUXPYOU^]Z]BBBBBBB  
@HWI-EAS443:3:63:246:1254#0/1  
GGAGAACTGTGATGAGAATGGGAGACCTTCACTACCTCC  
+HWI-EAS443:3:63:246:1254#0/1  
`aa``VU\_aa^]`^\_Z^Q^a`a]aa\_\_a\_]`\_a[Z[¥`\_\_  
@HWI-EAS443:3:63:246:1850#0/1  
AGAAACTGTGATGAGAATGGGAGACCTTCACTACCTCCAG  
+HWI-EAS443:3:63:246:1850#0/1  
aa\_T¥WaOLWP^`WLLSWU[]^^Z^\_ZNNXU¥W[WW^U]P  
@HWI-EAS443:3:63:254:1320#0/1  
GAAAATATACAGAGATTCGCTTGGAGAACTGTGATGAGA  
+HWI-EAS443:3:63:254:1320#0/1  
aa``abbaaab]aaY\_abaaa\_a]`a`aaaaaZ]a[Z]YY  
@HWI-EAS443:3:63:258:1197#0/1  
GTCGCTTTCAATCTGTGCCGATTTCTTCAATTAACCACC  
+HWI-EAS443:3:63:258:1197#0/1  
a\_`]`V¥`a`a^^^XVX``\_[]\_`[`[Z\_\_\_]YX``]`\_`  
@HWI-EAS443:3:63:342:102#0/1  
CTTCGCGCTACCTTTCTGACATGACCCTCGAGGAAATGTC  
+HWI-EAS443:3:63:342:102#0/1  
abbabab`aa`^aaaaab\_a`aaa¥`\_`\_aWa\_U¥Z¥aRV  
@HWI-EAS443:3:63:345:1087#0/1  
GTCGCTTTCAATCTGTGCCGATTTCTTCAATTAACCACC  
+HWI-EAS443:3:63:345:1087#0/1  
a\_`]a\_`ba\_R\_``\_`]`a\_`^\_a^\_]`^\_[W][`]S[\_^]  
@HWI-EAS443:3:63:374:339#0/1  
CGCATTTCTTCAATTAACCACCTTATTTCTCAAATTTCT  
+HWI-EAS443:3:63:374:339#0/1  
abaabaaa¥baaaa\_aaa\_a\_a`\_`\_`a^a\_```S`\_\_`¥  
@HWI-EAS443:3:63:381:816#0/1  
AATGGGAGACCTTCACTACCTCCAGAGCAGAAATGAAAAG

+HWI-EAS443:3:63:381:816#0/1  
\_\_a¥`^W``b\_\_`aa]a`[]abaa`a]VZ\_[][\_W\_¥T[  
@HWI-EAS443:3:63:398:640#0/1  
GAAACTGTGATGAGAATGGGAGACCTTCACTACCTCCAGA  
+HWI-EAS443:3:63:398:640#0/1  
\_¥Za`^¥`\_\_Z[`ZZ¥a`]a^Z\_\_]W^[\_aaa[T\_\_XZ¥  
@HWI-EAS443:3:63:405:1484#0/1  
CTCCCATTCTCATCACAGTTTCTCCAAGCGAATCTCTGTA  
+HWI-EAS443:3:63:405:1484#0/1  
a]`ZY`babba`\_^\_V]\_a`a`^`^^`\_\_\_\_YXYL]  
@HWI-EAS443:3:63:410:1372#0/1  
GCCGCATTTCTTCAATTAACCACCTTATTTCTCAAATTT  
+HWI-EAS443:3:63:410:1372#0/1  
abbaaaaaaaaaabaaaa`aa`aaaa`aaa`\_aaa`aa\_\_  
@HWI-EAS443:3:63:481:1348#0/1  
GAATGGGAGACCTTCACTACCTCCAGAGCAGAAATGAAAA  
+HWI-EAS443:3:63:481:1348#0/1  
aaaaZ`Zaa]aaaW`baX\_V\_^b\_TU]]¥\_a`\_\_\_\_a¥P`  
@HWI-EAS443:3:63:522:1817#0/1  
ATCGAGGCCAAGGGTGTTCCTCTTCTTTAAGGACTTT  
+HWI-EAS443:3:63:522:1817#0/1  
a\_a]a]Z^\_aaZZX¥]]Z`^`\_]\_VT]]\_^][UUUU]WX  
@HWI-EAS443:3:63:543:1791#0/1  
TGAGAATGGGAGACCTTCACTACCTCCAGAGCAGAAATGA  
+HWI-EAS443:3:63:543:1791#0/1  
WWU]YV\_S\_Z[Ua`````aZ¥aaa[`Z^a[WTTaRP[^X\_  
@HWI-EAS443:3:63:545:563#0/1  
CCGCATTTCTTCAATTAACCACCTTATTTCTCAAATTT  
+HWI-EAS443:3:63:545:563#0/1  
]a¥\_]¥babbbba^abb``\_bbba```bbabaaaa\_\_aa`a  
@HWI-EAS443:3:63:549:863#0/1  
GAGAATGGGAGACCTTCACTACCTCCAGAGCAGAAATGAA  
+HWI-EAS443:3:63:549:863#0/1  
^Z\_]`^`a`]¥X\_a``aaa`^a`aa¥^[`\_\_a\_Z[^\_N[  
@HWI-EAS443:3:63:558:78#0/1  
CACAGATTGAAAGCGACAGAGAATAGTTTGAACAAATAA  
+HWI-EAS443:3:63:558:78#0/1  
abbbbb¥`bbb^b`bbaaaa\_aaaab\_aaaa^a`aaa`a`  
@HWI-EAS443:3:63:592:1190#0/1  
GCTTGGAGAACTGTGATGAGAATGGGAGACCTTCACTAC  
+HWI-EAS443:3:63:592:1190#0/1  
aaa^^aZ¥SU]]]STYSWJY[[VZa`VU^XS¥^Z`^W[B  
@HWI-EAS443:3:63:619:1581#0/1  
GCAATAGTTGGAGAAATTTACCATTACCTTCTCTCCAG  
+HWI-EAS443:3:63:619:1581#0/1  
X¥QWYa`]babbb¥V[LZ]\_¥babbaZ¥^\_a^a`aa\_a^\_V  
@HWI-EAS443:3:63:647:330#0/1  
CTCTAATCGTTAAAGATTACACTGAAGTTGCTTTTCAGT  
+HWI-EAS443:3:63:647:330#0/1  
Xa`Z[a¥¥a^I\_baY`bY`UV^U`^\_Y\_Ya^Y^]b`PNZR





+HWI-EAS443:3:63:985:891#0/1  
`baaaab`^^^`\_\_`¥aaa\_\_\_\_\_`a`\_a¥\_^\_Y^`\_\_YUX  
@HWI-EAS443:3:63:992:705#0/1  
GCTTGGAGAACTGTGATGAGAATGGGAGACCTTCACTAC  
+HWI-EAS443:3:63:992:705#0/1  
aaa`a`a`^`a^\_aa^a]\_\_^a]]`a``Va^^^^^`\_^]]]  
@HWI-EAS443:3:64:1069:1087#0/1  
GCCGCATTTCTTCAATTAACCACCTTATTTCTCAAATTT  
+HWI-EAS443:3:64:1069:1087#0/1  
a\_R\_Tab^``\_a]]a`]a\_¥\_\_]][]ZY^]^^`\_^G\_`¥]  
@HWI-EAS443:3:64:1089:1325#0/1  
GATTACACTGAAGTTCGCTTTCAGTACTATGTTCTTTTCC  
+HWI-EAS443:3:64:1089:1325#0/1  
ZXa`\_`a\_aa`UZ^]a^¥^]Z^YY¥WI\_a^aa]a`[[``UM  
@HWI-EAS443:3:64:1097:599#0/1  
TGCCGCATTTCTTCAATTAACCACCTTATTTCTCAAATT  
+HWI-EAS443:3:64:1097:599#0/1  
]bbb`SSa^¥abaa[Q¥^aSJ^]P\_^ZY`^^Z\_aa¥[^a  
@HWI-EAS443:3:64:1114:202#0/1  
GAGAAACTGTGATGAGAATGGGAGACCTTCACTACCTCCA  
+HWI-EAS443:3:64:1114:202#0/1  
aaa`]a\_abZa\_\_a]a]\_aa`\_\_`^]X]\_S\_^\_XU]XYX  
@HWI-EAS443:3:64:1123:833#0/1  
GCTGAAACGAGAAAGCTTATCTCTTGTCTACTTCAAG  
+HWI-EAS443:3:64:1123:833#0/1  
aYT]XSGSSWYMOXJ[W\_ZOW^^UUYX[Q¥ZNUNNL[VW  
@HWI-EAS443:3:64:1127:1944#0/1  
GGAGAAACTGTGATGAGAATGGGAGACCTTCACTACCTCC  
+HWI-EAS443:3:64:1127:1944#0/1  
\_aa`\_`a¥abb`^`ab`^]aaa¥]\_]ZP]^`^[\_`\_`aYNZY¥  
@HWI-EAS443:3:64:1128:1007#0/1  
TGTGCCGCATTTCTTCAATTAACCACCTTATTTCTCAAA  
+HWI-EAS443:3:64:1128:1007#0/1  
^bSY`b^Z`ab]b``Ia^]abaaaK]a[aba\_¥\_baa\_a  
@HWI-EAS443:3:64:1142:1705#0/1  
GTCGCTTTCATCTGTGCCGCATTTCTTCAATTAACCACC  
+HWI-EAS443:3:64:1142:1705#0/1  
`Q^¥XYX[]^TRVQLGP[USFM[YZM[VZRNLPRUVS]SY  
@HWI-EAS443:3:64:1157:1077#0/1  
AGAAACTGTGATGAGAATGGGAGACCTTCACTACCTCCAG  
+HWI-EAS443:3:64:1157:1077#0/1  
ZY¥¥^ab\_[\_W\_^YYZ¥\_\_Z\_XXZX^]\_[`¥\_TMVYO[ZU  
@HWI-EAS443:3:64:1161:1735#0/1  
GTGATGAGAATGGGAGACCTTCACTACCTCCAGAGCAGAA  
+HWI-EAS443:3:64:1161:1735#0/1  
aU`a¥`a¥X¥[XUP^\_Z\_\_PPHaX\_^^R[^`\_]ZRW^\_U  
@HWI-EAS443:3:64:1174:96#0/1  
ATTCTAAGTGTCTCGCTGGATTCTTCTTTCAAGATCCATT  
+HWI-EAS443:3:64:1174:96#0/1  
abb`bbaa`aa\_a¥a`\_`a\_Y\_`\_`¥a\_aaa\_\_`a^`X\_^a`

@HWI-EAS443:3:64:1181:1988#0/1  
AAATCGTGGAAATGGATCTTGAAAGAGGAATCCAGCGAGAC  
+HWI-EAS443:3:64:1181:1988#0/1  
`aa^`¥aaa\_a^a\_TU¥`YX]`Y^^¥W]RTKUNJXZSWN  
@HWI-EAS443:3:64:1181:328#0/1  
TGAGAATGGGAGACCTTCACTACCTCCAGAGCAGAAATGA  
+HWI-EAS443:3:64:1181:328#0/1  
[`^aXX¥aa¥V¥aa]]aa`[\_aa]¥^RVa\_`P[aX]P^]Y  
@HWI-EAS443:3:64:1201:246#0/1  
ATTGTCTGCAAATCGCTTGCGGATATGCCAAAGGAAACAG  
+HWI-EAS443:3:64:1201:246#0/1  
aaba\_aab^bba\_\_\_\_\_`aa0aa[`^^]¥R[\_a\_aQZ[0]Y  
@HWI-EAS443:3:64:1204:1425#0/1  
GAGAAACTGTGATGAGAATGGGAGACCTTCACTACCTCCA  
+HWI-EAS443:3:64:1204:1425#0/1  
^ab`\_bbbb`\_]bbaa\_aaYa[a`\_X¥`^b`^]\_L`¥\_`^  
@HWI-EAS443:3:64:1252:1567#0/1  
GAGAAGGTAATGGTGAAATTTCTCCAATATTGCTCCCTC  
+HWI-EAS443:3:64:1252:1567#0/1  
aabaaba\_bb`ZZ¥aaaa`a\_aYU\_`^\_a\_\_\_\_]`]]\_`\_`  
@HWI-EAS443:3:64:1259:1272#0/1  
GGAGAAACTGTGATGAGAATGGGAGACCTTCACTACCTCC  
+HWI-EAS443:3:64:1259:1272#0/1  
`a00U¥UP`^NS[]TT¥VNT^¥]S\_[NPPVJSQRNSZ^[R  
@HWI-EAS443:3:64:1298:199#0/1  
GGAGAAACTGTGATGAGAATGGGAGACCTTCACTACCTCC  
+HWI-EAS443:3:64:1298:199#0/1  
^0[¥T¥\_\_\_aV`^ZX[Z¥U[^YZSLOW¥SVZVVLNLTS  
@HWI-EAS443:3:64:1332:233#0/1  
GGAGAAACTGTGATGAGAATGGGAGACCTTCACTACCTCC  
+HWI-EAS443:3:64:1332:233#0/1  
a`\_a`a`ab^¥`````]baaaa]a¥`[XTa\_\_\_````]P[a^X  
@HWI-EAS443:3:64:1360:138#0/1  
TGAGAATGGGAGACCTTCACTACCTCCAGAGCAGAAATGA  
+HWI-EAS443:3:64:1360:138#0/1  
ab`a`\_aaaa\_a\_\_\_````\_X`WX]^]X]\_¥\_]^^VUX\_]`  
@HWI-EAS443:3:64:1374:277#0/1  
TGATGAGAATGGGAGACCTTCACTACCTCCAGAGCAGAAA  
+HWI-EAS443:3:64:1374:277#0/1  
M`baV^b\_^aaab^b\_^Paaaaa^\_YU`a\_]aY`^W`SR^  
@HWI-EAS443:3:64:1478:1546#0/1  
AAACTGTGATGAGAATGGGAGACCTTCACTACCTCCAGAG  
+HWI-EAS443:3:64:1478:1546#0/1  
T¥^[0]b¥`b\_U\_`b```]Q¥bbV`Ya]\_[V`Y[Q\_][¥V\_`^  
@HWI-EAS443:3:64:1503:1466#0/1  
GTCATTCTAAGTGTCTCGCTGGATTCTTCTTTCAAGATCC  
+HWI-EAS443:3:64:1503:1466#0/1  
a\_a]bbaaaaa\_aa`a`^^`]a\_^\_YW]X\_a`\_\_\_`\_`\_`\_SY  
@HWI-EAS443:3:64:1559:1250#0/1  
CTCGTGACATTTCTCGAGGGTCATGTCAGAAAGGTAGCG



@HWI-EAS443:3:64:198:384#0/1  
GAATGGGAGACCTTCACTACCTCCAGAGCAGAAATGAAAA  
+HWI-EAS443:3:64:198:384#0/1  
a\_\_JY¥PPP^[aHI^Qa^¥R`VQ\_^`US\_Q^NZHV¥VGQN  
@HWI-EAS443:3:64:211:356#0/1  
CCGCATTTCTTCAATTAACCACCTTATTTCCCTCAAATTTTC  
+HWI-EAS443:3:64:211:356#0/1  
abaaZabaaba`aaaa`aaaaaa`a\_ba`a\_aaa^J^\_^`  
@HWI-EAS443:3:64:244:1234#0/1  
TGAGAATGGGAGACCTTCACTACCTCCAGAGCAGAAATGA  
+HWI-EAS443:3:64:244:1234#0/1  
``^^^aX[¥^^Y[aaaaba[]¥Sb¥¥^STGX\_]^¥^`\_\_  
@HWI-EAS443:3:64:251:1754#0/1  
GTTTCTCCAAGCGAATCTCTGTATATTTTCAGAGACTCGA  
+HWI-EAS443:3:64:251:1754#0/1  
a\_abbaabab`a^]¥aaa`\_a\_aa``````a\_`^\_]^^Y¥  
@HWI-EAS443:3:64:252:1564#0/1  
CGAGAGCAATTGGGACAGAAATTTGAGGAAATAAGGTGGT  
+HWI-EAS443:3:64:252:1564#0/1  
aaS¥UPY\_a`aaU[Z`a`\_VS[a`\_^`\_]`^`\_\_^SY\_XS  
@HWI-EAS443:3:64:27:708#0/1  
AGAAACTGTGATGAGAATGGGAGACCTTCACTACCTCCAG  
+HWI-EAS443:3:64:27:708#0/1  
aa\_X\_a`aXa\_¥a]`W^^`¥R¥W^`^^`^W^^]^^]]Y  
@HWI-EAS443:3:64:297:641#0/1  
GGCACAGATTGAAAGCGACAGAGAATAGTTTCGAACAAAT  
+HWI-EAS443:3:64:297:641#0/1  
abbbab`X`aba\_\_`aaaaaaaaa`Y][````a`aa`````  
@HWI-EAS443:3:64:29:537#0/1  
GCCGCATTTCTTCAATTAACCACCTTATTTCCCTCAAATTT  
+HWI-EAS443:3:64:29:537#0/1  
abbbba``aaaaa`^`a`a\_aaaaa`\_a````aa`````]a\_\_  
@HWI-EAS443:3:64:348:322#0/1  
TGCCGCATTTCTTCAATTAACCACCTTATTTCCCTCAAATT  
+HWI-EAS443:3:64:348:322#0/1  
aababbbaabaaaaabaaa`aaa^^`a`aa`\_a````aa^`a`  
@HWI-EAS443:3:64:363:1728#0/1  
GAAACTGTGATGAGAATGGGAGACCTTCACTACCTCCAGA  
+HWI-EAS443:3:64:363:1728#0/1  
]\_Zaaaa\_bb\_b`V\_aaa\_[aa\_\_`a\_YaX\_a]]^^aZZ`  
@HWI-EAS443:3:64:387:542#0/1  
GCCGCATTTCTTCAATTAACCACCTTATTTCCCTCAAATTT  
+HWI-EAS443:3:64:387:542#0/1  
^abb^bbbbbabbaabbbbbbaba`abbb`abbabaabaa  
@HWI-EAS443:3:64:401:1300#0/1  
AACGAGAAAGCTCTTATCTCTTGTCTACTTCAAGCAGTA  
+HWI-EAS443:3:64:401:1300#0/1  
aba¥\_a^¥]a`a^aa````^\_a\_\_`^`^W\_a^`\_\_```^Z^  
@HWI-EAS443:3:64:437:636#0/1  
GGCAACACCCTTGGCCTCGATATCGAAACAGCCACTCTTG

+HWI-EAS443:3:64:437:636#0/1  
]M]UX]aa]Q^T\_¥[^P`^VSOX[ZV[\_V`WJLZKNYZU  
@HWI-EAS443:3:64:489:898#0/1  
GAGAGCAATTGGGACAGAAATTTGAGGAAATAAGGTGGTT  
+HWI-EAS443:3:64:489:898#0/1  
aaaR`baZab`WWa[baa][b]bb[^]¥RP¥\_Y``Qb\_TZ  
@HWI-EAS443:3:64:490:1927#0/1  
ATATCCGCAAGCGATTTGCAGACAATGGATTGGGTGATGC  
+HWI-EAS443:3:64:490:1927#0/1  
a¥\_S¥\_X\_XPVUV¥YZ¥^a[[JW]¥PTRXZYKPRRVXRNN  
@HWI-EAS443:3:64:538:1132#0/1  
GCCGCATTTCTTCAATTAACCACCTTATTTCTCAAATTT  
+HWI-EAS443:3:64:538:1132#0/1  
[`b`a`^aababbb[bb`YX^^^`\_`abbaaaabaaa^a\_a  
@HWI-EAS443:3:64:558:960#0/1  
CGCTTGGAGAAACTGTGATGAGAATGGGAGACCTTCACTA  
+HWI-EAS443:3:64:558:960#0/1  
aaaaabaa`[^`a`Y^\_\_`a`\_``\_`^`Y[a\_X`^W^Y  
@HWI-EAS443:3:64:592:928#0/1  
CGCATTTCTTCAATTAACCACCTTATTTCTCAAATTTCT  
+HWI-EAS443:3:64:592:928#0/1  
a\_\_J`\_`bababb^b^\_`\_`[``Yb\_Yaaa^aa`UT``aa`]  
@HWI-EAS443:3:64:603:1425#0/1  
GTGCGTTTCAATCTGTGCCGATTTCTTCAATTAACCACC  
+HWI-EAS443:3:64:603:1425#0/1  
]¥\_`¥S\_aa\_]`\_]`YWY\_V]``][aa\_Z\_U`[¥aa]^[]  
@HWI-EAS443:3:64:649:362#0/1  
GTGCCGATTTCTTCAATTAACCACCTTATTTCTCAAAT  
+HWI-EAS443:3:64:649:362#0/1  
aaaaaba`baa\_aaaaabaa`\_a`\_]`\_`a`\_a^a\_a^\_\_`  
@HWI-EAS443:3:64:688:206#0/1  
AGAATGGGAGACCTTCACTACCTCCAGAGCAGAAATGAAA  
+HWI-EAS443:3:64:688:206#0/1  
abaaabbaab`aa`aaa\_aa`\_`^`\_`^a`\_`Z^\_\_a`^W  
@HWI-EAS443:3:64:695:1580#0/1  
AGAAACTGTGATGAGAATGGGAGACCTTCACTACCTCCAG  
+HWI-EAS443:3:64:695:1580#0/1  
]b``[a^`\_`YNZX]]XW\_¥RTOWWZ]`\_]a]]]OZU¥^X`  
@HWI-EAS443:3:64:768:165#0/1  
AGAAACTGTGATGAGAATGGGAGACCTTCACTACCTCCAG  
+HWI-EAS443:3:64:768:165#0/1  
aa`aa`a`^a`\_a`\_]`\_`\_`^`^SW]^`\_`Z^^X^Z^YWX  
@HWI-EAS443:3:64:768:560#0/1  
CGCATTTCTTCAATTAACCACCTTATTTCTCAAATTTCT  
+HWI-EAS443:3:64:768:560#0/1  
ab`]``\_`aba]`a]aa`aa`aaaa\_\_`a``\_`a`\_`a  
@HWI-EAS443:3:64:778:1949#0/1  
AGGCAACACCCTTGGCCTCGATATCGAAACAGCCACTCTT  
+HWI-EAS443:3:64:778:1949#0/1  
a`^bZU\_aba^Q]UU`a\_ZJ^S`^`\_`\_]VUJ[X^GZ¥VT

@HWI-EAS443:3:64:785:287#0/1  
GGAGGGAGCAATAGTTGGAGAAATTTACCATTACCTTCT  
+HWI-EAS443:3:64:785:287#0/1  
aaabaaaaaa\_aa`^a]^`aaaaa`\_\_a```aaUR\_\_]\_  
@HWI-EAS443:3:64:78:88#0/1  
CGCATTCTTCAATTAACCACCTTATTTCTCAAATTTCT  
+HWI-EAS443:3:64:78:88#0/1  
ab`aba`]b^U]^baa`^a]Y`a]Zab`[^`¥XUN¥`Z\_\_  
@HWI-EAS443:3:64:813:720#0/1  
AGAAACTGTGATGAGAATGGGAGACCTTCACTACCTCCAG  
+HWI-EAS443:3:64:813:720#0/1  
a\_^^^bbb`YFW`]]]aa]¥]W]^\_\_`P^a^]SX\_^\_\_]T  
@HWI-EAS443:3:64:874:1019#0/1  
GCCGCATTTCTTCAATTAACCACCTTATTTCTCAAATTT  
+HWI-EAS443:3:64:874:1019#0/1  
^aa`a^aaabbbbaabbb`abaa\_\_a``aaaba``¥\_aaa  
@HWI-EAS443:3:64:979:173#0/1  
GAATGGGAGACCTTCACTACCTCCAGAGCAGAAATGAAAA  
+HWI-EAS443:3:64:979:173#0/1  
a\_]Z\_X¥WQZU[SMXBBBBBBBBBBBBBBBBBBBBBBB  
@HWI-EAS443:3:65:1028:121#0/1  
AGAAACTGTGATGAGAATGGGAGACCTTCACTACCTCCAG  
+HWI-EAS443:3:65:1028:121#0/1  
aba``[^`b\_b`¥`a`]aba\_\_a\_^`a`a[a`\_Wa^ZX\_  
@HWI-EAS443:3:65:1031:1107#0/1  
GCCGCATTTCTTCAATTAACCACCTTATTTCTCAAATTT  
+HWI-EAS443:3:65:1031:1107#0/1  
abb\_`a`baaaaa`aaaa`aa^ba`aaaa``````aa``  
@HWI-EAS443:3:65:1034:736#0/1  
CTCCCATTCTCATCACAGTTTCTCCAAGCGAATCTCTGTA  
+HWI-EAS443:3:65:1034:736#0/1  
aabbab`aabb]baabababbbbabbaab\_]`aaa^bbU]  
@HWI-EAS443:3:65:1049:667#0/1  
GGTTAATTGAAGAAATGCGGCACAGATTGAAAGCGACAGA  
+HWI-EAS443:3:65:1049:667#0/1  
^`[^`aaabb\_ab]WWbbb`a]a`aaa`aba`¥b[aaa^``  
@HWI-EAS443:3:65:1052:538#0/1  
GCCGAGATCAAAGTCCTTAAAAGGAAGAGGCAACACCCT  
+HWI-EAS443:3:65:1052:538#0/1  
a][``aXaa`Q[]`Za`a\_]¥YZ\_`^^a^`\_`\_\_Y\_\_\_\_]Z  
@HWI-EAS443:3:65:1068:1894#0/1  
GCCGCATTTCTTCAATTAACCACCTTATTTCTCAAATTT  
+HWI-EAS443:3:65:1068:1894#0/1  
`baaaabbabaa]aa`]abaaa`aa\_bbaaaabaaaaaa  
@HWI-EAS443:3:65:1110:369#0/1  
TTACTACTGAAGTTCGCTTTCAGTACTATGTTCTTTTCCAT  
+HWI-EAS443:3:65:1110:369#0/1  
^Z]]a^baaa`^```]`ab`]``aa`abaZaaba`aaa`]  
@HWI-EAS443:3:65:1152:1908#0/1  
GTCTCTGAAAATATACAGAGATTTCGCTTGGAGAACTGTG

+HWI-EAS443:3:65:1152:1908#0/1  
aXba^]]Zaab`b\_aaa[]aY^X`¥`Z^a\_\_T[a\_Y\_`V^  
@HWI-EAS443:3:65:1154:1337#0/1  
TGAAAATATACAGAGATTTCGCTTGGAGAAACTGTGATGAG  
+HWI-EAS443:3:65:1154:1337#0/1  
aba`aaaa`aaa`a^`a\_aZ`^`a\_``aa\_a\_X]\_`^^\_  
@HWI-EAS443:3:65:1175:259#0/1  
CATAAATGTTATTTGTTTCGAACTATTCTCTGTCGCTTTC  
+HWI-EAS443:3:65:1175:259#0/1  
abbbb^ababbbbbbbbbbaaabbbbababba`baaaa\_  
@HWI-EAS443:3:65:1191:862#0/1  
CGCATTCTTCAATTAACCACCTTATTCCTCAAATTTCT  
+HWI-EAS443:3:65:1191:862#0/1  
abaabbababaaa`abaYa\_`^aaaaaaa`aaa^`aa\_`^`  
@HWI-EAS443:3:65:1219:58#0/1  
GAGAATGGGAGACCTTCACTACCTCCAGAGCAGAAATGAA  
+HWI-EAS443:3:65:1219:58#0/1  
a``ZW]^`a[\_VZU]^`[]^YX][ZS][aZ^\_PSW\_`¥¥  
@HWI-EAS443:3:65:1233:666#0/1  
CAGAGATTTCGCTTGGAGAAACTGTGATGAGAATGGGAGAC  
+HWI-EAS443:3:65:1233:666#0/1  
a```\_`]`ababaaaaa\_``¥abZaaa`aa^aa`aa`a]]  
@HWI-EAS443:3:65:1258:256#0/1  
TGAGAATGGGAGACCTTCACTACCTCCAGAGCAGAAATGA  
+HWI-EAS443:3:65:1258:256#0/1  
aa\_b`\_\_aaa\_a\_\_¥`a\_a^``Y^^Y^^W\_¥¥\_W¥¥¥\_`^  
@HWI-EAS443:3:65:125:1084#0/1  
AGGGCTTTCCTACTGAGGAGGGAGCAATAGTTGGAGAAATTT  
+HWI-EAS443:3:65:125:1084#0/1  
\_ZUYaaU¥]aa\_a][XZU¥\_Y`\_RHX]LL[U^a\_ZVHRQ^  
@HWI-EAS443:3:65:1286:472#0/1  
TGAAAATATACAGAGATTTCGCTTGGAGAAACTGTGATGAG  
+HWI-EAS443:3:65:1286:472#0/1  
]aYSZ^^aXa^[[[PV¥Y]`aZ][```TP[]a\_GYUa]¥^  
@HWI-EAS443:3:65:1306:520#0/1  
AGCGAGACACTTAGAATGACAATTGCATCTGTACCTACTT  
+HWI-EAS443:3:65:1306:520#0/1  
^\_`¥W\_]`^V\_WZ[¥^^¥a^`¥a\_`^aaa\_X]^`^^^W\_\_OR]  
@HWI-EAS443:3:65:1310:323#0/1  
GCCGCATTTCTTCAATTAACCACCTTATTCCTCAAATTT  
+HWI-EAS443:3:65:1310:323#0/1  
aaY]\_T`\_]Z`aa\_\_^^][ZZY[Z^^^]Y¥^^\_\_`^`\_`^  
@HWI-EAS443:3:65:1316:217#0/1  
CTCGAGGGTCATGTCAGAAAGGTAGCGCGAAGTAGGTACA  
+HWI-EAS443:3:65:1316:217#0/1  
`\_aaTT`aUa\_\_U]]¥LU[\_\_VZ`S^\_aZNaR]\_\_Q[US  
@HWI-EAS443:3:65:1325:405#0/1  
AACAAATCGTGGAATGGATCTTGAAGAGGAATCCAGCGA  
+HWI-EAS443:3:65:1325:405#0/1  
a]Y¥]TaYR]^`X\_W\_ZLXXP\_¥a\_\_``[aa^Z\_¥Z\_[Z^Z





+HWI-EAS443:3:65:1512:540#0/1  
abbaaa`\_babaaaba`^ba^][\_` ]`\_baW\_aa\_a]aa  
@HWI-EAS443:3:65:1515:704#0/1  
GTCGCTTTCAATCTGTGCCGATTTCTTCAATTAACCACC  
+HWI-EAS443:3:65:1515:704#0/1  
^\_P\$]WYY^XX\_Z\$N]SZVX`]\_`ab\_X\_HXVUXZ\$`\$L  
@HWI-EAS443:3:65:1518:1503#0/1  
CGCTTTCAATCTGTGCCGATTTCTTCAATTAACCACCTT  
+HWI-EAS443:3:65:1518:1503#0/1  
aa`]aaaba`X`aTa\_`X`aa`VaaW\$`aa`aY\_a[L\_\_  
@HWI-EAS443:3:65:1550:282#0/1  
CATTCTTCAATTAACCACCTTATTTCTCAAATTTCTGT  
+HWI-EAS443:3:65:1550:282#0/1  
a`^`bb`\$Z\_V`^`R[aWI^abba^]P\$ZU\_`a\$`V`aX  
@HWI-EAS443:3:65:1581:1766#0/1  
GAGAATGGGAGACCTTCACTACCTCCAGAGCAGAAATGAA  
+HWI-EAS443:3:65:1581:1766#0/1  
W\_a[\_\_\$XV[\_Za`Xaba]a`U`aa\$a]T^\_`^\$S\_aaaa  
@HWI-EAS443:3:65:1606:146#0/1  
CTGTGATGAGAATGGGAGACCTTCACTACCTCCAGAGCAG  
+HWI-EAS443:3:65:1606:146#0/1  
aba`bb`a]]` ]]a`\_a`a]\_]Z\_`HYMY^Ya^\_UR^G\$a  
@HWI-EAS443:3:65:1620:1864#0/1  
GTCGCTTTCAATCTGTGCCGATTTCTTCAATTAACCACC  
+HWI-EAS443:3:65:1620:1864#0/1  
a^aaa`Y`\_aa\_`\_\_\$Z^`X\$^\_]`\_\_`\_\_`^`\_\_`MU\_]`  
@HWI-EAS443:3:65:1664:1548#0/1  
AGAAACTGTGATGAGAATGGGAGACCTTCACTACCTCCAG  
+HWI-EAS443:3:65:1664:1548#0/1  
ab`\$`aab`b^\_`V]`\$U\_`^`\_\_`` ]`]`baaaaa[T]` ]`a  
@HWI-EAS443:3:65:1676:1114#0/1  
GCTTGAGAAACTGTGATGAGAATGGGAGACCTTCACTAC  
+HWI-EAS443:3:65:1676:1114#0/1  
aaaa\_b[baa`aa`Ya[aa\_a][`X\_a\_a]V\_S\_R\_XX^V  
@HWI-EAS443:3:65:1686:1041#0/1  
ATCGAGGCCAAGGGTGTGCCTTTCCTTTAAGGACTTT  
+HWI-EAS443:3:65:1686:1041#0/1  
ab`aaaa\_aaa\_a^a[a`^Z[\_`a\$¥aaa`[`\_W\$^`^`  
@HWI-EAS443:3:65:1700:1531#0/1  
TGTCGCTTTCAATCTGTGCCGATTTCTTCAATTAACCAC  
+HWI-EAS443:3:65:1700:1531#0/1  
ab\_`\$]Y`a`[\_`\_a\_a\_\_\_\_`^`\_`\_`a`aYa`]\_`a^\_`^\$¥\_`[  
@HWI-EAS443:3:65:1725:1296#0/1  
AGAAACTGTGATGAGAATGGGAGACCTTCACTACCTCCAG  
+HWI-EAS443:3:65:1725:1296#0/1  
aa\$U^]b`V`\$aa`a`^` ]`^`^\$a\$W^\_`^` ]` ]`ZQX\_[V\_  
@HWI-EAS443:3:65:216:75#0/1  
AGAAACTGTGATGAGAATGGGAGACCTTCACTACCTCCAG  
+HWI-EAS443:3:65:216:75#0/1  
[bSXR\_b^`^`UG\_`^`RROY`ZO]QJX\$P\$ZT`OBBBBBBB

@HWI-EAS443:3:65:231:635#0/1  
GAAAGCGAAGCTTCAGTGTAATCTTTAACCGATTAGAGACC  
+HWI-EAS443:3:65:231:635#0/1  
aa]b\_b\_^a`aaaa\_b^Z`aaa`aba`a[¥a`\_]`^]`\_\_  
@HWI-EAS443:3:65:250:524#0/1  
GCCGCATTTCTTCAATTAACCCACCTTATTTCCCTCAAATTT  
+HWI-EAS443:3:65:250:524#0/1  
aaabZJ^ba\_abaaaa`aa]Va\_aa^aa`aaaa``¥H^\_\_  
@HWI-EAS443:3:65:284:1775#0/1  
AATGGATCTTGAAAGAGGAATCCAGCGAGACACTTAGAAT  
+HWI-EAS443:3:65:284:1775#0/1  
^J¥aaaa`\_`Z¥`abURZ[W\_a¥WQ]]¥QWTHX¥XT]¥SW  
@HWI-EAS443:3:65:29:1008#0/1  
GGGCTTTCAGTGGAGGGAGCAATAGTTGGAGAAATTTTC  
+HWI-EAS443:3:65:29:1008#0/1  
a\_aa\_```X]a`\_`\_\_`\_]Y]\_`VV^XV]^ZLLUYYYY  
@HWI-EAS443:3:65:309:274#0/1  
TCCCATTCTCATCACAGTTTCTCCAAGCGAATCTCTGTAT  
+HWI-EAS443:3:65:309:274#0/1  
aaaaaabba`aabbaab\_aaa`aaZ^\_\_¥V^[\_`^`XY`  
@HWI-EAS443:3:65:313:554#0/1  
TGAGAATGGGAGACCTTCACTACCTCCAGAGCAGAAATGA  
+HWI-EAS443:3:65:313:554#0/1  
\_`^)`]aaa\_J`a`aa`aa\_a\_a\_`a`a`\_`^X^ZW`\_]`  
@HWI-EAS443:3:65:344:1975#0/1  
TGAGAATGGGAGACCTTCACTACCTCCAGAGCAGAAATGA  
+HWI-EAS443:3:65:344:1975#0/1  
\_\_S]\_W`ZP[T¥^aaZ^aa``aaa]aa]TZ\_`aXY^[YZ]  
@HWI-EAS443:3:65:345:1132#0/1  
GAGAAAGCTTATCTCTTGTCTACTTCAAGCAGTAGTT  
+HWI-EAS443:3:65:345:1132#0/1  
aa¥aa^aaaaaaa`\_a\_\_aV¥a````a`\_`a`[^\_¥```]^`  
@HWI-EAS443:3:65:34:1469#0/1  
GCCGCATTTCTTCAATTAACCCACCTTATTTCCCTCAAATTT  
+HWI-EAS443:3:65:34:1469#0/1  
T\_RV`YJX^bbbab``ZZa\_]Q\_`K`\_`\_¥``abVVbb  
@HWI-EAS443:3:65:376:1386#0/1  
GTCGCTTTCATCTGTGCCGCATTTCTTCAATTAACCCACC  
+HWI-EAS443:3:65:376:1386#0/1  
a`baaaaabbaab`a[a`aaaa`a`a`a]`a`aa`aaa[  
@HWI-EAS443:3:65:395:1719#0/1  
CTCCCATTCTCATCACAGTTTCTCCAAGCGAATCTCTGTA  
+HWI-EAS443:3:65:395:1719#0/1  
aab`abXa`Y]^Qaa\_M\_]abaZT[]`TXE[aUQU[QBBB  
@HWI-EAS443:3:65:430:866#0/1  
GAGAACTGTGATGAGAATGGGAGACCTTCACTACCTCCA  
+HWI-EAS443:3:65:430:866#0/1  
Z¥[\_UX]]¥PV]`X[X\_¥SW\_XK]]\_Y]^\_`[]YP]YMW  
@HWI-EAS443:3:65:431:14#0/1  
AGCAATTGGGACAGAAATTTGAGGAAATAAGGTGGTTAAT

+HWI-EAS443:3:65:431:14#0/1  
Za`>`\_¥[¥]M]aa]¥Z`a`>`aaVSY\_]YW^M^[MVZZX  
@HWI-EAS443:3:65:483:702#0/1  
CTCCCATTCTCATCACAGTTTCTCCAAGCGAATCTCTGTA  
+HWI-EAS443:3:65:483:702#0/1  
ab`XX\_b\_`^`>`^]a`¥^^aW]]^aa\_]`\_TV^U\_V[]Y]  
@HWI-EAS443:3:65:485:1935#0/1  
TGCCGCATTTCTTCAATTAACCACCTTATTTCTCAAATT  
+HWI-EAS443:3:65:485:1935#0/1  
aaabaaaaaabaaaaaab`ab\_aa`aaaaaaa`aaaa\_  
@HWI-EAS443:3:65:487:655#0/1  
TGCAAATCGCTTGGGATATGCCAAAGGAAACAGTCTACC  
+HWI-EAS443:3:65:487:655#0/1  
aabbbbaa`aaaabaaaaa[```a`aaa`aaaaZ¥`\_`a\_  
@HWI-EAS443:3:65:505:1160#0/1  
GCCGCATTTCTTCAATTAACCACCTTATTTCTCAAATTT  
+HWI-EAS443:3:65:505:1160#0/1  
abba`\_``aaaab]baa]```aaaaa^aaaa`aa]S¥[[  
@HWI-EAS443:3:65:513:1211#0/1  
TCCCATTCTCATCACAGTTTCTCCAAGCGAATCTCTGTAT  
+HWI-EAS443:3:65:513:1211#0/1  
ab^ab^a^aaaa`Saaa^a`a\_aaa`\_a`][^a`^\_\_^`\_  
@HWI-EAS443:3:65:526:673#0/1  
TGAGAATGGGAGACCTTCACTACCTCCAGAGCAGAAATGA  
+HWI-EAS443:3:65:526:673#0/1  
a`]`U]\_aaa`b`aaa\_aba`^b]aaaa``aa`X[a\_a[`  
@HWI-EAS443:3:65:560:1811#0/1  
TCTCCCATTCTCATCACAGTTTCTCCAAGCGAATCTCTGT  
+HWI-EAS443:3:65:560:1811#0/1  
`bab`\_`aaaYaba\_ab]\_[WU\_]\_\_a]S^a`¥QY]^\_V  
@HWI-EAS443:3:65:584:454#0/1  
GTCGCTTTCAATCTGTGCCGCATTTCTTCAATTAACCACC  
+HWI-EAS443:3:65:584:454#0/1  
aT]``aaU]Xa]aaaW\_]aa`\_`a]YaaY`a``aaaa^\_[  
@HWI-EAS443:3:65:586:71#0/1  
TGATGAGAATGGGAGACCTTCACTACCTCCAGAGCAGAAA  
+HWI-EAS443:3:65:586:71#0/1  
abaab\_a`\_aa`\_¥`]Y¥\_\_¥\_¥¥\_^¥WWZW\_V¥WU\_UYY  
@HWI-EAS443:3:65:641:870#0/1  
GCCGCATTTCTTCAATTAACCACCTTATTTCTCAAATTT  
+HWI-EAS443:3:65:641:870#0/1  
aaaaaaaaaaaaa]`aaaa`aaaaaaaa`aaaa`^aa`\_  
@HWI-EAS443:3:65:644:1268#0/1  
AACTGTGATGAGAATGGGAGACCTTCACTACCTCCAGAGC  
+HWI-EAS443:3:65:644:1268#0/1  
````a[]]`¥`a\_]XXU\_\_\_\_\_^^\_a¥\_aa¥¥`¥^\_¥^¥  
@HWI-EAS443:3:65:682:727#0/1  
GGAGAACTGTGATGAGAATGGGAGACCTTCACTACCTCC  
+HWI-EAS443:3:65:682:727#0/1  
\_b`¥\_¥¥\_`\_]`a^[\_]\_a]RW][XaVRZ^\_]^V[a\_]Y^\_

@HWI-EAS443:3:65:684:1284#0/1  
GATGAGAATGGGAGACCTTCACTACCTCCAGAGCAGAAAT  
+HWI-EAS443:3:65:684:1284#0/1  
]ba`aaabbbbbaaaaaaaaaaaba`aaa`^`]aaaa\_a  
@HWI-EAS443:3:65:699:304#0/1  
GCCGCATTTCTTCAATTAACCACCTTATTTCTCAAATTT  
+HWI-EAS443:3:65:699:304#0/1  
QVTR`¥RYaa¥Za\_T\_YYWQRR`YXZ^¥X¥\_``]WWO]¥  
@HWI-EAS443:3:65:705:1881#0/1  
GAAACTGTGATGAGAATGGGAGACCTTCACTACCTCCAGA  
+HWI-EAS443:3:65:705:1881#0/1  
U¥¥ba\_`S`a¥Q\_\_[U`abaZWa`a```a`ab\_GW\_aY\_]`  
@HWI-EAS443:3:65:730:1169#0/1  
GAATGGGAGACCTTCACTACCTCCAGAGCAGAAATGAAAA  
+HWI-EAS443:3:65:730:1169#0/1  
aV]aaa[U``\_U``aa\_a`\_``YX^^`\_``\_ZZ^¥X  
@HWI-EAS443:3:65:763:958#0/1  
AGAAACTGTGATGAGAATGGGAGACCTTCACTACCTCCAG  
+HWI-EAS443:3:65:763:958#0/1  
abbbabb`VTZaa`a`XVa`a`a\_^^\_`^[\_`a`Y^^\_]¥  
@HWI-EAS443:3:65:764:1352#0/1  
GCCGCATTTCTTCAATTAACCACCTTATTTCTCAAATTT  
+HWI-EAS443:3:65:764:1352#0/1  
aa\_\_aa`Za``a[``[[H^a¥`aa]V[\_`]aZ^a`Y`a\_a  
@HWI-EAS443:3:65:769:1284#0/1  
CAATTAACCACCTTATTTCTCAAATTTCTGTCCAATTG  
+HWI-EAS443:3:65:769:1284#0/1  
\_\_R]``\_a^aa\_a`aaa]\_\_^XXU[aab`a``Z`[G[`a  
@HWI-EAS443:3:65:788:1151#0/1  
GTCGCTTTCAATCTGTGCCGATTTCTTCAATTAACCACC  
+HWI-EAS443:3:65:788:1151#0/1  
a\_a`aaaaaa`a\_a^`aa`aa^aa`^\_a]a`[a`a^]\_`  
@HWI-EAS443:3:65:794:761#0/1  
GAAACTGTGATGAGAATGGGAGACCTTCACTACCTCCAGA  
+HWI-EAS443:3:65:794:761#0/1  
]Xb\_a`]`b^]]XW^aaa\_RE¥ZTaQZaaa[^^`¥N[\_Z[  
@HWI-EAS443:3:65:79:1108#0/1  
CGTGAATGGATCTTGAAAGAGGAATCCAGCGAGACACTT  
+HWI-EAS443:3:65:79:1108#0/1  
aa\_a`^aaa`Y^`aa]a\_¥a`\_aa``a\_a`^Z^\_\_]]  
@HWI-EAS443:3:65:803:704#0/1  
GTAAAGATTACACTGAAGTTCGCTTTCACTACTATGTTC  
+HWI-EAS443:3:65:803:704#0/1  
aaaaabbbbbaabaaaa`a`a`a^aaa]Z\_]a`aaaa^``  
@HWI-EAS443:3:65:805:1200#0/1  
CGCATTTCTTCAATTAACCACCTTATTTCTCAAATTTCT  
+HWI-EAS443:3:65:805:1200#0/1  
]bbb][^ba\_]aa^^a`\_``a`\_``````\_aXW`\_```  
@HWI-EAS443:3:65:825:338#0/1  
CAAATCGTGAATGGATCTTGAAAGAGGAATCCAGCGAGA

+HWI-EAS443:3:65:825:338#0/1  
\_\_¥\_a`ZTbbab\_a\_^Z`b^a^b]ZZa`LZ[`XZTH¥V^Y  
@HWI-EAS443:3:65:831:1394#0/1  
CGCATTCTTCAATTAACCACCTTATTTCTCAAATTTCT  
+HWI-EAS443:3:65:831:1394#0/1  
`[\_W¥^Z`XYOYU`a`a\_]`aY¥`\_`¥``aYTV]U]^`^  
@HWI-EAS443:3:65:83:646#0/1  
ATCGCACGCAAAGAGGGCCTATTATCTTTTGCCTAGGCAT  
+HWI-EAS443:3:65:83:646#0/1  
aU¥]\_\_a``]HW\_^`]aaa\_`]¥Z¥a[`¥\_`]^Z`]`\_¥]  
@HWI-EAS443:3:65:867:1360#0/1  
TCTCCCATTCTCATCACAGTTTCTCCAAGCGAATCTCTGT  
+HWI-EAS443:3:65:867:1360#0/1  
aZ]aba`Z]]a\_[X``]PZTZ``ZXa`^SY]SVWZ¥`ZSO  
@HWI-EAS443:3:65:89:899#0/1  
GCCGCATTTCTTCAATTAACCACCTTATTTCTCAAATTT  
+HWI-EAS443:3:65:89:899#0/1  
aba``baaaaaaaaa`aaaa`a`]aaaaaaaa]P\_``\_  
@HWI-EAS443:3:65:909:343#0/1  
GCCGCATTTCTTCAATTAACCACCTTATTTCTCAAATTT  
+HWI-EAS443:3:65:909:343#0/1  
abba```abaaaaaba`baabaabaaaaaaaaaaaa`a  
@HWI-EAS443:3:65:939:367#0/1  
GTGATGAGAATGGGAGACCTTCACTACCTCCAGAGCAGAA  
+HWI-EAS443:3:65:939:367#0/1  
^Waa^VHXXTZbb[\_aZ`XWL¥^¥[JSV[G]aXJZ^]¥WY  
@HWI-EAS443:3:65:948:1339#0/1  
GTCGCTTTCAATCTGTGCCGCATTTCTTCAATTAACCACC  
+HWI-EAS443:3:65:948:1339#0/1  
aaaababbbbabaa\_aaaa\_]aaaaaaaaaaaa^aa\_a  
@HWI-EAS443:3:65:962:1686#0/1  
TCGCTTTCAATCTGTGCCGCATTTCTTCAATTAACCACCT  
+HWI-EAS443:3:65:962:1686#0/1  
aaa\_``Ya`a\_a`]V\_aa`¥^`\_¥W\_`\_X^`[¥aSW`W\_`  
@HWI-EAS443:3:65:963:1777#0/1  
CCGCATTTCTTCAATTAACCACCTTATTTCTCAAATTTCT  
+HWI-EAS443:3:65:963:1777#0/1  
Za\_UV¥aLbXSZZ`\_]`\_`¥\_^\_abbbb]ZZ`aaaa^^a  
@HWI-EAS443:3:66:1033:530#0/1  
GTCGCTTTCAATCTGTGCCGCATTTCTTCAATTAACCACC  
+HWI-EAS443:3:66:1033:530#0/1  
aaaaaaaaaaa`a`a\_a`\_`\_`a`a\_aa``Zaa`\_]\_]\_U  
@HWI-EAS443:3:66:1051:930#0/1  
TTTCACCATTACCTTCTCTTCCAGGACATACTTATGAGGA  
+HWI-EAS443:3:66:1051:930#0/1  
aa`aaaaa\_aaaaa`a\_`aa\_^`\_`^\_a^^`Xa\_^][Z  
@HWI-EAS443:3:66:1086:182#0/1  
CAGCGAGACACTTAGAATGACAATTGCATCTGTACTACT  
+HWI-EAS443:3:66:1086:182#0/1  
`Z``¥\_^L]YP]a]]]\_`a\_\_\_a¥Z`¥K¥L¥SU]¥Z^[FZ

@HWI-EAS443:3:66:1090:1014#0/1  
GTCGCTTTCAATCTGTGCCGATTTCTTCAATTAACCACC  
+HWI-EAS443:3:66:1090:1014#0/1  
a`baaaaaababaaa\_`a`aaaaaaaa`aaa`a`````\_`  
@HWI-EAS443:3:66:1109:999#0/1  
ATTCTCTGTCGCTTTCAATCTGTGCCGATTTCTTCAATT  
+HWI-EAS443:3:66:1109:999#0/1  
`aaaaaba\_aa``````aaaaa`\_]aYT]```U¥a]`^^\_  
@HWI-EAS443:3:66:1110:1947#0/1  
AACTATTCTCTGTCGCTTTCAATCTGTGCCGATTTCTTC  
+HWI-EAS443:3:66:1110:1947#0/1  
^¥`^`abbbbbb`[¥abbab`bb\_aaJ]W``]\_`aaa`\_¥^  
@HWI-EAS443:3:66:1114:415#0/1  
CTGGTTCATGCTCATGCCTAGGCAAAAGATAATAGGCCCT  
+HWI-EAS443:3:66:1114:415#0/1  
aabaabbbbbb`aba¥b`abbaaabaaaaa`a`a`\_`aa\_a  
@HWI-EAS443:3:66:1142:539#0/1  
GTCGCTTTCAATCTGTGCCGATTTCTTCAATTAACCACC  
+HWI-EAS443:3:66:1142:539#0/1  
a`\_`aaYb\_\_]a`\_`[`Y^^^]\_\_a`a`\_`aaa^Zaa]¥¥^^]S  
@HWI-EAS443:3:66:1143:1529#0/1  
GCCGATTTCTTCAATTAACCACCTTATTTCTCAAATTT  
+HWI-EAS443:3:66:1143:1529#0/1  
^a`¥`\_`bbbbbbbbbbbbbb`ab`ba^`abbbb`\_`abaaa  
@HWI-EAS443:3:66:1153:169#0/1  
GATGAGAATGGGAGACCTTCACTACCTCCAGAGCAGAAAT  
+HWI-EAS443:3:66:1153:169#0/1  
]`^`¥`RV]]]bbXHZ]Z¥W^`aZ\_\_R\_Z]Y]YTZ^XaUYTX  
@HWI-EAS443:3:66:1155:949#0/1  
GCCGATTTCTTCAATTAACCACCTTATTTCTCAAATTT  
+HWI-EAS443:3:66:1155:949#0/1  
^Z]\_`aba]`\_]¥[\_`a\_\_Y\_V¥]`^`[aa`^`^]`aa`^T\_\_`  
@HWI-EAS443:3:66:1159:717#0/1  
GAGAACTGTGATGAGAATGGGAGACCTTCACTACCTCCA  
+HWI-EAS443:3:66:1159:717#0/1  
a]`\_]`][aZaZa`U^X^`]SYZ`\_`VU[aa[]XY[^XY^  
@HWI-EAS443:3:66:1219:830#0/1  
AAATGTTATTTGTTGAAACTATTCTCTGTCGCTTTCAAT  
+HWI-EAS443:3:66:1219:830#0/1  
a¥abb]aaaaab`X^`a`aab`aWa\_\_`¥]`^U\_\_\_[\_\_\_  
@HWI-EAS443:3:66:1231:659#0/1  
AATGGGAGACCTTCACTACCTCCAGAGCAGAAATGAAAAG  
+HWI-EAS443:3:66:1231:659#0/1  
\_bb`¥¥a` `aaaaabaaaaa]^`aRa\_aa^¥aaaa`\_`\_`  
@HWI-EAS443:3:66:1255:863#0/1  
GTTTCCTTTGGCATATCCGCAAGCGATTTGCAGACAATGG  
+HWI-EAS443:3:66:1255:863#0/1  
a`bbbbba`aaaaaa`\_`aaa`a`\_`aa`a`\_`aa`^`\_\_``¥  
@HWI-EAS443:3:66:1256:1285#0/1  
CTGAAAATATACAGAGATTCGCTTGGAGAACTGTGATGA

+HWI-EAS443:3:66:1256:1285#0/1  
`a^`\_a`bbbab\_[¥baa`a`aa\_Z`ab¥T^`\_Y\_  
@HWI-EAS443:3:66:1264:492#0/1  
GTCGCTTCAATCTGTGCCGATTTCTTCAATTAACCACC  
+HWI-EAS443:3:66:1264:492#0/1  
a`abaaba`aaa`a`a\_a`aaa\_aa`\_a`a\_^^`\_]  
@HWI-EAS443:3:66:1272:251#0/1  
GCCGCATTTCTTCAATTAACCACCTTATTTCTCAAATTT  
+HWI-EAS443:3:66:1272:251#0/1  
aa`a^^a]a^aaa`\_aa`\_]Y]^Y``\_aa\_^^]^\_\_\_\_^  
@HWI-EAS443:3:66:1292:900#0/1  
GTGCCGCATTTCTTCAATTAACCACCTTATTTCTCAAAT  
+HWI-EAS443:3:66:1292:900#0/1  
a`\_`\_a^`aa`aa^`\_a``^`\_\_\_\_```a^a]\_`]^Y`\_  
@HWI-EAS443:3:66:1331:1080#0/1  
CCGCATTTCTTCAATTAACCACCTTATTTCTCAAATTT  
+HWI-EAS443:3:66:1331:1080#0/1  
aabbbbbbababbabb\_abaabbbbabbbbabbbbaba  
@HWI-EAS443:3:66:1364:1698#0/1  
ATTATCTTTTGCCTAGGCATGAGCATGAACCAGTCTCGTG  
+HWI-EAS443:3:66:1364:1698#0/1  
aabbaaab^ZW\_^\_[X^a\_\_a\_Sa\_aaa`]`\_XZ^[YVW  
@HWI-EAS443:3:66:1365:328#0/1  
AGGGCTTTCAGGAGGAGGAGCAATAGTTGGAGAAATTT  
+HWI-EAS443:3:66:1365:328#0/1  
ababaaabaaaabaaa`aaa`a`\_`aaa^\_aa\_a`\_]a`\_  
@HWI-EAS443:3:66:1393:1482#0/1  
AGGCAACACCTTGGCCTCGATATCGAAACAGCCACTCTT  
+HWI-EAS443:3:66:1393:1482#0/1  
a\_^bbbbbaabaaa\_a`\_abaaba\_aa`a`\_a[Ua[¥¥`^  
@HWI-EAS443:3:66:1404:493#0/1  
GCCGCATTTCTTCAATTAACCACCTTATTTCTCAAATTT  
+HWI-EAS443:3:66:1404:493#0/1  
aaab`[\_S]abbaZWa^W\_TZU¥¥a`^a¥^^a][]```\_  
@HWI-EAS443:3:66:1408:963#0/1  
CTTGAAAGAGGAATCCAGCGAGACACTTAGAATGACAATT  
+HWI-EAS443:3:66:1408:963#0/1  
abaabbabbaaabbbbbbababbaabbbabaabbaa`aab  
@HWI-EAS443:3:66:1473:778#0/1  
TGCCGCATTTCTTCAATTAACCACCTTATTTCTCAAATT  
+HWI-EAS443:3:66:1473:778#0/1  
a`\_]U``Y\_]``a\_Wa\_aa\_abZa\_Z¥\_aa^Q^`\_[Wa`  
@HWI-EAS443:3:66:1491:1357#0/1  
GAGAACTGTGATGAGAATGGGAGACCTTCACTACCTCCA  
+HWI-EAS443:3:66:1491:1357#0/1  
aaaa`aaab^aaaa[aaa`\_]`\_]`\_a`\_`a`\_`\_]`\_]  
@HWI-EAS443:3:66:14:1136#0/1  
TGATGAGAATGGGAGACCTTCACTACCTCCAGAGCAGAAA  
+HWI-EAS443:3:66:14:1136#0/1  
a\_T^^)`XX¥\_a\_\_`[aa\_]¥`\_`\_]`\_`^^^Z\_^ZWU[



@HWI-EAS443:3:66:1528:1379#0/1  
TGATGAGAATGGGAGACCTTCACTACCTCCAGAGCAGAAA  
+HWI-EAS443:3:66:1528:1379#0/1  
a¥Zb^R\_X\_aaaa`\_\_aaX\_a\_a`\_\_\_a`\_[]\_\_Za]^N  
@HWI-EAS443:3:66:1542:494#0/1  
CAAATCGTGAATGGATCTTAAAAGAGGAATCCAGCGAGA  
+HWI-EAS443:3:66:1542:494#0/1  
Zab¥`a`bbb`]a`X]bZ]G[U[R¥\_`a`a`[^X`a`]  
@HWI-EAS443:3:66:1544:1693#0/1  
GTGATGAGAATGGGAGACCTTCACTACCTCCAGAGCAGAA  
+HWI-EAS443:3:66:1544:1693#0/1  
aaa\_aaab\_aaa^\_]`a`\_`\_b^`\_X`\_`^`^`Y`\_`X  
@HWI-EAS443:3:66:1555:682#0/1  
GCCGCATTTCTTCAATTAACCACCTTATTTCTCAAATTT  
+HWI-EAS443:3:66:1555:682#0/1  
abbb`bbababaaaa`aaa]aaaa`\_]\_aa  
@HWI-EAS443:3:66:1561:1444#0/1  
GGAGAACTGTGATGAGAATGGGAGACCTTCACTACCTCC  
+HWI-EAS443:3:66:1561:1444#0/1  
aba\_¥\_a`[^`YaXX^a\_^][a`Y`^GJY`N`[a\_VQLPW  
@HWI-EAS443:3:66:1631:611#0/1  
CTGTGCGTTTCAATCTGTGCCGATTTCTTCAATTAACCA  
+HWI-EAS443:3:66:1631:611#0/1  
^b`Ybaabbaaba`^`baXa]`bab]aaa\_¥`a``[TZ  
@HWI-EAS443:3:66:1710:1969#0/1  
TGAGAATGGGAGACCTTCACTACCTCCAGAGCAGAAATGA  
+HWI-EAS443:3:66:1710:1969#0/1  
¥ZW\_a^^b`\_P\_¥\_YZ\_Pa`Z]\_XU]¥Q\_]WY\_aXZX\_a`  
@HWI-EAS443:3:66:1715:62#0/1  
GCCGCATTTCTTCAATTAACCACCTTATTTCTCAAATTT  
+HWI-EAS443:3:66:1715:62#0/1  
aaaaaabbbabaaa`baaa]`\_aaaaa`aaaa^\_a`a  
@HWI-EAS443:3:66:174:1268#0/1  
CATCCTCATAAGTATGTCCTGGAAGAGAAGGTAATGGTGA  
+HWI-EAS443:3:66:174:1268#0/1  
abaabaababba\_b\_a\_aaaa`]^a`[^`^Va]\_^XX[Y  
@HWI-EAS443:3:66:179:424#0/1  
CCGCATTTCTTCAATTAACCACCTTATTTCTCAAATTT  
+HWI-EAS443:3:66:179:424#0/1  
abbaabaaaaaa^ba^aaaa\_baaaa\_\_\_aaaa\_^`a\_a  
@HWI-EAS443:3:66:205:858#0/1  
AGAACTGTGATGAGAATGGGAGACCTTCACTACCTCCAG  
+HWI-EAS443:3:66:205:858#0/1  
Sa[XW`Z\_[\_]T\_aaYM[a\_¥YXN]VV^[PNVXR]]^YQ  
@HWI-EAS443:3:66:232:153#0/1  
TGAGAATGGGAGACCTTCACTACCTCCAGAGCAGAAATGA  
+HWI-EAS443:3:66:232:153#0/1  
````YU[a`^Q^Y¥¥]^`\_^]UY[[^VP][^XR[S[Z[¥S  
@HWI-EAS443:3:66:26:43#0/1  
CGCGCTACCTTTCTGACATGACCCTCGAGGAAATGTCACG

+HWI-EAS443:3:66:26:43#0/1  
ababa^Kaa`ba`W^Ua¥`a]\_^aaU`a¥WR\_]\_¥Xa  
@HWI-EAS443:3:66:26:821#0/1  
TGGGAAACAAATCGTGGAATGGATCTTGAAAGAGGAATCC  
+HWI-EAS443:3:66:26:821#0/1  
aa[[^aba]abaabX`XT¥`\_X`\_a\_¥\_^VZ^[X^LYa`  
@HWI-EAS443:3:66:277:663#0/1  
TGTGCCGATTTCTTCAATTAACCACCTTATTTCTCCTCAAA  
+HWI-EAS443:3:66:277:663#0/1  
aa^bbabaabbaaaabb`aaaaabaaaaaaaa`aaa]`  
@HWI-EAS443:3:66:281:475#0/1  
GAATGGGAGACCTTCACTACCTCCAGAGCAGAAATGAAAA  
+HWI-EAS443:3:66:281:475#0/1  
aaaa`\_]Va\_aa`\_`aa```S¥a\_^]S¥^¥\_[PZ\_\_¥U\_T  
@HWI-EAS443:3:66:300:1098#0/1  
ATGAGAATGGGAGACCTTCACTACCTCCAGAGCAGAAATG  
+HWI-EAS443:3:66:300:1098#0/1  
aa¥Z`\_aa^\_WIZ`bbaab`¥`aa]a`a`aa`a[LY`]  
@HWI-EAS443:3:66:335:1336#0/1  
GATTACACTGAAGTTCGCTTTCAGTACTATGTTCTTTTCC  
+HWI-EAS443:3:66:335:1336#0/1  
H\_YaZWaa`¥`¥b]V`¥Y`\_bbba\_aa¥^bb\_bbba\_\_]  
@HWI-EAS443:3:66:340:1736#0/1  
TGAGAATGGGAGACCTTCACTACCTCCAGAGCAGAAATGA  
+HWI-EAS443:3:66:340:1736#0/1  
`^a`aTW`]\_Z^]Uaaab]^¥`aa^U`¥a`\_`V]\_[\_\_]  
@HWI-EAS443:3:66:351:1316#0/1  
ATAAGTATGTCCTGGAAGAGAAGGTAATGGTGAAATTTCT  
+HWI-EAS443:3:66:351:1316#0/1  
a`\_`[]]a\_Y^aa`]`a`a^\_ZYTxa^U[Z`^Z]\_`^¥¥V  
@HWI-EAS443:3:66:37:1113#0/1  
GCCGCATTTCTTCAATTAACCACCTTATTTCTCCTCAAATTT  
+HWI-EAS443:3:66:37:1113#0/1  
aa¥`aX^SS]^`a`\_`aba``[[`a]T¥``a`^a\_X¥a\_\_  
@HWI-EAS443:3:66:386:349#0/1  
CGAGGGTCATGTCAGAAAGGTAGCGCGAAGTAGGTACAGA  
+HWI-EAS443:3:66:386:349#0/1  
aaa^¥\_]a`aa^a`a^`a`T]]`a`\_`\_Y`\_]U\_^`\_`\_`  
@HWI-EAS443:3:66:406:1495#0/1  
GCTTTCAATCTGTGCCGATTTCTTCAATTAACCACCTTA  
+HWI-EAS443:3:66:406:1495#0/1  
ab\_\_aa]X][`\_¥\_\_P[aaaS`a`Y\_W`aa`\_`\_`^`\_`\_`  
@HWI-EAS443:3:66:447:211#0/1  
ATTCTCTGTCGCTTTCATCTGTGCCGATTTCTTCAATT  
+HWI-EAS443:3:66:447:211#0/1  
a`\_`aa\_aaY\_[a`a`\_]`P¥]^Y\_[[^RYU]\_Y¥]Y¥Y^^  
@HWI-EAS443:3:66:475:249#0/1  
CACAGATTGAAAGCGACAGAGAATAGTTTTCGAACAAATAA  
+HWI-EAS443:3:66:475:249#0/1  
abaabaabbaaa`aaaaabaaaaaaaa^aa`\_^a^T`a`aa

@HWI-EAS443:3:66:525:55#0/1  
GCCGCATTTCTTCAATTAACCACCTTATTTCTCAAATTT  
+HWI-EAS443:3:66:525:55#0/1  
aaaaa`aaa`aa`a\_aa`\_\_`[``\_a`^^a\_^W^a^`  
@HWI-EAS443:3:66:527:303#0/1  
GATGAGAATGGGAGACCTTCACTACCTCCAGAGCAGAAAT  
+HWI-EAS443:3:66:527:303#0/1  
aa\_Z[TQH¥^Y^`]`aaab^baaaX^XXa`JLaWDMUSHP  
@HWI-EAS443:3:66:529:1110#0/1  
GCCGCATTTCTTCAATTAACCACCTTATTTCTCAAATTT  
+HWI-EAS443:3:66:529:1110#0/1  
ab`Za`a`aaaab`^`abaa``aXaaaa`aa^]ab``a¥\_  
@HWI-EAS443:3:66:529:680#0/1  
GCCGCATTTCTTCAATTAACCACCTTATTTCTCAAATTT  
+HWI-EAS443:3:66:529:680#0/1  
a]V``Q`a[V]\_aaHR]\_`PXX[Z^Y¥`\_]`YU`^\_^]\_\_\_\_  
@HWI-EAS443:3:66:588:502#0/1  
AGAAACTGTGATGAGAATGGGAGACCTTCACTACCTCCAG  
+HWI-EAS443:3:66:588:502#0/1  
aaabaabb`aaaaaaaaaaaa\_a\_a`a`\_a```^\_\_\_\_^`  
@HWI-EAS443:3:66:592:1704#0/1  
GAGAAACTGTGATGAGAATGGGAGACCTTCACTACCTCCA  
+HWI-EAS443:3:66:592:1704#0/1  
aba\_\_`aa``aaa`\_]`^a``]`^a^aaaa`abaaa\_\_\_\_`\_a  
@HWI-EAS443:3:66:661:732#0/1  
CGCATTTCTTCAATTAACCACCTTATTTCTCAAATTTCT  
+HWI-EAS443:3:66:661:732#0/1  
abb^`aaaaaaaa^aaaa`a``a`aa`aaa`aa^`aaa`a  
@HWI-EAS443:3:66:663:485#0/1  
GAAACTGTGATGAGAATGGGAGACCTTCACTACCTCCAGA  
+HWI-EAS443:3:66:663:485#0/1  
ab\_aabbUaaabaa`b``X``aaaa`\_a``\_]S]]a\_a\_  
@HWI-EAS443:3:66:683:1156#0/1  
CGCATTTCTTCAATTAACCACCTTATTTCTCAAATTTCT  
+HWI-EAS443:3:66:683:1156#0/1  
aba\_a``aaab``a¥^]\_aaaa`^aa`\_aaaa\_VZ^\_a\_a  
@HWI-EAS443:3:66:685:1191#0/1  
GTCGCTTTCAATCTGTGCCGCATTTCTTCAATTAACCACC  
+HWI-EAS443:3:66:685:1191#0/1  
a\_aaa^aZW\_\_a`\_a¥`a`aa`\_`a`\_`^\_\_\_\_`\_\_`T^`¥  
@HWI-EAS443:3:66:73:1599#0/1  
GTCGCTTTCAATCTGTGCCGCATTTCTTCAATTAACCACC  
+HWI-EAS443:3:66:73:1599#0/1  
\_¥`])`\_`\_`aWOIV`a\_a\_a^Z\_[Z`^^]Y\_[^¥[]L  
@HWI-EAS443:3:66:745:982#0/1  
GAATGGGAGACCTTCACTACCTCCAGAGCAGAAATGAAAA  
+HWI-EAS443:3:66:745:982#0/1  
aZWZW\_\_\_\_b[[]bb``\_YaX[a`]`^aIQRa]a\_a`\_`\_]X  
@HWI-EAS443:3:66:746:658#0/1  
GCCGCATTTCTTCAATTAACCACCTTATTTCTCAAATTT

+HWI-EAS443:3:66:746:658#0/1  
a`X¥\_YPZ\_OQT]SHVU^Q\_]Q\_P¥TI[WWZ]W[MMRW\_]  
@HWI-EAS443:3:66:750:1573#0/1  
CTTGAATGGAATGGTAACACGGTTTCGAGTCTCTGAAAATA  
+HWI-EAS443:3:66:750:1573#0/1  
aa`\_`abbaaab\_Z\_abbabab]K\_^`¥^a`aa\_]aaaa  
@HWI-EAS443:3:66:768:1972#0/1  
GGGAGCAATAGTTGGAGAAATTTACCATTACCTTCTCTT  
+HWI-EAS443:3:66:768:1972#0/1  
aa^a`baaaab^`^aa`\_]a\_\_aaa`a`\_aaa\_¥\_¥^  
@HWI-EAS443:3:66:769:1526#0/1  
TGAGAATGGGAGACCTTCACTACCTCCAGAGCAGAAATGA  
+HWI-EAS443:3:66:769:1526#0/1  
\_\_`\_`aaa`a`\_\_`^a`aa^``\_]a\_\_^Y`ZX]]\_]\_  
@HWI-EAS443:3:66:809:1542#0/1  
GCCGCATTTCTTCAATTAACCACCTTATTTCTCAAATTT  
+HWI-EAS443:3:66:809:1542#0/1  
abbaabaaaa`aaaaaaaaaaaaabaaaaaaaa`aa  
@HWI-EAS443:3:66:902:226#0/1  
GCCGCATTTCTTCAATTAACCACCTTATTTCTCAAATTT  
+HWI-EAS443:3:66:902:226#0/1  
aaVa^a`¥¥Y^W^JOW`ZOX[S^T[ZU^\_YQUQHONO]MT  
@HWI-EAS443:3:66:918:2026#0/1  
AAAATATACAGAGATTCGCTTGGAGAAACTGTGATGAGAA  
+HWI-EAS443:3:66:918:2026#0/1  
aababbbbbb`abababbaaba``ab\_bbaa`aba`a^a`  
@HWI-EAS443:3:66:91:835#0/1  
GAAACTGTGATGAGAATGGGAGACCTTCACTACCTCCAGA  
+HWI-EAS443:3:66:91:835#0/1  
aa\_Taaa`a\_a^aX`a``]]][W`\_`a\_\_YR¥ZV^^]^^  
@HWI-EAS443:3:66:942:1460#0/1  
GTCGCTTTCAATCTGTGCCGATTTCTTCAATTAACCACC  
+HWI-EAS443:3:66:942:1460#0/1  
\_X`^V¥^Z\_¥\_\_[\_¥¥`a\_WZ^^aa`X````Z`\_\_\_\_  
@HWI-EAS443:3:66:946:1076#0/1  
AACTATTCTCTGTCGCTTTCAATCTGTGCCGATTTCTTC  
+HWI-EAS443:3:66:946:1076#0/1  
`baabab`b`aa`^S\_`ba¥aaa]]a^a`]^`^`a^RaaU  
@HWI-EAS443:3:66:962:702#0/1  
AATAAGCTGAAACGAGAAAGCTTTATCTCTTGTCTACT  
+HWI-EAS443:3:66:962:702#0/1  
abbbbaabaaaaaaa^]b`aaa`aaa\_aabaa`^`^a  
@HWI-EAS443:3:66:973:1614#0/1  
GTCGCTTTCAATCTGTGCCGATTTCTTCAATTAACCACC  
+HWI-EAS443:3:66:973:1614#0/1  
a`baaaa`a`aa`\_]a]a`aaa`aa\_aa`aaa````\_`\_  
@HWI-EAS443:3:66:983:486#0/1  
GTCGCTTTCAATCTGTGCCGATTTCTTCAATTAACCACC  
+HWI-EAS443:3:66:983:486#0/1  
a\_aaaaaaaaaaa`\_[a\_aa\_aaaaaa\_aa`aa`[`a``\_`\_`

@HWI-EAS443:3:67:1011:1231#0/1  
GCCGCATTTCTTCAATTAACCACCTTATTTCTCAAATTT  
+HWI-EAS443:3:67:1011:1231#0/1  
abbbbabbbbbbbbaaabaabbaaaabaaaabaa  
@HWI-EAS443:3:67:1017:1084#0/1  
GGAGAACTGTGATGAGAATGGGAGACCTTCACTACCTCC  
+HWI-EAS443:3:67:1017:1084#0/1  
aaa`^W]^`^]aa[a^`^`\_^U^Z]^`^`\_`[\_`\_\_\_\_^`^`  
@HWI-EAS443:3:67:1018:1525#0/1  
GCCGCATTTCTTCAATTAACCACCTTATTTCTCAAATTT  
+HWI-EAS443:3:67:1018:1525#0/1  
`ba^0¥ZW]bZ`aaHSV\_`^`\_X\_TaRPX]QKV`T¥TXbaa  
@HWI-EAS443:3:67:1063:1590#0/1  
ATGAGAATGGGAGACCTTCACTACCTCCAGAGCAGAAATG  
+HWI-EAS443:3:67:1063:1590#0/1  
aU]QR[[^`[\_`\_aa`RaWQaZ¥]a\_VT]PT^`\_NVXX`N]\_  
@HWI-EAS443:3:67:1085:421#0/1  
CACGGTTCGAGTCTCTGAAAATATACAGAGATTCGCTTGG  
+HWI-EAS443:3:67:1085:421#0/1  
ab``aaaab\_a^baaba`aaaaab\_abaaYa``a`\_a\_a  
@HWI-EAS443:3:67:1097:512#0/1  
ACTGTTTCTTTGGCATATCCGCAAGCGATTTGCAGACAA  
+HWI-EAS443:3:67:1097:512#0/1  
aa`^`[a[aaaa\_aa]`Vaa`Xa`\_¥`[\_`[\_`\_¥`\_`[Z`\_`  
@HWI-EAS443:3:67:1098:23#0/1  
TGATGAGAATGGGAGACCTTCACTACCTCCAGAGCAGAAA  
+HWI-EAS443:3:67:1098:23#0/1  
^a^TVR\_WVaaSX0[YRS¥TYWSSZLDPSV[TRV[¥`ZY[  
@HWI-EAS443:3:67:1129:1202#0/1  
GAGAACTGTGATGAGAATGGGAGACCTTCACTACCTCCA  
+HWI-EAS443:3:67:1129:1202#0/1  
aaa`a`aa`^`\_a]Wa]\_`a`\_]a`\_`a^`\_`^`\_`\_]`^^[  
@HWI-EAS443:3:67:1136:956#0/1  
GATGAGAATGGGAGACCTTCACTACCTCCAGAGCAGAAAT  
+HWI-EAS443:3:67:1136:956#0/1  
aaa]a`X`\_a^]\_a`\_a\_]\_a`\_`W\_]^^`^`\_Y^`]`\_`^`  
@HWI-EAS443:3:67:1151:1872#0/1  
AAACTGTGATGAGAATGGGAGACCTTCACTACCTCCAGAG  
+HWI-EAS443:3:67:1151:1872#0/1  
abba`a]a`a`\_``aa`\_a¥\_a\_]`a`^a\_Y]a`\_`^`  
@HWI-EAS443:3:67:116:567#0/1  
TGCCGCATTTCTTCAATTAACCACCTTATTTCTCAAATT  
+HWI-EAS443:3:67:116:567#0/1  
aabbab\_abbabababaaa^aaa`bbaaaaaa^`aaa\_aa  
@HWI-EAS443:3:67:1174:55#0/1  
CGCACGCAAAGAGGGCCTATTATCTTTTGCCTAGGCATGA  
+HWI-EAS443:3:67:1174:55#0/1  
abababaa`abaaaa\_aaba`baaaa`\_`^aaaa\_\_aa\_  
@HWI-EAS443:3:67:120:1961#0/1  
TGTCGCTTTCAATCTGTGCCGATTTCTTCAATTAACCAC

+HWI-EAS443:3:67:120:1961#0/1  
a^U¥]``aa^`b`[^`aaaa`aaa`a`a`\_T``\_\_`^  
@HWI-EAS443:3:67:1303:220#0/1  
GAGAACTGTGATGAGAATGGGAGACCTTCACTACCTCCA  
+HWI-EAS443:3:67:1303:220#0/1  
a]baabaabbaab`bababaaaa`aa^a\_aa^X\_Z\_\_  
@HWI-EAS443:3:67:1314:100#0/1  
GAAAATATACAGAGATTCGCTTGGAGAACTGTGATGAGA  
+HWI-EAS443:3:67:1314:100#0/1  
aYb¥`ba]WSZ^T`a`WFZa]PQ¥[]a^\_]\_a^\_Y[a^]  
@HWI-EAS443:3:67:1324:775#0/1  
GCGGCACAGATTGAAAGCGACAGAGAATAGTTTCGAACAA  
+HWI-EAS443:3:67:1324:775#0/1  
`¥`bbba`aa[aZb`aaaa`aa`Z`aaa```Va`aGa\_  
@HWI-EAS443:3:67:1328:1275#0/1  
GGCATATCCGCAAGCGATTTGCAGACAATGGATTGGGTGA  
+HWI-EAS443:3:67:1328:1275#0/1  
abbaaab\_]^\_b`a\_aaaa`¥`aaaa`aaa\_a^VPYZVY¥  
@HWI-EAS443:3:67:1346:247#0/1  
GAAGTAGGTACAGATGCAATTGTCATTCTAAGTGTCTCGC  
+HWI-EAS443:3:67:1346:247#0/1  
aa`aUabb\_baabaabaa`baa¥X`a`^a`^`Za\_]\_]`Z  
@HWI-EAS443:3:67:134:1421#0/1  
CTGAAAGCGAACTTCAGTGTAATCTTTAACCGATTAGAGA  
+HWI-EAS443:3:67:134:1421#0/1  
aa\_abbabaa`a^aaaa¥`]aaaa`aaaa`a\_^a\_^\_]  
@HWI-EAS443:3:67:1397:1158#0/1  
GTGATGAGAATGGGAGACCTTCACTACCTCCAGAGCAGAA  
+HWI-EAS443:3:67:1397:1158#0/1  
\_R\_`[^`V`ZY^X`[U]¥V][^]ZVTXR[RT]V`VaU^\_ZZ  
@HWI-EAS443:3:67:1398:670#0/1  
AGAAACTGTGATGAGAATGGGAGACCTTCACTACCTCCAG  
+HWI-EAS443:3:67:1398:670#0/1  
aba[aa\_a]b```]^S`\_]`a]^`^^`\_`¥Y^`¥]]^^]¥  
@HWI-EAS443:3:67:139:35#0/1  
GCCGCATTTCTTCAATTAACCACCTTATTTCTCAAATTT  
+HWI-EAS443:3:67:139:35#0/1  
aZ``YS\_P\_[TNUOZ¥WUHY]\_[R\_TRRWYU^]ZOFUUVW  
@HWI-EAS443:3:67:1415:207#0/1  
GCCGCATTTCTTCAATTAACCACCTTATTTCTCAAATTT  
+HWI-EAS443:3:67:1415:207#0/1  
\_Va^¥\_ZW]^WWYYY^aY[H^ZVZ\_]a^UHO^P[]Wa^]  
@HWI-EAS443:3:67:1433:1737#0/1  
GCCGCATTTCTTCAATTAACCACCTTATTTCTCAAATTT  
+HWI-EAS443:3:67:1433:1737#0/1  
aaaa\_aaaa]a`^\_]a`aa^Wa]]a]aa````\_]`^`\_\_`a  
@HWI-EAS443:3:67:1457:1372#0/1  
ATCAAGGAATGGGCGATCACCCAATCCATTGTCTGCAAAT  
+HWI-EAS443:3:67:1457:1372#0/1  
a]`aaabaaa]]a\_Y`\_\_^\_]U^[`aM`a`^^PUM^ZaB

@HWI-EAS443:3:67:1471:1905#0/1  
GCCGCATTTCTTCAATTAACCACCTTATTTCTCAAATTT  
+HWI-EAS443:3:67:1471:1905#0/1  
a\_H[ZSW]ZV`a`]U^`\_`QQ[ZV]\_W[`ZU^]]]Z\_`\_  
@HWI-EAS443:3:67:151:212#0/1  
CAGGTAGACTGTTTCCTTTGGCATATCCGCAAGCGATTTG  
+HWI-EAS443:3:67:151:212#0/1  
¥\_Y``[``WX¥`]]`a¥]a\_a¥Z^ZXZX\_[]Q^XX\_ZJ  
@HWI-EAS443:3:67:152:1209#0/1  
GCCGCATTTCTTCAATTAACCACCTTATTTCTCAAATTT  
+HWI-EAS443:3:67:152:1209#0/1  
`bb`aX^aaaa^ab]aa\_]\_a]aZ``\_aa`a`\_`a```\_\_  
@HWI-EAS443:3:67:1562:908#0/1  
GGAGAACTGTGATGAGAATGGGAGACCTTCACTACCTCC  
+HWI-EAS443:3:67:1562:908#0/1  
`b\_baa`a^a]S]`¥]b]]^aa`Y`]]^`^`^[\_^V^\_R  
@HWI-EAS443:3:67:1608:85#0/1  
GCCGCATTTCTTCAATTAACCACCTTATTTCTCAAATTT  
+HWI-EAS443:3:67:1608:85#0/1  
aW`]¥Yaaa^a\_`W[`^¥^U^]VS]\_[``^VX]X]]Z\_^^  
@HWI-EAS443:3:67:1617:288#0/1  
TGCCGCATTTCTTCAATTAACCACCTTATTTCTCAAATT  
+HWI-EAS443:3:67:1617:288#0/1  
K\_]a^S¥Z`a]¥¥`T]J`¥Z0Zb\_G¥Y[`ab\_¥^aa^][`  
@HWI-EAS443:3:67:1656:1427#0/1  
GCCGCATTTCTTCAATTAACCACCTTATTTCTCAAATTT  
+HWI-EAS443:3:67:1656:1427#0/1  
abZHVYTY`T`RU¥b[[WXQ\_a`]VZbaZ[U]aXNWa\_`  
@HWI-EAS443:3:67:1661:832#0/1  
ATGAGAATGGGAGACCTTCACTACCTCCAGAGCAGAAATG  
+HWI-EAS443:3:67:1661:832#0/1  
\_aZZZW`baZ]ZaaaRaVba`a`^Y`N]^`a]\_a]][\_a  
@HWI-EAS443:3:67:1680:271#0/1  
TGGAGAACTGTGATGAGAATGGGAGACCTTCACTACCTC  
+HWI-EAS443:3:67:1680:271#0/1  
abaaaaaYaab\_a\_aa\_`^`aaaa\_a^YX^a^\_`\_]NT`T  
@HWI-EAS443:3:67:1691:831#0/1  
CTGAAAATATACAGAGATTCGCTTGGAGAACTGTGATGA  
+HWI-EAS443:3:67:1691:831#0/1  
ababaabbababaaab\_bbbb`aabbaaaaaaaaa\_aaab`  
@HWI-EAS443:3:67:1762:28#0/1  
TGAGAATGGGAGACCTTCACTACCTCCAGAGCAGAAATGA  
+HWI-EAS443:3:67:1762:28#0/1  
ababa\_aaab`aaZ^`aa`[aa\_Za`[^]Ya¥¥`^\_`\_`\_  
@HWI-EAS443:3:67:197:1188#0/1  
AGAAACTGTGATGAGAATGGGAGACCTTCACTACCTCCAG  
+HWI-EAS443:3:67:197:1188#0/1  
aa`\_[aabY`aa`]a`a\_a\_`XXaa]]\_Y`\_\_]\_\_\_`\_\_\_\_  
@HWI-EAS443:3:67:274:349#0/1  
GAGAACTGTGATGAGAATGGGAGACCTTCACTACCTCCA

+HWI-EAS443:3:67:274:349#0/1  
aabbZ`aaa\_` `[b^`\_`aaaba\_a\_\_a`\_\_a]\_\_\_\_\_`\_W\_  
@HWI-EAS443:3:67:275:1659#0/1  
CCGCATTTCTTCAATTAACCACCTTATTTTCCTCAAATTTTC  
+HWI-EAS443:3:67:275:1659#0/1  
a``¥a`ab```a^aaaY``\_b`^aaaaa``a`b¥F[a`a`  
@HWI-EAS443:3:67:280:173#0/1  
TGAGAATGGGAGACCTTCACTACCTCCAGAGCAGAAATGA  
+HWI-EAS443:3:67:280:173#0/1  
][¥\_VQW\_`]S\_¥[W]YS`\_]\_a¥UX`]\_]`^`]\_a^W¥^]U  
@HWI-EAS443:3:67:291:1754#0/1  
AGAAACTGTGATGAGAATGGGAGACCTTCACTACCTCCAG  
+HWI-EAS443:3:67:291:1754#0/1  
¥¥]¥\_`b^OYR\_SX¥X\_T[Raa`X`\_Q^[\_`^`]OW[PJYa  
@HWI-EAS443:3:67:401:1037#0/1  
CCGCATTTCTTCAATTAACCACCTTATTTTCCTCAAATTTTC  
+HWI-EAS443:3:67:401:1037#0/1  
ab\_\_H\_aa]baba]aa^^\_\_a`baa`\_aaaaabaaa``\_`  
@HWI-EAS443:3:67:406:1243#0/1  
AGAAACTGTGATGAGAATGGGAGACCTTCACTACCTCCAG  
+HWI-EAS443:3:67:406:1243#0/1  
aaa^Z\_aa^a````a```^`\_WU\_\_^`\_`\_\_`\_`\_\_W\_^`]\_`  
@HWI-EAS443:3:67:417:506#0/1  
TGAGAATGGGAGACCTTCACTACCTCCAGAGCAGAAATGA  
+HWI-EAS443:3:67:417:506#0/1  
ab]aa`aaa\_W\_a\_\_\_`aaa`aa\_\_\_a\_\_\_`\_^`^^`\_`\_`  
@HWI-EAS443:3:67:511:703#0/1  
TGGAGAAACTGTGATGAGAATGGGAGACCTTCACTACCTC  
+HWI-EAS443:3:67:511:703#0/1  
ZYO\_\_WHXa`[\_W`\_`^`a`Z`\_]K]^¥\_aaa\_\_\_NT^  
@HWI-EAS443:3:67:517:756#0/1  
CGCATTTCTTCAATTAACCACCTTATTTTCCTCAAATTTCT  
+HWI-EAS443:3:67:517:756#0/1  
a``¥Z^U`a\_]YV¥a]U¥`¥¥a\_\_Z[]a]\_`\_]ZX\_a\_aa  
@HWI-EAS443:3:67:518:94#0/1  
CCGCATTTCTTCAATTAACCACCTTATTTTCCTCAAATTTTC  
+HWI-EAS443:3:67:518:94#0/1  
abbbbbbabbbbbabaaaaaaaabaabaa``aaa^aa`a`  
@HWI-EAS443:3:67:524:1664#0/1  
AGGGCCTATTATCTTTTGCCTAGGCATGAGCATGAACCAG  
+HWI-EAS443:3:67:524:1664#0/1  
`\_]\_\_bba]¥a`ba``]^[aaX]]^aa[X\_[\_`^¥^\_a]¥`Z  
@HWI-EAS443:3:67:534:1409#0/1  
GCGCTACCTTTCTGACATGACCCTCGAGGAAATGTCACGA  
+HWI-EAS443:3:67:534:1409#0/1  
abab`bbbaaaba\_\_aaaaba`b`a`aaIZZ¥`V\_Z\_\_`  
@HWI-EAS443:3:67:576:2036#0/1  
CGCATTTCTTCAATTAACCACCTTATTTTCCTCAAATTTCT  
+HWI-EAS443:3:67:576:2036#0/1  
\_\_[bZa^a][a]aZWaa`¥`a¥a^a```\_aa`aa\_\_`\_]`\_`



@HWI-EAS443:3:67:59:1677#0/1  
GCCGCATTTCTTCAATTAACCACCTTATTTCTCAAATTT  
+HWI-EAS443:3:67:59:1677#0/1  
¥Z¥¥ZKQ¥W¥¥ba^`b\_RW¥T^``^aaa\_aY``aa¥¥X[  
@HWI-EAS443:3:67:635:502#0/1  
TGCCGCATTTCTTCAATTAACCACCTTATTTCTCAAATT  
+HWI-EAS443:3:67:635:502#0/1  
aa`^bb\_bbabaabaaaba]aaaabbbbaabaaaaaaa  
@HWI-EAS443:3:67:669:1359#0/1  
CGCATTTCTTCAATTAACCACCTTATTTCTCAAATTTCT  
+HWI-EAS443:3:67:669:1359#0/1  
aa`\_`aabbabaaba`baaaaaabaabaaba`a`aaa  
@HWI-EAS443:3:67:686:464#0/1  
TGCCGCATTTCTTCAATTAACCACCTTATTTCTCAAATT  
+HWI-EAS443:3:67:686:464#0/1  
[ab``a\_`babaababbbbaabaabbababbabaaa`b  
@HWI-EAS443:3:67:712:1914#0/1  
GTCGCTTTCAATCTGTGCCGCATTTCTTCAATTAACCACC  
+HWI-EAS443:3:67:712:1914#0/1  
^Ib\_aYY\_a¥Y[UYS`UUXZTX^W[W\_Y`\_Y^¥¥^ZZ`\_  
@HWI-EAS443:3:67:714:1450#0/1  
CTCTGTCGCTTTCAATCTGTGCCGCATTTCTTCAATTAAC  
+HWI-EAS443:3:67:714:1450#0/1  
\_S\_Z\_J\_\_aa``\_^\_[ ]ZSUTTza]Z^[W]Y\_XTZYYWZ¥  
@HWI-EAS443:3:67:723:1330#0/1  
CCGCATTTCTTCAATTAACCACCTTATTTCTCAAATTTTC  
+HWI-EAS443:3:67:723:1330#0/1  
`[Y[USZ]^`\_^`\_S^^]a``aWR¥]¥TWW¥[^ZW\_W^]  
@HWI-EAS443:3:67:742:112#0/1  
AGAAACTGTGATGAGAATGGGAGACCTTCACTACCTCCAG  
+HWI-EAS443:3:67:742:112#0/1  
aaaaa`baXa\_^^^`\_\_````\_`^U[^U\_^]\_WW]¥X^^  
@HWI-EAS443:3:67:754:1378#0/1  
AATTTGAGGAAATAAGGTGGTTAATTGAAGAAATGCCGCA  
+HWI-EAS443:3:67:754:1378#0/1  
YT`baZ^¥¥X¥W\_U\_X¥T¥WQ]b)`]K]T¥a\_a[HZSHQ]  
@HWI-EAS443:3:67:761:146#0/1  
GTCTCTGAAAATATACAGAGATTCGCTTGGAGAACTGTG  
+HWI-EAS443:3:67:761:146#0/1  
a\_\_NVTTTW\_XYRX¥^^`XOMQLT[QNT[[LV]QPRR^Y¥  
@HWI-EAS443:3:67:767:765#0/1  
AGTCTCTGAAAATATACAGAGATTCGCTTGGAGAACTGT  
+HWI-EAS443:3:67:767:765#0/1  
aa\_aa`aaa\_aa``a¥aaa^aW\_`^`aa`\_\_\_¥\_^VL[¥ZU  
@HWI-EAS443:3:67:784:971#0/1  
ATGAGAATGGGAGACCTTCACTACCTCCAGCAGAAATG  
+HWI-EAS443:3:67:784:971#0/1  
aaaaaababaab`\_\_aa`a\_`a^``a``\_```^a^\_Z`a  
@HWI-EAS443:3:67:841:1501#0/1  
GCCGCATTTCTTCAATTAACCACCTTATTTCTCAAATTT

+HWI-EAS443:3:67:841:1501#0/1  
ab\_X`¥`babba^`\_]\_aaba`^`^`^aaa`aaaX`^`  
@HWI-EAS443:3:67:880:798#0/1  
AGAAACTGTGATGAGAATGGGAGACCTTCACTACCTCCAG  
+HWI-EAS443:3:67:880:798#0/1  
a\_]\_Ya`a]R`Za¥XP`¥S\_a[]`^a]\_Y]`^U^\_]`  
@HWI-EAS443:3:67:896:1729#0/1  
ACTGTGATGAGAATGGGAGACCTTCACTACCTCCAGAGCA  
+HWI-EAS443:3:67:896:1729#0/1  
^b\_\_[aabba\_[¥[]VWaa`aa\_]a`\_\_aX\_Z\_\_\_NW\_a  
@HWI-EAS443:3:67:897:526#0/1  
GTCGCTTTCAATCTGTGCCGATTTCTTCAATTAACCACC  
+HWI-EAS443:3:67:897:526#0/1  
^Zbb\_Ia`aSVQ^abIa\_V`¥^baa^^a]a\_Z]aI`^YaW  
@HWI-EAS443:3:68:1006:1902#0/1  
AGAAACTGTGATGAGAATGGGAGACCTTCACTACCTCCAG  
+HWI-EAS443:3:68:1006:1902#0/1  
`aaa`aaa^aa`a`a`\_aa`\_`¥`^`\_a¥^`\_`^^`^`  
@HWI-EAS443:3:68:101:45#0/1  
GTCGCTTTCAATCTGTGCCGATTTCTTCAATTAACCACC  
+HWI-EAS443:3:68:101:45#0/1  
a\_a\_\_^`^X¥]X[LYYZV^\_TPVWWU]XXXQXXRYXRYZ  
@HWI-EAS443:3:68:1070:250#0/1  
AAACTGTGATGAGAATGGGAGACCTTCACTACCTCCAGAG  
+HWI-EAS443:3:68:1070:250#0/1  
aaKabVXbaaaWDOYR\_[RRa^¥¥]`HRQ¥¥GV\_NYQPMF  
@HWI-EAS443:3:68:1106:661#0/1  
GATGAGAATGGGAGACCTTCACTACCTCCAGAGCAGAAAT  
+HWI-EAS443:3:68:1106:661#0/1  
aaab`b\_\_bb```a`aaa`a\_aa\_\_`a\_]a^\_]`^`^`\_`\_`  
@HWI-EAS443:3:68:1110:1091#0/1  
GCCGATTTCTTCAATTAACCACCTTATTTCTTCAAATTT  
+HWI-EAS443:3:68:1110:1091#0/1  
`¥aaZb\_aaaa`Zaaa`aaT[a\_\_aVaa`\_a]a]]`\_`\_`  
@HWI-EAS443:3:68:1129:1023#0/1  
CATATCCGCAAGCGATTTGCAGACAATGGATTGGGTGATG  
+HWI-EAS443:3:68:1129:1023#0/1  
abaXab¥¥`¥XPU`UUa`\_`\_`a]]XZVaa`VZ¥]aUaXUV  
@HWI-EAS443:3:68:1145:923#0/1  
TTGTCAATTCTAAGTGTCTCGCTGGATTCCTCTTCAAGAT  
+HWI-EAS443:3:68:1145:923#0/1  
aa]]]a]aaaa`]]]a]a\_\_`X^)`[aY\_Z\_Z`\_`\_`a`\_`\_`  
@HWI-EAS443:3:68:1146:1660#0/1  
CCCATTCTCATCACAGTTTCTCCAAGCGAATCTCTGTATA  
+HWI-EAS443:3:68:1146:1660#0/1  
ababbbbabbbababbaaaaaaba`aa`^`^`aZaa^a`a  
@HWI-EAS443:3:68:1212:25#0/1  
GCCTAGGCAAAAAGATAATAGGCCCTCTTTGCGTGCGATTG  
+HWI-EAS443:3:68:1212:25#0/1  
aa`V]^\_ZQX[¥aU]]^\_aT[]VM`U¥YY]M^UZEXW¥¥`

@HWI-EAS443:3:68:1234:322#0/1  
ATCGGTTAAAGATTACACTGAAGTTCGCTTTCAGTACTAT  
+HWI-EAS443:3:68:1234:322#0/1  
aaa\_a\_¥\_a^Y]a`a\_a[\_\_\_W¥^Z\_\_a^]\_aY¥]Z]W`\_`  
@HWI-EAS443:3:68:1278:1265#0/1  
GCCGCATTTCTTCAATTAACCACCTTATTTCCCTCAAATTT  
+HWI-EAS443:3:68:1278:1265#0/1  
aaY`bba^`^Z]ZR^a`aaaa\_a`Z`Y^\_ZXa^[^Y`\_`  
@HWI-EAS443:3:68:1287:258#0/1  
GAAACGAGAAAGCTCTTATCTCTTGTCTACTTCAAGCAG  
+HWI-EAS443:3:68:1287:258#0/1  
a\_aaZI\_a¥T]^`^¥Ya\_G[Z\_]\_^X¥Q^^^\_\_Z¥S]ZU\_  
@HWI-EAS443:3:68:1309:471#0/1  
CGCATTTCTTCAATTAACCACCTTATTTCCCTCAAATTTCT  
+HWI-EAS443:3:68:1309:471#0/1  
abbbba]¥U¥¥ba[[^[[Z]^][a]a`^\_a\_ZYVRYbbaaa  
@HWI-EAS443:3:68:1339:1819#0/1  
CGCATTTCTTCAATTAACCACCTTATTTCCCTCAAATTTCT  
+HWI-EAS443:3:68:1339:1819#0/1  
abaabbbabbabb`bb`ab`^babbbb^^aaaaab`aaa  
@HWI-EAS443:3:68:1351:1225#0/1  
CCGCATTTCTTCAATTAACCACCTTATTTCCCTCAAATTTCT  
+HWI-EAS443:3:68:1351:1225#0/1  
aa¥\_]`\_¥`\_`^`````aZ0`aa```aa`¥T```[\_`Z]a  
@HWI-EAS443:3:68:1358:776#0/1  
GTCGCTTCAATCTGTGCCGCTTCTTCAATTAACCACC  
+HWI-EAS443:3:68:1358:776#0/1  
`abb`bbabbbb`bbabaabaababbbb`aaaaba]aaY  
@HWI-EAS443:3:68:1366:1767#0/1  
GAAACTGTGATGAGAATGGGAGACCTTCACTACCTCCAGA  
+HWI-EAS443:3:68:1366:1767#0/1  
ab`baaaabb^ba^^`aa\_¥a`ZUa\_\_a\_\_`[\_aR`^\_  
@HWI-EAS443:3:68:1401:1034#0/1  
GTGTTGCCTCTTCTTTAAGGACTTTTGATCTCGGCGGA  
+HWI-EAS443:3:68:1401:1034#0/1  
]\_a\_aaaa]]b`]¥`abaa\_]`0[aaaa\_^a\_]a\_[a^\_  
@HWI-EAS443:3:68:1409:1641#0/1  
TGATGAGAATGGGAGACCTTCACTACCTCCAGAGCAGAAA  
+HWI-EAS443:3:68:1409:1641#0/1  
aababb\_bbaa[]`aaa¥aaaaaa`a[^`¥]U][¥`V`[a  
@HWI-EAS443:3:68:141:61#0/1  
GCCGCATTTCTTCAATTAACCACCTTATTTCCCTCAAATTT  
+HWI-EAS443:3:68:141:61#0/1  
aa`^\_aa`\_````\_a`a```]\_\_\_\_\_^\_X^```\_]^^ZW[\_Y¥  
@HWI-EAS443:3:68:1461:1432#0/1  
AGAATGGGAGACCTTCACTACCTCCAGAGCAGAAATGAAA  
+HWI-EAS443:3:68:1461:1432#0/1  
ab`abab`bba]\_aaab`a\_\_`a`aa\_\_^\_a¥a\_\_`````  
@HWI-EAS443:3:68:1475:1684#0/1  
CGCTTGGAGAAACTGTGATGAGAATGGGAGACCTTCACTA

+HWI-EAS443:3:68:1475:1684#0/1  
abaa`abaa\_aaa`aYaa\_^UaRZXXa\_PXMV^Y`]ZRS[  
@HWI-EAS443:3:68:1475:1960#0/1  
GTTTCGAAACTATTCTCTGTCGCTTCAATCTGTGCCGCAT  
+HWI-EAS443:3:68:1475:1960#0/1  
aaaaaaaaabaaaaaaaaab\_\_a`aaaaaaaaa\_\_\_\_\_aZa\_  
@HWI-EAS443:3:68:1483:1075#0/1  
GAATGGGAGACCTTCACTACCTCCAGAGCAGAAATGAAAA  
+HWI-EAS443:3:68:1483:1075#0/1  
`aabb]]aaa]\_\_`^a\_aa`¥a`\_\_a\_a\_\_a^¥\_a^\_¥`\_  
@HWI-EAS443:3:68:1487:678#0/1  
GAAACTGTGATGAGAATGGGAGACCTTCACTACCTCCAGA  
+HWI-EAS443:3:68:1487:678#0/1  
aa`aaaa\_aaaa\_a\_\_aaaa^a`\_]`\_\_aa\_\_^]]\_]`^`]  
@HWI-EAS443:3:68:1496:907#0/1  
GTCAGAAAGGTAGCGCGAAGTAGGTACAGATGCAATTGTC  
+HWI-EAS443:3:68:1496:907#0/1  
QWb`bb[Y]aT[bbbY\_R¥]¥abaaWaba^`a]¥I\_ba`^  
@HWI-EAS443:3:68:1518:933#0/1  
CACGGTTCGAGTCTCTGAAAATATACAGAGATTCGCTTGG  
+HWI-EAS443:3:68:1518:933#0/1  
aaabbaabbab`aaaab`a`aaaaaab`a`\_`a`a^¥`\_`a  
@HWI-EAS443:3:68:1555:1796#0/1  
CGTGAATGGATCTTGAAAGAGGAATCCAGCGAGACACTT  
+HWI-EAS443:3:68:1555:1796#0/1  
^b^a`b^aaZ^bbaa]bb¥Z\_aba``]`aaaa`VUJZY`a  
@HWI-EAS443:3:68:1568:998#0/1  
CCGCATTTCTTCAATTAACCACCTTATTTCTCAAATTT  
+HWI-EAS443:3:68:1568:998#0/1  
abbbbbbbbbbbabbbbaaa`a`ababbbbaaaaaaaaaaaaa  
@HWI-EAS443:3:68:1577:432#0/1  
GGAGAAACTGTGATGAGAATGGGAGACCTTCACTACCTCC  
+HWI-EAS443:3:68:1577:432#0/1  
aa`TT][\_`VVR\_a\_[V¥^a^XY`^]U]X]^Y^^XX^X]  
@HWI-EAS443:3:68:157:769#0/1  
GCCGCATTTCTTCAATTAACCACCTTATTTCTCAAATTT  
+HWI-EAS443:3:68:157:769#0/1  
abbbbaUabbbbbbb]baabaa]aaaa\_baaaaaaaaaaaa  
@HWI-EAS443:3:68:1586:982#0/1  
GTCGCTTCAATCTGTGCCGCATTTCTTCAATTAACCACC  
+HWI-EAS443:3:68:1586:982#0/1  
\_VQ\_OVa^Y^¥]^`^R\_PP¥]a[aaba\_a\_a^¥a`[]\_F  
@HWI-EAS443:3:68:1601:807#0/1  
AGTCTCTGAAAATATACAGAGATTCGCTTGGAGAACTGT  
+HWI-EAS443:3:68:1601:807#0/1  
\_b]I]Va`a`aaabb`Yab``b¥b`b``PR]Va¥a^S^\_W  
@HWI-EAS443:3:68:1636:1530#0/1  
GCGGCACAGATTGAAAGCGACAGAGAATAGTTTCGAACAA  
+HWI-EAS443:3:68:1636:1530#0/1  
aaababaabaa`baa`aaa\_\_\_aa`^Za\_aXa`^a`\_U\_\_

@HWI-EAS443:3:68:1652:748#0/1  
AAGGTCTCCCATTCTCATCACAGTTTCTCCAAGCGAATCT  
+HWI-EAS443:3:68:1652:748#0/1  
[X¥aWa\_Q]``\_^^``^¥ba`baabaa^]a\_¥\_¥L¥`T\_  
@HWI-EAS443:3:68:1752:1683#0/1  
CTGTGCCGCATTTCTTCAATTAACCACCTTATTTCTCAA  
+HWI-EAS443:3:68:1752:1683#0/1  
TVX\_¥a``a``b\_]ba^^abbbb`ba¥bbbbbbbababa  
@HWI-EAS443:3:68:1775:962#0/1  
GAAACTGTGATGAGAATGGGAGACCTTCACTACCTCCAGA  
+HWI-EAS443:3:68:1775:962#0/1  
\_^^\_aa\_X^baaa\_a`Za`aa`a\_¥¥aa\_a``a^[]`X``^  
@HWI-EAS443:3:68:1777:1649#0/1  
GCCGCATTTCTTCAATTAACCACCTTATTTCTCAAATTT  
+HWI-EAS443:3:68:1777:1649#0/1  
aaabaabab\_ba\_aaaaa]``\_Yaaaaa]\_a^a`\_a`\_  
@HWI-EAS443:3:68:195:1929#0/1  
TGCCGCATTTCTTCAATTAACCACCTTATTTCTCAAATT  
+HWI-EAS443:3:68:195:1929#0/1  
`abbababaabaaa\_``a`aa`ab]a`^`aYS`aab`a``  
@HWI-EAS443:3:68:239:1911#0/1  
GCCGCATTTCTTCAATTAACCACCTTATTTCTCAAATTT  
+HWI-EAS443:3:68:239:1911#0/1  
a`YWXTTXVaY^]Z\_X]aab^ZXVX]^Y]]\_baXV]XU  
@HWI-EAS443:3:68:24:481#0/1  
ATGAGAATGGGAGACCTTCACTACCTCCAGAGCAGAAATG  
+HWI-EAS443:3:68:24:481#0/1  
aabUb^]aaa`aUaa`Xaa]^`\_`Za^]\_0]¥^^\_H^¥^  
@HWI-EAS443:3:68:256:1990#0/1  
CTGTGCTTTCAATCTGTGCCGCATTTCTTCAATTAACCA  
+HWI-EAS443:3:68:256:1990#0/1  
`MX[]`a\_aaa`¥a^¥ZW]`aa¥^\_``\_`\_V¥\_aaV^W  
@HWI-EAS443:3:68:259:1353#0/1  
GAATGGGAGACCTTCACTACCTCCAGAGCAGAAATGAAAA  
+HWI-EAS443:3:68:259:1353#0/1  
\_aaaa`aaaa`]\_\_`aa\_`````\_aY¥^^`[¥\_a\_\_\_\_[^  
@HWI-EAS443:3:68:276:152#0/1  
GAAACTGTGATGAGAATGGGAGACCTTCACTACCTCCAGA  
+HWI-EAS443:3:68:276:152#0/1  
aZ^]\_``^`Va^Z`\_\_aaba\_¥NZ[Z\_X\_]]]]XX]ZY]X  
@HWI-EAS443:3:68:280:494#0/1  
TGTTTTGATATCGAGCCAAGGGTGTTCCTCTTCCTTTT  
+HWI-EAS443:3:68:280:494#0/1  
aa```a^a[¥U`a]a¥a]¥TTVRFZX\_\_Z\_]X]]^^V^^^  
@HWI-EAS443:3:68:286:592#0/1  
GCCGCATTTCTTCAATTAACCACCTTATTTCTCAAATTT  
+HWI-EAS443:3:68:286:592#0/1  
a[^^]]\_\_a`[^`\_¥]ZIY^`\_`\_]VYaa``\_`\_T0ZaZ¥  
@HWI-EAS443:3:68:288:646#0/1  
ATGAGAATGGGAGACCTTCACTACCTCCAGAGCAGAAATG

+HWI-EAS443:3:68:288:646#0/1  
aaaaaaaaaaa`aYa`^\_aa\_a`\_`^\_\_\_\_^^\_\_^\_\_\_\_`  
@HWI-EAS443:3:68:292:1027#0/1  
GATGAGAATGGGAGACCTTCACTACCTCCAGAGCAGAAAT  
+HWI-EAS443:3:68:292:1027#0/1  
aa`\_`^Z^\_]`^babaaa^`aaa`a\_a\_a\_]¥YS[\_aZ[V`  
@HWI-EAS443:3:68:295:1024#0/1  
TGAAAATATACAGAGATTGCTTGGAGAACTGTGATGAG  
+HWI-EAS443:3:68:295:1024#0/1  
`[^abaaaaaaaa]\_\_aa`\_`aa\_aXaa^\_a[`ZT\_]\_  
@HWI-EAS443:3:68:303:1129#0/1  
GATTACACTGAAGTTCGCTTTCAGTACTATGTTCTTTTCC  
+HWI-EAS443:3:68:303:1129#0/1  
]a^¥`^Ua]^\_OZMRS\_SQV`\_OWR^Y\_Y^¥W^a\_]\_`^O  
@HWI-EAS443:3:68:341:1138#0/1  
GCTTGCAGATATGCCAAAGGAAACAGTCTACCTGAAAGCT  
+HWI-EAS443:3:68:341:1138#0/1  
abaa]abbaaaaa`\_]a\_]\_^``¥LX]`[[^a[SW^```^  
@HWI-EAS443:3:68:35:922#0/1  
TGAGAATGGGAGACCTTCACTACCTCCAGAGCAGAAATGA  
+HWI-EAS443:3:68:35:922#0/1  
a^^]a¥Yaa`]a¥^a]\_\_[WZ^`U\_a\_]^[\_]X]YR]XU]  
@HWI-EAS443:3:68:410:617#0/1  
GCCGCATTTCTTCAATTAACCACCTTATTTCCCTCAAATTT  
+HWI-EAS443:3:68:410:617#0/1  
aaab``aaaa\_aaaaaaaaa`aaa`aa`\_a`aa`\_`a^a`\_`  
@HWI-EAS443:3:68:416:636#0/1  
AGAAACTGTGATGAGAATGGGAGACCTTCACTACCTCCAG  
+HWI-EAS443:3:68:416:636#0/1  
a`^aaaaa]a\_aa`a^^\_a¥`\_a`^a\_\_\_\_a`\_`^a\_\_^\_\_  
@HWI-EAS443:3:68:428:227#0/1  
ATGAGAATGGGAGACCTTCACTACCTCCAGAGCAGAAATG  
+HWI-EAS443:3:68:428:227#0/1  
aa`]aaaaaa\_aa^[[``\_^[`¥^^\_]Z¥]\_\_\_\_\_[[¥\_\_  
@HWI-EAS443:3:68:428:857#0/1  
AGAAACTGTGATGAGAATGGGAGACCTTCACTACCTCCAG  
+HWI-EAS443:3:68:428:857#0/1  
a]\_aaaaaY`^\_a^\_WW^\_\_^]V\_\_^[\_\_^]\_^YY^]]  
@HWI-EAS443:3:68:436:1133#0/1  
GGCACAGATTGAAAGCGACAGAGAATAGTTTGAACAAAT  
+HWI-EAS443:3:68:436:1133#0/1  
aabbabbaba\_aba`ba`aaaaaa\_aaXaa``[aaaa`  
@HWI-EAS443:3:68:453:37#0/1  
TGAGAATGGGAGACCTTCACTACCTCCAGAGCAGAAATGA  
+HWI-EAS443:3:68:453:37#0/1  
a`S`\_U^ba]G[\_X``]`[Y^[UWXXXa[YNY[NMS¥YY  
@HWI-EAS443:3:68:469:1684#0/1  
AGAAACTGTGATGAGAATGGGAGACCTTCACTACCTCCAG  
+HWI-EAS443:3:68:469:1684#0/1  
`a[`aaa`U`¥^\_]`^`^a\_[\_\_\_\_]`\_\_\_\_a`X\_\_VY\_]`^V

@HWI-EAS443:3:68:529:1647#0/1  
GCCGCATTTCTTCAATTAACCACCTTATTTCCCTCAAATTT  
+HWI-EAS443:3:68:529:1647#0/1  
abb``ab`bbab`aaab`aaa`a`baaaaaaaaaa`a  
@HWI-EAS443:3:68:533:1608#0/1  
ATGAGAATGGGAGACCTTCACTACCTCCAGAGCAGAAATG  
+HWI-EAS443:3:68:533:1608#0/1  
^baaW\$aab^\$`aaaaSL`aaaa[XX]a`^Z\_aa\_[[\_a\_  
@HWI-EAS443:3:68:535:904#0/1  
CAGAGATTGCTTGGAGAACTGTGATGAGAATGGGAGAC  
+HWI-EAS443:3:68:535:904#0/1  
aaaa`X^aa`aa^\_a\_a[\$`^\$`U^\_Z\_\_\_\_\_Y^^\$VZYW  
@HWI-EAS443:3:68:605:1495#0/1  
GAATGGGAGACCTTCACTACCTCCAGAGCAGAAATGAAAA  
+HWI-EAS443:3:68:605:1495#0/1  
V\_`aZL[W\_[^][`aaabbbbbba^]\_a^ab][Z\_b`  
@HWI-EAS443:3:68:607:2003#0/1  
GAAACTGTGATGAGAATGGGAGACCTTCACTACCTCCAGA  
+HWI-EAS443:3:68:607:2003#0/1  
]`QJ\_]aQX[a\$Ya\_W\_]W``a\_\_b`aaa]]a`\$YU  
@HWI-EAS443:3:68:617:823#0/1  
GAAACTGTGATGAGAATGGGAGACCTTCACTACCTCCAGA  
+HWI-EAS443:3:68:617:823#0/1  
a`U\_aab\_aaa\_]^^^`U]^a`^`\$`\_aa``a`^^a`\_aa  
@HWI-EAS443:3:68:620:1334#0/1  
AGAAACTGTGATGAGAATGGGAGACCTTCACTACCTCCAG  
+HWI-EAS443:3:68:620:1334#0/1  
]Z\_`\$aa\_V`a\_a````\_Z[``[``a`a`^`^^[a\$[[  
@HWI-EAS443:3:68:627:905#0/1  
CGCTTGCGGATATGCCAAAGGAAACAGTCTACCTGAAAGC  
+HWI-EAS443:3:68:627:905#0/1  
a[U[b]b`aa\$`Qa]`SZWS[`ZGYPSQSY\_\_\_PQW\$LWa  
@HWI-EAS443:3:68:663:740#0/1  
GAAACTGTGATGAGAATGGGAGACCTTCACTACCTCCAGA  
+HWI-EAS443:3:68:663:740#0/1  
aa[babb]babbaab\_abbaa`\_b`a`baaaaa\_aa\_\_a\_  
@HWI-EAS443:3:68:689:83#0/1  
GCGCGAAGTAGGTACAGATGCAATTGTCATTCTAAGTGTG  
+HWI-EAS443:3:68:689:83#0/1  
a\_aaa`\_aV\_a\_^aZUaY[\_`U[^\_\_Y^]\_\_Y\_Y\$]X\_YV  
@HWI-EAS443:3:68:719:561#0/1  
CTTGGAGAACTGTGATGAGAATGGGAGACCTTCACTACC  
+HWI-EAS443:3:68:719:561#0/1  
`baaa]baU`bab\_aaabaaaa\_ab^\_a`^aaaa`aa`\_  
@HWI-EAS443:3:68:756:1301#0/1  
GCCGCATTTCTTCAATTAACCACCTTATTTCCCTCAAATTT  
+HWI-EAS443:3:68:756:1301#0/1  
^]\_HY]^aaaY]b^W`aa]\_ZT`X]ab[\_Z[[`T^Z``a\_  
@HWI-EAS443:3:68:765:793#0/1  
AGAAACTGTGATGAGAATGGGAGACCTTCACTACCTCCAG

+HWI-EAS443:3:68:765:793#0/1  
WV]S^abbb[baaaa^Y^aba\_PXWaaaa`aa`^`\_aS^  
@HWI-EAS443:3:68:783:324#0/1  
CTGAAAATATACAGAGATTTCGCTTGGAGAACTGTGATGA  
+HWI-EAS443:3:68:783:324#0/1  
abbbbbb`bbbabbbbaa^\_a`\_a[Z]\_W`^U`W`^`^  
@HWI-EAS443:3:68:796:461#0/1  
GTCGCTTTCAATCTGTGCCGATTTCTTCAATTAACCACC  
+HWI-EAS443:3:68:796:461#0/1  
a\_]¥Za`\_a\_aWW\_[aa\_¥a^VX`\_W\_Y\_\_\_`OP[W^  
@HWI-EAS443:3:68:830:547#0/1  
GTGATGAGAATGGGAGACCTTCACTACCTCCAGAGCAGAA  
+HWI-EAS443:3:68:830:547#0/1  
a]ab[a\_babaaaa\_aaZa\_]aa\_Za\_\_^`\_a^`a\_a¥¥  
@HWI-EAS443:3:68:837:525#0/1  
AGAACTGTGATGAGAATGGGAGACCTTCACTACCTCCAG  
+HWI-EAS443:3:68:837:525#0/1  
\_`^`WWabbX`^abY`^`¥a¥a`a`\_a\_a`\_`\_Z¥¥` [\_\_\_  
@HWI-EAS443:3:68:874:139#0/1  
GCGAAGTAGGTACAGATGCAATTGTCATTCTAAGTGTCTC  
+HWI-EAS443:3:68:874:139#0/1  
abbbbab[ba^[aa`\_`aaaaaba\_aaba\_a` [Y\_`Y`\_`\_`  
@HWI-EAS443:3:68:885:145#0/1  
GGACCCCACTGCATTTTTGACATCCTCATAAGTATGTCC  
+HWI-EAS443:3:68:885:145#0/1  
K\_\_\_`aR¥\_\_\_a`¥abba^¥^\_Yab¥\_]`^`Q]FZ`aT^¥  
@HWI-EAS443:3:68:89:1190#0/1  
CTCTGTGCTTTCAATCTGTGCCGATTTCTTCAATTAAC  
+HWI-EAS443:3:68:89:1190#0/1  
a\_b\_a\_a`aYa\_^QUWa\_[[S\_\_\_a¥\_\_\_X\_W` [G¥^[^`\_`  
@HWI-EAS443:3:68:910:1401#0/1  
CCGCATTTCTTCAATTAACCACCTTATTTTCTCAAATTC  
+HWI-EAS443:3:68:910:1401#0/1  
a\_U\_WYW\_^YR\_Y¥\_¥L\_Y]`\_¥]ZS¥a]\_a`¥Z\_L`]]V  
@HWI-EAS443:3:68:916:115#0/1  
CGCGAAGTAGGTACAGATGCAATTGTCATTCTAAGTGTCT  
+HWI-EAS443:3:68:916:115#0/1  
`babbbbabbbabbbbaab\_babbbba\_aba\_aabaaa\_a  
@HWI-EAS443:3:68:918:102#0/1  
TGAGAATGGGAGACCTTCACTACCTCCAGAGCAGAAATGA  
+HWI-EAS443:3:68:918:102#0/1  
abaaaaabaaWb`\_Wa`^\_V`^]W\_]`\_`R`Y`\_S[0^`Z  
@HWI-EAS443:3:68:925:1539#0/1  
ATGAGAATGGGAGACCTTCACTACCTCCAGAGCAGAAATG  
+HWI-EAS443:3:68:925:1539#0/1  
^\_ROZYRT]WU\_^VY^`aaZZZ`\_`¥^ULLY¥XRH¥QY` [\_\_\_\_  
@HWI-EAS443:3:68:937:361#0/1  
GATGAGAATGGGAGACCTTCACTACCTCCAGAGCAGAAAT  
+HWI-EAS443:3:68:937:361#0/1  
`aabaa`\_`a`^a]]\_`\_`^a^\_\_X\_\_\_U¥a¥]R`\_`]UZZ



@HWI-EAS443:3:68:997:834#0/1  
AAAAGGAAGAGGCAACACCCTTGGCCTCGATATCGAAACA  
+HWI-EAS443:3:68:997:834#0/1  
`[\_]VFYYbbabbaba`^¥`]aa][ ]`aa^\_¥aWaV¥¥U[  
@HWI-EAS443:3:69:1033:1583#0/1  
TGAGAATGGGAGACCTTCACTACCTCCAGAGCAGAAATGA  
+HWI-EAS443:3:69:1033:1583#0/1  
\_\_a`¥\_\_]]`aa\_[^a]``XX\_JTZ][^POFFZ[\_^`Z[ ]  
@HWI-EAS443:3:69:1064:916#0/1  
GAAACTGTGATGAGAATGGGAGACCTTCACTACCTCCAGA  
+HWI-EAS443:3:69:1064:916#0/1  
]bab`a`abbbabaYa^`b`b`b`aaaa`a\_[]`a\_a\_  
@HWI-EAS443:3:69:1201:1113#0/1  
CAAAAGTCCTTAAAAGGAAGAGGCAACACCCTTGGCCTCG  
+HWI-EAS443:3:69:1201:1113#0/1  
`bZVbbabbbbaaab\_abaaaa\_bbbaa\_aab¥Qa`aa`  
@HWI-EAS443:3:69:1230:160#0/1  
CTCGTGACATTTCTCGAGGGTCATGTCAGAAAGGTAGCG  
+HWI-EAS443:3:69:1230:160#0/1  
TZa\_¥¥WZa`¥`\_\_`^\_¥a\_^W]\_\_W][\_a]\_\_¥HY\_\_^  
@HWI-EAS443:3:69:1230:947#0/1  
ATCTTTTGCCTAGGCATGAGCATGAACCAGTCTCGTGACA  
+HWI-EAS443:3:69:1230:947#0/1  
abaaababaaaaa\_¥aYa[Y``aaa^RZa`\_aY\_N[[XX  
@HWI-EAS443:3:69:1276:751#0/1  
GCCGCATTTCTTCAATTAACCACCTTATTTCTCAAATTT  
+HWI-EAS443:3:69:1276:751#0/1  
aaababbbbbb`abbbbbaaa`aabab``babaabaa  
@HWI-EAS443:3:69:1277:1666#0/1  
GAATGGGAGACCTTCACTACCTCCAGAGCAGAAATGAAAA  
+HWI-EAS443:3:69:1277:1666#0/1  
aaaaaaaaa\_\_a`aaa`a\_]a\_\_aa`a\_\_`^\_\_a\_^¥`¥  
@HWI-EAS443:3:69:1393:1246#0/1  
AGCAATTGGGACAGAAATTTGAGGAAATAAGGTGGTTAAT  
+HWI-EAS443:3:69:1393:1246#0/1  
Y]TY\_a`]ZWa^`¥^bbbbb`^^b`ababb`aY`\_[^`V  
@HWI-EAS443:3:69:1454:919#0/1  
TGAGAATGGGAGACCTTCACTACCTCCAGAGCAGAAATGA  
+HWI-EAS443:3:69:1454:919#0/1  
abab\_\_abba`a`^Z`\_`aaaa`\_`\_`\_a\_a\_\_a^\_\_aa\_  
@HWI-EAS443:3:69:1498:1266#0/1  
CCGCATTTCTTCAATTAACCACCTTATTTCTCAAATTT  
+HWI-EAS443:3:69:1498:1266#0/1  
aaaaababbbbaaab`aa`\_`^aaaba`\_`\_`aaa\_baaa  
@HWI-EAS443:3:69:1547:1132#0/1  
TGCCGCATTTCTTCAATTAACCACCTTATTTCTCAAATT  
+HWI-EAS443:3:69:1547:1132#0/1  
a```baaabbabb\_aabbaa^`a`Ybaaaa\_[b`a``b[  
@HWI-EAS443:3:69:1564:979#0/1  
AGAAACTGTGATGAGAATGGGAGACCTTCACTACCTCCAG

+HWI-EAS443:3:69:1564:979#0/1  
`baaa\_ab\_a^)`\_a^^aa`a¥a^UJa\_]a[S`UU]]¥\_`  
@HWI-EAS443:3:69:1583:1004#0/1  
TCTCCCATTCTCATCACAGTTTCTCCAAGCGAATCTCTGT  
+HWI-EAS443:3:69:1583:1004#0/1  
^abaaXbbaZaW`a\_`a`a\_a\_a`\_]a]\_\_Z^R\_RLZ^\_^Y  
@HWI-EAS443:3:69:1620:656#0/1  
AAAGAGGAATCCAGCGAGACACTTAGAATGACAATTGCAT  
+HWI-EAS443:3:69:1620:656#0/1  
a`\_a`b[`L\_aaa^`aa`^\_\_aa^]a^`\_a`\_`\_`\_^\_]`^  
@HWI-EAS443:3:69:1635:1757#0/1  
GCTTGGAGAACTGTGATGAGAATGGGAGACCTTCACTAC  
+HWI-EAS443:3:69:1635:1757#0/1  
^¥T]Z\_YaZ`]ZXZNXZV`^^PVXa]aG¥OQJJO[Y]RNWN  
@HWI-EAS443:3:69:1639:686#0/1  
CTGTGATGAGAATGGGAGACCTTCACTACCTCCAGAGCAG  
+HWI-EAS443:3:69:1639:686#0/1  
ab[T]\_`¥XYZYZ¥a¥¥XQaX`ZZ¥X^[VX]SZ\_R]^\_]  
@HWI-EAS443:3:69:1675:1097#0/1  
GGAGGGAGCAATAGTTGGAGAAATTTACCATTACCTTCT  
+HWI-EAS443:3:69:1675:1097#0/1  
`aabbbba]babb]```a\_abaaaaabaa`[[a`a]¥aaaa  
@HWI-EAS443:3:69:1681:916#0/1  
GCCGCATTTCTTCAATTAACCACCTTATTTCCCTCAAATTT  
+HWI-EAS443:3:69:1681:916#0/1  
abbbabbababbaaabbbbaaaa\_bbababa\_aab``aba  
@HWI-EAS443:3:69:1687:1261#0/1  
CCGCATTTCTTCAATTAACCACCTTATTTCCCTCAAATTT  
+HWI-EAS443:3:69:1687:1261#0/1  
ab^T]V\_aWSZTQW`aPW[PZIN¥a\_^WXTTP][WLR^[Z]  
@HWI-EAS443:3:69:1734:1059#0/1  
GCCGCATTTCTTCAATTAACCACCTTATTTCCCTCAAATTT  
+HWI-EAS443:3:69:1734:1059#0/1  
a`a`a`aa\_`a¥¥]`a`a\_[]`^a`\_`\_`\_`\_^\_]X¥\_`\_`  
@HWI-EAS443:3:69:1760:522#0/1  
CTTGGAGAACTGTGATGAGAATGGGAGACCTTCACTACC  
+HWI-EAS443:3:69:1760:522#0/1  
aba`a`a`aaa]a\_ba\_`Ya[\_`a`RZUV[Z^[ZRZZLS  
@HWI-EAS443:3:69:1779:76#0/1  
GCTGAAACGAGAAAGCTTATCTCTTGTCTACTTCAAG  
+HWI-EAS443:3:69:1779:76#0/1  
a[Y[I\_XOVV¥LN[a[ZXXZX]ZXUW]^TUXNQJSXUTOY  
@HWI-EAS443:3:69:1781:829#0/1  
ATGAGAATGGGAGACCTTCACTACCTCCAGAGCAGAAATG  
+HWI-EAS443:3:69:1781:829#0/1  
U`^T`X`¥¥]TaZZK¥]X\_RY`\_Z\_a¥N¥SU¥U`ZJ]``  
@HWI-EAS443:3:69:218:377#0/1  
GTCGCTTTCAATCTGTGCCGCATTTCTTCAATTAACCACC  
+HWI-EAS443:3:69:218:377#0/1  
^\_bb`aab\_V^aabb]\_aa\_aabaaaa`]¥aaaa\_aZ`[P

@HWI-EAS443:3:69:243:848#0/1  
CAGAGATTTCGCTTGAGAACTGTGATGAGAATGGGAGAC  
+HWI-EAS443:3:69:243:848#0/1  
ab`[]aaaaaaaaaaaXa\_aa¥a\_`^\_^`^`\_¥U^VT  
@HWI-EAS443:3:69:245:307#0/1  
GCCGCATTTCTTCAATTAACCACCTTATTTCTCAAATTT  
+HWI-EAS443:3:69:245:307#0/1  
Y¥`\_W^\_a[L^¥Z^`Z^YX\_VW[TO¥aV]K\_]aZ¥\_aa^  
@HWI-EAS443:3:69:258:174#0/1  
TGAGAATGGGAGACCTTCACTACCTCCAGAGCAGAAATGA  
+HWI-EAS443:3:69:258:174#0/1  
ab]¥R]¥F¥]\_b`\_aWP\_[][\_XPZ\_Y^VUUZ\_\_PZ\_WZU  
@HWI-EAS443:3:69:279:737#0/1  
CGCATTTCTTCAATTAACCACCTTATTTCTCAAATTTCT  
+HWI-EAS443:3:69:279:737#0/1  
aabUbabaaaaabaabba\_aa\_aaZbaaaaaaa\_aa`aa  
@HWI-EAS443:3:69:320:1231#0/1  
TGCCGCATTTCTTCAATTAACCACCTTATTTCTCAAATT  
+HWI-EAS443:3:69:320:1231#0/1  
¥abb^\_Y`\_[]`bbbZZ\_\_ba`aba`V`Zabaab^`L`\_`  
@HWI-EAS443:3:69:337:338#0/1  
GCCTGGTCCAATCGCACGCAAAGAGGGCCTATTATCTTTT  
+HWI-EAS443:3:69:337:338#0/1  
`aaaa]W`\_aaaaaa\_a`\_]\_\_Z^[U[¥[aZV[\_]\_\_YW  
@HWI-EAS443:3:69:342:1594#0/1  
CCGCATTTCTTCAATTAACCACCTTATTTCTCAAATTTCT  
+HWI-EAS443:3:69:342:1594#0/1  
a]LJZ]ST\_\_[aa¥aUa]\_\_\_\_\_][Ta\_\_\_\_\_`\_a^^\_Y¥a  
@HWI-EAS443:3:69:35:913#0/1  
CGCTTTCAATCTGTGCCGCATTTCTTCAATTAACCACCTT  
+HWI-EAS443:3:69:35:913#0/1  
aaaaaab`aaaa\_aaaa\_`a`\_`a\_a`]a]V`¥\_\_TZ`\_  
@HWI-EAS443:3:69:407:1743#0/1  
TGTCGCTTTCAATCTGTGCCGCATTTCTTCAATTAACCAC  
+HWI-EAS443:3:69:407:1743#0/1  
aa`baa`aaaa¥]a`\_^YaaaaY`\_aaaa`U`aa\_\_aa  
@HWI-EAS443:3:69:421:949#0/1  
GCCGCATTTCTTCAATTAACCACCTTATTTCTCAAATTT  
+HWI-EAS443:3:69:421:949#0/1  
aaY^ZTabbab^¥bVa[Jb`YaIVPYS`\_`a`a\_¥JLZ\_^  
@HWI-EAS443:3:69:439:137#0/1  
TGAGAATGGGAGACCTTCACTACCTCCAGAGCAGAAATGA  
+HWI-EAS443:3:69:439:137#0/1  
`^^a\_U`bb\_UZ[`aZT]a]X¥\_a```\_]\_U¥]R][S][`U  
@HWI-EAS443:3:69:443:706#0/1  
TGTCATTCTAAGTGTCTCGCTGGATTCTTCTTTCAAGATC  
+HWI-EAS443:3:69:443:706#0/1  
\_b\_a]aaaa`aa¥a^a\_\_X`^\_a]^`\_\_^¥\_`^\_`¥Y¥^  
@HWI-EAS443:3:69:446:470#0/1  
GCCGCATTTCTTCAATTAACCACCTTATTTCTCAAATTT

+HWI-EAS443:3:69:446:470#0/1  
aabbaabbb`bababbba`aaaaaa\_Taaaaaaaaaabaa  
@HWI-EAS443:3:69:449:1828#0/1  
GAGAACTGTGATGAGAATGGGAGACCTTCACTACCTCCA  
+HWI-EAS443:3:69:449:1828#0/1  
abbbabaaa¥`aaaaa^aa`a\_`¥a\_`\_]`aa^a`\_^aaU  
@HWI-EAS443:3:69:463:779#0/1  
TGAGAATGGGAGACCTTCACTACCTCCAGAGCAGAAATGA  
+HWI-EAS443:3:69:463:779#0/1  
XRV[QQVHWX¥[Xa^TT¥`baUaa^bb]aY``^ZS\_Z^X  
@HWI-EAS443:3:69:485:1930#0/1  
TGAGAATGGGAGACCTTCACTACCTCCAGAGCAGAAATGA  
+HWI-EAS443:3:69:485:1930#0/1  
`W¥Z^b^\_^Zbaaabaab\_\_a]a`a¥aXKU]]\_]`a`\_  
@HWI-EAS443:3:69:508:76#0/1  
GAATGGGAGACCTTCACTACCTCCAGAGCAGAAATGAAAA  
+HWI-EAS443:3:69:508:76#0/1  
aaabbaa\_`\_^a`a¥`a¥^\_\_¥\_aW\_^¥\_YY¥\_\_WW^Y  
@HWI-EAS443:3:69:533:816#0/1  
ATTCTCTGTCGCTTTCAATCTGTGCCGATTTCTTCAATT  
+HWI-EAS443:3:69:533:816#0/1  
abababab\_aaaaaa`V]\_`\_¥\_aaa`¥a`a`a\_¥\_```  
@HWI-EAS443:3:69:561:1855#0/1  
GTCGCTTTCAATCTGTGCCGATTTCTTCAATTAACCACC  
+HWI-EAS443:3:69:561:1855#0/1  
a¥aaa\_aab`a\_a\_`]\_a`aa`\_aa^a\_\_`Za``````\_  
@HWI-EAS443:3:69:577:304#0/1  
GAGAACTGTGATGAGAATGGGAGACCTTCACTACCTCCA  
+HWI-EAS443:3:69:577:304#0/1  
abaaabaaa`bab`]b`aaa`aaba\_\_\_\_\_`a\_aaU\_^`a\_  
@HWI-EAS443:3:69:590:479#0/1  
GCTTTTAGACTGTTTCCTTTGGCATATCCGCAAGCG  
+HWI-EAS443:3:69:590:479#0/1  
aaaa]aaaa]`a\_\_\_a^``````]]^`\_`^Y]`\_`^X\_Y\_  
@HWI-EAS443:3:69:60:2007#0/1  
GATGAGAATGGGAGACCTTCACTACCTCCAGAGCAGAAAT  
+HWI-EAS443:3:69:60:2007#0/1  
¥UQX]\_¥ZYVSVWXT`U¥\_SRL^`\_O]]TRHV[LX[]]a  
@HWI-EAS443:3:69:611:764#0/1  
TGCCGATTTCTTCAATTAACCACCTTATTTCTCAAATT  
+HWI-EAS443:3:69:611:764#0/1  
`b^ab`Uabaaaa^¥`bb\_a`aa\_aa]^]aa`a`^¥\_`[  
@HWI-EAS443:3:69:666:659#0/1  
ATGAGAATGGGAGACCTTCACTACCTCCAGAGCAGAAATG  
+HWI-EAS443:3:69:666:659#0/1  
abb`a`aabaa`aaaaaaaaaaaaaaaaaaaa^a`\_¥]¥]\_a  
@HWI-EAS443:3:69:698:933#0/1  
TGAGAATGGGAGACCTTCACTACCTCCAGAGCAGAAATGA  
+HWI-EAS443:3:69:698:933#0/1  
Y`^babY^`\_^]^`aaaa[baab`aa\_]aS^aa`\_\_a`a`



+HWI-EAS443:3:69:967:272#0/1  
abbbbbbabbbbabbbbabababaabaabaaaa\_]ab  
@HWI-EAS443:3:69:985:1240#0/1  
CTGGAAGAGAAGGTAATGGTCAAATTTCTCCAATATTGC  
+HWI-EAS443:3:69:985:1240#0/1  
abababbbbbbbVba`^a\_ba\_\_babaaaaabbbaa`  
@HWI-EAS443:3:69:986:1491#0/1  
GATGAGAATGGGAGACCTTCACTACCTCCAGAGCAGAAAT  
+HWI-EAS443:3:69:986:1491#0/1  
`a\_aaa]baaa^[X\_aaaaaba^`¥]a\_`X]S]a[`\_`  
@HWI-EAS443:3:6:1018:1200#0/1  
TGAGAATGGGAGACCTTCACTACCTCCAGAGCAGAAATGA  
+HWI-EAS443:3:6:1018:1200#0/1  
aaa`][aaa`a]^[]\_\_¥`V^^[^X^\_\_]\_a]]`\_`\_`  
@HWI-EAS443:3:6:102:797#0/1  
GCCGCATTTCTTCAATTAACCACCTTATTTCTCAAATTT  
+HWI-EAS443:3:6:102:797#0/1  
`V]¥^[]]WT\_\_X[]a`^TY^Ya^W^[]X¥[VY`[VWXP  
@HWI-EAS443:3:6:1095:1841#0/1  
GATGAGAATGGGAGACCTTCACTACCTCCAGAGCAGAAAT  
+HWI-EAS443:3:6:1095:1841#0/1  
`abaaaab`baa\_b`\_`\_`aabU`aY]a\_G`^a\_a`aZ\_^  
@HWI-EAS443:3:6:1165:50#0/1  
GAAAATATACAGAGATTCGCTTGGAGAACTGTGATGAGA  
+HWI-EAS443:3:6:1165:50#0/1  
a\_\_aaa`aa]\_a\_b\_a\_^a]\_^`^Z\_]X]Z\_`\_]`W]\_X]B  
@HWI-EAS443:3:6:1170:1245#0/1  
ATGAGAATGGGAGACCTTCACTACCTCCAGAGCAGAAATG  
+HWI-EAS443:3:6:1170:1245#0/1  
Y[Q]ba`abb\_^a`YT`)]`\_`a\_PU^aP[\_\_\_^\_aa`\_`\_`  
@HWI-EAS443:3:6:1179:137#0/1  
CTGTGATGAGAATGGGAGACCTTCACTACCTCCAGAGCAG  
+HWI-EAS443:3:6:1179:137#0/1  
abb\_bababb\_aaba`\_b^a^`\_\_\_\_]a\_[0a^U\_YX[[^a  
@HWI-EAS443:3:6:1183:716#0/1  
GAATGGGAGACCTTCACTACCTCCAGAGCAGAAATGAAAA  
+HWI-EAS443:3:6:1183:716#0/1  
aaaba`aaa\_a`ba^a¥]a]ZaV]¥`\_`[`aa`\_`\_`a\_`\_]  
@HWI-EAS443:3:6:1247:838#0/1  
TGAGAATGGGAGACCTTCACTACCTCCAGAGCAGAAATGA  
+HWI-EAS443:3:6:1247:838#0/1  
`\_`[W`\_ZZ¥`\_`[OLV¥¥`¥PZUYUPVLVV`RVaT¥UZ`B  
@HWI-EAS443:3:6:1385:1979#0/1  
GCCGCATTTCTTCAATTAACCACCTTATTTCTCAAATTT  
+HWI-EAS443:3:6:1385:1979#0/1  
\_LG\_`W]\_aW\_aZZWVZZ^FF[I^]]¥aY\_GN\_N[ZZ\_BB  
@HWI-EAS443:3:6:1389:1395#0/1  
AAGGTCTCTAATCGGTTAAAGATTACACTGAAGTTTCGCTT  
+HWI-EAS443:3:6:1389:1395#0/1  
aa¥[ZU`abb¥baa`\_aa`\_]`aa`\_a^a\_¥G^[\_`Z\_^\_¥

@HWI-EAS443:3:6:1392:323#0/1  
GACTCCAACACCATGTCAAGCTTTCAGGTAGACTGTTTCC  
+HWI-EAS443:3:6:1392:323#0/1  
a^S`\_``a^aY¥\_a\_]^\_aV[\_^X]\_\_WR]XW\_\_]^\_WU  
@HWI-EAS443:3:6:1393:1476#0/1  
CCGCATTTCTTCAATTAACCACCTTATTTCCCTCAAATTC  
+HWI-EAS443:3:6:1393:1476#0/1  
\_`\_aS¥^b^b]FRY``a^STTLR]bab`bTS\_\_`]`b^`  
@HWI-EAS443:3:6:1460:855#0/1  
CCGCATTTCTTCAATTAACCACCTTATTTCCCTCAAATTC  
+HWI-EAS443:3:6:1460:855#0/1  
a\_Y[¥Wb¥a]]^[Wb¥a^ITa¥K[[\_a\_b\_YaZWSaab^^  
@HWI-EAS443:3:6:148:694#0/1  
GACTGTTTCTTTGGCATATCCGCAAGCGATTTGCAGACA  
+HWI-EAS443:3:6:148:694#0/1  
ab`aa`aaaa`[Ya¥aaaa\_]Z^\_a][``]`\_a[aa`\_a  
@HWI-EAS443:3:6:158:492#0/1  
TGACAATTGCATCTGTACCTACTTCGCGCTACCTTTCTGA  
+HWI-EAS443:3:6:158:492#0/1  
ab`a`\_`^a\_[aaa`\_a\_a\_]`\_\_^^a\_\_]]\_\_\_U`\_\_  
@HWI-EAS443:3:6:1607:1869#0/1  
GAATGGGAGACCTTCACTACCTCCAGAGCAGAAATGAAAA  
+HWI-EAS443:3:6:1607:1869#0/1  
aaaabab^baaa\_a`a]aaZN\_R]^\_[a^^`\_a\_aa`aa\_[  
@HWI-EAS443:3:6:1631:1369#0/1  
ACCTTCTCTTCCAGGACATACTTATGAGGATGTCAAAAAT  
+HWI-EAS443:3:6:1631:1369#0/1  
\_aYba\_aa`a`aaaaZa`aRa\_^a^[aa\_``[R[^]\_^  
@HWI-EAS443:3:6:1678:216#0/1  
CAATCTGTGCCGATTTCTTCAATTAACCACCTTATTTCC  
+HWI-EAS443:3:6:1678:216#0/1  
Z`[`a``]^PZ]UW\_¥aV\_`^aa\_]]]]P¥ZT\_`a][^¥^  
@HWI-EAS443:3:6:1688:1189#0/1  
CTGAAACGAGAAAGCTCTTATCTCTTGTCTACTTCAAGC  
+HWI-EAS443:3:6:1688:1189#0/1  
aaa\_``\_`a`HP]b^¥a`aaaY```aaa]¥]`a\_aa\_a\_bZ  
@HWI-EAS443:3:6:178:25#0/1  
GCCGCATTTCTTCAATTAACCACCTTATTTCCCTCAAATTT  
+HWI-EAS443:3:6:178:25#0/1  
aY]YTYT[ULZa[YWUPZ[PS\_LVT][`WTWG[N¥BBBBB  
@HWI-EAS443:3:6:267:1694#0/1  
TGTCTCGCTGGATTCCTCTTCAAGATCCATTCCACGATT  
+HWI-EAS443:3:6:267:1694#0/1  
`\_Xb]ZZV\_aa\_\_`]¥a\_a`Ya]\_a[\_a\_`\_a`a\_a^\_X  
@HWI-EAS443:3:6:305:371#0/1  
TGAGAATGGGAGACCTTCACTACCTCCAGAGCAGAAATGA  
+HWI-EAS443:3:6:305:371#0/1  
abbbbaabbbaba`aaaaaaba]`\_aaa^a[aa`^`aa\_  
@HWI-EAS443:3:6:323:1480#0/1  
CGCATTTCTTCAATTAACCACCTTATTTCCCTCAAATTTCT

+HWI-EAS443:3:6:323:1480#0/1  
`^`U`abbaa\_bbbbbbbbbbaabbbbbb`aababaaa`a  
@HWI-EAS443:3:6:338:1845#0/1  
ATGAGAATGGGAGACCTTCACTACCTCCAGAGCAGAAATG  
+HWI-EAS443:3:6:338:1845#0/1  
aa[\_^`a[\_`\_U]Y]R¥X^`UY\_G^U]X^]]Z]\_U¥BBB  
@HWI-EAS443:3:6:348:854#0/1  
GAGAATGGGAGACCTTCACTACCTCCAGAGCAGAAATGAA  
+HWI-EAS443:3:6:348:854#0/1  
a]`^`\_a\_\_¥V`[[V[\_a```\_¥\_¥]`a`X¥a^¥\_``[B  
@HWI-EAS443:3:6:407:957#0/1  
AGAATGGGAGACCTTCACTACCTCCAGAGCAGAAATGAAA  
+HWI-EAS443:3:6:407:957#0/1  
ab\_Uabbaaaaaaaaaa\_`Z`a`a`\_a`a`\_`\_a`  
@HWI-EAS443:3:6:443:754#0/1  
GCCGCATTTCTTCAATTAACCACCTTATTTCTCAAATTT  
+HWI-EAS443:3:6:443:754#0/1  
``YabY\_abaabb`aabb^aaa^aa\_baaaabaaaaba`  
@HWI-EAS443:3:6:482:1478#0/1  
GCCGCATTTCTTCAATTAACCACCTTATTTCTCAAATTT  
+HWI-EAS443:3:6:482:1478#0/1  
S\_ba`bbbbbaabbbbXbbbab\_\_bbababaabbbbabbbb  
@HWI-EAS443:3:6:503:955#0/1  
CGCTTTCAATCTGTGCCGCATTTCTTCAATTAACCACCTT  
+HWI-EAS443:3:6:503:955#0/1  
¥aabbaaababb\_\_bbbaVaabaabb¥babbbab`babba`  
@HWI-EAS443:3:6:504:608#0/1  
ATGAGAATGGGAGACCTTCACTACCTCCAGAGCAGAAATG  
+HWI-EAS443:3:6:504:608#0/1  
abbbba`b\_aa\_bb\_\_aaaa`aa¥`^aa\_a\_`a]aaaa  
@HWI-EAS443:3:6:520:739#0/1  
AGAAACTGTGATGAGAATGGGAGACCTTCACTACCTCCAG  
+HWI-EAS443:3:6:520:739#0/1  
aba[\_`a`aaa\_bb\_`S\_`^a`a]a\_a`]¥0a\_aa\_W]V\_`^a  
@HWI-EAS443:3:6:575:1469#0/1  
CGCATTTCTTCAATTAACCACCTTATTTCTCAAATTTCT  
+HWI-EAS443:3:6:575:1469#0/1  
aaSM```\_S^`\_X\_b`S]\_aN¥`babYZSRYb\_aab^^aa  
@HWI-EAS443:3:6:585:586#0/1  
CCGCATTTCTTCAATTAACCACCTTATTTCTCAAATTTCT  
+HWI-EAS443:3:6:585:586#0/1  
¥`\_ZS`YS]]aVaabaaa``Z^a\_aa¥0\_a[a¥aba`]  
@HWI-EAS443:3:6:624:539#0/1  
GAAAATATACAGAGATTCGCTTGGAGAACTGTGATGAGA  
+HWI-EAS443:3:6:624:539#0/1  
a[\_`aa\_a\_Ya`aa¥a]WY¥^`\_WYaZYY^\_aU\_]a\_BB  
@HWI-EAS443:3:6:627:1289#0/1  
GAGAACTGTGATGAGAATGGGAGACCTTCACTACCTCCA  
+HWI-EAS443:3:6:627:1289#0/1  
`\_a\_]`\_`aYX[\_`^]V\_\_\_Y^^^XUR[X¥[W]YR]XWB



@HWI-EAS443:3:6:629:942#0/1  
GAAACTGTGATGAGAATGGGAGACCTTCACTACCTCCAGA  
+HWI-EAS443:3:6:629:942#0/1  
ab\_aaab]a[\_aaa]\_`a`YX\_[^`a`\_]Y]\_`\_`  
@HWI-EAS443:3:6:676:673#0/1  
AGAAACTGTGATGAGAATGGGAGACCTTCACTACCTCCAG  
+HWI-EAS443:3:6:676:673#0/1  
`YWZ¥\_aa]\_N\_\_G^S\_`a`\_Z\_\_Y]^^R\_V\_^VV`W^^`  
@HWI-EAS443:3:6:683:1506#0/1  
TGAGAATGGGAGACCTTCACTACCTCCAGAGCAGAAATGA  
+HWI-EAS443:3:6:683:1506#0/1  
aa``aaaa\_`Z``\_¥`]a``aVH\_YR^a]X^a\_\_\_\_\_]\_\_\_  
@HWI-EAS443:3:6:751:542#0/1  
ACCCAATCCATTGTCTGCAAATCGCTTGCGGATATGCCAA  
+HWI-EAS443:3:6:751:542#0/1  
a`\_a\_aa\_\_aaaaZY`a\_\_aa\_Y\_]`\_]X`\_¥^]Z`XU]]  
@HWI-EAS443:3:6:764:1470#0/1  
CAGAGATTCGCTTGGAGAACTGTGATGAGAATGGGAGAC  
+HWI-EAS443:3:6:764:1470#0/1  
`X]Xa]Xab^a`\_aaaUZ]\_¥¥¥¥`V[[JSUZHEL\_Y\_]B  
@HWI-EAS443:3:6:781:1648#0/1  
AGGCAACACCCTTGGCCTCGATATCGAAACAGCCACTCTT  
+HWI-EAS443:3:6:781:1648#0/1  
a]aaa\_`a^Sa`[HSZ\_W]\_^¥\_\_UUW^S¥¥¥SUNBBBBB  
@HWI-EAS443:3:6:803:305#0/1  
CGCTTTCAATCTGTGCCGATTCTTCAATTAACCACCTT  
+HWI-EAS443:3:6:803:305#0/1  
ab¥`aZa\_a^XabXbbb`bb[a``\_\_a\_\_aaa`Z^`\_^\_]`  
@HWI-EAS443:3:6:815:1024#0/1  
GCCGATTTCTTCAATTAACCACCTTATTTCTCAAATTT  
+HWI-EAS443:3:6:815:1024#0/1  
a¥¥\_a`]aaaaX`a¥bba]\_a``Pb[a`a`\_[a[aa`aa`  
@HWI-EAS443:3:6:81:740#0/1  
AGAAACTGTGATGAGAATGGGAGACCTTCACTACCTCCAG  
+HWI-EAS443:3:6:81:740#0/1  
aa\_a]\_[\_a]a]\_aVa^a`^[\_^`\_]`\_`\_\_\_\_]^\_\_U^[WY^  
@HWI-EAS443:3:6:91:1871#0/1  
GCCGATTTCTTCAATTAACCACCTTATTTCTCAAATTT  
+HWI-EAS443:3:6:91:1871#0/1  
XXS^bbba\_[[aTaX^Z`bPS]a]\_bb`S`abbb^Y\_^aI  
@HWI-EAS443:3:6:920:1261#0/1  
TAAATAAGCTGAAACGAGAAAGCTTATCTCTTGTCTA  
+HWI-EAS443:3:6:920:1261#0/1  
aa\_abaa\_`aa[\_a[aaa[^Y`\_aU`a\_a[aa`]\_^\_QY]  
@HWI-EAS443:3:6:926:63#0/1  
TGAGAATGGGAGACCTTCACTACCTCCAGAGCAGAAATGA  
+HWI-EAS443:3:6:926:63#0/1  
ab````\_`aaa]a\_[X]`]]X`\_XV\_]^[`Y\_X^`Y]X^\_Y  
@HWI-EAS443:3:6:953:240#0/1  
TATCTTTTGCCTAGGCATGAGCATGAACCAGTCTCGTGAC

+HWI-EAS443:3:6:953:240#0/1  
aba`aa]SX\_P]aba\_a^[`\_\_\_\_\_a`aW\_[aNY\_]`P¥BB  
@HWI-EAS443:3:6:957:970#0/1  
GCCGCATTTCTTCAATTAACCACCTTATTTCTCAAATTT  
+HWI-EAS443:3:6:957:970#0/1  
^[¥`Q\_aaZPZ]¥][aa\_\_LW\_UZ[^\_\_Y[YP]\_\_Z\_^X[  
@HWI-EAS443:3:6:959:748#0/1  
ACTGTGATGAGAATGGGAGACCTTCACTACCTCCAGAGCA  
+HWI-EAS443:3:6:959:748#0/1  
a\_ababbababaaabaa^b^0\_a\_]`Zaa\_0a¥W`aZa0\_  
@HWI-EAS443:3:6:998:572#0/1  
CGCTTGGAGAACTGTGATGAGAATGGGAGACCTTCACTA  
+HWI-EAS443:3:6:998:572#0/1  
aaabaababa\_aZbbQb\_\_b]aZ\_\_aa\_^aSUSZVU`Q¥\_  
@HWI-EAS443:3:70:1003:2001#0/1  
GCGCGAAGTAGGTACAGATGCAATTGTCATTCTAAGTGTC  
+HWI-EAS443:3:70:1003:2001#0/1  
ababbbab`b`baabbbbbaabbbaaaaa`aba`U\_`\_a  
@HWI-EAS443:3:70:1045:1266#0/1  
CGCTTGGAGAACTGTGATGAGAATGGGAGACCTTCACTA  
+HWI-EAS443:3:70:1045:1266#0/1  
ab`aabaab[baaa`aaaa]Q]a\_a¥Z^a¥aaa\_a¥`a  
@HWI-EAS443:3:70:1133:236#0/1  
GATGAGAATGGGAGACCTTCACTACCTCCAGAGCAGAAAT  
+HWI-EAS443:3:70:1133:236#0/1  
aa[a\_b\_`¥^abQ`\_`YVY]`\_^WXU[V¥\_¥\_UW]YUZZ  
@HWI-EAS443:3:70:1156:536#0/1  
GAAACAAATCGTGGAATGGATCTTGAAAGAGGAATCCAGC  
+HWI-EAS443:3:70:1156:536#0/1  
abab\_ba`aaa\_ba`aaaa\_`\_aa]`a``a`a\_\_^W]\_\_T  
@HWI-EAS443:3:70:1172:140#0/1  
TGCCGCATTTCTTCAATTAACCACCTTATTTCTCAAATT  
+HWI-EAS443:3:70:1172:140#0/1  
ab\_\_b[^aab`aa``aabaa\_`a¥T``aaaa\_]a^\_[\_`\_  
@HWI-EAS443:3:70:1180:1702#0/1  
GCAAATCGCTTGGGATATGCCAAAGGAAACAGTCTACCT  
+HWI-EAS443:3:70:1180:1702#0/1  
`bbbbabbabaa]abbaa`bababb`aa`a]b^Taaa^`Y  
@HWI-EAS443:3:70:1180:1876#0/1  
CCGCATTTCTTCAATTAACCACCTTATTTCTCAAATTT  
+HWI-EAS443:3:70:1180:1876#0/1  
ab]SV]H^¥¥Z[Y`[]ZUWabVO]¥``\_\_ab`a^QRSY¥R  
@HWI-EAS443:3:70:127:1478#0/1  
GCCGCATTTCTTCAATTAACCACCTTATTTCTCAAATTT  
+HWI-EAS443:3:70:127:1478#0/1  
`bba^QMZHR`aaXX`aZ`a`\_aa\_`a\_^`a^aa]R\_U\_  
@HWI-EAS443:3:70:1297:1997#0/1  
AAATAAGCTGAAACGAGAAAGCTTATCTCTTGTCTAC  
+HWI-EAS443:3:70:1297:1997#0/1  
aaa`ababaaaba`aaaa\_`a\_aa``\_`]a```a^``^aY

@HWI-EAS443:3:70:131:1527#0/1  
GCCGCATTTCTTCAATTAACCACCTTATTTCCCTCAAATTT  
+HWI-EAS443:3:70:131:1527#0/1  
aba]a^`bbbbbbbbbaXab`bbba¥aaabaabaS`aaa  
@HWI-EAS443:3:70:1331:1777#0/1  
GAAACTGTGATGAGAATGGGAGACCTTCACTACCTCCAGA  
+HWI-EAS443:3:70:1331:1777#0/1  
a`bb^bb`babbbb\_babba`aa]U\_aa`aaaa\_`\_`[^`^  
@HWI-EAS443:3:70:1331:202#0/1  
CAGCGAGACACTTAGAATGACAATTGCATCTGTACCTACT  
+HWI-EAS443:3:70:1331:202#0/1  
a[a`^ba][`S\_`aaX\_`a[aa^QV¥XL[Y`UY[\_\_\_`^^  
@HWI-EAS443:3:70:1335:1752#0/1  
TGCCGCATTTCTTCAATTAACCACCTTATTTCCCTCAAATT  
+HWI-EAS443:3:70:1335:1752#0/1  
aa`b`\_bba)`Y`bab\_bab`aaa\_baaabbaa`\_`\_`a`  
@HWI-EAS443:3:70:1355:832#0/1  
CACGGTTCGAGTCTCTGAAAATATACAGAGATTCGCTTGG  
+HWI-EAS443:3:70:1355:832#0/1  
ababbb`babaaaaba`abaabab`a]aba`a\_`\_`\_`^\_a  
@HWI-EAS443:3:70:1388:682#0/1  
ATTGTCTGCAAATCGCTTGGCGATATGCCAAAGGAAACAG  
+HWI-EAS443:3:70:1388:682#0/1  
abbaaaaaaba^`aa\_aa\_aa^`\_`\_`[^`^\_`\_¥^0]aG\_\_  
@HWI-EAS443:3:70:1449:1427#0/1  
ATTCTCTGTCGCTTTCAATCTGTGCCGCATTTCTTCAATT  
+HWI-EAS443:3:70:1449:1427#0/1  
`bb\_¥`¥¥`ab[R^`aab[[`a]`\_`a\_Xa`\_`^¥\_RW`\_`a  
@HWI-EAS443:3:70:1451:806#0/1  
GCTGGATTCCTTTCAAGATCCATTCCACGATTTGTTTC  
+HWI-EAS443:3:70:1451:806#0/1  
ababbabba\_bbbaaaabbaaabbaa\_aa`aaaaaa\_aa[  
@HWI-EAS443:3:70:1456:1123#0/1  
TGCCGCATTTCTTCAATTAACCACCTTATTTCCCTCAAATT  
+HWI-EAS443:3:70:1456:1123#0/1  
ZV¥]VZRa\_QQ]TVQ\_`¥[¥WX^ab\_\_]bZSa¥^S^SS^]  
@HWI-EAS443:3:70:1470:1858#0/1  
TGGAGAACTGTGATGAGAATGGGAGACCTTCACTACCTC  
+HWI-EAS443:3:70:1470:1858#0/1  
ab\_K\_\_ba^bb[bU`a`babbb]\_\_a¥`]aaa`aa^V]\_  
@HWI-EAS443:3:70:1487:728#0/1  
GGCTTTCCTGAGGAGGGAGCAATAGTTGGAGAAATTTCA  
+HWI-EAS443:3:70:1487:728#0/1  
abbbbbbbba`\_`bb`aaabababbbba`abbbaba`aa`\_  
@HWI-EAS443:3:70:1489:1891#0/1  
CATTCTCATCACAGTTTCTCCAAGCGAATCTCTGTATATT  
+HWI-EAS443:3:70:1489:1891#0/1  
abb\_`babb`bbba`baaab`bbb\_aaaaabab`\_`\_`aa\_a  
@HWI-EAS443:3:70:1498:1229#0/1  
AGAAACTGTGATGAGAATGGGAGACCTTCACTACCTCCAG

+HWI-EAS443:3:70:1498:1229#0/1  
Yb`[a`bb[X\_b\_^`S`aa`]X`¥`\_]a`aS]a\_\_``  
@HWI-EAS443:3:70:1562:307#0/1  
CTGGTTCATGCTCATGCCTAGGCAAAAGATAATAGGCCCT  
+HWI-EAS443:3:70:1562:307#0/1  
abbb\_bbbbbbbabaa`bbbabbbbabbabbaba`aaZ`a  
@HWI-EAS443:3:70:1582:19#0/1  
GATGAGAATGGGAGACCTTCACTACCTCCAGAGCAGAAAT  
+HWI-EAS443:3:70:1582:19#0/1  
a`^a\_a`\_`aaa¥aT\_W\_\_`^`W\_¥QW¥UY\_YYYUT\_WTU¥  
@HWI-EAS443:3:70:1583:1396#0/1  
CTTGGAGAACTGTGATGAGAATGGGAGACCTTCACTACC  
+HWI-EAS443:3:70:1583:1396#0/1  
]SZb]Xa\_\_aba`aUa\_N][^XaaaVXJaa`[`WPVTZT  
@HWI-EAS443:3:70:1597:1419#0/1  
CGCATTCTTCAATTAACCACCTTATTTCTCAAATTTCT  
+HWI-EAS443:3:70:1597:1419#0/1  
aaabbaU`ba^¥`bV¥^bbaY``ba`\_a\_bbU]`W`baab  
@HWI-EAS443:3:70:1621:1302#0/1  
AGAAACTGTGATGAGAATGGGAGACCTTCACTACCTCCAG  
+HWI-EAS443:3:70:1621:1302#0/1  
\_`^]`\_`\_Z\_\_\_\_][\_a¥a``aaa`\_U¥[]a\_] [R[¥TT]¥  
@HWI-EAS443:3:70:1630:915#0/1  
GATGAGAATGGGAGACCTTCACTACCTCCAGAGCAGAAAT  
+HWI-EAS443:3:70:1630:915#0/1  
`ba]\_a\_ababa^a¥`¥ba\_aaaa¥\_\_\_\_^aa`[[^TZ^\_\_  
@HWI-EAS443:3:70:1635:827#0/1  
GCGGCACAGATTGAAAGCGACAGAGAATAGTTTCGAACAA  
+HWI-EAS443:3:70:1635:827#0/1  
`b`aZ`a^aabbbbaba\_aZX`^^`¥ZX\_Z`b^EW`\_J]a  
@HWI-EAS443:3:70:1684:302#0/1  
TGTGCCGATTTCTTCAATTAACCACCTTATTTCTCAAA  
+HWI-EAS443:3:70:1684:302#0/1  
`\_[bb\_b`abbbaaaa`\_b^abaaa`bababa\_aa\_[\_`  
@HWI-EAS443:3:70:1734:518#0/1  
GCACAGATTGAAAGCGACAGAGAATAGTTTCGAACAAATA  
+HWI-EAS443:3:70:1734:518#0/1  
aaaaabaa\_baaaa`a`\_`a\_a\_a^`\_Z\_a^`\_`^`\_`\_a  
@HWI-EAS443:3:70:1737:1895#0/1  
GCTGTTTCGATATCGAGCCAAGGGTGTTCCTCTTCCTT  
+HWI-EAS443:3:70:1737:1895#0/1  
``bbabbbbabbba\_babb^b\_ZabYb`a\_\_`aabbaaab  
@HWI-EAS443:3:70:1750:1248#0/1  
CCGCATTTCTTCAATTAACCACCTTATTTCTCAAATTTT  
+HWI-EAS443:3:70:1750:1248#0/1  
abbbbbbbabbbbbbbbbb`babbbbbbbbabbaaabba  
@HWI-EAS443:3:70:1770:915#0/1  
GAGAATGGGAGACCTTCACTACCTCCAGAGCAGAAATGAA  
+HWI-EAS443:3:70:1770:915#0/1  
]baaabbaabbaaaaa`babaa`b`aaa`aXab`\_`aaaa

@HWI-EAS443:3:70:17:522#0/1  
GAAAATATACAGAGATTTCGCTTGGAGAACTGTGATGAGA  
+HWI-EAS443:3:70:17:522#0/1  
]Y`Z`bbabaaaa^aabaa`aaa\_\_Z]]\_`aV¥^^^\_¥  
@HWI-EAS443:3:70:187:255#0/1  
CGCTTGGAGAACTGTGATGAGAATGGGAGACCTTCACTA  
+HWI-EAS443:3:70:187:255#0/1  
aaaa`aa``[aa\_`U^U[`^\_^\_¥\_\_]¥`^W¥¥VW^UWV  
@HWI-EAS443:3:70:18:231#0/1  
GCCGCATTTCTTCAATTAACCACCTTATTTCTCAAATTT  
+HWI-EAS443:3:70:18:231#0/1  
aa`a`V`aaaa`a`aaaa`[\_\_`a\_`a\_\_\_`]YUU\_\_\_  
@HWI-EAS443:3:70:208:366#0/1  
GAGAACTGTGATGAGAATGGGAGACCTTCACTACCTCCA  
+HWI-EAS443:3:70:208:366#0/1  
abb`Yaaa\_Yaaaa`a`X`¥`\_^`^\_¥^`^`^]Z^Y\_^  
@HWI-EAS443:3:70:216:847#0/1  
AGAAACTGTGATGAGAATGGGAGACCTTCACTACCTCCAG  
+HWI-EAS443:3:70:216:847#0/1  
a\_WWXaaa¥a\_a`[[^`a]¥]Y]¥^a\_^VV]ZZ^Y^]VV¥  
@HWI-EAS443:3:70:267:1921#0/1  
GAGAACTGTGATGAGAATGGGAGACCTTCACTACCTCCA  
+HWI-EAS443:3:70:267:1921#0/1  
ab`¥`abab`bba^`aaa`]`]\_V`a\_\_a\_a\_a``]aaa  
@HWI-EAS443:3:70:285:1110#0/1  
CCGCATTTCTTCAATTAACCACCTTATTTCTCAAATTT  
+HWI-EAS443:3:70:285:1110#0/1  
`baaaa^aba````aaababaaaaabaaa`````\_Z\_aa`a  
@HWI-EAS443:3:70:295:300#0/1  
GACTGTTTCTTTGGCATATCCGCAAGCGATTTGCAGACA  
+HWI-EAS443:3:70:295:300#0/1  
aaa\_aV`\_`a\_¥^`Y`[`\_`¥```]^[U`¥\_VT^¥VUV¥Y  
@HWI-EAS443:3:70:307:878#0/1  
GCCGCATTTCTTCAATTAACCACCTTATTTCTCAAATTT  
+HWI-EAS443:3:70:307:878#0/1  
\_abba^abaaba`\_aaaabab\_baba\_bbbaabba``aaa  
@HWI-EAS443:3:70:315:572#0/1  
CATCTGTACCTACTTCGCGCTACCTTTCTGACATGACCCT  
+HWI-EAS443:3:70:315:572#0/1  
aabaaaababaa`aaa\_aaa``\_aa\_\_a`a`aa`\_a`]`]  
@HWI-EAS443:3:70:32:1410#0/1  
ATTGTCTGCAAATCGCTTGGGATATGCCAAAGGAAACAG  
+HWI-EAS443:3:70:32:1410#0/1  
aa\_¥^`\_`a^Sa`P^YZN[[YTT[TP^\_ZYXSROZXRVO  
@HWI-EAS443:3:70:32:2008#0/1  
CTTGAATGGAATGGTAACACGGTTCGAGTCTCTGAAAATA  
+HWI-EAS443:3:70:32:2008#0/1  
]b]aba^Y`aaaaS^baaba]¥]\_`Y`UbYb\_a``Y^Y`  
@HWI-EAS443:3:70:341:1414#0/1  
TGCCGCATTTCTTCAATTAACCACCTTATTTCTCAAATT

+HWI-EAS443:3:70:341:1414#0/1  
abbbbbbaa`abaabbaabbabbabbaaba`bbaaaaaaaaa  
@HWI-EAS443:3:70:438:760#0/1  
GTGATGAGAATGGGAGACCTTCACTACCTCCAGAGCAGAA  
+HWI-EAS443:3:70:438:760#0/1  
\_NZO^`]]V^XWT¥LRS¥[JW[T¥Y^H]W^[TXRXSYUY  
@HWI-EAS443:3:70:478:521#0/1  
ATATCCGCAAGCGATTTGCAGACAATGGATTGGGTGATGC  
+HWI-EAS443:3:70:478:521#0/1  
^[\_a`\_a\_¥aabbaa`a\_a`\_aaaa`X^XXZX[V[YLV`  
@HWI-EAS443:3:70:486:281#0/1  
AGAAACTGTGATGAGAATGGGAGACCTTCACTACCTCCAG  
+HWI-EAS443:3:70:486:281#0/1  
\_`aaaaab\_b¥aaX``\_aa\_a`\_]^a\_a^YZ]^`X  
@HWI-EAS443:3:70:492:1209#0/1  
AGAATGGGAGACCTTCACTACCTCCAGAGCAGAAATGAAA  
+HWI-EAS443:3:70:492:1209#0/1  
\_a`aa^`a`aaa`aaa`aaa\_aa`\_`aa`^`\_`a`\_`  
@HWI-EAS443:3:70:503:1123#0/1  
CTTGGAGAAACTGTGATGAGAATGGGAGACCTTCACTACC  
+HWI-EAS443:3:70:503:1123#0/1  
a\_abaaaRL]aaaTS¥\_aaZPX\_\_Q\_Z[X\_aXUZ\_[VZLN  
@HWI-EAS443:3:70:507:1447#0/1  
AGAAACTGTGATGAGAATGGGAGACCTTCACTACCTCCAG  
+HWI-EAS443:3:70:507:1447#0/1  
^[^Y`aa^Tb`aaabaa\_a``[Gb[`a`WYa¥L]a\_a`  
@HWI-EAS443:3:70:564:13#0/1  
CGCTTGGAGAAACTGTGATGAGAATGGGAGACCTTCACTA  
+HWI-EAS443:3:70:564:13#0/1  
\_¥b¥\_\_bbbaa\_T¥aI\_\_`aadW`Yaaa]a¥¥[¥a]]V`¥  
@HWI-EAS443:3:70:582:181#0/1  
GCCGCATTTCTTCAATTAACCACCTTATTTCTCAAATTT  
+HWI-EAS443:3:70:582:181#0/1  
\_^^`^LYZZ\_a]ZOX\_`UMXTR[TZ[XYP¥Y]RZSY\_[U  
@HWI-EAS443:3:70:643:942#0/1  
TGAGAATGGGAGACCTTCACTACCTCCAGAGCAGAAATGA  
+HWI-EAS443:3:70:643:942#0/1  
]baaY`R\_^`P\_YY`]^`¥TXWRQ¥\_[RXL`UWV\_XQ\_  
@HWI-EAS443:3:70:670:2028#0/1  
GAAGAGAAGGTAATGGTGAATTTCTCCAATATTGCTCC  
+HWI-EAS443:3:70:670:2028#0/1  
a]X]^\_K\_[SZ`\_T¥T`\_¥`\_a`aa`aa\_\_[¥^¥Za]\_\_  
@HWI-EAS443:3:70:685:1374#0/1  
GCTTGGAGAAACTGTGATGAGAATGGGAGACCTTCACTAC  
+HWI-EAS443:3:70:685:1374#0/1  
`bbabb`\_abbbbb`baaab`\_baaaaaaaaaaaaaabaaaa  
@HWI-EAS443:3:70:687:197#0/1  
TGCGGCACAGATTGAAAGCGACAGAGAATAGTTTCGAACA  
+HWI-EAS443:3:70:687:197#0/1  
\_[^`\_¥a^^baab^\_¥`^`\_ZT]^aaZRa`T]Z[]]H\_

@HWI-EAS443:3:70:698:173#0/1  
CGCATTCTTCAATTAACCACCTTATTTCTCAAATTTCT  
+HWI-EAS443:3:70:698:173#0/1  
abb`bbaaabaa\_ab\_abaaa`aaaaaa\_aaaaaaaa\_`a  
@HWI-EAS443:3:70:713:96#0/1  
AGAAACTGTGATGAGAATGGGAGACCTTCACTACCTCCAG  
+HWI-EAS443:3:70:713:96#0/1  
a``]aa\_¥```\_^\_^a\_abb]V`a¥P\_N^[]`aQYZUU[Y  
@HWI-EAS443:3:70:776:563#0/1  
GCCGCATTCTTCAATTAACCACCTTATTTCTCAAATTT  
+HWI-EAS443:3:70:776:563#0/1  
`abbbbbbbabbbbbbbbbabbbbbbbbbbbbbabbbab  
@HWI-EAS443:3:70:77:777#0/1  
GTGCCGCATTCTTCAATTAACCACCTTATTTCTCAAAT  
+HWI-EAS443:3:70:77:777#0/1  
a[[aaab]a`a`^a¥\_a\_aa\_aa\_\_a\_aa\_``aa`\_X]`  
@HWI-EAS443:3:70:783:1698#0/1  
GGAGAACTGTGATGAGAATGGGAGACCTTCACTACCTCC  
+HWI-EAS443:3:70:783:1698#0/1  
abaZWaaaa\_\_a[YW^V`\_`\_]W¥^a\_^Ua`^[\_^a]\_\_  
@HWI-EAS443:3:70:848:117#0/1  
GAAACTGTGATGAGAATGGGAGACCTTCACTACCTCCAGA  
+HWI-EAS443:3:70:848:117#0/1  
a[`b`ab[baaa]aZ^`]PZ\_b\_\_`a\_a`a\_^^\_¥`\_Y  
@HWI-EAS443:3:70:867:42#0/1  
GAAACTGTGATGAGAATGGGAGACCTTCACTACCTCCAGA  
+HWI-EAS443:3:70:867:42#0/1  
a[\_\_\_]^Na\_aa\_a\_\_Yaaa]a^\_0]V]^\_I[XX^¥VV^0  
@HWI-EAS443:3:71:1035:1009#0/1  
GATGAGAATGGGAGACCTTCACTACCTCCAGAGCAGAAAT  
+HWI-EAS443:3:71:1035:1009#0/1  
aa`a\_b[`aaa\_`a`a\_aa`aa\_aX`a\_aa`^a\_\_a]\_^  
@HWI-EAS443:3:71:1058:498#0/1  
GAAAGCTCTTATCTCTTGTCTACTTCAAGCAGTAGTTGT  
+HWI-EAS443:3:71:1058:498#0/1  
a`XZaabaababab`baba`aaa`a`aabaa`a\_`a^aa\_  
@HWI-EAS443:3:71:1067:1120#0/1  
CGCGCTACCTTTCTGACATGACCCTCGAGGAAATGTCACG  
+HWI-EAS443:3:71:1067:1120#0/1  
ab`[a]b]aR]XSW¥0`ZZa^\_aa\_Ya\_Za\_`¥a\_X``]V  
@HWI-EAS443:3:71:1116:263#0/1  
CAGAGATTTCGCTTGGAGAACTGTGATGAGAATGGGAGAC  
+HWI-EAS443:3:71:1116:263#0/1  
`baabaaabbabb`¥b\_¥aaabT\_Uaa`a^\_ab\_a^a]X  
@HWI-EAS443:3:71:1122:1306#0/1  
GAGATTTCGCTTGGAGAACTGTGATGAGAATGGGAGACCT  
+HWI-EAS443:3:71:1122:1306#0/1  
^a\_S\_W`X\_X]aa^^YZ\_^\_ZT^N]aX`\_a\_\_aYN\_XSVW  
@HWI-EAS443:3:71:1126:1265#0/1  
GTCGCTTTCAATCTGTGCCGCATTCTTCAATTAACCACC

+HWI-EAS443:3:71:1126:1265#0/1  
^\_`a]aaaa]a`aa\_`aa`aaa`aaabaaaa`a\_  
@HWI-EAS443:3:71:112:659#0/1  
GCCGCATTTCTTCAATTAACCACCTTATTTCTCAAATTT  
+HWI-EAS443:3:71:112:659#0/1  
aaaY\_V]`aa\_a\_\_\_YY¥]`aaZY^\_a]^^]`]^`^¥^]]^  
@HWI-EAS443:3:71:1147:420#0/1  
GCCGCATTTCTTCAATTAACCACCTTATTTCTCAAATTT  
+HWI-EAS443:3:71:1147:420#0/1  
abab`bbbaabaaaabaaa\_aaa`a`abaa`\_aaa`aaaa  
@HWI-EAS443:3:71:1163:2024#0/1  
GAGAACTGTGATGAGAATGGGAGACCTTCACTACCTCCA  
+HWI-EAS443:3:71:1163:2024#0/1  
ababb\_bbb^abbababb\_aaaab`\_a\_a\_baabba`\_``  
@HWI-EAS443:3:71:1166:1227#0/1  
GAAACTGTGATGAGAATGGGAGACCTTCACTACCTCCAGA  
+HWI-EAS443:3:71:1166:1227#0/1  
a¥J`a\_aYX¥ab]]R]`\_]aa¥V^`aa^YY^a``]\_^`U  
@HWI-EAS443:3:71:1193:809#0/1  
AGAATGGGAGACCTTCACTACCTCCAGAGCAGAAATGAAA  
+HWI-EAS443:3:71:1193:809#0/1  
`bbbabb\_\_baT^b`a`baaaa`^[aa`aaaa\_]a]¥`  
@HWI-EAS443:3:71:1214:1102#0/1  
GTCGCTTTCAATCTGTGCCGCATTTCTTCAATTAACCACC  
+HWI-EAS443:3:71:1214:1102#0/1  
a\_ab\_aaa\_\_¥aZaaaa\_Za\_a`ab^a`V^a`aa]^`\_W  
@HWI-EAS443:3:71:1220:661#0/1  
CAGAAAGGTAGCGGAAGTAGGTACAGATGCAATTGTCAT  
+HWI-EAS443:3:71:1220:661#0/1  
aa`U¥aba][¥a`aS¥Z`Tabb]aa¥a`baSaSaab]]bb  
@HWI-EAS443:3:71:1224:1701#0/1  
CCGCATTTCTTCAATTAACCACCTTATTTCTCAAATTTCT  
+HWI-EAS443:3:71:1224:1701#0/1  
`Z]X]\_a`b`^`aYa\_[`YR[\_ZZ`a]`^`^]Y`ZV`a¥0  
@HWI-EAS443:3:71:1234:1045#0/1  
ACTGTGATGAGAATGGGAGACCTTCACTACCTCCAGAGCA  
+HWI-EAS443:3:71:1234:1045#0/1  
```\_¥a^]`\_\_U]UQU^]T[U[a``\_¥^¥```aaU\_W]\_V  
@HWI-EAS443:3:71:1252:1050#0/1  
GCTTGGAGAACTGTGATGAGAATGGGAGACCTTCACTAC  
+HWI-EAS443:3:71:1252:1050#0/1  
aaaaaaab¥Y[[aZY\_Y]`Wa``\_a[¥¥X\_[[[]X`\_\_\_W  
@HWI-EAS443:3:71:1266:81#0/1  
GTCGCTTTCAATCTGTGCCGCATTTCTTCAATTAACCACC  
+HWI-EAS443:3:71:1266:81#0/1  
aa`a[Z`a\_] [SPU`^¥S^\_^[]YV^aY[SZaZ[JUYRG  
@HWI-EAS443:3:71:1300:285#0/1  
GGCCTATTATCTTTTGCCTAGGCATGAGCATGAACCGATC  
+HWI-EAS443:3:71:1300:285#0/1  
aba`baabb\_aa`abaaaa`\_ba`aaaaabaab`a\_\_a^^



@HWI-EAS443:3:71:1301:1208#0/1  
GAACATAGTACTGAAAGCGAACTTCAGTGTAACTTTAAC  
+HWI-EAS443:3:71:1301:1208#0/1  
^ababb`b`bb`]a`abaaaaaba`bb\_bababababba\_  
@HWI-EAS443:3:71:1304:499#0/1  
AGGAATGGGGCATCACCCAATCCATTGTCTGCAAATCGCT  
+HWI-EAS443:3:71:1304:499#0/1  
`bb`[b``[^]bbbab`abT]¥VWabbaaba`aa\_aa][[  
@HWI-EAS443:3:71:1330:298#0/1  
ACCTACTTCGCGCTACCTTTCTGACATGACCCTCGAGGAA  
+HWI-EAS443:3:71:1330:298#0/1  
`\_^b]IZa[^`W]a\_\_aaaaaaaZaa¥`aYZ¥\_`Sa\_XZ  
@HWI-EAS443:3:71:1339:1747#0/1  
GAATGGGAGACCTTCACTACCTCCAGAGCAGAAATGAAAA  
+HWI-EAS443:3:71:1339:1747#0/1  
aaaab\_babab\_aaabaabaaa`\_aaa`baaa`aaa\_`a`  
@HWI-EAS443:3:71:1341:603#0/1  
CAGAAAGGTAGCGGAAGTAGGTACAGATGCAATTGTCAT  
+HWI-EAS443:3:71:1341:603#0/1  
aab^\_\_a\_FW\_]\_`^^`T[a]Za^`b[[a[^`aV]TQS]  
@HWI-EAS443:3:71:1360:396#0/1  
GAGAAACTGTGATGAGAATGGGAGACCTTCACTACCTCCA  
+HWI-EAS443:3:71:1360:396#0/1  
aa`aba`ba`b^aaaa`a\_a`a][]aa`aZa\_aa\_¥`Z\_Z  
@HWI-EAS443:3:71:1389:1447#0/1  
CACAGATTGAAAGCGACAGAGAATAGTTTCGAACAAATAA  
+HWI-EAS443:3:71:1389:1447#0/1  
]abbbbaaababaa\_babbbbabbb`bbbbbbbbbbabb  
@HWI-EAS443:3:71:1422:686#0/1  
GTCGCTTTCAATCTGTGCCGATTTCTTCAATTAACCACC  
+HWI-EAS443:3:71:1422:686#0/1  
aaabaabb\_aaa`a``[\_aa\_`aa\_aa`¥¥aa``Y\_\_]V  
@HWI-EAS443:3:71:1428:811#0/1  
AGCGCGAAGTAGGTACAGATGCAATTGTCATTCTAAGTGT  
+HWI-EAS443:3:71:1428:811#0/1  
ab\_babZ]ba`]b^abZ]abaababb`^Ma]b\_ba`aaaX  
@HWI-EAS443:3:71:148:442#0/1  
GAAACTGTGATGAGAATGGGAGACCTTCACTACCTCCAGA  
+HWI-EAS443:3:71:148:442#0/1  
aX`Y`\_aVXLHaZ]\_[P`¥QQ^URUZTVZXUW^RP[HRSV  
@HWI-EAS443:3:71:1503:2006#0/1  
GTCGCTTTCAATCTGTGCCGATTTCTTCAATTAACCACC  
+HWI-EAS443:3:71:1503:2006#0/1  
a\_^]]Ta^WZLU]W\_^aaaa]]`\_]a`\_\_aa[^a^\_\_SU  
@HWI-EAS443:3:71:1548:1024#0/1  
TGCCGATTTCTTCAATTAACCACCTTATTTCTCAAATT  
+HWI-EAS443:3:71:1548:1024#0/1  
abbaaabbbababababbaa`^a`aaaabaa\_`baa`\_aa  
@HWI-EAS443:3:71:1560:1718#0/1  
AACTGCATTTTTGACATCCTCATAAGTATGTCCTGGAAGA

+HWI-EAS443:3:71:1560:1718#0/1  
]\_]¥X¥a\_]U`aba`bbbbb[ba]Ua\_aabaa\_ba`[a  
@HWI-EAS443:3:71:1612:983#0/1  
GCCGCATTTCTTCAATTAACCACCTTATTTCTCAAATTT  
+HWI-EAS443:3:71:1612:983#0/1  
\_bababaaa^ab`aaba`b]abbUbbabbabbbaaabba  
@HWI-EAS443:3:71:1618:217#0/1  
TTCCTTTGGCATATCCGCAAGCGATTTGCAGACAATGGAT  
+HWI-EAS443:3:71:1618:217#0/1  
ab`ababb`\_aaaa`b`\_`a¥a¥`aa][`\_`\_a\_\_a\_V^  
@HWI-EAS443:3:71:1620:1654#0/1  
GCCGCATTTCTTCAATTAACCACCTTATTTCTCAAATTT  
+HWI-EAS443:3:71:1620:1654#0/1  
aab^aabaaYbaa`\_baaa\_aa`\_a``aaa`aaaa]^a`a  
@HWI-EAS443:3:71:162:1452#0/1  
ATTACTGAAGTTTCGCTTTCAGTACTATGTTCTTTTCCA  
+HWI-EAS443:3:71:162:1452#0/1  
ab`^a]a`a[\_WZ`a`^`^`\_`^W`^`\_`X[\_`^`^^`\_  
@HWI-EAS443:3:71:1636:1032#0/1  
AACTGTGATGAGAATGGGAGACCTTCACTACCTCCAGAGC  
+HWI-EAS443:3:71:1636:1032#0/1  
aba`\_\_baab\_Y^`bbaaa`a`^aaab\_aa^^a\_^^a[^R  
@HWI-EAS443:3:71:1648:80#0/1  
GTCAGAAAGGTAGCGGAAGTAGGTACAGATGCAATTGTC  
+HWI-EAS443:3:71:1648:80#0/1  
II^[aaU^a`]Z`^P\_]¥b]¥^\_WbYaY\_VXXUZ[RSdT  
@HWI-EAS443:3:71:1670:1354#0/1  
GATGAGAATGGGAGACCTTCACTACCTCCAGAGCAGAAAT  
+HWI-EAS443:3:71:1670:1354#0/1  
aabb`a`aaa`a^``aa`\_a^`YU^`\_`\_]`\_\_\_\_]^`\_]^\_\_  
@HWI-EAS443:3:71:1732:534#0/1  
GCCGCATTTCTTCAATTAACCACCTTATTTCTCAAATTT  
+HWI-EAS443:3:71:1732:534#0/1  
T\_[R`\_`^`\_`abb`TT`^`XaS\_WU`babb\_]R`^a`RYba  
@HWI-EAS443:3:71:1759:632#0/1  
TGAGAATGGGAGACCTTCACTACCTCCAGAGCAGAAATGA  
+HWI-EAS443:3:71:1759:632#0/1  
`\_Y\_V\_ZYU]¥UZO]¥]\_]`¥TX]]ZRZUWUX\_XXY[YR  
@HWI-EAS443:3:71:176:1766#0/1  
GTCGCTTTCAATCTGTGCCGCATTTCTTCAATTAACCACC  
+HWI-EAS443:3:71:176:1766#0/1  
aaaYa\_[a`^^`a`\_`\_`a`^aW`\_`\_`\_`\_`\_`]^a¥Y^  
@HWI-EAS443:3:71:1783:2016#0/1  
GATGAGAATGGGAGACCTTCACTACCTCCAGAGCAGAAAT  
+HWI-EAS443:3:71:1783:2016#0/1  
¥^\_b`\_aaaaba`\_`\_aaaa\_aa\_\_\_\_a`\_[a\_a]YVZ^  
@HWI-EAS443:3:71:201:591#0/1  
CCGCATTTCTTCAATTAACCACCTTATTTCTCAAATTTCT  
+HWI-EAS443:3:71:201:591#0/1  
ab\_Z^`X`a]abaZ``¥a\_aa¥Z\_\_aa`]X``aa]]`\_\_\_\_\_

@HWI-EAS443:3:71:235:778#0/1  
GGCCTATTATCTTTTGCCTAGGCATGAGCATGAACCCAGTC  
+HWI-EAS443:3:71:235:778#0/1  
aabbaaba]ab`baaabaabaa`aaaa`baa[aa````]`  
@HWI-EAS443:3:71:239:779#0/1  
GCCGCATTTCTTCAATTAACCCACCTTATTTCCCTCAAATTT  
+HWI-EAS443:3:71:239:779#0/1  
ab\_[]^Y[]^aZXL^¥T\_¥¥````[Q`Y]\_¥\_ZTU^X¥  
@HWI-EAS443:3:71:255:1240#0/1  
CTATTCTCTGTCGCTTTCAATCTGTGCCGCATTTCTTCAA  
+HWI-EAS443:3:71:255:1240#0/1  
a^Tq]babaa`aa\_\_a`^VSZ`[SY^a^`a]]\_\_`\_]^[^  
@HWI-EAS443:3:71:268:797#0/1  
AGAAACTGTGATGAGAATGGGAGACCTTCACTACCTCCAG  
+HWI-EAS443:3:71:268:797#0/1  
Y`TT`a\_XSUT]``YK]`SZa^¥QYX`abaaVS¥\_WaYWT  
@HWI-EAS443:3:71:271:275#0/1  
AGAAACTGTGATGAGAATGGGAGACCTTCACTACCTCCAG  
+HWI-EAS443:3:71:271:275#0/1  
``aaaaba[aaa^aaa\_a\_\_a\_]\_`\_\_\_\_]\_[\_]Y\_] ]^  
@HWI-EAS443:3:71:272:1312#0/1  
GAAACTGTGATGAGAATGGGAGACCTTCACTACCTCCAGA  
+HWI-EAS443:3:71:272:1312#0/1  
```aa^]]bbZ`\_a`a`^ZPP^\_]¥¥]aa\_]\_a\_\_`a`^  
@HWI-EAS443:3:71:295:738#0/1  
GCGGCACAGATTGAAAGCGACAGAGAATAGTTTCGAACAA  
+HWI-EAS443:3:71:295:738#0/1  
a\_RV^`ZP^^\_]¥IYV[\_a``Sa[[]Y[^]OW[]`UTVXU  
@HWI-EAS443:3:71:321:1050#0/1  
GCCGCATTTCTTCAATTAACCCACCTTATTTCCCTCAAATTT  
+HWI-EAS443:3:71:321:1050#0/1  
aaaaa\_^aa^`aa][`aS`\_aa\_aa¥aa\_a]``aa^G[\_`  
@HWI-EAS443:3:71:371:1990#0/1  
CTTGAATGGAATGGTAACACGGTTTCGAGTCTCTGAAAATA  
+HWI-EAS443:3:71:371:1990#0/1  
a`\_¥a]^a[¥^¥]^X\_`^\_\_YRVY^YTVX\_Z^]YY^]aW^  
@HWI-EAS443:3:71:384:30#0/1  
GGAGAACTGTGATGAGAATGGGAGACCTTCACTACCTCC  
+HWI-EAS443:3:71:384:30#0/1  
aa]aabaaaa`\_`abaa[``aa`^a\_[Z\_\_¥^\_`¥TV^XY  
@HWI-EAS443:3:71:38:1115#0/1  
GAGAATGGGAGACCTTCACTACCTCCAGAGCAGAAATGAA  
+HWI-EAS443:3:71:38:1115#0/1  
`Y`][`a\_aa\_X\_\_\_\_]baa]`\_\_]`a\_] [[]\_]\_ZWZ]^ [P  
@HWI-EAS443:3:71:405:301#0/1  
GAAACTGTGATGAGAATGGGAGACCTTCACTACCTCCAGA  
+HWI-EAS443:3:71:405:301#0/1  
aaa`aaaYa`aa¥a]a` `[`\_\_]\_\_\_\_]\_] ]^]]^^\_^]Y  
@HWI-EAS443:3:71:409:1581#0/1  
TGATGAGAATGGGAGACCTTCACTACCTCCAGAGCAGAAA

+HWI-EAS443:3:71:409:1581#0/1  
`bbY`a`T^aZY[¥Wabaaaaaaaa\_a`aaa]QZaa`a`a  
@HWI-EAS443:3:71:474:152#0/1  
GCGAGACACTTAGAATGACAATTGCATCTGTACTTCTTC  
+HWI-EAS443:3:71:474:152#0/1  
aabaa`ab\_aaaaaaba\_aaaa\_aa\_``]`a\_\_\_^\_\_]  
@HWI-EAS443:3:71:535:133#0/1  
ATTATCTTTTGCCTAGGCATGAGCATGAACCAGTCTCGTG  
+HWI-EAS443:3:71:535:133#0/1  
aaaaabbaaaaa`\_aabaa`^`\_`\_`^aa[^`X`^^¥X^  
@HWI-EAS443:3:71:545:506#0/1  
GCCGCATTTCTTCAATTAACCACCTTATTTCTCAAATTT  
+HWI-EAS443:3:71:545:506#0/1  
`V`aZ^Z]\_`a`\_a^]X]`^]`¥¥]T]a[[\_aaa\_`^S]  
@HWI-EAS443:3:71:549:171#0/1  
CGCCTGGTCCAATCGCACGCAAAGAGGGCCTATTATCTTT  
+HWI-EAS443:3:71:549:171#0/1  
aba^Z]`VZ¥\_ZXW\_\_Z]a]Y]^^Y\_\_^VZ¥]\_]UW^Z]  
@HWI-EAS443:3:71:554:566#0/1  
GCTTGGAGAACTGTGATGAGAATGGGAGACCTTCACTAC  
+HWI-EAS443:3:71:554:566#0/1  
abb`baaababaab\_`aa`^`^`aaab\_\_aS^a]`^`a\_a\_  
@HWI-EAS443:3:71:605:976#0/1  
CTGTGATGAGAATGGGAGACCTTCACTACCTCCAGAGCAG  
+HWI-EAS443:3:71:605:976#0/1  
aabV^`^`a^a\_XZ¥Wa[]Uaa\_\_aaa`aaa`a`[``[\_\_\_\_  
@HWI-EAS443:3:71:619:672#0/1  
GAGAATGGGAGACCTTCACTACCTCCAGAGCAGAAATGAA  
+HWI-EAS443:3:71:619:672#0/1  
aabaabbaa```aaVaaba`a]\_`aaa```Z```Z`]\_\_U  
@HWI-EAS443:3:71:631:1284#0/1  
GTGCCGCATTTCTTCAATTAACCACCTTATTTCTCAAAT  
+HWI-EAS443:3:71:631:1284#0/1  
aabba¥bbba\_`baba\_ab\_ab[a^baabbaba```aaab  
@HWI-EAS443:3:71:638:719#0/1  
GCCGCATTTCTTCAATTAACCACCTTATTTCTCAAATTT  
+HWI-EAS443:3:71:638:719#0/1  
a¥aaaU`[a¥[Y\_¥Qa¥]X[\_`YW]`^`\_a`^`ZWH[`\_\_  
@HWI-EAS443:3:71:643:183#0/1  
GCCGCATTTCTTCAATTAACCACCTTATTTCTCAAATTT  
+HWI-EAS443:3:71:643:183#0/1  
aabbaaa`aaaaa`aaaa````^`aaaa\_\_aaa`]``\_  
@HWI-EAS443:3:71:646:91#0/1  
ATTTCTTCAATTAACCACCTTATTTCTCAAATTTCTGTC  
+HWI-EAS443:3:71:646:91#0/1  
a`aYaa`[[`\_`^V]aTZ\_`Ya\_`\_```\_YY¥]\_]`\_[R  
@HWI-EAS443:3:71:667:824#0/1  
AACAAATCGTGAATGGATCTTGAAAGAGGAATCCAGCGA  
+HWI-EAS443:3:71:667:824#0/1  
aaabbaaaaXa¥\_`aa[\_¥¥^\_[W\_`YWX\_`a\_`\_\_P[]

@HWI-EAS443:3:71:681:314#0/1  
ATGAGAATGGGAGACCTTCACTACCTCCAGAGCAGAAATG  
+HWI-EAS443:3:71:681:314#0/1  
abb`S^a¥^b]aba\_aa`aaaa^¥^a\_U\_a`\_bR\_Z`  
@HWI-EAS443:3:71:755:229#0/1  
TGCCGCATTTCTTCAATTAACCACCTTATTTCTCAAATT  
+HWI-EAS443:3:71:755:229#0/1  
aaaaabbbaaa`aaabbaaa\_aa\_aaabbbaaa`a`a`  
@HWI-EAS443:3:71:778:845#0/1  
CCGCATTTCTTCAATTAACCACCTTATTTCTCAAATTTCT  
+HWI-EAS443:3:71:778:845#0/1  
abbbabbbabaaaababbbaababbbbaaaabbaYabaa`  
@HWI-EAS443:3:71:784:1012#0/1  
CGCATTTCTTCAATTAACCACCTTATTTCTCAAATTTCT  
+HWI-EAS443:3:71:784:1012#0/1  
Za`Y`¥^a`ZaXYVTL[¥S[WYX][ZUXa`\_P¥\_aZ^]a  
@HWI-EAS443:3:71:791:1182#0/1  
TGAGAATGGGAGACCTTCACTACCTCCAGAGCAGAAATGA  
+HWI-EAS443:3:71:791:1182#0/1  
^`^`^`aa]QR`]`\_a\_aa^]`a¥[\_aa^^SN[`a]]^^]\_  
@HWI-EAS443:3:71:866:104#0/1  
GCCGCATTTCTTCAATTAACCACCTTATTTCTCAAATTT  
+HWI-EAS443:3:71:866:104#0/1  
a\_\_\_FZ\_[Y¥\_]Q^U\_^RSQYXQP\_\_W`]aUS[^^YR[UV  
@HWI-EAS443:3:71:872:943#0/1  
TGAGAATGGGAGACCTTCACTACCTCCAGAGCAGAAATGA  
+HWI-EAS443:3:71:872:943#0/1  
aPV]0¥`b¥`\_QXa]ba^[aa\_b^¥`¥]ZZ`[aU¥Wa`\_  
@HWI-EAS443:3:71:873:213#0/1  
GAGCAATTGGGACAGAAATTTGAGGAAATAAGGTGGTTAA  
+HWI-EAS443:3:71:873:213#0/1  
a¥aXU^aaaa`SY¥a\_\_[aa`aYW\_]Y\_\_\_U\_¥0¥aU¥X]  
@HWI-EAS443:3:71:942:1310#0/1  
GTGCTTTCAATCTGTGCCGCATTTCTTCAATTAACCACC  
+HWI-EAS443:3:71:942:1310#0/1  
\_Uaa`[[[aa]Y]`¥`Z¥`a\_\_\_]\_\_[a`a`\_\_\_`[¥]^X  
@HWI-EAS443:3:71:942:556#0/1  
GAATGGGAGACCTTCACTACCTCCAGAGCAGAAATGAAAA  
+HWI-EAS443:3:71:942:556#0/1  
Ta^aW\_bbU`Yaab]baa`aa\_]a`aa`b¥¥¥abaa`¥  
@HWI-EAS443:3:71:956:1451#0/1  
GCCGCATTTCTTCAATTAACCACCTTATTTCTCAAATTT  
+HWI-EAS443:3:71:956:1451#0/1  
aaa\_a`\_a\_a`a[`b\_\_`^`\_ab^a`bbaaaaa`a`^`\_  
@HWI-EAS443:3:72:1024:2029#0/1  
CGCTTGGAGAAACTGTGATGAGAATGGGAGACCTTACTA  
+HWI-EAS443:3:72:1024:2029#0/1  
Yab]Z\_babbbababa^]`Vababaaaa`abaa\_`aa\_b  
@HWI-EAS443:3:72:1030:1982#0/1  
AGGGCTTTCACTGAGGAGGGAGCAATAGTTGGAGAAATTT

+HWI-EAS443:3:72:1030:1982#0/1  
a`¥^a^`^aa\_`^`\_¥^`\_¥`^^aVUOVXX\_`^`\_\_V\_X  
@HWI-EAS443:3:72:103:1087#0/1  
CAGAAATTTGAGGAAATAAGGTGGTTAATTGAAGAAATGC  
+HWI-EAS443:3:72:103:1087#0/1  
a]TNQWa`¥\_KY[OVX\_N[^T^XOZZ[NTTRY[MT[VW^  
@HWI-EAS443:3:72:1047:1720#0/1  
TGCCGCATTTCTTCAATTAACCACCTTATTTCTCAAATT  
+HWI-EAS443:3:72:1047:1720#0/1  
ab^bb\_`a`b`bab]]b`a\_aaaa`SaaaaVa`a^a\_`  
@HWI-EAS443:3:72:1050:1347#0/1  
GCCGCATTTCTTCAATTAACCACCTTATTTCTCAAATTT  
+HWI-EAS443:3:72:1050:1347#0/1  
a`]^bb^^a\_Za\_JZ]\_a`¥S^\_a^]S]\_\_^J¥a^YW```  
@HWI-EAS443:3:72:1056:315#0/1  
GAAACTGTGATGAGAATGGGAGACCTTCACTACCTCCAGA  
+HWI-EAS443:3:72:1056:315#0/1  
aZOXY`a[]\_X[XQWQUa]XFONV\_UUYQN]\_U]^XMRVY  
@HWI-EAS443:3:72:1065:1082#0/1  
GAAACTGTGATGAGAATGGGAGACCTTCACTACCTCCAGA  
+HWI-EAS443:3:72:1065:1082#0/1  
a`ba``\_]baaa`Xa`¥V^Y^`]a\_`^a]]\_\_\_\_\_`W```  
@HWI-EAS443:3:72:1102:147#0/1  
GAATGGGAGACCTTCACTACCTCCAGAGCAGAAATGAAAA  
+HWI-EAS443:3:72:1102:147#0/1  
a`\_aaa`Zaa\_Y\_\_^aWa¥¥¥^¥Y¥[¥¥Y¥]¥YW\_¥W¥YW  
@HWI-EAS443:3:72:1120:1889#0/1  
GAGAATGGGAGACCTTCACTACCTCCAGAGCAGAAATGAA  
+HWI-EAS443:3:72:1120:1889#0/1  
ababba`\_]aabab`abaaaa`^]``aaa`¥aaa\_\_a`aa  
@HWI-EAS443:3:72:1145:107#0/1  
TGATGAGAATGGGAGACCTTCACTACCTCCAGAGCAGAAA  
+HWI-EAS443:3:72:1145:107#0/1  
`a]abaaaa\_b`a^\_]\_^\_Z\_ZYU\_\_PN¥VNUWW\_]WYYXU  
@HWI-EAS443:3:72:1154:2032#0/1  
ACGAGACTGGTTCATGCTCATGCCTAGGCAAAGATAATA  
+HWI-EAS443:3:72:1154:2032#0/1  
]abaaabaabQ`\_aYV]`ba¥^a`Z\_\_RV`aaaZYZadN`  
@HWI-EAS443:3:72:1225:1693#0/1  
GCCGCATTTCTTCAATTAACCACCTTATTTCTCAAATTT  
+HWI-EAS443:3:72:1225:1693#0/1  
a\_\_a\_a`a`\_a`\_Y^\_\_`\_]\_^]`^`a^\_\_\_\_[\_^]\_¥]  
@HWI-EAS443:3:72:1234:305#0/1  
GCTTTCAATCTGTGCCGCATTTCTTCAATTAACCACCTTA  
+HWI-EAS443:3:72:1234:305#0/1  
^]`^`\_YU¥``\_a^^^^a^]`a[[a\_TSUZ[[\_¥P¥XT\_\_\_\_  
@HWI-EAS443:3:72:1273:1083#0/1  
GAGCAATTGGGACAGAAATTTGAGGAAATAAGGTGGTTAA  
+HWI-EAS443:3:72:1273:1083#0/1  
a\_\_aX\_b``aa\_aaa^^^a`aa\_dW[``\_a`\_\_aZa¥Y]\_\_

@HWI-EAS443:3:72:130:1201#0/1  
CCGCATTTCTTCAATTAACCACCTTATTTTCCTCAAATTTTC  
+HWI-EAS443:3:72:130:1201#0/1  
aa`^JY¥T`\_a]Z^\_TTWaa`\_YW]¥^\_a`¥\_W\_]\_]\_  
@HWI-EAS443:3:72:1325:692#0/1  
CCGCATTTCTTCAATTAACCACCTTATTTTCCTCAAATTTTC  
+HWI-EAS443:3:72:1325:692#0/1  
`bababbbabbaaaba`\_abaabaaaaaabaabab\_  
@HWI-EAS443:3:72:1341:1204#0/1  
GAAACTGTGATGAGAATGGGAGACCTTCACTACCTCCAGA  
+HWI-EAS443:3:72:1341:1204#0/1  
a]T]]]bX¥`\_`\_a[HZa`^X`VV[]`\_]\_]a\_V\_U^]`^X  
@HWI-EAS443:3:72:1398:2027#0/1  
TGTCGCTTTCAATCTGTGCCGATTTCTTCAATTAACCAC  
+HWI-EAS443:3:72:1398:2027#0/1  
aa```\_a\_a`\_aa`\_aZ`^¥a¥`\_`a]`^`\_`\_a\_a\_\_^\_Z  
@HWI-EAS443:3:72:1406:774#0/1  
GTCGCTTTCAATCTGTGCCGATTTCTTCAATTAACCACC  
+HWI-EAS443:3:72:1406:774#0/1  
aaab`\_aba`aa`a`\_a`\_`\_aaaa^aa^a`\_a`\_^]`V^  
@HWI-EAS443:3:72:1444:269#0/1  
AGAAACTGTGATGAGAATGGGAGACCTTCACTACCTCCAG  
+HWI-EAS443:3:72:1444:269#0/1  
]b\_a`\_`bbab\_a`Ta\_aaaaaYaYUZaaZ`\_a\_W¥^W¥]^  
@HWI-EAS443:3:72:144:1997#0/1  
AGAAACTGTGATGAGAATGGGAGACCTTCACTACCTCCAG  
+HWI-EAS443:3:72:144:1997#0/1  
a`]aab`a][`\_\_\_\_[^`YYSZ[\_\_\_\_\_]\_]\_VX^\_]\_]\_]\_¥\_X  
@HWI-EAS443:3:72:1467:1394#0/1  
GCCGCATTTCTTCAATTAACCACCTTATTTTCCTCAAATTT  
+HWI-EAS443:3:72:1467:1394#0/1  
a\_]`[a`ba]ab[a`aba^\_aaa\_aaaa`\_`[aQa^\_a\_a  
@HWI-EAS443:3:72:1476:132#0/1  
GTAATGGTGAATTTCTCCAATTTGCTCCCTCCTCAGT  
+HWI-EAS443:3:72:1476:132#0/1  
a`a`aaa^aaa\_aaa^a`^\_aZa`\_a\_a`^`^]¥\_ZZ\_W]¥T  
@HWI-EAS443:3:72:1525:1196#0/1  
CCGCATTTCTTCAATTAACCACCTTATTTTCCTCAAATTTTC  
+HWI-EAS443:3:72:1525:1196#0/1  
abbababbabbaa\_babba\_\_¥`bb`babaabaaaaaaa  
@HWI-EAS443:3:72:154:506#0/1  
ATTGTCTGCAAATCGCTTGGGATATGCCAAAGGAAACAG  
+HWI-EAS443:3:72:154:506#0/1  
a¥baYaa`^`\_`a`[[`\_aaa^¥\_R]^Y[OS[[W[W^`Z[S  
@HWI-EAS443:3:72:154:783#0/1  
AGAAACTGTGATGAGAATGGGAGACCTTCACTACCTCCAG  
+HWI-EAS443:3:72:154:783#0/1  
a`Y^¥babYaaW\_TY\_^\_Ya]bV\_^`\_`\_]`^aa````^`\_  
@HWI-EAS443:3:72:1601:1185#0/1  
GAAACTGTGATGAGAATGGGAGACCTTCACTACCTCCAGA

+HWI-EAS443:3:72:1601:1185#0/1  
\_WX\_a^aL\_bTaPY[]\_^^N^WS¥^¥\_JSR]U]R^LZ[]0  
@HWI-EAS443:3:72:1602:1402#0/1  
CAGAGATTCGCTTGGAGAACTGTGATGAGAATGGGAGAC  
+HWI-EAS443:3:72:1602:1402#0/1  
`abaaaabababab\_abb\_`aa]\_aa``a``\_`ZZa^N  
@HWI-EAS443:3:72:1616:1234#0/1  
CTGTGATGAGAATGGGAGACCTTCACTACCTCCAGAGCAG  
+HWI-EAS443:3:72:1616:1234#0/1  
VabHWQbbUWW[bbbbbaabUabbab^b`]ba`bba`ab]b  
@HWI-EAS443:3:72:1620:587#0/1  
CTTTGGCATATCCGCAAGCGATTTGCAGACAATGGATTGG  
+HWI-EAS443:3:72:1620:587#0/1  
¥aaabbabbbb`b`bb\_G\_bbbb]\_`aaZU]b¥Uab\_JP  
@HWI-EAS443:3:72:1675:1034#0/1  
GCCGCATTTCTTCAATTAACCACCTTATTTCCCTCAAATTT  
+HWI-EAS443:3:72:1675:1034#0/1  
Q\_b``¥`X\_a\_SW^bbbb`b[a`a]`bb¥\_¥a`R`\_ab  
@HWI-EAS443:3:72:1675:1731#0/1  
GAAAATATACAGAGATTCGCTTGGAGAACTGTGATGAGA  
+HWI-EAS443:3:72:1675:1731#0/1  
^`\_¥K``]bZb[`\_JabbaR^`\_PP¥\_a]a`bYS¥a][`Y  
@HWI-EAS443:3:72:1690:25#0/1  
GATGAGAATGGGAGACCTTCACTACCTCCAGAGCAGAAAT  
+HWI-EAS443:3:72:1690:25#0/1  
¥Sb\_abbabbbb`^^a`bUb^baa^a`\_`a^]Qa`\_a\_a  
@HWI-EAS443:3:72:1724:105#0/1  
AGAAACTGTGATGAGAATGGGAGACCTTCACTACCTCCAG  
+HWI-EAS443:3:72:1724:105#0/1  
`a¥`a¥bb`a\_ab]a\_\_bab^]a]XT\_aX\_X\_¥GPY[Z[]  
@HWI-EAS443:3:72:172:267#0/1  
GAGAACTGTGATGAGAATGGGAGACCTTCACTACCTCCA  
+HWI-EAS443:3:72:172:267#0/1  
a`¥Xa^^`a[a\_^aTa¥\_]`[Z`R[WS¥^R]XYY]Y^VG  
@HWI-EAS443:3:72:1743:463#0/1  
AATGACAATTGCATCTGTACCTACTTCGCGCTACCTTCT  
+HWI-EAS443:3:72:1743:463#0/1  
abbaa\_aaaaaa`Z\_a`^a`^`a\_a]a`a]Z`\_`]\_  
@HWI-EAS443:3:72:177:682#0/1  
TGGAGAACTGTGATGAGAATGGGAGACCTTCACTACCTC  
+HWI-EAS443:3:72:177:682#0/1  
a`\_Ua^^¥\_\_X]b``\_YS`¥ZZ]XW]aa`[[]]\_`^`X]  
@HWI-EAS443:3:72:1782:326#0/1  
CCGCATTTCTTCAATTAACCACCTTATTTCCCTCAAATTT  
+HWI-EAS443:3:72:1782:326#0/1  
QX\_^bbbbbbbaabba\_a\_X\_[abbba^a^`\_baba`b`  
@HWI-EAS443:3:72:1788:178#0/1  
CTCCGATGAGGACCCCAACTGCATTTTTGACATCCTCATA  
+HWI-EAS443:3:72:1788:178#0/1  
\_`V\_`a`aaaPVTQ^`[JY^VLZ[¥[WXZ[^R[ZWW]Z



@HWI-EAS443:3:72:179:1760#0/1  
GAATGGGAGACCTTCACTACCTCCAGAGCAGAAATGAAAA  
+HWI-EAS443:3:72:179:1760#0/1  
^¥`X[XYR¥`\_\_Zaa\_`bab`U0[\_]V]ZZ^^`\_\_  
@HWI-EAS443:3:72:19:91#0/1  
GTCGCTTTCAATCTGTGCCGATTCTTCAATTAACCACC  
+HWI-EAS443:3:72:19:91#0/1  
a`R\_`S\_SS[[]XKOVZ¥aNFXY¥^U[NRQY\_[TXTTRQ  
@HWI-EAS443:3:72:229:438#0/1  
GCAAAATCGCTTGCGGATATGCCAAAGGAAACAGTCTACCT  
+HWI-EAS443:3:72:229:438#0/1  
aabbababaaa`aaa`\_\_`][\_\_`a`¥V[\_U`\_Y]]^V]^  
@HWI-EAS443:3:72:243:337#0/1  
TGCCGATTCTTCAATTAACCACCTTATTTCTCAAATT  
+HWI-EAS443:3:72:243:337#0/1  
aba`aa\_baaaaaba`abaaaa`aaaaa`aaa`aaaaaaa`  
@HWI-EAS443:3:72:247:741#0/1  
GCCGATTCTTCAATTAACCACCTTATTTCTCAAATTT  
+HWI-EAS443:3:72:247:741#0/1  
abbbbbbbbabababaa]aaaaaabbbaaaaaaaaaa[a  
@HWI-EAS443:3:72:253:1520#0/1  
GAGAATGGGAGACCTTCACTACCTCCAGAGCAGAAATGAA  
+HWI-EAS443:3:72:253:1520#0/1  
a`aa]b`aaaa`a`¥aa^`a`a¥`a\_\_ZX`\_Z\_]Y¥^\_\_  
@HWI-EAS443:3:72:298:18#0/1  
GAAACTGTGATGAGAATGGGAGACCTTCACTACCTCCAGA  
+HWI-EAS443:3:72:298:18#0/1  
`Z[^Zab]a\_`a^a^Y`\_\_\_Z`YUY]^^][TWXYVVU  
@HWI-EAS443:3:72:337:1454#0/1  
GCCGATTCTTCAATTAACCACCTTATTTCTCAAATTT  
+HWI-EAS443:3:72:337:1454#0/1  
abbabbbbbbbbaabbabaabbaaaabaabbaaaa`aba  
@HWI-EAS443:3:72:353:1320#0/1  
GGAGGGAGCAATAGTTGGAGAAATTTACCATTACCTTCT  
+HWI-EAS443:3:72:353:1320#0/1  
a`a\_aa\_aaaaaaa^a`aaa```aa`a^aa`^a`\_\_^]\_  
@HWI-EAS443:3:72:392:970#0/1  
GAGAACTGTGATGAGAATGGGAGACCTTCACTACCTCCA  
+HWI-EAS443:3:72:392:970#0/1  
``^^``aa\_aaXaaaV[¥]`ZS][U`¥Z``^]\_VWNU[  
@HWI-EAS443:3:72:409:81#0/1  
GTCATTCTAAGTGTCTCGCTGGATTCTTCAAGATCC  
+HWI-EAS443:3:72:409:81#0/1  
a^`aa`¥\_a]a^\_a`^\_\_aaS\_]WP`Z\_\_\_X^[]]¥QY  
@HWI-EAS443:3:72:427:556#0/1  
CTGTGATGAGAATGGGAGACCTTCACTACCTCCAGAGCAG  
+HWI-EAS443:3:72:427:556#0/1  
aa`^`aa\_ab\_W`a\_WX\_]¥]a`aa^X^\_[¥^a`\_UXV¥`  
@HWI-EAS443:3:72:431:1068#0/1  
GCCGATTCTTCAATTAACCACCTTATTTCTCAAATTT

+HWI-EAS443:3:72:431:1068#0/1  
ab`aa\_bb]`b`ba\_baZ\_a``aabaaaaaaaaaaaa`aaa  
@HWI-EAS443:3:72:447:268#0/1  
GCCGCATTTCTTCAATTAACCACCTTATTTCTCAAATTT  
+HWI-EAS443:3:72:447:268#0/1  
aaa``]`aaaa\_aaaa`^^``\_a`aa`a`\_a\_``\_a`  
@HWI-EAS443:3:72:462:1076#0/1  
GCCGCATTTCTTCAATTAACCACCTTATTTCTCAAATTT  
+HWI-EAS443:3:72:462:1076#0/1  
a^V¥YKP[^a[]\_U]^\_aT0`]a\_\_\_\_ZZY^\_a`^`V[]ZY  
@HWI-EAS443:3:72:47:952#0/1  
TCGTGACATTTCTTCGAGGGTCATGT CAGAAAGGTAGCGC  
+HWI-EAS443:3:72:47:952#0/1  
aba`¥I\_aaa`aa^a`[a\_`U\_````[``\_a^[[`ZP[``\_][  
@HWI-EAS443:3:72:500:454#0/1  
GATGAGAATGGGAGACCTTCACTACCTCCAGAGCAGAAAT  
+HWI-EAS443:3:72:500:454#0/1  
`]bb[\_0\_abb[]b`]aa\_ab`a[``]\_aa]P\_\_[\_`Z^\_`  
@HWI-EAS443:3:72:576:860#0/1  
CGCTTGGAGAAACTGTGATGAGAATGGGAGACCTTCACTA  
+HWI-EAS443:3:72:576:860#0/1  
abaaaabaabaabaab]a\_aa`a`aa``\_[]V[a^\_Z`\_^`  
@HWI-EAS443:3:72:633:842#0/1  
GAGAGCAATTGGGACAGAAATTTGAGGAAATAAGGTGGTT  
+HWI-EAS443:3:72:633:842#0/1  
aaaSaV¥TZ`¥^Z]Xaa[a```\_aY\_a\_Y^a\_[\_\_aPaaQU  
@HWI-EAS443:3:72:670:433#0/1  
TCTCCATTCTCATCACAGTTTCTCCAAGCGAATCTCTGT  
+HWI-EAS443:3:72:670:433#0/1  
a\_aaYa`aaa`aaa\_\_a\_^a[``\_a\_\_\_\_XQ```aSV¥RU]^`Z  
@HWI-EAS443:3:72:692:2033#0/1  
CGCTTGGAGAAACTGTGATGAGAATGGGAGACCTTCACTA  
+HWI-EAS443:3:72:692:2033#0/1  
a\_aZ^\_]`^¥V]a\_^YZWWT¥¥^YVWVXXX]]YX^^^U^  
@HWI-EAS443:3:72:699:778#0/1  
AGAAACTGTGATGAGAATGGGAGACCTTCACTACCTCCAG  
+HWI-EAS443:3:72:699:778#0/1  
aa\_Zaaa\_U\_\_a\_V\_]`^\_Z\_```¥```W[^\_`V¥¥]Z^¥^  
@HWI-EAS443:3:72:705:99#0/1  
TGAGAATGGGAGACCTTCACTACCTCCAGAGCAGAAATGA  
+HWI-EAS443:3:72:705:99#0/1  
ab\_a]`aaaa\_a`¥W`^]\_[`X][^X^^]^XV^XTW^\_Y  
@HWI-EAS443:3:72:721:1498#0/1  
CTTGGAGAAACTGTGATGAGAATGGGAGACCTTCACTACC  
+HWI-EAS443:3:72:721:1498#0/1  
aa\_aa`^MW^\_\_`N]]\_Y^^U`^]\_Y]^`\_X\_\_¥\_]¥]SZ  
@HWI-EAS443:3:72:725:976#0/1  
GCCGCATTTCTTCAATTAACCACCTTATTTCTCAAATTT  
+HWI-EAS443:3:72:725:976#0/1  
abaaa`a`aa`aa`\_aa`\_`aaaaaaaa```aaaa\_a``

@HWI-EAS443:3:72:752:1906#0/1  
ATCCGCAAGCGATTTGCAGACAATGGATTGGGTGATGCCC  
+HWI-EAS443:3:72:752:1906#0/1  
aa`][bT`aaaa]`aaYTD¥aaa^U¥MUSX[N`^UM^]  
@HWI-EAS443:3:72:81:1126#0/1  
GCCGCATTTCTTCAATTAACCACCTTATTTCTCAAATTT  
+HWI-EAS443:3:72:81:1126#0/1  
aba^\_¥aaaaaabJ]Z`WXa\_]`]OZXa```a\_^X]XX`^  
@HWI-EAS443:3:72:825:653#0/1  
CTGTGCGTTTCAATCTGTGCCGCATTTCTTCAATTAACCA  
+HWI-EAS443:3:72:825:653#0/1  
abb^ababbbababab`bbaabaabbb\_bbaaabab`aaa  
@HWI-EAS443:3:72:849:160#0/1  
GCCGCATTTCTTCAATTAACCACCTTATTTCTCAAATTT  
+HWI-EAS443:3:72:849:160#0/1  
aaab`aaaaaaaa`aba`a\_\_a`aaaa¥a`a^`a``  
@HWI-EAS443:3:72:857:1927#0/1  
GCCGCATTTCTTCAATTAACCACCTTATTTCTCAAATTT  
+HWI-EAS443:3:72:857:1927#0/1  
a`abbaabaabaaaaaba`bbabababaaaaabaaa`a  
@HWI-EAS443:3:72:883:226#0/1  
AGAAACTGTGATGAGAATGGGAGACCTTCACTACCTCCAG  
+HWI-EAS443:3:72:883:226#0/1  
a\_\_][aa]`aabaa`][`\_X\_^[\_`Ya]^aR[Y¥¥]  
@HWI-EAS443:3:72:885:575#0/1  
AGAAAGGTAGCGCGAAGTAGGTACAGATGCAATTGTCATT  
+HWI-EAS443:3:72:885:575#0/1  
ab\_baabYbaabababab`aaa^aaba`aaaa`a\_a`aa  
@HWI-EAS443:3:72:908:1680#0/1  
GCCGCATTTCTTCAATTAACCACCTTATTTCTCAAATTT  
+HWI-EAS443:3:72:908:1680#0/1  
abbbbbbbabbbbaabaababbbabaaa`ababaab`baa  
@HWI-EAS443:3:72:91:803#0/1  
ATGAGAATGGGAGACCTTCACTACCTCCAGAGCAGAAATG  
+HWI-EAS443:3:72:91:803#0/1  
aaaaaa^aaaa`aaa`\_\_aaa`a^`\_\_`\_\_\_\_`^`^]\_\_\_\_  
@HWI-EAS443:3:72:920:1459#0/1  
AGAAACTGTGATGAGAATGGGAGACCTTCACTACCTCCAG  
+HWI-EAS443:3:72:920:1459#0/1  
aaaaaaaa[aa\_a`Yaaaa`\_[a`\_\_a^\_\_WX^\_¥¥Y  
@HWI-EAS443:3:72:923:1670#0/1  
AGAATGGGAGACCTTCACTACCTCCAGAGCAGAAATGAAA  
+HWI-EAS443:3:72:923:1670#0/1  
abaaa`\_aa^aaa`\_ba`a`^aa`\_\_\_\_`a\_`\_`^`a``  
@HWI-EAS443:3:72:924:1955#0/1  
GCCGCATTTCTTCAATTAACCACCTTATTTCTCAAATTT  
+HWI-EAS443:3:72:924:1955#0/1  
`b`b`b`^]XXbb\_V`\_M[[b`^`T^b`\_Wbaaaa^aa\_\_  
@HWI-EAS443:3:72:942:164#0/1  
CAGGTAGACTGTTTCTTTGGCATATCCGCAAGCGATTTG

+HWI-EAS443:3:72:942:164#0/1  
aabb[\_aab\_\_Wab\_aaba^\_\_^bba^Xbaaaa^b]aa`W  
@HWI-EAS443:3:72:943:373#0/1  
GGCACAGATTGAAAGCGACAGAGAATAGTTTCGAACAAAT  
+HWI-EAS443:3:72:943:373#0/1  
a`aa\_ab`a`b`a``aa^`a`a``a]aa]a^`]^`\_^  
@HWI-EAS443:3:72:945:795#0/1  
TCGCTTTCAATCTGTGCCGATTTCTTCAATTAACCACCT  
+HWI-EAS443:3:72:945:795#0/1  
Xa\_G\_bb^V]\_a\_M]`abaSZ\_aXX][aIa][LaYJV[aV  
@HWI-EAS443:3:72:949:99#0/1  
AAACTGTGATGAGAATGGGAGACCTTCACTACCTCCAGAG  
+HWI-EAS443:3:72:949:99#0/1  
aaa`bbab`ab\_b[\_aaaa\_a`^[a`]^]a`]^\_`^Y\_aY\_  
@HWI-EAS443:3:72:962:1026#0/1  
AAAAGTCCTTAAAAGGAAGAGGCAACACCCTTGGCCTCGA  
+HWI-EAS443:3:72:962:1026#0/1  
aT¥^¥]¥`a`b`\_`\_]bZ[Y\_[aa\_¥¥R`YX`YS]`a\_  
@HWI-EAS443:3:72:980:1341#0/1  
GAGAATGGGAGACCTTCACTACCTCCAGAGCAGAAATGAA  
+HWI-EAS443:3:72:980:1341#0/1  
aaaaaaaa`]aaaaaaaaabb^aaaaaaaa\_\_^¥aaa`\_`\_aa``  
@HWI-EAS443:3:73:1024:1926#0/1  
GTGCCGATTTCTTCAATTAACCACCTTATTTCTCAAAT  
+HWI-EAS443:3:73:1024:1926#0/1  
a`aabbababa\_aaabb`baaaaaa`\_`aaaaaa``a`a`  
@HWI-EAS443:3:73:1027:134#0/1  
CAGAGATTGCTTGGAGAACTGTGATGAGAATGGGAGAC  
+HWI-EAS443:3:73:1027:134#0/1  
a`\_\_`W]¥¥aX\_¥W`\_a]`V¥Z^IXYX¥UXKPZ¥]`PYNB  
@HWI-EAS443:3:73:1052:1003#0/1  
TGGAGAACTGTGATGAGAATGGGAGACCTTCACTACCTC  
+HWI-EAS443:3:73:1052:1003#0/1  
abaab`bbaab\_aabaaaaa`aa`\_aa]`aa`a\_aaaZ^\_  
@HWI-EAS443:3:73:1056:352#0/1  
TGCCGATTTCTTCAATTAACCACCTTATTTCTCAAATT  
+HWI-EAS443:3:73:1056:352#0/1  
ab`^bTJa`^`]¥`aaaa[`Y^a]aa`aaa`X\_a^^`^X  
@HWI-EAS443:3:73:1064:787#0/1  
ATTACACTGAAGTTGCTTTTCAGTACTATGTTCTTTTCCA  
+HWI-EAS443:3:73:1064:787#0/1  
\_baY]\_bb\_ba`Ya`ba`abaaa\_aaa[abQ[aa`a`\_]a  
@HWI-EAS443:3:73:1068:668#0/1  
AGAACTGTGATGAGAATGGGAGACCTTCACTACCTCCAG  
+HWI-EAS443:3:73:1068:668#0/1  
a``[`aaa^^`a\_a^VZ][¥Y]^Y]^ZZ]¥U]RP[YPVV  
@HWI-EAS443:3:73:1072:153#0/1  
GAAACTGTGATGAGAATGGGAGACCTTCACTACCTCCAGA  
+HWI-EAS443:3:73:1072:153#0/1  
aa]aXa]aba`UT`W[a\_¥XNKMUW¥VRKQQRSLSPNDWN

@HWI-EAS443:3:73:1079:933#0/1  
TGCCGCATTTCTTCAATTAACCACCTTATTTCCCTCAAATT  
+HWI-EAS443:3:73:1079:933#0/1  
a[aaaa]aaa`aaaaaa`\_a`\_`aa`a^`\_\_`\_\_`^```  
@HWI-EAS443:3:73:1108:560#0/1  
CAAGGAATGGGGCATCACCCAATCCATTGTCTGCAAATCG  
+HWI-EAS443:3:73:1108:560#0/1  
]^aaabaa\_UQ[]`bKbbb]bbba]bbab\_V^aab`\_`T]  
@HWI-EAS443:3:73:1155:936#0/1  
GAAACTGTGATGAGAATGGGAGACCTTCACTACCTCCAGA  
+HWI-EAS443:3:73:1155:936#0/1  
`[\_¥^\_UX\_aVa]¥P\_a`\_\_`Z^^[^\_\_¥^^]^ZSS`V  
@HWI-EAS443:3:73:1175:1525#0/1  
ATCGCACGCAAAGAGGGCCTATTATCTTTTGCCTAGGCAT  
+HWI-EAS443:3:73:1175:1525#0/1  
aa`babaaaa`aa\_a\_a\_^\_aaa\_^Z`aa¥Y[\_a¥\_\_\_\_  
@HWI-EAS443:3:73:1222:766#0/1  
TTTCCTTTGGCATATCCGCAAGCGATTTGCAGACAATGGA  
+HWI-EAS443:3:73:1222:766#0/1  
abababa[baabaaa]aaa\_\_aa`\_\_`a`\_\_\_\_¥a\_\_¥Y[  
@HWI-EAS443:3:73:1250:393#0/1  
CTTGAATGGAATGGTAACACGGTTCGAGTCTCTGAAAATA  
+HWI-EAS443:3:73:1250:393#0/1  
``babbbbaabbabaa]bb`abbab`^baaba`aaaa  
@HWI-EAS443:3:73:1264:635#0/1  
CGCGCTACCTTCTGACATGACCCTCGAGGAAATGTCACG  
+HWI-EAS443:3:73:1264:635#0/1  
aaaaaab`abaa\_\_a`aaa`\_`\_]\_[`]^[[\_a\_\_[\_U\_`  
@HWI-EAS443:3:73:131:1134#0/1  
TGAGAATGGGAGACCTTCACTACCTCCAGAGCAGAAATGA  
+HWI-EAS443:3:73:131:1134#0/1  
aa`\_X`bZb`[b`^ab^]b\_]aaaa]QaRaRaa^a[\_`\_`  
@HWI-EAS443:3:73:1379:147#0/1  
GGAGAACTGTGATGAGAATGGGAGACCTTCACTACCTCC  
+HWI-EAS443:3:73:1379:147#0/1  
¥`aaQWZNT¥Q¥T\_PZVZUTa]T[SPNFJVL¥¥^SSQPPQ  
@HWI-EAS443:3:73:1401:139#0/1  
GGAATGGGGCATCACCCAATCCATTGTCTGCAAATCGCTT  
+HWI-EAS443:3:73:1401:139#0/1  
`]U[IY\_aZMWYQGLXMQJ[FPSYRVQU`UUUWBBBBBBB  
@HWI-EAS443:3:73:1404:764#0/1  
GCCGCATTTCTTCAATTAACCACCTTATTTCCCTCAAATTT  
+HWI-EAS443:3:73:1404:764#0/1  
aa`\_`bbbaaaaaa`ab`\_\_a`aabaaaa`\_aa`\_\_a\_a`  
@HWI-EAS443:3:73:1422:865#0/1  
GAAACTGTGATGAGAATGGGAGACCTTCACTACCTCCAGA  
+HWI-EAS443:3:73:1422:865#0/1  
]]R\_`^`aYaa\_a¥]^`^¥]aU\_`^¥LWR^\_Y`\_\_`X]^\_Z^]  
@HWI-EAS443:3:73:1433:185#0/1  
GGATCTTGAAAGAGGAATCCAGCGAGACACTTAGAATGAC

+HWI-EAS443:3:73:1433:185#0/1  
aa]a^aaaaaa[aaaa\_aYX` ` \_a\_a^]¥Xa\_` `\_\_^` ` \_¥Z  
@HWI-EAS443:3:73:1450:86#0/1  
AGAAACTGTGATGAGAATGGGAGACCTTCACTACCTCCAG  
+HWI-EAS443:3:73:1450:86#0/1  
`b`Jal\_`aa[ `Tab¥ab`aa`baZ^\_aZaR\_\_WSaZZ]a  
@HWI-EAS443:3:73:1466:1889#0/1  
TCTGTGCCGATTTCTTCAATTAACCACCTTATTTCTCA  
+HWI-EAS443:3:73:1466:1889#0/1  
`W[\_]\_b¥baaaaa^[aaaa][\_a\_a^]aa`aa\_\_[ ` ` \_a  
@HWI-EAS443:3:73:1503:915#0/1  
CGCTTTCAATCTGTGCCGATTTCTTCAATTAACCACCTT  
+HWI-EAS443:3:73:1503:915#0/1  
abaaababab\_aaaa^\_\_[\_]aaa[aa\_a`aa\_a\_\_\_\_[0a`  
@HWI-EAS443:3:73:1534:1328#0/1  
GGCAACACCCTTGGCCTCGATATCGAAACAGCCACTCTTG  
+HWI-EAS443:3:73:1534:1328#0/1  
¥K\_\_` ` \_TR^\_\_^YYNRV[¥\_\_`X¥V¥NW[SS¥¥UWWVRR  
@HWI-EAS443:3:73:154:1783#0/1  
GTGCTTTCAATCTGTGCCGATTTCTTCAATTAACCACC  
+HWI-EAS443:3:73:154:1783#0/1  
aabb`aabbbaa]`\_aaa` `aaaaaa]`a`a\_aaaa\_  
@HWI-EAS443:3:73:1550:1557#0/1  
GAAACTGTGATGAGAATGGGAGACCTTCACTACCTCCAGA  
+HWI-EAS443:3:73:1550:1557#0/1  
aa¥a`abP]¥`aVR]UWWQ[P\_¥JF[[RYRIWSG`]VL^X  
@HWI-EAS443:3:73:1559:625#0/1  
AGACTGTTTCTTTGGCATATCCGCAAGCGATTTGCAGAC  
+HWI-EAS443:3:73:1559:625#0/1  
\_¥\_bba]¥Z¥\_aa¥[[TT`X¥[\_^]X][JYVX^`TQO\_0J  
@HWI-EAS443:3:73:1591:272#0/1  
CACGGTTCGAGTCTCTGAAAATATACAGAGATTCGCTTGG  
+HWI-EAS443:3:73:1591:272#0/1  
aaabb^baa]^`[ ` `aaa` `aaaa` ]\_WZa^\_`V¥MY^`\_  
@HWI-EAS443:3:73:1603:2006#0/1  
GAAAATATACAGAGATTCGCTTGGAGAACTGTGATGAGA  
+HWI-EAS443:3:73:1603:2006#0/1  
abbabaabb\_aaa¥aaaa¥^`a\_\_`a\_aa\_^XMP]X\_¥]^  
@HWI-EAS443:3:73:1643:1652#0/1  
GAAAGCTTTATCTCTTGTCTACTTCAAGCAGTAGTTGT  
+HWI-EAS443:3:73:1643:1652#0/1  
aaaaa`a`aa\_a^`aaaa^a\_aa`aa\_a\_\_\_\_a¥\_\_]`\_^  
@HWI-EAS443:3:73:166:1124#0/1  
CTCTGAAAATATACAGAGATTCGCTTGGAGAACTGTGAT  
+HWI-EAS443:3:73:166:1124#0/1  
\_`bbb]b`^bbbbbbb\_bXa`b\_ab\_a]aa\_^^^a`^`\_^  
@HWI-EAS443:3:73:176:259#0/1  
CTTGGAGAACTGTGATGAGAATGGGAGACCTTCACTACC  
+HWI-EAS443:3:73:176:259#0/1  
^a¥` ` `babaaba[\_]Z\_a^ZYY\_` ` ` \_a\_`VWV`Y`\_\_Q

@HWI-EAS443:3:73:194:403#0/1  
AGGGTGTTCCTCTTCTTTTAAGGACTTTTGATCTCGGC  
+HWI-EAS443:3:73:194:403#0/1  
`\_`aW^^aa`aaa`^^^^`a^¥``¥^\_\_¥`\_W\_^] ^¥\_  
@HWI-EAS443:3:73:216:66#0/1  
TCATGCCTAGGCAAAAGATAATAGGCCCTCTTTGCGTGCG  
+HWI-EAS443:3:73:216:66#0/1  
\_]VP\_Sa¥^SUXZXX]^]YYTTZPZQSY¥ZTWNSLTQY  
@HWI-EAS443:3:73:262:805#0/1  
CCGCATTTCTTCAATTAACCACCTTATTTCTCAAATTT  
+HWI-EAS443:3:73:262:805#0/1  
`abaaaaaaaaaa\_aa\_aaaaa\_a`aa\_a`\_aa`W\_\_\_\_\_`  
@HWI-EAS443:3:73:275:528#0/1  
CTTGGAGAACTGTGATGAGAATGGGAGACCTTCACTACC  
+HWI-EAS443:3:73:275:528#0/1  
ababbaba]baaa\_a]aaaa`a`a\_a]a`^`\_\_a\_^Y\_  
@HWI-EAS443:3:73:285:232#0/1  
TGAGAATGGGAGACCTTCACTACCTCCAGAGCAGAAATGA  
+HWI-EAS443:3:73:285:232#0/1  
abaaaaaaaa`a[aaa`^¥^a`^`\_^]^Z^^`\_\_a^BBBBB  
@HWI-EAS443:3:73:318:872#0/1  
CTCCCATTCTCATCACAGTTTCTCCAAGCGAATCTCTGTA  
+HWI-EAS443:3:73:318:872#0/1  
]^T^Z^¥¥^¥^`^b`^YFY]babab\_GY`^R]`[a¥\_¥`  
@HWI-EAS443:3:73:331:398#0/1  
GGAGAACTGTGATGAGAATGGGAGACCTTCACTACCTCC  
+HWI-EAS443:3:73:331:398#0/1  
aa\_aZ¥\_]\_a]`Y`\_`\_^]¥]\_\_]^V^Y^^^X^YYY  
@HWI-EAS443:3:73:345:643#0/1  
ATCGGTTAAAGATTACACTGAAGTTCGTTTCAGTACTAT  
+HWI-EAS443:3:73:345:643#0/1  
abb]bGa\_a`[JY^a\_\_`\_\_XW`Sa`¥U]]aW]^[][]`  
@HWI-EAS443:3:73:349:98#0/1  
GAATGGTAACACGGTTCGAGTCTCTGAAAATATACAGAGA  
+HWI-EAS443:3:73:349:98#0/1  
a``aaa\_aa`\_\_a\_]\_^a^`]\_\_]^YLY¥]]^]]XZ\_] ^X  
@HWI-EAS443:3:73:362:942#0/1  
GCCGCATTTCTTCAATTAACCACCTTATTTCTCAAATTT  
+HWI-EAS443:3:73:362:942#0/1  
\_abbbaaaaa\_aaaaaa`\_aa``a`aaa\_``aa^X^^\_  
@HWI-EAS443:3:73:370:860#0/1  
GAGAACTGTGATGAGAATGGGAGACCTTCACTACCTCCA  
+HWI-EAS443:3:73:370:860#0/1  
¥\_]ab\_baa`b`a\_ba¥a`a\_a[a\_\_a^Ya\_\_`a\_aTaaW  
@HWI-EAS443:3:73:377:1903#0/1  
GAAACTGTGATGAGAATGGGAGACCTTCACTACCTCCAGA  
+HWI-EAS443:3:73:377:1903#0/1  
aUSVS^XDTa]\_V¥\_T]]¥[¥`Y``RKZa`Za^`Y\_\_\_\_]I  
@HWI-EAS443:3:73:382:1816#0/1  
GAGAACTGTGATGAGAATGGGAGACCTTCACTACCTCCA

+HWI-EAS443:3:73:382:1816#0/1  
\_bbabb`\_\_abaa^^a`\_a^`aa`ab^^bb``a^`^`aa  
@HWI-EAS443:3:73:385:400#0/1  
GCGGCACAGATTGAAAGCGACAGAGAATAGTTTCGAACAA  
+HWI-EAS443:3:73:385:400#0/1  
abbaabaaaaaaaa]`^`aa\_aa\_aa`aa]a`\_`^`\_\_[  
@HWI-EAS443:3:73:436:1258#0/1  
GAAACTGTGATGAGAATGGGAGACCTTCACTACCTCCAGA  
+HWI-EAS443:3:73:436:1258#0/1  
`a]ZbaaRa]a`Zaaaa`\_\_a[a`\_aaaa]aa^^`\_\_\_\_  
@HWI-EAS443:3:73:449:829#0/1  
CCGCATTTCTTCAATTAACCACCTTATTTCCCTCAAATTTCT  
+HWI-EAS443:3:73:449:829#0/1  
ab^aZ`bbabbaaabaababbaaaab\_G\_baabaaaa`\_a  
@HWI-EAS443:3:73:451:94#0/1  
CGCATTTCTTCAATTAACCACCTTATTTCCCTCAAATTTCT  
+HWI-EAS443:3:73:451:94#0/1  
\_\_S¥`Zbbbaa^bb¥¥`a^`\_bbZ`b\_ZT`a]abaaaaXa  
@HWI-EAS443:3:73:474:1999#0/1  
CTTTCTGACATGACCCTCGAGGAAATGTCACGAGACTGGT  
+HWI-EAS443:3:73:474:1999#0/1  
aaa]aTUZaa]¥^aa\_L\_a[\_[^XZZ¥N\_\_`^[^P[VXGU  
@HWI-EAS443:3:73:488:1289#0/1  
GCGCTACCTTTCTGACATGACCCTCGAGGAAATGTCACGA  
+HWI-EAS443:3:73:488:1289#0/1  
\_]`a^VX\_]\_¥\_`¥X\_`Z]\_[a\_Z^^¥Z`\_^ZZ\_V`¥USV  
@HWI-EAS443:3:73:531:488#0/1  
GCCGCATTTCTTCAATTAACCACCTTATTTCCCTCAAATTT  
+HWI-EAS443:3:73:531:488#0/1  
\_baa¥Q\_a`aaaaWaaaa^^[aaaaaaaa\_\_aa`a\_a`  
@HWI-EAS443:3:73:54:72#0/1  
CCGCATTTCTTCAATTAACCACCTTATTTCCCTCAAATTTCT  
+HWI-EAS443:3:73:54:72#0/1  
aab`aaaa`aa\_\_`a\_\_\_\_]\_`^Xa\_`]\_\_\_\_`]]\_`\_]  
@HWI-EAS443:3:73:552:1450#0/1  
GTCGCTTTCAATCTGTGCCGATTTCTTCAATTAACCACC  
+HWI-EAS443:3:73:552:1450#0/1  
`aba`]\_]\_aa\_`bba`abaa``aaaaaaaaaaaaabaaa\_b  
@HWI-EAS443:3:73:583:832#0/1  
GAAACTGTGATGAGAATGGGAGACCTTCACTACCTCCAGA  
+HWI-EAS443:3:73:583:832#0/1  
a^U¥^aaabb`baaaab\_OW¥aaa`aYaa`a\_a]a\_a^\_a  
@HWI-EAS443:3:73:64:813#0/1  
AGAAACTGTGATGAGAATGGGAGACCTTCACTACCTCCAG  
+HWI-EAS443:3:73:64:813#0/1  
[ZY^aa`aUa\_aa¥`Z[^]\_WOY¥W\_^]aUUU]\_Y^SZ]  
@HWI-EAS443:3:73:662:884#0/1  
TGAGAATGGGAGACCTTCACTACCTCCAGAGCAGAAATGA  
+HWI-EAS443:3:73:662:884#0/1  
abb[MXU¥V^SM¥\_] ^S]Pab``aaa`¥Ra\_a[U[a]aa^



@HWI-EAS443:3:73:678:1088#0/1  
GAGAATGGGAGACCTTCACTACCTCCAGAGCAGAAATGAA  
+HWI-EAS443:3:73:678:1088#0/1  
aabaaba`abaaabaabaaaaaaaa`aa`a`\_aaaa  
@HWI-EAS443:3:73:700:50#0/1  
GTGCCGATTTCTTCAATTAACCACCTTATTCCTCAAAT  
+HWI-EAS443:3:73:700:50#0/1  
a`aaaa`aa`Y]aa\_\_a\_\_\_^Y^[Ta[\_a]^^X^]¥X¥\_  
@HWI-EAS443:3:73:717:994#0/1  
GCCGATTTCTTCAATTAACCACCTTATTCCTCAAATTT  
+HWI-EAS443:3:73:717:994#0/1  
abbb\_ababaaab^^a`ba`^`aaaaba`aaaaaaaa  
@HWI-EAS443:3:73:719:740#0/1  
GTGCGTTTCAATCTGTGCCGATTTCTTCAATTAACCACC  
+HWI-EAS443:3:73:719:740#0/1  
aW\_VYZL¥`aTa`^^YRa\_\_]Y¥`\_`\_\_^\_^`\_]\_]Y]Y]  
@HWI-EAS443:3:73:754:1740#0/1  
TGAGAATGGGAGACCTTCACTACCTCCAGAGCAGAAATGA  
+HWI-EAS443:3:73:754:1740#0/1  
aaRR]\_[`a[0¥F^aa`aa^\_a\_S]YV]Z`a`\_\_Z^\_^\_[  
@HWI-EAS443:3:73:75:1215#0/1  
TGAGAATGGGAGACCTTCACTACCTCCAGAGCAGAAATGA  
+HWI-EAS443:3:73:75:1215#0/1  
`bY`OSSP[WK\_\_aaV[bXa^aa¥^`\_Y`W`\_Ya[`V\_^Y  
@HWI-EAS443:3:73:781:1482#0/1  
AAGGAATGGGCATCACCCAATCCATTGTCTGCAAATCGC  
+HWI-EAS443:3:73:781:1482#0/1  
¥QP][^M¥a)```\_W\_a`a]\_a[SYR[^[Z\_VX]`][[¥  
@HWI-EAS443:3:73:792:795#0/1  
GGTTAATTGAAGAAATGCGGCACAGATTGAAAGCGACAGA  
+HWI-EAS443:3:73:792:795#0/1  
ab`bbbbabaabab\_bbab`aaaa`aaaaaaaa`aaaaa  
@HWI-EAS443:3:73:795:1921#0/1  
GAGAACTGTGATGAGAATGGGAGACCTTCACTACCTCCA  
+HWI-EAS443:3:73:795:1921#0/1  
]U`\_W`\_]\_SSaaa]^Q]]PZZSQ¥\_[[`a¥¥W\_WU[V]  
@HWI-EAS443:3:73:796:998#0/1  
AGAACTGTGATGAGAATGGGAGACCTTCACTACCTCCAG  
+HWI-EAS443:3:73:796:998#0/1  
aaa^aaaa]a\_`aV`]]\_a\_ZZ]]]]\_Z^\_^]\_Y\_^]]]  
@HWI-EAS443:3:73:819:843#0/1  
GTGATGAGAATGGGAGACCTTCACTACCTCCAGAGCAGAA  
+HWI-EAS443:3:73:819:843#0/1  
aXaZa\_Z]^`a^\_¥a`a\_^`\_]]\_]]\_]^Z[Z^\_ZS  
@HWI-EAS443:3:73:828:1678#0/1  
ATGAGAATGGGAGACCTTCACTACCTCCAGAGCAGAAATG  
+HWI-EAS443:3:73:828:1678#0/1  
`aaa`baaaa]\_`a`aa`aa`aa`\_aa`]^`\_`\_  
@HWI-EAS443:3:73:82:567#0/1  
GCCGATTTCTTCAATTAACCACCTTATTCCTCAAATTT

+HWI-EAS443:3:73:82:567#0/1  
^abbbabbbabbbb¥bbb^bb\_abaabbbbbaaaa^aaba  
@HWI-EAS443:3:73:841:736#0/1  
CGAGAAAGCTCTTATCTCTTGTCTACTTCAAGCAGTAGT  
+HWI-EAS443:3:73:841:736#0/1  
aa\_aZTV`X`^aZTZP¥]\_^OS]a\_```\_[\_^`Z[QS]\_¥  
@HWI-EAS443:3:73:874:473#0/1  
GCGCGAAGTAGGTACAGATGCAATTGTCATTCTAAGTGTC  
+HWI-EAS443:3:73:874:473#0/1  
aaaab]bb\_baa]aaaa`a`aaa`a\_\_aaa\_aaa`Y\_^]  
@HWI-EAS443:3:73:882:349#0/1  
GAAAATATACAGAGATTCGCTTGGAGAACTGTGATGAGA  
+HWI-EAS443:3:73:882:349#0/1  
^Y]Yaaaa^\_aa\_a[Y\_Y\_[\_¥X¥Y`X[[SY\_YVW^\_[^U  
@HWI-EAS443:3:73:924:37#0/1  
GAGAACTGTGATGAGAATGGGAGACCTTCACTACCTCCA  
+HWI-EAS443:3:73:924:37#0/1  
a`a^aa`ab\_a\_`a^a\_\_\_a```]\_WVW\_\_UY`\_VR^VU[  
@HWI-EAS443:3:73:969:1925#0/1  
CAATTGCATCTGTACCTACTTCGCGCTACCTTTCTGACAT  
+HWI-EAS443:3:73:969:1925#0/1  
a^`[aZ\_[`\_]ZU\_baaaa[]U]\_```a^`XUS^YYa`^Z  
@HWI-EAS443:3:73:979:1848#0/1  
GGGAAACAAATCGTGGAATGGATCTTGAAAGAGGAATCCA  
+HWI-EAS443:3:73:979:1848#0/1  
abaK]bba`ab\_YH]`¥`^b¥a[\_aaaa\_a¥]a`Z``RYZ  
@HWI-EAS443:3:74:1001:847#0/1  
ATTTGTTCGAAACTATTCTCTGTCGCTTCAATCTGTGCC  
+HWI-EAS443:3:74:1001:847#0/1  
aabaaaa`^aa\_baababbaa`^aa`a`aa\_aYaa^\_¥V  
@HWI-EAS443:3:74:1040:780#0/1  
GCTGTTTCGATATCGAGCCAAGGGTGTGCCTCTTCCTT  
+HWI-EAS443:3:74:1040:780#0/1  
a``UJ\_a]b¥W\_Za`S]a]`a`Ya\_W`^^^HSXT`YHS``  
@HWI-EAS443:3:74:1068:1956#0/1  
GAGAACTGTGATGAGAATGGGAGACCTTCACTACCTCCA  
+HWI-EAS443:3:74:1068:1956#0/1  
aaaa^`]a\_W^¥\_] [Zaaa`Z]W\_a\_a]\_aa\_[\_¥¥]Z\_^  
@HWI-EAS443:3:74:1093:1432#0/1  
TGAGAATGGGAGACCTTCACTACCTCCAGAGCAGAAATGA  
+HWI-EAS443:3:74:1093:1432#0/1  
aba``U]\_^ [ZZWTWaaa`][^a`aabZYY`]aa[]`bXa  
@HWI-EAS443:3:74:1105:1194#0/1  
TGAGAATGGGAGACCTTCACTACCTCCAGAGCAGAAATGA  
+HWI-EAS443:3:74:1105:1194#0/1  
ab`aa [bbba`ba\_aaaabb`aaaaaa^\_`a`\_b]\_\_`a]  
@HWI-EAS443:3:74:111:1732#0/1  
GGTACAGATGCAATTGTCATTCTAAGTGTCCTCGCTGGATT  
+HWI-EAS443:3:74:111:1732#0/1  
H¥\_a\_]bb`^^b\_abaab\_bbbbbbb\_Jbab`baa]`bYU\_

@HWI-EAS443:3:74:1130:1015#0/1  
AAACTGTGATGAGAATGGGAGACCTTCACTACCTCCAGAG  
+HWI-EAS443:3:74:1130:1015#0/1  
aaTXab`b^a\_0Zaa`aa\_Ya\_]a`^aaZ]^]\_^Z\_\_`[]  
@HWI-EAS443:3:74:1145:1027#0/1  
GACTGTTTCTTTGGCATATCCGCAAGCGATTTGCAGACA  
+HWI-EAS443:3:74:1145:1027#0/1  
[a`aaNa^X\_b[\_[aR`]aab`aZaaa`]^\_X]aYbaXWS  
@HWI-EAS443:3:74:1145:308#0/1  
TGAGAATGGGAGACCTTCACTACCTCCAGAGCAGAAATGA  
+HWI-EAS443:3:74:1145:308#0/1  
\_aS¥[PVa]`PWNas^`][\_U`\_[`^[W\_[TL]aU]YY]U  
@HWI-EAS443:3:74:1152:559#0/1  
CCGCATTTCTTCAATTAACCACCTTATTTCTCAAATTT  
+HWI-EAS443:3:74:1152:559#0/1  
abbbabababbbbabbbbaabaabbababbabababbbba  
@HWI-EAS443:3:74:1179:860#0/1  
GTCGCTTTCAATCTGTGCCGATTTCTTCAATTAACCACC  
+HWI-EAS443:3:74:1179:860#0/1  
aZSUZX\_R¥0JQ\_[]X^\_Q`]]YZ¥¥XUUX¥^ZNTWSUL  
@HWI-EAS443:3:74:1269:439#0/1  
TGTCATTCTAAGTGTCTCGCTGGATTCCTTTCAAGATC  
+HWI-EAS443:3:74:1269:439#0/1  
```Xabb^a[bbZaaaa`a\_]¥`aXM^aaaaaaba[Y  
@HWI-EAS443:3:74:130:1773#0/1  
TGAGAATGGGAGACCTTCACTACCTCCAGAGCAGAAATGA  
+HWI-EAS443:3:74:130:1773#0/1  
WTT]QWY^[Z`XH]¥TT\_^^Z[^0^T\_SMVOR][ZX\_[\_¥  
@HWI-EAS443:3:74:1330:1972#0/1  
AGAACTGTGATGAGAATGGGAGACCTTCACTACCTCCAG  
+HWI-EAS443:3:74:1330:1972#0/1  
K`aba[H^]`aa^\_bbbaa\_S]]`\_O\_]aXSaY¥aa¥¥V  
@HWI-EAS443:3:74:1365:1163#0/1  
GCCGCATTTCTTCAATTAACCACCTTATTTCTCAAATTT  
+HWI-EAS443:3:74:1365:1163#0/1  
a[aVX]bX`W\_a\_`\_`¥a]`¥`adWab\_H[aa\_\_`\_\_\_\_  
@HWI-EAS443:3:74:1427:344#0/1  
TGAGAATGGGAGACCTTCACTACCTCCAGAGCAGAAATGA  
+HWI-EAS443:3:74:1427:344#0/1  
^¥]K]a^^\_Z]a`\_X^^`a\_`\_VT]P^[\_YGXaW\_X\_\_X  
@HWI-EAS443:3:74:1465:836#0/1  
CGCGCTACCTTTCTGACATGACCCTCGAGGAAATGTCACG  
+HWI-EAS443:3:74:1465:836#0/1  
TZba\_\_Q¥QZX[[b\_\_bbbaab\_Ja`a`¥¥\_\_\_\_]\_bU]\_a  
@HWI-EAS443:3:74:1478:802#0/1  
GAAACTGTGATGAGAATGGGAGACCTTCACTACCTCCAGA  
+HWI-EAS443:3:74:1478:802#0/1  
aaaa\_ab\_b`aaab\_\_ab``\_] ]]^\_V\_\_`\_X`\_X^^]  
@HWI-EAS443:3:74:1514:453#0/1  
CTGTGATGAGAATGGGAGACCTTCACTACCTCCAGAGCAG

+HWI-EAS443:3:74:1514:453#0/1  
a`Z¥Yba]aYb\_^`aa¥a^^]b\_bL¥[DS]^W\_SR`TY¥  
@HWI-EAS443:3:74:1517:553#0/1  
GCCGAGATCAAAAGTCCTTAAAAGGAAGAGGCAACACCCT  
+HWI-EAS443:3:74:1517:553#0/1  
aa¥bZaab\_aaa`b`a\_b`aaa\_a`b`b`\_\_aX`]]X]  
@HWI-EAS443:3:74:1518:751#0/1  
AACAAATCGTGGAATGGATCTTGAAAGAGGAATCCAGCGA  
+HWI-EAS443:3:74:1518:751#0/1  
aa`babbbaabbaabaaa`aaa\_aaa`ba`X`\_U¥W  
@HWI-EAS443:3:74:1536:15#0/1  
ACCATGTCAAGCTTTCAGGTAGACTGTTTCCTTTGGCATA  
+HWI-EAS443:3:74:1536:15#0/1  
aWFZbb¥Q\_`a]aba]aaa]`aYR\_a`Y`\_U`Wa[Z[\_\_\_]  
@HWI-EAS443:3:74:1580:1056#0/1  
GTGCCGATTTCTTCAATTAACCACCTTATTTCTCAAAT  
+HWI-EAS443:3:74:1580:1056#0/1  
a`b`abababb^bb\_bbbba\_\_a\_Sbaabba\_aa`a\_aa  
@HWI-EAS443:3:74:1592:346#0/1  
GCCGCATTTCTTCAATTAACCACCTTATTTCTCAAATTT  
+HWI-EAS443:3:74:1592:346#0/1  
a^U^SaV]`aaYZa^`a\_a]aS]ZZ`a`aSU`\_\_[]^]\_  
@HWI-EAS443:3:74:1649:647#0/1  
GCTTCAATCTGTGCCGATTTCTTCAATTAACCACCTTA  
+HWI-EAS443:3:74:1649:647#0/1  
a\_[Y¥`a`I^\_N^YU]ZX\_`^Ya[US[aa\_]VU[^MYZ\_  
@HWI-EAS443:3:74:1671:885#0/1  
AGAAACTGTGATGAGAATGGGAGACCTTCACTACCTCCAG  
+HWI-EAS443:3:74:1671:885#0/1  
abaabaaXZbaaa`aaaabbaaa`\_]a\_\_a`]\_]T\_\_¥\_\_  
@HWI-EAS443:3:74:1694:1454#0/1  
GCCGCATTTCTTCAATTAACCACCTTATTTCTCAAATTT  
+HWI-EAS443:3:74:1694:1454#0/1  
Q\_`\_\_^ab`\_X\_VXX^^NaVaaYb¥XLa`a`bba`\_]a  
@HWI-EAS443:3:74:1711:905#0/1  
ATTATCTTTTGCCTAGGCATGAGCATGAACCAGTCTCGTG  
+HWI-EAS443:3:74:1711:905#0/1  
aabbbb[babbUX`a`Uabbb\_a[aa[bbaSaa\_\_a\_\_]^  
@HWI-EAS443:3:74:1721:432#0/1  
CGAAGTAGGTACAGATGCAATTGTCATTCTAAGTGTCTCG  
+HWI-EAS443:3:74:1721:432#0/1  
ababb`aab\_b\_bbaaa¥babbb¥¥\_b`[b`]a]aaY`NY  
@HWI-EAS443:3:74:1752:91#0/1  
GCGCTACCTTTCTGACATGACCCTCGAGGAAATGTCACGA  
+HWI-EAS443:3:74:1752:91#0/1  
ab\_aabbaabaaaa`aaba`aaa`\_^\_a`]a`ab¥aaZ\_  
@HWI-EAS443:3:74:186:638#0/1  
GCCGCATTTCTTCAATTAACCACCTTATTTCTCAAATTT  
+HWI-EAS443:3:74:186:638#0/1  
V^]YSZ[`XabaXabb[Z`aaSSJ\_aabaa`]aaaaTa

@HWI-EAS443:3:74:206:1103#0/1  
GTCCTTAAAAGGAAGAGGCAACACCCTTGGCCTCGATATC  
+HWI-EAS443:3:74:206:1103#0/1  
aVa\_a[Y`aaa`\_a\_¥`¥[`a^^]YTX¥¥¥\_¥ZUGRP  
@HWI-EAS443:3:74:222:1111#0/1  
GCCGCATTTCTTCAATTAACCACCTTATTTCTCAAATTT  
+HWI-EAS443:3:74:222:1111#0/1  
aaaaa`aa`aaa`a]``a`aa\_\_`aa`^a\_`a\_`\_\_]^  
@HWI-EAS443:3:74:234:307#0/1  
CGCTTGGAGAAACTGTGATGAGAATGGGAGACCTTCACTA  
+HWI-EAS443:3:74:234:307#0/1  
aaa`X^a[b\_`a`aa`a[\_U\_\_[[^\_[\_Y\_\_\_Y¥¥a`¥¥`  
@HWI-EAS443:3:74:241:1475#0/1  
CGAGAAAGCTTCTTATCTTCTTCTACTTCAAGCAGTAGT  
+HWI-EAS443:3:74:241:1475#0/1  
a¥¥^S¥RYa`XXTY\_a\_a^[T\_\_\_^X¥[a]`R^`GPX]  
@HWI-EAS443:3:74:27:1899#0/1  
CTTGAATGGAATGGTAACACGGTTTCGAGTCTCTGAAAATA  
+HWI-EAS443:3:74:27:1899#0/1  
aa`]]`aa\_`a`Z]Zaa\_`\_SYVV\_ZYYX\_]^^XX]]^WZ  
@HWI-EAS443:3:74:324:1757#0/1  
GAGAAACTGTGATGAGAATGGGAGACCTTCACTACCTCCA  
+HWI-EAS443:3:74:324:1757#0/1  
^^^`Y][X^IYS]]V]`¥^a[V^^`Y`\_[]`TZ]Y^]\_`\_  
@HWI-EAS443:3:74:327:537#0/1  
TGCCGCATTTCTTCAATTAACCACCTTATTTCTCAAATT  
+HWI-EAS443:3:74:327:537#0/1  
aaaa`aaaa`bbaaaaaaa`aa`^aaaa``Z\_`\_a`\_a`  
@HWI-EAS443:3:74:328:1186#0/1  
GCCGCATTTCTTCAATTAACCACCTTATTTCTCAAATTT  
+HWI-EAS443:3:74:328:1186#0/1  
abbb\_`abbbbba``abbabbbbaba\_baaaaabaaaaa  
@HWI-EAS443:3:74:353:1819#0/1  
AAACTGTGATGAGAATGGGAGACCTTCACTACCTCCAGAG  
+HWI-EAS443:3:74:353:1819#0/1  
aVV^XXT]]\_T^J]ZVU]PZV¥Y]UV`ZZV\_]WLV\_]ZWR  
@HWI-EAS443:3:74:354:122#0/1  
AGAAACTGTGATGAGAATGGGAGACCTTCACTACCTCCAG  
+HWI-EAS443:3:74:354:122#0/1  
abaaaaab\_`aa`a\_\_aaa]a\_Y]^`^\_]\_^]Y]]YY^  
@HWI-EAS443:3:74:354:715#0/1  
GAATGGGAGACCTTCACTACCTCCAGAGCAGAAATGAAAA  
+HWI-EAS443:3:74:354:715#0/1  
`P`QVWa]X\_Z^¥T`¥ZU]XW^``ZUUVPXP[F SRVPXLP  
@HWI-EAS443:3:74:371:1714#0/1  
AGAAACTGTGATGAGAATGGGAGACCTTCACTACCTCCAG  
+HWI-EAS443:3:74:371:1714#0/1  
aVJ[`bX]X^¥[¥`^V[^[Z\_YW[ZYG[`ZFT`^\_WSZ^^  
@HWI-EAS443:3:74:37:651#0/1  
CTGTTTCTTTGGCATATCCGCAAGCGATTTGCAGACAAT



@HWI-EAS443:3:74:666:221#0/1  
GTCTGCTTTCAATCTGTGCCGATTTCTTCAATTAACCACC  
+HWI-EAS443:3:74:666:221#0/1  
a[`aaY^¥\_\_`\_]\_^\_\_\_\_`^\_\_\_\_^\_\_¥^Z[^\_^^¥^YW  
@HWI-EAS443:3:74:684:1782#0/1  
GGAGAACTGTGATGAGAATGGGAGACCTTCACTACCTCC  
+HWI-EAS443:3:74:684:1782#0/1  
^a]YY¥bb`[I\_aab^WYbXS^^a`^UY`\_a]`aa]^\_a\_  
@HWI-EAS443:3:74:699:454#0/1  
GAATGGGAGACCTTCACTACCTCCAGAGCAGAAATGAAAA  
+HWI-EAS443:3:74:699:454#0/1  
aaaabbaabaaaa`a`aa\_aa\_a`a\_a`\_a\_\_`a`\_^]^  
@HWI-EAS443:3:74:716:1216#0/1  
GAAGGTAATGGTGAATTTCTCCAATTTGCTCCCTCCT  
+HWI-EAS443:3:74:716:1216#0/1  
aW^aaUa^```Xaaaaa\_a\_aa`a`\_aa^```aa^a¥aZ\_  
@HWI-EAS443:3:74:749:952#0/1  
GAGAACTGTGATGAGAATGGGAGACCTTCACTACCTCCA  
+HWI-EAS443:3:74:749:952#0/1  
aa`aaaaZa\_\_`a¥\_``[ ]\_¥[^\_a¥Y\_^TX^\_^\_  
@HWI-EAS443:3:74:751:1602#0/1  
AGAACTGTGATGAGAATGGGAGACCTTCACTACCTCCAG  
+HWI-EAS443:3:74:751:1602#0/1  
aaVJW`\_]NV][b[a\_^RZHWSLNTZ¥OY]SR\_^RY\_^]\_  
@HWI-EAS443:3:74:759:1906#0/1  
AATAAGCTGAAACGAGAAAGCTTTATCTCTTGTCTACT  
+HWI-EAS443:3:74:759:1906#0/1  
\_a[\_\_\_\_a\_[Y0]¥SaT]\_V¥\_U^\_]YW\_^a[TZYV]\_\_Y^  
@HWI-EAS443:3:74:774:1993#0/1  
CGAGAAAGCTTTATCTCTTGTCTACTTCAAGCAGTAGT  
+HWI-EAS443:3:74:774:1993#0/1  
aaa\_a``aaaa\_aaaa`Ua```]a\_^`a``aa\_^a`\_G`\_Z  
@HWI-EAS443:3:74:803:1797#0/1  
AGCGAGACACTTAGAATGACAATTGCATCTGTACCTACTT  
+HWI-EAS443:3:74:803:1797#0/1  
\_^ba\_babbbaaa\_]baaaaa`a\_aa```\_Z^aa\_a``^  
@HWI-EAS443:3:74:808:1728#0/1  
CGCATTTCTTCAATTAACCACCTTATTTCTCAAATTTCT  
+HWI-EAS443:3:74:808:1728#0/1  
aaa`aa`aaaaaaba[`aaaaaaaa`aaaa`[aa`aa  
@HWI-EAS443:3:74:85:671#0/1  
GCCGATTTCTTCAATTAACCACCTTATTTCTCAAATTT  
+HWI-EAS443:3:74:85:671#0/1  
`abaa`a`a\_a``a``W[aa`a`^aa[a`\_\_^aaaR¥a]`  
@HWI-EAS443:3:74:947:995#0/1  
GTGATGAGAATGGGAGACCTTCACTACCTCCAGAGCAGAA  
+HWI-EAS443:3:74:947:995#0/1  
aZa`aa\_b```aa``]V¥\_\_\_\_\_a]SVa\_X`¥\_\_^\_^¥  
@HWI-EAS443:3:74:966:458#0/1  
CTGTGATGAGAATGGGAGACCTTCACTACCTCCAGAGCAG

+HWI-EAS443:3:74:966:458#0/1  
a\_\_Y\_baaab\_`abba`b\_aaaa`a`aa\_b[\_aa`a`\_`  
@HWI-EAS443:3:75:1027:1537#0/1  
GATTACACTGAAGTTCGCTTTTCAGTACTATGTTCTTTTCC  
+HWI-EAS443:3:75:1027:1537#0/1  
`a`ba`baa``\_``\_a````\_[a^`a`a\_a`a\_\_\_\_\_^  
@HWI-EAS443:3:75:1040:1280#0/1  
CGCATTCTTCAATTAACCACCTTATTTCTCAAATTTCT  
+HWI-EAS443:3:75:1040:1280#0/1  
abb¥bba`baabbaabababbbabbbbaabbb`bbaa`b  
@HWI-EAS443:3:75:1059:1444#0/1  
AGAATGGGAGACCTTCACTACCTCCAGAGCAGAAATGAAA  
+HWI-EAS443:3:75:1059:1444#0/1  
ab`¥aa^baaaZ]abaaaa[^`a]aa`\_a[\_a`b^aa  
@HWI-EAS443:3:75:1089:918#0/1  
CAAAGAGGGCCTATTATCTTTTGCCTAGGCATGAGCATGA  
+HWI-EAS443:3:75:1089:918#0/1  
abba^XW\_¥bbbaa[`b[babb]baabbbbab\_\_`aabb  
@HWI-EAS443:3:75:1103:1074#0/1  
GGAGAACTGTGATGAGAATGGGAGACCTTCACTACCTCC  
+HWI-EAS443:3:75:1103:1074#0/1  
aa`a\_XY^ab\_aaaaab`X\_\_[^`]\_\_Y]\_aa]`U\_]\_`  
@HWI-EAS443:3:75:1111:1734#0/1  
GCCGCATTTCTTCAATTAACCACCTTATTTCTCAAATTT  
+HWI-EAS443:3:75:1111:1734#0/1  
]a`\_aZ¥\_X`^\_a¥F^`ab^`aaa\_a`UaaZa``]^aUb  
@HWI-EAS443:3:75:1122:298#0/1  
AGAAACTGTGATGAGAATGGGAGACCTTCACTACCTCCAG  
+HWI-EAS443:3:75:1122:298#0/1  
aaQWaab\_]\_``]\_aa`a`aa`][G[^`¥`¥\_`SN^^^\_`  
@HWI-EAS443:3:75:1123:782#0/1  
AGAAACTGTGATGAGAATGGGAGACCTTCACTACCTCCAG  
+HWI-EAS443:3:75:1123:782#0/1  
ab\_]b`aa^aabb\_b\_^aa`aaa\_\_`aa\_a`aa\_]a``aa  
@HWI-EAS443:3:75:1163:100#0/1  
CATAAGTATGTCCTGGAAGAGAAGGTAATGGTAAAATTTTC  
+HWI-EAS443:3:75:1163:100#0/1  
aabbbbaV\_ab^`aaaa\_SaZ^`aaVVa]\_^WZa``^aaa[  
@HWI-EAS443:3:75:1177:1305#0/1  
CTTGGAGAACTGTGATGAGAATGGGAGACCTTCACTACC  
+HWI-EAS443:3:75:1177:1305#0/1  
^¥¥a^a`¥a¥`b`Zbb`aaa`^aaU`^¥`a]^`^Z` [  
@HWI-EAS443:3:75:1199:776#0/1  
CGCATTCTTCAATTAACCACCTTATTTCTCAAATTTCT  
+HWI-EAS443:3:75:1199:776#0/1  
ab`^`bbbbbbbbbbba`baaabababaababa`baa`b  
@HWI-EAS443:3:75:1204:1066#0/1  
CGCTTCAATCTGTGCCGATTTCTTCAATTAACCACCTT  
+HWI-EAS443:3:75:1204:1066#0/1  
¥a`baabba^abbG]bT`aa`bXa`a^b\_aaa¥¥]aaa



@HWI-EAS443:3:75:1221:308#0/1  
GAAACTGTGATGAGAATGGGAGACCTTCACTACCTCCAGA  
+HWI-EAS443:3:75:1221:308#0/1  
abbbabbaabbaabaaabba\_baa`aaa`aa¥^a\_] ^a\_  
@HWI-EAS443:3:75:1226:1844#0/1  
GCCGCATTTCTTCAATTAACCACCTTATTTCTCAAATTT  
+HWI-EAS443:3:75:1226:1844#0/1  
abbb\_aaa`a\_[0a`aa[`YZ]aZ\_\_aaX\_\_[``\_a`a^\_  
@HWI-EAS443:3:75:129:1538#0/1  
AAACTGTGATGAGAATGGGAGACCTTCACTACCTCCAGAG  
+HWI-EAS443:3:75:129:1538#0/1  
`bbaaa`aaa`X`aa\_\_^\_]\_¥W\_``\_\_`aa\_\_\_a`\_\_]  
@HWI-EAS443:3:75:1326:526#0/1  
TTGTCATTCTAAGTGTCTCGCTGGATTCTTCTTTCAAGAT  
+HWI-EAS443:3:75:1326:526#0/1  
aab`\_aabaaaaa```aa`X]aa]^``]]R\_a`a`\_`\_`\_  
@HWI-EAS443:3:75:1382:1305#0/1  
AGAAACTGTGATGAGAATGGGAGACCTTCACTACCTCCAG  
+HWI-EAS443:3:75:1382:1305#0/1  
aa\_\_b^ab`^aa]a\_a`ba^`]]Ua\_`a]`a0a\_¥\_a\_  
@HWI-EAS443:3:75:140:1273#0/1  
ATTATCTTTTGCCTAGGCATGAGCATGAACCAGTCTCGTG  
+HWI-EAS443:3:75:140:1273#0/1  
a[\_¥\_bbb\_]bbba\_ZabaXVZaaaa`^`aa\_R\_X[\_V^  
@HWI-EAS443:3:75:141:510#0/1  
CACGGTTCGAGTCTCTGAAAATATACAGAGATTCGCTTGG  
+HWI-EAS443:3:75:141:510#0/1  
^\_b\_`¥^\_`¥`\_]\_[`\_aRI[[[]VXa^U`[]`^]aba\_YY\_  
@HWI-EAS443:3:75:1473:591#0/1  
CAGAGATTCGCTTGGAGAAACTGTGATGAGAATGGGAGAC  
+HWI-EAS443:3:75:1473:591#0/1  
`a`^[X\_¥¥\_X\_\_aaU\_Ya\_Za\_^^^[a]\_\_aaa``\_b]R  
@HWI-EAS443:3:75:1490:1295#0/1  
AGCTGAAACGAGAAAGCTTTATCTTGTCTACTTCAA  
+HWI-EAS443:3:75:1490:1295#0/1  
aabbbbbbbbbbaaa\_babbbbaab`bababababbaba\_aa  
@HWI-EAS443:3:75:1506:1329#0/1  
CTCTGAAAATATACAGAGATTCGCTTGGAGAAACTGTGAT  
+HWI-EAS443:3:75:1506:1329#0/1  
Q\_bbbabbbbbbb`bbbb`baababbbbbbaabaababaa  
@HWI-EAS443:3:75:1527:703#0/1  
GAGATTCGCTTGGAGAAACTGTGATGAGAATGGGAGACCT  
+HWI-EAS443:3:75:1527:703#0/1  
abbbVa`bba`bbXS[Z]aaa¥a`\_aa\_a\_`a\_`S`\_]NZ  
@HWI-EAS443:3:75:1550:1320#0/1  
GAAACTGTGATGAGAATGGGAGACCTTCACTACCTCCAGA  
+HWI-EAS443:3:75:1550:1320#0/1  
abbbababbabbaabbb`baab`abaababb\_abYaaa\_  
@HWI-EAS443:3:75:1553:653#0/1  
GCCGCATTTCTTCAATTAACCACCTTATTTCTCAAATTT

+HWI-EAS443:3:75:1553:653#0/1  
X[aaabbbbbbbbababbab]\_`b^bbbabav`a`bb`bba  
@HWI-EAS443:3:75:1554:1524#0/1  
GTGCCGCATTTCTTCAATTAACCACCTTATTTCTCAAAT  
+HWI-EAS443:3:75:1554:1524#0/1  
`[aaaba]aaa`aa\_a\_aa]\_^`\_Z^`\_aa\_a\_^a`\_\_`^  
@HWI-EAS443:3:75:155:730#0/1  
GCCGCATTTCTTCAATTAACCACCTTATTTCTCAAATTT  
+HWI-EAS443:3:75:155:730#0/1  
`ab\_^S`babbab^[aaZbaaa`aaaaa` `[aa\_aa`a`  
@HWI-EAS443:3:75:1581:257#0/1  
CGCTTTCAATCTGTGCCGCATTTCTTCAATTAACCACCTT  
+HWI-EAS443:3:75:1581:257#0/1  
ab`\_bbaaa^baa[aa]baa`\_a\_b`\_\_`ab\_aaaaW¥`\_  
@HWI-EAS443:3:75:1582:470#0/1  
CGCATTTCTTCAATTAACCACCTTATTTCTCAAATTTCT  
+HWI-EAS443:3:75:1582:470#0/1  
Xbbba`a\_¥b``¥bbaba^J^`b`b\_a\_a``]babab¥b  
@HWI-EAS443:3:75:159:2010#0/1  
AAACTGTGATGAGAATGGGAGACCTTCACTACCTCCAGAG  
+HWI-EAS443:3:75:159:2010#0/1  
a\_^a\_]W`[¥``VU]Z\_PR]\_`\_`\_W`a\_ZYaYZ^`[]¥U  
@HWI-EAS443:3:75:1614:597#0/1  
TGCGGCACAGATTGAAAGCGACAGAGAATAGTTTCGAACA  
+HWI-EAS443:3:75:1614:597#0/1  
ab`baaaabbaaab`bab^aa\_aaaaa`]ab^aa`\_V\_^a  
@HWI-EAS443:3:75:1620:830#0/1  
GAAACTGTGATGAGAATGGGAGACCTTCACTACCTCCAGA  
+HWI-EAS443:3:75:1620:830#0/1  
abaaWUZ`\_Ya\_WW`\_V\_X\_TUUP¥UUQNTXYHX`QJ TZ¥  
@HWI-EAS443:3:75:1640:191#0/1  
GCCGCATTTCTTCAATTAACCACCTTATTTCTCAAATTT  
+HWI-EAS443:3:75:1640:191#0/1  
a[aaaaba\_a`b`b`b\_aaU]a`[aa`baa[Z^¥a`\_\_a\_  
@HWI-EAS443:3:75:1683:275#0/1  
GAGAAACTGTGATGAGAATGGGAGACCTTCACTACCTCCA  
+HWI-EAS443:3:75:1683:275#0/1  
aaabaaabbababb`aabababab\_¥]aa\_a\_aaaS`[^]  
@HWI-EAS443:3:75:1683:577#0/1  
TGCCGCATTTCTTCAATTAACCACCTTATTTCTCAAATT  
+HWI-EAS443:3:75:1683:577#0/1  
a¥`\_`aaabaa¥bbS`a`[\_¥`\_`Waaabb`\_Ya^a`\_a\_  
@HWI-EAS443:3:75:1774:335#0/1  
AAACGAGAAAGCTCTTATCTCTTGTCTACTTCAAGCAGT  
+HWI-EAS443:3:75:1774:335#0/1  
`aXa^]¥RZ^a^a`bb\_^T]O\_b\_O¥`\_a\_ab`\_^\_S`\_W  
@HWI-EAS443:3:75:1778:573#0/1  
GAAACTGTGATGAGAATGGGAGACCTTCACTACCTCCAGA  
+HWI-EAS443:3:75:1778:573#0/1  
aababbbbaabbbbbbbaa\_abbbbabbbbaabaabb

@HWI-EAS443:3:75:17:321#0/1  
GAAACTGTGATGAGAATGGGAGACCTTCACTACCTCCAGA  
+HWI-EAS443:3:75:17:321#0/1  
`¥`aaa\_aaa`\_```\_\_\_]^^^\_^^\_^^\_]]Y^X  
@HWI-EAS443:3:75:199:1157#0/1  
CTTGGAGAACTGTGATGAGAATGGGAGACCTTCACTACC  
+HWI-EAS443:3:75:199:1157#0/1  
aaabab``b`aaa]]]aaaa````a`^^`\_\_^^`\_\_^`\_^  
@HWI-EAS443:3:75:248:1030#0/1  
AGCGCGAAGTAGGTACAGATGCAATTGTCATTCTAAGTGT  
+HWI-EAS443:3:75:248:1030#0/1  
`ab`b]\_¥b[aa\_Rbbaa`\_aaY`[a\_\_`\_a`\_\_a\_aUa^  
@HWI-EAS443:3:75:256:1873#0/1  
TGGAGAACTGTGATGAGAATGGGAGACCTTCACTACCTC  
+HWI-EAS443:3:75:256:1873#0/1  
ab`b`bbbbba\_`aa`a\_`a\_aa\_\_`\_]```\_\_a`\_a\_\_]a  
@HWI-EAS443:3:75:338:372#0/1  
GCTGTTTCGATATCGAGCCAAGGGTGTTCCTCTTCCTT  
+HWI-EAS443:3:75:338:372#0/1  
abbbabaabaabababaaaabaa`aU`^aU\_`\_``aZ````  
@HWI-EAS443:3:75:377:442#0/1  
CCGCATTTCTTCAATTAACCACCTTATTTCTCAAATTC  
+HWI-EAS443:3:75:377:442#0/1  
aaabaabbbb`b`bb`\_`bbabbb`baaabbaababbab  
@HWI-EAS443:3:75:388:1314#0/1  
GTCGCTTCAATCTGTGCCGATTTCTTCAATTAACCACC  
+HWI-EAS443:3:75:388:1314#0/1  
aababaabbbbaba`aabaaaabaaaaaab\_Y```aaaa  
@HWI-EAS443:3:75:400:1931#0/1  
AGAACTGTGATGAGAATGGGAGACCTTCACTACCTCCAG  
+HWI-EAS443:3:75:400:1931#0/1  
a`^`aa^¥ZVZ^]`R¥^VNRQ[[[\_]^]Y\_`\_Y]R^]`^\_SL  
@HWI-EAS443:3:75:402:455#0/1  
AAGGAATGGGCATCACCCAATCCATTGTCTGCAAATCGC  
+HWI-EAS443:3:75:402:455#0/1  
\_¥[¥U\_WVTLWZY]T`V`\_`XZ^^^UX[W\_VY]NYSS¥^V  
@HWI-EAS443:3:75:408:929#0/1  
GAAACTGTGATGAGAATGGGAGACCTTCACTACCTCCAGA  
+HWI-EAS443:3:75:408:929#0/1  
`\_\_`^a`[a\_\_`\_]`^a`^`\_\_^^]]^`\_\_`^`^^Y^^¥^]  
@HWI-EAS443:3:75:423:980#0/1  
AAATCGTGAATGGATCTTGAAAGAGGAATCCAGCGAGAC  
+HWI-EAS443:3:75:423:980#0/1  
a`QV^]JV¥\_\_`ZTZ]`^S[\_\_VX`^`^YVW¥aVS¥^V  
@HWI-EAS443:3:75:444:1972#0/1  
CGAGAAAGCTCTTATCTCTTGTCTACTTCAAGCAGTAGT  
+HWI-EAS443:3:75:444:1972#0/1  
aaa\_]a¥S]\_`\_\_SSa\_\_Z]VM]a\_]`^]\_\_Y\_]`^Y]]0  
@HWI-EAS443:3:75:482:686#0/1  
GAACCAGTCTCGTGACATTTCTCGAGGGTCATGTCAGAA

+HWI-EAS443:3:75:482:686#0/1  
Zabbb`Ubbbbb[`aabb```b`bbaaabWa`\_^b`aaZ  
@HWI-EAS443:3:75:493:1678#0/1  
AGAATGGGAGACCTTCACTACCTCCAGAGCAGAAATGAAA  
+HWI-EAS443:3:75:493:1678#0/1  
RM^¥]O\_\_T^VWa¥\_`[¥Saa^\_\_W\_¥YQ]ZJ\_[]^X¥NR  
@HWI-EAS443:3:75:524:1799#0/1  
GAAGAAATGCGGCACAGATTGAAAGCGACAGAGAATAGTT  
+HWI-EAS443:3:75:524:1799#0/1  
aaaa`aa`aa`a\_a`a`a`\_\_]a`a`\_a\_^`[Y`  
@HWI-EAS443:3:75:541:1621#0/1  
TGCCGCATTTCTTCAATTAACCACCTTATTCCTCAAATT  
+HWI-EAS443:3:75:541:1621#0/1  
ababba\_abbbbbbaaaaaaabbaabaab^bbbW`a`  
@HWI-EAS443:3:75:547:1075#0/1  
GGAGAACTGTGATGAGAATGGGAGACCTTCACTACCTCC  
+HWI-EAS443:3:75:547:1075#0/1  
aaaa]`\_aaa[¥\_\_`^[]¥^^]`[]^[[¥[^a\_ZX¥SV]\_  
@HWI-EAS443:3:75:547:1153#0/1  
GAGAACTGTGATGAGAATGGGAGACCTTCACTACCTCCA  
+HWI-EAS443:3:75:547:1153#0/1  
`b]baba`^bb`aa`baaaaaaa`a\_aba`ab`\_a\_a  
@HWI-EAS443:3:75:552:819#0/1  
TGCCGCATTTCTTCAATTAACCACCTTATTCCTCAAATT  
+HWI-EAS443:3:75:552:819#0/1  
R¥`Y¥T]\_bba`Z^\_ba[X¥[\_ba^`aa`V`a`a``Y¥\_  
@HWI-EAS443:3:75:586:881#0/1  
GCCGCATTTCTTCAATTAACCACCTTATTCCTCAAATTT  
+HWI-EAS443:3:75:586:881#0/1  
aaab`abaa\_aaaa`b`aaaaaa^aaYaa`a]a`\_`aba\_  
@HWI-EAS443:3:75:600:1525#0/1  
AGAAACTGTGATGAGAATGGGAGACCTTCACTACCTCCAG  
+HWI-EAS443:3:75:600:1525#0/1  
a[Y`ab\_]L]a`\_Z\_a] []TQPZVZ\_^U`\_`\_¥\_]X\_\_ZZ  
@HWI-EAS443:3:75:606:585#0/1  
CGAGAAAGCTTTATCTCTTGTCTACTTCAAGCAGTAGT  
+HWI-EAS443:3:75:606:585#0/1  
ZVZ`b\_XZ\_babbbbbaaa\_]\_bab\_ababba\_Yab`\_S]  
@HWI-EAS443:3:75:615:302#0/1  
GAAACTGTGATGAGAATGGGAGACCTTCACTACCTCCAGA  
+HWI-EAS443:3:75:615:302#0/1  
ab`aaaa\_aa`aaaa`aaa\_]aaa\_\_`\_aa`a[S\_`\_`^  
@HWI-EAS443:3:75:623:774#0/1  
GCCGCATTTCTTCAATTAACCACCTTATTCCTCAAATTT  
+HWI-EAS443:3:75:623:774#0/1  
Sa¥`\_U\_`a^`^a\_Q¥[`¥LWU^S]U^]`a^`X`T\_]XTQ  
@HWI-EAS443:3:75:64:1299#0/1  
GCCGCATTTCTTCAATTAACCACCTTATTCCTCAAATTT  
+HWI-EAS443:3:75:64:1299#0/1  
abbab¥abbbbabb`babbbbababaXbabbbb`a]aaa`

@HWI-EAS443:3:75:655:169#0/1  
GCCGCATTTCTTCAATTAACCACCTTATTTCCCTCAAATTT  
+HWI-EAS443:3:75:655:169#0/1  
a¥ab¥^a^a¥]a`\_^¥¥^`]\_\_¥`^^\_¥[[]^`^]\_[]Z  
@HWI-EAS443:3:75:678:1493#0/1  
CTGAAAATATACAGAGATTCGCTTGGAGAACTGTGATGA  
+HWI-EAS443:3:75:678:1493#0/1  
ab``\_V\_bbabaabaa`\_aa`aa``aaaaa`aY¥``a\_  
@HWI-EAS443:3:75:680:231#0/1  
GCCGCATTTCTTCAATTAACCACCTTATTTCCCTCAAATTT  
+HWI-EAS443:3:75:680:231#0/1  
aZS`a`aXT\_baa\_]abab]T^\_a``abaaaa``\_^a]\_  
@HWI-EAS443:3:75:720:1492#0/1  
GTGCTTTCAATCTGTGCCGCATTTCTTCAATTAACCACC  
+HWI-EAS443:3:75:720:1492#0/1  
^N]a[OXa[VYS[NWGWZ[¥][W]V^\_¥^WZQZYTYYPNZR  
@HWI-EAS443:3:75:733:1294#0/1  
TGAGAATGGGAGACCTTCACTACCTCCAGAGCAGAAATGA  
+HWI-EAS443:3:75:733:1294#0/1  
abaa^Y\_^ZZT¥]```a^\_a`a]`^a¥]a`\_PZa`]U  
@HWI-EAS443:3:75:743:501#0/1  
TCTCTGAAAATATACAGAGATTCGCTTGGAGAACTGTGA  
+HWI-EAS443:3:75:743:501#0/1  
abbbbbbaabbbbbbababaaaaaaa`bbaaaaaaaaX`a  
@HWI-EAS443:3:75:772:388#0/1  
GAAACTGTGATGAGAATGGGAGACCTTCACTACCTCCAGA  
+HWI-EAS443:3:75:772:388#0/1  
a`aaaab\_b`aa``\_aaa\_PUZV^YXDJ^¥X[XNV\_GQZV  
@HWI-EAS443:3:75:775:309#0/1  
GTAATGGTGAATTTCTCCAATTTGCTCCCTCCTCAGT  
+HWI-EAS443:3:75:775:309#0/1  
^V^aU`YHY]`[`]^ZS[W[W``^W]QOQPK[\_\_\_]ZXIG  
@HWI-EAS443:3:75:779:251#0/1  
GAGAACTGTGATGAGAATGGGAGACCTTCACTACCTCCA  
+HWI-EAS443:3:75:779:251#0/1  
aab`aaaab\_b`aa\_b`aaaa`a^[¥`a^^^`\_^W^YV\_  
@HWI-EAS443:3:75:839:688#0/1  
ATCCGCAAGCGATTTGCAGACAATGGATTGGGTGATGCC  
+HWI-EAS443:3:75:839:688#0/1  
`¥``a`\_]\_]baaaaba¥¥\_a^`a\_]a¥^^¥\_Ya^¥BBBB  
@HWI-EAS443:3:75:884:794#0/1  
GCCGCATTTCTTCAATTAACCACCTTATTTCCCTCAAATTT  
+HWI-EAS443:3:75:884:794#0/1  
aaa^HRaa``b¥aaU`aa[`]aa`aa\_aa`¥aaba`aaa`  
@HWI-EAS443:3:75:890:180#0/1  
GAAAATATACAGAGATTCGCTTGGAGAACTGTGATGAGA  
+HWI-EAS443:3:75:890:180#0/1  
aaaaababbabaab]aaaaaa\_a]`a\_aa^`a^``\_aY`\_  
@HWI-EAS443:3:75:976:961#0/1  
GCCAAAGGAAACAGTCTACCTGAAAGCTTGACATGGTGTT

+HWI-EAS443:3:75:976:961#0/1  
aaaa¥`]'`aa`a\_]aaaa\_a[^\_\_`^`aaa``\_\_`Y\_]\_  
@HWI-EAS443:3:75:980:1307#0/1  
GAAAGCTCTTATCTCTTGTCTACTTCAAGCAGTAGTTGT  
+HWI-EAS443:3:75:980:1307#0/1  
aaaaaa`^baabb`bbbb\_a`abaaa\_aaa\_aa\_`a\_aa^  
@HWI-EAS443:3:75:983:1186#0/1  
AGAAACTGTGATGAGAATGGGAGACCTTCACTACCTCCAG  
+HWI-EAS443:3:75:983:1186#0/1  
abb`¥`bb\_^\_b\_\_bba`a[a\_a]\_a^`\_aa\_X\_`¥^a\_a  
@HWI-EAS443:3:75:98:927#0/1  
CGCATTCTTCAATTAACCACCTTATTTCTCAAATTTCT  
+HWI-EAS443:3:75:98:927#0/1  
abbaaaaaa`aababaa`Xa\_aaaa`a^`aa]a``[\_`  
@HWI-EAS443:3:76:1014:2042#0/1  
TGAGAATGGGAGACCTTCACTACCTCCAGAGCAGAAATGA  
+HWI-EAS443:3:76:1014:2042#0/1  
^\_\_\_a`abba]aaQ¥aabaZ^]]a[[aa`[`]`^``\_`\_¥  
@HWI-EAS443:3:76:1019:1619#0/1  
AGAAACTGTGATGAGAATGGGAGACCTTCACTACCTCCAG  
+HWI-EAS443:3:76:1019:1619#0/1  
ababaabba`aa`b`aaaaaaaa`aaaa`aa\_\_[U]a  
@HWI-EAS443:3:76:1027:1853#0/1  
GAAACTGTGATGAGAATGGGAGACCTTCACTACCTCCAGA  
+HWI-EAS443:3:76:1027:1853#0/1  
]UYZQ0¥R]]Y[LTVY¥TVSZ`]W[SNZ`ZY]\_`UTZU]V  
@HWI-EAS443:3:76:1028:219#0/1  
GTCGCTTTCAATCTGTGCCGATTTCTTCAATTAACCACC  
+HWI-EAS443:3:76:1028:219#0/1  
a^¥a^)`\_¥^^]Z]]X]Z\_]\_^`\_X^\_ZZY]^]]WUWZW  
@HWI-EAS443:3:76:1034:600#0/1  
CCGCATTTCTTCAATTAACCACCTTATTTCTCAAATTTCT  
+HWI-EAS443:3:76:1034:600#0/1  
aabbbbbbbbaaabbbba`baabbabba`babaaaa^  
@HWI-EAS443:3:76:1049:279#0/1  
AAAGAGGGCCTATTATCTTTTGCCTAGGCATGAGCATGAA  
+HWI-EAS443:3:76:1049:279#0/1  
W\_``[``]N[bbbaaabbbb`]a\_\_a`b^\_\_aaZaa^\_\_  
@HWI-EAS443:3:76:1054:1485#0/1  
GTCGCTTTCAATCTGTGCCGATTTCTTCAATTAACCACC  
+HWI-EAS443:3:76:1054:1485#0/1  
aW\_a^U^^`ZX\_¥ZMDK^\_]\_]\_\_WX¥\_VWUZ[]^ZVWX  
@HWI-EAS443:3:76:1085:529#0/1  
ATGAGAATGGGAGACCTTCACTACCTCCAGAGCAGAAATG  
+HWI-EAS443:3:76:1085:529#0/1  
aaaabbabbbbaaaaa`b`aaaba\_aa\_a\_a\_a`a^\_\_aa  
@HWI-EAS443:3:76:1100:1381#0/1  
AGAAACTGTGATGAGAATGGGAGACCTTCACTACCTCCAG  
+HWI-EAS443:3:76:1100:1381#0/1  
^^`YWX\_\_O\_ZO\_PML]GY\_]`aZWV[VYFF[`\_WHDP\_\_

@HWI-EAS443:3:76:1147:508#0/1  
CTTGGAGAACTGTGATGAGAATGGGAGACCTTCACTACC  
+HWI-EAS443:3:76:1147:508#0/1  
a`bbbb`R`b`bb`bab`]b\_baaaa]aT`aaaa`\_Ya  
@HWI-EAS443:3:76:1157:1787#0/1  
AGAATGGGAGACCTTCACTACCTCCAGAGCAGAAATGAAA  
+HWI-EAS443:3:76:1157:1787#0/1  
\_a[\_Xa[\_\_\_UWY\_ZY\_\_UXb[^\_Z¥aaW]]^`aZ\_``]¥  
@HWI-EAS443:3:76:1175:780#0/1  
GCCGCATTTCTTCAATTAACCACCTTATTTCTCAAATTT  
+HWI-EAS443:3:76:1175:780#0/1  
a`aa^\_aaaZa`¥\_\_aa\_`^^^¥`\_a`aX¥a\_]L]`\_]  
@HWI-EAS443:3:76:1194:957#0/1  
GCCGCATTTCTTCAATTAACCACCTTATTTCTCAAATTT  
+HWI-EAS443:3:76:1194:957#0/1  
a``a[[]a`a`^`\_a\_]X\_]U^\_\_`\_WXa^^\_]^^^  
@HWI-EAS443:3:76:1216:857#0/1  
GCCGCATTTCTTCAATTAACCACCTTATTTCTCAAATTT  
+HWI-EAS443:3:76:1216:857#0/1  
a```\_`a`S\_]X\_\_^UZ]YW^]U^U^]Z^ZW  
@HWI-EAS443:3:76:1249:693#0/1  
CTGTGCCGCATTTCTTCAATTAACCACCTTATTTCTCAA  
+HWI-EAS443:3:76:1249:693#0/1  
a`a`b^\_aaabbb\_baaaaabb`]aa\_ab]aaaa\_\_aUa`  
@HWI-EAS443:3:76:1251:577#0/1  
GCCGCATTTCTTCAATTAACCACCTTATTTCTCAAATTT  
+HWI-EAS443:3:76:1251:577#0/1  
aW`WTZaaa][[ZZ^`\_]W]\_^\_[`a\_]W][U\_^V^X^  
@HWI-EAS443:3:76:1279:281#0/1  
TTCGAACTATTCTGTGCGCTTTCAATCTGTGCCGCATT  
+HWI-EAS443:3:76:1279:281#0/1  
aa^a\_a`a\_a`¥`]`a\_]a]a`^]\_]^[W\_XZ\_WZ^]  
@HWI-EAS443:3:76:1314:1279#0/1  
GAAACTGTGATGAGAATGGGAGACCTTCACTACCTCCAGA  
+HWI-EAS443:3:76:1314:1279#0/1  
aaa]Q]UN`^\_]YYY^`\_]\_[`YZ^^ZW¥]^]SVYUY]Y^  
@HWI-EAS443:3:76:131:1730#0/1  
GCCGCATTTCTTCAATTAACCACCTTATTTCTCAAATTT  
+HWI-EAS443:3:76:131:1730#0/1  
abaRUIR\_\_a^`aa\_aa\_\_a`a`^`\_a`\_`aW`a`\_`\_W\_  
@HWI-EAS443:3:76:1320:432#0/1  
CTGCTCTGGAGGTAGTGAAGGTCTCCCATTCTCATCACAG  
+HWI-EAS443:3:76:1320:432#0/1  
aababbbb`b`¥aa\_baaa\_H]a`^`aaa[X^`\_`T[a  
@HWI-EAS443:3:76:1334:376#0/1  
TGAGAATGGGAGACCTTCACTACCTCCAGAGCAGAAATGA  
+HWI-EAS443:3:76:1334:376#0/1  
abaa]^abababaVR¥a\_aaa`\_^aW^aa\_aT\_a`\_]``\_  
@HWI-EAS443:3:76:1335:305#0/1  
TGCCGCATTTCTTCAATTAACCACCTTATTTCTCAAATT

+HWI-EAS443:3:76:1335:305#0/1  
aZ^`\_¥a`a\_aa^a`aa`^\_`]]`a`TZ`^^]`^`\_  
@HWI-EAS443:3:76:1342:1225#0/1  
CTATTATCTTTGCCTAGGCATGAGCATGAACCAGTCTCG  
+HWI-EAS443:3:76:1342:1225#0/1  
U\_abbbbbbbbbbb`bbb`b`bbb`abbbbaZaaba^b`  
@HWI-EAS443:3:76:1371:1816#0/1  
GCCGCATTTCTTCAATTAACCACCTTATTCCTCAAATTT  
+HWI-EAS443:3:76:1371:1816#0/1  
aQ\_]YVYY`][Y^\_Y[ZHYU]UW^OZ^Z^XZ]WZVWZWZ  
@HWI-EAS443:3:76:1388:1569#0/1  
GAGCAATTGGGACAGAAATTTGAGGAAATAAGGTGGTTAA  
+HWI-EAS443:3:76:1388:1569#0/1  
`Z^a`^`[\_a^^\_a[\_U\_]a\_]\_¥]X\_\_XM[\_Z\_]UTL[  
@HWI-EAS443:3:76:1412:1583#0/1  
AGAAACTGTGATGAGAATGGGAGACCTTCACTACCTCCAG  
+HWI-EAS443:3:76:1412:1583#0/1  
`bbb`¥bb`bbabaa\_aaaa`aa`^]a\_S^U\_a[Z\_\_\_\_\_a  
@HWI-EAS443:3:76:1448:667#0/1  
AGAAACTGTGATGAGAATGGGAGACCTTCACTACCTCCAG  
+HWI-EAS443:3:76:1448:667#0/1  
```aaabbbbaaba]`aabbaa^^¥aa\_a\_\_`\_U\_¥R]a  
@HWI-EAS443:3:76:1460:597#0/1  
CCGCATTTCTTCAATTAACCACCTTATTCCTCAAATTT  
+HWI-EAS443:3:76:1460:597#0/1  
abbbbbbbbbbababbbba`ba`baabaa`ababaabaa\_  
@HWI-EAS443:3:76:1494:958#0/1  
ACTGTGATGAGAATGGGAGACCTTCACTACCTCCAGAGCA  
+HWI-EAS443:3:76:1494:958#0/1  
a][TW`\_\_aI`aabab`aaa\_ab`a`]`\_[V^ZV`\_\_`N\_  
@HWI-EAS443:3:76:156:1481#0/1  
AACACGGTTCGAGTCTCTGAAAATATACAGAGATTCGCTT  
+HWI-EAS443:3:76:156:1481#0/1  
aU`ba`^]`^b`WXa\_aa]`a\_a\_a`^`^`[^`¥^]`^`  
@HWI-EAS443:3:76:1599:1570#0/1  
CTGAAAATATACAGAGATTCGCTTGGAGAACTGTGATGA  
+HWI-EAS443:3:76:1599:1570#0/1  
a`\_TW^b`ab¥aa]ZQ\_a]aaU[X¥``^Waa\_] [ZZ  
@HWI-EAS443:3:76:1696:1119#0/1  
GTTTCGAGTCTCTGAAAATATACAGAGATTCGCTTGGAGAA  
+HWI-EAS443:3:76:1696:1119#0/1  
\_RVFM[`]a\_X`^\_]S\_¥ZPP^\_XZY]XOQT¥X\_]Z^ZX  
@HWI-EAS443:3:76:1711:1118#0/1  
TGAGAATGGGAGACCTTCACTACCTCCAGAGCAGAAATGA  
+HWI-EAS443:3:76:1711:1118#0/1  
aa`a]\_aaa`\_a\_X¥`\_\_\_\_\_^]T]WW[[WZWW`YXWWYX  
@HWI-EAS443:3:76:230:1194#0/1  
CGCTTGGAGAACTGTGATGAGAATGGGAGACCTTCACTA  
+HWI-EAS443:3:76:230:1194#0/1  
aab]\_`]PWTQ`aa`YY`OT[WXXU¥^[¥¥P]][^\_]Y]



@HWI-EAS443:3:76:235:569#0/1  
CTGTGATGAGAATGGGAGACCTTCACTACCTCCAGAGCAG  
+HWI-EAS443:3:76:235:569#0/1  
abbbbbba[babbbbbbbbaabbbbaa`aaaabaaaa\_ab  
@HWI-EAS443:3:76:246:1209#0/1  
GAGAATGGGAGACCTTCACTACCTCCAGAGCAGAAATGAA  
+HWI-EAS443:3:76:246:1209#0/1  
a[ZFU``R`]PW\_]VK]X]¥^[W\_\_[]QU¥\_¥GWQ¥¥BB  
@HWI-EAS443:3:76:307:1135#0/1  
GAGAATGGGAGACCTTCACTACCTCCAGAGCAGAAATGAA  
+HWI-EAS443:3:76:307:1135#0/1  
a\_\_`aaaa`\_a\_\_`aZ^a`\_[Z\_^\_]\_¥\_\_YW\_¥\_QW  
@HWI-EAS443:3:76:363:1096#0/1  
AACTGTGATGAGAATGGGAGACCTTCACTACCTCCAGAGC  
+HWI-EAS443:3:76:363:1096#0/1  
\_\_aaa`a^a\_Wa`aaaa¥`\_aa``aaa`^Z`a`\_\_^\_Z  
@HWI-EAS443:3:76:372:357#0/1  
CAAATCGTGAATGGATCTTGAAGAGGAATCCAGCGAGA  
+HWI-EAS443:3:76:372:357#0/1  
a``[W[^Ja^]\_S^^¥¥Wa[^T^\_VVb\_aa^^K^^TP[a\_  
@HWI-EAS443:3:76:405:1771#0/1  
CGCATTTCTTCAATTAACCACCTTATTTCTCAAATTTCT  
+HWI-EAS443:3:76:405:1771#0/1  
¥U\_babbbbbbbbababbb^aabaVU\_`PZLRH¥]Y`\_^\_P  
@HWI-EAS443:3:76:431:805#0/1  
AACGAGAAAGCTCTTATCTCTTGTCTACTTCAAGCAGTA  
+HWI-EAS443:3:76:431:805#0/1  
^¥`a`^`a^[a\_\_\_aa\_\_a`\_\_\_a]a]aa¥\_^\_]U]^`Z\_  
@HWI-EAS443:3:76:462:144#0/1  
GTCGCTTCAATCTGTGCCGATTTCTTCAATTAACCACC  
+HWI-EAS443:3:76:462:144#0/1  
a\_``Z[\_`\_]^^[^\_WYY^[X^]\_¥U¥^PXX^^[¥XUXVT  
@HWI-EAS443:3:76:491:1030#0/1  
GTCTCTGAAAATATACAGAGATTCGCTTGGAGAACTGTG  
+HWI-EAS443:3:76:491:1030#0/1  
`Z`X`^]W[VW^Y¥`]^U¥¥\_ZQL]QT]]][YXZVVVUVGW  
@HWI-EAS443:3:76:535:1510#0/1  
GCCGCATTTCTTCAATTAACCACCTTATTTCTCAAATTT  
+HWI-EAS443:3:76:535:1510#0/1  
abaa`¥\_aaaa`a\_W\_a`a]`aaaaaaa`aa¥aZVZ[a\_`  
@HWI-EAS443:3:76:536:243#0/1  
CGGTTGAGTCTCTGAAAATATACAGAGATTCGCTTGGAG  
+HWI-EAS443:3:76:536:243#0/1  
abbbbbbaabbbbbbaaaab`bbabbaba`a\_a`a`a`\_a  
@HWI-EAS443:3:76:53:59#0/1  
TGCCGCATTTCTTCAATTAACCACCTTATTTCTCAAATT  
+HWI-EAS443:3:76:53:59#0/1  
aaaa\_]\_aaaaaa\_U`aaaa\_[``^a`aaa`\_`aa]QW\_]`  
@HWI-EAS443:3:76:580:428#0/1  
AACAAATCGTGAATGGATCTTGAAGAGGAATCCAGCGA

+HWI-EAS443:3:76:580:428#0/1  
aa``^`bba^aababb`aaaab\_aXaaba``]Z`b`]]  
@HWI-EAS443:3:76:591:51#0/1  
CAGAGATTGCTTGGAGAACTGTGATGAGAATGGGAGAC  
+HWI-EAS443:3:76:591:51#0/1  
`abbbba`baaabbaaaaa`\_a^¥`\_`a`a\_\_\_aa`T\_QS  
@HWI-EAS443:3:76:607:211#0/1  
GAATGGGAGACCTTCACTACCTCCAGAGCAGAAATGAAAA  
+HWI-EAS443:3:76:607:211#0/1  
a[\_`[\_`[^` [XUXUV\_^^[W[[UUUWT^U¥¥VWVW[¥YWYW  
@HWI-EAS443:3:76:617:377#0/1  
GCTTGGAGAACTGTGATGAGAATGGGAGACCTTCACTAC  
+HWI-EAS443:3:76:617:377#0/1  
a]VNZ\_ZXYZFS]YTWTZY]V¥BBBBBBBBBBBBBBBB  
@HWI-EAS443:3:76:623:1726#0/1  
TGACATTTCTCGAGGGTCATGTCAGAAAGGTAGCGCGAA  
+HWI-EAS443:3:76:623:1726#0/1  
]\_b`R¥`abbbb`^¥`baa\_a``\_SZSX]baTb¥YVa^`¥  
@HWI-EAS443:3:76:623:687#0/1  
CCGCATTTCTTCAATTAACCACCTTATTTCTCAAATTTTC  
+HWI-EAS443:3:76:623:687#0/1  
abbb`bbbbbbbbbbbbbabababb¥bbbb`bbbabbaba  
@HWI-EAS443:3:76:638:102#0/1  
GAATGGGAGACCTTCACTACCTCCAGAGCAGAAATGAAAA  
+HWI-EAS443:3:76:638:102#0/1  
aUS¥Z`VV[^ZWUQ¥XWWWWWVUU^UWWW¥VWVWVWBBB  
@HWI-EAS443:3:76:674:1185#0/1  
AGAACTGTGATGAGAATGGGAGACCTTCACTACCTCCAG  
+HWI-EAS443:3:76:674:1185#0/1  
Z^a`^`a^[^a\_\_S\_a`]^\_^`\_WZW`\_`[^\_]QX¥WSZZ  
@HWI-EAS443:3:76:683:703#0/1  
CCCATTCTCATCACAGTTTCTCCAAGCGAATCTCTGTATA  
+HWI-EAS443:3:76:683:703#0/1  
abb`bbb`bbba\_\_\_bZ`^¥ab]\_]¥\_\_Z`[L]a\_a\_[a[  
@HWI-EAS443:3:76:695:1769#0/1  
CCGCATTTCTTCAATTAACCACCTTATTTCTCAAATTTTC  
+HWI-EAS443:3:76:695:1769#0/1  
\_aa```babbab`[``\_Z`bbbaa`aaaa`a\_`^Z\_``\_a  
@HWI-EAS443:3:76:708:184#0/1  
TGCCGCATTTCTTCAATTAACCACCTTATTTCTCAAATT  
+HWI-EAS443:3:76:708:184#0/1  
abaabaaaaaaaaaaaaaaaaa``\_a\_aaa`¥\_a``[¥`]  
@HWI-EAS443:3:76:745:1565#0/1  
CGCATTTCTTCAATTAACCACCTTATTTCTCAAATTTCT  
+HWI-EAS443:3:76:745:1565#0/1  
¥`\_X¥\_\_`b\_`¥a\_b^]b`bba^`a`^\_]b`bSLS`baba  
@HWI-EAS443:3:76:748:1457#0/1  
TGTCGCTTTCAATCTGTGCCGATTTCTTCAATTAACCAC  
+HWI-EAS443:3:76:748:1457#0/1  
ab^a\_a\_]\_a`X`\_`aW`a\_`a]^`\_\_\_\_[WZ\_\_^X]^

@HWI-EAS443:3:76:748:838#0/1  
CCGCATTTCTTCAATTAACCACCTTATTTCCCTCAAATTC  
+HWI-EAS443:3:76:748:838#0/1  
aabb`bbabbaaaabba`aaaaaa`a`\_^`aaa¥aa`\_\_  
@HWI-EAS443:3:76:751:1437#0/1  
AGAAACTGTGATGAGAATGGGAGACCTTCACTACCTCCAG  
+HWI-EAS443:3:76:751:1437#0/1  
aa`^aaaa^aa`a`\_a`aa`\_a\_\_`\_\_`\_^a\_\_^\_^\_  
@HWI-EAS443:3:76:776:1058#0/1  
TGAGAATGGGAGACCTTCACTACCTCCAGAGCAGAAATGA  
+HWI-EAS443:3:76:776:1058#0/1  
aaa\_¥`a`a`\_`\_]aaaaaa\_]Z¥]]a^`\_`\_]\_¥  
@HWI-EAS443:3:76:782:39#0/1  
CAGAGATTGCTTGGAGAACTGTGATGAGAATGGGAGAC  
+HWI-EAS443:3:76:782:39#0/1  
Vbaab`bbaba`bbaaa]aba¥a[a^[\_^\_aaa]aQ¥  
@HWI-EAS443:3:76:784:1524#0/1  
GCGGCACAGATTGAAAGCGACAGAGAATAGTTTGAACAA  
+HWI-EAS443:3:76:784:1524#0/1  
^\_abbabb]^abba\_a\_^]W]]a]Zaa\_\_\_^aa`]\_\_Paa  
@HWI-EAS443:3:76:800:1066#0/1  
ATGAGAATGGGAGACCTTCACTACCTCCAGAGCAGAAATG  
+HWI-EAS443:3:76:800:1066#0/1  
a`^]aaTab]aaaa` `[`baaaa[]a`aaa\_\_\_a` `` `a  
@HWI-EAS443:3:76:801:1243#0/1  
CACAGATTGAAAGCGACAGAGAATAGTTTGAACAAATAA  
+HWI-EAS443:3:76:801:1243#0/1  
ab]`a[Vabbbb`\_XRZaa^baaaa`V`[aa[a\_]a`[``  
@HWI-EAS443:3:76:826:913#0/1  
GCCGCATTTCTTCAATTAACCACCTTATTTCCCTCAAATTT  
+HWI-EAS443:3:76:826:913#0/1  
aaa^a`aaaaaaaaaaaa` `aa`a\_aa\_a][`a`\_`a^a  
@HWI-EAS443:3:76:836:964#0/1  
GGAGAACTGTGATGAGAATGGGAGACCTTCACTACCTCC  
+HWI-EAS443:3:76:836:964#0/1  
aa\_ZMDW\_aaQ`V]aX]SY\_Y¥Y[[Z]Y[U]]UXYXYXUY  
@HWI-EAS443:3:76:852:1149#0/1  
AGGGCCTATTATCTTTTGCCTAGGCATGAGCATGAACCAG  
+HWI-EAS443:3:76:852:1149#0/1  
aaa]abbabaaa\_babaaab`a[aaaaaa\_aaaa`a^\_a\_  
@HWI-EAS443:3:76:885:219#0/1  
TGCCGCATTTCTTCAATTAACCACCTTATTTCCCTCAAATT  
+HWI-EAS443:3:76:885:219#0/1  
ab¥XaWa[[^R¥]V\_ZaaZ]XZ[``^]^^WZQV\_RZTQa`  
@HWI-EAS443:3:76:909:379#0/1  
AGAAACTGTGATGAGAATGGGAGACCTTCACTACCTCCAG  
+HWI-EAS443:3:76:909:379#0/1  
aba\_Q\_bbabb\_aaa]a`ab`\_b\_Y\_\_` `a^`\_^\_a¥^aa  
@HWI-EAS443:3:76:96:1799#0/1  
ATCAAGGAATGGGGCATCACCCAATCCATTGTCTGCAAAT

+HWI-EAS443:3:76:96:1799#0/1  
WW\_T\_ZF[QT^RU]\_^X]a^UY]T`XXQOZXMUYZYR  
@HWI-EAS443:3:76:982:1308#0/1  
GCCTCTTCCTTTTAAGGACTTTTGATCTCGGCGGAGCCGA  
+HWI-EAS443:3:76:982:1308#0/1  
aba]aaaa\_ab¥`^^ZTZ[NY\_\_`[¥VVX¥RZ`W\_\_UU[U  
@HWI-EAS443:3:77:103:603#0/1  
GAGCAATTGGGACAGAAATTTGAGGAAATAAGGTGGTTAA  
+HWI-EAS443:3:77:103:603#0/1  
a`ba\_aaba\_[[abbVYXa`a^aa`\_`\_aa`b\_Za\_S^R\_  
@HWI-EAS443:3:77:105:241#0/1  
TGAGAATGGGAGACCTTCACTACCTCCAGAGCAGAAATGA  
+HWI-EAS443:3:77:105:241#0/1  
abbaaaabbbaa`^````a`\_\_\_\_\_]\_`\_`¥FYa[NY^^\_  
@HWI-EAS443:3:77:1063:654#0/1  
ATGAGAATGGGAGACCTTCACTACCTCCAGAGCAGAAATG  
+HWI-EAS443:3:77:1063:654#0/1  
abb`a``bbb]P]aa`baababba`aaaaaa\_aa^a`aa  
@HWI-EAS443:3:77:1065:34#0/1  
TGGTAACACGGTTCGAGTCTCTGAAAATATACAGAGATTC  
+HWI-EAS443:3:77:1065:34#0/1  
^b`\_`^ZU^a\_0^aaa^P`a[`ba^]a\_`a\_S]a\_a\_Y[X  
@HWI-EAS443:3:77:1074:1494#0/1  
AGAAACTGTGATGAGAATGGGAGACCTTCACTACCTCCAG  
+HWI-EAS443:3:77:1074:1494#0/1  
aa¥MSZ]¥¥aU`S`\_^\_]UYW`\_UHYHHWVR\_^¥VQM¥S  
@HWI-EAS443:3:77:1074:830#0/1  
GCCGCATTTCTTCAATTAACCACCTTATTTCTCAAATTT  
+HWI-EAS443:3:77:1074:830#0/1  
aaa\_R¥`aY[V^OPX\_\_[XPT]VH[\_\_\_\_]`[ZaVMGXZOY  
@HWI-EAS443:3:77:1087:187#0/1  
GAGAACTGTGATGAGAATGGGAGACCTTCACTACCTCCA  
+HWI-EAS443:3:77:1087:187#0/1  
a^[R^X`VaSUKU[¥Q¥TLY`^)`RR\_VX][VXUVVYUVX  
@HWI-EAS443:3:77:1137:665#0/1  
GCCGCATTTCTTCAATTAACCACCTTATTTCTCAAATTT  
+HWI-EAS443:3:77:1137:665#0/1  
aabb\_X]bb¥^aa`\_aba]aaa\_]aa\_ab^]Ua]¥I`aa`  
@HWI-EAS443:3:77:1166:1415#0/1  
AGAATGGGAGACCTTCACTACCTCCAGAGCAGAAATGAAA  
+HWI-EAS443:3:77:1166:1415#0/1  
ab`bbbb`ab`b\_baab`aaaa\_aaaaaab`^a`a`a`  
@HWI-EAS443:3:77:1181:1320#0/1  
GCCGCATTTCTTCAATTAACCACCTTATTTCTCAAATTT  
+HWI-EAS443:3:77:1181:1320#0/1  
aaab``bababaababbab\_aba\_baaaabaXaab`aaaa  
@HWI-EAS443:3:77:1209:213#0/1  
TGAGAATGGGAGACCTTCACTACCTCCAGAGCAGAAATGA  
+HWI-EAS443:3:77:1209:213#0/1  
ababaabbbba]a\_\_\_aa`a]a`[RaX\_\_a\_\_¥]`]]^]a\_

@HWI-EAS443:3:77:1240:861#0/1  
CTTGGAGAACTGTGATGAGAATGGGAGACCTTCACTACC  
+HWI-EAS443:3:77:1240:861#0/1  
abbbbbbababbbb\_bbbbbababbbbaba`aababaaa\_S  
@HWI-EAS443:3:77:1244:1478#0/1  
GCTTGGAGAACTGTGATGAGAATGGGAGACCTTCACTAC  
+HWI-EAS443:3:77:1244:1478#0/1  
aababb`a\_U`aa^a[`a¥a\_`aaaa`a^]Ya\_aa^^aN  
@HWI-EAS443:3:77:125:249#0/1  
TGGGAAACAAATCGTGAATGGATCTTGAAAGAGGAATCC  
+HWI-EAS443:3:77:125:249#0/1  
abbaaa]a^^^aaa¥a`aa`a`\_\_\_aaa]\_\_\_aa^T`]]]  
@HWI-EAS443:3:77:1284:584#0/1  
AGAATGGGAGACCTTCACTACCTCCAGAGCAGAAATGAAA  
+HWI-EAS443:3:77:1284:584#0/1  
¥\_X[b`ZWZbb¥\_]0\_\_\_^¥STQV^Z^]a¥]U\_X\_bb]T`  
@HWI-EAS443:3:77:1308:883#0/1  
GCCGCATTTCTTCAATTAACCACCTTATTTCTCAAATTT  
+HWI-EAS443:3:77:1308:883#0/1  
PX\_`aZ`^a``[S\_Za`^a]Z^]¥Za]]ab¥E¥S[aab`^  
@HWI-EAS443:3:77:1327:341#0/1  
AGAAACTGTGATGAGAATGGGAGACCTTCACTACCTCCAG  
+HWI-EAS443:3:77:1327:341#0/1  
abaa`\_ba\_aaaa\_a^aaaaa`]^Z``]^X\_^U¥\_]Y]\_  
@HWI-EAS443:3:77:1343:1497#0/1  
GTGATGAGAATGGGAGACCTTCACTACCTCCAGAGCAGAA  
+HWI-EAS443:3:77:1343:1497#0/1  
a\_ba`baaabaaab^aaa\_aaaaa\_aa`aa``¥a`\_a¥\_  
@HWI-EAS443:3:77:1348:1990#0/1  
ATCGGTTAAAGATTACACTGAAGTTCGCTTTCAGTACTAT  
+HWI-EAS443:3:77:1348:1990#0/1  
aa^ba^aa``^ba`X¥bZaVaaaa\_a`aab^\_RWa``\_\_\_  
@HWI-EAS443:3:77:1363:1289#0/1  
GAAACTGTGATGAGAATGGGAGACCTTCACTACCTCCAGA  
+HWI-EAS443:3:77:1363:1289#0/1  
¥[FYbVa\_aV]\_P][¥¥¥0U\_UTW`]]U]Z]\_\_\_¥¥¥Ta  
@HWI-EAS443:3:77:137:1679#0/1  
CCGCATTTCTTCAATTAACCACCTTATTTCTCAAATTT  
+HWI-EAS443:3:77:137:1679#0/1  
a\_Q¥SQSW]QZ]YHTQWHSSX^X[ZQ]UUY\_X¥NLUVRLV  
@HWI-EAS443:3:77:137:270#0/1  
CCGCATTTCTTCAATTAACCACCTTATTTCTCAAATTT  
+HWI-EAS443:3:77:137:270#0/1  
aa`aa`abaaabaaa^abaaaaa`Xa\_a\_`a\_aa¥\_]\_\_\_  
@HWI-EAS443:3:77:1399:768#0/1  
ATGAGAATGGGAGACCTTCACTACCTCCAGAGCAGAAATG  
+HWI-EAS443:3:77:1399:768#0/1  
abb```ZM[ab]``¥[`R^`ZX\_[X^]b]aZ\_a¥\_¥aa  
@HWI-EAS443:3:77:139:22#0/1  
AGAAACTGTGATGAGAATGGGAGACCTTCACTACCTCCAG

+HWI-EAS443:3:77:139:22#0/1  
abaabaab^a\_aa\_a\_Yaaaa\_a]]^\_^\_^^]]U]YXR]  
@HWI-EAS443:3:77:1418:1573#0/1  
GAGAACTGTGATGAGAATGGGAGACCTTCACTACCTCCA  
+HWI-EAS443:3:77:1418:1573#0/1  
`a\_bbbbbba`ab`abba`abbb^\_abab¥bb\_\_a\_Wa  
@HWI-EAS443:3:77:1418:624#0/1  
AGAACTGTGATGAGAATGGGAGACCTTCACTACCTCCAG  
+HWI-EAS443:3:77:1418:624#0/1  
aba`aa]`aW]]][UUGS]\_¥bRb`YWaa\_\_L\_T\_TWaR^`  
@HWI-EAS443:3:77:1423:288#0/1  
CCGCATTTCTTCAATTAACCACCTTATTTCTCAAATTC  
+HWI-EAS443:3:77:1423:288#0/1  
a¥]Y¥bba^abaaabaabZX\_¥`bb]b¥aSVbWaaaaV^L  
@HWI-EAS443:3:77:1435:1990#0/1  
CTGTGATGAGAATGGGAGACCTTCACTACCTCCAGAGCAG  
+HWI-EAS443:3:77:1435:1990#0/1  
`[aaZaWXba`aababZa¥H[`^\_R\_bTY^] []a`a^Yb  
@HWI-EAS443:3:77:1481:1310#0/1  
AGAACTGTGATGAGAATGGGAGACCTTCACTACCTCCAG  
+HWI-EAS443:3:77:1481:1310#0/1  
Ub¥X¥a]\_\_a[Y`YbYV`\_Ua]\_[[Sba]aT[aWa\_^\_\_a  
@HWI-EAS443:3:77:1526:1688#0/1  
GAGAACTGTGATGAGAATGGGAGACCTTCACTACCTCCA  
+HWI-EAS443:3:77:1526:1688#0/1  
^aba`baaba\_Uaaab\_\_bbW\_\_b`^\_b\_Ub^bZIU[TY¥  
@HWI-EAS443:3:77:159:319#0/1  
GGTAGACTGTTTCTTTGGCATATCCGCAAGCGATTTGCA  
+HWI-EAS443:3:77:159:319#0/1  
\_^[\_`Y\_\_`V\_\_\_\_¥\_\_¥¥¥¥¥^U[¥¥\_¥XQSUYWYVQVX  
@HWI-EAS443:3:77:1627:751#0/1  
AGAACTGTGATGAGAATGGGAGACCTTCACTACCTCCAG  
+HWI-EAS443:3:77:1627:751#0/1  
abbaabbbbaa`^`\_`baaaaaa\_^]a^aY]a[]a]V`a  
@HWI-EAS443:3:77:1657:1242#0/1  
AAAATATACAGAGATTCGCTTGGAGAACTGTGATGAGAA  
+HWI-EAS443:3:77:1657:1242#0/1  
aaabbbbaabbabaaa`b`aaba`a`aa^aa^aVab^a]`  
@HWI-EAS443:3:77:1658:822#0/1  
ATCGTGGAATGGATCTTGAAAGAGGAATCCAGCGAGACAC  
+HWI-EAS443:3:77:1658:822#0/1  
`bba¥abab^bb`^¥aaaa\_ab\_a\_a]\_]`\_\_\_\_]a\_Sa^  
@HWI-EAS443:3:77:1740:1235#0/1  
CACGGTTCGAGTCTCTGAAAATATACAGAGATTCGCTTGG  
+HWI-EAS443:3:77:1740:1235#0/1  
`b\_abaaabbbbbbb`bb^abbbb`bbbbba]babbbb  
@HWI-EAS443:3:77:174:1287#0/1  
GTGATGAGAATGGGAGACCTTCACTACCTCCAGAGCAGAA  
+HWI-EAS443:3:77:174:1287#0/1  
a\_aaa\_aa][baa`aa^aaa\_a\_a`a`a\_\_`\_^VU`\_]¥¥

@HWI-EAS443:3:77:203:1998#0/1  
AGAACTGTGATGAGAATGGGAGACCTTCACTACCTCCAG  
+HWI-EAS443:3:77:203:1998#0/1  
a`a`X\_\_\_\_\_^a\_]MS[\_\_\_^Z[\_\_\_^)]\_Z^^ZZ  
@HWI-EAS443:3:77:217:231#0/1  
GCCGCATTTCTTCAATTAACCACCTTATTTCTCAAATTT  
+HWI-EAS443:3:77:217:231#0/1  
a\_`YK[VRZ[Z[UZ^^¥XT\_]]X¥W¥^XYXYQVUW]WY  
@HWI-EAS443:3:77:239:148#0/1  
AAACGAGAAAGCTCTTATCTCTTGTCTACTTCAAGCAGT  
+HWI-EAS443:3:77:239:148#0/1  
abbaa¥a\_]X^`aaaa`aaaaa`^^`aa`\_`\_`\_\_\_\_`]  
@HWI-EAS443:3:77:253:676#0/1  
GAAACTGTGATGAGAATGGGAGACCTTCACTACCTCCAGA  
+HWI-EAS443:3:77:253:676#0/1  
0¥Zb)`baa[ba]Vbab`b\_bbWR¥`L]J\_aaUaVa^^V  
@HWI-EAS443:3:77:256:1814#0/1  
GCCGCATTTCTTCAATTAACCACCTTATTTCTCAAATTT  
+HWI-EAS443:3:77:256:1814#0/1  
abbbb\_aaa\_baabaaababababa`a`aaaaaa¥\_a]\_  
@HWI-EAS443:3:77:257:435#0/1  
GCCGCATTTCTTCAATTAACCACCTTATTTCTCAAATTT  
+HWI-EAS443:3:77:257:435#0/1  
I`bbb`¥b`R\_b\_Y]\_Z\_\_aa¥\_X\_aI`aZ]]ZT\_H]`aa  
@HWI-EAS443:3:77:272:1850#0/1  
GTCGCTTTCAATCTGTGCCGCATTTCTTCAATTAACCACC  
+HWI-EAS443:3:77:272:1850#0/1  
a`baa^Z`\_`\_`aa`^\_aa]aVZ\_]a`\_b^^`\_`\_`a[`aa  
@HWI-EAS443:3:77:288:167#0/1  
TGCCGCATTTCTTCAATTAACCACCTTATTTCTCAAATT  
+HWI-EAS443:3:77:288:167#0/1  
a^b`a^]abaabaaa`aa\_aaa\_aa^a[\_^a^a^XO^^^`  
@HWI-EAS443:3:77:294:25#0/1  
TATCTTTTGCCTAGGCATGAGCATGAACCAGTCTCGTGAC  
+HWI-EAS443:3:77:294:25#0/1  
a`aa`a\_Yaa`\_aa]\_]a^a\_\_\_\_\_`U\_\_\_WW`X^XYVW  
@HWI-EAS443:3:77:297:754#0/1  
GAAACTGTGATGAGAATGGGAGACCTTCACTACCTCCAGA  
+HWI-EAS443:3:77:297:754#0/1  
`\_`^^b]S]\_`a¥^Ya\_baaX`Y¥[\_¥X^ZU\_aUT`U`¥S  
@HWI-EAS443:3:77:298:723#0/1  
GGCATCACCCAATCCATTGTCTGCAAATCGCTTGCGGATA  
+HWI-EAS443:3:77:298:723#0/1  
ab```aaa\_Zaaaaaa^T\_^^`\_U]a^^)`^`\_`\_`^T]  
@HWI-EAS443:3:77:313:120#0/1  
CGCATTTCTTCAATTAACCACCTTATTTCTCAAATTTCT  
+HWI-EAS443:3:77:313:120#0/1  
¥b`\_bbb`bbaababb`bb¥\_bb¥bbbabaaaa^baa\_b  
@HWI-EAS443:3:77:321:1231#0/1  
GCCGCATTTCTTCAATTAACCACCTTATTTCTCAAATTT

+HWI-EAS443:3:77:321:1231#0/1  
aa`T¥XX\_a]\_`^VQ\_`\_¥^V[b[Xaa][`[a]`[¥N]\_\_\_  
@HWI-EAS443:3:77:358:1018#0/1  
CCGCATTTCTTCAATTAACCACCTTATTTCTCAAATTC  
+HWI-EAS443:3:77:358:1018#0/1  
abbb\_abbabbbbab^bb^baabbbba`bab¥¥aaaa  
@HWI-EAS443:3:77:426:679#0/1  
AGAACTGTGATGAGAATGGGAGACCTTCACTACCTCCAG  
+HWI-EAS443:3:77:426:679#0/1  
a\_`T`a\_]¥\_Z\_a`aa\_\_^`\_T\_V]Z```aa\_\_¥[]aZaa  
@HWI-EAS443:3:77:458:850#0/1  
GAACTGTGATGAGAATGGGAGACCTTCACTACCTCCAGA  
+HWI-EAS443:3:77:458:850#0/1  
`abbaa\_[baabaaaaabaa]a\_aaaaaaaaaa^`aaa\_  
@HWI-EAS443:3:77:482:851#0/1  
GTCGCTTCAATCTGTGCCGATTTCTTCAATTAACCACC  
+HWI-EAS443:3:77:482:851#0/1  
]¥^aaba^`X`¥Y\_T\_a`]^a^`^]a]^`\_^^¥Y`Y[\_¥  
@HWI-EAS443:3:77:494:1091#0/1  
CATCTGTACCTACTTCGCGCTACCTTCTGACATGACCCT  
+HWI-EAS443:3:77:494:1091#0/1  
aa`a^`^abaaaa\_\_aaq]¥X`¥X^¥^^[ZY¥aS[\_^^\_W  
@HWI-EAS443:3:77:505:773#0/1  
AGAACTGTGATGAGAATGGGAGACCTTCACTACCTCCAG  
+HWI-EAS443:3:77:505:773#0/1  
a\_baaaaa\_b`a`aaaaa`aR`V`¥\_`^``\_]Za]\_¥¥^  
@HWI-EAS443:3:77:516:395#0/1  
CGCTGGATTCTTCTTCAAGATCCATTCCACGATTTGTTT  
+HWI-EAS443:3:77:516:395#0/1  
Z\_\_abbbbaa]`bb`^W\_``baa\_bbbbbb`\_abW¥`ba  
@HWI-EAS443:3:77:562:1842#0/1  
CCGCATTTCTTCAATTAACCACCTTATTTCTCAAATTC  
+HWI-EAS443:3:77:562:1842#0/1  
ababbbbbbbaabbaabbaabaabaabb]aaaa  
@HWI-EAS443:3:77:600:320#0/1  
GCCGCATTTCTTCAATTAACCACCTTATTTCTCAAATTT  
+HWI-EAS443:3:77:600:320#0/1  
aaa]^`a]aaaa`\_a\_\_a^``\_`aY\_\_¥¥[\_`\_`\_`\_]`^  
@HWI-EAS443:3:77:606:1065#0/1  
GCCGCATTTCTTCAATTAACCACCTTATTTCTCAAATTT  
+HWI-EAS443:3:77:606:1065#0/1  
abbbbabbaaab^\_abaaaabaaaaaaaa`aba`aaaa`  
@HWI-EAS443:3:77:633:1238#0/1  
GCTTCAATCTGTGCCGATTTCTTCAATTAACCACCTTA  
+HWI-EAS443:3:77:633:1238#0/1  
ababbbbabba`abbbbbaaaaaaaaaaba`aa`aaabab  
@HWI-EAS443:3:77:656:330#0/1  
AAGGTCTCTAATCGGTTAAAGATTACCTGAAGTTCGCTT  
+HWI-EAS443:3:77:656:330#0/1  
aa^^[`aa`baaaaa\_a¥\_`^`\_`a\_a\_¥W[\_`¥\_^Z[\_^`



@HWI-EAS443:3:77:666:874#0/1  
GCCGCATTTCTTCAATTAACCACCTTATTTCTCAAATTT  
+HWI-EAS443:3:77:666:874#0/1  
aaaaaZbbbabbbaababaa`aaaaabaaa\_abaaaa`a  
@HWI-EAS443:3:77:66:160#0/1  
GAATGGGAGACCTTCACTACCTCCAGAGCAGAAATGAAAA  
+HWI-EAS443:3:77:66:160#0/1  
`]Z`a\_\_Z\_U^\_Y¥Z`Y¥¥WQU¥¥W¥¥¥QU¥URWRWWYWY  
@HWI-EAS443:3:77:72:2018#0/1  
GAATGGGAGACCTTCACTACCTCCAGAGCAGAAATGAAAA  
+HWI-EAS443:3:77:72:2018#0/1  
``b`ba[[]`VabaXbb\_V\_``aabaaa^baa¥J]\_aaa\_\_\_\_  
@HWI-EAS443:3:77:772:333#0/1  
GCCGCATTTCTTCAATTAACCACCTTATTTCTCAAATTT  
+HWI-EAS443:3:77:772:333#0/1  
^abbaabaa]`aaa`a`X]b\_`a`aba````aa\_a\_`  
@HWI-EAS443:3:77:775:1288#0/1  
GCGGCACAGATTGAAAGCGACAGAGAATAGTTTCGAACAA  
+HWI-EAS443:3:77:775:1288#0/1  
^bb`abaa\_a`aabaa\_aba`aaaaaa`a]`a`\_\_aW`a  
@HWI-EAS443:3:77:898:276#0/1  
AGAAACTGTGATGAGAATGGGAGACCTTCACTACCTCCAG  
+HWI-EAS443:3:77:898:276#0/1  
U`¥R¥`TF[^b\_¥Vb\_¥`W¥`b\_]`]ba\_ab\_^[QTaMb  
@HWI-EAS443:3:77:911:1871#0/1  
AGAAACTGTGATGAGAATGGGAGACCTTCACTACCTCCAG  
+HWI-EAS443:3:77:911:1871#0/1  
`aabaaaa]`a`a^a]aa^\_^`\_^\_\_`\_a\_\_aY¥]\_¥\_[  
@HWI-EAS443:3:77:935:1786#0/1  
ATCCGCAAGCGATTTGCAGACAATGGATTGGGTGATGCCC  
+HWI-EAS443:3:77:935:1786#0/1  
a\_\_aaaa\_`a`\_a[\_`\_][[\_a]\_\_Z`¥]¥VVQ^^WUW^[  
@HWI-EAS443:3:77:991:1333#0/1  
CTTGGAGAAACTGTGATGAGAATGGGAGACCTTCACTACC  
+HWI-EAS443:3:77:991:1333#0/1  
aaaaaababbbabYaa`a\_^aa`aa`\_a`\_\_\_\_^^a^^\_\_R  
@HWI-EAS443:3:78:1051:572#0/1  
AAGAGGCAACACCCTTGGCCTCGATATCGAAACAGCCACT  
+HWI-EAS443:3:78:1051:572#0/1  
a]^aaa\_\_aZ`]S\_`Z\_¥¥[\_Za\_¥\_¥S\_\_`\_S]VZ]^ZW  
@HWI-EAS443:3:78:1065:481#0/1  
AGAATGGGAGACCTTCACTACCTCCAGAGCAGAAATGAAA  
+HWI-EAS443:3:78:1065:481#0/1  
ab\_aaa\_aXaZ\_\_`^\_\_`a[Z`X¥¥a¥^\_\_`\_[\_W\_¥^¥  
@HWI-EAS443:3:78:1072:946#0/1  
CTTGGAGAAACTGTGATGAGAATGGGAGACCTTCACTACC  
+HWI-EAS443:3:78:1072:946#0/1  
aa^\_aa`VSY[\_`W]V\_aU¥UZY\_Z\_XWP[V]\_\_^XUTNU  
@HWI-EAS443:3:78:1075:1816#0/1  
GTCGCTTTCAATCTGTGCCGATTTCTTCAATTAACCACC

+HWI-EAS443:3:78:1075:1816#0/1  
Z`¥aaaYab\_Taaba[FY]¥^^\_WXW\_XHZ\_Z`aV¥a]0  
@HWI-EAS443:3:78:1108:1511#0/1  
GAAAGCTCTTATCTCTTGTCTACTTCAAGCAGTAGTTGT  
+HWI-EAS443:3:78:1108:1511#0/1  
aT¥[T\_]Pa^Y¥ZaRP^^GY\_^ZQ\_`\_\_`aZ^^][\_NU[X  
@HWI-EAS443:3:78:1136:1212#0/1  
GAGAATGGGAGACCTTCACTACCTCCAGAGCAGAAATGAA  
+HWI-EAS443:3:78:1136:1212#0/1  
a^a`aaaa\_\_a^Wa```aWaa]^a^]\_\_]\_`aa^^^a``\_  
@HWI-EAS443:3:78:1185:382#0/1  
TGCCGCATTTCTTCAATTAACCACCTTATTTCTCAAATT  
+HWI-EAS443:3:78:1185:382#0/1  
aaa`baabaaaba`a\_bbaa\_\_a`\_aaaa`\_GYa`a`\_aa  
@HWI-EAS443:3:78:1198:109#0/1  
TGAGAATGGGAGACCTTCACTACCTCCAGAGCAGAAATGA  
+HWI-EAS443:3:78:1198:109#0/1  
ab\_baaaba\_bZ^\_aa\_aaa`¥Y`^\_^\_^^\_\_aX^]\_\_^  
@HWI-EAS443:3:78:1204:414#0/1  
TGAGAATGGGAGACCTTCACTACCTCCAGAGCAGAAATGA  
+HWI-EAS443:3:78:1204:414#0/1  
a]Q][`a`[aUaMP[^\_\_][Z[^UXLSW\_TZZYVVU]X]X  
@HWI-EAS443:3:78:1206:1417#0/1  
CTGTGCTTTCAATCTGTGCCGCATTTCTTCAATTAACCA  
+HWI-EAS443:3:78:1206:1417#0/1  
abbaaaaabb``abbaa`a`aZaaaa\_a`````aaaa^aa  
@HWI-EAS443:3:78:1220:1205#0/1  
TGCCGCATTTCTTCAATTAACCACCTTATTTCTCAAATT  
+HWI-EAS443:3:78:1220:1205#0/1  
a\_\_\_\_`aabbbab^)`aaa`ba\_\_\_\_^aaaaaaa`a]aa^aa  
@HWI-EAS443:3:78:130:307#0/1  
GAAACTGTGATGAGAATGGGAGACCTTCACTACCTCCAGA  
+HWI-EAS443:3:78:130:307#0/1  
aaababa[]`^aa`aa`[a^`aa\_a`\_^aa\_a^a\_^\_\_[[  
@HWI-EAS443:3:78:1310:553#0/1  
ATCTTTTGCCTAGGCATGAGCATGAACCAGTCTCGTGACA  
+HWI-EAS443:3:78:1310:553#0/1  
abbaaaabaa`a\_a^aaa\_a^aaaaa¥L^a\_aa^a^a^V^  
@HWI-EAS443:3:78:1345:255#0/1  
GCCGCATTTCTTCAATTAACCACCTTATTTCTCAAATTT  
+HWI-EAS443:3:78:1345:255#0/1  
a\_`aU[aa`¥aa]\_\_aa\_^]^^Y``^`^Y]\_\_^^Z`^\_  
@HWI-EAS443:3:78:1376:847#0/1  
GGAGAAACTGTGATGAGAATGGGAGACCTTCACTACCTCC  
+HWI-EAS443:3:78:1376:847#0/1  
\_\_\_\_[\_`\_\_`^a\_\_a\_`Y`\_\_`]^`^VV\_^V\_]\_^VUYVY  
@HWI-EAS443:3:78:1415:484#0/1  
AACAAATCGTGGAATGGATCTTGAAAGAGGAATCCAGCGA  
+HWI-EAS443:3:78:1415:484#0/1  
ab]`K\_]\_XPab^\_Uaa`Q`Y``[\_`\_]a`]U^\_G\_\_R^]

@HWI-EAS443:3:78:1451:668#0/1  
TCTCCA ACTATTGCTCCCTCCTCAGTGAAAGCCCTTAGTA  
+HWI-EAS443:3:78:1451:668#0/1  
\_]¥aT`aaa^XabYYZQV\_[]YLN YU^WY^Y TSGVYXYG[  
@HWI-EAS443:3:78:1469:497#0/1  
AGATTACACTGAAGTTCGCTTTCAGTACTATGTTCTTTTC  
+HWI-EAS443:3:78:1469:497#0/1  
\_ZSaabSb¥ba^Xb^a`^ZaaaRU¥ZNE¥\_bb^\_Gaa^\_^  
@HWI-EAS443:3:78:1498:1835#0/1  
AGAAACTGTGATGAGAATGGGAGACCTTCACTACCTCCAG  
+HWI-EAS443:3:78:1498:1835#0/1  
aaaaa\_abU`aa\_]`\_aa^\_\_\_\_\_Z]^`U\_X\_aZW\_RW\_]`  
@HWI-EAS443:3:78:1525:1213#0/1  
GCCGCATTTCTTCAATTAACCACCTTATTTCTCAAATTT  
+HWI-EAS443:3:78:1525:1213#0/1  
a\_`]W`[a\_L\_`[``aaa]ZP\_SS^Y^a\_`W[a]W¥]a]^  
@HWI-EAS443:3:78:1546:1193#0/1  
AGAAACTGTGATGAGAATGGGAGACCTTCACTACCTCCAG  
+HWI-EAS443:3:78:1546:1193#0/1  
X^^^¥R\_]¥U`a¥S\_TZZ``H]¥KKVTF[aa]ZQ[LFS^  
@HWI-EAS443:3:78:1547:324#0/1  
GAATGGGAGACCTTCACTACCTCCAGAGCAGAAATGAAAA  
+HWI-EAS443:3:78:1547:324#0/1  
^¥aabbaaba`Xaa\_aaaa`[a]^`a\_a¥\_a````a\_^\_\_  
@HWI-EAS443:3:78:1628:1309#0/1  
CTGTGATGAGAATGGGAGACCTTCACTACCTCCAGAGCAG  
+HWI-EAS443:3:78:1628:1309#0/1  
abbbbaabbabbabbaaaba`aa\_b^bb`\_a\_aaa\_a\_`a  
@HWI-EAS443:3:78:1644:948#0/1  
GTGATGAGAATGGGAGACCTTCACTACCTCCAGAGCAGAA  
+HWI-EAS443:3:78:1644:948#0/1  
[^\_aaa`b`aa`a`]aa\_^a`]a\_``\_X]``^\_]\_\_^\_  
@HWI-EAS443:3:78:1674:397#0/1  
GAATGGGAGACCTTCACTACCTCCAGAGCAGAAATGAAAA  
+HWI-EAS443:3:78:1674:397#0/1  
]^ [aaab\_^ [P [ `a\_bXR^H^ [Q`aaYU]Zb\_\_ [ `aa\_ZO  
@HWI-EAS443:3:78:1675:1608#0/1  
ATCGCACGCAAAGAGGGCCTATTATCTTTTTGCCTAGGCAT  
+HWI-EAS443:3:78:1675:1608#0/1  
`[\_aYa\_`GZ\_\_RVVPZVXaU`W\_Y\_\_\_V\_UU\_Y]\_XX^  
@HWI-EAS443:3:78:184:307#0/1  
GAAACTGTGATGAGAATGGGAGACCTTCACTACCTCCAGA  
+HWI-EAS443:3:78:184:307#0/1  
a\_Taa^\_^`^]a]a]Y\_a\_\_^\_YWV¥[]\_]^[Z^[VVQ]R  
@HWI-EAS443:3:78:211:111#0/1  
GAAACTGTGATGAGAATGGGAGACCTTCACTACCTCCAGA  
+HWI-EAS443:3:78:211:111#0/1  
aaaaaaaa\_baab`b``a``\_\_\_\_]^\_\_`\_^\_`][Z]]Z\_Z  
@HWI-EAS443:3:78:211:716#0/1  
GCCGCATTTCTTCAATTAACCACCTTATTTCTCAAATTT

+HWI-EAS443:3:78:211:716#0/1  
ababa`abaa`b^aaaaa`¥`aa`aaa\_aa`a``\_\_  
@HWI-EAS443:3:78:230:93#0/1  
AGAAACTGTGATGAGAATGGGAGACCTTCACTACCTCCAG  
+HWI-EAS443:3:78:230:93#0/1  
a\_Y`a``\_a\_a\_]\_ZZa^\_]\_Z¥X^] ^Z]VWZ]ZZZX  
@HWI-EAS443:3:78:237:1511#0/1  
GCCGCATTTCTTCAATTAACCACCTTATTTCTCAAATTT  
+HWI-EAS443:3:78:237:1511#0/1  
\_bb`bbaaaaaabbbaaaaba\_aaaaaaaaa`aa]`  
@HWI-EAS443:3:78:238:889#0/1  
GGAGAACTGTGATGAGAATGGGAGACCTTCACTACCTCC  
+HWI-EAS443:3:78:238:889#0/1  
aaZ]Q]\_a`ZSZTZ¥OUPOSaZaaaT]UTYRDWQVNY\_\_\_\_  
@HWI-EAS443:3:78:293:142#0/1  
CGGCACAGATTGAAAGCGACAGAGAATAGTTTCGAACAAA  
+HWI-EAS443:3:78:293:142#0/1  
aaa]`a]WG\_^Y\_\_aaa¥YT a^[]^WYZT]¥Y]NTV¥VY  
@HWI-EAS443:3:78:311:1789#0/1  
GATGAGAATGGGAGACCTTCACTACCTCCAGAGCAGAAAT  
+HWI-EAS443:3:78:311:1789#0/1  
`baba[``aVaaaaa`b`bbb`a`^aaaa`^`\_XVZ`\_\_  
@HWI-EAS443:3:78:327:738#0/1  
GTCGCTTTCAATCTGTGCCGATTTCTTCAATTAACCACC  
+HWI-EAS443:3:78:327:738#0/1  
a`aaaaaaaa^\_a\_\_¥`a``]a`\_\_`\_] ^\_\_a\_^]]]  
@HWI-EAS443:3:78:351:1407#0/1  
GCCGCATTTCTTCAATTAACCACCTTATTTCTCAAATTT  
+HWI-EAS443:3:78:351:1407#0/1  
^`a¥\_¥bba`baabbba\_L\_\_`aa\_]`aa``babb^X^\_a  
@HWI-EAS443:3:78:36:869#0/1  
ATGAGAATGGGAGACCTTCACTACCTCCAGAGCAGAAATG  
+HWI-EAS443:3:78:36:869#0/1  
aab^a`aaaaaXa`Z¥\_¥a\_\_\_^\_\_``\_¥\_^\_\_V\_`^¥  
@HWI-EAS443:3:78:376:770#0/1  
GGCACAGATTGAAAGCGACAGAGAATAGTTTCGAACAAAT  
+HWI-EAS443:3:78:376:770#0/1  
a\_]XU`S^Y[VNS^\_a¥XU[Y[[^ [a`0^]]`YZM[U[W  
@HWI-EAS443:3:78:394:1201#0/1  
TGAGAATGGGAGACCTTCACTACCTCCAGAGCAGAAATGA  
+HWI-EAS443:3:78:394:1201#0/1  
\_]U\_K¥ZZY^X\_XY^]Z]^a][`V`a`WWWa``UP\_^[]  
@HWI-EAS443:3:78:399:1177#0/1  
GCCGCATTTCTTCAATTAACCACCTTATTTCTCAAATTT  
+HWI-EAS443:3:78:399:1177#0/1  
\_baaab``abba^`aa]bb^b\_abaaa`aaaaaaaaabaa  
@HWI-EAS443:3:78:407:1328#0/1  
AGAAACTGTGATGAGAATGGGAGACCTTCACTACCTCCAG  
+HWI-EAS443:3:78:407:1328#0/1  
a]a\_aaaa[]```\_a^a\_] ^¥\_`^\_]\_a\_\_\_\_\_WW]W]\_



+HWI-EAS443:3:78:763:1750#0/1  
`[a`S`ab`^aaa]aa^\_\_`\_]`[[aaaa`a`b\_YX`]  
@HWI-EAS443:3:78:780:823#0/1  
GCCGCATTTCTTCAATTAACCACCTTATTTCTCAAATTT  
+HWI-EAS443:3:78:780:823#0/1  
T\_bbb^bbbaba`ZZ`bbbbb^`aaabbabbbbb\_baa  
@HWI-EAS443:3:78:798:910#0/1  
AGATTCGCTTGGAGAACTGTGATGAGAATGGGAGACCTT  
+HWI-EAS443:3:78:798:910#0/1  
ab][`aa`\_`aa]a]Y][\_`W`TXa¥\_Y\_Y\_^ZP[JPRZ¥  
@HWI-EAS443:3:78:801:1038#0/1  
GCCGCATTTCTTCAATTAACCACCTTATTTCTCAAATTT  
+HWI-EAS443:3:78:801:1038#0/1  
ababaaabb`ba`aaaababaa`\_aaaaaaaa`a\_aa`a  
@HWI-EAS443:3:78:805:955#0/1  
GAAACTGTGATGAGAATGGGAGACCTTCACTACCTCCAGA  
+HWI-EAS443:3:78:805:955#0/1  
\_WU]]`XOMVWYP[MRZZ``[¥YYPWYW¥¥VXWPQ[PUUU  
@HWI-EAS443:3:78:815:1646#0/1  
CTGTGATGAGAATGGGAGACCTTCACTACCTCCAGAGCAG  
+HWI-EAS443:3:78:815:1646#0/1  
a`a[ba`ba`\_Z`\_^]\_]aaa\_aa`\_a`^^aaaa^^¥a`  
@HWI-EAS443:3:78:819:789#0/1  
GTGCGTTTCAATCTGTGCCGATTTCTTCAATTAACCACC  
+HWI-EAS443:3:78:819:789#0/1  
``aa\_aaaaaaaaa^`a`a`aaaa^aa`\_^a`a^]\_\_\_]]  
@HWI-EAS443:3:78:827:1844#0/1  
TGCCGCATTTCTTCAATTAACCACCTTATTTCTCAAATT  
+HWI-EAS443:3:78:827:1844#0/1  
abbb`aabbbaabaabbbaaa\_abbbbbaaababaaaa  
@HWI-EAS443:3:78:853:1033#0/1  
GAAACTGTGATGAGAATGGGAGACCTTCACTACCTCCAGA  
+HWI-EAS443:3:78:853:1033#0/1  
^W`Yba¥I`\_]``baa]ba`Xa`U^b[a\_bVb`a\_^S]`a  
@HWI-EAS443:3:78:85:2009#0/1  
GTGATGAGAATGGGAGACCTTCACTACCTCCAGAGCAGAA  
+HWI-EAS443:3:78:85:2009#0/1  
`\_^]a\_aa\_aa^`¥V]aa¥[[¥a`Z^^`\_\_\_\_]^¥]¥\_]S  
@HWI-EAS443:3:78:936:1937#0/1  
GCCGCATTTCTTCAATTAACCACCTTATTTCTCAAATTT  
+HWI-EAS443:3:78:936:1937#0/1  
abbbbbbbbabbbbbbba\_babbaaaaabba\_aaa  
@HWI-EAS443:3:78:951:1423#0/1  
AATCGTTAAAGATTACACTGAAGTTCGCTTTCAGTACTA  
+HWI-EAS443:3:78:951:1423#0/1  
`a`]P¥K¥a\_\_\_U\_\_\_`Z^^`^QY^Z^^]¥S`UV[S[OVX  
@HWI-EAS443:3:78:982:1881#0/1  
GTGATGAGAATGGGAGACCTTCACTACCTCCAGAGCAGAA  
+HWI-EAS443:3:78:982:1881#0/1  
aabaababa`\_`a`\_]Z^]X\_aa`\_``aa[\_aX`\_^`\_^`[^

@HWI-EAS443:3:78:996:1583#0/1  
GTGCGTTTCAATCTGTGCCGATTTCTTCAATTAACCACC  
+HWI-EAS443:3:78:996:1583#0/1  
aaabaaaaaaaaS^¥L[QR^^\_a]a^`U`^^^]Y\_¥\_ZV  
@HWI-EAS443:3:79:1049:725#0/1  
GTGATGAGAATGGGAGACCTTCACTACCTCCAGAGCAGAA  
+HWI-EAS443:3:79:1049:725#0/1  
\_W[`b`bab`^^ba][Ya`^`R`a¥¥ZPa]¥`aUb¥\_a\_Y  
@HWI-EAS443:3:79:105:1372#0/1  
GGAGAACTGTGATGAGAATGGGAGACCTTCACTACCTCC  
+HWI-EAS443:3:79:105:1372#0/1  
abbbab`ba`\_[`^aa¥J\_`a\_`\_\_Y`^ZaaaXR[a]aa  
@HWI-EAS443:3:79:1086:2024#0/1  
TGAGAATGGGAGACCTTCACTACCTCCAGAGCAGAAATGA  
+HWI-EAS443:3:79:1086:2024#0/1  
Va^^aaa]\_`a`a`[\_a`^`[Pa¥`¥¥[^GZ`SSUN`^a  
@HWI-EAS443:3:79:1086:32#0/1  
AAACTGTGATGAGAATGGGAGACCTTCACTACCTCCAGAG  
+HWI-EAS443:3:79:1086:32#0/1  
aaa`bba^`bb\_b\_`abab`a\_^`a\_]\_\_X]^\_U¥\_] ]  
@HWI-EAS443:3:79:1151:601#0/1  
ATAGTACTGAAAGCGAACTTCACTGTAATCTTTAACCGAT  
+HWI-EAS443:3:79:1151:601#0/1  
abaa\_¥`¥b`a`^\_aXa\_\_`\_`b`b`a[^]aa`\_a^^a`\_`  
@HWI-EAS443:3:79:1160:1369#0/1  
ACAGATTGAAAGCGACAGAGAATAGTTTCGAACAAATAAC  
+HWI-EAS443:3:79:1160:1369#0/1  
aaab`a`aaaa`a`aaaaa`aaa]a\_\_aWaa\_^^`aa^  
@HWI-EAS443:3:79:1164:1199#0/1  
GTGCGTTTCAATCTGTGCCGATTTCTTCAATTAACCAC  
+HWI-EAS443:3:79:1164:1199#0/1  
a`^`abbabbaaaaaab`a`aaaabab`aaaaabaa`\_`aa  
@HWI-EAS443:3:79:1171:1266#0/1  
ACGAGAAAGCTCTTATCTCTTGTCTACTTCAAGCAGTAG  
+HWI-EAS443:3:79:1171:1266#0/1  
U`\_P¥V]S]a\_bba^^^`^`aXQ\_X\_]\_\_`a`a`^aU]\_  
@HWI-EAS443:3:79:1177:659#0/1  
CGCATTTCTTCAATTAACCACCTTATTTCCCTCAAATTTCT  
+HWI-EAS443:3:79:1177:659#0/1  
aa`^`bbabbaabbb^ababaabbabba`\_a\_babaaa^a  
@HWI-EAS443:3:79:1189:319#0/1  
GCCGATTTCTTCAATTAACCACCTTATTTCCCTCAAATTT  
+HWI-EAS443:3:79:1189:319#0/1  
a`aaaabab\_a`X`^baaaVYaXW`\_`aa`]¥a¥a^^a\_a  
@HWI-EAS443:3:79:121:623#0/1  
GAAAGCTCTTATCTCTTGTCTACTTCAAGCAGTAGTTGT  
+HWI-EAS443:3:79:121:623#0/1  
aa]`aa`aaa\_a`^`aaa\_aa]V]aaa^R[\_\_\_`¥\_\_\_]^\_Y  
@HWI-EAS443:3:79:1240:1931#0/1  
CCGCATTTCTTCAATTAACCACCTTATTTCCCTCAAATTTCT

+HWI-EAS443:3:79:1240:1931#0/1  
a]VSZaZQ\_a`U^`^Y^V¥0YQMR\_¥RXH]X^R[[TXQN\_  
@HWI-EAS443:3:79:1263:79#0/1  
CAAGGTCTCTAATCGGTAAAGATTACACTGAAGTTCGCT  
+HWI-EAS443:3:79:1263:79#0/1  
abb`bbbbbbba`bbaab`aa`\_\_b`aaa^[``¥Z^`^a  
@HWI-EAS443:3:79:132:431#0/1  
GAAACTGTGATGAGAATGGGAGACCTTCACTACCTCCAGA  
+HWI-EAS443:3:79:132:431#0/1  
a]a[`aa\_\_aaa`a^¥``aaZ\_]\_\_]]``\_]\_\_\_^¥\_^\_V  
@HWI-EAS443:3:79:1337:1510#0/1  
AGAAACTGTGATGAGAATGGGAGACCTTCACTACCTCCAG  
+HWI-EAS443:3:79:1337:1510#0/1  
ab\_a^aba\_b\_]\_^`[\_a\_[[]\_XZ]aaaa`a]Za\_\_[aa  
@HWI-EAS443:3:79:1352:794#0/1  
ATGAGAATGGGAGACCTTCACTACCTCCAGAGCAGAAATG  
+HWI-EAS443:3:79:1352:794#0/1  
a¥b`^`a`¥¥^[]W\_]\_aaaba\_ba`]`b^^^b^`Yba  
@HWI-EAS443:3:79:1385:769#0/1  
GGAGAACTGTGATGAGAATGGGAGACCTTCACTACCTCC  
+HWI-EAS443:3:79:1385:769#0/1  
abaaabb\_bb\_a`aaaa`^`aaa^a\_[[aa[a`\_aWY^[Y  
@HWI-EAS443:3:79:1399:348#0/1  
ATGAGAATGGGAGACCTTCACTACCTCCAGAGCAGAAATG  
+HWI-EAS443:3:79:1399:348#0/1  
\_bbba^abbbbaaaXbbbababbaaaa`aa^b``b`\_\_ba  
@HWI-EAS443:3:79:1411:1448#0/1  
GAAACTGTGATGAGAATGGGAGACCTTCACTACCTCCAGA  
+HWI-EAS443:3:79:1411:1448#0/1  
\_bbbbbaUabbb]babaab^Za`¥`baaa^`a[KVZFR\_\_  
@HWI-EAS443:3:79:141:1254#0/1  
GCCGCATTTCTTCAATTAACCACCTTATTTCTCAAATTT  
+HWI-EAS443:3:79:141:1254#0/1  
`bbaaS]baabbababb\_`baaabaaaaaaa`]^aa\_  
@HWI-EAS443:3:79:1427:1262#0/1  
GATGAGAATGGGAGACCTTCACTACCTCCAGAGCAGAAAT  
+HWI-EAS443:3:79:1427:1262#0/1  
aa```baa`^`aWa^\_]``^````^Z^¥YZXR`U^^TP[\_  
@HWI-EAS443:3:79:1429:274#0/1  
GCCGCATTTCTTCAATTAACCACCTTATTTCTCAAATTT  
+HWI-EAS443:3:79:1429:274#0/1  
a`b`bbaaaba^a\_aaba]¥a^^ab\_aaaZ\_a¥a^\_\_a`  
@HWI-EAS443:3:79:1453:897#0/1  
CAACTGCATTTTTGACATCCTCATAAGTATGTCCTGGAAG  
+HWI-EAS443:3:79:1453:897#0/1  
abbbbabbaabbbbaabbbbabbbbabbbba^bbbabbb  
@HWI-EAS443:3:79:146:1357#0/1  
GCTTGGAGAACTGTGATGAGAATGGGAGACCTTCACTAC  
+HWI-EAS443:3:79:146:1357#0/1  
aa]Wa¥^ZP]^a¥WY^[NUNYYYV`U¥RYLV[RR[WWTNY



@HWI-EAS443:3:79:1488:254#0/1  
GAAACTGTGATGAGAATGGGAGACCTTCACTACCTCCAGA  
+HWI-EAS443:3:79:1488:254#0/1  
^`ab]Zb`YbbZKbb`b`Z^]U\_``^aY`\_`a^X[FFOVV  
@HWI-EAS443:3:79:1525:1450#0/1  
GGAGAACTGTGATGAGAATGGGAGACCTTCACTACCTCC  
+HWI-EAS443:3:79:1525:1450#0/1  
aaa]XQ`\_]\_a^¥`a^Ga`\_`\_a\_a]aUYQZRR]]^¥LPUXR  
@HWI-EAS443:3:79:1542:1355#0/1  
GGACCCCAACTGCATTTTTGACATCCTCATAAGTATGTCC  
+HWI-EAS443:3:79:1542:1355#0/1  
^]]J¥^Yaab]aX`bb`[S\_YWUZXF^XR^WY¥^aRYG^`  
@HWI-EAS443:3:79:1552:897#0/1  
GTCGCTTTCAATCTGTGCCGATTTCTTCAATTAACCACC  
+HWI-EAS443:3:79:1552:897#0/1  
aaaa\_bba\_baa]aaaa\_a\_aba[ba\_a\_ba`aZ[\_W^  
@HWI-EAS443:3:79:1665:690#0/1  
TGCCAAAGGAAACAGTCTACCTGAAAGCTTGACATGGTGT  
+HWI-EAS443:3:79:1665:690#0/1  
aaXV]bb`baa`¥aa\_[\_\_T]a``a¥a¥a^\_a`a`Taa  
@HWI-EAS443:3:79:1679:962#0/1  
AGAAACTGTGATGAGAATGGGAGACCTTCACTACCTCCAG  
+HWI-EAS443:3:79:1679:962#0/1  
]bW¥ab]\_bbbaT^`\_bababa\_ab`¥^[^a][\_`G]a  
@HWI-EAS443:3:79:1691:1677#0/1  
CGCATTTCTTCAATTAACCACCTTATTTCTCAAATTTCT  
+HWI-EAS443:3:79:1691:1677#0/1  
\_`^b`aa¥`abbb`bbaXaY\_^a^```a^\_a`babb`aYb  
@HWI-EAS443:3:79:1704:343#0/1  
TGAGAATGGGAGACCTTCACTACCTCCAGAGCAGAAATGA  
+HWI-EAS443:3:79:1704:343#0/1  
ab\_aaababa^^`Sa`\_a]`a]^a^]\_aY^U`\_a^\_^^  
@HWI-EAS443:3:79:1720:923#0/1  
GTCGCTTTCAATCTGTGCCGATTTCTTCAATTAACCACC  
+HWI-EAS443:3:79:1720:923#0/1  
^aaba`ba`aaa]aa\_aa^a^`aab`ba\_a\_ab^bR\_\_\_\_]  
@HWI-EAS443:3:79:1732:39#0/1  
GAAAATATACAGAGATTCGCTTGGAGAACTGTGATGAGA  
+HWI-EAS443:3:79:1732:39#0/1  
`bbbbbbbbb¥`bab`baa`T]aa``a`]^T```X]^ZW[¥  
@HWI-EAS443:3:79:1751:1349#0/1  
AGAAACTGTGATGAGAATGGGAGACCTTCACTACCTCCAG  
+HWI-EAS443:3:79:1751:1349#0/1  
aaIUX`\_a^`^\_S`]Z`\_a`XRTR^SLQ]]VW\_YYYYY]Y  
@HWI-EAS443:3:79:185:171#0/1  
GAAAGCTCTTATCTCTTGTCTACTTCAAGCAGTAGTTGT  
+HWI-EAS443:3:79:185:171#0/1  
\_`^`Ka`aaaaa`a`aaa\_aaaaa`aa^a`\_`a^`a`\_``^  
@HWI-EAS443:3:79:192:1262#0/1  
GAAACTGTGATGAGAATGGGAGACCTTCACTACCTCCAGA

+HWI-EAS443:3:79:192:1262#0/1  
SaTabbaaaaS¥\_¥\_a[ab`¥]^a]\_`bbaaaa]]\_OW\_\_\_  
@HWI-EAS443:3:79:195:405#0/1  
CGCGAAGTAGGTACAGATGCAATTGTCATTCTAAGTGTCT  
+HWI-EAS443:3:79:195:405#0/1  
abba\_a\_X\_\_\_\_\_ [U\_]a^`\_a]aU`aZ¥¥¥Y\_XSZ^]W  
@HWI-EAS443:3:79:26:314#0/1  
GATGAGAATGGGAGACCTTCACTACCTCCAGAGCAGAAAT  
+HWI-EAS443:3:79:26:314#0/1  
a]TVR^V[^]OPMYa[T]¥ZTJ[SY¥YY]`URR[^UWNJ  
@HWI-EAS443:3:79:294:286#0/1  
CTTCGCGCTACCTTTCTGACATGACCCTCGAGGAAATGTC  
+HWI-EAS443:3:79:294:286#0/1  
ab\_bbbabZY[]a`\_`Z`a\_]\_a`XX^`Y`\_\_aZZ  
@HWI-EAS443:3:79:345:1041#0/1  
TGAGAATGGGAGACCTTCACTACCTCCAGAGCAGAAATGA  
+HWI-EAS443:3:79:345:1041#0/1  
aa\_`¥¥`aaa]b`aa`^a`a]aa`a`\_\_Q`\_\_a¥ZT\_\_^  
@HWI-EAS443:3:79:379:1994#0/1  
AACAAATCGTGAATGGATCTTGAAAGAGGAATCCAGCGA  
+HWI-EAS443:3:79:379:1994#0/1  
Y^^YPPa¥YZTZWW`a\_T`Z\_]WX]\_V¥\_U¥^^]Y`]]  
@HWI-EAS443:3:79:406:735#0/1  
GTCGCTTTCAATCTGTGCCGATTTCTTCAATTAACCACC  
+HWI-EAS443:3:79:406:735#0/1  
^[W\_`^\_a\_¥¥W]QVU^a`\_`¥V`[a]¥YY¥[Y\_`U[```  
@HWI-EAS443:3:79:408:1653#0/1  
GCCGCATTTCTTCAATTAACCACCTTATTTCTCAAATTT  
+HWI-EAS443:3:79:408:1653#0/1  
^abbb^bbabbab\_`^`aabaabbbb`baab`a`aaabbaa  
@HWI-EAS443:3:79:466:1787#0/1  
GCCGCATTTCTTCAATTAACCACCTTATTTCTCAAATTT  
+HWI-EAS443:3:79:466:1787#0/1  
a¥]^a\_Z[Y`Y¥`Z\_aZT^`babaT\_\_KRU^a[[`^^a`\_  
@HWI-EAS443:3:79:498:1879#0/1  
GAAACTGTGATGAGAATGGGAGACCTTCACTACCTCCAGA  
+HWI-EAS443:3:79:498:1879#0/1  
^aUabbb`\_baba`abbaaaaa[aaa`\_aa`bbP\_aaa\_\_\_  
@HWI-EAS443:3:79:498:306#0/1  
GATGAGAATGGGAGACCTTCACTACCTCCAGAGCAGAAAT  
+HWI-EAS443:3:79:498:306#0/1  
aaab`b`a`aa^]b]]Z`\_`a\_\_a`[\_[[[Wa¥\_Z^]RX`^  
@HWI-EAS443:3:79:500:1068#0/1  
GCCGCATTTCTTCAATTAACCACCTTATTTCTCAAATTT  
+HWI-EAS443:3:79:500:1068#0/1  
^]a\_\_H\_aZZV`aba\_U¥^VZ^ZX]]S[ZTa\_a`YXS`a]  
@HWI-EAS443:3:79:511:878#0/1  
GCTTGGAGAAACTGTGATGAGAATGGGAGACCTTCACTAC  
+HWI-EAS443:3:79:511:878#0/1  
^b`^`^S`RRU\_^\_X`^a]`SY^\_]S[GX]^[[XY[]¥

@HWI-EAS443:3:79:535:1585#0/1  
TGCCGCATTTCTTCAATTAACCACCTTATTTCCCTCAAATT  
+HWI-EAS443:3:79:535:1585#0/1  
abb`baZaTab¥Vb^W^aa^a\_aabaa^¥W^b]\_a\_I\_a`  
@HWI-EAS443:3:79:559:546#0/1  
CAGAGATTCGCTTGGAGAACTGTGATGAGAATGGGAGAC  
+HWI-EAS443:3:79:559:546#0/1  
abbb\_WZaabaaaa`aa^`aaa\_aa`b^a\_aaa¥a\_\_\_\_]  
@HWI-EAS443:3:79:574:1560#0/1  
ATGAGAATGGGAGACCTTCACTACCTCCAGAGCAGAAATG  
+HWI-EAS443:3:79:574:1560#0/1  
aa]a`ZZ`\_\_\_\_` `[a\_\_`aa`a\_`^a```\_\_``\_]\_^\_  
@HWI-EAS443:3:79:587:1234#0/1  
GGAGAACTGTGATGAGAATGGGAGACCTTCACTACCTCC  
+HWI-EAS443:3:79:587:1234#0/1  
\_]V^abba`^````a^aXa\_W]]¥¥\_`^a¥]S]\_YWVWLR]  
@HWI-EAS443:3:79:617:1346#0/1  
CGCATTTCTTCAATTAACCACCTTATTTCCCTCAAATTTCT  
+HWI-EAS443:3:79:617:1346#0/1  
\_b`bb^`^`^`WU\_`T^aba^aaaa``a^a^L]``YZ¥`  
@HWI-EAS443:3:79:635:1844#0/1  
AGAGATTCGCTTGGAGAACTGTGATGAGAATGGGAGACC  
+HWI-EAS443:3:79:635:1844#0/1  
aa`a\_\_`a\_`\_[a]\_\_`a]\_\_\_U\_]`^W[]\_QNVWW^`¥\_  
@HWI-EAS443:3:79:635:891#0/1  
CTTGGAGAACTGTGATGAGAATGGGAGACCTTCACTACC  
+HWI-EAS443:3:79:635:891#0/1  
abab\_NWYZU`\_\_UWY¥`¥^V0¥a`\_\_a]`Y[V\_aa]]W¥  
@HWI-EAS443:3:79:652:183#0/1  
TTTCAATCTGTGCCGCATTTCTTCAATTAACCACCTTATT  
+HWI-EAS443:3:79:652:183#0/1  
aababa\_\_`\_ab\_aaaXa`a]a`M[\_a\_aa\_\_a\_\_\_\_^a`  
@HWI-EAS443:3:79:660:1457#0/1  
GAAAGAGGAATCCAGCGAGACACTTAGAATGACAATTGCA  
+HWI-EAS443:3:79:660:1457#0/1  
`TWH\_baJ¥`]baaZa[\_`aaa\_a``aaaaba`aa]^aaa  
@HWI-EAS443:3:79:680:159#0/1  
CTGAAAATATACAGAGATTCGCTTGGAGAACTGTGATGA  
+HWI-EAS443:3:79:680:159#0/1  
`bbababaabbaababa\_[]^a`aba`aaaa\_aa\_a`]`\_  
@HWI-EAS443:3:79:689:497#0/1  
GCCGCATTTCTTCAATTAACCACCTTATTTCCCTCAAATTT  
+HWI-EAS443:3:79:689:497#0/1  
abbbbbbbbbbbbbbbbbbaabaabaabbbbaabab`abaa  
@HWI-EAS443:3:79:716:1023#0/1  
GTCGCTTTCAATCTGTGCCGCATTTCTTCAATTAACCACC  
+HWI-EAS443:3:79:716:1023#0/1  
aaa]abaabab^` [^`aaa`aaaa\_aaa`\_aaa]\_\_aaa  
@HWI-EAS443:3:79:732:173#0/1  
GCCGCATTTCTTCAATTAACCACCTTATTTCCCTCAAATTT

+HWI-EAS443:3:79:732:173#0/1  
aa`b\_bbababaababab`\_\_a`aaaabaa\_\_a`b``a`a  
@HWI-EAS443:3:79:750:324#0/1  
CTTGGAGAACTGTGATGAGAATGGGAGACCTTCACTACC  
+HWI-EAS443:3:79:750:324#0/1  
ababaa]`a\_G¥]XbaabLaVaa\_[a[X`\_\_\_\_]¥`Z[\_]  
@HWI-EAS443:3:79:757:1377#0/1  
CTAAGGGCTTTCCTGAGGAGGGAGCAATAGTTGGAGAAA  
+HWI-EAS443:3:79:757:1377#0/1  
abbaaabbbbbbababba`ba\_abbaab\_]a`aaa`a`  
@HWI-EAS443:3:79:75:261#0/1  
GCATTTCTTCAATTAACCACCTTATTTCTCAAATTTCTG  
+HWI-EAS443:3:79:75:261#0/1  
`\_a\_[`aaaa^^aaa\_Yaa`]``aa^`]a`\_````\_\_Zaa  
@HWI-EAS443:3:79:762:1650#0/1  
CAGTCTCGTGACATTTCTCGAGGGTCATGTCAGAAAGGT  
+HWI-EAS443:3:79:762:1650#0/1  
a^]Raabb]]\_aX`^a[baa\_\_¥`a]`a`TPa\_aXU[^WH  
@HWI-EAS443:3:79:825:1775#0/1  
GCGGCACAGATTGAAAGCGACAGAGAATAGTTTCGAACAA  
+HWI-EAS443:3:79:825:1775#0/1  
abbaba`\_b`a`aaa[S\_a`\_a^¥^¥a[a`Q\_`^T[\_Xaa  
@HWI-EAS443:3:79:851:1231#0/1  
AGAATGGGAGACCTTCACTACCTCCAGAGCAGAAATGAAA  
+HWI-EAS443:3:79:851:1231#0/1  
abZI`bb\_[aa\_aaTa`aa\_aaabaa¥¥ZLWaa`aa`^^]  
@HWI-EAS443:3:79:861:955#0/1  
CGCTTGGAGAACTGTGATGAGAATGGGAGACCTTCACTA  
+HWI-EAS443:3:79:861:955#0/1  
abbaab`aa`]`aaa^b\_a`¥^`\_abaa\_a]^a`a`Y`\_  
@HWI-EAS443:3:79:869:583#0/1  
ATGAGAATGGGAGACCTTCACTACCTCCAGAGCAGAAATG  
+HWI-EAS443:3:79:869:583#0/1  
abbababbba`a`[aaa`aab^[`aa\_`[aa\_a]\_`aa  
@HWI-EAS443:3:79:883:449#0/1  
AATTGAAGAAATGCGGCACAGATTGAAAGCGACAGAGAAT  
+HWI-EAS443:3:79:883:449#0/1  
aaba\_Y`bababaaaa\_aa`b`aaaaabaa`a`b\_a\_^`  
@HWI-EAS443:3:79:89:900#0/1  
GAAACTGTGATGAGAATGGGAGACCTTCACTACCTCCAGA  
+HWI-EAS443:3:79:89:900#0/1  
a`\_]`\_¥H\_a`^^XLWa`Q`¥W^a\_Va¥\_\_\_a^USVU\_¥  
@HWI-EAS443:3:79:912:1387#0/1  
GTGATGAGAATGGGAGACCTTCACTACCTCCAGAGCAGAA  
+HWI-EAS443:3:79:912:1387#0/1  
aYYZaaZ[TL]a^^^a`a\_]R]`\_¥¥^XZ\_V¥¥LV^\_]^[  
@HWI-EAS443:3:79:949:456#0/1  
TGCCGCATTTCTTCAATTAACCACCTTATTTCTCAAATT  
+HWI-EAS443:3:79:949:456#0/1  
\_b]aaaaZa\_b`[^¥a^`bbbaabbb\_bbbabbaaaWbb

@HWI-EAS443:3:79:958:415#0/1  
GTGATGAGAATGGGAGACCTTCACTACCTCCAGAGCAGAA  
+HWI-EAS443:3:79:958:415#0/1  
aaaaabaaaa`a\_a\_a\_\_\_aa\_a`a`]\_\_\_\_`a^aS\_`\_\_  
@HWI-EAS443:3:79:971:299#0/1  
GGAGAACTGTGATGAGAATGGGAGACCTTCACTACCTCC  
+HWI-EAS443:3:79:971:299#0/1  
ab\_aaaa\_aa]a]`a^a`¥`aa\_]`¥]U``X`]V\_U]UVQ  
@HWI-EAS443:3:7:1011:961#0/1  
GAAACTGTGATGAGAATGGGAGACCTTCACTACCTCCAGA  
+HWI-EAS443:3:7:1011:961#0/1  
aaaaaaaa^baabaa\_``aaa\_a\_\_^`V\_Y^\_VV]V\_^`^  
@HWI-EAS443:3:7:1101:167#0/1  
GCCGCATTTCTTCAATTAACCACCTTATTTCTCAAATTT  
+HWI-EAS443:3:7:1101:167#0/1  
`LbaW\_a\_R\_`\_[^a\_^U¥WOSa\_a^`]I^^\_WW``]^  
@HWI-EAS443:3:7:1171:218#0/1  
CCGCATTTCTTCAATTAACCACCTTATTTCTCAAATTT  
+HWI-EAS443:3:7:1171:218#0/1  
`bba¥`^aabaab]b`]`Raaa\_aaab`Wa\_a^^b``]  
@HWI-EAS443:3:7:1194:1883#0/1  
TGAGAATGGGAGACCTTCACTACCTCCAGAGCAGAAATGA  
+HWI-EAS443:3:7:1194:1883#0/1  
aV^[¥b^\_aa[¥`[FY`VPQ^RQY^RN``]\_ZL]R]\_X`U  
@HWI-EAS443:3:7:1200:806#0/1  
GAGAATGGGAGACCTTCACTACCTCCAGAGCAGAAATGAA  
+HWI-EAS443:3:7:1200:806#0/1  
aJ]MU]a]][\_Z[J¥\_``\_Z^T[\_Z\_¥`S`YU]WUT¥^UT  
@HWI-EAS443:3:7:1240:943#0/1  
GCCGCATTTCTTCAATTAACCACCTTATTTCTCAAATTT  
+HWI-EAS443:3:7:1240:943#0/1  
aaQab\_abaRa`a`a]\_I]a`V\_b`¥`a`0\_\_^\_^`\_`Y  
@HWI-EAS443:3:7:124:296#0/1  
CTTGGAGAACTGTGATGAGAATGGGAGACCTTCACTACC  
+HWI-EAS443:3:7:124:296#0/1  
a]ZX^^^]aa`]V`\_\_`Y\_\_`RRYY^XL]\_VZ`ZZTKX  
@HWI-EAS443:3:7:1295:637#0/1  
GTCGCTTTCAATCTGTGCCGCATTTCTTCAATTAACCACC  
+HWI-EAS443:3:7:1295:637#0/1  
XMXaaaa`^\_\_[]ZLXR`X]\_]^S^`\_¥YT[]¥WX]VU  
@HWI-EAS443:3:7:1309:1339#0/1  
ATTTCTCGAGGGTCATGTCAGAAAGGTAGCGGAAGTAG  
+HWI-EAS443:3:7:1309:1339#0/1  
]a^¥`a`aa[U^ba\_] ^YV`Z`VM\_]\_``Za`a^¥bZa¥  
@HWI-EAS443:3:7:1315:36#0/1  
GAAACTGTGATGAGAATGGGAGACCTTCACTACCTCCAGA  
+HWI-EAS443:3:7:1315:36#0/1  
aaa¥Q\_aa^aa\_]ZY\_aa^^Y[VMV^`N\_V]]OU]VRWZU  
@HWI-EAS443:3:7:1349:1572#0/1  
GAGAACTGTGATGAGAATGGGAGACCTTCACTACCTCCA

+HWI-EAS443:3:7:1349:1572#0/1  
abba]]Zab¥\_\_\_a`aTX`PYYP]¥]`\_[\_VPYGRHZG\_  
@HWI-EAS443:3:7:1388:570#0/1  
CTGTGATGAGAATGGGAGACCTTCACTACCTCCAGAGCAG  
+HWI-EAS443:3:7:1388:570#0/1  
U\_a\_XZ`a\_a¥Z\_Waa]^¥\_[ZXH\_]a¥X]¥XX`bV\_^UX  
@HWI-EAS443:3:7:1412:1147#0/1  
GTCGCTTTCAATCTGTGCCGATTTCTTCAATTAACCACC  
+HWI-EAS443:3:7:1412:1147#0/1  
`\_ZHW`bba\_\_\_`baU\_]Wa¥Xa`Za`W`\_^`\_^[W^¥W  
@HWI-EAS443:3:7:1415:1339#0/1  
GAAACTGTGATGAGAATGGGAGACCTTCACTACCTCCAGA  
+HWI-EAS443:3:7:1415:1339#0/1  
aaaa\_aa`baabaa`aa`a\_\_\_`^^`\_Ya]\_\_V]]X^^`^  
@HWI-EAS443:3:7:1491:1726#0/1  
GAAAATATACAGAGATTCGCTTGGAGAACTGTGATGAGA  
+HWI-EAS443:3:7:1491:1726#0/1  
a\_a`aaaaaaaa`aa\_]X`\_\_`^`]^`^`\_Z^\_V\_XU\_Z][  
@HWI-EAS443:3:7:1558:208#0/1  
GAATGGGAGACCTTCACTACCTCCAGAGCAGAAATGAAAA  
+HWI-EAS443:3:7:1558:208#0/1  
a`aabaaaaX¥a`Ua\_a\_YX]UX\_\_`^`Y^]YYY]^]]¥B  
@HWI-EAS443:3:7:157:1009#0/1  
GAGAATGGGAGACCTTCACTACCTCCAGAGCAGAAATGAA  
+HWI-EAS443:3:7:157:1009#0/1  
aZ\_ZaaaQ]Z`\_]\_[XNYa`]]Z[Z^W¥¥V^Z[`RIRS[BB  
@HWI-EAS443:3:7:1585:669#0/1  
AGAAACTGTGATGAGAATGGGAGACCTTCACTACCTCCAG  
+HWI-EAS443:3:7:1585:669#0/1  
abaaa\_aa\_baaa[a`\_]\_[a`^a^YU\_¥P]X^\_XVYUY^]  
@HWI-EAS443:3:7:1610:1001#0/1  
CTTGAATGGAATGGTAACACGGTTCGAGTCTCTGAAAATA  
+HWI-EAS443:3:7:1610:1001#0/1  
ab\_babbb\_bbbbbaba\_b¥bbbbbaab`¥b\_aa\_\_baVa  
@HWI-EAS443:3:7:1618:1450#0/1  
CTTGAATGGAATGGTAACACGGTTCGAGTCTCTGAAAATA  
+HWI-EAS443:3:7:1618:1450#0/1  
Kbab][a`^babbb\_^ba^`\_a`aaa\_a\_^`L^a^\_b^\_a  
@HWI-EAS443:3:7:167:891#0/1  
GGAGAACTGTGATGAGAATGGGAGACCTTCACTACCTCC  
+HWI-EAS443:3:7:167:891#0/1  
ab\_^`¥Y`abU`aaZ¥¥SZaaZa`aWX\_\_a`a\_]\_T`¥\_a  
@HWI-EAS443:3:7:173:290#0/1  
CAAATCGTGAATGGATCTTGAAAGAGGAATCCAGCGAGA  
+HWI-EAS443:3:7:173:290#0/1  
\_bbbab\_bbaab`Zaababaaaba`Z``a]L]`\_b\_a`  
@HWI-EAS443:3:7:1756:344#0/1  
GAGAATGGGAGACCTTCACTACCTCCAGAGCAGAAATGAA  
+HWI-EAS443:3:7:1756:344#0/1  
aYaRaaaaS`\_`\_^`\_^aSa\_SS¥WU^aY\_T^\_WS¥\_W¥W

@HWI-EAS443:3:7:1768:1444#0/1  
CGCTTGGAGAACTGTGATGAGAATGGGAGACCTTCACTA  
+HWI-EAS443:3:7:1768:1444#0/1  
ab\_abaabaaaa¥aVaa`a[`S`\_\_^\_\_\_WGT¥QTZYZ¥  
@HWI-EAS443:3:7:192:1208#0/1  
GTGATGAGAATGGGAGACCTTCACTACCTCCAGAGCAGAA  
+HWI-EAS443:3:7:192:1208#0/1  
a\_b^\_``aUYaa\_a^\_aaa\_\_\_\_\_`^^Z^T\_]`[\_aZZ  
@HWI-EAS443:3:7:196:280#0/1  
GCCGCATTTCTTCAATTAACCACCTTATTTCTCAAATTT  
+HWI-EAS443:3:7:196:280#0/1  
aaaaaab``V`a\_babaa`\_`aa`aa[aa``aa`\_a\_a`a  
@HWI-EAS443:3:7:212:979#0/1  
GTGCTTTCAATCTGTGCCGCATTTCTTCAATTAACCACC  
+HWI-EAS443:3:7:212:979#0/1  
aaaaa¥aaaa\_^\_a]^``\_a\_X\_^^^`\_Z^^\_\_\_\_\_W¥]¥^  
@HWI-EAS443:3:7:213:925#0/1  
CCAGTCTCGTGACATTTCTCGAGGGTCATGTCAGAAAGG  
+HWI-EAS443:3:7:213:925#0/1  
aaab¥a^aba]X\_]bbab\_b\_`^\_baQ\_V\_ba``[[`aab  
@HWI-EAS443:3:7:220:263#0/1  
TAAGTATGCTGGAAGAGAAGGTAATGGTAAAATTTCTC  
+HWI-EAS443:3:7:220:263#0/1  
aaaaPaaa]a)`aa`a\_`¥[\_`Z^Y[`S\_^^]]]Y[^^^  
@HWI-EAS443:3:7:246:414#0/1  
GAAACTGTGATGAGAATGGGAGACCTTCACTACCTCCAGA  
+HWI-EAS443:3:7:246:414#0/1  
a``^N[``]`¥`a`a\_]`^Z^\_Z]^`^^\_]`^\_]V^]X  
@HWI-EAS443:3:7:250:195#0/1  
GTGCTTTCAATCTGTGCCGCATTTCTTCAATTAACCACC  
+HWI-EAS443:3:7:250:195#0/1  
a\_aaa\_`a[a[a\_`[Wa^\_aYX^\_¥U^]^^^\_`Z^XX^XL  
@HWI-EAS443:3:7:260:331#0/1  
CTTGGAGAACTGTGATGAGAATGGGAGACCTTCACTACC  
+HWI-EAS443:3:7:260:331#0/1  
a^b\_Zabbababb^`a]bXba\_`aa\_aa\_^^\_`Z\_``Q  
@HWI-EAS443:3:7:262:137#0/1  
AATTTACCATTACCTTCTTCCAGGACATACTTATGAG  
+HWI-EAS443:3:7:262:137#0/1  
aaaa]P¥``]Z¥`M[\_R\_[a\_]S^\_VDF\_ZU[^YVYY`[B  
@HWI-EAS443:3:7:294:1919#0/1  
GAAACTGTGATGAGAATGGGAGACCTTCACTACCTCCAGA  
+HWI-EAS443:3:7:294:1919#0/1  
`\_WQ\_]b[R]^`R`Raa]]XX]TZa`^W[W]\_`PXFVUH]  
@HWI-EAS443:3:7:311:730#0/1  
GAGAATGGGAGACCTTCACTACCTCCAGAGCAGAAATGAA  
+HWI-EAS443:3:7:311:730#0/1  
a`baa`bb¥Z\_a``aaaa`aa\_`\_aZaa\_````]^````^  
@HWI-EAS443:3:7:327:1188#0/1  
GAGAACTGTGATGAGAATGGGAGACCTTCACTACCTCCA

+HWI-EAS443:3:7:327:1188#0/1  
aaa`^Q\_aa]aaa`a\_^`^`^`^`Y^X\_]^\_RV]YY\_  
@HWI-EAS443:3:7:367:1072#0/1  
GCTTGGAGAACTGTGATGAGAATGGGAGACCTTCACTAC  
+HWI-EAS443:3:7:367:1072#0/1  
aaaa`b[a]^`a]WaZa`\_]\_]`\_`\_`\_`¥¥¥¥¥W^`¥\_U  
@HWI-EAS443:3:7:384:771#0/1  
GGAGAACTGTGATGAGAATGGGAGACCTTCACTACCTCC  
+HWI-EAS443:3:7:384:771#0/1  
]\_V\_\_OU¥¥¥U\_]aTZ^ZZSa¥Q¥SXWZS\_a`ZXXGRTK  
@HWI-EAS443:3:7:39:634#0/1  
TTCGCTTGGAGAACTGTGATGAGAATGGGAGACCTTCACTAC  
+HWI-EAS443:3:7:39:634#0/1  
aaaaaa\_aX`a]W]a\_aY]R[Z\_[Z\_\_a\_]T]]ZW[BBBB  
@HWI-EAS443:3:7:42:144#0/1  
GCCGCATTTCTTCAATTAACCACCTTATTTCTCAAATTT  
+HWI-EAS443:3:7:42:144#0/1  
aa\_W`Z[ZZ`aa][[X[a¥X`¥Y¥XQX][W[OP^]¥WBBB  
@HWI-EAS443:3:7:443:510#0/1  
AGAACTGTGATGAGAATGGGAGACCTTCACTACCTCCAG  
+HWI-EAS443:3:7:443:510#0/1  
`UZ[`N\_aK[aabab\_b\_b`aX`^UYa]HRZ\_]P`^\_X\_\_  
@HWI-EAS443:3:7:492:485#0/1  
TGAGAATGGGAGACCTTCACTACCTCCAGAGCAGAAATGA  
+HWI-EAS443:3:7:492:485#0/1  
ab`\_Y¥aaaa`a`^]a`Ya]a`WUZU]\_\_X`]]\_]\_]`^Y  
@HWI-EAS443:3:7:562:1225#0/1  
GTCGCTTTCAATCTGTGCCGATTTCTTCAATTAACCACC  
+HWI-EAS443:3:7:562:1225#0/1  
aaabaabbabaabaa\_aaaa\_aaaa\_a`\_aaaaaa^`^^  
@HWI-EAS443:3:7:571:539#0/1  
GGTTAATTGAAGAAATGCGGCACAGATTGAAAGCGACAGA  
+HWI-EAS443:3:7:571:539#0/1  
`b^abbbbaabbbbabbaaaaa`baaabaa\_b^b`^aa`  
@HWI-EAS443:3:7:585:971#0/1  
GCCGCATTTCTTCAATTAACCACCTTATTTCTCAAATTT  
+HWI-EAS443:3:7:585:971#0/1  
a\_aa\_`aa`^`^`^]aa`\_]\_\_\_\_\_^^`\_`\_`\_`\_`^\_X[]^  
@HWI-EAS443:3:7:589:943#0/1  
GAATGGGAGACCTTCACTACCTCCAGAGCAGAAATGAAAA  
+HWI-EAS443:3:7:589:943#0/1  
a¥aaa¥^W^\_\_¥a]\_a[`\_]Z\_¥X`\_]\_]\_aaZ`^¥]\_a\_\_  
@HWI-EAS443:3:7:599:1429#0/1  
TGTCGCTTTCAATCTGTGCCGATTTCTTCAATTAACCAC  
+HWI-EAS443:3:7:599:1429#0/1  
]`W`aa]^\_U\_`a]HV]^Y`^YSZWW\_]MX`\_Z`¥Y\_a^  
@HWI-EAS443:3:7:61:379#0/1  
GCCGCATTTCTTCAATTAACCACCTTATTTCTCAAATTT  
+HWI-EAS443:3:7:61:379#0/1  
\_`aZZa^Y\_`]XT]X[]ZVX[VYW[Y[Wa[¥`\_]`^\_Z\_P`



@HWI-EAS443:3:7:691:1297#0/1  
GAGAATGGGAGACCTTCACTACCTCCAGAGCAGAAATGAA  
+HWI-EAS443:3:7:691:1297#0/1  
abab]babb`a`aaaaab\_bbZJaa]abab^aa[a`aaaa  
@HWI-EAS443:3:7:691:1605#0/1  
GCCGCATTTCTTCAATTAACCACCTTATTTCTCAAATTT  
+HWI-EAS443:3:7:691:1605#0/1  
[```abbbZ\_aab``bbb`a`baaaa`b`aZabaaa^aa`  
@HWI-EAS443:3:7:695:1875#0/1  
AAAATATACAGAGATTCGCTTGGAGAAACTGTGATGAGAA  
+HWI-EAS443:3:7:695:1875#0/1  
aaabaaab\_b`aa`\_\_aa\_\_aa\_\_\_aa\_\_`W^^]\_\_][\_  
@HWI-EAS443:3:7:699:832#0/1  
CTTGGAGAAACTGTGATGAGAATGGGAGACCTTCACTACC  
+HWI-EAS443:3:7:699:832#0/1  
a]G\_¥ZUVUR][`R`\_[a¥WV[V^]X[VNXHVU]^SLWUT  
@HWI-EAS443:3:7:721:848#0/1  
TGCCGCATTTCTTCAATTAACCACCTTATTTCTCAAATT  
+HWI-EAS443:3:7:721:848#0/1  
aababa`bbaabbaabaaa`aa[ab`abaa\_[aa`aaaa  
@HWI-EAS443:3:7:74:666#0/1  
GAGAATGGGAGACCTTCACTACCTCCAGAGCAGAAATGAA  
+HWI-EAS443:3:7:74:666#0/1  
aaa`aa`aaYa\_\_`Z^aa\_```\_\_`^¥`\_a^\_aX[[\_\_`U  
@HWI-EAS443:3:7:759:1074#0/1  
GAAAATATACAGAGATTCGCTTGGAGAAACTGTGATGAGA  
+HWI-EAS443:3:7:759:1074#0/1  
a`aabaaaa`a`aa\_aaaa\_a\_aa^\_]Y\_X^\_W\_Z)`^^W  
@HWI-EAS443:3:7:800:881#0/1  
GTGCCGCATTTCTTCAATTAACCACCTTATTTCTCAAAT  
+HWI-EAS443:3:7:800:881#0/1  
aabaaa`a`a`abaaa\_a\_a`^^a`]aaaa`a^\_a`[Ya  
@HWI-EAS443:3:7:860:1534#0/1  
CTCCCATTCTCATCACAGTTTCTCCAAGCGAATCTCTGTA  
+HWI-EAS443:3:7:860:1534#0/1  
aaa`bbaaababba`aaa^aa`a`^aaa\_a^``Y`\_\_\_\_]`  
@HWI-EAS443:3:7:949:1617#0/1  
GTCGCTTTCAATCTGTGCCGCATTTCTTCAATTAACCACC  
+HWI-EAS443:3:7:949:1617#0/1  
a¥`\_\_]`PG][`XW^X^`Ua]\_¥WWG][X¥\_]Y]SSS^W¥  
@HWI-EAS443:3:7:973:824#0/1  
GGAGAAACTGTGATGAGAATGGGAGACCTTCACTACCTCC  
+HWI-EAS443:3:7:973:824#0/1  
\_V¥¥V`ZXaaRa\_T]`^R^\_\_\_\_^¥YQHSPY¥XJVRSNWRL  
@HWI-EAS443:3:7:988:377#0/1  
AGAATGGGAGACCTTCACTACCTCCAGAGCAGAAATGAAA  
+HWI-EAS443:3:7:988:377#0/1  
W[[[aZQ\_^\_\_¥`¥¥`b`\_`aa`XXaY¥aW^b[a\_[b`aa  
@HWI-EAS443:3:7:991:1494#0/1  
TGGGAAACAAATCGTGAATGGATCTTGAAAGAGGAATCC

+HWI-EAS443:3:7:991:1494#0/1  
aaaaaaaa`ba`b^`\_aaa`]^`^aaaa\_`a\_a\_a^\_`^W  
@HWI-EAS443:3:7:999:1141#0/1  
GTCGCTTTCAATCTGTGCCGATTTCTTCAATTAACCACC  
+HWI-EAS443:3:7:999:1141#0/1  
`[¥Ya\_X\_T[\_\_\_X]][]`U[\_]X^^UM[\_\_\_]ZWM[XO  
@HWI-EAS443:3:80:1034:220#0/1  
CATAAATGTTATTTGTTGAAACTATTCTCTGTCGCTTTC  
+HWI-EAS443:3:80:1034:220#0/1  
abbaabbbbbbaaa\_abbbaaabbb\_ababb]`baaba[  
@HWI-EAS443:3:80:1044:451#0/1  
GCCGATTTCTTCAATTAACCACCTTATTTCTCAAATTT  
+HWI-EAS443:3:80:1044:451#0/1  
aa\_VUXSS`N¥]XH[a`]WLWT\_\_\_\_\_aaaZGNaa¥WaaU¥  
@HWI-EAS443:3:80:1078:735#0/1  
CGCTTTCAATCTGTGCCGATTTCTTCAATTAACCACCTT  
+HWI-EAS443:3:80:1078:735#0/1  
[aa^`YU¥¥VYbbabaaba`a\_`R`a`a`b``¥¥]`\_`a  
@HWI-EAS443:3:80:1141:630#0/1  
GATGAGAATGGGAGACCTTCACTACCTCCAGAGCAGAAAT  
+HWI-EAS443:3:80:1141:630#0/1  
a`a^¥Z`\_a`aa[\_[\_[a[[\_`\_a\_X^^Z]Z¥T\_]\_a^^^  
@HWI-EAS443:3:80:1177:406#0/1  
CTGTGATGAGAATGGGAGACCTTCACTACCTCCAGAGCAG  
+HWI-EAS443:3:80:1177:406#0/1  
abb`bbbbbbbbbbbbbaaabab`baaXa\_aab`a\_`b  
@HWI-EAS443:3:80:1180:1701#0/1  
GAGAAACTGTGATGAGAATGGGAGACCTTCACTACCTCCA  
+HWI-EAS443:3:80:1180:1701#0/1  
`abbaa`ab^a`\_a\_ba\_\_aaa`\_\_[^a^`\_`\_]X`VX\_  
@HWI-EAS443:3:80:1193:1232#0/1  
ACTGTGATGAGAATGGGAGACCTTCACTACCTCCAGAGCA  
+HWI-EAS443:3:80:1193:1232#0/1  
aaba]baabab\_aa\_aa^baa`aa`a¥aa\_Zaa\_aa\_\_^Z  
@HWI-EAS443:3:80:1196:194#0/1  
GAGAAACTGTGATGAGAATGGGAGACCTTCACTACCTCCA  
+HWI-EAS443:3:80:1196:194#0/1  
aa`bZba¥U^a¥`]^`\_`[^\_UP\_\_OHGPU\_U\_\_\_W\_WG]  
@HWI-EAS443:3:80:1199:1814#0/1  
GAATGGGAGACCTTCACTACCTCCAGAGCAGAAATGAAAA  
+HWI-EAS443:3:80:1199:1814#0/1  
aaaaabb`baPaa`Ybaa`SY^`Z\_`\_`\_`aaaaa\_a\_]`  
@HWI-EAS443:3:80:1249:1014#0/1  
GTCGCTTTCAATCTGTGCCGATTTCTTCAATTAACCACC  
+HWI-EAS443:3:80:1249:1014#0/1  
]XZaaaa```YSVZ[[[W\_aY[P¥^]^][YUU\_`\_WZWXZV  
@HWI-EAS443:3:80:127:781#0/1  
GAAACTGTGATGAGAATGGGAGACCTTCACTACCTCCAGA  
+HWI-EAS443:3:80:127:781#0/1  
^X\_¥\_ba^\_ZabZY[X¥\_\_TO[ZY`^YQ^^]a[aZaa^XZ

@HWI-EAS443:3:80:1333:1956#0/1  
GAGAATGGGAGACCTTCACTACCTCCAGAGCAGAAATGAA  
+HWI-EAS443:3:80:1333:1956#0/1  
aaaaba\_Va`aa^\_Y`b`Z]`a\_aa[aaaa``a¥[¥`\_\_  
@HWI-EAS443:3:80:1405:413#0/1  
CCGCATTTCTTCAATTAACCACCTTATTTCTCAAATTTCT  
+HWI-EAS443:3:80:1405:413#0/1  
aababbbbabbbaabbabaabaabaabab`\_a`aaabba¥  
@HWI-EAS443:3:80:1421:1013#0/1  
CGCATTTCTTCAATTAACCACCTTATTTCTCAAATTTCT  
+HWI-EAS443:3:80:1421:1013#0/1  
¥````aabSabaa\_`^`adM[`]Wa`^`\_`YSa¥a^[\_`XS`  
@HWI-EAS443:3:80:1508:119#0/1  
GGCTGTTTCGATATCGAGGCCAAGGGTGTGCCTCTTCCT  
+HWI-EAS443:3:80:1508:119#0/1  
`aaaaa`N][WT^U`S^]TSH¥[^\_H\_\_\_RNSYW\_`GMZ  
@HWI-EAS443:3:80:1555:1178#0/1  
GTGCCGCATTTCTTCAATTAACCACCTTATTTCTCAAAT  
+HWI-EAS443:3:80:1555:1178#0/1  
aXY\_]ba¥aba]]aaa`ba`a\_a\_]aaaa`a]V\_\_a\_`a  
@HWI-EAS443:3:80:1585:999#0/1  
GCCGCATTTCTTCAATTAACCACCTTATTTCTCAAATTT  
+HWI-EAS443:3:80:1585:999#0/1  
¥`bbaabbbbbbaabbabaaa`\_bbabba\_[baa\_abab  
@HWI-EAS443:3:80:1605:785#0/1  
TGAGAATGGGAGACCTTCACTACCTCCAGAGCAGAAATGA  
+HWI-EAS443:3:80:1605:785#0/1  
YbU`[abaaa]^`^W\_a`\_`M^\_[N^XQ^a``U``\_`^a`\_`^  
@HWI-EAS443:3:80:1607:587#0/1  
AGAATGGGAGACCTTCACTACCTCCAGAGCAGAAATGAAA  
+HWI-EAS443:3:80:1607:587#0/1  
ab\_bbb`ZZ\_\_\_[a[ZaYab^Pba[\_aUbX0^VQaaa`Z`  
@HWI-EAS443:3:80:1632:1712#0/1  
GCCGCATTTCTTCAATTAACCACCTTATTTCTCAAATTT  
+HWI-EAS443:3:80:1632:1712#0/1  
aW¥`]N\_a`YY]YY\_a``¥MP^ZFZa¥``\_TYU¥Z[Y`[a  
@HWI-EAS443:3:80:1644:868#0/1  
GCCGCATTTCTTCAATTAACCACCTTATTTCTCAAATTT  
+HWI-EAS443:3:80:1644:868#0/1  
a\_]Z\_aba`\_aa[\_^aaa\_]\_`^Xa¥^\_a\_]XaXa^Z`]^  
@HWI-EAS443:3:80:1658:1942#0/1  
AGAAACTGTGATGAGAATGGGAGACCTTCACTACCTCCAG  
+HWI-EAS443:3:80:1658:1942#0/1  
`abbb¥ab\_\_Yaa`\_Xa^¥a\_¥\_KMI\_a0^SWTHRXXZ^  
@HWI-EAS443:3:80:1780:1472#0/1  
CACGGTTCGAGTCTCTGAAAATATACAGAGATTCGCTTGG  
+HWI-EAS443:3:80:1780:1472#0/1  
ab`abaaa`a]a¥YW]a\_a\_`^`\_`[]]]aX[¥[¥[^]LZ  
@HWI-EAS443:3:80:197:610#0/1  
GGCACAGATTGAAAGCGACAGAGAATAGTTTCGAACAAAT

+HWI-EAS443:3:80:197:610#0/1  
aaaaaaaa`^\_aa\_a\_a`^^`^`\_a`^]`\_T\_\_\_\_^^\_\_¥\_^^  
@HWI-EAS443:3:80:200:383#0/1  
ATGAGAATGGGAGACCTTCACTACCTCCAGAGCAGAAATG  
+HWI-EAS443:3:80:200:383#0/1  
aaaU\_`ZZaaaY]a[`a`a`\_]Y`\_^`\_¥Xaa\_^[¥S¥\_  
@HWI-EAS443:3:80:237:187#0/1  
CTGTGCGTTTCAATCTGTGCCGATTTCTTCAATTAACCA  
+HWI-EAS443:3:80:237:187#0/1  
aab\_a¥aaaaaaaa`\_a]aa`aa`\_`\_`\_a`\_`\_`Y[¥\_\_  
@HWI-EAS443:3:80:246:1722#0/1  
ATGAGAATGGGAGACCTTCACTACCTCCAGAGCAGAAATG  
+HWI-EAS443:3:80:246:1722#0/1  
aa¥]]]\_]`\_`a^a\_aa`^\_L\_`^^a\_aaY\_\_\_\_[Y¥`^  
@HWI-EAS443:3:80:251:392#0/1  
GTCGCTTTCAATCTGTGCCGATTTCTTCAATTAACCACC  
+HWI-EAS443:3:80:251:392#0/1  
a^aa`^^`a`aa\_\_`\_]\_\_\_\_\_`\_`^`\_`^^]`^`^^`\_¥X  
@HWI-EAS443:3:80:264:1222#0/1  
GCCGATTTCTTCAATTAACCACCTTATTTCTCAAATTT  
+HWI-EAS443:3:80:264:1222#0/1  
abbab[a\_aabaa`[b^Yaaaa`aaaaaaaaabba[]]a`a  
@HWI-EAS443:3:80:314:919#0/1  
TTTGGCATATCCGCAAGCGATTTGCAGACAATGGATTGGG  
+HWI-EAS443:3:80:314:919#0/1  
`aa¥`]T\_U\_\_]`^`a`[PLGS^^[Z^^[T]XaVTWLGPS  
@HWI-EAS443:3:80:316:1852#0/1  
GTCGCTTTCAATCTGTGCCGATTTCTTCAATTAACCACC  
+HWI-EAS443:3:80:316:1852#0/1  
\_a`^^`¥aaab\_¥^¥a]ab]a\_Y[a^aYZ\_aaa[aaa\_a]a  
@HWI-EAS443:3:80:338:1910#0/1  
AGAAATTTGAGGAAATAAGGTGGTTAATTGAAGAAATGCG  
+HWI-EAS443:3:80:338:1910#0/1  
a`^a\_\_\_\_\_`^`[^\_\_\_\_TW^WX\_^T[^WLWQY^T^`\_`[UZS  
@HWI-EAS443:3:80:344:1451#0/1  
CTGTGCGTTTCAATCTGTGCCGATTTCTTCAATTAACCA  
+HWI-EAS443:3:80:344:1451#0/1  
aa\_PW\_a¥WTXUUUV^SXQLRVZ[XSPMRTY[XNWM¥UWXP  
@HWI-EAS443:3:80:380:44#0/1  
GCCGATTTCTTCAATTAACCACCTTATTTCTCAAATTT  
+HWI-EAS443:3:80:380:44#0/1  
a^ZaYZY\_X[``\_\_\_\_`^\_]`\_]X^[^`YXW]\_\_YUV^Y¥  
@HWI-EAS443:3:80:401:1938#0/1  
ATATCCGCAAGCGATTTGCAGACAATGGATTGGGTGATGC  
+HWI-EAS443:3:80:401:1938#0/1  
TY\_X\_YX\_LZM[]RVX]U\_]UZ]URJO]]SQJSNQMKBBB  
@HWI-EAS443:3:80:408:711#0/1  
CAGAGATTGCTTGGAGAAACTGTGATGAGAATGGGAGAC  
+HWI-EAS443:3:80:408:711#0/1  
abb\_a]aUaaaa`aa`aYaXYa`V[[\_¥\_aY¥¥a`[W]\_\_

@HWI-EAS443:3:80:451:1122#0/1  
GTGCCGATTTCTTCAATTAACCACCTTATTTCTCAAAT  
+HWI-EAS443:3:80:451:1122#0/1  
`\_baab\_0Xa^^`aaa]aaaa\_`[¥^a`aa`a¥Z^Y\_W]a  
@HWI-EAS443:3:80:460:327#0/1  
AGAAACTGTGATGAGAATGGGAGACCTTCACTACCTCCAG  
+HWI-EAS443:3:80:460:327#0/1  
aaa^aaab\_aa`b\_`[X^`]]`\_`^^^\_\_^`^^^\_\_^`^U\_  
@HWI-EAS443:3:80:461:170#0/1  
GAGAATGGGAGACCTTCACTACCTCCAGAGCAGAAATGAA  
+HWI-EAS443:3:80:461:170#0/1  
aabaabab`baa\_aaaa\_aa`a`V\_\_aZ[¥Za¥^[\_a¥[  
@HWI-EAS443:3:80:473:134#0/1  
ATGAGAATGGGAGACCTTCACTACCTCCAGAGCAGAAATG  
+HWI-EAS443:3:80:473:134#0/1  
a^\_]W^`]]a[a[\_[a\_\_^`^`X]Z]]`\_]`VY^^\_  
@HWI-EAS443:3:80:515:1616#0/1  
GCCGATTTCTTCAATTAACCACCTTATTTCTCAAATTT  
+HWI-EAS443:3:80:515:1616#0/1  
abba`aaaa`a]¥^`a]a```a\_a`Y`aaa`a[^R`\_]\_  
@HWI-EAS443:3:80:518:263#0/1  
GTGCTTTCAATCTGTGCCGATTTCTTCAATTAACCACC  
+HWI-EAS443:3:80:518:263#0/1  
QY\_b^ZSTS]SPMYVLYXUUS\_`QYUYZ\_VL[ZaaZULY\_  
@HWI-EAS443:3:80:544:109#0/1  
CTCCAACACCATGTCAAGCTTTCAGGTAGACTGTTTCCTT  
+HWI-EAS443:3:80:544:109#0/1  
aa`b`b```Zb`]Vaaa^[`a\_a`aa\_```\_\_a\_``^`\_]\_  
@HWI-EAS443:3:80:558:169#0/1  
GAGCAATTGGGACAGAAATTTGAGGAAATAAGGTGGTTAA  
+HWI-EAS443:3:80:558:169#0/1  
a`bb^abbbbbaabbaabaaa`ba[\_\_a\_¥baUba\_^`^`  
@HWI-EAS443:3:80:571:497#0/1  
AGACTGTTTCCTTTGGCATATCCGCAAGCGATTTGCAGAC  
+HWI-EAS443:3:80:571:497#0/1  
¥b\_X\_bbb`b\_`[X`^b\_abab```]Z\_a]baa]`a`]`¥  
@HWI-EAS443:3:80:586:1813#0/1  
GAAACTGTGATGAGAATGGGAGACCTTCACTACCTCCAGA  
+HWI-EAS443:3:80:586:1813#0/1  
a¥Y`b`\_N`aa]aba\_````a`Vaa`\_a¥`a``a\_Z¥Z\_  
@HWI-EAS443:3:80:608:312#0/1  
ATGCAATTGTCATTCTAAGTGTCTCGCTGGATTCTCTTT  
+HWI-EAS443:3:80:608:312#0/1  
aabaabab`a`ba\_baaa]aaaa`Z^\_aa\_````\_`^a`\_  
@HWI-EAS443:3:80:627:1525#0/1  
GCCGATTTCTTCAATTAACCACCTTATTTCTCAAATTT  
+HWI-EAS443:3:80:627:1525#0/1  
abb`a``bbbab````bbbababaaaa`b`aabba\_aaa  
@HWI-EAS443:3:80:645:1202#0/1  
GCCGATTTCTTCAATTAACCACCTTATTTCTCAAATTT

+HWI-EAS443:3:80:645:1202#0/1  
aabaYVRaa\_`ZRY`^aWb````]\_]aaLUaaa`\_^a\_]`  
@HWI-EAS443:3:80:699:62#0/1  
CACAGATTGAAAGCGACAGAGAATAGTTTCGAACAAATAA  
+HWI-EAS443:3:80:699:62#0/1  
`aa`aZaabaaa\_a`a`a`aa```\_V\_a^]W¥]\_^]\_a^`  
@HWI-EAS443:3:80:725:1899#0/1  
AGAAACTGTGATGAGAATGGGAGACCTTCACTACCTCCAG  
+HWI-EAS443:3:80:725:1899#0/1  
aa¥bbaaa`aaaa`aa`Z```\_^\_\_\_\_a`\_a`\_`^a[  
@HWI-EAS443:3:80:753:1630#0/1  
GCCGCATTTCTTCAATTAACCACCTTATTTCTCAAATTT  
+HWI-EAS443:3:80:753:1630#0/1  
abbab^aaabba`aabbba^aa\_a`aaaa\_aaba`aa^`  
@HWI-EAS443:3:80:75:1198#0/1  
GCTACCTTTCTGACATGACCCTCGAGGAAATGTCACGAGA  
+HWI-EAS443:3:80:75:1198#0/1  
ab`aab[\_Z`Ra\_]U[\_]U^QXXX\_\_LYV^XY^`WXST^`  
@HWI-EAS443:3:80:767:1632#0/1  
GAGAACTGTGATGAGAATGGGAGACCTTCACTACCTCCA  
+HWI-EAS443:3:80:767:1632#0/1  
ab]`V\_a\_[Yaaa`aa\_]\_b`\_\_\_\_`aa\_b`a\_^^`\_aaR\_  
@HWI-EAS443:3:80:769:1245#0/1  
GTCGCTTTCAATCTGTGCCGATTTCTTCAATTAACCACC  
+HWI-EAS443:3:80:769:1245#0/1  
a`abaabab`aa`aa`aa\_aaa`baaa`aaabaaa`\_a`\_  
@HWI-EAS443:3:80:818:363#0/1  
GCCGCATTTCTTCAATTAACCACCTTATTTCTCAAATTT  
+HWI-EAS443:3:80:818:363#0/1  
aabbababbabaaaabbaa`aaa\_aaaaaa\_\_aaaa`aaa`  
@HWI-EAS443:3:80:876:1735#0/1  
GCCGCATTTCTTCAATTAACCACCTTATTTCTCAAATTT  
+HWI-EAS443:3:80:876:1735#0/1  
``babb]babbaba]bbbbbbbaabaabbaaaaaabaa`  
@HWI-EAS443:3:80:893:1423#0/1  
CTGTGATGAGAATGGGAGACCTTCACTACCTCCAGAGCAG  
+HWI-EAS443:3:80:893:1423#0/1  
`\_[GYZ]\_¥^]0^`XXYZXY][[\_aa``]VV]\_`\_Y^^W`  
@HWI-EAS443:3:80:983:1581#0/1  
CGCTTGGAGAACTGTGATGAGAATGGGAGACCTTCACTA  
+HWI-EAS443:3:80:983:1581#0/1  
aa\_aW\_¥¥Zaab^`\_Haaa`baZ]T^S[\_`a¥aP^]]`^`  
@HWI-EAS443:3:80:996:1626#0/1  
ACCTACTTCGCGCTACCTTTCTGACATGACCCTCGAGGAA  
+HWI-EAS443:3:80:996:1626#0/1  
V^abb\_baa\_^\_a`¥a`\_b]b`\_aa\_\_`abaaba^[\_`a`  
@HWI-EAS443:3:81:1029:1066#0/1  
CCGCATTTCTTCAATTAACCACCTTATTTCTCAAATTT  
+HWI-EAS443:3:81:1029:1066#0/1  
abbabbbaabbbabb`abaab`babbbaa\_babaabaaa`

@HWI-EAS443:3:81:1031:669#0/1  
GAATGGGAGACCTTCACTACCTCCAGAGCAGAAATGAAAA  
+HWI-EAS443:3:81:1031:669#0/1  
^aaa¥\_^X^UPZ`0a¥UQ¥XZY\_[aZ`U¥aYVY`ZJNL  
@HWI-EAS443:3:81:107:760#0/1  
ATTGTCTGCAAATCGCTTGC GGATATGCCAAAGGAAACAG  
+HWI-EAS443:3:81:107:760#0/1  
aab\_¥babb]`\_`\_Z\_^\_^¥aaa^\_NZ\_[^S\_X¥N¥UQGV  
@HWI-EAS443:3:81:1081:414#0/1  
GGCATATCCGCAAGCGATTTGCAGACAATGGATTGGGTGA  
+HWI-EAS443:3:81:1081:414#0/1  
aabbb\_^bUb^bZaabTb`bZba]bQ`aababVa\_``NZ`  
@HWI-EAS443:3:81:1109:1031#0/1  
TGAAAATATACAGAGATTCGCTTGGAGAAACTGTGATGAG  
+HWI-EAS443:3:81:1109:1031#0/1  
a]\_a```a\_`\_`\_\_\_Q`\_`\_`\_\_\_\_\_]\_¥\_^`Z¥]\_Z^^  
@HWI-EAS443:3:81:1152:1708#0/1  
AGAAACTGTGATGAGAATGGGAGACCTTCACTACCTCCAG  
+HWI-EAS443:3:81:1152:1708#0/1  
`\_Z]\_a¥¥N\_]W¥]aaaa^ZY\_bYTV]T¥aZUZ¥P^^[\_Y  
@HWI-EAS443:3:81:1156:1409#0/1  
GCCGCATTTCTTCAATTAACCACCTTATTTCTCAAATTT  
+HWI-EAS443:3:81:1156:1409#0/1  
^]Y\_^¥]]`^a¥PYa^a`a]]¥`¥MYa`Y¥¥[aa\_aa`[a  
@HWI-EAS443:3:81:1190:1021#0/1  
GTGATGAGAATGGGAGACCTTCACTACCTCCAGAGCAGAA  
+HWI-EAS443:3:81:1190:1021#0/1  
a\_aaab\_a\_aaaaa]a\_`a`a`]a^^\_\_[\_`\_a¥\_\_\_X  
@HWI-EAS443:3:81:1243:1720#0/1  
TGAAAATATACAGAGATTCGCTTGGAGAAACTGTGATGAG  
+HWI-EAS443:3:81:1243:1720#0/1  
`b`Z^``¥]Y[b^^a¥]]S\_`\_¥aaa\_a```\_\_HWX[XX\_  
@HWI-EAS443:3:81:1245:766#0/1  
CTGGAGGTAGTGAAGGTCTCCCATTCTCATCACAGTTTCT  
+HWI-EAS443:3:81:1245:766#0/1  
abbb`bb`bb`aababT`a\_bbaba`a\_\_``aaabXa\_Y]  
@HWI-EAS443:3:81:127:1292#0/1  
GAAACTGTGATGAGAATGGGAGACCTTCACTACCTCCAGA  
+HWI-EAS443:3:81:127:1292#0/1  
a\_NU\_`YSZ`XZaSa\_a`\_¥]QY^[]\_\_\_\_\_ZSV[`[^  
@HWI-EAS443:3:81:1297:870#0/1  
AACTGTGATGAGAATGGGAGACCTTCACTACCTCCAGAGC  
+HWI-EAS443:3:81:1297:870#0/1  
aaaaXJ]Z^`\_aWaV`]b\_]\_]a`X^W^^MF¥FXaaY\_  
@HWI-EAS443:3:81:1433:1240#0/1  
GGAGAAACTGTGATGAGAATGGGAGACCTTCACTACCTCC  
+HWI-EAS443:3:81:1433:1240#0/1  
¥\_W`Y¥`X^bab]`a`aa`abaa[aaP\_aQ¥ba\_aY]SNN  
@HWI-EAS443:3:81:1474:1307#0/1  
GCCGCATTTCTTCAATTAACCACCTTATTTCTCAAATTT

+HWI-EAS443:3:81:1474:1307#0/1  
a[[a^aaaa\_aa\_`^aaa\_\_Z\_]Y\_\_a\_`X)`\_`]^`^`^`  
@HWI-EAS443:3:81:1510:396#0/1  
GTCGCTTTCAATCTGTGCCGATTTCTTCAATTAACCACC  
+HWI-EAS443:3:81:1510:396#0/1  
a\_\_\_SS^JOYMMVYSLWWV¥W¥\_W[MY][NNZVV\_XPIXY  
@HWI-EAS443:3:81:1524:103#0/1  
GCCAAAGGAAACAGTCTACCTGAAAGCTTGACATGGTGTT  
+HWI-EAS443:3:81:1524:103#0/1  
a\_V]]\_[\_^\_¥¥\_\_^¥`]ZG\_aRZU[W\_]\_WGZ`[\_Z]Z\_  
@HWI-EAS443:3:81:156:1557#0/1  
GCCGCATTTCTTCAATTAACCACCTTATTTCTCAAATTT  
+HWI-EAS443:3:81:156:1557#0/1  
aba\_a`abbbbb`bbbababbaabaaaaabaaa\_YU`aa  
@HWI-EAS443:3:81:1619:445#0/1  
TGGAGAACTGTGATGAGAATGGGAGACCTTCACTACCTC  
+HWI-EAS443:3:81:1619:445#0/1  
[aababbbabbbabababb`abaa^baX[aa`baba`UaI  
@HWI-EAS443:3:81:1648:388#0/1  
TGGAGAACTGTGATGAGAATGGGAGACCTTCACTACCTC  
+HWI-EAS443:3:81:1648:388#0/1  
a\_Y`¥^\_a^ba\_aaa]`a]\_bbba]a]NQ\_^VZV\_\_XR^M  
@HWI-EAS443:3:81:164:1789#0/1  
CCGCATTTCTTCAATTAACCACCTTATTTCTCAAATTTTC  
+HWI-EAS443:3:81:164:1789#0/1  
ababaaaaba`aaa`aaaaaaaa`a`a\_````\_a``\_-----  
@HWI-EAS443:3:81:1694:1192#0/1  
CCGCATTTCTTCAATTAACCACCTTATTTCTCAAATTTTC  
+HWI-EAS443:3:81:1694:1192#0/1  
YJY`¥^^RSRPUVSX\_U[`]TSY\_\_WZ\_WYY`X^¥\_AZ¥S  
@HWI-EAS443:3:81:1737:1722#0/1  
GAGAATGGGAGACCTTCACTACCTCCAGAGCAGAAATGAA  
+HWI-EAS443:3:81:1737:1722#0/1  
[aba\_b`ba^\_ba[abab`ba`Gaa^ab`^^bbaaab`aa  
@HWI-EAS443:3:81:173:1031#0/1  
CACGGTTCGAGTCTCTGAAAATATACAGAGATTCGCTTGG  
+HWI-EAS443:3:81:173:1031#0/1  
aa¥\_UJ\_b`Y]RW]aTa[UNWMY`OQ¥WRHOPUT\_]Q[^  
@HWI-EAS443:3:81:1751:1834#0/1  
GCCGCATTTCTTCAATTAACCACCTTATTTCTCAAATTT  
+HWI-EAS443:3:81:1751:1834#0/1  
ab```bbbabbaaabbaa^`a`aaabaa`\_b[baaa[`  
@HWI-EAS443:3:81:1771:719#0/1  
TGAGAATGGGAGACCTTCACTACCTCCAGAGCAGAAATGA  
+HWI-EAS443:3:81:1771:719#0/1  
\_]`]a^aaa]aa`aaa`aaaa`\_`\_]Y\_a\_\_[\_`\_`\_`Z  
@HWI-EAS443:3:81:204:141#0/1  
CTTTTGCCTAGGCATGAGCATGAACCACTCTCGTGACATT  
+HWI-EAS443:3:81:204:141#0/1  
aba^`bbaababaaaaaaa`aaaa\_aaa]`\_a`R^\_UTX\_



@HWI-EAS443:3:81:239:725#0/1  
GTGCGTTTCAATCTGTGCCGATTTCTTCAATTAACCACC  
+HWI-EAS443:3:81:239:725#0/1  
aabbbaaaabbaaa\_\_^aaaaa^`aaaaaaa`aa`a\_aaa\_  
@HWI-EAS443:3:81:240:869#0/1  
CGCATTCTTCAATTAACCACCTTATTTCCCTCAAATTTCT  
+HWI-EAS443:3:81:240:869#0/1  
abb`babbabbbba^M\_aaaaababaa`aaaaZaaaa`a  
@HWI-EAS443:3:81:263:27#0/1  
GCCGATTTCTTCAATTAACCACCTTATTTCCCTCAAATTT  
+HWI-EAS443:3:81:263:27#0/1  
a¥¥a[]`TVX`a][T`[^Y^ZZ¥`\_`\_Y\_\_\_\_^V^YYQ^¥^¥  
@HWI-EAS443:3:81:27:475#0/1  
CAGAGATTGCGTTGGAGAACTGTGATGAGAATGGGAGAC  
+HWI-EAS443:3:81:27:475#0/1  
`W`\_]UUXaaa`\_]^^¥PW¥^`ZZTXXZYNUUZ^[TNNP  
@HWI-EAS443:3:81:280:1817#0/1  
GATGAGAATGGGAGACCTTCACTACCTCCAGAGCAGAAAT  
+HWI-EAS443:3:81:280:1817#0/1  
abaaa`[aa`\_\_a`aaaa`abba\_\_\_\_aa\_Ya]aa\_¥\_\_\_\_  
@HWI-EAS443:3:81:29:1419#0/1  
CAAATCGCTTGGGATATGCCAAAGGAAACAGTCTACCTG  
+HWI-EAS443:3:81:29:1419#0/1  
aaa¥[a`a\_ZX¥TZ^¥PQZ^\_^UJSUZ^`YUTU¥WY^]XP  
@HWI-EAS443:3:81:305:574#0/1  
GTGCGTTTCAATCTGTGCCGATTTCTTCAATTAACCACC  
+HWI-EAS443:3:81:305:574#0/1  
^`X\_0¥WUV¥XT`]S`\_Ta\_RR^¥OV¥\_YP¥a[R[\_QY\_  
@HWI-EAS443:3:81:374:1678#0/1  
GCCGATTTCTTCAATTAACCACCTTATTTCCCTCAAATTT  
+HWI-EAS443:3:81:374:1678#0/1  
aa[¥`bbbabbabaabaa`bb^bbbabaa`ba`aaabbaa  
@HWI-EAS443:3:81:417:1566#0/1  
ATCGTGGAATGGATCTTGAAAGAGGAATCCAGCGAGACAC  
+HWI-EAS443:3:81:417:1566#0/1  
^\_a\_]a^T^^`¥\_`a`\_YY]T[¥]\_a`\_``\_[\_¥X[^¥`^  
@HWI-EAS443:3:81:437:482#0/1  
AGAAACTGTGATGAGAATGGGAGACCTTCACTACCTCCAG  
+HWI-EAS443:3:81:437:482#0/1  
X[\_¥Xa``]¥Z¥aba`[`a¥\_¥¥Z``b`^\_\_Y\_\_a^aNS[  
@HWI-EAS443:3:81:461:645#0/1  
TGCCGATTTCTTCAATTAACCACCTTATTTCCCTCAAATT  
+HWI-EAS443:3:81:461:645#0/1  
a[^a]W^\_`^`^aaaYZ)`]aa[`\_a`\_Z`]¥X^^`^Z`¥  
@HWI-EAS443:3:81:579:639#0/1  
GAGACACTTAGAATGACAATTGCATCTGTACCTACTTCGC  
+HWI-EAS443:3:81:579:639#0/1  
aba]aaababbb]bb`abbaaaaaaaaa`aaaaaaa`aa\_  
@HWI-EAS443:3:81:603:460#0/1  
TGAGAATGGGAGACCTTCACTACCTCCAGAGCAGAAATGA

+HWI-EAS443:3:81:603:460#0/1  
ab`Z¥aab`\_a`\_a\_aa`aaa`\_`\_]a`\_a\_\_Z`a¥  
@HWI-EAS443:3:81:634:1859#0/1  
CCGCATTTCTTCAATTAACCACCTTATTTCCCTCAAATTC  
+HWI-EAS443:3:81:634:1859#0/1  
abbab¥^`aRWZ^]W¥^^]¥^b`a`aa`\_]`a\_aa^^¥V  
@HWI-EAS443:3:81:660:1383#0/1  
CTTTTGCCTAGGCATGAGCATGAACCAGTCTCGTGACATT  
+HWI-EAS443:3:81:660:1383#0/1  
a`ZZ[\_a¥\_a¥T^\_Va`a¥]\_¥a\_a\_a]\_[aaZWYT^]  
@HWI-EAS443:3:81:686:1937#0/1  
GAAACTGTGATGAGAATGGGAGACCTTCACTACCTCCAGA  
+HWI-EAS443:3:81:686:1937#0/1  
[bababbabaaa`abaa[^`aa\_aaaaa`aa`ab`\_`\_`  
@HWI-EAS443:3:81:692:44#0/1  
GCCGCATTTCTTCAATTAACCACCTTATTTCCCTCAAATTT  
+HWI-EAS443:3:81:692:44#0/1  
aa\_aYaa^Xaa\_^^aa\_\_\_[¥[¥\_\_Y^^`Z\_\_`\_]XS\_\_U  
@HWI-EAS443:3:81:69:215#0/1  
TAAATAAGCTGAAACGAGAAAGCTTTATCTCTTGTCTA  
+HWI-EAS443:3:81:69:215#0/1  
ababbababaaaa¥aa\_a`\_`aa`\_`\_`a\_\_`aaa\_\_\_\_\_  
@HWI-EAS443:3:81:812:630#0/1  
GCCGCATTTCTTCAATTAACCACCTTATTTCCCTCAAATTT  
+HWI-EAS443:3:81:812:630#0/1  
[``^]^aaaaaaa`aa¥a`aa`Waaa``a]\_`\_aa`a]  
@HWI-EAS443:3:81:824:194#0/1  
GAGATTCGCTTGGAGAACTGTGATGAGAATGGGAGACCT  
+HWI-EAS443:3:81:824:194#0/1  
a)`YV[G]¥`Y`UYU^]W\_]RVX^W`XXWSVVYXTTT  
@HWI-EAS443:3:81:833:242#0/1  
CTTTGGCATATCCGCAAGCGATTTGCAGACAATGGATTGG  
+HWI-EAS443:3:81:833:242#0/1  
abbb`abbbbabbbbba`baaabababaa\_a^  
@HWI-EAS443:3:81:833:811#0/1  
GTCGCTTTCAATCTGTGCCGATTTCTTCAATTAACCACC  
+HWI-EAS443:3:81:833:811#0/1  
a`aaaaaaaaaaaa`aaaa`aaa`aa\_a\_aaa^`\_`aa[  
@HWI-EAS443:3:81:872:184#0/1  
TGGATCTTGAAAGAGGAATCCAGCGAGACACTTAGAATGA  
+HWI-EAS443:3:81:872:184#0/1  
abb[`^aabaa[Y[aaa^X]\_`\_^`^[\_PaZ^`\_]`]  
@HWI-EAS443:3:81:878:1384#0/1  
TGCCGCATTTCTTCAATTAACCACCTTATTTCCCTCAAATT  
+HWI-EAS443:3:81:878:1384#0/1  
][¥aa\_^Y`a`^`^V]\_aa^aaa\_\_a\_\_`a\_¥^¥a`ZQ¥\_  
@HWI-EAS443:3:81:894:2015#0/1  
GAAACTGTGATGAGAATGGGAGACCTTCACTACCTCCAGA  
+HWI-EAS443:3:81:894:2015#0/1  
a[aa^aa]\_T`a`U\_Y`^a\_\_¥]a^b\_\_a`¥`\_[UP]

@HWI-EAS443:3:81:904:1593#0/1  
TGGAGAACTGTGATGAGAATGGGAGACCTTCACTACCTC  
+HWI-EAS443:3:81:904:1593#0/1  
aaQWI`TaQYWIYa]ZVNRWxba`V\_R`¥Y]`\_aROFPHR  
@HWI-EAS443:3:81:940:2008#0/1  
GAAACTGTGATGAGAATGGGAGACCTTCACTACCTCCAGA  
+HWI-EAS443:3:81:940:2008#0/1  
[babaab\_aababaaaaaaaaaaaaa\_^ba`aa\_aa\_aa\_  
@HWI-EAS443:3:81:954:570#0/1  
GAAACTGTGATGAGAATGGGAGACCTTCACTACCTCCAGA  
+HWI-EAS443:3:81:954:570#0/1  
aaa^^ba\_ba`b\_a\_aaa`a¥a\_V[a`\_\_`aa]]`\_^a]  
@HWI-EAS443:3:81:970:1275#0/1  
GGAGAACTGTGATGAGAATGGGAGACCTTCACTACCTCC  
+HWI-EAS443:3:81:970:1275#0/1  
aa^`a]aaba\_aaaaaa`a\_aaa`a\_`^`^`\_\_`a]\_^¥\_  
@HWI-EAS443:3:81:993:1378#0/1  
GTCATTCTAAGTGTCTCGCTGGATTCTTCTTTCAAGATCC  
+HWI-EAS443:3:81:993:1378#0/1  
a\_`aab`bbaa`a\_aaaaaa]``\_\_b`ba``aaaa\_\_]  
@HWI-EAS443:3:82:1010:2028#0/1  
GAAACTGTGATGAGAATGGGAGACCTTCACTACCTCCAGA  
+HWI-EAS443:3:82:1010:2028#0/1  
`bba\_baabb`¥U\_`¥G\_abW\_Y^`\_PPZ^`a]G`\_a¥a\_  
@HWI-EAS443:3:82:1027:114#0/1  
GCATTTCTTCAATTAACCACCTTATTTCTCAAATTTCTG  
+HWI-EAS443:3:82:1027:114#0/1  
`a^baa`b``a\_baaa^\_a^baabaa^`a^\_aaaa\_aa  
@HWI-EAS443:3:82:1100:819#0/1  
GCGGCACAGATTGAAAGCGACAGAGAATAGTTTCGAACAA  
+HWI-EAS443:3:82:1100:819#0/1  
abbbababbbabbbbbbbaabababbaababba^Va^ba  
@HWI-EAS443:3:82:1194:136#0/1  
ATGAGAATGGGAGACCTTCACTACCTCCAGAGCAGAAATG  
+HWI-EAS443:3:82:1194:136#0/1  
]\_\_SaX]b\_Zaa```aba``X`^¥X`X^a`^^UVb^^]``  
@HWI-EAS443:3:82:1197:86#0/1  
CTTGAAAGAGGAATCCAGCGAGACACTTAGAATGACAATT  
+HWI-EAS443:3:82:1197:86#0/1  
abbbKbab[b`]abY\_Wb`bba\_Ya\_a`]baMba^^aaa  
@HWI-EAS443:3:82:119:364#0/1  
GCGAGACACTTAGAATGACAATTGCATCTGTACCTACTTC  
+HWI-EAS443:3:82:119:364#0/1  
`XXXYP\_\_aaaaZV]a[]XYaZ]¥[aaa\_\_NMYZ`¥[\_\_[  
@HWI-EAS443:3:82:1209:1417#0/1  
GAAACTGTGATGAGAATGGGAGACCTTCACTACCTCCAGA  
+HWI-EAS443:3:82:1209:1417#0/1  
abUTNZ^^bbaa\_URZ`bRKHXX`[R¥L]¥`RTT]UPZ\_`  
@HWI-EAS443:3:82:1220:342#0/1  
TGAGAATGGGAGACCTTCACTACCTCCAGAGCAGAAATGA

+HWI-EAS443:3:82:1220:342#0/1  
`b`\_Y\_]aYb][[^aa¥UZZ\_\_¥Z`X[[`\_b^`a\_\_V\_a^  
@HWI-EAS443:3:82:1223:898#0/1  
CCTGGAAGAGAAGGTAATGGTGAAATTTCTCCAACCTATTG  
+HWI-EAS443:3:82:1223:898#0/1  
aababbbbbbabb`bbbab`abbbbbbabb``bbbb  
@HWI-EAS443:3:82:1232:1345#0/1  
GATGAGAATGGGAGACCTTCACTACCTCCAGAGCAGAAAT  
+HWI-EAS443:3:82:1232:1345#0/1  
a^bb\_`^aba\_a\_a`a^\_aa]a\_a\_Z\_]\_aaUa\_[aZ¥Y`  
@HWI-EAS443:3:82:1254:1253#0/1  
GAATGGGAGACCTTCACTACCTCCAGAGCAGAAATGAAAA  
+HWI-EAS443:3:82:1254:1253#0/1  
aVMVO¥X\_]`\_Qa[^a^`\_\_¥`aa[Y\_]N[[`¥¥^`\_T¥¥  
@HWI-EAS443:3:82:1318:1200#0/1  
GAGAATGGGAGACCTTCACTACCTCCAGAGCAGAAATGAA  
+HWI-EAS443:3:82:1318:1200#0/1  
aaSS^QU^a\_aR\_a\_`\_`a\_¥]^V^[X^a\_\_a\_]Ya\_]  
@HWI-EAS443:3:82:1319:1206#0/1  
CTCGCTGGATTCTCTTTCAAGATCCATTCCACGATTTGT  
+HWI-EAS443:3:82:1319:1206#0/1  
abaZa`aa^`aaaa`ab`b`aaaa`a\_aaaaa`\_\_aa`  
@HWI-EAS443:3:82:1335:728#0/1  
GCCGCATTTCTTCAATTAACCACCTTATTTCTCAAATTT  
+HWI-EAS443:3:82:1335:728#0/1  
a`\_a\_\_aaa`\_a\_\_\_`\_aa\_]a\_\_]``aa^]a\_\_`\_`[]  
@HWI-EAS443:3:82:1426:1054#0/1  
GCCGCATTTCTTCAATTAACCACCTTATTTCTCAAATTT  
+HWI-EAS443:3:82:1426:1054#0/1  
aba¥[^`aRaaZXZ`aa`^\_baabaab`aZPaY`a\_baa  
@HWI-EAS443:3:82:1490:494#0/1  
AAACTGTGATGAGAATGGGAGACCTTCACTACCTCCAGAG  
+HWI-EAS443:3:82:1490:494#0/1  
aba\_b`Yaaab[b`a\_`bb`]a\_\_``aYY]`]Z`^\_`\_\_^  
@HWI-EAS443:3:82:1522:491#0/1  
GAGAATGGGAGACCTTCACTACCTCCAGAGCAGAAATGAA  
+HWI-EAS443:3:82:1522:491#0/1  
`YRU\_\_¥X^^\_`¥UZTY\_^^)`\_¥VXZ^]a``[\_[a``]\_  
@HWI-EAS443:3:82:1537:726#0/1  
AGAAGGTAATGGTGAAATTTCTCCAACCTATTGCTCCCTCC  
+HWI-EAS443:3:82:1537:726#0/1  
aaabaa]aa``[^`aaa`bbaZb]aaa\_a`aaa\_a\_\_^aa\_  
@HWI-EAS443:3:82:153:1757#0/1  
GTACAGATGCAATTGTCATTCTAAGTGTCTCGCTGGATTC  
+HWI-EAS443:3:82:153:1757#0/1  
a\_Ua[RRW^aYYZ\_] ^W[^]UR^^VXWaUaW]Z^Y]U^]  
@HWI-EAS443:3:82:153:880#0/1  
ATGAGAATGGGAGACCTTCACTACCTCCAGAGCAGAAATG  
+HWI-EAS443:3:82:153:880#0/1  
]¥\_¥¥WWW`\_`\_]`\_Z¥^^QZYR^)``][\_\_S^]]NXT\_[

@HWI-EAS443:3:82:1631:39#0/1  
ATGAGAATGGGAGACCTTCACTACCTCCAGAGCAGAAATG  
+HWI-EAS443:3:82:1631:39#0/1  
Vb`\_b[abaaa]aaa¥aa\_]^bb`Za\_]\_a`ba]]¥]^a`  
@HWI-EAS443:3:82:1716:555#0/1  
GAGAATGGGAGACCTTCACTACCTCCAGAGCAGAAATGAA  
+HWI-EAS443:3:82:1716:555#0/1  
¥Xb`ba\_\_`b`a`b]Ua]]aaa]`\_\_aVaab\_M`a[``  
@HWI-EAS443:3:82:198:1597#0/1  
TGCCGCATTTCTTCAATTAACCACCTTATTTCTCAAATT  
+HWI-EAS443:3:82:198:1597#0/1  
a`bbaaaa`abaaaaaaaa\_aba`a`aaa\_aaaba¥`a`  
@HWI-EAS443:3:82:207:1101#0/1  
AGAATGGGAGACCTTCACTACCTCCAGAGCAGAAATGAAA  
+HWI-EAS443:3:82:207:1101#0/1  
aa\_`a^aa[aaaa`a`a`a`\_`a`\_]Q\_\_\_^]X]\_\_\_\_¥  
@HWI-EAS443:3:82:240:951#0/1  
GTGATGAGAATGGGAGACCTTCACTACCTCCAGAGCAGAA  
+HWI-EAS443:3:82:240:951#0/1  
\_P¥GN]S]R]^¥^XK\_\_\_V[Q]XZ[QUNQTSL[BBBBBBB  
@HWI-EAS443:3:82:24:574#0/1  
TTCGCTTGGAGAACTGTGATGAGAATGGGAGACCTTCAC  
+HWI-EAS443:3:82:24:574#0/1  
aabaa`abbaa]]Y`aa]a`\_aaa^`\_a`\_\_ZZ\_\_Y]]\_  
@HWI-EAS443:3:82:271:1048#0/1  
GTGCCGCATTTCTTCAATTAACCACCTTATTTCTCAAAT  
+HWI-EAS443:3:82:271:1048#0/1  
aaaabbb¥abbabababababab`a`abaaaaaaaa`aa  
@HWI-EAS443:3:82:311:702#0/1  
CTTATGAGGATGTCAAAAATGCAGTTGGGGTCCTCATCGG  
+HWI-EAS443:3:82:311:702#0/1  
abbabbab\_aab`aabb\_aba`¥aaa`aaa[\_\_\_`\_`\_]aa  
@HWI-EAS443:3:82:320:872#0/1  
ACCCAATCCATTGTCTGCAAATCGCTTGCGGATATGCCAA  
+HWI-EAS443:3:82:320:872#0/1  
^b[J^aaaa`Va¥aa]\_a]¥P]\_a\_]V`\_]LWXIHWJ^  
@HWI-EAS443:3:82:334:1706#0/1  
CCGCATTTCTTCAATTAACCACCTTATTTCTCAAATTT  
+HWI-EAS443:3:82:334:1706#0/1  
abab`abbb\_bbx\_bbbbbabbba\_baababaaa[baab  
@HWI-EAS443:3:82:357:418#0/1  
AGAAACTGTGATGAGAATGGGAGACCTTCACTACCTCCAG  
+HWI-EAS443:3:82:357:418#0/1  
`b]aaaab`baaa`b\_aab`a\_aa\_\_\_a`aaa\_Za`a]\_\_  
@HWI-EAS443:3:82:386:1329#0/1  
GCCGCATTTCTTCAATTAACCACCTTATTTCTCAAATTT  
+HWI-EAS443:3:82:386:1329#0/1  
aaa`]aaaaaa`¥`a`\_S¥T\_\_^]\_\_a`\_a`\_`\_[Z`^\_  
@HWI-EAS443:3:82:449:1484#0/1  
TGCCGCATTTCTTCAATTAACCACCTTATTTCTCAAATT

+HWI-EAS443:3:82:449:1484#0/1  
aabba\_\_aabaa\_ba`baaa[`a\_\_aaaa` `ab`aaYaaa  
@HWI-EAS443:3:82:452:799#0/1  
TGAGAATGGGAGACCTTCACTACCTCCAGAGCAGAAATGA  
+HWI-EAS443:3:82:452:799#0/1  
aba`ZZ\_ab][\_`aa\_aa]`¥` ``Z`a\_\_\_\_`a\_a\_[^¥]W  
@HWI-EAS443:3:82:455:320#0/1  
CTTGGAGAACTGTGATGAGAATGGGAGACCTTCACTACC  
+HWI-EAS443:3:82:455:320#0/1  
`bbbbaa^Xaabb]aaaaa¥ZZaa\_`a` ``^`a` ``\_Y]\_  
@HWI-EAS443:3:82:472:1061#0/1  
GAAACTGTGATGAGAATGGGAGACCTTCACTACCTCCAGA  
+HWI-EAS443:3:82:472:1061#0/1  
a`¥`aa]\_^WWa]Za`a` `Y^a`a\_a`a` `^`]a\_\_`\_\_` ``  
@HWI-EAS443:3:82:517:1448#0/1  
GAGAACTGTGATGAGAATGGGAGACCTTCACTACCTCCA  
+HWI-EAS443:3:82:517:1448#0/1  
`ab`bbaaaabab`b` `b`aa[]X`a\_aa[a\_`aXZ`\_a^  
@HWI-EAS443:3:82:536:232#0/1  
TGTGATGAGAATGGGAGACCTTCACTACCTCCAGAGCAGA  
+HWI-EAS443:3:82:536:232#0/1  
ab^[XZ^aa[[Zb`a`a\_[b]`a` `YPHX\_Z`a]WWa^^aX  
@HWI-EAS443:3:82:584:605#0/1  
AGAACTGTGATGAGAATGGGAGACCTTCACTACCTCCAG  
+HWI-EAS443:3:82:584:605#0/1  
aaa`aaab\_aaaa\_a` ``aa`\_`\_\_` ``]\_aa\_`V]\_\_\_\_\_]  
@HWI-EAS443:3:82:608:836#0/1  
TCTGAAAATATACAGAGATTTCGCTTGGAGAACTGTGATG  
+HWI-EAS443:3:82:608:836#0/1  
abbba` `` `b`aaabaa`0`aaaa` ``\_Z¥]^aaaa^Z¥[\_`  
@HWI-EAS443:3:82:651:1937#0/1  
GCCGCATTTCTTCAATTAACCACCTTATTTCTCAAATTT  
+HWI-EAS443:3:82:651:1937#0/1  
abbaaaa\_aaaaaa`abbaaaaaaaaaaaaaaaaa`aaaa  
@HWI-EAS443:3:82:703:1839#0/1  
CTTGGAGAACTGTGATGAGAATGGGAGACCTTCACTACC  
+HWI-EAS443:3:82:703:1839#0/1  
aa` ``Zwa`aba^R\_a^W^[^Z^^Y`ZWWW^^ZY`\_` `^¥[  
@HWI-EAS443:3:82:732:474#0/1  
ATGGTAACACGGTTTCGAGTCTCTGAAAATATACAGAGATT  
+HWI-EAS443:3:82:732:474#0/1  
^b^XO\_aaa`aW` `]aa\_abaabaW\_\_aaa`a^aZZa¥\_]`  
@HWI-EAS443:3:82:738:1582#0/1  
CGCAAGCGATTTGCAGACAATGGATTGGGTGATGCCCCAT  
+HWI-EAS443:3:82:738:1582#0/1  
aaab`]aaa`a]W\_aa^`\_]X^` `]^VPPKVMXM^\_[ZYP  
@HWI-EAS443:3:82:787:1033#0/1  
GTCGCTTTCAATCTGTGCCGATTTCTTCAATTAACCACC  
+HWI-EAS443:3:82:787:1033#0/1  
aVQ]¥U]]`ba\_\_UXV¥\_`aT]T`[^\_XOXV[`\_\_OWW^Z

@HWI-EAS443:3:82:799:201#0/1  
GTCGCTTTCAATCTGTGCCGATTTCTTCAATTAACCACC  
+HWI-EAS443:3:82:799:201#0/1  
\_W]a[aaZ`a^¥[aYU`RaYZ]^¥^a`YZ\_a`^ZZT¥\_]  
@HWI-EAS443:3:82:803:1366#0/1  
GTCGCTTTCAATCTGTGCCGATTTCTTCAATTAACCACC  
+HWI-EAS443:3:82:803:1366#0/1  
a¥a`a\_a\_a\_` `\_\_\_\_^`a\_^`a`\_^`a\_^\_\_aa]^\_Z\_^\_  
@HWI-EAS443:3:82:811:1816#0/1  
GAATGGGAGACCTTCACTACCTCCAGAGCAGAAATGAAAA  
+HWI-EAS443:3:82:811:1816#0/1  
`UT¥SQ`^`\_\_aaaa`V[^S^P¥\_a\_a]^[]aaX^VZ`[\_\_\_\_  
@HWI-EAS443:3:82:826:582#0/1  
GAACCACTCTCGTGACATTTCTTCCGAGGGTCATGTCAGAA  
+HWI-EAS443:3:82:826:582#0/1  
^a^bab`U`babaa^U[`aaa^aZVX^]Z\_Y\_aZ```][  
@HWI-EAS443:3:82:879:339#0/1  
GCCGATTTCTTCAATTAACCACCTTATTTCTCAAATTT  
+HWI-EAS443:3:82:879:339#0/1  
aYUW[Z^]\_Y^V[X`\_\_a^^X¥^QZ[]^X]RWZaPRT^]  
@HWI-EAS443:3:82:896:1656#0/1  
CGCTTGGAGAACTGTGATGAGAATGGGAGACCTTCACTA  
+HWI-EAS443:3:82:896:1656#0/1  
aa[RFW`aaa\_a\_[aY\_aW`\_\_[\_UYU\_][]\_Z\_[]`\_W^\_  
@HWI-EAS443:3:82:945:1657#0/1  
GAAACTGTGATGAGAATGGGAGACCTTCACTACCTCCAGA  
+HWI-EAS443:3:82:945:1657#0/1  
abbbaba`baaaaaa^G`a\_aaa```\_aaaaa`aY```\_  
@HWI-EAS443:3:82:972:1427#0/1  
CGCTTGGAGAACTGTGATGAGAATGGGAGACCTTCACTA  
+HWI-EAS443:3:82:972:1427#0/1  
abaaababaaaab`^aaaa`aaaaaaaa\_a`a`\_^Z^```  
@HWI-EAS443:3:82:989:428#0/1  
GAATGGGAGACCTTCACTACCTCCAGAGCAGAAATGAAAA  
+HWI-EAS443:3:82:989:428#0/1  
abbabbbbaaa^`aaaaaa\_bbaab```ab\_a`ab```a\_  
@HWI-EAS443:3:82:996:1019#0/1  
AGAAACTGTGATGAGAATGGGAGACCTTCACTACCTCCAG  
+HWI-EAS443:3:82:996:1019#0/1  
abaaa`bb\_baaaaaaaaaaa\_aaa`\_\_\_\_aa`a\_\_`\_^\_`  
@HWI-EAS443:3:83:1011:1696#0/1  
GATGAGAATGGGAGACCTTCACTACCTCCAGAGCAGAAAT  
+HWI-EAS443:3:83:1011:1696#0/1  
`aaaab`¥\_b``\_abaaa`a\_\_a`a`aa```\_aYaa```]a  
@HWI-EAS443:3:83:1027:1614#0/1  
GAAATAAGGTGGTTAATTGAAGAAATGCGGCACAGATTGA  
+HWI-EAS443:3:83:1027:1614#0/1  
a[a```]aaY``U¥Xa\_a`[a\_] [UXU[]\_ZXQ]¥[\_WWP  
@HWI-EAS443:3:83:1039:1592#0/1  
CGCATTTCTTCAATTAACCACCTTATTTCTCAAATTTCT





@HWI-EAS443:3:83:1477:1225#0/1  
CAGAAATTTGAGGAAATAAGGTGGTTAATTGAAGAAATGC  
+HWI-EAS443:3:83:1477:1225#0/1  
abbabbbbbb`ab`aabaaaa]ab\_baaaa\_aa\_`a`a^  
@HWI-EAS443:3:83:147:547#0/1  
CGAGGGTCATGTCAGAAAGGTAGCGCGAAGTAGGTACAGA  
+HWI-EAS443:3:83:147:547#0/1  
aaa]a`^aaaa\_aRa]\_\_aaXaaaa\_a\_``Xa\_^V\_^`\_\_  
@HWI-EAS443:3:83:1492:263#0/1  
ATGAGAATGGGAGACCTTCACTACCTCCAGAGCAGAAATG  
+HWI-EAS443:3:83:1492:263#0/1  
abb\_b\_baa`a\_a\_\_\_aa]`Z\_\_U]aOW\_\_^`^aXY^^\_  
@HWI-EAS443:3:83:1500:1796#0/1  
GGAGAACTGTGATGAGAATGGGAGACCTTCACTACCTCC  
+HWI-EAS443:3:83:1500:1796#0/1  
a][\_bbbIVb^RWaZa]`Jaa`\_\_aZV]\_\_^`Z^\_SGP00  
@HWI-EAS443:3:83:152:923#0/1  
ACTGTGATGAGAATGGGAGACCTTCACTACCTCCAGAGCA  
+HWI-EAS443:3:83:152:923#0/1  
Q¥[VO\_T][W\_]`RRR]Va[SUU`b^]T`¥]U]XG[^`X`  
@HWI-EAS443:3:83:1637:1528#0/1  
GAAACTGTGATGAGAATGGGAGACCTTCACTACCTCCAGA  
+HWI-EAS443:3:83:1637:1528#0/1  
[abbaaa¥abbaabababb^Va[Y]^aaa^aaa^`X]\_\_N  
@HWI-EAS443:3:83:168:815#0/1  
GCTACCTTTCTGACATGACCCTCGAGGAAATGTCACGAGA  
+HWI-EAS443:3:83:168:815#0/1  
¥\_[Q]^¥\_a^¥W\_^WXUa]aZ`T`\_]U]UZU¥T\_ZY^^  
@HWI-EAS443:3:83:1782:177#0/1  
ATGAGAATGGGAGACCTTCACTACCTCCAGAGCAGAAATG  
+HWI-EAS443:3:83:1782:177#0/1  
aba^Z]baa]`\_\_a`aaUP¥]a\_U[``\_\_`^`^`RZ```  
@HWI-EAS443:3:83:1790:1479#0/1  
GAGAATGGGAGACCTTCACTACCTCCAGAGCAGAAATGAA  
+HWI-EAS443:3:83:1790:1479#0/1  
MYb\_bba`^WU`a`\_S\_baa`^X`XOGR`^`\_[Ra`\_\_\_\_  
@HWI-EAS443:3:83:207:771#0/1  
GCCGCATTTCTTCAATTAACCACCTTATTTCTCAAATTT  
+HWI-EAS443:3:83:207:771#0/1  
]abbbbaababb\_Tababbaaaaaaaaaaaaaaaaa`baa  
@HWI-EAS443:3:83:269:964#0/1  
AAACTGTGATGAGAATGGGAGACCTTCACTACCTCCAGAG  
+HWI-EAS443:3:83:269:964#0/1  
ZT\_aaa`\_]`a^\_[\_\_\_aaZ][[\_a\_aa\_]Q¥¥T¥`[¥W^  
@HWI-EAS443:3:83:28:1360#0/1  
GCCGCATTTCTTCAATTAACCACCTTATTTCTCAAATTT  
+HWI-EAS443:3:83:28:1360#0/1  
aba]`bbbbbbba]^bbabaaaaaaaaabbaaabbb\_S\_aa  
@HWI-EAS443:3:83:28:1454#0/1  
CATTTCTTCAATTAACCACCTTATTTCTCAAATTTCTGT

+HWI-EAS443:3:83:28:1454#0/1  
X^\_U`a\_\_\_\_SHY`bab\_I¥a]]¥P`^aa\_ba\_UZ]\_a]¥W  
@HWI-EAS443:3:83:309:571#0/1  
CCGCAAGCGATTTGCAGACAATGGATTGGGTGATGCCCCA  
+HWI-EAS443:3:83:309:571#0/1  
a\_ZZ]]^`]TZ]VH[WSRVY[^`[YMHILVUXJUXPXU^V  
@HWI-EAS443:3:83:317:1793#0/1  
CGCTTGGAGAACTGTGATGAGAATGGGAGACCTTCACTA  
+HWI-EAS443:3:83:317:1793#0/1  
`]a[ZYRXX]IZ`]^PZYZ][VZ]¥\_XWSY^][VUV]^W]  
@HWI-EAS443:3:83:351:1066#0/1  
AGACTGTTTCCTTTGGCATATCCGCAAGCGATTTGCAGAC  
+HWI-EAS443:3:83:351:1066#0/1  
]T^`¥W]S\_^ba\_¥]Y``]ZP\_a]bRGTxazY`[¥Y[YN\_  
@HWI-EAS443:3:83:366:195#0/1  
TGAGAATGGGAGACCTTCACTACCTCCAGAGCAGAAATGA  
+HWI-EAS443:3:83:366:195#0/1  
aa``aaaa\_]][\_``\_``\_``\_V]^]\_]Y]\_\_\_]\_VW]]\_\_\_  
@HWI-EAS443:3:83:407:1575#0/1  
CTCTGAAAATATACAGAGATTCGCTTGGAGAACTGTGAT  
+HWI-EAS443:3:83:407:1575#0/1  
`bbYb`YU\_\_aababaa`\_baba^abWaa^bObaS\_Y\_aZ  
@HWI-EAS443:3:83:428:1768#0/1  
TACTTATGAGGATGTCAAAAATGCAGTTGGGGTCCTCATC  
+HWI-EAS443:3:83:428:1768#0/1  
abbbbbbbbaa[ `b[\_b^Y^a`aaX]a]a`a`a\_aa\_aa^a  
@HWI-EAS443:3:83:452:1600#0/1  
GAGAATGGGAGACCTTCACTACCTCCAGAGCAGAAATGAA  
+HWI-EAS443:3:83:452:1600#0/1  
aa¥J[ `Sa`aa\_aa\_Z\_\_\_]]]UVY[X\_NH^^ZTWX]]\_I  
@HWI-EAS443:3:83:460:1573#0/1  
GCCGCATTTCTTCAATTAACCACCTTATTTCCCTCAAATTT  
+HWI-EAS443:3:83:460:1573#0/1  
aaa\_]¥\_^``a]ZU]a]Y]]`a\_[WZ][ZZ\_]\_^][VY]Y^  
@HWI-EAS443:3:83:490:492#0/1  
TGAGAATGGGAGACCTTCACTACCTCCAGAGCAGAAATGA  
+HWI-EAS443:3:83:490:492#0/1  
ab\_\_YababbaaU``aaaa`YYaa\_]a\_aa\_^\_``^  
@HWI-EAS443:3:83:535:601#0/1  
GAAACTGTGATGAGAATGGGAGACCTTCACTACCTCCAGA  
+HWI-EAS443:3:83:535:601#0/1  
a^^^aaa\_aa`aa``aa[\_\_\_a^Y^\_``\_``\_]\_\_\_\_]  
@HWI-EAS443:3:83:537:466#0/1  
GGAGAACTGTGATGAGAATGGGAGACCTTCACTACCTCC  
+HWI-EAS443:3:83:537:466#0/1  
`^^[¥HQ\_^^¥^^\_a]`\_^^\_`^VYP^)^Y]RY\_\_VZZ\_Y  
@HWI-EAS443:3:83:547:1634#0/1  
AGAATGGGAGACCTTCACTACCTCCAGAGCAGAAATGAAA  
+HWI-EAS443:3:83:547:1634#0/1  
W^RGW`¥X`babaYX`a` `a`b`aaX\_WZ` `]`¥V[]a^Q\_

@HWI-EAS443:3:83:568:806#0/1  
CGCTTGGAGAACTGTGATGAGAATGGGAGACCTTCACTA  
+HWI-EAS443:3:83:568:806#0/1  
``\_aaa``\_`a^\_]a`S`]ZZ[``^^a\_aTRX^XY`S^P  
@HWI-EAS443:3:83:570:427#0/1  
GAGAATGGGAGACCTTCACTACCTCCAGAGCAGAAATGAA  
+HWI-EAS443:3:83:570:427#0/1  
a^b`Ua\_¥`Uaaa\_a\_aa\_`a\_Z\_`\_\_\_Z\_^\_\_\_\_X`aY\_  
@HWI-EAS443:3:83:626:752#0/1  
AGCGAATCTCTGTATATTTTCAGAGACTCGAACCGTGTTA  
+HWI-EAS443:3:83:626:752#0/1  
abba]Y\_`abab`a`^abaa`aa^aa`a`a^\_`¥a]\_U`\_  
@HWI-EAS443:3:83:63:1358#0/1  
CTGTGCCGATTTCTTCAATTAACCACCTTATTTCTCAA  
+HWI-EAS443:3:83:63:1358#0/1  
aY^XX^a]a`¥ZX^Y]\_ZW]¥Q]`^\_¥\_¥^\_^^¥\_^¥^¥V  
@HWI-EAS443:3:83:65:137#0/1  
GAGAATGGGAGACCTTCACTACCTCCAGAGCAGAAATGAA  
+HWI-EAS443:3:83:65:137#0/1  
`[ZPJ`\_`^Z```abaa`¥OX^]\_aaV`]a\_^¥SSLXVPQ  
@HWI-EAS443:3:83:678:1501#0/1  
CGCATTTCTTCAATTAACCACCTTATTTCTCAAATTTCT  
+HWI-EAS443:3:83:678:1501#0/1  
abbbabb\_abbab`Taabaaaa``aaaa\_aab\_ba\_\_`a  
@HWI-EAS443:3:83:708:1145#0/1  
GAGAACTGTGATGAGAATGGGAGACCTTCACTACCTCCA  
+HWI-EAS443:3:83:708:1145#0/1  
¥S[ [YX] ]\_abb]aaQW\_^¥a`YaaX` `XP`a` [ ]^`WSa  
@HWI-EAS443:3:83:738:167#0/1  
ATGAGGACCCCACTGCATTTTTGACATCCTCATAAGTAT  
+HWI-EAS443:3:83:738:167#0/1  
`VXXVSQOQRY¥[\_¥Ua]RW¥` [UYTLXYQXZ¥¥^W]XWY  
@HWI-EAS443:3:83:744:460#0/1  
CAAATCGCTTGCAGATATGCCAAAGGAAACAGTCTACCTG  
+HWI-EAS443:3:83:744:460#0/1  
abbbbaabaaa`¥` `` `bab`aa` `` ]Ya\_a¥` ]T\_\_\_Y]¥  
@HWI-EAS443:3:83:794:241#0/1  
GAATGGGAGACCTTCACTACCTCCAGAGCAGAAATGAAAA  
+HWI-EAS443:3:83:794:241#0/1  
a¥^^` `` [aa`Z[`]a`a]W¥]^Z]] [¥T]]¥W[ZV]^^[  
@HWI-EAS443:3:83:822:1034#0/1  
TGCCGATTTCTTCAATTAACCACCTTATTTCTCAAATT  
+HWI-EAS443:3:83:822:1034#0/1  
\_Y`]P\_`b¥b¥[Z`^¥^baba`V\_`a]]¥¥^b`ba`^^\_b  
@HWI-EAS443:3:83:827:1544#0/1  
ATGAGAATGGGAGACCTTCACTACCTCCAGAGCAGAAATG  
+HWI-EAS443:3:83:827:1544#0/1  
aaaa\_]aaaZ^]`Z`aaaab¥aa` `aa\_`a`a\_\_^\_]\_a`  
@HWI-EAS443:3:83:835:1272#0/1  
AATGGGAGACCTTCACTACCTCCAGAGCAGAAATGAAAAG

+HWI-EAS443:3:83:835:1272#0/1  
ababaaabaabbbbbabaaabaaa`abaa\_aaba``aa`  
@HWI-EAS443:3:83:850:422#0/1  
GCCGCATTTCTTCAATTAACCACCTTATTTCTCAAATTT  
+HWI-EAS443:3:83:850:422#0/1  
a`[`V\_ZaaZZVK\_[][\_[RV\_U]baaaa¥VZ\_a¥aaa\_`  
@HWI-EAS443:3:83:883:59#0/1  
CTGAAAATATACAGAGATTCGCTTGGAGAACTGTGATGA  
+HWI-EAS443:3:83:883:59#0/1  
`bb`bbbbbb`J`abaab\_a`a`ababaaa^ab``aaa^  
@HWI-EAS443:3:83:903:98#0/1  
GTCGCTTTCAATCTGTGCCGCATTTCTTCAATTAACCACC  
+HWI-EAS443:3:83:903:98#0/1  
a`aa`^aa^\_\_`Z\_a[\_\_\_S\_^\_a[Waa]^`\_^[X]\_YR  
@HWI-EAS443:3:83:943:1122#0/1  
CCGCATTTCTTCAATTAACCACCTTATTTCTCAAATTTTC  
+HWI-EAS443:3:83:943:1122#0/1  
aabbbbbbbbaaabababaaaa\_bbbbbbaabbbbabab\_  
@HWI-EAS443:3:83:951:146#0/1  
GCGAGACACTTAGAATGACAATTGCATCTGTACTACTTC  
+HWI-EAS443:3:83:951:146#0/1  
^`a\_^)`a`^`^`^`a\_\_\_\_]a``\_a^`\_¥\_a]^¥Y¥[V¥\_¥  
@HWI-EAS443:3:83:978:959#0/1  
AAACGAGAAAGCTCTTATCTCTTGTCTACTTCAAGCAGT  
+HWI-EAS443:3:83:978:959#0/1  
abba`ab`a`baaabb`b\_babab``[\_a`aaaa`\_aa\_]`  
@HWI-EAS443:3:83:980:1541#0/1  
CTTGGAGAACTGTGATGAGAATGGGAGACCTTCACTACC  
+HWI-EAS443:3:83:980:1541#0/1  
aa`Z[ba\_`^bbU`]]baa[`a^a`^a^^`^`\_aU`\_[0  
@HWI-EAS443:3:84:1026:1510#0/1  
CTGAAAATATACAGAGATTCGCTTGGAGAACTGTGATGA  
+HWI-EAS443:3:84:1026:1510#0/1  
abaaU^aa`aba\_b\_^X]abbb\_`a^]^]W\_[a`L^[a`¥  
@HWI-EAS443:3:84:105:852#0/1  
CCGCATTTCTTCAATTAACCACCTTATTTCTCAAATTTTC  
+HWI-EAS443:3:84:105:852#0/1  
abbbbaabbbab`ababaabaaaaaaaaabaaaaaSa\_aa  
@HWI-EAS443:3:84:1063:547#0/1  
AGAAACTGTGATGAGAATGGGAGACCTTCACTACTCCAG  
+HWI-EAS443:3:84:1063:547#0/1  
Za¥]\_`¥ZNY\_\_^[\_`\_¥\_]aUY]a^`Y^ZXZRJY¥a  
@HWI-EAS443:3:84:1064:1206#0/1  
GCCGCATTTCTTCAATTAACCACCTTATTTCTCAAATTTTC  
+HWI-EAS443:3:84:1064:1206#0/1  
`a`abbbbaa\_ba`aba`a```\_aaa`aaa`abaa\_\_aa\_  
@HWI-EAS443:3:84:1066:1479#0/1  
GAAACTGTGATGAGAATGGGAGACCTTCACTACTCCAGA  
+HWI-EAS443:3:84:1066:1479#0/1  
`babbbb[b`aaa\_abbaaabba`ba`aababa\_aaa````

@HWI-EAS443:3:84:1106:1219#0/1  
CACGGTTCGAGTCTCTGAAAATATACAGAGATTCGCTTGG  
+HWI-EAS443:3:84:1106:1219#0/1  
^W]O\_Va`a\_YW^Yaa`^ZaYa^¥R`XX]aa^a`aaZW  
@HWI-EAS443:3:84:1133:905#0/1  
GAGAATGGGAGACCTTCACTACCTCCAGAGCAGAAATGAA  
+HWI-EAS443:3:84:1133:905#0/1  
aaa]`^aaa\_a`aX^Z^\_Q]\_a¥^\_\_[\_^a^`¥[R[\_W¥  
@HWI-EAS443:3:84:1260:1956#0/1  
GCCGCATTTCTTCAATTAACCACCTTATTTCTCAAATTT  
+HWI-EAS443:3:84:1260:1956#0/1  
a```aaa`Q[aa`\_`aaaa\_\_aa`a`aaa`a\_\_``\_\_a[Y  
@HWI-EAS443:3:84:1297:1570#0/1  
GAGAACTGTGATGAGAATGGGAGACCTTCACTACCTCCA  
+HWI-EAS443:3:84:1297:1570#0/1  
a\_`[Z]a\_YTY``¥¥^aSRWYV^[]^`^a^`X[Y]\_  
@HWI-EAS443:3:84:1304:50#0/1  
ACTGTGATGAGAATGGGAGACCTTCACTACCTCCAGAGCA  
+HWI-EAS443:3:84:1304:50#0/1  
aab`abbbb`aa``bb\_\_aN^bbXa`aaZ[a]Z\_a\_a\_]`  
@HWI-EAS443:3:84:1346:1028#0/1  
GAAACTGTGATGAGAATGGGAGACCTTCACTACCTCCAGA  
+HWI-EAS443:3:84:1346:1028#0/1  
`^aa[ab]\_\_aa`a[^Z\_a\_Z`a[\_aZ`aa`\_ZZ`\_]\_\_X  
@HWI-EAS443:3:84:1371:692#0/1  
GCCGCATTTCTTCAATTAACCACCTTATTTCTCAAATTT  
+HWI-EAS443:3:84:1371:692#0/1  
aa`b\_babb\_bbaa\_aa`a\_\_a\_\_aa`baa\_]a`a\_`a`a  
@HWI-EAS443:3:84:1387:1196#0/1  
GTCGCTTTCAATCTGTGCCGATTTCTTCAATTAACCACC  
+HWI-EAS443:3:84:1387:1196#0/1  
`\_[\_`a\_]`aa^`]^\_LZ`X]]a`WaaZ`aaa¥¥XM[YV  
@HWI-EAS443:3:84:1391:1356#0/1  
AGAAACTGTGATGAGAATGGGAGACCTTCACTACCTCCAG  
+HWI-EAS443:3:84:1391:1356#0/1  
aaaaaaaaT\_\_a\_[aa`XZaZ^aU`\_^\_Sa[^`¥[Y[]``  
@HWI-EAS443:3:84:1427:991#0/1  
GAGAATGGGAGACCTTCACTACCTCCAGAGCAGAAATGAA  
+HWI-EAS443:3:84:1427:991#0/1  
]\_b`]bbabbbbbaaa`aaaaWXaaaba`ab]aaIbaY[  
@HWI-EAS443:3:84:1431:1542#0/1  
ATGAGAATGGGAGACCTTCACTACCTCCAGAGCAGAAATG  
+HWI-EAS443:3:84:1431:1542#0/1  
Vaa\_aaaab[\_[a`RJa\_\_`]aa^\_a]]^aZ\_^]a^\_^\_a  
@HWI-EAS443:3:84:1457:1849#0/1  
GCTTTAGAGTACTGTTTCTTTGGCATATCCGCAAGCG  
+HWI-EAS443:3:84:1457:1849#0/1  
`U¥bbabbaY``[\_bb]]`QY^bUa]ab`baWTZU]a\_PW  
@HWI-EAS443:3:84:1485:1576#0/1  
AAACTGTGATGAGAATGGGAGACCTTCACTACCTCCAGAG

+HWI-EAS443:3:84:1485:1576#0/1  
a`bS`\_J`\_aa^a\_`aa^Za\_RZ``a^a\_]`^\_X\_\_^^  
@HWI-EAS443:3:84:1501:1639#0/1  
GAAACGAGAAAGCTCTTATCTCTTGTCTACTTCAAGCAG  
+HWI-EAS443:3:84:1501:1639#0/1  
abbb¥b`^bbUbW\_Sabab¥b`abb`Xbb\_baZb`aaab  
@HWI-EAS443:3:84:150:220#0/1  
AACAAATCGTGGAATGGATCTTGAAAGAGGAATCCAGCGA  
+HWI-EAS443:3:84:150:220#0/1  
a`aZ[Q^H\_MaZN^YR\_]Z¥XSXXXZV¥^]WX]¥ROGZR  
@HWI-EAS443:3:84:151:1484#0/1  
GCCGCATTTCTTCAATTAACCACCTTATTTCTCAAATTT  
+HWI-EAS443:3:84:151:1484#0/1  
aaaU[`Y`^T^abaZVR`a[U`aa\_aa]Ya]\_^T\_\_a\_\_  
@HWI-EAS443:3:84:1630:396#0/1  
GCGGCACAGATTGAAAGCGACAGAGAATAGTTTCGAACAA  
+HWI-EAS443:3:84:1630:396#0/1  
a[a\_]aT[[]\_\_a`]\_]\_PRYFZ^^\_]Z\_]\_VSR¥VP^  
@HWI-EAS443:3:84:164:77#0/1  
AATGGGAGACCTTCACTACCTCCAGAGCAGAAATGAAAAG  
+HWI-EAS443:3:84:164:77#0/1  
aa\_Y`^¥\_Z]`aa`^`¥XU\_\_\_\_\_`\_[[¥\_Z[^`\_\_XRZZ  
@HWI-EAS443:3:84:1657:1317#0/1  
GCCGCATTTCTTCAATTAACCACCTTATTTCTCAAATTT  
+HWI-EAS443:3:84:1657:1317#0/1  
aW¥\_\_`ba\_aaa`^\_\_a¥STW\_]aa`aaa]\_`\_]\_\_\_\_¥  
@HWI-EAS443:3:84:1704:177#0/1  
GAAACTGTGATGAGAATGGGAGACCTTCACTACCTCCAGA  
+HWI-EAS443:3:84:1704:177#0/1  
a\_WZN¥b)`\_\_^U]¥`ba]a¥^YN[[^QQQ[^PL]LHRXS  
@HWI-EAS443:3:84:186:1870#0/1  
GAAACTGTGATGAGAATGGGAGACCTTCACTACCTCCAGA  
+HWI-EAS443:3:84:186:1870#0/1  
Wa`Zb\_\_S\_Y`aS¥¥]YNXbaabaaUabbabbaaa\_U]\_  
@HWI-EAS443:3:84:198:139#0/1  
GATGAGAATGGGAGACCTTCACTACCTCCAGAGCAGAAAT  
+HWI-EAS443:3:84:198:139#0/1  
`]ab¥a[^`a]W\_]W¥Z^\_Z]\_[^UXT^^VZSQVX]NUXW  
@HWI-EAS443:3:84:202:1252#0/1  
GCTCTTATCTCTTGTCTACTTCAAGCAGTAGTTGTAAGG  
+HWI-EAS443:3:84:202:1252#0/1  
abaaaa`^ba`aaaaaa`a\_a```aaa\_a]\_\_\_\_`\_\_\_\_  
@HWI-EAS443:3:84:208:1887#0/1  
TGAGAATGGGAGACCTTCACTACCTCCAGAGCAGAAATGA  
+HWI-EAS443:3:84:208:1887#0/1  
aabaabaa`aaaaaaaabaaaa\_aaaa\_`aaaa\_a`^`  
@HWI-EAS443:3:84:219:208#0/1  
GCCGCATTTCTTCAATTAACCACCTTATTTCTCAAATTT  
+HWI-EAS443:3:84:219:208#0/1  
aaa`a\_aaa\_a\_\_\_\_`aa`\_\_`]\_```\_`\_`\_`^`^\_]`^`^`

@HWI-EAS443:3:84:224:48#0/1  
AGAAACTGTGATGAGAATGGGAGACCTTCACTACCTCCAG  
+HWI-EAS443:3:84:224:48#0/1  
Z\_¥X^`][`Za]a`Y\_]Zabb\_^YFY^```Z]RJZZ]^X]  
@HWI-EAS443:3:84:231:1131#0/1  
TGCGGCACAGATTGAAAGCGACAGAGAATAGTTTCGAACA  
+HWI-EAS443:3:84:231:1131#0/1  
`aa\_¥`R\_a¥WVZ]aY\_Wa][`\_ZaZ\_] [Q`X\_W` [P`a^  
@HWI-EAS443:3:84:242:219#0/1  
GAATGGGAGACCTTCACTACCTCCAGAGCAGAAATGAAAA  
+HWI-EAS443:3:84:242:219#0/1  
aX¥`aaa\_b\_Z^¥\_¥a\_^\_[^^¥]`Z^¥V\_¥W¥¥¥¥Y^¥  
@HWI-EAS443:3:84:264:1698#0/1  
GCCGCATTTCTTCAATTAACCACCTTATTTCTCAAATTT  
+HWI-EAS443:3:84:264:1698#0/1  
aa^^aS¥aa\_]X\_^`\_ab\_b^a]Z^)``\_\_aa\_]ZW0Y\_`  
@HWI-EAS443:3:84:264:663#0/1  
CGCTTTCAATCTGTGCCGCATTTCTTCAATTAACCACCTT  
+HWI-EAS443:3:84:264:663#0/1  
abb^\_aabbb`b]bb`baabba¥aaaaVa\_aba`a\_aaa  
@HWI-EAS443:3:84:26:626#0/1  
GCCGCATTTCTTCAATTAACCACCTTATTTCTCAAATTT  
+HWI-EAS443:3:84:26:626#0/1  
a]\_a[a^\_\_`\_^]a`\_`\_^\_\_^]\_\_H[^\_¥\_\_U\_V`X  
@HWI-EAS443:3:84:283:764#0/1  
AGGGCTTTCACTGAGGAGGGAGCAATAGTTGGAGAAATTT  
+HWI-EAS443:3:84:283:764#0/1  
WX^`aZT]b`bZ]W¥\_ZWZ`aaa[UR\_^H¥[`S^¥YDU¥\_  
@HWI-EAS443:3:84:299:549#0/1  
AGAAACTGTGATGAGAATGGGAGACCTTCACTACCTCCAG  
+HWI-EAS443:3:84:299:549#0/1  
`a¥RX]]XYUTQRMXYUO\_WYP[Z¥W`YIZU^a^GSa\_VQ  
@HWI-EAS443:3:84:326:1836#0/1  
GTCGCTTTCAATCTGTGCCGCATTTCTTCAATTAACCACC  
+HWI-EAS443:3:84:326:1836#0/1  
U¥`^`b`a`¥`ab\_a^```baaaaa\_]`^`aab\_`aaaa  
@HWI-EAS443:3:84:329:1645#0/1  
GTCGCTTTCAATCTGTGCCGCATTTCTTCAATTAACCACC  
+HWI-EAS443:3:84:329:1645#0/1  
aabababbbbbbbba]abababaaabaaabbaaa^aaaaa  
@HWI-EAS443:3:84:32:1248#0/1  
GTCGCTTTCAATCTGTGCCGCATTTCTTCAATTAACCACC  
+HWI-EAS443:3:84:32:1248#0/1  
a\_baaa\_aba^ab\_aJaaaaZ``a`aa`]]``\_a`^`\_`X  
@HWI-EAS443:3:84:359:1944#0/1  
GCCGCATTTCTTCAATTAACCACCTTATTTCTCAAATTT  
+HWI-EAS443:3:84:359:1944#0/1  
`ab`b\_``a`a`a[\_a`a`a\_aaaa`\_a\_aa]`a`\_^`]¥  
@HWI-EAS443:3:84:369:1471#0/1  
GCGCGAAGTAGGTACAGATGCAATTGTCATTCTAAGTGTC

+HWI-EAS443:3:84:369:1471#0/1  
`RZPVW]YSZVPG\_]\_]a^ZZW][XNFYYXPW\_ZZU`^\_  
@HWI-EAS443:3:84:382:223#0/1  
GCCGCATTTCTTCAATTAACCACCTTATTTCTCAAATTT  
+HWI-EAS443:3:84:382:223#0/1  
aaabaaaabaaba^abba`a`aaaaaa\_aaa\_`Va`a  
@HWI-EAS443:3:84:391:1822#0/1  
TCGATATCGAGGCCAAGGGTGTTCCTCTTCTTTAAGG  
+HWI-EAS443:3:84:391:1822#0/1  
abbbbababaaabbb`¥¥aaaR`aaaaaaaaa\_a`ZX  
@HWI-EAS443:3:84:403:1023#0/1  
AAATGTTATTTGTTGAAACTATTCTGTGCTTTCAAT  
+HWI-EAS443:3:84:403:1023#0/1  
`MX^`^a`aa`aY\_a^\_Y]^`^a`\_]`W^^^\_\_\_[]U]^`^\_  
@HWI-EAS443:3:84:435:1259#0/1  
GCCGCATTTCTTCAATTAACCACCTTATTTCTCAAATTT  
+HWI-EAS443:3:84:435:1259#0/1  
[`bb¥VaaS^a¥a[`a`[^X]\_`ZUW^]¥abaa`^^¥^  
@HWI-EAS443:3:84:440:1192#0/1  
ACCACCTATTTCTCAAATTTCTGTCCCAATTGCTCTCG  
+HWI-EAS443:3:84:440:1192#0/1  
`aaZ\_`aa\_baaaa`a`]^aa`a`aZ\_\_a`\_^`\_`\_]`\_  
@HWI-EAS443:3:84:466:985#0/1  
TGCCGCATTTCTTCAATTAACCACCTTATTTCTCAAATT  
+HWI-EAS443:3:84:466:985#0/1  
abba]aabbaabab\_\_a\_a`a`a`a^]\_a\_\_`aaa\_\_`  
@HWI-EAS443:3:84:469:921#0/1  
ACCTACTTCGCGCTACCTTTCTGACATGACCCTCGAGGAA  
+HWI-EAS443:3:84:469:921#0/1  
aaaabaaaaaaaa`a`a`a^`]^aa^[T\_`\_]`^¥N^Y¥]  
@HWI-EAS443:3:84:481:340#0/1  
CACAGATTGAAAGCGACAGAGAATAGTTTGAACAAATAA  
+HWI-EAS443:3:84:481:340#0/1  
a`a`a`babaabaaa\_\_aaaaaZ\_`\_a[`[^a`a`  
@HWI-EAS443:3:84:482:548#0/1  
ATCGTGGAATGGATCTTGAAAGAGGAATCCAGCGAGACAC  
+HWI-EAS443:3:84:482:548#0/1  
[`b`]ba]aabaa[aaaa`aaaaaY`aa`[W[a¥]T[`\_  
@HWI-EAS443:3:84:485:640#0/1  
AGGCAACACCCTTGGCCTCGATATCGAAACAGCCACTCTT  
+HWI-EAS443:3:84:485:640#0/1  
]\_I\_ZS]¥b`aaaaabaa\_^]\_`ab`¥^a``¥\_Z\_] []  
@HWI-EAS443:3:84:492:1562#0/1  
GCCTAGGCAAAAAGATAATAGGCCCTTTTGGTGGCGATTG  
+HWI-EAS443:3:84:492:1562#0/1  
abbbbbbabb`bbbbbbaabbbbbaabbaabaabab`]^`  
@HWI-EAS443:3:84:502:340#0/1  
TGCCGCATTTCTTCAATTAACCACCTTATTTCTCAAATT  
+HWI-EAS443:3:84:502:340#0/1  
[]`ba^¥`^ab`bbab]aaXP]¥`W\_aabaaaab]¥¥aa



@HWI-EAS443:3:84:51:495#0/1  
GTGCCGATTTCTTCAATTAACCACCTTATTTCTCAAAT  
+HWI-EAS443:3:84:51:495#0/1  
a¥\_`aa\_TWaaaa\_aZV\_``Z]ZW\_aY`\_\_\_\_`\_]\_`\_\_`Y`  
@HWI-EAS443:3:84:522:1518#0/1  
GCATCACCCAATCCATTGTCTGCAAATCGCTTGCGGATAT  
+HWI-EAS443:3:84:522:1518#0/1  
^bbba^abbbabba\_aaa]ba\_aa^a`\_`aa[P\_aaa`a`  
@HWI-EAS443:3:84:568:675#0/1  
GCCGCATTTCTTCAATTAACCACCTTATTTCTCAAATTT  
+HWI-EAS443:3:84:568:675#0/1  
abaa`aaaa`baa\_\_aa]]\_a`aaa`aaa`aa^\_`^a\_\_  
@HWI-EAS443:3:84:56:638#0/1  
TGCCGCATTTCTTCAATTAACCACCTTATTTCTCAAATT  
+HWI-EAS443:3:84:56:638#0/1  
¥H\_baa¥aaaaaaaaZaa^\_\_aaabaa`a`\_aaaa\_U\_b\_  
@HWI-EAS443:3:84:578:1062#0/1  
CTGTGATGAGAATGGGAGACCTTCACTACCTCCAGAGCAG  
+HWI-EAS443:3:84:578:1062#0/1  
`\_]\_¥a]aa]\_\_UU]V`Y\_\_\_\_[^`\_`¥`\_\_^``\_`V`¥¥^  
@HWI-EAS443:3:84:584:129#0/1  
GCCGCATTTCTTCAATTAACCACCTTATTTCTCAAATTT  
+HWI-EAS443:3:84:584:129#0/1  
aWX\_`^^\_]V¥`YY^`]T[^U^T[[[VX[^[UWZZVLY¥¥  
@HWI-EAS443:3:84:639:221#0/1  
ATTCGCTTGGAGAACTGTGATGAGAATGGGAGACCTTCA  
+HWI-EAS443:3:84:639:221#0/1  
^`¥bbbabbbabab\_baa`baaba`^^a^^a^a``aaa``  
@HWI-EAS443:3:84:653:265#0/1  
AGAAACTGTGATGAGAATGGGAGACCTTCACTACCTCCAG  
+HWI-EAS443:3:84:653:265#0/1  
aaa`aa`aSb`aa[WY`a¥aa`a^\_a\_\_\_\_^^\_]UZU¥^\_[  
@HWI-EAS443:3:84:655:753#0/1  
GCGGCACAGATTGAAAGCGACAGAGAATAGTTTCGAACAA  
+HWI-EAS443:3:84:655:753#0/1  
aab````a\_`aaaaa¥SY[`\_a```W^Za]^a\_[[[a^Z\_  
@HWI-EAS443:3:84:66:811#0/1  
CGAGAAAGCTTCTTCTTCTTCTTCTTCAAGCAGTAGT  
+HWI-EAS443:3:84:66:811#0/1  
aa``TWV^`\_`\_\_U¥a`Y^]`^\_]YUY^^^\_[\_`^]X]]W  
@HWI-EAS443:3:84:686:493#0/1  
AGAAACTGTGATGAGAATGGGAGACCTTCACTACCTCCAG  
+HWI-EAS443:3:84:686:493#0/1  
a`Vabab`¥`bWba\_\_¥W`\_aaa]``aaaWaaS[a`Z¥``  
@HWI-EAS443:3:84:688:399#0/1  
CTGTGCCGATTTCTTCAATTAACCACCTTATTTCTCAA  
+HWI-EAS443:3:84:688:399#0/1  
aaa\_baabaaaa\_aaaaaaaaa\_`aaaaabaa`\_a`a¥  
@HWI-EAS443:3:84:710:1331#0/1  
GTCGCTTTCAATCTGTGCCGATTTCTTCAATTAACCACC

+HWI-EAS443:3:84:710:1331#0/1  
U]bbb¥\_Z`X¥]aababa`U`T`¥``aaaYa`ba]\_baab  
@HWI-EAS443:3:84:716:1801#0/1  
CACAGATTGAAAGCGACAGAGAATAGTTTCGAACAAATAA  
+HWI-EAS443:3:84:716:1801#0/1  
`\_`\_¥`Z`^^^`¥`\_^`\_^`^`\_]R``X0^[[\_[Za`  
@HWI-EAS443:3:84:719:1529#0/1  
GCCGCATTTCTTCAATTAACCACCTTATTTCTCAAATTT  
+HWI-EAS443:3:84:719:1529#0/1  
`bbbaaabbbbbbbbbbabaabbabaaabaabbab]bbaa  
@HWI-EAS443:3:84:728:1219#0/1  
GCCGCATTTCTTCAATTAACCACCTTATTTCTCAAATTT  
+HWI-EAS443:3:84:728:1219#0/1  
a`aaW[XaaaY]aSVV`\_`\_PZ\_VaQY¥XR\_b``]QG¥^W  
@HWI-EAS443:3:84:731:391#0/1  
CGCATTTCTTCAATTAACCACCTTATTTCTCAAATTTCT  
+HWI-EAS443:3:84:731:391#0/1  
aabaaba`baaaaaba`\_^aa\_aaaaa`aaa`]\_a`a\_a  
@HWI-EAS443:3:84:733:1746#0/1  
GGAGAACTGTGATGAGAATGGGAGACCTTCACTACCTCC  
+HWI-EAS443:3:84:733:1746#0/1  
a\_Wa\_Waa`^ZaW¥YX`\_`\_a^][\_`\_aa\_aa`^\_aY\_aN  
@HWI-EAS443:3:84:736:731#0/1  
AGAACTGTGATGAGAATGGGAGACCTTCACTACCTCCAG  
+HWI-EAS443:3:84:736:731#0/1  
aba]aaaa`a^aa\_a\_a`a]\_^]]^]V`\_Y^^Y\_VU  
@HWI-EAS443:3:84:797:1457#0/1  
GGAGAACTGTGATGAGAATGGGAGACCTTCACTACCTCC  
+HWI-EAS443:3:84:797:1457#0/1  
aa``¥Wa`]\_Waa[[Ua^``X¥`[\_[[ZUXR`\_]^[\_¥\_Z  
@HWI-EAS443:3:84:861:1527#0/1  
GATTACACTGAAGTTCGCTTTCAGTACTATGTTCTTTTCC  
+HWI-EAS443:3:84:861:1527#0/1  
abbaab`bb\_a¥`abaa\_aabaa]aaabaa`a\_baaaa`  
@HWI-EAS443:3:84:862:1914#0/1  
CCGCATTTCTTCAATTAACCACCTTATTTCTCAAATTTCT  
+HWI-EAS443:3:84:862:1914#0/1  
\_`^a\_a`a`\_`bbaa\_^`\_`baaaa[aaaa\_aabaaa\_a\_  
@HWI-EAS443:3:84:880:542#0/1  
TGATGAGAATGGGAGACCTTCACTACCTCCAGAGCAGAAA  
+HWI-EAS443:3:84:880:542#0/1  
aba`a`a]a``¥a\_\_a\_¥`\_]a\_\_`\_^]\_¥`^`^`Y^^  
@HWI-EAS443:3:84:912:149#0/1  
CCGCATTTCTTCAATTAACCACCTTATTTCTCAAATTTCT  
+HWI-EAS443:3:84:912:149#0/1  
aab\_^`[aZ[aa`abba\_XX]a\_a`aaaa[[`aaa`]\_bT  
@HWI-EAS443:3:84:931:1060#0/1  
GCCGCATTTCTTCAATTAACCACCTTATTTCTCAAATTT  
+HWI-EAS443:3:84:931:1060#0/1  
aaab`\_abaaaa`aabbaaa^ba`aaZbaaa\_a`aaaaba

@HWI-EAS443:3:84:945:1641#0/1  
CGCATTCTTCAATTAACCACCTTATTTCTCAAATTTCT  
+HWI-EAS443:3:84:945:1641#0/1  
`babbbababbbababbb^aaabbbabbbbbbabbbaaa  
@HWI-EAS443:3:84:972:679#0/1  
GCCGCATTTCTTCAATTAACCACCTTATTTCTCAAATTT  
+HWI-EAS443:3:84:972:679#0/1  
aaaXJMXZY]\_a`[WZTS]XX`]\_\_\_\_^\_`]U^]TR^`X\_  
@HWI-EAS443:3:84:977:317#0/1  
GCCGCATTTCTTCAATTAACCACCTTATTTCTCAAATTT  
+HWI-EAS443:3:84:977:317#0/1  
a`aa`aaaa^aaa`\_aa`^\_a\_\_aaaa`\_`a\_`Za\_\_  
@HWI-EAS443:3:84:97:930#0/1  
GTCGCTTCAATCTGTGCCGCATTTCTTCAATTAACCACC  
+HWI-EAS443:3:84:97:930#0/1  
^\_bbaaba`¥\_\_`\_X`a\_\_`aaaa`a`]`a`Z\_aaaa  
@HWI-EAS443:3:85:1015:352#0/1  
ATTTCTTCAATTAACCACCTTATTTCTCAAATTTCTGTC  
+HWI-EAS443:3:85:1015:352#0/1  
^aYS\_Y`]¥`\_`]`\_Vaa`U^aaa^M¥\_¥a^^`Vbaa]  
@HWI-EAS443:3:85:1016:1940#0/1  
GCCGCATTTCTTCAATTAACCACCTTATTTCTCAAATTT  
+HWI-EAS443:3:85:1016:1940#0/1  
aabb`^ab\_R\_baa^ababa]a\_J¥baa\_aZ^aaa^`\_]a  
@HWI-EAS443:3:85:1031:892#0/1  
GTAATGGTGAATTTCTCCAATTTGCTCCCTCCTCAGT  
+HWI-EAS443:3:85:1031:892#0/1  
a\_abaa`]aaaaaaaa`a`aaaa`aa\_\_aa\_`a`a`a`a`\_`a`  
@HWI-EAS443:3:85:1033:412#0/1  
TGCCGCATTTCTTCAATTAACCACCTTATTTCTCAAATT  
+HWI-EAS443:3:85:1033:412#0/1  
aaa`aaaab\_abbaa`b`a¥`\_`aaaaaa\_\_b\_^T^a`  
@HWI-EAS443:3:85:1044:291#0/1  
GTCGCTTCAATCTGTGCCGCATTTCTTCAATTAACCACC  
+HWI-EAS443:3:85:1044:291#0/1  
a`a`a`aa`\_aa`aaa`]`\_^`^\_a\_\_Z`\_`\_^`a`a`a`^]`^XX  
@HWI-EAS443:3:85:1058:1993#0/1  
CAGTCTCGTGACATTTCTCGAGGGTCATGTCAGAAAGGT  
+HWI-EAS443:3:85:1058:1993#0/1  
aba[`\_`[W^^a\_\_]\_aX`]V]W\_W\_\_`^QZ^][`[\_XQ  
@HWI-EAS443:3:85:1084:1051#0/1  
TGCCGCATTTCTTCAATTAACCACCTTATTTCTCAAATT  
+HWI-EAS443:3:85:1084:1051#0/1  
Z\_a`a`aaaa`\_^`^a^a\_a`a`aba`\_a\_a`^`^`¥[aa  
@HWI-EAS443:3:85:1098:661#0/1  
AGAAACTGTGATGAGAATGGGAGACCTTCACTACCTCCAG  
+HWI-EAS443:3:85:1098:661#0/1  
^bababbb`baabab\_a`^aaa`UY`a`a`a`¥`a\_X^^^X`  
@HWI-EAS443:3:85:1115:160#0/1  
AGACTGTTTCTTTGGCATATCCGCAAGCGATTTGCAGAC

+HWI-EAS443:3:85:1115:160#0/1  
aa`aZ¥V[QMV\_VV^YZZa\_Y`¥[T[T\_U\_^^^`GV]\_Y  
@HWI-EAS443:3:85:1146:125#0/1  
GCCGCATTTCTTCAATTAACCACCTTATTTCTCAAATTT  
+HWI-EAS443:3:85:1146:125#0/1  
]aab`S`\_aaaa\_[a¥a\_]Yba^a\_`a`aYV^`\_`X^`\_`  
@HWI-EAS443:3:85:116:485#0/1  
AGAAACTGTGATGAGAATGGGAGACCTTCACTACCTCCAG  
+HWI-EAS443:3:85:116:485#0/1  
a\_]aa\_\_aXa`\_Z]`\_^]`a\_W\_WP]¥W^¥^^]\_RX^WV]  
@HWI-EAS443:3:85:1179:1552#0/1  
CGTGGAAATGGATCTTGAAAGAGGAATCCAGCGAGACACTT  
+HWI-EAS443:3:85:1179:1552#0/1  
[`¥bb¥P\_baab`bbXaS]Wbb]aaTM\_¥`]aX\_¥aJX¥  
@HWI-EAS443:3:85:118:1846#0/1  
AGAAACTGTGATGAGAATGGGAGACCTTCACTACCTCCAG  
+HWI-EAS443:3:85:118:1846#0/1  
a\_`]a]LR\_YVZ]VGZ^THVU¥S]¥TGUUZZOFU[V]ZH[  
@HWI-EAS443:3:85:1271:761#0/1  
CAGAGATTGCTTGGAGAACTGTGATGAGAATGGGAGAC  
+HWI-EAS443:3:85:1271:761#0/1  
aaaaZZ\_aab`\_\_`a\_aX\_a]abX]U]X`YHZa\_VULYZR  
@HWI-EAS443:3:85:1272:1286#0/1  
TGAGAATGGGAGACCTTCACTACCTCCAGAGCAGAAATGA  
+HWI-EAS443:3:85:1272:1286#0/1  
ab`¥¥baa`Z¥a\_¥\_a\_V^\_aa^]`^G¥R]U^V\_\_N^`\_[^  
@HWI-EAS443:3:85:1307:268#0/1  
TGCCGCATTTCTTCAATTAACCACCTTATTTCTCAAATT  
+HWI-EAS443:3:85:1307:268#0/1  
X[a`\_Z]a`]M[^\_]aa\_¥MY^X]`^^^a^JZ\_T^Waba  
@HWI-EAS443:3:85:1327:810#0/1  
GAAACTGTGATGAGAATGGGAGACCTTCACTACCTCCAGA  
+HWI-EAS443:3:85:1327:810#0/1  
`aab\_aa`baaba^`abbaa\_b`][`\_\_aaa¥¥Y`^\_`a^  
@HWI-EAS443:3:85:1328:731#0/1  
GGTTAATTGAAGAAATGCGGCACAGATTGAAAGCGACAGA  
+HWI-EAS443:3:85:1328:731#0/1  
ab`baaaaa`aaaaaba^aa]b\_ab\_``b\_``a\_aa```\_  
@HWI-EAS443:3:85:1328:998#0/1  
ATGGTAACACGGTTCGAGTCTCTGAAAATATACAGAGATT  
+HWI-EAS443:3:85:1328:998#0/1  
¥Vab`^a^ba`Z]aZ`Z]T^\_a[]YZZW`\_a\_a^^a^]¥  
@HWI-EAS443:3:85:1348:1382#0/1  
GGAAGAGGCAACACCCTTGGCCTCGATATCGAAACAGCCA  
+HWI-EAS443:3:85:1348:1382#0/1  
Z\_bbb`ZZaa^abUa`R\_^^a]]Zb`X`W\_aaU\_]ab`X  
@HWI-EAS443:3:85:1419:1208#0/1  
GAGAATGGGAGACCTTCACTACCTCCAGAGCAGAAATGAA  
+HWI-EAS443:3:85:1419:1208#0/1  
W]WRZ^\_]ZZ¥¥X¥TT\_\_\_^Y[`XRW]`[P¥aa\_Y¥^W\_

@HWI-EAS443:3:85:1419:2012#0/1  
GAGCAATTGGGACAGAAATTTGAGGAAATAAGGTGGTTAA  
+HWI-EAS443:3:85:1419:2012#0/1  
a¥babba`bY`¥X^\_abaaa\_baa````ba\_aaVa`^^a`  
@HWI-EAS443:3:85:1420:705#0/1  
GAGAATGGGAGACCTTCACTACCTCCAGAGCAGAAATGAA  
+HWI-EAS443:3:85:1420:705#0/1  
\_\_]babbb`X`aaYbbaaabb\_^aaZaa`baaba`aab^^  
@HWI-EAS443:3:85:1502:495#0/1  
AGAAACTGTGATGAGAATGGGAGACCTTCACTACCTCCAG  
+HWI-EAS443:3:85:1502:495#0/1  
ababaaab¥`Y`a``\_a\_aaa``\_]`\_^a]\_a]\_\_UT\_^  
@HWI-EAS443:3:85:150:227#0/1  
GTCGCTTTCAATCTGTGCCGATTTCTTCAATTAACCACC  
+HWI-EAS443:3:85:150:227#0/1  
a\_aaa``\_a`¥\_^]\_]`\_\_a`\_a`^^`\_^^```]\_XU`^^  
@HWI-EAS443:3:85:1551:612#0/1  
GGAGAACTGTGATGAGAATGGGAGACCTTCACTACCTCC  
+HWI-EAS443:3:85:1551:612#0/1  
`V^V\_]X[]TW^\_a]\_]X`^`\_[`[ULX\_¥X\_NWPZVT  
@HWI-EAS443:3:85:1554:1742#0/1  
GAAACTGTGATGAGAATGGGAGACCTTCACTACCTCCAGA  
+HWI-EAS443:3:85:1554:1742#0/1  
W¥a\_aab\_aa¥`Y]Mbbbabab[a[^Y¥¥baZXa^^a]Y  
@HWI-EAS443:3:85:1590:1064#0/1  
AGAAACTGTGATGAGAATGGGAGACCTTCACTACCTCCAG  
+HWI-EAS443:3:85:1590:1064#0/1  
aaaaa\_ab\_a\_ab`^aaaa`[a¥\_Ua`\_\_]`\_Z\_\_WV]\_  
@HWI-EAS443:3:85:1592:1006#0/1  
GTCGCTTTCAATCTGTGCCGATTTCTTCAATTAACCACC  
+HWI-EAS443:3:85:1592:1006#0/1  
¥aabaZ^W^b\_aXab\_a\_]`H^Y^aS`[]`aaaa\_U\_SI  
@HWI-EAS443:3:85:1618:1128#0/1  
GCCGATTTCTTCAATTAACCACCTTATTTCTCAAATTT  
+HWI-EAS443:3:85:1618:1128#0/1  
a`Y\_]abb`P\_]Xaa\_aa\_TU`\_Wa\_aaba]^a]a\_\_a^W  
@HWI-EAS443:3:85:161:405#0/1  
GCCGATTTCTTCAATTAACCACCTTATTTCTCAAATTT  
+HWI-EAS443:3:85:161:405#0/1  
aaaaaa`abaaaaaaa`T]aaaa`aaa``^aaa¥a``\_\_  
@HWI-EAS443:3:85:1628:1673#0/1  
AGAAACTGTGATGAGAATGGGAGACCTTCACTACCTCCAG  
+HWI-EAS443:3:85:1628:1673#0/1  
a¥aa¥aabHa]a\_\_`^\_^`\_]\_a\_NIY`^^\_\_`Z¥Z[U\_T  
@HWI-EAS443:3:85:1682:289#0/1  
AAACGAGAAAGCTTCTTCTTCTTCTACTTCAAGCAGT  
+HWI-EAS443:3:85:1682:289#0/1  
ab^`ba¥``\_`^a\_a`aaQa\_aa\_a]Xa][a\_`¥\_a]`a^  
@HWI-EAS443:3:85:1714:117#0/1  
AGAAACTGTGATGAGAATGGGAGACCTTCACTACCTCCAG

+HWI-EAS443:3:85:1714:117#0/1  
aaaaa]bb]a\_ba`a\_\_aaaa¥\_^^V`^`\_]Za\_UU\_VX\_^  
@HWI-EAS443:3:85:1756:1214#0/1  
ATCAAGGAATGGGGCATCACCCAATCCATTGTCTGCAAAT  
+HWI-EAS443:3:85:1756:1214#0/1  
ZS]^\_U^VR\_^ZWP]\_]\_TR¥W\_X][^a^P[[TPT[X  
@HWI-EAS443:3:85:1789:775#0/1  
GTCGCTTTCAATCTGTGCCGATTTCTTCAATTAACCACC  
+HWI-EAS443:3:85:1789:775#0/1  
]M^`]Y`^^`]¥ZZ`N]¥[`X`]¥]Y¥\_]TS]\_¥XYZT  
@HWI-EAS443:3:85:180:1345#0/1  
CTAGGCAAAAGATAATAGGCCCTCTTTGCGTGCATTGGA  
+HWI-EAS443:3:85:180:1345#0/1  
a^a^\_aa]^`¥Z¥\_a`\_^[\_a]\_`aS^]\_\_ZSX\_S¥V¥¥S[  
@HWI-EAS443:3:85:181:1498#0/1  
AGAACTGTGATGAGAATGGGAGACCTTCACTACCTCCAG  
+HWI-EAS443:3:85:181:1498#0/1  
^aZS^ZJZXVX¥^`^]R]^]V`\_ZW^[¥W[^]S]YV\_  
@HWI-EAS443:3:85:198:1895#0/1  
GAGAACTGTGATGAGAATGGGAGACCTTCACTACCTCCA  
+HWI-EAS443:3:85:198:1895#0/1  
[b[b^ababYb`a]aaa]aaaa`aa`^^`a\_aa`\_a`\_  
@HWI-EAS443:3:85:222:1993#0/1  
TGAGAATGGGAGACCTTCACTACCTCCAGAGCAGAAATGA  
+HWI-EAS443:3:85:222:1993#0/1  
VG[\_[a\_\_`aUQ¥aba\_a^aab]\_¥\_]¥aVSM][a`Q^]  
@HWI-EAS443:3:85:236:533#0/1  
GAGGGAGCAATAGTTGGAGAAATTTACCATTACCTTCTC  
+HWI-EAS443:3:85:236:533#0/1  
`^aaa\_aaaaaa\_\_aaa\_^^aaa\_]\_`a`^^aa`\_`\_`\_`\_  
@HWI-EAS443:3:85:283:615#0/1  
GTTTCCTTTGGCATATCCGCAAGCGATTTGCAGACAATGG  
+HWI-EAS443:3:85:283:615#0/1  
a\_¥\_W¥U[S]UUX`¥ZX[V[WHHXLUMVY¥VW\_UUURU¥W  
@HWI-EAS443:3:85:319:1601#0/1  
ATGTCAGAAAGGTAGCGGAAGTAGGTACAGATGCAATTG  
+HWI-EAS443:3:85:319:1601#0/1  
aY\_abb]Ua\_WX[aa`\_]`^b\_ab¥V[bbaaa`bba`\_]`  
@HWI-EAS443:3:85:332:439#0/1  
GTCGCTTTCAATCTGTGCCGATTTCTTCAATTAACCACC  
+HWI-EAS443:3:85:332:439#0/1  
aX`\_\_N` [HUYSQ`U]¥X]X\_]UQZUW^U]S]ZWW]JYH  
@HWI-EAS443:3:85:370:310#0/1  
GATGAGAATGGGAGACCTTCACTACCTCCAGAGCAGAAAT  
+HWI-EAS443:3:85:370:310#0/1  
aaa¥[\_`\_`aab^`a^]a\_^`aa`a¥¥[\_`\_`a¥^`^\_SO[\_`  
@HWI-EAS443:3:85:373:1018#0/1  
TCTGTCGCTTTCAATCTGTGCCGATTTCTTCAATTAACC  
+HWI-EAS443:3:85:373:1018#0/1  
T^\_]a`]V]]\_¥^Z[\_]G`\_]XX¥`aa]a\_¥\_V]Tba``

@HWI-EAS443:3:85:429:420#0/1  
GAGAACTGTGATGAGAATGGGAGACCTTCACTACCTCCA  
+HWI-EAS443:3:85:429:420#0/1  
a^b[aa^ab^a¥aa`b\_`aa`\_]`ZY[``\_`V\_a]Z]V\_^  
@HWI-EAS443:3:85:433:1721#0/1  
AGAAACTGTGATGAGAATGGGAGACCTTCACTACCTCCAG  
+HWI-EAS443:3:85:433:1721#0/1  
YOU¥¥bV[MUUV^a¥X]QH]ZZ`V\_`aa]\_NYR^]¥aaZT  
@HWI-EAS443:3:85:443:807#0/1  
CGCATTCTTCAATTAACCACCTTATTTCTCAAATTTCT  
+HWI-EAS443:3:85:443:807#0/1  
ababbaaababa¥aa\_`aaaaaa`aaaaaaaaaaa`aaa  
@HWI-EAS443:3:85:443:937#0/1  
TGCGGCACAGATTGAAAGCGACAGAGAATAGTTTCGAACA  
+HWI-EAS443:3:85:443:937#0/1  
TXZa¥ZYabaSSVa¥\_`Z^^a^aa[`XM]^`TI^VHP[\_T  
@HWI-EAS443:3:85:450:1073#0/1  
GATGAGAATGGGAGACCTTCACTACCTCCAGAGCAGAAAT  
+HWI-EAS443:3:85:450:1073#0/1  
[^^abaa\_a^^aa]\_bababaab`aba\_`baaaaa\_aYa  
@HWI-EAS443:3:85:47:1556#0/1  
GGAGAACTGTGATGAGAATGGGAGACCTTCACTACCTCC  
+HWI-EAS443:3:85:47:1556#0/1  
\_aa¥ZX`b`a\_a\_\_\_\_\_S¥\_\_\_a^a\_[]`¥]\_`\_]`]]Y\_  
@HWI-EAS443:3:85:519:853#0/1  
GCCGCATTCTTCAATTAACCACCTTATTTCTCAAATTT  
+HWI-EAS443:3:85:519:853#0/1  
`aabaaaa`a\_`a`aaa`\_`\_a\_a`^aaa\_\_`^^`^^  
@HWI-EAS443:3:85:540:1669#0/1  
TGAGAATGGGAGACCTTCACTACCTCCAGAGCAGAAATGA  
+HWI-EAS443:3:85:540:1669#0/1  
a`a\_aabaaaaaaaaaaaaabaa```a\_\_\_\_\_a```a  
@HWI-EAS443:3:85:572:612#0/1  
GTCGCTTTCAATCTGTGCCGATTTCTTCAATTAACCACC  
+HWI-EAS443:3:85:572:612#0/1  
a^`Z`a```\_`\_W\_`a`[\_`\_W\_`a`^a`\_^]`^]X  
@HWI-EAS443:3:85:57:1018#0/1  
AAACTGTGATGAGAATGGGAGACCTTCACTACCTCCAGAG  
+HWI-EAS443:3:85:57:1018#0/1  
\_]Za`a]aa\_`[`a`]]`a¥aYZ]]\_a\_^^\_¥[]\_\_\_\_^¥Y  
@HWI-EAS443:3:85:593:760#0/1  
GTCGCTTTCAATCTGTGCCGATTTCTTCAATTAACCACC  
+HWI-EAS443:3:85:593:760#0/1  
aaaaa`abaaaaa\_a\_aa`aa\_a`^`a`^^`\_aaa`\_`\_\_\_\_  
@HWI-EAS443:3:85:623:1247#0/1  
GCCGCATTCTTCAATTAACCACCTTATTTCTCAAATTT  
+HWI-EAS443:3:85:623:1247#0/1  
]bbb`ababbbbbbaabbabaabbbbab`abab¥¥bba  
@HWI-EAS443:3:85:631:198#0/1  
AGAAACTGTGATGAGAATGGGAGACCTTCACTACCTCCAG





@HWI-EAS443:3:85:903:263#0/1  
GAAACTGTGATGAGAATGGGAGACCTTCACTACCTCCAGA  
+HWI-EAS443:3:85:903:263#0/1  
aa[a`aa\_a`aa`a^`aa`\_a^^^X`^`\_^`\_`^X^`]  
@HWI-EAS443:3:85:929:1751#0/1  
GAAACTGTGATGAGAATGGGAGACCTTCACTACCTCCAGA  
+HWI-EAS443:3:85:929:1751#0/1  
^b\_Q^bb^baa]``aaaaaaaa[a``abaa``\_\_aaaa\_  
@HWI-EAS443:3:85:939:1440#0/1  
GGAGAACTGTGATGAGAATGGGAGACCTTCACTACCTCC  
+HWI-EAS443:3:85:939:1440#0/1  
a`abbabb`YW\_aabab\_aaaa\_^\_H\_[a``a^\_\_a\_\_`R  
@HWI-EAS443:3:85:983:198#0/1  
AGAACTGTGATGAGAATGGGAGACCTTCACTACCTCCAG  
+HWI-EAS443:3:85:983:198#0/1  
ab\_\_babbb\_]a\_Na``bba\_aa\_]\_\_aaa\_^a]\_\_\_\_`a  
@HWI-EAS443:3:85:990:1980#0/1  
GACAGAAATTTGAGGAAATAAGGTGGTAAATTGAAGAAAT  
+HWI-EAS443:3:85:990:1980#0/1  
aYS`RW^Z^\_^¥^b\_Sa\_b\_\_a`PY`S\_aUWXaa¥a[a`W  
@HWI-EAS443:3:86:1011:479#0/1  
GTCGCTTCAATCTGTGCCGATTTCTTCAATTAACCACC  
+HWI-EAS443:3:86:1011:479#0/1  
a¥`aa``aaaaaaaa\_aa`a\_``aa\_aa``]aaa`^W^]V  
@HWI-EAS443:3:86:1015:245#0/1  
AGAGATTCGCTTGGAGAACTGTGATGAGAATGGGAGACC  
+HWI-EAS443:3:86:1015:245#0/1  
a`ab]aa\_baa\_ab`aa`\_[aa]a[][[a^\_Z\_a`ZZPLU  
@HWI-EAS443:3:86:1036:1416#0/1  
GAAAGAGGAATCCAGCGAGACACTTAGAATGACAATTGCA  
+HWI-EAS443:3:86:1036:1416#0/1  
\_aaabbb\_`aba\_aaaaababaaaa`abbbaabab^]P`  
@HWI-EAS443:3:86:1077:1652#0/1  
GGAGAACTGTGATGAGAATGGGAGACCTTCACTACCTCC  
+HWI-EAS443:3:86:1077:1652#0/1  
`aab`babbbYbbbaaaaaab^U`^RZaa`ba`a`^a\_\_  
@HWI-EAS443:3:86:1106:414#0/1  
CGCATTTCTTCAATTAACCACCTTATTTCTCAAATTTCT  
+HWI-EAS443:3:86:1106:414#0/1  
abbabbbbbbabbbbbba\_]abbbbbabbabb`bbbbbb  
@HWI-EAS443:3:86:1158:77#0/1  
GCCGATTTCTTCAATTAACCACCTTATTTCTCAAATTT  
+HWI-EAS443:3:86:1158:77#0/1  
Y¥bb¥^`bbbbbaabababZ``\_\_ab`bbbaabaa¥bab  
@HWI-EAS443:3:86:1208:380#0/1  
ATGAGAATGGGAGACCTTCACTACCTCCAGAGCAAATG  
+HWI-EAS443:3:86:1208:380#0/1  
N`\_aWa\_b`aabb]`ab`[^aab`\_RPabaa^Mb^`a\_a  
@HWI-EAS443:3:86:1239:445#0/1  
AACAAATCGTGAATGGATCTTGAAGAGGAATCCAGCGA

+HWI-EAS443:3:86:1239:445#0/1  
aaabba`^ab`a`[`bb]`\_b`````\_aaaba`a^¥aUM`¥  
@HWI-EAS443:3:86:1270:735#0/1  
GGAGAACTGTGATGAGAATGGGAGACCTTCACTACCTCC  
+HWI-EAS443:3:86:1270:735#0/1  
ab[baaaab¥[a\_aa\_baaaaa^[W\_\_``\_\_]`\_\_0\_¥Z  
@HWI-EAS443:3:86:1295:227#0/1  
CACAGATTGAAAGCGACAGAGAATAGTTTCGAACAAATAA  
+HWI-EAS443:3:86:1295:227#0/1  
\_Yaab]R]baa\_^a`Kbbb\_bbYbabYabaa`U]bb^Vba  
@HWI-EAS443:3:86:1299:1087#0/1  
CGCTTGGAGAACTGTGATGAGAATGGGAGACCTTCACTA  
+HWI-EAS443:3:86:1299:1087#0/1  
abbbabbbbabbbbabbbbabbbbabbbbabb`b]bb  
@HWI-EAS443:3:86:1301:646#0/1  
AGAACTGTGATGAGAATGGGAGACCTTCACTACCTCCAG  
+HWI-EAS443:3:86:1301:646#0/1  
abaababb`baaaaaabaa\_`Laa[Z`V`[``ZU]U[\_\_\_  
@HWI-EAS443:3:86:1317:220#0/1  
TGAGAATGGGAGACCTTCACTACCTCCAGAGCAGAAATGA  
+HWI-EAS443:3:86:1317:220#0/1  
abaaa\_baba¥a\_\_^aa\_`Ta`TUa¥U\_a\_`S\_a^\_¥¥a\_  
@HWI-EAS443:3:86:1331:1789#0/1  
AGAACTGTGATGAGAATGGGAGACCTTCACTACCTCCAG  
+HWI-EAS443:3:86:1331:1789#0/1  
]0¥`U`aS¥aaaYS\_[`a`[aa`[[`aXa][a¥TYSM`\_  
@HWI-EAS443:3:86:1341:569#0/1  
GATGAGAATGGGAGACCTTCACTACCTCCAGAGCAGAAAT  
+HWI-EAS443:3:86:1341:569#0/1  
a`a^`U[bbbZ¥a¥^QX^J¥XV[XQX[[`aY`UZaVZ^\_  
@HWI-EAS443:3:86:1352:871#0/1  
GAAATATACAGAGATTCGCTTGGAGAACTGTGATGAGA  
+HWI-EAS443:3:86:1352:871#0/1  
a[OPaaaa\_Z]a^a\_a^Z[[`]aQ]\_YHZ\_]\_Qa]`]Z\_Z  
@HWI-EAS443:3:86:1425:353#0/1  
CTCGTGACATTTCTCGAGGGTCATGTCAGAAAGGTAGCG  
+HWI-EAS443:3:86:1425:353#0/1  
\_a]^XaUZ`]aa`aa`baaaa¥[\_\_a¥TZa`\_]a]¥\_`Qa  
@HWI-EAS443:3:86:1469:275#0/1  
GAACTGTGATGAGAATGGGAGACCTTCACTACCTCCAGA  
+HWI-EAS443:3:86:1469:275#0/1  
Y\_0\_`[a\_baaa^b\_aaaaYWa`U^a\_]`^\_aUO\_XR^AY  
@HWI-EAS443:3:86:1485:951#0/1  
TGCCGCATTTCTTCAATTAACCACCTTATTTCTCAAATT  
+HWI-EAS443:3:86:1485:951#0/1  
\_bZ]W\_a^a]^`Z^\_\_\_][a]\_XTN\_\_\_a]aU\_\_Z\_]``¥  
@HWI-EAS443:3:86:1540:132#0/1  
AGGCAACACCCTTGGCCTCGATATCGAAACAGCCACTCTT  
+HWI-EAS443:3:86:1540:132#0/1  
a\_\_\_aa]b][MY]a^S`ZSa``aXL[\_VBBBBBBBBBBBB

@HWI-EAS443:3:86:1542:536#0/1  
CGCATTCTTCAATTAACCACCTTATTTCCCTCAAATTTCT  
+HWI-EAS443:3:86:1542:536#0/1  
ab`\_^Z[¥[XX\_\_aa`^TZ\_RW[``¥a`YU¥W\_OT`^Zaa  
@HWI-EAS443:3:86:1602:544#0/1  
GCCGCATTTCTTCAATTAACCACCTTATTTCCCTCAAATTT  
+HWI-EAS443:3:86:1602:544#0/1  
\_I`]\_aba`Waa``aaa[[JZaGGRaaba`YSb^^^]a``  
@HWI-EAS443:3:86:1635:839#0/1  
CAGAAAGGTAGCGGAAGTAGGTACAGATGCAATTGTCAT  
+HWI-EAS443:3:86:1635:839#0/1  
`aU````]`Paa\_aba`aaJaa\_Z`^aaa`aZXXaaaZ[\_Y  
@HWI-EAS443:3:86:1640:287#0/1  
GAAAGCTCTTATCTCTTGTCTACTTCAAGCAGTAGTTGT  
+HWI-EAS443:3:86:1640:287#0/1  
a`aab)``baab\_babbb^a[a`\_aa^a\_\_^¥a`^`^`a\_  
@HWI-EAS443:3:86:1645:975#0/1  
TGAGAATGGGAGACCTTCACTACCTCCAGAGCAGAAATGA  
+HWI-EAS443:3:86:1645:975#0/1  
`a`b\_¥abbbabaa`aaZ\_]`YRS``¥[aa^X]aVa¥a^¥  
@HWI-EAS443:3:86:164:1067#0/1  
GCCGCATTTCTTCAATTAACCACCTTATTTCCCTCAAATTT  
+HWI-EAS443:3:86:164:1067#0/1  
`\_`b\_^Wa`a\_^UJP`^a]¥R`aa`Z\_\_VT\_\_aZUYQ^Q^  
@HWI-EAS443:3:86:1650:896#0/1  
GAGAAACTGTGATGAGAATGGGAGACCTTCACTACCTCCA  
+HWI-EAS443:3:86:1650:896#0/1  
`aa^baab`G`aaa\_a\_a^a^Y^\_\_0[\_^XaYa\_ZV^0]^  
@HWI-EAS443:3:86:1664:1048#0/1  
GCCGCATTTCTTCAATTAACCACCTTATTTCCCTCAAATTT  
+HWI-EAS443:3:86:1664:1048#0/1  
``Y^^[S^^[[P[`Z^aaWLTVHP\_b`YLR]Q[`\_a`P  
@HWI-EAS443:3:86:1698:1196#0/1  
GCCGCATTTCTTCAATTAACCACCTTATTTCCCTCAAATTT  
+HWI-EAS443:3:86:1698:1196#0/1  
aTDXXVV\_]ZWWW\_JZXY]LSTSSY\_[`P¥^U\_XWPTZ^^  
@HWI-EAS443:3:86:1755:65#0/1  
AGAAACTGTGATGAGAATGGGAGACCTTCACTACCTCCAG  
+HWI-EAS443:3:86:1755:65#0/1  
abaab`a`\_`baa`aa`abaaa¥a^WZaa]aX``YW`VY^Z  
@HWI-EAS443:3:86:1761:1881#0/1  
GTGCGTTTCAATCTGTGCCGATTTCTTCAATTAACCACC  
+HWI-EAS443:3:86:1761:1881#0/1  
]FX]^V^¥V[``][^S\_^WWYTMP^`O^UMPOV[XVM[Y[Z  
@HWI-EAS443:3:86:181:984#0/1  
CAGCGAGACACTTAGAATGACAATTGCATCTGTACCTACT  
+HWI-EAS443:3:86:181:984#0/1  
aababbbaabbbbabaabaa\_abaaa`aaaa\_a`a`a\_a  
@HWI-EAS443:3:86:189:1059#0/1  
TGTCGCTTTCAATCTGTGCCGATTTCTTCAATTAACCAC

+HWI-EAS443:3:86:189:1059#0/1  
Xba^aaVZ\_a\_aaYY^[ZQ^aaa^^¥¥aa^]`aa`aa\_`]  
@HWI-EAS443:3:86:242:127#0/1  
CGCATTCTTCAATTAACCACCTTATTTCTCAAATTTCT  
+HWI-EAS443:3:86:242:127#0/1  
aba\_bbbbbbabbbbaabaabaabbb`abbbabbaab  
@HWI-EAS443:3:86:246:1242#0/1  
GCCGCATTCTTCAATTAACCACCTTATTTCTCAAATTT  
+HWI-EAS443:3:86:246:1242#0/1  
aa\_aaT\_````\_`^Y````]^\_a`\_a`\_`^]]^`\_^\_¥\_\_\_\_  
@HWI-EAS443:3:86:262:634#0/1  
GCGGCACAGATTGAAAGCGACAGAGAATAGTTTCGAACAA  
+HWI-EAS443:3:86:262:634#0/1  
aaaa`OQ\_]VW\_TOT\_^`VT[aWaRUPXTOXPP^VYVSX  
@HWI-EAS443:3:86:26:1583#0/1  
CTTTCAGGTAGACTGTTTCCTTTGGCATATCCGCAAGCGA  
+HWI-EAS443:3:86:26:1583#0/1  
abbbb`abab`\_bbbbbaabbbbababbbbaabb`\_aaa  
@HWI-EAS443:3:86:275:1050#0/1  
CGCTTGGAGAACTGTGATGAGAATGGGAGACCTTCACTA  
+HWI-EAS443:3:86:275:1050#0/1  
a^aZ^`XTR`aTHW\_V^Z]aa`a[aR][Ta^]UVLMXZ^  
@HWI-EAS443:3:86:308:213#0/1  
GAACCAGTCTCGTGACATTTCTCGAGGGTCATGTCAGAA  
+HWI-EAS443:3:86:308:213#0/1  
\_aaabab\_aaaaZ````^````\_`[\_V``\_V[W\_`TUR^Y¥  
@HWI-EAS443:3:86:328:1506#0/1  
GTGATGAGAATGGGAGACCTTCACTACCTCCAGAGCAGAA  
+HWI-EAS443:3:86:328:1506#0/1  
[a\_YZ[\_ZT[`¥¥¥]`XXa¥Z\_]XaV\_Y\_\_XLMYVXQFU  
@HWI-EAS443:3:86:344:1526#0/1  
TTACACTGAAGTTCGCTTTCAGTACTATGTTCTTTTCCAT  
+HWI-EAS443:3:86:344:1526#0/1  
a)`\_b`aa`aa]H]aaaaZWV^[aa\_]`]]\_`\_^Z^^Y\_G  
@HWI-EAS443:3:86:349:454#0/1  
CGCTTGGAGAACTGTGATGAGAATGGGAGACCTTCACTA  
+HWI-EAS443:3:86:349:454#0/1  
]ba]abb````\_aa`a^a¥aa\_`V]aaaaYa[````^a]]`  
@HWI-EAS443:3:86:34:1540#0/1  
CCGCATTTCTTCAATTAACCACCTTATTTCTCAAATTTCT  
+HWI-EAS443:3:86:34:1540#0/1  
aaYQH^a`]aQQ[aRWY^aaa`]PP\_\_a¥U\_`[RU`]R]  
@HWI-EAS443:3:86:362:574#0/1  
CTTGGAGAACTGTGATGAGAATGGGAGACCTTCACTACC  
+HWI-EAS443:3:86:362:574#0/1  
aa``bbbbbbabb\_a`ababaabba``baaaaa`aaaaXD  
@HWI-EAS443:3:86:366:1416#0/1  
AGAAACTGTGATGAGAATGGGAGACCTTCACTACCTCCAG  
+HWI-EAS443:3:86:366:1416#0/1  
aa\_aY\_] [Y^V] [Z\_\_`\_\_^^R^^^WZ^^` [^^WWW[^Y

@HWI-EAS443:3:86:381:1803#0/1  
GAAACTGTGATGAGAATGGGAGACCTTCACTACCTCCAGA  
+HWI-EAS443:3:86:381:1803#0/1  
a\_`baba`abaa`a^baaaa\_`\_`^`\_aaaaa^^\_a]`a`  
@HWI-EAS443:3:86:400:1526#0/1  
GCGCGAAGTAGGTACAGATGCAATTGTCATTCTAAGTGTC  
+HWI-EAS443:3:86:400:1526#0/1  
^`\_a\_^[aY¥¥XSbb\_`aa`ab]\_aa]a`aaaa`aa]a`a  
@HWI-EAS443:3:86:422:1020#0/1  
CGCTTGGAGAACTGTGATGAGAATGGGAGACCTTCACTA  
+HWI-EAS443:3:86:422:1020#0/1  
aUXaSZ[R^PV]\_¥a]\_LSa^VR[RRQNR[WSZBBBBBBB  
@HWI-EAS443:3:86:424:1119#0/1  
CCGCATTTCTTCAATTAACCACCTTATTTCCCTCAAATTC  
+HWI-EAS443:3:86:424:1119#0/1  
¥`¥¥a^aaa¥a\_]¥`¥a^ab\_\_a`Yaa[\_abaa¥¥aaab  
@HWI-EAS443:3:86:448:1489#0/1  
GCCGCATTTCTTCAATTAACCACCTTATTTCCCTCAAATTT  
+HWI-EAS443:3:86:448:1489#0/1  
`aa`b¥¥`ab`ab\_aa\_b]U]aa[aaaa`aa\_\_a[Y`b`a  
@HWI-EAS443:3:86:448:1525#0/1  
TGCCGCATTTCTTCAATTAACCACCTTATTTCCCTCAAATT  
+HWI-EAS443:3:86:448:1525#0/1  
\_U`abaSaaa\_a^b```aaa\_aaaaaaaa`aa`\_^^Y)`\_`  
@HWI-EAS443:3:86:451:607#0/1  
GAGAACTGTGATGAGAATGGGAGACCTTCACTACCTCCA  
+HWI-EAS443:3:86:451:607#0/1  
aaa`aa\_aa\_a^\_a^a\_¥a`aaW\_^]\_^\_^^\_Y^]¥]]  
@HWI-EAS443:3:86:459:851#0/1  
GAAACTGTGATGAGAATGGGAGACCTTCACTACCTCCAGA  
+HWI-EAS443:3:86:459:851#0/1  
a¥¥abab]ba^\_Z^X`aaaa[a\_`\_\_V^`XaY\_\_[^`\_`]  
@HWI-EAS443:3:86:503:1418#0/1  
TGCCGCATTTCTTCAATTAACCACCTTATTTCCCTCAAATT  
+HWI-EAS443:3:86:503:1418#0/1  
`bbaa`Y`b)`abba\_]`[^`ba^`b`aa]\_aba¥)`]  
@HWI-EAS443:3:86:507:1933#0/1  
CACAGATTGAAAGCGACAGAGAATAGTTTTCGAACAAATAA  
+HWI-EAS443:3:86:507:1933#0/1  
``bbb`b¥S\_`a\_\_]]`\_Z`^`^`VT\_a^a]bb\_]\_`aa  
@HWI-EAS443:3:86:584:152#0/1  
GTCGCTTTCAATCTGTGCCGCATTTCTTCAATTAACCACC  
+HWI-EAS443:3:86:584:152#0/1  
a^abbaaaaa`aa`aa\_`^\_a¥¥a`a]a\_\_`\_a\_`^[[]^  
@HWI-EAS443:3:86:600:1890#0/1  
CTGAAAATATACAGAGATTCGCTTGGAGAACTGTGATGA  
+HWI-EAS443:3:86:600:1890#0/1  
\_]¥¥Y¥WZaP¥[aTa][TP]aa[J[^ZRX[^VVUS]\_0]I  
@HWI-EAS443:3:86:606:122#0/1  
GCCGCATTTCTTCAATTAACCACCTTATTTCCCTCAAATTT

+HWI-EAS443:3:86:606:122#0/1  
aa`¥W[T]a]XP`XVYHRXZZ]TWYYWQT[¥]]ZQTWWWWW  
@HWI-EAS443:3:86:628:746#0/1  
GATGAGAATGGGAGACCTTCACTACCTCCAGAGCAGAAAT  
+HWI-EAS443:3:86:628:746#0/1  
^^bbb\_`^]a¥ZT¥aaaaaaaa\_]`]]aaU\_T\_]V`[[T\_  
@HWI-EAS443:3:86:662:1079#0/1  
GTCGCTTTCAATCTGTGCCGATTTCTTCAATTAACCACC  
+HWI-EAS443:3:86:662:1079#0/1  
`a```aaaabaa`a]\_ba\_a\_```aaa`a\_```a`aaa^`\_^  
@HWI-EAS443:3:86:667:495#0/1  
CAGAGATTCGCTTGGAGAACTGTGATGAGAATGGGAGAC  
+HWI-EAS443:3:86:667:495#0/1  
aba`]Zbaaa`a`^aaba`a`aaRb\_aX`aZ\_[[\_]TKJW  
@HWI-EAS443:3:86:673:177#0/1  
TGAAAATATACAGAGATTCGCTTGGAGAACTGTGATGAG  
+HWI-EAS443:3:86:673:177#0/1  
ab`aaaaaaaaa\_a^`\_\_`\_\_\_[UU\_]\_^`^`Z`^]\_Z^  
@HWI-EAS443:3:86:682:575#0/1  
GAAAGCTCTTATCTCTTGTCTACTTCAAGCAGTAGTTGT  
+HWI-EAS443:3:86:682:575#0/1  
aZ]MZ¥aa```aaaa`aaa¥[``]]Z```^aXaa¥a¥`a^[YO  
@HWI-EAS443:3:86:694:1623#0/1  
GTGATGAGAATGGGAGACCTTCACTACCTCCAGAGCAGAA  
+HWI-EAS443:3:86:694:1623#0/1  
a[``[a\_R```^`\_^\_`a\_\_\_```^`^^`\_\_`Z]^^^X]^YX  
@HWI-EAS443:3:86:696:613#0/1  
GAGAACTGTGATGAGAATGGGAGACCTTCACTACCTCCA  
+HWI-EAS443:3:86:696:613#0/1  
abbb`babb]b`aaaaaa\_\_a\_\_a`\_\_```aa\_`a^\_\_]\_\_  
@HWI-EAS443:3:86:722:1580#0/1  
GCCGATTTCTTCAATTAACCACCTTATTTCCCTCAAATTT  
+HWI-EAS443:3:86:722:1580#0/1  
^^¥¥`bbb\_[b\_b¥X^ba\_\_Z¥aba¥a`\_^`\_aaabaaaa  
@HWI-EAS443:3:86:732:497#0/1  
GAGAATGGGAGACCTTCACTACCTCCAGAGCAGAAATGAA  
+HWI-EAS443:3:86:732:497#0/1  
a`a[``]^aaa\_Z\_\_\_aa\_`\_^[[`Y\_^X`[^\_^YQZZZP  
@HWI-EAS443:3:86:749:970#0/1  
AAACTGTGATGAGAATGGGAGACCTTCACTACCTCCAGAG  
+HWI-EAS443:3:86:749:970#0/1  
]¥SZabba[aaa`\_Ybbbaaa^`aa]aaYa¥V\_a`aaa\_a  
@HWI-EAS443:3:86:778:466#0/1  
GATGAGAATGGGAGACCTTCACTACCTCCAGAGCAGAAAT  
+HWI-EAS443:3:86:778:466#0/1  
aa`\_[\_HU^aWZ]\_U\_\_\_^YZ^Ta[ZYYY`¥[aZ]¥UY\_\_  
@HWI-EAS443:3:86:838:441#0/1  
AACACGGTTCGAGTCTCTGAAAATATACAGAGATTCGCTT  
+HWI-EAS443:3:86:838:441#0/1  
a\_aaaa¥¥a`^X[X^\_aZQW]W]aa\_¥SW\_W]P[ZS`NTT

@HWI-EAS443:3:86:861:1377#0/1  
GAGAATGGGAGACCTTCACTACCTCCAGAGCAGAAATGAA  
+HWI-EAS443:3:86:861:1377#0/1  
]U`^b`[^¥]a`ba`b^]`baaaaaY`^b]VT¥`^aa`  
@HWI-EAS443:3:86:868:1776#0/1  
GAAACTGTGATGAGAATGGGAGACCTTCACTACCTCCAGA  
+HWI-EAS443:3:86:868:1776#0/1  
OYa`^b¥`\_^`W`¥bbbK¥^^\_a[T`abY`^PI\_ba\_JQ  
@HWI-EAS443:3:86:934:282#0/1  
TGCCGCATTTCTTCAATTAACCACCTTATTTCTCAAATT  
+HWI-EAS443:3:86:934:282#0/1  
aba]a`abbbaaaaa[`bbaaaba]bbaaba[^`\_b`aaa  
@HWI-EAS443:3:86:940:193#0/1  
GAAACAAATCGTGAATGGATCTTGAAGAGGAATCCAGC  
+HWI-EAS443:3:86:940:193#0/1  
]¥aabaa\_[I^U^]V¥¥aT[aY^bba`\_bbt¥\_]HSSZJ  
@HWI-EAS443:3:86:94:1689#0/1  
TGAGAATGGGAGACCTTCACTACCTCCAGAGCAGAAATGA  
+HWI-EAS443:3:86:94:1689#0/1  
a`Z[[[]aa`¥¥aab[`]aa\_aaaY^X^\_\_^^]\_]VR]`¥  
@HWI-EAS443:3:86:954:1042#0/1  
CTCCCATTCTCATCACAGTTTCTCCAAGCGAATCTCTGTA  
+HWI-EAS443:3:86:954:1042#0/1  
]¥a¥T`H\_X¥`U`U^\_Jb`V]aa[Y^¥NJ]`TZR]aJ]  
@HWI-EAS443:3:86:99:1046#0/1  
GTCTCTGAAAATATACAGAGATTTCGCTTGGAGAACTGTG  
+HWI-EAS443:3:86:99:1046#0/1  
a\_b]a\_a]aaa¥\_\_`a\_\_VWTW^¥`^]W\_ZQO]\_¥^\_¥YN  
@HWI-EAS443:3:87:1012:1488#0/1  
AGCGCGAAGTAGGTACAGATGCAATTGTCATTCTAAGTGT  
+HWI-EAS443:3:87:1012:1488#0/1  
`b\_]aaaa\_a`a`b`aa`\_aa`\_aaa\_[aa`U`\_a\_a`  
@HWI-EAS443:3:87:1018:247#0/1  
AACTGTGATGAGAATGGGAGACCTTCACTACCTCCAGAGC  
+HWI-EAS443:3:87:1018:247#0/1  
aa\_``\_ba`b\_a`aaaa\_`\_^]a\_]a^`aZS`]\_]Z  
@HWI-EAS443:3:87:1024:524#0/1  
CCGCATTTCTTCAATTAACCACCTTATTTCTCAAATTTCT  
+HWI-EAS443:3:87:1024:524#0/1  
a`Z`\_bba^a\_Z[\_babaaa```baabaaaaa]XYaaaaa  
@HWI-EAS443:3:87:1026:747#0/1  
GGAGAACTGTGATGAGAATGGGAGACCTTCACTACCTCC  
+HWI-EAS443:3:87:1026:747#0/1  
\_b]\_`^W\_ab\_\_P\_a`ba`aa]b``a`\_a`a\_\_aaZ^aTa  
@HWI-EAS443:3:87:1038:243#0/1  
CGCATTTCTTCAATTAACCACCTTATTTCTCAAATTTCT  
+HWI-EAS443:3:87:1038:243#0/1  
\_`a[`ab`bba[^a^bb^`Qaabaaa[`]aaaaa\_bab  
@HWI-EAS443:3:87:1077:1668#0/1  
GAGAATGGGAGACCTTCACTACCTCCAGAGCAGAAATGAA

+HWI-EAS443:3:87:1077:1668#0/1  
`\_baYaba¥¥`a¥`\_\_`^`b^^¥¥^\_QXbaaaa]a`ba`  
@HWI-EAS443:3:87:1092:1413#0/1  
TGAGAATGGGAGACCTTCACTACCTCCAGAGCAGAAATGA  
+HWI-EAS443:3:87:1092:1413#0/1  
ab`baaabba`aa`\_aaab`ab`\_a\_``a`a^\_a\_`\_aa\_  
@HWI-EAS443:3:87:1111:513#0/1  
CACGGTTCGAGTCTCTGAAAATATACAGAGATTCGCTTGG  
+HWI-EAS443:3:87:1111:513#0/1  
aaabbabbbbabbabbaaabbbbabbabbaaaa^aabb  
@HWI-EAS443:3:87:1179:366#0/1  
TTCTCTGTCGCTTTCAATCTGTGCCGCATTTCTTCAATTA  
+HWI-EAS443:3:87:1179:366#0/1  
ab^aaabaaa]`ba]aa`\_aa^`\_a]aa``]a`W``a``  
@HWI-EAS443:3:87:1220:636#0/1  
GGAGAACTGTGATGAGAATGGGAGACCTTCACTACCTCC  
+HWI-EAS443:3:87:1220:636#0/1  
a\_H]P]PL[aR¥VN]^]`^Q``\_SP^X]]¥]]\_Z]QVUTY  
@HWI-EAS443:3:87:1288:345#0/1  
GAAACTGTGATGAGAATGGGAGACCTTCACTACCTCCAGA  
+HWI-EAS443:3:87:1288:345#0/1  
\_aaba\_bYb\_a]Q]``\_a`0[aa\_\_\_X`\_VRZ^[Y[M[`^  
@HWI-EAS443:3:87:1325:1822#0/1  
AGAACTGTGATGAGAATGGGAGACCTTCACTACCTCCAG  
+HWI-EAS443:3:87:1325:1822#0/1  
aba`a]aa0a^]a[a^^\_]P[R\_\_^G`\_XZHP\_VGUORY\_  
@HWI-EAS443:3:87:1344:353#0/1  
GTCGCTTTCAATCTGTGCCGCATTTCTTCAATTAACCACC  
+HWI-EAS443:3:87:1344:353#0/1  
`VPa\_aU`[UTXV\_b`¥QFX00¥[\_NZ`¥]V¥a[XQNW\_Z  
@HWI-EAS443:3:87:1365:148#0/1  
CACGGTTCGAGTCTCTGAAAATATACAGAGATTCGCTTGG  
+HWI-EAS443:3:87:1365:148#0/1  
aaP`W0]Zbb^¥FR]]]S\_XTaaaa`YXb^a\_R\_0^¥I`  
@HWI-EAS443:3:87:138:1303#0/1  
CCGCATTTCTTCAATTAACCACCTTATTTCCCTCAAATTTCT  
+HWI-EAS443:3:87:138:1303#0/1  
a``a`aaaa`aaaa`Y`a`[``a`^`\_```\_aaa\_`\_\_\_\_  
@HWI-EAS443:3:87:1405:1492#0/1  
GAAACTGTGATGAGAATGGGAGACCTTCACTACCTCCAGA  
+HWI-EAS443:3:87:1405:1492#0/1  
`[aaa`K]babbybabba[a^\_\_aaa\_^b`aYa`\_]aaaa  
@HWI-EAS443:3:87:1408:1358#0/1  
CTATTATCTTTTGCCTAGGCATGAGCATGAACCAGTCTCG  
+HWI-EAS443:3:87:1408:1358#0/1  
W¥a^\_Xb]¥a``b\_a^abU\_aba`aa\_bbab\_b[a]\_aab  
@HWI-EAS443:3:87:1452:1855#0/1  
CGCATTTCTTCAATTAACCACCTTATTTCCCTCAAATTTCT  
+HWI-EAS443:3:87:1452:1855#0/1  
aa\_bbbbbbbabbabbbba\_ba^bbbbbbababJb\_bbbbab



@HWI-EAS443:3:87:1477:1042#0/1  
ATCGGTTAAAGATTACACTGAAGTTCGCTTTCAGTACTAT  
+HWI-EAS443:3:87:1477:1042#0/1  
^aabba\_Zab\_^`a\_¥]]Z`W^a\_\_W]^`a` [Ya\_]W\_^`  
@HWI-EAS443:3:87:1480:991#0/1  
CTGTGCCGATTCTTCAATTAACCACCTTATTTCTCAA  
+HWI-EAS443:3:87:1480:991#0/1  
Va]Q)`¥aaa`\_b\_\_b¥babbbbaaaTG\_b`\_bb^M¥a]\_  
@HWI-EAS443:3:87:1519:1210#0/1  
CCGATGAGGACCCCAACTGCATTTTTGACATCCTCATAAG  
+HWI-EAS443:3:87:1519:1210#0/1  
`S¥^ab`\_SYW0¥W¥]ZabZ`bab`\_¥\_Z¥\_]Ka]]b`\_\_  
@HWI-EAS443:3:87:1544:904#0/1  
GTGCCGATTCTTCAATTAACCACCTTATTTCTCAAAT  
+HWI-EAS443:3:87:1544:904#0/1  
a`]M¥`QR^aXHZXW¥^)`^[[\_ZUUa`^a\_`[¥V¥W`]^a  
@HWI-EAS443:3:87:1574:447#0/1  
CTGAAACGAGAAAGCTCTTATCTCTTGTCTACTTCAAGC  
+HWI-EAS443:3:87:1574:447#0/1  
`\_^\_b`a`\_a\_b\_aa\_¥\_a`\_a\_bbaaabbbaT`aba^b`Z  
@HWI-EAS443:3:87:1584:981#0/1  
GAATGGGAGACCTTCACTACCTCCAGAGCAGAAATGAAAA  
+HWI-EAS443:3:87:1584:981#0/1  
aa`abaaaa¥¥ba`b^\_a\_\_aa\_[a¥`Vaa\_a`\_`a`a\_  
@HWI-EAS443:3:87:1609:192#0/1  
AGAAACTGTGATGAGAATGGGAGACCTTCACTACCTCCAG  
+HWI-EAS443:3:87:1609:192#0/1  
¥¥S]Yabba¥\_\_b]\_P][RRX`a\_OLZa][[XWDPNVR¥T  
@HWI-EAS443:3:87:1617:644#0/1  
GAAAATATACAGAGATTCGCTTGGAGAACTGTGATGAGA  
+HWI-EAS443:3:87:1617:644#0/1  
abba`babb`bbab`aaabaaba`a`aa\_aa\_a\_aa^`^  
@HWI-EAS443:3:87:166:1993#0/1  
AGAACTGTGATGAGAATGGGAGACCTTCACTACCTCCAG  
+HWI-EAS443:3:87:166:1993#0/1  
¥^Z]\_ZZNDV][PU][`[W¥UR¥[Z^VVZ]]YZV¥Y^`WW  
@HWI-EAS443:3:87:1705:343#0/1  
CCGCATTTCTTCAATTAACCACCTTATTTCTCAAATTT  
+HWI-EAS443:3:87:1705:343#0/1  
ab^VY`bb^a`P`ab`a[]a]Zaa`^`aaaa`\_aaaI  
@HWI-EAS443:3:87:1781:470#0/1  
GCCGCATTTCTTCAATTAACCACCTTATTTCTCAAATTT  
+HWI-EAS443:3:87:1781:470#0/1  
`S¥X`\_\_`bb`^¥aabaaaaWaaVa\_aaZ`a]aaaba\_Xa  
@HWI-EAS443:3:87:1783:1276#0/1  
ATGAGAATGGGAGACCTTCACTACCTCCAGAGCAGAAATG  
+HWI-EAS443:3:87:1783:1276#0/1  
aa\_Zbaabbba]\_^abaaa\_aa\_\_aa`][a\_\_a\_\_`a  
@HWI-EAS443:3:87:231:1666#0/1  
GAGAACTGTGATGAGAATGGGAGACCTTCACTACCTCCA

+HWI-EAS443:3:87:231:1666#0/1  
a^`aabb`a`\_aaaa\_K\_a]``aa`\_\_^aa\_``\_\_Z]\_`  
@HWI-EAS443:3:87:272:1815#0/1  
GAGAATGGGAGACCTTCACTACCTCCAGAGCAGAAATGAA  
+HWI-EAS443:3:87:272:1815#0/1  
aaa\_YZa^ZaY`a\_^]XU\_K¥aUHH]XVP[\_NYSFVW]Sa  
@HWI-EAS443:3:87:326:1338#0/1  
CCGCATTTCTTCAATTAACCACCTTATTTCTCAAATTTTC  
+HWI-EAS443:3:87:326:1338#0/1  
aabbaa^¥]^¥^VZabY^aa]J^S^bbb^Rab`Zaa\_a^  
@HWI-EAS443:3:87:361:530#0/1  
AGAGGCAACACCCTTGGCCTCGATATCGAAACAGCCACTC  
+HWI-EAS443:3:87:361:530#0/1  
YPUab\_\_V]^¥\_\_]W¥``[Y]aXY`WHYRI[XZ]¥]ZVS]  
@HWI-EAS443:3:87:393:1565#0/1  
TGAGAATGGGAGACCTTCACTACCTCCAGAGCAGAAATGA  
+HWI-EAS443:3:87:393:1565#0/1  
aaaaaa`^`\_`aaa`aabaaaaaa`aaaa\_a\_\_`\_`a`[  
@HWI-EAS443:3:87:396:946#0/1  
GAATGGGAGACCTTCACTACCTCCAGAGCAGAAATGAAAA  
+HWI-EAS443:3:87:396:946#0/1  
a\_aaaa¥[aZ]\_[\_`^¥Z¥0Y¥^`\_¥¥VN[¥\_\_RGX^¥PUTU  
@HWI-EAS443:3:87:39:374#0/1  
TGCCGCATTTCTTCAATTAACCACCTTATTTCTCAAATT  
+HWI-EAS443:3:87:39:374#0/1  
abbbbaV`bbabbb^`aab`aaab`aabbaaaabaaa\_aa  
@HWI-EAS443:3:87:411:1673#0/1  
GTGCGTTTCAATCTGTGCCGATTTCTTCAATTAACCACC  
+HWI-EAS443:3:87:411:1673#0/1  
a\_a^^b]T0\_aabaa]^abYV\_a^\_]^`\_[S\_]`bRaa^a  
@HWI-EAS443:3:87:448:111#0/1  
GCCGCATTTCTTCAATTAACCACCTTATTTCTCAAATTT  
+HWI-EAS443:3:87:448:111#0/1  
aa`L[[WZ\_``aaa\_]P]\_¥T¥[X¥ZMZ]\_\_TP^TDVWZ¥  
@HWI-EAS443:3:87:47:1932#0/1  
GCCGCATTTCTTCAATTAACCACCTTATTTCTCAAATTT  
+HWI-EAS443:3:87:47:1932#0/1  
ab\_Saa\_Q¥baUaa¥^\_Ya`ZXa`YWH[[]^V^a]`¥¥`^  
@HWI-EAS443:3:87:497:1769#0/1  
GAAACTGTGATGAGAATGGGAGACCTTCACTACCTCCAGA  
+HWI-EAS443:3:87:497:1769#0/1  
abbbbab[aba`abaaaa`baaa`[abbaa`a^`a\_`aa  
@HWI-EAS443:3:87:507:343#0/1  
GAGAATGGGAGACCTTCACTACCTCCAGAGCAGAAATGAA  
+HWI-EAS443:3:87:507:343#0/1  
aaa`aaaa\_a`aaa\_aaa\_`a`^\_]`a\_\_\_\_\_aY\_\_¥`¥`  
@HWI-EAS443:3:87:537:59#0/1  
AGAAACTGTGATGAGAATGGGAGACCTTCACTACCTCCAG  
+HWI-EAS443:3:87:537:59#0/1  
aaaaa\_bbS\_[`a\_\_V]\_aa``]`^X^`^^Y]]^^[YX]

@HWI-EAS443:3:87:559:1035#0/1  
GCCGCATTTCTTCAATTAACCACCTTATTTCTCAAATTT  
+HWI-EAS443:3:87:559:1035#0/1  
aaaaa]bbbbbabbbbabbbbbbbaabbbbaabaa`abaa  
@HWI-EAS443:3:87:572:1326#0/1  
GTCTCTGAAAATATACAGAGATTCGCTTGGAGAACTGTG  
+HWI-EAS443:3:87:572:1326#0/1  
aYa\_aa\_`^`a`Y]\_P]¥`[\_[¥[\_^`¥Z^[TZ][SP]  
@HWI-EAS443:3:87:583:635#0/1  
GGCCAAGGGTGTGCCTCTTCTTTTAAGGACTTTTGATC  
+HWI-EAS443:3:87:583:635#0/1  
ababb`a`¥^aabbbbbbabb]b\_baabaaabaab  
@HWI-EAS443:3:87:588:999#0/1  
ATTCTCTGTCGCTTCAATCTGTGCCGCATTTCTTCAATT  
+HWI-EAS443:3:87:588:999#0/1  
abbbabb`[ba\_aaaaaa`a^P¥`\_a][``\_\_aa\_aaa\_  
@HWI-EAS443:3:87:595:938#0/1  
CGAGAAAGCTCTTATCTCTTGTCTACTTCAAGCAGTAGT  
+HWI-EAS443:3:87:595:938#0/1  
aaa^W\_UZ``a[S\_`ZR]\_]a[`ZX\_`Xa^aa^S[^U  
@HWI-EAS443:3:87:624:1323#0/1  
CTGTGCCGCATTTCTTCAATTAACCACCTTATTTCTCAA  
+HWI-EAS443:3:87:624:1323#0/1  
^```bbaa`bbbabbabbbbbbabbabbbbaaabab^  
@HWI-EAS443:3:87:65:1290#0/1  
GTTTCCTTTGGCATATCCGCAAGCGATTTGCAGACAATGG  
+HWI-EAS443:3:87:65:1290#0/1  
aababba)`aabbaaaaaa\_a`aa`^^aa`\_\_\_a`\_`a¥  
@HWI-EAS443:3:87:664:780#0/1  
CTTGAGAACTGTGATGAGAATGGGAGACCTTCACTACC  
+HWI-EAS443:3:87:664:780#0/1  
aba`a^`[^aaaa`b```aa\_W]aa\_T\_``````\_````\_Z[  
@HWI-EAS443:3:87:69:1039#0/1  
CTCCCATTCTCATCACAGTTTCTCCAAGCGAATCTCTGTA  
+HWI-EAS443:3:87:69:1039#0/1  
aab`YWYO^\_Y]J]^W`^YX^\_Y\_ZXX¥L¥JOWTZ¥WUVZ  
@HWI-EAS443:3:87:707:208#0/1  
GAAACTGTGATGAGAATGGGAGACCTTCACTACCTCCAGA  
+HWI-EAS443:3:87:707:208#0/1  
Ta`b`bb^bb^T^]0]baa\_a]\_\_\_\_\_`aaabaXL]a\_\_ba  
@HWI-EAS443:3:87:746:1421#0/1  
GTTGCCTCTTCTTTTAAGGACTTTTGATCTCGCGGAGC  
+HWI-EAS443:3:87:746:1421#0/1  
`aaaabaaaaaaaaaaaa\_a`\_`aaaaa`a`\_a[\_```XZ  
@HWI-EAS443:3:87:758:287#0/1  
TGCCGCATTTCTTCAATTAACCACCTTATTTCTCAAATT  
+HWI-EAS443:3:87:758:287#0/1  
Y[XS¥^b\_[T`bP\_UWIaZ\_a\_HNRX\_U^`]H)`¥a¥QH  
@HWI-EAS443:3:87:790:52#0/1  
CCGCATTTCTTCAATTAACCACCTTATTTCTCAAATTTCT

+HWI-EAS443:3:87:790:52#0/1  
abaababbbbaa^bbb\_ba¥Z^abbaabaaaa^TWaaaa  
@HWI-EAS443:3:87:801:937#0/1  
AGAAACTGTGATGAGAATGGGAGACCTTCACTACCTCCAG  
+HWI-EAS443:3:87:801:937#0/1  
\_aW`bab`U]`\_`b]b\_\_a`Ta`^]`aa[`aaa]^\_[aa  
@HWI-EAS443:3:87:85:258#0/1  
GTTATTTGTTGCGAACTATTCTCTGTCGCTTTCAATCTGT  
+HWI-EAS443:3:87:85:258#0/1  
`]^¥aaabaaaa\_``aaaaaaaa^\_a`^``¥a\_\_^\_\_]  
@HWI-EAS443:3:87:881:619#0/1  
TGAGAACTGGGAGACCTTCACTACCTCCAGAGCAGAAATGA  
+HWI-EAS443:3:87:881:619#0/1  
`\_aa\_aabaaa]a`abaaaa`aaa\_`aaaa\_aa`\_\_aa\_  
@HWI-EAS443:3:87:950:765#0/1  
ATTCTCTGTCGCTTTCAATCTGTGCCGATTTCTTCAATT  
+HWI-EAS443:3:87:950:765#0/1  
abb`aaaa`\_a`\_ab\_a`\_a^^[aV[^^aaa^`V^\_`  
@HWI-EAS443:3:87:955:574#0/1  
CCGCATTTCTTCAATTAACCACCTTATTTCCCTCAAATTTTC  
+HWI-EAS443:3:87:955:574#0/1  
aaa`\_a`b`a`abbbb^bYXS`S\_b\_ab`LXZ`^`aaaa`  
@HWI-EAS443:3:87:98:1363#0/1  
GGAAGAGGCAACACCCTTGGCCTCGATATCGAAACAGCCA  
+HWI-EAS443:3:87:98:1363#0/1  
ab]bbb\_bbb`\_Tabb¥¥U[ab`abba`aaaa[Y^`a\_\_\_  
@HWI-EAS443:3:88:1001:1555#0/1  
GGAGAACTGTGATGAGAATGGGAGACCTTCACTACCTCC  
+HWI-EAS443:3:88:1001:1555#0/1  
aba`\_`¥[[]]Laa\_`W]]]X^\_TQ]NN[\_\_\_\_`^^`YX\_UX  
@HWI-EAS443:3:88:1003:1099#0/1  
GGAGAACTGTGATGAGAATGGGAGACCTTCACTACCTCC  
+HWI-EAS443:3:88:1003:1099#0/1  
`\_bbab\_abbababbab`aabbaab^M\_aaaaaaaaa\_a  
@HWI-EAS443:3:88:100:161#0/1  
TGTCGCTTTCAATCTGTGCCGATTTCTTCAATTAACCAC  
+HWI-EAS443:3:88:100:161#0/1  
\_b\_aba\_a`a]`^aa\_N¥a\_`[U\_a¥^\_`^`]^`[\_]a][  
@HWI-EAS443:3:88:1026:1745#0/1  
CTGTGATGAGAATGGGAGACCTTCACTACCTCCAGAGCAG  
+HWI-EAS443:3:88:1026:1745#0/1  
abba`\_]W\_QV`^¥WT^Z]]]a\_`X[\_¥[RXa`]YHSY[  
@HWI-EAS443:3:88:1073:935#0/1  
AGAAACTGTGATGAGAATGGGAGACCTTCACTACCTCCAG  
+HWI-EAS443:3:88:1073:935#0/1  
aba`bab\_aaaa`[\_a\_\_b`bTa]aaaaaaaa]aa`W`a  
@HWI-EAS443:3:88:1096:543#0/1  
ACACGGTTTCGAGTCTCTGAAAATATACAGAGATTCGCTTG  
+HWI-EAS443:3:88:1096:543#0/1  
aaa[¥RXb¥Y]`L[^ZQa`aW`aZa`^aa\_a0a`^`Q\_`a

@HWI-EAS443:3:88:1101:132#0/1  
CGCATTCTTCAATTAACCACCTTATTTCTCAAATTTCT  
+HWI-EAS443:3:88:1101:132#0/1  
\_aa`abbabbaabbb^ba`b\_Ybbbbbb`bbabbbbbb\_b  
@HWI-EAS443:3:88:1111:1143#0/1  
ATGAGAATGGGAGACCTTCACTACCTCCAGAGCAGAAATG  
+HWI-EAS443:3:88:1111:1143#0/1  
`baaa`abbba^aa`ab`]a^aa\_a`]a\_a\_`\_\_a\_aZaa  
@HWI-EAS443:3:88:1117:785#0/1  
CTGTGATGAGAATGGGAGACCTTCACTACCTCCAGAGCAG  
+HWI-EAS443:3:88:1117:785#0/1  
abbabbbbbbabbbbaaab`bbababa\_`b\_abbab^ab  
@HWI-EAS443:3:88:1145:77#0/1  
GGAGAACTGTGATGAGAATGGGAGACCTTCACTACCTCC  
+HWI-EAS443:3:88:1145:77#0/1  
ababaa`\_ab\_a^\_b\_b^`^aa^a\_RV\_aX\_]\_^\_XZ\_UU  
@HWI-EAS443:3:88:1156:1711#0/1  
AAACTGTGATGAGAATGGGAGACCTTCACTACCTCCAGAG  
+HWI-EAS443:3:88:1156:1711#0/1  
aba[baQb`abaa]\_aaa`Ua`[X\_]a]a\_YZ\_^ZS^V[  
@HWI-EAS443:3:88:1196:1032#0/1  
CGAGAAAGCTTCTTCTTCTTCTTCAAGCAGTAGT  
+HWI-EAS443:3:88:1196:1032#0/1  
abaa\_a¥bab\_bbYb`babbb\_baaa`baaaaaa`b\_\_a\_  
@HWI-EAS443:3:88:1211:1119#0/1  
ATGAGAATGGGAGACCTTCACTACCTCCAGAGCAGAAATG  
+HWI-EAS443:3:88:1211:1119#0/1  
aaa`baba`aaaaaaba^\_`aa\_ab``\_Z¥aaaa`\_\_aa  
@HWI-EAS443:3:88:1223:1132#0/1  
AAACTGTGATGAGAATGGGAGACCTTCACTACCTCCAGAG  
+HWI-EAS443:3:88:1223:1132#0/1  
\_]OW``]¥\_\_¥]\_QX¥TR\_`\_ZXL^`X^W\_VYR¥[UZ\_`^  
@HWI-EAS443:3:88:1246:246#0/1  
GTGCCGATTTCTTCAATTAACCACCTTATTTCTCAAAT  
+HWI-EAS443:3:88:1246:246#0/1  
aaa]Xa[abaa`abYa\_baaa\_] [WJ\_`\_a`a]Q]]\_`\_\_  
@HWI-EAS443:3:88:124:77#0/1  
GAGAACTGTGATGAGAATGGGAGACCTTCACTACCTCCA  
+HWI-EAS443:3:88:124:77#0/1  
aaaXPY\_`a]`\_`¥aZZ]a\_]U\_WXU]^XUX^XUU¥XU  
@HWI-EAS443:3:88:1256:154#0/1  
GAAATTTCTCCAATATTGCTCCCTCCTCAGTGAAAGCCC  
+HWI-EAS443:3:88:1256:154#0/1  
ZXb[bbaa\_Vbbabbbbaabb[aa^`b^aaa]aaab\_UH  
@HWI-EAS443:3:88:1319:411#0/1  
GAAAATATACAGAGATTCGCTTGGAGAACTGTGATGAGA  
+HWI-EAS443:3:88:1319:411#0/1  
\_```a^b¥aXX\_V¥]¥`ZW]ZYLaa¥WLM`aQZ]R¥RXR  
@HWI-EAS443:3:88:1338:183#0/1  
AAAAGGAAGAGGCAACACCCTTGGCCTCGATATCGAAACA

+HWI-EAS443:3:88:1338:183#0/1  
abbbabbbbbbabbbaa^\_aaaa`Z\_Z\_`aab^a^`\_¥\_  
@HWI-EAS443:3:88:1347:1373#0/1  
AGCGATTTGCAGACAATGGATTGGGTGATGCCCCATTCCT  
+HWI-EAS443:3:88:1347:1373#0/1  
`]]\_aabbabaaVb\_babZU^^WHS¥b^VYRRX\_aa\_OM[  
@HWI-EAS443:3:88:1377:1050#0/1  
GAGAATGGGAGACCTTCACTACCTCCAGAGCAGAAATGAA  
+HWI-EAS443:3:88:1377:1050#0/1  
a`aabaabab[a``aa`b^ba`Zaa^babb^a`aa`a\_`a  
@HWI-EAS443:3:88:1384:783#0/1  
AGAAACTGTGATGAGAATGGGAGACCTTCACTACCTCCAG  
+HWI-EAS443:3:88:1384:783#0/1  
`abWbIbb\_aa[`WVbRaa\_aa\_[a¥S`¥aG^^^Z^O]]^  
@HWI-EAS443:3:88:1422:1334#0/1  
GTGCCGCATTTCTCAATTAACCACCTTATTCCTCAAAT  
+HWI-EAS443:3:88:1422:1334#0/1  
^S¥ZNY¥Z¥ZY[^`aZZZa\_`WZ\_ZZY^W]TQ¥N^SYUVG  
@HWI-EAS443:3:88:1474:1428#0/1  
GGCTGTTTCGATATCGAGGCCAAGGGTGTTCCTCCTCCT  
+HWI-EAS443:3:88:1474:1428#0/1  
abbaaaba¥[\_`^HY^¥aa^[]]N\_`H¥ZaJ[R\_RW\_PMY  
@HWI-EAS443:3:88:1534:1767#0/1  
ATGAGAATGGGAGACCTTCACTACCTCCAGAGCAGAAATG  
+HWI-EAS443:3:88:1534:1767#0/1  
aa]bbaa`ba[\_`¥\_H¥b^U^\_[`FQ]O[^a¥]Ja[\_aaa`  
@HWI-EAS443:3:88:1562:1061#0/1  
ATTCGCTTGGAGAACTGTGATGAGAATGGGAGACCTTCA  
+HWI-EAS443:3:88:1562:1061#0/1  
aba^aabbb\_]abba\_bb`aa`^aa^abab]`a\_[V`aWa  
@HWI-EAS443:3:88:1589:320#0/1  
GAAACGAGAAAGCTCTTATCTCTTGTCTACTTCAAGCAG  
+HWI-EAS443:3:88:1589:320#0/1  
Z¥aaab¥baaVHO¥^babaa``abbVbbb^^a`V\_^`\_`\_\_  
@HWI-EAS443:3:88:1616:1005#0/1  
TGAGAATGGGAGACCTTCACTACCTCCAGAGCAGAAATGA  
+HWI-EAS443:3:88:1616:1005#0/1  
[abbbabbbabbab`bbbbabbaabaabbab\_aba\_bbbb  
@HWI-EAS443:3:88:1629:1896#0/1  
GTAACACGGTTCGAGTCTCTGAAAATATACAGAGATTCGC  
+HWI-EAS443:3:88:1629:1896#0/1  
^GXaZa`X\_ZYYWRZL`]\_]\_\_XX]^WUMDP\_UYVUXU  
@HWI-EAS443:3:88:1647:1144#0/1  
CGCATTTCTTCAATTAACCACCTTATTCCTCAAATTTCT  
+HWI-EAS443:3:88:1647:1144#0/1  
ab^a^bbabaaababbaaa`aababbabYaaaaaaba\_a  
@HWI-EAS443:3:88:1651:986#0/1  
GTGATGAGAATGGGAGACCTTCACTACCTCCAGAGCAGAA  
+HWI-EAS443:3:88:1651:986#0/1  
^WaVa\_U`X`a¥X^OWZ^G[]a^V`\_aH]OTU^\_a`aa[R

@HWI-EAS443:3:88:1662:1990#0/1  
CAAGGTCTCTAATCGGTTAAAGATTACACTGAAGTTCGCT  
+HWI-EAS443:3:88:1662:1990#0/1  
¥b`a][[ababba`ba`aaabab`b]Y^`a][[]T]D]Z]  
@HWI-EAS443:3:88:1681:1423#0/1  
AAACGAGAAAGCTCTTATCTCTTGTCTACTTCAAGCAGT  
+HWI-EAS443:3:88:1681:1423#0/1  
abba`aaaba```abb``\_b`baa\_a`ba\_a`aa`aSaa`  
@HWI-EAS443:3:88:171:887#0/1  
GAATGGGAGACCTTCACTACCTCCAGAGCAGAAATGAAAA  
+HWI-EAS443:3:88:171:887#0/1  
Y`baaaaU\_S`a`¥abaaa`a\_ba`b`aa\_b^V`a`[\_`\_¥  
@HWI-EAS443:3:88:180:246#0/1  
AGAAACTGTGATGAGAATGGGAGACCTTCACTACCTCCAG  
+HWI-EAS443:3:88:180:246#0/1  
a[`^`aa¥W`aa\_¥¥¥XYZ¥R¥V[ZSY]^SY]XWX[]W]  
@HWI-EAS443:3:88:222:467#0/1  
GCCGCATTTCTTCAATTAACCACCTTATTTCCCTCAAATTT  
+HWI-EAS443:3:88:222:467#0/1  
aaab``aaaaa``\_aaaaaa\_\_`a\_```\_\_aa]\_\_a^\_  
@HWI-EAS443:3:88:249:529#0/1  
GCCGCATTTCTTCAATTAACCACCTTATTTCCCTCAAATTT  
+HWI-EAS443:3:88:249:529#0/1  
a^`IWV]aa^\_\_U¥`]a^a[T]UZ[`[[S¥]\_^]ZQXYX[  
@HWI-EAS443:3:88:268:1978#0/1  
AGAAACTGTGATGAGAATGGGAGACCTTCACTACCTCCAG  
+HWI-EAS443:3:88:268:1978#0/1  
aaWQ^ba\_JTa¥QVY\_V`^aZa[YTARF\_\_aaa^UT¥\_[Z  
@HWI-EAS443:3:88:279:76#0/1  
ATCCGCAAGCGATTTGCAGACAATGGATTGGGTGATGCC  
+HWI-EAS443:3:88:279:76#0/1  
aaaabaaaaa`a`aa`\_aZ^^¥a^^^^[WRZW\_W[^WW[  
@HWI-EAS443:3:88:336:566#0/1  
CTTTCAATCTGTGCCGATTTCTTCAATTAACCACCTTAT  
+HWI-EAS443:3:88:336:566#0/1  
abb^abbaaa]aa`a\_Q]`\_`\_`aaaa^Z^`\_a\_`\_\_a\_  
@HWI-EAS443:3:88:368:1636#0/1  
CGCGCTACCTTTCTGACATGACCCTCGAGGAAATGTCAG  
+HWI-EAS443:3:88:368:1636#0/1  
\_aVF¥`bbba^bbaZaaa\_a]aa`aa¥`a¥aaa`\_W\_`U[  
@HWI-EAS443:3:88:376:169#0/1  
CGAGAGCAATTGGGACAGAAATTTGAGGAAATAAGGTGGT  
+HWI-EAS443:3:88:376:169#0/1  
abbb`baaabab`X^abaa\_^abbbabaa\_aa`aa`W`a]  
@HWI-EAS443:3:88:378:767#0/1  
TGCCGCATTTCTTCAATTAACCACCTTATTTCCCTCAAATT  
+HWI-EAS443:3:88:378:767#0/1  
aaaaaa`aaaaa`\_a\_aa`aa`\_aa`\_aaaa^a`^\_\_a\_  
@HWI-EAS443:3:88:383:1812#0/1  
GTGATGAGAATGGGAGACCTTCACTACCTCCAGAGCAGAA

+HWI-EAS443:3:88:383:1812#0/1  
aYTNV\_¥UV\_\_]ZGNNKTHLZUZS][SZTY^SW¥P¥\_SV  
@HWI-EAS443:3:88:391:761#0/1  
GAGAATGGGAGACCTTCACTACCTCCAGAGCAGAAATGAA  
+HWI-EAS443:3:88:391:761#0/1  
VG[MX^Za]MZ^]ZUY]ZZV¥]]`^]Z\_Z][PaSTP¥`RH  
@HWI-EAS443:3:88:420:1663#0/1  
ACTATTCTCTGTGCGTTTCAATCTGTGCCGCATTTCTTCA  
+HWI-EAS443:3:88:420:1663#0/1  
aaa¥[]¥`\_Y^\_Y]WXS^ZaX¥VVR^\_]QSW]ZY]WVS¥  
@HWI-EAS443:3:88:430:624#0/1  
TGAGAATGGGAGACCTTCACTACCTCCAGAGCAGAAATGA  
+HWI-EAS443:3:88:430:624#0/1  
ababaaaaaa\_aa`a`aaa\_a]`\_`\_`^`\_\_aa[\_\_\_aZ  
@HWI-EAS443:3:88:454:637#0/1  
GTCGCTTTCATCTGTGCCGCATTTCTTCAATTAACCACC  
+HWI-EAS443:3:88:454:637#0/1  
aabbbbababaaaabaaaa]aababaaaaaaaaaaaa`aaaa  
@HWI-EAS443:3:88:468:1031#0/1  
CGCATTTCTTCAATTAACCACCTTATTTCTCAAATTTCT  
+HWI-EAS443:3:88:468:1031#0/1  
abbaabbaabaaaaaaaa`aaaaabaaaa`R]`a``a  
@HWI-EAS443:3:88:477:327#0/1  
GCTTGGAGAACTGTGATGAGAATGGGAGACCTTCACTAC  
+HWI-EAS443:3:88:477:327#0/1  
aaaabbabaZaab\_baaaYQY`¥`\_a``]¥¥¥¥\_¥\_\_\_¥  
@HWI-EAS443:3:88:497:1645#0/1  
GAATGGGAGACCTTCACTACCTCCAGAGCAGAAATGAAAA  
+HWI-EAS443:3:88:497:1645#0/1  
\_Z¥^]Z]XWZ¥abaaaa^a]\_^W¥VYW`\_\_a`Z¥a^  
@HWI-EAS443:3:88:524:651#0/1  
TGAGAATGGGAGACCTTCACTACCTCCAGAGCAGAAATGA  
+HWI-EAS443:3:88:524:651#0/1  
aa`\_^a^aaaabaa]aaaa]`aaa`a\_\_[X\_[^`a`  
@HWI-EAS443:3:88:527:547#0/1  
GGCACAGATTGAAAGCGACAGAGAATAGTTTCGAACAAAT  
+HWI-EAS443:3:88:527:547#0/1  
T¥Za`¥S\_ab^VX^b^b`a¥¥Ya\_\_a``JabVbbb¥`[^a  
@HWI-EAS443:3:88:544:1289#0/1  
GAGATTGCTTGGAGAACTGTGATGAGAATGGGAGACCT  
+HWI-EAS443:3:88:544:1289#0/1  
Z\_\_Zaaaabb]baSaa]aa\_U¥aab`^\_G\_aaaa]]`a  
@HWI-EAS443:3:88:552:1186#0/1  
TGAGAATGGGAGACCTTCACTACCTCCAGAGCAGAAATGA  
+HWI-EAS443:3:88:552:1186#0/1  
aa`b`babbaaa`a`aa]aaa]¥[[¥`a¥`XZa^¥¥`aa  
@HWI-EAS443:3:88:563:752#0/1  
ATATTTTCAGAGACTCGAACCGTGTACCATTCCATTCAA  
+HWI-EAS443:3:88:563:752#0/1  
[a^`b`a`^b\_baaaa`a`aaT`W`a`Z``````¥`WX`



@HWI-EAS443:3:88:627:582#0/1  
GAAAATATACAGAGATTCGCTTGGAGAACTGTGATGAGA  
+HWI-EAS443:3:88:627:582#0/1  
aaa]]`a`aaaa\_a]``a\_a\_aa\_a¥`\_\_aaZaV]`¥`]  
@HWI-EAS443:3:88:643:1076#0/1  
GAAAATATACAGAGATTCGCTTGGAGAACTGTGATGAGA  
+HWI-EAS443:3:88:643:1076#0/1  
a]Y^^`\_`a\_WZTTU\_\_a`^^\_\_^X[]`^¥X\_X]]Z]]ZU  
@HWI-EAS443:3:88:709:1225#0/1  
GCCGCATTTCTTCAATTAACCACCTTATTTCCCTCAAATTT  
+HWI-EAS443:3:88:709:1225#0/1  
V¥````\_\_Vbbab`¥`aZ¥`b`a^^baa`aabb`aa^```  
@HWI-EAS443:3:88:726:30#0/1  
GAATGGGAGACCTTCACTACCTCCAGAGCAGAAATGAAAA  
+HWI-EAS443:3:88:726:30#0/1  
a\_a`baaZ`^`^[\_a]`\_aa\_\_a]S¥aWaWSa[]`^a\_¥¥\_  
@HWI-EAS443:3:88:729:1497#0/1  
GCCGCATTTCTTCAATTAACCACCTTATTTCCCTCAAATTT  
+HWI-EAS443:3:88:729:1497#0/1  
aa`^Q^`XX[a[XQ]W^T¥¥ZZWPYX¥Y¥\_^[a^YL^UZW  
@HWI-EAS443:3:88:733:948#0/1  
GCGGCACAGATTGAAAGCGACAGAGAATAGTTTCGAACAA  
+HWI-EAS443:3:88:733:948#0/1  
``aa]a[]a\_S]a[\_^a\_aTYR]^\_VX[^aX^^NTZZW\_\_  
@HWI-EAS443:3:88:749:1173#0/1  
ACCCAATCCATTGTCTGCAAATCGCTTGGCGATATGCCAA  
+HWI-EAS443:3:88:749:1173#0/1  
aaa` `aabbaa`X^aa`abab\_aULY\_\_`aa]]`\_`[VPZP^  
@HWI-EAS443:3:88:771:1943#0/1  
TGCCGCATTTCTTCAATTAACCACCTTATTTCCCTCAAATT  
+HWI-EAS443:3:88:771:1943#0/1  
`ab`\_aaa`ab`aaSYa]^`aa`\_Z\_[\_\_`\_¥aa]]]^  
@HWI-EAS443:3:88:783:27#0/1  
ACCATGTCAAGCTTTCAGGTAGACTGTTTCCTTTGGCATA  
+HWI-EAS443:3:88:783:27#0/1  
`baabbaab`a\_aaaaabaV`a\_\_ab]``\_\_aa` `^aa`  
@HWI-EAS443:3:88:794:1719#0/1  
ACCTACTTCGCGCTACCTTTCTGACATGACCCTCGAGGAA  
+HWI-EAS443:3:88:794:1719#0/1  
aaba` `bUab]`b¥b`P`a\_aaHa`aaaaa\_`\_\_a¥`[a  
@HWI-EAS443:3:88:878:1858#0/1  
CGAGAAAGCTTCTTCTTCTTCTACTTCAAGCAGTAGT  
+HWI-EAS443:3:88:878:1858#0/1  
aaabaa¥b`a\_baab`b`babba`bbaaaaaa]aaaa\_  
@HWI-EAS443:3:89:101:1525#0/1  
CTGTGATGAGAATGGGAGACCTTCACTACCTCCAGAGCAG  
+HWI-EAS443:3:89:101:1525#0/1  
`[babb`Y`¥Xbab\_]`^a^a¥`^` `b^]X\_\_aa`aXaa`\_  
@HWI-EAS443:3:89:1043:772#0/1  
GCCGCATTTCTTCAATTAACCACCTTATTTCCCTCAAATTT

+HWI-EAS443:3:89:1043:772#0/1  
aaabbabbaaab`a`bb`aaaa\_baabbaa\_a`aaaba`  
@HWI-EAS443:3:89:1049:629#0/1  
GAAACTGTGATGAGAATGGGAGACCTTCACTACCTCCAGA  
+HWI-EAS443:3:89:1049:629#0/1  
^a^VaWa^bb^T¥b\_aab`]Ua^[HaQa`b\_a]\_`J¥T`\_  
@HWI-EAS443:3:89:1054:741#0/1  
TCTGTGCCGATTTCTTCAATTAACCACCTTATTTCTCA  
+HWI-EAS443:3:89:1054:741#0/1  
\_¥YaP^^`^ba`a`Z`aa\_abaa\_aaa`\_aaa`¥X]¥`\_a  
@HWI-EAS443:3:89:1058:257#0/1  
TGCCGCATTTCTTCAATTAACCACCTTATTTCTCAAATT  
+HWI-EAS443:3:89:1058:257#0/1  
\_b\_Q]¥`b^`P\_a\_bbaa\_aY0[[W`]a`a`WX]^`^``a  
@HWI-EAS443:3:89:1059:1024#0/1  
GCCGCATTTCTTCAATTAACCACCTTATTTCTCAAATTT  
+HWI-EAS443:3:89:1059:1024#0/1  
aaabbbbbbbbaabbabaabaabbbbbbaabaa``bba  
@HWI-EAS443:3:89:1080:1024#0/1  
AGAAACTGTGATGAGAATGGGAGACCTTCACTACCTCCAG  
+HWI-EAS443:3:89:1080:1024#0/1  
aa\_aba`b\_b`aa`a¥a`a``]a^XL^^^a`]\_W\_\_\_\_]\_\_  
@HWI-EAS443:3:89:1091:1643#0/1  
GAATGGGAGACCTTCACTACCTCCAGAGCAGAAATGAAAA  
+HWI-EAS443:3:89:1091:1643#0/1  
aaa]^¥`[\_a\_T`a\_a\_a\_W\_`^]^`¥`¥`¥Y\_`^`\_]`^  
@HWI-EAS443:3:89:1093:413#0/1  
GCCGCATTTCTTCAATTAACCACCTTATTTCTCAAATTT  
+HWI-EAS443:3:89:1093:413#0/1  
aY]GWS]Ra\_[W\_IZV\_UP]Y\_VVU¥U]WU¥UaY]X^[]Z  
@HWI-EAS443:3:89:1155:1375#0/1  
ATTACACTGAAGTTCGCTTTCAGTACTATGTTCTTTTCCA  
+HWI-EAS443:3:89:1155:1375#0/1  
``a\_`baba^a^¥aababa`a^`a``aba\_a\_aaaa^^a  
@HWI-EAS443:3:89:1156:2033#0/1  
GGGAAACAAATCGTGGAATGGATCTTGAAAGAGGAATCCA  
+HWI-EAS443:3:89:1156:2033#0/1  
aabNb`bbaaaa`Saaaaa]a^TUPaa¥`Ua`a\_`^` [[]]  
@HWI-EAS443:3:89:1156:249#0/1  
TCGCTTTCAATCTGTGCCGATTTCTTCAATTAACCACCT  
+HWI-EAS443:3:89:1156:249#0/1  
a^`^TW^XWa`aa¥F]aa¥aaba`aa`YLJ````\_`[^Z\_[\_  
@HWI-EAS443:3:89:1226:766#0/1  
GACTCCAACACCATGTCAAGCTTTCAGGTAGACTGTTTCC  
+HWI-EAS443:3:89:1226:766#0/1  
a[\_]a`[]`^`¥¥]ab`UT\_Y[baa^Z\_aUaaa^aa\_X]G¥  
@HWI-EAS443:3:89:1234:700#0/1  
CTCTGTGCTTTCAATCTGTGCCGATTTCTTCAATTAAC  
+HWI-EAS443:3:89:1234:700#0/1  
¥bbba]bbbabababbbbbba\_aaaabbb``bbabbbbaaa

@HWI-EAS443:3:89:1238:203#0/1  
GCCGCATTTCTTCAATTAACCACCTTATTTCCCTCAAATTT  
+HWI-EAS443:3:89:1238:203#0/1  
aaabOU[\_UW]aP]ab¥a`TUNUN¥`\_^[^JXa[YJU\_]]  
@HWI-EAS443:3:89:1243:2016#0/1  
CGTGAATGGATCTTGAAAGAGGAATCCAGCGAGACACTT  
+HWI-EAS443:3:89:1243:2016#0/1  
aaTabb\_^bba`0`\_bbaababbaa¥W[\_`Ga`aaW\_GaJ  
@HWI-EAS443:3:89:1256:1860#0/1  
ATATCCGCAAGCGATTTGCAGACAATGGATTGGGTGATGC  
+HWI-EAS443:3:89:1256:1860#0/1  
SX]XW`aXa`^a\_\_]U`aaV]]a\_aH]Z^RLXaUaUGLZ  
@HWI-EAS443:3:89:1269:534#0/1  
AGAAACTGTGATGAGAATGGGAGACCTTCACTACCTCCAG  
+HWI-EAS443:3:89:1269:534#0/1  
aabaaaab¥aab\_ab\_aa`ab`a\_\_`ab^a`aa\_\_\_a]\_`  
@HWI-EAS443:3:89:1286:1079#0/1  
CACGGTTCGAGTCTCTGAAAATATACAGAGATTCGCTTGG  
+HWI-EAS443:3:89:1286:1079#0/1  
`^bbbbbbba`^a\_`Ub^[`b`ba`bb]Zaaa¥aaaaa\_  
@HWI-EAS443:3:89:1290:1306#0/1  
AAACTGTGATGAGAATGGGAGACCTTCACTACCTCCAGAG  
+HWI-EAS443:3:89:1290:1306#0/1  
abaaaaaab\_ba`ab\_a`Z¥a`a\_]NV\_`aaP^¥VW¥`¥\_  
@HWI-EAS443:3:89:1342:1066#0/1  
GAGAATGGGAGACCTTCACTACCTCCAGAGCAGAAATGAA  
+HWI-EAS443:3:89:1342:1066#0/1  
^0^]U^US^aaaZ[Z[¥¥T]WaTY]\_`a\_aXT`a\_\_a\_\_Q  
@HWI-EAS443:3:89:134:140#0/1  
ATATCCGCAAGCGATTTGCAGACAATGGATTGGGTGATGC  
+HWI-EAS443:3:89:134:140#0/1  
X\_¥Sab`¥HU^]`\_ZZ`^]]YQ]X`Z^VQF[\_[BBBBBB  
@HWI-EAS443:3:89:1410:348#0/1  
CTTGGAGAAACTGTGATGAGAATGGGAGACCTTCACTACC  
+HWI-EAS443:3:89:1410:348#0/1  
¥Pbb¥\_Z``TJZ`bb`a`¥aXba`aMZa]b`bbb¥`bbba  
@HWI-EAS443:3:89:1432:882#0/1  
AATGTTATTTGTTGAAACTATTCTCTGTGCTTTCAATC  
+HWI-EAS443:3:89:1432:882#0/1  
ab^bWb^b^`a`a^\_]aa^aaaa^b`aaaa\_aa\_]``a]  
@HWI-EAS443:3:89:1450:529#0/1  
CCGCATTTCTTCAATTAACCACCTTATTTCCCTCAAATTT  
+HWI-EAS443:3:89:1450:529#0/1  
XZ`¥babb`aababbbababbb`babba\_bab]`aababY  
@HWI-EAS443:3:89:1455:1127#0/1  
GGGCCTATTATCTTTTGCCTAGGCATGAGCATGAACCACT  
+HWI-EAS443:3:89:1455:1127#0/1  
a`¥``baabaa\_aaa`aa``aaa]aaa`a\_aab`aW``a^  
@HWI-EAS443:3:89:145:1408#0/1  
GCCGCATTTCTTCAATTAACCACCTTATTTCCCTCAAATTT

+HWI-EAS443:3:89:145:1408#0/1  
aa]\_SO^bW^`^aTGSYQT^ZQW¥`¥YY[[`^U]YFT][^  
@HWI-EAS443:3:89:1464:1188#0/1  
GGAGAACTGTGATGAGAATGGGAGACCTTCACTACCTCC  
+HWI-EAS443:3:89:1464:1188#0/1  
aa`a`a`aa\_`\_`a\_a`aa`a]a]^\_\_V^¥`^][Z^V  
@HWI-EAS443:3:89:149:534#0/1  
GATGAGAATGGGAGACCTTCACTACCTCCAGAGCAGAAAT  
+HWI-EAS443:3:89:149:534#0/1  
\_XSb]aaJa`[\_N\_\_Y\_VFZa]^\_WF¥`\_Y¥``]U\_RG^R  
@HWI-EAS443:3:89:1530:1444#0/1  
CGCATTCTTCAATTAACCACCTTATTTCTCAAATTTCT  
+HWI-EAS443:3:89:1530:1444#0/1  
a\_aabba`bb\_]bbbbbbababbbabbb`bb`baabbbab  
@HWI-EAS443:3:89:1589:1020#0/1  
ATAAGCTGAAACGAGAAAGCTCTTATCTCTTGTCTACTT  
+HWI-EAS443:3:89:1589:1020#0/1  
^b`\_[aabab`[\_bb\_]a`aaa`^aW`¥^aa\_\_\_\_`\_^`  
@HWI-EAS443:3:89:1593:277#0/1  
ATGAGAATGGGAGACCTTCACTACCTCCAGAGCAGAAATG  
+HWI-EAS443:3:89:1593:277#0/1  
a\_babb]\_ba^\_a^\_N`aY`\_a\_W¥`ZU`b¥Z\_[\_W^R\_^  
@HWI-EAS443:3:89:1673:978#0/1  
GAGAATGGGAGACCTTCACTACCTCCAGAGCAGAAATGAA  
+HWI-EAS443:3:89:1673:978#0/1  
aa\_]ab[a`[aa`SaUab^`a¥¥]\_^`a``[[aZX^aa`  
@HWI-EAS443:3:89:167:1842#0/1  
CTGGAAGAGAAGGTAATGGTGAATTTCTCCAATTTGC  
+HWI-EAS443:3:89:167:1842#0/1  
ab`````aZ]^`L^a[XHP[YU[[a\_`\_`¥``]ZVMLUW  
@HWI-EAS443:3:89:1699:453#0/1  
ATGTTATTTGTTGCGAACTATTCTCTGTGCTTTCAATCT  
+HWI-EAS443:3:89:1699:453#0/1  
\_¥a¥`aa¥bb\_a¥b`^bbbaabZbabbbab]aaa\_aabYa  
@HWI-EAS443:3:89:1756:1265#0/1  
AAGGGTGTTCCTCTTCTTTAAGGACTTTTGATCTCGG  
+HWI-EAS443:3:89:1756:1265#0/1  
^\_¥a[H]VWW^JW\_a[\_W^b\_a]^`^NVT[a\_[X`\_\_R¥[  
@HWI-EAS443:3:89:1764:516#0/1  
CGCATTCTTCAATTAACCACCTTATTTCTCAAATTTCT  
+HWI-EAS443:3:89:1764:516#0/1  
¥bbaa`abab\_abb\_baabbabbb\_bbabaababab  
@HWI-EAS443:3:89:1766:286#0/1  
GAAACTGTGATGAGAATGGGAGACCTTCACTACCTCCAGA  
+HWI-EAS443:3:89:1766:286#0/1  
aaaa[``]ba\_a`ba¥``][\_a\_T`\_\_a\_`\_^UZ^]^\_X  
@HWI-EAS443:3:89:187:690#0/1  
GAAACTGTGATGAGAATGGGAGACCTTCACTACCTCCAGA  
+HWI-EAS443:3:89:187:690#0/1  
a^]aba`F^\_\_aXYLX`aaa\_`\_L`U^`a]X\_U]^]]\_`^



+HWI-EAS443:3:89:420:942#0/1  
`^`\_XX\_`^`][abP\_¥X\_X`S[``a`Y[^¥^X]VX\_[T  
@HWI-EAS443:3:89:447:1037#0/1  
GAAACTGTGATGAGAATGGGAGACCTTCACTACCTCCAGA  
+HWI-EAS443:3:89:447:1037#0/1  
aabaaaaaaaaaaa`aaaa[a^\_`aa`aa`\_\_T\_\_^`]]  
@HWI-EAS443:3:89:450:297#0/1  
TTCGCTTGGAGAACTGTGATGAGAATGGGAGACCTTCAC  
+HWI-EAS443:3:89:450:297#0/1  
aaa]baaabab\_\_R\_`aM\_[aa\_\_]^`\_`^`\_]X\_\_\_^^X  
@HWI-EAS443:3:89:466:499#0/1  
GTGATGAGAATGGGAGACCTTCACTACCTCCAGAGCAGAA  
+HWI-EAS443:3:89:466:499#0/1  
a]aaab\_a[^`X\_\_a`\_`\_`\_Z[^`\_\_\_\_a^\_U]\_¥`U¥  
@HWI-EAS443:3:89:503:1506#0/1  
AGAAACTGTGATGAGAATGGGAGACCTTCACTACCTCCAG  
+HWI-EAS443:3:89:503:1506#0/1  
a¥` [bba`Xa`\_`\_`\_X\_\_a^\_\_a]]`\_\_\_\_`\_`\_\_\_\_U^^¥  
@HWI-EAS443:3:89:531:454#0/1  
GCCGCATTTCTTCAATTAACCACCTTATTTCTCAAATTT  
+HWI-EAS443:3:89:531:454#0/1  
aaaX^bb\_^bb]¥`a\_ab[[W`^[ba[a\_aa¥`[\_`[\_a]  
@HWI-EAS443:3:89:542:35#0/1  
CAACTGCATTTTTGACATCCTCATAAGTATGTCCTGGAAG  
+HWI-EAS443:3:89:542:35#0/1  
ababbbbbbbbabaaaabaabbbab]aabaa`abb\_aa  
@HWI-EAS443:3:89:577:703#0/1  
GAGCAATTGGGACAGAAATTTGAGGAAATAAGGTGGTTAA  
+HWI-EAS443:3:89:577:703#0/1  
aa`^YZ]^`X\_a]]Ya\_`Z^\_¥XaaY]^`JYX`V``U\_X]  
@HWI-EAS443:3:89:642:1930#0/1  
GAGAACTGTGATGAGAATGGGAGACCTTCACTACCTCCA  
+HWI-EAS443:3:89:642:1930#0/1  
a^``\_ba`\_\_^aaa\_`\_a^YF^\_\_\_^X`^`a]^`\_]U`]^`  
@HWI-EAS443:3:89:644:913#0/1  
CGAGAGCAATTGGGACAGAAATTTGAGGAAATAAGGTGGT  
+HWI-EAS443:3:89:644:913#0/1  
a`abbbbaabbabaabbbb^bbbbbbbab`bbbbabb`ba^  
@HWI-EAS443:3:89:649:1932#0/1  
CATGTCAGAAAGGTAGCGGAAGTAGGTACAGATGCAATT  
+HWI-EAS443:3:89:649:1932#0/1  
a\_bbb`bbbaa^XI^`a]aaU^\_[bba\_bbb``aaaaba\_  
@HWI-EAS443:3:89:683:566#0/1  
ATCGCACGCAAAGAGGGCCTATTATCTTTTGCCTAGGCAT  
+HWI-EAS443:3:89:683:566#0/1  
aaaaababaa[]YZ[a\_N¥``baaa\_`\_aa^X[`aa\_\_a\_  
@HWI-EAS443:3:89:742:339#0/1  
TGAGAATGGGAGACCTTCACTACCTCCAGAGCAGAAATGA  
+HWI-EAS443:3:89:742:339#0/1  
`\_W`^`^`^aa`^]]¥`]]\_ZaXTP[YV``¥¥VY`^[Y¥^^

@HWI-EAS443:3:89:766:1259#0/1  
GCCGCATTTCTTCAATTAACCACCTTATTTCTCAAATTT  
+HWI-EAS443:3:89:766:1259#0/1  
aab]\_]\_^aaaaaa\_\_V]a\_\_`aa^aa[aaa\_`a`X  
@HWI-EAS443:3:89:773:1054#0/1  
GTCGCTTTCAATCTGTGCCGCATTTCTTCAATTAACCACC  
+HWI-EAS443:3:89:773:1054#0/1  
a`abaaaaaba`aa^``[`aaaaa`a[[]]a\_^a^Y^`\_  
@HWI-EAS443:3:89:774:895#0/1  
GTGATGAGAATGGGAGACCTTCACTACCTCCAGAGCAGAA  
+HWI-EAS443:3:89:774:895#0/1  
a[```a¥XZ^\_^`Q`\_\_\_a\_^a[U^\_]¥^\_]`Q\_¥¥\_UW  
@HWI-EAS443:3:89:782:1172#0/1  
AGAAACTGTGATGAGAATGGGAGACCTTCACTACCTCCAG  
+HWI-EAS443:3:89:782:1172#0/1  
`X^^`¥\_¥a\_a\_a\_a`\_]\_`^`[R[a`]`\_]\_¥\_`\_]  
@HWI-EAS443:3:89:841:866#0/1  
GCCGCATTTCTTCAATTAACCACCTTATTTCTCAAATTT  
+HWI-EAS443:3:89:841:866#0/1  
a¥X¥a^^`[^`\_`VU\_a`\_P]\_]\_\_¥`\_\_\_\_\_¥[Ua¥\_  
@HWI-EAS443:3:89:923:1426#0/1  
GAGAATGGGAGACCTTCACTACCTCCAGAGCAGAAATGAA  
+HWI-EAS443:3:89:923:1426#0/1  
¥`aaaaba`aba`ab\_bbaabaaaa\_ababaab``a```\_  
@HWI-EAS443:3:89:981:1346#0/1  
GTGATGAGAATGGGAGACCTTCACTACCTCCAGAGCAGAA  
+HWI-EAS443:3:89:981:1346#0/1  
aZbaaaaa\_aa`[^X`][\_\_aaV`\_ZV^\_\_\_\_ZU`\_U\_  
@HWI-EAS443:3:89:985:1076#0/1  
GTCGCTTTCAATCTGTGCCGCATTTCTTCAATTAACCACC  
+HWI-EAS443:3:89:985:1076#0/1  
`aaaaaaabb`a`aa^aaab\_abba`a\_`aabaaa^\_\_^]  
@HWI-EAS443:3:89:999:1889#0/1  
GAAAATATACAGAGATTCGCTTGGAGAACTGTGATGAGA  
+HWI-EAS443:3:89:999:1889#0/1  
aaaaaabababababaaa`aaaa`a`a\_a`X`\_[a^\_a^\_a^`\_  
@HWI-EAS443:3:8:1095:1135#0/1  
CGCATTTCTTCAATTAACCACCTTATTTCTCAAATTTCT  
+HWI-EAS443:3:8:1095:1135#0/1  
`babbbbabb^abbbba\_aaaabaaba``aaaa\_aaab\_b  
@HWI-EAS443:3:8:1101:1242#0/1  
ATGAGAATGGGAGACCTTCACTACCTCCAGAGCAGAAATG  
+HWI-EAS443:3:8:1101:1242#0/1  
a]ZWbba]aT]LZX^P¥\_\_aY\_`QHXGT\_¥a]^UT¥Q\_¥  
@HWI-EAS443:3:8:1105:555#0/1  
AGAAACTGTGATGAGAATGGGAGACCTTCACTACCTCCAG  
+HWI-EAS443:3:8:1105:555#0/1  
`b`a[[]]T\_¥ab^bZ\_abSZ0¥`U\_`\_]Z\_[NO]N]Z\_  
@HWI-EAS443:3:8:1148:342#0/1  
GCCGCATTTCTTCAATTAACCACCTTATTTCTCAAATTT

+HWI-EAS443:3:8:1148:342#0/1  
a`¥`¥`aaa\_aa]`^\_baaX`a\_¥a`a`RZ\_`^`^`^`^`^`  
@HWI-EAS443:3:8:1165:224#0/1  
TGAGAATGGGAGACCTTCACTACCTCCAGAGCAGAAATGA  
+HWI-EAS443:3:8:1165:224#0/1  
aa\_aZ`a`¥a¥^]\_]^^XX^XY^^]\_UU]YX¥]]]  
@HWI-EAS443:3:8:1199:23#0/1  
GAGAAACTGTGATGAGAATGGGAGACCTTCACTACCTCCA  
+HWI-EAS443:3:8:1199:23#0/1  
aaUYS^HV¥H^Hab]aXXZS`\_^\_NFJVHU\_RMVLG]YUP  
@HWI-EAS443:3:8:1233:1298#0/1  
AATGGTAACACGGTTCGAGTCTCTGAAAATATACAGAGAT  
+HWI-EAS443:3:8:1233:1298#0/1  
a`babWaaa\_]aaWaaa^a\_`a^`\_]a`^`^`^]`^aZV  
@HWI-EAS443:3:8:1282:804#0/1  
GCCGCATTTCTTCAATTAACCACCTTATTCCTCAAATTT  
+HWI-EAS443:3:8:1282:804#0/1  
`a\_VZ]\_X[\_]WY`a`][QPVWT`]X\_\_\_WX^U^\_\_\_\_]  
@HWI-EAS443:3:8:1309:225#0/1  
CCGCATTTCTTCAATTAACCACCTTATTCCTCAAATTT  
+HWI-EAS443:3:8:1309:225#0/1  
`babba`\_abaaabbbaaaaa^babba`\_b\_a\_¥b`a`  
@HWI-EAS443:3:8:1376:711#0/1  
CTCTGTGCCTTCAATCTGTGCCGCATTTCTTCAATTAAC  
+HWI-EAS443:3:8:1376:711#0/1  
`babbaab`aba`aa\_aa\_a\_\_\_`\_\_aaa\_aa\_\_\_a`a`  
@HWI-EAS443:3:8:1377:450#0/1  
GCCGCATTTCTTCAATTAACCACCTTATTCCTCAAATTT  
+HWI-EAS443:3:8:1377:450#0/1  
ab\_aY`\_Ta`aaIaaaa\_WZ[]U`\_K`a¥IS[]`0\_\_`^¥  
@HWI-EAS443:3:8:140:1022#0/1  
GCCGCATTTCTTCAATTAACCACCTTATTCCTCAAATTT  
+HWI-EAS443:3:8:140:1022#0/1  
ab\_\_\_U`aaa`aaa^aabb`aaaa`^a\_\_a\_aa¥^a^\_`  
@HWI-EAS443:3:8:1412:300#0/1  
CTGTGATGAGAATGGGAGACCTTCACTACCTCCAGAGCAG  
+HWI-EAS443:3:8:1412:300#0/1  
Q\_\_QRZ[^TaUS\_OXX]^YD[b\_XN¥Z\_] [R^^XZ]F^a  
@HWI-EAS443:3:8:1469:1404#0/1  
GAAACTGTGATGAGAATGGGAGACCTTCACTACCTCCAGA  
+HWI-EAS443:3:8:1469:1404#0/1  
[\_baabbMbbbbbbaa\_bbbabbZYYaa`^¥YVYPaaZW^^`  
@HWI-EAS443:3:8:1473:15#0/1  
GAAACAAATCGTGAATGGATCTTGAAAGAGGAATCCAGC  
+HWI-EAS443:3:8:1473:15#0/1  
[`¥¥ab`aaRa`bb`\_aaa`^¥`aa\_]aa^aa^^\_W¥\_\_W  
@HWI-EAS443:3:8:1531:186#0/1  
GAAAATATACAGAGATTCGCTTGGAGAACTGTGATGAGA  
+HWI-EAS443:3:8:1531:186#0/1  
a\_^`\_`^`^]a^`^]`W^^\_]WZZZ]RZ]SXSXXWZB



@HWI-EAS443:3:8:1564:678#0/1  
GTGACATTTCTCGAGGGTCATGTCAGAAAGGTAGCGCGA  
+HWI-EAS443:3:8:1564:678#0/1  
\_Ya^]]W[NVQNWVN\_`TLT[¥NDM^W¥MYNRXVNB BBB  
@HWI-EAS443:3:8:1623:773#0/1  
GCCGCATTTCTTCAATTAACCACCTTATTTCTCAAATTT  
+HWI-EAS443:3:8:1623:773#0/1  
a\_]bbbbbaab`]`bbbbba]`a\_ba`bba¥`a\_a``baa  
@HWI-EAS443:3:8:1629:804#0/1  
GAGAATGGGAGACCTTCACTACCTCCAGAGCAGAAATGAA  
+HWI-EAS443:3:8:1629:804#0/1  
W\_`PW¥a[X¥\_aX]\_W]ZSX\_GT`[LYa\_`FYa¥[Xa`^\_  
@HWI-EAS443:3:8:162:1780#0/1  
GAGAATGGGAGACCTTCACTACCTCCAGAGCAGAAATGAA  
+HWI-EAS443:3:8:162:1780#0/1  
\_Y[bbbb^b]bbaaaabbaabababaaaa`a`\_aaa[aa^aa  
@HWI-EAS443:3:8:1677:434#0/1  
GAAACTGTGATGAGAATGGGAGACCTTCACTACCTCCAGA  
+HWI-EAS443:3:8:1677:434#0/1  
aaaaY\_bR¥`\_a\_^T^\_``aVa¥VQ¥\_Y^VUXOHKVVV^R  
@HWI-EAS443:3:8:1701:363#0/1  
GAAAATATACAGAGATTCGCTTGGAGAACTGTGATGAGA  
+HWI-EAS443:3:8:1701:363#0/1  
\_ab^`¥aaabaaa\_\_^X`Z]]baaa[aa`a]`a\_a]\_X  
@HWI-EAS443:3:8:178:1519#0/1  
GCCGCATTTCTTCAATTAACCACCTTATTTCTCAAATTT  
+HWI-EAS443:3:8:178:1519#0/1  
ab\_S\_L¥\_b`a\_^a`aY^]aa`a]aa``]aa`aMbX[`\_\_  
@HWI-EAS443:3:8:219:1423#0/1  
TGATGAGAATGGGAGACCTTCACTACCTCCAGAGCAGAAA  
+HWI-EAS443:3:8:219:1423#0/1  
\_\_\_aa\_a\_abYaaaa`aa¥[^\_a\_Za`aX]\_^]\_]\_YZ¥  
@HWI-EAS443:3:8:232:1564#0/1  
TGAGAATGGGAGACCTTCACTACCTCCAGAGCAGAAATGA  
+HWI-EAS443:3:8:232:1564#0/1  
aaaa`a\_V]`V`[NZa`ba\_\_aY¥X][\_a\_\_\_\_`\_S^V\_\_`  
@HWI-EAS443:3:8:239:651#0/1  
GTTATTTGTTCGAAACTATTCTCTGTGCTTTCAATCTGT  
+HWI-EAS443:3:8:239:651#0/1  
aZ\_\_\_a\_aVa\_`^^]^^^\_\_]\_^\_\_X^`^X\_]\_^]\_X^]`Z  
@HWI-EAS443:3:8:27:85#0/1  
GCCGCATTTCTTCAATTAACCACCTTATTTCTCAAATTT  
+HWI-EAS443:3:8:27:85#0/1  
aabbb¥bab`]baaY\_a\_bbaab`a^baa`aaaaa\_\_`\_`  
@HWI-EAS443:3:8:284:1755#0/1  
CAGAGATTCGCTTGGAGAACTGTGATGAGAATGGGAGAC  
+HWI-EAS443:3:8:284:1755#0/1  
abb\_aa`abbbba\_b\_aS`b\_b\_^a\_Ubaa[^a\_a\_\_aZ¥  
@HWI-EAS443:3:8:310:613#0/1  
GAATGGGAGACCTTCACTACCTCCAGAGCAGAAATGAAAA



@HWI-EAS443:3:8:496:1273#0/1  
CAGAGATTTCGTTGGAGAACTGTGATGAGAATGGGAGAC  
+HWI-EAS443:3:8:496:1273#0/1  
``\_T^a`aa[\_\_\_\_\_`\_Sa\_^^`¥\_¥¥`]\_^Z[¥W¥W¥SG  
@HWI-EAS443:3:8:497:1533#0/1  
ATGAGAATGGGAGACCTTCACTACCTCCAGAGCAGAAATG  
+HWI-EAS443:3:8:497:1533#0/1  
`b[b\_^a`¥^^a[\_a\_\_abaa\_`Z\_\_`aa]\_^aaZ\_\_`  
@HWI-EAS443:3:8:498:66#0/1  
GCCGCATTTCTTCAATTAACCACCTTATTTCCCTCAAATTT  
+HWI-EAS443:3:8:498:66#0/1  
abab`babaaba^aaaa`a\_aa]^a\_aa`a\_^a\_a[`a\_\_  
@HWI-EAS443:3:8:567:719#0/1  
CAGAAAGGTAGCGGAAGTAGGTACAGATGCAATTGTCAT  
+HWI-EAS443:3:8:567:719#0/1  
aZ]ZQ¥`b]bbaa¥a\_aa]^\_a^a\_a\_a\_`Iaaaa`TGaa  
@HWI-EAS443:3:8:596:1124#0/1  
ATCTGTGCCGCATTTCTTCAATTAACCACCTTATTTCCCTC  
+HWI-EAS443:3:8:596:1124#0/1  
aaaa`^aaaa```aa^`¥^`aaaa^\_a\_a\_\_aa^\_\_`\_  
@HWI-EAS443:3:8:619:1920#0/1  
AGAAACTGTGATGAGAATGGGAGACCTTCACTACCTCCAG  
+HWI-EAS443:3:8:619:1920#0/1  
ab^[b¥\$`M`¥\_a]]]Xa\_Z^aaUY^`abG¥`H]VN[\_^  
@HWI-EAS443:3:8:626:1098#0/1  
GTGACATTTCCCTCGAGGGTCATGTCAGAAAGGTAGCGCGA  
+HWI-EAS443:3:8:626:1098#0/1  
aY`a[U`a]\_\_`a\_\_aZO[^\_¥^¥\_\_\_\_^^N^[¥^¥\_`^  
@HWI-EAS443:3:8:667:1265#0/1  
ATGGAATGGTAACACGGTTCGAGTCTCTGAAAATATACAG  
+HWI-EAS443:3:8:667:1265#0/1  
aaabaaaba\_aaaa`a\_\_`a^`\_^]]\_^^^\_\_^^P`  
@HWI-EAS443:3:8:729:618#0/1  
ACTGTGATGAGAATGGGAGACCTTCACTACCTCCAGAGCA  
+HWI-EAS443:3:8:729:618#0/1  
aaba`aabb^aaaabaaX`\_`\_`aab`\_a\_]`a^`aV`^\_  
@HWI-EAS443:3:8:76:1158#0/1  
GAAACTGTGATGAGAATGGGAGACCTTCACTACCTCCAGA  
+HWI-EAS443:3:8:76:1158#0/1  
a\_WZ`\_`[^^^]Y`X[¥`[YFVTV[WWW\_[S^WVSYQUB  
@HWI-EAS443:3:8:783:300#0/1  
GCCGCATTTCTTCAATTAACCACCTTATTTCCCTCAAATTT  
+HWI-EAS443:3:8:783:300#0/1  
ab^SaTWRY\_a\_a\_a[YUR^GZ¥]`\_Ua]]\_WYPVI``\_S  
@HWI-EAS443:3:8:795:1245#0/1  
ATGAGAATGGGAGACCTTCACTACCTCCAGAGCAGAAATG  
+HWI-EAS443:3:8:795:1245#0/1  
aabaaaaabaa\_`Y]`a`aa[\_`\_Z\_^]^`\_^\_Ua¥¥¥\_a  
@HWI-EAS443:3:8:80:1130#0/1  
AGAAACTGTGATGAGAATGGGAGACCTTCACTACCTCCAG

+HWI-EAS443:3:8:80:1130#0/1  
`babaa`a]]`ab\_`¥a\_a\_¥Taa`\_`\_aa\_`^`\_`^¥]\_X  
@HWI-EAS443:3:8:827:922#0/1  
GAAACTGTGATGAGAATGGGAGACCTTCACTACCTCCAGA  
+HWI-EAS443:3:8:827:922#0/1  
aaaaaba`baab¥a\_aaaaaa\_`\_`¥]a^aaV\_a\_]`a\_  
@HWI-EAS443:3:8:836:530#0/1  
CTCGCTGGATTCTCTTTCAAGATCCATTCCACGATTTGT  
+HWI-EAS443:3:8:836:530#0/1  
Z¥`\_`¥`baU][¥Z\_¥`\_`\_`ZQ\_aab¥R^`^`\_]a`\_`^a^]  
@HWI-EAS443:3:8:842:385#0/1  
TGCCGCATTTCTTCAATTAACCACCTTATTTCTCAAATT  
+HWI-EAS443:3:8:842:385#0/1  
abbaa`abbb`bbaabaaaa`aa]aaaaa`\_aYaa`aa  
@HWI-EAS443:3:8:847:1675#0/1  
AGAGGGCCTATTATCTTTTGCCTAGGCATGAGCATGAACC  
+HWI-EAS443:3:8:847:1675#0/1  
aaaaWQ\_aaa\_aaa]`\_a`^`\_`^aa[aa`\_`\_`][\_]`NXY  
@HWI-EAS443:3:8:864:199#0/1  
GGGAGCAATAGTTGGAGAAATTTACCATTACCTTCTCTT  
+HWI-EAS443:3:8:864:199#0/1  
aaa`baaa`¥`]a`a^a]\_\_`\_]`XW^`\_]WS[^Z^XXZ  
@HWI-EAS443:3:8:889:540#0/1  
GCCGCATTTCTTCAATTAACCACCTTATTTCTCAAATTT  
+HWI-EAS443:3:8:889:540#0/1  
aaaaXY`^ZW^`\_`¥^aa¥`^Y\_W[a`\_`^¥]WY¥S^^Z^V¥  
@HWI-EAS443:3:8:897:325#0/1  
AGAATGGGAGACCTTCACTACCTCCAGAGCAGAAATGAAA  
+HWI-EAS443:3:8:897:325#0/1  
ab`aab`aab`a`\_`\_`\_`aaaa\_\_aa`^a¥a`\_a¥\_]`\_`^\_¥  
@HWI-EAS443:3:8:986:1524#0/1  
GAAACTGTGATGAGAATGGGAGACCTTCACTACCTCCAGA  
+HWI-EAS443:3:8:986:1524#0/1  
aY^VR¥aW[]ab`a\_¥^¥\_a`a]Q]`a\_`W^\_YO¥XVW[X  
@HWI-EAS443:3:8:998:219#0/1  
GAAACTGTGATGAGAATGGGAGACCTTCACTACCTCCAGA  
+HWI-EAS443:3:8:998:219#0/1  
aaaaYbb\_a`ab\_b`\_`aaa`¥a\_]`[\_`V`]V\_OUX^X]\_Y  
@HWI-EAS443:3:8:999:917#0/1  
TGAGAATGGGAGACCTTCACTACCTCCAGAGCAGAAATGA  
+HWI-EAS443:3:8:999:917#0/1  
`aUbab]`bb\_b`a`aaV^[\_`XY`\_`[a]YR\_`¥ZY]a¥  
@HWI-EAS443:3:90:1015:164#0/1  
TGCCGCATTTCTTCAATTAACCACCTTATTTCTCAAATT  
+HWI-EAS443:3:90:1015:164#0/1  
Y[Y`aZ^V[\_`\_U^XY¥a`^`\_Y`¥DXW`a^`\_ZR]HT`^]`^  
@HWI-EAS443:3:90:1017:802#0/1  
TGCCGCATTTCTTCAATTAACCACCTTATTTCTCAAATT  
+HWI-EAS443:3:90:1017:802#0/1  
ababbaaa`aabaababbabbaaaabaabbaaaaaaaba

@HWI-EAS443:3:90:1059:1185#0/1  
CTGCTCTGGAGGTAGTGAAGGTCTCCCATTCTCATCACAG  
+HWI-EAS443:3:90:1059:1185#0/1  
abababaaa`b¥aa`V`\_aH[UG[aaS]\_^`¥^H`S  
@HWI-EAS443:3:90:1064:804#0/1  
GCCGCATTTCTTCAATTAACCACCTTATTTCCCTCAAATTT  
+HWI-EAS443:3:90:1064:804#0/1  
Y`aa[S^`¥b`b¥`¥a`\_X\_b`W¥^^abab`Q`Y`aV^Z\_  
@HWI-EAS443:3:90:1085:868#0/1  
TGAGAATGGGAGACCTTCACTACCTCCAGAGCAGAAATGA  
+HWI-EAS443:3:90:1085:868#0/1  
`b`a]bab`aUa^a\_a^aXaa^\_\_a\_Z\_a\_aV`aZ^\_aa\_  
@HWI-EAS443:3:90:1132:1005#0/1  
AAGAGAAGGTAATGGTGAATTTCTCCAATTTCTGCTCCC  
+HWI-EAS443:3:90:1132:1005#0/1  
abaaaaab`^baa``]baaaaba\_a`aaaaaaaa`a^\_^  
@HWI-EAS443:3:90:1179:1606#0/1  
TGATGAGAATGGGAGACCTTCACTACCTCCAGAGCAGAAA  
+HWI-EAS443:3:90:1179:1606#0/1  
^`ba\_]Y`]ba[aX```^`^a[a`^`\_T\_\_\_\_\_``\_\_\_\_  
@HWI-EAS443:3:90:1229:716#0/1  
GAGAACTGTGATGAGAATGGGAGACCTTCACTACCTCCA  
+HWI-EAS443:3:90:1229:716#0/1  
\_aZaab`^aa]^`a`ab`bb`^XUQZ]adW`aPQ][FZ  
@HWI-EAS443:3:90:1247:954#0/1  
AAACTGTGATGAGAATGGGAGACCTTCACTACCTCCAGAG  
+HWI-EAS443:3:90:1247:954#0/1  
Z[\_¥baababbaaaaaabaaba]]aa\_aaaa^``\_a`a`a  
@HWI-EAS443:3:90:1317:129#0/1  
AGAACTGTGATGAGAATGGGAGACCTTCACTACCTCCAG  
+HWI-EAS443:3:90:1317:129#0/1  
abaa`bb\_babWab\_a`abb\_a`RXaa¥\_\_aaW`\_\_\_\_^  
@HWI-EAS443:3:90:1369:1797#0/1  
ATTATCTTTTGCCTAGGCATGAGCATGAACCGTCTCGTG  
+HWI-EAS443:3:90:1369:1797#0/1  
¥^```QXQ`XXXW[^bbab\_Q]]\_``Y``]\_`b[GZaa¥a  
@HWI-EAS443:3:90:136:1479#0/1  
GCCGCATTTCTTCAATTAACCACCTTATTTCCCTCAAATTT  
+HWI-EAS443:3:90:136:1479#0/1  
^ab`T`b`bbbbb`bbbbb`^bbabbbaabbbbabaa  
@HWI-EAS443:3:90:1373:702#0/1  
TGTTATTTGTTGAAACTATTCTCTGTCGCTTTCAATCTG  
+HWI-EAS443:3:90:1373:702#0/1  
aaaaaba¥`a\_a\_\_abaa`ab¥\_a^a\_a]aV^aaP^a  
@HWI-EAS443:3:90:1390:577#0/1  
TGAGAATGGGAGACCTTCACTACCTCCAGAGCAGAAATGA  
+HWI-EAS443:3:90:1390:577#0/1  
`\_[ZZba\_V\_Nb[]FV]aa]aa`V`][¥[UbQ\_a\_a\_aa^  
@HWI-EAS443:3:90:1431:80#0/1  
CAGAGATTCGCTTGGAGAACTGTGATGAGAATGGGAGAC

+HWI-EAS443:3:90:1431:80#0/1  
`abbb]]bab[b`ab[ba`\_`b^a`ab[b]\_aa`\_W`]V  
@HWI-EAS443:3:90:1458:1942#0/1  
TGCCGCATTTCTTCAATTAACCACCTTATTTCTCAAATT  
+HWI-EAS443:3:90:1458:1942#0/1  
¥b`ab^X\_bbbaab^b\_bbaabb\_^abbbab`W`[\_`bbba  
@HWI-EAS443:3:90:1477:1841#0/1  
GAAACTGTGATGAGAATGGGAGACCTTCACTACCTCCAGA  
+HWI-EAS443:3:90:1477:1841#0/1  
^baa¥b`\_Ua`a`UXXa`\_L`Y`\_^`Wa^ZaXDX\_^^\_^  
@HWI-EAS443:3:90:1488:293#0/1  
GCCGCATTTCTTCAATTAACCACCTTATTTCTCAAATTT  
+HWI-EAS443:3:90:1488:293#0/1  
aa][Ua^\_aHJXYa\_bXa`aaaa]aa^b`\_`Ja]^`^\_a^[  
@HWI-EAS443:3:90:1545:235#0/1  
GTGCCGCATTTCTTCAATTAACCACCTTATTTCTCAAAT  
+HWI-EAS443:3:90:1545:235#0/1  
a\_bVN¥TRbaVLUaW`\_a\_]\_YY^TU^Z¥`\_^]V]KFV][  
@HWI-EAS443:3:90:1593:447#0/1  
GGAATGGTAACACGGTTCGAGTCTCTGAAAATATACAGAG  
+HWI-EAS443:3:90:1593:447#0/1  
aaR]bbb`^ZX[T\_\_a`I`aaXaR\_\_`G\_aZU[UYWRZPS  
@HWI-EAS443:3:90:1682:759#0/1  
AGAACTGTGATGAGAATGGGAGACCTTCACTACCTCCAG  
+HWI-EAS443:3:90:1682:759#0/1  
aabbaabaV`ba^\_aaaababaZa0ZaaabaaaI[aa^a`  
@HWI-EAS443:3:90:1690:201#0/1  
TGCCGCATTTCTTCAATTAACCACCTTATTTCTCAAATT  
+HWI-EAS443:3:90:1690:201#0/1  
V`WH\_Z`\_bb]]¥XY`b`aaa`aNU^baabbNP¥`\_`aaa  
@HWI-EAS443:3:90:1704:1313#0/1  
GAAACTGTGATGAGAATGGGAGACCTTCACTACCTCCAGA  
+HWI-EAS443:3:90:1704:1313#0/1  
^WZ¥\_ab`^`aa]\_\_aaa`\_Za`RS¥\_\_a`\_a\_]\_ZZ\_\_]  
@HWI-EAS443:3:90:171:389#0/1  
AGGTAGACTGTTTCTTTGGCATATCCGCAAGCGATTTGC  
+HWI-EAS443:3:90:171:389#0/1  
abbRb`aaaa`aaa\_YaZ^aa`\_a\_X]`[]a]\_\_\_^^]T  
@HWI-EAS443:3:90:1734:630#0/1  
GAGAACTGTGATGAGAATGGGAGACCTTCACTACCTCCA  
+HWI-EAS443:3:90:1734:630#0/1  
aabaabbbb]\_R`a`\_`\_`aaaa^ZZY\_a]a^a`WSa¥¥\_  
@HWI-EAS443:3:90:178:1786#0/1  
CGCATTTCTTCAATTAACCACCTTATTTCTCAAATTTCT  
+HWI-EAS443:3:90:178:1786#0/1  
abaY]aa`¥¥^^Za\_aa`aaaa\_W`\_`\_`a`aa[a`Z\_\_\_\_  
@HWI-EAS443:3:90:185:2041#0/1  
CACGGTTCGAGTCTCTGAAAATATACAGAGATTCGCTTGG  
+HWI-EAS443:3:90:185:2041#0/1  
aaabb\_a`\_`a`¥¥aaaaaaa]\_a`aab]`\_`\_`¥`\_`^^]\_^

@HWI-EAS443:3:90:198:342#0/1  
GCCGCATTTCTTCAATTAACCACCTTATTTCTCAAATTT  
+HWI-EAS443:3:90:198:342#0/1  
aa`a^aaa`aaa`aaa``\_a`\_``\_````^`\_``\_``\_`  
@HWI-EAS443:3:90:27:1451#0/1  
TACAGATGCAATTGTCATTCTAAGTGTCTCGCTGGATTCC  
+HWI-EAS443:3:90:27:1451#0/1  
a`a``a`aaa\_aaa^aaaa\_aaS\_^\_^`^aZ]V\_]Z^]^\_  
@HWI-EAS443:3:90:301:1267#0/1  
GCCGCATTTCTTCAATTAACCACCTTATTTCTCAAATTT  
+HWI-EAS443:3:90:301:1267#0/1  
a``^a`^``]\_aaa`a`Z]``^]Z]\_aa[aY`\_a`¥^a¥`  
@HWI-EAS443:3:90:317:826#0/1  
GAGAATGGGAGACCTTCACTACCTCCAGAGCAGAAATGAA  
+HWI-EAS443:3:90:317:826#0/1  
`Z\_[^``[``\_K¥HKU\_UKVZ^]\_\_V[¥[Z\_^\_] [NY[VZ  
@HWI-EAS443:3:90:389:1170#0/1  
GCCGCATTTCTTCAATTAACCACCTTATTTCTCAAATTT  
+HWI-EAS443:3:90:389:1170#0/1  
`W¥¥XJZ\_U\_^aaR[]aS¥Z\_^a\_Sa]XXXZZ^Y`a`aW\_  
@HWI-EAS443:3:90:426:1227#0/1  
TGAGAATGGGAGACCTTCACTACCTCCAGAGCAGAAATGA  
+HWI-EAS443:3:90:426:1227#0/1  
¥X]a]\_`ZZ¥Za¥a`^ab\_a]a`aaaaa¥][aa\_\_a`a`  
@HWI-EAS443:3:90:440:722#0/1  
TGATGAGAATGGGAGACCTTCACTACCTCCAGAGCAGAAA  
+HWI-EAS443:3:90:440:722#0/1  
abaa\_`aaa`a`]^`^a\_a\_aa`aa`a````a\_`^^a\_\_`  
@HWI-EAS443:3:90:472:638#0/1  
GGGTGTTGCCTCTTCCTTTTAAGGACTTTTGATCTCGGCG  
+HWI-EAS443:3:90:472:638#0/1  
`\_^SXP]`^¥\_W[¥[] [Z¥\_Z[YYZVYW]ZUUX[^ZKXV  
@HWI-EAS443:3:90:488:1527#0/1  
GCCGCATTTCTTCAATTAACCACCTTATTTCTCAAATTT  
+HWI-EAS443:3:90:488:1527#0/1  
abba\_bbbbbbaabbbbbbbbaa\_aaaaabaa`bbaUaaa`  
@HWI-EAS443:3:90:556:1167#0/1  
GGTAGACTGTTTCTTTGGCATATCCGCAAGCGATTTGCA  
+HWI-EAS443:3:90:556:1167#0/1  
]Zb]`babb\_bababa\_aaa`aa\_aaa`\_Ubab\_a]`[aa  
@HWI-EAS443:3:90:55:233#0/1  
TGAGAATGGGAGACCTTCACTACCTCCAGAGCAGAAATGA  
+HWI-EAS443:3:90:55:233#0/1  
abI[Z[a\_b`XbS\_`\_Z¥]\_V^\_\_]\_]UZH\_S]\_WUWW¥¥  
@HWI-EAS443:3:90:596:820#0/1  
CTGTGCTTTCAATCTGTGCCGCATTTCTTCAATTAACCA  
+HWI-EAS443:3:90:596:820#0/1  
V\_`QJ¥``bbY[\_a^¥]S]ba```^`\_`^¥]baaba]^]^\_  
@HWI-EAS443:3:90:654:762#0/1  
GCCGCATTTCTTCAATTAACCACCTTATTTCTCAAATTT

+HWI-EAS443:3:90:654:762#0/1  
aaaaaab`aaaa`aa`]aa`\_a`\_`a`a[a\_`\_\_`^a  
@HWI-EAS443:3:90:687:1718#0/1  
GTCGCTTTCAATCTGTGCCGATTTCTTCAATTAACCACC  
+HWI-EAS443:3:90:687:1718#0/1  
aabb`aaabb`aab`aaaaabaaaaaabbaab`aa\_  
@HWI-EAS443:3:90:700:933#0/1  
GAAACTGTGATGAGAATGGGAGACCTTCACTACCTCCAGA  
+HWI-EAS443:3:90:700:933#0/1  
a`X¥abbX`b`\_^baaaaa^a[\_\_aa\_aa`aaU`a```\_  
@HWI-EAS443:3:90:701:1854#0/1  
GAGAACTGTGATGAGAATGGGAGACCTTCACTACCTCCA  
+HWI-EAS443:3:90:701:1854#0/1  
`Rbbab¥[`IabVX`¥`b¥`a\_]U\_aXSaS`aX^HOWa\_b  
@HWI-EAS443:3:90:702:1424#0/1  
TGAGAATGGGAGACCTTCACTACCTCCAGAGCAGAAATGA  
+HWI-EAS443:3:90:702:1424#0/1  
aaORXQab\_¥OYX^]SY^[\_¥\_aa]]Z]aQ]`a`]V]`]`  
@HWI-EAS443:3:90:74:1836#0/1  
CTGTGATGAGAATGGGAGACCTTCACTACCTCCAGAGCAG  
+HWI-EAS443:3:90:74:1836#0/1  
aa]U^a][`a\_aaaaUXaaa\_V\_aaW`\_S[]a[\_]^`\_`  
@HWI-EAS443:3:90:800:388#0/1  
CCTACTTCGCGCTACCTTTCTGACATGACCCTCGAGGAAA  
+HWI-EAS443:3:90:800:388#0/1  
a\_L^[Z`ababa]PK^]U\_aUVbW\_Raaa]MUa`S\_ZXPX  
@HWI-EAS443:3:90:825:367#0/1  
GTCGCTTTCAATCTGTGCCGATTTCTTCAATTAACCACC  
+HWI-EAS443:3:90:825:367#0/1  
a\_a\_aY\_a\_a[aa^¥Y^\_\_Z[\_`a`S`\_`\_`aa]\_\_0\_\_SX  
@HWI-EAS443:3:90:852:1121#0/1  
AGAATGGGAGACCTTCACTACCTCCAGAGCAGAAATGAAA  
+HWI-EAS443:3:90:852:1121#0/1  
I\_\_aZbb[Q\_V\_ab\_]a`\_bba`]aaa^baYbU[[abaaZ  
@HWI-EAS443:3:90:864:226#0/1  
CATATCCGCAAGCGATTTGCAGACAATGGATTGGGTGATG  
+HWI-EAS443:3:90:864:226#0/1  
`abbb\_aabbaabaab`a\_aaa\_aa`aaa\_\_`W¥WaUZ^  
@HWI-EAS443:3:90:869:1027#0/1  
CTGAAAATATACAGAGATTCGCTTGGAGAACTGTGATGA  
+HWI-EAS443:3:90:869:1027#0/1  
ab\_aaabbbbab`\_aaa\_Yab`aaaabaa\_\_aaYM\_\_a\_  
@HWI-EAS443:3:90:879:357#0/1  
ATCGCACGCAAAGAGGCCTATTATCTTTTGCCTAGGCAT  
+HWI-EAS443:3:90:879:357#0/1  
¥¥aa``bbb\_\_`aaaa`¥Y`aaaa\_aaaa`\_a\_a`aa`\_  
@HWI-EAS443:3:90:898:1370#0/1  
CTGTGATGAGAATGGGAGACCTTCACTACCTCCAGAGCAG  
+HWI-EAS443:3:90:898:1370#0/1  
aababa`baaa`a`aa¥a`aaaaa\_aaa``aa\_`\_`^`



@HWI-EAS443:3:90:902:730#0/1  
GCCGCATTTCTTCAATTAACCACCTTATTTCCCTCAAATTT  
+HWI-EAS443:3:90:902:730#0/1  
a`\_ZZR¥]````]YYa]]^^`Za`\_`¥`RY\_^[QY````  
@HWI-EAS443:3:90:912:773#0/1  
GCCGCATTTCTTCAATTAACCACCTTATTTCCCTCAAATTT  
+HWI-EAS443:3:90:912:773#0/1  
abababbababaaa\_bb\_baaba`aabaaa`baaa`baa  
@HWI-EAS443:3:90:93:275#0/1  
ATTATCTTTTGCCTAGGCATGAGCATGAACCAGTCTCGTG  
+HWI-EAS443:3:90:93:275#0/1  
[Ra`Z]WRPVbYW^L\_dWV^\_aa]`W][¥W\_aZFU^]TGV  
@HWI-EAS443:3:90:952:629#0/1  
AGGCAACACCCTTGGCCTCGATATCGAAACAGCCACTCTT  
+HWI-EAS443:3:90:952:629#0/1  
^`bab\_aba`aaa¥Taab\_aaaaZ\_Z\_a\_a\_\_W\_\_\_a\_\_  
@HWI-EAS443:3:90:98:896#0/1  
GCGCTACCTTTCTGACATGACCCTCGAGAAATGTCACGA  
+HWI-EAS443:3:90:98:896#0/1  
abbbZ`aa^]a¥`\_R````S\_a`¥a`PKX\_a`\_\_GRX\_[R  
@HWI-EAS443:3:90:990:120#0/1  
ATTACACTGAAGTTCGCTTTTCAGTACTATGTTCTTTTCCA  
+HWI-EAS443:3:90:990:120#0/1  
`bbaW`[aa`[aa\_F]Qa`b`SWb¥\_aY\_a^`Ya^adW`\_  
@HWI-EAS443:3:91:1009:815#0/1  
AAAGTCCTTAAAAGGAAGAGGCAACACCCTTGGCCTCGAT  
+HWI-EAS443:3:91:1009:815#0/1  
aa`aaa\_bbbb^``]aabaa^bbb`a\_¥¥aa\_\_\_\_`a\_``a  
@HWI-EAS443:3:91:1019:1575#0/1  
GCCGCATTTCTTCAATTAACCACCTTATTTCCCTCAAATTT  
+HWI-EAS443:3:91:1019:1575#0/1  
a\_\_P]]SV¥[]XHSW[S[[NQXS[SPSPSQQ[[YUHY[X  
@HWI-EAS443:3:91:1061:1753#0/1  
TTTGGCATATCCGCAAGCGATTTGCAGACAATGGATTGGG  
+HWI-EAS443:3:91:1061:1753#0/1  
aaa^bbbb[aab]]baaUa``aa\_aSabaaaa\_a\_ZU]`  
@HWI-EAS443:3:91:1127:788#0/1  
CGCTTTCAATCTGTGCCGATTTCTTCAATTAACCACCTT  
+HWI-EAS443:3:91:1127:788#0/1  
T\_bbbbbbbabb]abbbabbbabbbbbbba]babbb  
@HWI-EAS443:3:91:1132:475#0/1  
CATCTGTACCTACTTCGCGCTACCTTTCTGACATGACCCT  
+HWI-EAS443:3:91:1132:475#0/1  
abbbbbbbbbbbabbbbababbbabab`bababbaa\_\_\_\_  
@HWI-EAS443:3:91:1142:984#0/1  
GCGCGAAGTAGGTACAGATGCAATTGTCATTCTAAGTGTC  
+HWI-EAS443:3:91:1142:984#0/1  
aXaWa\_X`X]\_XOVXa\_\_^]]X^WXUUX]]U^YZ]XPLM  
@HWI-EAS443:3:91:1156:817#0/1  
GAATGGGAGACCTTCACTACCTCCAGAGCAGAAATGAAAA

+HWI-EAS443:3:91:1156:817#0/1  
aa\_\_`aa`a`Z`¥[^^¥TW\_¥¥\_`UY¥W`Y¥Y^¥¥¥¥S  
@HWI-EAS443:3:91:1185:1948#0/1  
AACAAATCGTGGAATGGATCTTGAAAGAGGAATCCAGCGA  
+HWI-EAS443:3:91:1185:1948#0/1  
T`b\_\_b`\_\_]`¥aaa```baba^abbaabaaaaV^ba]a\_  
@HWI-EAS443:3:91:1191:241#0/1  
TCCAACACCATGTCAAGCTTTTCAGGTAGACTGTTTCCTTT  
+HWI-EAS443:3:91:1191:241#0/1  
`ba]^aa^a`a^[a]V`[[a]^]b^R\_a\_\_a^a``^Z\_X^  
@HWI-EAS443:3:91:1260:863#0/1  
CACCATACCTTCTCTCCAGGACATACTTATGAGGATGT  
+HWI-EAS443:3:91:1260:863#0/1  
`babbbbbbbabbbbbbbbbbbbbbbbabbbbbbbbbbb`  
@HWI-EAS443:3:91:1391:873#0/1  
ACTGCATTTTTGACATCCTCATAAGTATGTCCTGGAAGAG  
+HWI-EAS443:3:91:1391:873#0/1  
a¥aba`bbbaaa^`a`[^aYab¥a`X\_ba`S\_a^P]^`a^^  
@HWI-EAS443:3:91:1431:640#0/1  
ATGAGAATGGGAGACCTTCACTACCTCCAGAGCAGAAATG  
+HWI-EAS443:3:91:1431:640#0/1  
abb`babbbbaaba\_`aaZaaaa^\_a[]aaaa\_aa\_a\_`a  
@HWI-EAS443:3:91:153:196#0/1  
TGAGAATGGGAGACCTTCACTACCTCCAGAGCAGAAATGA  
+HWI-EAS443:3:91:153:196#0/1  
ababaabbaaaa\_XX[[\_`\_\_\_\_^\_\_^ZZa]\_]\_ZSS[\_]  
@HWI-EAS443:3:91:1592:1271#0/1  
AAAGATTACACTGAAGTTCGCTTTCAGTACTATGTTCTTT  
+HWI-EAS443:3:91:1592:1271#0/1  
a\_XR`Z]aba`a]aYa]b¥b]aaa]\_¥U\_`a\_`a``Ya\_\_  
@HWI-EAS443:3:91:1593:73#0/1  
CGCTTGGAGAAACTGTGATGAGAATGGGAGACCTTCACTA  
+HWI-EAS443:3:91:1593:73#0/1  
UbaNb[bbbaaaUbKU[[]¥¥ababbb]bVa[aaUaab`bb  
@HWI-EAS443:3:91:1606:1388#0/1  
GAGAAACTGTGATGAGAATGGGAGACCTTCACTACCTCCA  
+HWI-EAS443:3:91:1606:1388#0/1  
aa\_XaS\_^aWa[]\_^\_Y^U\_aaU`BBBBBBBBBBBBBBBB  
@HWI-EAS443:3:91:1628:1199#0/1  
TGAGAATGGGAGACCTTCACTACCTCCAGAGCAGAAATGA  
+HWI-EAS443:3:91:1628:1199#0/1  
a]`````abbaaaa[¥a^\_a\_[`^]\_aTR]a\_\_\_\_`[^\_\_\_\_a[  
@HWI-EAS443:3:91:1659:1493#0/1  
GAAACTGTGATGAGAATGGGAGACCTTCACTACCTCCAGA  
+HWI-EAS443:3:91:1659:1493#0/1  
^baaTW`b\_[b[[]ab\_`^b\_\_¥\_\_¥[Q¥aZG\_QY]^Y  
@HWI-EAS443:3:91:1679:764#0/1  
CGCATTTCTTCAATTAACCACCTTATTTCTCAAATTTCT  
+HWI-EAS443:3:91:1679:764#0/1  
ab\_¥abaabbaaaababa\_bbabbaaabb`b`ba\_aaaaa

@HWI-EAS443:3:91:224:1155#0/1  
TGTCGCTTTCAATCTGTGCCGATTTCTTCAATTAACCAC  
+HWI-EAS443:3:91:224:1155#0/1  
Yba^W]RZ^`¥S`\_`VP^X`]`a¥a`\_[ZZYZ[^\_^XN[Q  
@HWI-EAS443:3:91:224:1810#0/1  
GTGCCGATTTCTTCAATTAACCACCTTATTTCTCAAAT  
+HWI-EAS443:3:91:224:1810#0/1  
a``a````a`a\_a`\_aaa`aa`a[[`\_`\_`^^U^\_\_^\_^  
@HWI-EAS443:3:91:235:273#0/1  
CAGAGATTGCTTGGAGAACTGTGATGAGAATGGGAGAC  
+HWI-EAS443:3:91:235:273#0/1  
abbbb`bbbbabbbabbaaaab]b`\_a^a`a`a]a^`\_U  
@HWI-EAS443:3:91:244:244#0/1  
CACGGTTCGAGTCTCTGAAAATATACAGAGATTCGCTTGG  
+HWI-EAS443:3:91:244:244#0/1  
]W\_`^¥]M]\_Y¥`R¥aaWU[ZYY`]YY`X¥LOYO^MSU[¥  
@HWI-EAS443:3:91:245:576#0/1  
GATATGCCAAAGGAAACAGTCTACCTGAAAGCTTGACATG  
+HWI-EAS443:3:91:245:576#0/1  
\_`Y```^]W^``aaaa\_a`]^Xa`\_]`XGT\_]W]\_\_X^¥¥  
@HWI-EAS443:3:91:247:1212#0/1  
GCCGATTTCTTCAATTAACCACCTTATTTCTCAAATTT  
+HWI-EAS443:3:91:247:1212#0/1  
a`\_aaY`^\_b\_]`XYZ[XQTZSR`]I]XI`UX¥[U][Y¥  
@HWI-EAS443:3:91:280:206#0/1  
CGAGAAAGCTTTATCTCTTGTCTACTTCAAGCAGTAGT  
+HWI-EAS443:3:91:280:206#0/1  
abababbbbbbbbbbb`bbb`babbaaabab`ab`aa\_  
@HWI-EAS443:3:91:330:354#0/1  
CTATTATCTTTGCCTAGGCATGAGCATGAACCAGTCTCG  
+HWI-EAS443:3:91:330:354#0/1  
a`[\_][a^]a]`aS]\_] [aW`aaaa`¥\_aaa\_¥V`L[`\_]`  
@HWI-EAS443:3:91:376:195#0/1  
GAAACTGTGATGAGAATGGGAGACCTTCACTACCTCCAGA  
+HWI-EAS443:3:91:376:195#0/1  
a¥PP¥V]`\_UZWN`ILR¥VWW¥SUUWWWYNHKWWYUWBB  
@HWI-EAS443:3:91:405:1381#0/1  
CCGATTTCTTCAATTAACCACCTTATTTCTCAAATTTTC  
+HWI-EAS443:3:91:405:1381#0/1  
abaXI^a\_baab`Yaa```^]aaa`aaaaa\_aa[aa\_\_`  
@HWI-EAS443:3:91:431:209#0/1  
CTATTATCTTTGCCTAGGCATGAGCATGAACCAGTCTCG  
+HWI-EAS443:3:91:431:209#0/1  
\_a``]W[aaVUYXWY¥``\_^][``\_]\_Za]]^aVS^^]  
@HWI-EAS443:3:91:439:315#0/1  
TGCCGATTTCTTCAATTAACCACCTTATTTCTCAAATT  
+HWI-EAS443:3:91:439:315#0/1  
ab\_H]X\_T^abb^a`a]]a[``\_`^^[a\_aZ`\_`Z][¥\_  
@HWI-EAS443:3:91:492:1231#0/1  
GATGAGAATGGGAGACCTTCACTACCTCCAGAGCAGAAAT

+HWI-EAS443:3:91:492:1231#0/1  
aba` [ [¥Z]a\_b\_]\_aaa\_]`¥`ZYa\_PTS`X^N\_aW]\_\_  
@HWI-EAS443:3:91:504:214#0/1  
ATTTACCATTTACCTTCTCTTCCAGGACATACTTATGAGG  
+HWI-EAS443:3:91:504:214#0/1  
abaa`a\_aaaaa\_`a`a\_a`\_\_\_\_`\_\_^`\_`\_]\_`\_`a^`\_\_  
@HWI-EAS443:3:91:50:276#0/1  
AATGGATCTTGAAAGAGGAATCCAGCGAGACACTTAGAAT  
+HWI-EAS443:3:91:50:276#0/1  
`Zaabbaa\_a`U¥`\_\_\_\_` [ ]`\_`\_V^¥\_W]`ZZ`WJ¥\_\_  
@HWI-EAS443:3:91:537:845#0/1  
ATCCGCAAGCGATTTGCAGACAATGGATTGGGTGATGCCC  
+HWI-EAS443:3:91:537:845#0/1  
aa` `bab\_aab`aaaaa[aa¥¥a`^a]X]^U¥¥¥^X¥XGZ  
@HWI-EAS443:3:91:581:1344#0/1  
CTGTGATGAGAATGGGAGACCTTCACTACCTCCAGAGCAG  
+HWI-EAS443:3:91:581:1344#0/1  
a\_b`baaa`a]a`baaaa`aa`Raa`\_\_a\_X\_\_`\_^\_a^`  
@HWI-EAS443:3:91:623:550#0/1  
CAGAAAGGTAGCGGAAGTAGGTACAGATGCAATTGTCAT  
+HWI-EAS443:3:91:623:550#0/1  
¥R\_R\_\_\_XH\_¥\_\_^\_0¥[0¥b]PP\_VVZMb¥¥SZab\_¥S^  
@HWI-EAS443:3:91:650:1573#0/1  
ATGGTAACACGGTTGAGTCTCTGAAAATATACAGAGATT  
+HWI-EAS443:3:91:650:1573#0/1  
a`^^¥aab¥a\_XYaZ\_\_`U^X\_[`a^a`aaY` `a`Za\_^\_  
@HWI-EAS443:3:91:654:608#0/1  
AGAAACTGTGATGAGAATGGGAGACCTTCACTACCTCCAG  
+HWI-EAS443:3:91:654:608#0/1  
```aaaaa\_aa\_a`a`a` `]]^a`\_]\_\_\_\_a\_\_]]]^\_`^`\_\_  
@HWI-EAS443:3:91:671:1253#0/1  
TCGCTTTCAATCTGTGCCGATTTCTTCAATTAACCACCT  
+HWI-EAS443:3:91:671:1253#0/1  
abbaababaaaaa^a`ba`¥`a`aaaaa`aa`¥aa`Xa  
@HWI-EAS443:3:91:718:1853#0/1  
CCGCATTTCTTCAATTAACCACCTTATTTCTCAAATTT  
+HWI-EAS443:3:91:718:1853#0/1  
abbb`bbbbbba` `ababb`abb`baaaaaaaaaa` `aa`a  
@HWI-EAS443:3:91:721:130#0/1  
GCCGCATTTCTTCAATTAACCACCTTATTTCTCAAATTT  
+HWI-EAS443:3:91:721:130#0/1  
a][NQ\_]QWLRPU]NQ]]RUTRZY]UW\_X]VHUWW]XW]^  
@HWI-EAS443:3:91:759:520#0/1  
CAAATCGTGAATGGATCTTGAAAGAGGAATCCAGCGAGA  
+HWI-EAS443:3:91:759:520#0/1  
\_abbbab`bbbabba]baaabbbababbbab\_`a][baa`  
@HWI-EAS443:3:91:775:1231#0/1  
ATTACACTGAAGTTTCGCTTTTCAGTACTATGTTCTTTTCCA  
+HWI-EAS443:3:91:775:1231#0/1  
aaa]` `[abZM\_\_aaa\_`aaa`b[ ]\_aYaaZ]`¥^`^VT^

@HWI-EAS443:3:91:783:1711#0/1  
CTGTGATGAGAATGGGAGACCTTCACTACCTCCAGAGCAG  
+HWI-EAS443:3:91:783:1711#0/1  
aabababbbaabbbbbbbbbbbaabbbbabbaabbbbab  
@HWI-EAS443:3:91:789:1301#0/1  
AGAAACTGTGATGAGAATGGGAGACCTTCACTACCTCCAG  
+HWI-EAS443:3:91:789:1301#0/1  
XO¥\_V]`bY`a^aX`aa¥S^Z]`a\_^^ab]a¥WZ^^`` [  
@HWI-EAS443:3:91:805:462#0/1  
GCTGGATTCTCTTTCAAGATCCATTCCACGATTTGTTTC  
+HWI-EAS443:3:91:805:462#0/1  
abbbbaabba]b`bbbb`a`aaaa\_baa``abaaaaa`a`  
@HWI-EAS443:3:91:818:520#0/1  
AGATTACACTGAAGTTCGCTTTCAGTACTATGTTCTTTTC  
+HWI-EAS443:3:91:818:520#0/1  
abbbbbbb`babababababbaab\_a`babb`a\_baaa\_  
@HWI-EAS443:3:91:818:804#0/1  
TCCCATTCTCATCACAGTTTCTCCAAGCGAATCTCTGTAT  
+HWI-EAS443:3:91:818:804#0/1  
aba`abaabaababaaaaaaaaaaaaa\_b```a`aaa\_aa  
@HWI-EAS443:3:91:829:625#0/1  
AGAAACTGTGATGAGAATGGGAGACCTTCACTACCTCCAG  
+HWI-EAS443:3:91:829:625#0/1  
\_bbaa¥``[baa`\_a]a\_aaa\_a`\_\_\_\_]\_`a\_V^\_\_\_\_]\_]  
@HWI-EAS443:3:91:859:1275#0/1  
AAACTGTGATGAGAATGGGAGACCTTCACTACCTCCAGAG  
+HWI-EAS443:3:91:859:1275#0/1  
a\_^^aa[SZaa^^`\_a`\_\_[¥\_Z]a\_]`\_a[]\_¥\_a\_]\_  
@HWI-EAS443:3:91:897:1623#0/1  
TGCCAAAGGAAACAGTCTACCTGAAAGCTTGACATGGTGT  
+HWI-EAS443:3:91:897:1623#0/1  
aba``abbab¥`\_ba``aa`abaZ```aaaaaaaaaX]`  
@HWI-EAS443:3:91:89:434#0/1  
CTGTGCCGATTTCTTCAATTAACCACCTTATTTCTCAA  
+HWI-EAS443:3:91:89:434#0/1  
abb`bbaa```abbbbbabb]ababaabaaaabaaabaa  
@HWI-EAS443:3:91:90:1020#0/1  
AACTATTCTCTGTCGCTTCAATCTGTGCCGATTTCTTC  
+HWI-EAS443:3:91:90:1020#0/1  
RG^`Z¥`a¥Y¥Z[\_b\_\_a¥V\_Q`a]US]```[QW``\_[ZP  
@HWI-EAS443:3:91:90:1542#0/1  
CGCTTGGAGAACTGTGATGAGAATGGGAGACCTTCACTA  
+HWI-EAS443:3:91:90:1542#0/1  
\_\_a^^\_bbbYb`b^0`U]\_^`aa]X]a\_TX`[X`V]  
@HWI-EAS443:3:91:940:657#0/1  
AAACGAGAAAGCTTATCTCTTGTCTACTTCAAGCAGT  
+HWI-EAS443:3:91:940:657#0/1  
]^aaa`ba`¥a¥bbabab^baaaba`aaa\_aaaaaab[  
@HWI-EAS443:3:91:944:1619#0/1  
AACACGGTTCGAGTCTCTGAAAATATACAGAGATTCGCTT

+HWI-EAS443:3:91:944:1619#0/1  
aba\_W`a^¥a`a`]X\_¥`a\_aaa\_`\_``aaa`\_`\_]Y`ZWY  
@HWI-EAS443:3:91:952:100#0/1  
TGAGAATGGGAGACCTTCACTACCTCCAGAGCAGAAATGA  
+HWI-EAS443:3:91:952:100#0/1  
ab][U\_aaa\_Y]Q[V\_^`W\_\_VV]YVW`X\_]\_UWU]]X  
@HWI-EAS443:3:91:957:624#0/1  
AAACGAGAAAGCTCTTATCTCTTGTCTACTTCAAGCAGT  
+HWI-EAS443:3:91:957:624#0/1  
a``abababa`\_a\_aaab`bbaaaaaaaaa\_aa`\_aaa`b\_  
@HWI-EAS443:3:92:1035:1219#0/1  
CGCTTGGAGAACTGTGATGAGAATGGGAGACCTTCACTA  
+HWI-EAS443:3:92:1035:1219#0/1  
aaa``aa`a\_a^¥aa]b^aa^X[`^a¥\_\_aZZZ\_[a\_U[[  
@HWI-EAS443:3:92:1041:455#0/1  
GAAAGCTCTTATCTCTTGTCTACTTCAAGCAGTAGTTGT  
+HWI-EAS443:3:92:1041:455#0/1  
a`aaa`babb[b[`\_abba`ba]abaaaaU¥`Uaaaa\_W  
@HWI-EAS443:3:92:1042:168#0/1  
AACAAATCGTGAATGGATCTTGAAGAGGAATCCAGCGA  
+HWI-EAS443:3:92:1042:168#0/1  
abaababab`aaaaaba^``aba\_aa`\_aa\_aa\_\_\_\_`X\_^  
@HWI-EAS443:3:92:1082:1555#0/1  
TGAAAATATACAGAGATTCGCTTGGAGAACTGTGATGAG  
+HWI-EAS443:3:92:1082:1555#0/1  
aa``a`a`a`\_`a`\_`\_]`\_\_\_\_`][^\_aZ\_\_\_\_\_]^^^  
@HWI-EAS443:3:92:110:1730#0/1  
ACTGTGATGAGAATGGGAGACCTTCACTACCTCCAGAGCA  
+HWI-EAS443:3:92:110:1730#0/1  
T\_bb\_babbbb[aaaQZ`aaaa]`bba`aaa\_``a`\_```  
@HWI-EAS443:3:92:1182:616#0/1  
CTTGGAGAACTGTGATGAGAATGGGAGACCTTCACTACC  
+HWI-EAS443:3:92:1182:616#0/1  
aa`a\_abS`^aab]b\_¥b[a]a\_\_b]a\_\_Z\_`\_¥]Y`^]  
@HWI-EAS443:3:92:1199:448#0/1  
GCCGCATTTCTTCAATTAACCACCTTATTTCTCAAATTT  
+HWI-EAS443:3:92:1199:448#0/1  
a`^bbbabXbbaabb`ba`a\_^babbba`¥aaaaaba^  
@HWI-EAS443:3:92:1345:880#0/1  
CTTATGAGGATGTCAAAAATGCAGTTGGGGTCCTCATCGG  
+HWI-EAS443:3:92:1345:880#0/1  
abbabbbabaab`aaaa`aa[]ba`Q`bb`Z\_`aa\_Q\_`  
@HWI-EAS443:3:92:1346:1396#0/1  
GAAACTGTGATGAGAATGGGAGACCTTCACTACCTCCAGA  
+HWI-EAS443:3:92:1346:1396#0/1  
Zba¥abaZaaabaaXX`\_abY^^U\_aXJX[`a\_Q\_¥X\_`a  
@HWI-EAS443:3:92:1368:1270#0/1  
ATGCGGCACAGATTGAAAGCGACAGAGAATAGTTTCGAAC  
+HWI-EAS443:3:92:1368:1270#0/1  
aaaYZ`Y`Ybaaaa¥aaaa\_¥\_\_`a\_a``baa\_aa[`^aZ

@HWI-EAS443:3:92:1376:767#0/1  
AGATTACACTGAAGTTCGCTTTCAGTACTATGTTCTTTTC  
+HWI-EAS443:3:92:1376:767#0/1  
`ba\_bbab`abb`a`a`^aaaaab`\_\_baa\_aaaaaaa^  
@HWI-EAS443:3:92:1427:749#0/1  
TGCCGCATTTCTTCAATTAACCACCTTATTTCTCAAATT  
+HWI-EAS443:3:92:1427:749#0/1  
`b`ba^ba`abaY^aa^¥^T¥aabaZbaa[ `b`a]aa  
@HWI-EAS443:3:92:1430:1629#0/1  
TGCCGCATTTCTTCAATTAACCACCTTATTTCTCAAATT  
+HWI-EAS443:3:92:1430:1629#0/1  
aa`abaaaaWba^`aabaa`^a]aaaabaaa\_baa` `a\_  
@HWI-EAS443:3:92:1431:170#0/1  
GCCGCATTTCTTCAATTAACCACCTTATTTCTCAAATTT  
+HWI-EAS443:3:92:1431:170#0/1  
aV¥`FGX]XSTSWTX^^UVGRXVZ]ZS]]^XO[IUZXZZ  
@HWI-EAS443:3:92:1432:1179#0/1  
AGAAACTGTGATGAGAATGGGAGACCTTCACTACCTCCAG  
+HWI-EAS443:3:92:1432:1179#0/1  
aaaaUaaa[M^aa`\_a\_\_`\_]`WO^\_[\_Vaa^\_a^V^\_  
@HWI-EAS443:3:92:1444:1821#0/1  
CAAAAGTCCTTAAAAGGAAGAGGCAACACCCTTGGCCTCG  
+HWI-EAS443:3:92:1444:1821#0/1  
]abbabZNaabb`b`b`Yaaaabaa\_VaaS^`\_`\_^\_\_U  
@HWI-EAS443:3:92:1459:1328#0/1  
GAAACTGTGATGAGAATGGGAGACCTTCACTACCTCCAGA  
+HWI-EAS443:3:92:1459:1328#0/1  
\_\_baabaWb^aa\_b` `abaa^a\_Z` `\_\_baa^`\_`\_^TaQ  
@HWI-EAS443:3:92:1466:177#0/1  
CGCTTGGAGAACTGTGATGAGAATGGGAGACCTTCACTA  
+HWI-EAS443:3:92:1466:177#0/1  
abbbbbbbbaabaab\_babb`baaab`b\_baQZaaV[D[\_  
@HWI-EAS443:3:92:147:590#0/1  
GCCGCATTTCTTCAATTAACCACCTTATTTCTCAAATTT  
+HWI-EAS443:3:92:147:590#0/1  
\_bbb`Na¥`a`a\_aab\_] ]abb`abab`aaaa¥babbaa  
@HWI-EAS443:3:92:1536:1322#0/1  
CAAGCGAATCTCTGTATATTTTCAGAGACTCGAACCGTGT  
+HWI-EAS443:3:92:1536:1322#0/1  
`ba`aaa\_aSb\_ba`aa`aba`a\_aa\_a]\_WaaaWX^U\_X  
@HWI-EAS443:3:92:1541:1127#0/1  
GTGCTTTCAATCTGTGCCGCATTTCTTCAATTAACCACC  
+HWI-EAS443:3:92:1541:1127#0/1  
]SH`X]¥]\_¥a¥W¥L¥UZSZR\_^]`]a¥TSOW[\_[JHTGX  
@HWI-EAS443:3:92:1549:551#0/1  
GCCGCATTTCTTCAATTAACCACCTTATTTCTCAAATTT  
+HWI-EAS443:3:92:1549:551#0/1  
a`¥aaaaaa]baaaabaaa`\_`\_]aa`aaa^Wa` `\_\_` `\_  
@HWI-EAS443:3:92:1556:1175#0/1  
TGAAAATATACAGAGATTCGCTTGGAGAACTGTGATGAG

+HWI-EAS443:3:92:1556:1175#0/1  
aaaaaaaaaba^a`^a^aa^a^a\_a`^a\_\_\_\_]aa^\_]Z`^`  
@HWI-EAS443:3:92:1658:383#0/1  
AGCAATTGGGACAGAAATTTGAGGAAATAAGGTGGTTAAT  
+HWI-EAS443:3:92:1658:383#0/1  
]\_Y^URY`\_`YU`[Ia]UW`PF\_aY\_Ja]N¥\_^Z^LFHa`  
@HWI-EAS443:3:92:1737:1345#0/1  
GCCGCATTTCTTCAATTAACCACCTTATTTCTCAAATTT  
+HWI-EAS443:3:92:1737:1345#0/1  
`a`bbbbbb`bbaabbabbaba^`babbb`\_`babaabab  
@HWI-EAS443:3:92:1741:1411#0/1  
TGAGAATGGGAGACCTTCACTACCTCCAGAGCAGAAATGA  
+HWI-EAS443:3:92:1741:1411#0/1  
aa\_baaabaa¥¥\_]a^Z^a\_a]Y\_^]`a\_\_Z]a^[\_`\_`\_  
@HWI-EAS443:3:92:1742:967#0/1  
TGAGAATGGGAGACCTTCACTACCTCCAGAGCAGAAATGA  
+HWI-EAS443:3:92:1742:967#0/1  
```a\_aaba\_`b\_[Yaa\_a``^]a`^\_a`ZZa\_\_^\_`^  
@HWI-EAS443:3:92:1775:1226#0/1  
GCCGCATTTCTTCAATTAACCACCTTATTTCTCAAATTT  
+HWI-EAS443:3:92:1775:1226#0/1  
abaa^^`][Z]¥aa]aaa]a^\_a`\_a\_a^a\_¥`a¥[^\_[]  
@HWI-EAS443:3:92:178:333#0/1  
CGCTTTCAATCTGTGCCGCATTTCTTCAATTAACCACCTT  
+HWI-EAS443:3:92:178:333#0/1  
aaaaabababa`baaaaaa``aa\_aaaa\_aaa``]\_\_]aa  
@HWI-EAS443:3:92:179:558#0/1  
GGCCTATTATCTTTTGCCTAGGCATGAGCATGAACCAGTC  
+HWI-EAS443:3:92:179:558#0/1  
a[baa`abaabaaa\_a\_aaaaba\_abaaa\_aaa``Z]\_[\_  
@HWI-EAS443:3:92:208:1411#0/1  
GATGAGAATGGGAGACCTTCACTACCTCCAGAGCAGAAAT  
+HWI-EAS443:3:92:208:1411#0/1  
¥Xbbabbbbaabbba`baabbbbababaaba]aaa`a[aa\_  
@HWI-EAS443:3:92:220:712#0/1  
TGTCTGCAAATCGCTTGGCGATATGCCAAAGGAAACAGTC  
+HWI-EAS443:3:92:220:712#0/1  
a]`aabaabaaaa\_\_`^a`]\_[\_]QYU^[\_¥\_^]\_^VX  
@HWI-EAS443:3:92:238:1961#0/1  
GCTTGGAGAACTGTGATGAGAATGGGAGACCTTCACTAC  
+HWI-EAS443:3:92:238:1961#0/1  
aaaZa`W¥Vabaa¥H[[XUXOHZX[N]\_X[XDPP[[ZW¥S  
@HWI-EAS443:3:92:259:204#0/1  
CAGAAATTTGAGGAAATAAGGTGGTTAATTGAAGAAATGC  
+HWI-EAS443:3:92:259:204#0/1  
¥`bb\_bbbbbabbbbbbb¥bb\_bb`abbbb`bababbbb^  
@HWI-EAS443:3:92:300:91#0/1  
ATTACACTGAAGTTTCGCTTTTCAGTACTATGTTCTTTTCCA  
+HWI-EAS443:3:92:300:91#0/1  
a\_ba`babbb`Zbaaaaaaaaa^]aa`]]`b\_^Ua`aa^]^



@HWI-EAS443:3:92:30:1035#0/1  
GAGAATGGGAGACCTTCACTACCTCCAGAGCAGAAATGAA  
+HWI-EAS443:3:92:30:1035#0/1  
aa`^a`aabYa\_Z]^a^a]^\_\_a` ``¥a\_]`T¥M]^`^\_  
@HWI-EAS443:3:92:313:1550#0/1  
CGCTTTCAATCTGTGCCGATTTCTTCAATTAACCCACCTT  
+HWI-EAS443:3:92:313:1550#0/1  
aab^aabbbbaaa]bbbbaaaaabaabaaaabaaaa\_\_aa  
@HWI-EAS443:3:92:326:976#0/1  
AGAAACTGTGATGAGAATGGGAGACCTTCACTACCTCCAG  
+HWI-EAS443:3:92:326:976#0/1  
]\_\_R0¥Xa^R^ba\_XT`SaaP]\_`Z`^\_^]aWa]I]^NW\_  
@HWI-EAS443:3:92:367:105#0/1  
TTCTCCAATTTGCTCCCTCCTCAGTGAAAGCCCTTAGT  
+HWI-EAS443:3:92:367:105#0/1  
aZ¥a\_a]\_\_\_\_\_`\_[]`^\_[]`^X`^\_\_X^VV^^VVUX^X^U  
@HWI-EAS443:3:92:395:563#0/1  
CACAGATTGAAAGCGACAGAGAATAGTTTCGAACAAATAA  
+HWI-EAS443:3:92:395:563#0/1  
`Vaab`¥bbbabaa`ba`aa`aaaaSaaaa\_a\_aaaaba  
@HWI-EAS443:3:92:397:456#0/1  
GAAACTGTGATGAGAATGGGAGACCTTCACTACCTCCAGA  
+HWI-EAS443:3:92:397:456#0/1  
abb\_Z¥UVR¥W^ZZOY`Y``WLOZPYI¥[^¥H¥PYVF[[\_  
@HWI-EAS443:3:92:408:475#0/1  
GCCGCATTTCTTCAATTAACCCACCTTATTTCTCAAATTT  
+HWI-EAS443:3:92:408:475#0/1  
abaaaabbaaabaaba`aa``aaaba`a][a]aaabaa  
@HWI-EAS443:3:92:431:970#0/1  
GAGAATGGGAGACCTTCACTACCTCCAGAGCAGAAATGAA  
+HWI-EAS443:3:92:431:970#0/1  
^ZXS¥aY`\_\_\_Zaaaaa\_aa`^`[¥`¥\_^^^a\_^Y`\_[]`^\_  
@HWI-EAS443:3:92:464:342#0/1  
AGAAACTGTGATGAGAATGGGAGACCTTCACTACCTCCAG  
+HWI-EAS443:3:92:464:342#0/1  
aa\_a^aab^`\_`a\_a]^`^a\_\_^a^Z]\_¥^^ZX^U\_^VZZ¥  
@HWI-EAS443:3:92:544:1414#0/1  
GAGAAACTGTGATGAGAATGGGAGACCTTCACTACCTCCA  
+HWI-EAS443:3:92:544:1414#0/1  
aa`abbaab`\_`aaaab\_baaab\_a`\_``aaa`\_a```a^\_  
@HWI-EAS443:3:92:555:905#0/1  
GCGAGACACTTAGAATGACAATTGCATCTGTACCTACTTC  
+HWI-EAS443:3:92:555:905#0/1  
aXQONF¥¥¥TVXY[`WVPQRTVR^`SV`PUMS^ZZ]YX[^  
@HWI-EAS443:3:92:560:913#0/1  
GCCGCATTTCTTCAATTAACCCACCTTATTTCTCAAATTT  
+HWI-EAS443:3:92:560:913#0/1  
abbab`aba`aab``bbbba`aaaaa`aaa^``a`aaa\_  
@HWI-EAS443:3:92:603:658#0/1  
GCCGCATTTCTTCAATTAACCCACCTTATTTCTCAAATTT

+HWI-EAS443:3:92:603:658#0/1  
\_aaaaabb\_bbaabaaab\_b` `aabaaaaaaaaab`\_  
@HWI-EAS443:3:92:685:1498#0/1  
AGAAACTGTGATGAGAATGGGAGACCTTCACTACCTCCAG  
+HWI-EAS443:3:92:685:1498#0/1  
aaaaaaaa\_\_a^a`\_\_`^`^`\_aa\_\_[\_`a^^a`^`^`\_]\_^  
@HWI-EAS443:3:92:693:963#0/1  
CTGTGATGAGAATGGGAGACCTTCACTACCTCCAGAGCAG  
+HWI-EAS443:3:92:693:963#0/1  
^`ba`b\_^a` `a^^Z\_YZWT\_aaaa`a^]` `aaa\_a`\_`  
@HWI-EAS443:3:92:711:1981#0/1  
AGAAACTGTGATGAGAATGGGAGACCTTCACTACCTCCAG  
+HWI-EAS443:3:92:711:1981#0/1  
aabbbbaa\_a`a]\_aaa\_XQ[\_a\_^V^\_\_a]]`a`\_]\_[a¥  
@HWI-EAS443:3:92:723:393#0/1  
GCGCGAAGTAGGTACAGATGCAATTGTCATTCTAAGTGTC  
+HWI-EAS443:3:92:723:393#0/1  
aaa^ba\_a]`ba^`\_a` `aa¥`\_aa`^X`a` \_\_\_`aX^X^  
@HWI-EAS443:3:92:768:780#0/1  
GCTTTCAATCTGTGCCGATTTCTTCAATTAACCACCTTA  
+HWI-EAS443:3:92:768:780#0/1  
`Z\_` `^a]Z^b` `YabX[\_]`¥` `^XZ`a`V[YZ`^¥¥a  
@HWI-EAS443:3:92:784:1039#0/1  
TCATGTCAGAAAGGTAGCGGAAGTAGGTACAGATGCAAT  
+HWI-EAS443:3:92:784:1039#0/1  
aaaab]aW^^]`aaVZ]^^\_b`Ya^aaa]`\_`a`^`][S]  
@HWI-EAS443:3:92:788:1368#0/1  
GCCGCATTTCTTCAATTAACCACCTTATTTCTCAAATTT  
+HWI-EAS443:3:92:788:1368#0/1  
aba\_`bbbbaabbbabbbbbaaaabbbabbbba\_babZ`bab  
@HWI-EAS443:3:92:83:2000#0/1  
GCCGCATTTCTTCAATTAACCACCTTATTTCTCAAATTT  
+HWI-EAS443:3:92:83:2000#0/1  
Kb`bbbbaa`Qa]ababababa¥`b\_]`^aa\_aaaa]a\_a\_a  
@HWI-EAS443:3:92:858:1455#0/1  
TGAGAATGGGAGACCTTCACTACCTCCAGAGCAGAAATGA  
+HWI-EAS443:3:92:858:1455#0/1  
aaaaaaaa\_\_`^Y]\_`^\_a\_aX\_`\_\_`a^]¥\_`\_Y` `^\_  
@HWI-EAS443:3:92:861:387#0/1  
AGAAACTGTGATGAGAATGGGAGACCTTCACTACCTCCAG  
+HWI-EAS443:3:92:861:387#0/1  
a\_aab^aa\_a`a\_[Z` `a[`a`a`\_`\_\_`a^a`¥^\_N]\_\_  
@HWI-EAS443:3:92:866:1269#0/1  
CGCTTGGAGAACTGTGATGAGAATGGGAGACCTTCACTA  
+HWI-EAS443:3:92:866:1269#0/1  
abbbabbbbaa`\_]\_abaa`\_^]]Ya\_aa\_` `¥XK[`VSK\_`  
@HWI-EAS443:3:92:891:1840#0/1  
CGAGAGCAATTGGGACAGAAATTTGAGGAAATAAGGTGGT  
+HWI-EAS443:3:92:891:1840#0/1  
aabaa`YJ¥abb¥Y¥bbbabab` `aW^aVUab`aabPaa\_

@HWI-EAS443:3:92:981:924#0/1  
GCCGCATTTCTTCAATTAACCACCTTATTTCTCAAATTT  
+HWI-EAS443:3:92:981:924#0/1  
a`aaa`X\_Ra¥NV`bba` `[^^ab\_aYa]Ua\_XIXaa\_  
@HWI-EAS443:3:93:1003:1500#0/1  
GAAACTGTGATGAGAATGGGAGACCTTCACTACCTCCAGA  
+HWI-EAS443:3:93:1003:1500#0/1  
aaa\_X\_a^a]aa`aa`\_aa]R^`X^`\_Y\_\_Y]]VY]^  
@HWI-EAS443:3:93:1052:1966#0/1  
GTCAGAAAGGTAGCGGAAGTAGGTACAGATGCAATTGTC  
+HWI-EAS443:3:93:1052:1966#0/1  
a]`aaaaaa`Yaaaaaaaaa^a`a^`a\_a\_aa^` `\_\_W`  
@HWI-EAS443:3:93:110:1317#0/1  
GTGATGAGAATGGGAGACCTTCACTACCTCCAGAGCAGAA  
+HWI-EAS443:3:93:110:1317#0/1  
a¥][\_\_\_\_\_a`XUZLLX]TX\_ZU]RQZXYZVZ\_UNYUX  
@HWI-EAS443:3:93:1116:1013#0/1  
GGAGAAATTTACCATTACCTTCTCTTCCAGGACATACTT  
+HWI-EAS443:3:93:1116:1013#0/1  
a[UONWV[^^\_N][PX¥^[PY`\_`TLYUY[^WYUYFV^  
@HWI-EAS443:3:93:1152:802#0/1  
ATTACACTGAAGTTCGCTTTCAGTACTATGTTCTTTTCCA  
+HWI-EAS443:3:93:1152:802#0/1  
aX^aaZab^THa\_XZ`\_\_a^W¥¥a^a`^V\_¥a]\_\_LHY  
@HWI-EAS443:3:93:1162:1274#0/1  
GCAAGCGATTTGCAGACAATGGATTGGGTGATGCCCCATT  
+HWI-EAS443:3:93:1162:1274#0/1  
aa`a`baaaa\_\_\_a\_a^\_aa\_a¥^QY]U¥^¥NWYWYTU\_  
@HWI-EAS443:3:93:1184:711#0/1  
CCGCAAGCGATTTGCAGACAATGGATTGGGTGATGCCCCA  
+HWI-EAS443:3:93:1184:711#0/1  
`^bbb^`a[WRR¥¥`^OL¥aa\_¥`W\_X[[aQXGX[GUK¥X  
@HWI-EAS443:3:93:1188:722#0/1  
GTCGCTTTCAATCTGTGCCGATTTCTTCAATTAACCACC  
+HWI-EAS443:3:93:1188:722#0/1  
a^\_aQ\_\_`[a¥`W¥^W[[^\_\_Y^`][\_^^^\_^^^W]XZ  
@HWI-EAS443:3:93:1194:233#0/1  
GCCGCATTTCTTCAATTAACCACCTTATTTCTCAAATTT  
+HWI-EAS443:3:93:1194:233#0/1  
aW^a]Z\_\_VQ`^^PU]YXMSRDKRRUTSTKRMW^ZZ\_BB  
@HWI-EAS443:3:93:119:557#0/1  
TGCCGCATTTCTTCAATTAACCACCTTATTTCTCAAATT  
+HWI-EAS443:3:93:119:557#0/1  
aa`\_`\_`\_VSb^`a`¥aXba¥][Ya\_a\_[``^¥]aa¥¥\_`\_  
@HWI-EAS443:3:93:1212:610#0/1  
GAAAATATACAGAGATTCGCTTGGAGAACTGTGATGAGA  
+HWI-EAS443:3:93:1212:610#0/1  
a]JX]aaa`a`a`aY^]]a^aUaaM^`X^`R\_] ^PUZ]  
@HWI-EAS443:3:93:131:1608#0/1  
CACAGATTGAAAGCGACAGAGAATAGTTTGAACAAATAA

+HWI-EAS443:3:93:131:1608#0/1  
aaabaa`bbbbaaab^a`a`ba`a`\_baV\_aaaa``abb  
@HWI-EAS443:3:93:1334:1654#0/1  
GCCGCATTTCTTCAATTAACCACCTTATTTCTCAAATTT  
+HWI-EAS443:3:93:1334:1654#0/1  
SS¥`\_¥ZVQV\_YZZZ`b\_WZ`]``^\_bb^¥\_\_U\_``aa\_  
@HWI-EAS443:3:93:1367:522#0/1  
CGCATTTCTTCAATTAACCACCTTATTTCTCAAATTTCT  
+HWI-EAS443:3:93:1367:522#0/1  
ab^babbaba[aaabab\_Yaaaaaaba\_\_aaa\_]\_aa]a  
@HWI-EAS443:3:93:1413:1456#0/1  
GAAACTGTGATGAGAATGGGAGACCTTCACTACCTCCAGA  
+HWI-EAS443:3:93:1413:1456#0/1  
a`bbYabaa\_aa^a`aabb^\_b\_\_S\_TK[IX\_YS\_]G\_]\_  
@HWI-EAS443:3:93:1448:1776#0/1  
GACATTTCTCGAGGGTCATGTCAGAAAGGTAGCGCGAAG  
+HWI-EAS443:3:93:1448:1776#0/1  
a\_[`\_\_\_P^X¥\_\_``UQaUaZG¥\_^Q\_\_NT^\_[UQ¥TW`  
@HWI-EAS443:3:93:1459:902#0/1  
ATTCTCTGTCGCTTTCAATCTGTGCCGATTTCTTCAATT  
+HWI-EAS443:3:93:1459:902#0/1  
`aa[`¥`a¥Z```aaXaa\_Z^a`aZW\_Y`[aa[]`YX\_Z`  
@HWI-EAS443:3:93:1468:818#0/1  
GAAACTGTGATGAGAATGGGAGACCTTCACTACCTCCAGA  
+HWI-EAS443:3:93:1468:818#0/1  
a\_]\_]\_aa\_b`aa\_\_`X`a`¥\_a`[[\_aV]X\_¥[O[GPZVV  
@HWI-EAS443:3:93:1478:1812#0/1  
CGCTTGGAGAACTGTGATGAGAATGGGAGACCTTCACTA  
+HWI-EAS443:3:93:1478:1812#0/1  
abaaVbbbb[b`ab^\_bbbaa\_`[\_aW^VZLFZVI[L[B  
@HWI-EAS443:3:93:149:90#0/1  
GAAACTGTGATGAGAATGGGAGACCTTCACTACCTCCAGA  
+HWI-EAS443:3:93:149:90#0/1  
a^M\_\_aaGa\_aa]aa^¥^]ZX`V\_^\_\_V¥H]¥VUXVVX^B  
@HWI-EAS443:3:93:1529:911#0/1  
AGAACTGTGATGAGAATGGGAGACCTTCACTACCTCCAG  
+HWI-EAS443:3:93:1529:911#0/1  
^`ba\_b`Ta^aa\_b`aaaaa]]][OGa`H\_\_^`VUUUVYa  
@HWI-EAS443:3:93:1546:2019#0/1  
GCGCGAAGTAGGTACAGATGCAATTGTCATTCTAAGTGTC  
+HWI-EAS443:3:93:1546:2019#0/1  
`OVJ\_^ZX][]¥Xaa\_^WTS```X[`X]]^UFU]^`G[BB  
@HWI-EAS443:3:93:1611:1937#0/1  
GGAATGGGGCATCACCCAATCCATTGTCTGCAAATCGCTT  
+HWI-EAS443:3:93:1611:1937#0/1  
a¥a\_\_\_\_[^^Za\_T\_R\_G`\_Y^¥\_\_NWNSWWN\_\_¥QTWNBB  
@HWI-EAS443:3:93:1656:82#0/1  
TGCCGCATTTCTTCAATTAACCACCTTATTTCTCAAATT  
+HWI-EAS443:3:93:1656:82#0/1  
aa[`Yaaaaaa\_HSa^a`aa^^`\_Ia\_La`a\_`\_]S^`]a

@HWI-EAS443:3:93:1664:1002#0/1  
ACTGGTTCATGCTCATGCCTAGGCAAAAGATAATAGGCC  
+HWI-EAS443:3:93:1664:1002#0/1  
VYaa`Za`a`a^aa`\_aZ\_]\_GX[Y\_W\_\_N\_`¥Q\_UUW¥^  
@HWI-EAS443:3:93:1696:1174#0/1  
AGAAACTGTGATGAGAATGGGAGACCTTCACTACCTCCAG  
+HWI-EAS443:3:93:1696:1174#0/1  
aa\_^a\_^[\`aTba^a`^¥`]\`aaXX\_^QR[Y¥NLSMSZa  
@HWI-EAS443:3:93:1703:1019#0/1  
GCCGCATTTCTTCAATTAACCACCTTATTTCTCAAATTT  
+HWI-EAS443:3:93:1703:1019#0/1  
a]aa\_abb\_bbb`aabaaa`a`\_aaaaa\_^\_a`a\_\_a^a  
@HWI-EAS443:3:93:1749:204#0/1  
GAAACTGTGATGAGAATGGGAGACCTTCACTACCTCCAGA  
+HWI-EAS443:3:93:1749:204#0/1  
aaa`]ab\_baa`\_a\_\_aa`a^a]XX`^X`V`\_YY^WVX^]  
@HWI-EAS443:3:93:177:1163#0/1  
CAAGGAATGGGCATCACCCAATCCATTGTCTGCAAATCG  
+HWI-EAS443:3:93:177:1163#0/1  
aa`\_a\_\_XPPW\_^\_\_aaZ^U]`W¥[Z^]STVV[TVGUBBB  
@HWI-EAS443:3:93:186:1336#0/1  
GTCGCTTTCAATCTGTGCCGCATTTCTTCAATTAACCACC  
+HWI-EAS443:3:93:186:1336#0/1  
^Xab^`aa`X`\_a\_YZ`¥`\_]X]\_\_`\_\_`^`\_]\_]¥V[]  
@HWI-EAS443:3:93:235:555#0/1  
GAGCAATTGGGACAGAAATTTGAGGAAATAAGGTGGTTAA  
+HWI-EAS443:3:93:235:555#0/1  
`VaUZ\_aaaa^[\_a\_X^¥L^\_W\_aWZUYXR`\_Ya[PY[B  
@HWI-EAS443:3:93:237:1070#0/1  
AGAAACTGTGATGAGAATGGGAGACCTTCACTACCTCCAG  
+HWI-EAS443:3:93:237:1070#0/1  
[¥ZZ`aabT```aa\_U^`a¥\_Z\_Z^]`^V^^`a^\_\_]\_]\_  
@HWI-EAS443:3:93:266:530#0/1  
ACAGAAATTTGAGGAAATAAGGTGGTTAATTGAAGAAATG  
+HWI-EAS443:3:93:266:530#0/1  
a[\_\_\_`[\`abaa^aaU]P\_a\_baS`]W\_a\_Z`a`\_\_\_`XRX\_  
@HWI-EAS443:3:93:271:564#0/1  
CGTGAATGGATCTTGAAAGAGGAATCCAGCGAGACACTT  
+HWI-EAS443:3:93:271:564#0/1  
aa\_bb\_abaa\_a¥\_ba`aabaaa`a\_a`a^a^\_\_^[\_`\_`  
@HWI-EAS443:3:93:27:173#0/1  
AGGCAACACCCTTGGCCTCGATATCGAAACAGCCACTCTT  
+HWI-EAS443:3:93:27:173#0/1  
a`\_aZ`\_^aa^Y\_\_¥XRZ^\_Y^]^Z^UYU¥¥[UUUSUBBB  
@HWI-EAS443:3:93:27:534#0/1  
GCCGCATTTCTTCAATTAACCACCTTATTTCTCAAATTT  
+HWI-EAS443:3:93:27:534#0/1  
a`aaaY\_R`\_`aa\_\_a`\_]^`\_`^`¥aa^RX`^^PX`\_^  
@HWI-EAS443:3:93:282:866#0/1  
AGAAACTGTGATGAGAATGGGAGACCTTCACTACCTCCAG

+HWI-EAS443:3:93:282:866#0/1  
a^`\_`aa\_aa`^`\_]`\_a[Y\_]Y^`^^^`^]]\_Y^^^  
@HWI-EAS443:3:93:339:1300#0/1  
GCCGCATTTCTTCAATTAACCACCTTATTTCTCAAATTT  
+HWI-EAS443:3:93:339:1300#0/1  
\_`a\_QY^aba¥[]YYWOTa]a^Y]\_`aZU^Y`a`^XR]]]  
@HWI-EAS443:3:93:379:1920#0/1  
TCGCTGGATTCTTCTTTCAAGATCCATTCCACGATTTGTT  
+HWI-EAS443:3:93:379:1920#0/1  
a¥Pb]]`a\_ab\_ZU]`````\_`a\_a\_a\_\_\_N\_a\_\_U^XU]\_  
@HWI-EAS443:3:93:386:1478#0/1  
GGCACAGATTGAAAGCGACAGAGAATAGTTTCGAACAAAT  
+HWI-EAS443:3:93:386:1478#0/1  
^FU[R¥\_a[WY^\_TZa`Y`aa`\_[YN¥VT^V[XNY``¥YB  
@HWI-EAS443:3:93:399:1215#0/1  
GTCAGAAAGGTAGCGCGAAGTAGGTACAGATGCAATTGTC  
+HWI-EAS443:3:93:399:1215#0/1  
a\_a`^Z¥]aaXa``aaa`^^]a`aZ``aa``a`a\_`\_`]`  
@HWI-EAS443:3:93:39:648#0/1  
GCCGCATTTCTTCAATTAACCACCTTATTTCTCAAATTT  
+HWI-EAS443:3:93:39:648#0/1  
aaabaaaa```\_a`aa`Y\_\_a\_]``[\_\_\_\_]aa^¥M¥\_\_\_\_  
@HWI-EAS443:3:93:40:1013#0/1  
GCAATTGGGACAGAAATTTGAGGAAATAAGGTGGTTAATT  
+HWI-EAS443:3:93:40:1013#0/1  
Z\_]N^\_\_`X^[^a``[^ba^^`ba¥bb`Y^^I¥S``aa[a  
@HWI-EAS443:3:93:424:653#0/1  
GAAACTGTGATGAGAATGGGAGACCTTCACTACCTCCAGA  
+HWI-EAS443:3:93:424:653#0/1  
a\_aaabbSa\_aa\_`aaaba\_\_aaa``a\_aX`\_`^\_\_]\_Y]  
@HWI-EAS443:3:93:429:321#0/1  
GCCGCATTTCTTCAATTAACCACCTTATTTCTCAAATTT  
+HWI-EAS443:3:93:429:321#0/1  
a``a] []`WQ[\_YLV[[^]]^¥^XUUZ\_]WSU]¥XX]^XB  
@HWI-EAS443:3:93:432:726#0/1  
GGTTAATTGAAGAAATGCGGCACAGATTGAAAGCGACAGA  
+HWI-EAS443:3:93:432:726#0/1  
abPW^bb]a¥ZaY`aba\_aaaaa`aa`a`\_`aa`\_a]`aa  
@HWI-EAS443:3:93:43:1646#0/1  
GAGAACTGTGATGAGAATGGGAGACCTTCACTACCTCCA  
+HWI-EAS443:3:93:43:1646#0/1  
aabaaabab`baaaa`aab``aa`a`]X^a\_\_a\_Y`^a`  
@HWI-EAS443:3:93:44:854#0/1  
AATGGGAGACCTTCACTACCTCCAGAGCAGAAATGAAAAG  
+HWI-EAS443:3:93:44:854#0/1  
][bbbbab`aaa``aaaa\_a\_]`\_a¥a^aa¥H¥aa\_\_\_^a  
@HWI-EAS443:3:93:467:850#0/1  
AACTGTGATGAGAATGGGAGACCTTCACTACCTCCAGAGC  
+HWI-EAS443:3:93:467:850#0/1  
]\_abY``[^ba\_¥a``\_ST\_]a`[^Y]^`\_`a\_ZW¥]¥a`

@HWI-EAS443:3:93:469:1429#0/1  
GCCGCATTTCTTCAATTAACCACCTTATTTCTCAAATTT  
+HWI-EAS443:3:93:469:1429#0/1  
aabbabbaa\_baaabaaaaabbabaaaaaa`aaaaaaaaaa  
@HWI-EAS443:3:93:519:1280#0/1  
GAAACTGTGATGAGAATGGGAGACCTTCACTACCTCCAGA  
+HWI-EAS443:3:93:519:1280#0/1  
a\_b]abbababb`aaabbaa\_aa`aaaaaaa`\_¥]``a`Y  
@HWI-EAS443:3:93:534:1993#0/1  
ATGAGAATGGGAGACCTTCACTACCTCCAGAGCAGAAATG  
+HWI-EAS443:3:93:534:1993#0/1  
a]¥¥VTZZba\_`]W¥a`\_baa\_`\_QYL¥]\_\_a[]a\_]^aa  
@HWI-EAS443:3:93:540:210#0/1  
AGAAACTGTGATGAGAATGGGAGACCTTCACTACCTCCAG  
+HWI-EAS443:3:93:540:210#0/1  
aba`aabaabaababababaa\_b`X\_``\_a`a`^\_\_]X\_\_  
@HWI-EAS443:3:93:545:1439#0/1  
AGAAACTGTGATGAGAATGGGAGACCTTCACTACCTCCAG  
+HWI-EAS443:3:93:545:1439#0/1  
a`\_aaabb\_bb`a`\_aaa^`]b\_``\_\_aa\_a\_WS`]`\_a  
@HWI-EAS443:3:93:568:1588#0/1  
GAAAATATACAGAGATTCGCTTGGAGAACTGTGATGAGA  
+HWI-EAS443:3:93:568:1588#0/1  
\_`ab^a^``aa`aUIW\_baVWV¥NY]a[`U^]VZRYYY\_\_  
@HWI-EAS443:3:93:569:230#0/1  
GAGAATGGGAGACCTTCACTACCTCCAGAGCAGAAATGAA  
+HWI-EAS443:3:93:569:230#0/1  
aab`\_\_aa`\_a[\_^a^aa\_`aV`\_\_\_\_\_a[\_Z[aV¥V¥^¥U  
@HWI-EAS443:3:93:61:518#0/1  
TCGCTTTCAATCTGTGCCGCATTTCTTCAATTAACCACCT  
+HWI-EAS443:3:93:61:518#0/1  
aba¥WX`\_`\_^]`^`\_FZ^X\_ZZZ`\_`\_a]]Z`Z]][^\_UG]  
@HWI-EAS443:3:93:640:1083#0/1  
GAGAAACTGTGATGAGAATGGGAGACCTTCACTACCTCCA  
+HWI-EAS443:3:93:640:1083#0/1  
aabaabaaab`b\_aaaaaa`\_a\_\_a`\_Y\_`\_a`\_a]]\_]\_\_  
@HWI-EAS443:3:93:672:1029#0/1  
GTCGCTTTCAATCTGTGCCGCATTTCTTCAATTAACCACC  
+HWI-EAS443:3:93:672:1029#0/1  
a\_``¥¥a`^`\_`^`Z]^a^X]\_\_^`\_`\_`[W^`\_¥WS^Y\_  
@HWI-EAS443:3:93:703:978#0/1  
GAAACTGTGATGAGAATGGGAGACCTTCACTACCTCCAGA  
+HWI-EAS443:3:93:703:978#0/1  
`[\_aUab]aaaa¥\_\_`aa`\_\_aa\_]\_\_]\_0\_\_]X]RTV[^  
@HWI-EAS443:3:93:760:1629#0/1  
GAGATTCGCTTGGAGAACTGTGATGAGAATGGGAGACCT  
+HWI-EAS443:3:93:760:1629#0/1  
\_ab^aabab`a\_b`bbaabab[aa`aa`^aaaa\_`\_\_`\_  
@HWI-EAS443:3:93:760:466#0/1  
GGAAATAAGGTGGTTAATTGAAGAAATGCGGCACAGATTG

+HWI-EAS443:3:93:760:466#0/1  
aa\_aab`ab¥N[\_Z\_\_a¥ZNX^a\_[Y^^\_\_Q[^`\_]^^`  
@HWI-EAS443:3:93:764:416#0/1  
GTGGTTAATTGAAGAAATGCGGCACAGATTGAAAGCGACA  
+HWI-EAS443:3:93:764:416#0/1  
a`bb\_aaaaaba`aaaa`aaa`\_aaaaaaaa`Wa^]\_  
@HWI-EAS443:3:93:79:1782#0/1  
GAAACTGTGATGAGAATGGGAGACCTTCACTACCTCCAGA  
+HWI-EAS443:3:93:79:1782#0/1  
Ybaba¥a]ab]RZbabZ\_¥a\_MY^`^\_baabb[b^\_b\_\_a  
@HWI-EAS443:3:93:801:1076#0/1  
TGTGATGAGAATGGGAGACCTTCACTACCTCCAGAGCAGA  
+HWI-EAS443:3:93:801:1076#0/1  
a`P[¥V\_YT]^Z^ZOHXR^[`WVO]]][QMRUTV^V]VY^B  
@HWI-EAS443:3:93:848:1193#0/1  
GTGCCGATTTCTTCAATTAACCACCTTATTTCTCAAAT  
+HWI-EAS443:3:93:848:1193#0/1  
a[a¥]a0SPM]a^QXa¥Q\_`\_]`^b\_¥a`Ua[TOR\_\_^X¥]  
@HWI-EAS443:3:93:855:1458#0/1  
GAAACTGTGATGAGAATGGGAGACCTTCACTACCTCCAGA  
+HWI-EAS443:3:93:855:1458#0/1  
`T`Z[ab^ba``aa\_a\_\_\_\_\_][VV\_U[]^\_]¥[GZ^]  
@HWI-EAS443:3:93:923:1068#0/1  
GCTGTTTCGATATCGAGGCCAAGGGTGTTCCTCTTCTT  
+HWI-EAS443:3:93:923:1068#0/1  
aabbaababbbbaa]baa`baaaaRaab`aaa\_aa]Rab  
@HWI-EAS443:3:93:927:1698#0/1  
GCATCACCCAATCCATTGTCTGCAAATCGCTTGCGGATAT  
+HWI-EAS443:3:93:927:1698#0/1  
\_`ab[XWaaaaaa^aa]VUY¥Y``aaXV\_]`^\_]YaNX^Z  
@HWI-EAS443:3:93:992:1050#0/1  
AGAAACTGTGATGAGAATGGGAGACCTTCACTACCTCCAG  
+HWI-EAS443:3:93:992:1050#0/1  
a\_YZ]Waa\_\_]\_\_Wa\_Q\_a^\_U`\_^]`\_^]Y¥^0^UUV]]  
@HWI-EAS443:3:93:993:1636#0/1  
GAAACTGTGATGAGAATGGGAGACCTTCACTACCTCCAGA  
+HWI-EAS443:3:93:993:1636#0/1  
aa¥``YZ[`¥aaZQX¥]X[[]T[UQUVP¥ZPZLRZUW^[Y  
@HWI-EAS443:3:93:998:1799#0/1  
GAGAATGGGAGACCTTCACTACCTCCAGAGCAGAAATGAA  
+HWI-EAS443:3:93:998:1799#0/1  
¥¥\_[^U[¥\_H\_b^bbVV`ba\_\_^`\_`bababaab\_a\_baYa  
@HWI-EAS443:3:94:1036:1102#0/1  
CTGTGCCGATTTCTTCAATTAACCACCTTATTTCTCAA  
+HWI-EAS443:3:94:1036:1102#0/1  
¥ab\_baKb\_X¥bba\_]``Ya`]a]Z\_a\_b`aa`aa]`a`Y  
@HWI-EAS443:3:94:1064:244#0/1  
GCTTGAGAAACTGTGATGAGAATGGGAGACCTTCACTAC  
+HWI-EAS443:3:94:1064:244#0/1  
`\_b`\_a^a`Z]`\_a\_a\_aa^a[``a`\_Za^QQZZTZ¥¥[S



@HWI-EAS443:3:94:1079:1040#0/1  
GGAGAACTGTGATGAGAATGGGAGACCTTCACTACCTCC  
+HWI-EAS443:3:94:1079:1040#0/1  
T\_¥][WWZa`Z\_]^\_W¥]a`^\_SQX\_U¥ZSZ\_]\_¥Z`ZH  
@HWI-EAS443:3:94:1086:606#0/1  
GTCGCTTTCAATCTGTGCCGATTTCTTCAATTAACCACC  
+HWI-EAS443:3:94:1086:606#0/1  
a^^¥[[\_[\_[\_V`Z]SN`)][\_]X`]WWZ\_^\_^ZZ]WM  
@HWI-EAS443:3:94:111:1134#0/1  
CTATTATCTTTTGCCTAGGCATGAGCATGAACCAGTCTCG  
+HWI-EAS443:3:94:111:1134#0/1  
ab`ba]\_ba`a``aa\_\_`aa\_aa`a[a`\_a\_\_\_\_`a]\_`\_]  
@HWI-EAS443:3:94:1157:1884#0/1  
GTCATGTCAGAAAGGTAGCGCGAAGTAGGTACAGATGCAA  
+HWI-EAS443:3:94:1157:1884#0/1  
aWaa]`Yba`[\_`aa`T`YYa`Xa\_\_W\_[SFY]\_`^^Y¥[X  
@HWI-EAS443:3:94:1167:746#0/1  
CTCTGAAAATATACAGAGATTCGCTTGGAGAACTGTGAT  
+HWI-EAS443:3:94:1167:746#0/1  
aa[bbaa`baaaa\_ab`bYaab\_\_^aa^a\_\_\_\_aaaZa\_^  
@HWI-EAS443:3:94:1265:356#0/1  
CGCATTTCTTCAATTAACCACCTTATTTCTCAAATTTCT  
+HWI-EAS443:3:94:1265:356#0/1  
abbbbbbb\_bbababbbba`baabbabbbbbbb^ababbbab  
@HWI-EAS443:3:94:1322:1363#0/1  
GAATGGGAGACCTTCACTACCTCCAGAGCAGAAATGAAAA  
+HWI-EAS443:3:94:1322:1363#0/1  
aa`ab`aaba^`a\_aa\_`aa\_aa^`a`aZa`aa`aaa`a\_  
@HWI-EAS443:3:94:1324:247#0/1  
TTTAAGGACTTTTGATCTCGGCGGAGCCGATCAAGGAATG  
+HWI-EAS443:3:94:1324:247#0/1  
Q\_Y]RU]^^X^KW\_QRZa]^]XXYUYN[QPSNTSY]BBBB  
@HWI-EAS443:3:94:135:1823#0/1  
AGCGCGAAGTAGGTACAGATGCAATTGTCAATTCTAAGTGT  
+HWI-EAS443:3:94:135:1823#0/1  
`a`aa]a]`S`aaY][`¥^ZX\_`^]`V^\_]X\_\_\_\_WRGPY  
@HWI-EAS443:3:94:1397:1068#0/1  
ATTCTCTGTCGCTTTCAATCTGTGCCGATTTCTTCAATT  
+HWI-EAS443:3:94:1397:1068#0/1  
T\_ba¥bb`aa`YQWb¥T^\_W¥b^RJVFZ¥a¥PW]PI]]a  
@HWI-EAS443:3:94:1450:607#0/1  
GAAACTGTGATGAGAATGGGAGACCTTCACTACCTCCAGA  
+HWI-EAS443:3:94:1450:607#0/1  
`^X\_\_ab\_a\_aa\_]`^`\_a^^a\_`Y^^V`XX^YYYYR0]YX  
@HWI-EAS443:3:94:146:774#0/1  
AAACGAGAAAGCTTCTTCTTCTTCTACTTCAAGCAGT  
+HWI-EAS443:3:94:146:774#0/1  
aaaa]ab^a\_\_a``aaa\_`aa\_`]\_`\_\_`\_^\_a\_\_X`\_U  
@HWI-EAS443:3:94:1587:576#0/1  
ACACGGTTTCGAGTCTCTGAAAATATACAGAGATTCGCTTG

+HWI-EAS443:3:94:1587:576#0/1  
aSa^^^\_a`aaYW`^a\_Y`\_a\_\_ZV^\_]`]]^UZZ^^U  
@HWI-EAS443:3:94:1595:322#0/1  
CGCGAAGTAGGTACAGATGCAATTGTCATTCTAAGTGTCT  
+HWI-EAS443:3:94:1595:322#0/1  
\_\_Q\_]\_aPa]a`aY^bb`baaaaS^\_aabbYab`b^b^^`  
@HWI-EAS443:3:94:1627:420#0/1  
GTCGCTTTCAATCTGTGCCGATTTCTTCAATTAACCACC  
+HWI-EAS443:3:94:1627:420#0/1  
aN[\_S`\_aW`^R¥W\_ZZ\_]Z`¥^X]^ZZ^\_ZZWZZSY  
@HWI-EAS443:3:94:1708:1000#0/1  
GTCGCTTTCAATCTGTGCCGATTTCTTCAATTAACCACC  
+HWI-EAS443:3:94:1708:1000#0/1  
aSab`aba\_aaa\_aa]a\_\_a`aaa`^^`a\_^a`\_``Z[^X  
@HWI-EAS443:3:94:1721:1897#0/1  
GAGAACTGTGATGAGAATGGGAGACCTTCACTACCTCCA  
+HWI-EAS443:3:94:1721:1897#0/1  
aaa`aa````aaaaa\_`\_a\_``a\_`[^\_`aY^a^RRRR\_  
@HWI-EAS443:3:94:1743:549#0/1  
CAGAAAGGTAGCGGAAGTAGGTACAGATGCAATTGTCAT  
+HWI-EAS443:3:94:1743:549#0/1  
¥bZKVabb\_bbbb\_bbaa^bba[^aba`aaU`aaa`a`ab  
@HWI-EAS443:3:94:184:222#0/1  
TGCCGATTTCTTCAATTAACCACCTTATTTCTCAAATT  
+HWI-EAS443:3:94:184:222#0/1  
Xa\_`b\_Z¥\_R\_[¥]JRZ[W\_]^[`][VZYa`YLO[[T]a\_  
@HWI-EAS443:3:94:202:29#0/1  
AGGCAACACCCTTGGCCTCGATATCGAAACAGCCACTCTT  
+HWI-EAS443:3:94:202:29#0/1  
abaabbaaaaa`a```Y\_\_aUXa\_¥a¥`V\_`¥UUSUZUU  
@HWI-EAS443:3:94:204:972#0/1  
AGAAACTGTGATGAGAATGGGAGACCTTCACTACCTCCAG  
+HWI-EAS443:3:94:204:972#0/1  
aaabaa`bU``a`Sa¥K][`]SN\_YaX\_a[N\_`G^]]U^^  
@HWI-EAS443:3:94:234:122#0/1  
GCCGATTTCTTCAATTAACCACCTTATTTCTCAAATTT  
+HWI-EAS443:3:94:234:122#0/1  
aH]\_X\_`][UYTY¥]\_\_UPGYZZI^SWT^[[[^W][WYV[  
@HWI-EAS443:3:94:23:583#0/1  
ACTGGTTCATGCTCATGCCTAGGCAAAAGATAATAGGCCC  
+HWI-EAS443:3:94:23:583#0/1  
M^`b]P^[¥aa\_]bYX\_``a\_``¥]VX\_a\_a¥\_\_\_`NYW  
@HWI-EAS443:3:94:26:836#0/1  
GAAACTGTGATGAGAATGGGAGACCTTCACTACCTCCAGA  
+HWI-EAS443:3:94:26:836#0/1  
aV[abbaa`Jba``]Z]baaab\_YF^`aTU^\_\_]`]a`a\_  
@HWI-EAS443:3:94:28:737#0/1  
GTGATGAGAATGGGAGACCTTCACTACCTCCAGAGCAGAA  
+HWI-EAS443:3:94:28:737#0/1  
`\_b^`baa\_`aaa`]``\_`^`^\_a^`\_\_^]\_^Y^V^U\_`YU

@HWI-EAS443:3:94:291:410#0/1  
GCCGCATTTCTTCAATTAACCACCTTATTTCCCTCAAATTT  
+HWI-EAS443:3:94:291:410#0/1  
a\_`[XX`XY`a\_VT¥\_\_^W`^`^`\_\_\_\_^^`U\_]`^X¥`]Y  
@HWI-EAS443:3:94:403:1067#0/1  
AGAATGGGAGACCTTCACTACCTCCAGAGCAGAAATGAAA  
+HWI-EAS443:3:94:403:1067#0/1  
\_\_`^a\_Z]¥\_`^ba\_`bbaaaabaaaa`aaaaWO\_aa\_\_a  
@HWI-EAS443:3:94:429:1103#0/1  
GAAACTGTGATGAGAATGGGAGACCTTCACTACCTCCAGA  
+HWI-EAS443:3:94:429:1103#0/1  
a\_J¥^`XX^[^¥Y\_`a^`Y`\_`\_^SY]\_]\_]\_[OZ[`  
@HWI-EAS443:3:94:438:1119#0/1  
GCCGCATTTCTTCAATTAACCACCTTATTTCCCTCAAATTT  
+HWI-EAS443:3:94:438:1119#0/1  
aabaa]^`V`a]XX]X`Q^`a][X``]Q``Z^]\_`¥L]  
@HWI-EAS443:3:94:472:1970#0/1  
GAAAATATACAGAGATTCGCTTGGAGAAACTGTGATGAGA  
+HWI-EAS443:3:94:472:1970#0/1  
\_[bbbaaZa`ba]ab`abbaaaba`````aX^Y^^]\_  
@HWI-EAS443:3:94:476:1685#0/1  
AGAAACTGTGATGAGAATGGGAGACCTTCACTACCTCCAG  
+HWI-EAS443:3:94:476:1685#0/1  
`WTH^Z]\_N\_W[^Y^YZ^`a^YO[a`[``Y\_] [XPWDX\_  
@HWI-EAS443:3:94:532:351#0/1  
AGGGCCTATTATCTTTTGCCTAGGCATGAGCATGAACCAG  
+HWI-EAS443:3:94:532:351#0/1  
[aab`aabbbbaaaba`aaaaab^abaaaaa`aaa\_\_`a  
@HWI-EAS443:3:94:543:1105#0/1  
GAGAAACTGTGATGAGAATGGGAGACCTTCACTACCTCCA  
+HWI-EAS443:3:94:543:1105#0/1  
aaaaa`aaa]a^`aaa]\_aaa^\_a^]\_^^\_`X^`YYYYVX  
@HWI-EAS443:3:94:57:364#0/1  
GCCGCATTTCTTCAATTAACCACCTTATTTCCCTCAAATTT  
+HWI-EAS443:3:94:57:364#0/1  
a^aba\_aaa`a`aa`a^aa\_\_`\_^`\_a\_``]\_`\_`T\_^^  
@HWI-EAS443:3:94:593:1881#0/1  
ACAGAGATTCGCTTGGAGAAACTGTGATGAGAATGGGAGA  
+HWI-EAS443:3:94:593:1881#0/1  
¥R]aaa`aa`a`\_a`\_`a`\_`aV`]\_\_]^`^\_]`]]\_`^  
@HWI-EAS443:3:94:607:510#0/1  
CAGAGATTCGCTTGGAGAAACTGTGATGAGAATGGGAGAC  
+HWI-EAS443:3:94:607:510#0/1  
aab`\_Z`aab`a^]\_¥a`¥P]a\_W`\_]¥a¥RY`a[[]]X  
@HWI-EAS443:3:94:658:408#0/1  
TGATGAGAATGGGAGACCTTCACTACCTCCAGAGCAGAAA  
+HWI-EAS443:3:94:658:408#0/1  
aa\_aa`b`\_abaa\_baa\_a`````\_`^W]¥`aa\_a¥¥a^^`  
@HWI-EAS443:3:94:67:1906#0/1  
GACAGAAATTTGAGGAAATAAGGTGGTTAATTGAAGAAAT

+HWI-EAS443:3:94:67:1906#0/1  
]¥ab`[J^ba`\_\_`^\_aaaYa`[Sa^PRXa`¥ZXHY`a`\_  
@HWI-EAS443:3:94:685:1197#0/1  
GAGAACTGTGATGAGAATGGGAGACCTTCACTACCTCCA  
+HWI-EAS443:3:94:685:1197#0/1  
^`bab\_bbb\_b`bbab^ababaZ\_Vbabaaaaaba`a`[  
@HWI-EAS443:3:94:790:647#0/1  
CAAAGAGGGCCTATTATCTTTTGCCTAGGCATGAGCATGA  
+HWI-EAS443:3:94:790:647#0/1  
aaa^`aba^\_aaabaaaa`\_\_aa\_P^Zaa[\_U`X]L\_IYa  
@HWI-EAS443:3:94:855:1559#0/1  
GCTTTCAATCTGTGCCGATTTCTTCAATTAACCACCTTA  
+HWI-EAS443:3:94:855:1559#0/1  
`b`^`^`b¥a]a¥aZSaYa[T]\_\_\_\_`aaV]¥]X^P^b`\_  
@HWI-EAS443:3:94:856:603#0/1  
GATGAGAATGGGAGACCTTCACTACCTCCAGAGCAGAAAT  
+HWI-EAS443:3:94:856:603#0/1  
a\_``\_\_`^`aa]a]^``]`]a`]^`\_\_\_\_¥]`W^\_WX]\_  
@HWI-EAS443:3:94:967:1705#0/1  
ATAAGGTGGTTAATTGAAGAAATGCGGCACAGATTGAAAG  
+HWI-EAS443:3:94:967:1705#0/1  
N¥`Y`a\_\_WXaa\_RQ`[]0]\_¥`a¥a^\_\_b` `[R[b¥¥S]  
@HWI-EAS443:3:94:992:471#0/1  
ATGAGAATGGGAGACCTTCACTACCTCCAGAGCAGAAATG  
+HWI-EAS443:3:94:992:471#0/1  
aaaabaabbaaa`aaaa``aaaa\_\_`Za`a`a`\_a\_^]aa  
@HWI-EAS443:3:94:999:634#0/1  
GAAACTGTGATGAGAATGGGAGACCTTCACTACCTCCAGA  
+HWI-EAS443:3:94:999:634#0/1  
a[aa\_ab¥aaaa^`\_\_\_\_`a^`SWU\_^\_[Y\_`]^\_V[Z[Y  
@HWI-EAS443:3:95:1038:339#0/1  
GAGAACTGTGATGAGAATGGGAGACCTTCACTACCTCCA  
+HWI-EAS443:3:95:1038:339#0/1  
aabb[babb]b`bbY`aabb\_`bbaQ^¥aa^\_aa`\_bXU\_  
@HWI-EAS443:3:95:1047:881#0/1  
ATCGCACGCAAAGAGGGCCTATTATCTTTTGCCTAGGCAT  
+HWI-EAS443:3:95:1047:881#0/1  
][¥^]\_Q¥R\_b^XZ\_¥]W¥]¥V^a^S[¥a^HNU`a`¥TZ]  
@HWI-EAS443:3:95:1048:422#0/1  
CCGCATTTCTTCAATTAACCACCTTATTTCTCAAATTC  
+HWI-EAS443:3:95:1048:422#0/1  
`aa`¥a`a`b\_aa`\_`^`^bb\_bbbaab^bbaababbba  
@HWI-EAS443:3:95:1102:566#0/1  
GTGATGAGAATGGGAGACCTTCACTACCTCCAGAGCAGAA  
+HWI-EAS443:3:95:1102:566#0/1  
aaba^]\_a\_`XWZ`P]`YO`\_]`^`^YXa]R\_\_VUDRa^Z  
@HWI-EAS443:3:95:1148:1549#0/1  
TGAAAGAGGAATCCAGCGAGACACTTAGAATGACAATTGC  
+HWI-EAS443:3:95:1148:1549#0/1  
¥`\_aabababbbaa^a\_\_`\_`\_`aZaaaa^`aa`^`\_`\_`\_W

@HWI-EAS443:3:95:115:22#0/1  
CCGCATTTCTTCAATTAACCACCTTATTTCCCTCAAATTTTC  
+HWI-EAS443:3:95:115:22#0/1  
ab^\_Z\_aaa]\_a]SZaSaa`aXLVa\_a\_a\_\_a`[N[aUZU  
@HWI-EAS443:3:95:1164:962#0/1  
TGTGATGAGAATGGGAGACCTTCACTACCTCCAGAGCAGA  
+HWI-EAS443:3:95:1164:962#0/1  
aa\_b\_aaaa`aba`^a\_]\_\_a¥` `a^]aV]^a^^Y\_a]  
@HWI-EAS443:3:95:117:1260#0/1  
AGACTGTTTCTTTGGCATATCCGCAAGCGATTTGCAGAC  
+HWI-EAS443:3:95:117:1260#0/1  
aaa`]^UaXaaa\_\_^aa\_a\_RZ`^\_^]V]^a¥V^^YY\_ZW  
@HWI-EAS443:3:95:118:1090#0/1  
CCGCATTTCTTCAATTAACCACCTTATTTCCCTCAAATTTTC  
+HWI-EAS443:3:95:118:1090#0/1  
abaaZ\_b^`aaY`aa]a`]T]aab]`aaa`]aaa]aaa][  
@HWI-EAS443:3:95:1205:1196#0/1  
CACGGTTCGAGTCTCTGAAAATATACAGAGATTCGCTTGG  
+HWI-EAS443:3:95:1205:1196#0/1  
aabbababaabbaab\_bb\_aabbbbbb`baababa`a`aa`b  
@HWI-EAS443:3:95:1254:305#0/1  
TGAGAATGGGAGACCTTCACTACCTCCAGAGCAGAAATGA  
+HWI-EAS443:3:95:1254:305#0/1  
ab\_a`\_baab`b`]^a^\_aUaa]]`Z¥`a\_Y]]a][^`\_-[  
@HWI-EAS443:3:95:1304:819#0/1  
CAGAGATTCGCTTGGAGAAACTGTGATGAGAATGGGAGAC  
+HWI-EAS443:3:95:1304:819#0/1  
ab` `^MZaa`bb\_Z\_bb]X`]`bb^b`]`bbb\_aabbbbaa^R  
@HWI-EAS443:3:95:1306:777#0/1  
ATCACCCAATCCATTGTCTGCAAATCGCTTGGCGGATATGC  
+HWI-EAS443:3:95:1306:777#0/1  
`bab\_aabab\_Yaa\_`N\_\_^aa`aYa`\_a\_Z\_^\_\_\_\_^]  
@HWI-EAS443:3:95:1320:454#0/1  
AATGGGAGACCTTCACTACCTCCAGAGCAGAAATGAAAAG  
+HWI-EAS443:3:95:1320:454#0/1  
abbbba`bb`abaaaabaZ\_aY`\_b\_baab]`aa^VX\_\_¥  
@HWI-EAS443:3:95:1328:401#0/1  
GCGCTACCTTTCTGACATGACCCTCGAGGAAATGTCACGA  
+HWI-EAS443:3:95:1328:401#0/1  
aabbbaabbb`bbbbbbbaaZabbb`b`babababNbWba  
@HWI-EAS443:3:95:1369:607#0/1  
GCTGAAACGAGAAAGCTTATCTCTTGTCTACTTCAAG  
+HWI-EAS443:3:95:1369:607#0/1  
\_bbabb`b`bbaaa\_b\_Yba\_b\_baba\_abZaaaaUaaa  
@HWI-EAS443:3:95:1541:1471#0/1  
CGCTTGGAGAAACTGTGATGAGAATGGGAGACCTTACTA  
+HWI-EAS443:3:95:1541:1471#0/1  
abbbbaa`baabbababaa\_`baabbbbaa`^\_aa\_aWaa  
@HWI-EAS443:3:95:1568:1320#0/1  
CAGAGATTCGCTTGGAGAAACTGTGATGAGAATGGGAGAC

+HWI-EAS443:3:95:1568:1320#0/1  
Vbbbabbbbbbabbab[babbabab` `a`a`ab[UabV  
@HWI-EAS443:3:95:1577:1271#0/1  
CGCATTCTTCAATTAACCACCTTATTCCTCAAATTTCT  
+HWI-EAS443:3:95:1577:1271#0/1  
abbaaaba`ab`¥babb¥abY`babab`a\_b\_aa`ab``]  
@HWI-EAS443:3:95:1617:1701#0/1  
GAAACTGTGATGAGAATGGGAGACCTTCACTACCTCCAGA  
+HWI-EAS443:3:95:1617:1701#0/1  
`bbb`ab^b`abaaaaab¥a\_a`X\_`a\_\_``a¥^`Z\_[aR  
@HWI-EAS443:3:95:1650:1282#0/1  
GGTTAATTGAAGAAATGCGGCACAGATTGAAAGCGACAGA  
+HWI-EAS443:3:95:1650:1282#0/1  
^bVba^bbbbba`ba`bbR^`^b^a`\_`aaba]Ya`a\_\_aa¥  
@HWI-EAS443:3:95:1685:1747#0/1  
GAAACTGTGATGAGAATGGGAGACCTTCACTACCTCCAGA  
+HWI-EAS443:3:95:1685:1747#0/1  
`a`a`a[\_aa`\_`a`^`¥`\_`¥a`Z`]\_^\_Y\_^VY\_]S\_ZS  
@HWI-EAS443:3:95:171:691#0/1  
GAATGGGAGACCTTCACTACCTCCAGAGCAGAAATGAAAA  
+HWI-EAS443:3:95:171:691#0/1  
a]aaa`a`aa\_a`\_`aa`\_`[\_`\_`^¥a\_\_]`\_`¥¥`\_]\_^  
@HWI-EAS443:3:95:1742:589#0/1  
TGTGATGAGAATGGGAGACCTTCACTACCTCCAGAGCAGA  
+HWI-EAS443:3:95:1742:589#0/1  
]R\_U\_`^`^`a`¥[aU\_ZWJYT¥YQV¥VY`UV^^^YWNZQ  
@HWI-EAS443:3:95:1760:608#0/1  
GTCGCTTCAATCTGTGCCGATTTCTTCAATTAACCACC  
+HWI-EAS443:3:95:1760:608#0/1  
abbb`)]`b`babaaa`a^Y^^\_a\_a\_aa¥a`a`baPY`¥U  
@HWI-EAS443:3:95:1787:1716#0/1  
GAATGGGAGACCTTCACTACCTCCAGAGCAGAAATGAAAA  
+HWI-EAS443:3:95:1787:1716#0/1  
abaab`\_]a`¥aa`T`\_aa]V`^a`^`^aUa`^`\_aaa\_Z^^  
@HWI-EAS443:3:95:207:482#0/1  
GCGAGACACTTAGAATGACAATTGCATCTGTACCTACTTC  
+HWI-EAS443:3:95:207:482#0/1  
aaa\_aa]aaaa¥R^aa\_]\_^a\_a[^`\_`a^`\_]`\_`¥V  
@HWI-EAS443:3:95:215:665#0/1  
GTGCCGATTTCTTCAATTAACCACCTTATTCCTCAAAT  
+HWI-EAS443:3:95:215:665#0/1  
aZ`W]`T\_\_`aaa`UZ¥]\_a]a[[U`\_]a`]^`^X``\_\_  
@HWI-EAS443:3:95:226:926#0/1  
TGAGAATGGGAGACCTTCACTACCTCCAGAGCAGAAATGA  
+HWI-EAS443:3:95:226:926#0/1  
ab`^[\_`baaaaa\_aa`\_`a`aa[]`\_]`\_`aY^^`a^Y```\_`  
@HWI-EAS443:3:95:238:1476#0/1  
GCCGATTTCTTCAATTAACCACCTTATTCCTCAAATTT  
+HWI-EAS443:3:95:238:1476#0/1  
`baTX^TZW][Y`X\_W`¥Y\_^^^\_R`^^aS`[^`^][aY[

@HWI-EAS443:3:95:259:1349#0/1  
GCATTTCTTCAATTAACCACCTTATTTCCCTCAAATTTCTG  
+HWI-EAS443:3:95:259:1349#0/1  
¥a\_T¥V^a^¥`R]a¥\_ZYa`\_¥ZY`^W^\_baba¥^aa^a`  
@HWI-EAS443:3:95:264:33#0/1  
GGAGGGAGCAATAGTTGGAGAAATTTACCATTACCTTCT  
+HWI-EAS443:3:95:264:33#0/1  
\_Z]^\_Ua]a^[S\_Y`\_\_W\_W^\_¥Y[X]WVZ^RZZZ]ZZV  
@HWI-EAS443:3:95:26:62#0/1  
CACCATGTCAAGCTTTCAGGTAGACTGTTTCCTTTGGCAT  
+HWI-EAS443:3:95:26:62#0/1  
aa`aa`bZ``¥`Q^`\_\_^a\_R\_aZNT\_WQYQZWTX\_]\_^]  
@HWI-EAS443:3:95:291:1184#0/1  
GAGAATGGGAGACCTTCACTACCTCCAGAGCAGAAATGAA  
+HWI-EAS443:3:95:291:1184#0/1  
a`a`^aaaa```aaaaa\_a`[[aa``a`a[\_a\_W\_aa\_\_  
@HWI-EAS443:3:95:303:1508#0/1  
CGAGGGTCATGTCAGAAAGGTAGCGCGAAGTAGGTACAGA  
+HWI-EAS443:3:95:303:1508#0/1  
ab`Z¥V[\_`a¥aaaYY)``[`ba]a]^Q]a`\_^aa\_a`  
@HWI-EAS443:3:95:303:1691#0/1  
TCTGTCGCTTTCATCTGTGCCGATTTCTTCAATTAACC  
+HWI-EAS443:3:95:303:1691#0/1  
aabba```b^ab``abaZ^aaaa^^`aa\_adW]a`aaa]\_  
@HWI-EAS443:3:95:327:1765#0/1  
GAGAAACTGTGATGAGAATGGGAGACCTTCACTACCTCCA  
+HWI-EAS443:3:95:327:1765#0/1  
aaa¥^`aab``X¥aaaa`aa¥¥aa`^^`aa^a\_\_\_^^\_\_  
@HWI-EAS443:3:95:328:651#0/1  
TGGGAAACAAATCGTGGAATGGATCTTGAAAGAGGAATCC  
+HWI-EAS443:3:95:328:651#0/1  
a]X¥^a`a\_] [``aU`a¥\_\_\_]\_\_Y`\_\_^\_¥^\_]\_`]^WG  
@HWI-EAS443:3:95:378:1880#0/1  
GCCGCATTTCTTCAATTAACCACCTTATTTCCCTCAAATTT  
+HWI-EAS443:3:95:378:1880#0/1  
`bSb\_^a[ ]ZU]a]Y)`a\_YZQW\_a`a]]aX`])`a`[Z  
@HWI-EAS443:3:95:387:1321#0/1  
GCCGCATTTCTTCAATTAACCACCTTATTTCCCTCAAATTT  
+HWI-EAS443:3:95:387:1321#0/1  
aaaa^a`[OY[Za[YY\_Q\_Y`YYT`\_\_Z`X]T¥]^Y^¥ZY  
@HWI-EAS443:3:95:393:1339#0/1  
TGTTATTTGTTGAAACTATTCTCTGTCGCTTTCATCTG  
+HWI-EAS443:3:95:393:1339#0/1  
abaabbaa`abaaaabaaaab\_aaba`aaa``\_aa``\_aa  
@HWI-EAS443:3:95:411:1561#0/1  
AACTGTGATGAGAATGGGAGACCTTCACTACCTCCAGAGC  
+HWI-EAS443:3:95:411:1561#0/1  
`¥U]bY¥Zabab]a`a`\_`^`Y`X`a`aS[ ]a`a`Z]S  
@HWI-EAS443:3:95:430:1980#0/1  
ATCGGTTAAAGATTACACTGAAGTTCGCTTTCAGTACTAT

+HWI-EAS443:3:95:430:1980#0/1  
^T¥V\_\_aa`\_\_a\_aaa^`\_^^S`¥UFZ^\_^^^WRTY^^^  
@HWI-EAS443:3:95:483:779#0/1  
GCCGCATTTCTTCAATTAACCACCTTATTTCTCAAATTT  
+HWI-EAS443:3:95:483:779#0/1  
a\_aaa\_aaaa`a`]`aa`a^`\_`\_[aaaaa^\_aa\_\_\_aa`  
@HWI-EAS443:3:95:505:2041#0/1  
GGAGAACTGTGATGAGAATGGGAGACCTTCACTACCTCC  
+HWI-EAS443:3:95:505:2041#0/1  
abbba`bbbb`baab\_babaaa\_a`a`a`a`\_`a\_a`aa  
@HWI-EAS443:3:95:518:1361#0/1  
GCCGCATTTCTTCAATTAACCACCTTATTTCTCAAATTT  
+HWI-EAS443:3:95:518:1361#0/1  
abb¥^TWabaK¥aV`^b`\_JXa[\_`a`a`aaabaa[QaWa  
@HWI-EAS443:3:95:541:259#0/1  
GAATGGGAGACCTTCACTACCTCCAGAGCAGAAATGAAAA  
+HWI-EAS443:3:95:541:259#0/1  
ababb`aba^aaa\_a`aa¥Va^]\_`\_a¥^a]]\_a`\_Q^\_  
@HWI-EAS443:3:95:545:217#0/1  
ATTGCATCTGTACCTACTTCGCGCTACCTTTCTGACATGA  
+HWI-EAS443:3:95:545:217#0/1  
abbbbaababa^]aaa\_`a`^`^`\_a`S¥aa`\_`\_¥X\_^^^  
@HWI-EAS443:3:95:551:1695#0/1  
AGAAACTGTGATGAGAATGGGAGACCTTCACTACCTCCAG  
+HWI-EAS443:3:95:551:1695#0/1  
`bbab`ab[a[b^]\_\_\_aaaY^^\_a^\_a`a`a\_a\_\_W\_^  
@HWI-EAS443:3:95:602:739#0/1  
CAGAAAGGTAGCGGAAGTAGGTACAGATGCAATTGTCAT  
+HWI-EAS443:3:95:602:739#0/1  
ab`abbbbRa\_\_babbbbbb\_bbaabaaabb^b`bbba`a`  
@HWI-EAS443:3:95:608:199#0/1  
ATGAGAATGGGAGACCTTCACTACCTCCAGAGCAGAAATG  
+HWI-EAS443:3:95:608:199#0/1  
aaa]baa`bb]abaPaaa\_a\_aaY^`\_a`a]a¥`a`G^\_\_  
@HWI-EAS443:3:95:631:540#0/1  
GCCGCATTTCTTCAATTAACCACCTTATTTCTCAAATTT  
+HWI-EAS443:3:95:631:540#0/1  
`T`¥bb\_bb¥Taaa`a`\_`^aZaa]^`aaaa\_aaX\_^^`a`  
@HWI-EAS443:3:95:647:657#0/1  
AGAAACTGTGATGAGAATGGGAGACCTTCACTACCTCCAG  
+HWI-EAS443:3:95:647:657#0/1  
¥R¥WZRbb`^`^`U`RWV¥][NV^VY[aa\_aS\_aT]a`Wb  
@HWI-EAS443:3:95:654:1003#0/1  
GTGCCGCATTTCTTCAATTAACCACCTTATTTCTCAAAT  
+HWI-EAS443:3:95:654:1003#0/1  
\_¥ZYW]XOWUTV]TJNPVYLO^OYUF\_\_WZ^`L`J`a`\_`]  
@HWI-EAS443:3:95:660:1274#0/1  
GGCATATCCGCAAGCGATTTGCAGACAATGGATTGGGTGA  
+HWI-EAS443:3:95:660:1274#0/1  
aabaabZa^aaaaa^aa\_aa`^`\_`\_aa`a`a]`[^`^^WZ\_



@HWI-EAS443:3:95:684:1388#0/1  
GCCGCATTTCTTCAATTAACCACCTTATTTCTCAAATTT  
+HWI-EAS443:3:95:684:1388#0/1  
\_abbbbbbbbabbbbabbbbabbbbabbbbabbbbabbb  
@HWI-EAS443:3:95:687:419#0/1  
TGCCGCATTTCTTCAATTAACCACCTTATTTCTCAAATT  
+HWI-EAS443:3:95:687:419#0/1  
ababbaabbb`bbabbbbbaaaa`ababaaa`bbaaaaa  
@HWI-EAS443:3:95:718:998#0/1  
TGCCGCATTTCTTCAATTAACCACCTTATTTCTCAAATT  
+HWI-EAS443:3:95:718:998#0/1  
\_\_`b\_a\_VabV`bbPbbbab¥\_baaab\_\_baaa`a`VZb`  
@HWI-EAS443:3:95:723:1472#0/1  
GATGAGAATGGGAGACCTTCACTACCTCCAGAGCAGAAAT  
+HWI-EAS443:3:95:723:1472#0/1  
¥\_\_Z\_XW`W`]a`Q¥`]aaa\_aSVaaQbb\_aa`R`\_a`  
@HWI-EAS443:3:95:777:294#0/1  
CATTTCTCGAGGGTCATGTCAGAAAGGTAGCGCGAAGTA  
+HWI-EAS443:3:95:777:294#0/1  
a]\_ababbbbaabP\_bba^`\_baa`bb[bbaaabaabS`  
@HWI-EAS443:3:95:823:1535#0/1  
TGCGGCACAGATTGAAAGCGACAGAGAATAGTTTGAACA  
+HWI-EAS443:3:95:823:1535#0/1  
aaaaa`Y\_aa`a`aaaa\_aa`aa`aa\_a¥aa`a`a`\_`  
@HWI-EAS443:3:95:826:507#0/1  
CCGCATTTCTTCAATTAACCACCTTATTTCTCAAATTTTC  
+HWI-EAS443:3:95:826:507#0/1  
aab`abbbbbbba]b`abbbbbbbaababaabaa\_  
@HWI-EAS443:3:95:836:1316#0/1  
CACAGATTGAAAGCGACAGAGAATAGTTTGAACAAATAA  
+HWI-EAS443:3:95:836:1316#0/1  
aabbbbbb`bbaa\_abaababb`ababaa^abaabbab`  
@HWI-EAS443:3:95:856:1174#0/1  
GGTAGACTGTTTCTTTGGCATATCCGCAAGCGATTTGCA  
+HWI-EAS443:3:95:856:1174#0/1  
¥\_S¥^ab¥¥ba\_a`aaaZ¥`abbbba`a^aWa`^Q]  
@HWI-EAS443:3:95:892:1067#0/1  
CGCTTTCAATCTGTGCCGCATTTCTTCAATTAACCACCTT  
+HWI-EAS443:3:95:892:1067#0/1  
^`baba`Y\_aab`bbZbaa\_a^Z`bbb\_aba\_a`aa`  
@HWI-EAS443:3:95:933:491#0/1  
GAAACTGTGATGAGAATGGGAGACCTTCACTACCTCCAGA  
+HWI-EAS443:3:95:933:491#0/1  
J\_Sa`a`aaU`YR\_¥`\_`abb`ZZb]`a^a`ZZ`aabbb  
@HWI-EAS443:3:95:941:692#0/1  
GAAAATATACAGAGATTGCTTGGAGAACTGTGATGAGA  
+HWI-EAS443:3:95:941:692#0/1  
aaaaabbbbaab`a`aa^a`aaaa`a\_aa]\_[`a^aZ  
@HWI-EAS443:3:95:941:818#0/1  
TGCCGCATTTCTTCAATTAACCACCTTATTTCTCAAATT

+HWI-EAS443:3:95:941:818#0/1  
`babbaabbbbbb`abbaba`aaW\_ababbba`b`\_]\_`ab  
@HWI-EAS443:3:95:95:1035#0/1  
TGAAAATATACAGAGATTTCGCTTGGAGAACTGTGATGAG  
+HWI-EAS443:3:95:95:1035#0/1  
^aZ¥ZY]]\_Z`^`ba¥`[[\_W]U¥YU]T[\_TQU¥\_W^  
@HWI-EAS443:3:95:972:582#0/1  
AGAAACTGTGATGAGAATGGGAGACCTTCACTACCTCCAG  
+HWI-EAS443:3:95:972:582#0/1  
abaa]I\_b]a\_`aZaX¥]^]`Z`SV\_a^aaUXaZLTNZLY  
@HWI-EAS443:3:95:982:1081#0/1  
AGGGCTTTCCTGAGGAGGGAGCAATAGTTGGAGAAATTT  
+HWI-EAS443:3:95:982:1081#0/1  
VZ\_aabb¥a`b`ZT]ba\_\_b`¥a`bbQaaaaaa`aYY  
@HWI-EAS443:3:95:993:1312#0/1  
AGAAACTGTGATGAGAATGGGAGACCTTCACTACCTCCAG  
+HWI-EAS443:3:95:993:1312#0/1  
\_RW\_\_Va\_^T`V[Taa\_Pa`a\_\_[HT\_aY``\_`aTUY[XQ  
@HWI-EAS443:3:96:1099:962#0/1  
GATGAGAATGGGAGACCTTCACTACCTCCAGAGCAGAAAT  
+HWI-EAS443:3:96:1099:962#0/1  
`b]abaabbbaba\_aa\_^baaaa[aa\_aaaaa`b\_^aa  
@HWI-EAS443:3:96:109:159#0/1  
CTTGGAGAACTGTGATGAGAATGGGAGACCTTCACTACC  
+HWI-EAS443:3:96:109:159#0/1  
aa]¥abZ0\_]a\_X^W^]^a^GS[¥aa¥¥SPGUNP\_W^BBB  
@HWI-EAS443:3:96:1114:926#0/1  
GAAACTGTGATGAGAATGGGAGACCTTCACTACCTCCAGA  
+HWI-EAS443:3:96:1114:926#0/1  
aa\_\_¥aa]a^aa\_a\_\_aa``\_a\_Y^\_^\_\_a`^\_^XY]a\_  
@HWI-EAS443:3:96:1190:732#0/1  
CGGCACAGATTGAAAGCGACAGAGAATAGTTTCGAACAAA  
+HWI-EAS443:3:96:1190:732#0/1  
a`aS``abaabbababJaaZUbba^\_\_`\_\_^Y]aaa`\_\_b  
@HWI-EAS443:3:96:1192:1238#0/1  
TGCCGCATTTCTTCAATTAACCACCTTATTTCTCAAATT  
+HWI-EAS443:3:96:1192:1238#0/1  
`abababbbb`baaba\_aaa`\_bY¥aaaa`]SadW`aaaa  
@HWI-EAS443:3:96:1202:1433#0/1  
GAGAATGGGAGACCTTCACTACCTCCAGAGCAGAAATGAA  
+HWI-EAS443:3:96:1202:1433#0/1  
ab\_abbbba`a`^ba\_aabba[aa\_\_¥^UZUZVSX`^WZ  
@HWI-EAS443:3:96:1206:159#0/1  
GAGAACTGTGATGAGAATGGGAGACCTTCACTACCTCCA  
+HWI-EAS443:3:96:1206:159#0/1  
I\_\_]\_`\_Ta`a]\_Z\_aaab]]`aaTGG¥\_\_aG\_\_XN\_]Ra  
@HWI-EAS443:3:96:1208:57#0/1  
ACCTACTTCGCGCTACCTTTCTGACATGACCCTCGAGGAA  
+HWI-EAS443:3:96:1208:57#0/1  
a\_abaaaaaa^aSba\_^aa^Q¥a\_[¥a\_¥WNWaT^^[TUO

@HWI-EAS443:3:96:1239:638#0/1  
GTCCTGGAAGAGAAGGTAATGGTCAAATTTCTCCA  
+HWI-EAS443:3:96:1239:638#0/1  
a\_\_]ab`aa^Z[a\_Ua\_]\_U\_`\_^`^R¥`¥UXX\_\_a  
@HWI-EAS443:3:96:1326:912#0/1  
GAAACAAATCGTGAATGGATCTTAAAAGAGGAATCCAGC  
+HWI-EAS443:3:96:1326:912#0/1  
a]^XU[a]a\_\_Z^[]\_` `[W[Y^ZYV¥U\_W¥R[¥FMTWWR  
@HWI-EAS443:3:96:1371:1145#0/1  
TGCCGCATTTCTTCAATTAACCACCTTATTTCTCAAATT  
+HWI-EAS443:3:96:1371:1145#0/1  
¥b¥abaabbbUbb\_aTabaa\_^b^^a`\_aaa^`\_^\_^`ba  
@HWI-EAS443:3:96:1393:966#0/1  
TGAGAATGGGAGACCTTCACTACCTCCAGAGCAGAAATGA  
+HWI-EAS443:3:96:1393:966#0/1  
abaa¥`\_b\_YZXYQ\_\_\_\_\_a]`\_\_U\_U]^X]Y\_aN]\_^`\_  
@HWI-EAS443:3:96:1510:1140#0/1  
TGAGAATGGGAGACCTTCACTACCTCCAGAGCAGAAATGA  
+HWI-EAS443:3:96:1510:1140#0/1  
abab`baba\_\_`\_`aaaUa`Ua]]a^`U\_aU^^`\_`  
@HWI-EAS443:3:96:1552:704#0/1  
AATTGAAGAAATGCGGCACAGATTGAAAGCGACAGAGAAT  
+HWI-EAS443:3:96:1552:704#0/1  
aaaaa`aaaa`a```^a`\_a\_a^a\_]^^^]\_```\_\_^\_  
@HWI-EAS443:3:96:1628:1726#0/1  
GAGACACTTAGAATGACAATTGCATCTGTACCTACTTCGC  
+HWI-EAS443:3:96:1628:1726#0/1  
abab\_babbbbaabbaabb[ab`\_a0aa¥aGIb`Ua^0¥B  
@HWI-EAS443:3:96:1673:537#0/1  
TGCCGCATTTCTTCAATTAACCACCTTATTTCTCAAATT  
+HWI-EAS443:3:96:1673:537#0/1  
X`a^Z^bb^^`aVY`a¥aa]S`]X\_`a`WY\_S^`¥`\_  
@HWI-EAS443:3:96:1738:1826#0/1  
CAGAGATTGCTTGGAGAACTGTGATGAGAATGGGAGAC  
+HWI-EAS443:3:96:1738:1826#0/1  
a]`bb`baaaaaabKa`Y[[¥]S[VU]TYYZWBBBBBBB  
@HWI-EAS443:3:96:176:77#0/1  
AAACTGTGATGAGAATGGGAGACCTTCACTACCTCCAGAG  
+HWI-EAS443:3:96:176:77#0/1  
a```]bZ^Ta^Y\_Xa`¥]aWZY]^\_U\_Z\_]WQ]WW^WT  
@HWI-EAS443:3:96:180:258#0/1  
GAGAACTGTGATGAGAATGGGAGACCTTCACTACCTCCA  
+HWI-EAS443:3:96:180:258#0/1  
a`a\_\_`\_aXa\_[a^aXa^]^^¥]YWWWXY]Y^XXXYY  
@HWI-EAS443:3:96:187:77#0/1  
AGAACTGTGATGAGAATGGGAGACCTTCACTACCTCCAG  
+HWI-EAS443:3:96:187:77#0/1  
aa`a]\_aVa^`^aWX\_^]X\_BBBBBBBBBBBBBBBB  
@HWI-EAS443:3:96:262:360#0/1  
TGAGAATGGGAGACCTTCACTACCTCCAGAGCAGAAATGA

+HWI-EAS443:3:96:262:360#0/1  
aa¥baaaaaa^a\_\_\_\_[\_`a]`\_X]\_^U\_\_Z\_]\_`U]^^\_\_\_\_  
@HWI-EAS443:3:96:268:1054#0/1  
GTCGCTTTCAATCTGTGCCGATTTCTTCAATTAACCACC  
+HWI-EAS443:3:96:268:1054#0/1  
a\_aaa``a\_N`\_\_a\_a^^^\_`\_a[aa^Y`\_`a^^\_\_^W  
@HWI-EAS443:3:96:287:1910#0/1  
GATGAGAATGGGAGACCTTCACTACCTCCAGAGCAGAAAT  
+HWI-EAS443:3:96:287:1910#0/1  
aabb`baabaaabaa`aaaab\_aba[a`aa`\_``\_a^\_aa  
@HWI-EAS443:3:96:310:91#0/1  
GGTTAATTGAAGAAATGCGGCACAGATTGAAAGCGACAGA  
+HWI-EAS443:3:96:310:91#0/1  
aa\_``aa\_b`aa``aa¥a`\_\_^`a^\_aa]^]aR`]X]\_\_\_\_  
@HWI-EAS443:3:96:357:1136#0/1  
CCGCATTTCTTCAATTAACCACCTTATTTCCCTCAAATTTTC  
+HWI-EAS443:3:96:357:1136#0/1  
YS[\_¥\_baaW]JRa`Y`[F[`]aaZ¥aa^]Rab]SG\_aa\_  
@HWI-EAS443:3:96:378:863#0/1  
AGAAACTGTGATGAGAATGGGAGACCTTCACTACCTCCAG  
+HWI-EAS443:3:96:378:863#0/1  
aa``a`]`Ya`a\_aaPV`aa[`a`Z\_^`]^]`\_]\_\_Y[]  
@HWI-EAS443:3:96:381:2026#0/1  
CCGCATTTCTTCAATTAACCACCTTATTTCCCTCAAATTTTC  
+HWI-EAS443:3:96:381:2026#0/1  
aaaa`aaaaaaaa`aaa`a``aaa``\_\_`a`\_``\_`^a  
@HWI-EAS443:3:96:389:284#0/1  
GTCTCCCATTCTCATCACAGTTTCTCCAAGCGAATCTCTG  
+HWI-EAS443:3:96:389:284#0/1  
a\_aa^aaaaa\_aaaa\_aaaa^^`V`]¥\_\_^Y`\_`^\_V]Q]`  
@HWI-EAS443:3:96:430:2027#0/1  
GCCGCATTTCTTCAATTAACCACCTTATTTCCCTCAAATTT  
+HWI-EAS443:3:96:430:2027#0/1  
aabbbaabaaaabb[`]Wa`\_aa[\_`^aa`aaaab\_PXa^^  
@HWI-EAS443:3:96:462:1545#0/1  
AGAAACTGTGATGAGAATGGGAGACCTTCACTACCTCCAG  
+HWI-EAS443:3:96:462:1545#0/1  
aa]]``aaGaaa`\_\_U¥aa]``^`\_`^¥`^^aY```0\_\_V`Z  
@HWI-EAS443:3:96:467:654#0/1  
AGAAACTGTGATGAGAATGGGAGACCTTCACTACCTCCAG  
+HWI-EAS443:3:96:467:654#0/1  
aaU¥\_aa`]aa`]a[`aaaa\_`^[Z^`^`^^\_YV^[W[]  
@HWI-EAS443:3:96:46:493#0/1  
AGAAACTGTGATGAGAATGGGAGACCTTCACTACCTCCAG  
+HWI-EAS443:3:96:46:493#0/1  
abaZa^abab\_abab\_\_aaa\_`\_`YV]\_\_\_\_Y\_aRWX\_]Y[  
@HWI-EAS443:3:96:506:1147#0/1  
AGAAACTGTGATGAGAATGGGAGACCTTCACTACCTCCAG  
+HWI-EAS443:3:96:506:1147#0/1  
aaa``aaa\_baaaaa`aaaaa`a\_[]¥`a`a^aa\_`^`\_]\_`

@HWI-EAS443:3:96:510:297#0/1  
GCCGCATTTCTTCAATTAACCACCTTATTTCTCAAATTT  
+HWI-EAS443:3:96:510:297#0/1  
¥R]^Z\_Yaba\_¥¥aaa]ba]¥^]Za`abaaRQ¥`^\_\_\_\_[Y  
@HWI-EAS443:3:96:517:1964#0/1  
CTTATGAGGATGTCAAAAATGCAGTTGGGGTCCTCATCGG  
+HWI-EAS443:3:96:517:1964#0/1  
a`a`aaa]b```Saaa\_^\_a]aXaa`\_\_^PPY\_a\_`[\_\_\_\_]  
@HWI-EAS443:3:96:518:1819#0/1  
AACAAATCGTGGAATGGATCTTGAAAGAGGAATCCAGCGA  
+HWI-EAS443:3:96:518:1819#0/1  
abaaZ]^`aaN`XWaz\_aX\_Y¥\_aVRY\_¥VSU`^XW^ZFY^  
@HWI-EAS443:3:96:555:750#0/1  
AGAAACTGTGATGAGAATGGGAGACCTTCACTACCTCCAG  
+HWI-EAS443:3:96:555:750#0/1  
^a¥]]aaUT\_VaaXb\_\_aa`YV`^ZP`]^\_X`V^¥^¥`\_  
@HWI-EAS443:3:96:772:1099#0/1  
TGAGAATGGGAGACCTTCACTACCTCCAGAGCAGAAATGA  
+HWI-EAS443:3:96:772:1099#0/1  
ab]^a\_abab\_baaaa^a^`a\_aa]^`^`a¥ba`]^`^a^  
@HWI-EAS443:3:96:792:1109#0/1  
GTCTCGCTGGATTCTCTTTCAAGATCCATTCCACGATTT  
+HWI-EAS443:3:96:792:1109#0/1  
]a`a`b`b]b]\_`a`aabb\_Xaaa\_a^^`aa\_`a¥b\_aZa  
@HWI-EAS443:3:96:800:477#0/1  
CTGTGCCGCATTTCTTCAATTAACCACCTTATTTCTCAA  
+HWI-EAS443:3:96:800:477#0/1  
`bb`b`b^¥a\_ab]ab¥`ba\_bbUab`\_bbaaba`Ybaab  
@HWI-EAS443:3:96:803:1515#0/1  
TGAGAATGGGAGACCTTCACTACCTCCAGAGCAGAAATGA  
+HWI-EAS443:3:96:803:1515#0/1  
]\_U]H[`\_^]`a]^¥[^`a\_]a][\_][¥Z¥Z`a````\_a  
@HWI-EAS443:3:96:839:1770#0/1  
GATGAGAATGGGAGACCTTCACTACCTCCAGAGCAGAAAT  
+HWI-EAS443:3:96:839:1770#0/1  
^Zababaaa\_baZ\_aa`\_a`baaa\_\_Z``\_a¥\_\_^\_a\_`\_  
@HWI-EAS443:3:96:872:1613#0/1  
GCTGTTTCGATATCGAGGCCAAGGGTGTTCCTCTTCCTT  
+HWI-EAS443:3:96:872:1613#0/1  
`aaa^a`aaa`a^^````\_a`^^^X`^`[^`\_]\_aY^]^  
@HWI-EAS443:3:96:880:827#0/1  
TCGCTTTCAATCTGTGCCGCATTTCTTCAATTAACCACCT  
+HWI-EAS443:3:96:880:827#0/1  
`aaa\_aaa\_X[`\_aUaa^a\_`a`a`a\_\_\_\_\_`\_]0^\_]Sa  
@HWI-EAS443:3:96:881:1074#0/1  
ATATCCGCAAGCGATTTGCAGACAATGGATTGGGTGATGC  
+HWI-EAS443:3:96:881:1074#0/1  
ab\_ba`a[\_aaTaaa`abaaa\_\_\_\_a\_a¥ZYWUV^QR][PQ  
@HWI-EAS443:3:96:892:1325#0/1  
TGAGAATGGGAGACCTTCACTACCTCCAGAGCAGAAATGA

+HWI-EAS443:3:96:892:1325#0/1  
abab\_a^ba`]W]\_\_`a`a\_``\_U\_]`\_\_Z[Wa\_]\_\_\_\_\_  
@HWI-EAS443:3:96:895:1593#0/1  
GAAACTGTGATGAGAATGGGAGACCTTCACTACCTCCAGA  
+HWI-EAS443:3:96:895:1593#0/1  
``ababbabbb`babbbaabaaaaab`ba`b\_`[aaa  
@HWI-EAS443:3:96:920:759#0/1  
GTCGCTTTCAATCTGTGCCGATTTCTTCAATTAACCACC  
+HWI-EAS443:3:96:920:759#0/1  
a`\_a[\_aaa`\_a^aa]\_`[\_S[aa\_X`]U\_0`\_\_^[PTYU  
@HWI-EAS443:3:96:926:400#0/1  
AACACGGTTCGAGTCTCTGAAAATATACAGAGATTCGCTT  
+HWI-EAS443:3:96:926:400#0/1  
\_`ZVS`¥OU^aYY[¥WOXZMT¥TO]]SM\_aS^W]HEXRPV  
@HWI-EAS443:3:96:945:1612#0/1  
GAATGGGAGACCTTCACTACCTCCAGAGCAGAAATGAAAA  
+HWI-EAS443:3:96:945:1612#0/1  
^aaab`a`]a\_T\_\_aaXX\_]L^a`a¥`a`^^¥\_a\_`\_¥Z\_  
@HWI-EAS443:3:96:957:578#0/1  
GCCGATTTCTTCAATTAACCACCTTATTTCTCAAATTT  
+HWI-EAS443:3:96:957:578#0/1  
^¥\_aW]^aa``]Rab[Y]NR¥aIaa`]^aKI^WYWZ\_``  
@HWI-EAS443:3:96:95:905#0/1  
CACGGTTCGAGTCTCTGAAAATATACAGAGATTCGCTTGG  
+HWI-EAS443:3:96:95:905#0/1  
]Sa¥bab`bb¥R\_b`a\_ab`aaaabaab^aabaa`\_aa\_N  
@HWI-EAS443:3:96:960:1488#0/1  
TGTCGCTTTCAATCTGTGCCGATTTCTTCAATTAACCAC  
+HWI-EAS443:3:96:960:1488#0/1  
ab\_aaaaaaaaaaaaa\_b[[`\_\_baa`aa``abaaa]]\_\_  
@HWI-EAS443:3:96:989:1352#0/1  
AATTGCATCTGTACCTACTTCGCGCTACCTTTCTGACATG  
+HWI-EAS443:3:96:989:1352#0/1  
aaaa`a\_aa`\_U\_aa\_a`a```\_`W\_aY¥\_¥\_\_\_^T\_\_\_W  
@HWI-EAS443:3:96:997:513#0/1  
GCCGATTTCTTCAATTAACCACCTTATTTCTCAAATTT  
+HWI-EAS443:3:96:997:513#0/1  
a^aa^¥aab`aa^aaaa\_W^a\_Va`\_aaaYXa```^\_a^a  
@HWI-EAS443:3:96:99:1719#0/1  
CTCCCATTCTCATCACAGTTTCTCCAAGCGAATCTCTGTA  
+HWI-EAS443:3:96:99:1719#0/1  
aaaa`[abbabaabbabba`aaaaaaY^¥a```a`aa\_a  
@HWI-EAS443:3:97:1014:1480#0/1  
GGAGAACTGTGATGAGAATGGGAGACCTTCACTACCTCC  
+HWI-EAS443:3:97:1014:1480#0/1  
aa\_aaa`aba\_]`a`¥a\_[aaa`\_`a[``aTaZ\_dW[¥V¥  
@HWI-EAS443:3:97:1018:1679#0/1  
AAACGAGAAAGCTTATCTCTTGTCTACTTCAAGCAGT  
+HWI-EAS443:3:97:1018:1679#0/1  
abYZ\_b`ZaWXM^[`aaaR][\_]WV\_XV\_`^¥¥NZY\_YXa¥

@HWI-EAS443:3:97:1031:242#0/1  
AGAACTGTGATGAGAATGGGAGACCTTCACTACCTCCAG  
+HWI-EAS443:3:97:1031:242#0/1  
\_bZJ\_a`b\_\_a]ba]¥abZ^aWa`X\_`V`X^\_]RaYU\_`  
@HWI-EAS443:3:97:105:464#0/1  
GTAATGGTAAAATTTCTCCAATATTGCTCCCTCCTCAGT  
+HWI-EAS443:3:97:105:464#0/1  
a^aa]aa^a¥VX¥\_\_`a[[]`¥`\_ZX^`^`]]\_ZRRX[Y  
@HWI-EAS443:3:97:1098:757#0/1  
TGAGAATGGGAGACCTTCACTACCTCCAGAGCAGAAATGA  
+HWI-EAS443:3:97:1098:757#0/1  
ZbIbaUbbba^[T¥aa`\_[]\_[G]\_Z\_\_^H]NVaIR][a`  
@HWI-EAS443:3:97:109:1008#0/1  
TGAGAATGGGAGACCTTCACTACCTCCAGAGCAGAAATGA  
+HWI-EAS443:3:97:109:1008#0/1  
a¥Ua¥^Uaa`T[R]`\_W]\_\_^Q^\_\_^U]XRNXUUUX\_ZWX  
@HWI-EAS443:3:97:122:244#0/1  
GAAAGAGGAATCCAGCGAGACACTTAGAATGACAATTGCA  
+HWI-EAS443:3:97:122:244#0/1  
`]YY`]^[^\_]a`WPaa`[]`RTX[]`Z¥Z`^W\_]¥VZX]  
@HWI-EAS443:3:97:1251:1540#0/1  
CTCGCTGGATTCTCTTTCAAGATCCATTCCACGATTTGT  
+HWI-EAS443:3:97:1251:1540#0/1  
`b[aZab`babZXb\_aba\_aa\_aaY\_aaa^Za]a\_aaZa`  
@HWI-EAS443:3:97:1321:579#0/1  
GCCGCATTTCTTCAATTAACCACCTTATTTCTCAAATTT  
+HWI-EAS443:3:97:1321:579#0/1  
a`ab[bbbbabbabbbbbbaaaZ\_bbbbbba\_babaabba  
@HWI-EAS443:3:97:134:100#0/1  
GAACAGTCTCGTGACATTTCTCGAGGGTCATGTCAGAA  
+HWI-EAS443:3:97:134:100#0/1  
aaaY`\_a¥`a¥a¥`^UR\_^¥QW\_W\_Y^¥VLMY\_^WWYBBB  
@HWI-EAS443:3:97:1385:812#0/1  
AGATTCGCTTGGAGAACTGTGATGAGAATGGGAGACCTT  
+HWI-EAS443:3:97:1385:812#0/1  
abaaaab`abbaaba`a]aa\_a\_aa\_Y\_]aa\_a\_a^UY\_\_  
@HWI-EAS443:3:97:1459:847#0/1  
TGCGGCACAGATTGAAAGCGACAGAGAATAGTTTCGAACA  
+HWI-EAS443:3:97:1459:847#0/1  
ab]ababW`ba¥ba`\_ab\_aaaab\_baYIabSaa]aY`Ha  
@HWI-EAS443:3:97:1522:1364#0/1  
TGAGAATGGGAGACCTTCACTACCTCCAGAGCAGAAATGA  
+HWI-EAS443:3:97:1522:1364#0/1  
ab\_a\_aaa]`\_b\_]aa`aX``]X`]U\_\_^\_X`a]^\_`¥  
@HWI-EAS443:3:97:1550:194#0/1  
GCTTGGAGAACTGTGATGAGAATGGGAGACCTTCACTAC  
+HWI-EAS443:3:97:1550:194#0/1  
a]^U]aaaX¥F]aVa[¥`[aQ`\_\_R\_NW¥RG¥FR¥UW^U  
@HWI-EAS443:3:97:1569:1331#0/1  
ATACTTATGAGGATGTCAAAAATGCAGTTGGGGTCTCAT

+HWI-EAS443:3:97:1569:1331#0/1  
abXbb\_b^[Sba[ab]Q¥aa^WKaYba`TQ¥\_PW[Va[¥R  
@HWI-EAS443:3:97:1601:546#0/1  
GCCGCATTTCTTCAATTAACCACCTTATTTCTCAAATTT  
+HWI-EAS443:3:97:1601:546#0/1  
M`b\_aabb\_[abaa¥bbaba¥bbbbbbabbGJ^¥ababa\_  
@HWI-EAS443:3:97:1616:648#0/1  
GAATGGGAGACCTTCACTACCTCCAGAGCAGAAATGAAAA  
+HWI-EAS443:3:97:1616:648#0/1  
M`ba`)`ab[]S`a`a\_abU[b`[^ba[J¥`\_\_aaa^[\_a  
@HWI-EAS443:3:97:163:444#0/1  
ACGGTTCGAGTCTCTGAAAATATACAGAGATTCGCTTGGA  
+HWI-EAS443:3:97:163:444#0/1  
abaa\_\_abab^a[\_a`^`^aaa\_Za`a[\_\_\_G`]]`¥^Z  
@HWI-EAS443:3:97:1714:1828#0/1  
GTTATTTGTTCGAAACTATTCTCTGTGCTTTCAATCTGT  
+HWI-EAS443:3:97:1714:1828#0/1  
a\_a`\_aaa]\_]a\_]\_Ua^aaX^Uab]X¥W`^^W\_]X^^^  
@HWI-EAS443:3:97:1719:945#0/1  
GAAACTGTGATGAGAATGGGAGACCTTCACTACCTCCAGA  
+HWI-EAS443:3:97:1719:945#0/1  
¥`bb`bbab]abbbabbbbaabb\_\_bb\_\_aaa\_^b¥Xaaa  
@HWI-EAS443:3:97:175:1307#0/1  
TGCCTAGGCAAAGATAATAGGCCCTCTTTGCGTGCGATT  
+HWI-EAS443:3:97:175:1307#0/1  
a\_[\_¥V\_Zba\_^bbabbaaWYaa`b^`\_\_^`ab[a\_\_\_`V  
@HWI-EAS443:3:97:187:1416#0/1  
CACAGATTGAAAGCGACAGAGAATAGTTTCGAACAAATAA  
+HWI-EAS443:3:97:187:1416#0/1  
abY^¥bb[S\_\_\_`[aaV[P¥^Ya`^aa\_¥aa^SU\_UMO\_ba  
@HWI-EAS443:3:97:187:554#0/1  
CGCTTTCAATCTGTGCCGCATTTCTTCAATTAACCACCTT  
+HWI-EAS443:3:97:187:554#0/1  
ab\_aa`[a\_aaaa^`\_aa\_Zaaa`\_`^¥a\_\_\_Z`^\_Z\_\_  
@HWI-EAS443:3:97:204:1314#0/1  
GAAACTGTGATGAGAATGGGAGACCTTCACTACCTCCAGA  
+HWI-EAS443:3:97:204:1314#0/1  
aaa`\_ab\_aaaa\_b`a`ba\_\_aaZ\_]^a``\_^^^\_^[\_^\_  
@HWI-EAS443:3:97:226:1919#0/1  
GCCGCATTTCTTCAATTAACCACCTTATTTCTCAAATTT  
+HWI-EAS443:3:97:226:1919#0/1  
a\_¥SSaab```\_¥[\_aaa[J]^`Ra`aa\_a`^a`a`X`a  
@HWI-EAS443:3:97:241:1025#0/1  
TGTGCCGCATTTCTTCAATTAACCACCTTATTTCTCAA  
+HWI-EAS443:3:97:241:1025#0/1  
N^`bbba[Y``R¥`baabaabXaba`Y`Za\_bbaaaa[¥0  
@HWI-EAS443:3:97:302:572#0/1  
AGAAACTGTGATGAGAATGGGAGACCTTCACTACCTCCAG  
+HWI-EAS443:3:97:302:572#0/1  
Ybab`a``[b\_U`]baabaaaabaQ[a\_\_\_¥Y`Y``\_\_^`



@HWI-EAS443:3:97:342:1967#0/1  
GAAACTGTGATGAGAATGGGAGACCTTCACTACCTCCAGA  
+HWI-EAS443:3:97:342:1967#0/1  
a^X^aab^baa`aaa`]`a]\_aaS¥^^`a^a^Z[W`\_^`  
@HWI-EAS443:3:97:349:212#0/1  
TGCCGCATTTCTTCAATTAACCACCTTATTTCCCTCAAATT  
+HWI-EAS443:3:97:349:212#0/1  
ab\_I`]`a`aa]ZY¥0\_Z¥^\_\_]^]aaa`\_^][a\_]\_^\_\_  
@HWI-EAS443:3:97:352:644#0/1  
GCCGCATTTCTTCAATTAACCACCTTATTTCCCTCAAATTT  
+HWI-EAS443:3:97:352:644#0/1  
a\_YUTZ[`a^`M]\_Y¥^^NS`LP\_\_¥\_WaZX\_]OFS\_^^  
@HWI-EAS443:3:97:371:803#0/1  
CACGGTTCGAGTCTCTGAAAATATACAGAGATTCGCTTGG  
+HWI-EAS443:3:97:371:803#0/1  
\_Z`\_]aZ`]`\_Waa`a\_ab]ba]a`\_`a\_a¥a\_Y^OW\_aa  
@HWI-EAS443:3:97:373:1476#0/1  
GAGCAATTGGGACAGAAATTTGAGGAAATAAGGTGGTTAA  
+HWI-EAS443:3:97:373:1476#0/1  
````¥¥ba\_a[^\_b\_]ab¥aba¥]]R`a\_aaa]``R[T`  
@HWI-EAS443:3:97:377:825#0/1  
GCCGCATTTCTTCAATTAACCACCTTATTTCCCTCAAATTT  
+HWI-EAS443:3:97:377:825#0/1  
abaaabbaaababbaab`aaaaababbaaaaaabaaaaa  
@HWI-EAS443:3:97:423:1542#0/1  
TGAGAATGGGAGACCTTCACTACCTCCAGAGCAGAAATGA  
+HWI-EAS443:3:97:423:1542#0/1  
`aaa]`\_a`a\_a[^`¥`\_`^a`^]`Q`\_`¥`^\_a\_¥\_\_\_^  
@HWI-EAS443:3:97:466:477#0/1  
GCATTTCTTCAATTAACCACCTTATTTCCCTCAAATTTCTG  
+HWI-EAS443:3:97:466:477#0/1  
ababbb^abaaabbbbaba^^bb`baba¥aaa\_aa`a\_aa  
@HWI-EAS443:3:97:476:530#0/1  
CACCATGTCAAGCTTTCAGGTAGACTGTTTCCTTTGGCAT  
+HWI-EAS443:3:97:476:530#0/1  
ab\_¥Z`b\_abbbabaa`a`aV`\_aZab\_a\_a]`^\_a\_]`a  
@HWI-EAS443:3:97:493:822#0/1  
TGCCGCATTTCTTCAATTAACCACCTTATTTCCCTCAAATT  
+HWI-EAS443:3:97:493:822#0/1  
ab`\_``aaaa]aaa`aaaa`\_a^`a\_aaa`\_a\_a`\_`  
@HWI-EAS443:3:97:587:1387#0/1  
GCCGCATTTCTTCAATTAACCACCTTATTTCCCTCAAATTT  
+HWI-EAS443:3:97:587:1387#0/1  
aaaWTKZa]LXZJU^TX0aTQRY^UL`\_^\_X^YU¥UY¥BB  
@HWI-EAS443:3:97:619:384#0/1  
AGAAACTGTGATGAGAATGGGAGACCTTCACTACCTCCAG  
+HWI-EAS443:3:97:619:384#0/1  
abaa^aabVaYaa\_a^`\_a`XaV¥X]\_U^X`\_0¥^]Y^`  
@HWI-EAS443:3:97:624:635#0/1  
CAAATCGTGAATGGATCTTGAAGAGGAATCCAGCGAGA

+HWI-EAS443:3:97:624:635#0/1  
`^^aaZba`aXV]bba\_a\_a`¥0[Z[]¥a]a^aa^WW`^  
@HWI-EAS443:3:97:62:652#0/1  
TGAGAATGGGAGACCTTCACTACCTCCAGAGCAGAAATGA  
+HWI-EAS443:3:97:62:652#0/1  
aaababbabb`b\_a`aaa``a````\_]a^\_a]`a``\_  
@HWI-EAS443:3:97:681:583#0/1  
AGAAGGTAATGGTGAATTTCTCCAATATTGCTCCCTCC  
+HWI-EAS443:3:97:681:583#0/1  
aba]T]Xa]\_aaVaaaaa`^aa\_a`^\_aaa`^a¥`\_\_¥]  
@HWI-EAS443:3:97:696:955#0/1  
CTTTGGCATATCCGCAAGCGATTTGCAGACAATGGATTGG  
+HWI-EAS443:3:97:696:955#0/1  
abaaab^bbbab`bba`bbb\_]aaaaaba\_baaa]\_`\_\_\_\_  
@HWI-EAS443:3:97:715:665#0/1  
TGAGAATGGGAGACCTTCACTACCTCCAGAGCAGAAATGA  
+HWI-EAS443:3:97:715:665#0/1  
`b\_aT]bbbb]a\_`^a\_\_a]`ZY``\_\_a]a¥aa\_^\_`a^  
@HWI-EAS443:3:97:716:1522#0/1  
AGATTACACTGAAGTTCGCTTTCAGTACTATGTTCTTTTC  
+HWI-EAS443:3:97:716:1522#0/1  
``abab`a\_`¥^aa\_`¥aaaa^aa\_]\_`¥b`\_\_YSa``SR  
@HWI-EAS443:3:97:787:1228#0/1  
GCCGCATTTCTTCAATTAACCACCTTATTTCTCAAATTT  
+HWI-EAS443:3:97:787:1228#0/1  
aa^aa^a^aaa^]a[aaa^[Y`\_^`a`\_X^¥XP^^K]a\_\_  
@HWI-EAS443:3:97:804:439#0/1  
CGCATTTCTTCAATTAACCACCTTATTTCTCAAATTTCT  
+HWI-EAS443:3:97:804:439#0/1  
abbbabb`bb``bbbabaab\_abbabbaaabababbaab  
@HWI-EAS443:3:97:836:322#0/1  
AAAAGAACATAGTACTGAAAGCGAACTTCAAGTGAATCTT  
+HWI-EAS443:3:97:836:322#0/1  
aaaaaababaaa\_a`aa`aa\_\_a`a]aa¥\_a]a^\_^`Ya\_  
@HWI-EAS443:3:97:858:191#0/1  
GTGATGAGAATGGGAGACCTTCACTACCTCCAGAGCAGAA  
+HWI-EAS443:3:97:858:191#0/1  
aa¥]aa\_\_a``aaa\_a`UZ[UN\_U¥`TQVWWW\_W¥U^¥YY  
@HWI-EAS443:3:97:858:636#0/1  
GCCGCATTTCTTCAATTAACCACCTTATTTCTCAAATTT  
+HWI-EAS443:3:97:858:636#0/1  
aba^0^`aaa[Y0][aa`\_ZR\_OV]``^`a]G^\_\_a]\_]a  
@HWI-EAS443:3:97:85:1030#0/1  
TGAGAATGGGAGACCTTCACTACCTCCAGAGCAGAAATGA  
+HWI-EAS443:3:97:85:1030#0/1  
ab`aaaaaa^[^[^¥^\_Za[\_a\_Y¥VSZXZ`]]aZS]`\_]`  
@HWI-EAS443:3:97:909:1500#0/1  
CGCATTTCTTCAATTAACCACCTTATTTCTCAAATTTCT  
+HWI-EAS443:3:97:909:1500#0/1  
abbbabbbbbbbaababbb`aa\_baabba]b

@HWI-EAS443:3:97:909:505#0/1  
CCGCATTTCTTCAATTAACCACCTTATTTCCCTCAAATTTTC  
+HWI-EAS443:3:97:909:505#0/1  
a\_b`aaabaXab`baba]`bbb\_``baa`abab`baaa  
@HWI-EAS443:3:97:97:1802#0/1  
GCCGCATTTCTTCAATTAACCACCTTATTTCCCTCAAATTT  
+HWI-EAS443:3:97:97:1802#0/1  
a`a\_Y\_`^`Y`aaa\_a]`^X[^`aa\_`Z`TZWa`R]^Z\_  
@HWI-EAS443:3:98:1021:1832#0/1  
CACGCAAAGAGGGCCTATTATCTTTTGCCTAGGCATGAGC  
+HWI-EAS443:3:98:1021:1832#0/1  
U\_K`¥a\_ab]`aX`b[\_Yab[]bU^aa]`YaR]a`b[UZ  
@HWI-EAS443:3:98:1070:721#0/1  
CCGCATTTCTTCAATTAACCACCTTATTTCCCTCAAATTTTC  
+HWI-EAS443:3:98:1070:721#0/1  
abbbb\_bb\_b`\_]\_bb\_ba¥bba`bbbbbb\_bb¥`b`bab\_  
@HWI-EAS443:3:98:1079:302#0/1  
GTCGCTTTCAATCTGTGCCGCATTTCTTCAATTAACCACC  
+HWI-EAS443:3:98:1079:302#0/1  
a`aaQN¥a`\_\_\_^X]U^ZL]N[^]M]^T^Y¥ZZ¥SU[XU  
@HWI-EAS443:3:98:1161:559#0/1  
ATGAGAATGGGAGACCTTCACTACCTCCAGAGCAGAAATG  
+HWI-EAS443:3:98:1161:559#0/1  
abb\_a`aabbaaa\_`^`aa\_aaa`U`\_`\_ab^aYab\_Y]^a  
@HWI-EAS443:3:98:1206:1126#0/1  
GAATGGGAGACCTTCACTACCTCCAGAGCAGAAATGAAAA  
+HWI-EAS443:3:98:1206:1126#0/1  
\_\_abbbbaS\_]Qaaa`baaaZYa]HX]`a[aa\_[aaa`\_`\_`  
@HWI-EAS443:3:98:1226:1777#0/1  
ACCTACTTCGCGCTACCTTTCTGACATGACCCTCGAGGAA  
+HWI-EAS443:3:98:1226:1777#0/1  
ab^X`a\_\_\_bZaa`aR\_\_aa`\_`bb`a^\_]HZUa\_`\_`^  
@HWI-EAS443:3:98:1231:312#0/1  
CTTGGAGAACTGTGATGAGAATGGGAGACCTTCACTACC  
+HWI-EAS443:3:98:1231:312#0/1  
`bbabbbba`bb^baba\_b\_aabb`b`X]^a\_a^`aUN  
@HWI-EAS443:3:98:1234:1001#0/1  
TGGATCTTCAAAGAGGAATCCAGCGAGACACTTAGAATGA  
+HWI-EAS443:3:98:1234:1001#0/1  
aba`\_`bab\_`\_aaaaaa\_\_aa]a^a^Va^`]^a]^`a\_  
@HWI-EAS443:3:98:1267:652#0/1  
AATGGGAGACCTTCACTACCTCCAGAGCAGAAATGAAAAG  
+HWI-EAS443:3:98:1267:652#0/1  
ababbbbaabbabb^baabaaa`\_abaaaaaa`abbaa`ab  
@HWI-EAS443:3:98:1314:1294#0/1  
GATGAGAATGGGAGACCTTCACTACCTCCAGAGCAGAAAT  
+HWI-EAS443:3:98:1314:1294#0/1  
aabbabaabbb`\_aa`\_aa\_bYaa]`a\_¥aa\_a]a¥XXaa  
@HWI-EAS443:3:98:1319:1913#0/1  
TGGAGAACTGTGATGAGAATGGGAGACCTTCACTACCTC

+HWI-EAS443:3:98:1319:1913#0/1  
ab`Iaa`ab[ `\_bWU`^aaa\_a^\_\_\_\_`aG^\_\_\_\_R``0[^G  
@HWI-EAS443:3:98:1359:1683#0/1  
ATTATCTTTTGCCTAGGCATGAGCATGAACCAGTCTCGTG  
+HWI-EAS443:3:98:1359:1683#0/1  
^b\_XI)`WWZ\_WX[^WWTO]aaZL^`a\_YOS]XUPYBBBB  
@HWI-EAS443:3:98:1363:458#0/1  
GAGAAATTTTACCATTACCTTCTCTTCCAGGACATACTTA  
+HWI-EAS443:3:98:1363:458#0/1  
abaa\_\_a¥Y]aWUYZa]¥Ta[^aWaa[a[a\_[S]\_\_\_\_a`a  
@HWI-EAS443:3:98:1407:701#0/1  
GAAACTGTGATGAGAATGGGAGACCTTCACTACCTCCAGA  
+HWI-EAS443:3:98:1407:701#0/1  
aaXa\_bbZ^[\_aaa¥^^ZTZZ^Z^`\_`\_Ya\_T¥RV`XL]a^  
@HWI-EAS443:3:98:1431:1123#0/1  
GAAACTGTGATGAGAATGGGAGACCTTCACTACCTCCAGA  
+HWI-EAS443:3:98:1431:1123#0/1  
aa`[^baYa\_`a`a\_`a\_`\_`\_GY\_\_\_\_^RZSHX¥RO¥\_V  
@HWI-EAS443:3:98:1479:910#0/1  
TGCATCTGTACCTACTTCGCGCTACCTTTCTGACATGACC  
+HWI-EAS443:3:98:1479:910#0/1  
abJbb\_aa`aXaaaa\_`b`a]\_a\_S`^`^aa\_\_aa]`\_]  
@HWI-EAS443:3:98:1510:1084#0/1  
AGAAACTGTGATGAGAATGGGAGACCTTCACTACCTCCAG  
+HWI-EAS443:3:98:1510:1084#0/1  
aa^[a\_^baa^]X¥b\_`a`a\_0YYUGaa]\_Ya]Y^`V^[U  
@HWI-EAS443:3:98:1575:1999#0/1  
GAAAAGAACATAGTACTGAAAGCGAACTTCAGTGAATCT  
+HWI-EAS443:3:98:1575:1999#0/1  
\_a\_¥abb^S\_`bb\_abab¥bbaZaa¥babab`baaab`Va  
@HWI-EAS443:3:98:1589:801#0/1  
GAAACTGTGATGAGAATGGGAGACCTTCACTACCTCCAGA  
+HWI-EAS443:3:98:1589:801#0/1  
a]H`Vaa\_b^¥XPY\_S`\_SRQTX]Y\_^0]OT[V\_0¥]]¥^  
@HWI-EAS443:3:98:164:1075#0/1  
GCCGCATTTCTTCAATTAACCACCTTATTTCTCAAATTT  
+HWI-EAS443:3:98:164:1075#0/1  
aa]baaab`aaaaaaaa`\_a]aaa````^a`a``baa  
@HWI-EAS443:3:98:1651:695#0/1  
ATCGGTTAAAGATTACTGAAGTTCGCTTTCAGTACTAT  
+HWI-EAS443:3:98:1651:695#0/1  
ab^baaaaa`a\_`baWa`[ ]\_\_`^a]\_V]a`Y^`^ZW^\_\_  
@HWI-EAS443:3:98:1711:1410#0/1  
GAGAAACTGTGATGAGAATGGGAGACCTTCACTACCTCCA  
+HWI-EAS443:3:98:1711:1410#0/1  
aa]a`b`ab\_\_`a`a]`aa\_[\_`aaZO`¥^YHWaZG^^\_\_  
@HWI-EAS443:3:98:1771:654#0/1  
CTTGGAGAACTGTGATGAGAATGGGAGACCTTCACTACC  
+HWI-EAS443:3:98:1771:654#0/1  
abb`]bbbbb^bb\_baababa`abba```^^\_\_`]`XU\_aR

@HWI-EAS443:3:98:1777:606#0/1  
CACAGATTGAAAGCGACAGAGAATAGTTTCGAACAAATAA  
+HWI-EAS443:3:98:1777:606#0/1  
Y¥Z¥aaM[aX`XZ\_aa`P¥]X[a\_baU^`Vb`ZS^aaabb  
@HWI-EAS443:3:98:181:1516#0/1  
CACAGATTGAAAGCGACAGAGAATAGTTTCGAACAAATAA  
+HWI-EAS443:3:98:181:1516#0/1  
abbb^aaaaaba\_\_\_\_]b`a\_`a\_\_` `[a\_a`^a`\_\_aaaa  
@HWI-EAS443:3:98:224:719#0/1  
ATCCGCAAGCGATTTGCAGACAATGGATTGGGTGATGCCC  
+HWI-EAS443:3:98:224:719#0/1  
aaab]`aab\_b\_a`aab`baa]a`aa\_Q[U\_XVa]¥\_Z`a  
@HWI-EAS443:3:98:241:773#0/1  
AGAAACTGTGATGAGAATGGGAGACCTTCACTACCTCCAG  
+HWI-EAS443:3:98:241:773#0/1  
GT[^XRR\_\_Y¥Z¥\_\_R¥¥¥V¥Z[\_TI\_ZF0¥a^XOXGJP\_  
@HWI-EAS443:3:98:261:740#0/1  
GCCGCATTTCTTCAATTAACCACCTTATTTCTCAAATTT  
+HWI-EAS443:3:98:261:740#0/1  
aa`baab`a`aaa`aaa^`\_a^\_a`a\_a\_\_`\_\_^`\_`^  
@HWI-EAS443:3:98:340:840#0/1  
GTCGCTTTCAATCTGTGCCGATTTCTTCAATTAACCACC  
+HWI-EAS443:3:98:340:840#0/1  
^`a]Z0` ``Z^Ya\_]YRZ]ZaR\_S\_` `]TUP¥]P[`\_ZN¥  
@HWI-EAS443:3:98:377:130#0/1  
GAAACTGTGATGAGAATGGGAGACCTTCACTACCTCCAGA  
+HWI-EAS443:3:98:377:130#0/1  
``a`^`bYa`\_a^aXXaaa\_`aXYV\_`^V¥X^YUXXX¥X¥Y  
@HWI-EAS443:3:98:386:532#0/1  
GAGAATGGGAGACCTTCACTACCTCCAGAGCAGAAATGAA  
+HWI-EAS443:3:98:386:532#0/1  
aab`aabbb\_b` [ `a`aa` `a]aa\_¥a`\_aa` ` \_\_\_\_`a\_¥  
@HWI-EAS443:3:98:392:65#0/1  
TGAGAATGGGAGACCTTCACTACCTCCAGAGCAGAAATGA  
+HWI-EAS443:3:98:392:65#0/1  
abQbSZH\_¥aQ]Q\_aZ^S^0^\_YPPZNY^OYBBBBBBBBB  
@HWI-EAS443:3:98:423:918#0/1  
GAGAAACTGTGATGAGAATGGGAGACCTTCACTACCTCCA  
+HWI-EAS443:3:98:423:918#0/1  
a`a`aZaaa\_a\_aa\_a^\_\_aa^Z`I[^\_]\_\_]^^WUZX]^  
@HWI-EAS443:3:98:425:1313#0/1  
ATGAGAATGGGAGACCTTCACTACCTCCAGAGCAGAAATG  
+HWI-EAS443:3:98:425:1313#0/1  
abaabaabaaa\_baaaa\_`a`aa^`\_`a\_a\_a^`a\_¥[``  
@HWI-EAS443:3:98:537:140#0/1  
GAAACTGTGATGAGAATGGGAGACCTTCACTACCTCCAGA  
+HWI-EAS443:3:98:537:140#0/1  
`YXOR`ZMZ\_ZWSaYX¥UG[[V[WJN]RRVMSKRGLV\_B  
@HWI-EAS443:3:98:571:428#0/1  
TGGAGAAACTGTGATGAGAATGGGAGACCTTCACTACCTC

+HWI-EAS443:3:98:571:428#0/1  
]abab^baZ`^]b`ab]]][a`¥`Y\_[RSU`\_]`]a`¥]a`  
@HWI-EAS443:3:98:579:1772#0/1  
GAATGGGAGACCTTCACTACCTCCAGAGCAGAAATGAAAA  
+HWI-EAS443:3:98:579:1772#0/1  
\_]WTRYYZ[`\_\_X[VZ¥¥\_RWS]YQ\_SZ`YRXPVαOMQL  
@HWI-EAS443:3:98:586:1799#0/1  
ATCGCACGCAAAGAGGGCCTATTATCTTTTGCCTAGGCAT  
+HWI-EAS443:3:98:586:1799#0/1  
[``]ab\_Ya\_aa`ZaaX¥`[^a`a\_\_a^Z]]`^\_a\_ZN¥\_  
@HWI-EAS443:3:98:610:160#0/1  
ATGAGAATGGGAGACCTTCACTACCTCCAGAGCAGAAATG  
+HWI-EAS443:3:98:610:160#0/1  
a^aabZ[]babVbWP`aYa^\_``[R`\_]`a\_\_X^`^XZa`  
@HWI-EAS443:3:98:627:258#0/1  
TGTCGCTTTCAATCTGTGCCGATTTCTTCAATTAACCAC  
+HWI-EAS443:3:98:627:258#0/1  
abaabbaaa`aaaaba`b`\_baaaaaaaaaaaaa`aaa`]]`  
@HWI-EAS443:3:98:628:1415#0/1  
GAAACTGTGATGAGAATGGGAGACCTTCACTACCTCCAGA  
+HWI-EAS443:3:98:628:1415#0/1  
`aaa`ab]aaaa`aaaa`aaa\_`aa``a\_\_\_¥¥\_\_^``\_  
@HWI-EAS443:3:98:654:959#0/1  
AGGCAACACCTTGGCCTCGATATCGAAACAGCCACTCTT  
+HWI-EAS443:3:98:654:959#0/1  
abb]^babbbbaaa`^]aa\_aa\_aaaa\_a]\_aaa[\_V¥^\_\_  
@HWI-EAS443:3:98:678:170#0/1  
AGAAACTGTGATGAGAATGGGAGACCTTCACTACCTCCAG  
+HWI-EAS443:3:98:678:170#0/1  
abaaaabb\_aaaa\_a`\_a`\_`a\_¥\_\_`^aX``^¥\_^]`^a  
@HWI-EAS443:3:98:684:1970#0/1  
AGAAACTGTGATGAGAATGGGAGACCTTCACTACCTCCAG  
+HWI-EAS443:3:98:684:1970#0/1  
a\_aa`]¥`TaYa¥\_a\_a`^\_Xa^^XYY^`RX^^R^]¥^X  
@HWI-EAS443:3:98:732:2028#0/1  
GAAACTGTGATGAGAATGGGAGACCTTCACTACCTCCAGA  
+HWI-EAS443:3:98:732:2028#0/1  
¥aab\_\_ZTaba]\_a¥0¥\_\_T``¥TV¥aaaa`aSa]G¥¥\_`  
@HWI-EAS443:3:98:755:1214#0/1  
AAACTGTGATGAGAATGGGAGACCTTCACTACCTCCAGAG  
+HWI-EAS443:3:98:755:1214#0/1  
]ba¥]\_N]^a[U``abbaa\_]UVP`aaa^aUNUa\_a\_a]a  
@HWI-EAS443:3:98:758:740#0/1  
GTCGCTTTCAATCTGTGCCGATTTCTTCAATTAACCACC  
+HWI-EAS443:3:98:758:740#0/1  
a`\_a`\_aa\_b\_]Taa^aQL]`\_`a^]\_aY\_\_a`\_\_Z^`^W  
@HWI-EAS443:3:98:852:1490#0/1  
AGGTACAGATGCAATTGTCATTCTAAGTGTCTCGCTGGAT  
+HWI-EAS443:3:98:852:1490#0/1  
abbaaaa\_abbbbaabb```ba\_aba`\_]`aa]`\_\_a`]`

@HWI-EAS443:3:98:861:861#0/1  
GAAACTGTGATGAGAATGGGAGACCTTCACTACCTCCAGA  
+HWI-EAS443:3:98:861:861#0/1  
^`aba`aR`abbabaabbaaab`a^`aab\_aa`\_aa\_aaa  
@HWI-EAS443:3:98:889:1053#0/1  
CAGAGATTGCTTGGAGAACTGTGATGAGAATGGGAGAC  
+HWI-EAS443:3:98:889:1053#0/1  
abbbbaabab`bbbababaaabb`baaaaba\_aa`a\_a`  
@HWI-EAS443:3:98:899:1012#0/1  
CAAGGAATGGGGCATCACCCAATCCATTGTCTGCAAATCG  
+HWI-EAS443:3:98:899:1012#0/1  
abbbb`babbaababbbabaaa`aabaa`aa^b`aa`b  
@HWI-EAS443:3:98:905:808#0/1  
GTTTCCTTTGGCATATCCGCAAGCGATTTGCAGACAATGG  
+HWI-EAS443:3:98:905:808#0/1  
U\_`\_`\_`W^`¥aa`^^b^\_]a\_b`U^b``aa\_¥Z]\_b`  
@HWI-EAS443:3:98:958:460#0/1  
GAATGGGAGACCTTCACTACCTCCAGAGCAGAAATGAAAA  
+HWI-EAS443:3:98:958:460#0/1  
a^X]X¥aYa^UU]]\_\_U`aW^[YZV`UaN\_`S^^\_\_WUW¥  
@HWI-EAS443:3:98:972:317#0/1  
GGGAAACAAATCGTGAATGGATCTTGAAGAGGAATCCA  
+HWI-EAS443:3:98:972:317#0/1  
a]ZUY``\_\_X^YaUa`ZYU``V]N^^`]^^¥V¥R]]TTZ  
@HWI-EAS443:3:98:999:533#0/1  
CGCTTTCAATCTGTGCCGATTTCTTCAATTAACCACCTT  
+HWI-EAS443:3:98:999:533#0/1  
^aY`abb`Z[`bbbb^bbaa`^bb¥ab`\_bb`a[\_`^¥V\_  
@HWI-EAS443:3:99:1035:118#0/1  
CGAGAAAGCTTATCTCTTGTCTACTTCAAGCAGTAGT  
+HWI-EAS443:3:99:1035:118#0/1  
abbbbaabababbbbab`aabababbabbaa¥aaab`aba  
@HWI-EAS443:3:99:1104:697#0/1  
GCCGCATTTCTTCAATTAACCACCTTATTTCTCAAATTT  
+HWI-EAS443:3:99:1104:697#0/1  
aa`b`abab`aaa`aaaa`\_a`^aa`aaa`^a``\_\_a`\_  
@HWI-EAS443:3:99:1114:1108#0/1  
AGAAACTGTGATGAGAATGGGAGACCTTCACTACCTCCAG  
+HWI-EAS443:3:99:1114:1108#0/1  
`]Z]T`bb`baab`^`aaa\_bY¥\_aa`a\_aaY¥\_]`\_b  
@HWI-EAS443:3:99:1117:486#0/1  
CGCTTGGAGAACTGTGATGAGAATGGGAGACCTTCACTA  
+HWI-EAS443:3:99:1117:486#0/1  
Z\_abbbbabbbbbb`abbbab`aba`babb`¥a`\_b\_ab  
@HWI-EAS443:3:99:1126:1444#0/1  
TGGTAACACGGTTCGAGTCTCTGAAAATATACAGAGATTC  
+HWI-EAS443:3:99:1126:1444#0/1  
abTS\_bbbb\_b^bb\_Y`^L¥S``baa^aa`a[bbababa¥  
@HWI-EAS443:3:99:1128:552#0/1  
GAAACTGTGATGAGAATGGGAGACCTTCACTACCTCCAGA

+HWI-EAS443:3:99:1128:552#0/1  
a`aa\_baabaab\_baaaabaaa`^\_aa\_a\_``^^^\_`\_\_\_\_  
@HWI-EAS443:3:99:1138:425#0/1  
GAAACTGTGATGAGAATGGGAGACCTTCACTACCTCCAGA  
+HWI-EAS443:3:99:1138:425#0/1  
aba¥[bb`b`bb]aaaabaa\_a`\_`\_a\_`\_aaU[a]`\_`\_]  
@HWI-EAS443:3:99:1139:267#0/1  
TGAAGAAATGCGGCACAGATTGAAAGCGACAGAGAATAGT  
+HWI-EAS443:3:99:1139:267#0/1  
Xb¥[\_bab`bb¥]RXbbaba\_^^aYY`Y`S00Z¥^Z\_^  
@HWI-EAS443:3:99:1186:568#0/1  
CGCTTGGAGAACTGTGATGAGAATGGGAGACCTTCACTA  
+HWI-EAS443:3:99:1186:568#0/1  
`bbbbbbbabbbbbbb`bbbbbbba`babbaba``ab\_b]`^  
@HWI-EAS443:3:99:118:1875#0/1  
CTGAAACGAGAAAGCTCTTATCTCTTGTCTACTTCAAGC  
+HWI-EAS443:3:99:118:1875#0/1  
aaaaaba`a[`a\_a`\_a`[]aYa`U^`¥`\_``\_``\_W\_\_  
@HWI-EAS443:3:99:121:622#0/1  
GTCGCTTTCAATCTGTGCCGATTTCTTCAATTAACCACC  
+HWI-EAS443:3:99:121:622#0/1  
a]aa`a`aa````\_`\_`[a\_``[V]aa\_``Z\_\_a^`\_¥^^X^  
@HWI-EAS443:3:99:1226:97#0/1  
GAGAACTGTGATGAGAATGGGAGACCTTCACTACCTCCA  
+HWI-EAS443:3:99:1226:97#0/1  
aa`aa`\_ab¥b^aa\_a]\_aaaa]a^XX\_\_Y\_Y\_WMM^VU]  
@HWI-EAS443:3:99:1268:450#0/1  
AGAACTGTGATGAGAATGGGAGACCTTCACTACCTCCAG  
+HWI-EAS443:3:99:1268:450#0/1  
`baaa`bb^a`ab\_b\_\_a^`a]ba^]\_`\_a]a`RG`WV\_Z  
@HWI-EAS443:3:99:127:975#0/1  
GAAACTGTGATGAGAATGGGAGACCTTCACTACCTCCAGA  
+HWI-EAS443:3:99:127:975#0/1  
``UR``¥SZW\_aWa`a``aZ¥a\_a\_YZ^a\_aY`a\_Y\_^`R  
@HWI-EAS443:3:99:1296:1532#0/1  
AGAACTGTGATGAGAATGGGAGACCTTCACTACCTCCAG  
+HWI-EAS443:3:99:1296:1532#0/1  
a`^¥ZY\_b\_aaa`a]aVaab`¥`]a\_a^M\_\_a\_[-[]`a  
@HWI-EAS443:3:99:1350:1588#0/1  
GAAACTGTGATGAGAATGGGAGACCTTCACTACCTCCAGA  
+HWI-EAS443:3:99:1350:1588#0/1  
aaZ``¥`[`¥^abbababbbab[^`baY]aaXRR\_GW`aY  
@HWI-EAS443:3:99:1387:798#0/1  
TGAGAATGGGAGACCTTCACTACCTCCAGAGCAGAAATGA  
+HWI-EAS443:3:99:1387:798#0/1  
abaabbbbaa\_``Uab`[``ba^U\_a\_`[\_a\_\_b``aa[a  
@HWI-EAS443:3:99:1388:1381#0/1  
GCCGCATTTCTTCAATTAACCACCTTATTTCCCTCAAATTT  
+HWI-EAS443:3:99:1388:1381#0/1  
aLH\_`abb`]abaa¥\_b\_a^`\_`Sa`abaaaI]]V`\_aa`



@HWI-EAS443:3:99:143:1724#0/1  
AGAACTGTGATGAGAATGGGAGACCTTCACTACCTCCAG  
+HWI-EAS443:3:99:143:1724#0/1  
`]aba`a\_^`^aa\_^Y\_``¥\_]\_\_\_\_]^\_]\_Y^`^V¥VR^^  
@HWI-EAS443:3:99:1453:389#0/1  
GGAGAACTGTGATGAGAATGGGAGACCTTCACTACCTCC  
+HWI-EAS443:3:99:1453:389#0/1  
¥U]`\_a]^a¥NHX\_aQ`Z^X[`^N\_THHR\_VZNVVLX¥PS  
@HWI-EAS443:3:99:1465:814#0/1  
ATGGAAAAGAACATAGTACTGAAAGCGAACTTCAGTGTAA  
+HWI-EAS443:3:99:1465:814#0/1  
aZ\_a[a¥\_U`[NV^RZX`S`^YV`¥¥[¥]\_¥G\_\_Q[]\_¥  
@HWI-EAS443:3:99:1497:104#0/1  
CGCATTTCTTCAATTAACCACCTTATTTCTCAAATTTCT  
+HWI-EAS443:3:99:1497:104#0/1  
abab`bbbb`bbbbbbb\_aaba`bbbababaaab]P]  
@HWI-EAS443:3:99:1563:582#0/1  
CGCATTTCTTCAATTAACCACCTTATTTCTCAAATTTCT  
+HWI-EAS443:3:99:1563:582#0/1  
a\_PX`^^]aba\_babbba^aZH¥\_ab\_aHNU`Va¥aVaW\_  
@HWI-EAS443:3:99:1591:934#0/1  
GCGGCACAGATTGAAAGCGACAGAGAATAGTTTCGAACAA  
+HWI-EAS443:3:99:1591:934#0/1  
`aa``aabb`abb``abaa\_a\_aaba\_\_a\_^a`Za^`[\_a  
@HWI-EAS443:3:99:1650:1927#0/1  
ATCTGTACCTACTTCGCGCTACCTTTCTGACATGACCCTC  
+HWI-EAS443:3:99:1650:1927#0/1  
aUH¥WF[ZV¥¥L¥a\_[LX]^`[TXaaZDW[XQXa[VZDTWK  
@HWI-EAS443:3:99:170:1065#0/1  
TGAGAATGGGAGACCTTCACTACCTCCAGAGCAGAAATGA  
+HWI-EAS443:3:99:170:1065#0/1  
ababab`YPYab`Sbaa[aa[aa]\_a``PaaPRaa\_BBBB  
@HWI-EAS443:3:99:1751:1326#0/1  
GCCGCATTTCTTCAATTAACCACCTTATTTCTCAAATTT  
+HWI-EAS443:3:99:1751:1326#0/1  
ab`a\_T`a\_WaT]XR]\_`aZa\_X^aa^aZ\_ZGZ\_WLYY[`  
@HWI-EAS443:3:99:1768:464#0/1  
AAAGAGGGCCTATTATCTTTTGCCTAGGCATGAGCATGAA  
+HWI-EAS443:3:99:1768:464#0/1  
ab¥XQaabaY`abaaaab`¥^X`W\_aaa¥`a\_\_`[a^R[a  
@HWI-EAS443:3:99:1782:688#0/1  
CAGCGAGACACTTAGAATGACAATTGCATCTGTACCTACT

+HWI-EAS443:3:99:1782:688#0/1  
`b^`\_a`a]aaaaaaabaa\_aaa``[a\_`a]]`XXaaNa  
@HWI-EAS443:3:99:296:179#0/1  
TGAAAATATACAGAGATTTCGCTTGGAGAACTGTGATGAG  
+HWI-EAS443:3:99:296:179#0/1  
ab\_\_\_`baaaZab`a\_a``a\_a\_aa`a\_`\_]a`X`Y]\_^\_  
@HWI-EAS443:3:99:305:1751#0/1  
GAATGGGAGACCTTCACTACCTCCAGAGCAGAAATGAAAA  
+HWI-EAS443:3:99:305:1751#0/1  
a`aabababa\_baabbaaaUa]abaa\_aaa\_`aaa\_]`]  
@HWI-EAS443:3:99:31:86#0/1  
GCCGCATTTCTTCAATTAACCACCTTATTTCTCAAATTT  
+HWI-EAS443:3:99:31:86#0/1  
`Wia\_Saaa¥\_a\_] [a\_] ^SV]Y\_[V^\_] [¥\_^ [ZR^X^  
@HWI-EAS443:3:99:324:983#0/1  
ATTCTCTGTCGCTTTCAATCTGTGCCGCATTTCTTCAATT  
+HWI-EAS443:3:99:324:983#0/1  
U`^a]YZ\_P¥]]^a[X\_Z\_^]`¥]MUTYXV\_VNY`¥UP\_a  
@HWI-EAS443:3:99:328:213#0/1  
GCCGCATTTCTTCAATTAACCACCTTATTTCTCAAATTT  
+HWI-EAS443:3:99:328:213#0/1  
```abaYba\_abbbaa[bbaa\_aaaab\_```aaRTa]aaYaU]  
@HWI-EAS443:3:99:343:945#0/1  
CGAGAAAGCTCTTATCTCTTGTCTACTTCAAGCAGTAGT  
+HWI-EAS443:3:99:343:945#0/1  
aaa`aa\_`\_]aa`aaaa\_aaV`\_a\_]\_^`\_\_`P\_\_Y  
@HWI-EAS443:3:99:348:589#0/1  
GTCGCTTTCAATCTGTGCCGCATTTCTTCAATTAACCACC  
+HWI-EAS443:3:99:348:589#0/1  
a\_RZ` [a^ [aaa` [bIaXTYN\_aa\_\_\_YGR`\_XU\_HYWOM  
@HWI-EAS443:3:99:354:1788#0/1  
ATTACACTGAAGTTTCGCTTTCAGTACTATGTTCTTTTCCA  
+HWI-EAS443:3:99:354:1788#0/1  
¥[\_^aba`a`aa`aaaaaa\_a`^a`^\_ab]aaa`a`\_ [a  
@HWI-EAS443:3:99:358:1173#0/1  
GAAACTGTGATGAGAATGGGAGACCTTCACTACCTCCAGA  
+HWI-EAS443:3:99:358:1173#0/1  
^aM` `ba`Y]abb\_^U[`]H]\_`\_\_`U0aY`a\_aG¥^U¥\_  
@HWI-EAS443:3:99:360:1018#0/1  
GTCGCTTTCAATCTGTGCCGCATTTCTTCAATTAACCACC  
+HWI-EAS443:3:99:360:1018#0/1  
a`aaaaa` `\_a]\_a\_aZ]\_^a`aa\_aa`Za\_`\_]`\_]\_  
@HWI-EAS443:3:99:368:874#0/1  
CTGTCGCTTTCAATCTGTGCCGCATTTCTTCAATTAACCA  
+HWI-EAS443:3:99:368:874#0/1  
abXYaaa]RZa^ba\_abaY\_`b[P\_a^aS`a\_[aa][¥V`  
@HWI-EAS443:3:99:377:1384#0/1  
GTCGCTTTCAATCTGTGCCGCATTTCTTCAATTAACCACC  
+HWI-EAS443:3:99:377:1384#0/1  
aaab^aaaaaaYa`\_aa`b\_a^aa`]\_\_\_^`\_aa\_^`\_\_



+HWI-EAS443:3:99:727:402#0/1  
aX]R\_Y`b^S[Tba\_a`a^U^^\_ZZ\_\_a^`XY\_\_[[\_a\_  
@HWI-EAS443:3:99:741:1820#0/1  
GAAACTGTGATGAGAATGGGAGACCTTCACTACCTCCAGA  
+HWI-EAS443:3:99:741:1820#0/1  
```babb`b`^b`aaaabbaa¥`]`a\_\_aU]\_N¥^\_\_`aX  
@HWI-EAS443:3:99:811:517#0/1  
GAGAACTGTGATGAGAATGGGAGACCTTCACTACCTCCA  
+HWI-EAS443:3:99:811:517#0/1  
`Z\_U``¥]V^YS¥aTXNRa`aa]bZRV^`\_a¥URFLRVVQ  
@HWI-EAS443:3:99:845:902#0/1  
CGCTTGGAGAACTGTGATGAGAATGGGAGACCTTCACTA  
+HWI-EAS443:3:99:845:902#0/1  
X\_a`abbXababbb\_Zab]a\_a`ab\_bb`\_aaa]`ZaZ\_b  
@HWI-EAS443:3:99:923:523#0/1  
GCCGCATTTCTTCAATTAACCACCTTATTTCCCTCAAATTT  
+HWI-EAS443:3:99:923:523#0/1  
aaabaabbbbabababbaa`aabaabbb\_¥a\_aaaaa  
@HWI-EAS443:3:99:938:1468#0/1  
AATTGGGACAGAAATTTGAGGAAATAAGGTGGTTAATTGA  
+HWI-EAS443:3:99:938:1468#0/1  
```bbbaabbbbaabbbbababbbba`baabb`bb\_baaaa`b  
@HWI-EAS443:3:99:956:148#0/1  
GAAATTTACCATTACCTTCTTCCAGGACATACTTATG  
+HWI-EAS443:3:99:956:148#0/1  
\_ba¥bbaVa\_\_aba`a\_aa\_a]^W[]\_a^`^Y`^V\_NZ]a  
@HWI-EAS443:3:99:988:938#0/1  
CTTATGAGGATGTCAAAAATGCAGTTGGGGTCCTCATCGG  
+HWI-EAS443:3:99:988:938#0/1  
abbabbabba`baabbabbab]aa\_babaaN\_aba\_`]]`  
@HWI-EAS443:3:9:1075:779#0/1  
ACCTACTTCGCGCTACCTTTCTGACATGACCCTCGAGGAA  
+HWI-EAS443:3:9:1075:779#0/1  
`\_Xaa\_b`baXbXa\_Z^^ab\_`\_a¥\_abaaWa`¥`¥\_PRY  
@HWI-EAS443:3:9:1118:1674#0/1  
GAGAACTGTGATGAGAATGGGAGACCTTCACTACCTCCA  
+HWI-EAS443:3:9:1118:1674#0/1  
`aaa`a`Ybaaa`\_ab\_`aaa^^b^R^\_Z^a\_\_`]YY^0`  
@HWI-EAS443:3:9:1199:1515#0/1  
GTCGCTTTCAATCTGTGCCGATTTCTTCAATTAACCACC  
+HWI-EAS443:3:9:1199:1515#0/1  
a`aa\_a`a\_a`a^a`\_a\_`b\_\_a`\_¥`a¥`^```\_]\_`0  
@HWI-EAS443:3:9:119:1699#0/1  
GCCGCATTTCTTCAATTAACCACCTTATTTCCCTCAAATTT  
+HWI-EAS443:3:9:119:1699#0/1  
^a¥T^a\_`\_``bb^^ababaaaa`a`aa`a`\_aaaaa`  
@HWI-EAS443:3:9:1240:1422#0/1  
AGAACTGTGATGAGAATGGGAGACCTTCACTACCTCCAG  
+HWI-EAS443:3:9:1240:1422#0/1  
[\_]\_aYa\_T]abaUa^\_ab^]¥^XSWa]Za^^^GSYGYUa

@HWI-EAS443:3:9:1293:1094#0/1  
GATGAGAATGGGAGACCTTCACTACCTCCAGAGCAGAAAT  
+HWI-EAS443:3:9:1293:1094#0/1  
]bbbbaaaaa]\_aa`\_]\_[ab``[`[]\_]\_^a\_Xa\_]\_]¥\_Z  
@HWI-EAS443:3:9:1300:1595#0/1  
GGGCTTTCCTGAGGAGGGAGCAATAGTTGGAGAAATTTTC  
+HWI-EAS443:3:9:1300:1595#0/1  
a`a\_`a`a^aa]aa]Yaa¥`X\_]\_]`Y\_\_\_\_\_^\_a\_\_R^R  
@HWI-EAS443:3:9:1312:620#0/1  
AACACGGTTCGAGTCTCTGAAAATATACAGAGATTCGCTT  
+HWI-EAS443:3:9:1312:620#0/1  
aa``Ya\_]`^\_aa]\_a\_ab\_\_a^\_aa\_]\_a`a`\_\_OFT\_a  
@HWI-EAS443:3:9:1339:1779#0/1  
GAGAAGGTAATGGTGAATTTCTCCAATATTGCTCCCTC  
+HWI-EAS443:3:9:1339:1779#0/1  
aba\_aaaZbaa`XWaaa\_aa`Wa^]a`]aa\_\_a¥`Z[Z\_¥  
@HWI-EAS443:3:9:1348:346#0/1  
GCCGCATTTCTTCAATTAACCACCTTATTTCTCAAATTT  
+HWI-EAS443:3:9:1348:346#0/1  
a``]YY`Y`Xaa^]a`\_]\_YY[LT]]^\_`^XP\_XZZ^\_]\_  
@HWI-EAS443:3:9:134:1878#0/1  
GAATGGGGCATCACCCAATCCATTGTCTGCAAATCGCTTG  
+HWI-EAS443:3:9:134:1878#0/1  
aaa]^`\_[aaaaa`aa¥aaaa\_`\_]\_]`\_`a`aU`\_^X]N  
@HWI-EAS443:3:9:1398:1098#0/1  
CAAATCGTGAATGGATCTTGAAGAGGAATCCAGCGAGA  
+HWI-EAS443:3:9:1398:1098#0/1  
`¥`¥`b[a\_Z\_]¥UXb`baa\_U¥XZX^¥W`U¥baZ]^``  
@HWI-EAS443:3:9:1419:626#0/1  
TGAGAATGGGAGACCTTCACTACCTCCAGAGCAGAAATGA  
+HWI-EAS443:3:9:1419:626#0/1  
aba[¥`\_]bb[`aUWa`[a[Y`Y[QQ`\_\_X]\_UaU]\_\_\_X  
@HWI-EAS443:3:9:1495:481#0/1  
GAGAATGGGAGACCTTCACTACCTCCAGAGCAGAAATGAA  
+HWI-EAS443:3:9:1495:481#0/1  
a¥a\_`ab``\_a`[Y`\_\_a`\_\_¥W\_¥U\_^V\_¥^`WU]`\_Y¥  
@HWI-EAS443:3:9:1569:331#0/1  
ATCAAAAGTCCTTAAAAGGAAGAGGCAACACCCTTGGCCT  
+HWI-EAS443:3:9:1569:331#0/1  
a^Z`aaaa`X`aa`aa`\_]\_a\_^`YZZ^W[MUSYZ¥YSZ]  
@HWI-EAS443:3:9:1576:1224#0/1  
GAAACAAATCGTGAATGGATCTTGAAGAGGAATCCAGC  
+HWI-EAS443:3:9:1576:1224#0/1  
aTaaaaa`a\_a¥aaa`a`\_`aZaa`[[Xa\_]\_\_\_\_\_YX^`X  
@HWI-EAS443:3:9:1588:788#0/1  
ATTATCTTTTGCCTAGGCATGAGCATGAACCAGTCTCGTG  
+HWI-EAS443:3:9:1588:788#0/1  
\_abaa`^`ba\_a^``a¥`a^]a\_`a`aaZZ`a]Q\_X\_Y`  
@HWI-EAS443:3:9:1634:1368#0/1  
GCCGCATTTCTTCAATTAACCACCTTATTTCTCAAATTT

+HWI-EAS443:3:9:1634:1368#0/1  
a`\_a¥aa`aM^a^`^aaa¥WUXRWZ\_`^a`\_YU`MY^^\_`^]  
@HWI-EAS443:3:9:1648:326#0/1  
TGGAGAAACTGTGATGAGAATGGGAGACCTTCACTACCTC  
+HWI-EAS443:3:9:1648:326#0/1  
aaaaaaaa\_a`X^^`a`^Y`\_`\_]U\_TVW]^X\_U]]XX]B  
@HWI-EAS443:3:9:1649:1887#0/1  
AGAATGGGAGACCTTCACTACCTCCAGAGCAGAAATGAAA  
+HWI-EAS443:3:9:1649:1887#0/1  
ab[a\_aaaX][`\_`\_¥]X`VNFVWSU\_UY TZ\_USW\_ZZYB  
@HWI-EAS443:3:9:1666:1689#0/1  
CCGCATTTCTTCAATTAACCACCTTATTTCTTCAAATTT  
+HWI-EAS443:3:9:1666:1689#0/1  
[`bbbbbb`bb`bbbbbb`ab[[H^`a\_a\_0aaa[aa\_a\_`  
@HWI-EAS443:3:9:168:793#0/1  
GTCGCTTTCAATCTGTGCCGATTTCTTCAATTAACCACC  
+HWI-EAS443:3:9:168:793#0/1  
aabaaaaa^`aaaaa\_aaaaaaaaa\_baa`aaaaa][`\_`\_`  
@HWI-EAS443:3:9:177:340#0/1  
ATGAGAATGGGAGACCTTCACTACCTCCAGAGCAGAAATG  
+HWI-EAS443:3:9:177:340#0/1  
aXa`a`Y`\_`aaU`^`Y`\_`\_`a`^`^`\_`]]`^X^`\_\_`^U^`\_`  
@HWI-EAS443:3:9:181:1899#0/1  
GCCGCATTTCTTCAATTAACCACCTTATTTCTTCAAATTT  
+HWI-EAS443:3:9:181:1899#0/1  
`b`YaXa`aaaab]\_`^`abbaaaaaa`aaa`\_baaabaa  
@HWI-EAS443:3:9:183:1143#0/1  
GGCCTATTATCTTTTGCCTAGGCATGAGCATGAACCAGTC  
+HWI-EAS443:3:9:183:1143#0/1  
V¥`\_¥¥`b[\_\_\_aWZWaa`[]]aa[I\_a^a\_baa\_]Z`aU  
@HWI-EAS443:3:9:198:563#0/1  
GGAAGAGGCAACACCCTTGGCCTCGATATCGAAACAGCCA  
+HWI-EAS443:3:9:198:563#0/1  
^WJ^XH]^`\_XZVU^`U`XTQUJN`[VUZT^EU`TOXTBB  
@HWI-EAS443:3:9:199:509#0/1  
GCTTGGAGAAACTGTGATGAGAATGGGAGACCTTCACTAC  
+HWI-EAS443:3:9:199:509#0/1  
aa\_RXTR`[^\_aZYJ^\_¥\_]`UZV\_a¥G¥¥U\_TQ¥YLLSB  
@HWI-EAS443:3:9:228:2035#0/1  
GGCATATCCGCAAGCGATTTGCAGACAATGGATTGGGTGA  
+HWI-EAS443:3:9:228:2035#0/1  
aa`[]ba[abab[bbb\_a^a\_bbaaabba\_\_a]^`H\_RS^X  
@HWI-EAS443:3:9:229:268#0/1  
CGAGAAAGCTTCTTCTTCTTGTCTACTTCAAGCAGTAGT  
+HWI-EAS443:3:9:229:268#0/1  
\_a`b`b`bbbZ\_b`ZZbaaabaaaaaaaaa`aaaaa\_\_a\_  
@HWI-EAS443:3:9:233:1300#0/1  
CTCCAACACCATGTCAAGCTTTTCAAGTAGACTGTTTCCTT  
+HWI-EAS443:3:9:233:1300#0/1  
aabaabaaaabaa]^`a`a^a\_a`aaaXa`aa`\_\_^^\_]U^

@HWI-EAS443:3:9:260:1434#0/1  
GAATGGGAGACCTTCACTACCTCCAGAGCAGAAATGAAAA  
+HWI-EAS443:3:9:260:1434#0/1  
abaabb`\_bab`aabaab`bba\_a`[aab`\_`aaa^aa\_  
@HWI-EAS443:3:9:266:1749#0/1  
GTCGCTTTCAATCTGTGCCGATTTCTTCAATTAACCACC  
+HWI-EAS443:3:9:266:1749#0/1  
a`aa^\_I\_\_\_aX\_RYTWWMMY`\_`\_a`]L]¥\_aa\_Z^\_UG  
@HWI-EAS443:3:9:311:344#0/1  
AGAAACTGTGATGAGAATGGGAGACCTTCACTACCTCCAG  
+HWI-EAS443:3:9:311:344#0/1  
`a]ababbS`\_ab`a^a`X¥^`\_^¥\_\_\_V``]XY^^`\_  
@HWI-EAS443:3:9:319:1221#0/1  
GAGAACTGTGATGAGAATGGGAGACCTTCACTACCTCCA  
+HWI-EAS443:3:9:319:1221#0/1  
aaa`baa`b`\_aa\_\_aTa\_a`¥Z\_^^\_\_\_\_^`\_OU^UR^  
@HWI-EAS443:3:9:377:376#0/1  
AGAAACTGTGATGAGAATGGGAGACCTTCACTACCTCCAG  
+HWI-EAS443:3:9:377:376#0/1  
aaZUaaa^Zaa`b\_a\_a¥WUa¥a]¥W^Y]]]a\_\_¥^^V`a  
@HWI-EAS443:3:9:410:1145#0/1  
GCCGATTTCTTCAATTAACCACCTTATTTCTCAAATTT  
+HWI-EAS443:3:9:410:1145#0/1  
aa``^a]P¥\_TX^Y\_ZO\_W`\_0[[]adW`]]`R\_aSLa\_a  
@HWI-EAS443:3:9:43:753#0/1  
GTGATGAGAATGGGAGACCTTCACTACCTCCAGAGCAGAA  
+HWI-EAS443:3:9:43:753#0/1  
aabbababW`abaa\_a\_a`aa`a`\_\_\_aaa\_¥a``\_`a]\_  
@HWI-EAS443:3:9:467:891#0/1  
AGCGCGAAGTAGGTACAGATGCAATTGTCATTCTAAGTGT  
+HWI-EAS443:3:9:467:891#0/1  
`babbb]ab\_bbbZ`aabaaaa`aa`U`Z`U\_b`aa^\_^  
@HWI-EAS443:3:9:482:772#0/1  
TTATCTTTTGCCTAGGCATGAGCATGAACCAGTCTCGTGA  
+HWI-EAS443:3:9:482:772#0/1  
Z`U]aQV¥NjX[`\_Ya[S]`a[OXZPT]``\_aVaa¥ZL^U  
@HWI-EAS443:3:9:495:253#0/1  
GATGAGAATGGGAGACCTTCACTACCTCCAGAGCAGAAAT  
+HWI-EAS443:3:9:495:253#0/1  
aX¥`^^X^]^^YVYVXYXVVRsXYVORXYVUXUyMNLXB  
@HWI-EAS443:3:9:545:1182#0/1  
CGCTTGGAGAACTGTGATGAGAATGGGAGACCTTCACTA  
+HWI-EAS443:3:9:545:1182#0/1  
ab\_U]¥\_Iaa\_ba\_^Zaaaaa[`a[aaX\_\_YP]\_XZ[a\_  
@HWI-EAS443:3:9:551:1435#0/1  
ATCTTTTGCCTAGGCATGAGCATGAACCAGTCTCGTGACA  
+HWI-EAS443:3:9:551:1435#0/1  
]abVaa`bbabba`ab`^Ya\_baaa[aba]\_a\_`Q\_`S`  
@HWI-EAS443:3:9:605:1321#0/1  
GTCGCTTTCAATCTGTGCCGATTTCTTCAATTAACCACC

+HWI-EAS443:3:9:605:1321#0/1  
a\_aab`aaaaYaaaa\_a`aaa`aaaa`a`a`aa`\_\_\_\_  
@HWI-EAS443:3:9:647:469#0/1  
GTCGCTTTCAATCTGTGCCGATTTCTTCAATTAACCACC  
+HWI-EAS443:3:9:647:469#0/1  
a`Wa[¥a][VX¥WWZZ`WY^PP^\_]`^X\_]\_\_^ZYW]WO  
@HWI-EAS443:3:9:661:391#0/1  
GAGAATGGGAGACCTTCACTACCTCCAGAGCAGAAATGAA  
+HWI-EAS443:3:9:661:391#0/1  
aaa`aabaa\_aa^\_aa^b\_aa\_\_a]^\_aWaY\_[VN`\_`\_\_^  
@HWI-EAS443:3:9:672:1013#0/1  
GAAAATATACAGAGATTCGCTTGGAGAACTGTGATGAGA  
+HWI-EAS443:3:9:672:1013#0/1  
\_W]¥`a^\_\_\_\_a^`^^^^`^\_W\_]\_UZ^Z]\_W[]S]Z^W  
@HWI-EAS443:3:9:676:333#0/1  
GAAACTGTGATGAGAATGGGAGACCTTCACTACCTCCAGA  
+HWI-EAS443:3:9:676:333#0/1  
¥]VXQZ]R\_¥^^^a]X`aZX]UYRZT[Y^\_a\_U[VZ^^[Y  
@HWI-EAS443:3:9:714:264#0/1  
GTGATGAGAATGGGAGACCTTCACTACCTCCAGAGCAGAA  
+HWI-EAS443:3:9:714:264#0/1  
a]bW\_]a\_]a^Z^^PHRV]TSN^YXXRK¥WR\_TT]BB  
@HWI-EAS443:3:9:732:706#0/1  
GTGCCGATTTCTTCAATTAACCACCTTATTTCTCAAAT  
+HWI-EAS443:3:9:732:706#0/1  
a^a¥Zb`aaaa\_aaa\_aaa`a\_\_aW¥aaaa``]\_\_^\_\_`  
@HWI-EAS443:3:9:745:433#0/1  
TGAGAATGGGAGACCTTCACTACCTCCAGAGCAGAAATGA  
+HWI-EAS443:3:9:745:433#0/1  
`a^a^`a\_LX]a]W\_]\_\_\_\_\_`^]aUZ^`]\_^N\_]a^`  
@HWI-EAS443:3:9:757:1831#0/1  
GCCGATTTCTTCAATTAACCACCTTATTTCTCAAATTT  
+HWI-EAS443:3:9:757:1831#0/1  
ab`abbaba\_baabbbabb`ba`aaaaSZ\_\_aaaa`¥a  
@HWI-EAS443:3:9:847:20#0/1  
AAACTGTGATGAGAATGGGAGACCTTCACTACCTCCAGAG  
+HWI-EAS443:3:9:847:20#0/1  
a^a\_ab`baab`b`a\_aaa^a\_\_\_^`\_X\_^ZZ]VZ]\_^\_  
@HWI-EAS443:3:9:879:919#0/1  
GCCGATTTCTTCAATTAACCACCTTATTTCTCAAATTT  
+HWI-EAS443:3:9:879:919#0/1  
aaa`¥MPW`^`\_]`a`\_a^a`\_0^^`\_`WZ¥a`^ZZ]^  
@HWI-EAS443:3:9:89:148#0/1  
ATCTCTGTATATTTTCAGAGACTCGAACCGTGTACCATT  
+HWI-EAS443:3:9:89:148#0/1  
^\_ZZzb\_`¥RVW`aWPY`WXW]RVUX`RYaPXTZLNxz^]  
@HWI-EAS443:3:9:901:1147#0/1  
GCATCACCCAATCCATTGTCTGCAAATCGCTTGCGGATAT  
+HWI-EAS443:3:9:901:1147#0/1  
^bba`aU¥`[abb^bbaa]aaaababa]a\_aa`^aa\_]\_



@HWI-EAS443:3:9:907:902#0/1  
CGCATTCTTCAATTAACCACCTTATTTCTCAAATTTCT  
+HWI-EAS443:3:9:907:902#0/1  
a`Y`aY]N\_\_a`\_\_YXY`a\_\_a^]`\_\_^a`\_W`\_\_\_\_`  
@HWI-EAS443:3:9:917:635#0/1  
GCTTGGAGAACTGTGATGAGAATGGGAGACCTTCACTAC  
+HWI-EAS443:3:9:917:635#0/1  
¥\_aaa^\_¥\_`\_^`b^\_a]aab[[^a`\_V`XRT`^¥^\_Y[Y  
@HWI-EAS443:3:9:932:46#0/1  
TGAGAATGGGAGACCTTCACTACCTCCAGAGCAGAAATGA  
+HWI-EAS443:3:9:932:46#0/1  
abab[^`abb\_a¥HY^`\_\_\_\_`\_[U`TV^aX\_W]`[V[^`^`  
@HWI-EAS443:3:9:93:1238#0/1  
TAGGTACAGATGCAATTGTCATTCTAAGTGTCTCGCTGGA  
+HWI-EAS443:3:9:93:1238#0/1  
aaa¥]aaaa`aaa`aa^`aaa\_aa`a\_aaaa]Y]`\_\_\_\_  
@HWI-EAS443:3:9:952:1944#0/1  
CGCATTCTTCAATTAACCACCTTATTTCTCAAATTTCT  
+HWI-EAS443:3:9:952:1944#0/1  
abbbbbbabbbbbbbbabba`bbababa`b`bbbbbaaa  
@HWI-EAS443:3:9:979:988#0/1  
GAATGGGAGACCTTCACTACCTCCAGAGCAGAAATGAAAA  
+HWI-EAS443:3:9:979:988#0/1  
aaaaab`aba`b`abaaa`a`\_\_a`aa`a¥`\_a`\_a`\_`  
@HWI-EAS443:3:28:939:410#0/1  
GTCTTTTCTTCTATATATGGGTCCTCCTGTTTTCTTAGGG  
+HWI-EAS443:3:28:939:410#0/1  
a¥`SGV`\_^aaaP`]`bbaa`\_\_]X^aaa]aaa]a`\_\_Ga  
@HWI-EAS443:3:29:1685:1416#0/1  
GTCTGTTCTTCTATATATGGGTCCTCCTGTTTTCTTAGGG  
+HWI-EAS443:3:29:1685:1416#0/1  
aZU¥DZ`[ba\_\_`a`a\_aa`a\_a`^`[aaaa`\_`a````\_`  
@HWI-EAS443:3:30:1280:1166#0/1  
AGGATGAGTTCTCACATCCACTTTCCGTCTATTCTTCTAT  
+HWI-EAS443:3:30:1280:1166#0/1  
`aa0aZBBBBBBBBBBBBBBBBBBBBBBBBBBBBBBBBB  
@HWI-EAS443:3:36:765:244#0/1  
ATAGAAGAATAGACGAAAGGGGATGAGAGA ACTCATCCT  
+HWI-EAS443:3:36:765:244#0/1  
[^¥a^`[ab`a¥^^ab[W¥VUD]b\_a`a`¥`¥Z]Xa¥R\_\_W  
@HWI-EAS443:3:47:1773:156#0/1  
TCCGTTTATTCTTCTATATATGGGTCCTCCTGTTTTCTTA  
+HWI-EAS443:3:47:1773:156#0/1  
UZaa[DYJW^N\_\_Y\_]¥]ZS¥\_aX[FUZ¥T\_a]``¥KX`G  
@HWI-EAS443:3:48:1058:1123#0/1  
CGTCTATTGTTCTATATATGGGTCCTCCTGTTTTCTTAGG  
+HWI-EAS443:3:48:1058:1123#0/1  
aa¥`ab^G`Xaaa`bbbabb]`abaa`^Ybba¥\_\_QV`  
@HWI-EAS443:3:5:1391:1105#0/1  
CTATTTTTCTATATATGGGTCCTCCTGTTTTCTTAGGGTC

+HWI-EAS443:3:5:1391:1105#0/1  
KaVbb0bb\_aababbbb\_babbbbb\_bbaaaabb\_babbbb  
@HWI-EAS443:3:61:122:1892#0/1  
ATAGAAGAATAGACGGAAAGTGGATGAGAGAAATCATCCT  
+HWI-EAS443:3:61:122:1892#0/1  
^Yabbaba\_b`ab[¥^aaba\_a[YY`aUaZ]RPYGV]^P\_  
@HWI-EAS443:3:63:1114:1338#0/1  
GTCTTTTCTTCTATATATGGGTCCTCCTGTTTTCTTAGGG  
+HWI-EAS443:3:63:1114:1338#0/1  
aWW[V\_GG`^aaaTa\_Waa^a]baUaaaV^aaa`\_^a[WG  
@HWI-EAS443:3:68:1124:1662#0/1  
GGATGAGCTCTCATCCACTTCCGTCTATTCTTCTATA  
+HWI-EAS443:3:68:1124:1662#0/1  
aa\_Y¥VM[¥Ra^^OFZWPWxaaaV[¥YRb0a^Uaaababa  
@HWI-EAS443:3:69:1455:778#0/1  
GTCTTTTCTTCTATATATGGGTCCTCCTGTTTTCTTAGGG  
+HWI-EAS443:3:69:1455:778#0/1  
aPU`GY\_Raa^`S\_`Ma[Z`]^`\_`\_\_X`^`]]`^ZZT  
@HWI-EAS443:3:71:379:1042#0/1  
CGTCTCTTCTTCTATATATGGGTCCTCCTGTTTTCTTAGG  
+HWI-EAS443:3:71:379:1042#0/1  
aZZa[QW`\_bb`¥S\_bbb]bba`bb\_bb`¥abaabba]]  
@HWI-EAS443:3:76:672:1497#0/1  
CTATTTTTCTATATATGGGTCCTCCTGTTTTCTTAGGGTC  
+HWI-EAS443:3:76:672:1497#0/1  
¥bJb]H^\_ba[babbbbbbb\_bb`Zaab`\_babbaa\_`S]b  
@HWI-EAS443:3:95:891:1372#0/1  
GTCTATTCTTCTATATATGGGTCCTCCTGTTTTCTCAGGG  
+HWI-EAS443:3:95:891:1372#0/1  
a[V`P`aVbbabaa`aa`aa`\_a`\_a`\_aaa`aaaaa^^]^`^  
@HWI-EAS443:3:35:26:1259#0/1  
CTGTTCTTCTATATATGGGTCCTCCTGTTTTCTTAGGGTC  
+HWI-EAS443:3:35:26:1259#0/1  
`bIbaabbbbaa\_abb\_¥ZL^babbbb\_bbbbab¥[\_`Za  
@HWI-EAS443:3:49:40:724#0/1  
GTCTTCTTCTATATATGGGTCCTCCTGTTTTCTTAGGGTC  
+HWI-EAS443:3:49:40:724#0/1  
[¥F¥b`bbbbbbbbba\_\_`a`\_`baa\_\_ba\_a`bb\_\_`^`b  
@HWI-EAS443:3:50:1279:908#0/1  
CTTTTCTTCTATATATGGGTCCTCCTGTTTTCTTAGGGTC  
+HWI-EAS443:3:50:1279:908#0/1  
`bV\_¥SZ[X`¥\_WW¥\_X[\_`\_\_bb`bbb`^\_RX\_VX¥¥¥U  
@HWI-EAS443:3:53:757:148#0/1  
TAAGAAAACAGGAGGACCCATATATAGAAGAATAGACAGG  
+HWI-EAS443:3:53:757:148#0/1  
]`^aR^X[`abb]T`VZ^V[aZ\_`^`^bU\_`]U\_`^aZNRU  
@HWI-EAS443:3:46:1623:904#0/1  
TAAAGGATGAGTTCTCTNATCCACTTCCGTCTATTCTTC  
+HWI-EAS443:3:46:1623:904#0/1  
a\_`a^]La`¥]V`MWUPDD[]XRM\_\_SPSZUY\_N\_]V`¥P

@HWI-EAS443:3:49:814:1448#0/1  
GTCCGTCTATTCTTCTATATATGGGTCCTCCTGTTTTCTT  
+HWI-EAS443:3:49:814:1448#0/1  
a\_U¥b`\_aTbaSbaab`baaaaa^`^\_aaa[aaaaaa[aa  
@HWI-EAS443:3:50:1439:719#0/1  
ACCGTCTATTCTTCTATATATGGGTCCTCCTGTTTTCTTA  
+HWI-EAS443:3:50:1439:719#0/1  
[]]b`abUaaKaa]\_abb\_¥ab^X```a]`aYabba[abW  
@HWI-EAS443:3:5:1009:477#0/1  
GTCCGTCTATTCTTCTATATATGGGTCCTCCTGTTTTCTT  
+HWI-EAS443:3:5:1009:477#0/1  
[HEVaQ`¥N]aTab]``a\_a]X^a]P[`aXY`a\_`a^Z^a  
@HWI-EAS443:3:63:1470:999#0/1  
GCCGTCTATTCTTCTATATATGGGTCCTCCTGTTTTCTTA  
+HWI-EAS443:3:63:1470:999#0/1  
aR]b]bSabVba]a]babbab`a¥aaa\_a`Z`aab^aaa  
@HWI-EAS443:3:89:1037:1353#0/1  
TGTCTATTCTTCTATATATGGGTCCTCCTGTTTTCTTAGG  
+HWI-EAS443:3:89:1037:1353#0/1  
Z\_a¥``]aaK``¥a`ba`aba\_]aZa]\_b``baabbbab]\_  
@HWI-EAS443:3:93:153:1315#0/1  
TGGACCCATATATAGAAGAATAGACGGAAAGTGGATGAGA  
+HWI-EAS443:3:93:153:1315#0/1  
X`¥^bbb`aZ``^\_Y¥NY^ab]RU^^]`^`]U`^\_\_a`XZ  
@HWI-EAS443:3:12:310:486#0/1  
AGAATAGACGGAAAGTGGATGAGAGAACTCATCCTTTATG  
+HWI-EAS443:3:12:310:486#0/1  
aabaaaaaaabaaaaUa`\_``a`\_\_\_a\_````^^^`\_\_\_^\_  
@HWI-EAS443:3:13:1546:1077#0/1  
TTCTTCTATATATGGGTCCTCCTGTTTTCTTAGGGTCCTT  
+HWI-EAS443:3:13:1546:1077#0/1  
a^][a]a]aZ`]`a`aXHY[XW`¥^aaa`a`ZX¥XDU`T^  
@HWI-EAS443:3:14:377:1326#0/1  
CGTCTATTCTTCTATATATGGGTCCTCCTGTTTTCTTAGG  
+HWI-EAS443:3:14:377:1326#0/1  
ab¥G`ab`Xab`abb\_babb\_¥¥bbab`bb`abbbbabb`  
@HWI-EAS443:3:14:79:1466#0/1  
GTCTATTCTTCTATATATGGGTCCTCCTGTTTTCTTAGGG  
+HWI-EAS443:3:14:79:1466#0/1  
^¥]bUa[E]bbbbbbbbbbbaa\_bbbbbba]babbbbb`aY  
@HWI-EAS443:3:16:448:644#0/1  
CAGGAGACCCATATATAGAAGAATAGACGGAAAGTGGAT  
+HWI-EAS443:3:16:448:644#0/1  
YVbaR¥S`a`a`aa[aa`a`\_¥ZY`Xa\_```[^WPUW\_¥X^  
@HWI-EAS443:3:18:1335:1386#0/1  
CATATATAGAAGAATAGACGGAAAGTGGATGAGAGAACTC  
+HWI-EAS443:3:18:1335:1386#0/1  
`Ua``Y¥\_\_ab`aab`\_aab\_¥a^a¥a[Q\_aaa]a\_`¥]\_  
@HWI-EAS443:3:18:157:400#0/1  
TAGAAGAATAGACGGAAAGTGGATGAGAGAACTCATCCTT



@HWI-EAS443:3:2:1125:628#0/1  
AGAAAACAGGAGGCCATATATAGAAGAATAGACGGAAA  
+HWI-EAS443:3:2:1125:628#0/1  
aaaaaa\_`a`a\_a`V`a`aaa\_``^a]\_a`a\_]a\_\_\_^  
@HWI-EAS443:3:31:133:319#0/1  
GTCTATTCTTCTATATATGGGTCCTCCTGTTTTCTTAGGG  
+HWI-EAS443:3:31:133:319#0/1  
aaaaSabVbbbbab^aa``^^^baabaaa`baaaaaa^^^  
@HWI-EAS443:3:32:1235:1300#0/1  
CATATATAGAAGAATAGACGGAAAGTGGATGAGAGAACTC  
+HWI-EAS443:3:32:1235:1300#0/1  
aab^aabaa\_aa\_`aaa`\_a`a`^^Y`a\_]``\_^^\_^^^  
@HWI-EAS443:3:36:1030:532#0/1  
GAAGAATAGACGGAAAGTGGATGAGAGAACTCATCCTTTA  
+HWI-EAS443:3:36:1030:532#0/1  
a^``\_V\_^a\_]aY]^aX\_^Z^`U¥ZWZ]VYVTV¥Y]] [Z  
@HWI-EAS443:3:36:1435:1055#0/1  
GTCTATTCTTCTATATATGGGTCCTCCTGTTTTCTTAGGG  
+HWI-EAS443:3:36:1435:1055#0/1  
\_VV`GaaNa`^^^a`a\_\_W]a^\_\_\_\_aZ¥a`\_[U\_YRVSW  
@HWI-EAS443:3:37:764:588#0/1  
CGTCTATTCTTCTATATATGGGTCCTCCTGTTTTCTTAGG  
+HWI-EAS443:3:37:764:588#0/1  
a`a]aUbb[aab\_Xa``abaabbbbbbbab\_abbbbbbb]`b  
@HWI-EAS443:3:38:229:1421#0/1  
AAGAAAACAGGAGGCCATATATAGAAGAATAGACGGAA  
+HWI-EAS443:3:38:229:1421#0/1  
`VV\_V^aa`¥[V^\_\_^a^ZZ[V^MY\_XR¥TY\_[ZUQY^W  
@HWI-EAS443:3:39:1428:260#0/1  
CCCATATATAGAAGAATAGACGGAAAGTGGATGAGAGAAC  
+HWI-EAS443:3:39:1428:260#0/1  
V`¥UYbZYZRbbOY^^`a\_aZaa\_a^P]]]X¥0\_Qa^\_T  
@HWI-EAS443:3:39:490:1573#0/1  
GTCTATTCTTCTATATATGGGTCCTCCTGTTTTCTTAGGG  
+HWI-EAS443:3:39:490:1573#0/1  
a\_W`G\_aZ`ab^Z^aa`aSU\_]baaa\_U`YY````\_a\_Y\_\_  
@HWI-EAS443:3:3:262:1540#0/1  
GTCTATTCTTCTATATATGGGTCCTCCTGTTTTCTTAGGG  
+HWI-EAS443:3:3:262:1540#0/1  
aZU¥0\_¥M^K`[^a\_\_\_\_aa\_WY[]\_X[VH^¥^MX\_[SBB  
@HWI-EAS443:3:40:41:375#0/1  
GGACCCTAAGAAAACAGGAGGCCATATATAGAAGAATA  
+HWI-EAS443:3:40:41:375#0/1  
a[NWJS[JPLFWVYO¥QSY]U¥BBBBBBBBBBBBBBBB  
@HWI-EAS443:3:42:1483:1802#0/1  
CTATTCTTCTATATATGGGTCCTCCTGTTTTCTTAGGGTC  
+HWI-EAS443:3:42:1483:1802#0/1  
`\_I¥a\_ba]babababaa`UbbaU`ba`abb\_bb\_\_bb`¥  
@HWI-EAS443:3:42:771:684#0/1  
CTATTCTTCTATATATGGGTCCTCCTGTTTTCTTAGGGTC

+HWI-EAS443:3:42:771:684#0/1  
\_][^aabbabbaaba`bbbbbbbaababbabbbbbb\_`  
@HWI-EAS443:3:42:94:423#0/1  
TAAAGGATGAGTTCTCTCATCCACTTTCCGTCTATTCTTC  
+HWI-EAS443:3:42:94:423#0/1  
abbbababa]`YaX^]YPL\_^XWXX`aX¥Y^XaXa¥K¥aa  
@HWI-EAS443:3:43:909:1039#0/1  
CATATATAGAAGAATAGACGGAAAGTGGATGAGAGAACTC  
+HWI-EAS443:3:43:909:1039#0/1  
a\_baaabbbbaaaabbaabaaaaa]aa\_aa`a`a\_`^a^  
@HWI-EAS443:3:44:258:51#0/1  
AGAAAACAGGAGGACCCATATATAGAAGAATAGACGGAAA  
+HWI-EAS443:3:44:258:51#0/1  
[`X^^aaaba[aa\_a\_`\_`\_a``b^Za[W\_\_`¥¥a\_Z^T  
@HWI-EAS443:3:44:472:1416#0/1  
AAAGGATGAGTTCTCTCATCCACTTTCCGTCTATTCTTCT  
+HWI-EAS443:3:44:472:1416#0/1  
aa`V\_WaaVZW\_U\_U\_XX]UUNNS^MNM\_¥ZUHT^G\_^Z¥  
@HWI-EAS443:3:45:1387:835#0/1  
CATATATAGAAGAATAGACGGAAAGTGGATGAGAGAACTC  
+HWI-EAS443:3:45:1387:835#0/1  
aaaaa[a`aaa^¥a`aa`]\_a`a[aa\_aa\_a\_`]^^a^  
@HWI-EAS443:3:45:701:928#0/1  
CCCTAAGAAAACAGGAGGACCCATATATAGAAGAATAGAC  
+HWI-EAS443:3:45:701:928#0/1  
aY`b`¥TYWa`W¥][`aa]SNDUaZ\_``][Z`[[[]]SR  
@HWI-EAS443:3:47:1638:1146#0/1  
GGACCCTAAGAAAACAGGAGGACCCATATATAGAAGAATA  
+HWI-EAS443:3:47:1638:1146#0/1  
\_UOTU¥a¥IRUU[XYPa\_^\_PPYV][^W\_\_]W`¥L]O]ZT  
@HWI-EAS443:3:48:1017:1125#0/1  
AAGAAAACAGGAGGACCCATATATAGAAGAATAGACGGAA  
+HWI-EAS443:3:48:1017:1125#0/1  
abbaaa`\_ab\_Ya[``]\_]a\_aaa\_a\_^a^^a\_a`\_\_\_\_\_  
@HWI-EAS443:3:48:1098:1110#0/1  
CATATATAGAAGAATAGACGGAAAGTGGATGAGAGAACTC  
+HWI-EAS443:3:48:1098:1110#0/1  
`ab`babbabbaababaabaaaaa]aa\_aaaa\_\_a`]a\_  
@HWI-EAS443:3:48:1249:475#0/1  
GACCCTAAGAAAACAGGAGGACCCATATATAGAAGAATAG  
+HWI-EAS443:3:48:1249:475#0/1  
aaa``baaaaaaaaab````a\_\_\_\_a\_a\_a\_a\_]a^^a\_`  
@HWI-EAS443:3:49:1285:1000#0/1  
TCCGTCTATTCTTCTATATATGGGTCCTCCTGTTTTCTTA  
+HWI-EAS443:3:49:1285:1000#0/1  
aU^ba\_bWb\_R\_bababbbbbbbbaaaaaaa`abbaXaaa  
@HWI-EAS443:3:4:1112:399#0/1  
GTCTATTCTTCTATATATGGGTCCTCCTGTTTTCTTAGGG  
+HWI-EAS443:3:4:1112:399#0/1  
]OWZF^aXa`^`a]a`a`[V¥][V¥Y]RXX\_\_^[W¥¥¥

@HWI-EAS443:3:52:637:192#0/1  
GTCTATTCTTCTATATATGGGTCCTCCTGTTTTCTTAGGG  
+HWI-EAS443:3:52:637:192#0/1  
aUNaTa]Q\_`¥^a\_UaV`a^`^]^^YY]a\_\_`\_U¥a^ZZ[  
@HWI-EAS443:3:53:417:155#0/1  
CCCTAAGAAAACAGGAGGCCCATATATAGAAGAATAGAC  
+HWI-EAS443:3:53:417:155#0/1  
ababbbbabbabbabbba\_`aababaaaa`\_aa\_a`a`]  
@HWI-EAS443:3:54:1605:1108#0/1  
CCTAAGAAAACAGGAGGCCCATATATAGAAGAATAGACG  
+HWI-EAS443:3:54:1605:1108#0/1  
`abbbbbbbbbbbbbbaabbbabbabbbaabbbb`b  
@HWI-EAS443:3:55:1010:345#0/1  
CGTCTATTCTTCTATATATGGGTCCTCCTGTTTTCTTAGG  
+HWI-EAS443:3:55:1010:345#0/1  
abbabQbbabbbbbbbbbbbbbbbbabbbbbbbabb  
@HWI-EAS443:3:55:1069:402#0/1  
TAAGAAAACAGGAGGCCCATATATAGAAGAATAGACGGA  
+HWI-EAS443:3:55:1069:402#0/1  
a\_`b[aaa]aaaa\_aZ]X]a`a\_b^\_]``\_^aaa`]\_\_\_\_  
@HWI-EAS443:3:55:1200:1726#0/1  
TAGAAGAATAGACGAAAGTGGATGAGAGAACTCATCCTT  
+HWI-EAS443:3:55:1200:1726#0/1  
aaa`a``aaba\_``\_\_aaY``\_^`¥^¥``\_X^Z[\_VS[K  
@HWI-EAS443:3:57:462:39#0/1  
CTATTCTTCTATATATGGGTCCTCCTGTTTTCTTAGGGTC  
+HWI-EAS443:3:57:462:39#0/1  
`aTZa```]bbb]bbbbbbbbbbYbb``aaaaab\_abb`\_  
@HWI-EAS443:3:57:735:1209#0/1  
GTCTATTCTTCTATATATGGGTCCTCCTGTTTTCTTAGGG  
+HWI-EAS443:3:57:735:1209#0/1  
aY]a0aa0bbaa`b\_a\_aaVaV\_Y`````^aba^aa````\_  
@HWI-EAS443:3:59:776:723#0/1  
CGTCTATTCTTCTATATATGGGTCCTCCTGTTTTCTTAGG  
+HWI-EAS443:3:59:776:723#0/1  
V\_\_\_\_\_Xab[`bbbaaX[`bbb[\_a`bbbb`abbbb]bbb  
@HWI-EAS443:3:5:324:389#0/1  
GAAGAATAGACGAAAGTGGATGAGAGAACTCATCCTTTA  
+HWI-EAS443:3:5:324:389#0/1  
abaaaaaa][abaa`^`\_b`\_^a^a\_a\_^\_\_\_\_a`W¥\_aa\_  
@HWI-EAS443:3:5:491:557#0/1  
AGAATAGACGAAAGTGGATGAGAGAACTCATCCTTTATG  
+HWI-EAS443:3:5:491:557#0/1  
abaabaababbaaab^aa\_abaa^a``\_\_Wa`S^aa`\_a`  
@HWI-EAS443:3:60:1180:464#0/1  
GTCTATTCTTCTATATATGGGTCCTCCTGTTTTCTTAGGG  
+HWI-EAS443:3:60:1180:464#0/1  
\_X\_aQaaVaa\_a`X^L^a`\_[¥Y¥^]\_]`\_]S¥^W¥^T  
@HWI-EAS443:3:60:11:1542#0/1  
AGGACCCATATATAGAAGAATAGACGAAAGTGGATGAGA





@HWI-EAS443:3:74:344:689#0/1  
TCCGTCTATTCTTCTATATATGGGTCCTCCTGTTTTCTTA  
+HWI-EAS443:3:74:344:689#0/1  
a]a`Y`]F^a]abbb`aYa^aaa`\_aaaaaa`aaaaaa`  
@HWI-EAS443:3:74:374:721#0/1  
AGAAGAATAGACGGAAAGTGGATGAGAGAACTCATCCTTT  
+HWI-EAS443:3:74:374:721#0/1  
`bbbbba`bb¥bbb¥\_abaaabaab`^¥bUY^aaaaaa\_a\_  
@HWI-EAS443:3:79:231:1319#0/1  
GAATAGACGGAAAGTGGATGAGAGAACTCATCCTTTATGA  
+HWI-EAS443:3:79:231:1319#0/1  
``^`[^`^\_a`\_aaZXaa`aZ^Z]]^0^``\_`^aa\_\_aa\_¥`  
@HWI-EAS443:3:79:415:1489#0/1  
CCCTAAGAAAACAGGAGACCCATATATAGAAGAATAGAC  
+HWI-EAS443:3:79:415:1489#0/1  
`¥U¥][a``]\_`bZW`^^^`^`\_`[S[J¥ZZ\_Q]]^XYTY^  
@HWI-EAS443:3:7:92:1211#0/1  
CATATATAGAAGAATAGACGGAAAGTGGATGAGAGAACTC  
+HWI-EAS443:3:7:92:1211#0/1  
abaabbbabbabbabbbba`]`aaa]aaaa`aa\_a]a\_\_a  
@HWI-EAS443:3:80:1097:594#0/1  
CGTCTATTCTTCTATATATGGGTCCTCCTGTTTTCTTAGG  
+HWI-EAS443:3:80:1097:594#0/1  
aaa]^JZbKabaabbabbbbbbabaabb]abbbbab\_W  
@HWI-EAS443:3:80:924:81#0/1  
TTCTTCTATATATGGGTCCTCCTGTTTTCTTAGGGTCCTT  
+HWI-EAS443:3:80:924:81#0/1  
aaUbb`aab`b`aa````Za]]`\_\_a`a[a`[a\_R]XX`\_  
@HWI-EAS443:3:82:153:1887#0/1  
AAGAAAACAGGAGACCCATATATAGAAGAATAGACGGAA  
+HWI-EAS443:3:82:153:1887#0/1  
^T\_a^R`aa`\_`a\_aa`\_a\_\_]\_\_^W^^`[V¥\_¥\_`¥XZ]  
@HWI-EAS443:3:83:421:1883#0/1  
TAGAAGAATAGACGGAAAGTGGATGAGAGAACTCATCCTT  
+HWI-EAS443:3:83:421:1883#0/1  
abb`bbbaabaabbaa`^a^aaa\_aa\_¥Yaa\_\_`aa`\_\_`  
@HWI-EAS443:3:86:1420:1628#0/1  
CATATATAGAAGAATAGACGGAAAGTGGATGAGAGAACTC  
+HWI-EAS443:3:86:1420:1628#0/1  
H\_a^`^abb^``abaaba`aa`ab\_Xb¥aabab`a`\_`\_\_^  
@HWI-EAS443:3:87:198:1730#0/1  
GAAGAATAGACGGAAAGTGGATGAGAGAACTCATCCTTTA  
+HWI-EAS443:3:87:198:1730#0/1  
a`baa`^`R¥T`baa\_aI¥SY\_aNU\_`^`aY`]\_a`ZU¥^  
@HWI-EAS443:3:88:1193:1114#0/1  
GACCCATATATAGAAGAATAGACGGAAAGTGGATGAGAGA  
+HWI-EAS443:3:88:1193:1114#0/1  
a\_]SWX^\_aaaZSR[TXW\_X]`\_\_YYZ^]FZ`]``¥`QZ]  
@HWI-EAS443:3:88:1316:1315#0/1  
CATATATAGAAGAATAGACGGAAAGTGGATGAGAGAACTC

+HWI-EAS443:3:88:1316:1315#0/1  
abbbbbbbbaabaaaabaabaaba]aa\_aa\_aaaaa\_a\_  
@HWI-EAS443:3:89:173:1915#0/1  
AGGACCCTAAGAAAACAGGAGGCCATATATAGAAGAAT  
+HWI-EAS443:3:89:173:1915#0/1  
aa\_¥\_ba\_]\_\_a`¥`ZP\_]U`^W¥a^\_^`^^¥ZV[R^Z  
@HWI-EAS443:3:8:808:1762#0/1  
GAAGAATAGACGGAAAGTGGATGAGAGAACTCATCCTTTA  
+HWI-EAS443:3:8:808:1762#0/1  
^\_aaaaX`a\_aaY\_a`a¥`a^a`\_`\_^\_AY^\_AYY^^`\_  
@HWI-EAS443:3:91:1354:345#0/1  
ATGAGTTCTCTCATCCACTTTCCGTCTATTCTTCTATATA  
+HWI-EAS443:3:91:1354:345#0/1  
aa[X\_^^b¥b`SbTLHN\_ab^Y¥YRb]b\_Wab\_abaabb  
@HWI-EAS443:3:92:545:273#0/1  
CATATATAGAAGAATAGACGGAAAGTGGATGAGAGAACTC  
+HWI-EAS443:3:92:545:273#0/1  
a`^bbbaab\_babbabbabb`aaa[aba\_babaaYaP`a  
@HWI-EAS443:3:93:695:604#0/1  
GAATAGACGGAAAGTGGATGAGAGAACTCATCCTTTATGA  
+HWI-EAS443:3:93:695:604#0/1  
YL[[W]O]`¥]PXS]^^^]SWPVQP]¥ZRX\_`\_^\_W^BB  
@HWI-EAS443:3:95:273:1075#0/1  
CGTCTATTCTTCTATATATGGTCCTCCTGTTTTCTTAGG  
+HWI-EAS443:3:95:273:1075#0/1  
[]a\_[LZ]L^bbbabbbbababa`babbabb`abbbbbb\_b  
@HWI-EAS443:3:97:641:45#0/1  
AAAGGATGAGTTCTCTCATCCACTTTCCGTCTATTCTTCT  
+HWI-EAS443:3:97:641:45#0/1  
\_ba`a[``UZR[QVMYOJXMPXWS[\_UQa[V[VYYLTYSY  
@HWI-EAS443:3:98:1575:970#0/1  
AGAAAACAGGAGGCCATATATAGAAGAATAGACGGAAA  
+HWI-EAS443:3:98:1575:970#0/1  
`b\_aabaab`ba¥ZYUaaa`aaaa\_aa\_a`````]V\_]W\_  
@HWI-EAS443:3:98:486:1351#0/1  
CATATATAGAAGAATAGACGGAAAGTGGATGAGAGAACTC  
+HWI-EAS443:3:98:486:1351#0/1  
aa`aa]aab`\_aaa¥W\_\_`aa`aaZG]a`a````\_]\_\_\_\_[  
@HWI-EAS443:3:9:1644:157#0/1  
CATATATAGAAGAATAGACGGAAAGTGGATGAGAGAACTC  
+HWI-EAS443:3:9:1644:157#0/1  
``bbbbbabbbba^bbb]XabaaaaSa¥`W`Y`\_^\_Y^]  
@HWI-EAS443:3:9:641:483#0/1  
GAAGAATAGACGGAAAGTGGATGAGAGAACTCATCCTTTA  
+HWI-EAS443:3:9:641:483#0/1  
aZY^P^^T^[\_a\_YLJZX\_XK[\_O]Y\_ZXO]ZZ]NRX]]X  
@HWI-EAS443:3:27:666:1792#0/1  
ATGGACTCCAATACCCTGGAACCTAAGAAGCAGATGTCCTG  
+HWI-EAS443:3:27:666:1792#0/1  
a`\_^a]\_aa`¥a`aa\_Y¥\_a\_\_`aa`\_¥`¥\_^YW`W^¥

@HWI-EAS443:3:76:929:602#0/1  
CCAATACCCTGGAAC TAAGAAGCAGATACTGGGCCTGATT  
+HWI-EAS443:3:76:929:602#0/1  
aaabaaaabaaa^aaaa\_b\_aaaa\_`\_a\_\_[[[\_`\_`\_^]  
@HWI-EAS443:3:44:515:1131#0/1  
TGCCCAGTATCTGCTTCTTAGTTCCAGGGGATTGGAGTCC  
+HWI-EAS443:3:44:515:1131#0/1  
abaaZHUG\_a][a\_a`MX\_\_Y¥a]W\_aZaG\_OSZ¥S`NNQ  
@HWI-EAS443:3:87:1515:228#0/1  
GCCAAGTATCTGCTTCTTAGTTCCAGGGTATTGGAGTCCA  
+HWI-EAS443:3:87:1515:228#0/1  
aa\_aabaabab\_\_aa\_aaaa^a^`\_`[aXa`Wb\_\_`XXZ`  
@HWI-EAS443:3:9:181:887#0/1  
CCAGTATCTGCTTCTTAGTTCCAGGGTATTGGAGTCTATG  
+HWI-EAS443:3:9:181:887#0/1  
aa\_`^a]b`\_`]`a\_aaaaQa`a`a]ZLZ\_^R¥\_a^KDX^T  
@HWI-EAS443:3:16:1410:1053#0/1  
CCAGTATCTGCTTCTTAGTTCCAGGGAATTGGAGTCCATG  
+HWI-EAS443:3:16:1410:1053#0/1  
`b\_ORZ^\_\_`Q\_[S]ZUW`S[SS`ZH¥XZ\_Z]VRX¥YS[  
@HWI-EAS443:3:29:696:1980#0/1  
GCCCAGAATCTGCTTCTTAGTTCCAGGGTATTGGAGTCCA  
+HWI-EAS443:3:29:696:1980#0/1  
ab¥a^[MZ[]PG\_LY]NX¥PYY^ZULOZBBBBBBBBBBBB  
@HWI-EAS443:3:37:1449:365#0/1  
ATCTGCTTCTTAGTTCCAGGGTATTGGAGCCATGGTTTC  
+HWI-EAS443:3:37:1449:365#0/1  
a]baW]ba[bab[`]ba^]]b\_]\_]\_`a`Gba]`aaU\_aM  
@HWI-EAS443:3:54:1318:369#0/1  
CTCCACTCCTGGTCCTTATGGCCCAGTATCTGCTTTTTAG  
+HWI-EAS443:3:54:1318:369#0/1  
SZ`¥[OX[O\_]¥\_^J`V\_]bb`JMKaOUG[M¥GV\_IK]W`  
@HWI-EAS443:3:70:222:421#0/1  
GGCCCCGTATCTGCTTCTTAGTTCCAGGGTATTGGAGTCC  
+HWI-EAS443:3:70:222:421#0/1  
`abaa]^V`aaaYaaa`a^^^\_`a^`]a\_\_W`^^[^Z[\_¥  
@HWI-EAS443:3:78:1074:1422#0/1  
TAAGAAGCAGATACTGGGCATAAGGACCAGGAGAGGAGG  
+HWI-EAS443:3:78:1074:1422#0/1  
K¥X¥\_VXZ\_VZZMXX`a]M[a]YO\_^UFJQ`[Y\_FYa¥PV  
@HWI-EAS443:3:96:1561:220#0/1  
CTAAGAAGCAGATACTGGGTCATAAGGACCAGGAGTGGAG  
+HWI-EAS443:3:96:1561:220#0/1  
ab\_bbbbX]aaabbbb]abQ`\_abaa\_aRZ¥`aaaYb\_^`  
@HWI-EAS443:3:97:1605:82#0/1  
ATCTGCTTCTTAGTTCCAGGGGATTGGAGTCCATGGTTTC  
+HWI-EAS443:3:97:1605:82#0/1  
aa]baWaaU`b`b\_aZY^aaaG`]\_\_]VRUUP¥^`ZX\_\_Z  
@HWI-EAS443:3:91:237:164#0/1  
ATATGCTTCTTAGTTCCAGGGTATTGGAGTCCATGGTTTC

+HWI-EAS443:3:91:237:164#0/1  
¥WL\_babb\_¥Z`Xaba`]ab\_0^aaaa\_aQVW]\_a[FZ^Y  
@HWI-EAS443:3:92:1582:1490#0/1  
TTAGTTCCAGGGTATTGGAGTCCATGGTTTCCACATTGTC  
+HWI-EAS443:3:92:1582:1490#0/1  
\_W]`aaSFVU[RL]\_\_WYUYSZS]\_Y`[a`Z\_YI]`ZS¥]  
@HWI-EAS443:3:35:591:532#0/1  
GGCCCAGTATCTGCTTCTTAGTTCAGGGTATTGNAGTCC  
+HWI-EAS443:3:35:591:532#0/1  
a`ab`Z^[a]a]a``\_[Ya]]]``a[a][U]^\_ZDRYVva  
@HWI-EAS443:3:74:1263:428#0/1  
CTCCAATACCCTGGNACTAAGAAGCAGATACTGGGCCATA  
+HWI-EAS443:3:74:1263:428#0/1  
abb\_¥\_]abbbbbTD^abbbbaabaabaaaa`aaa`]aaa  
@HWI-EAS443:3:77:198:1600#0/1  
GGCCCAGNATCTGCTTCTTAGTTCAGGGTATTGGAGTCC  
+HWI-EAS443:3:77:198:1600#0/1  
`baa`\_^D[^\_aaa\_bbab`baab`U\_abWba\_]\_aa¥a^  
@HWI-EAS443:3:85:1395:566#0/1  
TGGAECTAAGAANCAGATACTGGGCCATAAGGACCAGGAG  
+HWI-EAS443:3:85:1395:566#0/1  
aaaS\_^aa[a\_WDR\_a`^`\_X`a\_^^¥¥\_\_\_\_\_^]\_a\_]`  
@HWI-EAS443:3:92:1434:526#0/1  
CTTCTTAGTTCAGGGTATTGNAGTCCATGGTTTCCACAT  
+HWI-EAS443:3:92:1434:526#0/1  
`ab¥bbb[`a\_aaab\_\_aaaYDYaaa`baab`ba\_W`0aa  
@HWI-EAS443:3:9:1289:385#0/1  
ATGGCCCAGTATCTGCTTCTTAGTTCAGGGTATTGGAGT  
+HWI-EAS443:3:9:1289:385#0/1  
aabba\_abb]aa]`a[aa¥[`\_a\_\_YTD¥aaX\_\_\_\_\_Y\_T  
@HWI-EAS443:3:25:1314:896#0/1  
AGCCCAGTATCTGCTTCTTAGTTCAGGGTATTGGAGTCC  
+HWI-EAS443:3:25:1314:896#0/1  
aa`^[a\_RR\_b`^a]\_S^aaa[aa^`aaZW][¥¥`X¥[]\_`  
@HWI-EAS443:3:39:139:683#0/1  
ACCCAGTATCTGCTTCTTAGTTCAGGGTATTGGAGTCCA  
+HWI-EAS443:3:39:139:683#0/1  
aaa`¥\_]a`^a\_\_a`\_[\_^`^^`^W\_Y^^]^\_Z\_\_^  
@HWI-EAS443:3:39:1613:1518#0/1  
GCTCCACTCCTGGTCCTTATGGCCCAGTATCTGCTTCTTA  
+HWI-EAS443:3:39:1613:1518#0/1  
\_aabababaaaa`¥\_aaaaZa`W\_a`\_\_`¥¥¥U`Z`^W  
@HWI-EAS443:3:87:712:224#0/1  
ACCTCCACTCCTGGTCCTTATGGCCCAGTATCTGCTTCTT  
+HWI-EAS443:3:87:712:224#0/1  
aa\_X`a^R]]¥T^WWKR¥aX^VXURXUSLYVTZUYPWWZR  
@HWI-EAS443:3:96:990:289#0/1  
ATGGAAACCATGGACTCCAATACCCTGGAECTAAGAAGCA  
+HWI-EAS443:3:96:990:289#0/1  
a\_X`bb`babababb\_\_\_abb¥`Vaaa\_\_S^ba`^`Ya

@HWI-EAS443:3:10:1094:173#0/1  
GCTTCTTAGTTCAGGGTATTGGAGTCCATGGTTTCCACA  
+HWI-EAS443:3:10:1094:173#0/1  
aG\_\_]\_\_WVUY^RUY]]VV]VXYXRXXUYXU]WXVYYX  
@HWI-EAS443:3:10:1364:966#0/1  
CTCCACTCCTGGTCCTTATGGCCCAGTATCTGCTTCTTAG  
+HWI-EAS443:3:10:1364:966#0/1  
'b\_'bbbabbbb^aaaaba`ab`b]babb]ba^^a\_aaaa  
@HWI-EAS443:3:10:929:1412#0/1  
TGGACTCCAATACCCTGGAAGCAGATACTGGGC  
+HWI-EAS443:3:10:929:1412#0/1  
aaaaaa`aaa^a[aa`a\_a`a\_a`a`a`a`\_¥¥`Y`]  
@HWI-EAS443:3:12:1311:296#0/1  
TTAGTTCAGGGTATTGGAGTCCATGGTTTCCACATTCTC  
+HWI-EAS443:3:12:1311:296#0/1  
abba`aaaaabaV`aaaaa^\_\_a\_aa^`^Xa]\_a`]\_^  
@HWI-EAS443:3:13:1142:1572#0/1  
GCCCAGTATCTGCTTCTTAGTTCAGGGTATTGGAGTCCA  
+HWI-EAS443:3:13:1142:1572#0/1  
a\_\_U^X]T`\_]a^\_a`aaa¥W`\_a`\_UJN``a`[\_`X^R`  
@HWI-EAS443:3:13:478:1665#0/1  
GCCCAGTATCTGCTTCTTAGTTCAGGGTATTGGAGTCCA  
+HWI-EAS443:3:13:478:1665#0/1  
aaa^`ab\_aaab¥S][¥]\_]`X^`^Z\_VNDW\_VV\_Ya  
@HWI-EAS443:3:14:1232:255#0/1  
GCCCAGTATCTGCTTCTTAGTTCAGGGTATTGGAGTCCA  
+HWI-EAS443:3:14:1232:255#0/1  
aaaaaa`aaaa`\_[a`a^a^]a\_]Y`\_\_\_^`XVX\_  
@HWI-EAS443:3:15:853:724#0/1  
ATCTGCTTCTTAGTTCAGGGTATTGGAGTCCATGGTTTC  
+HWI-EAS443:3:15:853:724#0/1  
ab`baaaaa\_aaaa`\_`aaVaa`\_\_\_^\_\_`a`]`\_`\_  
@HWI-EAS443:3:16:1711:189#0/1  
CCAGTATCTGCTTCTTAGTTCAGGGTATTGGAGTCCATG  
+HWI-EAS443:3:16:1711:189#0/1  
aa]UKSbaa`¥^aab[IaaWYSW`\_`WYa`VVIVQMGYaY  
@HWI-EAS443:3:16:641:1796#0/1  
CAGTATCTGCTTCTTAGTTCAGGGTATTGGAGTCCATGG  
+HWI-EAS443:3:16:641:1796#0/1  
a`]bab^aY`aaaaaZZ\_a`\_TY^P\_a`W[aa]^\_\_ZaS  
@HWI-EAS443:3:16:716:1570#0/1  
TATGGCCCAGTATCTGCTTCTTAGTTCAGGGTATTGGAG  
+HWI-EAS443:3:16:716:1570#0/1  
^\_]\_aa\_QX^a\_Y¥\_aa`\_`[VTYP¥[PVML[^ZW¥XL  
@HWI-EAS443:3:17:752:1352#0/1  
CTCCTGGTCCTTATGGCCCAGTATCTGCTTCTTAGTTC  
+HWI-EAS443:3:17:752:1352#0/1  
aaaa`aUa\_]`a`\_b`aa\_Qa[^[^`¥`^`^`N^`¥¥  
@HWI-EAS443:3:18:1183:920#0/1  
TGGCCCAGTATCTGCTTCTTAGTTCAGGGTATTGGAGTC

+HWI-EAS443:3:18:1183:920#0/1  
`abbabbbbaaaababa]bb\_a\_aabWbba]aa`aa`a]\_  
@HWI-EAS443:3:18:1346:335#0/1  
GCTTCTTAGTTCAGGGTATTGGAGTCCATGGTTCCACA  
+HWI-EAS443:3:18:1346:335#0/1  
a^\_aM`a`¥`¥^]¥V^W`YY^YVYVZ[X]^Y]]WSV]]  
@HWI-EAS443:3:18:796:1254#0/1  
GCCCAGTATCTGCTTCTTAGTTCAGGGTATTGGAGTCCA  
+HWI-EAS443:3:18:796:1254#0/1  
aaaa\_a\_a\_\_a`\_[¥`aY\_]\_^X¥\_\_`X¥^X\_]`\_XU][  
@HWI-EAS443:3:19:434:1518#0/1  
ATGGCCCAGTATCTGCTTCTTAGTTCAGGGTATTGGAGT  
+HWI-EAS443:3:19:434:1518#0/1  
aa`Z\_a\_a\_]`\_^]]¥\_¥^]\_V]]\_^]]YRU]]]UXVYV  
@HWI-EAS443:3:19:722:1028#0/1  
ATCTGCTTCTTAGTTCAGGGTATTGGAGTCCATGGTTTC  
+HWI-EAS443:3:19:722:1028#0/1  
]b^`a¥a^]]`YZ\_]`QR^`T`X¥N^^\_Y\_¥PZ``G`]  
@HWI-EAS443:3:1:1135:831#0/1  
GCCCAGTATCTGCTTCTTAGTTCAGGGTATTGGAGTCCA  
+HWI-EAS443:3:1:1135:831#0/1  
a`aa`a\_aa\_aa\_baZab`Z`a\_\_Xaaa¥`a\_\_\_\_\_`¥TBB  
@HWI-EAS443:3:1:540:972#0/1  
AAGAAGCAGATACTGGGCCATAAGGACCAGGAGTGGAGGA  
+HWI-EAS443:3:1:540:972#0/1  
\_P\_]aJa]¥]a\_a`Va\_aaa`aaa\_[N]a`^aR\_a\_BBB  
@HWI-EAS443:3:1:62:200#0/1  
CTCCTGGTCCTTATGGCCCAGTATCTGCTTCTTAGTTC  
+HWI-EAS443:3:1:62:200#0/1  
\_baaaba\_b`\_]aaaXaaaa\_\_aa`a]\_``\_a``]X\_¥\_B  
@HWI-EAS443:3:1:749:1404#0/1  
CTGCTTCTTAGTTCAGGGTATTGGAGTCCATGGTTTCCA  
+HWI-EAS443:3:1:749:1404#0/1  
abaaababbbaab]aaabbWbaaaa\_b]Z`a`aa\_abaa^  
@HWI-EAS443:3:20:1111:716#0/1  
CCTGGAACATAAGAAGCAGATACTGGGCCATAAGGACCAGG  
+HWI-EAS443:3:20:1111:716#0/1  
abbaba`abbbba`b``bbba\_aaaa\_aabbabaaa`aa  
@HWI-EAS443:3:20:1480:119#0/1  
ATCTGCTTCTTAGTTCAGGGTATTGGAGTCCATGGTTTC  
+HWI-EAS443:3:20:1480:119#0/1  
aa`aa`aa^a`aa\_a\_]`a\_W^^\_]^W`Z]XX¥^^X^ZV  
@HWI-EAS443:3:20:179:1188#0/1  
CCCAGTATCTGCTTCTTAGTTCAGGGTATTGGAGTCCAT  
+HWI-EAS443:3:20:179:1188#0/1  
^`a\_a`b`baaa`aaba^a]aab¥a`]K`\_`Y^^¥\_a]aZ  
@HWI-EAS443:3:20:598:288#0/1  
CTCCTGGTCCTTATGGCCCAGTATCTGCTTCTTAGTTC  
+HWI-EAS443:3:20:598:288#0/1  
ab`baba^aabbbaabaaaaa\_``a``^a`\_\_a\_dW\_\_¥^

@HWI-EAS443:3:22:196:1759#0/1  
ACTCCAATACCCTGGA ACTAAGAAGCAGATACTGGGCCAT  
+HWI-EAS443:3:22:196:1759#0/1  
aaa`abba]aaaa\_¥aaaaa``aaa`a\_a`aa]`^`\_`a`\_  
@HWI-EAS443:3:22:882:329#0/1  
CCTTATGGCCCAGTATCTGCTTCTTAGTTCCAGGGTATTG  
+HWI-EAS443:3:22:882:329#0/1  
aaaa`baabb[abSaa`aaaaa]aaaa\_\_`a`aaaVa\_^a  
@HWI-EAS443:3:23:439:1233#0/1  
AAGAAGCAGATACTGGGCCATAAGGACCAGGAGTGGAGGA  
+HWI-EAS443:3:23:439:1233#0/1  
^Ta\_aaaa^¥aX^\_] ^¥a`\_\_`^\_\_]\_\_a\_^X[`\_\_`\_  
@HWI-EAS443:3:23:89:1152#0/1  
TCCTCCACTCCTGGTCCTTATGGCCCAGTATCTGCTTCTT  
+HWI-EAS443:3:23:89:1152#0/1  
aaa]abb[MZY`a^Uaa\_X\_W]U^^][T]R[aZV]P]XBB  
@HWI-EAS443:3:24:1717:1455#0/1  
AAGAAGCAGATACTGGGCCATAAGGACCAGGAGTGGAGGA  
+HWI-EAS443:3:24:1717:1455#0/1  
a^`a\_YF^`X]a``aa[RV]aRa¥\_¥T^`^^WaU^`]]\_]`  
@HWI-EAS443:3:24:334:1225#0/1  
CATGGACTCCAATACCCTGGA ACTAAGAAGCAGATACTGG  
+HWI-EAS443:3:24:334:1225#0/1  
abX`aaaaaaaa\_aaaa^aa\_\_a`a`a]`[]`aa`a``]ZZ\_¥  
@HWI-EAS443:3:25:1105:923#0/1  
CTGGA ACTAAGAAGCAGATACTGGGCCATAAGGACCAGGA  
+HWI-EAS443:3:25:1105:923#0/1  
ab\_Zaabbbbbb\_bbabaabbaabbab`ababaaa\_\_aba\_  
@HWI-EAS443:3:25:1119:570#0/1  
CTAAGAAGCAGATACTGGGCCATAAGGACCAGGAGTGGAG  
+HWI-EAS443:3:25:1119:570#0/1  
U`¥X¥[\_^Z\_aba[X]\_[Xb]a`[\_T]aXT\_¥a^b]bbaa  
@HWI-EAS443:3:25:1295:360#0/1  
GCCCAGTATCTGCTTCTTAGTTCCAGGGTATTGGAGTCCA  
+HWI-EAS443:3:25:1295:360#0/1  
aa^`a[a\_] [a^^aV\_\_OUO`VYXY\_VKMX^^NKRWWX]  
@HWI-EAS443:3:25:1341:1377#0/1  
TGGACTCCAATACCCTGGA ACTAAGAAGCAGATACTGGGC  
+HWI-EAS443:3:25:1341:1377#0/1  
abaaa`a\_aaaa`\_`a`¥\_`aa`\_`^`¥\_\_\_¥¥YU\_¥¥W  
@HWI-EAS443:3:25:1568:954#0/1  
CTCCAATACCCTGGA ACTAAGAAGCAGATACTGGGCCATA  
+HWI-EAS443:3:25:1568:954#0/1  
a\_a¥abbbba`bbb`babbababaaabb`a\_Yaaa]`a`a  
@HWI-EAS443:3:26:232:818#0/1  
ATGGCCCAGTATCTGCTTCTTAGTTCCAGGGTATTGGAGT  
+HWI-EAS443:3:26:232:818#0/1  
aa¥`aa`aZ`a\_\_aa\_a`a]\_X\_\_\_\_\_Y`U\_X]X\_R\_X  
@HWI-EAS443:3:27:158:950#0/1  
GCCCAGTATCTGCTTCTTAGTTCCAGGGTATTGGAGTCC

+HWI-EAS443:3:27:158:950#0/1  
`bb\_``I¥W\_YY^Uaba^¥Y¥Sbabb]`U]`aZG¥BBBB  
@HWI-EAS443:3:27:494:875#0/1  
TAAGAAGCAGATACTGGGCCATAAGGACCAGGAGTGGAGG  
+HWI-EAS443:3:27:494:875#0/1  
abaa`ba]abb]aab`a\_baaa\_aaU\_`JaZ`\_X``Ra¥  
@HWI-EAS443:3:27:872:1067#0/1  
GGCCCAGTATCTGCTTCTTAGTTCCAGGGTATTGGAGTCC  
+HWI-EAS443:3:27:872:1067#0/1  
[\_babb\_`]aba`bbbbbb`aaa]bab¥aaaa`aZ`aa  
@HWI-EAS443:3:28:432:1477#0/1  
CAGTATCTGCTTCTTAGTTCCAGGGTATTGGAGTCCATGG  
+HWI-EAS443:3:28:432:1477#0/1  
¥\_\_Z\_aa\_a\_¥Z`XVaV^X\_Q]\_\_QKW^XWYZ¥P]WQOWS  
@HWI-EAS443:3:28:764:511#0/1  
ATGGCCCAGTATCTGCTTCTTAGTTCCAGGGTATTGGAGT  
+HWI-EAS443:3:28:764:511#0/1  
aWV[b`aW0[`Q]a]S]b`aa¥¥T[]X¥`XVUPZ]Y^U]W  
@HWI-EAS443:3:29:1362:647#0/1  
CCTGGTCTTATGGCCCAGTATCTGCTTCTTAGTTCCAGG  
+HWI-EAS443:3:29:1362:647#0/1  
a][a[W\_abaaa\_NS\_W¥bJ`\_W\_\_\_^\_¥aa\_\_QTKNYa  
@HWI-EAS443:3:29:1517:2011#0/1  
GAACTAAGAAGCAGATACTGGGCCATAAGGACCAGGAGTG  
+HWI-EAS443:3:29:1517:2011#0/1  
a\_ba`b`bb^`b`aaaa`V\_X]a\_`aaYT\_a¥\_`^\_WN[  
@HWI-EAS443:3:30:1550:1778#0/1  
AATACCCTGGA ACTAAGAAGCAGATACTGGGCCATAAGGA  
+HWI-EAS443:3:30:1550:1778#0/1  
aabbaa\_a\_bbbabb]baa`aa`aaa``a`\_a^aaa`````  
@HWI-EAS443:3:30:1664:940#0/1  
TGAGAATGTGGAAACCATGGACTCCAATACCCTGGA ACTA  
+HWI-EAS443:3:30:1664:940#0/1  
aaaaaUab^ba`aa^¥`aa\_\_\_`ZY`\_\_`^]]`aXX^V\_\_\_  
@HWI-EAS443:3:32:1022:848#0/1  
CTGCTTCTTAGTTCCAGGGTATTGGAGTCCATGGTTTCCA  
+HWI-EAS443:3:32:1022:848#0/1  
aaaaabbbbaa`aaab`bXaaaa`^^`\_aaa\_Y`````  
@HWI-EAS443:3:33:145:1439#0/1  
CTCCAATACCCTGGA ACTAAGAAGCAGATACTGGGCCATA  
+HWI-EAS443:3:33:145:1439#0/1  
a`bb^T\_Wabb]`\_`aba¥SVW^\_aa]a¥Z`¥[S^`a\_\_\_  
@HWI-EAS443:3:34:1301:545#0/1  
TCTGCTTCTTAGTTCCAGGGTATTGGAGTCCATGGTTTCC  
+HWI-EAS443:3:34:1301:545#0/1  
a\_aa\_aaaaaaaa`aa`Xaaa`V][``\_]\_XWW]WX  
@HWI-EAS443:3:35:512:490#0/1  
TGGCCCAGTATCTGCTTCTTAGTTCCAGGGTATTGGAGTC  
+HWI-EAS443:3:35:512:490#0/1  
aabbb]a`bbbbaaaaaaY]]aaaY]a`U¥```¥¥\_V`



@HWI-EAS443:3:36:1634:1139#0/1  
GGCCCAGTATCTGCTTCTTAGTTCCAGGGTATTGGAGTCC  
+HWI-EAS443:3:36:1634:1139#0/1  
^U`]Waa¥\_a\_`QSa\_`a]\_`^YVTVSTTQ[UX^\_V^SJS  
@HWI-EAS443:3:36:561:1762#0/1  
GGCCAGTATCTGCTTCTTAGTTCCAGGGTATTGGAGTCCA  
+HWI-EAS443:3:36:561:1762#0/1  
abbb`a``aaa``abaa\_¥\_aaaa``\_Qa]^\_W` [UaY\_  
@HWI-EAS443:3:37:570:1147#0/1  
GGCCCAGTATCTGCTTCTTAGTTCCAGGGTATTGGAGTCC  
+HWI-EAS443:3:37:570:1147#0/1  
`bbbb[b`\_baY\_b^Ya\_ba\_¥bbaba`\_GX``¥[\_Y¥\_^  
@HWI-EAS443:3:38:1295:1537#0/1  
GGCCAGTATCTGCTTCTTAGTTCCAGGGTATTGGAGTCCA  
+HWI-EAS443:3:38:1295:1537#0/1  
aba^^^GY^^WYLOYYYZPVOY`YX¥]]NZLRRQPQ[[^T  
@HWI-EAS443:3:38:1324:152#0/1  
ATGGCCCAGTATCTGCTTCTTAGTTCCAGGGTATTGGAGT  
+HWI-EAS443:3:38:1324:152#0/1  
`TU\_`aa\_`X\_\_\_\_\_`\_\_`]\_`Y\_W]\_YOZURWNUZV^VTV  
@HWI-EAS443:3:38:1522:1204#0/1  
CTGCTTCTTAGTTCCAGGGTATTGGAGTCCATGGTTTCCA  
+HWI-EAS443:3:38:1522:1204#0/1  
abba¥^`a`ab\_\_¥`¥\_ZXR`a`\_\_]b\_[RVTL¥NZ]Y]S  
@HWI-EAS443:3:39:1244:569#0/1  
GGCCAGTATCTGCTTCTTAGTTCCAGGGTATTGGAGTCCA  
+HWI-EAS443:3:39:1244:569#0/1  
abaaZZYa^a`b`\_a\_aY[`\_^¥Z\_Z`\_Y\_V]^`^``ZYZU  
@HWI-EAS443:3:39:135:388#0/1  
CCTCCACTCCTGGTCCTTATGGCCCAGTATCTGCTTCTTA  
+HWI-EAS443:3:39:135:388#0/1  
[^a^a^Tabb`a`bXa`aa^a``\_¥T¥[Ra\_^UT\_H^]``Z  
@HWI-EAS443:3:39:223:1297#0/1  
CTGGAAGTAAAGCAGATACTGGGCCATAAGGACCAGGA  
+HWI-EAS443:3:39:223:1297#0/1  
a`a¥Ua\_\_a[a[`]\_¥`\_\_\_\_\_^^^`Xa`\_`ZZ^\_^]\_YY  
@HWI-EAS443:3:3:1450:1273#0/1  
CTAAGAAGCAGATACTGGGCCATAAGGACCAGGAGTGGAG  
+HWI-EAS443:3:3:1450:1273#0/1  
abbbbbbaabbaa`aaa`ba`aaaa`aaaQ^ba^a]a`\_a  
@HWI-EAS443:3:40:262:1255#0/1  
GGCCAGTATCTGCTTCTTAGTTCCAGGGTATTGGAGTCCA  
+HWI-EAS443:3:40:262:1255#0/1  
\_abbaaYab`[abababba`\_ab\_]P\_Ra``¥\_XQKZ^a  
@HWI-EAS443:3:40:280:1362#0/1  
GGCCAGTATCTGCTTCTTAGTTCCAGGGTATTGGAGTCCA  
+HWI-EAS443:3:40:280:1362#0/1  
`a`Y]¥Wa]`X^[^\_`\_¥Y¥Y]a\_P`X^H¥PPTTGQOY]]  
@HWI-EAS443:3:42:1262:1707#0/1  
GGCCCAGTATCTGCTTCTTAGTTCCAGGGTATTGGAGTCC

+HWI-EAS443:3:42:1262:1707#0/1  
abbaba`K^bba¥Y¥aaabab`aaa`^^bY\_a`[[`Yaaa  
@HWI-EAS443:3:42:1538:1597#0/1  
CTTCTTAGTTCCAGGGTATTGGAGTCCATGGTTTCCACAT  
+HWI-EAS443:3:42:1538:1597#0/1  
aa`aabbbaabaabaWa`Sba\_`aa`a^a\_Y`\_^a\_\_\_\_\_@HWI-EAS443:3:42:453:276#0/1  
CCTCCACTCCTGGTCCTTATGGCCCAGTATCTGCTTCTTA  
+HWI-EAS443:3:42:453:276#0/1  
aaaaba]Xb]aaXGaa`Z``aYaa`[[V`\_]¥\_¥ZVXVTU  
@HWI-EAS443:3:42:719:476#0/1  
GCCCAGTATCTGCTTCTTAGTTCCAGGGTATTGGAGTCCA  
+HWI-EAS443:3:42:719:476#0/1  
abaaba`aa`a^aJaaab^`]aa\_\_a``[a\_`^a`a\_a[a  
@HWI-EAS443:3:43:1485:329#0/1  
TGCTTCTTAGTTCCAGGGTATTGGAGTCCATGGTTTCCAC  
+HWI-EAS443:3:43:1485:329#0/1  
]bb¥\_aa\_Z\_ZVXU¥aabU`Zaa^]aSX[^```aYJT][  
@HWI-EAS443:3:43:1659:442#0/1  
CCTGGTCCTTATGGCCCAGTATCTGCTTCTTAGTTCCAGG  
+HWI-EAS443:3:43:1659:442#0/1  
ababbabbbbabb`aaab\_aa]bb`aa]ba\_a\_aX¥]WZ  
@HWI-EAS443:3:43:319:886#0/1  
GGACTCCAATACCCTGGAECTAAGAAGCAGATACTGGGCC  
+HWI-EAS443:3:43:319:886#0/1  
\_¥R¥b]a`YW]WWUaZYUUXaTZ`X]aX```\_\_ZRYWR]a[  
@HWI-EAS443:3:44:1377:556#0/1  
CCTGGAECTAAGAAGCAGATACTGGGCCATAAGGACCAGG  
+HWI-EAS443:3:44:1377:556#0/1  
`NW\_YR]WTWYa^SRV[[^UQBBBBBBBBBBBBBBBB  
@HWI-EAS443:3:44:824:480#0/1  
CCCAGTATCTGCTTCTTAGTTCCAGGGTATTGGAGTCCAT  
+HWI-EAS443:3:44:824:480#0/1  
aa`abaJa`]Y]aa`Y\_WbaYTVZ]b^U`TVaaYaXaXa\_  
@HWI-EAS443:3:44:843:985#0/1  
TGCTTCTTAGTTCCAGGGTATTGGAGTCCATGGTTTCCAC  
+HWI-EAS443:3:44:843:985#0/1  
ababa`aaab\_aa``aaa¥aaaa`a^````aa]\_a\_\_``@HWI-EAS443:3:45:333:1283#0/1  
GCCCAGTATCTGCTTCTTAGTTCCAGGGTATTGGAGTCCA  
+HWI-EAS443:3:45:333:1283#0/1  
aaaa^b[a¥WNI¥\_R[\_XaVSU[W^aZ\_]RLYXPR]G]QZ  
@HWI-EAS443:3:45:767:824#0/1  
ACCATGGACTCCAATACCCTGGAECTAAGAAGCAGATACT  
+HWI-EAS443:3:45:767:824#0/1  
]\_bb\_`b\_aaa`a\_aaaaabbba`aaa¥¥a`a`ab`aaaa  
@HWI-EAS443:3:46:999:775#0/1  
CTTCTTAGTTCCAGGGTATTGGAGTCCATGGTTTCCACAT  
+HWI-EAS443:3:46:999:775#0/1  
abbababbabaa\_bbb\_aaaaa`b^aaa`ba^aba`a\_aa

@HWI-EAS443:3:47:1032:440#0/1  
GCCCAGTATCTGCTTCTTAGTTCCAGGGTATTGGAGTCCA  
+HWI-EAS443:3:47:1032:440#0/1  
aaa\_`b`a\_a`Z`a`aa^aU\_^^[a`aY`\_\_`^V\_^X]^  
@HWI-EAS443:3:47:1499:316#0/1  
CCCAGTATCTGCTTCTTAGTTCCAGGGTATTGGAGTCCAT  
+HWI-EAS443:3:47:1499:316#0/1  
abbbba]bbbbabbabbbb]a\_a\_bbaR``a\_aZ`Y^ZZ\_  
@HWI-EAS443:3:47:88:872#0/1  
CCTCCACTCCTGGTCCTTATGGCCCAGTATCTGCTTCTTA  
+HWI-EAS443:3:47:88:872#0/1  
^Z^\_]\_aabb]^VR`\_`a`a^a\_[`[P`¥SPUV]XY][^  
@HWI-EAS443:3:48:20:140#0/1  
TGGCCAGTATCTGCTTCTTAGTTCCAGGGTATTGGAGTC  
+HWI-EAS443:3:48:20:140#0/1  
``aaa[S`Ybaaaaaaaaaab`]T¥]^¥`U^XYVL¥¥Z[  
@HWI-EAS443:3:48:337:1340#0/1  
AAGAAGCAGATACTGGGCCATAAGGACCAGGAGTGGAGGA  
+HWI-EAS443:3:48:337:1340#0/1  
a`b[X`Xb\_Y\_aa\_a\_\_a`a`Wa¥^¥a¥`\_a]a]`\_\_Sa¥  
@HWI-EAS443:3:48:358:177#0/1  
CTCCACTCCTGGTCCTTATGGCCCAGTATCTGCTTCTTAG  
+HWI-EAS443:3:48:358:177#0/1  
aaaaa\_aaaaaa^\_\_aa``\_Z\_[\_[Z\_`¥\_\_U^\_¥\_\_¥^  
@HWI-EAS443:3:48:510:1955#0/1  
GGAAGCAGATACTGGGCCATAAGGACCAGGAGTGGAGG  
+HWI-EAS443:3:48:510:1955#0/1  
abab]aYFRbba\_aaab`aaS`b^\_abaaaaa`[`a[\_\_X  
@HWI-EAS443:3:49:976:1085#0/1  
GCCCAGTATCTGCTTCTTAGTTCCAGGGTATTGGAGTCCA  
+HWI-EAS443:3:49:976:1085#0/1  
aa``ab^^babaaaa\_aba`aa`KR\_a\_Y\_a`aX[]0`^`  
@HWI-EAS443:3:4:302:1194#0/1  
TAAGAAGCAGATACTGGGCCATAAGGACCAGGAGTGGAGG  
+HWI-EAS443:3:4:302:1194#0/1  
a``^`\_¥aa`a`aaa\_^aXM[aaa^V]^`^\_a\_YaWaa`a`  
@HWI-EAS443:3:4:709:1512#0/1  
TAAGAAGCAGATACTGGGCCATAAGGACCAGGAGTGGAGG  
+HWI-EAS443:3:4:709:1512#0/1  
Y`[RRX`]b`¥`\_PU]\_ZS[XaYaVYX\_QQ[XP\_0aYSaQ  
@HWI-EAS443:3:50:1402:926#0/1  
CCAGTATCTGCTTCTTAGTTCCAGGGTATTGGAGTCCATG  
+HWI-EAS443:3:50:1402:926#0/1  
^ba\_¥aaaab`bbabbbba````ba\_Uaa`¥^`a\_Za`aa  
@HWI-EAS443:3:50:717:1197#0/1  
CCAGTATCTGCTTCTTAGTTCCAGGGTATTGGAGTCCATG  
+HWI-EAS443:3:50:717:1197#0/1  
aaabaabaa`bb\_bbaa\_a`^aba\_aa`\_`\_a`^`aa\_  
@HWI-EAS443:3:50:865:1407#0/1  
CTCCAATACCCTGGAAGCAGATACTGGGCCATA

+HWI-EAS443:3:50:865:1407#0/1  
^\_\_X[ab]bZ`ba[LaZba\_^¥[a\_b]aabbabbbbaaab  
@HWI-EAS443:3:51:380:213#0/1  
ATGGACTCCAATACCCTGGAAC TAAGAAGCAGATACTGGG  
+HWI-EAS443:3:51:380:213#0/1  
]b\_XZab¥[¥U]aUaba\_\_]abaaabaabaaba\_`a`a`a  
@HWI-EAS443:3:51:636:959#0/1  
CTCCACTCCTGGTCCTTATGGCCCAGTATCTGCTTCTTAG  
+HWI-EAS443:3:51:636:959#0/1  
abbbbbbaaaba\_\_¥aaa\_a\_\_¥W`\_Ya`¥`V¥a[R``¥[  
@HWI-EAS443:3:52:702:678#0/1  
GGCCCAGTATCTGCTTCTTAGTTCCAGGGTATTGGAGTCC  
+HWI-EAS443:3:52:702:678#0/1  
\_`a\_X]\_abab]W\_bb`a`\_^¥\_`^`aaa[aa\_]\_]\_^[[  
@HWI-EAS443:3:54:854:90#0/1  
AGAATGTGGAACCATGGACTCCAATACCCTGGAAC TAAG  
+HWI-EAS443:3:54:854:90#0/1  
aba`bbbb`[\_`^[\_`bbba]a[\_`\_a\_¥\_`abaX`^`\_\_a  
@HWI-EAS443:3:54:88:238#0/1  
GCCCAGTATCTGCTTCTTAGTTCCAGGGTATTGGAGTCCA  
+HWI-EAS443:3:54:88:238#0/1  
aaaabbaaaaabaaaabaaa\_`¥][aaaU``\_a\_\_a^[Y¥  
@HWI-EAS443:3:55:1585:1422#0/1  
ATCTGCTTCTTAGTTCCAGGGTATTGGAGTCCATGGTTTC  
+HWI-EAS443:3:55:1585:1422#0/1  
aa]aa`ab\_ba\_¥T¥]\_\_a\_YPaa[^a]Q[\_a]\_a]\_`V  
@HWI-EAS443:3:55:1710:605#0/1  
ATGGACTCCAATACCCTGGAAC TAAGAAGCAGATACTGGG  
+HWI-EAS443:3:55:1710:605#0/1  
abaa`\_b\_aaa`^¥\_Y\_¥\_¥\_`^a`\_ZZ\_a\_\_`¥R[Q¥Q^]  
@HWI-EAS443:3:56:1428:974#0/1  
CTCCTGGTCCTTATGGCCCAGTATCTGCTTCTTAGTTCCA  
+HWI-EAS443:3:56:1428:974#0/1  
abaaabaaaaaba`aa`\_Xa\_U\_\_\_`[S``\_`a`\_[aUUU  
@HWI-EAS443:3:56:497:1266#0/1  
CATGGACTCCAATACCCTGGAAC TAAGAAGCAGATACTGG  
+HWI-EAS443:3:56:497:1266#0/1  
a^ba\_`aa]a[ ]\_\_a`b]`aa¥`XR`Y]a¥`a\_`\_¥\_[H  
@HWI-EAS443:3:57:453:677#0/1  
CCAGTATCTGCTTCTTAGTTCCAGGGTATTGGAGTCCATG  
+HWI-EAS443:3:57:453:677#0/1  
ab`\_`a`[¥b\_bba\_aa\_a]``]a\_`Y^^aba^^\_a`a\_a  
@HWI-EAS443:3:58:1066:658#0/1  
ATGGACTCCAATACCCTGGAAC TAAGAAGCAGATACTGGG  
+HWI-EAS443:3:58:1066:658#0/1  
^^bb`aa^\_Z]a\_]¥\_`YZX\_Ya\_[\_\_aba\_``a]`]a^a  
@HWI-EAS443:3:58:423:394#0/1  
AAGAAGCAGATACTGGGCCATAAGGACCAGGAGTGGAGGA  
+HWI-EAS443:3:58:423:394#0/1  
ab`¥\_\_W\_`a\_`^`a`\_^aa\_`^abaaaX¥ba^a¥bb`baa

@HWI-EAS443:3:59:249:947#0/1  
ATGGCCCAGTATCTGCTTCTTAGTTCCAGGGTATTGGAGT  
+HWI-EAS443:3:59:249:947#0/1  
Y`a`\_V`¥IZ\_\_]]`aa`^]][\_`[¥TZZFYVUXUZ[Y  
@HWI-EAS443:3:59:413:551#0/1  
TCTGCTTCTTAGTTCCAGGGTATTGGAGTCCATGGTTTCC  
+HWI-EAS443:3:59:413:551#0/1  
aaab`aa`a\_a`\_`aaaaaZ````\_`aaZaa\_]`aXZ\_ZZ  
@HWI-EAS443:3:59:814:1300#0/1  
ATGGCCCAGTATCTGCTTCTTAGTTCCAGGGTATTGGAGT  
+HWI-EAS443:3:59:814:1300#0/1  
aa[abaa^aaa`¥aa\_a\_aa]aaaa^aW\_`[OJS¥P  
@HWI-EAS443:3:5:1182:939#0/1  
ATCTGCTTCTTAGTTCCAGGGTATTGGAGTCCATGGTTTC  
+HWI-EAS443:3:5:1182:939#0/1  
ababbaab^`b`aaaaaaaaaV``^`\_`a^^\_\_aaaWaaB  
@HWI-EAS443:3:60:1337:310#0/1  
ATGGACTCCAATACCCTGGAACCTAAGAAGCAGATACTGGG  
+HWI-EAS443:3:60:1337:310#0/1  
`bba¥^`^\_aaa`¥`abaXa^`\_a`\_`[\_`a`\_^UY`\_`  
@HWI-EAS443:3:60:34:861#0/1  
ATCTGCTTCTTAGTTCCAGGGTATTGGAGTCCATGGTTTC  
+HWI-EAS443:3:60:34:861#0/1  
`aaaa`a`[\_`aa¥a\_\_`a`\_XZ¥]\_^WYY¥\_]X]^W]]]  
@HWI-EAS443:3:60:435:1030#0/1  
CTCCTGGTCTTATGGCCCAGTATCTGCTTCTTAGTTCCA  
+HWI-EAS443:3:60:435:1030#0/1  
abbb^a]Vabaaba`a`aa\_a¥`\_\_\_\_\_`Z^`\_^\_`^¥^`  
@HWI-EAS443:3:60:695:758#0/1  
GCTTCTTAGTTCCAGGGTATTGGAGTCCATGGTTTCCACA  
+HWI-EAS443:3:60:695:758#0/1  
^`a`\_`aa`aba`^^V`baa`ZVQVa`X]\_`¥XZZU¥  
@HWI-EAS443:3:60:754:681#0/1  
GCCCAGTATCTGCTTCTTAGTTCCAGGGTATTGGAGTCCA  
+HWI-EAS443:3:60:754:681#0/1  
abb^]\_abaaaa`aaaaaa`\_`a`aa`Ya\_\_\_W\_a^`^`  
@HWI-EAS443:3:61:1664:1933#0/1  
CATGGACTCCAATACCCTGGAACCTAAGAAGCAGATACTGG  
+HWI-EAS443:3:61:1664:1933#0/1  
`YYaXa[\_QO¥¥YUZPW¥abaaR\_¥]^W^Q`ZVX`ZRX\_\_  
@HWI-EAS443:3:61:1788:1650#0/1  
GGCCCAGTATCTGCTTCTTAGTTCCAGGGTATTGGAGTCC  
+HWI-EAS443:3:61:1788:1650#0/1  
`bb`\_U`\_ab`^V[^^]`a¥aaabbaaa`U\_\_^ZV]YHVW  
@HWI-EAS443:3:63:1214:826#0/1  
ATGGACTCCAATACCCTGGAACCTAAGAAGCAGATACTGGG  
+HWI-EAS443:3:63:1214:826#0/1  
]abbaaa]Z`aa^``¥\_aQa¥aa¥T]`[a`\_a\_\_¥`a`\_`  
@HWI-EAS443:3:66:1136:991#0/1  
CATGGACTCCAATACCCTGGAACCTAAGAAGCAGATACTGG

+HWI-EAS443:3:66:1136:991#0/1  
aabba]aabaaaab\_aaaaa\_baaabaaaa\_aaaaaa`\_\_  
@HWI-EAS443:3:68:644:57#0/1  
CTGCTTCTTAGTTCAGGGTATTGGAGTCCATGGTTTCCA  
+HWI-EAS443:3:68:644:57#0/1  
abbbbababa`aabaaabba]a`aaaa]aaa`aa]aa]\_`  
@HWI-EAS443:3:6:1340:1099#0/1  
ATGGCCCAGTATCTGCTTCTTAGTTCAGGGTATTGGAGT  
+HWI-EAS443:3:6:1340:1099#0/1  
abXFY[\_]LXa]\_aXU]N\_[YKT[XW¥¥X^GZP\_]UXBB  
@HWI-EAS443:3:70:885:894#0/1  
CTTCTTAGTTCAGGGTATTGGAGTCCATGGTTTCCACAT  
+HWI-EAS443:3:70:885:894#0/1  
abbbbabbb`abbbb`a]baaaa\_a`aaa`aa`a\_a\_b\_aa  
@HWI-EAS443:3:72:909:2008#0/1  
CTGGAATAAGAAGCAGATACTGGGCCATAAGGACCAGGA  
+HWI-EAS443:3:72:909:2008#0/1  
\_bb\_^bbb[\_b\_]baPWbaaJ¥ZZaaaaabaaa^Y^\_\_W  
@HWI-EAS443:3:73:377:1700#0/1  
TGAGAATGTGGAACCATGGACTCCAATACCCTGGAACCTA  
+HWI-EAS443:3:73:377:1700#0/1  
`a\_\_Yabb¥aabb`aabaaaWbabb`aYaab\_`\_\_`^`a  
@HWI-EAS443:3:73:467:669#0/1  
CCATGGACTCCAATACCCTGGAACCTAAGAAGCAGATACTG  
+HWI-EAS443:3:73:467:669#0/1  
aaa^`[W`a\_a¥\_a`aa\_Z¥\_`[]`Z[X^`X^\_¥¥\_  
@HWI-EAS443:3:73:770:1491#0/1  
CCAGTATCTGCTTCTTAGTTCAGGGTATTGGAGTCCATG  
+HWI-EAS443:3:73:770:1491#0/1  
a\_Z]]Z^ba`P`a^Z`U`^a`aKKW`a¥`W`XWZ  
@HWI-EAS443:3:74:1332:318#0/1  
ATGGCCCAGTATCTGCTTCTTAGTTCAGGGTATTGGAGT  
+HWI-EAS443:3:74:1332:318#0/1  
]S\_aX\_aa\_aa¥Rbbaab\_baa\_N\_W[a`abO\_aYa\_\_\_V  
@HWI-EAS443:3:76:34:1709#0/1  
TTATGGCCCAGTATCTGCTTCTTAGTTCAGGGTATTGGA  
+HWI-EAS443:3:76:34:1709#0/1  
\_bba]^¥b`¥`]baa`¥\_WT\_Wa¥`UTZ\_[[Z00^RXVNY  
@HWI-EAS443:3:76:573:172#0/1  
CATGGACTCCAATACCCTGGAACCTAAGAAGCAGATACTGG  
+HWI-EAS443:3:76:573:172#0/1  
V\_`bb`¥`\_\_aa`\_\_aa\_¥W`^\_bb]bb`]^`b`b`aaa  
@HWI-EAS443:3:76:82:901#0/1  
TGCTTCTTAGTTCAGGGTATTGGAGTCCATGGTTTCCAC  
+HWI-EAS443:3:76:82:901#0/1  
abbabbbabb`aaba\_aaXb`^^`a`]a^Z`^^`aaa`  
@HWI-EAS443:3:77:285:1569#0/1  
CTGGAATAAGAAGCAGATACTGGGCCATAAGGACCAGGA  
+HWI-EAS443:3:77:285:1569#0/1  
aaQZPba`Mb`]Y^YaYa^\_[]]U¥]^\_\_\_\_`]ZR\_\_]UU¥

@HWI-EAS443:3:77:982:186#0/1  
CATGGACTCCAATACCCTGGAAC TAAGAAGCAGATACTGG  
+HWI-EAS443:3:77:982:186#0/1  
ababb]\_`ab`abba\_\_]]``]P`baa\_a¥S[aaaaZaaa  
@HWI-EAS443:3:78:760:1453#0/1  
CTAAGAAGCAGATACTGGGCCATAAGGACCAGGAGTGGAG  
+HWI-EAS443:3:78:760:1453#0/1  
`a¥W```Vabbbā]bbabb```a^`Q`bbabba¥b]ba`b  
@HWI-EAS443:3:79:1175:470#0/1  
ATGGACTCCAATACCCTGGAAC TAAGAAGCAGATACTGGG  
+HWI-EAS443:3:79:1175:470#0/1  
abbaaabababbba[`abaaaaaa¥aa`a\_\_aa]aU``aa  
@HWI-EAS443:3:79:1710:341#0/1  
GGCCCAGTATCTGCTTCTTAGTTCCAGGGTATTGGAGTCC  
+HWI-EAS443:3:79:1710:341#0/1  
\_\_`]R\_babb¥ab¥^ba]bZ`a`[\_aaa`¥¥^XaaU]UZY  
@HWI-EAS443:3:79:229:97#0/1  
TAAGAAGCAGATACTGGGCCATAAGGACCAGGAGTGGAGG  
+HWI-EAS443:3:79:229:97#0/1  
a``aaaaaa\_aa^a\_``\_`\_`a\_\_`\_\_\_\_\_``X\_X\_\_^\_\_  
@HWI-EAS443:3:79:648:71#0/1  
TAAGAAGCAGATACTGGGCCATAAGGACCAGGAGTGGAGG  
+HWI-EAS443:3:79:648:71#0/1  
aa[aa^Y`\_]aZ`^`\_`][0\_^\_]\_`]^`^`^Z`Z^]Z^^  
@HWI-EAS443:3:79:717:931#0/1  
CCTCCACTCCTGGTCCTTAGTTCCAGGGTATTGGAGTCCAT  
+HWI-EAS443:3:79:717:931#0/1  
aabbabaabaaa\_¥aaaaa\_`[a`a`a\_``\_`\_`¥\_a\_\_¥\_\_  
@HWI-EAS443:3:79:847:1860#0/1  
CCCAGTATCTGCTTCTTAGTTCCAGGGTATTGGAGTCCAT  
+HWI-EAS443:3:79:847:1860#0/1  
ab\_aaaa`a]]`YY]\_\_\_a\_aab`¥`^Raa¥\_Y\_\_RWV^\_  
@HWI-EAS443:3:7:780:649#0/1  
GCCCAGTATCTGCTTCTTAGTTCCAGGGTATTGGAGTCCA  
+HWI-EAS443:3:7:780:649#0/1  
aYZXZb`aa`abaa[X`]X\_\_\_SN\_aa\_G\_]Y¥\_aU]RZ\_  
@HWI-EAS443:3:81:769:587#0/1  
TAGTTCCAGGGTATTGGAGTCCATGGTTTCCACATTCTCA  
+HWI-EAS443:3:81:769:587#0/1  
`ZaaaaWV\_\_XQZ^a\_]][XY]]XOWW]`Y\_\_ZZNWY^[\_  
@HWI-EAS443:3:82:231:625#0/1  
ATGGCCCAGTATCTGCTTCTTAGTTCCAGGGTATTGGAGT  
+HWI-EAS443:3:82:231:625#0/1  
aaQUa]ZURGa`ZV¥VWa\_[[\_[\_`YSVPLTZWZRWZPHWR  
@HWI-EAS443:3:83:1252:1613#0/1  
GGA AACCATGGACTCCAATACCCTGGAAC TAAGAAGCAGA  
+HWI-EAS443:3:83:1252:1613#0/1  
```aaaaa\_aaa^]]X`a¥¥`\_\_\_^^^Z`^\_`¥a]\_\_\_\_\_  
@HWI-EAS443:3:83:1712:232#0/1  
CTCCAATACCCTGGAAC TAAGAAGCAGATACTGGGCCATA

+HWI-EAS443:3:83:1712:232#0/1  
abb`bbbaaaabbababbabaaa`^`aa`aa]^W^aaa  
@HWI-EAS443:3:83:741:354#0/1  
GGAAGTAAGAAGCAGATACTGGGCCATAAGGACCAGGAGT  
+HWI-EAS443:3:83:741:354#0/1  
aa\_PU]^`\_T]X]X¥VPRN[U[[`¥Y\_V[L¥[LO[\_^\_W  
@HWI-EAS443:3:84:191:1784#0/1  
TTATGGCCCAGTATCTGCTTCTTAGTTCCAGGGTATTGGA  
+HWI-EAS443:3:84:191:1784#0/1  
`T`aZZ¥]^`aTUT\_a`]W^QTNT]W¥¥`Y[UXU00VPW]\_  
@HWI-EAS443:3:85:1439:224#0/1  
GAGAATGTGGAAACCATGGACTCCAATACCCTGGAAGTAA  
+HWI-EAS443:3:85:1439:224#0/1  
abbaabb`baaaaY[^`a``Wa\_`a``^¥\_]\_a`^aX``^  
@HWI-EAS443:3:86:1086:157#0/1  
CTTCTTAGTTCCAGGGTATTGGAGTCCATGGTTTCCACAT  
+HWI-EAS443:3:86:1086:157#0/1  
Y`bba`abbabbbb\_b\_ba]\_0^\_ab`bbaabaa¥aaa  
@HWI-EAS443:3:86:252:778#0/1  
CTAAGAAGCAGATACTGGGCCATAAGGACCAGGAGTGGAG  
+HWI-EAS443:3:86:252:778#0/1  
abba^abbabbaaaaaaaaaaaaaaaaaa¥Zb\_\_a0a`\_a  
@HWI-EAS443:3:86:548:396#0/1  
ATCTGCTTCTTAGTTCCAGGGTATTGGAGTCCATGGTTTC  
+HWI-EAS443:3:86:548:396#0/1  
abaabaab\_aa`^aaa]a^`Waaa`\_a`\_`\_`aa\_\_`Z  
@HWI-EAS443:3:87:1373:59#0/1  
GCCCAGTATCTGCTTCTTAGTTCCAGGGTATTGGAGTCCA  
+HWI-EAS443:3:87:1373:59#0/1  
aYJV^aNX`\_[U¥^ZM¥\_¥^]\_]ZRPPUUYYSVYV^QQYY  
@HWI-EAS443:3:88:106:1610#0/1  
GCCCAGTATCTGCTTCTTAGTTCCAGGGTATTGGAGTCCA  
+HWI-EAS443:3:88:106:1610#0/1  
a\_U`a\_PR`U`bbaa^\_Z[ZQX`H^MN\_S\_aaa[]]¥UW  
@HWI-EAS443:3:88:114:521#0/1  
CCAGTATCTGCTTCTTAGTTCCAGGGTATTGGAGTCCATG  
+HWI-EAS443:3:88:114:521#0/1  
]\_^\_[H\_Y`aaa\_¥aa^`\_TZTT\_bb\_ab``¥TT^\_Z]^`\_  
@HWI-EAS443:3:88:1681:951#0/1  
CTCCACTCCTGGTCCTTATGGCCCAGTATCTGCTTCTTAG  
+HWI-EAS443:3:88:1681:951#0/1  
abaab`bbbb`baabbbbaaba\_aa]^`^¥`a`ab\_ba¥a  
@HWI-EAS443:3:88:531:615#0/1  
TGGAAGTAAGAAGCAGATACTGGGCCATAAGGACCAGGAG  
+HWI-EAS443:3:88:531:615#0/1  
a`^a^abaaaa\_¥\_\_aaaa\_aaa^`aa`a`Y`[T``^a  
@HWI-EAS443:3:88:94:412#0/1  
GGCCCAGTATCTGCTTCTTAGTTCCAGGGTATTGGAGTCC  
+HWI-EAS443:3:88:94:412#0/1  
`\_^\_a`¥\_aa`aZ^a¥`a`a¥`\_`¥\_aZMY\_¥a\_¥]N^W





+HWI-EAS443:3:94:656:1131#0/1  
a\_^\_^`^` [K^\_]`\_X\_a]a` ``¥Y^`\_`VIRaY` `a^TU  
@HWI-EAS443:3:94:789:377#0/1  
GCCCAGTATCTGCTTCTTAGTTCCAGGGTATTGGAGTCCA  
+HWI-EAS443:3:94:789:377#0/1  
a\_a`abaab`aa\_bb`aaa\_\_aa`aa\_\_\_a`a\_a`\_\_YU`  
@HWI-EAS443:3:95:721:715#0/1  
GCCCAGTATCTGCTTCTTAGTTCCAGGGTATTGGAGTCCA  
+HWI-EAS443:3:95:721:715#0/1  
ZQ¥a¥\_\_\_XU[[a\_¥ba^` `bbbb^\_^aK¥` [^\_b`R^]a  
@HWI-EAS443:3:96:1064:488#0/1  
GCCCAGTATCTGCTTCTTAGTTCCAGGGTATTGGAGTCCA  
+HWI-EAS443:3:96:1064:488#0/1  
a\_aVPSVYVY^`\_¥\_]XUX\_VYQVY^YUYVY\_]V]YVSB  
@HWI-EAS443:3:96:492:110#0/1  
TTCTTAGTTCCAGGGTATTGGAGTCCATGGTTTCCACATT  
+HWI-EAS443:3:96:492:110#0/1  
aaaaaab`a`\_`aa`X` `]\_\_^a]]X\_Z\_\_Z`aZU\_ZZ^`  
@HWI-EAS443:3:98:945:17#0/1  
CTAAGAAGCAGATACTGGGCCATAAGGACCAGGAGTGGAG  
+HWI-EAS443:3:98:945:17#0/1  
`\_aS\_UZT^a^]aSY`\_`a¥]Ia]a]`aaYJT^Z\_bSbaYa  
@HWI-EAS443:3:99:1488:589#0/1  
TAAGAAGCAGATACTGGGCCATAAGGACCAGGAGTGGAGG  
+HWI-EAS443:3:99:1488:589#0/1  
`b`b`aa`a\_aa\_\_a`a`\_Z\_b]aaa`S^\_aaWaXa`^\_a  
@HWI-EAS443:3:9:1348:252#0/1  
CTCCACTCCTGGTCCTTATGGCCCAGTATCTGCTTCTTAG  
+HWI-EAS443:3:9:1348:252#0/1  
a\_a^`abaa\_aRXaYa\_aaPG[Q\_W]T^^¥^\_TQYQ[^Ya  
@HWI-EAS443:3:9:30:1296#0/1  
CTGCTTCTTAGTTCCAGGGTATTGGAGTCCATGGTTTCCA  
+HWI-EAS443:3:9:30:1296#0/1  
aa`bbbabbb[`]ababa\_bbaaaaa\_baa`a`^aaaa  
@HWI-EAS443:3:9:78:290#0/1  
GGCCCAGTATCTGCTTCTTAGTTCCAGGGTATTGGAGTCC  
+HWI-EAS443:3:9:78:290#0/1  
aab` `aa[Z\_]W\_^]\_`\_`aaU[^\_Z^^aVYWR`Y\_RLRX  
@HWI-EAS443:3:9:928:702#0/1  
TGAGAATGTGGAAACCATGGACTCCAATACCCTGGAACCTA  
+HWI-EAS443:3:9:928:702#0/1  
`baa]aaa[aaaaaaaa`aa`]a\_]`^`a^^)`aa\_\_Za\_  
@HWI-EAS443:3:25:1741:295#0/1  
TTGAAACAACCTAGTTCAGACAATGGAACGTGCTACCCAGG  
+HWI-EAS443:3:25:1741:295#0/1  
NSZU¥`bV^ab\_Z`a\_baZWa]aba¥b\_RR]S¥a]`Raa`  
@HWI-EAS443:3:83:1093:635#0/1  
GCTACCCAGGAGATTTTCATCGATTATGAGGAGCTAAGAGA  
+HWI-EAS443:3:83:1093:635#0/1  
`GQVPZRJ¥XVXZX`aVX\_W`SUYZ` `Z\_^ZZRULVSJSR



+HWI-EAS443:3:23:584:1267#0/1  
aaabaaaabaaa^Y`a\_\_`QU^a\_]W[^W^^[Z[Z]]XP  
@HWI-EAS443:3:24:1001:579#0/1  
CAATGAGATACCCAATTACAGCAGACAAGAGAAAAGCTAAT  
+HWI-EAS443:3:24:1001:579#0/1  
abbaaab\_abaabbababaabaaaaaVbbb`\_abbb`aa  
@HWI-EAS443:3:25:1235:1867#0/1  
CAATGAGATACCCAATTACAGCAGACAAGAGAAAAGCTAAT  
+HWI-EAS443:3:25:1235:1867#0/1  
ab\_bbbbbbbbabbbabbaabababaababbbabaa`bbb  
@HWI-EAS443:3:25:264:967#0/1  
CAAAAAGTAATGTGCTAATTGGGCAAGGGGACGTAGTGTT  
+HWI-EAS443:3:25:264:967#0/1  
abba\_ab\_a]abaaaaaa`a`]^`a`a\_[\_]`^a`\_a]Z]^`  
@HWI-EAS443:3:27:1057:736#0/1  
AAAGGATGCAGGTGCATTGACTGAAGATCCAGAAGGAAGG  
+HWI-EAS443:3:27:1057:736#0/1  
aabbaaaaaaaZ`^aa`aa\_a```a`aaaa\_````\_aaa  
@HWI-EAS443:3:29:1594:439#0/1  
CAATGAGATACCCAATTACAGCAGACAAGAGAAAAGCTAAT  
+HWI-EAS443:3:29:1594:439#0/1  
¥QRbba\_Jbb^aa\_^bb^aSUX^a[QX\_b^¥¥`aa^U`\_]  
@HWI-EAS443:3:2:1567:622#0/1  
GATTTCTCATTTTGGGCAAAGAAGACAAGAGATGGCCCAG  
+HWI-EAS443:3:2:1567:622#0/1  
a\_\_```X\_a`]`\_[UR\_¥\_\_^^\_]Z^]]Z\_ZW^ZURVZ^  
@HWI-EAS443:3:30:1753:650#0/1  
CAATGAGATACCCAATTACAGCAGACAAGAGAAAAGCTAAT  
+HWI-EAS443:3:30:1753:650#0/1  
`bbaX¥bbababbbaabb[bb`X\_a``ab\_bba\_aGa`¥b  
@HWI-EAS443:3:32:864:1869#0/1  
CAAAAAGTAATGTGCTAATTGGGCAAGGGGACGTAGTGTT  
+HWI-EAS443:3:32:864:1869#0/1  
¥\_Y[QW^T]^`]TMX]Y\_¥YUSW]^`][NYW[[WFUDKZRO  
@HWI-EAS443:3:32:935:249#0/1  
TGGCAATGATTTCTCATTTTGGGCAAAGAAGACAAGAGAT  
+HWI-EAS443:3:32:935:249#0/1  
¥^aabaS`^ZZ]Xa`\_aaab`\_a\_abbb`\_aa¥Q`\_b`]  
@HWI-EAS443:3:35:1719:1076#0/1  
CAAGGACAAACCCTCTGGAGCAAACAAACGATCTGAGCA  
+HWI-EAS443:3:35:1719:1076#0/1  
`¥WZ¥X^RW`]Y^Q\_]^SXYV]^W^`P\_\_¥\_a`a`[\_Ta  
@HWI-EAS443:3:37:1474:1543#0/1  
GACGATTTCTCATTTTGGGCAAAGAAGACAAGAGATGCCC  
+HWI-EAS443:3:37:1474:1543#0/1  
¥XT]WQ\_W`¥US¥¥``YPFMVW\_`^`\_`\_aMI^X`^^\_¥QQ  
@HWI-EAS443:3:39:869:415#0/1  
ATGATTCAGAGAGGAATGAACAAGGACAAACCGTCCTGA  
+HWI-EAS443:3:39:869:415#0/1  
aa^a^aaa`a¥bYaaaa`aa`\_a`a^`\_a`\_MPaR¥UZ`^`

@HWI-EAS443:3:42:1469:937#0/1  
CAATGAGATACCCAATTACAGCAGACAAGAGAAAGCTAAT  
+HWI-EAS443:3:42:1469:937#0/1  
abbbbbb¥Ub[`baa[aababb][IWZ[`^bbbaababbaa  
@HWI-EAS443:3:46:1700:1187#0/1  
CAAGGACAAACCCTCTGGAGCAAAACAAACGATCTGAGCA  
+HWI-EAS443:3:46:1700:1187#0/1  
aa^X^\_`]^`^U\_aa¥`^`RaS`¥`^^aa¥`aY[Z\_TX¥S\_  
@HWI-EAS443:3:48:1073:1122#0/1  
CAATGAGATACCCAATTACAGCAGACAAGAGAAAGCTAAT  
+HWI-EAS443:3:48:1073:1122#0/1  
aa]^`a]^`ab^`aTbaaaaa^^T]^YZ`W\_a\_aY¥aY``a`  
@HWI-EAS443:3:50:1763:1594#0/1  
CAATGAGATACCCAATTACAGCAGACAAGAGAAAGCTAAT  
+HWI-EAS443:3:50:1763:1594#0/1  
^`]^\_ababbb`aa]babbZbaWb`b[aabbbbbb[baa`]a  
@HWI-EAS443:3:50:246:1455#0/1  
ATCATCATTCTCACTTCTCCTCCTGGAGGTACATCTGCT  
+HWI-EAS443:3:50:246:1455#0/1  
abbabbbbbbXbab`bbabaab``aa^¥`aa`aaaaZa`¥a  
@HWI-EAS443:3:51:567:640#0/1  
CAATGAGATACCCAATTACAGCAGACAAGAGAAAGCTAAT  
+HWI-EAS443:3:51:567:640#0/1  
aaabb\_bab```\_`babb`aaba\_baa\_ab`bba`a\_a\_`a  
@HWI-EAS443:3:51:634:768#0/1  
CAATGAGATACCCAATTACAGCAGACAAGAGAAAGCTAAT  
+HWI-EAS443:3:51:634:768#0/1  
Zaaabbbbbbbaabbbbababbabbbbbb`¥\_bbaZa  
@HWI-EAS443:3:54:276:122#0/1  
AAGAAGTGGAGATCTAATGTGCGAGTCCCGCAAGCGCGA  
+HWI-EAS443:3:54:276:122#0/1  
\_U\_MUa```¥``^LWTR`S[\_T\_^HX^¥XLQ^QBBBBBBBB  
@HWI-EAS443:3:59:215:1296#0/1  
GCCTTGTTGTAATTGAATACTGGAGAATTGCCTATTCCAC  
+HWI-EAS443:3:59:215:1296#0/1  
aba\_^aa\_bZ\_\_\_]a[`baZ^`]^`^`bbbaa^FW]a]QN]\_  
@HWI-EAS443:3:61:337:1043#0/1  
CAATGAGATACCCAATTACAGCAGACAAGAGAAAGCTAAT  
+HWI-EAS443:3:61:337:1043#0/1  
abY`¥S\_ab`]a[aba`bbb`a¥^^`[^bbaa]``a`\_\_\_\_  
@HWI-EAS443:3:63:1291:1899#0/1  
TACTACTAAGACCACTGTGGACCATATGGCCAGAATAAA  
+HWI-EAS443:3:63:1291:1899#0/1  
¥I^bb\_babaX[ba\_I\_b\_0a`bab\_a`]TLV¥HX][Wab  
@HWI-EAS443:3:64:690:293#0/1  
GAAAGCTATGTGCTAATTGGGCAAGGGGACGTAGTGTGG  
+HWI-EAS443:3:64:690:293#0/1  
¥``aab\_W\_aVaX\_ZS]b`Z`a`aaaa\_`^^[\_S\_[a`[  
@HWI-EAS443:3:64:84:988#0/1  
GTGCCTTATTCTCTCTGGAATCATGTCCATTATTCTCTT

+HWI-EAS443:3:64:84:988#0/1  
a`¥baba^aa\_]`aa`VX\_]¥`Y``\_a^^Q]a`Z`Z  
@HWI-EAS443:3:67:84:476#0/1  
CAATGAGATACCCAATTACAGCAGACAAGAGAAAGCTAAT  
+HWI-EAS443:3:67:84:476#0/1  
aaaa\_aaa\_a\_````\_a^`^X[]^`^^`\_]^`^`^]  
@HWI-EAS443:3:68:1656:1974#0/1  
CAATGAGATACCCAATTACAGCAGACAAGAGAAAGCTAAT  
+HWI-EAS443:3:68:1656:1974#0/1  
ababbbabbbbaa\_babbbabbbabbaabb`baaaaaaaaaa  
@HWI-EAS443:3:68:1685:793#0/1  
GCCTCTTATCGTTTGTGTTTGTCTCCAGAGGGTTTGCCTTG  
+HWI-EAS443:3:68:1685:793#0/1  
a\_`a^aaaa\_b\_aaaZ```[[^`^[]X^``U¥\_]R[W]\_\_  
@HWI-EAS443:3:68:715:676#0/1  
GCCTTGTTGTAATTGAATACTGGAGAATTGCCTATTCCAC  
+HWI-EAS443:3:68:715:676#0/1  
abbbbbbabb`bababbabaaaaaabaaaYaaa\_a`\_a`  
@HWI-EAS443:3:70:1280:1413#0/1  
CATTCTATTCCACCATGTTACGGCCAGAGGTGGCCTGCA  
+HWI-EAS443:3:70:1280:1413#0/1  
`\_\_[P¥a\_\_\_Z¥X\_Y\_^```[^`^XVV¥`\_NQ[GKNUKX  
@HWI-EAS443:3:71:1251:595#0/1  
CAATGAGATACCCAATTACAGCAGACAAGAGAAAGCTAAT  
+HWI-EAS443:3:71:1251:595#0/1  
abbbbbb\_babaaabbbbabbbbabbbabb^bRaaab  
@HWI-EAS443:3:73:274:469#0/1  
CAATGAGATACCCAATTACAGCAGACAAGAGAAAGCTAAT  
+HWI-EAS443:3:73:274:469#0/1  
¥abbbabbaababa`bbbabaababb`aa`bbbbbaaaaa  
@HWI-EAS443:3:75:94:1174#0/1  
CAATGAGATACCCAATTACAGCAGACAAGAGAAAGCTAAT  
+HWI-EAS443:3:75:94:1174#0/1  
aTZZ¥V¥U\_`b``\_Y`b`aaa`KUH¥T\_T]^JMWUR[[¥  
@HWI-EAS443:3:76:1611:698#0/1  
CACCTCNATGCAATTTTCTCATTGACTGTGAATGTGAGA  
+HWI-EAS443:3:76:1611:698#0/1  
`bab¥]D]babbbabab^¥`\_ab¥Y`a`\_0aV[^a[`R¥a  
@HWI-EAS443:3:77:630:923#0/1  
TTGCCTTGTTGTAATTGAATACTGGAGAATTGCTCCCACC  
+HWI-EAS443:3:77:630:923#0/1  
`b]ab\_b¥bb\_J\_[bU\_]XPVaU[YbNab][YaQF^RR\_`  
@HWI-EAS443:3:80:1679:1488#0/1  
CAATGAGATACCCAATTACAGCAGACAAGAGAAAGCTAAT  
+HWI-EAS443:3:80:1679:1488#0/1  
Kbab\_baU`bbKZWbbab¥UWa[ba^ba[LVbabbbRHwa^  
@HWI-EAS443:3:84:1225:1355#0/1  
CAATGAGATACCCAATTACAGCAGACAAGAGAAAGCTAAT  
+HWI-EAS443:3:84:1225:1355#0/1  
`[````]W^aY`Y`aa`[¥]^aa`\_\_`^aaaaa`¥U`\_`\_`

@HWI-EAS443:3:85:1123:544#0/1  
CAATGAGATACCCAATTACAGCAGACAAGAGAAAGCTAAT  
+HWI-EAS443:3:85:1123:544#0/1  
abba¥ab\_bb^bababbbabb`bbaabababbaabab\_aa  
@HWI-EAS443:3:85:447:343#0/1  
CAATGAGATACCCAATTACAGCAGACAAGAGAAAGCTAAT  
+HWI-EAS443:3:85:447:343#0/1  
U\_a`a`^^a¥[¥a^S^baZ\_\_`b`ZZ]a¥aT^`Yab`^Ya  
@HWI-EAS443:3:88:1779:1842#0/1  
GGTCCACAGTGGTCTTAGTGAGTATCTCGCGAGGGGGGGA  
+HWI-EAS443:3:88:1779:1842#0/1  
ab¥¥Xba\_bUba^X\_bTbUaS`aaaYV]``¥P]EVE^`aB  
@HWI-EAS443:3:89:1058:532#0/1  
AGAGCAGCTAAGACCACTGTGGACCATATGGCCATAATCA  
+HWI-EAS443:3:89:1058:532#0/1  
aa`baababbbaaaabaaa`\_aa\_``[aa\_aa\_\_a\_]`W]  
@HWI-EAS443:3:89:1147:1739#0/1  
CAATGAGATACCCAATTACAGCAGACAAGAGAAAGCTAAT  
+HWI-EAS443:3:89:1147:1739#0/1  
`abbbbbbbba\_`babbbbbbbbaaababbbbbbaaaaaa  
@HWI-EAS443:3:8:682:1040#0/1  
CAAAATGAGAAATCCTCTCAGGACAGCAGACTCTCTTGTC  
+HWI-EAS443:3:8:682:1040#0/1  
a`^`bbbbbb^abbbba`abaa]P`[aa`aaU[]PX\_W^T  
@HWI-EAS443:3:90:505:103#0/1  
CAATGAGATACCCAATTACAGCAGACAAGAGAAAGCTAAT  
+HWI-EAS443:3:90:505:103#0/1  
a]aabab\_a]`\_^`^`aa\_aaaaa[[]Ra\_aa\_]`[¥^^\_  
@HWI-EAS443:3:91:1117:540#0/1  
TGGATCAGACTTACAGTTCTTGGAAAGGATGCAGGTGCAT  
+HWI-EAS443:3:91:1117:540#0/1  
aba`aaab``baaa`b\_a`abba`\_^aaa\_a]`a`X`Z\_\_  
@HWI-EAS443:3:93:196:72#0/1  
AACAAACGATGCTGGATCAGACCGAGTGATGGTCTTGGAA  
+HWI-EAS443:3:93:196:72#0/1  
[a`aab]baaba`aa^]U\_\_\_UWaW^WaW¥\_[VU\_WUZYY  
@HWI-EAS443:3:93:292:395#0/1  
CAATGAGATACCCAATTACAGCAGACAAGAGAAAGCTAAT  
+HWI-EAS443:3:93:292:395#0/1  
aX^`aaaaaaaaaaaaaaaa\_\_`a`a]`\_^`\_`W^[]\_[]^  
@HWI-EAS443:3:95:1152:171#0/1  
CGGGCCGGTATTCTCACAAGAGGATTGCATGATCAAGGC  
+HWI-EAS443:3:95:1152:171#0/1  
X`bb`Tbbbbbbbaababbbabbbababbaabaabbbabbbba  
@HWI-EAS443:3:95:883:452#0/1  
CAATGAGATACCCAATTACAGCAGACAAGAGAAAGCTAAT  
+HWI-EAS443:3:95:883:452#0/1  
a`baa``ZabaL`babbaa`a¥bbb[``bb``aab`baa`  
@HWI-EAS443:3:97:1153:873#0/1  
CAATGAGATACCCAATTACAGCAGACAAGAGAAAGCTAAT

+HWI-EAS443:3:97:1153:873#0/1  
aaababbbabba]bbbbbabbb^bbaabbabbaaaba\_aaa  
@HWI-EAS443:3:97:524:2011#0/1  
CAATGAGATACCCAATTACAGCAGACAAGAGAAAAGCTAAT  
+HWI-EAS443:3:97:524:2011#0/1  
\_bU\_¥a`ZTZ`ZUY^¥]S]\_V][¥\_]`VT\_]Za]^XUTa[  
@HWI-EAS443:3:99:1788:1502#0/1  
CAATGAGATACCCAATTACAGCAGACAAGAGAAAAGCTAAT  
+HWI-EAS443:3:99:1788:1502#0/1  
abababbaab`\_aaaaa`\_a\_aaa\_\_aaaa\_\_\_aYa\_\_a  
@HWI-EAS443:3:9:584:463#0/1  
TTGCTGGGAAAGGATGCAGGTGCATTGACTGAAGATCCA  
+HWI-EAS443:3:9:584:463#0/1  
VaaZa[`a]J0abTD[¥^WZPL`VZaaX¥Z[TP`[a\_Z``  
@HWI-EAS443:3:9:736:1450#0/1  
CAATGAGATACCCAATTACAGCAGACAAGAGAAAAGCTAAT  
+HWI-EAS443:3:9:736:1450#0/1  
aa`a[UY\_a`bbababP`\_baXX```a¥a`\_a]`a\_^`¥a  
@HWI-EAS443:3:13:1140:594#0/1  
GAGGATTTCTCATTTTGGGCAANGAAGACAAGAGATGGCC  
+HWI-EAS443:3:13:1140:594#0/1  
aaab`a`aaa\_aaaa`a`\_\_ZD[``a`\_a]\_^\_U^\_¥Z  
@HWI-EAS443:3:8:1182:1142#0/1  
AGACGGGCGATCTGAACCTTGTCAATAGGGCAAACCGCG  
+HWI-EAS443:3:8:1182:1142#0/1  
ab[D[^aaaa`[\_[aY]\_a`]\_a\_Q¥¥^WHXaaQPDDU`  
@HWI-EAS443:3:100:537:209#0/1  
AATGATTTCTCATTTTGGGCAAGACAAGAGATATGG  
+HWI-EAS443:3:100:537:209#0/1  
U`V^WT[\_[Y\_aa^X¥\_bba]HYb^aa`¥XT\_I]SY^BBB  
@HWI-EAS443:3:10:1193:1820#0/1  
GATCTAATGTCGAGTGGCGACTCGCGAGATACTCAATA  
+HWI-EAS443:3:10:1193:1820#0/1  
a]aV^`¥`UT\_U\_^PGV]UW¥WWQWW¥BBBBBBBBBBBB  
@HWI-EAS443:3:10:833:76#0/1  
CTGCTGCCTTGCATATGTCTACGGCTTGTCTCAGTTTG  
+HWI-EAS443:3:10:833:76#0/1  
XaZ\_a¥\_XTbb`]^ba¥¥ab^H`K`]BBBBBBBBBBBB  
@HWI-EAS443:3:1:96:115#0/1  
ATGGCCATATGGTCCACAGTGGTCTTAGGGAGTATCTAGC  
+HWI-EAS443:3:1:96:115#0/1  
Zba^\_I[a`^]SZTPXZaXVa[N\_aS¥QBBBBBBBBBBBB  
@HWI-EAS443:3:32:1546:1836#0/1  
ATGGCAATGAGATACCCAATTACAGCAGAAAAGAGAAAGC  
+HWI-EAS443:3:32:1546:1836#0/1  
``Xa^^bab\_Z¥[\_YT`bbaa^¥b]]¥]\_IaaaXa[baa¥  
@HWI-EAS443:3:35:286:931#0/1  
GATTTCTCATTTTGGGCAAAGACGACAAGAGATATGGNCC  
+HWI-EAS443:3:35:286:931#0/1  
aaaaaaaaaaaaa`[aa`a\_`^]\_XZ]]^\_[Z`X]ODN]



@HWI-EAS443:3:37:867:984#0/1  
GCTGGATCAGACCGAGTGATGGTATCAACTCTGGCCGAAA  
+HWI-EAS443:3:37:867:984#0/1  
\_ZORMOS]\_YYX\_`WPDTSX¥UW^PTBBBBBBBBBBBBBB  
@HWI-EAS443:3:39:316:1753#0/1  
ATGGCAATGAGATACCCAATTACAGCAGACAACAGAAAGC  
+HWI-EAS443:3:39:316:1753#0/1  
aaV`aa`aRRtb`Uab`^`Saa`[aYYVaVXDR[`a[ZV  
@HWI-EAS443:3:42:1363:1914#0/1  
ATGAACTCTCCTCCTTATTTAACTTGATTTCTTAAGTGG  
+HWI-EAS443:3:42:1363:1914#0/1  
\_RIR\_a\_aSR[aTSVb\_a`bbaaZaaa¥¥aZ]]FS¥ZP\_U  
@HWI-EAS443:3:47:377:894#0/1  
ATGTGCCACAGCACAGATTGGAGGAGAAAGGATGGCGG  
+HWI-EAS443:3:47:377:894#0/1  
]Y]XVaWJaabbYX]LRY`[V[ba¥ZFIHP]a`Vaa]GUO  
@HWI-EAS443:3:4:291:1130#0/1  
GCTAATTGGCAAGGGGACGTAGTGTGGGAATGAAAAGA  
+HWI-EAS443:3:4:291:1130#0/1  
a[^aa\_a\_[aG]Ua\_`Z`W`^`\_Q\_YY`¥GS\_]QZBBBB  
@HWI-EAS443:3:52:634:378#0/1  
CCGCACTCAGAATGAAGTGGATGATGGCAAAGAGATAGTC  
+HWI-EAS443:3:52:634:378#0/1  
a^``]aba\_baaab`Tb\_bY[\_a¥]`XY\_`¥`¥a\_^XVVT  
@HWI-EAS443:3:56:997:1666#0/1  
ATCAGACCGAGTGATGGTAGCACCTCTGGCCGTAACAAGG  
+HWI-EAS443:3:56:997:1666#0/1  
aZa[aaabY[UZZ\_^TSTRLQaVa\_^`GR]N]P`aR^BBB  
@HWI-EAS443:3:59:1476:1459#0/1  
ATTGAAGTGTGCACTTAACCCAAGGGACGTGGTGGGGGC  
+HWI-EAS443:3:59:1476:1459#0/1  
\_]`aa`Va^[N[`¥YZa]][\_`ba`bb\_aa]^aaaWQZI  
@HWI-EAS443:3:63:475:327#0/1  
TGCTGTAATTGGGTATCTCATTGCCATCATCAACTTCTTC  
+HWI-EAS443:3:63:475:327#0/1  
¥`^``UU\_ba\_[H\_¥babXbaa]SwwbYaVG]aVY^YRS  
@HWI-EAS443:3:71:988:173#0/1  
TCTCCCAGTAGCCGGCGGAACAGGCAGTGTTTTTATTTAA  
+HWI-EAS443:3:71:988:173#0/1  
aaa\_aaab\_[\_Z`aaY`^S^]^^¥PS^HSG[XBBBBBBBB  
@HWI-EAS443:3:98:1126:2009#0/1  
CCGCACTCAGAATGAAGTGGATGATGGGAATGAGATAGCC  
+HWI-EAS443:3:98:1126:2009#0/1  
Zbb`UaZ`bbbabbbabZb]a`babb[F[\_bV]a]b\_S]\_  
@HWI-EAS443:3:98:888:516#0/1  
CTGCTGCAATTGGGTATCTCATTGCCATCATCCACTTAAT  
+HWI-EAS443:3:98:888:516#0/1  
U\_`UaVJZRTY`Za`^TX\_]bbbNHQ¥0¥`T¥YU\_bU``  
@HWI-EAS443:3:10:1471:874#0/1  
AAACTTATTTTCGAAANGGTTGAAAGGTTGAAACATGGTAC

+HWI-EAS443:3:10:1471:874#0/1  
a¥` [ba\_\_ba`aabRD]b^`aa\_abaY`a\_aYGa]¥KK¥]  
@HWI-EAS443:3:18:1492:1235#0/1  
CTCTCTTGAAATGCGCCACAGCACANAGATTGGAGGAGT  
+HWI-EAS443:3:18:1492:1235#0/1  
a`aaa[\_aa`bbZbHa¥aaaXZ]aYVDVa^a``XXa`[\_`W  
@HWI-EAS443:3:52:590:2005#0/1  
GTCCCGTTTTTCGTTNCATTACCAACTACGCCCCCTTGC  
+HWI-EAS443:3:52:590:2005#0/1  
aP][S[Y]¥`^ZVWDPNZ^ONSV¥USPNYSG]U¥VZBBB  
@HWI-EAS443:3:61:1052:1531#0/1  
GTTGAGGATTAGCTCATNTTTCAGTTTTGGTGGGGTCACT  
+HWI-EAS443:3:61:1052:1531#0/1  
\_X`\_Z`a`[\_a[X\_¥aDX`\_`TZXS`\_`WYZVFOTYSZ  
@HWI-EAS443:3:62:1389:491#0/1  
GCTGCCTTGCATATGTNTACGGCTTGTCCCCAGTTGGAT  
+HWI-EAS443:3:62:1389:491#0/1  
aaWa^Za[a]MUZV¥VDP^]aBBBBBBBBBBBBBBBBBBB  
@HWI-EAS443:3:64:619:378#0/1  
GTTCACTTTCAAAGGACNAGCGGATCATCGGTCAAGAAA  
+HWI-EAS443:3:64:619:378#0/1  
a]V[]RZa^¥UPST`\_`¥TDV`Za`TSNZ^`\_]\_QNRP^WSQ  
@HWI-EAS443:3:77:1371:1971#0/1  
AGAGAATAAAAGAAATGAGAGATCTAATGTTCGNAGTCCCG  
+HWI-EAS443:3:77:1371:1971#0/1  
Y[I[[ZYVDWU¥PXD[PV¥XNUBBBBBBBBBBBBBBBBBBB  
@HWI-EAS443:3:78:1111:856#0/1  
AAAAGCACTGAGAGATCTAATGTTCGNGTCCCGCACTCGC  
+HWI-EAS443:3:78:1111:856#0/1  
^aa`\_HVW]Z]\_\_a\_¥`aaa`a`\_SD¥¥]`L[VPUUN[^  
@HWI-EAS443:3:79:509:1440#0/1  
CGCACTCGCGAGATGCTCACTAAGNCCACTGTGGACCATA  
+HWI-EAS443:3:79:509:1440#0/1  
``a¥\_aaaa\_]\_\_^[]`aa`a\_¥VDX\_a`¥ZV\_YJV[X]P  
@HWI-EAS443:3:80:1310:1053#0/1  
CGAAGGTACCATGTTTCAANCTTTCAACTTTTCGAAATA  
+HWI-EAS443:3:80:1310:1053#0/1  
a\_SLW^[¥aaabb`a[abUDX`aWQaaaU`\_aa`\_]¥^\_Z  
@HWI-EAS443:3:11:160:1823#0/1  
GAATAAAAGAACTGAGAGATCTAATGTGCAGTCCCGCACT  
+HWI-EAS443:3:11:160:1823#0/1  
abbbabababbbbabab`a`abbbaa`\_bb`Zbaaaba\_\_  
@HWI-EAS443:3:65:570:634#0/1  
CGTTCCCTCTTTGATCTCTAACCTTAAAATCGGTCAATA  
+HWI-EAS443:3:65:570:634#0/1  
``a`\_`^a^[^S\_^bZbba\_```\_bbZ^`¥\_XaY^UP\_X  
@HWI-EAS443:3:95:700:605#0/1  
AAAGAACTGAGAGATCTAATGTTCGAGTCCCGCACTCGCGA  
+HWI-EAS443:3:95:700:605#0/1  
aa\_Z``aa`aa`a`\_`aaaaX`\_[\_^UUZW[UZ\_[ZZ\_Y



+HWI-EAS443:3:36:1303:141#0/1  
aaaaab\_a`aa^\_\_`\_aa`Y^a\_\_\_\_\_^Y\_\_^^]]^]^^W\_  
@HWI-EAS443:3:36:34:184#0/1  
CGGGCCATCTCTTGTCTTCTTTGCCCAAATGAGAAATCC  
+HWI-EAS443:3:36:34:184#0/1  
abbabb]abab\_aa\_aaaaa`aa``]`X]````^``S]aa  
@HWI-EAS443:3:39:1120:1715#0/1  
GCAATGAGATACCCAATTACAGCAGACAAGAGAAAGCTAA  
+HWI-EAS443:3:39:1120:1715#0/1  
Zabb¥\_Z\_ab¥baa```a^aa^T]b^Vbaa^P]aa`a[WU  
@HWI-EAS443:3:42:534:466#0/1  
GGATTTCTCATTTTGGGCAAAGAAGACAAGAGATGGCCCA  
+HWI-EAS443:3:42:534:466#0/1  
aa\_aaaaaaaaaaaaaa\_a[`aa\_aa]aaa\_``^]^^]\_`  
@HWI-EAS443:3:46:1262:2009#0/1  
GGATTTCTCATTTTGGGCAAAGAAGACAAGAGATGGCCCA  
+HWI-EAS443:3:46:1262:2009#0/1  
UZ^aabb`¥`bb\_ababa¥babbba^a^b`aba\_^\_\_\_\_`  
@HWI-EAS443:3:49:1215:1105#0/1  
TGGGCCATCTCTTGTCTTCTTTGCCCAAATGAGAAATCC  
+HWI-EAS443:3:49:1215:1105#0/1  
¥T]\_\_Z^¥^^WaZT[\_b`]\_a^YKYNVYISX]YZ]¥a¥¥  
@HWI-EAS443:3:4:787:340#0/1  
GGCCATTCTATTCCACCATGTTACGGCCAGAGGGGATCC  
+HWI-EAS443:3:4:787:340#0/1  
^^bbZbbb`\_TaV^J\_a\_T\_a\_]baa]TPRS^ZBBBBBBB  
@HWI-EAS443:3:52:1352:1167#0/1  
CTGGATAGTCTGCTGTCTTCTTTGCCCAAATGAGAAATCC  
+HWI-EAS443:3:52:1352:1167#0/1  
abababbb^abb]b\_]a`aa`a]ba]`a`Sa^`abbbY¥]  
@HWI-EAS443:3:53:439:1321#0/1  
GCAATGAGATACCCAATTACAGCAGACAAGAGAAAGCTAA  
+HWI-EAS443:3:53:439:1321#0/1  
^babbbbabaa````b`¥aaaabaaaaaaaa]\_a\_a\_\_  
@HWI-EAS443:3:58:1386:1357#0/1  
GAGGCCATCTCTTGTCTTCTTTGCCCAAATGAGAAATCC  
+HWI-EAS443:3:58:1386:1357#0/1  
abaaab^babbaabaabbaaba\_\_aa^aababbaaaaa\_`  
@HWI-EAS443:3:58:1580:765#0/1  
GCAATGAGATACCCAATTACAGCAGACAAGAGAAAGCTAA  
+HWI-EAS443:3:58:1580:765#0/1  
a\_`\_aaaa`a\_`a`aa`V`]`\_]`\_`^^^`\_`V\_\_^  
@HWI-EAS443:3:58:338:983#0/1  
GGATTTCTCATTTTGGGCAAAGAAGACAAGAGATGGCCCA  
+HWI-EAS443:3:58:338:983#0/1  
abXba]abaaaaaba`aa\_`aa`aW^^\_aa``^\_\_WZ`¥  
@HWI-EAS443:3:63:1741:1984#0/1  
GCAATGAGATACCCAATTACAGCAGACAAGAGAAAGCTAA  
+HWI-EAS443:3:63:1741:1984#0/1  
]\_YaX`\_^^aba^R¥`abbaaaaa\_¥]^a``\_X`¥`Ya]

@HWI-EAS443:3:71:1610:1830#0/1  
ATGGTATCTCATTGCCATCATCCACTTCATTCTGAGAGCG  
+HWI-EAS443:3:71:1610:1830#0/1  
W`\_`a\_b`ZabWMMU`b^M\_abb]VW¥[\_`RV\_^]FMV\_  
@HWI-EAS443:3:73:1366:1772#0/1  
GGATTTCTCATTGTTGGGCAAAGAAGACAAGAGATGGCGCA  
+HWI-EAS443:3:73:1366:1772#0/1  
aaPWP\_aZR^H]^]TR¥[RV\_Y[OYTQWYSR^RLXMIDT  
@HWI-EAS443:3:74:484:510#0/1  
ATAAAAGAAGACTGAGAGATCTAATGTCGCAGTCCCCCCTC  
+HWI-EAS443:3:74:484:510#0/1  
T`VY^``aba\_HXbaaa\_^\_Y¥Vba]VHF\_^S¥GDULRU\_  
@HWI-EAS443:3:75:1191:758#0/1  
GCAATGAGATACCCAATTACAGCAGACAAGAGAAAGCTAA  
+HWI-EAS443:3:75:1191:758#0/1  
abbbbbbbbbbbbbbbbabbbababaaaaabbbbaba`aaa  
@HWI-EAS443:3:75:382:155#0/1  
GGATTTCTCATTGTTGGGCAAAGAAGACAAGAGATGGCCCA  
+HWI-EAS443:3:75:382:155#0/1  
abUQ^[aaa^`ZT]a`a¥T[a``a\_¥WUaZ^UV\_ZRSRL  
@HWI-EAS443:3:77:1100:1796#0/1  
GGATTTCTCATTGTTGGGCAAAGAAGACAAGAGATGGCCCA  
+HWI-EAS443:3:77:1100:1796#0/1  
a`a`baaabbaa]baaaa`a]a`aab`a`a0\_``aYa  
@HWI-EAS443:3:77:1560:30#0/1  
GGATTTCTCATTGTTGGGCAAAGAAGACAAGAGATGCCAG  
+HWI-EAS443:3:77:1560:30#0/1  
`b[aaa`Z`aaaSaa`¥^QXa\_\_\_\_]^Z\_`]\_X\_aZZZ[^  
@HWI-EAS443:3:77:643:603#0/1  
CACCCGCACTTCATTTGGGAAAACAACCTCCATAATCACA  
+HWI-EAS443:3:77:643:603#0/1  
abbbbaabaaa`aa`\_`a``aa``aaaa`a\_``aaaaaaa  
@HWI-EAS443:3:79:20:901#0/1  
GGATTTCTCATTGTTGGGCAAAGAAGACAAGAGATGCCAG  
+HWI-EAS443:3:79:20:901#0/1  
aVOY`aa``\_P\_a¥XZa`[P]Z[0[\_[\_¥UYRYL]OYXRW  
@HWI-EAS443:3:7:1221:1227#0/1  
AAAAGAAGACTGAGAGATCTAATGTCGCAGTCCCGCGCGCGG  
+HWI-EAS443:3:7:1221:1227#0/1  
TZV¥bbT[\_¥I\_T\_b¥\_`W^bab`a^b[X¥ZHKOFHVbB  
@HWI-EAS443:3:86:1421:53#0/1  
GGCAATGATTTCTCATTGTTGGGCAAAGAAGACAAGAGATA  
+HWI-EAS443:3:86:1421:53#0/1  
ab`babbabbb\_baabbbbab^aaaba`ba^a`a\_a`aa  
@HWI-EAS443:3:87:876:2029#0/1  
AAACGATACAGTTCTTGGAAAGGATGCAGGTGCATTGACT  
+HWI-EAS443:3:87:876:2029#0/1  
abbbbaaaaa^aaaa``aaaa`a\_aa\_W`aa\_aaa\_a  
@HWI-EAS443:3:88:1557:276#0/1  
AAAAAGTAATGTGCTAATTGGGCAAGGGGACGTAGTGTTG

+HWI-EAS443:3:88:1557:276#0/1  
ab`bab^babb\_b\_baaaaaa\_a`b[a\_\_^a`\_`Za^`b  
@HWI-EAS443:3:88:847:528#0/1  
AAACGATGCTGGATCAGACCGAGTGATGGTATCAAGCATC  
+HWI-EAS443:3:88:847:528#0/1  
abaa`\_`b`a`\_`^`b`^aaXa]¥[`a`Va^]^¥aY^^\_  
@HWI-EAS443:3:94:1586:805#0/1  
GGATTTCTCATTTTGGGCAAAGAAGACAAGAGATGCCAG  
+HWI-EAS443:3:94:1586:805#0/1  
a\_Y``T`ZN\_baZXWT[G[`^XaXaUMX\_^WZ^WQTMRVY  
@HWI-EAS443:3:94:607:1222#0/1  
CGGGCCATCTCTTGTCTTCTTTGCCAAAATGAGAAATCC  
+HWI-EAS443:3:94:607:1222#0/1  
aa`a¥\_\_]Z\_aaTb`aaaa`aaa`\_`a^`a`aa`]`^`\_Z  
@HWI-EAS443:3:95:1252:886#0/1  
CCCTTTTAACATTGTGGGATCTTGTGACCATTGAATTTTC  
+HWI-EAS443:3:95:1252:886#0/1  
`bbbbbbbbbbbaababab`bbbabaaabbbbbaabaa\_  
@HWI-EAS443:3:97:545:1240#0/1  
CAAAAAGAGAGATTCTCATTTTGGGCAAAGAAGACAAG  
+HWI-EAS443:3:97:545:1240#0/1  
ab``aaa¥aabbbaaaaaa]aaaa`a`a^`aaaa^`\_a  
@HWI-EAS443:3:98:1329:887#0/1  
CTTGTCTGCTGTAATTGGGTATCTCATTGCCATCTTCAGT  
+HWI-EAS443:3:98:1329:887#0/1  
abbbabbbaabaaaba[abaaaabaabba`aaa\_baaaba  
@HWI-EAS443:3:99:1081:1168#0/1  
CATCCTTTCCAAGAACTGTAAGTCGTTTGGTTGCACCATC  
+HWI-EAS443:3:99:1081:1168#0/1  
`\_`ba\_abb[``b`¥]bbaaabbaa]`b^a\_abab\_\_`aK  
@HWI-EAS443:3:99:1416:329#0/1  
GGTGGTTCACTTTCAAAGGACAAGCGGATCATAAGTAA  
+HWI-EAS443:3:99:1416:329#0/1  
Z`X¥VWHKbb`bbb`ba\_aaXb`\_ab`^YaaGabSaaFHR  
@HWI-EAS443:3:99:1513:1000#0/1  
GGATTTCTCATTTTGGGCAAAGAAGACAAGAGATGGCCCA  
+HWI-EAS443:3:99:1513:1000#0/1  
ab^Ub\_aa`\_aa`bbb]`aWb^`\_`aJa^a]a¥WbBBBBB  
@HWI-EAS443:3:75:920:380#0/1  
CAATAACAAAAGAGAAGAAAGAAGANCTCCAGGATTGGGG  
+HWI-EAS443:3:75:920:380#0/1  
`bbbb¥bb`bb```abbVabbbab]D]aaab\_a`aab\_ab  
@HWI-EAS443:3:17:731:1284#0/1  
GCATGTGTACTTTTTGATTATGGCCATATGGTCCAAAGTG  
+HWI-EAS443:3:17:731:1284#0/1  
`RV`bXa]aaa]`ba`\_`¥a^^¥Y`YaMMYJUSSWPFM¥R]  
@HWI-EAS443:3:36:1102:832#0/1  
TAGGGTTGAGGATTAGCTCATCTTTTCGGTTTTGGTGGGGT  
+HWI-EAS443:3:36:1102:832#0/1  
ZaI¥`ab\_ORZ\_TUaWII`aSQZYTXFL[aZ]BBBBBBBB

@HWI-EAS443:3:40:700:1207#0/1  
GAATAAAAGAAGACTGAGAGATCTAATGACGCAGTCCCCGCC  
+HWI-EAS443:3:40:700:1207#0/1  
aX[WL¥WWFKR^V\_[YSBBBBBBBBBBBBBBBBBBBB  
@HWI-EAS443:3:44:533:1617#0/1  
CCAGAGTCTCGTTTTTCGTTTCATTACCAACTACGTCCC  
+HWI-EAS443:3:44:533:1617#0/1  
¥FSXWYO]Z`^XY\_LGUXYNQYX]XSUTYU]WSOYQRLW  
@HWI-EAS443:3:61:1185:1834#0/1  
CGTGGCCCTGAGTCAGTGCTAGTCAACTTATGAATGGA  
+HWI-EAS443:3:61:1185:1834#0/1  
ab]`Y¥XS\_¥bba[Ubbbaa\_`a¥a`\_TY\_aTRZ`Sa\_0  
@HWI-EAS443:3:61:1218:1360#0/1  
AAAGGTTGAAAGGTTGAAACATGGTACCTTCGGCCCTGCC  
+HWI-EAS443:3:61:1218:1360#0/1  
abaaa\_aaaabaa\_aaaaaabaa`¥bb\_`\_[\_VZZ^¥¥WY  
@HWI-EAS443:3:78:1461:571#0/1  
GATGGCAATGAGATACCCAATTACAGCAGGCAAGAGAAAG  
+HWI-EAS443:3:78:1461:571#0/1  
a]]\_NX]]P]RaW]`\_YR[a\_\_^W[ZX¥SH^¥P¥¥\_^^]\_  
@HWI-EAS443:3:79:360:2032#0/1  
GCCCCGTTTTTCGTTTCATTACCAACTACGCCCCCTTGC  
+HWI-EAS443:3:79:360:2032#0/1  
]X[ba]\_`^]PZ]P`Va[`]T]Y]YL[``LER¥Z]STHS  
@HWI-EAS443:3:84:276:1667#0/1  
AGAATGTTATACAACAAAATGGAATTTGTACCATTTTCAGT  
+HWI-EAS443:3:84:276:1667#0/1  
a\_a¥`aYaa]a^¥^Wa^a`]^Z\_^a`¥\_G`]\_`\_]`Y[  
@HWI-EAS443:3:91:1392:765#0/1  
GCCATATCTCTTGTATTCTTTGCCAAAATGAGAAATCAT  
+HWI-EAS443:3:91:1392:765#0/1  
a`\_]X\_ROGP¥FTUG]]U^ZSOX^XVPQZ^[^Z¥WW]XHR  
@HWI-EAS443:3:95:283:1666#0/1  
GACCCGTTTTTCGTTTCATTACCAACTACGTCCGCTTGC  
+HWI-EAS443:3:95:283:1666#0/1  
a]babbRVa`Y[XXQWZ``]QFV\_XLX^b]MQJ`PU]\_aS  
@HWI-EAS443:3:98:1004:1968#0/1  
TGTA CTCTTATTTTCAGTGTGGAGGTTGACCGTTAGNA  
+HWI-EAS443:3:98:1004:1968#0/1  
Vb\_`^\_U\_`^`abb`\_`aRaa`\_baab\_G\_ZMJD[]aaYD[  
@HWI-EAS443:3:10:1455:137#0/1  
TGGCAATGAGATACCCAATTACAGCAGACAAGAGAGCATT  
+HWI-EAS443:3:10:1455:137#0/1  
aaa`aa^`a``^\_W^`\_\_X^`X\_]W]]^Z[Y]V]ZZ  
@HWI-EAS443:3:11:1116:808#0/1  
GGCAATGAGATACCCAATTACAGCAGACAAGAGAAAGCTA  
+HWI-EAS443:3:11:1116:808#0/1  
aba`aabab]]`¥^aY^`aaa\_aaa`\_P\_Ya`a`aW^]a\_  
@HWI-EAS443:3:12:1157:639#0/1  
TCACATTCACAGTCAATGAGGAAAATTGCATCCTATTCTC

+HWI-EAS443:3:12:1157:639#0/1  
`]aaa^[Y]ZX[^]\_W\_a]^zZQLY`^`¥]XXX¥`\_`TTU  
@HWI-EAS443:3:12:964:1515#0/1  
CCCCTTATTCTCTTGCTGCTGTAATTGGGTATCTCATT  
+HWI-EAS443:3:12:964:1515#0/1  
aabbbabab`bbabab]bbb\_^b`\_`bb^aa[aa`aaaa  
@HWI-EAS443:3:13:1454:1909#0/1  
GGCAATGAGATACCCAATTACAGCAGACAAGAGAAAAGCTA  
+HWI-EAS443:3:13:1454:1909#0/1  
aa\_aaa\_\_aa`baWWaa\_`X^\_U`ZVYWa]\_¥Z^ZODT  
@HWI-EAS443:3:19:855:462#0/1  
CGTTCCCTTGCGTTTCACTGACTTCTTCGGGAGACAATAG  
+HWI-EAS443:3:19:855:462#0/1  
L\_^[\_a`b`b`a\_\_Z\_bbb`\_bbb`ab`\_a`a]baa`baZ  
@HWI-EAS443:3:20:115:174#0/1  
AGGATTTCTCATTTTGGGCAAAGAAGACAAGAGATGGCCC  
+HWI-EAS443:3:20:115:174#0/1  
aa\_Z`aaaaa]]aa`a]]`a\_Z^`[[`]]`¥^]ZWXWVY  
@HWI-EAS443:3:22:1557:546#0/1  
AGGATTTCTCATTTTGGGCAAAGAAGACAAGAGATGGCCC  
+HWI-EAS443:3:22:1557:546#0/1  
`b]00S[`IOWa¥]SH]baY\_S\_aY`Z^U`YSYGNXPBB  
@HWI-EAS443:3:22:752:1428#0/1  
AGCTAACGGGCAACCTCCAAACACTGAAAATAAGAGAACA  
+HWI-EAS443:3:22:752:1428#0/1  
URS]]]TZPPUaX^¥[¥V[WW¥ON^¥WYSZYVU\_]ZFR\_T\_`  
@HWI-EAS443:3:23:1502:386#0/1  
CTGTAATTGGGTATCTCATTGCCATCATCCACTTCTTCCT  
+HWI-EAS443:3:23:1502:386#0/1  
Z¥\_U\_ba`ab`S\_a]\_X`baa\_Y\_^V^`¥Z¥\_a`X`\_SZ`  
@HWI-EAS443:3:27:1088:464#0/1  
GGGCCATCTCTTGCTTCTTTGCCAAAATGAGAAATCCT  
+HWI-EAS443:3:27:1088:464#0/1  
a\_````bb]X^]\_Z]^Y]aaa¥VVTZ\_]¥]aa`aZ^LS^  
@HWI-EAS443:3:27:1261:120#0/1  
GGCAATGAGATACCCAATTACAGCAGACAAGAGAAAAGCTA  
+HWI-EAS443:3:27:1261:120#0/1  
ab\_`Ya^`ba]a[J`T\_\_aa]\_\_¥^SW\_^`XS]`\_Z`SS[  
@HWI-EAS443:3:27:648:165#0/1  
GGCAATGAGATACCCAATTACAGCAGACAAGAGAAAAGCTA  
+HWI-EAS443:3:27:648:165#0/1  
a]\_aaabbaa`aa¥\_aa`aa\_`\_^`\_]]`\_\_`\_`\_[]\_^  
@HWI-EAS443:3:27:673:540#0/1  
TAGCTTTCTCTTGCTGCTGTAATTGGGTATCTCATTGCC  
+HWI-EAS443:3:27:673:540#0/1  
a¥b\_abbba^a`[`aba\_[[X`aaaZYPaa^`\_^]^`X`  
@HWI-EAS443:3:28:1434:109#0/1  
AGGGGATCTCATTGCCATCATCCACTTCTGAGTGCG  
+HWI-EAS443:3:28:1434:109#0/1  
\_Z¥`NU^QXYTU`]GPRaVTVGXVMW[Z^a`GaXOV¥ZNR



@HWI-EAS443:3:29:227:1990#0/1  
CCGGGCCAATTCTCTTTCTAGCATGTACGCCACCATCAAG  
+HWI-EAS443:3:29:227:1990#0/1  
aaaa\_`bWH^`b\_a`aab`\_[aaa\_^^a\_a`aaaa]a`]Z  
@HWI-EAS443:3:2:1751:754#0/1  
GGGGCCATTCTATTCCACCATGTTACGGCCAGAGGGGAT  
+HWI-EAS443:3:2:1751:754#0/1  
abaaa`a`baa`baa]ab\_¥`aaa\_`^`^aa\_YSZEX¥B  
@HWI-EAS443:3:31:370:1395#0/1  
CGGGGATCTCATTGCCATCATCCACTTCATTCTGAGTGCG  
+HWI-EAS443:3:31:370:1395#0/1  
`¥^\_G]`bbbb`Q[a\_aabbabbaba\_bbaabaaaaV\_a[  
@HWI-EAS443:3:31:928:755#0/1  
GGCAATGAGATACCCAATTACAGCAGACAAGAGAAAAGCTA  
+HWI-EAS443:3:31:928:755#0/1  
aabbbbbbbbaababbaaba`abaabaaaaaaa`aaa\_a`  
@HWI-EAS443:3:32:1350:51#0/1  
GGCAATGAGATACCCAATTACAGCAGACAAGAGAAAAGCTA  
+HWI-EAS443:3:32:1350:51#0/1  
aba`aaa\_aQabaa[aa]\_\_\_a\_]a\_^`]a```\_Ya^\_`  
@HWI-EAS443:3:32:161:1007#0/1  
GGGTGGGGTTCACCTTTCAAAGGACAAGCGGATCATCAGT  
+HWI-EAS443:3:32:161:1007#0/1  
a``Vaaab]ababaaaaaaaaa^`a`^aaa`\_]\_``\_a`^T  
@HWI-EAS443:3:33:178:909#0/1  
GGCAATGAGATACCCAATTACAGCAGACAAGAGAAAAGCTA  
+HWI-EAS443:3:33:178:909#0/1  
aabbb^a`^`\_ababba]a``aa`aa^\_a\_0[a]`\_UX\_¥X  
@HWI-EAS443:3:35:296:959#0/1  
CCACCGTCCATTATTCTCTTGTCTGCTGTAATTGGGTATC  
+HWI-EAS443:3:35:296:959#0/1  
aaaaa`]aaa`aa``aaa\_`\_]`Q\_`YXQH[^\_[]V][\_  
@HWI-EAS443:3:35:59:1309#0/1  
GGCAATGAGATACCCAATTACAGCAGACAAGAGAAAAGCTA  
+HWI-EAS443:3:35:59:1309#0/1  
V^a^\_X\_Z\_¥`bbbaa^a`bb`W`¥\_¥^INZ\_\_\_¥¥`\_YH  
@HWI-EAS443:3:37:1326:1952#0/1  
GCGGGGATACTACTAAGACCACTGTGGACCATATGGCCA  
+HWI-EAS443:3:37:1326:1952#0/1  
a`a`aZ```bbaba`bbbb\_bb`a^¥aUZFb`abaa^b`]  
@HWI-EAS443:3:38:48:1271#0/1  
TGGCAATGAGATACCCAATTACAGCAGACAAGAGAGCATT  
+HWI-EAS443:3:38:48:1271#0/1  
abb\_\_^\_a¥\_\_]^\_aba`aa^```\_T\_X¥XTY¥a][Z]¥  
@HWI-EAS443:3:46:1376:772#0/1  
AGGATTTCTCATTTTGGGCAAAGAAGACAAGAGATGGCCC  
+HWI-EAS443:3:46:1376:772#0/1  
abb\_abbababaaaaaaaaa`ab\_`ba\_```a\_a\_^^^\_^^  
@HWI-EAS443:3:46:329:1419#0/1  
CTGTAATTGGGTATCTCATTGCCATCATCCACTTCTTCCT

+HWI-EAS443:3:46:329:1419#0/1  
abbababbbab\_bbabbbbbbabbbaabbaababbabbaab  
@HWI-EAS443:3:47:284:1219#0/1  
AGGATTTCTCATTTTGGGCAAAGAAGACAAGAGATGGCCC  
+HWI-EAS443:3:47:284:1219#0/1  
SYaYTa aaaY#a\_\_\_\_]^a\_[\_Z¥YVWaa\_\_\_\_]^]]`VU\_  
@HWI-EAS443:3:52:606:1860#0/1  
GGCGTACATGCTAGAAAGAGAATTGGTCCGTA AAAACAAG  
+HWI-EAS443:3:52:606:1860#0/1  
Vba`a`bbS¥#a]b\_\_abbbabba]R]aU`Jaa`ab`a`[  
@HWI-EAS443:3:53:139:774#0/1  
GGCAATGAGATACCCAATTACAGCAGACAAGAGAAAAGCTA  
+HWI-EAS443:3:53:139:774#0/1  
^]\_aaa`[aaaaabaaaaaa`baZa\_[\_¥a`b`P\_a\_a`  
@HWI-EAS443:3:53:1603:832#0/1  
GGCAATGAGATACCCAATTACAGCAGACAAGAGAAAAGCTA  
+HWI-EAS443:3:53:1603:832#0/1  
aa[bbbbbaabba\_abbabaaababba\_abb`]aa`][b`  
@HWI-EAS443:3:58:1713:36#0/1  
GGGCCATCTCTTGTCTTCTTTGCCCAAATGAGAAATCCT  
+HWI-EAS443:3:58:1713:36#0/1  
aa`\_`ab`a\_aa]]\_`a`\_a\_a\_XT`\_^aaa`\_`aZV`  
@HWI-EAS443:3:5:1242:813#0/1  
CGCACTCGCGAGATACTACTAAGACCACTGTGGAGCGTA  
+HWI-EAS443:3:5:1242:813#0/1  
[O]R]Z¥]¥Z¥^XFKV\_¥MKUTRUTKT[T¥`VBBBBBBBB  
@HWI-EAS443:3:5:1486:1540#0/1  
GGCAATGAGATACCCAATTACAGCAGACAAGAGAAAAGCTA  
+HWI-EAS443:3:5:1486:1540#0/1  
Y\_b]bbbbabab`V`bb`ababbbbabbbbbb`b`baaa  
@HWI-EAS443:3:60:440:56#0/1  
AGAATGTGGAGTCTGCTGCTCCTGAGAGGATTTCTCATTTT  
+HWI-EAS443:3:60:440:56#0/1  
a`\_aab\_baPa][`baa`[^a`^`aVaa^^a]N]¥]`Y`^  
@HWI-EAS443:3:60:85:1063#0/1  
GGCAATGAGATACCCAATTACAGCAGACAAGAGAAAAGCTA  
+HWI-EAS443:3:60:85:1063#0/1  
aZ`Z¥Z^a\_XUWX`OGY[]\_YMO¥X¥aXOOVZ[\_¥PRYQ  
@HWI-EAS443:3:61:1701:1934#0/1  
TGGCCATCTCTTGTCTTCTTTGCCCAAATGAGAAATCCT  
+HWI-EAS443:3:61:1701:1934#0/1  
aa]]a\_a`\_`]`b\_\_^aaaabb`ab```a`^`\_```^SS`  
@HWI-EAS443:3:61:653:356#0/1  
GGGCCATCTCTTGTCTTCTTTGCCCAAATGAGAAATCCT  
+HWI-EAS443:3:61:653:356#0/1  
a\_abbab\_a\_aaa[a`aaa`aaaa]]]``^a`^`a\_\_MZ]  
@HWI-EAS443:3:62:1144:497#0/1  
GGCAATGAGATACCCAATTACAGCAGACAAGAGAAAAGCTA  
+HWI-EAS443:3:62:1144:497#0/1  
aba`aaaaaa`a`[aaa`\_`^`\_X`\_`\_`^[\_`\_]`WZ^`\_`]

@HWI-EAS443:3:65:1452:1114#0/1  
CGGGGATCTCATTGCCATCATCCACTTCATTCTGAGTGCG  
+HWI-EAS443:3:65:1452:1114#0/1  
ab\_UHW¥P]U¥¥Z\_`]¥`^ZQ[\_^\_]\_VVY]Z\_]0`^YST  
@HWI-EAS443:3:66:1230:886#0/1  
GGGCCATCTCTTGTCTTCTTTGCCCAAATGAGAAATCCT  
+HWI-EAS443:3:66:1230:886#0/1  
I¥`b`¥a¥SZ\_b[abbb`[\_\_bbaM]aTabbbbbbb¥ab  
@HWI-EAS443:3:67:367:436#0/1  
AGGGTATCTCATTGCCATCATCCACTTCATTCTGAGCGCG  
+HWI-EAS443:3:67:367:436#0/1  
¥\_bUaabaZ]`\_ZaZ^abUabaS`aababb`b`[UJaaa  
@HWI-EAS443:3:68:1340:1377#0/1  
GGCAATGAGATACCCAATTACAGCAGACAAGAGAAAGCTA  
+HWI-EAS443:3:68:1340:1377#0/1  
a\_`aaaaaaa\_aaa`aba`a`aa```\_\_\_\_\_a`a`\_`V\_\_  
@HWI-EAS443:3:68:574:138#0/1  
GGCAATGAGATACCCAATTACAGCAGACAAGAGAAAGCTA  
+HWI-EAS443:3:68:574:138#0/1  
``]a`\_P\_a`aa`aaaaa\_`aaaa^\_Z`\_`aU\_\_\_\_\_  
@HWI-EAS443:3:69:1485:34#0/1  
AAACGACTTACAGTTCTTGAAAGGATGCAGGTGCTGCTG  
+HWI-EAS443:3:69:1485:34#0/1  
YR¥\_a]Z`````^a`^b^UZ]`Y^[YHU^`Y[]NW¥\_\_  
@HWI-EAS443:3:6:441:846#0/1  
GAGAATGGAAGGATGCAGGTGCATTGACTGAAGATCCAG  
+HWI-EAS443:3:6:441:846#0/1  
aab^^aba[[\_Yba`\_aaa\_aVa\_^\_U\_\_a^a\_\_a^Z\_\_^`  
@HWI-EAS443:3:71:1237:513#0/1  
CTGTAATTGGGTATCTCATTGCCATCATCCACTTCTTCCT  
+HWI-EAS443:3:71:1237:513#0/1  
\_`\_[[`aabbb`¥a^\_Y^aa\_]¥a\_¥`\_`\_Vaa\_`¥][S`\_  
@HWI-EAS443:3:72:443:504#0/1  
CGGGGTCACCTTTCAAAGGACAAGCGGATCATCAGTCAAG  
+HWI-EAS443:3:72:443:504#0/1  
H\_\_RH\_]OY[aab\_U`ZXS`\_`\_W[IOJZI\_KYXUIWX\_  
@HWI-EAS443:3:75:561:1200#0/1  
GGGCCATCTCTTGTCTTCTTTGCCCAAATGAGAAATCCT  
+HWI-EAS443:3:75:561:1200#0/1  
[^ab`[Y`aRV¥\_]a\_aaa]Y¥Z\_]aaaa`aaa^P\_YU[  
@HWI-EAS443:3:76:1493:1902#0/1  
GGCCGTAACATGGTGAATAGGAATGGCCCAACAAANAGT  
+HWI-EAS443:3:76:1493:1902#0/1  
a`\_`^a`aa\_\_aU\_^`Wa\_R\_]ZMPWZX\_]T\_¥DD[ ]N  
@HWI-EAS443:3:77:1325:1059#0/1  
GCCTTGTTGTAATTGAATACTGGAGAATTGCCTCTGAGTG  
+HWI-EAS443:3:77:1325:1059#0/1  
WW]VZ`aaa\_YFQVZ¥\_\_^^¥U[J[X¥¥\_¥TX]V]Z]]Q[  
@HWI-EAS443:3:77:1406:974#0/1  
TGGCAATGAGATACCCAATTACAGCAGACAAGAGAGCATT

+HWI-EAS443:3:77:1406:974#0/1  
a```]\_bb`aaab\_PYbbabbaaaa\_aabb`\_aa]a`ab`  
@HWI-EAS443:3:79:109:731#0/1  
CTGTAATTGGGTATCTCATTGCCATCATCCACTTCTTCCT  
+HWI-EAS443:3:79:109:731#0/1  
a^WLT\_``aaaZY¥`a^Z]U[\_aX\_`a[¥`]Y¥Y^\_T^aX  
@HWI-EAS443:3:79:381:499#0/1  
GTGCCTTCATCTGGATCTTCAGTCAATGCACCTGCTCCTA  
+HWI-EAS443:3:79:381:499#0/1  
aaabaaaaaaaa\_aaa`a`a```\_aaa`a```^``\_\_^\_  
@HWI-EAS443:3:7:1088:1996#0/1  
GGCAATGAGATACCCAATTACAGCAGACAAGAGAAAAGCTA  
+HWI-EAS443:3:7:1088:1996#0/1  
aa`¥`b```V¥aYGX¥``¥YTVG]RU^^YVYVS\_RW[WN  
@HWI-EAS443:3:7:132:1735#0/1  
GCTGGGAAAGGATGCAGGTGCATTGACTGAAGATCCAGA  
+HWI-EAS443:3:7:132:1735#0/1  
`b^WZZaXaa`UYXSaabaW`aaILH¥aXVQaYVZQ`Q]`  
@HWI-EAS443:3:81:927:916#0/1  
AGGATTTCTCATTTTGGGCAAAGAAGACAAGAGATGGCCC  
+HWI-EAS443:3:81:927:916#0/1  
aba]aabbaaaaaaaaaaaaaaaaaba`aaaaaa`aa``^W\_  
@HWI-EAS443:3:82:1514:1228#0/1  
AGGATTTCTCATTTTGGGCAAAGAAGACAAGAGATGCCCA  
+HWI-EAS443:3:82:1514:1228#0/1  
`\_T\_]`aS\_`a\_Y¥bbX¥S¥babb`baJ`ababaKbaWab  
@HWI-EAS443:3:83:229:1135#0/1  
GGGCCATCTCTTGTCTTCTTTGCCCAAATGAGAAATCCT  
+HWI-EAS443:3:83:229:1135#0/1  
¥YG[^`^^aSa^W`U^aaa^a\_U[^¥]]QW\_YXXZU\_RZ^a  
@HWI-EAS443:3:84:672:521#0/1  
GGCAATGAGATACCCAATTACAGCAGACAAGAGAAAAGCTC  
+HWI-EAS443:3:84:672:521#0/1  
aaa\_]X`RZaQZ[W]`Z\_^\_^]`ZZZU\_]Za\_`][Z]LQP  
@HWI-EAS443:3:84:813:1715#0/1  
GGCAATGAGATACCCAATTACAGCAGACAAGAGAAAAGCTA  
+HWI-EAS443:3:84:813:1715#0/1  
`a\_\_aaaaaa`b\_a¥a\_]b0aa]a^a\_`aSbaa]a``\_]`  
@HWI-EAS443:3:85:1149:158#0/1  
GGGCCATCTCTTGTCTTCTTTGCCCAAATGAGAAATCCT  
+HWI-EAS443:3:85:1149:158#0/1  
aaba]abab`aaaa\_ab]ab\_a[`[\_a`aaaabaa`aX]^  
@HWI-EAS443:3:85:1207:396#0/1  
GAGATAGTCTGCTGCTCCTGAGAGGATTTCTCATTGTTGGGC  
+HWI-EAS443:3:85:1207:396#0/1  
^P\_ZZV[VZ[aZ[XY[]^¥XVPY]WR^^\_^^W¥[^^^]^¥V  
@HWI-EAS443:3:86:1128:1454#0/1  
GGTTGCCTCTCTGGAATCATGTCCATTATTCTTGTCTG  
+HWI-EAS443:3:86:1128:1454#0/1  
]aabbb```a^^¥Q]b\_bab\_`ab`bbabbab`b\_`YO\_[

@HWI-EAS443:3:86:1722:1163#0/1  
GGCAATGAGATACCCAATTACAGCAGACAAGAGAAAGCTA  
+HWI-EAS443:3:86:1722:1163#0/1  
`babbbbababaa\_bbbbbGaa\_abaZ\_ab`aa`\_`Ia`  
@HWI-EAS443:3:87:885:873#0/1  
AGGATTTCTCATTTTGGGCAAAGAAGACAAGAGATGGCCC  
+HWI-EAS443:3:87:885:873#0/1  
YRQ^\_\_M[Z``bV`XV\_X¥]`Z]J`^T\_NQ[U`X^HG  
@HWI-EAS443:3:88:1161:204#0/1  
AAAATGAGAAATCCTCTCAGGACAGCAGACTCCACATTCT  
+HWI-EAS443:3:88:1161:204#0/1  
`aa`abab^aaa\_`a`a\_a`a`\_\_`]`a\_\_^U\_`W`^^W^  
@HWI-EAS443:3:90:38:1049#0/1  
GGCAATGAGATACCCAATTACAGCAGACAAGAGAAAGCTA  
+HWI-EAS443:3:90:38:1049#0/1  
abbaZ\_babb\_bb`\_b``aa`^aaa\_````a`a`¥\_a]^  
@HWI-EAS443:3:92:1612:365#0/1  
GGGCCATCTCTTGTCTTCTTTGCCAAAATGAGAAATCCT  
+HWI-EAS443:3:92:1612:365#0/1  
ab`\_abbZaTaab[Yaa\_aba]V`a^aaaaabaa`\_NX\_  
@HWI-EAS443:3:92:831:72#0/1  
CTGTAATTGGGTATCTCATTGCCATCATCCACTTCTTCCT  
+HWI-EAS443:3:92:831:72#0/1  
abbbbbbbbaa`bb`b\_bbbbbabb\_bbba`\_`baabba^b  
@HWI-EAS443:3:94:398:676#0/1  
TGGCAATGAGATACCCAATTACAGCAGACAAGAGANCATT  
+HWI-EAS443:3:94:398:676#0/1  
aaaa`aaa]aa\_aa`\_`a`\_`a\_a```a`\_a\_\_]`TDV\_\_^  
@HWI-EAS443:3:95:495:827#0/1  
ATGTGCCTCTCTGGAATCATGTCCATTATTCTCTTGTCTG  
+HWI-EAS443:3:95:495:827#0/1  
abb]abbaaaa^ababaaaba\_a[aaa`abaaaaa¥\_]aa  
@HWI-EAS443:3:96:1082:1793#0/1  
GCAATGAGATACCCAATTACAGCAGACAAGAGAATGGAAA  
+HWI-EAS443:3:96:1082:1793#0/1  
]aZ`\_b]X^``ZI`YU`^aY`\_ba]`baUaX^\_aa`^]]  
@HWI-EAS443:3:99:1404:500#0/1  
AGGATTTCTCATTTTGGGCAAAGAAGACAAGAGATGGCCC  
+HWI-EAS443:3:99:1404:500#0/1  
]bK`a\_¥R[VS\_\_aaabb`\_`a`^`aXXaaaa\_]ZYOFJH  
@HWI-EAS443:3:9:1509:657#0/1  
CCGGCCATATGGCCATAATCAAAAAGTACACATCAGGAA  
+HWI-EAS443:3:9:1509:657#0/1  
``ba^`[bbb`bba\_`baabaabaaaaGb^¥]a`^aaaaa  
@HWI-EAS443:3:9:1767:680#0/1  
AGGATTTCTCATTTTGGGCAAAGAAGACAAGAGATGGCCC  
+HWI-EAS443:3:9:1767:680#0/1  
TTTZX\_aV`TW`Z\_]\_SHW^L^a\_``Z\_\_UZVa`\_¥ZWLL  
@HWI-EAS443:3:14:1017:679#0/1  
CAACCTTTTCGAAATAAGNTTTATATACCTTAGGGTAATG

+HWI-EAS443:3:14:1017:679#0/1  
\_```abbaa`ba[aa\_X]D¥baaa`aa`^a`aa]\_X\_¥a`  
@HWI-EAS443:3:17:1534:913#0/1  
ATTTCTTCATACCCTTCATNTACTCTTATTTTCAGTGTTT  
+HWI-EAS443:3:17:1534:913#0/1  
¥Va^^^\_LW¥X0¥``Y]UD0a`]a^aV`]`aTU\_V`Q`a  
@HWI-EAS443:3:17:549:830#0/1  
CGGGGTATCTCANTGCCATCATCCACTTCATTCTGAGTGC  
+HWI-EAS443:3:17:549:830#0/1  
aaaaaVaabaa¥D[aaaaaaaa`aaa```aaa``aa\_\_U`^  
@HWI-EAS443:3:2:995:751#0/1  
CACCCGTTTTCGTTTNATTACCAACTACGTCCCCTTGC  
+HWI-EAS443:3:2:995:751#0/1  
aa`\_ab^\_aaZa`aZDRba``Y``OaRa\_Ha\_X\_R¥^\_¥0  
@HWI-EAS443:3:39:1234:1629#0/1  
GAGAGGATTTCTCATTTNGGGCAAAGAAGACAAGAGATGG  
+HWI-EAS443:3:39:1234:1629#0/1  
abbbbaaaab`aaaba^DU]\_baababbaa`\_]`a`a\_\_^  
@HWI-EAS443:3:46:1262:1609#0/1  
AGGCCGNAGACATATGCAAGGCAGCAATAGGGTTGAGGAT  
+HWI-EAS443:3:46:1262:1609#0/1  
aaa``]DY¥\_aaaa\_¥^`[]````^¥Z`[\_\_ZP]`]a]YY  
@HWI-EAS443:3:99:305:586#0/1  
CTCCGTTTTCGTTTCATTACCAACTANGTCCCCTTGCC  
+HWI-EAS443:3:99:305:586#0/1  
``aSa^aa\_]\_aY``Zab¥]`^bY¥[ZYD^aa`a```a^`  
@HWI-EAS443:3:23:1433:868#0/1  
TCCCGTTTTCGTTTCATTACCAAACTACGTCCCCTTGCG  
+HWI-EAS443:3:23:1433:868#0/1  
XYOR`TS\_J^^a`bX¥``aXQW]PVJV¥^BBBBBBBBBBB  
@HWI-EAS443:3:24:860:980#0/1  
GCCCCTTTTCGTTTCATTACCAACAGTACGTCCCCTTGCC  
+HWI-EAS443:3:24:860:980#0/1  
`ba^b`TT\_bU`T]Q]G]a\_aUaUbg\_`H^^XVZUa[LFZ  
@HWI-EAS443:3:27:800:1032#0/1  
TGCTGCCTTGCCATATGTCTACGGCTTGTTCAGTTGGG  
+HWI-EAS443:3:27:800:1032#0/1  
\_Y¥aa\_bba^ba``aa¥[\_``aa\_aYD0¥J]BBBBBBBBB  
@HWI-EAS443:3:29:447:778#0/1  
GTCTTGCTTCTTTGCCAAAATGTGAAATCCTCTCAGGA  
+HWI-EAS443:3:29:447:778#0/1  
a^aaa\_\_`a`a\_a`]\_\_\_\_a`¥[^VY[^¥^\_`Z¥^]]^\_] ]  
@HWI-EAS443:3:32:559:1809#0/1  
ATGAGGATTAGCTCATCTTTTCAGTTTTGGTGGGGTCACTT  
+HWI-EAS443:3:32:559:1809#0/1  
J\_a[YU\_``[^a^\_¥VT][[a``][`J¥\_ZUVSGUGZ[YV  
@HWI-EAS443:3:33:1536:677#0/1  
ACCTGATGTGTACTTTTTGATTATGGCCATATGTTCCACA  
+HWI-EAS443:3:33:1536:677#0/1  
V^`\_aa``\_¥QIU¥ZYU]W¥BBBBBBBBBBBBBBBBBBBBB

@HWI-EAS443:3:33:1760:1776#0/1  
GCCCGTTTTCGTTTCATTACCAACTACGTGCCCTTGCC  
+HWI-EAS443:3:33:1760:1776#0/1  
aZ^ab\_]\_`P\_aa`aaa`\_K^[Yb\_\_\_T]HHMLLLYUGW  
@HWI-EAS443:3:34:642:1037#0/1  
GAAGTGGACAGGGCCGAAGGTACCATGTTTCGACCTTCA  
+HWI-EAS443:3:34:642:1037#0/1  
]bbbabbbbaaaaaZ]aaaS`ZbM`WSZ\_WVY\_`U]\_W¥  
@HWI-EAS443:3:37:821:637#0/1  
CCCCGTTTTCGTTTCATTACCAACTACGCCCCCTTGCC  
+HWI-EAS443:3:37:821:637#0/1  
a¥a]a`aa\_\_a`aa]\_\_a`U`a`abb¥a`LF\_bab]TX`a  
@HWI-EAS443:3:39:1207:1358#0/1  
CGTACAACAAGTTTTCTCCAGTAGCCGGCGAACAGGCG  
+HWI-EAS443:3:39:1207:1358#0/1  
a\_TTIV^W`^VKX^aX`X¥P[Y¥`\_Va¥`ZX`BBBBB  
@HWI-EAS443:3:3:1311:237#0/1  
CACGTCCCTGGGTTAAGTGCAACTTCGATATAAACAA  
+HWI-EAS443:3:3:1311:237#0/1  
Iab\_\_V]]bb`a`bb¥^^`U¥babMa`UKZbaa`\_aYaG  
@HWI-EAS443:3:40:1045:2040#0/1  
TCCCCGCACTCAGAATGAAGTGGATGCTGGCAATGAGATA  
+HWI-EAS443:3:40:1045:2040#0/1  
`a`]`aaZ[W`Y¥N¥`QQ\_]L\_aa`OGXEQV¥ZNTUNUX  
@HWI-EAS443:3:49:1154:512#0/1  
TCCGTTTTCGTCTCATTACCAACTACGTCCCCTTGCCC  
+HWI-EAS443:3:49:1154:512#0/1  
XN¥b\_]a^\_\_\_a]aaaaaba\_]a]aa`RZJZ¥YZ]¥]¥  
@HWI-EAS443:3:50:1264:1953#0/1  
GGACCATATGGCCATAATCAAAAAGAACACATCAGGAAGN  
+HWI-EAS443:3:50:1264:1953#0/1  
`[UV\_`Ya\_\_`\_a^\_]W¥I\_`¥UGUGXTT[RN\_\_^^OD  
@HWI-EAS443:3:50:230:739#0/1  
TGATGGCAATGAGATACCCAATTACAGCAGATAAGAGAAA  
+HWI-EAS443:3:50:230:739#0/1  
ab`aaa¥YUabaaV]bb^H\_V\_Z¥[Taab^]\_WWaaYaaZ  
@HWI-EAS443:3:50:927:273#0/1  
GATCAGACCGAGTGATGGGATCACCTCTGGCCGTAACATA  
+HWI-EAS443:3:50:927:273#0/1  
^`b[bba]``ab¥b\_b\_bU^^S\_\_Z¥\_a\_\_MG\_Z`aZa^`  
@HWI-EAS443:3:51:663:59#0/1  
GATGAATACTCCAGCACGGAGAGAGTGGTAGTGGGTATTT  
+HWI-EAS443:3:51:663:59#0/1  
abbaabbaaa\_a```aXba^b`b\_^OYa]BBBBBBBBBBB  
@HWI-EAS443:3:58:722:1141#0/1  
GGTCTGCTGTAATTGGGCATCTCATTGCCATCATCCACTT  
+HWI-EAS443:3:58:722:1141#0/1  
`\_\_\_a^a\_Z^`aaaaaaaa\_a`a\_\_aaa]a^\_^`^]  
@HWI-EAS443:3:59:676:1037#0/1  
CGGGGACGCAGTGTGGTAATGAAACGAAAACGGGACTCT





@HWI-EAS443:3:80:1628:643#0/1  
AAAAGAAGCTGAGAGATCTAATGTTGCAGTCCCGCACTCGA  
+HWI-EAS443:3:80:1628:643#0/1  
^`a\_aX]\_b`]bVab\_Jb]]]VYZYHV[F¥QZZWTHR¥G  
@HWI-EAS443:3:81:1767:477#0/1  
GGATGGGGGCGTACATGCTAGAAAAGAGAATTGGTCCGTAA  
+HWI-EAS443:3:81:1767:477#0/1  
a][^]bHaaUa\_\_Qaa\_\_\_Y`ZXWSUWWX\_`]UTPRXHUU  
@HWI-EAS443:3:86:1333:1396#0/1  
TTAAGACCACTGTGGACCATATGGCCATAATTA AAAAGTA  
+HWI-EAS443:3:86:1333:1396#0/1  
KabaVb^abb¥\_bVY\_V\_`abaab`Kaa¥\_\_¥aa^a^a[Y  
@HWI-EAS443:3:87:1108:1388#0/1  
ACCAAGGAGGCACAGGATGTGATTATGGAAGTTGGTTTCC  
+HWI-EAS443:3:87:1108:1388#0/1  
S\_bbbbb\_babbbbbbababbabbabbaa^PYZfZ`bQW  
@HWI-EAS443:3:91:1553:1433#0/1  
CGGGGCCGTAGTGTGGTAATGAAACGAAAACGGGACTCT  
+HWI-EAS443:3:91:1553:1433#0/1  
ababb`bb`bbababbbSaabbbbbRb`aabNaaa\_H\_W\_  
@HWI-EAS443:3:92:163:1030#0/1  
CGCCATATCTCTTGTCTTCTTTGCCAACATGAGAAATCC  
+HWI-EAS443:3:92:163:1030#0/1  
H[¥[VT\_\_\_Q\_W[]ZXXX[aaUaab`YWHHH^baaaZaZY  
@HWI-EAS443:3:96:195:1993#0/1  
ACCCGTTTTCGGTTTATTACCAACTACGTCCTTGGCC  
+HWI-EAS443:3:96:195:1993#0/1  
VUU\_Z^`Raa^VTaVIbRbaa\_\_\_`a`a^VF¥[VTGTLTB  
@HWI-EAS443:3:96:927:1496#0/1  
CCCGTTTTCGTTTTATTACGAACACTACGTCCTTGGCCA  
+HWI-EAS443:3:96:927:1496#0/1  
aU`bN^aaaa\_`aW```b¥JU`\_a]\_`\_UGF]V^¥[]Y\_  
@HWI-EAS443:3:97:595:1518#0/1  
GAAGTGGACAGGCCCGAAGGTACCATGTTTCAACCTTCA  
+HWI-EAS443:3:97:595:1518#0/1  
^Y^OJQ]ZR\_Y[KWQ¥¥WUWK¥ZR^LWYZGX¥TYXYaZUN  
@HWI-EAS443:3:10:1041:485#0/1  
TGGCAATGAGATACCCAATTACAGCAGACAAGAGAAAGAT  
+HWI-EAS443:3:10:1041:485#0/1  
SYZPY]\_a\_aa]]^X]aa[a\_\_[[LQ\_RKDRa\_a[OW[H[  
@HWI-EAS443:3:10:159:806#0/1  
ACAGTGTCTTACGAATCCACTGTACCGGCTTCTGGGTGG  
+HWI-EAS443:3:10:159:806#0/1  
[[Q]]`T^aa`^aa^^`]aaaaY`a`]a[BBBBBBBBBB  
@HWI-EAS443:3:10:372:166#0/1  
CACCGTCCATTATTCTTGTCTGCTGTAATTGGGTATCT  
+HWI-EAS443:3:10:372:166#0/1  
aYZ`b]a¥Y`\_\_`[X\_a\_]X^`TY]]OPT[^Z^WFXQX¥  
@HWI-EAS443:3:10:90:227#0/1  
TGGCAATGAGATACCCAATTACAGCAGACAAGAGAAAGCT

+HWI-EAS443:3:10:90:227#0/1  
abbbabbabbaaba`aabaaaaaa`aa\_`aaaa`a\_a  
@HWI-EAS443:3:11:129:1540#0/1  
GAGGATTTCTCATTTTGGGCAAAGAAGACAAGAGATGGCC  
+HWI-EAS443:3:11:129:1540#0/1  
R]\_\_bbb[\_a\_\_abbaVSZ\_a¥]¥\_^Zb`\_WUb`\_aa`a  
@HWI-EAS443:3:11:1366:2030#0/1  
TGCATCCTTTCCAAGAACTGTAAGTCGTTTGGTTGCTTTG  
+HWI-EAS443:3:11:1366:2030#0/1  
`b`baaab`THV``[WW^`^J^[\_a]YF]X\_XUIN`\_]  
@HWI-EAS443:3:11:1784:773#0/1  
GAGGATTTCTCATTTTGGGCAAAGAAGACAAGAGATGGCC  
+HWI-EAS443:3:11:1784:773#0/1  
a]bbaabbbbabababaaa`a`aa`a`a`\_`\_`\_]\_]XO  
@HWI-EAS443:3:11:253:823#0/1  
TGGCAATGAGATACCCAATTACAGCAGACAAGAGAAAGCT  
+HWI-EAS443:3:11:253:823#0/1  
aaaaabbabaaaaaaaaaaaa`aaaa`^`a\_aa`^`a  
@HWI-EAS443:3:12:1242:503#0/1  
TGGCAATGAGATACCCAATTACAGCAGACAAGAGAAAGCT  
+HWI-EAS443:3:12:1242:503#0/1  
`bb\_abbabaaaaa\_abaaaa`a^`a`^`a`aa\_\_aZ¥  
@HWI-EAS443:3:12:1246:175#0/1  
TTGTAATTGAATACTGGAGAATTGCCTCTTACCAGTGTCC  
+HWI-EAS443:3:12:1246:175#0/1  
aaa^`aaaZ`\_\_^]`a`¥[X^`X¥^Z^]]XXW`Y¥XUB  
@HWI-EAS443:3:13:1233:1658#0/1  
GAGGATTTCTCATTTTGGGCAAAGAAGACAAGAGATGGCC  
+HWI-EAS443:3:13:1233:1658#0/1  
¥[`^`a`\_`\_`[`ba¥[Y`bb^a]\_`^^`aba[]a`^`SY^  
@HWI-EAS443:3:13:146:769#0/1  
AAGAGAGTCTGCTGCTCCTGAGAGGATTTCTCATTTTGGGC  
+HWI-EAS443:3:13:146:769#0/1  
aba[aaa`abbaU\_S\_aaa]`T\_aTY``]aaaa`a\_\_a]  
@HWI-EAS443:3:14:1142:1483#0/1  
TGCGTTTCACTGACTTCTTCGGGAGACAATAGTACGGTTC  
+HWI-EAS443:3:14:1142:1483#0/1  
Uaab`a``¥¥\_b]a`])aa]Z]aaZa\_a`]¥TG^GUDI  
@HWI-EAS443:3:14:245:850#0/1  
CATCCCCCTCATGTACTCTTATTTTCAGTGTGGAGGTT  
+HWI-EAS443:3:14:245:850#0/1  
]b¥K^^bbb^Ub\_abb]abb\_bab[babababbbT¥a`\_`  
@HWI-EAS443:3:14:70:1572#0/1  
TGGCAATGAGATACCCAATTACAGCAGACAAGAGAAAGCT  
+HWI-EAS443:3:14:70:1572#0/1  
TQ^`YTP¥[SO```a¥[¥¥¥Z¥¥S^SVaSUR`b]a``RI  
@HWI-EAS443:3:15:1246:1075#0/1  
GAGGATTTCTCATTTTGGGCAAAGAAGACAAGAGATGGCC  
+HWI-EAS443:3:15:1246:1075#0/1  
\_Xa^^aabaaXX`aba^¥aa¥M¥^[`aa`b[a`^`\_][TZN

@HWI-EAS443:3:15:1298:739#0/1  
TGGCAATGAGATACCCAATTACAGCAGACAAGAGAAAGCT  
+HWI-EAS443:3:15:1298:739#0/1  
]bba^aba\_`a``\_Z0]b`Y``]aY]aaabV`¥a`¥a`Y^  
@HWI-EAS443:3:15:1440:1063#0/1  
TGCTTTTTCGTTTCATTACCAACTACGTCCCCTTGCCC  
+HWI-EAS443:3:15:1440:1063#0/1  
^T\_baab\_\_[^^a`]aa^WV\_[VZY[``\_`V¥¥YY¥Z]WO[  
@HWI-EAS443:3:17:100:1252#0/1  
GCCTTCCTGATGTGTACTTTTTGATTATGGCCATATCGTC  
+HWI-EAS443:3:17:100:1252#0/1  
aI\_RU`\_]\_[W¥M]R[Z`ZZY\_S¥¥BBBBBBBBBBBBBBB  
@HWI-EAS443:3:17:1049:952#0/1  
GGCAATGAGATACCCAATTACAGCAGACAAGAGAATGATG  
+HWI-EAS443:3:17:1049:952#0/1  
ab`a`ab¥baaba`b`\_aaa`a^^a`a``\_a\_``^a\_a``  
@HWI-EAS443:3:17:1136:1134#0/1  
GGCCATCTCTTGCTTCTTTGCCAAAATGAGAAATCCTC  
+HWI-EAS443:3:17:1136:1134#0/1  
`\_aaabaaaaa\_aaaaaaaa\_a^a`aaaa````]a\_  
@HWI-EAS443:3:17:1748:284#0/1  
GAGGATTTCTCATTTTGGGCAAAGAAGACAAGAGATGGCC  
+HWI-EAS443:3:17:1748:284#0/1  
Z`bbaaa^HZVabab^a]`[]Z^YaWaWPVYb\_aTY^aTO  
@HWI-EAS443:3:18:397:1336#0/1  
TGGCAATGAGATACCCAATTACAGCAGACAAGAGAAAGCT  
+HWI-EAS443:3:18:397:1336#0/1  
a``^\_`a¥`````aba^^^\_^^^a^ab\_aa\_aZ]`VZaa^  
@HWI-EAS443:3:19:373:165#0/1  
GAGGATTTCTCATTTTGGGCAAAGAAGACAAGAGATGGCC  
+HWI-EAS443:3:19:373:165#0/1  
¥[a`T]]¥b^\_a\_Z¥^^^YY]XH]`[``\_]U`ZZXXP[¥R  
@HWI-EAS443:3:1:1378:1494#0/1  
AGAAGTGAAGATCTAATGTCGCAGTCCCGCACTCGGGAG  
+HWI-EAS443:3:1:1378:1494#0/1  
ZU\_^]\_^aa``[a¥a`aU]VLZa\_aPNVYFQSLZBBBBBB  
@HWI-EAS443:3:1:1442:1104#0/1  
CGTNTGCTGTAATTGGGTATCTCATTGCCATCATCCACTT  
+HWI-EAS443:3:1:1442:1104#0/1  
\_b^D^aabbba`bbabbaba\_b\_aaaa¥^`aX\_a\_Y\_`aB  
@HWI-EAS443:3:22:859:1057#0/1  
GAGGATTTCTCATTTTGGGCAAAGAAGACAAGAGATGGCC  
+HWI-EAS443:3:22:859:1057#0/1  
aYb\_]\_a\_a\_b\_aaaa¥][¥Z¥\_aa\_[``^\_]V\_XDMR\_Y  
@HWI-EAS443:3:23:1722:1394#0/1  
GAGGATTTCTCATTTTGGGCAAAGAAGACAAGAGATGGCC  
+HWI-EAS443:3:23:1722:1394#0/1  
abbaabbbabaabbbaaab`aa`aa`ba^a`a`a`\_a^]Z  
@HWI-EAS443:3:23:1752:112#0/1  
GAGGATTTCTCATTTTGGGCAAAGAAGACAAGAGATGGCC

+HWI-EAS443:3:23:1752:112#0/1  
aaab`bbb\_b\_aabaaabU[X\_a`^`^`]^`a^\_¥XT`\_ZU  
@HWI-EAS443:3:23:600:556#0/1  
GGCCATCTCTTGCTTCTTTGCCAAAATGAGAAATCCTC  
+HWI-EAS443:3:23:600:556#0/1  
abbbbabaa`bb]baaabaaaa[a`bbabbbaaaa\_a`  
@HWI-EAS443:3:24:149:453#0/1  
TGGCAATGAGATACCCAATTACAGCAGACAAGAGAAAGCT  
+HWI-EAS443:3:24:149:453#0/1  
SP¥^^`bbY\_Y`]ba]`\_abb]abab`¥ab`^^a`^`a`a  
@HWI-EAS443:3:25:1387:511#0/1  
TGGCAATGAGATACCCAATTACAGCAGACAAGAGAAAGCT  
+HWI-EAS443:3:25:1387:511#0/1  
YZa\_]`^ab`^^]ZbWFZYaaaa\_ZZXUSVTW`aUR^\_WY  
@HWI-EAS443:3:25:277:843#0/1  
TGGCAATGAGATACCCAATTACAGCAGACAAGAGAAAGCT  
+HWI-EAS443:3:25:277:843#0/1  
abaaaabab`aaabb`baaaaaaaaa`aa`a\_a`Z`aa`Za  
@HWI-EAS443:3:26:1752:906#0/1  
GAGTAAGGATGGTGGACATCCTTAGACAGAATCCAAATGA  
+HWI-EAS443:3:26:1752:906#0/1  
a\_[¥abbbXaa\_Xba`\_ba\_\_`^a`^aa`^\_\_\_\_`Ga]^  
@HWI-EAS443:3:26:916:408#0/1  
GTGGACAGGGCCGAAGGTACCATGTTTCAACCTTTCAACC  
+HWI-EAS443:3:26:916:408#0/1  
`I^a¥\_]Z]`\_`Z[^YaR^¥]Y¥^W\_]\_\_\_\_[]]^ZV`WX  
@HWI-EAS443:3:27:208:1868#0/1  
CGGGGCCACCATCAAGGGAGCAATTTTACAATCCTGGAGC  
+HWI-EAS443:3:27:208:1868#0/1  
a\_\_\_\_`ababbb`aa\_aaabaab^a\_baaaaaaaaa]]\_`Y\_  
@HWI-EAS443:3:27:87:681#0/1  
TGGCAATGAGATACCCAATTACAGCAGACAAGAGAAAGCT  
+HWI-EAS443:3:27:87:681#0/1  
aa^a]aa`^`^`V[ab]a[^a`^a^`]a\_aa`aaa¥]`\_  
@HWI-EAS443:3:27:969:650#0/1  
TGGCAATGAGATACCCAATTACAGCAGACAAGAGAAAGCT  
+HWI-EAS443:3:27:969:650#0/1  
aa`aababbaaba^`baaaa``aaaa\_a`aaaa\_\_\_\_]`  
@HWI-EAS443:3:28:1405:196#0/1  
AAATGAAGTGGAGATCTAATGTCGCAGTCCCGCACTCGC  
+HWI-EAS443:3:28:1405:196#0/1  
aa`abb`^`^`aabaaa[baaaaY]```a[^ZW`V^T\_Z[W  
@HWI-EAS443:3:28:1505:503#0/1  
TCGCACTCAGAATGAAGTGGATGATGGCAATGAGATAGTC  
+HWI-EAS443:3:28:1505:503#0/1  
a¥`VZ¥U¥]`a[a]S^aXaa]a`TQ][SX]^¥P[XY]^PU  
@HWI-EAS443:3:28:502:1973#0/1  
TGGCAATGAGATACCCAATTACAGCAGACAAGAGAAAGCT  
+HWI-EAS443:3:28:502:1973#0/1  
`Yaa`^`a¥^`¥babaT`aabbb]aaa^Y^]aaWba^[]Y

@HWI-EAS443:3:28:637:1160#0/1  
GAGGATTTCTCATTTTGGGCAAAGAAGACAAGAGATGGCC  
+HWI-EAS443:3:28:637:1160#0/1  
[aab\_bbbba\_b]bbbb`b`ababaa`bb^b\_`aaa\_a^a\_  
@HWI-EAS443:3:28:668:1192#0/1  
TGGCAATGAGATACCCAATTACAGCAGACAAGAGAAAGCT  
+HWI-EAS443:3:28:668:1192#0/1  
¥\_¥\_b¥^aS\_^a`ZZ\_bb\_aV`aSa¥\_]a`aaaWZ]0^  
@HWI-EAS443:3:28:692:1243#0/1  
GAGGATTTCTCATTTTGGGCAAAGAAGACAAGAGATGGCC  
+HWI-EAS443:3:28:692:1243#0/1  
abaabbbbbbb`[baba`Zaa]a\_\_U\_a`a^aaa\_]^Za`  
@HWI-EAS443:3:29:1398:394#0/1  
TGGCAATGAGATACCCAATTACAGCAGACAAGAGAAAGCT  
+HWI-EAS443:3:29:1398:394#0/1  
abba`\_bb`aa\_\_^`aaaa`Za^^a\_Z\_\_a^aa¥`\_Z\_  
@HWI-EAS443:3:29:736:1825#0/1  
CATAATTTCTCACTTCTCCTCCTGGAGTGACATCTGCTC  
+HWI-EAS443:3:29:736:1825#0/1  
a`aSb0HV\_\_a`a`a\_H`a`a[aVFTS^FGP`[WVNQBB  
@HWI-EAS443:3:29:893:296#0/1  
GCCATATGGTCCACAGTGGTCTTAGTGAGTATCTCGGGAG  
+HWI-EAS443:3:29:893:296#0/1  
a[JX\_RTZVJTSU00¥00TUX^`Y`U`]BBBBBBBBBBBB  
@HWI-EAS443:3:2:1626:185#0/1  
CAAAATGAGAAATCCTCTCAGGACAGCAGACTCCACATTC  
+HWI-EAS443:3:2:1626:185#0/1  
aabababab`a`b`\_`¥a¥ab`\_Y]aX\_a^Y\_^[\_Y^\_AY  
@HWI-EAS443:3:2:708:980#0/1  
TGGCAATGAGATACCCAATTACAGCAGACAAGAGAAAGCT  
+HWI-EAS443:3:2:708:980#0/1  
^YZW^b¥¥^¥`a`aS0\_aaaVa\_^\_a]Sa^\_^`\_]a^a  
@HWI-EAS443:3:30:332:1248#0/1  
TGGCAATGAGATACCCAATTACAGCAGACAAGAGAAAGCT  
+HWI-EAS443:3:30:332:1248#0/1  
a¥V`aaba]X]\_abaab`aa`aW`b`\_`ba\_\_^\_a[`^S]  
@HWI-EAS443:3:30:508:1039#0/1  
TGGCAATGAGATACCCAATTACAGCAGACAAGAGAAAGCT  
+HWI-EAS443:3:30:508:1039#0/1  
T\_aZT[XZ]SZ¥^`a[^b]X\_a^`^^^]ZV¥Ya`\_HT`P  
@HWI-EAS443:3:31:1364:864#0/1  
GAGGATTTCTCATTTTGGGCAAAGAAGACAAGAGATGGCC  
+HWI-EAS443:3:31:1364:864#0/1  
`abb^Y`¥Z`a]aba]^\_a]¥]]]]`a^Q`aa`SZ\_ZL  
@HWI-EAS443:3:31:458:867#0/1  
TGGCAATGAGATACCCAATTACAGCAGACAAGAGAAAGCT  
+HWI-EAS443:3:31:458:867#0/1  
Y\_W`\_`bbaZYaaaa]\_Y\_ba[\_Z^^]aaY`a\_WY`b¥  
@HWI-EAS443:3:33:1020:763#0/1  
GAGAGAAGTGGATGATGGCAATGAGATACCCAATTACAGC

+HWI-EAS443:3:33:1020:763#0/1  
XQ\_VV^W[[aa\_\_`¥]R¥^RP[^STLPH]^VQU¥ZSS[^B  
@HWI-EAS443:3:33:1354:521#0/1  
ATCAGTCAAGAAAGAAGAAGAGTGCTAACGGGCAATCTC  
+HWI-EAS443:3:33:1354:521#0/1  
`b\_U\_a`^^aab]Z]\_¥^YV`¥[P^X\_]RWURZ`¥UP¥^  
@HWI-EAS443:3:33:462:869#0/1  
TGGCAATGAGATACCCAATTACAGCAGACAAGAGAAAGCT  
+HWI-EAS443:3:33:462:869#0/1  
ab`b\_S^``ba`bbab`b\_Zab]a\_Z\_]^Z^¥]\_Y]N¥^  
@HWI-EAS443:3:33:954:1692#0/1  
TGGCAATGAGATACCCAATTACAGCAGACAAGAGAAAGCT  
+HWI-EAS443:3:33:954:1692#0/1  
aa\_`abba\_aa[\_aa`baa`aa`\_`\_\_Xa\_\_^]`a^R\_  
@HWI-EAS443:3:34:1236:415#0/1  
TGGCAATGAGATACCCAATTACAGCAGACAAGAGAAAGCT  
+HWI-EAS443:3:34:1236:415#0/1  
abbaa^bb^b\_\_aa\_^`bb`aaaaUY^\_a`aa^^]\_V^P\_  
@HWI-EAS443:3:34:1373:160#0/1  
GAGGATTTCTCATTTTGGGCAAAGAAGACAAGAGATGCCC  
+HWI-EAS443:3:34:1373:160#0/1  
abbaaaaaba\_`abaaaa¥aaaaa`\_a`````^\_^Z^XXX  
@HWI-EAS443:3:34:80:1870#0/1  
TGGTATTCTCACAAGAGGATTGCATGATCAAGGCAGGTAG  
+HWI-EAS443:3:34:80:1870#0/1  
[YUQ¥ZDZ^`bU\_W[a]]ba^`b¥Zaaaab]T`RUFZT  
@HWI-EAS443:3:35:1398:637#0/1  
TGGCAATGAGATACCCAATTACAGCAGACAAGAGAAAGCT  
+HWI-EAS443:3:35:1398:637#0/1  
a¥[`aaP]`Zaa`aZWTba[a`aa^`aQaa\_\_a^]`\_`0\_  
@HWI-EAS443:3:35:1667:677#0/1  
AGAGAATAAAAGAACTGAGAGATCTAATGTTCGAGTGCCG  
+HWI-EAS443:3:35:1667:677#0/1  
\_a^]WZ`bYa\_\_^Z^bbaab]I]]`bH¥VP`H]BBBBBB  
@HWI-EAS443:3:36:1100:1428#0/1  
GCTGTAATTGGGTATCTCATTGCCATCATCCACTTCTTCC  
+HWI-EAS443:3:36:1100:1428#0/1  
a`S`WQ¥TU\_VTXMVYY^\_YZ[^`V[X^T^^\_XYVOYYYYX^  
@HWI-EAS443:3:36:1183:1125#0/1  
GATGGCAATGAGATACCCAATTACAGCAGACAAGAGCAAG  
+HWI-EAS443:3:36:1183:1125#0/1  
`[\_`SU\_TZ^UU]]`ZX¥a^^YaVTSY]OXJZSFGXWGNU¥  
@HWI-EAS443:3:36:1201:1206#0/1  
GGAAAAGCACTTTTGCATCTTTTGGAAATGCCTCACGAG  
+HWI-EAS443:3:36:1201:1206#0/1  
X`[\_VaUS\_\_`b]¥ZWVb`bba\_U\_^TZ`\_`\_]UWb\_S¥00  
@HWI-EAS443:3:36:720:962#0/1  
GAGGATTTCTCATTTTGGGCAAAGAAGACAAGAGATGGCC  
+HWI-EAS443:3:36:720:962#0/1  
a\_^\_aYF[aa`]`aaaa`a`^U`aba`a``V[ ]`\_]`]]\_a

@HWI-EAS443:3:36:882:65#0/1  
TGGCAATGAGATACCCAATTACAGCAGACAAGAGAAAGCT  
+HWI-EAS443:3:36:882:65#0/1  
`bba`\_¥a\_]a`aaa^aaaa`]WU`Z¥^`a]^\_]Z]YX  
@HWI-EAS443:3:37:194:1727#0/1  
TGGCAATGAGATACCCAATTACAGCAGACAAGAGAAAGCT  
+HWI-EAS443:3:37:194:1727#0/1  
aa`bY`b```babbabab`aaab`baYabXGW]\_aa\_\_a]  
@HWI-EAS443:3:39:1136:1309#0/1  
GAGGATTTCTCATTTTGGGCAAAGAAGACAAGAGATGCGC  
+HWI-EAS443:3:39:1136:1309#0/1  
]aYM[aa\_b]\_baa`ab\_Q¥[¥I`abaaa]]¥[\_a^VUGS  
@HWI-EAS443:3:39:1595:1323#0/1  
TGGCAATGAGATACCCAATTACAGCAGACAAGAGAAAGCT  
+HWI-EAS443:3:39:1595:1323#0/1  
ab]aU^bbUaY`b]Xabaa^W^\_T[`T`[PVU^X^¥ZXR  
@HWI-EAS443:3:39:789:405#0/1  
GAGGATTTCTCATTTTGGGCAAAGAAGACAAGAGATGGCC  
+HWI-EAS443:3:39:789:405#0/1  
aaaZZ\_aaa``aaaa`a`aa\_`aa]W^\_\_`[Z^\_\_Z]^X  
@HWI-EAS443:3:3:138:751#0/1  
TGGCAATGAGATACCCAATTACAGCAGACAAGAGAAAGTT  
+HWI-EAS443:3:3:138:751#0/1  
¥`bIbba`S¥aaaa`a¥Xa¥a[[]\_a\_aaY`b^b`\_b^GX  
@HWI-EAS443:3:40:619:1643#0/1  
TGGCAATGAGATACCCAATTACAGCAGACAAGAGAAAGCT  
+HWI-EAS443:3:40:619:1643#0/1  
\_`]a]]aabS]¥`\_aaa]aa`aa][`^aa\_]\_a]aRW\_``  
@HWI-EAS443:3:42:1164:1384#0/1  
AATTACAACAAGGCAACCAAACGACTTACAGTTCTTACTG  
+HWI-EAS443:3:42:1164:1384#0/1  
abbabbbababa\_aaa`]aaaaa``a`aaa^``^aaa`\_  
@HWI-EAS443:3:42:1172:1013#0/1  
GATGATCCGCTTGTCTTTTGAAGTGAACCCACCAGAAG  
+HWI-EAS443:3:42:1172:1013#0/1  
ab\_b`ab\_Yaaaa`]\_abaa``aa`Vaaa]a]a``aaa]a  
@HWI-EAS443:3:42:1325:508#0/1  
GAGGATTTCTCATTTTGGGCAAAGAAGACAAGAGATGGCC  
+HWI-EAS443:3:42:1325:508#0/1  
abbbaabbab`]abbbb`aaaabbababababaaa`a`a`  
@HWI-EAS443:3:42:1417:1849#0/1  
TGGCAATGAGATACCCAATTACAGCAGACAAGAGAAAGCT  
+HWI-EAS443:3:42:1417:1849#0/1  
aa`¥`bbbabaaab]]\_aaaa^aaYaa`^`\_a`a`a^a`\_  
@HWI-EAS443:3:42:1422:1565#0/1  
GTTGGCAATGAGATACCCAATTACAGCAGACAAGAGAAAG  
+HWI-EAS443:3:42:1422:1565#0/1  
¥NV[R¥\_T\_``^¥Y`Y\_aZa\_]`\_]`X]a`¥XR\_]¥[\_\_\_\_  
@HWI-EAS443:3:42:647:1479#0/1  
GTGGACAGGGCCGAAGGTACCATGTTTCAACCTTCAACC

+HWI-EAS443:3:42:647:1479#0/1  
\_SWNU][QX`[a]I]Y^^[\_`\_OX`a`]a\_X\_\_^`]`¥W  
@HWI-EAS443:3:42:943:1276#0/1  
GAGGATTTCTCATTTTGGGCAAAGAAGACAAGAGATGGCC  
+HWI-EAS443:3:42:943:1276#0/1  
R\_\_\_\_^`aaa^abbbb\_bbab`ba¥abbb^b`^bb\_abb  
@HWI-EAS443:3:43:1296:815#0/1  
TGGGGGAATAGGAATGGCCCAACAACAAGTACAGTTCATT  
+HWI-EAS443:3:43:1296:815#0/1  
V]`HV`a[^`^`Y`\_aV[K^]U]W[aaX[N[XQ[T]^W^W  
@HWI-EAS443:3:43:99:1901#0/1  
GTCGCGTTTTCGTTTCATTACCAACTACGTCCCCTTGC  
+HWI-EAS443:3:43:99:1901#0/1  
^^]ITZ`^YZYb\_a`a[¥RR\_`S[]aP``YFF^VYLSTV\_  
@HWI-EAS443:3:44:1775:1271#0/1  
GAGGATTTCTCATTTTGGGCAAAGAAGACAAGAGATGGCC  
+HWI-EAS443:3:44:1775:1271#0/1  
a`a[Z`ba]`0¥b`aa`URZY`\_\_a``¥^a[`\_`\_\_XW]X  
@HWI-EAS443:3:44:366:208#0/1  
TGGCAATGAGATACCCAATTACAGCAGACAAGAGAAAGCT  
+HWI-EAS443:3:44:366:208#0/1  
aba``^abaa``aa^a`a`\_`^`¥`\_Y^`Ya^`\_`R^R^  
@HWI-EAS443:3:45:399:1053#0/1  
TGGCAATGAGATACCCAATTACAGCAGACAAGAGAAAGCT  
+HWI-EAS443:3:45:399:1053#0/1  
ab\_\_\_\_`aV^b\_X]]a`baa]^aaWaaaY^^a`baa`^Za  
@HWI-EAS443:3:45:450:1473#0/1  
TGGCAATGAGATACCCAATTACAGCAGACAAGAGAAAGCT  
+HWI-EAS443:3:45:450:1473#0/1  
\_¥\_RTVaaaa`\_aa\_\_a`\_aaZa``aaY]`\_`a\_aa\_V]UQ  
@HWI-EAS443:3:45:651:1083#0/1  
TGGCAATGAGATACCCAATTACAGCAGACAAGAGAAAGCT  
+HWI-EAS443:3:45:651:1083#0/1  
`baa`\_ab^`\_bb`[aaabaU[Y^aa`abaa`aa``Y\_  
@HWI-EAS443:3:45:86:1335#0/1  
TGGCAATGAGATACCCAATTACAGCAGACAAGAGAAAGCT  
+HWI-EAS443:3:45:86:1335#0/1  
abaa`aaaabba`a`\_baaa``aaaa\_\_a\_aaab`\_`¥`  
@HWI-EAS443:3:45:944:1802#0/1  
GCGGCCGATTTTAAAGGGTTAGAGATCAAAGAGGGAACGT  
+HWI-EAS443:3:45:944:1802#0/1  
S[]\_¥I¥S]a`bZb^``aX[bbbb\_ZWb`aaab\_a]bX`U  
@HWI-EAS443:3:46:1513:375#0/1  
AAAAGAAGTGAAGATCTAATGTTCGAGTCCCGCACACGC  
+HWI-EAS443:3:46:1513:375#0/1  
^SZWa`\_[\_Xababa`\_aaK\_PLS¥YZaQIQ]WU]GGGNY  
@HWI-EAS443:3:46:1775:967#0/1  
TGGCAATGAGATACCCAATTACAGCAGACAAGAGAAAGCT  
+HWI-EAS443:3:46:1775:967#0/1  
aba``\_ab\_aaaa`a`a`\_`^aa[\_]]Y^Xa``a^^^R`



@HWI-EAS443:3:47:459:150#0/1  
CTAATGTGCTAATTGGGCAAGGGGACGTAGTGTGGGAGT  
+HWI-EAS443:3:47:459:150#0/1  
^bYQW\_b`M`aabba[R¥UZ\_]bb]a`J`bK\_]ab`HLIZ  
@HWI-EAS443:3:47:62:93#0/1  
GAGGATTTCTCATTTTGGGCAAAGAAGACAAGAGATGGCC  
+HWI-EAS443:3:47:62:93#0/1  
aaaa\_aaaaa\_]aaa`\_`\_^\_a^`\_]\_]\_]\_¥Y\_ZTR  
@HWI-EAS443:3:48:1692:1113#0/1  
TGGCAATGAGATACCCAATTACAGCAGACAAGAGAAAGCT  
+HWI-EAS443:3:48:1692:1113#0/1  
aba`\_`aaba`]aa[^¥^`a[a\_\_`\_¥^¥`\_`\_^[^Z^  
@HWI-EAS443:3:49:765:130#0/1  
GAGGATTTCTCATTTTGGGCAAAGAAGACAAGAGATGGCC  
+HWI-EAS443:3:49:765:130#0/1  
aaaa]T¥X`aS\_\_Y^`\_`\_YOXZ\_]^^^\_W]YVXUTV  
@HWI-EAS443:3:4:1554:62#0/1  
GTCGCGTTTTCGTTTCATTACCAACACTACGTCCCCTTGC  
+HWI-EAS443:3:4:1554:62#0/1  
aPUDV]\_\_[]U[PX]RMTSVJLY¥0^VRURUVPRRXRBBB  
@HWI-EAS443:3:4:682:239#0/1  
TGGCAATGAGATACCCAATTACAGCAGACAAGAGAAAGCT  
+HWI-EAS443:3:4:682:239#0/1  
aaV\_^]^bTa[Ia`]X[\_\_\_]\_^\_XFT]0^SZ]S\_]SBBBB  
@HWI-EAS443:3:50:1278:1639#0/1  
GAGGATTTCTCATTTTGGGCAAAGAAGACAAGAGATGGCC  
+HWI-EAS443:3:50:1278:1639#0/1  
\_^abbbba`\_`bbbbbb`baa`baa`baaaaaaaaa¥Z^  
@HWI-EAS443:3:50:1774:654#0/1  
TGGCAATGAGATACCCAATTACAGCAGACAAGAGAAAGCT  
+HWI-EAS443:3:50:1774:654#0/1  
abbaabb`bbbbbbabbbbbbabbaabaabababaaabaa  
@HWI-EAS443:3:50:752:857#0/1  
TGGCAATGAGATACCCAATTACAGCAGACAAGAGAAAGCT  
+HWI-EAS443:3:50:752:857#0/1  
a`a`aabbba`aa`\_`\_aaaa\_aa^`a`¥a`aaaa`\_`Z^  
@HWI-EAS443:3:51:1155:558#0/1  
TGGCAATGAGATACCCAATTACAGCAGACAAGAGAAAGCT  
+HWI-EAS443:3:51:1155:558#0/1  
abbaaabbaabaaaa`baaa\_a`a`aa`\_`\_aaa`^\_]\_]a  
@HWI-EAS443:3:51:1516:1676#0/1  
TGGCAATGAGATACCCAATTACAGCAGACAAGAGAAAGCT  
+HWI-EAS443:3:51:1516:1676#0/1  
]\_M\_Y¥aaa\_YaaaX`a`]YaRS¥LZa¥P¥]^aa`ZaUY  
@HWI-EAS443:3:51:1616:1945#0/1  
ATTGCATCCTACTCTGTTCTGGTGGAGCAGCAGCAAGAGA  
+HWI-EAS443:3:51:1616:1945#0/1  
WZ]bKbb`\_`a\_bVa\_U[\_WIZ\_L`VX`a`b`\_`\_Q¥¥]¥]N  
@HWI-EAS443:3:53:661:1547#0/1  
CTTCTCTTTGATCTCTAACCCCTAAAAATCGGTCAATAG

+HWI-EAS443:3:53:661:1547#0/1  
abbbbabbbb`baabab\_aaaX`bbaaabbbba\_`aaaa\_  
@HWI-EAS443:3:53:667:71#0/1  
CGTTTTCGTTTCATTACCAACTACGTCCCCTTGCAAGA  
+HWI-EAS443:3:53:667:71#0/1  
Xa\_¥¥\_R\_\_bbbbZ\_bbXb`Zaa¥ab`[[[¥V\_bb]^`b  
@HWI-EAS443:3:54:641:1409#0/1  
TGGCAATGAGATACCCAATTACAGCAGACAAGAGAAAGCT  
+HWI-EAS443:3:54:641:1409#0/1  
`abaaaab`aaaaaaaabbaa\_aa`aa`aaaaa``\_`  
@HWI-EAS443:3:54:758:897#0/1  
CGGGCAAGGGGACGTAGTGTGGTAATGAAACGAAAAAGG  
+HWI-EAS443:3:54:758:897#0/1  
ab^[abbba]^^[\_U]bXb¥baaTOT\_^[aWQ[[`a[FZK  
@HWI-EAS443:3:55:1655:380#0/1  
GAGGAGAGTTGATACAAACCCTGGCCATGCAGATCTAAAT  
+HWI-EAS443:3:55:1655:380#0/1  
a]aZU^Z[[`aaaT]X]aRFY]XZZF^VUFQXFYQTFQ[Q  
@HWI-EAS443:3:55:802:674#0/1  
CTTCCTGATGTGTACTTTTTGATTATGGCCATATGGGCCA  
+HWI-EAS443:3:55:802:674#0/1  
Ka`bbb`bb`Ybab^\_bb`bb`b\_b\_[S¥a¥I¥OHYHGXH  
@HWI-EAS443:3:57:1157:1448#0/1  
ATTGTTTCATACCCTTCATGTACTCTTATTTTCAGTGTTTG  
+HWI-EAS443:3:57:1157:1448#0/1  
Xa`Sabbabbababaa`bbababbbbbbbbaaabbbbbbb  
@HWI-EAS443:3:57:280:1999#0/1  
CGCACTCGCGAGATACTCACTAAGACCACTGTGGACGATA  
+HWI-EAS443:3:57:280:1999#0/1  
¥K[\_VU[\_Z\_V\_]PZUMFYT¥BBBBBBBBBBBBBBBBBBB  
@HWI-EAS443:3:58:1449:204#0/1  
TGGCAATGAGATACCCAATTACAGCAGACAAGAGAAAGCT  
+HWI-EAS443:3:58:1449:204#0/1  
aaa`a`baaYaa\_a\_aaa`a^^`¥^^`\_\_\_]a\_^\_\_¥`Z`  
@HWI-EAS443:3:58:1598:1554#0/1  
GATGGCAATGAGATACCCAATTACAGCAGACAAGAGGAAA  
+HWI-EAS443:3:58:1598:1554#0/1  
`\_`[Saaa^a\_]a\_SZ[[\_`\_\_^`\_]`a\_X\_^XW`]]]  
@HWI-EAS443:3:59:1106:1992#0/1  
TGGCAATGAGATACCCAATTACAGCAGACAAGAGAAAGAT  
+HWI-EAS443:3:59:1106:1992#0/1  
ab^]bbbbbb\_ba```[abaa`V`\_^aaa`a]`Z^ZX`GV  
@HWI-EAS443:3:59:1165:141#0/1  
CCAAAATGAGAAATCCTCTCAGGACAGCAGACTCCAGCCC  
+HWI-EAS443:3:59:1165:141#0/1  
[J]]]Z^¥Z\_`Ya\_X\_]aaaa¥X]^]a\_S[VNPGQQR  
@HWI-EAS443:3:59:1505:114#0/1  
GTCAAATGTCCAAGCACATCCCGCATTGCTGGAAGAGT  
+HWI-EAS443:3:59:1505:114#0/1  
aZ\_a```a\_Z[¥\_¥\_¥`W^\_VVY\_V¥[Y[\_WU^¥WPRWUT

@HWI-EAS443:3:59:1598:389#0/1  
TGGCAATGAGATACCCAATTACAGCAGACAAGAGAAAGCT  
+HWI-EAS443:3:59:1598:389#0/1  
abb`aa`abaaa]0Xbaa^a\_a\_Qaba¥a\_[]X]YN`L[  
@HWI-EAS443:3:59:350:1665#0/1  
GAGGATTTCTCATTTTGGGCAAAGAAGACAAGAGATGGCC  
+HWI-EAS443:3:59:350:1665#0/1  
\_`baaabaabbba`ab\_a`b^abaa]aaab]¥\_\_^T\_XTS  
@HWI-EAS443:3:59:565:1426#0/1  
CGCACTCAGAATGAAGTGGATGATGGCAATGAGATAACAA  
+HWI-EAS443:3:59:565:1426#0/1  
\_\_RXZ`b\_Z\_`^RTQ[0\_`]abb]a`^¥[\_T`R`a`XTQ`  
@HWI-EAS443:3:59:586:1342#0/1  
TGGCAATGAGATACCCAATTACAGCAGACAAGAGAAAGCT  
+HWI-EAS443:3:59:586:1342#0/1  
a`aaaabaa`a`aa\_abaa`aaaa\_a^a\_a\_Za\_\_^X\_UX  
@HWI-EAS443:3:59:653:416#0/1  
GTGGACAGGGCCGAAGGTACCATGTTTCAACCTTCAACC  
+HWI-EAS443:3:59:653:416#0/1  
aaYa\_`\_]\_aa[][\_V\_]aZ[\_`]\_aW\_¥`aVZ[^\_VZ]OZ  
@HWI-EAS443:3:59:701:1387#0/1  
GATCTTGTGACCATTGAATTTTCAATTTCCAGTGCCT  
+HWI-EAS443:3:59:701:1387#0/1  
\_WQ^WS^^\_Q\_]TQ^¥aZZXUQZH[[BBBBBBBBBBBBBB  
@HWI-EAS443:3:59:830:1889#0/1  
AAAGAACTGAGAGATCTAATGTTCGCAGTCCCGCACTGGCG  
+HWI-EAS443:3:59:830:1889#0/1  
Va\_aaaRaabb[`S[Ua`\_`a`bYab\_`\_`¥X\_Z\_JFON[  
@HWI-EAS443:3:5:1337:1285#0/1  
GAGGATTTCTCATTTTGGGCAAAGAAGACAAGAGATGGCC  
+HWI-EAS443:3:5:1337:1285#0/1  
a`aaa\_aa\_a\_```a\_`^\_^^`\_`\_a]`^\_^^\_X^`BB  
@HWI-EAS443:3:5:1385:424#0/1  
TTACCCTAAGGTATATAAACTTATTTTCAAAGGTTGAA  
+HWI-EAS443:3:5:1385:424#0/1  
abb`aababbb^abaaaaa\_a`aaaa`a\_`a`b\_]`aaa  
@HWI-EAS443:3:5:1625:1390#0/1  
GAGGATTTCTCATTTTGGGCAAAGAAGACAAGAGATGGCC  
+HWI-EAS443:3:5:1625:1390#0/1  
a`a¥[\_a\_\_a\_^aaaa`aa^\_]\_]^a\_X]^a^\_]Z\_\_BB  
@HWI-EAS443:3:5:450:101#0/1  
GCCGCAGCACAGATTGGAGGAGTAAGGATGGTGGACAT  
+HWI-EAS443:3:5:450:101#0/1  
aUaaZaaa`aa]ab¥a`ba\_ba^a\_a\_^^\_]¥aU\_\_ZS\_\_  
@HWI-EAS443:3:60:1616:603#0/1  
GAGGATTTCTCATTTTGGGCAAAGAAGACAAGAGATGGCC  
+HWI-EAS443:3:60:1616:603#0/1  
abab^aaa\_a`a`aaaa^a`\_a^\_aa\_\_^\_]\_\_X\_]`  
@HWI-EAS443:3:60:169:1856#0/1  
AAAAAACTGAGAGATCTAATGTTCGCAGTCCCGCACTCGCG

+HWI-EAS443:3:60:169:1856#0/1  
aaa¥aa\_a`\_\_a\_\_\_\_\_`a[a`Y`\_\_][WW\_UQX]^^VV]T  
@HWI-EAS443:3:60:265:866#0/1  
TGAGGGCACATCTGGGGTGGAGTCTGCTGTCCTGAGAGGA  
+HWI-EAS443:3:60:265:866#0/1  
]`YD[`abaXa]aaba^P\_a¥`\_\_\_\_][[XY`[N¥RTQX`S  
@HWI-EAS443:3:60:397:1348#0/1  
TGGCAATGAGATACCCAATTACAGCAGACAAGAGAAAGCT  
+HWI-EAS443:3:60:397:1348#0/1  
aaa`^^abaaaaaba`baaaa\_\_aa\_\_\_\_\_a[`\_¥]\_]\_\_  
@HWI-EAS443:3:60:743:751#0/1  
TGGCAATGAGATACCCAATTACAGCAGACAAGAGAAAGCT  
+HWI-EAS443:3:60:743:751#0/1  
abbaaabbbabbabbbbaaa]aa]b`\_aaa`aaaa```  
@HWI-EAS443:3:61:1387:263#0/1  
TGGCAATGAGATACCCAATTACAGCAGACAAGAGAAAGCT  
+HWI-EAS443:3:61:1387:263#0/1  
abaZ]abbabaaa`ab```aa`aaaa\_\_^¥`[\_^]XZTT  
@HWI-EAS443:3:61:719:69#0/1  
GCCATATGGTCCACAGTGGTCTTAGTGAGTATCTCGTGAG  
+HWI-EAS443:3:61:719:69#0/1  
a`UYRMT^`U¥^]NZ\_NX\_MRSSZYSBBBBBBBBBBBBB  
@HWI-EAS443:3:62:1144:558#0/1  
GAGGATTTCTCATTTTGGGCAAAGAAGACAAGAGATGGCC  
+HWI-EAS443:3:62:1144:558#0/1  
aZ^^¥P]\_RMWFS]\_\_\_¥`^XXZ¥ZX¥]^RZY]ZXZZZW  
@HWI-EAS443:3:62:1520:711#0/1  
TGGCAATGAGATACCCAATTACAGCAGACAAGAGAAAGCT  
+HWI-EAS443:3:62:1520:711#0/1  
^^b`babaaaaaaaaabbaab`aaaaaaaaaaaa`a`\_aaa  
@HWI-EAS443:3:62:94:1735#0/1  
ACCATATGGCCATAATCAAAAAGTACACATCAGGAAAACA  
+HWI-EAS443:3:62:94:1735#0/1  
a`ba\_a`a`aa^aa\_]aa]\_S]^[]`[]^R[^`a\_\_  
@HWI-EAS443:3:63:1626:1337#0/1  
TGGCAATGAGATACCCAATTACAGCAGACAAGAGAAAGCT  
+HWI-EAS443:3:63:1626:1337#0/1  
abaaaabbbbaaaa`bbbaa`^^aadW`]aa`aa`]aa  
@HWI-EAS443:3:64:384:211#0/1  
TGGCAATGAGATACCCAATTACAGCAGACAAGAGAAAGCT  
+HWI-EAS443:3:64:384:211#0/1  
abab]]bbabaabaaaaa`b`aaa`a]\_a\_a`aa``\_W`  
@HWI-EAS443:3:64:680:1401#0/1  
GTCTCGTTTTTCGTTTCATTACCAACTACGTCCCTTGC  
+HWI-EAS443:3:64:680:1401#0/1  
a]``a^Y\_``]^\_]¥aZ]]aY``^a^[\_^Z[¥^ZVYLQV  
@HWI-EAS443:3:65:125:1081#0/1  
CAATGATTTCTCATTTTGGGCAAAGAAGACAAGAGATATG  
+HWI-EAS443:3:65:125:1081#0/1  
^N\_a^^bba`aa\_a`aaaa\_a]abaXa\_`a^`\_^`^`\_¥

@HWI-EAS443:3:65:1395:81#0/1  
TGGCAATGAGATACCCAATTACAGCAGACAAGAGAAAGCT  
+HWI-EAS443:3:65:1395:81#0/1  
abb^]YK^Y`\_aa\_\_`Ya\_\_WS`]\_aZ\_]Z`W`RFQ\_W^  
@HWI-EAS443:3:65:1400:1319#0/1  
TGGCAATGAGATACCCAATTACAGCAGACAAGAGAAAGCT  
+HWI-EAS443:3:65:1400:1319#0/1  
`\_V¥Q¥X^V`^a\_]Y]\_¥aaYY¥^^]\_Zaaa^[\_Y\_W]]  
@HWI-EAS443:3:65:1722:640#0/1  
TGGCAATGAGATACCCAATTACAGCAGACAAGAGAAAGCT  
+HWI-EAS443:3:65:1722:640#0/1  
\_`\_\_Y\_`aaa^aa]]Y`^`\_0Y]`X]\_Z¥`Ma^]a\_a\_]`  
@HWI-EAS443:3:66:75:40#0/1  
GGTTGAAAGTTGAAACATGGTACCTTCGGCCCTGTCCAC  
+HWI-EAS443:3:66:75:40#0/1  
a]W[Z¥VM^`V`^`WO[X¥\_]Q^¥^XZ[Z]YY¥U[WSVVW  
@HWI-EAS443:3:67:1110:346#0/1  
TGGCAATGAGATACCCAATTACAGCAGACAAGAGAAAGCT  
+HWI-EAS443:3:67:1110:346#0/1  
aaaba^b]aba`a``abaa`a`aa^Ya\_\_\_¥aa`a`\_a\_\_\_  
@HWI-EAS443:3:67:1247:1779#0/1  
GAGGATTTCTCATTTTGGGCAAAGAAGACAAGAGATGGCC  
+HWI-EAS443:3:67:1247:1779#0/1  
aaQQNa\_N]V^VWRWLNKUaaZYG]]`¥NXK¥SVYWGWOL  
@HWI-EAS443:3:68:1552:1491#0/1  
TGGCAATGAGATACCCAATTACAGCAGACAAGAGAAAGCT  
+HWI-EAS443:3:68:1552:1491#0/1  
aa`¥`^aa`aaa]]ba^Za`aa\_ba`\_`[a\_]\_\_]\_]a  
@HWI-EAS443:3:68:704:672#0/1  
TGCCGGTGCATTGACTGAAGATCCAGATGAAGGCACATCT  
+HWI-EAS443:3:68:704:672#0/1  
Ua^JT^]T\_aa]a\_a]T]baabaab\_Ua`X]]XM``]a`b  
@HWI-EAS443:3:69:1119:905#0/1  
TGGCAATGAGATACCCAATTACAGCAGACAAGAGAAAGCT  
+HWI-EAS443:3:69:1119:905#0/1  
^```\_aabaa^^\_aabb`aa`aa`a`\_a\_aaa]Z\_a\_`  
@HWI-EAS443:3:69:637:280#0/1  
TGGCAATGAGATACCCAATTACAGCAGACAAGAGAAAGCT  
+HWI-EAS443:3:69:637:280#0/1  
\_bbbaZUaVV]]ababa[aaZb[Y]S¥Y¥Xbaa``¥]WZ`  
@HWI-EAS443:3:69:759:1246#0/1  
ATGGCAATGAGATACCCAATTACAGCAGACAAGAGAGTCT  
+HWI-EAS443:3:69:759:1246#0/1  
aaU\_b^WR¥a¥IXa`b`¥`a]]Y]`a`^Y`a`\_aZ]LY`  
@HWI-EAS443:3:6:307:1414#0/1  
TGGCAATGAGATACCCAATTACAGCAGACAAGAGAAAGCT  
+HWI-EAS443:3:6:307:1414#0/1  
ab^`aa[``aabaX]`b\_]baaa`a^a[]T]baa`\_`^a  
@HWI-EAS443:3:70:1475:1709#0/1  
CAATGATTTCTCATTTTGGGCAAAGAAGACAAGAGATATG

+HWI-EAS443:3:70:1475:1709#0/1  
``[¥X`aaa`\_a^Y`[Y^bWabaaabaaaaa^a]\_a[U  
@HWI-EAS443:3:70:24:1880#0/1  
GAGGATTTCTCATTTTGGGCAAAGAAGACAAGAGATGGCC  
+HWI-EAS443:3:70:24:1880#0/1  
Z^`[aaabaabb\_a`U^aaa[L¥aaaaaV^`]aYVSa\_  
@HWI-EAS443:3:71:271:1526#0/1  
CGCACTCAGAATGAAGTGGATGATGGCAATGAGATAGTCT  
+HWI-EAS443:3:71:271:1526#0/1  
`b\_a`aaa¥]aa\_a`W`\_\_\_\_`][Za^[^Z^\_\_]¥UUWW  
@HWI-EAS443:3:71:848:200#0/1  
CAAAATGAGAAATCCTCTCAGGACAGCAGACTCCACATTC  
+HWI-EAS443:3:71:848:200#0/1  
a^[`a]MYb^\_\_¥RH[¥V\_`a`¥R]^¥abY[\_`\_^0^a\_]`  
@HWI-EAS443:3:72:898:953#0/1  
ATGCAATCCTCTTGTGAGAATACCATGGCCACAATTTCCC  
+HWI-EAS443:3:72:898:953#0/1  
aaa`bbaa`\_`]a^Y`\_a^`\_\_^¥`^\_\_]`\_a\_ZZ^S¥[  
@HWI-EAS443:3:73:1320:1911#0/1  
AAACGAAGTGGAGATCTAATGTGCGAGTCCCGCACTCGC  
+HWI-EAS443:3:73:1320:1911#0/1  
^`\_JVa`]¥aababaabbaa^`]V`]`\_ZN`P]PXY^aXU\_  
@HWI-EAS443:3:74:522:93#0/1  
GAGGATTTCTCATTTTGGGCAAAGAAGACAAGAGATGCCC  
+HWI-EAS443:3:74:522:93#0/1  
Y¥V]¥aa¥]^\_b`ZZ\_]a]^aaYa\_`]R¥a\_``aY[]YSR  
@HWI-EAS443:3:74:614:1640#0/1  
TGGCAATGAGATACCCAATTACAGCAGACAAGAGAAAAGCT  
+HWI-EAS443:3:74:614:1640#0/1  
a``aXV`\_X\_]`\_ba\_baabbbbaa`aaa`aa`\_b\_\_a\_\_  
@HWI-EAS443:3:74:68:1485#0/1  
TGGCAATGAGATACCCAATTACAGCAGACAAGAGAAAAGCT  
+HWI-EAS443:3:74:68:1485#0/1  
^aab]¥`b\_aa`\_b`abaa`[\_`\_abaaa``Ya¥aXa\_\_Y  
@HWI-EAS443:3:75:1064:1723#0/1  
TGGCAATGAGATACCCAATTACAGCAGACAAGAGAAAAGCT  
+HWI-EAS443:3:75:1064:1723#0/1  
abX^Xa`a\_Zaab`R¥b\_b`ba[b\_aX`bbbbbbba`]Ia  
@HWI-EAS443:3:75:1113:830#0/1  
GAGGATTTCTCATTTTGGGCAAAGAAGACAAGAGATGGCC  
+HWI-EAS443:3:75:1113:830#0/1  
\_abaaabaababbbabbab\_aaaaaaba``aaaa`\_`\_`Y  
@HWI-EAS443:3:75:1549:1984#0/1  
GATGGCAATGAGATACCCAATTACAGCAGACAAGAGGAAA  
+HWI-EAS443:3:75:1549:1984#0/1  
a\_\_]\_¥T]``aaaU]a\_R\_aaa\_]\_\_VR[\_P\_Ra^a[0¥`  
@HWI-EAS443:3:75:907:202#0/1  
GAGGATTTCTCATTTTGGGCAAAGAAGACAAGAGATGGCC  
+HWI-EAS443:3:75:907:202#0/1  
\_Z`bUYW¥baW¥^``T`\_V^`Waba\_a`]ba`G^SW\_[IX

@HWI-EAS443:3:76:1347:1434#0/1  
TGGCAATGAGATACCCAATTACAGCAGACAAGAGAAAGCT  
+HWI-EAS443:3:76:1347:1434#0/1  
a`aa^aaa\_b`a\_a]`aa`^`\_a\_]`\_a`^`\_[X\_  
@HWI-EAS443:3:77:1231:645#0/1  
GGGCATCTCATTGCCATCATCCACTTCATTCTGAGTGCGG  
+HWI-EAS443:3:77:1231:645#0/1  
aaYDWaa`Vb`\_¥YQ¥a\_]Z\_]a¥a\_\_aa\_T`^aU^T]\_  
@HWI-EAS443:3:77:1436:440#0/1  
GCTGTAATTGGGTATCTCATTGCCATCATCCACTTCTTCC  
+HWI-EAS443:3:77:1436:440#0/1  
aab^NLO\_]`^ZU\_^JUWYXUURZ^[\_X\_]YS\_¥\_RSPUR  
@HWI-EAS443:3:77:1647:263#0/1  
TGGCAATGAGATACCCAATTACAGCAGACAAGAGAAAGCT  
+HWI-EAS443:3:77:1647:263#0/1  
aba\_Xaaa^a`a]W\_aa`\_aa`\_\_\_\_a^W^^\_\_\_\_`¥^]]^  
@HWI-EAS443:3:77:235:580#0/1  
GAGGATTTCTCATTTTGGGCAAAGAAGACAAGAGATGGCC  
+HWI-EAS443:3:77:235:580#0/1  
`abaaaaaaaaaaaaaaaaaaaaa`^`aa`\_`\_\_Y\_^\_\_  
@HWI-EAS443:3:77:436:623#0/1  
GAGGATTTCTCATTTTGGGCAAAGAAGACAAGAGATGGCC  
+HWI-EAS443:3:77:436:623#0/1  
]]ba\_`aaaaabaaaa`a`^aaaaaa^aaa`\_\_`\_\_]  
@HWI-EAS443:3:77:843:444#0/1  
GAGGGATCTAATGTCGAGTCCCGCACTCGCGAGATACTC  
+HWI-EAS443:3:77:843:444#0/1  
a`abbabbbabbX``baaVbb^Z^`aaaa]a\_`^`^`\_T  
@HWI-EAS443:3:78:464:1685#0/1  
TGGCAATGAGATACCCAATTACAGCAGACAAGAGAAAGCT  
+HWI-EAS443:3:78:464:1685#0/1  
^aba`ZV]]aa]Yaabbaa`b`ba`aaa`aaaa^aaa`\_Z  
@HWI-EAS443:3:78:491:511#0/1  
TGGCAATGAGATACCCAATTACAGCAGACAAGAGAAAGCT  
+HWI-EAS443:3:78:491:511#0/1  
`bab`^`aZ¥aaaaa`Y`aaaaba]T\_a]\_aaa`a`\_`^`  
@HWI-EAS443:3:78:591:1577#0/1  
GGGCTCTGCTGTAATTGGGTATCTCATTGCCATCATCCAC  
+HWI-EAS443:3:78:591:1577#0/1  
aa\_`\_aaZaaaN\_X¥b`U\_Ya\_baZ[abS`ba¥Ua]Wa¥R  
@HWI-EAS443:3:79:1171:325#0/1  
TGGCAATGAGATACCCAATTACAGCAGACAAGAGAAAGCT  
+HWI-EAS443:3:79:1171:325#0/1  
TaXZU¥b¥R^abbVT¥V`¥YVIXa^`\_`U\_W^`a\_P^TN]  
@HWI-EAS443:3:79:976:1774#0/1  
AAGAGAGTCTGCTGTCTGAGAGGATTTCTCATTTTGGGC  
+HWI-EAS443:3:79:976:1774#0/1  
a\_`^^`ZbaaaYZ¥a`\_]\_[aX¥``\_aa\_]\_\_`a\_`\_Ta\_  
@HWI-EAS443:3:7:1017:1814#0/1  
CGAGCAGTCAATTGCTGAGGCAATAATTGTGGCCATTGTA

+HWI-EAS443:3:7:1017:1814#0/1  
]¥abX^KK^b\_\_ba\_b^b\_VVb¥`UYXa\_U\_¥aaY`BBBB  
@HWI-EAS443:3:7:1278:715#0/1  
TGGCAATGAGATACCCAATTACAGCAGACAAGAGAAAGCT  
+HWI-EAS443:3:7:1278:715#0/1  
RRP^[]¥XX`abZUWPYW¥a]QVUNZ¥]Ja\_\_Z\_``PXJ[  
@HWI-EAS443:3:7:1361:157#0/1  
TGGAATTCTCACAAGAGGATTGCATGATCAAGGCAGTTAG  
+HWI-EAS443:3:7:1361:157#0/1  
abaGa`Z\_]Q\_aaab\_aaV`aZP^\_\_X`WZZ`^UXBBBBB  
@HWI-EAS443:3:7:1647:1840#0/1  
ATGGCAATGAGATACCCAATTACAGCAGACAAGAGAGCAT  
+HWI-EAS443:3:7:1647:1840#0/1  
]a```aYZJS^ba^PT[]\_`aaU\_¥UXH\_a]\_`\_]ZKSaB  
@HWI-EAS443:3:7:564:603#0/1  
GACCACTGTGGACCATATGGCCATAATCAAAAAGTAGGAA  
+HWI-EAS443:3:7:564:603#0/1  
ab`\_¥\_X`]baYYYaa\_Z[XZ`¥QT[[^]X¥^Za[aa`]  
@HWI-EAS443:3:80:550:2007#0/1  
TGGCAATGAGATACCCAATTACAGCAGACAAGAGAAAGCT  
+HWI-EAS443:3:80:550:2007#0/1  
\_a\_a^```Y`aaa`^\_ba`]aaaabaa\_`a`Xa^a`\_Y^a  
@HWI-EAS443:3:80:613:745#0/1  
TGGCAATGAGATACCCAATTACAGCAGACAAGAGAAAGCT  
+HWI-EAS443:3:80:613:745#0/1  
aaaaaaab`b`a`aaabaaaa`a\_`a`X\_`\_\_`a\_\_]\_W`  
@HWI-EAS443:3:80:92:710#0/1  
GAGGATTTCTCATTGTTGGGCAAAGAAGACAAGAGATGGCC  
+HWI-EAS443:3:80:92:710#0/1  
`baaZ^baaa]Y`aaa\_Y]aaaa¥`¥a`a\_`^\_]\_[XXU^\_  
@HWI-EAS443:3:81:230:1484#0/1  
GAGGATTTCTCATTGTTGGGCAAAGAAGACAAGAGATGGCC  
+HWI-EAS443:3:81:230:1484#0/1  
`baaaababaa¥\_a`aa]aaZ]`aba^aaaa]\_]\_]\_Y\_^  
@HWI-EAS443:3:81:474:957#0/1  
GTCTCGTTTTTCGTTTCATTACCAACTACTGCCCTTGC  
+HWI-EAS443:3:81:474:957#0/1  
aa\_H`b\_abaab`aa^[`aa\_aaZ]a\_`aa\_Ya]]Y\_^]  
@HWI-EAS443:3:81:538:673#0/1  
TGGCAATGAGATACCCAATTACAGCAGACAAGAGAAAGCT  
+HWI-EAS443:3:81:538:673#0/1  
abab^abaabaabaabbbaaa`aaaa\_aaabaaa``^  
@HWI-EAS443:3:82:374:1708#0/1  
TGGCAATGAGATACCCAATTACAGCAGACAAGAGAAAGCT  
+HWI-EAS443:3:82:374:1708#0/1  
a[Ua¥¥]]\_aa]aaaabaa\_`[]X^```\_aa\_Y\_\_X`Z[`  
@HWI-EAS443:3:83:532:301#0/1  
CCAAAATGAGAAATCCTCTCAGGACAGCAGACTCCAAGCC  
+HWI-EAS443:3:83:532:301#0/1  
aba``^abbbbbbaabaabaabbaabaaaa`^\_P\_SR[B



@HWI-EAS443:3:84:252:679#0/1  
ATGGCAATGAGATACCCAATTACAGCAGACAAGAGAGCAT  
+HWI-EAS443:3:84:252:679#0/1  
`a`aaaaa\_b]aaaaa[`a^`aa\_\_`a\_\_a`a^a\_aZ  
@HWI-EAS443:3:84:454:1821#0/1  
TGGCAATGAGATACCCAATTACAGCAGACAAGAGAAAGCT  
+HWI-EAS443:3:84:454:1821#0/1  
a`[a`aaaQY\_¥`^¥\_¥W\_\_\_¥¥Y]¥\_a\_WZ^YaaaZW\_  
@HWI-EAS443:3:86:1001:1618#0/1  
ATCTAATGTCGCAGTCCCGCACTCGCGAGATACTCAGTAA  
+HWI-EAS443:3:86:1001:1618#0/1  
aaa^)]aa\_aa\_aaQ`[\_H\_S\_`P\_G]\_\_a\_[NNM¥FWY^  
@HWI-EAS443:3:86:1529:265#0/1  
GATCAGGGTTGAGGATACTGGTAAGAGGCAATTCTCTAGT  
+HWI-EAS443:3:86:1529:265#0/1  
aa`]YZWQP\_a``Za\_``¥]F[¥WYW]V`H\_YLUTDM]Z  
@HWI-EAS443:3:87:1018:1771#0/1  
TGGCAATGAGATACCCAATTACAGCAGACAAGAGAAAGCT  
+HWI-EAS443:3:87:1018:1771#0/1  
abaaaabbaaaabaaaab`aaaa`aaa\_a\_aaaa``a¥a  
@HWI-EAS443:3:87:576:267#0/1  
CTAATGTGCTAATTGGGCAAGGGACGTAGTGTGGGAAT  
+HWI-EAS443:3:87:576:267#0/1  
I¥bb¥¥TaU\_¥^aa`b`aVaV¥U\_SHXH[\_]\_Zab¥Y`Ua  
@HWI-EAS443:3:87:83:911#0/1  
TGGCAATGAGATACCCAATTACAGCAGACAAGAGAAAGCT  
+HWI-EAS443:3:87:83:911#0/1  
aaa`]`aa\_aaaaaaaaa`aaY``\_```Z\_^`\_\_[\_^^  
@HWI-EAS443:3:88:969:85#0/1  
GAATGATTTCTCATTTTGGGCAAAGAAGACAAGAGATATG  
+HWI-EAS443:3:88:969:85#0/1  
aa`aaabaa`aaaaaaba`\_\_a`\_a```]a\_a\_¥\_]\_  
@HWI-EAS443:3:88:999:226#0/1  
TGGCAATGAGATACCCAATTACAGCAGACAAGAGAAAGCT  
+HWI-EAS443:3:88:999:226#0/1  
aa\_a`\_ba`a^`\_]a`a`a^`\_Z^`\_Z\_\_\_\_\_``^\_S\_  
@HWI-EAS443:3:89:477:1795#0/1  
ATGGCAATGAGATACCCAATTACAGCAGACAAGAGAGTCT  
+HWI-EAS443:3:89:477:1795#0/1  
aa^^[]WLY\_R\_Y\_`a[U\_VL^]UWUWZ\_\_XV^BBBBBBB  
@HWI-EAS443:3:8:1523:1520#0/1  
GAGGATTTCTCATTTTGGGCAAAGAAGACAAGAGATGGCC  
+HWI-EAS443:3:8:1523:1520#0/1  
a`^Y`aaaY]Y^\_a\_]\_`Z\_\_\_a\_]\_^Z`^\_]\_]X^YVW  
@HWI-EAS443:3:8:803:1741#0/1  
TGGCAATGAGATACCCAATTACAGCAGACAAGAGAAAGCT  
+HWI-EAS443:3:8:803:1741#0/1  
aa\_\_a¥aa\_ba\_b`aabba^b\_a`[aab^a`abaYa\_Z^  
@HWI-EAS443:3:90:1107:983#0/1  
TGGCAATGAGATACCCAATTACAGCAGACAAGAGAAAGCT

+HWI-EAS443:3:90:1107:983#0/1  
\_QL\_\_a]baaa\_a^N\_a[aaa\_b\_\_`a][a\_a\_a¥a\_\_aa  
@HWI-EAS443:3:90:195:102#0/1  
TGGCAATGAGATACCCAATTACAGCAGACAAGAGAAAGCT  
+HWI-EAS443:3:90:195:102#0/1  
aabb[W^^^bb\_\_aaY]b]]W]\_XY^[[\_\_`¥\_^^^ZS^  
@HWI-EAS443:3:91:1350:685#0/1  
AAAATTGCATCCTACTCTGTTCTGGTGGAGCAGCAGGCAG  
+HWI-EAS443:3:91:1350:685#0/1  
]``bbaa^^aababaaZ\_bbba\_abU^aaba]bZaaaP]a  
@HWI-EAS443:3:92:1345:438#0/1  
CTAATGTGCTAATTGGGCAAGGGGACGTAGTGTGGGAAT  
+HWI-EAS443:3:92:1345:438#0/1  
ab`\_]a[\_]b\_baabb\_^abbb]\_ba^a`]^`aaa\_F¥`Y  
@HWI-EAS443:3:93:1299:401#0/1  
TGGCAATGAGATACCCAATTACAGCAGACAAGAGAAAGCT  
+HWI-EAS443:3:93:1299:401#0/1  
aba`a`bb`aa`\_] [aa\_aaa¥\_a0``\_\_^]\_\_a``]^`Wa  
@HWI-EAS443:3:94:1677:409#0/1  
AGCTTCTCTGTCTGCTGTAATTGGGTATCTCATTGCCA  
+HWI-EAS443:3:94:1677:409#0/1  
a\_abbbbabaa\_a^\_^`a`a`baX^ZV`aSa\_a\_]T^¥  
@HWI-EAS443:3:94:1739:1396#0/1  
AAAGAATGTGCTAATTGGGCAAGGGGACGTAGTGTGGTA  
+HWI-EAS443:3:94:1739:1396#0/1  
aa` [ `baa¥aaaa`baaaa\_a`ba^a^ab`]^`¥`\_aaaZ¥  
@HWI-EAS443:3:94:32:67#0/1  
GAACGCTAATGTGCTAATTGGGCAAGGGGACGTAGTGTG  
+HWI-EAS443:3:94:32:67#0/1  
T`\_TUG[OQO\_V^\_aa]^U¥\_^^V^^a\_[M[ `NLTP¥YUU  
@HWI-EAS443:3:94:615:1999#0/1  
GAGGATTTCTCATTGTTGGGCAAAGAAGACAAGAGATGGCC  
+HWI-EAS443:3:94:615:1999#0/1  
a`V[a\_[ab`aab\_aaaaaabaa``bb\_a`aaaa`\_\_^`  
@HWI-EAS443:3:95:1684:67#0/1  
TGTGTACTTTTTGATTATGGCCATATGGTCCACAGTTGTC  
+HWI-EAS443:3:95:1684:67#0/1  
Oba`^a`aab`bb]ab`baaaaa`\_a\_X\_X\_^\_]XJZBB  
@HWI-EAS443:3:95:407:1551#0/1  
GAGGATTTCTCATTGTTGGGCAAAGAAGACAAGAGATGGCC  
+HWI-EAS443:3:95:407:1551#0/1  
`bbbbbb`bbbbbbba\_]abbbaaa`aab`ab``\_aadW  
@HWI-EAS443:3:95:440:1487#0/1  
AGACAATAAAAGAACTGAGAGATCTAATGTCGCAGTCCCG  
+HWI-EAS443:3:95:440:1487#0/1  
Y¥WT]\_U[ba`¥Ub\_bb[SPS][a]aa\_bP]^`[bbOT`YJ  
@HWI-EAS443:3:95:548:792#0/1  
TGGCAATGAGATACCCAATTACAGCAGACAAGAGAAAGCT  
+HWI-EAS443:3:95:548:792#0/1  
PS\_0¥aTUTUUV\_`^\_Y^`^`aI`a^\_ZI\_VU^\_aOPTa\_\_

@HWI-EAS443:3:95:925:463#0/1  
TGGCAATGAGATACCCAATTACAGCAGACAAGAGAAAGCT  
+HWI-EAS443:3:95:925:463#0/1  
aba`¥XXZZb[a¥¥F[^\_a\_Y\_\_a[`]\_\_ZT[]¥Z¥T]RP  
@HWI-EAS443:3:95:935:820#0/1  
GTCCTCCTGATGTGTACTTTTTGATTATGGCCATATGGTC  
+HWI-EAS443:3:95:935:820#0/1  
W\_``[F]¥¥W¥¥W`R¥Ub``]b^V^`U]`aa`\_UVXb]BB  
@HWI-EAS443:3:96:671:1094#0/1  
TGGCAATGAGATACCCAATTACAGCAGACAAGAGAAAGCT  
+HWI-EAS443:3:96:671:1094#0/1  
Y¥`W]¥¥PWT\_V\_ZIX]W[¥YW¥YZ]`ZUZU\_[Y]T^]B  
@HWI-EAS443:3:97:1121:1497#0/1  
GAACAGGCAGTGTATTATATTGAAGTGTGCACTTAAACCA  
+HWI-EAS443:3:97:1121:1497#0/1  
][^aa`Tb\_`¥¥ZVR¥Wa``R^[\_¥ZaI]]^¥¥`bVZN¥  
@HWI-EAS443:3:97:97:227#0/1  
AAAAGAAGTCTAATGTCGAGTCCCGCACGCGC  
+HWI-EAS443:3:97:97:227#0/1  
]ab¥\_^\_bbb¥X^b`a`b[]]aPU\_`a]W\_`\_`\_BBBBBB  
@HWI-EAS443:3:98:1000:1251#0/1  
GAGGATTTCTCATTTTGGGCAAAGAAGACAAGAGATGGCC  
+HWI-EAS443:3:98:1000:1251#0/1  
aaa]Yabaaa`aaaaaaaa\_a`a``\_aa\_a^`\_aa`^¥\_^  
@HWI-EAS443:3:99:1765:1430#0/1  
GAGGATTTCTCATTTTGGGCAAAGAAGACAAGAGATGGCC  
+HWI-EAS443:3:99:1765:1430#0/1  
a`aa\_bb[\_b[baaa`a^`W`\_`a\_\_a`R`\_a[\_\_\_]\_OVX  
@HWI-EAS443:3:99:443:332#0/1  
TGGCAATGAGATACCCAATTACAGCAGACAAGAGAAAGCT  
+HWI-EAS443:3:99:443:332#0/1  
abbTPP^W[]Q\_\_[[FRQV\_`PP^YOU`\_Z`\_]\_UZ`X[  
@HWI-EAS443:3:9:45:1872#0/1  
GCACAGGATGTGATTATGGAAGTTGTTTTCCCAAATTAAG  
+HWI-EAS443:3:9:45:1872#0/1  
abaaaaa`a]`¥\_aa`a]WaaGXPVXa]H[WGT\_NFL]Y  
@HWI-EAS443:3:70:714:61#0/1  
GCCCCTTTTCGTTTCATTACCAACANTACGTCCCCTTGCC  
+HWI-EAS443:3:70:714:61#0/1  
aba\_baaaaa`aa]aaaa`aa\_[Dwa\_aW]XY]`^]Y  
@HWI-EAS443:3:100:136:1720#0/1  
GGTGGGTTCACTTTCAAAGGACAAGCGGATCATCTGTCA  
+HWI-EAS443:3:100:136:1720#0/1  
abV]X^L\_^a]aa¥Y^aS]b^\_aa\_¥Sa\_W¥\_\_W\_F\_WTB  
@HWI-EAS443:3:100:1691:342#0/1  
GAATAAAAGAAGTCTAATGTCGAGTCCCGCAC  
+HWI-EAS443:3:100:1691:342#0/1  
abUbVbbabYaGbaa[ba`ZZaaaaQDKXW`S\_TWZBBBB  
@HWI-EAS443:3:100:277:101#0/1  
GTCCCCTTTTCGTTTCATTACCAAGACTACGTCCCCTTGC

+HWI-EAS443:3:100:277:101#0/1  
^^a]aa\_]ba\_bXaaTaa\_a]]\_UHY]\_^a]UVQY]\_BB  
@HWI-EAS443:3:100:63:1979#0/1  
GAATAAAAGAAGACTGAGAGATCTAATGTTGCAGTCCCGCAC  
+HWI-EAS443:3:100:63:1979#0/1  
VaZSbb`W¥b]aSa¥Xa`M]bbbbab\_a` `[ `]J]\_Z¥¥B  
@HWI-EAS443:3:100:650:910#0/1  
GTGAGTTCCTCATACCCTTCATGTACTCTTATTTTCAGTG  
+HWI-EAS443:3:100:650:910#0/1  
aS¥FMX]G\_aS[XSR\_[^\_X]\_Z^^]\_\_\_U\_a\_a\_UX\_SB  
@HWI-EAS443:3:100:671:935#0/1  
GAGGATACTGGTAAGAGGCAATTCTCCAGCATTCAATTAC  
+HWI-EAS443:3:100:671:935#0/1  
a]]a[a\_NTPXDPXX[a` [XYOWRXPM[WDY\_^Y^UBBBB  
@HWI-EAS443:3:100:722:1145#0/1  
CGCACTCGCGAGATACTCACTAAGACCACTGTGGAGCATA  
+HWI-EAS443:3:100:722:1145#0/1  
ab`X\_aba`aS\_U^b\_bM`]bZ``\_^FVX``¥aa\_Ha^ZB  
@HWI-EAS443:3:10:133:459#0/1  
GCACTCCCGAGATACTCACTAAGACCACTGTGGACCATAT  
+HWI-EAS443:3:10:133:459#0/1  
aaVZ^SHY`Z¥VW]\_UZ[T`XY\_[QQYWN]O¥YXXZTX^U  
@HWI-EAS443:3:10:495:1045#0/1  
AGTGGATGATAGCAATGAGATACCCAATTACAGCAGACAA  
+HWI-EAS443:3:10:495:1045#0/1  
abNX¥ab^]XGY[^XL^`^aaaa]YU`aaY^]HYW[\_``  
@HWI-EAS443:3:10:617:474#0/1  
AAACTTATTTTGGAAAAGGTTGAAAGGTTGAAACATGGTAC  
+HWI-EAS443:3:10:617:474#0/1  
QX^bbb¥a`abbab[X[bSabba`aa`abaaY^\_aa\_]¥a  
@HWI-EAS443:3:10:726:75#0/1  
AGGGGACGTAGTGTGGTAATGAAACGAAAAAGGGACTCT  
+HWI-EAS443:3:10:726:75#0/1  
^`\_Z]\_`Y\_W¥SZZ``ZF[VVNQ[ZV\_XY¥VGU\_[UNSQS  
@HWI-EAS443:3:10:761:665#0/1  
TCCTGATGTGTACTTTTTGATTATGGCCATATGGGCCACA  
+HWI-EAS443:3:10:761:665#0/1  
aa`Yaab]^bY]\_baaaaaaaaa`aYZa\_a\_YVR^GS^ZT]  
@HWI-EAS443:3:10:789:1633#0/1  
GAGATCTAATGTCGCAGGCCCGCACTCGCGAGATACTCAC  
+HWI-EAS443:3:10:789:1633#0/1  
`Zba`\_W¥a^\_V]a]\_WM^]\_a^]]Ua`U^S^]S^SS]\_S  
@HWI-EAS443:3:11:1000:349#0/1  
AAAAGAAGACTGAGAGATCTAATGTCGCAGTCCCTCACTCGC  
+HWI-EAS443:3:11:1000:349#0/1  
VXa\_KQRaba`^Tbaa[Xabba^UYab\_]MUKVW¥H¥` [  
@HWI-EAS443:3:11:1477:1855#0/1  
ATCTAATGTCGCAGTCCCGCACTCGCGAGATGCTCACTAA  
+HWI-EAS443:3:11:1477:1855#0/1  
\_T^a^b`aYPS[a[¥I`WP[GG¥ZN]\_`BBBBBBBBBBBB

@HWI-EAS443:3:11:1478:580#0/1  
AATTGGGCAAGGGGACGTAGTGTGGGAATGAAACGAAAA  
+HWI-EAS443:3:11:1478:580#0/1  
`X`a\_\_Za`^`[]`U`b]\_`^`XZ]aNNRN[XZ\_G[\_BBB  
@HWI-EAS443:3:11:1663:1211#0/1  
AAAAGAAGTCTAATGTCGCAGTGCCGCACTCGC  
+HWI-EAS443:3:11:1663:1211#0/1  
]¥[X\_[¥aaba\_\_aYSV]`b\_bI[a\_XHSGG^N^HV\_V\_^  
@HWI-EAS443:3:11:1733:1253#0/1  
GAATAAAAGAAGTCTAATGTCGCAGTTCCGCAC  
+HWI-EAS443:3:11:1733:1253#0/1  
aY¥`][abb\_PTZa]\_aaa`Ta^``]\_P¥Xa`YFSLSUPB  
@HWI-EAS443:3:11:524:2017#0/1  
GGGACGTAGAGTTGGTAATGAAACGAAACGGGACTCTA  
+HWI-EAS443:3:11:524:2017#0/1  
a`X¥aa]a¥a0aU]\_^R¥\_YWWS^LZ^`Y\_V^UWOXNUUB  
@HWI-EAS443:3:11:560:1679#0/1  
GACGAGCAGTCAATTGCTGAGGCAATAATTGTGGACATGG  
+HWI-EAS443:3:11:560:1679#0/1  
abaa`aab\_abbaa`\_a\_¥`\_`a^\_b`BBBBBBBBBBBB  
@HWI-EAS443:3:11:601:839#0/1  
CAGAATGAAGCGGATGATGGCAATGAGATACCCAATTACA  
+HWI-EAS443:3:11:601:839#0/1  
aaba\_bbZV\_F\_aa`b¥Y`aaaa`\_aa\_aaaa\_aa^a`a  
@HWI-EAS443:3:11:880:1491#0/1  
AGTGTACATCTGCTCCCAGCACGTCCCTTGGGTTGAGTGC  
+HWI-EAS443:3:11:880:1491#0/1  
^MN\_UaaU`aT\_X^Q¥XX`\_L]V\_]`]¥FOYG¥TN^X]B  
@HWI-EAS443:3:12:1105:1607#0/1  
ATCCAGACGAAGGCACATCTGGGGTGGAGTCTGCTGCCT  
+HWI-EAS443:3:12:1105:1607#0/1  
¥¥`¥]^\_`\_XX^a\_X`\_aa`X[Q`aUa^Q`XR[WVMVY  
@HWI-EAS443:3:12:119:246#0/1  
AAAAGAAGTCTAATGTCGCAGTCCCAGTCCGCACTCGC  
+HWI-EAS443:3:12:119:246#0/1  
`aaXNRRaa¥¥\_¥a\_XW`¥^ab¥^`\_aa[ZUZQXN[P^ZY  
@HWI-EAS443:3:12:1377:284#0/1  
GGGCAAGGGGACGTAGTGTGGTAATGAGACGAAACGGG  
+HWI-EAS443:3:12:1377:284#0/1  
aaa\_a`abbaX^b¥Z]Vb[a`\_VG\_aaWG[Q\_S]]^G\_\_]  
@HWI-EAS443:3:12:1568:1407#0/1  
GGATTTCTCATTGTCGAAAGAAGACAAGAGATATGGCC  
+HWI-EAS443:3:12:1568:1407#0/1  
ab[aa`\_]abbba`\_a^\_a\_GQaTVS\_\_Xb`a`]^VSW^B  
@HWI-EAS443:3:12:1662:847#0/1  
GAACTGAGAGATGTAATGTCGCAGTCCCAGTCCGCGAGA  
+HWI-EAS443:3:12:1662:847#0/1  
abb^^ab[ZbaXFUPXbaYZa\_YTN\_Z]YNS^[G]U^R^^  
@HWI-EAS443:3:12:383:967#0/1  
GGGGCGTAGTGTGGTAATGAAACGAAACGGGACTCTA

+HWI-EAS443:3:12:383:967#0/1  
`T\_\_X\_a¥U¥YZ]]SL`^WLQ\_]U\_\_]R][¥VOTLV`\_]  
@HWI-EAS443:3:12:561:1520#0/1  
GGGACGTAGTGTGGTAATGAAACGAAAATGGGACTCTAG  
+HWI-EAS443:3:12:561:1520#0/1  
R\_`a¥\_^\_ZZ]abXVa\_aJ^aba\_^b[ZFUYXaa`abaU  
@HWI-EAS443:3:12:636:298#0/1  
GGGACGTAGTGTGGTAATTAACGAAAACGGGACTCTAG  
+HWI-EAS443:3:12:636:298#0/1  
aaa`aaW\_b\_aaaaaZ\_a\_a\_`a]\_`^\_OY\_\_\_Z]]]]^  
@HWI-EAS443:3:12:690:246#0/1  
ATCCTCAACTCTGATCCTCTCACATTCACAGTCAATGAGG  
+HWI-EAS443:3:12:690:246#0/1  
aaa\_¥aaaa\_\_\_\_\_]]\_`\_^Z\_`¥`\_Z^]\_VLP^Z[]]\_N  
@HWI-EAS443:3:13:1331:370#0/1  
CAACCATTGTGACTTCTTCATACCCTTCATGTACTCTTAT  
+HWI-EAS443:3:13:1331:370#0/1  
aa][\_\_aa[]aSI\_¥PWb]^aOZ]S\_`¥`\_]\_X^aW``Xa  
@HWI-EAS443:3:13:319:242#0/1  
CCCGTTTTCGTTTCATTACCAACTCCGTCCTGCCC  
+HWI-EAS443:3:13:319:242#0/1  
aabb`aaabb`a\_aaa`abaaa`aa`TW\_U[RY¥YW^VQB  
@HWI-EAS443:3:13:608:85#0/1  
CGGCTTCTGGTTGCCTTAGGGACAAGAGGCTGAAATGGTT  
+HWI-EAS443:3:13:608:85#0/1  
aba`^Z^T\_\_QVHRP`LOQY[TRU[RNVEDH¥`ZZYN]LL  
@HWI-EAS443:3:13:790:446#0/1  
CACTGACTTCTTCGGGAGACAATAGTACGCTCCCTCTTG  
+HWI-EAS443:3:13:790:446#0/1  
K`ab`\_]\_`¥¥b\_``aaa`\_U\_aa[`b^]¥N\_b`[IH`aa  
@HWI-EAS443:3:13:866:1761#0/1  
ACCGATTTTTAAGGGCTAGAGATCAAAGAGGGAACGACT  
+HWI-EAS443:3:13:866:1761#0/1  
^]`\_QZZ[\_^Y\_^[]T\_\_Y¥aa]P¥]`^^^RRaaaa^^Q[  
@HWI-EAS443:3:13:891:728#0/1  
AAAAGGTTGAAAGTTGAAACATGGTACCTTCGGCCCTGT  
+HWI-EAS443:3:13:891:728#0/1  
RH^Z^¥¥\_W\_T``Zaa^\_U\_¥¥]]¥a`YUaX^VV¥ZHTWR  
@HWI-EAS443:3:14:1303:1306#0/1  
ATCTGCTCCCAGCACGTCCCTTGGGTTAAGGGCAACACTT  
+HWI-EAS443:3:14:1303:1306#0/1  
WU`aba```R¥Z\_]¥XZ]V^aa`¥TJVYV¥FURXZUXZ[N  
@HWI-EAS443:3:14:1414:997#0/1  
AATGAAGTGGATAATGGCAATGAGATACCCAATTACAGCA  
+HWI-EAS443:3:14:1414:997#0/1  
abba`aa\_`\_\_`¥\_]\_Y¥[^^^0^\_[a\_`¥\_````[^ZU]  
@HWI-EAS443:3:14:1779:1627#0/1  
AAAGAACTGAGAGATCTAATGGCGCAGTCCCGCACTCGCG  
+HWI-EAS443:3:14:1779:1627#0/1  
a^^^T\_P^^\_W0^[YNX`\_`ON]]QT]XOYWWP\_[TLLR[

@HWI-EAS443:3:14:349:145#0/1  
GCCGTAGACATCTGCAAGGCAGCAATAGGGTTGAGGATTA  
+HWI-EAS443:3:14:349:145#0/1  
aa\_aY\_a`\_]\_WNU¥\_[Y\_Z]WUTGQ\_X\_a\_X^\_]\_\_WNNB  
@HWI-EAS443:3:14:364:251#0/1  
AAACGATGCTGGATCAGACCGAGTGCTGGTATCACCTCTG  
+HWI-EAS443:3:14:364:251#0/1  
¥QW[W\_TVOWW^SYS^]^a¥ZZRIUFS]BBBBBBBBBBBB  
@HWI-EAS443:3:14:716:431#0/1  
AAAGAATTGAGAGATCTAATGTCGCAGTCCCGCACTCGCG  
+HWI-EAS443:3:14:716:431#0/1  
]\_aaZMD[ba`ba\_`aaaw`aw]`\_^\_Y^\_]S]`UNZY]  
@HWI-EAS443:3:14:717:224#0/1  
GAAGAGCAGCAGTGTCAGCAGACCCATTAGCATCTATCTT  
+HWI-EAS443:3:14:717:224#0/1  
`Y\_¥00X\_PYV]TVQUVVTKNRSSSUZWZPB  
@HWI-EAS443:3:15:1006:1793#0/1  
GCCATTCCTATTCCACCATGTTACGCCAGAGGGGATACC  
+HWI-EAS443:3:15:1006:1793#0/1  
aZa]bbabbaaaTU`aKbab\_`a`ba]]aa]]`RadWbM]  
@HWI-EAS443:3:15:1016:111#0/1  
GTCTTAGTGAGTATCTCGCGAGGGCGGGACTGCGACATTA  
+HWI-EAS443:3:15:1016:111#0/1  
^aabaabaab`bb]b\_bZ]XbQaQa`bTS[\_TaT[RVXP  
@HWI-EAS443:3:15:1059:1774#0/1  
AGGTACCATGTTTCAACCTTTCAACCTTTTCGAAATAAGT  
+HWI-EAS443:3:15:1059:1774#0/1  
a^`Xaa`b\_bZS^a`a\_U`T\_Ya`\_\_\_\_`^\_a]]^^^^¥[  
@HWI-EAS443:3:15:1344:858#0/1  
CAGGGGTGAGGATACTGGTAAGAGGCAATTCTCCAGTATT  
+HWI-EAS443:3:15:1344:858#0/1  
X¥ab¥G\_ababWT\_bZ^bYVT[T¥W^`T`\_b^T`abI^\_\_  
@HWI-EAS443:3:15:930:1995#0/1  
CATCACTCGGTCTGATCCAGCATCGGTTGTTTTGCTCCAG  
+HWI-EAS443:3:15:930:1995#0/1  
VVVb^a\_\_¥ZXHR[\_WX¥¥¥X\_`X\_HU][F[ZK]SH\_GX^  
@HWI-EAS443:3:16:1077:1807#0/1  
TTCACCTTTCAAAGGACAAGCGGATCATCAGTAAAGAAAG  
+HWI-EAS443:3:16:1077:1807#0/1  
\_¥YX]]]`S\_I¥aSRP\_^ZN¥aa[`UaURZ¥JDUQ\_aTP`  
@HWI-EAS443:3:16:1126:1018#0/1  
AAAACCTATTTCGAAAAGGTTGAAAGGTTGAAACATGGTA  
+HWI-EAS443:3:16:1126:1018#0/1  
Z^Y¥\_`\_Y\_]`a\_]`aab`]\_\_`aVq]\_`a]Qa  
@HWI-EAS443:3:16:1176:1000#0/1  
AGGAGGCACAGGATGTGATTATGGAAGTTGTTTTTCCAAA  
+HWI-EAS443:3:16:1176:1000#0/1  
\_WVI\_`aaa\_`a`]¥P^aVXP\_0\_T^BBBBBBBBBBBB  
@HWI-EAS443:3:16:1198:1051#0/1  
AAAGAACTGAGAGATCTAATGTCGCAGTCCCGCCCTCGCG

+HWI-EAS443:3:16:1198:1051#0/1  
`T`U\_ab`Z`[a]¥`aaa`\_a\_\_a\_a\_]JSZ`Q`  
@HWI-EAS443:3:16:1718:455#0/1  
GTCCCGTTTTCGTTTGATTACCAACTACTCGTCCCCTTGC  
+HWI-EAS443:3:16:1718:455#0/1  
^¥Wa`a]\_aaWb\_a^Iaa\_a¥`aa¥```aVa^^UWW`¥¥T  
@HWI-EAS443:3:16:1754:1615#0/1  
ATGCGGGATGTGCTTGGGACATTTGACACTGTTCAAATAA  
+HWI-EAS443:3:16:1754:1615#0/1  
a`^¥bb\_\_VTa^\_Zaaa^T¥S`a`RKU\_]`QF[X\_]`a¥  
@HWI-EAS443:3:16:629:1940#0/1  
GGCCGAAGGTACCATGTTTCAACCTTTCAACCTTTTCGAA  
+HWI-EAS443:3:16:629:1940#0/1  
¥babab¥^abbababaaabb`a¥\_a\_aababbaaa`^\_`  
@HWI-EAS443:3:16:815:704#0/1  
CACTCGCGAGATACTACTAAGGCCACTGTGGACCATATG  
+HWI-EAS443:3:16:815:704#0/1  
^^\_^\_¥^\_]baaYb]V`Y`bUTELaSa\_`W`^`\_[OXU[^  
@HWI-EAS443:3:17:1142:627#0/1  
GTGTACTTTTTGATTATGGCCATATTGTCCACAGTGGTCT  
+HWI-EAS443:3:17:1142:627#0/1  
`WaX\_\_babba\_Z`a\_a\_\_X[^^^¥FRLQYQQ[V[Z^YT[  
@HWI-EAS443:3:17:1343:1132#0/1  
CCGGCTAGTGGGAGAAACCTTGTTTTACGGACCAATTCTC  
+HWI-EAS443:3:17:1343:1132#0/1  
``¥RRZ^FPXW^^^PUVXUQ¥¥V[\_ZTZZXJX¥WYW]W^¥  
@HWI-EAS443:3:17:1392:904#0/1  
GAGATCTAATGTGCGAGTCCCGCCCTCGCGAGATACTCAC  
+HWI-EAS443:3:17:1392:904#0/1  
a``UUR¥\_R]UOTRWX][OXGPMRYBBBBBBBBBBBBBB  
@HWI-EAS443:3:17:1529:289#0/1  
AAAAGAAGTGAAGATCTAACGTCGAGTCCCGCACTCGC  
+HWI-EAS443:3:17:1529:289#0/1  
^aabbaaaaaaaba]aa\_^a\_\_¥a`¥[^^\_XXVZV\_¥  
@HWI-EAS443:3:17:392:449#0/1  
GTCCCGTTTTCGTTTCAGTACCAACTACTCGTCCCCTTGC  
+HWI-EAS443:3:17:392:449#0/1  
a¥aa^T]a]NZ]¥``bSVU¥PNXYZSZGYTQMVMRUWTP  
@HWI-EAS443:3:17:572:1068#0/1  
TGATTATGGCCATATGGTCCACAGTGGGCTTAGTGAGTAT  
+HWI-EAS443:3:17:572:1068#0/1  
abaaaa¥]a`a`^a[VZU\_`\_]a[T`XG]\_\_¥[N`[¥N\_B  
@HWI-EAS443:3:18:557:1522#0/1  
ATTTTACAATCCTGGAGCTCTTCTTCTTCTTTTGTTA  
+HWI-EAS443:3:18:557:1522#0/1  
]ZWZ^Za`XQaa¥UHYY\_W[]aP^XF¥UWZZ]TTOW\_I^¥  
@HWI-EAS443:3:18:792:1409#0/1  
GCTAGGGTCCCGTTTTCGTTTCATTACCAACTACTGCC  
+HWI-EAS443:3:18:792:1409#0/1  
ababaa^UaabaXaaa\_a^a`aaa\_a\_\_a`Taa]a^^TZW



@HWI-EAS443:3:18:82:1625#0/1  
TTCTCATTGTTGGCAAAGAAGACAAGAGATGTGGCCCAGC  
+HWI-EAS443:3:18:82:1625#0/1  
aU`^]PZJXY`\_\_`^]RRMP`QY`^`^\_]RGT]TU¥]WXS  
@HWI-EAS443:3:18:94:797#0/1  
ATAGGGTTGAGGATTAGCTCATCTTTTCAGTTTTTGTGGGT  
+HWI-EAS443:3:18:94:797#0/1  
a`b^a`aaa^[\_a^¥aaa\_a\_aaaa`a\_aaa^YUa\_\_\_\_  
@HWI-EAS443:3:18:999:2026#0/1  
ACAGCACACAGATTGGAGGAGTAAGGATGGGGGACATCCT  
+HWI-EAS443:3:18:999:2026#0/1  
a^bbUba\_L`^]\_¥a`YS`\_]`[Y`XX]\_N\_WHUQ¥RNR  
@HWI-EAS443:3:19:121:1957#0/1  
GTTTTCGCTTCATTACCAACTACGTCCCCTTGCCCAAT  
+HWI-EAS443:3:19:121:1957#0/1  
^WW]X]]Y`\_`SVV[`]YJUY\_KOQFM¥\_]VLNQ][^¥ZB  
@HWI-EAS443:3:19:1580:674#0/1  
ATGGTACCTTCGGCCCTGCCTCTTCAGAAATCAAGTTAA  
+HWI-EAS443:3:19:1580:674#0/1  
`]ba¥^aX][`]b`[[^YY`\_aRT\_\_]¥]``[\_\_^]U]¥¥  
@HWI-EAS443:3:19:168:429#0/1  
ATTGGGCAAGGGGACGTAGTGTGGTAATGAAAAGAAAAC  
+HWI-EAS443:3:19:168:429#0/1  
aab\_Z¥^Za^`b`T`]^a`\_]a`bHWJR][aYEKR\_]YB  
@HWI-EAS443:3:1:1013:1823#0/1  
AAAAGAATTGAGAGATCTAATGTCGCAGTCCCGCACTCGC  
+HWI-EAS443:3:1:1013:1823#0/1  
aa¥^`bZD^`baaaa\_Sabb\_b\_Yaaaa][QX]][BBBBB  
@HWI-EAS443:3:1:1029:391#0/1  
TCCTGATGTGTACTTTTTGATTATGGCCATATGGTACACA  
+HWI-EAS443:3:1:1029:391#0/1  
a]\_aa]`a`VS]`a`a`\_`[^`^`\_WS^XX]U\_QBBBBB  
@HWI-EAS443:3:1:1349:541#0/1  
GAGAATAAAGAAGTGAGAGATCTAATGTCGCAGTCCCGC  
+HWI-EAS443:3:1:1349:541#0/1  
]¥a`\_Z^`Z`\_`¥DVXaaa\_a\_Qa`Y¥aZTLZBBBBBBBB  
@HWI-EAS443:3:1:1457:1680#0/1  
CGTTTTCGTTTCATTACCAACTACGTCCCATTGCCCAA  
+HWI-EAS443:3:1:1457:1680#0/1  
abaZ¥bY`bb`abaaTG\_a]b`^a\_b]\_V\_G]``W\_ZaB  
@HWI-EAS443:3:1:314:133#0/1  
CAGAATGAAGTGGATGATGGGAATGAGATACCCAATTACA  
+HWI-EAS443:3:1:314:133#0/1  
S^`KaabV0baabbaaM¥`SX¥b`aba^baaV^^abaBB  
@HWI-EAS443:3:1:421:1722#0/1  
AAAAGAAGTGGAGATCTAATGTCGCAGTACCGCACTCGC  
+HWI-EAS443:3:1:421:1722#0/1  
aa\_\_`a[NX`¥`¥`¥QQ``[[aNWaU\_a¥BBBBBBBBBBBB  
@HWI-EAS443:3:1:700:449#0/1  
AAAGAAGTGGATGATCTAATGTCGCAGTCCCGCACTCGCG

+HWI-EAS443:3:1:700:449#0/1  
aaaabbabaabSbaa\_bbaab\_ab\_\_aS\_\_X\_]\_]\_\_aBB  
@HWI-EAS443:3:1:710:1471#0/1  
GGGAAAACAATTTCCATAATCACATCCTGTGCCTCCTTGG  
+HWI-EAS443:3:1:710:1471#0/1  
\_bbVbXY[\_[D^^\_Z`aY^^]b\_b`R]a]Q` `GUKU^BBB  
@HWI-EAS443:3:1:77:554#0/1  
CTGCTGTCTGAGAGGATTTCTCATTTTAGGCAAAGAAGA  
+HWI-EAS443:3:1:77:554#0/1  
[b\_]\_]ZWYa]\_]\_ab`TY^\_aaa]a`a^0^]WY\_aaaU]B  
@HWI-EAS443:3:20:1149:1606#0/1  
ATCTAATGTCGCAGTCCCGCACTCGCTAGATACTCACTAA  
+HWI-EAS443:3:20:1149:1606#0/1  
a\_\_aaa\_aRa]M` `TW\_\_`a`]\_^¥\_GZUZY¥Q¥W\_U\_Y¥  
@HWI-EAS443:3:20:1479:1972#0/1  
AAAAGAAGTGCAGATCTAATGTCGGAGTCCCGCACTCGC  
+HWI-EAS443:3:20:1479:1972#0/1  
Va[bbabU`\_b][ZWXY\_^P`\_LJVM\_YNQO[¥TU\_]`^QQ  
@HWI-EAS443:3:20:415:674#0/1  
GAAGTGCAGATCTAATGTTGCAGTCCCGCACTCGCGAGA  
+HWI-EAS443:3:20:415:674#0/1  
^`\_ba` `^babbbbbbabbaba\_abaababaa` `baaa  
@HWI-EAS443:3:20:535:1961#0/1  
AGAAGTGCAGATCTAATGCCGAGTCCCGCACTCGCGAG  
+HWI-EAS443:3:20:535:1961#0/1  
a\_\_aa` `]X\_XY^a` ^YZOF^LN]PM¥]LHNWVYZTTQXR  
@HWI-EAS443:3:20:54:1428#0/1  
CAGTGGTCTTAGGGAGTATCTCGCGAGTGCGGGACTGCGA  
+HWI-EAS443:3:20:54:1428#0/1  
`\_VO[\_T`^^\_]FQS[ZZ\_^Q[0¥\_W¥ZWU\_Z¥V`R[[UK  
@HWI-EAS443:3:20:68:1945#0/1  
GGGCGATCTGAAGTATGTCAATAGGGCAAACCAGCGACTG  
+HWI-EAS443:3:20:68:1945#0/1  
` `aba]\_a]abbaabaaab\_aaaaaabaaabaa`a`¥\_a  
@HWI-EAS443:3:20:707:2025#0/1  
GGCCATTCCTTTTCCACCATGTTACGCCAGAGGTGATAC  
+HWI-EAS443:3:20:707:2025#0/1  
]baababbbaabbba`\_bb` ` \_ba^aa^aaXU`MDTGVM  
@HWI-EAS443:3:20:783:1104#0/1  
AAAAGTTGAAAGTTGAAACATGGTACCTTCGGCCCTGT  
+HWI-EAS443:3:20:783:1104#0/1  
a`ZXW]Y^`YT]\_aW`a`\_aYYa`\_V`\_¥`\_]`^X\_]`^W  
@HWI-EAS443:3:20:820:1394#0/1  
AATAAAAGAACTGAGGGATCTAATGTCGCAGTCCCGCACT  
+HWI-EAS443:3:20:820:1394#0/1  
abbba[``[ `^a`aa¥aa`\_^b`aba`\_\_a`UUZa^`\_`\_`  
@HWI-EAS443:3:20:912:837#0/1  
GAATACTGCCCGACATGACCCCAAGCACGGAGACGTGCT  
+HWI-EAS443:3:20:912:837#0/1  
]]a^[^a\_]a\_aaa`aa]^XXPb`Y`R]¥^YaMJZPV¥]]

@HWI-EAS443:3:20:933:1494#0/1  
TGGCAATGAGATACCCAATTACAGCAGCCAAGAGAATAAT  
+HWI-EAS443:3:20:933:1494#0/1  
``S`[^]`Ya`aabZ¥ab`aa]`a^`¥JU\_a`Iaa[W\_aa  
@HWI-EAS443:3:21:1133:1543#0/1  
CTGCTGTAATTGGGTATCTCATTGCCATCATCCACGTCAT  
+HWI-EAS443:3:21:1133:1543#0/1  
GWU\_\_bQQ¥ZW[V[XUMU\_`\_XY^¥\_`[KUVZ¥a]HHYZ]  
@HWI-EAS443:3:21:1210:496#0/1  
GGGACGTAGTGTGGTAATGAAACGAGAACGGGACTCTAG  
+HWI-EAS443:3:21:1210:496#0/1  
aba]^ba`a\_aaaba^aaa^\_`^X][\_]^G`\_\_XZ^^]]V  
@HWI-EAS443:3:21:1257:1523#0/1  
AGCACTTTTGCATCTTTTGGAAATGCCTCAAGAGATGGT  
+HWI-EAS443:3:21:1257:1523#0/1  
aX`\_`a¥S¥^`a¥PJ]¥b]`aU¥Ya`SW¥^X¥`ZVBBBBB  
@HWI-EAS443:3:21:1281:935#0/1  
ATCTAATGTCGCAGTCCCGCACTCGCGGATACTCACTAA  
+HWI-EAS443:3:21:1281:935#0/1  
]XZZH]TSZSRWK[X[XRWT]BBBBBBBBBBBBBBBBBB  
@HWI-EAS443:3:21:50:1125#0/1  
CAGGGCCGAAGGTACCATGTTTCAACCTTCAACCTTTTC  
+HWI-EAS443:3:21:50:1125#0/1  
aa`^`^`a[a][U]^\_a\_a]`\_a`ZX`^]`^a¥V¥^^^][  
@HWI-EAS443:3:21:843:1758#0/1  
AAAAGAAGTCTAATGTCGCATTCCCGCACTCGC  
+HWI-EAS443:3:21:843:1758#0/1  
]¥¥¥\_¥\_a`¥a[`aaW\_\_^\_^]]^]^^`a`\_ZM¥]^S¥N¥  
@HWI-EAS443:3:22:1045:1391#0/1  
CTGCCTTGCATATGTCTACGGCTTGGTCCTCAGTTGGATT  
+HWI-EAS443:3:22:1045:1391#0/1  
aSL^\_Y¥TVQRN`XXZTBBBBBBBBBBBBBBBBBBBB  
@HWI-EAS443:3:22:1420:1489#0/1  
GGACGTAGTGTGGTAATGAAACGAAAACGGGACGCTAGC  
+HWI-EAS443:3:22:1420:1489#0/1  
Q\_NR\_[R[NZX[UV^RZTWWZXR]UG^LRRTUWOGYYFLF  
@HWI-EAS443:3:22:1524:1658#0/1  
AAAAGTTGAAAGTTGAAACATGGTACCTTCGGCCCTGT  
+HWI-EAS443:3:22:1524:1658#0/1  
aba\_`XW\_^¥`¥Y\_]aa\_\_\_\_a`^`^0¥`Z\_^]VRSXW¥XQ  
@HWI-EAS443:3:22:589:688#0/1  
CAAGGAGGCACAGGATGTGATTATGGAAGTTTTTTTCCCA  
+HWI-EAS443:3:22:589:688#0/1  
^HV^\_abb\_^^]`a^]¥PPYaaYYYUBBBBBBBBBBBBBB  
@HWI-EAS443:3:22:88:1372#0/1  
TCCCGTTTTCGTTTCATTACCAACACTACGCCCCCTGCC  
+HWI-EAS443:3:22:88:1372#0/1  
abbaTJ^`\_aa`b[abbaba``Ubbb[b`XMaab[Z^^\_  
@HWI-EAS443:3:22:903:552#0/1  
CTTATTTTCGAAAAGGTTGAAAGGTTGAAACATGGTACCTT

+HWI-EAS443:3:22:903:552#0/1  
^RXQKR` [ZN]U]XVV[]]]ZZWJ^aUU¥F[W]¥Y\_]P¥^  
@HWI-EAS443:3:23:1290:1087#0/1  
GCCACAGCACACAGATTGGAGGAGTAAGGATGGGGGACAT  
+HWI-EAS443:3:23:1290:1087#0/1  
\_Y]WVYaa`¥^`R\_FY[[S]JWVNOX¥USSSQLGV]QLL[  
@HWI-EAS443:3:23:1619:1176#0/1  
CGGCGGAACAGGCAGTGTATTATATTGAAGTGTGGACTTA  
+HWI-EAS443:3:23:1619:1176#0/1  
\_\_bbb` [Z]b\_L\_\_QUWZaY^S[BBBBBBBBBBBBBBBB  
@HWI-EAS443:3:23:1691:1165#0/1  
AAAAGAAGTCTAATGTCGTAGTCCCGCACTCGC  
+HWI-EAS443:3:23:1691:1165#0/1  
aba\_bV\_bb`\_abb]a\_]bX`\_SS]]\_a¥ZUN]TWT`^\_W  
@HWI-EAS443:3:23:1700:466#0/1  
GGGACGTAGTGTGGTAATGAAAGGAAAACGGGACTCTAG  
+HWI-EAS443:3:23:1700:466#0/1  
aaaYP\_aYaYT`\_b`WRHXLO[XNOIU\_\_S^X`YG[^WR^  
@HWI-EAS443:3:23:1744:767#0/1  
AGAGAATAAAAGAACTGAGAAATCTAATGTCGCAGTCCCG  
+HWI-EAS443:3:23:1744:767#0/1  
abT[abb]abba`a\_babaZP]aVabW^a^]\_UY\_UP¥O[  
@HWI-EAS443:3:23:244:780#0/1  
AGGGGGCGTAGTGTGGTAATGAAACGAAAACGGGACTCT  
+HWI-EAS443:3:23:244:780#0/1  
a`aaabaa\_a`\_b`^aYDNa^R]abV`aaaaQ`a^\_a\_\_  
@HWI-EAS443:3:23:434:951#0/1  
TGCTGTAATTGGGTATCTCATTGCCATCATGCACTTCATT  
+HWI-EAS443:3:23:434:951#0/1  
aa`WaU^U` `SX`]bSDVaaT[[P¥RT`S]JG^T`G^\_JWQ  
@HWI-EAS443:3:23:555:1708#0/1  
AAAAGAAGTCTAATGTCGCAGTCCCGCACTCGC  
+HWI-EAS443:3:23:555:1708#0/1  
\_^\_S\_\_`aWF[Q\_]\_b`\_a]\_`bSY`UN\_]¥GRY\_^\_JN  
@HWI-EAS443:3:24:112:744#0/1  
TTCCTGATGTGTACTTTTTGATTATGGCCATATTGTCCAC  
+HWI-EAS443:3:24:112:744#0/1  
¥bbb\_bY\_b\_babaabbbb]ba`a]V`a`J^TI\_U[P^W  
@HWI-EAS443:3:24:1303:484#0/1  
TGGTATTCTACAAGAGGGTTGCATGATCAAGGCAGTTAG  
+HWI-EAS443:3:24:1303:484#0/1  
Z¥[KUVa]UNX¥ba\_W\_\_WNQXQY\_baa\_aaa]X]aW`PZ  
@HWI-EAS443:3:24:1373:1652#0/1  
TCCAGATGAAGGCAGATCTGGGGTGGAGTCTGCTGTCCCTG  
+HWI-EAS443:3:24:1373:1652#0/1  
R\_[\_\_[a\_^\_WZ`\_L`babb\_V\_P^`bbOb` `^`a^a]^a¥  
@HWI-EAS443:3:24:1684:539#0/1  
CTGAGAAGTTGACAATAAGTTATTCGTCATCAATGATGTG  
+HWI-EAS443:3:24:1684:539#0/1  
]\_V`a^YZY¥DY^`T\_^\_P¥a^\_\_X]GQVZ[PTa^^^]QY

@HWI-EAS443:3:24:634:1194#0/1  
AAGAAGTGAAGATCTAATGTCGCAGTCCCGCCCTCGCGA  
+HWI-EAS443:3:24:634:1194#0/1  
[a¥ZI\_YaWUR¥^[b]a`Z^^aXUaTR]\_ZN¥G]MU[Y]`  
@HWI-EAS443:3:25:1477:1962#0/1  
AAGGTTGAAAGTTGAAACATGGTACCTTCGGCCCTGTCC  
+HWI-EAS443:3:25:1477:1962#0/1  
`bba\_bb`ababababaa`aaaa^a`\_aa\_\_`\_`^^¥UZ^  
@HWI-EAS443:3:25:412:174#0/1  
GAATAAAAGTACTGAGAGATCTAATGTCGCAGTCCCGCAC  
+HWI-EAS443:3:25:412:174#0/1  
a^aH[a`QXGSUQ`]aVaV^RO^V^`RPHR^XRYRRSYVY  
@HWI-EAS443:3:26:1026:964#0/1  
TATTCCGATCATTCCCATCACACTGTCGATGGATTCAATT  
+HWI-EAS443:3:26:1026:964#0/1  
abbbbaa\_abaa`\_aba`aaa\_aa^aa[[aa`^``]¥`^  
@HWI-EAS443:3:26:1385:282#0/1  
CTGCTGTAATTGGGATCTCATTGCCATCATCCACTTCAT  
+HWI-EAS443:3:26:1385:282#0/1  
aWaV\_bb`bbba\_F¥a]^aa`\_aZH`¥\_XZ]RZ[aWR^  
@HWI-EAS443:3:26:153:392#0/1  
ATGTCGCAGTCCCGCACTCGCGAGATACGCACTAAGACCA  
+HWI-EAS443:3:26:153:392#0/1  
TbaS]Z\_QWaabaWT^a`XabZU[\_ZYGXa`]a`X[aR[  
@HWI-EAS443:3:26:1651:908#0/1  
ATGTCGCAGTCCCGCACTCGCGAGATAGTCACTAAGACCA  
+HWI-EAS443:3:26:1651:908#0/1  
`ab]abb`aYaVU`\_`\_aZH\_Z[Qa\_\_\_NRMZK\_\_\_Q\_GQB  
@HWI-EAS443:3:26:694:1278#0/1  
ATTATGGCCATATTGTCCACAGTGGTCTTAGTGAGTATCT  
+HWI-EAS443:3:26:694:1278#0/1  
aa`P]\_Va]ZZX`OWRZZ`¥ZZKW^GBBBBBBBBBBBBBB  
@HWI-EAS443:3:26:711:986#0/1  
CTCTTATTTTTCAGTGTGGAGGTTTCCCGTTAGCACTTC  
+HWI-EAS443:3:26:711:986#0/1  
aa[ab^^bb¥abbaa¥b]a`bbbW\_Lb\_aa`a`]aaY`aV  
@HWI-EAS443:3:27:1411:1506#0/1  
CTGGATCAATCTCCTGGTTGCCTTTCTGAGAATCGCTGTT  
+HWI-EAS443:3:27:1411:1506#0/1  
\_T^]Y]`aZ]aa¥```SPXb\_^U[Va`a`\_]`^b]]\_¥¥^  
@HWI-EAS443:3:27:1436:1285#0/1  
GTTATTGTCAACTTCTCAGTTCCTTGGGTTTCACTGACTT  
+HWI-EAS443:3:27:1436:1285#0/1  
aa¥OY]]R]^ST^QFL\_WW[SMMV`WDPF\_ZBBBBBBBBB  
@HWI-EAS443:3:27:1665:183#0/1  
AAAAGAAGTGAAGATCTAATGTCGCAGTCCCGCAGTCGC  
+HWI-EAS443:3:27:1665:183#0/1  
]aT\_NX\_]bbb\_Z`]PQaL\_[b\_ZaTN`]`OFW¥BBBBBBB  
@HWI-EAS443:3:27:183:1446#0/1  
AAAAGAAGTGAAGATCTAATGTCGCAGTCCCCCACTCGC

+HWI-EAS443:3:27:183:1446#0/1  
Y`baabbaaab`babaaaaYa[aa\_[aa]F^W\_\_`P`  
@HWI-EAS443:3:27:439:1586#0/1  
AGTGTCTTACGAATCCACTGTACCGCTTCTGGGTGCCT  
+HWI-EAS443:3:27:439:1586#0/1  
X^Z]abbbabbba\_aabaa¥Zba`V]`^QBBBBBBBB  
@HWI-EAS443:3:27:764:1374#0/1  
CAGTAGCCGGCGAACAGGCAGTGTATATTTAAGTGTT  
+HWI-EAS443:3:27:764:1374#0/1  
ab`W^aaaa^aTX\_aa^[¥`^\_BBBBBBBBBBBBBBBB  
@HWI-EAS443:3:27:868:507#0/1  
TGCCTTGCATATGTCTACGGCTTTTCTCAGTTGGATTC  
+HWI-EAS443:3:27:868:507#0/1  
`a`abb`aa`¥\_babbb`\_bb\_HT]H]VRFVX^[]MRZL  
@HWI-EAS443:3:27:889:318#0/1  
CAGGGCCGAAGGTACCATGTTTCAACCTTTCAACCTTTTC  
+HWI-EAS443:3:27:889:318#0/1  
Za¥V^^`bba^^IabZT]bV\_^`bV`]`ba`¥`]`VbaZ  
@HWI-EAS443:3:28:526:531#0/1  
GGCCATTCTATTCCACCATGTTACGGCCAGAGGGGATAC  
+HWI-EAS443:3:28:526:531#0/1  
a`aaba]aaabaaaa\_ab`¥aaaV[[^^L[V\_G\_ZG]M  
@HWI-EAS443:3:29:1103:1187#0/1  
AAAAGAAGTCTAGAGATCTAATGTCGCAGTCCCGCACTCGC  
+HWI-EAS443:3:29:1103:1187#0/1  
`aaaa`a`\_`\_`\_¥\_]\_b[^V^Y^\_V]^¥^YXVW]B  
@HWI-EAS443:3:29:726:945#0/1  
AGCAGACCCATTAGCATCTCTTGTCAAATGTGCCACAGC  
+HWI-EAS443:3:29:726:945#0/1  
¥U\_]b`X`a]L[\_\_\_N¥\_\_\_YUYODY^P[¥G`\_Z`\_`\_]  
@HWI-EAS443:3:2:1115:365#0/1  
AAAAGAAGTGGGAGATCTAATGTCGCAGTCCCGCACTCGC  
+HWI-EAS443:3:2:1115:365#0/1  
aaaab`aTbaa`aa`a`a`a`^\_aXZZTU^^^XX\_¥  
@HWI-EAS443:3:2:1166:1441#0/1  
CAGGGCCGAAGGTACCATGTTTCAACCTTTCAACCTTTTC  
+HWI-EAS443:3:2:1166:1441#0/1  
aba`a`abbb]bb\_abbaababaa`baa\_aa\_Raab^  
@HWI-EAS443:3:2:1411:1118#0/1  
AAAGAAGTGGGAGATCTAATGTCGCAGTCCCGCACTCGCG  
+HWI-EAS443:3:2:1411:1118#0/1  
[QIRN\_[abV^L`bTQ^YaaaXXaS`TXFRaPGGMVGUB  
@HWI-EAS443:3:2:188:149#0/1  
AAAGAAGTGGGAGATCTAATGTCGCAATCCCGCACTCGCG  
+HWI-EAS443:3:2:188:149#0/1  
aa\_WQ]\_a`aa\_]`^T^`\_`\_ZZXZ`\_^UV]]U]WW]]]`  
@HWI-EAS443:3:2:241:1167#0/1  
CAGAATGAAGAGGATGATGGCAATGAGATACCCAATTACA  
+HWI-EAS443:3:2:241:1167#0/1  
`^]SaX^ZZ¥Gaa`[a[[T¥[TSRLWKSRL`\_`\_a\_X][BB

@HWI-EAS443:3:2:384:626#0/1  
TGGCCATATGGTCCATAGTGGTCTTAGTGAGTATCTCGCG  
+HWI-EAS443:3:2:384:626#0/1  
^VW]aPV\_Ma`VRV¥GSUP^X\_`a]Z]X` `a[ `UZBBBBB  
@HWI-EAS443:3:2:803:1631#0/1  
GGGACGTAGTGTGGGAATGAAACGAAAACGGGACTCTAG  
+HWI-EAS443:3:2:803:1631#0/1  
]bbaaa¥abZ`¥bb\_F[b^`Zaba`a\_ba\_a\_a` [a^Xaa  
@HWI-EAS443:3:2:863:133#0/1  
GGGACGTAGTGTGGGAATGAAACGAAAACGGGACTCTAG  
+HWI-EAS443:3:2:863:133#0/1  
aa^XW`P[¥L\_Qa`]GU^\_] ^VTPY^TZOFV^ULNLRWBB  
@HWI-EAS443:3:2:914:1554#0/1  
GGAAAAGCACTTTTGCATCTTTTGGAAATGCCTGAAGAG  
+HWI-EAS443:3:2:914:1554#0/1  
aa^`\_UMRW\_\_JX`a¥¥a\_a]^I^\_]WPT0aUOWG]R\_\_Z  
@HWI-EAS443:3:30:1026:1062#0/1  
CCCGCACTCGCGAGATACTACTAATACCACTGTGGACCA  
+HWI-EAS443:3:30:1026:1062#0/1  
aaYTWP[WT^ZBBBBBBBBBBBBBBBBBBBBBBBBBBB  
@HWI-EAS443:3:30:129:354#0/1  
CAGGGCCGAAGGTACCATGTTTCAACCTTCAACCTTTTC  
+HWI-EAS443:3:30:129:354#0/1  
aW¥X]a` []][[T]aZ]^YPZ^]]\_RXOX¥XT\_S¥QYZ¥  
@HWI-EAS443:3:30:1703:1740#0/1  
GCTGGATCAGACCGAGTGATGGTATCACCTCTGGACGTAA  
+HWI-EAS443:3:30:1703:1740#0/1  
a^\_a\_^G¥\_\_\_\_`\_¥¥\_FKVM¥^BBBBBBBBBBBBBBBBB  
@HWI-EAS443:3:30:201:681#0/1  
GGAGAGAACAAAAGAACTGAGAGATCTAATGTCGCAGTCC  
+HWI-EAS443:3:30:201:681#0/1  
``\_`]aU]L\_`[\_\_¥^^¥Z^X\_^¥T¥W\_SS\_W¥U^S[UWX  
@HWI-EAS443:3:30:304:1392#0/1  
ATATGGTCCACAGTGGTCTTAGTGAGTATCTCCCGAGTGC  
+HWI-EAS443:3:30:304:1392#0/1  
aa\_[\_`W^X\_Y[ `UX`QP[aV[V¥T]S`SRSXDYOVKDIT  
@HWI-EAS443:3:30:306:1951#0/1  
CCGTAAAACAAGGTTTCTCCCAGCAGCCGGCGAACAGGC  
+HWI-EAS443:3:30:306:1951#0/1  
a\_PZ^`aaa` `ZPPWS\_S` [\_¥JJ¥W\_[VR\_WBBBBBBBBB  
@HWI-EAS443:3:30:728:1113#0/1  
TGCCTTGCATATGTCTACGGCTTTTTCTCAGTTGGATTC  
+HWI-EAS443:3:30:728:1113#0/1  
a^abbbbbbabbabbabbabbbaa\_H[TM[L¥QQT]QVDS[Y  
@HWI-EAS443:3:30:76:347#0/1  
AAAAGAAGTGGAGATCTAATGTCGCAGCCCCGCACTCGC  
+HWI-EAS443:3:30:76:347#0/1  
¥S[K\_J`aZaa[\_V]ba\_V¥a`b]a`]H]aaa`\_a\_XN[  
@HWI-EAS443:3:30:805:219#0/1  
TGCTGTAATTGGGCATCTCATTGCCATCATCCACTTCATT





@HWI-EAS443:3:33:1393:1380#0/1  
GGGGACGTAGTGTGGTAATGAAAAGAAAACGGGACTCTA  
+HWI-EAS443:3:33:1393:1380#0/1  
\_\_aa\_\_\_`a`R`^^M[OZVaXVa\_FTKV\_^HHLHKKXXYU  
@HWI-EAS443:3:33:1479:684#0/1  
GAATAAAAGAACTGAGAGATCTAATGTCGCAGCCCCGCAC  
+HWI-EAS443:3:33:1479:684#0/1  
¥QS[`TTT^]YY]\_]0\_XWYY]YNX\_L¥^]XTOHIOYJRV  
@HWI-EAS443:3:33:1501:1898#0/1  
GAATAAAAGAACTGAGAGATCTAATGTCGCAGTGCCGCAC  
+HWI-EAS443:3:33:1501:1898#0/1  
G]b`¥¥[\_¥a¥X``aaYW¥^\_WWaY``\_aaaVLJQGWX`T  
@HWI-EAS443:3:33:1589:672#0/1  
GGAGCAGCAGCAAAGGGGAGAAGTTTTATTATTTAGACAG  
+HWI-EAS443:3:33:1589:672#0/1  
X`WUVaZZ]Y[bIPUWWXZUR\_aBBBBBBBBBBBBBBBB  
@HWI-EAS443:3:33:1663:963#0/1  
ATCTAATGTCGCAGTCCCGCACTCGCGAGATAATCACTAA  
+HWI-EAS443:3:33:1663:963#0/1  
aa`aaaa\_^^`\_a¥^^\_W\_GW¥BBBBBBBBBBBBBBBB  
@HWI-EAS443:3:33:1729:797#0/1  
AAAGAACTGAGAGATCTAATGTCGCAGTCCCGAACTCGCG  
+HWI-EAS443:3:33:1729:797#0/1  
aaaa`b¥aa\_a`a]VYaa`^[Z`\_`\_V^X\_]LKTXX^XVV  
@HWI-EAS443:3:33:244:1804#0/1  
AAACACTGCCTGTTCCCGCGCTACTGGGAGAAAACCTGT  
+HWI-EAS443:3:33:244:1804#0/1  
aabbaa``aa`[WUba\_a^NPa¥`WPGQ^^][[\_U\_WWZU  
@HWI-EAS443:3:33:362:1849#0/1  
ATCTAATGTCGCAGTCCCGCACTCCCGAGATACTCACTAA  
+HWI-EAS443:3:33:362:1849#0/1  
a[ORT[O[X\_P¥]LO]b`BBBBBBBBBBBBBBBBBBBB  
@HWI-EAS443:3:33:388:1471#0/1  
CAGTATTCTTGCCCCACTTCATTTGGGAAAAAACTTCC  
+HWI-EAS443:3:33:388:1471#0/1  
a\_a[Q]a^]\_baaa`\_a^[^a^^SSR¥`\_]UG\_]ZQLUP  
@HWI-EAS443:3:33:396:415#0/1  
AAAACCTATTTCGAAAAGGTTGAAAGGTTGAAACATGGTA  
+HWI-EAS443:3:33:396:415#0/1  
a[YRR¥ZU]`[\_\_\_`\_^W][]¥Y\_`[^V]¥Z\_ZWUWW]YI]  
@HWI-EAS443:3:33:546:240#0/1  
AGCAAAACAAACGATGCTGGATCAGACCGAGTGATTGTAT  
+HWI-EAS443:3:33:546:240#0/1  
aaaa^\_abaaaa`\_`aa`[¥]aa^`V^[\_\_WW¥TPXUXY  
@HWI-EAS443:3:33:720:142#0/1  
GAACCCCGCACTCAGAATGAAGTGGATGATGGAAATGAGA  
+HWI-EAS443:3:33:720:142#0/1  
a\_]a`b`a`[^a[af¥`\_^^`¥aRMV`¥0`VG[0¥QPSV  
@HWI-EAS443:3:33:872:1356#0/1  
GACAGGGCCGAAGGTACCATGTTTCAACCTTTCAACCTTT

+HWI-EAS443:3:33:872:1356#0/1  
aaa[^^[aa`¥`bbP`abba`\_abba`\_]aaaX`^```aa  
@HWI-EAS443:3:34:134:531#0/1  
AAAGAAGTCTAATGTCGCAGTCCCGCCCTCGCG  
+HWI-EAS443:3:34:134:531#0/1  
[bbaaaaXW[¥aaV\_a`aU`^Z`\_baVDS^¥SUGSOBBBB  
@HWI-EAS443:3:34:1562:1307#0/1  
AAAGAAGTCTAATGTCGCAGTCCCGCCCTCGCG  
+HWI-EAS443:3:34:1562:1307#0/1  
¥`b]a`Y`aa`^\_SaaZ`]\_\_YYaBBBBBBBBBBBBBB  
@HWI-EAS443:3:34:291:230#0/1  
AGGGGACGTAGTGTGGTAATGAAACGAAAAGGGACTCT  
+HWI-EAS443:3:34:291:230#0/1  
`abba`a`UU\_]`a`^JQW]TYY^O^X\_Q¥FSZ¥LDRUT  
@HWI-EAS443:3:34:603:626#0/1  
CACTCGCGAGATACTTACTAAGACCACTGTGGACCATATG  
+HWI-EAS443:3:34:603:626#0/1  
ab`abbbba\_T]\_aaI\_a\_aa`]aaa\_aa]a`\_a^`\_^]\_  
@HWI-EAS443:3:35:1004:1722#0/1  
GTGAATTCTTCATACCCTTCATGTACTCCTATTTTCAGTG  
+HWI-EAS443:3:35:1004:1722#0/1  
`O]\_^`ZP\_aa```[\_`\_`^```]SX`WJ]^¥a^^Y]W\_  
@HWI-EAS443:3:35:1104:315#0/1  
GGGATGTGCTTGGGACATTTGACACTGTCCGAATAATAAA  
+HWI-EAS443:3:35:1104:315#0/1  
]b[Y`S`a[¥`[S[``\_\_\_\_]a`][[S[ZW]a00TT^^\_VQ  
@HWI-EAS443:3:35:1657:694#0/1  
AAAAGAAGTCTAATGTCGCAGGCCCGCACTCGC  
+HWI-EAS443:3:35:1657:694#0/1  
aabbba`baaaba`a`aba[aaa`UPaUF^¥[[HGV^LX  
@HWI-EAS443:3:35:1710:1880#0/1  
CGTTTTCGTTTCATTACCAACGCTACGTCCCTTGCCCAA  
+HWI-EAS443:3:35:1710:1880#0/1  
\_\_`babbbabababa[aaZH¥bba``babaaa`UZ`Va  
@HWI-EAS443:3:35:1731:1079#0/1  
CGAGATATTCACTAAGACCACTGTGGACCATATGGCCATA  
+HWI-EAS443:3:35:1731:1079#0/1  
abaaaa`¥baaaaa`a`aa`a`\_`\_\_Rba\_a``\_¥T`W\_  
@HWI-EAS443:3:35:235:350#0/1  
AAGAAGTCTAATGTCGCAGTCCCGCCCTCGCGA  
+HWI-EAS443:3:35:235:350#0/1  
a]aab]^`^\_Q\_aaaaa¥\_aY]W`^`YNP`\_`YYG[¥]Z`LD  
@HWI-EAS443:3:35:421:1400#0/1  
CCAGCATCGTTTGTGTTTGGCCAGAGGGTTTGTCTTGTT  
+HWI-EAS443:3:35:421:1400#0/1  
\_aU¥\_XVa^Q`\_^[aUQX[D[`]^^`RYUR^[G`¥FTZUI  
@HWI-EAS443:3:35:421:1660#0/1  
AAAAGAAGTCTAATGTCGCAGTCCCGCACTCGC  
+HWI-EAS443:3:35:421:1660#0/1  
\_¥]aa\_UYbaaT]]bUb\_U`[\_ZIa`]\_bbOFXH`Q[[[\_

@HWI-EAS443:3:36:1013:1796#0/1  
TGCTGTAATTGGGGATCTCATTGCCATCATCCACTTCATT  
+HWI-EAS443:3:36:1013:1796#0/1  
KUb`¥SZVaVbbaGaSXXbb[Vabab¥VaXb[VLVN\_\_\_\_]  
@HWI-EAS443:3:36:1209:281#0/1  
AATAAAAGAATTGAGAGATCTAATGTCGCAGTCCCGCACT  
+HWI-EAS443:3:36:1209:281#0/1  
\_S`XV\_\_^VS\_X¥\_¥a`V`\_\_\_\_aa]`W[`]SVV\_Z^QLR  
@HWI-EAS443:3:36:1290:2016#0/1  
AAAGAAGTCTAATGTCGCAGGCCCGCACTCGCG  
+HWI-EAS443:3:36:1290:2016#0/1  
^[\_Z\_\_b]XRMWaa^XU\_Z[aVTHL`¥HXaaVFNaSYLM^  
@HWI-EAS443:3:36:1354:175#0/1  
AAAGCACTTTTGCATCTTTTGGAAATACCTCAAGAGTTG  
+HWI-EAS443:3:36:1354:175#0/1  
aa]`bYabaa]`^`abaaa`a`\_¥]`[\_`Y¥Xa[aY]`  
@HWI-EAS443:3:36:1396:1879#0/1  
GTTTATATTGAAGTGTGCACTTAACCAAAGGGACGTGCT  
+HWI-EAS443:3:36:1396:1879#0/1  
aUY^\_\_a\_\_S]\_X\_OXa]Y]YX^[PYHVW[R]RVMMOFP  
@HWI-EAS443:3:36:157:153#0/1  
AAGAAGTCTAATGTCGCAGTCCCGCACTCGCGA  
+HWI-EAS443:3:36:157:153#0/1  
aa^RX\_a`a\_R^Y^]^ZM¥\_]aVRHHF[[[¥`¥¥T\_S^QP  
@HWI-EAS443:3:36:235:318#0/1  
CTACTCGGAGAAACCTTGTTTTACGGACCAATTCTCTTTC  
+HWI-EAS443:3:36:235:318#0/1  
a`X`XGU`YVW[]XXZ[a]\_\_]`\_UPQ[[[SV[ZZ\_Y^^\_  
@HWI-EAS443:3:36:248:354#0/1  
CGAGATACTACTAAGACCACTGCGGACCATATGGCCATA  
+HWI-EAS443:3:36:248:354#0/1  
aa\_¥a^¥`b¥WY[UY\_¥`a`a\_\_XaY¥Ya]\_\_[\_`^`X^NJ  
@HWI-EAS443:3:36:425:328#0/1  
TGGCAATGAGATACCCAATTACAGCAGACACGAGAATAAT  
+HWI-EAS443:3:36:425:328#0/1  
abb[QZWba]a`ZZaSU\_YS`[¥a^^^`HH¥S`XGGSZR  
@HWI-EAS443:3:36:860:1503#0/1  
AGAAGTCTAATGTCGCAGTCCCGCACTCGCGAG  
+HWI-EAS443:3:36:860:1503#0/1  
a`a¥aaaba`^a\_\_aaa\_\_N\_S`[YMWUaWa¥¥U\_S\_WY¥  
@HWI-EAS443:3:37:1096:620#0/1  
AGAAGTCTAATGTCGCAGTCCCTCACTCGCGAG  
+HWI-EAS443:3:37:1096:620#0/1  
aa^a\_`^`^abaab]babb^Yababba]UaP\_Ua`ba`XQ¥  
@HWI-EAS443:3:37:1303:1070#0/1  
CTAATGTGCTAATTGGGCAAGGGGCGTAGTGTGGTAAT  
+HWI-EAS443:3:37:1303:1070#0/1  
a```¥ZUbaa`X`ab`a`Z\_ba]WF\_]HPGTT`\_`\_NUTX  
@HWI-EAS443:3:37:1369:651#0/1  
GGGAGATCAATGGCCCTGAGTCAGTGCTAGCCAACACTTA

+HWI-EAS443:3:37:1369:651#0/1  
abaZ`aaaaa\_aa\_^\_XXU`\_`Y^VaVYPHDTGRV`WVVU  
@HWI-EAS443:3:37:1389:196#0/1  
CAAACGACTTACAGTTCTTGAAAGGATGAAGGTGCATTG  
+HWI-EAS443:3:37:1389:196#0/1  
ab]aa`a`aab`aa^aaa`a`aa`a^]aLS]\_W`]\_\_Z^  
@HWI-EAS443:3:37:1399:1700#0/1  
AAAAGAAGCTGAGAGATCTAATGTCGCAGTGCCGCACTCGC  
+HWI-EAS443:3:37:1399:1700#0/1  
Z\_\_WXX^¥¥\_WZ¥aU¥\_aaa\_\_¥ZXaZ¥XD[[^¥`]W]LQ  
@HWI-EAS443:3:37:1508:363#0/1  
TGGACAGGGCCGAAGGTACCATGTTTCAACCTTCAACCT  
+HWI-EAS443:3:37:1508:363#0/1  
```^bba\_a]aaaa`V`^X\_ab]\_a^\_aP^`^\_a`\_a[\_  
@HWI-EAS443:3:37:517:1221#0/1  
CGTTTTCGTTTCATTACCAACTACGTCACCTTGCCCAA  
+HWI-EAS443:3:37:517:1221#0/1  
aa¥^aa`VT``[a]U`a¥TZ^a`¥]JRaGa¥XU\_```\_]  
@HWI-EAS443:3:37:808:30#0/1  
AGCAGACAAGAGAATAATGGACATGATTCAAGAGAGGAAT  
+HWI-EAS443:3:37:808:30#0/1  
\_``b`b`b`b`b]aa`aaa`]^a^a`Y`\_¥FT]^`Ya`Za`  
@HWI-EAS443:3:37:983:162#0/1  
AAAAGAAGCTGAGAGATCTAATGTCGCAGTGCCGCACTCGC  
+HWI-EAS443:3:37:983:162#0/1  
ab`b`¥a`bb```aaaaaaaaab\_`\_`\_]HMaYY`NXZ`RT  
@HWI-EAS443:3:38:1035:65#0/1  
CCGTTTTCGTTTCATTACCAACTACGTCCTTACCCA  
+HWI-EAS443:3:38:1035:65#0/1  
abbbbbbabb`bbbaab¥\_baabaa\_]ZZW`[FY\_]Z  
@HWI-EAS443:3:38:1104:723#0/1  
AGAGAATAAAAGCACTGAGAGATCTAATGTCGCAGTCCCG  
+HWI-EAS443:3:38:1104:723#0/1  
Z`\_b`bbabb\_W¥]ba`b^baaaa`aba]W¥WX`\_`[\_Z  
@HWI-EAS443:3:38:144:1059#0/1  
CAGAATCCAAGTGAAGCAAGCCATAGACATATGCAAGG  
+HWI-EAS443:3:38:144:1059#0/1  
ab]aaab\_X`aaa\_X`aaa¥a]J¥a[a\_\_\_\_\_``\_\_[UM  
@HWI-EAS443:3:38:169:699#0/1  
AAAAGAAGCTGAGAGATCTAATGACGCAGTCCCGCACTCGC  
+HWI-EAS443:3:38:169:699#0/1  
`\_W\_YD[aaY^U\_¥[aa^[\_a`]^X^T^W^M`PR[^[[  
@HWI-EAS443:3:38:378:572#0/1  
AAACGACTTACAGCTCTTGAAAGGATGCAGGTGCATTGA  
+HWI-EAS443:3:38:378:572#0/1  
\_b\_¥Z¥aa\_VV^\_I]bb^\_aZ¥`^]^[ab`X]Za\_a\_`\_`  
@HWI-EAS443:3:38:469:1866#0/1  
AGGGGACGTAGTGTGGTAATGAAACGAAAAAGGGACTCT  
+HWI-EAS443:3:38:469:1866#0/1  
aa]ZaaaaXa[\_a¥a\_aW^a\_\_`abX¥Wa¥WHTWV^\_V]R

@HWI-EAS443:3:38:535:448#0/1  
CAGGGCCGAAGGTACCATGTTTCAACCTTTCAACCTTTTC  
+HWI-EAS443:3:38:535:448#0/1  
\_`OS^]][^^^WFZ\_a`[aZ\_\_^]Va``¥¥U¥Z[\_`]a^[  
@HWI-EAS443:3:38:628:208#0/1  
CACTCGCGAGATACTACTAAGACCACTGTGTACCATATG  
+HWI-EAS443:3:38:628:208#0/1  
`Zb¥¥^`aU]R^S\_a^\_aa`a[]V^aaVSSPDD`[^^]WO  
@HWI-EAS443:3:39:1569:1086#0/1  
GAGAAATCCTCTCAGGACAGCAGACTCCACCTCAGATGTG  
+HWI-EAS443:3:39:1569:1086#0/1  
`^V^a\_a\_] [¥]]baTTXHJ^\_¥[aU[^`YNDLQ¥Z\_a^V  
@HWI-EAS443:3:39:251:1148#0/1  
CGCGAGTTACTACTAAGACCACTGTGGACCATATGGCCA  
+HWI-EAS443:3:39:251:1148#0/1  
^Vaaba`aVb`][YVM\_SY¥WaaaWR¥\_aa\_a\_]U[\_¥  
@HWI-EAS443:3:39:554:1526#0/1  
ATTCTCTTGTCTGCTGTAATTGGGAATCTCATTGCCATCA  
+HWI-EAS443:3:39:554:1526#0/1  
`a`baaa`^ [a`R]]\_J]]Y]PZPDRZ`a\_Z]THYadWR¥  
@HWI-EAS443:3:39:815:501#0/1  
ATCCAGCACCGTTTGTTCCTCCAGAGGGTTTGTCCCTTG  
+HWI-EAS443:3:39:815:501#0/1  
aab`^`baab[^aa`]^aaaaa`a\_aaaP[\_`]\_`\_`a  
@HWI-EAS443:3:39:868:1537#0/1  
GAATAAAAGAAGTCTAATGTTGCAGTCCCGCAC  
+HWI-EAS443:3:39:868:1537#0/1  
¥^Za`^`\_`aaabb¥b`]a¥a\_aaa`^^aYY`b`¥`ZL  
@HWI-EAS443:3:39:903:95#0/1  
GTCCCGGTTTCGTTTCATTACCAACTACGTCCCTTGC  
+HWI-EAS443:3:39:903:95#0/1  
aWWRW]STVWW¥VNZVWYURUTWRRPVSVVWTSWVWUY  
@HWI-EAS443:3:3:1029:2035#0/1  
GCCATGGGATTCTCACAAGAGGATTGCATGATCAAGGCAG  
+HWI-EAS443:3:3:1029:2035#0/1  
ITHV[[bNba\_[]IXTabaaab`\_a[^a^^KaXa``^Qa`  
@HWI-EAS443:3:3:1039:1691#0/1  
AAAGAAGTCTAATGTCGCAGTCCCGCACTCGCG  
+HWI-EAS443:3:3:1039:1691#0/1  
^]Zaa`^`bbab^`]F¥ba\_`¥U`¥a]ZNVX^U\_¥\_¥S[T  
@HWI-EAS443:3:3:109:559#0/1  
GAATAAAAGAAGTCTAATGTCGCAGTCCCGCAC  
+HWI-EAS443:3:3:109:559#0/1  
^VZ¥¥¥WUaM[J[aT]RaU\_`a\_X]aH\_T¥Y\_RL]H\_LBB  
@HWI-EAS443:3:3:1166:1265#0/1  
CCCGTTTTCGTTTAATTACCAACTACGTCCCTTGTCCC  
+HWI-EAS443:3:3:1166:1265#0/1  
abab`a\_aTaaaaaaaaba\_\_b`a^aaa\_]\_\_¥\_\_`^Y]  
@HWI-EAS443:3:3:1191:1636#0/1  
TAAACTGCCTGTTCCGCCGGTACTGGGAGAAACCTTG

+HWI-EAS443:3:3:1191:1636#0/1  
abaaab^^`¥ab[\_S\_a`Sa¥FVYSHZZ[Q[\_]VNRLT\_  
@HWI-EAS443:3:3:1297:1510#0/1  
GAGAGATCTAATGTCGCAGACCCGCACTCGCGAGATACTC  
+HWI-EAS443:3:3:1297:1510#0/1  
Y\_b\_\_ba\_abZbbabb`b`H`ba^b\_bbb^Tba`ba\_\_b]  
@HWI-EAS443:3:3:1696:658#0/1  
AAAAGAAGCTGAGAGATCTAATGTCGCAGTGCCGCACTCGC  
+HWI-EAS443:3:3:1696:658#0/1  
Sa[^¥Zbbbbbabb[KaIbab\_¥¥]ba]`ZFUaa]Mga[]B  
@HWI-EAS443:3:3:638:1988#0/1  
AATTGGGCAAGGGGACGTAGTGTGGTAATGAAAGGAAAA  
+HWI-EAS443:3:3:638:1988#0/1  
\_]aaaa`[bbba`aIaabb^\_^aa`\_a`a¥]aaG\_U`^^  
@HWI-EAS443:3:40:1198:1120#0/1  
AGAATTGCCTCTTACCAGTATCCCCAACCTGATCCTCTC  
+HWI-EAS443:3:40:1198:1120#0/1  
a`aaaa``aaaa`a\_aaa]`\_\_`\_¥XI[`^^`]\_\_^X^U  
@HWI-EAS443:3:40:1286:1381#0/1  
TGAGAGATCTAATGTCGCAGTCCCGCCCTCGCGAGATACT  
+HWI-EAS443:3:40:1286:1381#0/1  
a\_Z]^]¥`[a`^aa^\_a``]Z`^YZTFZR¥SZZU^MNY][  
@HWI-EAS443:3:40:1327:997#0/1  
CTTCTTTGGCCAAAATGAGAAATCCTCTCAGGACAGCAGA  
+HWI-EAS443:3:40:1327:997#0/1  
\_\_SXa[VOH]X\_UR]RORVWPP]ZV¥b¥ba¥ZY`VP\_\_T¥  
@HWI-EAS443:3:40:1375:1058#0/1  
CTCAGAATGAAGTGGACGATGGCAATGAGATACCCAATTA  
+HWI-EAS443:3:40:1375:1058#0/1  
X`bbb`\_abbabbbbab\_bbbabbaba`[bbbaaWabbb  
@HWI-EAS443:3:40:1454:1209#0/1  
TAGAGTCCCGTTTTTCATTTATTACCAACTACGTCCCC  
+HWI-EAS443:3:40:1454:1209#0/1  
aaa`a]\_^\_aX^`][`\_a`\_\_`a[JH[``^^aa]V\_Z`W  
@HWI-EAS443:3:40:146:424#0/1  
CGCGAGATACTCACTAAGACCACTGTGGACCATCTGGCCA  
+HWI-EAS443:3:40:146:424#0/1  
aba\_]`^V¥W¥ZZ]Z]WW]]^^`¥WLF`BBBBBBBBBBBB  
@HWI-EAS443:3:40:1478:137#0/1  
GACATGATTCCGGAGAGGAATGAACAAGGACAAACCCTCT  
+HWI-EAS443:3:40:1478:137#0/1  
a`[Z\_\_[U¥^UN[V¥Y¥YY]¥Z¥WTP¥VWQKPITUUWWW  
@HWI-EAS443:3:40:214:1162#0/1  
AAAGAAGCTGAGAGATCTAATGTCGCAGTCCCGCCCTCGCG  
+HWI-EAS443:3:40:214:1162#0/1  
abbaabaaaaabaaaaaaaaaWa`a`^Waaa\_^H^¥a\_`^  
@HWI-EAS443:3:40:288:1128#0/1  
GTCCCGCACTCGCGAGATACTCACTACGACCACTGTGGAC  
+HWI-EAS443:3:40:288:1128#0/1  
^IX^]¥UYZZ\_T¥ONWRUSVZUTUWQBBBBBBBBBBBBBB

@HWI-EAS443:3:40:301:505#0/1  
CCGTAAAACAAGGTTTCTCCCAGTAGCCGGGGGAACAGGC  
+HWI-EAS443:3:40:301:505#0/1  
ab`Q]0[]NU\_XZZNOU^aPFPJTO^aBBBBBBBBBBBB  
@HWI-EAS443:3:40:396:423#0/1  
CTTGATCATGCAATCCTTGTGAGACTACCATGGCCACA  
+HWI-EAS443:3:40:396:423#0/1  
\_TQ`]U\_U\_aa¥TQ\_X\_a[ZTUa`URDPOYPUQRYWNL  
@HWI-EAS443:3:42:1333:51#0/1  
AAAGGTTGAAAGGTTGAAACATGGTACCTTCGGCCCTGTC  
+HWI-EAS443:3:42:1333:51#0/1  
^]L\_^¥`[\_V`\_]W\_a\_]a^Y`a¥Na\_a¥aa]Z^U[V^¥`  
@HWI-EAS443:3:42:499:1532#0/1  
GAACTGGACTTGTGTTGGCCATTCCTATTCCACCATGT  
+HWI-EAS443:3:42:499:1532#0/1  
W¥Y¥\_^H¥\_bbbXU\_]Y\_UXYZa`ZYMNTIWZQ\_^RGGO  
@HWI-EAS443:3:42:965:493#0/1  
CGTACATGCTAGAAAGAGAATTGGCCCGTAAAACAAGGTT  
+HWI-EAS443:3:42:965:493#0/1  
`b^a`^bbbab^aabaXaa`\_ab`a\_a\_]`\_aa¥\_`a[FV  
@HWI-EAS443:3:43:1046:996#0/1  
GGTGGGTTCACTTTCAAAGGACGAGCGGATCATCAGTCA  
+HWI-EAS443:3:43:1046:996#0/1  
abU]aa[aaa`a\_a[aa\_``\_[YGL]\_a`^a[\_a]\_a]^\_  
@HWI-EAS443:3:43:1192:212#0/1  
AGAGTCTCGTTTTCGTTTCATTACCAACTACGTCCCCT  
+HWI-EAS443:3:43:1192:212#0/1  
ab¥b`\_abab¥ba`¥a¥a`¥`aa`]W\_`R``[]V^WU[U[^  
@HWI-EAS443:3:43:1577:522#0/1  
TGCATATGTCTACGGCTTGTTCCTCAGTTGGGTTCTGTCT  
+HWI-EAS443:3:43:1577:522#0/1  
Xb``abbbbb`abbab]FH^S¥¥¥RZT\_YZBBBBBBBB  
@HWI-EAS443:3:43:1788:89#0/1  
GTCCCCTTTTCGTTTCATTACCAACTACGCCCCCTTGC  
+HWI-EAS443:3:43:1788:89#0/1  
a\_a]G\_¥`\_aYaN\_Z¥^] []UH^UW¥UYYS¥¥GW¥YWSPST  
@HWI-EAS443:3:43:478:1196#0/1  
AAAGAAGTCTGAGATCTAATGTCGCTGTCCCGCACTCGCG  
+HWI-EAS443:3:43:478:1196#0/1  
[KUaV^Xa¥TUTaP]aaa\_aa^\_WZ^MH\_aXH\_]`\_aS`\_  
@HWI-EAS443:3:43:530:891#0/1  
ATTGGGCAAGGGGACGTAGTGTGGTAATGAAAAGAAAAC  
+HWI-EAS443:3:43:530:891#0/1  
aa^^`bb`\_\_abbV`a\_[]\_a]aaaPY`a\_\_\_\_]HZRTa^F  
@HWI-EAS443:3:43:612:27#0/1  
AAAGAAGTCTGAGATCTAATGTCGAAGTCCCGCACTCGCG  
+HWI-EAS443:3:43:612:27#0/1  
\_Zaa¥\_aa\_\_abbbaabbb`¥]bQa\_S\_¥]\_UHVW```a  
@HWI-EAS443:3:43:921:1596#0/1  
GAGAGATCTAATGTCGAGTCCCCTCACTCGCGAGATACTC

+HWI-EAS443:3:43:921:1596#0/1  
` `aab]\_U\_abb\_T`^`\_Yaba\_G\_X]]VUZ[QYJ^XQ\_  
@HWI-EAS443:3:44:1031:696#0/1  
GGGCCATATCTCTTGTCTTCTTTGCCAGAATGAGAAATC  
+HWI-EAS443:3:44:1031:696#0/1  
`\_bbbabbbababbbbaaaabbaaaaaaaaaabbaabaa^  
@HWI-EAS443:3:44:152:882#0/1  
GGGGGCGTAGTGTGGTAATGAAACGAAACGGGACTCTA  
+HWI-EAS443:3:44:152:882#0/1  
ab` `aab\_ab¥b`bba¥` `abaaaP^Xaa\_\_\_\_\_^UZ\_a¥\_  
@HWI-EAS443:3:44:178:1332#0/1  
TGCTAATTGGGCAAGGGGACGTAGTGGTGGTAATGAAACG  
+HWI-EAS443:3:44:178:1332#0/1  
U` [ [TSU^^\_\_\_\_OS\_aba[]]FZ]U\_G¥a`Ya[HS]\_[PR  
@HWI-EAS443:3:44:734:1488#0/1  
AAAAGAAGTGGAGATCTAATGTTGCAGTCCCGCACTCGC  
+HWI-EAS443:3:44:734:1488#0/1  
aaaaaaaaa^`aaa^`^aaaaa^a` `aa[ `Z` ]\_`^^¥V  
@HWI-EAS443:3:44:824:1959#0/1  
AAAAGTATTTCGAAAAGGTTGAAAGGTTGAAACATGGTA  
+HWI-EAS443:3:44:824:1959#0/1  
aababa`a\_` `aa` ]`\_a\_N\_`^\_`a\_X`a\_\_`\_a^`^R\_  
@HWI-EAS443:3:44:833:126#0/1  
CTTGTCTTCTTTGGCCAAAATGAGAAATCCTCTCAGGACA  
+HWI-EAS443:3:44:833:126#0/1  
aaaaUaa` `aba\_G\_¥` ` ` ` \_aaa` ` \_W\_\_\_\_\_^\_` `WW¥  
@HWI-EAS443:3:45:1042:1018#0/1  
CTATTGCTGCCTTGCATATGTCTACGGCTTTTTCCTCAGT  
+HWI-EAS443:3:45:1042:1018#0/1  
aabaabbbb`\_` `b`bbb`bbb^a¥¥aaa`L]ZI`]NHFX  
@HWI-EAS443:3:45:1210:129#0/1  
CACTTCAGATATCAAGTAAAATAAGGAGAGAGTTGATA  
+HWI-EAS443:3:45:1210:129#0/1  
\_babbaab^K`bbb`bbbabbbb\_abbabb`bab`abaaa  
@HWI-EAS443:3:45:1322:1702#0/1  
GGTTCACCTTTAAAAAGGACAAGCGGATCATCAGTCAAGAA  
+HWI-EAS443:3:45:1322:1702#0/1  
aa¥¥^[\_aXF[TY\_]YYT\_]\_\_^]\_[H^R^WRQUX^]X  
@HWI-EAS443:3:45:1649:1630#0/1  
ATTCTGGCTAAGGATGTCCACCATCCTTACTCCTCCAATC  
+HWI-EAS443:3:45:1649:1630#0/1  
[[Y`b\_U`ba^H]T¥Y¥Z\_]H`¥W]X[T^]b\_\_`ZV[ `Y\_  
@HWI-EAS443:3:45:601:700#0/1  
AGAGAATAATGGACATGATTCCAGAGGGGAATGAACAAGG  
+HWI-EAS443:3:45:601:700#0/1  
`aH^]aab\_bab`aaaa¥aaa\_\_`\_aaaaU]aa`aU`\_\_a  
@HWI-EAS443:3:46:1184:1373#0/1  
AAAAGCACTGAGAGATCTAATGTTCGAGTCCCGCACTCGC  
+HWI-EAS443:3:46:1184:1373#0/1  
^\_\_bPG` `a\_`^`\_¥V`abaX`]SaQ\_aa` `\_]ZW^`¥^[X



@HWI-EAS443:3:46:1211:1047#0/1  
GACAGGGCCGAAGGTACCATGTTTCAACCTTTCAACCTTT  
+HWI-EAS443:3:46:1211:1047#0/1  
aaa^]Z`a#b``ZN\_TXRQ#Z\_a\_\_VW^`a#^\_^ZZ\_\_^  
@HWI-EAS443:3:47:1040:932#0/1  
CAATAATTGTGGCCATGGGATTCTCACAAAGAGGATTGCAT  
+HWI-EAS443:3:47:1040:932#0/1  
aabababbbbaaaaa[\_J`a]WTNYVV#^Z\_a^\_\_\_X`Z  
@HWI-EAS443:3:47:1242:987#0/1  
AAAAGAAGTGGAGATCTAACGTCGCAGTCCCGCACTCGC  
+HWI-EAS443:3:47:1242:987#0/1  
aaaabbbabb`bbaaab`a`a`aa`ab^`#\_a^Z\_a\_\_^  
@HWI-EAS443:3:47:1685:1950#0/1  
AAAGAAGTCCAGAGATCTAATGTCGCAGTCCCGCACTCGCG  
+HWI-EAS443:3:47:1685:1950#0/1  
a`S\_UaZWOR`HVR`Y\_XKF`W`YTZ]R]\_TPZVW#^VSN  
@HWI-EAS443:3:47:547:990#0/1  
ATCTAATGTCGCAGTCCCGCACTCGCGAGATACTCACTAA  
+HWI-EAS443:3:47:547:990#0/1  
aa#QOZP`[\_^WP^M#RZYFJ#N#\_HZ#avJXJFNYNNU\_  
@HWI-EAS443:3:48:1430:1333#0/1  
ATCTAATGTCGCAGTCCCGCACTCGCGAGATAGTCACTAA  
+HWI-EAS443:3:48:1430:1333#0/1  
\_L\_[a#Q`QT]JZ\_PXPGMaZVV[LX[#^]HLQQSONRR  
@HWI-EAS443:3:48:1577:1551#0/1  
AAAGGTTGAAAGGTTGAAACATGGTACCTTCGGCCCTGTC  
+HWI-EAS443:3:48:1577:1551#0/1  
aabbaaba`ba]abaaaaa]\_aa^a`\_^#X^Z^Y#0  
@HWI-EAS443:3:48:1617:360#0/1  
AAAGGTTGAAAGGTTGAAACATGGTACCTTCGGCCCTGTC  
+HWI-EAS443:3:48:1617:360#0/1  
a`aa]T\_baaaab\_a`aa`\_`aa^a`^`^Z^\_`VOY\_RP  
@HWI-EAS443:3:48:362:735#0/1  
CCCGTTTTCGGTTTATTACCAACTACGTCCTTGGCC  
+HWI-EAS443:3:48:362:735#0/1  
aaX`]XUaVGX\_aS`YSN#TR^\_^ZBBBBBBBBBBBBB  
@HWI-EAS443:3:48:75:1396#0/1  
GTGATTATGGAAGTTGTTTTCCCAAATGAAGGGGGGGCAA  
+HWI-EAS443:3:48:75:1396#0/1  
aX\_X]aaa`a`#PLVNN[\_]OVVTZXRRTBBBBBBBBBBB  
@HWI-EAS443:3:48:868:1812#0/1  
TGTGTACTTTTTGATTATGGCCATATGGTCCACAGGGGTC  
+HWI-EAS443:3:48:868:1812#0/1  
Ub]#YSabbbbbbb\_]ba#ZXXZT\_WHXHO[ZW#]GaaTX  
@HWI-EAS443:3:48:920:560#0/1  
CACTCGGTTTGATCCAGCATCGTTTGTGTTTGTCTCCAGAGG  
+HWI-EAS443:3:48:920:560#0/1  
\_S``T`#`bb#baM`V`^a\_Z#Ya\_b]``^aaSR`[Yb^  
@HWI-EAS443:3:48:986:1993#0/1  
AAGAAGTCCAGAGATCTAATGTCGCAGTCCCGCACTCGCGA

+HWI-EAS443:3:48:986:1993#0/1  
aaaaaabaa`aaa\_aaaba`^\_]Gaa¥¥`^^\_Y\_¥\_¥W^Y  
@HWI-EAS443:3:49:1006:1162#0/1  
AAAAGAAGTGAAGATCTAATGTCGCAATCCCGCACTCGC  
+HWI-EAS443:3:49:1006:1162#0/1  
ababbbaabab]abaaab`ba]`a`aa`aaaa`aaaa\_  
@HWI-EAS443:3:49:1060:520#0/1  
ACTTATTTTCGAAAAGTTGAAAGTTGAAACATGGTACCT  
+HWI-EAS443:3:49:1060:520#0/1  
abbbabbbabaaaabbaaba`aa`aab`aaaaab`\_a\_\_a  
@HWI-EAS443:3:49:1121:407#0/1  
GAATAAAAGAAGTGAAGGATCTAATGTCGAGTCCCGCAC  
+HWI-EAS443:3:49:1121:407#0/1  
^^¥`aaaaaba\_a`^aaaa¥bb\_bbXX`¥¥`Z¥\_a`\_ZS  
@HWI-EAS443:3:49:1454:1202#0/1  
GAGAATAAAAGAAGTGAAGATCTAATGTTGCAGTCCCGC  
+HWI-EAS443:3:49:1454:1202#0/1  
a^baaaaaa^`a^ab`a\_a]`\_`a\_aa^\_\_]\_¥RWY]]  
@HWI-EAS443:3:49:1633:934#0/1  
AGATCTAATGTCGAGTCCCGCCCTCGCGAGATACTCACT  
+HWI-EAS443:3:49:1633:934#0/1  
[b\_aa\_]Zaa[`Z`a]T\_`aaWFPWY¥]W^\_T\_^T\_[¥VS  
@HWI-EAS443:3:49:1718:1484#0/1  
GGCGTACATGCTAGAAAGAGAATTGGTCCGTAATAAAAGG  
+HWI-EAS443:3:49:1718:1484#0/1  
aSNUWX^[Q¥QUWNT`]Y^GYaT[[]R[a\_\_VBBBBBBB  
@HWI-EAS443:3:49:366:742#0/1  
GCTAGAGGCCGTTTTCGTTTTATTACCAACTACTCGTCC  
+HWI-EAS443:3:49:366:742#0/1  
Iaa¥`b¥Y^`\_b`\_\_bbbVb\_bb¥\_] [\_\_]Y]¥a`]YO]  
@HWI-EAS443:3:49:510:324#0/1  
AGGGGACGTAGTGTGGGAATGAAACGAAAACGGGACTCT  
+HWI-EAS443:3:49:510:324#0/1  
ab\_bb]Z¥\_^^[`aba\_H¥bZ\_a]`HXYba\_QaZ`¥R`Xa  
@HWI-EAS443:3:49:844:1444#0/1  
GAAGGCTAATGTGCTAATTGGGCAAGGGGACGAGTGTG  
+HWI-EAS443:3:49:844:1444#0/1  
aa]RaYXZa[]G]UVUTPUY]U^RXWQ]ZBBBBBBBBBBB  
@HWI-EAS443:3:4:1307:1022#0/1  
GGCCGTAACATGGCGGAATAGGAATGGCCCAACAACAAGT  
+HWI-EAS443:3:4:1307:1022#0/1  
`WZSaMb`WUaXJ[a`USaaZ\_\_\_\_[X[]GVaHa¥Sa\_a0  
@HWI-EAS443:3:4:1576:1231#0/1  
CTTGTGTGAATTGAATACTGGAGAAATGCCTCTTACCAGT  
+HWI-EAS443:3:4:1576:1231#0/1  
^bbbXbb0`babb\_`b^aaa]\_bbaa¥a\_S^Wa^a`aa\_F  
@HWI-EAS443:3:4:1617:299#0/1  
GTACTTTTTGATTATGGCCATATGGTCCACAGGGGTCTTA  
+HWI-EAS443:3:4:1617:299#0/1  
aWPPW]Y¥[^`ZR^VZV\_BBBBBBBBBBBBBBBBBBBBBB

@HWI-EAS443:3:4:166:1270#0/1  
GGGGACGTAGTGTGGTAATGAAACGAAAACGGGGCTCTA  
+HWI-EAS443:3:4:166:1270#0/1  
`bRaa0a¥\_bZSNZV[S\_aU[Ha`FHHa^RRR\_`GVY¥BB  
@HWI-EAS443:3:4:580:1673#0/1  
GGGGTGGGGTCTGCTGTCCTGAGAGATTTCTCATTTTGG  
+HWI-EAS443:3:4:580:1673#0/1  
aba¥L\_aaaa`abaW\_Ua\_\_a\_aaa`\_^a`Ya[\_`\_`\_aV  
@HWI-EAS443:3:50:1124:1383#0/1  
ATCTAATGTCGCAGGCCCGCACTCGCGAGATACTCACTAA  
+HWI-EAS443:3:50:1124:1383#0/1  
X¥¥Y\_\_^ZTDS`\_QR`\_ZQPTVZVFZR`VOFOTYXRVIYU  
@HWI-EAS443:3:50:1217:308#0/1  
AAAACCTATTTTCGAAAAGGTTGAAAGGTTGAAACATGGTA  
+HWI-EAS443:3:50:1217:308#0/1  
aa`aabaaaa\_b^`^\_aa]^a]\_[a`Z`a`\_`^aa\_[^a  
@HWI-EAS443:3:50:129:152#0/1  
CGCACTCGCGAAATACTCACTAAGACCACTGTGGACCATA  
+HWI-EAS443:3:50:129:152#0/1  
ab[babbaabaa`b`b`Yab`ba`abaa`Zbaa\_\_^`  
@HWI-EAS443:3:50:1453:106#0/1  
AAAAGAAGTGGAGATGTAATGTCGCAGTCCCGCACTCGC  
+HWI-EAS443:3:50:1453:106#0/1  
`\_¥U[¥[¥[WZb^[I\_IR¥bbb\_V¥\_LKJGMWYVR[\_[\_¥  
@HWI-EAS443:3:50:497:183#0/1  
GTCCGTAAAACAAGTTTTACCCAGTAGCCGGCGGAACAG  
+HWI-EAS443:3:50:497:183#0/1  
aba`aS]a]baabbb\_bbUZ^`¥]Zbaaab^^b\_aZZa  
@HWI-EAS443:3:50:548:1601#0/1  
AAAGCACTTTTGCCTTTTTGGAAATGCCTCAAGAGTTG  
+HWI-EAS443:3:50:548:1601#0/1  
a^WX`UYa[YSbWGRbb`[]bbaaaT]OHF¥[`aU`aVaa  
@HWI-EAS443:3:50:879:1498#0/1  
GGACAGGGCCGAAGGTACCATGTTTCAACCTTTCAACCTT  
+HWI-EAS443:3:50:879:1498#0/1  
^`\_aabbb\_ZM¥aa]aHa[ab\_b`aY`V`Ya`U`]X]U  
@HWI-EAS443:3:51:29:1983#0/1  
CAGAATGACGTGGATGATGGCAATGAGATACCCAATTACA  
+HWI-EAS443:3:51:29:1983#0/1  
aababb\_a^`0`\_`\_\_\_\_`\_^W]\_\_¥]X^¥X^]HZ^XW]  
@HWI-EAS443:3:51:550:775#0/1  
TGAGGATTAGCTCATCTTTTCAGTTTTGGTGGGGTCACTTT  
+HWI-EAS443:3:51:550:775#0/1  
^^`\_`\_YFVY\_ZLW¥^a^U[U\_¥¥X¥¥\_]SFFPJJOZ¥Y  
@HWI-EAS443:3:51:750:100#0/1  
AAAGGTTGAAAGGTTGAAACATGGTACCTTCGGCCCTGTC  
+HWI-EAS443:3:51:750:100#0/1  
ab\_bb`bbabbbabbbbababbbb\_babbb¥aa^a\_b`aa  
@HWI-EAS443:3:52:1090:433#0/1  
CTGCCTTGACATATGTCTACGGCTTGTCTCAGTTGGATT

+HWI-EAS443:3:52:1090:433#0/1  
aabaaabbaabaaa`ab\_a```BBBBBBBBBBBBBBBB  
@HWI-EAS443:3:52:1440:728#0/1  
ACGGCTTGTTCCCTCAGGTGGATTCTGTCTAAGGATGTCCA  
+HWI-EAS443:3:52:1440:728#0/1  
aaaa`a`S^[Y`^[RWDWV\_M[`UUGQRRZTU[¥PHLRLS  
@HWI-EAS443:3:52:1636:1732#0/1  
CAGCAATAGGGCTGAGGATTAGCTCATCTTTCAGTTTTGG  
+HWI-EAS443:3:52:1636:1732#0/1  
abba`a¥Sa]G\_ZYa¥\_baa`aa`aaaaabaa\_T]`\_ba  
@HWI-EAS443:3:53:1492:405#0/1  
GAGTAAGGATGGTTGACATCCTTAGACAGAATCCAAGTGA  
+HWI-EAS443:3:53:1492:405#0/1  
\_aa`a\_bb^]Y]RGRYZY^P^`]``\_aba\_ZRUVa]`aU  
@HWI-EAS443:3:53:1692:239#0/1  
GCCTTGACATATGTCTACGGCTTGTTCCTCAGTTGGGTTCT  
+HWI-EAS443:3:53:1692:239#0/1  
`bbbbbbbbbbbbbbababab\_b\_L\_^F[]XR]S^JVGWBBB  
@HWI-EAS443:3:53:1788:657#0/1  
GCTGTAATTGGGTATCTCATTTCCATCATCCACTTCATTC  
+HWI-EAS443:3:53:1788:657#0/1  
W¥baX¥abbXWULaa```]aFZab``````aWa`W\_\_aT  
@HWI-EAS443:3:53:290:308#0/1  
GTCCCCTTTTCGTTTCTTTACCAACTACGTCCCCTTGC  
+HWI-EAS443:3:53:290:308#0/1  
a\_a\_abU^aa`b]^]a`a`]\_^\_X\_\_^\_YaX^^X\_XX^U  
@HWI-EAS443:3:53:54:1417#0/1  
GATGAATACTCCAGCACGGAGAGAGTGGTAGTGAGGATTG  
+HWI-EAS443:3:53:54:1417#0/1  
\_a\_b\_Z\_^a`aZ]XXX]aP¥N¥ZVUBBBBBBBBBBBBBB  
@HWI-EAS443:3:53:583:57#0/1  
GGCGTACATGCTAGAAAGAGAATTGGTCCGTAAGACAAGG  
+HWI-EAS443:3:53:583:57#0/1  
abbaXb][b]V\_a\_]\_W]Z]]]ZU\_^ZML^aONN\_aX¥]W  
@HWI-EAS443:3:53:62:1523#0/1  
ATTCTTCCCTACCCTTCATGTACTCTTATTTTCAGTGTTTG  
+HWI-EAS443:3:53:62:1523#0/1  
X\_aa\_aaN`]bbbbabbb`\_b`aaaabbbab]bbbbaaa  
@HWI-EAS443:3:53:690:1104#0/1  
AAAGAAGTGGAGATCTAATGACGCAGTCCCGCACTCGCG  
+HWI-EAS443:3:53:690:1104#0/1  
a`]\_V¥abaaaaa`a^aa`aZG¥```a^`¥R¥U^`^\_¥¥  
@HWI-EAS443:3:53:741:849#0/1  
CTGATGTGACTTTTTGATTATGGCCATATGGGCCACAGT  
+HWI-EAS443:3:53:741:849#0/1  
]a\_X[\_S\_I¥S¥bbaYa`ZXMabbZS]OJYPTHHQOQUT]  
@HWI-EAS443:3:54:124:100#0/1  
GGGGACGTAGTGTGGGAATGAAACGAAAACGGGACTCTA  
+HWI-EAS443:3:54:124:100#0/1  
ab`aP^a\_\_a¥\_U`aaW[^V[M[\_T\_X\_^\_V\_\_¥W¥SU[W

@HWI-EAS443:3:54:1410:73#0/1  
GGGCCATTCTATTCCACCATGTTACGCCAGAGGGGATA  
+HWI-EAS443:3:54:1410:73#0/1  
aaa]VR\_V][W^`RPJ¥HSYX^KZZWYBBBBBBBBBBBB  
@HWI-EAS443:3:54:1413:740#0/1  
AAAACCTATTTGAAAAGGTTGAAAGGTTGAAACATGGTA  
+HWI-EAS443:3:54:1413:740#0/1  
a\_SPP`¥X¥baS`Y^Z¥```a]YPX¥^Y`]`¥ZXZQY[K\_  
@HWI-EAS443:3:54:1552:1071#0/1  
ATCTAATGTGCGAGTCCCGCACTCGCGAGATACTCCCTAA  
+HWI-EAS443:3:54:1552:1071#0/1  
`baba`bbGQaYU`Sa\_a]SZ¥WZZPKT¥G]^¥UBBBBBB  
@HWI-EAS443:3:54:1642:681#0/1  
ATCTGCTCCCAGCACGTCCCTTGGGTTAAGTGCACACTT  
+HWI-EAS443:3:54:1642:681#0/1  
`\_`\_0¥b`RG^YU`aQU\_`SVOZOW`YU^TPLVZFQ¥`\_  
@HWI-EAS443:3:54:443:175#0/1  
CTAATGTGCTAATTGGGCAAGGGAACGTAGTGTGGTAAT  
+HWI-EAS443:3:54:443:175#0/1  
abbabb^b`bb`babaaa`aba^a¥b`\_a\_a`aaa^\_\_\_\_  
@HWI-EAS443:3:54:650:387#0/1  
TGCTGTAATTGGGTATCTCATTGCCATCATCCACTCCATT  
+HWI-EAS443:3:54:650:387#0/1  
`b`bb[a^bbbbb`b`aaaaab`Saabbbb\_aba`b[aba  
@HWI-EAS443:3:54:692:413#0/1  
GCGAGATGCTCACTAAGACCACTGTGGACCATATGGCCAT  
+HWI-EAS443:3:54:692:413#0/1  
]Y`¥aX¥`Yb\_\_WW\_\_ZVaVb¥¥YUW\_Vb]MV^U\_baaaX  
@HWI-EAS443:3:55:1046:491#0/1  
AAAAGAAGTGGGAGATCTAATGTGCGAGTCCCGCACTCGC  
+HWI-EAS443:3:55:1046:491#0/1  
`aa```aaabaaaba\_[a\_VaaXaaW\_a[[¥Ya[SV`^\_^  
@HWI-EAS443:3:55:324:1535#0/1  
GCGGGATGTGCTTGGGACATTTGACACTGCCCAAATAATA  
+HWI-EAS443:3:55:324:1535#0/1  
¥a¥[aa`IR]\_`U\_]\_U\_Z¥W`aR\_X\_¥¥D¥[[IUX\_U``  
@HWI-EAS443:3:55:653:1490#0/1  
GCTGCCTTGCATATGTCTACGGCTTGTTCCTCAGGTGGAT  
+HWI-EAS443:3:55:653:1490#0/1  
^^bbbbbbbbbbbbbbabb`abab\_JZ^GZ[XGXH¥\_OH[  
@HWI-EAS443:3:56:476:1232#0/1  
AAAAGAAGTGGGAGATCTAATGTGCGAGCCCCGCACTCGC  
+HWI-EAS443:3:56:476:1232#0/1  
[aTUbab`aa[b\_a`b\_\_aabb\_a`a`YDUQa¥P[V[[\_¥  
@HWI-EAS443:3:57:1703:1993#0/1  
CACCATCAAGGGAGCAATTTTACAATCCTGGAGCTGTTCT  
+HWI-EAS443:3:57:1703:1993#0/1  
YYbbbbbbbaab¥bbbaabaaba]bb`a\_[`\_G]`T\_  
@HWI-EAS443:3:57:418:834#0/1  
AAAACCTATTTGAAAAGGTTGAAAGGTTGAAACATGGTA

+HWI-EAS443:3:57:418:834#0/1  
]Q¥SWa`YUaa^`]X^Y]a^`Z¥`[`]Y\_`\_^]S^^`U^  
@HWI-EAS443:3:57:840:120#0/1  
TCCAGGATTGTAATAATTGCTCCCTTGATGGTGGGGTACAT  
+HWI-EAS443:3:57:840:120#0/1  
]X`Ybba``bab[Z^^^\_0a¥GWZ[^YWa`Y\_XE]FO]P]  
@HWI-EAS443:3:58:1141:171#0/1  
CCCGCACTCAGAATGATGTGGATGATGGCAATGAGATACC  
+HWI-EAS443:3:58:1141:171#0/1  
aaabababaab`aabYJ¥`ba^aa^Z]]X\_```[¥]]][JZ  
@HWI-EAS443:3:58:1276:1488#0/1  
AAAAGAAGTCTAATGTCGCAGCCCCGCACTCGC  
+HWI-EAS443:3:58:1276:1488#0/1  
G[^Y]a\_``ab\_a^\_\_b¥bb`bbb\_b\_[FW[bb\_a^\_ab]  
@HWI-EAS443:3:58:273:313#0/1  
GTGAATGTGGGAGGATCAGGGTTGAGGATACTGGTAAGAG  
+HWI-EAS443:3:58:273:313#0/1  
a]XXT[`0[PZ^]XGNZWSWVPTRYBBBBBBBBBBBBBB  
@HWI-EAS443:3:58:461:973#0/1  
CTGCTGTAATTGGGGATCTCATTGCCATCATCCACTTCAT  
+HWI-EAS443:3:58:461:973#0/1  
\_X]R\_Z¥Q0aQXXTGZX¥]UX\_`URLNU]QR¥¥TRXY\_US  
@HWI-EAS443:3:59:1069:1309#0/1  
GTACTTTTTGATTATGGCCATATGGTCCACAGTGGGCTTA  
+HWI-EAS443:3:59:1069:1309#0/1  
a¥^aaaa`aaaa\_`aa`a\_J\_\_G`Vaba`ZRS¥aQT\_\_T  
@HWI-EAS443:3:59:1210:1316#0/1  
AAAAGAAGTCTAATGTCGCAGTCCCGCAGTCGC  
+HWI-EAS443:3:59:1210:1316#0/1  
¥]b\_0]\_U]X\_]S¥a[aaa^QWTXHQ\_`WEIQDN¥`P  
@HWI-EAS443:3:59:1326:776#0/1  
GTCCCGTTTTCGTTTTATTACCAACTACGTCGTTGC  
+HWI-EAS443:3:59:1326:776#0/1  
a\_\_PXa]TT]VXVZ\_]WX\_]L[a¥K¥`\_a\_]VXPSGYYYT  
@HWI-EAS443:3:59:1496:1326#0/1  
GAATAAAAAGAAGTCTAATGTCGCAGTCCCGCAC  
+HWI-EAS443:3:59:1496:1326#0/1  
a[a[OD]XKR`Q`VISa]\_aV¥]U`aSaaX[XLNZUTFOR  
@HWI-EAS443:3:59:235:1914#0/1  
AAAAGTTGAAAGTTGAAACATGGTACCTTCGGCCCTGT  
+HWI-EAS443:3:59:235:1914#0/1  
\_IPS[YTZ]SW[WYT]^a\_]YZQS[OX`[BBBBBBBBBBB  
@HWI-EAS443:3:59:824:1890#0/1  
GTCTGCTGCTCCTGAGAGGATTTCTCATTGAGCAAAGAA  
+HWI-EAS443:3:59:824:1890#0/1  
\_GGOWI¥^G`aWR\_Y¥Z`MNYX\_X¥VG]\_TYG[WYWUSZY  
@HWI-EAS443:3:5:1056:1849#0/1  
ATCTAATGTCGCAGTCCCGCAATCGCGAGATACTCACTAA  
+HWI-EAS443:3:5:1056:1849#0/1  
WaaU`[`aYPb^a``¥[\_GYRJ\_\_`X`ZFZ[\_[\_[S^]BB

@HWI-EAS443:3:5:1443:683#0/1  
AATCCACTGTACCGCTTCTGGTTGCCTTAGGGAGAAGAG  
+HWI-EAS443:3:5:1443:683#0/1  
aba]ab`bbaa\_N¥a[aZJ^0[Y^]RHP¥RF^`MBBBBBB  
@HWI-EAS443:3:5:179:1652#0/1  
GTCCCCGTTTTCGTTTCATTACCAACTACGTTCCCTTGC  
+HWI-EAS443:3:5:179:1652#0/1  
ababbbbabbbbabbbbabbbbabaababba`WF[a\_`aba  
@HWI-EAS443:3:5:263:1845#0/1  
GTTCACTTTCAAAAGGACAAGAGGATCATCAGTCAAGAAA  
+HWI-EAS443:3:5:263:1845#0/1  
`TaZ^^`bWKW\_]aaa]a\_YF¥\_\_¥0\_ZN\_`JFY\_\_Ya`  
@HWI-EAS443:3:5:563:1325#0/1  
GGGACGTAGTGTGGGAATGAAACGAAAACGGGACTCTAG  
+HWI-EAS443:3:5:563:1325#0/1  
a``abbTab`babb\_G]`b`Ybb^`Yaa\_¥\_aa[¥\_\_a\_]`  
@HWI-EAS443:3:60:1046:1051#0/1  
TAATGTCGCAGTCCCCGCCCTCGCGAGATACTACTAAGAC  
+HWI-EAS443:3:60:1046:1051#0/1  
\_¥¥¥\_MXTZ`[OQS\_T^I[]`ZY¥S^`^VT]`YLQW¥`]W  
@HWI-EAS443:3:60:1126:1033#0/1  
GAACTGAGAGATCTAATGTCGCAGTCCCGAACTCGCGAGA  
+HWI-EAS443:3:60:1126:1033#0/1  
aV]TY[TMW0[ZXHZXaaZVaV^SPLL^PGOPFX^\_VRLL  
@HWI-EAS443:3:60:26:1735#0/1  
CTGCTGTAATTGGGCATCTCATTGCCATCATCCACTTCAT  
+HWI-EAS443:3:60:26:1735#0/1  
aR¥\_UUZ\_YWaUX¥H`YZV]R¥`P`a^Y`¥[^L\_]ZTRV  
@HWI-EAS443:3:60:617:424#0/1  
GCTGTAATTGGGTATCTCATTGCCATCATCCACCTCATTC  
+HWI-EAS443:3:60:617:424#0/1  
`aZ]]^R\_abb]b¥`ZUaaaab¥a\_aZXa\_a\_¥`]]\_`^`  
@HWI-EAS443:3:60:726:370#0/1  
TCCCCGTTTTCGTTTCACTACCAACTACGTTCCCTTGCC  
+HWI-EAS443:3:60:726:370#0/1  
aaaaab`aaaaa`aaaa`ab``a^^a\_`a\_aU\_\_\_\_\_^^`\_`\_`  
@HWI-EAS443:3:60:781:25#0/1  
ATCTAATGTCGCAGTCCCGCACTCGCGGATACTACTACTAA  
+HWI-EAS443:3:60:781:25#0/1  
^Z`¥\_W¥\_PX\_WZ\_R¥]VUYKRYP\_Z[EYXWRDTUYMVS[  
@HWI-EAS443:3:60:799:679#0/1  
GAATAAAAGAACTGAGAGATCTGATGTCGCAGTCCCGCAC  
+HWI-EAS443:3:60:799:679#0/1  
aaaaaaaa`a`\_aa\_\_aa\_a]aaaaa\_\_W\_`aWUU^^\_¥Y  
@HWI-EAS443:3:61:1153:1467#0/1  
CAGACCGAGTGATGGTATCACCTCTGGCCGTAAAATGGTG  
+HWI-EAS443:3:61:1153:1467#0/1  
¥]WZZ\_¥b]`b¥a¥¥H[I[V\_^`YXX¥aV`UaZG[SPSHP  
@HWI-EAS443:3:61:194:1729#0/1  
AAAAGAAGTCTAATGTCGCAGTCCCGCACTCGC

+HWI-EAS443:3:61:194:1729#0/1  
OP¥\_¥YYaZ^]PY]\_¥Y¥¥^Z¥S]S]P[\_]X¥DPOUTZLM  
@HWI-EAS443:3:61:450:1088#0/1  
ATTTCCAAAAAGATGCAAAAGAGCTTTTCCAGAACTGGGG  
+HWI-EAS443:3:61:450:1088#0/1  
]^\_Z`¥¥Y^\_`\_]a`\_W^][DXaY[W[`¥]]^Z^^¥TY[  
@HWI-EAS443:3:61:855:917#0/1  
AGAGAATAAAAGAACTGAGAGTTCTAATGTCGCAGTCCCG  
+HWI-EAS443:3:61:855:917#0/1  
`\_\_\_b\_ba[Z¥^`^bab^^bUab]¥`aa[]`Q`\_]Y[WQ  
@HWI-EAS443:3:62:321:1919#0/1  
TTCCTATTCCACCATGTTACGCCAGAGGGGATACCATCA  
+HWI-EAS443:3:62:321:1919#0/1  
^b`b`b\_Q¥]a\_XaZUV^aa\_¥bY¥QXQSG¥\_Z\_\_Z¥S[`  
@HWI-EAS443:3:63:1128:948#0/1  
ATCAAACCTTTGGTCAACATCATCATTCTCACTTCACCTC  
+HWI-EAS443:3:63:1128:948#0/1  
Saaa`^a]`a¥[X`a``baba[`bbaaaa\_Z`a`aaaa`  
@HWI-EAS443:3:63:1291:1649#0/1  
CCGCACTCAGAAAGAAGTGGATGATGGCAATGAGATACCC  
+HWI-EAS443:3:63:1291:1649#0/1  
a^aW\_^aZ¥SZ\_a¥Yab[U\_U^¥Z^\_`\_[a¥GOQW]SHPZ  
@HWI-EAS443:3:63:195:1123#0/1  
TGTACTCTTATTTTCAGTGTGGAGGTAGCCCGTTAGCA  
+HWI-EAS443:3:63:195:1123#0/1  
aaYb]\_aa\_V\_aaa^`aYa`aa`[W[\_Za^\_\_\_RY^\_V]Z  
@HWI-EAS443:3:63:321:757#0/1  
AAGAACTGAGCGATCTAATGTCGCAGTCCCGCACTCGCGA  
+HWI-EAS443:3:63:321:757#0/1  
]]`UXaZTU[G`MWaU^W`^Z¥a^]\_S\_aa]YOTY]XKT  
@HWI-EAS443:3:63:791:1545#0/1  
CCCGTTTTCGTTTCATTACCAACACTACGACCCCTTGCCC  
+HWI-EAS443:3:63:791:1545#0/1  
`[\_USY[Z\_W¥a]¥``SYP^PW`]]`^PTDH]VGWY]NVB  
@HWI-EAS443:3:63:866:1244#0/1  
GGCGTACATGCTAGAAAGAGAATTGGTCTGTAACAAGG  
+HWI-EAS443:3:63:866:1244#0/1  
a`a^\_aaabaaaa`aa`a`aaaa\_````\_aaaZa`aa  
@HWI-EAS443:3:64:1166:1103#0/1  
CCCGTTTTCGTTTCATTACCAACACTACGACCCCTTGCCC  
+HWI-EAS443:3:64:1166:1103#0/1  
]a[a]^a\_Z¥HZaa^\_aaa]a[\_a`aaaYT]^`¥TLZ`¥S  
@HWI-EAS443:3:64:1353:1302#0/1  
AGAGAATAAAAGAACTGAGAGATCTAATGCCGCAGTCCCG  
+HWI-EAS443:3:64:1353:1302#0/1  
\_ab`bbbbbbbaababababaaaaabbab\_TYaaa`\_]a^  
@HWI-EAS443:3:64:1433:176#0/1  
GGTCCACAGTGGTCTTAGTGAGTTTCTCGCGAGTGCGGGA  
+HWI-EAS443:3:64:1433:176#0/1  
]a]``]b\_bTbaSa`aZ\_\_¥\_a\_\_[\_Z\_^`]a¥\_U`¥`U



@HWI-EAS443:3:64:1484:871#0/1  
GTGACTTCTTCATACCCTTCATGTACTCTTATTTTCAGTG  
+HWI-EAS443:3:64:1484:871#0/1  
`Ta¥GVaUa\_]^¥Z^a`\_S^T`\_]`[Z^`^a`\_^\_\_]Xa  
@HWI-EAS443:3:64:1603:1231#0/1  
GCCGAAGGTACCATGTTTCAACCTTTCAACCTTTTCGAAA  
+HWI-EAS443:3:64:1603:1231#0/1  
aa`W]a\_ZR\_YR[a\_X`]^\_[¥¥\_\_`Z¥Y¥\_\_^]Y[`VWW  
@HWI-EAS443:3:65:1096:1657#0/1  
GAATAAAAGAACTGAGAGATCTAATGTTGCAGTCCCGCAC  
+HWI-EAS443:3:65:1096:1657#0/1  
a`^YY`[`a\_a^OYH^W^`aY\_Z\_P]VW¥X`WEX¥UW^W\_  
@HWI-EAS443:3:65:1185:1807#0/1  
ATAAAAGAACTGAGAGATCTAATGTCGAGTCCCACACTC  
+HWI-EAS443:3:65:1185:1807#0/1  
\_O]Y^[TXOJR\_W^ZaaaR`SV`XBBBBBBBBBBBBBBBB  
@HWI-EAS443:3:65:206:895#0/1  
GGGTATCTCATTGCCATCATCCACTACATTCTGAGTGCGG  
+HWI-EAS443:3:65:206:895#0/1  
aaZ[VT\_]USV`RWSUOSXRP]\_]¥G\_RV]YQ`¥TTSHY¥  
@HWI-EAS443:3:65:383:79#0/1  
AATTGGGCAAGGGGACGTAGTGTGGTAATGAAAAGAAAA  
+HWI-EAS443:3:65:383:79#0/1  
ab`ab`]¥\_[bbbbS\_\_`\_aYaW\_b`TF¥``]\_^JNVXYS  
@HWI-EAS443:3:65:613:1696#0/1  
GTCGCTGGTTTGCCTATTGACAAAGTCAGATCGCCCCT  
+HWI-EAS443:3:65:613:1696#0/1  
T¥`P`\_\_`b\_a\_QX\_ZX¥``X`\_a`XXH`a`[XQ[^^aXYR  
@HWI-EAS443:3:66:1339:490#0/1  
GAACAAGGACAAACCCTCTGGAGCAAAACAAACGGTGCTG  
+HWI-EAS443:3:66:1339:490#0/1  
aaa`aa^O^`aaa\_\_[\_¥`\_[[``\_\_`\_`\_`a¥``V`UY\_  
@HWI-EAS443:3:66:1443:696#0/1  
ATCTCTCTTGGAAATGGGCCACAGCACACAGATTGGAGGA  
+HWI-EAS443:3:66:1443:696#0/1  
\_\_T\_Z]¥`ZW\_W\_b\_¥H¥``b]^\_]¥aaa]^aa]`W`\_J  
@HWI-EAS443:3:66:34:1219#0/1  
CAGATTGGAGGAGTAAGGGTGGTGGACATCCTTAGACAGA  
+HWI-EAS443:3:66:34:1219#0/1  
aa^Z``a`aaa\_^^`\_XFR\_]W¥[Z^^¥¥\_[W\_W¥¥\_U^  
@HWI-EAS443:3:66:418:1375#0/1  
CGAAAAGGTTGAAAGTTGAAACATGGTACCTTCGGCCCT  
+HWI-EAS443:3:66:418:1375#0/1  
abaa]]`¥]]VS¥^ZRO[¥¥`a\_a\_XMPaYXW\_aZZaY\_X  
@HWI-EAS443:3:66:571:1641#0/1  
AAAAGAACTGAGAGATCTAATGCCGAGTCCCGCACTCGC  
+HWI-EAS443:3:66:571:1641#0/1  
¥UW^VZZa][a``][a0\_aaXN`a`]US^a^X]VYZ¥a`  
@HWI-EAS443:3:66:824:1934#0/1  
AGGGGACGCAGTGTGGTAATGAAACGAAAACGGGACTCT

+HWI-EAS443:3:66:824:1934#0/1  
Zaaaa\_^\_H^ZVUN\_`a¥\_a¥V[^`NZ` `aaS[YZ[LX^X  
@HWI-EAS443:3:66:926:1037#0/1  
GCTAATTGGGCAAGGGGACGTAGTGTGGGAATGAAACGA  
+HWI-EAS443:3:66:926:1037#0/1  
aaa¥aaaa\_aa\_\_\_\_`\_\_]\_a]]`U\_]\_¥¥FT]VWY^WGSZ  
@HWI-EAS443:3:67:1264:191#0/1  
GCTGGAATTGGGTATCTCATTGCCATCATCCACTTCATTC  
+HWI-EAS443:3:67:1264:191#0/1  
][SQG¥OWXa\_[P[¥^XZX^XaU¥W^YR\_UVNS[XTKUZU  
@HWI-EAS443:3:67:1360:1636#0/1  
CTGTAATTGGGGATCTCATTGCCATCATCCACTTCATTCT  
+HWI-EAS443:3:67:1360:1636#0/1  
`T\_TV¥¥\_]WL^\_QNQO[\_^ZYSDSQYHQQNWZ^UW^  
@HWI-EAS443:3:67:1694:1740#0/1  
CTTATTTCGAAAAGGTTGAAAGGTTGAAACATGGTACCTT  
+HWI-EAS443:3:67:1694:1740#0/1  
aaabba^¥aaa`ab`\_aaaa^aa^aY\_aa]\_\_aSP¥]Xa\_  
@HWI-EAS443:3:67:257:61#0/1  
TCGCGAGATACTACTAAGACCCCTGTGGACCATATGGCC  
+HWI-EAS443:3:67:257:61#0/1  
abbba^b]a\_`ba¥^a` `a`a[bXY]GXNXSXSXZOUZVX  
@HWI-EAS443:3:67:489:989#0/1  
ATAAAAGAACTCAGAGATCTAATGTCGCAGTCCCGCACTC  
+HWI-EAS443:3:67:489:989#0/1  
UXXXQ^¥¥^QMG[a\_aV` []¥Z]YVaa\_a¥FW^WQXFRSZ  
@HWI-EAS443:3:67:605:601#0/1  
ATTTTACAATCCAGGAGCTCTTCTTTCTTCTTTTGTTA  
+HWI-EAS443:3:67:605:601#0/1  
`UU]S` `\_]X^VFMYT[[Z¥T`a¥]¥P[RXY¥\_\_` `a[\_\_\_\_  
@HWI-EAS443:3:67:933:1897#0/1  
GGCCATTCTATTCCACCATGTTACGGCCAGAGGGGATAC  
+HWI-EAS443:3:67:933:1897#0/1  
V\_aa\_Z]ababbbb\_bababZbbabbabbaaaZbRb¥]aZ  
@HWI-EAS443:3:67:981:336#0/1  
ATTGGGCAAGGGGACGTAGTGTGGGAATGAAACGAAAAC  
+HWI-EAS443:3:67:981:336#0/1  
abaaaaZ¥]`a]XZaaYY]P`Z¥a]NYZ\_a[V^G[UPPWD  
@HWI-EAS443:3:68:1693:526#0/1  
AATTGGGCAAGGGGACGTAGTGTGGGAATGAAACGAAAA  
+HWI-EAS443:3:68:1693:526#0/1  
Y` `` `a\_`Saa`a`¥`\_Q]U\_^aa¥¥HUZ]\_R¥[XXTVZ¥  
@HWI-EAS443:3:68:178:1139#0/1  
GTGGACCATATGGCCATAATCAAAAAGTAAACATCAGGAA  
+HWI-EAS443:3:68:178:1139#0/1  
aZ\_T\_b^IU¥V¥`YR¥¥QVVWR¥a\_TTS¥G\_ZQTOHYW]^  
@HWI-EAS443:3:69:1645:1048#0/1  
ATTGACAAAGTTGAGATCGCCCCTAACTTCCTTGATCATG  
+HWI-EAS443:3:69:1645:1048#0/1  
SXVV`babVb[¥`\_a`aV¥Y¥QS\_T¥^WKR\_`QX\_HHaa

@HWI-EAS443:3:69:1725:1681#0/1  
AAAACCTTATTTTCGAAAAGGTTGAAAGGTTGAAACATGGTA  
+HWI-EAS443:3:69:1725:1681#0/1  
a`aaabaaaaaaaa`aa`XZaaa``\_¥^`a\_\_`]aa`^^a  
@HWI-EAS443:3:69:45:207#0/1  
TGGCCATATGGTCCACAGTGGTCTGAGTGAGTATCTCGCG  
+HWI-EAS443:3:69:45:207#0/1  
abaaaa^T\_aa]ba]\_T\_Ya`U``aV^Va`aW`XNY[[XR  
@HWI-EAS443:3:69:787:110#0/1  
GGGAGAGACGAGCTGTCAATTGCTGAGGCAATAATTGTGG  
+HWI-EAS443:3:69:787:110#0/1  
\_aaXbZb¥\_b¥baa\_`U^T[ba][[YY¥^b¥\_[V`\_aYVX  
@HWI-EAS443:3:6:1140:98#0/1  
TGCTGTAATTGGGTATCTCATTGCCATCATCAACTTCATT  
+HWI-EAS443:3:6:1140:98#0/1  
a`GZ¥V^0bb]\_Y[`aRa\_`aZ¥UGZ\_Ra]GG]H^¥0¥`B  
@HWI-EAS443:3:6:1518:989#0/1  
ATCAGACCGAGTGATGGTATCACCTCTGGCCGTAAGATGG  
+HWI-EAS443:3:6:1518:989#0/1  
\_a`ba]X`a``¥b^)`aUU\_H`¥SaUZ\_HGQa[\_]NQ]BB  
@HWI-EAS443:3:6:372:1854#0/1  
ATCTGCTCCCAGCACGTCCCTTGGGCTAAGTGCAACACTT  
+HWI-EAS443:3:6:372:1854#0/1  
a[a\_a[b\_ZRaTZ`\_a\_`^[GTa`QHL`aZG^[¥\_\_\_GUT  
@HWI-EAS443:3:6:404:719#0/1  
TGTCTGCTGTAATTGGGTATCTCATTGCCATCATACACTT  
+HWI-EAS443:3:6:404:719#0/1  
\_b\_aba`\_]UaZ¥\_``aG`Z[ ]Y`YNYFF^`^^[GT\_U\_^  
@HWI-EAS443:3:6:631:1739#0/1  
GGACAGGGCCGAAGGTACCATGTTTCAACCTTTCAACCTT  
+HWI-EAS443:3:6:631:1739#0/1  
[aabb`a^\_[aab]`Zaa\_aaa\_aa\_aaXV`\_\_\_``\_aVa  
@HWI-EAS443:3:6:695:1055#0/1  
AAAAGAAGTCTGAGAGATCTAATGTTGCAGTCCCGCACTCGC  
+HWI-EAS443:3:6:695:1055#0/1  
a¥bbbaba`aaaba```bbaaa¥a`aaa\_`^`Y\_`^`\_a\_  
@HWI-EAS443:3:70:1042:684#0/1  
GTCCCGTTTTCGTTTTATTACCAACACTACGTCCCGTTGC  
+HWI-EAS443:3:70:1042:684#0/1  
YOR\_`[LX\_¥\_^PYR]] [RWTX[ZP[a`]ZZJVNWN]Y]Z  
@HWI-EAS443:3:70:125:231#0/1  
GGCCATTCTATTCCACCATGTTACGGCCAGAGCGGATAC  
+HWI-EAS443:3:70:125:231#0/1  
a^aaUP\_abRHY`]PXQ¥T^YNXRZQE]¥BBBBBBBBBBBB  
@HWI-EAS443:3:70:1652:2002#0/1  
AAAGAAGTCTGAGAGATCTAATGTCGAGTCCCGCCCTCGCG  
+HWI-EAS443:3:70:1652:2002#0/1  
X¥\_]V^`a\_RG]P¥H\_]Z0^aaa``]VW^a[VYDVUP\_Y\_  
@HWI-EAS443:3:70:402:943#0/1  
CTACTGGGAGAAACCTTGATTTACGGACCAATTCTCTTTC

+HWI-EAS443:3:70:402:943#0/1  
a^WaTaXT`aQX[a[`¥]FZU\_`\_]V[¥]]SPX\_¥]\_UWSS  
@HWI-EAS443:3:70:506:78#0/1  
AAAACCTATTTTCGAAAAGGTTGAAAGGTTGAAACATGGTA  
+HWI-EAS443:3:70:506:78#0/1  
aa`baa`baa\_a`a\_aa\_a`a^`aa]\_`a`\_`\_`\_]X\_  
@HWI-EAS443:3:71:1297:927#0/1  
GGCCGAAGGTACCATGTTTCAACCTTTCAACCTTTTCGAA  
+HWI-EAS443:3:71:1297:927#0/1  
abbbbbaaa\_a\_Uaababb`bba`bbbabaa^baab`aa`  
@HWI-EAS443:3:71:1518:769#0/1  
AAAGAACTGAGAGATCTAATGTCGCAGGCCCGCACTCGCG  
+HWI-EAS443:3:71:1518:769#0/1  
WTZaWUIUb[b]^Tbba[T[]I¥^b`[HU`Q^aa[aS\_GZ  
@HWI-EAS443:3:71:389:598#0/1  
CCTTGGGTTAAGAGCAACACTTCAATATAAACACTGCCTG  
+HWI-EAS443:3:71:389:598#0/1  
`ZZ¥US[¥ZTUWF\_W`W¥T\_]UZSZaR¥`PPXa`X^[PO[  
@HWI-EAS443:3:71:405:389#0/1  
AAAAGGTTGAAAGGTTGAAACATGGTACCTTCGGCCCTGT  
+HWI-EAS443:3:71:405:389#0/1  
a`aabbaa`\_^`[\_aaaaaaaaa]a`\_a`\_`a`\_Xaa^  
@HWI-EAS443:3:71:754:1596#0/1  
CCACTGTGGACCATATGGCCATAATCAAAAAGCACACATC  
+HWI-EAS443:3:71:754:1596#0/1  
a\_XXY¥^VYXaa`T¥UTRN\_QG]\_¥¥GXOSQXFT]\_^RHU  
@HWI-EAS443:3:71:845:697#0/1  
AAAAGAAGCTGAGAGATCTAATGTCGCAGGCCCGCACTCGC  
+HWI-EAS443:3:71:845:697#0/1  
TYT[¥^ZZ`\_Z]`[ZYa`X`bPW\_ZUYHZU]¥\_ZMPVZ[  
@HWI-EAS443:3:72:1050:1930#0/1  
AAAAGAAGCTGAGAGATCTAATGTCGAAGTCCCGCACTCGC  
+HWI-EAS443:3:72:1050:1930#0/1  
`]Y]RYY`[bb]YE[SY]\_\_`\_`\_bYF`\_N]MKVV[W[XY`  
@HWI-EAS443:3:72:1161:1352#0/1  
GCACAGGATGTGATTATGGAAGGTTTTCCTCAAATGAAG  
+HWI-EAS443:3:72:1161:1352#0/1  
aa`aaaa`aa^a\_a]Y\_a``¥aJURGW^¥FXVFV^GKO]W  
@HWI-EAS443:3:72:696:1443#0/1  
GTTTTCGTTTCATTACCAACTAGTCCCCTTGCCCAAT  
+HWI-EAS443:3:72:696:1443#0/1  
a`aaaabaa`baaa\_abaa`ba\_a``Ua\_aa^Z^a]\_\_`\_`  
@HWI-EAS443:3:73:1394:532#0/1  
GGGGCGTAGTGTGGTAATGAAACGAAAACGGGACTCTA  
+HWI-EAS443:3:73:1394:532#0/1  
aabaaabaab`baa`bUaaa`aaaUa\_\_a`Q`aa\_QaZ\_]`  
@HWI-EAS443:3:73:1553:971#0/1  
GTCCCCTTTTCGTTTCATTACCAACTGCGTCCCCTTGCC  
+HWI-EAS443:3:73:1553:971#0/1  
a\_`W¥\_T]`a]`W`aW\_a\_^T]a\_]`\_]\_\_¥\_VYV[X^Z^V

@HWI-EAS443:3:73:1660:1570#0/1  
TGGGTATCTCATTGCCATCATGCACTTCATTCTGAGTGCG  
+HWI-EAS443:3:73:1660:1570#0/1  
T\_aZZ[ababaZMza[\_aOWOJZ]RZJHWa]MH`I]SaR[  
@HWI-EAS443:3:73:1721:1893#0/1  
TGCTAATTGGGCAAGGGGACGTAGTGTGGGAATGAAACG  
+HWI-EAS443:3:73:1721:1893#0/1  
]WTQJSSZb¥¥X][ST\_\_¥`[HY]FYZN¥`BBBBBBBBBB  
@HWI-EAS443:3:73:264:315#0/1  
GGGCGAGGGGACGTAGTGTGGTAATGAAACGAAAACGGG  
+HWI-EAS443:3:73:264:315#0/1  
\_aba]\_aa]XX\_bV\_a0[P]¥`[¥]YYY\_]GXY^¥`[[VZ  
@HWI-EAS443:3:73:285:1881#0/1  
CTAGCACTGACTCAGGGCCATTGATCTCCCTCATCATTGA  
+HWI-EAS443:3:73:285:1881#0/1  
aa`Wabba\_bb\_ba]Y[a\_a\_\_^[Ya\_aaa]aZXa`Y^]\_  
@HWI-EAS443:3:73:430:476#0/1  
CCCGTTTTCGTTTCAGTACCAACTACTCGTCCCCTTGCCC  
+HWI-EAS443:3:73:430:476#0/1  
aa¥¥`^a]¥¥]a^U^UZ¥a\_]^[^aa`^`]UaX\_VX[[[XT  
@HWI-EAS443:3:73:462:1602#0/1  
ATTGGGCAAGGGGACGTAGTGTGGGAATGAAACGAAAAC  
+HWI-EAS443:3:73:462:1602#0/1  
aaa\_¥`\_aWR^^[R\_\_V[\_Z`]\_]XGY`VSZ``TXZQ\_[0  
@HWI-EAS443:3:73:765:1270#0/1  
GAGAGATCTAATGTCGCAGTCCCGCCCTCGCGAGATACTC  
+HWI-EAS443:3:73:765:1270#0/1  
^¥\_¥ZQ\_\_ZTZ`\_VURaZVRUZ]H\_K]VGX\_PO\_HM^`Y`  
@HWI-EAS443:3:73:791:135#0/1  
AAAAGAATTGAGAGATCTAATGTCGCAGTCCCGCACTCGC  
+HWI-EAS443:3:73:791:135#0/1  
Z\_b^aa[I[\_\_\_a]¥]QUaaa[¥Uaaa]\_FS\_`XXSXBBBB  
@HWI-EAS443:3:73:909:1554#0/1  
CTGTAATTGGGTATCTCATTGCCATCGTCCACTTCATTCT  
+HWI-EAS443:3:73:909:1554#0/1  
abbaa`abbbbYbbababbbabbbabaaabaaaaaaa`  
@HWI-EAS443:3:74:139:1804#0/1  
GTACTTTTTGATTATGGCCATATGGTCCACAGTGGCCTTA  
+HWI-EAS443:3:74:139:1804#0/1  
`P`^`QI[\_Q\_]a\_`\_JabXGU¥W\_[`a¥[`YFMJKT[ZN  
@HWI-EAS443:3:74:1722:802#0/1  
AAAGAACTGAGAGATCTAATGTCGCAGTCCCGCACTCGCG  
+HWI-EAS443:3:74:1722:802#0/1  
[^`^]abaaW`]ab`b]]]aP]XZ\_^PDZ^V[[M¥W[ZT  
@HWI-EAS443:3:74:217:1696#0/1  
CAAACCACTTACAGTTCTTGAAAGGATGCAGGTGCATTG  
+HWI-EAS443:3:74:217:1696#0/1  
\_NV\_[OU[YOS]WXXZ`UFT]XKXXSZQOYZJMN[[]VOF  
@HWI-EAS443:3:74:325:1921#0/1  
ATCTAATGTCGCAGTCCCGCCCTCGCGAGATACTCACTAA

+HWI-EAS443:3:74:325:1921#0/1  
^[a^[^ZZ\_\_]\_\_]Z^a[TWH^\_¥] []VJYR[[TN]¥KZZ  
@HWI-EAS443:3:74:754:1089#0/1  
TGGGGATCTCATTGCCATCATCCACTTCATTCTGAGTGCG  
+HWI-EAS443:3:74:754:1089#0/1  
abb[F^¥ba]¥ZabS\_SX] []X\_b]a^PU^`a`TU¥P`Y`  
@HWI-EAS443:3:75:1086:1187#0/1  
GCCGAAGGTACCATGTTTCAACCTTTCAACCTTTTCGAAA  
+HWI-EAS443:3:75:1086:1187#0/1  
aaa`] ]^` []]aa`] [aa`a\_`\_\_\_\_a\_\_^¥` \_`` [-^^[  
@HWI-EAS443:3:75:1138:836#0/1  
GAATAAAGAAGTCTGAGAGATCTAATGCCGCAGTCCCGCAC  
+HWI-EAS443:3:75:1138:836#0/1  
]`a^Wb^ababaab`aa`a\_a\_b\_a^NX\_a\_a¥R\_\_\_\_]F^  
@HWI-EAS443:3:75:1217:1035#0/1  
GTACTTTTTGACTATGGCCATATGGTCCACAGTGGTCTTA  
+HWI-EAS443:3:75:1217:1035#0/1  
XF\_] ]bb`] ]^[aa`a\_^aTRPPU[H[Xa[Z¥]aaMU]\_`  
@HWI-EAS443:3:75:1278:559#0/1  
ACTGAAGGTCCAGATGAAGGCACATCTGGGGTGGAGTCTG  
+HWI-EAS443:3:75:1278:559#0/1  
^`bbaaYFTa`^a¥`a^`a¥\_aaa^^^` ``Wa`^BBBBB  
@HWI-EAS443:3:75:149:290#0/1  
GTCCCGTTTTTCATTTTATTACCAACTACGTCCCCTTGC  
+HWI-EAS443:3:75:149:290#0/1  
a\_babb` `aaab`^`aaa`a`aa\_aa\_a\_` `Z`¥\_\_Z^\_\_  
@HWI-EAS443:3:75:1784:1081#0/1  
GAATATAAGAAGTCTGAGAGATCTAATGTCGCAGTCCCGCAC  
+HWI-EAS443:3:75:1784:1081#0/1  
^¥^aaaa`ba` `bbabab`a`\_^`aa]]] ` `YX^[^^^\_  
@HWI-EAS443:3:76:1236:1442#0/1  
CTTGTCTGCTGTAATTGGGTATCTCATTGCAATCATCCAC  
+HWI-EAS443:3:76:1236:1442#0/1  
I¥`\_RT¥a^^[\_ba¥a\_a\_[\_bbb` `Y[\_]F]¥\_a`¥H\_\_  
@HWI-EAS443:3:76:1482:737#0/1  
CTCTTATTTTCAGTGTGGAGGTTGGCCGTTAGCACTTC  
+HWI-EAS443:3:76:1482:737#0/1  
aa^W¥S^^a` `ZZT\_`\_aa\_G¥TK[HGRW` TZN`N\_0][X  
@HWI-EAS443:3:76:1547:1510#0/1  
GCAGGTGCATTGAATGAAGATCCAGATGAAGGCACATCTG  
+HWI-EAS443:3:76:1547:1510#0/1  
`\_[QQKPW\_YPZ¥PZSY]LJTBBBBBBBBBBBBBBBBBBB  
@HWI-EAS443:3:76:1710:1472#0/1  
AAAAGAAGTCTGAGAGATCTAATGTCTCAGTCCCGCACTCGC  
+HWI-EAS443:3:76:1710:1472#0/1  
a`¥T^[\_`\_b`¥P]YZN^\_a¥USJDX\_ZLTY\_aURFKNIF  
@HWI-EAS443:3:76:258:800#0/1  
TGGCGTACATGCTAGAACGAGAATTGGTCCGTAACAAG  
+HWI-EAS443:3:76:258:800#0/1  
\_bab` ] `bbbab]\_`TUG[aaba^aZYRRb` ]YM^[\_XP^

@HWI-EAS443:3:76:391:1733#0/1  
TGGCAATGAGATACCCAATTACAGCAGACAAGAAAATAAT  
+HWI-EAS443:3:76:391:1733#0/1  
S`R¥I[XIH[^`¥\_P\_¥¥\_UR^a\_`\_`¥aa]V¥H[a^¥a`  
@HWI-EAS443:3:76:799:874#0/1  
AGGAGGCACAGGATGTGATTATGGAAGGTGTTTTCCCAAA  
+HWI-EAS443:3:76:799:874#0/1  
abb`aaaaabaa`aXa`aa\_aaa\_]GVVG¥]WGVXGZ[  
@HWI-EAS443:3:77:1192:1969#0/1  
CGCGAGATACTCACTGAGACCACTGTGGACCATATGGCCA  
+HWI-EAS443:3:77:1192:1969#0/1  
a\_H\_[bba]bba`bba`a\_`aba^\_`a`ab`aaa`a]`aa  
@HWI-EAS443:3:77:1428:1153#0/1  
ATCAAACCTTTGGGCAACATCATCATTCTCACTTCTCCTC  
+HWI-EAS443:3:77:1428:1153#0/1  
M^\_W¥W]aXa`X\_a¥aZVaXa`¥\_baXTa`aZZ`bVX\_G  
@HWI-EAS443:3:77:1720:658#0/1  
GCTGCTCCACCAGAACAGAGGAGGATGCAATTTTCCTCAT  
+HWI-EAS443:3:77:1720:658#0/1  
\_b`abbb[bbbaab`bbZbM`bbbbb]b`bbbaa`b`a\_  
@HWI-EAS443:3:77:979:107#0/1  
CAGGGCCGAAGGTACCATGTTTCAACCTTTCAACCTTTTC  
+HWI-EAS443:3:77:979:107#0/1  
¥abba\_bbabab\_bb`abbabbaaba¥abb`\_\_¥ba`a]  
@HWI-EAS443:3:77:987:233#0/1  
AGCAGGGTCAGCAGACCCATTAGCATCTCTCTTGAAATG  
+HWI-EAS443:3:77:987:233#0/1  
abab]E]¥M^\_V\_aYWa]\_`a\_`^YYX\_^]YQ`Ya[^X¥]  
@HWI-EAS443:3:78:1248:289#0/1  
ATCTGGGGAGGAGTCTGCTGCTGAGAGGATTTCTCATT  
+HWI-EAS443:3:78:1248:289#0/1  
abUabbb\_Gaba]a[bb]Zaa[H^]XbTa^Y[baH^\_X\_a  
@HWI-EAS443:3:78:1446:879#0/1  
AAACTTATTTGAAAAGGTTGAAAGGTTGAAACATGGTAC  
+HWI-EAS443:3:78:1446:879#0/1  
aab\_bbbbb`a`aaaba]baaa\_aa^a\_``aWaaa\_W`^  
@HWI-EAS443:3:78:1698:1100#0/1  
CAGGGCCGAAGGTACCATGTTTCAACCTTTCAACCTTTTC  
+HWI-EAS443:3:78:1698:1100#0/1  
aabba`¥^Y¥^`\_`^W`bbUFWY`a]W\_aa``^¥F¥^a`R  
@HWI-EAS443:3:78:56:1111#0/1  
TCCCGTTTTCGTTTCATTACCAACTACGCCCTTGCC  
+HWI-EAS443:3:78:56:1111#0/1  
\_bba``aZ^`^YZaaXR[^`^`]V\_\_a¥Y^YL^a`UQZS`V  
@HWI-EAS443:3:78:790:648#0/1  
CCCTTCATGTACTTATTTCAGTGTGTAGGTTGCC  
+HWI-EAS443:3:78:790:648#0/1  
abbb[]`b[bab\_bb^ba\_\_`a^aa]a]JHSa^P[0`a\_  
@HWI-EAS443:3:79:1391:297#0/1  
AGGGGACGTAGTGTGGGAATGAAACGAAAACGGGACTCT

+HWI-EAS443:3:79:1391:297#0/1  
aabaa`a[\_aaabbbbaaI^Ka\_a`b]¥U\_\_aF[YaaW^^a  
@HWI-EAS443:3:79:1522:1328#0/1  
GTCCCGTTTTTCGTTTCATTACCAACTACGCCCTTGC  
+HWI-EAS443:3:79:1522:1328#0/1  
`TXSUaY)`^U`X]aa)`a`PN[[LY]\_`M\_G]SXGZ]RU  
@HWI-EAS443:3:79:1593:1072#0/1  
AAAGAAGTCTAATGTCGCAGTCCCCCACTCGCG  
+HWI-EAS443:3:79:1593:1072#0/1  
Uba[baa[bVaa[Ibbbb[ab`^ba\_b\_abaG`V\_\_`ZN^  
@HWI-EAS443:3:79:17:1333#0/1  
GAGATCTAATGTCGCAGTCCCGCACTCGCGAGATGCTCAC  
+HWI-EAS443:3:79:17:1333#0/1  
`¥`^]a\_QX\_`Za`aUJ\_`\_R^P¥X¥V¥ZYSNSY]R[U]  
@HWI-EAS443:3:79:199:1324#0/1  
GTACATGCTAGAAAGAGAATTGGTACGTAAAACAAGTTT  
+HWI-EAS443:3:79:199:1324#0/1  
\_R\_a`^ab^`\_[aMTR\_X`Z]^ZKG\_\_X]]¥a[\_¥¥YXN]  
@HWI-EAS443:3:79:654:1341#0/1  
GGCTTGTTCCTCAGTTGGATTCTGTCTAAGGATGGCCACC  
+HWI-EAS443:3:79:654:1341#0/1  
a\_aa\_WU\_baYH\_`Z`WWZVa¥GQR¥NXROVZYFV\_]VU  
@HWI-EAS443:3:79:77:1717#0/1  
AGAACACCGCACTCAGAATGAAGTGGATGATGGCAATGAG  
+HWI-EAS443:3:79:77:1717#0/1  
`^HYM^¥H[S]¥\_aSVW¥ULXXV^]Z^^IZVUVMSYQ]V  
@HWI-EAS443:3:79:80:618#0/1  
AATGAAGTGGATGATGGCAATGAGATACCCAACACTACAGCA  
+HWI-EAS443:3:79:80:618#0/1  
aabb\_Za[aa`a`Ya`aaY``\_Y\_aa\_\_`\_Y[\_\_\_\_`  
@HWI-EAS443:3:79:899:392#0/1  
GGGGACGTAGTGTGGTAATGAAACGAAAAAGGGACTCTA  
+HWI-EAS443:3:79:899:392#0/1  
aaba^a\_Vbbabab`b`abTH\_[b`a[b`]T\_\_aTa\_^a^  
@HWI-EAS443:3:79:983:1854#0/1  
GGCGTACATGCTAGAAAGAGAATTGGTCCGAAAACAAGG  
+HWI-EAS443:3:79:983:1854#0/1  
^bZ^M`^]]¥T\_\_OIZX^T^\_TZ\_`YZ]`H¥KW¥DVRGY  
@HWI-EAS443:3:79:98:684#0/1  
GTACTTTTTGATTATGGCCATATGGTCCACAGCGGTCTTA  
+HWI-EAS443:3:79:98:684#0/1  
aXNH`\_]WQ]\_Q¥VU[V\_\_ZNBBBBBBBBBBBBBBBBBBB  
@HWI-EAS443:3:7:1063:1581#0/1  
AAAAGAAGTCTAATGTCGCAGTCCCGCACTCGC  
+HWI-EAS443:3:7:1063:1581#0/1  
abbaaababaa\_] [Y^R`^Z^\_SRKN^^MEIMUUUUUYB  
@HWI-EAS443:3:7:1258:412#0/1  
CTGTAATTGGTATCTCATTGCCATCATCCACTTAATTCT  
+HWI-EAS443:3:7:1258:412#0/1  
aaaI¥OT\_abb[a^U`¥\_`R^a\_`\_[]^PXHa[MX\_RDQ



@HWI-EAS443:3:7:1399:1305#0/1  
TAATTGGGCAAGGGGACGTAGTGTGGTAATTAACGAAA  
+HWI-EAS443:3:7:1399:1305#0/1  
aW``abNN[^ab``a`a`^X`U]U\_aRG\_G`HHa]BBBBB  
@HWI-EAS443:3:7:1622:376#0/1  
AAACGATGCTGGATCAGACCGAGTGATGGTATCAACTCTG  
+HWI-EAS443:3:7:1622:376#0/1  
[baZa^Z^Y]]¥`^NWaXXZ\_`¥WaM^a`UVQJPEK[UBB  
@HWI-EAS443:3:7:1695:1335#0/1  
AAAGAAGTGGAGATCTAATGTCGCAGTCCCGCAATCGCG  
+HWI-EAS443:3:7:1695:1335#0/1  
\_\_^b[aJa]]`Ya\_aa\_a^`U¥ZJYaSSL\_XGKEPUYBB  
@HWI-EAS443:3:7:1739:1335#0/1  
AGAGAATAAAAGAAGTGGAGATCTAATGTCGCAGTCCCG  
+HWI-EAS443:3:7:1739:1335#0/1  
Va^bb`bUaba\_b^I]ba`a^N\_IaaabaIab\_aa]FLR^  
@HWI-EAS443:3:7:185:138#0/1  
CAGGTGCATAGACTGAAGATCCAGATGAAGGCACATCTGG  
+HWI-EAS443:3:7:185:138#0/1  
aab^UbaaYD[a`aabb`X^R]a`^a\_X\_`¥\_\_\_]Z\_``  
@HWI-EAS443:3:7:240:1554#0/1  
CCCGTTTTTCGTTTTATTACCAACTACGCCCCCTTGCCC  
+HWI-EAS443:3:7:240:1554#0/1  
a\_0\_^\_a`S][`\_VVaaZ^GZ^``Z¥[[FZ``YTY^[^Z  
@HWI-EAS443:3:7:325:637#0/1  
AATTGGGCAAGGGGACGTAGTGTGGCAATGAAACGAAAA  
+HWI-EAS443:3:7:325:637#0/1  
`[^Zaa\_a``[a^`aQYaHa¥\_aXMPNU]Xa`T¥N¥BB  
@HWI-EAS443:3:7:453:1444#0/1  
CGCACTCGCGAGATTCTACTAAGACCACTGTGGACCATA  
+HWI-EAS443:3:7:453:1444#0/1  
H\_bb`]a]]bb[J\_aaabVb]aSab\_`baXX¥]]bb\_`b  
@HWI-EAS443:3:7:614:1831#0/1  
GTGGTCTTAGTGAGTATCTCGCGAGTGC GGGAATGCGACA  
+HWI-EAS443:3:7:614:1831#0/1  
]I`\_Z¥\_\_\_YQab`RZ^^\_ZS`YUaUa¥\_ZYBBBBBBBBB  
@HWI-EAS443:3:7:712:773#0/1  
CTGCTGTAATTGGGTATCTCATTGCCATCATCCGCTTCAT  
+HWI-EAS443:3:7:712:773#0/1  
a^Z[bZa]PYaaaaXaaaa\_`¥`\_NXW`^\_UJY¥[\_YNWX  
@HWI-EAS443:3:7:924:1389#0/1  
TGTACTCTTATTTTCAGTGTGGAGGTTGCCCGTAGCA  
+HWI-EAS443:3:7:924:1389#0/1  
SaJ¥bbYV\_`^`\_YRV`ZaTaaba`^^VVV`\_U`PZ]OFZ  
@HWI-EAS443:3:7:992:647#0/1  
AAAGAAGTGGAGATCTAATGTCGCAGTCCCGCAATCGCG  
+HWI-EAS443:3:7:992:647#0/1  
RYb¥ab`W¥W¥`\_aZbaa`aR\_¥[a[FF[UUO[IRSaQb  
@HWI-EAS443:3:80:1399:2011#0/1  
GAATAAAAGAAGTGGAGATCTAATGTCGCAGTCCGGCAC

+HWI-EAS443:3:80:1399:2011#0/1  
[\_aTT^\_a^I\_a`]abbb`a\_¥MY\_HV[`bbHNFiaaRP  
@HWI-EAS443:3:80:1539:1600#0/1  
CAAGGGAGCAATTTTACAATCCTGGAGCTATTCTTTCTTC  
+HWI-EAS443:3:80:1539:1600#0/1  
V\_bababbababbabbbbbb\_]abaa¥GaGba`bbaaba\_  
@HWI-EAS443:3:80:281:804#0/1  
GAACTGAGAGATCTAATGTCGCAGTCCCGCCCTCGCGAGA  
+HWI-EAS443:3:80:281:804#0/1  
`abb\_^Zab`\_babbb\_XPaZb`a[]`bZRKU[WQ`VP[T  
@HWI-EAS443:3:80:315:145#0/1  
CAGGTGCATTGACTGAAGATCCAGATGAAGGCACGTCTGG  
+HWI-EAS443:3:80:315:145#0/1  
aabaYbaVbaaaa\_aa`a`¥`\_a^^`]^a¥¥`¥\_UY^¥\_  
@HWI-EAS443:3:80:840:1443#0/1  
CTGCTGTAATTGGGTATCTCATTGCCATCACCCACTTCAT  
+HWI-EAS443:3:80:840:1443#0/1  
aaa`^`\_`aaaaa¥aaaa`\_`]a\_]\_a]FZ`a``a`\_`  
@HWI-EAS443:3:81:1134:1027#0/1  
GGCCGAAGGTACCATGTTTCAACCTTTCAACCTTTTCGAA  
+HWI-EAS443:3:81:1134:1027#0/1  
`\_aa^aYbb^baaaabaa\_aa`a`\_aa\_a`aaaa`\_a\_\_  
@HWI-EAS443:3:81:1212:1435#0/1  
ATCTGGGGCGGAGTCTGCTGTCCTGAGAGGATTTCTCATT  
+HWI-EAS443:3:81:1212:1435#0/1  
`aWZ¥aa\_G^ZS\_Q`\_a]^`Z`TYVHTXa\_¥\_TJYSZ`U  
@HWI-EAS443:3:81:123:1693#0/1  
TTCCCATCACATTGTCGATGGATTCAATCCCCACTTCTG  
+HWI-EAS443:3:81:123:1693#0/1  
S`abbVa`a¥G¥bb\_\_`\_`aaaabb]^V]Zb`aZHV\_^]T  
@HWI-EAS443:3:81:1317:1258#0/1  
AAAGAAGTGAAGATCTAACGTCGCAGTCCCGCACTCGCG  
+HWI-EAS443:3:81:1317:1258#0/1  
aZ¥S[\_`aa`[^Xaa`X`a`\_U¥^a\_Y[a[]U]\_\_W\_^  
@HWI-EAS443:3:81:157:391#0/1  
TGCTGTCCTGAGAGGATTTCTCATTCTGGGCAAAGAAGAC  
+HWI-EAS443:3:81:157:391#0/1  
abaX^a`a[`]\_^`a`]`]\_^a]Z\_aa`]]`[Z^``Z`\_a  
@HWI-EAS443:3:81:431:74#0/1  
AAAAGGTTGAAAGTTGAAACATGGTACCTTCGGCCCTGT  
+HWI-EAS443:3:81:431:74#0/1  
\_`[abbTa`\_`bb`Yab`a`bbbbU¥aa`a\_a`aa[^\_a]  
@HWI-EAS443:3:81:63:1678#0/1  
AAAGAAGTGAAGATCTAATGTCGCAGTCCCGCACTCGCG  
+HWI-EAS443:3:81:63:1678#0/1  
WZYa[`\_R]]DRRa¥Zabaa`S^W^]MFO`\_L`Y^W`I[B  
@HWI-EAS443:3:82:516:1563#0/1  
AAAGAAGTGAAGATCTAATGTCGCAGTCCCGCACTCGCG  
+HWI-EAS443:3:82:516:1563#0/1  
aY^\_^a]YV`Q`\_HY`aa[] [Wa]N]a[QVZN\_QXP^`]S

@HWI-EAS443:3:82:866:1473#0/1  
GGAGGTTGCCCGTTAGCACTTCTTCTTCTTTCCTGACTGA  
+HWI-EAS443:3:82:866:1473#0/1  
`]WY]V]Z`^a\_YU^VYYLX[]`]]]]]¥` [¥VLYNTYX  
@HWI-EAS443:3:83:1232:34#0/1  
AACTGAGAGATCTAATGTGGCAGTCCCGCACTCGCGAGAT  
+HWI-EAS443:3:83:1232:34#0/1  
\_VT\_\_aa`ba]abX\_aY]H\_\_aX¥`PR\_`¥ZaUV[\_`\_XVN  
@HWI-EAS443:3:83:1501:1607#0/1  
AAAGAAGTCTAATGTGGCAGTCCCGCACTCGCG  
+HWI-EAS443:3:83:1501:1607#0/1  
\_\_X¥S[W\_bb\_ab`^]\_aaVb¥PZQW\_PVF]a`U]^TPW]  
@HWI-EAS443:3:83:524:929#0/1  
GAGGATCAGAGTTGAGGATACTGGTAAGAGGCAATTCTCC  
+HWI-EAS443:3:83:524:929#0/1  
aa^YR]baZoz]a`\_]\_[Zn¥WVTGRV¥VGNSUYXXWYX  
@HWI-EAS443:3:84:336:1188#0/1  
CTAAAGTGCTAATTGGGCAAGGGACGTAGTGTGGTAAT  
+HWI-EAS443:3:84:336:1188#0/1  
aaa¥I\_\_abaaaaabaaaa`\_\_a\_a`¥U\_Ya]`a[S\_`]  
@HWI-EAS443:3:84:848:547#0/1  
AGGTACCATGTTTCAACCTTTCAACCTTTTCGAAATAAGT  
+HWI-EAS443:3:84:848:547#0/1  
¥baPa`Y\_^Z\_a\_Z\_^¥Z\_¥U[\_Z]^b\_]QQZ` [ ]¥]S\_`  
@HWI-EAS443:3:84:902:44#0/1  
ATTGGGTAAGGGGACGTAGTGTGGTAATGAAACGAAAAC  
+HWI-EAS443:3:84:902:44#0/1  
¥^`a^`\_¥\_`a`\_XW`RU]\_`\_]`a^NGZN¥S^¥¥\_R¥¥[O  
@HWI-EAS443:3:85:1066:1764#0/1  
GTCTGATCTAGCATCGTTTGTTTTGTCCAGAGGGTTTGT  
+HWI-EAS443:3:85:1066:1764#0/1  
a\_\_]` [¥[F[XR\_Y`aY\_\_VLWN]\_]^VYya^`\_[]^MEN  
@HWI-EAS443:3:85:1323:192#0/1  
AACAAACGATGCTGGATCAGACCGAGTGATGGTATGACCT  
+HWI-EAS443:3:85:1323:192#0/1  
Sabb[baWZ]\_]a¥a[bYaa[XJZ[XS^`][WDWQFYGYZ  
@HWI-EAS443:3:85:1341:1214#0/1  
GGGAGATCAATGGCCCTGAGTCAGTGCTAGACAACACTTA  
+HWI-EAS443:3:85:1341:1214#0/1  
abaabbabbababaa\_baaa`aa\_a`aaaa\_aa^a\_aa]  
@HWI-EAS443:3:85:1683:252#0/1  
GTCCCGTGTTCGTTTCATTACCAACTACGTCCCCTTGC  
+HWI-EAS443:3:85:1683:252#0/1  
aRSULXVM\_X]XFORXQ^PVLQ`YWBBBBBBBBBBBBBBB  
@HWI-EAS443:3:85:897:1688#0/1  
AGCACGTCCCTGGGTTAAGTGCAACACTTCATTATAAAC  
+HWI-EAS443:3:85:897:1688#0/1  
``\_¥¥^\_¥\_]a]Y^RF¥¥b`Y`\_`a`\_a\_[Ra^^`a```` [ ]  
@HWI-EAS443:3:86:1125:1394#0/1  
CACTAAGACCACGGTGGACCATATGGCCATAATCAAAAAG

+HWI-EAS443:3:86:1125:1394#0/1  
a`a`Z`aV^Z`II`]b`[`]Ybabbb¥\_a]]\_^X]aaYWY  
@HWI-EAS443:3:86:1538:388#0/1  
GGTGGGTTCACTTTCAAAGGACAAGCGGATAATCAGTCA  
+HWI-EAS443:3:86:1538:388#0/1  
\_`T`Y^X¥¥¥[^[a[S[¥Z\_\_[YU¥Z¥XRWWJR[FYWLLT  
@HWI-EAS443:3:86:1646:1784#0/1  
TCCCGTTTTAGTTTTATTACCAACTACGTCCCCTTGCC  
+HWI-EAS443:3:86:1646:1784#0/1  
aa\_`[¥aa[F\_`^`aX`baa]S\_a\_\_^aaV`\_ZWT[]ZNLZ  
@HWI-EAS443:3:86:1663:481#0/1  
CAAGGACAAACCCTCTGGAGAAAAACAAACGATGCTGGAT  
+HWI-EAS443:3:86:1663:481#0/1  
aabbbababbaaba\_a]] [F\_aa`\_aaaa\_aa[aaa\_Y  
@HWI-EAS443:3:86:1762:1192#0/1  
AAACGATGCTGGATCAGACCGAGTGATGGTAACACCTCTG  
+HWI-EAS443:3:86:1762:1192#0/1  
U`\_XOWaZ[^[^aZ]`[]Z\_BBBBBBBBBBBBBBBBBBB  
@HWI-EAS443:3:86:373:1928#0/1  
TAATGTGCGAGCCCGCACTCGCGAGATACTCACTAAGAC  
+HWI-EAS443:3:86:373:1928#0/1  
`^b[T]TS^`QH[\_T¥¥TNQb`Z¥UDQU]b¥ZZVZ]]QOR  
@HWI-EAS443:3:86:392:413#0/1  
GAAAGTTGAAACATGGCACCTTCGGCCCTGTCCACTTCA  
+HWI-EAS443:3:86:392:413#0/1  
aabaa`^aabaaaaa\_Ja^`a`^`\_\_`^aaZ[^X]`\_Y^  
@HWI-EAS443:3:86:883:1745#0/1  
GTCCCGTTTTCGCTTCATTACCAACTACGTCCCCTTGC  
+HWI-EAS443:3:86:883:1745#0/1  
a\_a\_XIXa` `[^G\_\_\_\_`^`[]X\_PP^UBBBBBBBBBBBBBBB  
@HWI-EAS443:3:87:1156:1820#0/1  
AGCACGTCCCTTGGGTTAAGTGAATACTTCAATATAAAC  
+HWI-EAS443:3:87:1156:1820#0/1  
aa]b^a^WV\_\_Sa¥TRTT`ONP¥aUHXQ^WKRZWXY[BBB  
@HWI-EAS443:3:87:1177:1036#0/1  
ATCCTCTCACATTCACAGTCAATGAGGGAAATTGCATCCT  
+HWI-EAS443:3:87:1177:1036#0/1  
aa\_``aa\_a^aa`aa^`\_X]aaa\_\_`Sa\_\_a\_a\_V]\_0^\_  
@HWI-EAS443:3:87:95:210#0/1  
GCTGCCTTGCATATGTCTACGGCTTTTTCTCAGTTGGAT  
+HWI-EAS443:3:87:95:210#0/1  
a`\_aa` ` `Z\_\_^Z\_X\_\_^Y¥¥^BBBBBBBBBBBBBBBBBB  
@HWI-EAS443:3:88:1422:21#0/1  
AAGAGGATTGCATGATCAAGGAAGTTAGGGGCGATCTGAA  
+HWI-EAS443:3:88:1422:21#0/1  
aa`\_\_^`\_b` `]WbbaZWaaROF`\_NVY^] ^XL\_VRHKMF[  
@HWI-EAS443:3:88:1465:1562#0/1  
GGGGACGTAGTGTGGTAATGAAACGAAAAGGGGACTCTA  
+HWI-EAS443:3:88:1465:1562#0/1  
`aZ]Tab`¥^G`b`bYVULIaUaYQ^`a`aGQUa^N\_M[\_

@HWI-EAS443:3:88:1728:1056#0/1  
GAATAAAAGAACTGAGTGATCTAATGTCGCAGTCCCGCAC  
+HWI-EAS443:3:88:1728:1056#0/1  
abbbbbbbabbabbbaabbbbbbb`baabb\_`a`\_\_a  
@HWI-EAS443:3:88:203:1831#0/1  
ACTCGGAGATACTACTAAGACCACTGTGGACTATATGG  
+HWI-EAS443:3:88:203:1831#0/1  
WaWba`aSVVYFUUa\_Y]`HRT\_a`RYYPWV]WN]W]¥]\_  
@HWI-EAS443:3:88:370:1555#0/1  
GCTAATTGGGCAAGGGGACGTAGTGTGGCAATGAAACGA  
+HWI-EAS443:3:88:370:1555#0/1  
aZXV¥TPY[VPSQYU\_XFLTMK[W\_TYUSFQLJVSSXNNW  
@HWI-EAS443:3:88:994:506#0/1  
AAAAGAACTGAGAGATCTAATGGCGCAGTCCCGCACTCGC  
+HWI-EAS443:3:88:994:506#0/1  
a`^^`\_]P¥VU\_a\_[[]X\_a[^MSY]T^T¥RUa\_N[^[]U  
@HWI-EAS443:3:89:1197:570#0/1  
CTTATTTGAAAAGGTTGAAAGGTTGAAACATGGTACCTT  
+HWI-EAS443:3:89:1197:570#0/1  
abbWbbbb`aaaababbbbbba`ba\_0ZbbabaXb`\_a\_  
@HWI-EAS443:3:89:1433:1421#0/1  
CCTGATGTGACTTTTTGATTATGGCCATATGGGCCACAG  
+HWI-EAS443:3:89:1433:1421#0/1  
P]bba^a`^¥b\_b`^`^^aab\_¥S``XX¥\_IQ]^XJ\_  
@HWI-EAS443:3:89:436:592#0/1  
CGCGAGATACTACTAAGACCACTGCGGACCATATGGCCA  
+HWI-EAS443:3:89:436:592#0/1  
aa]a^VOSQ\_Z¥a`]OZ][\_a]`X[DTOV\_`[VJOYXS¥Y  
@HWI-EAS443:3:89:609:1640#0/1  
CTTCGGGAGACAATAGCACGTTCCCTCTTTGATCTCTAAC  
+HWI-EAS443:3:89:609:1640#0/1  
``aba\_a`^`ba^b\_H\_SPP¥¥[¥\_\_\_^^^G]\_X[\_^ZR  
@HWI-EAS443:3:89:68:1705#0/1  
AAAAGAACTGAGAGATCTAATGTCGCAGTCCCTGCACTCGC  
+HWI-EAS443:3:89:68:1705#0/1  
\_aa\_\_\_aaYbaZYT]\_a¥0Y\_\_Ya]\_ZZV`]GR\_^`YYXV  
@HWI-EAS443:3:89:696:2028#0/1  
CACCATCAAGGGAGCAATTTTACAATCCTGGAGCTGTTCT  
+HWI-EAS443:3:89:696:2028#0/1  
a`a]]G\_]\_¥¥aa`\_a]^aa][\_UYWa\_`WX\_Z[G[`Z^  
@HWI-EAS443:3:8:651:1279#0/1  
GGCCGAAGGTACCATGTTTCAACCTTTCAACCTTTTCGAA  
+HWI-EAS443:3:8:651:1279#0/1  
^a\_bababb`bbbbbb`bb`baabababba\_[`bba\_aa\_  
@HWI-EAS443:3:8:678:1883#0/1  
TAATGTCGCAGGCCCGCACTCGCGAGATACTACTAAGAC  
+HWI-EAS443:3:8:678:1883#0/1  
aba\_`Z¥¥a`WIW`a`b¥JPZ\_ZUW^\_¥VUSSXGUM^¥]U  
@HWI-EAS443:3:8:881:826#0/1  
AATAAAAGAACTGAGAGATCTAATGTCGCAGACCCGCACT

+HWI-EAS443:3:8:881:826#0/1  
\_]]\_Y]aT\_bW^^a`a`\_\_X[aV[a^a\_YaaIRNUX[SBB  
@HWI-EAS443:3:8:989:1614#0/1  
GGGAGTAGATGAATACTCCAGCACGGAGAGGGGTAGTG  
+HWI-EAS443:3:8:989:1614#0/1  
aaaY[R[]aa\_Za\_XHW\_^]aYSFY\_¥`Ua¥QDW`Q¥BBB  
@HWI-EAS443:3:90:1268:1507#0/1  
ATCTATTGTCGCAGTCCCGCACTCGCGAGATACTCACTAA  
+HWI-EAS443:3:90:1268:1507#0/1  
aa`aaba`[¥a\_a\_¥\_\_\_OXT\_^`\_¥\_W`¥]YSYPRT\_[\_  
@HWI-EAS443:3:90:1429:1631#0/1  
ATCTAATGTCGCAGTCCCGCACTCGAGAGATACTCACTAA  
+HWI-EAS443:3:90:1429:1631#0/1  
aa`U[X]XH]^`\_aQ[aaNNGW`VOF¥T`¥\_GV¥¥\_¥Q¥W  
@HWI-EAS443:3:90:1782:1450#0/1  
AAAAGATCTGAGAGATCTAATGTCGCAGTCCCGCACTCGC  
+HWI-EAS443:3:90:1782:1450#0/1  
ab`a`b`aaaaab`][aaaab\_[Y\_`aY]Q][GT\_SX]\_  
@HWI-EAS443:3:90:30:1558#0/1  
GAATGAAGTGGGTGATGGCAATGAGATACCCAATTACAGC  
+HWI-EAS443:3:90:30:1558#0/1  
T\_OPXLZ^S\_WOTXTX^aa`¥¥^]Q[`a^]]aULM^`]Wa  
@HWI-EAS443:3:90:476:1295#0/1  
AGAGAATAAAAGAACTGAGAGATCTAATGTCGCAGGCCCG  
+HWI-EAS443:3:90:476:1295#0/1  
[¥X¥bbbZ¥¥[`a`^Y`\_bbb]Y^babbaaY`aaI\_`^P  
@HWI-EAS443:3:91:1017:1981#0/1  
AAAAGAAGTCTGAGAGATCTAATGTCGCAGTCCCGGACTCGC  
+HWI-EAS443:3:91:1017:1981#0/1  
[aVb\_V`ba\_SI¥ab^abbbbaa`b\_VaZ\_`bbaV\_]V]H]  
@HWI-EAS443:3:91:1252:2021#0/1  
CTTGCGACCATTGAATTTTCACAATTTCCAGTTCCTGAT  
+HWI-EAS443:3:91:1252:2021#0/1  
a¥[G]¥`U`b`^\_aa¥¥a[ba`^`aa]^D]aY^^ba\_`  
@HWI-EAS443:3:91:1427:1217#0/1  
CCCCAGTTCTGGAAAAGCACTTTTGCATCTTCTTGAAAT  
+HWI-EAS443:3:91:1427:1217#0/1  
aaa`bb\_¥abbWbbba`[bababb\_\_aaa¥^Wa[^aaaa  
@HWI-EAS443:3:91:402:1371#0/1  
TAATGTCGCAGTCCCGCACTCGCGAGATACTCAGTAAGAC  
+HWI-EAS443:3:91:402:1371#0/1  
a\_a`XXa]W\_]WX^a`aV`U[a\_^V¥^YY¥TDM^YMOW  
@HWI-EAS443:3:91:745:158#0/1  
AAAAGAGCTGAGAGATCTAATGTCGCAGTCCCGCACTCGC  
+HWI-EAS443:3:91:745:158#0/1  
a^`a\_[W^^baaabaa[`aab\_aa`a`¥Y\_¥\_UVZV\_\_R  
@HWI-EAS443:3:92:1460:1092#0/1  
AAAAGAAGTCTGAGAGATCTAATGTCGCAGTACCGCACTCGC  
+HWI-EAS443:3:92:1460:1092#0/1  
[aabb`WS```¥J]^`W\_\_Wa\_^bQbaaaJHHGa\_\_`a^aH

@HWI-EAS443:3:92:195:539#0/1  
AAAAGAAGCTGAGAGATCTAATGTCGCAGTCCCGAACTCGC  
+HWI-EAS443:3:92:195:539#0/1  
]YQZ]]b\_W¥a\_¥``][aa^`NQ]ZHXXU\_WFHxGUU  
@HWI-EAS443:3:92:24:493#0/1  
AAAAGTTATTTGAAAAGGTTGAAAGGTTGAAACATGGTA  
+HWI-EAS443:3:92:24:493#0/1  
aZa\_aa\_`aa\_\_`^aY]\_]RVa\_[¥\_\_X\_`^]\_\_\_\_]\_SZ]  
@HWI-EAS443:3:92:536:719#0/1  
GAAGTGGCTGATGGCAATGAGATACCCAATTACAGCAGAC  
+HWI-EAS443:3:92:536:719#0/1  
]`abIb]D[aH^bbb`Va¥¥aaWba]aab`aa\_a\_\_aa]\_  
@HWI-EAS443:3:93:1189:301#0/1  
AAAGAAGCTGAGAGATCTAATGTCGCAGTCCCCACTCGCG  
+HWI-EAS443:3:93:1189:301#0/1  
]]][bUababYZ`\_Za^bVa`[IZ`[baaSJQJQWJ`\_`Qa  
@HWI-EAS443:3:93:1260:574#0/1  
GTCCCGTTTTCGTTTCATGACCAACTACGTCCCCTTGC  
+HWI-EAS443:3:93:1260:574#0/1  
aaa¥R^VPXS¥\_QLU^\_WFY¥`¥TJR^U[¥¥SXFZWNUVY  
@HWI-EAS443:3:93:1335:1148#0/1  
TCCTGATGAGTACTTTTTGATTATGGCCATATGGTCCACA  
+HWI-EAS443:3:93:1335:1148#0/1  
a\_``bbb\_Gba\_Rbb`bSY]\_ba\_FJ^``GP¥U^GHYBBB  
@HWI-EAS443:3:93:446:1791#0/1  
CTCTTGCCTTCTTTGCCAAAATGAGAAATCCTCTCAGGA  
+HWI-EAS443:3:93:446:1791#0/1  
abb`aZF^a¥aaa\_aa``]a]```aaaUa[J[aZ`^a\_\_\_\_  
@HWI-EAS443:3:93:570:1445#0/1  
AATAAAGAAGCTGAGAGAATAATGTCGCAGTCCCGCACT  
+HWI-EAS443:3:93:570:1445#0/1  
aaabaaaba`baaaaa`Jaaa`aa``\_aaa\_`\_`\_]\_\_  
@HWI-EAS443:3:93:657:908#0/1  
CCCGTTTGCCTTTCATTACCAACTACGTCCCCTTGGCC  
+HWI-EAS443:3:93:657:908#0/1  
a`a`\_a`T\_a`aa\_aaaaa¥aa`a`aa\_aW^\_\_¥\_¥\_¥S^  
@HWI-EAS443:3:93:795:713#0/1  
TTATTCTCTGTCTGCTGTTATTGGGTATCTCATTGCCAT  
+HWI-EAS443:3:93:795:713#0/1  
^^ZRWZbaV^aYYaa]S]IDRXaOSOFX]Y¥¥^MSQVR\_]\_  
@HWI-EAS443:3:93:800:1327#0/1  
GCTGTAATTGGGCATCTCATTGCCATCATCCACTTCATTC  
+HWI-EAS443:3:93:800:1327#0/1  
]b\_VWaa¥OS\_WGZ]aba`[`bbaa`U`\_]`^ZXb\_\_`\_\_`  
@HWI-EAS443:3:93:853:521#0/1  
GCTGTAATTGGGTATCTCATTGCCATCATCCACTTGATTC  
+HWI-EAS443:3:93:853:521#0/1  
`[]YEUUR¥Q¥TQNVWUNPJONWT]XNWVMVRNKKDLSS[  
@HWI-EAS443:3:94:1300:1724#0/1  
AAAAGAAGCTGAGAGATCTAATGTCGCAGTCCCACACTCGC

+HWI-EAS443:3:94:1300:1724#0/1  
`\_`\_^\_VOWab`abaaZbaaab^TWLa`VTH[[a[[a[aJ  
@HWI-EAS443:3:94:1459:1502#0/1  
ATGAAGTGGATGATGGCAATGAGATACCCAATTACCGCAG  
+HWI-EAS443:3:94:1459:1502#0/1  
aba\_W[GabV^a`^b]a\_aa`b`\_`\_V]a`\_a]0\_^[\_`  
@HWI-EAS443:3:94:1551:2044#0/1  
GAATAAAAGTACTGAGAGATCTAATGTCGCAGTCCCGCAC  
+HWI-EAS443:3:94:1551:2044#0/1  
`b`bba\_baIaaab^aabUa`\_baa\_^b^^\_K]^\_^SRK  
@HWI-EAS443:3:94:169:1195#0/1  
CAATCCCCAGTTCGGAAAAGCACTTTTGCATCTTTTGTG  
+HWI-EAS443:3:94:169:1195#0/1  
aba`aa`¥aa^]]^`¥`^]S`\_`\_^`^[]\_\_^]Z^]\_\_^¥  
@HWI-EAS443:3:94:438:260#0/1  
GTACTTTTTGATTATGGCCATATGGTCCACAGTGGGCTTA  
+HWI-EAS443:3:94:438:260#0/1  
aa]abbbbaabaaaa\_aa^RZYV`V] []U`ZV\_^GQ^\_\_  
@HWI-EAS443:3:94:860:323#0/1  
GAAGGTACCATGTTTCAACCTTTCAACCTTTTCGAAATAA  
+HWI-EAS443:3:94:860:323#0/1  
a`\_]aVa`\_aaa`\_a¥`\_`^`\_`^^YW¥a`\_^]\_[]^¥^  
@HWI-EAS443:3:94:87:1694#0/1  
CCCGTCTTCGTTTCATTACCAACACTACGTCCCCTTGCCC  
+HWI-EAS443:3:94:87:1694#0/1  
`V`\_`VJM\_a\_PYVXOL][^PYTZ^\_] [XVRWVQYYUBBBB  
@HWI-EAS443:3:95:1018:396#0/1  
GGGGACGTAGTGTGGTAATGAAACGAAAAAGGGACTCTA  
+HWI-EAS443:3:95:1018:396#0/1  
abbb\_\_a]U\_L]`¥b¥V\_\_`ZWT`RTZZ\_^FVV\_\_S[U]Y  
@HWI-EAS443:3:95:1106:1391#0/1  
CCTCTTACCAGTATCCTCAACTCTGATCCTCTCACATTCA  
+HWI-EAS443:3:95:1106:1391#0/1  
abbbbaaa\_bbaaaWXb]b¥L\_]ba]ba]a``Zb^`a`Za  
@HWI-EAS443:3:95:1115:898#0/1  
GCTGCCTTGATATGTCTACGGCTTTTTCTCAGTTGGAT  
+HWI-EAS443:3:95:1115:898#0/1  
abbbbabbbbbbbaabb`bbaaaLP`G\_]QN^¥]RaQB  
@HWI-EAS443:3:95:1369:1698#0/1  
CTGTAATTGGGTATCTCATTGCCATAATCCACTTCATTCT  
+HWI-EAS443:3:95:1369:1698#0/1  
aaZZ[\_YaabTH[^SbabUYYPW[G`\_a\_S[DYYa`bYHU  
@HWI-EAS443:3:95:1496:1719#0/1  
ACTCAGAATGAAGTGGATGATGGGAATGAGATACCCAATT  
+HWI-EAS443:3:95:1496:1719#0/1  
aZ\_aaba^`aK\_bQ\_a\_Wa\_aV`SaK[`XO^I\_¥`N[]^¥  
@HWI-EAS443:3:95:1709:1709#0/1  
ATCAAGGGAGCAATTTTACAATCCTGGAGCTTTTCTTTCT  
+HWI-EAS443:3:95:1709:1709#0/1  
^\_YaaabbaK\_babbabaa^aU^a]SYbS`Yab`YW^`Z



@HWI-EAS443:3:95:469:1885#0/1  
TCCTGATGTGACTTTTTGATTATGGCCATATGGTGCACA  
+HWI-EAS443:3:95:469:1885#0/1  
`bb^`ZaaOTXa`ba\_`a^bVa]]`ab¥[\_[Z]JOMWUV  
@HWI-EAS443:3:96:1135:1918#0/1  
AGGGGACGTAGTGTGGTAATGAAACGAAAAAGGGACTCT  
+HWI-EAS443:3:96:1135:1918#0/1  
ab\_baa`b\_`b\_`\_aaaW`\_a¥aa]FY[aa`G[ ]\_ ]^W¥  
@HWI-EAS443:3:96:1551:982#0/1  
AAAAGAAGTGGAGATCTAATGTCGCAGTCCAGCACTCGC  
+HWI-EAS443:3:96:1551:982#0/1  
V`bYaa][Taaa``ab`aY\_aXT[BBBBBBBBBBBBBBBB  
@HWI-EAS443:3:96:547:1338#0/1  
AAGGTTGAAAGTTGAAACATGGTACCTTCGGCCCTGTCC  
+HWI-EAS443:3:96:547:1338#0/1  
^\_]\_H`b\_b\_IZa[U]aaaa[a`]VTaaaS[RQa\_X[\_K¥\_  
@HWI-EAS443:3:96:694:1376#0/1  
GAACTGAGAGATCTAATGTCGCCGTCCCGCACTCGCGAGA  
+HWI-EAS443:3:96:694:1376#0/1  
\_R¥QV]`bROW[bZaX^W\_b\_J^\_a¥^a]U\_^[]`]SaB  
@HWI-EAS443:3:96:763:1129#0/1  
TCCTGATGTGACTTTTTGATTATGGCCATATTGTCCACA  
+HWI-EAS443:3:96:763:1129#0/1  
a\_aa`\_`a^a^\_`^aaaa`\_a\_\_` ]^^^ ]WETZ\_WZZ^  
@HWI-EAS443:3:96:805:783#0/1  
GGGGACGTAGTGTGGTAATGAAACGAAACGGGAATCTA  
+HWI-EAS443:3:96:805:783#0/1  
a\_S\_aab\_a\_T\_Va\_R[`Y]¥U^WMYH\_V\_FZ[^NGSSBB  
@HWI-EAS443:3:97:1198:1454#0/1  
ATTCCAGAGAGGAATGAACAAGGACAAACCTTCTGGAGCA  
+HWI-EAS443:3:97:1198:1454#0/1  
aa`a¥¥\_aaaa`W\_abX]^` ]\_ba0a`WDZSbZY``¥^0\_  
@HWI-EAS443:3:97:1498:395#0/1  
GAGGATCAGAGTTGAGGATACTGGTAAGAGGCAATTCTCC  
+HWI-EAS443:3:97:1498:395#0/1  
aa][`XaY]Y^`R` ]]a]\_`¥TY\_]`\_QQ^\_GW]W`WXQU  
@HWI-EAS443:3:97:1539:144#0/1  
AAAAGAAGTGGAGATCTAATGTCGCAGTCCCGCAATCGC  
+HWI-EAS443:3:97:1539:144#0/1  
`aa\_\_aa`baa\_aba\_Gaa\_aa`¥VX^^YX]GVVYG]RWW  
@HWI-EAS443:3:97:204:826#0/1  
ATTGTCGATGGATTCAATTTCCCAGTTCTGGAAAAGCACT  
+HWI-EAS443:3:97:204:826#0/1  
`aaV\_`baabb`aaa\_aaa^aaa`a\_a`aa[aaaaaa`^\_  
@HWI-EAS443:3:97:340:341#0/1  
GTCCCGTTTTTGTTCATTACCAACTACGTCCCCTTGC  
+HWI-EAS443:3:97:340:341#0/1  
a`a]Pa\_a\_[F^V\_` `a`\_aa]]`VaZ]a^`YQRY¥V\_V  
@HWI-EAS443:3:97:369:753#0/1  
CGCGGGATACTCACTAAGACCACTGTGGACCATATGGCCA

+HWI-EAS443:3:97:369:753#0/1  
]T]`\_`Z`T^`\_]\_[\_\_^\_RYY\_]\_^XVVS^]^[^]¥]\_VRUT  
@HWI-EAS443:3:97:431:987#0/1  
ATGAAGGGGATGATGGCAATGAGATACCCAATTACAGCAG  
+HWI-EAS443:3:97:431:987#0/1  
`K¥WWYSXU¥ba`^b^^a¥b¥UUW`ZLO\_UXVaH\_¥RR`  
@HWI-EAS443:3:97:718:1454#0/1  
TGCTGTAATTGGGGATCTCATTGCCATCATCCACTTCATT  
+HWI-EAS443:3:97:718:1454#0/1  
`U`b`]`bab]`G`a\_aaaa\_a`\_`a`aaYU[[`\_`¥``\_`  
@HWI-EAS443:3:97:833:864#0/1  
CTTGGAAATGCGCCACAGCACACAGATTGGAGGAGTAAGG  
+HWI-EAS443:3:97:833:864#0/1  
a]Pa]^ZVXMGLNZVYa^aU\_aV[QQ\_a\_`GaPFTRI[\_B  
@HWI-EAS443:3:98:113:798#0/1  
GACAGGGCCGAAGGTACCATGTTTCAACCTTTCAACCTTT  
+HWI-EAS443:3:98:113:798#0/1  
aaa[a`a`^a^[Y[[`]¥U^aW]`\_]\_^YS¥]]W[WWWW^  
@HWI-EAS443:3:98:1422:677#0/1  
GCTGTAATTGGGAATCTCATTGCCATCATCCACTTCATTC  
+HWI-EAS443:3:98:1422:677#0/1  
¥`b`T\_Z\_¥\_UUN` `[`abba¥¥aa^NSY]\_¥L]`Q¥a]U  
@HWI-EAS443:3:98:1580:1449#0/1  
GAACCCCGCACTCAGAATGAAGTGGATGATGGAAATGAGA  
+HWI-EAS443:3:98:1580:1449#0/1  
a\_`K¥Xabb` `b¥aba`bb¥K` ]`WX][PY[]OaWa¥S`P  
@HWI-EAS443:3:98:1622:1834#0/1  
ATGAACAAAGACAAACCCTCTGGAGCAAAACAAACGATGC  
+HWI-EAS443:3:98:1622:1834#0/1  
aa[abbb`\_`[[H^`URND]M^aYS¥MVY¥WOX^R[WXXH  
@HWI-EAS443:3:98:513:1932#0/1  
GAGAGATCTAATGTCGTAGTCCCGCACTCGCGAGATACTC  
+HWI-EAS443:3:98:513:1932#0/1  
`[a\_Xabb^bbba`a`bb[aa^a`aba\_b\_aaab\_[\_a  
@HWI-EAS443:3:98:593:657#0/1  
GACAGGGCCGAAGGTACCATGTTTCAACCTTTCAACCTTT  
+HWI-EAS443:3:98:593:657#0/1  
abaaaa`aa\_\_aaZa\_aaab\_a`\_aa`[``]\_a\_^^a`a  
@HWI-EAS443:3:98:645:63#0/1  
GAACTGGACTTGTTGTTGGGCCATTCCCTATTCCACCATGT  
+HWI-EAS443:3:98:645:63#0/1  
aV\_[\_WfVUXU[ST`RJYYPMS[PPWN^S\_SPKBBBBBBB  
@HWI-EAS443:3:99:1085:1550#0/1  
GGCAAGGGGACGTAGTGTGGTAATGAAACGAAAAGGGGA  
+HWI-EAS443:3:99:1085:1550#0/1  
aa\_`SabaVR]b\_\_\_\_QbNaa[X`HY^V`\_HaZZ`ZBBBBB  
@HWI-EAS443:3:99:1133:362#0/1  
CCCGTTTTCGTTTTCATTACTAACACTACGTCCCCCTTGCCC  
+HWI-EAS443:3:99:1133:362#0/1  
`YW[baaa\_babbbbbbbKbabbbbaaYa\_`a`abLRX

@HWI-EAS443:3:99:1405:640#0/1  
AAAAGAAGCTGAGAGATCTAATGTCGCAGTCGCGCACTCGC  
+HWI-EAS443:3:99:1405:640#0/1  
VXJ[\_b[TXTYUY\_a`TT[b¥[OWQITb[XQX^IIF¥aaa  
@HWI-EAS443:3:99:344:263#0/1  
ATTCAATTCCCCAGTTCTGGAAAAGCACTTTTGGCTCTTT  
+HWI-EAS443:3:99:344:263#0/1  
aababbbba^\_]aaaaaab`aa`a\_a¥`````\_]X[Xa\_\_  
@HWI-EAS443:3:99:584:1115#0/1  
AGGCAACCAGCAGCCGGTACAGTGGATTTCGTAAGGCACT  
+HWI-EAS443:3:99:584:1115#0/1  
^^^a\_]¥a`¥UY[[^¥Z[Y^GZ^YUBBBBBBBBBBBBB  
@HWI-EAS443:3:99:585:1776#0/1  
ATTTTACAATCCTGGAGCTATTCTTTCTTCTTTTGTTA  
+HWI-EAS443:3:99:585:1776#0/1  
[bbV\_`Za\_[]aa\_P]aIaba`X`aaTb`b`^bbaa\_  
@HWI-EAS443:3:99:624:1876#0/1  
AATGTCGCAGTCCCGCACTGGCGAGATACTACTAAGACC  
+HWI-EAS443:3:99:624:1876#0/1  
`bb]I]a^aaa]a^b`abPZ\_aUbYG)`¥bZOHRKa`S\_  
@HWI-EAS443:3:99:67:80#0/1  
TATAAACACTGCCTGTTCCGCCGGCTACTGGGAGGAACCT  
+HWI-EAS443:3:99:67:80#0/1  
aU¥SQRUSZ^\_SP[aZQZXWIH^BBBBBBBBBBBBBBBB  
@HWI-EAS443:3:99:727:1195#0/1  
GGGTTCTTCTTTGACTTCCTGATGTGTACTTTTTGATTA  
+HWI-EAS443:3:99:727:1195#0/1  
]a^QXXS\_X¥Ia]¥FH`Yaaa\_QUb\_a^L][aa¥a]BBBB  
@HWI-EAS443:3:99:811:1336#0/1  
AAAAGAAGCTGAGAGATCTAATGTCGCAGTCCCGCATTTCGC  
+HWI-EAS443:3:99:811:1336#0/1  
`aaaaaaabaaaa\_a`aa\_aa^\_a\_aaY\_a\_\_\_¥FQ\_^¥  
@HWI-EAS443:3:9:1271:1925#0/1  
AAAAGAAGCTGAGAGATCTAATGTCGCAGTCCGGCACTCGC  
+HWI-EAS443:3:9:1271:1925#0/1  
[\_`\_b^`\_a`a`U]\_XHaaJa`VV^Za[\_SQFTY\_MWSZN  
@HWI-EAS443:3:9:1408:1620#0/1  
CTCACTAAGACCACTGTGGACCATATGGCCATAAGCAAAA  
+HWI-EAS443:3:9:1408:1620#0/1  
a`^\_XPXOPYaT][aTOQY\_\_aVSXX\_STUG^HFDK[W[B  
@HWI-EAS443:3:9:168:1045#0/1  
AGATGAAGGCACATCTGGGGTGGAGACTGCTGTCCTGAGA  
+HWI-EAS443:3:9:168:1045#0/1  
WVZZ^WZO^YQWOZZ\_^^`[RV`XDH]URP\_SU]V¥abb  
@HWI-EAS443:3:9:300:359#0/1  
AATGTCGCAGTCCCGCACTCGCGAGATACTCAATAAGACC  
+HWI-EAS443:3:9:300:359#0/1  
`^ab\_aaaaa`\_`\_\_\_\_`\_\_[[Z\_[V^¥^RWQV\_¥¥¥QS  
@HWI-EAS443:3:9:43:643#0/1  
GGTGGGGTCTGCTGTCCTGAGAGGATTTCTCATTTTGGGC

+HWI-EAS443:3:9:43:643#0/1  
aaX`aaa¥a^a^`a^a^\_a^aaa`^\_]Z`\_`\_a\_¥\_¥S  
@HWI-EAS443:3:9:514:1843#0/1  
AAATGCGGGATGGGCTTGGGACATTTGACACTGTCCAAAT  
+HWI-EAS443:3:9:514:1843#0/1  
O\_SS\_]Z]]\_aGZ]OG[\_Z`]aUWW\_¥][OXZRWS^]X^  
@HWI-EAS443:3:9:589:1353#0/1  
AGAAGAAGTGCTAACGTGCAACCTCCAAACACTGAAAATA  
+HWI-EAS443:3:9:589:1353#0/1  
`]Z^GR\_aWa`aaa\_a]Xa\_a\_\_`\_`^a\_\_\_\_\_¥\_Y\_¥a  
@HWI-EAS443:3:9:782:883#0/1  
GTCCCGTTTTTCGTTTCAGTACCAACACTACGTCCCCTTGC  
+HWI-EAS443:3:9:782:883#0/1  
a^\_\_¥a`a`[a¥\_\_\_\_\_¥`]S]\_¥`¥^¥Z¥XYSW¥WWYW  
@HWI-EAS443:3:9:808:1779#0/1  
AGGGGACGTAGTGTGGTAATGAAAAGAAAACGGGACTCT  
+HWI-EAS443:3:9:808:1779#0/1  
¥a\_bbaaba^`¥b`abaS[]OVJb^F^Y]a\_QQ[]WRTWS  
@HWI-EAS443:3:9:960:1819#0/1  
GGGACGTAGTGTGGTAATGAAACGAAAACGGGAGTCTAG  
+HWI-EAS443:3:9:960:1819#0/1  
[b\_a\_aRZ\_Q]Vbb[I`a[a`\_`[\_a\_`VYW\_XFR]S\_`  
@HWI-EAS443:3:100:1164:677#0/1  
AGAGAGTCTGCTGTCCTGAGAGGATTTCTCATTTTGGGCA  
+HWI-EAS443:3:100:1164:677#0/1  
ababab`\_`\_U\_VQJY`RW`\_aaaa`¥R¥TZaa\_aS\_\_Y\_  
@HWI-EAS443:3:10:1731:85#0/1  
GAATAAAAGAAGTCTAATGTCGCAGTCCCGGAA  
+HWI-EAS443:3:10:1731:85#0/1  
aWS[VZORVHMMW]ZZXZZUGMOBBBBBBBBBBBBBBBB  
@HWI-EAS443:3:11:460:967#0/1  
GATGGCAATGAGATACCCAATTACAGCAGACAAGAGAGCA  
+HWI-EAS443:3:11:460:967#0/1  
`bU`a^`bZ\_¥a^abb`^`]aa`¥aaa`\_Taaa^\_a`a  
@HWI-EAS443:3:13:1400:29#0/1  
AGCGCCTTGCATATGTCTACGGCTTGTTCCTCAGTTGGAT  
+HWI-EAS443:3:13:1400:29#0/1  
a`bYaa`ba^a`\_]`¥^THY[R]BBBBBBBBBBBBBBBB  
@HWI-EAS443:3:13:641:732#0/1  
ATGGCAATGAGATACCCAATTACAGCAGACAAGAGAAAAGC  
+HWI-EAS443:3:13:641:732#0/1  
`ab`aababaa\_aaaa`aaaaaa`aa`aa`a`aaaa`YaX  
@HWI-EAS443:3:13:861:920#0/1  
CTCACTAAGACCACTGTGGACCATATGGCCATAATCATGG  
+HWI-EAS443:3:13:861:920#0/1  
^U^XHZ]]¥XUX¥TQRU\_L\_RHNX\_LZ¥Z^ZBBBBBBBBBB  
@HWI-EAS443:3:14:1365:834#0/1  
CAATTACAACAAGGCAACCAAACGACTTACAGTTCTTACT  
+HWI-EAS443:3:14:1365:834#0/1  
^¥\_¥¥b¥aa`ZH\_b^a^aXba]Ya^T\_\_YZ`[\_Ra\_a[^`

@HWI-EAS443:3:15:874:41#0/1  
ATGGCAATGAGATACCCAATTACAGCAGACAAGAGAAAAGC  
+HWI-EAS443:3:15:874:41#0/1  
`SabbKabb\_bY]^baT^\_aab\_aa]\_a\_\_[\_a`\_a¥a\_¥  
@HWI-EAS443:3:16:155:83#0/1  
ATGGCAATGAGATACCCAATTACAGCAGACAAGAGAAAAGC  
+HWI-EAS443:3:16:155:83#0/1  
[Y^`bXab¥¥[T]¥R[a`a\_aa`]aa`¥X`\_Qa\_\_Z^W^J  
@HWI-EAS443:3:17:1333:983#0/1  
ATGGCAATGAGATACCCAATTACAGCAGACAAGAGAAAAGC  
+HWI-EAS443:3:17:1333:983#0/1  
\_aab¥aaabbbaaa\_a¥baabaaa`\_aa`]\_ab`aa`aa^  
@HWI-EAS443:3:17:1495:1016#0/1  
ATGGCAATGAGATACCCAATTACAGCAGACAAGAGAAAAGC  
+HWI-EAS443:3:17:1495:1016#0/1  
aaba]^aba`aa`aaX\_aaa`a^a`]\_¥`\_\_\_\_a\_X[\_^`S  
@HWI-EAS443:3:17:1661:1070#0/1  
AGAGGATTTCTCATTTTGGGCAAAGAAGACAAGAGATGGC  
+HWI-EAS443:3:17:1661:1070#0/1  
\_X][Y`[aZ^\_XQ^baa]YaX`]V`aaa^TZaaZ¥YQ0^B  
@HWI-EAS443:3:18:859:449#0/1  
CTGCTGTAATTGGGTATCTCATTGCCATCATCCACTTATT  
+HWI-EAS443:3:18:859:449#0/1  
a]]a^¥\_VYa^X]^RZaZY\_] [aZXXZ` `ZVVZ\_ZWZ\_^  
@HWI-EAS443:3:18:947:1290#0/1  
ATGGCAATGAGATACCCAATTACAGCAGACAAGAGAAAAGC  
+HWI-EAS443:3:18:947:1290#0/1  
¥UY`\_]`\_`\_ba^ZRNT\_a^Y^ZQQ`]X[]Ya`aV`\_W[P  
@HWI-EAS443:3:19:1023:1099#0/1  
AAACAAGTTTCTCCCAGTAGCCGGCGGAACAGGCAGGGT  
+HWI-EAS443:3:19:1023:1099#0/1  
abbabab\_U\_aaaaa`a^W`a\_`aa``\_]`¥Z`a^BBBBB  
@HWI-EAS443:3:19:415:1581#0/1  
GCACTGGGGTGGAGTCTGCTGTCCTGAGAGGATTTCTCAT  
+HWI-EAS443:3:19:415:1581#0/1  
^Z\_aaaYaaZXZZUT^Q]\_^aZaaWW¥Y¥ZZZZWYVTQ]`  
@HWI-EAS443:3:1:1210:289#0/1  
ATGGCAATGAGATACCCAATTACAGCAGACAAGAGAAAAGC  
+HWI-EAS443:3:1:1210:289#0/1  
ab```a`abaaaa\_X]bba`aZaa^a`````\_a`\_aB  
@HWI-EAS443:3:1:325:1404#0/1  
AGTTAATGTGCTAATTGGGCAAGGGGACGTAGTGTGGTA  
+HWI-EAS443:3:1:325:1404#0/1  
WPDSa\_]`\_^QP¥X][VWZ¥a[^a`aZ\_bO\_WF¥^BBBBB  
@HWI-EAS443:3:22:1713:810#0/1  
ATGGCAATGAGATACCCAATTACAGCAGACAAGAGAAAAGC  
+HWI-EAS443:3:22:1713:810#0/1  
\_bb^H^a`^aaWa`Z]]a`a^\_Z^`\_`\_UF^\_\_`a\_]Z\_N  
@HWI-EAS443:3:22:661:322#0/1  
GCTTTCTCTGTCTGCTGTAATTGGGTATCTCATTGCCAT

+HWI-EAS443:3:22:661:322#0/1  
aaaa`aaaa]a`aa¥aa`\_\_a``[\_XZVZ\_VZ\_`^`Z[\_  
@HWI-EAS443:3:22:947:1166#0/1  
AAACTAATGTGCTAATTGGGCAAGGGGACGTAGTGTGGT  
+HWI-EAS443:3:22:947:1166#0/1  
WQZV¥¥T¥¥X`\_\_[\_a\_Va\_X]WHZ^URGU^ZS`J[LS\_NR  
@HWI-EAS443:3:23:1440:194#0/1  
GCTGCACATCTGGGGTGGAGTCTGCTGTCCTGAGAGGATT  
+HWI-EAS443:3:23:1440:194#0/1  
abbbabbbb\_babb[T¥baba^ab\_bb`Qabbaaab`aa  
@HWI-EAS443:3:23:970:794#0/1  
ATGGCAATGAGATACCCAATTACAGCAGACAAGAGAAAAGC  
+HWI-EAS443:3:23:970:794#0/1  
]b`T]Xb^Z\_babb]aabbaaaV^YUaba[VT`aaa¥a`U  
@HWI-EAS443:3:24:628:1837#0/1  
GTTTGCTGTAATTGGGTATCTCATTGCCATCATCCACTTC  
+HWI-EAS443:3:24:628:1837#0/1  
¥US¥[`b^Ta]\_`]ba^aaba`aa`a^aa]Wa]\_ULX\_[]  
@HWI-EAS443:3:25:1570:1431#0/1  
AAATGATGATGTTGACCAAAGTTTGATTATCGCTGCTGGA  
+HWI-EAS443:3:25:1570:1431#0/1  
abbbbbbbbabbbbbbaaaaaab\_bbbababa^a`aa\_a`¥`  
@HWI-EAS443:3:25:1689:866#0/1  
CTGCTGTAATTGGGTATCTCATTGCCATCATCCACTTGAT  
+HWI-EAS443:3:25:1689:866#0/1  
a```¥aS\_[\_\_ba]Z]b`b\_U^`W\_]WFUXQHZU¥[G]¥  
@HWI-EAS443:3:25:1708:686#0/1  
ATGGCAATGAGATACCCAATTACAGCAGACAAGAGAAAAGC  
+HWI-EAS443:3:25:1708:686#0/1  
SWa^IZ]`a`ba`a^`a]`aX`¥\_bVaaZT¥PS\_`¥aaYX  
@HWI-EAS443:3:26:605:580#0/1  
ATACTCACTAAGACCACTGTGGACCATATGGCCATAAAAA  
+HWI-EAS443:3:26:605:580#0/1  
`aaaaaaaab`aaaaaaa\_a`a`a`[\_a\_a```]\_\_\_\_`  
@HWI-EAS443:3:27:220:990#0/1  
TGGCAATGAGATACCCAATTACAGCAGACAAGAGAATGTG  
+HWI-EAS443:3:27:220:990#0/1  
aa\_a\_WUR]PZR^Z`a[¥^YPXa`\_`\_aJRNT^[Q\_\_XLGZ  
@HWI-EAS443:3:27:406:1339#0/1  
ATGGCAATGAGATACCCAATTACAGCAGACAAGAGAAAAGC  
+HWI-EAS443:3:27:406:1339#0/1  
`\_aaa````aaaabbbbZb`aaab\_a\_a[\_^\_]\_a`a`\_`  
@HWI-EAS443:3:28:556:1322#0/1  
ATGGCAATGAGATACCCAATTACAGCAGACAAGAGAAAAGC  
+HWI-EAS443:3:28:556:1322#0/1  
]a\_aaa]aaaa]`[``R`\_a\_aa\_\_aa]aaaYY`\_aaY[[  
@HWI-EAS443:3:29:1696:122#0/1  
AAAAGAAGTGGAGATCTAATGTCGCAGTCCCGCACTGGC  
+HWI-EAS443:3:29:1696:122#0/1  
a\_]`^`X^Ga^`[\_PSGSYXVY^UOYVRXVVOVRWUNBBBB

@HWI-EAS443:3:2:461:1663#0/1  
ATGGCAATGAGATACCCAATTACAGCAGACAAGAGAAAGC  
+HWI-EAS443:3:2:461:1663#0/1  
a\_aa]\_aaa`V]Sa[[\_aa\_\_ZL]\_\_`\_]WY^`\_\_\_R`WO  
@HWI-EAS443:3:30:293:1819#0/1  
TGCTGTAATTGGGTATCTCATTGCCATCATCCACTTCTTC  
+HWI-EAS443:3:30:293:1819#0/1  
`abaaX^^aaaaaZbab^b^\_]aaa`aa\_aaa`\_^`^^a  
@HWI-EAS443:3:31:164:211#0/1  
ATGGCAATGAGATACCCAATTACAGCAGACAAGAGAAAGC  
+HWI-EAS443:3:31:164:211#0/1  
Sa`bbb`b\_]W`abbVaaaa`¥b\_a```¥a`]aa^0^aa  
@HWI-EAS443:3:31:1724:1524#0/1  
ATGGCAATGAGATACCCAATTACAGCAGACAAGAGAAAGC  
+HWI-EAS443:3:31:1724:1524#0/1  
a\_a[Paab\_a]X`aZ]^a\_a^[\_][``\_]Z^\_\_¥\_[R]W  
@HWI-EAS443:3:32:50:573#0/1  
CGGGGGGCGATCTGAAC TTTGTCAATAGGGCAAACCAGCG  
+HWI-EAS443:3:32:50:573#0/1  
ababa^bbba```abaabaaaaZT`aa^`WZ`MO\_aa  
@HWI-EAS443:3:33:1183:306#0/1  
GTCCTTACGAATCCACTGTACCGGCTTCTGGTTGCCTGGG  
+HWI-EAS443:3:33:1183:306#0/1  
a[`¥`]VTW]YR[``ZXUOYYBBBBBBBBBBBBBBBBBB  
@HWI-EAS443:3:33:1250:943#0/1  
ACCAACTACTGCCCCCTTGCCAATTAGCACATTAGGTT  
+HWI-EAS443:3:33:1250:943#0/1  
¥a\_\_U`^aV]b^\_]R\_Y[TRYVRYRN[WKX]YY[RVJXP  
@HWI-EAS443:3:34:1302:847#0/1  
CTGGGGTTCACTTTCAAAGGACAAGCGGATCATCAGTCA  
+HWI-EAS443:3:34:1302:847#0/1  
ababaa`abaabaaaaaaaa\_a\_a`a\_aa`\_\_^`R\_VXU]  
@HWI-EAS443:3:35:1403:1274#0/1  
GGGCCATTCTATTCCACCATGTTACGGCCAGAGGTGGTA  
+HWI-EAS443:3:35:1403:1274#0/1  
^aaaaU¥``\_I¥^H¥\_aaa]`ba\_aX`ab¥QXHaaQYFNV  
@HWI-EAS443:3:36:1098:1526#0/1  
AGTGGACAGGGCCGAAGGTACCATGTTTCAACCTTTCAAC  
+HWI-EAS443:3:36:1098:1526#0/1  
\_a`Taa^\_a`R`\_aa\_NX\_\_H]]MZ`\_]aNW[`^aa`  
@HWI-EAS443:3:36:1550:133#0/1  
GAGGATTTCTATTTTGGGCAAAGAAGACAAGAGATAACA  
+HWI-EAS443:3:36:1550:133#0/1  
a\_b^V]aaa`¥U`¥a^`a`Z[¥Y`]aTXSFNY\_]XLYTS  
@HWI-EAS443:3:36:834:1567#0/1  
GGGCTCCTTATTTTAACTTGATTTCTGAAGTGGACAGGGC  
+HWI-EAS443:3:36:834:1567#0/1  
GUYa`ba\_\_`ab\_b`bb`a``ba`baa`\_QZJ\_b`¥]bb  
@HWI-EAS443:3:37:710:1019#0/1  
AGAGGATTTCTATTTTGGGCAAAGAAGACAAGAGATGGC

+HWI-EAS443:3:37:710:1019#0/1  
aa\_`\_¥QUY^\_^\_¥]^^]^^\_[]W¥][TDR^W¥Z]XMJK  
@HWI-EAS443:3:38:1014:1204#0/1  
GAAGATGGCAATGAGATACCCAATTACAGCAGACAAGAGA  
+HWI-EAS443:3:38:1014:1204#0/1  
aQV][X]\_^VZ]W`XXaaY^W]\_^\_[YXSMQVRY\_]Z  
@HWI-EAS443:3:38:837:1423#0/1  
GCTAATTGGGCAAGGGGACGTAGTGTGGTAATGAAAAGA  
+HWI-EAS443:3:38:837:1423#0/1  
^\_bb\_^\_`¥`Y\_Z\_]\_^Z\_ZWS]R^¥aXUFW[NWH]XJNV  
@HWI-EAS443:3:39:154:1555#0/1  
TGGGCCTTCATCTGGATCTTCAGTCAATGCACCTGCATCC  
+HWI-EAS443:3:39:154:1555#0/1  
a^YU`\_a^b\_aa[\_\_\_`[\_`\_]\_`Y`a`]¥`\_RY\_[^T`^V  
@HWI-EAS443:3:39:200:161#0/1  
CTTTCTTGAAATGTGCCACAGCACACAGATTGGAGGAGT  
+HWI-EAS443:3:39:200:161#0/1  
aaI^bbbbb¥Zaab`bb`aabbaaaaaaK^\_a`Ra`Ya[  
@HWI-EAS443:3:39:305:29#0/1  
GCACCTCCTTATTTAACTTGATTTCTGAAGTGGACAGGG  
+HWI-EAS443:3:39:305:29#0/1  
V]¥H\_^]]Z^KX`]00PYS]]S[ZZ\_^VS[T`ZU¥BBBB  
@HWI-EAS443:3:39:977:949#0/1  
ATGGCAATGAGATACCCAATTACAGCAGACAAGAGAAAGC  
+HWI-EAS443:3:39:977:949#0/1  
\_ba\_a\_aba¥a`aabaaaa\_aaa\_b[\_`aaZ\_aaaa`\_V  
@HWI-EAS443:3:3:1331:294#0/1  
ATGGCAATGAGATACCCAATTACAGCAGACAAGAGAAAGC  
+HWI-EAS443:3:3:1331:294#0/1  
^]\_aYZT^a^b¥`a^YLW¥`\_¥S[]GWaYYY¥ZV[WLQ[B  
@HWI-EAS443:3:3:1676:494#0/1  
TGGGGGATGTGCTTGGGACATTTGACACTGTCCAAATAAT  
+HWI-EAS443:3:3:1676:494#0/1  
a]G\_Z\_VV^P]PMR`XX¥JX[WPY]a]]][XNWWYLWXUBB  
@HWI-EAS443:3:42:99:528#0/1  
TCCTTGGTCCGTAACAAGGTTTCTCCCAGTAGCCGGCG  
+HWI-EAS443:3:42:99:528#0/1  
abbabaaaaa\_```baabab¥a`aaaaa]¥aaa¥`]^a  
@HWI-EAS443:3:43:1300:426#0/1  
AGAGGATTTCTCATTTTGGGCAAAGAAGACAAGAGATGGC  
+HWI-EAS443:3:43:1300:426#0/1  
abY^aVPX\_XXa^[T[X¥a`LI\_TX\_X^LM\_]Q]RL]SF  
@HWI-EAS443:3:43:1708:1192#0/1  
GCCATTCTTGTCTGCTGTAATTGGGTATCTCATTGCCA  
+HWI-EAS443:3:43:1708:1192#0/1  
``XGT]T^[aS¥]QZ^`¥[\_NV`WPSQLH\_GLF[`ZXKLT  
@HWI-EAS443:3:43:1765:1522#0/1  
GAGGATTTCTCATTTTGGGCAAAGAAGACAAGAGATAAGC  
+HWI-EAS443:3:43:1765:1522#0/1  
aaa`aabb`a^abb`aaba\_```aa\_a`a`\_\_a`a`\_S



@HWI-EAS443:3:43:858:1460#0/1  
ATGATTTCTCAGTTCTCCTCCTGGAGTGTACATCTGCTCC  
+HWI-EAS443:3:43:858:1460#0/1  
a^FW`\_¥\_\_\_\_\_¥¥[TV¥`\_^SX0\_aP`Y\_a^^a]UVT  
@HWI-EAS443:3:44:1240:509#0/1  
CGAGGGCAAGGGGACGTAGTGTGGTAATGAAACGAAAAC  
+HWI-EAS443:3:44:1240:509#0/1  
ababbbba`abbbbaab`ab\_b[abb^Z`aaa]`Zb[``aG  
@HWI-EAS443:3:47:1152:2029#0/1  
TCCATGGATTCAATTCCCCAGTTCTGGAAAAGCACTTTTG  
+HWI-EAS443:3:47:1152:2029#0/1  
a^IZ^aba]\_\_`¥^`Z`^]\_\_\_¥`\_¥^^\_¥^\_]W^]S]  
@HWI-EAS443:3:48:1188:1517#0/1  
GAGATGACCCCAAGCACGGAGATGTCGCTGAGAGGGATAA  
+HWI-EAS443:3:48:1188:1517#0/1  
ZXI0bbb`W`bbbbZa`b`]a^[[Ra\_Z\_\_\_Z``\_NRVG  
@HWI-EAS443:3:48:472:1158#0/1  
CCCATTAGCATCTCTTGGAAATGTGCCACAGCACANAG  
+HWI-EAS443:3:48:472:1158#0/1  
¥abbbb`ba`Zabb`bb\_bb\_a`ab`^a[a]¥]`[b¥D¥a  
@HWI-EAS443:3:49:1656:1169#0/1  
ACCGCACTCAGAATGAAGTGGATGATGGCAATGAGATAGT  
+HWI-EAS443:3:49:1656:1169#0/1  
a`aa\_a\_aa`a`aaa\_`b`aa\_``\_``\_`^V\_aV^\_\_^\_T  
@HWI-EAS443:3:49:750:617#0/1  
AAAGAACTGAGAGATCTAATGTCGCAGTCCCGCACTCTCG  
+HWI-EAS443:3:49:750:617#0/1  
Va[TWbbbbXHH`babaYbbb`\_babZX¥[a]^WXZIH\_^  
@HWI-EAS443:3:49:826:114#0/1  
ATGGCAATGAGATACCCAATTACAGCAGACAAGAGAAAAGC  
+HWI-EAS443:3:49:826:114#0/1  
abbb`a`babbbbaa`ababba\_aaZaaa^a\_baaa`a]  
@HWI-EAS443:3:50:1427:1099#0/1  
AAAAAAGAAGTGAAGTGGATGATGGCAATGAGATAGTC  
+HWI-EAS443:3:50:1427:1099#0/1  
abbaababXa`baa`ab`aaaa\_aa\_`b`\_a`a`\_`\_`Z[`  
@HWI-EAS443:3:50:1530:1365#0/1  
CCGCACTCAGAATGAAGTGGATGATGGCAATGAGATAGTC  
+HWI-EAS443:3:50:1530:1365#0/1  
ababa`aUUb`a]\_a\_YZ`a[Wbaa`a]a\_a]``]`Z\_\_X  
@HWI-EAS443:3:51:532:83#0/1  
TTCAATATAAACACTGCCTGTTCCGCCGGCTACTGGGGGA  
+HWI-EAS443:3:51:532:83#0/1  
aaaaaa\_b`aaaS`a`\_\_\_`Q¥a[`[\_\_\_\_VIPPTaaG\_Q  
@HWI-EAS443:3:52:13:199#0/1  
ATGGCAATGAGATACCCAATTACAGCAGACAAGAGAAAAGC  
+HWI-EAS443:3:52:13:199#0/1  
`bbba`bbbaa\_a`\_a`aa`a\_\_\_a`\_\_X`^Ua\_a`]V^¥  
@HWI-EAS443:3:52:437:421#0/1  
CTGCCTTGCATATGTCTACGGCTTGTTCCTCAGTTGGGTT

+HWI-EAS443:3:52:437:421#0/1  
ababa¥Zaaababb\_`aa\_ba¥^\_]T\_FTLTLVSB BBBB  
@HWI-EAS443:3:53:1179:1166#0/1  
GCTTCTTCTTTGCCCAAATGAGAAATCCTCTCAGGACAG  
+HWI-EAS443:3:53:1179:1166#0/1  
`][W¥Zb¥a`\_]TVT^[`aX][`\_a``[S]]`a`a]Y¥¥  
@HWI-EAS443:3:53:1470:755#0/1  
ATGGCAATGAGATACCCAATTACAGCAGACAAGAGAAAAGC  
+HWI-EAS443:3:53:1470:755#0/1  
ab\_b`X[b\_Z\_¥]V¥0[a````Vaa`\_S¥Ta]aa\_b]U`V  
@HWI-EAS443:3:53:1682:426#0/1  
TCGCGTTTTTCGTTTCATTACCAACTACGTCCCCTTGCC  
+HWI-EAS443:3:53:1682:426#0/1  
J`a[Y¥\_Y`P\_W]`\_`bbb[OYTNYN`aa`IL¥FMaSVSJ  
@HWI-EAS443:3:53:885:1990#0/1  
GTGCCGTTTTTCGTTTCATTACCAACTACGTCCCCTTGC  
+HWI-EAS443:3:53:885:1990#0/1  
aMDW\_b\_a`QZU`U\_a^a`M`\_\_a\_¥a[ZZSVZMVXXN  
@HWI-EAS443:3:53:893:1191#0/1  
ATGGCAATGAGATACCCAATTACAGCAGACAAGAGAAAAGC  
+HWI-EAS443:3:53:893:1191#0/1  
`YM]]Wabbb`Y\_`]^aaa[``]`bXb]\_\_aZ\_WG¥Y`a`  
@HWI-EAS443:3:54:731:452#0/1  
AGAGAGTCTGCTGCTGCTGAGAGGATTTCTCATTTTGGGCA  
+HWI-EAS443:3:54:731:452#0/1  
aaXb`a`aa`aa[\_a]`])\_abZ^aa[aVX[aaaa\_aSY  
@HWI-EAS443:3:54:767:276#0/1  
GCTTCTCTTGTCTGCTGTAATTGGGTATCTCATTGCCAT  
+HWI-EAS443:3:54:767:276#0/1  
aaaba\_bab`aa`a¥U^\_XU^aaa`U^`¥`^]a`¥MQY\_  
@HWI-EAS443:3:54:779:491#0/1  
GGCGCCTTGTGTAATTGAATACTGGAGAATTGCCTCTTA  
+HWI-EAS443:3:54:779:491#0/1  
\_\_a`a`bbb`bbaabbab`]ababa`ba^a]aZ`\_]aa`  
@HWI-EAS443:3:55:1139:225#0/1  
GTGAGAGGATCAGGGTTGAGGATACTGGTAAGAGGCAGAA  
+HWI-EAS443:3:55:1139:225#0/1  
`\_a^bb`Za]a`aYa\_Z\_a]¥V]aab^]]`[`TXYZV  
@HWI-EAS443:3:55:46:709#0/1  
ATGGCAATGAGATACCCAATTACAGCAGACAAGAGAAAAGC  
+HWI-EAS443:3:55:46:709#0/1  
Ybbab^a`baaaaa`aab^a`aaaa`\_aRX`Qa\_b^a\_aa  
@HWI-EAS443:3:56:234:756#0/1  
ATGGCAATGAGATACCCAATTACAGCAGACAAGAGAAAAGC  
+HWI-EAS443:3:56:234:756#0/1  
``bb¥T^aa\_a^`IVaa`a`T`P``aa\_\_a\_\_a``aZ  
@HWI-EAS443:3:58:359:2018#0/1  
ATGGCAATGAGATACCCAATTACAGCAGACAAGAGAAAAGC  
+HWI-EAS443:3:58:359:2018#0/1  
aaa`a\_Z]^WRYa`b\_]a`^Y`aa\_aQXZ\_^QX¥^^a¥[G

@HWI-EAS443:3:59:1006:942#0/1  
AGAGGATTTCTCATTTTGGGCAAAGAAGACAAGAGATGGC  
+HWI-EAS443:3:59:1006:942#0/1  
aa^\_`Wbbaabaabaaaabb` `aaba`bbaa^a\_aW]a]W  
@HWI-EAS443:3:5:1328:832#0/1  
ATCAATCTCCTGGTTGCCTTTCTGAGAATAGCTGTTGATC  
+HWI-EAS443:3:5:1328:832#0/1  
][L[^^]Z^Y^\_\_X]VVXX`RTQ¥` `Y`^aU`BBBBBBBB  
@HWI-EAS443:3:60:1570:1453#0/1  
ATGGCAATGAGATACCCAATTACAGCAGACAAGAGAAAGA  
+HWI-EAS443:3:60:1570:1453#0/1  
XaZSJY` `S]XT¥[MaV^bYPI[PWU[Sa`X^` `TZULXF  
@HWI-EAS443:3:60:298:1936#0/1  
ATGGCAATGAGATACCCAATTACAGCAGACAAGAGAAAGC  
+HWI-EAS443:3:60:298:1936#0/1  
aZaY`a^WOZ`YP^V[^`V]X¥[\_\_\_\_\_]Y¥TWQQTU^VQ  
@HWI-EAS443:3:61:1519:759#0/1  
TGGCAATGAGATACCCAATTACAGCAGACAAGAGAATGTG  
+HWI-EAS443:3:61:1519:759#0/1  
U¥GZba][V`^a^[UZaa\_a[aa`\_U^\_]\_VQN^VVRWU  
@HWI-EAS443:3:61:506:595#0/1  
GTGTACTTTTTGATTATGGCCATATGGTCCACAGTGGGCT  
+HWI-EAS443:3:61:506:595#0/1  
a^[NKZaa`a\_[\_\_a^^S\_^¥PNUQ[URRWMQTTNVBBBB  
@HWI-EAS443:3:62:519:1018#0/1  
ATGGCAATGAGATACCCAATTACAGCAGACAAGAGAAAGC  
+HWI-EAS443:3:62:519:1018#0/1  
abbbbb`aabaaaabbabbaaba]\_]\_aa¥^OX` `\_^S]\_`  
@HWI-EAS443:3:63:385:337#0/1  
ATAAAAGAAGACTGAGAGATCTAATGTCGCAGTCCCGCAGTC  
+HWI-EAS443:3:63:385:337#0/1  
[baS`bbWQRN[`a]aa\_\_\_\_[`\_\_S\_TQW`VU\_`¥[VFT^  
@HWI-EAS443:3:63:734:694#0/1  
ATGGCAATGAGATACCCAATTACAGCAGACAAGAGAAAGC  
+HWI-EAS443:3:63:734:694#0/1  
[Q^`^`Z^¥ZVXZX¥aa\_¥`aa\_^\_]\_^\_]\_\_\_\_\_]\_]`  
@HWI-EAS443:3:63:740:1293#0/1  
ATGGCAATGAGATACCCAATTACAGCAGACAAGAGAAAGC  
+HWI-EAS443:3:63:740:1293#0/1  
aaaaaa\_ababaaabbbbbaaaaa\_aba` ``a^b`ab[\_`  
@HWI-EAS443:3:64:1482:263#0/1  
GTGCTGCTGTCTGAGAGGATTTCTCATTTTGGGCAAAGA  
+HWI-EAS443:3:64:1482:263#0/1  
`]baaaaaa[a^bb`\_][¥a[aaa\_a`aaaaa^X]\_a` `aa  
@HWI-EAS443:3:64:187:1510#0/1  
GAGGATTTCTCATTTTGGGCAAAGAAGACAAGAGATAAGC  
+HWI-EAS443:3:64:187:1510#0/1  
`ba\_baa`bababbaaa\_aaaaaa]a\_\_a`aa`a`ba¥a  
@HWI-EAS443:3:66:1445:286#0/1  
ATGGCAATGAGATACCCAATTACAGCAGACAAGAGAAAGC

+HWI-EAS443:3:66:1445:286#0/1  
aaabaaa``^`\_ba``abb``^`\_aaaaaaa`aa\_aa¥[^Z  
@HWI-EAS443:3:66:568:919#0/1  
AGCTGTGCTAATTGGGCAAGGGGACGTAGTGTGGTAATG  
+HWI-EAS443:3:66:568:919#0/1  
`aaaaX\_a\_aaaa`¥`¥)``\_`\_aW]¥X]\_`\_N^`¥Q  
@HWI-EAS443:3:66:908:1060#0/1  
AAAGAAGTCTAATGTCGAGTCCCCTCACTCNCG  
+HWI-EAS443:3:66:908:1060#0/1  
abbb]aaaab^a]aa``a`b¥U[\_¥aa`a`a[¥H¥[[DYa  
@HWI-EAS443:3:67:455:1912#0/1  
ATGGCAATGAGATACCCAATTACAGCAGACAAGAGAAAAGC  
+HWI-EAS443:3:67:455:1912#0/1  
a`a\_aXaaaa¥\_\_a`a\_b`\_¥aaa\_\_a^\_aaaXaR`aa]H  
@HWI-EAS443:3:68:1200:1466#0/1  
ATGGCAATGAGATACCCAATTACAGCAGACAAGAGAAAAGC  
+HWI-EAS443:3:68:1200:1466#0/1  
aa\_`aaaa`aa^ZU¥a\_a`\_¥VY\_\_RZ[[¥\_\_^^Z^\_^\_]  
@HWI-EAS443:3:68:123:324#0/1  
ATGGCAATGAGATACCCAATTACAGCAGACAAGAGAAAAGC  
+HWI-EAS443:3:68:123:324#0/1  
aa`aaaabaaaaaaaaaaaaabaaa`aaa`\_`¥[¥`\_V]\_]  
@HWI-EAS443:3:68:1351:1611#0/1  
ATGGCAATGAGATACCCAATTACAGCAGACAAGAGAAAAGC  
+HWI-EAS443:3:68:1351:1611#0/1  
Ya\_a]ab]bb`WD[Z]aaaa`aaaaaaaa``\_a\_aaSaa\_  
@HWI-EAS443:3:68:1517:405#0/1  
AGAGGATTTCTCATTGGGCAAAGAAGACAAGAGATGGC  
+HWI-EAS443:3:68:1517:405#0/1  
`¥^¥`\_b^SQ`¥\_a`ZZJP¥bbabZZYa`Y^\_\_a`TOX  
@HWI-EAS443:3:69:1311:252#0/1  
GCCATCTTCAGTCAATGCACCTGCATCCTTCCAAGAAGT  
+HWI-EAS443:3:69:1311:252#0/1  
[aZaZaW^`\_]¥aa`a[^Z]Yb`a\_Y¥ZT[]WY[a\_P``  
@HWI-EAS443:3:69:510:385#0/1  
ATGGCAATGAGATACCCAATTACAGCAGACAAGAGAAAAGC  
+HWI-EAS443:3:69:510:385#0/1  
aaabaaabbaaaaaaaaaabaaaa`aaaaaa\_aXaaaaa¥a\_  
@HWI-EAS443:3:69:759:820#0/1  
AGAGGATTTCTCATTGGGCAAAGAAGACAAGAGATGGC  
+HWI-EAS443:3:69:759:820#0/1  
[`ab`^aab`^`\_`abaa^Yba\_a\_a\_0¥aa\_S¥^ab`\_¥^a  
@HWI-EAS443:3:70:1793:809#0/1  
NGCTAATGTGCTAATTGGGCAAGGGGACGTAGTGTGGGA  
+HWI-EAS443:3:70:1793:809#0/1  
DKRKNWUWMMUWSNRWUWUWUQUSBBBBBBBBBBBB  
@HWI-EAS443:3:70:732:381#0/1  
CCGCACTCGGAGATACTACTAAGACCACTGTGGACTAT  
+HWI-EAS443:3:70:732:381#0/1  
a\_aabbbbbbabababababababaaaaba]`¥`a`aWZa

@HWI-EAS443:3:70:994:993#0/1  
AACGGTCACAAGATCCCACAATGTTATACAACAAAATGGA  
+HWI-EAS443:3:70:994:993#0/1  
a\_F]\_^a`\_a\_`\_\_`\_`\_¥¥Xa`^^`\_a\_`\_\_`^`^¥Y^  
@HWI-EAS443:3:71:1709:996#0/1  
CTCTTGTCTGCTGTAATTGGGTATCTCATTGCCATCANCC  
+HWI-EAS443:3:71:1709:996#0/1  
abbbb`bbbabaaa]bbababab^ba`bb^[`abaZDLZ  
@HWI-EAS443:3:72:1035:1533#0/1  
GCAAAACAAACGATGCTGGATCAGACCGAGTGATGGTCTT  
+HWI-EAS443:3:72:1035:1533#0/1  
`^`[a`bbabb`ab`baa^aYbbbaaa\_\_aaaaa]^`a  
@HWI-EAS443:3:72:1666:1530#0/1  
GAAGAAGTGGATGATGGCAATGAGATACCCAATTACAGCA  
+HWI-EAS443:3:72:1666:1530#0/1  
aa`a`^a^aa`a`\_a`a][`a`^`\_\_`[[`\_a`\_`^`Y`^`Z`^  
@HWI-EAS443:3:72:277:507#0/1  
GTGTACTTTTTGATTATGGCCATATGGTCCACAGTGGGCT  
+HWI-EAS443:3:72:277:507#0/1  
``a¥[`aZaX^[Ya\_b`\_aZaVP^VNQSB BBBB BBBB  
@HWI-EAS443:3:72:976:574#0/1  
GGAAAAGCACTTTTGCATCTTTTGGAAATGCCTCAANAG  
+HWI-EAS443:3:72:976:574#0/1  
a\_abbaaaa^aaaa\_aa^b`aaaaa\_a`a\_\_a`\_UDWa  
@HWI-EAS443:3:73:1353:1963#0/1  
TGCTGTAATTGGGTATCTCATTGCCATCATCCACTTCTTC  
+HWI-EAS443:3:73:1353:1963#0/1  
ab[`b\_\_^ba[`aSba`a`^`aaaa`]a`a`\_Sa\_X`\_`]  
@HWI-EAS443:3:75:1027:1728#0/1  
GGGAGAGAATAAAAGAACTGAGAGATCTAATGTCGCAGCC  
+HWI-EAS443:3:75:1027:1728#0/1  
aa\_]aYW^Z[TL[^\_aXaUOWVXT\_a\_XQQYJMXT[¥JU  
@HWI-EAS443:3:76:1201:1487#0/1  
CCNGTTTTCGTTTTATTACCAACTACGTCCCCTTGCCC  
+HWI-EAS443:3:76:1201:1487#0/1  
^YD]^`bbba^`bbbbbb\_aaa`b`baaa`\_^SX^a\_X]S  
@HWI-EAS443:3:76:1689:722#0/1  
ATCCTGATGTGACTTTTTGATTATGGCCATATGGTCCGT  
+HWI-EAS443:3:76:1689:722#0/1  
aaaaab`bb\_\_[a^a`baaaaa\_a\_]`V`^W\_XYUWW¥R  
@HWI-EAS443:3:78:1275:1958#0/1  
ATGGTATTCTACAAGAGGATTGCATGATCAAGGCAGGTA  
+HWI-EAS443:3:78:1275:1958#0/1  
^]\_\_V¥XX^N]\_LYVZRa[JMQXX`]^V[S\_aZaBBBBBB  
@HWI-EAS443:3:78:1386:457#0/1  
AGGCCATATGGTCCACAGTGGTCTTAGTGAGTATCTCGGG  
+HWI-EAS443:3:78:1386:457#0/1  
a\_]\_MRXR]TXSSQV`^RM`^VZ\_\_QaSa¥`W]ZUPWVBB  
@HWI-EAS443:3:78:1653:627#0/1  
ATGGCAATGAGATACCCAATTACAGCAGACAAGAGAAAAGC

+HWI-EAS443:3:78:1653:627#0/1  
ab[DQ^aba`ba^a¥`a`aa`]Y\_Z]U`^a`aa`\_\_^^¥  
@HWI-EAS443:3:78:982:334#0/1  
ATGGCAATGAGATACCCAATTACAGCAGACAAGAGAAAAGC  
+HWI-EAS443:3:78:982:334#0/1  
aaa`\_aaabaaa\_aa^`aaa`a`a^`aa\_a`aaaa]` [  
@HWI-EAS443:3:79:1373:1063#0/1  
ATNTAATGTCGCAGTCCCGCACTCGCGAGATACTCACTAA  
+HWI-EAS443:3:79:1373:1063#0/1  
a¥D^aaba`\_aUaa¥`\_a`T[a\_\_\_¥a[\_\_\_WZZZUUQ¥\_\_\_  
@HWI-EAS443:3:79:166:387#0/1  
ATGGCAATGAGATACCCAATTACAGCAGACAAGAGAAAAGC  
+HWI-EAS443:3:79:166:387#0/1  
[baaa^aaaaaaaaab`Y```a^U]]`\_`\_````[\_\_\_[¥\_\_\_  
@HWI-EAS443:3:7:409:510#0/1  
GTCTGCTGTAATTGGGTATCTCATTGCCATCATCCACCTC  
+HWI-EAS443:3:7:409:510#0/1  
a\_aa`\_`a[``a`¥^aHaa¥`]`\_`\_`^^`\_W\_^\_^`]]W]  
@HWI-EAS443:3:80:1590:71#0/1  
GGATCAGACCGAGTGATGGTATCACCTCTGGCCGTAAAAT  
+HWI-EAS443:3:80:1590:71#0/1  
abba`^aa`^aaaW`\_a``¥`\_H¥XXZZ\_X^VV\_ZOIENU  
@HWI-EAS443:3:80:218:556#0/1  
ATGGCAATGAGATACCCAATTACAGCAGACAAGAGAAAAGC  
+HWI-EAS443:3:80:218:556#0/1  
abba`YU`a[``\_`aaa^aaaa`]\_^^`^`a\_a``^^^`^`  
@HWI-EAS443:3:81:187:187#0/1  
AGGGTCTTCTTTGCCAAAATGAGAAATCCTCTCAGGACA  
+HWI-EAS443:3:81:187:187#0/1  
\_a]aVaaaaa`a`\_ZS\_[[\_`^Z^`^^[^\_`a^a\_[SS  
@HWI-EAS443:3:82:1470:1292#0/1  
ACGCCTCTCACATTACAGTCAATGAGGAAAATTGCATCC  
+HWI-EAS443:3:82:1470:1292#0/1  
]S¥UU\_Z^]`\_`aba]b[bbYXa\_a[[]`Q¥aaaa``\_\_`\_]`  
@HWI-EAS443:3:86:1162:676#0/1  
AAAAGAAGTCTGAGATCTAATGTCGCAGTCCCGCACTGGC  
+HWI-EAS443:3:86:1162:676#0/1  
Vb]UaabTb]XaRb\_a]b^b]bPJ]Z]\_`Y¥U\_SUUG`^`  
@HWI-EAS443:3:86:1405:2008#0/1  
CGATGGTTTTGCCCTATTGACAAAGTTCAGATCGCCCCTAA  
+HWI-EAS443:3:86:1405:2008#0/1  
`aH¥bbaab`aabaa`\_bbb`bbbXaaba`YaaYa¥`\_bX  
@HWI-EAS443:3:86:1473:428#0/1  
AGAGGATTTCTCATTTTGGGCAAAGAAGACAAGAGATGGC  
+HWI-EAS443:3:86:1473:428#0/1  
aZ^^[Vbba]^Sab¥abb^`\_ba^[`abZZaaa[¥aO\_\_W  
@HWI-EAS443:3:87:1536:898#0/1  
TGGCAATGAGATACCCAATTACAGCAGACAAGAGAATGTG  
+HWI-EAS443:3:87:1536:898#0/1  
ab`aaabba``¥aaa]babbaaaa[a^\_a`aaa`]`a¥a



+HWI-EAS443:3:92:1271:730#0/1  
aRN¥^`PU^¥NY¥¥Z[\_W[\_]^VZ\_R¥]\_¥]TRRVZGNW  
@HWI-EAS443:3:92:1289:640#0/1  
AGAGAATAAAAGAACTGAGAGATCTAATGTCGCAGTCGCG  
+HWI-EAS443:3:92:1289:640#0/1  
YX][U¥`a¥\_`¥```bba`abaT^\_bVbb`UZ[Qb[¥GQ]  
@HWI-EAS443:3:92:1552:1582#0/1  
AGAGGATTTCTCATTTTGGGCAAAGAAGACAAGAGATGGC  
+HWI-EAS443:3:92:1552:1582#0/1  
a]Wa[[¥[WVX^^¥U`S``a\_W]Ia[]a\_XY)`[\_Y[^BB  
@HWI-EAS443:3:92:640:847#0/1  
ATGGCAATGAGATACCCAATTACAGCAGACAAGAGAAAAGC  
+HWI-EAS443:3:92:640:847#0/1  
aaa\_aaaa`aaa`a``aaaa`aX\_`\_\_\_\_`\_^\_\_^`^^G^¥  
@HWI-EAS443:3:92:941:2009#0/1  
CGTTTTCGTTTTATTACCAACTACGTCCCCTTGCCAAA  
+HWI-EAS443:3:92:941:2009#0/1  
]``IUa]0]aa]Zaaa`]]`b[[[a`TRVaYX[``b`KGZ\_  
@HWI-EAS443:3:94:1117:1985#0/1  
GGGGGGTTCACTTTCAAAGGACAAGCGGATCATCAGTCA  
+HWI-EAS443:3:94:1117:1985#0/1  
`ZGaa\_]\_bb`aaabaaaa[[a¥[a^a[a`\_\_\_aa\_\_[\_a  
@HWI-EAS443:3:94:1327:655#0/1  
GAATAAAAGAACTGAGAGATCTAATGTCGCAGTCCCGNAC  
+HWI-EAS443:3:94:1327:655#0/1  
a\_`aaaaa¥Ya[\_`\_aY\_^a\_¥`a¥]aWWY¥\_]]]WTVDPW  
@HWI-EAS443:3:94:1518:639#0/1  
ATGGCAATGAGATACCCAATTACAGCAGACAAGAGAAAAGC  
+HWI-EAS443:3:94:1518:639#0/1  
aabaaaabaaba`ba`aaaaaaa\_\_S`\_\_Z`\_aaa\_\_^aU  
@HWI-EAS443:3:95:509:986#0/1  
ACAGCACACAGATTGGAGGAGTAAGGATGGTGGACATGCT  
+HWI-EAS443:3:95:509:986#0/1  
Xab¥¥aa]\_¥\_[babbTXY^aH^`\_XS¥SZVXHW`RNFQ^  
@HWI-EAS443:3:96:1494:1958#0/1  
AGAGAATAAAAGAACTGAGAGATCTAATGTCGCAGTCACG  
+HWI-EAS443:3:96:1494:1958#0/1  
abababaab[a`aa``aa[Y[\_`Za``aa^^`[a]]THV\_  
@HWI-EAS443:3:97:544:387#0/1  
ATGGCAATGAGATACCCAATTACAGCAGACAAGAGAAAAGC  
+HWI-EAS443:3:97:544:387#0/1  
abba^\_ba`¥aaaaaaaaaaaa`a\_``^\_`]a`a^FZaY  
@HWI-EAS443:3:98:1575:816#0/1  
AGAGAATAAAAGAACTGAGAGATCTAATGTCGCAGTCACG  
+HWI-EAS443:3:98:1575:816#0/1  
XWT\_TV\_b`]VaaOW\_abb¥¥Q`J¥\_`YY¥^^ST]XWDKP  
@HWI-EAS443:3:98:1722:789#0/1  
CTNAGAATGAAGTGGATGATGGCAATGAGATACCCAATTA  
+HWI-EAS443:3:98:1722:789#0/1  
¥]D]bbbbbb`ab\_bbaabaaa``abbabaaaaY\_Saaaa^



@HWI-EAS443:3:98:299:877#0/1  
ATGGCAATGAGATACCCAATTACAGCAGACAAGAGAAAGC  
+HWI-EAS443:3:98:299:877#0/1  
\_`ba`aaabb\_^`ba`aaaba`¥^a^a`aba^aaaa\_^a\_  
@HWI-EAS443:3:9:1165:391#0/1  
AGAGGATTTCTCATTTTGGGCAAAGAAGACAAGAGATGGC  
+HWI-EAS443:3:9:1165:391#0/1  
`TZ]HW\_XaS`S¥\_`Y`aa^`\_]aZ\_[YGWV\_URWX]BB  
@HWI-EAS443:3:9:131:1393#0/1  
ATGGCAATGAGATACCCAATTACAGCAGACAAGAGAAAGC  
+HWI-EAS443:3:9:131:1393#0/1  
aab`ababb`b`aa\_aabaa\_`\_`\_a\_^`W^````a[a\_W  
@HWI-EAS443:3:9:1638:958#0/1  
GCTATGTGCTAATTGGGCAAGGGGACGTAGTGTGGTAAT  
+HWI-EAS443:3:9:1638:958#0/1  
^SY\_]XW[G^a]U^```¥R[\_V\_YLV¥VV`V¥S¥Z\_QRBB  
@HWI-EAS443:3:9:57:90#0/1  
ATGGCAATGAGATACCCAATTACAGCAGACAAGAGAAAGC  
+HWI-EAS443:3:9:57:90#0/1  
`bbaTT^b`Ua\_`U^`U¥Sa]]¥bbaab^Y¥WW`a[SYa`  
@HWI-EAS443:3:9:689:1126#0/1  
ATCTGAACCTTTGTCAATAGGGCAAACCAGCGACTGAAACC  
+HWI-EAS443:3:9:689:1126#0/1  
S^```\_S`\_Y`bba\_VOVba`a`a[QU]¥¥`^]VW\_TFWa  
@HWI-EAS443:3:10:1587:1051#0/1  
AAGCACTTTTGCATCTTTTTGGNAATGCCTCAAGAGTTGG  
+HWI-EAS443:3:10:1587:1051#0/1  
aabaa\_aaaaa`aa\_aabaa[D¥``a]]`^`]a^a^\_\_]  
@HWI-EAS443:3:12:966:1743#0/1  
AAAGAAGTGAAGATCTAATGTCGCAGTCCNCACTCGCG  
+HWI-EAS443:3:12:966:1743#0/1  
aa`aaaa\_a\_a]]`S^VZ[^Z\_\_Z]]X]VPDI[YUU[ZB  
@HWI-EAS443:3:13:559:825#0/1  
GTCTCTTGTCCCTAAGGCAACCAGAAGCCGGNACAGTGGA  
+HWI-EAS443:3:13:559:825#0/1  
a`aRWR[]Xa[NRHY¥X`X[Ua[Y[ZBBBBBBBBBBBBBB  
@HWI-EAS443:3:15:1039:1116#0/1  
CCCGTTTTCGTTTTATTACCAACTACGTCCNCTTGCCC  
+HWI-EAS443:3:15:1039:1116#0/1  
abb\_R¥bb¥bYa\_\_\_ba`]a^bYa`\_`^a\_`[D¥`[WX]\_  
@HWI-EAS443:3:16:1302:2028#0/1  
GGGAGATCAATGGCCCTGAGTCAGTNCTAGTCAACTTA  
+HWI-EAS443:3:16:1302:2028#0/1  
a`aaaaa``aaa¥a]\_a`a]\_aaTDV\_`^^\_\_a0\_V]^\_  
@HWI-EAS443:3:17:1216:1203#0/1  
AGTGGNCTTAGTGAGTATCTCGCGAGTGCGGGACTGCGAC  
+HWI-EAS443:3:17:1216:1203#0/1  
a\_¥\_UDWa`¥\_Y\_a\_Z\_\_^¥ZUP[V¥NXNSZZVWW¥W¥W¥  
@HWI-EAS443:3:17:1675:1713#0/1  
TGTAATTGGGTATCTCATTGCCATCATCCACTTCANTCTG

+HWI-EAS443:3:17:1675:1713#0/1  
abNa^`\_`\_a]`\_a]U]Z¥XXS]ZUZ^^R^Y]RDWDUXUB  
@HWI-EAS443:3:17:851:1420#0/1  
AAACAAACGATGCTGGATCAGACCGAGNGATGGTATCACC  
+HWI-EAS443:3:17:851:1420#0/1  
abbaabbaaa\_aa\_[]\_a^]X`[UaXDJ\_\_\_\_`S\_\_Z^ZT  
@HWI-EAS443:3:18:1154:1452#0/1  
ATTATTCTCTTGCTGCTGTAATTGGGTATNTCATTGCCA  
+HWI-EAS443:3:18:1154:1452#0/1  
a`aaaaaa¥¥[aW[]\_a\_SOU\_\_\_a`¥T¥UDUW^\_X^Z\_`  
@HWI-EAS443:3:18:299:606#0/1  
GTGTACTTTTTGANTATGGCCATATGGTCCACAGTGGTCT  
+HWI-EAS443:3:18:299:606#0/1  
a¥a\_Z[^`\_`\_a\_[DW^¥a]\_[ZVSUG[YYSRZGNFX[R¥W  
@HWI-EAS443:3:19:1153:149#0/1  
CTCACTAAGACCACTGTGGNCCATATGGCCATAATCAAAA  
+HWI-EAS443:3:19:1153:149#0/1  
`a\_aWa`^a¥Z\_`VZba`ZDY\_``\_Z^`RO]^`\_XZa\_\_a  
@HWI-EAS443:3:19:1407:1871#0/1  
AAAAGAAGTGGAGATNTAATGTCGCAGTCCCGCACTCGC  
+HWI-EAS443:3:19:1407:1871#0/1  
aaaa\_a`aaaa\_aa\_XDRa`baZ]\_a`[U\_U]YXX]XX¥N  
@HWI-EAS443:3:19:560:1617#0/1  
AAAAGAAGTGGAGATCTAATGTCGCAGTCCCGCANTCGC  
+HWI-EAS443:3:19:560:1617#0/1  
`¥baaaabaab\_a`aa\_aba`a^]`aa^Y\_`\_]aRDT[UV  
@HWI-EAS443:3:20:1210:1505#0/1  
GGATGATNGCAATGAGATACCCAATTACAGCAGACAAGAG  
+HWI-EAS443:3:20:1210:1505#0/1  
]¥aaa\_^D]abba`abb`ba`aaYa\_a¥aa^aba\_``]aa  
@HWI-EAS443:3:20:1619:1358#0/1  
AAATGCGGGATGTGCTTGGGACATTTGACACTGTCNAAAT  
+HWI-EAS443:3:20:1619:1358#0/1  
aaaabYbababa\_b¥aa\_]V``aaaa``\_aQaaZODR\_^\_  
@HWI-EAS443:3:20:588:565#0/1  
TGGGTATCTCATTGCCATCNTCCACTTCATTCTGAGTGCG  
+HWI-EAS443:3:20:588:565#0/1  
abaaUaaaa\_baaaa```ZDU`\_a`\_a\_aa``^¥^`[^`  
@HWI-EAS443:3:20:681:192#0/1  
GTCCCGTTTTTCNTTTCATTACCAACTACGTCCCCTTGC  
+HWI-EAS443:3:20:681:192#0/1  
a]a^[a]^`VDM\_¥]\_^]\_\_]`\_^`^]\_Z^Z]ZZXVUV[  
@HWI-EAS443:3:21:1103:446#0/1  
GTCNCGTTTTTCGTTTCATTACCAACTACGTCCCCTTGC  
+HWI-EAS443:3:21:1103:446#0/1  
`TPDRaZ]Z¥0]P^^SY]UU\_W¥XR^X^^VYPVSRR[^BB  
@HWI-EAS443:3:23:1186:422#0/1  
AGGGGACGTAGTGTGGTAATGAAACGAANACGGGACTCT  
+HWI-EAS443:3:23:1186:422#0/1  
L\_abbb`b`\_a^`\_b``XXX`a`b\_M]^`^DYDY\_¥WG^U\_

@HWI-EAS443:3:23:630:1549#0/1  
ATTANCTCATCTTTCAGTTTTGGTGGGTTCACTTTCAAAA  
+HWI-EAS443:3:23:630:1549#0/1  
aaW[D]\_a\_```aaa`[[N]S\_U^^VSU``[``]\_\_`T¥`  
@HWI-EAS443:3:23:970:1422#0/1  
TAATGTGCGAGTCCCGCANTCGCGAGATACTACTAAGAC  
+HWI-EAS443:3:23:970:1422#0/1  
aaaZRSQ]`a\_NV¥VXaJDV\_Z\_¥V¥¥V¥U\_¥WS¥¥¥VWV  
@HWI-EAS443:3:26:1199:1082#0/1  
CAGGTGCATTGACTGAAGATCCAGATGAANGCACATCTGG  
+HWI-EAS443:3:26:1199:1082#0/1  
abab]bbbbbabbbbbababaab`baa¥DW`aaaaa``  
@HWI-EAS443:3:26:1371:1497#0/1  
ACTAAGACCACTGTNGACCATATGGCCATAATCAAAAAGT  
+HWI-EAS443:3:26:1371:1497#0/1  
a^bbabaaabaab[DYaa`aaa`]\_````\_`\_Q\_\_`a^SU  
@HWI-EAS443:3:26:861:1249#0/1  
AGAAGTGANAGATCTAATGTGCGAGTCCCGCACTCGCGAG  
+HWI-EAS443:3:26:861:1249#0/1  
^P¥TT^aTDV¥````^^`SU]`WZG]`\_¥^SYG]¥`¥¥¥  
@HWI-EAS443:3:27:1348:1767#0/1  
ATGCAATCCTCTTGTGAGAATACCATGGCCACANTTATTG  
+HWI-EAS443:3:27:1348:1767#0/1  
`YW\_baa`aaa\_^X`\_X`^ZZ¥OK¥Y\_W[V\_LZDDT\_S[X  
@HWI-EAS443:3:27:1489:311#0/1  
CTAATGTGCGNGTCCCGCACTCGCGAGATACTACTAAGA  
+HWI-EAS443:3:27:1489:311#0/1  
abbbbbbbab[D^\_```aa``aaa`[a\_a`aaY`¥a`\_a`\_\_  
@HWI-EAS443:3:27:452:744#0/1  
ACCATCACTCGGTCTNATCCAGCATCGTTTTGTTTTGCTCC  
+HWI-EAS443:3:27:452:744#0/1  
a\_bbaa`aaa`aZa^DW`\_`\_\_a\_^`Z[^\_\_\_\_``[^[\_U  
@HWI-EAS443:3:28:425:366#0/1  
GGGACGTAGTGTGGTAATGAAACGAAAACGGGACNCTAG  
+HWI-EAS443:3:28:425:366#0/1  
aaa`\_a^aa`aZaaaG[\_\_\_\_[\_aY`\_\_a^K[\_[ZTDT[¥U  
@HWI-EAS443:3:28:744:490#0/1  
GGAAAAGCACTTTTGCATCTNTTTGGAAATGCCTCAAGAG  
+HWI-EAS443:3:28:744:490#0/1  
SaWaa`\_b\_Y\_NW`^a`\_b[DYba^`V`[`bab`]aabaa  
@HWI-EAS443:3:29:1046:1370#0/1  
ATCTAATGTGCGAGTCCCGCACTCGCGAGATACNCACTAA  
+HWI-EAS443:3:29:1046:1370#0/1  
¥¥````^bababZRN¥aaaa]ZM\_¥^Wa`¥Y[LDX``^]B  
@HWI-EAS443:3:2:829:1098#0/1  
GGGCGATCTGAANTTTGTCAATAGGGCAAACCAGCGACTG  
+HWI-EAS443:3:2:829:1098#0/1  
a`a`a`^`\_a`WDX^\_aV\_\_\_\_\_Y\_a\_¥`^^V¥¥\_W`¥UU¥  
@HWI-EAS443:3:30:1051:187#0/1  
GAGATCTAATGTGCGAGTCCCGCACTCGCGAGATNCTCAC

+HWI-EAS443:3:30:1051:187#0/1  
a]baa`ababa\_aa`a`\_\_a]`¥¥¥\_X`¥\_N`RKDNNUQVW  
@HWI-EAS443:3:30:1701:874#0/1  
GCCATATCTCTGTCTTCTTTGCNCAAAATGAGAAATCCT  
+HWI-EAS443:3:30:1701:874#0/1  
]aaba]bXbaa`b^a`a]aa¥SPDXa\_\_\_XT\_a\_\_\_^¥ZG\_  
@HWI-EAS443:3:32:1129:129#0/1  
GGCCGTAACATGGTGAATAGGAATGNCCCAACAACAAGT  
+HWI-EAS443:3:32:1129:129#0/1  
aaaab``abaabb\_b\_\_aaaa\_\_`YDS¥^\_^^][0`\_`X  
@HWI-EAS443:3:32:1225:238#0/1  
TCCCGTTTTCGTTTCANTACCAACTACGTCCCCTTGCC  
+HWI-EAS443:3:32:1225:238#0/1  
`ZT`b^a\_¥T\_V``a[D[`aaa[U]\_^\_^\_TNXT\_W[\_\_\_`  
@HWI-EAS443:3:32:1767:1514#0/1  
AAAGAAGTCTAATGTCGCANTCCCGCACTCGCG  
+HWI-EAS443:3:32:1767:1514#0/1  
abab\_b`bb\_aaaaaSaanaa\_¥`^QDXUSXY`^\_Wa\_a\_  
@HWI-EAS443:3:33:1251:234#0/1  
GCTGCCTTGCATATGTCNACGGCTTGTTCCTCAGTTGGAT  
+HWI-EAS443:3:33:1251:234#0/1  
abaa`aaab`abaa[a[D[\_\_\_`\_`HW^PSPKMKRWGHNZ  
@HWI-EAS443:3:33:916:707#0/1  
CTGATGTNTACTTTTTGATTATGGCCATATGGTCCACAGT  
+HWI-EAS443:3:33:916:707#0/1  
a`a`\_bVDWZ`babba]`aaa]``a]Q]VTYWZTYU]XT  
@HWI-EAS443:3:33:99:394#0/1  
AATTGGGCAAGGGGACGTAGNGTTGGTAATGAAACGAAAA  
+HWI-EAS443:3:33:99:394#0/1  
aaba[`ZaZZ\_b``VaaUYMD[¥\_`aVMTZUY\_Q¥NZ\_`¥  
@HWI-EAS443:3:34:1635:472#0/1  
GTCCNGTTTTCGTTTCATTACCAACTACGTCCCCTTGC  
+HWI-EAS443:3:34:1635:472#0/1  
a`a[D[\_aba^b\_aa\_`baa\_\_aa^\_V`a\_`XVYXYXBB  
@HWI-EAS443:3:35:320:1790#0/1  
TAATGTCNACGTCCCGCACTCGCGAGATACTCACTAAGAC  
+HWI-EAS443:3:35:320:1790#0/1  
ab`b^a¥D¥b[T¥bb^a[a\_a\_b\_\_\_XRWb\_\_a[R^\_TPX  
@HWI-EAS443:3:35:661:941#0/1  
CCCGTTTTCGTTTCATTACCAACTACGTNCCCTTGCCC  
+HWI-EAS443:3:35:661:941#0/1  
a^[ZH`a`W¥SX^]U\_PZ]X`\_W`ZYWTULDW]`YTQ\_K\_  
@HWI-EAS443:3:35:863:1704#0/1  
AAGAAGTCTAATGTCGCAGTCCCGCACNCGCGA  
+HWI-EAS443:3:35:863:1704#0/1  
`\_\_`b`\_\_aQ^¥¥\_\_a`a¥]L\_S]RXYQ`aW[L[DZT\_TZ  
@HWI-EAS443:3:36:1583:1369#0/1  
GCCTTCATCTGGATCTTCAGTCAATGCACCTGCATNCTTT  
+HWI-EAS443:3:36:1583:1369#0/1  
ab`ababbab\_aaaabbaaa\_aa]aaa`a\_a`\_\_¥D^`\_\_

@HWI-EAS443:3:36:964:1314#0/1  
CGCACTCANAATGAAGTGGATGATGGCAATGAGATACCCA  
+HWI-EAS443:3:36:964:1314#0/1  
aa^`\_aa¥DWab^Y¥aU`]abaX]¥[aZa`] ]^Z\_aa^R\_  
@HWI-EAS443:3:37:1391:1477#0/1  
CTTTCNGTTTTGGTGGGTTCACTTTCAAAGGACAAGCGG  
+HWI-EAS443:3:37:1391:1477#0/1  
]bbb[D]aba`ab]`ab¥b`bbaabaaaXa`aaaaab\_a  
@HWI-EAS443:3:38:1549:364#0/1  
AAAGAAGTGAAGANCTAATGTCGCAGTCCCGCACTCGCG  
+HWI-EAS443:3:38:1549:364#0/1  
aabbaa`abaa`aYDZaa``a]aa^``W\_XVVUNTWWWWW  
@HWI-EAS443:3:39:1327:1625#0/1  
AATAAAGAAGTGAAGATCTNATGTCGCAGTCCCGCACT  
+HWI-EAS443:3:39:1327:1625#0/1  
[b]]a^W]Zbaabaaaa`\_YDXY`]L\_`a\_SS^¥T\_] ^S  
@HWI-EAS443:3:39:1490:1646#0/1  
GAANGCTAATGTGCTAATTGGCAAGGGGACGTAGTGTTG  
+HWI-EAS443:3:39:1490:1646#0/1  
ab]D[\_abbba^baaa`aTa\_aa\_^b`a``] ^[] [^a^^Z  
@HWI-EAS443:3:40:1085:1914#0/1  
CTGCTGTCNTGAGAGATTTCTCATTGTTGGCAAAGAAGA  
+HWI-EAS443:3:40:1085:1914#0/1  
aa`\_W\_\_WDRW\_`a^````^R]Z\_aTYZ]YRUOU\_^Z[a  
@HWI-EAS443:3:40:1313:2014#0/1  
AAAGAAGTGAAGATCTAATGTCGCAGTCCCGCNCTCGCG  
+HWI-EAS443:3:40:1313:2014#0/1  
aaaaaa^a``]a¥^`Yaa\_\_\_Ya`¥¥^Sa]SUVDXW\_Y¥¥  
@HWI-EAS443:3:42:529:903#0/1  
GTCCCGTTTTNCGTTTTATTACCAACTACGTCCCTTGC  
+HWI-EAS443:3:42:529:903#0/1  
a\_aaaaZa¥D[a\_aaaab`aa\_a``aa`aaa^a\_``\_]\_\_  
@HWI-EAS443:3:42:930:2042#0/1  
CAAATGAGAAATCCTCTCNGGACAGCAGACTCCACCCCA  
+HWI-EAS443:3:42:930:2042#0/1  
``^SWS[\_W\_b\_b`bbba[D^[^Uaabaabaaa`^b`^aaa  
@HWI-EAS443:3:43:1163:602#0/1  
CAAACGACTTACAGTTCTTGAAANGATGCAGGTGCATTG  
+HWI-EAS443:3:43:1163:602#0/1  
abbb\_bbaabaa`b^a`aaba\_a[D^]ab`aaa]a]aa\_a  
@HWI-EAS443:3:43:1191:1720#0/1  
AAAAGAANTGAGAGATCTAATGTCGCAGTCCCGCACTCGC  
+HWI-EAS443:3:43:1191:1720#0/1  
abaaa`[D]a`a``^aaaa\_a`]a\_^`[]`\_WTW^^]¥Z[  
@HWI-EAS443:3:44:595:1488#0/1  
AAACGACTTACAGTTCTTGAAAGGATNCAGGTGCATTGA  
+HWI-EAS443:3:44:595:1488#0/1  
aaaaaaaa^^`aa\_\_aaa`a\_\_\_\_\_`aWDSa]^U]]\_\_^\_\_  
@HWI-EAS443:3:44:767:797#0/1  
GCGAGATACTACTAAGACCACTGNGGACCATATGGCCAT

+HWI-EAS443:3:44:767:797#0/1  
```aa¥`ba`TaZ^aaa`Z`baa]D[`^[]```]aaa``[Z  
@HWI-EAS443:3:45:1319:101#0/1  
CTCGCGAGTNCGGGACTGCGACATTAGATCTCTCAGTTCT  
+HWI-EAS443:3:45:1319:101#0/1  
ababababZDXbba`ab\_b\_\_aaa`a^`\_`^`^^a^`\_\_`  
@HWI-EAS443:3:45:1584:197#0/1  
TGGCCCTGAGTCAGTGCTAGTCAACACTTNTCAATGGATA  
+HWI-EAS443:3:45:1584:197#0/1  
a`\_`\_\_bbaba`^`\_a]a]a^`[^`^Y]W^[DY\_\_\_a]\_`\_`  
@HWI-EAS443:3:46:1275:1147#0/1  
GGGCGANCTGAACCTTGTCAATAGGGCAAACCAGCGACTG  
+HWI-EAS443:3:46:1275:1147#0/1  
aa`^`WDU^`\_Z¥¥Z`a`[^`aaa]aaa`¥P]Z¥`\_`^`[]`\_`  
@HWI-EAS443:3:46:22:1315#0/1  
CGCGAGANACTCACTAAGACCACTGTGGACCATATGGCCA  
+HWI-EAS443:3:46:22:1315#0/1  
ab][a\_XDPa`\_`\_`a^a\_\_^W]\_¥T^`]^`^ZVMJU^WQO  
@HWI-EAS443:3:46:543:706#0/1  
ATCTAATGTCGCAGTCCCGCACTCGNGAGATACTCACTAA  
+HWI-EAS443:3:46:543:706#0/1  
aaaaaaaaa]^a`]a\_\_`XZ^^`[^`XDXZ^[[WWW¥[^`¥\_ZR  
@HWI-EAS443:3:47:694:599#0/1  
AAAAGAAGTGGAGATNTAATGTCGCAGTCCCGCACTCGC  
+HWI-EAS443:3:47:694:599#0/1  
ababaRbabbabaa`^D^a\_abX[aZ`a^a]\_^`[^`^\_U\_Y  
@HWI-EAS443:3:48:959:442#0/1  
AACNCAAGGAAGTGGAGAAGTTGACAATAACTTATTCGTCA  
+HWI-EAS443:3:48:959:442#0/1  
a`VDI`\_`b`[¥\_a]a]`\_a^\_`\_¥X[a^]0`\_]a][`]X\_  
@HWI-EAS443:3:49:1317:1119#0/1  
ATCTGCTCCCAGCACGTCCCTTGGGTTAAGTGCAACNCTT  
+HWI-EAS443:3:49:1317:1119#0/1  
ab]baZ]```aba]]\_`]aa\_a^a[ZaT[]X^^`TDQ\_`  
@HWI-EAS443:3:49:626:1990#0/1  
GCTGGCCATATCTCTTGTCTTCTTTGCCAAAATGNGAA  
+HWI-EAS443:3:49:626:1990#0/1  
\_\_¥`\_`Z`¥\_\_\_Z]]Y\_\_YZ^X¥^`\_]¥FOZ[Z]^Z[D¥]Y  
@HWI-EAS443:3:49:897:557#0/1  
ATGATCCGCTTGTCCCTTTTGAAGTGNACCCACCAAAACT  
+HWI-EAS443:3:49:897:557#0/1  
abaaaa`bbbbaba\_\_bbbb`aa`\_¥D^`\_`[\_\_\_\_`\_`\_`Wa  
@HWI-EAS443:3:4:1229:650#0/1  
GTTCCCTCNTTGTCTCTAACCCTTAAAAATCGGTCAATA  
+HWI-EAS443:3:4:1229:650#0/1  
aaaaa`aXD[`a\_a]a\_baa\_\_^a^a`a\_\_\_X¥`^`[^`\_`\_`  
@HWI-EAS443:3:4:183:1966#0/1  
TGGTTGCCTTGTGTAANTGAATACTGGAGAATTGCCTCT  
+HWI-EAS443:3:4:183:1966#0/1  
Xbaba]^aaa¥abaRbZD]ba`\_`\_`a^aaaaab]Ibaa`a

@HWI-EAS443:3:4:787:1562#0/1  
AGAGAATAAAAGAACTGNGAGATCTAATGTCGCAGTCCCG  
+HWI-EAS443:3:4:787:1562#0/1  
abbaa^bab`abaaa`[D^\_bab]abaaba]`aba^^\_^`  
@HWI-EAS443:3:50:1733:253#0/1  
GCTGTNATTGGGTATCTCATTGCCATCATCCACTTCATTC  
+HWI-EAS443:3:50:1733:253#0/1  
a]aVTD^bbaab]a`^^^[Y0]V^\_]Q\_SM¥]]][UU[\_^R  
@HWI-EAS443:3:50:981:1666#0/1  
AGAAGTGAAGATCNAATGTCGCAGTCCCGCACTCGCGAG  
+HWI-EAS443:3:50:981:1666#0/1  
aaaa[ba`ba`aaXD^aaa`Z`]`a\_¥^Z[]^¥`W\_W¥W\_  
@HWI-EAS443:3:51:1610:1825#0/1  
CCAACAACAAGTACAGTTCATTACCCTNAGGTATATAAAA  
+HWI-EAS443:3:51:1610:1825#0/1  
`\_bbaba`babab^abbbabbba^`[[D¥ab\_bbabba`  
@HWI-EAS443:3:51:872:1473#0/1  
CCACAGNGGTCTTAGTGAGTATCTCGCGAGTGCGGGACTG  
+HWI-EAS443:3:51:872:1473#0/1  
abbbb]D[b¥aabaaba``aaaa]]]]]aYJVXaaaTU]T  
@HWI-EAS443:3:52:1326:676#0/1  
AAAGAAGTGAAGATCTAATGTCGCAGNCCCAGCACTCGCG  
+HWI-EAS443:3:52:1326:676#0/1  
a\_]\_¥aaaa\_a\_a\_\_[]R`aQ`¥\_¥XDU\_\_``Z¥[¥¥¥¥  
@HWI-EAS443:3:52:985:357#0/1  
TCGCGAGATACTACTAAGNCCACTGTGGACCATATGGCC  
+HWI-EAS443:3:52:985:357#0/1  
aaaa`aaaaa`^a\_aaaYDVaa]aa\_a^a\_\_a`aaa\_]\_  
@HWI-EAS443:3:53:1484:1083#0/1  
GTCCCGTTTTTCGTTTCATTACCAACTACNTCCCCTTGC  
+HWI-EAS443:3:53:1484:1083#0/1  
a`a`b`^`b]P¥Y`^]`aa\_PX]TPa¥a^XDTR^GaY[PR  
@HWI-EAS443:3:54:1328:994#0/1  
CTGCTGTAATTGGGTATCTCATTGCCATNATCCACTTCAT  
+HWI-EAS443:3:54:1328:994#0/1  
abbabbababba]b[baaa\_\_aaaaa]DYaa\_a\_a\_`\_a  
@HWI-EAS443:3:55:539:550#0/1  
CCTGAGAGGANTTCTCATTTTGGGCAAAGAAGACAAGAGA  
+HWI-EAS443:3:55:539:550#0/1  
aa^a]`a`\_ZD[a`a]]^]a``\_]Z`Z`^\_]\_T]]]a\_`T  
@HWI-EAS443:3:55:656:11#0/1  
AGAGAATAAAAGAACTGAGAGATCTAATGTCGCAGTNCCG  
+HWI-EAS443:3:55:656:11#0/1  
aa`aa`aaa\_aaaa¥aa\_a`aa`\_`aYaa^``\_\_\_ODV^`  
@HWI-EAS443:3:56:1119:133#0/1  
GAGAGATCTAATGTNGCAGTCCCGCACTCGCGAGATACTC  
+HWI-EAS443:3:56:1119:133#0/1  
abaaabaabaabaYD¥¥ab`\_\_\_\_\_^^¥a\_a¥a\_`^¥\_¥\_¥  
@HWI-EAS443:3:56:1244:862#0/1  
GGCGTACATGCTAGNAAGAGAATTGGTCCGTAACAAGG

+HWI-EAS443:3:56:1244:862#0/1  
aa`b`aa\_baaba[D^a`aa\_aaab`^a[]aaaaa^a`a`  
@HWI-EAS443:3:57:1026:119#0/1  
AAAAGAAGTGGAGATCTAATNTCGCAGTCCCGCACTCGC  
+HWI-EAS443:3:57:1026:119#0/1  
ab]aa]a\_ab`a`b`\_`aa\_`DP\_a``\_]`^X¥`Y]X[Y^]  
@HWI-EAS443:3:58:1130:1532#0/1  
GCCTTGTGTGAATNGAATACTGGAGAATTGCCTTACCA  
+HWI-EAS443:3:58:1130:1532#0/1  
`^`^aa`ababb^D]bab¥W]]]Y\_aa^a\_a^aU\_a`[Z`  
@HWI-EAS443:3:58:722:286#0/1  
GTAATTGGGTANCTCATTGCCATCATCCACTTCATTCTGA  
+HWI-EAS443:3:58:722:286#0/1  
aYW¥^¥Ya]QZD[XWX\_¥`^]¥]X\_Y\_`]]`¥[¥¥¥][^S  
@HWI-EAS443:3:5:633:1597#0/1  
GTCTTAGTGAGTATCTCGCGAGTGCGGGACTGCGANATTA  
+HWI-EAS443:3:5:633:1597#0/1  
¥¥bbaab`bb`UbQ[aYa\_b`^W¥IYba¥RZ¥0]YDV\_`a  
@HWI-EAS443:3:61:1180:1226#0/1  
ATTNCAGAGAGGAATGAACAAGGACAAACCCTCTGGAGCA  
+HWI-EAS443:3:61:1180:1226#0/1  
`^`^D[`a``aa`aaa`aaaa`aa^``¥V`\_]\_`¥WXUW  
@HWI-EAS443:3:61:1717:518#0/1  
GTCCCGTTTTTCGTNTCATTACCAACTACGTCCCCTTGC  
+HWI-EAS443:3:61:1717:518#0/1  
a^\_VSa``aa]TRDX\_\_a\_a`]aY`a^\_\_X\_VVYYXVWRN  
@HWI-EAS443:3:62:1133:1853#0/1  
CAAGGACAAACCCNCTGGAGCAAAACAAACGATGCTGGAT  
+HWI-EAS443:3:62:1133:1853#0/1  
T\_`\_\_b`\_bZb]WD[bbaabb`babbabbabb`abb`  
@HWI-EAS443:3:62:990:1748#0/1  
AGGGGACGTAGTGTGGTAATGAAACGAAACGNGACTCT  
+HWI-EAS443:3:62:990:1748#0/1  
aa^a`¥]aU]`[\_a`¥T]^UQSY¥L[¥\_\_]LXDXQW¥]S  
@HWI-EAS443:3:63:1375:479#0/1  
GCACTCGCGAGATACTCACTAAGACCACTGTGGACNATAT  
+HWI-EAS443:3:63:1375:479#0/1  
a`XXDWZ\_LNRZLPPUUGXZVLS[Y¥YVVNQY]^VDVVVQ  
@HWI-EAS443:3:64:1765:85#0/1  
GAGAGATCTAATGTCGCAGTCCCGCACNCGCGAGATACTC  
+HWI-EAS443:3:64:1765:85#0/1  
aaaaa`aab`^ab\_\_a^``W[W\_`X[TDT^U`UZU¥WX¥W  
@HWI-EAS443:3:64:576:1221#0/1  
AAAAGAAGTGGAGATCTAATGTCGCAGTCCCGCACNCGC  
+HWI-EAS443:3:64:576:1221#0/1  
ab[a\_baba\_Y\_bb^]aaaaa\_a\_aaa^`aa^aa^DZ`a  
@HWI-EAS443:3:65:1032:884#0/1  
GGAGAAACCTTGTTTTANGGACCAATTCTCTTCTAGCAT  
+HWI-EAS443:3:65:1032:884#0/1  
WX\_a`bbbb`bbabab^DZbbbb``bbab]bbbab`aaaa



@HWI-EAS443:3:65:1188:1070#0/1  
GGACGTAGTGTGGTAATGAAACGAAAACGGNACTCTAGC  
+HWI-EAS443:3:65:1188:1070#0/1  
¥`\_]a¥]bJaXZb\_^]ZTPY]\_FS0¥Q]]UDFL][WZW]  
@HWI-EAS443:3:65:1326:558#0/1  
CAGTATTCTTGCCCCACTTCATTTGGGAANACAACCTCC  
+HWI-EAS443:3:65:1326:558#0/1  
abaaabbabbbababababbbabbbabbb^D^aba\_ba^\_  
@HWI-EAS443:3:65:1670:411#0/1  
AACAAAGANAAACCCTCTGGAGCAAAACAAACGATGCTGG  
+HWI-EAS443:3:65:1670:411#0/1  
aaaaaa`^D^aa`\_\_a`\_Z]^\_^]\_`^a]aaa^aa^a\_\_a\_  
@HWI-EAS443:3:65:688:879#0/1  
ATTGGGCAAGGGGACGTAGNGTTGGTAATGAAACGAAAAC  
+HWI-EAS443:3:65:688:879#0/1  
abab^`ba\_]aba\_aba\_YD¥`baa^`a\_]aaaNU]```U  
@HWI-EAS443:3:66:932:1628#0/1  
AAAGAACTGAGAGATCTAATGTCGCAGTCCCNCACTCGCG  
+HWI-EAS443:3:66:932:1628#0/1  
aab`aa^aa`\_aaa^aaaa`a[a]`a\_¥S\_VDX¥ZU\_UYW  
@HWI-EAS443:3:67:1258:791#0/1  
GTACTTTTTGATTANGGCCATATGGTCCACAGTGGTCTTA  
+HWI-EAS443:3:67:1258:791#0/1  
```abbbbbbb^DT`bba^a^¥^R¥``a`\_VXaUQ]a\_  
@HWI-EAS443:3:67:338:1682#0/1  
CTTGAAATGNGCCACAGCACACAGATTGGAGGAGTAAGG  
+HWI-EAS443:3:67:338:1682#0/1  
aa^]Z`aU\_XDQ`\_a\_VZaa`aa\_a^^`\_\_^`\_^\_Y`\_Y^  
@HWI-EAS443:3:69:566:1229#0/1  
ACGACTTACANTTCTTGAAAGGATGCAGGTGCATTGACT  
+HWI-EAS443:3:69:566:1229#0/1  
aaaaa`^^aVDWa``aa\_^`a\_¥^`\_]\_\_ZZ¥]`\_V^`Z^  
@HWI-EAS443:3:6:230:1966#0/1  
AAAGAACTGAGAGATCTAATGTCNCAGTCCCGCACTCGCG  
+HWI-EAS443:3:6:230:1966#0/1  
a\_b`]Z`]baa[baba`a]`\_[D[`a0aa`^`^`^`\_\_B  
@HWI-EAS443:3:70:1176:1566#0/1  
AAGANCTGAGAGATCTAATGTCGCAGTCCCGCACTCGCGA  
+HWI-EAS443:3:70:1176:1566#0/1  
aba¥D^b[[\_bb^a]aaa`aUaa`aa¥[```aa¥^\_W]¥]¥  
@HWI-EAS443:3:71:207:950#0/1  
GTCCCGTTTTCGTTTTATTACCAACTNCGTCCCCTTGC  
+HWI-EAS443:3:71:207:950#0/1  
abab`Y\_UaMY\_VbaWT]]XZ```aZ```VD¥`¥]aa[QRNN  
@HWI-EAS443:3:72:1782:442#0/1  
GATCTAATGTCGCAGTCCCGCACTCGCGAGATACTCNCTA  
+HWI-EAS443:3:72:1782:442#0/1  
a]`\_\_^W\_UT\_PT¥PUX`QUW`¥`YV[VYVUQUV^PDRVY  
@HWI-EAS443:3:72:701:1374#0/1  
GTCCCGTTTTCGTTTTATTACCAACNCTACGTCCTTGC

+HWI-EAS443:3:72:701:1374#0/1  
\_S\_aab\_aa^]]Q`a[a`bb]\_SXDY`aa]\_`X[[\_`^¥\_  
@HWI-EAS443:3:74:1500:1662#0/1  
ATCATTCTCCTCCTCCTCCTGGAGGTANATCTGCTCC  
+HWI-EAS443:3:74:1500:1662#0/1  
aaaaaba`baaa\_b`aa`aa`\_`aa\_W\_W[D[``\_`^]ZT  
@HWI-EAS443:3:74:619:488#0/1  
AAAGAAGTGGAGATCTAATGTCGCAGTCCCGCANTCGCG  
+HWI-EAS443:3:74:619:488#0/1  
abaa\_babbaaaaa``aaaaa]\_a\_aaV\_a\_^^VDX\_\_`^`  
@HWI-EAS443:3:75:467:546#0/1  
CCCGTTTTCGTTTTATTACCAACTACGTCCCCTTNCCC  
+HWI-EAS443:3:75:467:546#0/1  
aaa\_G\_bbb`X`ba\_`^`^]`baa^aaaaaaaaZUDZ[`  
@HWI-EAS443:3:76:553:1466#0/1  
CGCGAGANACTCACTAAGACCACTGTGGACCATATGGCCA  
+HWI-EAS443:3:76:553:1466#0/1  
abbb``^DYbabbbbaaWaaaa^a\_\_``¥aaa`a\_\_\_\_\_`\_  
@HWI-EAS443:3:76:638:2036#0/1  
GGCCATTCTATTCCACCATGTTACGGCCAGAGNTGATAC  
+HWI-EAS443:3:76:638:2036#0/1  
^S^a`a`aaa¥`^a^¥`]^]ZR^aWRV]YZNXRDDVYRSS  
@HWI-EAS443:3:76:80:1182#0/1  
CAATTACAGCAGACAAGAGAATAATGGACATGATNCCAGA  
+HWI-EAS443:3:76:80:1182#0/1  
aaTabbbbbbb\_babbbbbaba``^babaa\_`b[DY```a  
@HWI-EAS443:3:76:948:1143#0/1  
AAAATGGAATTTGAACATTTTCAGTCTNTTGTCCCTAAGG  
+HWI-EAS443:3:76:948:1143#0/1  
`ZT^^`\_Zbaa`\_]a¥aaa`a\_a`\_^YDYa`^\_\_\_\_\_``\_a  
@HWI-EAS443:3:77:1551:1482#0/1  
AGAGAATAAAAGAACTGAGAGATCNAATGTCGCAGTCCCG  
+HWI-EAS443:3:77:1551:1482#0/1  
¥\_¥¥^[[bbbbbababbbbb``WDY]¥bVQ0a`b]XLS^  
@HWI-EAS443:3:78:1189:2025#0/1  
GGCCCAACAACAAGTACAGTTCATTACCCNAAGGTATATA  
+HWI-EAS443:3:78:1189:2025#0/1  
aa\_`W\_a\_\_`V`\_X]\_`^\_]¥¥\_``^`¥]HDO]aRNY\_\_\_\_  
@HWI-EAS443:3:78:470:735#0/1  
GGAAAAGCACTNTTGCATCTTTTTGGAAATGCCTCAAGAG  
+HWI-EAS443:3:78:470:735#0/1  
aaaaa`ab\_a[D¥\_\_aa`\_\_\_\_`a\_SX]\_`^\_\_\_\_]]U\_W\_  
@HWI-EAS443:3:79:787:448#0/1  
GCTCCCTTGATGGTGGCGTACATGCTAGAANGAGAATTGG  
+HWI-EAS443:3:79:787:448#0/1  
a`\_ab``a\_]\_ba¥```^R[^]]\_\_aa``YD VW\_\_a^^`  
@HWI-EAS443:3:7:360:1853#0/1  
AGAAGTGGAGATCTAATGTCNCAGTCCCGCACTCGCGAG  
+HWI-EAS443:3:7:360:1853#0/1  
]b]ab\_a]a`P^UaI\_\_\_\_`NNDU^OZ^Pb¥¥Z\_NVF[BBB

@HWI-EAS443:3:81:1042:546#0/1  
GGGACGTAGTGTGGTAATGAAACGAAAACGNGACTCTAG  
+HWI-EAS443:3:81:1042:546#0/1  
aa\_\_R\_Q]aS`\_a`aU\_``[Z`^\_Y\_\_^XWDZYVRU]^  
@HWI-EAS443:3:81:151:665#0/1  
CTGTAATTGGGTATCTCATTGCCATCATCCANTTCATTCT  
+HWI-EAS443:3:81:151:665#0/1  
ab`]RW]VaaYDU¥```]]Z]]a`\_^VTZ[MDO[`^Z^[^  
@HWI-EAS443:3:84:124:448#0/1  
AAAGAAGTGAAGTCTAATGTGCGCAGTCCCGCACTCGCG  
+HWI-EAS443:3:84:124:448#0/1  
aaaaaaaaa` `[DZ\_`a`aa¥a\_`a\_W`\_\_^^¥¥¥¥^^  
@HWI-EAS443:3:85:1241:1800#0/1  
AGAATAAAAGAACTGAGAGATCTAATGTGCGCAGTCCNGCA  
+HWI-EAS443:3:85:1241:1800#0/1  
abab^]ab`¥^\_baba^baba]aabaaZVbaaa¥a]DX]a  
@HWI-EAS443:3:85:89:791#0/1  
AAAGAANTGAGAGATCTAATGTGCGCAGTCCCGCACTCGCG  
+HWI-EAS443:3:85:89:791#0/1  
a]aa\_^D¥a`^\_aa\_`a`\_aa]`a]\_\_X^\_`]^\_]]\_Z^  
@HWI-EAS443:3:86:1304:1564#0/1  
CATCTGGGGNGGAGTCTGCTGCTGCTGAGAGATTCTCAT  
+HWI-EAS443:3:86:1304:1564#0/1  
abbbbbbb[D[bbbaabb`bbaabbbbbbababbbab`ab  
@HWI-EAS443:3:86:1563:1943#0/1  
AGAGAATAAAAGANCTGAGAGATCTAATGTGCGCAGTCCCG  
+HWI-EAS443:3:86:1563:1943#0/1  
\_bZ¥`\_ba]bbb[D¥baYa\_aaab]aba\_^R¥\_abXQUPa  
@HWI-EAS443:3:88:207:1599#0/1  
GATTTCTCATTTTGGGCAAAGAAGNCAAGAGATATGGCCC  
+HWI-EAS443:3:88:207:1599#0/1  
¥a¥bbb`abbbbabbaabX`aX¥[DUYaYa`^^`aa\_^`  
@HWI-EAS443:3:8:1094:1853#0/1  
GAATAAAAGAACTGAGAGATCTNATGTGCGCAGTCCCGCAC  
+HWI-EAS443:3:8:1094:1853#0/1  
aa```aaaa`a]aaaa`\_`a[DWa\_^^aSa`UYVV^U\_R  
@HWI-EAS443:3:8:1192:1929#0/1  
GCACTCGGAGATACTNACTAAGACCACTGTGGACCATAT  
+HWI-EAS443:3:8:1192:1929#0/1  
\_\_ba`aa\_abaa`aa^D^\_Zaaaaa\_[]`aaYaa`]\_`aa\_  
@HWI-EAS443:3:8:1378:1667#0/1  
GCCCCACATGACCCCAAGCACGGAGATGTGCTGANAGGG  
+HWI-EAS443:3:8:1378:1667#0/1  
`a\_b`ba`abaa]aaaa\_a\_`a`a]`¥LQaY\_aRDWa^a  
@HWI-EAS443:3:8:381:749#0/1  
AAAGAAGTGAAGTCTAATGNCGCAGTCCCGCACTCGCG  
+HWI-EAS443:3:8:381:749#0/1  
abb```aaab\_^aaaaaaa¥DZ\_aaa\_¥`\_`\_\_a`\_`]a  
@HWI-EAS443:3:90:203:1047#0/1  
CTGTAATTGGGTATCTCATTGCCATCATCCACNTCATTCT

+HWI-EAS443:3:90:203:1047#0/1  
aaZ\_¥Z^\_abUPS`[aTTa^aZ[^VG^`a\_\_VDXUYU[\_^  
@HWI-EAS443:3:91:1083:737#0/1  
TATAAACACNGCCTGTTCCGCCGGCTACTGGGAGAAACCT  
+HWI-EAS443:3:91:1083:737#0/1  
aaaa^a`aYD¥]SW\_Y`¥`]Z`a^^`\_RVLMZ^¥LP`UGW  
@HWI-EAS443:3:91:1165:376#0/1  
AGAGAATAAAAGAACTGAGAGATNTAATGTCGCAGTCCCG  
+HWI-EAS443:3:91:1165:376#0/1  
aaabababbbbababababba[D^b`bba\_baaa`a`]\_  
@HWI-EAS443:3:91:81:1651#0/1  
CCCGTTTTCGTTTCATTACCAACTNCGTCCCCTTGCCC  
+HWI-EAS443:3:91:81:1651#0/1  
abb`bbbbbaabbbbbbbbaa\_abb[DYW]aabaaaa\_a  
@HWI-EAS443:3:92:1160:327#0/1  
GCCCTATTGACAAAGTTCAGNTCGCCCCTAACTGCCTTGA  
+HWI-EAS443:3:92:1160:327#0/1  
aa`Ybbaaba`ba`a¥a`a^DZ``aaZ]a`^^aa\_\_\_^a`  
@HWI-EAS443:3:94:1275:823#0/1  
ATAAAAGAACTGNGAGATCTAATGTCGCAGTCCCGCACTC  
+HWI-EAS443:3:94:1275:823#0/1  
]`〕`\_\_\_ZZUa]D[\_`b\_\_bbabb\_ZTZZWZ`a`a^^`TL  
@HWI-EAS443:3:94:1786:1488#0/1  
GGAGNAACCTTGTTTTACGGACCAATTCTCTTTCTAGCAT  
+HWI-EAS443:3:94:1786:1488#0/1  
aaSUDV]aa\_]\_aa\_ba\_a\_W\_Ia^H]\_^`\_[`\_\_a`\_\_\_  
@HWI-EAS443:3:95:739:278#0/1  
ATGATGGCAATGAGATACCCAATTACANCAGACAAGAGAA  
+HWI-EAS443:3:95:739:278#0/1  
XXb]aabbYa``ZUN]VGW]a`]a`P¥DWb``\_a\_aaaaY  
@HWI-EAS443:3:96:975:1553#0/1  
CAATGGATAATCAGGAACTGGGAAANTGTGAAAATTCAAT  
+HWI-EAS443:3:96:975:1553#0/1  
`bbaab\_bbb\_abb`ab`a\_ab^aWD¥VK^WVVU[\_XYYB  
@HWI-EAS443:3:97:1551:742#0/1  
GAATGAAGTGGATGATGGCAATGANATACCCAATTACAGC  
+HWI-EAS443:3:97:1551:742#0/1  
aa`b\_\_aa^`aa`aa`^`Y\_a\_\_MDW\_`V[V\_^\_\_\_Z^\_X  
@HWI-EAS443:3:97:952:1980#0/1  
GAGGATTTTCNCATTTTGGGCAAAGAAGACAAGAGATATGG  
+HWI-EAS443:3:97:952:1980#0/1  
a`ab^aa`[DS`aaa```[abaa^a\_ab\_a\_`aa\_\_`Raa  
@HWI-EAS443:3:98:1073:1765#0/1  
AGAGAATNAAAGAACTGAGAGATCTAATGTCGCAGTCCCG  
+HWI-EAS443:3:98:1073:1765#0/1  
ababaaVD]^ba`a\_^`ababa\_Y`ba`a\_[¥Za[MOWN\_  
@HWI-EAS443:3:99:592:536#0/1  
GTATTCTACAAGAGGATTNCATGATCAAGGCAGTTAGGG  
+HWI-EAS443:3:99:592:536#0/1  
a^`a`a`^`a`^`b`^a`aZDX`aa\_^\_a\_`aZ¥aV`VY¥B

@HWI-EAS443:3:9:370:1176#0/1  
CTCTTGTCTTCTTTNCCCAAATGAGAAATCCTCTCAGGA  
+HWI-EAS443:3:9:370:1176#0/1  
aaaa`a\_\_aa\_]a¥DRaa\_`]\_^]\_^`\_\_[V\_`^^]\_]Y  
@HWI-EAS443:3:100:711:1594#0/1  
GACCCGTTTTCGTTTCATTACCAACTACGTCCCCTTGC  
+HWI-EAS443:3:100:711:1594#0/1  
V`RW\_ba[b\_bababY`b`aHR`aHaJ[a\_Sa¥PPIa0aB  
@HWI-EAS443:3:100:875:1616#0/1  
ATTGGGTATCTCATTGCCATCATCCACTTCATTCTGAGAG  
+HWI-EAS443:3:100:875:1616#0/1  
aba^a¥VW\_Z`Sabbbaabbaa^^^]`^`aaabaU`U\_ZFZ  
@HWI-EAS443:3:10:935:517#0/1  
GTTGGGCCATTCTTCCACCATGTTACGGCCAGAGGGG  
+HWI-EAS443:3:10:935:517#0/1  
a^VYMQSX¥`S[¥UW¥UWT]USYUVW¥¥WUJWSSSWWBBB  
@HWI-EAS443:3:11:1480:311#0/1  
CACCCGTTTTCGTTTCATTACCAACTACGTCCCCTTGC  
+HWI-EAS443:3:11:1480:311#0/1  
`\_\_\_\_]bYbaaaa\_]\_Tabaa¥V`^`¥`b\_TSY][VV]]`B  
@HWI-EAS443:3:12:759:191#0/1  
GCGCGATCTGAACCTTGTCAATAGGGCAAACCAGCGACTG  
+HWI-EAS443:3:12:759:191#0/1  
a\_`\_a]\_\_\_\_\_¥`^^W^`¥¥^V¥`¥`¥U]XWWWUXVWWWUB  
@HWI-EAS443:3:13:431:1105#0/1  
CACCCGTTTTCGTTTCATTACCAACTACGTCCCCTTGC  
+HWI-EAS443:3:13:431:1105#0/1  
aaa\_a`[\_`\_`aY\_\_^`\_`\_`a^a\_X`^^`\_TMP]X]]VXV  
@HWI-EAS443:3:14:1188:1818#0/1  
AAAGAAGTGAAGATCTAATGTGCGCAGTCCCGCACTCGAG  
+HWI-EAS443:3:14:1188:1818#0/1  
aaa`\_`\_0]\_\_VXH0]^YaVY\_Q]QS¥\_ZXZW^W^^ZQGGV  
@HWI-EAS443:3:16:1368:947#0/1  
CACAGATTGGAGGAGTAAGGATGGTGGACATCCTTAGAGA  
+HWI-EAS443:3:16:1368:947#0/1  
Z^Q[^S`\_]`\_¥`aV\_S\_]¥`^Xa[K\_`[¥¥a¥S\_Z¥bWJH  
@HWI-EAS443:3:17:733:833#0/1  
CAGTTTTGGTGGGTTCACTTTCAAAGGACAAGCGGATGA  
+HWI-EAS443:3:17:733:833#0/1  
`Y\_T]a`^`Pbb`G`QaWaXaZR^Y¥U^U]W`^`[\_`RPDH  
@HWI-EAS443:3:1:389:80#0/1  
GGGGAGGAGAGTTGATACAAACCCTGGCCATGCAGATCTC  
+HWI-EAS443:3:1:389:80#0/1  
aaaa\_b`¥`¥`W`\_]\_W¥]U¥SWWWWUJUSWWWUJBBBBBBBB  
@HWI-EAS443:3:1:684:1115#0/1  
CACCCGTTTTCGTTTCATTACCAACTACGTCCCCTTGC  
+HWI-EAS443:3:1:684:1115#0/1  
[\_Z\_aa[\_bbbb]aa\_Z^aa^[ab`baaaba``[\_^^UaB  
@HWI-EAS443:3:20:1112:324#0/1  
CAAGGGGCGATCTGAACCTTGTCAATAGGGCAAACCAGCG

+HWI-EAS443:3:20:1112:324#0/1  
abbabbbb\_V`aU`a]b^¥`JX`aaaa^R` ``Q[¥bUa  
@HWI-EAS443:3:20:865:1547#0/1  
CGATGGCAATGAGATACCCAATTACAGCAGACAAGAGAAA  
+HWI-EAS443:3:20:865:1547#0/1  
ababbbbabbabbbbbaabbbbbaaaabaaaaaaa`  
@HWI-EAS443:3:20:924:1181#0/1  
GAGCGATCTGAAC TTTGTCAATAGGGCAAACCAGCGACTG  
+HWI-EAS443:3:20:924:1181#0/1  
[\_abbabbbbabbabbb\_Zbb]baaaa[aaa`a\_]b\_  
@HWI-EAS443:3:22:1197:2028#0/1  
ACTTCTCATT TTTGGGCAAAGAAGACAAGAGATATGGCCCA  
+HWI-EAS443:3:22:1197:2028#0/1  
a)`^Y\_¥\_\_\_\_\_^^XW\_]\_^\_Z^^^ZZ\_[^ZZX^XZ^  
@HWI-EAS443:3:22:1389:1494#0/1  
CGCCCGTTTTCGTTTCATTACCAACTACGTCCCCTTGC  
+HWI-EAS443:3:22:1389:1494#0/1  
YbW¥\_]K^bU¥Ub`] `bbb¥`] `Y\_a`VaP`VDPPS^\_HW  
@HWI-EAS443:3:22:837:751#0/1  
ATAGTCTGCTGTCCTGAGAGGATTTCTCATTTTGGGCAA  
+HWI-EAS443:3:22:837:751#0/1  
¥WY]\_aYZR]]TNT\_QYZR^a` `aRGRHLX^\_TWQaZ[FU  
@HWI-EAS443:3:23:862:1570#0/1  
GAATAAAGAAGACTGAGAGATCTAATGTCGCAGTCCCGCCN  
+HWI-EAS443:3:23:862:1570#0/1  
ab`Zb\_bbaa`baaa`b`aaa]baaa0a`b\_a[]\_a\_`GD  
@HWI-EAS443:3:24:1012:1006#0/1  
CGAGCAGTCAATTGCTGAGGCAATAATTGTGGCCATGGGA  
+HWI-EAS443:3:24:1012:1006#0/1  
aa`a]aI^]RUa\_]`]SL[aXRUa[[RZW]UBBBBBBBB  
@HWI-EAS443:3:24:390:724#0/1  
GGCCCGTTTTCGTTTCATTACCAACTACGTCCCCTTGC  
+HWI-EAS443:3:24:390:724#0/1  
a`baab`\_aaab\_a`aaaa\_¥a`]aaa`^aY¥\_Za[\_\_\_Y  
@HWI-EAS443:3:26:1625:1805#0/1  
TTCCCCGCACTCAGAATGAAGTGGATGATGGCAATGAGAT  
+HWI-EAS443:3:26:1625:1805#0/1  
\_aaba`bbUFX^b`^VX^[URU\_\_\_\_\_^U¥bXP[YX\_[\_]S  
@HWI-EAS443:3:26:616:384#0/1  
CACCCGTTTTCGTTTCATTACCAACTACGTCCCCTTGC  
+HWI-EAS443:3:26:616:384#0/1  
ab`b`aYWaXSa^baaabQP`¥b`W` `a` `aa][V]aZH]  
@HWI-EAS443:3:27:1215:1789#0/1  
GAAGTGGATGATGGCAATGAGATACCCAATTACAGCAGTC  
+HWI-EAS443:3:27:1215:1789#0/1  
\_`b`S¥¥]^\_a`]aaa`UJ\_`\_\_a`Z]a\_a`¥Z`\_`[\_TM  
@HWI-EAS443:3:27:259:1437#0/1  
AAGGACATGATTCCAGAGAGGAATGAACAAGGACAAACCC  
+HWI-EAS443:3:27:259:1437#0/1  
a^Z\_bb^a`aaaaa`a\_YaaaaaaaaaaaaX\_aaaa]a`

@HWI-EAS443:3:27:55:1358#0/1  
CACCCGTTTTTCGTTTCATTACCAACTACGTCCCCTTGC  
+HWI-EAS443:3:27:55:1358#0/1  
`Z`aa^Z^`a\_]\_^`]^a\_`\_`a`]`\_XW]Z^\_WW[^  
@HWI-EAS443:3:28:828:1133#0/1  
GTCATATGGTCCACAGTGGTCTTAGTGAGTATCTCGCGAG  
+HWI-EAS443:3:28:828:1133#0/1  
aababb\_``\_baa```[b]^a`a`a]aaa¥a`[`¥^]U[  
@HWI-EAS443:3:29:1494:1162#0/1  
CCGTTTTCGTTTCATTACCAACTACGTCCCCTTGCCNA  
+HWI-EAS443:3:29:1494:1162#0/1  
a`babbb`babbaaaaa`aaa\_b\_aa`a\_^`\_`\_`\_XDX  
@HWI-EAS443:3:2:249:655#0/1  
GCCTCTGTCTGCTGTAATTGGGTATCTCATTGCCATCAT  
+HWI-EAS443:3:2:249:655#0/1  
aa\_\_a`aaY[ZYZ`^^]```UUaU`¥HWUZVY[RZ]ZQUV  
@HWI-EAS443:3:2:34:1706#0/1  
CCGTTTTCGTTTCATTACCAACTACGTCCCCTTGCCTA  
+HWI-EAS443:3:2:34:1706#0/1  
aa`FTX`a]``aa`\_`\_Y\_]U¥[[aZV]MRDP]LTQKDO  
@HWI-EAS443:3:2:792:1984#0/1  
AGGCCGTAGACATATGCAAGGCAGCAATAGGGTTGAGGAT  
+HWI-EAS443:3:2:792:1984#0/1  
a\_\_Oa¥`^a^GS\_I\_aSa\_^\_¥]XQUW\_UWVXVVRVBBB  
@HWI-EAS443:3:30:1003:1620#0/1  
ACCATTTCTCATTCTCCTCCTGGAGTGACATCTGCTCC  
+HWI-EAS443:3:30:1003:1620#0/1  
a``T]`¥bU`]^`^HPH]a[`RT\_\_`¥]\_Qa\_\_Z`YUMWT  
@HWI-EAS443:3:30:1311:671#0/1  
ATCTCATTGCCATCATCCACTTCATTCTGAGTGCGGGGAT  
+HWI-EAS443:3:30:1311:671#0/1  
ZP\_Z\_U\_\_baT^\_a\_KY¥Z\_QHQX]P\_\_`G\_G¥TNV^TLZ  
@HWI-EAS443:3:30:353:313#0/1  
GATGGCAATGAGATACCCAATTACAGCAGACAAGAGAAAG  
+HWI-EAS443:3:30:353:313#0/1  
`aaaaaaa`a^aaaaabaaa`a`aaaa`\_a\_\_`\_a\_^\_  
@HWI-EAS443:3:30:371:732#0/1  
CCCCACTCAGAATGAAGTGGATGATGGCAATGAGATAAC  
+HWI-EAS443:3:30:371:732#0/1  
ab\_Z^X]XYZST]^]TQ\_] [[S\_YXJSVBBBBBBBBBBBB  
@HWI-EAS443:3:30:580:19#0/1  
GCCCCGTTTTTCGTTTCATTACCAACTACGTCCCCTTGC  
+HWI-EAS443:3:30:580:19#0/1  
abbaabaaaaab\_aa`aa`\_\_`\_\_\_a^`\_¥\_¥¥\_UVWT¥Z  
@HWI-EAS443:3:30:641:453#0/1  
GCGGTATCTCATTGCCATCATCCACTTCATTCTGAGTGCG  
+HWI-EAS443:3:30:641:453#0/1  
aaa`U^ab\_\_]]`]`¥]]^¥^`^ZZ`\_¥\_\_\_ZUVW[V\_W^  
@HWI-EAS443:3:30:871:359#0/1  
GTCATATGGTCCACAGTGGTCTTAGTGAGTATCTCGCGAG

+HWI-EAS443:3:30:871:359#0/1  
aRa`\_^)^X[\_aa`aa¥\_aSV`\_^]SZ]]G^¥`STNTUMU  
@HWI-EAS443:3:30:964:48#0/1  
GGCCCGTTTTTCGTTTCATTACCAACTACGTCCCCTTGC  
+HWI-EAS443:3:30:964:48#0/1  
a\_X^P^XU[[a[\_^X]XM^WW[RQ]SUWR]STUSIVVBB  
@HWI-EAS443:3:32:1688:1361#0/1  
CACCCGTTTTTCGTTTCATTACCAACTACGTCCCCTTGC  
+HWI-EAS443:3:32:1688:1361#0/1  
[aaaabT[bb]a]WbT`abb\_a^`^¥]aaUa`]0]G\_¥]\_  
@HWI-EAS443:3:33:252:1429#0/1  
CTGATGTGTACTTTTTGATTATGGCCATATGGTCCACAAT  
+HWI-EAS443:3:33:252:1429#0/1  
`¥]ZZ\_Z\_V`^a\_Z`a^^I]`Q¥``[BBBBBBBBBBBBB  
@HWI-EAS443:3:33:698:1151#0/1  
GCTCTGCTGTAATTGGGTATCTCATTGCCATCATCCACTT  
+HWI-EAS443:3:33:698:1151#0/1  
K\_bbbbbbababbbba`aabbbb[bbbbbbb`aba`baba  
@HWI-EAS443:3:34:1492:1883#0/1  
CCATTATTCTTGTCTGCTGTAATTGGGTATCTCATTAC  
+HWI-EAS443:3:34:1492:1883#0/1  
aba`\_`aa```aa\_]\_]\_a\_Z¥U¥¥`^`XGZTFZUBBBBB  
@HWI-EAS443:3:34:737:894#0/1  
ANAAGTGAAGATCTAATGTCGCAGTCCCGCACTCGCGAG  
+HWI-EAS443:3:34:737:894#0/1  
¥DTa¥a`aaaaa\_aaaaa[\_a\_\_aRU^\_Z\_V^¥¥¥V¥TY  
@HWI-EAS443:3:35:1438:1654#0/1  
GAGCAAAACAAACGATGCTGGATCAGACCGAGTGATGGGA  
+HWI-EAS443:3:35:1438:1654#0/1  
`\_`\_ba¥bbb``aa``aaPU¥W\_\_aXZM`YRYJ]\_¥¥`N\_  
@HWI-EAS443:3:35:232:413#0/1  
GTTGGCCATTCTATTCCACCATGTTACGCCAGAGGGG  
+HWI-EAS443:3:35:232:413#0/1  
aa`aaaab`aaa`aaaa`Vaa`a`^\_aa\_¥a[RY[^¥M¥  
@HWI-EAS443:3:35:526:1664#0/1  
TNCCCTTCATGTACTCTTATTTTCAGTGTGGAGGTTGC  
+HWI-EAS443:3:35:526:1664#0/1  
^DRaaaa`Y`\_`aaa\_aa`aa`aaLY][`VQ^\_G]X\_  
@HWI-EAS443:3:36:1270:1689#0/1  
CATTGTTTTACGGACCAATTCTCTTTCTAGCATGTACGCC  
+HWI-EAS443:3:36:1270:1689#0/1  
TX`a\_S\_bbbasX`Xabba[\_bbbaba`aaaaXa\_bbY¥`  
@HWI-EAS443:3:37:494:1071#0/1  
AGTACAACAAGGCAACCAAACGACTTACAGTTCTTGAAAA  
+HWI-EAS443:3:37:494:1071#0/1  
\_TL¥]`T`Yaa[\_Y[\_Y^`\_HRZQ\_[`RWNLKNW[R^WP¥  
@HWI-EAS443:3:37:719:1969#0/1  
TNGATGATGGCAATGAGATACCCAATTACAGCAGACAAGA  
+HWI-EAS443:3:37:719:1969#0/1  
¥D][\_aVa]\_aa``¥b`\_`abb`bba\_abHTaaa``aa\_\_



@HWI-EAS443:3:38:1662:1586#0/1  
TGATGGTATCACCTCTGGCCGTAACATGGTGAATAGGCA  
+HWI-EAS443:3:38:1662:1586#0/1  
aVa^H]S^ZSbPYZYOV\_^¥Y][YVYJO`GRVJQFV`YLF  
@HWI-EAS443:3:38:609:1110#0/1  
GNGAGATCTAATGTGCGAGTCCCGCACTCGCGAGATACTC  
+HWI-EAS443:3:38:609:1110#0/1  
[DU\_Y\_aaaaaaa[aa`a`[aab\_\_H\_UaYR^`\_¥\_¥PYV  
@HWI-EAS443:3:39:1691:1857#0/1  
GATGGCAATGAGATACCCAATTACAGCAGACAAGAGAAAG  
+HWI-EAS443:3:39:1691:1857#0/1  
]^Z^¥`a^]S]a`^ba\_\_^\_W]^`K`^[]^a]]]R`]]]SF  
@HWI-EAS443:3:39:458:882#0/1  
ACCTAATGTGCGAGTCCCGCACTCGCGAGATACTCACTAA  
+HWI-EAS443:3:39:458:882#0/1  
aXaZbaaa\_`a`aa]aaa\_`S`^`\_`^GV``ZSU^a¥[R¥¥  
@HWI-EAS443:3:39:616:1570#0/1  
AAAAGAAGTGGAGAGATCTAATGTGCGAGTCCCGCACTCNC  
+HWI-EAS443:3:39:616:1570#0/1  
ab¥b¥^baaaaaaaaa`abaaa^a\_ba\_]a^TY`R`^ZDR  
@HWI-EAS443:3:3:1102:801#0/1  
CGGGTGGGTTCACTTTCAAAGGACAAGCGGATCATCAGT  
+HWI-EAS443:3:3:1102:801#0/1  
`bb¥L`b]a[aV\_^Q¥V]\_Z]WbUG[\_aOJ[`S]`b`\_aX  
@HWI-EAS443:3:3:640:567#0/1  
CGCGAGATACTCACTAAGACCACTGTGGACCATATGGCNA  
+HWI-EAS443:3:3:640:567#0/1  
abbb\_a]`a¥`a]aaa`aa\_\_a`aa]a\_\_\_\_\_[]`\_\_a\_VDX  
@HWI-EAS443:3:3:810:452#0/1  
GGTGGAGTCTGCTGCTGCTGAGAGGATTTCTCATTGTCGNC  
+HWI-EAS443:3:3:810:452#0/1  
R[^¥``¥]`bY\_`b`aVb\_b\_ab\_b`[[]`\_\_aa\_aZ¥DI  
@HWI-EAS443:3:3:856:334#0/1  
CACCCGTTTTCTTTTATTACCAACTACGTCCCTTGC  
+HWI-EAS443:3:3:856:334#0/1  
abbabbbbabbbabbbabbbbbb\_babb`aa\_a`Waaa]  
@HWI-EAS443:3:42:105:448#0/1  
CAAGGATTTCTCATTGTTGGCAAAGAAGACAAGAGATATG  
+HWI-EAS443:3:42:105:448#0/1  
a`Y\_\_TTa¥]^`[\_a\_W`a`a`X^¥`aZQ]^U]^[]^aXV  
@HWI-EAS443:3:44:1530:892#0/1  
CGCCTCCTTATTTTAACTTGATTTCTGAAGTGGACAGGGC  
+HWI-EAS443:3:44:1530:892#0/1  
abbab`abbaabb`aaaba`\_aaa`a`a\_a]aRZ\_a``]U  
@HWI-EAS443:3:44:330:1349#0/1  
TGCTAATTGGGCAAGGGGACGTAGTGTGGTAATGAAAAG  
+HWI-EAS443:3:44:330:1349#0/1  
^ba`abb^[X[ba]b`aa]abUG]W\_\_`^^Q``¥`\_\_¥EV  
@HWI-EAS443:3:45:1021:827#0/1  
CTCAGTTCCTGATTATCCATTGATAAGTGTGACTAGCAC

+HWI-EAS443:3:45:1021:827#0/1  
ab\_bba\_babbabbaababbbb[bbab`babaaab`baa\_  
@HWI-EAS443:3:45:1268:532#0/1  
CACCCGTTTTTCGTTTCATTACCAACTACTGCCCTTGC  
+HWI-EAS443:3:45:1268:532#0/1  
ZabbbaXaV[WZaaY¥Y^^¥WP¥^W¥\_TO^\_GXPWXPTXL  
@HWI-EAS443:3:45:653:793#0/1  
AGAAGAGCTCCAGGATTGAAAATTGCTCCCTTGATGGGG  
+HWI-EAS443:3:45:653:793#0/1  
[] []baZR]b\_\_bb`¥`a]XFU\_a¥a\_a]a^VW\_] ^a\_HW  
@HWI-EAS443:3:47:1108:573#0/1  
CCCGCACTCAGAATGAAGTGGATGATGGCAATGAGATAAA  
+HWI-EAS443:3:47:1108:573#0/1  
aabb¥¥`aaa¥P\_a\_YL¥Vab^Uaaaab\_^a^J\_I` `aY  
@HWI-EAS443:3:47:1660:646#0/1  
CACCCGTTTTTCGTTTCATTACCAACTACTGCCCTTGC  
+HWI-EAS443:3:47:1660:646#0/1  
U`b\_UbYbabbbbbb¥`bba`] `bI[¥ab^a^aZ`]ZYaa  
@HWI-EAS443:3:47:232:599#0/1  
TGCTGCCTGTTCCGCCGCTACTGGGAGAAACCTTGTTTT  
+HWI-EAS443:3:47:232:599#0/1  
^]a^XX^`b\_^] ` \_ ] ] \_ [W[ZBBBBBBBBBBBBBBBB  
@HWI-EAS443:3:47:298:1569#0/1  
CTGGGGCGATCTGAACCTTGTCAATAGGGCAAACCAGCGA  
+HWI-EAS443:3:47:298:1569#0/1  
`b`babbaaaaaRa`Mab`a`X`a^^a^^Xa`a^P`\_Z\_\_  
@HWI-EAS443:3:47:539:1545#0/1  
ATGCTAATGTGCTAATTGGGCAAGGGGACGTAGTGTGGT  
+HWI-EAS443:3:47:539:1545#0/1  
a\_]bbab\_abaaaabbabab\_aa]WaK^^aX` ` []WaaRY  
@HWI-EAS443:3:47:550:991#0/1  
GAGTAGATGAATACTCCAGCACGGAGAGAGTGGTAGTGGG  
+HWI-EAS443:3:47:550:991#0/1  
XQ\_]aa\_\_aa]a`aaa¥\_`^\_\_a\_Va]\_]\_Ya`S[\_BBBB  
@HWI-EAS443:3:48:131:168#0/1  
GCCCCGTTTTTCGTTTCATTACCAACTACTGCCCTTGC  
+HWI-EAS443:3:48:131:168#0/1  
aY]\_`b]a`aa¥S¥a`aa`a`Y\_\_XaY]`\_aY]]Y^[P¥T  
@HWI-EAS443:3:48:437:1698#0/1  
GCTCTCTTGCTGCTGTAATTGGGTATCTCATTGCCATCA  
+HWI-EAS443:3:48:437:1698#0/1  
^[bbba`b\_\_] `]Y]Z`b¥bbabb[bbaa¥¥baaY`baYa  
@HWI-EAS443:3:49:213:1145#0/1  
ACGACTTACAGTTCTTGAAAGGATGCAGGTGCATTGANT  
+HWI-EAS443:3:49:213:1145#0/1  
V]]X\_aa[a^a[a^ba` [¥\_aba\_aa\_\_a`\_aaS[XaTDX  
@HWI-EAS443:3:4:1446:1102#0/1  
AACTTGAAAGGATGCAGGTGCATTGACTGAAGATCCAGA  
+HWI-EAS443:3:4:1446:1102#0/1  
Za` [b]bab`¥TV`a^\_bbZa\_^bbaabbabbbb\_PPbaX

@HWI-EAS443:3:4:983:2018#0/1  
CACCCGTTTTTCGTTTCATTACCAACTACTGCCCCCTTGC  
+HWI-EAS443:3:4:983:2018#0/1  
aa^`ba\_S\_bbbabbaaaabaabb\_aX^a\_`aYa[Waa`a  
@HWI-EAS443:3:50:1128:378#0/1  
AAGTGGACAGGGCCGAAGGTACCATGTTTCAACCTTTCAA  
+HWI-EAS443:3:50:1128:378#0/1  
a[S`b¥b¥`R^UH\_ORW¥Y¥]GZ]¥OJ[¥FY\_XWV\_VFRX  
@HWI-EAS443:3:50:465:2023#0/1  
GAATACTCCAGCACGGAGAGAGTGGTAGTGAGTATTGAAC  
+HWI-EAS443:3:50:465:2023#0/1  
aaab\_``aba`ababba\_`b^\_¥ba\_a`Z^HYWQ¥aZOFV  
@HWI-EAS443:3:51:1708:939#0/1  
GNAGGTGCATTGACTGAAGATCCAGATGAAGGCACATCTG  
+HWI-EAS443:3:51:1708:939#0/1  
YDQ[\_PS[[^[]WYZSZbWMJ]\_`[ZXZVXM¥MZSZLO\_Z  
@HWI-EAS443:3:51:708:2016#0/1  
CGTTTTTCGTTTCATTACCAACTACTGCCCCCTTGCCCCGA  
+HWI-EAS443:3:51:708:2016#0/1  
a^[aba\_`aba]babaaa\_\_a[aa]`[^^\_\_ORXVTHT  
@HWI-EAS443:3:53:1448:641#0/1  
CATGAGTATCTCGCGAGTGCGGGACTGCGACATTAGATCT  
+HWI-EAS443:3:53:1448:641#0/1  
^H\_bbbaba`aba`b`^a^`Yaa`aa^a[]`baab^aT]  
@HWI-EAS443:3:54:15:1561#0/1  
GAGAGGATTTCTCATTGTTGGCAAAGAAGACAAGAGATGG  
+HWI-EAS443:3:54:15:1561#0/1  
[S¥WR]b\_aZ¥Z\_`^K]b¥ba`¥NSZV¥\_]`T\_\_`]WYH  
@HWI-EAS443:3:54:713:1986#0/1  
GAGAAATCCTCTCAGGACAGCAGACTCCACCCAGATGNG  
+HWI-EAS443:3:54:713:1986#0/1  
aaabbbbb`abaaabaa`aaaba`¥aa¥a\_`\_]aaa^[DX  
@HWI-EAS443:3:56:1345:1363#0/1  
CTGCTGTAATTGGGTATCTCATTGCCATCATCCACTTCTT  
+HWI-EAS443:3:56:1345:1363#0/1  
`¥a\_bab\_Xb\_a`¥^\_]b\_Xab]a`b`ab\_¥aRab\_\_a  
@HWI-EAS443:3:58:1189:1698#0/1  
GCTGCTCTGAGAGATTTCTCATTGTTGGCAAAGAAGAGA  
+HWI-EAS443:3:58:1189:1698#0/1  
]YZ]YISYba`aaY]RX\_\_XT¥aa\_^\_a\_¥a[T]a¥\_`G]  
@HWI-EAS443:3:58:1530:1893#0/1  
ATTGACTGAAGATCCAGATGAAGGCACATCTGGGGTGGGG  
+HWI-EAS443:3:58:1530:1893#0/1  
aQM[¥HP]V`X]Q]\_¥VLRZ]\_RZKK¥TZTHZ\_\_¥BBBBB  
@HWI-EAS443:3:59:264:1635#0/1  
GATGGCAATGAGATACCCAATTACAGCAGACAAGAGAAAG  
+HWI-EAS443:3:59:264:1635#0/1  
R\_Ya¥¥^¥[N]Z¥P]b`^`bV[\_a¥W\_`^^`[T]^WY[Y  
@HWI-EAS443:3:59:904:783#0/1  
GGCCATATGGTCCACAGTGGTCTTAGTGAGTATCTCGCCA

+HWI-EAS443:3:59:904:783#0/1  
^V]`\_]X\_\_P]ZZ]^\_Y^RO[[T^U]` `L[[YZDMXFM  
@HWI-EAS443:3:5:1034:395#0/1  
TCCTGATGTGTACTTTTTGATTATGGCCATATGGTCCATA  
+HWI-EAS443:3:5:1034:395#0/1  
X`^)`ZT\_Q¥[^U`ab`¥`a`U`\_^aR¥VQTBBBBBBBBB  
@HWI-EAS443:3:5:610:173#0/1  
GCGTTCTTGAAAGGATGCAGGTGCATTGACTGAAGATCC  
+HWI-EAS443:3:5:610:173#0/1  
a`aX]U`¥`XY[`¥Y` `UX[[XTHR\_U\_[TV`Y\_¥^BBB  
@HWI-EAS443:3:60:407:295#0/1  
CACCCGTTTTCGTTTCATTACCAACTACGTCCCCTTGC  
+HWI-EAS443:3:60:407:295#0/1  
abb`abIaba\_bZ^`\_]`^`¥Y\_\_\_\_`^`^]V^]WS^¥V^  
@HWI-EAS443:3:61:1168:1252#0/1  
GATGGCAATGAGATACCCAATTACAGCAGACAAGAGAAAG  
+HWI-EAS443:3:61:1168:1252#0/1  
aNR¥^\_R`\_`\_\_^PZY` [¥UXST\_¥WU^VFF^OZRWXXYG  
@HWI-EAS443:3:61:1638:93#0/1  
AAAGAAGTGAAGATCTAATGTCGCAGTCCCGCACTCGGG  
+HWI-EAS443:3:61:1638:93#0/1  
`bbb\_a\_aaa`ab^a\_b`Uabaaab\_bYUVSVWVFSVKFV  
@HWI-EAS443:3:62:1515:1350#0/1  
GCCATTCTTATCCACCATGTTACGCCAGAGGTGATAAC  
+HWI-EAS443:3:62:1515:1350#0/1  
aa]bbabbaba`aa`aba\_`abaa\_aaa\_\_`\_NQZ¥ZFX  
@HWI-EAS443:3:62:481:1913#0/1  
GCTGTCTGAGAGATTTCTCATTGTTGGCAAAGAAGAAG  
+HWI-EAS443:3:62:481:1913#0/1  
aabbaabbaabba`aaabbabaaaa`^aab]` `a\_aa\_  
@HWI-EAS443:3:63:1556:233#0/1  
GGGTCTTCTTTGCCAAAATGAGAAATCCTCTCAGGACAG  
+HWI-EAS443:3:63:1556:233#0/1  
a`b`abba\_` `Ua`a^aababbaa`aNn`\_]Zaa`\_^aa  
@HWI-EAS443:3:63:328:916#0/1  
AAAAGAAGTGAAGATCTAATGTCGCAGTCCCGCACTCTC  
+HWI-EAS443:3:63:328:916#0/1  
aaaba\_aaaaa`\_]`\_`a\_aa\_aYa\_a`\_Y^^^]\_^VZFZ  
@HWI-EAS443:3:64:1260:576#0/1  
GATGGGTGGAGTCTGCTGCTGCTGAGAGATTCTCATT  
+HWI-EAS443:3:64:1260:576#0/1  
a]\_aaaa]b`\_]\_\_a¥` `^`\_¥¥\_]\_\_a]]Z` `YaRV^`^`  
@HWI-EAS443:3:64:1641:707#0/1  
CGAGTGATGGTATCACCTCTGGCCGTAACATGGTGGAAAGC  
+HWI-EAS443:3:64:1641:707#0/1  
ab^`ababbb^b`X\_[V^N[a^TU]a\_V]\_U\_YaaV\_¥L  
@HWI-EAS443:3:64:531:534#0/1  
TCGCCATGGTATTCTCACAAGAGGATTGCATGATCAAGG  
+HWI-EAS443:3:64:531:534#0/1  
a\_¥S¥a\_\_abS^aa`\_]SW\_` `[aaZ\_]Wa]a]OXV]\_ZX

@HWI-EAS443:3:65:1178:1782#0/1  
AAAAGAAGTCTAATGTCGCAGTCCCGCACTCCC  
+HWI-EAS443:3:65:1178:1782#0/1  
^]`]TPS^R]]P`J]VR]¥\_¥YRSKYZYBBBBBBBBBBBB  
@HWI-EAS443:3:65:904:1726#0/1  
CAAAAAGATGCAAAAGTGCTTTTCCAGAAGTGGGAATAG  
+HWI-EAS443:3:65:904:1726#0/1  
aaabaa`\_]XaaaaTU\_\_`\_\_\_\_\_aaaa`\_`¥`\_]XDR  
@HWI-EAS443:3:66:1281:886#0/1  
CACCCGTTTTCGTTTCATTACCAACTACGTCCCCTTGC  
+HWI-EAS443:3:66:1281:886#0/1  
a`T\_ba\_aaaab^aaabaaa`[`][`a\_\_^a^a\_`]\_Z¥^  
@HWI-EAS443:3:68:239:255#0/1  
ATTCTGCTGTCTGAGAGGATTTCTCATTTTGGGCAAAGA  
+HWI-EAS443:3:68:239:255#0/1  
aaaaa`aaa`aaaZ`[a`a\_¥`\_\_`a`^`\_`YV^`\_\_\_\_  
@HWI-EAS443:3:68:442:320#0/1  
CACCCGTTTTCGTTTCATTACCAACTACGTCCCCTTGC  
+HWI-EAS443:3:68:442:320#0/1  
a[a`aa[\_a\_`aUWZX^X`\_NTW^\_]\_^UPVX\_SVYSSX  
@HWI-EAS443:3:6:158:1654#0/1  
GCCAGGGTTTGTATCAACTCTCCTTATTTTAACTTAA  
+HWI-EAS443:3:6:158:1654#0/1  
abba`XQN\_^VY¥aaaV^aa\_a]]`a`^]a`\_`^BB  
@HWI-EAS443:3:6:190:657#0/1  
ANAAGAAGTCTAATGTCGCAGTCCCGCACTCGC  
+HWI-EAS443:3:6:190:657#0/1  
^D¥b`[baabaaba`aaa]ba\_\_a^\_\_^¥`^¥`¥^^¥\_B  
@HWI-EAS443:3:70:1537:1766#0/1  
TGATTCCAGAGGAATGAACAAGGACAAACCCTCTGGTG  
+HWI-EAS443:3:70:1537:1766#0/1  
a\_^X¥VUP^U[S[^[YZX\_YLGWXZ]VY[\_[X[^[]]`WZ  
@HWI-EAS443:3:70:234:1263#0/1  
GAGAGGATTTCTCATTTTGGGCAAAGAAGACAAGAGATGG  
+HWI-EAS443:3:70:234:1263#0/1  
\_XYVaX[Xaaaa`¥a\_a`]0^`]U]]a[S^a\_XXSX¥¥ZG  
@HWI-EAS443:3:71:1275:161#0/1  
GATGGCAATGAGATACCCAATTACAGCAGACAAGAGAAAG  
+HWI-EAS443:3:71:1275:161#0/1  
aaaaaaaa`a^¥]``\_]`aaaaZ``\_a`^\_\_a```\_]`\_`  
@HWI-EAS443:3:72:1353:945#0/1  
TGGGTGGGTTCACTTTCAAAGGACAAGCGGATCATCAGT  
+HWI-EAS443:3:72:1353:945#0/1  
[b]`]aa]¥aVa]aaaab\_a\_]`\_a\_aaWaa]a\_a`^^^^`  
@HWI-EAS443:3:73:1587:730#0/1  
TGCCCTTCATGTACTCTTATTTTCAGTGTGGAGGTTGC  
+HWI-EAS443:3:73:1587:730#0/1  
[a]\_H¥VX^bb¥XH¥Y\_]Y]Za\_RaaVY0^Y¥bW]]LUYB  
@HWI-EAS443:3:73:1719:246#0/1  
GGCCCGTTTTCGTTTCATTACCAACTACGTCCCCTTGC

+HWI-EAS443:3:73:1719:246#0/1  
`GUT\_\_[^^YR[Y`a[\_`]TT\_]\_TSUXUSRUZSJXYX]V  
@HWI-EAS443:3:73:324:129#0/1  
CACCCGTTTTCGTTTCATTACCAACTACGTCCCCTTGC  
+HWI-EAS443:3:73:324:129#0/1  
abbabbaabbab\_a\_\_aaabaaa\_a]aa\_a\_\_[^^^[[[  
@HWI-EAS443:3:73:902:846#0/1  
GCAGTGTGCAGCAGACCCATTAGCATCTCTCTTGAAATTT  
+HWI-EAS443:3:73:902:846#0/1  
ab`¥GPIDN[WLYX[HV¥\_\_\_aV`S\_V\_HS¥\_UBBBBBBB  
@HWI-EAS443:3:74:119:1645#0/1  
GCTGCCGTTAGCACTTCTTCTTCTTCTTGACTGATGAT  
+HWI-EAS443:3:74:119:1645#0/1  
\_QPaa^^`\_UIXSVaaaa[[`^]a\_XZWSaXQWWaV[\_R  
@HWI-EAS443:3:74:165:1802#0/1  
GCTGGGTTCACTTTCAAAGGACAAGCGGATCATCAGTCA  
+HWI-EAS443:3:74:165:1802#0/1  
a\_H]baVWabaa]P]b¥`^Q[Yba]W][LU\_^¥]Ya[\_aX  
@HWI-EAS443:3:75:1716:1681#0/1  
AGGCCGTAGACATATGCAAGGCAGCAATAGGGTTGAGGAT  
+HWI-EAS443:3:75:1716:1681#0/1  
aa[b]baab\_Z`a\_a\_aaa[\_`^^^\_\_`a^`[`¥[T]\_`  
@HWI-EAS443:3:75:521:2038#0/1  
ACGTGTTTATATTGAAGTGTGCACTTAACCCAAGGGACG  
+HWI-EAS443:3:75:521:2038#0/1  
aa\_]\_abaaaab`a`[\_]`¥`abaaaaaaabaaaY``aa  
@HWI-EAS443:3:76:1138:1199#0/1  
TGCCCGTTTTCGTTTCATTACCAACTACGTCCCCTTGC  
+HWI-EAS443:3:76:1138:1199#0/1  
`aaaaab\_aaaa`SV]a`\_b`\_a`\_a\_aa`\_^Y^^]\_`U  
@HWI-EAS443:3:78:1508:1572#0/1  
ATAGTCTGCTGTCCTGAGAGGATTTCTCATTGTTGGGCAA  
+HWI-EAS443:3:78:1508:1572#0/1  
aa\_aWa`^GZ`YRSa]Sa`¥^^`^`W\_]^\_aaaY\_[VT]^  
@HWI-EAS443:3:78:1541:207#0/1  
GAGAGGATTTCTCATTGTTGGCAAAGAAGACAAGAGATGG  
+HWI-EAS443:3:78:1541:207#0/1  
aababa\_aba]bXaaaa`a]]Z]\_^\_`][a^a^^]X]^  
@HWI-EAS443:3:78:1668:1500#0/1  
CACCCGTTTTCGTTTCATTACCAACTACGTCCCCTTGC  
+HWI-EAS443:3:78:1668:1500#0/1  
aaaa^b^aba`\_ababbab[[`aaa`a``\_\_\_^Z`ZSS  
@HWI-EAS443:3:78:938:557#0/1  
GCGTGGAGTCTGCTGTCCTGAGAGGATTTCTCATTGTTGGG  
+HWI-EAS443:3:78:938:557#0/1  
a\_a[aa\_aVZ\_a`a¥`\_aa^a^a`]\_`\_`¥\_a`\_\_\_\_]\_  
@HWI-EAS443:3:79:1692:368#0/1  
CCCGCACTCAGAATGAAGTGGATGATGGCAATGAGATAGT  
+HWI-EAS443:3:79:1692:368#0/1  
a]Yb```a^ab`ba^¥b\_abb`aa`a`a\_\_ab¥a^\_V`\_`

@HWI-EAS443:3:7:572:1214#0/1  
GTCATATCTCTTGTCTTCTTTGCCCAAATGAGAAATCCT  
+HWI-EAS443:3:7:572:1214#0/1  
aX\_^a]aaa]`V]\_]\_]a]\_\_`]W\_`^^^Z`\_^] ^YVSZ  
@HWI-EAS443:3:81:1621:69#0/1  
GATGGCAATGAGATACCCAATTACAGCAGACAAGAGAAAG  
+HWI-EAS443:3:81:1621:69#0/1  
\_bbb\_`abaa`abbbaa\_abaaa¥aa^\_[YT``^b\_aa`\_  
@HWI-EAS443:3:81:302:1401#0/1  
CGGGTGGGTTCACTTTCAAAGGACAAGCGGATCATCAGT  
+HWI-EAS443:3:81:302:1401#0/1  
\_\_bb[b`aRXaaaababb\_\_U`aY`aS]aaaa\_aaaaa`^  
@HWI-EAS443:3:81:550:464#0/1  
CCATCTCTTGTCTTCTTTGCCCAAATGAGAAATCCTCTC  
+HWI-EAS443:3:81:550:464#0/1  
]bba\_\_```XI^ab`aa`babba\_a`ababaa]`aaa\_``  
@HWI-EAS443:3:83:30:1707#0/1  
GAGGACGTAGTGTGGTAATGAAACGAAACGGGACTCTA  
+HWI-EAS443:3:83:30:1707#0/1  
a^W¥\_a\_T\_¥SaP^b]]`\_\_Z¥Z`Y\_a\_UTLX\_[^`\_`W]  
@HWI-EAS443:3:84:204:1969#0/1  
ATGATTTCTCATTTTGGGCAAAGAAGACAAGAGATATGGC  
+HWI-EAS443:3:84:204:1969#0/1  
aa^aa¥\_\_\_aQ`\_YPQM^aW][\_[HXaa\_TYU\_]0`WXU`  
@HWI-EAS443:3:84:280:1882#0/1  
TAGGAATGGCCCAACAACAAGTACAGTTCATTACCCTATG  
+HWI-EAS443:3:84:280:1882#0/1  
ZbbabY`WQ\_baab`^]b^a`YaZIOY]]aaXaaYa^bZ^  
@HWI-EAS443:3:84:386:1085#0/1  
CACCCGTTTTCGTTTCATTACCAACTACGTCCCCTTGC  
+HWI-EAS443:3:84:386:1085#0/1  
aa``ab^`a``a]Ya`\_`^`\_a`Y`\_\_\_a\_\_Y\_\_^W^X]]  
@HWI-EAS443:3:86:1114:1086#0/1  
AAGTGGACAGGGCCGAAGGTACCATGTTTCAACCTTTCAA  
+HWI-EAS443:3:86:1114:1086#0/1  
aab\_a]aaaa\_Z¥]aa\_aV```a`a````a`TN[\_\_\_^`^`  
@HWI-EAS443:3:86:1234:306#0/1  
GGGGTCTGATCCAGCATCGTTTGTGTTTGTCTCCAGAGGGTT  
+HWI-EAS443:3:86:1234:306#0/1  
ab`]^a\_baaa\_ab^aaaa]aab```aaa\_`¥R\_\_\_aa`T`  
@HWI-EAS443:3:86:494:1169#0/1  
GACCCGTTTTCGTTTCATTACCAACTACGTCCCCTTGC  
+HWI-EAS443:3:86:494:1169#0/1  
`abbbabbbbbbabbabbbbabbaababbbbaaaaaaaa\_  
@HWI-EAS443:3:87:285:1308#0/1  
CACCCGTTTTCGTTTCATTACCAACTACGTCCCCTTGC  
+HWI-EAS443:3:87:285:1308#0/1  
a\_aabaaabbbbabbaabababbbbaaaabaa\_a\_a]]a`a`  
@HWI-EAS443:3:87:288:1130#0/1  
CACCCGTTTTCGTTTCATTACCAACTACGTCCCCTTGC

+HWI-EAS443:3:87:288:1130#0/1  
aaaaaa\_Zaaaa^\_aaaa`a\_aaX¥`^`^aaa]`\_a\_]\_^`  
@HWI-EAS443:3:88:103:1737#0/1  
GCGCCATTCTATTCCACCATGTTACGCCAGAGGTGATA  
+HWI-EAS443:3:88:103:1737#0/1  
ab]aabbabbaaabbabaa\_``a\_\_a\_]XL^0¥N\_RR¥  
@HWI-EAS443:3:88:130:1897#0/1  
TAATGTGCGAGTCCCGCACTCGCGAGATACTCACTAAGCC  
+HWI-EAS443:3:88:130:1897#0/1  
`a`aa¥YD¥aXKa`VZ^^Z^¥a`^]]]\_SWUaa¥¥]PBB  
@HWI-EAS443:3:88:893:50#0/1  
ACTTAACCCAAGGGACGTGCTGGGAGCAGATGTACTACTAC  
+HWI-EAS443:3:88:893:50#0/1  
aabb]TSXZa\_b`b\_¥b`aaa^bR`GH`Ia^]`P]X`GT  
@HWI-EAS443:3:89:1089:821#0/1  
GGAGAGGATTTCTCATTGTTGGGCAAAGAAGACAAGAGATG  
+HWI-EAS443:3:89:1089:821#0/1  
a\_Y^YZ\_\_\_aaaa`aaa`aaaaa[[aa[aa\_Xaa`]W\_^]  
@HWI-EAS443:3:89:75:474#0/1  
CACCCGTTTTCGTTTCATTACCAACTACGTCCCTTGC  
+HWI-EAS443:3:89:75:474#0/1  
`¥`a`aa`abab\_aaa`a`aaaaaa`\_a\_a]^U`]^`^`\_  
@HWI-EAS443:3:8:1051:1157#0/1  
GATGGCAATGAGATACCCAATTACAGCAGACAAGAGAAAG  
+HWI-EAS443:3:8:1051:1157#0/1  
¥\_R`\_`W`]^\WSLY¥bZ]S¥\_aYG`PGUJ]RS`a[I`X^V  
@HWI-EAS443:3:90:1101:848#0/1  
GCTGTCTGAGAGGATTTCTCATTGTTGGGCAAAGAAGAAAG  
+HWI-EAS443:3:90:1101:848#0/1  
ab```bba[E[aaa`abaaba]aaaa\_\_a\_aaaa\_aaaa`  
@HWI-EAS443:3:90:1649:1684#0/1  
GATGGCAATGAGATACCCAATTACAGCAGACAAGAGAAAG  
+HWI-EAS443:3:90:1649:1684#0/1  
`bbbb`bbbb`abbbba`bbbbbaba^bba`bbbbbbbaab  
@HWI-EAS443:3:90:508:657#0/1  
AGCCCTTCATGTACTCTTATTTTCAGTGTGTTGGAGGTTGC  
+HWI-EAS443:3:90:508:657#0/1  
Yabbbbb`baa`ababb`abab`[Pb```b]^]]R^^Z  
@HWI-EAS443:3:91:152:1734#0/1  
CACCCGTTTTCGTTTCATTACCAACTACGTCCCTTGC  
+HWI-EAS443:3:91:152:1734#0/1  
abba`baaaaba]aabaa`aa`aaaa`b`a]`Z`]\_]`^  
@HWI-EAS443:3:92:1115:1669#0/1  
GGGAGAGGATTTCTCATTGTTGGGCAAAGAAGACAAGAGAT  
+HWI-EAS443:3:92:1115:1669#0/1  
aa]`\_[V¥¥QZ^TZ^`[aYUWYa`^¥\_¥`Z`[V`]\_]`]]T  
@HWI-EAS443:3:92:1378:190#0/1  
AGAGGCACATCTGGGGTGGAGTCTGCTGTCCTGAGAGGAT  
+HWI-EAS443:3:92:1378:190#0/1  
abaaa¥a`baaaaaaa¥a`aaZ¥aa\_```\_`^a[a\_a^Z^



@HWI-EAS443:3:92:1433:1540#0/1  
GCCTTGCATATGTCTACGGCTTGTTCCTCAGTTGGATTTT  
+HWI-EAS443:3:92:1433:1540#0/1  
aa\_aaa`abaaba\_aa\_a^a`LS\_YOQOHWP[RYER]SU  
@HWI-EAS443:3:92:926:211#0/1  
CCCCGACTCAGAATGAAGTGGATGATGGCAATGAGATAAA  
+HWI-EAS443:3:92:926:211#0/1  
`babbbaaaaba\_aa`^bTaa`a\_]\_a^]]\_a[aS]¥][  
@HWI-EAS443:3:96:1109:546#0/1  
CACCCGTTTTCGTTTCATTACCAACTACGTCCCCTTGC  
+HWI-EAS443:3:96:1109:546#0/1  
abba`b`bbbaaabb]abbb\_\_a^]aaaa^a`aW][\_XY\_  
@HWI-EAS443:3:96:1411:1408#0/1  
CACTGTGGACCATATGGCCATAATCAAAAAGTACACATAA  
+HWI-EAS443:3:96:1411:1408#0/1  
][ba]bb`bUWaa]baa\_Wa]`a^)`a`aJGa`\_YaaG\_  
@HWI-EAS443:3:97:939:767#0/1  
CACCCGTTTTCGTTTCATTACCAACTACGTCCCCTTGC  
+HWI-EAS443:3:97:939:767#0/1  
a\_a\_\_babbbba¥abb\_bbbb`b`aaabaaa`S]`aa\_¥  
@HWI-EAS443:3:99:1716:1276#0/1  
TGGAAGTTGTTTTCCCAAATGAAGTGGGGGCAAGAATAAT  
+HWI-EAS443:3:99:1716:1276#0/1  
abbaaba`^Xb]a\_\_\_[[\_aa`b\_b`a\_a¥`a^\_^\_G`  
@HWI-EAS443:3:9:1388:1431#0/1  
CGGTCTGCTGTCTGAGAGGATTTCTCATTGTTGGGCAAAG  
+HWI-EAS443:3:9:1388:1431#0/1  
[b]\_\_Ka`bbYa`ab`a`a^`a`¥a`aa\_\_a`^^^a  
@HWI-EAS443:3:9:1598:1720#0/1  
AAAGAAGTCTAATGTTCGAGATCTAATGTTCGAGTCCCGCACTCGGG  
+HWI-EAS443:3:9:1598:1720#0/1  
a\_a^`[^]Q]GP]Q\_SU`N\_]U^`QNRXRUUUNUBBBBB  
@HWI-EAS443:3:9:1603:499#0/1  
GGGGCCATGGTATTCTCACAAGAGGATTGCATGATCAAGG  
+HWI-EAS443:3:9:1603:499#0/1  
``]aZ^a`a]Q`a\_\_^Y\_Z``]aURU\_\_YW^^¥WNZW`B  
@HWI-EAS443:3:9:1744:1955#0/1  
GACCCGTTTTCGTTTCATTACCAACTACGTCCCCTTGC  
+HWI-EAS443:3:9:1744:1955#0/1  
Vb\_\_[\_`bb[aaab^bba\_¥\_aa]bUa`\_aXMJYW``R  
@HWI-EAS443:3:9:50:1742#0/1  
CNGATGTCAGTATTCTTGCCCCACTTCATTTGGGAAAAC  
+HWI-EAS443:3:9:50:1742#0/1  
YD[\_`^`^Y]`aaaaaabab`a`aaaa`^^`^Y]^`aa  
@HWI-EAS443:3:9:80:309#0/1  
CACCCGTTTTCGTTTCATTACCAACTACGTCCCCTTGC  
+HWI-EAS443:3:9:80:309#0/1  
aab`aaaaaaabaaaaaaa`\_`aaa\_a\_\_^`^`^`^`  
@HWI-EAS443:3:100:67:766#0/1  
GGGTGGGTTCACTTTCAAAGGACAAGCGGATCATCAGTC

+HWI-EAS443:3:100:67:766#0/1  
\_bb^bbba`\_\_abaaa`aaaa`aa`a`\_a^aa\_aa]\_  
@HWI-EAS443:3:100:876:872#0/1  
AGGGTATCTCATTGCCATCATCCACTTCATTCTGAGTGCG  
+HWI-EAS443:3:100:876:872#0/1  
abbbabbababbbbaabbabba\_a`ba`aba]baaa\_a¥a  
@HWI-EAS443:3:10:1415:151#0/1  
CGGGTATCTCATTGCCATCATCCACTTCATTCTGAGTGCG  
+HWI-EAS443:3:10:1415:151#0/1  
^`aW\_\_\_\_]\_`babZO\_]aaQE[Z`^¥Za]SZa\_¥XWHZ  
@HWI-EAS443:3:11:1685:517#0/1  
CTGATGTGTACTTTTTGATTATGGCCATATGGTCCACAGG  
+HWI-EAS443:3:11:1685:517#0/1  
a¥aSTXL\_K\_¥T`YX`a[UaZS][LSV][BBBBBBBBBBB  
@HWI-EAS443:3:11:557:755#0/1  
ATCCCGTTTTCGTTTCATTACCAACTACGTCCCTTGC  
+HWI-EAS443:3:11:557:755#0/1  
a`bbbaVabab]\_aa^]a`\_`^\_a\_a`a\_aW¥\_\_¥\_]^[  
@HWI-EAS443:3:11:951:617#0/1  
ACCCGTTTTCGTTTCATTACCAACTACGTCCCTTGCC  
+HWI-EAS443:3:11:951:617#0/1  
aba\_^Yabb`b]abaaabb^^`a\_aaaa[^\_`WTZa`a` [  
@HWI-EAS443:3:12:425:161#0/1  
CGCGATCTGAACCTTGTCAATAGGGCAAACCAGCGACTGA  
+HWI-EAS443:3:12:425:161#0/1  
G^bb¥aX¥YWXbTbb\_a]UYab]bbTK^bQ`Z]aaV\_a\_^  
@HWI-EAS443:3:12:460:836#0/1  
AGGTGGGTTCACCTTCAAAGGACAAGCGGATCATCAGTC  
+HWI-EAS443:3:12:460:836#0/1  
ab\_Wa`a0aa`\_b`aaaaaaaa[aaa```aa\_W\_aaaa^]  
@HWI-EAS443:3:12:749:1147#0/1  
GTGGGTATCTCATTGCCATCATCCACTTCATTCTGAGTGC  
+HWI-EAS443:3:12:749:1147#0/1  
aQa`aN\_```\_\_a`\_^`\_\_`¥\_]¥¥``\_^\_YS¥X¥\_W`W  
@HWI-EAS443:3:12:945:1270#0/1  
CGTCTGCTGTAATTGGGTATCTCATTGCCATCATCCACTT  
+HWI-EAS443:3:12:945:1270#0/1  
`aaaa`ba```baaaa\_ba```a`\_`\_`^`^`^]\_^\_^  
@HWI-EAS443:3:13:1325:996#0/1  
GGCTTCTGGTTGCCTTAGGGACAAGAGACTGAAATGGTTG  
+HWI-EAS443:3:13:1325:996#0/1  
aaabbaaab\_ab\_aaaab`aa`a\_aaa\_]aa`\_\_aa`]aa  
@HWI-EAS443:3:13:389:657#0/1  
ATAGGAATGGCCCAACAACAAGTACAGTTCATTACCCTAT  
+HWI-EAS443:3:13:389:657#0/1  
abbbababbaaabbbbababbbb\_aaab```bbabaaaa`\_  
@HWI-EAS443:3:13:482:1111#0/1  
ACCCGTTTTCGTTTCATTACCAACTACGTCCCTTGCC  
+HWI-EAS443:3:13:482:1111#0/1  
^\_``aP``][aV\_\_\_\_aaaaa][Ya\_P]^^UVW\_\_NQ]ZU

@HWI-EAS443:3:13:684:1444#0/1  
AAAAGAAGTCTAATGTTCGAGTCCCGCACTCGG  
+HWI-EAS443:3:13:684:1444#0/1  
`Za`RXZP[MWU`aa`\_\_Y\_aQ\_\_]¥UMSNV[VP^]BBB  
@HWI-EAS443:3:14:114:1828#0/1  
CACGTTCCCTCTTTGATCTCTAACCCCTAAAAATCGGTCA  
+HWI-EAS443:3:14:114:1828#0/1  
abaa^^aaa\_`aaaaaa`aaaaaa`a]aaaa^a[\_W\_a  
@HWI-EAS443:3:14:674:566#0/1  
AAAAGAAGTCTAATGTTCGAGTCCCGCACTCGG  
+HWI-EAS443:3:14:674:566#0/1  
T\_b`¥U\_aaaa\_]aa]aba`ab¥`^ab`aa][\_SN[] [F  
@HWI-EAS443:3:15:1056:157#0/1  
AGGGTATCTCATTGCCATCATCCACTTCATTCTGAGTGCG  
+HWI-EAS443:3:15:1056:157#0/1  
abbb\_bbbbbbbbaaaaaaaaa`aaaa`aaa\_aaaa]aZa  
@HWI-EAS443:3:15:106:1250#0/1  
CTCCCGTTTTCGTTTCATTACCAACTACGTCCTTGC  
+HWI-EAS443:3:15:106:1250#0/1  
`Y`aabVQ¥\_\_b]X]\_aa`a\_\_a\_\_`\_`a\_] [PW`]V`]  
@HWI-EAS443:3:15:211:851#0/1  
GGGTGGGTTCACTTTCAAAGGACAAGCGGATCATCAGTC  
+HWI-EAS443:3:15:211:851#0/1  
aa^Ja]bV^S[\_\_ba`b^X^]\_]aa\_Tba`¥`aa`abY`  
@HWI-EAS443:3:15:243:405#0/1  
GCCGTTAGCACTTCTTCTTCTTCTTACTGATGATCCGC  
+HWI-EAS443:3:15:243:405#0/1  
abbb]a`a\_[a¥aaaaa][ZT\_a`NL]Za^]][^¥S[V`^  
@HWI-EAS443:3:15:315:1126#0/1  
ACCCGTTTTCGTTTCATTACCAACTACGTCCTTGC  
+HWI-EAS443:3:15:315:1126#0/1  
`bbbaUG\_`^`\_a`b^\_¥S^]U`\_aaaaUa\_\_`\_\_` [\_\_\_\_  
@HWI-EAS443:3:15:427:257#0/1  
AGCCATTCTATTCCACCATGTTACGGCCAGAGGTGATAC  
+HWI-EAS443:3:15:427:257#0/1  
aaaa`aa]`¥^aaaaaaaaa\_¥a`Z`]\_a\_Q^\_N\_WWZN  
@HWI-EAS443:3:16:115:305#0/1  
CGTGGGAGATCAATGGCCCTGAGTCAGTGCTAGTCAACAC  
+HWI-EAS443:3:16:115:305#0/1  
ab]bbaabaaabaaaabaaabaa^aaaX`\_`a\_a¥`\_aYaa  
@HWI-EAS443:3:17:1487:1588#0/1  
GGACGTAGTGTTGGTAATGAAACGAAACGGGACTCTAGG  
+HWI-EAS443:3:17:1487:1588#0/1  
T\_\_WbbUUIY\_b`\_\_^ba¥MaUF\_\_^\_b[aab\_G^00aRS  
@HWI-EAS443:3:17:1526:100#0/1  
TGGGGCGATCTGAACCTTGTCAATAGGGCAAACCAGCGAC  
+HWI-EAS443:3:17:1526:100#0/1  
aa`a\_\_a] [VWYGWWU¥¥¥UWV¥WWU\_ZRWWVSUWSSSTR  
@HWI-EAS443:3:17:915:837#0/1  
ACCCGTTTTCGTTTCATTACCAACTACGTCCTTGC



@HWI-EAS443:3:1:443:598#0/1  
AGGCCATATGGTCCACAGTGGTCTTAGTGAGTATCTCGCG  
+HWI-EAS443:3:1:443:598#0/1  
aX]aaabaaaXR[]a]aaU`¥\_a`aS¥^^^U`]YBBBBB  
@HWI-EAS443:3:20:1106:2047#0/1  
NGAGAAACCTTGTTTTACGGACCAATTCTCTTTCTAGCAT  
+HWI-EAS443:3:20:1106:2047#0/1  
DMSQTRRVYSJPTQXWUUQQVURSUYXXURYXXXWTUXU  
@HWI-EAS443:3:20:1134:1329#0/1  
GCTTCCTGATGTGTACTTTTTGATTATGGCCATATGGTCC  
+HWI-EAS443:3:20:1134:1329#0/1  
aab`bbb`ba`Wa`aaabaababaaaaN^b\_a[]RUUSO[  
@HWI-EAS443:3:20:1303:495#0/1  
AGGGTATCTCATTGCCATCATCCACTTCATTCTGAGTGCG  
+HWI-EAS443:3:20:1303:495#0/1  
¥\_`\_Ia`\_a¥¥aa`a^aba`a`\_`\_a\_^[^ba`ZT\_aX\_Y\_  
@HWI-EAS443:3:20:1572:393#0/1  
GGGGTATCTCATTGCCATCATCCACTTCATTCTGAGTGCG  
+HWI-EAS443:3:20:1572:393#0/1  
a`aar^`a^a`TUN¥`W`¥¥^U\_^TZ\_\_¥\_ZU[WZKZ  
@HWI-EAS443:3:20:559:1431#0/1  
ACCCGTTTTTCGTTTCATTACCAACTACGTCCTTCC  
+HWI-EAS443:3:20:559:1431#0/1  
a`a^YSUZJZ^S\_\_a`UZa\_]`[^\_]W[[\_Z][G^][Y¥U  
@HWI-EAS443:3:21:1270:1097#0/1  
ACCCGTTTTTCGTTTCATTACCAACTACGTCCTTCC  
+HWI-EAS443:3:21:1270:1097#0/1  
aaba`Z`\_a\_W]]XN`aaa^\_a`\_¥^¥`^^LX^SZ]^`ND  
@HWI-EAS443:3:21:1494:1415#0/1  
CGGGGTGGAGTCTGCTGCTGCTGAGAGGATTTCTCATTTG  
+HWI-EAS443:3:21:1494:1415#0/1  
aaXaaURSSUaVZaa`LZWN]]RX`^]¥¥^K\_ZVV]P¥V  
@HWI-EAS443:3:21:1562:932#0/1  
CGGGTATCTCATTGCCATCATCCACTTCATTCTGAGTGCG  
+HWI-EAS443:3:21:1562:932#0/1  
`\_`abSaa`b\_aaaaZ¥aa^aa^`\_Vab`\_`\_`\_a`\_aZ`S`  
@HWI-EAS443:3:21:467:505#0/1  
AGCTGGGAGCAGATGTACTCCAGGAGGAGAAGTGAGAA  
+HWI-EAS443:3:21:467:505#0/1  
`aaabaaa¥aaaaaa¥aaaaa\_]`a]aa^a[R`Xa^a]Y  
@HWI-EAS443:3:21:63:1727#0/1  
AGCCATTCTATTCCACCATGTTACGGCCAGAGGTGATAC  
+HWI-EAS443:3:21:63:1727#0/1  
\_S\_a`\_`\_a\_a`a`\_`\_`aaaa\_\_^`aa¥¥^`\_S]VVLVBBB  
@HWI-EAS443:3:21:701:1197#0/1  
GATTGGGTATCTCATTGCCATCATCCACTTCATTCTGAGT  
+HWI-EAS443:3:21:701:1197#0/1  
aabaaaaX]bbaaa^IZa]\_a`\_]\_aa`\_]¥\_U¥a]XX]]`W  
@HWI-EAS443:3:22:1206:1811#0/1  
TCCCGTTTTTCGTTTCATTACCAACTACGTCCTTCC

+HWI-EAS443:3:22:1206:1811#0/1  
a\_\_`[Xa`bab`aaa`ab\_UZa`aS`\_L[¥PX\_W\_SRUF  
@HWI-EAS443:3:22:1761:2010#0/1  
AAAAATGGAATTTGAACCATTTAGTCTCTTGTCCTAAG  
+HWI-EAS443:3:22:1761:2010#0/1  
Obb`aaabbb`b\_V\_b\_abbba¥baXbbba0]P]\_\_ab\_¥  
@HWI-EAS443:3:22:208:457#0/1  
ACCGTTTTCGTTTCATTACCAACTACGTCCCCTTGCCC  
+HWI-EAS443:3:22:208:457#0/1  
aaaa`a`aZaZaaaWa`\_W\_aaa\_a`]JR¥WP^^¥W\_^Z  
@HWI-EAS443:3:22:31:553#0/1  
ACCCGTTTTCGTTTCATTACCAACTACGTCCCCTTGCC  
+HWI-EAS443:3:22:31:553#0/1  
abbaaabbaabaaaaabaaaaa`]Zaaa^[^]\_a^[Y[[  
@HWI-EAS443:3:23:930:438#0/1  
CGGGTATCTCATTGCCATCATCCACTTCATTCTGAGTGCG  
+HWI-EAS443:3:23:930:438#0/1  
a`bb\_bb]babaabaaaaabaabb`bb`\_bbaa[b^\_  
@HWI-EAS443:3:24:1186:460#0/1  
ACCCGTTTTCGTTTCATTACCAACTACGTCCCCTTGCC  
+HWI-EAS443:3:24:1186:460#0/1  
a]`]aH^Q^Q\_Q^\_P\_[]\_P\_a[S``WXPYLV^\_WJLMSZ  
@HWI-EAS443:3:24:151:449#0/1  
TTCCCGTTTTCGTTTCATTACCAACTACGTCCCCTTGCC  
+HWI-EAS443:3:24:151:449#0/1  
abb`ab`aaaaa`aaa`aaaaa`a\_a`a`\_`^`\_`^`\_]\_^  
@HWI-EAS443:3:24:73:1623#0/1  
CCCCGTTTTCGTTTCATTACCAACTACGTCCCCTTGCC  
+HWI-EAS443:3:24:73:1623#0/1  
abaa[V¥`\_Z\_[^a¥`^`^`a]`VZa\_[V\_[Q[a¥\_[P[^Z  
@HWI-EAS443:3:24:791:331#0/1  
TGGGGCGATCTGAACCTTGTCAATAGGGCAAACCAGCGAC  
+HWI-EAS443:3:24:791:331#0/1  
aaaaaaaaa\_a]`aZaaa\_¥`aa`\_`aaT\_aa]\_\_\_^\_WW  
@HWI-EAS443:3:25:1511:1721#0/1  
TGATGGCAATGAGATACCCAATTACAGCAGACAAGAGAAA  
+HWI-EAS443:3:25:1511:1721#0/1  
ab\_a]a\_aabbaaa\_a\_[^a`\_`a^a\_\_a`\_]^\_\_\_\_`^\_  
@HWI-EAS443:3:25:41:1296#0/1  
CTTGGTCCGTAAAACAAGTTTCTCCAGTAGCCGGCGGA  
+HWI-EAS443:3:25:41:1296#0/1  
abbbbaab`b]bbbaa[\_]U\_aaababb¥\_a\_aaa\_\_`\_^  
@HWI-EAS443:3:26:1290:835#0/1  
CCCCGTTTTCGTTTCATTACCAACTACGTCCCCTTGCC  
+HWI-EAS443:3:26:1290:835#0/1  
S\_ba`MUZ^[^¥Z]]]\_b`aab\_UP\_`\_]`ZZ`Xa`V``\_  
@HWI-EAS443:3:26:1738:1785#0/1  
ATAGGGTTGAGGATTAGCTCATCTTTTCAGTTTTGGTGGGG  
+HWI-EAS443:3:26:1738:1785#0/1  
]TYa^`Y^\_abb^\_baaaaR\_a¥\_aa`Ybaba\_aa¥^`\_G



+HWI-EAS443:3:30:1515:268#0/1  
Ybaa^a`\_^\_aaba¥b`b`]^a\_a`aa`P¥a`TYPYZ\_\_\_  
@HWI-EAS443:3:30:1558:353#0/1  
GGGGCCATTCTTCCACCATGTTACGCCAGAGGTGAT  
+HWI-EAS443:3:30:1558:353#0/1  
`Z`]V[aa\_Y\_a\_aa][[\_`\_`\_^aa^\_]SYY¥YWSRZBB  
@HWI-EAS443:3:30:1656:378#0/1  
CGCCCCGTTAGCACTTCTTCTTCTTCTTCTTACTGATGATCC  
+HWI-EAS443:3:30:1656:378#0/1  
a`^bYbabab`^aababbaba\_bbb\_bba^U`aab\_\_aV`  
@HWI-EAS443:3:30:408:753#0/1  
GCCCCGTTTCGTTTCATTACCAACTACGCCCCCTTGCC  
+HWI-EAS443:3:30:408:753#0/1  
abbbbaaabba[ba`aab`^\_aaaa`aa^¥`a`\_^\_^X\_  
@HWI-EAS443:3:30:498:992#0/1  
TCGGGGTCTTCTTCTTGCCTTCTGATGTGTACTTTTTGA  
+HWI-EAS443:3:30:498:992#0/1  
¥\_Z\_RXR]W\_a¥ZZ\_YUIU0aVV\_¥T[^SHFSSKZ\_TVYB  
@HWI-EAS443:3:32:1441:388#0/1  
GTGTAATTGGGTATCTCATTGCCATCATCCACTTCATTCT  
+HWI-EAS443:3:32:1441:388#0/1  
HUa`babbbb]a`\_\_`bbaba`¥a`Y`baI[R]]a`¥`ab  
@HWI-EAS443:3:32:476:2029#0/1  
TGGGGCGATCTGAACCTTGTCAATAGGGCAAACCAGCGAC  
+HWI-EAS443:3:32:476:2029#0/1  
aaaa\_b[`R`aWH][MZ`UXa¥\_N[UU\_`^a[\_GJSaV\_`  
@HWI-EAS443:3:32:558:1282#0/1  
GCCCCGTTTCGTTTCATTACCAACTACGCCCCCTTGCC  
+HWI-EAS443:3:32:558:1282#0/1  
ababbXa`a`\_^aaaaaaaaba`a\_aaa]S¥a\_`[KP^\_  
@HWI-EAS443:3:33:1241:983#0/1  
AAAAGAAGTGAAGATCTAATGTCGCAGTCCCGCACTCGN  
+HWI-EAS443:3:33:1241:983#0/1  
abbaaababaaaa`babaaaa]aa\_`a^`^]X]W^`TWD  
@HWI-EAS443:3:34:116:1463#0/1  
GGGTGGGTTCACCTTCAAAGGACAAGCGGATCATCAGTC  
+HWI-EAS443:3:34:116:1463#0/1  
aa`Qa`a\_`bbaaaaa^a`aaY`^Ua`Y`^aa[a`a\_`]^  
@HWI-EAS443:3:34:388:1152#0/1  
ACCCGTTTCGTTTCATTACCAACTACGCCCCCTTGCC  
+HWI-EAS443:3:34:388:1152#0/1  
¥babb\_aaabb^aabaaaaaabaa`aaaa^a^Z^ZXLQV  
@HWI-EAS443:3:35:1792:1201#0/1  
NTCCCGTTTTCGTTTCATTACCAACTACGCCCCCTTGC  
+HWI-EAS443:3:35:1792:1201#0/1  
DNQTTTSLPUSVNTUNTRQLMTSBBBBBBBBBBBBBBBB  
@HWI-EAS443:3:35:273:309#0/1  
TGCTGTCCTGAGAGGATTTCTCATTTTGGGCAAAGAAGAA  
+HWI-EAS443:3:35:273:309#0/1  
abbaa\_babb^`\_`\_]Ya¥`^a]aa`\_`]^a`a`\_`\_\_a]



@HWI-EAS443:3:35:537:1806#0/1  
ACCCGTTTTCGTTTCATTACCAACTACGTCCTTGCC  
+HWI-EAS443:3:35:537:1806#0/1  
ab\_aWR^`aaU¥aa\_a\_\_`¥a`aa`¥]^a\_S\_a`\_UVYV\_  
@HWI-EAS443:3:36:1128:1776#0/1  
CGGGTATCTCATTGCCATCATCCACTTCATTCTGAGTGCG  
+HWI-EAS443:3:36:1128:1776#0/1  
abbaZbbaaabaaaaaaabaaa`aaaWaaa````\_aU`\_\_  
@HWI-EAS443:3:36:433:249#0/1  
AGGGTATCTCATTGCCATCATCCACTTCATTCTGAGTGCG  
+HWI-EAS443:3:36:433:249#0/1  
abaa\_aaaaaaaabaa`aaaaZYa`\_`a\_\_\_a`\_Va``  
@HWI-EAS443:3:36:769:345#0/1  
GCCCGTTTTCGTTTCATTACCAACTACGTCCTTGCC  
+HWI-EAS443:3:36:769:345#0/1  
aa`ba`\_`a`\_]aa\_aa\_a]\_aa¥`Y^\_aaVY]X\_]X]WY  
@HWI-EAS443:3:37:1181:457#0/1  
GGGCCCCAACAAAGTACAGTTCATTACCCTAAGGTATAT  
+HWI-EAS443:3:37:1181:457#0/1  
aba`aabaaaa`aaa\_baa`^a\_aaaa]^NX¥JZaY`aa^  
@HWI-EAS443:3:37:1313:2038#0/1  
CTGCTGTAATTGGGTATCTCATTGCCATCATCCACTTCAC  
+HWI-EAS443:3:37:1313:2038#0/1  
abbabb]babbbbbbGbaaaaba\_aaab`bS^Wbbb¥\_aaV  
@HWI-EAS443:3:37:1786:1936#0/1  
AGTGTCTTACGAATCCACTGTACCGGCTTCTGGTTGCCG  
+HWI-EAS443:3:37:1786:1936#0/1  
Vbaaa`abU`\_]LVaa^SW`H]]^YX^SOTTTBBBBBBBBB  
@HWI-EAS443:3:37:615:825#0/1  
GCTGTCTGAGAGGATTTCTCATTGTTGGGCAAAGAAGACG  
+HWI-EAS443:3:37:615:825#0/1  
\_`\_^\_b¥Zb^`\_`a`\_aaa`[a]\_a][][HTX[\_¥^`\_]X  
@HWI-EAS443:3:38:1017:763#0/1  
TCGCGAGATACTACTAAGACCACTGTGGACCATATGGCG  
+HWI-EAS443:3:38:1017:763#0/1  
a\_U\_RT\_X\_^Wa^`a[``]L^U`aOMUTXTHYWXV¥`\_YO  
@HWI-EAS443:3:38:1442:749#0/1  
GTGCTAATTGGGCAAGGGGACGTAGTGTGGTAATGAAAA  
+HWI-EAS443:3:38:1442:749#0/1  
aX^aaa^aaa`[Y^\_a`aaWYa^[aWaYa\_QNYWVXNW[G  
@HWI-EAS443:3:38:368:1694#0/1  
GCTCGGTCTGATCCAGCATCGTTTGTGTTGCTCCAGAGGG  
+HWI-EAS443:3:38:368:1694#0/1  
\_`aa\_¥`\_¥\_\_aa`[abbbab^abaaaaa^^\_a¥\_aa¥W  
@HWI-EAS443:3:38:786:1195#0/1  
GTGCATTGACTGAAGATCCAGATGAAGGCACATCTGGGGG  
+HWI-EAS443:3:38:786:1195#0/1  
`bbaZ`bWW`aU]Z\_abbaaa`a]``¥aYU\_\_\_aa`aaH  
@HWI-EAS443:3:39:1056:953#0/1  
GGGCCATATGGTCCACAGTGGTCTTAGTGAGTATCTCGCG

+HWI-EAS443:3:39:1056:953#0/1  
a\_abbabbbaaaabbbb\_aa^aabaab`aWa`aa`^`Y  
@HWI-EAS443:3:39:1140:204#0/1  
CGGGGTGGAGTCTGCTGCCTGAGAGGATTTCTCATTTTG  
+HWI-EAS443:3:39:1140:204#0/1  
abb`W`ab\_aa`babbb\_abaabaa\_X`a\_G]\_a`]¥a^  
@HWI-EAS443:3:39:1154:1544#0/1  
AAAAGGACAAGCGGATCATCAGTCAAGAAAGAAGAAGAAAT  
+HWI-EAS443:3:39:1154:1544#0/1  
]YaW^`¥b]]b`^`a^\_a[\_]\_a\_\_a]¥\_\_b¥M^aa^Z]XD  
@HWI-EAS443:3:39:1792:843#0/1  
NTTCACTTTCAAAGGACAAGCGGATCATCAGTCAAGAAA  
+HWI-EAS443:3:39:1792:843#0/1  
DKXUYZZXSYXXYXMVTTXUXUVUSXYXPXUYXXZV  
@HWI-EAS443:3:39:706:622#0/1  
GACCCTTCATGTACTCTTATTTTCAGTGTTTGGAGGTTGC  
+HWI-EAS443:3:39:706:622#0/1  
`X\_aaaa\_a\_]\_\_aaa\_`\_a`a^`aXa]`^]XW\_UMTUZ  
@HWI-EAS443:3:39:856:353#0/1  
GGGTGGGTTCACTTTCAAAGGACAAGCGGATCATCAGTC  
+HWI-EAS443:3:39:856:353#0/1  
a\_aVaa`Y\_\_Y\_^^^`[VYMZ\_]XN[\_\_[XYY^]Y\_XX  
@HWI-EAS443:3:3:1740:323#0/1  
TGCCTTAACCCAAGGGACGTGCTGGGAGCAGATGTACAA  
+HWI-EAS443:3:3:1740:323#0/1  
``a^X\_¥bYT^W^a\_`Wa^^V]``\_U`S¥QV`^^BBBBBB  
@HWI-EAS443:3:3:1744:953#0/1  
GTGGTCCGTAACAAGGTTTCTCCCAGTAGCCGGCGGAA  
+HWI-EAS443:3:3:1744:953#0/1  
a\_ba`¥ab`aaaa¥\_¥`\_U¥^¥a¥T¥¥]W¥`WS\_WS¥¥BB  
@HWI-EAS443:3:3:455:613#0/1  
GATAGGAATGGCCCAACAACAAGTACAGTTCATTACCCTA  
+HWI-EAS443:3:3:455:613#0/1  
aaabbaaa^H]\_\_a`\_aa`\_a[a[\_\_X\_]`a`\_]ZX`\_  
@HWI-EAS443:3:3:732:979#0/1  
CCCCGACTCAGAATGAAGTGGATGATGGCAATGAGATACA  
+HWI-EAS443:3:3:732:979#0/1  
`a[RX]ZV\_aa`¥`\_Q`SPab^[]U`]`W^[GZ]¥HL\_WD  
@HWI-EAS443:3:40:1393:419#0/1  
ACCCGTTTTCGTTTCATTACCAACTACGTCCCCTTGCC  
+HWI-EAS443:3:40:1393:419#0/1  
aaYbbaaab`\_\_aaaa\_aaZa\_`a]]aaYVX``]WR[`V  
@HWI-EAS443:3:40:388:54#0/1  
CCCCGTTTTCGTTTCATTACCAACTACGTCCCCTTGCC  
+HWI-EAS443:3:40:388:54#0/1  
aaabb\_abbab`aa\_aa`aaaa\_a^VR][^`]`VRZ¥V  
@HWI-EAS443:3:40:510:1272#0/1  
GTGCTAATTGGCAAGGGGACGTAGTGTGGTAATGAAAA  
+HWI-EAS443:3:40:510:1272#0/1  
aRN¥¥XX`a[```[YU]N[V\_]UZYXXV]]VVYGNRWWF

@HWI-EAS443:3:40:863:1654#0/1  
CCCCGTTTTCGTTTCATTACCAACTACGTCCTTGCC  
+HWI-EAS443:3:40:863:1654#0/1  
aaaa`\_aaa`]a`a`abaabaab^]ba`Xa`aaV][a\_  
@HWI-EAS443:3:43:183:1372#0/1  
CATTCTTGTCTGCTGTAATTGGGTATCTCATTGCCATC  
+HWI-EAS443:3:43:183:1372#0/1  
aa¥V\_``¥^a`[^F[VUV¥¥¥Z\_UH¥\_`]]ZVOW][ZW  
@HWI-EAS443:3:43:206:555#0/1  
GGCCGTAGACATATGCAAGGCAGCAATAGGGTTGAGGATT  
+HWI-EAS443:3:43:206:555#0/1  
aabba`bba\_\_bbabb`abababa\_`aabba`ab\_aa¥aa  
@HWI-EAS443:3:43:896:174#0/1  
CGGGTATCTCATTGCCATCATCCACTTCATTCTGAGTGCG  
+HWI-EAS443:3:43:896:174#0/1  
abbb\_bbaaaababbaaa]ba`\_aa`aa`a``aa[aTa\_a  
@HWI-EAS443:3:44:28:942#0/1  
TTCTTCTTTGCCAAAATGAGAAATCCTCTCAGGACAGCA  
+HWI-EAS443:3:44:28:942#0/1  
a``aaaaaaaaaaaa]aabaaaa``aaaa^¥]`aa^`  
@HWI-EAS443:3:45:1613:864#0/1  
CCCCGTTTTCGTTTCATTACCAACTACGTCCTTGCC  
+HWI-EAS443:3:45:1613:864#0/1  
aba`b`]^`b`aa^[bbaa[aaa¥^]`\_\_[UQ]NT]Y^\_  
@HWI-EAS443:3:45:733:1368#0/1  
ACCCGTTTTCGTTTCATTACCAACTACGTCCTTGCC  
+HWI-EAS443:3:45:733:1368#0/1  
```ab`a`\_aaYaa\_aa\_]`¥a\_\_a\_\_`XTXY]^`^¥W¥U  
@HWI-EAS443:3:45:880:1906#0/1  
ACCCGTTTTCGTTTCATTACCAACTACGTCCTTGCC  
+HWI-EAS443:3:45:880:1906#0/1  
a\_^ab`^aa\_]a`\_aaaa\_`aa]`Z`a^\_ZZ^]Y]W^X]  
@HWI-EAS443:3:45:95:1667#0/1  
CTCTTATTTTCAGTGTGGAGGTTGCCGTTAGCACTTT  
+HWI-EAS443:3:45:95:1667#0/1  
R^\_bb\_¥a`a\_Q\_a^]\_¥aa``¥Yb¥\_¥[¥`a\_N\_TO\_\_H  
@HWI-EAS443:3:46:1682:1184#0/1  
CCCCGTTTTCGTTTCATTACCAACTACGTCCTTGCC  
+HWI-EAS443:3:46:1682:1184#0/1  
a``\_bZQ¥XX\_VZ[Z[Z\_]^[[\_^`[\_]]][S]Y¥]VZVUU  
@HWI-EAS443:3:46:23:863#0/1  
TGGGTTGAGGATTAGCTCATCTTTTCAGTTTTGGTGGGTTT  
+HWI-EAS443:3:46:23:863#0/1  
`\_a¥¥\_Wa`\_]^\_WQ[¥][VO^a[JMKO][Y\_ZU]\_^SVR  
@HWI-EAS443:3:46:256:704#0/1  
CTCCCGTTTTCGTTTCATTACCAACTACGTCCTTGCC  
+HWI-EAS443:3:46:256:704#0/1  
abbbbbbbba^aaaabaa`aaa`a\_aa[a\_`\_\_^a\_\_\_  
@HWI-EAS443:3:46:297:892#0/1  
CCCCGTTTTCGTTTCATTACCAACTACGTCCTTGCC

+HWI-EAS443:3:46:297:892#0/1  
abb`¥ZZ^a`YW¥P`]P\_UX` `aaaa`]YY[TY¥WXT¥  
@HWI-EAS443:3:46:731:29#0/1  
TGGGGACGTAGTGTGGTAATGAAACGAAAACGGGACTCT  
+HWI-EAS443:3:46:731:29#0/1  
abba\_\_aba\_b\_b`ab`¥^`a`a¥F\_^\_\_ZLXa\_VUY[¥  
@HWI-EAS443:3:46:789:1174#0/1  
CCCCGTTTTCGTTTCATTACCAACTACGTCCCCTTGCCN  
+HWI-EAS443:3:46:789:1174#0/1  
¥U\_S\_`baaa^¥¥^^^Z\_[]a\_NZ^\_X]Z^J[XU`N[RWD  
@HWI-EAS443:3:47:1155:72#0/1  
CCCCGTTTTCGTTTCATTACCAACTACGTCCCCTTGCC  
+HWI-EAS443:3:47:1155:72#0/1  
a]Z\_\_JZab\_[H¥a`]aaa[]\_\_V\_ZS\_V\_\_[W[QRYWLR  
@HWI-EAS443:3:47:1405:555#0/1  
CCTGCTGTAATTGGGTATCTCATTGCCATCATCCACTTCA  
+HWI-EAS443:3:47:1405:555#0/1  
aabbbbbb`bbbbbbbab]a]baabaaaaaaaa[a\_baZ`  
@HWI-EAS443:3:47:1732:1326#0/1  
TGTGGGTTCACTTTCAAAGGACAAGCGGATCATCAGTCA  
+HWI-EAS443:3:47:1732:1326#0/1  
N^G]`bb`a^`bbbb\_]¥bbZbY]]\_G[abaa\_`R^]X`\_  
@HWI-EAS443:3:48:1180:390#0/1  
CCCCCACTCAGAATGAAGTGGATGATGGCAATGAGATACA  
+HWI-EAS443:3:48:1180:390#0/1  
abababbb\_bbaabb``babbaabaabb`aaababaaa[`  
@HWI-EAS443:3:48:257:1263#0/1  
CGGGTATCTCATTGCCATCATCCACTTCATTCTGAGTGCG  
+HWI-EAS443:3:48:257:1263#0/1  
`¥]bSba`abbaaaaaabaaaa]a^`aaaa`a`^^^aV`  
@HWI-EAS443:3:48:988:216#0/1  
ACCCGTTTTCGTTTCATTACCAACTACGTCCCCTTGCC  
+HWI-EAS443:3:48:988:216#0/1  
aa\_abXabaaa\_aa`aaaa\_¥\_`^aa¥a``[\_ZUTY]`\_U  
@HWI-EAS443:3:49:1364:1155#0/1  
CGTTAGCACTTCTTCTTTCTTGGACTGATGATCCGCTN  
+HWI-EAS443:3:49:1364:1155#0/1  
YaKU\_bbXabbb`aaaUZaa`bZb]M]b``baaba]b\_^D  
@HWI-EAS443:3:49:489:330#0/1  
GGAGAGACGAGCAGTCAATTGCTGAGGCAATAATTGTGGG  
+HWI-EAS443:3:49:489:330#0/1  
aaa`aa`ba`\_^aRP\_\_a`Ia¥\_¥\_]a`V\_\_^`[X\_VF  
@HWI-EAS443:3:49:567:37#0/1  
GAACTGTACTTGTGTTGGGCCATTCCCTATTCCACCATGC  
+HWI-EAS443:3:49:567:37#0/1  
a^\_WYaZ\_R^bbbab\_aba\_`ab^`]`\_\_a\_Z]^TV]\_aa  
@HWI-EAS443:3:49:614:631#0/1  
TGGGGACGTAGTGTGGTAATGAAACGAAAACGGGACTCT  
+HWI-EAS443:3:49:614:631#0/1  
`b\_aaaab`a\_\_aVbbaYT^aa[abPa`aaaHaaa¥R`]\_

@HWI-EAS443:3:4:1329:1317#0/1  
TGGGGCGATCTGAACCTTTGTCAATAGGGCAAACCAGCGAC  
+HWI-EAS443:3:4:1329:1317#0/1  
aaa\_`^]\_¥¥\_\_[^Ya` `` `¥\_]\_Z` \_[W^[¥W¥¥^VVVW  
@HWI-EAS443:3:4:1612:1855#0/1  
TACTACTAAGACCACTGTGGACCATATGGCCATAATCAT  
+HWI-EAS443:3:4:1612:1855#0/1  
aa^\_[b`aaabaV\_`\_\_b]a`\_¥\_]\_^a¥[ ]\_V^`YV]B  
@HWI-EAS443:3:4:378:419#0/1  
TAATGTGCAGTCCCGCACTCGCGAGATACTCACTAAGAA  
+HWI-EAS443:3:4:378:419#0/1  
`^[aaUY^¥baaUGTU[[[VPZX]XQP`UY^TRQ]]\_UBB  
@HWI-EAS443:3:4:59:1868#0/1  
GAAGTGGACAGGGCCGAAGGTACCATGTTTCAACCTTCA  
+HWI-EAS443:3:4:59:1868#0/1  
a]b^PQY^aaQNOJMa][[]UXJR\_`^`QY\_Z`UPTOMU]`  
@HWI-EAS443:3:4:620:595#0/1  
CGGGCCATATCTCTTGTCTTCTTTGCCAAAATGAGAAAT  
+HWI-EAS443:3:4:620:595#0/1  
¥bba\_bVbaaaaa[[baa`aabb[Xa]aab`bbbab`baa  
@HWI-EAS443:3:4:856:348#0/1  
GCCCCTTTTCGTTTTATTACCAACTACGTCCCCTTGCC  
+HWI-EAS443:3:4:856:348#0/1  
abaaaR^a\_]` `aa¥a`]b\_\_aa]¥\_aa^¥U\_JVQ¥XUKD  
@HWI-EAS443:3:4:950:207#0/1  
CCCTTGTTGTAATTGAATACTGGAGAATTGCCTTACCA  
+HWI-EAS443:3:4:950:207#0/1  
H]baUQX\_`Z`a\_`bbbb¥¥`bbXbaa^]`H`baba¥HSb  
@HWI-EAS443:3:50:1612:534#0/1  
ACCCGTTTTCGTTTTATTACCAACTACGTCCCCTTGCC  
+HWI-EAS443:3:50:1612:534#0/1  
abaa\_\_ba^S\_`a^Za`\_]\_¥¥\_aTa\_a`^aZ\_a^[`Y¥¥T  
@HWI-EAS443:3:50:700:1328#0/1  
CAGGCATTTCCAAAAGATGCAAAAGTGCTTTTCCAGAAC  
+HWI-EAS443:3:50:700:1328#0/1  
a\_^\_aabbbbb`abbbba`b]aaaa\_aabaaa`aaa`aa  
@HWI-EAS443:3:51:1082:793#0/1  
GGGTGGGTTCACCTTTCAAAGGACAAGCGGATCATCAGTC  
+HWI-EAS443:3:51:1082:793#0/1  
O\_\_U\_W\_¥¥U`Ta`bUb^a[¥R\_baYbabXI`Uba\_\_¥GQ  
@HWI-EAS443:3:51:71:1000#0/1  
ATCCCGTTTTCGTTTTATTACCAACTACGTCCCCTTGCC  
+HWI-EAS443:3:51:71:1000#0/1  
¥X¥SUa]a\_U0¥a^`ba]baZVXa`\_T\_\_`][[¥]^¥aa[  
@HWI-EAS443:3:52:316:1091#0/1  
TGATTTCTCATTTTGGGCAAAGAAGACAAGAGATATGGCC  
+HWI-EAS443:3:52:316:1091#0/1  
\_babba`babbbababa`a\_]aaaaa\_a`a`aa]\_]`¥^`  
@HWI-EAS443:3:52:665:170#0/1  
GCTCTGTCTGCTGTAATTGGGTATCTCATTGCCATCATC

+HWI-EAS443:3:52:665:170#0/1  
aababa`aaab`aa¥`aaaaNa\_]\_Z\_a`]\_]\_]T^VT  
@HWI-EAS443:3:53:111:1981#0/1  
GAACAAAATGGAATTTGAACCATTTAGTCTCTTGTCCCT  
+HWI-EAS443:3:53:111:1981#0/1  
W\_[R\_bbb\_]`aTaaa[¥`aab`b`^^`\_aaTa¥YI^a]a  
@HWI-EAS443:3:53:1369:805#0/1  
ACCCGTTTTTCGTTTCATTACCAACTACGTCCCCTTGCC  
+HWI-EAS443:3:53:1369:805#0/1  
aa\_abbabaaa`a\_bbb]``^`ab`¥a`W]^Xa\_\_\_0  
@HWI-EAS443:3:53:994:545#0/1  
TGATGGCAATGAGATACCCAATTACAGCAGACAAGAGAAA  
+HWI-EAS443:3:53:994:545#0/1  
`a\_aaaYa]aaZZ\_ab¥`^`bbaa^]ba\_b`Z`abaaa`  
@HWI-EAS443:3:54:1174:1226#0/1  
ACCCGTTTTTCGTTTCATTACCAACTACGTCCCCTTGCC  
+HWI-EAS443:3:54:1174:1226#0/1  
[Y¥`aa`a`b\_aaYa[aaW`aaHaa\_\_X\_Y]\_^M\_[]MW  
@HWI-EAS443:3:54:1281:1820#0/1  
AGAGAATAAAAGAACTGAGAGATCTAATGTGCGAGTCCCT  
+HWI-EAS443:3:54:1281:1820#0/1  
\_¥Za\_bbbabbbbaM`b``\_\_ba]aaab`\_\_a`aVT]S]  
@HWI-EAS443:3:54:1413:1239#0/1  
CCCCGTTTTTCGTTTCATTACCAACTACGTCCCCTTGCC  
+HWI-EAS443:3:54:1413:1239#0/1  
``abbbbbbbabbbbbbb`bbababb`bbbab`[a[  
@HWI-EAS443:3:54:1451:1008#0/1  
GCCGTTTTTCGTTTCATTACCAACTACGTCCCCTTGCCC  
+HWI-EAS443:3:54:1451:1008#0/1  
aab`abb`baaa`[aaba\_a`^a`aa]a`UUZ\_\_PQ^Z  
@HWI-EAS443:3:54:1692:1287#0/1  
CGGGCAAGGGGACGTAGTGTGGTAATGAAACGAAAACGG  
+HWI-EAS443:3:54:1692:1287#0/1  
ababbbbababaa\_babbb`Gaabaabb`b`baba`b  
@HWI-EAS443:3:54:441:1308#0/1  
CTCCCGTTTTTCGTTTCATTACCAACTACGTCCCCTTGCC  
+HWI-EAS443:3:54:441:1308#0/1  
aaa`]W¥aaa¥`\_\_`aaaa^a```]\_aa\_a\_]\_]¥[WSS[  
@HWI-EAS443:3:55:118:1296#0/1  
ACTTCCTGATGTGTACTTTTTGATTATGGCCATATGGTCC  
+HWI-EAS443:3:55:118:1296#0/1  
aaa`]\_abaa`Y`^]aab^aa¥Xaaa`[[`\_\_S[ TGYOQ^  
@HWI-EAS443:3:55:146:141#0/1  
GGGATGATGGCAATGAGATACCCAATTACAGCAGACAAGA  
+HWI-EAS443:3:55:146:141#0/1  
\_`a\_aa\_aaaa^```a]^`\_]Y\_]`\_\_R\_\_SY\_WZ]^`¥  
@HWI-EAS443:3:55:1702:509#0/1  
GCCCGTTTTTCGTTTCATTACCAACTACGTCCCCTTGCC  
+HWI-EAS443:3:55:1702:509#0/1  
^`Y¥WW\_\_]V\_U``[W]baY LX]¥][\_YQ^UVBBBBBBBB

@HWI-EAS443:3:55:381:135#0/1  
CGGTCTTAGTGAGTATCTCGCGAGTGC GGGACTGCGACAT  
+HWI-EAS443:3:55:381:135#0/1  
aa\_¥aa\_aaa`¥]N\_aaaa\_a]^V`Xab`VY^^[a[S[\_  
@HWI-EAS443:3:55:64:497#0/1  
GATCTAATGTGCGAGTCCCGCACTCGCGAGATACTCACTT  
+HWI-EAS443:3:55:64:497#0/1  
a^O[a¥Z]X^^¥QQZ¥¥XRXTFFTT¥WTS]BBBBBBBBBB  
@HWI-EAS443:3:56:105:917#0/1  
AGGGTATCTCATTGCCATCATCCACTTCATTCTGAGTGCG  
+HWI-EAS443:3:56:105:917#0/1  
ZV\_\_V]¥¥^ZW^XRWVT]R^Q[¥ZX\_U`]XX``]OZLHOO  
@HWI-EAS443:3:56:1532:1988#0/1  
GACAGATTGGAGGAGTAAGGATGGTGGACATCCTTAGACA  
+HWI-EAS443:3:56:1532:1988#0/1  
I¥`Xa¥b¥b¥X¥b¥Y¥0\_Y``[QU^F\_b[]\_¥a`]XBBBBB  
@HWI-EAS443:3:56:691:1296#0/1  
AGCTAATTGGGCAAGGGGACGTAGTGTGGTAATGAAACG  
+HWI-EAS443:3:56:691:1296#0/1  
^`baa`abbbb`abab`baabaaba`Yaa^W\_^aXWa¥FX  
@HWI-EAS443:3:57:1339:405#0/1  
GGGGTATCTCATTGCCATCATCCACTTCATTCTGAGTGCG  
+HWI-EAS443:3:57:1339:405#0/1  
]\_\_Y[b[a\_S\_`ZS\_]```¥^UUO\_\_GUaa¥````T\_T`  
@HWI-EAS443:3:57:468:617#0/1  
GGGGTATCTCATTGCCATCATCCACTTCATTCTGAGTGCG  
+HWI-EAS443:3:57:468:617#0/1  
`\_\_b^aaaaaaaaaaaaa`aaaaa\_aaaaaa`a`\_dWa\_`  
@HWI-EAS443:3:59:1016:1834#0/1  
CTGGATCAGACCGAGTGATGGTATCACCTCTGGCCGTAAA  
+HWI-EAS443:3:59:1016:1834#0/1  
`abbaabbbabaa\_a¥ab\_a`Qbaabba`aQ\_`W¥N]^G  
@HWI-EAS443:3:59:1093:378#0/1  
GAATAAAAGAAGTCTAATGTGCGAGTCCCGCAG  
+HWI-EAS443:3:59:1093:378#0/1  
a]a]]aaaaY^YYb\_aaaa`\_^\_U^b]`aadWTWRRY`RG  
@HWI-EAS443:3:59:1358:185#0/1  
GCTGTAATTGGGTATCTCATTGCCATCATCCACTTCATTA  
+HWI-EAS443:3:59:1358:185#0/1  
aaaa\_aaa\_¥^a]aaaa`\_a\_RP[`\_aa\_a\_[¥`aNR\_\_G  
@HWI-EAS443:3:59:152:694#0/1  
ACCCGTTTTCGTTTCATTACCAACACTACGTCCTTGCC  
+HWI-EAS443:3:59:152:694#0/1  
aabbb``aaa\_[aaaaa`aaa`¥`aaa¥`a[T\_^\_YY\_UW  
@HWI-EAS443:3:59:1550:1609#0/1  
ACCCGTTTTCGTTTCATTACCAACACTACGTCCTTGCC  
+HWI-EAS443:3:59:1550:1609#0/1  
\_``\_\_aba¥Z^aa\_[a\_dWY`^^a^`aBBBBBBBBBBBB  
@HWI-EAS443:3:59:427:809#0/1  
CCCCGTTTTCGTTTCATTACCAACACTACGTCCTTGCC

+HWI-EAS443:3:59:427:809#0/1  
abbbbXU\_b\_`baabb`aaabababaaaXTZYX\_VFUWU  
@HWI-EAS443:3:59:456:59#0/1  
CACCTTCATGTACTCTTATTTTCAGTGTGGAGGTTGC  
+HWI-EAS443:3:59:456:59#0/1  
a^\_a[aa`^aa\_[]`^^\_\_\_\_`\_^\_\_`VZ[\_\_\_Y¥N\_RGWOO  
@HWI-EAS443:3:59:556:1296#0/1  
AAGTTATTGTCAACTTCTCAGTTCCTTGCGTTTCACTGAG  
+HWI-EAS443:3:59:556:1296#0/1  
`Z]T]a`aX¥a`YRSZa`Ua¥IZaa\_][aaSQZY]YPYXG  
@HWI-EAS443:3:59:730:752#0/1  
ACCCGTTTTCGTTTCATTACCAACTACGTCCCCTTGCC  
+HWI-EAS443:3:59:730:752#0/1  
aa```\_¥a`\_a^]\_]X`^]XX^YX][¥\_W\_VXXXVWVYY  
@HWI-EAS443:3:59:979:328#0/1  
TGATGGCAATGAGATACCCAATTACAGCAGACAAGAGAAA  
+HWI-EAS443:3:59:979:328#0/1  
abaa`aaaa`aaaa\_a`\_\_aaaaaaaa`aaaZ`^`ZU\_\_^  
@HWI-EAS443:3:5:136:1581#0/1  
CGGGTTGAGGATTAGCTCATCTTTCAGTTTTGGTGGGTTC  
+HWI-EAS443:3:5:136:1581#0/1  
abaaababaaabaaa`aaaa`aba`aa\_aa`aaVbaaU``  
@HWI-EAS443:3:5:717:1977#0/1  
TGATGGCAATGAGATACCCAATTACAGCAGACAAGAGAAA  
+HWI-EAS443:3:5:717:1977#0/1  
aabb\_bbbbbbbbabbb`baaaabbab`baaab``bb`a  
@HWI-EAS443:3:60:538:1016#0/1  
AGGGCCATTCTTCCACCATGTTACGGCCAGAGGTGAT  
+HWI-EAS443:3:60:538:1016#0/1  
`U\_] [babaaaa`a`ba`aaa`]Maa\_T`]XLT YVG\_RU  
@HWI-EAS443:3:60:606:1554#0/1  
CGACCGATTTTTAAGGGTTAGAGATCAAAGAGGGAACGTA  
+HWI-EAS443:3:60:606:1554#0/1  
aYZ`a`Z¥`a`¥[[\_[\_]\_\_\_\_]`\_`ZZ]\_Y[^\_aY`Z\_  
@HWI-EAS443:3:61:1416:1274#0/1  
AGGGTATCTCATTGCCATCATCCACTTCATTCTGAGTGCG  
+HWI-EAS443:3:61:1416:1274#0/1  
\_a`a\_bbbba^aaa\_¥X\_a`abbbba`a`aaa¥]]\_H^TW  
@HWI-EAS443:3:61:466:1524#0/1  
CGCACTGACTCAGGGCATTGATCTCCACATCATTGATG  
+HWI-EAS443:3:61:466:1524#0/1  
abba`aaaaaba\_\_]^a¥][`¥^a\_aaaa`\_¥OY¥ZY[V[  
@HWI-EAS443:3:62:1012:109#0/1  
GATGATCCAGAGAGGAATGAACAAGGACAAACCCTCTGG  
+HWI-EAS443:3:62:1012:109#0/1  
IS`abb`aaaa\_]\_bbbab[[ba^b[b[`¥ba[IaSZbb  
@HWI-EAS443:3:62:170:46#0/1  
TTCCCGTTTTCGTTTCATTACCAACTACGTCCCCTTGCC  
+HWI-EAS443:3:62:170:46#0/1  
aa`\_`b\_aa\_a]`^^\_^^^¥V¥^]]VR[ZZWVXYYYY



@HWI-EAS443:3:62:1742:1842#0/1  
CCCCGTTTTTCGTTTCATTACCAACTACGTCCCCTTGCC  
+HWI-EAS443:3:62:1742:1842#0/1  
^b]`YHY`aaa\_UR]a`Z[`a]\_T\_Yaa]ZR\_]`^VOPOQU  
@HWI-EAS443:3:63:1386:1680#0/1  
ACCGTTTTTCGTTTCATTACCAACTACGTCCCCTTGCCC  
+HWI-EAS443:3:63:1386:1680#0/1  
a`]aPaW`^b¥`\_`aa^YSa\_[a\_^\_Z\_ZZGV^XXZXZX  
@HWI-EAS443:3:63:673:1348#0/1  
CCATTCTATTCCACCATGTTACGGCCAGAGGTGATACCC  
+HWI-EAS443:3:63:673:1348#0/1  
a^^^aaba^]`aa^^\_R]`\_ab]^`^VGTSRBBBBBBBB  
@HWI-EAS443:3:65:1350:741#0/1  
CGGGTATCTCATTGCCATCATCCACTTCATTCTGAGTGCG  
+HWI-EAS443:3:65:1350:741#0/1  
aab[HWbba`aa^\_`aWa\_a^]baab^]`\_Z¥`a\_`¥`^\_  
@HWI-EAS443:3:65:1634:787#0/1  
CGGGGTGGAGTCTGCTGTCCTGAGAGGATTTCTCATTTTG  
+HWI-EAS443:3:65:1634:787#0/1  
aa`^T``]b[[ab````]ZWUL\_bXQQ`aX¥P\_]abaW  
@HWI-EAS443:3:65:518:621#0/1  
GGGGTATCTCATTGCCATCATCCACTTCATTCTGAGTGCG  
+HWI-EAS443:3:65:518:621#0/1  
TSSSOH^aab¥`[a\_b]aaaa[baaab^\_`aaa`\_aXaaa  
@HWI-EAS443:3:65:747:331#0/1  
AAAAGAAGTCTAATGTCGCAGTCCCCTGACTCGA  
+HWI-EAS443:3:65:747:331#0/1  
abbY`Y`abb¥^```[^b]a\_¥R¥][a`^[[]¥aZP¥VTD  
@HWI-EAS443:3:66:1018:1021#0/1  
CCCCCGACTCAGAATGAAGTGGATGATGGCAATGAGATA  
+HWI-EAS443:3:66:1018:1021#0/1  
abaaaa\_\_`aa¥VLYa^`a`X¥`U\_]T¥\_\_\_\_\_^\_\_¥X\_  
@HWI-EAS443:3:66:1633:105#0/1  
CCCCGTTTTTCGTTTCATTACCAACTACGTCCCCTTGCC  
+HWI-EAS443:3:66:1633:105#0/1  
aaabba\_bb\_babaaabaaa`aa\_aa\_]a^[^\_\_\_\_\_VV  
@HWI-EAS443:3:66:399:1983#0/1  
TGTTGGGCCATTCTATTCCACCATGTTACGGCCAGAGGG  
+HWI-EAS443:3:66:399:1983#0/1  
`RQ``¥SZaa`Wba`\_``baaaba[SV`b\_\_]\_V`BBBBB  
@HWI-EAS443:3:66:461:1693#0/1  
AGGCCATATGGTCCACAGTGGTCTTAGTGAGTATCTCGCG  
+HWI-EAS443:3:66:461:1693#0/1  
aZ[`\_aaa`W\_T````^NJPZS``\_`RR\_`\_VaW¥¥^NZS  
@HWI-EAS443:3:67:1106:198#0/1  
ACTTAGTGAGTATCTCGCGAGTGGGGACTGCGACATTAG  
+HWI-EAS443:3:67:1106:198#0/1  
aab\_^\_]aa`X¥¥\_\_`[RV\_WDZR]a`X\_Z]W]WWY]¥RZ  
@HWI-EAS443:3:67:1238:814#0/1  
GCTGGATCAGACCGAGTGATGGTATCACCTCTGGCCGTAT

+HWI-EAS443:3:67:1238:814#0/1  
ababa`aabaaaa\_ba¥`aaaa\_aa\_a`\_^`\_\_\_\_[aW\_Z  
@HWI-EAS443:3:67:414:679#0/1  
ACCCGTTTTTCGTTTCATTACCAACTACGTCCCCTTGCC  
+HWI-EAS443:3:67:414:679#0/1  
a\_`aa\_`a`aa]\_`^`a`^`\_`[^`a`\_\_\_\_]\_Y\_]`^Y]ZU  
@HWI-EAS443:3:67:604:748#0/1  
CGTTCACCTTTCAAAGGACAAGCGGATCATCAGTCAAGAA  
+HWI-EAS443:3:67:604:748#0/1  
H\_abb`babbbbab]bbabbbbababaabbbbabbbbab  
@HWI-EAS443:3:67:633:828#0/1  
GGATCAATCTCCTGGTTGCCTTTCTGAGAATAGCTGTTGG  
+HWI-EAS443:3:67:633:828#0/1  
`\_OQ\_`^][aZZT[`¥EXW`HVTR]Z]a^^YBBBBBBBBBB  
@HWI-EAS443:3:68:1114:1469#0/1  
CTCTGCTGTAATTGGGTATCTCATTGCCATCATCCACTTC  
+HWI-EAS443:3:68:1114:1469#0/1  
¥aWZG^\_QPY^[\_b`aaZa`^UZaVab^TZ\_QPa^a\_`]^`  
@HWI-EAS443:3:68:446:1812#0/1  
TGGGTTGAGGATACTGGTAAGAGGCAATTCTCCAGTATTC  
+HWI-EAS443:3:68:446:1812#0/1  
aa¥aX`[^`\_]`a]\_\_YUS¥\_`¥Vaaa\_`^`a`\_Y\_^^^  
@HWI-EAS443:3:69:786:504#0/1  
TCCGTTTTTCGTTTCATTACCAACTACGTCCCCTTGCCC  
+HWI-EAS443:3:69:786:504#0/1  
aa\_bababaa\_aaY`]aa\_a`a\_a`a\_Y]U]\_\_\_\_]`^LXT]  
@HWI-EAS443:3:69:981:1416#0/1  
CGTCGCAGTCCCGCACTCGCGAGATACTACTAAGACCAC  
+HWI-EAS443:3:69:981:1416#0/1  
aaabbbbbb^b`ba`abababaaaaba`aaa`aaaXa\_aaa  
@HWI-EAS443:3:6:1488:1166#0/1  
TGCCGTAGACATATGCAAGGCAGCAATAGGGTTGAGGATT  
+HWI-EAS443:3:6:1488:1166#0/1  
abI`b`bbbabaababaabb\_\_a\_\_`babab¥ab`abaa^  
@HWI-EAS443:3:6:813:259#0/1  
CTGAGAGGATTTCTCATTGTTGGCAAAGAAGACAAGAGAC  
+HWI-EAS443:3:6:813:259#0/1  
abb`b^aaaYaa\_]Zaa``aaa]Pa\_\_a`a`\_a\_a`a\_`^  
@HWI-EAS443:3:70:1280:636#0/1  
GGGGTATCTCATTGCCATCATCCACTTCTGAGTGCG  
+HWI-EAS443:3:70:1280:636#0/1  
\_X¥a¥abbbbabaa`aa]aab`\_aa``aa]`]^][\_]`  
@HWI-EAS443:3:70:1606:1308#0/1  
CCCCGTTTTTCGTTTCATTACCAACTACGTCCCCTTGCC  
+HWI-EAS443:3:70:1606:1308#0/1  
abaaaab¥\_`baa``a`aaa^aaaa]aa¥]Y`YZ`X¥\_[  
@HWI-EAS443:3:70:485:1383#0/1  
GAAGTGGACAGGGCCGAAGGTACCATGTTTCAACCTTTCA  
+HWI-EAS443:3:70:485:1383#0/1  
aaba\_`aaaZ^\_a¥aV`S[[QW]a]¥V[`a^]¥NY\_Y\_`a

@HWI-EAS443:3:70:609:493#0/1  
TTGTGGGAGATCAATGGCCCTGAGTCAGTGCTAGTCAACA  
+HWI-EAS443:3:70:609:493#0/1  
aba\_bbaaaaaaaaaaaaaa`a``]a`aZa````\_\_``\_`  
@HWI-EAS443:3:70:976:223#0/1  
CCCCGTTTTTCGTTTCATTACCAACTACGTCCCCTTGCC  
+HWI-EAS443:3:70:976:223#0/1  
aa`\_b\_[a\_]b`\_a\_aaaa\_\_`V]`\_`a^`]]V]]WXYXW  
@HWI-EAS443:3:71:1107:120#0/1  
CCCGCACTCAGAATGAAGTGGATGATGGCAATGAGATACG  
+HWI-EAS443:3:71:1107:120#0/1  
a[R\_[¥Za]aa[aabaYZNaaaa`V^b\_[Y^`b¥a[\_YVF  
@HWI-EAS443:3:71:760:799#0/1  
CCCCGTTTTTCGTTTCATTACCAACTACGTCCCCTTGCC  
+HWI-EAS443:3:71:760:799#0/1  
aaa[b\_abba`\_babaaaa\_a`\_`\_aaa[Za\_]¥\_YY¥¥  
@HWI-EAS443:3:72:1255:1989#0/1  
CAAGGACAAACCCTCTGGAGCAAAACAAACGATGCTGGAN  
+HWI-EAS443:3:72:1255:1989#0/1  
abbbaaa`bb\_aaaVbaaa\_aa]aa^aaa\_aaaa`Xa\_YD  
@HWI-EAS443:3:72:300:1360#0/1  
AGGGAGATCAATGGCCCTGAGTCAGTGCTAGTCAACTT  
+HWI-EAS443:3:72:300:1360#0/1  
^aaaa`a\_aaa\_aWa`b¥`\_]``XX¥¥]\_\_Z`]`^`a^^  
@HWI-EAS443:3:72:423:250#0/1  
CTCCCGTTTTTCGTTTCATTACCAACTACGTCCCCTTGCC  
+HWI-EAS443:3:72:423:250#0/1  
abbbabaaba]]]a`\_\_aaaZ\_ba¥a`aa`a^`^X^YV^  
@HWI-EAS443:3:72:964:2027#0/1  
ATCCCGTTTTTCGTTTCATTACCAACTACGTCCCCTTGCC  
+HWI-EAS443:3:72:964:2027#0/1  
\_abWTYQXb`\_\_Za^Qababa]`aW]`aa¥]ZTHY[XLN\_  
@HWI-EAS443:3:73:1049:464#0/1  
GCCATATCTCTTGTCTTCTTTGCCAAAATGAGAAATCCA  
+HWI-EAS443:3:73:1049:464#0/1  
aaababaabaaaa`abaaaa`a`\_a`\_\_``aaaa`\_a\_Y`  
@HWI-EAS443:3:73:1690:1303#0/1  
CTCGTTTCATTACCAACTACGTCCCCTTGCCCAATTAG  
+HWI-EAS443:3:73:1690:1303#0/1  
[`bb]^bbb\_¥]a]^S\_`^`aV]TT]\_WUFUXWTRGZ]^W  
@HWI-EAS443:3:73:375:1696#0/1  
GCCATATCTCTTGTCTTCTTTGCCAAAATGAGAAATCCA  
+HWI-EAS443:3:73:375:1696#0/1  
ababaabbbbaaY`baabaaaaabba`aba`aaa`baa\_\_  
@HWI-EAS443:3:73:704:554#0/1  
CCCCGTTTTTCGTTTCATTACCAACTACGTCCCCTTGCC  
+HWI-EAS443:3:73:704:554#0/1  
^``bba]b``baaabba^Xaba^baab`\_`\_aaaa`a`  
@HWI-EAS443:3:73:799:1672#0/1  
ATCCCGTTTTTCGTTTCATTACCAACTACGTCCCCTTGCC



@HWI-EAS443:3:78:1481:901#0/1  
CTCGCGAGATACTCACTAAGACCACTGTGGACCATATGGA  
+HWI-EAS443:3:78:1481:901#0/1  
V^aS^a^`ab¥S¥XQX[¥¥ZZabb`^`[^`URI\_XX]b¥F  
@HWI-EAS443:3:78:781:1831#0/1  
CTTTGCCAAAATGAGAAATCCTCTCAGGACAGCAGACTA  
+HWI-EAS443:3:78:781:1831#0/1  
aWa]¥abbab```aaaab`a[TY\_aaa`a^`aa\_a`^`a  
@HWI-EAS443:3:79:1437:980#0/1  
CGGGCGATCTGAACCTTTGTCAATAGGGCAAACCAGCGACT  
+HWI-EAS443:3:79:1437:980#0/1  
abbabbbabbbab^abba`]\_bbbabbZbbbab\_babbab  
@HWI-EAS443:3:79:1622:1827#0/1  
ACCGCCGGCTACTGGGAGAAACCTTGTTTTACGGACCAAT  
+HWI-EAS443:3:79:1622:1827#0/1  
a^aa\_[a\_\_aaUU^Q\_J``\_]VZ¥W¥SQ[]QR\_¥[TYNWZ  
@HWI-EAS443:3:7:1768:1534#0/1  
ACCTGATGTGTACTTTTTGATTATGGCCATATGGTCCACA  
+HWI-EAS443:3:7:1768:1534#0/1  
\_a]ab`\_b\_bZHN\_RYb]a]^VaV`\_V]ZSXGNYGOBBBB  
@HWI-EAS443:3:7:677:1117#0/1  
TGGGGCGATCTGAACCTTTGTCAATAGGGCAAACCAGCGAC  
+HWI-EAS443:3:7:677:1117#0/1  
aba]W\_aZJT[\_OVQYaa[QZY`Z[¥^^XX`\_SZ¥[^Z\_S  
@HWI-EAS443:3:7:822:706#0/1  
CGGGTGGAGTCTGCTGTCCTGAGAGGATTTCTCATTTTGG  
+HWI-EAS443:3:7:822:706#0/1  
abbaY``^\_aa¥]\_a`V]GZaT`Xaa`Q¥`X`Uaaa¥aU`  
@HWI-EAS443:3:7:842:965#0/1  
AGCCCCGACATGACCCCAAGCACGGAGATGTCGCTGAGAGG  
+HWI-EAS443:3:7:842:965#0/1  
\_Z¥aba]baabbaaZ`Z]a]^]]WSb¥]RZ¥aG\_\_U\_S\_Z  
@HWI-EAS443:3:7:948:417#0/1  
GGGGCAAGGGGACGTAGTGTGGTAATGAAACGAAAACGG  
+HWI-EAS443:3:7:948:417#0/1  
aaa¥aaabbaa``b\_aa\_b\_a`aQNZ`\_a\_P^`\_¥\_Q`\_  
@HWI-EAS443:3:80:1128:58#0/1  
NTGTAATTGGGTATCTCATTGCCATCATCCACTTCATTCT  
+HWI-EAS443:3:80:1128:58#0/1  
DNZZZVZYWYWXUMWWWZZWWWYWWTNTZZXXZXZZ  
@HWI-EAS443:3:80:230:1019#0/1  
CCTTGTGTAATTGAATACTGGAGAATTGCCTCTTACCAT  
+HWI-EAS443:3:80:230:1019#0/1  
abbbbaab`babb]aa]aaaaa\_a``a\_\_aaaaaa``  
@HWI-EAS443:3:80:279:1797#0/1  
CGTGGTCTTAGTGAGTATCTCGCGAGTGCGGGACTGCGAC  
+HWI-EAS443:3:80:279:1797#0/1  
a\_Z¥\_T\_aa\_a¥]a]YXUaT]XYWUOS]`\_[WYY[^[YXY  
@HWI-EAS443:3:80:394:1688#0/1  
CAACAAAATGGAATTTGAACCATTTTCAGTCTCTTGTCCCA

+HWI-EAS443:3:80:394:1688#0/1  
a`R\_QX[^T[[Za\_a\_a`\_Z]Z^^^`]V[a`\_¥\$S^`^`  
@HWI-EAS443:3:81:745:495#0/1  
GTGGCCCAACAACAAGTACAGTTCATTACCCTAAGGTATA  
+HWI-EAS443:3:81:745:495#0/1  
`aabX[`\_\_a\_Q\_aaaa]aa`aa`aab^^^a\_\_a¥Raa\_  
@HWI-EAS443:3:81:884:61#0/1  
CGCTCCCTTGATGGTGGCGTACATGCTAGAAAGAGAATTG  
+HWI-EAS443:3:81:884:61#0/1  
Zabbb[abb`bbbabbba`aba`a¥ba`aaZ`ababaa[  
@HWI-EAS443:3:82:324:1383#0/1  
AGGGTATCTCATTGCCATCATCCACTTCATTCTGAGTGCG  
+HWI-EAS443:3:82:324:1383#0/1  
abbbYbbb`bbab^abbaabaaaaaab\_aaaa`aXaaa  
@HWI-EAS443:3:82:737:464#0/1  
TGGGCGATCTGAACCTTGTCAATAGGGCAAACCAGCGACT  
+HWI-EAS443:3:82:737:464#0/1  
abaaab`aabaaaaaaaaaaaaaaaa`aaaaaaaa`\_`  
@HWI-EAS443:3:83:1466:205#0/1  
AGCCACCATCAAGGGAGCAATTTTACAATCCTGGAGCTCT  
+HWI-EAS443:3:83:1466:205#0/1  
a`\_WaaaaY\_a]`\_\_aa^^^L`a^`^`\_`RXW`]^WX^R]  
@HWI-EAS443:3:83:1678:1756#0/1  
GGCCATTCTATTCCACCATGTTACGGCCAGAGGTGATAA  
+HWI-EAS443:3:83:1678:1756#0/1  
aaW0^`Z`Y[FV\_[aX¥¥Z`\_QV[R\_]XBBBBBBBBBBB  
@HWI-EAS443:3:83:972:229#0/1  
AAAGAAGTCTGAGATCTAATGTTCGAGTCCCGCACTCGCC  
+HWI-EAS443:3:83:972:229#0/1  
]]XPQU¥aaabaQ0¥Nb\_S¥[aaba\_GUTXPV^R`GTaQQ  
@HWI-EAS443:3:84:34:607#0/1  
TGCTGCCTTGATATGTCTACGGCTTGTTCCTCAGTTGGG  
+HWI-EAS443:3:84:34:607#0/1  
ab`Z\_bba`b¥Q`a^`\_aa\_aaa`BBBBBBBBBBBBBBB  
@HWI-EAS443:3:84:517:1584#0/1  
CGGTATCTCATTGCCATCATCCACTTCATTCTGAGTGCGG  
+HWI-EAS443:3:84:517:1584#0/1  
`¥]^a`aab^aaaaaaaa`baaaa```a\_aa`\_[QYaaX  
@HWI-EAS443:3:84:895:722#0/1  
GAGTCTGCTGCTGAGAGGATTTCTCATTGTTGGGCAAAC  
+HWI-EAS443:3:84:895:722#0/1  
Y\_aababa`^[bb^a`^`b¥b]\_bba\_ab\_\_]aa]ba` [  
@HWI-EAS443:3:85:1171:825#0/1  
CGGACGTAGTGTGGTAATGAAACGAAAACGGGACTCTAG  
+HWI-EAS443:3:85:1171:825#0/1  
¥¥bUYb[Ya\_aa`aWP\_Y\_PGW`Vb\_a]\_\_ZYa^RHMOZW  
@HWI-EAS443:3:85:1617:988#0/1  
AGGCCATATGGTCCACAGTGGTCTTAGTGAGTATCTCGCG  
+HWI-EAS443:3:85:1617:988#0/1  
a``aaaabaa`\_a^a\_ba]^`¥aa¥aW`a]¥`^`\_U^U^

@HWI-EAS443:3:85:601:71#0/1  
CACATCTGGGTGGAGTCTGCTGTCCTGAGAGGATTTCTN  
+HWI-EAS443:3:85:601:71#0/1  
a^aabaa]\_aZHa^^`a¥ab`^aa]]`Z\_]\_aXOWa]VD  
@HWI-EAS443:3:85:643:907#0/1  
GGGGTATCTCATTGCCATCATCCACTTCATTCTGAGTGCG  
+HWI-EAS443:3:85:643:907#0/1  
a`L`Na`aaa`^^`Z\_```\_`a^^`]`¥SV`\_a¥\_UZZ]  
@HWI-EAS443:3:86:1202:1027#0/1  
GTGCTAATTGGCAAGGGGACGTAGTGTGGTAATGAAAA  
+HWI-EAS443:3:86:1202:1027#0/1  
aU]^¥aaa¥a`¥RVQ]T]a\_Za^\_aT`]\_`YLFVWZVRG  
@HWI-EAS443:3:86:1345:1312#0/1  
TGGGGACGTAGTGTGGTAATGAAACGAAAACGGGACTCT  
+HWI-EAS443:3:86:1345:1312#0/1  
aa[]\_`Za¥aaYbSSV¥]¥\_`a0\_]UY[^¥ZRQ¥^]]LFL  
@HWI-EAS443:3:86:305:1298#0/1  
CTCTTCTTTGCCAAAATGAGAAATCCTCTCAGGACAGCA  
+HWI-EAS443:3:86:305:1298#0/1  
`babbb`bbabbba`[¥aaaaaaabaaabaaa`aaa]`a  
@HWI-EAS443:3:86:650:29#0/1  
CGGTCTTAGTGAGTATCTCGCGAGTGC GGGACTGCGACAT  
+HWI-EAS443:3:86:650:29#0/1  
abbaabbab`bababb\_`\_a^b\_a¥aZa`a[Z¥^Z\_NR[\_  
@HWI-EAS443:3:86:983:1363#0/1  
CGCCATATCTCTTGTCTTCTTTGCCAAAATGAGAAATCC  
+HWI-EAS443:3:86:983:1363#0/1  
`bbbabbbbbbabbbaabbabbaba`aabbbaababbaa[  
@HWI-EAS443:3:87:1580:878#0/1  
ACCCGTTTTCGTTTCATTACCAACTACGTCCCCTTGCC  
+HWI-EAS443:3:87:1580:878#0/1  
aTFWbbbb\_YbWb\_Wabb`^`aaSaG`b¥b`W[Waaa\_UY  
@HWI-EAS443:3:87:174:2037#0/1  
CATCTCTTGTCTTCTTTGCCAAAATGAGAAATCCTCTCA  
+HWI-EAS443:3:87:174:2037#0/1  
YT a`[^T¥ZP]aY^Y]S0[\_X¥`K^\_]Sxa`[]YS\_^YF  
@HWI-EAS443:3:87:324:1924#0/1  
GCCCGTTTTCGTTTCATTACCAACTACGTCCCCTTGCC  
+HWI-EAS443:3:87:324:1924#0/1  
`\_SXaRLVaa`aa\_\_a`abaY\_a^ba\_]a[]\_]`a^\_]S  
@HWI-EAS443:3:88:1348:111#0/1  
CCCCGTTTTCGTTTCATTACCAACTACGTCCCCTTGCC  
+HWI-EAS443:3:88:1348:111#0/1  
\_ba^b`ab`bbbbba`b`b\_abb\_a`baa`]]a^\_\_a`]  
@HWI-EAS443:3:88:842:1108#0/1  
CGGGGACGTAGTGTGGTAATGAAACGAAAACGGGACTCT  
+HWI-EAS443:3:88:842:1108#0/1  
a\_abbab`¥ab`b`bba¥a]aaabbaabbaYUa`a`Zaaa  
@HWI-EAS443:3:89:1130:1506#0/1  
ACCCGTTTTCGTTTCATTACCAACTACGTCCCCTTGCC





@HWI-EAS443:3:91:1235:2033#0/1  
TGGGGCGATCTGAACCTTTGTCAATAGGGCAAACCAGCGAC  
+HWI-EAS443:3:91:1235:2033#0/1  
ab`a]^bZHZWZZ`L`^`YZVZa\_`]]^GQaa\_[\_aU`VX  
@HWI-EAS443:3:91:1277:977#0/1  
AAAAGAAGCTGAGAGATCTAATGTTCGAGTCCCGCACTCGN  
+HWI-EAS443:3:91:1277:977#0/1  
abbaba`ab^aaa`aa`aaaab`aa\_`aV`\_`^a^]\_`]ZD  
@HWI-EAS443:3:91:1793:543#0/1  
NAAAGAAGCTGAGAGATCTAATGTTCGAGTCCCGCACTCGC  
+HWI-EAS443:3:91:1793:543#0/1  
DNVWSSWWWWWVXXVRVWXXWUUVVWVWWWUWWTWUWTS  
@HWI-EAS443:3:92:1003:458#0/1  
TGGTATTCTCACAAGAGATTGCATGATCAAGGCAGTTAN  
+HWI-EAS443:3:92:1003:458#0/1  
a\_a[bb`bb`b¥^ab¥`S`WX¥babaaJYTabYa^BBBB  
@HWI-EAS443:3:92:1181:412#0/1  
TCCGTTTTCGTTTCATTACCAACTACGTCCCCTTGCCC  
+HWI-EAS443:3:92:1181:412#0/1  
a\_X^V^a\_X^[aWI[aaaZV^]OZ^a[\_a¥]U[\_XSUKX¥  
@HWI-EAS443:3:92:1196:244#0/1  
CTTCATTACCAACTACGTCCCCTTGCCCAATTAGCACA  
+HWI-EAS443:3:92:1196:244#0/1  
abbb\_`bb^ZXa[\_abb¥\_U[¥0\_aaaXaaaaaaaa`U^^a  
@HWI-EAS443:3:92:237:786#0/1  
CGGGGACGTAGTGTGGTAATGAAACGAAAACGGGACTCT  
+HWI-EAS443:3:92:237:786#0/1  
aa\_`\_`\_aa\_`a]a[aaaU\_\_\_a\_`aN`]]`aLW¥^^^]]  
@HWI-EAS443:3:92:60:1149#0/1  
ACCCGTTTTCGTTTCATTACCAACTACGTCCCCTTGCC  
+HWI-EAS443:3:92:60:1149#0/1  
ZT^¥W¥`^¥QHYa¥`b]^¥¥[\_JaaaXY]]\_QX^LDFS  
@HWI-EAS443:3:92:767:178#0/1  
GGGGTATCTCATTGCCATCATCCACTTCATTCTGAGTGCG  
+HWI-EAS443:3:92:767:178#0/1  
a^TZV[\_¥]V^[^¥NZZ^S¥¥WRUWW¥WZ¥VV¥¥Y^W¥SU  
@HWI-EAS443:3:92:819:1667#0/1  
TTCCCGTTTTCGTTTCATTACCAACTACGTCCCCTTGCC  
+HWI-EAS443:3:92:819:1667#0/1  
^\_`ZX¥a¥Za`¥PXWOU¥PXZVUZ`a\_\_SU]N]UXU[`Z^  
@HWI-EAS443:3:92:92:918#0/1  
CTCCCGTTTTCGTTTCATTACCAACTACGTCCCCTTGCC  
+HWI-EAS443:3:92:92:918#0/1  
aa]aab¥]aa`a\_`\_`aa`\_`\_`a\_`\_`\_¥U^]V\_\_^\_]]]]  
@HWI-EAS443:3:94:1613:1480#0/1  
TGATGGCAATGAGATACCCAATTACAGCAGACAAGAGAAA  
+HWI-EAS443:3:94:1613:1480#0/1  
aba^ba`\_`\_`aa`Z\_aaY`aaa\_Saa`\_`a`YaV`\_a\_\_\_\_  
@HWI-EAS443:3:94:189:629#0/1  
CTAATGTGCTAATTGGGCAAGGGGACGTAGTGTGGTAAN

+HWI-EAS443:3:94:189:629#0/1  
`bbbbb`bbaabababaaa^bb\_a\_\_b\_]`\_a^`aaV\_RD  
@HWI-EAS443:3:94:48:2010#0/1  
ATTTTACAATCCTGGAGCTCTTCTTTCTCTTTTGT  
+HWI-EAS443:3:94:48:2010#0/1  
YUWaaa\_a¥]bb^VOZ^WR]VP\_Y]T¥`[¥^\_BBBBBBBB  
@HWI-EAS443:3:95:1611:1822#0/1  
ACCCGTTTTCGTTTCATTACCAACTACGCCCCCTTGCC  
+HWI-EAS443:3:95:1611:1822#0/1  
a\_^SaYbaa`aa`P`aabW]``]bY\_a`]]]X\_\_¥¥[H  
@HWI-EAS443:3:95:1631:673#0/1  
GTACTCTTATTTTCAGTGTTTGGAGGTTGCCGTTAGCAG  
+HWI-EAS443:3:95:1631:673#0/1  
`PYZaZaa\_aa`aRQaQ\_`\_`^QVa^R¥[PPVYW]¥^GMM  
@HWI-EAS443:3:95:423:1134#0/1  
ACCCGTTTTCGTTTCATTACCAACTACGCCCCCTTGCC  
+HWI-EAS443:3:95:423:1134#0/1  
\_aTab¥bbbabaabab```aZaa]a`aYXb]aaaa\_[]^P  
@HWI-EAS443:3:96:269:295#0/1  
AGCCCGTTAGCACTTCTTCTTTCTTGGACTGATGATCC  
+HWI-EAS443:3:96:269:295#0/1  
aa[\_\_\_a]¥]a\_¥Z`a`a\_^`a\_^`Xa\_\_ZZ\_a^^\_Z^ZV  
@HWI-EAS443:3:96:469:528#0/1  
GAAGTGGACAGGGCCGAAGGTACCATGTTTCAACCTTCA  
+HWI-EAS443:3:96:469:528#0/1  
VSb\_Y¥bbb`^`ba¥Q\_Z\_\_\_[a`a]ab\_`aaaaWWSX]aa  
@HWI-EAS443:3:96:955:1227#0/1  
ACCCGTTTTCGTTTCATTACCAACTACGCCCCCTTGCC  
+HWI-EAS443:3:96:955:1227#0/1  
¥Z\_Q\_¥aa^X\_]\_]\_\_W\_^\_]ZZ¥^[aa¥]JXZT`T^\_MR  
@HWI-EAS443:3:96:974:503#0/1  
ACCCGTTTTCGTTTCATTACCAACTACGCCCCCTTGCC  
+HWI-EAS443:3:96:974:503#0/1  
^Y`ab¥\_PaaaY]SYab\_aUHabSZGYZR[UG¥\_Ga^]I^  
@HWI-EAS443:3:97:1257:1508#0/1  
AGAGTCTGCTGTCCTGAGAGGATTTCTCATTTTGGGCAA  
+HWI-EAS443:3:97:1257:1508#0/1  
]baba\_bbabaa^`a`Yaab`a`a`a`b`baaaa^`\_a  
@HWI-EAS443:3:98:670:89#0/1  
CGGTCCACAGTGGTCTTAGTGAGTATCTCGGAGTGCGGG  
+HWI-EAS443:3:98:670:89#0/1  
ab^``\_a`bb`bb^[bbab`baa\_\_`a^aZ]V`Y\_K]a`  
@HWI-EAS443:3:98:944:2030#0/1  
CAAACCCTCTGGAGCAAACAAACGATGCTGGATCAGACT  
+HWI-EAS443:3:98:944:2030#0/1  
abbba\_ba\_`\_V¥a\_aaaa]aaaa]a`^¥a\_^\_¥a\_aX^  
@HWI-EAS443:3:99:1656:1417#0/1  
ATTGGAGGAGTAAGGATGGTGGACATCCTTAGACAGAATA  
+HWI-EAS443:3:99:1656:1417#0/1  
\_b\_b`aababa`b\_`abab]aa^¥¥aUZaabVQJ][^aaBB

@HWI-EAS443:3:99:272:1991#0/1  
CACCCCGCACTCAGAATGAAGTGGATGATGGCAATGAGAT  
+HWI-EAS443:3:99:272:1991#0/1  
ab^`bb^bbabbaabb[abb[0[`b`baabaaba\_ba[a\_  
@HWI-EAS443:3:99:580:1633#0/1  
CGTCTGCTGTAATTGGGTATCTCATTGCCATCATCCACTT  
+HWI-EAS443:3:99:580:1633#0/1  
aba^ba`b`^a\_bbabbaba`a]baa\_\_YaaXaa\_X^]]a  
@HWI-EAS443:3:99:943:1023#0/1  
CGGGCAAGGGGACGTAGTGTGGTAATGAAACGAAAACGG  
+HWI-EAS443:3:99:943:1023#0/1  
ababbaaabbb`abbabUbabaaY``ba[b`F\_a`aaG]`  
@HWI-EAS443:3:9:236:494#0/1  
TGGGGCGATCTGAAC TTTGTCAATAGGGCAAACCAGCGAC  
+HWI-EAS443:3:9:236:494#0/1  
\_aaa^ab[V^QPT]\_\_a¥^\_SZO[XRZa^^Z`]ZUZ¥WWW  
@HWI-EAS443:3:9:699:189#0/1  
TGGGAGTAGATGAATACTCCAGCACGGAGAGAGTGGTAGG  
+HWI-EAS443:3:9:699:189#0/1  
\_^[^]¥YR\_]ba`^ZZL[¥]X¥[^Z`\_Z`\_\_Z\_NBBBBBB  
@HWI-EAS443:3:9:760:303#0/1  
CCCCGCACTCAGAATGAAGTGGATGATGGCAATGAGATAG  
+HWI-EAS443:3:9:760:303#0/1  
aa^`b`aabaab`^bba`b[ba]`aY\_`]¥`\_\_`^YTZ\_¥  
@HWI-EAS443:3:9:761:949#0/1  
TGGGGACGTAGTGTGGTAATGAAACGAAAACGGGACTCT  
+HWI-EAS443:3:9:761:949#0/1  
aba`V¥ab\_\_a[`Zaaa\_¥a\_YXaaX`W]a`P¥\_`R]]^  
@HWI-EAS443:3:9:92:615#0/1  
GTGGCCATATGGTCCACAGTGGTCTTAGTGAGTATCTCGC  
+HWI-EAS443:3:9:92:615#0/1  
a]aaaaaa^aX`^T`W]aa^`]SPa`^`W`a`Z]YSYQUU  
@HWI-EAS443:3:100:1013:36#0/1  
AACAGAGTAGGATGCAATTTTCCTCATTGACTGTGAATGT  
+HWI-EAS443:3:100:1013:36#0/1  
a¥`ab`^`b^a^baa`[abbaRS\_X\_aaa`]aa[aRK[BB  
@HWI-EAS443:3:100:1058:795#0/1  
AAAGAAGTGAAGATCTAATGTGCGCAGTCCCGCACTCGCG  
+HWI-EAS443:3:100:1058:795#0/1  
abb^`babaaaaaaaaZbaaab``aaab\_¥Z\_]\_\_^Z^YVa  
@HWI-EAS443:3:100:1117:1458#0/1  
CCTTGT TTTACGGACCAATTCTCTTTCTAGCATGTACGCC  
+HWI-EAS443:3:100:1117:1458#0/1  
`a\_a`a`^`^WUa^\_0^\_R`WJ]¥\_R¥G¥baT`¥\_¥\_BBBB  
@HWI-EAS443:3:100:1135:265#0/1  
GGCAAGGGGACGTAGTGTGGTAATGAAACGAAAACGGGA  
+HWI-EAS443:3:100:1135:265#0/1  
a`\_]\_aaab\_W`¥\_a¥`\_a`aYZ^`¥\_aT\_ZW\_¥GYBBB  
@HWI-EAS443:3:100:1175:58#0/1  
GTCCCGTTTTTCGTTTCATTACCAACTACGTCCCTTGC

+HWI-EAS443:3:100:1175:58#0/1  
aa\_WU\_]`a`^aY\_]^^\_]VT[V^Y¥XV^YYUTVXBBB  
@HWI-EAS443:3:100:1208:17#0/1  
AAGAAGTCTAATGTCGAGTCTAATGTCGAGTCCCCTCGACTCGCGA  
+HWI-EAS443:3:100:1208:17#0/1  
ab[W[`b^]S^`^a\_aa\_bbQ`a^`aPRNN\_¥¥Q^Y¥BBB  
@HWI-EAS443:3:100:1278:502#0/1  
GAGATCTAATGTCGAGTCCCCTCGACTCGCGAGATACTCAC  
+HWI-EAS443:3:100:1278:502#0/1  
aabbbYbb^ab`aaba\_a``\_Y`a`a[aWa\_a¥``W`QaB  
@HWI-EAS443:3:100:1305:268#0/1  
GAACAAGGACAAACCCTCTGGAGCAAAACAAACGATGCTG  
+HWI-EAS443:3:100:1305:268#0/1  
a¥^[aX`^\_YYN[NNSaY^Za^`Y`^^[V]VUX\_]¥ZVZB  
@HWI-EAS443:3:100:1437:1924#0/1  
GATGTGCTTGGGACATTTGACACTGTCCAAATAATAAAAC  
+HWI-EAS443:3:100:1437:1924#0/1  
aa`a0]S\_a^a\_`PUS^¥a\_P\_V\_`Z[VZW^^WXT^¥BBB  
@HWI-EAS443:3:100:149:2040#0/1  
CAATTACAACAAGGCAACCAACGACTTACAGTTCTTGGA  
+HWI-EAS443:3:100:149:2040#0/1  
`ZSX\_a\_```\_b\_baab\_^ab^QVZ¥Z¥[]``TKXaPTB  
@HWI-EAS443:3:100:1504:997#0/1  
TAATGTCGAGTCCCCTCGACTCGCGAGATACTCACTAAGAC  
+HWI-EAS443:3:100:1504:997#0/1  
a`aaa\_Xb^]YZQ[V`H0^XVU[\_\_\_\_]\_N¥^N\_U^SXBBB  
@HWI-EAS443:3:100:1525:1743#0/1  
AGTGAGTATTGACCGATTTTTAAGGGTTAGAGATCAAAGA  
+HWI-EAS443:3:100:1525:1743#0/1  
`]P]baW^Ya^[DIZWYbba][UY`YH[[UPWW¥DQ[BBB  
@HWI-EAS443:3:100:1607:748#0/1  
GACCGATTTTTAAGGGTTAGAGATCAAAGAGGGAACGTAC  
+HWI-EAS443:3:100:1607:748#0/1  
abb`aaabbbbaabb``aaaaaba\_aaaa[K\_\_`ZKWSaB  
@HWI-EAS443:3:100:1642:966#0/1  
GAATGAAGTGGATGATGGCAATGAGATACCCAATTACAGC  
+HWI-EAS443:3:100:1642:966#0/1  
a``V]¥\_aUba[aa\_Z]^G\_\_[a`¥IZ\_W^W\_\_\_\_]VU]BB  
@HWI-EAS443:3:100:1661:878#0/1  
CAGGTGCATTGACTGAAGATCCAGATGAAGGCACATCTGG  
+HWI-EAS443:3:100:1661:878#0/1  
Xbaa]bZzabbaUbUbbab`bTU]UYabZb\_`aWYZ\_``B  
@HWI-EAS443:3:100:1675:1587#0/1  
AGAGAATAAAAGAACTGAGAGATCTAATGTCGAGTCCCCTCG  
+HWI-EAS443:3:100:1675:1587#0/1  
`baa\_ababb`a^aYab[[Y^\_aVaaVbb^Y[DU¥KBBBB  
@HWI-EAS443:3:100:167:1131#0/1  
AATAAAAGAACTGAGAGATCTAATGTCGAGTCCCCTCGACT  
+HWI-EAS443:3:100:167:1131#0/1  
T\_bba`a`\_bb``U``\_^^ab````S\_aaa^\_]U]a`¥MO

@HWI-EAS443:3:100:167:1610#0/1  
TGTGGACCATATGGCCATAATCAAAAAGTACACATCAGGA  
+HWI-EAS443:3:100:167:1610#0/1  
]\_[\_abab¥aa`¥\_^\_b¥aa`\_[aa``aZ\_^\_U]PRVa^\_  
@HWI-EAS443:3:100:1684:690#0/1  
TGGGTTAAGTGCAAACTTCAATATAAACTGCCTGTTC  
+HWI-EAS443:3:100:1684:690#0/1  
XOZU[aa[[Z^]aa^\_S`aU`aaaa]ZD[^a][P[SBBB  
@HWI-EAS443:3:100:168:1029#0/1  
GAATAAAGAAGTGAAGATCTAATGTCGCAGTCCCGCAC  
+HWI-EAS443:3:100:168:1029#0/1  
U\_a\_YaZ¥\_Z^a```N^\_\_a`^`bbb`[``aa^`SRJY^B  
@HWI-EAS443:3:100:1694:1202#0/1  
TACATCTGCTCCCAGCACGTCCCTTGGGTTAAGTGCAACA  
+HWI-EAS443:3:100:1694:1202#0/1  
aabaa[abbbMDRb`]^UaYSMRab\_b^D¥Y^¥LYKB  
@HWI-EAS443:3:100:1721:246#0/1  
AAAAGAAGTGAAGATCTAATGTCGCAGTCCCGCACTCGC  
+HWI-EAS443:3:100:1721:246#0/1  
a`\_aaa`\_a]aUabaa[``\_][a]\_ZG¥\_YUGFSQSBBBB  
@HWI-EAS443:3:100:172:464#0/1  
GAAGAAGTCAAGTGAACGCAAGGAAGTGAAGTTGACAA  
+HWI-EAS443:3:100:172:464#0/1  
a`aa\_a]\_aa\_a`a`\_a`\_\_`\_^Z``^^^\_X^\_Z^^  
@HWI-EAS443:3:100:190:35#0/1  
AGGGGACGTAGTGTGGTAATGAAACGAAACGGGACTCT  
+HWI-EAS443:3:100:190:35#0/1  
\_ba\_aZ^aZW^`b\_\_a\_JWaa\_] [`¥`RR]]W]^`VB  
@HWI-EAS443:3:100:201:65#0/1  
CTGTAATTGGGTATCTCATTGCCATCATCCACTTCATTCT  
+HWI-EAS443:3:100:201:65#0/1  
¥abb`bbabbaabbbabbbba\_[bab\_^\_\_Z¥bUa\_IYa  
@HWI-EAS443:3:100:219:260#0/1  
ATGATGGCAATGAGATACCCAATTACAGCAGACAAGAGAA  
+HWI-EAS443:3:100:219:260#0/1  
abbaabbaabb`a`ab`a`aaaa^`a]a``\_\_`a`aa\_  
@HWI-EAS443:3:100:225:44#0/1  
GTCCCGTTTTCGTTTCATTACCAACTACGTCCCTTGC  
+HWI-EAS443:3:100:225:44#0/1  
a]W\_\_a]V]¥T\_V\_\_\_^] ^] ^W\_¥Y^V]WXZYVYXBBBB  
@HWI-EAS443:3:100:257:224#0/1  
GTCCCGTTTTCGTTTCATTACCAACTACGTCCCTTGC  
+HWI-EAS443:3:100:257:224#0/1  
`aa\_\_bXaaa`baa`\_aaaa`Ra^V`^a`\_aY]\_UY\_Y\_V  
@HWI-EAS443:3:100:25:402#0/1  
AAAGAAGTGAAGATCTAATGTCGCAGTCCCGCACTCGCG  
+HWI-EAS443:3:100:25:402#0/1  
aaaa`a`\_\_`\_aaa`^a`\_a`¥aa`\_`SW^^\_YZUWWWBB  
@HWI-EAS443:3:100:267:1201#0/1  
GTCAGCAGACCCATTAGCATCTCTTGGAAATGTGCCAC

+HWI-EAS443:3:100:267:1201#0/1  
`Y]]a¥`ZZ\_\_`a\_WX¥`\_¥T`\_a`V^]a\_Y\_Q[RBBB  
@HWI-EAS443:3:100:274:15#0/1  
GTTTTACGGACCAATTCTCTTTCTAGCATGTACGCCACCA  
+HWI-EAS443:3:100:274:15#0/1  
¥VWVY[[^\_QS¥¥[\_]¥[RZ^\_[^^^Z[]\_U]VRXVBB  
@HWI-EAS443:3:100:298:651#0/1  
ATCAGACCGAGTGATGGTATCACCTCTGGCCGTAACATGG  
+HWI-EAS443:3:100:298:651#0/1  
a`\_bba\_aaaaQa`]aa¥aZ^]Z\_\_\_ZU^V`HZ\_G^BBB  
@HWI-EAS443:3:100:346:189#0/1  
GTCCC GTTTTCGTTTCATTACCAACTACGTCCCCTTGC  
+HWI-EAS443:3:100:346:189#0/1  
a[\_WZ¥H]aZ^LP]Z¥\_\_^[^[\_Y\_UW\_]\_X]UNTWBBB  
@HWI-EAS443:3:100:391:553#0/1  
GTCCC GTTTTCGTTTCATTACCAACTACGTCCCCTTGC  
+HWI-EAS443:3:100:391:553#0/1  
a`aaaa\_aab\_a\_\_aaaa\_\_`\_a`\_`^^`^aZ^]^^]V\_^  
@HWI-EAS443:3:100:393:1310#0/1  
AAAAGAAGTGGAGATCTAATGTCGCAGTCCCGCACTCGC  
+HWI-EAS443:3:100:393:1310#0/1  
J\_\_]abbbbb`Z¥¥`baabbbbaa[b`ba`XZR\_RWW¥`B  
@HWI-EAS443:3:100:403:856#0/1  
AAGGATGGTGGACATCCTTAGACAGAATCCAAGTGGAGAA  
+HWI-EAS443:3:100:403:856#0/1  
aaaa\_\_\_`]a`\_\_`\_\_\_a`a^Y\_aa\_\_¥\_]aW\_a\_aWZB  
@HWI-EAS443:3:100:404:1108#0/1  
GTCCGTAAAACAAGGTTTCTCCAGTAGCCGGCGGAACAG  
+HWI-EAS443:3:100:404:1108#0/1  
]E^^`Xa]aaT\_R\_]U`[^`[]¥^¥^^^¥a[P¥¥UUBBB  
@HWI-EAS443:3:100:489:1985#0/1  
AAAGAAGTGGAGATCTAATGTCGCAGTCCCGCACTCGCG  
+HWI-EAS443:3:100:489:1985#0/1  
````^aa¥Qa^X`Yaaa\_a^N\_aa\_\_W`a\_¥^[^¥[YBB  
@HWI-EAS443:3:100:527:534#0/1  
GAAGTGGATGATGGCAATGAGATACCCAATTACAGCAGAC  
+HWI-EAS443:3:100:527:534#0/1  
`aab\_abbbba\_``aaaabab\_``Xa^aaa`aXaaUaaa\_  
@HWI-EAS443:3:100:529:198#0/1  
GGATGTGCTTGGGACATTTGACACTGTCCAAATAATAAAA  
+HWI-EAS443:3:100:529:198#0/1  
aTLT`R\_^]S¥YYY¥]Z¥^UPSTU¥USPYVYXYTSZBBB  
@HWI-EAS443:3:100:562:1989#0/1  
AAAAGATGCAAAAGTGTCTTTCCAGAACTGGGGAATTGAA  
+HWI-EAS443:3:100:562:1989#0/1  
a\_``baKabbaaabZa`aaa`\_]`aaaaaaaVb`\_]`a\_\_a\_  
@HWI-EAS443:3:100:565:715#0/1  
AAACGATGCTGGATCAGACCGAGTGATGGTATCACCTCTG  
+HWI-EAS443:3:100:565:715#0/1  
`¥^^aX^a`]a]¥¥Z¥]\_[\_^a`W]\_¥`PJRGX]VOV^BB

@HWI-EAS443:3:100:580:1061#0/1  
AAAAGAAGTCTAATGTCGCAGTCCCGCACTCGC  
+HWI-EAS443:3:100:580:1061#0/1  
ab\_^babab\_^`[]aaaa`¥ab¥a^aaa`^^`a^aY\_]`B  
@HWI-EAS443:3:100:61:1850#0/1  
AAGAAGTCTAATGTCGCAGTCCCGCACTCGCGA  
+HWI-EAS443:3:100:61:1850#0/1  
aaaa`\_\_a\_b\_[\_¥`^^`a\_R]]Za`UR¥VSSZ¥W^BBBB  
@HWI-EAS443:3:100:622:1093#0/1  
TGCTGTAATTGGGTATCTCATTGCCATCATCCACTTCATT  
+HWI-EAS443:3:100:622:1093#0/1  
a^ZRa[YZ¥Wa][R`a]\_¥WOWa[[TY¥^WN]¥YXYBBB  
@HWI-EAS443:3:100:703:662#0/1  
GTCCCGTTTTCGTTTTATTACCAACTACGTCCCCTTGC  
+HWI-EAS443:3:100:703:662#0/1  
a`aP^a`aaa[a\_aa\_\_a¥aVK^`\_a\_aa\_`]^V]V^UBB  
@HWI-EAS443:3:100:708:329#0/1  
TCTGCTGTAATTGGGTATCTCATTGCCATCATCCACTTCA  
+HWI-EAS443:3:100:708:329#0/1  
]bRFU^TY[^[]aS`\_XXT\_\_Y^]aU^`^`SaYU]^\_BB  
@HWI-EAS443:3:100:747:1499#0/1  
AAGGGAGCAATTTTACAATCCTGGAGCTCTTCTTCTTCT  
+HWI-EAS443:3:100:747:1499#0/1  
aa`a`aa`a`baabaaaa]^¥aa\_a¥YKX`^aaXN¥`U\_  
@HWI-EAS443:3:100:769:1484#0/1  
GCGAGATACTACTAAGACCACTGTGGACCATATGGCCAT  
+HWI-EAS443:3:100:769:1484#0/1  
`aabaaaab^aaaa`[a\_`a\_`^^`a^[V`\_a\_`[\_]ZY\_  
@HWI-EAS443:3:100:771:989#0/1  
CAAGGGAGCAATTTTACAATCCTGGAGCTCTTCTTCTTCT  
+HWI-EAS443:3:100:771:989#0/1  
`aaaababa`\_`bababWa¥\_ab\_]US`[aa\_[]IYa\_\_  
@HWI-EAS443:3:100:790:412#0/1  
GTCTTAGTGAGTATCTCGCGAGTGCAGGACTGCGACATTA  
+HWI-EAS443:3:100:790:412#0/1  
a\_a\_a`\_]aaa\_a\_\_`VWWa]\_Z`SZ`\_UU¥^Z^MS^\_BB  
@HWI-EAS443:3:100:801:426#0/1  
AAAACAAACGATGCTGGATCAGACCGAGTGATGGTATCAC  
+HWI-EAS443:3:100:801:426#0/1  
^X¥`a¥¥b^^]aa\_]^aa`Raa]^`a`F\_\_Xaa[\_]SBB  
@HWI-EAS443:3:100:812:1474#0/1  
TGCTGCTCCTGAGAGGATTTCTCATTGCGCAAAGAAGAC  
+HWI-EAS443:3:100:812:1474#0/1  
a`aba`\_^bba`\_aa]a`a^a`^`baa\_\_aa\_`\_aaa\_aaZ  
@HWI-EAS443:3:100:81:105#0/1  
GTCTGCTGCTCCTGAGAGGATTTCTCATTGCGCAAAGAA  
+HWI-EAS443:3:100:81:105#0/1  
aaabb\_aa`\_^`a^aab`\_`aa\_a\_\_aaaa`^^`^\_]a^^  
@HWI-EAS443:3:100:835:291#0/1  
GTCCCGTTTTCGTTTTATTACCAACTACGTCCCCTTGC

+HWI-EAS443:3:100:835:291#0/1  
aTZ]\_\_WY`]V]PU[\_\_\_]a`[U\_VTY]\_Z¥¥ORURQVUBB  
@HWI-EAS443:3:100:863:630#0/1  
CCCGTTTTTCGTTTCATTACCAACTACTCGTCCCCTTGCCC  
+HWI-EAS443:3:100:863:630#0/1  
a\_`a\_^`abY]]¥`aaa¥\_aZ`[\_\_^[XNYWVZ\_¥^RBB  
@HWI-EAS443:3:100:893:585#0/1  
GCGAGATACTACTAAGACCACTGTGGACCATATGGCCAT  
+HWI-EAS443:3:100:893:585#0/1  
abb`a]`UTa\_`a``baa^a¥a\_]\_a\_]`\_a]^\_`WR^[  
@HWI-EAS443:3:100:897:135#0/1  
ATCTAATGTCGAGTCCCGCACTCGCGAGATACTACTAA  
+HWI-EAS443:3:100:897:135#0/1  
`a`^aa^a]J\_^a\_XV`a¥PTQV\_`¥\_¥`X¥^S^RVPBBB  
@HWI-EAS443:3:100:898:257#0/1  
GTCTTCTTTGCCCAAATGAGAAATCCTCTCAGGACAGCA  
+HWI-EAS443:3:100:898:257#0/1  
a```bVaaa\_`][a`aaaaa]\_aa^^a\_a^\_^`¥`\_\_B  
@HWI-EAS443:3:100:898:606#0/1  
GTATCTCATTGCCATCATCCACTTCATTCTGAGTGCGGGG  
+HWI-EAS443:3:100:898:606#0/1  
a`aQN][\_]V`^[\_^¥a\_Y[a^`\_VZa\_VaaV]Y`N\_S`B  
@HWI-EAS443:3:100:930:918#0/1  
GTCCCGTTTTTCGTTTCATTACCAACTACTCGTCCCCTTG  
+HWI-EAS443:3:100:930:918#0/1  
aaa`aa\_aaa¥^^aaa`aa]WYa\_]\_^a`^^]^¥^X\_\_\_B  
@HWI-EAS443:3:100:969:1090#0/1  
GCCACCATCAAGGGAGCAATTTTACAATCCTGGAGCTCTT  
+HWI-EAS443:3:100:969:1090#0/1  
Ya\_a¥\_^aa`[\_`bab`U\_aababaaaaY`]aaabG`Sbb  
@HWI-EAS443:3:100:970:788#0/1  
AGGGGACGTAGTGTGGTAATGAAACGAAAACGGGACTCT  
+HWI-EAS443:3:100:970:788#0/1  
U¥\_ab]b\_YU\_S\_]¥```[U]XXI[RbZa`¥LT^]WH`BB  
@HWI-EAS443:3:100:972:317#0/1  
AAAGAAGTGAAGATCTAATGTCGAGTCCCGCACTCGCG  
+HWI-EAS443:3:100:972:317#0/1  
]` `]Z]U` `]a^[T]Z]`\_aaVH\_S^aYN[¥ULTNNVBBB  
@HWI-EAS443:3:10:1004:902#0/1  
CAATCCCCAGTTCTGGAAAAGCACTTTTGCATCTTTTGT  
+HWI-EAS443:3:10:1004:902#0/1  
^abbbb`¥abbbbabaabba` `[b`bbbb¥ab`bbb`bb  
@HWI-EAS443:3:10:1025:1204#0/1  
TTACAACAAGGCAACCAAACGACTTACAGTTCTTGAAAG  
+HWI-EAS443:3:10:1025:1204#0/1  
]]a```a`aaaaY``\_aa^Ta\_\_\_a][`\_]aRZ\_aY\_\_\_a  
@HWI-EAS443:3:10:1045:872#0/1  
GTCTTCTTTGCCCAAATGAGAAATCCTCTCAGGACAGCA  
+HWI-EAS443:3:10:1045:872#0/1  
aXS\_`¥\_^`\_WXV\_¥U\_¥\_Q\_^V\_\_NVVSQY¥W^UY^WTU



@HWI-EAS443:3:10:1049:1976#0/1  
ACTCGGTCTGATCCAGCATCGTTTGTGCTCCAGAGGG  
+HWI-EAS443:3:10:1049:1976#0/1  
[b[[[\_aaa`\_]Uaa`\_Y]G^Za`^`ZNRUY\_Z\_a¥  
@HWI-EAS443:3:10:1116:454#0/1  
AGGATTTCTCATTTTGGGCAAAGAAGACAAGAGATATGGC  
+HWI-EAS443:3:10:1116:454#0/1  
¥bb[^\_\_`b\_YZaaa`a\_aa\_aaa\_aa]a`aaa```aa]\_  
@HWI-EAS443:3:10:1147:1448#0/1  
AAAAGAAGCTGAGAGATCTAATGTCGCAGTCCCGCACTCGC  
+HWI-EAS443:3:10:1147:1448#0/1  
Y^b^UaRR\_W^ba`a`Xba\_a`QX¥]]YQYS][¥H]GVaZ  
@HWI-EAS443:3:10:1184:139#0/1  
ATGAATACTCCAGCACGGAGAGAGTGGTAGTGAGTATTGA  
+HWI-EAS443:3:10:1184:139#0/1  
abbaaaa]aaa]]\_\_XaaY\_V[Q`M`BBBBBBBBBBBBBB  
@HWI-EAS443:3:10:1199:1739#0/1  
ACCCCGCACTCAGAATGAAGTGGATGATGGCAATGAGATA  
+HWI-EAS443:3:10:1199:1739#0/1  
]`\_¥``aZaaaa\_aba`aaaS`a^\_a\_0aa^\_XZ^¥`S0^  
@HWI-EAS443:3:10:1200:1852#0/1  
AAAAGAAGCTGAGAGATCTAATGTCGCAGTCCCGCACTCGC  
+HWI-EAS443:3:10:1200:1852#0/1  
aabbaabaaabaaaaaabaaa^\_a`aa¥^\_^^`\_`¥^] ^  
@HWI-EAS443:3:10:121:117#0/1  
AGCCGGCGGAACAGGCAGTGTATATTGAAGTGTGCAC  
+HWI-EAS443:3:10:121:117#0/1  
a[a\_aaab]¥a``aa\_¥aW`W^\_NZQV^QUURU¥UYZWVW  
@HWI-EAS443:3:10:1234:349#0/1  
TCCCGTTTTCGTTTCATTACCAACTACGTCCTTCCCTGCC  
+HWI-EAS443:3:10:1234:349#0/1  
`PM^^`a`QS^]\_a^S^\_UQTXXTTW\_YTYTGSU¥XUVR  
@HWI-EAS443:3:10:1241:1183#0/1  
TCATTTCTCACTTCTCCTCCTGGAGTGTACATCTGCTCCC  
+HWI-EAS443:3:10:1241:1183#0/1  
`a`\_aa^¥]`¥Z]`a\_``a^`aa`\_¥a^¥[¥RMZV[^RMV  
@HWI-EAS443:3:10:1245:509#0/1  
AATGAAGTGGATGATGGCAATGAGATACCCAATTACAGCA  
+HWI-EAS443:3:10:1245:509#0/1  
a^bb```Wababb¥]^`\_]\_^`][¥\_RZ[aaaaTQY^Z`  
@HWI-EAS443:3:10:1288:364#0/1  
ATTCTTCATACCCTTCATGTACTTTATTTTCAGTGTTTG  
+HWI-EAS443:3:10:1288:364#0/1  
abb`bbbbbbbabbbbabbbbababbbbbbbaabbbbbbb  
@HWI-EAS443:3:10:1296:1416#0/1  
CACTCAGAATGAAGTGGATGATGGCAATGAGATACCCAAT  
+HWI-EAS443:3:10:1296:1416#0/1  
abaab\_\_TZb``^b[ba¥abaaa]aaa]a``Ya]M]Ua^`  
@HWI-EAS443:3:10:129:977#0/1  
CATCATTTCTCACTTCTCCTCCTGGAGTGTACATCTGCTC

+HWI-EAS443:3:10:129:977#0/1  
abbbabbab\_bbabaaa`aaaaaa\_a\_¥a^a\_a\_`^a^\_\_  
@HWI-EAS443:3:10:1319:1832#0/1  
CTCTAACCCCTTAAAAATCGGTCAATACTCACTACCACTCT  
+HWI-EAS443:3:10:1319:1832#0/1  
abab]b[FPabab\_b\_a]bb¥\_`\_[a\_b^[Rbba`a\_^\_a  
@HWI-EAS443:3:10:1389:742#0/1  
CACTCGCGAGATACTCACTAAGACCACTGTGGACCATATG  
+HWI-EAS443:3:10:1389:742#0/1  
[\_P\_Vb^Z\_b\_a`[\_[G[^aXTVJV¥IZP]^\_UR[YXYZ  
@HWI-EAS443:3:10:1478:516#0/1  
GTTCACTTTCAAAGGACAAGCGGATCATCAGTCAAGAAA  
+HWI-EAS443:3:10:1478:516#0/1  
a¥aTZRW\_]S\_^`\_VYXRRYG^UY]WYYTOZVSTYYYYZZ  
@HWI-EAS443:3:10:1496:500#0/1  
CTCGCGAGATACTCACTAAGACCACTGTGGACCATATGGC  
+HWI-EAS443:3:10:1496:500#0/1  
aaU`ab^`ab`XJZ\_]b`\_aaa^PY[Ua¥\_^X]\_`a`W  
@HWI-EAS443:3:10:1498:1341#0/1  
ATTGGGTATCTCATTGCCATCATCCACTTCATTCTGAGTG  
+HWI-EAS443:3:10:1498:1341#0/1  
`bbaab`bVa\_ba]a`a]ba\_`\_a`\_a`a^Wa`\_a0`  
@HWI-EAS443:3:10:150:1508#0/1  
ATCAAGGGAGCAATTTTACAATCCTGGAGCTCTTCTTTCT  
+HWI-EAS443:3:10:150:1508#0/1  
a`baaa\_\_aaaa¥aaa\_aaaa`\_\_\_\_\_[]aW\_\_\_\_\_^^`  
@HWI-EAS443:3:10:1515:1341#0/1  
ACTAGCACTGACTCAGGGCCATTGATCTCCCACATCATTG  
+HWI-EAS443:3:10:1515:1341#0/1  
`a`]aaa\_aaaa```\_a\_]\_^\_a^XT\_]ZW^Z\_\_V]]]^  
@HWI-EAS443:3:10:1523:259#0/1  
TGCCCCGTTAGCACTTCTTCTTTCTTCTTACTGATGATCC  
+HWI-EAS443:3:10:1523:259#0/1  
a`\_\_a\_w[\_Xa`]``R`\_Ua`¥U`\_\_YY\_^SXUU¥UU  
@HWI-EAS443:3:10:153:1121#0/1  
GGGAGATCAATGGCCCTGAGTCAGTGCTAGTCAACACTTA  
+HWI-EAS443:3:10:153:1121#0/1  
`] [¥\_ULL^`TVU\_QRUV]]USNSVYYRYRYTRY[V]XVNY  
@HWI-EAS443:3:10:1564:1583#0/1  
CAAACCTTTGGTCAACATCATCATTCTCACTTCTCCTCCT  
+HWI-EAS443:3:10:1564:1583#0/1  
`baaabbbbbbbbabaaabbaabb`\_a\_aa`b`aa`aaa`  
@HWI-EAS443:3:10:1600:1662#0/1  
AAAAGAAGTGAAGATCTAATGTCGCAGTCCCGCACTCGC  
+HWI-EAS443:3:10:1600:1662#0/1  
`aba¥aa`baaaaaa\_aa`a`YX\_\_^FY¥¥\_Y¥U^^¥\_¥  
@HWI-EAS443:3:10:1605:1379#0/1  
CTGATGTGACTTTTTGATTATGGCCATATGGTCCACAGT  
+HWI-EAS443:3:10:1605:1379#0/1  
abbabbabbbbbbbbabbbbbbbabba`\_a\_]ba^ab]

@HWI-EAS443:3:10:1624:827#0/1  
AAAAGAAGTCTAATGTCGCAGTCCCGCACTCGC  
+HWI-EAS443:3:10:1624:827#0/1  
a`abaab\_b\_bbbbababbabb\_aa¥bb[U¥\_`^\_\_¥\_^  
@HWI-EAS443:3:10:166:996#0/1  
ACTTCTTCTTTCTTGACTGATGATCCGCTTGCCTTT  
+HWI-EAS443:3:10:166:996#0/1  
Xb`aab`bbaba`a\_aabaaaba`^^`Z[^a\_IY\_]`aa  
@HWI-EAS443:3:10:1708:1612#0/1  
ATGTGCCACAGCACAGATTGGAGGAGTAAGGATGGTGG  
+HWI-EAS443:3:10:1708:1612#0/1  
a]bZ`aa[aa[TU^Taa\_`\_\_\_\_\_a¥YaU\_¥\_VYY¥\_T[R  
@HWI-EAS443:3:10:1724:513#0/1  
ATGTGCAGTCCCGCACTCGCGAGATACTCACTAAGACCA  
+HWI-EAS443:3:10:1724:513#0/1  
abbaab¥`\_]`a¥a`\_\_a`a`a^`U\_aN\_¥\_W¥a]YZOFZ  
@HWI-EAS443:3:10:1754:1658#0/1  
AAAGAAGTCTAATGTCGCAGTCCCGCACTCGCG  
+HWI-EAS443:3:10:1754:1658#0/1  
\_Z]XP¥a`b`X^]R\_aaa^P[SQU[RZRW[VYJVNUFQ  
@HWI-EAS443:3:10:1779:1353#0/1  
ATTCTACAAGAGGATTGCATGATCAAGGCAGTTAGGGGC  
+HWI-EAS443:3:10:1779:1353#0/1  
aba\_aaa\_aab`a`aa`\_`\_X¥aa`W^aX]SZY]TP  
@HWI-EAS443:3:10:184:1039#0/1  
TCCCGTTTTCGTTTCATTACCAACTACGTCCCCTTGCC  
+HWI-EAS443:3:10:184:1039#0/1  
aaa`b`aaa`a\_aa\_aa`a`[`a\_`\_`^Z^\_Z[]Y^\_Z  
@HWI-EAS443:3:10:187:441#0/1  
CCCGTTTTCGTTTCATTACCAACTACGTCCCCTTGCCC  
+HWI-EAS443:3:10:187:441#0/1  
`bbba`Z`aT`\_baaa`Y]aZabb\_]`Ua¥`a¥`b\_[]  
@HWI-EAS443:3:10:189:553#0/1  
AAGCACTTTTGCATCTTTTTGGAAATGCCTCAAGAGTTGG  
+HWI-EAS443:3:10:189:553#0/1  
a^ba¥`]aa`a^QYY\_^[aa\_a\_]¥`¥`]`\_ZKYQ^\_^aZ  
@HWI-EAS443:3:10:203:815#0/1  
GAGAGAATAAAAGAAGTCTAATGTCGCAGTCCC  
+HWI-EAS443:3:10:203:815#0/1  
a¥aZa\_U`a\_a^\_]`a[^\_]X\_^]ZLU]]X^UYXV  
@HWI-EAS443:3:10:221:2015#0/1  
ATTGGGTATCTCATTGCCATCATCCACTTCATTCTGAGTG  
+HWI-EAS443:3:10:221:2015#0/1  
a[[baT\_babaWR¥TRXaa^aa\_Y[Wa\_\_[^ZWOW\_`\_HY  
@HWI-EAS443:3:10:237:1454#0/1  
AGAGAATAAAAGAAGTCTAATGTCGCAGTCCCG  
+HWI-EAS443:3:10:237:1454#0/1  
a`abb]baaM`b`babab\_bb`bbbbaab\_baab`\_aa^]  
@HWI-EAS443:3:10:253:1191#0/1  
ATCTGCTCCCAGCACGTCCCTTGGGTAAAGTGCAACTT

+HWI-EAS443:3:10:253:1191#0/1  
^¥baaa\_a^[S[]a`^Za¥[^^[\_Q\_`\_[WY[]\_S^W[¥  
@HWI-EAS443:3:10:266:326#0/1  
AAAAGAAGTCTAATGTCGAGTCCCGCACTCGC  
+HWI-EAS443:3:10:266:326#0/1  
[\_¥U\_U¥\_^^]aaa`aZ\_a[\_aP][][]a\_NN^N¥^P[`Z`\_  
@HWI-EAS443:3:10:293:468#0/1  
GTCCCGTTTTTCGTTTCATTACCAACTACGTCCTTGC  
+HWI-EAS443:3:10:293:468#0/1  
a)^^¥\_QR[\_^\_V^^]¥Y]^V`\_\_a^Z\_YYXX]UYYYVV  
@HWI-EAS443:3:10:307:1109#0/1  
ATGGTATTCTCACAAGAGGATTGCATGATCAAGGCAGTTA  
+HWI-EAS443:3:10:307:1109#0/1  
`R]WF]``aba]Z¥`^Z`^a\_``aaaa¥a]Z`]]¥\_TX^  
@HWI-EAS443:3:10:319:976#0/1  
TCCCGTTTTTCGTTTCATTACCAACTACGTCCTTGC  
+HWI-EAS443:3:10:319:976#0/1  
aaabaX`¥aaa[aa`aaa`¥``]Sa`\_a\_aV¥^¥WW]]]^  
@HWI-EAS443:3:10:336:1323#0/1  
AAGAAGTCTAATGTCGAGTCCCGCACTCGCGA  
+HWI-EAS443:3:10:336:1323#0/1  
W`P\_[\_Z]abaaaa\_^R¥a¥ZW]^NF¥\_ZW\_[]\_a\_ZY]  
@HWI-EAS443:3:10:395:1103#0/1  
CGCACTCGGAGATACTACTAAGACCACTGTGGACCATA  
+HWI-EAS443:3:10:395:1103#0/1  
abaaaaaaaaaa`aa^`a^`a`\_][TY\_^\_]\_X\_  
@HWI-EAS443:3:10:420:1657#0/1  
CCATTATTCTTGTCTGCTGTAATTGGGTATCTCATTGC  
+HWI-EAS443:3:10:420:1657#0/1  
a`bba`abba`abbaabaaa]aaaa¥\_a[Z]X\_`aa¥\_a  
@HWI-EAS443:3:10:424:62#0/1  
ATGGTTGGGAGAAGAGCAACAGCTATTCTCAGAAAGGCAA  
+HWI-EAS443:3:10:424:62#0/1  
aaa`U``[^`bZY\_a^T]¥FQZTTQLSDTNN[]\_\_Y¥PRT  
@HWI-EAS443:3:10:447:1463#0/1  
TTCCTGATGTGTACTTTTTGATTATGGCCATATGGTCCAC  
+HWI-EAS443:3:10:447:1463#0/1  
aaaaa`]^`aaa^a`aaa`a``aaaa`R\_\_a^`¥WZQX\_\_]  
@HWI-EAS443:3:10:483:1690#0/1  
GTCCCGTTTTTCGTTTCATTACCAACTACGTCCTTGC  
+HWI-EAS443:3:10:483:1690#0/1  
a[\_Y\_YRS\_W`YY\_Z\_Q]^][Z[\_V^WWZ]^VZWZUZW^  
@HWI-EAS443:3:10:531:1415#0/1  
CTGCTCCACCAGAACAGAGTAGGATGCAATTTTCCTCATT  
+HWI-EAS443:3:10:531:1415#0/1  
abbb[bb`baaa[\_\_\_a`a]aaa`\_]aa¥\_a\_\_\_\_\_¥[  
@HWI-EAS443:3:10:571:222#0/1  
AAAAGAAGTCTAATGTCGAGTCCCGCACTCGC  
+HWI-EAS443:3:10:571:222#0/1  
\_[Z¥^^a`ab^\_]` `[aa\_a^a`[\_aW[^`^^¥USSUW

@HWI-EAS443:3:10:580:246#0/1  
CAAGGACAAACCCTCTGGAGCAAACAAACGATGCTGGAT  
+HWI-EAS443:3:10:580:246#0/1  
````^a`bb`babaaaba`baba`aaabb^aa`bZ¥aaa\_  
@HWI-EAS443:3:10:592:996#0/1  
CGCTTGTCTTTTGAAGTGAACCCACCAAACTGAAAGA  
+HWI-EAS443:3:10:592:996#0/1  
^`S]SaU]U`bb`Y`````\_aab]Maa]LP]¥``\_a`\_J^^  
@HWI-EAS443:3:10:61:1339#0/1  
GCTGGCCATATCTCTTGTCTTCTTTGCCCAAAATGAGAA  
+HWI-EAS443:3:10:61:1339#0/1  
`bSa`\_aa`a¥a[a\_^\_\_[[`\_aZa`\_\_`aaY`a\_]aa]`  
@HWI-EAS443:3:10:638:1183#0/1  
AATTGGGCAAGGGGACGTAGTGTGGTAATGAAACGAAAA  
+HWI-EAS443:3:10:638:1183#0/1  
aabaabbaba]]aa`\_]P[Ub[abbQYa¥a\_`aSaX``X  
@HWI-EAS443:3:10:674:957#0/1  
CGTTTTCGTTTCATTACCAACTACGTCCCCTTGCCCAA  
+HWI-EAS443:3:10:674:957#0/1  
abbaabbbabbbabb`bbabaabaa\_a`a\_\_`\_a^`aa  
@HWI-EAS443:3:10:759:1802#0/1  
AGTGTACATCTGCTCCCAGCACGTCCCTTGGGTAAAGTGC  
+HWI-EAS443:3:10:759:1802#0/1  
`aa`^babaaaaa\_\_[\_b^^a¥\_^^\_\_\_\_]\_\_YY\_`^V^U  
@HWI-EAS443:3:10:772:1245#0/1  
TGCTGTAATTGGGTATCTCATTGCCATCATCCACTTCATT  
+HWI-EAS443:3:10:772:1245#0/1  
ababbaa\_bbaaa\_aaaaaaa`\_a\_\_a^XV]]`\_\_\_\_`\_  
@HWI-EAS443:3:10:784:493#0/1  
ATCCTTTCCAAGAACTGTAAGTCGTTTGGTTGCCTTGTTG  
+HWI-EAS443:3:10:784:493#0/1  
a`a`bab`ab`a]^Y]^¥a`a¥\_a\_\_a\_]Z^aS^`]^`\_`a  
@HWI-EAS443:3:10:785:261#0/1  
ATTAGCATCTCTTGGAAATGTGCCACAGCACACAGATT  
+HWI-EAS443:3:10:785:261#0/1  
¥¥Waa¥]¥`^\_^HW]\_`\_`VZaU[[[\_Ua^^`G`S]\_^]Z  
@HWI-EAS443:3:10:793:1339#0/1  
CCCCTTTTCGTTTCATTACCAACTACGTCCCCTTGCCC  
+HWI-EAS443:3:10:793:1339#0/1  
aa\_WFU^VaaZ^\_aaaab]]^\_aa^Y[OaZWYRTY`^]QU  
@HWI-EAS443:3:10:813:1768#0/1  
AAGCACTTTTGCATCTTTTTGGAAATGCCTCAAGAGTTGG  
+HWI-EAS443:3:10:813:1768#0/1  
a[YH`]]VZ\_a^\_\_Y\_\_\_\_^^\_a`\_^\_Y^VU^U]X^U]\_T  
@HWI-EAS443:3:10:868:860#0/1  
AGTGGATGATGGCAATGAGATACCCAATTACAGCAGACAA  
+HWI-EAS443:3:10:868:860#0/1  
`aH\_]aaYS¥a\_\_TV\_W\_UTUX]\_Y¥[Z[RRW^]]XWa`  
@HWI-EAS443:3:10:872:1118#0/1  
GGCACATTTCCAAGAGAGATGCTAATGGGTCTGCTGACAC

+HWI-EAS443:3:10:872:1118#0/1  
¥XaaW\_VS[Z[¥[^YL¥[X\_\_G]PW`\_¥`WPT¥LF[RETW  
@HWI-EAS443:3:10:891:290#0/1  
AAGAAGACTGAGAGATCTAATGTCGCAGTCCCGCACTCGCGA  
+HWI-EAS443:3:10:891:290#0/1  
`\_X^a][[^\_\_bXX]a][YU¥Z]NP[ZGOW]R[Z[U[SN[  
@HWI-EAS443:3:10:901:1572#0/1  
AAAAGAAGACTGAGAGATCTAATGTCGCAGTCCCGCACTCGC  
+HWI-EAS443:3:10:901:1572#0/1  
a\_baa\_bbbbbbbaba\_b^abb\_\_aaaa\_Q\_a\_b\_Y¥]aa  
@HWI-EAS443:3:10:958:394#0/1  
GGATCAGACCGAGTGATGGTATCACCTCTGGCCGTAACAT  
+HWI-EAS443:3:10:958:394#0/1  
a\_^¥Ua\_\_^[W^^UW[Z\_[UUTPRRWUWTWWWYWWYQWW  
@HWI-EAS443:3:11:1059:773#0/1  
GAATAAAGAAGACTGAGAGATCTAATGTCGCAGTCCCGCAC  
+HWI-EAS443:3:11:1059:773#0/1  
a\_^ba[abaaaaaaaa`bababaabbaa`]aa]\_`a\_\_]  
@HWI-EAS443:3:11:1079:1297#0/1  
TCCCGTTTTTCGTTTCATTACCAACTACGTCCCTTGCC  
+HWI-EAS443:3:11:1079:1297#0/1  
aaaXaUa`Y\_]bXU`aba\_\_¥^aa`Y\_T¥V`\_^ZY[^YP  
@HWI-EAS443:3:11:1139:584#0/1  
GAATAAAGAAGACTGAGAGATCTAATGTCGCAGTCCCGCAC  
+HWI-EAS443:3:11:1139:584#0/1  
a]\_a^`\_\_a^]T^\_]\_^\_\_\_\_^^]X\_\_YWQT^]X]WWWXUX  
@HWI-EAS443:3:11:1141:389#0/1  
TAAAAGAAGACTGAGAGATCTAATGTCGCAGTCCCGCACTCG  
+HWI-EAS443:3:11:1141:389#0/1  
aaaa`a`a\_aaaa\_a\_`aa`aa^`\_`a]^^^YYYY\_  
@HWI-EAS443:3:11:1185:1538#0/1  
ATTTCTCACTTCTCCTCCTGGAGTGACATCTGCTCCCAG  
+HWI-EAS443:3:11:1185:1538#0/1  
aaba`a`\_abaa`\_\_`a`\_\_\_U¥¥W`¥`S^\_¥USW^V]  
@HWI-EAS443:3:11:1265:894#0/1  
ATCTGCTCCCAGCACGTCCCTTGGGTTAAGTGCAACTT  
+HWI-EAS443:3:11:1265:894#0/1  
^Ybbbaa`a`aa`\_`a\_a\_¥`][\_¥a^]ZS[[\_\_U^¥`^  
@HWI-EAS443:3:11:1317:1652#0/1  
TAATGTGCTAATTGGGCAAGGGACGTAGTGTTGGTAATG  
+HWI-EAS443:3:11:1317:1652#0/1  
aaab^Ya[aa`a`baWa\_\_ba`a^a]^`U`a\_^T^^UU  
@HWI-EAS443:3:11:1344:1139#0/1  
GCTGTAATTGGGTATCTCATTGCCATCATCCACTTCATTC  
+HWI-EAS443:3:11:1344:1139#0/1  
\_abb[aab`\_`b\_abaa`aaaa`\_aa`aa\_\_`^`\_¥`aa[  
@HWI-EAS443:3:11:1380:1663#0/1  
AAAGAAGACTGAGAGATCTAATGTCGCAGTCCCGCACTCGCG  
+HWI-EAS443:3:11:1380:1663#0/1  
aabX^a\_aX\_Y`]\_¥^`a\_a^U¥\_V`VT¥[NU¥NYWBBB

@HWI-EAS443:3:11:1397:1065#0/1  
CTCGCGAGATACTCACTAAGACCACTGTGGACCATATGGC  
+HWI-EAS443:3:11:1397:1065#0/1  
^ba`aa^`bba`aaaababbaa\_aaab\_`\_`\_]`aX`\_Y  
@HWI-EAS443:3:11:142:1145#0/1  
GGGCGATCTGAACCTTTGTCAATAGGGCAAACCAGCGACTG  
+HWI-EAS443:3:11:142:1145#0/1  
aabba^Z`aab`aaaaa`bbaaaaaa\_aaaaaa]aa\_`a  
@HWI-EAS443:3:11:1433:28#0/1  
TAAAGAAGACTGAGAGATCTAATGTCGCAGTCCCGCACTCG  
+HWI-EAS443:3:11:1433:28#0/1  
aaaaaa\_a\_aa`\_a`\_^a`^`X]^\_\_aVXWXYWUXXV  
@HWI-EAS443:3:11:1491:998#0/1  
GCACTCGCGAGATACTCACTAAGACCACTGTGGACCATAT  
+HWI-EAS443:3:11:1491:998#0/1  
aaaaaab`a\_aaaa¥a\_a\_a[\_`a]aa`^^`^\_X]\_]\_\_  
@HWI-EAS443:3:11:1524:898#0/1  
TACCCTTCATGTACTCTTATTTTCAGTGTTTGGAGGTTGC  
+HWI-EAS443:3:11:1524:898#0/1  
`^^\_aa^aa`\_\_\_`\_a`aaa`^\_]a^^`\_]Z`]ZZ\_R  
@HWI-EAS443:3:11:1526:1525#0/1  
GAATAAAAGAAGACTGAGAGATCTAATGTCGCAGTCCCGCAC  
+HWI-EAS443:3:11:1526:1525#0/1  
aa\_babaaba\_\_aa^aa`¥[[\_`a\_ba\_[aS]Y]KKRZ^¥X  
@HWI-EAS443:3:11:1543:336#0/1  
AAAAGAAGACTGAGAGATCTAATGTCGCAGTCCCGCACTCGC  
+HWI-EAS443:3:11:1543:336#0/1  
Z^[\_[bbabbbba¥]a]Z]a¥]^bZ]\_[aa\_N]I[] [SYBBB  
@HWI-EAS443:3:11:1546:688#0/1  
AGAGAATAAAAGAAGACTGAGAGATCTAATGTCGCAGTCCCG  
+HWI-EAS443:3:11:1546:688#0/1  
`aaa[abbbb`a^babbb\_abbaabbaa\_a^aa`Y¥]\_a  
@HWI-EAS443:3:11:1575:168#0/1  
AAAGAAGACTGAGAGATCTAATGTCGCAGTCCCGCACTCGCG  
+HWI-EAS443:3:11:1575:168#0/1  
aab`aa\_ab^Z\_\_aa^aaa`a^`\_^\_a[YV]YYXVUXYYB  
@HWI-EAS443:3:11:1581:1801#0/1  
AAAGAAGACTGAGAGATCTAATGTCGCAGTCCCGCACTCGCG  
+HWI-EAS443:3:11:1581:1801#0/1  
aaVY\_aUa\_V[aW\_\_Y\_b\_`XY`]\_\_BBBBBBBBBBBBB  
@HWI-EAS443:3:11:1595:382#0/1  
GAAAAGCACTTTTGCATCTTTTGGAAATGCCTCAAGAGT  
+HWI-EAS443:3:11:1595:382#0/1  
aZa\_ZZN¥`]]aR`GU^¥^a`\_\_aJU`Y¥XQLVYR¥S^P  
@HWI-EAS443:3:11:1623:266#0/1  
ATTGGGCAAGGGGACGTAGTGTGGTAATGAAACGAAAAC  
+HWI-EAS443:3:11:1623:266#0/1  
``aaaa^W)`a^\_^[aQY\_[]`¥`ZVNKXVTQ\_\_Y^PBBBB  
@HWI-EAS443:3:11:1663:1273#0/1  
CACTGTGGACCATATGGCCATAATCAAAAAGTACACATCA

+HWI-EAS443:3:11:1663:1273#0/1  
abbababbabbabaaaaaa`Z``aTaaaa¥`Wa^a`a\_Sa  
@HWI-EAS443:3:11:1678:1023#0/1  
GTACTTTTTGATTATGGCCATATGGTCCACAGTGGTCTTA  
+HWI-EAS443:3:11:1678:1023#0/1  
aTQT\_\_^`]X¥]Z]^YVY]TWWYXTUSTUNTWSSZXBBBB  
@HWI-EAS443:3:11:1684:1071#0/1  
CGTTTTTCGTTTCATTACCAACTACGTCCCCTTGCCCAA  
+HWI-EAS443:3:11:1684:1071#0/1  
aaaabaab`aaaabaa]aaa\_a\_aa[a`\_WVQ[\_\_\_TTRa\_  
@HWI-EAS443:3:11:1697:1936#0/1  
AAGGGAGCAATTTTACAATCCTGGAGCTCTTCTTTCTTCT  
+HWI-EAS443:3:11:1697:1936#0/1  
abaaaaaab`bbaaa\_aaa^¥^a`\_[ZaU```]a`a]aa[a  
@HWI-EAS443:3:11:1704:864#0/1  
TAAAAGAAGTGGAGATCTAATGTCGCAGTCCCGCACTCG  
+HWI-EAS443:3:11:1704:864#0/1  
aab^a^]\_`b^\_aa\_a\_]aaa`a\_[\_Va\_VPQY]U¥YGY[  
@HWI-EAS443:3:11:1714:1173#0/1  
GAAAATAAGAGTACATGAAGGGTATGAAGAATTCACAATG  
+HWI-EAS443:3:11:1714:1173#0/1  
a\_a¥\_a]Q¥]aX\_[ZT`[\_a`^PZ^\_\_^^V]`^VXV^X¥\_  
@HWI-EAS443:3:11:172:922#0/1  
CAAGAGAATAATGGACATGATTCCAGAGAGGAATGAACAA  
+HWI-EAS443:3:11:172:922#0/1  
^Z^`\_¥^U`¥aa`[]`a`Z¥[TX^a``aa^¥P`][a[D¥]  
@HWI-EAS443:3:11:1750:1730#0/1  
ATCTAATGTCGCAGTCCCGCACTCGCGAGATACTCACTAA  
+HWI-EAS443:3:11:1750:1730#0/1  
aaaab^aa\_[`a\_\_\_[R^^a`[N[^GV`QXRV¥USITKBBB  
@HWI-EAS443:3:11:1782:849#0/1  
CAATCCCCAGTTCTGGAAAAGCACTTTTGCATCTTTTTG  
+HWI-EAS443:3:11:1782:849#0/1  
a`b\_\_aaa]aaZS\_`a\_PaZHUIY``\_]`^`S[aJ\_¥P^a\_  
@HWI-EAS443:3:11:178:1566#0/1  
CAGGAGGAGAAGTGGAGAAATGATGATGTTGACCAAAGTTT  
+HWI-EAS443:3:11:178:1566#0/1  
abbbabbabYab\_baa`aab`aabaab\_aaa\_a``\_]W``  
@HWI-EAS443:3:11:184:197#0/1  
AGTTCAGATCGCCCCTAACTGCCTTGATCATGCAATCCTC  
+HWI-EAS443:3:11:184:197#0/1  
ab^aabaa\_b\_aaaa`aaa\_\_a\_]\_\_\_`a[W]\_\_^^^]`^`  
@HWI-EAS443:3:11:202:483#0/1  
GGAGAGAATAAAAGAAGTGGAGAGATCTAATGTCGCAGTCC  
+HWI-EAS443:3:11:202:483#0/1  
a\_`QU``U]R`YVY]UXZa^^¥¥¥]\_]WZNR\_W^^]VX  
@HWI-EAS443:3:11:208:36#0/1  
AAAAGAAGTGGAGATCTAATGTCGCAGTCCCGCACTCGC  
+HWI-EAS443:3:11:208:36#0/1  
abbb^]Vaaba`aabaa`T^`b\_`aa`aT^a\_``Qa]aa\_



@HWI-EAS443:3:11:209:1983#0/1  
AAAAGAACTGAGAGATCTAATGTCGCAGTCCCGCACTCGC  
+HWI-EAS443:3:11:209:1983#0/1  
a\_bb` ``¥aab\_aaa]\_aaa\_\_R^^\_a^\_]\_\_^^R\_]\_¥\_  
@HWI-EAS443:3:11:230:1360#0/1  
AAAAGAACTGAGAGATCTAATGTCGCAGTCCCGCACTCGC  
+HWI-EAS443:3:11:230:1360#0/1  
SXaU`\_^`\_aXT[\_a[\_`\_^`\_[aUa` `M^`¥GX[ `T`X¥  
@HWI-EAS443:3:11:297:1202#0/1  
AAAAGAACTGAGAGATCTAATGTCGCAGTCCCGCACTCGC  
+HWI-EAS443:3:11:297:1202#0/1  
abaaaaabaaaaaaaaaaaa\_aa^a`aa^]`^\_^]\_\_\_]\_¥^  
@HWI-EAS443:3:11:304:1746#0/1  
GTCCATTATTCTTGTCTGCTGTAATTGGGTATCTCATT  
+HWI-EAS443:3:11:304:1746#0/1  
a\_baaaa[a`X]\_^\_]a^`Z^P^][^aW]O\_\_^][][]  
@HWI-EAS443:3:11:309:234#0/1  
GTCCCGTTTTTCGTTTCATTACCAACTACGTCCCTTGC  
+HWI-EAS443:3:11:309:234#0/1  
a^\_¥Y`^`\_S\_^URP[\_^YGY]\_ZSWV]ZUUURVYUUBBB  
@HWI-EAS443:3:11:349:20#0/1  
TAGAGATCAAAGAGGGAACGTACTATTGTCTCCCGAAGAA  
+HWI-EAS443:3:11:349:20#0/1  
aab`baababababbaaa\_b[a\_a` ``a]`\_\_a^a\_\_a\_]`  
@HWI-EAS443:3:11:369:70#0/1  
TACTTTTTGATTATGGCCATATGGTCCACAGTGGTCTTAG  
+HWI-EAS443:3:11:369:70#0/1  
aa`abaaabY^`a`a^a`]]WU^][^Y¥[T\_^UU\_^BB  
@HWI-EAS443:3:11:36:764#0/1  
CCCGCACTCAGAATGAAGTGGATGATGGCAATGAGATACC  
+HWI-EAS443:3:11:36:764#0/1  
a`\_^a^V]a`]a\_aaTK¥Wa^]`]LS\_a^VZ\_\_Y]RP^\_^  
@HWI-EAS443:3:11:393:1225#0/1  
CCGCACTCAGAATGAAGTGGATGATGGCAATGAGATACCC  
+HWI-EAS443:3:11:393:1225#0/1  
aaaaaaaa`aaaa` ``\_^a^`\_aZaa\_WW` ``^`]V\_a\_]`  
@HWI-EAS443:3:11:393:688#0/1  
AATGTCGCAGTCCCGCACTCGCGAGATACTCACTAAGACC  
+HWI-EAS443:3:11:393:688#0/1  
a]\_bPX]baUY^a`a`WX]a[aaT]T^JZN`^WWZ\_[S\_U  
@HWI-EAS443:3:11:394:1126#0/1  
GTACTTTTTGATTATGGCCATATGGTCCACAGTGGTCTTA  
+HWI-EAS443:3:11:394:1126#0/1  
a\_a`bbaaba`aaa`\_\_a`\_U^\_] [X]]¥]` `R]\_NX\_\_[  
@HWI-EAS443:3:11:437:537#0/1  
CACTCGCGAGATACTCACTAAGACCACTGTGGACCATATG  
+HWI-EAS443:3:11:437:537#0/1  
aaa`\_\_¥`R`¥`¥a`a]^ [Z`aU`\_`WPTPZ]]^^Z^ZQZ  
@HWI-EAS443:3:11:445:88#0/1  
GTCCCAAGCACATCCCGCATTTGCTGGAACAGTGCCTTA

+HWI-EAS443:3:11:445:88#0/1  
a`a`\_]\_\_a\_a¥a\_\_¥\_]\_\_¥¥¥`\_W¥ZW¥V¥^S^SUW¥V¥  
@HWI-EAS443:3:11:486:411#0/1  
CTCCTCCTGGAGTGACATCTGCTCCCAGCACGTCCCTTG  
+HWI-EAS443:3:11:486:411#0/1  
abbbaa`bbaa\_[aa\_abaaaa[Zx]`a`]XaZXU¥]`\_  
@HWI-EAS443:3:11:49:1426#0/1  
TCTCTTTCTAGCATGTACGCCACCATCAAGGGAGCAATTT  
+HWI-EAS443:3:11:49:1426#0/1  
a^aaaaababaaaaa^aa\_a`\_[a]^¥Z`\_a\_\_]`\_`¥a^  
@HWI-EAS443:3:11:508:161#0/1  
AAAGAACTGAGAGATCTAATGTCGCAGTCCCGCACTCGCG  
+HWI-EAS443:3:11:508:161#0/1  
RRN\_ZK\_S\_]PZYVW¥`\_VZN]]ZSW¥]XS[Z\_R[LBBB  
@HWI-EAS443:3:11:537:747#0/1  
GAGAGATCTAATGTCGCAGTCCCGCACTCGCGAGATACTC  
+HWI-EAS443:3:11:537:747#0/1  
a]a`aaaa]aaZ^\_a\_aaU\_\_`^\_\_^U\_Za¥\_¥W]NVN  
@HWI-EAS443:3:11:567:111#0/1  
CCCCTTTTCGTTTTATTACCAACTACGTCCCCCTTGCCC  
+HWI-EAS443:3:11:567:111#0/1  
``ab`\_`aaaa`a``aaaa\_a`a\_a\_\_\_\_\_ZXUR]]Z]ZZZ  
@HWI-EAS443:3:11:594:1140#0/1  
AATAAAAGAACTGAGAGATCTAATGTCGCAGTCCCGCACT  
+HWI-EAS443:3:11:594:1140#0/1  
^b`VROYUM]]T`R]¥[¥[V¥a\_aFDS`a^FLFNPLXBBB  
@HWI-EAS443:3:11:60:464#0/1  
TGGTCCACAGTGGTCTTAGTGAGTATCTCGCGAGTGCGGG  
+HWI-EAS443:3:11:60:464#0/1  
\_a]GV¥^\_\_¥`bb]`baaa¥``]]````¥`Z\_TV¥U¥\_W]X  
@HWI-EAS443:3:11:635:817#0/1  
GAATGAACAAGGACAAACCCTCTGGAGCAAAACAAACGAT  
+HWI-EAS443:3:11:635:817#0/1  
`¥b`aaaaaaaa]aaaU`aaaUaa¥V`a\_\_\_a]a`\_V`\_^  
@HWI-EAS443:3:11:638:634#0/1  
CGCACTCAGAATGAAGTGGATGATGGCAATGAGATACCCA  
+HWI-EAS443:3:11:638:634#0/1  
abab\_bbbaZ[bba¥aQbaa`^`\_`aa`a\_]a\_``]\_\_X\_a  
@HWI-EAS443:3:11:647:1258#0/1  
CATTAGCATCTCTTGGAAATGTGCCACAGCACACAGAT  
+HWI-EAS443:3:11:647:1258#0/1  
aaa\_baaaaaaaaa`aa¥aa\_]`b`\_`aa^aa`\_a\_]`  
@HWI-EAS443:3:11:675:654#0/1  
CTAATGTCGCAGTCCCGCACTCGCGAGATACTCACTAAGA  
+HWI-EAS443:3:11:675:654#0/1  
ab`P`aX[aaaaa¥a[S]`a]URa]YF[QV¥\_[^QU`\_¥U  
@HWI-EAS443:3:11:678:987#0/1  
CCCCTTTTCGTTTTATTACCAACTACGTCCCCCTTGCCC  
+HWI-EAS443:3:11:678:987#0/1  
a``^JUa`b\_PX\_Zaa`[ZUR`\_a`[a\_WWDR]SY[W`UB

@HWI-EAS443:3:11:682:610#0/1  
AAAGAAGTCTAATGTCGCAGTCCCGCACTCGCG  
+HWI-EAS443:3:11:682:610#0/1  
aaa`^^^aaa`aaa\_aaa\_aW\_\_a\_aT\_\_`^\_^\_ZU\_¥\_  
@HWI-EAS443:3:11:693:1450#0/1  
GTCTGCTGTCCTGAGAGATTTCTCATTGTTGGGCAAAGAA  
+HWI-EAS443:3:11:693:1450#0/1  
a`baa`^aWYbSS]aY¥^`\_^¥Z\_Y]``\_]T[\_\_\_YT[^\_  
@HWI-EAS443:3:11:73:828#0/1  
ACGACTTACAGTTCTTGAAAGGATGCAGGTGCATTGACT  
+HWI-EAS443:3:11:73:828#0/1  
aaa`^aaaaab^aa`aaa]aaaa\_^a[aa`Y`¥a\_^\_\_`W  
@HWI-EAS443:3:11:757:1719#0/1  
AATGAAGTGGATGATGGCAATGAGATACCCAATTACAGCA  
+HWI-EAS443:3:11:757:1719#0/1  
¥^]bTLVZb^]\_ba`YV^XZaaYUS[QOFVa]aaZU¥W\_\_  
@HWI-EAS443:3:11:771:1267#0/1  
GTCCCGTTTTCGTTTTATTACCAACTACGTCCCCTTGC  
+HWI-EAS443:3:11:771:1267#0/1  
a]a¥^b`a\_]aa^`\_\_\_`Xa\_[a\_]\_W¥`^\_UZ\_U^¥X`U  
@HWI-EAS443:3:11:779:902#0/1  
CTCGCGAGATACTCACTAAGACCACTGTGGACCATATGGC  
+HWI-EAS443:3:11:779:902#0/1  
abbaaab`b\_aa`aabbaaa`a\_aY[a\_a\_``^`\_\_  
@HWI-EAS443:3:11:790:40#0/1  
GAATAAAAGAAGTCTAATGTCGCAGTCCCGCAC  
+HWI-EAS443:3:11:790:40#0/1  
a[^¥`\_\_`TX^)^X\_¥X]^U\_XY]]]UUYYYYSPUXXYXB  
@HWI-EAS443:3:11:793:1138#0/1  
GTGGCGTACATGCTAGAAAGAGAATTGGTCCGTAACAA  
+HWI-EAS443:3:11:793:1138#0/1  
a\_aaaa^aa`aa`a\_a`^a\_^\_]\_^\_]\_Z]\_\_¥Z\_^Z`\_  
@HWI-EAS443:3:11:811:206#0/1  
GTTGCCGTTTAGCACTTCTTCTTCTTCTTGACTGATGAT  
+HWI-EAS443:3:11:811:206#0/1  
[FQaVX^bR\_`a[S]^`\_^`\_¥^W^`\_¥`\_\_XY^\_^\_]X  
@HWI-EAS443:3:11:814:1240#0/1  
AAAAGAAGTCTAATGTCGCAGTCCCGCACTCGC  
+HWI-EAS443:3:11:814:1240#0/1  
`b`ba`bb`babaaa\_abaaaa\_a\_aa¥^^]L[¥¥]^Z` [  
@HWI-EAS443:3:11:840:1285#0/1  
GTCCCGTTTTCGTTTTATTACCAACTACGTCCCCTTGC  
+HWI-EAS443:3:11:840:1285#0/1  
a^aaab`aaa]`[a```a`aa\_a¥\_a`^a^a]X\_XX]]\_\_  
@HWI-EAS443:3:11:843:747#0/1  
ATAAAGTGGCTGTTCCGCCGCTACTGGGAGAAACCTT  
+HWI-EAS443:3:11:843:747#0/1  
aa`aa`aa`aaa¥`Xa``¥`\_`a¥^[KT[^UTNN]BBBB  
@HWI-EAS443:3:11:873:527#0/1  
GAGTATTGACCGATTTTTAAGGGTTAGAGATCAAAGAGGG

+HWI-EAS443:3:11:873:527#0/1  
`¥`V[a`\_^`¥¥`\_]Y[`\_Z¥\_\_`^]X]]¥T[]\_Z]  
@HWI-EAS443:3:11:884:739#0/1  
GGGTTTGTCTTGTTCATTCTCTCTGGAATCATGTCCAT  
+HWI-EAS443:3:11:884:739#0/1  
aaaPaa\_P\_aaaa]aY¥aaY\_`^`a\_\_^\_¥]a`\_]^^`  
@HWI-EAS443:3:11:923:463#0/1  
GTCCCGTTTTTCGTTTCATTACCAACTACGTCCCCTTGC  
+HWI-EAS443:3:11:923:463#0/1  
a`\_`\_bVa¥`^a¥`\_`a`a\_\_`\_Z`\_^`\_]ZXXXY]U  
@HWI-EAS443:3:11:942:1251#0/1  
ACTTGTGTTGGGCCATTCTATTCCACCATGTTACGGCC  
+HWI-EAS443:3:11:942:1251#0/1  
a`\_W[QaaY`a^Y`\_`aaaa`a`^aTLX`a¥`\_Z`a¥B  
@HWI-EAS443:3:11:965:197#0/1  
ATGTGCGAGTCCCGCACTCGCGAGATACTCACTAAGACCA  
+HWI-EAS443:3:11:965:197#0/1  
aab[aaaaa^a\_\_\_\_`]a```]a¥\_XV`W\_N^NZ\_¥]]QNB  
@HWI-EAS443:3:11:96:1694#0/1  
GATGATCCGCTTGTCTTTTAAAAGTGAACCCACCAAAC  
+HWI-EAS443:3:11:96:1694#0/1  
`abXYS`\_`aaa\_\_ab`\_a]abbaRT[a`a^V^\_\_XbT\_a  
@HWI-EAS443:3:11:991:82#0/1  
AAAGAAGTGAAGATCTAATGTGCGAGTCCCGCACTCGCG  
+HWI-EAS443:3:11:991:82#0/1  
aaba`a\_aaaaaa`\_`\_^\_a`¥[a\_¥aYWS¥¥¥T¥WT¥BB  
@HWI-EAS443:3:12:1002:634#0/1  
ATCTAATGTGCGAGTCCCGCACTCGCGAGATACTCACTAA  
+HWI-EAS443:3:12:1002:634#0/1  
\_`Z`]SP^Q[VLX¥RVNOMMNW[VUWRSUUTSUSBBBBB  
@HWI-EAS443:3:12:1014:1145#0/1  
CGCACTCGCGAGATACTCACTAAGACCACTGTGGACCATA  
+HWI-EAS443:3:12:1014:1145#0/1  
¥ab[^^\_aZb^Y¥[ab\_[bbabY`aUN^[`a^`XZa^a^a  
@HWI-EAS443:3:12:1030:1448#0/1  
TTCTAGCATGTACGCCACCATCAAGGGAGCAATTTTACAA  
+HWI-EAS443:3:12:1030:1448#0/1  
abb`ba[Vb^a`\_ULb^a\_a\_aaa[aaa]XY\_\_Y`][a\_  
@HWI-EAS443:3:12:1036:1394#0/1  
AAAAGAAGTGAAGATCTAATGTGCGAGTCCCGCACTCGC  
+HWI-EAS443:3:12:1036:1394#0/1  
aaaaaaaa`baaaaa`\_abaaaYV`[aY^]]XZ\_]^^]^X  
@HWI-EAS443:3:12:1047:443#0/1  
ATCTGCTCCCAGCACGTCCCTTGGGTTAAGTGCAACACTT  
+HWI-EAS443:3:12:1047:443#0/1  
aaa`b`\_^\_¥\_]¥¥`V^\_Y[^X\_]V[R`]]\_O]X¥]V]UV^  
@HWI-EAS443:3:12:1065:1713#0/1  
GGGTTCACTTTCAAAGGACAAGCGGATCATCAGTCAAGA  
+HWI-EAS443:3:12:1065:1713#0/1  
ab`I`Wabba]`ab[VYZXaaaaZaba]Xa^R```]`a`aa

@HWI-EAS443:3:12:1088:1560#0/1  
GAATAAAAGAACTGAGAGATCTAATGTCGCAGTCCCGCAC  
+HWI-EAS443:3:12:1088:1560#0/1  
aaa`\_a`a\_\_^V`\_aaa\_]a`\_a\_RRUNZXMMBBBBB  
@HWI-EAS443:3:12:1097:838#0/1  
AAAAGAACTGAGAGATCTAATGTCGCAGTCCCGCACTCGC  
+HWI-EAS443:3:12:1097:838#0/1  
VYUW¥`\_`\_]b]`U`a[ZY[]bb]\_baa`HVWaaaVaaQaa  
@HWI-EAS443:3:12:1098:886#0/1  
GGGGACGTAGTGTGGTAATGAAACGAAAACGGGACTCTA  
+HWI-EAS443:3:12:1098:886#0/1  
`baa\_aa\_aa^a\_aaa]\_`a\_\_`a[`\_\_`\_G]a\_]V\_Y]^  
@HWI-EAS443:3:12:1099:1914#0/1  
ATAAAAGAACTGAGAGATCTAATGTCGCAGTCCCGCACTC  
+HWI-EAS443:3:12:1099:1914#0/1  
¥NUa\$¥UX`[]^`^^^`^a`\_]`^YXXR^WM[W^]TY[[B  
@HWI-EAS443:3:12:117:1357#0/1  
GAACAAGGACAAACCCTCTGGAGCAAACAAACGATGCTG  
+HWI-EAS443:3:12:117:1357#0/1  
¥WUZWU]bab`bb\_`^`b`^W^¥Va]YYa[^aaZZb¥a\_  
@HWI-EAS443:3:12:1205:106#0/1  
ATAAAAGAACTGAGAGATCTAATGTCGCAGTCCCGCACTC  
+HWI-EAS443:3:12:1205:106#0/1  
abaaaa`aabaaa`a`a^a\_\_`a][`]^WYV^\_^]Y]]  
@HWI-EAS443:3:12:1206:1083#0/1  
TAAAAGAACTGAGAGATCTAATGTCGCAGTCCCGCACTCG  
+HWI-EAS443:3:12:1206:1083#0/1  
aab```Zaabaa`aaa`aaa`aa\_]\_```XN[Z^^Z[]TV  
@HWI-EAS443:3:12:1214:1425#0/1  
GAGAATAAAAGAACTGAGAGATCTAATGTCGCAGTCCCGC  
+HWI-EAS443:3:12:1214:1425#0/1  
UabT[X\_Vb]KS[bbbbaa^\_babaPaa[\_b^\_bRTSaYB  
@HWI-EAS443:3:12:1219:550#0/1  
CTGTCCTGAGAGGATTTCTCATTTTGGGCAAAGAAGACAA  
+HWI-EAS443:3:12:1219:550#0/1  
aabT]\_\_¥OX`a]P¥aa``aY\_a]Za^]J^XX¥Z\_a\_S[[  
@HWI-EAS443:3:12:1221:854#0/1  
GGGCGATCTGAACTTTGTCAATAGGGCAAACCAGCGACTG  
+HWI-EAS443:3:12:1221:854#0/1  
¥\_bbbabbbba\_ab`bbab`abaaa`abaaa\_aaZ`\_\_`a  
@HWI-EAS443:3:12:1247:1328#0/1  
TGCAGGTGCATTGACTGAAGATCCAGATGAAGGCACATCT  
+HWI-EAS443:3:12:1247:1328#0/1  
aa^abb]b`¥baa`¥bbabbaa`^aaa`aaaa\_aa^`\_Q\_  
@HWI-EAS443:3:12:126:1358#0/1  
GTGGCGTACATGCTAGAAAGAGAATTGGTCCGTAAAACAA  
+HWI-EAS443:3:12:126:1358#0/1  
a\_aaaZ¥`aaa`a`^\_P\_\_a[]\_aa]X]X^^^^¥aZR`Y  
@HWI-EAS443:3:12:1271:566#0/1  
GCCGTAGACATATGCAAGGCAGCAATAGGGTTGAGGATTA

+HWI-EAS443:3:12:1271:566#0/1  
a\_`a\_aa`a`aa\_aa\_`a]a^\_a\_[\_\_X\_\_^`\_][\_]  
@HWI-EAS443:3:12:1278:803#0/1  
TCCCGTTTTCGTTTCATTACCAACTACGTCCCCTTGCC  
+HWI-EAS443:3:12:1278:803#0/1  
[`a^aS[bbZb[`VXV`ab¥[\_TYaaa^aaY]^\_\_a]¥`]  
@HWI-EAS443:3:12:128:595#0/1  
GTTGCCCGTTAGCACTTCTTCTTCTTTCTTGACTGATGAT  
+HWI-EAS443:3:12:128:595#0/1  
aa\_aaYQPNZY[ZQ\_Z^Y^^V[\_`\_][[\_aZ`ZV\_YZ\_BB  
@HWI-EAS443:3:12:1306:337#0/1  
GATCTAATGTCGCAGTCCCGCACTCGCGAGATACTCACTA  
+HWI-EAS443:3:12:1306:337#0/1  
abaababbbaba`ab^aaaa`a`¥aaa^`\_`X`^`¥\_`  
@HWI-EAS443:3:12:1344:608#0/1  
GGTTGCCTTAGGACAAGAGACTGAAATGGTTCAAATTCC  
+HWI-EAS443:3:12:1344:608#0/1  
ab\_aaa^aabb]SX\_`^a\_a^W`aa`aaa]¥^]\_a^\_`]^  
@HWI-EAS443:3:12:1356:1096#0/1  
ATGGTATTCTCACAAGAGATTGCATGATCAAGGCAGTTA  
+HWI-EAS443:3:12:1356:1096#0/1  
`ba\_aabbababaaaa`\_b\_babaaabaa`\_\_`a`abH\_B  
@HWI-EAS443:3:12:1373:798#0/1  
GTCCCGTTTTCGTTTCATTACCAACTACGTCCCCTTGCC  
+HWI-EAS443:3:12:1373:798#0/1  
a`\_`a`aba\_a^`\_`a\_a\_]a`^\_\_a`])Y¥RZ^^]X  
@HWI-EAS443:3:12:1402:820#0/1  
CAAGCACGGAGATGTCGCTGAGAGGGATAAGAGTCAGCAA  
+HWI-EAS443:3:12:1402:820#0/1  
a\_\_baabbbabbbbaa`[a\_\_b]`bb`b\_\_b`a`TaaQa`  
@HWI-EAS443:3:12:1405:606#0/1  
AAAGAAGTCTGAGAGATCTAATGTCGCAGTCCCGCACTCGCG  
+HWI-EAS443:3:12:1405:606#0/1  
a`aa`\_`aaaaaaaa^`\_`a]\_]`\_]XZ[Z[^¥^U^]¥  
@HWI-EAS443:3:12:1415:876#0/1  
GTGAATTCTTCATACCCTTCATGTACTCTTATTTTCAGTG  
+HWI-EAS443:3:12:1415:876#0/1  
aab\_¥bb]b^HXa^X^^ab\_`aa\_`Za\_aa^aa`a^\_a]a  
@HWI-EAS443:3:12:1437:541#0/1  
AAAGAAGTCTGAGAGATCTAATGTCGCAGTCCCGCACTCGCG  
+HWI-EAS443:3:12:1437:541#0/1  
`b]b`Xabaaaa[\_`baaa]UYa]a[[]]ZZ\_W[\_]Za0`  
@HWI-EAS443:3:12:1500:710#0/1  
TCCCGTTTTCGTTTCATTACCAACTACGTCCCCTTGCC  
+HWI-EAS443:3:12:1500:710#0/1  
aaaab`abbab\_aa\_aaaa`]^`a\_a\_a`\_a]^X¥\_`^U  
@HWI-EAS443:3:12:1509:1845#0/1  
AAAAGAAGTCTGAGAGATCTAATGTCGCAGTCCCGCACTCGC  
+HWI-EAS443:3:12:1509:1845#0/1  
aa`aa\_`V^aaa^^`\_`aa]`][[¥Z\_`\_RTRRY^TTRZB



+HWI-EAS443:3:12:264:1293#0/1  
a`baabaaaa\_a`a`\_aaaa\_a`\_\_\_\_`\_a^^a]a\_\_\_\_\_a¥  
@HWI-EAS443:3:12:276:1913#0/1  
GGAAAAGCACCTTTTGCATCTTTTTGGAAATGCCTCAAGAG  
+HWI-EAS443:3:12:276:1913#0/1  
a^]bZaaaa`a]TNa¥a`a\_]a]\_YVa\_a\_a^`aX\_a`  
@HWI-EAS443:3:12:277:658#0/1  
CGCGAGATACTCACTAAGACCACTGTGGACCATATGGCCA  
+HWI-EAS443:3:12:277:658#0/1  
aaa^[a]S^a\_a`Z^a`a\_[aaY]\_^^^UM\_^¥^]`W^]]  
@HWI-EAS443:3:12:277:89#0/1  
CCCGTTTTCGTTTTATTACCAACTACGTCCCCTTGCCC  
+HWI-EAS443:3:12:277:89#0/1  
abaa\_aabaa\_^aaaaaaa\_a`\_\_`\_`aaa^^]\_Y^^\_]XX  
@HWI-EAS443:3:12:309:762#0/1  
CCCGTTTTCGTTTTATTACCAACTACGTCCCCTTGCCC  
+HWI-EAS443:3:12:309:762#0/1  
aba`^aaaa\_aba`aabab^`\_\_`aaa]a[[\_\_\_\_`\_]U  
@HWI-EAS443:3:12:350:1201#0/1  
GGGACGTAGTGTGGTAATGAAACGAAAACGGGACTCTAG  
+HWI-EAS443:3:12:350:1201#0/1  
abaaaa`aa`aba`W`aaa`aX`aaaa`^aa^\_]`Z  
@HWI-EAS443:3:12:357:696#0/1  
AAAGAAGTGAAGATCTAATGTCGCAGTCCCGCACTCGCG  
+HWI-EAS443:3:12:357:696#0/1  
\_\_\_\_[LMZYU¥Y[Y¥Z`]T¥[aU]]^a\_P^[]`TWWXX\_\_U  
@HWI-EAS443:3:12:361:2000#0/1  
GAATAAAAGAACTGAGAGATCTAATGTCGCAGTCCCGCAC  
+HWI-EAS443:3:12:361:2000#0/1  
T`b¥^a`a`[aaabb^a^aaaY^a¥^\_aa`]`aa\_a\_Z  
@HWI-EAS443:3:12:362:1138#0/1  
CTGCTGTAATTGGGTATCTCATTGCCATCATCCACTTCAT  
+HWI-EAS443:3:12:362:1138#0/1  
abbbba`aabba`bbbbabbbbaabaababaaabaaaa  
@HWI-EAS443:3:12:378:309#0/1  
AAAGAAGTGAAGATCTAATGTCGCAGTCCCGCACTCGCG  
+HWI-EAS443:3:12:378:309#0/1  
aaaa]¥aba^aa`\_]aa]V¥]Z\_\_`\_]`^Y¥^\_X`]T¥  
@HWI-EAS443:3:12:379:1621#0/1  
CAGTGGTCTTAGTGAGTATCTCGCGAGTGCGGGACTGCGA  
+HWI-EAS443:3:12:379:1621#0/1  
ab\_¥abNbab`^Zaa]ab`\_\_`]^\_aaUUZ`aa\_¥\_\_a\_`  
@HWI-EAS443:3:12:410:856#0/1  
CCCGTTTTCGTTTTATTACCAACTACGTCCCCTTGCCC  
+HWI-EAS443:3:12:410:856#0/1  
`Ta]XaY^a`YWR[aHXa`[ZL\_P^\_]\_UZS¥^TTBBBB  
@HWI-EAS443:3:12:414:1006#0/1  
AATTGGGCAAGGGGACGTAGTGTGGTAATGAAACGAAAA  
+HWI-EAS443:3:12:414:1006#0/1  
``aaa^]``W\_aa\_^`Yaa`^a\_`UXZ^\_\_aa`^]``a





+HWI-EAS443:3:12:723:1285#0/1  
aaaaaaa]aaabba]baaa¥\_a`\_a`\_`\_\_^`\_N`]a^^  
@HWI-EAS443:3:12:743:1512#0/1  
GAGGAAAATTGCATCCTACTCTGTTCTGGTGGAGCAGCAG  
+HWI-EAS443:3:12:743:1512#0/1  
^XXO^X\_Z¥a][W\_b\_a\_bb]aa¥a`aa\_U\_ZZ`X\_`]^a  
@HWI-EAS443:3:12:74:1114#0/1  
CCCCTTTTTCGTTTTATTACCAACTACTCGTCCCCTTGCCC  
+HWI-EAS443:3:12:74:1114#0/1  
abaa`aaaab\_a`\_a\_aaaaa`\_`a\_a`\_]a`\_]WUZ]]  
@HWI-EAS443:3:12:74:747#0/1  
ATGTGCTAATTGGGCAAGGGGACGTAGTGTGGTAATGAA  
+HWI-EAS443:3:12:74:747#0/1  
aba^aaa\_R\_a\_b`aabaaa\_aZ[`a\_a^^aa[[Y]Z\_  
@HWI-EAS443:3:12:755:305#0/1  
ATCCAGATGAAGGCACATCTGGGGTGGAGTCTGCTGCCT  
+HWI-EAS443:3:12:755:305#0/1  
aaaaaba`ba`ab`YZ`aaa`\_Wa\_¥aZR^[\_^`RVV^  
@HWI-EAS443:3:12:756:250#0/1  
GGTGGACATCCTTAGACAGAATCCAAGTGGAGCAAGCC  
+HWI-EAS443:3:12:756:250#0/1  
a^H¥]]ab]^]aa]`¥`]]`adWTZ\_Va\_\_YZZ[``\_^YY  
@HWI-EAS443:3:12:757:1415#0/1  
GGGAGATCAATGGCCCTGAGTCAGTGCTAGTCAACTTA  
+HWI-EAS443:3:12:757:1415#0/1  
¥W¥b`\_Saba`aYa]\_`a`aVaa\_U\_\_\_¥]UUZ`^`]]^\_  
@HWI-EAS443:3:12:770:826#0/1  
GATCTAATGTGCGAGTCCCGCACTCGCGAGATACTACTA  
+HWI-EAS443:3:12:770:826#0/1  
TaXaa\_\_Z`¥`]]`bb^Z[\_]aWVX`^`¥]\_\_\_\_]M^[\_Y\_\_  
@HWI-EAS443:3:12:778:721#0/1  
ATAAAAAGAACTGAGAGATCTAATGTGCGAGTCCCGCACTC  
+HWI-EAS443:3:12:778:721#0/1  
aab`\_a\_Paa`[]\_a[^`aa\_aaaUI\_Va[RZW[``^URY  
@HWI-EAS443:3:12:806:1287#0/1  
AAAGAACTGAGAGATCTAATGTGCGAGTCCCGCACTCGCG  
+HWI-EAS443:3:12:806:1287#0/1  
abaaaa\_aa`aa`a``aa`aa^]U`aXXY^Z]W]¥\_¥W]  
@HWI-EAS443:3:12:80:437#0/1  
GGTCCGTAAAACAAGTTTTCTCCAGTAGCCGGCGGAACA  
+HWI-EAS443:3:12:80:437#0/1  
a^^`ab[a]aa```]`aW`¥a]^^^a`T\_`^Va¥]^^¥Y[B  
@HWI-EAS443:3:12:821:283#0/1  
AATTCTTCATACCCTTCATGTACTCTTATTTTCAGTGTTT  
+HWI-EAS443:3:12:821:283#0/1  
a\_bbabbbbaa`babb`bbbbbab^bbbbabaa``\_baab  
@HWI-EAS443:3:12:828:778#0/1  
AGGGGACGTAGTGTGGTAATGAAACGAAAACGGGACTCT  
+HWI-EAS443:3:12:828:778#0/1  
a\_¥^`\_aaL]bZ^T]\_\_WGY[ZPZa]`[a^SFV`]GZ¥\_R

@HWI-EAS443:3:12:829:735#0/1  
CATTATTCTCTGTCTGCTGTAATTGGGTATCTCATTGCC  
+HWI-EAS443:3:12:829:735#0/1  
]aa`aa`]aababa\_a]¥]^V`aaa`X`a]a``````\_\_  
@HWI-EAS443:3:12:840:113#0/1  
CCCCTTTTCGTTTCATTACCAACTACGTCCCCTTGCCC  
+HWI-EAS443:3:12:840:113#0/1  
aaabaabaab\_ab\_aaaa`a`\_a`\_a]FZ¥X]^]Y]]Y]  
@HWI-EAS443:3:12:875:247#0/1  
AACAAACGATGCTGGATCAGACCGAGTGATGGTATCACCT  
+HWI-EAS443:3:12:875:247#0/1  
`aaaaa]aa`a`\_a`\_¥a`^U¥`^`Ua^W]¥Q¥¥W^TBB  
@HWI-EAS443:3:12:881:1828#0/1  
GAACTGTAAGTCGTTTGGTTGCCTTGTGTAATTGAATAC  
+HWI-EAS443:3:12:881:1828#0/1  
`a\_a\_baa`a`\_M\_abaa\_aaaaa[`\_Z\_a`^`a\_WaS  
@HWI-EAS443:3:12:897:1912#0/1  
GAATGAACAAGGACAAACCCTCTGGAGCAAAACAAACGAT  
+HWI-EAS443:3:12:897:1912#0/1  
aaa\_abbbbaa\_Va`abab^ba^`^\_aabaY\_0^aaY`\_\_  
@HWI-EAS443:3:12:906:859#0/1  
AAAAGAAGTCTAATGTCGCAGTCCCGCACTCGC  
+HWI-EAS443:3:12:906:859#0/1  
U`a`abb^aa\_\_\_\_\_Y]`aaaab\_]a[b\_[]^Z^`[`YQZQ  
@HWI-EAS443:3:12:922:372#0/1  
AGAAGAGCTCCAGATTGTAATAATTGCTCCCTTGATGGTG  
+HWI-EAS443:3:12:922:372#0/1  
abaaa`aaaa``]`]`aa\_a`\_`a`\_`\_a^Y]``a`^\_\_Ya  
@HWI-EAS443:3:12:953:409#0/1  
AAAGAAGTCTAATGTCGCAGTCCCGCACTCGCG  
+HWI-EAS443:3:12:953:409#0/1  
[FW¥aa`aaXa\_Y]XS^`[¥aUOW\_U[PF[¥R¥RUZ[^WB  
@HWI-EAS443:3:12:986:18#0/1  
GAACTGAGAGATCTAATGTCGCAGTCCCGCACTCGCGAGA  
+HWI-EAS443:3:12:986:18#0/1  
aaaaaaaaaba\_]a`]aaX]Z^^aYY]^^^[]`\_¥a¥\_W^W  
@HWI-EAS443:3:13:1012:2012#0/1  
ATCTAATGTCGCAGTCCCGCACTCGCGAGATACTCACTAA  
+HWI-EAS443:3:13:1012:2012#0/1  
a[aaa`a\_W^XR`N[`a^¥Y\_TW\_X¥W\_W¥¥UU¥YTY¥¥  
@HWI-EAS443:3:13:1025:1537#0/1  
CGCACTCAGAATGAAGTGGATGATGGCAATGAGATACCCA  
+HWI-EAS443:3:13:1025:1537#0/1  
]\_^ab\_b\_bU^¥`MSV^\_YV]baba]¥Q^aa\_¥QXQX]\_a  
@HWI-EAS443:3:13:1045:237#0/1  
ATGGCCATATGGTCCACAGTGGTCTTAGTGAGTATCTCGC  
+HWI-EAS443:3:13:1045:237#0/1  
\_bWaa]^`RUV]P`Z`ZX]U^ZNPU^U¥U^PVW[PSBBBB  
@HWI-EAS443:3:13:1050:597#0/1  
TGGACCATATGGCCATAATCAAAAAGTACACATCAGGAAG

+HWI-EAS443:3:13:1050:597#0/1  
`Xaaa\_ab`bba[^a^\_`a^\_`a`aYa`a`a`Z]aa`\_a  
@HWI-EAS443:3:13:1058:1945#0/1  
GGGTTCACITTTCAAAGGACAAGCGGATCATCAGTCAAGA  
+HWI-EAS443:3:13:1058:1945#0/1  
aa\_XTaaQaZaY`\_`\_]`^^Z\_`\_`Z\_a\_[S`^¥^^\_S`^^\_  
@HWI-EAS443:3:13:106:446#0/1  
GGGACGTAGTGTGGTAATGAAACGAAAACGGGACTCTAG  
+HWI-EAS443:3:13:106:446#0/1  
`ZW\_baW^`Q\_`abaZ]a^`OY\_Z`T`[^\_`^`¥UX^]\_^  
@HWI-EAS443:3:13:1070:1614#0/1  
GGGGACGTAGTGTGGTAATGAAACGAAAACGGGACTCTA  
+HWI-EAS443:3:13:1070:1614#0/1  
a\_\_a\_]a^^SZ¥¥\_`^`XW¥X\_^^`X^\_Z^`SXX^RUBBBB  
@HWI-EAS443:3:13:1089:1087#0/1  
AAAAGAAGTCTGAGATCTAATGTCGCAGTCCCGCACTCGC  
+HWI-EAS443:3:13:1089:1087#0/1  
abaaa\_\_[abaaa`^\_\_aaaaa]a]aaa¥`\_`^¥]X`XZ]^  
@HWI-EAS443:3:13:114:1465#0/1  
CTCTTGCTCTTTGCCAAAATGAGAAATCCTCTCAGGA  
+HWI-EAS443:3:13:114:1465#0/1  
aab]aa\_aaab`\_`^aa[^ZZ¥^\_`\_`]aaaa]`a\_a\_[[`  
@HWI-EAS443:3:13:1158:602#0/1  
TTCCTGATGTGACTTTTTGATTATGGCCATATGGTCCAC  
+HWI-EAS443:3:13:1158:602#0/1  
abbbba[^babaa\_bbbb\_YZbaaaa`a\_`\_NZYSMWY]B  
@HWI-EAS443:3:13:1177:1235#0/1  
CTGCTGCTCTGAGAGATTTCTCATTTTGGCAAAGAAGA  
+HWI-EAS443:3:13:1177:1235#0/1  
Y¥Q\_`\_W¥¥^a¥\_Sa`]V`aRWY[abbb`^\_WS\_a`L`Y  
@HWI-EAS443:3:13:1186:115#0/1  
ATGAAGTGGATGATGGCAATGAGATACCCAATTACAGCAG  
+HWI-EAS443:3:13:1186:115#0/1  
^aaa\_aWb^Y`R[a`[\_]`a^`V¥^`¥X\_Z\_\_\_ZX^XV^  
@HWI-EAS443:3:13:118:1119#0/1  
AATCTGTGTGCTGTGGCACATTTCCAAGAGAGATGCTAAT  
+HWI-EAS443:3:13:118:1119#0/1  
Z\_]a^\_Z\_]¥[Z[XZ¥abZ\_a`\_`Z\_`]Za`UaLaaa\_`\_`\_  
@HWI-EAS443:3:13:1210:76#0/1  
GAATAAAAGAAGTCTAATGTCGCAGTCCCGCAC  
+HWI-EAS443:3:13:1210:76#0/1  
a`]bSb\_X[Q\_]b]a\_X[QQ`\_`[Y`\_`\_`W¥UY¥PZ[RPL  
@HWI-EAS443:3:13:1219:570#0/1  
TGCTGCTCTGAGAGATTTCTCATTTTGGCAAAGAAGAC  
+HWI-EAS443:3:13:1219:570#0/1  
abbbbaaabababbaaba`aaaaabaaaa\_a`\_`aa`a`\_  
@HWI-EAS443:3:13:1246:146#0/1  
CAATTACAGCAGACAAGAGAATAATGGACATGATTCCAGA  
+HWI-EAS443:3:13:1246:146#0/1  
a`bbbb`abaaa`\_`a\_aaa\_\_aa\_`aa\_¥`\_`\_`\_]\_Y^\_^

@HWI-EAS443:3:13:1342:1074#0/1  
GGTGCATTGACTGAAGATCCAGATGAAGGCACATCTGGGG  
+HWI-EAS443:3:13:1342:1074#0/1  
a\_N`[[[\_a`X[^]aXKKU]^]VUXYYRKTMTS¥¥\_BB  
@HWI-EAS443:3:13:1388:1727#0/1  
GTCCCCGTTTTCGTTTCATTACCAACTACGTCCCCCTTGC  
+HWI-EAS443:3:13:1388:1727#0/1  
`[baab\_ab`ab]^a\_ab\_a`aaa`aa`\_^`]W¥\_\_\_\_\_

@HWI-EAS443:3:13:1389:190#0/1  
GAAGTGGATGATGGCAATGAGATACCCAATTACAGCAGAC  
+HWI-EAS443:3:13:1389:190#0/1  
`\_ab^`a\_aa`^^¥T`\_`a`\_Z^W^`\_`\_`\_Z\_\_^`^X  
@HWI-EAS443:3:13:1416:588#0/1  
GAGAATAAAAGAACTGAGAGATCTAATGTCGCAGTCCCGC  
+HWI-EAS443:3:13:1416:588#0/1  
a`a]aaaaaaaa\_aZaa`a^`\_`\_aa\_aaZ[^]\_a]XY\_]`  
@HWI-EAS443:3:13:1421:1556#0/1  
GAAACCTTGTTTTACGGACCAATTCTCTTTCTAGCATGTA  
+HWI-EAS443:3:13:1421:1556#0/1  
aa^b][`aa¥aaaaY]aa]UaZVYL^[\_\_\_\_¥`Z`[[`\_V\_  
@HWI-EAS443:3:13:1460:333#0/1  
AGGGGACGTAGTGTGGTAATGAAACGAAAACGGGACTCT  
+HWI-EAS443:3:13:1460:333#0/1  
^aa\_aab\_a\_\_V\_P^aaSO`a`\_a\_[¥WQWYT^aa[X\_XZ  
@HWI-EAS443:3:13:1477:1499#0/1  
AAAGAAGTGAAGATCTAATGTCGCAGTCCCGCACTCGCG  
+HWI-EAS443:3:13:1477:1499#0/1  
aaba\_a\_a`baa\_a`aa^`a`T\_\_`aXX\_Y]TUW^X\_R\_  
@HWI-EAS443:3:13:1488:701#0/1  
TGGTGGGTTCACTTTCAAAGGACAAGCGGATCATCAGTC  
+HWI-EAS443:3:13:1488:701#0/1  
[`aP`bbabaaabbb¥`\_\_`]aaa`abaaa`\_`\_aa]`a`W  
@HWI-EAS443:3:13:149:211#0/1  
GGTGGGTTCACTTTCAAAGGACAAGCGGATCATCAGTCA  
+HWI-EAS443:3:13:149:211#0/1  
ab\_baa\_aba\_aaaaaa]a`\_`a^aa`a\_a\_a^a\_a^^`  
@HWI-EAS443:3:13:1593:965#0/1  
ATGGCAATGAGATACCCAATTACAGCAGACAAGAGAATAA  
+HWI-EAS443:3:13:1593:965#0/1  
aabb`aaabaa\_a`\_\_\_a`a\_a^`^aa^`\_`\_`\_a^]a`\_  
@HWI-EAS443:3:13:1641:202#0/1  
AAAGAAGTGAAGATCTAATGTCGCAGTCCCGCACTCGCG  
+HWI-EAS443:3:13:1641:202#0/1  
`a`\_`\_a\_\_aaa\_a\_\_S\_\_\_\_`\_ZV^Q^\_YUUVZTWWBBBBB  
@HWI-EAS443:3:13:1668:1548#0/1  
GAATAAAAGAACTGAGAGATCTAATGTCGCAGTCCCGCAC  
+HWI-EAS443:3:13:1668:1548#0/1  
a^abbbba\_aab\_bb\_bbb^baabbaa`^a^Yaa\_aY]¥  
@HWI-EAS443:3:13:1706:98#0/1  
TACGCCACCATCAAGGGAGCAATTTTACAATCCTGGAGCT

+HWI-EAS443:3:13:1706:98#0/1  
abab[W] []a¥GT`¥PY^YKZ^a]aa\_Z^¥¥GPP\_^W`VY  
@HWI-EAS443:3:13:178:2021#0/1  
TAAGGATGTCCACCATCCTTACTCCTCCAATCTGTGTGCT  
+HWI-EAS443:3:13:178:2021#0/1  
a\_^aa^aUS\_`Z]^SPX[VY^a\_\_^P]^`YGS^Z\_PSPLUU  
@HWI-EAS443:3:13:180:304#0/1  
GAATAAAAGAAGACTGAGAGATCTAATGTCGCAGTCCCGCAC  
+HWI-EAS443:3:13:180:304#0/1  
a\_`baba\_a`aaaabaa`\_a\_aa`ab\_\_\_a``\_^\_a]`[a  
@HWI-EAS443:3:13:188:1373#0/1  
CAAACGATGCTGGATCAGACCGAGTGATGGTATCACCTCT  
+HWI-EAS443:3:13:188:1373#0/1  
aa]a`T^Waa^`aaX\_a\_\_\_YDWSP\_Z¥\_ZW\_UPXN^BBB  
@HWI-EAS443:3:13:197:1391#0/1  
GCGAGATACTACTAAGACCACTGTGGACCATATGGCCAT  
+HWI-EAS443:3:13:197:1391#0/1  
`aa]ba`aaabaa\_aabaabaa]a^`aa\_]````\_```Z  
@HWI-EAS443:3:13:210:550#0/1  
GGAGTCTGCTGTCCTGAGAGGATTTCTCATTTTGGGCAA  
+HWI-EAS443:3:13:210:550#0/1  
aba^^baabaaQX\_\_b\_aa^\_\_^aa\_aa\_aa`\_a\_a\_\_\_`  
@HWI-EAS443:3:13:217:1223#0/1  
GGGACGTAGTGTGGTAATGAAACGAAAACGGGACTCTA  
+HWI-EAS443:3:13:217:1223#0/1  
a^]Z]aa^aaV¥¥a`]V]^]XU^¥VYVX]^ZZ^]YS[ZVV  
@HWI-EAS443:3:13:241:447#0/1  
CCGTTTTCGTTTCATTACCAACACTACGTCCCCTTGCCCA  
+HWI-EAS443:3:13:241:447#0/1  
a``Y`bbba\_\_W^^U`b`a]Y`a[aa^\_¥Z]Xaaa`YPOY  
@HWI-EAS443:3:13:242:436#0/1  
ATGGCAATGAGATACCCAATTACAGCAGACAAGAGAATAA  
+HWI-EAS443:3:13:242:436#0/1  
aaabaaYabaaaa`a`b`aaa`a`aaa`\_a`aaa\_\_\_aa  
@HWI-EAS443:3:13:254:831#0/1  
CTAATGTGCTAATTGGGCAAGGGGACGTAGTGTGGTAAT  
+HWI-EAS443:3:13:254:831#0/1  
aba`b`ba`Y^aaaaaaa\_ba`a^`a¥\_aWa^`a\_OVZ^  
@HWI-EAS443:3:13:257:319#0/1  
GGATTTCTCATTTTGGGCAAAGAAGACAAGAGATATGGCC  
+HWI-EAS443:3:13:257:319#0/1  
\_a¥`\_\_bb`[aaaaaaa`a¥aa]Waaaa`a`a`\_a`\_T¥0  
@HWI-EAS443:3:13:267:574#0/1  
GTGAATTCTTCATACCCTTCATGTACTCTTATTTTCAGTG  
+HWI-EAS443:3:13:267:574#0/1  
`^`YL`Xaa`aa¥W¥`aa`^aaYY]a`a^^````¥[```  
@HWI-EAS443:3:13:292:2001#0/1  
CAAGCCGTAGACATATGCAAGGCAGCAATAGGGTTGAGGA  
+HWI-EAS443:3:13:292:2001#0/1  
aaa]aaT\_¥¥\_a\_\_a^\_aa\_^`^^\_]Y\_^]]WUVS]XSX

@HWI-EAS443:3:13:303:490#0/1  
AAAAGAAGTCTAATGTTCGAGTCCCGCACTCGC  
+HWI-EAS443:3:13:303:490#0/1  
aaa\_`aa`aaaa`\_ab\_aaZ\_\_\_\_\_Z\_]¥]aX\_]\_\_\_\_  
@HWI-EAS443:3:13:31:148#0/1  
CTGAAATGGTTCAAATCCATTTTGTGTATAACATTGTG  
+HWI-EAS443:3:13:31:148#0/1  
a\_b^\_T\_]a^`^a¥S]a[a`^aa`^[]]P\_T\_]\_]`[`Wa  
@HWI-EAS443:3:13:336:884#0/1  
CCCGTTTTTCGTTTCATTACCAACTACGTCCCCTTGCCC  
+HWI-EAS443:3:13:336:884#0/1  
aaab\_aa`ab^`\_aa^aa`a¥\_`\_`a\_\_U^]\_`¥UY\_X\_  
@HWI-EAS443:3:13:33:1194#0/1  
AGAGAATAAAAGAAGTCTAATGTTCGAGTCCCG  
+HWI-EAS443:3:13:33:1194#0/1  
\_ba`¥a^Z`\_`\_aa`aaaa]a^`aaaaaa\_aaaaa^a`\_]`  
@HWI-EAS443:3:13:37:1728#0/1  
AATAAAAGAAGTCTAATGTTCGAGTCCCGCACT  
+HWI-EAS443:3:13:37:1728#0/1  
aXbabbbWaaab\_¥^ba`aaabbb`abSb[\_[^a`^a\_[Z  
@HWI-EAS443:3:13:408:869#0/1  
GGGTTAGAGATCAAAGAGGGAACGTACTATTGTCTCCCGA  
+HWI-EAS443:3:13:408:869#0/1  
^V\_a`Z]\_ZS`^^]ZZ`\_]Z`¥XXa\_a¥]¥YV\_\_V^ZR[  
@HWI-EAS443:3:13:41:1353#0/1  
CGCGAGATACTACTAAGACCACTGTGGACCATATGGCCA  
+HWI-EAS443:3:13:41:1353#0/1  
aa][¥[H]^`^`a`a\_aZ\_aa\_\_^ZY\_^\_Z\_]W]]¥  
@HWI-EAS443:3:13:427:360#0/1  
TGCTGTAATTGGGTATCTCATTGCCATCATCCACTTCATT  
+HWI-EAS443:3:13:427:360#0/1  
`ba^b]ZZaaaaa]\_`a]Z``Va\_¥^`\_a^\_]Z^`^Z\_]`  
@HWI-EAS443:3:13:444:387#0/1  
CCGCACTCGGAGATACTACTAAGACCACTGTGGACCAT  
+HWI-EAS443:3:13:444:387#0/1  
aaabZb`aaaaab[^`\_aaa``aa`a\_]a]¥aW¥^`\_`\_`  
@HWI-EAS443:3:13:454:246#0/1  
CTCACTAAGACCACTGTGGACCATATGGCCATAATCAAAA  
+HWI-EAS443:3:13:454:246#0/1  
abbbaa\_\_^`a¥ba^[¥]`]aa`aab]\_`aT\_`TF[a`a  
@HWI-EAS443:3:13:454:577#0/1  
AAAGAAGTCTAATGTTCGAGTCCCGCACTCGCG  
+HWI-EAS443:3:13:454:577#0/1  
a\_Za`aaaaaaaaaab\_a`a`\_]`aa]`\_`\_`\_`\_]`  
@HWI-EAS443:3:13:488:1071#0/1  
GGGACGTAGTGTGGTAATGAAACGAAACGGGACTCTAG  
+HWI-EAS443:3:13:488:1071#0/1  
`aaZ^\_SZb]aQ]`aHS]^`¥Y\_a^MVZXFZZ`]ZV]Y\_B  
@HWI-EAS443:3:13:496:276#0/1  
GAAGTCTAATGTTCGAGTCCCGCACTCGCGAGA





@HWI-EAS443:3:13:625:586#0/1  
CATCATTTCTCACTTCTCCTCCTGGAGTGTACATCTGCTC  
+HWI-EAS443:3:13:625:586#0/1  
\_`Zabababbbababaaaa`a\_baa`\_`^a\_aaaa^`a`Z[  
@HWI-EAS443:3:13:62:1625#0/1  
TGAGTATCTCGCGAGTGC GGGACTGCGACATTAGATCTCT  
+HWI-EAS443:3:13:62:1625#0/1  
aaaaP^QXUY`PUH]Z``¥V\_VU^QV]IXU]YZSN]U\_XL  
@HWI-EAS443:3:13:633:1470#0/1  
GTGCTAACGGGCAACCTCCAAACACTGAAAATAAGAGTAC  
+HWI-EAS443:3:13:633:1470#0/1  
`\_abbababaa`aa^\_aaaaaaaa`a`]aaaa^`a\_V`]  
@HWI-EAS443:3:13:652:960#0/1  
CATTATTCTCTTGTCTGCTGTAATTGGGTATCTCATTGCC  
+HWI-EAS443:3:13:652:960#0/1  
abY^^]]ROY][¥R[^^\_]HR[UP^a]G^WX¥[TUUBB  
@HWI-EAS443:3:13:674:1003#0/1  
ATAAAAAGAACTGAGAGATCTAATGTCGCAGTCCCGCACTC  
+HWI-EAS443:3:13:674:1003#0/1  
aa^^aaa`a`aaa\_aaa\_\_`a\_aa¥\_\_]\_\_X]\_\_^^R^Z\_  
@HWI-EAS443:3:13:687:639#0/1  
GAGCTCCAGGATTGTA AAAATTGCTCCCTTGATGGTGGCGT  
+HWI-EAS443:3:13:687:639#0/1  
``ab\_abaaaabbb`^`abaaaaaa]a`a]aa`Taa\_b\_  
@HWI-EAS443:3:13:712:242#0/1  
CCCGTTTTCGTTTTATTACCAACTACGTCCCCTTGCCC  
+HWI-EAS443:3:13:712:242#0/1  
abaa]ZXV]b\_aa\_a`aaa\_aVU`aaa¥\_]XU]^X]V[YQ  
@HWI-EAS443:3:13:712:278#0/1  
AGCACTTTTGCATCTTTTTGGAAATGCCTCAAGAGTTGGT  
+HWI-EAS443:3:13:712:278#0/1  
aaaa\_\_a\_ab`aa\_aaaa\_a`W¥\_a`\_`\_Za]^]\_aUP  
@HWI-EAS443:3:13:721:41#0/1  
GTCCCCTTTTTCGTTTTATTACCAACTACGTCCCCTTGCC  
+HWI-EAS443:3:13:721:41#0/1  
`LW[[aPT]¥[aWVWZX[R[¥SX]X^YY]XWVTXWVWWW  
@HWI-EAS443:3:13:734:1297#0/1  
CCCGTTTTCGTTTTATTACCAACTACGTCCCCTTGCCC  
+HWI-EAS443:3:13:734:1297#0/1  
`Xb\_`aa\_a`VX]a`V^aX[aaWa\_`bYNPX\_Z\_]`^\_YMY  
@HWI-EAS443:3:13:736:38#0/1  
GCGAGATACTACTAAGACCACTGTGGACCATATGGCCAT  
+HWI-EAS443:3:13:736:38#0/1  
aaa^a\_`\_`^`^X\_\_`^^V¥]]\_Z^^]]^Z^]^ZWX]Z  
@HWI-EAS443:3:13:756:342#0/1  
AAACGACTTACAGTTCTTGAAAGGATGCAGGTGCATTGA  
+HWI-EAS443:3:13:756:342#0/1  
aaa``[Va]¥\_\_`^\_Z^a``[a[`\_`^a\_`\_U`]]^]\_`  
@HWI-EAS443:3:13:764:1288#0/1  
ATGGACATGATTCCAGAGAGGAATGAACAAGGACAAACCC

+HWI-EAS443:3:13:764:1288#0/1  
aaaa`aaaa[aaa`a`\_aaaa\_`aa`a`^\_]aa`]]  
@HWI-EAS443:3:13:764:483#0/1  
AAAGAAGTCTAATGTCGAGTCCCGCACTCGCG  
+HWI-EAS443:3:13:764:483#0/1  
[`UWPOU¥XUU¥^T^XaS¥a\_G[Y\_^\_I]T\_\_NGOPGTY[  
@HWI-EAS443:3:13:774:989#0/1  
ATGGCAATGAGATACCCAATTACAGCAGACAAGAGAATAA  
+HWI-EAS443:3:13:774:989#0/1  
UYbba\_aa`¥^Xa`^aaa]a^aabaaba`aaaaaaaa\_\_  
@HWI-EAS443:3:13:815:608#0/1  
GTCCCGTTTTCGTTTCATTACCAACTACGTCCCCTTGC  
+HWI-EAS443:3:13:815:608#0/1  
a\_a`b\_aaaab\_aa\_`a`a`\_a`\_a\_a`\_\_^^]\_^\_^]  
@HWI-EAS443:3:13:85:1867#0/1  
AGAGAATAAAAGAAGTCTAATGTCGAGTCCCG  
+HWI-EAS443:3:13:85:1867#0/1  
aaa`[babbaba`aa`aaaaaaabaaa^^Y`a\_Xaa`]  
@HWI-EAS443:3:13:862:1490#0/1  
GATTAGCTCATCTTTTCAGTTTTGGTGGGTTCACTTTCAA  
+HWI-EAS443:3:13:862:1490#0/1  
`^babbabXbaaaaL`b\_aba``]aaa^a^[RXa`Z\_\_a  
@HWI-EAS443:3:13:878:1907#0/1  
AGCAGACAAGAGAATAATGGACATGATTCCAGAGAGGAAT  
+HWI-EAS443:3:13:878:1907#0/1  
aa]\_b\_a¥`a[UFT[X\_`a\_[`¥^^^]Q[[\_Y¥]^`^`P  
@HWI-EAS443:3:13:879:742#0/1  
CAAGGACAAACCCTCTGGAGCAAAACAAACGATGCTGGAT  
+HWI-EAS443:3:13:879:742#0/1  
]\_X\_a`^^W^a`a`a`a]\_\_W^]Xa`UT\_¥U`¥^\_¥YU  
@HWI-EAS443:3:13:880:652#0/1  
AATGTCGAGTCCCGCACTCGCGAGATACTACTAAGACC  
+HWI-EAS443:3:13:880:652#0/1  
aabb]`baaa[[\_^^^Y^`\_]a^`]¥¥¥`U^SY¥^^¥WWW  
@HWI-EAS443:3:13:884:1978#0/1  
ATAAAAGAAGTCTAATGTCGAGTCCCGCACTC  
+HWI-EAS443:3:13:884:1978#0/1  
V\_`bbb\_aabUbaaba`aababY[a\_bbX]a[[^`Y]  
@HWI-EAS443:3:13:893:512#0/1  
ACAGTGGTCTTAGTGAGTATCTCGCGAGTGGGGACTGCG  
+HWI-EAS443:3:13:893:512#0/1  
aaaZ]aa\_aaa\_a[aa`aa]^P¥¥ZZ^^¥`a¥VZ`V[  
@HWI-EAS443:3:13:91:1055#0/1  
GTGTACATCTGCTCCAGCACGTCCCTTGGGTTAAGTGCA  
+HWI-EAS443:3:13:91:1055#0/1  
a\_\_J^ab\_`aaaaZ][¥Z]aa]N[a\_\_`\_\_S^TKZ[¥`]  
@HWI-EAS443:3:13:923:1328#0/1  
GAACAAGGACAAACCCTCTGGAGCAAAACAAACGATGCTG  
+HWI-EAS443:3:13:923:1328#0/1  
`[\_`baaSZ]]\_aZPUaUa^\_abaa^a^\_aaX`a\_Za]Z\_

@HWI-EAS443:3:13:94:1158#0/1  
AAAGAAGTCTAATGTCGCAGTCCCGCACTCGCG  
+HWI-EAS443:3:13:94:1158#0/1  
`¥baaaaa\_`^ba`aaY``\_Va\_a\_dNa\_[T\_R¥¥[^Y¥  
@HWI-EAS443:3:13:951:619#0/1  
AAAAGAAGTCTAATGTCGCAGTCCCGCACTCGCG  
+HWI-EAS443:3:13:951:619#0/1  
\_abbbba\_baaaaaaaaa\_aa\_aa`^`^a``\_a^^a\_\_\_\_  
@HWI-EAS443:3:13:951:894#0/1  
AAAAGAAGTCTAATGTCGCAGTCCCGCACTCGCG  
+HWI-EAS443:3:13:951:894#0/1  
ab`aa\_`¥aaa`\_a]`\_a`[aa¥````\_`^U\_^\_]¥^X  
@HWI-EAS443:3:13:970:99#0/1  
GTTGCTTCTCCCAACCATTGTGAATTCTTCATACCCTT  
+HWI-EAS443:3:13:970:99#0/1  
a]``[Z`T^¥QXXF^`^^S^^VZ]MT^\_Za[QT]VQTY^S  
@HWI-EAS443:3:13:994:551#0/1  
AAAAGAAGTCTAATGTCGCAGTCCCGCACTCGCG  
+HWI-EAS443:3:13:994:551#0/1  
aaW\_baa]baba]^`\_`aa`aa]`a`\_\_]\_\_][[]]\_]  
@HWI-EAS443:3:13:995:193#0/1  
GAGAATAAAAGAAGTCTAATGTCGCAGTCCCGC  
+HWI-EAS443:3:13:995:193#0/1  
`a\_RT\_¥V^¥\_]¥[X]\_\_U\_\_^Z\_^V¥`NTTT]SFJV0YY  
@HWI-EAS443:3:13:995:936#0/1  
GAATAAAAGAAGTCTAATGTCGCAGTCCCGCAC  
+HWI-EAS443:3:13:995:936#0/1  
aXaaaaaaaaaaa\_aaa\_a`a`\_aaaaa]\_Z`a`Z\_\_W^\_]Y  
@HWI-EAS443:3:14:1017:420#0/1  
AAAAGAAGTCTAATGTCGCAGTCCCGCACTCGCG  
+HWI-EAS443:3:14:1017:420#0/1  
`aba`^a\_aaaaaaa`\_aaa`a¥]a¥aaU\_\_V\_¥Z^\_V¥X  
@HWI-EAS443:3:14:1057:1450#0/1  
CCCGTTTTTCGTTTCATTACCAACTACGTCCCCTTGCCC  
+HWI-EAS443:3:14:1057:1450#0/1  
a\_\_\_\_L¥`a\_a]`^`^\_\_aaa\_a`^]`^`aX¥Y]]]VTY]^X]  
@HWI-EAS443:3:14:1086:758#0/1  
GAGAATAAAAGAAGTCTAATGTCGCAGTCCCGC  
+HWI-EAS443:3:14:1086:758#0/1  
¥¥]Y¥¥[Z\_\_]P[X¥`^a``a]^XU¥Z[]]Y¥¥[[VT¥[[  
@HWI-EAS443:3:14:1121:1784#0/1  
GTCCCGTTTTTCGTTTCATTACCAACTACGTCCCCTTGCG  
+HWI-EAS443:3:14:1121:1784#0/1  
`a¥]J\_\_^b\_``\_\_`¥```aVP`aW`¥a\_VR][GSSZXOL  
@HWI-EAS443:3:14:1125:676#0/1  
GGTGGGTTCACTTTCAAAGGACAAGCGGATCATCAGTCA  
+HWI-EAS443:3:14:1125:676#0/1  
a`Y\_a`]X^¥R¥\_XR[^\_W`\_V^^X\_V\_\_]X]\_V^^YXX  
@HWI-EAS443:3:14:1162:166#0/1  
GTGCCACAGCACACAGATTGGAGGAGTAAGGATGGTGGAC

+HWI-EAS443:3:14:1162:166#0/1  
a\_aa\_`Z`a`Z\_V\_\_W`^\_\_¥^¥U^WW[^VWW[^RV¥RR  
@HWI-EAS443:3:14:1212:344#0/1  
GCTGCTGCTCCACCAGAACAGAGTAGGATGCAATTTTCCT  
+HWI-EAS443:3:14:1212:344#0/1  
a)`^^`RS][S]ZT[W^[\_`\_\_KZ\_\_U¥\_[PV¥¥\_¥¥UY  
@HWI-EAS443:3:14:1216:95#0/1  
AGATACCCAATTACAGCAGACAAGAGAATAATGGACATGA  
+HWI-EAS443:3:14:1216:95#0/1  
aaaaa`\_]aabaa¥aa]aa^`aa\_`^`\_`\_`a^Z`\_]`  
@HWI-EAS443:3:14:1218:864#0/1  
TTACAATCCTGGAGCTCTTCTTTCTTCTTTTGTATTG  
+HWI-EAS443:3:14:1218:864#0/1  
aa`\_]`^a^a`aaYU]]Wa\_Y]a\_Z`a`ZZ`aa`^a\_\_¥U  
@HWI-EAS443:3:14:1221:1261#0/1  
GGGCGATCTGAACCTTTGTCAATAGGGCAAACCAGCGACTG  
+HWI-EAS443:3:14:1221:1261#0/1  
a]TZ`aU^RUa^PYa\_`X^W¥YU¥^]VYU^U\_`X^X`^a  
@HWI-EAS443:3:14:1259:435#0/1  
GCGAGATACTACTAAGACCACTGTGGACCATATGGCCAT  
+HWI-EAS443:3:14:1259:435#0/1  
a\_`WSX\_U\_a`XT`X]a\_`a`R`^M^SZ¥]`\_]XMYX\_U\_  
@HWI-EAS443:3:14:1260:402#0/1  
TGGGCCATATCTTGTCTTCTTTGCCAAAATGAGAAAT  
+HWI-EAS443:3:14:1260:402#0/1  
abba`abbab\_b`aaaaaa`aaba\_a\_a\_a`ababa`\_a  
@HWI-EAS443:3:14:1299:1680#0/1  
GTTTCTAGCAGCGATAATCAAACCTTTGGTCAACATCATCA  
+HWI-EAS443:3:14:1299:1680#0/1  
XL^RS`SZW]S^aa]]X¥X¥^¥W^¥Z^RDLY[XWYVVVNQ  
@HWI-EAS443:3:14:1301:443#0/1  
GAACAAGGACAAACCCTCTGGAGCAAAACAAACGATGCTG  
+HWI-EAS443:3:14:1301:443#0/1  
^[\`^^^\_Z^^]\_]IT`\_a\_[L[[]`X[aaa\_a`^RYa  
@HWI-EAS443:3:14:1328:669#0/1  
CCTGAGAGGATTTCTCATTTTGGGCAAAGAAGACAAGAGA  
+HWI-EAS443:3:14:1328:669#0/1  
`a\_aLa]\_`b`ba[^\_T]X^`[U[^[^Y]``]`^^a`^`^  
@HWI-EAS443:3:14:1369:1606#0/1  
CACATTGTCGATGGATTCAATCCCCAGTTCTGGAAAAGC  
+HWI-EAS443:3:14:1369:1606#0/1  
`aaaa`a]a`a\_a`\_¥\_\_a^\_¥\_X\_\_X\_Z\_]`\_\_^V  
@HWI-EAS443:3:14:1387:1648#0/1  
AAAGAAGTGGAGATCTAATGTCGCAGTCCCGCACTCGCG  
+HWI-EAS443:3:14:1387:1648#0/1  
Y]baababaabbbaa\_bbaba`\_aWaa^Y`^MZ\_]^[aR\_  
@HWI-EAS443:3:14:1392:212#0/1  
AAGGATGCAGGTGCATTGACTGAAGATCCAGATGAAGGCA  
+HWI-EAS443:3:14:1392:212#0/1  
aaa`a\_a¥``\_Za^\_\_^a`¥`a\_a`\_¥UW\_\_¥\_^^\_SV

@HWI-EAS443:3:14:1418:346#0/1  
CCCCTTTTTCGTTTCATTACCAACTACGTCCCCTTGCCC  
+HWI-EAS443:3:14:1418:346#0/1  
aabaabbbbbbbbabbaabbababbaba`^¥\_baa`X\_  
@HWI-EAS443:3:14:1440:339#0/1  
GCTGTAATTGGGTATCTCATTGCCATCATCCACTTCATTC  
+HWI-EAS443:3:14:1440:339#0/1  
a`ab`a`aaa`a^aa^aa`aaaY^\_\_\_`]`X\_^``X\_`^X  
@HWI-EAS443:3:14:1476:292#0/1  
CACTAAGACCACTGTGGACCATATGGCCATAATCAAAAAG  
+HWI-EAS443:3:14:1476:292#0/1  
aabbbbbbbbab`bbabaaaaabaaba`¥`a^a]0¥`\_a`Z  
@HWI-EAS443:3:14:1511:1505#0/1  
AAAAGTGCTTTTCCAGAAGTGGGAATTGAATCCATCGAC  
+HWI-EAS443:3:14:1511:1505#0/1  
aa`^bZb`aaa``\_\_aW\_\_aa`a^X\_ba`a^a^\_]\_Y\_]X  
@HWI-EAS443:3:14:1543:899#0/1  
TGAGGAACAAGCCGTAGACATATGCAAGGCAGCAATAGGG  
+HWI-EAS443:3:14:1543:899#0/1  
aaaZa[[X]\_`ZYY[`aZRY^`]`YX\_[\_W[¥TQY]VYT[  
@HWI-EAS443:3:14:1554:322#0/1  
GTCCCCTTTTCGTTTCATTACCAACTACGTCCCCTTGCC  
+HWI-EAS443:3:14:1554:322#0/1  
a`aab^`aa`b\_`\_^\_aaa\_¥a\_W\_\_`X\_^X]¥X]\_¥X  
@HWI-EAS443:3:14:1556:370#0/1  
ACGGCTTGTTCTCCTCAGTTGGATTCTGTCTAAGGATGTCCA  
+HWI-EAS443:3:14:1556:370#0/1  
a\_baZ`aXXZQQQLXWN\_HQLT\_NYQBBBBBBBBBBBBBB  
@HWI-EAS443:3:14:1565:17#0/1  
GAATAAAGAAGTCTAATGTCGCAGTCCCGCAC  
+HWI-EAS443:3:14:1565:17#0/1  
a\_\_^`¥[`a¥`^`\_`\_^]^^U^]]`^¥\_]VXVYYSOQBB  
@HWI-EAS443:3:14:1612:1434#0/1  
AGGGGACGTAGTGTGGTAATGAAACGAAAACGGGACTCT  
+HWI-EAS443:3:14:1612:1434#0/1  
aaba``aa\_\_a^]XaaaH¥`^`¥^¥G`G^\_]G^\_]G]RR  
@HWI-EAS443:3:14:1643:876#0/1  
AAAAGAAGTCTAATGTCGCAGTCCCGCACTCGC  
+HWI-EAS443:3:14:1643:876#0/1  
\_`a\_a`Yaa\_\_XQR\_Qa¥\_``¥¥\_¥^VRVWT¥Y¥WWWVW  
@HWI-EAS443:3:14:1646:750#0/1  
TGAATGTGAGAGGATCAGGGTTGAGGATACTGGTAAGAGG  
+HWI-EAS443:3:14:1646:750#0/1  
ab`[aaX^^a^a`YXSQ[]`W\_ZWY\_^^YTZ]VPW[]TQX  
@HWI-EAS443:3:14:169:568#0/1  
GGGACGTAGTGTGGTAATGAAACGAAAACGGGACTCTAG  
+HWI-EAS443:3:14:169:568#0/1  
aaa¥aa\_^aab\_bbaU`aaabaaa\_a\_aa`\_\_¥Y¥\_]`  
@HWI-EAS443:3:14:1723:262#0/1  
ACCAATTCTCTTTCTAGCATGTACGCCACCATCAAGGGAG

+HWI-EAS443:3:14:1723:262#0/1  
\_^\a`a\_[aYa`¥Z`^aWaa`^a]a¥`]]`0^`S\_¥a  
@HWI-EAS443:3:14:1724:827#0/1  
GCACCAACTCTTGAGGCATTTCCAAAAAGATGCAAAAGTG  
+HWI-EAS443:3:14:1724:827#0/1  
aYOVNZQPRDV^YJVXKX¥¥¥VOSPROOUUTTNNWUUSXGT  
@HWI-EAS443:3:14:1725:1291#0/1  
CCGTTTTTCGTTTCATTACCAACTACGTCCCCTTGCCCA  
+HWI-EAS443:3:14:1725:1291#0/1  
aaaaabb`b`aa`aba``\_ba`\_aa`aa^\_]¥^^`\_¥^Z\_  
@HWI-EAS443:3:14:190:353#0/1  
GTCCATTATTCTTGTCTGCTGTAATTGGGTATCTCATT  
+HWI-EAS443:3:14:190:353#0/1  
a\_aa`\_`\_`\_a^\_a`\_]`\_\_^ZVTX\_^[¥^N¥YUYVY¥Z  
@HWI-EAS443:3:14:194:813#0/1  
CCCGTTTTTCGTTTCATTACCAACTACGTCCCCTTGCCC  
+HWI-EAS443:3:14:194:813#0/1  
aaaa\_`aab^a``aaaaa^Y\_```Y\_a^\_`\_`\_Y^^^V  
@HWI-EAS443:3:14:199:420#0/1  
AGAGAATAAAAGAACTGAGAGATCTAATGTGCGAGTCCCG  
+HWI-EAS443:3:14:199:420#0/1  
a\_QabaabZ`Ya`\_aa`Q¥`bb^bb`Uab[abbaa]`^ab  
@HWI-EAS443:3:14:200:1154#0/1  
AGAGAATAAAAGAACTGAGAGATCTAATGTGCGAGTCCCG  
+HWI-EAS443:3:14:200:1154#0/1  
abb`abbbbab`U\_abb```b\_aaba\_aa\_aba^\_UXaa`  
@HWI-EAS443:3:14:207:58#0/1  
CTAATGTGCGAGTCCCGCACTCGCGAGATACTCACTAAGA  
+HWI-EAS443:3:14:207:58#0/1  
abaabb^aba]a``a¥aaZ\_```¥`]aW^^Z^¥X¥Y]S¥W  
@HWI-EAS443:3:14:215:434#0/1  
CAATGTGATGGGAATGATCGGAATACTGCCCGACATGACC  
+HWI-EAS443:3:14:215:434#0/1  
a]]ba\_b]aa``a``b]\_]baa\_aa`aaZ\_]`a`^\_`a]Z  
@HWI-EAS443:3:14:221:926#0/1  
GCCCTGAGTCAGTGCTAGTCAACTTATCAATGGATAAT  
+HWI-EAS443:3:14:221:926#0/1  
abba`VJ^QYaa\_aaZ[YTba^WaaaaYY¥`Zaa[`Za`X  
@HWI-EAS443:3:14:293:1879#0/1  
CACTCGCGAGATACTCACTAAGACCACTGTGGACCATATG  
+HWI-EAS443:3:14:293:1879#0/1  
`P\_GYT]`[TWNRT]\_`XYV]VLTVHXWYWWR]]]]S^PB  
@HWI-EAS443:3:14:294:745#0/1  
AACTGAGAGATCTAATGTGCGAGTCCCGCACTCGCGAGAT  
+HWI-EAS443:3:14:294:745#0/1  
a]aaaa\_aaa`aa`\_`a\_a`\_`\_]```W`]a][`\_`^^Y^  
@HWI-EAS443:3:14:309:1310#0/1  
GAATAAAAGAACTGAGAGATCTAATGTGCGAGTCCCGCAC  
+HWI-EAS443:3:14:309:1310#0/1  
a`a[`aXYZQZa`X¥¥Y¥X[``^`\_`Y\_U`]\_WS[¥Y]^Q

@HWI-EAS443:3:14:313:1013#0/1  
GAGAATAAAAGAACTGAGAGATCTAATGTCGCAGTCCCGC  
+HWI-EAS443:3:14:313:1013#0/1  
a`b\_^[\_P[]aa¥]a`]Zaa¥[W`\_QZ`N\_]aZ[M[V`¥[  
@HWI-EAS443:3:14:326:1215#0/1  
GAACCCCGCACTCAGAATGAAGTGGATGATGGCAATGAGA  
+HWI-EAS443:3:14:326:1215#0/1  
Z¥a``\_a\_aa`b\_ZY`bbbaab]\_`Z]aZ\_a[DZ]``Za^  
@HWI-EAS443:3:14:385:854#0/1  
GTCCCGTTTTCGTTTTATTACCAACTACGTCCCCCTTGC  
+HWI-EAS443:3:14:385:854#0/1  
aaaZ`¥\_aaaa`a`a\_aX¥^]a\_\_aa\_a]^]a\_`\_SY\_`  
@HWI-EAS443:3:14:396:1057#0/1  
AACTGAGAGATCTAATGTCGCAGTCCCGCACTCGCGAGAT  
+HWI-EAS443:3:14:396:1057#0/1  
¥L¥aab\_]`baaabbbb\_a`]ba\_aab\_a\_a\_a`¥¥\_^[  
@HWI-EAS443:3:14:416:1742#0/1  
AAAGGATGCAGGTGCATTGACTGAAGATCCAGATGAAGGC  
+HWI-EAS443:3:14:416:1742#0/1  
aaa^X\_¥^aa\_UX^`¥\_\_a\_Z\_\_a\_a¥\_``\_\_\_¥Z`[W¥  
@HWI-EAS443:3:14:420:1529#0/1  
AAAGAAGTGCAGAGATCTAATGTCGCAGTCCCGCACTCGCG  
+HWI-EAS443:3:14:420:1529#0/1  
^SL\_]YTU]S`\_¥XV\_¥^XUVVTY\_Y¥RYV^Z]Y\_XV]XY  
@HWI-EAS443:3:14:421:1727#0/1  
AAAGAAGTGCAGAGATCTAATGTCGCAGTCCCGCACTCGCG  
+HWI-EAS443:3:14:421:1727#0/1  
aaaY¥a``¥a¥^X`]a\_\_\_X]ZX`^Y\_] ^V^`X^V\_X  
@HWI-EAS443:3:14:436:1507#0/1  
GTCCCGTTTTCGTTTTATTACCAACTACGTCCCCCTTGC  
+HWI-EAS443:3:14:436:1507#0/1  
]baKa\_¥YX]a`[¥Vaa`U]aYWR]RX]a[^`^a\_[V\_^  
@HWI-EAS443:3:14:447:115#0/1  
AGTATTCTTGCCCCACTTCATTTGGGAAAACAACTTCCA  
+HWI-EAS443:3:14:447:115#0/1  
aaS\_aa`a\_a\_W\_]¥¥]\_`U^YX\_^WZ¥]^WX]X]WZ  
@HWI-EAS443:3:14:470:1055#0/1  
ATCTAATGTCGCAGTCCCGCACTCGCGAGATACTCACTAA  
+HWI-EAS443:3:14:470:1055#0/1  
^`aa\_Zaa\_aaaa^^`aa\_[H^Z¥`\_a¥`¥[\_¥[¥a\_¥\_a  
@HWI-EAS443:3:14:487:403#0/1  
GTCCCGTTTTCGTTTTATTACCAACTACGTCCCCCTTGC  
+HWI-EAS443:3:14:487:403#0/1  
aR]ab^\_``^L^`\_Y\_\_`¥Z^[a\_^S^^WOYR`WRVVY  
@HWI-EAS443:3:14:489:15#0/1  
ATGGTACCTTCGGCCCTGTCCACTTCAGAAATCAAGTTAA  
+HWI-EAS443:3:14:489:15#0/1  
Y`b\_Yba\_^aaaZ[R][a[[Ya^[\_]a\_[\_`[LZ`]X]]^  
@HWI-EAS443:3:14:495:169#0/1  
AAAAGAACTGAGAGATCTAATGTCGCAGTCCCGCACTCGC

+HWI-EAS443:3:14:495:169#0/1  
[Y`\_\_bab]abb]a]XTaZZ`aF`aQ`MYTKHZ\_JXHPF  
@HWI-EAS443:3:14:507:906#0/1  
CAACATCATCATTCTCACTTCTCCTCCTGGAGTGACAT  
+HWI-EAS443:3:14:507:906#0/1  
abaaa`aa\_aaaa`aaaa`\_a\_a``\_Za`ZZ\_RaXa`\_Z  
@HWI-EAS443:3:14:517:1697#0/1  
TGCTGTAATTGGGTATCTCATTGCCATCATCCAATTTCATT  
+HWI-EAS443:3:14:517:1697#0/1  
[^V]YVab\_bb`Y`\_]\_¥\_\_ZX¥]^`XaX¥`^^a]Z\_aa  
@HWI-EAS443:3:14:526:1490#0/1  
ATGGTACCTTCGGCCCTGTCCACTTCAGAAATCAAGTTAA  
+HWI-EAS443:3:14:526:1490#0/1  
a`^\_aaaaaa[^`\_`a`¥¥\_`^\_aa\_\_a\_\_]`\_`X\_^]  
@HWI-EAS443:3:14:550:1466#0/1  
GTCCCGTTTTTCGTTTCATTACCAACTACGTCCCTTGC  
+HWI-EAS443:3:14:550:1466#0/1  
aabaaaaaaaaaaaaaaaa`aaaab`aaaab``\_]\_\_a`]¥\_a  
@HWI-EAS443:3:14:571:1992#0/1  
CCCGTTTTTCGTTTCATTACCAACTACGTCCCTTGGCC  
+HWI-EAS443:3:14:571:1992#0/1  
a`aaWZ[^`a^VR¥¥\_YYa]^`^`^`[¥VZY]U\_^RSYY[^`  
@HWI-EAS443:3:14:602:1732#0/1  
TAATGTCGCAGTCCCGCACTCGCGAGATACTCACTAAGAC  
+HWI-EAS443:3:14:602:1732#0/1  
aaba``aaba`¥aaaHaX^a\_\_a^`XaWaaa``Q¥a[¥`]  
@HWI-EAS443:3:14:615:324#0/1  
TCCCGTTTTTCGTTTCATTACCAACTACGTCCCTTGGCC  
+HWI-EAS443:3:14:615:324#0/1  
abaaa`aaaab`\_\_aa\_a`a`^a``^`X]Z]`]]\_]X  
@HWI-EAS443:3:14:618:1100#0/1  
AAAAGAAGTGAAGATCTAATGTCGCAGTCCCGCACTCGC  
+HWI-EAS443:3:14:618:1100#0/1  
aab]`\_¥^`a¥¥aa]Y^¥`a]^`a\_\_a`YVZ¥PY]RVYR¥  
@HWI-EAS443:3:14:624:1827#0/1  
AAAAGAAGTGAAGATCTAATGTCGCAGTCCCGCACTCGC  
+HWI-EAS443:3:14:624:1827#0/1  
ab`aa`aa¥[¥aYaLaa`\_]a`ZVaa]¥`Q[GGPRN\_ZG  
@HWI-EAS443:3:14:679:1809#0/1  
GGAGAGAATAAAAGAAGTGAAGATCTAATGTCGCAGTCC  
+HWI-EAS443:3:14:679:1809#0/1  
`[X`a`a\_a^XZ¥RQbaa\_b^aYaR`^[\_aZUa^\_^]S]]  
@HWI-EAS443:3:14:683:1828#0/1  
GAATAAAAGAAGTGAAGATCTAATGTCGCAGTCCCGCAC  
+HWI-EAS443:3:14:683:1828#0/1  
R\_\_babZ\_a\_abab¥Ia`abababbbabbaaa`aZa\_a^a  
@HWI-EAS443:3:14:684:1127#0/1  
GTCCCGTTTTTCGTTTCATTACCAACTACGTCCCTTGC  
+HWI-EAS443:3:14:684:1127#0/1  
\_`aab\_¥`\_aaa^YN]a`^`a\_YZaaaa[R[X]NZTPX



@HWI-EAS443:3:14:686:1313#0/1  
CGCACTCAGAATGAAGTGGATGATGGCAATGAGATACCCA  
+HWI-EAS443:3:14:686:1313#0/1  
aaabbbbaabbb`bababba`b`aababaab]\_¥a`a  
@HWI-EAS443:3:14:687:1575#0/1  
ACAAGCCGTAGACATATGCAAGGCAGCAATAGGGTTGAGG  
+HWI-EAS443:3:14:687:1575#0/1  
\_¥` [W]\_¥NWYQO^ZZLUXGT]^aaV¥]V[BBBBBBBB  
@HWI-EAS443:3:14:688:279#0/1  
AAAAGAAGTGAAGATCTAATGTCGAGTCCCGCACTCGC  
+HWI-EAS443:3:14:688:279#0/1  
aaa\_aaa`aaaa`\_`¥a` `` `W\_\_\_`^¥\_\_¥W¥¥Y¥^¥  
@HWI-EAS443:3:14:691:1377#0/1  
AAGAAGTGAAGATCTAATGTCGAGTCCCGCACTCGCGA  
+HWI-EAS443:3:14:691:1377#0/1  
]\_aaba`aa\_a`\_\_aaa^adWa¥Y\_[WW\_[^UNV^Q\_QBB  
@HWI-EAS443:3:14:710:384#0/1  
GGATGGTGGACATCCTTAGACAGAATCCAAGTGAAGACA  
+HWI-EAS443:3:14:710:384#0/1  
^abbb\_[[bb\_baaa`bb`a`baaaaaba\_ab\_aaaa^b  
@HWI-EAS443:3:14:863:214#0/1  
TCCTGATGTGTACTTTTTGATTATGGCCATATGGTCCACA  
+HWI-EAS443:3:14:863:214#0/1  
aaaaa\_aa\_a\_]Vaaaa`\_a` `` \_\_XX\_^)^Y]ZYW]W^  
@HWI-EAS443:3:14:868:1156#0/1  
CCCGTTTTCGTTTCATTACCAACTACGTCCCCTTGCCC  
+HWI-EAS443:3:14:868:1156#0/1  
aaba¥aaaabaaa`bb`ba`a[aba`b\_a^` `` \_\_a`¥^  
@HWI-EAS443:3:14:892:1744#0/1  
GACCAATTCTTTCTAGCATGTACGCCACCATCAAGGGA  
+HWI-EAS443:3:14:892:1744#0/1  
a^ababaXR[\_aa]b\_aKT\_¥W` ]^` ]` \_[¥Y\_\_^]W]  
@HWI-EAS443:3:14:896:454#0/1  
CACGTCCCTTGGGTTAAGTGAACACTTCAATATAAACAC  
+HWI-EAS443:3:14:896:454#0/1  
` `a`X`aab^b`b[a` `aYaaaaaa`b` `a\_baaa\_a` `U  
@HWI-EAS443:3:14:913:1316#0/1  
GTCCATTATTCTTTGTCTGCTGTAATTGGGTATCTCATT  
+HWI-EAS443:3:14:913:1316#0/1  
a]aa`\_aa`a`a`Y]]aa\_^]`^Z]^\_\_^]W`W^^X\_Z¥  
@HWI-EAS443:3:14:913:1477#0/1  
AGAGAATAAAAGAACTGAGAGATCTAATGTCGAGTCCCG  
+HWI-EAS443:3:14:913:1477#0/1  
abaaaa`\_`aaaaaaa`[aab`^a`^aaa\_a\_\_\_aZ`a]^  
@HWI-EAS443:3:14:917:1439#0/1  
AAAGAAGTGAAGATCTAATGTCGAGTCCCGCACTCGCG  
+HWI-EAS443:3:14:917:1439#0/1  
aa` `b\_]aa\_\_a` `aa[\_]V\_\_ [aa\_\_\_\_\_Z^\_[PV` ]\_  
@HWI-EAS443:3:14:923:942#0/1  
CGCACTCAGAATGAAGTGGATGATGGCAATGAGATACCCA

+HWI-EAS443:3:14:923:942#0/1  
aaaaaaaaaba\_aa\_\_a^aa`aa\_`\_`\_\_aa\_a\_\_a\_`[`  
@HWI-EAS443:3:14:93:1018#0/1  
GGCGATCTGAACCTTGTCAATAGGGCAAACCAGCGACTGA  
+HWI-EAS443:3:14:93:1018#0/1  
aabba^]¥¥\_``aaaY]a\_\_`a\_]`\_Zaa]a`a`a`a\_]U  
@HWI-EAS443:3:14:946:120#0/1  
AAAGAAGTCTGAGAGATCTAATGTTCGAGTCCCGCACTCGCG  
+HWI-EAS443:3:14:946:120#0/1  
aaa`¥a¥`b`¥]\_`\_]\_a]aa¥]]][aQT]¥`]VYSV]X^  
@HWI-EAS443:3:14:955:958#0/1  
AGAGAATAAAAGAAGTCTGAGAGATCTAATGTTCGAGTCCCG  
+HWI-EAS443:3:14:955:958#0/1  
aa\_\_T[\_bab^bb]aba`\_`ba`a\_]Y]b^^a`^`a`^aX\_  
@HWI-EAS443:3:14:98:1974#0/1  
GTCCCGTTTTTCGTTTTATTACCAACTACGTCCCTTGC  
+HWI-EAS443:3:14:98:1974#0/1  
a\_baba[`aa`UZ`aaaaaaaa`aa`aaSY`Z`]^X\_  
@HWI-EAS443:3:15:1001:440#0/1  
CCCGCACTCGCGAGATACTACTAAGACCACTGTGGACCA  
+HWI-EAS443:3:15:1001:440#0/1  
`\_`\_a`^bbY0\_[bbababaaaab^a`^Xaab`^¥a`aa  
@HWI-EAS443:3:15:1017:1283#0/1  
CTCGGTCTGATCCAGCATCGTTTTGTTTTGCTCCAGAGGGT  
+HWI-EAS443:3:15:1017:1283#0/1  
aaaaaYa`a`X\_\_a]¥a\_a`¥`Z`\_`Z\_\_¥Q[Z[a[VV  
@HWI-EAS443:3:15:1038:555#0/1  
AAGCACTTTTGCATCTTTTTGGAAATGCCTCAAGAGTTGG  
+HWI-EAS443:3:15:1038:555#0/1  
`bba`aaaaaaaa\_a^aaaaab\_aa\_aaa^a^\_\_a`a`^`\_`^  
@HWI-EAS443:3:15:1063:929#0/1  
AAAGAAGTCTGAGAGATCTAATGTTCGAGTCCCGCACTCGCG  
+HWI-EAS443:3:15:1063:929#0/1  
`aa[Va`aa\_a`[^\_`aa`aaV]\_`^`aR¥\_\_`^V]\_\_`]V]  
@HWI-EAS443:3:15:1069:1880#0/1  
GAGAGATCTAATGTTCGAGTCCCGCACTCGCGAGATACTC  
+HWI-EAS443:3:15:1069:1880#0/1  
ab`a^^\_T`ab`b`\_b]a\_NZ\_aa¥[¥R[aZ¥`b`\_`baaa  
@HWI-EAS443:3:15:1120:599#0/1  
AAAGAAGTCTGAGAGATCTAATGTTCGAGTCCCGCACTCGCG  
+HWI-EAS443:3:15:1120:599#0/1  
aabaab`bba[aaaa^aaaab\_aa`a`^`Z\_aa\_^\_]a^^`  
@HWI-EAS443:3:15:1127:1912#0/1  
CTCTTGTCTTCTTTGCCAAAATGAGAAATCCTCTCAGGA  
+HWI-EAS443:3:15:1127:1912#0/1  
aa\_b`^`ab^b\_Y^`^`bbb^`^`bbbbb`bb`[^`abbaa  
@HWI-EAS443:3:15:1135:1111#0/1  
AGAAAGAAGAGCTCCAGGATTGTAATAATTGCTCCCTTGAT  
+HWI-EAS443:3:15:1135:1111#0/1  
Vbb\_ba`a[ab]b\_Y\_bbbbbbaa`a]aaa\_a`^`\_ba]aa

@HWI-EAS443:3:15:1152:213#0/1  
GACACTGTCCAAATAATAAACTTCTCCCCTTTGCTGCTG  
+HWI-EAS443:3:15:1152:213#0/1  
\_`bbb]aW\_P^^aaa`Raaaaa`\_`XL[]\_Q\_\_Y\_^\_] [  
@HWI-EAS443:3:15:1177:764#0/1  
CTGTAATTGGGTATCTCATTGCCATCATCCACTTCATTCT  
+HWI-EAS443:3:15:1177:764#0/1  
`bbbbbbb`¥`¥b`^`^abab`Raa``aV^]`aa``baZ^  
@HWI-EAS443:3:15:1182:1140#0/1  
AAAAGAAGTCTGAGATCTAATGTCGCAGTCCCGCACTCGC  
+HWI-EAS443:3:15:1182:1140#0/1  
abbbbbbbbbbbbbbaabbabbaba`ab`aa``a`aaaa\_  
@HWI-EAS443:3:15:1204:728#0/1  
TGATGTTGACCAAAGTTTGATTATCGCTGCTAGAAACATA  
+HWI-EAS443:3:15:1204:728#0/1  
[b^a```^Y[^][LWX`bb\_bZ`X^\_\_\_\_`^^`]ZVRY^a  
@HWI-EAS443:3:15:1244:617#0/1  
CTGCTGTAATTGGGTATCTCATTGCCATCATCCACTTCAT  
+HWI-EAS443:3:15:1244:617#0/1  
\_XSa]]LFM\_XTOMV`a]X[X[¥QNRYS]ZMUJ[[\_LSX  
@HWI-EAS443:3:15:1248:1312#0/1  
CACTGACTCAGGGCATTGATCTCCCACATCATTGATGAC  
+HWI-EAS443:3:15:1248:1312#0/1  
abba`aabbba[]I^abY]`a\_aa\_aa^aa\_a^\_\_`aa`^  
@HWI-EAS443:3:15:125:1223#0/1  
ATGGCAATGAGATACCCAATTACAGCAGACAAGAGAATAA  
+HWI-EAS443:3:15:125:1223#0/1  
aaaaaa`aa\_a`aaaaaaaa`\_a`\_a``aa\_\_a`\_`a`  
@HWI-EAS443:3:15:1271:1117#0/1  
AAGTGCTTTTCCAGAAGTGGGAATTGAATCCATCGACAA  
+HWI-EAS443:3:15:1271:1117#0/1  
[QYSa[`abb`^`^abbabbaba^aa`\_aaa\_baabb]aa  
@HWI-EAS443:3:15:1311:1960#0/1  
ATTTTACAATCCTGGAGCTCTTCTTCTTCTTTTGTTA  
+HWI-EAS443:3:15:1311:1960#0/1  
][\_¥¥a``baZ[MFT¥a\_¥KV`Zbb[G¥^S]W`abbb`a  
@HWI-EAS443:3:15:1322:1145#0/1  
AGAGAATAAAAGAACTGAGAGATCTAATGTCGCAGTCCCG  
+HWI-EAS443:3:15:1322:1145#0/1  
W`aa\_X¥H\_¥R`bba``[¥`ba`ab`abb`abWbb]^WQU  
@HWI-EAS443:3:15:1330:1662#0/1  
GAATAAAAGAACTGAGAGATCTAATGTCGCAGTCCCGCAC  
+HWI-EAS443:3:15:1330:1662#0/1  
aaaaaaaaaaaa^aaaaa``\_aa\_aa^\_\_^`a^X^^`\_]X  
@HWI-EAS443:3:15:1353:385#0/1  
GCTAGAGTCCCGTTTTCGTTTCATTACCAACTACGTCC  
+HWI-EAS443:3:15:1353:385#0/1  
abbaa\_a^a]¥aaaaa[b\_\_a\_aaa`\_\_`^a`\_a^a\_¥\_  
@HWI-EAS443:3:15:1358:1408#0/1  
GGAATAGGAATGGCCCAACAACAAGTACAGTTCATTACCC

+HWI-EAS443:3:15:1358:1408#0/1  
aa¥a\_a^a` `` ` ^ ` \_\_ ` \_ [ ^ ` U \_ ] \_ Z ^ Z \_\_ ] \_ [ [ W  
@HWI-EAS443:3:15:1370:511#0/1  
GACAGAATCCAAGTGAAGCAAGCCGTAGACATATGCAA  
+HWI-EAS443:3:15:1370:511#0/1  
` ` ¥ X ^ T b a N \_ ` R a Z b \_ ` ] ^ \_ [ a a ` P [ b ] ] b \_ Z a ` a ¥ W ` \_ ^  
@HWI-EAS443:3:15:1435:737#0/1  
AAAAGAAGTGAAGATCTAATGTCGCAGTCCCGCACTCGC  
+HWI-EAS443:3:15:1435:737#0/1  
aaba` P ¥ \_ b a ` b a a \_ Y \_ b a ` a ` T Z ` ^ ` [ Z a \_ a a \_ ¥ ] ` \_ \_ ]  
@HWI-EAS443:3:15:1447:194#0/1  
GTCCCGTTTTCGTTTTATTACCAACTACGTCCCTTGC  
+HWI-EAS443:3:15:1447:194#0/1  
aYb ` ^ b \_ a a a ] b ` ` b a ` a a \_ a \_ a ` P ` Y a ` U T \_ ] S H X \_ ¥ V ]  
@HWI-EAS443:3:15:1456:800#0/1  
GTCCCGTTTTCGTTTTATTACCAACTACGTCCCTTGC  
+HWI-EAS443:3:15:1456:800#0/1  
aaaaabaabaabaab ` ` a a a ` ] ` a ` a \_ a ` \_ a ^ ^ ^ Z ^ ` a ^  
@HWI-EAS443:3:15:145:434#0/1  
CATGATTCCAGAGGAATGAACAAGGACAAACCCTCTGG  
+HWI-EAS443:3:15:145:434#0/1  
S ` T a a \_ \_ b \_ W U F ^ ` [ \_ b ^ ] U \_ ] a ` ] M V b Z ] ^ X V ¥ ] Y Y P  
@HWI-EAS443:3:15:1520:983#0/1  
CCCCGTTTTCGTTTTATTACCAACTACGTCCCTTGC  
+HWI-EAS443:3:15:1520:983#0/1  
abbb ` b b b b a a b b a a b b b b ` ` a \_ b a b a ` ` ` a ` \_ a a ` b a V ]  
@HWI-EAS443:3:15:1555:744#0/1  
ATAAAAGAAGTGAAGATCTAATGTCGCAGTCCCGCACTC  
+HWI-EAS443:3:15:1555:744#0/1  
\_ a a ¥ a a a a b a \_ Z Z ` ¥ ^ \_ a \_ a ` ¥ ^ a ` \_ ] [ ¥ ^ P ` ] ] \_ S Q Y \_ ]  
@HWI-EAS443:3:15:1578:566#0/1  
GAAGAGCAACAGCTATTCTCAGAAAGGCAACCAGGAGATT  
+HWI-EAS443:3:15:1578:566#0/1  
abbaabaaa ` a a [ ` ` a ` \_ ` \_ ` a \_ a \_ ` \_ \_ \_ a ¥ ] \_ ` a ] a \_ ] `  
@HWI-EAS443:3:15:1588:1770#0/1  
GAGAATAAAAGAAGTGAAGATCTAATGTCGCAGTCCCGC  
+HWI-EAS443:3:15:1588:1770#0/1  
\_ a ¥ a a ] ` ` ` a b b b a ` ] W b b ` Z a \_ ] b K a a N P Z U ^ \_ ¥ P X H Y P  
@HWI-EAS443:3:15:160:150#0/1  
AAGTGGATGATGGCAATGAGATACCCAATTACAGCAGACA  
+HWI-EAS443:3:15:160:150#0/1  
aaa ` \_ a a ^ b a a a a a a \_ a a \_ a a \_ a ` \_ a ` ^ ` ^ a ` ] X \_ \_ Z \_  
@HWI-EAS443:3:15:1635:724#0/1  
AAAGAAGTGAAGATCTAATGTCGCAGTCCCGCACTCGCG  
+HWI-EAS443:3:15:1635:724#0/1  
abbb ^ ¥ H \_ ^ a b b b a b T a a a ` ^ X \_ ` \_ ` ` a Z ` \_ [ U X W X [ \_ [ ]  
@HWI-EAS443:3:15:1640:1228#0/1  
CTGTGGCACATTTCCAAGAGAGATGCTAATGGGTCTGCTG  
+HWI-EAS443:3:15:1640:1228#0/1  
aabb ` ` b a ] \_ b b b a ` ` b b a a b a a b ` b ` ` b a a b W a ` ` ^ a a

@HWI-EAS443:3:15:1672:148#0/1  
GATTCCAGAGAGGAATGAACAAGGACAAACCCTCTGGAGC  
+HWI-EAS443:3:15:1672:148#0/1  
`\_`aSV`b`a^b`aaabaa`a`ba`WZa\_TUU\_G]a^^`P  
@HWI-EAS443:3:15:1697:1422#0/1  
TAATTGGGTATCTCATTGCCATCATCCACTTCATTCTGAG  
+HWI-EAS443:3:15:1697:1422#0/1  
aaaaaaa\_^aa^aX```a^V\_a[``\_V][Ya^Y\_``X`^]¥  
@HWI-EAS443:3:15:1698:759#0/1  
ATAAAAGAAGACTGAGAGATCTAATGTCGCAGTCCCGCACTC  
+HWI-EAS443:3:15:1698:759#0/1  
a``¥a\_`\_¥Vbaabab\_ZX\_b[a`U\_SZ`\_¥SHPaSTLYU  
@HWI-EAS443:3:15:1707:690#0/1  
TCTCTTTCTAGCATGTACGCCACCATCAAGGGAGCAATTT  
+HWI-EAS443:3:15:1707:690#0/1  
a]b]abaU`ab\_aaaaa`U[[a]¥\_SV`[a`¥`a^aX\_Z\_  
@HWI-EAS443:3:15:1719:823#0/1  
CTCAGGGCCATTGATCTCCACATCATTGATGACGAATAA  
+HWI-EAS443:3:15:1719:823#0/1  
`bbbbabaabaaaaaaaaa\_\_\_`aa\_`a`aaaa^Wa``a`\_  
@HWI-EAS443:3:15:1728:129#0/1  
GTCCCGTTTTTCGTTTTATTACCAACTACGTCCCTTGC  
+HWI-EAS443:3:15:1728:129#0/1  
a`aa`b`bbb¥baaa\_`baa¥0aa]a^aa^`Z[W^]`])`W  
@HWI-EAS443:3:15:1745:1956#0/1  
ATAACATTGTGGGATCTTGTGACCATTGAATTTTACAAT  
+HWI-EAS443:3:15:1745:1956#0/1  
aabaaaaaaaa\_][\_aaaaZ]]\_])`aaa``\_aaa`aa\_a  
@HWI-EAS443:3:15:1769:627#0/1  
GTTTGTGTTTGTCCAGAGGGTTTGTCTTGTTCATTCTC  
+HWI-EAS443:3:15:1769:627#0/1  
a^^`a`ZZaa\_a\_]W`¥a`XW\_\_¥RPF[]`[WP^`¥XMX  
@HWI-EAS443:3:15:1775:1889#0/1  
GGGGACGTAGTGTGGTAATGAAACGAAAACGGGACTCTA  
+HWI-EAS443:3:15:1775:1889#0/1  
abbbab^aa`a`abbSabb\_[a^F\_aaa\_F\_```^a\_\_a  
@HWI-EAS443:3:15:1788:941#0/1  
ATAAAAGAAGACTGAGAGATCTAATGTCGCAGTCCCGCACTC  
+HWI-EAS443:3:15:1788:941#0/1  
abbbba\_X\_`babbbbbb]ab^Y]b`[\_UVa[GXa\_ZaH\_\_  
@HWI-EAS443:3:15:184:688#0/1  
AAAGAAGACTGAGAGATCTAATGTCGCAGTCCCGCACTCGCG  
+HWI-EAS443:3:15:184:688#0/1  
abbaYa\_a]aaaa`aa`aaaa]a]]`^Y```\_]\_Wa^^N[V  
@HWI-EAS443:3:15:186:208#0/1  
GGGTGGAGTCTGCTGTCCTGAGAGGATTTCTCATTTTGGG  
+HWI-EAS443:3:15:186:208#0/1  
abbWa`aa\_a`aaaa¥a\_\_a`aaa\_\_\_`\_\_`\_\_`\_^`^¥\_  
@HWI-EAS443:3:15:187:706#0/1  
GAATAAAAGAAGACTGAGAGATCTAATGTCGCAGTCCCGCAC



@HWI-EAS443:3:15:421:1987#0/1  
AGCACTGACTCAGGGCCATTGATCTCCCACATCATTGATG  
+HWI-EAS443:3:15:421:1987#0/1  
`[a\_a\_aaZ\_\_VR¥Ya\_`]QU]RZ[^\_a\_``ZX\_WV¥]RX  
@HWI-EAS443:3:15:454:1798#0/1  
AGGGGACGTAGTGTGGTAATGAAACGAAAACGGGACTCT  
+HWI-EAS443:3:15:454:1798#0/1  
abbabab]^¥\_¥aaaaaPaa`abaY\_Waab`TV^\_aX]\_  
@HWI-EAS443:3:15:45:2044#0/1  
TGGGTATCTCATTGCCATCATCCACTTCATTCTGAGTGCG  
+HWI-EAS443:3:15:45:2044#0/1  
aaaaW``aaaa\_aaaa\_\_a\_\_`a\_`\_X`a]\_`^Y]X]S`  
@HWI-EAS443:3:15:501:214#0/1  
GAGGATTTCTCATTTTGGGCAAAGAAGACAAGAGATATGG  
+HWI-EAS443:3:15:501:214#0/1  
Y]ba[V\_aaaaa`U^`W^aa`0`\_\_\_\_]X`]Ma^\_¥]`]\_\_  
@HWI-EAS443:3:15:50:1518#0/1  
AAAGAAGTGAAGATCTAATGTCGCAGTCCCGCACTCGCG  
+HWI-EAS443:3:15:50:1518#0/1  
aa^^VZ`WQW\_URWa\_aS\_a`a[¥`YG\_YaL]^\_] [KKT  
@HWI-EAS443:3:15:532:212#0/1  
CTTCTGATGTGTACTTTTTGATTATGGCCATATGGTCCA  
+HWI-EAS443:3:15:532:212#0/1  
`ba\_\_a^a`\_b`a``aab`^Z`\_aW]\_ZPXTT\_NZUV  
@HWI-EAS443:3:15:543:385#0/1  
TTACTATCAACTGGATCAATCTCCTGGTTGCCTTTCTGAG  
+HWI-EAS443:3:15:543:385#0/1  
abaaa^T¥GYNZ^Xb` [ ]^`U^`aP^`HPXUR`]a``aY\_  
@HWI-EAS443:3:15:612:1150#0/1  
GGCGATCTGAACCTTGTCAATAGGGCAAACCAGCGACTGA  
+HWI-EAS443:3:15:612:1150#0/1  
``ba]^aZSUWU^a¥Z]``aWTSY][0\_a]U^]]`\_[[[Y  
@HWI-EAS443:3:15:614:237#0/1  
GGAAATGTGCCACAGCACACAGATTGGAGGAGTAAGGATG  
+HWI-EAS443:3:15:614:237#0/1  
aaabb¥b[aaaaaab`a`\_[aa[\_\_aa[\_\_\_]aR`\_a^^]\_  
@HWI-EAS443:3:15:624:1824#0/1  
CAGTCCCGCACTCGCGAGATACTACTAAGACCACTGTGG  
+HWI-EAS443:3:15:624:1824#0/1  
Ta[F^ba]b\_W^TWXTa\_^]^aUaR¥T`ZX\_a\_S]T^^`W  
@HWI-EAS443:3:15:672:597#0/1  
GAGATCTAATGTCGCAGTCCCGCACTCGCGAGATACTCAC  
+HWI-EAS443:3:15:672:597#0/1  
abZ`\_a]baab¥ba`]b[aabX^T¥a`a\_a\_a[\_\_\_V\_\_\_[Z  
@HWI-EAS443:3:15:674:1902#0/1  
AAAGAAGTGAAGATCTAATGTCGCAGTCCCGCACTCGCG  
+HWI-EAS443:3:15:674:1902#0/1  
a[bab`a^`a`aba`Y^^aa`]b`a[YIU`aY`]`¥aaY^  
@HWI-EAS443:3:15:676:1746#0/1  
TAGTACGTTCCCTCTTTGATCTCTAACCTTAAAAATCGG

+HWI-EAS443:3:15:676:1746#0/1  
a\_¥]aa\_G]a¥^]Z`^bba\_a`[aa`MU]\_`a^aa`a¥\_\_  
@HWI-EAS443:3:15:719:232#0/1  
TGAAGTGGGGGCAAGAATACTGACATCAGAGTCACAGCTG  
+HWI-EAS443:3:15:719:232#0/1  
aba\_aVaaaa`\_aaa`aa\_``\_]`^`^a¥\_\_\_^^ZX\_  
@HWI-EAS443:3:15:727:690#0/1  
CCCCACTCAGAATGAAGTGGATGATGGCAATGAGATACC  
+HWI-EAS443:3:15:727:690#0/1  
ababbbaaa`a]abaZabNaa\_``YVaaV\_\_`\_a```a``  
@HWI-EAS443:3:15:779:1045#0/1  
AAAAGAAGTGGAGATCTAATGTCGCAGTCCCAGTCCG  
+HWI-EAS443:3:15:779:1045#0/1  
\_¥`^¥`^`^`\_]a`XZY^abXab\_`\_a``V[RUWWLX]aYV  
@HWI-EAS443:3:15:783:688#0/1  
ATTCCCCAGTTCTGGAAAAGCACTTTTGCATCTTTTGGGA  
+HWI-EAS443:3:15:783:688#0/1  
abb`b[aba`a`\_]Z]`ZZ`X]¥\_Z`\_aaaYaXTXY[¥a  
@HWI-EAS443:3:15:793:1862#0/1  
GGCATTTCAAAAAGATGCAAAAGTGCTTTTCCAGAACTG  
+HWI-EAS443:3:15:793:1862#0/1  
a`\_SY]]¥W[\_WWK]RP[Y¥PU]`HWG[UR]O]]^W[]^^  
@HWI-EAS443:3:15:830:691#0/1  
CGCACTCGCGAGATACTCACTAAGACCACTGTGGACCATA  
+HWI-EAS443:3:15:830:691#0/1  
aab\_babbaa`aaaa`aa`aab`aa]\_a^`]a]`]a\_\_a  
@HWI-EAS443:3:15:839:543#0/1  
TGCTGTAATTGGGTATCTCATTGCCATCATCCACTTCATT  
+HWI-EAS443:3:15:839:543#0/1  
]Xa¥a\_\_Za^\_a¥LVSUW``RQSUDU`aaY[HTTNVWOLS  
@HWI-EAS443:3:15:850:219#0/1  
GGGGACGTAGTGTGGTAATGAAACGAAAACGGGACTCTA  
+HWI-EAS443:3:15:850:219#0/1  
abb`^`b`ab]b^aaa]^`\_¥``\_]\_W\_]aG]]^UX^^XX  
@HWI-EAS443:3:15:860:1296#0/1  
GTCCCGTTTTCGTTTCATTACCAACTACGTCCTTGC  
+HWI-EAS443:3:15:860:1296#0/1  
a`aa`a]\_a``a\_```aa`aaaa`\_a`\_a\_]Z\_a\_\_^]]\_  
@HWI-EAS443:3:15:866:174#0/1  
AAGGCAGCAATAGGGTTGAGGATTAGCTCATCTTTCAGTT  
+HWI-EAS443:3:15:866:174#0/1  
ZN\_aaaabaa`\_YVZaaaa`\_a\_a^S^a[a\_\_\_\_[\_RP  
@HWI-EAS443:3:15:89:1026#0/1  
CTCGCGAGATACTCACTAAGACCACTGTGGACCATATGGC  
+HWI-EAS443:3:15:89:1026#0/1  
a]b¥Z¥X\_W^^QTaa]]a`[Xa¥[UY]V\_]a]Z\_W[a^]  
@HWI-EAS443:3:15:907:24#0/1  
AACCTTGTTTTACGGACCAATTCTCTTTCTAGCATGTACG  
+HWI-EAS443:3:15:907:24#0/1  
abbbbbbababaaba```aaaaa^aa``aa`aaa[`a^`



@HWI-EAS443:3:15:920:693#0/1  
CCTGATGTGACTTTTTGATTATGGCCATATGGTCCACAG  
+HWI-EAS443:3:15:920:693#0/1  
aba`V\_]Q\_TWQZ¥Y]a\_¥^aa`ULW^¥OQLVTOSX]L^S  
@HWI-EAS443:3:15:923:552#0/1  
CAGGTGCATTGACTGAAGATCCAGATGAAGGCACATCTGG  
+HWI-EAS443:3:15:923:552#0/1  
]bb`]bbbb]aabbabbbaa\_aaa`aababaa]\_baZaba  
@HWI-EAS443:3:15:924:600#0/1  
CGCACTCGCGAGATACTCACTAAGACCACTGTGGACCATA  
+HWI-EAS443:3:15:924:600#0/1  
abb\_PZX\_¥Y`^]Y]bba[S^a`]YQPLLaMb]R`]HUaL  
@HWI-EAS443:3:15:960:396#0/1  
GCGGGATGTGCTTGGGACATTTGACACTGTCCAAATAATA  
+HWI-EAS443:3:15:960:396#0/1  
aaba`\_\_b`a\_\_\_a]`^\_\_\_\_`\_`\_]\_]`\_¥YWW^\_\_\_\_X`  
@HWI-EAS443:3:16:1006:577#0/1  
CTCGCGAGATACTCACTAAGACCACTGTGGACCATATGGC  
+HWI-EAS443:3:16:1006:577#0/1  
]ba`UX\_baU`ba`aabbaabbZ`bSa¥aa]W¥a\_[]`  
@HWI-EAS443:3:16:105:382#0/1  
CGCCGGCTACTGGGAGAAACCTTGTTTTACGGACCAATTC  
+HWI-EAS443:3:16:105:382#0/1  
aaaabaaaa\_^]`a\_`¥a]¥a\_a^^aa\_^a`^^^]X]][]  
@HWI-EAS443:3:16:1126:1404#0/1  
AAGAAGTGAAGATCTAATGTCGCAGTCCCGCACTCGCGA  
+HWI-EAS443:3:16:1126:1404#0/1  
a]Z^U[baabaaa`aaaaab\_a`\_aa\_X`]`¥`a¥`\_^`\_`  
@HWI-EAS443:3:16:1157:1677#0/1  
GTTGCCGTTAGCACTTCTTCTTCTTCTTGACTGATGAT  
+HWI-EAS443:3:16:1157:1677#0/1  
aaabbab^`a\_\_`a¥aa`aaaaaaa`a^aaa`Uaa```aa  
@HWI-EAS443:3:16:124:77#0/1  
CTGTAATTGGGTATCTCATTGCCATCATCCACTTCATTCT  
+HWI-EAS443:3:16:124:77#0/1  
abbaaababbZbaabaaaaabaabaaaaaaa\_aaV¥\_  
@HWI-EAS443:3:16:1255:320#0/1  
CTGCTGTAATTGGGTATCTCATTGCCATCATCCACTTCAT  
+HWI-EAS443:3:16:1255:320#0/1  
ab`abaaaababb`aa\_baaaaaaaaaaaa\_YaZa`]\_a  
@HWI-EAS443:3:16:1260:645#0/1  
GTCCCGTTTTCGTTTTATTACCAACTACGTCCCCTTGC  
+HWI-EAS443:3:16:1260:645#0/1  
\_HWNW]V`aa¥\_[]¥¥XX^`]NRZY[^V`QXFXOYRNTZ  
@HWI-EAS443:3:16:1314:207#0/1  
CTCAGAATGAAGTGGATGATGGCAATGAGATACCCAATTA  
+HWI-EAS443:3:16:1314:207#0/1  
``a\_][]`\_¥NQb[a\_aTZYRaa``][aYXXP`U]OYY\_X\_  
@HWI-EAS443:3:16:1322:1418#0/1  
CACACAGATTGGAGGAGTAAGGATGGTGGACATCCTTAGA

+HWI-EAS443:3:16:1322:1418#0/1  
abaaaaabaabbaaabaab]a\_`^`Zaa\_aa`\_Y``\_a\_  
@HWI-EAS443:3:16:1336:1406#0/1  
AGAGAATAAAAGAACTGAGAGATCTAATGTCGCAGTCCCG  
+HWI-EAS443:3:16:1336:1406#0/1  
`]HWaZaa\_aaa\_[Y^a`\_`\_^ZX\_`\_\_[VZ^]]XIJNUX  
@HWI-EAS443:3:16:1393:618#0/1  
GAATAAAAGAACTGAGAGATCTAATGTCGCAGTCCCGCAC  
+HWI-EAS443:3:16:1393:618#0/1  
aS\_]`aa][OU¥`^^^]`\_^]`\_V¥^\_X]\_VUNXUTNR  
@HWI-EAS443:3:16:1463:1091#0/1  
TGCTAATTGGGCAAGGGGACGTAGTGTGGTAATGAAACG  
+HWI-EAS443:3:16:1463:1091#0/1  
aaaaa`bba\_``aaaaa[¥`\_`a¥a\_aaXJX^`\_¥`^U[  
@HWI-EAS443:3:16:1484:1188#0/1  
ATCTAATGTCGCAGTCCCGCACTCGCGAGATACTCACTAA  
+HWI-EAS443:3:16:1484:1188#0/1  
^Y¥Za\_ab]Z¥W]a^NYUKT[UVZUV^S`N]GT]GNV¥UB  
@HWI-EAS443:3:16:1521:1588#0/1  
GTGGCGTACATGCTAGAAAGAGAATTGGTCCGTAACAA  
+HWI-EAS443:3:16:1521:1588#0/1  
`abbba`aaabb[baaaa\_aaaaaaaaaaW\_`a¥a\_aa¥`a  
@HWI-EAS443:3:16:152:1363#0/1  
AAAGAACTGAGAGATCTAATGTCGCAGTCCCGCACTCGCG  
+HWI-EAS443:3:16:152:1363#0/1  
aaa`\_]aa\_`[a`aZ``aa`aW\_\_`]XNX¥aT`¥\_W^WW  
@HWI-EAS443:3:16:1533:1236#0/1  
AAAAGAACTGAGAGATCTAATGTCGCAGTCCCGCACTCGC  
+HWI-EAS443:3:16:1533:1236#0/1  
abaaa`aabaab`\_`[\_ba`aaZaa\_aa]]\_X¥\_X`XU\_¥  
@HWI-EAS443:3:16:1551:489#0/1  
GTCGCAGTCCCGCACTCGCGAGATACTCACTAAGACCACT  
+HWI-EAS443:3:16:1551:489#0/1  
\_ZaaZa\_Y¥`]XHV¥]¥¥`^`^^^Y¥^^U¥ZY^VYY[ST  
@HWI-EAS443:3:16:1555:2001#0/1  
CACCATCCTTACTCCTCCAATCTGTGTGCTGTGGCACATT  
+HWI-EAS443:3:16:1555:2001#0/1  
Uaaba^^bab`bba^Y]ababbbbaaab[YTababab`  
@HWI-EAS443:3:16:1557:1820#0/1  
CAACACTTCAATATAAACTGCCTGTTCCGCCGCTACT  
+HWI-EAS443:3:16:1557:1820#0/1  
`bbabbbbabbbabab`baaaaa\_\_aa]a^W[a``WQP  
@HWI-EAS443:3:16:1558:122#0/1  
GAATAAAAGAACTGAGAGATCTAATGTCGCAGTCCCGCAC  
+HWI-EAS443:3:16:1558:122#0/1  
a`aaa\_aaa\_a\_aa\_¥\_`]`^`^`^\_a^^]UY\_X]UXZZX^  
@HWI-EAS443:3:16:1579:1774#0/1  
AATAAACTTCTCCCCTTTGCTGCTGCTCCACCAGAACAG  
+HWI-EAS443:3:16:1579:1774#0/1  
aa\_\_VX`Z\_\_\_\_`^aW]^Z^^W[`T\_^XPWTZWV^WVWRW]



+HWI-EAS443:3:16:364:1517#0/1  
abaR`ab`aaa`\_P\_aa`a^^`\_ ]\_\_\_\_[`W\_Z\_YW\_] ]  
@HWI-EAS443:3:16:381:872#0/1  
ATGGCAATGAGATACCCAATTACAGCAGACAAGAGAATAA  
+HWI-EAS443:3:16:381:872#0/1  
a][[aaaaaaa]aaW`a\_\_\_aa`^\_^`\_a\_\_\_^^\_\_\_^`  
@HWI-EAS443:3:16:385:1918#0/1  
AGCAGACAAGAGAATAATGGACATGATTCCAGAGAGGAAT  
+HWI-EAS443:3:16:385:1918#0/1  
aaaaa\_aba¥\_\_\_`\_a\_\_\_`\_^a`[\_a\_Y\_\_¥V]^Z\_\_\_`\_`  
@HWI-EAS443:3:16:398:235#0/1  
GTCCCGTTTTCGTTTTATTACCAACTACTCGTCCCTTGC  
+HWI-EAS443:3:16:398:235#0/1  
aaaa`b^]]\_aaZ`\_a\_\_\_`\_^`\_`\_a`[\_¥aY^UVRWRRW  
@HWI-EAS443:3:16:418:51#0/1  
GTCCCGTTTTCGTTTTATTACCAACTACTCGTCCCTTGC  
+HWI-EAS443:3:16:418:51#0/1  
a¥`a`a\_aaa`b^`\_]Ua\_aZ¥\_\_\_`\_^]]ZWZY¥T¥U¥U  
@HWI-EAS443:3:16:43:799#0/1  
ATGAAGGCACATCTGGGGTGGAGTCTGCTGTCCTGAGAGG  
+HWI-EAS443:3:16:43:799#0/1  
a\_\_\_`X[[aa`¥aa\_ZZY¥W[\_Z\_\_\_`¥`\_]U\_\_\_W^W]U^`  
@HWI-EAS443:3:16:448:272#0/1  
CAAAATGAGAAATCCTCTCAGGACAGCAGACTCCACCCCA  
+HWI-EAS443:3:16:448:272#0/1  
aa[aS¥a\_aaba`aaaaaaaa`aa`a^[\`^`Z^`\_ZZ`  
@HWI-EAS443:3:16:449:1886#0/1  
GCTAGAGTCCCGTTTTCGTTTTATTACCAACTACTCGTCC  
+HWI-EAS443:3:16:449:1886#0/1  
`bab`a\_Ua[[a\_\_\_^`aY\_^]]aa\_a]Za^¥aG\_a`TTT¥  
@HWI-EAS443:3:16:483:895#0/1  
AAAGAAGTGGAGATCTAATGTCGCAGTCCCGCACTCGCG  
+HWI-EAS443:3:16:483:895#0/1  
VGW¥`^`a[¥¥`^babbaaa`ab]^\_\_[]`]]]\_\_a\_a  
@HWI-EAS443:3:16:489:546#0/1  
CCGCACTCGCGAGATACTACTAAGACCACTGTGGACCAT  
+HWI-EAS443:3:16:489:546#0/1  
aa¥`]baabaaaa`¥aaa`\_`X`aa`^`a\_\_\_aa`a`  
@HWI-EAS443:3:16:493:1168#0/1  
ATCTAATGTCGCAGTCCCGCACTCGCGAGATACTACTAA  
+HWI-EAS443:3:16:493:1168#0/1  
Xabb[\_]a^a`b¥XP\_\_^VOZRZ^V]\_\_¥¥X]^YQ[ZWZ[  
@HWI-EAS443:3:16:517:981#0/1  
AAAAGAAGTGGAGATCTAATGTCGCAGTCCCGCACTCGC  
+HWI-EAS443:3:16:517:981#0/1  
aaX`^P]`aV\_N¥`XY[`\_\_`Q`\_`U^H`\_aYa]^X]X]  
@HWI-EAS443:3:16:547:1657#0/1  
GTTCTCAGTTGGATTCTGTCTAAGGATGTCCACCATCCT  
+HWI-EAS443:3:16:547:1657#0/1  
aaabbY^Z\_aaYI^aaa`]\_\_`aZ[^\_\_`\_]ZR`^a]SYY

@HWI-EAS443:3:16:553:460#0/1  
GTTTTCGTTTCATTACCAACACTACGTCCCCTTGCCCAAT  
+HWI-EAS443:3:16:553:460#0/1  
a\_`aaaa^\_aaa`\_a]``a^\_]``\_aW`]^]]\_]]^]]Y\_  
@HWI-EAS443:3:16:560:949#0/1  
CAATTCTCTTTCTAGCATGTACGCCACCATCAAGGGAGCA  
+HWI-EAS443:3:16:560:949#0/1  
Y[\_Zbba`XYY`aaaab[aabaab`Yaa`abaaaa`ab`\_  
@HWI-EAS443:3:16:599:736#0/1  
GTTCTTGAAAGGATGCAGGTGCATTGACTGAAGATCCAG  
+HWI-EAS443:3:16:599:736#0/1  
a^^^]\_aa^\_a`ZZa`\_a`Q\_]¥^\_\_`¥\_\_\_\_`¥^¥\_¥¥\_  
@HWI-EAS443:3:16:627:1016#0/1  
GCGAGATACTACTAAGACCACTGTGGACCATATGGCCAT  
+HWI-EAS443:3:16:627:1016#0/1  
a^Z[H^T\_YaYa]a^V[\_`a```\_0^Y]a`XPYYYYVWWQ  
@HWI-EAS443:3:16:69:709#0/1  
TAAAAGAAGTCTAATGTTCGAGTCCCGCACTCG  
+HWI-EAS443:3:16:69:709#0/1  
`¥[Z¥U¥IPbba[Y¥Tbbb\_]`bQb¥Y¥[]`¥VYN¥JR\_  
@HWI-EAS443:3:16:711:1106#0/1  
GTCCCCTTTTCGTTTCATTACCAACACTACGTCCCCTTGC  
+HWI-EAS443:3:16:711:1106#0/1  
aV¥¥^a^\_V[^a¥[^TS\_^\_\_\_\_¥¥¥`U¥W\_WT^S\_YWUB  
@HWI-EAS443:3:16:781:926#0/1  
GAGAGATCTAATGTTCGAGTCCCGCACTCGCGAGATACTC  
+HWI-EAS443:3:16:781:926#0/1  
\_b^]] [Z`a\_aaa¥^aaaaUUaa^a^a[``\_`W\_Q¥WQYS  
@HWI-EAS443:3:16:79:1650#0/1  
GCTGTAATTGGGTATCTCATTGCCATCATCCACTTCATTC  
+HWI-EAS443:3:16:79:1650#0/1  
`bb[Qs^[Z\_YWK\_¥aa]aXXXaaa\_aa\_]```a`^`\_\_`  
@HWI-EAS443:3:16:837:1565#0/1  
CAGCGATAATCAAACCTTTGGTCAACATCATCTTTCTCAC  
+HWI-EAS443:3:16:837:1565#0/1  
UR\_`b`\_]\_^``aab``bbVb¥bbb`b^[a\_]¥aa\_aZH`a  
@HWI-EAS443:3:16:841:1992#0/1  
AAACAAACGATGCTGGATCAGACCGAGTGATGGTATCACC  
+HWI-EAS443:3:16:841:1992#0/1  
aba`aab\_aaaa\_``\_a\_aa`a\_`^`\_Y\_^^]\_U\_WPJVW  
@HWI-EAS443:3:16:850:1573#0/1  
AGAAGTCTAATGTTCGAGTCCCGCACTCGCGAG  
+HWI-EAS443:3:16:850:1573#0/1  
ab\_babababbbbababaa^\_\_`ba\_a`a\_a¥\_¥¥^¥a^\_  
@HWI-EAS443:3:16:858:1469#0/1  
TAAAAGAAGTCTAATGTTCGAGTCCCGCACTCG  
+HWI-EAS443:3:16:858:1469#0/1  
aaaaa¥\_aaa\_a\_a`\_\_\_\_`aa]¥Ya\_a`¥Wa]`^TR[]¥[  
@HWI-EAS443:3:16:875:21#0/1  
GGATGCAGGTGCATTGACTGAAGATCCAGATGAAGGCACA



@HWI-EAS443:3:17:1056:1335#0/1  
CTTCCTGATGTGACTTTTTGATTATGGCCATATGGTCCA  
+HWI-EAS443:3:17:1056:1335#0/1  
ab`baaaaa`\_b\_aaaaaba]\_`aa\_\_a`\_aXN]VW^`  
@HWI-EAS443:3:17:1068:1143#0/1  
ATGGTATTCTCACAAGAGGATTGCATGATCAAGGCAGTTA  
+HWI-EAS443:3:17:1068:1143#0/1  
aabaUabaa`a¥ab`a\_aa^\_aaaaaa\_\_a\_``]``GX]  
@HWI-EAS443:3:17:1069:1892#0/1  
CTTCCTGATGTGACTTTTTGATTATGGCCATATGGTCCA  
+HWI-EAS443:3:17:1069:1892#0/1  
\_^^ab`\_\_ab^^`aaaababaabaaa\_\_aa\_]\_PQXMPUZ  
@HWI-EAS443:3:17:1093:1533#0/1  
ACCCCGCACTCAGAATGAAGTGGATGATGGCAATGAGATA  
+HWI-EAS443:3:17:1093:1533#0/1  
aa]a\_aa\_a`a\_a[\_aaZU^SaX¥^`\_¥^\_^^]^\_\_[Z[Z  
@HWI-EAS443:3:17:1114:185#0/1  
CTGAGAGATCTAATGTGCGAGTCCCGCACTCGCGAGATAC  
+HWI-EAS443:3:17:1114:185#0/1  
abaababbaaababbabbba`a`bXaaaaa^b`^¥  
@HWI-EAS443:3:17:1115:1443#0/1  
TCGTCATCAATGATGTGGGAGATCAATGGCCCTGAGTCAG  
+HWI-EAS443:3:17:1115:1443#0/1  
`b`\_aaaZ\_a`aP¥\_Uaaaa¥\_¥]a¥`Y\_][][]^\_U^]Z  
@HWI-EAS443:3:17:1128:640#0/1  
CAACATCATCATTTCTCACTTCTCCTCCTGGAGTGATACAT  
+HWI-EAS443:3:17:1128:640#0/1  
abbaaabbaabaaa\_aaa`aa`a`a`aaa¥¥a\_a\_a^``  
@HWI-EAS443:3:17:1189:1421#0/1  
GTCCCGTTTTCGTTTTATTACCAACTACGTCCCTTGC  
+HWI-EAS443:3:17:1189:1421#0/1  
aaaa\_b\_abaab\_ab\_aaaa\_a\_\_aaaa\_\_\_[WUZ\_^Y^  
@HWI-EAS443:3:17:1199:702#0/1  
TGCTGTAATTGGGTATCTCATTGCCATCATCCACTTCATT  
+HWI-EAS443:3:17:1199:702#0/1  
abaaa\_\_aababaXa`aaa`a\_\_\_`[\_`^^\_\_a^]a][a\_  
@HWI-EAS443:3:17:1212:693#0/1  
ATCTAATGTGCGAGTCCCGCACTCGCGAGATACTCACTAA  
+HWI-EAS443:3:17:1212:693#0/1  
aaaa\_VVaZ`W][ZSQV^X]SVQ[\_[XVYTP[Z[ZUW¥RM  
@HWI-EAS443:3:17:1233:435#0/1  
AAGAAGAGCTCCAGGATTGTAATAATTGCTCCCTTGATGGT  
+HWI-EAS443:3:17:1233:435#0/1  
abbaa¥]S¥¥`aab\_RaaaX`\_`a\_]`a¥a\_a`aa`Z\_^U  
@HWI-EAS443:3:17:1233:605#0/1  
AAAAGAAGACTGAGAGATCTAATGTGCGAGTCCCGCACTCGC  
+HWI-EAS443:3:17:1233:605#0/1  
aaaa`¥a^aaa\_a`aa]ba`b`\_^]aa\_]X^\_YR\_\_\_`X  
@HWI-EAS443:3:17:1241:1021#0/1  
CTGCTGTAATTGGGTATCTCATTGCCATCATCCACTTCAT

+HWI-EAS443:3:17:1241:1021#0/1  
abba`b`ba`a`S\_a\_aa¥aa¥]¥a]aaa`[]`]a[`a  
@HWI-EAS443:3:17:1291:971#0/1  
GATCTAATGTCGCAGTCCCCGACTCGCGAGATACTCACTA  
+HWI-EAS443:3:17:1291:971#0/1  
aba^Y\_]a`Z\_\_\_a`[]^]W¥^X^[]^[]¥YNQ^ZPZ[  
@HWI-EAS443:3:17:1294:254#0/1  
CTCGCGAGATACTCACTAAGACCACTGTGGACCATATGGC  
+HWI-EAS443:3:17:1294:254#0/1  
^^`\_aa^aaaa`aa\_\_abaa`]`^aa^a¥]YYN\_aY`\_Y  
@HWI-EAS443:3:17:1299:293#0/1  
AAAGAACTGAGAGATCTAATGTCGCAGTCCCCGACTCGCG  
+HWI-EAS443:3:17:1299:293#0/1  
abaa¥aaaaaaaa`¥a`\_aaV\_a`a]\_¥]`]^]]UU\_  
@HWI-EAS443:3:17:1370:535#0/1  
GGACGTAGTGTGGTAATGAAACGAAAACGGGACTCTAGC  
+HWI-EAS443:3:17:1370:535#0/1  
a`\_b\_aa]a\_aaaY^`\_\_\_\_\_ZFYZ\_]`PW]^SV^]]WYY  
@HWI-EAS443:3:17:1374:58#0/1  
ATAAAAGAACTGAGAGATCTAATGTCGCAGTCCCCGACTC  
+HWI-EAS443:3:17:1374:58#0/1  
^Y¥V`^a¥V`¥a\_bORRY¥a]VT^V][WXYOS`\_`LDH]J  
@HWI-EAS443:3:17:1387:49#0/1  
TCCCGTTTTTCGTTTCATTACCAACTACGTCCCCTTGCC  
+HWI-EAS443:3:17:1387:49#0/1  
aa\_abXaba\_b\_aa^`\_`\_\_a^Ua\_[\_^]XXYYX^X^GY  
@HWI-EAS443:3:17:1409:893#0/1  
TGCTGTAATTGGGTATCTCATTGCCATCATCCACTTCATT  
+HWI-EAS443:3:17:1409:893#0/1  
Xab\_aOW^`aaa[ZOZ^^]Z^XQOZZa]`^`^aa^^]^  
@HWI-EAS443:3:17:1422:721#0/1  
GTCCCGTTTTTCGTTTCATTACCAACTACGTCCCCTTGCC  
+HWI-EAS443:3:17:1422:721#0/1  
[[aa`¥]b`bbba`a`aaaaXT`QV`a\_a[\_V\_VWS^][VY  
@HWI-EAS443:3:17:1435:1020#0/1  
TGACTGAAGATCCAGATGAAGGCACATCTGGGGTGGAGTC  
+HWI-EAS443:3:17:1435:1020#0/1  
abbXbbabbaa`¥aa`a`a\_aa`\_`[a\_aaa`ZU\_\_`[^\_  
@HWI-EAS443:3:17:1442:263#0/1  
GCCGGCTACTGGGAGAAACCTTGTTTTACGGACCAATTCT  
+HWI-EAS443:3:17:1442:263#0/1  
`X]W[`XYPUUTXJJNPVGSV[NTYZURHSVWWPNQVWBB  
@HWI-EAS443:3:17:1484:769#0/1  
TGAAGATCCAGATGAAGGCACATCTGGGGTGGAGTCTGCT  
+HWI-EAS443:3:17:1484:769#0/1  
a\_R[T¥ba\_X`]\_]\_0^`a`aXT`V^aaa`P`ZV\_XZV`Z]  
@HWI-EAS443:3:17:1489:2012#0/1  
GAATAAAAGAACTGAGAGATCTAATGTCGCAGTCCCCGACTC  
+HWI-EAS443:3:17:1489:2012#0/1  
^aab`\_`bbabaabbb^`ba\_a`^`b\_aa\_aa\_\_\_a^`^^





+HWI-EAS443:3:17:1725:713#0/1  
aba`\_`a\_aT¥\_XaZa\_R[Z]aY` ``\_R\_NZQLX\_\_^] ^U  
@HWI-EAS443:3:17:1726:1173#0/1  
GTCCCGTTTTTCGTTTCATTACCAACTACTCGTCCCCTTGC  
+HWI-EAS443:3:17:1726:1173#0/1  
aZX]\_bXV\_a^a\_]M]a[[M[YZWY`\_^W^]ZVVVWXXP  
@HWI-EAS443:3:17:1773:1802#0/1  
AAATGTGCCACAGCACACAGATTGGAGGAGTAAGGATGGT  
+HWI-EAS443:3:17:1773:1802#0/1  
abbaY]\_P`a\_aaaa^\_Ya\_W\_`]\_]`a\_^ZZ\_`¥]\_\_II  
@HWI-EAS443:3:17:183:652#0/1  
ACGATGCTGGATCAGACCGAGTGATGGTATCACCTCTGGC  
+HWI-EAS443:3:17:183:652#0/1  
a`aaaa`aa\_\_`a\_`\_`¥`^ [¥¥[\_`V\_^V¥ZZ[^W¥¥¥  
@HWI-EAS443:3:17:189:67#0/1  
ATCCTACTCTGTTCTGGTGGAGCAGCAGCAAAGGGGAGAA  
+HWI-EAS443:3:17:189:67#0/1  
aaa`a\_`aaaaY`aaa\_\_b`\_\_`\_\_\_\_\_PPWU]\_aW\_WX  
@HWI-EAS443:3:17:215:1176#0/1  
ATCCAGCATCGTTTGTTCCTCCAGAGGGTTTGTCCCTTG  
+HWI-EAS443:3:17:215:1176#0/1  
aaaaaaaa^ab^a\_a]aa`\_`aa^`Y¥\_\_Y\_\_\_YUW\_^  
@HWI-EAS443:3:17:217:789#0/1  
CATGATCCAGAGGAATGAACAAGGACAAACCCTCTGG  
+HWI-EAS443:3:17:217:789#0/1  
aaaaaaaa¥aa]\_^aaa`a`a`]\_`\_`\_` [WZW]]\_\_\_Y  
@HWI-EAS443:3:17:229:1858#0/1  
GGGACGTAGTGTGGTAATGAAACGAAAACGGGACTCTA  
+HWI-EAS443:3:17:229:1858#0/1  
a^`W¥`aZ¥^`]X]]SWa\_aXRaaZTXaa\_\_\_\_Za[T`\_\_\_\_  
@HWI-EAS443:3:17:26:754#0/1  
TGCCTTGCATATGTCTACGGCTTGTTCCTCAGTTGGATTC  
+HWI-EAS443:3:17:26:754#0/1  
abbaaabba\_aabb`bbab\_LT]U\_]VFUHYTYGPZY  
@HWI-EAS443:3:17:28:293#0/1  
GGAATGAACAAGGACAAACCCTCTGGAGCAAAACAAACGA  
+HWI-EAS443:3:17:28:293#0/1  
Za[`VaZ¥^¥[^a`¥ZN^\_YZaaaaaa]R\_\_aa^SV^\_  
@HWI-EAS443:3:17:292:1351#0/1  
TAATGTGCGAGTCCCGCACTCGCGAGATACTACTAAGAC  
+HWI-EAS443:3:17:292:1351#0/1  
ab`]a^a`b`\_aaaZ`¥a^]Y]\_`\_] [QTX]U^¥] [^V  
@HWI-EAS443:3:17:297:299#0/1  
CCGTTTTCGTTTCATTACCAACTACTCGTCCCCTTGCCCA  
+HWI-EAS443:3:17:297:299#0/1  
abbaababb\_ba`\_aaaa]\_a`aa`a\_`¥^\_^`\_`Y^\_\_  
@HWI-EAS443:3:17:383:839#0/1  
TGGCCATGGTATTCTCACAAGAGGATTGCATGATCAAGGC  
+HWI-EAS443:3:17:383:839#0/1  
abbbaz¥`¥[aaaa\_aaaaa`a`\_`\_a^`\_a^X`\_]\_

@HWI-EAS443:3:17:41:1060#0/1  
GCGAGATACTCACTAAGACCACTGTGGACCATATGGCCAT  
+HWI-EAS443:3:17:41:1060#0/1  
aa\_`a`[\`aaaaaaaa`aa^]\`^`Y]]a``a``\_\_\_`U  
@HWI-EAS443:3:17:452:143#0/1  
CAGATGTGCCTTCATCTGGATCTTCAGTCAATGCACCTGC  
+HWI-EAS443:3:17:452:143#0/1  
\_¥ZOX\_S\_]¥`\_ba]Q\_ba¥U^¥PXa`dWVbU`aa\_]\_\_bW  
@HWI-EAS443:3:17:465:620#0/1  
AAAGAAGTGAAGATCTAATGTGCGCAGTCCCGCACTCGCG  
+HWI-EAS443:3:17:465:620#0/1  
aa\_``aaa`[\`aa\_\_\_\_\_a`\_a]\_V\_\_`X\_\_]^\_N]Y\_^Z\_  
@HWI-EAS443:3:17:472:1947#0/1  
AAAAGAAGTGAAGATCTAATGTGCGCAGTCCCGCACTCGCG  
+HWI-EAS443:3:17:472:1947#0/1  
aa[aa`[\`¥a`a\_\_\_\_\_aa\_\_R`ZY`SBBBBBBBBBBBB  
@HWI-EAS443:3:17:487:665#0/1  
AAGGATGCAGGTGCATTGACTGAAGATCCAGATGAAGGCA  
+HWI-EAS443:3:17:487:665#0/1  
aa`\_]\_]aaaa\_Va\_``^`a\_aa\_^^`¥\_\_^`\_¥a\_\_¥\_]\_  
@HWI-EAS443:3:17:48:1977#0/1  
CTCGCGAGATACTCACTAAGACCACTGTGGACCATATGGC  
+HWI-EAS443:3:17:48:1977#0/1  
aa``aabba`b`\_abaaaaa`a\_a`]Y]]`a``\_a]Y\_]\_  
@HWI-EAS443:3:17:49:1960#0/1  
GCCGTAGACATATGCAAGGCAGCAATAGGGTTGAGGATTA  
+HWI-EAS443:3:17:49:1960#0/1  
aa^`S\_baX]]^`[b`a[W¥¥[aZ[\`\_]RRYQXU\_ULZVY]  
@HWI-EAS443:3:17:503:813#0/1  
GTCTTAGTGAAGTATCTCGCGAGTGCAGGACTGCGACATTA  
+HWI-EAS443:3:17:503:813#0/1  
`abaaa`[aaa\_aa`]^a\_P]`X^Z`\_ZM^\_]¥\_Y¥\_  
@HWI-EAS443:3:17:517:772#0/1  
GAATGAAGTGGATGATGGCAATGAGATACCCAATTACAGC  
+HWI-EAS443:3:17:517:772#0/1  
ZLY^`¥``^a`Y``OV^a[]]aaQZ^\_\_WOU]\_YV\_X\_^[]  
@HWI-EAS443:3:17:534:68#0/1  
CATTATTCTCTGTCTGCTGTAATTGGGTATCTCATTGCC  
+HWI-EAS443:3:17:534:68#0/1  
\_MaYZ\_a^`]¥Ta\_UWaRYa^Z^\_\_\_\_\_T[\_\_\_[UY\_S SZ]  
@HWI-EAS443:3:17:577:1862#0/1  
AAAGAAGTGAAGATCTAATGTGCGCAGTCCCGCACTCGCG  
+HWI-EAS443:3:17:577:1862#0/1  
^^^YP^`bW`Ibaa[HWZYX]T`¥`\_[bHVZaXaGU\_aX¥\_  
@HWI-EAS443:3:17:597:719#0/1  
ATTGAATACTGGAGAATTGCCTCTTACCAGTATCCTCAAC  
+HWI-EAS443:3:17:597:719#0/1  
```a`aa`[abaJa\_a\_\_Za\_a```Y`\_^`[Z^a[S`\_aU  
@HWI-EAS443:3:17:610:99#0/1  
TGGGCCATTCTATTCCACCATGTTACGCCAGAGGTGAT

+HWI-EAS443:3:17:610:99#0/1  
`abaa`\_baaaba\_a`ba\_Taa`aaaa`ZaZ^^\_TZWZ  
@HWI-EAS443:3:17:614:95#0/1  
AAAGAACTGAGAGATCTAATGTCGCAGTCCCCTCGACTCGCG  
+HWI-EAS443:3:17:614:95#0/1  
aaaa``\_aaa`a`\_^`a`\_aU\_Y^\_\_U]]Z¥YYUXZ\_WV  
@HWI-EAS443:3:17:675:954#0/1  
TAATGTCGCAGTCCCCTCGACTCGCGAGATACTCACTAAGAC  
+HWI-EAS443:3:17:675:954#0/1  
[[^ab\_\_[\_]]abZ`^`]XX^X\_WM]WOV`R]JVSTXZY\_  
@HWI-EAS443:3:17:694:317#0/1  
CACTCGCGAGATACTCACTAAGACCACTGTGGACCATATG  
+HWI-EAS443:3:17:694:317#0/1  
abaabbbbaaaa`aaaa\_aaaaaaaaa\_\_` `` `¥^]`^a  
@HWI-EAS443:3:17:706:540#0/1  
GAGAGAATAAAGAACTGAGAGATCTAATGTCGCAGTCCC  
+HWI-EAS443:3:17:706:540#0/1  
aaa\_aaaa`a[aaa`¥aa\_a\_a` `a` [ `aa^`a\_\_`Y^^]  
@HWI-EAS443:3:17:706:779#0/1  
CTAATGTGCTAATTGGGCAAGGGGACGTAGTGTGGTAAT  
+HWI-EAS443:3:17:706:779#0/1  
a[I[^a\_[^\_¥\_\_Ya\_b^]Q\_a^V^Va]`a[aZa^WHUY]  
@HWI-EAS443:3:17:730:542#0/1  
CTAATGTCGCAGTCCCCTCGACTCGCGAGATACTCACTAAGA  
+HWI-EAS443:3:17:730:542#0/1  
abbbab]]M\_bb`aaa` `]a`aaaa`a^`^\_aa^^`aa^`  
@HWI-EAS443:3:17:747:270#0/1  
GCGAGATACTCACTAAGACCACTGTGGACCATATGGCCAT  
+HWI-EAS443:3:17:747:270#0/1  
abaaaaaaaa\_\_` `a` [ ]\_Z^a]`a[ `S[\_]]\_][SY  
@HWI-EAS443:3:17:783:1703#0/1  
GGGACGTAGTGTGGTAATGAAACGAAACGGGACTCTA  
+HWI-EAS443:3:17:783:1703#0/1  
ab\_b[\_` ]I^P`VbabV`U\_a^bbX\_\_aaaT¥S^`^`X]  
@HWI-EAS443:3:17:811:1517#0/1  
CATATCTCTTGTCTTCTTTGCCAAAATGAGAAATCCTCT  
+HWI-EAS443:3:17:811:1517#0/1  
a\_aba` ]`b`a`\_¥aaVa`abba`aaaa`aaabaaaa]\_  
@HWI-EAS443:3:17:829:1029#0/1  
CAATCCCCAGTTCTGGAAAAGCACTTTTGCATCTTTTTG  
+HWI-EAS443:3:17:829:1029#0/1  
T`\_S[R`\_aXYZaN¥Z¥[b\_0¥^`QT^[T`G`^JZ^R`Z\_  
@HWI-EAS443:3:17:829:343#0/1  
CTCACTAAGACCACTGTGGACCATATGGCCATAATCAAAA  
+HWI-EAS443:3:17:829:343#0/1  
^[\_]abba`\_Y\_aTaab` `` `a[X]`¥^¥\_]]`\_a[Z` `  
@HWI-EAS443:3:17:866:896#0/1  
GTCCCCTTTTCGTTTCATTACCAACACTACGTCCCCTTGC  
+HWI-EAS443:3:17:866:896#0/1  
a\_aaab\_aaa`a^\_\_^¥^a` ]Y` \_[ `\_\_`^^V^UZ[]W]Z

@HWI-EAS443:3:17:884:1161#0/1  
GTGGGTTCACTTTCAAAGGACAAGCGGATCATCAGTCAA  
+HWI-EAS443:3:17:884:1161#0/1  
`G\_`^`a`aa`^^^U]`]^a[[^a`^¥[\_]^a]¥]X  
@HWI-EAS443:3:17:933:1121#0/1  
AGCACTTTTGCATCTTTTGGAAATGCCTCAAGAGTTGGT  
+HWI-EAS443:3:17:933:1121#0/1  
`WaXZaa`[`aWaZ\_[a\_a`\_a^Xa\_a\_a`\_`^a\_\_X\_\_]R  
@HWI-EAS443:3:17:97:1193#0/1  
CAAGGGAGCAATTTTACAATCCTGGAGCTCTTCTTTCTTC  
+HWI-EAS443:3:17:97:1193#0/1  
a)`^[\_]\_a`aY[a^`^\_`X[[¥[^[ZU^]^^YZ^^^[\_]^  
@HWI-EAS443:3:17:990:1425#0/1  
GTCCCCTTTTCGTTTCATTACCAACTACGTCCCCTTGC  
+HWI-EAS443:3:17:990:1425#0/1  
a]aaabababUa`baYaa`aa\_aa^a\_[aa`][\_]`X^]]  
@HWI-EAS443:3:18:100:1653#0/1  
CTTCATTTGGGAAAACAATTCATAATCACATCCTGTGC  
+HWI-EAS443:3:18:100:1653#0/1  
QYH\_\_[\_]¥[\_]¥W`\_¥`a`^YX`aa\_\_Zbb`^a^`]ZW\_\_  
@HWI-EAS443:3:18:1018:497#0/1  
ATGGACATGATTCCAGAGAGGAATGAACAAGGACAAACCC  
+HWI-EAS443:3:18:1018:497#0/1  
a`bbaXS`a`¥`\_a`a]b[a]\_`abZXG^aaa[\_^a\_ZG^  
@HWI-EAS443:3:18:1023:1360#0/1  
GTGGATGATGGCAATGAGATACCCAATTACAGCAGACAAG  
+HWI-EAS443:3:18:1023:1360#0/1  
`¥`a\_a]`^\_]`\_`^`\_a`^^¥\_\_`^^`\_]]]`^^]^^W  
@HWI-EAS443:3:18:1024:1994#0/1  
GAATAAAAGAAGACTGAGAGATCTAATGTCGCAGTCCCGCAC  
+HWI-EAS443:3:18:1024:1994#0/1  
Z¥bb¥bb¥¥`baa¥[I\_HXabbbaaa^`a`\_Y[aaYa``Q  
@HWI-EAS443:3:18:1037:1231#0/1  
AAAGAAGTGGAGATCTAATGTCGCAGTCCCGCACTCGCG  
+HWI-EAS443:3:18:1037:1231#0/1  
aaa`¥aaa`a`\_`a`]`\_`\_\_\_U^Y]^\_X^^UUWMMW¥XZYX  
@HWI-EAS443:3:18:1039:293#0/1  
ATTCTCTGTCTGCTGTAATTGGGTATCTCATTGCCATCA  
+HWI-EAS443:3:18:1039:293#0/1  
^`]b¥Y¥baZaaaaa^][`b]Y\_`P`][\_VWW`\_TX^X^`  
@HWI-EAS443:3:18:1073:501#0/1  
ATCATTCTCACTTCTCCTCCTGGAGTGTACATCTGCTCC  
+HWI-EAS443:3:18:1073:501#0/1  
a`\_`\_aaba^abaaaaa\_ab`^¥`\_aaa[aa`\_`a`^^Z  
@HWI-EAS443:3:18:1093:1573#0/1  
GAATAAAAGAAGACTGAGAGATCTAATGTCGCAGTCCCGCAC  
+HWI-EAS443:3:18:1093:1573#0/1  
a`aaaaaaa`aaaa`aa`aaaa`\_\_\_a`Y\_`\_]`\_`^`  
@HWI-EAS443:3:18:1116:159#0/1  
TCCTGATGTGACTTTTTGATTATGGCCATATGGTCCACA



@HWI-EAS443:3:18:1264:483#0/1  
GAGAATAAAAGAACTGAGAGATCTAATGTCGCAGTCCCGC  
+HWI-EAS443:3:18:1264:483#0/1  
`ab`abaaabbababaaabaaa\_baaab\_aaa`a^^^`\_  
@HWI-EAS443:3:18:1284:948#0/1  
AAAAGAACTGAGAGATCTAATGTCGCAGTCCCGCACTCGC  
+HWI-EAS443:3:18:1284:948#0/1  
¥a`\_U\_babbbb`\_`a`bbaaba`\_`aa`\_aa^^WVZ`R  
@HWI-EAS443:3:18:1333:205#0/1  
AAAGAACTGAGAGATCTAATGTCGCAGTCCCGCACTCGCG  
+HWI-EAS443:3:18:1333:205#0/1  
^a]\_V\_aaaa\_aaaaYaa\_] ^VYYYYU]VX^NYVYNVX[  
@HWI-EAS443:3:18:1340:1371#0/1  
TTCTGAAGTGGACAGGGCCGAAGGTACCATGTTTCAACCT  
+HWI-EAS443:3:18:1340:1371#0/1  
aa]`X`aaS\_a^aY\_YN¥YS¥UYV^V]^YV[ZYN\_[RKX  
@HWI-EAS443:3:18:1348:948#0/1  
CCATTATTCTTGTCTGCTGTAATTGGGTATCTCATTGC  
+HWI-EAS443:3:18:1348:948#0/1  
a`bbaabbaaaaab`aaa`a^`^aaaa^S\_a\_\_X\_\_a¥  
@HWI-EAS443:3:18:1366:1420#0/1  
GGTGGGTTCACTTTCAAAGGACAAGCGGATCATCAGTCA  
+HWI-EAS443:3:18:1366:1420#0/1  
a`S][¥KYH^[\_`¥QWaZNVNN\_] ^ZQY][NRYLNS\_RLU  
@HWI-EAS443:3:18:1404:916#0/1  
GTTTTCGTTTCATTACCAACTACGTCCCCTTGCCCAAT  
+HWI-EAS443:3:18:1404:916#0/1  
``aaa¥`^X^aa`baZ\_a`\_`aa\_\_a^^\_]¥`\_`WYW]\_¥  
@HWI-EAS443:3:18:1411:1793#0/1  
CCCGTTTTCGTTTCATTACCAACTACGTCCCCTTGCCC  
+HWI-EAS443:3:18:1411:1793#0/1  
a`ab`aba`b[aabbaaaa¥abaaa`b`a]^`\_\_\_\_\_U\_]`  
@HWI-EAS443:3:18:1424:269#0/1  
GAAGGGTATGAAGAATTCACAATGGTTGGGAGAAGAGCAA  
+HWI-EAS443:3:18:1424:269#0/1  
`a`bba^baY`abb`ab\_a\_a`¥a`¥aa¥`X\_\_U`]aW^W  
@HWI-EAS443:3:18:1434:1586#0/1  
GGGCAAGGGGACGTAGTGTGGTAATGAAACGAAAACGGG  
+HWI-EAS443:3:18:1434:1586#0/1  
V\_`bb`bbWZ^`a`Yb`ba¥XXaZ^^b]X`[]ab\_\_a`  
@HWI-EAS443:3:18:1437:1132#0/1  
CAAGAGAATAATGGACATGATTCCAGAGAGGAATGAACAA  
+HWI-EAS443:3:18:1437:1132#0/1  
abb\_^]\_aabVP\_`bYa^a`aZV\_\_^P\_Zaa\_\_a¥^ZZ\_^  
@HWI-EAS443:3:18:1510:1843#0/1  
TCCCGTTTTCGTTTCATTACCAACTACGTCCCCTTGCC  
+HWI-EAS443:3:18:1510:1843#0/1  
aa\_`a\_aaa]\_Y\_a^`\_`^^`aZaV\_\_^^W[Z^¥^ZRZZ  
@HWI-EAS443:3:18:1521:1053#0/1  
CTGTAATTGGGTATCTCATTGCCATCATCCACTTCATTCT

+HWI-EAS443:3:18:1521:1053#0/1  
¥a`aa\_bb``aabaabbabbabZaaabba]b\_ba^aaa`a  
@HWI-EAS443:3:18:1527:1127#0/1  
AAAGAAGTCTAATGTCGAGTCCCGCACTCGCG  
+HWI-EAS443:3:18:1527:1127#0/1  
aaab^a\_ba`a`\_]\_aZa`aa^]\_^`a¥]]Z^ZUY]VR^]  
@HWI-EAS443:3:18:1529:290#0/1  
ATGTCGAGTCCCGCACTCGCGAGATACTACTAAGACCA  
+HWI-EAS443:3:18:1529:290#0/1  
]¥YHZ¥`\_XS0^R^`UZ`X`WZUZUV¥YRRX¥T¥GT¥V  
@HWI-EAS443:3:18:152:823#0/1  
ATGTCGAGTCCCGCACTCGCGAGATACTACTAAGACCA  
+HWI-EAS443:3:18:152:823#0/1  
aaa`^a`]][^aY^0[¥`R]¥¥Y[[^Y^¥`\_][Y`^^^][¥  
@HWI-EAS443:3:18:1532:379#0/1  
AAAAGAAGTCTAATGTCGAGTCCCGCACTCGCG  
+HWI-EAS443:3:18:1532:379#0/1  
aaaa````\_aab^aa`]]`a\_abXZa[`[YZ\_\_][RUNZU[W  
@HWI-EAS443:3:18:1592:758#0/1  
CCGCACTCGCGAGATACTACTAAGACCACTGTGGACCAT  
+HWI-EAS443:3:18:1592:758#0/1  
abbbbbbbbabaaaa\_\_aaaXaa``\_\_a\_aaNa\_\_¥Y\_\_  
@HWI-EAS443:3:18:1649:550#0/1  
GAATAAAGAAGTCTAATGTCGAGTCCCGCAC  
+HWI-EAS443:3:18:1649:550#0/1  
\_T¥aY]¥^`R\_Y]aaYab\_]GZ```[`SP[]¥YKDHQVWU  
@HWI-EAS443:3:18:1664:1055#0/1  
TATAAACACTGCCTGTTCCGCCGCTACTGGGAGAAACCT  
+HWI-EAS443:3:18:1664:1055#0/1  
`b`¥\_\_\_^`a]¥`\_¥\_aa[`[aa^]WOYX[U]]][BBBBB  
@HWI-EAS443:3:18:1687:1382#0/1  
AGTGAGTATTGACCGATTTTTAAGGGTTAGAGATCAAAGA  
+HWI-EAS443:3:18:1687:1382#0/1  
[¥[`UV`\_a\_[YV[¥W^`a\_XXS]]]V¥U\_\_``]QH``bX  
@HWI-EAS443:3:18:1697:753#0/1  
AAAAGAAGTCTAATGTCGAGTCCCGCACTCGCG  
+HWI-EAS443:3:18:1697:753#0/1  
`babaaa`aba`````\_aa`aa^[a\_\_\_^]V]X^^]]]\_V  
@HWI-EAS443:3:18:1733:250#0/1  
CCGCACTCAGAATGAAGTGGATGATGGCAATGAGATACCC  
+HWI-EAS443:3:18:1733:250#0/1  
W\_]bbbZb`bb\_bbaUa`bb¥abXaaa¥^abaa\_YG^^[P  
@HWI-EAS443:3:18:1753:322#0/1  
ATGCGGGATGTGCTTGGGACATTTGACACTGTCCAAATAA  
+HWI-EAS443:3:18:1753:322#0/1  
aaa`aa][`U``\_YQ]a]\_^aZ\_\_^S¥]\_\_][WSU\_^^\_]`  
@HWI-EAS443:3:18:175:1365#0/1  
AGGCATTTCCAAAAGATGCAAAAAGTGTCTTTTCCAGAACT  
+HWI-EAS443:3:18:175:1365#0/1  
a`\_aa`\_`a\_a`\_a\_\_^]\_^`^^`\_]`Z\_^\_]\_\_`[\_`\_]`



@HWI-EAS443:3:18:176:555#0/1  
AAGAAGTGGAGATCTAATGTCGCAGTCCCGCACTCGCGA  
+HWI-EAS443:3:18:176:555#0/1  
^X` [a^`a` ]]b\_¥\_KS\_bXbaa`a^YZa`^X`a[]YRS  
@HWI-EAS443:3:18:198:2031#0/1  
CAACATCATCATTTCTCACTTCTCCTCCTGGAGTGTACAT  
+HWI-EAS443:3:18:198:2031#0/1  
U^[aa^a`T\_¥S\_Z^^`\_[XY]b\_ZWaaa`a¥]H]Wba\_Z  
@HWI-EAS443:3:18:206:122#0/1  
CAGTGGTCTTAGTGAGTATCTCGCGAGTGCGGGACTGCGA  
+HWI-EAS443:3:18:206:122#0/1  
aaa^baXabb`^G`a`a`¥a^LYMSXFV\_^aXLYGRR¥X  
@HWI-EAS443:3:18:249:942#0/1  
GTCGCAGTCCCGCACTCGCGAGATACTCACTAAGACCACT  
+HWI-EAS443:3:18:249:942#0/1  
aT^`^^[LY[YY^V`P[^¥[PPTQVUU[VUV^¥USSVVWT  
@HWI-EAS443:3:18:26:726#0/1  
GACATTTGACACTGTCCAAATAATAAACTTCTCCCCTTT  
+HWI-EAS443:3:18:26:726#0/1  
a¥[\_]^a][Z]^`]XY[^\_¥¥[]U[NZ\_¥[]T\_¥\_] [U^  
@HWI-EAS443:3:18:288:1160#0/1  
ATGCAATCCTCTTGTGAGAATACCATGGCCACAATTATTG  
+HWI-EAS443:3:18:288:1160#0/1  
```aaa``\_a\_\_\_\_]^]aX^^a\_\_`^YFS\_\_^]`]W\_^^^  
@HWI-EAS443:3:18:303:41#0/1  
CCCGTTTTCGTTTTATTACCAACTACGTCCCCTTGCCC  
+HWI-EAS443:3:18:303:41#0/1  
abbb\_aababaaa[aaaa^aa¥aaa\_aa]\_\_\_\_U^\_Y\_^  
@HWI-EAS443:3:18:303:859#0/1  
AGGGGACGTAGTGTGGTAATGAAACGAAAACGGGACTCT  
+HWI-EAS443:3:18:303:859#0/1  
\_aaaaabb¥Z]^a\_abaSL^¥TX`a\_\_ZX``Z\_\_^SFSX^  
@HWI-EAS443:3:18:321:1799#0/1  
CTGCCTTGCATATGTCTACGGCTTGTTCCTCAGTTGGATT  
+HWI-EAS443:3:18:321:1799#0/1  
aY]aa\_a`a\_a`\_¥^a^`\_`\_]`\_WDKOLVVVVQSXFRBBB  
@HWI-EAS443:3:18:324:262#0/1  
GTCCCCTTTTCGTTTTATTACCAACTACGTCCCCTTGC  
+HWI-EAS443:3:18:324:262#0/1  
a\_aaa\_N]^`aab^aaaaaa`a`a\_\_`aa\_\_]V[\_]\_]V]\_  
@HWI-EAS443:3:18:328:967#0/1  
CATTATTCTCTTGTCTGCTGTAATTGGGTATCTCATTGCC  
+HWI-EAS443:3:18:328:967#0/1  
TTba\_a`\_aa^\_]\_bbbbaaa\_^baa\_a]baaaa]aa[a`  
@HWI-EAS443:3:18:347:1399#0/1  
ATCTGGGGTGGAGTCTGCTGCTCCTGAGAGATTCTCATT  
+HWI-EAS443:3:18:347:1399#0/1  
aabbaaXQZ\_XY[U\_`\_POLYa^\_¥`a`\_]\_]\_a^\_¥`\_\_^  
@HWI-EAS443:3:18:355:294#0/1  
TGTCGCAGTCCCGCACTCGCGAGATACTCACTAAGACCAC

+HWI-EAS443:3:18:355:294#0/1  
\_\_`aaa^¥aaaa`a[Y¥a\_\_]V\_[[¥\_Z`¥^]`^`¥YG¥^¥  
@HWI-EAS443:3:18:396:1004#0/1  
GGAGAGACGAGCAGTCAATTGCTGAGGCAATAATTGTGGC  
+HWI-EAS443:3:18:396:1004#0/1  
\_aaa\_]`^a¥`a\_a\_aZVU\_Y`\_\_Y[\_a\_]\_a\_\_QQVRUY  
@HWI-EAS443:3:18:438:649#0/1  
GAATAAAAGAAGTCTGAGAGATCTAATGTCGCAGTCCCGCAC  
+HWI-EAS443:3:18:438:649#0/1  
a\_M`]aaab^]a]V¥]`^]a^``\_\_aV`````U[^U`PU¥  
@HWI-EAS443:3:18:449:220#0/1  
CCACTGTGGACCATATGGCCATAATCAAAAAGTACACATC  
+HWI-EAS443:3:18:449:220#0/1  
a```^]W```\_`a\_\_a`\_\_^^YRZTQ\_]\_\_[\_U]X]]WXV  
@HWI-EAS443:3:18:527:201#0/1  
AAAGAAGTCTGAGAGATCTAATGTCGCAGTCCCGCACTCGCG  
+HWI-EAS443:3:18:527:201#0/1  
aaaaaaaaabb\_aaaaaaa]\_a\_aaR`]\_^\_]¥]Y]X^  
@HWI-EAS443:3:18:536:1594#0/1  
GCCGGCTACTGGGAGAAACCTTGTTCACGGACCAATTCT  
+HWI-EAS443:3:18:536:1594#0/1  
abb^ba`bY`S^`]a\_aa`\_\_\_`Q`a`\_]a`[T[\_`]]`\_`  
@HWI-EAS443:3:18:573:875#0/1  
GGATTTCTCATTGTTGGGCAAAGAAGACAAGAGATATGGCC  
+HWI-EAS443:3:18:573:875#0/1  
`b\_Ya`aa`a`\_aaa`aa^aaa`V¥\_`aWq^`\_Xa^^^  
@HWI-EAS443:3:18:576:1619#0/1  
GGGTTCTGCTCGCTGGTTGCCCTATTGACAAAGTTCAGAT  
+HWI-EAS443:3:18:576:1619#0/1  
a]^M^baa¥aQ`aa^Za^\_aaZ`VY¥]aXaG\_^\_Z\_]`  
@HWI-EAS443:3:18:593:575#0/1  
CTGTAATTGGGTATCTCATTGCCATCATCCACTTCATTCT  
+HWI-EAS443:3:18:593:575#0/1  
aaaVS\_Y\_[X`]`]^]^[^]\_\_`¥ZZ\_\_a]^^^U[\_VVY  
@HWI-EAS443:3:18:670:423#0/1  
CTTCTTTCTTGACTGATGATCCGCTTGTCTTTTAAAAGT  
+HWI-EAS443:3:18:670:423#0/1  
abbbbbbbbababbbbb`aabababaa`abbbbaaa]  
@HWI-EAS443:3:18:718:352#0/1  
CGTTTTCGTTTCATTACCAACTACTGCCCTTGCCCAA  
+HWI-EAS443:3:18:718:352#0/1  
`b`aba^b\_aaaabaa`a`aU\_\_^aZ`^XZ^^YV\_UQT[`  
@HWI-EAS443:3:18:72:1122#0/1  
TGTCTGCTGTAATTGGGTATCTCATTGCCATCATCCACTT  
+HWI-EAS443:3:18:72:1122#0/1  
aaa`]baab^W[a`aa\_a```aaa`aaa\_`^a]Z¥`\_  
@HWI-EAS443:3:18:74:1946#0/1  
ATGGAGAGAATAAAAGAAGTCTGAGAGATCTAATGTCGCAGT  
+HWI-EAS443:3:18:74:1946#0/1  
]VZYU¥XZ\_Y^\_Z¥¥]aa`Z]¥`a`Y`Y`]`OWYDY\_\_\_[U

@HWI-EAS443:3:18:755:1619#0/1  
CATCATTTCTCACTTCTCCTCCTGGAGTGTACATCTGCTC  
+HWI-EAS443:3:18:755:1619#0/1  
aa\_aaaa`T[\_Za[W]a\_[[\_¥^`RZP[¥\_¥T[Z^¥Q  
@HWI-EAS443:3:18:766:712#0/1  
GGAAAATTGCATCCTACTCTGTTCTGGTGGAGCAGCAGCA  
+HWI-EAS443:3:18:766:712#0/1  
\_U`aUS^]¥[^\_\_`[\_\_\_\_]`^U`)]XS\_]^[^]]W[VW\_US  
@HWI-EAS443:3:18:814:92#0/1  
CTCCCCAAGAAGTCAGTGAAACGCAAGGAAGTGAAGAAGTT  
+HWI-EAS443:3:18:814:92#0/1  
aababb`aba`a^a`baa\_a`^a`\_ba]^Zaa\_a`\_aW\_  
@HWI-EAS443:3:18:814:966#0/1  
GGCACATTTCCAAGAGAGATGCTAATGGGTCTGCTGACAC  
+HWI-EAS443:3:18:814:966#0/1  
aaaaaaaaaaaa¥][ZR^\_a`\_¥MZ\_a\_]WZZ^YW¥]V]S  
@HWI-EAS443:3:18:81:1784#0/1  
AAAAGAAGTGAAGATCTAATGTCGCAGTCCCGCACTCGC  
+HWI-EAS443:3:18:81:1784#0/1  
abaaY`aaa\_a\_a¥]aaa\_\_`\_]`\_a`\_Y`Y\_]`\_`ZVZV  
@HWI-EAS443:3:18:822:347#0/1  
TCGCGAGATACTCACTAAGACCACTGTGGACCATATGGCC  
+HWI-EAS443:3:18:822:347#0/1  
ab`baa`\_a\_aa\_a`aaaa`\_V``]^\_`^a^]\_`\_`\_¥  
@HWI-EAS443:3:18:833:1406#0/1  
GGAGGTTGCCGTTAGCACTTCTTCTTCTTCTTCTGACTGA  
+HWI-EAS443:3:18:833:1406#0/1  
aaa\_[R^X]ab^Z^YU\_VX\_\_`^a`^[^a`[\_^Z\_¥\_Z\_  
@HWI-EAS443:3:18:840:789#0/1  
AAAGAAGTGAAGATCTAATGTCGCAGTCCCGCACTCGCG  
+HWI-EAS443:3:18:840:789#0/1  
aZ\_XNO[\_^`\_]^[`\_`\_`[¥X[¥\_[R¥`XR[¥N[UW^WW  
@HWI-EAS443:3:18:868:816#0/1  
GGAATAGGAATGGCCCAACAACAAGTACAGTTCATTACCC  
+HWI-EAS443:3:18:868:816#0/1  
X\_V¥ab\_Z\_bY^`YQS]I¥W]^V`V^UF\_PT¥aaWI¥[JS  
@HWI-EAS443:3:18:869:218#0/1  
CCCTAACTGCCTTGATCATGCAATCCTCTTGTGAGAATAC  
+HWI-EAS443:3:18:869:218#0/1  
`aaababbbbaabaaaabaa``aaaaaaaaaaa]a^\_``^  
@HWI-EAS443:3:18:944:1299#0/1  
ATTTTACAATCCTGGAGCTCTTCTTCTTCTTCTTGTTA  
+HWI-EAS443:3:18:944:1299#0/1  
abaaababaa``^`\_Xa^a^]aZ``a^`^^`\_\_`\_`\_`^]a  
@HWI-EAS443:3:18:944:1811#0/1  
TGCTGTAATTGGGTATCTCATTGCCATCATCCACTTCATT  
+HWI-EAS443:3:18:944:1811#0/1  
aa`^b\_aa^b[a`^b\_F\_XaX\_`]¥a^WaSZ]a\_`¥`\_`^\_  
@HWI-EAS443:3:18:948:46#0/1  
ATCAAACCTTTGGTCAACATCATCATTCTCACTTCTCCTC

+HWI-EAS443:3:18:948:46#0/1  
abababbababbaaaaaaaaab\_aaaa`a\_``aa\_`¥Y\_\_  
@HWI-EAS443:3:18:968:222#0/1  
CAAGGGACGTGCTGGGAGCAGATGTACACTCCAGGAGGAG  
+HWI-EAS443:3:18:968:222#0/1  
``UaZaS^bZba\_baaW\_[V\_\_WUW¥¥V^NNUMaBBBBBB  
@HWI-EAS443:3:18:994:429#0/1  
AAGAAGTGGAGATCTAATGTCGCAGTCCCGCACTCGCGA  
+HWI-EAS443:3:18:994:429#0/1  
aaa\_a`aaaaab`a``aaaa^`a\_`a^`aa\_aU`^``¥\_`^  
@HWI-EAS443:3:19:1032:933#0/1  
AAAAGAAGTGGAGATCTAATGTCGCAGTCCCGCACTCGC  
+HWI-EAS443:3:19:1032:933#0/1  
^bbbaa`\_baaababaaaaaaa]`\_``^¥\_a\_aR\_\_\_\_¥  
@HWI-EAS443:3:19:1059:727#0/1  
TAATGTCGCAGTCCCGCACTCGCGAGATACTCACTAAGAC  
+HWI-EAS443:3:19:1059:727#0/1  
aa^]b\_``aaa\_\_aaaa]`\_^`^`¥`¥\_[Z`¥¥[\_\_\_\_`]^  
@HWI-EAS443:3:19:1062:787#0/1  
AATAAAGAAGTGGAGATCTAATGTCGCAGTCCCGCACT  
+HWI-EAS443:3:19:1062:787#0/1  
\_\_\_\_]Y]¥[a[FWU\_XUbXX^aRN[a][Z]Y[¥Y\_[¥¥FLL  
@HWI-EAS443:3:19:1072:874#0/1  
ATGGTATTCTCACAAGAGGATTGCATGATCAAGGCAGTTA  
+HWI-EAS443:3:19:1072:874#0/1  
aa``[bba\_`aaaa]ba`^aaaa\_`aa^``aaa\_a\_aH\_Y  
@HWI-EAS443:3:19:1076:130#0/1  
GGCACATCTGGGGTGGAGTCTGCTGTCCTGAGAGGATTTC  
+HWI-EAS443:3:19:1076:130#0/1  
`baaa``aa`aa]Naa^aS¥\_`^`^aU^Z\_aR\_¥a`X¥`[W  
@HWI-EAS443:3:19:112:1618#0/1  
GTACTTTTTGATTATGGCCATATGGTCCACAGTGGTCTTA  
+HWI-EAS443:3:19:112:1618#0/1  
a]a`a\_``\_¥aa^[MJJ]]PX]XP\_R``[[[]SLXMRW¥Z¥  
@HWI-EAS443:3:19:1138:279#0/1  
GCTGTCCTGAGAGGATTTCTCATTGTTGGCAAAGAAGACA  
+HWI-EAS443:3:19:1138:279#0/1  
a`ab`\_\_aa\_a\_aa^\_\_`^`\_\_`a\_a\_``\_]`\_`^`\_]`\_`^Y^  
@HWI-EAS443:3:19:1150:457#0/1  
GCAGACAAGAGAATAATGGACATGATTCCAGAGAGGAATG  
+HWI-EAS443:3:19:1150:457#0/1  
]a`ba\_b`bbaababbabaa^bbabaa^aXbaa\_`a\_a\_a  
@HWI-EAS443:3:19:1163:936#0/1  
CAATTTTACAATCCTGGAGCTCTTCTTTCTTCTTTTGT  
+HWI-EAS443:3:19:1163:936#0/1  
a\_\_`Z\_b`ab\_b]a\_`^abY\_N^a`a\_abYaab][aab\_`  
@HWI-EAS443:3:19:1201:1430#0/1  
AAAGAAGTGGAGATCTAATGTCGCAGTCCCGCACTCGCG  
+HWI-EAS443:3:19:1201:1430#0/1  
aaba`aaaaaaa\_a`]aa``a^`^`\_`T\_\_]\_[U[]¥\_] ]

@HWI-EAS443:3:19:1215:1465#0/1  
GAATAAAAGAACTGAGAGATCTAATGTCGCAGTCCCGCAC  
+HWI-EAS443:3:19:1215:1465#0/1  
aab`abbbaa`]ab``aaaaaaabb`\_a\_aa^`\_aN\_^¥  
@HWI-EAS443:3:19:1227:2019#0/1  
TGAGAAATGATGATGTTGACCAAAGTTTGATTATCGCTGC  
+HWI-EAS443:3:19:1227:2019#0/1  
`a^^Y]TZ^^W^^\_¥H]ab``ZU^a\_WZa\_¥^`Y\_ZR\_^W  
@HWI-EAS443:3:19:1244:1998#0/1  
ATCTAATGTCGCAGTCCCGCACTCGCGAGATACTCACTAA  
+HWI-EAS443:3:19:1244:1998#0/1  
a¥`aab`aX[¥aaa^SX[`SN¥ZZP^TQJN¥Q^U]NV\_B  
@HWI-EAS443:3:19:1265:1741#0/1  
CTTGTTTTACGGACCAATTCTCTTTCTAGCATGTACGCCA  
+HWI-EAS443:3:19:1265:1741#0/1  
aaba`bbba`baaa`aab^aaaa`aaa`\_aa^a\_\_^^`  
@HWI-EAS443:3:19:1275:1478#0/1  
GTCCCGTTTTCGTTTCATTACCAACTACTGCCCTTGC  
+HWI-EAS443:3:19:1275:1478#0/1  
^JX^P¥\_]¥aaaQba`abaaaY`aR\_a\_a^a\_Ya^a\_0\_S  
@HWI-EAS443:3:19:1297:312#0/1  
CATCATATTTCTCACTTCTCCTCCTGGAGGTACATCTG  
+HWI-EAS443:3:19:1297:312#0/1  
\_Y`a¥¥bbabbbbaaabab^^a`aabbaa\_a^`aa[a]a  
@HWI-EAS443:3:19:1305:816#0/1  
ATCTAATGTCGCAGTCCCGCACTCGCGAGATACTCACTAA  
+HWI-EAS443:3:19:1305:816#0/1  
aaaaaaaa`\_a\_aaU[aZ^¥UXZ[\_^^Z`WZ¥¥Z[^V¥¥^  
@HWI-EAS443:3:19:1317:752#0/1  
TGATTCCAGAGAGGAATGAACAAGGACAAACCCTCTGGAG  
+HWI-EAS443:3:19:1317:752#0/1  
[[NX[\_\_\_^WR^\_Z\_\_\_¥XY^¥V¥\_O]]X¥a¥[]WW[\_][H^  
@HWI-EAS443:3:19:1331:419#0/1  
CGCACTCGCGAGATACTCACTAAGACCACTGTGGACCATA  
+HWI-EAS443:3:19:1331:419#0/1  
aaa`abbabaabaaa`baa\_baaa¥]\_a`\_a`aa`ZW¥\_\_  
@HWI-EAS443:3:19:1435:1025#0/1  
GAGAGATCTAATGTCGCAGTCCCGCACTCGCGAGATACTC  
+HWI-EAS443:3:19:1435:1025#0/1  
``aa`\_a\_aaaba\_^a`\_\_]Z¥¥YQNNUZUR\_W^QWQNB  
@HWI-EAS443:3:19:1513:1149#0/1  
CTAATGTCGCAGTCCCGCACTCGCGAGATACTCACTAAGA  
+HWI-EAS443:3:19:1513:1149#0/1  
abbbbaaaaaabb\_\_^`a`a^a\_[`a\_aVQXT`^\_Ua\_S\_B  
@HWI-EAS443:3:19:1554:720#0/1  
AAAAGGACAAGCGGATCATCAGTCAAGAAAGAAGAAG  
+HWI-EAS443:3:19:1554:720#0/1  
U^¥]¥VI`SV¥\_ba]^`\_^Y\_^`a^Z^)``aZ]b^ORZ¥]  
@HWI-EAS443:3:19:1584:298#0/1  
CAACAAGGCAACCAAACGACTTACAGTTCTTGAAAGGAT

+HWI-EAS443:3:19:1584:298#0/1  
`bbabbbba\_aa`Yaaa\_aaM[aa\_aaaa]aaba¥\_\_a^a\_  
@HWI-EAS443:3:19:1595:567#0/1  
CAGCTGTGACTCTGATGTCAGTATTCTTGCCCCACTTCA  
+HWI-EAS443:3:19:1595:567#0/1  
a`bbaba`b]b`b^aU¥`aY`aa\_`^^`Y`\_\_\_\_[\_]SZ  
@HWI-EAS443:3:19:159:1304#0/1  
GGGGACGTAGTGTGGTAATGAAACGAAAACGGGACTCTA  
+HWI-EAS443:3:19:159:1304#0/1  
`a`\_aba\_a```X`[aI\_a^\_baW^^aaa\_^aY¥]]\_^W  
@HWI-EAS443:3:19:1645:628#0/1  
CTTTGCTGCTGCTCCACCAGAACAGAGTAGGATGCAATTT  
+HWI-EAS443:3:19:1645:628#0/1  
abbbbabbbaba`bbbb`abbab\_ababab]baabTbabbb  
@HWI-EAS443:3:19:1647:1511#0/1  
TGGGTATCTCATTGCCATCATCCACTTCATTCTGAGTGCG  
+HWI-EAS443:3:19:1647:1511#0/1  
aaa`Ua^^a`aa[a^Y^^[\_`X\_a^\_a]\_`a[`[VXW`V[  
@HWI-EAS443:3:19:164:1263#0/1  
CTCACTAAGACCACTGTGGACCATATGGCCATAATCAAAA  
+HWI-EAS443:3:19:164:1263#0/1  
a\_\_baaba`baaba`¥]a^`ab`]a`Y\_```¥`a\_\_\_aaa  
@HWI-EAS443:3:19:1689:1823#0/1  
GAATGAAGTGGATGATGGCAATGAGATACCCAATTACAGC  
+HWI-EAS443:3:19:1689:1823#0/1  
abbbbbb`b[baabaaa\_baa`aa`[Y`]T]\_aa^ba\_`\_K  
@HWI-EAS443:3:19:173:103#0/1  
ATCTAATGTCGCAGTCCCGCACTCGCGAGATACTCACTAA  
+HWI-EAS443:3:19:173:103#0/1  
aaaaaa\_aZ^^a`^^¥`^^Y\_¥[V[[[[VWWWVV¥WYYU  
@HWI-EAS443:3:19:1740:346#0/1  
AAAGAAGTGGAGATCTAATGTCGCAGTCCCGCACTCGCG  
+HWI-EAS443:3:19:1740:346#0/1  
aaabZ¥^aba]aa^`^aaaab]a^Y`a\_^ZW[V\_]`^]`^V^  
@HWI-EAS443:3:19:1765:1244#0/1  
GCTGTCTGAGAGATTTCTCATTGTTGGGCAAAGAAGACA  
+HWI-EAS443:3:19:1765:1244#0/1  
a`aa\_aa`\_b`a\_\_a`\_\_^]aa`a\_`^^`\_]a\_^\_`^V\_  
@HWI-EAS443:3:19:1772:179#0/1  
AAAGAAGTGGAGATCTAATGTCGCAGTCCCGCACTCGCG  
+HWI-EAS443:3:19:1772:179#0/1  
]b^¥Z]P^\_bb`b\_HYb`aabTN`M`b¥X¥N\_^TLXQ]N\_  
@HWI-EAS443:3:19:195:1738#0/1  
TAAAAGAAGTGGAGATCTAATGTCGCAGTCCCGCACTCG  
+HWI-EAS443:3:19:195:1738#0/1  
`a\_VaT^\_[WUX]\_U]ba^\_bbb¥bbbbbb`a```^GX`\_a  
@HWI-EAS443:3:19:21:387#0/1  
AAAGAAGTGGAGATCTAATGTCGCAGTCCCGCACTCGCG  
+HWI-EAS443:3:19:21:387#0/1  
aa`aaaaaaa`aaaa`aa`ab^aaaaa[[[]`aY`^]]]\_

@HWI-EAS443:3:19:293:689#0/1  
AAGAAGAGCTCCAGGATTGTAATAATTGCTCCCTTGATGGT  
+HWI-EAS443:3:19:293:689#0/1  
aZ\_^W\_YZ`aaa`a`R]\_\_]\`a\_\_\_a\_\_a`X]\_\_a^^[ZT  
@HWI-EAS443:3:19:294:962#0/1  
GGGGACGTAGTGTGGTAATGAAACGAAAACGGGACTCTA  
+HWI-EAS443:3:19:294:962#0/1  
aaa]U\_aZ[a[a^aa\_V\_\_`\_`aaQ\_\_\_`a[^\_^Y^^]\_  
@HWI-EAS443:3:19:313:455#0/1  
GTTTGTATCAACTCTCCTCCTTATTTTAACTTGATTTCTG  
+HWI-EAS443:3:19:313:455#0/1  
\_S`V\_¥`]F¥Waa^HOU]S`\_WOXLLV`YWX`^XMTXRYW  
@HWI-EAS443:3:19:334:2006#0/1  
AAAAGAAGCTGAGAGATCTAATGTCGCAGTCCCGCACTCGC  
+HWI-EAS443:3:19:334:2006#0/1  
aaaa[\_`\_`\_`^a\_\_\_]aa```ZW\_T```Y^\_\_¥Z¥Y[TW  
@HWI-EAS443:3:19:348:1559#0/1  
ATAAAAAGAACTGAGAGATCTAATGTCGCAGTCCCGCACTC  
+HWI-EAS443:3:19:348:1559#0/1  
^\_b`WYRZ\_ZPW`[^aZb`]b]a^`U`]IX[\_R\_`[RGO  
@HWI-EAS443:3:19:356:1249#0/1  
GCACTCGCGAGATACTCACTAAGACCACTGTGGACCATAT  
+HWI-EAS443:3:19:356:1249#0/1  
[bbbabbaa``[bbbbbabbb`bbabbaaaa]aab`aba  
@HWI-EAS443:3:19:357:1308#0/1  
AAAAGAAGCTGAGAGATCTAATGTCGCAGTCCCGCACTCGC  
+HWI-EAS443:3:19:357:1308#0/1  
]a\_XQH]a¥F¥aa]Zb`U[HWVMbab`LHSOQ`N`\_HFHX  
@HWI-EAS443:3:19:371:1440#0/1  
GAATTGGTCCGTAAAACAAGTTTCTCCAGTAGCCGGCG  
+HWI-EAS443:3:19:371:1440#0/1  
aaaa``][aab¥aaaa\_aaa`Q[\_`\_a`a`WU\_\_`\_`¥^\_  
@HWI-EAS443:3:19:379:697#0/1  
GAATGTGAGAGGATCAGGGTTGAGGATACTGGTAAGAGGC  
+HWI-EAS443:3:19:379:697#0/1  
a\_aaa^b\_aZa`a`\_`aaaSa`^a\_\_\_\_\_Xa\_aa`¥^^][  
@HWI-EAS443:3:19:380:914#0/1  
CAACACTTCAATATAAACACTGCCTGTTCCGCCGGCTACT  
+HWI-EAS443:3:19:380:914#0/1  
a\_¥U\_^[Y`Y\_S^]XRJWUQXVS[[^ZH]JY^^UJJGWYB  
@HWI-EAS443:3:19:390:79#0/1  
ACATTGTGGGATCTTGTGACCATTGAATTTTCACAATTTTC  
+HWI-EAS443:3:19:390:79#0/1  
aaaaa`^aa`\_a¥`Xa[\_`\_^\_\_\_\_\_a\_S\_a``^^\_^]\_XW[  
@HWI-EAS443:3:19:391:1221#0/1  
CTGTAATTGGGTATCTCATTGCCATCATCCACTTCATTCT  
+HWI-EAS443:3:19:391:1221#0/1  
aba`abbbba`bbbbbbbabbbabbbbaabaaabbaaa  
@HWI-EAS443:3:19:400:1367#0/1  
CGCGAGATACTCACTAAGACCACTGTGGACCATATGGCCA

+HWI-EAS443:3:19:400:1367#0/1  
a`a`XY¥[`aa``[[\_Y``\_\_a\_S[T\_\_\_\_^]X[^^^  
@HWI-EAS443:3:19:433:547#0/1  
TGTTCCGCCGGCTACTGGGAGAAACCTTGTTTTACGGACC  
+HWI-EAS443:3:19:433:547#0/1  
a`aaa`\_¥a\_^a`WW]a^U^P[[J^JX\_P]a]¥T` [TDX  
@HWI-EAS443:3:19:443:252#0/1  
ATGAACAAGGACAAACCCTCTGGAGCAAAACAAACGATGC  
+HWI-EAS443:3:19:443:252#0/1  
a\_aaa\_a`a¥`\_aaX^¥\_\_U\_\_^]\_R^^^\_X\_]X]]YY^U  
@HWI-EAS443:3:19:473:101#0/1  
ATTCCAGAGAGGAATGAACAAGGACAAACCCTCTGGAGCA  
+HWI-EAS443:3:19:473:101#0/1  
aba¥T\_a^aXab]`\_aaa`\_aa\_¥\_a]\_UVZ^\_\_`\_0\_V]  
@HWI-EAS443:3:19:485:610#0/1  
GTTTTCGTTTCATTACCAACACTACGTCCCCTTGCCCAAT  
+HWI-EAS443:3:19:485:610#0/1  
`P\_]` `TR`¥`¥` [YUZ^^[^WX[XR¥NXZXTTRWBBBB  
@HWI-EAS443:3:19:502:68#0/1  
CATTTCTCACTTCTCCTCCTGGAGTGTACATCTGCTCCCA  
+HWI-EAS443:3:19:502:68#0/1  
aab^^Ybbbabbbaba\_bba`baUa\_a^bb`^aa]U^a`a  
@HWI-EAS443:3:19:513:1367#0/1  
CGCACTCGCGAGATACTACTAAGACCACTGTGGACCATA  
+HWI-EAS443:3:19:513:1367#0/1  
aa`^aabaaaa`\_aa`aaa`aa^aaaa\_]`Za`a¥]`  
@HWI-EAS443:3:19:517:1697#0/1  
GCTGTAATTGGGTATCTCATTGCCATCATCCACTTCATTC  
+HWI-EAS443:3:19:517:1697#0/1  
aaa`\_b`^aa^a0`]a\_a`¥a\_aa`^aa¥\_]` `\_\_\_\_^\_^  
@HWI-EAS443:3:19:539:1555#0/1  
CTATTGACAAAGTTCAGATCGCCCCTAACTGCCTTGATCA  
+HWI-EAS443:3:19:539:1555#0/1  
a^J\_]`¥¥a^a[\_ZZ\_a\_]\_\_^U¥]U]`X` [[FR`XZLL]  
@HWI-EAS443:3:19:540:638#0/1  
GGAATGAACAAGGACAAACCCTCTGGAGCAAAACAAACGA  
+HWI-EAS443:3:19:540:638#0/1  
abaabaa\_aaaaaaab]a\_aaa`aa\_\_a`aa`a^aaa^`a  
@HWI-EAS443:3:19:616:1729#0/1  
AAAAGAAGTGGAGATCTAATGTCGCAGTCCCGCACTCGC  
+HWI-EAS443:3:19:616:1729#0/1  
`Uba¥]^aY`a[a\_a¥`^aaaa^a¥`a`¥`^a¥`]\_UYW\_  
@HWI-EAS443:3:19:619:557#0/1  
CGCGAGATACTACTAAGACCACTGTGGACCATATGGCCA  
+HWI-EAS443:3:19:619:557#0/1  
abbbababbabbaaaaba`aaa`aa\_a\_\_aaa\_a``\_]`\_`  
@HWI-EAS443:3:19:61:1506#0/1  
GAACTGTACTTGTGTTGGCCATTCTTCCACCATGT  
+HWI-EAS443:3:19:61:1506#0/1  
\_aba\_`V]`baaaaba`^aYa]aaaaaaaa]a\_aaaa\_



@HWI-EAS443:3:19:628:768#0/1  
ACAGCACACAGATTGGAGGAGTAAGGATGGTGGACATCCT  
+HWI-EAS443:3:19:628:768#0/1  
aa^aaaaaaaa\_aaa]¥a\_\_`^a`^`\_a\_¥```¥`^¥`\_`  
@HWI-EAS443:3:19:630:1146#0/1  
AAGGCAACCAAACGACTTACAGTTCTTGGAAAGGATGCAG  
+HWI-EAS443:3:19:630:1146#0/1  
aa¥U\_bb`)]`b`^aa`a`a`a\_a`a`a`X`aa¥¥a\_[a  
@HWI-EAS443:3:19:640:157#0/1  
TACGCCACCATCAAGGGAGCAATTTTACAATCCTGGAGCT  
+HWI-EAS443:3:19:640:157#0/1  
a¥\_U][`Y`]Uaa`)]L][¥`\_`a`a[aa\_¥`U\_]W^]`  
@HWI-EAS443:3:19:663:1231#0/1  
TCCCGTTTTCGTTTCATTACCAACTACGTCCCCTTGCC  
+HWI-EAS443:3:19:663:1231#0/1  
abaaaX\_]\_]\_[U`^`b]¥b`\_`b`\_a[TZ[`ZaVT[R]\_Q]  
@HWI-EAS443:3:19:677:557#0/1  
ATCAAGGGAGCAATTTTACAATCCTGGAGCTCTTCTTCT  
+HWI-EAS443:3:19:677:557#0/1  
^ba]^`a^Tba\_]\_]`Uaaa^^¥][a`T¥Z^^^[[a^`R^  
@HWI-EAS443:3:19:711:1155#0/1  
AAAGAAGTGGAGATCTAATGTGCGAGTCCCGCACTCGCG  
+HWI-EAS443:3:19:711:1155#0/1  
aZQW]^a[aaa`\_]\_]a`aaa]\_a]a`¥`\_ZQZ]\_X][`]  
@HWI-EAS443:3:19:775:1035#0/1  
AAAAGAAGTGGAGATCTAATGTGCGAGTCCCGCACTCGC  
+HWI-EAS443:3:19:775:1035#0/1  
a`baa^^aa`aa^aa\_aa`\_aa`\_¥¥a`\_ZY¥Z`TV¥Y¥¥  
@HWI-EAS443:3:19:800:154#0/1  
ATAACATTGTGGGATCTTGTGACCATTGAATTTTCACAAT  
+HWI-EAS443:3:19:800:154#0/1  
ab^\_`Z^]`^FWV`\_`\_PX`\_`La`LQVZP`TLRN\_XEXF][^  
@HWI-EAS443:3:19:80:1310#0/1  
CAAAGAGAAGAAAGAAGAGCTCCAGGATTGTAATAATTGC  
+HWI-EAS443:3:19:80:1310#0/1  
aaWW[¥WTL[T¥a\_]\_]`^Q\_a`]TZaUZ^`[\_]]`[X[H\_X  
@HWI-EAS443:3:19:848:569#0/1  
GGCCCAACAACAAGTACAGTTCATTACCCTAAGGTATATA  
+HWI-EAS443:3:19:848:569#0/1  
\_a`abbb¥^ba^a¥^b\_W\_b]`bb¥b`a\_b\_aba\_aa`a^  
@HWI-EAS443:3:19:857:368#0/1  
CATCAAGGGAGCAATTTTACAATCCTGGAGCTCTTCTTTC  
+HWI-EAS443:3:19:857:368#0/1  
aaabbaab\_aaabababbbbaaaa`aa`^`aXaW`\_`\_`a¥^  
@HWI-EAS443:3:19:869:1529#0/1  
ATCTAATGTGCGAGTCCCGCACTCGCGAGATACTCACTAA  
+HWI-EAS443:3:19:869:1529#0/1  
aaaa`aaaV`Z^`\_Q[`¥¥`¥`\_¥¥`^¥^W¥UWXRTQV¥¥  
@HWI-EAS443:3:19:875:1133#0/1  
TGAGTATTGACCGATTTTTAAGGGTTAGAGATCAAAGAGG

+HWI-EAS443:3:19:875:1133#0/1  
aaabUaaa\_aaabaaaaa`\_aaa¥\_aa`a\_^`a]]\_`^`\_  
@HWI-EAS443:3:19:879:790#0/1  
AGAGAATAAAAGAACTGAGAGATCTAATGTCGCAGTCCCCG  
+HWI-EAS443:3:19:879:790#0/1  
aaabaaa\_b`ab\_a`baa[aaa`\_`^aab]\_\_\_aa]¥\_¥\_  
@HWI-EAS443:3:19:897:1832#0/1  
CCCCTTTTTCGTTTCATTACCAACACTACGTCCCCCTTGCCC  
+HWI-EAS443:3:19:897:1832#0/1  
aaaa\_aaaaa]aa`aa\_a^¥aa`\_`\_`]]]\_X^\_Z^^]  
@HWI-EAS443:3:19:897:517#0/1  
ATGCCCATATGGTCCACAGTGGTCTTAGTGAGTATCTCGC  
+HWI-EAS443:3:19:897:517#0/1  
`^bbabb`aa^\_¥]a\_a[UYa`a`\_J\_`^]aa^¥XX\_ZUU  
@HWI-EAS443:3:19:897:990#0/1  
CGTTTTTCGTTTCATTACCAACACTACGTCCCCCTTGCCCCA  
+HWI-EAS443:3:19:897:990#0/1  
abaaaaab^aaabaaaa\_aaaaaa\_a`^`^\_W]^`^`\_  
@HWI-EAS443:3:19:910:1393#0/1  
AAAGAACTGAGAGATCTAATGTCGCAGTCCCCGACTCGCG  
+HWI-EAS443:3:19:910:1393#0/1  
`U\_RV¥0a¥\_¥Z`\_S\_a`aaa[¥X^SXNV`]`[\_`^Z\_N\_  
@HWI-EAS443:3:19:924:1035#0/1  
GAATAAAAGAACTGAGAGATCTAATGTCGCAGTCCCCGCAC  
+HWI-EAS443:3:19:924:1035#0/1  
a`aa`a`a`a`\_`\_`\_`\_a`\_`^aa`\_`]^`\_¥\_`^X]^`^Y]VY  
@HWI-EAS443:3:19:928:1104#0/1  
AAAGAACTGAGAGATCTAATGTCGCAGTCCCCGACTCGCG  
+HWI-EAS443:3:19:928:1104#0/1  
aaaa\_aaba\_a`aRa`\_a\_aa\_\_\_\_\_aU`^^\_`^Z`^^^^`  
@HWI-EAS443:3:19:939:1598#0/1  
TAATGTCGCAGTCCCCGACTCGCGAGATACTACTAAGAC  
+HWI-EAS443:3:19:939:1598#0/1  
`]aba¥aa^aa[``a\_a`a`a]aa^\_]T`[\_`\_W^a^Q\_¥  
@HWI-EAS443:3:19:941:976#0/1  
AAAAGAACTGAGAGATCTAATGTCGCAGTCCCCGACTCGC  
+HWI-EAS443:3:19:941:976#0/1  
a`a]UQZWaaaa`\_`^`\_`aa\_aaZ]^`[^a¥¥^^]¥R¥¥\_WW  
@HWI-EAS443:3:19:966:1264#0/1  
AAAGAACTGAGAGATCTAATGTCGCAGTCCCCGACTCGCG  
+HWI-EAS443:3:19:966:1264#0/1  
`]\_T`\_[XZ`^¥VZX]aaaa\_]a\_W]\_a`\_¥P[ZZZYS  
@HWI-EAS443:3:19:97:1987#0/1  
CTGTAATTGGGTATCTCATTGCCATCATCCACTTCATTCT  
+HWI-EAS443:3:19:97:1987#0/1  
a`^S^`^YYYVR¥`a`^^`^`aaa`\_`[^¥^]¥¥]`^XS¥  
@HWI-EAS443:3:1:1023:1328#0/1  
ATGTGCCACAGCACACAGATTGGAGGAGTAAGGATGGTGG  
+HWI-EAS443:3:1:1023:1328#0/1  
aaaUaJ[aaa`P[R^W^aQV^`^`Q`¥Na¥`\_`^`aaUBBBBB

@HWI-EAS443:3:1:1099:1729#0/1  
AAAAGAAGTCTAATGTTCGAGTCCCCTCGC  
+HWI-EAS443:3:1:1099:1729#0/1  
`a` [aS]U`aVaaa^UU[a^¥a^J]a` ¥UZZWBBBBBBB  
@HWI-EAS443:3:1:1111:565#0/1  
GTGGATGATGGCAATGAGATACCCAATTACAGCAGACAAG  
+HWI-EAS443:3:1:1111:565#0/1  
a`ba\_a\_X`b`^``aaaa\_¥`\_]W`\_`\_\_Z^\_U]\_^`^`BB  
@HWI-EAS443:3:1:1153:619#0/1  
GGAGGTTGCCCGTTAGCACTTCTTCTTCTTCTTCTGACTGA  
+HWI-EAS443:3:1:1153:619#0/1  
abU^]Ya]Y]H`¥a[\_VIZa]X`aZ^aXN^aGa`H^]`BB  
@HWI-EAS443:3:1:1198:1272#0/1  
ATGTGCCACAGCACAGATTGGAGGAGTAAGGATGGTGG  
+HWI-EAS443:3:1:1198:1272#0/1  
a]a¥a\_Vaaaba`aaY`a^`aaa^b\_UaZ`\_\_`\_`¥aBBBB  
@HWI-EAS443:3:1:1214:1391#0/1  
GCTACTGGGAGAAACCTTGTTTTACGGACCAATTCTCTTT  
+HWI-EAS443:3:1:1214:1391#0/1  
aa`a`ba`bab¥Xa\_Xaab\_aa``Zaa\_X[`\_a`0`Xaa`  
@HWI-EAS443:3:1:1215:1586#0/1  
ATCATTCTCCTTCTCCTCCTGGAGGTACATCTGCTCC  
+HWI-EAS443:3:1:1215:1586#0/1  
a^X\_SQ\_aa[\_V^a\_^\_[aHH`\_aa`¥a\_aU`\_U\_WBBBB  
@HWI-EAS443:3:1:1232:264#0/1  
ATGAAGTGGATGATGGCAATGAGATACCCAATTACAGCAG  
+HWI-EAS443:3:1:1232:264#0/1  
`b^HU`Z^`\_a\_Za]a\_\_\_\_`[[]\_\_`^^]\_¥]^^Z]BBBB  
@HWI-EAS443:3:1:1243:796#0/1  
CCCGTTTTCGTTTTATTACCAACTACGTCCCCTTGCCC  
+HWI-EAS443:3:1:1243:796#0/1  
aaa\_bbbbaa\_bba]¥bba``aaaaabbbaa]`¥[^\_baYUB  
@HWI-EAS443:3:1:1271:1380#0/1  
AAAGAAGTCTAATGTTCGAGTCCCCTCGC  
+HWI-EAS443:3:1:1271:1380#0/1  
aa`baaT\_babaa\_a^baabb^X`\_ab\_V`WaWaW\_Q]BB  
@HWI-EAS443:3:1:1296:262#0/1  
CAAGGACAAACCCTCTGGAGCAAAACAAACGATGCTGGAT  
+HWI-EAS443:3:1:1296:262#0/1  
abb`bX[]aa]a[aaaba\_`\_\_\_aa]aa`\_a` [ `P`aaBB  
@HWI-EAS443:3:1:1380:1221#0/1  
GCGAGATACTACTAAGACCACTGTGGACCATATGGCCAT  
+HWI-EAS443:3:1:1380:1221#0/1  
aWaZ¥VLQ]\_^`\_] [ ] ] ]\_ZTWT\_VWUWWZVBBBBBBB  
@HWI-EAS443:3:1:1404:551#0/1  
TAGAGTCCCCTTTTCTTTTATTACCAACTACGTCCCC  
+HWI-EAS443:3:1:1404:551#0/1  
a`aY`]¥` `b\_aa^Y\_\_a[DTaa`SWa\_W\_]`\_Y`YYBBB  
@HWI-EAS443:3:1:1450:1829#0/1  
GGGGACGTAGTGTGGTAATGAAACGAAACGGGACTCTA



@HWI-EAS443:3:1:324:1230#0/1  
TGCCTTGTGTAATTGAATACTGGAGAATTGCCTCTTACC  
+HWI-EAS443:3:1:324:1230#0/1  
aba¥\_ba`bbaa¥b``aX¥a¥a`aaa\_`a\_aYR`\_\_^BBB  
@HWI-EAS443:3:1:409:1586#0/1  
TGCTGTAATTGGGTATCTCATTGCCATCATCCACTTCATT  
+HWI-EAS443:3:1:409:1586#0/1  
`aN`b`^¥ba`a¥DWZD]Y\_`\_\_\_\_^`\_I`^G\_]BBBBBBB  
@HWI-EAS443:3:1:417:380#0/1  
GCGGGATGTGCTTGGGACATTTGACACTGTCCAAATAATA  
+HWI-EAS443:3:1:417:380#0/1  
`\_a`b`\_`aWa\_aa\_aa^¥\_aa\_`\_`^aYaa]^X^`¥\_\_BBB  
@HWI-EAS443:3:1:432:550#0/1  
GGCTTGTTCCTCAGTTGGATTCTGTCTAAGGATGTCCACC  
+HWI-EAS443:3:1:432:550#0/1  
aa\_¥a]JX`^`\_TXV\_aa]]\_`^`\_]Z[VY\_]U]\_BBBBBB  
@HWI-EAS443:3:1:433:696#0/1  
TGCTGCTCCACCAGAACAGAGTAGGATGCAATTTTCCTCA  
+HWI-EAS443:3:1:433:696#0/1  
`\_NZaROTUWT]¥MSNL]a¥SS\_Y[WXZGZ^^^]VVBBBB  
@HWI-EAS443:3:1:451:1402#0/1  
GAATAAAAGAAGACTGAGAGATCTAATGTCGCAGTCCCGCAC  
+HWI-EAS443:3:1:451:1402#0/1  
a[aaaab`a`a`baa`^`\_0aa\_baXN`VaaUX^BBBBB  
@HWI-EAS443:3:1:504:631#0/1  
GGCCATTCTATTCCACCATGTTACGGCCAGAGGTGATAC  
+HWI-EAS443:3:1:504:631#0/1  
^bb[aaaaaaaa\_aY`[a\_\_a[aa[`a¥`[\_\_XNSBBBB  
@HWI-EAS443:3:1:517:651#0/1  
AAAAGAAGACTGAGAGATCTAATGTCGCAGTCCCGCACTCGC  
+HWI-EAS443:3:1:517:651#0/1  
^[¥`bb¥SX^Ta`aa]J]baab¥a]a\_aTX]RUYaX]\_BB  
@HWI-EAS443:3:1:556:1096#0/1  
GCGAGATACTACTAAGACCACTGTGGACCATATGGCCAT  
+HWI-EAS443:3:1:556:1096#0/1  
aaa`a\_aa\_aa\_aaaaa^\_Ya\_a`Q`\_\_\_\_^^`^`^]VBB  
@HWI-EAS443:3:1:611:1576#0/1  
TGCTAATTGGGCAAGGGGACGTAGTGTGGTAATGAAACG  
+HWI-EAS443:3:1:611:1576#0/1  
ab\_^baY^bab¥aaba\_`^^aS[[M[\_^baVVTX¥RX^BB  
@HWI-EAS443:3:1:616:535#0/1  
ATCCTTTCCAAGAACTGTAAGTCGTTTGGTTGCCTTGTG  
+HWI-EAS443:3:1:616:535#0/1  
`bb`aaaaXa`a\_[^ab\_`a`0`b`\_\_aa¥aa]¥^\_\_`aB  
@HWI-EAS443:3:1:632:287#0/1  
GAATAAAAGAAGACTGAGAGATCTAATGTCGCAGTCCCGCAC  
+HWI-EAS443:3:1:632:287#0/1  
a]\_a`a\_\_\_\_\_Y``^`\_`\_V\_`\_\_aUVYL¥^VWUBBBBB  
@HWI-EAS443:3:1:645:799#0/1  
GTCCCCTTTTCGTTTCATTACCAACTACGTCCCCTTGC

+HWI-EAS443:3:1:645:799#0/1  
a^\_^bX\_aa¥a¥\_\_^\_\_a\_]¥\_\_Ya]\_\_]\_WX]YUYBBB  
@HWI-EAS443:3:1:648:503#0/1  
CCCCACTCAGAATGAAGTGGATGATGGCAATGAGATACC  
+HWI-EAS443:3:1:648:503#0/1  
aaab`b\_babbaabba`b\_a\_aaba`aa¥^aaa`aa`a¥B  
@HWI-EAS443:3:1:670:34#0/1  
GTTTGTCTTGTTCATTCCTCTCTGGAATCATGTCCATTA  
+HWI-EAS443:3:1:670:34#0/1  
a[\_`aWLS[`] [¥VU\_WPX]Z]OZYVMVYS]XYUVTBBBB  
@HWI-EAS443:3:1:747:755#0/1  
GAATAAAAGAACTGAGAGATCTAATGTTCGAGTCCCGCAC  
+HWI-EAS443:3:1:747:755#0/1  
^^\_ab^Q[baaa`Y` `aa[a¥a\_aaa[]^SPSPG\_V^^BB  
@HWI-EAS443:3:1:786:1203#0/1  
CTTCCTGATGTGTACTTTTTGATTATGGCCATATGGTCCA  
+HWI-EAS443:3:1:786:1203#0/1  
ab`` `^b`¥aNa[[a\_b`bbbabaaa]TTYaY\_VM[TBBB  
@HWI-EAS443:3:1:798:1315#0/1  
GAATAAAAGAACTGAGAGATCTAATGTTCGAGTCCCGCAC  
+HWI-EAS443:3:1:798:1315#0/1  
`b[^bbb\_PJZ`a[abbba[XaaY`]BBBBBBBBBBBBBB  
@HWI-EAS443:3:1:879:519#0/1  
GGGTGGAGTCTGCTGTCCTGAGAGGATTTCTCATTTTGGG  
+HWI-EAS443:3:1:879:519#0/1  
aaa]a][` [Y]a^\_^UPU¥¥UZZ^^]X\_¥V[WW]¥]]BBB  
@HWI-EAS443:3:1:963:444#0/1  
AAAGAACTGAGAGATCTAATGTTCGAGTCCCGCACTCGCG  
+HWI-EAS443:3:1:963:444#0/1  
aa`a`aYbbbbbaaa`Y`a^ab^`\_`aabXX^UTV\_PTS[BB  
@HWI-EAS443:3:1:964:831#0/1  
AATAAAAGAACTGAGAGATCTAATGTTCGAGTCCCGCACT  
+HWI-EAS443:3:1:964:831#0/1  
^^`^` `]XZa[`` [aa\_aa]a^]aa`^aa` `YVY]` [0BB  
@HWI-EAS443:3:20:1004:534#0/1  
CCCGTTTTTCGTTTCATTACCAACTACGTCCCTTGCCC  
+HWI-EAS443:3:20:1004:534#0/1  
\_N`ZQT` `aa]aXHZaa^¥XQU^a`^P\_]¥SY]WGQ\_OU  
@HWI-EAS443:3:20:1065:1292#0/1  
ATGGTACCTTCGGCCCTGTCCACTTCAGAAATCAAGTTAA  
+HWI-EAS443:3:20:1065:1292#0/1  
aa`\_Z`aa\_\_a`\_a`a\_a^]a¥^`\_\_a\_a\_aa]`S\_ZY\_\_  
@HWI-EAS443:3:20:1079:1360#0/1  
GGTGGTTCACTTTCAAAGGACAAGCGGATCATCAGTCA  
+HWI-EAS443:3:20:1079:1360#0/1  
ab]aaa\_]`\_aaaa^U`]Zaa\_Z]`\_]a]`[\_^\_a\_\_0\_`  
@HWI-EAS443:3:20:1084:1279#0/1  
AAAAGAACTGAGAGATCTAATGTTCGAGTCCCGCACTCGC  
+HWI-EAS443:3:20:1084:1279#0/1  
ZQ¥S`N\_abZ`b`aaaaa\_S` `aa` `a^U\_a` ``]]^\_\_Q

@HWI-EAS443:3:20:1148:2011#0/1  
GGGGACGTAGTGTGGTAATGAAACGAAAACGGGACTCTA  
+HWI-EAS443:3:20:1148:2011#0/1  
``bbbbbaabab^babSbba^`bbY`aab`aaaaZ\_a`a  
@HWI-EAS443:3:20:1188:1745#0/1  
CAGAATGAAGTGGATGATGGCAATGAGATACCCAATTACA  
+HWI-EAS443:3:20:1188:1745#0/1  
aabbbbaaaaaababbbbaaabbabbbabaaabbaab[a  
@HWI-EAS443:3:20:1193:290#0/1  
AACTGAGAGATCTAATGTGCGAGTCCCGCACTCGCGAGAT  
+HWI-EAS443:3:20:1193:290#0/1  
ab`X[Ta\_baaa\_]abb`\_Y]¥aQ]aaa`Z[``]\_a``QV  
@HWI-EAS443:3:20:1196:977#0/1  
TTGTAATTGAATACTGGAGAATTGCCTTTACCAGTATCC  
+HWI-EAS443:3:20:1196:977#0/1  
`aXV````\_ZS`a``aZ`bY^^^[a¥Wab`\_a`b\_^\_``^  
@HWI-EAS443:3:20:1243:289#0/1  
GGAAAAGCACTTTTGCATCTTTTGGAAATGCCTCAAGAG  
+HWI-EAS443:3:20:1243:289#0/1  
¥a^bb\_ab^abb`\_aaa\_bbbbbba`\_abb^`aaa`b]`  
@HWI-EAS443:3:20:1263:365#0/1  
TAATGTCGAGTCCCGCACTCGCGAGATACTCACTAAGAC  
+HWI-EAS443:3:20:1263:365#0/1  
`]b\_\_X```a\_V[Y]a]XX]YSW^^`X]VU¥^YLT[]YP  
@HWI-EAS443:3:20:1264:336#0/1  
AAAAGAAGTGAAGATCTAATGTCGAGTCCCGCACTCGC  
+HWI-EAS443:3:20:1264:336#0/1  
aabb^`aabbba[aba`aaaabYaaa`a][Ra[¥[^¥]U  
@HWI-EAS443:3:20:1287:1012#0/1  
CTCGGAGATACTCACTAAGACCACTGTGGACCATATGGC  
+HWI-EAS443:3:20:1287:1012#0/1  
abb`abbabb\_aaabbaabaabbababaa`aaaaa`\_  
@HWI-EAS443:3:20:1312:1503#0/1  
TTGAGGATTAGCTCATCTTTCAGTTTTGGTGGGTTCACTT  
+HWI-EAS443:3:20:1312:1503#0/1  
aaaYa\_`aa\_^Z`Y`^Z^aa^]^\_aa^\_ZYa^aS[]XVZ]  
@HWI-EAS443:3:20:1312:920#0/1  
AAGCCGTAGACATATGCAAGGCAGCAATAGGGTTGAGGAT  
+HWI-EAS443:3:20:1312:920#0/1  
`\_a^a^\_a^`\_aaa`\_`a\_]\_Z]^`^`\_Z\_\_Z\_\_XW  
@HWI-EAS443:3:20:132:206#0/1  
GAATAAAAGAAGTGAAGATCTAATGTCGAGTCCCGCAC  
+HWI-EAS443:3:20:132:206#0/1  
aX\_VUX¥`aNPUa¥¥VW\_\_aaZYU¥XLPX¥TVHHXXG]PU  
@HWI-EAS443:3:20:1343:942#0/1  
TGCTGTAATTGGGTATCTCATTGCCATCATCCACTTCATT  
+HWI-EAS443:3:20:1343:942#0/1  
`¥JaZY`Na`aaaU\_`\_\_\_\_`\_UZ\_ZZ^^^X\_Y\_\_G^^`  
@HWI-EAS443:3:20:1360:159#0/1  
TGCTGTAATTGGGTATCTCATTGCCATCATCCACTTCATT

+HWI-EAS443:3:20:1360:159#0/1  
abaaa]]Xbab¥[V`a`b\_[aa\_[]]a[`aYX`\_a`U^`  
@HWI-EAS443:3:20:1372:1589#0/1  
CAATAGTACGTTCCCTCTTTGATCTCTAACCCCTAAAAAT  
+HWI-EAS443:3:20:1372:1589#0/1  
¥¥\_[[S^a¥^a\_PHIWO\_]`^`N`\_`aSYa¥a]XZ` `][` [¥  
@HWI-EAS443:3:20:1372:756#0/1  
TGCCTTGTTGTAATTGAATACTGGAGAATTGCCTCTTACC  
+HWI-EAS443:3:20:1372:756#0/1  
WF^aV¥a]a`^XZ\_^`\_^baaaaY`aYV]U[VZZO[``XS  
@HWI-EAS443:3:20:137:323#0/1  
TCCCGTTTTTCGTTTCATTACCAACTACGTCCCCTTGCC  
+HWI-EAS443:3:20:137:323#0/1  
aaQ[¥U`aa`ZXaaUW\_W`Z]X`a`VJ]¥K[[]`¥TQ[]  
@HWI-EAS443:3:20:1407:328#0/1  
TCTTGCTGCTGTAATTGGGTATCTCATTGCCATCATCCA  
+HWI-EAS443:3:20:1407:328#0/1  
\_P\_\_bQR^]R[]N[^a\_ZYRTY[U[RP\_^BBBBBBBBBBB  
@HWI-EAS443:3:20:1460:1388#0/1  
TGAATACTCCAGCACGGAGAGAGTGGTAGTGAGTATTGAC  
+HWI-EAS443:3:20:1460:1388#0/1  
aa` `a\_aaa[aa`\_\_aa^`[aQa]`aY^aL]S]VU¥¥NIE  
@HWI-EAS443:3:20:147:856#0/1  
GAATAAAAGAAGACTGAGAGATCTAATGTCGCAGTCCCGCAC  
+HWI-EAS443:3:20:147:856#0/1  
a\_bbbbabbbZa\_`b`aa]\_a`aabab¥aa`aa\_a`a]\_\_\_\_  
@HWI-EAS443:3:20:1494:668#0/1  
GTCCCGTTTTTCGTTTCATTACCAACTACGTCCCCTTGC  
+HWI-EAS443:3:20:1494:668#0/1  
a[[N[^U` `aaaZ`¥TN\_¥a[N¥XW\_^^^VYPVTLTYST  
@HWI-EAS443:3:20:149:836#0/1  
GCAAGGGGACGTAGTGTGGTAATGAAACGAAAACGGGAC  
+HWI-EAS443:3:20:149:836#0/1  
a`ab`aab[abaab[a\_abaN`a` `^a` ` `\_\_aa\_`^WUY  
@HWI-EAS443:3:20:1524:696#0/1  
TGGAAAAGCACTTTTGCATCTTTTGGAAATGCCTCAAGA  
+HWI-EAS443:3:20:1524:696#0/1  
]J\_`bbbb]ab]bab`ba¥`^`aaaabaaaW\_aaba\_  
@HWI-EAS443:3:20:155:1201#0/1  
CAACCTCCAAACTGAAAATAAGAGTACATGAAGGGTAT  
+HWI-EAS443:3:20:155:1201#0/1  
abbab`babaa\_aaa^aV]aaaaaa\_`a[ `a`U`Y^Y\_`  
@HWI-EAS443:3:20:1560:749#0/1  
GTCTGCTGTAATTGGGTATCTCATTGCCATCATCCACTTC  
+HWI-EAS443:3:20:1560:749#0/1  
¥0\_aa^a` `]`aa`\_]Za`Z\_X`¥a[Z`¥R[[YV]V¥YV  
@HWI-EAS443:3:20:1617:1286#0/1  
AGAAGTGGAGATCTAATGTCGCAGTCCCGCACTCGCGAG  
+HWI-EAS443:3:20:1617:1286#0/1  
aba\_Wa`\_b\_aabRaaaaa]a\_^`b\_XUV]U\_\_\_]\_\_Z^^]



@HWI-EAS443:3:20:1626:1806#0/1  
TGCTAATTGGGCAAGGGGACGTAGTGTGGTAATGAAACG  
+HWI-EAS443:3:20:1626:1806#0/1  
aa`baaaaa\_aXa``^`]¥`W^XV]^a`\_X]]\_^^\_R\_  
@HWI-EAS443:3:20:1631:1784#0/1  
GAGAATAAAAGAACTGAGAGATCTAATGTCGCAGTCCCGC  
+HWI-EAS443:3:20:1631:1784#0/1  
aaa`abbba^aab\_aaaaaaa¥abaa[RY¥`a`R\_X]]V  
@HWI-EAS443:3:20:1634:754#0/1  
ATTGCATCTACTCTGTTCTGGTGGAGCAGCAGCAAAGGG  
+HWI-EAS443:3:20:1634:754#0/1  
aU`ba`baaababaaaab`aba^aaZaSZ\_\_`aZ^¥\_\_`a  
@HWI-EAS443:3:20:1664:1446#0/1  
AATTGGGCAAGGGGACGTAGTGTGGTAATGAAACGAAAA  
+HWI-EAS443:3:20:1664:1446#0/1  
aaaabab\_aabaaa`[a\_aa]a\_aa]0[]\_^^\_S\_\_\_\_\_^  
@HWI-EAS443:3:20:1672:1455#0/1  
ATCATCATTTCTCACTTCTCCTCCTGGAGTGTACATCTGC  
+HWI-EAS443:3:20:1672:1455#0/1  
UYb[baaabbaa[ZU¥b`]UNQ¥Rbbb\_aVL[[Z]aGV`^  
@HWI-EAS443:3:20:1689:153#0/1  
GCTAGAGTCCCGTTTTCGTTTTATTACCAACTACTCGTCC  
+HWI-EAS443:3:20:1689:153#0/1  
aab`a`a^\_X\_b\_\_a`[b\_\_\_X\_`\_`Y]^]Y\_VY^X¥YXY  
@HWI-EAS443:3:20:1702:404#0/1  
ACTCGGTCTGATCCAGCATCGTTTGTGTTTGTCCAGAGGG  
+HWI-EAS443:3:20:1702:404#0/1  
a\_b^bb`aaa¥a[\_\_\_a¥aa\_b¥`aa\_`a`\_¥a¥U¥\_Y`\_\_  
@HWI-EAS443:3:20:18:943#0/1  
ACAGCAGACAAGAGAATAATGGACATGATTCCAGAGAGGA  
+HWI-EAS443:3:20:18:943#0/1  
aa`aa]¥OZ¥ZXV[NX]Z^¥^TQ¥aV^¥PQNZ]WTUPNUV  
@HWI-EAS443:3:20:213:1244#0/1  
AAAAGAACTGAGAGATCTAATGTCGCAGTCCCGCACTCGC  
+HWI-EAS443:3:20:213:1244#0/1  
`b¥`aaa`b^W`a```X[a[a\_Z]]a¥`N[^ZYFZY\_[-  
@HWI-EAS443:3:20:218:1734#0/1  
ATACTACTAAGACCACTGTGGACCATATGGCCATAATCA  
+HWI-EAS443:3:20:218:1734#0/1  
`a``^a\_a`a^S`\_abaS\_[[`a\_a\_^\_]]Za\_^VY^]]]  
@HWI-EAS443:3:20:261:340#0/1  
GTCCCGTTTTCGTTTCATTACCAACTACTCGTCCCTTGC  
+HWI-EAS443:3:20:261:340#0/1  
a[\_a\_^Z``^^`Y```\_a\_\_\_\_\_```^]\_\_^XRYVVTZVV[  
@HWI-EAS443:3:20:264:1636#0/1  
GACCAATTCTCTTTCTAGCATGTACGCCACCATCAAGGGA  
+HWI-EAS443:3:20:264:1636#0/1  
`a`a¥Z^a`¥aa`bUababTaZWa^aa`U\_]a\_\_aY\_Z`^  
@HWI-EAS443:3:20:27:126#0/1  
GTGGATGATGGCAATGAGATACCCAATTACAGCAGACAAG

+HWI-EAS443:3:20:27:126#0/1  
a¥a`[\_\_\_]^\_\_\_]\_^`\_]\_^]\_\_\_]^[^]^W]]W^^X]XZ  
@HWI-EAS443:3:20:286:1497#0/1  
CACATCTGGGGTGGAGTCTGCTGTCCTGAGAGGATTTCTC  
+HWI-EAS443:3:20:286:1497#0/1  
¥\_\_^X][O[ZTJ^YTGv\_a\_V]URX\_SF^\_]NY^ZX¥\_^ZU  
@HWI-EAS443:3:20:29:1016#0/1  
CAAGGACAAACCCTCTGGAGCAAACAAACGATGCTGGAT  
+HWI-EAS443:3:20:29:1016#0/1  
`]\_\_`bababaaaaa\_a\_]\_]\_\_a`aaYUaa`\_^\_]XWV  
@HWI-EAS443:3:20:328:497#0/1  
GTCCCCTTTTCGTTTCATTACCAACTACGTCCCCTTGC  
+HWI-EAS443:3:20:328:497#0/1  
aU\_RU`Z]Q`^`P`[¥W\_\_`V¥YO[a]]][USHWSQNN  
@HWI-EAS443:3:20:342:60#0/1  
GAATAAAAGAACTGAGAGATCTAATGTCGCAGTCCCGCAC  
+HWI-EAS443:3:20:342:60#0/1  
a\_\_a^`a`\_^`^a\_a\_U\_W\_Y\_^`\_XR\_]^\_ZZXZZ^X^  
@HWI-EAS443:3:20:359:1508#0/1  
CCCCTTTTCGTTTCATTACCAACTACGTCCCCTTGGCC  
+HWI-EAS443:3:20:359:1508#0/1  
abab\_`aaaa`a`aaa\_ba\_aX\_aa]aa`]]`\_ZZ]\_X^  
@HWI-EAS443:3:20:375:184#0/1  
AATGTCGCAGTCCCGCACTCGCGAGATACTCACTAAGACC  
+HWI-EAS443:3:20:375:184#0/1  
a¥ZaSa\_a]¥WS`\_U^¥UWM]^UWWWWSUSUPUT¥SBBB  
@HWI-EAS443:3:20:385:458#0/1  
AATGCGGGATGTGCTTGGGACATTTGACTGTCCAAATA  
+HWI-EAS443:3:20:385:458#0/1  
`XZa]ba^`a^aa[0\_\_\_]\_aa`\_\_\_\_\_¥`^]^^^\_\_  
@HWI-EAS443:3:20:399:1594#0/1  
CCCGCACTCAGAATGAAGTGGATGATGGCAATGAGATACC  
+HWI-EAS443:3:20:399:1594#0/1  
`bbababab\_]aaa`aaXaa`a\_Ya\_a\_\_a`a`\_Xa\_\_  
@HWI-EAS443:3:20:39:1110#0/1  
GTCCCCTTTTCGTTTCATTACCAACTACGTCCCCTTGC  
+HWI-EAS443:3:20:39:1110#0/1  
^O^ba\_VV]aa^Y]]]\_¥^¥¥]WS[^\_^\_][VRX[XZQS00  
@HWI-EAS443:3:20:477:619#0/1  
TGCTCCCAGCACGTCCCTTGGGTAAAGTGCAACTTCAA  
+HWI-EAS443:3:20:477:619#0/1  
`ab`^\_^aZ\_a^X]VQV^a`a`W^`¥^T^X`]P]^\_V`\_¥  
@HWI-EAS443:3:20:487:202#0/1  
TTGAAAGGATGCAGGTGCATTGACTGAAGATCCAGATGA  
+HWI-EAS443:3:20:487:202#0/1  
`bbZN]\_]¥¥]`Xaa`I^a`[^aZR^VJ¥SXV`¥X]VVUK  
@HWI-EAS443:3:20:571:626#0/1  
GTCTGCTGTAATTGGGTATCTCATTGCCATCATCCACTTC  
+HWI-EAS443:3:20:571:626#0/1  
a\_aa```^MX\_`aa`X`\_^\_]\_^]\_\_\_^\_Y\_]\_^]\_^Y

@HWI-EAS443:3:20:605:1338#0/1  
AAAGAAGTCTAATGTCGCAGTCCCGCACTCGCG  
+HWI-EAS443:3:20:605:1338#0/1  
¥U\_]\_aa`[`a\_a][aaa`a`Z`^`a\_T\_a\_[\_X\_¥^U[\_  
@HWI-EAS443:3:20:645:119#0/1  
TATGTTTCTAGCAGCGATAATCAAACCTTGGTCAACATCA  
+HWI-EAS443:3:20:645:119#0/1  
a\_J¥[YaaVPUIX`Z`\_`^X[[ZUXRW[[]WNQY]TZXU¥  
@HWI-EAS443:3:20:651:172#0/1  
TGGGAGATCAATGGCCCTGAGTCAGTGCTAGTCAACACTT  
+HWI-EAS443:3:20:651:172#0/1  
abaaaaa\_abaaaaa\_aa`aa^[`a]¥ZZ\_\_[\_\_\_\_Z^W[[  
@HWI-EAS443:3:20:668:1244#0/1  
AAAGAAGTCTAATGTCGCAGTCCCGCACTCGCG  
+HWI-EAS443:3:20:668:1244#0/1  
aa``bb`\_`\_`aaaa`aabT\_\_aa[`\_¥\_\_\_\_S\_¥¥`  
@HWI-EAS443:3:20:670:1984#0/1  
GATGAAGGCACATCTGGGGTGGAGTCTGCTGCTGAGAG  
+HWI-EAS443:3:20:670:1984#0/1  
abbbb`H¥a`bb^\_aaaaZK^aa\_\_`a`aa\_aaQaa`aaa  
@HWI-EAS443:3:20:674:814#0/1  
CAACCAAACGACTTACAGTTCTTGGAAAGGATGCAGGTGC  
+HWI-EAS443:3:20:674:814#0/1  
aa¥a`[``\_\_a[X^bab]aab^)`Ra]Yaa]a`¥aaM^^  
@HWI-EAS443:3:20:680:1408#0/1  
GTCCCGTTTTCGTTTCATTACCAACTACGTCCCTTGC  
+HWI-EAS443:3:20:680:1408#0/1  
a]aaa\_Raaab¥\_`HY¥XZ\_¥)``\_`\_a\_`[YUZ[NJUZ  
@HWI-EAS443:3:20:688:204#0/1  
AAAGAAGTCTAATGTCGCAGTCCCGCACTCGCG  
+HWI-EAS443:3:20:688:204#0/1  
aab`aaaa^)^aaa`aaa\_\_a¥)``\_`[¥^\_\_\_\_^¥¥Y^¥]  
@HWI-EAS443:3:20:68:1764#0/1  
AATAAAGAAGTCTAATGTCGCAGTCCCGCACT  
+HWI-EAS443:3:20:68:1764#0/1  
a`b\_\_W¥a`Y^`babb\_aa`b]`ab\_a`````\_`a`]^R  
@HWI-EAS443:3:20:694:1382#0/1  
CTGCTGCTGAGAGATTTCTCATTGTTGGGCAAAGAAGA  
+HWI-EAS443:3:20:694:1382#0/1  
aaa]¥aUYb\_a\_\_[]`aX]^\_\_[[`\_`W]^^^U]^^]\_^  
@HWI-EAS443:3:20:702:1022#0/1  
AAAGATGCAAAAGTCTTTCCAGAAGTGGGAATTGAAT  
+HWI-EAS443:3:20:702:1022#0/1  
aaaaa^aaba[aaZa`a``\_`^aa`\_Yaa```Z``\_``^  
@HWI-EAS443:3:20:706:1392#0/1  
CTTTCAAAGGACAAGCGGATCATCAGTCAAGAAAGAAGA  
+HWI-EAS443:3:20:706:1392#0/1  
Ubbababbbbabbb`baabbbbbbbaabbbbbbbaaaa  
@HWI-EAS443:3:20:725:766#0/1  
ATGCGGGATGTGCTTGGGACATTTGACACTGTCCAAATAA

+HWI-EAS443:3:20:725:766#0/1  
Y[\_]aba\_bZ`XV¥a\_\_¥L[[\_]abaSaa`aa`\_aT]a\_`\_  
@HWI-EAS443:3:20:738:693#0/1  
CTCAGAATGAAGTGGATGATGGCAATGAGATACCCAATTA  
+HWI-EAS443:3:20:738:693#0/1  
abbbba\_bb\_\_`abbabbaa`aabbbbababa`b`baab  
@HWI-EAS443:3:20:772:360#0/1  
AAAAGAAGTGAAGATCTAATGTCGCAGTCCCGCACTCGC  
+HWI-EAS443:3:20:772:360#0/1  
\_`bZZ]]Ha]YQZ¥\_[aaR`]]`U\_BBBBBBBBBBBBBBB  
@HWI-EAS443:3:20:777:633#0/1  
AAAAGAAGTGAAGATCTAATGTCGCAGTCCCGCACTCGC  
+HWI-EAS443:3:20:777:633#0/1  
abaab[aab\_baaaaa\_aa\_a^¥`\_\_a\_] [N]¥]T^W¥  
@HWI-EAS443:3:20:790:418#0/1  
GTTTTACGGACCAATTCTCTTTCTAGCATGTACGCCACCA  
+HWI-EAS443:3:20:790:418#0/1  
a^bb^bab]abaaaa\_a`baaaaa``aaa¥a`a^\_aa]`  
@HWI-EAS443:3:20:827:230#0/1  
GTCCCGTTTTCGTTTCATTACCAACTACGTCCCTTGC  
+HWI-EAS443:3:20:827:230#0/1  
aG]TY^GSY\_\_]SVR¥\_\_]] [W]YU\_¥W^^]YUUUVUUWU  
@HWI-EAS443:3:20:837:860#0/1  
GCTGCTCTGAGAGATTTCTCATTTTGGGCAAAGAAGACA  
+HWI-EAS443:3:20:837:860#0/1  
`b\_` [ba^a\_¥¥]ZW``]]Y``abaa]a\_aa]aa`aaa¥\_  
@HWI-EAS443:3:20:840:231#0/1  
GTTTTATATACCTTAGGGTAATGAAGTACTTGTGTTG  
+HWI-EAS443:3:20:840:231#0/1  
a]a`^^`^^\_Y\_]¥\_^T¥Y^]]\_] ^[]\_W[YWY^Y[YZWY  
@HWI-EAS443:3:20:849:1181#0/1  
AAAGAAGTGAAGATCTAATGTCGCAGTCCCGCACTCGCG  
+HWI-EAS443:3:20:849:1181#0/1  
a`\_a\_a`aa\_aa\_``aaaaaW\_a¥\_¥¥\_] ^\_^^¥WVWU¥  
@HWI-EAS443:3:20:86:1315#0/1  
TGGCAATGAGATACCCAATTACAGCAGACAAGAGAATAAT  
+HWI-EAS443:3:20:86:1315#0/1  
a`aba`Z``J¥ba]bb^babb`[\_]a]aa¥HXaaYbbbb\_  
@HWI-EAS443:3:20:890:642#0/1  
AAAAGAAGTGAAGATCTAATGTCGCAGTCCCGCACTCGC  
+HWI-EAS443:3:20:890:642#0/1  
aaaaa`a`baaa^aaaZa`\_aa^\_\_^`aX^V]\_\_X\_\_]X]  
@HWI-EAS443:3:20:915:1118#0/1  
CTTGTCTGCTGTAATTGGGTATCTCATTGCCATCATCCAC  
+HWI-EAS443:3:20:915:1118#0/1  
W\_bb```aaa¥b``¥aa[\_]T¥^Z`\_W\_b\_```aa^aa\_Za]  
@HWI-EAS443:3:20:925:756#0/1  
CTGCTGTAATTGGGTATCTCATTGCCATCATCCACTTCAT  
+HWI-EAS443:3:20:925:756#0/1  
ababbaa```bbb\_`^aaa`aaaaaab`aaa`]]`\_`[\_]`\_a



+HWI-EAS443:3:21:111:445#0/1  
abbb`a[aba¥\_baa[aZaa^[¥ba`a^`Q]``a^\_SUY  
@HWI-EAS443:3:21:1132:105#0/1  
GCACTCGCGAGATACTACTAAGACCACTGTGGACCATAT  
+HWI-EAS443:3:21:1132:105#0/1  
aS]\_b¥¥[aa]`YaY¥ZOW`NTVY[¥[YLQFZ]YV[^[^W  
@HWI-EAS443:3:21:1151:283#0/1  
GGAAAAGCACTTTTGCATCTTTTGGAAATGCCTCAAGAG  
+HWI-EAS443:3:21:1151:283#0/1  
aa\_aa`a`a[`aa\_a[`aXa`aa^a\_`\_]\_Y]Y]\_Z\_¥\_  
@HWI-EAS443:3:21:1165:844#0/1  
CTGCTGTCCTGAGAGGATTTCTCATTGTTGGCAAAGAAGA  
+HWI-EAS443:3:21:1165:844#0/1  
abbaaa]Va^bTa``\_0\_a`aa`\_Yaa`¥X¥[OU]`\_\_a^  
@HWI-EAS443:3:21:1175:69#0/1  
GGATCTTCAGTCAATGCACCTGCATCCTTTCCAAGAACTG  
+HWI-EAS443:3:21:1175:69#0/1  
aaab]\_a^¥b`aa\_aa^X[ZY]0\_\_^[Y\_Y\_]¥S`XSV]¥  
@HWI-EAS443:3:21:1208:201#0/1  
TGCTGTAATTGGGTATCTCATTGCCATCATCCACTTCATT  
+HWI-EAS443:3:21:1208:201#0/1  
ab`aa^\_]aaaa[]a`[aY\_aa`¥]`^¥\_]TU\_R^U\_^Z  
@HWI-EAS443:3:21:1238:1192#0/1  
ATGAGAAATCCTCTCAGGACAGCAGACTCCACCCAGATG  
+HWI-EAS443:3:21:1238:1192#0/1  
aabbaaaabaaaaaaaaaaa`aaa\_\_`]`]\_a^`¥\_`^^¥\_  
@HWI-EAS443:3:21:1248:565#0/1  
GCAGTGTGAGCAGACCCATTAGCATCTCTCTTGAAATGT  
+HWI-EAS443:3:21:1248:565#0/1  
aa`a[a\_aa\_a\_¥\_¥\_¥\_``[\_\_¥WW^¥UW^`\_\_[\_`UNU  
@HWI-EAS443:3:21:1260:1888#0/1  
GAGAATAAAAGAACTGAGAGATCTAATGTCGCAGTCCCGC  
+HWI-EAS443:3:21:1260:1888#0/1  
aYUO\_S`^a`^Z\_[\_a`Y`aXQ`\_a\_a`RW¥]\_Z[YGUUV  
@HWI-EAS443:3:21:1318:1234#0/1  
CAGTCCCGCACTCGCGAGATACTACTAAGACCACTGTGG  
+HWI-EAS443:3:21:1318:1234#0/1  
a`^aaabbbabba¥aa`aaaaZa]a^a\_aSa^^aY[`]  
@HWI-EAS443:3:21:1332:837#0/1  
ACCGATTTTTAAGGGTTAGAGATCAAAGAGGGAACGTACT  
+HWI-EAS443:3:21:1332:837#0/1  
¥^]\_aZaa`aaaa`P]X\_aaYaaYVG¥Y`a`\_Y]aX]^Y  
@HWI-EAS443:3:21:134:633#0/1  
AATTGGGCAAGGGGACGTAGTGTGGTAATGAAACGAAAA  
+HWI-EAS443:3:21:134:633#0/1  
¥`^bbbab`Yabbb^ab\_¥\_S`aaa[]\_a`X`\_[DTZ\_\_]  
@HWI-EAS443:3:21:1360:1032#0/1  
GTCCCGTTTTCGTTTCATTACCAACTACGTCCCTTGC  
+HWI-EAS443:3:21:1360:1032#0/1  
]JY^aa\_Y\_``a¥^]Q¥aZ[[V]\_^PX[X]Y]XZUVSSR

@HWI-EAS443:3:21:136:145#0/1  
ATTTGGACAGTGTCAAATGTCCCAAGCACATCCCGCATTT  
+HWI-EAS443:3:21:136:145#0/1  
aaaa\_aaa]`^a`aa`a\_Vaaa`^\_\_\_\_^\_\_-]^XUV  
@HWI-EAS443:3:21:1398:244#0/1  
AGAGAATAAAAGAACTGAGAGATCTAATGTGCGCAGTCCCG  
+HWI-EAS443:3:21:1398:244#0/1  
^bW\_]ab)`a`ba[Iba`baa]`[a\_aaaW\_b\_ab[PU[^  
@HWI-EAS443:3:21:1400:1492#0/1  
GTCCCGTTTTTCGTTTCATTACCAACACTACGTCCCCTTGC  
+HWI-EAS443:3:21:1400:1492#0/1  
¥U¥RPM`aa`[U`UYQU]]^T¥¥TXU]TNSVLMJOLUXR  
@HWI-EAS443:3:21:1409:362#0/1  
GTGGCGTACATGCTAGAAAGAGAATTGGTCCGTAAAACAA  
+HWI-EAS443:3:21:1409:362#0/1  
a]\_\_\_a^)`¥aa^`^\_YY\_W`Y\_\_`VYXX\_YV\_^\_X^X  
@HWI-EAS443:3:21:1434:874#0/1  
GCTTGTCTTTTGAAGTGAACCCACCAAACTGAAAGAT  
+HWI-EAS443:3:21:1434:874#0/1  
a^a\_¥U^PaaaY`¥\_aX`\_a^¥M^^^YZZU]`[]^¥YW  
@HWI-EAS443:3:21:1447:1470#0/1  
AGAGAATAAAAGAACTGAGAGATCTAATGTGCGCAGTCCCG  
+HWI-EAS443:3:21:1447:1470#0/1  
\_^^\_a]]aaaa]\_\_^a\_a^\_`^`¥`\_Y^^R^¥VNNWY  
@HWI-EAS443:3:21:1456:349#0/1  
AAAAGAACTGAGAGATCTAATGTGCGCAGTCCCGCACTCGC  
+HWI-EAS443:3:21:1456:349#0/1  
aab]R^\_Q¥Z]a^^^V^¥[`¥ZZ[[]¥TTJKWIJTTHZV  
@HWI-EAS443:3:21:1502:744#0/1  
GTCCCGTTTTTCGTTTCATTACCAACACTACGTCCCCTTGC  
+HWI-EAS443:3:21:1502:744#0/1  
a[\_^]¥PXa`Z\_V[]TX¥[^UR[NPV]]YWZWSNUTYBBB  
@HWI-EAS443:3:21:1507:941#0/1  
AAAGAACTGAGAGATCTAATGTGCGCAGTCCCGCACTCGCG  
+HWI-EAS443:3:21:1507:941#0/1  
aab`\_a\_aa`\_^\_aa]aa`aa^\_\_]\_\_WXX]^\_YYYYU]U^  
@HWI-EAS443:3:21:1525:296#0/1  
GCACCTTTTGCATCTTTTTGGAAATGCCTCAAGAGTTGGTG  
+HWI-EAS443:3:21:1525:296#0/1  
`[\_Vaaa`a^^ZXa`\_`^^Z^^\_XRZWY]^Y]Y]]YY^  
@HWI-EAS443:3:21:1526:171#0/1  
AAAAGAACTGAGAGATCTAATGTGCGCAGTCCCGCACTCGC  
+HWI-EAS443:3:21:1526:171#0/1  
aaaaa`a^baaaa^^\_\_aa`aaZT[V\_\_WVXQYQUSYVQJ  
@HWI-EAS443:3:21:1627:1713#0/1  
TAATGTGCGCAGTCCCGCACTCGCGAGATACTACTAAGAC  
+HWI-EAS443:3:21:1627:1713#0/1  
X`aa`Ua\_Zaaa^\_\_X`TT`U`aR]XN]ZN`UaZ\_\_\_VBB  
@HWI-EAS443:3:21:1662:542#0/1  
AAAAGAACTGAGAGATCTAATGTGCGCAGTCCCGCACTCGC

+HWI-EAS443:3:21:1662:542#0/1  
a\_aYWWba¥`\_aa]`ZPbb`¥aY\_aX]RLZNIZFXXXG[W  
@HWI-EAS443:3:21:1671:716#0/1  
GGCCCAACAACAAGTACAGTTCATTACCCCTAAGGTATATA  
+HWI-EAS443:3:21:1671:716#0/1  
a\_XPW[[[]SJ[TWQ]NSTOPY`NT[ZTGQ¥W^MDVX]Y¥  
@HWI-EAS443:3:21:1730:1764#0/1  
TAACATTGTGGGATCTTGTGACCATTGAATTTTCACAATT  
+HWI-EAS443:3:21:1730:1764#0/1  
aaa¥\_aa^YVXR][[U^\_NYXXS]U^`\_]`\_][M^W^XX]  
@HWI-EAS443:3:21:1768:1795#0/1  
GATTTCTCATTTTGGGCAAAGAAGACAAGAGATATGGCCC  
+HWI-EAS443:3:21:1768:1795#0/1  
aabba^b`abbaaa\_a]aaa`a\_a`^a\_\_^^^`^`^UW[  
@HWI-EAS443:3:21:1773:776#0/1  
GAATAAAAGAACTGAGAGATCTAATGTCGCAGTCCCGCAC  
+HWI-EAS443:3:21:1773:776#0/1  
`¥` `\_a` `]`\_`\_\_^^`\_`\_\_^`^]`\_`\_]YXV]\_XY]XYXX  
@HWI-EAS443:3:21:180:866#0/1  
CCAGCATCGTTTGTTCCTCAGAGGGTTTGTCCCTTGTT  
+HWI-EAS443:3:21:180:866#0/1  
ab¥bba`ba¥`aaaa¥aaaa`a¥`X`^]\_aaa\_a^` `a\_\_  
@HWI-EAS443:3:21:181:731#0/1  
CGTTTTCGTTTTATTACCAACTACGTCCCCTTGCCCAA  
+HWI-EAS443:3:21:181:731#0/1  
aa[^]\_]Ra`Z]`a`\_¥^¥\_`aWWZ\_YVT\_OZ^[WY]Z  
@HWI-EAS443:3:21:192:879#0/1  
GCTAGTCAACACTTATCAATGGATAATCAGGAACTGGGAA  
+HWI-EAS443:3:21:192:879#0/1  
aaUaa^aa]aYa[¥Z[YXT¥a]a\_YY[P\_PSWZZWT^QKN  
@HWI-EAS443:3:21:202:216#0/1  
CGTACATGCTAGAAAGAGAATTGGTCCGTAACAAGTT  
+HWI-EAS443:3:21:202:216#0/1  
a`^aaaaa`^`a`^aa`a\_a` `aaR\_`\_`[^`\_GZ]a\_UW  
@HWI-EAS443:3:21:223:1946#0/1  
CTAATGTGCTAATTGGGCAAGGGACGTAGTGTGGTAAT  
+HWI-EAS443:3:21:223:1946#0/1  
aaa` `]WY\_`U\_a\_Y` [a`\_R¥]\_XY^Z\_`[^¥SOP[S  
@HWI-EAS443:3:21:234:918#0/1  
CATCATTTCTCACTTCTCCTCCTGGAGTGACATCTGCTC  
+HWI-EAS443:3:21:234:918#0/1  
`\_V^ZY]W`\_¥LY]TZZaa`a^^\_a¥]GXV]VPWUTVOV^  
@HWI-EAS443:3:21:279:650#0/1  
AGAGAATAAAAGAACTGAGAGATCTAATGTCGCAGTCCCG  
+HWI-EAS443:3:21:279:650#0/1  
`aabX`aaa`ba`baaa`aaaa`aaaaR^a^^\_]`\_`^`  
@HWI-EAS443:3:21:285:1287#0/1  
AAGGGTATGAAGAATTACAATGGTTGGGAGAAGAGCAAC  
+HWI-EAS443:3:21:285:1287#0/1  
\_¥\_a^OT^]`X`a` `a^a^]`aa^\_¥Z[^¥Z¥Y]\_`\_`\_`



@HWI-EAS443:3:21:28:1511#0/1  
AAAAGAAGTCTAATGTCGCAGTCCCGCACTCGC  
+HWI-EAS443:3:21:28:1511#0/1  
ab`aa\_aaaa\_`aa\_aa¥aaa]`\_a\_\_X]\_a[\_\_\_]^\_^\_  
@HWI-EAS443:3:21:304:28#0/1  
CGGCTACTGGGAGAAACCTTGTTCACGGACCAATTCTCT  
+HWI-EAS443:3:21:304:28#0/1  
ababaaW\_`]a[a`a^R^[^^W`\_]U]\_]V\_]\_]`R\_]Z  
@HWI-EAS443:3:21:313:443#0/1  
AGACCACTGTGGACCATATGGCCATAATCAAAAAGTACAC  
+HWI-EAS443:3:21:313:443#0/1  
ZV`baaaHRNW\_`a¥JUHXa\_\_aPMGGRU\_S^\_aFHX\_LG  
@HWI-EAS443:3:21:318:1589#0/1  
TTCATTACCAACTACGTCCCCTTGCCCAATTAGCACAT  
+HWI-EAS443:3:21:318:1589#0/1  
aaabaabaabaaaaaa`^a^aa\_\_`\_^`a`]^XPX\_]\_^  
@HWI-EAS443:3:21:322:1203#0/1  
GAGAGGATTTCTCATTGGGCAAAGAAGACAAGAGATAT  
+HWI-EAS443:3:21:322:1203#0/1  
aWOW]SY\_XVaUYaa^¥[WFYUUYUP\_JHX[]NU¥RX]^\_  
@HWI-EAS443:3:21:412:935#0/1  
ATGATGGCAATGAGATACCCAATTACAGCAGACAAGAGAA  
+HWI-EAS443:3:21:412:935#0/1  
abaaabaa\_aaaa`aabaaaa`aaaa\_a`\_]a`aa`  
@HWI-EAS443:3:21:425:879#0/1  
TCCCGTTTTCGTTTCATTACCAACTACGTCCCCTTGCC  
+HWI-EAS443:3:21:425:879#0/1  
[b[`bVvaz]a`I`XVYT[Z[``aaVR`^UGWGSYNFVWE  
@HWI-EAS443:3:21:428:1698#0/1  
CTGCTGAATTGGGTATCTCATTGCCATCATCCACTTCAT  
+HWI-EAS443:3:21:428:1698#0/1  
aa^X[0]^Z]SQ¥M[\_`\_^[NVYU\_`\_^XL[`]TS\_\_U  
@HWI-EAS443:3:21:452:1016#0/1  
GGGAGATCAATGGCCCTGAGTCAGTGCTAGTCAACACTTA  
+HWI-EAS443:3:21:452:1016#0/1  
a`^`]¥[\_a^Y]Z¥^^][W^a`W\_a[\_ZNWUX^\_VU\_Z  
@HWI-EAS443:3:21:453:353#0/1  
TCTGTCTAAGGATGTCCACCATCCTTACTCCTCCAATCTG  
+HWI-EAS443:3:21:453:353#0/1  
aab^aaa`aa`^¥U\_a`^^`ZZ\_Z`^U¥\_`XW^[\_^Z^\_  
@HWI-EAS443:3:21:470:1498#0/1  
TTGCCTTACCAGTATCCTCAACCCTGATCCTCTCACAT  
+HWI-EAS443:3:21:470:1498#0/1  
\_¥Xa^¥a`abbbbaa¥``aaabb\_aaa^[\_aa`\_``a\_aa  
@HWI-EAS443:3:21:508:1192#0/1  
GTCCCGTTTTCGTTTCATTACCAACTACGTCCCCTTGC  
+HWI-EAS443:3:21:508:1192#0/1  
aaaaaa¥ababa\_`\_aaaaaaa^a`\_a\_Z]`^\_^^XZ^  
@HWI-EAS443:3:21:549:878#0/1  
ATAATGGACATGATTCCAGAGAGGAATGAACAAGGACAAA



@HWI-EAS443:3:21:732:660#0/1  
CTAATGTCGAGTCCCGCACTCGCGAGATACTCACTAAGA  
+HWI-EAS443:3:21:732:660#0/1  
abaa]bVb`aaaUaaaa]\_\_a\_\_^]\_¥W¥¥^\_^Z[Y[^  
@HWI-EAS443:3:21:736:964#0/1  
GAGAATAATGGACATGATTCCAGAGAGGAATGAACAAGGA  
+HWI-EAS443:3:21:736:964#0/1  
a`b`ab]baa`ba`a\_aa]\_`a\_a`^^^¥a\_\_^^`Y^  
@HWI-EAS443:3:21:79:109#0/1  
ACAAGGACAAACCCTCTGGAGCAAACAAACGATGCTGGA  
+HWI-EAS443:3:21:79:109#0/1  
aabbb`baba\_```aaaa`a\_]a\_a¥a\_a^ZVU[^]`^Y  
@HWI-EAS443:3:21:802:1892#0/1  
AAAAGAAGTGGAGATCTAATGTCGAGTCCCGCACTCGC  
+HWI-EAS443:3:21:802:1892#0/1  
aba`a\_a[^aa^`\_Y\_```\_^]SS¥^WUZXU[^]UUUX  
@HWI-EAS443:3:21:829:48#0/1  
CGAGATACTCACTAAGACCACTGTGGACCATATGGCCATA  
+HWI-EAS443:3:21:829:48#0/1  
abaaaaaa`a`a\_a`aa`aXa^^][^\_\_^`XR^Z]  
@HWI-EAS443:3:21:849:1098#0/1  
AAGAAGTGGAGATCTAATGTCGAGTCCCGCACTCGCGA  
+HWI-EAS443:3:21:849:1098#0/1  
\_aZ`\_aa\_a\_\_\_\_\_Y`\_aaY]a`\_X]RR[RWXUWXRXX  
@HWI-EAS443:3:21:868:1631#0/1  
CATTACCAACACTACGTCCCCTTGCCCAATTAGCACATTA  
+HWI-EAS443:3:21:868:1631#0/1  
aaaaaa\_aa[aX\_\_`^V`]a\_[]YY^^\_VX\_OV^O]RW^  
@HWI-EAS443:3:22:1005:845#0/1  
AAAAGAAGTGGAGATCTAATGTCGAGTCCCGCACTCGC  
+HWI-EAS443:3:22:1005:845#0/1  
abaaaaa`aaa\_aa```aa`ab^`\_```YW`^^YV¥\_\_Z]  
@HWI-EAS443:3:22:1008:517#0/1  
CGCGAGATACTCACTAAGACCACTGTGGACCATATGGCCA  
+HWI-EAS443:3:22:1008:517#0/1  
ababbbba`bababbbbaaab^bb\_aaa\_aaaaaa`[Wa  
@HWI-EAS443:3:22:1024:752#0/1  
AAAGAAGTGGAGATCTAATGTCGAGTCCCGCACTCGCG  
+HWI-EAS443:3:22:1024:752#0/1  
`ZZ`a\_aa\_YV[]R¥UX`\_YUVP RRY]BBBBBBBBBBBBB  
@HWI-EAS443:3:22:1027:219#0/1  
ATCCTTACTCCTCCAATCTGTGTGCTGTGGCACATTTCCA  
+HWI-EAS443:3:22:1027:219#0/1  
`b`^b^¥`b`[a\_\_aaa`aaV\_\_]]`a\_\_`¥`U^aa`^]`^  
@HWI-EAS443:3:22:1034:1162#0/1  
GGCTTGTTCCTCAGTTGGATTCTGTCTAAGGATGTCCACC  
+HWI-EAS443:3:22:1034:1162#0/1  
ababa[`aa`aaZY]a^`a`bab`\_[\_\_a`aU^S\_]a^U`  
@HWI-EAS443:3:22:1059:1013#0/1  
GGTGGTTCACTTTCAAAGGACAAGCGGATCATCAGTCA

+HWI-EAS443:3:22:1059:1013#0/1  
a^T\_`a]aa^¥a`^Z]`aa^W]Y¥Y]¥Y`¥¥^Y^`W^¥  
@HWI-EAS443:3:22:1092:265#0/1  
GTGGCGTACATGCTAGAAAGAGAATTGGTCCGTAAAACAA  
+HWI-EAS443:3:22:1092:265#0/1  
a^\_QZb`aaaa\_\_a`\_aYa]\_a\_W]V]^^[^Z¥[^UZ]  
@HWI-EAS443:3:22:1112:201#0/1  
CCCCTTTTCGTTTTATTACCAACTACTGCCCCCTTGCCC  
+HWI-EAS443:3:22:1112:201#0/1  
a```Xaaaab\_aa```ab\_^aa[``\_a`^]]W`\_¥Z¥^W  
@HWI-EAS443:3:22:1142:67#0/1  
CTTGTCCTTTTGAAAGTGAACCCACCAAACTGAAAGATG  
+HWI-EAS443:3:22:1142:67#0/1  
X`abVKUababbb`a¥^a\_babababaa]a^bbba\_a`  
@HWI-EAS443:3:22:1156:197#0/1  
GTCCCGTTTTCGTTTTATTACCAACTACTGCCCCCTTGC  
+HWI-EAS443:3:22:1156:197#0/1  
aa`\_`b\_aaaa^aa\_aa`a^\_\_`^`Y`\_]`YUVZU^^[Z  
@HWI-EAS443:3:22:1165:843#0/1  
CTTGAAAGGATGCAGGTGCATTGACTGAAGATCCAGATG  
+HWI-EAS443:3:22:1165:843#0/1  
abbaabba¥`abbbab`]]abaababbbbaa`]abaaa  
@HWI-EAS443:3:22:1213:192#0/1  
TCCCGCACTCGCGAGATACTACTAAGACCACTGTGGACC  
+HWI-EAS443:3:22:1213:192#0/1  
`a^Xa[\_Ua¥¥K\_W`W]WU\_]^[\_ZXUXWY]]TNTVKP]^  
@HWI-EAS443:3:22:1216:892#0/1  
GAGATCTAATGTGCGAGTCCCGCACTCGCGAGATACTCAC  
+HWI-EAS443:3:22:1216:892#0/1  
a`[\_`a\_Z]\_¥b^a]]\_ROS[[[¥OT\_VTXSWZ`]UYWZ\_ZT  
@HWI-EAS443:3:22:1228:303#0/1  
CCATCACATTGTCGATGGATTCAATTCGCCAGTTCTGGAA  
+HWI-EAS443:3:22:1228:303#0/1  
`\_aba]\_abb\_U`aaaa¥^baY`aaaURV```a]Saa\_aa  
@HWI-EAS443:3:22:1240:1323#0/1  
GGCCATATCTTGTCTTCTTTGCCCAAAATGAGAAATCC  
+HWI-EAS443:3:22:1240:1323#0/1  
aa`abbbab`bbab\_abbaabbaa\_aa\_aaaa\_aaa`a[\_  
@HWI-EAS443:3:22:1272:1332#0/1  
ATTCCGATCATTCCCATCACATTGTCGATGGATTCAATTC  
+HWI-EAS443:3:22:1272:1332#0/1  
aa`\_`a`a\_a\_]`Y`\_\_a^a\_\_]V^X]]]]ZU]]^ZY  
@HWI-EAS443:3:22:1320:67#0/1  
CCCCGCACTCAGAATGAAGTGGATGATGGCAATGAGATAC  
+HWI-EAS443:3:22:1320:67#0/1  
aaaab\_a`b`\_b\_ab`\_aaQba``a^^^`U\_\_^aP]V`]N  
@HWI-EAS443:3:22:1352:753#0/1  
CCCTAACTGCCTTGATCATGCAATCCTCTTGTGAGAATAC  
+HWI-EAS443:3:22:1352:753#0/1  
aa\_Ua\_\_a`X^a`]]aaa[a`\_V```]\_[\_`\_a^[\_`\_]`¥V

@HWI-EAS443:3:22:1359:562#0/1  
CGATGCTGGATCAGACCGAGTGATGGTATCACCTCTGGCC  
+HWI-EAS443:3:22:1359:562#0/1  
aba`b\_bbba\_M`aaaaa` `[b\_` ` \_[``Za\_Q`^`\_`¥^  
@HWI-EAS443:3:22:1374:546#0/1  
GCTGTCCTGAGAGATTTCTCATTTTGGGCAAAGAAGACA  
+HWI-EAS443:3:22:1374:546#0/1  
a`ba`\_`aa\_a\_aa]a`a`Y`aa`a`¥]`\_\_a`\_\_\_Y`  
@HWI-EAS443:3:22:1377:1382#0/1  
GTCCCCTTTTCGTTTTATTACCAACTACGTCCCCCTTGC  
+HWI-EAS443:3:22:1377:1382#0/1  
`a`VT^¥[\_`\_b\_a\_\_\_aaa[¥]M^Y]\_]O`YRSXOIDK]  
@HWI-EAS443:3:22:137:446#0/1  
TGCTAATTGGGCAAGGGGACGTAGTGTGGTAATGAAACG  
+HWI-EAS443:3:22:137:446#0/1  
`a`a`\_`aa`aaa`\_aa`\_Y` ``]`\_ZaY`a`X^^]UR`^MY  
@HWI-EAS443:3:22:1389:634#0/1  
GCTGTCCTGAGAGATTTCTCATTTTGGGCAAAGAAGACA  
+HWI-EAS443:3:22:1389:634#0/1  
aaa`\_`\_]`aaa`a^¥aa`¥aX\_aa`\_aR\_\_\_\_]\_]\_^\_[ ]`  
@HWI-EAS443:3:22:1443:535#0/1  
AAAAGAAGTCTGAGATCTAATGTCGCAGTCCCGCACTCGC  
+HWI-EAS443:3:22:1443:535#0/1  
`ba`\_`\_`a`abaa\_b`a\_ba`ab\_\_b]aa]]]V\_\_\_\_\_Z^V  
@HWI-EAS443:3:22:1447:526#0/1  
GAGAATAAAGAAGTCTGAGATCTAATGTCGCAGTCCCGC  
+HWI-EAS443:3:22:1447:526#0/1  
a`\_`UH^¥[R^`V[PaYUa]a]ZP[a`^P][RV`¥PWXQG  
@HWI-EAS443:3:22:1449:561#0/1  
AAAGAAGTCTGAGATCTAATGTCGCAGTCCCGCACTCGCG  
+HWI-EAS443:3:22:1449:561#0/1  
aXO]Z\_]\_R[``a[]Y\_aX` ``]TXVUXVKVUUNUTBBBBB  
@HWI-EAS443:3:22:1462:1126#0/1  
GAGAATAAAGAAGTCTGAGATCTAATGTCGCAGTCCCGC  
+HWI-EAS443:3:22:1462:1126#0/1  
``babbbaabbaa`aabaaaa\_ba\_aa`\_a`^a[[^\_\_[  
@HWI-EAS443:3:22:1488:758#0/1  
CACTCGCAGATACTACTAAGACCACTGTGGACCATATG  
+HWI-EAS443:3:22:1488:758#0/1  
aaaaab` ``aabV[b¥^aaa]a\_\_aa\_a^¥a`^ZZ]Z^``  
@HWI-EAS443:3:22:1490:1141#0/1  
GGAAGTTGTTTTCCCAAATGAAGTGGGGCAAGAATACTG  
+HWI-EAS443:3:22:1490:1141#0/1  
aa]`aU[\_S]a`V^[\_X\_\_a] [\_X`] `¥YPYVW[UZVMTY  
@HWI-EAS443:3:22:1516:1166#0/1  
TCCTGATGTGTACTTTTTGATTATGGCCATATGGTCCACA  
+HWI-EAS443:3:22:1516:1166#0/1  
^`\_W¥`^YY¥¥¥VZ¥`\_aa`aa`\_¥]^UUXVUERSVQTHT  
@HWI-EAS443:3:22:1546:1427#0/1  
AAAAGAAGTCTGAGATCTAATGTCGCAGTCCCGCACTCGC

+HWI-EAS443:3:22:1546:1427#0/1  
`aaaaba`aaaaaaa`\_bba`a¥\_a\_a\_W¥\_\_\_\_¥[M[¥¥[  
@HWI-EAS443:3:22:1561:292#0/1  
AAGAAGTCTGAGATCTAATGTCGCAGTCCCGCACTCGCGA  
+HWI-EAS443:3:22:1561:292#0/1  
aaaUa[b[`bbaa`\_aaba`S^ZT]bXQFZXV¥U\_¥Z¥UG  
@HWI-EAS443:3:22:1588:1816#0/1  
CCGCACTCAGAATGAAGTGGATGATGGCAATGAGATACCC  
+HWI-EAS443:3:22:1588:1816#0/1  
aa``¥U^`a`[^`T]R]\_a`^WFY`GNUX^S\_N¥U]VP  
@HWI-EAS443:3:22:1608:1831#0/1  
ATCCGCTTGTCTTTTGAAGTGAACCCACAAAAGTAA  
+HWI-EAS443:3:22:1608:1831#0/1  
Y]MM\_a`\_aaba^Q\_]\_W\_`^JNZMHSYOH¥^\_\_QJUY[  
@HWI-EAS443:3:22:163:693#0/1  
CTCACTAAGACCACTGTGGACCATATGGCCATAATCAAAA  
+HWI-EAS443:3:22:163:693#0/1  
`ab`abb``^bbb`\_\_UUU^ab]YY^]¥`^OXV\_VZW]`a  
@HWI-EAS443:3:22:1643:2000#0/1  
AAAGAAGTCTGAGATCTAATGTCGCAGTCCCGCACTCGCG  
+HWI-EAS443:3:22:1643:2000#0/1  
aa\_UR`X]a]`a\_`^X`a`^Z]U[Z\_^PTPZTXGPRZTZ  
@HWI-EAS443:3:22:1688:589#0/1  
AAAAGAAGTCTGAGATCTAATGTCGCAGTCCCGCACTCGC  
+HWI-EAS443:3:22:1688:589#0/1  
aaaaa`a\_aaa\_aa\_a]ba\_aaYZ`]\_]WXTXX]X^YXX  
@HWI-EAS443:3:22:169:1284#0/1  
CACTTTCAAAAAGGACAAGCGGATCATCAGTCAAGAAAGAA  
+HWI-EAS443:3:22:169:1284#0/1  
aba^^a^[aR¥\_aab^ZYaaa^V^`Ya`aW`Kaa\_aa`]`  
@HWI-EAS443:3:22:1731:572#0/1  
ATAAAAAGAAGTCTGAGATCTAATGTCGCAGTCCCGCACTC  
+HWI-EAS443:3:22:1731:572#0/1  
\_VYT\_WT¥^Z``X`[^`V\_``\_`XT¥RYZOSTSSQTZSY  
@HWI-EAS443:3:22:1738:1284#0/1  
CTTTCTAGCATGTACGCCACCATCAAGGGAGCAATTTTAC  
+HWI-EAS443:3:22:1738:1284#0/1  
aabb\_a``\_ba^a``\_`b``\_aaa^V`[Z\_bYa[baaa`W  
@HWI-EAS443:3:22:1741:489#0/1  
AATCCAAGTCTGAGGAACAAGCCGTAGACATATGCAAGGCAG  
+HWI-EAS443:3:22:1741:489#0/1  
aaa\_W`\_Yaaa]W\_`¥\_[aHVa^\_a¥H]^]V]R[]VXW]^  
@HWI-EAS443:3:22:1750:1629#0/1  
CAGCACGTCCCTTGGGTTAAGTGCAACACTTCAATATAAA  
+HWI-EAS443:3:22:1750:1629#0/1  
[\_b\_^R^XPZ`ab]]a^a\_a[G]^U]G[Va\_T\_\_a``\_¥`  
@HWI-EAS443:3:22:1760:901#0/1  
CTCGGTCTGATCCAGCATCGTTTTGTTTTGCTCCAGAGGGT  
+HWI-EAS443:3:22:1760:901#0/1  
aaba`\_bbbaabbbbbbbbabbbabb\_Ya\_`^``baa\_

@HWI-EAS443:3:22:1765:99#0/1  
AGCAAATGCGGGATGTGCTTGGGACATTTGACTGTCCA  
+HWI-EAS443:3:22:1765:99#0/1  
abU`ZU]`\_\_\_\_\_Z]aX\_R^]^[MhMZ#Z]]VXXZXPWXV  
@HWI-EAS443:3:22:1791:977#0/1  
AAGGGAGCAATTTTACAATCCTGGAGCTCTTCTTCTTCT  
+HWI-EAS443:3:22:1791:977#0/1  
abbabb\_#aabbab`a\_aa#Z\_a``UZ#N#`\_]a`aWaa\_a  
@HWI-EAS443:3:22:221:36#0/1  
CAGTGGTCTTAGTGAGTATCTCGCGAGTGCGGGACTGCGA  
+HWI-EAS443:3:22:221:36#0/1  
`baSa#V`a\_]`T`]\_XTZ^^X[[\_UZr\_^\_\_][SXZURZV  
@HWI-EAS443:3:22:289:901#0/1  
AAAAGAAGTGGAGATCTAATGTCGCAGTCCCGCACTCGC  
+HWI-EAS443:3:22:289:901#0/1  
``]ba\_babbaabaaabba[aa]aaaa\_\_aa]#` [ ]aaa  
@HWI-EAS443:3:22:32:1646#0/1  
TGGTGGGTTCACTTTCAAAGGACAAGCGGATCATCAGTC  
+HWI-EAS443:3:22:32:1646#0/1  
`b\_G\_b`]ba`aWWab\_\_`^aXa`^]a`b\_`aaaa`Y`  
@HWI-EAS443:3:22:338:733#0/1  
AAAGAAGTGGAGATCTAATGTCGCAGTCCCGCACTCGCG  
+HWI-EAS443:3:22:338:733#0/1  
^]aaaa\_`\_\_`a[`aaaa`ba\_a\_`\_`X]\_YX\_\_\_T`\_\_  
@HWI-EAS443:3:22:385:1475#0/1  
GGCAAGGGGACGTAGTGTGGTAATGAAACGAAAACGGGA  
+HWI-EAS443:3:22:385:1475#0/1  
`^a^\_a^aaa`a^\_`]aYa`^V\_\_^S\_\_aQ[Y^^\_GTRWY  
@HWI-EAS443:3:22:430:976#0/1  
GCAGACAAGAGAATAATGGACATGATTCCAGAGAGGAATG  
+HWI-EAS443:3:22:430:976#0/1  
aaba`aaaaaaa`abaaa`aaa``a`\_a^^`\_`^a\_\_a^`  
@HWI-EAS443:3:22:458:574#0/1  
GCATCCTTTCCAAGAAGTGAAGTCGTTTGGTTGCCCTTGT  
+HWI-EAS443:3:22:458:574#0/1  
`Z` [TOVa#M[X#\_LPV^US]W]WXSXQYZVY^WTQR^OZ  
@HWI-EAS443:3:22:495:406#0/1  
GGATTAGCTCATCTTTCAGTTTTGGTGGGTTCACTTTCAA  
+HWI-EAS443:3:22:495:406#0/1  
a`aaa\_a\_\_^V[ ]\_`a^`]\_]`X`S\_Z^]UUTZ]\_]V]]  
@HWI-EAS443:3:22:496:1259#0/1  
GTTTTCGTTTCATTACCAACTACGTCCCCTTGCCCAAT  
+HWI-EAS443:3:22:496:1259#0/1  
`aaaa`ba\_a[aaaa``aaa`\_`a\_\_Z^X\_a^#V\_\_W]^\_  
@HWI-EAS443:3:22:496:1992#0/1  
CAATAACAAAAGAGAAGAAAGAAGAGCTCCAGGATTGTAA  
+HWI-EAS443:3:22:496:1992#0/1  
a^``#aa^aaaa\_`a`\_`a`\_a\_\_\_\_a^a\_\_\_\_#\_#]\_Z^^  
@HWI-EAS443:3:22:525:266#0/1  
GAAGTGGAGATCTAATGTCGCAGTCCCGCACTCGCGAGA

+HWI-EAS443:3:22:525:266#0/1  
a^`^¥aaa]\_`^¥\_a\_[`a¥\_\_aa\_W[¥¥¥`WSU¥\_^^¥^W  
@HWI-EAS443:3:22:55:431#0/1  
GCAGTCAATTGCTGAGGCAATAATTGTGGCCATGGTATTC  
+HWI-EAS443:3:22:55:431#0/1  
aa]J¥abbaaaba``aaaaaaaaaa]Y\_``\_`^TaLWZ\_N  
@HWI-EAS443:3:22:565:644#0/1  
GGTCAACATCATCATTCTCACTTCTCCTCCTGGAGTGTA  
+HWI-EAS443:3:22:565:644#0/1  
aaG[aa\_a¥[\_]M^a^`Naa\_[G\_]`ZQW^`]¥\_H¥W¥  
@HWI-EAS443:3:22:578:366#0/1  
GCGAGATACTACTAAGACCACTGTGGACCATATGGCCAT  
+HWI-EAS443:3:22:578:366#0/1  
a`bVb]Z^\_b`a`abba```a`^]¥a\_a\_\_]a\_\_aaGa¥^  
@HWI-EAS443:3:22:587:1494#0/1  
CTAATGTCGCGAGTCCCGCACTCGCGAGATACTACTAAGA  
+HWI-EAS443:3:22:587:1494#0/1  
aaaa]\_Zbaaaa^ab]X`]\_aaaa``^¥a`[Ua\_\_aaZ\_  
@HWI-EAS443:3:22:599:1543#0/1  
CTCGCGAGATACTACTAAGACCACTGTGGACCATATGGC  
+HWI-EAS443:3:22:599:1543#0/1  
`\_aZaa`\_aa\_\_\_\_\_``\_a\_\_`¥\_^]]\_^^]\_]\_]\_[¥W  
@HWI-EAS443:3:22:610:913#0/1  
GTCCCGTTTTCGTTTTATTACCAACTACGTCCCCTTGC  
+HWI-EAS443:3:22:610:913#0/1  
`a]LYa]``^^\_QWP`W\_¥[W`\_¥¥^¥[a`TKWW]XYKZ¥  
@HWI-EAS443:3:22:632:88#0/1  
CTGATGTGACTTTTTGATTATGGCCATATGGTCCACAGT  
+HWI-EAS443:3:22:632:88#0/1  
abbbbbbWbbbbbbbabbbbaaaaa`a^]aP^^a\_a`P  
@HWI-EAS443:3:22:646:76#0/1  
AAAAGAAGTGAAGATCTAATGTCGCGAGTCCCGCACTCGC  
+HWI-EAS443:3:22:646:76#0/1  
abbaaababbaabaaaa\_\_ab]`aaaaY\_\_\_\_\_`W]^]\_`^  
@HWI-EAS443:3:22:688:1516#0/1  
GGATTTCTCATTTTGGGCAAAGAAGACAAGAGATATGGCC  
+HWI-EAS443:3:22:688:1516#0/1  
a\_a\_`\_\_^\_]\_aS¥^\_aaa\_aa^\_\_\_\_]`[^\_^]V`ZVZ¥X  
@HWI-EAS443:3:22:692:856#0/1  
GTCCCGTTTTCGTTTTATTACCAACTACGTCCCCTTGC  
+HWI-EAS443:3:22:692:856#0/1  
a\_a`aa^aaaaa\_`\_\_`\_aa`a`[a^`\_^\_Y]\_]\_]V^X  
@HWI-EAS443:3:22:699:1164#0/1  
ATGATGGCAATGAGATACCCAATTACAGCAGACAAGAGAA  
+HWI-EAS443:3:22:699:1164#0/1  
aa`]ba`aabaab`]bbbabba`a\_aa\_``^P^\_```\_a  
@HWI-EAS443:3:22:723:215#0/1  
ATTTTACAATCCTGGAGCTCTTCTTTCTTCTTTTGTTA  
+HWI-EAS443:3:22:723:215#0/1  
¥¥\_b\_bba]\_]`V[XX¥¥\_ZPY\_WT]`¥\_[Za`]SU\_\_



@HWI-EAS443:3:22:745:574#0/1  
GGCCCAACAACAAGTACAGTTCATTACCCTAAGGTATATA  
+HWI-EAS443:3:22:745:574#0/1  
aaaaa`a\_aaWb`\_Ua¥aa^`\_a`\_`[\_a`[\_TNY^`\_^  
@HWI-EAS443:3:22:75:703#0/1  
GAGGTTGCCCGTTAGCACTTCTTCTTTCTTGACTGAT  
+HWI-EAS443:3:22:75:703#0/1  
\_Z^bRaaaaaa^a]aaaaaaa`aaa\_\_`\_`a`a\_]\_`Y\_  
@HWI-EAS443:3:22:760:26#0/1  
AAAAGAAGTCTAATGTCGCAGTCCCGCACTCGC  
+HWI-EAS443:3:22:760:26#0/1  
aa`aaRWN\_WYWTSFHUV^QY\_[VWU[\_SWGW]YGWUVUW  
@HWI-EAS443:3:22:769:1022#0/1  
ATCAAACCTTTGGTCAACATCATCATTCTCACTTCTCCTC  
+HWI-EAS443:3:22:769:1022#0/1  
¥[ba```abbb`\_aaa`a\_ba``aaabaab`aaabaaaa  
@HWI-EAS443:3:22:833:1503#0/1  
CCGTAACAAGGTTTCTCCAGTAGCCGCGGAACAGGC  
+HWI-EAS443:3:22:833:1503#0/1  
\_\_\_^bbbbbba`[a]bbb```baa`\_`baa]`aa^aZ`¥^^  
@HWI-EAS443:3:22:838:1043#0/1  
AAACGACTTACAGTTCCTGGAAAGGATGCAGGTGCATTGA  
+HWI-EAS443:3:22:838:1043#0/1  
aaa`\_`\_`\_a`\_`[a`a\_]`^`\_`^`^`^V`\_`^]Z^\_  
@HWI-EAS443:3:22:865:673#0/1  
GAGAATAAAGAAGTCTAATGTCGCAGTCCCGC  
+HWI-EAS443:3:22:865:673#0/1  
a^aVZ¥a`^`[M^^^a¥`^a^`¥\_YV`\_UX^¥]\_RXX[VU  
@HWI-EAS443:3:22:890:1548#0/1  
AGAAGTCTAATGTCGCAGTCCCGCACTCGCGAG  
+HWI-EAS443:3:22:890:1548#0/1  
`a`a\_a`a\_]`^]a`a``aaU]\_\_Z\_T`\_]\_\_[[YN`^^^U  
@HWI-EAS443:3:22:908:402#0/1  
GAGAGAATAAAGAAGTCTAATGTCGCAGTCCC  
+HWI-EAS443:3:22:908:402#0/1  
V\_babbababaa]baabbabbbbabbbbZ¥aabb`\_`a`  
@HWI-EAS443:3:22:937:336#0/1  
TGTGCCATGGTATTCTCACAAGAGGATTGCATGATCAAG  
+HWI-EAS443:3:22:937:336#0/1  
aaU]a`a¥P[\_TVJ[XTV\_\_\_XRFV[VR\_¥RYZTP^N\_UB  
@HWI-EAS443:3:23:1010:250#0/1  
AATAAAGAAGTCTAATGTCGCAGTCCCGCACT  
+HWI-EAS443:3:23:1010:250#0/1  
abbbbbbaababaa\_abaa`aa`bb`\_`aaaaY\_Z^`^¥X]  
@HWI-EAS443:3:23:1025:1119#0/1  
GATCCTCTCACATTACAGTCAATGAGGAAAATTGCATCC  
+HWI-EAS443:3:23:1025:1119#0/1  
ababbb]`]aZ`b`X`¥bb]Y`a`a`a`a`aa`\_`a[a`\_]`  
@HWI-EAS443:3:23:1033:1239#0/1  
CTGTCCTGAGAGGATTTCTCATTTTGGGCAAAGAAGACAA

+HWI-EAS443:3:23:1033:1239#0/1  
UXXZ¥WVWR^ab[M^[[V`[] [bb[ZIK[]UaR\_bbaZ¥Z  
@HWI-EAS443:3:23:1035:1035#0/1  
AAAAGAAGTCTAATGTCGCAGTCCCGCACTCGC  
+HWI-EAS443:3:23:1035:1035#0/1  
ab`b`[\_V]U]¥Y)`a`aa\_\_`^`^Y\_aX\_YWU]XaZPX  
@HWI-EAS443:3:23:1061:970#0/1  
AAAAGAAGTCTAATGTCGCAGTCCCGCACTCGC  
+HWI-EAS443:3:23:1061:970#0/1  
a`J[bM\_\_ab`b`a]bYba^bbZ`\_U`\_SYUZ`U]\_aY[N  
@HWI-EAS443:3:23:1068:1614#0/1  
ATTGGGCAAGGGGACGTAGTGTGGTAATGAAACGAAAAC  
+HWI-EAS443:3:23:1068:1614#0/1  
abbaa`aba`aa\_\_\_b\_\_a]a\_a`[Va`WP[abX\_]aaaR  
@HWI-EAS443:3:23:1084:1483#0/1  
GGAATTGAATCCATCGACAATGTGATGGGAATGATCGGAA  
+HWI-EAS443:3:23:1084:1483#0/1  
`bababaabba\_ababb`baaa`aa\_aa`aa\_aa`\_`\_\_`  
@HWI-EAS443:3:23:1090:545#0/1  
CTGATGTGTACTTTTTGATTATGGCCATATGGTCCACAGT  
+HWI-EAS443:3:23:1090:545#0/1  
aa`abbabababbbbababbaa\_aa]¥Xaa`\_VR^WSa[S  
@HWI-EAS443:3:23:1113:1632#0/1  
AAAAGAAGTCTAATGTCGCAGTCCCGCACTCGC  
+HWI-EAS443:3:23:1113:1632#0/1  
aab\_aaaaaabaa\_a[^aaaaa\_`\_\_a\_¥`N]\_\_\_Z^] ^U  
@HWI-EAS443:3:23:111:434#0/1  
GAGTAAGGATGGTGGACATCCTTAGACAGAATCCAACTGA  
+HWI-EAS443:3:23:111:434#0/1  
aaa`aaaa`a` `[a`aaaaabaa` ``aaaa`a]a` `a`a  
@HWI-EAS443:3:23:1124:73#0/1  
TTTTCAGTGTGGAGGTTGCCGTTAGCACTTCTTCTTC  
+HWI-EAS443:3:23:1124:73#0/1  
abbb]`\_Wa`baba\_bbZaZNXV`\_]\_¥`S¥Z`\_]`aW`\_Y  
@HWI-EAS443:3:23:1125:1264#0/1  
AGGGGACGTAGTGTGGTAATGAAACGAAAACGGGACTCT  
+HWI-EAS443:3:23:1125:1264#0/1  
^`abaa`aX\_b]` `aYa]Z\_RRVa^F[WZ^^FW\_ZTTXNX  
@HWI-EAS443:3:23:114:933#0/1  
CTGCTGTAATTGGGTATCTCATTGCCATCATCCACTTCAT  
+HWI-EAS443:3:23:114:933#0/1  
aaaaaa[]aaaaa^^aaa`aa` `` `aa^^V[`` [¥a\_\_\_`  
@HWI-EAS443:3:23:1155:1357#0/1  
CCCGTTTTCGTTTCATTACCAACTACGTCCCCTTGCCC  
+HWI-EAS443:3:23:1155:1357#0/1  
`\_U`\_¥\_JQaPa`a[`¥YYaa¥a¥a`aPWL]G^`VR^[O\_  
@HWI-EAS443:3:23:1191:134#0/1  
GAATAAAGAAGTCTAATGTCGCAGTCCCGCAC  
+HWI-EAS443:3:23:1191:134#0/1  
a]LQ[]VSa`PZV]LN[\_\_\_T\_^]Z^ZLWNR[PTWZ]XWQ

@HWI-EAS443:3:23:1208:1256#0/1  
CCCCACTCAGAATGAAGTGGATGATGGCAATGAGATACC  
+HWI-EAS443:3:23:1208:1256#0/1  
aYO\_]b[Yaa\_Z\_ZX]S¥XR[ZQ¥YX]Z¥S^VX^¥\_[YVH  
@HWI-EAS443:3:23:1230:2022#0/1  
GTCCCCGTTTTCGTTTCATTACCAACTACGTCCCCCTTGC  
+HWI-EAS443:3:23:1230:2022#0/1  
a`a\_ab`aaaa`aa]aa`a]aa\_\_\_\_\_a]\_N]V]XY[W[  
@HWI-EAS443:3:23:1276:1378#0/1  
TGAAGGGTATGAAGAATTCACAATGGTTGGGAGAAGAGCA  
+HWI-EAS443:3:23:1276:1378#0/1  
ab^P^]]XaabZ[\_`aa`b]`Y[a[\_aa`XS[]]¥\_GVDV  
@HWI-EAS443:3:23:1298:558#0/1  
AAAAGAAGTCTAATGTCGAGTCCCCGACTCGC  
+HWI-EAS443:3:23:1298:558#0/1  
R[`Za^¥W¥¥`[^¥`^a\_]JY]ZR]]ZWGY\_]`TQO¥VYS  
@HWI-EAS443:3:23:1312:1348#0/1  
AGGCAATAATTGTGGCCATGGTATTCTCACAAGAGGATTG  
+HWI-EAS443:3:23:1312:1348#0/1  
aaabab``aaa`\_YW]\_YVUY\_^R]YYZ`][L]a[X]U  
@HWI-EAS443:3:23:131:192#0/1  
AAAAGAAGTCTAATGTCGAGTCCCCGACTCGC  
+HWI-EAS443:3:23:131:192#0/1  
aZb`aaaa^^¥\_aa\_aaaa`a^¥aZ¥`ZZ^\_`WT^[`Y^  
@HWI-EAS443:3:23:1321:1875#0/1  
AAAGAAGTCTAATGTCGAGTCCCCGACTCGCG  
+HWI-EAS443:3:23:1321:1875#0/1  
]aa^aaaa`aXa^\_aa\_aa¥a\_]a\_W\_a\_ZZ^Y¥\_]W[  
@HWI-EAS443:3:23:1346:1617#0/1  
GAAAAGCACTTTTGCATCTTTTGGAAATGCCTCAAGAGT  
+HWI-EAS443:3:23:1346:1617#0/1  
`bbbbbb\_b\_a\_aaa`aaabbaabaa```baa\_aW\_ab`a\_  
@HWI-EAS443:3:23:1371:915#0/1  
AGAAGTCTAATGTCGAGTCCCCGACTCGCGAG  
+HWI-EAS443:3:23:1371:915#0/1  
`a`ba\_bbbba\_aaaaab\_\_\_a^bZ¥¥`^^^\_]S¥a\_^  
@HWI-EAS443:3:23:1384:660#0/1  
TTCCGGGAGACAATAGTACGTTCCCTCTTTGATCTCTAACC  
+HWI-EAS443:3:23:1384:660#0/1  
abaaaaaaaa`a`aa`^^^\_\_\_G]X`^`a^W[]]\_W\_\_^UZ  
@HWI-EAS443:3:23:1401:1576#0/1  
CGCTGGTTTGCCTATTGACAAAGTTCAGATCGCCCCTAA  
+HWI-EAS443:3:23:1401:1576#0/1  
\_[U\_a]T\_P`¥^]]`b`]¥[\_\_Y\_]\_^aUX\_X¥[Z¥\_W  
@HWI-EAS443:3:23:1430:235#0/1  
CTCGGAGATACTACTAAGACCACTGTGGACCATATGGC  
+HWI-EAS443:3:23:1430:235#0/1  
ababbbabbaaaa]a¥aaaa`^\_a`a\_]a`a^\_U``a`\_¥  
@HWI-EAS443:3:23:1464:851#0/1  
AAAAGAAGTCTAATGTCGAGTCCCCGACTCGC



@HWI-EAS443:3:23:311:381#0/1  
GAGATACTACTAAGACCACTGTGGACCATATGGCCATAA  
+HWI-EAS443:3:23:311:381#0/1  
`¥¥\_aUa\_`¥`babbbbaababX`baaa]]b\_abWaa`]^  
@HWI-EAS443:3:23:353:665#0/1  
GCTAATGTGCTAATTGGGCAAGGGGACGTAGTGTGGTAA  
+HWI-EAS443:3:23:353:665#0/1  
aaa\_`aba`]^b]b\_XVbaa0X`aZF\_aGX[Q^Y\_\_\_NGa  
@HWI-EAS443:3:23:358:1715#0/1  
CACTTCTCCTCCTGGAGTGACATCTGCTCCCAGCACGTC  
+HWI-EAS443:3:23:358:1715#0/1  
ababX¥`bbbaabaa\_U`abaaaa`aa\_aaaaQXaa¥YX  
@HWI-EAS443:3:23:364:967#0/1  
CTTCCTGATGTGACTTTTTGATTATGGCCATATGGTCCA  
+HWI-EAS443:3:23:364:967#0/1  
abbbbababba`aaabbaabb]babaa`aaaXa`Ya`\_`a  
@HWI-EAS443:3:23:392:87#0/1  
GCCCTGAGTCAGTGCTAGTCAACACTTATCAATGGATAAT  
+HWI-EAS443:3:23:392:87#0/1  
abaabbbb`aaa\_aaa\_\_^`a\_a\_aa^a`\_\_aa`\_`\_`\_\_  
@HWI-EAS443:3:23:39:373#0/1  
ATCCGCTTGCTTTTTGAAAGTGAACCCACCAAAACTGAA  
+HWI-EAS443:3:23:39:373#0/1  
aaaaaaaa[[\_¥`aaa\_a`X\_] [T^U^\_\_\_\_\_W^^]^  
@HWI-EAS443:3:23:464:1855#0/1  
GTCTTCTTTGCCAAAATGAGAAATCCTCTCAGGACAGCA  
+HWI-EAS443:3:23:464:1855#0/1  
^X[`]XZZV`\_Y`aU¥\_Q\_]V[^]VZX[[VXX^XY`\_Za  
@HWI-EAS443:3:23:487:72#0/1  
CGTTTTCGTTTCATTACCAACTACGTCCCCTTGCCCAA  
+HWI-EAS443:3:23:487:72#0/1  
`b`aaaab`aa`\_aa¥`a`\_a`\_a\_\_Y^^Z^Z\_]`]]^X  
@HWI-EAS443:3:23:48:212#0/1  
TGAAGGCACATCTGGGGTGGAGTCTGCTGCTCCTGAGAGGA  
+HWI-EAS443:3:23:48:212#0/1  
aaaa\_bba`\_a`\_`aaY¥a`ZZU\_\_a`a[ZZ\_^`]`\_W\_\_  
@HWI-EAS443:3:23:514:1031#0/1  
CATCTGCTCCCAGCACGTCCCTTGGGTTAAGTGCAACACT  
+HWI-EAS443:3:23:514:1031#0/1  
[Y^aaba[]X`0D¥V[aV\_`[Q\_a`YJSa`aY\_Ta]H\_ZR  
@HWI-EAS443:3:23:524:583#0/1  
GAATAAAAGAACTGAGAGATCTAATGTCGCAGTCCCGCAC  
+HWI-EAS443:3:23:524:583#0/1  
]¥I[¥`bU^^W`\_QTU`abaabab[bX`]aa`\_Y^[KV^  
@HWI-EAS443:3:23:52:70#0/1  
ACCTTGTTTTACGGACCAATTCTCTTTCTAGCATGTACGC  
+HWI-EAS443:3:23:52:70#0/1  
aaaaabY]a`a`aa`\_`X`aa`\_a¥`\_`\_\_^`\_\_WUW\_]`  
@HWI-EAS443:3:23:563:1912#0/1  
TGGTATTCTACAAGAGGATTGCATGATCAAGGCAGTTAG





+HWI-EAS443:3:23:978:787#0/1  
abYaa`aa\_aaa\_\_\_\_\_`a^`\_`\_`a[\_]\_]a\_[aW¥\_a^\_  
@HWI-EAS443:3:23:993:1236#0/1  
TGCTGCTCCACCAGAACAGAGTAGGATGCAATTTTCCTCA  
+HWI-EAS443:3:23:993:1236#0/1  
`bababVaaaa\_X]a^I`^`N]`PR`\_`YY`aaY\_aH[  
@HWI-EAS443:3:24:1043:1055#0/1  
GTATCTCATTGCCATCATCCACTTCATTCTGAGTGCGGGG  
+HWI-EAS443:3:24:1043:1055#0/1  
aabbbb`a`b\_abaa`a\_\_\_\_\_a`\_`aa^aa¥[]a`\_ZZa  
@HWI-EAS443:3:24:1046:944#0/1  
CCCGCACTCAGAATGAAGTGGATGATGGCAATGAGATACC  
+HWI-EAS443:3:24:1046:944#0/1  
abbbabbbbbb`bbba`baabaabaaaaaaaaabba`aa¥`  
@HWI-EAS443:3:24:1055:1369#0/1  
CAACTCTCCTTATTTTAACTTGATTTCTGAAGTGGAC  
+HWI-EAS443:3:24:1055:1369#0/1  
a`Yaa`aaaaaaaa`\_]`X`aa\_aaa\_\_`a`a`a`\_Ya\_`¥  
@HWI-EAS443:3:24:1068:1218#0/1  
CGATCTGAACTTTGTCAATAGGGCAAACCAGCGACTGAAC  
+HWI-EAS443:3:24:1068:1218#0/1  
]bb^Yab`bVbb\_^^^]\_^¥WZ\_\_`Y`\_W^VPZZF[aa`U  
@HWI-EAS443:3:24:107:695#0/1  
GAGTAAGGATGGTGGACATCCTTAGACAGAATCCAACCTGA  
+HWI-EAS443:3:24:107:695#0/1  
VH\_a[`b^`^a`\_W[\_ba`abba`b\_X^\_aa\_b]T¥\_a\_]`  
@HWI-EAS443:3:24:1093:50#0/1  
TCCCTCTTTGATCTCTAACCCCTTAAAAATCGGTCAACT  
+HWI-EAS443:3:24:1093:50#0/1  
aaaa\_`\_`\_a^aa\_]`^aZ¥[\_`\_]\_^\_^¥\_^Z[^\_^]Z\_  
@HWI-EAS443:3:24:1094:1130#0/1  
GGTGGAGTCTGCTGTCTGAGAGATTCTCATTGTTGGGC  
+HWI-EAS443:3:24:1094:1130#0/1  
aa¥aaabTa\_aa^a¥\_`\_a¥\_¥`\_\_\_\_\_a\_^¥\_¥a^^\_[]`  
@HWI-EAS443:3:24:1104:1503#0/1  
AAAGAAGTGGAGATCTAATGTCGAGTCCCGCACTCGCG  
+HWI-EAS443:3:24:1104:1503#0/1  
abb^aaaaababaaa`aaaab\_a`^`]YT\_a¥`¥[\_Z^\_\_  
@HWI-EAS443:3:24:1128:1025#0/1  
CTGCTCCCAGCACGTCCCTTGGGTTAAGTGCAACACTTCA  
+HWI-EAS443:3:24:1128:1025#0/1  
ab\_bab]Zbbbbaa\_aaaS\_M\_a]^¥^^Za`\_aaaYaa\_]`  
@HWI-EAS443:3:24:1132:1614#0/1  
ATCTAATGTCGAGTCCCGCACTCGCGAGATACTCACTAA  
+HWI-EAS443:3:24:1132:1614#0/1  
ababaaab[]baaa\_\_`\_`¥[[]aaa\_a`\_\_a\_\_V\_S\_`a  
@HWI-EAS443:3:24:1157:978#0/1  
CAGTGGTCTTAGTGAGTATCTCGCGAGTGGGGACTGCGA  
+HWI-EAS443:3:24:1157:978#0/1  
abbaab`bbb`aaaba`abaa\_aaa]\_Ya[aa`^Uaa\_]`



@HWI-EAS443:3:24:1163:821#0/1  
ATGGCCATATGGTCCACAGTGGTCTTAGTGAGTATCTCGC  
+HWI-EAS443:3:24:1163:821#0/1  
\_`aa`Z¥a\_\_Y]]Z\_¥VabV[a\_QYO¥]^`aZVVLXJ  
@HWI-EAS443:3:24:1176:875#0/1  
CGCACTCGCGAGATACTCACTAAGACCACTGTGGACCATA  
+HWI-EAS443:3:24:1176:875#0/1  
abbbbabbbb`bbbaabaaaabb\_aabbabbaaaaaaaaa  
@HWI-EAS443:3:24:122:1581#0/1  
GCCCGTTAGCACTTCTTCTTTCTTGACTGATGATCCG  
+HWI-EAS443:3:24:122:1581#0/1  
aa`a`^Z^`a`a`a`aa`a``\_`^a\_\_aa`aaa\_¥\_Z\_`]  
@HWI-EAS443:3:24:1234:527#0/1  
GAATAAAAGAACTGAGAGATCTAATGTCGCAGTCCCGCAC  
+HWI-EAS443:3:24:1234:527#0/1  
`bb\_\_aS¥`[UU\_aaaaa]]`a]\_\_ZH`YP]ZNH`\_[^N  
@HWI-EAS443:3:24:1261:757#0/1  
GGCCATATGGTCCACAGTGGTCTTAGTGAGTATCTCGCGA  
+HWI-EAS443:3:24:1261:757#0/1  
aabbbbbbbZbbabab`bb]aababab\_`a`a\_b\_a]  
@HWI-EAS443:3:24:1327:848#0/1  
TGGATCAATCTCCTGGTTGCCTTTCTGAGAATAGCTGTTG  
+HWI-EAS443:3:24:1327:848#0/1  
abbbbabbbb¥abbabba\_\_a`^]aaaaabaaaa```S¥]  
@HWI-EAS443:3:24:1330:1268#0/1  
CTGTAATTGGGTATCTCATTGCCATCATCCACTTCATTCT  
+HWI-EAS443:3:24:1330:1268#0/1  
`b`babbbbababb^babbbb`\_bbaaaababaaaaaab  
@HWI-EAS443:3:24:1348:532#0/1  
GTCCCGTTTTCGTTTTATTACCAACTACGTCCCTTGC  
+HWI-EAS443:3:24:1348:532#0/1  
aaaaaa\_aaa\_a`aa\_aaaa\_`^a`^a```^`^]\_^\_`^VNU  
@HWI-EAS443:3:24:136:313#0/1  
AAAAGAACTGAGAGATCTAATGTCGCAGTCCCGCACTCGC  
+HWI-EAS443:3:24:136:313#0/1  
a\_bba¥abaa`aaaa`aaaa[aaa``Za`a]a\_a^`\_\_  
@HWI-EAS443:3:24:1371:444#0/1  
AAAGAACTGAGAGATCTAATGTCGCAGTCCCGCACTCGCG  
+HWI-EAS443:3:24:1371:444#0/1  
aa^b`aQbabab[^\_U`a¥aaZ]`Z\_\_Z\_Y]Q¥^N\_TV¥\_  
@HWI-EAS443:3:24:1377:1269#0/1  
GAGGATCAGGGTTGAGGATACTGGTAAGAGGCAATTCTCC  
+HWI-EAS443:3:24:1377:1269#0/1  
a`a`a``aa\_a\_a`aaa\_^]W`\_\_]\_^¥^X`WZY\_\_W]YX  
@HWI-EAS443:3:24:1396:1894#0/1  
AGAGAATAAAAGAACTGAGAGATCTAATGTCGCAGTCCCG  
+HWI-EAS443:3:24:1396:1894#0/1  
\_babaa\_baaaaab`aab¥baa``baab`U\_\_baG`[UV  
@HWI-EAS443:3:24:1414:240#0/1  
TGCTGTAATTGGGTATCTCATTGCCATCATCCACTTCATT

+HWI-EAS443:3:24:1414:240#0/1  
ab`bb`\_abbbaaHaa^aT`a`a]]`\_][\_\_ZW^]]`YX^\_  
@HWI-EAS443:3:24:1418:868#0/1  
GCAAGGGGACGTAGTGTGGTAATGAAACGAAAACGGGAC  
+HWI-EAS443:3:24:1418:868#0/1  
aaaabbbb\_aa^^`^b\_babZZ`a^a]P^\_]a¥XV\_UW  
@HWI-EAS443:3:24:1420:769#0/1  
GTCCCGTTTTTCGTTTCATTACCAACTACTGCCCTTGC  
+HWI-EAS443:3:24:1420:769#0/1  
aa]ZUa]a`b\_Z`a\_`^a\_\_`¥`V^`¥`¥^a\_[^S]UW[U  
@HWI-EAS443:3:24:1437:1726#0/1  
CTGCCTTGCATATGTCTACGGCTTGTTCCTCAGTTGGATT  
+HWI-EAS443:3:24:1437:1726#0/1  
abbbbabbbbbbbZbbb^ba\_a\_L^RQ[¥` [ `^¥YaPPY  
@HWI-EAS443:3:24:1438:551#0/1  
GACCGATTTTTAAGGGTTAGAGATCAAAGAGGGAACGTAC  
+HWI-EAS443:3:24:1438:551#0/1  
abababbbbbbbbabbb\_bbaaaaaa`ababbaba`baba  
@HWI-EAS443:3:24:1452:1694#0/1  
GAATAAAGAAGACTGAGAGATCTAATGTCGCAGTCCCGCAC  
+HWI-EAS443:3:24:1452:1694#0/1  
`b`b`ZbaaaV`abaaRabaaaa`^aa^[[`[^a^  
@HWI-EAS443:3:24:145:685#0/1  
GATGGCAATGAGATACCCAATTACAGCAGACAAGAGAATA  
+HWI-EAS443:3:24:145:685#0/1  
a]\_aa^SSWa`YY[aa`aa`\_\_\_`aa\_a]]\_[^^a^^^\_  
@HWI-EAS443:3:24:1520:14#0/1  
ATATCTTGTCTTCTTTGCCAAAATGAGAAATCCTCTC  
+HWI-EAS443:3:24:1520:14#0/1  
]a^a¥`a`a`a`aa]]`a`X`^^^ab\_baZa^¥\_a¥a\_  
@HWI-EAS443:3:24:1541:1263#0/1  
GGGTTGAGGATTAGCTCATCTTTTCAGTTTTGGTGGGTTCA  
+HWI-EAS443:3:24:1541:1263#0/1  
aaaT¥]^`aa\_W\_¥`[¥QX^Z¥^Y\_T[^`G^T[INRV  
@HWI-EAS443:3:24:1582:472#0/1  
GTCCCGTTTTTCGTTTCATTACCAACTACTGCCCTTGC  
+HWI-EAS443:3:24:1582:472#0/1  
a`a`ababba^b`a`bbab\_\_a`\_a\_aa\_a\_Y\_]`^^\_Y  
@HWI-EAS443:3:24:159:805#0/1  
AAAAGAAGACTGAGAGATCTAATGTCGCAGTCCCGCACTCGC  
+HWI-EAS443:3:24:159:805#0/1  
abb\_^`aaaaaaaaaaaaa`aa^a\_a\_a^`\_a^aX^^`^`  
@HWI-EAS443:3:24:1666:1044#0/1  
GTCCCGTTTTTCGTTTCATTACCAACTACTGCCCTTGC  
+HWI-EAS443:3:24:1666:1044#0/1  
abaaabababababb`bbaa\_aa]a`aa\_]`\_]`\_`\_X  
@HWI-EAS443:3:24:1690:824#0/1  
AAAGAAGACTGAGAGATCTAATGTCGCAGTCCCGCACTCGCG  
+HWI-EAS443:3:24:1690:824#0/1  
aba\_^`bab^bbaa`b\_b\_\_^a`aaWN]\_Z`\_Y\_UU^a

@HWI-EAS443:3:24:1711:1472#0/1  
ATTGTCGATGGATTCAATCCCCAGTTCTGGAAAAGCACT  
+HWI-EAS443:3:24:1711:1472#0/1  
abbaaaabababbaGaYW`MX]X[]\_a\_aa]]^`\_aT]J^  
@HWI-EAS443:3:24:1734:983#0/1  
CTCTCTGGAATCATGTCCATTATTCTTGTCTGCTGTAA  
+HWI-EAS443:3:24:1734:983#0/1  
``V\_aabb]ba\_\_bb]`aabaaba^b[bbb\_T\_bJa\_aY\_  
@HWI-EAS443:3:24:1753:931#0/1  
AAAAGAAGTCTGAGATCTAATGTCGCAGTCCCCGCACTCGC  
+HWI-EAS443:3:24:1753:931#0/1  
JWbaa`V`U`b]b]^Mbaba`b[aaUbIH[bb¥¥bS[bZ  
@HWI-EAS443:3:24:1761:467#0/1  
AAAAGAAGTCTGAGATCTAATGTCGCAGTCCCCGCACTCGC  
+HWI-EAS443:3:24:1761:467#0/1  
ababbabaab`bbaaaSaaaab\_a\_\_`a]ZUZa`X\_]aU  
@HWI-EAS443:3:24:177:1075#0/1  
GTCCCGTTTTTCGTTTCATTACCAACTACGTCCCCTTGC  
+HWI-EAS443:3:24:177:1075#0/1  
aaba]bZaaabbUa^aaaaa````a\_aa`\_^`\_]`\_^[X  
@HWI-EAS443:3:24:1783:1177#0/1  
AACATTGTGGGATCTTGTGACCATTGAATTTTCACAATTT  
+HWI-EAS443:3:24:1783:1177#0/1  
a]X\_\_`^aVaa`X¥aaSN^`]Uaa^aaababaP¥K`^^aY  
@HWI-EAS443:3:24:185:222#0/1  
CCTGATGTGTACTTTTTGATTATGGCCATATGGTCCACAG  
+HWI-EAS443:3:24:185:222#0/1  
aaZ]SaaRSI`^`OSQa`\_\_\_\_\_]NU`^\_X[VMXGYXLU¥M  
@HWI-EAS443:3:24:186:84#0/1  
TTGGGTATCTCATTGCCATCATCCACTTCATTCTGAGTGC  
+HWI-EAS443:3:24:186:84#0/1  
abbba`aaaa`ab\_]\_aa`\_a\_aaa`aa]]\_a¥`\_]\_W\_Z  
@HWI-EAS443:3:24:194:587#0/1  
CCCGTTTTTCGTTTCATTACCAACTACGTCCCCTTGGCC  
+HWI-EAS443:3:24:194:587#0/1  
ababaabbabaaabba`ba`a`]aaa\_aa\_aaaa\_^`\_]a  
@HWI-EAS443:3:24:229:108#0/1  
ATCTAATGTCGCAGTCCCCGCACTCGCGAGATACTCACTAA  
+HWI-EAS443:3:24:229:108#0/1  
abb`\_Q\_\_\_aaa]a\_a`a`aY\_X`\_\_¥H^^[\_¥^XVP^U^  
@HWI-EAS443:3:24:270:570#0/1  
GATGAAGGCACATCTGGGTGGAGTCTGCTGTCCCTGAGAG  
+HWI-EAS443:3:24:270:570#0/1  
\_babaabbbbaaaaa`abaZZaaa\_aaaaa\_\_``aa[a\_a  
@HWI-EAS443:3:24:284:385#0/1  
GAATGAAGTGGATGATGGCAATGAGATACCCAATTACAGC  
+HWI-EAS443:3:24:284:385#0/1  
a]Vbba\_a]aY^`a`\_`a\_\_]\_aaa\_^a^a]a\_\_]\_]a^\_  
@HWI-EAS443:3:24:288:229#0/1  
TAAAAGAAGTCTGAGATCTAATGTCGCAGTCCCCGCACTCG

+HWI-EAS443:3:24:288:229#0/1  
¥a^¥Za` `b[bb^`^aabb\_aaXT]^aZR`aaX[L\_Y]W  
@HWI-EAS443:3:24:340:937#0/1  
AAAAGAAGTCTAATGTCGAGTCCCCGACTCGC  
+HWI-EAS443:3:24:340:937#0/1  
aabbbaaaababaaaaa`ab^b`aa\_X` ``\_aaa]^`\_\_  
@HWI-EAS443:3:24:349:208#0/1  
AAAGAAGTCTAATGTCGAGTCCCCGACTCGCG  
+HWI-EAS443:3:24:349:208#0/1  
\_b`Wabb¥]]`¥^a``a``a`aaaa¥V` ``[\_R[RX[ZU  
@HWI-EAS443:3:24:371:1836#0/1  
GTCCCGTTTTCGTTTCATTACCAACTACGTCCCCTTGC  
+HWI-EAS443:3:24:371:1836#0/1  
aUbb\_^]`aaZY\_\_`ba\_b\_````a\_ab\_S\_```\_]a  
@HWI-EAS443:3:24:393:1272#0/1  
GCGGGATGTGCTTGGGACATTTGACTGTCCAAATAATA  
+HWI-EAS443:3:24:393:1272#0/1  
^bbaa]]^Zaa`a`aa[aaaaaa¥\_aa` `Xa\_`a`\_`a`a  
@HWI-EAS443:3:24:423:1892#0/1  
GGCGATCTGAACCTTGTCAATAGGGCAAACCGACTGA  
+HWI-EAS443:3:24:423:1892#0/1  
YYba^ab\_\_aW[[a\_W\_babUQT[]\_Z\_VP]¥PJ\_ZLYV]  
@HWI-EAS443:3:24:430:132#0/1  
CCGCACTCAGAATGAAGTGGATGATGGCAATGAGATACCC  
+HWI-EAS443:3:24:430:132#0/1  
abaa\_S\_``a`aba]bbSbbb¥aaS` `a`Z^baaY[a^QX  
@HWI-EAS443:3:24:433:862#0/1  
AAAAGAAGTCTAATGTCGAGTCCCCGACTCGC  
+HWI-EAS443:3:24:433:862#0/1  
abbbababbbb`bbbaabbbababaaaa`abbaaa]a`\_  
@HWI-EAS443:3:24:472:1724#0/1  
AAAAGAAGTCTAATGTCGAGTCCCCGACTCGC  
+HWI-EAS443:3:24:472:1724#0/1  
abaaa` `b\_a`]aVa^YaaaaaXaZ^`UU\_\_\_\_^[a]YG^  
@HWI-EAS443:3:24:484:1993#0/1  
AGAGAATAAAAGAAGTCTAATGTCGAGTCCCCG  
+HWI-EAS443:3:24:484:1993#0/1  
aa`T\_ba`b`baZa\_a`aU^ab^aaaaa`Q`a`b\_Y\_Z\_X  
@HWI-EAS443:3:24:48:1860#0/1  
CCCGTTTTCGTTTCATTACCAACTACGTCCCCTTGGCC  
+HWI-EAS443:3:24:48:1860#0/1  
``a\_\_bbabbbbbbbbbbbbbbbbbbb`abb\_\_aa``  
@HWI-EAS443:3:24:523:595#0/1  
CTGCTGTCTGAGAGGATTTCTATTTTGGGCAAAGAAGA  
+HWI-EAS443:3:24:523:595#0/1  
aaababab`ababbabaaa\_aaabbaa`baa\_[babbbba  
@HWI-EAS443:3:24:541:1347#0/1  
GGGTATCTCATTGCCATCATCCACTTCTGAGTGCGG  
+HWI-EAS443:3:24:541:1347#0/1  
aS¥Haaaa``aa\_]`]aaaa\_a` `a\_[aa\_^` `XaX\_\_

@HWI-EAS443:3:24:557:297#0/1  
CACTCGCGAGATACTCACTAAGACCACTGTGGACCATATG  
+HWI-EAS443:3:24:557:297#0/1  
ZY`^\_PT¥[R^RW¥Za`^YVVZ`^U^NXF]OXYSWHS]\_  
@HWI-EAS443:3:24:560:276#0/1  
CTGATGTGACTTTTTGATTATGGCCATATGGTCCACAGT  
+HWI-EAS443:3:24:560:276#0/1  
aabbabababbbbbbabbbaaba`a]]`\_aa[^P  
@HWI-EAS443:3:24:623:1271#0/1  
GGCAAGGGGACGTAGTGTGGTAATGAAACGAAAACGGGA  
+HWI-EAS443:3:24:623:1271#0/1  
]abbbbabaaab]ab`a\_abaW`^`¥ba``aUa`\_a`]  
@HWI-EAS443:3:24:624:83#0/1  
GTCCCCTTTTCGTTTCATTACCAACTACGTCCCCTTGC  
+HWI-EAS443:3:24:624:83#0/1  
aX`VsaoDXYS^]\_XUXTVWNP^UXBBBBBBBBBBBBBB  
@HWI-EAS443:3:24:638:431#0/1  
ATCAAGGGAGCAATTTTACAATCCTGGAGCTCTTCTTCT  
+HWI-EAS443:3:24:638:431#0/1  
aaa^W\_b]a¥bbVbba^a`\_`^U`¥¥a`YY`a`\_`^`Wa  
@HWI-EAS443:3:24:664:1620#0/1  
CGCACTCAGAATGAAGTGGATGATGGCAATGAGATACCCA  
+HWI-EAS443:3:24:664:1620#0/1  
ababbbbababbababbaabbaaa`abbbbaa`ba`\_b  
@HWI-EAS443:3:24:673:658#0/1  
GTACTTTTTGATTATGGCCATATGGTCCACAGTGGTCTTA  
+HWI-EAS443:3:24:673:658#0/1  
aP[Ya\_a`aa`\_Wa¥Y¥aY[FWU]YR\_a^\_]Y`aZW^^X  
@HWI-EAS443:3:24:678:118#0/1  
AATAAAAGAACTGAGAGATCTAATGTCGCAGTCCCGCACT  
+HWI-EAS443:3:24:678:118#0/1  
`bbbaabbaabaaa^a`a`aa\_aa`\_a\_\_a]^^^\_]Y  
@HWI-EAS443:3:24:68:633#0/1  
ATCAACTCTCCTTATTTTAACTTGATTTCTGAAGTGG  
+HWI-EAS443:3:24:68:633#0/1  
abaaab``aaaaaaaaaaaa`a`a`a^\_\_a`^^^`\_]Y  
@HWI-EAS443:3:24:71:910#0/1  
GAATAAAAGAACTGAGAGATCTAATGTCGCAGTCCCGCAC  
+HWI-EAS443:3:24:71:910#0/1  
`^W[a^\_a`^`^`aaaS\_Z[a`^aaaYYY\_K^Z]U]¥¥R[  
@HWI-EAS443:3:24:728:424#0/1  
TGGCAATGAGATACCCAATTACAGCAGACAAGAGAATAAT  
+HWI-EAS443:3:24:728:424#0/1  
aaaabbbb\_a`¥`a\_aaaa`aaa`aaa`]aQa]b`\_`aa`  
@HWI-EAS443:3:24:729:1896#0/1  
TGCTGTAATTGGGTATCTCATTGCCATCATCCACTTCATT  
+HWI-EAS443:3:24:729:1896#0/1  
`]Y`U[S`a^U]XQPR`X`\_PZaa`X[PZPZRV]R[ZU  
@HWI-EAS443:3:24:738:918#0/1  
GGTTCACCTTTCAAAGGACAAGCGGATCATCAGTCAAGAA

+HWI-EAS443:3:24:738:918#0/1  
aV`bab`\_ab\_Y`baab¥aaaaaa^\_aa^^`¥ZW\_`\_\_\_\_  
@HWI-EAS443:3:24:750:1102#0/1  
CAGTCCCCTCGACTCGCGAGATACTACTAAGACCACTGTGG  
+HWI-EAS443:3:24:750:1102#0/1  
`aa`bbbababba`bbabab``aaabab^`````a``[XZa  
@HWI-EAS443:3:24:781:1652#0/1  
TATGGCCATATGGTCCACAGTGGTCTTAGTGAGTATCTCG  
+HWI-EAS443:3:24:781:1652#0/1  
a`aa`baa``[UWNT][\_]XS^`NRV`TXS\_ZKS`SJPPS  
@HWI-EAS443:3:24:784:1920#0/1  
CGTAAAACAAGTTTCTCCCAGTAGCCGGCGAACAGGCA  
+HWI-EAS443:3:24:784:1920#0/1  
[[U`\_abV`b`Uba`bb¥]L¥b`aaa\_b\_\_[V¥baaPJSb  
@HWI-EAS443:3:24:78:1188#0/1  
GAATAAAGAAGACTGAGAGATCTAATGTTCGCAGTCCCAC  
+HWI-EAS443:3:24:78:1188#0/1  
aaaaba]a\_aa^[ba\_aaa]aaYS¥a]a\_a^[U\_\_\_\_[^\_\_  
@HWI-EAS443:3:24:816:1301#0/1  
CAATCCCCAGTTCTGGAAAAGCACTTTTGCATCTTTTTG  
+HWI-EAS443:3:24:816:1301#0/1  
T¥baZa^`b`````b`\_b``aab\_abbabb\_ab¥a¥bbaa`  
@HWI-EAS443:3:24:820:588#0/1  
AATAAAGAAGACTGAGAGATCTAATGTTCGCAGTCCCAC  
+HWI-EAS443:3:24:820:588#0/1  
\_\_a`a`ab``]\_bbaaabaaba`^aa^``¥a¥a`a^^`  
@HWI-EAS443:3:24:840:1297#0/1  
CCCGTTTTCGTTTCATTACCAACTACGTCCCCTTGCCC  
+HWI-EAS443:3:24:840:1297#0/1  
`a[RJ[Pa\_[R`][^[[[\_]NL]^W[^ZP[]Y\_RNVVYB  
@HWI-EAS443:3:24:860:1215#0/1  
TACGGACCAATTCTTTCTAGCATGTACGCCACCATCAA  
+HWI-EAS443:3:24:860:1215#0/1  
Z`R¥aZV^\_RYQ¥¥Q^YZ\_\_YOY]X`Y^`Y`a]VUVa`]  
@HWI-EAS443:3:24:909:739#0/1  
AAGAAGTGAAGTCGTTTGGTTGCCTTGTTGTAATTGAAT  
+HWI-EAS443:3:24:909:739#0/1  
aaabaabaab`babaaaab\_\_aba`aaaaab\_b``\_a`aa  
@HWI-EAS443:3:24:993:1757#0/1  
GGGCCATTCTATTCCACCATGTTACGGCCAGAGGTGATA  
+HWI-EAS443:3:24:993:1757#0/1  
^ba`T`a]\_b\_\_b^aaaaaaa`^abaaa^T`¥S]VLU]VY  
@HWI-EAS443:3:25:1013:1031#0/1  
AAAGAAGTGAAGTCTAATGTTCGCAGTCCCACCTCGCG  
+HWI-EAS443:3:25:1013:1031#0/1  
abbb[baa`abbaaabaaba`\_`abaa¥\_a\_aa[`¥a\_`^`  
@HWI-EAS443:3:25:1033:1820#0/1  
GGCCATGGTATTCTCACAAAGAGATTGCATGATCAAGGCA  
+HWI-EAS443:3:25:1033:1820#0/1  
\_`b^a\_a^U`Y`¥V^¥W\_Z[[\_aYWW][YT\_\_U\_\_]¥UYW

@HWI-EAS443:3:25:1060:295#0/1  
CGCGAGATACTCACTAAGACCACTGTGGACCATATGGCCA  
+HWI-EAS443:3:25:1060:295#0/1  
a`bbb`ba^\_\_bb`bbbbb\_¥aabbbaa^^]\_aaa``a[^`  
@HWI-EAS443:3:25:106:968#0/1  
CCCCAAATGAGAAATCCTCTCAGGACAGCAGACTCCACCC  
+HWI-EAS443:3:25:106:968#0/1  
abbbba`bb¥\_U^`a``ababaa]\_ab]b\_aaa\_aaaa^a  
@HWI-EAS443:3:25:1090:939#0/1  
AGGGGACGTAGTGTGGTAATGAAACGAAAACGGGACTCT  
+HWI-EAS443:3:25:1090:939#0/1  
abbbb[bbaba\_bbbb`X^aa\_aa`^`^abb]^`aaa`\_`  
@HWI-EAS443:3:25:1119:839#0/1  
GAACTGAGAGATCTAATGTGCGAGTCCCGCACTCGCGAGA  
+HWI-EAS443:3:25:1119:839#0/1  
`]^`HZa`YS[¥\_VX¥]a`ZVNV]QN^YQNYVT¥XU¥\_VZT  
@HWI-EAS443:3:25:112:1880#0/1  
GGCGGAACAGGCAGTGTATATTGAAGTGTGCACTTAA  
+HWI-EAS443:3:25:112:1880#0/1  
^aa\_\_`a^aX]b]^X]Ia¥UZV]aJZ`OFSV]DDEO¥¥`\_  
@HWI-EAS443:3:25:1132:1201#0/1  
TGCTAACGGGCAACCTCCAAACACTGAAAATAAGAGTACA  
+HWI-EAS443:3:25:1132:1201#0/1  
abaaba`aaa`Z^\_a`a`a`\_a`\_a`^`^^`^^`^`Xa^^  
@HWI-EAS443:3:25:1138:1399#0/1  
CAATTACAGCAGACAAGAGAATAATGGACATGATTCCAGA  
+HWI-EAS443:3:25:1138:1399#0/1  
^Ubbbabba``ab`a¥¥`^`b`¥`Sa``abaa\_]`]Wa¥  
@HWI-EAS443:3:25:1138:1860#0/1  
CTGTAATTGGGTATCTCATTGCCATCATCCACTTCATTCT  
+HWI-EAS443:3:25:1138:1860#0/1  
ab\_OR¥``\_URT¥¥b`ab\_baba`aab^`W¥T^`V`a¥Z[  
@HWI-EAS443:3:25:115:1057#0/1  
GTCCCCTTTTCGTTTCATTACCAACTACGTCCCCTTGC  
+HWI-EAS443:3:25:115:1057#0/1  
aS`W`a0^`\_`VaU^^^^`\_^ZQPVVZUTY]VGMZVYRUU[  
@HWI-EAS443:3:25:1196:1735#0/1  
ATCTAATGTCGAGTCCCGCACTCGCGAGATACTCACTAA  
+HWI-EAS443:3:25:1196:1735#0/1  
a¥[\_ba`]NOY\_a¥FZQUPYT\_YXNVXJZQMWRNVTLQX[  
@HWI-EAS443:3:25:1208:1424#0/1  
CAAACCTTTGGTCAACATCATCATTCTCACTTCTCCTCCT  
+HWI-EAS443:3:25:1208:1424#0/1  
aabbababab`b`\_\_babb``baaaabbaaa`abaaa`a\_  
@HWI-EAS443:3:25:1228:1241#0/1  
TCCCCTTTTCGTTTCATTACCAACTACGTCCCCTTGCC  
+HWI-EAS443:3:25:1228:1241#0/1  
aaa`a`aa`¥`\_`aaaaaaaa\_aa^a`\_`\_\_\_]\_^\_¥^^]\_]`  
@HWI-EAS443:3:25:1257:1096#0/1  
AGTGTCAAATGTCCCAAGCACATCCCGCATTTGCTGGAAC

+HWI-EAS443:3:25:1257:1096#0/1  
a]bbbbba`bbbabbbbab`abb`bbbbbbbababaaa  
@HWI-EAS443:3:25:1274:575#0/1  
GAGATACCCAATTACAGCAGACAAGAGAATAATGGACATG  
+HWI-EAS443:3:25:1274:575#0/1  
a¥`W`^^`Ya\_aa\_\_\_a\_V` ``¥Xa\_\_Z0]^S`Y\_X]]X  
@HWI-EAS443:3:25:1325:1452#0/1  
CAGAATGAAGTGGATGATGGCAATGAGATACCCAATTACA  
+HWI-EAS443:3:25:1325:1452#0/1  
\_`abbbb`aaabbbbbbbbabbbabbbabb`bbabb\_b  
@HWI-EAS443:3:25:1465:1342#0/1  
ATCCAGATGAAGGCACATCTGGGGTGGAGTCTGCTGCCT  
+HWI-EAS443:3:25:1465:1342#0/1  
^`bbbbba\_`babbbabbabba]\_\_a`a[aaaaa[```  
@HWI-EAS443:3:25:1480:521#0/1  
CATTGTGGGATCTTGTGACCATTGAATTTTCACAATTTCC  
+HWI-EAS443:3:25:1480:521#0/1  
abbbbbba` `bbbbbbb\_abb^bbbabbb^babbb`¥  
@HWI-EAS443:3:25:1483:429#0/1  
TGGAAATGTGCCACAGCACAGATTGGAGGAGTAAGGAT  
+HWI-EAS443:3:25:1483:429#0/1  
`bbbaX`aR¥^\_b`^Zaaa\_¥\_aUY]H]\_aXSYR[T\_]^[  
@HWI-EAS443:3:25:1547:107#0/1  
CGCACTCGCGAGATACTACTAAGACCACTGTGGACCATA  
+HWI-EAS443:3:25:1547:107#0/1  
]bK`bb\_ababbbba^bK[bb\_a` `¥`aaba]aba]V\_ab  
@HWI-EAS443:3:25:1599:681#0/1  
CCGCTTGTCTTTTGAAGTGAACCCACCAAACTGAAAG  
+HWI-EAS443:3:25:1599:681#0/1  
a]`bbbbbaabbbbbbbabaaabaaabWbbba`bbbbba  
@HWI-EAS443:3:25:1661:241#0/1  
CAGGTGCATTGACTGAAGATCCAGATGAAGGCACATCTGG  
+HWI-EAS443:3:25:1661:241#0/1  
ab¥¥b`babbbb`ababbabaabababb\_ab^bZab^bb]  
@HWI-EAS443:3:25:168:777#0/1  
CCATTATTCTTGTCTGCTGTAATTGGGTATCTCATTGC  
+HWI-EAS443:3:25:168:777#0/1  
aUabbbbbbbbbbbabbabba`^aba^bb^`ba`aaa`Xa  
@HWI-EAS443:3:25:1697:1350#0/1  
CAATTACAACAAGGCAACCAACGACTTACAGTTCTTGGA  
+HWI-EAS443:3:25:1697:1350#0/1  
aa\_` `bb`aaV[VX^bb`ZXS^ab`bbbab¥bR]¥`S^^\_  
@HWI-EAS443:3:25:174:55#0/1  
AGAATGAAGTGGATGATGGCAATGAGATACCCAATTACAG  
+HWI-EAS443:3:25:174:55#0/1  
aba`baaaa]b\_aaaa\_aa\_` `aa`a\_\_a^\_a\_W`]\_\_`a  
@HWI-EAS443:3:25:1773:1334#0/1  
AGAATGAAGTGGATGATGGCAATGAGATACCCAATTACAG  
+HWI-EAS443:3:25:1773:1334#0/1  
Y]`bbbb^\_bbbbba`¥b¥aabbbba`\_\_¥\_ab]b`a^b





+HWI-EAS443:3:25:342:698#0/1  
abbaa\_^^aaa^aaaaaaaaa\_Z\_aaZ^a`^¥T¥\_\_R¥  
@HWI-EAS443:3:25:387:1169#0/1  
CTCGGTCTGATCCAGCATCGTTTGTTCCTCCAGAGGGT  
+HWI-EAS443:3:25:387:1169#0/1  
aabba^aa]baababb¥`b`aaa\_aaa^]\_^a\_a`a\_\_W  
@HWI-EAS443:3:25:400:610#0/1  
CAACCCTGATCCTCTCACATTACAGTCAATGAGGAAAAT  
+HWI-EAS443:3:25:400:610#0/1  
abbba\_bbbabbbbbbbbbbaaba`b`abab\_bbaW\_b  
@HWI-EAS443:3:25:419:712#0/1  
GGAAAAGCACTTTTGCATCTTTTTGGAAATGCCTCAAGAG  
+HWI-EAS443:3:25:419:712#0/1  
aa]a]ON]UFNPJLTZ[YaQVZ^R[\_]TS[\_Y]V\_^V]X]  
@HWI-EAS443:3:25:428:649#0/1  
CCCTCTTTGATCTCTAACCTTAAAAATCGGTCAATACTC  
+HWI-EAS443:3:25:428:649#0/1  
\_`^`aaaaYa\_\_¥a`\_[[aXa`¥NWX`¥S]¥V¥a\_\_\_ZZV  
@HWI-EAS443:3:25:485:259#0/1  
GAAATGGTTCAAATTCATTTTGTGTATAACATTGTGGG  
+HWI-EAS443:3:25:485:259#0/1  
a\_a¥`^`][`\_`¥¥^¥¥\_\_\_\_¥[^a^\_\_\_\_ZTX\_¥\_[]Y]  
@HWI-EAS443:3:25:53:1275#0/1  
CCCCTTTTCGTTTCATTACCAACTACGTCCCCTTGCCC  
+HWI-EAS443:3:25:53:1275#0/1  
aba`X¥\_`a]Ya¥baaab\_]`P\_`Z`a¥]a\_`VGNV\_^V  
@HWI-EAS443:3:25:576:1719#0/1  
AGAGTCCCGTTTTCGTTTCATTACCAACTACGTCCCCT  
+HWI-EAS443:3:25:576:1719#0/1  
aab\_Zaaa¥]¥aaa\_NQ`\_a`a`\_\_\_\_a\_a^^a[XT^a^XW  
@HWI-EAS443:3:25:576:272#0/1  
CTGCTGTAATTGGGTATCTCATTGCCATCATCCACTTCAT  
+HWI-EAS443:3:25:576:272#0/1  
^`b`b]\_b`b`baa[abbbbbbbba\_abab]Za``b`[aa  
@HWI-EAS443:3:25:595:540#0/1  
CTGTAATTGGGTATCTCATTGCCATCATCCACTTCATTCT  
+HWI-EAS443:3:25:595:540#0/1  
ab]\_bbbbbabababbbabbbbaabbbabbbba``abaa  
@HWI-EAS443:3:25:598:1749#0/1  
CAAAATGAGAAATCCTCTCAGGACAGCAGACTCCACCCCA  
+HWI-EAS443:3:25:598:1749#0/1  
abbbbaababa[ab^ab¥`a\_[`\_a[[a\_`\_`\_`[\_\_\_\_  
@HWI-EAS443:3:25:59:698#0/1  
CCGCACTCGGAGATACTACTAAGACCACTGTGGACCAT  
+HWI-EAS443:3:25:59:698#0/1  
ababaaa^]\_a`aa`aa\_]aaa``\_a``\_\_VZUPa]]^  
@HWI-EAS443:3:25:615:1553#0/1  
TCTGCTGTAATTGGGTATCTCATTGCCATCATCCACTTCA  
+HWI-EAS443:3:25:615:1553#0/1  
abbabab\_babaaaa]baaaaaa`baa\_ab\_`aaaa\_a`

@HWI-EAS443:3:25:645:1185#0/1  
CCCCAGTTCTGGAAAAGCACTTTTGCATCTTTTTGGAAAT  
+HWI-EAS443:3:25:645:1185#0/1  
aabbbaabbb`\_bb¥`\_bbabaaaa`aa`babba`Tbaaa  
@HWI-EAS443:3:25:66:516#0/1  
GCTGGATCAGACCGAGTGATGGTATCACCTCTGGCCGTAA  
+HWI-EAS443:3:25:66:516#0/1  
a^aba`Xbb`abb`\_a\_baXbaZa^]a\_a`¥``a\_a`U\_`  
@HWI-EAS443:3:25:687:458#0/1  
GGAAAAGCACTTTTGCATCTTTTTGGAAATGCCTCAAGAG  
+HWI-EAS443:3:25:687:458#0/1  
a\_\_^¥^VG[V^^UN[LV]^^^[]\_X]PRNNVXYX^Y]X]  
@HWI-EAS443:3:25:691:1388#0/1  
GGATTTCTCATTTTGGGCAAAGAAGACAAGAGATATGGCC  
+HWI-EAS443:3:25:691:1388#0/1  
aUVX\_\_^[] [YV\_\_ZU\_]\_X¥X¥X¥Y]]^W^]SY]S]WXX  
@HWI-EAS443:3:25:694:1622#0/1  
CAATCCCCAGTTCTGGAAAAGCACTTTTGCATCTTTTTG  
+HWI-EAS443:3:25:694:1622#0/1  
\_a`bbbaaa^`aaa\_a`bb``aa``\_\_aa`aaa`a`a`]  
@HWI-EAS443:3:25:700:463#0/1  
CTCGCGAGATACTCACTAAGACCACTGTGGACCATATGGC  
+HWI-EAS443:3:25:700:463#0/1  
N\_[X`aS`W^X¥]aa\_bbabb` ``^a]]Z^U[\_`aa`a\_^  
@HWI-EAS443:3:25:71:279#0/1  
CTGCTGCTCCTGAGAGGATTTCTCATTTTGGGCAAAGAAGA  
+HWI-EAS443:3:25:71:279#0/1  
abbbb`bbbbbbb`ba\_abaaa`\_bbba`abaaa`aZ`aa  
@HWI-EAS443:3:25:763:734#0/1  
CTTGTGACCATTGAATTTTACAATTTCCAGTTCCTGAT  
+HWI-EAS443:3:25:763:734#0/1  
abbb`ababbbbbbbbbbb`b^`babaaaa`aaa`aaWa  
@HWI-EAS443:3:25:778:1699#0/1  
AATAAAAGAAGTCTGAGAGATCTAATGTCGCAGTCCCGCACT  
+HWI-EAS443:3:25:778:1699#0/1  
abaa]Z\_` [ `aaaa`aaa]^aa` ```\_`[^a`Y\_\_Z]¥S[]  
@HWI-EAS443:3:25:793:1340#0/1  
CTGCATGGCCAGGTTTGTATCAACTCTCCTCCTTATTTT  
+HWI-EAS443:3:25:793:1340#0/1  
a`bb`]aTaa^]]U\_Y\_¥a\_aa¥aa^\_P\_]` ]\_\_UYa\_^  
@HWI-EAS443:3:25:802:1886#0/1  
AAATGAGAAATCCTCTCAGGACAGCAGACTCCACCCAGA  
+HWI-EAS443:3:25:802:1886#0/1  
ababbaaaa`\_aa\_aVaa`\_`aa¥aa\_\_¥`]a\_¥`\_¥¥¥  
@HWI-EAS443:3:25:818:1215#0/1  
CTTCTGATGTGTACTTTTTGATTATGGCCATATGGTCCA  
+HWI-EAS443:3:25:818:1215#0/1  
abbaab`bbbab`abbba`aa`babaaabba^\_^G]Q\_\_a  
@HWI-EAS443:3:25:821:463#0/1  
AAAGAAGTCTGAGAGATCTAATGTCGCAGTCCCGCACTCGCG

+HWI-EAS443:3:25:821:463#0/1  
abbaaaabbababaaaaaab¥\_aaaa¥\_``\_a[````\_`  
@HWI-EAS443:3:25:831:215#0/1  
ACTGTACTTGTGTGGGCCATTCCCTATTCCACCATGTTA  
+HWI-EAS443:3:25:831:215#0/1  
`aab[aabb`HWZW`U`¥aa]aaaaSba`ZHQ\_^VaV\_a  
@HWI-EAS443:3:25:833:401#0/1  
CACTTCTTCTTCTTCTTGGACTGATGATCCGCTTGCCTT  
+HWI-EAS443:3:25:833:401#0/1  
aXZa¥¥a¥`RZ]a`^`aY^\_]a^[ababa`ab`ZaVZX\_`  
@HWI-EAS443:3:25:845:675#0/1  
TGCTGTAATTGGGTATCTCATTGCCATCATCCACTTCATT  
+HWI-EAS443:3:25:845:675#0/1  
\_aaaaaaYb\_\_\_a`baZX`a\_\_a]`a\_a\_`¥YV\_^[Z`\_  
@HWI-EAS443:3:25:849:613#0/1  
CAGAGGGTTTGTCTTGTTCATTCTCTCTGGAATCATGT  
+HWI-EAS443:3:25:849:613#0/1  
Z\_aba`¥W\_^aab`bbbabbbab`bbb\_[ab\_\_bbabbb  
@HWI-EAS443:3:25:857:1081#0/1  
CGTTTTCGTTTCATTACCAACTACGTCCCCTTGCCCAA  
+HWI-EAS443:3:25:857:1081#0/1  
abbbbbbbbbbb`bbabbbbaabbbbbbaaa`aaaa`a`  
@HWI-EAS443:3:25:884:581#0/1  
CTAATGTGCTAATTGGGCAAGGGGACGTAGTGTGGTAAT  
+HWI-EAS443:3:25:884:581#0/1  
abbbbbabbbbbbbbabbbabba]\_ab`aaababbb]aa]  
@HWI-EAS443:3:25:88:1061#0/1  
TTCTCATTGTTGGCAAAGAAGACAAGAGATATGGCCCAGC  
+HWI-EAS443:3:25:88:1061#0/1  
\_bba\_\_\_abaa^`\_Sa^a`a]`bb`^[Z[]a[W]aa`^`[  
@HWI-EAS443:3:25:913:783#0/1  
CCCCACTCAGAATGAAGTGGATGATGGCAATGAGATACC  
+HWI-EAS443:3:25:913:783#0/1  
a\_bb¥b\_bb\_\_Zaaa¥]a]a^]]\_TWVY^aa\_]a\_¥PS  
@HWI-EAS443:3:25:953:594#0/1  
TGTGCCACAGCACACAGATTGGAGGAGTAAGGATGGTGA  
+HWI-EAS443:3:25:953:594#0/1  
abab\_U\_abbbaa`ba`aabaaaa\_a^aaa`\_``T`\_`  
@HWI-EAS443:3:25:955:941#0/1  
CTGTCTAAGGATGTCCACCATCCTTACTCCTCCAATCTGT  
+HWI-EAS443:3:25:955:941#0/1  
abbbbbbbbbbbbabbbabbbabbbabbbabbbba  
@HWI-EAS443:3:25:956:1092#0/1  
CTGAGAGATCTAATGTGCGAGTCCCCTCGCGAGATAC  
+HWI-EAS443:3:25:956:1092#0/1  
abbbbabbbabbbbbbbbbb`abbababbbababaaaa  
@HWI-EAS443:3:25:98:1862#0/1  
ATCTAATGTGCGAGTCCCCTCGCGAGATACTCACTAA  
+HWI-EAS443:3:25:98:1862#0/1  
aaaaba`^aXa]^Wa`\_L^X`UaZ\_SV[\_UPTWYRST[Y

@HWI-EAS443:3:26:1015:1407#0/1  
ATTGCATCCTACTCTGTTCTGGTGGAGCAGCAGCAAAGGG  
+HWI-EAS443:3:26:1015:1407#0/1  
ZbbaU¥baab`a`\_]\_aa`¥`aa^]`a\_]aYKO[T^]a  
@HWI-EAS443:3:26:1059:179#0/1  
AGTACATGAAGGTATGAAGAATTCACAATGGTTGGGAGA  
+HWI-EAS443:3:26:1059:179#0/1  
abababbaaabbaZbabaaa`abaaa`aa`aaZ`^^\_¥`^  
@HWI-EAS443:3:26:1060:422#0/1  
GCCTCGCGAGATACTACTAAGACCACTGTGGACCATAT  
+HWI-EAS443:3:26:1060:422#0/1  
a\_TTVVS\_a`a`^XSU\_ZNYTTW`Y\_\_\_U]TW]^ZUGT^X  
@HWI-EAS443:3:26:1071:212#0/1  
GGAGTCTGCTGTCCTGAGAGGATTTCTCATTTTGGGCAA  
+HWI-EAS443:3:26:1071:212#0/1  
aa\_a]\_aa^aa^^\_a[[\_]\_]`¥`^`\_`\_\_\_Z^\_VY]Y  
@HWI-EAS443:3:26:1075:1954#0/1  
GGGTTCACTTTCAAAGGACAAGCGGATCATCAGTCAAGA  
+HWI-EAS443:3:26:1075:1954#0/1  
¥WSMFS\_QOOL`Y[Q[VWZZSS]Y¥ZQVYYTVW[QRZ]X]  
@HWI-EAS443:3:26:1106:1170#0/1  
GTCCCCTTTTCGTTTCATTACCAACTACGTCCCCTTGC  
+HWI-EAS443:3:26:1106:1170#0/1  
aN\_]`bX^aa\_a\_\_`aa]`\_^a`\_a\_Y^][XY\_XY^]\_W  
@HWI-EAS443:3:26:1130:1080#0/1  
CAACTCTCCTCCTTATTTAACTTGATTCTGAAGTGGAC  
+HWI-EAS443:3:26:1130:1080#0/1  
abaabbaa\_aabbbbbbbbababaaabbaaababa`baa\_  
@HWI-EAS443:3:26:1131:826#0/1  
AAAAGAAGTGAAGATCTAATGTCGCAGTCCCGCACTCGC  
+HWI-EAS443:3:26:1131:826#0/1  
\_abbabaabbabbaaaabbabb`[a`aa`\_`\_`a`\_\_\_^a\_  
@HWI-EAS443:3:26:1136:1728#0/1  
CGAGCAGTCAATTGCTGAGGCAATAATTGTGGCCATGGTA  
+HWI-EAS443:3:26:1136:1728#0/1  
abb`[aaabbbbaaa\_ab\_\_abbabaaaa\_a`^XZF[`QX  
@HWI-EAS443:3:26:1141:77#0/1  
GGGACGTAGTGTGGTAATGAAACGAAAACGGGACTCTAG  
+HWI-EAS443:3:26:1141:77#0/1  
`bba`b\_ab\_babbbR`aaa`bZa\_\_aaH\_a`^U^]^^  
@HWI-EAS443:3:26:1145:1038#0/1  
CTCACTAAGACCACTGTGGACCATATGGCCATAATCAAAA  
+HWI-EAS443:3:26:1145:1038#0/1  
a^]`bb^`^]ab`¥`aT¥`a]\_Va\_aa\_^VVYY[\_\_\_\_  
@HWI-EAS443:3:26:1161:1117#0/1  
GTCCATTATTCTTGTCTGCTGTAATTGGGTATCTCATT  
+HWI-EAS443:3:26:1161:1117#0/1  
aa\_bbbbaaaaaabab\_\_`aaaa^^`aa``[M[`Y`^]]^  
@HWI-EAS443:3:26:1173:785#0/1  
GGCGTACATGCTAGAAAGAGAATTGGTCCGTAACAAGG

+HWI-EAS443:3:26:1173:785#0/1  
aaab`a]Y`b[¥\_a^a^a¥aNaaaaXW`¥a[\_¥R^^^]]\_  
@HWI-EAS443:3:26:1181:159#0/1  
TCCTGATTATCCATTGATAAGTGTGACTAGCACTGACTC  
+HWI-EAS443:3:26:1181:159#0/1  
aRabaaaVabTQ[a\_[`aa^\_L\_S¥aa\_]\_aa\_Za\_\_X^W  
@HWI-EAS443:3:26:1187:444#0/1  
GGGGACGTAGTGTGGTAATGAAACGAAAACGGGACTCTA  
+HWI-EAS443:3:26:1187:444#0/1  
`Z]aX\_a\_\_aYb\_aa[R^^\_`^\_a^]`^`^^\_][S]V\_X  
@HWI-EAS443:3:26:1261:417#0/1  
AAACGACTTACAGTTCCTGGAAAGGATGCAGGTGCATTGA  
+HWI-EAS443:3:26:1261:417#0/1  
aba\_aa`aaaaa\_a\_baaa`\_a\_\_`a^\_a\_XaX`^`^`  
@HWI-EAS443:3:26:1319:917#0/1  
GTCCCGTTTTTCGTTTCATTACCAACTACGTCCCTTGC  
+HWI-EAS443:3:26:1319:917#0/1  
a\_`\_ab]R\_\_abW[a]\_aaa][\_\_^\_a^`\_U]XYZX]\_W  
@HWI-EAS443:3:26:1323:2014#0/1  
CGTTTTTCGTTTCATTACCAACTACGTCCCTTGCCCAA  
+HWI-EAS443:3:26:1323:2014#0/1  
a\_`abbb¥Saabb`abaaababaabaa\_b]a`^`\_a\_aa`  
@HWI-EAS443:3:26:1366:849#0/1  
ATTGGGCAAGGGGACGTAGTGTGGTAATGAAACGAAAAC  
+HWI-EAS443:3:26:1366:849#0/1  
abb`^aaa`^^aa`\_a`\_a\_]`^aaaV]\_`¥\_aaW^Z`^]G  
@HWI-EAS443:3:26:1386:1331#0/1  
ATGGCAATGAGATACCCAATTACAGCAGACAAGAGAATAA  
+HWI-EAS443:3:26:1386:1331#0/1  
a]ba]aa``[F`aaa\_aaa\_a`]]`\_`a`]a`\_\_`\_`^`^`  
@HWI-EAS443:3:26:138:52#0/1  
GGGTGGAGTCTGCTGTCCTGAGAGGATTTCTCATTTTGGG  
+HWI-EAS443:3:26:138:52#0/1  
ab\_]aa\_a^\_a\_\_a^\_\_\_`]]`^`Z]]\_V^YY\_]¥^^  
@HWI-EAS443:3:26:1402:202#0/1  
AATAAAAGAACTGAGAGATCTAATGTCGCAGTCCCGCACT  
+HWI-EAS443:3:26:1402:202#0/1  
a^[Ybbb`JaaZUZ\_Waa[^XbXX\_^F[TTXNQYF¥^U]U  
@HWI-EAS443:3:26:1454:863#0/1  
ATCCCTCTCAGCGACATCTCCGTGCTTGGGGTCATGTCGG  
+HWI-EAS443:3:26:1454:863#0/1  
Zbbba`]]`abaa`X^ab]^aaaZ^]a]]^]TK¥^`]¥\_\_`  
@HWI-EAS443:3:26:1587:1295#0/1  
CTAATGTCGCAGTCCCGCACTCGCGAGATACTCACTAAGA  
+HWI-EAS443:3:26:1587:1295#0/1  
abbbbbbab]bbbbbbba^bbbbba````aa`a``¥aaa]a  
@HWI-EAS443:3:26:1590:1311#0/1  
CTCGCGAGATACTCACTAAGACCACTGTGGACCATATGGC  
+HWI-EAS443:3:26:1590:1311#0/1  
aab`]bbbbab`b^`a`^bbbaaa`a`]Za`a\_aa`Vaa]U

@HWI-EAS443:3:26:1617:317#0/1  
GAAGATCCAGATGAAGGCACATCTGGGGTGGAGTCTGCTG  
+HWI-EAS443:3:26:1617:317#0/1  
Q\_`[\`IW\_b`a\_YXabaa`aab`aaaabRaa``\_¥a`Vaa  
@HWI-EAS443:3:26:161:874#0/1  
CATCACTCGGTCTGATCCAGCATCGTTTGTGTTTGCTCCAG  
+HWI-EAS443:3:26:161:874#0/1  
abbbbbabba\_aaY]aabaa\_Z\_ab\_\_a`X\_aa¥a\_\_\_\_`\_  
@HWI-EAS443:3:26:1650:766#0/1  
GCAGACCCATTAGCATCTCTCTTGAAATGTGCCACAGCA  
+HWI-EAS443:3:26:1650:766#0/1  
aa]a[b[]a`^ab`abb^WW^bbabbbaaaa^aVU^aaaU\_  
@HWI-EAS443:3:26:1666:1795#0/1  
AAAGAAGTGGAGATCTAATGTGCGAGTCCCGCACTCGCG  
+HWI-EAS443:3:26:1666:1795#0/1  
aaaa\_aaa`a^\_S^a\_baaaa^`¥`\_aZ]]NaU]R^`]U\_  
@HWI-EAS443:3:26:1731:132#0/1  
AGCAGACAAGAGAATAATGGACATGATTCCAGAGAGGAAT  
+HWI-EAS443:3:26:1731:132#0/1  
\_a\_ab`\_\_abab\_ab`aa`]Waa\_\_XZ[^W]W\_]Y]W  
@HWI-EAS443:3:26:186:134#0/1  
GTATCTCATTGCCATCATCCACTTCATTCTGAGTGCAGGGG  
+HWI-EAS443:3:26:186:134#0/1  
a\_a`^`\_\_\_\_[]a`HG\_0^^Z^U]VVV]U[R[UVXV¥`XY  
@HWI-EAS443:3:26:188:507#0/1  
CACAATGGTTGGGAGAAGAGCAACAGCTATTCTCAGAAAG  
+HWI-EAS443:3:26:188:507#0/1  
ababaabbaaabaabaabaaba`a\_aaa```a\_\_`aaaa  
@HWI-EAS443:3:26:20:1998#0/1  
GACGAGCAGTCAATTGCTGAGGCAATAATTGTGGCCATGG  
+HWI-EAS443:3:26:20:1998#0/1  
\_¥aYaUaba[bba]a`baYUZUaaa`[`ZT]UTW\_\_[FLB  
@HWI-EAS443:3:26:225:58#0/1  
GGGACGTAGTGTGGTAATGAAACGAAAACGGGACTCTAG  
+HWI-EAS443:3:26:225:58#0/1  
aba[\_b^\_a^a\_aa\_Q^`^`Y`aW\_^^Y^¥^Z^]X]^YWS  
@HWI-EAS443:3:26:24:1293#0/1  
CTGATGTGACTTTTTGATTATGGCCATATGGTCCACAGT  
+HWI-EAS443:3:26:24:1293#0/1  
a``aaaaaaaaaaaaa`aaba`\_aaaT¥XT]S^`YVZ¥V  
@HWI-EAS443:3:26:24:1332#0/1  
GTCCCCTTTTTCGTTTCATTACCAACTACGTCCTTGC  
+HWI-EAS443:3:26:24:1332#0/1  
`ababaabbbbaab`\_aabaa`babaab`a`aaa^[aY\_  
@HWI-EAS443:3:26:261:1014#0/1  
GTGGCGTACATGCTAGAAAGAGAATTGGTCCGTAACAA  
+HWI-EAS443:3:26:261:1014#0/1  
aUUY^YQVa[`]^S]`\_a\_]\_\_Ya^QZ¥PZ\_¥Z[Z`VN]R  
@HWI-EAS443:3:26:262:1101#0/1  
GGCACATCTGGGGTGGAGTCTGCTGCTCCTGAGAGGATTC

+HWI-EAS443:3:26:262:1101#0/1  
aab\_[[]\_ZW\_^K^\_Y^SZ]a\_[V\_bTVZ]aaZY]UXY  
@HWI-EAS443:3:26:263:349#0/1  
GGCAAGGGGACGTAGTGTGGTAATGAAACGAAAACGGGA  
+HWI-EAS443:3:26:263:349#0/1  
YbbUI\_ba^abb]U\_Y\_ZbS]LR]VHTaa¥aHX\_`^Y^`0  
@HWI-EAS443:3:26:390:1299#0/1  
GGGGACGTAGTGTGGTAATGAAACGAAAACGGGACTCTA  
+HWI-EAS443:3:26:390:1299#0/1  
````[baNab¥a]aaZN\_]V`aaa\_\_\_a\_\_\_`\_U\_]¥X\_  
@HWI-EAS443:3:26:391:265#0/1  
AGGGGACGTAGTGTGGTAATGAAACGAAAACGGGACTCT  
+HWI-EAS443:3:26:391:265#0/1  
`bbbb`ba^ba^bYbbb\_\_a¥Y¥aaa`a`baYaaaSO[[^  
@HWI-EAS443:3:26:39:1907#0/1  
AAAGAAGTGGAGATCTAATGTCGCAGTCCCGCACTCGCG  
+HWI-EAS443:3:26:39:1907#0/1  
a`X]Za\_\_\_\_\_[\_Y`]^]^Y`U\_]V\_^\_X`]`X\_U]U  
@HWI-EAS443:3:26:413:64#0/1  
AAAAGAAGTGGAGATCTAATGTCGCAGTCCCGCACTCGC  
+HWI-EAS443:3:26:413:64#0/1  
aa\_ab[aabaabaaaa\_a``a\_\_a\_\_a\_\_^\_]¥GV]]`^  
@HWI-EAS443:3:26:416:1944#0/1  
ATAGGGTTGAGGATTAGCTCATCTTTTCAGTTTTTGGTGGGT  
+HWI-EAS443:3:26:416:1944#0/1  
a`a`\_`U`\_aaa\_\_\_\_\_`a]\_`\_^\_\_\_\_\_¥¥\_\_^Z^YXZ  
@HWI-EAS443:3:26:433:473#0/1  
CTTCTGATGTGTACTTTTTGATTATGGCCATATGGTCCA  
+HWI-EAS443:3:26:433:473#0/1  
aabbabaZ`b\_b]babaaab`]baab^aaa`\_]^VZTV]U  
@HWI-EAS443:3:26:437:1008#0/1  
ATTTCCAAAAAGATGCAAAAGTGCTTTTCCAGAAGTGGGG  
+HWI-EAS443:3:26:437:1008#0/1  
Z`aa¥a^^`VZb¥Vaba`abbTbaa^^`bab`baabaaaa  
@HWI-EAS443:3:26:447:998#0/1  
ATTCTCTTTCTAGCATGTACGCCACCATCAAGGGAGCAAT  
+HWI-EAS443:3:26:447:998#0/1  
abbbabaaabaaaaaaa\_baaaaaa^\_a``[aaaa\_a`  
@HWI-EAS443:3:26:448:569#0/1  
CCCGTTTTCGTTTCATTACCAACTACGTCCCCTTGCCC  
+HWI-EAS443:3:26:448:569#0/1  
aaa\_[Ya`\_aX`\_aaaa^a[XY¥[\_\_X\_QP[S¥^Y^R[Z  
@HWI-EAS443:3:26:454:225#0/1  
GTGGAGTCTGCTGTCCTGAGAGGATTTCTCATTTTGGGCA  
+HWI-EAS443:3:26:454:225#0/1  
a`ab`a`aabaaa]\_\_`a\_`a`\_\_aa\_]```\_a`\_ZW^  
@HWI-EAS443:3:26:461:177#0/1  
CGTAGACATATGCAAGGCAGCAATAGGGTTGAGGATTAGC  
+HWI-EAS443:3:26:461:177#0/1  
a\_MYbbaa^aa^a`````¥`]^^\_ZN¥WZ\_a`\_[^\_W`ZS



@HWI-EAS443:3:26:498:1021#0/1  
CTGGGGTGGAGTCTGCTGTCCTGAGAGGATTTCTCATTTT  
+HWI-EAS443:3:26:498:1021#0/1  
a`WW]^LWP\_WUP]^`RXTaZNUZ\_RUXOUZ[^a`\_XVa`  
@HWI-EAS443:3:26:52:1590#0/1  
GACTCAGGGCCATTGATCTCCCACATCATTGATGACGAAT  
+HWI-EAS443:3:26:52:1590#0/1  
Y\_\_Y`abaa`Z\_VZ]^`a[P¥`¥U\_^]I[a]\_\_YX[W  
@HWI-EAS443:3:26:537:554#0/1  
AGAACCCCGCACTCAGAATGAAGTGGATGATGGCAATGAG  
+HWI-EAS443:3:26:537:554#0/1  
]^¥^`aa\_a`a`a`aa`aa[``^aa[``\_^`\_]^\_^  
@HWI-EAS443:3:26:549:210#0/1  
GAAGAAGTGCTAACGGGCAACCTCCAAACACTGAAAATAA  
+HWI-EAS443:3:26:549:210#0/1  
a\_```abZb`aba`aaZ`a¥`a`a`\_^Z^`^`\_`[[^\_\_\_\_]  
@HWI-EAS443:3:26:579:630#0/1  
GCTGGATCAGACCGAGTGTATGGTATCACCTCTGGCCGTAA  
+HWI-EAS443:3:26:579:630#0/1  
`bbabT[abb]aa\_`¥^aaaa\_Xa¥Z^`\_aU^[Y\_`Q\_^  
@HWI-EAS443:3:26:581:1179#0/1  
AAAGAAGTGGAGATCTAATGTCGCAGTCCCGCACTCGCG  
+HWI-EAS443:3:26:581:1179#0/1  
ab`b`]a`aa\_baaaaab`aa^aaaa¥`\_a\_``^¥\_\_`\_  
@HWI-EAS443:3:26:60:1481#0/1  
CCCGCACTCAGAATGAAGTGGATGATGGCAATGAGATACC  
+HWI-EAS443:3:26:60:1481#0/1  
a\_\_aaa\_]ba^``\_aXZ`Y[ZVWUPZ]]Z\_U]ZW\_`X[]  
@HWI-EAS443:3:26:613:909#0/1  
GTCAGTATTCTTGCCCCACTTCATTTGGGAAAACAATT  
+HWI-EAS443:3:26:613:909#0/1  
aY\_X]^]G\_a^aS^¥a^]]U¥W¥[Y¥VY[UGY`\_]X[]X  
@HWI-EAS443:3:26:664:799#0/1  
GGCCATATGGTCCACAGTGGTCTTAGTGAGTATCTCGCGA  
+HWI-EAS443:3:26:664:799#0/1  
aababbabaaaa`bbaYba\_aaaa`\_aa`]baa```UaR  
@HWI-EAS443:3:26:670:1225#0/1  
AATAAAAGAACTGAGAGATCTAATGTCGCAGTCCCGCACT  
+HWI-EAS443:3:26:670:1225#0/1  
V\_ZO]OUYMT[\_[¥X]W\_^^aV]^ZNWG]\_Y¥\_\_ZS^P]R  
@HWI-EAS443:3:26:673:1290#0/1  
GTCCATTATTCTTGTCTGCTGTAATTGGGTATCTCATT  
+HWI-EAS443:3:26:673:1290#0/1  
a\_`^U]a]^]Y\_]¥Pa\_\_YWQ[Y[\_[¥][G¥YW¥^\_UX  
@HWI-EAS443:3:26:692:651#0/1  
AAAAGAAGTGGAGATCTAATGTCGCAGTCCCGCACTCGC  
+HWI-EAS443:3:26:692:651#0/1  
]abbb]aY`bW^¥aa[Z`YT`bY]^a`\_U[]\_ZVXYTTZ]  
@HWI-EAS443:3:26:710:1392#0/1  
CTCGCGAGATACTCACTAAGACCACTGTGGACCATATGGC

+HWI-EAS443:3:26:710:1392#0/1  
aa`[b^I^\_aT\_aS`\_`a`\_a^aa^VWMaR^`\_\_\_\_VUWY\_  
@HWI-EAS443:3:26:718:78#0/1  
CAAGGACAAACCCTCTGGAGCAAACAAACGATGCTGGAT  
+HWI-EAS443:3:26:718:78#0/1  
abbbb`aa\_a¥\_aaaaba`a^`a\_a``aaU`^^`Q\_a\_¥^  
@HWI-EAS443:3:26:722:958#0/1  
AAAGAAGTCTAATGTCGCAGTCCCGCACTCGCG  
+HWI-EAS443:3:26:722:958#0/1  
aa``aab`ab^baa``abaaa\_a\_aaa\_a\_`\_aT¥`\_`\_\_\_\_  
@HWI-EAS443:3:26:72:405#0/1  
GAATAAAGAAGTCTAATGTCGCAGTCCCGCAC  
+HWI-EAS443:3:26:72:405#0/1  
]Ya\_a``ZYZZ]]aa`]¥\_a`a]]aaRX`Yaa\_[¥]H`W\_  
@HWI-EAS443:3:26:736:1449#0/1  
AGCATCTCTTGGAAATGTGCCACAGCACACAGATTGGA  
+HWI-EAS443:3:26:736:1449#0/1  
`V[aabaaaa\_a^``aa``]^`\_aa`\_a^``\_`\_]`\_][^  
@HWI-EAS443:3:26:738:1485#0/1  
GGACGTAGTGTGGTAATGAAACGAAAACGGGACTCTAGC  
+HWI-EAS443:3:26:738:1485#0/1  
`bWabZ[^aUaaaPYa`[aba[^Z`\_a`^¥]^]X^^\_^]  
@HWI-EAS443:3:26:749:967#0/1  
CACATTCACAGTCAATGAGGAAAATTGCATCCTACTCTGT  
+HWI-EAS443:3:26:749:967#0/1  
ababbbbbbbbabbbbb\_bbbabbbbbbbba`b`baaa`  
@HWI-EAS443:3:26:76:75#0/1  
CTCAGAATGAAGTGGATGATGGCAATGAGATACCCAATTA  
+HWI-EAS443:3:26:76:75#0/1  
a`aaa^`aa`^aVaa]^`a`\_`^`^]\_\_]^XY^\_\_^S^\_Z¥  
@HWI-EAS443:3:26:789:1350#0/1  
GTCTGCTGTAATTGGGTATCTCATTGCCATCATCCACTTC  
+HWI-EAS443:3:26:789:1350#0/1  
a\_ba`a`a`X]aaa[VNa`\_`^a`\_`^`aa^`\_`\_`]a]^`\_`  
@HWI-EAS443:3:26:792:685#0/1  
CATTATTCTCTTGTCTGCTGTAATTGGGTATCTCATTGCC  
+HWI-EAS443:3:26:792:685#0/1  
aaba``aaa^aab^aaaabaZ`\_aa\_] [0[\_[`W`\_]VW  
@HWI-EAS443:3:26:817:1950#0/1  
GTCCCGTTTTTCGTTTCATTACCAACACTACGTCCTTGC  
+HWI-EAS443:3:26:817:1950#0/1  
a`a[^`\_a\_bZT0\_ababab[P[`X``ab¥¥N^`\_`\_`\_RB  
@HWI-EAS443:3:26:81:172#0/1  
CGTTTTCGTTTCATTACCAACACTACGTCCTTGCCTTGC  
+HWI-EAS443:3:26:81:172#0/1  
a\_0][WZQG[YV\_YV^ZL¥WY[SX]XOM[XV¥XOMXWSXB  
@HWI-EAS443:3:26:823:981#0/1  
AAAAGAAGTCTAATGTCGCAGTCCCGCACTCGC  
+HWI-EAS443:3:26:823:981#0/1  
^^^ab`a`babbaabaabaabb\_aaa\_\_\_\_^a^`^aa\_\_^

@HWI-EAS443:3:26:845:634#0/1  
AAGGCAACCAAACGACTTACAGTTCTTGAAAGGATGCAG  
+HWI-EAS443:3:26:845:634#0/1  
aabaaba`abaa``aaa`\_a\_a\_aab\_\_`V^\_^ZaV\_\_  
@HWI-EAS443:3:26:851:449#0/1  
GTTCACCTTCAAAGGACAAGCGATCATCAGTCAAGAAA  
+HWI-EAS443:3:26:851:449#0/1  
\_Y^`ZSS]^`^`]^`aaa\_\_\_`a]a^[\_^^`\_\_aZ[^\_`]]Y  
@HWI-EAS443:3:26:915:78#0/1  
GTCTGCTGTAATTGGGTATCTCATTGCCATCATCCACTTC  
+HWI-EAS443:3:26:915:78#0/1  
aTW]^`T\_PZ\_]\_\_\_]¥¥YU[ZYPZV^`VPS¥SRUQPVUUUR  
@HWI-EAS443:3:26:922:1985#0/1  
AAAGAAGTGAAGATCTAATGTCGCAGTCCCGCACTCGCG  
+HWI-EAS443:3:26:922:1985#0/1  
`a`a`ab\_\_a\_b\_``a¥aaaa]\_\_a^¥X\_]][[]]¥Z]]  
@HWI-EAS443:3:26:930:537#0/1  
ATAAAGAAGTGAAGATCTAATGTCGCAGTCCCGCACTC  
+HWI-EAS443:3:26:930:537#0/1  
¥]RY¥OHYTUTZQNPZT\_Q]WQ\_]Q[]¥W¥GLQRIHQYVB  
@HWI-EAS443:3:27:1000:1535#0/1  
CTGCTGCTCTGAGAGATTTCTCATTGTTGGGCAAAGAAGA  
+HWI-EAS443:3:27:1000:1535#0/1  
a`bb`Ya]¥ba`\_`a^aa^^^]aaaaa[^\_```]a`aa  
@HWI-EAS443:3:27:1006:627#0/1  
GTCCCGTTTTCGTTTTATTACCAACTACGTCCCCTTGC  
+HWI-EAS443:3:27:1006:627#0/1  
a`bbbaabbababababaaa`aaabbabaa\_Yaa\_\_`\_¥  
@HWI-EAS443:3:27:1013:1366#0/1  
CTAATGTCGCAGTCCCGCACTCGCGAGATACTCACTAAGA  
+HWI-EAS443:3:27:1013:1366#0/1  
abbbab]^`bbbababab`aabba`X^\_`aTa^aaa`R`  
@HWI-EAS443:3:27:1013:1880#0/1  
AAAGAAGTGAAGATCTAATGTCGCAGTCCCGCACTCGCG  
+HWI-EAS443:3:27:1013:1880#0/1  
abb`aaaaa`a`a^`\_a``aYa^\_`\_¥\_\_¥W\_[^W\_YZW  
@HWI-EAS443:3:27:1021:1629#0/1  
GTCCCGTTTTCGTTTTATTACCAACTACGTCCCCTTGC  
+HWI-EAS443:3:27:1021:1629#0/1  
aTPYUT¥\_\_XVYSYUP]UFQLJTY[QWSPVBBBBBBBBB  
@HWI-EAS443:3:27:1023:507#0/1  
TGGGTATCTCATTGCCATCATCCACTTCATTCTGAGTGCG  
+HWI-EAS443:3:27:1023:507#0/1  
^[R^NWU^`a[\_]\_a¥US[Z^¥^Z^]SL]a]]PXHMR`[a  
@HWI-EAS443:3:27:1052:674#0/1  
CTGGAATCATGTCCATTATTCTCTTGCTGCTGTAATTGG  
+HWI-EAS443:3:27:1052:674#0/1  
abababbaabbbbabbabbbab`bb`a``]P``\_`^abU`  
@HWI-EAS443:3:27:1065:688#0/1  
ACAAGGACAAACCCTCTGGAGCAAACAAACGATGCTGGA



@HWI-EAS443:3:27:142:347#0/1  
CCCCTTTTTCGTTTCATTACCAACTACGTCCCCTTGCCC  
+HWI-EAS443:3:27:142:347#0/1  
a`ab``a`aa^aaaaaa`aa`^`^aa`a]]Y¥`^^\_\_\_\_  
@HWI-EAS443:3:27:1486:1636#0/1  
CGTTAGCACTTCTTCTTCTTCTTGACTGATGATCCGCTT  
+HWI-EAS443:3:27:1486:1636#0/1  
ab`\_bbaa`bbUbb\_bbabaaaaaa^bbab`aa``a``a  
@HWI-EAS443:3:27:1507:354#0/1  
CTGTAATTGGGTATCTCATTGCCATCATCCACTTCATTCT  
+HWI-EAS443:3:27:1507:354#0/1  
]bba`abbbabbbbZb\_ba¥a\_]bb]bba\_b[bb`\_bb`a  
@HWI-EAS443:3:27:1526:1201#0/1  
GAGAATAAAAGAAGTCTAATGTCGAGTCCCGC  
+HWI-EAS443:3:27:1526:1201#0/1  
`^`\_aaaaa^T^abaab\_baa¥ba]ba``Yaaa^[\_]\_\_  
@HWI-EAS443:3:27:153:618#0/1  
GAATAAAAGAAGTCTAATGTCGAGTCCCGCAC  
+HWI-EAS443:3:27:153:618#0/1  
aaa\_VYb\_\_¥X`aaa^a[[\_`a`\_ab`aa`[]^`Ya]a^\_  
@HWI-EAS443:3:27:1598:1604#0/1  
GGGACGTGCTGGGAGCAGATGTACTCCAGGAGGAGAAG  
+HWI-EAS443:3:27:1598:1604#0/1  
abb\_abaa`bbaaa`^^[\_a`\_^`^aXU[\_`U^a\_a[¥a  
@HWI-EAS443:3:27:162:405#0/1  
CGCACTCGGAGATACTACTAAGACCACTGTGGACCATA  
+HWI-EAS443:3:27:162:405#0/1  
aaaaaabaaaa^a``a\_]aaa``\_aaa`aXXP\_\_a`^\_  
@HWI-EAS443:3:27:1654:763#0/1  
GAGAGGATCAGGGTTGAGGATACTGGTAAGAGGCAATTCT  
+HWI-EAS443:3:27:1654:763#0/1  
a`a`Z`^^`a\_[Pa\_^\_\_\_`\_W]`]YY`^`\_]^U^^`^X¥  
@HWI-EAS443:3:27:1654:987#0/1  
TTCCTGATGTGTACTTTTTGATTATGGCCATATGGTCCAC  
+HWI-EAS443:3:27:1654:987#0/1  
aa\_aabab`Ra`\_`aaa\_\_a[^a^`\_]Q]^Z\_SQPNR¥0  
@HWI-EAS443:3:27:166:1798#0/1  
CTGCTGTAATTGGGTATCTCATTGCCATCATCCACTTCAT  
+HWI-EAS443:3:27:166:1798#0/1  
aaa`a``\_aaa`\_^[aZa`\_a``Xaaa¥aa]a`S]\_`^``  
@HWI-EAS443:3:27:166:543#0/1  
CTCTTTCTAGCATGTACGCCACCATCAAGGGAGCAATTTT  
+HWI-EAS443:3:27:166:543#0/1  
abb`bababbaaaa\_baa`aa`aa`a`aa\_a``aaaa``  
@HWI-EAS443:3:27:1686:364#0/1  
GTCCCCTTTTCGTTTCATTACCAACTACGTCCCCTTGCC  
+HWI-EAS443:3:27:1686:364#0/1  
aYJQP``a`aZaY`[V^aU\_XR\_^U\_V`VaUR¥UVX^[V  
@HWI-EAS443:3:27:1722:1439#0/1  
ATTGACTGTGAATGTGAGAGGATCAGGGTTGAGGATACTG

+HWI-EAS443:3:27:1722:1439#0/1  
abaaaab^U¥`^`X0]PY0^`[UP]^`^T][S[]NPTDTP  
@HWI-EAS443:3:27:1778:1100#0/1  
GGTGGGTTCACTTTCAAAGGACAAGCGGATCATCAGTCA  
+HWI-EAS443:3:27:1778:1100#0/1  
¥[Pa\_a`aaa\_ab`\_\_`\_\_`[\_]\_¥aWaa\_\_Y\_a^ZaZV\_  
@HWI-EAS443:3:27:1782:591#0/1  
GAATAAAAGAAGACTGAGAGATCTAATGTCGCAGTCCCGCAC  
+HWI-EAS443:3:27:1782:591#0/1  
]][`a\_ab\_[¥[a\_a``a¥FX`K[VaMR\_Y\_\_U]¥0[RRU  
@HWI-EAS443:3:27:1790:337#0/1  
AAAAGAAGACTGAGAGATCTAATGTCGCAGTCCCGCACTCGC  
+HWI-EAS443:3:27:1790:337#0/1  
ab[`ba\_¥bbbbaa`^]b[abbXUa`ab`Y[U[X`NXR[Q  
@HWI-EAS443:3:27:206:696#0/1  
TCGCGAGATACTACTAAGACCACTGTGGACCATATGGCC  
+HWI-EAS443:3:27:206:696#0/1  
]a^aaHS^TYU`\_]\_X\_bXY]Y`]aTUS]S¥¥ZJ[[[ZZ\_\_  
@HWI-EAS443:3:27:212:975#0/1  
AGAGAATAAAAGAAGACTGAGAGATCTAATGTCGCAGTCCCG  
+HWI-EAS443:3:27:212:975#0/1  
abaaabbbbaabaabbabaaa`aabb^bb^a`aaaY`aba  
@HWI-EAS443:3:27:222:605#0/1  
CCTTGTGTGAATTGAATACTGGAGAATTGCCTCTTACCAG  
+HWI-EAS443:3:27:222:605#0/1  
aa`][SYTTaa][]^aQGG]a\_^\_SYUY[`\_W`^]\_[SZ[  
@HWI-EAS443:3:27:251:224#0/1  
GTCCCGTTTTTCGTTTCATTACCAACTACGTCCCCTTGC  
+HWI-EAS443:3:27:251:224#0/1  
`¥`aaa`\_aaaa\_a\_a`a\_\_`````]`\_\_a\_\_W]]\_]Y]Z  
@HWI-EAS443:3:27:296:684#0/1  
CCGCACTCGCGAGATACTACTAAGACCACTGTGGACCAT  
+HWI-EAS443:3:27:296:684#0/1  
abaa^`abaaaa````aa`aa`aa\_\_aZaa[]Ya\_\_\_\_``¥  
@HWI-EAS443:3:27:358:717#0/1  
GCCATATCTCTTGTCTTCTTTGCCAAAATGAGAAATCCT  
+HWI-EAS443:3:27:358:717#0/1  
^a``aK`bbbaababaabb`b`aa]a`\_`babababaa`a`  
@HWI-EAS443:3:27:417:1210#0/1  
CTAATGTGCTAATTGGGCAAGGGGACGTAGTGTGGTAAT  
+HWI-EAS443:3:27:417:1210#0/1  
aabbab\_bba\_aaaa`aaaaa\_a`a````^a\_aaaR\_aX  
@HWI-EAS443:3:27:420:173#0/1  
CGCACTCGCGAGATACTACTAAGACCACTGTGGACCATA  
+HWI-EAS443:3:27:420:173#0/1  
a`aZ`babaaaaaaaa`aa\_\_aaa^`^\_a]^`Y\_\_\_\_^`\_Y¥  
@HWI-EAS443:3:27:424:125#0/1  
CTCCTGGTTGCCTTTCTGAGAATAGCTGTTGCTCTTCTCC  
+HWI-EAS443:3:27:424:125#0/1  
a]V\_```^¥Z`\_UXUaW\_Y\_\_¥\_Z¥\_U]OZR[RVPUTRRV

@HWI-EAS443:3:27:430:1342#0/1  
GTACTTTTTGATTATGGCCATATGGTCCACAGTGGTCTTA  
+HWI-EAS443:3:27:430:1342#0/1  
a`aaabaaaabbaa\_`¥b\_a[\_^[YV`^QVa]X\_\_GVX\_V  
@HWI-EAS443:3:27:439:1888#0/1  
AAAAGAAGTGGAGATCTAATGTCGCAGTCCCGCACTCGC  
+HWI-EAS443:3:27:439:1888#0/1  
aaba[abaa`¥LaUa\_aaaaaWa\_aa\_Z`\_Z]\_U\_W\_^\_  
@HWI-EAS443:3:27:442:1233#0/1  
AAGAAGTGGAGATCTAATGTCGCAGTCCCGCACTCGCGA  
+HWI-EAS443:3:27:442:1233#0/1  
\_\_ZN]aWU\_\_\_aaaaab`ba\_a`aa^Uaa`^]¥a¥\_U^UT  
@HWI-EAS443:3:27:445:114#0/1  
GTTCCCTCTTTGATCTCTAACCTTAAAAATCGGTCAATA  
+HWI-EAS443:3:27:445:114#0/1  
aaa\_`a\_`aa`a`\_`]a\_aaaa\_`\_\_\_\_\_``\_\_\_\_\_WZ^]\_\_\_  
@HWI-EAS443:3:27:497:306#0/1  
GAGGATTTCTATTTTGGGCAAAGAAGACAAGAGATATGG  
+HWI-EAS443:3:27:497:306#0/1  
ab`aabbbababbaaaba`abaabaabbaaaaaa\_a^aa  
@HWI-EAS443:3:27:49:1852#0/1  
TCCCGTTTTCGTTTTATTACCAACTACGTCCCTTGCC  
+HWI-EAS443:3:27:49:1852#0/1  
ababaaaaaba\_a`a`aaaabaaaa`\_aaa[aa``]\_\_\_\_\_  
@HWI-EAS443:3:27:505:494#0/1  
ATCCAGATGAAGGCACATCTGGGGTGGAGTCTGCTGTCCT  
+HWI-EAS443:3:27:505:494#0/1  
`^[W\_bU\_U^aba`\_UXbaaabaUaa\_a¥\_\_aaaa[a]]  
@HWI-EAS443:3:27:508:846#0/1  
TTTTGTTGTATAACATTGTGGGATCTTGTGACCATTGAAT  
+HWI-EAS443:3:27:508:846#0/1  
aa][aXW^^ZY`¥XT`a`RSZa^^a`YUG\_¥`¥a]U¥[SY  
@HWI-EAS443:3:27:518:1673#0/1  
GGGCCATTCTATTCCACCATGTTACGGCCAGAGGTGATA  
+HWI-EAS443:3:27:518:1673#0/1  
YEJWaTaaab^X[a]aaaaaaV¥aaVWaa`YaVTIDVEY  
@HWI-EAS443:3:27:545:1410#0/1  
GAATAATGGACATGATTCCAGAGAGGAATGAACAAGGACA  
+HWI-EAS443:3:27:545:1410#0/1  
`[\_X¥YSMWY¥Y\_a[QHTa]R¥YaY\_\_\_W^a\_`X¥U[\_\_\_  
@HWI-EAS443:3:27:555:265#0/1  
CAATCCCCAGTTCTGGAAAAGCACTTTTGCATCTTTTTG  
+HWI-EAS443:3:27:555:265#0/1  
`bbbbbbba`¥\_]\_Z^¥T`bba``a`a`a`\_¥aa]aaaa\_  
@HWI-EAS443:3:27:590:1880#0/1  
ATCCTTTCCAAGAAGTAAAGTTCGTTTGGTTGCCTTGTTG  
+HWI-EAS443:3:27:590:1880#0/1  
a[S]aa^^`aa\_aaa\_aU\_`^X\_UTVW\_WQ\_a`]X]YTZ^  
@HWI-EAS443:3:27:630:1485#0/1  
ATCATTCTCACTTCTCCTCCTGGAGTGTACATCTGCTCC

+HWI-EAS443:3:27:630:1485#0/1  
a`aa\_a\_aaaaaa\_aa]a]aa`\_ZZUS\_¥a[a[`\_\_\_\_VZ[  
@HWI-EAS443:3:27:64:781#0/1  
CTTCCTGATGTGTACTTTTTGATTATGGCCATATGGTCCA  
+HWI-EAS443:3:27:64:781#0/1  
aaabaaaaab`aY[\_aaaaa\_a`]`\_\_a\_VW]WFZY^^`  
@HWI-EAS443:3:27:655:812#0/1  
TATCTCTTGTCTTCTTTGCCAAAATGAGAAATCCTCTCA  
+HWI-EAS443:3:27:655:812#0/1  
aaaaaaaaaa\_aa`aa`a\_a`a\_\_a`a`````\_`W^\_\_^`  
@HWI-EAS443:3:27:670:1276#0/1  
GCACCTGCATCCTTTCCAAGAACTGTAAGTCGTTTGGTTG  
+HWI-EAS443:3:27:670:1276#0/1  
abbbba`abbbbaaabaabba\_aa\_aa\_`^]a`a^  
@HWI-EAS443:3:27:691:1013#0/1  
CCAGAACAGAGTAGGATGCAATTTTCCTCATTGACTGTGA  
+HWI-EAS443:3:27:691:1013#0/1  
aaaaaba`aaa^a\_]`^a`a`````a\_\_\_`aa`````\_`V\_^  
@HWI-EAS443:3:27:692:662#0/1  
AAAAGAACTGAGAGATCTAATGTCGCAGTCCCGCACTCGC  
+HWI-EAS443:3:27:692:662#0/1  
^\_^`^]`^a^^aaa\_[`aa`[[aX[Y\_aa^¥U¥\_`\_ZPQZ¥  
@HWI-EAS443:3:27:729:382#0/1  
GTCCCGTTTTCGTTTCATTACCAACTACGTCCCCTTGC  
+HWI-EAS443:3:27:729:382#0/1  
a]aa`b\_`ba`b\_`a`aaa\_\_aa]a\_aa[\_¥X\_]WYX]^  
@HWI-EAS443:3:27:730:84#0/1  
CTGTAATTGGGTATCTCATTGCCATCATCCACTTCATTCT  
+HWI-EAS443:3:27:730:84#0/1  
abaabbbabbabbbbaababbabbbba`bbaaa\_`aa`a  
@HWI-EAS443:3:27:792:730#0/1  
ATCTAATGTCGCAGTCCCGCACTCGCGAGATACTCACTAA  
+HWI-EAS443:3:27:792:730#0/1  
a\_`aa\_aa]a\_\_\_\_\_S\_^\_ZYIS^¥]¥¥^¥W¥WWW^¥¥¥¥¥  
@HWI-EAS443:3:27:793:693#0/1  
ATCTAATGTCGCAGTCCCGCACTCGCGAGATACTCACTAA  
+HWI-EAS443:3:27:793:693#0/1  
a`aaaaa^a`\_`\_¥\_aaV^UZUYRY^S¥VZUW¥¥W¥WSW  
@HWI-EAS443:3:27:803:1938#0/1  
ATAAAAGAACTGAGAGATCTAATGTCGCAGTCCCGCACTC  
+HWI-EAS443:3:27:803:1938#0/1  
`aab\_b^Taa`ZaN\_a\_]\_aS[aWU[[[\_U]]`]YU\_U^a  
@HWI-EAS443:3:27:821:1008#0/1  
ATCTAATGTCGCAGTCCCGCACTCGCGAGATACTCACTAA  
+HWI-EAS443:3:27:821:1008#0/1  
abbb]bab]`a\_a\_U\_bb`\_Xa`a¥a`````^^\_\_\_\_\_a  
@HWI-EAS443:3:27:826:752#0/1  
GGAGTGATACATCTGCTCCCAGCACGTCCCTTGGGTAAAGT  
+HWI-EAS443:3:27:826:752#0/1  
]\_baababbbbbb`bbb`abaaa\_b\_¥a\_abaabaaba\_



@HWI-EAS443:3:27:831:120#0/1  
TCCCGTTTTTCGTTTCATTACCAACTACGTCCTTCCG  
+HWI-EAS443:3:27:831:120#0/1  
a`\_b]a`aa]TU¥]]`\_\_\_\_\_^W\_]^^V\_YUYVYYYYVY  
@HWI-EAS443:3:27:848:2031#0/1  
AACAAAAGAGAAGAAAGAAGAGCTCCAGGATTGTAATAA  
+HWI-EAS443:3:27:848:2031#0/1  
][I[Y\_VSa`Zaa\_a`aa\_Z`^Ka`\_aa`a]\_Wa`a\_`¥  
@HWI-EAS443:3:27:849:1668#0/1  
AAAGAAGTCTAATGTCGCAGTCCCGCACTCGCG  
+HWI-EAS443:3:27:849:1668#0/1  
`[\_T¥\_\_¥\_N¥WST\_a]YU`Z]^`V^][`[[M[Y¥UNX  
@HWI-EAS443:3:27:860:334#0/1  
AGCACGGAGATGTCGCTGAGAGGGATAAGAGTCAGCAAAA  
+HWI-EAS443:3:27:860:334#0/1  
aa¥b^aa[b`X`HZaU[aVa]`^YZ¥PWV^X]\_\_RZSLQ  
@HWI-EAS443:3:27:866:326#0/1  
CTAATGTGCTAATTGGGCAAGGGACGTAGTGTGGTAAT  
+HWI-EAS443:3:27:866:326#0/1  
aa\_HZZR`b^QSa¥Zaab¥¥`^a¥a¥0`bT¥a`YFGLW  
@HWI-EAS443:3:27:872:1082#0/1  
AAAGAAGTCTAATGTCGCAGTCCCGCACTCGCG  
+HWI-EAS443:3:27:872:1082#0/1  
aa`^¥`a¥^ZY]^XR¥\_a`^¥T\_¥`^¥Z^`W[UUW\_VW¥  
@HWI-EAS443:3:27:874:200#0/1  
GTGTTTATATTGAAGTGTGCACTTAACCAAGGGACGTG  
+HWI-EAS443:3:27:874:200#0/1  
a\_a^aa^Vaa`\_[\_YU`]¥\_\_\_Y^^\_\_^^X^^\_]^V\_^X^  
@HWI-EAS443:3:27:895:322#0/1  
GTACTCTATTTTCAGTGTGGAGGTTGCCCGTTAGCAC  
+HWI-EAS443:3:27:895:322#0/1  
¥JRW¥[¥\_W\_]YWX¥[`OY]]`P`\_VYZ¥]LURV¥¥TTJ  
@HWI-EAS443:3:27:901:282#0/1  
CTAATGTCGCAGTCCCGCACTCGCGAGATACTCACTAAGA  
+HWI-EAS443:3:27:901:282#0/1  
abbaab¥baabbY\_baaba`[\_aX\_Z`\_\_\_J]\_\_`¥\_^ZZ  
@HWI-EAS443:3:27:90:256#0/1  
AAAAGAAGTCTAATGTCGCAGTCCCGCACTCGCG  
+HWI-EAS443:3:27:90:256#0/1  
a`Z^¥X`baabaaa`aaaaaa\_aa`\_Z^\_U\_N¥^\_\_^  
@HWI-EAS443:3:27:924:1099#0/1  
CTGCTGTCTGAGAGGATTTCTCATTGTTGGCAAAGAAGA  
+HWI-EAS443:3:27:924:1099#0/1  
``\_aab`aa\_]R)`a`^`aaaa]```a`¥[ ]\_\_^]````^  
@HWI-EAS443:3:27:926:72#0/1  
GTATCTCATTGCCATCATCCACTTCATTCTGAGTGCGGGG  
+HWI-EAS443:3:27:926:72#0/1  
``aWW¥]\_`Q¥Z`a^Y0¥S\_TN[ ] [O[`ITULWLαXM[BB  
@HWI-EAS443:3:27:937:721#0/1  
GGGCGATCTGAACCTTTGTCAATAGGGCAAACCAGCGACTG

+HWI-EAS443:3:27:937:721#0/1  
^aabaababbbbaaabbba`aaaa^b`aabb^X`aaba¥aa  
@HWI-EAS443:3:27:939:183#0/1  
AAAAGAAGTCTGAGATCTAATGTCGCAGTCCCGCACTCGC  
+HWI-EAS443:3:27:939:183#0/1  
^a`b` ``a`b^aa^aZXa\_X` `]Z\_[aaVT¥YU][USP[S  
@HWI-EAS443:3:27:947:771#0/1  
CAAAATGAGAAATCCTCTCAGGACAGCAGACTCCACCCCA  
+HWI-EAS443:3:27:947:771#0/1  
`bbbbbb`baaaaaabbbbaaaaa`¥a`\_]`a\_\_aWaaa`\_`\_`  
@HWI-EAS443:3:27:94:1015#0/1  
CAAGGGAGCAATTTTACAATCCTGGAGCTTTCTTTCTTC  
+HWI-EAS443:3:27:94:1015#0/1  
aba`aabab[K¥aaaaaaaaa]\_Y]` `\_\_`^¥^`\_\_`^^  
@HWI-EAS443:3:27:953:1136#0/1  
GCAGTGTGAGCAGACCCATTAGCATCTCTTGGAAATGT  
+HWI-EAS443:3:27:953:1136#0/1  
Xabbbbab`a`bbababb\_bb`abbaa\_baab\_aabaaa\_  
@HWI-EAS443:3:27:988:761#0/1  
CCCGTTTTCGTTTTATTACCAACTACGTCCCCTTGCCC  
+HWI-EAS443:3:27:988:761#0/1  
\_`\_`QT¥[`baU¥bb]b¥¥R^a[``ba`b`UP\_W\_a]b\_PX  
@HWI-EAS443:3:28:1033:169#0/1  
CAATTCTTTTCTAGCATGTACGCCACCATCAAGGGAGCA  
+HWI-EAS443:3:28:1033:169#0/1  
abbbabbbbbbbaaab`bab`baa`]a\_^aa`a\_ba`aa\_a  
@HWI-EAS443:3:28:103:1371#0/1  
ATAAAAGAAGTCTGAGATCTAATGTCGCAGTCCCGCACTC  
+HWI-EAS443:3:28:103:1371#0/1  
¥a\_b`b]` `bbbbbbaa`[[a]bb`b^aTbaaa`\_aY`\_a^a  
@HWI-EAS443:3:28:1040:1880#0/1  
CTAATGTGCTAATTGGGCAAGGGACGTAGTGTGGTAAT  
+HWI-EAS443:3:28:1040:1880#0/1  
ab`U]` `b¥baa]S]OW^aa¥X\_]X`aU\_a]a\_a^[Q\_^]  
@HWI-EAS443:3:28:1050:251#0/1  
TGCTGTAATTGGGTATCTCATTGCCATCATCCACTTCATT  
+HWI-EAS443:3:28:1050:251#0/1  
ab\_ab\_aababaaY\_a]a]aa^`\_`^a`^` `^V\_X`^^^`\_`^  
@HWI-EAS443:3:28:1068:1073#0/1  
GAGAATAAAAGAAGTCTGAGATCTAATGTCGCAGTCCCGC  
+HWI-EAS443:3:28:1068:1073#0/1  
aa`\_a`baaaaaa¥aa`^`\_` `^aa\_a`¥YU[\_\_ZY`^^¥  
@HWI-EAS443:3:28:1139:1503#0/1  
ATCAAATTTGGTCAACATCATCTTTCTCACTTCTCCTC  
+HWI-EAS443:3:28:1139:1503#0/1  
Xb\_\_aV[^Y`Y`IS`aa]b`Y`abbaa`\_`^aa`aab`^`\_  
@HWI-EAS443:3:28:1140:496#0/1  
CGGCGAACAGGCAGTGTATATTGAAGTGTGCACTTA  
+HWI-EAS443:3:28:1140:496#0/1  
abbabbaba`abbaaH[Z\_aSaW]aHJYZR[IaXR]M[ `S

@HWI-EAS443:3:28:1163:1564#0/1  
AACAAAGGACAAACCCTCTGGAGCAAACAAACGATGCTGG  
+HWI-EAS443:3:28:1163:1564#0/1  
]`aabb`babbaaa`aaaa\_`^aa`aa\_baa[aa``````\_  
@HWI-EAS443:3:28:1175:961#0/1  
GTCCCCGTTTTCTTTTCATTACCAACTACGTCCCCCTTGC  
+HWI-EAS443:3:28:1175:961#0/1  
\_HR[[Z[[\_a`a`]YVXa[[\_W]`[^V`\_U\_UVFL^XVRK  
@HWI-EAS443:3:28:1188:1740#0/1  
AATGTCGCAGTCCCGCACTCGCGAGATACTCACTAAGACC  
+HWI-EAS443:3:28:1188:1740#0/1  
aaaa`aaaaa¥a```^[a\_^[P[[^¥^[[¥^[^`^^^¥¥  
@HWI-EAS443:3:28:1206:1159#0/1  
GCTGTAATTGGGTATCTCATTGCCATCATCCACTTCATTC  
+HWI-EAS443:3:28:1206:1159#0/1  
a`ba¥GTa`a\_\_\_\_`¥W^^ZRa`^¥`\_]`\_\_^^Va^\_Y]\_Y  
@HWI-EAS443:3:28:1215:548#0/1  
CTCTTTCTAGCATGTACGCCACCATCAAGGGAGCAATTTT  
+HWI-EAS443:3:28:1215:548#0/1  
`aab``abbbabb\_L\_`baa`a\_b``Y\_abaab`a^`aa`  
@HWI-EAS443:3:28:1227:1269#0/1  
AGCAGACCCATTAGCATCTCTTTGGAAATGTGCCACAGC  
+HWI-EAS443:3:28:1227:1269#0/1  
¥`\_a^R`aSa]aQUa\_`]aa¥]`aYaaa\_`¥`XY`¥\_\_Z  
@HWI-EAS443:3:28:1232:2032#0/1  
ATGTCCACCATCCTTACTCCTCCAATCTGTGTGCTGTGGC  
+HWI-EAS443:3:28:1232:2032#0/1  
a¥^[`b`Xaaa`][`\_W]¥RTa\_Y\_\_^`V^R[`V\_VU  
@HWI-EAS443:3:28:1267:367#0/1  
CTGCTGTAATTGGGTATCTCATTGCCATCATCCACTTCAT  
+HWI-EAS443:3:28:1267:367#0/1  
a[¥X\_\_P¥X`\_[ZWFU`^aXa``STXUFS\_RIWTJ¥LFQ`  
@HWI-EAS443:3:28:130:676#0/1  
GCCATATGGTCCACAGTGGTCTTAGTGAGTATCTCGCGAG  
+HWI-EAS443:3:28:130:676#0/1  
`bbabaaba\_bbbaaa`b`¥]a^Vb[¥`\_¥a\_\_\_\_Za\_]XY  
@HWI-EAS443:3:28:1364:1310#0/1  
ATTTGGGAAAACAACCTTCCATAATCACATCCTGTGCCCTCC  
+HWI-EAS443:3:28:1364:1310#0/1  
abbab\_babbaaaaaaaaaabbaaa```ba[aa\_a`\_a\_\_  
@HWI-EAS443:3:28:1365:1685#0/1  
CTTCCTGATGTGTACTTTTTGATTATGGCCATATGGTCCA  
+HWI-EAS443:3:28:1365:1685#0/1  
abbaaaaaaaaa\_aa``aaaaaaaa`a\_`\_]`^`a\_\_\_\_OVU^¥\_  
@HWI-EAS443:3:28:1390:124#0/1  
AAGAAGTGGAGATCTAATGTCGCAGTCCCGCACTCGCGA  
+HWI-EAS443:3:28:1390:124#0/1  
[baabab`ababaa\_babbb`\_a\_`b`^`[^a^\_\_a[a^\_X  
@HWI-EAS443:3:28:1391:890#0/1  
AATAAAAGAAGTGGAGATCTAATGTCGCAGTCCCGCACT

+HWI-EAS443:3:28:1391:890#0/1  
a[aa`^^baaY¥^aaaa`b`baabaaYa` `a` \_\_\_` `[a¥  
@HWI-EAS443:3:28:1419:1431#0/1  
TCGCGAGATACTACTAAGACCACTGTGGACCATATGGCC  
+HWI-EAS443:3:28:1419:1431#0/1  
aaa\_aaaa\_\_^aaa\_a`aa\_]a\_`]a\_]\_\_^\_\_\_]]Z  
@HWI-EAS443:3:28:1425:1066#0/1  
GAATAAAAGAAGACTGAGAGATCTAATGTCGCAGTCCCGCAC  
+HWI-EAS443:3:28:1425:1066#0/1  
aaaaaaba` `a^a` `[aa`a\_a`]aa]\_\_^`\_XX\_X^UWZ  
@HWI-EAS443:3:28:1426:475#0/1  
ATCCAGATGAAGGCACATCTGGGGTGGAGTCTGCTGTCCT  
+HWI-EAS443:3:28:1426:475#0/1  
aaa`abbbab`aba\_aba\_aba^TUaa`a\_R`aXa`\_\_Z\_  
@HWI-EAS443:3:28:1434:677#0/1  
ATAAAAGAAGACTGAGAGATCTAATGTCGCAGTCCCGCACTC  
+HWI-EAS443:3:28:1434:677#0/1  
aaaba`b\_a\_aaaa\_a\_a\_aaaaa`a` `a^¥]]\_X]]\_¥  
@HWI-EAS443:3:28:1441:1188#0/1  
GAATAAAAGAAGACTGAGAGATCTAATGTCGCAGTCCCGCAC  
+HWI-EAS443:3:28:1441:1188#0/1  
aY` `^aaaaab\_a\_X]` `aaaaaaaa\_]a`aa]Y^S` []¥  
@HWI-EAS443:3:28:1465:1843#0/1  
AAAGGATGCAGGTGCATTGACTGAAGATCCAGATGAAGGC  
+HWI-EAS443:3:28:1465:1843#0/1  
abba]bbb`ba\_JY`aZIZ[a\_P`a[b]\_Sb^^`aa]TW  
@HWI-EAS443:3:28:1498:272#0/1  
GCTGTAATTGGGTATCTCATTGCCATCATCCACTTCATTC  
+HWI-EAS443:3:28:1498:272#0/1  
aaa`^]V\_]T\_^\_a\_\_WV\_]¥[Y]\_Z\_[XQZV^VSZ]ZT  
@HWI-EAS443:3:28:1501:1064#0/1  
CAAAGAGGGAACGTACTATTGTCTCCCGAAGAAGTCAGTG  
+HWI-EAS443:3:28:1501:1064#0/1  
]]b]\_` `ba`baab]babbbabbbbaaab^aaabb`^aa\_a  
@HWI-EAS443:3:28:1553:1445#0/1  
ATTAGCTCATCTTTCAGTTTTGGTGGGTTCACTTTCAAAA  
+HWI-EAS443:3:28:1553:1445#0/1  
a¥aaaab\_abbbbYR]`P`ab`]¥R^F]^\_U^ba^X]Ya  
@HWI-EAS443:3:28:1579:37#0/1  
GCTAGTCAACACTTATCAATGGATAATCAGGAACTGGGAA  
+HWI-EAS443:3:28:1579:37#0/1  
X]V\_baaTYH[H[^`aT[R]a¥S\_VV]WVa¥P[M]`¥^PR  
@HWI-EAS443:3:28:1581:734#0/1  
ATTCCTATTCCACCATGTTACGGCCAGAGGTGATACCATC  
+HWI-EAS443:3:28:1581:734#0/1  
`bb]`bbabbaaa`bbbaabaaaaa¥Q¥N]L[[P\_QS¥RR  
@HWI-EAS443:3:28:1601:537#0/1  
GAATAAAAGAAGACTGAGAGATCTAATGTCGCAGTCCCGCAC  
+HWI-EAS443:3:28:1601:537#0/1  
¥Y[b`^^`ZU`N¥`abbb^bX]\_a\_aY^a^WL¥FPP¥GZY

@HWI-EAS443:3:28:1609:1025#0/1  
CATCCTTACTCCTCCAATCTGTGTGCTGTGGCACATTTCC  
+HWI-EAS443:3:28:1609:1025#0/1  
abba\_bbaabb`b`abbbabbabaa`bb\_bbab\_abbb[S  
@HWI-EAS443:3:28:1615:239#0/1  
AATAAAAGAACTGAGAGATCTAATGTCGCAGTCCCGCACT  
+HWI-EAS443:3:28:1615:239#0/1  
\_ab]`abaa^bb[b\_^]`]bL[bbTH]Z``ZNPWaq`G]  
@HWI-EAS443:3:28:1667:1288#0/1  
GGTGGTTCACTTTCAAAGGACAAGCGGATCATCAGTCA  
+HWI-EAS443:3:28:1667:1288#0/1  
ab`bbbaa`aabba`aababb\_a`aa]\_a\_a\_a`aaa¥^a  
@HWI-EAS443:3:28:1747:308#0/1  
GAATAAAAGAACTGAGAGATCTAATGTCGCAGTCCCGCAC  
+HWI-EAS443:3:28:1747:308#0/1  
a`aaaaaab^aaa`aaa\_Xaa`\_aWZ\_W\_]VVU[V^S  
@HWI-EAS443:3:28:1785:1474#0/1  
AAAGAACTGAGAGATCTAATGTCGCAGTCCCGCACTCGCG  
+HWI-EAS443:3:28:1785:1474#0/1  
ab\_bbbabbabaaaa`bbaaa^`\_Ya`¥¥^^^X`¥\_YFY  
@HWI-EAS443:3:28:197:249#0/1  
AAAGAACTGAGAGATCTAATGTCGCAGTCCCGCACTCGCG  
+HWI-EAS443:3:28:197:249#0/1  
a`a\_bbbaaa]bba\_babaaa^b\_b```\_`aa\_a`a\_Z^`\_  
@HWI-EAS443:3:28:245:774#0/1  
GGGCGATCTGAACCTTGTCAATAGGGCAAACCAGCGACTG  
+HWI-EAS443:3:28:245:774#0/1  
a`\_baaaba]aW][a\_a\_¥aa`aa^a`aa`\_]`^````\_  
@HWI-EAS443:3:28:264:1205#0/1  
GAACTGAGAGATCTAATGTCGCAGTCCCGCACTCGCGAGA  
+HWI-EAS443:3:28:264:1205#0/1  
`aab`aaaba[\_aaa`aaWbaaaa\_\_aa\_bS`Wa\_a\_N\_\_  
@HWI-EAS443:3:28:264:255#0/1  
TAAAAGAACTGAGAGATCTAATGTCGCAGTCCCGCACTCG  
+HWI-EAS443:3:28:264:255#0/1  
aa````\_RW`\_]baa`a``aa`a\_]\_\_a\_W\_]`^V^^`^WZ  
@HWI-EAS443:3:28:26:282#0/1  
CCCGCACTCGCGATACTACTAAGACCACTGTGGACCA  
+HWI-EAS443:3:28:26:282#0/1  
`[Z¥`[a[XVXLGYZU[\_UYRXT[WOOQUBBBBBBBBBBBB  
@HWI-EAS443:3:28:303:1478#0/1  
GAACTGAGAGATCTAATGTCGCAGTCCCGCACTCGCGAGA  
+HWI-EAS443:3:28:303:1478#0/1  
¥¥W`\_\_¥WQTVT\_Z]QZ\_UaZ¥[XI[``\_]P\_Z`^`UDSV  
@HWI-EAS443:3:28:308:1547#0/1  
GTCCCGTTTTCGTTTTATTACCAACACTACGTCCCCTTGC  
+HWI-EAS443:3:28:308:1547#0/1  
¥^a`b[TYabbb\_¥a\_aZa\_Z^ZX\_\_ab\_SW\_T]]`RMQ  
@HWI-EAS443:3:28:315:250#0/1  
CCCGTTTTCGTTTTATTACCAACACTACGTCCCCTTGCC

+HWI-EAS443:3:28:315:250#0/1  
aYabXb^WS` `[X`a\_a`[a`X`a`T]a^\_Y]X\_NMVYP  
@HWI-EAS443:3:28:317:594#0/1  
CCCGTTTTTCGTTTCATTACCAACTACTCGTCCCCTTGCCC  
+HWI-EAS443:3:28:317:594#0/1  
abab`aabab`aa^aaaaaaaaaaaa` `\_^`\_`^^^`^^X  
@HWI-EAS443:3:28:324:675#0/1  
CCCGTTTTTCGTTTCATTACCAACTACTCGTCCCCTTGCCC  
+HWI-EAS443:3:28:324:675#0/1  
aaaa\_\_aaab¥a`^`\_`aa¥`\_`a\_\_a^¥W\_\_\_\_]V]]\_`^^  
@HWI-EAS443:3:28:332:95#0/1  
GGGACGTAGTGTGGTAATGAAACGAAAACGGGACTCTAG  
+HWI-EAS443:3:28:332:95#0/1  
aab\_\_b\_Ya`a[aa]0\_a\_a^\_a]a]\_`^`Q`\_\_XXXU]VV  
@HWI-EAS443:3:28:334:1781#0/1  
CTGTAATTGGGTATCTCATTGCCATCATCCACTTCATTCT  
+HWI-EAS443:3:28:334:1781#0/1  
aaHN\_\_ZTWV¥JNVW^ZZRMU¥^` [[\_PTYX]XU\_]XU^U  
@HWI-EAS443:3:28:35:1291#0/1  
AGAGAATAATGGACATGATTCCAGAGAGGAATGAACAAGG  
+HWI-EAS443:3:28:35:1291#0/1  
abX]\_Y]\_`^Y`aW^`aabSYba^a`a\_ab`aa` `][U^¥^  
@HWI-EAS443:3:28:372:282#0/1  
ATAGGGTTGAGGATTAGCTCATCTTTTCAGTTTTTGGTGGGT  
+HWI-EAS443:3:28:372:282#0/1  
abbabb]`R\_bb\_abaaaaab`\_baa`aaa`aaa`\_`a\_S  
@HWI-EAS443:3:28:418:623#0/1  
CGCTTGTCCTTTTTGAAAGTGAACCCACCAAACTGAAAGA  
+HWI-EAS443:3:28:418:623#0/1  
aabbba\_bbbbbbaabb`a^aabaabbaabaaaaaa¥aa`  
@HWI-EAS443:3:28:461:822#0/1  
AAAAGAACTGAGAGATCTAATGTCGCAGTCCCGCACTCGC  
+HWI-EAS443:3:28:461:822#0/1  
aaaa`\_a`\_`aaaa\_\_a`a`\_`^`\_a\_\_U\_\_a¥^NZ¥^¥W  
@HWI-EAS443:3:28:468:1212#0/1  
CAATAACTTATTCGTCATCAATGATGTGGGAGATCAATGG  
+HWI-EAS443:3:28:468:1212#0/1  
a]P¥a` `aaaaaZ`\_aaaa`aa` `Z^Z`\_`^X^^Xa\_[X\_W  
@HWI-EAS443:3:28:526:1291#0/1  
AAAAGAACTGAGAGATCTAATGTCGCAGTCCCGCACTCGC  
+HWI-EAS443:3:28:526:1291#0/1  
aZI` `XXX]aab`aZW`a`Xaa^aYaaZZ` `]`P^Ya^YVP  
@HWI-EAS443:3:28:530:470#0/1  
AAAGAACTGAGAGATCTAATGTCGCAGTCCCGCACTCGCG  
+HWI-EAS443:3:28:530:470#0/1  
`¥U¥¥`\_`[\_`^a`\_]`\_`aaab` `W^a`¥`a\_Q¥S\_a^^]`\_`  
@HWI-EAS443:3:28:536:1292#0/1  
GTCCCCTTTTTTCGTTTCATTACCAACTACTCGTCCCCTTGCC  
+HWI-EAS443:3:28:536:1292#0/1  
aababb]^abbba`a`aaaaaaaa`a`\_`aa]R`\_a`¥[[`\_`

@HWI-EAS443:3:28:591:922#0/1  
CTGATGTGACTTTTTGATTATGGCCATATGGTCCACAGT  
+HWI-EAS443:3:28:591:922#0/1  
aaX`a^¥YW\_aaaaVYaaa`\_W`]\_\_^][`WZ¥\_\_aXZ  
@HWI-EAS443:3:28:592:1286#0/1  
GGATTTCTCATTTTGGGCAAAGAAGACAAGAGATATGGCC  
+HWI-EAS443:3:28:592:1286#0/1  
^`a`abb^babaVXY[baY^^ZV`\_`W^\_Y^aa]aaaW]Y  
@HWI-EAS443:3:28:600:1849#0/1  
GTCCCCTTTTCGTTTCATTACCAACACTACGTCCCCTTGC  
+HWI-EAS443:3:28:600:1849#0/1  
a]bba`\_aaaa^]a\_`a\_b^[a`¥a^]a`QOV¥\_\_YXZX  
@HWI-EAS443:3:28:601:515#0/1  
GAGAATAAAAGAACTGAGAGATCTAATGTCGCAGTCCCGC  
+HWI-EAS443:3:28:601:515#0/1  
]a`aaaaaaaa\_a[aa`aVaaaaaaaa¥\_a`aa]\_\_[^\_  
@HWI-EAS443:3:28:61:1944#0/1  
AAAAGAACTGAGAGATCTAATGTCGCAGTCCCGCACTCGC  
+HWI-EAS443:3:28:61:1944#0/1  
Z]\_aabbb]¥a`\_[\_ababaaa^a[a`XPa\_^Y`Q`[aYa  
@HWI-EAS443:3:28:640:1205#0/1  
CACAGTGGTCTTAGTGAGTATCTCGCGAGTGCGGGACTGC  
+HWI-EAS443:3:28:640:1205#0/1  
aaa\_]¥\_]Saa`\_RV^\_^`^^[YYWY\_URPYZ[RNOY[  
@HWI-EAS443:3:28:699:1028#0/1  
GGGACGTAGTGTGGTAATGAAACGAAAACGGGACTCTAG  
+HWI-EAS443:3:28:699:1028#0/1  
a\_TLY\_S[[S`\_`¥]NX\_`\_`\_Y¥^[\_[U[Z[]UNPV^]  
@HWI-EAS443:3:28:731:162#0/1  
AAAAGAACTGAGAGATCTAATGTCGCAGTCCCGCACTCGC  
+HWI-EAS443:3:28:731:162#0/1  
ababaaaaaaaa`\_`\_`aaa`aa]\_\_`\_Y]]\_]Z[\_]VX  
@HWI-EAS443:3:28:741:1919#0/1  
GTCCCCTTTTCGTTTCATTACCAACACTACGTCCCCTTGC  
+HWI-EAS443:3:28:741:1919#0/1  
¥D]]¥\_T`¥]\_VW[[a`]X`a^a^`a`¥`\_V[`]XQUYT  
@HWI-EAS443:3:28:81:409#0/1  
GGTATCTCATTGCCATCATCCACTTCATTCTGAGTGCGGG  
+HWI-EAS443:3:28:81:409#0/1  
][U``bbbabb`a[`aa¥\_ba\_baa`¥aaaa\_W^Paa^Y^  
@HWI-EAS443:3:28:832:1909#0/1  
CTGTCCACTTCAGAAATCAAGTTAAAATAAGGAGGAGAGT  
+HWI-EAS443:3:28:832:1909#0/1  
aa]V^`aa`\_`aa[a^U`\_`\_`aa]a`\_¥\_\_`\_S\_^\_]V  
@HWI-EAS443:3:28:844:115#0/1  
AATAAAAGAACTGAGAGATCTAATGTCGCAGTCCCGCACT  
+HWI-EAS443:3:28:844:115#0/1  
Obbba`a`¥b`b]^`\_¥ab]b`¥ab\_T`\_b\_¥]Z\_¥]H]Z  
@HWI-EAS443:3:28:894:1185#0/1  
ACTCACTAAGACCACTGTGGACCATATGGCCATAATCAAA

+HWI-EAS443:3:28:894:1185#0/1  
Yaba\_bab\_Y¥b`b`a¥T\_b^baabZV\_bVa`^`^Taab^  
@HWI-EAS443:3:28:991:1013#0/1  
CTTTCCAAGAACTGTAAGTCGTTTGGTTGCCTTGTGTAA  
+HWI-EAS443:3:28:991:1013#0/1  
abaab`bbabaababab\_aa`aaaa[a```aa^aa`\_a`  
@HWI-EAS443:3:28:996:166#0/1  
TAAAAGAACTGAGAGATCTAATGTCGCAGTCCCGCACTCG  
+HWI-EAS443:3:28:996:166#0/1  
]¥`abZXZ\_b\_TVa]aZ\_^`ab¥T\_`]YGTLRVKZQZRD  
@HWI-EAS443:3:29:1018:1032#0/1  
GGCCATATGGTCCACAGTGGTCTTAGTGAGTATCTCGCGA  
+HWI-EAS443:3:29:1018:1032#0/1  
a`bb\_Z¥WY]`a^Za^V^bVa^XV^[\_Z^a\_\_ZZBBBBB  
@HWI-EAS443:3:29:1074:86#0/1  
AACAAGGACAAACCCTCTGGAGCAAAACAAACGATGCTGG  
+HWI-EAS443:3:29:1074:86#0/1  
aaaa\_abaaa`\_\_]\_aS`a`¥[\_`¥¥^W`^`NZ\_\_`N¥`¥  
@HWI-EAS443:3:29:1077:234#0/1  
TGCATCCTTTCCAAGAACTGTAAGTCGTTTGGTTGCCTTG  
+HWI-EAS443:3:29:1077:234#0/1  
aaaabaaaa\_\_aaaa\_]\_aa]`\_\_]\_a]]`aa^\_\_]^^^\_  
@HWI-EAS443:3:29:1079:497#0/1  
CGCCACCATCAAGGGAGCAATTTTACAATCCTGGAGCTCT  
+HWI-EAS443:3:29:1079:497#0/1  
abaabbabbabbbb`baababbabaaaa\_a\_`a`a`a¥a  
@HWI-EAS443:3:29:1090:176#0/1  
TGAAGGCACATCTGGGGTGGAGTCTGCTGTCTGAGAGGA  
+HWI-EAS443:3:29:1090:176#0/1  
abaaaba¥`a`Xbaaaa^aa^a[^ab\_^`X`[\_]JZ\_\_W  
@HWI-EAS443:3:29:1119:1740#0/1  
AAAAGAACTGAGAGATCTAATGTCGCAGTCCCGCACTCGC  
+HWI-EAS443:3:29:1119:1740#0/1  
aba`]`aaa\_a]a\_`aY\_`aaa]]]`aUW\_\_`]-¥¥]]¥\_  
@HWI-EAS443:3:29:1122:1517#0/1  
AAACGACTTACAGTTCTTGAAAGGATGCAGGTGCATTGA  
+HWI-EAS443:3:29:1122:1517#0/1  
``\_`Z]^b^Z^^aY`]]¥XVY¥SVOU[¥``\_Yaa\_¥T`^  
@HWI-EAS443:3:29:1135:1942#0/1  
CGCCCCTAACTGCCTTGATCATGCAATCCTTGTGAGAA  
+HWI-EAS443:3:29:1135:1942#0/1  
ababbabbbb`a\_a`aaaUb\_aabaa\_[\_baa`aa`^\_  
@HWI-EAS443:3:29:1138:418#0/1  
AAAGAACTGAGAGATCTAATGTCGCAGTCCCGCACTCGCG  
+HWI-EAS443:3:29:1138:418#0/1  
^[Z[JZ]W[¥aba]`a^]aabaXaa^aZQ[a`VaaSHNJ]  
@HWI-EAS443:3:29:1148:858#0/1  
TGCTGTAATTGGGTATCTCATTGCCATCATCCACTTCATT  
+HWI-EAS443:3:29:1148:858#0/1  
^`a]Y^U¥b^¥¥`PYZGXa¥\_\_^XHTZ]`RG¥aZ^¥]^ZX





+HWI-EAS443:3:29:1385:240#0/1  
a\_\_a`\_`\_a]a`¥a^`0`a^`VV^^\_]W]^[]Y^QBB  
@HWI-EAS443:3:29:13:1447#0/1  
GTCTGCTGCTCCTGAGAGGATTTCTCATTTTGGGCAAAGAA  
+HWI-EAS443:3:29:13:1447#0/1  
a`baaaaZ^aaaa¥aaa`aaaaaaRaa`a\_\_`aa`Z[^  
@HWI-EAS443:3:29:1419:906#0/1  
GCGAGATACTCACTAAGACCACTGTGGACCATATGGCCAT  
+HWI-EAS443:3:29:1419:906#0/1  
a\_]¥aabaabba\_baa`\_\_\_a\_aa\_a`a]\_^aa\_aa\_[` [  
@HWI-EAS443:3:29:1428:157#0/1  
CTGCTGTAATTGGGTATCTCATTGCCATCATCCACTTCAT  
+HWI-EAS443:3:29:1428:157#0/1  
abba\_b[`abbaaa^aa[a]`a`^\_a¥a`aa`\_`aV]`  
@HWI-EAS443:3:29:142:177#0/1  
AAGAAGTGAAGATCTAATGTCGCAGTCCCGCACTCGCGA  
+HWI-EAS443:3:29:142:177#0/1  
aaaaaaaa`aaa\_aa\_aa¥```\_`Y¥^T`¥\_Y¥Y¥^B  
@HWI-EAS443:3:29:1439:469#0/1  
GGGACGTAGTGTGGTAATGAAACGAAAACGGGACTCTAG  
+HWI-EAS443:3:29:1439:469#0/1  
ab[]aab\_¥]bXa`]GV^^^Paa[[I^\_[PV^]NR¥¥`\_ [  
@HWI-EAS443:3:29:1455:832#0/1  
GCGAGATACTCACTAAGACCACTGTGGACCATATGGCCAT  
+HWI-EAS443:3:29:1455:832#0/1  
a]^`aaZ]]VZY`¥`a^YU`\_\_XXOS¥V^\_AZ``]XBBB  
@HWI-EAS443:3:29:1470:502#0/1  
ATACTGGTAAGAGGCAATTCTCCAGTATTCAATTACAACA  
+HWI-EAS443:3:29:1470:502#0/1  
¥abb¥`\_`bb\_¥`Sb`b`^P^^aaabb`aaabaaa\_aa  
@HWI-EAS443:3:29:1473:359#0/1  
GCGAGATACTCACTAAGACCACTGTGGACCATATGGCCAT  
+HWI-EAS443:3:29:1473:359#0/1  
aaa\_a\_aX]VU\_¥aZ]U\_]R]Y]UV`X\_V]¥R\_0SYOVBB  
@HWI-EAS443:3:29:1479:1576#0/1  
AAAGAAGTGAAGATCTAATGTCGCAGTCCCGCACTCGCG  
+HWI-EAS443:3:29:1479:1576#0/1  
ab\_aaaaaaaaa`^`aaa`^^aa`¥¥`a[`R]^ZU][  
@HWI-EAS443:3:29:1490:324#0/1  
GGGTTAGAGATCAAAGAGGGAACGTACTATTGTCTCCCGA  
+HWI-EAS443:3:29:1490:324#0/1  
\_a`Z\_¥X[[\_¥QY]Xa[]^]VV¥`Y`[`¥^U[^U]YYWBB  
@HWI-EAS443:3:29:1494:458#0/1  
AATTGGGCAAGGGGACGTAGTGTGGTAATGAAACGAAAA  
+HWI-EAS443:3:29:1494:458#0/1  
UWZVOZ¥^`a\_aaa[[]a[¥N\_aa`NHGYUI^[MQ\_[BB  
@HWI-EAS443:3:29:1524:1358#0/1  
GCGAGATACTCACTAAGACCACTGTGGACCATATGGCCAT  
+HWI-EAS443:3:29:1524:1358#0/1  
a\_a\_\_^a`Y`[`S^\_\_]\_ZZ]^Y^XWX]X¥\_\_\_^¥T]Y]]

@HWI-EAS443:3:29:1548:801#0/1  
AATAAAAGAAGTCTAATGTCGCAGTCCCGCACT  
+HWI-EAS443:3:29:1548:801#0/1  
abbbaabb`b`baabaaa\_ba[bb^\_a^aa^\_\_^[¥]a\_  
@HWI-EAS443:3:29:1569:1058#0/1  
AAAGAAGTCTAATGTCGCAGTCCCGCACTCGCG  
+HWI-EAS443:3:29:1569:1058#0/1  
]`ab]a\_a]ba[aaa^a`ba[`]X]XU¥S\_[`Z[W\_\_UB  
@HWI-EAS443:3:29:159:1697#0/1  
CAGTGGTCTTAGTGAGTATCTCGCGAGTGCGGGACTGCGA  
+HWI-EAS443:3:29:159:1697#0/1  
a\_\_¥¥VZbP\_`]Y\_aa¥a`\_[`XXLTRNRYNR[^[BBBB  
@HWI-EAS443:3:29:1606:1327#0/1  
TAAGACCACTGTGGACCATATGGCCATAATCAAAAAGTAC  
+HWI-EAS443:3:29:1606:1327#0/1  
Y[VZQ¥]¥^`TEVX]a^P\_[WR][X[[SOXRYYV\_] [BBB  
@HWI-EAS443:3:29:160:1664#0/1  
CTGTAATTGGGTATCTCATTGCCATCATCCACTTCATTCT  
+HWI-EAS443:3:29:160:1664#0/1  
aa`WX\_aa`a`]\_\_Y^aaa``aaa`aa]aa^`\_\_a\_\_[\_W  
@HWI-EAS443:3:29:1614:1140#0/1  
ATTACAACAAGGCAACCAAACGACTTACAGTTCTTGAAAA  
+HWI-EAS443:3:29:1614:1140#0/1  
aaaa\_aa¥`\_a`^^¥RZ``]\_\_R`\_`^Y`]]]\_¥^`X^Z  
@HWI-EAS443:3:29:1623:800#0/1  
ATCCCCAGTTCTGGAAAAGCACTTTTGCATCTTTTGGGA  
+HWI-EAS443:3:29:1623:800#0/1  
abaa`\_`aab`a`]`\_\_`a\_a\_a`\_`aW\_a\_aaaaa`  
@HWI-EAS443:3:29:1628:275#0/1  
CCATATCTTGTCTTCTTTGCCAAAATGAGAAATCCTC  
+HWI-EAS443:3:29:1628:275#0/1  
S\_a\_\_V]W`\_¥`T¥\_\_`a`]ZR]W^\_\_I¥aabZIUF[JXB  
@HWI-EAS443:3:29:1630:544#0/1  
GGGTAGAGATCAAAGAGGGAACGTACTATTGTCTCCCGA  
+HWI-EAS443:3:29:1630:544#0/1  
aaa)`aa`baa\_\_\_\_\_a\_a`^`^a]`^`\_a`\_]V`]XX\_X  
@HWI-EAS443:3:29:167:1147#0/1  
CTCGCGAGATACTCACTAAGACCACTGTGGACCATATGGC  
+HWI-EAS443:3:29:167:1147#0/1  
a^a\_`Y¥^\_] ]^^\_]`\_W`\_`a] ^Y] ^] ^`]X\_UYY^  
@HWI-EAS443:3:29:1740:2033#0/1  
GTCGCAGTCCCGCACTCGCGAGATACTCACTAAGACCACT  
+HWI-EAS443:3:29:1740:2033#0/1  
]M]aaa^Xaaaa`YV[¥PTP\_^^¥STUUQ¥\_¥[YS^]BB  
@HWI-EAS443:3:29:1754:160#0/1  
ATGGCCATATGGTCCACAGTGGTCTTAGTGAGTATCTCGC  
+HWI-EAS443:3:29:1754:160#0/1  
aS``¥^aa`a`]`¥PN]U\_^W]\_¥W`aYUU[[^W¥XBBBBB  
@HWI-EAS443:3:29:1789:847#0/1  
GCCCTGAGTCAGTGCTAGTCAACACTTATCAATGGATAAT

+HWI-EAS443:3:29:1789:847#0/1  
a`\_a\_[abaaaa\_Y¥^`\_^a\_\_a[`a\_]UW\_a`a\_aZBB  
@HWI-EAS443:3:29:182:1018#0/1  
AACTGAGAGATCTAATGTCGCAGTCCCGCACTCGCGAGAT  
+HWI-EAS443:3:29:182:1018#0/1  
aaab^aa`b\_`baaaa`Za`ba¥Xa`a\_a¥^¥\_`^^¥^UU  
@HWI-EAS443:3:29:191:769#0/1  
AAAAGAAGACTGAGAGATCTAATGTCGCAGTCCCGCACTCGC  
+HWI-EAS443:3:29:191:769#0/1  
\_[LZWSZa]`¥a`]]\_aaZV]a^a\_a^T[`aa\_^T]^]U¥  
@HWI-EAS443:3:29:209:1187#0/1  
GTCCCGTTTTCGTTTTATTACCAACTACGTCCCTTGC  
+HWI-EAS443:3:29:209:1187#0/1  
a[b`\_b\_[`]a\_Z`¥`]PZ`a\_WTZ]¥^`XDZa`aRW^`  
@HWI-EAS443:3:29:216:1021#0/1  
GGATGGTGGACATCCTTAGACAGAATCCAAGTGGAGGAACA  
+HWI-EAS443:3:29:216:1021#0/1  
\_\_bU`a^``\_]H]]aaZXQ^\_^^¥U]U¥^a^]]W]\_Zaab  
@HWI-EAS443:3:29:228:1812#0/1  
TGGTGGGTTCACTTTCAAAGGACAAGCGGATCATCAGTC  
+HWI-EAS443:3:29:228:1812#0/1  
^¥aY[baaaa``b\_abab\_a\_^]bb``bb]aa``\_ba]Ya  
@HWI-EAS443:3:29:232:950#0/1  
GAATAAAAGAAGACTGAGAGATCTAATGTCGCAGTCCCGCAC  
+HWI-EAS443:3:29:232:950#0/1  
a^a¥aaaa¥\_a``Z^¥a\_^^\_]\_V`\_Y\_¥a\_^W^\_\_W¥BB  
@HWI-EAS443:3:29:247:355#0/1  
TGCCCGTTAGCACTTCTTCTTCTTCTTGGACTGATGATCC  
+HWI-EAS443:3:29:247:355#0/1  
\_``]¥b\_¥`^`\_ZXY¥\_USaX^aZ¥a`U`]Z¥]]aa`\_`]  
@HWI-EAS443:3:29:277:419#0/1  
TGCTGTAATTGGGTATCTCATTGCCATCATCCACTTCATT  
+HWI-EAS443:3:29:277:419#0/1  
Z\_\_[\_]\_^```\_[Va\_^\_X]^^^[\_]X\_X]TNU\_Y\_]X  
@HWI-EAS443:3:29:296:250#0/1  
CTGCTGCTCTGAGAGGATTTCTCATTGCGCAAAGAAGA  
+HWI-EAS443:3:29:296:250#0/1  
a`]a`aU^aX]YY¥^WUM¥¥V[ZZZ`^`[Y[^[[``\_]Y¥  
@HWI-EAS443:3:29:306:1902#0/1  
GAATAAAAGAAGACTGAGAGATCTAATGTCGCAGTCCCGCAC  
+HWI-EAS443:3:29:306:1902#0/1  
^T^``VI\_\_UXaa]`UX`\_abU[Z[QPZJ[ZTTa`^F\_¥`  
@HWI-EAS443:3:29:306:480#0/1  
AAAGAAGACTGAGAGATCTAATGTCGCAGTCCCGCACTCGCG  
+HWI-EAS443:3:29:306:480#0/1  
a\_Z\_\_aaaaaa\_a\_``aa^aa\_a```\_W¥\_[]^[\_U\_]BB  
@HWI-EAS443:3:29:30:113#0/1  
GTGCAACTTCAATATAAAACTGCCTGTCCGCCGGCT  
+HWI-EAS443:3:29:30:113#0/1  
a]aa`a^`\_aaa\_\_\_\_\_a\_¥\_\_`\_¥a¥¥\_¥¥\_]`^¥¥^YWB

@HWI-EAS443:3:29:332:1673#0/1  
ATCTAATGTCGCAGTCCCGCACTCGCGAGATACTCACTAA  
+HWI-EAS443:3:29:332:1673#0/1  
aa`ab`\_\_¥a^`^W\_¥`¥\_Z`¥\_X`¥ZS¥V¥¥W^¥WXZB  
@HWI-EAS443:3:29:345:645#0/1  
CATCTCTCTTGAAATGTGCCACAGCACACAGATTGGAGG  
+HWI-EAS443:3:29:345:645#0/1  
`\_`aa`aa\_aa[\_a]\_`¥`\_aaaa`[\_`aaaa^\_¥\_U\_\_\_\_  
@HWI-EAS443:3:29:390:468#0/1  
GTCGCAGTCCCGCACTCGCGAGATACTCACTAAGACCACT  
+HWI-EAS443:3:29:390:468#0/1  
aRa\_\_aaMaaa``\_]\_PX^¥]S¥¥UWZYWS^¥¥I[P¥^]¥B  
@HWI-EAS443:3:29:442:562#0/1  
CTTCCTGATGTGTACTTTTTGATTATGGCCATATGGTCCA  
+HWI-EAS443:3:29:442:562#0/1  
aabbbbb^a\_a`\_aabbbbbbaabaaa^\_aaa]``XXG^aB  
@HWI-EAS443:3:29:458:909#0/1  
CTCAGAATGAAGTGGATGATGGCAATGAGATACCCAATTA  
+HWI-EAS443:3:29:458:909#0/1  
aaaQ`Yba]ZaX^\_a\_aV[\_`\_a\_]WP\_`\_]\_\_\_\_`a[]]B  
@HWI-EAS443:3:29:49:1265#0/1  
GAGGATTTCTCATTTTGGGCAAAGAAGACAAGAGATATGG  
+HWI-EAS443:3:29:49:1265#0/1  
aba`X]aabababa`aa`aa^Xa`aaaa^Z]\_\_¥\_a^]]  
@HWI-EAS443:3:29:51:1934#0/1  
GAGAATAAAAGAACTGAGAGATCTAATGTCGCAGTCCCGC  
+HWI-EAS443:3:29:51:1934#0/1  
abUP\_bb\_KXXab`Za`\_^[\_`\_a`b`a\_Uaaaa\_]aaa\_Z  
@HWI-EAS443:3:29:522:461#0/1  
CCCGTTTTTCGTTTCATTACCAACTACGTCCCCTTGCCC  
+HWI-EAS443:3:29:522:461#0/1  
aaba\_ababb[a`aabaaaaba`a`aba`[\_a`\_]`^`a\_\_  
@HWI-EAS443:3:29:549:1715#0/1  
CAGGTGCATTGACTGAAGATCCAGATGAAGGCACATCTGG  
+HWI-EAS443:3:29:549:1715#0/1  
\_^]W[IYbaZ]W0\_babaaJa^^`]P]b¥ZRba`aZR¥a\_  
@HWI-EAS443:3:29:554:1435#0/1  
CCCGTTTTTCGTTTCATTACCAACTACGTCCCCTTGCCC  
+HWI-EAS443:3:29:554:1435#0/1  
ab`^UVa\_bbXaV\_aaab^aa\_\_b\_`b\_`[U¥\_`^]`^`[¥  
@HWI-EAS443:3:29:556:159#0/1  
GTCTTAGTGAGTATCTCGCGAGTGC GGGACTGCGACATTA  
+HWI-EAS443:3:29:556:159#0/1  
aQa`]VaUaaa^`^YRWYRWPXQRQRZ\_PMF0YSRUWBBB  
@HWI-EAS443:3:29:578:1059#0/1  
GTCCCGTTTTTCGTTTCATTACCAACTACGTCCCCTTGCC  
+HWI-EAS443:3:29:578:1059#0/1  
a`a\_aa^`\_a``Y\_\_\_\_```\_`a^```\_a^YU`ZaXV]Y]  
@HWI-EAS443:3:29:649:1953#0/1  
GTCCCGTTTTTCGTTTCATTACCAACTACGTCCCCTTGCC

+HWI-EAS443:3:29:649:1953#0/1  
aab¥\_]TQT\_Q[`a`SL]a\_a`\_a\_U`\_URa``\_VVP]  
@HWI-EAS443:3:29:690:1171#0/1  
GATCTAATGTCGCAGTCCCCGACTCGCGAGATACTCACTA  
+HWI-EAS443:3:29:690:1171#0/1  
`bbbabbabXbbab`aab\_baaa`aaaaa\_\_\_a`\_^aa  
@HWI-EAS443:3:29:695:333#0/1  
ATTCCGATCATTCCCATCACATTGTCGATGGATTCAATTC  
+HWI-EAS443:3:29:695:333#0/1  
]a`babaabaa`baaaa\_a^aaa^]a`]a\_^¥Z^a\_\_YV  
@HWI-EAS443:3:29:726:290#0/1  
ATGAAGGCACATCTGGGGTGGAGTCTGCTGTCCTGAGAGG  
+HWI-EAS443:3:29:726:290#0/1  
a[`aaaa`a`\_a^aa`\_W\_\_¥\_¥^`\_¥\_[U¥T^\_W\_Y\_^  
@HWI-EAS443:3:29:72:1133#0/1  
ATCAGACCGAGTGATGGTATCACCTCTGGCCGTAACATGG  
+HWI-EAS443:3:29:72:1133#0/1  
a]a\_aaaaYaaQa\_^UZTW[`Wa\_ZYQTNVYYBBBBBBBB  
@HWI-EAS443:3:29:747:1504#0/1  
CCCCTTTTCGTTTTATTACCAACTACGTCCCCCTTGCCC  
+HWI-EAS443:3:29:747:1504#0/1  
aba`aaabb\_aaaaa`aa`a\_\_`\_`\_`\_]`^\_`V^^\_[Z  
@HWI-EAS443:3:29:763:1450#0/1  
CACTCGCGAGATACTCACTAAGACCACTGTGGACCATATG  
+HWI-EAS443:3:29:763:1450#0/1  
^ZZ]aa\_0[ZOTZTWZ¥`Z\_]PY\_VX\_[[NZTX]ZN]BBB  
@HWI-EAS443:3:29:788:90#0/1  
AAAGAAGTGAAGATCTAATGTCGCAGTCCCCGACTCGCG  
+HWI-EAS443:3:29:788:90#0/1  
\_`TTTT`[bb`^\_a]`[[]\_\_FNb\_aaS]^Y¥U[PZa\_]`  
@HWI-EAS443:3:29:839:966#0/1  
AGGGGACGTAGTGTGGTAATGAAACGAAAACGGGACTCT  
+HWI-EAS443:3:29:839:966#0/1  
abbab`ab^ab\_a`abT`a^`aaYa^`aa^`^\_]\_^]Y  
@HWI-EAS443:3:29:840:258#0/1  
TGCTGTAATTGGGTATCTCATTGCCATCATCCACTTCATT  
+HWI-EAS443:3:29:840:258#0/1  
aaabb[aaaaaaaYba^`\_a\_aa^]`\_\_a\_]`a`\_`W¥`]  
@HWI-EAS443:3:29:848:651#0/1  
TGGTCCGTAACAAGTTTTCTCCAGTAGCCGGCGGAAC  
+HWI-EAS443:3:29:848:651#0/1  
aaa]aabaaa]aZa`aS^a\_a`]\_\_`W\_\_\_\_]a`]`\_W¥¥  
@HWI-EAS443:3:29:906:839#0/1  
GATGCAGGTGCATTGACTGAAGATCCAGATGAAGGCACAT  
+HWI-EAS443:3:29:906:839#0/1  
aaaa`aa`[aaaaaaa`aaab\_\_a`\_\_`\_`\_`\_aa\_\_X`V\_^  
@HWI-EAS443:3:29:917:1655#0/1  
CAGAATGAAGTGGATGATGGCAATGAGATACCCAATTACA  
+HWI-EAS443:3:29:917:1655#0/1  
`bbbab`Z]Mzb`\_b^[]W]W^`baaW\_¥baa`]\_aa\_



+HWI-EAS443:3:2:1157:415#0/1  
abbabbbbbbbaab^a]bbaa`aaaaa\_Xa]aa\_aaa^a  
@HWI-EAS443:3:2:1157:922#0/1  
CCCGTTTTCGTTTCATTACCAACTACTCGTCCCCTTGCCC  
+HWI-EAS443:3:2:1157:922#0/1  
```baabaaaa`a^aaaa]^]aXa^`aa^Z]XXU\_\_TZFQ  
@HWI-EAS443:3:2:1164:874#0/1  
CGCACTCGCGAGATACTCACTAAGACCACTGTGGACCATA  
+HWI-EAS443:3:2:1164:874#0/1  
ab]aaaaa[^`a\_]^U^a[X\_] [SX¥\_a^]\_Sa^^¥ZU^\_  
@HWI-EAS443:3:2:1166:1651#0/1  
GGATTCTGTCTAAGGATGTCCACCATCCTTACTCCTCCAA  
+HWI-EAS443:3:2:1166:1651#0/1  
a]V`babba]ba^\_ba\_a\_Xaa¥\_a^]YY[VSa\_\_\_XYaV  
@HWI-EAS443:3:2:1177:936#0/1  
CGTAAACAAGTTTCTCCCAGTAGCCGGCGAACAGGCA  
+HWI-EAS443:3:2:1177:936#0/1  
a\_HUUa\_PR¥``PKXR^WT¥\_a¥`[[[\_W\_aW]WZ`BBB  
@HWI-EAS443:3:2:119:1017#0/1  
AAAGAAGTGAAGATCTAATGTGCGAGTCCCGCACTCGCG  
+HWI-EAS443:3:2:119:1017#0/1  
a`\_RZ¥\_aaab\_\_b\_`^aa\_a^`\_`a\_U` [Y`aIZZUUVV  
@HWI-EAS443:3:2:1206:548#0/1  
CCGTTTTCGTTTCATTACCAACTACTCGTCCCCTTGCCCA  
+HWI-EAS443:3:2:1206:548#0/1  
a\_SPbb`¥b```[aUaaa¥[\_¥a^ [¥G` ]`0\_^\_\_aRQ]X  
@HWI-EAS443:3:2:1213:972#0/1  
CGCACTCGCGAGATACTCACTAAGACCACTGTGGACCATA  
+HWI-EAS443:3:2:1213:972#0/1  
aa]a\_bbba`aa[`aXab`aaa\_`a\_\_a`\_` ]PZ¥VV\_\_`  
@HWI-EAS443:3:2:1241:1270#0/1  
GAATAAAAGAAGTGAAGATCTAATGTGCGAGTCCCGCAC  
+HWI-EAS443:3:2:1241:1270#0/1  
aaabaabaaaa`ba`aabaaaa```b^\_\_]a\_\_]V\_X\_UU  
@HWI-EAS443:3:2:1243:2043#0/1  
GACGAGCAGTCAATTGCTGAGGCAATAATTGTGGCCATGG  
+HWI-EAS443:3:2:1243:2043#0/1  
aZPK\_H[Xb]\_aaZ¥SVY\_^X[R^\_\_\_\_\_]\_UBBBBBBBB  
@HWI-EAS443:3:2:1311:684#0/1  
GTCCCGTTTTCGTTTCATTACCAACTACTCGTCCCCTTGCC  
+HWI-EAS443:3:2:1311:684#0/1  
^V^T[^V]a\_\_M`UFZW¥\_\_]\_\_\_ZU\_\_^]TTUZULV¥U  
@HWI-EAS443:3:2:1339:2035#0/1  
AAAAGAAGTGAAGATCTAATGTGCGAGTCCCGCACTCGC  
+HWI-EAS443:3:2:1339:2035#0/1  
aa`aaabUa`a¥` ]^^]a`^^\_]UZLY\_VOGX]YVXYVB  
@HWI-EAS443:3:2:1343:1129#0/1  
AGAAGAGCAGCAGTGTGAGCAGACCCATTAGCATCTCTCT  
+HWI-EAS443:3:2:1343:1129#0/1  
ab\_abab`aa``b[^U¥``VY\_XRX\_]^[ ]YS]^[\_WVU^



@HWI-EAS443:3:2:138:91#0/1  
TGGTATTCTCACAAGAGGATTGCATGATCAAGGCAGTTAG  
+HWI-EAS443:3:2:138:91#0/1  
aaaXaa\_``\_] ^X`]a\_^^`U]^a]]^X^]¥X^TTBB  
@HWI-EAS443:3:2:1406:1289#0/1  
CTAATGTGCTAATTGGGCAAGGGGACGTAGTGTGGTAAT  
+HWI-EAS443:3:2:1406:1289#0/1  
aaaaaa\_baaaaaaa\_a\_\_`aa`\_\_[aXS¥]a]\_\_WGZZY  
@HWI-EAS443:3:2:1465:506#0/1  
GTCCCCGTTTTCGTTTTATTACCAACTACGTCCCCCTTGC  
+HWI-EAS443:3:2:1465:506#0/1  
a^\_]`b^\_a`\_a^\_aX`\_\_\_\_]`¥Y`X`X`XXXWUY]\_U  
@HWI-EAS443:3:2:1477:180#0/1  
GAGAGAATAAAAGAACTGAGAGATCTAATGTCGCAGTCCC  
+HWI-EAS443:3:2:1477:180#0/1  
a^a^a^\_^^\_^^\_]WY`Y\_] ^YXY]^]^UX]XYYVSRV  
@HWI-EAS443:3:2:1522:66#0/1  
GGAAAAGCACTTTTGCATCTTTTTGGAAATGCCTCAAGAG  
+HWI-EAS443:3:2:1522:66#0/1  
[^`^\_a^aW[T^ZZ[^`^P]XZa\_]`[a\_a[KM¥LXQaBB  
@HWI-EAS443:3:2:1549:88#0/1  
ATGGCAATGAGATACCCAATTACAGCAGACAAGAGAATAA  
+HWI-EAS443:3:2:1549:88#0/1  
a^b\_Ya¥V¥\_a\_^ [SOW` `^^X`\_V` ]ZXUZV^ZXWZB  
@HWI-EAS443:3:2:1551:1500#0/1  
CCAGCATCGTTTGTTCCTCCAGAGGGTTTGCCTTGTT  
+HWI-EAS443:3:2:1551:1500#0/1  
aaabb¥` ]`ab^bab` `baaaaab]\_aZT\_bb]NRZ\_^Sa  
@HWI-EAS443:3:2:1587:1327#0/1  
GAGAAATGATGATGTTGACCAAAGTTTGATTATCGCTGCT  
+HWI-EAS443:3:2:1587:1327#0/1  
aOUTZRYaV¥aMJ¥W` `ROTZRZ]UU^\_U^^^XVXW^[BB  
@HWI-EAS443:3:2:1606:1218#0/1  
AAAAGAACTGAGAGATCTAATGTCGCAGTCCCGCACTCGC  
+HWI-EAS443:3:2:1606:1218#0/1  
aaa`a` `^aba^aaYYUa\_` `a^UUY^\_TRZW\_UZ¥XU¥U  
@HWI-EAS443:3:2:1623:1685#0/1  
AACAAGGACAAACCCTCTGGAGCAAAACAAACGATGCTGG  
+HWI-EAS443:3:2:1623:1685#0/1  
a` `baa]^ [aa[PXV` ¥` ZTT]T[XY]G\_\_]NVZ[¥P¥` B  
@HWI-EAS443:3:2:1627:454#0/1  
AATCAAACCTTGGTCAACATCATCATTTCTCACTTCTCCT  
+HWI-EAS443:3:2:1627:454#0/1  
aaa^aaa^aaaa^\_\_`^`^`^`^` `\_\_W`Z`^X`[X\_  
@HWI-EAS443:3:2:1633:139#0/1  
CATATCTCTTGTCTTCTTTGCCAAAATGAGAAATCCTCT  
+HWI-EAS443:3:2:1633:139#0/1  
ababb¥b`bba`^aa^baaa\_` [ `\_aaa]`a\_a` `^]`V\_  
@HWI-EAS443:3:2:1638:196#0/1  
AAAAGAACTGAGAGATCTAATGTCGCAGTCCCGCACTCGC

+HWI-EAS443:3:2:1638:196#0/1  
a[ `a\_^b] `aaaaa]Z[aa¥]aNraN\_a]^TUTVTVPLNB  
@HWI-EAS443:3:2:1651:236#0/1  
CAACACTTCAATATAAACACTGCCTGTTCCGCCGCTACT  
+HWI-EAS443:3:2:1651:236#0/1  
ab\_GR`bWZ¥aaabT]aa\_]aa`\_^R^`\_Z\_TW`UX¥\_NR  
@HWI-EAS443:3:2:1679:1509#0/1  
GCGAGATACTCACTAAGACCACTGTGGACCATATGGCCAT  
+HWI-EAS443:3:2:1679:1509#0/1  
MaaS`U`Ua`S\_] [a^\_aa\_a`\_]aMEW[X\_Z[^]]PUB  
@HWI-EAS443:3:2:1703:1236#0/1  
AAAAGAAGTGAAGATCTAATGTCGCAGTCCCGCACTCGC  
+HWI-EAS443:3:2:1703:1236#0/1  
[L\_bb\_a[bbb]^a]aab\_abb] `b`aa^^TUb\_\_Y[Y^M  
@HWI-EAS443:3:2:1717:886#0/1  
CGCTGTTTTGCCCTATTGACAAAGTTCAGATCGCCCTAA  
+HWI-EAS443:3:2:1717:886#0/1  
abaab`babba`abbbbbbbaabbb[a\_b`ba^a`a\_\_aa`  
@HWI-EAS443:3:2:1720:214#0/1  
GTCCCGTTTTCTTTTATTACCAACTACGTCCCCTTGC  
+HWI-EAS443:3:2:1720:214#0/1  
a[JU¥a][ZIVVW\_^MM[TTUWU^^YSVXSQFJGVQTUBB  
@HWI-EAS443:3:2:1737:306#0/1  
AAAAGAAGTGAAGATCTAATGTCGCAGTCCCGCACTCGC  
+HWI-EAS443:3:2:1737:306#0/1  
] `a`bab^bbaaaba]ba]aa¥[ `U`]NWVSZY^]^[ `X  
@HWI-EAS443:3:2:173:1741#0/1  
GAATTGCCTCTTACCAGTATCCTCAACCCTGATCCTCTCA  
+HWI-EAS443:3:2:173:1741#0/1  
X\_aa]abUb\_baaa\_bb`abbaababb\_VWaab\_Xa]b^^  
@HWI-EAS443:3:2:1743:1357#0/1  
CCCGCACTCAGAATGAAGTGGATGATGGCAATGAGATACC  
+HWI-EAS443:3:2:1743:1357#0/1  
aaa`^^aa^] `Xaa`XVbaaa]baY\_a]\_R\_] [¥]\_\_TL  
@HWI-EAS443:3:2:209:1558#0/1  
ATGTCGCAGTCCCGCACTCGCGAGATACTCACTAAGACCA  
+HWI-EAS443:3:2:209:1558#0/1  
a]a\_HVYP^L[SGTSYWR[MS]S]XKZ`\_V^G\_\_[UTU^B  
@HWI-EAS443:3:2:218:1414#0/1  
AAACGACTTACAGTTCTTGAAAGGATGCAGGTGCATTGA  
+HWI-EAS443:3:2:218:1414#0/1  
abbQI¥baaa¥T\_`\_\_VZ` [¥`]a] `aK]a[M` [^\_`¥W  
@HWI-EAS443:3:2:248:990#0/1  
AATGTCGCAGTCCCGCACTCGCGAGATACTCACTAAGACC  
+HWI-EAS443:3:2:248:990#0/1  
a\_^`YUZQaaR`XSR[0][ZTYV]^QW\_¥JESGRVBBBBB  
@HWI-EAS443:3:2:250:1136#0/1  
CTGTCTGAGAGGATTTCTCATTTTGGGCAAAGAAGACAA  
+HWI-EAS443:3:2:250:1136#0/1  
aabaaaab`bbbbaaaaaaaabab`aaa`a`\_`a`a`a`\_`a`\_`

@HWI-EAS443:3:2:250:592#0/1  
AAAGAAGTCTAATGTCGCAGTCCCGCACTCGCG  
+HWI-EAS443:3:2:250:592#0/1  
[^\a[Ra^\[ba¥^aa\_¥X[a]`RN`]``M`QT`TMRU¥RBB  
@HWI-EAS443:3:2:258:519#0/1  
GAGAGATCTAATGTCGCAGTCCCGCACTCGCGAGATACTC  
+HWI-EAS443:3:2:258:519#0/1  
a[SU\_\_a[^\_aS`^]]\_\_¥XH\_N\_LLNNTTXUUXUUXYUB  
@HWI-EAS443:3:2:298:1114#0/1  
TTCATTACCAACACTACGTCCCCTTGCCCAATTAGCACAT  
+HWI-EAS443:3:2:298:1114#0/1  
aaaaaaa^aa\_\_`]aa`a\_\_\_a]V]aUW¥a`\_`]a[`HY]  
@HWI-EAS443:3:2:29:1907#0/1  
ATTCATTCCCCAGTTCTGGAAAAGCACTTTTGCATCTTT  
+HWI-EAS443:3:2:29:1907#0/1  
a\_T\_[`]\_a]Q\_\_[\_X\_[[^\[¥`aa^][^\[¥^]^[Y]^X  
@HWI-EAS443:3:2:342:430#0/1  
AGGGGACGTAGTGTGGTAATGAAACGAAACGGGACTCT  
+HWI-EAS443:3:2:342:430#0/1  
ababb`aT\_VYbaa`H¥a]a[`b\_]W\_^¥H[\_aWR^VU  
@HWI-EAS443:3:2:355:1901#0/1  
AAAAGAAGTCTAATGTCGCAGTCCCGCACTCGC  
+HWI-EAS443:3:2:355:1901#0/1  
aa[\_]YZa[a\_aaaXHT`]aPX0\_a\_LSU[XVZLQTBB  
@HWI-EAS443:3:2:381:364#0/1  
CACCATCAAGGGAGCAATTTTACAATCCTGGAGCTCTTCT  
+HWI-EAS443:3:2:381:364#0/1  
abbabbabbbbbbabbab\_bab`a`^ba\_bab\_bbab  
@HWI-EAS443:3:2:405:793#0/1  
AAACGACTTACAGTTCTTGGAAAGGATGCAGGTGCATTGA  
+HWI-EAS443:3:2:405:793#0/1  
[aa[a\_WP\_ZV`a^^M]`Ua^`\_[\_\_^\_U\_`LDYRVaY`X  
@HWI-EAS443:3:2:408:462#0/1  
GAGAATAAAGAAGTCTAATGTCGCAGTCCCGC  
+HWI-EAS443:3:2:408:462#0/1  
^bbaaUY^\_aa\_a\_a\_Xaaba`aX[S`0aU]ZaQN\_Q¥\_  
@HWI-EAS443:3:2:412:1672#0/1  
AAAAGAAGTCTAATGTCGCAGTCCCGCACTCGC  
+HWI-EAS443:3:2:412:1672#0/1  
aaaba\_aaaaa^a`aU\_abaa`Z\_```YY^]\_U`]UY\_¥^  
@HWI-EAS443:3:2:415:845#0/1  
GTTCACTTTCAAAGGACAAGCGGATCATCAGTCAAGAAA  
+HWI-EAS443:3:2:415:845#0/1  
a`aa`ba`aaa\_]aa^a`aa^`[¥`Z`^`^`]\_^\_\_\_\_  
@HWI-EAS443:3:2:435:1050#0/1  
GTTTGTCTTGTTCATTCCTCTCTGGAATCATGTCCATTA  
+HWI-EAS443:3:2:435:1050#0/1  
aTa\_a^]Y`a`P`a\_Z\_]`X\_W^[[]`]]^]XXX^^^]  
@HWI-EAS443:3:2:512:1161#0/1  
AAAAGAAGTCTAATGTCGCAGTCCCGCACTCGC

+HWI-EAS443:3:2:512:1161#0/1  
abaabaaWa\_baaa`]\`aaa\_a\_\`\_\`aX\_Y¥\_¥\_[]\_\`]  
@HWI-EAS443:3:2:535:1504#0/1  
AAAAGAAGTCTGAGAGATCTAATGTCGCAGTCCCGCACTCGC  
+HWI-EAS443:3:2:535:1504#0/1  
aaaabaa\_aaaa\_\`a`Za`aaa\_\_a`\_aQZ^]a]YZ^XaU  
@HWI-EAS443:3:2:617:771#0/1  
CACCATCAAGGGAGCAATTTTACAATCCTGGAGCTCTTCT  
+HWI-EAS443:3:2:617:771#0/1  
a`aaa]]aZ]aa\_a\_a¥aaa^aZ`^\_Z\_X`]Z^U^UZ\_V]  
@HWI-EAS443:3:2:678:1496#0/1  
CGCACTCAGAATGAAGTGGATGATGGCAATGAGATACCCA  
+HWI-EAS443:3:2:678:1496#0/1  
]a\_bbbbababbb`ba`bbbaabab`]`aabbab\_Z]¥GUa  
@HWI-EAS443:3:2:67:266#0/1  
CTCAGAATGAAGTGGATGATGGCAATGAGATACCCAATTA  
+HWI-EAS443:3:2:67:266#0/1  
aa^OV^W]Z]Y¥¥W¥\_R^^`\`T]`YLOMQNMJJ]O]UBBB  
@HWI-EAS443:3:2:684:1090#0/1  
AAAGAAGTCTGAGAGATCTAATGTCGCAGTCCCGCACTCGCG  
+HWI-EAS443:3:2:684:1090#0/1  
aaaaaaaaabab^aa`\_abaab`\_\_Z\_a[NY^^¥¥¥\_¥`Q\_  
@HWI-EAS443:3:2:712:1165#0/1  
GGTGGTTCACTTTCAAAGGACAAGCGGATCATCAGTCA  
+HWI-EAS443:3:2:712:1165#0/1  
U`Z^Y^PYab`]a¥Q`\_URa[RJ`\_`W`aV]U[SY]aSG^  
@HWI-EAS443:3:2:730:299#0/1  
GGGAGATCAATGGCCCTGAGTCAGTGCTAGTCAACTTA  
+HWI-EAS443:3:2:730:299#0/1  
aVVUaZLL^\_^`\_GPG[^]RW[`]WLVWQLWV¥V[MVBB  
@HWI-EAS443:3:2:730:699#0/1  
ATTCAATCCCCAGTTCTGGAAAAGCACTTTTGCATCTTT  
+HWI-EAS443:3:2:730:699#0/1  
aaaa`a`aa\_\_a\_\_^`\_a\_\_[\_`]a\_]\_\_`\_`\_`[^Y^]`^  
@HWI-EAS443:3:2:736:729#0/1  
GTCCCGTTTTTCGTTTCATTACCAACTACGTCCTTGC  
+HWI-EAS443:3:2:736:729#0/1  
a¥VZ\_aXY]N¥aPZZUTVYXYWX]YUV`VX\_YZUUUX^]B  
@HWI-EAS443:3:2:756:170#0/1  
TGTCGCAGTCCCGCACTCGCGAGATACTACTAAGACCAC  
+HWI-EAS443:3:2:756:170#0/1  
]b¥`W]`aYY\_YP¥\_S¥\_UEW^]XSSUW¥¥T¥¥U¥UPBBB  
@HWI-EAS443:3:2:767:411#0/1  
ATAAAAGAAGTCTGAGAGATCTAATGTCGCAGTCCCGCACTC  
+HWI-EAS443:3:2:767:411#0/1  
abaa`a`a`aaa`a\_a\_aa`a\_\_`\_\_XX]^\_]O]^V  
@HWI-EAS443:3:2:770:1968#0/1  
GAGAATAAAAGAAGTCTGAGAGATCTAATGTCGCAGTCCCGC  
+HWI-EAS443:3:2:770:1968#0/1  
ab^`b`bbbaaaYa`bababa\_abbab\_a\_ab¥IP\_`^]

@HWI-EAS443:3:2:770:38#0/1  
GAATAAAAGAACTGAGAGATCTAATGTCGCAGTCCCGCAC  
+HWI-EAS443:3:2:770:38#0/1  
aaaabaaaa\_\_aa\_aaa`a\_aa\_\_a]^`\_]\_aYVSY\_MVS  
@HWI-EAS443:3:2:781:852#0/1  
CAGTCCCGCACTCGCGAGATACTCACTAAGACCACTGTGG  
+HWI-EAS443:3:2:781:852#0/1  
aa`aaaaaaa\_aaaaa\_````Wa¥\_^`\_`a`X¥]]\_`^`X  
@HWI-EAS443:3:2:782:779#0/1  
AAAAGAACTGAGAGATCTAATGTCGCAGTCCCGCACTCGC  
+HWI-EAS443:3:2:782:779#0/1  
aabaa`a¥a`aa\_a`\_`aa`ab^`\_`\_\_aVR]\_`]]Y]V\_V  
@HWI-EAS443:3:2:784:1091#0/1  
GAATAAAAGAACTGAGAGATCTAATGTCGCAGTCCCGCAC  
+HWI-EAS443:3:2:784:1091#0/1  
`aaabb`\_aabTbaaaabbaaaba\_\_a\_aa¥]^`^`a\_X  
@HWI-EAS443:3:2:890:767#0/1  
GCCCTGAGTCAGTGCTAGTCAACACTTATCAATGGATAAT  
+HWI-EAS443:3:2:890:767#0/1  
¥^a\_`ba\_`^`^`a¥a]aXT¥aZ\_R^`a\_SX¥a\_0[`\_XZ  
@HWI-EAS443:3:2:897:831#0/1  
AGAGAATAAAAGAACTGAGAGATCTAATGTCGCAGTCCCG  
+HWI-EAS443:3:2:897:831#0/1  
\_ba`a`babaaaba\_aaaaa]a^\_b\_ab^]a^^aGR\_Z^  
@HWI-EAS443:3:2:933:1258#0/1  
AAAGAACTGAGAGATCTAATGTCGCAGTCCCGCACTCGCG  
+HWI-EAS443:3:2:933:1258#0/1  
a`Ub]`H`ba`a`]a[`\_\_\_\_a]]^]`W¥Z[a^SXSNNZZB  
@HWI-EAS443:3:2:949:1349#0/1  
AGAATGAAGTGGATGATGGCAATGAGATACCCAATTACAG  
+HWI-EAS443:3:2:949:1349#0/1  
ab\_ab\_aaaRbaba`\_]a`¥aa`ba`\_\_^YGX^\_a``¥a^  
@HWI-EAS443:3:2:95:288#0/1  
GTCCCGTTTTTCGTTTCATTACCAACTACGTCCCTTGC  
+HWI-EAS443:3:2:95:288#0/1  
a¥a\_¥]Y\_`\_]`]T\_\_U]\_[`^Y\_ZV¥PV¥M[NLWVVVYZB  
@HWI-EAS443:3:2:976:244#0/1  
TGGACATGATTCCAGAGAGGAATGAACAAGGACAAACCCT  
+HWI-EAS443:3:2:976:244#0/1  
aaaa\_aaaa\_\_\_\_]a^a^a^^^`\_`ZX\_^\_X^Y^]]XUYX  
@HWI-EAS443:3:2:996:351#0/1  
CTTGTGACCATTGAATTTTCACAATTTCCAGTTCCTGAT  
+HWI-EAS443:3:2:996:351#0/1  
aa\_ZT`\_WP`a\_XYQY`aa\_\_Z[SY`\_`[[Y[`[VROV]UB  
@HWI-EAS443:3:30:1010:1287#0/1  
GAACCCCGCACTCAGAATGAAGTGGATGATGGCAATGAGA  
+HWI-EAS443:3:30:1010:1287#0/1  
```a]a`bba\_`]^`^`Z^\_]X\_UZZZ\_¥Y`[¥]]¥^]ZV  
@HWI-EAS443:3:30:1041:1352#0/1  
GGTATTCTCACAAGAGGATTGCATGATCAAGGCAGTTAGG

+HWI-EAS443:3:30:1041:1352#0/1  
aa^aaaa`aa`aaa`aa\_`^`aa\_a^``^^^]aV]Y]]  
@HWI-EAS443:3:30:1056:1318#0/1  
CGCACTCGCGAGATACTCACTAAGACCACTGTGGACCATA  
+HWI-EAS443:3:30:1056:1318#0/1  
a`H¥Xa^`\_\_[aZ][\_`¥[[`Wa`Z^[a[\_V`TBBBBBB  
@HWI-EAS443:3:30:1081:1165#0/1  
ATCTAATGTCGCAGTCCCGCACTCGCGAGATACTCACTAA  
+HWI-EAS443:3:30:1081:1165#0/1  
aa`abaaaT]a]]`\_aa]`X\_```^`aW[\_\_\_¥WU^¥\_  
@HWI-EAS443:3:30:1110:1946#0/1  
CCCGTTTTTCGTTTCATTACCAACTACGTCCCCCTTGCCC  
+HWI-EAS443:3:30:1110:1946#0/1  
a\_`aRU\_a\_]QUTU]\_[`¥[`YZ\_]a^[TVV\_\_VSVQNL  
@HWI-EAS443:3:30:1127:1862#0/1  
AAAGAAGTGCAGATCTAATGTCGCAGTCCCGCACTCGCG  
+HWI-EAS443:3:30:1127:1862#0/1  
]\_¥^`ba`aa\_b\_aVU¥\_U]a]]`Ub]Q[TYO^[U\_]YFV  
@HWI-EAS443:3:30:112:423#0/1  
TCTTTCTTGACTGATGATCCGCTTGCTTTTGAAAGTGA  
+HWI-EAS443:3:30:112:423#0/1  
abbaa`\_a\_aa`b]Z[Yaa`aaaa\_\_a^`Z]`Ya`aRU\_  
@HWI-EAS443:3:30:1137:638#0/1  
AAAAGAAGTGCAGATCTAATGTCGCAGTCCCGCACTCGCG  
+HWI-EAS443:3:30:1137:638#0/1  
`Y]Ua`aa```]a]a`aa`aa\_\_`aaaTY```\_]¥¥X]]  
@HWI-EAS443:3:30:1141:836#0/1  
GTCCCCTTTTTCGTTTCATTACCAACTACGTCCCCCTTGC  
+HWI-EAS443:3:30:1141:836#0/1  
``baaa[abbab\_bbab`baaaaa^a\_aa`````\_]`^\_U\_  
@HWI-EAS443:3:30:1186:1588#0/1  
ATCTAATGTCGCAGTCCCGCACTCGCGAGATACTCACTAA  
+HWI-EAS443:3:30:1186:1588#0/1  
a`a\_aa\_]R¥U]¥[WY`\_V\_¥¥W¥UV^UWWUZS[XUWWV^  
@HWI-EAS443:3:30:1209:75#0/1  
TCCAGATGAAGGCACATCTGGGGTGGAGTCTGCTGTCCCTG  
+HWI-EAS443:3:30:1209:75#0/1  
^Z]P\_Z^`X\_aaa\_¥\_¥U]^]]WM[ZTVKSUZ[QSNBBB  
@HWI-EAS443:3:30:1264:486#0/1  
GGGACGTAGTGTGGTAATGAAACGAAACGGGACTCTAG  
+HWI-EAS443:3:30:1264:486#0/1  
aa`[\_a[¥^Ub^abaP`\_[WX\_¥VSS]^]Q\_^^XNWWOWQ  
@HWI-EAS443:3:30:1296:1190#0/1  
AAGAAGTGCAGATCTAATGTCGCAGTCCCGCACTCGCGA  
+HWI-EAS443:3:30:1296:1190#0/1  
W\_UU\_[ab\_^^W¥aba`aab`b^ab^QZa]]`^^^X]U¥  
@HWI-EAS443:3:30:1308:193#0/1  
TCCCGTTTTTCGTTTCATTACCAACTACGTCCCCCTTGCC  
+HWI-EAS443:3:30:1308:193#0/1  
YZ`\_a\_`^aW`\_`Y\_`a`a\_N\_\_V^¥\_\_WUW¥V[RSP¥BB

@HWI-EAS443:3:30:1321:1053#0/1  
CTGCTGTAATTGGGTATCTCATTGCCATCATCCACTTCAT  
+HWI-EAS443:3:30:1321:1053#0/1  
a#U\_aa]^`bb\_`^\$aaaa`UX\_a\_aaaa\_aaaa^`^^`  
@HWI-EAS443:3:30:1334:495#0/1  
GAATAAAAGAAGTCTAATGTCGCGAGTCCCCGCAC  
+HWI-EAS443:3:30:1334:495#0/1  
[OV\_X[M^]]V]Z`LL\$#[^YU]NUBBBBBBBBBBBBBBB  
@HWI-EAS443:3:30:1352:1342#0/1  
CTAGCACTGACTCAGGGCCATTGATCTCCCACATCATTGA  
+HWI-EAS443:3:30:1352:1342#0/1  
\_[]\_a\_S^aaa\_X][P`Y[]P[T#R[^[QUU`\_]]\$UQSV  
@HWI-EAS443:3:30:1370:1438#0/1  
ATGTGCCACAGCACAGATTGGAGGAGTAAGGATGGTGG  
+HWI-EAS443:3:30:1370:1438#0/1  
\$M`[]\_bab[ab`T^UP\_S^\$TT^V]X`aYa`^aMDTX  
@HWI-EAS443:3:30:1377:1839#0/1  
CTGCTGTCTGAGAGGATTTCTCATTGCGCAAAGAAGA  
+HWI-EAS443:3:30:1377:1839#0/1  
`^aaaa\_\_[a`\_\_^aaa`aa\_````\_`\_]a]aa^^\_W^\_  
@HWI-EAS443:3:30:1427:1048#0/1  
GTCGTTTGGTTGCCTTGTGTAATTGAATACTGGAGAATT  
+HWI-EAS443:3:30:1427:1048#0/1  
a[X`\_]``]\_\_`\_]`^WQX\$Z]^X\_Y[[W[\_\_\_X]X]Y\$  
@HWI-EAS443:3:30:1471:320#0/1  
CGCACTCGCGAGATACTCACTAAGACCACTGTGGACCATA  
+HWI-EAS443:3:30:1471:320#0/1  
ab]bbbb`]bbbbbabab\_bSaa\_ba\_a`XYa`b`a\$^TZa  
@HWI-EAS443:3:30:1487:947#0/1  
GTCCCGTTTTCGTTTTATTACCAACTACGTCCCCTTGCC  
+HWI-EAS443:3:30:1487:947#0/1  
aZ`]Yb^a^\_\_aQ`^]Z\$[^YR`YMX]\_ZX[G\$^SNXXXU  
@HWI-EAS443:3:30:1505:1501#0/1  
TCCCGTTTTCGTTTTATTACCAACTACGTCCCCTTGCC  
+HWI-EAS443:3:30:1505:1501#0/1  
Ubb\$#P]ba\_\_abb`aabb`^bZab]\_aabXaa]`\_[\_Ya  
@HWI-EAS443:3:30:151:331#0/1  
CGTTTTCGTTTTATTACCAACTACGTCCCCTTGCCCAA  
+HWI-EAS443:3:30:151:331#0/1  
ab^]aW^a^\_a`\_\_^`^`\_\_aX]a\_WU]]Z\_XPP^W]XW  
@HWI-EAS443:3:30:1520:384#0/1  
GGTGCATTGACTGAAGATCCAGATGAAGGCACATCTGGGG  
+HWI-EAS443:3:30:1520:384#0/1  
a`Y\_U[aaaa^a`aa\_`\_VY^a\_]a\_\_\_^U\_``\_WW\_^X\_  
@HWI-EAS443:3:30:1539:1385#0/1  
CTGCTGTAATTGGGTATCTCATTGCCATCATCCACTTCAT  
+HWI-EAS443:3:30:1539:1385#0/1  
[P\_[ROLUHV^`\_\_WWZZVT`a`\$XTVX]0^Z^\_U\_YBBB  
@HWI-EAS443:3:30:1552:496#0/1  
TGACCGATTTTTAAGGGTTAGAGATCAAAGAGGGAACGTA

+HWI-EAS443:3:30:1552:496#0/1  
\_a]\_Z`Xbaaab`X]`\_aa\_a`\_^\_\_\_\_SVZ^aZT¥^VaWa  
@HWI-EAS443:3:30:1578:790#0/1  
GGACAAACCCTCTGGAGCAAACAAACGATGCTGGATCAG  
+HWI-EAS443:3:30:1578:790#0/1  
`^\_aaaa]`baabb^aaaa`aZaaa^a`\_`\_aa`¥UU]^  
@HWI-EAS443:3:30:1598:244#0/1  
AAAGAAGTCTGAGAGATCTAATGTCGCAGTCCCGCACTCGCG  
+HWI-EAS443:3:30:1598:244#0/1  
XaSa\_VXa[\_aWUaaZabZbb^L\_SWYXTVQ\_¥WTZM¥V`  
@HWI-EAS443:3:30:159:1517#0/1  
AAAAGAAGTCTGAGAGATCTAATGTCGCAGTCCCGCACTCGCG  
+HWI-EAS443:3:30:159:1517#0/1  
`¥Z]V\_aa\_U\_¥¥]XWaa\_a]S\_[^^`¥XL[``V`U¥S^T\_  
@HWI-EAS443:3:30:1601:749#0/1  
GGATGATGGCAATGAGATACCCAATTACAGCAGACAAGAG  
+HWI-EAS443:3:30:1601:749#0/1  
abS\_aWX]^T``aa\_\_`a`\_^`\_a`\_Z^¥P^\_¥0]YXX^  
@HWI-EAS443:3:30:1605:1606#0/1  
CACTCGCGAGATACTACTAAGACCACTGTGGACCATATG  
+HWI-EAS443:3:30:1605:1606#0/1  
aa`ba[aa\_]a`^a^aa`a```N`^`V^R\_\_VWUX]¥  
@HWI-EAS443:3:30:161:349#0/1  
ATGGCAATGAGATACCCAATTACAGCAGACAAGAGAATAA  
+HWI-EAS443:3:30:161:349#0/1  
a`a`a`aaa``\_a\_\_\_\_`\_`^`\_\_\_\_^]X\_\_Z¥\_]ZZ^U  
@HWI-EAS443:3:30:162:1250#0/1  
CGAGATACTACTAAGACCACTGTGGACCATATGGCCATA  
+HWI-EAS443:3:30:162:1250#0/1  
a¥^^YR¥`\_aaa\_a[V^aa`\_YWR\_X^aaY]¥^^]Z¥VV  
@HWI-EAS443:3:30:1639:650#0/1  
GGGACGTAGTGTGGTAATGAAACGAAAACGGGACTCTAG  
+HWI-EAS443:3:30:1639:650#0/1  
ab`a^b`bb`babbaXaab^\_aa`\_`^aZ\_aa`0]WZWY  
@HWI-EAS443:3:30:1694:1331#0/1  
ATCTAATGTCGCAGTCCCGCACTCGCGAGATACTACTAA  
+HWI-EAS443:3:30:1694:1331#0/1  
\_W`a\_^`\_NPaa`]RZ¥aYUHSPY`¥[VNRZ\_ZRUURUX^  
@HWI-EAS443:3:30:1736:288#0/1  
GAATAAAGAAGTCTGAGAGATCTAATGTCGCAGTCCCGCAC  
+HWI-EAS443:3:30:1736:288#0/1  
aaaa\_a`ba\_aabaaaaY]Sa\_\_aaX[`S^a\_]W[WYZW  
@HWI-EAS443:3:30:1736:314#0/1  
AAAGAAGTCTGAGAGATCTAATGTCGCAGTCCCGCACTCGCG  
+HWI-EAS443:3:30:1736:314#0/1  
aaaba¥\_baabaaaa]ba^aa\_[`]X^[YP[`] [VNV¥P¥  
@HWI-EAS443:3:30:187:360#0/1  
CCCGTTTTCTTTTCATTACCAACTACTCGTCCCTTGCCC  
+HWI-EAS443:3:30:187:360#0/1  
^a`ba\_abb\_babb]aaaa`a`abba\_`^`^V\_\_[¥\_



@HWI-EAS443:3:30:190:1586#0/1  
GTCGCAGTCCCGACTCGCGAGATACTACTAAGACCACT  
+HWI-EAS443:3:30:190:1586#0/1  
aWb`bbUZbba[`T`W`]a¥\_[a[a`]aa^aa^\_\_]\_¥[  
@HWI-EAS443:3:30:222:552#0/1  
GTTAGCACTTCTTCTTTCTTGACTGATGATCCGCTTG  
+HWI-EAS443:3:30:222:552#0/1  
a\_a[aa\_a\_a\_aaaaaa\_a\_aa\_\_a\_a\_^`\_\_^^¥^^\_  
@HWI-EAS443:3:30:234:1856#0/1  
GGCGATCTGAACCTTGTCAATAGGGCAAACCAGCGACTG  
+HWI-EAS443:3:30:234:1856#0/1  
V\_b\_^Z`b00V`W\_]XTI\_`YNRXUW[``T`V[SWU`Z\_\_  
@HWI-EAS443:3:30:247:417#0/1  
CATCGTTTGTGCTCCAGAGGGTTTGCCTTGTTTCATT  
+HWI-EAS443:3:30:247:417#0/1  
abaa`Uaaa]aa`aaXa¥NZ¥`a`WX``U\_\_\_\_^`]`^`WY]  
@HWI-EAS443:3:30:271:727#0/1  
CCGCACTCAGAATGAAGTGGATGATGGCAATGAGATACCC  
+HWI-EAS443:3:30:271:727#0/1  
aabaabaaa``\_aa\_Y]Y^aZ``\_\_\_\_^aYa\_a`^`]\_\_SW  
@HWI-EAS443:3:30:281:843#0/1  
GCACTCGCGAGATACTACTAAGACCACTGTGGACCATAT  
+HWI-EAS443:3:30:281:843#0/1  
abbbbbbb^`b\_aaaba^aaaa][a`aaaa\_aa¥¥a¥^BB  
@HWI-EAS443:3:30:286:216#0/1  
AAAATGAGAAATCCTCTCAGGACAGCAGACTCCACCCAG  
+HWI-EAS443:3:30:286:216#0/1  
¥SUI¥bba[aba\_X^RZ``abaaYa`[]H[Z\_¥a]XLZY¥  
@HWI-EAS443:3:30:307:1174#0/1  
TGCTGTAATTGGGTATCTCATTGCCATCATCCAATTTCATT  
+HWI-EAS443:3:30:307:1174#0/1  
a\_baaa^[abaaYG]`a\_\_`\_\_\_\_`a\_\_\_\_a]`a\_\_]`^]Y\_]`  
@HWI-EAS443:3:30:335:360#0/1  
GAATAAAAGAACTGAGAGATCTAATGTCGCAGTCCCGCAC  
+HWI-EAS443:3:30:335:360#0/1  
\_aabbbbaaaabaa\_aab\_aaaaa`aa^a\_aa`]a``[``a  
@HWI-EAS443:3:30:344:1315#0/1  
GGCGTACATGCTAGAAAGAGAATTGGTCCGTAACAAGG  
+HWI-EAS443:3:30:344:1315#0/1  
aba\_^bba\_bbaa`^Y[`bb]b\_\_a\_`aa]`a\_aa`aa`\_  
@HWI-EAS443:3:30:346:201#0/1  
GGTGGTTCACTTTCAAAGGACAAGCGGATCATCAGTCA  
+HWI-EAS443:3:30:346:201#0/1  
ab\_aab\_aaaa`aaa`aaaa`\_``\_aa`^`aa``^a]W`  
@HWI-EAS443:3:30:360:1285#0/1  
CGGCTACTGGGAGAAACCTTGTGTTTACGGACCAATTCTCT  
+HWI-EAS443:3:30:360:1285#0/1  
aa\_a`a^YT^^Z[[aa]a^\_WY`\_\_\_\_[\_Z\_^`Z\_]^[VW  
@HWI-EAS443:3:30:366:643#0/1  
ACTAAGACCACTGTGGACCATATGGCCATAATCAAAAAGT

+HWI-EAS443:3:30:366:643#0/1  
ababaa`babaaa^a]`\_`R¥Z]`[\_`aX^\_WX]Z``^PU  
@HWI-EAS443:3:30:372:923#0/1  
ATCTAATGTCGCAGTCCCGCACTCGCGAGATACTCACTAA  
+HWI-EAS443:3:30:372:923#0/1  
a`aaaa]WX`]\_V^¥`\_`R\_NZFRSWWW[WSXUUWWQWVQ  
@HWI-EAS443:3:30:412:1004#0/1  
ATGTCCACCATCCTTACTCCTCCAATCTGTGTGCTGTGGC  
+HWI-EAS443:3:30:412:1004#0/1  
aaa\_aa`ba]aaa\_aaa`aaaa`\_\_`a\_\_^^]^^[N^U^  
@HWI-EAS443:3:30:412:293#0/1  
GTTCCCTCTTTGATCTCTAACCTTAAAAATCGGTCAATA  
+HWI-EAS443:3:30:412:293#0/1  
^\_bbbaaaa`a`^aa`a^aa`\_\_\_\_^`]\_\_\_\_\_¥]Z`]^Z\_  
@HWI-EAS443:3:30:420:1342#0/1  
CGAGATACTCACTAAGACCACTGTGGACCATATGGCCATA  
+HWI-EAS443:3:30:420:1342#0/1  
aa\_`aaababaaabX\_\_abaa`aX`\_`abY\_\_\_\_`\_`\_aW\_  
@HWI-EAS443:3:30:423:1612#0/1  
AACTTGATTTCTGAAGTGGACAGGGCCGAAGGTACCATGT  
+HWI-EAS443:3:30:423:1612#0/1  
G]bb`a^`¥a`^\_a`]Y[[`\_YW]^`ba\_H[VI\_\_\_\_[ZU¥  
@HWI-EAS443:3:30:471:1655#0/1  
GAACTGAGAGATCTAATGTCGCAGTCCCGCACTCGCGAGA  
+HWI-EAS443:3:30:471:1655#0/1  
`Ubb`^`b`aaab]abbSa`aS¥HbabY^ba\_b^¥Wa\_^  
@HWI-EAS443:3:30:477:1964#0/1  
GGACGTAGTGTGGTAATGAAACGAAAACGGGACTCTAGC  
+HWI-EAS443:3:30:477:1964#0/1  
ab\_a^S\_b`K\_aa]FZa`\_aabRN¥a`a\_YU`YSQ^`YHX  
@HWI-EAS443:3:30:485:981#0/1  
GGCAAGGGGACGTAGTGTGGTAATGAAACGAAAACGGGA  
+HWI-EAS443:3:30:485:981#0/1  
abbbbb\_aaaab\_bb\_b^baaZaaa`\_abX]aaa\_K[[¥^  
@HWI-EAS443:3:30:513:523#0/1  
AAAGAAGTCTAATGTCGCAGTCCCGCACTCGCG  
+HWI-EAS443:3:30:513:523#0/1  
aaaaaaaa`aaa`a`aaaaa]a\_\_]X`]`X\_VY]WXX]  
@HWI-EAS443:3:30:553:1296#0/1  
CTGAGAGATCTAATGTCGCAGTCCCGCACTCGCGAGATAC  
+HWI-EAS443:3:30:553:1296#0/1  
ab^WababaaabbaaVaabb`V`a¥S¥H`\_`P`\_`^`¥RZZ  
@HWI-EAS443:3:30:561:246#0/1  
GCAACACTTCAATATAAACACTGCCTGTTCCGCCGGCTAC  
+HWI-EAS443:3:30:561:246#0/1  
aaaa`aaa^aaaaa`a^\_``Z``^]^^]\_^VX^YY  
@HWI-EAS443:3:30:569:1996#0/1  
GCGAGATACTCACTAAGACCACTGTGGACCATATGGCCAT  
+HWI-EAS443:3:30:569:1996#0/1  
ab]\_bbabb`bbba`aabbbb`RRZYaaaa\_a\_\_]X^\_Y

@HWI-EAS443:3:30:581:864#0/1  
CGTTTTCGTTTCATTACCAACTACGTCCCCTTGCCCAA  
+HWI-EAS443:3:30:581:864#0/1  
[aY]Vab¥Z`\_^`\_[a]¥aa]W¥a`aU]^]^^V^¥]^Z  
@HWI-EAS443:3:30:588:1264#0/1  
AGAGAATAAAAGAACTGAGAGATCTAATGTCGCAGTCCCG  
+HWI-EAS443:3:30:588:1264#0/1  
a\_^aabaabba\_aaaaaa`aaaaa`aaa^a¥aa]]\_\_^V  
@HWI-EAS443:3:30:588:1892#0/1  
GATGATCCGCTTGTCTTTTGAAGTGAACCCACCAAAC  
+HWI-EAS443:3:30:588:1892#0/1  
0¥`b\_Z\_\_Ua]a¥]a\_Yaaa]ab\_UX^`[Z\_b]b\_\_`aaR  
@HWI-EAS443:3:30:598:1469#0/1  
GGGGTTCTTCTTGCCTTCCTGATGTGTACTTTTTGATT  
+HWI-EAS443:3:30:598:1469#0/1  
aSS^W`]XQNQ]SWVG\_[[TYZ^SMa]`MR`W\_]XSFO\_R  
@HWI-EAS443:3:30:614:349#0/1  
AAAGAACTGAGAGATCTAATGTCGCAGTCCCGCACTCGCG  
+HWI-EAS443:3:30:614:349#0/1  
]SWb¥WX][]^\_S`\_a]R]a\_UR[`¥\_VU`]PTYLSWXQT  
@HWI-EAS443:3:30:626:1765#0/1  
GATGATGGCAATGAGATACCCAATTACAGCAGACAAGAGA  
+HWI-EAS443:3:30:626:1765#0/1  
aT]a`X[N¥a`\_`Z^a[`a\_`a^``aa\_\_`\_Y\_\_\_WYTY  
@HWI-EAS443:3:30:630:1270#0/1  
GAATTGCCTCTTACCAGTATCCTCAACCCTGATCCTCTCA  
+HWI-EAS443:3:30:630:1270#0/1  
\_V¥ZZ`\_aY``\_[aaa]\_a`^``aZa\_aa`X^[][\_`^`  
@HWI-EAS443:3:30:65:1545#0/1  
GGACGTAGTGTGGTAATGAAACGAAAACGGGACTCTAGC  
+HWI-EAS443:3:30:65:1545#0/1  
aa`a\_\_a\_XWYaaa]aa[[`aa]\_]``¥U[[V]]`[WOW  
@HWI-EAS443:3:30:668:397#0/1  
CTGCTGTAATTGGGTATCTCATTGCCATCATCCACTTCAT  
+HWI-EAS443:3:30:668:397#0/1  
`babab\_babbbab\_baaabaaaab\_baYa\_a`a\_aaa`a  
@HWI-EAS443:3:30:673:404#0/1  
GTCCCCTTTTTCGTTTCATTACCAACTACGTCCCCTTGC  
+HWI-EAS443:3:30:673:404#0/1  
`N¥¥T\_NXNP]ZWYZRTT¥X]TXZS¥¥S[PXBBBBBBBBB  
@HWI-EAS443:3:30:72:1457#0/1  
GGAGAAACCTTGTTTTACGGACCAATTCTTTTCTAGCAT  
+HWI-EAS443:3:30:72:1457#0/1  
a``aYRWR`a\_b`\_¥X¥`]0¥a]\_]Y\_a¥a\_^`\_¥ZI`\_^  
@HWI-EAS443:3:30:740:1154#0/1  
AAAGAACTGAGAGATCTAATGTCGCAGTCCCGCACTCGCG  
+HWI-EAS443:3:30:740:1154#0/1  
aaba aaa``a¥a\_`\_]`ab`aaY`¥`\_\_]\_\_`U\_N\_Y^UY]  
@HWI-EAS443:3:30:741:2012#0/1  
CACTCGCGAGATACTCACTAAGACCACTGTGGACCATATG

+HWI-EAS443:3:30:741:2012#0/1  
aabaa`b`\_`a`\_`\_`a`]\_`¥`^]a\_\_[]U]Y\_]`¥V[UV  
@HWI-EAS443:3:30:753:292#0/1  
GGCCATATCTCTTGTCTTCTTTGCCCAAATGAGAAATCC  
+HWI-EAS443:3:30:753:292#0/1  
```bbbaabbbbb[bab[bbbb`bbababbbbabba\_  
@HWI-EAS443:3:30:767:1848#0/1  
AACTGCCTTGATCATGCAATCCTCTTGTGAGAATACCATG  
+HWI-EAS443:3:30:767:1848#0/1  
a`SRSZ[U¥X¥U`aU^^^[\_N\_aa`\_WNFMQ]]\_TaXY^RJ  
@HWI-EAS443:3:30:797:263#0/1  
ATCCTCAACCCTGATCCTCTCACATTCACAGTCAATGAGG  
+HWI-EAS443:3:30:797:263#0/1  
aa]a\_]aba`ZOZWR]TWX]V]UR`^WZNG]PX`SWY¥WR  
@HWI-EAS443:3:30:813:33#0/1  
GAACTGAGAGATCTAATGTCGCAGTCCCGCACTCGCGAGA  
+HWI-EAS443:3:30:813:33#0/1  
\_YZ]]\_¥a]a`aa^T[^¥YX¥[\_VXVSTSWYP¥ZUTROB  
@HWI-EAS443:3:30:836:682#0/1  
AAAGAACTGAGAGATCTAATGTCGCAGTCCCGCACTCGCG  
+HWI-EAS443:3:30:836:682#0/1  
aaaa^a`baab`a`\_aaaa]````¥]`Z^\_`\_]\_T[X\_  
@HWI-EAS443:3:30:845:654#0/1  
AAAAGAACTGAGAGATCTAATGTCGCAGTCCCGCACTCGC  
+HWI-EAS443:3:30:845:654#0/1  
aa^baab`bbbbbb`a`baabb^a`a`\_`\_a]\_R\_[]Z  
@HWI-EAS443:3:30:882:1756#0/1  
TGTACTCTTATTTTCAGTGTGGAGGTTGCCCGTTAGCA  
+HWI-EAS443:3:30:882:1756#0/1  
`YO`\_`a`aa`ab`ab\_a¥a]\_a`\_`Ta]\_]\_aa^¥X\_]`^  
@HWI-EAS443:3:30:925:1502#0/1  
TCGTTTCATTACCAACTACGTCCCCTTGCCCAATTAGC  
+HWI-EAS443:3:30:925:1502#0/1  
aa`\_]`abbaabbabYa`aabba]`\_]`a`^\_a\_\_aa[[\_Z\_  
@HWI-EAS443:3:30:943:1804#0/1  
GTCCCGTTTTTCGTTTCATTACCAACTACGTCCCCTTGC  
+HWI-EAS443:3:30:943:1804#0/1  
a\_b^Q^abYa`X^¥UXb^[\_ZaZW]`a[^PYNPXU`]U]\_  
@HWI-EAS443:3:31:1028:972#0/1  
GTCCCGTTTTTCGTTTCATTACCAACTACGTCCCCTTGC  
+HWI-EAS443:3:31:1028:972#0/1  
\_PaYY\_OUW][a`[[QZ]ZYY[\_`Y`W¥]]^PX]ZYPMZW  
@HWI-EAS443:3:31:1066:1546#0/1  
GAGATCTAATGTCGCAGTCCCGCACTCGCGAGATACTCAC  
+HWI-EAS443:3:31:1066:1546#0/1  
X]]abbbbaZaJbaaT[\_bbabaa`bZ]abb`a`Z``¥Q  
@HWI-EAS443:3:31:106:251#0/1  
CGCGAGATACTCACTAAGACCACTGTGGACCATATGGCCA  
+HWI-EAS443:3:31:106:251#0/1  
abb]\_a`\_a`\_aa^]`\_`aa`^^W^W]`a^^\_Z^^¥^U

@HWI-EAS443:3:31:1075:1601#0/1  
AAAGAAGTCTAATGTCGCAGTCCCGCACTCGCG  
+HWI-EAS443:3:31:1075:1601#0/1  
aa]aa\_^^^Z`ab\_^T^aaa[T`\_XaT\_^a[[SN\_W\_`Y]  
@HWI-EAS443:3:31:107:514#0/1  
GGGACGTAGTGTGGTAATGAAACGAAAACGGGACTCTAG  
+HWI-EAS443:3:31:107:514#0/1  
^aa\_\_ba[\_[\_¥b`\_VX\_¥\_[¥a¥^WYa`^\_V¥Y][Z][H  
@HWI-EAS443:3:31:1101:1315#0/1  
ATCTGCTCCCAGCACGTCCCTTGGGTTAAGTGCAACACTT  
+HWI-EAS443:3:31:1101:1315#0/1  
aaaaaaaaa^\_]a`ZR`W`\_]\_]\_N\_\_^ZV]]`\_X\_X^X  
@HWI-EAS443:3:31:110:260#0/1  
TCCCGTTTTCGTTTCATTACCAACTACGTCCCCTTGCC  
+HWI-EAS443:3:31:110:260#0/1  
abbba\_aaaaa\_\_a\_\_aaaa\_`\_\_aa^V\_`Za\_^`WTYZ^  
@HWI-EAS443:3:31:1111:784#0/1  
AGGGAACGTACTATTGTCTCCCGAAGAAGTCAGTGAAACG  
+HWI-EAS443:3:31:1111:784#0/1  
abb¥Q\_\_Y^\_aa`^^`[\_¥]]^YNY`Y[^[VY`Xa\_^¥[V  
@HWI-EAS443:3:31:1147:1429#0/1  
TATTGACAAAGTTCAGATCGCCCCTAACTGCCTTGATCAT  
+HWI-EAS443:3:31:1147:1429#0/1  
``aaYXV\_¥I]\_`a]TZaZYQX\_`^`^^]NWW¥¥`¥Xa¥  
@HWI-EAS443:3:31:1147:1977#0/1  
CTAATGTCGCAGTCCCGCACTCGCGAGATACTCACTAAGA  
+HWI-EAS443:3:31:1147:1977#0/1  
ab\_¥`b]b^ba]`baaa`U\_`aa¥a\_aa\_a¥\_\_\_SZa\_P^  
@HWI-EAS443:3:31:1196:683#0/1  
TGAGAAATGATGATGTTGACCAAAGTTTGATTATCGCTGC  
+HWI-EAS443:3:31:1196:683#0/1  
ababababbabbaabaaaaaa[\_a¥aaaaa`a``a\_`aY  
@HWI-EAS443:3:31:120:2006#0/1  
AGAGAATAAAAGAACTGAGAGATCTAATGTCGCAGTCCCG  
+HWI-EAS443:3:31:120:2006#0/1  
T]¥T]aUaa`a]aaa`a``a`aY``a\_`[\_XaGaa\_U`VaV  
@HWI-EAS443:3:31:124:588#0/1  
CAACACTTCAATATAAACACTGCCTGTTCCGCCGGCTACT  
+HWI-EAS443:3:31:124:588#0/1  
\_a¥[\_[\_`bb¥aZ\_Y`b\_Wabaaaa\_Taa`ab\_]bX[[]  
@HWI-EAS443:3:31:1250:240#0/1  
ACCACTGTGGACCATATGGCCATAATCAAAAAGTACACAT  
+HWI-EAS443:3:31:1250:240#0/1  
aaaaabaYaa[\_`aaa\_a]^\_^\_`\_\_^``a\_\_YX]GUP\_X  
@HWI-EAS443:3:31:1266:1433#0/1  
CATGTCGGGCAGTATTCCGATCATTCCCATCACATTGTGCG  
+HWI-EAS443:3:31:1266:1433#0/1  
abbaaa\_Z\_bb^S\_bbaaaa`aba]aaaaa`aaaa`a\_  
@HWI-EAS443:3:31:1272:1202#0/1  
GAATAATGGACATGATTCCAGAGAGGAATGAACAAGGACA



@HWI-EAS443:3:31:158:1973#0/1  
TTCAATTACAACAAGGCAACCAAACGACTTACAGTTCTTG  
+HWI-EAS443:3:31:158:1973#0/1  
`abb`aabb`a\_aU[`aa`^`a`\_S^`\_`][`YX]]a^]G  
@HWI-EAS443:3:31:1620:837#0/1  
TCCCGTTTTCGTTTCATTACCAACTACGTCCCCTTGCC  
+HWI-EAS443:3:31:1620:837#0/1  
aaa`baaaa\_baaa`aaaaaU`a]a¥]a^a^ZVZY^\_\_¥U  
@HWI-EAS443:3:31:1648:525#0/1  
GCACCTTTTGCATCTTTTTGGAAATGCCTCAAGAGTTGGTG  
+HWI-EAS443:3:31:1648:525#0/1  
`XaVa¥a\_a\_aPD¥``]T][V^ZT`RPV]Y)`Y\_UZZWUZ  
@HWI-EAS443:3:31:1675:869#0/1  
GTCCATTATTCTTGTCTGCTGTAATTGGGTATCTCATT  
+HWI-EAS443:3:31:1675:869#0/1  
T^\_b`bbX`b^aSa`T^bbbaa^`aba^Za`K`ZQY`b`a  
@HWI-EAS443:3:31:1693:1541#0/1  
TGCTGTAATTGGGTATCTCATTGCCATCATCCACTTCATT  
+HWI-EAS443:3:31:1693:1541#0/1  
aa`ba^aabbab][aa\_a`a`\_a`\_a\_a\_\_\_a````\_`^  
@HWI-EAS443:3:31:1698:1348#0/1  
GAGAATAAAAGAACTGAGAGATCTAATGTCGAGTCCCGC  
+HWI-EAS443:3:31:1698:1348#0/1  
G[Y[^bbbabZZ[Y^[[Ub[YYWZ^[b]SZ¥[YZNISS¥K  
@HWI-EAS443:3:31:1778:1719#0/1  
GGGACGTAGTGTGGTAATGAAACGAAAACGGGACTCTAG  
+HWI-EAS443:3:31:1778:1719#0/1  
ab`US]WU¥Za]\_`aUXZ]\_]`G[^Z^\_]`^Y\_UVXYXX]  
@HWI-EAS443:3:31:1783:998#0/1  
GAGCTAATCCTCAACCCTATTGCTGCCTTGCATATGTCTA  
+HWI-EAS443:3:31:1783:998#0/1  
`Z\_`]`\_`U^````^^^bY`[`V]][]aV^]Xa`\_`a\_`^`^  
@HWI-EAS443:3:31:1786:1947#0/1  
AAGAACTGTAAGTCGTTTGGTTGCCTTGTGTAATTGAAT  
+HWI-EAS443:3:31:1786:1947#0/1  
ab`[`\_abZbaaaWU^`b\_a^\_]\_W]^a`^`^`\_Y]^R[]`  
@HWI-EAS443:3:31:183:16#0/1  
GCGGGATGTGCTTGGGACATTTGACACTGTCCAAATAATA  
+HWI-EAS443:3:31:183:16#0/1  
¥]^]ZN[¥V]XF[\_`\_YX[YW\_`¥V]]]WY^YS¥SYNY¥  
@HWI-EAS443:3:31:200:1708#0/1  
CCCGTTTTCGTTTCATTACCAACTACGTCCCCTTGCCC  
+HWI-EAS443:3:31:200:1708#0/1  
abb^U`aaba`\_\_aaa`aaaa]aaa^^a[^aa`a\_[W^\_\_  
@HWI-EAS443:3:31:232:1754#0/1  
CACTCGCGAGATACTCACTAAGACCACTGTGGACCATATG  
+HWI-EAS443:3:31:232:1754#0/1  
aaa`a[\_\_\_\_[^OW`\_a\_\_\_\_a`V\_`\_`\_XMOM]^`\_`^VRWX  
@HWI-EAS443:3:31:244:914#0/1  
CATATCTCTTGTCTTCTTTGCCAAAATGAGAAATCCTCT

+HWI-EAS443:3:31:244:914#0/1  
`XW0¥][[X]`¥a\_abW\_] ^Y`aWSJZY\_aa^\_V`\_` ^]  
@HWI-EAS443:3:31:245:428#0/1  
GAGAGAATAAAAAGAACTGAGAGATCTAATGTCGCGATCCC  
+HWI-EAS443:3:31:245:428#0/1  
`¥]abY^baa\_baaaaaaH`ba`a`a¥`a]`\_aa]]\_--]  
@HWI-EAS443:3:31:249:2036#0/1  
TGAAGATCCAGATGAAGGCACATCTGGGGTGGAGTCTGCT  
+HWI-EAS443:3:31:249:2036#0/1  
]O]bW` `a`a]¥]X\_Za`\_^]aa`PXMTJF[TY\_Z\_SNaW  
@HWI-EAS443:3:31:251:908#0/1  
CGCGAGATACTCACTAAGACCACTGTGGACCATATGGCCA  
+HWI-EAS443:3:31:251:908#0/1  
aabb`\_¥\_aaab\_bab` ]`baabab\_a]`a]Q]a\_] ^aaa  
@HWI-EAS443:3:31:289:1725#0/1  
GAGAAATCCTCTCAGGACAGCAGACTCCACCCAGATGTG  
+HWI-EAS443:3:31:289:1725#0/1  
`aab]baabababbaaaaaZab`^`a`bbbbbaa`^a]\_V]  
@HWI-EAS443:3:31:309:1871#0/1  
ATCTAATGTCGCGATCCCGCACTCGCGAGATACTCACTAA  
+HWI-EAS443:3:31:309:1871#0/1  
a¥a[a\_\_VUa¥\_PRS¥\_aWZKZS[R^SUSQUUWVSU\_BBB  
@HWI-EAS443:3:31:314:399#0/1  
AGATCCAGATGAAGGCACATCTGGGGTGGAGTCTGCTGTC  
+HWI-EAS443:3:31:314:399#0/1  
]¥\_aba` `aRaa` `¥`aaa`\_` `Y[ `WZZ\_]N\_¥\_¥¥\_WW  
@HWI-EAS443:3:31:316:177#0/1  
GAAAGAAGAGCTCCAGGATTGAAAATTGCTCCCTTGATG  
+HWI-EAS443:3:31:316:177#0/1  
aa]ba[aa`aaaa`aa`\_a\_\_ `\_\_a`^` `^]]]Y\_¥^\_  
@HWI-EAS443:3:31:330:1534#0/1  
AAAAGAACTGAGAGATCTAATGTCGCGATCCCGCACTCGC  
+HWI-EAS443:3:31:330:1534#0/1  
`b¥\_X`aa`ab\_aXa\_a`\_a` `^a[ `a^] `a¥a]\_Y`¥^  
@HWI-EAS443:3:31:336:992#0/1  
ATCAACTCTCCTCCTTATTTAACTTGATTTCTGAAGTGG  
+HWI-EAS443:3:31:336:992#0/1  
ZR\_^ [^^`ab` `baa`a^^\_a`\_]aa`ZZa`aaa]X\_¥]`  
@HWI-EAS443:3:31:33:632#0/1  
CCCGTTTTCGTTTTATTACCAACTACGTCCTTCCCC  
+HWI-EAS443:3:31:33:632#0/1  
aaaa¥Y`\_]` [\_\_WLW^ [\_\_]^¥Z¥W^]VLSW[¥BBBBBB  
@HWI-EAS443:3:31:34:1061#0/1  
TGGGTTCACTTTCAAAGGACAAGCGGATCATCAGTCAAG  
+HWI-EAS443:3:31:34:1061#0/1  
abaa^abbaaa\_aaabaa`aaaZaaa`\_` ```` `a`]` ` ^[  
@HWI-EAS443:3:31:353:227#0/1  
GCCCCAAAATGAGAAATCCTCTCAGGACAGCAGACTCCACC  
+HWI-EAS443:3:31:353:227#0/1  
abbabababbbbaabaabbababaaaaaaa`a`a\_\_



@HWI-EAS443:3:31:353:588#0/1  
TGGTCTTAGTGAGTATCTCGCGAGTGC GGGACTGCGACAT  
+HWI-EAS443:3:31:353:588#0/1  
]```baa^`a`[\_`ba¥X`^Z`a\_VPP^\_XZV\_^][V^`^]  
@HWI-EAS443:3:31:355:228#0/1  
CCCCGTTTTCGTTTTATTACCAACTACGTCCCCCTTGCCC  
+HWI-EAS443:3:31:355:228#0/1  
aaab\_`aaab[aaaaaaaaaaaa\_a\_aa`¥]\_^\_]Y]]¥V  
@HWI-EAS443:3:31:370:1757#0/1  
GAGGAACAAGCCGTAGACATATGCAAGGCAGCAATAGGGT  
+HWI-EAS443:3:31:370:1757#0/1  
abaaaba`aZaba\_a\_aaa`a\_\_a\_US]a\_\_\_\_]Z^`X\_0  
@HWI-EAS443:3:31:469:2045#0/1  
GGGGACGTAGTGTGGTAATGAAACGAAAACGGGACTCTA  
+HWI-EAS443:3:31:469:2045#0/1  
ab\_bbb`\_a`]`\_a`Uaaa][baa\_\_`aa\_\_YY`^^^Y\_  
@HWI-EAS443:3:31:474:719#0/1  
GAACAAGGACAAACCCTCTGGAGCAAAACAAACGATGCTG  
+HWI-EAS443:3:31:474:719#0/1  
a`a\_WWWZ\_a^0^]aaaa\_[\_]`a]¥W`^\_Z¥a`\_\_`\_`  
@HWI-EAS443:3:31:510:895#0/1  
GTTTTCGTTTTATTACCAACTACGTCCCCTTGCCCAAT  
+HWI-EAS443:3:31:510:895#0/1  
aL]Z]aYSX`YW\_]\_[\_YYY^\_\_\_\_][VWZ[BBBBBBBBBB  
@HWI-EAS443:3:31:533:105#0/1  
CTCCCCTTTGCTGCTGCCACCAGAACAGAGTAGGATGC  
+HWI-EAS443:3:31:533:105#0/1  
aaabbabaaa^aa^`aaZ`a]`\_`a\_\_\_\_^a\_\_S\_\_^^W\_W  
@HWI-EAS443:3:31:535:532#0/1  
GCGGGATGTGCTTGGGACATTTGACTGTCCAAATAATA  
+HWI-EAS443:3:31:535:532#0/1  
aabbaabbabaaaab\_aabaaaaaaaaa`a`X`aaaa`  
@HWI-EAS443:3:31:601:1538#0/1  
GTCCCCTTTTTCGTTTTATTACCAACTACGTCCCCCTTGC  
+HWI-EAS443:3:31:601:1538#0/1  
¥¥`a¥Xabbba`IaT\_``aaaa`ab`ab`\_`a¥\_Y^]  
@HWI-EAS443:3:31:630:1056#0/1  
TGGTATTCTACAAGAGGATTGCATGATCAAGGCAGTTAG  
+HWI-EAS443:3:31:630:1056#0/1  
WWRNa]\_\_¥\_\_`Z`ba]\_¥`\_aWYU`a`]`Y`X\_HV`Y  
@HWI-EAS443:3:31:665:2010#0/1  
CCCCGTTTTCGTTTTATTACCAACTACGTCCCCCTTGCCC  
+HWI-EAS443:3:31:665:2010#0/1  
aa^QQ^P¥S[OZ\_\_SZYJ\_[\_Y]\_NU¥YJFNVU^WRFVSB  
@HWI-EAS443:3:31:668:327#0/1  
GACCGATTTTTAAGGGTTAGAGATCAAAGAGGGAACGTAC  
+HWI-EAS443:3:31:668:327#0/1  
`\_aaaaabbbaaa^aaWabbbaaaaaaaaaaaa`\_a\_a[a^  
@HWI-EAS443:3:31:670:1016#0/1  
TGCTGTCCTGAGAGGATTTCTCATTTTGGGCAAAGAAGAC

+HWI-EAS443:3:31:670:1016#0/1  
aab`a^abaa]aaaaQ]a\_aa`aaaa`a`aaa\_\_\_^`a\_  
@HWI-EAS443:3:31:693:1268#0/1  
CCGTTTTCGTTTCATTACCAACTACGTCCCCTTGCCCA  
+HWI-EAS443:3:31:693:1268#0/1  
abaa`bbaaabbbbbbaabbbbaabbaabbaabbbb[  
@HWI-EAS443:3:31:732:39#0/1  
CACTCGCGAGATACTACTAAGACCACTGTGGACCATATG  
+HWI-EAS443:3:31:732:39#0/1  
abbbbbbbbabbaaaaaa`baaaa`aa^^Z¥X\_\_[\_^\_^]  
@HWI-EAS443:3:31:754:106#0/1  
ATCTAATGTCGAGTCCCGCACTCGCGAGATACTACTAA  
+HWI-EAS443:3:31:754:106#0/1  
aaaabaab\_aaaaa\_\_\_`¥\_¥\_^¥\_]\_V^[¥WTVV¥WWZW  
@HWI-EAS443:3:31:788:645#0/1  
TCCCGTTTTCGTTTCATTACCAACTACGTCCCCTTGCC  
+HWI-EAS443:3:31:788:645#0/1  
aabbb¥\_bbab^a`aa`aba`aa\_a`a`^`^\_\_\_\_^¥V  
@HWI-EAS443:3:31:814:794#0/1  
CAAGGACAAACCCTCTGGAGCAAAACAAACGATGCTGGAT  
+HWI-EAS443:3:31:814:794#0/1  
abbbbbbbbabbbbbbaab`b\_aabb`abaaaa`b`a  
@HWI-EAS443:3:31:822:1964#0/1  
CTTCATACCCTTCATGTACTCTTATTTTCAGTGTGGAG  
+HWI-EAS443:3:31:822:1964#0/1  
aa\_bbabbaZ`^aaaa]`aa`\_`a^^`baab\_a\_a`a]  
@HWI-EAS443:3:31:828:1776#0/1  
TCGTTTCATTACCAACTACGTCCCCTTGCCCAATTAGC  
+HWI-EAS443:3:31:828:1776#0/1  
aba`aabbbabaaba[aa`baYX`aaa]\_^\_a^WY^TD  
@HWI-EAS443:3:31:843:939#0/1  
TCCCGTTTTCGTTTCATTACCAACTACGTCCCCTTGCC  
+HWI-EAS443:3:31:843:939#0/1  
I\_aa\_[\_W\_b^Uabb`b`abababbaa]a`aXY¥]a\_U\_`  
@HWI-EAS443:3:31:856:967#0/1  
AGTGGTCTTAGTGAGTATCTCGCGAGTGGGACTGCGAC  
+HWI-EAS443:3:31:856:967#0/1  
`\_MOWZ`\_]\_ZWR^\_aR^`]]][¥VZVZZY\_]YRSY¥]SP  
@HWI-EAS443:3:31:874:983#0/1  
AAGAAGTGGAGATCTAATGTCGAGTCCCGCACTCGCGA  
+HWI-EAS443:3:31:874:983#0/1  
`a`aaaa\_a\_aaaa`aaaa^`aa`a¥^aa¥`V]¥\_\_\_\_]Z  
@HWI-EAS443:3:31:880:1851#0/1  
ATTTTACAATCCTGGAGCTCTTCTTTCTTCTTTTGTTA  
+HWI-EAS443:3:31:880:1851#0/1  
\_^\_]X[`baaa`\_¥VR`\_RVZaaa\_¥b`a¥a\_\_`]XS¥Z  
@HWI-EAS443:3:31:935:461#0/1  
CTAATGTGCTAATTGGGCAAGGGGACGTAGTGTGGTAAT  
+HWI-EAS443:3:31:935:461#0/1  
abbabb¥babbbbbbaaaaaabaa\_ab\_ab\_a]b`aR``\_`

@HWI-EAS443:3:31:960:1841#0/1  
CAAACGATGCTGGATCAGACCGAGTGATGGTATCACCTCT  
+HWI-EAS443:3:31:960:1841#0/1  
aabbba`a`aa\_`a\_bb¥aba[a^T`a\_\_`U\_\_\_^Z]]\_W  
@HWI-EAS443:3:31:967:166#0/1  
ATTCCGATCATTCCCATCACATTGTCGATGGATTCAATTC  
+HWI-EAS443:3:31:967:166#0/1  
``\_bb```a^b]a¥XYX[]^aaa\_]a`^b\_YT^SXZ^¥0  
@HWI-EAS443:3:31:974:1271#0/1  
ATTATGGCCATATGGTCCACAGTGGTCTTAGTGAGTATCT  
+HWI-EAS443:3:31:974:1271#0/1  
aaaWZ]aabZHZ`¥`[\_^]VM¥[J\_\_aX¥PZXTNX\_BB  
@HWI-EAS443:3:31:983:1519#0/1  
ACCAGAACAGAGTAGGATGCAATTTTCCTCATTGACTGTG  
+HWI-EAS443:3:31:983:1519#0/1  
aaaba`aaaa`\_]a`a\_`aa`\_aa\_`\_\_`a`a```^`\_`Z\_  
@HWI-EAS443:3:31:993:1525#0/1  
CCCGTTTTCGTTTCATTACCAACTACGTCCCCTTGCCC  
+HWI-EAS443:3:31:993:1525#0/1  
abbbabbbbaabbabbbbabbbbabbbbaaaaaaaaaa\_  
@HWI-EAS443:3:32:1055:1165#0/1  
AAATGAGAAATCCTCTCAGGACAGCAGACTCCACCCAGA  
+HWI-EAS443:3:32:1055:1165#0/1  
\_\_bT]ZWZU`b`RX^U¥0S¥\_G¥`¥J]QP^aQaVYQ^T\_\_  
@HWI-EAS443:3:32:1055:224#0/1  
GAATTGCCTCTTACCAGTATCCTCAACCCTGATCCTCTCA  
+HWI-EAS443:3:32:1055:224#0/1  
aa^V\_V[`a[a`aZT\_]T\_UZV^]V¥X]YY]]YY]Y^XYX  
@HWI-EAS443:3:32:1079:942#0/1  
ACTGAAGATCCAGATGAAGGCACATCTGGGGTGGAGTCTG  
+HWI-EAS443:3:32:1079:942#0/1  
abaaabaaaaa¥V`a\_\_`¥``\_\_¥a¥P[\_T\_^Y[\_^]  
@HWI-EAS443:3:32:1093:1980#0/1  
GTGGATGATGGCAATGAGATACCCAATTACAGCAGACAAG  
+HWI-EAS443:3:32:1093:1980#0/1  
`Y^¥a\_Yba^X`]R^¥\_\_W`[a^^`\_[^X`\_``\_]a^^Z  
@HWI-EAS443:3:32:1100:19#0/1  
CATTACCAACTACGTCCCCTTGCCCAATTAGCACATTA  
+HWI-EAS443:3:32:1100:19#0/1  
aaaabaabb`baaa`a`\_`\_`¥X][VY```^\_`W`V``^¥  
@HWI-EAS443:3:32:1105:1461#0/1  
CACTCGCGAGATACTACTAAGACCACTGTGGACCATATG  
+HWI-EAS443:3:32:1105:1461#0/1  
abaababbabaa`ababaabbaaaaaa^^[aUa]a^`\_\_a  
@HWI-EAS443:3:32:110:334#0/1  
GAGAATAAAAGAAGACTGAGAGATCTAATGTCGCAGTCCCGC  
+HWI-EAS443:3:32:110:334#0/1  
a^aX`V`aYZZ¥\_\_¥[]Va\_\_^`^\_\_\_\_V^V^\_`X[¥^WW  
@HWI-EAS443:3:32:1167:898#0/1  
GTCCATTATTCTTGTCTGCTGTAATTGGGTATCTCATT

+HWI-EAS443:3:32:1167:898#0/1  
aZ`OLUVZZZ^SFVS]OLOPKITROTYZYZ[OWUBBBBBB  
@HWI-EAS443:3:32:1186:1332#0/1  
AAAAGAAGTCTAATGTCGCAGTCCCGCACTCGC  
+HWI-EAS443:3:32:1186:1332#0/1  
\_\_\_a^a`aaa`Vaa`\_\_\_`aaZJX\_U^ZXY`\_[Y[U]\_^Z  
@HWI-EAS443:3:32:1196:872#0/1  
TGTCGCAGTCCCGCACTCGCGAGATACTACTAAGACCAC  
+HWI-EAS443:3:32:1196:872#0/1  
aa]a`aaa`\_a`^X¥[^Z^\_[^^^UY^¥¥¥¥[YTY`P^\_  
@HWI-EAS443:3:32:1208:385#0/1  
ATAACATTGTGGGATCTTGTGACCATTGAATTTTCACAAT  
+HWI-EAS443:3:32:1208:385#0/1  
abba`aabbaaaaaabab`aa\_\_aaaa\_aab```abaa  
@HWI-EAS443:3:32:1216:382#0/1  
CACATTGTCGATGGATTCAATTCCCCAGTTCTGGAAAAGC  
+HWI-EAS443:3:32:1216:382#0/1  
abbabbbaa]baabaaa`baba`^^^\_aaaaa`\_\_Y\_a\_  
@HWI-EAS443:3:32:1227:1628#0/1  
GGTGGGTTCACTTTCAAAGGACAAGCGGATCATCAGTCA  
+HWI-EAS443:3:32:1227:1628#0/1  
abQb`a]\_bbba`aab¥^aa`a]^`^RU\_Xaa\_[\_\_a`  
@HWI-EAS443:3:32:1246:155#0/1  
GTGGGTTCACTTTCAAAGGACAAGCGGATCATCAGTCAA  
+HWI-EAS443:3:32:1246:155#0/1  
`]b]G0a\_VR[aaaaYaa^WRF[KPV``Z^¥W[Q]\_Q`a\_  
@HWI-EAS443:3:32:1298:1217#0/1  
CTGTAATTGGGTATCTCATTGCCATCATCCACTTCATTCT  
+HWI-EAS443:3:32:1298:1217#0/1  
ab`W`aaaaab\_abab`abW`baaa^aaa[]`baaaa\_ba  
@HWI-EAS443:3:32:1313:1175#0/1  
ATAAAAAGAAGTCTAATGTCGCAGTCCCGCACTC  
+HWI-EAS443:3:32:1313:1175#0/1  
aab`aaaa`aa`a`a`aaaaa]Z```\_]^\_¥\_RH¥^\_  
@HWI-EAS443:3:32:1328:1315#0/1  
GTGCAACTTCAATATAAACTGCCTGTTCCGCCGGCT  
+HWI-EAS443:3:32:1328:1315#0/1  
`V]Paa\_a`a`a`a`\_\_a\_\_^\_\_¥\_¥¥`¥\_\_U`U\_\_B  
@HWI-EAS443:3:32:1353:1459#0/1  
ATGTCGCAGTCCCGCACTCGCGAGATACTACTAAGACCA  
+HWI-EAS443:3:32:1353:1459#0/1  
aaa````ba\_aa\_^`\_`a`\_a`¥^^^¥`V\_¥`^`X]\_aa  
@HWI-EAS443:3:32:1381:271#0/1  
GTTCTGATTATCCATTGATAAGTGTGACTAGCACTGAC  
+HWI-EAS443:3:32:1381:271#0/1  
a`b]```aabaabT]`aaa`a`^a¥a`\_a]W^`\_V\_Ya]``  
@HWI-EAS443:3:32:139:1988#0/1  
AAAGAAGTCTAATGTCGCAGTCCCGCACTCGCG  
+HWI-EAS443:3:32:139:1988#0/1  
a[[]W^`\_`^UaY]WWW`[]XW^Q¥VRX]^¥S[X\_X]VYW

@HWI-EAS443:3:32:139:427#0/1  
CGCACTCGCGAGATACTCACTAAGACCACTGTGGACCATA  
+HWI-EAS443:3:32:139:427#0/1  
aabb`]`\_]aRZaa`bba\_`abZa\_S¥\_`SWJPY]\_ZI[N  
@HWI-EAS443:3:32:1418:1069#0/1  
CTCTGATGTCAGTATTCTTGCCCCACTTCATTTGGGAAA  
+HWI-EAS443:3:32:1418:1069#0/1  
aaaabaaaa`b\_XZ\_b`^Yaa]W¥[^[a\_\_]\_`[]W¥]ZY  
@HWI-EAS443:3:32:1445:1192#0/1  
ATCATTTCTCACTTCTCCTCCTGGAGTGTACATCTGCTCC  
+HWI-EAS443:3:32:1445:1192#0/1  
aa`aa^\_]¥^`]YU[¥a[¥]^PV^U\_[\_YY]STQ¥[Y[  
@HWI-EAS443:3:32:145:714#0/1  
GAATAAAAGAACTGAGAGATCTAATGTCGAGTCCCGCAC  
+HWI-EAS443:3:32:145:714#0/1  
]a`bbbbabbbbbbbbaabbbbb`babaa\_aba\_aU\_  
@HWI-EAS443:3:32:1549:249#0/1  
GGTCAACATCATCATTCTCACTTCTCCTCCTGGAGTGTA  
+HWI-EAS443:3:32:1549:249#0/1  
ab^`ab`ba\_abaabaa`a`a\_aa¥a\_\_aY¥`a¥\_¥¥a\_a  
@HWI-EAS443:3:32:1586:1759#0/1  
CGTTTTCGTTTTATTACCAACTACGTCCCCTTGCCCAA  
+HWI-EAS443:3:32:1586:1759#0/1  
`aa\_`aX\_Y^`bbaab\_VbbaaY`Y`^VDWR¥¥\_Naaba  
@HWI-EAS443:3:32:1595:445#0/1  
AAGAGCTCCAGGATTGTAATAATTGCTCCCTTGATGGTGGC  
+HWI-EAS443:3:32:1595:445#0/1  
abaaaaaba¥ab`bba]aaa`aa\_`\_\_`^a\_a\_\_]YG^Z`  
@HWI-EAS443:3:32:1598:1350#0/1  
ATTTGGGAAAACAACCTCCATAATCACATCCTGTGCCTCC  
+HWI-EAS443:3:32:1598:1350#0/1  
ababba\_aaaaabb`aa]aaaaa[a\_a`Y``a]aWa`a`  
@HWI-EAS443:3:32:1638:1615#0/1  
CTGCTGTAATTGGGTATCTCATTGCCATCATCCACTTCAT  
+HWI-EAS443:3:32:1638:1615#0/1  
aab^bbaabbbbb¥aa`a`aaaa^S`a\_\_a¥\_\_W\_a\_`a  
@HWI-EAS443:3:32:163:1602#0/1  
ATCTAATGTCGAGTCCCGCACTCGCGAGATACTCACTAA  
+HWI-EAS443:3:32:163:1602#0/1  
a\_`\_aU¥ZW`M\_`^U\_\_U]KYWYPWRVV¥UU¥W[U^XZW  
@HWI-EAS443:3:32:1647:1200#0/1  
CTGAAATGGTTCAAATCCATTTTGTGTATAACATTGTG  
+HWI-EAS443:3:32:1647:1200#0/1  
a\_TTSaZ^J`[aaXSX]UNOX[[VX]]NHa]]QGY\_¥Ta\_  
@HWI-EAS443:3:32:164:306#0/1  
CTAATGTGCTAATTGGGCAAGGGACGTAGTGTGGTAAT  
+HWI-EAS443:3:32:164:306#0/1  
aZU]``¥^ba]aVLYXaaa¥`^VXX\_aUYYU\_X]]^NLJR  
@HWI-EAS443:3:32:1650:1085#0/1  
AATGAAGTGGATGATGGCAATGAGATACCCAATTACAGCA

+HWI-EAS443:3:32:1650:1085#0/1  
`b`baba]¥X^W`R\_aaZV]¥\_Z[^`VQOFTXbTaT¥VZ¥  
@HWI-EAS443:3:32:1661:818#0/1  
CAAACCTTTGGTCAACATCATCTTTCTCACTTCTCCTCCT  
+HWI-EAS443:3:32:1661:818#0/1  
J\_ba¥```\_¥T\_ba`aa^baVa\_[]S\_`¥N`\_`X`¥[[]]  
@HWI-EAS443:3:32:1671:401#0/1  
CCCGTTTTTCGTTTCATTACCAACTACGTCCCCTTGCCC  
+HWI-EAS443:3:32:1671:401#0/1  
\_bbbS¥bbbbbbabaaaba`b`]bY`aa^a[]`Wa\_`aa\_  
@HWI-EAS443:3:32:1689:1460#0/1  
CAAAATGAGAAATCCTCTCAGGACAGCAGACTCCACCCCA  
+HWI-EAS443:3:32:1689:1460#0/1  
ab]\_]bbbbaa^X``a`abab`a\_`a\_bbaaV\_TbHbYba  
@HWI-EAS443:3:32:1703:143#0/1  
GTCCCGTTTTTCGTTTCATTACCAACTACGTCCCCTTGCC  
+HWI-EAS443:3:32:1703:143#0/1  
`OQ]T¥MQZ[YV SX^L]`¥UQRUPLNU[VRZSLFNTNTLB  
@HWI-EAS443:3:32:1719:225#0/1  
AGAGAATAAAAGAACTGAGAGATCTAATGTGCGCAGTCCCG  
+HWI-EAS443:3:32:1719:225#0/1  
abaa``bbaaaaZU`abaaaa`Uaa\_aa]\_Y`[^`[\_V\_¥  
@HWI-EAS443:3:32:1738:212#0/1  
GAGAATAATGGACATGATTCCAGAGAGGAATGAACAAGGA  
+HWI-EAS443:3:32:1738:212#0/1  
aaa`aaaaaaa`\_`^`\_a]W^\_]\_Z\_\_ZW]Z^]ZY\_\_[]  
@HWI-EAS443:3:32:174:55#0/1  
AAATTGCATCCTACTCTGTTCTGGTGGAGCAGCAGCAAAG  
+HWI-EAS443:3:32:174:55#0/1  
ababaaaa`aa\_aba`ab`aa``aXa`^`\_`\_`\_]SG[Z^  
@HWI-EAS443:3:32:1763:1253#0/1  
GCAAGGGGACGTAGTGTGGTAATGAAACGAAAACGGGAC  
+HWI-EAS443:3:32:1763:1253#0/1  
a[[\_¥\_ab\_¥]TUYP\_Xaaa0\_¥^PRR`S`¥]\_LLYaGZY  
@HWI-EAS443:3:32:210:88#0/1  
CTTATTTTCAGTGTGGAGGTTGCCGTTAGCACTTCTT  
+HWI-EAS443:3:32:210:88#0/1  
abaabb`bbbb^XXbbb\_ba`GaVa`a`\_`¥X\_W¥aQ\_\_`  
@HWI-EAS443:3:32:214:799#0/1  
TCTGCTGTAATTGGGTATCTCATTGCCATCATCCACTTCA  
+HWI-EAS443:3:32:214:799#0/1  
abaaaba\_] [ba\_aa^aaaaaa\_T`\_a]a`a\_a`a^^\_a¥  
@HWI-EAS443:3:32:306:1431#0/1  
GCACTCGGAGATACTACTAAGACCACTGTGGACCATAT  
+HWI-EAS443:3:32:306:1431#0/1  
a\_J\_bbbba^a^aaaaaaaaa``¥[a`]Ya¥]`b¥`S^  
@HWI-EAS443:3:32:307:1705#0/1  
GAAAGAAGAGCTCCAGGATTGTAATAATTGCTCCCTTGATG  
+HWI-EAS443:3:32:307:1705#0/1  
a\_`] `ab]XZa\_aa`^]P`\_aXH]^^[[]\_]a\_X\_`^TYW

@HWI-EAS443:3:32:315:1524#0/1  
ATTGGGTATCTCATTGCCATCATCCACTTCATTCTGAGTG  
+HWI-EAS443:3:32:315:1524#0/1  
^aaUVXU]Y]Zb]``T^`Xa^N]Y¥¥^`[^`^\_NXJ]YSU  
@HWI-EAS443:3:32:340:940#0/1  
GGTTCACCTTTCAAAGGACAAGCGGATCATCAGTCAAGAA  
+HWI-EAS443:3:32:340:940#0/1  
^MZ\_a]\_a\_aZZZ``aa`^`a\_[\_OW[^\_a``[\_\_\_\_[¥[  
@HWI-EAS443:3:32:343:1137#0/1  
GGTCTTAGTGAGTATCTCGCGAGTGC GGGACTGCGACATT  
+HWI-EAS443:3:32:343:1137#0/1  
[a\_abab]¥a`\_aabb\_a]] [YT^`]^`^ZJ[^`Z[^`RaZRX  
@HWI-EAS443:3:32:343:1986#0/1  
CATTTCTCACTTCTCCTCCTGGAGTGTACATCTGCTCCCA  
+HWI-EAS443:3:32:343:1986#0/1  
abaaabaaba\_ab]b`Xa^Y]X[]Y^Wa`¥^[^V\_Ua`¥U  
@HWI-EAS443:3:32:346:1403#0/1  
TTCAATATAAACTGCCTGTTCCGCCGGCTACTGGGAGA  
+HWI-EAS443:3:32:346:1403#0/1  
[abbbb^`][babbabaab\_abbaaaa``^abRS[^`X[P  
@HWI-EAS443:3:32:349:361#0/1  
AAAAGAAGTGAAGATCTAATGTCGCAGTCCCGCACTCGC  
+HWI-EAS443:3:32:349:361#0/1  
aa[a\_aaa`\_]aa`]^`a[^`X`[^`^]U^U^VWQ]W\_Y\_  
@HWI-EAS443:3:32:392:1311#0/1  
GATCTTGTGACCATTGAATTTTACAATTTCCAGTTCCT  
+HWI-EAS443:3:32:392:1311#0/1  
]^\_baLYT]Ta\_ba\_Y^^bbbb\_\_¥abb^[\_`b\_THV`b[  
@HWI-EAS443:3:32:514:665#0/1  
TCAACATCATCTTTCTCACTTCTCCTCCTGGAGTGTACA  
+HWI-EAS443:3:32:514:665#0/1  
aabaaa\_aaa``a`a\_``P\_\_``VZ``\_]\_]X¥VV`]  
@HWI-EAS443:3:32:524:1551#0/1  
GAGAATAAAAGAACTGAGAGATCTAATGTCGCAGTCCCGC  
+HWI-EAS443:3:32:524:1551#0/1  
aa`bbbbbab]aaaaab`aabaaa`aaa\_\_\_aa\_]\_aa\_a  
@HWI-EAS443:3:32:541:1174#0/1  
GATGAAGGCACATCTGGGGTGGAGTCTGCTGTCCTGAGAG  
+HWI-EAS443:3:32:541:1174#0/1  
aa¥`¥V\_ab\_a`\_``\_¥]\_Q\_R¥\_Y\_¥\_QVXGY¥WY¥TS  
@HWI-EAS443:3:32:547:1361#0/1  
GTCCCCTTTTCTTTTATTACCAACTACGTCCCCTTGC  
+HWI-EAS443:3:32:547:1361#0/1  
aab\_b¥P\_bb\_0Xa`a]aaV¥aaa¥baaaSYUaY^RUZaa  
@HWI-EAS443:3:32:573:169#0/1  
GTCTGATCCAGCATCGTTTGTGTTTGTCTCCAGAGGGTTTGT  
+HWI-EAS443:3:32:573:169#0/1  
a[a^a\_^^`[^`\_``^Z`aX```^Z`^^\_^\_]X^]WW  
@HWI-EAS443:3:32:604:1372#0/1  
ATCACATTGTCGATGGATTCAATTCCTCCAGTTCTGGAAAA

+HWI-EAS443:3:32:604:1372#0/1  
¥[baa]a¥XWab`´`aR\_a^^U]^¥]\_\_[[FU[a^[Y`\_¥  
@HWI-EAS443:3:32:60:1328#0/1  
AATGTCGCAGTCCCGCACTCGCGAGATACTACTAAGACC  
+HWI-EAS443:3:32:60:1328#0/1  
\_Xa\_Xa`^UZ¥a`a¥\_\_^S`^\_¥SWUWX\_U\_\_¥W^ZW¥¥^  
@HWI-EAS443:3:32:653:1090#0/1  
GTGGATGATGGCAATGAGATACCCAATTACAGCAGACAAG  
+HWI-EAS443:3:32:653:1090#0/1  
`NU\_]XZR\_NOY`YXS^OQLZQY¥^XT[[U^\_\_\_V[^\_\_[  
@HWI-EAS443:3:32:661:758#0/1  
GGATGATGGCAATGAGATACCCAATTACAGCAGACAAGAG  
+HWI-EAS443:3:32:661:758#0/1  
`baba`aaaa\_abaa^aaaaa¥aaa[\_Z^Y¥]\_\_^¥T^X\_  
@HWI-EAS443:3:32:668:188#0/1  
CACTCGCGAGATACTACTAAGACCACTGTGGACCATATG  
+HWI-EAS443:3:32:668:188#0/1  
aabaaa`baaa`a`^aaaaa`a\_\_aa`\_W[¥\_]a]U`V]  
@HWI-EAS443:3:32:679:1220#0/1  
GAATAAAAGAACTGAGAGATCTAATGTCGCAGTCCCGCAC  
+HWI-EAS443:3:32:679:1220#0/1  
\_P]¥\_\_`\_¥Z^aX`QZ`[X\_a`V\_T[Z`QYUNN[[`URH]  
@HWI-EAS443:3:32:685:1959#0/1  
TCGCGAGATACTACTAAGACCACTGTGGACCATATGGCC  
+HWI-EAS443:3:32:685:1959#0/1  
Sab\_a`^`\_¥\_bbbb```\_U`b\_UabbYaab`U\_S]a\_bb  
@HWI-EAS443:3:32:687:93#0/1  
AAAGCACTTTTGCATCTTTTGGAAATGCCTCAAGAGTTG  
+HWI-EAS443:3:32:687:93#0/1  
J¥]S\_\_`bbaaV\_OW¥QOY`SY^`[F`ZP\_¥RP^^SaYQ\_  
@HWI-EAS443:3:32:689:901#0/1  
GGGTTCACTTTCAAAAAGGACAAGCGGATCATCAGTCAAGA  
+HWI-EAS443:3:32:689:901#0/1  
TRVMP[X^WWZXZHUV]\_TTW]]¥[¥¥W¥YY¥T¥VLWSVQ  
@HWI-EAS443:3:32:694:26#0/1  
GGCCATTCTATTCCACCATGTTACGGCCAGAGGTGATAC  
+HWI-EAS443:3:32:694:26#0/1  
``aabaabaaaaaaa`aaa`aaZ`\_a\_¥VVYXRZ[PYS  
@HWI-EAS443:3:32:695:327#0/1  
AAACAAACGATGCTGGATCAGACCGAGTGATGGTATCACC  
+HWI-EAS443:3:32:695:327#0/1  
aaa]abb[\_aa`][X^¥[Xa\_PZ^V`\_QN]\_`^X\_X`\_] ]  
@HWI-EAS443:3:32:721:1775#0/1  
ACCTTGTTTTACGGACCAATTCTCTTTCTAGCATGTACGC  
+HWI-EAS443:3:32:721:1775#0/1  
`a\_\_\_Z^aa`aa`\_a`\_aaa\_a```\_a\_a]```aa\_U^\_^a  
@HWI-EAS443:3:32:748:1838#0/1  
GGAAAAGCACTTTTGCATCTTTTGGAAATGCCTCAAGAG  
+HWI-EAS443:3:32:748:1838#0/1  
`^`^bbbbbbaY^a\_ab`\_aaaa[aaaaab`aaa[arFX^\_



@HWI-EAS443:3:32:768:1044#0/1  
GATGGCAATGAGATACCCAATTACAGCAGACAAGAGAATA  
+HWI-EAS443:3:32:768:1044#0/1  
ab\_baaabaaaa\_`aaaaaaaaaaaa`a\_\_`[[N]^`  
@HWI-EAS443:3:32:76:817#0/1  
GCTGTAATTGGGTATCTCATTGCCATCATCCACTTCATTC  
+HWI-EAS443:3:32:76:817#0/1  
ab`¥aaba`\_`XV\_aa\_W\_aaaa^` `[]a`aaZYM[¥a  
@HWI-EAS443:3:32:773:1275#0/1  
TGCTGTCCTGAGAGGATTTCTCATTTTGGGCAAAGAAGAC  
+HWI-EAS443:3:32:773:1275#0/1  
`¥`\_baabbbaa` `aaaaba`a`^a]`a`^^a]^\_aaaa  
@HWI-EAS443:3:32:820:599#0/1  
GAATGTGAGAGGATCAGGGTTGAGGATACTGGTAAGAGGC  
+HWI-EAS443:3:32:820:599#0/1  
\_Z\_^[]`aa` `\_\_`a]aW\_a` `[]¥WX`U[^]UV¥¥  
@HWI-EAS443:3:32:854:1004#0/1  
AGCAGACCCATTAGCATCTCTTGGAAATGTGCCACAGC  
+HWI-EAS443:3:32:854:1004#0/1  
\_\_^aXaa]aaa¥`aaaa`a^ZZ\_XT\_\_Z][aT¥LZ`aaV`  
@HWI-EAS443:3:32:876:286#0/1  
CAACAAGGCAACCAAACGACTTACAGTTCTTGGAAAGGAT  
+HWI-EAS443:3:32:876:286#0/1  
abaabba`bba` `abaabaaaa^`aa\_a`a`a`^\_\_aa`\_  
@HWI-EAS443:3:32:928:601#0/1  
CGTTTTCGTTTCATTACCAACACTACGTCCCCTTGCCCAA  
+HWI-EAS443:3:32:928:601#0/1  
`babbbbbbbaabbabbaab]abaaaabaaaa^]XRZb`¥T  
@HWI-EAS443:3:32:948:1777#0/1  
AAAGAAGTGAAGATCTAATGTCGCAGTCCCGCACTCGCG  
+HWI-EAS443:3:32:948:1777#0/1  
]\_UK[\_`]a\_a`\_UP\_\_[^R]LTPY[ZUON^^\_N\_T\_LYO  
@HWI-EAS443:3:33:1019:834#0/1  
GTCCCCTTTTCGTTTCATTACCAACACTACGTCCCCTTGC  
+HWI-EAS443:3:33:1019:834#0/1  
a\_aaab`aaaa`aa` `aa\_a`^\_\_V^^]]YVOYVUVQV  
@HWI-EAS443:3:33:101:530#0/1  
GGGAGATCAATGGCCCTGAGTCAGTGCTAGTCAACACTTA  
+HWI-EAS443:3:33:101:530#0/1  
aaaab`[]abaaab\_a\_aa`V`\_aY¥RY¥¥R\_Z`U`S[[\_  
@HWI-EAS443:3:33:1101:357#0/1  
CATTTCTCACTTCTCCTCCTGGAGTGTACATCTGCTCCCA  
+HWI-EAS443:3:33:1101:357#0/1  
ab[ZV`]b¥b\_]\_ba`aaaX`\_aU[\_V`\_NQLNU\_T\_\_  
@HWI-EAS443:3:33:1133:1280#0/1  
AAGAAGTGAAGATCTAATGTCGCAGTCCCGCACTCGCGA  
+HWI-EAS443:3:33:1133:1280#0/1  
aa\_\_aaa\_aaaa\_¥`a`\_aW`\_]\_SWX¥TTW¥WUQU¥\_  
@HWI-EAS443:3:33:1144:1806#0/1  
GCCACCATCAAGGGAGCAATTTTACAATCCTGGAGCTCTT

+HWI-EAS443:3:33:1144:1806#0/1  
aaaabbbabbbbaaaabbaaaabab\_a\_a\_Y^`R[P\_\_\_  
@HWI-EAS443:3:33:1152:958#0/1  
AGAAGAGCAACAGCTATTCTCAGAAAGCAACCAGGAGAT  
+HWI-EAS443:3:33:1152:958#0/1  
U^`^^aaabb^W^a`b\_``[OYaa\_¥S^`]aONU¥[QX]`  
@HWI-EAS443:3:33:1158:430#0/1  
AGAGAATAAAAGAACTGAGAGATCTAATGTCGCAGTCCCG  
+HWI-EAS443:3:33:1158:430#0/1  
\_`a\_`aabaaaa\_aaa`aa`\_`aa\_aa[\_\_\_Y^\_XVY¥X  
@HWI-EAS443:3:33:1160:461#0/1  
AAAAGAACTGAGAGATCTAATGTCGCAGTCCCGCACTCGC  
+HWI-EAS443:3:33:1160:461#0/1  
abb]bbabaa`\_]b``aba`bb[a`aaa¥aVYVYTX[ZTYTY  
@HWI-EAS443:3:33:1165:1682#0/1  
ATAAACACTGCCTGTTCCGCCGCTACTGGGAGAAACCTT  
+HWI-EAS443:3:33:1165:1682#0/1  
aa`a`\_a^a\_\_`\_¥^\_a\_\_Y^]`^`BBBBBBBBBBBBBB  
@HWI-EAS443:3:33:1185:484#0/1  
CACTGTGGACCATATGGCCATAATCAAAAAGTACACATCA  
+HWI-EAS443:3:33:1185:484#0/1  
`bbbbbbb[abaab[baa`baaa`]aa`aa]RTY]`^¥\_  
@HWI-EAS443:3:33:1194:141#0/1  
ATAAAAGAACTGAGAGATCTAATGTCGCAGTCCCGCACTC  
+HWI-EAS443:3:33:1194:141#0/1  
a¥ZX`¥UN^]\_\_`P`W[\_aa\_¥``VWT¥\_BBBBBBBBBBBB  
@HWI-EAS443:3:33:120:1070#0/1  
GCTGAGGCAATAATTGTGGCCATGGTATTCTCACAAGAGG  
+HWI-EAS443:3:33:120:1070#0/1  
abbbbaa`bbba]\_bb`L\_ab`\_GPQJZYaa\_aXG\_\_TL]R  
@HWI-EAS443:3:33:1230:1599#0/1  
GCACTCGCGAGATACTACTAAGACCACTGTGGACCATAT  
+HWI-EAS443:3:33:1230:1599#0/1  
aa`aaabZ[]aa0[¥\_`STNR¥Q¥UaTYU]GLT]U\_VOWX  
@HWI-EAS443:3:33:1242:1128#0/1  
CTAATGTGCTAATTGGGCAAGGGACGTAGTGTGGTAAT  
+HWI-EAS443:3:33:1242:1128#0/1  
`b`U\_a\_abaaaaa`aaa\_a\_`\_\_a`][^YaU`\_]VU\_^  
@HWI-EAS443:3:33:1250:1876#0/1  
ATGTGCCACAGCACACAGATTGGAGGAGTAAGGATGGTGG  
+HWI-EAS443:3:33:1250:1876#0/1  
WUZI[a\_`b`^]W\_¥ZRQn^`ZTVWWT]BBBBBBBBBB  
@HWI-EAS443:3:33:1253:570#0/1  
AGAAGAGCTCCAGGATTGTAATAATTGCTCCCTTGATGGTG  
+HWI-EAS443:3:33:1253:570#0/1  
]ba^[¥YX]aba]aTaba0\_WX`W\_^GR`\_W¥^[P`]YQ`  
@HWI-EAS443:3:33:1254:885#0/1  
CCCAGTTCTGGAAAAGCACTTTTGCATCTTTTTGGAAATG  
+HWI-EAS443:3:33:1254:885#0/1  
\_a\_W\_\_bbbbab`\_\_\_\_\_babaaaZZ`aabbaa`\_]¥Z^aa

@HWI-EAS443:3:33:1277:2025#0/1  
CCAGCATCGTTTGTGTTTGTCTCCAGAGGGTTTGTCCCTTGTT  
+HWI-EAS443:3:33:1277:2025#0/1  
abababaab\_aba\_\_aa`a`\_```aaa`W`^\_YZM]^`^]Y  
@HWI-EAS443:3:33:1298:158#0/1  
CTGCTGTAATTGGGTATCTCATTGCCATCATCCACTTCAT  
+HWI-EAS443:3:33:1298:158#0/1  
a^aa^[\_`¥a\_¥^¥¥aa`¥UWZZ¥Z`^\_`\_]OWFYT¥RS]V  
@HWI-EAS443:3:33:1307:1074#0/1  
GAAGAAGAAGTGCTAACGGGCAACCTCCAAACACTGAAAA  
+HWI-EAS443:3:33:1307:1074#0/1  
aabbabbbb`aabb`aaaaaa\_a\_`a\_a\_^]\_X]^a`  
@HWI-EAS443:3:33:1341:1870#0/1  
ATCTAATGTCGAGTCCCGCACTCGCGAGATACTCACTAA  
+HWI-EAS443:3:33:1341:1870#0/1  
a`babbab¥\_abbaZ\_bUa`ZaZ`]a\_\_SZ``G^QUQ¥`] ]  
@HWI-EAS443:3:33:1349:1199#0/1  
GCTGTAATTGGGTATCTCATTGCCATCATCCACTTCATTC  
+HWI-EAS443:3:33:1349:1199#0/1  
aaabaabbaaa`baaaa]a`aaa`a¥a\_a\_`Q\_\_¥\_a^¥  
@HWI-EAS443:3:33:1365:344#0/1  
GCACTCGCGAGATACTCACTAAGACCACTGTGGACCATAT  
+HWI-EAS443:3:33:1365:344#0/1  
aaa`ab`ab`a`a```a`\_`a\_a`^`\_\_\_`V\_UYY^^]^`^\_  
@HWI-EAS443:3:33:1392:1538#0/1  
CGTTAGCACTTCTTCTTCTTCTTGTACTGATGATCCGCTT  
+HWI-EAS443:3:33:1392:1538#0/1  
ab\_\_aZab`b`aba`\_bbbabab`ba\_abaaa]^`\_]aXa`  
@HWI-EAS443:3:33:1417:1996#0/1  
GTGGAGTCTGCTGTCCTGAGAGGATTTCTCATTTTGGGCA  
+HWI-EAS443:3:33:1417:1996#0/1  
aab^aaN]]aaaZJ[TYZZ]T`WJTTN¥MW[TQQV[YR\_[  
@HWI-EAS443:3:33:1421:927#0/1  
GATGCAGGTGCATTGACTGAAGATCCAGATGAAGGCACAT  
+HWI-EAS443:3:33:1421:927#0/1  
^^`b^Z^a`T\_aba\_a]^b`b`\_`[\_`^`b\_]a\_¥\_VNVDQU  
@HWI-EAS443:3:33:1427:48#0/1  
GTTCACCTTCAAAGGACAAGCGGATCATCAGTCAAGAAA  
+HWI-EAS443:3:33:1427:48#0/1  
a¥aa\_aaaa\_aaa`aa```^`]a`]\_W\_\_]\_^UX]Z\_Z\_] ]  
@HWI-EAS443:3:33:1439:1962#0/1  
ACTCGGTCTGATCCAGCATCGTTTGTGTTTGTCTCCAGAGGG  
+HWI-EAS443:3:33:1439:1962#0/1  
a`\_a\_\_Q\_]Y\_¥\_¥¥`\_WZaY\_\_`U^^\_\_TWQTYTWWW¥  
@HWI-EAS443:3:33:1446:504#0/1  
GGACGTAGTGTGGTAATGAAACGAAAACGGGACTCTAGC  
+HWI-EAS443:3:33:1446:504#0/1  
a`^ab\_\_¥Ta]aaaV]^`¥¥\_`R`WMR\_RV[SKMXVXVYY  
@HWI-EAS443:3:33:146:706#0/1  
GGAGAATTGCCTCTTACCAGTATCCTCAACCCTGATCCTC

+HWI-EAS443:3:33:146:706#0/1  
aUQ[^X][^a¥NWaVXaaX[M^T\_\_Z[SZY¥VV]]Z¥NQ\_  
@HWI-EAS443:3:33:1477:650#0/1  
CTCCCCTTTGCTGCTGCTCCACCAGAACAGAGTAGGATGC  
+HWI-EAS443:3:33:1477:650#0/1  
abababbbbbbba\_aaaaaaa`a`aa\_`a`Q\_P`YV`Z  
@HWI-EAS443:3:33:1493:1331#0/1  
AAAGAAGTCTAATGTCGCAGTCCCGCACTCGCG  
+HWI-EAS443:3:33:1493:1331#0/1  
aaaa`a¥ab`\_b`\_a\_a`a`Y\_^`¥¥W^\_TNVW¥WWW  
@HWI-EAS443:3:33:1525:1056#0/1  
AAAGAAGTCTAATGTCGCAGTCCCGCACTCGCG  
+HWI-EAS443:3:33:1525:1056#0/1  
¥Z[^¥\_^\_¥\_] [aa\_\_aaZ]]PPO¥X^WT¥`TXQR[[JZ  
@HWI-EAS443:3:33:1526:402#0/1  
CGTTTTCGTTTTATTACCAACTACGTCCCCTTGCCCAA  
+HWI-EAS443:3:33:1526:402#0/1  
a^P`b` [aZ\_aabaa` `abaa[^]X\_Y[\_TTZ[WIMV\_  
@HWI-EAS443:3:33:1542:1194#0/1  
GTCCCCTTTTTCGTTTTATTACCAACTACGTCCCCTTGCG  
+HWI-EAS443:3:33:1542:1194#0/1  
a\_]a`b]`W`aaT`a\_a`[^`V^\_]\_]\_[X[ULPK]YYYY  
@HWI-EAS443:3:33:1564:1189#0/1  
GCAGTGTGAGACCCATTAGCATCTCTCTTGAAATGT  
+HWI-EAS443:3:33:1564:1189#0/1  
aa\_S¥\_¥Z\_a` `]OYWX[\_ZVYOW[^¥]V]^T\_U^¥ZZU  
@HWI-EAS443:3:33:1607:1707#0/1  
GATGTGCTTGGGACATTTGACACTGTCCAAATAATAAAC  
+HWI-EAS443:3:33:1607:1707#0/1  
aaYa0a` [ `[^¥¥` `a`a\_a^V^a^^0`^^^RKO^^YVWD  
@HWI-EAS443:3:33:1659:1993#0/1  
CAAAGTTCAGATCGCCCCTAACTGCCTTGATCATGCAATC  
+HWI-EAS443:3:33:1659:1993#0/1  
a\_^^[P¥abbbb` [Iab\_[a\_a`aa\_a^bXXUQW^\_GaQ  
@HWI-EAS443:3:33:1663:461#0/1  
GAATAAAAGAAGTCTAATGTCGCAGTCCCGCAC  
+HWI-EAS443:3:33:1663:461#0/1  
^`J\_]b¥ZaUbSa`V¥TaR[Y`Z^¥`TN¥K[VMSVGSQNT  
@HWI-EAS443:3:33:1711:757#0/1  
CTCACTAAGACACTGTGGACCATATGGCCATAATCAAAA  
+HWI-EAS443:3:33:1711:757#0/1  
aaba` `bbbabbbba\_bbb`]a`babb`aTZb\_Y[\_MV\_bb  
@HWI-EAS443:3:33:1717:218#0/1  
GTCCCCTTTTTCGTTTTATTACCAACTACGTCCCCTTGCG  
+HWI-EAS443:3:33:1717:218#0/1  
aa\_\_\_\_a]`aa]`\_a`\_aa`^]\_^\_X\_V]^\_WXXVOYXXYV  
@HWI-EAS443:3:33:1747:483#0/1  
TGAAGATCCAGATGAAGGCACATCTGGGGTGGAGTCTGCT  
+HWI-EAS443:3:33:1747:483#0/1  
ababbabb]`b`]ba`]YQX\_`TX^]J[aX\_ZG\_VT\_[TX

@HWI-EAS443:3:33:206:609#0/1  
TCCCGTTTTTCGTTTCATTACCAACTACGTCCTCCCTTGCC  
+HWI-EAS443:3:33:206:609#0/1  
aaaba`aaa\_a\_`a`aa`a`aaaa^\_]`ZT^V^^^ZV`Y  
@HWI-EAS443:3:33:243:861#0/1  
AAAGAAGTCTAATGTCGCAGTCCCGCACTCGCG  
+HWI-EAS443:3:33:243:861#0/1  
ZV]a^baaaaa]a)`aaaaa\_a`^^¥`a`WQY\_[^T`Z  
@HWI-EAS443:3:33:257:972#0/1  
GCCTCGGAGATACTACTAAGACCACTGTGGACCATAT  
+HWI-EAS443:3:33:257:972#0/1  
abaaababa]]\_`\_\_aaa`[[\_`^a^Z`\_^X`]^V\_\_Y\_W  
@HWI-EAS443:3:33:262:567#0/1  
GGGACGTAGTGTGGTAATGAAACGAAAACGGGACTCTAG  
+HWI-EAS443:3:33:262:567#0/1  
aaaXbaZab^aVaa\_S^`a\_X`\_U`\_\_aTK^]WQMUTW¥Y  
@HWI-EAS443:3:33:265:1193#0/1  
AAAGAAGTCTAATGTCGCAGTCCCGCACTCGCG  
+HWI-EAS443:3:33:265:1193#0/1  
`\_\_Z\_Xa]abaa\_a`babba`aa`]`[¥\_aaV[\_^`\_`¥\_  
@HWI-EAS443:3:33:265:137#0/1  
ATCATTCTCCTTCTCCTCCTGGAGTGATCATCTGCTCC  
+HWI-EAS443:3:33:265:137#0/1  
aaaLZ`ab`a`a`\_`aa`\_]\_¥`¥`¥`[SU¥¥WVW¥¥  
@HWI-EAS443:3:33:309:304#0/1  
CAAACACTGAAAATAAGAGTACATGAAGGGTATGAAGAAT  
+HWI-EAS443:3:33:309:304#0/1  
abbVbabbbaba]`aba^aS\_aaaa`¥a`aZ`^aa`aa^  
@HWI-EAS443:3:33:310:1746#0/1  
AAACAAACGATGCTGGATCAGACCGAGTGATGGTATCACC  
+HWI-EAS443:3:33:310:1746#0/1  
UX¥`aaba`\_`a\_a\_^[\_`ab\_a`aY¥XV\_^¥WWN]Y¥¥ZY  
@HWI-EAS443:3:33:328:20#0/1  
GAATAAAGAAGTCTAATGTCGCAGTCCCGCAC  
+HWI-EAS443:3:33:328:20#0/1  
a`a^`a]``[a`a]^`a]\_\_`a^^aX^]]^¥G[W¥QS]W  
@HWI-EAS443:3:33:32:954#0/1  
AGGGGACGTAGTGTGGTAATGAAACGAAAACGGGACTCT  
+HWI-EAS443:3:33:32:954#0/1  
]\_T¥Z[\_`SH[PXXV]YOW]ZS[X\_]YNX]OZTXSV[S^  
@HWI-EAS443:3:33:333:343#0/1  
CGATCTGAACCTTGTCAATAGGGCAAACCGACTGAAC  
+HWI-EAS443:3:33:333:343#0/1  
\_]X\_\_^b]Q]aa`\_X¥baa`^`aa\_Z^baaaa`^^`a¥UZ  
@HWI-EAS443:3:33:357:184#0/1  
ATAAAGAAGTCTAATGTCGCAGTCCCGCACTC  
+HWI-EAS443:3:33:357:184#0/1  
aa^a`S]aZaa`aaa\_a\_\_`a`aVa`a\_a]¥Y^X^]YRV  
@HWI-EAS443:3:33:362:876#0/1  
ATCTAATGTCGCAGTCCCGCACTCGGAGATACTACTAA

+HWI-EAS443:3:33:362:876#0/1  
a\_\_aaa\_aUa\_a¥^X\_a`¥\_G¥P` ]\_XW¥¥¥USWW¥WV¥^  
@HWI-EAS443:3:33:372:340#0/1  
TGTCGCAGTCCCGCACTCGCGAGATACTACTAAGACCAC  
+HWI-EAS443:3:33:372:340#0/1  
aa]aa`aa¥a\_\_a\_\_¥` ][[Z[YXZOXZ[VV¥¥¥UUU¥S  
@HWI-EAS443:3:33:375:1530#0/1  
TTGGGTATCTCATTGCCATCATCCACTTCATTCTGAGTGC  
+HWI-EAS443:3:33:375:1530#0/1  
`\_aaaSabbab]a`]aa^`ba`baaaa^aa\_aW\_\_\_\_W^`  
@HWI-EAS443:3:33:386:1195#0/1  
GTCCCGTTTTCGTTTTATTACCAACTACGTCCCCTTGC  
+HWI-EAS443:3:33:386:1195#0/1  
^L\_]`\_P\_\_a`^` ]\_\_^[\_`\_] ^`^¥QY\_\_\_\_\_]X\_ZTX]W¥  
@HWI-EAS443:3:33:390:956#0/1  
GTTGCCCGTTAGCACTTCTTCTTCTTCTTCTTGACTGATGAT  
+HWI-EAS443:3:33:390:956#0/1  
a¥\_a`ab^PZa]baaaaaa`a`^a`^`\_S\_W\_^`^aX  
@HWI-EAS443:3:33:397:1826#0/1  
AGAGAATAAAAGAACTGAGAGATCTAATGTGCGCAGTCCCG  
+HWI-EAS443:3:33:397:1826#0/1  
aaaaabbbb`a]\_`aaYaYaY`\_aa`\_a\_Y\_KDTORYX]V  
@HWI-EAS443:3:33:405:1816#0/1  
GTCCCGTTTTCGTTTTATTACCAACTACGTCCCCTTGC  
+HWI-EAS443:3:33:405:1816#0/1  
a]ba\_b^a^\_aY]^^a`\_S`W[\_\_\_a^T^a`ZUX^\_ZGTTS  
@HWI-EAS443:3:33:42:1261#0/1  
GTTTGGTTGCCTTGTTGTAATTGAATACTGGAGAATTGCC  
+HWI-EAS443:3:33:42:1261#0/1  
a\_a`a`^`\_aa`\_a\_a`^baa\_\_aa`^\_a\_\_^[\_`\_¥Z`^  
@HWI-EAS443:3:33:436:50#0/1  
GTTTCACTGACTTCTTCGGGAGACAATAGTACGTTCCTC  
+HWI-EAS443:3:33:436:50#0/1  
a\_aaaaaaaaaa\_a`a```\_a^`\_`\_X^Y]ZWX]ZZWZZ  
@HWI-EAS443:3:33:440:1210#0/1  
AGTGGATGATGGCAATGAGATACCCAATTACAGCAGACAA  
+HWI-EAS443:3:33:440:1210#0/1  
a`R`\_[GX]]`a`^\_] ^]a``]\_aa`\_`\_`XV[\_^\_[-`\_`  
@HWI-EAS443:3:33:446:615#0/1  
GAAGTGGATGATGGCAATGAGATACCCAATTACAGCAGAC  
+HWI-EAS443:3:33:446:615#0/1  
aW`^Y`\_\_a¥` [U^\_\_a` [V`\_`X\_W\_^X^]]^]Y  
@HWI-EAS443:3:33:534:1715#0/1  
CTCTTATTTTCAGTGTGGAGGTTGCCCGTTAGCACTTC  
+HWI-EAS443:3:33:534:1715#0/1  
`^Z^abaaaa^`\_ [¥`aaa\_[`PW¥X[\_a[]SPTY¥\_]SU  
@HWI-EAS443:3:33:539:215#0/1  
CGATGGATTCAATTCCCCAGTTCTGGAAAAGCACTTTTGC  
+HWI-EAS443:3:33:539:215#0/1  
abbabbaa`abaaaaa```\_aaa`^`aa`^`^]\_\_¥` ]

@HWI-EAS443:3:33:54:524#0/1  
GTGCTAATTGGGCAAGGGGACGTAGTGTGGTAATGAAAC  
+HWI-EAS443:3:33:54:524#0/1  
a[`a`U`aa`]^]aaaa¥aaW[\_VWW\_a`TSSYRV¥^R  
@HWI-EAS443:3:33:569:1469#0/1  
CTGCTGTAATTGGGTATCTCATTGCCATCATCCACTTCAT  
+HWI-EAS443:3:33:569:1469#0/1  
aa]aa`^`¥aaa[¥[a`aaa]\_\_[a`\_`\_a]\_N[Z]^V^\_  
@HWI-EAS443:3:33:592:776#0/1  
CCTGTCCACTTCAGAAATCAAGTTAAAATAAGGAGGAGAG  
+HWI-EAS443:3:33:592:776#0/1  
a`aa[aaa`aaaa^^^¥`\_XSS`a`a\_\_^`]Y[[¥¥^Y\_]`  
@HWI-EAS443:3:33:637:1255#0/1  
TCCCGTTTTTCGTTTCATTACCAACTACGTCCCCTTGCC  
+HWI-EAS443:3:33:637:1255#0/1  
ababa[aaaabR\_ab`a\_aaaaaaa\_``^^\_H\_^^]V^]  
@HWI-EAS443:3:33:646:428#0/1  
ATGTCGCAGTCCCGCACTCGCGAGATACTACTAAGACCA  
+HWI-EAS443:3:33:646:428#0/1  
a`]`baaaa`abaX`S\_aaaaa^`¥UW\_`ZZ¥W[^\_\_W\_\_`  
@HWI-EAS443:3:33:676:1529#0/1  
GTCCCCTTTTCGTTTCATTACCAACTACGTCCCCTTGCC  
+HWI-EAS443:3:33:676:1529#0/1  
a]bab``aaaa\_`\_ab\_N]aaaa^a`\_aa^M^]\_^]UY\_  
@HWI-EAS443:3:33:682:991#0/1  
GTCCCCTTTTCGTTTCATTACCAACTACGTCCCCTTGCC  
+HWI-EAS443:3:33:682:991#0/1  
a`bbbb\_`aaaa]aaaa`a¥aaa`\_a`\_a`XU]^`V]U^`  
@HWI-EAS443:3:33:693:1187#0/1  
GTGGGTTCACTTTCAAAGGACAAGCGGATCATCAGTCAA  
+HWI-EAS443:3:33:693:1187#0/1  
aaaab`b\_K]aaaba`ba`a\_aa`\_`^\_a`^`\_`\_`\_`^`  
@HWI-EAS443:3:33:735:1471#0/1  
CCCCTTTTCGTTTCATTACCAACTACGTCCCCTTGCCC  
+HWI-EAS443:3:33:735:1471#0/1  
abba^aaba`aaaa``aaa¥aaa`aa\_]\_WMXLT]XZZ`  
@HWI-EAS443:3:33:742:363#0/1  
GGACGTAGTGTGGTAATGAAACGAAAACGGGACTCTAGC  
+HWI-EAS443:3:33:742:363#0/1  
aaaba^`aRb^abaQ\_a`aaab`\_`^aY\_^^X^Y]^Y\_U`  
@HWI-EAS443:3:33:759:710#0/1  
GCACTCGCGAGATACTACTAAGACCACTGTGGACCATAT  
+HWI-EAS443:3:33:759:710#0/1  
abbbababaab[a\_ab``aaaa`aa`a`\_]¥\_]\_]`\_a\_`  
@HWI-EAS443:3:33:78:1965#0/1  
CTGTAATTGGGTATCTCATTGCCATCATCCACTTCATTCT  
+HWI-EAS443:3:33:78:1965#0/1  
aa]XV`¥]^][Sa`b^ba\_\_Zbba^`\_`\_aaa\_¥a`\_`\_`\_`  
@HWI-EAS443:3:33:805:1285#0/1  
AAAAGAAGTGGAGATCTAATGTCGCAGTCCCGCACTCGC

+HWI-EAS443:3:33:805:1285#0/1  
`b\_a`aa`a\_a`^Wa\_a`a\_\_\_\_Wa^`¥]Q¥^WWPLT¥W¥S  
@HWI-EAS443:3:33:809:1595#0/1  
TTCACCTTTCAAAAAGGACAAGCGGATCATCAGTCAAGAAAG  
+HWI-EAS443:3:33:809:1595#0/1  
aaab\_]`^Xaaa[`aaaa`baa`a\_aaaaaTDY`a`aa^  
@HWI-EAS443:3:33:817:463#0/1  
CGAGATACTCACTAAGACCACTGTGGACCATATGGCCATA  
+HWI-EAS443:3:33:817:463#0/1  
abbbabaababab`]`aabbaa`^a`]`aaaa\_]a`^X`Z¥  
@HWI-EAS443:3:33:81:893#0/1  
GTCCCCTTTTCGTTTCATTACCAACTACTGCCCCCTTGC  
+HWI-EAS443:3:33:81:893#0/1  
a[``[`\_a\_aaa]ZaWH¥]Xaaa¥`^^ZaaXU^Za^TIKX  
@HWI-EAS443:3:33:872:498#0/1  
GAAGTGGGAATTGAATCCATCGACAATGTGATGGGAATG  
+HWI-EAS443:3:33:872:498#0/1  
aaaabbabbaabaaaaa\_`a`aa\_`a`]`a¥\_]V`\_`^]\_\_  
@HWI-EAS443:3:33:877:771#0/1  
AATAAAAGAACTGAGAGATCTAATGTCGCAGTCCCGCACT  
+HWI-EAS443:3:33:877:771#0/1  
]Z\_\_[\_`a\_aa^a`aa`^^aY``Z\_\_\_V¥Za`ZR[R[\_[^  
@HWI-EAS443:3:33:959:773#0/1  
TCTGAAGTGGACAGGGCCGAAGGTACCATGTTTCAACCTT  
+HWI-EAS443:3:33:959:773#0/1  
[[`a\_b`^`]aa\_\_a`\_¥S^^`U^][V]\_Y\_SX[[¥S`^  
@HWI-EAS443:3:33:987:1028#0/1  
AAAGAACTGAGAGATCTAATGTCGCAGTCCCGCACTCGCG  
+HWI-EAS443:3:33:987:1028#0/1  
aa]ba^aaaa\_a```aaaaa¥a\_a`[^¥``VU[W¥\_¥¥^  
@HWI-EAS443:3:33:99:897#0/1  
GAAGTGGAGATCTAATGTCGCAGTCCCGCACTCGCGAGA  
+HWI-EAS443:3:33:99:897#0/1  
`\_aba\_^aabbaaabaab\_b]ba\_\_b`a¥\_H¥X^WVXZ[Y  
@HWI-EAS443:3:34:1000:1076#0/1  
GTCCCCTTTTCGTTTCATTACCAACTACTGCCCCCTTGC  
+HWI-EAS443:3:34:1000:1076#0/1  
a\_`aaa`a`aa\_a`aaa`a`\_^^^\_]```Y^YX[YXRX  
@HWI-EAS443:3:34:1006:550#0/1  
AAGAACTGAGAGATCTAATGTCGCAGTCCCGCACTCGCGA  
+HWI-EAS443:3:34:1006:550#0/1  
abbaaabababaaaaabaab`aaaa\_``Y^W^^¥¥¥^^  
@HWI-EAS443:3:34:1014:1409#0/1  
CAAGGACAAACCCTCTGGAGCAAAACAAACGATGCTGGAT  
+HWI-EAS443:3:34:1014:1409#0/1  
^]¥aa`^OY`[[^VXGJOX`¥XMG^V^]^BBBBBBBBB  
@HWI-EAS443:3:34:1016:797#0/1  
CATTCCCATCACATTGTCGATGGATTCAATCCCCAGTTC  
+HWI-EAS443:3:34:1016:797#0/1  
a`\_`\_^^ab\_`]`^bab\_aaa\_]`YZZ]YU]¥VPSOXR



@HWI-EAS443:3:34:1058:42#0/1  
TGGTATTCTACAAGAGATTGCATGATCAAGGCAGTTAG  
+HWI-EAS443:3:34:1058:42#0/1  
aba[X`R^`babYaa\_aaa`a`b^a]aW[YI`aRZBB  
@HWI-EAS443:3:34:1074:1472#0/1  
AAAAGAAGTCTGAGATCTAATGTTCGAGTCCCGCACTCGC  
+HWI-EAS443:3:34:1074:1472#0/1  
\_^\_]a]X\_\_^¥U`bTU[^baa`aa\_\_aa^aa`a\_]WJ[XU  
@HWI-EAS443:3:34:1078:1922#0/1  
CCCCGTTTTCGTTTCATTACCAACTACGTCCCCTTGCCC  
+HWI-EAS443:3:34:1078:1922#0/1  
aaa`V]]\_^¥TY[Z`^¥^XX¥`Y^[BBBBBBBBBBBBBB  
@HWI-EAS443:3:34:1088:1861#0/1  
AAAAGAAGTCTGAGATCTAATGTTCGAGTCCCGCACTCGC  
+HWI-EAS443:3:34:1088:1861#0/1  
aa`a\_\_a`a`\_\_aa\_^\_aaaa`]`YR\_\_U\_UXXXUBBBBB  
@HWI-EAS443:3:34:1090:969#0/1  
GTCCTTGTTTCATTCCTCTCTGGAATCATGTCCATTATTCT  
+HWI-EAS443:3:34:1090:969#0/1  
aaaaaba`aaaaaaaaa\_]`\_`\_`aa\_]`\_`\_]`X]  
@HWI-EAS443:3:34:1103:1871#0/1  
GGAGAGACGAGCAGTCAATTGCTGAGGCAATAATTGTGGC  
+HWI-EAS443:3:34:1103:1871#0/1  
¥LL\_a]aaU`\_baXXaa]VQWPVZ\_[[MX[¥\_X]Z]BBBB  
@HWI-EAS443:3:34:1158:422#0/1  
GGATTTCTCATTTTGGCAAAGAAGACAAGAGATATGGCC  
+HWI-EAS443:3:34:1158:422#0/1  
\_babbbbbbbbabbb`bbabaabbbbaaaba`aa`^\_V[  
@HWI-EAS443:3:34:1186:314#0/1  
TTCCAAAAGATGCAAAAGTGCTTTTCCAGAACTGGGGAA  
+HWI-EAS443:3:34:1186:314#0/1  
ababba\_`aa`aaaaaaaa\_a`bab\_]\_aa\_]a`\_OHMO  
@HWI-EAS443:3:34:1203:439#0/1  
GAGAGATCTAATGTTCGAGTCCCGCACTCGCGAGATACTC  
+HWI-EAS443:3:34:1203:439#0/1  
abbbbbbbbab^aabaaaaa\_aaa\_a`\_]`a`a^^^SR^[  
@HWI-EAS443:3:34:1223:491#0/1  
GGATCTTCAGTCAATGCACCTGCATCCTTTCCAAGAACTG  
+HWI-EAS443:3:34:1223:491#0/1  
``ab^`a\_bbbbabYWaba]aUbVN^\_\_`b`\_`^`\_Z`]  
@HWI-EAS443:3:34:1224:1832#0/1  
AAAGAAGTCTGAGATCTAATGTTCGAGTCCCGCACTCGCG  
+HWI-EAS443:3:34:1224:1832#0/1  
abb`aaaaab\_a`babab`aa]a¥`a[^¥VVUTUZBBBBBB  
@HWI-EAS443:3:34:1228:887#0/1  
CCTTGTTTTACGGACCAATTCTTTCTAGCATGTACGCC  
+HWI-EAS443:3:34:1228:887#0/1  
a`bbbbbbbbbbbab`^`abbabbbabbabab]ab]a¥\_  
@HWI-EAS443:3:34:1298:105#0/1  
GCCTTCATCTGGATCTTCAGTCAATGCACCTGCATCCTTT

+HWI-EAS443:3:34:1298:105#0/1  
a`\_bbaabaaa`aa\_aa\_aa^aaaa^a\_]a`V\_`XX^B  
@HWI-EAS443:3:34:1298:925#0/1  
GGAGAATTGCCTCTTACCAGTATCCTCAACCCTGATCCTC  
+HWI-EAS443:3:34:1298:925#0/1  
U\_^aX]Xaa`bWF[\_b[\_`babbbXHX\_dWS][\_aa\_T\_  
@HWI-EAS443:3:34:1388:1274#0/1  
GTGTACTTTTTGATTATGGCCATATGGTCCACAGTGGTCT  
+HWI-EAS443:3:34:1388:1274#0/1  
^W\_^aaaaaa`\_aa\_`]¥a[^Z^`U\_U^`\_X^]TTVBBB  
@HWI-EAS443:3:34:1398:1445#0/1  
CGCGAGATACTCACTAAGACCACTGTGGACCATATGGCCA  
+HWI-EAS443:3:34:1398:1445#0/1  
aaa`aabababbababaaaaYbaaa`aaa\_\_`a`\_^W]ZL  
@HWI-EAS443:3:34:13:894#0/1  
AGGTGATACCATCACTCGGTCTGATCCAGCATCGTTTGT  
+HWI-EAS443:3:34:13:894#0/1  
Va¥FZ][\_`aa`[\_`\_]`XUVPPLUL[BBBBBBBBBBBB  
@HWI-EAS443:3:34:1412:1342#0/1  
AAAAGAAGTCTAATGTCGCAGTCCCGCACTCGC  
+HWI-EAS443:3:34:1412:1342#0/1  
\_W]^ZW[\_ZW`\_¥^`X]aa]aa^\_ZZaZ^^a`PLUUJU]B  
@HWI-EAS443:3:34:1413:689#0/1  
GTCCCGTTTTCGTTTCATTACCAACTACGTCCCCTTGC  
+HWI-EAS443:3:34:1413:689#0/1  
aaa`Ya¥aaa\_a\_`a`ab`a``aa````a`a^V]U[RQBB  
@HWI-EAS443:3:34:1416:139#0/1  
AAAAGCACTTTTGCATCTTTTTGGAAATGCCTCAAGAGTT  
+HWI-EAS443:3:34:1416:139#0/1  
U[RRa\_HW\_^[WZS[Y¥^`bb\_W`¥^T`WW[ZYRNVWZXB  
@HWI-EAS443:3:34:1435:1000#0/1  
TGCTGTAATTGGGTATCTCATTGCCATCATCCACTTCATT  
+HWI-EAS443:3:34:1435:1000#0/1  
¥a``aaW¥\_aa^`P¥````ab]S^`a`]UaZ`¥`XVYFS^\_  
@HWI-EAS443:3:34:1437:243#0/1  
TCCTGATGTGTACTTTTTGATTATGGCCATATGGTCCACA  
+HWI-EAS443:3:34:1437:243#0/1  
a`¥^ba`b\_b\_a`bbaaa`aaa\_a\_^`¥TW^MYXRZBB  
@HWI-EAS443:3:34:1479:862#0/1  
GAGAGATCTAATGTCGCAGTCCCGCACTCGCGAGATACTC  
+HWI-EAS443:3:34:1479:862#0/1  
`¥]^YMPQZ¥`]a[]X```VVVTGWNPNVXVZSBBBBBB  
@HWI-EAS443:3:34:1492:853#0/1  
ATCTCCCACATCATTGATGACGAATAAGTTATTGTCAACT  
+HWI-EAS443:3:34:1492:853#0/1  
¥``U¥W`ZY]aV\_a^[\_aWaZUU]^YZ[V][[]BBBBBB  
@HWI-EAS443:3:34:1517:1329#0/1  
GTTGAGGATTAGCTCATCTTTCAGTTTTGGTGGTTCCT  
+HWI-EAS443:3:34:1517:1329#0/1  
]I¥`]^W\_a^^\_ZZY`\_ZZ\_]W¥P\_\_\_\_\_YZQ\_BBBBBB

@HWI-EAS443:3:34:1534:1360#0/1  
GTCCCCGTTTTCGTTTCATTACCAACTACTGCCCCCTTGC  
+HWI-EAS443:3:34:1534:1360#0/1  
`U`\_]\_X]X^`VY[HS\_]¥]\_^\_^\_X¥VZ]WPDOVSLT  
@HWI-EAS443:3:34:1534:884#0/1  
CTAATGTCGCAGTCCCGCACTCGCGAGATACTCACTAAGA  
+HWI-EAS443:3:34:1534:884#0/1  
abbbbaababa`bbbbba^aaYa`a`a¥aaY`R`¥\_[]  
@HWI-EAS443:3:34:153:859#0/1  
CAGCGATAATCAAACCTTTGGTCAACATCATCATTTCTCAC  
+HWI-EAS443:3:34:153:859#0/1  
aaaabaaYL\_aab]]aaa`aSaa\_\_a`aa\_b`\_aaaa`X\_  
@HWI-EAS443:3:34:1552:309#0/1  
CTTGGAAATGTGCCACAGCACACAGATTGGAGGAGTAAGG  
+HWI-EAS443:3:34:1552:309#0/1  
abbbababbbabaababaabaaba\_aabb`a\_¥a\_¥¥¥U  
@HWI-EAS443:3:34:1582:833#0/1  
ATCAGGGTTGAGGATACTGGTAAGAGGCAATTCTCCAGTA  
+HWI-EAS443:3:34:1582:833#0/1  
ab]ab`a[aaba]QZW[`a\_]`a\_\_^Za^\_]WTFN[\_0\_  
@HWI-EAS443:3:34:1595:882#0/1  
CTAATGTCGCAGTCCCGCACTCGCGAGATACTCACTAAGA  
+HWI-EAS443:3:34:1595:882#0/1  
abbbbababaaab\_ab`ab^aa`aa\_[a\_aa\_aZ\_U\_¥\_V¥  
@HWI-EAS443:3:34:160:1869#0/1  
TCTTGGAAAGGATGCAGGTGCATTGACTGAAGATCCAGAT  
+HWI-EAS443:3:34:160:1869#0/1  
\_bb¥]WR[RQR\_]abaaaN\_a\_[PYW`\_S\_bY^Y]b¥]¥B  
@HWI-EAS443:3:34:1674:925#0/1  
GGGGACGTAGTGTGGTAATGAAACGAAAACGGGACTCTA  
+HWI-EAS443:3:34:1674:925#0/1  
aaaa\_`a^`a¥a^\_\_aT]`^^W]\_V^X^^X]VVVRXXYB  
@HWI-EAS443:3:34:1677:1062#0/1  
ACGACTTACAGTTCTTGGAAAGGATGCAGGTGCATTGACT  
+HWI-EAS443:3:34:1677:1062#0/1  
aaa`^aa\_a\_a[``a``]a]b[^]`^\_aaV\_VZUVYVWB  
@HWI-EAS443:3:34:1749:430#0/1  
GGGGACGTAGTGTGGTAATGAAACGAAAACGGGACTCTA  
+HWI-EAS443:3:34:1749:430#0/1  
ab]a`^a]`a^b\_a]aQY^\_\_]^\_U]YVV^UU[^TNNJQB  
@HWI-EAS443:3:34:1776:183#0/1  
GAATAAAAGAAGTGAAGATCTAATGTCGCAGTCCCGCAC  
+HWI-EAS443:3:34:1776:183#0/1  
`TZ¥Y¥¥\_aa\_U\_]a]`\_`0^\_W`\_TM]^¥WLLWBBBBB  
@HWI-EAS443:3:34:189:850#0/1  
CTTCCTGATGTGACTTTTTGATTATGGCCATATGGTCCA  
+HWI-EAS443:3:34:189:850#0/1  
aaababb`b`b`[aaaaaaaa]H)`Y`a`WTYSVP]BB  
@HWI-EAS443:3:34:190:1597#0/1  
GTCCACAGTGGTCTTAGTGAGTATCTCGCGAGTGCGGGAC

+HWI-EAS443:3:34:190:1597#0/1  
`abbabb`\_aZ[aaaaa¥\_a`^a\_a`\_N\_[¥[S0^V^VUR  
@HWI-EAS443:3:34:21:1709#0/1  
CACCATCAAGGGAGCAATTTTACAATCCTGGAGCTCTTCT  
+HWI-EAS443:3:34:21:1709#0/1  
abaaaa`^`a\_aaaaaa`aaa`aa\_\_^XP^[Y^V\_\_U`  
@HWI-EAS443:3:34:231:624#0/1  
AAATTGCATCCTACTCTGTTCTGGTGGAGCAGCAGCAAAG  
+HWI-EAS443:3:34:231:624#0/1  
`baa^ba`bbabaaaa\_aaaa\_X`\_\_a`^^`\_¥U]XZ  
@HWI-EAS443:3:34:241:1980#0/1  
GTGCTTTTCCAGAAGTGGGAATTGAATCCATCGACAATG  
+HWI-EAS443:3:34:241:1980#0/1  
`a`aaaababb`aaa]aa`^[ba\_\_aaa`aaaa¥`\_]`\_`Y  
@HWI-EAS443:3:34:325:345#0/1  
CATCTCTCTTGAAATGTGCCACAGCACACAGATTGGAGG  
+HWI-EAS443:3:34:325:345#0/1  
a\_aabaa`aa\_U]^^¥¥aa`a`a\_\_a`W^`a\_]\_]`^`Z  
@HWI-EAS443:3:34:342:859#0/1  
TGGGTATCTCATTGCCATCATCCACTTCATTCTGAGTGCG  
+HWI-EAS443:3:34:342:859#0/1  
¥QZ\_\_Z`¥X\_Q]VR[`]Uaa]\_XFX¥a\_]U]¥[TQFWOO  
@HWI-EAS443:3:34:353:126#0/1  
AAAAGAAGTGGAGATCTAATGTCGCAGTCCCGCACTCGC  
+HWI-EAS443:3:34:353:126#0/1  
aa]¥^\_[a`a```aY[[a\_]aa^\_\_a]`Y¥X]X]^XYXB  
@HWI-EAS443:3:34:402:540#0/1  
GCACTCGCGAGATACTACTAAGACCACTGTGGACCATAT  
+HWI-EAS443:3:34:402:540#0/1  
aaWaba`Vab``aaba`a^M^`\_a^X^]WP^`\_]a]\_Z]  
@HWI-EAS443:3:34:406:1979#0/1  
GTCCCGTTTTTCGTTTCATTACCAACTACGTCCTTGC  
+HWI-EAS443:3:34:406:1979#0/1  
[Sbaba^[Y^b¥HZa`¥^]bba^^aba]`bY[aW]\_`NYY  
@HWI-EAS443:3:34:40:1127#0/1  
TCTTCTCCCAACCATTGTGAATTCTTCATACCCTTCATGT  
+HWI-EAS443:3:34:40:1127#0/1  
abbabbbbbaaaaa`\_[Y`a]a`\_`a^\_]\_a`^^UW  
@HWI-EAS443:3:34:433:584#0/1  
GTCCCGTTTTTCGTTTCATTACCAACTACGTCCTTGC  
+HWI-EAS443:3:34:433:584#0/1  
\_\_bbbbaaaa`^^`aaaabaaaaaa\_aa]a¥Z^^]^U  
@HWI-EAS443:3:34:443:456#0/1  
TGCTAATTGGGCAAGGGGACGTAGTGTGGTAATGAAACG  
+HWI-EAS443:3:34:443:456#0/1  
abb\_^\_bbbbbaabbaaab\_ab\_a`abZFW\_^]Yaa[`  
@HWI-EAS443:3:34:448:1225#0/1  
GAGAATAAAGAAGTGGAGATCTAATGTCGCAGTCCCGC  
+HWI-EAS443:3:34:448:1225#0/1  
`a\_¥^^Y\_aa^Z^`aaaaaaaaaaaaa¥b`a`aW[\_]\_]`

@HWI-EAS443:3:34:488:1952#0/1  
GAGAATAAAAGAACTGAGAGATCTAATGTCGCAGTCCCCG  
+HWI-EAS443:3:34:488:1952#0/1  
]b\_\_bbbbbb`abbaab^b`baa`bbaa`aX`bZU\_U`Z]  
@HWI-EAS443:3:34:490:880#0/1  
AAAGAACTGAGAGATCTAATGTCGCAGTCCCCGACTCGCG  
+HWI-EAS443:3:34:490:880#0/1  
aaaa`aaaaabaa^a`a\_aaa]a`\_`]V¥`\_T\_^]XWWWU  
@HWI-EAS443:3:34:491:163#0/1  
TCCCGTTTTCGTTTCATTACCAACTACGTCCCCTTGCC  
+HWI-EAS443:3:34:491:163#0/1  
aaabbVa\_]\_\_U\_]a\_a\_`\_`\_]a]```\_Y]]VYVWU  
@HWI-EAS443:3:34:504:1028#0/1  
TTTCTGAAGTGGACAGGGCCGAAGGTACCATGTTTCAACC  
+HWI-EAS443:3:34:504:1028#0/1  
aaabaaab[^a\_aaaYZ\_\_`\_a\_X\_¥`\_^X\_^]\_YX  
@HWI-EAS443:3:34:528:312#0/1  
GGATCAGACCGAGTGATGGTATCACCTCTGGCCGTAACAT  
+HWI-EAS443:3:34:528:312#0/1  
aa\_S\_baa`P\_X^U\_a\_a[Ub\_]a`^¥aX`SG]]UBBBB  
@HWI-EAS443:3:34:531:1237#0/1  
ATCTAATGTCGCAGTCCCCGACTCGCGAGATACTCACTAA  
+HWI-EAS443:3:34:531:1237#0/1  
a`a`a`W\_¥a`\_T^a`¥[P]¥]¥¥WRUWVXTURUPWTY  
@HWI-EAS443:3:34:535:1637#0/1  
AAATGGTTCAAATTCCATTTTGTGTATAACATTGTGGGA  
+HWI-EAS443:3:34:535:1637#0/1  
`YVQ^¥N``ZQYZ`a`X`\_^\_^¥YGV`[`[`¥PP[MUMRZ  
@HWI-EAS443:3:34:549:684#0/1  
CACACAGATTGGAGGAGTAAGGATGGTGGACATCCTTAGA  
+HWI-EAS443:3:34:549:684#0/1  
aaa`aaa]`aa`a`]X`SU¥\_^^¥\_]UU^\_^\_YYY^YXUX  
@HWI-EAS443:3:34:556:81#0/1  
AAAGAACTGAGAGATCTAATGTCGCAGTCCCCGACTCGCG  
+HWI-EAS443:3:34:556:81#0/1  
aaaaa`aa`aaa]¥\_\_\_\_`\_`V\_^]Z[NZ¥WR[RTZRZUB  
@HWI-EAS443:3:34:591:105#0/1  
AGTGAGTATTGACCGATTTTTAAGGGTTAGAGATCAAAGA  
+HWI-EAS443:3:34:591:105#0/1  
ab\_`\_aR^a[N\_a`ZRT^`a\_YZaa¥F`\_`aa]]W\_^^\_Y  
@HWI-EAS443:3:34:605:1351#0/1  
CTAATGTGCTAATTGGGCAAGGGGACGTAGTGTGGTAAT  
+HWI-EAS443:3:34:605:1351#0/1  
a^W\_```ab]Sab```abWVX```Y`\_Y]aaZSW`\_`X\_]\_  
@HWI-EAS443:3:34:630:1355#0/1  
CAATGAGATACCCAATTACAGCAGACAAGAGAATAATGGA  
+HWI-EAS443:3:34:630:1355#0/1  
^P[^]\_aWaaaaa`\_^aaa`a`\_\_``]¥^]`X^]WW[]Y  
@HWI-EAS443:3:34:637:801#0/1  
CTCTTATTTTCAGTGTGGAGGTTGCCGTTAGCACTTC

+HWI-EAS443:3:34:637:801#0/1  
abbbbbbbbaaaaa`b\_a`aaaa`Y]W^aa`^`\_]Z¥X\_]Y  
@HWI-EAS443:3:34:645:287#0/1  
ATCTCCTGGTTGCCTTTCTGAGAATAGCTGTTGCTCTTCT  
+HWI-EAS443:3:34:645:287#0/1  
aaaaba`aa^aaaa`^^a^`\_``\_\_\_\_\_]]Y]RRW]YTTB  
@HWI-EAS443:3:34:645:97#0/1  
CCGCACTCGCGAGATACTCACTAAGACCACTGTGGACCAT  
+HWI-EAS443:3:34:645:97#0/1  
abbbb`abbaba`\_a`a`a`a`\_a`\_a\_XR\_¥¥W\_WZ  
@HWI-EAS443:3:34:653:1200#0/1  
CAGGGTTGAGGATACTGGTAAGAGGCAATTCTCCAGTATT  
+HWI-EAS443:3:34:653:1200#0/1  
¥¥SSSM\_a\_Z¥T\_Z¥a\_TVU¥\_]J¥S\_¥¥V][X]Z]L]Z`  
@HWI-EAS443:3:34:654:485#0/1  
CATATCTCTTGTCTTCTTTGCCAAAATGAGAAATCCTCT  
+HWI-EAS443:3:34:654:485#0/1  
abbabbaabaa[`baaaaaa\_aaaY``aaaa`\_`Y\_W\_  
@HWI-EAS443:3:34:660:229#0/1  
GAGAATAAAAGAACTGAGAGATCTAATGTGCGCAGTCCCGC  
+HWI-EAS443:3:34:660:229#0/1  
¥^b`^baSa^X]\_aaa`[^P[a]`a`Z`aa`]UWVVS  
@HWI-EAS443:3:34:698:1086#0/1  
GAGAGAATAAAAGAACTGAGAGATCTAATGTGCGCAGTCCC  
+HWI-EAS443:3:34:698:1086#0/1  
\_`baaabb]a[b`abbbb^aba`baabbab]aa\_`a]NX¥  
@HWI-EAS443:3:34:715:955#0/1  
GGGACGTAGTGTGGTAATGAAACGAAAACGGGACTCTAG  
+HWI-EAS443:3:34:715:955#0/1  
^[`^a\_PLZXaZ`baS`Z^\_V\_¥`\_`]aa\_Y]UW[XX]X  
@HWI-EAS443:3:34:802:1488#0/1  
GAGGATTTCTCATTTTGGGCAAAGAAGACAAGAGATATGG  
+HWI-EAS443:3:34:802:1488#0/1  
`Z]a^\_aaaa^]]\_`a[Q\_X`]T\_\_`\_\_\_\_^Z`^]]XB  
@HWI-EAS443:3:34:805:107#0/1  
GTACTTTTTGATTATGGCCATATGGTCCACAGTGGTCTTA  
+HWI-EAS443:3:34:805:107#0/1  
aa\_`aaaa^a`aa\_`\_a^^][X]X¥\_]¥^WZ^ZRRUZ  
@HWI-EAS443:3:34:817:1845#0/1  
GATCTAATGTGCGCAGTCCCGCACTCGCGAGATACTCACTA  
+HWI-EAS443:3:34:817:1845#0/1  
Q\_bb`b`\_\_OY\_b\_]babaaW\_Q\_UaUbba^`¥`XUBB  
@HWI-EAS443:3:34:846:1430#0/1  
CATTATTCTCTTGTCTGCTGTAATTGGGTATCTCATTGCC  
+HWI-EAS443:3:34:846:1430#0/1  
¥¥a\_`a``^`a`b`a\_H]]V¥`\_Y¥a¥\_[¥\_¥^`[BB  
@HWI-EAS443:3:34:871:897#0/1  
CAGCACGTCCCTTGGGTTAAGTGCAACACTTCAATATAAA  
+HWI-EAS443:3:34:871:897#0/1  
a^[`a`Za`^WV¥][\_XVY]\_[\_]U^`\_][^`\_`YZ

@HWI-EAS443:3:34:878:1382#0/1  
CAGGGCCATTGATCTCCACATCATTGATGACGAATAAGT  
+HWI-EAS443:3:34:878:1382#0/1  
¥¥XXPaYYaRRZab]a`P\_Y^[Y`XU¥^W\_RV^]XTZ[US  
@HWI-EAS443:3:34:880:358#0/1  
TCCCGTTTTCGTTTCATTACCAACTACGTCCCTTGCC  
+HWI-EAS443:3:34:880:358#0/1  
`baa]a`ab`b\_aabaaabaVa`¥aX\_aaXQ^^WUWVXX  
@HWI-EAS443:3:34:912:984#0/1  
CTAATGTCGCAGTCCCGCACTCGCGAGATACTCACTAAGA  
+HWI-EAS443:3:34:912:984#0/1  
a`^`¥[W]\_aaaY`a`\_\_T]^\_Y]] [X^¥XY^[OQUWWBB  
@HWI-EAS443:3:34:915:661#0/1  
GAATAAAAGAACTGAGAGATCTAATGTCGCAGTCCCGCAC  
+HWI-EAS443:3:34:915:661#0/1  
a`aaaabaaaaaa`aaa\_aaa`\_aa]`aa`\_U]Y^Y]W]  
@HWI-EAS443:3:34:918:1894#0/1  
CCCGCACTCGCGAGATACTCACTAAGACCACTGTGGACCA  
+HWI-EAS443:3:34:918:1894#0/1  
abb¥^^`XbabaZQ^` [a^]¥^\_\_` [ ` \_`^^¥KTRVUPMB  
@HWI-EAS443:3:34:91:1829#0/1  
GTCAGTGAACGCAAGGAAGTGAAGTTGACAATAACTT  
+HWI-EAS443:3:34:91:1829#0/1  
aabb`\_abbbbbbb` `]baaab¥[ba]aabb`aa\_\_^a`  
@HWI-EAS443:3:34:928:1713#0/1  
AAAGAACTGAGAGATCTAATGTCGCAGTCCCGCACTCGCG  
+HWI-EAS443:3:34:928:1713#0/1  
ab^PWaa\_UaSbUa`aaaa\_Z\_]\_`]Va\_\_YYXXVYUXV  
@HWI-EAS443:3:34:936:315#0/1  
AGCAAAGGGGAGAAGTTTTATTATTTGGACAGTGTCAAAT  
+HWI-EAS443:3:34:936:315#0/1  
]YI\_YZ^b\_^bba[aVYa\_]Xa`Z¥`a`]a¥a]`ZR^VWB  
@HWI-EAS443:3:34:972:721#0/1  
GTCCCGTTTTCGTTTCATTACCAACTACGTCCCTTGCC  
+HWI-EAS443:3:34:972:721#0/1  
aaaaab`aaaab\_aaaabab` `a`¥aaaaa`]]]W]]^XX  
@HWI-EAS443:3:34:998:1631#0/1  
CTGTAATTGGGTATCTCATTGCCATCATCCACTTCATTCT  
+HWI-EAS443:3:34:998:1631#0/1  
a\_HUHY`bbbUT`X`aa^]`aaZ]Za`P]abZRX\_]YGFT  
@HWI-EAS443:3:34:99:1128#0/1  
AAAAGAACTGAGAGATCTAATGTCGCAGTCCCGCACTCGC  
+HWI-EAS443:3:34:99:1128#0/1  
`babaaaaa^Z¥aa\_aaaYYa`]a^aa\_]`a\_X`]\_Y]X]  
@HWI-EAS443:3:35:1029:416#0/1  
GTCTGCTGTCTGAGAGATTCTCATTGTTGGGCAAAGAA  
+HWI-EAS443:3:35:1029:416#0/1  
aaaaaa`b`aa`a\_` [ ` ^`¥\_\_U` \_\_\_\_ [^^a\_` ` \_ZZ\_UR  
@HWI-EAS443:3:35:1098:591#0/1  
CTGCTGTCTGAGAGATTCTCATTGTTGGGCAAAGAA

+HWI-EAS443:3:35:1098:591#0/1  
abba]^[]aaa]^`Z[\_`]\aU`\_`aaZWUa``]V[\_  
@HWI-EAS443:3:35:1151:1050#0/1  
AAAGAAGTCTAATGTCGCAGTCCCGCACTCGCG  
+HWI-EAS443:3:35:1151:1050#0/1  
a\_a`a`a`a`\_`a`a`^`[¥[[\_V`a`^LYUUXT^  
@HWI-EAS443:3:35:1173:1584#0/1  
GTCTTAGTGAGTATCTCGCGAGTGC GGACTGCGACATTA  
+HWI-EAS443:3:35:1173:1584#0/1  
a\_\_aaaaUaaaYa`^^`\_`^`[[[^\_XV`]ZZ^Y\_]^^Z  
@HWI-EAS443:3:35:1196:1655#0/1  
GAGAATAAAGAAGTCTAATGTCGCAGTCCCGC  
+HWI-EAS443:3:35:1196:1655#0/1  
¥ZRW¥W[abb\_bbb`aaK¥`^a]aaa¥¥Pb]`aaX[Y¥T`  
@HWI-EAS443:3:35:1215:23#0/1  
AAAAGAAGTCTAATGTCGCAGTCCCGCACTCGC  
+HWI-EAS443:3:35:1215:23#0/1  
aa[bZbabba]a\_a¥aIaa`aa^YaPKRU`a\_VOQ¥`^N[  
@HWI-EAS443:3:35:1221:859#0/1  
TGTGCTTGGGACATTTGACACTGTCCAAATAATAAACTT  
+HWI-EAS443:3:35:1221:859#0/1  
aa\_\_baaa`S¥a`a`a`\_`\_]\_]Y`a`a`a\_]X  
@HWI-EAS443:3:35:1231:173#0/1  
CAACTCTCCTTATTTTAACTTGATTTCTGAAGTGGAC  
+HWI-EAS443:3:35:1231:173#0/1  
^J^b`^^X`aVZZT¥a`a]aab\_QW]\_\_YaaV]\_I[a[P  
@HWI-EAS443:3:35:1252:1251#0/1  
CCGCACTCGCGAGATACTCACTAAGACCACTGTGGACCAT  
+HWI-EAS443:3:35:1252:1251#0/1  
^\_UZZ¥X]Z^¥¥SNFXVV]]][XS][N¥VH]^MYOTX`aVV  
@HWI-EAS443:3:35:134:1292#0/1  
CCGCACTCGCGAGATACTCACTAAGACCACTGTGGACCAT  
+HWI-EAS443:3:35:134:1292#0/1  
ab`babaaaa`aY`a`aaa`aaZ¥`¥0^]YTTU^\_a^¥  
@HWI-EAS443:3:35:1368:23#0/1  
CGCACTCGCGAGATACTCACTAAGACCACTGTGGACCATA  
+HWI-EAS443:3:35:1368:23#0/1  
aaaaaaaaaaaaaba`\_`\_a]aa`\_Za\_a^][[¥^^V\_W`  
@HWI-EAS443:3:35:136:310#0/1  
CATCAGTCAAGAAAGAAGAAGTGTAAACGGGCAACCT  
+HWI-EAS443:3:35:136:310#0/1  
abab¥a\_b`]baaaa`aaaa\_a\_]aa`aaa`aaa\_]\_  
@HWI-EAS443:3:35:1379:728#0/1  
CAGGTGCATTGACTGAAGATCCAGATGAAGGCACATCTGG  
+HWI-EAS443:3:35:1379:728#0/1  
]ab\_[\_bbbabbbabbaaaaa`baaba\_\_aaaa`Wa\_R  
@HWI-EAS443:3:35:1410:1665#0/1  
TAATGTCGCAGTCCCGCACTCGCGAGATACTCACTAAGAC  
+HWI-EAS443:3:35:1410:1665#0/1  
`bb[b\_aaabbX\_\_a`a`a`^`^ZNYU]U¥a\_a`a`\_`\_N[



@HWI-EAS443:3:35:1435:1159#0/1  
AAAGAAGTCTAATGTCGCAGTCCCGCACTCGCG  
+HWI-EAS443:3:35:1435:1159#0/1  
`a\_]b`bbaa`\_Z[Q`¥[`b`\_P]ZR`a\_X\_Q¥]YSQ]  
@HWI-EAS443:3:35:1435:1480#0/1  
AAAAGAAGTCTAATGTCGCAGTCCCGCACTCGCG  
+HWI-EAS443:3:35:1435:1480#0/1  
`ba¥U\_ba[`\_Y`\_aU`]`]a`Y`\_\_`^V`a`\_`P]Qa[a  
@HWI-EAS443:3:35:1436:587#0/1  
CAGAATGAAGTGGATGATGGCAATGAGATACCCAATTACA  
+HWI-EAS443:3:35:1436:587#0/1  
ababbbb\_a`abbab`^abaaaabaab¥`aab`¥`aa`X`  
@HWI-EAS443:3:35:1444:85#0/1  
GCGAGATACTACTAAGACCACTGTGGACCATATGGCCAT  
+HWI-EAS443:3:35:1444:85#0/1  
`baaa\_bb[b`a^b\_\_]`^^`\_`Z^\_[RZ`Y```]\_URNU  
@HWI-EAS443:3:35:1462:266#0/1  
TGGGCCATTCTATTCCACCATGTTACGCCAGAGGTGAT  
+HWI-EAS443:3:35:1462:266#0/1  
abbb\_bbbbbabbaba`ba`abbabbaabbaa¥a\_aVa]V  
@HWI-EAS443:3:35:1498:1886#0/1  
AAAAGAAGTCTAATGTCGCAGTCCCGCACTCGCG  
+HWI-EAS443:3:35:1498:1886#0/1  
abaaa[a^baaa`^\_aZaa¥aaZQ]Va^\_aa]YY\_WR[LM  
@HWI-EAS443:3:35:1513:1297#0/1  
AAAGAAGTCTAATGTCGCAGTCCCGCACTCGCG  
+HWI-EAS443:3:35:1513:1297#0/1  
^[babbbbb]aba`bababb`abaaa`Zbbba`XZa`a[a  
@HWI-EAS443:3:35:1532:900#0/1  
GGCATTTCACAAAAGATGCAAAAGTGCTTTTCCAGAACTG  
+HWI-EAS443:3:35:1532:900#0/1  
abUWVa]¥^TUOMZ^N\_\_Z` [TY[MV]MMV¥^XUYMXUZ  
@HWI-EAS443:3:35:1571:1344#0/1  
ACTCGGTCTGATCCAGCATCGTTTGTGTTTGTCCAGAGGG  
+HWI-EAS443:3:35:1571:1344#0/1  
aa\_```Xaaa`a\_\_[`¥¥^`\_`^`]R`Na^`\_`^`\_`VaV`  
@HWI-EAS443:3:35:1575:429#0/1  
AGCAAATGCGGGATGTGCTTGGGACATTTGACACTGTCCA  
+HWI-EAS443:3:35:1575:429#0/1  
aa^`aa`a`aaa[\_`¥`¥[¥`Z[¥]^`Y`]¥¥`\_\_^X\_X\_  
@HWI-EAS443:3:35:1600:1438#0/1  
AAGGGAGCAATTTTACAATCCTGGAGCTCTTCTTCTTCT  
+HWI-EAS443:3:35:1600:1438#0/1  
^`a`^`^`b^T\_ba\_b`\_aaaa````WZS]^`\_`aa`]]\_L\_  
@HWI-EAS443:3:35:1601:1686#0/1  
AACAAAGGACAAACCCTCTGGAGCAAAACAAACGATGCTGG  
+HWI-EAS443:3:35:1601:1686#0/1  
`a]\_a`\_aabb`QX`¥a`\_\_b¥a\_\_aUbaa]a`\_aGa`^  
@HWI-EAS443:3:35:1603:142#0/1  
TAATGTCGCAGTCCCGCACTCGCGAGATACTACTAAGAC

+HWI-EAS443:3:35:1603:142#0/1  
aaa`bX`Y\_\_a¥\_`V[U^S]XUZPZRZZ^^UQNSV[V[  
@HWI-EAS443:3:35:160:1747#0/1  
TCCCGTTTTTCGTTTCATTACCAACTACTCGTCCCCTTGCC  
+HWI-EAS443:3:35:160:1747#0/1  
abab`aaaba^aaaa\_ba`b`aa`abZ[\_aaa]ZV^a  
@HWI-EAS443:3:35:1645:703#0/1  
GGTGGGTTCACTTTCAAAGGACAAGCGGATCATCAGTCA  
+HWI-EAS443:3:35:1645:703#0/1  
aa\_aaa\_a\_\_aaa`\_````\_]^\_¥W[]````\_\_\_\_\_Xa  
@HWI-EAS443:3:35:1675:2044#0/1  
CCCGTTTTTCGTTTCATTACCAACTACTCGTCCCCTTGCCC  
+HWI-EAS443:3:35:1675:2044#0/1  
`baaa[ab\_^a^L^aabT^\_a\_\_W]aG^M`Y]]WRKL  
@HWI-EAS443:3:35:1680:633#0/1  
GTCCATTATTCTTTGTCTGCTGTAATTGGGTATCTCATT  
+HWI-EAS443:3:35:1680:633#0/1  
`bb][^babba`^aa¥RZ` `[aa\_\_`a`abaVa]]`YaRW  
@HWI-EAS443:3:35:1696:1411#0/1  
AAAAGAAGTGAAGATCTAATGTCGCAGTCCCGCACTCGC  
+HWI-EAS443:3:35:1696:1411#0/1  
`aa[]]a\_ba\_a\_aa^bab\_aaQ\_^Q^[[aaZP]^UaHa  
@HWI-EAS443:3:35:1775:850#0/1  
GGCAGTGTATTATTGAAGTGTGCACTTAACCCAAGGGA  
+HWI-EAS443:3:35:1775:850#0/1  
a[`¥aRa^\_\_¥`T`\_ZP[[ST\_YWU¥W`^`V¥^WWWZWV  
@HWI-EAS443:3:35:1789:631#0/1  
AGTGTGGAGGTTGCCGTTAGCACTTCTTCTTCTTCT  
+HWI-EAS443:3:35:1789:631#0/1  
aaR`]]^`a`V`Z^]LPZLXGTVXP^^VR[VQYWYGV  
@HWI-EAS443:3:35:19:1191#0/1  
GACCGATTTTTAAGGTTAGAGATCAAAGAGGGAACGTAC  
+HWI-EAS443:3:35:19:1191#0/1  
a`a`Y`aaaWQS¥`Y`aaX`^`\_]P]\_\_`\_^]X]\_Y\_\_  
@HWI-EAS443:3:35:228:425#0/1  
ACTCACTAAGACCACTGTGGACCATATGGCCATAATCAAA  
+HWI-EAS443:3:35:228:425#0/1  
ababaa`^`\_SaaabaaXa`aba^W¥^a]aa\_WMZY[H¥H  
@HWI-EAS443:3:35:271:1256#0/1  
AAAAGAAGTGAAGATCTAATGTCGCAGTCCCGCACTCGC  
+HWI-EAS443:3:35:271:1256#0/1  
[\_T\_^ZV\_aaa`^aaaaaaaaZa[aXYQ`a\_[]GYU`^]  
@HWI-EAS443:3:35:271:260#0/1  
AGGGGACGTAGTGTGGTAATGAAACGAAACGGGACTCT  
+HWI-EAS443:3:35:271:260#0/1  
ababa`ab]\_\_U`\_a`aY\_ZXT`a`G^TS^`XX\_]SYV[X  
@HWI-EAS443:3:35:277:977#0/1  
AAAAGAAGTGAAGATCTAATGTCGCAGTCCCGCACTCGC  
+HWI-EAS443:3:35:277:977#0/1  
``aa^T¥aaaaa`\_\_aa`aaaW\_``¥Qaba¥a`^aVa

@HWI-EAS443:3:35:285:634#0/1  
ATCTAATGTCGCAGTCCCGCACTCGCGAGATACTCACTAA  
+HWI-EAS443:3:35:285:634#0/1  
L]\_¥\_\_\_OR\_^)] [ `a^\_\_U] `a` `WNURJ]XOW\_SN` [  
@HWI-EAS443:3:35:309:435#0/1  
ATCTAATGTCGCAGTCCCGCACTCGCGAGATACTCACTAA  
+HWI-EAS443:3:35:309:435#0/1  
aba^a¥¥bVa[ ` `^\_baa]ZD¥\_` [aMMVGVVYU[XUS[H  
@HWI-EAS443:3:35:322:1147#0/1  
CTCAGAATGAAGTGGATGATGGCAATGAGATACCCAATTA  
+HWI-EAS443:3:35:322:1147#0/1  
a\_b`aZ] `a` \_SRa\_\_\_\_\_ [ ` \_\_\_Y¥Y]^ [UT ` `a[VX]\_`  
@HWI-EAS443:3:35:33:416#0/1  
GGAGTAAGGATGGTGGACATCCTTAGACAGAATCCAAGT  
+HWI-EAS443:3:35:33:416#0/1  
aaaa`\_]aaaaaa^aa^`\_`aa\_\_` `S^^aY¥`\_`\_]\_`  
@HWI-EAS443:3:35:355:77#0/1  
CGCACTCGCGAGATACTCACTAAGACCACTGTGGACCATA  
+HWI-EAS443:3:35:355:77#0/1  
aaa¥a\_aaaa^a^X\_`\_\_Y^`\_^\_]^^X`VUOPYUV]YVV  
@HWI-EAS443:3:35:35:2006#0/1  
ATGTCGCAGTCCCGCACTCGCGAGATACTCACTAAGACCA  
+HWI-EAS443:3:35:35:2006#0/1  
\_] ^ `aaa^aY^aa]aa^a^`Y]¥X[ `V¥]^ ]¥SYUY  
@HWI-EAS443:3:35:381:557#0/1  
ATTTCTCATTTTGGCAAAGAAGACAAGAGATATGGCCCA  
+HWI-EAS443:3:35:381:557#0/1  
`\_] ^^aUGZ]¥^[¥\_ ^XUTa\_\_`YYXUX]^XZSRT^\_]LW  
@HWI-EAS443:3:35:414:1251#0/1  
ATTCTTCATACCCTTCATGTACTCTTATTTTCAGTGTTTG  
+HWI-EAS443:3:35:414:1251#0/1  
M¥YXQ¥a\_Y^aa]b`¥`\_ba¥` `VZMaS^\_b^YW¥\_aaY  
@HWI-EAS443:3:35:41:582#0/1  
AGAGAATAAAAGAACTGAGAGATCTAATGTCGCAGTCCCG  
+HWI-EAS443:3:35:41:582#0/1  
U\_\_b\_]a¥R\_aa\_Z\_ abbbbaa\_ abaa\_ ^b`\_Za`]a`¥  
@HWI-EAS443:3:35:454:1068#0/1  
CTTTGCTGCTGCTCCACCAGAACAGAGTAGGATGCAATTT  
+HWI-EAS443:3:35:454:1068#0/1  
aaaaabaabaaa` `a` ` `^Z`\_\_`X`0^[\_`¥`\_` `^]\_X  
@HWI-EAS443:3:35:458:1967#0/1  
TGAAGTACTTGTGTTGTTGGCCATTCTATTCCACCATG  
+HWI-EAS443:3:35:458:1967#0/1  
\_Ya`aab]bbaaa` `a^` `^^aaaaaaa`ba`bbaaaba`  
@HWI-EAS443:3:35:477:1105#0/1  
ATCTAATGTCGCAGTCCCGCACTCGCGAGATACTCACTAA  
+HWI-EAS443:3:35:477:1105#0/1  
aYa`bbaa[a\_aa]Yaa\_P]¥a¥^U\_UUUWP\_¥WZZGUZU  
@HWI-EAS443:3:35:498:145#0/1  
AAAAGAACTGAGAGATCTAATGTCGCAGTCCCGCACTCGC

+HWI-EAS443:3:35:498:145#0/1  
aa`bbaa`baaaa^\_\_`aa^aaVY\_\_]Z``b]`^\_^\_R^  
@HWI-EAS443:3:35:52:565#0/1  
CTCTTGTCTTCTTTGCCCAAATGAGAAATCCTCTCAGGA  
+HWI-EAS443:3:35:52:565#0/1  
a\_Z[X[]¥^W\_X[¥``ZWI[TVQ¥^\_SVVTV\_^[Z\_Z[[G  
@HWI-EAS443:3:35:560:1797#0/1  
AGGGGACGTAGTGTGGTAATGAAACGAAAACGGGACTCT  
+HWI-EAS443:3:35:560:1797#0/1  
SSababbb^YYSbU¥TTHU`UX`ab[U]aaab[UYY`[\_¥  
@HWI-EAS443:3:35:562:1765#0/1  
GCTGTAATTGGGTATCTCATTGCCATCATCCACTTCATTC  
+HWI-EAS443:3:35:562:1765#0/1  
^ba`Z^\_bbVba]`ab\_bbbbaababbaabbaa\_aaa\_ab  
@HWI-EAS443:3:35:595:539#0/1  
GCTGAGGCAATAATTGTGGCCATGGTATTCTCACAAGAGG  
+HWI-EAS443:3:35:595:539#0/1  
aba`a\_`abaabaaa`\_aaa`\_WTYG¥Y¥`X]T`U\_[Y\_\_  
@HWI-EAS443:3:35:599:931#0/1  
AGAGAATAAAAGAACTGAGAGATCTAATGTCGCAGTCCCG  
+HWI-EAS443:3:35:599:931#0/1  
a`U`]R^b\_^`¥\_ba`\_aa``a`aa\_\_a]``aa\_V\_a¥W  
@HWI-EAS443:3:35:611:85#0/1  
CGCGAGATACTCACTAAGACCACTGTGGACCATATGGCCA  
+HWI-EAS443:3:35:611:85#0/1  
abaabb`aaaaaa``aaa\_a``\_]`U``\_aaZ[HX`\_[RX  
@HWI-EAS443:3:35:612:1237#0/1  
GTCTTCTTTGCCCAAATGAGAAATCCTCTCAGGACAGCA  
+HWI-EAS443:3:35:612:1237#0/1  
^\_babbbbaabbb`^V^a`a\_\_baaab``\_\_W^]`aaZaa  
@HWI-EAS443:3:35:625:422#0/1  
CTAATGTCGCAGTCCCGCACTCGCGAGATACTCACTAAGA  
+HWI-EAS443:3:35:625:422#0/1  
a]a[`\_bbabXa[ba`b\_bb`abbbaaZHzaQaSaaL]`  
@HWI-EAS443:3:35:642:514#0/1  
AATGTCGCAGTCCCGCACTCGCGAGATACTCACTAAGACC  
+HWI-EAS443:3:35:642:514#0/1  
aaaa[aaaaa^aaa¥]X`aa`aa^¥]`\_¥a¥¥^]XY^Sa  
@HWI-EAS443:3:35:657:1248#0/1  
AAAGAACTGAGAGATCTAATGTCGCAGTCCCGCACTCGCG  
+HWI-EAS443:3:35:657:1248#0/1  
aaaZX`aa`]XW]X\_aa\_aaa¥aa`]¥Vaaa^`T\_^¥^VV  
@HWI-EAS443:3:35:688:853#0/1  
GTCCCGTTTTTCGTTTCATTACCAACTACGTCCCTTGC  
+HWI-EAS443:3:35:688:853#0/1  
a^aa`aZa``a`^[\_aaa\_a\_\_\_U\_\_a`\_a\_Ya`\_`^X]`  
@HWI-EAS443:3:35:872:964#0/1  
ACTCGGAGATACTCACTAAGACCACTGTGGACCATATGG  
+HWI-EAS443:3:35:872:964#0/1  
aabb^aaaaaa[`aaaaaaaa¥aaa`aa[a`\_aaaYa\_a¥

@HWI-EAS443:3:35:87:986#0/1  
GCGAGATACTACTAAGACCACTGTGGACCATATGGCCAT  
+HWI-EAS443:3:35:87:986#0/1  
abaaa`aaabb\_aa]V\_abbab`aY[[Ta\_JU[\_\_\_\_a`V  
@HWI-EAS443:3:35:889:1151#0/1  
TGCTGTAATTGGGTATCTCATTGCCATCATCCACTTCATT  
+HWI-EAS443:3:35:889:1151#0/1  
aababVaaa`Z\_aU]aaaaa`^^\_¥a[a^a¥U^`[UJ[]  
@HWI-EAS443:3:35:892:1349#0/1  
CCCAAGCACGGAGATGTCGCTGAGAGGGATAAGAGTCAGC  
+HWI-EAS443:3:35:892:1349#0/1  
abaaaabaa`a\_a`\_\_¥a\_`\_`\_¥a[^UV\_\_¥^\_Y¥\_¥]  
@HWI-EAS443:3:35:943:1778#0/1  
GAAGTGAAGATCTAATGTCGAGTCCCGCACTCGCGAGA  
+HWI-EAS443:3:35:943:1778#0/1  
aaaab^b\_`a`aaaabaa¥a^aZ¥WbV\_b\_a¥a\_aZ[V^  
@HWI-EAS443:3:35:980:290#0/1  
AAAGAAGTGAAGATCTAATGTCGAGTCCCGCACTCGCG  
+HWI-EAS443:3:35:980:290#0/1  
aa`aaaaaaaa\_`^^\_a`a`^\_\_\_\_W^a\_¥ZGXYWV¥  
@HWI-EAS443:3:35:996:1118#0/1  
GTGGCGTACATGCTAGAAAGAGAATTGGTCCGTA AAAACAA  
+HWI-EAS443:3:35:996:1118#0/1  
a^ab\_\_FZaa^U[\_¥^XXa[`[[a\_\_aG`X¥U]``\_aZQ  
@HWI-EAS443:3:36:1057:129#0/1  
GCGAGATACTACTAAGACCACTGTGGACCATATGGCCAT  
+HWI-EAS443:3:36:1057:129#0/1  
aa[ZPYRDXR`T\_Z^[Z```aXTUUM[TZXT]]X]¥`XSW  
@HWI-EAS443:3:36:1114:60#0/1  
AAAAGAAGTGAAGATCTAATGTCGAGTCCCGCACTCGC  
+HWI-EAS443:3:36:1114:60#0/1  
ab¥`\_`[\_ab`abb\_aa[a]abY]¥a`Z[]T¥`^a`\_  
@HWI-EAS443:3:36:1160:566#0/1  
GTCTTCTTTGCCAAAATGAGAAATCCTCTCAGGACAGCA  
+HWI-EAS443:3:36:1160:566#0/1  
aaaaaaaaaaaa¥Paa\_WMSW\_`]OQ\_[S¥TSJ[QOOSXTU  
@HWI-EAS443:3:36:1184:1576#0/1  
CGGGGTTCTTCTTGCCTTCCTGATGTGTACTTTTTTGAT  
+HWI-EAS443:3:36:1184:1576#0/1  
abaaaZabbabba\_aaabb\_bbba\_aa`ba`Ya`a\_aaaa  
@HWI-EAS443:3:36:1192:1278#0/1  
AAAGCACTTTTGCATCTTTTGGAAATGCCTCAAGAGTTG  
+HWI-EAS443:3:36:1192:1278#0/1  
aaaa`baa`aa`\_aaaaa\_a\_b¥a^a`\_]`^a`\_]\_^  
@HWI-EAS443:3:36:1193:1132#0/1  
CGTTTTCGTTTCATTACCAACTACGTCCCCTTGCCCAA  
+HWI-EAS443:3:36:1193:1132#0/1  
a`^abbbaaaa`bbaaabaaaa`aaaa^aaa\_`]]`aa[R  
@HWI-EAS443:3:36:1199:1837#0/1  
TCGCGAGATACTACTAAGACCACTGTGGACCATATGGCC



@HWI-EAS443:3:36:1400:1875#0/1  
CGTTTGTTCCTCCAGAGGGTTTGCCTTGTTCATTCCT  
+HWI-EAS443:3:36:1400:1875#0/1  
\_aaaabaabbbbaa[`abbbb`^aaY#a\_baa``\_bba`X`  
@HWI-EAS443:3:36:1435:600#0/1  
CTCCAGGATTGTAAAATTGCTCCCTTGATGGTGGCGTACA  
+HWI-EAS443:3:36:1435:600#0/1  
aZabbbbaaa\_W#`aabbababab`abaYZaab#a^a  
@HWI-EAS443:3:36:1449:1330#0/1  
GAATAAAAGAAGACTGAGAGATCTAATGTCGCAGTCCCGCAC  
+HWI-EAS443:3:36:1449:1330#0/1  
abaabaaa`]abaaba[bbaabaabb\_\_`aaa\_\_a``a^a  
@HWI-EAS443:3:36:1462:873#0/1  
CACCTGCATCCTTTCCAAGAACTGTAAGTCGTTTGGTTGC  
+HWI-EAS443:3:36:1462:873#0/1  
`aa`a\_]R\_]a#a][N\_a`Z`Y\_bQ[R\_]\_0[Z`a^X`]  
@HWI-EAS443:3:36:1464:1148#0/1  
CGAGATACTCACTAAGACCACTGTGGACCATATGGCCATA  
+HWI-EAS443:3:36:1464:1148#0/1  
Z^bb`]`baa`^bbaba`ab`a`\_aa^bUbw\_a`^a\_W^  
@HWI-EAS443:3:36:1468:965#0/1  
CGAGATACTCACTAAGACCACTGTGGACCATATGGCCATA  
+HWI-EAS443:3:36:1468:965#0/1  
`b`b]bb`X0^`a\_^\_ba`aaa^`\$SRaaaY]`][a\_[T  
@HWI-EAS443:3:36:1488:1645#0/1  
CTAATGTCGCAGTCCCGCACTCGCGAGATACTCACTAAGA  
+HWI-EAS443:3:36:1488:1645#0/1  
aabbbaY^bb`Ybbaab[a\_aa`\_]a`b\_aa#]ba`b  
@HWI-EAS443:3:36:1549:1064#0/1  
CAAAAGAGAAGAAAGAAGAGCTCCAGGATTGTAAAATTGC  
+HWI-EAS443:3:36:1549:1064#0/1  
^bbbbbab`a`Uabaaa`\$bbaa`aUaabZ\_P\_\_a`a`  
@HWI-EAS443:3:36:1581:1019#0/1  
AGAATAAAAGAAGACTGAGAGATCTAATGTCGCAGTCCCGCA  
+HWI-EAS443:3:36:1581:1019#0/1  
]`W`X#[`aU^Ybaaaa`aab\_aab#W\_a`a]`LZaTX  
@HWI-EAS443:3:36:1590:1896#0/1  
AGCCGTAGACATATGCAAGGCAGCAATAGGGTTGAGGATT  
+HWI-EAS443:3:36:1590:1896#0/1  
aYVZZY`b`N\_R#`]0`\_[Za#R`YZY[\_\_\_VVV^[]`^^\_  
@HWI-EAS443:3:36:1593:245#0/1  
ATAATGGACATGATTCCAGAGAGGAATGAACAAGGACAAA  
+HWI-EAS443:3:36:1593:245#0/1  
aZRMX`ZZYU[#`]\_\_XRW0][]S#UR^Y`^ZYU^\_YTI  
@HWI-EAS443:3:36:1598:506#0/1  
CTCACTAAGACCACTGTGGACCATATGGCCATAATCAAAA  
+HWI-EAS443:3:36:1598:506#0/1  
abbb`babbbb`babbbbbbbbab`abaaaYVR\_a\_  
@HWI-EAS443:3:36:1616:560#0/1  
GAGAGATCTAATGTCGCAGTCCCGCACTCGCGAGATACTC

+HWI-EAS443:3:36:1616:560#0/1  
Zababb]U\_abab]XU^baQsbQ`GL`\_S`^`LTUM¥QRU  
@HWI-EAS443:3:36:163:1024#0/1  
CTCCCCTTTGCTGCTGCTCCACCAGAACAGAGTAGGATGC  
+HWI-EAS443:3:36:163:1024#0/1  
aabbaa`a^]a\_`a^`a^a`\_\_`[]Y^\_[[Y¥RVX[PU[`  
@HWI-EAS443:3:36:1657:308#0/1  
GGGACGTAGTGTGGTAATGAAACGAAAACGGGACTCTAG  
+HWI-EAS443:3:36:1657:308#0/1  
aaaa^b`ab^b\_aaaY`a`a]aa\_a\_[\_aV`[\_]]`^Y\_  
@HWI-EAS443:3:36:1658:558#0/1  
GTCCCCTTTTCGTTTCATTACCAACTACGTCCCCTTGC  
+HWI-EAS443:3:36:1658:558#0/1  
aaa`ab`aba^a^`[aa`a\_`\_`Yaa[\_`a]QL[U[ZV]  
@HWI-EAS443:3:36:1719:1085#0/1  
GTCCCCTTTTCGTTTCATTACCAACTACGTCCCCTTGC  
+HWI-EAS443:3:36:1719:1085#0/1  
^RW```aaa^\_`V^`[V\_aUXW\_YR¥\_[[XTKRF^MOYS\_  
@HWI-EAS443:3:36:1733:1041#0/1  
GTCCCCTTTTCGTTTCATTACCAACTACGTCCCCTTGC  
+HWI-EAS443:3:36:1733:1041#0/1  
aYaaVYIa`a`¥VN¥`[]QTTT`\_]¥Y¥\_SNLQQ^QLHTL  
@HWI-EAS443:3:36:1767:160#0/1  
AAAAGAAGACTGAGAGATCTAATGTCGCAGTCCCGCACTCGC  
+HWI-EAS443:3:36:1767:160#0/1  
`ba`\_Rababb^aaaaaaaa¥bb\_a\_\_aa\_[WSLFF[]U]\_  
@HWI-EAS443:3:36:1776:1064#0/1  
AAAGAAGACTGAGAGATCTAATGTCGCAGTCCCGCACTCGCG  
+HWI-EAS443:3:36:1776:1064#0/1  
a]aa^aabbaa^`\_]a\_T`a]]¥]Z¥LX[WJNR^R¥VDU  
@HWI-EAS443:3:36:241:419#0/1  
GTCCCCTTTTCGTTTCATTACCAACTACGTCCCCTTGC  
+HWI-EAS443:3:36:241:419#0/1  
a`baab`\_`aaa]\_^`\_]`\_aaa```aa^aa\_X^^\_aYU^^  
@HWI-EAS443:3:36:27:1996#0/1  
TCCCGTTTTTCGTTTCATTACCAACTACGTCCCCTTGCC  
+HWI-EAS443:3:36:27:1996#0/1  
abbb\_¥`Zaa¥`aaUY\_ab]aaYa`\_`VV[^aaVPS¥a  
@HWI-EAS443:3:36:287:1188#0/1  
CGCACTCGCGAGATACTACTAAGACCACTGTGGACCATA  
+HWI-EAS443:3:36:287:1188#0/1  
aabZbabab`^^baaaaa`\_`abbaaaaa``¥]R[aaR[S  
@HWI-EAS443:3:36:345:1902#0/1  
GAATAAAAGAAGACTGAGAGATCTAATGTCGCAGTCCCGCAC  
+HWI-EAS443:3:36:345:1902#0/1  
a`[Xa\_YIRW`PHRXXTL[Z]^\_¥RQNNQ\_TRFT^¥MZU^  
@HWI-EAS443:3:36:358:39#0/1  
TGGATGATGGCAATGAGATACCCAATTACAGCAGACAAGA  
+HWI-EAS443:3:36:358:39#0/1  
aba¥ab[abbaa`ababa`aaa`\_aa`\_aa`\_`aYYX[a[



@HWI-EAS443:3:36:371:377#0/1  
CTGAGAGATCTAATGTCGCAGTCCCGCACTCGCGAGATAC  
+HWI-EAS443:3:36:371:377#0/1  
aa`aa[abaaaaa\_Y```\_\_^ab\_[aRa\_`\_`\_Z\_X¥¥a  
@HWI-EAS443:3:36:380:179#0/1  
GGTGGGTTCACTTTCAAAGGACAAGCGGATCATCAGTCA  
+HWI-EAS443:3:36:380:179#0/1  
aaG``aXaaa^```a`\_a\_\_[]`\_^`^\_Z]]\_^[`]Y[Y  
@HWI-EAS443:3:36:398:1157#0/1  
TGCATGGCCAGGGTTGTATCAACTCTCCTCCTTATTTTA  
+HWI-EAS443:3:36:398:1157#0/1  
abbbababbbbbb¥b`aX`^a^`a\_b\_^babaaaa`a`a  
@HWI-EAS443:3:36:401:887#0/1  
CTGTCCTGAGAGGATTTCTCATTTTGGGCAAAGAAGACAA  
+HWI-EAS443:3:36:401:887#0/1  
a`a\_ba`a`a\_aaa```aaaVaaa\_a\_T`]J^``aa^^aU  
@HWI-EAS443:3:36:404:1828#0/1  
AAAAGAAGTCTGAGAGATCTAATGTCGCAGTCCCGCACTCGC  
+HWI-EAS443:3:36:404:1828#0/1  
^\_\_Z¥^Saba\_a``bababbabX\_]a\_QVbb`Z^Xa¥b\_b  
@HWI-EAS443:3:36:422:474#0/1  
ATCTAATGTCGCAGTCCCGCACTCGCGAGATACTCACTAA  
+HWI-EAS443:3:36:422:474#0/1  
aaaabaaaX`a\_Z^T¥`a¥XJZT]ZYYV[RTRWSTRZR]¥  
@HWI-EAS443:3:36:433:1473#0/1  
TAATGTCGCAGTCCCGCACTCGCGAGATACTCACTAAGAC  
+HWI-EAS443:3:36:433:1473#0/1  
a^W]`]b\_ab`^a`b\_\_J``a\_`^X^`[V^¥\_\_`]]NR^a  
@HWI-EAS443:3:36:460:755#0/1  
TAAAAGAAGTCTGAGAGATCTAATGTCGCAGTCCCGCACTCG  
+HWI-EAS443:3:36:460:755#0/1  
ab]a^`Qaaaa`aa\_a`aa`aa]`a``\_`^a^\_``^`^a\_  
@HWI-EAS443:3:36:465:238#0/1  
CAGCACACAGATTGGAGGAGTAAGGATGGTGGACATCCTT  
+HWI-EAS443:3:36:465:238#0/1  
aaaa[aa\_^`¥a`a`a`a`W\_\_UZ¥¥^TKMY^WW¥^¥¥W  
@HWI-EAS443:3:36:479:728#0/1  
AACCATTGTGAATTCTTCATACCCTTCATGTACTCTTATT  
+HWI-EAS443:3:36:479:728#0/1  
abbaaaaaZ]UV\_\_Waaa\_aY```\_`\_\_\_\_X\_\_a^`¥\_a^  
@HWI-EAS443:3:36:490:23#0/1  
GTTATTGTCAACTTCTCAGTTCCTTGCGTTTCACTGACTT  
+HWI-EAS443:3:36:490:23#0/1  
a^`a`\_`¥aa]\_a^`^[X\_Z\_^^¥`^Z\_Y[W^¥V¥¥Q¥¥U  
@HWI-EAS443:3:36:50:1231#0/1  
GGGCGATCTGAACCTTGTCAATAGGGCAAACCAGCGACTG  
+HWI-EAS443:3:36:50:1231#0/1  
`^baaaabbbbbbbbab\_\_\_\_``baaab\_Z¥baa]a^S\_`^`  
@HWI-EAS443:3:36:518:1857#0/1  
AAAAGAAGTCTGAGAGATCTAATGTCGCAGTCCCGCACTCGC



@HWI-EAS443:3:36:653:1828#0/1  
CATCAAGGGAGCAATTTTACAATCCTGGAGCTCTTCTTTC  
+HWI-EAS443:3:36:653:1828#0/1  
abbbbaXa`^aba`baba`aba\_S\_K``aX\_aa\_a`a  
@HWI-EAS443:3:36:658:1954#0/1  
ATCAAACCTTTGGTCAACATCATCTTCTCACTTCTCCTC  
+HWI-EAS443:3:36:658:1954#0/1  
`baY`a^^^`\_Ubb]aa¥aa`^a`XY\_ab¥W\_Yba]\_  
@HWI-EAS443:3:36:65:222#0/1  
AAAGAAGTGAAGATCTAATGTCGCAGTCCCGCACTCGCG  
+HWI-EAS443:3:36:65:222#0/1  
ZZ¥^Y^`^`b¥[b\_`a`^`aaUa\_aa`0`\_a\_\_[\_V]S¥R  
@HWI-EAS443:3:36:662:828#0/1  
GGGCGATCTGAACCTTTGTCAATAGGGCAAACCAGCGACTG  
+HWI-EAS443:3:36:662:828#0/1  
ababb]Y\_R`a]S^^^T\_VH[^[\_aa^ST[^Z^Q[R¥¥^  
@HWI-EAS443:3:36:669:13#0/1  
TGAAGTGGATGATGGCAATGAGATACCCAATTACAGCAGA  
+HWI-EAS443:3:36:669:13#0/1  
\_¥¥aa]`\_R^\_TW\_\_\_S\_]`^WW]``^\_[[¥XRX^]YWU  
@HWI-EAS443:3:36:678:1089#0/1  
GATCCAGCATCGTTTGTGTTTGTCCAGAGGGTTTGTCTT  
+HWI-EAS443:3:36:678:1089#0/1  
[aabbba\_`bbabbabbabbababaaaa]aaa\_baa`  
@HWI-EAS443:3:36:698:1818#0/1  
CGTTTGTGTTTGTCCAGAGGGTTTGTCTTGTTCATTCCT  
+HWI-EAS443:3:36:698:1818#0/1  
aa\_aaaaaaaaa`aaaaaa`Waaa^b^a\_`\_\_\_aaZaZ^  
@HWI-EAS443:3:36:728:1801#0/1  
GAATAAAGAAGTGAAGATCTAATGTCGCAGTCCCGCAC  
+HWI-EAS443:3:36:728:1801#0/1  
aababbbaa`\_a[aWa`a\_\_a`aa\_X^\_\_`\_V^\_Xa^a  
@HWI-EAS443:3:36:730:816#0/1  
CAGCAGACTCCACCCAGATGTGCCTTCATCTGGATCTTC  
+HWI-EAS443:3:36:730:816#0/1  
abaabbaabaabaaaaab`a^a`aa[\_b`a\_Q\_\_[aaaa  
@HWI-EAS443:3:36:745:367#0/1  
AATAAAGAAGTGAAGATCTAATGTCGCAGTCCCGCACT  
+HWI-EAS443:3:36:745:367#0/1  
^`\_U\_\_baba^ba`aaa\_aab\_ab]aa`\_aP¥[`^`N[]  
@HWI-EAS443:3:36:772:1158#0/1  
GTATTCTACAAGAGGATTGCATGATCAAGGCAGTTAGGG  
+HWI-EAS443:3:36:772:1158#0/1  
aJ\_]aaYa``YW[]WZZ^\_\_¥^`Z^]\_[\_^]W^ZSNSWQ  
@HWI-EAS443:3:36:833:1556#0/1  
CGTTTTCGTTTCATTACCAACACTACGTCCCCTTGCCCAA  
+HWI-EAS443:3:36:833:1556#0/1  
a\_RR\_W\_¥R^^SW`b]`\_abbY`U`\_JX\_]ILUFHa`¥J  
@HWI-EAS443:3:36:841:1727#0/1  
TCCTGGTTGCCTTTCTGAGAATAGCTGTTGCTCTTCTCCC

+HWI-EAS443:3:36:841:1727#0/1  
`bb]baT\_aa¥W00\_ZMX¥aaUaU[UYIWPXLFLT\_ZZ[a  
@HWI-EAS443:3:36:847:289#0/1  
GTCCCGTTTTTCGTTTCATTACCAACTACTCGTCCCCTTGC  
+HWI-EAS443:3:36:847:289#0/1  
\_Yaa^\_L]]^^^HY][`]V[]]¥\_NZ¥U]¥`VQRXURTV^  
@HWI-EAS443:3:36:889:1029#0/1  
GTCCCGTTTTTCGTTTCATTACCAACTACTCGTCCCCTTGC  
+HWI-EAS443:3:36:889:1029#0/1  
a^bbbb\_^a`aaabaaaaaaba¥aa\_aa^Y^^a`XPJ]  
@HWI-EAS443:3:36:946:82#0/1  
AGAACCCCGCACTCAGAATGAAGTGGATGATGGCAATGAG  
+HWI-EAS443:3:36:946:82#0/1  
aaaaabaaaaa¥a][a\_]a`[U[Na`\_^\_]Y]V][W`Y]  
@HWI-EAS443:3:36:979:2028#0/1  
AAAGAAGTCTAATGTCGCAGTCCCGCACTCGCG  
+HWI-EAS443:3:36:979:2028#0/1  
ZX`\_W\_`]ba¥Y¥VV]baaa`VXX]^`QF[`ONOXR`NQY  
@HWI-EAS443:3:36:98:1367#0/1  
CTAGAGTCCCGTTTTTCGTTTCATTACCAACTACTCGTCCC  
+HWI-EAS443:3:36:98:1367#0/1  
aaZ\_]a[aaaa\_\_aaaa^\_`a]\_^\_`aaW\_]`\_`\_]S`^^  
@HWI-EAS443:3:36:992:1404#0/1  
GTCCCGTTTTTCGTTTCATTACCAACTACTCGTCCCCTTGC  
+HWI-EAS443:3:36:992:1404#0/1  
a]``abYYaaaa]```aa`aa\_aa\_aaZa^[S[W\_^VZ[^  
@HWI-EAS443:3:37:1065:852#0/1  
CGTACATGCTAGAAAGAGAATTGGTCCGTAACAAGGTT  
+HWI-EAS443:3:37:1065:852#0/1  
a^]^]a`ZSS[^[[Z\_\_^aaU`[]]QUU[]]RUa]FM  
@HWI-EAS443:3:37:1079:595#0/1  
ATCATTCTCACTTCTCCTCCTGGAGTGTACATCTGCTCC  
+HWI-EAS443:3:37:1079:595#0/1  
`baaabbaaba\_ab\_aa\_a^`aaaaW`^Ta¥Va]V]\_\_]  
@HWI-EAS443:3:37:1128:710#0/1  
AACTGAGAGATCTAATGTCGCAGTCCCGCACTCGCGAGAT  
+HWI-EAS443:3:37:1128:710#0/1  
`a\_\_abba^\_abbba`b`^a\_\_b`aaaabUb¥`^`a\_\_JX  
@HWI-EAS443:3:37:1131:1070#0/1  
CAATCCCCAGTTCTGGAAAAGCACTTTTGCATCTTTTGTG  
+HWI-EAS443:3:37:1131:1070#0/1  
ab\_abbbaaab`bbabaabaa`aaaa`\_Zaa\_aa\_a```  
@HWI-EAS443:3:37:1133:850#0/1  
TTCCCATCACATTGTCGATGGATTCAATCCCCAGTTCTG  
+HWI-EAS443:3:37:1133:850#0/1  
aa]\_\_aa`a`\_ba`^\_a\_\_a`\_]^^WLXY¥QYZ]Z\_X  
@HWI-EAS443:3:37:116:258#0/1  
CTAATGTCGCAGTCCCGCACTCGCGAGATACTCACTAAGA  
+HWI-EAS443:3:37:116:258#0/1  
aabbab\_b^baa]aab^aU^¥a`a`T^\_U¥`^`V[^¥FYX

@HWI-EAS443:3:37:1177:1120#0/1  
AGAGAATAAAAGAACTGAGAGATCTAATGTCGCAGTCCCG  
+HWI-EAS443:3:37:1177:1120#0/1  
ab`a^aaa\_Ka``\_YbbaSY`aaaa\_a`YQ^\_a^`Z]\_ZQ  
@HWI-EAS443:3:37:1196:671#0/1  
GGTGCATTGACTGAAGATCCAGATGAAGGCACATCTGGGG  
+HWI-EAS443:3:37:1196:671#0/1  
`[UZU¥aa`^aaaabaY`a[aaa`]X^X^FHVX\_aaa`]¥  
@HWI-EAS443:3:37:1210:1008#0/1  
CATGTACGCCACCATCAAGGGAGCAATTTTACAATCCTGG  
+HWI-EAS443:3:37:1210:1008#0/1  
abbb`b`babaa`a```babaaa\_]`aa¥U^H]``a^`¥  
@HWI-EAS443:3:37:1210:1043#0/1  
CTGCTGTCCTGAGAGGATTTCTCATTTTGGGCAAAGAAGA  
+HWI-EAS443:3:37:1210:1043#0/1  
abababaabbbabbababbabbbbabbbUaZWX¥\_aaa`  
@HWI-EAS443:3:37:1215:576#0/1  
CGCACTCGCGAGATACTCACTAAGACCACTGTGGACCATA  
+HWI-EAS443:3:37:1215:576#0/1  
abbaabbbbabababbaa]ba\_^ab`aaR`^aaaa\_aaa  
@HWI-EAS443:3:37:1223:399#0/1  
GTTTTCGTTTCATTACCAACTACGTCCCCTTGCCCAAT  
+HWI-EAS443:3:37:1223:399#0/1  
aYaa`ab`\_Z\_a`\_`\_`a]\_\_\_WW`]U`Na^¥a`Z¥V]\_  
@HWI-EAS443:3:37:1225:1206#0/1  
CGCACTCGCGAGATACTCACTAAGACCACTGTGGACCATA  
+HWI-EAS443:3:37:1225:1206#0/1  
\_aaaaaaaaab`bab\_aaaa`abaaaa^\_aXa]`Z``a]\_  
@HWI-EAS443:3:37:123:1639#0/1  
GCTGACTTTATCCCTCTCAGCGACATCTCCGTGCTTGGG  
+HWI-EAS443:3:37:123:1639#0/1  
ab``^aab]]^¥^aaa\_``POa`a\_]X[a`VK\_`a¥XS¥  
@HWI-EAS443:3:37:1260:1614#0/1  
GTCCCCTTTTCGTTTCATTACCAACTACGTCCCCTTGC  
+HWI-EAS443:3:37:1260:1614#0/1  
a``]aa`aba\_a\_``a`b\_aa`aa\_a¥^Y¥¥^baaT\_¥¥¥  
@HWI-EAS443:3:37:1265:858#0/1  
CTCGCGAGATACTCACTAAGACCACTGTGGACCATATGGC  
+HWI-EAS443:3:37:1265:858#0/1  
`bba\_a`aa\_aabbabbbaababbbaa^aSS\_a[a]aa]]  
@HWI-EAS443:3:37:1276:569#0/1  
ATAAAAGAACTGAGAGATCTAATGTCGCAGTCCCGCACTC  
+HWI-EAS443:3:37:1276:569#0/1  
abbaabbX\_aaaaaaba`]aaaa]a\_[YP]^aa]`\_\_\_\_S  
@HWI-EAS443:3:37:1311:466#0/1  
TAACCCTTAAAAATCGGTCAATACTCACTACCACTCTCTC  
+HWI-EAS443:3:37:1311:466#0/1  
aaa]\_\_aaaaa`a`a\_`¥\_\_\_\_`]\_a^]¥Za\_\_a^]]\_`^W  
@HWI-EAS443:3:37:1331:1318#0/1  
AAAAGAACTGAGAGATCTAATGTCGCAGTCCCGCACTCGC

+HWI-EAS443:3:37:1331:1318#0/1  
\_`^UX\_`a`R¥^`babaaba^\_aa^Gbz[\_Y[`aaZ  
@HWI-EAS443:3:37:1374:1493#0/1  
GTCCCGTTTTTCGTTTCATTACCAACTACTGCCCTTGC  
+HWI-EAS443:3:37:1374:1493#0/1  
¥ZaX\_`W`a]`Xa`ab`^¥aabVaa```Vb^bab[aVVZ  
@HWI-EAS443:3:37:1388:241#0/1  
GTCCCGTTTTTCGTTTCATTACCAACTACTGCCCTTGC  
+HWI-EAS443:3:37:1388:241#0/1  
a\_\_W\_a[\_\_aZa\_]`^Y[U[YXX^W\_TYXGYUUR¥WWTWV  
@HWI-EAS443:3:37:139:487#0/1  
CTTAGACAGAATCCAAGGAGGAACAAGCCGTAGACATAT  
+HWI-EAS443:3:37:139:487#0/1  
aaaa`]aaaababaaaaaaaa\_0^aa^`U^YX`]aa^W`  
@HWI-EAS443:3:37:1457:1610#0/1  
CTTCAATATAAACTGCCTGTTCCGCCGGCTACTGGGAG  
+HWI-EAS443:3:37:1457:1610#0/1  
abb\_]`abbaa[¥aaba`]`^Y\_aaaaSa[baa]PIW¥0¥  
@HWI-EAS443:3:37:1469:285#0/1  
GCACTCGGAGATACTACTAAGACCACTGTGGACCATAT  
+HWI-EAS443:3:37:1469:285#0/1  
abZR^ab`ba`a¥ZG\_\_^^\_aa]aaa\_[^MPaYZWYUMTX  
@HWI-EAS443:3:37:1494:339#0/1  
CGAGATACTACTAAGACCACTGTGGACCATATGGCCATA  
+HWI-EAS443:3:37:1494:339#0/1  
a`a]^bXaab\_``bVbb`S`bbb]bba`ZDO\_S¥aRaba]  
@HWI-EAS443:3:37:149:1859#0/1  
GGGAGATCAATGGCCCTGAGTCAGTGCTAGTCAACTTA  
+HWI-EAS443:3:37:149:1859#0/1  
`¥ba])bbbb`^bbaJ^]Z^b`Y[\_``]NM^]\_`^`a^  
@HWI-EAS443:3:37:1509:1586#0/1  
GTCCCGTTTTTCGTTTCATTACCAACTACTGCCCTTGC  
+HWI-EAS443:3:37:1509:1586#0/1  
abaa`baaababa\_`aaa`aabb``^¥aYa¥aa`Z\_\_\_^  
@HWI-EAS443:3:37:1541:1202#0/1  
GTCCGAGTCCCGCACTCGCGAGATACTACTAAGACCACT  
+HWI-EAS443:3:37:1541:1202#0/1  
aaa]Zaa^^a`]a]`WX¥^Z`^\_\_\_`U]QUYay^SU^UU  
@HWI-EAS443:3:37:1547:1678#0/1  
ATGAAGTGGATGATGGCAATGAGATACCAATTACAGCAG  
+HWI-EAS443:3:37:1547:1678#0/1  
`b¥ISbw\_ZWX^YTW^b]baZ]`b`^WPb\_ba]ba\_aaaa  
@HWI-EAS443:3:37:1636:434#0/1  
GCCATATGGTCCACAGTGGTCTTAGTGAGTATCTCGCGAG  
+HWI-EAS443:3:37:1636:434#0/1  
a\_TP[]X¥[Za]\_J¥\_G^aUXb^]`^Y`bNL[`R¥Q¥BBB  
@HWI-EAS443:3:37:1644:1616#0/1  
CTCGGAGATACTACTAAGACCACTGTGGACCATATGGC  
+HWI-EAS443:3:37:1644:1616#0/1  
Z[\_¥^a\_^[`b`aa`\_bbbZ\_bbbbbU^Q[ab``^a\_a`

@HWI-EAS443:3:37:1656:793#0/1  
AGATCAATGGCCCTGAGTCAGTGCTAGTCAACACTTATCA  
+HWI-EAS443:3:37:1656:793#0/1  
aba````aaa`Y[\_]^a]`\_]RZ[`a`Z^V]X]]¥`Z\_\_\_\_  
@HWI-EAS443:3:37:169:330#0/1  
CAGAATGAAGTGGATGATGGCAATGAGATACCCAATTACA  
+HWI-EAS443:3:37:169:330#0/1  
aabbbbb\_baabbaaa^`abaaaabaaa\_]b`b^aaaa^a  
@HWI-EAS443:3:37:203:460#0/1  
CCCCGTTTTCGTTTTATTACCAACTACGTCCCCTTGCCC  
+HWI-EAS443:3:37:203:460#0/1  
abbbZbba\_baa]ba``Yaa\_`aaa`\_aa]aaaaWV\_a`b  
@HWI-EAS443:3:37:244:511#0/1  
GCCATATCTCTGTCTTCTTTGCCAAAATGAGAAATCCT  
+HWI-EAS443:3:37:244:511#0/1  
aab\_aaaaa`aaa`aaaa`a`\_a`\_a^[]^\_a`Y]a`\_`\_`  
@HWI-EAS443:3:37:25:668#0/1  
AAAAGAAGTGGAGATCTAATGTCGCAGTCCCGCACTCGC  
+HWI-EAS443:3:37:25:668#0/1  
Y¥K¥]^`aaa[aaaaaab]abb\_aaaaY\_aa]^0^]a\_`  
@HWI-EAS443:3:37:269:1976#0/1  
CCCGCACTCAGAATGAAGTGGATGATGGCAATGAGATACC  
+HWI-EAS443:3:37:269:1976#0/1  
aba\_\_aa]aa^`¥\_a]^YR\_X0¥[NP^YWHJYV]]\_Y\_\_X  
@HWI-EAS443:3:37:293:467#0/1  
AAAGAAGTGGAGATCTAATGTCGCAGTCCCGCACTCGCG  
+HWI-EAS443:3:37:293:467#0/1  
a\_]`^\_aa`^`a`\_`\_`a[\_a^`XKVZ]UaU\_J\_^^^\_a  
@HWI-EAS443:3:37:316:72#0/1  
GAACCCCGCACTCAGAATGAAGTGGATGATGGCAATGAGA  
+HWI-EAS443:3:37:316:72#0/1  
`]]`a`````¥^¥]^¥Y\_\_VQ¥R`\_\_[^LNLZZWVUYQY]  
@HWI-EAS443:3:37:408:1022#0/1  
GCATTGACTGAAGATCCAGATGAAGGCACATCTGGGGTGG  
+HWI-EAS443:3:37:408:1022#0/1  
a^^¥\_ZZ¥^^abb^Z]UY\_aZX`^WZ]^`^QVW¥¥ZR^[`M  
@HWI-EAS443:3:37:42:381#0/1  
TAAAGAAGTGGAGATCTAATGTCGCAGTCCCGCACTCG  
+HWI-EAS443:3:37:42:381#0/1  
]\_Q]]¥TL[aa^\_RYPVa`[R]]R][¥¥LP¥`\_¥\_]\_[[]  
@HWI-EAS443:3:37:453:139#0/1  
AAAGAAGTGGAGATCTAATGTCGCAGTCCCGCACTCGCG  
+HWI-EAS443:3:37:453:139#0/1  
aVb`Q¥bbaUa[ab\_``[a^``aaaaYF¥H[^\_I\_`a`\_`\_`  
@HWI-EAS443:3:37:475:372#0/1  
GTCCCGTTTTCGTTTTATTACCAACTACGTCCCCTTGCC  
+HWI-EAS443:3:37:475:372#0/1  
`V]¥Z\_XUVRW`Z`]a[^`[QSRP]WSOGVU^S[SJFLY  
@HWI-EAS443:3:37:487:380#0/1  
CCCCGTTTTCGTTTTATTACCAACTACGTCCCCTTGCCC

+HWI-EAS443:3:37:487:380#0/1  
aba\_GRb\_ab]ab^Zab[\_Q]``aa\_\_aVGOZaaH`UX^P  
@HWI-EAS443:3:37:48:1528#0/1  
ATTTCCAAAAAGATGCAAAAGTGCTTTTCCAGAAGTGGGG  
+HWI-EAS443:3:37:48:1528#0/1  
`aaaaaa^VPY`¥Ra^`YZXW\_a\_\_`\_\_V¥[\_`a\_a^\_\_  
@HWI-EAS443:3:37:499:447#0/1  
GCGGGATGTGCTTGGGACATTTGACACTGTCCAAATAATA  
+HWI-EAS443:3:37:499:447#0/1  
\_]Zaa^Y]]W`GJS`a¥S[U\_¥]V^XS[SY¥RGRNQZHVP  
@HWI-EAS443:3:37:503:209#0/1  
CATTATTCTCTGTCTGTCTGTAATTGGGTATCTCATTGCC  
+HWI-EAS443:3:37:503:209#0/1  
¥¥a^a`]^\_\_^\_U]W]a\_Y\_OWa`a^`^UHSSU\_]¥YU[Y  
@HWI-EAS443:3:37:523:560#0/1  
GGCGATCTGAACCTTTGTCAATAGGGCAAACCAGCGACTGA  
+HWI-EAS443:3:37:523:560#0/1  
aaaaaa[\_\_\_a`\_`a\_Y[a[¥W\_\_aa¥Y]\_V\_Z[`^\_[^W\_  
@HWI-EAS443:3:37:573:939#0/1  
GTCCCCTTTTCGTTTCATTACCAACTACGTCCCCTTGC  
+HWI-EAS443:3:37:573:939#0/1  
a¥aaaa`aaaab\_aaaaaaaaa¥abaa]]JU^]aaaa\_TT^  
@HWI-EAS443:3:37:583:1903#0/1  
GGAAAATTGCATCCTACTCTGTTCTGGTGGAGCAGCAGCA  
+HWI-EAS443:3:37:583:1903#0/1  
aab\_baaaaba`aa\_bbaa`a¥``a\_[X^0\_\_a\_\_a`[Z^  
@HWI-EAS443:3:37:619:392#0/1  
GGTGGGTTCACTTTCAAAGGACAAGCGGATCATCAGTCA  
+HWI-EAS443:3:37:619:392#0/1  
a\_]a`b`\_`Y``aaa``a\_a`\_`\_a``MMY^T\_a\_\_Y]\_  
@HWI-EAS443:3:37:649:1012#0/1  
CTGGGAGAAACCTTGTTTTACGGACCAATTCTCTTTCTAG  
+HWI-EAS443:3:37:649:1012#0/1  
`\_]\_aaaZLaab`ab[aaa`aaa`aaaa[¥baaaa```^]  
@HWI-EAS443:3:37:667:761#0/1  
CAACCCTGATCCTCTCACATTCACAGTCAATGAGGAAAAT  
+HWI-EAS443:3:37:667:761#0/1  
`ba]bb[`aaaa¥[\_a]aa`\_aaa`a¥]]UX^T\_a\_\_WP]`  
@HWI-EAS443:3:37:719:1584#0/1  
GGGGACGTAGTGTGGTAATGAAACGAAAACGGGACTCTA  
+HWI-EAS443:3:37:719:1584#0/1  
]¥ababb`^`PT^bbaZaa\_Z`bb\_[`\_Z]a\_`a^Z\_b\_\_  
@HWI-EAS443:3:37:726:496#0/1  
AAAAGAGAAGAAAGAAGAGCTCCAGGATTGTAATAATTGCT  
+HWI-EAS443:3:37:726:496#0/1  
^TXbbab`b^^`ab`aaaa`baa^aaa[YUa¥T^`]Z`\_  
@HWI-EAS443:3:37:748:1351#0/1  
CATCCTACTCTGTTCTGGTGGAGCAGCAGCAAAGGGGAGA  
+HWI-EAS443:3:37:748:1351#0/1  
abbbbabbaaba`aaa`\_`aaabbba`a]HS]X]aa`aa`



@HWI-EAS443:3:37:764:2045#0/1  
TTGCGTTTCACTGACTTCTTCGGGAGACAATAGTACGTTC  
+HWI-EAS443:3:37:764:2045#0/1  
\_a`U\_T`bbbb`aa^bbabaaaYaaa\_V]\_a^V` [¥P¥`  
@HWI-EAS443:3:37:797:1467#0/1  
ATAAAAGAACTGAGAGATCTAATGTCGCAGTCCCGCACTC  
+HWI-EAS443:3:37:797:1467#0/1  
aaaabaa`a^aaa`[aaa\_aaa\_\_^b`RRV]ab^^\_a^¥  
@HWI-EAS443:3:37:808:352#0/1  
AGAATTGCCTCTTACCAGTATCCTCAACCCTGATCCTCTC  
+HWI-EAS443:3:37:808:352#0/1  
aa[`aaaaa```\_a^aa`Y`\_\_``a`W`PY^YY\_^^`X\_  
@HWI-EAS443:3:37:819:1870#0/1  
ATCTAATGTCGCAGTCCCGCACTCGCGAGATACTCACTAA  
+HWI-EAS443:3:37:819:1870#0/1  
aa\_`aaaa[`^`^Ma`\_NZ^`Y^[aYVSOPX`Z^[YVX^  
@HWI-EAS443:3:37:826:1954#0/1  
ATTGCCTCTTACCAGTATCCTCAACCCTGATCCTCTCACA  
+HWI-EAS443:3:37:826:1954#0/1  
[`¥YbLaba\_abba¥¥a`\_aa\_a`¥a]GUHDS^^\_¥a\_X0  
@HWI-EAS443:3:37:872:1119#0/1  
ATCTAATGTCGCAGTCCCGCACTCGCGAGATACTCACTAA  
+HWI-EAS443:3:37:872:1119#0/1  
aab\_^\_aa¥Y\_S^]¥Y^]SXFWMXQ¥¥]ZMMRa\_\_YUS]R  
@HWI-EAS443:3:37:889:510#0/1  
CTCTTTGATCTCTAACCCTTAAAAATCGGTCAATACTCAC  
+HWI-EAS443:3:37:889:510#0/1  
abaaa`a`\_babbbababbbb`¥aaababZa`^`Uaab`^  
@HWI-EAS443:3:37:896:995#0/1  
GTGGCGTACATGCTAGAAAGAGAATTGGTCCGTA AAAACAA  
+HWI-EAS443:3:37:896:995#0/1  
a\_]¥aa¥`a`^`Z^^a\_Za`¥[¥` [¥\_\_LKX\_Q\_^Z\_^[[  
@HWI-EAS443:3:37:924:1201#0/1  
TCGCGAGATACTCACTAAGACCACTGTGGACCATATGGCC  
+HWI-EAS443:3:37:924:1201#0/1  
Xb`^^[^S^aba]ba¥¥I¥`\_a\_a¥¥V`YF\_XOSNY^M[¥  
@HWI-EAS443:3:37:934:611#0/1  
GTGCTAATTGGGCAAGGGGACGTAGTGTGGTAATGAAAC  
+HWI-EAS443:3:37:934:611#0/1  
a^`\_a¥W\_a`aXRVQWXZNH]YVWYBBBBBBBBBBBBBB  
@HWI-EAS443:3:37:938:1765#0/1  
CCCGCACTCGCGAGATACTCACTAAGACCACTGTGGACCA  
+HWI-EAS443:3:37:938:1765#0/1  
ab\_Va¥a`a\_U¥aa^`a`]aaa\_\_Y¥`bTbaaVY^]a``  
@HWI-EAS443:3:37:939:1280#0/1  
TGGAGCAAAAACAAACGATGCTGGATCAGACCGAGTGATGG  
+HWI-EAS443:3:37:939:1280#0/1  
^a\_``aa]^^]baaVab]ZZa][Y][\_] ^Pa¥Z]W\_\_U\_S  
@HWI-EAS443:3:38:101:196#0/1  
CCCGCACTCAGAATGAAGTGGATGATGGCAATGAGATACC

+HWI-EAS443:3:38:101:196#0/1  
ababaaaa`a\_a`]`¥aVaa[\_¥[Y[^`^\_][[[[[]V\_¥R  
@HWI-EAS443:3:38:1023:1153#0/1  
CTAATGTGCTAATTGGGCAAGGGACGTAGTGTGGTAAT  
+HWI-EAS443:3:38:1023:1153#0/1  
a`¥UO[XR]X\_K¥S¥[\_`^W]VULM`aBBBBBBBBBBBBB  
@HWI-EAS443:3:38:1043:45#0/1  
CTGGGAGAAACCTTGTTTTACGGACCAATTCTCTTTCTAG  
+HWI-EAS443:3:38:1043:45#0/1  
a`¥aa¥\_Y]\_S`aab`aba]a`]]^]]W\_^P`Ya``[a\_V  
@HWI-EAS443:3:38:1063:1458#0/1  
ATCGGAATACTGCCCGACATGACCCCAAGCACGGAGATGT  
+HWI-EAS443:3:38:1063:1458#0/1  
ZV^OJR]\_abaabba`R`b]Z^ab``[\_`\_¥P[THMY¥ZXU  
@HWI-EAS443:3:38:1063:1953#0/1  
GAATAAAAGAACTGAGAGATCTAATGTGCGCAGTCCCGCAC  
+HWI-EAS443:3:38:1063:1953#0/1  
]¥`X^`b`Yb`V¥\_aba^\_a^`baM`Y`XWGRWEHPVFYY  
@HWI-EAS443:3:38:1104:1658#0/1  
AAATTGCATCCTACTCTGTTCTGGTGGAGCAGCAGCAAAG  
+HWI-EAS443:3:38:1104:1658#0/1  
Xa\_[bb\_\_abb``aa`a`ZR\_]a\_a```P[\_^\_a\_a`aP  
@HWI-EAS443:3:38:1133:1739#0/1  
CTCAGAATGAAGTGGATGATGGCAATGAGATACCCAATTA  
+HWI-EAS443:3:38:1133:1739#0/1  
aaba^X¥b`bUQT\_]X`\_`Z^[VUa\_`[LFSLTNWW\_S]\_  
@HWI-EAS443:3:38:1192:1386#0/1  
CTAATGTGCGAGTCCCGCACTCGCGAGATACTACTAAGA  
+HWI-EAS443:3:38:1192:1386#0/1  
a\_ZZ\_X¥OZ`Q¥RN^aXQ¥^`W`BBBBBBBBBBBBBBBBB  
@HWI-EAS443:3:38:1215:1160#0/1  
GATTTCTCATTTTGGGCAAAGAAGACAAGAGATATGGCCC  
+HWI-EAS443:3:38:1215:1160#0/1  
aa`bbbabbbaaaaaa`a`aaaa¥MS^aZX]Z\_^\_\_^^G  
@HWI-EAS443:3:38:1225:838#0/1  
GCTAGAGTCCCGTTTTTCGTTTCATTACCAACTACTAGTCC  
+HWI-EAS443:3:38:1225:838#0/1  
aabab\_b`aaaa`aaa`a]aaaaaaa]¥XR`Y`\_U^U]W  
@HWI-EAS443:3:38:1235:270#0/1  
AGAATAATGGACATGATTCCAGAGAGGAATGAACAAGGAC  
+HWI-EAS443:3:38:1235:270#0/1  
abbbaaaabaa^`a`^\_a`¥\_a`a\_aa]aYY]¥^^Z\_]\_U  
@HWI-EAS443:3:38:1278:1050#0/1  
AAAAGAACTGAGAGATCTAATGTGCGCAGTCCCGCACTCGC  
+HWI-EAS443:3:38:1278:1050#0/1  
aaa`aaa`a`a^`Xa`aaa]aaY`\_``[]XUUX^X]XVVV  
@HWI-EAS443:3:38:1298:931#0/1  
GAGAGATCTAATGTGCGCAGTCCCGCACTCGCGAGATACTC  
+HWI-EAS443:3:38:1298:931#0/1  
a^aaaaaabbb`aa\_aa`ba¥\_\_b\_\_`a\_aMNUW\_^W]WNM

@HWI-EAS443:3:38:1336:1588#0/1  
GGAGAGAATAAAAGAACTGAGAGATCTAATGTCGCAGTCC  
+HWI-EAS443:3:38:1336:1588#0/1  
YO^¥S\_V\_U][^X]LRQ\_[TU]¥\_VXVWLVPYSYJXTJMJ  
@HWI-EAS443:3:38:133:1444#0/1  
GAACTGTAAGTCGTTTGGTTGCCTTGTGTAATTGAATAC  
+HWI-EAS443:3:38:133:1444#0/1  
aabb\_\_\_\_W\_Sba^a`ba¥aabb`a`\_a^^`aaaa]  
@HWI-EAS443:3:38:1362:1382#0/1  
GTCCCCTTTTCGTTTCATTACCAACTACGTCCCCCTTGC  
+HWI-EAS443:3:38:1362:1382#0/1  
aa^\_ab`aaa^U^\_\_¥a\_\_\_¥a\_]a¥VaWXYTXXYYNF  
@HWI-EAS443:3:38:1378:893#0/1  
CTCGGTCTGATCCAGCATCGTTTGTGTTTGTCCAGAGGGT  
+HWI-EAS443:3:38:1378:893#0/1  
`aabb`abaaa^^\_aaaa]\_`aaa\_aa`¥ZWUJ^\_[a\_]R  
@HWI-EAS443:3:38:1395:896#0/1  
AAACGCAAGGAAGTGAAGTTGACAATAACTTATTCGTC  
+HWI-EAS443:3:38:1395:896#0/1  
abbabababaaaaXabaaa`[^`aa`a`aa\_Z`\_\_`\_`\_`^S  
@HWI-EAS443:3:38:1401:528#0/1  
GGGGACGTAGTGTGGTAATGAAACGAAACGGGACTCTA  
+HWI-EAS443:3:38:1401:528#0/1  
aaaa]`aZ^a]a)`aaT^\_\_\_\_]\_`X^ZYVYHUZ]VTVWWY  
@HWI-EAS443:3:38:1428:942#0/1  
GTCCTTGTTTCATTCCTCTCTGGAATCATGTCCATTATTCT  
+HWI-EAS443:3:38:1428:942#0/1  
aaaaa\_^aaa\_aaW]\_\_¥aa]`[^`a]Z``XSXY`¥\_]X  
@HWI-EAS443:3:38:1433:673#0/1  
TGGTCTTAGTGAGTATCTCGCGAGTGC GGACTGCGACAT  
+HWI-EAS443:3:38:1433:673#0/1  
aab^babaaaa¥b\_a\_Q]RX`[F[T]^`^PTQQRMTGQ\_U  
@HWI-EAS443:3:38:1435:256#0/1  
GAGAATAAAAGAACTGAGAGATCTAATGTCGCAGTCCCGC  
+HWI-EAS443:3:38:1435:256#0/1  
aabaabaaaaa\_`[aaaaba`aaaa`aa\_]\_X`^MPUVYT  
@HWI-EAS443:3:38:1454:351#0/1  
CATCATTTCTCACTTCTCCTCCTGGAGTGTACATCTGCTC  
+HWI-EAS443:3:38:1454:351#0/1  
abbbbbbbbaa`bbbb^HZaY¥\_ZZTX`GUM[RFWaBBB  
@HWI-EAS443:3:38:1476:777#0/1  
AAAGAACTGAGAGATCTAATGTCGCAGTCCCGCACTCGCG  
+HWI-EAS443:3:38:1476:777#0/1  
^Tababab^Z^[a[bab`a`bUZa\_ab\_\_PR[R[WYYX[¥  
@HWI-EAS443:3:38:1484:673#0/1  
GAGAATAAAAGAACTGAGAGATCTAATGTCGCAGTCCCGC  
+HWI-EAS443:3:38:1484:673#0/1  
a`a`aaaaaaaZ^^aa`\_a`\_\_`aa``XYX]^`^XX^YYY  
@HWI-EAS443:3:38:1495:1669#0/1  
CGCACTCGCGAGATACTACTAAGACCACTGTGGACCATA

+HWI-EAS443:3:38:1495:1669#0/1  
aaabaaaabb`\_a^a\_a\_aX`\_a`^a`aVXY]]VY]]^V  
@HWI-EAS443:3:38:150:857#0/1  
TCCTGATTATCCATTGATAAGTGTGACTAGCACTGACTC  
+HWI-EAS443:3:38:150:857#0/1  
[aa\_\_VMYZ`a]UYa\_`^`\_0\_T\_Y\_\_Q\_aa]\_a¥W^`\_R  
@HWI-EAS443:3:38:1589:1246#0/1  
AAAGAAGTCTAATGTCGCAGTCCCGCACTCGCG  
+HWI-EAS443:3:38:1589:1246#0/1  
aa][Ya\_ab`a]aWa^aaaa\_\_a]`a]\_MDLKOYUXXUU  
@HWI-EAS443:3:38:1650:1472#0/1  
CTGATGTGACTTTTTGATTATGGCCATATGGTCCACAGT  
+HWI-EAS443:3:38:1650:1472#0/1  
\_bbababbbbbbbbbbbbabaa`bbS`ZV^ZXZ`¥\_VQ  
@HWI-EAS443:3:38:1656:568#0/1  
TGCCTCTTACCAGTATCCTCAACCCTGATCCTCTCACATT  
+HWI-EAS443:3:38:1656:568#0/1  
a`^`aaabaa`\_aaVba\_`a`aa\_`]]`aa`VR^X^]`W^\_Y  
@HWI-EAS443:3:38:1675:141#0/1  
CGCACTCGCGAGATACTCACTAAGACCACTGTGGACCATA  
+HWI-EAS443:3:38:1675:141#0/1  
a\_ZSX\_a`^`]ZUUURZ^V¥V^^\_¥XUVYVUVIPMYXXVLK  
@HWI-EAS443:3:38:1719:697#0/1  
CTTTTGCATCTTTTTGGAAATGCCTCAAGAGTTGGTGCAT  
+HWI-EAS443:3:38:1719:697#0/1  
abbab`^`babbbbabbbb]]ab`a`abab¥\_\_a`VZbaaX  
@HWI-EAS443:3:38:1789:1346#0/1  
AAAAGAAGTCTAATGTCGCAGTCCCGCACTCGCG  
+HWI-EAS443:3:38:1789:1346#0/1  
V^[¥X[`b`^`a\_\_\_\_abbbb\_WX\_¥b`^`ZV`VaYXZ¥ZL  
@HWI-EAS443:3:38:18:122#0/1  
AGAAGTGTAAAGTCGTTTGGTTGCCTTGTGTAATTGAATA  
+HWI-EAS443:3:38:18:122#0/1  
¥b]^`baba^Sa`ab\_aaa`^`aaaa`a¥\_a¥\_Z\_^]`^`\_\_  
@HWI-EAS443:3:38:219:761#0/1  
GCCTTGTGTAATTGAATACTGGAGAATTGCCTCTTACCA  
+HWI-EAS443:3:38:219:761#0/1  
abbbabaaa`baaa`baabaabaaa\_aa`^`]^`a\_a`a\_a\_  
@HWI-EAS443:3:38:289:1731#0/1  
GAATGAACAAGGACAAACCCTCTGGAGCAAAACAAACGAT  
+HWI-EAS443:3:38:289:1731#0/1  
^baaaabbbba`babbbba\_aaa^Y`\_ab¥X^¥ba\_aYWO  
@HWI-EAS443:3:38:307:1518#0/1  
CCCGTTTTCGTTTCATTACCAACTACGTCCCCTTGCCC  
+HWI-EAS443:3:38:307:1518#0/1  
a^ba^`aabb\_`^`Y`^`a]a`\_aaaaX¥[TRUVVU^YR]]V  
@HWI-EAS443:3:38:318:1830#0/1  
GTGTACATCTGCTCCCAGCACGTCCCTTGGGTTAAGTGCA  
+HWI-EAS443:3:38:318:1830#0/1  
\_`a`bbbbba\_b^aba¥Y`ba^\_bbb\_a^`\_`^a^aaVaa[

@HWI-EAS443:3:38:371:1458#0/1  
CTTCCTGATGTGACTTTTTGATTATGGCCATATGGTCCA  
+HWI-EAS443:3:38:371:1458#0/1  
a[X¥\_b]WXb]Y]`a`^aa`][\_[^S^BBBBBBBBBB  
@HWI-EAS443:3:38:380:1425#0/1  
AAAGAAGTCTAATGTGCGCAGTCCCGCACTCGCG  
+HWI-EAS443:3:38:380:1425#0/1  
abb^K]`a]¥Za\_¥\_aa[aa\_Vb^`a\_Y\_YTU[Q\_U\_¥¥T  
@HWI-EAS443:3:38:406:732#0/1  
AAAGAAGTCTAATGTGCGCAGTCCCGCACTCGCG  
+HWI-EAS443:3:38:406:732#0/1  
`baaaaaabaaaaaaa`aa¥a\_aa`¥`¥Y¥^SZ¥\_]\_¥  
@HWI-EAS443:3:38:457:2037#0/1  
TGCTAATTGGGCAAGGGACGTAGTGTGGTAATGAAACG  
+HWI-EAS443:3:38:457:2037#0/1  
abbabaaa`a\_aaaaa`^`^`\_Z`^aaZHV^^W\_a`GT  
@HWI-EAS443:3:38:465:929#0/1  
GTCCCGTTTTCGTTTCATTACCAACTACGTCCCCTTGC  
+HWI-EAS443:3:38:465:929#0/1  
`ab`aaaa`[aX`aaaabaabaaba`\_UV\_]`\_\_\_V  
@HWI-EAS443:3:38:487:670#0/1  
GTGCCACAGCACAGATTGGAGGAGTAAGGATGGTGGAC  
+HWI-EAS443:3:38:487:670#0/1  
a\_a`^`^`\_XaYY[\_\_\_S[Y¥¥I[YSSSU¥¥[PFV[PRUWP  
@HWI-EAS443:3:38:508:1783#0/1  
CATCGTTTGTTCCTCCAGAGGGTTTGTCTTGTTCATT  
+HWI-EAS443:3:38:508:1783#0/1  
aba`]^bbbaaaaa]a¥baa`aaaY^^[OWWXXFT\_\_[\_`¥  
@HWI-EAS443:3:38:533:1176#0/1  
CTTTTTGATTATGGCCATATGGTCCACAGTGGTCTTAGTG  
+HWI-EAS443:3:38:533:1176#0/1  
abaaaaaaa`a`\_]aaa\_\_YGUW\_ZX\_a\_UX^QW^U^UY  
@HWI-EAS443:3:38:53:682#0/1  
GCTGTAATTGGGTATCTCATTGCCATCATCCACTTCATTC  
+HWI-EAS443:3:38:53:682#0/1  
aaab]WY^`aa]W\_\_a^^]^¥X^^^a¥W[RXUY¥Y[[¥[  
@HWI-EAS443:3:38:557:28#0/1  
AAAGAAGTCTAATGTGCGCAGTCCCGCACTCGCG  
+HWI-EAS443:3:38:557:28#0/1  
\_aaaaba`aaaaZa`a`\_a¥`a^`\_Y^WWW^V[ZYZZW  
@HWI-EAS443:3:38:568:1703#0/1  
CCCGTTTTCGTTTCATTACCAACTACGTCCCCTTGGCC  
+HWI-EAS443:3:38:568:1703#0/1  
aabaa\_aaba`a]aaaa\_\_a``aaaa`W][\_\_^^^\_G  
@HWI-EAS443:3:38:579:1087#0/1  
CACTCCAGGAGGAGAAGTGAGAAATGATGATGTTGACCAA  
+HWI-EAS443:3:38:579:1087#0/1  
a[b\_baaa`ZaWYQJ¥Wa```Y^]Y]\_R¥\_^^^\_`YVV  
@HWI-EAS443:3:38:582:126#0/1  
CGCGAGATACTCACTAAGACCACTGTGGACCATATGGCCA

+HWI-EAS443:3:38:582:126#0/1  
abaaaa`aaaa\_a\_aaaaaaaaa`a]`\_^WY^`^`\_^`^^]  
@HWI-EAS443:3:38:601:1221#0/1  
AAAGAAGTCTAATGTCGAGTCCCGCACTCGCG  
+HWI-EAS443:3:38:601:1221#0/1  
aab`aa`babXa\_\_aaaa\_aa^`\_\_a^aXUX[QXY\_^U  
@HWI-EAS443:3:38:621:838#0/1  
GCTAATTGGGCAAGGGGACGTAGTGTGGTAATGAAACGA  
+HWI-EAS443:3:38:621:838#0/1  
abaZ]aaaaaaaa`]^a\_ab\_aaVa\_\_a¥UUZ^^U\_aY¥R  
@HWI-EAS443:3:38:633:667#0/1  
TGAAGATCCAGATGAAGGCACATCTGGGGTGGAGTCTGCT  
+HWI-EAS443:3:38:633:667#0/1  
aaaaaa\_a`aa\_\_a`a`aaaa\_```a¥V\_¥X`¥^`¥¥  
@HWI-EAS443:3:38:648:869#0/1  
AAAAGAAGTCTAATGTCGAGTCCCGCACTCGC  
+HWI-EAS443:3:38:648:869#0/1  
a[W^a`Ubb``\_aa¥XN\_a`aa\_a``[XJV\_]\_`V^]\_ZV  
@HWI-EAS443:3:38:668:1647#0/1  
GTTTGGAGGTTGCCGTTAGCACTTCTTCTTCTTCTTGA  
+HWI-EAS443:3:38:668:1647#0/1  
aU`UX¥a[F[YJVV¥V`WMTKV^ZY[Q`GYUV¥]Y\_PMQ  
@HWI-EAS443:3:38:730:1191#0/1  
CTTGAAAGGATGCAGGTGCATTGACTGAAGATCCAGATG  
+HWI-EAS443:3:38:730:1191#0/1  
`^^\_bWL\_b^`a`a¥\_ZXX^bbaaa\_a\_^aYa`ZZ]]a`]  
@HWI-EAS443:3:38:752:1082#0/1  
CTGTAATTGGGTATCTCATTGCCATCATCCACTTCATTCT  
+HWI-EAS443:3:38:752:1082#0/1  
abbWaaaa`XSXa\_`Y]`a`aaa\_aa^aVZX`¥[Y¥]TW  
@HWI-EAS443:3:38:753:737#0/1  
AGTGGATGATGGCAATGAGATACCCAATTACAGCAGACAA  
+HWI-EAS443:3:38:753:737#0/1  
^bU[X^a\_P`bbU`aab`aa\_`a\_T]`\_a[\_a¥aa\_^\_W  
@HWI-EAS443:3:38:76:1283#0/1  
GTCCCGTTTTTCGTTTCATTACCAACTACGTCCCTTGC  
+HWI-EAS443:3:38:76:1283#0/1  
a`bbbb`aaaa`aabaaba]aa`aaaa`^X`^`\_BBB  
@HWI-EAS443:3:38:798:822#0/1  
GTGGATGATGGCAATGAGATACCCAATTACAGCAGACAAG  
+HWI-EAS443:3:38:798:822#0/1  
\_NZ¥RW\_SZZ\_TZY`\_TWP[S]\_Q]]Y[TVTQLS¥Y\_\_^  
@HWI-EAS443:3:38:812:568#0/1  
CTGGCCATATCTTGTCTTCTTTGCCAAAATGAGAAA  
+HWI-EAS443:3:38:812:568#0/1  
aaa]Y`b[aa\_\_VV`ab\_aa`a\_XRZ]]`¥^^[`]\_a^[¥  
@HWI-EAS443:3:38:86:694#0/1  
GCAAAACAAACGATGCTGGATCAGACCGAGTGATGGTATC  
+HWI-EAS443:3:38:86:694#0/1  
aa\_aaaba]\_aaa`aaaa\_\_^`a`]]`Z`\_U^Z`\_[U^Z[

@HWI-EAS443:3:38:883:280#0/1  
GTTTGGAGGTTGCCCGTTAGCACTTCTTCTTCTTTCTTGA  
+HWI-EAS443:3:38:883:280#0/1  
\_N\_aaa\_a`V`Z`M^^[WVZ^]\_\_\_\_\_YWU[^TLY]XV  
@HWI-EAS443:3:38:897:287#0/1  
TCTAACCTTAAAAATCGGTCAATACTCACTACCACTCTC  
+HWI-EAS443:3:38:897:287#0/1  
aabaaaabbaaaaaaaaaa]`aa`a`\_]aUX`^^\_]^[^]]T  
@HWI-EAS443:3:38:910:922#0/1  
ATGCCCATATGGTCCACAGTGGTCTTAGTGAGTATCTCGC  
+HWI-EAS443:3:38:910:922#0/1  
]a`````^X`Z]Q¥]^WWZTa]M\_\_¥XZVQUU^TSBBBB  
@HWI-EAS443:3:38:920:403#0/1  
GTCGCAGTCCCGCACTCGCGAGATACTCACTAAGACCACT  
+HWI-EAS443:3:38:920:403#0/1  
`TX^^`Z^`aY¥¥\_R]XZ]¥NTRYZVJ^SWTP^¥VZY¥0  
@HWI-EAS443:3:38:94:1680#0/1  
AATAAAAGAACTGAGAGATCTAATGTCGCAGTCCCGCACT  
+HWI-EAS443:3:38:94:1680#0/1  
K[`\_¥PXabbb`¥\_¥\_`babbab\_TVb\_ba¥UV¥Q¥\_\_`N  
@HWI-EAS443:3:38:997:1473#0/1  
AGAGAATAAAAGAACTGAGAGATCTAATGTCGCAGTCCCG  
+HWI-EAS443:3:38:997:1473#0/1  
aaaa`b\_aab`[`a\_abb\_aaaa`aaa`aYH\_ZaXX]YZS  
@HWI-EAS443:3:39:1002:1105#0/1  
GGTCCGTAACAAGTTTCTCCAGTAGCCGGCGGAACA  
+HWI-EAS443:3:39:1002:1105#0/1  
aa\_ab`ababb\_aaab^aaa`aaaa`¥`¥a`Z[^a\_S`\_W  
@HWI-EAS443:3:39:1020:605#0/1  
AAAGAACTGAGAGATCTAATGTCGCAGTCCCGCACTCGCG  
+HWI-EAS443:3:39:1020:605#0/1  
a\_`aaaabbababaabbaaaa`a\_aa^^a`U^[`\_`^[[  
@HWI-EAS443:3:39:1029:133#0/1  
AAAAGAACTGAGAGATCTAATGTCGCAGTCCCGCACTCGC  
+HWI-EAS443:3:39:1029:133#0/1  
a`bbbabbabaabaaaaaaaaab\_\_aaaa¥a\_VY¥LY¥\_`^W  
@HWI-EAS443:3:39:1038:217#0/1  
CTGGGAGAAACCTTGTTTTACGGACCAATTCTCTTTCTAG  
+HWI-EAS443:3:39:1038:217#0/1  
abbb`\_`abbaabbbabbba\_bb`aa`aa]\_\_aaa`\_`  
@HWI-EAS443:3:39:105:1103#0/1  
AAAAGAACTGAGAGATCTAATGTCGCAGTCCCGCACTCGC  
+HWI-EAS443:3:39:105:1103#0/1  
``aaa`]ba\_^Zaa\_\_a[RZ`aW\_[^¥]T`\_VZY¥^`Z[  
@HWI-EAS443:3:39:1073:513#0/1  
GATGCAGGTGCATTGACTGAAGATCCAGATGAAGGCACAT  
+HWI-EAS443:3:39:1073:513#0/1  
ZZ\_bb`¥`Y\_[bbba\_bbaaaaa\_`]aa`^ZZ]``^^aZ  
@HWI-EAS443:3:39:1074:74#0/1  
ATCATTCTCACTTCTCCTCCTGGAGTGACATCTGCTCC

+HWI-EAS443:3:39:1074:74#0/1  
ababbab`a`aabaaba`aa\_aaa^a¥a¥`^Q\_¥``W¥QM  
@HWI-EAS443:3:39:1094:1472#0/1  
CTGTCCTGAGAGGATTTCTCATTTTGGGCAAAGAAGACAA  
+HWI-EAS443:3:39:1094:1472#0/1  
YabbZ`\_a`\_]bbZaabYaRTb^aaa`]`\_a\_aa\_[a[]`  
@HWI-EAS443:3:39:1152:1331#0/1  
AGAAGTCTGAGAGATCTAATGTCGCAGTCCCGCACTCGCGAG  
+HWI-EAS443:3:39:1152:1331#0/1  
a`]^^aa]]\_[a\_`aaa]\_ZX¥aa\_WT¥`Z`UU\_a\_`X[Z  
@HWI-EAS443:3:39:1177:922#0/1  
ATGAAGTGGATGATGGCAATGAGATACCCAATTACAGCAG  
+HWI-EAS443:3:39:1177:922#0/1  
ZbaXY¥baZ^bYa`aaY]^Uaa`\_`Z[`¥PV][][SQ¥]  
@HWI-EAS443:3:39:1209:271#0/1  
AAAGAAGTCTGAGAGATCTAATGTCGCAGTCCCGCACTCGCG  
+HWI-EAS443:3:39:1209:271#0/1  
aa[aaaaaa^W^a`aaa`a]\_`\_`U\_`]^^^`\_UW  
@HWI-EAS443:3:39:1215:247#0/1  
TGTGGACCATATGGCCATAATCAAAAAGTACACATCAGGA  
+HWI-EAS443:3:39:1215:247#0/1  
[`Va]`ba[\_b^S`bbb\_R[\_¥a]bb[WH\_¥¥Y[]YWUZ]  
@HWI-EAS443:3:39:1236:1376#0/1  
AAGAAGTCTGAGAGATCTAATGTCGCAGTCCCGCACTCGCGA  
+HWI-EAS443:3:39:1236:1376#0/1  
aa`\_bbbbbb]bb`aabbaba^aaaaaZa\_a¥W\_a```\_a^  
@HWI-EAS443:3:39:1244:1239#0/1  
GCATCCTACTCTGTTCTGGTGGAGCAGCAGCAAAGGGGAG  
+HWI-EAS443:3:39:1244:1239#0/1  
aaYU]¥a¥``\_aaaa][aYU\_`VUa`][]PNRN¥\_[]\_VY  
@HWI-EAS443:3:39:1295:1067#0/1  
CTCTTGCTCTTTGCCAAAATGAGAAATCCTCTCAGGA  
+HWI-EAS443:3:39:1295:1067#0/1  
abbaba`bbaaaba]aa¥``]]]\_`a`Yaa[DR`a]\_a\_  
@HWI-EAS443:3:39:1325:1442#0/1  
AATGAAGTGTACTTGTGTTGGGCCATTCTTATTCCACCA  
+HWI-EAS443:3:39:1325:1442#0/1  
aaaaaaaaa`\_`a`aa`aa\_`]\_^[\_a\_aaa``]`\_a\_`^]]  
@HWI-EAS443:3:39:1334:1787#0/1  
GATGTCAGTATTCTTGCCCCACTTCATTTGGGAAAACAA  
+HWI-EAS443:3:39:1334:1787#0/1  
a`bba`aaaZ]\_SQ]aaa^\_Vb\_aa`a`\_aTIV]baaRaY  
@HWI-EAS443:3:39:1389:636#0/1  
GTCCCGTTTTTCGTTTCATTACCAACTACGTCCCTTGC  
+HWI-EAS443:3:39:1389:636#0/1  
^ET\_\_`LVY`^`W]T]¥XPVUZYNZOJSYVRRSVBBBBBB  
@HWI-EAS443:3:39:1441:227#0/1  
GTGGGAGATCAATGGCCCTGAGTCAGTGCTAGTCAACACT  
+HWI-EAS443:3:39:1441:227#0/1  
a\_aaa\_a`a^a\_a`^¥¥¥X^Y`YX¥^T[SWWLLSTZXUWRW



@HWI-EAS443:3:39:1466:502#0/1  
AATGTCGCAGTCCCGCACTCGCGAGATACTCACTAAGACC  
+HWI-EAS443:3:39:1466:502#0/1  
``^\_XH\_ab`N^aa`\_V]UZP¥]`^UY¥\_[MMVQXYRXU  
@HWI-EAS443:3:39:1500:1171#0/1  
AAAGAAGTGAAGATCTAATGTCGCAGTCCCGCACTCGCG  
+HWI-EAS443:3:39:1500:1171#0/1  
aaaa`abbaaa`a`aa\_aaZ¥Z```[^`^SYY\_]¥SYY  
@HWI-EAS443:3:39:1502:1422#0/1  
CGCACTCAGAATGAAGTGGATGATGGCAATGAGATACCCA  
+HWI-EAS443:3:39:1502:1422#0/1  
``\_^\_]`^abab`VY^J``¥[`ZR¥`¥Z]\_aW`BBBBBBB  
@HWI-EAS443:3:39:1552:842#0/1  
ATAGGGTTGAGGATTAGCTCATCTTTTCAGTTTTGGTGGGT  
+HWI-EAS443:3:39:1552:842#0/1  
ab\_a`aYbbabbaaaa]a\_`\_`[aa]U`^¥T]X\_Y`[aW  
@HWI-EAS443:3:39:1619:1745#0/1  
CTGTAATTGGGTATCTCATTGCCATCATCCACTTCATTCT  
+HWI-EAS443:3:39:1619:1745#0/1  
aabaa^bbb`\_`^aaaa`\_`a`\_¥`a\_a``UUY\_^\_^¥`XX  
@HWI-EAS443:3:39:1640:285#0/1  
AAAAGAAGTGAAGATCTAATGTCGCAGTCCCGCACTCGC  
+HWI-EAS443:3:39:1640:285#0/1  
a\_`ZYZZ`^a]XaZ`XbaUU]K[aaZaYXXFRLSJWRRS  
@HWI-EAS443:3:39:1644:787#0/1  
CTCGCGAGATACTCACTAAGACCACTGTGGACCATATGGC  
+HWI-EAS443:3:39:1644:787#0/1  
abbabab`ababbbbabaaaaaaaa`\_a\_Y`\_a`a`a`aX  
@HWI-EAS443:3:39:1650:500#0/1  
GGAGAAACCTTGTTTTACGGACCAATTCTTTCTAGCAT  
+HWI-EAS443:3:39:1650:500#0/1  
abaaabaaa`ab`aab\_^]`^ZaX^abaaaaY`\_a`Z^`^  
@HWI-EAS443:3:39:165:1312#0/1  
TAAACTGCCTGTTCCGCCGCTACTGGGAGAAACCTTG  
+HWI-EAS443:3:39:165:1312#0/1  
Zaa\_aaa\_W]`^`[^`baab\_R`\_]\_a^T`XPLGY^`^G]R  
@HWI-EAS443:3:39:1662:407#0/1  
GATACTCACTAAGACCACTGTGGACCATATGGCCATAATC  
+HWI-EAS443:3:39:1662:407#0/1  
aaa`][aaaaa\_]\_]aaaYaT¥^^`\_¥^Y^`NVWXWOWPD  
@HWI-EAS443:3:39:1690:1224#0/1  
GGCAAGGGGACGTAGTGTGGTAATGAAACGAAACGGGA  
+HWI-EAS443:3:39:1690:1224#0/1  
aa\_]¥a\_]\_]`^V]a)`[¥a]GUZTML\_]YNRVZ]VZUZL  
@HWI-EAS443:3:39:1733:1160#0/1  
AAAGAAGTGAAGATCTAATGTCGCAGTCCCGCACTCGCG  
+HWI-EAS443:3:39:1733:1160#0/1  
abba¥^abaaaa^abba\_a``\_]``XZa^V[^a]Y]ZW  
@HWI-EAS443:3:39:1761:1081#0/1  
GTCCCGTTTTGTTTTATTACCAACTACGTCCTTGCC

+HWI-EAS443:3:39:1761:1081#0/1  
`]]`Yb\_aaa\_b^aa`a^\_]`¥\_aY\_``\_XVV`RVVVRU  
@HWI-EAS443:3:39:1773:529#0/1  
ACTCACTAAGACCACTGTGGACCATATGGCCATAATCAAAA  
+HWI-EAS443:3:39:1773:529#0/1  
¥ababb`bbbabb^`ab`baa]\_W\_\_^bb`¥Va\_aSX]``  
@HWI-EAS443:3:39:179:1730#0/1  
CGAGCAGTCAATTGCTGAGGCAATAATTGTGGCCATGGTA  
+HWI-EAS443:3:39:179:1730#0/1  
aXSY`[ZP\_`^Y\_[a\_\_`YY\_```\_]X^\_VVYa¥ONWNJS  
@HWI-EAS443:3:39:183:1002#0/1  
TAATGTGCTAATTGGGCAAGGGGACGTAGTGTGGTAATG  
+HWI-EAS443:3:39:183:1002#0/1  
\_QQ]YS`WX]R][^SY\_\_[\_]ZRQ¥aUL¥[\_VVBBBBBBB  
@HWI-EAS443:3:39:248:738#0/1  
GTCTGCTGCTCTGAGAGGATTTCTCATTGTTGGGCAAAGAA  
+HWI-EAS443:3:39:248:738#0/1  
a[aaa`aa`aaa^^`aaaT¥`\_`\_`\_`[^\_\_^\_[^MW`\_`\_`  
@HWI-EAS443:3:39:287:1613#0/1  
TCCAGATGAAGGCACATCTGGGGTGGAGTCTGCTGCTCCTG  
+HWI-EAS443:3:39:287:1613#0/1  
`ba]aaaaba\_\_aaaa\_a`Z\_PKWZ\_\_^a`¥W\_\_¥¥Y\_[  
@HWI-EAS443:3:39:294:1230#0/1  
AAATTGCATCCTACTCTGTTCTGGTGGAGCAGCAGCAAAG  
+HWI-EAS443:3:39:294:1230#0/1  
\_\_X]^^aZ`U[aRXbaZGYZYb`XS¥\_`b\_¥¥WZQGR\_]`  
@HWI-EAS443:3:39:319:164#0/1  
AGGGGACGTAGTGTGGTAATGAAACGAAAACGGGACTCT  
+HWI-EAS443:3:39:319:164#0/1  
`bbbaaba\_abZbaaba]`\_¥\_^¥\_]Y^`[GZ[YRTY^W  
@HWI-EAS443:3:39:345:1109#0/1  
AAAGAAGTGAAGATCTAATGTCGCAGTCCCCTGCTCGCG  
+HWI-EAS443:3:39:345:1109#0/1  
^aa]Xaa```a\_\_\_`aaa\_a`W`\_aa`Z^a`Q^Z\_¥¥^\_¥  
@HWI-EAS443:3:39:36:1357#0/1  
CACTCGGTCTGATCCAGCATCGTTTGTGTTTGTCTCCAGAGG  
+HWI-EAS443:3:39:36:1357#0/1  
aaa`aa`S\_¥QUX¥`X^[Y¥\_]P[[]RT¥¥]PRT\_`RUYZY  
@HWI-EAS443:3:39:439:1197#0/1  
CAAGGACAAACCCTCTGGAGCAAACAAACGATGCTGGAT  
+HWI-EAS443:3:39:439:1197#0/1  
a`¥VSa\_]a[¥\_aZ`^\_]RXW]\_X¥\_¥^V^ZTWWZZUWW  
@HWI-EAS443:3:39:483:1045#0/1  
CCCCGTTTTGTTTTATTACCAACTACGTCCCCTTGCCC  
+HWI-EAS443:3:39:483:1045#0/1  
\_a`\_[XW\_\_a`^Z\_a¥¥```R¥Z^]\_Z¥L^SX`[[`\_OL  
@HWI-EAS443:3:39:511:1257#0/1  
GTCCCCTTTTTGTTTTATTACCAACTACGTCCCCTTGCC  
+HWI-EAS443:3:39:511:1257#0/1  
a```ab`aa^^]]`a`X]X]a``V\_`[[`UR\_\_`\_XTXN

@HWI-EAS443:3:39:549:753#0/1  
TCCCGTTTTCGTTTCATTACCAACTACGTCCTCCCTTGCC  
+HWI-EAS443:3:39:549:753#0/1  
aa`ab]``aaa\_aaaa``]``Y``[V[^UVX^\_^]]Y  
@HWI-EAS443:3:39:554:750#0/1  
GGCCATATCTCTTGTCTTCTTTGCCAAAATGAGAAATCC  
+HWI-EAS443:3:39:554:750#0/1  
]babWZ^Y`bba`\_Zb`ba`a\_V]a`ZG\_IZRY`\_aa^`V  
@HWI-EAS443:3:39:559:231#0/1  
TAATGTCGCAGTCCCGCACTCGCGAGATACTCACTAAGAC  
+HWI-EAS443:3:39:559:231#0/1  
aaaab`\_a\_P`¥^^]`a[\_^U^^^^¥V^]VVVV¥^WWWQ  
@HWI-EAS443:3:39:570:1096#0/1  
TTTGGTTGCCTTGTGTAATTGAATACTGGAGAATTGCCT  
+HWI-EAS443:3:39:570:1096#0/1  
aa[]\_¥W`\_``a\_aa\_a`^^`Xa\_U[]\_U]X]^Y\_^Y  
@HWI-EAS443:3:39:575:1443#0/1  
TTAGGGACAAGAGACTGAAATGGTTCAAATCCATTTTGT  
+HWI-EAS443:3:39:575:1443#0/1  
`b^RIQ¥Y`\_\_\_Y`[^¥¥]R`a`Y\_b^ZV^^XaVWVX[\_  
@HWI-EAS443:3:39:592:62#0/1  
GCCTTCATCTGGATCTTCAGTCAATGCACCTGCATCCTTT  
+HWI-EAS443:3:39:592:62#0/1  
a`Y¥\_\_\_^^^PQPRV][RSTUQ]VQVYVYSGTYYYVSVY  
@HWI-EAS443:3:39:595:1877#0/1  
CTTCATACCCTTCATGACTCTTATTTTCAGTGTGGAG  
+HWI-EAS443:3:39:595:1877#0/1  
L\_¥bb`bbb`bb``aabbbbaabbbbbbab`a`baaaX\_\_  
@HWI-EAS443:3:39:60:620#0/1  
AAACAAACGATGCTGGATCAGACCGAGTGATGGTATCACC  
+HWI-EAS443:3:39:60:620#0/1  
UKa\_W`aa\_aZZWbZZ[[\_`[RT\_U[^¥R[IUWRXOMTD  
@HWI-EAS443:3:39:622:425#0/1  
AATTGGGCAAGGGGACGTAGTGTGGTAATGAAACGAAAA  
+HWI-EAS443:3:39:622:425#0/1  
\_\_ab`^[a`aba^a\_a`Y^aX`\_^]aV¥[XNM^\_\_^ZZ\_[  
@HWI-EAS443:3:39:623:1711#0/1  
TGCTGTAATTGGGTATCTCATTGCCATCATCCACTTCATT  
+HWI-EAS443:3:39:623:1711#0/1  
¥¥`aa\_a`abaY`^aaa`aa\_WPY``aaa``0aa`\_``^  
@HWI-EAS443:3:39:623:574#0/1  
GAGAAATCCTCTCAGGACAGCAGACTCCACCCAGATGTG  
+HWI-EAS443:3:39:623:574#0/1  
aaaabbbaaaaaaaaaa`^a`^``\_`\_\_\_\_`^[W\_¥¥¥^¥UU  
@HWI-EAS443:3:39:627:378#0/1  
CTAATGTCGCAGTCCCGCACTCGCGAGATACTCACTAAGA  
+HWI-EAS443:3:39:627:378#0/1  
aaaa`a]aaa`aY^a[^aYZT]TZ]S]ZQTXSW¥Y[^^^V  
@HWI-EAS443:3:39:645:749#0/1  
CATCATTTCTCACTTCTCCTCCTGGAGTGACATCTGCTC

+HWI-EAS443:3:39:645:749#0/1  
aaba``aba`aaaaa¥\_\_a\_]PY[^`¥\_Y`\_a¥^Y¥Y  
@HWI-EAS443:3:39:64:599#0/1  
CCCTGAGTCAGTGCTAGTCAACACTTATCAATGGATAATC  
+HWI-EAS443:3:39:64:599#0/1  
``abbbbaa\_a\_\_ba]a\_bbbbaa`aa\_L]ab`¥¥¥Z`\_  
@HWI-EAS443:3:39:650:839#0/1  
TAATGTGCGCAGTCCCGCACTCGCGAGATACTCACTAAGAC  
+HWI-EAS443:3:39:650:839#0/1  
ab`Z\_aba``V\_bbab`a`aa\_aaaYV^^JL`\_aa]^aS  
@HWI-EAS443:3:39:656:769#0/1  
CTTGTGACCATTGAATTTTCACAATTTCCCAGTTCCTGAT  
+HWI-EAS443:3:39:656:769#0/1  
\_S\_WR`X`a\_a\_a\_X`Z¥`\_a]V¥^Y^\_[YVZ^\_V¥[^  
@HWI-EAS443:3:39:706:1101#0/1  
GTCCCGTTTTCGTTTTATTACCAACTACGTCCCTTGC  
+HWI-EAS443:3:39:706:1101#0/1  
`ababbaabbab^aaaa`a\_aaaa\_`aaY\_\_a\_\_^YY  
@HWI-EAS443:3:39:749:1518#0/1  
GGGACGTAGTGTGGTAATGAAACGAAAACGGGACTCTAG  
+HWI-EAS443:3:39:749:1518#0/1  
UR\_[`Z¥V¥Z``Z^¥Z`[XYZ`LZT`]`[\_QZXXVV¥\_N  
@HWI-EAS443:3:39:74:1678#0/1  
GTCGCAGTCCCGCACTCGCGAGATACTCACTAAGACCACT  
+HWI-EAS443:3:39:74:1678#0/1  
aa\_X\_¥`b¥]W][R`¥]XOX]TH^QZH^ZNZHSWZ\_]U  
@HWI-EAS443:3:39:752:899#0/1  
GTCATGTGCGGCAGTATTCCGATCATTCCCATCACATTGT  
+HWI-EAS443:3:39:752:899#0/1  
`ab\_aaab\_`^`aaaXaaaa`a]`aaa[¥¥V`a\_\_a\_V  
@HWI-EAS443:3:39:755:778#0/1  
GGGGACGTAGTGTGGTAATGAAACGAAAACGGGACTCTA  
+HWI-EAS443:3:39:755:778#0/1  
abaa¥ab`Xa¥a`ab`X\_]aZ[a`\_^Z`a¥¥^`Z^\_^\_W  
@HWI-EAS443:3:39:772:621#0/1  
AAGAAGTGTGAGATCTAATGTGCGCAGTCCCGCACTCGCGA  
+HWI-EAS443:3:39:772:621#0/1  
\_aaa[`bbba``baa`[bba\_baabaZ^a`[S[\_^]^^^U  
@HWI-EAS443:3:39:77:78#0/1  
CCCGTTTTCGTTTTATTACCAACTACGTCCCTTGGCC  
+HWI-EAS443:3:39:77:78#0/1  
aaaa]aa`aa``a`Z[ ]\_\_Y^`\_^`\_UY]]X]XVY]XY  
@HWI-EAS443:3:39:80:1940#0/1  
GCTGACTTTATCCCTCTCAGCGACATCTCCGTGCTTGGG  
+HWI-EAS443:3:39:80:1940#0/1  
aba`abbbabbabababaaaaabZaaba`abaZ¥^aa^YTP  
@HWI-EAS443:3:39:832:1426#0/1  
GGGGACGTAGTGTGGTAATGAAACGAAAACGGGACTCTA  
+HWI-EAS443:3:39:832:1426#0/1  
YFV¥]X`Wa^Xa\_] ]Z`a¥XZ[aPUG]\_[DKZ\_TULYRR

@HWI-EAS443:3:39:840:1127#0/1  
GTCCCCGTTTTCGTTTCATTACCAACTACGTCCCCCTTGC  
+HWI-EAS443:3:39:840:1127#0/1  
]]baaa[`baaaaabb`a`a`a\_aa^Y^`ZR^aaa]`VU  
@HWI-EAS443:3:39:855:565#0/1  
GAAAAGCACTTTTGCATCTTTTTGGAAATGCCTCAAGAGT  
+HWI-EAS443:3:39:855:565#0/1  
a`````aa^a^Ya\_\_aa`\_`a`\_`^U]T\_]`\_G^\_Z]^`W  
@HWI-EAS443:3:39:877:1234#0/1  
CTAATGTCGCAGTCCCGCACTCGCGAGATACTCACTAAGA  
+HWI-EAS443:3:39:877:1234#0/1  
aaabaa^baa^]UYaa¥aXXXaaa^`^Y¥UU¥WW^\_V]XT  
@HWI-EAS443:3:39:880:1595#0/1  
AATAAAAGAAGTCTAATGTCGCAGTCCCGCACT  
+HWI-EAS443:3:39:880:1595#0/1  
a^]\_ab`a`\_`aa^L`^`\_a^aW\_WVZ^`\_a0^UaU\_YRV  
@HWI-EAS443:3:39:922:1443#0/1  
ATAGGGTTGAGGATTAGCTCATCTTTTCAGTTTTGGTGGGT  
+HWI-EAS443:3:39:922:1443#0/1  
a`^W\_aTXYXRZZ]\_ba^]W\_baaa^Z\_QQYX]W`NWOOF  
@HWI-EAS443:3:39:932:1249#0/1  
GCTGTAATTGGGTATCTCATTGCCATCATCCACTTCATTC  
+HWI-EAS443:3:39:932:1249#0/1  
\_a`^]`^abb```¥`a`a]^a^`aaaa`b\_ba¥\_a`]^a[R  
@HWI-EAS443:3:3:1052:788#0/1  
ATCTAATGTCGCAGTCCCGCACTCGCGAGATACTCACTAA  
+HWI-EAS443:3:3:1052:788#0/1  
`Z`W\_\_\_a]0[[\_`\_\_SI^\_YQ[]¥YVWaa¥RZVGY¥W\_\_B  
@HWI-EAS443:3:3:1060:1100#0/1  
TGCTGTCCTGAGAGGATTTCTCATTTTGGGCAAAGAAGAC  
+HWI-EAS443:3:3:1060:1100#0/1  
\_X\_b`Ta]Y\_`a`^`0\_``¥^Y[`aa\_\_a¥[Y^`^`^[\_Y  
@HWI-EAS443:3:3:1092:271#0/1  
AAAGAAGTCTAATGTCGCAGTCCCGCACTCGCG  
+HWI-EAS443:3:3:1092:271#0/1  
a]Yba¥R^]\_Z^aZ^G\_\_\_\_\_aY^aXZ\_LFLRXW^NVRZBB  
@HWI-EAS443:3:3:1093:1926#0/1  
AGAAGTCTAATGTCGCAGTCCCGCACTCGCGAG  
+HWI-EAS443:3:3:1093:1926#0/1  
a`\_a\_```a`a`\_W\_\_W``YS^¥\_[ZW¥WYWYWUSUGZBB  
@HWI-EAS443:3:3:1096:1639#0/1  
TGGGCAAGGGGACGTAGTGTGGTAATGAAACGAAAACGG  
+HWI-EAS443:3:3:1096:1639#0/1  
ab^\_[a`¥\_]`\_`\_b\_]aS`\_`¥[N[\_\_\_U`\_NVX]\_\_TUB  
@HWI-EAS443:3:3:1144:145#0/1  
CTCACTAAGACCACTGTGGACCATATGGCCATAATCAAAA  
+HWI-EAS443:3:3:1144:145#0/1  
`a\_aZaaZa^WT]^`T\_a`a¥^a``aaXY[]^[[NWR¥B  
@HWI-EAS443:3:3:1155:455#0/1  
GAGAGATCTAATGTCGCAGTCCCGCACTCGCGAGATACTC

+HWI-EAS443:3:3:1155:455#0/1  
a` ``a\_a¥a\_aaaW\_[V\_aQ¥¥\_^UYYZW¥W]V^TNTS[B  
@HWI-EAS443:3:3:1156:636#0/1  
GCCATTCTATTCCACCATGTTACGGCCAGAGGTGATACC  
+HWI-EAS443:3:3:1156:636#0/1  
a`a`aaa\_aaaa\_\_`¥¥\_aa\_\_\_\_\_`\_]^^Y^Z¥W^U¥ZQB  
@HWI-EAS443:3:3:1215:784#0/1  
GAGAGATCTAATGTCGCAGTCCCGCACTCGCGAGATACTC  
+HWI-EAS443:3:3:1215:784#0/1  
aaaabab\_baaab\_\_`^`a]^\_a\_Z]^\_[\_[a¥a¥^ZS¥W  
@HWI-EAS443:3:3:1243:496#0/1  
AAAGAACTGAGAGATCTAATGTCGCAGTCCCGCACTCGCG  
+HWI-EAS443:3:3:1243:496#0/1  
a`b`R¥a]^`]Wa^`b\_]\_YabW^`¥a\_PZY\_`]YQVX`UV  
@HWI-EAS443:3:3:1244:1764#0/1  
AAAGAACTGAGAGATCTAATGTCGCAGTCCCGCACTCGCG  
+HWI-EAS443:3:3:1244:1764#0/1  
`G`]a^`\_a\_S[`\_\_[\_aX`WPTWG^]BBBBBBBBBBBBB  
@HWI-EAS443:3:3:1334:1645#0/1  
ATAAAAGAACTGAGAGATCTAATGTCGCAGTCCCGCACTC  
+HWI-EAS443:3:3:1334:1645#0/1  
ab`a`^a[`Nb[`\_`a]b^ba`\_aZ^a¥a\_\_XU[XN^BBB  
@HWI-EAS443:3:3:1373:110#0/1  
AAAAGAACTGAGAGATCTAATGTCGCAGTCCCGCACTCGC  
+HWI-EAS443:3:3:1373:110#0/1  
a`aa\_`a]aaaU`a]^`^a\_ZaaVZZ\_Z\_YWYWW¥UYBBB  
@HWI-EAS443:3:3:1388:1390#0/1  
AAAAGAACTGAGAGATCTAATGTCGCAGTCCCGCACTCGC  
+HWI-EAS443:3:3:1388:1390#0/1  
abbbbXbbbabba[bbababbbaaaYaa``\_aa`\_¥TXa^  
@HWI-EAS443:3:3:1394:67#0/1  
AATAAAAGAACTGAGAGATCTAATGTCGCAGTCCCGCACT  
+HWI-EAS443:3:3:1394:67#0/1  
abbab``\_¥¥`a`^aaba`¥\_a`ab]Y\_LZaWNV][QYTV  
@HWI-EAS443:3:3:139:991#0/1  
AAAAGAACTGAGAGATCTAATGTCGCAGTCCCGCACTCGC  
+HWI-EAS443:3:3:139:991#0/1  
`bbbbbbbaabbbbaabaababb\_\_ab\_a¥^R`X^N\_XBBB  
@HWI-EAS443:3:3:1402:463#0/1  
CTAATGTGCTAATTGGGCAAGGGACGTAGTGTGGTAAT  
+HWI-EAS443:3:3:1402:463#0/1  
aa````R^Kbaaa`````a[ba^]UXbUN¥Raaa\_ZU¥XB  
@HWI-EAS443:3:3:1408:1270#0/1  
GAATAAAAGAACTGAGAGATCTAATGTCGCAGTCCCGCAC  
+HWI-EAS443:3:3:1408:1270#0/1  
`^`aa^`\_]`Y\_a\_`aZa`^aa^`aV^]]^`¥YY^VRXB  
@HWI-EAS443:3:3:1416:721#0/1  
ATTCAATCCCCAGTTCTGGAAAAGCACTTTTGCATCTTT  
+HWI-EAS443:3:3:1416:721#0/1  
V``X[L[``\_`b\_`X`\_]`[`ba`a`R`a\_aaa`IT`Ka]a

@HWI-EAS443:3:3:1418:198#0/1  
CTTGTCTTCTTTGCCCAAATGAGAAATCCTCTCAGGACA  
+HWI-EAS443:3:3:1418:198#0/1  
aaba]Z`^]aaaaZSS]aaa¥\_\_a\_\_a`[]aQ\_\_` `[US^  
@HWI-EAS443:3:3:1422:787#0/1  
CGTTTTCGTTTTATTACCAACTACGTCCCCTTGCCCAA  
+HWI-EAS443:3:3:1422:787#0/1  
ab\_]bbaaW`babaa`abbaaabbaa``¥Waa`aWY^\_`  
@HWI-EAS443:3:3:1460:630#0/1  
TGAGAAATCCTCTCAGGACAGCAGACTCCACCCAGATGT  
+HWI-EAS443:3:3:1460:630#0/1  
abbababbaabaa``aaaaa`ab`aa\_`a¥\_ZV``¥^\_¥  
@HWI-EAS443:3:3:1471:439#0/1  
CTTTCAAAAGGACAAGCGGATCATCAGTCAAGAAAGA  
+HWI-EAS443:3:3:1471:439#0/1  
aaa`^\_\_\_baba`^a`ba\_]V[\_\_\_^a[ST`a^¥Z¥[]\_X  
@HWI-EAS443:3:3:1480:1615#0/1  
AAACGACTTACAGTTCTTGAAAGGATGCAGGTGCATTGA  
+HWI-EAS443:3:3:1480:1615#0/1  
aba\_`aaaa[ab\_aYbabb\_^aaa\_^a^aaZa]]^`a\_  
@HWI-EAS443:3:3:1480:662#0/1  
CTAGAGTCCCGTTTTCTTTTATTACCAACTACGTCCC  
+HWI-EAS443:3:3:1480:662#0/1  
`b\_]\_H0baJT^abaaaKaa]a`aa]]aa\_aSa`^aTROJ  
@HWI-EAS443:3:3:1520:431#0/1  
TCCTCCTTATTTTAACTTGATTCTGAAGTGGACAGGGCC  
+HWI-EAS443:3:3:1520:431#0/1  
aZH`a]aZ\_`bbbaa\_abbaa``aaaa\_`]`aa\_`a^aZW  
@HWI-EAS443:3:3:1525:1253#0/1  
GTCTGCTGTCTGAGAGATTTCTCATTGTTGGGCAAAGAA  
+HWI-EAS443:3:3:1525:1253#0/1  
X\_ZVaVab[]aba`b]\_babbabaG[a`a`abZS`\_aab\_  
@HWI-EAS443:3:3:1549:710#0/1  
ATCCAGCATCGTTTGTGTTTCTCCAGAGGGTTTGTCTTG  
+HWI-EAS443:3:3:1549:710#0/1  
a^XW`UV¥Kb^ab]a^[ZVKR]]aa`aaa]]a`^PS]^a  
@HWI-EAS443:3:3:1561:703#0/1  
TAAAAGAACTGAGAGATCTAATGTCGCAGTCCCGCACTCG  
+HWI-EAS443:3:3:1561:703#0/1  
`ba^\_`ZOTW`UZYaT[aa`a\_^UL^G[]^\_`MX^ZZV\_B  
@HWI-EAS443:3:3:1642:924#0/1  
GAATAAAAGAACTGAGAGATCTAATGTCGCAGTCCCGCAC  
+HWI-EAS443:3:3:1642:924#0/1  
a]aa`\_a`^¥aU`a[`]a^`]`^U\_aXV`G\_\_]]VV¥VYB  
@HWI-EAS443:3:3:1758:1042#0/1  
AAAGAACTGAGAGATCTAATGTCGCAGTCCCGCACTCGCG  
+HWI-EAS443:3:3:1758:1042#0/1  
a\_JYY\_]\_aa`aXa`Ua\_^aaU\_`U`BBBBBBBBBBBBBB  
@HWI-EAS443:3:3:1758:1401#0/1  
GTTCTGAAAAGCACTTTTGCATCTTTTGGAAATGCCTC

+HWI-EAS443:3:3:1758:1401#0/1  
aaaabaaaaabaa^`aaa^`a^aa\_aa\_a\_\_a\_aW^]X  
@HWI-EAS443:3:3:176:1335#0/1  
GTCCCGTTTTTCGTTTCATTACCAACTACTCGTCCCCTTGC  
+HWI-EAS443:3:3:176:1335#0/1  
a\_aaaaZ\_aaa^\_\_S[aa\_a`\_`a\_aX]a]]Y\_^U\_YYZX  
@HWI-EAS443:3:3:192:1241#0/1  
AAAAGAAGTGGAGATCTAATGTCGCAGTCCCGCACTCGC  
+HWI-EAS443:3:3:192:1241#0/1  
`aaabaa\_baaa`aaaaabaaa\_a\_aaa\_ZZ`[]X]]X\_R  
@HWI-EAS443:3:3:261:1043#0/1  
AGAATAAAAGAAGTGGAGATCTAATGTCGCAGTCCCGCA  
+HWI-EAS443:3:3:261:1043#0/1  
abaa\_abWabaa`a` `abUa^aa\_aa\_\_¥aa` `]a\_\_¥^  
@HWI-EAS443:3:3:262:812#0/1  
CCCGTTTTTCGTTTCATTACCAACTACTCGTCCCCTTGGCC  
+HWI-EAS443:3:3:262:812#0/1  
^¥bZTZ^]\_a\_b\_[a` `b`\_Za`aab`\_]aa`a`\_R`  
@HWI-EAS443:3:3:276:1710#0/1  
CAACCCTGATCCTCTCACATTCACAGTCAATGAGGAAAAT  
+HWI-EAS443:3:3:276:1710#0/1  
`ab]¥aZb\_]T\_YKYR]]Y`]\_aaaaS`^^aa^]\_a]a]a  
@HWI-EAS443:3:3:289:1130#0/1  
ATAAAAGAAGTGGAGATCTAATGTCGCAGTCCCGCACTC  
+HWI-EAS443:3:3:289:1130#0/1  
aaaaaa`\_a`a^`\_aa` `aaaaab]^`Vaa[]]\_\_]RPNR  
@HWI-EAS443:3:3:337:160#0/1  
GATGTGTACTTTTTGATTATGGCCATATGGTCCACAGTGG  
+HWI-EAS443:3:3:337:160#0/1  
aabKaaaaabbaaabaaaa`aa`aa`\_\_Y`QWW`Z^^G`\_  
@HWI-EAS443:3:3:360:1434#0/1  
ACTCACTAAGACCACTGTGGACCATATGGCCATAATCAAAA  
+HWI-EAS443:3:3:360:1434#0/1  
T¥^¥`aab^ab\_ba\_a]\_b`\_aa\_[a[a^`Z\_Y]`\_GX^`  
@HWI-EAS443:3:3:377:1179#0/1  
TGGGAATGATCGGAATACTGCCCCGACATGACCCCAAGCAC  
+HWI-EAS443:3:3:377:1179#0/1  
a`\_babaabbaaTababaa\_Ua\_bbaa]a\_]`Xa` `XXa  
@HWI-EAS443:3:3:388:1012#0/1  
ACTAAGACCACTGTGGACCATATGGCCATAATCAAAAAGT  
+HWI-EAS443:3:3:388:1012#0/1  
a\_bba^a` `aa`]\_^`\_a¥` ` `\_]S]\_VV]\_]\_]\_RL  
@HWI-EAS443:3:3:396:438#0/1  
TTCCTGATGTGTACTTTTTGATTATGGCCATATGGTCCAC  
+HWI-EAS443:3:3:396:438#0/1  
abZZ^a\_\_a`b\_a`a]b\_b`\_aa\_\_`^PZG\_XGWWW[BB  
@HWI-EAS443:3:3:399:155#0/1  
GGGGACGTAGTGTGGTAATGAAACGAAAACGGGACTCTA  
+HWI-EAS443:3:3:399:155#0/1  
a\_]aRNa¥]`\_aX`\_`LW¥¥`^^\_V`X]WUTZ^^ZUMBBB



@HWI-EAS443:3:3:407:1176#0/1  
AAGAGAATAATGGACATGATTCCAGAGAGGAATGAACAAG  
+HWI-EAS443:3:3:407:1176#0/1  
ab^\_aaaaaaaa`\_aaaaa\_\_\_\_\_a`\_\_\_\_aa\_^]\_\_`  
@HWI-EAS443:3:3:450:1444#0/1  
GAATAAAAGAACTGAGAGATCTAATGTCGCAGTCCCGCAC  
+HWI-EAS443:3:3:450:1444#0/1  
aa[\_V\_aaaa`\_a`\_aaa\_Y^\_^UaaV\_T^`\_VV\_\_a#^[  
@HWI-EAS443:3:3:466:1661#0/1  
ATGGTATTCTCACAAGAGGATTGCATGATCAAGGCAGTTA  
+HWI-EAS443:3:3:466:1661#0/1  
ab¥[`b\_bb^`\_RZaaR[\_aHaUa\_^a[UG``^BBBBBBB  
@HWI-EAS443:3:3:500:1621#0/1  
GATCAATGGCCCTGAGTCAGTGCTAGTCAACACTTATCAA  
+HWI-EAS443:3:3:500:1621#0/1  
abbabaaX^aa`ab`aIba`X\_\_^`aXa\_`¥^UWW^`WRa  
@HWI-EAS443:3:3:535:504#0/1  
TTCAAATTCCATTTTGTGTATAACATTGTGGGATCTTGT  
+HWI-EAS443:3:3:535:504#0/1  
aaabb^b\_^a\_aaaa`\_aaa\_`a[``aa^a`aaa^a\_\_\_\_  
@HWI-EAS443:3:3:579:553#0/1  
CACTCGCGAGATACTCACTAAGACCACTGTGGACCATATG  
+HWI-EAS443:3:3:579:553#0/1  
aab`ba`aYba`^Z]\_aa`^aa^]T^^adWa``\_\_X^a^`  
@HWI-EAS443:3:3:738:2006#0/1  
CAAAATGAGAAATCCTCTCAGGACAGCAGACTCCACCCCA  
+HWI-EAS443:3:3:738:2006#0/1  
abaabbb^bbbaba`baaabb\_b\_a\_\_aaa]a\_`a#NJYa  
@HWI-EAS443:3:3:763:1221#0/1  
GTGGGTTCACTTTCAAAGGACAAGCGGATCATCAGTCAA  
+HWI-EAS443:3:3:763:1221#0/1  
aW`a\_W`\_^Za^`Z]\_\_]\_[W^U^\_^\_ZZW^]UU\_ZMTN  
@HWI-EAS443:3:3:829:785#0/1  
CCCGTTTTCGTTTTATTACCAACTACGTCCCCTTGCCC  
+HWI-EAS443:3:3:829:785#0/1  
a\_aa`XYXa]Va[L])`Y^\_Q[\_^R^VR[TFFNRN^¥TSP  
@HWI-EAS443:3:3:842:1386#0/1  
AAAGAACTGAGAGATCTAATGTCGCAGTCCCGCACTCGCG  
+HWI-EAS443:3:3:842:1386#0/1  
`b¥aaY¥aaa^[\_a]Y\_`a`aN\_]QR^][[MVWR][[X\_  
@HWI-EAS443:3:3:861:1544#0/1  
CTTGAAAGGATGCAGGTGCATTGACTGAAGATCCAGATG  
+HWI-EAS443:3:3:861:1544#0/1  
`bbbbbbbbbba^abb\_baabbbb\_abaaaaa]aaaaa  
@HWI-EAS443:3:3:87:1181#0/1  
AAAGAACTGAGAGATCTAATGTCGCAGTCCCGCACTCGCG  
+HWI-EAS443:3:3:87:1181#0/1  
a[aa`V\_`X¥X\_`^Y[]¥^`^ULYJMXVHZLPVXPRKBBB  
@HWI-EAS443:3:3:890:2026#0/1  
AAAGAACTGAGAGATCTAATGTCGCAGTCCCGCACTCGCG

+HWI-EAS443:3:3:890:2026#0/1  
aa]\_\_a`])`a\_a^aWVSaa^\_NZ¥T`YQSWT¥QVQNQYBB  
@HWI-EAS443:3:3:896:283#0/1  
ATCTGCTCCCAGCACGTCCCTTGGGTTAAGTGCAACACTT  
+HWI-EAS443:3:3:896:283#0/1  
\_`\_aaX`\_\_`\_)¥]\_XTZV)`aaaV`\_`\_W[FR]U¥NR[  
@HWI-EAS443:3:3:902:625#0/1  
CCCGTTTTTCGTTTCATTACCAACTACGTCCCCTTGCCC  
+HWI-EAS443:3:3:902:625#0/1  
aaababbbabbbb]bbba^bbaabb^b\_]a^aba\_] ]  
@HWI-EAS443:3:3:953:25#0/1  
CGCGAGATACTACTAAGACCACTGTGGACCATATGGCCA  
+HWI-EAS443:3:3:953:25#0/1  
aa\_babaa`Tb\_aQa`aba`Za`a`\_a]`YU`\_\_\_\_`\_MTU  
@HWI-EAS443:3:3:973:1526#0/1  
TGCTGTAATTGGGTATCTCATTGCCATCATCCACTTCATT  
+HWI-EAS443:3:3:973:1526#0/1  
ababb¥])aaaaM`aX[`aaaba\_\_`¥a\_\_`a^a]Q^^\_  
@HWI-EAS443:3:3:97:398#0/1  
GAGAGAATAAAAGAACTGAGAGATCTAATGTCGCAGTCCC  
+HWI-EAS443:3:3:97:398#0/1  
aaa`baaaaa`\_`\_`Xaaaaa`\_V^a`aaUX^\_]VY[UV  
@HWI-EAS443:3:40:1001:1079#0/1  
AGAGAATAAAAGAACTGAGAGATCTAATGTCGCAGTCCCG  
+HWI-EAS443:3:40:1001:1079#0/1  
¥`¥aaab\_bbb`\_`L`bbbbbb`ba\_UabaabWZ\_\_b¥b`  
@HWI-EAS443:3:40:1037:879#0/1  
AAAGAACTGAGAGATCTAATGTCGCAGTCCCGCACTCGCG  
+HWI-EAS443:3:40:1037:879#0/1  
`bbaabbbbaY^bbb`ba`aaRab\_aa\_baa¥\_I\_[`^b\_  
@HWI-EAS443:3:40:1046:855#0/1  
TCCCGTTTTTCGTTTCATTACCAACTACGTCCCCTTGCC  
+HWI-EAS443:3:40:1046:855#0/1  
¥UY[aaaa`a]Z\_[`¥]\_ZXR[REK`\_`\_VNN[]RTU[R  
@HWI-EAS443:3:40:1061:715#0/1  
AGAGAATAAAAGAACTGAGAGATCTAATGTCGCAGTCCCG  
+HWI-EAS443:3:40:1061:715#0/1  
abababbb[U¥ba`aabbaa\_aba[FYa^`a\_T\_]a\_b\_  
@HWI-EAS443:3:40:1072:283#0/1  
CTAATGTCGCAGTCCCGCACTCGCGAGATACTACTAAGA  
+HWI-EAS443:3:40:1072:283#0/1  
a`babaaWaabb^abaaaW\_aaa`\_Z¥WZ`[\_a`YZTaa\_  
@HWI-EAS443:3:40:1093:1090#0/1  
AAAGAACTGAGAGATCTAATGTCGCAGTCCCGCACTCGCG  
+HWI-EAS443:3:40:1093:1090#0/1  
aabaaabaaa`aaaaaaaaa[a\_Z`ZZ`\_[W[L^W`^`^`  
@HWI-EAS443:3:40:1097:387#0/1  
TGATGGCAATGAGATACCAATTACAGCAGACAAGAGAAT  
+HWI-EAS443:3:40:1097:387#0/1  
abaabaaaaa`aa`aaaabaab`a\_a`\_`\_aQ]`a\_\_\_\_

@HWI-EAS443:3:40:109:298#0/1  
GAGAATAGCTGTTGCTCTTCTCCCAACCATTGTGAATTCT  
+HWI-EAS443:3:40:109:298#0/1  
abbababbaba]aaaa\_`^a`aUZ¥\_K^^`\_¥HQV`Y`  
@HWI-EAS443:3:40:1167:715#0/1  
CTAATGTCGCAGTCCCGCACTCGCGAGATACTCACTAAGA  
+HWI-EAS443:3:40:1167:715#0/1  
abbbbabbaaaaa]ababbaba`a`]`]\_\_`aaaaaa[`\_  
@HWI-EAS443:3:40:1181:866#0/1  
GTATCTCATTGCCATCATCCACTTCATTCTGAGTGCGGGG  
+HWI-EAS443:3:40:1181:866#0/1  
a]Ya\_ba```]\_`\_`^[aa`V^a`UZY[\_`]X]YY\_`[\_]  
@HWI-EAS443:3:40:1211:110#0/1  
GGGCAAGGGGACGTAGTGTGGTAATGAAACGAAAACGGG  
+HWI-EAS443:3:40:1211:110#0/1  
a`]W¥¥`a\_\_UYaUW\_W^U¥^^VWWT SRUWSWVWUWVW  
@HWI-EAS443:3:40:1222:931#0/1  
CTCCAATCTGTGTGCTGTGGCACATTTCCAAGAGAGATGC  
+HWI-EAS443:3:40:1222:931#0/1  
`babbbbbb\_baaaa`aa`aaaa\_baa[a\_a`aV^`¥  
@HWI-EAS443:3:40:1223:189#0/1  
GGTGGTTCACTTTCAAAGGACAAGCGGATCATCAGTCA  
+HWI-EAS443:3:40:1223:189#0/1  
aa]a\_a^¥^`Z^^ZUZ][¥`\_¥^¥¥]^SSRTZVYYYW¥W  
@HWI-EAS443:3:40:1231:1494#0/1  
CATGATTCCAGAGAGGAATGAACAAGGACAAACCCTCTGG  
+HWI-EAS443:3:40:1231:1494#0/1  
aabbaabaaY`^aabaaaaab]\_ba`]bbbaa`abaaaa]  
@HWI-EAS443:3:40:1260:420#0/1  
CTCGGTCTGATCCAGCATCGTTTGTGTTTGTCCAGAGGGT  
+HWI-EAS443:3:40:1260:420#0/1  
abbba\_bbbbbbaabaabbaabb`b\_b`aaa`a`Z`aa\_  
@HWI-EAS443:3:40:127:1341#0/1  
CTAATGTCGCAGTCCCGCACTCGCGAGATACTCACTAAGA  
+HWI-EAS443:3:40:127:1341#0/1  
[a`a\_]`X\_]Yaa¥U\_K\_V]U]]PNYLZVS^]]N¥]T¥  
@HWI-EAS443:3:40:1287:1587#0/1  
AAAGAAGTCTGAGATCTAATGTCGCAGTCCCGCACTCGCG  
+HWI-EAS443:3:40:1287:1587#0/1  
Z\_WWV[\_]T`\_U\_]P\_Y]a\_]ZY¥H¥¥a¥VUPHXO\_¥a`  
@HWI-EAS443:3:40:1309:1695#0/1  
TCCCGTTTTCGTTTCATTACCAACACTACGTCCCCTTGCC  
+HWI-EAS443:3:40:1309:1695#0/1  
a`aa`Z`ab]\_]a¥V¥]aaaa`aaU]\_b[Z\_aab¥^U¥T  
@HWI-EAS443:3:40:1315:587#0/1  
AAAAGAAGTCTGAGAGATCTAATGTCGCAGTCCCGCACTCGC  
+HWI-EAS443:3:40:1315:587#0/1  
\_`^[[\_T\_bb\_b`^[]`\_\_ba\_`UHP¥DY``aa\_`ZROX  
@HWI-EAS443:3:40:1336:1374#0/1  
CTTGGGTTAAGTGAACACTTCAATATAAACACTGCCTGT

+HWI-EAS443:3:40:1336:1374#0/1  
^b]`\_bb`b`ababaabababa\_`bb])a`bbbabbbaa  
@HWI-EAS443:3:40:1363:632#0/1  
ACGACTTACAGTTCTTGGAAAGGATGCAGGTGCATTGACT  
+HWI-EAS443:3:40:1363:632#0/1  
aab][aa``a^a^a`\_^¥\_a`^^^```VV^]\_`Y\_^]\_  
@HWI-EAS443:3:40:1373:601#0/1  
AAAGAAGTCTAATGTCGCAGTCCCGCACTCGCG  
+HWI-EAS443:3:40:1373:601#0/1  
`Z\_PI`aaW¥^`^]aa\_Ya^`b`NX\_[a¥YP^X`PZP¥^  
@HWI-EAS443:3:40:1382:1349#0/1  
AACGACTTACAGTTCTTGGAAAGGATGCAGGTGCATTGAC  
+HWI-EAS443:3:40:1382:1349#0/1  
`[[aaaa`a`a]¥\_a`a`\_`\_^¥ZV^`]^^X`\_`^^^\_  
@HWI-EAS443:3:40:1384:259#0/1  
CTCCCACATCATTGATGACGAATAAGTTATTGTCAACTTC  
+HWI-EAS443:3:40:1384:259#0/1  
abbabbabb\_babaaaa\_abaa`a`aZaaaa\_``aaa\_]`  
@HWI-EAS443:3:40:1386:439#0/1  
TAAAAGAAGTCTAATGTCGCAGTCCCGCACTCG  
+HWI-EAS443:3:40:1386:439#0/1  
¥\_¥a`¥Z¥H\_\_`bW`a^SaY`aONU`a\_FLMW¥\_¥^^]X  
@HWI-EAS443:3:40:1392:971#0/1  
CCCGCACTCAGAATGAAGTGGATGATGGCAATGAGATACC  
+HWI-EAS443:3:40:1392:971#0/1  
^aabbaZ]bVabbbb`ab¥bbbbbaaba\_a\_abaaUaab]  
@HWI-EAS443:3:40:1401:1356#0/1  
CTGGGCCATATCTTGTCTTCTTTGCCAAAATGAGAAA  
+HWI-EAS443:3:40:1401:1356#0/1  
^^ZP\_[`[[ba]`N`^W\_U\_\_R`a[\_\_\_H\_\_`a¥a\_XU^IR  
@HWI-EAS443:3:40:1442:486#0/1  
AGGGGACGTAGTGTGGTAATGAAACGAAAACGGGACTCT  
+HWI-EAS443:3:40:1442:486#0/1  
aa¥\_\_¥a¥`\_¥^¥`b\_\_Y]a`X]VZOTYJZUJ^\_WMRQ]L  
@HWI-EAS443:3:40:1447:1693#0/1  
CGCACTCGCGAGATACTCACTAAGACCACTGTGGACCATA  
+HWI-EAS443:3:40:1447:1693#0/1  
^\_\_abb\_baaabb`aababa`a^`]Hbbba^N[V]aa\_\_a  
@HWI-EAS443:3:40:1456:437#0/1  
TGGGAATGATCGGAATACTGCCCCGACATGACCCCAAGCAC  
+HWI-EAS443:3:40:1456:437#0/1  
aabaaaaaaa\_aa`aaaaa`aa\_QO\_\_`^`^a[U\_XMT  
@HWI-EAS443:3:40:1463:1861#0/1  
TCCTGATGTGACTTTTTGATTATGGCCATATGGTCCACA  
+HWI-EAS443:3:40:1463:1861#0/1  
a`\_`[\_`\_¥^Y`]aaaa`Ya`a\_]Xa]a]ZXUZW[^Y\_X  
@HWI-EAS443:3:40:1465:1980#0/1  
TCATCTACTCCATTTTGCTGACTCTTATCCCTCTCAGCG  
+HWI-EAS443:3:40:1465:1980#0/1  
\_aba¥aaZa`^`aaa\_a`\_]a`Z¥\_a`\_T`^a\_a`Z`[

@HWI-EAS443:3:40:1527:792#0/1  
AAAAGAAGTCTAATGTTCGAGTCCCGCACTCGC  
+HWI-EAS443:3:40:1527:792#0/1  
`b`ab\_bab`a`[\_aaaaabab]\_\_LZa\_[Q]V]HXYV`^  
@HWI-EAS443:3:40:1531:1658#0/1  
AGAGAATAAAAGAACTGAGAGATCTAATGTTCGAGTCCCG  
+HWI-EAS443:3:40:1531:1658#0/1  
ab]baaaaaa`\_`\_`aa[aaa`\_\_YP¥a^X[]]^[\_`X  
@HWI-EAS443:3:40:1553:97#0/1  
GCCATATCTTGTCTTCTTTGCCAAAATGAGAAATCCT  
+HWI-EAS443:3:40:1553:97#0/1  
a`\_¥\_¥Z¥\_¥\_\_ZYY^]Y^¥\_^¥YWUG[HVYVW¥YWYWIW  
@HWI-EAS443:3:40:1569:1215#0/1  
AGAGAATAAAAGAACTGAGAGATCTAATGTTCGAGTCCCG  
+HWI-EAS443:3:40:1569:1215#0/1  
abbbabbbbab`bbbbbaabaa\_S\_b`\_`\_¥a``¥a\_  
@HWI-EAS443:3:40:1589:1787#0/1  
CGCGAGATACTACTAAGACCACTGTGGACCATATGGCCA  
+HWI-EAS443:3:40:1589:1787#0/1  
aabbbb\_\_a^ab`bbbbaaaab\_a^`\_SW\_¥``a\_]Ra]  
@HWI-EAS443:3:40:1607:1149#0/1  
CTCGAGATACTACTAAGACCACTGTGGACCATATGGC  
+HWI-EAS443:3:40:1607:1149#0/1  
]bbbb\_abaabbbbabbaababbaa]b`abbaaY]aa^  
@HWI-EAS443:3:40:1612:362#0/1  
TGCTGACTTTATCCCTCTCAGCGACATCTCCGTGCTTGG  
+HWI-EAS443:3:40:1612:362#0/1  
aaabaaaa]baaa``]]\_\_\_\_`\_]\_`¥TQa¥\_Z`¥aY\_[\_Y  
@HWI-EAS443:3:40:1614:1053#0/1  
AAAGAAGTCTAATGTTCGAGTCCCGCACTCGCG  
+HWI-EAS443:3:40:1614:1053#0/1  
aa`¥^a\_aYaaa`\_a`aaaa`aa[X`^b]S\_YOZ`\_`\_a^  
@HWI-EAS443:3:40:1642:1201#0/1  
CTGTGGACCATATGGCCATAATCAAAAAGTACACATCAGG  
+HWI-EAS443:3:40:1642:1201#0/1  
aa^`a\_aababb``````abab`a`aXaaTaab`^^`aa  
@HWI-EAS443:3:40:1675:1594#0/1  
ATTGACAAAGTTCAGATCGCCCCTAACTGCCTTGATCATG  
+HWI-EAS443:3:40:1675:1594#0/1  
```aaabab`¥Za^]a\_aa\_\_`aaa`\_b````Q```aa`a`\_^  
@HWI-EAS443:3:40:1693:241#0/1  
AAAGAAGTCTAATGTTCGAGTCCCGCACTCGCG  
+HWI-EAS443:3:40:1693:241#0/1  
[````b^a¥\_b`^`b`aa`bbX]aR`^^bZVa^PXH¥^`V  
@HWI-EAS443:3:40:169:1101#0/1  
TTCCTGATGTGACTTTTTGATTATGGCCATATGGTCCAC  
+HWI-EAS443:3:40:169:1101#0/1  
aabaaaa^Ya\_a\_a`aaa]^`[\_YSaa^0[YY¥Ra^^Y  
@HWI-EAS443:3:40:1701:172#0/1  
GGATTTCTCATTTTGGGCAAAGAAGACAAGAGATATGGCC

+HWI-EAS443:3:40:1701:172#0/1  
``^`\_\_\_\_]T[^\_a^`Z^]Y^]\_AY]Z¥V[\_Z\_XYYU^W]X  
@HWI-EAS443:3:40:1701:1757#0/1  
ACTCACTAAGACCACTGTGGACCATATGGCCATAATCAAA  
+HWI-EAS443:3:40:1701:1757#0/1  
`¥¥abbaa``VG¥a]ab¥`abaaV\_aba¥ZW]RYY\_^YaJ  
@HWI-EAS443:3:40:1715:1284#0/1  
AGAGAATAAAAGAACTGAGAGATCTAATGTCGCAGTCCCG  
+HWI-EAS443:3:40:1715:1284#0/1  
abababbabaaaaaabbabbab`a^Zab\_^aaaa\_a\_a¥  
@HWI-EAS443:3:40:1751:319#0/1  
GAATAAAAGAACTGAGAGATCTAATGTCGCAGTCCCGCAC  
+HWI-EAS443:3:40:1751:319#0/1  
a]\_a^aS]¥[X][`ZZ\_[US]X^W¥TIU\_¥BBBBBBBBBB  
@HWI-EAS443:3:40:188:1850#0/1  
ATTCAATTCCCCAGTTCTGGAAAAGCACTTTTGCATCTTT  
+HWI-EAS443:3:40:188:1850#0/1  
abaaaaaba`aZ]^aa^¥^abba\_¥H\_]a[^[bY\_aa^]  
@HWI-EAS443:3:40:196:635#0/1  
TCCCGTTTTCGTTTCATTACCAACTACGTCCCTTGCC  
+HWI-EAS443:3:40:196:635#0/1  
aa^a`]^`a^\_`\_`a\_`\_`a\_`\_`XWX¥\_]^Va\_XYV\_]`  
@HWI-EAS443:3:40:226:1150#0/1  
CCGCACTCAGAATGAAGTGGATGATGGCAATGAGATACCC  
+HWI-EAS443:3:40:226:1150#0/1  
aabbabaab`aa`ba`ZY]]a```]]\_\_SK\_^a`U]b[b`  
@HWI-EAS443:3:40:240:1231#0/1  
CTCAGAATGAAGTGGATGATGGCAATGAGATACCCAATTA  
+HWI-EAS443:3:40:240:1231#0/1  
aa\_X\_U]ZV[]a]K\_aYaV]V]ZXU\_¥[^¥WV\_a¥RZ\_N]  
@HWI-EAS443:3:40:276:1219#0/1  
ATCTAATGTCGCAGTCCCGCACTCGCGAGATACTCACTAA  
+HWI-EAS443:3:40:276:1219#0/1  
a[^`\_Z]aaJ[^[]`¥`a[T\_\_\_^]Y^TPYRYZ`ZWJY[Y]  
@HWI-EAS443:3:40:352:1618#0/1  
AAAGAACTGAGAGATCTAATGTCGCAGTCCCGCACTCGCG  
+HWI-EAS443:3:40:352:1618#0/1  
aa^`[]]a`aX¥[a\_\_\_`aaa¥Z^Z`aYYaaZRUL¥¥aTaR  
@HWI-EAS443:3:40:35:1397#0/1  
CGTTTTCGTTTCATTACCAACTACGTCCCTTGCCCAA  
+HWI-EAS443:3:40:35:1397#0/1  
ab^`abbb`aabb`a\_aaa\_a^aba¥^aa[^`^U^a^¥W]  
@HWI-EAS443:3:40:404:867#0/1  
GTTCCGCCGGCTACTGGGAGAAACCTTGTTTTACGGACCA  
+HWI-EAS443:3:40:404:867#0/1  
a`\_`\_`\_`\_]W^`WLZ\_YNYUQaV[UUZU[V`WXUWUUUY  
@HWI-EAS443:3:40:423:164#0/1  
CTCGCGAGATACTCACTAAGACCACTGTGGACCATATGGC  
+HWI-EAS443:3:40:423:164#0/1  
aa``baaa`a`\_\_aaaaYaaa``\_\_^^^]]\_\_UTZ¥]]]

@HWI-EAS443:3:40:444:175#0/1  
CTAATGTCGCAGTCCCGCACTCGCGAGATACTCACTAAGA  
+HWI-EAS443:3:40:444:175#0/1  
aaTL¥¥KXX`V`¥^Y`a¥STPBBBBBBBBBBBBBBBBBBB  
@HWI-EAS443:3:40:463:1069#0/1  
GTCCCGTTTTCGTTTCATTACCAACTACGTCCCCTTGC  
+HWI-EAS443:3:40:463:1069#0/1  
aX\_\_ZXY\_a\_`T\_¥]`\_\_]`XXXOP]YWGJUUX\_^Y^OVRY  
@HWI-EAS443:3:40:46:684#0/1  
TCATTTCTCACTTCTCCTCCTGGAGTGTACATCTGCTCCC  
+HWI-EAS443:3:40:46:684#0/1  
aaabaaaaaaaaaaaaa`aa`a\_\_\_¥^UT` `a`UV^V^\_]`  
@HWI-EAS443:3:40:502:481#0/1  
CATTATTCTCTTGTCTGCTGTAATTGGGTATCTCATTGCC  
+HWI-EAS443:3:40:502:481#0/1  
`\_aY` `` `¥\_a`aZaa\_\_^\_ZX^\_a¥XXMZ\_\_\_\_`^SY\_]X  
@HWI-EAS443:3:40:50:1137#0/1  
GAACTGTACTTGTGTTGGGCCATTCTCATTCCACCATGT  
+HWI-EAS443:3:40:50:1137#0/1  
aXTXV[OV]V¥YSXQU[QUZUNPUWWWG[^]ZT[[RW[S  
@HWI-EAS443:3:40:532:2006#0/1  
TCTTGTCTTCTTTGCCCAAATGAGAAATCCTCTCAGGAC  
+HWI-EAS443:3:40:532:2006#0/1  
`]S¥` `aaa`\_aU[]aabaaa` `\_[[H\_Z[P^\_¥`\_a\_Z`Y  
@HWI-EAS443:3:40:544:1034#0/1  
AAAGAACTGAGAGATCTAATGTCGCAGTCCCGCACTCGCG  
+HWI-EAS443:3:40:544:1034#0/1  
`^^\_Wab\_Q`]aaaaaa`a`Zb\_`XXT`\_\_Z^H^T`Z`¥  
@HWI-EAS443:3:40:582:1970#0/1  
AAAGAACTGAGAGATCTAATGTCGCAGTCCCGCACTCGCG  
+HWI-EAS443:3:40:582:1970#0/1  
a`a[`aaaaVba]^R\_a[aaTa^\_a¥¥a\_VU`Y^YaGaW  
@HWI-EAS443:3:40:583:166#0/1  
ATCATTCTCACTTCTCCTCCTGGAGTGTACATCTGCTCC  
+HWI-EAS443:3:40:583:166#0/1  
aaaaaaaaaaaa`aa`aa` `\_^a` `¥`W`U`^^[`¥^\_W\_T  
@HWI-EAS443:3:40:586:1151#0/1  
CCCGCACTCAGAATGAAGTGGATGATGGCAATGAGATACC  
+HWI-EAS443:3:40:586:1151#0/1  
¥aaXa¥¥bb\_[ba`b`[aH\_\_aaaa\_baZ\_Y\_M\_YS`ba  
@HWI-EAS443:3:40:607:258#0/1  
TCTCTTGTCTGCTGTAATTGGGTATCTCATTGCCATCATC  
+HWI-EAS443:3:40:607:258#0/1  
aabbbab\_aaaaab\_`aaaaaaU\_`¥VaZ¥`\_a`ZY\_QT`  
@HWI-EAS443:3:40:613:105#0/1  
CCGTTTTCGTTTCATTACCAACTACGTCCCCTTGCCCA  
+HWI-EAS443:3:40:613:105#0/1  
a]babb]aaabbaa]bbbbaaa`a\_a^YW`^a`Z^V]ZX¥  
@HWI-EAS443:3:40:622:1382#0/1  
GAGATCTAATGTCGCAGTCCCGCACTCGCGAGATACTCAC

+HWI-EAS443:3:40:622:1382#0/1  
V\_RRO\_a¥\_`¥`a¥ab\_QZ¥aZa^T]`a`\_]\_aRZ`YYXS  
@HWI-EAS443:3:40:629:1218#0/1  
GATCTAATGTCGCAGTCCCCGACTCGCGAGATACTCACTA  
+HWI-EAS443:3:40:629:1218#0/1  
[ab]`bZbZ``aZ]\_aa^[U]a[VSYHV[Q]MVZ^`X\_  
@HWI-EAS443:3:40:662:1685#0/1  
GAACTGAGAGATCTAATGTCGCAGTCCCCGACTCGCGAGA  
+HWI-EAS443:3:40:662:1685#0/1  
[V\_V\_a`bWU\_[`abaaaVb]]`a]Rababaa[b\_a\_]\_a  
@HWI-EAS443:3:40:665:954#0/1  
AAGAAGTCTAATGTCGCAGTCCCCGACTCGCGA  
+HWI-EAS443:3:40:665:954#0/1  
a`b\_\_aaa`bb\_\_`abaaa^`aa`[Wa\_\_\_aSaWaW`\_\_  
@HWI-EAS443:3:40:679:1094#0/1  
CAGTGGTCTTAGTGAGTATCTCGCGAGTGGGGACTGCGA  
+HWI-EAS443:3:40:679:1094#0/1  
abbbaba\_b`ba\_a`ab```\_]``\_`R`Xaa\_H^Zaaa^  
@HWI-EAS443:3:40:679:180#0/1  
GCACTCGGAGATACTACTAAGACCACTGTGGACCATAT  
+HWI-EAS443:3:40:679:180#0/1  
a`¥`\_]\_Y[[^^[^][YTRS[WSYWRNYNNSSBBBBBBB  
@HWI-EAS443:3:40:742:560#0/1  
AAAAGAAGTCTAATGTCGCAGTCCCCGACTCGC  
+HWI-EAS443:3:40:742:560#0/1  
^^bbb`babbbabbbbabbbb```\_`QaVa`babUa¥a`a  
@HWI-EAS443:3:40:788:1396#0/1  
TTCCTGATTATCCATTGATAAGTGTGACTAGCACTGACT  
+HWI-EAS443:3:40:788:1396#0/1  
aaaaaaaa`a`````a`````\_`ZaZ\_Y`a\_\_\_a\_`X^\_`]  
@HWI-EAS443:3:40:797:222#0/1  
CTGCTGTAATTGGTATCTCATTGCCATCATCCACTTCAT  
+HWI-EAS443:3:40:797:222#0/1  
^PJU`¥SSTa]b\_aI`\_`b`^^Z¥¥ZO¥]QWaaT`[\_YRZ  
@HWI-EAS443:3:40:827:1434#0/1  
AAACTTTGGTCAACATCATCTTCTCACTTCTCCTCCTG  
+HWI-EAS443:3:40:827:1434#0/1  
a`a`aaaa]\_aa\_a^\_a\_\_`\_\_\_^\_\_```\_\_\_`^a\_^  
@HWI-EAS443:3:40:931:95#0/1  
ATTCCAGAGAGGAATGAACAAGGACAAACCCTCTGGAGCA  
+HWI-EAS443:3:40:931:95#0/1  
abb`^\_b`b[b^¥bbaa¥\_TZaa`\_`\_\_\_]Z\_a]`^]\_\_^  
@HWI-EAS443:3:40:951:614#0/1  
AAAGAAGTCTAATGTCGCAGTCCCCGACTCGCG  
+HWI-EAS443:3:40:951:614#0/1  
^^bbVXYabaabaab\_abaabaa\_XaV¥a`\_]\_YH^\_[[]\_  
@HWI-EAS443:3:40:996:1712#0/1  
AAAAGAAGTCTAATGTCGCAGTCCCCGACTCGC  
+HWI-EAS443:3:40:996:1712#0/1  
aa`a\_aa[a`a\_aaa\_abaabaa^`WWJWU^\_\_W`^`¥ZWZ



@HWI-EAS443:3:42:1007:2001#0/1  
GAATAAAAGAACTGAGAGATCTAATGTCGCAGTCCCGCAC  
+HWI-EAS443:3:42:1007:2001#0/1  
aVZV`bbaXb\_aaa\_b\_QYUZbbaXbX¥\_bbaS^aaSaa\_  
@HWI-EAS443:3:42:1028:1179#0/1  
GGGGACGTAGTGTGGTAATGAAACGAAAACGGGACTCTA  
+HWI-EAS443:3:42:1028:1179#0/1  
\_a]\_^`b\_aa[``b]a\_aaV0[bbaa^Z\_]X[]¥^¥[^N[  
@HWI-EAS443:3:42:1035:1159#0/1  
TAACTGCCTTGATCATGCAATCCTCTTGTGAGAATACCAT  
+HWI-EAS443:3:42:1035:1159#0/1  
aab\_baYV¥\_aaaY``a^\_a\_¥aa^`a[\_]\_]Y¥Z`\_`]  
@HWI-EAS443:3:42:1047:256#0/1  
GTGGTCTTAGTGAGTATCTCGCGAGTGCGGGACTGCGACA  
+HWI-EAS443:3:42:1047:256#0/1  
aabb`abbab^a`a\_a``¥Ua¥`¥ZL]Y`aaZ^^`\_`S¥^  
@HWI-EAS443:3:42:1052:812#0/1  
GTGGAATAGGAATGGCCCAACAACAAGTACAGTTCATTAC  
+HWI-EAS443:3:42:1052:812#0/1  
a`aa`aabbaaab`aaaaa\_\_ba`aaa^a`aa`\_`baaa\_  
@HWI-EAS443:3:42:1059:981#0/1  
GTCCCGTTTTTCGTTTTATTACCAACTACGTCCCCTTGC  
+HWI-EAS443:3:42:1059:981#0/1  
\_\_b\_ab\_aaa`b`\_a]aa````a\_\_a\_a`Y\_Y\_\_]X]^  
@HWI-EAS443:3:42:106:473#0/1  
AATAAAAGAACTGAGAGATCTAATGTCGCAGTCCCGCACT  
+HWI-EAS443:3:42:106:473#0/1  
\_bb\_aabbaaaa`baabaaaa^R^a]aaaaY`\_`\_`aP`^  
@HWI-EAS443:3:42:1100:1669#0/1  
GTCCCGTTTTTCGTTTTATTACCAACTACGTCCCCTTGC  
+HWI-EAS443:3:42:1100:1669#0/1  
a\_aPabU`[YX`0\_]\_]\_NZ`\_^\_\_X`\_aZ\_\_YVUY]]¥^Y  
@HWI-EAS443:3:42:1101:973#0/1  
ATCCAGATGAAGGCACATCTGGGGTGGAGTCTGCTGTCCT  
+HWI-EAS443:3:42:1101:973#0/1  
abb`baaa``aaaaa\_a`\_aa`aaWa`\_\_Z`\_`\_\_aW\_\_^  
@HWI-EAS443:3:42:1104:355#0/1  
CGTTTTTCGTTTTATTACCAACTACGTCCCCTTGCCCAA  
+HWI-EAS443:3:42:1104:355#0/1  
`aaab`^a`bb^bbbaaaba\_babbbba``V\_aaba`aaa  
@HWI-EAS443:3:42:1120:1311#0/1  
GGGAGAAACCTTGTGTTTACGGACCAATTCTTTCTAGCA  
+HWI-EAS443:3:42:1120:1311#0/1  
`baaaabbaabbbabbaaaba\_aJ^Za]\_a\_bb\_\_``[Za  
@HWI-EAS443:3:42:1144:1932#0/1  
GTCCCGTTTTTCGTTTTATTACCAACTACGTCCCCTTGC  
+HWI-EAS443:3:42:1144:1932#0/1  
\_Y^V]¥ZX[]S¥Y]`XSa\_]TQ]`^][\_`^¥Y^[UTV]XUX  
@HWI-EAS443:3:42:1169:1058#0/1  
CTCCGTGCTTGGGGTCATGTCGGGAGTATTCCGATCATT

+HWI-EAS443:3:42:1169:1058#0/1  
aabba`bbaabaa\_\_aaaa\_aa]F¥aa^aa`\_`]^\_\_a\_`  
@HWI-EAS443:3:42:1181:870#0/1  
ATCTGCTCCCAGCACGTCCCTTGGGTAAAGTGCAACACTT  
+HWI-EAS443:3:42:1181:870#0/1  
V\_ba`WZ\_VZ^VZ\_WW`L]Va\_SZH\_V\_]\_ZT0`X\_a`a  
@HWI-EAS443:3:42:1191:937#0/1  
CTGCTGTAATTGGGTATCTCATTGCCATCATCCACTTCAT  
+HWI-EAS443:3:42:1191:937#0/1  
aaa`abaaaabab]`ab`a\_a\_a^]^^a`aa\_\_`\_aaaa  
@HWI-EAS443:3:42:1195:1429#0/1  
CCCGCACTCAGAATGAAGTGGATGATGGCAATGAGATACC  
+HWI-EAS443:3:42:1195:1429#0/1  
Z\_^]\_U\_X[^`aab`a\_Z]^]YWQUY\_LaXUO[F[MYaZT  
@HWI-EAS443:3:42:120:641#0/1  
GAATAAAAGAAGTGAAGATCTAATGTCGCAGTCCCGCAC  
+HWI-EAS443:3:42:120:641#0/1  
a[aa\_aaaa[\_`a\_`aa`¥`a\_`a^`\_\_\_\_Y\_¥^V]H[  
@HWI-EAS443:3:42:1230:396#0/1  
AAAGGATGCAGGTGCATTGACTGAAGATCCAGATGAAGGC  
+HWI-EAS443:3:42:1230:396#0/1  
aababa\_aaabaUba¥a\_aaabb\_a\_\_`aab`a\_¥a`  
@HWI-EAS443:3:42:1248:538#0/1  
TGGCAATGAGATACCCAATTACAGCAGACAAGAGAATAAT  
+HWI-EAS443:3:42:1248:538#0/1  
S¥^Z¥^\_\_`\_`[\_`^aaa`\_\_`\_`\_]a`aa^b`a\_a`Z`]  
@HWI-EAS443:3:42:1259:1333#0/1  
CTCGCGAGATACTCACTAAGACCACTGTGGACCATATGGC  
+HWI-EAS443:3:42:1259:1333#0/1  
aabbaba]aaaababaaba\_`ba`aa]a\_a`a¥]``aa]  
@HWI-EAS443:3:42:1281:1786#0/1  
ACTCGCGAGATACTCACTAAGACCACTGTGGACCATATGG  
+HWI-EAS443:3:42:1281:1786#0/1  
aba`aaaa`aab`b```aaaaaaaaaab\_aaa\_`\_aa`a]  
@HWI-EAS443:3:42:1298:972#0/1  
TGGGCCATATCTCTTGTCTTCTTTGCCAAAATGAGAAAT  
+HWI-EAS443:3:42:1298:972#0/1  
abababbbababbabbaabb`aa\_`aabX^aaaaa`aa  
@HWI-EAS443:3:42:1302:912#0/1  
CGCACTCAGAATGAAGTGGATGATGGCAATGAGATACCCA  
+HWI-EAS443:3:42:1302:912#0/1  
Y^`V[\_Y[¥]P\_`bbaZ`bW[`abaX¥\_`^\_I]\_¥[W¥`a  
@HWI-EAS443:3:42:1310:1110#0/1  
ACATCTGCTCCCAGCACGTCCCTTGGGTAAAGTGCAACAC  
+HWI-EAS443:3:42:1310:1110#0/1  
a`TZ¥ZX^^]X¥\_\_`ZZUTS¥V¥X\_N]\_VGQZV\_^TUK  
@HWI-EAS443:3:42:1324:1365#0/1  
AGAGGATTTCTCATTTTGGGCAAAGAAGACAAGAGATATG  
+HWI-EAS443:3:42:1324:1365#0/1  
aabba[\_`baaba`aab\_a^^a[PZ]a`\_]\_`a¥a\_`a\_aa^

@HWI-EAS443:3:42:1376:1678#0/1  
GAGAATAAAAGAACTGAGAGATCTAATGTCGCAGTCCCCGC  
+HWI-EAS443:3:42:1376:1678#0/1  
`^bZaa\_U\_YVW\_Y]^aS]^a`^`^`a^V\_`^`R[aZ¥P[  
@HWI-EAS443:3:42:1392:1949#0/1  
GAATAAAAGAACTGAGAGATCTAATGTCGCAGTCCCCGCAC  
+HWI-EAS443:3:42:1392:1949#0/1  
^X¥RW]aWL[aZ`^`a¥S]^Xaa[^]]¥M[a`T]S`a\_[U  
@HWI-EAS443:3:42:1409:1692#0/1  
GAACTGTACTTGTGTGGGCCATTCTATTCCACCATGT  
+HWI-EAS443:3:42:1409:1692#0/1  
[S]bY¥\_aaab^\_YX[S¥KXW¥\_`a\_aa]ZaaY[[a\_[Y  
@HWI-EAS443:3:42:1429:1019#0/1  
GTCGCAGTCCCCCACTCGCGAGATACTCACTAAGACCACT  
+HWI-EAS443:3:42:1429:1019#0/1  
aa`aaba\_a\_a[^X\_a`^aaZ`^ZV^\_`¥¥`^\_V\_\_\_Y^V  
@HWI-EAS443:3:42:143:1335#0/1  
GCAATAGGGTTGAGGATTAGCTCATCTTTCAGTTTTGGTG  
+HWI-EAS443:3:42:143:1335#0/1  
abbababb`bbaaaabaab\_baaaaa\_aa\_aa\_a\_]\_  
@HWI-EAS443:3:42:1456:1390#0/1  
ATCTAATGTCGCAGTCCCCCACTCGCGAGATACTCACTAA  
+HWI-EAS443:3:42:1456:1390#0/1  
ababb\_\_a]¥`aZX^a\_YR^Z\_a¥¥\_\_a]¥]V]VWZ\_\_a  
@HWI-EAS443:3:42:1509:1232#0/1  
TCCCGTTTTCGTTTCATTACCAACTACGTCCCCTTGCC  
+HWI-EAS443:3:42:1509:1232#0/1  
a`\_a`abaa`^b[\_abaa]\_a\_`aaaa`\_YW^a\_a]a\_\_  
@HWI-EAS443:3:42:1542:160#0/1  
GCGAGATACTCACTAAGACCACTGTGGACCATATGGCCAT  
+HWI-EAS443:3:42:1542:160#0/1  
aaU[a[TVY]¥ZZ]^`\_ZZ^ZZ^\_UVSYPXZ]YNTQWYYP  
@HWI-EAS443:3:42:1567:388#0/1  
AAAAGAACTGAGAGATCTAATGTCGCAGTCCCCCACTCGC  
+HWI-EAS443:3:42:1567:388#0/1  
aU\_babM[aVb`aVa[Ga`ab\_PSS][bZY\_aa`Qa`]V^  
@HWI-EAS443:3:42:1568:791#0/1  
GCTGTCTGAGAGATTTCTATTTTGGGCAAAGAAGACA  
+HWI-EAS443:3:42:1568:791#0/1  
¥\_]\_^`bX¥\_a\_abb`bbbaaab[``abaZaa^a\_baaa`  
@HWI-EAS443:3:42:1580:69#0/1  
ATTGTGGGATCTTGTGACCATTTGAATTTTCACAATTTCCC  
+HWI-EAS443:3:42:1580:69#0/1  
abbbabbbab¥bbaabbaabbbbaabbabababaaaaaaa[  
@HWI-EAS443:3:42:1587:1291#0/1  
CAATCCCCAGTTCTGGAAAAGCACTTTTGCATCTTTTGTG  
+HWI-EAS443:3:42:1587:1291#0/1  
aa]^`bb^]b¥aaa`aa¥^b\_¥^a\_bb[¥`[`ZP\_aa`a^  
@HWI-EAS443:3:42:1590:1781#0/1  
CAATCCCCAGTTCTGGAAAAGCACTTTTGCATCTTTTGTG

+HWI-EAS443:3:42:1590:1781#0/1  
`bbbbbaabaa`bbbba`bbb`aa^baaab¥ab^aaabba  
@HWI-EAS443:3:42:160:1334#0/1  
CCAGAGGGTTTGCCTTGTTCATTCTCTCTGGAATCATG  
+HWI-EAS443:3:42:160:1334#0/1  
abbba`bb^aaaaa`baaaaaababaaaaba\_aaaaaaa  
@HWI-EAS443:3:42:166:1991#0/1  
TCCCGTTTTTCGTTTCATTACCAACTACGTCCCCTTGCC  
+HWI-EAS443:3:42:166:1991#0/1  
^ab`\_PWa¥[SXYIWZTM¥[TObV]]H]\_W^`a\_^BBBBB  
@HWI-EAS443:3:42:1675:1973#0/1  
ATCAAACCTTTGGTCAACATCATCATTCTCACTTCTCCTC  
+HWI-EAS443:3:42:1675:1973#0/1  
ababbbababbb\_`ba`aa\_aaaabbbab`a]aaZaa\_a`  
@HWI-EAS443:3:42:1689:604#0/1  
GAACCCCGCACTCAGAATGAAGTGGATGATGGCAATGAGA  
+HWI-EAS443:3:42:1689:604#0/1  
aaa`\_a\_a\_\_^`Z\_`¥¥`aY^`T`\_Y^`¥¥`¥WVU^^¥\_Y  
@HWI-EAS443:3:42:1716:1542#0/1  
GTCCCGTTTTTCGTTTCATTACCAACTACGTCCCCTTGCC  
+HWI-EAS443:3:42:1716:1542#0/1  
H]S`U¥`\_`bab\_]aab`abb]aa`a`aa]a`^¥Raa\_a¥  
@HWI-EAS443:3:42:1747:1330#0/1  
GGGTTCACCTTCAAAGGACAAGCGGATCATCAGTCAAGA  
+HWI-EAS443:3:42:1747:1330#0/1  
`b`^a^`\_bab`aaaaa\_Ua`a^]\_\_`^\_aW^`]\_`\_a]  
@HWI-EAS443:3:42:252:2038#0/1  
CCCGTTTTTCGTTTCATTACCAACTACGTCCCCTTGCCC  
+HWI-EAS443:3:42:252:2038#0/1  
a``a]`aa```\_]a[`aa^T\_a\_]`[^`^`V`^`\_XS[a\_a  
@HWI-EAS443:3:42:275:196#0/1  
GTGGAGTCTGCTGTCCTGAGAGGATTTCTCATTTTGGGCA  
+HWI-EAS443:3:42:275:196#0/1  
aL¥^¥YY\_Z]VUZLFS\_a¥VT[^RP¥YLZNS[]]¥PX\_[Z[  
@HWI-EAS443:3:42:292:405#0/1  
TTCTCTTTCTAGCATGTACGCCACCATCAAGGGAGCAATT  
+HWI-EAS443:3:42:292:405#0/1  
aaaabaa`aaaaaaa`a`a`a`a`a\_aa`a`a`\_a]\_`  
@HWI-EAS443:3:42:304:1059#0/1  
GTCCCGTTTTTCGTTTCATTACCAACTACGTCCCCTTGCC  
+HWI-EAS443:3:42:304:1059#0/1  
aababb\_bbabb\_a[]Ybaa`¥b\_\_¥aaaaaNa`\_aZXTW  
@HWI-EAS443:3:42:308:1814#0/1  
CCACTGTGGACCATATGGCCATAATCAAAAAGTACACATC  
+HWI-EAS443:3:42:308:1814#0/1  
`aaW^a^Z\_a^b`¥aaWa\_a]X`a`]^]ba`USa]\_G]WZ  
@HWI-EAS443:3:42:312:618#0/1  
ATCTAATGTCGAGTCCCGCACTCGCGAGATACTCACTAA  
+HWI-EAS443:3:42:312:618#0/1  
aaa`aaaa\_\_aa\_a¥\_\_a^ZG^[[Z`]U¥[Y¥[VUZ[¥\_¥

@HWI-EAS443:3:42:318:743#0/1  
CACTTTTGCATCTTTTTGGAAATGCCTCAAGAGTTGGTGC  
+HWI-EAS443:3:42:318:743#0/1  
\_¥bbb\_ba^` `babbb`Z^W` [bab^b[ ` \_a` ]a` `Y^\_  
@HWI-EAS443:3:42:333:1994#0/1  
GAACTGTACTTGTGTTGGGCCATTCCCTATCCACCATGT  
+HWI-EAS443:3:42:333:1994#0/1  
aaa\_^`P¥\_bb[T\_U]\_aaaaY]a^`^]a\_\_baaab¥GX  
@HWI-EAS443:3:42:336:147#0/1  
GCCATATCTCTTGTCTTCTTTGCCCAAATGAGAAATCCT  
+HWI-EAS443:3:42:336:147#0/1  
`Z[T\_^[U^\_aa]NN^` \_^VTZFTQPO[\_Z\_WQTWZVV  
@HWI-EAS443:3:42:354:917#0/1  
AGCACGTCCCTTGGGTTAAGTGCAACACTTCAATATAAAC  
+HWI-EAS443:3:42:354:917#0/1  
^]]ba\_¥`ZU` `aaaZX]]XUa` `a` `aX` ` `X` `\_\_a\_\_\_\_  
@HWI-EAS443:3:42:359:1400#0/1  
GTGTACTTTTTGATTATGGCCATATGGTCCACAGTGGTCT  
+HWI-EAS443:3:42:359:1400#0/1  
aaaaaaabbbbabaabbaYaaaa[PZYaba\_aPU\_aZ^a  
@HWI-EAS443:3:42:384:1896#0/1  
GGAGTCTGCTGTCCTGAGAGGATTTCTCATTTTGGGCAAA  
+HWI-EAS443:3:42:384:1896#0/1  
S\_`YUaTaab`abbaU`ab`ab`\_`aa`Ta]ab\_F]]^bba  
@HWI-EAS443:3:42:393:529#0/1  
CAGTGGTCTTAGTGAGTATCTCGCGAGTGC GGACTGCGA  
+HWI-EAS443:3:42:393:529#0/1  
a`aaaaZ`baXa`bb` `b` `^]UT[MWZ\_XX\_^[UX` `^V  
@HWI-EAS443:3:42:39:535#0/1  
ATTTTACAATCCTGGAGCTCTTCTTTCTTCTTTTGTTA  
+HWI-EAS443:3:42:39:535#0/1  
aabb`]aa[a`b^^¥R\_\_`\_a`] `aa`a`\_a]aa^` `]a]  
@HWI-EAS443:3:42:448:1733#0/1  
CCGTTTTCGTTTCATTACCAACTACGTCCCCTTGCCCA  
+HWI-EAS443:3:42:448:1733#0/1  
a` ` \_bbbbbaabbbbabbabbab`babaababa\_]aaa¥  
@HWI-EAS443:3:42:469:639#0/1  
GGTTCACCTTTCAAAGGACAAGCGGATCATCAGTCAAGAA  
+HWI-EAS443:3:42:469:639#0/1  
a\_^a` ` `aaaaaaaa^a` `\_]` ` `\_\_^` ` ` `^\_Z^\_]^^\_  
@HWI-EAS443:3:42:488:1044#0/1  
AGGATGTCCACCATCCTTACTCCTCCAATCTGTGTGCTGT  
+HWI-EAS443:3:42:488:1044#0/1  
`abab`\_b\_^`YY`\_`bbbb`\_]aaba^aa`¥¥[\_\_\_\_P  
@HWI-EAS443:3:42:499:1458#0/1  
GTCCCCTTTTTCGTTTCATTACCAACTACGTCCCCTTGC  
+HWI-EAS443:3:42:499:1458#0/1  
\_U`]a`Y\_^aXa]¥a`¥a]XX]aa`]\_`^[]X\_Q]Z]VV\_  
@HWI-EAS443:3:42:530:64#0/1  
CTTTCTGAGAATAGCTGTTGCTCTTCTCCCAACCATTGTG

+HWI-EAS443:3:42:530:64#0/1  
abb`\_a\_bbbbabbbabba``aa[\_aaaSaS\_¥\_a\_V\_  
@HWI-EAS443:3:42:531:253#0/1  
GTCCCGTTTTCGTTTCATTACCAACTACGTCCCCTTGC  
+HWI-EAS443:3:42:531:253#0/1  
a``\_ab\_aaa`aaaa`a`a\_[Z]`aa\_`^\_X^V[^\_Q\_W  
@HWI-EAS443:3:42:635:1338#0/1  
GCCCAACAACAAGTACAGTTCATTACCCTAAGGTATATAA  
+HWI-EAS443:3:42:635:1338#0/1  
ab`bbbabab^[Waab\_ab`ab`abb\_ab`aa[aaaabY  
@HWI-EAS443:3:42:640:1560#0/1  
GGAGTCTGCTGTCCTGAGAGGATTTCTCATTTTGGGCAAA  
+HWI-EAS443:3:42:640:1560#0/1  
a`S`[ZZa[PVW[XZXPY[`XV[a`Z`^[]``\_[HZW¥YY  
@HWI-EAS443:3:42:656:535#0/1  
GACCGATTTTAAAGGGTTAGAGATCAAAGAGGGAACGTAC  
+HWI-EAS443:3:42:656:535#0/1  
^aa¥^\_bbbb`Y`¥`aab\_abaa``aaa]``b¥a`a]^\_  
@HWI-EAS443:3:42:716:458#0/1  
ATCTAATGTCGCAGTCCCGCACTCGCGAGATACTCACTAA  
+HWI-EAS443:3:42:716:458#0/1  
aab`\_aaa¥]`¥\_ZZWaa`^HRXYZX[MXV^[RV\_`\_]U\_  
@HWI-EAS443:3:42:722:535#0/1  
ATCTAATGTCGCAGTCCCGCACTCGCGAGATACTCACTAA  
+HWI-EAS443:3:42:722:535#0/1  
aaaaa`ab^Z]¥Z¥Y¥]ZL^¥[Y^Z`XR[Z[[XUUNRU¥[  
@HWI-EAS443:3:42:736:176#0/1  
AAAGAAGTGCAGATCTAATGTCGCAGTCCCGCACTCGCG  
+HWI-EAS443:3:42:736:176#0/1  
aba`a\_aaa\_a`a`\_Xaa`aaYa\_`a\_¥\_¥\_WTZ\_¥`\_¥`  
@HWI-EAS443:3:42:737:895#0/1  
AATTGGGTATCTCATTGCCATCATCCACTTCATTCTGAGT  
+HWI-EAS443:3:42:737:895#0/1  
]¥bb``\_abb\_b\_X\_¥¥¥baba]aa``Za\_]\_Za^b^W`\_  
@HWI-EAS443:3:42:753:1595#0/1  
GTCCCGTTTTCGTTTCATTACCAACTACGTCCCCTTGC  
+HWI-EAS443:3:42:753:1595#0/1  
]a```a\_U`baa\_baUababaZbaXaabaXSY`\_a]\_\_a  
@HWI-EAS443:3:42:765:1103#0/1  
GATTTCTCATTTTGGGCAAAGAAGACAAGAGATATGGCCC  
+HWI-EAS443:3:42:765:1103#0/1  
a¥aaaaab¥bb[a¥`\_aaa[a]aaa\_a`a`\_`^\_¥Z^`\_  
@HWI-EAS443:3:42:776:1378#0/1  
GGACATGATTCCAGAGAGGAATGAACAAGGACAAACCTC  
+HWI-EAS443:3:42:776:1378#0/1  
aababbaaaaaab`baaa\_aaaaaaa\_a`a\_aa\_`\_^`\_  
@HWI-EAS443:3:42:826:764#0/1  
AAAGAAGTGCAGATCTAATGTCGCAGTCCCGCACTCGCG  
+HWI-EAS443:3:42:826:764#0/1  
[MaaIW\_¥aaa^[]`ab]``b^^`\_a\_G`\_Xa`\_\_a\_\_Y`

@HWI-EAS443:3:42:86:428#0/1  
CTCGCGAGATACTACTAAGACCACTGTGGACCATATGGC  
+HWI-EAS443:3:42:86:428#0/1  
aababbaaaaa`aaaaa]aa`aaa\_a]a\_Y`a^]V`aZ\_  
@HWI-EAS443:3:42:877:1173#0/1  
CCAGAGGGTTTGTCTTGTTCATTCTCTCTGGAATCATG  
+HWI-EAS443:3:42:877:1173#0/1  
\_`Xa[bb^0aa`Pa`a\_bSUa^^^`\_]\_\_`\_`a`]^aZ  
@HWI-EAS443:3:42:88:1387#0/1  
GTGGGTTCACTTTCAAAGGACAAGCGGATCATCAGTCAA  
+HWI-EAS443:3:42:88:1387#0/1  
a`ba[[b^T`¥]V^aNP]]WZ\_a\_H\_`\_X\_¥R]^X]ZXX  
@HWI-EAS443:3:42:898:1767#0/1  
CTAATGTCGAGTCCCGCACTCGCGAGATACTACTAAGA  
+HWI-EAS443:3:42:898:1767#0/1  
`bbbbabaabbabbbbbbabbbb`babaab^aaa^aaa`a  
@HWI-EAS443:3:42:925:1167#0/1  
CCCGTTTTCGTTTCATTACCAACTACGTCCCCTTGCCC  
+HWI-EAS443:3:42:925:1167#0/1  
aabaWZRVYaUaa]Zaa\_^LSSGZLX]X]\_¥PUXGXXT]T  
@HWI-EAS443:3:42:925:270#0/1  
ACCCTCTGGAGCAAACAAACGATGCTGGATCAGACCGAG  
+HWI-EAS443:3:42:925:270#0/1  
`b`b\_bb^b`^a`abbbXaa]`aba`ZUaaaa`a\_  
@HWI-EAS443:3:42:929:658#0/1  
GGTGGGTTCACTTTCAAAGGACAAGCGGATCATCAGTCA  
+HWI-EAS443:3:42:929:658#0/1  
abY`]^aaaaa`aaa^]aa\_aa[Y`\_^`\_¥aYa\_  
@HWI-EAS443:3:42:932:999#0/1  
GGGCGATCTGAACCTTGTCAATAGGGCAAACCGACTG  
+HWI-EAS443:3:42:932:999#0/1  
\_a`aUY[^¥a^`aa¥]\_b¥`Y`b[\_`ba`\_^a[^¥a¥`  
@HWI-EAS443:3:43:1001:1185#0/1  
CCATGGTATTCTCACAAGAGGATTGCATGATCAAGGCAGT  
+HWI-EAS443:3:43:1001:1185#0/1  
aa^`]`K¥\_UU\_\_`ZaZ^`^`a\_¥^^`^aT]^YU\_¥^Y\_U  
@HWI-EAS443:3:43:1002:1573#0/1  
AAAGAAGTGAAGATCTAATGTGCGAGTCCCGCACTCGCG  
+HWI-EAS443:3:43:1002:1573#0/1  
aa^^`baaab\_a`aa\_`babaY]`\_\_aY\_\_aY`^\_¥`¥WU  
@HWI-EAS443:3:43:1011:1162#0/1  
AAAGAAGTGAAGATCTAATGTGCGAGTCCCGCACTCGCG  
+HWI-EAS443:3:43:1011:1162#0/1  
aaaaX\_]¥RZaaa\_a\_a`\_a\_V`\_`\_^¥^¥\_¥¥YTUZZ¥  
@HWI-EAS443:3:43:102:876#0/1  
GAACTGAGAGATCTAATGTGCGAGTCCCGCACTCGCGAGA  
+HWI-EAS443:3:43:102:876#0/1  
aaab¥`aX]a¥a`[^`^`0a\_X`ZS`a^V\_\_ZPYRV\_YV[  
@HWI-EAS443:3:43:1073:77#0/1  
AAAAGAAGTGAAGATCTAATGTGCGAGTCCCGCACTCGC

+HWI-EAS443:3:43:1073:77#0/1  
W\_bbbbaVQO¥TTYa`bb^^\_U[bUI\_\_ZGF¥RQGR[SL  
@HWI-EAS443:3:43:10:1886#0/1  
AAAAGAAGTCTAATGTCGAGTCCCGCACTCGC  
+HWI-EAS443:3:43:10:1886#0/1  
¥\_Z[SYa`^¥^[WV^^]a\_] [[^U[XP^[^THYPZYR]X  
@HWI-EAS443:3:43:1124:1443#0/1  
GAGATCAATGGCCCTGAGTCAGTGCTAGTCAACACTTATC  
+HWI-EAS443:3:43:1124:1443#0/1  
^¥X]¥Za`ab`aWa`^\_]TXQaYY\_]Xa\_``][YU[¥^YL  
@HWI-EAS443:3:43:1192:1082#0/1  
CCCCGCACTCAGAATGAAGTGGATGATGGCAATGAGATAC  
+HWI-EAS443:3:43:1192:1082#0/1  
abbabb\_bbabbaabba`a^baabbaaaba`ba`aaa`¥  
@HWI-EAS443:3:43:1194:298#0/1  
CCCGTTTTCGTTTCATTACCAACTACGTCCCTTGCCC  
+HWI-EAS443:3:43:1194:298#0/1  
]]ab]aaa]`La^V^`U`^`¥¥Jaa]XH¥TWTTRWGJN[[  
@HWI-EAS443:3:43:1195:354#0/1  
CTTGCGTTTCACTGACTTCTTCGGGAGACAATAGTACGTT  
+HWI-EAS443:3:43:1195:354#0/1  
abababbbbbbabaaabb¥bb`a`b`b`abaaa\_Y\_Ua\_^  
@HWI-EAS443:3:43:1239:481#0/1  
GGAAAAGCACTTTTGCATCTTTTTGGAAATGCCTCAAGAG  
+HWI-EAS443:3:43:1239:481#0/1  
abababbaa`aaaa`\_aaaaabaaa``aa\_^`^^\_a¥a  
@HWI-EAS443:3:43:1240:1654#0/1  
AGCATCGTTTGTCTCCAGAGGGTTTGTCTTGTTC  
+HWI-EAS443:3:43:1240:1654#0/1  
P]G]\_YV¥W\_Xa\_V^TU\_NX\_T¥TT[\_^]OZa¥ab\_a][  
@HWI-EAS443:3:43:1279:226#0/1  
ATTGCATCTACTCTGTTCTGGTGGAGCAGCAGCAAAGGG  
+HWI-EAS443:3:43:1279:226#0/1  
R``a``\_U\_\_bb`X`a]`¥a`¥¥`^`¥`¥\_\_THV]`\_V  
@HWI-EAS443:3:43:1287:1021#0/1  
ATCTAATGTCGAGTCCCGCACTCGCGAGATACTCACTAA  
+HWI-EAS443:3:43:1287:1021#0/1  
aXT\_^abb^U^UX^PVXT[VQOZOEVZZaT]ZTTT[ZR^U  
@HWI-EAS443:3:43:1303:1800#0/1  
CAGAATCCAAGTGAAGCAAGCCGTAGACATATGCAAGG  
+HWI-EAS443:3:43:1303:1800#0/1  
ZTNUaaa]\_a\_^`\_¥¥^¥`a\_ZZZ¥\_Xaaa``a`^`][W  
@HWI-EAS443:3:43:1309:410#0/1  
CTGCTGCTGAGAGGATTTCTCATTGTTGGCAAAGA  
+HWI-EAS443:3:43:1309:410#0/1  
abbabba\_bbbbbbababbbbaabbbbabbb\_abbbaabb  
@HWI-EAS443:3:43:1311:111#0/1  
GTCCATTATTCTTGTCTGCTGTAATTGGGTATCTCATT  
+HWI-EAS443:3:43:1311:111#0/1  
a^a\_Wa]a[`Y\_RXa^ZZaWOYa`]Yaa`\_[TX\_LSS^ZV



@HWI-EAS443:3:43:1321:884#0/1  
CCCCTTTTCGTTTCATTACCAACTACGTCCCCTTGCCC  
+HWI-EAS443:3:43:1321:884#0/1  
RXa\_`W`aaabbbb`a`a`ab¥bbbaba[`ba¥Y\_a`]X  
@HWI-EAS443:3:43:1329:520#0/1  
ACTGACTTCTTCGGGAGACAATAGTACGTTCCCTCTTTGA  
+HWI-EAS443:3:43:1329:520#0/1  
a[aab[`^Z^[\_[O\_aWaa]aa\_TY]NT^QWLFNNXS^LX  
@HWI-EAS443:3:43:1362:701#0/1  
GGCCATATCTCTTGTCTTCTTTGCCAAAATGAGAAATC  
+HWI-EAS443:3:43:1362:701#0/1  
ab¥^`ababaa`aaa¥aaa¥a`a`\_¥`\_Zaaa]`\_`\_\_\_W  
@HWI-EAS443:3:43:1377:905#0/1  
TGTCGCAGTCCCGCACTCGCGAGATACTCACTAAGACCAC  
+HWI-EAS443:3:43:1377:905#0/1  
ab[a¥abbTRXV\_]V\_¥YV¥¥^`OFTR¥¥ZFVY[LWXYUU  
@HWI-EAS443:3:43:1396:1155#0/1  
CGCGAGATACTCACTAAGACCACTGTGGACCATATGGCCA  
+HWI-EAS443:3:43:1396:1155#0/1  
`aabbbbbbabababbbba`aabb`b^Y\_a\_aaa``\_Ya  
@HWI-EAS443:3:43:1461:1237#0/1  
CTTGAAAGGATGCAGGTGCATTGACTGAAGATCCAGATG  
+HWI-EAS443:3:43:1461:1237#0/1  
abbbabb`abbbb`abbabaabbaababbbbbb\_aabaa  
@HWI-EAS443:3:43:14:92#0/1  
CAAACCTTGGTCAACATCATCATTCTCACTTCTCCTCCT  
+HWI-EAS443:3:43:14:92#0/1  
aabbabbabb^a`a`\_`a`aaaaaaaa`aa`\_`\_\_a`  
@HWI-EAS443:3:43:1510:1269#0/1  
TAAGGATGTCCACCATCCTTACTCCTCCAATCTGTGTGCT  
+HWI-EAS443:3:43:1510:1269#0/1  
`¥`\_`aa^]\_¥^^aa^a^\_]^[aaaaZ^R]a`a^¥T[Y[V  
@HWI-EAS443:3:43:1510:164#0/1  
CACCATCAAGGGAGCAATTTTACAATCCTGGAGCTCTTCT  
+HWI-EAS443:3:43:1510:164#0/1  
`bbababbabababaa\_babaa`aaa`¥\_aaVaY`Ra\_X\_  
@HWI-EAS443:3:43:1517:277#0/1  
AAAAGAAGTGAAGATCTAATGTCGCAGTCCCGCACTCGC  
+HWI-EAS443:3:43:1517:277#0/1  
]\_`^a`\_`bbab^a¥a\_ba`ba]`\_¥a\_Y]\_]¥[ZZ]Y[Q  
@HWI-EAS443:3:43:1527:713#0/1  
GTCCCCTTTTCGTTTCATTACCAACTACGTCCCCTTGCC  
+HWI-EAS443:3:43:1527:713#0/1  
a][\_W`]aa\_b\_a¥X\_a`^[]a\_a[V[Y]VXTSUY[VJ  
@HWI-EAS443:3:43:1550:506#0/1  
TGGGTTCACTTTCAAAGGACAAGCGGATCATCAGTCAAG  
+HWI-EAS443:3:43:1550:506#0/1  
abba\_aaa`bba`aaaaaa^`a`\_`aa`\_`\_`\_`^\_a¥Y\_\_\_  
@HWI-EAS443:3:43:1554:1004#0/1  
CTTCCTGATGTGACTTTTTGATTATGGCCATATGGTCCA

+HWI-EAS443:3:43:1554:1004#0/1  
ab\_UU\_b\_`]¥0]Ra\_]aZ\_aaa`ba¥bU]Q¥ZWZQNW  
@HWI-EAS443:3:43:1556:541#0/1  
TGGTGGCGTACATGCTAGAAAGAGAATTGGTCCGTAAAAC  
+HWI-EAS443:3:43:1556:541#0/1  
]`aa`b`babbab`]P`]UTZab[]aa\_b^¥XaXaab^  
@HWI-EAS443:3:43:1559:2040#0/1  
CAGCATCGTTTGTGGTCCAGAGGGTTTGTCTTGTTTC  
+HWI-EAS443:3:43:1559:2040#0/1  
aaba`¥¥b[b`b\_¥]a`]a[W\_a\_aaaR`aa]UZ]¥^\_^\_  
@HWI-EAS443:3:43:1609:397#0/1  
AGAGAATAAAAGAACTGAGAGATCTAATGTCGCAGTCCCG  
+HWI-EAS443:3:43:1609:397#0/1  
[bV\_babab]\_b^[ba`Z``a\_babW`aaa[b¥`b¥X]\_a  
@HWI-EAS443:3:43:1641:772#0/1  
GAACAAGGACAAACCCTCTGGAGCAAAACAAACGATGCTG  
+HWI-EAS443:3:43:1641:772#0/1  
abaaabbbbaaba`X^b`Xaa\_baaaa`aaa\_aaaa\_a`  
@HWI-EAS443:3:43:1643:1716#0/1  
CCGTTTTCGTTTCATTACCAACACTACGTCCCCTTGCCCA  
+HWI-EAS443:3:43:1643:1716#0/1  
aaaa`bbabbabaabbbbab`baababaaaa^^¥ab\_^`  
@HWI-EAS443:3:43:1644:377#0/1  
TGTCCATTATTCTTGTCTGCTGTAATTGGGTATCTCAT  
+HWI-EAS443:3:43:1644:377#0/1  
aaaa`abbaba`a\_baba\_aa^aa`\_\_aaa`\_Y\_a]\_Z``  
@HWI-EAS443:3:43:1659:1274#0/1  
TTTCAAAGGACAAGCGGATCATCAGTCAAGAAAGAAGAA  
+HWI-EAS443:3:43:1659:1274#0/1  
ab\_Z`a¥^`^Z^a``^ba`\_`\_a^a^^]a`a^^`\_]`\_¥^  
@HWI-EAS443:3:43:1663:573#0/1  
CTCTCTGGAATCATGTCCATTATTCTTGTCTGCTGTAA  
+HWI-EAS443:3:43:1663:573#0/1  
ababbbbbbabbabbbbbb`babbaabb`ab\_aa  
@HWI-EAS443:3:43:1712:635#0/1  
AGTGGTCTTAGTGAGTATCTCGCGAGTGCGGGACTGCGAC  
+HWI-EAS443:3:43:1712:635#0/1  
aa`ba`aba`a\_[]\_Z``^\_WZR[]\_Z\_TW`^YV¥ZS[WW  
@HWI-EAS443:3:43:1715:649#0/1  
TAATGTGCAGTCCCGCACTCGCGAGATACTACTAAGAC  
+HWI-EAS443:3:43:1715:649#0/1  
a`aba``b^bb\_Ya]\_`U^`]`\_`¥\_¥¥W^^W^UZ[VVWS  
@HWI-EAS443:3:43:1717:1941#0/1  
TATCAATGGATAATCAGGAACTGGGAAATTGTGAAAATTC  
+HWI-EAS443:3:43:1717:1941#0/1  
a^aa``^ZW\_]aa`[`¥^]^^Y¥¥aXaaa¥WR[[\_\_\_\_[WL  
@HWI-EAS443:3:43:1735:1165#0/1  
GAATGAACAAGGACAAACCCTCTGGAGCAAAACAAACGAT  
+HWI-EAS443:3:43:1735:1165#0/1  
aaa`a`aaaaa\_^a`]a\_\_a[aa][^^¥YX[W^^XT¥]X

@HWI-EAS443:3:43:17:1327#0/1  
GTCCCCGTTTTCGTTTCATTACCAACTACGTCCCCCTTGC  
+HWI-EAS443:3:43:17:1327#0/1  
aaab`aZaba``\_aaaaaaaa^aa`aaaa`]Z^V\_`\_^X  
@HWI-EAS443:3:43:195:1456#0/1  
AAAGAACTGAGAGATCTAATGTGCGCAGTCCCGCACTCGCG  
+HWI-EAS443:3:43:195:1456#0/1  
aabaabab[bbbbbbbbbbb`b\_baaababaaMaaaab`  
@HWI-EAS443:3:43:249:1115#0/1  
CCTGATGTGACTTTTTGATTATGGCCATATGGTCCACAG  
+HWI-EAS443:3:43:249:1115#0/1  
abb\_]\_``a`aaaaaba]aaaa\_Z]a`\_N[[LYX¥VQGVX  
@HWI-EAS443:3:43:256:576#0/1  
GTTTCATTACCAACTACGTCCCCTTGCCCAATTAGCAC  
+HWI-EAS443:3:43:256:576#0/1  
a\_aaaaaaaa`a^a\_Xa\_\_^^`\_]^[^\_]`^Y[X]X]  
@HWI-EAS443:3:43:259:749#0/1  
GAGGATTTCTCATTTTGGGCAAAGAAGACAAGAGATATGG  
+HWI-EAS443:3:43:259:749#0/1  
aaaa`aaaaaaaa`X\_a`[\_a`a`a\_\_a\_a^`^\_\_  
@HWI-EAS443:3:43:309:339#0/1  
CTTCTTTGCCAAAATGAGAAATCCTCTCAGGACAGCAGA  
+HWI-EAS443:3:43:309:339#0/1  
abbbabbababbababbabb`bba`abaaba¥FYaa`aa\_  
@HWI-EAS443:3:43:331:1117#0/1  
GTGCATTGACTGAAGATCCAGATGAAGGCACATCTGGGGT  
+HWI-EAS443:3:43:331:1117#0/1  
a\_Zaaaaaa`a`\_a[\_\_a`\_a`a^S¥^`^¥Z[U\_\_a^V  
@HWI-EAS443:3:43:337:1912#0/1  
CAATGAGATACCCAATTACAGCAGACAAGAGAATAATGGA  
+HWI-EAS443:3:43:337:1912#0/1  
RR[S\_`¥\_]¥YS\_VQ\_U¥^Z]Q\_Y`b`VZVWQV`Y`^V[a  
@HWI-EAS443:3:43:368:931#0/1  
TGCCTTGTGTAATTGAATACTGGAGAATTGCCTCTTACC  
+HWI-EAS443:3:43:368:931#0/1  
a`aaa`aa`^a`\_a`aaa`aaa`\_`^^`\_a`\_]W  
@HWI-EAS443:3:43:405:503#0/1  
GGGGACGTAGTGTGGTAATGAAACGAAAACGGGACTCTA  
+HWI-EAS443:3:43:405:503#0/1  
\_`bb\_a\_P]`¥a[aa^G¥`a\_aaR][X`\_]`[[PR[WV  
@HWI-EAS443:3:43:434:1916#0/1  
GTGGCGTACATGCTAGAAAGAGAATTGGTCCGTAACAA  
+HWI-EAS443:3:43:434:1916#0/1  
\_QW\_]WT¥V¥\_¥Y[`XN\_]¥\_¥^`\_]UXI[ZRK¥\_WUL]R  
@HWI-EAS443:3:43:438:1363#0/1  
GCGGGAGAGACGAGCAGTCAATTGCTGAGGCAATAATTGT  
+HWI-EAS443:3:43:438:1363#0/1  
aa`X^]`a`\_]\_\_¥¥a\_T¥\_\_\_\_[¥^¥¥\_W¥U\_`[`]\_ZUQ  
@HWI-EAS443:3:43:43:439#0/1  
GTGGAATAGGAATGGCCCAACAACAAGTACAGTTCATTAC

+HWI-EAS443:3:43:43:439#0/1  
aaba]babab^aaaaaaN^aaaaaa\_¥aa`\_[\_\_aa`a\_  
@HWI-EAS443:3:43:441:1382#0/1  
AAAGAAGACTGAGAGATCTAATGTCGCAGTCCCGCACTCGCG  
+HWI-EAS443:3:43:441:1382#0/1  
a^aa`aaaa^aaa\_\_]a[a`¥a¥`\_V`\_Y`^¥Z[ZWW  
@HWI-EAS443:3:43:441:658#0/1  
ACTCACTAAGACCACTGTGGACCATATGGCCATAATCAAA  
+HWI-EAS443:3:43:441:658#0/1  
abbaaaba`aaaa`a]]b]\_`ba`aaaa`\_¥`\_a\_aa  
@HWI-EAS443:3:43:446:1251#0/1  
ATCTAATGTCGCAGTCCCGCACTCGCGAGATACTCACTAA  
+HWI-EAS443:3:43:446:1251#0/1  
^\_¥ZS\_]WR]¥YZ]SU`Xa]\_T¥OXWO[Y]ZU\_QTXZ]W  
@HWI-EAS443:3:43:449:1657#0/1  
AGAAGACTGAGAGATCTAATGTCGCAGTCCCGCACTCGCGAG  
+HWI-EAS443:3:43:449:1657#0/1  
^^\_b`aaa`baa\_a`aaaa¥a```[[`\_`^a^ZU]^Z  
@HWI-EAS443:3:43:455:1661#0/1  
TAAAAGAAGACTGAGAGATCTAATGTCGCAGTCCCGCACTCG  
+HWI-EAS443:3:43:455:1661#0/1  
ab`\_`aab`b``[\_X`a\_aaaaaU\_a¥\_]¥``WU]N[UZS  
@HWI-EAS443:3:43:457:142#0/1  
ATCACATTGTCGATGGATTCAATTCGCCAGTTCTGGAAAA  
+HWI-EAS443:3:43:457:142#0/1  
aaaaaabaa\_aaa`a`Z`\_a`a```\_`a]\_]\_^```\_¥¥^  
@HWI-EAS443:3:43:490:871#0/1  
ATCTCATTGCCATCATCCACTTCATTCTGAGTGCGGGGTT  
+HWI-EAS443:3:43:490:871#0/1  
abaaabbaaaaaaaaaaaaaaaaa\_a\_a\_a`\_[Ya`\_`a^X`  
@HWI-EAS443:3:43:501:557#0/1  
GGCGTACATGCTAGAAAGAGAATTGGTCCGTAACAAGG  
+HWI-EAS443:3:43:501:557#0/1  
a^ZXLX```aaa`a^][`[a\_]aa`TV`^P^a`a¥[]aa  
@HWI-EAS443:3:43:546:460#0/1  
AAAAGAAGACTGAGAGATCTAATGTCGCAGTCCCGCACTCGC  
+HWI-EAS443:3:43:546:460#0/1  
aaaabaaabbaabaa`aaaab^``aaaUa``\_]\_]\_\_\_\_^  
@HWI-EAS443:3:43:566:1578#0/1  
AAAGAAGACTGAGAGATCTAATGTCGCAGTCCCGCACTCGCG  
+HWI-EAS443:3:43:566:1578#0/1  
aaaaaaaa`aab`aaaa`a\_¥a\_\_`\_W¥\_\_¥¥\_¥^`^W`  
@HWI-EAS443:3:43:595:346#0/1  
GTGCAACACTTCAATATAAACACTGCCTGTTCCGCCGGCT  
+HWI-EAS443:3:43:595:346#0/1  
^S¥ZZ`\_AY]\_^\_aUaba^]X^`a]USTa`^UU]YH\_[S¥  
@HWI-EAS443:3:43:627:1344#0/1  
ATAAAAAGAAGACTGAGAGATCTAATGTCGCAGTCCCGCACTC  
+HWI-EAS443:3:43:627:1344#0/1  
aababb`aaabaaaaaaaa`abaab`\_] [ba\_\_\_\_`\_`Q]ZR

@HWI-EAS443:3:43:639:356#0/1  
AAAAGAAGCTGAGAGATCTAATGTCGCAGTCCCGCACTCGC  
+HWI-EAS443:3:43:639:356#0/1  
`aabaaaabaaaaa`aabaaa`]\_aa^aa\_^^^\_\_V  
@HWI-EAS443:3:43:655:1534#0/1  
GAGAAGAGCAACAGCTATTCTCAGAAAGGCAACCAGGAGA  
+HWI-EAS443:3:43:655:1534#0/1  
XYbab`WWabbbb\_a\_W[b\_abbba`\_a`aab\_\_[baab`  
@HWI-EAS443:3:43:66:809#0/1  
AAAGGATGCAGGTGCATTGACTGAAGATCCAGATGAAGGC  
+HWI-EAS443:3:43:66:809#0/1  
[XYWZ\_aaaa`^a\_W`^Y^\_aba\_``\_]`a]P]a^a]¥U  
@HWI-EAS443:3:43:682:898#0/1  
GTCCCGTTTTCGTTTTATTACCAACTACGTCCCCTTGC  
+HWI-EAS443:3:43:682:898#0/1  
a]aaabaaabab\_aaaaa¥H¥]a`a`aa^a^\_Z^¥[W[]  
@HWI-EAS443:3:43:686:1456#0/1  
ATGAAGGCACATCTGGGGTGGAGTCTGCTGCCTGAGAGG  
+HWI-EAS443:3:43:686:1456#0/1  
aXH[\_¥Y\_a[ba[]ab\_]Vaaa[VQ`\_NN\_LU^\_[\_a`a`  
@HWI-EAS443:3:43:691:1562#0/1  
CCCGTTTTCGTTTTATTACCAACTACGTCCCCTTGCC  
+HWI-EAS443:3:43:691:1562#0/1  
a\_]XUUXa\_Z`¥^aWaZVVO`ZU¥V\_\_TW[P]\_U]VW¥Y¥  
@HWI-EAS443:3:43:714:1432#0/1  
TCCCGTTTTCGTTTTATTACCAACTACGTCCCCTTGCC  
+HWI-EAS443:3:43:714:1432#0/1  
ab\_ab`baaab\_aaXaab]¥^a\_a`\_a^^\_[\_]\_W\_\_^[Z  
@HWI-EAS443:3:43:714:712#0/1  
GGGTGGAGTCTGCTGCCTGAGAGGATTTCTCATTTTGGG  
+HWI-EAS443:3:43:714:712#0/1  
\_abW[bababaa`ab`abaa\_a\_a[DX`ba\_\_\_`aaaa`\_  
@HWI-EAS443:3:43:721:1060#0/1  
ACATCATCATTTCTCACTTCTCCTCCTGGAGTGTACATCT  
+HWI-EAS443:3:43:721:1060#0/1  
`bbbaabbXb`b`a`a[aaaa\_a`\_a`\_a`aW`^aZa\_¥\_  
@HWI-EAS443:3:43:728:1914#0/1  
GCTGGATCAGACCGAGTGATGGTATCACCTCTGGCCGTAA  
+HWI-EAS443:3:43:728:1914#0/1  
ababa\_]\_]\_````^\_S^]\_`YKZ]Z^V]UUZVQYT]HZQ  
@HWI-EAS443:3:43:734:1544#0/1  
TGGCAATGAGATACCCAATTACAGCAGACAAGAGAATAAT  
+HWI-EAS443:3:43:734:1544#0/1  
`baZaUUUbKZ[aa\_0`¥`\_bbb[bZVvb^ab[````ba``  
@HWI-EAS443:3:43:742:204#0/1  
CCCGCACTCAGAATGAAGTGGATGATGGCAATGAGATACC  
+HWI-EAS443:3:43:742:204#0/1  
a]bbab`a\_baa]aW`a\_aaaaa\_Ya\_Z^`\_\_Y^R\_^ZU  
@HWI-EAS443:3:43:759:86#0/1  
GCTGTAATTGGGTATCTCATTGCCATCATCCACTTCATTC

+HWI-EAS443:3:43:759:86#0/1  
aaaaSJ^`aa¥`P`Sa`[\_QX[JLR]UW¥QSW\_SPR]YL  
@HWI-EAS443:3:43:778:759#0/1  
GTACTTTTTGATTATGGCCATATGGTCCACAGTGGTCTTA  
+HWI-EAS443:3:43:778:759#0/1  
`KZ\_aaaaaa`aa\_`¥\_\_XLKOT]BBBBBBBBBBBBBBB  
@HWI-EAS443:3:43:807:1381#0/1  
CTCTTGTGAGAATACCATGGCCACAATTATTGCCTCAGCA  
+HWI-EAS443:3:43:807:1381#0/1  
`aaabb`\_]`a`a`aab`a`a`a\_aaaaaa]]¥a[X^\_\_  
@HWI-EAS443:3:43:823:869#0/1  
CTGCTGTCCTGAGAGATTCTCATTGTTGGCAAAGAAGA  
+HWI-EAS443:3:43:823:869#0/1  
aa```Y]`\_a^J[`]¥`\_a`\_\_a\_\_\_\_]\_]\_\_^`\_^\_  
@HWI-EAS443:3:43:833:861#0/1  
GCTAGAGTCCCCTTTTCGTTTCATTACCAACTACGTCC  
+HWI-EAS443:3:43:833:861#0/1  
X¥WJ¥`^Vb[bbaaa`\_bbbaa``\_ba0`\_Ybab`T¥¥\_0  
@HWI-EAS443:3:43:861:817#0/1  
GGGCCATTGATCTCCACATCATTGATGACGAATAAGTTA  
+HWI-EAS443:3:43:861:817#0/1  
T\_aXXaTabbaU[K`R[\_[Z\_ba[`U\_^a`RHN¥aY]Z^Z  
@HWI-EAS443:3:43:868:687#0/1  
GAATAAAAGAACTGAGAGATCTAATGTCGCAGTCCCGCAC  
+HWI-EAS443:3:43:868:687#0/1  
ababbabab```aaba`a]a`aab`aa`aa`\_]Za\_\_\_\_  
@HWI-EAS443:3:43:871:294#0/1  
GTCCCCTTTTCGTTTCATTACCAACTACGTCCCCTTGC  
+HWI-EAS443:3:43:871:294#0/1  
]Z^aaZR]`¥SZ]RL]TZLY]]X\_[]Y^Z¥¥[PFMYU  
@HWI-EAS443:3:43:904:1757#0/1  
TGAACAAGGACAAACCCTCTGGAGCAAACAAACGATGCT  
+HWI-EAS443:3:43:904:1757#0/1  
aYab¥aa¥¥a\_b`a^aaa\_a`\_\_\_\_]aaaa\_a^`T]\_^\_^^  
@HWI-EAS443:3:43:92:1181#0/1  
GAACCCCGCACTCAGAATGAAGTGGATGATGGCAATGAGA  
+HWI-EAS443:3:43:92:1181#0/1  
```a\_aaaaa\_\_aa`aa^]]W``\_a\_\_\_\_Y¥^\_\_\_\_[\_Y  
@HWI-EAS443:3:43:937:1101#0/1  
GCGAGATACTACTAAGACCACTGTGGACCATATGGCCAT  
+HWI-EAS443:3:43:937:1101#0/1  
ababaabaabab`bba]``aa`aa`\_\_aa\_aaaa`\_W`\_  
@HWI-EAS443:3:43:938:1417#0/1  
ATCTAATGTCGCAGTCCCGCACTCGCGAGATACTCACTAA  
+HWI-EAS443:3:43:938:1417#0/1  
aaaaa\_aa^a][a\_V`a`\_`[[\_\_\_\_`\_Z[^ZVUYPV¥XY\_  
@HWI-EAS443:3:43:939:1016#0/1  
GTCAAATGTCCAAGCACATCCCCTTTGCTGGAACAGT  
+HWI-EAS443:3:43:939:1016#0/1  
^Q^]X`a\_Q]ba]aa`aa]¥WY`aa\_\_`a`Xa¥VV^Z^Z

@HWI-EAS443:3:43:96:352#0/1  
TGGCCATGGTATTCTCACAAGAGGATTGCATGATCAAGGC  
+HWI-EAS443:3:43:96:352#0/1  
aa`aaabbb\_\_bbba`^aaaaabaaa\_]\_aaa` `]`aa\_\_  
@HWI-EAS443:3:43:973:579#0/1  
CGCACTCGCGAGATACTACTAAGACCACTGTGGACCATA  
+HWI-EAS443:3:43:973:579#0/1  
aa\_a`aaaaa`a`a^a]\_` `aa`a^\_\_`\_aV`\_^\_]Y[^  
@HWI-EAS443:3:43:979:299#0/1  
AGCAGACAAGAGAATAATGGACATGATTCCAGAGAGGAAT  
+HWI-EAS443:3:43:979:299#0/1  
ababb`[aababa¥a[b\_\_b`aaa` `aa^`aa\_`]aa]a¥  
@HWI-EAS443:3:43:998:89#0/1  
CCCGTTTTCGTTTTATTACCAACTACGTCCCCTTGCCC  
+HWI-EAS443:3:43:998:89#0/1  
a`bba`aa\_baab`aba\_^a`a]` `^a^^^\_X\_\_^Z[  
@HWI-EAS443:3:44:1012:1015#0/1  
GCCTTGATCATGCAATCCTCTTGTGAGAATACCATGGCCA  
+HWI-EAS443:3:44:1012:1015#0/1  
a`aaabb` `b` `a`¥\_]`aaa\_\_a^aa` `¥\_[\_\_` `¥¥  
@HWI-EAS443:3:44:1023:686#0/1  
GAACTGAGAGATCTAATGTCGCAGTCCCGCACTCGCGAGA  
+HWI-EAS443:3:44:1023:686#0/1  
a`XXaaW`]aa` `a]`aUZ]\_`\_ZRZ[RXW¥[ZULXT^U  
@HWI-EAS443:3:44:1024:1398#0/1  
GCACTCGCGAGATACTACTAAGACCACTGTGGACCATAT  
+HWI-EAS443:3:44:1024:1398#0/1  
abbab`abb`aabaab`baaa` `^aaaaa`a]a\_`\_a\_\_  
@HWI-EAS443:3:44:1029:942#0/1  
ATCTCATTGCCATCATCCACTTCATTCTGAGTGCGGGGTT  
+HWI-EAS443:3:44:1029:942#0/1  
aabbb`b^^^]`baa\_]\_]`a\_^`aaaaaa\_aYX]`aN^  
@HWI-EAS443:3:44:1052:622#0/1  
TTGTAATTGAATACTGGAGAATTGCCTCTTACCAGTATCC  
+HWI-EAS443:3:44:1052:622#0/1  
a`UJ]ZaV]]T^aZV`a^WT\_aa^]WZ^XX[SR]]ZWNJI  
@HWI-EAS443:3:44:115:1391#0/1  
CCCTCTTTGATCTCTAACCTTAAAAATCGGTCAATACTC  
+HWI-EAS443:3:44:115:1391#0/1  
a\_aRRU^` `[X`YSa\_aSHNZ`PYXQ^`X\_NNY`P^VQVQ  
@HWI-EAS443:3:44:1164:251#0/1  
TGTAATTGGGTATCTCATTGCCATCATCCACTTCATTCTG  
+HWI-EAS443:3:44:1164:251#0/1  
`b` `\_\_abbbb\_bb`aaababaY`a¥a\_a^`V`a¥\_ba\_aa  
@HWI-EAS443:3:44:1176:47#0/1  
TGTCATTATTCTCTTGTCTGCTGTAATTGGGTATCTCAT  
+HWI-EAS443:3:44:1176:47#0/1  
a`\_`\_\_`a` `^`^`a^\_\_^\_]`^\_XXZ^`\_^\_XZ^T]ZZZ  
@HWI-EAS443:3:44:1190:947#0/1  
CCCGCACTCAGAATGAAGTGGATGATGGCAATGAGATACC

+HWI-EAS443:3:44:1190:947#0/1  
`S¥abZb[babaaab]`babba`a\_a\_a[\_\_\_\_TX`¥V\_V]  
@HWI-EAS443:3:44:119:565#0/1  
AGAGAATAAAAGAACTGAGAGATCTAATGTCGCAGTCCCG  
+HWI-EAS443:3:44:119:565#0/1  
¥¥QX[`a¥ZR^bbbaabbbb\_a`b][`aa`^``]Z][H  
@HWI-EAS443:3:44:120:1316#0/1  
GGGCGATCTGAAC TTTGTCAATAGGGCAAACCAGCGACTG  
+HWI-EAS443:3:44:120:1316#0/1  
a]a]a^`^aZ^b^`a`\_`\_ba\_aUY¥¥aYa]Xa¥VU^WZa  
@HWI-EAS443:3:44:1236:236#0/1  
CTGCTGTAATTGGGTATCTCATTGCCATCATCCACTTCAT  
+HWI-EAS443:3:44:1236:236#0/1  
[\_bb]\_X`\_]`abbb]a]Wb[\_bab`^`\_aaaaaaaa¥^^a  
@HWI-EAS443:3:44:1236:823#0/1  
GAGAATAATGGACATGATTCCAGAGAGGAATGAACAAGGA  
+HWI-EAS443:3:44:1236:823#0/1  
a`b^ab`^`a^]\_`a]`aa¥`\_^]Waa\_\_^`¥V[\_[¥¥Y  
@HWI-EAS443:3:44:1237:1587#0/1  
GTCCCGTTTTCGTTTCATTACCAACTACGTCCCCTTGC  
+HWI-EAS443:3:44:1237:1587#0/1  
\_N\_\_[\_`\_]`[aVa^a\_N`aaXPRWPZ¥\_\_UZZRPU]VYYG  
@HWI-EAS443:3:44:1253:400#0/1  
TCCCGTTTTCGTTTCATTACCAACTACGTCCCCTTGC  
+HWI-EAS443:3:44:1253:400#0/1  
a^a`a`]aaaaaaaa\_\_aaa`[\_`\_a`\_]`\_]\_Z^^\_^^¥S  
@HWI-EAS443:3:44:1262:1141#0/1  
GTCCCGTTTTCGTTTCATTACCAACTACGTCCCCTTGC  
+HWI-EAS443:3:44:1262:1141#0/1  
`\_`\_`\_`[aaa\_a`^`^a`^`^]]Y]\_\_`\_]\_WXXXYVWWW  
@HWI-EAS443:3:44:1267:448#0/1  
ATAAACACTGCCTGTTCCGCCGCTACTGGGAGAAACCTT  
+HWI-EAS443:3:44:1267:448#0/1  
ab]aa\_a`aa\_aaa\_`\_`a^Va\_[^¥UZU¥^XZL[\_`P¥ZW  
@HWI-EAS443:3:44:1286:505#0/1  
ATGGTATTCTCACAAGAGGATTGCATGATCAAGGCAGTTA  
+HWI-EAS443:3:44:1286:505#0/1  
T\_bbYbbaba^a^`\_a\_bbbbbbbbbbb`ba`a[[[\_aR` [   
@HWI-EAS443:3:44:1342:954#0/1  
AAAGAACTGAGAGATCTAATGTCGCAGTCCCGCACTCGCG  
+HWI-EAS443:3:44:1342:954#0/1  
aX0]Q]RWQLW¥X[a\_a\_\_^aVT`\_`XFJU^\_[SX^^`XV  
@HWI-EAS443:3:44:1354:1032#0/1  
GGTATCTCATTGCCATCATCCACTTCATTCTGAGTGCGGG  
+HWI-EAS443:3:44:1354:1032#0/1  
ab\_bbabaabbbbaa\_babaaaa`ba`aa^aa]`¥a`\_`\_`  
@HWI-EAS443:3:44:1363:1124#0/1  
TGTCGCAGTCCCGCACTCGCGAGATACTCACTAAGACCAC  
+HWI-EAS443:3:44:1363:1124#0/1  
aa\_]aaa\_\_aaZVU¥Za`\_`\_^]]W\_¥¥¥`^`^WW¥¥Q



@HWI-EAS443:3:44:1370:782#0/1  
GTCCCCGTTTTTCGTTTCATTACCAACTACTGCCCCCTTGC  
+HWI-EAS443:3:44:1370:782#0/1  
a\_a\_aaaaab`baa`\_]\_aaa^¥\_`Za]a\_\_^^Z^]]^¥¥T  
@HWI-EAS443:3:44:1439:964#0/1  
AAGGGAGCAATTTTACAATCCTGGAGCTCTTCTTCTTCT  
+HWI-EAS443:3:44:1439:964#0/1  
]¥a`^`\_`\_Z^bbba^¥`aaa\_Z\_X\_¥``\_`[\_aaa`aa`a  
@HWI-EAS443:3:44:1440:924#0/1  
ATCACTCGGTCTGATCCAGCATCGTTTGTGTTTGCTCCAGA  
+HWI-EAS443:3:44:1440:924#0/1  
aa`\_\_aa``\_]aa`a`UUa\_]a\_a\_aaba\_`\_`]^ZNXWX  
@HWI-EAS443:3:44:1443:24#0/1  
AGACAAGAGAATAATGGACATGATTCCAGAGAGGAATGAA  
+HWI-EAS443:3:44:1443:24#0/1  
abaa`[b\_aa^b\_aaaa\_`]aa^`¥\_\_`^^V[a]\_^^\_]  
@HWI-EAS443:3:44:1482:966#0/1  
AGAGGATTTCTCATTTTGGGCAAAGAAGACAAGAGATATG  
+HWI-EAS443:3:44:1482:966#0/1  
\_`a¥¥Yb^¥¥`a`a`\_`Yb¥bbZ]`a[aa¥aa]]baab`\_  
@HWI-EAS443:3:44:1488:1454#0/1  
GAATAAAAGAAGACTGAGAGATCTAATGTCGCAGTCCCGCAC  
+HWI-EAS443:3:44:1488:1454#0/1  
a¥aa¥aa\_Z]\_`Yaa`Z\_\_`T^¥[\_aXRX][^SJVYVTNN  
@HWI-EAS443:3:44:1523:1512#0/1  
CTCCAGTATTCAATTACAACAAGGCAACCAAACGACTTAC  
+HWI-EAS443:3:44:1523:1512#0/1  
abbbbbbabb^abbbb`abbabaaabaa`bbb^ba`aaaa  
@HWI-EAS443:3:44:1534:1657#0/1  
TGACCGATTTTTAAGGGTTAGAGATCAAAGAGGGAACGTA  
+HWI-EAS443:3:44:1534:1657#0/1  
aTa]`[FYaaa\_]a^^¥\_`\_]\_]RR]]R^V\_Z\_]^U]U^  
@HWI-EAS443:3:44:1556:1101#0/1  
AAAGAAGTGGAGATCTAATGTCGCAGTCCCGCACTCGCG  
+HWI-EAS443:3:44:1556:1101#0/1  
aab\_a\_aabaaaa\_a^a``bba\_a`a`\_`^]R[¥\_a]Y]\_  
@HWI-EAS443:3:44:1570:1780#0/1  
GAGAATAAAAGAAGACTGAGAGATCTAATGTCGCAGTCCCGC  
+HWI-EAS443:3:44:1570:1780#0/1  
a\_a\_\_aa\_]a¥]aP`aa\_a]\_\_Sa[]`a`¥¥XWWZXWM]S  
@HWI-EAS443:3:44:1573:1532#0/1  
CATTATTCTCTGTCTGCTGTAATTGGGTATCTCATTGCC  
+HWI-EAS443:3:44:1573:1532#0/1  
a[aa\_aa]`^a\_Y[^`aab`XZF^`aYbW`^V```a\_aR[  
@HWI-EAS443:3:44:1594:1399#0/1  
TGGAAATGTGCCACAGCACACAGATTGGAGGAGTAAGGAT  
+HWI-EAS443:3:44:1594:1399#0/1  
aaaab`aa^a\_aa^\_b]\_\_\_^`a]a^aaXa^)`W\_[]^YX  
@HWI-EAS443:3:44:1611:771#0/1  
AGAGAATAAAAGAAGACTGAGAGATCTAATGTCGCAGTCCCG

+HWI-EAS443:3:44:1611:771#0/1  
``baab`abbbaaaabbaaba`[aaaab\_\_aZ^¥a^VT\_  
@HWI-EAS443:3:44:1634:1486#0/1  
GGAAAAGCACTTTTGCATCTTTTTGGAAATGCCTCAAGAG  
+HWI-EAS443:3:44:1634:1486#0/1  
aaa`[`aaaa`aaa\_\_`\_aaa\_a`\_]`\_aa^]`^\_^\_Z^Va  
@HWI-EAS443:3:44:163:678#0/1  
CAGACCCATTAGCATCTCTCTTGGAAATGTGCCACAGCAC  
+HWI-EAS443:3:44:163:678#0/1  
^PXXaaa¥a^`[Zaaa]¥a\_\_¥[X]aV¥[LQT¥X¥]^]YX  
@HWI-EAS443:3:44:1658:1613#0/1  
GAGAATAAAAGAACTGAGAGATCTAATGTCGCAGTCCCGC  
+HWI-EAS443:3:44:1658:1613#0/1  
`¥`^\_aaaaa`\_]a`Z\_[Y^\_Va^^`\_UPZ^]\_WWWV\_V  
@HWI-EAS443:3:44:1662:1302#0/1  
CTGCTGTAATTGGGTATCTCATTGCCATCATCCACTTCAT  
+HWI-EAS443:3:44:1662:1302#0/1  
`bb`bb\_a\_baa`bVa^Za]`aaa`\_`\_a\_a\_]¥\_Va`¥\_\_  
@HWI-EAS443:3:44:1662:1743#0/1  
GAGAATAAAAGAACTGAGAGATCTAATGTCGCAGTCCCGC  
+HWI-EAS443:3:44:1662:1743#0/1  
a\_a`\_aaaa^¥aa^`^^`\_\_^`Za`¥``Z¥]¥]¥ZZXXZR  
@HWI-EAS443:3:44:167:1486#0/1  
GGAGAGAATAAAAGAACTGAGAGATCTAATGTCGCAGTCC  
+HWI-EAS443:3:44:167:1486#0/1  
^W]Y[]^\_aaa`ZSY``\_^`\_`\_`\_a`\_`R^¥R\_YUTN  
@HWI-EAS443:3:44:1703:837#0/1  
GTGGGTTCACTTTCAAAGGACAAGCGATCATCAGTCAA  
+HWI-EAS443:3:44:1703:837#0/1  
a\_aaa^Z]`\_aa`\_`\_\_a^^\_]`[\_`^^W]`X]`XX\_  
@HWI-EAS443:3:44:1711:1329#0/1  
AAAAGAACTGAGAGATCTAATGTCGCAGTCCCGCACTCGC  
+HWI-EAS443:3:44:1711:1329#0/1  
¥U¥¥aaa¥¥`\_a`X¥X`\_\_`\_W¥``]ZVTXX¥[[VYPXY  
@HWI-EAS443:3:44:171:285#0/1  
GGCGTACATGCTAGAAAGAGAATTGGTCCGTAACAAGG  
+HWI-EAS443:3:44:171:285#0/1  
ab[S¥¥^[PZ\_aSa\_VTa[]M^a\_a\_HY[`Z¥^\_SFHZa^  
@HWI-EAS443:3:44:185:126#0/1  
AAAGAACTGAGAGATCTAATGTCGCAGTCCCGCACTCGCG  
+HWI-EAS443:3:44:185:126#0/1  
aaaa\_a^a`Y`\_`\_\_aa]abUVUZUWZU[]YY]XU]XRV  
@HWI-EAS443:3:44:197:1009#0/1  
GTGGCGTACATGCTAGAAAGAGAATTGGTCCGTAACA  
+HWI-EAS443:3:44:197:1009#0/1  
a¥Ybaa`Z`\_`abab\_aaaaa\_a]`aaUa[`^¥^aaaa`a  
@HWI-EAS443:3:44:214:1329#0/1  
AAAAGAACTGAGAGATCTAATGTCGCAGTCCCGCACTCGC  
+HWI-EAS443:3:44:214:1329#0/1  
a`[a]a`^¥`aaaZaaaaa]aY]\_a`]Z``WOY\_\_¥\_ZY

@HWI-EAS443:3:44:228:1580#0/1  
GGCAAGGGGACGTAGTGTGGTAATGAAACGAAAACGGGA  
+HWI-EAS443:3:44:228:1580#0/1  
¥R¥[WY]TYRQ\_RT¥V\_X\_\_XFOUVYZ^YTOVR][\_]XVJ  
@HWI-EAS443:3:44:255:75#0/1  
CCCCTTTTCTTTTCATTACCAACTACTCGTCCCCCTTGCCC  
+HWI-EAS443:3:44:255:75#0/1  
a]bbaabaaaYabaaa`\_aa\_]a\_\_aZa]]a]^Y]aXQQ  
@HWI-EAS443:3:44:272:1074#0/1  
AAAAGAAGTCTAATGTCGCAGTCCCGCACTCGC  
+HWI-EAS443:3:44:272:1074#0/1  
aaa]`\_a\_a```a`¥`\_a¥S\_aY¥¥¥^`Y¥¥WW¥¥W¥Y]Y  
@HWI-EAS443:3:44:304:826#0/1  
GTAATTGAATACTGGAGAATTGCCTCTTACCAGTATCCTC  
+HWI-EAS443:3:44:304:826#0/1  
a\_\_aaaaabaaa`aaaaaaa`^aaaa\_\_]aa¥^`^\_\_\_\_  
@HWI-EAS443:3:44:324:799#0/1  
GTCCATTATTCTTGTCTGCTGTAATTGGGTATCTCATT  
+HWI-EAS443:3:44:324:799#0/1  
a`bbababaaaaaa`^`aa\_aa]`aaaa`R`a¥]\_`^a  
@HWI-EAS443:3:44:331:919#0/1  
GGCGTACATGCTAGAAAGAGAATTGGTCCGTAACAAGG  
+HWI-EAS443:3:44:331:919#0/1  
aaa\_\_^^`\_a¥`\_`\_\_^^¥\_¥a^\_¥\_T¥W\_W\_\_\_\_`N\_¥`¥  
@HWI-EAS443:3:44:366:476#0/1  
AGTCTGCTGTCTGAGAGGATTTCTCATTTTGGGCAAAGA  
+HWI-EAS443:3:44:366:476#0/1  
aba`a`aab\_ababab`aaXaaa^a`aaaaaa\_\_a``a`  
@HWI-EAS443:3:44:371:1786#0/1  
CAGAATGAAGTGGATGATGGCAATGAGATACCCAATTACA  
+HWI-EAS443:3:44:371:1786#0/1  
aabababaaaX``\_aaa[aa`aa`[`a`aa¥`aa`a\_a]`  
@HWI-EAS443:3:44:375:1923#0/1  
ATTCTTGCCCCACTTCATTTGGGAAAACAACTTCCATAA  
+HWI-EAS443:3:44:375:1923#0/1  
\_`bbab`bbaabbaba`baa``][\_`ab\_aa]a\_^^`\_a\_  
@HWI-EAS443:3:44:391:1169#0/1  
CCACCATCAAGGGAGCAATTTTACAATCCTGGAGCTCTTC  
+HWI-EAS443:3:44:391:1169#0/1  
aaa`abaaaaaaaab\_aaba`aa^a\_``^\_\_\_\_]\_W`]^`^W  
@HWI-EAS443:3:44:402:1575#0/1  
AAACGATGCTGGATCAGACCGAGTGTGGTATCACCTCTG  
+HWI-EAS443:3:44:402:1575#0/1  
a`aZ`^]`^UaZZZ`S\_\_\_\_¥aWN¥¥^UJPP[HUFRSWWH  
@HWI-EAS443:3:44:411:286#0/1  
GAGAATAAAAGAACTGAGAGATCTAATGTCGCAGTCCCGC  
+HWI-EAS443:3:44:411:286#0/1  
^[\_T¥]]\_\_\_\_^]]\_aaRVYZ`¥^a^Z[`P¥\_¥^]SZTQOY  
@HWI-EAS443:3:44:445:378#0/1  
AAGTGAACCCACAAAACGAAAGATGAGCTAATCCTCAA

+HWI-EAS443:3:44:445:378#0/1  
a`\_Taaaa`ababaY`aa`]a\_a`\_a\_a^`a`a\_\_`\_aa  
@HWI-EAS443:3:44:477:985#0/1  
ATTCAATCCCCAGTTCTGGAAAAGCACTTTTGCATCTTT  
+HWI-EAS443:3:44:477:985#0/1  
aa`\_]aba¥Y`a`\_aa]aa`]aa^a]¥`a`]a\_a\_\_a``a  
@HWI-EAS443:3:44:487:525#0/1  
CATCTGGGGTGGAGTCTGCTGTCCTGAGAGATTCTCAT  
+HWI-EAS443:3:44:487:525#0/1  
a`aaa`baaYa\_\_aa\_a\_aab\_^\_aa`a^ba\_``a\_\_]^\_  
@HWI-EAS443:3:44:525:563#0/1  
GTCCCGTTTTCGTTTCATTACCAACTACGTCCCTTGC  
+HWI-EAS443:3:44:525:563#0/1  
a`\_`\_a^\_a``b¥a\_\_\_aaa`\_^]¥\_\_\_a`^^Z]\_Z^\_Y  
@HWI-EAS443:3:44:531:1073#0/1  
GAGAGAATAAAAGAACTGAGAGATCTAATGTCGCAGTCCC  
+HWI-EAS443:3:44:531:1073#0/1  
aaaaaaab`babaaba``aaaa`\_aa\_ab¥\_\_\_`[^X]  
@HWI-EAS443:3:44:544:1418#0/1  
CAATCCCCAGTTCTGGAAAAGCACTTTTGCATCTTTTTG  
+HWI-EAS443:3:44:544:1418#0/1  
Y¥`\_`a\_b\_bbbababbaaba^¥W`\_ababa^aaabbbbab  
@HWI-EAS443:3:44:588:615#0/1  
TAATGTGCGAGTCCCGCACTCGCGAGATACTCACTAAGAC  
+HWI-EAS443:3:44:588:615#0/1  
VZ[¥a``¥[aZa^a\_ZZ\_a]a\_\_\_X\_a^Z^\_\_[W^^\_\_¥W  
@HWI-EAS443:3:44:611:1329#0/1  
TAATGTGCGAGTCCCGCACTCGCGAGATACTCACTAAGAC  
+HWI-EAS443:3:44:611:1329#0/1  
a]aXWKWZSa¥^TV`HPS^]ST]YLYNLQQFJQPYSYPP  
@HWI-EAS443:3:44:643:945#0/1  
TGTGACCATTGAATTTTCACAATTTCCCAGTTCCTGATTA  
+HWI-EAS443:3:44:643:945#0/1  
ab]`baaab`^`aaaaaaabaaaa`aaa^a\_\_aa[a`\_`  
@HWI-EAS443:3:44:64:312#0/1  
AAAGAAGTGGAGATCTAATGTGCGAGTCCCGCACTCGCG  
+HWI-EAS443:3:44:64:312#0/1  
`YS¥Q]aYWa`X¥^]Y]^`¥JR\_`]`W[^ZVYGW^[`\_]\_  
@HWI-EAS443:3:44:680:131#0/1  
GGTTCAGTTCGCTGGTTTCCCTATTGACAAAGTTCAGATC  
+HWI-EAS443:3:44:680:131#0/1  
a`\_aaRa\_\_a[aaaYaaa\_\_]\_\_\_a\_^¥`\_^\_X^]\_\_UW  
@HWI-EAS443:3:44:680:1481#0/1  
GGGCCATATCTCTTGTCTTCTTTGCCCAAATGAGAAATC  
+HWI-EAS443:3:44:680:1481#0/1  
a^`aa`bbbabbb\_b\_ababbaba¥\_\_`baa`bb`baaaU  
@HWI-EAS443:3:44:684:1086#0/1  
GCACTCGCGAGATACTCACTAAGACCACTGTGGACCATAT  
+HWI-EAS443:3:44:684:1086#0/1  
a\_[]baaaba\_[^a¥a\_\_aaaa`¥W]`a`^a]`\_\_[^``

@HWI-EAS443:3:44:686:328#0/1  
CAACCCTGATCCTCTCACATTCACAGTCAATGAGGAAAAT  
+HWI-EAS443:3:44:686:328#0/1  
abbaaa`aa`aaa`^`\_`a`\_aU`\_`a]a`^]`\_`^  
@HWI-EAS443:3:44:68:218#0/1  
ATAAAAGAACTGAGAGATCTAATGTCGCAGTCCCGCACTC  
+HWI-EAS443:3:44:68:218#0/1  
abaaaaa`aaa]aaa\_]aabaab¥\_\_a`a¥\_¥`^\_X^^¥  
@HWI-EAS443:3:44:697:1674#0/1  
CAATTACAGCAGACAAGAGAATAATGGACATGATTCCAGA  
+HWI-EAS443:3:44:697:1674#0/1  
ababbbaaaabb\_aa`a`baaa\_aaaa\_`^a`a`aYa\_\_  
@HWI-EAS443:3:44:718:928#0/1  
CTCCTGGTTGCCTTTCTGAGAATAGCTGTTGCTCTTCTCC  
+HWI-EAS443:3:44:718:928#0/1  
]bb`^`¥Q¥¥V^aa^]]`V[Ya]a]ab^00SY00\_HYLY  
@HWI-EAS443:3:44:720:697#0/1  
GATCTTCAGTCAATGCACCTGCATCCTTTCCAAGAACTGT  
+HWI-EAS443:3:44:720:697#0/1  
a\_a`aaaa`a]a`\_a\_a\_aa`^`\_\_\_aa`\_]`^]`^^`\_`Z  
@HWI-EAS443:3:44:765:1416#0/1  
GAATAAAAGAACTGAGAGATCTAATGTCGCAGTCCCGCAC  
+HWI-EAS443:3:44:765:1416#0/1  
a`\_aaa`ba]a`ab`a]\_\_a`a``YI[\_U`\_R]`a]]]Y  
@HWI-EAS443:3:44:781:989#0/1  
GCCCTGTCCACTTCAGAAATCAAGTTAAAATAAGGAGGAG  
+HWI-EAS443:3:44:781:989#0/1  
aaaa]X^a\_XU`\_]\_¥QU[QZRWUa¥YNT^][PR^^`aYV[  
@HWI-EAS443:3:44:796:1107#0/1  
AAAGAACTGAGAGATCTAATGTCGCAGTCCCGCACTCGCG  
+HWI-EAS443:3:44:796:1107#0/1  
aa`a`^a\_a^aa`^`\_`a`RX`]`X^U]UXYUY]]XY  
@HWI-EAS443:3:44:799:382#0/1  
AAAAGAACTGAGAGATCTAATGTCGCAGTCCCGCACTCGC  
+HWI-EAS443:3:44:799:382#0/1  
\_abaaabaa]aaba[`\_`^`aa`\_a¥\_aU\_Y¥[SS`¥[\_U  
@HWI-EAS443:3:44:829:1486#0/1  
GAATAAAAGAACTGAGAGATCTAATGTCGCAGTCCCGCAC  
+HWI-EAS443:3:44:829:1486#0/1  
aababbb`b`baaaaaaaaaaaaaaaaaYa[`a`^^``\_\_\_[  
@HWI-EAS443:3:44:859:213#0/1  
CCTTGATCATGCAATCCTCTTGTGAGAATACCATGGCCAC  
+HWI-EAS443:3:44:859:213#0/1  
aaabbaaaaaaaaa`a`\_aaaaa^a\_a`\_a`]]`[¥¥ZY\_Y  
@HWI-EAS443:3:44:890:913#0/1  
GTCGCAGTCCCGCACTCGCGAGATACTACTAAGACCACT  
+HWI-EAS443:3:44:890:913#0/1  
ZORXRZ]V\_a\_W`HZUSW¥TZZ¥`\_S[\_QW[XX¥¥`¥SVT  
@HWI-EAS443:3:44:906:1155#0/1  
AAAGAACTGAGAGATCTAATGTCGCAGTCCCGCACTCGCG

+HWI-EAS443:3:44:906:1155#0/1  
a^[^]Z`bbaTaaV^\_a\_aab\_[\_\_\_\_aU[\_]\_ZW¥a^]]\_  
@HWI-EAS443:3:44:906:1834#0/1  
AGAATAATGGACATGATTCCAGAGAGGAATGAACAAGGAC  
+HWI-EAS443:3:44:906:1834#0/1  
a)`a\_aaaaaaaaa\_``\_SMP`^\_XX^\_Z\_]X^\_UKKK  
@HWI-EAS443:3:44:914:1960#0/1  
GGAAAAGCACTTTTGCATCTTTTTGGAAATGCCTCAAGAG  
+HWI-EAS443:3:44:914:1960#0/1  
`b`Y`]baaZU`Z[a]`RV[]aU]^Xaa\_a][¥¥H`[^a\_  
@HWI-EAS443:3:44:967:1190#0/1  
TGGTGGCGTACATGCTAGAAAGAGAATTGGTCCGTA AAC  
+HWI-EAS443:3:44:967:1190#0/1  
a]bWaa``\_a\_a`a¥a\_a\_^\_a¥`Y``a^\_Y¥Y\_¥\_¥\_`N  
@HWI-EAS443:3:44:984:1988#0/1  
CATGGTATTCTCACAAGAGGATTGCATGATCAAGGCAGTT  
+HWI-EAS443:3:44:984:1988#0/1  
ababaababbbabbbbababbbb\_abb`babaa\_b^a  
@HWI-EAS443:3:44:992:1105#0/1  
AAAGAACTGAGAGATCTAATGTCGCAGTCCCGCACTCGCG  
+HWI-EAS443:3:44:992:1105#0/1  
\_[UXWaa```W\_`a`\_aaaa¥¥]`a]Q`\_\_\_\_[NX\_PSVV  
@HWI-EAS443:3:44:995:1669#0/1  
CTGCTGTAATTGGGTATCTCATTGCCATCATCCACTTCAT  
+HWI-EAS443:3:44:995:1669#0/1  
ab`¥aaa\_abab^]Wbaab¥aa\_a\_a`aaU][a^a\_]\_\_  
@HWI-EAS443:3:45:1044:959#0/1  
CCCGTTTTCGTTTTATTACCAACTACGTCCCCTTGCCC  
+HWI-EAS443:3:45:1044:959#0/1  
^RUaYY¥UO\_MRUOP¥U[MS^[HSZWSY¥VKNWXBBBBBB  
@HWI-EAS443:3:45:1047:374#0/1  
AATTGTGGCCATGGTATTCTCACAAGAGGATTGCATGATC  
+HWI-EAS443:3:45:1047:374#0/1  
TXXX`U\_V^[YPYVPQVQPQZFVXXJX¥KT¥ZYBBBBBB  
@HWI-EAS443:3:45:1056:270#0/1  
GAGATACTACTAAGACCACTGTGGACCATATGGCCATAA  
+HWI-EAS443:3:45:1056:270#0/1  
`Q¥P^RQXT[\_]X¥^QU]]\_^\_WV]NYTPV[¥\_ZRNOSXV  
@HWI-EAS443:3:45:106:1680#0/1  
CAGGGTTGAGGATACTGGTAAGAGGCAATTCTCCAGTATT  
+HWI-EAS443:3:45:106:1680#0/1  
ab```Ya`abb]bZb`RV[a^a\_[\_a`aab]b`U^`P`bb  
@HWI-EAS443:3:45:1118:1866#0/1  
TCGCGAGATACTACTAAGACCACTGTGGACCATATGGCC  
+HWI-EAS443:3:45:1118:1866#0/1  
a`b^b``WW]RK]a`baa\_a^\_b¥XZWa[\_Q]Y`a\_aXWY  
@HWI-EAS443:3:45:1128:714#0/1  
CTCGGTCTGATCCAGCATCGTTTTGTTTGTCTCCAGGGT  
+HWI-EAS443:3:45:1128:714#0/1  
a\_bb][abba`aa`aa`aa[aaa\_\_aa\_a`a[¥a¥\_aaS

@HWI-EAS443:3:45:1146:528#0/1  
ATTCCAGAGAGGAATGAACAAGGACAAACCCTCTGGAGCA  
+HWI-EAS443:3:45:1146:528#0/1  
aab`aaa\_a\_ba`aabaaaaaa¥^a`X^`\_\_aa`^\_aa  
@HWI-EAS443:3:45:1155:874#0/1  
AGGGGACGTAGTGTGGTAATGAAACGAAAACGGGACTCT  
+HWI-EAS443:3:45:1155:874#0/1  
aababa\_bYT\_ababaaQ^¥`[`a`U\_\_`\_`Qa\_`[[¥]\_  
@HWI-EAS443:3:45:1158:1510#0/1  
AAAAGAAGTCTAATGTCGCAGTCCCGCACTCGC  
+HWI-EAS443:3:45:1158:1510#0/1  
a]Vaaaa\_baabaa`a]a^Z`a^aa\_^a]]^a`\_Y^\_V\_^  
@HWI-EAS443:3:45:1242:74#0/1  
CCCGTTTTCGTTTTATTACCAACTACGTCCCCTTGCCC  
+HWI-EAS443:3:45:1242:74#0/1  
ab^baababbaaa`abaa`a`Y\_`a`[Y\_]\_\_0aYVW  
@HWI-EAS443:3:45:1277:380#0/1  
GGTGGTTCACTTTCAAAGGACAAGCGGATCATCAGTCA  
+HWI-EAS443:3:45:1277:380#0/1  
ab\_b`abbab`bbba`aabaaY\_a\_ba`b^aaab`b^`a  
@HWI-EAS443:3:45:1297:613#0/1  
CAACAACAAGTACAGTTCATTACCCTAAGGTATATAAAAC  
+HWI-EAS443:3:45:1297:613#0/1  
`bbbbbaabaa`a\_abbbabaa]abaabb^ab`baab`a  
@HWI-EAS443:3:45:1324:370#0/1  
AGGGGACGTAGTGTGGTAATGAAACGAAAACGGGACTCT  
+HWI-EAS443:3:45:1324:370#0/1  
ababaa`b\_ababaaab^Y]aa^a\_N\_]`a`Zaaa^[\_VY  
@HWI-EAS443:3:45:1339:717#0/1  
AGCATGTACGCCACCATCAAGGGAGCAATTTTACAATCCT  
+HWI-EAS443:3:45:1339:717#0/1  
[P`aa\_`aaa¥]\_X0^[^`W\_Z\_\_`^]X`]^Y^X\_]`GZZ  
@HWI-EAS443:3:45:1362:823#0/1  
AGAACCCCGCACTCAGAATGAAGTGGATGATGGCAATGAG  
+HWI-EAS443:3:45:1362:823#0/1  
abab\_`a`b`\_`aX\_a\_^aa]\_a^aa`\_\_`T\_\_\_\_^\_\_X[  
@HWI-EAS443:3:45:1381:339#0/1  
CGTACATGCTAGAAAGAGAATTGGTCCGTAACAAGGTT  
+HWI-EAS443:3:45:1381:339#0/1  
`X0\_^a\_\_b`\_\_^baaZaX[[ab\_YX\_\_Z\_^abaa^aa^¥  
@HWI-EAS443:3:45:1399:1130#0/1  
GTCCCCTTTTCTTTTATTACCAACTACGTCCCCTTGCC  
+HWI-EAS443:3:45:1399:1130#0/1  
aS¥^`]U``[Z\_`[\_^\_a[\_^U\_\_Z\_V[ZR^Y]VUV^Y\_U  
@HWI-EAS443:3:45:13:492#0/1  
CATTATTCTCTGTCTGCTGTAATTGGGTATCTCATTGCC  
+HWI-EAS443:3:45:13:492#0/1  
¥\_¥¥`bbba`\_\_Z¥X^`¥`\_[Z^a]ZX\_Z\_W[U``aZXY^  
@HWI-EAS443:3:45:1484:1499#0/1  
GAGAATAAAGAAGTCTAATGTCGCAGTCCCGC

+HWI-EAS443:3:45:1484:1499#0/1  
aaa`aaaa`aa`a^aaaaa`\_^a`\_a^\_]`\_`YX^]]  
@HWI-EAS443:3:45:1492:1155#0/1  
GTACTTTTTGATTATGGCCATATGGTCCACAGTGGTCTTA  
+HWI-EAS443:3:45:1492:1155#0/1  
``^`aaaaa`\_\_\_\_\_``^X`XTW[TVWYVNNNJRYGVVWS  
@HWI-EAS443:3:45:1504:1047#0/1  
GCCCTGTCCACTTCAGAAATCAAGTTAAAATAAGGAGGAG  
+HWI-EAS443:3:45:1504:1047#0/1  
a[``[`¥`R^Sa\_P]aW`a[[Wa\_\_YSY^`^Ya\_]a]]\_`  
@HWI-EAS443:3:45:153:1325#0/1  
ATGGCAATGAGATACCCAATTACAGCAGACAAGAGAATAA  
+HWI-EAS443:3:45:153:1325#0/1  
T[ ]N^¥b¥X^a¥`Z[Yb¥SZW^\_Y`^aUa\_P¥`¥^ab]Z]  
@HWI-EAS443:3:45:1546:1770#0/1  
ATGCAAGGCAGCAATAGGGTTGAGGATTAGCTCATCTTTC  
+HWI-EAS443:3:45:1546:1770#0/1  
aab`aab\_aa¥`\_``aaaN\_Y\_a\_^`\_`\_`\_`W\_`\_`]  
@HWI-EAS443:3:45:1567:625#0/1  
AAAGAAGTCTAATGTTCGAGTCCCGCACTCGCG  
+HWI-EAS443:3:45:1567:625#0/1  
\_\_b]]`ab\_aa`ba`aaa\_bSZa^^`SY[^^]`\_^Z^Y¥  
@HWI-EAS443:3:45:1640:656#0/1  
GGCGATCTGAACCTTGTCAATAGGGCAAACCAGCGACTGA  
+HWI-EAS443:3:45:1640:656#0/1  
abaa\_a^^^`]Vaa¥TZ[`¥a[aa]NY¥a`\_`aZ\_ZV[\_Z  
@HWI-EAS443:3:45:165:179#0/1  
AATGTGCTAATTGGGCAAGGGACGTAGTGTGGTAATGA  
+HWI-EAS443:3:45:165:179#0/1  
^bbaHXbb`aVPaa]a`Z[ ]P[aX`aRb`bb^PVa^`]  
@HWI-EAS443:3:45:1667:765#0/1  
AAAAGAAGTCTAATGTTCGAGTCCCGCACTCGC  
+HWI-EAS443:3:45:1667:765#0/1  
`aaa`ab]aaa`aaaa`a`\_aa\_\_`\_\_¥\_]a\_\_^]U[ ]^  
@HWI-EAS443:3:45:1679:1466#0/1  
GAGAGATCTAATGTTCGAGTCCCGCACTCGCGAGATACTC  
+HWI-EAS443:3:45:1679:1466#0/1  
a\_\_bba`aab[bb`aaaab\_a`\_a[Ya\_\_`\_\_¥a^Q^S^N  
@HWI-EAS443:3:45:1688:445#0/1  
AGAAGTCTAACGGCAACCTCCAAACTGAAAATAAGA  
+HWI-EAS443:3:45:1688:445#0/1  
aba\_b¥baa`] ^aaa`\_`\_`\_a\_\_\_\_\_^¥\_\_aa^`\_^`\_`\_a^  
@HWI-EAS443:3:45:1711:1597#0/1  
AAAGAAGTCTAATGTTCGAGTCCCGCACTCGCG  
+HWI-EAS443:3:45:1711:1597#0/1  
aaaa^b\_baaaaa`\_`\_aa\_abN]a\_\_`S\_¥Z¥¥Z¥ZUUT\_  
@HWI-EAS443:3:45:172:341#0/1  
TCCCGTTTTCGTTTCATTACCAACTACGTCCCCTTGCC  
+HWI-EAS443:3:45:172:341#0/1  
a`aab\_abbbb\_ab\_a`baaa`a\_a`aaaa]`\_\_\_\_\_^`\_^`



@HWI-EAS443:3:45:1788:1148#0/1  
TTCCTGATGTACTTTTTGATTATGGCCATATGGTCCAC  
+HWI-EAS443:3:45:1788:1148#0/1  
`baaaaabb`b\_aaabbaba`abT^[^\_^\_X[[[UYV]TZ  
@HWI-EAS443:3:45:179:1308#0/1  
TGGGGTGGAGTCTGCTGTCCTGAGAGGATTTCTCATTTTG  
+HWI-EAS443:3:45:179:1308#0/1  
abaaa\_aa`a\_aaa`aa`aa`\_`M`^`aa`\_a\_aaa`a[  
@HWI-EAS443:3:45:199:1390#0/1  
AGCAGACCCATTAGCATCTCTTTGGAAATGTGCCACAGC  
+HWI-EAS443:3:45:199:1390#0/1  
aba^aaaa]a\_N[`[a\_[bab\_aaa`baa`^ab^\_Saaa  
@HWI-EAS443:3:45:211:580#0/1  
GGACAAACCCTCTGGAGCAAACAAACGATGCTGGATCAG  
+HWI-EAS443:3:45:211:580#0/1  
aabaaaaaaaaaaaa\_aa\_aa``aaaa\_a\_\_a\_aa]^¥Ua\_  
@HWI-EAS443:3:45:282:819#0/1  
AACATCATCATTTCTCACTTCTCCTCCTGGAGTGTACATC  
+HWI-EAS443:3:45:282:819#0/1  
a`aaaYaa`aaaa[\_\_a]\_a^`a`a`\_\_`a¥YUa¥\_^^\_Y  
@HWI-EAS443:3:45:302:90#0/1  
ATTTTCCTCATTGACTGTGAATGTGAGAGGATCAGGGTTG  
+HWI-EAS443:3:45:302:90#0/1  
aabaa`b\_a^a`^V^a]YSZU`a]YD00b[kVW]Z``U]Y  
@HWI-EAS443:3:45:385:867#0/1  
GCTGGATCAGACCGAGTGATGGTATCACCTCTGGCCGTAA  
+HWI-EAS443:3:45:385:867#0/1  
a`Z\_\_V\_Za\_YZ]R]\_K^X`]a¥]YQTMOWT[X`¥[¥RXV  
@HWI-EAS443:3:45:397:548#0/1  
CTGCTGTCCTGAGAGGATTTCTCATTTTGGGCAAAGAAGA  
+HWI-EAS443:3:45:397:548#0/1  
UWbab\_a^^b]\_[\_¥\_````[^b`bab¥`¥YU]ba¥aaV¥  
@HWI-EAS443:3:45:408:1269#0/1  
GAGGATTAGCTCATCTTTCAGTTTTGGTGGGTTCACTTTC  
+HWI-EAS443:3:45:408:1269#0/1  
a`bb```YabYYZ¥a`¥a^X]Z``VV¥R\_b[HZZPSR`PJ  
@HWI-EAS443:3:45:418:903#0/1  
AAAGAAGTCTGAGAGATCTAATGTGCGAGTCCCGCACTCGCG  
+HWI-EAS443:3:45:418:903#0/1  
Y`\_YU[L\_V¥\_\_`SY`aa[`ba^TUa¥N`a\_ab]`R]`H`  
@HWI-EAS443:3:45:439:501#0/1  
AAAGAAGTCTGAGAGATCTAATGTGCGAGTCCCGCACTCGCG  
+HWI-EAS443:3:45:439:501#0/1  
a`\_`aa`aaaaWa\_aaa`aa`\_[a`a`UTZ¥QaY[¥\_¥¥`  
@HWI-EAS443:3:45:441:204#0/1  
GTCCCCTTTTTCGTTTCATTACCAACTACGTCCTTGC  
+HWI-EAS443:3:45:441:204#0/1  
aabaabaabbabaaa`aaabaaa`\_a\_a```^Z^]`¥XS  
@HWI-EAS443:3:45:445:1922#0/1  
CGCACTCGCGAGATACTCACTAAGACCACTGTGGACCATA

+HWI-EAS443:3:45:445:1922#0/1  
aaTXXX^[X\_NXUHRXW]NYNLT]XXaRWUR]Y^XBBBB  
@HWI-EAS443:3:45:475:1757#0/1  
GATCTAATGTGCGAGTCCCGCACTCGCGAGATACTCACTA  
+HWI-EAS443:3:45:475:1757#0/1  
abbabbbb\_Z]Za]``\_`^aaa^aUa\_a\_`Z`XaQa`  
@HWI-EAS443:3:45:510:1117#0/1  
CATCACTCGGTCTGATCCAGCATCGTTTGTGTTTGTCTCCAG  
+HWI-EAS443:3:45:510:1117#0/1  
a`b`aa`\_a`]a\_]\_\_\_\_\_a[\_a\_a^\_aa^^``[^]^YY¥  
@HWI-EAS443:3:45:515:695#0/1  
CCGTTTTCGTTTCATTACCAACTACGTCCCCTTGCCCA  
+HWI-EAS443:3:45:515:695#0/1  
a`\_Q¥[[\_a`¥`a`\_a`^aa\_YXZY^S]P`\_[PSRL]Z  
@HWI-EAS443:3:45:524:303#0/1  
AAAGAAGTCTAATGTGCGAGTCCCGCACTCGCG  
+HWI-EAS443:3:45:524:303#0/1  
\_[aa]a`bbbbbaabaaba^aa^aaZ]`aa[[`^^`a`  
@HWI-EAS443:3:45:563:936#0/1  
GTGCGAGTCCCGCACTCGCGAGATACTCACTAAGACCACT  
+HWI-EAS443:3:45:563:936#0/1  
aXUXZZ^N`\_¥[W¥¥¥^WWY\_NN¥UWWWQXZUUSWUV  
@HWI-EAS443:3:45:608:1098#0/1  
AAAAGAAGTCTAATGTGCGAGTCCCGCACTCGCG  
+HWI-EAS443:3:45:608:1098#0/1  
abbb`\_`bbbb`baaababb\_aaaab^\_\_\_\_\_]`^Z^  
@HWI-EAS443:3:45:60:1200#0/1  
AGAGAATAAAAGAAGTCTAATGTGCGAGTCCCG  
+HWI-EAS443:3:45:60:1200#0/1  
`aab^ababa\_\_`a`aa`Z`baa^`aabb`aa¥aaZ]^\_S  
@HWI-EAS443:3:45:675:242#0/1  
CCACTTCAGAAATCAAGTAAAATAAGGAGAGATTGAT  
+HWI-EAS443:3:45:675:242#0/1  
\_]`Z`]\_bb\_] [a``b^`WSR\_a\_RaaVa^[a^`¥]`a]  
@HWI-EAS443:3:45:675:74#0/1  
GAGGATTAGCTCATCTTTCAGTTTTGGTGGGTTCACTTTC  
+HWI-EAS443:3:45:675:74#0/1  
a`ba\_``\_a\_]¥^`W`a`X[\_^`^\_¥^Z\_\_Z]YXT¥^¥U  
@HWI-EAS443:3:45:677:1448#0/1  
CGTTTTCGTTTCATTACCAACTACGTCCCCTTGCCCAA  
+HWI-EAS443:3:45:677:1448#0/1  
aabbaaba\_b\_bbabbMbbGbbbb`bb\_aa`ba`\_a`  
@HWI-EAS443:3:45:689:886#0/1  
CTCGCGAGATACTCACTAAGACCACTGTGGACCATATGGC  
+HWI-EAS443:3:45:689:886#0/1  
]aaa\_¥¥Y¥[a]\_\_aU`a\_\_a^\_aa]Za\_S\_]\_a¥aa\_  
@HWI-EAS443:3:45:693:515#0/1  
GGGCCATATCTTGTCTTCTTTGCCAAAATGAGAAATC  
+HWI-EAS443:3:45:693:515#0/1  
a\_a`¥`\_UbQaXa`ZaXX¥\_aaabUZRaZW``]`aa¥XaX

@HWI-EAS443:3:45:695:541#0/1  
AAAGAAGCTGAGAGATCTAATGTCGCAGTCCCGCACTCGCG  
+HWI-EAS443:3:45:695:541#0/1  
`bab`a`abbbbabaabaab¥]a`b^[\_a\_a`a\_a`a  
@HWI-EAS443:3:45:698:892#0/1  
GTGTACATCTGCTCCAGCACGTCCCTTGGGTAAAGTGCA  
+HWI-EAS443:3:45:698:892#0/1  
aZbabbbaaaba\_`aaa\_a]`[\_`\_\_\_aa`a]a`\_aY`R[  
@HWI-EAS443:3:45:734:1244#0/1  
GTCCATTATTCTTGTCTGCTGTAATTGGGTATCTCATT  
+HWI-EAS443:3:45:734:1244#0/1  
`ababab`b`\_aaaaa`ba\_aa^^a`a\_\_\_¥aa\_`[\_`\_a  
@HWI-EAS443:3:45:747:861#0/1  
GTGGGTTCACTTTCAAAGGACAAGCGGATCATCAGTCAA  
+HWI-EAS443:3:45:747:861#0/1  
a]a`aZ`Z^)``a^^[\_`\_`^`^`^¥^a^]\_Y]\_]\_YY\_]`  
@HWI-EAS443:3:45:799:484#0/1  
CACTGACTCAGGGCCATTGATCTCCACATCATTGATGAC  
+HWI-EAS443:3:45:799:484#0/1  
ab\_bbbaab`abbaaabbbaaaa`¥`a`bb`bb`baaba\_  
@HWI-EAS443:3:45:813:366#0/1  
GGGACGTAGTGTGGTAATGAAACGAAACGGGACTCTA  
+HWI-EAS443:3:45:813:366#0/1  
aaaa\_\_b\_\_b\_a\_aaaVY\_\_a^`^L^)``\_P¥^`XKX[[Z  
@HWI-EAS443:3:45:827:910#0/1  
CAGCACACAGATTGGAGGAGTAAGGATGGTGGACATCCTT  
+HWI-EAS443:3:45:827:910#0/1  
abbaabbabbaaaaa^a`\_]`aaa``^aa\_a`^X^^¥a``  
@HWI-EAS443:3:45:864:1725#0/1  
GGCACATTTCCAAGAGAGATGCTAATGGGTCTGCTGACAC  
+HWI-EAS443:3:45:864:1725#0/1  
a`aa\_aaaa`aa^`````^`\_]\_^[\_a]RY]\_V\_¥YY¥Y  
@HWI-EAS443:3:45:865:604#0/1  
AAAAGAAGCTGAGAGATCTAATGTCGCAGTCCCGCACTCGC  
+HWI-EAS443:3:45:865:604#0/1  
aba¥\_]aUS\_XIZbababa`]b\_aaaaTT[]a\_`\_\_^\_X  
@HWI-EAS443:3:45:875:322#0/1  
CTCTTGTCTGCTGTAATTGGGTATCTCATTGCCATCATCC  
+HWI-EAS443:3:45:875:322#0/1  
aabbbbb^bbabb\_aabbaba\_ba`b^aaa````aa\_a`a\_  
@HWI-EAS443:3:45:887:547#0/1  
GTCCCCTTTTCGTTTCATTACCAACTACGTCCCCTTGC  
+HWI-EAS443:3:45:887:547#0/1  
a\_]WQ\_JYTVHU¥ZVJVXWWLU][KZ[V[^NTRXNUWYV  
@HWI-EAS443:3:45:917:615#0/1  
GCTCCCTTGATGGTGGCGTACATGCTAGAAAGAGAATTGG  
+HWI-EAS443:3:45:917:615#0/1  
a`]Y^\_aaaa¥]aZ^a`^VSZ^\_a^`\_a¥R[`]`^`ZT]\_  
@HWI-EAS443:3:45:918:1393#0/1  
GGGACGTAGTGTGGTAATGAAACGAAACGGGACTCTA

+HWI-EAS443:3:45:918:1393#0/1  
a`aa\_Ya\_]\_a^a\_aXaMS\_[¥^`YJVZ^^YFQV[QUUUWV  
@HWI-EAS443:3:45:982:1859#0/1  
AAAGAAGTCTAATGTCGAGATCTAATGTCGAGTCCCGCACTCGCG  
+HWI-EAS443:3:45:982:1859#0/1  
a`^¥\_a^aa``X`^`a`aaZ\_\_\_a[\_Z¥^\_^Z[¥ZZW\_  
@HWI-EAS443:3:45:993:384#0/1  
GAGAATAAAAGAACTGAGAGATCTAATGTCGAGTCCCGC  
+HWI-EAS443:3:45:993:384#0/1  
a`^`aba`a\_]a\_babab``]^a`aa^`\_Ua]YZ¥\_`^  
@HWI-EAS443:3:46:1029:1036#0/1  
TGCTGTAATTGGGTATCTCATTGCCATCATCCACTTCATT  
+HWI-EAS443:3:46:1029:1036#0/1  
ababaaa`baaaa^aaaa\_a``a`a`a`\_¥\_\_a``^\_\_  
@HWI-EAS443:3:46:1030:1031#0/1  
GTCCCGTTTTCGTTTCATTACCAACTACGTCCCCTTGCC  
+HWI-EAS443:3:46:1030:1031#0/1  
aZZW\_a[\_``\_V`\_\_^`^\_]ZVR^X^]]Y]Y]]VMPU  
@HWI-EAS443:3:46:1033:763#0/1  
CCCGTTTTCGTTTCATTACCAACTACGTCCCCTTGCCC  
+HWI-EAS443:3:46:1033:763#0/1  
abba`aabbbaba`bbbbaaaa`aaaba``\_``\_\_a\_`^`  
@HWI-EAS443:3:46:1039:1502#0/1  
CAAGTACAGTTCATTACCCTAAGGTATATAAACTTATTT  
+HWI-EAS443:3:46:1039:1502#0/1  
aabb\_baaaababbbbaa`babab]baaaaaba^aaaaaa  
@HWI-EAS443:3:46:104:1338#0/1  
CTGCTGTCCTGAGAGGATTTCTCATTGTTGGCAAAGAAGA  
+HWI-EAS443:3:46:104:1338#0/1  
`\_¥Z\_aZ`a¥`\_`^\_a`^a\_a`ab``¥X¥[``a`¥Y^W]  
@HWI-EAS443:3:46:109:970#0/1  
TCCCGTTTTCGTTTCATTACCAACTACGTCCCCTTGCC  
+HWI-EAS443:3:46:109:970#0/1  
ab`bb\_\_baab\_aaaabaaa]a\_aaaaa\_a^\_\_^\_\_[\_]  
@HWI-EAS443:3:46:1116:1886#0/1  
CTGCTGTCCTGAGAGGATTTCTCATTGTTGGCAAAGAAGA  
+HWI-EAS443:3:46:1116:1886#0/1  
`aaaaa^\_aaa`aa`aa`aa^a^`aaaaa]\_^````\_^\_  
@HWI-EAS443:3:46:1130:112#0/1  
GATACCATCACTCGGTCTGATCCAGCATCGTTTGTTCG  
+HWI-EAS443:3:46:1130:112#0/1  
a`a`\_``a`^`^a`][\_`^Z[[^ZV\_[aV]\_`YZY^V  
@HWI-EAS443:3:46:1147:612#0/1  
CTCACTAAGACCACTGTGGACCATATGGCCATAATCAAAA  
+HWI-EAS443:3:46:1147:612#0/1  
Y¥¥aXJV\_b``XXX]Xab]\_YUUAZaNAT\_VaLZYF^baa  
@HWI-EAS443:3:46:1164:1867#0/1  
CTTCCTGATGTGTACTTTTTGATTATGGCCATATGGTCCA  
+HWI-EAS443:3:46:1164:1867#0/1  
aaaaaa]a]a\_a]a`aabaa]aa`aa]^`\_aZ`V[^VUU]

@HWI-EAS443:3:46:1278:753#0/1  
CAACCCTGATCCTCTCACATTCACAGTCAATGAGGAAAAT  
+HWI-EAS443:3:46:1278:753#0/1  
aab\_`^aT]\_aa`\_\_`\_a\_a^`]\_aV\_`[\_aaa\_^YYa^  
@HWI-EAS443:3:46:1299:1464#0/1  
TAATGTGCGAGTCCCCTCGACTCGCGAGATACTCACTAAGAC  
+HWI-EAS443:3:46:1299:1464#0/1  
a\_`^^a^a`X\_`[V\_U[\_R]UTY¥YZ^US]^[[TX\_U  
@HWI-EAS443:3:46:1302:1247#0/1  
GAACCCCGCACTCAGAATGAAGTGGATGATGGCAATGAGA  
+HWI-EAS443:3:46:1302:1247#0/1  
`^\_¥]`b`¥]`^¥[`^YZ]]\_aP]]U\_`YZ[[P¥TU^K¥S  
@HWI-EAS443:3:46:1313:51#0/1  
CGTACATGCTAGAAAGAGAATTGGTCCGTA AAAACAAGGTT  
+HWI-EAS443:3:46:1313:51#0/1  
`ba`]babaaaa]\_\_bababaaa`]^\_b^^\_\_a\_`^`Z\_  
@HWI-EAS443:3:46:1344:1227#0/1  
AATGTGCGAGTCCCCTCGACTCGCGAGATACTCACTAAGACC  
+HWI-EAS443:3:46:1344:1227#0/1  
a`a\_[]`^]\_[\_]Y\_^T\_``¥X^Q^W]ZTY¥¥[¥^¥¥YYV  
@HWI-EAS443:3:46:1353:392#0/1  
CTCATCTTTTCAGTTTTGGTGGGTTCACTTTCAAAAAGGACA  
+HWI-EAS443:3:46:1353:392#0/1  
`baababbbaaa]bbaba]b`b`aaaaaba`a\_\_aa\_`\_a  
@HWI-EAS443:3:46:1365:1980#0/1  
GAACTGAGAGATCTAATGTGCGAGTCCCCTCGACTCGCGAGA  
+HWI-EAS443:3:46:1365:1980#0/1  
aabaaPbaaaa`\_`aaabV[R¥a\_N\_^\_^W\_U\_¥W\_YYV  
@HWI-EAS443:3:46:1384:1932#0/1  
CAGTCCCCTCGACTCGCGAGATACTCACTAAGACCACTGTGG  
+HWI-EAS443:3:46:1384:1932#0/1  
aaaRa[aa\_aaa¥]ZX]baaTR]`a`aa[aU\_\_T`S^Z  
@HWI-EAS443:3:46:1386:1328#0/1  
AAAGAACTGAGAGATCTAATGTGCGAGTCCCCTCGACTCGCG  
+HWI-EAS443:3:46:1386:1328#0/1  
a`a`^^`bab\_\_aaaaaaaa^\_\_\_\_`W^`\_¥YLZYW¥V[  
@HWI-EAS443:3:46:1394:138#0/1  
CCCCTTTTCGTTTTATTACCAACTACGTCCCCTTGCCC  
+HWI-EAS443:3:46:1394:138#0/1  
^a`ZS\_a^\_X^PGNZaXQZ\_a]]QTT]WDPO[ZXTTVTO  
@HWI-EAS443:3:46:1402:1903#0/1  
CCCCTTTTCGTTTTATTACCAACTACGTCCCCTTGCCC  
+HWI-EAS443:3:46:1402:1903#0/1  
aabb\_`bbbaa`aaababaaba`aaaa`a\_`\_`¥`a\_\_]  
@HWI-EAS443:3:46:1408:1562#0/1  
GGTGGGTTCACTTTCAAAAAGGACAAGCGGATCATCAGTCA  
+HWI-EAS443:3:46:1408:1562#0/1  
\_Q]XW\_Y[L[R^XGZZ\_`]Y\_] ^NUZ\_]UVNQ^]UR[  
@HWI-EAS443:3:46:1440:897#0/1  
CCCCTTTTCGTTTTATTACCAACTACGTCCCCTTGCCC

+HWI-EAS443:3:46:1440:897#0/1  
aaa[DRYa[^WQX]ZY`]RP¥\_XZX\_\_Z¥aBBBBBBBBBB  
@HWI-EAS443:3:46:1457:933#0/1  
GAATAAAAGAACTGAGAGATCTAATGTCGCAGTCCCGCAC  
+HWI-EAS443:3:46:1457:933#0/1  
a`U\_`bbbaU`abaaa`bab\_baaab]]`a`b\_a^[]\_NU  
@HWI-EAS443:3:46:1463:1557#0/1  
GTCCCGTTTTTCGTTTCATTACCAACTACGTCCCCTTGC  
+HWI-EAS443:3:46:1463:1557#0/1  
a\_aaaa^\_a\_¥Z¥[^\_aa]`XZa`][^¥Z¥\_] [R[VVT  
@HWI-EAS443:3:46:1466:421#0/1  
GTCGCTGAGAGGATAAGAGTCAGCAAAATGGGAGTAGAT  
+HWI-EAS443:3:46:1466:421#0/1  
a`aaaab\_a\_baa¥`\_\_a\_aW\_`a\_\_\_\_\_`^^`\_¥aW^[[^  
@HWI-EAS443:3:46:1492:1324#0/1  
GGAGAGAATAAAAGAACTGAGAGATCTAATGTCGCAGTCC  
+HWI-EAS443:3:46:1492:1324#0/1  
aa[a^a[\_a`\_^\_V\_]a`\_\_`a\_\_]`\_]a\_]^\_^^X]Y  
@HWI-EAS443:3:46:1498:470#0/1  
AAAAGAACTGAGAGATCTAATGTCGCAGTCCCGCACTCGC  
+HWI-EAS443:3:46:1498:470#0/1  
abbbbaaaabbbbaaaaabaab\_`aa\_a^\_\_^^¥[W\_W\_\_  
@HWI-EAS443:3:46:1516:1557#0/1  
CATTCCCATCACATTGTCGATGGATTCAATCCCCAGTTC  
+HWI-EAS443:3:46:1516:1557#0/1  
aab`^a`aa\_\_^\_\_aa]aa\_\_\_\_`\_]\_^]X`^Y]^ZW\_U\_Z  
@HWI-EAS443:3:46:151:1014#0/1  
TGCGGGATGTGCTTGGGACATTTGACACTGTCCAAATAAT  
+HWI-EAS443:3:46:151:1014#0/1  
aa]baba¥^JYU[Y\_\_aaaaa]`aab]aa`]HL]`aa\_a  
@HWI-EAS443:3:46:1524:1374#0/1  
GTCCCGTTTTTCGTTTCATTACCAACTACGTCCCCTTGC  
+HWI-EAS443:3:46:1524:1374#0/1  
aQaa\_\_N]Y[NZPPa`[]TQK]X^Y¥¥R¥¥YJSZBBBBBB  
@HWI-EAS443:3:46:1559:1040#0/1  
GAGAATAAAAGAACTGAGAGATCTAATGTCGCAGTCCCGC  
+HWI-EAS443:3:46:1559:1040#0/1  
^`aS\_b]\_^`Y`V]a\_T]]`aYb^YaaY]a\_[ZXLQXZ\_  
@HWI-EAS443:3:46:1566:1322#0/1  
CTAATGTCGCAGTCCCGCACTCGCGAGATACTCACTAAGA  
+HWI-EAS443:3:46:1566:1322#0/1  
a`a``bX¥bbaa\_`\_`][`\_`\_aaab^`Z]TS`^[`Y[^`Z  
@HWI-EAS443:3:46:1566:1416#0/1  
AAATGGTTCAAATTCATTTTGTGTATAACATTGTGGGA  
+HWI-EAS443:3:46:1566:1416#0/1  
aa\_`YUVXF]aaa`\_a\_a`a`\_`¥VY\_a\_`T[X\_\_W¥^X^  
@HWI-EAS443:3:46:1571:308#0/1  
ATCTAATGTCGCAGTCCCGCACTCGCGAGATACTCACTAA  
+HWI-EAS443:3:46:1571:308#0/1  
ab`ab`bba\_XX][¥`\_aa^^\_[YSP\_\_aZUZUXW^¥¥\_W

@HWI-EAS443:3:46:1574:891#0/1  
ATTTGGGAAACAACCTCCATAATCACATCCTGTGCCTCC  
+HWI-EAS443:3:46:1574:891#0/1  
`bbbb\_b`b^a`aa`a`\_`aaaaa^a\_\_V]aa^aYX`\_Y  
@HWI-EAS443:3:46:1592:417#0/1  
AGAAACCTTGTTTTACGGACCAATTCTTTCTAGCATGT  
+HWI-EAS443:3:46:1592:417#0/1  
XbaS¥\_X`a]HY]¥[Ja`¥[aaU^a`^`^`a`\_`a\_a\_aY`¥  
@HWI-EAS443:3:46:1599:1279#0/1  
AAAGAAGCTGAGAGATCTAATGTCGCAGTCCCGCACTCGCG  
+HWI-EAS443:3:46:1599:1279#0/1  
ab`b^]aaaa`\_aa``aaaaa\_`a^a`V^^ZU^[Z^¥¥WZ  
@HWI-EAS443:3:46:164:331#0/1  
CCCGTTTTCGTTTCATTACCAACACTACGTCCCCTTGCCC  
+HWI-EAS443:3:46:164:331#0/1  
abbbbaabab¥baX]aaaa¥``aaaaaaa][[^`\_UORZ[  
@HWI-EAS443:3:46:1670:1718#0/1  
AATAAAGAAGCTGAGAGATCTAATGTCGCAGTCCCGCACT  
+HWI-EAS443:3:46:1670:1718#0/1  
]S¥[¥\_`\_]b\_¥^\_]¥a[abba^^)`¥X]XXOZ]]YF]V  
@HWI-EAS443:3:46:1677:598#0/1  
GTCCCGTTTTCGTTTCATTACCAACACTACGTCCCCTTGCC  
+HWI-EAS443:3:46:1677:598#0/1  
\_]a\_\_baaaa``W\_a\_\_aa`Z^`^`^`\_\_[SWYZ[\_¥WV  
@HWI-EAS443:3:46:1681:714#0/1  
AAAGAAGCTGAGAGATCTAATGTCGCAGTCCCGCACTCGCG  
+HWI-EAS443:3:46:1681:714#0/1  
aaaa`aababaaa`aaaa\_aa]a^Q\_a¥¥¥^`\_X¥¥RZ[Y  
@HWI-EAS443:3:46:1696:1093#0/1  
ATTCTCTTTCTAGCATGTACGCCACCATCAAGGGAGCAAT  
+HWI-EAS443:3:46:1696:1093#0/1  
`ba\_aaaababaa`aaa\_a`a`\_`^`^`a\_]b^```[^^`  
@HWI-EAS443:3:46:1709:804#0/1  
CGTTTTCGTTTCATTACCAACACTACGTCCCCTTGCCCAA  
+HWI-EAS443:3:46:1709:804#0/1  
abVaZb]¥XJOX^a\_b¥V¥TZa\_adWEWR\_X¥WUMMO\_¥Y  
@HWI-EAS443:3:46:1725:85#0/1  
GTCCCGTTTTCGTTTCATTACCAACACTACGTCCCCTTGCC  
+HWI-EAS443:3:46:1725:85#0/1  
a`a`\_a\_aaa^aY\_`^^aa\_V]\_¥R]Y\_\_]]Y]XVYYYYX  
@HWI-EAS443:3:46:1737:747#0/1  
AAAAGAAGCTGAGAGATCTAATGTCGCAGTCCCGCACTCGC  
+HWI-EAS443:3:46:1737:747#0/1  
ab]]a^`aaaaa\_aVaaa\_aab]`\_a\_a\_W\_^^Z\_]^[^]\_Z  
@HWI-EAS443:3:46:1757:1086#0/1  
GGATTTCTCATTTTGGGCAAAGAAGACAAGAGATATGGCC  
+HWI-EAS443:3:46:1757:1086#0/1  
ab\_aaba`aabaab`aaa\_\_a\_aaa\_a\_a\_a```\_`^W  
@HWI-EAS443:3:46:1783:1224#0/1  
GTGGAGTCTGCTGCTCCTGAGAGGATTTCTCATTTTGGGCA

+HWI-EAS443:3:46:1783:1224#0/1  
a\_`XN[Z\_\_^ZT^SU]S¥QVT` `UW[[USWUJW[UWZSPS  
@HWI-EAS443:3:46:198:1971#0/1  
GGAAAATTGCATCCTACTCTGTTCTGGTGGAGCAGCAGCA  
+HWI-EAS443:3:46:198:1971#0/1  
KYV\_bU¥X`Y¥]]^UaaaWSaXaabb^SX^` `U\_HJS0a^  
@HWI-EAS443:3:46:218:84#0/1  
ATTGCATCCTACTCTGTTCTGGTGGAGCAGCAGCAAAGGG  
+HWI-EAS443:3:46:218:84#0/1  
^bbaa`b\_\_ba\_a\_bbaaabbb`ba`a\_\_aZ^a[\_¥¥aa`  
@HWI-EAS443:3:46:268:1960#0/1  
GCATTGACTGAAGATCCAGATGAAGGCACATCTGGGGTGG  
+HWI-EAS443:3:46:268:1960#0/1  
a`[\_¥`\_]`aYabVPV^aa]`YZW¥\_YW`S`[U`a^` `W\_\_  
@HWI-EAS443:3:46:273:453#0/1  
GCGAGATACTACTAAGACCACTGTGGACCATATGGCCAT  
+HWI-EAS443:3:46:273:453#0/1  
aabab`baaaaaaaaaaaaaaaaaab^a]a\_`[\_\_\_a`^^¥]  
@HWI-EAS443:3:46:303:606#0/1  
AGCAGTGTGAGCAGACCCATTAGCATCTCTCTTGGAAATG  
+HWI-EAS443:3:46:303:606#0/1  
U\_ba\_Z`\_[b`\_¥aWXR^Z]¥WOOXH]aSQX¥]Z\_U`J]  
@HWI-EAS443:3:46:332:558#0/1  
CCGCACTCGCGAGATACTACTAAGACCACTGTGGACCAT  
+HWI-EAS443:3:46:332:558#0/1  
aaaa[a]aaaaYb[`¥VQa]\_\_QZ^aXSTNN\_U\_`\_^[U\_  
@HWI-EAS443:3:46:349:1192#0/1  
GCAATTTTCCTCATTGACTGTGAATGTGAGAGGATCAGGG  
+HWI-EAS443:3:46:349:1192#0/1  
ababbaababaaab`ba`b0`\_\_`a]Q^Xaa¥VRW\_`a  
@HWI-EAS443:3:46:371:1531#0/1  
GAACCCCGCACTCAGAATGAAGTGGATGATGGCAATGAGA  
+HWI-EAS443:3:46:371:1531#0/1  
\_bbabbabb`aaa`ababaabG`a^^a` ``^`a\_a`aaa  
@HWI-EAS443:3:46:371:848#0/1  
ATCTGCTCCCAGCACGTCCCTTGGGTAAAGTCAACACTT  
+HWI-EAS443:3:46:371:848#0/1  
aaab[`^a^aSa\_a^`\_]a`\_`[Z\_¥`\_^][Q[^a¥¥\_ZaY  
@HWI-EAS443:3:46:394:1237#0/1  
GAATAAAAGAACTGAGAGATCTAATGTCGAGTCCCGCAC  
+HWI-EAS443:3:46:394:1237#0/1  
aaaZ]a¥ab¥aaba\_¥\_]Z`W`aa¥¥Q¥^¥[`\_\_][J^XW[  
@HWI-EAS443:3:46:414:289#0/1  
CTGCTGTAATTGGGTATCTCATTGCCATCATCCACTTCAT  
+HWI-EAS443:3:46:414:289#0/1  
S[`bbbbbaaba`WUI\_¥T[\_]aa¥OW¥a[`[aa¥\_Vba^  
@HWI-EAS443:3:46:445:862#0/1  
CCCGTTTTCGTTTTATTACCAACTACGTCCCTTGCCC  
+HWI-EAS443:3:46:445:862#0/1  
`\_\_b^`ab`b\_`a^aba`a\_a`]aYa\_^^\_UUWVYX¥¥[^



@HWI-EAS443:3:46:45:557#0/1  
GATACCATCACTCGGTCTGATCCAGCATCGTTTGTTTTGC  
+HWI-EAS443:3:46:45:557#0/1  
`abbab`ba]`a`^`[[`\_¥ZY[`YTX^`\_¥T¥` `[`a¥RV  
@HWI-EAS443:3:46:468:1243#0/1  
GTTCACTTTCAAAGGACAAGCGGATCATCAGTCAAGAAA  
+HWI-EAS443:3:46:468:1243#0/1  
a\_a¥]]baba`ZX¥^\_]a\_[\_a\_\_a`adW[[\_a\_][\_--  
@HWI-EAS443:3:46:46:680#0/1  
TGAAGGCACATCTGGGGTGGAGTCTGCTGTCCTGAGAGGA  
+HWI-EAS443:3:46:46:680#0/1  
aaaZXW¥Zaa`\_a\_Y¥VU`a^]NW\_`SPQPFQU^UaT\_XW  
@HWI-EAS443:3:46:484:1525#0/1  
TTGGATTCTGTCTAAGGATGTCCACCATCCTTACTCCTCC  
+HWI-EAS443:3:46:484:1525#0/1  
`ba]]ab`bb¥`\_\_Z[¥TZW]\_a\_[`aWY¥]^¥a`[\_^W  
@HWI-EAS443:3:46:497:1340#0/1  
GTCCCGTTTTCGTTTCATTACCAACTACGTCCCTTGC  
+HWI-EAS443:3:46:497:1340#0/1  
aaa^aba\_a`^a^aa\_abaa[S`]\_a`aaa[V[\_\_\_][U\_]`  
@HWI-EAS443:3:46:530:897#0/1  
GTTGAGGATTAGCTCATCTTTTCTTTTGGTGGGTTCACT  
+HWI-EAS443:3:46:530:897#0/1  
^\_aa`aa]^]\_`^`[U¥\_\_WW`Za`^YaVY]^RVQQR¥  
@HWI-EAS443:3:46:550:1059#0/1  
GAATAAAAGAACTGAGAGATCTAATGTTCGAGTCCCGCAC  
+HWI-EAS443:3:46:550:1059#0/1  
a\_ab]Ua]a][Va`¥¥`aZa\_ba\_\_b¥a¥`U\_YP[a\_¥N¥  
@HWI-EAS443:3:46:555:966#0/1  
AGAGAATAAAAGAACTGAGAGATCTAATGTTCGAGTCCCG  
+HWI-EAS443:3:46:555:966#0/1  
^aa\_^b\_b\_ba`V^¥`abba¥]]`a`aabLaa[aa`aaa\_  
@HWI-EAS443:3:46:557:119#0/1  
GATACTACTAAGACCACTGTGGACCATATGGCCATAATC  
+HWI-EAS443:3:46:557:119#0/1  
a]a\_]\_`\_]a`\_^]`^]\_^]\_\_^]`[]^Z]^YXXYXXYY  
@HWI-EAS443:3:46:563:765#0/1  
AAGTGGATGATGGCAATGAGATACCCAATTACAGCAGACA  
+HWI-EAS443:3:46:563:765#0/1  
a^`¥aaaa`X¥YGV]Z^`aa\_\_aaI`\_\_[\_T`U\_YU^UVZ  
@HWI-EAS443:3:46:563:996#0/1  
ATGGCCATATGGTCCACAGTGGTCTTAGTGAGTATCTCGC  
+HWI-EAS443:3:46:563:996#0/1  
aa\_a`\_`RVUF¥Y[a\_\_`[T]`S\_¥\_Z^U\_[\_UUPWVRUM  
@HWI-EAS443:3:46:57:64#0/1  
AAAGAAGTGGAGATCTAATGTTCGAGTCCCGCACTCGCG  
+HWI-EAS443:3:46:57:64#0/1  
WS`ZUU\_]bUFV`aXR[a]Zaa`aa\_TN]¥`T\_P[L[BBB  
@HWI-EAS443:3:46:597:294#0/1  
GGGCAGTATTCCGATCATTCCCATCACATTGTCGATGGAT

+HWI-EAS443:3:46:597:294#0/1  
abaaba` `aaaaa^aaba` `]\_` ]\_\_\_\_aaa^¥` ^]a` ]^  
@HWI-EAS443:3:46:613:1520#0/1  
CGCGAGATACTCACTAAGACCACTGTGGACCATATGGCCA  
+HWI-EAS443:3:46:613:1520#0/1  
aaaabbbababUaaabbbbaabbaabISaSa\_` bbaa[0` `  
@HWI-EAS443:3:46:639:1018#0/1  
GTCCCGTTTTTCGTTTCATTACCAACTACGTCCCCTTGC  
+HWI-EAS443:3:46:639:1018#0/1  
aa` \_a` ^aba` a\_aa` abaa\_\_aa` a]\_` ]Y]^` ]¥\_¥WV  
@HWI-EAS443:3:46:666:791#0/1  
GTCCCGTTTTTCGTTTCATTACCAACTACGTCCCCTTGC  
+HWI-EAS443:3:46:666:791#0/1  
aWX¥` aRY¥\$^SZZWU¥] ]SJOUGOWM^ ]¥PRZNRUN]Y  
@HWI-EAS443:3:46:717:1013#0/1  
TCCCGTTTTTCGTTTCATTACCAACTACGTCCCCTTGCC  
+HWI-EAS443:3:46:717:1013#0/1  
aaaaa\_abaab]` a` aa` a` `a` \_a` `` `a]¥[^\_ZZ[¥W  
@HWI-EAS443:3:46:71:611#0/1  
CCCCGCACTCAGAATGAAGTGGATGATGGCAATGAGATAC  
+HWI-EAS443:3:46:71:611#0/1  
V¥` ^bbbbb^¥K` ^^\_ZYb[[` [abY` ab\_\_^\_aa^S[]]  
@HWI-EAS443:3:46:835:983#0/1  
GGATTTCTCATTTTGGGCAAAGAAGACAAGAGATATGGCC  
+HWI-EAS443:3:46:835:983#0/1  
a]V` aaaa` aaaaaa\_\_\_\_` a` \_]\_a\_\_\_\_Wa¥a^` \_^^Z^\_  
@HWI-EAS443:3:46:840:38#0/1  
GAATAAAAGAAGACTGAGAGATCTAATGTCGCAGTCCCGCAC  
+HWI-EAS443:3:46:840:38#0/1  
a^` a` YZaa\_` ^` ` \_a^a]^` \_]` `aYYUVY\_VZYV]TGT  
@HWI-EAS443:3:46:859:749#0/1  
GTCCCGTTTTTCGTTTCATTACCAACTACGTCCCCTTGC  
+HWI-EAS443:3:46:859:749#0/1  
` ^aW^b[` bbaaaba^^a^b\_ab]Z^Waaaa[VRR]a[[Y  
@HWI-EAS443:3:46:861:121#0/1  
ATCTAATGTCGCAGTCCCGCACTCGCGAGATACTCACTAA  
+HWI-EAS443:3:46:861:121#0/1  
ababaabb\_aba^a\_\_` a\_aY]` Z` ^` W` VYWT^U[W[¥¥  
@HWI-EAS443:3:46:873:1150#0/1  
GCGAGATACTCACTAAGACCACTGTGGACCATATGGCCAT  
+HWI-EAS443:3:46:873:1150#0/1  
a` b¥a]` aab\_a` aa\_\_a\_\_aaa` \_\_\_\_\_]aX` \_` \_` Z^\_  
@HWI-EAS443:3:46:884:870#0/1  
AGATACTCACTAAGACCACTGTGGACCATATGGCCATAAT  
+HWI-EAS443:3:46:884:870#0/1  
abbaa^baSab` ]a]\_` baaa\_a\_\_a\_\_\_\_^` a` ` [¥[^YJ  
@HWI-EAS443:3:46:896:1616#0/1  
AGCACGTCCCTTGGGTAAAGTGCAACACTTCAATATAAAC  
+HWI-EAS443:3:46:896:1616#0/1  
a\_ab` ]aa` aaaa` \_Y\_aaa]aQaa` aa\_a[a` aaaa[UM



+HWI-EAS443:3:47:1197:198#0/1  
W¥\_H\_`a`babU`bXV\_a¥¥\_]ab\_\_aMHN¥aNJLUUP  
@HWI-EAS443:3:47:1202:1097#0/1  
CTAATGTCGAGTCCCGCACTCGCGAGATACTACTAAGA  
+HWI-EAS443:3:47:1202:1097#0/1  
abbabbaaaab`aaaa\_aaa`X¥aU^¥^\_¥]^`^`[PU  
@HWI-EAS443:3:47:1230:122#0/1  
GTCCCGTTTTTCGTTTCATTACCAACTACTCGCCCTTGC  
+HWI-EAS443:3:47:1230:122#0/1  
a]aaabY\_`\_]b¥\_[[Wa`\_VW¥^]YT\_\_Y[YXPVWTWUU  
@HWI-EAS443:3:47:1233:639#0/1  
CTTGAGGCATTTCCAAAAGATGCAAAAGTGCTTTTCCAG  
+HWI-EAS443:3:47:1233:639#0/1  
abbbbbbbbbbaabbbababababab]b`baaaa\_aa  
@HWI-EAS443:3:47:125:1199#0/1  
CAATCCCCAGTTCTGGAAAAGCACTTTTGCATCTTTTGTG  
+HWI-EAS443:3:47:125:1199#0/1  
aba^]^`[`]¥U\_aaXI]^`VYX^`\_aaY\_]^\_Y]¥\_\_Y]  
@HWI-EAS443:3:47:1266:1289#0/1  
GTCGAGTCCCGCACTCGCGAGATACTACTAAGACCACT  
+HWI-EAS443:3:47:1266:1289#0/1  
a\_a\_]^^aa\_[^Za`\_a^`Ya\_\_ZU^¥[¥W\_\_¥WSWZSZ  
@HWI-EAS443:3:47:1313:1064#0/1  
GGTGGTTCACTTTCAAAGGACAAGCGGATCATCAGTCA  
+HWI-EAS443:3:47:1313:1064#0/1  
a\_F¥RUUXYOZL¥\_¥a^^VXUT\_YSYM¥RPVSWZRXLJ¥V  
@HWI-EAS443:3:47:1361:1964#0/1  
AGTCAATGCACCTGCATCCTTTCCAAGAACTGTAAGTCGT  
+HWI-EAS443:3:47:1361:1964#0/1  
WZa¥HQbbb¥`QZ^T^YVQYZ\_Z`a\_``RTOY^`Y^`WVR  
@HWI-EAS443:3:47:1387:494#0/1  
AAAGAAGTGAAGATCTAATGTCGAGTCCCGCACTCGCG  
+HWI-EAS443:3:47:1387:494#0/1  
a\_T^¥T^aa`a`aa`]^`^`aa[ ]`\_]\_XX]Y^\_[X\_Z¥T]  
@HWI-EAS443:3:47:1389:1485#0/1  
CCCGCACTCAGAATGAAGTGGATGATGGCAATGAGATACC  
+HWI-EAS443:3:47:1389:1485#0/1  
¥]^`ZZWZV`\_]\_Y\_Q``]WLa^\_]Q]¥`MPV`\_`PRXYVPL  
@HWI-EAS443:3:47:1417:397#0/1  
CAATGAGATACCCAATTACAGCAGACAAGAGAATAATGGA  
+HWI-EAS443:3:47:1417:397#0/1  
aaaaaababa`^`baaabaaa`aa`\_a\_aab`aa`\_aa`\_`  
@HWI-EAS443:3:47:1428:1156#0/1  
GGGATGTGCTTGGGACATTTGACTGTCCAAATAATAAA  
+HWI-EAS443:3:47:1428:1156#0/1  
¥b¥a`Z`SW`a`\_`\_N^`ZY\_]`PZ\_OMTU[\_`X]X\_VY  
@HWI-EAS443:3:47:1431:390#0/1  
AATAAAAGAACTGAGAGATCTAATGTCGAGTCCCGCACT  
+HWI-EAS443:3:47:1431:390#0/1  
^Waa[[RZFY^abbba`a`W¥`[\_^\_¥Z\_]XWGLS^¥LOU

@HWI-EAS443:3:47:1438:156#0/1  
CACTCGCGAGATACTACTAAGACCACTGTGGACCATATG  
+HWI-EAS443:3:47:1438:156#0/1  
a^baababaa^a\_\_\_\_\_`^`\_`\_^[[^Y]T`\_][PP^][[  
@HWI-EAS443:3:47:1463:1120#0/1  
GTGGCGTACATGCTAGAAAGAGAATTGGTCCGTAACAA  
+HWI-EAS443:3:47:1463:1120#0/1  
`\_aaa`Y`Z`a\_aV]`\_^`¥`¥`\_a\_\_`W¥^`\_¥^¥[^¥V¥  
@HWI-EAS443:3:47:1464:415#0/1  
GGGCAACCTCCAAACACTGAAAATAAGAGTACATGAAGGG  
+HWI-EAS443:3:47:1464:415#0/1  
^b¥ab\_X`^¥ba`a`]Zaa\_\_`\_a]Z`a]\_\_`a`^a`  
@HWI-EAS443:3:47:1473:355#0/1  
GTGTACTTTTTGATTATGGCCATATGGTCCACAGTGGTCT  
+HWI-EAS443:3:47:1473:355#0/1  
a`a]\_\_aaaaa\_\_aa`^^^YWUZZQWWWVWRYWUU^NTT  
@HWI-EAS443:3:47:1525:1038#0/1  
GTTCCGCCGGCTACTGGGAGAAACCTTGTTTTACGGACCA  
+HWI-EAS443:3:47:1525:1038#0/1  
`ababaa`a`\_]`VL\_\_[T\_¥\_\_Q\_UUVYaa[SSYFQRY[  
@HWI-EAS443:3:47:1543:64#0/1  
ATGGCAATGAGATACCCAATTACAGCAGACAAGAGAATAA  
+HWI-EAS443:3:47:1543:64#0/1  
ab\_aLY¥bbb\_aa`ZX¥Z^a`]`bab]Q[]Y\_\_a\_W`\_Z  
@HWI-EAS443:3:47:1580:1863#0/1  
ATTCTTCATACCCTTCATGTACTCTTATTTTCAGTGTTTG  
+HWI-EAS443:3:47:1580:1863#0/1  
ab`]abbbbbbb`bbbbbbbabbbbbbbab`bbbbbb  
@HWI-EAS443:3:47:1592:930#0/1  
CTAATGTCGCAGTCCCGCACTCGCGAGATACTACTAAGA  
+HWI-EAS443:3:47:1592:930#0/1  
\_abbaa\_ababa^VaZ^aaaSa`]a[a^P^U^]U[S^¥S\_  
@HWI-EAS443:3:47:160:904#0/1  
GTGGCGTACATGCTAGAAAGAGAATTGGTCCGTAACAA  
+HWI-EAS443:3:47:160:904#0/1  
aa[Xab`aaaa]`a]`\_`\_TZ`aa`^X[]VZWa]O¥\_  
@HWI-EAS443:3:47:1623:1486#0/1  
CTCTTATTTTCAGTGTGGAGGTTGCCCGTTAGCACTTC  
+HWI-EAS443:3:47:1623:1486#0/1  
abbbbaabbbbaaabbbbbbabb`\_`¥Y\_]aa\_a\_[T`b\_  
@HWI-EAS443:3:47:1647:1056#0/1  
ATCACATTGTCGATGGATTCAATCCCCAGTTCTGGAAAA  
+HWI-EAS443:3:47:1647:1056#0/1  
aaaa`aab\_aaa¥a`\_`Y\_a`^`\_`^R]X^^]L[^^^^  
@HWI-EAS443:3:47:1678:544#0/1  
CCCGTTTTCGTTTCATTACCAACACTACGTCCCCTTGCCC  
+HWI-EAS443:3:47:1678:544#0/1  
aaabbbbbbaaa`abbaa\_aa]baaa\_b`\_]a\_^aa\_ZS  
@HWI-EAS443:3:47:1774:592#0/1  
GCGGGATGTGCTTGGGACATTTGACACTGTCCAAATAATA

+HWI-EAS443:3:47:1774:592#0/1  
a`baa`ab`a\_]`aa[\_¥^a\_a\_]\_X`a]ZP^Y^^[[Z`  
@HWI-EAS443:3:47:214:701#0/1  
CCCCACTCAGAATGAAGTGGATGATGGCAATGAGATACC  
+HWI-EAS443:3:47:214:701#0/1  
`¥Kb`baaaab^bbb`ab[]U`ab\_¥\_a¥a\_\_[]` `` NU  
@HWI-EAS443:3:47:239:329#0/1  
ATAAAAGAAGTCTAATGTCGCAGTCCCCGACTC  
+HWI-EAS443:3:47:239:329#0/1  
`bbaaaaaYbb\_aaa``aaaaabZX^\_]`^]\_\_\_Y\_¥^U  
@HWI-EAS443:3:47:240:332#0/1  
ATTACCAACTACGTCCCCTTGCCCAATTAGCACATTAG  
+HWI-EAS443:3:47:240:332#0/1  
aabaabababb\_aa\_aYa^]a]`\_`a` `\_\_¥R`\_a`\_  
@HWI-EAS443:3:47:258:1576#0/1  
TGGGTATCTCATTGCCATCATCCACTTCATTCTGAGTGCG  
+HWI-EAS443:3:47:258:1576#0/1  
`a`RVb¥`ba\_`X`VT[aXaaUY`MX^U[YZT[YOFXFRY  
@HWI-EAS443:3:47:27:1488#0/1  
GCTGTAATTGGGTATCTCATTGCCATCATCCACTTCATTC  
+HWI-EAS443:3:47:27:1488#0/1  
ababababbaba\_`a`a`aaa\_` `aaaa`a\_aaa`^aa` [  
@HWI-EAS443:3:47:319:947#0/1  
GTCCCGTTTTTCGTTTCATTACCAACTACGTCCCCTTGC  
+HWI-EAS443:3:47:319:947#0/1  
aa\_W\_baaaaZZ^ab\_`aa`\_` `¥¥a[`a^\_Y[[[^[^\_Z\_W  
@HWI-EAS443:3:47:323:1333#0/1  
AAAAGAAGTCTAATGTCGCAGTCCCCGACTCGC  
+HWI-EAS443:3:47:323:1333#0/1  
XX\_[][\_]bbbba¥\_¥WaZa\_\_W\_^Z]\_YUV]]`ZUY]]F  
@HWI-EAS443:3:47:382:479#0/1  
CTAATGTCGCAGTCCCCGACTCGCGAGATACTCACTAAGA  
+HWI-EAS443:3:47:382:479#0/1  
` `bbbba`a`\_b`^aaa\_]Yaaa^[EVUY[R]]` `^a\_]`  
@HWI-EAS443:3:47:394:941#0/1  
AGAGAATAAAAGAACTGAGAGATCTAATGTCGCAGTCCCCG  
+HWI-EAS443:3:47:394:941#0/1  
]bYaSaaabZZaaaabbba` `aa`b¥`a\_Ua\_a`bG]`aa  
@HWI-EAS443:3:47:400:1508#0/1  
GTCCCGTTTTTCGTTTCATTACCAACTACGTCCCCTTGC  
+HWI-EAS443:3:47:400:1508#0/1  
Mab^aaaab]a\_`bb` `bab^aa`aaa\_`^S¥a` [bVa]b`  
@HWI-EAS443:3:47:401:621#0/1  
ATAAAAGAAGTCTAATGTCGCAGTCCCCGACTC  
+HWI-EAS443:3:47:401:621#0/1  
aaa` `a`\_a\_a`\_\_a\_\_\_^` `\_\_`\_]\_]`^`V]^Y]YTX^  
@HWI-EAS443:3:47:40:168#0/1  
GCGAGATACTACTAAGACCACTGTGGACCATATGGCCAT  
+HWI-EAS443:3:47:40:168#0/1  
abbbbbbaaba`aa`baa`aaa`a^Y\_a\_\_\_\_\_`¥]^]Y]W



+HWI-EAS443:3:47:686:101#0/1  
abbabbb`bbbaa¥bbbaaba`\_b\_a\_baaa`aWabaa  
@HWI-EAS443:3:47:71:433#0/1  
TGCTAATTGGGCAAGGGACGTAGTGTGGTAATGAAACG  
+HWI-EAS443:3:47:71:433#0/1  
]b`\_^`^aaaba^¥babbUZ`¥¥aYaaa\_[DJT]]V`^TY  
@HWI-EAS443:3:47:72:1439#0/1  
GTCCCGTTTTTCGTTTCATTACCAACTACGTCCCTTGC  
+HWI-EAS443:3:47:72:1439#0/1  
aa`\_]\_aS[a\_\_a]^`¥aaY^^¥`\_]U\_X^VZRZRLSV  
@HWI-EAS443:3:47:735:320#0/1  
CAGAATGAAGTGGATGATGGCAATGAGATACCCAATTACA  
+HWI-EAS443:3:47:735:320#0/1  
aabaabb^Z`\_bbaabaaaa]aaaaaa`a^¥`a`aaa^a  
@HWI-EAS443:3:47:736:586#0/1  
GCGAGATACTACTAAGACCACTGTGGACCATATGGCCAT  
+HWI-EAS443:3:47:736:586#0/1  
abbabbb`\_ababaababa^\_`aaa`a`\_`a]a\_\_aa\_\_`\_`  
@HWI-EAS443:3:47:753:141#0/1  
AGGGGACGTAGTGTGGTAATGAAACGAAAACGGGACTCT  
+HWI-EAS443:3:47:753:141#0/1  
abbbba`b`\_ab`\_abbb^`\_aaaaabR`\_`aaN^a`XP]PY  
@HWI-EAS443:3:47:758:1055#0/1  
AAAGAAGTGAAGATCTAATGTCGCAGTCCCGCACTCGCG  
+HWI-EAS443:3:47:758:1055#0/1  
\_aa`^`ZX\_b`ba`aaaa[`V^`^`\_bbaa`]P^[X[V^  
@HWI-EAS443:3:47:779:193#0/1  
ACTCAGGGCCATTGATCTCCACATCATTGATGACGAATA  
+HWI-EAS443:3:47:779:193#0/1  
a\_a\_abaaa`aaa`X`^`]^`^`\_`Z]^`\_`X`\_`X`  
@HWI-EAS443:3:47:77:23#0/1  
AGGGGACGTAGTGTGGTAATGAAACGAAAACGGGACTCT  
+HWI-EAS443:3:47:77:23#0/1  
abbbbaaa¥`b`b¥baaa\_a^X]a\_N\_[a`SV]\_X\_^R^  
@HWI-EAS443:3:47:812:424#0/1  
TGAATACTGGAGAATTGCCTCTTACCAGTATCCTCAACCC  
+HWI-EAS443:3:47:812:424#0/1  
abb`babbb`Y`aaa\_a\_aIaa¥XUa\_[`UYaT[aW^V  
@HWI-EAS443:3:47:820:851#0/1  
GCTGTCCTGAGAGATTTCTCATTGTTGGGCAAAGAAGACA  
+HWI-EAS443:3:47:820:851#0/1  
aaaa`^a`¥`aab\_aaa[[\_`aa`a\_\_`^`¥`\_`Z¥a\_]`^  
@HWI-EAS443:3:47:868:442#0/1  
CCCGTTTTTCGTTTCATTACCAACTACGTCCCTTGGCC  
+HWI-EAS443:3:47:868:442#0/1  
aaa`^`abbba\_aa^aaab`]\_^]a`^`a[^^`^`\_]a\_UXS  
@HWI-EAS443:3:47:876:304#0/1  
GTCCCGTTTTTCGTTTCATTACCAACTACGTCCCTTGC  
+HWI-EAS443:3:47:876:304#0/1  
aaaaab^abaab^aa`abaa\_\_a`^a\_a`\_]`^`[ZV^][Z



@HWI-EAS443:3:47:885:1267#0/1  
CATCATTTCTCACTTCTCCTCCTGGAGTGTACATCTGCTC  
+HWI-EAS443:3:47:885:1267#0/1  
abbbbbbbbaaaaab\_`b`aab\_`a\_b\_a\_aa\_aa^`^`  
@HWI-EAS443:3:47:930:418#0/1  
ATCTGGATCTTCAGTCAATGCACCTGCATCCTTTCCAAGA  
+HWI-EAS443:3:47:930:418#0/1  
aab`ababbbbbbaabbababaaaa`abaaaa`aa````  
@HWI-EAS443:3:47:935:326#0/1  
GGGAGATCAATGGCCCTGAGTCAGTGCTAGTCAACACTTA  
+HWI-EAS443:3:47:935:326#0/1  
aa\_`a\_YY]``^^\_Z^Z`\_aZV¥XN[SV[^WRV^UVUUXR  
@HWI-EAS443:3:47:936:387#0/1  
CATATCTCTTGTCTTCTTTGCCAAAATGAGAAATCCTCT  
+HWI-EAS443:3:47:936:387#0/1  
\_`abaSa[aZbb[b\_ZWa`aS]`aaabbb`^^a`ZRUaZX  
@HWI-EAS443:3:47:949:1275#0/1  
AAAGAAGTGAAGATCTAATGTCGCAGTCCCGCACTCGCG  
+HWI-EAS443:3:47:949:1275#0/1  
aaY][^]a]aaaV`Xb]aaa^[[ZX^\_\_`a`HX[[USY  
@HWI-EAS443:3:47:94:228#0/1  
GGGCGATCTGAACCTTGTCAATAGGGCAAACAGCGACTG  
+HWI-EAS443:3:47:94:228#0/1  
aRM¥a`a`[HY`\_a\_[\_\_\_\_][`YP\_\_^P^`W\_[X^\_  
@HWI-EAS443:3:48:101:1384#0/1  
GAACTGAGAGATCTAATGTCGCAGTCCCGCACTCGCGAGA  
+HWI-EAS443:3:48:101:1384#0/1  
aaaa]LXW¥^]bX`]aaXaW`XROY`PT]`aaaZ^`X]¥  
@HWI-EAS443:3:48:1027:76#0/1  
GGACGTAGTGTGGTAATGAAACGAAAACGGGACTCTAGC  
+HWI-EAS443:3:48:1027:76#0/1  
a\_L[a¥[`R^MY`aQST]YJOVRXLX[TUY[YLOSSQUPJ  
@HWI-EAS443:3:48:1064:704#0/1  
GTCCATTATTCTTGTCTGCTGTAATTGGGTATCTCATT  
+HWI-EAS443:3:48:1064:704#0/1  
\_Y\_aab`]b\_]`\_aa`]\_b\_S¥aYZ¥aa`Y^PY]¥`\_\_a]  
@HWI-EAS443:3:48:1066:1629#0/1  
GAATAAAGAAGTGAAGATCTAATGTCGCAGTCCCGCAC  
+HWI-EAS443:3:48:1066:1629#0/1  
a`aa`babaaaaa\_aaaaaa\_aa\_aa`\_a\_a\_V\_V[\_\_\_\_]^  
@HWI-EAS443:3:48:1069:547#0/1  
CCCCTTTGCTGCTGCTCCACCAGAACAGAGTAGGATGCAA  
+HWI-EAS443:3:48:1069:547#0/1  
aba`bbbaaabaaba\_aZQ[`[a^`\_[aWaZ^a\_\_\_\_`Z^\_  
@HWI-EAS443:3:48:1085:644#0/1  
AAAGAAGTGAAGATCTAATGTCGCAGTCCCGCACTCGCG  
+HWI-EAS443:3:48:1085:644#0/1  
aaaa¥aaa\_\_]a]a^[bb\_aa¥^^Vaa\_N\_Z]VXZVQSX\_  
@HWI-EAS443:3:48:1098:154#0/1  
AAAGAAGTGAAGATCTAATGTCGCAGTCCCGCACTCGCG

+HWI-EAS443:3:48:1098:154#0/1  
aaaa` `aaaaaaaa\_\_aa¥`a¥`\_^`WWY¥^[VWV¥^V¥  
@HWI-EAS443:3:48:1100:283#0/1  
CGCACTCGCGAGATACTCACTAAGACCACTGTGGACCATA  
+HWI-EAS443:3:48:1100:283#0/1  
aa]aa`a`aaa`a`\_a\_\_]a`\_\_^]^^^\_\_]\_\_^VUV]]  
@HWI-EAS443:3:48:1114:1355#0/1  
GGAATGAACAAGGACAAACCCTCTGGAGCAAAACAAACGA  
+HWI-EAS443:3:48:1114:1355#0/1  
a¥URQ]SU¥ZR]R^\_VJV^UPXUMU[GVURUUTZZRVODK  
@HWI-EAS443:3:48:1182:1180#0/1  
TGCTGGGCCATATCTCTTGTCTTCTTTGCCAAAATGAGA  
+HWI-EAS443:3:48:1182:1180#0/1  
a` `` \_]a`aaaaba` `aa`^\_aa\_a` `]` `` `` `` \_^` \_  
@HWI-EAS443:3:48:1196:170#0/1  
GGGGACGTAGTGTGGTAATGAAACGAAAACGGGACTCTA  
+HWI-EAS443:3:48:1196:170#0/1  
abaa¥\_b`\_b\_b\_aaaVa`\_aXa^¥` [^^T^`\_YU]¥ZV  
@HWI-EAS443:3:48:1200:839#0/1  
GACAAGAGAATAATGGACATGATTCCAGAGAGGAATGAAC  
+HWI-EAS443:3:48:1200:839#0/1  
aa\_baaaa`aaaaaaaa\_aaaaa\_a^\_a¥`^a\_\_` `a\_\_W  
@HWI-EAS443:3:48:1208:312#0/1  
GAATAAAAGAACTGAGAGATCTAATGTCGCAGTCCCGCAC  
+HWI-EAS443:3:48:1208:312#0/1  
a\_aa^aa`]X\_]a\_\_` `^^U`\_]aU]]]\_]UY]XYU]  
@HWI-EAS443:3:48:1213:1302#0/1  
AAAAGAACTGAGAGATCTAATGTCGCAGTCCCGCACTCGC  
+HWI-EAS443:3:48:1213:1302#0/1  
^\_aSa^X]Z]Z`]X\_\_HN\_^ZWJV` [RZRG¥YOWBBBBBB  
@HWI-EAS443:3:48:1227:775#0/1  
GAAGAGCAGCAGTGTTCAGCAGACCCATTAGCATCTCTCTT  
+HWI-EAS443:3:48:1227:775#0/1  
\_`T`aZabb^a\_SaQZY¥aaN`\_T^]aaOL¥SZ¥¥WaW\_¥  
@HWI-EAS443:3:48:123:1003#0/1  
GCTGGATCAGACCGAGTGATGGTATCACCTCTGGCCGTAA  
+HWI-EAS443:3:48:123:1003#0/1  
aabba\_aabaa`¥`aa\_a`\_aa[]^¥`^Z` `^Z¥^V[P[U  
@HWI-EAS443:3:48:1252:1722#0/1  
GAATAAAAGAACTGAGAGATCTAATGTCGCAGTCCCGCAC  
+HWI-EAS443:3:48:1252:1722#0/1  
\_Z\_aW\_¥aaZ\_]a`a¥`a`^Q^a[]a\_\_a^][QP][YZ[VQ  
@HWI-EAS443:3:48:1265:773#0/1  
TAATGTCGCAGTCCCGCACTCGCGAGATACTCACTAAGAC  
+HWI-EAS443:3:48:1265:773#0/1  
a\_aUYIbUX\_\_a[a¥¥a[\_aOGW^G¥U\_VUaY\_^^\_XYRZ  
@HWI-EAS443:3:48:1275:755#0/1  
CCCGCACTCAGAATGAAGTGGATGATGGCAATGAGATACC  
+HWI-EAS443:3:48:1275:755#0/1  
^bab]abaa`b[abb`\_b\_baabbb^aUa`aaaa^b]]a¥\_

@HWI-EAS443:3:48:1279:48#0/1  
CCGTTTTTCGTTTCATTACCAACTACTGCCCCCTTGCCCA  
+HWI-EAS443:3:48:1279:48#0/1  
^bbbbbbb`abbbbabab^ba`baaaa`]^^`a`a]Y]Y  
@HWI-EAS443:3:48:1280:1967#0/1  
GAGATACTACTAAGACCACTGTGGACCATATGGCCATAA  
+HWI-EAS443:3:48:1280:1967#0/1  
aa``aaaa`aaabaaa\_Z`aaa\_a``]\_^a`Va\_U\_\_\_U\_  
@HWI-EAS443:3:48:1289:1731#0/1  
AAAGAAGTCTAATGTGCGAGTCCCGCACTCGCG  
+HWI-EAS443:3:48:1289:1731#0/1  
a]WI\_]aabaZb¥¥aX\_b`aaXaU¥Za[NQXX\_\_\_¥YaGY  
@HWI-EAS443:3:48:130:1295#0/1  
CTGATGTCAGTATTCTTGCCCCACTTCATTTGGGAAAAC  
+HWI-EAS443:3:48:130:1295#0/1  
[`aa\_^\_bbZbabbba\_ab[Yb\_a[W^a`^`abaRO[b^F  
@HWI-EAS443:3:48:1318:384#0/1  
CAACTCTCCTTATTTAACTTGATTTCTGAAGTGGAC  
+HWI-EAS443:3:48:1318:384#0/1  
abbbb`ba`baa]aabbbba`bbbabbabb`ab\_aaa\_  
@HWI-EAS443:3:48:1318:56#0/1  
GAGAATAAAAGAACTGAGAGATCTAATGTCGAGTCCCGC  
+HWI-EAS443:3:48:1318:56#0/1  
T¥`YYb```abbb^]b\_baaaa^aaabb\_\_a\_\_a`¥a¥``  
@HWI-EAS443:3:48:1334:573#0/1  
GCCATGGTATTCTCACAAGAGGATTGCATGATCAAGGCAG  
+HWI-EAS443:3:48:1334:573#0/1  
aa]\_`a]Y^ba`a\_\_\_\_`a^``]a`a\_\_aa\_\_W`]`¥G[\_  
@HWI-EAS443:3:48:1343:1682#0/1  
CTCGGAGATACTACTAAGACCACTGTGGACCATATGGC  
+HWI-EAS443:3:48:1343:1682#0/1  
aabaab\_b\_a\_```aaa\_ba`a`a`\_W`[a`^`\_¥\_\_WZ  
@HWI-EAS443:3:48:1349:928#0/1  
CGTTAGCACTTCTTCTTTCTTGGACTGATGATCCGCTT  
+HWI-EAS443:3:48:1349:928#0/1  
^aab`baaaababa`b`abbb`baba\_a¥\_aaaa\_\_b`a]  
@HWI-EAS443:3:48:1350:701#0/1  
AAAGAAGTCTAATGTGCGAGTCCCGCACTCGCG  
+HWI-EAS443:3:48:1350:701#0/1  
abb`\_aab]aaaaaaba\_ba¥aaa\_aW`\_\_\_\_¥^YX¥^`  
@HWI-EAS443:3:48:1352:1210#0/1  
CCCGCACTCAGAATGAAGTGGATGATGGCAATGAGATACC  
+HWI-EAS443:3:48:1352:1210#0/1  
aaaa`````aab\_aaa\_\_¥aa^aa]`a`Z^\_a\_^^^\_\_\_V  
@HWI-EAS443:3:48:1352:983#0/1  
GGCCATATCTTGTCTTCTTTGCCAAAATGAGAAATC  
+HWI-EAS443:3:48:1352:983#0/1  
aYS[¥aaaa`a`aa`Z`a\_aaa^^`\_[a[`aaa`Z^`Y  
@HWI-EAS443:3:48:1354:314#0/1  
AAAGAGAAGAAAGAAGAGCTCCAGGATTGAAAATTGCTC

+HWI-EAS443:3:48:1354:314#0/1  
]Y¥¥^\_]U`^`]¥X\_¥\_T\_[TT^\_]\_YNVV[V¥aWJ[L  
@HWI-EAS443:3:48:1362:1655#0/1  
AGGGGACGTAGTGTGGTAATGAAACGAAAACGGGACTCT  
+HWI-EAS443:3:48:1362:1655#0/1  
a\_aa^abb`]b[`VaUaS`aX\_aaa^a`aaS`\_a^]XYR  
@HWI-EAS443:3:48:1382:171#0/1  
GTCCCGTTTTTCGTTTCATTACCAACTACGTCCCTTGC  
+HWI-EAS443:3:48:1382:171#0/1  
`H^`ab\_bbaab¥\_^\_abaa]L\_`^a\_\_ZTa]]]^¥^W^Z  
@HWI-EAS443:3:48:1384:875#0/1  
TGCTGTAATTGGGTATCTCATTGCCATCATCCACTTCATT  
+HWI-EAS443:3:48:1384:875#0/1  
]b\_]\_T[ZZb\_ba\_XYX]SY¥^^[Za¥\_\_a`U[aa\_V]^W  
@HWI-EAS443:3:48:1398:257#0/1  
GTGGACCATATGGCCATAATCAAAAAGTACACATCAGGAA  
+HWI-EAS443:3:48:1398:257#0/1  
^^bbaaaIaa]`ba`\_\_^a`U]\_a`a¥M^[\`¥`TQ¥`a[\_  
@HWI-EAS443:3:48:1411:230#0/1  
GTCTTCTTTGCCAAAATGAGAAATCCTCTCAGGACAGCA  
+HWI-EAS443:3:48:1411:230#0/1  
a¥^a[H`\_\_\_\_[\_^`^YZ\_aaQQV[\_ST¥V\_NU\_^TWT^QW  
@HWI-EAS443:3:48:1412:725#0/1  
CAATTACAGCAGACAAGAGAATAATGGACATGATTCCAGA  
+HWI-EAS443:3:48:1412:725#0/1  
W\_b`a¥^VY`bb¥`a\_a^a^\_S¥ba^`^b\_]`b¥X¥^Z¥  
@HWI-EAS443:3:48:1505:17#0/1  
GAATAAAAGAACTGAGAGATCTAATGTCGCAGTCCCGCAC  
+HWI-EAS443:3:48:1505:17#0/1  
a^^`aa``a]\_`aa`a^a^`]`\_]\_aX]`]]`XX]]]]UX  
@HWI-EAS443:3:48:151:351#0/1  
CTGCTGTCTGAGAGGATTTCTCATTGTTGGCAAAGAAGA  
+HWI-EAS443:3:48:151:351#0/1  
ab`a`a[aabbaa\_ba\_bbb\_a`\_aaaaaa]aa``]^`a  
@HWI-EAS443:3:48:1526:1280#0/1  
GTCCCGTTTTTCGTTTCATTACCAACTACGTCCCTTGC  
+HWI-EAS443:3:48:1526:1280#0/1  
aM]\_^b\_\_\_\_`a]\_a^^¥\_^XRY^]WV]¥^\_VZVZRFM^Z  
@HWI-EAS443:3:48:1535:473#0/1  
TGTCGCAGTCCCGCACTCGCGAGATACTACTAAGACCAC  
+HWI-EAS443:3:48:1535:473#0/1  
aaaaaabb[aaaa`¥`\_a`\_`Za\_\_\_\_^^^PV^X¥YPPXP  
@HWI-EAS443:3:48:1536:1127#0/1  
GAAGATCCAGATGAAGGCACATCTGGGGTGGAGTCTGCTG  
+HWI-EAS443:3:48:1536:1127#0/1  
\_bbbaababb^ba^aab^aaaaabaaba¥ba^a^[\_`a\_`Y  
@HWI-EAS443:3:48:1547:849#0/1  
GTGGTCTTAGTGAGTATCTCGCGAGTGCGGGACTGCGACA  
+HWI-EAS443:3:48:1547:849#0/1  
``bb`abb`b`aab`a```]\_]\_T]Z^[\_`]\_LVY[Q¥SVY

@HWI-EAS443:3:48:1569:1992#0/1  
AAAAGAAGCTGAGAGATCTAATGTCGCAGTCCCGCACTCGC  
+HWI-EAS443:3:48:1569:1992#0/1  
aa\_aaa`a^^aaa\_Y`a\_aa`a¥^`\_[^S¥¥\_¥^T\_YWWW  
@HWI-EAS443:3:48:1598:1699#0/1  
GGACATGATTCCAGAGAGGAATGAACAAGGACAAACCCCTC  
+HWI-EAS443:3:48:1598:1699#0/1  
¥b``Xa``\_bb]X¥a]TaTZX``ZZUZ]ZZZR^a`GXYYN  
@HWI-EAS443:3:48:1655:816#0/1  
GACCGATTTTTAAGGGTTAGAGATCAAAGAGGGAACGTAC  
+HWI-EAS443:3:48:1655:816#0/1  
a\_¥^`[Y`aaa\_[aa¥^`]]][X]¥Z`\_]`^\_\_]]^X`Z^]  
@HWI-EAS443:3:48:1686:1671#0/1  
AAAGAAGCTGAGAGATCTAATGTCGCAGTCCCGCACTCGCG  
+HWI-EAS443:3:48:1686:1671#0/1  
`abN`a`\_`\_`aa`^ab^ab¥Z]`XLR¥ZWRXY^N¥¥B  
@HWI-EAS443:3:48:1693:724#0/1  
CGCACTCGCGAGATACTCACTAAGACCACTGTGGACCATA  
+HWI-EAS443:3:48:1693:724#0/1  
U\_WX^Wa\_¥^G[ZYT``VWa``ZOZZ\_\_``\_RQWUX¥  
@HWI-EAS443:3:48:1695:1644#0/1  
CTGAAATGGTTCAAATCCATTTTGTGTATAACATTGTG  
+HWI-EAS443:3:48:1695:1644#0/1  
`aabb\_abbab\_baabbaa`a\_bbaaab`a`aaa^a`a^^  
@HWI-EAS443:3:48:1698:246#0/1  
ATCTAATGTCGCAGTCCCGCACTCGCGAGATACTCACTAA  
+HWI-EAS443:3:48:1698:246#0/1  
aa\_babba`ab`a`\_SZ`\_]X\_]\_]X[\_¥XX^X^U]^Y  
@HWI-EAS443:3:48:1736:59#0/1  
AAAGAAGCTGAGAGATCTAATGTCGCAGTCCCGCACTCGCG  
+HWI-EAS443:3:48:1736:59#0/1  
a\_W¥`a0\_]aaaa]aaaa^baQ`aZa`VS\_`^UIR[[XYY  
@HWI-EAS443:3:48:1768:301#0/1  
ATACTCACTAAGACCACTGTGGACCATATGGCCATAATCA  
+HWI-EAS443:3:48:1768:301#0/1  
`b`a`]aYbbabaa`\_abb\_a`^Y^a\_\_a`YU]¥V]`TR  
@HWI-EAS443:3:48:184:1347#0/1  
AGCAAAACAAACGATGCTGGATCAGACCGAGTGATGGTAT  
+HWI-EAS443:3:48:184:1347#0/1  
aa`aaa`babb^`\_`a\_aaa`^a`XaZUZa^`^`\_U[U  
@HWI-EAS443:3:48:201:1125#0/1  
CCGTTTTCGTTTCATTACCAACTACGTCCCCTTGCCCA  
+HWI-EAS443:3:48:201:1125#0/1  
abba`ba`a\_aa[abbbbbaaa``]aaaa^a`^a[^a]\_\_a  
@HWI-EAS443:3:48:233:2012#0/1  
GAATAATGGACATGATTCCAGAGAGGAATGAACAAGGACA  
+HWI-EAS443:3:48:233:2012#0/1  
a[^\_^]`aW\_\_`T]Z¥^V¥¥¥\_Y]`^^X\_WZVZ¥ZZ^X^  
@HWI-EAS443:3:48:250:1841#0/1  
GAGAAATCCTCTCAGGACAGCAGACTCCACCCAGATGTG

+HWI-EAS443:3:48:250:1841#0/1  
a^QY\_ba\_U\_U^`]ZR]\_\_a\_aaYRYZRWY]W]ZYZRUU[  
@HWI-EAS443:3:48:280:320#0/1  
CAATTCCCCAGTTCTGGAAAAGCACTTTTGCATCTTTTGTG  
+HWI-EAS443:3:48:280:320#0/1  
a`¥baa`aW\_ba`[\_bb^aa`[a^Q^[]aa^`a\_b```\_¥  
@HWI-EAS443:3:48:316:668#0/1  
AAAGAAGTGGAGATCTAATGTCGCAGTCCCGCACTCGCG  
+HWI-EAS443:3:48:316:668#0/1  
aa^^`¥aaaa\_b]``aaaa`^a]Raa¥\_aa^\_[^`[\_¥a  
@HWI-EAS443:3:48:356:1178#0/1  
CTGTAATTGGGTATCTCATTGCCATCATCCACTTCATTCT  
+HWI-EAS443:3:48:356:1178#0/1  
aba\_aabbbbaaab`aaaba`a¥aaabaa\_]aaa`aaa\_a  
@HWI-EAS443:3:48:35:1434#0/1  
GAGGTTGCCGTTAGCACTTCTTCTTCTTTCTTGACTGAT  
+HWI-EAS443:3:48:35:1434#0/1  
`¥aaUabb\_aa`abbaa`bbY^`]babaa```Z\_^a[aa  
@HWI-EAS443:3:48:378:660#0/1  
AAAGAAGTGGAGATCTAATGTCGCAGTCCCGCACTCGCG  
+HWI-EAS443:3:48:378:660#0/1  
a`aa^`[baaa\_aZaaaU`aaUaa`[a¥^\_\_\_¥^¥\_Wa¥]  
@HWI-EAS443:3:48:386:426#0/1  
CATCAAGGGAGCAATTTTACAATCCTGGAGCTCTTCTTTC  
+HWI-EAS443:3:48:386:426#0/1  
aYab````]ab]babbbba`aa^a]a^NYaYaGaYW`]V  
@HWI-EAS443:3:48:406:560#0/1  
TGGAAATGTGCCACAGCACACAGATTGGAGGAGTAAGGAT  
+HWI-EAS443:3:48:406:560#0/1  
\_T\_U\_VXQWb^SW\_T^`S]a[[aZTT`XWaa[`HUZ`Ya¥Y  
@HWI-EAS443:3:48:412:1345#0/1  
CCGCACTCGCGAGATACTACTAAGACCACTGTGGACCAT  
+HWI-EAS443:3:48:412:1345#0/1  
abbbbbbbbbbbbabbbabba`bbbbbaababbab`baa`b  
@HWI-EAS443:3:48:420:738#0/1  
CGCGAGATACTACTAAGACCACTGTGGACCATATGGCCA  
+HWI-EAS443:3:48:420:738#0/1  
abbaaaa^¥\_babaaaab```baaa^a[\_^`\_a``\_a^¥`  
@HWI-EAS443:3:48:423:59#0/1  
CAAGGACAAACCCTCTGGAGCAAACAAACGATGCTGGAT  
+HWI-EAS443:3:48:423:59#0/1  
`L[`baaaU[Na\_Z^aba`bbabaaaaa`a`]`V]aR\_`  
@HWI-EAS443:3:48:466:639#0/1  
CTGCTGTCCTGAGAGGATTTCTCATTGTTGGCAAAGAAGA  
+HWI-EAS443:3:48:466:639#0/1  
ab\_babaaa\_b`]\_bb````]\_aa[baa`\_b\_aaaaa`[``  
@HWI-EAS443:3:48:486:1046#0/1  
GGGACGTAGTGTGGTAATGAAACGAAAACGGGACTCTAG  
+HWI-EAS443:3:48:486:1046#0/1  
aaa\_]b]\_a]a]aa`W[```[\_^U^V```\_V]]]]UXYYX]

@HWI-EAS443:3:48:494:1985#0/1  
CGCGAGATACTCACTAAGACCACTGTGGACCATATGGCCA  
+HWI-EAS443:3:48:494:1985#0/1  
`a`b\_\_bab`aUb\_abbab`aab]aaaa`aaa`a\_^[a  
@HWI-EAS443:3:48:513:186#0/1  
GTCCCCGTTTTCGTTTCATTACCAACTACGTCCCCCTTGC  
+HWI-EAS443:3:48:513:186#0/1  
aY]\_]b¥`aab`a`aaa^]\_a\_\_^`YUS]]S[]][UV  
@HWI-EAS443:3:48:568:1636#0/1  
CCCCGTTTTCGTTTCATTACCAACTACGTCCCCCTTGGCC  
+HWI-EAS443:3:48:568:1636#0/1  
Z\_WVZ¥ba`¥`M`Ua`bb[]bbaaaaa`b`K\_IYDUP`X^  
@HWI-EAS443:3:48:619:1193#0/1  
CGCGAGATACTCACTAAGACCACTGTGGACCATATGGCCA  
+HWI-EAS443:3:48:619:1193#0/1  
`aab\_ba`aa`[]aa`\_\_`aaa\_\_\_\_`^\_\_\_\_H¥YZ]\_] ]]  
@HWI-EAS443:3:48:633:1108#0/1  
GATTAGCTCATCTTTCAGTTTTGGTGGGTTCACTTTCAAAA  
+HWI-EAS443:3:48:633:1108#0/1  
¥^YS`a]Y`a\_\_^X¥[V¥V][\_YRSWaUV`JU`^`ZO¥^Z  
@HWI-EAS443:3:48:643:426#0/1  
CTGTAATTGGGTATCTCATTGCCATCATCCACTTCATTCT  
+HWI-EAS443:3:48:643:426#0/1  
ab`abba`baabbbba¥`a`aaa^aa`bb[]ba\_a  
@HWI-EAS443:3:48:662:960#0/1  
AAAAGAAGTGAAGATCTAATGTCGCAGTCCCGCACTCGC  
+HWI-EAS443:3:48:662:960#0/1  
\_^\_]\_[aaaa[a]`\_\_V\_V¥`\_\_\_\_[^\_Q[¥VPZUXX)`¥  
@HWI-EAS443:3:48:684:25#0/1  
GTCCCCGTTTTCGTTTCATTACCAACTACGTCCCCCTTGC  
+HWI-EAS443:3:48:684:25#0/1  
a¥\_\_Xb¥`aaZa\_^`]]\_\_`WW^]]^]]X]WWYYZZ¥Z  
@HWI-EAS443:3:48:699:1351#0/1  
CCTCAACCCTGATCCTCTCACATTACAGTCAATGAGGAA  
+HWI-EAS443:3:48:699:1351#0/1  
aaabbbba`abbbbaa`bba`baaaaaa\_aa`baaaaa  
@HWI-EAS443:3:48:708:212#0/1  
AAGGATGCAGGTGCATTGACTGAAGATCCAGATGAAGGCA  
+HWI-EAS443:3:48:708:212#0/1  
a\_aOFSb\_]Y`G\_S¥XV^`Y\_a\_a\_\_\_Z¥]\_^N\_^¥U¥^  
@HWI-EAS443:3:48:735:346#0/1  
CTCGCGAGATACTCACTAAGACCACTGTGGACCATATGGC  
+HWI-EAS443:3:48:735:346#0/1  
`baaabab`bbabaaab[F[a[aaaa\_`a`¥^^\_ZTWZU  
@HWI-EAS443:3:48:743:898#0/1  
CAGAGGGTTTGTCTTGTTCATTCTCTCTGGAATCATGT  
+HWI-EAS443:3:48:743:898#0/1  
[\_`X`b`]`a`aaa¥`\_`Za`W^a\_a^\_]U\_]`\_`V  
@HWI-EAS443:3:48:750:372#0/1  
TGAAGTACTTGTGTTGGGCCATTCTATTCCACCATG

+HWI-EAS443:3:48:750:372#0/1  
`ba`ZbbYa\_aababb`aaba`¥`a^¥a`a`^^^`^T\_`  
@HWI-EAS443:3:48:752:467#0/1  
CTCGCGAGATACTACTAAGACCACTGTGGACCATATGGC  
+HWI-EAS443:3:48:752:467#0/1  
abbbba]]abba\_\_b\_bba`a`\_N`¥ab\_\_aUaaaa`¥  
@HWI-EAS443:3:48:769:692#0/1  
TAAAAGAAGTCTAATGTTCGAGTCCCGCACTCG  
+HWI-EAS443:3:48:769:692#0/1  
[`[aZ]]a\_aaababUa^aa\_aa\_]`^\_]XZMXYV¥YUY  
@HWI-EAS443:3:48:791:115#0/1  
CATCTCTCTTGAAATGTGCCACAGCACACAGATTGGAGG  
+HWI-EAS443:3:48:791:115#0/1  
abaa`bbbbbbbabababaabaabaaaaab[L^aa¥aa  
@HWI-EAS443:3:48:801:1792#0/1  
CTCTTATTTTCAGTGTGGAGGTTGCCCGTTAGCACTTC  
+HWI-EAS443:3:48:801:1792#0/1  
Za`a¥`\_`a¥^`\_]Z^\_a^`¥`aa^^[GY[ZM¥aWZXDWUD  
@HWI-EAS443:3:48:815:1988#0/1  
ATGAACAAGGACAAACCCTCTGGAGCAAACAAACGATGC  
+HWI-EAS443:3:48:815:1988#0/1  
Y¥`]aYbba`b\_aab`XaX\_]T\_^H]]a^Ha`a\_^\_[¥N  
@HWI-EAS443:3:48:83:1006#0/1  
GGGCGATCTGAACCTTGTCAATAGGGCAAACCAGCGACTG  
+HWI-EAS443:3:48:83:1006#0/1  
aaZa`a`^aa`Xa^`¥^`^`a`]\_\_aY\_\_Z¥`]Y^S  
@HWI-EAS443:3:48:852:1752#0/1  
GTCTGCTGTAATTGGGTATCTCATTGCCATCATCCACTTC  
+HWI-EAS443:3:48:852:1752#0/1  
`X^a\_UaYL¥\_aaa¥]aba[[X¥\_\_WUP[\_Y]\_\_\_\_`\_\_ZL  
@HWI-EAS443:3:48:865:758#0/1  
CAAACGACTTACAGTTCTTGAAAGGATGCAGGTGCATTG  
+HWI-EAS443:3:48:865:758#0/1  
abbbabaabbbabababbbba`abaabaab`]a\_aaaa  
@HWI-EAS443:3:48:879:1211#0/1  
TACGCCACCATCAAGGGAGCAATTTTACAATCCTGGAGCT  
+HWI-EAS443:3:48:879:1211#0/1  
abaa`\_`a\_^a¥^^a`aa\_\_`\_\_a`aa]\_\_`WZ\_]X^Z^  
@HWI-EAS443:3:48:879:210#0/1  
GGGCGATCTGAACCTTGTCAATAGGGCAAACCAGCGACTG  
+HWI-EAS443:3:48:879:210#0/1  
`^^`¥a`aa¥\_YU`a\_\_\_\_\_^^¥^^^`VUY^U^^ZZ^  
@HWI-EAS443:3:48:890:993#0/1  
ATTCTACAAGAGGATTGCATGATCAAGGCAGTTAGGGGC  
+HWI-EAS443:3:48:890:993#0/1  
aba`a^`\_`a`^`aa`^`aa`\_`a`\_\_¥`S\_VX`\_[G  
@HWI-EAS443:3:48:892:848#0/1  
CTGTAATTGGGTATCTCATTGCCATCATCCACTTCATTCT  
+HWI-EAS443:3:48:892:848#0/1  
abbaabbbbab`bbbbabbbbab¥abbabb]abb`b



@HWI-EAS443:3:48:915:749#0/1  
TTCCTGATGTACTTTTTGATTATGGCCATATGGTCCAC  
+HWI-EAS443:3:48:915:749#0/1  
a`\_a`aa]a]\_\_aaaa`\_a`\_\_`\_]\_[\_[¥[ZXOR[WM  
@HWI-EAS443:3:48:930:16#0/1  
GCTGTCCTGAGAGATTTCTCATTTTGGGCAAAGAAGACA  
+HWI-EAS443:3:48:930:16#0/1  
a\_aa^`\_`aaa\_aa^ab`^a^^aaaa`\_]\_\_]^a^`\_]\_  
@HWI-EAS443:3:48:960:1903#0/1  
TCGCGAGATACTACTAAGACCACTGTGGACCATATGGCC  
+HWI-EAS443:3:48:960:1903#0/1  
a`aaa`\_]`\_\_¥ZXTV\_U\_^\_VJY\_[ZU[\_MU^]X\_]`^`PI  
@HWI-EAS443:3:48:995:541#0/1  
CTGCTGTCCTGAGAGATTTCTCATTTTGGGCAAAGAAGA  
+HWI-EAS443:3:48:995:541#0/1  
aabbbababbbbbbabaabbbbbbbaabbbbababbbaba  
@HWI-EAS443:3:48:996:722#0/1  
GGGACAAGAGACTGAAATGGTTCAAATTCATTTTGTGT  
+HWI-EAS443:3:48:996:722#0/1  
aaa^\_a\_b\_aaaab`\_aaaa\_aa```aa\_\_\_aaa`a`aa^  
@HWI-EAS443:3:48:9:65#0/1  
ATAAAAAGAACTGAGAGATCTAATGTCGCAGTCCCGCACTC  
+HWI-EAS443:3:48:9:65#0/1  
abaa\_`YZaaaZ\_Yaaa`aa`aaa^aY`^aU^[^^[U][[  
@HWI-EAS443:3:49:1019:1558#0/1  
GGGGACGTAGTGTGGTAATGAAACGAAAACGGGACTCTA  
+HWI-EAS443:3:49:1019:1558#0/1  
abaa`abU`\_`a```a¥¥`XZV`\_TT]`\_aT^`\_¥W¥T¥Z  
@HWI-EAS443:3:49:1038:902#0/1  
CTTGAAATGTGCCACAGCACACAGATTGGAGGAGTAAGG  
+HWI-EAS443:3:49:1038:902#0/1  
aaa\_¥\_a\_aababa^`\_`^b]\_]b`^`bbb`bbaba\_a`a  
@HWI-EAS443:3:49:1048:1667#0/1  
AAAAGAAGTCTAATGTCGCAGTCCCGCACTCGC  
+HWI-EAS443:3:49:1048:1667#0/1  
aaa¥[XIRba\_`^^[¥Ub`\_aa`P\_WNaS¥XYaXRU\_¥]N  
@HWI-EAS443:3:49:1057:1691#0/1  
GCGATAATCAAACCTTTGGTCAACATCATCTTTCTCACTT  
+HWI-EAS443:3:49:1057:1691#0/1  
`\_]\_\_X\_UZ`\_XXVWZ]¥^VY]W[T[SQXUP¥¥[JUMTRYO  
@HWI-EAS443:3:49:1059:1067#0/1  
GCGAGATACTACTAAGACCACTGTGGACCATATGGCCAT  
+HWI-EAS443:3:49:1059:1067#0/1  
^a`a````bbbb`\_]bb`^`abbbabW\_\_`^`a]aaa\_[Wa\_T  
@HWI-EAS443:3:49:1064:1942#0/1  
TGTACTCTTATTTTTCAGTGTGGAGGTTGCCCGTTAGCA  
+HWI-EAS443:3:49:1064:1942#0/1  
[`[^Ha^abab`aa`aba[[`\_aa^`]^a]LLX]^V`^W^  
@HWI-EAS443:3:49:1074:1273#0/1  
CAGAATGAAGTGGATGATGGCAATGAGATACCCAATTACA



@HWI-EAS443:3:49:1283:39#0/1  
GAGGGTTTGCCTTGTTTCATTCCTCTCTGGAATCATGTCC  
+HWI-EAS443:3:49:1283:39#0/1  
a]`]^\_aaaa¥¥baaaaa\_aa\_^a[`\_\_a`\_¥a^^aa^`^  
@HWI-EAS443:3:49:1284:248#0/1  
GCTGTAATTGGGTATCTCATTGCCATCATCCACTTCATTC  
+HWI-EAS443:3:49:1284:248#0/1  
aaa`^`Y[aaaaM\_a`a\_\_a\_^\_X`\_\_TZ]]X^]VV^^V  
@HWI-EAS443:3:49:1302:106#0/1  
AACAAAAGAGAAGAAAGAAGAGCTCCAGGATTGTAATTA  
+HWI-EAS443:3:49:1302:106#0/1  
a`abab]a`bX`[\_\_aa\_aa]a^`\_\_^a`b[`Sa``]a\_  
@HWI-EAS443:3:49:1316:1435#0/1  
CAAGGCAGCAATAGGGTTGAGGATTAGCTCATCTTTCAGT  
+HWI-EAS443:3:49:1316:1435#0/1  
`abbb`bbbbbb`aababbbababbbba`aaabba\_``  
@HWI-EAS443:3:49:1342:1983#0/1  
GAATAAAAGAAGACTGAGAGATCTAATGTCGCAGTCCCGCAC  
+HWI-EAS443:3:49:1342:1983#0/1  
aa`bb`bbaabbbabaabb\_`aaaaba[a`ab\_\_\_aaY`]  
@HWI-EAS443:3:49:1355:401#0/1  
AGAATAAAAGAAGACTGAGAGATCTAATGTCGCAGTCCCGCA  
+HWI-EAS443:3:49:1355:401#0/1  
abaabbbbaaaababbbba`ab`abbaabaab\_\_\_aa`a  
@HWI-EAS443:3:49:136:181#0/1  
CTTCCTGATGTGTACTTTTTGATTATGGCCATATGGTCCA  
+HWI-EAS443:3:49:136:181#0/1  
`bbbabbbbababbbbbbba]b\_b`b`^\_¥)`\_  
@HWI-EAS443:3:49:1379:1122#0/1  
GGTGGTTCACTTTCAAAGGACAAGCGGATCATCAGTCA  
+HWI-EAS443:3:49:1379:1122#0/1  
aaQb\_RYYL¥^a¥[RTI\_^]aTZQW]PZ\_NZKZa^UIOZX  
@HWI-EAS443:3:49:1383:1123#0/1  
GAACTGAGAGATCTAATGTCGCAGTCCCGCACTCGCGAGA  
+HWI-EAS443:3:49:1383:1123#0/1  
aaa`baaaaaaa\_aa\_aba``¥``\_Z¥^`¥Z^¥\_\_[\_W`W  
@HWI-EAS443:3:49:1429:368#0/1  
GTGACCATTGAATTTTCACAATTTCCAGTTCCTGATTAT  
+HWI-EAS443:3:49:1429:368#0/1  
aa`a`abbb`aabbbbaaaaabbaa\_\_aaa`¥[aa`aaaa  
@HWI-EAS443:3:49:1483:1309#0/1  
CTCTTATCCCTCTCAGCGACATCTCCGTGCTTGGGGTCAT  
+HWI-EAS443:3:49:1483:1309#0/1  
\_ab\_bb`baa\_baT¥a\_^\_baaaabXbabaa\_``aa¥][\_  
@HWI-EAS443:3:49:1505:923#0/1  
GCTAATTGGGCAAGGGGACGTAGTGTGGTAATGAAACGA  
+HWI-EAS443:3:49:1505:923#0/1  
\_`[¥OYabaa^\_^[¥\_U\_N\_bUQ\_Z`[a`]J[U^]ZUXLY]  
@HWI-EAS443:3:49:1510:1470#0/1  
AGTAAGGATGGTGGACATCCTTAGACAGAATCCAACGAG

+HWI-EAS443:3:49:1510:1470#0/1  
ababbabaaaa^baa\_ab\_`aaaa`^aaaaa^¥\_`Y`^`  
@HWI-EAS443:3:49:1571:1010#0/1  
CCCGTTTTTCGTTTCATTACCAACTACGTCCCCTTGCCC  
+HWI-EAS443:3:49:1571:1010#0/1  
abb\_a`bbabaababbbbaa`aa`a`ba¥a`a]`\_\_a``\_]  
@HWI-EAS443:3:49:1598:1540#0/1  
ATGGAGAGAATAAAAGAACTGAGAGATCTAATGTCGCAGT  
+HWI-EAS443:3:49:1598:1540#0/1  
`bab`aba]bbbbaaaa^ba`aaaaaaaaaab[Z¥\_`a^  
@HWI-EAS443:3:49:160:1724#0/1  
AATAAAAGAACTGAGAGATCTAATGTCGCAGTCCCGCACT  
+HWI-EAS443:3:49:160:1724#0/1  
`bbababaabab]b``abbabbaab\_aaab``a`a\_``aa  
@HWI-EAS443:3:49:161:965#0/1  
AAAGAACTGAGAGATCTAATGTCGCAGTCCCGCACTCGCG  
+HWI-EAS443:3:49:161:965#0/1  
aa\_`[\_`\_ab\_aaa^`[aaa`aU^\_``a¥`¥]`¥U¥\_]\_U]  
@HWI-EAS443:3:49:1622:166#0/1  
AGAGAATAAAAGAACTGAGAGATCTAATGTCGCAGTCCCG  
+HWI-EAS443:3:49:1622:166#0/1  
ababababb`bb`aaabaab[\_`a[bbabb`Uaa`\_YYZ\_\_  
@HWI-EAS443:3:49:166:1212#0/1  
TTGGGTATCTCATTGCCATCATCCACTTCATTCTGAGTGC  
+HWI-EAS443:3:49:166:1212#0/1  
abaa`^``aa¥`aa`\_`a\_a^\_\_`a`\_`\_a\_\_\_\_]\_X\_]`  
@HWI-EAS443:3:49:1695:891#0/1  
CTGAGAGATCTAATGTCGCAGTCCCGCACTCGCGAGATAC  
+HWI-EAS443:3:49:1695:891#0/1  
aa\_ab]b[a]bb^\_a`a`aaV\_`^`XKV\_``UU^Q[UTU  
@HWI-EAS443:3:49:1703:552#0/1  
GGGGACGTAGTGTGGTAATGAAACGAAAACGGGACTCTA  
+HWI-EAS443:3:49:1703:552#0/1  
aaaa¥\_`[^aTa[\_`aYHT^\_YN]^Z[WY^XJV^WRUZWWT  
@HWI-EAS443:3:49:1717:311#0/1  
GGTCCACAGTGGTCTTAGTGAGTATCTCGCGAGTGCGGGA  
+HWI-EAS443:3:49:1717:311#0/1  
ab¥^aTXb\_0\_`^¥`aaXb0aX^Z¥ZR]ZTX\_T\_R¥0`BBB  
@HWI-EAS443:3:49:1718:284#0/1  
GGGAAATTGTGAAAATTCAATGGTCACAAGATCCCACAAT  
+HWI-EAS443:3:49:1718:284#0/1  
abbbbbbbbaaa`]^bbababaa\_aaa\_\_baaa\_Ua```a  
@HWI-EAS443:3:49:1745:1855#0/1  
AATAAAAGAACTGAGAGATCTAATGTCGCAGTCCCGCACT  
+HWI-EAS443:3:49:1745:1855#0/1  
aababbab`b^aaa\_a\_aa`aaabb``R[aa]^[[^¥]^  
@HWI-EAS443:3:49:1750:1665#0/1  
AAAGAACTGAGAGATCTAATGTCGCAGTCCCGCACTCGCG  
+HWI-EAS443:3:49:1750:1665#0/1  
a\_]0[\_`aabaaaa\_a[aa¥aaRS`[\_`¥Y¥^Y[UZ¥YYSR

@HWI-EAS443:3:49:1763:1854#0/1  
ATCAGGGTTGAGGATACTGGTAAGAGGCAATTCTCCAGTA  
+HWI-EAS443:3:49:1763:1854#0/1  
ab\_aaa^abaaa^`\_a`\_a`\_`[\_W`\_`\_¥`]]\_¥U\_  
@HWI-EAS443:3:49:1779:1320#0/1  
GTCCCCGTTTTCGTTTCATTACCAACTACGTCCCCCTTGC  
+HWI-EAS443:3:49:1779:1320#0/1  
a`aRZa[`aYV^[]^WZa^YV]]Y]]^]]^VTTSV]VWU  
@HWI-EAS443:3:49:205:931#0/1  
ATCTGCTCCCAGCACGTCCCTTGGGTTAAGTGCAACTT  
+HWI-EAS443:3:49:205:931#0/1  
ababaaaa`aaaaab`\_[]`aa`\_a`\_a\_Y[P^\_V`]aa  
@HWI-EAS443:3:49:224:484#0/1  
CTAATGTCGAGTCCCGCACTCGCGAGATACTACTAAGA  
+HWI-EAS443:3:49:224:484#0/1  
abbbbaabbbba`ab`b`b`a`ab\_b`aabababbaa`  
@HWI-EAS443:3:49:238:212#0/1  
ATGAAGTGGATGATGGCAATGAGATACCCAATTACAGCAG  
+HWI-EAS443:3:49:238:212#0/1  
`aaa`[Zbbabb[aa\_\_`aaa^a\_[aZ^```aa`^`\_N``  
@HWI-EAS443:3:49:250:803#0/1  
GTTGCCTTGTGTAATTGAATACTGGAGAATTGCCTCTTA  
+HWI-EAS443:3:49:250:803#0/1  
aabb`aababbaaaaaaabb]aaa`aaaaaa]a`aaa  
@HWI-EAS443:3:49:28:600#0/1  
CGCACTCGCGAGATACTACTAAGACCACTGTGGACCATA  
+HWI-EAS443:3:49:28:600#0/1  
`\_^\_a\_a)`^\_¥^\_]a\_X]]^Y`\_]`\_]`^ZRW[ZUV[Z  
@HWI-EAS443:3:49:362:262#0/1  
AATAATGGACATGATTCCAGAGAGGAATGAACAAGGACAA  
+HWI-EAS443:3:49:362:262#0/1  
aXabb\_b^¥Saab]`b^¥`b`\_]ZZY```]aW\_\_aa`]¥T  
@HWI-EAS443:3:49:36:107#0/1  
AAAAGAAGTGGAGATCTAATGTCGAGTCCCGCACTCGC  
+HWI-EAS443:3:49:36:107#0/1  
[b``bbbaa\_aa`^)`aaaa`Za`¥QZ]`\_S][][]TU[`[  
@HWI-EAS443:3:49:403:773#0/1  
GAAGTGGATGATGGCAATGAGATACCCAATTACAGCAGAC  
+HWI-EAS443:3:49:403:773#0/1  
\_``bPba\_bb^aaaaaaa]a^¥aa`aaaa¥U\_a[\_a^T  
@HWI-EAS443:3:49:439:197#0/1  
GGGACGTAGTGTGGTAATGAAACGAAAACGGGACTCTAG  
+HWI-EAS443:3:49:439:197#0/1  
[bbVN`VX\_XaX`aa¥]W¥a[a[D¥`\_¥`Za\_a¥S`Z]WR  
@HWI-EAS443:3:49:460:139#0/1  
CATTAGCATCTCTCTTGGAAATGTGCCACAGCACACAGAT  
+HWI-EAS443:3:49:460:139#0/1  
abbbbabbbbab`bbbbbbbaaaaa^bbab¥a\_abaa  
@HWI-EAS443:3:49:479:729#0/1  
CTATTGTCTCCCGAAGAAGTCAGTGAACGCAAGGAACTG

+HWI-EAS443:3:49:479:729#0/1  
abbbab`ab`^]0^VZ]Y\_\_aR^\_aaZa\_S\_]`X`  
@HWI-EAS443:3:49:500:451#0/1  
TCCCGTTTTCGTTTCATTACCAACTACGTCCCCTTGCC  
+HWI-EAS443:3:49:500:451#0/1  
ab[X\_`abb\_`abaabbaba\_aa¥a`aaaa¥^`\_\_`\_]`\_  
@HWI-EAS443:3:49:531:1027#0/1  
ATCATTCTCATTCTCCTCCTGGAGGTACATCTGCTCC  
+HWI-EAS443:3:49:531:1027#0/1  
a`aabaaaa\_a\_aaaaa\_Ya\_aa]`aV\_¥a\_^\_X\_Y¥^NQ  
@HWI-EAS443:3:49:560:292#0/1  
AAAAGAAGTGAAGATCTAATGTCGCAGTCCCGCACTCGC  
+HWI-EAS443:3:49:560:292#0/1  
abbbbaabbbbaaababaaab`aaaa^`aa\_\_\_\_`][  
@HWI-EAS443:3:49:568:1171#0/1  
CTCTGGAGCAAAACAAACGATGCTGGATCAGACCGAGTGA  
+HWI-EAS443:3:49:568:1171#0/1  
ababbbbbbabaaaaabbababbbbabababab`bbaaab  
@HWI-EAS443:3:49:599:708#0/1  
CGCGAGATACTACTAAGACCACTGTGGACCATATGGCCA  
+HWI-EAS443:3:49:599:708#0/1  
S`¥bVVb^UZ`Y^¥bbZXaX¥¥a^^aZ]ZKMXba`¥NJUa  
@HWI-EAS443:3:49:603:552#0/1  
ATGTCGCAGTCCCGCACTCGCGAGATACTACTAAGACCA  
+HWI-EAS443:3:49:603:552#0/1  
`bbIW][aa[[[a\_`\_ab][V`\_U]¥V\_[\_Z[`U^[ZG^  
@HWI-EAS443:3:49:613:1693#0/1  
TCCCGTTTTCGTTTCATTACCAACTACGTCCCCTTGCC  
+HWI-EAS443:3:49:613:1693#0/1  
aaaab\_abaaa^aa`aaaa^[aa\_a\_`a\_\_XZZ¥^^^¥¥  
@HWI-EAS443:3:49:641:415#0/1  
AAAAGAAGTGAAGATCTAATGTCGCAGTCCCGCACTCGC  
+HWI-EAS443:3:49:641:415#0/1  
abbabbbabab]baaabbaabb\_aabba\_a^aa\_\_a`a]  
@HWI-EAS443:3:49:651:1457#0/1  
GCGAGATACTACTAAGACCACTGTGGACCATATGGCCAT  
+HWI-EAS443:3:49:651:1457#0/1  
abbab\_`aaa\_baaaaaaa`\_ba^a^\_a\_a`^```]``  
@HWI-EAS443:3:49:659:865#0/1  
GCGATAATCAAACCTTGGTCAACATCATCTTCTCACTT  
+HWI-EAS443:3:49:659:865#0/1  
`^aabaaaaaa\_abab]FZaa^`a\_`a\_`aaa[a[`\_a\_  
@HWI-EAS443:3:49:687:150#0/1  
AAAAGAAGTGAAGATCTAATGTCGCAGTCCCGCACTCGC  
+HWI-EAS443:3:49:687:150#0/1  
abbabababbbbbbab`abba\_b\_aa`\_\_`a\_`^`¥\_]`  
@HWI-EAS443:3:49:712:1222#0/1  
AAATCAAGTTAAAATAAGGAGGAGAGTTGATACAAACCT  
+HWI-EAS443:3:49:712:1222#0/1  
`aabaaabab`a`b`^aa\_ba\_a\_a^aa`aa`a\_\_RRR`

@HWI-EAS443:3:49:733:889#0/1  
GAAGAAGTCAGTGAAACGCAAGGAAGTGAAGTTGACAA  
+HWI-EAS443:3:49:733:889#0/1  
abaaaababbb`]aaba`aaba\_a`aaabaa\_\_a\_a\_a`  
@HWI-EAS443:3:49:737:500#0/1  
AGGGGACGTAGTGTGGTAATGAAACGAAAACGGGACTCT  
+HWI-EAS443:3:49:737:500#0/1  
a`aababbb`a`bab`a`^aaa^`aWq]ab`¥`^]X\_]`  
@HWI-EAS443:3:49:750:1305#0/1  
CTGTAATTGGGTATCTCATTGCCATCATCCACTTCATTCT  
+HWI-EAS443:3:49:750:1305#0/1  
a\_\_Y¥U`bbbbab`aY¥]`a]\_bb]a\_ZZ`aabaabaU`  
@HWI-EAS443:3:49:756:576#0/1  
AGCACGTCCCTTGGGTAAAGTGCAACACTTCAATATAAAC  
+HWI-EAS443:3:49:756:576#0/1  
aaaaab`^a\_bbaab`abab^b¥aa\_a`aaa`\_a`aa`a`  
@HWI-EAS443:3:49:788:95#0/1  
GTCCCGTTTTTCGTTTCATTACCAACACTACGTCCTTGC  
+HWI-EAS443:3:49:788:95#0/1  
a`\_Z^`Zaba¥b^^^aa\_]`[\_^`\_\_^`]OVUXY][Y  
@HWI-EAS443:3:49:799:1623#0/1  
AAAAGAAGTGAAGATCTAATGTCGCAGTCCCGCACTCGC  
+HWI-EAS443:3:49:799:1623#0/1  
`abYXRWa\_X\_aaba]aaaba`\_]X¥`a[X]]][WT¥Z\_ZR  
@HWI-EAS443:3:49:81:113#0/1  
GAATAAAAGAAGTGAAGATCTAATGTCGCAGTCCCGCAC  
+HWI-EAS443:3:49:81:113#0/1  
\_babbbbab\_ababbaaaa`aaaaba\_ab`aa[]`¥`^[]`  
@HWI-EAS443:3:49:878:558#0/1  
CGCACTCAGAATGAAGTGGATGATGGCAATGAGATACCCA  
+HWI-EAS443:3:49:878:558#0/1  
ababbbbbbabbbbbbabbabbaabaabbbababaa]`aa  
@HWI-EAS443:3:49:890:1438#0/1  
TCCTCATTGACTGTGAATGTGAGAGGATCAGGGTTGAGGA  
+HWI-EAS443:3:49:890:1438#0/1  
abab\_ababaaa^W`aabaPZ`a`bY^]`\_]\_T^U\_^¥  
@HWI-EAS443:3:49:939:738#0/1  
AAAGAAGTGAAGATCTAATGTCGCAGTCCCGCACTCGCG  
+HWI-EAS443:3:49:939:738#0/1  
`baY\_\_`abaab`¥a\_a`abY^a`a`^¥\_`¥¥¥¥\_\_]]\_`  
@HWI-EAS443:3:49:950:349#0/1  
CAGTGGTCTTAGTGAGTATCTCGCGAGTGCGGGACTGCGA  
+HWI-EAS443:3:49:950:349#0/1  
ababbbabbbbaaabbbbbb][R^]b][O[bb[^`^]a`  
@HWI-EAS443:3:49:986:674#0/1  
GCTTGGGACATTTGACACTGTCCAAATAATAAACTTCTC  
+HWI-EAS443:3:49:986:674#0/1  
`a`a\_\_^`a`aaa\_X\_a\_ba`^^^¥`\_`aa`]`¥^a^a¥  
@HWI-EAS443:3:4:1001:451#0/1  
CCCGTTTTTCGTTTCATTACCAACACTACGTCCTTGCC

+HWI-EAS443:3:4:1001:451#0/1  
aba\_00HbaaVYX[]¥VX\_[^^P]]\_aS¥U\_U\_ZU[ZR]]  
@HWI-EAS443:3:4:1013:769#0/1  
AGGGGACGTAGTGTGGTAATGAAACGAAAACGGGACTCT  
+HWI-EAS443:3:4:1013:769#0/1  
abbb¥\_b\_\_bXb^aaaY^\_a\_` `a¥a^\_\_`X^`\_UU`UX  
@HWI-EAS443:3:4:1057:1476#0/1  
ATCCAGATGAAGGCACATCTGGGGTGGAGTCTGCTGCCT  
+HWI-EAS443:3:4:1057:1476#0/1  
a\_[^b`abbb¥^`ba` ``abaaaUbaabZ^`a\_aaSXV`  
@HWI-EAS443:3:4:1113:1796#0/1  
AAGAAGTGAAGATCTAATGTCGCAGTCCCGCACTCGCGA  
+HWI-EAS443:3:4:1113:1796#0/1  
aaV[ba¥aa`aa`XW`^`aa][[O[aX]Z\_]ZFTNN]G¥B  
@HWI-EAS443:3:4:1128:802#0/1  
CCCCGTTTTCGTTTTATTACCAACTACGTCCCCCTTGCCC  
+HWI-EAS443:3:4:1128:802#0/1  
`aab]bb`bb[ `a`aa[\_a` `aaa`aa\_a^QZ¥[\_ZYMWR  
@HWI-EAS443:3:4:1170:344#0/1  
GGATGGTGGACATCCTTAGACAGAATCCAAGTGGAGGAACA  
+HWI-EAS443:3:4:1170:344#0/1  
ab` `aa]aa`aaa`aaaaY\_\_a\_` `]\_^\_Xaa` ``^\_U[  
@HWI-EAS443:3:4:1170:482#0/1  
GGGACGTAGTGTGGTAATGAAACGAAAACGGGACTCTAG  
+HWI-EAS443:3:4:1170:482#0/1  
^ab^bbaababababZ`aa`[a\_`a`\_a\_P]a`ZTa^\_^^  
@HWI-EAS443:3:4:1224:1797#0/1  
ATGAAGTGGATGATGGCAATGAGATACCCAATTACAGCAG  
+HWI-EAS443:3:4:1224:1797#0/1  
`ab[¥Z^`aaaa\_a¥¥G]aaaY[\_\_\_\_]^ [`a\_\_aS^^X[a  
@HWI-EAS443:3:4:1240:881#0/1  
ATCTAATGTCGCAGTCCCGCACTCGCGAGATACTCACTAA  
+HWI-EAS443:3:4:1240:881#0/1  
\_O^PVaa\_U¥TO[¥UUXaYZVZ^\_[` [RBBBBBBBBBBBB  
@HWI-EAS443:3:4:1252:1445#0/1  
AGAGAATAAAAAGAACTGAGAGATCTAATGTCGCAGTCCCG  
+HWI-EAS443:3:4:1252:1445#0/1  
^` `bbabbb][K\_b]aabaa`aaaa`a\_ba\_a^aa^` `^`  
@HWI-EAS443:3:4:1284:1781#0/1  
GTCCCGTTTTCGTTTTATTACCAACTACGTCCCCCTTGC  
+HWI-EAS443:3:4:1284:1781#0/1  
aa¥FV^`VXaY]\_XVU[bXT]U\_[GYU]]^ZRNHSTWMZR  
@HWI-EAS443:3:4:1320:1424#0/1  
CAAACGACTTACAGTTCTTGAAAGGATGCAGGTGCATTG  
+HWI-EAS443:3:4:1320:1424#0/1  
Vbbbb`¥I\_\_`]^`Wa`bbZb`ZZ¥aVab[b\_`¥VIaab]  
@HWI-EAS443:3:4:1346:1898#0/1  
CTGTAATTGGGTATCTCATTGCCATCATCCACTTCATTCT  
+HWI-EAS443:3:4:1346:1898#0/1  
Xabb^bbbbbbaVbabbbab\_baa`b^bbbabababab[b



@HWI-EAS443:3:4:1348:739#0/1  
CCCCGTTTTTCGTTTCATTACCAACTACGTCCCCTTGCCC  
+HWI-EAS443:3:4:1348:739#0/1  
aa`\_U^aaabZ^^Y^a]a^`Z[\_Yaa^a[VVY`]¥YSMV  
@HWI-EAS443:3:4:1369:1239#0/1  
GCCTTCATCTGGATCTTCAGTCAATGCACCTGCATCCTTT  
+HWI-EAS443:3:4:1369:1239#0/1  
a\_]a\_a]aV¥`[^Taaaa\_aa`\_\_\_a^[\_a\_\_\_ZP\_\_¥  
@HWI-EAS443:3:4:1393:601#0/1  
AACAAGGACAAACCCTCTGGAGCAAAACAAACGATGCTGG  
+HWI-EAS443:3:4:1393:601#0/1  
\_aPabaa`[``aUQ[aUaba¥aYY^Qa[\_aa]\_aU\_]X]\_  
@HWI-EAS443:3:4:1427:1257#0/1  
TCTCTTGTCTTCTTTGCCCAAATGAGAAATCCTCTCAGG  
+HWI-EAS443:3:4:1427:1257#0/1  
Y`a`\_``\_V\_WKV^a^PZ^aZT`aaa```\_W[[\_`^\_\_  
@HWI-EAS443:3:4:143:863#0/1  
GAGAATAAAAGAAGACTGAGAGATCTAATGTCGCAGTCCCGC  
+HWI-EAS443:3:4:143:863#0/1  
\_aWZ^ab¥0`a^X\_aaRaZ^VVV`]W^a^¥¥¥^`¥Z¥MQT  
@HWI-EAS443:3:4:1459:1509#0/1  
AGAGAATAATGGACATGATTCCAGAGAGGAATGAACAAGG  
+HWI-EAS443:3:4:1459:1509#0/1  
ab[baaZ\_`^^]\_Sa]`]XWUTV¥[YW]`]a`^a\_\_\_Y]B  
@HWI-EAS443:3:4:1472:1718#0/1  
AAAGAAGACTGAGAGATCTAATGTCGCAGTCCCGCACTCGCG  
+HWI-EAS443:3:4:1472:1718#0/1  
^[bab]aaaaa`]`\_[`a`ba\_YU\_\_aU¥[X¥STF^Z`UT  
@HWI-EAS443:3:4:1481:1297#0/1  
GTCCCGTTTTTCGTTTCATTACCAACTACGTCCCCTTGCC  
+HWI-EAS443:3:4:1481:1297#0/1  
a`a\_abaabb\_baaa\_aaaa[Xa]W`\_``]\_^]\_Y]]]`X  
@HWI-EAS443:3:4:1500:374#0/1  
GAGAATAAAAGAAGACTGAGAGATCTAATGTCGCAGTCCCGC  
+HWI-EAS443:3:4:1500:374#0/1  
a]a]\_\_`[\_`^\_¥^\_]`U]X]W\_\_V^`RUXYXUYUYYYB  
@HWI-EAS443:3:4:1594:432#0/1  
AAAAGAAGACTGAGAGATCTAATGTCGCAGTCCCGCACTCGC  
+HWI-EAS443:3:4:1594:432#0/1  
abbab\_a\_baaaaaa\_aa`aa\_\_`\_`\_XXY]]^X]XX]U  
@HWI-EAS443:3:4:1606:1426#0/1  
AAAGAAGACTGAGAGATCTAATGTCGCAGTCCCGCACTCGCG  
+HWI-EAS443:3:4:1606:1426#0/1  
abbaaa\_babaaa\_a`aab`[\_`\_aaZZUZ\_`[YTW`Z`  
@HWI-EAS443:3:4:1651:1793#0/1  
TCCTGATGTGACTTTTTGATTATGGCCATATGGTCCACA  
+HWI-EAS443:3:4:1651:1793#0/1  
Z\_``¥a`aY¥X\_Pa¥X]¥¥\_`\_`Y]YHX][W`][FFS]BB  
@HWI-EAS443:3:4:1659:407#0/1  
ATCTAATGTCGCAGTCCCGCACTCGCGAGATACTCACTAA



@HWI-EAS443:3:4:552:337#0/1  
GGGAGCAATTTTACAATCCTGGAGCTCTTCTTCTCTCTCT  
+HWI-EAS443:3:4:552:337#0/1  
^ab]^Y\_^a¥`aaa^UYSXN¥X]GWGQUZ^]`P\_RQZU^  
@HWI-EAS443:3:4:576:956#0/1  
GCTGGATCAGACCGAGTGATGGTATCACCTCTGGCCGTAA  
+HWI-EAS443:3:4:576:956#0/1  
aababaaabaa`\_`\_aaSba`a\_U`Z]^`U¥\_W¥^Z¥¥`N^\_  
@HWI-EAS443:3:4:593:651#0/1  
ATAAAAGAACTGAGAGATCTAATGTCGCAGTCCCGCACTC  
+HWI-EAS443:3:4:593:651#0/1  
ababaabab`aa\_aaaaa]aa`aa^`a`aa^U`\_`\_Z¥  
@HWI-EAS443:3:4:668:1086#0/1  
GATCTAATGTCGCAGTCCCGCACTCGCGAGATACTACTACTA  
+HWI-EAS443:3:4:668:1086#0/1  
aLa\_a\_]\_aaa[\_¥\_U[[a^WKXUXMR\_W^[U¥\_]WBBBB  
@HWI-EAS443:3:4:673:1240#0/1  
AAAGAACTGAGAGATCTAATGTCGCAGTCCCGCACTCGCG  
+HWI-EAS443:3:4:673:1240#0/1  
V\_`Y]QX\_^]\_\_a¥Zab\_]aY¥ZG^aJYJL[U^]WMQ¥B  
@HWI-EAS443:3:4:680:553#0/1  
AGAGAATAAAAGAACTGAGAGATCTAATGTCGCAGTCCCG  
+HWI-EAS443:3:4:680:553#0/1  
ab`baaaaa\_aaaaa^aaaaaaa`ab]^a^a`\_¥]^a^  
@HWI-EAS443:3:4:681:234#0/1  
CCCGTTTTCGTTTTATTACCAACTACGTCCCCTTGCCC  
+HWI-EAS443:3:4:681:234#0/1  
abbb`aab]bZaaa]\_aaa`aaZaX\_a`^Y[]^]`\_`^UW  
@HWI-EAS443:3:4:689:1171#0/1  
AATAAAAGAACTGAGAGATCTAATGTCGCAGTCCCGCACT  
+HWI-EAS443:3:4:689:1171#0/1  
a`bababb`a^^aaa\_aaab`aaa\_\_aaa]U^`[\_`^  
@HWI-EAS443:3:4:689:652#0/1  
CGTTTTCGTTTTATTACCAACTACGTCCCCTTGCCCCA  
+HWI-EAS443:3:4:689:652#0/1  
ab[[]^b^b]]]Yaa]aZ^Y^UUUV]\_`a^XSXNV^[NZ¥`^  
@HWI-EAS443:3:4:691:1354#0/1  
GCTGCTCCACCAGAACAGAGTAGGATGCAATTTTCTCAT  
+HWI-EAS443:3:4:691:1354#0/1  
aaa`aaaab\_U`^[\_`\_aaYa0^aa`a^a\_aa`\_¥\_^Y\_]`  
@HWI-EAS443:3:4:731:1866#0/1  
GAATAAAAGAACTGAGAGATCTAATGTCGCAGTCCCGCAC  
+HWI-EAS443:3:4:731:1866#0/1  
aaa\_aaaa^`a`aaaa¥`a\_^\_a`a`a]\_]\_\_^Y]Z]]][W  
@HWI-EAS443:3:4:742:880#0/1  
AGAGAATAAAAGAACTGAGAGATCTAATGTCGCAGTCCCG  
+HWI-EAS443:3:4:742:880#0/1  
ababbaaab[bb^a]¥T¥a\_a`aa\_abab\_]`\_bb^\_R][  
@HWI-EAS443:3:4:763:203#0/1  
GGTGGTTCACTTTCAAAGGACAAGCGGATCATCAGTCA

+HWI-EAS443:3:4:763:203#0/1  
`TGTV\_G`\_N]^UM^U`P`VX]Y[X]XLTWY[TW\_QMU  
@HWI-EAS443:3:4:769:391#0/1  
AAAAGAAGCTGAGAGATCTAATGTCGCAGTCCCGCACTCGC  
+HWI-EAS443:3:4:769:391#0/1  
\_\_bab]bababb`\_aaUbbaaa\_aa\_aX^[\_aW^]\_a\_  
@HWI-EAS443:3:4:780:1290#0/1  
GTGTACTTTTTGATTATGGCCATATGGTCCACAGTGGTCT  
+HWI-EAS443:3:4:780:1290#0/1  
a¥a^a\_aaaaa\_aaaa`^]]`\_WN]NX¥\_T¥YPW`VX]  
@HWI-EAS443:3:4:818:1333#0/1  
GTCGCAGTCCCGCACTCGCGAGATACTCACTAAGACCACT  
+HWI-EAS443:3:4:818:1333#0/1  
aWaa`^`¥`V¥Z[\_`a[]^\_[YXY^V]S^\_^RSVU^¥¥  
@HWI-EAS443:3:4:818:1364#0/1  
AAAAGAAGCTGAGAGATCTAATGTCGCAGTCCCGCACTCGC  
+HWI-EAS443:3:4:818:1364#0/1  
^]bab¥U¥abba]aaaVbaabba\_bbab\_[]aab\_aUQa\_  
@HWI-EAS443:3:4:84:1760#0/1  
GGGCAACCTCCAAACACTGAAAATAAGAGTACATGAAGGG  
+HWI-EAS443:3:4:84:1760#0/1  
abbb`baba[Wa¥a\_aWaa`aa\_aa`a\_a]`aaa`aaXX  
@HWI-EAS443:3:4:871:1559#0/1  
GGGACGTAGTGTGGTAATGAAACGAAACGGGACTCTAG  
+HWI-EAS443:3:4:871:1559#0/1  
aaaaabaaa]b`aaaU^aa`R`aIa^^`\_L¥\_[]¥Z][V]]  
@HWI-EAS443:3:4:877:746#0/1  
GAAATGTGCCACAGCACACAGATTGGAGGAGTAAGGATGG  
+HWI-EAS443:3:4:877:746#0/1  
aaaaaa\_a^`a`X`\_a\_\_aX`a`X`a^`]]\_\_\_\_]]`  
@HWI-EAS443:3:4:891:375#0/1  
ATTGACTGAAGATCCAGATGAAGGCACATCTGGGGTGGAG  
+HWI-EAS443:3:4:891:375#0/1  
abbbb`abbbbaaaaaaaaa`a`a`aaZaaaaWa`\_a  
@HWI-EAS443:3:4:919:517#0/1  
GAAAGAAGAGCTCCAGGATTGAAAATTGCTCCCTTGATG  
+HWI-EAS443:3:4:919:517#0/1  
a`\_aa\_a\_Xa]^\_¥]^`\_¥\_\_\_V]^XY`]^U\_[UV^X`YBB  
@HWI-EAS443:3:4:921:618#0/1  
CATTATTCTCTGTCTGTGTAATTGGGTATCTCATTGCC  
+HWI-EAS443:3:4:921:618#0/1  
abbbaba`b\_a\_]Z`a\_\_\_\_]\_\_aaa\_[[\_Z`^\_\_\_\_[VT  
@HWI-EAS443:3:4:923:269#0/1  
GCTAATTGGGCAAGGGGACGTAGTGTGGTAATGAAACGA  
+HWI-EAS443:3:4:923:269#0/1  
a\_a`\_a\_\_\_\_^[\_a`a]U^`YZ\_Y\_]\_^]GVYN\_X]^G]X  
@HWI-EAS443:3:4:934:1231#0/1  
GAGGATTTCTCATTGGGCAAAGAAGACAAGAGATATGG  
+HWI-EAS443:3:4:934:1231#0/1  
]`aSaababaYYbabba^ZaaX\_ba]aaYa`aa`abaa[

@HWI-EAS443:3:4:945:274#0/1  
GCTGTAATTGGGTATCTCATTGCCATCATCCACTTCATTC  
+HWI-EAS443:3:4:945:274#0/1  
aaaa]\_\_aa\_``]`\_\_\_\_\_`\_^]X`X\_]Y^U^^X\_]X  
@HWI-EAS443:3:50:1003:1663#0/1  
AGAGAATAAAAGAACTGAGAGATCTAATGTCGCAGTCCCG  
+HWI-EAS443:3:50:1003:1663#0/1  
W\_¥b\_abaabbbaaSbb`ba[aaJaaaa[\_a`\_aS^RS\_  
@HWI-EAS443:3:50:1013:700#0/1  
GGGGACGTAGTGTGGTAATGAAACGAAAACGGGACTCTA  
+HWI-EAS443:3:50:1013:700#0/1  
`\_`aa`]aY`\_b]ba\_Z\_[\_a`[aXa\_aaaH]V\_^]`[\_`\_  
@HWI-EAS443:3:50:1032:668#0/1  
GAGAATAAAAGAACTGAGAGATCTAATGTCGCAGTCCCGC  
+HWI-EAS443:3:50:1032:668#0/1  
a`ba`baaa`^a`aa`a`b\_a¥a`]aa¥`a^\_a[Z^¥\_`^  
@HWI-EAS443:3:50:1040:1552#0/1  
CATGACCCCAAGCACGGAGATGTCGCTGAGAGGGATAAGA  
+HWI-EAS443:3:50:1040:1552#0/1  
`a]\_^OZ`\_b\_\_TVYW¥VX^Z\_YM\_]W[[WZaab`Q]\_WX  
@HWI-EAS443:3:50:1089:1520#0/1  
CTGCTGTAATTGGGTATCTCATTGCCATCATCCACTTCAT  
+HWI-EAS443:3:50:1089:1520#0/1  
abbbbbbbbbbbbaaa`a`abbb\_]abbba`aaabb[ab  
@HWI-EAS443:3:50:1118:1045#0/1  
GTTTTCGTTTCATTACCAACTACGTCCCCTTGCCCAAT  
+HWI-EAS443:3:50:1118:1045#0/1  
aX`baab\_]`^V[\_a\_W^YY]]Z^USZ]^]Z]\_UMSSVWV  
@HWI-EAS443:3:50:1133:349#0/1  
TACCCTTCATGTACTCTTATTTTCAGTGTGGAGGTTGC  
+HWI-EAS443:3:50:1133:349#0/1  
a^\_\_^aa`a¥]`^`^a[Y\_`^VWX[^[a```V[]Y¥YW  
@HWI-EAS443:3:50:1180:361#0/1  
CCACTGTGGACCATATGGCCATAATCAAAAAGTACACATC  
+HWI-EAS443:3:50:1180:361#0/1  
S\_¥Y\_b¥`bb¥aWS¥WaSXR\_[U[Z\_U\_b\_¥\_Z\_`]]`U¥  
@HWI-EAS443:3:50:1184:35#0/1  
CATCACTCGGTCTGATCCAGCATCGTTTGTGGTCTCCAG  
+HWI-EAS443:3:50:1184:35#0/1  
]abbabbbb`Z]bbaa]]Z]Saa\_bbbbaa`ba]ZZ`WO\_  
@HWI-EAS443:3:50:1227:2024#0/1  
AAGAAGTGAAGATCCAGATGAAGGCACATCTGGGGTGGAG  
+HWI-EAS443:3:50:1227:2024#0/1  
abbb\_`aababb`a`bbaab\_]\_[aa¥`a\_a\_`¥\_]\_]`\_  
@HWI-EAS443:3:50:1228:717#0/1  
ATTGACTGAAGATCCAGATGAAGGCACATCTGGGGTGGAG  
+HWI-EAS443:3:50:1228:717#0/1  
abbbbabbbbaaa`bbaabaaa\_\_a`aa`abb`aUa``a  
@HWI-EAS443:3:50:1241:1437#0/1  
TCCCGTTTTCGTTTCATTACCAACTACGTCCCCTTGCC

+HWI-EAS443:3:50:1241:1437#0/1  
Z¥[aaY`aaW`X[ar^]a[`W¥YT\_]a`SaZVRWXZZ\_UP  
@HWI-EAS443:3:50:1280:786#0/1  
ATTTTCAGTGTGGAGGTTGCCCGTTAGCACTTCTTCTT  
+HWI-EAS443:3:50:1280:786#0/1  
abbbb^bababba\_ba^aa\_a\_a\_a]a\_\_\_aa\_ba¥aa  
@HWI-EAS443:3:50:1299:1595#0/1  
CTAATGTGCTAATTGGGCAAGGGACGTAGTGTGGTAAT  
+HWI-EAS443:3:50:1299:1595#0/1  
Ya``bbbabba\_¥```ab`b\_]X¥`Va\_a`U`aabb¥a]b  
@HWI-EAS443:3:50:1303:810#0/1  
GAAGGGTATGAAGAATTCACAATGGTTGGGAGAAGAGCAA  
+HWI-EAS443:3:50:1303:810#0/1  
aaababS]`ba`a`\_aaa\_``\_aaa^``a`^`^Za\_`\_]`  
@HWI-EAS443:3:50:1329:629#0/1  
GGCCCAACAACAAGTACAGTTCATTACCCTAAGGTATATA  
+HWI-EAS443:3:50:1329:629#0/1  
aabbbbbbababbb\_babbaaabbbb```baabb^babba  
@HWI-EAS443:3:50:1357:962#0/1  
CTCATTGCCATCATCCACTTCATTCTGAGTGC GGGGTTCT  
+HWI-EAS443:3:50:1357:962#0/1  
ab]\_bb`b`]a¥`TZ\_a^^aZ]a`b```ba`abab]Ha\_b  
@HWI-EAS443:3:50:1358:103#0/1  
AAAAGAAGTGAAGATCTAATGTCGCAGTCCCGCACTCGC  
+HWI-EAS443:3:50:1358:103#0/1  
a`a`bbbabbbbab[b`b`bbbaT`[aa`\_\_`a`]^aHaQ  
@HWI-EAS443:3:50:1363:308#0/1  
GTTTATATTGAAGTGTGCACTTAACCCAAGGGACGTGCT  
+HWI-EAS443:3:50:1363:308#0/1  
`T[\_^^[aaa[^`Ra^¥^[¥U]\_^\_XSR[¥\_¥¥W[`W]WY  
@HWI-EAS443:3:50:1371:1574#0/1  
AATAAAAGAACTGAGAGATCTAATGTCGCAGTCCCGCACT  
+HWI-EAS443:3:50:1371:1574#0/1  
ab\_\_\_\_\_`^a]abbbb`aaaaabb\_S``aaX\_GYa^]N\_  
@HWI-EAS443:3:50:1376:788#0/1  
CTGGAGTGTACATCTGCTCCCAGCACGTCCCTTGGGTAA  
+HWI-EAS443:3:50:1376:788#0/1  
a\_\_YYabb`Q[bbbbaa\_`aaZVaVa\_`[P¥a]UZX\_]T  
@HWI-EAS443:3:50:1377:1630#0/1  
AGAGAATAAAAGAACTGAGAGATCTAATGTCGCAGTCCCG  
+HWI-EAS443:3:50:1377:1630#0/1  
`aabbabbaabaaabb`b`aaaabaab^`aaaa^\_^^\_  
@HWI-EAS443:3:50:1410:867#0/1  
AACAAACGATGCTGGATCAGACCGAGTGATGGTATCACCT  
+HWI-EAS443:3:50:1410:867#0/1  
`RR`b¥W^T``aVbaa]IaXHX]OOWHHY^GH¥P¥RY`\_`  
@HWI-EAS443:3:50:1425:117#0/1  
TAATGTGCAGTCCCGCACTCGCGAGATACTCACTAAGAC  
+HWI-EAS443:3:50:1425:117#0/1  
a\_ab\_aW[``\_[aW^ZWJH`VT`]¥aU^Xa^^X`[P]¥PJ

@HWI-EAS443:3:50:1465:1235#0/1  
ATCTAATGTCGCAGTCCCGCACTCGCGAGATACTCACTAA  
+HWI-EAS443:3:50:1465:1235#0/1  
`a`a`aaYZa¥X^¥a`[Q¥U^]Y]¥`\_^ZZ[UVU[[Z[]  
@HWI-EAS443:3:50:1489:1857#0/1  
AAAGAAGTCTAATGTCGCAGTCCCGCACTCGCG  
+HWI-EAS443:3:50:1489:1857#0/1  
a^bb\_U`bbabbbbaabbbabbTZ`aa[S``\_`V[\_^X]U\_  
@HWI-EAS443:3:50:1491:652#0/1  
AAAGAAGTCTAATGTCGCAGTCCCGCACTCGCG  
+HWI-EAS443:3:50:1491:652#0/1  
`b\_Wabaa`bbbbbbba\_ba`a^^\_aaaaa`]\_aa`[`  
@HWI-EAS443:3:50:1506:172#0/1  
AGAGGGTTTGTCTTGTTCATTCTCTCTGGAATCATGTC  
+HWI-EAS443:3:50:1506:172#0/1  
ab`\_``[bb\_^aaabbaa[aaa\_[`aaaa\_Z`aaa\_a`\_`  
@HWI-EAS443:3:50:1527:801#0/1  
GAGAGATCTAATGTCGCAGTCCCGCACTCGCGAGATACTC  
+HWI-EAS443:3:50:1527:801#0/1  
aa]`a[^[\_aa`b^`aa`[^[]]QZZZ`¥¥[VU[VTZW  
@HWI-EAS443:3:50:1610:39#0/1  
GGTCCACAGTGGTCTTAGTGAGTATCTCGCGAGTGC GGGA  
+HWI-EAS443:3:50:1610:39#0/1  
aaV\_abaaa\_ab¥aaaaUaa`U\_\_\_\_¥a`R`T¥T``\_R  
@HWI-EAS443:3:50:1622:33#0/1  
CATGGCCACAATTATTGCCTCAGCAATTGACTGCTCGTCT  
+HWI-EAS443:3:50:1622:33#0/1  
ababbbb\_abbbbbba\_`]aabaabbab¥`aa`aa^`ab  
@HWI-EAS443:3:50:1627:694#0/1  
GAGAGATCTAATGTCGCAGTCCCGCACTCGCGAGATACTC  
+HWI-EAS443:3:50:1627:694#0/1  
a^]aabaabbaabY¥a]¥¥]XX¥V¥\_\_^^^^[^^^YS[S  
@HWI-EAS443:3:50:1635:1988#0/1  
ACCCTGATCCTCTCACATTCACAGTCAATGAGGAAAATTG  
+HWI-EAS443:3:50:1635:1988#0/1  
YNXX`W\_SaUZ\_V¥]T\_`TQ¥N¥aTZZU]aYa^``]V]S\_  
@HWI-EAS443:3:50:1662:609#0/1  
GTGGCGTACATGCTAGAAAGAGAATTGGTCCGTA AAACAA  
+HWI-EAS443:3:50:1662:609#0/1  
]N\_\_XSV[\_\_\_]¥¥YL^L^TWZU]aaa[[WVP¥FXN¥XR]¥  
@HWI-EAS443:3:50:1667:1048#0/1  
GGGCCATTGATCTCCACATCATTGATGACGAATAAGTTA  
+HWI-EAS443:3:50:1667:1048#0/1  
aaaaababb\_a\_aa`aaaa\_aa`aa```^\_\_^`\_\_\_\_]`\_  
@HWI-EAS443:3:50:1688:722#0/1  
TCCTGATGTGTACTTTTTGATTATGGCCATATGGTCCACA  
+HWI-EAS443:3:50:1688:722#0/1  
aa`baa`a`aa`aaabbaaaa`a`\_^\_\_`ZZ[HYZ\_] [SZ  
@HWI-EAS443:3:50:1751:1116#0/1  
TTGTCTTTTTGAAAGTGAACCCACCAAACTGAAAGATGA

+HWI-EAS443:3:50:1751:1116#0/1  
^`b`aZ^abba`^^T^bb]a\_Za¥S`aaaaab¥]¥\_[aa[  
@HWI-EAS443:3:50:184:1275#0/1  
CAGGTGCATTGACTGAAGATCCAGATGAAGGCACATCTGG  
+HWI-EAS443:3:50:184:1275#0/1  
aaa^Xaabb`bb`bbbbaaaa\_bbaabaaaaabaaa`aba  
@HWI-EAS443:3:50:196:1567#0/1  
CTGTGGACCATATGGCCATAATCAAAAAGTACACATCAGG  
+HWI-EAS443:3:50:196:1567#0/1  
abaabbbababbaaabbaaTa`\_`aaaaYD[Ua^aa\_Y¥\_  
@HWI-EAS443:3:50:245:995#0/1  
AAAGAACTGAGAGATCTAATGTCGCAGTCCCGCACTCGCG  
+HWI-EAS443:3:50:245:995#0/1  
[ab`Yab`baa`b]]bbb`b^^\_[¥`YZ¥aa]WWUJWR]  
@HWI-EAS443:3:50:268:581#0/1  
GTGGGAGATCAATGGCCCTGAGTCAGTGCTAGTCAACACT  
+HWI-EAS443:3:50:268:581#0/1  
a\_abbabab`baaab`\_aaaa`\_a\_\_\_^\_[[\_X`G\_^a  
@HWI-EAS443:3:50:288:90#0/1  
AGAAGTACTGAGAGATCTAATGTCGCAGTCCCGCACTCGCGAG  
+HWI-EAS443:3:50:288:90#0/1  
abaa`bba```aa\_bb\_ba\_aa\_\_`\_^Xaa\_^\_\_`Ua\_a  
@HWI-EAS443:3:50:292:882#0/1  
CATTGTGGGATCTTGTGACCATTGAATTTTACAATTTCC  
+HWI-EAS443:3:50:292:882#0/1  
^U¥¥^Z`\_J^bbbaabbaa^`abb`b`¥]`^`aaaa^T[  
@HWI-EAS443:3:50:325:397#0/1  
CGGCTACTGGGAGAAACCTTGTTTTACGGACCAATTCTCT  
+HWI-EAS443:3:50:325:397#0/1  
\_Za`XQH\_XXW\_OX\_\_\_\_\_QW¥IUab¥X^\_aYMX[XRR\_`¥  
@HWI-EAS443:3:50:331:124#0/1  
AAAGAACTGAGAGATCTAATGTCGCAGTCCCGCACTCGCG  
+HWI-EAS443:3:50:331:124#0/1  
abaabbaa\_Z\_\_babbbbs`a[[aa`aZLX]\_J¥X^NZ¥a  
@HWI-EAS443:3:50:370:40#0/1  
GAACCCCGCACTCAGAATGAAGTGGATGATGGCAATGAGA  
+HWI-EAS443:3:50:370:40#0/1  
abbbbabb`Yb\_a`baaaaa[Z[Wabbabaa`[¥^b^ba  
@HWI-EAS443:3:50:377:1234#0/1  
GAGAATAAAAGAACTGAGAGATCTAATGTCGCAGTCCCGC  
+HWI-EAS443:3:50:377:1234#0/1  
aWa`aaaaaab``]aa`a^a]a`a`\_ab]\_a\_aa\_\_]]`]  
@HWI-EAS443:3:50:412:947#0/1  
CTAATGTCGCAGTCCCGCACTCGCGAGATACTCACTAAGA  
+HWI-EAS443:3:50:412:947#0/1  
ab\_bbbbab`bY`\_bbbaabaa^¥`a``bbabaaabba\_a  
@HWI-EAS443:3:50:422:1574#0/1  
AAGAACTGAGAGATCTAATGTCGCAGTCCCGCACTCGCGA  
+HWI-EAS443:3:50:422:1574#0/1  
abaaa¥bbbababaa[abaaaZa\_\_aaYQ`a]a\_]`\_Xaa



@HWI-EAS443:3:50:45:1157#0/1  
GGTGGGTTCACTTTCAAAGGACAAGCGGATCATCAGTCA  
+HWI-EAS443:3:50:45:1157#0/1  
`b\_]a\_aaaa`bbb`ba\_\_aa`\_]a]aa`a\_a`a`\_^a  
@HWI-EAS443:3:50:490:953#0/1  
ACCATTGAATTTTCACAATTTCCCAGTTCCTGATTATCCA  
+HWI-EAS443:3:50:490:953#0/1  
aaabbbbaabbbbabbbbbaaaaaabaaaabaa`aaaa]a  
@HWI-EAS443:3:50:491:1087#0/1  
CCCCTTTTCGTTTCATTACCAACTACGTCCCCTTGCCC  
+HWI-EAS443:3:50:491:1087#0/1  
aaab`bbabb`bbabbbb]L\_aaa\_]`[UP^aaYaUT``Z  
@HWI-EAS443:3:50:507:1215#0/1  
GTCTGCTGTAATTGGGTATCTCATTGCCATCATCCACTTC  
+HWI-EAS443:3:50:507:1215#0/1  
aa`aa^a`^abb\_\_b`a^aV]aa`\_Y````aZ\_][][]`[  
@HWI-EAS443:3:50:555:449#0/1  
CCCCTTTTCGTTTCATTACCAACTACGTCCCCTTGCCC  
+HWI-EAS443:3:50:555:449#0/1  
abab`ababaaababbab[abaaaabbZaa`^`a`\_aXZP  
@HWI-EAS443:3:50:560:254#0/1  
GAATAAAAGAACTGAGAGATCTAATGTCGCAGTCCCGCAC  
+HWI-EAS443:3:50:560:254#0/1  
X`bbbb¥a``]ab]a`^b^a][``a`Y]aa\_\_aaa\_^]  
@HWI-EAS443:3:50:59:602#0/1  
ATGACCCCAAGCACGGAGATGTCGCTGAGAGGGATAAGAG  
+HWI-EAS443:3:50:59:602#0/1  
a^^a`\_`\_YU[[\_^a\_¥]\_^Ua\_]`^¥WQaaa¥`]S¥W  
@HWI-EAS443:3:50:655:824#0/1  
AAAAGAACTGAGAGATCTAATGTCGCAGTCCCGCACTCGC  
+HWI-EAS443:3:50:655:824#0/1  
aaabaabaaaabab`aabaaaaZaaaa\_a\_```\_^a`^a  
@HWI-EAS443:3:50:690:1041#0/1  
AAAAGAACTGAGAGATCTAATGTCGCAGTCCCGCACTCGC  
+HWI-EAS443:3:50:690:1041#0/1  
Va\_T\_b`^[babb¥¥baaa\_ba¥\_ba]TT]a`[[I[Q\_\_a  
@HWI-EAS443:3:50:707:562#0/1  
GAGAGATCTAATGTCGCAGTCCCGCACTCGCGAGATACTC  
+HWI-EAS443:3:50:707:562#0/1  
^U¥\_Z\_\_\_ba\_bb\_aaaaaZXYT\_¥¥`Xa`aX]^a\_[-\_  
@HWI-EAS443:3:50:707:845#0/1  
CTTGTCTGCTGTAATTGGGTATCTCATTGCCATCATCCAC  
+HWI-EAS443:3:50:707:845#0/1  
`aa¥`[a[`bbKJabaaa\_\_ababTba][^G¥b`a]T`a`  
@HWI-EAS443:3:50:739:1096#0/1  
GTGCCACAGCACAGATTGGAGGAGTAAGGATGGTGGAC  
+HWI-EAS443:3:50:739:1096#0/1  
aaa\_SO]¥\_V¥``ZWUR`¥`XTaa\_ZKSU¥`W``^R`ZRG  
@HWI-EAS443:3:50:743:899#0/1  
CATTATTCTCTGTCTGCTGTAATTGGGTATCTCATTGCC

+HWI-EAS443:3:50:743:899#0/1  
H¥b]ab\_V`^`abb`abbaa[\_b^abab\_X\_S\_``^`Z[[  
@HWI-EAS443:3:50:834:440#0/1  
GGGACAAGAGACTGAAATGGTTCAAATTCATTTTGTGT  
+HWI-EAS443:3:50:834:440#0/1  
\_aaaaZ\_bba`bbb^bab`b`b`aa¥H]\_a\_aaaaa``U  
@HWI-EAS443:3:50:836:172#0/1  
GGTGGAGTCTGCTGTCCTGAGAGATTCTCATTTTGGGC  
+HWI-EAS443:3:50:836:172#0/1  
Z\_Pa^\_\_0^abb\_\_a^`ab]b`bba`bbaa\_aaaaba]a`  
@HWI-EAS443:3:50:841:1461#0/1  
GTACTTTTGTATTATGGCCATATGGTCCACAGTGGTCTTA  
+HWI-EAS443:3:50:841:1461#0/1  
aZHXa`ba`a]Y\_¥[[[\_`¥X[\_^PU]Q\_X]QYUFRH[S  
@HWI-EAS443:3:50:865:968#0/1  
CTTTGCTGCTGCCACCAGAACAGAGTAGGATGCAATTT  
+HWI-EAS443:3:50:865:968#0/1  
abbbbbbbbaabaa`\_Z\_a`T`[``¥`P]aa]¥WX]aaaa  
@HWI-EAS443:3:50:86:662#0/1  
CATTATTCTTGTCTGCTGTAATTGGGTATCTCATTGCC  
+HWI-EAS443:3:50:86:662#0/1  
aabbbbbbabbbbbbabbaa`\_aabbbbb^bb`aabbab\_a  
@HWI-EAS443:3:50:875:46#0/1  
CGCGAGATACTCACTAAGACCACTGTGGACCATATGGCCA  
+HWI-EAS443:3:50:875:46#0/1  
abababbba`b^babaabaa`^`aaT^`aaaaa^aa^aa  
@HWI-EAS443:3:50:910:443#0/1  
CTCCTCTTATTTAACTTGATTTCTGAAGTGGACAGGGC  
+HWI-EAS443:3:50:910:443#0/1  
``\_ZZV`baZ`XV¥G¥`ZSZSaS`T¥U\_Ta[XW]a¥BBBB  
@HWI-EAS443:3:50:954:315#0/1  
CAATTTTACAATCCTGGAGCTCTTCTTTCTTCTTTTGT  
+HWI-EAS443:3:50:954:315#0/1  
U`bbbbbbba\_P\_abbbabaa[bbbbba^`bababbbb`b  
@HWI-EAS443:3:50:957:1520#0/1  
GTCCCGTTTTTCGTTTCATTACCAACTACGTCCTTGC  
+HWI-EAS443:3:50:957:1520#0/1  
a`aa`b`aaaab`aaa`a\_`¥Va`[\_]a\_^a\_[V][[\_WR  
@HWI-EAS443:3:50:958:28#0/1  
AACTGAGAGATCTAATGTTCGAGTCCCGCACTCGCGAGAT  
+HWI-EAS443:3:50:958:28#0/1  
ababbbbb\_ba^`]b\_[Yabb]\_MY\_]\_¥[]aabab]b\_a  
@HWI-EAS443:3:51:1008:1118#0/1  
CTGGATCAGACCGAGTGATGGTATCACCTCTGGCCGTAAC  
+HWI-EAS443:3:51:1008:1118#0/1  
a`bb\_bbaa]``bb\_Va\_ZaaZa^^`\_aa`a^^^]aW^ZQ  
@HWI-EAS443:3:51:1017:502#0/1  
GTCTGCTGTCCTGAGAGATTCTCATTTTGGGCAAAGAA  
+HWI-EAS443:3:51:1017:502#0/1  
]aa`b`aba`bb]b\_bb\_bb^[\_]bbbbba`¥¥aabba

@HWI-EAS443:3:51:1029:1263#0/1  
AAAAGAAGTCTGAGATCTAATGTTCGAGTCCCGCACTCGC  
+HWI-EAS443:3:51:1029:1263#0/1  
\_\_a`bbbaa^`^^a`aba`Z^U]aaaaaX^a^X^PPXV  
@HWI-EAS443:3:51:1039:1401#0/1  
AGTCTGCTGTCTGAGAGGATTTCTCATTTTGGGCAAAGA  
+HWI-EAS443:3:51:1039:1401#0/1  
ababb\_\_¥baab`^`b\_ba\_\_bb[a[aab``aaaaa^W]\_  
@HWI-EAS443:3:51:1084:1000#0/1  
TTTCAGTGTGGAGGTTGCCGTTAGCACTTCTTCTTCT  
+HWI-EAS443:3:51:1084:1000#0/1  
`a^\_]a``[^aa`\_`a\_`^Y^\_[K[[U¥QNV]SZa^]\_^\_  
@HWI-EAS443:3:51:1089:149#0/1  
GTCCGTAACAAGGTTTCTCCAGTAGCCGGCGAACAG  
+HWI-EAS443:3:51:1089:149#0/1  
abb`a`bbbbbbbaYbbab¥bba[a\_\_aab]ab\_`¥¥aa  
@HWI-EAS443:3:51:1108:279#0/1  
CCATTATTCTTGTCTGCTGTAATTGGGTATCTCATTGC  
+HWI-EAS443:3:51:1108:279#0/1  
abbbbababababaabb`aX^aabbabb\_abaaaa`\_]`  
@HWI-EAS443:3:51:1160:340#0/1  
CGGTCTGATCCAGCATCGTTTGTGGTCCAGAGGGTTT  
+HWI-EAS443:3:51:1160:340#0/1  
aYa]¥``¥\_]aZba[aab[`b\_[Z\_aaa^]R]]\_aaa]]]  
@HWI-EAS443:3:51:1171:61#0/1  
AAAGAAGTCTGAGATCTAATGTTCGAGTCCCGCACTCGCG  
+HWI-EAS443:3:51:1171:61#0/1  
^aa]b]¥\_\_\_\_[R[]]Wbbb`\_aZaYF[¥FYZFWa¥TXb`b  
@HWI-EAS443:3:51:1183:296#0/1  
GTCCCGTTTTCGTTTCATTACCAACTACGTCCCTTGC  
+HWI-EAS443:3:51:1183:296#0/1  
`baaababbbabab`bbab]``aaaaba\_a\_\_^`\_a^¥]  
@HWI-EAS443:3:51:1201:724#0/1  
ATCTGCTCCAGCACGTCCCTTGGGTTAAGTGCAACTT  
+HWI-EAS443:3:51:1201:724#0/1  
a\_`aaaa¥a¥aa`a\_a\_\_`\_aaaY]Zaa``V`¥\_a`\_U`a  
@HWI-EAS443:3:51:1230:1080#0/1  
TCCCGTTTTCGTTTCATTACCAACTACGTCCCTTGC  
+HWI-EAS443:3:51:1230:1080#0/1  
aa`aaaaba\_aaaa\_\_aaa\_Sa`X¥^`a`\_^[XV\_^`^WV  
@HWI-EAS443:3:51:1250:733#0/1  
CTGCTGTAATTGGGTATCTCATTGCCATCATCCACTTCAT  
+HWI-EAS443:3:51:1250:733#0/1  
a[YUY`UXV^^\_V`PZ\_PZTX¥WQQMY]a¥Y`a`^ZYMSZ  
@HWI-EAS443:3:51:1277:760#0/1  
GTCCCGTTTTCGTTTCATTACCAACTACGTCCCTTGC  
+HWI-EAS443:3:51:1277:760#0/1  
a^UTJ¥Y[`XX\_`aaYTXZ`VUYXT^Wa`Y¥ZSTQZTTSJ  
@HWI-EAS443:3:51:1295:1800#0/1  
AAGGATGTCCACCATCCTTACTCCTCCAATCTGTGTGCTG

+HWI-EAS443:3:51:1295:1800#0/1  
aabaabaaa\_[ba\_\_b]b\_a^baa]QGbba\_baSaa\_Q[b  
@HWI-EAS443:3:51:1300:1118#0/1  
AACTGAGAGATCTAATGTCGAGTCCCGCACTCGCGAGAT  
+HWI-EAS443:3:51:1300:1118#0/1  
abX`aVUaa\_]aaa[bbUIa`a]\_b\_\_baQV`WU\_]Y¥XZ  
@HWI-EAS443:3:51:1391:57#0/1  
ATTTGGGAAAACAACCTCCATAATCACATCCTGTGCCTCC  
+HWI-EAS443:3:51:1391:57#0/1  
aabZ`¥V]a\_babaZ`\_aa`b`aa`ab¥\_a\_ZaV`\_`W  
@HWI-EAS443:3:51:1412:1861#0/1  
AAAAGAAGTCTAATGTCGAGTCCCGCACTCGC  
+HWI-EAS443:3:51:1412:1861#0/1  
^b\_bb`a[aa\_baa`b\_a``bbY¥a`\_`¥[\_]\_^ZTWU\_V  
@HWI-EAS443:3:51:1418:1059#0/1  
CCCGTTTTCGTTTCATTACCAACTACGTCCCTTGCCC  
+HWI-EAS443:3:51:1418:1059#0/1  
`aab`aab`b^ab`\_bba`Yaa]a\_aaa`W]XS¥a\_\_¥^`  
@HWI-EAS443:3:51:1462:1443#0/1  
GGCCATTCTATTCCACCATGTTACGGCCAGAGGTGATAC  
+HWI-EAS443:3:51:1462:1443#0/1  
aaU]aX]]`[ab¥¥[a[¥]`a`\_^¥\_a`[SROSY^URWB  
@HWI-EAS443:3:51:1496:1113#0/1  
CTGCTGTAATTGGGTATCTCATTGCCATCATCCACTTCAT  
+HWI-EAS443:3:51:1496:1113#0/1  
ZabZa^^]`ba`abb`aababbbb\_a\_I\_bWbb]\_a]ab  
@HWI-EAS443:3:51:1501:1498#0/1  
ATGCAGGTGCATTGACTGAAGATCCAGATGAAGGCACATC  
+HWI-EAS443:3:51:1501:1498#0/1  
`bb``Sb^b^`aabZ`ababa^V¥\_aa\_aa]^baX^Z\_\_X  
@HWI-EAS443:3:51:1515:639#0/1  
GAATAAAAAGAACTGAGAGATCTAATGTCGAGTCCCGCAC  
+HWI-EAS443:3:51:1515:639#0/1  
^aaaabbaa]b`baaabaaa\_baaaa\_``Wa[^]\_^`\_]\_  
@HWI-EAS443:3:51:1518:146#0/1  
CTTAACCCAAGGGACGTGCTGGGAGCAGATGTACTCCA  
+HWI-EAS443:3:51:1518:146#0/1  
]bab[baaa[^\_^\_abaZWONVaUbbbab]^`ba[`a  
@HWI-EAS443:3:51:1532:857#0/1  
CATCAAGGGAGCAATTTTACAATCCTGGAGCTCTTCTTC  
+HWI-EAS443:3:51:1532:857#0/1  
a```a`¥Y`\_Za`]^`b]a`aaRaa``^aYa^^aaa\_a^  
@HWI-EAS443:3:51:1532:945#0/1  
AATCAAACCTTTGGTCAACATCATCTTCTCACTTCTCCT  
+HWI-EAS443:3:51:1532:945#0/1  
Z^^\_]YX][a\_a\_QXZ`a\_¥W\_X[X`^^`aZT^\_\_Z\_Q¥\_  
@HWI-EAS443:3:51:154:94#0/1  
AAGAAGTGAAGTCGTTTGGTTGCCTTGTGTAATTGAAT  
+HWI-EAS443:3:51:154:94#0/1  
aXb\_`\_]`a\_]a¥Wa``aaa\_Xa[[\_a]\_\_Z`^`\_`RP\_

@HWI-EAS443:3:51:1578:1540#0/1  
CGCGAGATACTACTAAGACCACTGTGGACCATATGGCCA  
+HWI-EAS443:3:51:1578:1540#0/1  
ab`aabbbb`bababbbbaaababaabaaa^\_baaaa\_`  
@HWI-EAS443:3:51:1598:1297#0/1  
TGTCGCAGTCCCGCACTCGCGAGATACTACTAAGACCAC  
+HWI-EAS443:3:51:1598:1297#0/1  
[ba`P[\_^Ya`b]a[aa]]SbV¥R`XN\_\_^[¥]\_a\_WSVU  
@HWI-EAS443:3:51:1636:549#0/1  
CATTACCAACACTACGTCCCCTTGCCCAATTAGCACATTA  
+HWI-EAS443:3:51:1636:549#0/1  
Z^b\_^bVZ^¥a`¥a`a`a^aZ^U`^YT\_`\_\_a`Y\_^T  
@HWI-EAS443:3:51:1670:213#0/1  
GAATGAAGTGGATGATGGCAATGAGATACCCAATTACAGC  
+HWI-EAS443:3:51:1670:213#0/1  
^a^baa[^Z`\_a\_XPH[[S^`]UYZ]Z¥a[]`Y\_aa`TVV  
@HWI-EAS443:3:51:1673:861#0/1  
TAGCATCTCTCTTGAAATGTGCCACAGCACACAGATTGG  
+HWI-EAS443:3:51:1673:861#0/1  
abbbbabaa[T`bb`ba`a[Y\_`aabbaa\_a`\_a\_aaa^  
@HWI-EAS443:3:51:1696:1205#0/1  
ATCATCATTTCTCACTTCTCCTCCTGGAGTGACATCTGC  
+HWI-EAS443:3:51:1696:1205#0/1  
]\_b\_Z\_[ba\_b\_^\_abbbaTPa¥Wa^`b`YX]\_X\_^U\_`]  
@HWI-EAS443:3:51:191:333#0/1  
AAAAGAAGTGGAGATCTAATGTCGCAGTCCCGCACTCGC  
+HWI-EAS443:3:51:191:333#0/1  
ababaaaababaaaaabaaab¥\_a\_aa[\_\_\_^a`\_`a¥\_`^  
@HWI-EAS443:3:51:235:1455#0/1  
AATGAAGTGGATGATGGCAATGAGATACCCAATTACAGCA  
+HWI-EAS443:3:51:235:1455#0/1  
abb`abSba`\_b\_a]`TQaba^aaaa\_]baaab[^aG¥  
@HWI-EAS443:3:51:245:711#0/1  
CGCGAGATACTACTAAGACCACTGTGGACCATATGGCCA  
+HWI-EAS443:3:51:245:711#0/1  
abbbb`b`babbabab\_bbaaaaaab\_baaa`¥`\_`aa[`]  
@HWI-EAS443:3:51:249:768#0/1  
CTCGCGAGATACTACTAAGACCACTGTGGACCATATGGC  
+HWI-EAS443:3:51:249:768#0/1  
aa^X\_b`baa^aaaa\_aaaaa\_a`\_]\_`\_`\_\_^a¥\_a\_\_  
@HWI-EAS443:3:51:259:1451#0/1  
GAGAGAATAAAAAGAACTGAGAGATCTAATGTCGCAGTCCC  
+HWI-EAS443:3:51:259:1451#0/1  
^S¥[aaab¥W`^¥OW`^V^a`a\_a]Z`]a¥[[ZZaYFY[  
@HWI-EAS443:3:51:320:331#0/1  
ACCCCGCACTCAGAATGAAGTGGATGATGGCAATGAGATA  
+HWI-EAS443:3:51:320:331#0/1  
aaa`¥¥ba`aYa\_aaa\_¥a]a]¥\_^^`\_`\_[NZ\_a\_a^\_R  
@HWI-EAS443:3:51:397:661#0/1  
AAAAGAAGTGGAGATCTAATGTCGCAGTCCCGCACTCGC

+HWI-EAS443:3:51:397:661#0/1  
abaabaabbababaaa`baaaaaa\_ab`]``aa\_`\_\_`  
@HWI-EAS443:3:51:41:1885#0/1  
GCGATCTGAACCTTGTCAATAGGGCAAACAGCGACTGAA  
+HWI-EAS443:3:51:41:1885#0/1  
ab^aR\_Zb]aa`a`WX¥[\_\_a`Sa`aa^Va^[X^VXRxa  
@HWI-EAS443:3:51:48:56#0/1  
AAAAGAAGTGAAGATCTAATGTCGCAGTCCCGCACTCGC  
+HWI-EAS443:3:51:48:56#0/1  
aabaa\_a`aaaa`aaaaa`aa^a\_``[W]^\_\_U¥\_\_\_\_[  
@HWI-EAS443:3:51:496:781#0/1  
GCTGTAATTGGGTATCTCATTGCCATCATCCACTTCATTC  
+HWI-EAS443:3:51:496:781#0/1  
a\_aa[\_`aa\_\_`V\_^]\_^]\_^X^X\_`^X^^]\_`]Y^^X  
@HWI-EAS443:3:51:571:142#0/1  
GGGGACGTAGTGTGGTAATGAAACGAAAACGGGACTCTA  
+HWI-EAS443:3:51:571:142#0/1  
aaa]U[`VV^P][aZ]VY¥X¥XZ]P¥SYYYU\_^ZGNUUR[  
@HWI-EAS443:3:51:580:291#0/1  
AGACAAGAGAATAATGGACATGATTCCAGAGAGGAATGAA  
+HWI-EAS443:3:51:580:291#0/1  
[[]¥[abTaaa\_\_abbba``aaab````a\_a]baa``Ya^  
@HWI-EAS443:3:51:586:1641#0/1  
GAACTGTACTTGTGTGGGCCATTCTATTCCACCATGT  
+HWI-EAS443:3:51:586:1641#0/1  
aaaabaaaabbabbaaaa``YY\_aa\_aaaba`¥^\_``aaa  
@HWI-EAS443:3:51:602:1573#0/1  
GCGGGATGTGCTTGGGACATTTGACACTGTCCAAATAATA  
+HWI-EAS443:3:51:602:1573#0/1  
\_a```^`b`^a`baaa`abaaaa\_`¥aa\_`¥^`aa`aa  
@HWI-EAS443:3:51:613:1593#0/1  
AAAGAAGTGAAGATCTAATGTCGCAGTCCCGCACTCGCG  
+HWI-EAS443:3:51:613:1593#0/1  
aaba[aaaaabbbaa\_baaaa\_a^`a`\_``a[a`\_\_]\_a¥  
@HWI-EAS443:3:51:616:1310#0/1  
GGCCATATCTCTTGTCTTCTTTGCCAAAATGAGAAATCC  
+HWI-EAS443:3:51:616:1310#0/1  
abbaaaa`\_b^aab\_`ab`a`aaaa`\_\_a\_ba``a`a^\_  
@HWI-EAS443:3:51:618:630#0/1  
CACTCGCGAGATACTACTAAGACCACTGTGGACCATATG  
+HWI-EAS443:3:51:618:630#0/1  
`^bbabbbbaabaaaababaaaa`aaa`a]aaa`aaaaa  
@HWI-EAS443:3:51:624:1379#0/1  
TGGCAATGAGATACCCAATTACAGCAGACAAGAGAATAAT  
+HWI-EAS443:3:51:624:1379#0/1  
ab]^T^`a^bZZ^^]aaa]¥Yba\_bb```a]`a\_[a`\_a  
@HWI-EAS443:3:51:64:1204#0/1  
TGTGGCCATGGTATTCTCACAAGAGGATTGCATGATCAAG  
+HWI-EAS443:3:51:64:1204#0/1  
`b```]`a^ZPVGW]\_X¥\_Z[]\_[U¥`H¥]TX]XTZVLBBB

@HWI-EAS443:3:51:650:827#0/1  
CCCCTTTTTCGTTTCATTACCAACTACGTCCCCTTGCCC  
+HWI-EAS443:3:51:650:827#0/1  
a`a\_HT^a`^`aaa]ab\_¥aa\_a`aaa\_[Ya]Z]aZUF  
@HWI-EAS443:3:51:652:1817#0/1  
CAATGAGATACCCAATTACAGCAGACAAGAGAATAATGGA  
+HWI-EAS443:3:51:652:1817#0/1  
a`ababb`babaa¥Y`aa\_aaaa^Uaaa\_a]\_aaaa`Y  
@HWI-EAS443:3:51:655:1151#0/1  
AAAAGAAGTGGAGATCTAATGTCGCAGTCCCGCACTCGC  
+HWI-EAS443:3:51:655:1151#0/1  
aaaaaaaa^a`aaa`\_aa`aaa^a\_aa¥Za^R`]]`¥\_¥  
@HWI-EAS443:3:51:690:762#0/1  
GTGGCGTACATGCTAGAAAGAGAATTGGTCCGTAACAA  
+HWI-EAS443:3:51:690:762#0/1  
a`baaa\_a[`aa\_]J]`\_a]a^aa`a`¥¥\_a¥\_\_a`V^\_  
@HWI-EAS443:3:51:694:349#0/1  
AATGAAGTGGGGCAAGAATACTGACATCAGAGTCACAGC  
+HWI-EAS443:3:51:694:349#0/1  
a`b`a`b^bab]b[aaaa^`a]`aaX^`a\_a^aTa^a\_`[  
@HWI-EAS443:3:51:712:282#0/1  
CACTGTGGACCATATGGCCATAATCAAAAAGTACACATCA  
+HWI-EAS443:3:51:712:282#0/1  
ab[`¥YaZ¥VabbbZYaU`b`J`a]\_a`WK\_`ZISba`aQ  
@HWI-EAS443:3:51:767:25#0/1  
GTGGATGATGGCAATGAGATACCCAATTACAGCAGACAAG  
+HWI-EAS443:3:51:767:25#0/1  
a]aa^ab\_\_`b\_\_^`\_`a]\_\_\_\_X\_\_\_\_`\_]\_]\_]XXX]\_  
@HWI-EAS443:3:51:80:432#0/1  
AAGGCACATCTGGGTGGAGTCTGCTGTCCTGAGAGGATT  
+HWI-EAS443:3:51:80:432#0/1  
aaaa^\_aaa^aba` `[aa¥a^¥`a¥\_a^W^aa[¥]^XW\_\_  
@HWI-EAS443:3:51:815:1952#0/1  
GTGGGTTCACTTTCAAAGGACAAGCGGATCATCAGTCAA  
+HWI-EAS443:3:51:815:1952#0/1  
a`aaaWaaW][aaY[`a`^Z^aa¥`\_aaZ^^Z]OX`RL¥\_  
@HWI-EAS443:3:51:828:1973#0/1  
AGGGGACGTAGTGTGGTAATGAAACGAAAACGGGACTCT  
+HWI-EAS443:3:51:828:1973#0/1  
a`a`aaab`ababaab`NV¥VW¥a\_Q^aa`[DX``SV^Z^  
@HWI-EAS443:3:51:86:877#0/1  
CCCCTTTTTCGTTTCATTACCAACTACGTCCCCTTGCCC  
+HWI-EAS443:3:51:86:877#0/1  
aaab`abbaaababbab^\_aaaa\_ababa\_a`\_`\_`\_]`\_  
@HWI-EAS443:3:51:892:1595#0/1  
GTGTACTTTTTGATTATGGCCATATGGTCCACAGTGGTCT  
+HWI-EAS443:3:51:892:1595#0/1  
a`]P[`aaa\_`PS`Z`S`RZV[SPXFLWFQ[Q\_[PPYHWU  
@HWI-EAS443:3:51:905:1777#0/1  
ATAATGGACATGATTCCAGAGAGGAATGAACAAGGACAAA

+HWI-EAS443:3:51:905:1777#0/1  
a\_a`\_aa^aaaa\_`Y\_`\_]X[`a¥FM¥\_` `HXU]UY\_\_^\_  
@HWI-EAS443:3:51:925:1150#0/1  
TGAATACTCCAGCACGGAGAGAGTGGTAGTGAGTATTGAC  
+HWI-EAS443:3:51:925:1150#0/1  
aaaa`aa`^aa^\_Waa]`Z^^^Ya\_] ^BBBBBBBBBBBB  
@HWI-EAS443:3:51:940:1020#0/1  
GGAAAAGCACTTTTGCATCTTTTGGAAATGCCTCAAGAG  
+HWI-EAS443:3:51:940:1020#0/1  
\_bab\_X`aa]baaaaYU^^aaaaaaaabaaa^\_aY\_X`^a  
@HWI-EAS443:3:51:985:1837#0/1  
CTTTTGCATCTTTTGGAAATGCCTCAAGAGTTGGTGCAT  
+HWI-EAS443:3:51:985:1837#0/1  
a\_[Y]b`]babba```baaaaYT`\_aa`aa`aaa¥bU`a  
@HWI-EAS443:3:52:1000:1376#0/1  
AGAGAATAAAAGAACTGAGAGATCTAATGTCGCAGTCCCG  
+HWI-EAS443:3:52:1000:1376#0/1  
aaab`abaa\_\_a^a^`a¥\_\_aYa\_ba`aa\_Y^`\_\_W¥^¥`  
@HWI-EAS443:3:52:1002:423#0/1  
ATCTCATTGCCATCATCCACTTCATTCTGAGTGCGGGGTT  
+HWI-EAS443:3:52:1002:423#0/1  
\_NZSNSVS]Z]S[`\_ [¥[UU^¥M^\_]Z\_^]\_RZL¥XZVNY  
@HWI-EAS443:3:52:1017:1574#0/1  
AAAGAAGTGAAGATCTAATGTCGCAGTCCCGCACTCGCG  
+HWI-EAS443:3:52:1017:1574#0/1  
`a]\_\_`aZT^a¥Z`^`a\_a`¥SHSY`SU`¥a[T]\_\_\_\_^`  
@HWI-EAS443:3:52:1019:1461#0/1  
GTGGGTTCACTTTCAAAGGACAAGCGGATCATCAGTCAA  
+HWI-EAS443:3:52:1019:1461#0/1  
]^a`^R^]^]aaa`]`\_`\_a]\_a^a[a^Ua]a`ZaaH\_\_\_\_  
@HWI-EAS443:3:52:103:1975#0/1  
AATTGGGCAAGGGGACGTAGTGTGGTAATGAAACGAAAA  
+HWI-EAS443:3:52:103:1975#0/1  
]ab\_]aa\_\_^bSVa`^[\_¥R^W`a^^X\_^a¥Z\_bR]¥^`a  
@HWI-EAS443:3:52:1058:1298#0/1  
GAAGAGCAACAGCTATTCTCAGAAAGGCAACCAGGAGATT  
+HWI-EAS443:3:52:1058:1298#0/1  
aaabaabba`aa^aaaaa`aaa` ``YW¥a[0\_a\_Q\_[\_\_  
@HWI-EAS443:3:52:1061:1275#0/1  
CTAATGTCGCAGTCCCGCACTCGCGAGATACTCACTAAGA  
+HWI-EAS443:3:52:1061:1275#0/1  
aba^`bab\_` `aaaa`Ub\_\_\_\_a` `` [a`^\_]a\_a\_a`a\_a  
@HWI-EAS443:3:52:1070:1271#0/1  
GACTCCACCCAGATGTGCCTTCATCTGGATCTTCAGTCA  
+HWI-EAS443:3:52:1070:1271#0/1  
ababaabab`bab`aa`] [\_`b\_ab\_aaaaabaaaa\_`a  
@HWI-EAS443:3:52:1111:1631#0/1  
AGGGGACGTAGTGTGGTAATGAAACGAAACGGGACTCT  
+HWI-EAS443:3:52:1111:1631#0/1  
abab` `ab]`\_¥ba`baX^a^^Za\_G^` `a`V]a`SMVV^



@HWI-EAS443:3:52:1123:1752#0/1  
CTGACTCAGGGCCATTGATCTCCCACATCATTGATGACGA  
+HWI-EAS443:3:52:1123:1752#0/1  
abbaaabaaaa`]aaaaa`a`\_`a`aa¥`a\_aa\_a\_Xa^  
@HWI-EAS443:3:52:1126:27#0/1  
AAAAGAAGTCTGAGATCTAATGTCGCAGTCCCGCACTCGC  
+HWI-EAS443:3:52:1126:27#0/1  
V]VaWaSU`\_[a`bb^T``a]bTN^Z`aVW¥Y[VWZ^BBB  
@HWI-EAS443:3:52:1137:201#0/1  
CGCGAGATACTCACTAAGACCACTGTGGACCATATGGCCA  
+HWI-EAS443:3:52:1137:201#0/1  
\_b`bab\_bb^babaaabba\_```ab`a\_^^`^`^`aabTRa  
@HWI-EAS443:3:52:1138:232#0/1  
CACAGTGGTCTTAGTGAGTATCTCGCGAGTCCGGGACTGC  
+HWI-EAS443:3:52:1138:232#0/1  
abbb`]```^baab``abaa\_b\_V\_VZZTYZG¥``]XZNV  
@HWI-EAS443:3:52:1140:259#0/1  
AAAGAAGTCTGAGATCTAATGTCGCAGTCCCGCACTCGCG  
+HWI-EAS443:3:52:1140:259#0/1  
aaaa`]aaaa`b`a\_aa`aa\_]a`\_a\_VU¥¥\_¥¥^W^W^  
@HWI-EAS443:3:52:1141:117#0/1  
AAAGAAGTCTGAGATCTAATGTCGCAGTCCCGCACTCGCG  
+HWI-EAS443:3:52:1141:117#0/1  
aabbaa`baabaaaa`ab\_ab\_\_\_\_\_`a^^¥\_\_ZW¥^W]Ua  
@HWI-EAS443:3:52:1148:1047#0/1  
CCCGTTTTCGTTTTATTACCAACTACGTCCCTTGCCC  
+HWI-EAS443:3:52:1148:1047#0/1  
aabbaabbababbabaaba`aa\_a`ba`a`a`\_`b`a\_^\_  
@HWI-EAS443:3:52:117:892#0/1  
GTCCCGTTTTCGTTTTATTACCAACTACGTCCCTTGCC  
+HWI-EAS443:3:52:117:892#0/1  
aaaaaaaaaaaab\_aaaabaa\_¥a\_\_a\_a`a`]\_[T]^^\_Z  
@HWI-EAS443:3:52:1194:1703#0/1  
TTTGGTTGCCTTGTGTAATTGAATACTGGAGAATTGCCT  
+HWI-EAS443:3:52:1194:1703#0/1  
abbb]\_b\_aa`b`]b`\_baa\_aa`aa`aaaa`aaaa\_¥Qa  
@HWI-EAS443:3:52:1212:59#0/1  
AATAAAAGAAGTCTGAGATCTAATGTCGCAGTCCCGCACT  
+HWI-EAS443:3:52:1212:59#0/1  
]QX¥]Y¥]OZ\_ab]a]aSXHa]T¥Y¥ZXY¥\_RT\_\_SUYZY  
@HWI-EAS443:3:52:1216:849#0/1  
AAAGAAGTCTGAGATCTAATGTCGCAGTCCCGCACTCGCG  
+HWI-EAS443:3:52:1216:849#0/1  
^a```a`b```aaaa\_aaab^``[^^^`^`\_aZaa`\_^\_  
@HWI-EAS443:3:52:1248:829#0/1  
GAATTGCCTCTTACCAGTATCCTCAACCCTGATCCTCTCA  
+HWI-EAS443:3:52:1248:829#0/1  
abab``aab`aaa`a`^a`^`\_`aa^]X^\_\_aY^\_\_\_\_\_  
@HWI-EAS443:3:52:1256:1445#0/1  
AGGGGACGTAGTGTGGTAATGAAACGAAAACGGGACTCT

+HWI-EAS443:3:52:1256:1445#0/1  
a^`b`aaaa`b¥b`aaa\_\_` `[X` `P^\_\_a` Saa\_ZV^U\_  
@HWI-EAS443:3:52:1258:693#0/1  
CAATTCTCCAGTATTCAATTACAACAAGGCAACCAAACGA  
+HWI-EAS443:3:52:1258:693#0/1  
aZa` `^`b^`\_\_¥¥`ba` ` `bb`a`abba\_aaa`\_^ba\_b`  
@HWI-EAS443:3:52:126:481#0/1  
CACCTGCATCCTTTCCAAGAACTGTAAGTCGTTTGGTTGC  
+HWI-EAS443:3:52:126:481#0/1  
abaaababaaaaaaaa]a` `aa^] ^\_\_a\_\_a`^a`\_  
@HWI-EAS443:3:52:1303:538#0/1  
CGTACATGCTAGAAAGAGAATTGGTCCGTAACAAGGTT  
+HWI-EAS443:3:52:1303:538#0/1  
a\_GR`\_X¥a` `^UTX[ ]\_S]SaR]OP¥\_TQH^^^a]ba]a  
@HWI-EAS443:3:52:1312:1490#0/1  
AATTACAGCAGACAAGAGAATAATGGACATGATTCCAGAG  
+HWI-EAS443:3:52:1312:1490#0/1  
^b`¥^Ybbb^`aa]W`U`Z]bRa`\_`a]Q\_\_\_\_\_a\_VY]^`\_  
@HWI-EAS443:3:52:1324:806#0/1  
GGGAGATCAATGGCCCTGAGTCAGTGCTAGTCAACACTTA  
+HWI-EAS443:3:52:1324:806#0/1  
\_\_^^`^a¥a`aaa¥[YZa` `Z^^[ [ `^` [ ] ^[Y^Y¥W]\_]  
@HWI-EAS443:3:52:1343:1056#0/1  
CAAAATGAGAAATCCTCTCAGGACAGCAGACTCCACCCCA  
+HWI-EAS443:3:52:1343:1056#0/1  
ab\_bbbab`bbbb`abababbbaabaababab^[ba\_` `a  
@HWI-EAS443:3:52:137:196#0/1  
AGAGAATAAAAGAACTGAGAGATCTAATGTGCGAGTCCCG  
+HWI-EAS443:3:52:137:196#0/1  
TYWYS¥\_a[ \_Q\_ `baaa^aY\_SZ^a[ `bbXZ\_ `^ZOR[HQ  
@HWI-EAS443:3:52:1384:1260#0/1  
TGTTCCGCCGGCTACTGGGAGAAACCTTGTTTTACGGACC  
+HWI-EAS443:3:52:1384:1260#0/1  
`a`\_Z\_a^`^Z`a[TZ^a¥GZQY¥WVT\_[S\_\_]YN\_^QWQ  
@HWI-EAS443:3:52:1413:1639#0/1  
TAATGTGCGAGTCCCGCACTCGCGAGATACTCACTAAGAC  
+HWI-EAS443:3:52:1413:1639#0/1  
^b^\_bTP¥\_TPZa`NSF¥UX\_¥P^YYJSUW^MTRZ\_BBBB  
@HWI-EAS443:3:52:1423:753#0/1  
GTCCCGTTTTTCGTTTCATTACCAACTACGTCCCCTTGC  
+HWI-EAS443:3:52:1423:753#0/1  
aaaaabaaba`¥abaaaba^\_a\_\_a\_aa]a\_^Y¥^\_\_^V  
@HWI-EAS443:3:52:1426:654#0/1  
AAAGAACTGAGAGATCTAATGTGCGAGTCCCGCACTCGCG  
+HWI-EAS443:3:52:1426:654#0/1  
aaaa\_` `aa`\_¥b\_a[ `a\_a\_^¥]\_\_TW¥¥\_`^¥Y\_^UUW  
@HWI-EAS443:3:52:1462:698#0/1  
CAATCCCCAGTTCTGGAAAAGCACTTTTGCATCTTTTTG  
+HWI-EAS443:3:52:1462:698#0/1  
^bbb]]b`bab`babbbbaa`¥aab` `ab\_ab\_baaaa

@HWI-EAS443:3:52:1463:1899#0/1  
GGGAGAAACCTTGTTTTACGGACCAATTCTCTTTCTAGCA  
+HWI-EAS443:3:52:1463:1899#0/1  
ZI\_aW\_¥\_U¥\_\_b]Z`^Q]^ [RS]U^\_RYZ``SKYaWHS  
@HWI-EAS443:3:52:1476:421#0/1  
AATAAAAGAACTGAGAGATCTAATGTCGCAGTCCCGCACT  
+HWI-EAS443:3:52:1476:421#0/1  
a`b\_Y\_^a\_]\_aa`X[TZaYaa^`a\_\_a[\_Y` [PXPQQ\_U  
@HWI-EAS443:3:52:1521:544#0/1  
CTCGCGAGATACTCACTAAGACCACTGTGGACCATATGGC  
+HWI-EAS443:3:52:1521:544#0/1  
abb`bbbbaaaabbaaaba\_\_ababZRW\_T\_aa¥ab`]]`  
@HWI-EAS443:3:52:1541:453#0/1  
ATCTCATTGCCATCATCCACTTCATTCTGAGTGC GGGGTT  
+HWI-EAS443:3:52:1541:453#0/1  
``^Zaaa]aaaaaaa[aa`bb\_\_aaY\_Y¥a]`^`]a¥U¥  
@HWI-EAS443:3:52:1555:289#0/1  
GAGATCTAATGTCGCAGTCCCGCACTCGCGAGATACTCAC  
+HWI-EAS443:3:52:1555:289#0/1  
0`b\_Z`bbbb\_\_¥b\_ZY\_]a]]``a\_[````]]¥a\_  
@HWI-EAS443:3:52:1583:831#0/1  
GTCCCGTTTTTCGTTTTATTACCAACTACGTCCCCTTGC  
+HWI-EAS443:3:52:1583:831#0/1  
Xaa\_aba^¥]a[abY^Uaa[YD¥\_Ra]\_ZUa\_¥SY^]TFR  
@HWI-EAS443:3:52:1584:1680#0/1  
AGAGAATAAAAGAACTGAGAGATCTAATGTCGCAGTCCCG  
+HWI-EAS443:3:52:1584:1680#0/1  
`b]aaabbbabba``aabaaba\_ba\_ba\_^aaa\_Y¥``\_  
@HWI-EAS443:3:52:15:649#0/1  
GAGGATTTCTCATTGTTGGCAAAGAAGACAAGAGATATGG  
+HWI-EAS443:3:52:15:649#0/1  
a]aa^`a^]a`^^^\_` [X\_a\_a^¥¥¥¥^^^]] [Y\_^  
@HWI-EAS443:3:52:1607:1372#0/1  
AAAAGAACTGAGAGATCTAATGTCGCAGTCCCGCACTCGC  
+HWI-EAS443:3:52:1607:1372#0/1  
^Z[T\_aaab``ab\_aa[aaa\_\_a` [[a`Z^^]]V[]`¥[Y  
@HWI-EAS443:3:52:1609:1396#0/1  
GTGTACATCTGCTCCAGCACGTCCCTTGGGTTAAGTGCA  
+HWI-EAS443:3:52:1609:1396#0/1  
a\_aaa\_baaab\_a^\_\_`b]a]b`]\_\_aaa`a]a\_]PY^`  
@HWI-EAS443:3:52:1671:1178#0/1  
TATCAACTCTCCTTATTCTTAACTTGATTTCTGAAGTG  
+HWI-EAS443:3:52:1671:1178#0/1  
aaa^^`^V¥\_[P¥U]a^YYa`^XPR¥]][^aYT\_`XUXRT  
@HWI-EAS443:3:52:1697:647#0/1  
CCCGTTTTTCGTTTCATTACCAACTACGTCCCCTTGCCC  
+HWI-EAS443:3:52:1697:647#0/1  
a\_aaZ^bb`VHZba^\_[¥Y[a\_Y\_^`P\_^`¥ZU¥0JV]¥  
@HWI-EAS443:3:52:1702:511#0/1  
GTGGAGTCTGCTGCCTGAGAGGATTTCTCATTGTTGGCA

+HWI-EAS443:3:52:1702:511#0/1  
[U¥\_]X]b]aa^XSa\_bP`ZWXZ` `aZ[P\_`ba` [aNKZ  
@HWI-EAS443:3:52:170:215#0/1  
CTAATGTCGCAGTCCCGCACTCGCGAGATACTACTAAGA  
+HWI-EAS443:3:52:170:215#0/1  
abbabbbbaa\_aaaaa\_\_aaa\_a[ `T]\_ ^¥WP^^\_ [ \_^  
@HWI-EAS443:3:52:1741:1894#0/1  
CTGTGGACCATATGGCCATAATCAAAAAGTACACATCAGG  
+HWI-EAS443:3:52:1741:1894#0/1  
abb\_\_aa`aaa`aaaZ`^\_]`\_]R`\_`\_¥TWY\_S]\_V]]\_  
@HWI-EAS443:3:52:1744:1331#0/1  
AGAGAATAAAAGAACTGAGAGATCTAATGTCGCAGTCCCG  
+HWI-EAS443:3:52:1744:1331#0/1  
` `a`]^babba]\_Z]ba^¥^aba^aaaa]ZY[\_]WVXZT]  
@HWI-EAS443:3:52:1754:343#0/1  
CCCGTTTTTCGTTTCATTACCAACTACGTCCCTTGCCC  
+HWI-EAS443:3:52:1754:343#0/1  
aaaa`ababaaaaababaaaba^¥a^X^^]`¥] []VT]  
@HWI-EAS443:3:52:1772:1897#0/1  
ATTCCAGAGAGGAATGAACAAGGACAAACCCTCTGGAGCA  
+HWI-EAS443:3:52:1772:1897#0/1  
aaaaa`aa\_\_aa\_aa\_^a¥`\_`\_\_\_\_\_^] ^\_\_^\_ ^X]]^  
@HWI-EAS443:3:52:1780:1386#0/1  
AGAATTCACAATGGTTGGGAGAAGAGCAACAGCTATTCTC  
+HWI-EAS443:3:52:1780:1386#0/1  
a¥Y\_`¥\_aa\_`Z[a¥aS]L[W^¥[\_Y]Z¥a^W¥ZX\_^Q¥X  
@HWI-EAS443:3:52:1790:540#0/1  
TGGGTTCACTTTCAAAGGACAAGCGGATCATCAGTCAAG  
+HWI-EAS443:3:52:1790:540#0/1  
[\_bb^bab`bbbbbbbabbbbabbbba^bbabb`abba  
@HWI-EAS443:3:52:18:1654#0/1  
GTCCCGTTTTTCGTTTCATTACCAACTACGTCCCTTGCC  
+HWI-EAS443:3:52:18:1654#0/1  
aab¥`b\_Z` `Y^YZ` ` `] []UVT¥\_aa\_YV]VZZ\_Z¥WZS  
@HWI-EAS443:3:52:198:1272#0/1  
AGAGAATAAAAGAACTGAGAGATCTAATGTCGCAGTCCCG  
+HWI-EAS443:3:52:198:1272#0/1  
abbb`bbba\_ba`aaba`aaaaaaa`ab\_aa]`\_\_a^\_\_  
@HWI-EAS443:3:52:219:1225#0/1  
CGCACTCGCGAGATACTACTAAGACCACTGTGGACCATA  
+HWI-EAS443:3:52:219:1225#0/1  
a` `Z¥aaaa` ` `a`\_\_`\_^\_a^YX¥`^^\_ [] [^^^Z[[  
@HWI-EAS443:3:52:21:1159#0/1  
CTAATGTCGCAGTCCCGCACTCGCGAGATACTACTAAGA  
+HWI-EAS443:3:52:21:1159#0/1  
\_\_VXY`aa` [Y^]a^a`]H]RX]VZM¥YVYX]a¥^X[SYV  
@HWI-EAS443:3:52:23:555#0/1  
CTGCTGTCTGAGAGATTTCTCATTGCGCAAAGAAGA  
+HWI-EAS443:3:52:23:555#0/1  
aabbababbabababbaabaaaaabaaa`aa`¥aaa` `aa

@HWI-EAS443:3:52:245:226#0/1  
AAAGAACTGAGAGATCTAATGTCGCAGTCCCGCACTCGCG  
+HWI-EAS443:3:52:245:226#0/1  
`\_a`aaabba`\_ba`baaa`\_`aa[WZ\_Y]`\_`¥`^`  
@HWI-EAS443:3:52:249:286#0/1  
CTCTTGAAATGTGCCACAGCACACAGATTGGAGGAGTAA  
+HWI-EAS443:3:52:249:286#0/1  
ababba^aaabbaaaabaabaa`a^aa``aaa\_aa^`[[^  
@HWI-EAS443:3:52:24:2026#0/1  
GGTCCACAGTGGTCTTAGTGAGTATCTCGCGAGTGCGGGA  
+HWI-EAS443:3:52:24:2026#0/1  
`aabbb\_U[^abQb]`\_`b`^`\_HQZ¥]¥]aaZJ`\_¥¥X``]M  
@HWI-EAS443:3:52:255:1966#0/1  
ATTGGGTATCTCATTGCCATCATCCACTTCATTCTGAGTG  
+HWI-EAS443:3:52:255:1966#0/1  
\_baab\_FVba`[^a`baaY\_aWU^`[^`^`^]a\_\_aZ\_]`^  
@HWI-EAS443:3:52:265:859#0/1  
AATAAAAGAACTGAGAGATCTAATGTCGCAGTCCCGCACT  
+HWI-EAS443:3:52:265:859#0/1  
][a`¥]Y`^aaa\_Y¥U^a^`[^`aabbaaaXTZN`^aaa^[[  
@HWI-EAS443:3:52:272:1971#0/1  
CCCGTTTTCGTTTTATTACCAACTACGTCCCCTTGCCC  
+HWI-EAS443:3:52:272:1971#0/1  
`aab\_aaab`\_aaaa`aaaa`\_`^```Y]`\_`^`\_YWUZ  
@HWI-EAS443:3:52:277:398#0/1  
CGTTTTCGTTTTATTACCAACTACGTCCCCTTGCCCAA  
+HWI-EAS443:3:52:277:398#0/1  
ababbbbaabbabbbbab`baaaa`aba`\_aa`\_aa^S[\_  
@HWI-EAS443:3:52:280:431#0/1  
AATAAAAGAACTGAGAGATCTAATGTCGCAGTCCCGCACT  
+HWI-EAS443:3:52:280:431#0/1  
aWaSS\_Ybaabbb[aa`Taabaabb`a``aaK¥\_]a]F]`  
@HWI-EAS443:3:52:291:1132#0/1  
GAGAATAAAAGAACTGAGAGATCTAATGTCGCAGTCCCGC  
+HWI-EAS443:3:52:291:1132#0/1  
a`aaaaaaaa`a`\_a`a`Y`a\_aa^`aX]`\_`\_[Z\_]`^`  
@HWI-EAS443:3:52:30:1548#0/1  
AGTTCCTGATTATCCATTGATAAGTGTGACTAGCACTGA  
+HWI-EAS443:3:52:30:1548#0/1  
YaQ^^^^¥]`^]a]YI\_[R[^Y^QaZY`[YV]XTRUTW]  
@HWI-EAS443:3:52:331:399#0/1  
AAAAGAACTGAGAGATCTAATGTCGCAGTCCCGCACTCGC  
+HWI-EAS443:3:52:331:399#0/1  
aa^a`\_a^aa¥a`a\_a\_b\_aaa]\_a\_\_a]]]`^]a^U\_`^  
@HWI-EAS443:3:52:356:18#0/1  
GAACCCCGCACTCAGAATGAAGTGGATGATGGCAATGAGA  
+HWI-EAS443:3:52:356:18#0/1  
a`a^Y`\_`¥Z`\_`\_aW[Z^[¥aV¥`MDVST^^VVG\_Y\_X\_T  
@HWI-EAS443:3:52:365:245#0/1  
GTCCGTAACAAGGTTTCTCCCAGTAGCCGCGGAACAG



@HWI-EAS443:3:52:565:1748#0/1  
AAAGAAGTCTAATGTCGCAGTCCCGCACTCGCG  
+HWI-EAS443:3:52:565:1748#0/1  
aaa^¥aaaa\_`^]\_\_\_\_`\_\_dW`\_\_`^Z[\_\_\_\_]PWUUTU^  
@HWI-EAS443:3:52:568:464#0/1  
CTTGTTTTACGGACCAATTCTTTCTAGCATGTACGCCA  
+HWI-EAS443:3:52:568:464#0/1  
`R[ab`^¥QR`^¥WQ\_b¥UY[ab\_`][[`I\_¥Taa¥``Z  
@HWI-EAS443:3:52:593:1111#0/1  
ATCTAATGTCGCAGTCCCGCACTCGCGAGATACTCACTAA  
+HWI-EAS443:3:52:593:1111#0/1  
a\_aa\_`a\_HZ\_aaZHW]^aaR]U\_X[]^¥NV[^^\_\_^YX]  
@HWI-EAS443:3:52:604:193#0/1  
TGAAACATGGTACCTTCGGCCCTGTCCACTTCAGAAATCA  
+HWI-EAS443:3:52:604:193#0/1  
abbaaaaab`\_`aaaa\_`]`\_`ZX¥^W\_^Y`^^a\_^RZ  
@HWI-EAS443:3:52:604:691#0/1  
GCAGTGTGAGACCCATTAGCATCTCTTGGAAATGT  
+HWI-EAS443:3:52:604:691#0/1  
a`XaZ\_^[LY¥¥]ZSYN^YRVORU[WVSVT[ZZKSVWZXP  
@HWI-EAS443:3:52:610:272#0/1  
CAAGCCGTAGACATATGCAAGGCAGCAATAGGGTTGAGGA  
+HWI-EAS443:3:52:610:272#0/1  
aa^aa`a\_aba`\_aaaba`aa`a]\_Y\_`a`dW\_a\_¥a[  
@HWI-EAS443:3:52:625:144#0/1  
GAACTGAGAGATCTAATGTCGCAGTCCCGCACTCGCGAGA  
+HWI-EAS443:3:52:625:144#0/1  
aaaabbabbbbaa\_bbaab`aaaaUW`\_^\_¥¥`Z\_\_aY\_U  
@HWI-EAS443:3:52:64:1643#0/1  
AGAGAATAAAAGAACTGAGAGATCTAATGTCGCAGTCCCG  
+HWI-EAS443:3:52:64:1643#0/1  
aaZbZ]bab]aa`Z]a^a\_\_WaSaab`aa\_\_\_\_]\_aX\_[]\_  
@HWI-EAS443:3:52:676:980#0/1  
CAGTGGTCTTAGTGAGTATCTCGCGAGTGCGGGACTGCGA  
+HWI-EAS443:3:52:676:980#0/1  
a^\_a`aZ`]`[a`X^babbXS\_Z\_]Q\_GUQS¥][DROO`Z  
@HWI-EAS443:3:52:694:337#0/1  
GGAAAGGATGCAGGTGCATTGACTGAAGATCCAGATGAAG  
+HWI-EAS443:3:52:694:337#0/1  
aa[`Ya`\_Z`RVaYR]TX\_`\_ZV^\_¥^[VUUW[\_V[^R[W  
@HWI-EAS443:3:52:702:1787#0/1  
GGCACATTTCCAAGAGAGATGCTAATGGGTCTGCTGACAC  
+HWI-EAS443:3:52:702:1787#0/1  
a)`Y`^^[UZ]aa`\_\_YZXKTY\_\_`RUUTZ\_VFOX[Q[Z  
@HWI-EAS443:3:52:716:999#0/1  
GATCTTGACCATTGAATTTTCACAATTTCCAGTTCCT  
+HWI-EAS443:3:52:716:999#0/1  
aa]b`a]b]a^baaaa\_aa\_`\_a^Waa`^aa]\_[\_^a  
@HWI-EAS443:3:52:733:553#0/1  
GAACTGAGAGATCTAATGTCGCAGTCCCGCACTCGCGAGA

+HWI-EAS443:3:52:733:553#0/1  
aaa`aaaa`baaaaaab\_`a`]\`Z^\_[¥]Z¥`\_aX^[\` [  
@HWI-EAS443:3:52:78:1864#0/1  
GTCCCGTTTTCGTTTCATTACCAACACTACGTCCCCTTGC  
+HWI-EAS443:3:52:78:1864#0/1  
[I^\_`a]]a^]U^\_`[[Ua\_[\_¥Z`aQW\_]U^¥^[XNX\_  
@HWI-EAS443:3:52:795:300#0/1  
AAAAGAAGTGGAGATCTAATGTCGCAGTCCCGCACTCGC  
+HWI-EAS443:3:52:795:300#0/1  
abbbbbbab\_bbbbaabbbba^`bb`\_aaaa[\_^\_aV  
@HWI-EAS443:3:52:799:1104#0/1  
CTACCACTCTCTCCGTGCTGGAGTATTCATCTACTCCCAT  
+HWI-EAS443:3:52:799:1104#0/1  
`^aaaa`baaa`\_\_`a`aa\_a¥^aa[\`]\`\_\_\_\_ZUVa  
@HWI-EAS443:3:52:801:896#0/1  
GCTTGTTCTCAGTTGGATTCTGTCTAAGGATGTCCACCA  
+HWI-EAS443:3:52:801:896#0/1  
`b`aaaa`^aab\_`aa`\_a\_aa\_\_aa\_a`\_^`W[\_^M[\_  
@HWI-EAS443:3:52:821:1686#0/1  
GAATAAAGAAGTGGAGATCTAATGTCGCAGTCCCGCAC  
+HWI-EAS443:3:52:821:1686#0/1  
`S````]a\_aa\_`^a\_`a]UV[[]\_`¥\_^^^\_RZ`W^]]]  
@HWI-EAS443:3:52:83:1690#0/1  
GTCCCGTTTTCGTTTCATTACCAACACTACGTCCCCTTGC  
+HWI-EAS443:3:52:83:1690#0/1  
a¥abab[\_ba]aZZZ^`b[b\_a``a¥^]\_a\_H\_]¥\_YP]a  
@HWI-EAS443:3:52:860:707#0/1  
AAAGAAGTGGAGATCTAATGTCGCAGTCCCGCACTCGCG  
+HWI-EAS443:3:52:860:707#0/1  
aabb`aabbaaaaa`aa\_aa`aa\_``¥^¥``aZ\_^\_X^  
@HWI-EAS443:3:52:866:641#0/1  
GTCCCGTTTTCGTTTCATTACCAACACTACGTCCCCTTGC  
+HWI-EAS443:3:52:866:641#0/1  
aaa`baabaababbaabaa]Ya`\_`\_aa`a\_\_[]\_`aa]  
@HWI-EAS443:3:52:929:495#0/1  
CGCACTCGCGAGATACTCACTAAGACCACTGTGGACCATA  
+HWI-EAS443:3:52:929:495#0/1  
abaaaaab`babbaaaa\_a\_\_aaaa\_\_a]aa\_`\_\_`\_a`  
@HWI-EAS443:3:52:930:1658#0/1  
AATAAAGAAGTGGAGATCTAATGTCGCAGTCCCGCACT  
+HWI-EAS443:3:52:930:1658#0/1  
J`Ub`]aaWU¥b`ba`[^SU\_`aabXaba]¥\_]Y\_W\_W]a  
@HWI-EAS443:3:52:94:1941#0/1  
AAAAGAAGTGGAGATCTAATGTCGCAGTCCCGCACTCGC  
+HWI-EAS443:3:52:94:1941#0/1  
aaba[\`a`aaa]a\_aa^abaaa]]a^\_[Z^\_\_\_\_]]]]X^X  
@HWI-EAS443:3:52:95:1571#0/1  
CGTTTTCGTTTCATTACCAACACTACGTCCCCTTGCCCAA  
+HWI-EAS443:3:52:95:1571#0/1  
aa`Z]`aa¥aaaa\_`aaaY`UXa`aY`X\_YW\_\_\_\_`[ZPZ^



@HWI-EAS443:3:53:1035:657#0/1  
CTGCTGTAATTGGGTATCTCATTGCCATCATCCACTTCAT  
+HWI-EAS443:3:53:1035:657#0/1  
[[Z`b¥]¥aba`\_Q]aYabaW^¥MZ`[ba\_bPba[b``\_Y  
@HWI-EAS443:3:53:1054:579#0/1  
AATGTGCCACAGCACACAGATTGGAGGAGTAAGGATGGTG  
+HWI-EAS443:3:53:1054:579#0/1  
ab``^b\_aa[abXaaa`bZaabaa`a[a`a`ba``aa^`  
@HWI-EAS443:3:53:1059:140#0/1  
CCACTTCATTTGGGAAAACAACCTCCATAATCACATCCTG  
+HWI-EAS443:3:53:1059:140#0/1  
aaaa`aY¥Vba\_\_`X[\_`a`a`abaaaaabV``aaWR][  
@HWI-EAS443:3:53:1067:527#0/1  
CTGCTGTAATTGGGTATCTCATTGCCATCATCCACTTCAT  
+HWI-EAS443:3:53:1067:527#0/1  
`b`bbbbbbbbb\_\_\_\_abbb`bba`aabb`bba`bab]JWa  
@HWI-EAS443:3:53:1100:463#0/1  
CAATTACAGCAGACAAGAGAATAATGGACATGATTCCAGA  
+HWI-EAS443:3:53:1100:463#0/1  
\_bbbbbbbbbabbabbbbabbba`bbaabaaaa\_``aa\_  
@HWI-EAS443:3:53:1113:1090#0/1  
CTAATGTGCTAATTGGGCAAGGGACGTAGTGTTGGTAAT  
+HWI-EAS443:3:53:1113:1090#0/1  
ab^TVOWb[aa¥aZa`〕`\_RZ]``^`\_a`^Pa^a\_\_Y\_\_¥  
@HWI-EAS443:3:53:112:1506#0/1  
TCCCGTTTTTCGTTTCATTACCAACTACGTCCCCTTGCC  
+HWI-EAS443:3:53:112:1506#0/1  
aaaaaaabaaa`aaa`ba````a`a`a`a`\_`a`\_]`\_\_\_\_[SSW  
@HWI-EAS443:3:53:1161:1759#0/1  
AATAAAAGAACTGAGAGATCTAATGTCGCAGTCCCGCACT  
+HWI-EAS443:3:53:1161:1759#0/1  
aaa[bb]Xaab`a^aaba\_R^babb]]][Q\_b]X\_I^a`\_Z  
@HWI-EAS443:3:53:1162:1151#0/1  
AAAAGAACTGAGAGATCTAATGTCGCAGTCCCGCACTCGC  
+HWI-EAS443:3:53:1162:1151#0/1  
T^[X[ab[`[[[[[``b`b`aabaab`bb[]]`[¥UWaSaX  
@HWI-EAS443:3:53:1172:863#0/1  
AAAAGAACTGAGAGATCTAATGTCGCAGTCCCGCACTCGC  
+HWI-EAS443:3:53:1172:863#0/1  
`]]Z¥WbaZ¥[b\_^Ta^bb`a``XMQ^a`\_][PTX]a``QP  
@HWI-EAS443:3:53:1206:1086#0/1  
GTGGACCATATGGCCATAATCAAAAAGTACACATCAGGAA  
+HWI-EAS443:3:53:1206:1086#0/1  
aaa`^^`]aaaZX¥¥[XT`W0¥^aa\_XUX^`R¥SPZ[]LY  
@HWI-EAS443:3:53:1224:361#0/1  
CATCAAGGGAGCAATTTTACAATCCTGGAGCTCTTCTTTC  
+HWI-EAS443:3:53:1224:361#0/1  
abZbbb`b`Xa\_babbbab`a¥bababa\_b\_S¥ab¥abbG  
@HWI-EAS443:3:53:1236:1310#0/1  
GAGAGATCTAATGTCGCAGTCCCGCACTCGCGAGATACTC

+HWI-EAS443:3:53:1236:1310#0/1  
]`babU`\_\_a`aaU`[\_`a\_aUa\_]X\_¥[`]\_\_`0  
@HWI-EAS443:3:53:1292:421#0/1  
ACTTAACCCAAGGGACGTGCTGGGAGCAGATGTACTCC  
+HWI-EAS443:3:53:1292:421#0/1  
aa[``ba`b\_b^\_Z\_`[^Va`U^\_a¥`a\_UY`Va[`[G  
@HWI-EAS443:3:53:1321:1754#0/1  
GATCTTGTGACCATTGAATTTTCACAATTTCCCAGTTCCT  
+HWI-EAS443:3:53:1321:1754#0/1  
`]^a`a`b[TW¥aa``aaa][aYa¥\_aaYLQ`\_\_UVL[  
@HWI-EAS443:3:53:1333:1200#0/1  
TGCTGTCTGAGAGGATTTCTCATTTTGGGCAAAGAAGAC  
+HWI-EAS443:3:53:1333:1200#0/1  
Zaab\_`X^`a]`a^^aba\_\_PT\_aaa^`\_a¥¥]a`V`\_V  
@HWI-EAS443:3:53:134:712#0/1  
AAAGAAGTGTGAGATCTAATGTGCGCAGTCCCGCACTCGCG  
+HWI-EAS443:3:53:134:712#0/1  
a`a¥XZ`^^\_aa]``a`\_`abY\_a][\_Q[VR]NY^^[SU  
@HWI-EAS443:3:53:1376:1719#0/1  
AAAAGAAGTGTGAGAGATCTAATGTGCGCAGTCCCGCACTCGC  
+HWI-EAS443:3:53:1376:1719#0/1  
ab`aba`^abaa]`\_aaaa\_aa\_S\_``^[^XZZ]`XZ^U  
@HWI-EAS443:3:53:1487:789#0/1  
TTCTCTTTCTAGCATGTACGCCACCATCAAGGGAGCAATT  
+HWI-EAS443:3:53:1487:789#0/1  
V¥QR\_`Maab`[Xaa`Z¥a`YIb^^YT^aab\_Ra]`\_a\_  
@HWI-EAS443:3:53:148:1274#0/1  
GCTGACTTTTTCGTTTCATTACCAACTACGTTCCCTTGCC  
+HWI-EAS443:3:53:148:1274#0/1  
aaaaY`aaaaaa^\_aa`a^[\_a^¥aa]\_]¥`¥`¥¥^  
@HWI-EAS443:3:53:1528:675#0/1  
ATCTAATGTGCGCAGTCCCGCACTCGCGAGATACTCACTAA  
+HWI-EAS443:3:53:1528:675#0/1  
ab`ababb¥`X\_a]aaa\_¥0Zaaa]aaaa[`aa`\_¥\_\_  
@HWI-EAS443:3:53:1616:684#0/1  
TCCCGTTTTTCGTTTCATTACCAACTACGTTCCCTTGCC  
+HWI-EAS443:3:53:1616:684#0/1  
aaaab`abb\_`]aa`bbba\_`aaaa\_aa^^`\_[\_`\_aZR¥]  
@HWI-EAS443:3:53:1653:1667#0/1  
GTGCGAGTCCCGCACTCGCGAGATACTCACTAAGACCACT  
+HWI-EAS443:3:53:1653:1667#0/1  
a\_¥^\_X¥\_S¥Z[OGNT¥`YSV`U¥WU]XWS¥UUWU¥QUUV  
@HWI-EAS443:3:53:1672:1237#0/1  
CCCGTTTTTCGTTTCATTACCAACTACGTTCCCTTGCC  
+HWI-EAS443:3:53:1672:1237#0/1  
aa\_bbbbbbababb\_bbbbb\_baababa`baaZ¥`a\_`Y`V  
@HWI-EAS443:3:53:1696:1068#0/1  
GGGAGAGACGAGCAGTCAATTGCTGAGGCAATAATTGTGG  
+HWI-EAS443:3:53:1696:1068#0/1  
abaaabbaa`]`QTZXQ^ZUZ`aa[U\_]VW`V`\_S^WT[Y

@HWI-EAS443:3:53:183:954#0/1  
CCCCTTTTTCGTTTCATTACCAACTACTGCCCCCTTGCCC  
+HWI-EAS443:3:53:183:954#0/1  
aa\_aV[^`b`aa`Zaab]Q]aaa`Z¥^¥ZV¥¥\_S`¥Z  
@HWI-EAS443:3:53:184:1818#0/1  
GGCCCTGAGTCAGTGCTAGTCAACTTATCAATGGATAA  
+HWI-EAS443:3:53:184:1818#0/1  
abbbb\_bba`bba^aa`a`[ab`ab¥aaaaaaaaaaaaXa¥  
@HWI-EAS443:3:53:200:354#0/1  
AAAAGAAGTGAAGATCTAATGTCGCAGTCCCGCACTCGC  
+HWI-EAS443:3:53:200:354#0/1  
aaa[b[abbaaaaaaaaa\_ab¥a`\_aa]\_\_\_\_^\_]\_\_\_\_]\_  
@HWI-EAS443:3:53:226:1696#0/1  
CGCACTCGCGAGATACTCACTAAGACCACTGTGGACCATA  
+HWI-EAS443:3:53:226:1696#0/1  
\_X\_aa^`aaa\_]^^`aaa\_aaZ^^\_]aa]]N`]]a]\_\_Y  
@HWI-EAS443:3:53:234:879#0/1  
TGTGACCATTGAATTTTCACAATTTCCAGTTCCTGATTA  
+HWI-EAS443:3:53:234:879#0/1  
abab]babbbbabbbbaab`aaabbaa\_ab`a\_\_aa¥aa^  
@HWI-EAS443:3:53:241:1278#0/1  
CTTGTGACCATTGAATTTTCACAATTTCCAGTTCCTGAT  
+HWI-EAS443:3:53:241:1278#0/1  
aaba]ab¥ba^a\_Z\_bbba^ba^]`aaaY[TV]a[aaa\_a  
@HWI-EAS443:3:53:265:1680#0/1  
TAATGTGCTAATTGGGCAAGGGGACGTAGTGTGGTAATG  
+HWI-EAS443:3:53:265:1680#0/1  
aaabba`ababbaa¥aa`a^\_a\_aaZ]^`\_`aa]^`V  
@HWI-EAS443:3:53:273:418#0/1  
GAGAATAAAGAAGTGAAGATCTAATGTCGCAGTCCCGC  
+HWI-EAS443:3:53:273:418#0/1  
aabaabbaaaba`abaaaa`aba`aa]aa\_aaY`\_\_^^  
@HWI-EAS443:3:53:27:733#0/1  
ATCTCATTGCCATCATCCACTTCTGAGTGCAGGGGTT  
+HWI-EAS443:3:53:27:733#0/1  
ababaaaabaaaaa\_````a`a`aa`a\_aYa`aaa\_X\_  
@HWI-EAS443:3:53:284:1220#0/1  
GCTTGGGACATTTGACACTGTCCAAATAATAAACTTCTC  
+HWI-EAS443:3:53:284:1220#0/1  
a`YTT^]U^YY]\_aY^\_`a^^`¥`UYVZ^\_[¥NL^`PZ[  
@HWI-EAS443:3:53:301:67#0/1  
TTCACCTTCAAAGGACAAGCGGATCATCAGTCAAGAAAG  
+HWI-EAS443:3:53:301:67#0/1  
`bbaa`abaaaaabb`aaY`abb\_a\_aa]\_b``\_\_b`\_a  
@HWI-EAS443:3:53:311:1542#0/1  
AAAGAAGTGAAGATCTAATGTCGCAGTCCCGCACTCGCG  
+HWI-EAS443:3:53:311:1542#0/1  
`X[\_H[ZaaaaaSX\_]aaaV^¥a`^\_a`V]a\_]aU[¥  
@HWI-EAS443:3:53:314:372#0/1  
AAAGAAGTGAAGATCTAATGTCGCAGTCCCGCACTCGCG

+HWI-EAS443:3:53:314:372#0/1  
`b\_`aa`aa`bVaZb`a`¥VbVaa\_¥bV[Z\_N\_V^`^]¥\_  
@HWI-EAS443:3:53:340:952#0/1  
TCTTCTCCCAACCATTGTGAATTCTTCATACCCTTCATGT  
+HWI-EAS443:3:53:340:952#0/1  
abaababbab^a]Ua`bPaSNNaR`aaa^RZRvaa\_[aaU  
@HWI-EAS443:3:53:344:735#0/1  
ATGAAGGCACATCTGGGGTGGAGTCTGCTGTCCTGAGAGG  
+HWI-EAS443:3:53:344:735#0/1  
aa¥aaa\_a`[a`¥a]a``V]`^`¥Raa¥\_[ST¥Z^Z^Q`]  
@HWI-EAS443:3:53:416:864#0/1  
CAATCCCCAGTTCTGGAAAAGCACTTTTGCATCTTTTGT  
+HWI-EAS443:3:53:416:864#0/1  
aaabbbaba\_b`a`aa`aa`aaaa`a```a\_\_a`a`aaaa  
@HWI-EAS443:3:53:445:240#0/1  
AGAGAATAAAAGAACTGAGAGATCTAATGTCGCAGTCCCG  
+HWI-EAS443:3:53:445:240#0/1  
abab``bbbab\_aabbabaaaaabbabaaa]`b`ZTZ[  
@HWI-EAS443:3:53:448:838#0/1  
ATCAAACCTTTGGTCAACATCATCTTTCTCACTTCTCCTC  
+HWI-EAS443:3:53:448:838#0/1  
]aabaabbbbbb^`aa`bbabaababaabbbaba`\_a\_\_\_\_  
@HWI-EAS443:3:53:459:42#0/1  
CATTATTCTCTTGTCTGCTGTAATTGGGTATCTCATTGCC  
+HWI-EAS443:3:53:459:42#0/1  
ab\_bbbbbbbbbbbbbbbabba`abbabbabb\_ba`aab\_\_  
@HWI-EAS443:3:53:472:18#0/1  
ATCTCATTGCCATCATCCACTTCATTCTGAGTGC GGGGTT  
+HWI-EAS443:3:53:472:18#0/1  
\_``V\_]¥\_IZ]\_^\_¥R¥¥]^`\_`a\_Z`^SS`^W]bb^G[  
@HWI-EAS443:3:53:499:1304#0/1  
AAACAAACGATGCTGGATCAGACCGAGTGATGGTATCACC  
+HWI-EAS443:3:53:499:1304#0/1  
aba^a`bab`ba`a`a^X\_aaa\_a`aaUbaaaXWZa¥\_^[  
@HWI-EAS443:3:53:512:1891#0/1  
GCTGGGAGCAGATGTACTCCAGGAGGAGAAGTGAGAAA  
+HWI-EAS443:3:53:512:1891#0/1  
`^Z\_\_a^a`[XV]¥I\_X]\_YTT^T¥^[\_¥Y`T`W^VYN  
@HWI-EAS443:3:53:542:1286#0/1  
AGAGGATTTCTCATTTTGGGCAAAGAAGACAAGAGATATG  
+HWI-EAS443:3:53:542:1286#0/1  
aaabaabbaaaaaabaaaa\_a`aaa`aaa`a^a\_a`\_a``  
@HWI-EAS443:3:53:542:560#0/1  
GAGGATTTCTCATTTTGGGCAAAGAAGACAAGAGATATGG  
+HWI-EAS443:3:53:542:560#0/1  
ababaaabaa`aaaabbaa\_\_a`aa^b`aa`\_`a`]HY`¥  
@HWI-EAS443:3:53:553:1553#0/1  
GAGATCTAATGTCGCAGTCCCGCACTCGCGAGATACTCAC  
+HWI-EAS443:3:53:553:1553#0/1  
````abb`\_``Zaaabb^baabaaaaX``a`\_Z\_aa¥`¥

@HWI-EAS443:3:53:581:130#0/1  
TGTCGCAGTCCCGCACTCGCGAGATACTCACTAAGACCAC  
+HWI-EAS443:3:53:581:130#0/1  
ab`ab\_abT`\_\_¥\_^`a¥a¥`¥\_¥¥¥W¥UX\_\_^¥U¥^W  
@HWI-EAS443:3:53:595:900#0/1  
GGGAAATTGTGAAAATTCAATGGTCACAAGATCCCACAAT  
+HWI-EAS443:3:53:595:900#0/1  
aab\_abbbb`aaaaabaaaaaaaa`aaaaaa`aa\_a\_aaa  
@HWI-EAS443:3:53:599:602#0/1  
GCTGTAATTGGGTATCTCATTGCCATCATCCACTTCATTC  
+HWI-EAS443:3:53:599:602#0/1  
a^ab[SWaaa`]Wa`\_YY[YXQY^Z¥`X^\_] ^XNXRYZU  
@HWI-EAS443:3:53:59:926#0/1  
AAAAGAAGTGAAGATCTAATGTCGCAGTCCCGCACTCGC  
+HWI-EAS443:3:53:59:926#0/1  
ababaabaaa\_aaaa`\_`aaa`\_aaaaaR`\_]\_Y`X\_^]  
@HWI-EAS443:3:53:672:394#0/1  
TCCCGTTTTCGTTTCATTACCAACTACGTCCCCTTGCC  
+HWI-EAS443:3:53:672:394#0/1  
aaa`baabbabaab`abab\_\_a`¥aaa`\_`b¥]`^[a]a]]  
@HWI-EAS443:3:53:700:265#0/1  
ATCAAACCTTTGGTCAACATCATCATTCTCACTTCTCCTC  
+HWI-EAS443:3:53:700:265#0/1  
ababaaababbb\_aaa\_ab`abXH`bb^a\_a]ba\_a¥]a\_  
@HWI-EAS443:3:53:714:59#0/1  
GAATAAAAGAAGTGAAGATCTAATGTCGCAGTCCCGCAC  
+HWI-EAS443:3:53:714:59#0/1  
W¥bbb`b\_a`a]bb[abba`aaaabb`Tbaaa`a`aaaT[  
@HWI-EAS443:3:53:714:991#0/1  
AAAGAAGTGAAGATCTAATGTCGCAGTCCCGCACTCGCG  
+HWI-EAS443:3:53:714:991#0/1  
ab^aa`\_`baaaa`\_`aaa\_ab¥\_a`aaUW`^¥\_[¥\_^\_W^  
@HWI-EAS443:3:53:740:72#0/1  
AAAAGAAGTGAAGATCTAATGTCGCAGTCCCGCACTCGC  
+HWI-EAS443:3:53:740:72#0/1  
abbab\_aabb\_baba`bbaabb\_]b\_aa\_\_`]a^\_^\_aU  
@HWI-EAS443:3:53:745:1078#0/1  
AAGAGAAGAAAGAAGAGCTCCAGGATTGTAATAATTGCTCC  
+HWI-EAS443:3:53:745:1078#0/1  
aaaaaaaaabaabaaaa`aa\_aab]aaaa`aa\_aaaaaa]V  
@HWI-EAS443:3:53:758:1542#0/1  
TGCTAATTGGGCAAGGGGACGTAGTGTGGTAATGAAACG  
+HWI-EAS443:3:53:758:1542#0/1  
aaa\_J\_Zbab`\_`a\_a`[\_W^^Pa][T^aaaPZa`\_`\_Z]G\_  
@HWI-EAS443:3:53:786:1095#0/1  
CACTTTTGCATCTTTTGGAAATGCCTCAAGAGTTGGTGC  
+HWI-EAS443:3:53:786:1095#0/1  
aa\_baaabaabbaabbbbababa\_abaa`\_a\_baaba^a^  
@HWI-EAS443:3:53:787:389#0/1  
GTCTGCTGTAATTGGGTATCTCATTGCCATCATCCACTTC

+HWI-EAS443:3:53:787:389#0/1  
aaab` `ab`aababa\_¥aa[a[`aaa]^aa` `a¥Q]Y\_aZ  
@HWI-EAS443:3:53:816:423#0/1  
ATCTAATGTCGCAGTCCCGCACTCGCGAGATACTCACTAA  
+HWI-EAS443:3:53:816:423#0/1  
a^Xb`aaa]]`\_aa\_\_\_\_\_WWQR¥^a^a\_a\_`SZYW¥T¥^\_  
@HWI-EAS443:3:53:81:1898#0/1  
GAGAATAAAAGAACTGAGAGATCTAATGTCGCAGTCCCGC  
+HWI-EAS443:3:53:81:1898#0/1  
`` `^bbbb`\_ `K`ab¥`Z¥X`baaaa\_WQ\_T\_\_Y\_XYGR  
@HWI-EAS443:3:53:820:77#0/1  
GAATAAAAGAACTGAGAGATCTAATGTCGCAGTCCCGCAC  
+HWI-EAS443:3:53:820:77#0/1  
aaabbaaaaaa^ba`bab`a\_ba`bba^b^` `^`\_`\_`\_`^V  
@HWI-EAS443:3:53:829:957#0/1  
ATTCAATTCCCCAGTTCTGGAAAAGCACTTTTGCATCTTT  
+HWI-EAS443:3:53:829:957#0/1  
\_b¥Z\_b`^^ba`]b^aXaZ\_ba`]aaaXaaaa`SZ\_S^\_a  
@HWI-EAS443:3:53:836:1468#0/1  
GCTGTAATTGGGTATCTCATTGCCATCATCCACTTCATTC  
+HWI-EAS443:3:53:836:1468#0/1  
a`aa` `aaaaaRVa`]V^^` [\_\_\_\_`\_]\_\_V[\_`\_\_[\_`Y  
@HWI-EAS443:3:53:907:1881#0/1  
AAAGATGCAAAAAGTGCTTTTCCAGAAGTGGGAATTGAAT  
+HWI-EAS443:3:53:907:1881#0/1  
\_` `ba\_baba\_baSZMX`]W^Za^a]Y]]b[W\_SF\_^\_a\_  
@HWI-EAS443:3:53:915:400#0/1  
GTCCCGTTTTTCGTTTCATTACCAACTACGTCCCCTTGC  
+HWI-EAS443:3:53:915:400#0/1  
`]\_` `aaaabbab^abaaba\_aXbaa`\_` `aaaY]\_Uaa^\_Y  
@HWI-EAS443:3:53:932:1590#0/1  
AGAGAATAAAAGAACTGAGAGATCTAATGTCGCAGTCCCG  
+HWI-EAS443:3:53:932:1590#0/1  
\_`^QSa\_a`aSZ¥W\_Ya`a[[`ZZOYba]aVXNWYVPULYF  
@HWI-EAS443:3:53:940:862#0/1  
CCCGTTTTTCGTTTCATTACCAACTACGTCCCCTTGC  
+HWI-EAS443:3:53:940:862#0/1  
abababbbbaaaaaa\_a`N`aababa\_aa`X`a`\_a]TX  
@HWI-EAS443:3:53:964:377#0/1  
GCTGCCTTGCATATGTCTACGGCTTGTTCCTCAGTTGGAT  
+HWI-EAS443:3:53:964:377#0/1  
abaa`\_` `ba`baab\_aa`\_XR¥a]KW¥[`XMG]P]WXKK  
@HWI-EAS443:3:53:96:1487#0/1  
GTCCCGTTTTTCGTTTCATTACCAACTACGTCCCCTTGC  
+HWI-EAS443:3:53:96:1487#0/1  
]O^N\_aVUSYSXLLSY¥^\_]NUUQVUYZVYT[¥UZRVSV  
@HWI-EAS443:3:53:984:1953#0/1  
CATGATTCCAGAGGAATGAACAAGGACAAACCCTCTGG  
+HWI-EAS443:3:53:984:1953#0/1  
\_bbbbbbbabbbabbbbbbbbbbbbbbbbb`aaababba

@HWI-EAS443:3:53:990:83#0/1  
TTCTCTTTCTAGCATGTACGCCACCATCAAGGGAGCAATT  
+HWI-EAS443:3:53:990:83#0/1  
aaXb`abb\_aaa^abaaa`]¥V\_^\_\_dWX`b\_a^a^^^`  
@HWI-EAS443:3:54:101:64#0/1  
AGGATGTCCACCATCCTTACTCCTCCAATCTGTGTGCTGT  
+HWI-EAS443:3:54:101:64#0/1  
abb\_bb`aaa\_`aa`]a`\_a\_R`\_]`[`Za`[^aY^]]  
@HWI-EAS443:3:54:1026:84#0/1  
CGCACTCGCGAGATACTCACTAAGACCACTGTGGACCATA  
+HWI-EAS443:3:54:1026:84#0/1  
\_ab^abbb`a[b¥`\_\_a¥`\_abab\_`a^`a\_a^\_]¥¥¥]  
@HWI-EAS443:3:54:1035:1103#0/1  
AAAATTCAATGGTCACAAGATCCCACAATGTTATACAACA  
+HWI-EAS443:3:54:1035:1103#0/1  
a^^¥ba`Wa^USaaa`aa`^[\_a\_\_aaa`]`aa`^`\_^\_  
@HWI-EAS443:3:54:1055:1818#0/1  
TAAAAGAAGTCTAATGTTCGAGATCTAATGTTCGAGTCCCGCACTCG  
+HWI-EAS443:3:54:1055:1818#0/1  
]\_`¥¥aabaa^b\_baab^bba`a[aaaSb^\_\_ab]WVRPF  
@HWI-EAS443:3:54:1079:967#0/1  
GTCCCGTTTTTCGTTTTATTACCAACTACGTCCCTTGC  
+HWI-EAS443:3:54:1079:967#0/1  
`X`aab\_aa\_Z^¥YU\_\_aaa[[]`aY^\_[[]XWZ[WZLY[Y  
@HWI-EAS443:3:54:1147:447#0/1  
TGGCAATGAGATACCCAATTACAGCAGACAAGAGAATAAT  
+HWI-EAS443:3:54:1147:447#0/1  
TS]aXabaab\_^QP\_a^N\_b[N\_\_Sab`HYI\_a`WWX¥a`  
@HWI-EAS443:3:54:1151:1100#0/1  
CTCGCGAGATACTCACTAAGACCACTGTGGACCATATGGC  
+HWI-EAS443:3:54:1151:1100#0/1  
abbbb\_Z¥¥`Z^b\_[\_`^\_^]a^a`¥]a\_W]a]]W\_`Z  
@HWI-EAS443:3:54:1169:361#0/1  
CAGCACACAGATTGGAGGAGTAAGGATGGTGGACATCCTT  
+HWI-EAS443:3:54:1169:361#0/1  
aYba`^a`Z^^`a^^\_aa`a`a]```aaaXaa`a\_PU`a  
@HWI-EAS443:3:54:117:902#0/1  
GAATAAAAGAAGTCTAATGTTCGAGATCTAATGTTCGAGTCCCGCAC  
+HWI-EAS443:3:54:117:902#0/1  
a¥X^^\_V\_a]W]\_¥\_\_]Y^U\_\_`T¥`V^\_Z[aRZZUURU[  
@HWI-EAS443:3:54:1204:634#0/1  
AAAAGAAGTCTAATGTTCGAGATCTAATGTTCGAGTCCCGCAC  
+HWI-EAS443:3:54:1204:634#0/1  
`baa]ababaa`aabaabaabba\_\_`aa`a^^`\_`a\_a]  
@HWI-EAS443:3:54:1222:1366#0/1  
AAAAGAAGTCTAATGTTCGAGATCTAATGTTCGAGTCCCGCAC  
+HWI-EAS443:3:54:1222:1366#0/1  
`a¥SWQ`a`^N`a\_aX[a\_ba^\_`^Z]U^\_\_YZ^`]]\_]  
@HWI-EAS443:3:54:1263:769#0/1  
GAATAAAAGAAGTCTAATGTTCGAGATCTAATGTTCGAGTCCCGCAC

+HWI-EAS443:3:54:1263:769#0/1  
ababa`\_a`\_b`ba`aaa`aaaaab\_\_a`a`\_]a`\_`\_]  
@HWI-EAS443:3:54:1302:99#0/1  
GTCTGCTGTAATTGGGTATCTCATTGCCATCATCCACTTC  
+HWI-EAS443:3:54:1302:99#0/1  
aaaba\_ab`\_aaa\_aa^`aYaZ`aa\_Y]\_aX\_`ZX^X\_aV  
@HWI-EAS443:3:54:1319:1122#0/1  
GCACCTGCATCCTTCCAAGAACTGTAAGTCGTTTGGTTG  
+HWI-EAS443:3:54:1319:1122#0/1  
aabaabbbbaa][bbaaab^baaYaba\_\_a¥\_a^\_aa\_\_aa  
@HWI-EAS443:3:54:1319:297#0/1  
CTAATGTGCTAATTGGGCAAGGGGACGTAGTGTGGTAAT  
+HWI-EAS443:3:54:1319:297#0/1  
abbbbbaabbbbbbbabbbabbaaa`aaababbbb`^\_a^  
@HWI-EAS443:3:54:131:1940#0/1  
GCTGTAATTGGGTATCTCATTGCCATCATCCACTTCATTC  
+HWI-EAS443:3:54:131:1940#0/1  
aS`[DHM[RY[`Y]YVZ¥MMW¥ZN[^XYHG^PRSNRVNL  
@HWI-EAS443:3:54:1322:795#0/1  
GTCCCCGTTTTCGTTTCATTACCAACTACGTCCCCCTTGC  
+HWI-EAS443:3:54:1322:795#0/1  
]U^baa¥OU¥[¥\_T\_TS`^^YL[^P^[``]¥FTQFYOORZ  
@HWI-EAS443:3:54:1334:622#0/1  
ATGGCCATATGGTCCACAGTGGTCTTAGTGAGTATCTCGC  
+HWI-EAS443:3:54:1334:622#0/1  
`]`aaZ``[W`]ZW^^¥\_]TP¥P¥\_a`]Q[`\_[\_YVV[^X  
@HWI-EAS443:3:54:1379:828#0/1  
CCCCGCACTCAGAATGAAGTGGATGATGGCAATGAGATAC  
+HWI-EAS443:3:54:1379:828#0/1  
aa\_¥`\_X]\_Y^V`¥a\_[]`aW\_````Z\_ZU^`Y]a¥a^\_]N  
@HWI-EAS443:3:54:1393:1668#0/1  
CCCGTTTTTCGTTTCATTACCAACTACGTCCCCCTTGGCC  
+HWI-EAS443:3:54:1393:1668#0/1  
aa]aPKbbaaaba\_bab^¥b`aaa`aVaU]aYaXa]XPL  
@HWI-EAS443:3:54:1393:786#0/1  
GTCCCCGTTTTCGTTTCATTACCAACTACGTCCCCCTTGC  
+HWI-EAS443:3:54:1393:786#0/1  
OH\_a¥\_bbbb[[]WT^]abb]^Qa\_aZW[¥`TXZ¥a\_V¥Z  
@HWI-EAS443:3:54:1396:1590#0/1  
AATAAAAGAACTGAGAGATCTAATGTCGCAGTCCCCGCACT  
+HWI-EAS443:3:54:1396:1590#0/1  
abbbbabbabaababaaba¥baaaa`^`\_`aaVY\_¥a^^]\_  
@HWI-EAS443:3:54:1440:133#0/1  
GTTGCCTTGTGTAATTGAATACTGGAGAATTGCCTCTTA  
+HWI-EAS443:3:54:1440:133#0/1  
^]\_\_^`\_a[]a¥`a\_aa` ``b`\_\_a`\_a^^a^]VUa]`a¥  
@HWI-EAS443:3:54:1474:818#0/1  
AAGTGGATGATGGCAATGAGATACCCAATTACAGCAGACA  
+HWI-EAS443:3:54:1474:818#0/1  
[V\_`b`Yba¥a^b]^`abb\_Z^]b^]¥aaaa`\_aa][^a^a



@HWI-EAS443:3:54:1500:909#0/1  
ATAAAGAAGACTGAGAGATCTAATGTCGCAGTCCCGCACTC  
+HWI-EAS443:3:54:1500:909#0/1  
aba`aba\_\_ba`aaa`b\_aaaba\_`a\_`a`¥[Y`]`aZ  
@HWI-EAS443:3:54:1532:124#0/1  
GGGTATCTCATTGCCATCATCCACTTCATTCTGAGTGCGG  
+HWI-EAS443:3:54:1532:124#0/1  
aba[bb\_b\_`ba^X\_aa¥a\_RR\_Ua\_U¥aaR``\_]¥U\_]  
@HWI-EAS443:3:54:157:1819#0/1  
GCATTGACTGAAGATCCAGATGAAGGCACATCTGGGGTGG  
+HWI-EAS443:3:54:157:1819#0/1  
aababbbbabbbbabaaaaabaaaa`aa\_aa¥a\_Va\_  
@HWI-EAS443:3:54:1625:1100#0/1  
GCCATATGGTCCACAGTGGTCTTAGTGAGTATCTCGCGAG  
+HWI-EAS443:3:54:1625:1100#0/1  
a`aababbaa`ab`ba¥aZ\_\_bb]]Vb`a\_aa\_a\_bTV^a  
@HWI-EAS443:3:54:1631:188#0/1  
AAGGCAGCAATAGGGTTGAGGATTAGCTCATCTTTCAGTT  
+HWI-EAS443:3:54:1631:188#0/1  
aJ[``\_]\_\_Q]QHOKPQ^[LL¥W^`X^\_NG][\_HYUZ^UZR¥  
@HWI-EAS443:3:54:1669:1224#0/1  
GGTTCACCTTTCAAAGGACAAGCGGATCATCAGTCAAGAA  
+HWI-EAS443:3:54:1669:1224#0/1  
ab]aa\_Z]ba¥aa`aaa[\_\_aa\_aa]a¥\_aX`]RW`Za\_\_  
@HWI-EAS443:3:54:1680:1159#0/1  
CACTAAGACCACTGTGGACCATATGGCCATAATCAAAAAG  
+HWI-EAS443:3:54:1680:1159#0/1  
ababbaaabbaab`^b\_baa[bab`aa]aaab[LWb\_`b`  
@HWI-EAS443:3:54:1728:957#0/1  
AGAGAATAAAGAAGACTGAGAGATCTAATGTCGCAGTCCCG  
+HWI-EAS443:3:54:1728:957#0/1  
ababaabbbbaaba\_b`baa\_bbaaabba`a]aa`\_\_\_\_  
@HWI-EAS443:3:54:204:861#0/1  
GTGGTAGTGAGTATTGACCGATTTTTAAGGGTTAGAGATC  
+HWI-EAS443:3:54:204:861#0/1  
`^b\_V]\_LYM\_YWZYT XR\_ZDV]`V^XVaa¥DP[RR^WHP  
@HWI-EAS443:3:54:210:255#0/1  
GTCCCGTTTTCGTTTTATTACCAACTACGTCCCCTTGC  
+HWI-EAS443:3:54:210:255#0/1  
aZ^[`a`Ra\_\_aZ`[]`aZ]^\_\_YW\_0\_`Y^VRR[XV]S  
@HWI-EAS443:3:54:218:1390#0/1  
ATCTAATGTCGCAGTCCCGCACTCGCGAGATACTCACTAA  
+HWI-EAS443:3:54:218:1390#0/1  
a\_`aT^bbVU[]SX`a^b^U0`a\_QXYY\_S]VOXR]]V^a  
@HWI-EAS443:3:54:226:2000#0/1  
GGTGGTTCACTTTCAAAGGACAAGCGGATCATCAGTCA  
+HWI-EAS443:3:54:226:2000#0/1  
aa\_``^`a`^```\_\_`````\_a`ZY[YVX\_\_\_^RY\_¥^^  
@HWI-EAS443:3:54:229:907#0/1  
AAAAGAAGACTGAGAGATCTAATGTCGCAGTCCCGCACTCGC

+HWI-EAS443:3:54:229:907#0/1  
`^UM[abbaUa[[\_^a`SHS`\_`a\_HU[^G\_[H  
@HWI-EAS443:3:54:293:424#0/1  
GAATAAAAGAAGACTGAGAGATCTAATGTCGCAGTCCCGCAC  
+HWI-EAS443:3:54:293:424#0/1  
aa]\_I\_¥a`¥a`aT\_Ra^`\_XPaa]\_[\_`UW\_[RX]  
@HWI-EAS443:3:54:293:667#0/1  
AAAAGAAGACTGAGAGATCTAATGTCGCAGTCCCGCACTCGC  
+HWI-EAS443:3:54:293:667#0/1  
aaaaa\_babaa]`aaabaaaa\_¥¥aaa¥`[^¥`\_\_[\_a[  
@HWI-EAS443:3:54:322:564#0/1  
GGATTTCTCATTTTGGCAAAGAAGACAAGAGATATGGCC  
+HWI-EAS443:3:54:322:564#0/1  
aa[bbaa`aabaaabbb`a]aba^ba\_\_ab`b`aaa\_aa\_  
@HWI-EAS443:3:54:331:1509#0/1  
ATCATCAGTCAAGAAAGAAGAAGAGTGCTAACGGGCAAC  
+HWI-EAS443:3:54:331:1509#0/1  
aab`^\_a`\_\_[ZZ\_¥a\_]aaaaa`¥Xa`aa`ZQ^`a\_a\_  
@HWI-EAS443:3:54:382:276#0/1  
TCTGCTGTAATTGGGTATCTCATTGCCATCATCCACTTCA  
+HWI-EAS443:3:54:382:276#0/1  
]]ab`bb\_]abbbbb^a\_¥a`aa`aa`a`a\_\_\_\_\_`\_`^\_  
@HWI-EAS443:3:54:392:32#0/1  
AAAGAAGACTGAGAGATCTAATGTCGCAGTCCCGCACTCGCG  
+HWI-EAS443:3:54:392:32#0/1  
aaaaa^\_bbab\_a\_aYaaa`a]`a[^`\_]`\_]Z]^X\_V¥  
@HWI-EAS443:3:54:39:310#0/1  
GAGAATAAAAGAAGACTGAGAGATCTAATGTCGCAGTCCCGC  
+HWI-EAS443:3:54:39:310#0/1  
aaaV`b`[]ab`aaaaa`\_b`aaa`\_aa\_aa``aY^^``\_  
@HWI-EAS443:3:54:41:1268#0/1  
TGCTGTAATTGGGTATCTCATTGCCATCATCCACTTCATT  
+HWI-EAS443:3:54:41:1268#0/1  
aaaaa\_``aaaaaY`a\_a\_aa\_a\_`a`]a`a\_`\_a\_]^\_\_  
@HWI-EAS443:3:54:421:339#0/1  
CGTTTTCGTTTTATTACCAACTACTCGTCCCCTTGCCCAA  
+HWI-EAS443:3:54:421:339#0/1  
abaZab`b¥`b\_bbba`abba``baaba[Z]]``aaa\_a]  
@HWI-EAS443:3:54:427:1132#0/1  
CCCCAAATGAGAAATCCTCTCAGGACAGCAGACTCCACCC  
+HWI-EAS443:3:54:427:1132#0/1  
abbbbbbbabbbbbbaaaa`abaaaa\_a`aaa``aU`a`X^  
@HWI-EAS443:3:54:435:140#0/1  
CCACTTCAGAAATCAAGTTAAAATAAGGAGGAGAGTTGAT  
+HWI-EAS443:3:54:435:140#0/1  
abbabbbbbbbbabababbbbaaabaabbabb`b\_b\_aaaa  
@HWI-EAS443:3:54:451:630#0/1  
CGCACTCGCGAGATACTACTAAGACCACTGTGGACCATA  
+HWI-EAS443:3:54:451:630#0/1  
`b]LZaaaaXa`]\_\_[\_a`\_^`T\_¥MNXaaa¥a\_ZWP^\_\_

@HWI-EAS443:3:54:454:453#0/1  
CGCTTGTCTTTTGAAGTGAACCCACCAAACTGAAAGA  
+HWI-EAS443:3:54:454:453#0/1  
aaba]\_a`0¥bbbbVH¥`T\_]a\_Xaa\_]¥Q^ab\_a\_a\_  
@HWI-EAS443:3:54:460:1641#0/1  
GGGGACGTAGTGTGGTAATGAAACGAAAACGGGACTCTA  
+HWI-EAS443:3:54:460:1641#0/1  
aa\_a`\_bQabY`¥aa`U\_a`a\_a`Z\_`a`U\_]ZS¥^W¥S  
@HWI-EAS443:3:54:510:797#0/1  
AAAAGAAGTGAAGATCTAATGTCGCAGTCCCGCACTCGC  
+HWI-EAS443:3:54:510:797#0/1  
a`KIROZa]ZP^X`Y`ab¥¥aaZ\_a]W]^aa\_`XTY¥^a`  
@HWI-EAS443:3:54:523:68#0/1  
CCGATTTTTAAGGGTTAGAGATCAAAGAGGGAACGTACTA  
+HWI-EAS443:3:54:523:68#0/1  
ab`¥¥\_b`\_XWS]aSLZ^`]0]T]Pa[`X]HTT[\_`\_a`  
@HWI-EAS443:3:54:560:1012#0/1  
CTCAGAATGAAGTGGATGATGGCAATGAGATACCCAATTA  
+HWI-EAS443:3:54:560:1012#0/1  
abbbbabbbbab\_bbbab\_a`abb`^`^`]^baa\_baba\_  
@HWI-EAS443:3:54:593:1090#0/1  
CGCGAGATACTCACTAAGACCACTGTGGACCATATGGCCA  
+HWI-EAS443:3:54:593:1090#0/1  
W[ab\_aaaaabbbabbbbbbabbbba[¥\_a`aaa\_aQ\_bb  
@HWI-EAS443:3:54:607:1593#0/1  
GGATGATGGCAATGAGATACCCAATTACAGCAGACAAGAG  
+HWI-EAS443:3:54:607:1593#0/1  
aa^¥[RLaaWWY`YYZX`XZ\_W¥]^ZRZY¥Z^VSY[ZL[  
@HWI-EAS443:3:54:60:1455#0/1  
GGTGGTTCACTTTCAAAGGACAAGCGGATCATCAGTCA  
+HWI-EAS443:3:54:60:1455#0/1  
`a[aa\_S`a\_aaaa]\_`YU\_\_\_\_^`a\_]\_\_`¥^\_^U¥  
@HWI-EAS443:3:54:619:1326#0/1  
GCTGTGGCACATTTCCAAGAGAGATGCTAATGGGTCTGCT  
+HWI-EAS443:3:54:619:1326#0/1  
`aab^\_a`^\_\_aaa]\_\_ZYZa^X`\_`]^`\_W\_]X]]XWW  
@HWI-EAS443:3:54:621:797#0/1  
GGATGATGGCAATGAGATACCCAATTACAGCAGACAAGAG  
+HWI-EAS443:3:54:621:797#0/1  
aaabbaa`Z^¥`aaaa`a`a`b`aaa\_aa`\_a`a`a`a`  
@HWI-EAS443:3:54:674:707#0/1  
GAAAAGCACTTTTGCATCTTTTGGAAATGCCTCAAGAGT  
+HWI-EAS443:3:54:674:707#0/1  
`a\_U¥`YU^a`^^`PW\_]`a^ZUZW]WQ]¥^Y[IUXZ¥aY  
@HWI-EAS443:3:54:677:1671#0/1  
ATCAGACCGAGTGATGGTATCACCTCTGGCCGTAACATGG  
+HWI-EAS443:3:54:677:1671#0/1  
a]\_\_a]a\_aaa`R[`\_[XPUX]QUYV^\_a^SQ[VJO[BBBB  
@HWI-EAS443:3:54:682:1627#0/1  
AAAGAAGTGAAGATCTAATGTCGCAGTCCCGCACTCGCG

+HWI-EAS443:3:54:682:1627#0/1  
aaa`a\_aaaa```\_^\_aaaaa^^`\_]\_¥¥¥\_Q]\_¥¥¥¥¥\_  
@HWI-EAS443:3:54:702:549#0/1  
AGTCAATGAGGAAAATTGCATCCTACTCTGTTCTGGTGGA  
+HWI-EAS443:3:54:702:549#0/1  
``a`a``b``bb`babbbabbabbbabaa``aabbZ^`\_  
@HWI-EAS443:3:54:746:679#0/1  
AAAAGAAGTCTGAGAGATCTAATGTCGCAGTCCCGCACTCGC  
+HWI-EAS443:3:54:746:679#0/1  
ab`bbaaababbbbaaabbaab`aaaaa``a``¥T`^^a\_  
@HWI-EAS443:3:54:757:1469#0/1  
AAAGAAGTCTGAGAGATCTAATGTCGCAGTCCCGCACTCGCG  
+HWI-EAS443:3:54:757:1469#0/1  
\_¥¥\_]`X¥S]\_^XR^Y^Za```^^`]¥ZZ]¥YXSXVMM[  
@HWI-EAS443:3:54:767:1496#0/1  
AAAGAAGTCTGAGAGATCTAATGTCGCAGTCCCGCACTCGCG  
+HWI-EAS443:3:54:767:1496#0/1  
`X\_bab^bbbbbababaaabb^Ya]`^T`^`\_]SQ`Xa¥]  
@HWI-EAS443:3:54:791:1030#0/1  
CGCACTCGCGAGATACTACTAAGACCACTGTGGACCATA  
+HWI-EAS443:3:54:791:1030#0/1  
W¥\_Waa`¥\_babbbb\_\_\_\_\_Wa\_abb`abbab[``aa``aa  
@HWI-EAS443:3:54:797:1996#0/1  
GTCCCGTTTTCGTTTTATTACCAACTACTCGTCCCCTTGC  
+HWI-EAS443:3:54:797:1996#0/1  
\_aa[ ]`ZaaaabT¥[0a\_aa`V`a\_a]\_\_ZTNLTFUVZ[\_  
@HWI-EAS443:3:54:815:1530#0/1  
AAGGACAAACCCTCTGGAGCAAAACAAACGATGCTGGATC  
+HWI-EAS443:3:54:815:1530#0/1  
a\_a¥aaaU`\_aU`Za```\_]\_[^``^¥a\_a]a\_\_a¥`\_P[TU  
@HWI-EAS443:3:54:863:871#0/1  
CCTGTTTTTACGGACCAATTCTCTTTCTAGCATGTACGCC  
+HWI-EAS443:3:54:863:871#0/1  
ababbabbbbaaaa`aaa\_aa^baaaaaaaaaaaaa`b\_aa\_  
@HWI-EAS443:3:54:906:460#0/1  
GGGCGATCTGAACCTTGTCAATAGGGCAAACAGCGACTG  
+HWI-EAS443:3:54:906:460#0/1  
aa]]^P`\_]a`WS[Z`WM¥`\_a^U¥0\_S^XSZ^aV`QF^`  
@HWI-EAS443:3:54:933:449#0/1  
TAGCATGTACGCCACCATCAAGGGAGCAATTTTACAATCC  
+HWI-EAS443:3:54:933:449#0/1  
a``^aaa`a[a`\_aY¥\_\_\_\_`aaaa```\_]`^aaaa`\_\_\_\_a]]  
@HWI-EAS443:3:54:955:537#0/1  
GGACGTAGTGTGGTAATGAAACGAAAACGGGACTCTAGC  
+HWI-EAS443:3:54:955:537#0/1  
aa\_`b```]Xaaaa^PY¥¥]Za\_V¥RY^[SX`\_YRZVTTXF  
@HWI-EAS443:3:54:959:1048#0/1  
GTCCCGTTTTCGTTTTATTACCAACTACTCGTCCCCTTGC  
+HWI-EAS443:3:54:959:1048#0/1  
a¥baa\_U¥b¥Ua\_]baaaIaa`\_V`aaa]P`P]a]`VGVP

@HWI-EAS443:3:54:991:248#0/1  
ATCTCATTGCCATCATCCACTTCATTCTGAGTGCGGGGTT  
+HWI-EAS443:3:54:991:248#0/1  
abaaababbaaaa^b`a]a\_aa``aaaaa]a\_aa\_`¥`  
@HWI-EAS443:3:55:1000:294#0/1  
GGCCCAACAACAAGTACAGTTCATTACCCTAAGGTATATA  
+HWI-EAS443:3:55:1000:294#0/1  
aa\_^\_a`¥aa^a`\_Xa]\_a[`\_a`a`¥Y\_^]]a`U\_a^\_^  
@HWI-EAS443:3:55:1103:242#0/1  
GCACTCGCGAGATACTCACTAAGACCACTGTGGACCATAT  
+HWI-EAS443:3:55:1103:242#0/1  
aaaaabaab`baa[\_a\_a^aa`a\_]a\_`a^a`\_`\_]a]  
@HWI-EAS443:3:55:1127:1224#0/1  
AGAACCCCGCACTCAGAATGAAGTGGATGATGGCAATGAG  
+HWI-EAS443:3:55:1127:1224#0/1  
OX`abaaabba[````\_`aaaa`ZaUJabWFZ]T`\_\_`Ra  
@HWI-EAS443:3:55:1140:742#0/1  
GTCGCAGTCCCGCACTCGCGAGATACTCACTAAGACCACT  
+HWI-EAS443:3:55:1140:742#0/1  
``aaaa¥Yabaa`]aaaaa^a\_a\_a\_aaaaaX`U]`\_`  
@HWI-EAS443:3:55:1163:914#0/1  
AACTGAGAGATCTAATGTCGCAGTCCCGCACTCGCGAGAT  
+HWI-EAS443:3:55:1163:914#0/1  
ab\_``ba^aaaaa^ba`a`a`¥`^`\_`P\_\_`^¥a`Z\_  
@HWI-EAS443:3:55:1191:2031#0/1  
GTGCTAATTGGCAAGGGGACGTAGTGTGGTAATGAAAC  
+HWI-EAS443:3:55:1191:2031#0/1  
\_LYRNQ¥^¥^^aGRFZ\_[WOJYLVMP[TVYPTTFSQKGL  
@HWI-EAS443:3:55:119:1791#0/1  
ATGCAATCCTCTTGTGAGAATACCATGGCCACAATTATTG  
+HWI-EAS443:3:55:119:1791#0/1  
\_VHY`^TX]Za]aS¥]X`\_^Y¥]WZ[Z^¥]¥[¥[X]]W]V  
@HWI-EAS443:3:55:1208:929#0/1  
CTCAGAATGAAGTGGATGATGGCAATGAGATACCCAATTA  
+HWI-EAS443:3:55:1208:929#0/1  
abba`bbbbaa\_baaabaabbaabbabaab\_]aaa`a  
@HWI-EAS443:3:55:1229:657#0/1  
GCTAATGTGCTAATTGGCAAGGGGACGTAGTGTGGTAA  
+HWI-EAS443:3:55:1229:657#0/1  
aaZVUa\_]a^`XZ\_¥a`\_MPZ\_YU\_SX]OX`W\_W\_`^GSS  
@HWI-EAS443:3:55:1235:1539#0/1  
GAACCCACCAAAACTGAAAGATGAGCTAATCCTCAACCCT  
+HWI-EAS443:3:55:1235:1539#0/1  
aa`a`b``aaa[aa`b`aaaaa\_baaaaYa`\_\_\_\_]^`  
@HWI-EAS443:3:55:123:360#0/1  
GAACTGAGAGATCTAATGTCGCAGTCCCGCACTCGCGAGA  
+HWI-EAS443:3:55:123:360#0/1  
aaa\_aaaaa\_`\_a`\_aaY]^`^`aW¥\_\_`^¥¥[Z\_¥^V\_W  
@HWI-EAS443:3:55:1246:1141#0/1  
AAACTGAAAGATGAGCTAATCCTCAACCCTATTGCTGCCT

+HWI-EAS443:3:55:1246:1141#0/1  
`a^aaaab\_ba\_aaaaa`a\_aaa`¥\_a`a\_a]]`\_`]  
@HWI-EAS443:3:55:1259:718#0/1  
CACTGTGGACCATATGGCCATAATCAAAAAGTACACATCA  
+HWI-EAS443:3:55:1259:718#0/1  
aba¥0U]a¥`b`bY]PSU\_OGOQa^a\_Q^XY`\_S[¥`R\_H  
@HWI-EAS443:3:55:1279:329#0/1  
AAAGAAGTCTAATGTTCGAGTCCCGCACTCGCG  
+HWI-EAS443:3:55:1279:329#0/1  
a`Z\_aZ]^Ta]^\_abaZabaa]X]¥RZWOGT`[\_UQF^  
@HWI-EAS443:3:55:1288:1236#0/1  
GCGAGATACTACTAAGACCACTGTGGACCATATGGCCAT  
+HWI-EAS443:3:55:1288:1236#0/1  
aaaaaaaa^a`aa`\_a^U^`Z[\_`\_^\_]\_\_]\_\_^W\_  
@HWI-EAS443:3:55:1296:1180#0/1  
GATCTAATGTTCGAGTCCCGCACTCGCGAGATACTACTA  
+HWI-EAS443:3:55:1296:1180#0/1  
aa`]Z\_`]X]^¥]^NLZT¥TSP]QXVV]^Z[[UWWZTXZ  
@HWI-EAS443:3:55:1303:380#0/1  
GTGGGTTCACTTTCAAAGGACAAGCGGATCATCAGTCAA  
+HWI-EAS443:3:55:1303:380#0/1  
``][```\_`\_aaa¥`\_`a`\_[]^a^a\_Y^W[`X^\_]V\_\_  
@HWI-EAS443:3:55:1335:1830#0/1  
ATCTCTTGTCTTCTTTGCCAAAATGAGAAATCCTCTCAG  
+HWI-EAS443:3:55:1335:1830#0/1  
abVbabbbba]aa¥abaa]\_\_aaaaba\_a`aabaGa\_aVaa  
@HWI-EAS443:3:55:1362:940#0/1  
GTCCCGTTTTCGTTTTATTACCAACTACGTCCTTGC  
+HWI-EAS443:3:55:1362:940#0/1  
a\_UFLbaa]a\_aN`R[]`\_`ZM]\_T[W^`YWRTNV][TSU  
@HWI-EAS443:3:55:1400:594#0/1  
CTAATGTTCGAGTCCCGCACTCGCGAGATACTACTAAGA  
+HWI-EAS443:3:55:1400:594#0/1  
\_`a^abaab\_aaaa^`^¥YQ`Ja`b^aX]XU`VW[\_R\_`]  
@HWI-EAS443:3:55:1481:1039#0/1  
AAAGAAGTCTAATGTTCGAGTCCCGCACTCGCG  
+HWI-EAS443:3:55:1481:1039#0/1  
ZaY[X\_\_^aa`Z[aKZ`^Q`bXSa\_S[FXU\_]a`][]ZT\_  
@HWI-EAS443:3:55:1488:602#0/1  
AAACAAACGATGCTGGATCAGACCGAGTGGTATCACC  
+HWI-EAS443:3:55:1488:602#0/1  
`[\_`\_`bbb\_babaa\_]babaXWZa]bababb`Ua\_ZYX[  
@HWI-EAS443:3:55:1524:698#0/1  
AAAAGAAGTCTAATGTTCGAGTCCCGCACTCGCG  
+HWI-EAS443:3:55:1524:698#0/1  
abaa\_baaaab\_aa`a[ba\_ba¥a`\_`[Z\_[NX^^\_aW\_¥  
@HWI-EAS443:3:55:152:1639#0/1  
AAAGAAGTCTAATGTTCGAGTCCCGCACTCGCG  
+HWI-EAS443:3:55:152:1639#0/1  
`aZZ¥¥¥^\_\_Y¥`^]TW]]`¥`][`]UZZXZ¥T^[]XNO

@HWI-EAS443:3:55:1549:925#0/1  
TGGGCAAGGGGACGTAGTGTGGTAATGAAACGAAAACGG  
+HWI-EAS443:3:55:1549:925#0/1  
``^`[\_abbbb^a[^b`\_`a^[EUY]\_UZaR]T¥`¥GZa  
@HWI-EAS443:3:55:1582:1533#0/1  
GCTGACTCTTATCCCTCTCAGCGACATCTCCGTGCTTGGG  
+HWI-EAS443:3:55:1582:1533#0/1  
aaaa`b]abaa[Z[a¥a¥\_aZa[[`aS`[^a\_\_V``\_`¥  
@HWI-EAS443:3:55:1634:94#0/1  
CTAATGTCGCAGTCCCGCACTCGCGAGATACTACTAAGA  
+HWI-EAS443:3:55:1634:94#0/1  
ababab[a\_bba[[babba`b\_aab`\_Z¥b`^ab`bbbba  
@HWI-EAS443:3:55:1700:771#0/1  
CGGTCAATACTCACTACCACTCTCTCCGTGCTGGAGTATT  
+HWI-EAS443:3:55:1700:771#0/1  
ab`Vabb^abb^bP`a`a\_]`a[^aa`[ZZ`^]¥Y[^a`  
@HWI-EAS443:3:55:20:1057#0/1  
AAGCGGATCATCAGTCAAGAAAGAAGAAGTGCTAACG  
+HWI-EAS443:3:55:20:1057#0/1  
a¥^]aaVZY\_`a]TLYZ^`[\_`\_`W\_[]`\_^]P]X^\_^Z\_  
@HWI-EAS443:3:55:223:1073#0/1  
CTGCTGTAATTGGGTATCTCATTGCCATCATCCACTTCAT  
+HWI-EAS443:3:55:223:1073#0/1  
`bbbb`Zabba¥XXbaba]]aaaaa`ab`^`\_`aV]`  
@HWI-EAS443:3:55:241:1743#0/1  
ATCAAACCTTTGGTCAACATCATCATTCTCACTTCTCCTC  
+HWI-EAS443:3:55:241:1743#0/1  
]Xa¥Va¥baa¥]F0`aUY`Z\_XYa`\_aa\_PZ\_^aY\_¥GX^  
@HWI-EAS443:3:55:256:1005#0/1  
TCCCGTTTTCGTTTTATTACCAACTACGTCCCCTTGCC  
+HWI-EAS443:3:55:256:1005#0/1  
aa`\_]\_0]^aab[aa`aa]]^aa`\_aY\_[¥aS[`\_\_\_\_^\_[Y  
@HWI-EAS443:3:55:258:708#0/1  
AAAAGAAGTGAAGATCTAATGTCGCAGTCCCGCACTCGC  
+HWI-EAS443:3:55:258:708#0/1  
aa`¥baaaaa`aaa`aaaaaaa\_`a`a^\_\_`^[^`¥a\_  
@HWI-EAS443:3:55:279:1655#0/1  
CCTTCATCTGGATCTTCAGTCAATGCACCTGCATCCTTTC  
+HWI-EAS443:3:55:279:1655#0/1  
[b`babba\_\_\_a^`bbb\_abbabba]baYS¥aba^a`a\_  
@HWI-EAS443:3:55:288:156#0/1  
GTGTACATCTGCTCCAGCACGTCCCTTGGGTTAAGTGCA  
+HWI-EAS443:3:55:288:156#0/1  
\_XaX`]]ZW]^Q[^¥0^[YSWUBBBBBBBBBBBBBBBB  
@HWI-EAS443:3:55:303:222#0/1  
GTCCCGTTTTCGTTTCATTACCAACTACGTCCCCTTGC  
+HWI-EAS443:3:55:303:222#0/1  
a```b`aa`b^`\_\_\_a`\_`\_`^W\_]\_a^`V^WTV¥]]V  
@HWI-EAS443:3:55:320:1548#0/1  
GAGAATAAAGAAGTGAAGATCTAATGTCGCAGTCCCGC

+HWI-EAS443:3:55:320:1548#0/1  
]^\_ab]`[baaabbaaab[baab`aa`\_aaaa^aa\_\_\_\_  
@HWI-EAS443:3:55:356:89#0/1  
GCACATCTGGGGTGGAGTCTGCTGTCCTGAGAGGATTCT  
+HWI-EAS443:3:55:356:89#0/1  
a\_`]]\_\_`\_aaaR`^Y]YX^^U\_]UXYWWW\_VV^VWYXX^  
@HWI-EAS443:3:55:361:1656#0/1  
TGTTGACTAGCACTGACTCAGGGCCATTGATCTCCACAT  
+HWI-EAS443:3:55:361:1656#0/1  
abababbabbbbaaaaaaaaa`aa`aaa`aaa\_aa\_a`  
@HWI-EAS443:3:55:39:944#0/1  
GAATAAAGAAGACTGAGAGATCTAATGTCGCAGTCCCGCAC  
+HWI-EAS443:3:55:39:944#0/1  
]J\_\_U\_]`a\_]aa`a\_\_`^^a\_[`aaW^^^]¥S[Y[W[Q[  
@HWI-EAS443:3:55:425:829#0/1  
AATGGACATGATTCCAGAGAGGAATGAACAAGGACAAACC  
+HWI-EAS443:3:55:425:829#0/1  
OZZa`abaP[ZYW\_OM\_S[ZZ`^V]GZ[`XaYSXa\_]\_^  
@HWI-EAS443:3:55:437:1924#0/1  
GCATGTACGCCACCATCAAGGGAGCAATTTTACAATCCTG  
+HWI-EAS443:3:55:437:1924#0/1  
```b`¥ab`a\_`P]]N^]¥^X\_[WR^a]W\_\_`]\_Y`UGTX  
@HWI-EAS443:3:55:452:55#0/1  
GGATCAGACCGAGTGATGGTATCACCTCTGGCCGTAACAT  
+HWI-EAS443:3:55:452:55#0/1  
`\_¥Q\_ba]^a]]a^aaVaa^^[^]Y¥VQWa][[\_JJUQVS  
@HWI-EAS443:3:55:45:386#0/1  
GCGAGATACTACTAAGACCACTGTGGACCATATGGCCAT  
+HWI-EAS443:3:55:45:386#0/1  
aaaaa)`HaT`¥¥`a[`\_[\_\_\_X`^)`^NUZR\_^XOX^  
@HWI-EAS443:3:55:474:995#0/1  
GCCATGGTATTCTCACAAGAGGATTGCATGATCAAGGCAG  
+HWI-EAS443:3:55:474:995#0/1  
`ab`U\_\_L\_\_WSX\_QUUL^V\_a\_S\_]¥[U^OG]\_[Z¥BBB  
@HWI-EAS443:3:55:516:848#0/1  
ATCACATTGTCGATGGATTCAATCCCCAGTTCTGGAAAA  
+HWI-EAS443:3:55:516:848#0/1  
aa[`[¥bb`Y[a\_`WW^`a``]a]\_Q¥aa``aaa`]Z]\_Y  
@HWI-EAS443:3:55:52:426#0/1  
ATCAACTCTCCTTATTTTAACTTGATTCTGAAGTGG  
+HWI-EAS443:3:55:52:426#0/1  
¥a`UW\_a[V]aaa\_bYQ]aa`RVaaaa[ ]a\_]aYTP`TZP  
@HWI-EAS443:3:55:553:42#0/1  
CCCGCACTCAGAATGAAGTGGATGATGGCAATGAGATACC  
+HWI-EAS443:3:55:553:42#0/1  
V\_¥\_aab\_T\_a]\_ba]\_a`b\_¥¥b^``aa^]Za\_aYZ^]Y  
@HWI-EAS443:3:55:563:1968#0/1  
CTGGGAGAAACCTTGTTTTACGGACCAATTCTCTTTCTAG  
+HWI-EAS443:3:55:563:1968#0/1  
a``¥^Z]VX^^^\_][TWQTZ\_^PQWRLZPP\_Z¥¥NT`\_a



@HWI-EAS443:3:55:607:293#0/1  
GCGAGATACTACTAAGACCACTGTGGACCATATGGCCAT  
+HWI-EAS443:3:55:607:293#0/1  
`ab]`aaaa\_`aaaaa\_`\_`\_a]aa^\_^[\_`\_]\_\_\_\_]]X  
@HWI-EAS443:3:55:619:166#0/1  
GAATAAAAGAACTGAGAGATCTAATGTCGCAGTCCCGCAC  
+HWI-EAS443:3:55:619:166#0/1  
aabb^\_S`ab]a`]¥\_aa\_\_[aaaaRTYY\_`LNTXSYNN  
@HWI-EAS443:3:55:688:1913#0/1  
CCAGGATTGTAATGCTCCCTTGATGGTGGCGTACATG  
+HWI-EAS443:3:55:688:1913#0/1  
`ba```bb\_`bbaa`ba\_aa``aa``aa]W[[``W\_XX¥\_  
@HWI-EAS443:3:55:70:554#0/1  
AGAGAATAAAAGAACTGAGAGATCTAATGTCGCAGTCCCG  
+HWI-EAS443:3:55:70:554#0/1  
Jaaaabba^bb¥\_`bbabbaaaaa`abb[aa`]a\_``a`  
@HWI-EAS443:3:55:722:1517#0/1  
GTCCCGTTTTCGTTTCATTACCAACTACTGCCCTTGC  
+HWI-EAS443:3:55:722:1517#0/1  
\_]aaa`bbbaaaa\_aba`aba\_a¥abab^\_]`\_aaa`  
@HWI-EAS443:3:55:741:58#0/1  
CTTCTTTGCCAAAATGAGAAATCCTCTCAGGACAGCAGA  
+HWI-EAS443:3:55:741:58#0/1  
a`a^\_``Y`]`a]Z¥^aZ`^TZVNV¥WaY[aa]]]a\_¥a\_  
@HWI-EAS443:3:55:769:1063#0/1  
CCCGTTTTCGTTTCATTACCAACTACTGCCCTTGCC  
+HWI-EAS443:3:55:769:1063#0/1  
`abbababaa`aaaabaaa^aa`a`ab``aa`a`\_\_\_^a]  
@HWI-EAS443:3:55:789:847#0/1  
AGTCTGCTGCTGAGAGGATTTCTCATTTTGGGCAAAGA  
+HWI-EAS443:3:55:789:847#0/1  
`a`b^¥abbabb`aYa`bb`\_bbababbabaabbaa`Tab  
@HWI-EAS443:3:55:78:1062#0/1  
GGACAAGAGACTGAAATGGTTCAAATTCATTTTGTGTA  
+HWI-EAS443:3:55:78:1062#0/1  
abaaa]a`a\_aaa¥^aaaa]^]`aZ\_`^`^a```a\_`\_^^  
@HWI-EAS443:3:55:849:1314#0/1  
ATCCAGATGAAGGCACATCTGGGGTGGAGTCTGCTGCCT  
+HWI-EAS443:3:55:849:1314#0/1  
abbaaaaabbaaaaa`b`aaaaa]aa\_a]`aaY`a\_]\_`  
@HWI-EAS443:3:55:856:187#0/1  
AGTCCCGCACTCGCGAGATACTACTAAGACCACTGTGGA  
+HWI-EAS443:3:55:856:187#0/1  
aa\_``aaa\_\_a]a\_a[\_Z`\_Z\_]^\_`\_`[[^]U[aV]\_Y  
@HWI-EAS443:3:55:873:852#0/1  
GAACTGACTTGTGTTGGCCATTCCATTCCACCATGT  
+HWI-EAS443:3:55:873:852#0/1  
]TY¥^bVaX^^UaW00a\_]SYY[aa`\_a`aaVV^^]aaa[  
@HWI-EAS443:3:55:918:1222#0/1  
AAAGAAGTACTGAGAGATCTAATGTCGCAGTCCCGCACTCGCG



@HWI-EAS443:3:56:1134:1497#0/1  
CGCACTCGCGAGATACTCACTAAGACCACTGTGGACCATA  
+HWI-EAS443:3:56:1134:1497#0/1  
`b^aZ`bbab^ba`ZSaY`¥aaa]a[\_a[aa]\_Z]\_a\_\_a  
@HWI-EAS443:3:56:1138:1465#0/1  
GGCGTACATGCTAGAAAGAGAATTGGTCCGTAACAAGG  
+HWI-EAS443:3:56:1138:1465#0/1  
abSXJ\_a]]b]]RbaaZa`\_S[a¥aZNX]]`Y[WT`a[Z  
@HWI-EAS443:3:56:115:1976#0/1  
ACTGGGAGAAACCTTGTTTTACGGACCAATTCTCTTTCTA  
+HWI-EAS443:3:56:115:1976#0/1  
aaa\_a\_\_^`a`\_^\_\_Y\_\_\_\_Y]XX]^`U\_^0\_\_^L¥X^]  
@HWI-EAS443:3:56:1163:1510#0/1  
GCCGGCTACTGGGAGAAACCTTGTTTTACGGACCAATTCT  
+HWI-EAS443:3:56:1163:1510#0/1  
`^]aaaaaZY\_a\_T^VZaWxa`WP[\_`VZX\_YLSYQQWFY  
@HWI-EAS443:3:56:1186:1238#0/1  
AAAAGAGAAGAAAGAAGAGCTCCAGGATTGTAATAATTGCT  
+HWI-EAS443:3:56:1186:1238#0/1  
¥`\_X\_a[Y]baa`^`bZ]WU\_`^¥¥a`^\_Z\_a`^^^a  
@HWI-EAS443:3:56:119:58#0/1  
GGTGGTTCACTTTCAAAGGACAAGCGGATCATCAGTCA  
+HWI-EAS443:3:56:119:58#0/1  
aaZaaaW`YPY\_^^^\_Z\_[a`WS]Y\_Za]W¥RZ^US\_TUW  
@HWI-EAS443:3:56:1220:617#0/1  
TGCTGGATCAGACCGAGTGATGGTATCACCTCTGGCCGTA  
+HWI-EAS443:3:56:1220:617#0/1  
aaaaaba`Saaa\_]aa\_b\_a`aNS[¥`[\_^V^`\_W^aW[  
@HWI-EAS443:3:56:122:38#0/1  
GTACTTTTTGATTATGGCCATATGGTCCACAGTGGTCTTA  
+HWI-EAS443:3:56:122:38#0/1  
a¥X\_a`^^a^V\_`\_a\_\_^YWV[^]SUZSPT[W^ZLTZZU  
@HWI-EAS443:3:56:1255:915#0/1  
AATTGGGCAAGGGACGTAGTGTGGTAATGAAACGAAAA  
+HWI-EAS443:3:56:1255:915#0/1  
\_b\_bbbbababbbba\_a`a`^[babaa^Ya]¥]a`Ia[`aa  
@HWI-EAS443:3:56:127:1660#0/1  
ATAAAAGAAGACTGAGAGATCTAATGTCGCAGTCCCGCACTC  
+HWI-EAS443:3:56:127:1660#0/1  
`aaaW`^^aa]Y`a^\_aa\_a^a\_^a^¥`YY[U^\_\_]\_  
@HWI-EAS443:3:56:1304:1146#0/1  
GCTCCACCAGAACAGAGTAGGATGCAATTTTCCTCATTGA  
+HWI-EAS443:3:56:1304:1146#0/1  
a\_a]^`aa`\_\_a\_]`\_`Xaaa^a\_]YVa`\_a¥P`]S`^VZ  
@HWI-EAS443:3:56:1316:666#0/1  
GAGATCTAATGTCGCAGTCCCGCACTCGCGAGATACTCAC  
+HWI-EAS443:3:56:1316:666#0/1  
a\_[]WUXa\_¥`\_W]0`^PQUURUXP^[YSQM]WGWB BBBB  
@HWI-EAS443:3:56:131:489#0/1  
CATCTGCTCCAGCACGTCCCTTGGGTTAAGTGCAACACT

+HWI-EAS443:3:56:131:489#0/1  
`abaabaaaa`aa`Z^¥[\_Y]]`¥\_\_W`W\_[¥]¥¥W\_  
@HWI-EAS443:3:56:1339:414#0/1  
GATTAGCTCATCTTTCAGTTTTGGTGGGTTCACTTTCAAAA  
+HWI-EAS443:3:56:1339:414#0/1  
a]a`aaa`¥`a^]a\_`^`^`\_¥LYUaY^P^[^]\_]VS^\_  
@HWI-EAS443:3:56:1364:1812#0/1  
AAAAGAAGTCTGAGATCTAATGTCGCAGTCCCGCACTCGC  
+HWI-EAS443:3:56:1364:1812#0/1  
aa`aaaa`\_]a`UaRFY``\_X^]a`U^aTUZ\_WRUQ¥¥^S  
@HWI-EAS443:3:56:1370:1968#0/1  
AACCCCTAAAAATCGGTCAATACTCACTACCACTCTCTCC  
+HWI-EAS443:3:56:1370:1968#0/1  
¥[IFZZ\_¥[P¥¥Z\_\_][MK[RTYBBBBBBBBBBBBBBBB  
@HWI-EAS443:3:56:1382:583#0/1  
CAATAACTTATTTCATCAATGATGTGGGAGATCAATGG  
+HWI-EAS443:3:56:1382:583#0/1  
ab`aba\_bbbbb^baa\_a\_`b^bbb\_`b¥`ab]bbbbY  
@HWI-EAS443:3:56:1420:1777#0/1  
GACTGAAGATCCAGATGAAGGCACATCTGGGGTGGAGTCT  
+HWI-EAS443:3:56:1420:1777#0/1  
`bababbbab`abbababb\_aaa^aa^baabaVaa^b^`a  
@HWI-EAS443:3:56:1421:76#0/1  
ATTCAATTCCCCAGTTCTGGAAAAGCACTTTTGCATCTTT  
+HWI-EAS443:3:56:1421:76#0/1  
`ba]abb`R]Y[]`^\_H\_]XW[\_^T\_Sa]a`aTNZ\_``\_  
@HWI-EAS443:3:56:1501:47#0/1  
ATGTCGCAGTCCCGCACTCGCGAGATACTCACTAAGACCA  
+HWI-EAS443:3:56:1501:47#0/1  
abba¥W`abaa\_W¥`\_Z``^]aQ`S[[\_`\_¥\_Z\_\_\_\_TN\_  
@HWI-EAS443:3:56:1551:1283#0/1  
GACCCATTAGCATCTCTCTTGGAAATGTGCCACAGCACAC  
+HWI-EAS443:3:56:1551:1283#0/1  
abaaabbbbaabaaaaabbaabaa`aa`aaa`a`a^  
@HWI-EAS443:3:56:1563:1250#0/1  
AGAAGTCTGAGATCTAATGTCGCAGTCCCGCACTCGCGAG  
+HWI-EAS443:3:56:1563:1250#0/1  
ab[a`bbb`bbba[a^M]\_a^¥`aa\_UaaT\_]Y`¥]\_`\_¥  
@HWI-EAS443:3:56:157:2043#0/1  
AAAAGAAGTCTGAGATCTAATGTCGCAGTCCCGCACTCGC  
+HWI-EAS443:3:56:157:2043#0/1  
aaaaa`aaaaa^aa``aa`aa]\_`Z`[UZWW]^\_Y]]]¥  
@HWI-EAS443:3:56:1584:907#0/1  
GAATAAAAGAAGTCTGAGATCTAATGTCGCAGTCCCGCAC  
+HWI-EAS443:3:56:1584:907#0/1  
a¥U\_Y\_]`b]\_W\_a[`U^VSZa`\_abZ`\_W`\_][^Y`YXV  
@HWI-EAS443:3:56:1593:1549#0/1  
CTAATGTGCTAATTGGGCAAGGGGACGTAGTGTGGTAAT  
+HWI-EAS443:3:56:1593:1549#0/1  
ab[a]TVb]b[\_aaa\_\_`\_\_ba`XV]`ZQ\_Z\_^a``VO^\_

@HWI-EAS443:3:56:1680:1603#0/1  
GGCATTTCCAAAGATGCAAAGTGCTTTCCAGAACTG  
+HWI-EAS443:3:56:1680:1603#0/1  
ab]Y`baaV[[\_`\_\_\_\_¥a\_\_^\_YaZa¥``a\_\_\_\_a]`Ya`  
@HWI-EAS443:3:56:169:814#0/1  
GCTAATGTGCTAATTGGGCAAGGGGACGTAGTGTGGTAA  
+HWI-EAS443:3:56:169:814#0/1  
aaa]`aa]aaa`aaa]aa`aaaa^\_b^^aWa]\_a]V^^  
@HWI-EAS443:3:56:1703:1163#0/1  
AAAGAAGTGAAGATCTAATGTCGCAGTCCCGCACTCGCG  
+HWI-EAS443:3:56:1703:1163#0/1  
a\_bZ^ba`a\_]\_ab`I^`Xaa¥YDM\_aW\_\_\_\_aXRTL MN][  
@HWI-EAS443:3:56:1705:790#0/1  
GCTGTAATTGGGTATCTCATTGCCATCATCCACTTCATTC  
+HWI-EAS443:3:56:1705:790#0/1  
a\_a^Y`\_a`aaa]\_\_\_\_^¥`^a^ZZ^^Z^^Y]]V]\_]\_\_\_\_]V  
@HWI-EAS443:3:56:1711:1084#0/1  
CCCGTTTTCGTTTCATTACCAACTACGTCCCCTTGCCC  
+HWI-EAS443:3:56:1711:1084#0/1  
a`baT^bbabbbbaaabab`bbababbba``aaba``a¥  
@HWI-EAS443:3:56:17:1110#0/1  
AAAGAAGTGAAGATCTAATGTCGCAGTCCCGCACTCGCG  
+HWI-EAS443:3:56:17:1110#0/1  
aaba\_aaa```]`\_\_a`\_a``a¥````\_W`\_Z^V\_W^¥¥[  
@HWI-EAS443:3:56:180:28#0/1  
AGAGAATAAAAGAACTGAGAGATCTAATGTCGCAGTCCCG  
+HWI-EAS443:3:56:180:28#0/1  
[bababaabbab^aabaabbba\_abaabb\_aaaaZ\_\_a`  
@HWI-EAS443:3:56:20:973#0/1  
ATCAGACCGAGTGATGGTATCACCTCTGGCCGTAACATGG  
+HWI-EAS443:3:56:20:973#0/1  
aa\_`aa`a`a`W`¥]`[Xa^[\_^^\_YY^\_^^U¥]S[Z[Y  
@HWI-EAS443:3:56:214:1005#0/1  
ATTCTCTTTCTAGCATGTACGCCACCATCAAGGGAGCAAT  
+HWI-EAS443:3:56:214:1005#0/1  
a`aab\_\_`a``¥Z^`a\_]a``\_`\_\_\_\_\_Z[aaa\_`]X\_]`  
@HWI-EAS443:3:56:240:1014#0/1  
AAAAGAAGTGAAGATCTAATGTCGCAGTCCCGCACTCGC  
+HWI-EAS443:3:56:240:1014#0/1  
abaa``aa^F^`^^\_a]aaaa\_`]``a¥````\_`^^[^[^  
@HWI-EAS443:3:56:246:1450#0/1  
AATAAAAGAACTGAGAGATCTAATGTCGCAGTCCCGCACT  
+HWI-EAS443:3:56:246:1450#0/1  
a]aaa\_TZ[^\_\_][T[^`^^[^^^¥QV`¥XLZ]SQSLLW^  
@HWI-EAS443:3:56:261:320#0/1  
GAATAAAAGAACTGAGAGATCTAATGTCGCAGTCCCGCAC  
+HWI-EAS443:3:56:261:320#0/1  
aaaaaaaaab]]]aaaaZaa``aa^aa^```a\_]^\_\_\_\_^¥]  
@HWI-EAS443:3:56:335:1626#0/1  
ATTGCATCTACTCTGTTCTGGTGGAGCAGCAGCAAAGGG

+HWI-EAS443:3:56:335:1626#0/1  
¥\_W^Z\_\_¥W\_ba`\_\_¥\_\_^a]I]Z]]YW[``\_Q¥`]¥V  
@HWI-EAS443:3:56:336:643#0/1  
CCCGTTTTCGTTTCATTACCAACTACTCGTCCCCTTGCCC  
+HWI-EAS443:3:56:336:643#0/1  
abbbabbbababbaabababaaabaaabbaa]``\_a[P\_a\_a  
@HWI-EAS443:3:56:344:137#0/1  
TTGTCTTCTTTGCCCAAATGAGAAATCCTCTCAGGACAG  
+HWI-EAS443:3:56:344:137#0/1  
aba```a^^]baa]W^V\_`aaa`\_]^[¥\_\_`¥`\_PW[[  
@HWI-EAS443:3:56:350:478#0/1  
CACTCGCGAGATACTACTAAGACTGTGGACCATATG  
+HWI-EAS443:3:56:350:478#0/1  
a]aba`\_a`a^a`\_`aaaa`^`a\_]aaa`\_\_aY¥a`\_\_\_X  
@HWI-EAS443:3:56:36:1233#0/1  
GTGGATGATGGCAATGAGATACCCAATTACAGCAGACAAG  
+HWI-EAS443:3:56:36:1233#0/1  
\_W¥`]`a\_aa^``a^\_]`^``\_a`a`Y`aa]^^`\_`[`  
@HWI-EAS443:3:56:37:1199#0/1  
GGTGGTTCACTTTCAAAGGACAAGCGGATCATCAGTCA  
+HWI-EAS443:3:56:37:1199#0/1  
`\_[bb`\_`aaabbaababaaaaab¥`aaa```\_`aa^a^a`  
@HWI-EAS443:3:56:397:2038#0/1  
GAGAGATCTAATGTCGCAGTCCCGCACTCGCGAGATACTC  
+HWI-EAS443:3:56:397:2038#0/1  
aba\_Xaabbbba`]``baZZ`a`a`\_[[`Za\_\_^a¥`\_`  
@HWI-EAS443:3:56:417:662#0/1  
CTTCATTTGGGAAAACAACCTCCATAATCACATCCTGTGC  
+HWI-EAS443:3:56:417:662#0/1  
abbaaaaa`bb`\_^^`aaaaa\_aaaaaaaaaa`a`aa[a`  
@HWI-EAS443:3:56:41:981#0/1  
CTGATGATCCGCTTGTCTTTTGAAGTGAACCCACCAAA  
+HWI-EAS443:3:56:41:981#0/1  
a\_ba]a`a`b`]`a][X`aaa`]a`]a\_a\_aa`Z`\_\_Y  
@HWI-EAS443:3:56:423:18#0/1  
TGGATTCTGTCTAAGGATGTCCACCATCCTTACTCCTCCA  
+HWI-EAS443:3:56:423:18#0/1  
abb`ababb\_\_b]`ba\_\_b\_\_\_\_\_[[`¥^a`^Z`W¥`¥`¥`  
@HWI-EAS443:3:56:456:1825#0/1  
AAAGAAGTGAAGATCTAATGTCGCAGTCCCGCACTCGCG  
+HWI-EAS443:3:56:456:1825#0/1  
Z]¥\_]\_V^]OT]a\_^^aZ\_]TW]]YRU`\_]Y[¥U]]Z¥  
@HWI-EAS443:3:56:461:572#0/1  
CAGGATTGTAATAATTGCTCCCTTGATGGTGGCGTACATGC  
+HWI-EAS443:3:56:461:572#0/1  
a]\_¥YY`^OSJY]\_¥PW[]¥W`\_[Y[`^P]Z\_TQVYT¥^S  
@HWI-EAS443:3:56:476:1852#0/1  
TATCTCATTGCCATCATCCACTTCATTCTGAGTGCGGGGT  
+HWI-EAS443:3:56:476:1852#0/1  
a]a[`ab\_ZW¥Z¥U\_\_aaa`a\_aZV\_a\_^Q¥XNW]]X\_XL

@HWI-EAS443:3:56:476:1902#0/1  
GTCCCGTTTTTCGTTTCATTACCAACTACGTCCCCTTGC  
+HWI-EAS443:3:56:476:1902#0/1  
^Vb^^baa]b]¥^a¥a`abba\_aaaa\_baa]^aaV^a`YY  
@HWI-EAS443:3:56:479:380#0/1  
AGAGGATTTCTCATTTTGGGCAAAGAAGACAAGAGATATG  
+HWI-EAS443:3:56:479:380#0/1  
\_aab``abaaa``^a[a`¥``[S^b\_\_a`\_`[a^a`X`\_^  
@HWI-EAS443:3:56:483:908#0/1  
CCCCTAACTGCCTTGATCATGCAATCCTCTTGTGAGAATA  
+HWI-EAS443:3:56:483:908#0/1  
abaaabbabbabaaaaabaaaaaa`aaaa`aaaYa`a  
@HWI-EAS443:3:56:538:554#0/1  
GGGCCATATCTCTTGTCTTTTGGCCAAAATGAGAAATC  
+HWI-EAS443:3:56:538:554#0/1  
Z\_baWRV¥J`WZWX\_U¥[aSX]\_bab`[aY]S¥b`\_MaVX  
@HWI-EAS443:3:56:577:197#0/1  
GGGGACGTAGTGTGGTAATGAAACGAAAACGGGACTCTA  
+HWI-EAS443:3:56:577:197#0/1  
aa`a\_ab`^aZaUa`aSU[``][^YN[RYYXUZ¥ZQMPS¥R  
@HWI-EAS443:3:56:590:665#0/1  
GTCCCGTTTTTCGTTTCATTACCAACTACGTCCCCTTGC  
+HWI-EAS443:3:56:590:665#0/1  
a`aaaaaaaab\_aa\_\_`a^`a`\_a]aa`a]\_]\_¥\_Y]\_  
@HWI-EAS443:3:56:591:1358#0/1  
GAATAAAAGAAGTCTAATGTCGCAGTCCCGCAC  
+HWI-EAS443:3:56:591:1358#0/1  
aaaaabba`a`\_]aa\_b`\_aaaaa`\_`aaa\_\_^^`\_^  
@HWI-EAS443:3:56:594:239#0/1  
CTGCTGTAATTGGGTATCTCATTGCCATCATCCACTTCAT  
+HWI-EAS443:3:56:594:239#0/1  
abbbaaX\_bbbabaaba`W^ababa\_aabaaa^`^aaa`\_  
@HWI-EAS443:3:56:614:1058#0/1  
GCAAGGGGACGTAGTGTGGTAATGAAACGAAAACGGGAC  
+HWI-EAS443:3:56:614:1058#0/1  
aa^^abbb\_\_b`\_aV¥]aaaY\_\_¥`\_\_`P¥]\_\_`¥\_\_^¥U  
@HWI-EAS443:3:56:630:862#0/1  
ATTGTCTCCCGAAGAAGTCAGTGAAACGCAAGGAACTGAG  
+HWI-EAS443:3:56:630:862#0/1  
aaaaaa`a\_aaY``XN[T]`^[^\_`aW`\_]\_¥^]]````\_  
@HWI-EAS443:3:56:636:650#0/1  
CCCGTTTTTCGTTTCATTACCAACTACGTCCCCTTGGCC  
+HWI-EAS443:3:56:636:650#0/1  
aaa`aabbbbbbbbbbaaaababaababaaab^`aaaa^  
@HWI-EAS443:3:56:656:716#0/1  
GCTAATGTGCTAATTGGGCAAGGGGACGTAGTGTGGTAA  
+HWI-EAS443:3:56:656:716#0/1  
aab\_W\_b^bbbabbaabbaabaaba^b]ab^b^baaX^a  
@HWI-EAS443:3:56:676:341#0/1  
CAGCGATAATCAAACCTTGGTCAACATCATCATTTCTCAC

+HWI-EAS443:3:56:676:341#0/1  
abbbbaWaaa[aab`aba`b¥\_\_a`a\_]aa\_aaaYaaa\_  
@HWI-EAS443:3:56:69:225#0/1  
CCCGTTTTCGTTTCATTACCAACTACTCGTCCCCTTGCCC  
+HWI-EAS443:3:56:69:225#0/1  
abab\_abaab^aa\_`baaa[aa^`]a`^a^\_[[\_^W[YZ^  
@HWI-EAS443:3:56:727:90#0/1  
CTTTTGCATCTTTTTGGAAATGCCTCAAGAGTTGGTGCAT  
+HWI-EAS443:3:56:727:90#0/1  
abb\_aaabbabbbbbbbbaabaZ\_a^X^a\_`aaaa\_a]X`  
@HWI-EAS443:3:56:738:203#0/1  
AAGAGACTGAAATGGTTCAAATCCATTTTGTGTATAAC  
+HWI-EAS443:3:56:738:203#0/1  
aabaaaabbaa`baa\_¥a^\_a`a`a`aaa\_abX`a`^`^  
@HWI-EAS443:3:56:748:1597#0/1  
GGAGTCTGCTGTCCTGAGAGGATTTCTCATTTTGGGCAAA  
+HWI-EAS443:3:56:748:1597#0/1  
U\_b`b\_baZa`U¥``bXaW`]UW\_\_I\_VNbba^YMU\_a0a  
@HWI-EAS443:3:56:750:40#0/1  
ATGTGCCACAGCACACAGATTGGAGGAGTAAGGATGGTGG  
+HWI-EAS443:3:56:750:40#0/1  
a]a\_aaaa```aa\_a¥`b^`aaa\_aaVa^\_\_aa][aaS\_\_  
@HWI-EAS443:3:56:753:589#0/1  
GTCCCGTTTTCGTTTCATTACCAACTACTCGTCCCCTTGCC  
+HWI-EAS443:3:56:753:589#0/1  
aaa^a`aaaab\_a`\_]\_aa^\_Xaa\_a\_```^P^\_^Z^YS[  
@HWI-EAS443:3:56:76:437#0/1  
ATCGGAATACTGCCCCGACATGACCCCAAGCACGGAGATGT  
+HWI-EAS443:3:56:76:437#0/1  
aaaaaaaaaaaa`a`aa\_`a\_\_[\_\_]S\_\_\_\_\_`¥U\_^Z\_X  
@HWI-EAS443:3:56:799:1355#0/1  
GCTGTAATTGGGTATCTCATTGCCATCATCCACTTCATTC  
+HWI-EAS443:3:56:799:1355#0/1  
aaaaZaaabbaa]ba`^`````[\_\_\_\_`a\_Y`a`a`Y^aaY  
@HWI-EAS443:3:56:819:1006#0/1  
CGCGAGATACTCACTAAGACCACTGTGGACCATATGGCCA  
+HWI-EAS443:3:56:819:1006#0/1  
`bbaababbbbaaaabbaaabb`ab`a\_a\_ba`````Y[`a  
@HWI-EAS443:3:56:835:1347#0/1  
GAATAAAAGAAGACTGAGAGATCTAATGTCGAGTCCCGCAC  
+HWI-EAS443:3:56:835:1347#0/1  
]b`babbab\_Uabb`^aaa]a`\_```UYU^`\_VY]V¥]^Y  
@HWI-EAS443:3:56:83:449#0/1  
AAAGAAGTACTGAGAGATCTAATGTCGAGTCCCGCACTCGCG  
+HWI-EAS443:3:56:83:449#0/1  
¥bb`\_`^aa^\_\_aaaa`W\_`Y¥Z]]\_X``aa]ZXZZ]¥]  
@HWI-EAS443:3:56:841:1373#0/1  
CTCTTATTTTTCAGTGTGGAGGTTGCCCGTTAGCACTTC  
+HWI-EAS443:3:56:841:1373#0/1  
abab`bbb`b^Za`]\_aaba\_aaW`WQZ`^I^^SMYX^a[



@HWI-EAS443:3:56:852:1187#0/1  
GTGGAATAGGAATGGCCCAACAACAAGTACAGTTCATTAC  
+HWI-EAS443:3:56:852:1187#0/1  
a`a`\_a\_\_\_\_`¥aa`a\_aa^a\_]``\_`aaa\_`\_\_a`\_`  
@HWI-EAS443:3:56:852:654#0/1  
GTCCCCGTTTTCGTTTCATTACCAACTACGTCCCCCTTGC  
+HWI-EAS443:3:56:852:654#0/1  
aNRZ]aHQ`V[WMYXMQP[a[]VVNURLZS[ZYFLNLT^R  
@HWI-EAS443:3:56:854:1707#0/1  
TGGGTATCTCATTGCCATCATCCACTTCATTCTGAGTGCG  
+HWI-EAS443:3:56:854:1707#0/1  
UabUK[[`aX^a]aXWWW¥a]¥\_[]\_RK¥YZ]][[`Y¥¥  
@HWI-EAS443:3:56:863:138#0/1  
GAGATCTGCATGGCCAGGGTTTGTATCAACTCTCCTCCTT  
+HWI-EAS443:3:56:863:138#0/1  
a`[PSTXaZ`[¥]]VN]a\_W\_\_\_\_]V]]¥RXZU\_][]S]]]  
@HWI-EAS443:3:56:880:562#0/1  
ATCTAATGTCGCAGTCCCGCACTCGCGAGATACTCACTAA  
+HWI-EAS443:3:56:880:562#0/1  
a`aaXaaaZ\_aZ\_¥^`\_`¥YPZ]Y[ZZR^[WUW[¥Y¥U[^  
@HWI-EAS443:3:56:89:1110#0/1  
TTCTCTTTCTAGCATGTACGCCACCATCAAGGGAGCAATT  
+HWI-EAS443:3:56:89:1110#0/1  
^aa`bb[S\_\_R\_a^bba\_TWXXZaY`ab\_]`R^\_]ZQ¥`\_  
@HWI-EAS443:3:56:911:1811#0/1  
TCTGCTGTAATTGGGTATCTCATTGCCATCATCCACTTCA  
+HWI-EAS443:3:56:911:1811#0/1  
abaa\_bb\_¥a`baa[Ua\_\_a[]\_`\_]R`¥R\_\_¥TaUa`UU  
@HWI-EAS443:3:56:91:556#0/1  
CCCCGTTTTCGTTTCATTACCAACTACGTCCCCCTTGGCC  
+HWI-EAS443:3:56:91:556#0/1  
VabbUab`a`^`^¥Uaa`Z^abaab]`abaa`\_`Y`a\_Y  
@HWI-EAS443:3:56:940:1074#0/1  
GCCCCTAAGTGCCTTGATCATGCAATCCTCTTGTGAGAAT  
+HWI-EAS443:3:56:940:1074#0/1  
aaaaabbbbaaaaaabaabaaaa`aaa`\_aab[baa^^^\_a  
@HWI-EAS443:3:56:953:904#0/1  
AAGAGACTGAAATGGTTCAAATTCATTTTGTGTATAAC  
+HWI-EAS443:3:56:953:904#0/1  
^\_a`a`bbaaZ`ba\_aaaa^a\_aaabaaa\_]a\_aaa]V  
@HWI-EAS443:3:56:975:1547#0/1  
CAAGCCGTAGACATATGCAAGGCAGCAATAGGGTTGAGGA  
+HWI-EAS443:3:56:975:1547#0/1  
aabaabbaaab\_aaaaaaa`ba\_`a[\_aa`b`a]aaaa\_  
@HWI-EAS443:3:56:978:893#0/1  
ATCTAATGTCGCAGTCCCGCACTCGCGAGATACTCACTAA  
+HWI-EAS443:3:56:978:893#0/1  
a`]`a\_a`X``aa[Q¥\_aZ¥V]¥¥VZ¥T^XZ]\_\_]ZRX¥[  
@HWI-EAS443:3:56:97:810#0/1  
ATGTGCGAGTCCCGCACTCGCGAGATACTCACTAAGACCA

+HWI-EAS443:3:56:97:810#0/1  
aabb`abUba`ab^a^b`Sa`[\_Z\_\_V`WWZ`^a¥QR[`  
@HWI-EAS443:3:57:1075:678#0/1  
CTTGTGACCATTGAATTTTCAACAATTTCCCAGTTCCTGAT  
+HWI-EAS443:3:57:1075:678#0/1  
abbb\_baaabbaba¥abbbabab\_aab\_a`aaa\_[Y`a\_a  
@HWI-EAS443:3:57:1130:392#0/1  
CCCGTTTTTCGTTTCATTACCAACTACGTCCCCTTGCCC  
+HWI-EAS443:3:57:1130:392#0/1  
abbb`abbabaabaabab\_]ba`a`aa`a`^^]Za\_a`\_`  
@HWI-EAS443:3:57:1134:849#0/1  
CCCGTTTTTCGTTTCATTACCAACTACGTCCCCTTGCCC  
+HWI-EAS443:3:57:1134:849#0/1  
`Z¥¥PZWa`\_Zabb`baa[Z¥]`a`a]\_ZVWVYGYZ]S¥V  
@HWI-EAS443:3:57:1144:978#0/1  
GTCCCCTTTTCGTTTCATTACCAACTACGTCCCCTTGCC  
+HWI-EAS443:3:57:1144:978#0/1  
aaaaaaaaabb]abaaabaaa\_\_a`aabaa`\_`^`\_X\_  
@HWI-EAS443:3:57:1159:1071#0/1  
CTTGTTTCATTCTCTCTGGAATCATGTCCATTATTCTCTT  
+HWI-EAS443:3:57:1159:1071#0/1  
¥bbbVa]\_\_`\_]`ba`baaa]abSbba[abab\_baa[`a`a  
@HWI-EAS443:3:57:1159:395#0/1  
TATTGACAAAGTTCAGATCGCCCCTAACTGCCTTGATCAT  
+HWI-EAS443:3:57:1159:395#0/1  
a`\_aR]a¥[V`H]ZHW^\_a]NW]RZZ^^`\_Q\_X]`U^\_]X  
@HWI-EAS443:3:57:1171:1745#0/1  
GAGAATAATGGACATGATTCCAGAGAGGAATGAACAAGGA  
+HWI-EAS443:3:57:1171:1745#0/1  
^^a\_bbaba^^`aaa`abba`baab\_bb`bbb`aaaabaa  
@HWI-EAS443:3:57:1179:1160#0/1  
ATTGACTGAAGATCCAGATGAAGGCACATCTGGGGTGGAG  
+HWI-EAS443:3:57:1179:1160#0/1  
abaaa]b`R¥`a]0`V¥¥XP¥]`^XN^]L\_\_\_\_^XMY¥BB  
@HWI-EAS443:3:57:1188:329#0/1  
GTGACTCTGATGTCAGTATTCTTGCCCCACTTCATTTGG  
+HWI-EAS443:3:57:1188:329#0/1  
a¥`WY^\_\_\_¥\_WL[ZTRU]]Z^^]¥YU¥[XZXRYQTXXWY  
@HWI-EAS443:3:57:1199:683#0/1  
GTCCCCTTTTCGTTTCATTACCAACTACGTCCCCTTGCC  
+HWI-EAS443:3:57:1199:683#0/1  
a`\_[baaaaa`aa\_aa\_a`Za\_^a\_aa`\_^\_¥^\_\_\_\_`V  
@HWI-EAS443:3:57:120:861#0/1  
ATAAAAGAACTGAGAGATCTAATGTCGCAGTCCCGCACTC  
+HWI-EAS443:3:57:120:861#0/1  
aaa`ab`aaaabaaaa`aaa`aa\_aa`]a^`\_`^a^\_`  
@HWI-EAS443:3:57:1214:1080#0/1  
GAAGTGGATGATGGCAATGAGATACCCAATTACAGCAGAC  
+HWI-EAS443:3:57:1214:1080#0/1  
a`]¥Qb\_[ba[\_a¥`aba`^^^`[]a`aaab`Y\_`]^`\_`^

@HWI-EAS443:3:57:1268:1190#0/1  
GGGGACGTAGTGTGGTAATGAAACGAAAACGGGACTCTA  
+HWI-EAS443:3:57:1268:1190#0/1  
aaaa`¥\_]`[]\_aa^[``]Y¥]]L]Z]^]V]¥¥][¥VY[  
@HWI-EAS443:3:57:1276:1887#0/1  
GAAGGCACATCTGGGGTGGAGTCTGCTGTCCTGAGAGGAT  
+HWI-EAS443:3:57:1276:1887#0/1  
aa^RWaa`^b\_aaa^aYaa¥]¥\_Za[\_\_\_^[V]]Z`Va`\_\_  
@HWI-EAS443:3:57:1281:332#0/1  
CGTACATGCTAGAAAGAGAATTGGTCCGTAACAAGGTT  
+HWI-EAS443:3:57:1281:332#0/1  
aaK]Zabb]]][b^X`¥I[\_Tab]ZWWW]T]]`[N¥\_^VSB  
@HWI-EAS443:3:57:1408:343#0/1  
AAAGAAGTCTGAGAGATCTAATGTCGCAGTCCCGCACTCGCG  
+HWI-EAS443:3:57:1408:343#0/1  
aa]00X[a`\_[X`T]^aZ¥a\_T]¥TZ]XY`V][[[MZRQ^  
@HWI-EAS443:3:57:1447:724#0/1  
GGAGTCTGCTGTCCTGAGAGGATTTCTCATTTTGGGCAAA  
+HWI-EAS443:3:57:1447:724#0/1  
aa\_`Vaaa]aa^\_\_`a\_aX\_a\_aa^S`\_\_`aaaX`\_U\_\_a  
@HWI-EAS443:3:57:1450:1337#0/1  
CTTCCTGATGTGTACTTTTTGATTATGGCCATATGGTCCA  
+HWI-EAS443:3:57:1450:1337#0/1  
abb`abbaaabababbbbbb\_`abbb[bbaa\_aaMYXX`X  
@HWI-EAS443:3:57:1456:1565#0/1  
TACAGTTCTTGGAAAGGATGCAGGTGCATTGACTGAAGAT  
+HWI-EAS443:3:57:1456:1565#0/1  
ab^abab\_bb\_`^`aaaaaa[aa\_Ya\_^aaaaYa``a\_`a  
@HWI-EAS443:3:57:150:659#0/1  
GTCCCGTTTTCGTTTTATTACCAACTACGTCCCTTGC  
+HWI-EAS443:3:57:150:659#0/1  
\_YZ\_ab`Z^\_]VP]]`^[]\_]W`X\_[ZZa`[^¥V[RMYX  
@HWI-EAS443:3:57:1537:1485#0/1  
AGAGAATAAAGAAGTCTAATGTCGCAGTCCCG  
+HWI-EAS443:3:57:1537:1485#0/1  
]¥Za`¥V¥bbaa\_aabb\_Y^``bab`abbaXaaa`¥]\_Ga  
@HWI-EAS443:3:57:1545:1415#0/1  
AAAAGAAGTCTGAGAGATCTAATGTCGCAGTCCCGCACTCGC  
+HWI-EAS443:3:57:1545:1415#0/1  
aaaaaaaaabaaa`aa\_ba\_ab`¥\_\_`a^\_Y\_[^\_S¥¥\_`^  
@HWI-EAS443:3:57:1559:1484#0/1  
AAAAGAAGTCTGAGAGATCTAATGTCGCAGTCCCGCACTCGC  
+HWI-EAS443:3:57:1559:1484#0/1  
a`^`\_^\_X\_V]aYb`a[aaabaU^`QZ`^Y[aa[^VU¥\_`^  
@HWI-EAS443:3:57:1583:554#0/1  
GAGAATAAAGAAGTCTAATGTCGCAGTCCCGC  
+HWI-EAS443:3:57:1583:554#0/1  
a[]`aba`aaa`aaa`\_a`a\_\_Yaaa\_\_\_\_`\_U]\_\_U]X¥^  
@HWI-EAS443:3:57:165:985#0/1  
GGGCGATCTGAACCTTTGTCAATAGGGCAAACCAGCGACTG

+HWI-EAS443:3:57:165:985#0/1  
a`aabaabab``baabaaaaaa\_a`aaa\_\_aa\_a`bVa  
@HWI-EAS443:3:57:1665:1779#0/1  
CCCGTTTTTCGTTTCATTACCAACACTACGTCCCCTTGCCC  
+HWI-EAS443:3:57:1665:1779#0/1  
aa]baabbabaaaaabaaa`^Z[¥aa\_a\_XS]R`ZRYZ^  
@HWI-EAS443:3:57:1725:898#0/1  
GAGAATAATGGACATGATTCCAGAGAGGAATGAACAAGGA  
+HWI-EAS443:3:57:1725:898#0/1  
K`[Sa^aabaab\_bbbba`]a`ab`abab^¥[aaaaZa  
@HWI-EAS443:3:57:1777:267#0/1  
GTCCCCTTTTCGTTTCATTACCAACACTACGTCCCCTTGC  
+HWI-EAS443:3:57:1777:267#0/1  
\_aWUV[]`\_aY`]^ZRXbaa```0¥Q^\_Y¥XMR^JZ[XB  
@HWI-EAS443:3:57:234:1610#0/1  
GCTAGAAAGAGAATTGGTCCGTAAAACAAGTTTCTCCCA  
+HWI-EAS443:3:57:234:1610#0/1  
aaaaaab[]ba`aaa\_a¥\_^a\_\_aaaZaaa]¥\_\_`\_¥\_X\_  
@HWI-EAS443:3:57:235:2012#0/1  
AGAGAATAAAAGAACTGAGAGATCTAATGTGCGCAGTCCCG  
+HWI-EAS443:3:57:235:2012#0/1  
ZQY[^`aba[^QX`[^\_``[^`Y`a¥ab\_b^^\_W]¥]N  
@HWI-EAS443:3:57:241:1797#0/1  
GGGAGATCAATGGCCCTGAGTCAGTGCTAGTCAACACTTA  
+HWI-EAS443:3:57:241:1797#0/1  
\_`[\_aba]bba][\_[\_^`Za\_`\_]VZ]V¥¥Z]NaU\_`]  
@HWI-EAS443:3:57:248:269#0/1  
GTACTTTTTGATTATGGCCATATGGTCCACAGTGGTCTTA  
+HWI-EAS443:3:57:248:269#0/1  
\_RS^a^]W]^\_a`^`^¥]Y[XWYYJSNQYJSTNDP[GVB  
@HWI-EAS443:3:57:249:357#0/1  
ATGAAGTGGATGATGGCAATGAGATACCCAATTACAGCAG  
+HWI-EAS443:3:57:249:357#0/1  
aba\_ab^bb^abR\_aaa\_a`aaa\_\_a\_\_\_`a\_```a^]¥a  
@HWI-EAS443:3:57:255:84#0/1  
GGGACGTAGTGTGGTAATGAAACGAAACGGGACTCTAG  
+HWI-EAS443:3:57:255:84#0/1  
aa\_^Xb\_^a\_a\_aaaX^^\_[^\_V`^]^^V[Y]VXXXXX]  
@HWI-EAS443:3:57:260:1209#0/1  
GGGCCATATCTCTTGTCTTCTTTGCCAAAATGAGAAATC  
+HWI-EAS443:3:57:260:1209#0/1  
aa`bbbbbbbaabababbaabbba`aaaab`\_^```aaa`  
@HWI-EAS443:3:57:261:1407#0/1  
AAAGAACTGAGAGATCTAATGTGCGCAGTCCCGCACTCGCG  
+HWI-EAS443:3:57:261:1407#0/1  
aaaa`a\_aaa\_a`\_a\_\_`\_a¥^^^\_ZW^\_\_XWV^¥¥¥¥¥  
@HWI-EAS443:3:57:311:1620#0/1  
GGATGATGGCAATGAGATACCCAATTACAGCAGACAAGAG  
+HWI-EAS443:3:57:311:1620#0/1  
aa¥U0`0\_¥aZ]\_]`\_`RG^Y``\_`[[[Y¥PXTY]\_]`\_`

@HWI-EAS443:3:57:31:1112#0/1  
AAAGAAGTCTAATGTTCGAGTCCCGCACTCGCG  
+HWI-EAS443:3:57:31:1112#0/1  
a\_a`aa^aa\_b\_\_`a`aaaaZa]\_`\_Ya\_\_¥`Z\_TZZX[  
@HWI-EAS443:3:57:325:1188#0/1  
AAGCGGATCATCAGTCAAGAAAGAAGAAGTGTAAACG  
+HWI-EAS443:3:57:325:1188#0/1  
a]^`a\_\_\_\_\_a`\_\_[^`[^]\_\_\_\_`[]^W`Z\_U]\_\_^`XX  
@HWI-EAS443:3:57:383:1247#0/1  
CCCCGTTTTCGTTTCATTACCAACTACGTCCCCTTGCCC  
+HWI-EAS443:3:57:383:1247#0/1  
a^Wa^`\_a]YR[\_\_\_`^`\_SUNR\_^TUXTQS\_\_RFRVBBB  
@HWI-EAS443:3:57:383:380#0/1  
CTGCTGTCTGAGAGGATTTCTCATTTTGGGCAAAGAAGA  
+HWI-EAS443:3:57:383:380#0/1  
`a`[\_baba^¥[``^XS¥^^^aaaaaaaa\_VVZa`a^aaa  
@HWI-EAS443:3:57:386:1902#0/1  
GAATAAAAGAAGTCTAATGTTCGAGTCCCGCAC  
+HWI-EAS443:3:57:386:1902#0/1  
a`a\_`a`¥N\_]`Z^^^\_[Y`X`^RGRU\_¥WMUVXRUB  
@HWI-EAS443:3:57:391:347#0/1  
GCTCCAGCACGTCCCTTGGGTTAAGTGCAACTTCAAT  
+HWI-EAS443:3:57:391:347#0/1  
a`a\_]a`a`a¥\_\_\_[\_Z^[U\_[Z^W[[U¥¥^¥W[SSS^  
@HWI-EAS443:3:57:409:1786#0/1  
GATGAAGGCACATCTGGGGTGGAGTCTGCTGCTGAGAG  
+HWI-EAS443:3:57:409:1786#0/1  
^ba]aaX\_]a`[\_`aaa^aSa`Z`^`a`X`\_`ZVaX[\_`  
@HWI-EAS443:3:57:438:424#0/1  
ATTCCATTTTGTGTATAACATTGTGGGATCTTGTGACCA  
+HWI-EAS443:3:57:438:424#0/1  
ab\_ZW`b`^Z`]`bZ\_\_\_bYSWI\_U`aa`^aaba¥aX`\_a  
@HWI-EAS443:3:57:455:110#0/1  
GGATGATGGCAATGAGATACCCAATTACAGCAGACAAGAG  
+HWI-EAS443:3:57:455:110#0/1  
`baWbaIa`[SYaaa[\_Y\_^VOYW¥\_^¥]^Y`\_]ZZNT\_\_  
@HWI-EAS443:3:57:46:1855#0/1  
TGCAGGTGCATTGACTGAAGATCCAGATGAAGGCACATCT  
+HWI-EAS443:3:57:46:1855#0/1  
a``[QXH^Z\_aaabaT[]`[X`b`¥QYT[``\_ZP^\_]SX  
@HWI-EAS443:3:57:478:1013#0/1  
GGCCCTGAGTCAAGTCAACTTATCAATGGATAA  
+HWI-EAS443:3:57:478:1013#0/1  
aabbabbbaabab\_aaaab`\_aaXa¥`aaaa]aa`\_`a]  
@HWI-EAS443:3:57:480:1837#0/1  
CAAACGACTTACAGTTCTTGGAAAGGATGCAGGTGCATTG  
+HWI-EAS443:3:57:480:1837#0/1  
aabbabababaaaa^b\_baaa]]a\_\_\_`a^`aaX\_aa\_¥^  
@HWI-EAS443:3:57:500:56#0/1  
CTTATTTTTCAGTGTGGAGGTTGCCGTTAGCACTTCTT





+HWI-EAS443:3:58:1012:1703#0/1  
XW[a`WX\_R\_¥]\_aa\_a^\_U¥\_ZZ\_¥` ``^a0[SX]MRRX  
@HWI-EAS443:3:58:1042:89#0/1  
ATAAAAGAAGACTGAGAGATCTAATGTCGCAGTCCCGCACTC  
+HWI-EAS443:3:58:1042:89#0/1  
abaa`\_ba\_[aaaaab[a\_a\_\_bb^]a¥\_a]]]\_]]]\_¥  
@HWI-EAS443:3:58:1042:98#0/1  
GTCCCGTTTTTCGTTTCATTACCAACTACGTCCCTTGC  
+HWI-EAS443:3:58:1042:98#0/1  
aaa` `b`aaa\_b`aa]`aa`]Ya`^a\_aa\_a\_]Y^^]^^¥  
@HWI-EAS443:3:58:1043:1435#0/1  
CTCGCGAGATACTACTAAGACCACTGTGGACCATATGGC  
+HWI-EAS443:3:58:1043:1435#0/1  
`]ZG¥V]\_[Y^ZY]QX\_\_\_QUN^¥TPLZTU]\_X]V[VVW  
@HWI-EAS443:3:58:1055:135#0/1  
CAACCATTGTGAATTCTTCATACCCTTCATGTACTCTTAT  
+HWI-EAS443:3:58:1055:135#0/1  
abbaabbbbaa^T`aZbaaaba`a\_baa\_ba`a`b\_a`ab  
@HWI-EAS443:3:58:1058:1456#0/1  
GTCTTAGTGAGTATCTCGCGAGTGC GGGACTGCGACATTA  
+HWI-EAS443:3:58:1058:1456#0/1  
a\_]`aaaUaab`baaXZY]\_¥]L\_Y`aaHSXSQ[NP¥[`Z  
@HWI-EAS443:3:58:1076:534#0/1  
CAATTCTCTTTCTAGCATGTACGCCACCATCAAGGGAGCA  
+HWI-EAS443:3:58:1076:534#0/1  
ababbababb` `baa¥abbabaaa\_a`aaaaa` `aabaa  
@HWI-EAS443:3:58:1082:1595#0/1  
CGTCATCAATGATGTGGGAGATCAATGGCCCTGAGTCAGT  
+HWI-EAS443:3:58:1082:1595#0/1  
Ya[YaaVabbaXXaaaUI¥ba^Ybaa\_TP]ZZ`IbbZ[Z¥  
@HWI-EAS443:3:58:1103:743#0/1  
AGAGGTGATACCATCACTCGGTCTGATCCAGCATCGTTTG  
+HWI-EAS443:3:58:1103:743#0/1  
aaaaa¥baa\_\_aaa^¥\_\_]\_VZX[X^Z^R[YS\_[]Q[]W  
@HWI-EAS443:3:58:1141:98#0/1  
CTAATGTCGCAGTCCCGCACTCGCGAGATACTACTAAGA  
+HWI-EAS443:3:58:1141:98#0/1  
abbabbaabaabaaa`ab\_a`\_¥`a\_a\_[\_Ra[\_^`\_][¥¥  
@HWI-EAS443:3:58:1146:929#0/1  
ATAGGGTTGAGGATTAGCTCATCTTTTCAGTTTTGGTGGGT  
+HWI-EAS443:3:58:1146:929#0/1  
¥`bbbb^bbabbabb`ba`\_aa]`b\_]`\_Yab`aa^a` `[  
@HWI-EAS443:3:58:1158:413#0/1  
ATTTCTCATTTTTGGGCAAAGAAGACAAGAGATATGGCCCA  
+HWI-EAS443:3:58:1158:413#0/1  
``^a\_WZ]X]`aS\_`^a\_`a]`a`U[F[Xb\_URLL^]P¥¥  
@HWI-EAS443:3:58:1167:570#0/1  
CTCGCGAGATACTACTAAGACCACTGTGGACCATATGGC  
+HWI-EAS443:3:58:1167:570#0/1  
abbbabababaaaaaaa\_baaa`\_aa\_bb\_\_a\_`a^\_a\_` ` \_



@HWI-EAS443:3:58:1213:819#0/1  
GTGCTAATTGGGCAAGGGGACGTAGTGTGGTAATGAAAC  
+HWI-EAS443:3:58:1213:819#0/1  
YDY\_\_TP`a^bYNTNQRZaGXQN]VH^[] [GLXPWYVS\_V  
@HWI-EAS443:3:58:1231:888#0/1  
GTCCCCGTTTTCGTTTTATTACCAACTACGTCCCCCTTGC  
+HWI-EAS443:3:58:1231:888#0/1  
a[WY\_b^^a`\_a^\_\_Zaa`\_WZ\_\_]`^^^`ZZZZ^]Y]V  
@HWI-EAS443:3:58:1236:202#0/1  
GAATAAAAGAAGACTGAGAGATCTAATGTCGCAGTCCCCGCAC  
+HWI-EAS443:3:58:1236:202#0/1  
aaaaaaaaab\_\_`ab`a\_a\_\_\_\_`\_]`a^\_\_]^`X]^`U]  
@HWI-EAS443:3:58:125:1757#0/1  
CGTTTTCGTTTTATTACCAACTACGTCCCCCTTGCCCAA  
+HWI-EAS443:3:58:125:1757#0/1  
[a\_K`bbba\_b\_ab\_ba\_b\_b^]a[PX\_aaa`YHb]``¥  
@HWI-EAS443:3:58:1285:1609#0/1  
GATCTAATGTCGCAGTCCCCGACTCGCGAGATACTACTA  
+HWI-EAS443:3:58:1285:1609#0/1  
`¥b[ab\_bb\_\_^a\_\_Wbb\_XXa`\_a[b`aa^a`Ua^`¥¥\_  
@HWI-EAS443:3:58:1297:254#0/1  
GCCCAACAACAAGTACAGTTCATTACCCTAAGGTATATAA  
+HWI-EAS443:3:58:1297:254#0/1  
aaa`aaaa\_a\_a^a^aa`a\_`a`\_]`^a]]aaU^a`\_\_U  
@HWI-EAS443:3:58:1298:1422#0/1  
CGTTCCTCTTTGATCTCTAACCTTAAAAATCGGTCAAT  
+HWI-EAS443:3:58:1298:1422#0/1  
aa]````ZY\_¥Ya¥\_NZN¥^YOVOMX^W]ZZa]aaYSZRZ  
@HWI-EAS443:3:58:1315:1403#0/1  
AGCAGCGATAATCAAACCTTTGGTCAACATCATCATTTCTC  
+HWI-EAS443:3:58:1315:1403#0/1  
^\_T]a^\_\_aZ]^ [T¥VTabXY¥¥`[^ [a\_] [aY`aaa\_a¥  
@HWI-EAS443:3:58:1318:389#0/1  
ATTCAATTCCCCAGTTCTGGAAAAGCACTTTTGCATCTTT  
+HWI-EAS443:3:58:1318:389#0/1  
\_¥\_[XZ`^Q[[Z[^S\_TX^LREVS`^\_\_\_X¥ZQOV]¥\_¥Z  
@HWI-EAS443:3:58:1359:170#0/1  
GTCCCCGTTTTCGTTTTATTACCAACTACGTCCCCCTTGC  
+HWI-EAS443:3:58:1359:170#0/1  
aaa`baaaa\_b\_aa\_abaa\_\_a`]`\_a`^a^WUY]ZY[U  
@HWI-EAS443:3:58:1371:1228#0/1  
AGAGAATAAAAGAAGACTGAGAGATCTAATGTCGCAGTCCCG  
+HWI-EAS443:3:58:1371:1228#0/1  
aaR^\_baaa^a]b`\_`aa¥``aa^aaaaa`S\_`a¥FZ\_\_  
@HWI-EAS443:3:58:1393:1837#0/1  
AAATCAAGTTAAAATAAGGAGGAGAGTTGATACAAACCCT  
+HWI-EAS443:3:58:1393:1837#0/1  
aa`\_Qaa`\_aa`\_¥a\_\_`a]`\_Z`ZaZ^`\_\_]V]\_\_ZHW]  
@HWI-EAS443:3:58:1435:846#0/1  
TTCTCACAAAGAGATTGCATGATCAAGGCAGTTAGGGGCG

+HWI-EAS443:3:58:1435:846#0/1  
ababa`a`aaabaaaaa`baa^``a`Xa[at\_Y[]N\_  
@HWI-EAS443:3:58:1454:213#0/1  
TAATTGTGGCCATGGTATTCTCACAAGAGATTGCATGAT  
+HWI-EAS443:3:58:1454:213#0/1  
``ab`^]a^X][TNWDU]]WYQUW¥XYR¥[FLZYVYZYZU  
@HWI-EAS443:3:58:1459:806#0/1  
ATGTGCGAGTCCCGCACTCGCGAGATACTACTAAGACCA  
+HWI-EAS443:3:58:1459:806#0/1  
aaa`\_ba`aZ``a`^`\_`\_¥¥^ZV\_\_W\_W\_¥\_\_\_`^UW^  
@HWI-EAS443:3:58:1487:935#0/1  
GTGCGAGTCCCGCACTCGCGAGATACTACTAAGACCACT  
+HWI-EAS443:3:58:1487:935#0/1  
aU\_\_[aa`¥W^``\_\_QaZ^X\_Z¥^¥^`^UW^Z[WMZ¥¥^  
@HWI-EAS443:3:58:14:349#0/1  
CACTCGGTCTGATCCAGCATCGTTTGTGTTTGTCTCCAGAGG  
+HWI-EAS443:3:58:14:349#0/1  
`)]`aaa`[``¥V¥]\_Y¥^]¥^`U^[VR¥[\_[^[[[]T¥[  
@HWI-EAS443:3:58:1505:1051#0/1  
CCATTTTGTGACTCTTATCCCTCTCAGCGACATCTCCGT  
+HWI-EAS443:3:58:1505:1051#0/1  
aabbabbbbabbaabbbbabaaab\_aaaaaa`aaaa`Z¥  
@HWI-EAS443:3:58:1557:1385#0/1  
GTGCGAGTCCCGCACTCGCGAGATACTACTAAGACCACT  
+HWI-EAS443:3:58:1557:1385#0/1  
`X]aaa`GT\_a`\_U]\_RVT\_U]PXZZ[U^Z\_YS^VWQ\_VY  
@HWI-EAS443:3:58:1557:734#0/1  
TAATGTGCGAGTCCCGCACTCGCGAGATACTACTAAGAC  
+HWI-EAS443:3:58:1557:734#0/1  
a`ab`\_`]aa`\_`^`[^¥^[\_`\_^^^S¥¥\_UW^ZSYV  
@HWI-EAS443:3:58:1576:1642#0/1  
GGGAGATCAATGGCCCTGAGTCAGTGCTAGTCAACACTTA  
+HWI-EAS443:3:58:1576:1642#0/1  
^LVRUUPW^]UZ^ZVMPYPYWW^WFSWVWVTVUTNJOSU  
@HWI-EAS443:3:58:1603:754#0/1  
CTAATGTGCTAATTGGGCAAGGGACGTAGTGTGGTAAT  
+HWI-EAS443:3:58:1603:754#0/1  
W^\_bbaS`\_`K\_\_¥baa`Va\_\_aQaaRW[aXSa`a`SZT  
@HWI-EAS443:3:58:1603:794#0/1  
GTTCACTTTCAAAAGGACAAGCGGATCATCAGTCAAGAAA  
+HWI-EAS443:3:58:1603:794#0/1  
a`a`a\_aaa¥a\_aaaa``^a^`a^`]\_a\_\_\_\_\_]\_\_`\_`^`  
@HWI-EAS443:3:58:1612:186#0/1  
AAAAGAAGTGAAGATCTAATGTGCGAGTCCCGCACTCGC  
+HWI-EAS443:3:58:1612:186#0/1  
aababaaabaaaa`a`baaaa`^`\_aZ`^`\_¥¥^Z^Z  
@HWI-EAS443:3:58:1628:422#0/1  
GGATGCAGGTGCATTGACTGAAGATCCAGATGAAGGCACA  
+HWI-EAS443:3:58:1628:422#0/1  
`GZ^a^\_a`Wa^`¥`\_`[U``¥\_W¥W¥Z¥\_¥¥¥W¥[[[V¥QX

@HWI-EAS443:3:58:1648:1182#0/1  
CCTTTCCAAGAAGTGTAAAGTCGTTTGGTTGCCTTGTGTGTA  
+HWI-EAS443:3:58:1648:1182#0/1  
aabbaabba^aa`ba`aab\_`\_`aa\_\_\_aa`[aa\_`aa\_a  
@HWI-EAS443:3:58:1656:1763#0/1  
ATTCAATTCCCCAGTTCTGGAAAAGCACTTTTGCATCTTT  
+HWI-EAS443:3:58:1656:1763#0/1  
aaa`\_aa]WUZ^`Y\_\_[\`[]W`\_\_aX[]\_`\_`\_0^aV`\_\_  
@HWI-EAS443:3:58:1668:100#0/1  
CGCACTCAGAATGAAGTGGATGATGGCAATGAGATACCCA  
+HWI-EAS443:3:58:1668:100#0/1  
ababab\_aa`abb¥\_b\_bb\_ab`abb¥\_`ba\_\_\_]\_a[\_¥`  
@HWI-EAS443:3:58:1669:848#0/1  
GTCCCCTTTTCGTTTCATTACCAACTACGTCCCCTTGC  
+HWI-EAS443:3:58:1669:848#0/1  
aV[[]`OPZa[\_[\_YX\_^]RRW]O\_V\_^RS[ZGRYRYVR  
@HWI-EAS443:3:58:1672:1530#0/1  
ATCAAAGAGGGAACGTACTATTGTCTCCCGAAGAAGTCAG  
+HWI-EAS443:3:58:1672:1530#0/1  
aa^a`ab\_a`]aa\_aZa\_a`aa\_]Wa`]X`]\_^]\_\_ZR\_T  
@HWI-EAS443:3:58:1700:348#0/1  
TAGAGATCAAAGAGGGAACGTACTATTGTCTCCCGAAGAA  
+HWI-EAS443:3:58:1700:348#0/1  
a^¥aa^a^[a`Y`baX]a\_a^]\_`\_Z][Z\_YW[a]^][W  
@HWI-EAS443:3:58:1705:299#0/1  
ATCTAATGTCGCAGTCCCGCACTCGCGAGATACTCACTAA  
+HWI-EAS443:3:58:1705:299#0/1  
a\_\_a`\_W\_NPV¥\_ZQNZYXNQURRQ[NUNRVUKMOQR  
@HWI-EAS443:3:58:1706:1467#0/1  
ACAGAATCCAAGTGAAGCAAGCCGTAGACATATGCAAG  
+HWI-EAS443:3:58:1706:1467#0/1  
aa`\_`aa¥Xaa\_baa[aaa\_baa[a¥Z`a`\_a`\_aY\_\_a  
@HWI-EAS443:3:58:182:52#0/1  
AAAAGAAGTGAAGATCTAATGTCGCAGTCCCGCACTCGC  
+HWI-EAS443:3:58:182:52#0/1  
`^\_]\_T]`abX\_ZaX`\_]\_\_`bY`\_XV[UU¥Z^YLSWU[Z  
@HWI-EAS443:3:58:200:1345#0/1  
AGGGGACGTAGTGTGGTAATGAAACGAAAACGGGACTCT  
+HWI-EAS443:3:58:200:1345#0/1  
`a]aY\_aa[\_`V]Zaaa¥¥\_[[\_`a¥Z[\_\_\_X\_Z\_^UYZ^W  
@HWI-EAS443:3:58:205:947#0/1  
CATCTCTTGGAAATGTGCCACAGCACACAGATTGGAGG  
+HWI-EAS443:3:58:205:947#0/1  
[bbbbbb`abbbbba¥`\_`[aba\_aabba]abbb\_aabaa`\_`  
@HWI-EAS443:3:58:218:472#0/1  
GGTTCACTTTCAAAGGACAAGCGGATCATCAGTCAAGAA  
+HWI-EAS443:3:58:218:472#0/1  
`bSabaaa`ba^YaTS0^a`\_[aaa\_`\_`aaa\_a]\_`^`^\_  
@HWI-EAS443:3:58:235:1599#0/1  
ATCTCATTGCCATCATCCACTTCATTCTGAGTGCGGGGTT

+HWI-EAS443:3:58:235:1599#0/1  
`[a^Ya\_YX¥ZVaZa[]XaW\_\_Z\_a\_\_\_aW`\_`^^ZT[  
@HWI-EAS443:3:58:244:145#0/1  
GGTGGGTTCACTTTCAAAGGACAAGCGGATCATCAGTCA  
+HWI-EAS443:3:58:244:145#0/1  
aa]`a`\_]`\_`^]\_]`^]XY^[\_YV^]Y^^Y]YY^  
@HWI-EAS443:3:58:285:919#0/1  
AAAAGAAGTCTAATGTCGCAGTCCCCTCGC  
+HWI-EAS443:3:58:285:919#0/1  
`aa^a^U^\_X^]Wa^`[]X[[]a\_a[W¥^`YZ^ZVQUV  
@HWI-EAS443:3:58:303:532#0/1  
CAGATGTGCCTTCATCTGGATCTTCAGTCAATGCACCTGC  
+HWI-EAS443:3:58:303:532#0/1  
abba^\_aaaabaa`aaaaa]aaaaaa\_aa\_aaZ]a`\_a\_  
@HWI-EAS443:3:58:317:1812#0/1  
TGCTGTAATTGGGTATCTCATTGCCATCATCCACTTCATT  
+HWI-EAS443:3:58:317:1812#0/1  
]^a`Za^]bba\_G¥\_\_`Wbaaaaaaaaa\_]OY\_a\_\_Z`\_  
@HWI-EAS443:3:58:318:961#0/1  
GTCCCCTTTTCGTTTCATTACCAACTACGTCCCCTTGC  
+HWI-EAS443:3:58:318:961#0/1  
aW`H\_T`\_b]aXa^a]a[aa`[S`^aY¥^GSWYYWX[Z  
@HWI-EAS443:3:58:360:1291#0/1  
TGCTAATTGGGCAAGGGGACGTAGTGTGGTAATGAAACG  
+HWI-EAS443:3:58:360:1291#0/1  
ababb`abaaaaaaaaa`aW^\_Ua^a\_YV\_[ZNU¥[DT  
@HWI-EAS443:3:58:367:825#0/1  
GGATTTCTCATTGTTGGCAAAGAAGACAAGAGATATGGCC  
+HWI-EAS443:3:58:367:825#0/1  
aa\_aaaaaa`aaa`]\_aa`\_\_a`\_a`\_]`^a^\_[X]]^]  
@HWI-EAS443:3:58:404:906#0/1  
CTCGCGAGATACTACTAAGACCACTGTGGACCATATGGC  
+HWI-EAS443:3:58:404:906#0/1  
[[[aaab]0]^[\_`a\_UZ\_R`a`aY[XH[`\_^BBBBBBBB  
@HWI-EAS443:3:58:423:15#0/1  
CTAATGTGCTAATTGGGCAAGGGGACGTAGTGTGGTAAT  
+HWI-EAS443:3:58:423:15#0/1  
¥`ab`b]¥`¥`aa]aaa^]`^`ZWW`]YbT`b^aL0^V  
@HWI-EAS443:3:58:431:91#0/1  
GGCGTACATGCTAGAAAGAGAATTGGTCCGTAACAAGG  
+HWI-EAS443:3:58:431:91#0/1  
a]Ra`aUa`a]Y]a[\_`aUa^\_a^]PWNUa¥[V`TT`Q^`  
@HWI-EAS443:3:58:449:285#0/1  
CTGCTGTAATTGGGTATCTCATTGCCATCATCCACTTCAT  
+HWI-EAS443:3:58:449:285#0/1  
abbaab`¥Vabbba^a`aa`aaa`aa`\_Z[^\_a^\_\_  
@HWI-EAS443:3:58:454:30#0/1  
GAGAGATCTAATGTCGCAGTCCCCTCGCAGATACTC  
+HWI-EAS443:3:58:454:30#0/1  
a`a\_aaa^`aT`a^`\_¥\_aZW[]Y[MY^[^Z`W^SYSVWW

@HWI-EAS443:3:58:454:467#0/1  
CTGTGGACCATATGGCCATAATCAAAAAGTACACATCAGG  
+HWI-EAS443:3:58:454:467#0/1  
aab`ababaaaa^ab\_a`YNY`]¥Za]Q¥V`^`QVT\_[]`a  
@HWI-EAS443:3:58:459:2001#0/1  
CGCACTCGCGAGATACTACTAAGACCACTGTGGACCATA  
+HWI-EAS443:3:58:459:2001#0/1  
aa^`Y[aZa`^`VVVHX^XW`\_`ZZ[W\_V¥WMKK¥UXZP¥  
@HWI-EAS443:3:58:471:366#0/1  
AAAAGAAGTGGAGATCTAATGTCGCAGTCCCGCACTCGC  
+HWI-EAS443:3:58:471:366#0/1  
aUaaa[abab`^`\_`aaa\_`a`\_R\_\_`\_¥¥¥¥¥XL[^¥[^  
@HWI-EAS443:3:58:535:1057#0/1  
GTTCACTTTCAAAAAGGACAAGCGGATCATCAGTCAAGAAA  
+HWI-EAS443:3:58:535:1057#0/1  
``aababbbba`baa\_``aa\_aaaaaaa`aa\_a```Z]aa`  
@HWI-EAS443:3:58:556:619#0/1  
CTCATTGCCATCATCCACTTCATTCTGAGTGC GGGTTCT  
+HWI-EAS443:3:58:556:619#0/1  
abaaaaaaaaaaaa\_aa\_aaaa\_aaa]`a\_aWa``aaaZa^a  
@HWI-EAS443:3:58:581:1157#0/1  
GGAGAGAATAAAAAGAACTGAGAGATCTAATGTCGCAGTCC  
+HWI-EAS443:3:58:581:1157#0/1  
ab\_`Tbbabbbbb\_baaa``ab[^abbaba\_`baabY^a  
@HWI-EAS443:3:58:581:75#0/1  
TGAGTATCTCGCGAGTGC GGGACTGCGACATTAGATCTCT  
+HWI-EAS443:3:58:581:75#0/1  
ab``^aa^Z\_]X]OW^]QL]aZU[\_U^RXZY\_SNJVWTQS  
@HWI-EAS443:3:58:591:417#0/1  
AAACGATGCTGGATCAGACCGAGTGTGGTATCACCTCTG  
+HWI-EAS443:3:58:591:417#0/1  
aaaaaa`aaa^`aZ\_`^Z¥YY]aW^US¥]TVW\_¥VSUV¥\_  
@HWI-EAS443:3:58:600:585#0/1  
CTGCTGTCTGAGAGATTTCTCATTGTTGGCAAAGAAGA  
+HWI-EAS443:3:58:600:585#0/1  
`S^]Y\_0\_W]OR[W\_[]¥W[YZT\_\_a^W\_\_¥LQZV\_\_V\_R  
@HWI-EAS443:3:58:626:1571#0/1  
AAAAGAAGTGGAGATCTAATGTCGCAGTCCCGCACTCGC  
+HWI-EAS443:3:58:626:1571#0/1  
aabaZ]aaaaaaaa\_\_^aa`XZa\_a\_`X[XaZaZ\_a`aX  
@HWI-EAS443:3:58:638:668#0/1  
CACTCGCGAGATACTACTAAGACCACTGTGGACCATATG  
+HWI-EAS443:3:58:638:668#0/1  
a`bbaaaaaaaaa`a\_`aaa`Q]a\_`\_a]^`a^a\_Z^\_]\_  
@HWI-EAS443:3:58:674:1240#0/1  
ACTAAGACCACTGTGGACCATATGGCCATAATCAAAAAGT  
+HWI-EAS443:3:58:674:1240#0/1  
]]\_`^\_\_a`^`^`\_Fa]ZYaaa¥[YUa]\_¥^^`\_\_¥]^a\_X  
@HWI-EAS443:3:58:682:359#0/1  
GAACTGAGAGATCTAATGTCGCAGTCCCGCACTCGCGAGA

+HWI-EAS443:3:58:682:359#0/1  
T\_a\_¥a¥a` [X] `¥\_bb\_VW`W\_¥]ZXUXaXRT^aZaW\_]  
@HWI-EAS443:3:58:69:1986#0/1  
AGAGAATAAAAGAACTGAGAGATCTAATGTCGCAGTCCCG  
+HWI-EAS443:3:58:69:1986#0/1  
¥Z`aK\_a`\_b\_ZZ]\_]U\_W^]\_`aaaaaYa\_\_a[Za\_]Y  
@HWI-EAS443:3:58:710:1428#0/1  
CTCACTAAGACCACTGTGGACCATATGGCCATAATCAAAA  
+HWI-EAS443:3:58:710:1428#0/1  
abaa`bab`aaabaa¥\_b^a\_a`a`aa`\_\_a` `XL[ `aa  
@HWI-EAS443:3:58:715:633#0/1  
GTTCTGGAAAAGCACTTTTGCATCTTTTTGGAAATGCCTC  
+HWI-EAS443:3:58:715:633#0/1  
a\_aaV^^\_Xaaa`\_Z\_a`^]a[ `^aa\_` `a^ZV[¥\_[\_^\_  
@HWI-EAS443:3:58:766:1477#0/1  
AAAAGAACTGAGAGATCTAATGTCGCAGTCCCGCACTCGC  
+HWI-EAS443:3:58:766:1477#0/1  
]`U\_^S]aaa]V]PaVXQ¥]aaXXGXSMEW` [GYXHN[\_¥  
@HWI-EAS443:3:58:775:1447#0/1  
AAGCCGTAGACATATGCAAGGCAGCAATAGGGTTGAGGAT  
+HWI-EAS443:3:58:775:1447#0/1  
a`XUY^P[aY¥`a^\_]W^^\_]^S^¥Ya\_a` [G`^\_] []^  
@HWI-EAS443:3:58:779:1916#0/1  
GTCCCGTTTTCGTTTTATTACCAACTACGTCCCCTTGC  
+HWI-EAS443:3:58:779:1916#0/1  
]M\_bbb]Ra`^¥[^a\_]a\_a\_\_`a`a[ `a^` []Z]R[VW]  
@HWI-EAS443:3:58:829:526#0/1  
GGGACGTAGTGTGGTAATGAAACGAAAACGGGACTCTAG  
+HWI-EAS443:3:58:829:526#0/1  
aaa`ab\_ab^baab`Z^aaa\_`a] `V^`a[¥`\_]S]^W`a  
@HWI-EAS443:3:58:838:854#0/1  
AAAAGAACTGAGAGATCTAATGTCGCAGTCCCGCACTCGC  
+HWI-EAS443:3:58:838:854#0/1  
` `abb`aaaa`a\_aaaaababb\_a\_`aaZ\_aa`a\_`¥¥\_¥  
@HWI-EAS443:3:58:842:1500#0/1  
TAATGTCGCAGTCCCGCACTCGCGAGATACTCACTAAGAC  
+HWI-EAS443:3:58:842:1500#0/1  
Ma\_abX`bb^F¥baXa`T` [ `a¥\_` [a`aH`^`\_aR^P  
@HWI-EAS443:3:58:848:762#0/1  
AGAGATCTAATGTCGCAGTCCCGCACTCGCGAGATACTCA  
+HWI-EAS443:3:58:848:762#0/1  
\_\_¥a`bbbaabba` `ab[ `a`a\_Z\_\_aaa\_U` ]^¥¥` \_`  
@HWI-EAS443:3:58:849:657#0/1  
GGATGATGGCAATGAGATACCCAATTACAGCAGACAAGAG  
+HWI-EAS443:3:58:849:657#0/1  
ab`abaabb\_aaabaaa` \_`aaabaa\_aa\_`a\_a` ` ` \_`  
@HWI-EAS443:3:58:883:1617#0/1  
CATTATTCTTGTCTGTGTAATTGGGTATCTCATTGCC  
+HWI-EAS443:3:58:883:1617#0/1  
\_W^\_Y\_X\_\_[\_[[VYZ`X`IRZ`¥a\_HQN\_FJV¥aT]X\_^

@HWI-EAS443:3:58:916:1080#0/1  
TGCTGTAATTGGGTATCTCATTGCCATCATCCACTTCATT  
+HWI-EAS443:3:58:916:1080#0/1  
aa\_`^Ya`baaaYYWW\_bZ[^a\_YP]aYa\_[^\_a\_]\_`]  
@HWI-EAS443:3:58:920:1924#0/1  
ATATCTCTTGTCTTCTTTGCCAAAATGAGAAATCCTCTC  
+HWI-EAS443:3:58:920:1924#0/1  
W\_a\_Z]bab\_babbaabb`]^abaabbaabbab\_¥]a¥`a  
@HWI-EAS443:3:58:951:1154#0/1  
GTCCCCGTTTTCGTTTTATTACCAACTACGTCCCCTTGC  
+HWI-EAS443:3:58:951:1154#0/1  
aU`^`a]]`ZWZV`^\_a\_\_^]\_\_`\_a\_[Y[[¥^¥^¥[Q  
@HWI-EAS443:3:58:956:118#0/1  
AAAAGAAGTGGAGATCTAATGTCGCAGTCCCGCACTCGC  
+HWI-EAS443:3:58:956:118#0/1  
aaabb\_b\_bb`aaaaa\_aaab¥\_`^\_a\_YQV¥\_¥\_T\_¥\_¥  
@HWI-EAS443:3:58:970:365#0/1  
AGAGAATAAAAGAACTGAGAGATCTAATGTCGCAGTCCCG  
+HWI-EAS443:3:58:970:365#0/1  
ab\_babbaaab\_babaaaa\_aaaaaaab^`aa`aUY]\_a  
@HWI-EAS443:3:58:980:811#0/1  
AACAAACGATGCTGGATCAGACCGAGTGATGGTATCACCT  
+HWI-EAS443:3:58:980:811#0/1  
^^bb`\_^b^\_aa`bZZ\_]\_baXMT[Z]¥\_]RVPZ¥ZMKJS  
@HWI-EAS443:3:58:981:1408#0/1  
AAAGAAGTGGAGATCTAATGTCGCAGTCCCGCACTCGCG  
+HWI-EAS443:3:58:981:1408#0/1  
\_\_¥U`\_`ab^]a¥X]^aa^W\_¥Y\_[\_]X[X[\_\_\_^\_XV`  
@HWI-EAS443:3:59:1009:1011#0/1  
GTCTGCTGTCTGAGAGATTTCTCATTGTTGGGCAAAGAA  
+HWI-EAS443:3:59:1009:1011#0/1  
aaabaaab`ababababaaabbaaaaaaaaaYa\_\_YXa^X  
@HWI-EAS443:3:59:1011:485#0/1  
AATAAAAGAACTGAGAGATCTAATGTCGCAGTCCCGCACT  
+HWI-EAS443:3:59:1011:485#0/1  
^aaZbbVW¥bb`^babbabbbbababaa`XNTaVYTHPL  
@HWI-EAS443:3:59:1040:166#0/1  
GTGCTAATTGGGCAAGGGGACGTAGTGTGGTAATGAAAC  
+HWI-EAS443:3:59:1040:166#0/1  
[`bbaaa\_bbb\_Z¥^abb`Z`a\_^b]b\_aaXFTTQZT¥^U  
@HWI-EAS443:3:59:1042:447#0/1  
CTTCTGATGTGTACTTTTTGATTATGGCCATATGGTCCA  
+HWI-EAS443:3:59:1042:447#0/1  
abababbaab`b\_]abbbbbbbaaaaa\_aaaX\_^]XR^VZ  
@HWI-EAS443:3:59:1082:819#0/1  
AATAAAAGAACTGAGAGATCTAATGTCGCAGTCCCGCACT  
+HWI-EAS443:3:59:1082:819#0/1  
```a^a```bb```[`abab`bbbb`baa`a\_`¥aZRT¥^  
@HWI-EAS443:3:59:1097:1359#0/1  
GAACTGAGAGATCTAATGTCGCAGTCCCGCACTCGCGAGA

+HWI-EAS443:3:59:1097:1359#0/1  
¥¥\_Z\_]a\_aa`\_b`\_Q^^`T`bb\_\_¥T¥ZTRU^ZQ  
@HWI-EAS443:3:59:1105:1398#0/1  
AAGAAGTCTAATGTCGAGTCCCGCACTCGCGA  
+HWI-EAS443:3:59:1105:1398#0/1  
ZWb^¥P\_VXX\_¥\_aZ[]`Za\_¥I¥Xa[abb^RZ\_\_VWSNX  
@HWI-EAS443:3:59:1159:988#0/1  
GGCGGAACAGGCAGTGTATATTGAAGTGTGCACTTAA  
+HWI-EAS443:3:59:1159:988#0/1  
a`aaaaaaaa`aV¥RaaT¥U¥`S¥\_`GVPQJQ[GW^UU  
@HWI-EAS443:3:59:1178:861#0/1  
CTTCCTGATGTGTACTTTTTGATTATGGCCATATGGTCCA  
+HWI-EAS443:3:59:1178:861#0/1  
abbaabbabb`b`aabbaa`abaaa`aaaV]]NLN^XY  
@HWI-EAS443:3:59:11:1504#0/1  
GTCTGCTGTAATTGGGTATCTCATTGCCATCATCCACTTC  
+HWI-EAS443:3:59:11:1504#0/1  
\_\_a`aab`\_`a]U]a^baaa\_aaa]aaaa`a]a^Y\_]V  
@HWI-EAS443:3:59:1202:556#0/1  
AAAGAAGTCTAATGTCGAGTCCCGCACTCGCG  
+HWI-EAS443:3:59:1202:556#0/1  
aaa``aaaaaaaaabaabbXaaaa\_aa\_]\_\_]RFV[]  
@HWI-EAS443:3:59:1213:202#0/1  
AAACAAACGATGCTGGATCAGACCGAGTGATGGTATCACC  
+HWI-EAS443:3:59:1213:202#0/1  
abaaabbabaaaaaaaa`a\_aa`aa`a¥a`Z\_S^MW¥RP  
@HWI-EAS443:3:59:1225:1666#0/1  
AAAGAAGTCTAATGTCGAGTCCCGCACTCGCG  
+HWI-EAS443:3:59:1225:1666#0/1  
^¥\_a`\_]Y`aa¥^^aabaa\_]E[a`ba^a^QR[YVPPaTS  
@HWI-EAS443:3:59:1248:169#0/1  
GGCTTGTTCCTCAGTTGGATTCTGTCTAAGGATGTCCACC  
+HWI-EAS443:3:59:1248:169#0/1  
abaaabab`ba\_a`abb`ab\_aa[]`\_aaaRa`USRVGO  
@HWI-EAS443:3:59:1289:1816#0/1  
CTTCCTGATGTGTACTTTTTGATTATGGCCATATGGTCCA  
+HWI-EAS443:3:59:1289:1816#0/1  
aa]aYQZZaVRO]U[ZX```^`[]]W`BBBBBBBBBBB  
@HWI-EAS443:3:59:1313:896#0/1  
AAAAGAAGTCTAATGTCGAGTCCCGCACTCGC  
+HWI-EAS443:3:59:1313:896#0/1  
aabbN`\_\_aaaaab`\_ab`aaaZ`b]a`\_RU]\_ST^UR  
@HWI-EAS443:3:59:1378:551#0/1  
GGCCATATCTTGTCTTCTTTGCCAAAATGAGAAATC  
+HWI-EAS443:3:59:1378:551#0/1  
aa^^`bb`\_Y\_[¥ab]^aa]aa`baa^X]a][a^aUWa]P  
@HWI-EAS443:3:59:1378:913#0/1  
AGAGAATAATGGACATGATTCCAGAGGAATGAACAAGG  
+HWI-EAS443:3:59:1378:913#0/1  
abaa]bbb\_a`\_`a^bb\_bbaabb]babbabYaa\_W^aa\_



@HWI-EAS443:3:59:138:1111#0/1  
TACTTTTTGATTATGGCCATATGGTCCACAGTGGTCTTAG  
+HWI-EAS443:3:59:138:1111#0/1  
ababbbbbbbaaaa\_Y]aaaWW[0¥N^\_SS^[JL[RWV]ZZ  
@HWI-EAS443:3:59:1430:1461#0/1  
GGGCGATCTGAACCTTTGTCAATAGGGCAAACCAGCGACTG  
+HWI-EAS443:3:59:1430:1461#0/1  
a``\_babbaaaa]^abaaaa¥aaa]^aaaaVaa\_¥¥`\_`  
@HWI-EAS443:3:59:1476:924#0/1  
GCTGTAATTGGGTATCTCATTGCCATCATCCACTTCATTC  
+HWI-EAS443:3:59:1476:924#0/1  
JabaXRWb`a¥\_a``\_Sa\_a`baZb`a`a`Saaa^W`aP  
@HWI-EAS443:3:59:1496:1604#0/1  
CAGACAAGAGAATAATGGACATGATTCCAGAGAGGAATGA  
+HWI-EAS443:3:59:1496:1604#0/1  
^¥b][\_TGOS\_ba`bY]\_ba[\_^X\_a[UU[VV`^PVT]HP  
@HWI-EAS443:3:59:1503:1673#0/1  
CACTCGCGAGATACTCACTAAGACCACTGTGGACCATATG  
+HWI-EAS443:3:59:1503:1673#0/1  
\_a`aa]^a\_WZa`\_a`\_`a`abT]aa`S^XGY]ZRXZ\_]`  
@HWI-EAS443:3:59:1513:796#0/1  
CGCACTCAGAATGAAGTGGATGATGGCAATGAGATACCCA  
+HWI-EAS443:3:59:1513:796#0/1  
abababbbbaabbbbaabaababbabbbba^abbZb`aZQa\_\_  
@HWI-EAS443:3:59:1535:770#0/1  
GCCCCAACAAAGTACAGTTCATTACCCTAAGGTATATAA  
+HWI-EAS443:3:59:1535:770#0/1  
a``U\_H¥`\_S`\_`G`Z`\_ZWT\_aa\_aTY^\_AS`IXYH]]P  
@HWI-EAS443:3:59:1545:1467#0/1  
CTAATGTGCGAGTCCCGCACTCGCGAGATACTCACTAAGA  
+HWI-EAS443:3:59:1545:1467#0/1  
abbbbbb`ababbaababaababbbb]aab]\_\_^\_¥^S\_RX  
@HWI-EAS443:3:59:1610:618#0/1  
GGTGGGTTCACTTTCAAAGGACAAGCGGATCATCAGTCA  
+HWI-EAS443:3:59:1610:618#0/1  
aaS`\_b\_a`^`aaa\_\_a`a^^`Yaaaa\_\_P]`]VX]YW  
@HWI-EAS443:3:59:1611:97#0/1  
CTGCTCCCAGCACGTCCCTTGGGTTAAGTGCAACACTTCA  
+HWI-EAS443:3:59:1611:97#0/1  
abbbbbbbaabbbabababaaaabbaababba¥ab`Va``WVa¥V  
@HWI-EAS443:3:59:1666:1307#0/1  
GAATAAAAGAACTGAGAGATCTAATGTGCGAGTCCCGCAC  
+HWI-EAS443:3:59:1666:1307#0/1  
a^Uaaa\_``Y^¥\_]aZ]aaa\_\_a`aWZ``]VSPFPQQFQ  
@HWI-EAS443:3:59:1685:1480#0/1  
GTCCCGTTTTCTTTTTCATTACCAACTACGTCCCCTTGC  
+HWI-EAS443:3:59:1685:1480#0/1  
`X`Z¥a\_aa`[\_`aaa\_¥`^\_QR````^`\_AY¥YUPVMY[YQ  
@HWI-EAS443:3:59:1715:1483#0/1  
GATCTAATGTGCGAGTCCCGCACTCGCGAGATACTCACTA



@HWI-EAS443:3:59:309:1813#0/1  
CACATTCACAGTCAATGAGGAAAATTGCATCCTACTCTGT  
+HWI-EAS443:3:59:309:1813#0/1  
ababaaZbaaaaababbb^[\_`\_]baba\_bb\_Xab`0[a\_Q  
@HWI-EAS443:3:59:316:1535#0/1  
ATACTCACTAAGACCACTGTGGACCATATGGCCATAATCA  
+HWI-EAS443:3:59:316:1535#0/1  
`ZZR¥\_T\_a[¥UY¥]P]VW\_WOTa]TG^UORPY]¥URZNW  
@HWI-EAS443:3:59:353:1319#0/1  
AAAGAAGTCTAATGTGCGCAGTCCCGCACTCGCG  
+HWI-EAS443:3:59:353:1319#0/1  
aaaa\_^Zaa\_aaaaa]aaaa]a\_`aa[`a\_R]M^YGXPU  
@HWI-EAS443:3:59:422:1503#0/1  
GTGCCTTCATCTGGATCTTCAGTCAATGCACCTGCATCCT  
+HWI-EAS443:3:59:422:1503#0/1  
aa`bba¥]`a`b¥P\_aaa`b`[ba`T¥]]bS]`\_¥V^P[  
@HWI-EAS443:3:59:430:290#0/1  
GGAGTGTACATCTGCTCCCAGCACGTCCCTTGGGTAAAGT  
+HWI-EAS443:3:59:430:290#0/1  
\_`ababaaabbabbbbbb\_\_bbaaaabbaa`a\_^\_aaZ  
@HWI-EAS443:3:59:431:1433#0/1  
GAATAAAAGAAGTCTAATGTGCGCAGTCCCGCAC  
+HWI-EAS443:3:59:431:1433#0/1  
`ababbabaaaa`aa`ba\_a\_ababa\_baaa^\_`^VX`]V  
@HWI-EAS443:3:59:437:354#0/1  
GTCCCGTTTTCGTTTCATTACCAACTACGTCCCTTGC  
+HWI-EAS443:3:59:437:354#0/1  
a`a`]b\_U`a]a\_`\_T]`\_aS\_ba\_^a]a\_]M[M`GY]\_R  
@HWI-EAS443:3:59:444:166#0/1  
CTGGAGTGTACATCTGCTCCCAGCACGTCCCTTGGGTAA  
+HWI-EAS443:3:59:444:166#0/1  
`bb`W\_]`[b[\_aabbab`]aa\_aa`V`aa^T[`^R[^Y  
@HWI-EAS443:3:59:449:614#0/1  
ATGTGCCACAGCACAGATTGGAGGAGTAAGGATGGTGG  
+HWI-EAS443:3:59:449:614#0/1  
aaaaaab`aaaa^\_ba`aaaa\_aYXaYa`¥`]¥¥XU\_\_  
@HWI-EAS443:3:59:488:1488#0/1  
CTGTAATTGGGTATCTCATTGCCATCATCCACTTCATTCT  
+HWI-EAS443:3:59:488:1488#0/1  
abb\_a`abbab\_ababYaaaaaaaaabbabaaYa`a^\_aX^  
@HWI-EAS443:3:59:506:954#0/1  
TCCCGTTTTCGTTTCATTACCAACTACGTCCCTTGCC  
+HWI-EAS443:3:59:506:954#0/1  
`aa``]aba]baaab\_aX\_`]`Q```Y[aXLM\_ZZTRY¥U  
@HWI-EAS443:3:59:523:726#0/1  
TTCACAGTCAATGAGGAAAATTGCATCCTACTCTGTTCTG  
+HWI-EAS443:3:59:523:726#0/1  
\_a`]`aa```aaaabbaaaa\_aba`aaaa\_]aaT¥\_`]  
@HWI-EAS443:3:59:531:1451#0/1  
CACGGAGATGTCGCTGAGAGGGATAAGAGTCAGCAAAATG

+HWI-EAS443:3:59:531:1451#0/1  
ababaabaaa^aa\_a`\_a`aa]\_\_\_a\_aa^\_¥a`\_`U¥¥¥\_  
@HWI-EAS443:3:59:538:436#0/1  
CCCGTTTTCGTTTCATTACCAACTACTCGTCCCCTTGCCC  
+HWI-EAS443:3:59:538:436#0/1  
abbbabbbbabbbbabab]baabbbba\_a\_^`\_a\_]a\_  
@HWI-EAS443:3:59:539:423#0/1  
CAACAAGGCAACCAAACGACTTACAGTTCTTGAAAGGAT  
+HWI-EAS443:3:59:539:423#0/1  
ab`abaaaabaaabbbbaaaaa`aab`\_`aaa`a\_`]\_a`^  
@HWI-EAS443:3:59:53:817#0/1  
CGTACATGCTAGAAAGAGAATTGGTCCGTAACAAGGTT  
+HWI-EAS443:3:59:53:817#0/1  
ab`bbbbbbba`]`ababaabbXaab\_]`a`a`\_`aX]  
@HWI-EAS443:3:59:577:415#0/1  
ATGTGCGAGTCCCGCACTCGCGAGATACTCACTAAGACCA  
+HWI-EAS443:3:59:577:415#0/1  
a`b`aa`\_`a]a`aa`Vaa`a\_a]a^¥^V`a`Yaa\_UW[L¥  
@HWI-EAS443:3:59:580:1901#0/1  
GATTATCCATTGATAAGTGTGACTAGCACTGACTCAGGG  
+HWI-EAS443:3:59:580:1901#0/1  
aaaaaaa`abbaabaa\_]`a`aaaaabba\_a`\_`X]\_XW  
@HWI-EAS443:3:59:590:232#0/1  
GCAGGTGCATTGACTGAAGATCCAGATGAAGGCACATCTG  
+HWI-EAS443:3:59:590:232#0/1  
aaab\_¥]¥babbaabbab\_X^Y^ba`a`\_R`\_ZSQUR^`]  
@HWI-EAS443:3:59:592:52#0/1  
TCTGCTGTAATTGGGTATCTCATTGCCATCATCCACTTCA  
+HWI-EAS443:3:59:592:52#0/1  
a`ab`ab[a`aaaaa[\_a]J`\_`^^]\_Z[\_^X^UUUX]WW  
@HWI-EAS443:3:59:595:250#0/1  
AAAAGAAGTGAAGATCTAATGTCGAGTCCCGCACTCGC  
+HWI-EAS443:3:59:595:250#0/1  
a`]aa^a`\_`aaaa`^a`a`a`¥`\_`\_`aY`\_`WWWPWYZWV  
@HWI-EAS443:3:59:616:1434#0/1  
GAAAGTTGAAACATGGTACCTTCGCCCTGTCCACTTCA  
+HWI-EAS443:3:59:616:1434#0/1  
ab`^baa\_0Zab\_aaY]\_aaaaaa[`a^MPQ[\_PHM`W\_  
@HWI-EAS443:3:59:624:237#0/1  
TGATGTCAGTATTCTTGCCCCACTTCATTTGGGAAAACA  
+HWI-EAS443:3:59:624:237#0/1  
Xba^HMRRaI`\_`aYRRS`aZ`PY]a^^¥`a¥G¥TGGMXUX  
@HWI-EAS443:3:59:630:2005#0/1  
AATCAAACCTTGGTCAACATCATCTTTCTCACTTCTCCT  
+HWI-EAS443:3:59:630:2005#0/1  
^`baab^baa\_]^NJ\_XR\_\_X\_]abaaY^X`^a¥`SX^HZ  
@HWI-EAS443:3:59:642:167#0/1  
CTAATGTCGAGTCCCGCACTCGCGAGATACTCACTAAGA  
+HWI-EAS443:3:59:642:167#0/1  
aaaabbaabbbbabbaa[``bbb`aLaaa]``QU^`\_`^

@HWI-EAS443:3:59:659:525#0/1  
GTCGCAGTCCCGCACTCGCGAGATACTCACTAAGACCACT  
+HWI-EAS443:3:59:659:525#0/1  
aaa]\_aa¥a^`a[``aaa]VaYY\_`aa^`\_S^Z\_VV^[T  
@HWI-EAS443:3:59:65:757#0/1  
GTGGCGTACATGCTAGAAAGAGAATTGGTCCGTAAAACAA  
+HWI-EAS443:3:59:65:757#0/1  
a]]^ab¥aaaaa`a`a\_a¥````a`aa\_W\_^\_¥a^¥^^\_^  
@HWI-EAS443:3:59:682:578#0/1  
CCCCGTTTTCGTTTTATTACCAACTACGTCCCCTTGCCC  
+HWI-EAS443:3:59:682:578#0/1  
abbbabbbbabbbabbbbaaa`abbaba``aZ^aa^a\_V  
@HWI-EAS443:3:59:685:733#0/1  
GTGGACCATATGGCCATAATCAAAAAGTACACATCAGGAA  
+HWI-EAS443:3:59:685:733#0/1  
`F^]Z\_\_¥[QY¥]`^[]YPWTU\_]N[QN^^^PVZUPR¥RR  
@HWI-EAS443:3:59:68:34#0/1  
ATCAACTGGATCAATCTCCTGGTTGCCTTTCTGAGAATAG  
+HWI-EAS443:3:59:68:34#0/1  
WS\_]baTWbbZYZ¥G¥TQZ`bU][TY`]TXV\_BBBBBBB  
@HWI-EAS443:3:59:785:1267#0/1  
TCCCGTTTTCGTTTTATTACCAACTACGTCCCCTTGCC  
+HWI-EAS443:3:59:785:1267#0/1  
abaababbaabaab`\_aaa`abaabaabba`][UY][¥RV  
@HWI-EAS443:3:59:791:1791#0/1  
GTCCCGTTTTCGTTTTATTACCAACTACGTCCCCTTGCC  
+HWI-EAS443:3:59:791:1791#0/1  
]T¥Paba[^Z\_¥P]][bX\_]`\_bb`baa`b¥\_ZRYSGJG  
@HWI-EAS443:3:59:818:1130#0/1  
CTGTAATTGGGTATCTCATTGCCATCATCCACTTCATTCT  
+HWI-EAS443:3:59:818:1130#0/1  
abababbbbaabbaabbaaabaabbbba`UbbaY\_b\_a  
@HWI-EAS443:3:59:838:827#0/1  
TGTGGACCATATGGCCATAATCAAAAAGTACACATCAGGA  
+HWI-EAS443:3:59:838:827#0/1  
a¥RXa[aaaaa]\_[aaa\_baaaW]TYaWDW\_XPFWTNWaZ  
@HWI-EAS443:3:59:84:798#0/1  
CGCCACCATCAAGGGAGCAATTTTACAATCCTGGAGCTCT  
+HWI-EAS443:3:59:84:798#0/1  
ab^ba\_abaa`ab`aaa`]Ybaaaaaa`a^`W```WG^WR  
@HWI-EAS443:3:59:868:1372#0/1  
GACCGATTTTTAAGGGTTAGAGATCAAAGAGGGAACGTAC  
+HWI-EAS443:3:59:868:1372#0/1  
aaa\_b]^``aaaXa^a\_aaaaaaaaaaaaaaaaa^Y^`ZX]\_T  
@HWI-EAS443:3:59:88:49#0/1  
AATTGGGTATCTCATTGCCATCATCCACTTCATTCTGAGT  
+HWI-EAS443:3:59:88:49#0/1  
]¥baa`aababbaabbaba[aaab\_^\_]`a]\_\_VLR^  
@HWI-EAS443:3:59:892:1483#0/1  
GAATAAAAAGAACTGAGAGATCTAATGTCGCAGTCCCGCAC

+HWI-EAS443:3:59:892:1483#0/1  
` `` `]¥W`^` abbaababa^` `aa¥Xaaaaa\_]PFY¥ZP  
@HWI-EAS443:3:59:912:1226#0/1  
CAGCACGTCCCTTGGGTAAAGTGCAACACTTCAATATAAA  
+HWI-EAS443:3:59:912:1226#0/1  
a]aaa`b` `` `aab^\_aU`\_Z\_Sb`^` aba\_RR\_\_`W¥a^V  
@HWI-EAS443:3:59:917:760#0/1  
CTGCTGTCTGAGAGGATTTCTCATTGTTGGCAAAGAAGA  
+HWI-EAS443:3:59:917:760#0/1  
abbbbbbba^aa`\_`bba\_abaabbbbbbbbabNa` `PYaa\_  
@HWI-EAS443:3:59:944:914#0/1  
ATTTTACAATCCTGGAGCTCTTCTTTCTTCTTTTGTTA  
+HWI-EAS443:3:59:944:914#0/1  
`bbbbbaaaabaaab]a`a^aaabaa`aa`aZaa`] []` ¥  
@HWI-EAS443:3:59:99:1024#0/1  
GGGGACGTAGTGTGGTAATGAAACGAAAACGGGACTCTA  
+HWI-EAS443:3:59:99:1024#0/1  
aba`\_ab[^ZYa^\_a\_NV^T]^a^a^ [V]`\_WZYJMWUU  
@HWI-EAS443:3:5:1042:243#0/1  
AAAAGAAGTGAAGATCTAATGTCGCAGTCCCGCACTCGC  
+HWI-EAS443:3:5:1042:243#0/1  
aabba`^`ba`\_\_aaa`aaa`^ [ZZZ]aZ^SWRUPBBBBB  
@HWI-EAS443:3:5:1057:1338#0/1  
GTCCCGTTTTCGTTTCATTACCAACTACGTCCCTTGC  
+HWI-EAS443:3:5:1057:1338#0/1  
\_ [ ` \_ba` ]aa` \_ [ ` \_\_SZ^`VT [ `V\_]R\_^]XOY^X]BBB  
@HWI-EAS443:3:5:1092:131#0/1  
AACACTTCAATATAAACACTGCCTGTTCCGCCGCTACTG  
+HWI-EAS443:3:5:1092:131#0/1  
^Tb¥] [b¥Q^baaa^`\_b\_aYQVXa^aa¥b¥XX\_V^` BBB  
@HWI-EAS443:3:5:1094:541#0/1  
AAAAGAAGTGAAGATCTAATGTCGCAGTCCCGCACTCGC  
+HWI-EAS443:3:5:1094:541#0/1  
aaaaaabba [b`\_\_baa` `` `a`Yaa\_b`\_\_Xa^`\_aX [B  
@HWI-EAS443:3:5:113:1098#0/1  
GACGAATAAGTTATTGTCAACTTCTCAGTTCCTTGCCTT  
+HWI-EAS443:3:5:113:1098#0/1  
aabbaab`bbabaaa`¥bab`\_\_` `` `a¥`^`\_`a]a0^a  
@HWI-EAS443:3:5:1168:1443#0/1  
GCGTTTCACTGACTTCTTCGGGAGACAATAGTACGTTCCC  
+HWI-EAS443:3:5:1168:1443#0/1  
aab`ZZa^]\_`^a]aab]TW¥¥aRJYa]OXQ¥P [PSLVB  
@HWI-EAS443:3:5:1176:1757#0/1  
TTCCTGATGTGTACTTTTTGATTATGGCCATATGGTCCAC  
+HWI-EAS443:3:5:1176:1757#0/1  
`babbbba¥`\_\_aa`\_abaaaabaa`\_a`\_\_aa`^WWYVOY\_B  
@HWI-EAS443:3:5:1224:1644#0/1  
TGCTGTAATTGGGTATCTCATTGCCATCATCCACTTCATT  
+HWI-EAS443:3:5:1224:1644#0/1  
abaab`\_`aab^`a]\_a`\_\_^a`\_a\_Va` `` `aa]W [ \_ ` \_\_ `a`\_

@HWI-EAS443:3:5:1246:1144#0/1  
GGAGAGAATAAAAGAAGACTGAGAGATCTAATGTCGCAGTCC  
+HWI-EAS443:3:5:1246:1144#0/1  
aa]a`aaaabaaa`aa\_bbaaaaaa\_ba`aa`¥\_\_aa\_\_B  
@HWI-EAS443:3:5:1291:363#0/1  
AAGAAGACTGAGAGATCTAATGTCGCAGTCCCGCACTCGCGA  
+HWI-EAS443:3:5:1291:363#0/1  
aaaXIM[a\_aaa\_\_Ia\_\_ab]R`U^^^`GUULBBBBBBBB  
@HWI-EAS443:3:5:1317:1766#0/1  
AAAGAAGACTGAGAGATCTAATGTCGCAGTCCCGCACTCGCG  
+HWI-EAS443:3:5:1317:1766#0/1  
[b]V\_`\_]`]U\_]`]^V`]a\_ZXRQZ\_aQBBBBBBBBBBBB  
@HWI-EAS443:3:5:131:160#0/1  
CTGAGAATAGCTGTTGCTCTTCTCCCAACCATTGTGAATT  
+HWI-EAS443:3:5:131:160#0/1  
aa]X]aa`^Z^MQSSSLYWTWFW[GVUWURWBBBBBBB  
@HWI-EAS443:3:5:132:392#0/1  
GAAGACTGAGAGATCTAATGTCGCAGTCCCGCACTCGCGAGA  
+HWI-EAS443:3:5:132:392#0/1  
aa`ab``aa]\_a\_bbb]b[aaaXb\_`^^`[^Z]V[L^PUa  
@HWI-EAS443:3:5:1346:1524#0/1  
CAAGGACAAACCCTCTGGAGCAAACAAACGATGCTGGAT  
+HWI-EAS443:3:5:1346:1524#0/1  
HWab]ab\_T^N`\_`bbKbab\_b`¥^`bbVUbaV]KaBBBB  
@HWI-EAS443:3:5:1352:1912#0/1  
AAAGAAGACTGAGAGATCTAATGTCGCAGTCCCGCACTCGCG  
+HWI-EAS443:3:5:1352:1912#0/1  
Wbbbb\_bUb\_^`aa[babaa[\_a\_]bTGY\_a\_`\_SBBBB  
@HWI-EAS443:3:5:1375:535#0/1  
AATCAAACCTTGGTCAACATCATCATTTCTCACTTCTCCT  
+HWI-EAS443:3:5:1375:535#0/1  
a\_a¥[b`Zaabb`Qaaaaaa\_LWbaaX[\_a[`aSa\_]B  
@HWI-EAS443:3:5:1384:411#0/1  
CTGATGTGTACTTTTTGATTATGGCCATATGGTCCACAGT  
+HWI-EAS443:3:5:1384:411#0/1  
¥^Z¥`\_H\_U[^bb`JS`¥aab¥S[OK`\_^¥]VHWJ]YBB  
@HWI-EAS443:3:5:1401:122#0/1  
GACAAACCCTCTGGAGCAAACAAACGATGCTGGATCAGA  
+HWI-EAS443:3:5:1401:122#0/1  
¥bbbb`aa\_bLbba^aab[b`R\_aa^babb^aaV[`[a`B  
@HWI-EAS443:3:5:1407:210#0/1  
CAAAAAGATGCAAAAGTCTTTTCCAGAAGTGGGAATTG  
+HWI-EAS443:3:5:1407:210#0/1  
a^^^Zab`¥ba^[^b\_J\_]``aa¥U`\_]aZbb]\_\_aaaab  
@HWI-EAS443:3:5:1448:1310#0/1  
AAAAGAAGACTGAGAGATCTAATGTCGCAGTCCCGCACTCGC  
+HWI-EAS443:3:5:1448:1310#0/1  
ab`aaUab\_0\_Y¥aa[[b]abb^YaVaa`TaaaS^US``B  
@HWI-EAS443:3:5:1462:497#0/1  
TCCGCTTGTCTTTTGAAGTGAACCCACAAAAGTAAAA

+HWI-EAS443:3:5:1462:497#0/1  
]¥a]aaaaaQW`aaa]\_a\_\_Q\_aY\_HZ\_U¥`\_^U\_[^BB  
@HWI-EAS443:3:5:1555:1730#0/1  
TAAGGACACTGTTCCAGCAAATGCGGGATGTGCTTGGGAC  
+HWI-EAS443:3:5:1555:1730#0/1  
W\_a`aaab^bb`^RQ¥]]Y¥``aX``Y[N\_LZIDXVOW`B  
@HWI-EAS443:3:5:1568:1196#0/1  
AAAAGAAGTGAAGATCTAATGTCGCAGTCCCGCACTCGC  
+HWI-EAS443:3:5:1568:1196#0/1  
YYJY`S`^]b\_b`aa\_aa\_[a]L[b`aa`¥PWR]PR`]BB  
@HWI-EAS443:3:5:1621:1742#0/1  
GAATAAAGAAGTGAAGATCTAATGTCGCAGTCCCGCAC  
+HWI-EAS443:3:5:1621:1742#0/1  
a[]`[¥\_aa`a[`]Y`a`a\_a`a`^`\_\_^`¥RZXVBBB  
@HWI-EAS443:3:5:1633:924#0/1  
CGTTTCATTACCAACTACTGTCCTCCCTTGCCCAATTAGCA  
+HWI-EAS443:3:5:1633:924#0/1  
abbbbabbbba^bb\_babbbba`^^Z`aaa`a^aaa`\_a\_a  
@HWI-EAS443:3:5:1783:1170#0/1  
CAACACTTCAATATAAACACTGCCTGTTCCGCCGGCTACT  
+HWI-EAS443:3:5:1783:1170#0/1  
abaab[aaabababa`\_ab`bbb\_bb`b\_bba\_ab^`ba]  
@HWI-EAS443:3:5:186:197#0/1  
CTCGCGAGATACTACTAAGACTGTGGACCATATGGC  
+HWI-EAS443:3:5:186:197#0/1  
abbb\_bbbbbbaabbbbaabbaYaabb^baa^babbbba^  
@HWI-EAS443:3:5:187:1595#0/1  
CTAATGTCGCAGTCCCGCACTCGCGAGATACTACTAAGA  
+HWI-EAS443:3:5:187:1595#0/1  
a`WZ]RT`¥`ba`aa¥Y`ZY^\_XJV`]^aaa`[`Y`^BBB  
@HWI-EAS443:3:5:189:1352#0/1  
ATGATGGCAATGAGATACCCAATTACAGCAGACAAGAGAA  
+HWI-EAS443:3:5:189:1352#0/1  
[`¥`¥a[[ab^\_X`^Zaa[`aaaaTP\_\_b`bb^`\_`\_`aa  
@HWI-EAS443:3:5:199:1782#0/1  
ATAACTTATTCGTCATCAATGATGTGGGAGATCAATGGCC  
+HWI-EAS443:3:5:199:1782#0/1  
a`b\_a^¥`Y¥^Y\_\_a\_aaaaa`^]Y^^`\_`\_`M`\_a\_S^B  
@HWI-EAS443:3:5:241:301#0/1  
AAAAGAAGTGAAGATCTAATGTCGCAGTCCCGCACTCGC  
+HWI-EAS443:3:5:241:301#0/1  
abbbbaabba`aabaabbbabba`aaaa]\_\_a`\_U`^¥B  
@HWI-EAS443:3:5:266:1035#0/1  
TCCCGTTTTCGTTTCATTACCAACTACTGTCCTCCCTTGCC  
+HWI-EAS443:3:5:266:1035#0/1  
`a`baaab`b`^a`aaba^\_a\_a\_aaaa]`\_`]\_\_^  
@HWI-EAS443:3:5:266:1986#0/1  
GAATAAAGAAGTGAAGATCTAATGTCGCAGTCCCGCAC  
+HWI-EAS443:3:5:266:1986#0/1  
\_V\_Y¥¥\_a]`aaa`ZYbba[Q[\_V``][[\_ZUR\_\_^BBB



@HWI-EAS443:3:5:340:855#0/1  
AAAGAAGTCTAATGTCGAGTCCCGCACTCGCG  
+HWI-EAS443:3:5:340:855#0/1  
aaaaaaaaaa]aa`\_`aa`\_[a\_¥`a¥\_¥¥¥\_ZV¥[LVB  
@HWI-EAS443:3:5:341:532#0/1  
ATCTGCTCCAGCACGTCCCTTGGGTTAAGTGCAACTT  
+HWI-EAS443:3:5:341:532#0/1  
aaabbab`[aaa[a^a^`a`\_a\_YaTaa\_^¥a]`aVa\_\_a  
@HWI-EAS443:3:5:355:1993#0/1  
AAAAGAAGTCTAATGTCGAGTCCCGCACTCGC  
+HWI-EAS443:3:5:355:1993#0/1  
`baba\_]\_aY`aaY`W[\_aa\_\_^`]YaaR\_] [JSY\_U\_\_Z  
@HWI-EAS443:3:5:396:1821#0/1  
AGAGAATAAAAGAAGTCTAATGTCGAGTCCCG  
+HWI-EAS443:3:5:396:1821#0/1  
][`bbbaa`bbbaXaaaYbaa\_[aba`a¥\_W[^PHTBBB  
@HWI-EAS443:3:5:458:1026#0/1  
ATCTAATGTCGAGTCCCGCACTCGCGAGATACTACTAA  
+HWI-EAS443:3:5:458:1026#0/1  
a`P]aaa¥\_¥^`a]LTLPTLSHQ^\_S^¥BBBBBBBBBB  
@HWI-EAS443:3:5:459:812#0/1  
GATCTTGACCATTGAATTTTCAATTTCCAGTTCCT  
+HWI-EAS443:3:5:459:812#0/1  
a]`[[¥YSL^]XV]WW\_H]\_\_^\_Z¥`\_`^^`YZ^^]TUX]  
@HWI-EAS443:3:5:476:288#0/1  
GAGAGAATAAAAGAAGTCTAATGTCGAGTCCC  
+HWI-EAS443:3:5:476:288#0/1  
^`¥`b\_abb`aW`a`aabaaa`\_Raa`ab^^^\_a]WTBB  
@HWI-EAS443:3:5:597:381#0/1  
ACTTTTGCATCTTTTGGAAATGCCTCAAGAGTTGGTGCA  
+HWI-EAS443:3:5:597:381#0/1  
a]]V\_`ba¥b]a¥a\_^a]Z^]HN¥JQ^\_b\_b^aa`ZaYB  
@HWI-EAS443:3:5:610:1773#0/1  
GGAAAAGCACTTTTGCATCTTTTGGAAATGCCTCAAGAG  
+HWI-EAS443:3:5:610:1773#0/1  
abbbbaab`abababbbbabbbababbababbaabbY  
@HWI-EAS443:3:5:630:1955#0/1  
AGCAGACCCATTAGCATCTCTTGGAAATGTGCCACAGC  
+HWI-EAS443:3:5:630:1955#0/1  
\_Z]`K\_`Z]\_\_^`Ta`a\_YXG^Z``[\_[^\_Z```S]a[B  
@HWI-EAS443:3:5:637:1216#0/1  
AAAAGAAGTCTAATGTCGAGTCCCGCACTCGC  
+HWI-EAS443:3:5:637:1216#0/1  
`bbbababaaaaaaa`abbaa\_^a`\_a`\_]^^]\_]\_^`B  
@HWI-EAS443:3:5:647:1053#0/1  
CGCACTCGCGAGATACTACTAAGACCACTGTGGACCATA  
+HWI-EAS443:3:5:647:1053#0/1  
`bbbbba`abba`aabbaababaa\_a[R[ZVZ¥Taaaa  
@HWI-EAS443:3:5:690:1232#0/1  
GTCCCGTTTTCTTTCATTACCAACTACGTCCTTGC

+HWI-EAS443:3:5:690:1232#0/1  
aZR` `]WTZaa]DX]^Q]^a]RZa^^V\_\_¥^R¥aQ[BBBB  
@HWI-EAS443:3:5:738:1484#0/1  
TATTCTCACAAGAGGATTGCATGATCAAGGCAGTTAGGGG  
+HWI-EAS443:3:5:738:1484#0/1  
abbaaaabaaaaaaaaa^a\_aa`\_\_\_\_`^a^\_\_aVV]\_\_BB  
@HWI-EAS443:3:5:755:1259#0/1  
AATGTCGCAGTCCCGCACTCGCGAGATACTCACTAAGACC  
+HWI-EAS443:3:5:755:1259#0/1  
aaba^aba`a`aaZaa]^aaa¥a`a^`a\_aY\_¥]Z\_`aBB  
@HWI-EAS443:3:5:781:1958#0/1  
GAACTGAGAGATCTAATGTCGCAGTCCCGCACTCGCGAGA  
+HWI-EAS443:3:5:781:1958#0/1  
\_a[^`aaaa`baabbbbb\_bb^`bQ\_Y`^aa\_\_YaN\_\_]\_  
@HWI-EAS443:3:5:803:320#0/1  
ATCCAGCATCGTTTGTTCCTCCAGAGGGTTTGCCTTG  
+HWI-EAS443:3:5:803:320#0/1  
abbabbaaaXb`aab[ab\_a`\_a`\_a\_aaa^`a`\_]`^`\_`  
@HWI-EAS443:3:5:813:1142#0/1  
CCCGTTTTCGTTTCATTACCAACTACGTCCCCTTGCCC  
+HWI-EAS443:3:5:813:1142#0/1  
ab`b\_babbaaabaabbbbbaaaaa\_abaaaSaXa]¥aT^\_  
@HWI-EAS443:3:5:830:805#0/1  
GTCCCGTTTTCGTTTCATTACCAACTACGTCCCCTTGCC  
+HWI-EAS443:3:5:830:805#0/1  
a\_aa^a`babVb\_a¥aaa`b^`\_a\_\_Yaa^\_S]]\_[]`R`B  
@HWI-EAS443:3:5:869:745#0/1  
ATAAAAAGAACTGAGAGATCTAATGTCGCAGTCCCGCACTC  
+HWI-EAS443:3:5:869:745#0/1  
a]^`Y`b\_\_a`\_ba]ab[]`Wa`\_b^MXaa\_bU\_T`^`RkV^B  
@HWI-EAS443:3:5:882:931#0/1  
GAATAAAAAGAACTGAGAGATCTAATGTCGCAGTCCCGCAC  
+HWI-EAS443:3:5:882:931#0/1  
Z[Yb`ba`aaaabb^`\_b\_]`aba`aVX\_UZaV^YUaa\_B  
@HWI-EAS443:3:5:894:554#0/1  
AATGTCGCAGTCCCGCACTCGCGAGATACTCACTAAGACC  
+HWI-EAS443:3:5:894:554#0/1  
abab`]Z\_`^`^XYXT[\_\_aa¥aYa¥`^V^Y^¥^a^BBBB  
@HWI-EAS443:3:5:926:23#0/1  
TGTA CTCTTATTTTCAGTGTTCGGAGTTGCCCGTTAGCA  
+HWI-EAS443:3:5:926:23#0/1  
ab[]J`Z`baab\_YRaa\_UXba]FR`^`RPUKHT\_BBBBBB  
@HWI-EAS443:3:5:956:1296#0/1  
CATTGACTGAAGATCCAGATGAAGGCACATCTGGGGTGGA  
+HWI-EAS443:3:5:956:1296#0/1  
][abb`bbbbbbabbbbabbbbabbbbabbbababababaaab  
@HWI-EAS443:3:5:964:355#0/1  
ATCTAATGTCGCAGTCCCGCACTCGCGAGATACTCACTAA  
+HWI-EAS443:3:5:964:355#0/1  
aa\_aaa`b\_[a\_Za¥[VYVa\_Wa^a¥¥Q¥UZ\_ZWYUU]BB

@HWI-EAS443:3:5:986:1742#0/1  
TAATGTCGAGTCCCGCACTCGCGAGATACTCACTAAGAC  
+HWI-EAS443:3:5:986:1742#0/1  
``^W^aZY^a[^S]a`aS\_`[]X¥^^`Qa\_aR]aaabbBB  
@HWI-EAS443:3:60:1002:1839#0/1  
CAGAATGAAGTGGATGATGGCAATGAGATACCCAATTACA  
+HWI-EAS443:3:60:1002:1839#0/1  
\_`^aaaaaP\_b`ba`aa`ZY^`^`\_`a`aa[`]\_W[a`\_aXa  
@HWI-EAS443:3:60:1042:664#0/1  
AAAGAAGTGAAGTGGATGATGGCAATGAGATACCCAATTACA  
+HWI-EAS443:3:60:1042:664#0/1  
\_]``[`abba\_]aaaa`aa^a`^`[]T]`^X]R][YVY`  
@HWI-EAS443:3:60:104:794#0/1  
AAAGAAGTGAAGTGGATGATGGCAATGAGATACCCA  
+HWI-EAS443:3:60:104:794#0/1  
aaaaaaaaaaaa`a`\_aa\_aa^`\_```^\_]U¥W]WZW^V  
@HWI-EAS443:3:60:1053:1793#0/1  
CGCACTCAGAATGAAGTGGATGATGGCAATGAGATACCCA  
+HWI-EAS443:3:60:1053:1793#0/1  
abbbabbaabab\_bb`a]aaaaa]`a`ba`\_```R``a  
@HWI-EAS443:3:60:1134:1160#0/1  
ATGTCCATTATTCTTGTCTGCTGTAATTGGGTATCTCA  
+HWI-EAS443:3:60:1134:1160#0/1  
]b[aa\_YZ`aYX]a^SQ0[[DT[FR\_]a`\_L\_UL`\_^  
@HWI-EAS443:3:60:1180:904#0/1  
GCTGTAATTGGGTATCTCATTGCCATCATCCACTTCATTC  
+HWI-EAS443:3:60:1180:904#0/1  
¥^abWQZ`baZaYXba]\_aZ]XN\_\_\_aaaa^¥\_]PY\_a`U  
@HWI-EAS443:3:60:1189:122#0/1  
GTGGGAGATCAATGGCCCTGAGTCAGTGCTAGTCAACACT  
+HWI-EAS443:3:60:1189:122#0/1  
a\_aa`NaW\_]YX\_`YWNTZ\_[¥TRZZT¥USWYQQNQPN  
@HWI-EAS443:3:60:1190:1837#0/1  
AAAAGAAGTGAAGTGGATGATGGCAATGAGATACCCA  
+HWI-EAS443:3:60:1190:1837#0/1  
aaaa`aa\_aaaaaaa`aaaaa^[]¥``[^^^ZX`¥Z^`¥  
@HWI-EAS443:3:60:1193:706#0/1  
ATCCTACTCTGTTCTGGTGGAGCAGCAGCAAAGGGGAGAA  
+HWI-EAS443:3:60:1193:706#0/1  
aaaaab`a\_aa\_a^a\_]`aa^a`\_a`^`[W\_\_[\_`^`^`\_]`  
@HWI-EAS443:3:60:1217:1364#0/1  
TCCCGTTTTCGTTTCATTACCAACTACGTCCCCTTGCC  
+HWI-EAS443:3:60:1217:1364#0/1  
^]bY¥VVT`T\_P]Q¥]]`]Z\_¥¥U]L][XUT`V[VJGTR¥  
@HWI-EAS443:3:60:1227:279#0/1  
GCCTTGTTGTAATTGAATACTGGAGAATTGCCTCTTACCA  
+HWI-EAS443:3:60:1227:279#0/1  
aa`aab`aa\_a\_aY^`]a\_]\_`¥a^¥`\_`\_]\_Z\_]VZ]  
@HWI-EAS443:3:60:1233:381#0/1  
GTGGTCTTAGTGAGTATCTCGCGAGTGGGACTGCGACA

+HWI-EAS443:3:60:1233:381#0/1  
aaaa`abaab[aaaaa\_`YaXZN\_Wa[`a`UPY]U]UTY  
@HWI-EAS443:3:60:1243:240#0/1  
GTCTTAGTGAGTATCTCGCGAGTGGGACTGCGACATTA  
+HWI-EAS443:3:60:1243:240#0/1  
a`aaa\_a]`)]`\_\_`\_^¥^\_]`GZZ[\_^RZVZYLSPTVY  
@HWI-EAS443:3:60:1244:617#0/1  
AATGGACATGATTCCAGAGAGGAATGAACAAGGACAAACC  
+HWI-EAS443:3:60:1244:617#0/1  
aabaXaabbabb^VbaY`a`]babbbaa\_aab`[J[\_`XY  
@HWI-EAS443:3:60:1247:1791#0/1  
GTCGCAGTCCCGCACTCGCGAGATACTCACTAAGACCACT  
+HWI-EAS443:3:60:1247:1791#0/1  
`V¥aa¥]PUYTV¥`XWPRJ¥`^Z\_¥Z]ZV`\_^G^PPT¥N  
@HWI-EAS443:3:60:1299:647#0/1  
TAATGTCGCAGTCCCGCACTCGCGAGATACTCACTAAGAC  
+HWI-EAS443:3:60:1299:647#0/1  
aa]^\_\_^¥`[]a`aaa[a\_\_`S`]``[^R^\_SY][[YQ  
@HWI-EAS443:3:60:1379:578#0/1  
AAAAGAACTGAGAGATCTAATGTCGCAGTCCCGCACTCGC  
+HWI-EAS443:3:60:1379:578#0/1  
ababaabaabbaa`aaabbaab`\_b\_aa¥`^a\_¥`````a\_  
@HWI-EAS443:3:60:1413:625#0/1  
CTCAGTTGGATTCTGTCTAAGGATGTCCACCATCCTTACT  
+HWI-EAS443:3:60:1413:625#0/1  
`babbaaba`abaabaaaa`aa`a\_\_`````\_\_Q\_```Y\_a  
@HWI-EAS443:3:60:1433:1940#0/1  
GCGAGATACTCACTAAGACCACTGTGGACCATATGGCCAT  
+HWI-EAS443:3:60:1433:1940#0/1  
aabRY`QZ```]F]a`aaaU^¥a`\_a`[YaQ^HVaaMG`\_  
@HWI-EAS443:3:60:1489:208#0/1  
GCTCCCTTGATGGTGGCGTACATGCTAGAAAGAGAATTGG  
+HWI-EAS443:3:60:1489:208#0/1  
aaa`\_\_aa\_[\_a[T^]Z^WYT[^WZ¥`W¥¥\_SWW^^¥¥Y  
@HWI-EAS443:3:60:1503:770#0/1  
GTCGCAGTCCCGCACTCGCGAGATACTCACTAAGACCACT  
+HWI-EAS443:3:60:1503:770#0/1  
aZaa\_\_a]`\_a`U¥\_\_a`^V`Z\_¥U\_[¥¥\_\_¥W¥TSYS^  
@HWI-EAS443:3:60:1519:1618#0/1  
CCCCTTTTCGTTTCATTACCAACTACGTCCTTGGCC  
+HWI-EAS443:3:60:1519:1618#0/1  
¥bababbb`bb]ab\_abaabbab`\_abb`\_XaaH]`aS]a  
@HWI-EAS443:3:60:1553:1222#0/1  
CTTGTTCTCAGTTGGATTCTGTCTAAGGATGTCCACCAT  
+HWI-EAS443:3:60:1553:1222#0/1  
ababab\_a\_bba[aaaab`ab\_Ta\_^aaZ^^[¥Wa[¥``  
@HWI-EAS443:3:60:1577:1780#0/1  
GATCTTGTGACCATTGAATTTTCACAATTTCCAGTTCCCT  
+HWI-EAS443:3:60:1577:1780#0/1  
abbabbbYbb`bbbbbbabbbbaa`aabbbbaa`^baU`b

@HWI-EAS443:3:60:157:1687#0/1  
GTCCCCGTTTTTCGTTTCATTACCAACTACGTCCCCCTTGC  
+HWI-EAS443:3:60:157:1687#0/1  
]YaR\_baMY`a^X`abab`baa`Y`b`aaa`]XT]WT¥Ta  
@HWI-EAS443:3:60:1602:373#0/1  
AGAGAATAAAAGAACTGAGAGATCTAATGTGCGCAGTCCCCG  
+HWI-EAS443:3:60:1602:373#0/1  
¥\_Y`^¥aa`abba]aa\_^b``b^bbbbb]^`^`\_YW^\_]  
@HWI-EAS443:3:60:1606:934#0/1  
CCCCGACTCGCGAGATACTACTAAGACCACTGTGGACCA  
+HWI-EAS443:3:60:1606:934#0/1  
`\_babbbb\_bab\_aabbabaa\_ba\_P[[\_`¥]YYaa^Y`Y  
@HWI-EAS443:3:60:1608:558#0/1  
GTGTCAGCAGACCCATTAGCATCTCTTTGGAAATGTGCC  
+HWI-EAS443:3:60:1608:558#0/1  
a\_\_\_`aa\_\_\_`a`\_\_aa`aa`\_a^`\_\_¥aaaY`a\_\_a^`¥^  
@HWI-EAS443:3:60:1635:2013#0/1  
ATTCTGTCTAAGGATGTCCACCATCCTTACTCCTCCAATC  
+HWI-EAS443:3:60:1635:2013#0/1  
abaa`a`aaaa]\_aaa`[^`^a\_^]\_a¥Z¥`Y]^^^\_a[  
@HWI-EAS443:3:60:1669:1206#0/1  
GGAAAAGCACTTTTGCATCTTTTTGGAAATGCCTCAAGAG  
+HWI-EAS443:3:60:1669:1206#0/1  
aaaa`Y¥NJM]\_`aZU¥babb\_]X]¥I¥aZTT]SaY[T^  
@HWI-EAS443:3:60:1697:1633#0/1  
CTCAGAATGAAGTGGATGATGGCAATGAGATACCCAATTA  
+HWI-EAS443:3:60:1697:1633#0/1  
`bbababbabab\_]K\_aa\_\_a[UY\_aaaU`]\_W]O\_Z\_\_^  
@HWI-EAS443:3:60:1719:1242#0/1  
GTCCCCGTTTTTCGTTTCATTACCAACTACGTCCCCCTTGC  
+HWI-EAS443:3:60:1719:1242#0/1  
aa`[¥b^`aab\_a`^\_aa`Z[[[^X^\_\_U^W]]TOXV  
@HWI-EAS443:3:60:1721:218#0/1  
GCCAAAATGAGAAATCCTCTCAGGACAGCAGACTCCACC  
+HWI-EAS443:3:60:1721:218#0/1  
a^Waaaa`aaab\_`¥`U[a\_Z[¥Z[ZZ`Y]\_`YW¥RS¥ZW  
@HWI-EAS443:3:60:1755:585#0/1  
TGGTTGGGAGAAGAGCAACAGCTATTCTCAGAAAGGCAAC  
+HWI-EAS443:3:60:1755:585#0/1  
aba^aaba`baa`\_aaaa`a`\_aaa`\_a^\_aa`\_aa¥`\_Z  
@HWI-EAS443:3:60:1774:1468#0/1  
CTTGGAAAGGATGCAGGTGCATTGACTGAAGATCCAGATG  
+HWI-EAS443:3:60:1774:1468#0/1  
ababb`aa]aaaaaaaa\_aaaa\_a^`b\_b`]^^Za\_\_`a  
@HWI-EAS443:3:60:19:1034#0/1  
AAAGAACTGAGAGATCTAATGTGCGCAGTCCCCGACTCGCG  
+HWI-EAS443:3:60:19:1034#0/1  
^R[`ZIVTS[RU[US^\_Z]X`NZPX[BBBBBBBBBBBBBB  
@HWI-EAS443:3:60:208:148#0/1  
GAATGAAGTGGATGATGGCAATGAGATACCCAATTACAGC



@HWI-EAS443:3:60:477:828#0/1  
ATCTGAACTTTGTCAATAGGGCAAACCAGCGACTGAACCC  
+HWI-EAS443:3:60:477:828#0/1  
WXaaaU`aa]baa]^`^]aaaaUaa¥aaa`aa``\_a\_``aa  
@HWI-EAS443:3:60:506:342#0/1  
GATGATGGCAATGAGATACCCAATTACAGCAGACAAGAGA  
+HWI-EAS443:3:60:506:342#0/1  
aYV`Z^aWNRXW`PXPZSJOZS^WVV][^NQTXUXXTXU  
@HWI-EAS443:3:60:508:857#0/1  
GTCCCCGTTTTCGTTTCATTACCAACTACGTCCCCTTGC  
+HWI-EAS443:3:60:508:857#0/1  
aRP)`R\_^ZQRb^aRTWZa[NN\_ZU\_U`PUY^BBBBBBBB  
@HWI-EAS443:3:60:525:111#0/1  
GTTGACTAGCACTGACTCAGGGCCATTGATCTCCCACATC  
+HWI-EAS443:3:60:525:111#0/1  
a^T\_NY[\_`]]YX\_Z¥S^¥UOQTTUTPXU¥YUVTVYYXXU  
@HWI-EAS443:3:60:52:1153#0/1  
GTCTGCTGTAATTGGGTATCTCATTGCCATCATCCACTTC  
+HWI-EAS443:3:60:52:1153#0/1  
aabbaaab^a\_a`[\_`aU`a```a]`\_¥a\_a``]]`\_S^\_U  
@HWI-EAS443:3:60:54:1112#0/1  
CTCCTGGTTGCCTTTCTGAGAATAGCTGTTGCTCTTCTCC  
+HWI-EAS443:3:60:54:1112#0/1  
a^`a\_^^QUVS\_\_[\_`¥`\_`b\_[^^][RRSVYPSSWTRSV  
@HWI-EAS443:3:60:557:1621#0/1  
CTTCCTGATGTGACTTTTTGATTATGGCCATATGGTCCA  
+HWI-EAS443:3:60:557:1621#0/1  
[^`baaWZa¥Z¥PaZ^baaaaaZZ^][`a`VSVTYLWWZ  
@HWI-EAS443:3:60:581:1111#0/1  
CTAATGTCGCAGTCCCGCACTCGCGAGATACTCACTAAGA  
+HWI-EAS443:3:60:581:1111#0/1  
aaabbaabaaaa\_abaaaaaba`Z`aa``aaaa`\_\_`S¥  
@HWI-EAS443:3:60:584:1346#0/1  
CATATGCAAGGCAGCAATAGGGTTGAGGATTAGCTCATCT  
+HWI-EAS443:3:60:584:1346#0/1  
a]```aaZRaaaa0¥Taa\_YNSY¥^^`\_[\_`XZV¥`\_\_W^  
@HWI-EAS443:3:60:591:635#0/1  
GAGGATTTCTCATTTTGGGCAAAGAAGACAAGAGATATGG  
+HWI-EAS443:3:60:591:635#0/1  
]S^][\_a``]]Z]^[[WWZR[^]PZ]a^¥ZR[U^YUXS^S  
@HWI-EAS443:3:60:628:1887#0/1  
GAATAAAAGAACTGAGAGATCTAATGTCGCAGTCCCGCAC  
+HWI-EAS443:3:60:628:1887#0/1  
`ab``aZ`\_^abaabaaab``aa`aa\_aa`a`N[````\_`\_`  
@HWI-EAS443:3:60:657:244#0/1  
TGTACATCTGCTCCCAGCACGTCCCTTGGGTTAAGTGCAA  
+HWI-EAS443:3:60:657:244#0/1  
aa\_babbbbaa\_aaaaa`aaa^a`\_`aaa`¥^^[Y]\_^\_]  
@HWI-EAS443:3:60:664:504#0/1  
AGAAGAAGTGCTAACGGGCAACCTCCAAACTGAAAATA

+HWI-EAS443:3:60:664:504#0/1  
\_aa^\_a\_X\_b\_^`\_Z\_^\_b\_^\_a¥aaXH]aa```][a``¥  
@HWI-EAS443:3:60:666:967#0/1  
ACTGCCTGTTCCGCCGCTACTGGGAGAAACCTTGTTTTA  
+HWI-EAS443:3:60:666:967#0/1  
`)]a``aaZOZa[`\_[YML]¥JQOX]NXSYW[BBB  
@HWI-EAS443:3:60:688:33#0/1  
AAGAACTGAGAGATCTAATGTCGAGTCCCGCACTCGCGA  
+HWI-EAS443:3:60:688:33#0/1  
``^W^^bba`aQaa]¥aa\_PUaN]`RLP\_a[OYZ`¥YXT  
@HWI-EAS443:3:60:717:1506#0/1  
GTGGCGTACATGCTAGAAAGAGAATTGGTCCGTAACAA  
+HWI-EAS443:3:60:717:1506#0/1  
\_F¥aZPJ]WYab\_[`a[OLN`\_\_a\_RQZLTZ`LQUZ[K¥\_  
@HWI-EAS443:3:60:730:2021#0/1  
ATAAAAGAACTGAGAGATCTAATGTCGAGTCCCGCACTC  
+HWI-EAS443:3:60:730:2021#0/1  
a[\_babY]b```a`b\_aa\_abbba]`\_a\_X^M`Z]\_^YU  
@HWI-EAS443:3:60:775:1749#0/1  
CATTTCTCACTTCTCCTCCTGGAGTGTACATCTGCTCCCA  
+HWI-EAS443:3:60:775:1749#0/1  
aaa]a`aab\_a`aa]^[^^`][aQFWU`]a¥\_]\_^ZU^]\_  
@HWI-EAS443:3:60:783:1721#0/1  
GTCTGCTGTAATTGGGTATCTCATTGCCATCATCCACTTC  
+HWI-EAS443:3:60:783:1721#0/1  
aa\_abab```aabb^b`¥bbbaaba`¥`aaaa\_Z`a]aa\_  
@HWI-EAS443:3:60:826:363#0/1  
GTTTTATATACCTTAGGGTAATGAACTGTACTTGTTGTTG  
+HWI-EAS443:3:60:826:363#0/1  
aaaaaaaaaaaaaaaaabaaZa`aa`\_aa^`\_a``^\_a]^`  
@HWI-EAS443:3:60:848:1782#0/1  
CGGCCCTGTCCACTTCAGAAATCAAGTAAAATAAGGAGG  
+HWI-EAS443:3:60:848:1782#0/1  
a`¥aaaa```aaa\_a^ab`abaa`a\_a\_a^```a```\_^\_\_^  
@HWI-EAS443:3:60:856:610#0/1  
CCCGTTTTCGTTTCATTACCAACTACGTCCCCTTGCCC  
+HWI-EAS443:3:60:856:610#0/1  
aabbabbb\_babaabbbbbaaaaaabaaaa`aa`\_a`aaaa  
@HWI-EAS443:3:60:886:578#0/1  
CCAAAAGTAAAGATGAGCTAATCCTCAACCCTATTGCTG  
+HWI-EAS443:3:60:886:578#0/1  
abbaaaabbbbabaabababbaaaaaaaa`\_a`aaaa\_a  
@HWI-EAS443:3:60:887:1270#0/1  
TGGGCCATATCTCTTGTCTTCTTTGCCCAAAATGAGAAAT  
+HWI-EAS443:3:60:887:1270#0/1  
]¥OM\_bba]\_Z`W¥Q^\_^]^^a\_\_aa^¥aYaa[]`aaaY`  
@HWI-EAS443:3:60:890:1631#0/1  
CTAATGTCGAGTCCCGCACTCGCGAGATACTCACTAAGA  
+HWI-EAS443:3:60:890:1631#0/1  
aaU¥^a\_]¥^aS\_`a`\_ZV¥¥`X[[Z[X¥U^ZSW¥¥¥\_`^¥



@HWI-EAS443:3:60:899:145#0/1  
CTGAGAGATCTAATGTCGCAGTCCCGCACTCGCGAGATAC  
+HWI-EAS443:3:60:899:145#0/1  
abbabaaaaababa`aa`b`\_`a`\_`\_]\_\_`[`¥\_WVWW  
@HWI-EAS443:3:60:962:987#0/1  
GTCCCGTTTTCGTTTCATTACCAACTACGTCCCCTTGC  
+HWI-EAS443:3:60:962:987#0/1  
\_S`^^¥T0¥`a^`¥`[^a`\_`X\_UY`\_\_^aa\_]XZU^V¥]  
@HWI-EAS443:3:61:1008:743#0/1  
GTGCCACAGCACACAGATTGGAGGAGTAAGGATGGTGGAC  
+HWI-EAS443:3:61:1008:743#0/1  
aXQZ\_a]0[\_[TTWaba\_\_aa^`aTa^aV¥¥Q¥¥^NUQVW  
@HWI-EAS443:3:61:1024:960#0/1  
GTCCCGTTTTCGTTTCATTACCAACTACGTCCCCTTGC  
+HWI-EAS443:3:61:1024:960#0/1  
]N¥[Ua[XGU¥]YVP]Z¥LW[]VQ¥X^]SLSNTTQNQTQO  
@HWI-EAS443:3:61:1034:783#0/1  
AGGGGACGTAGTGTGGTAATGAAACGAAAACGGGACTCT  
+HWI-EAS443:3:61:1034:783#0/1  
ababa\_ab^^`bab\_bY\_]aaaa`Xa\_aa`V[\_\_¥GWUY  
@HWI-EAS443:3:61:1040:1256#0/1  
ATTGCATCCTACTCTGTTCTGGTGGAGCAGCAGCAAAGGG  
+HWI-EAS443:3:61:1040:1256#0/1  
\_\_`aa\_¥Zabba`aaa`aaaaSaYZbaa][`XXOUV\_T\_  
@HWI-EAS443:3:61:1090:835#0/1  
GAATAAAAGAACTGAGAGATCTAATGTCGCAGTCCCGCAC  
+HWI-EAS443:3:61:1090:835#0/1  
aX¥`\_Z[]¥[\_\_YY[\_\_\_\_[Z\_^YZVZS^ZTV[VTUSVSUU  
@HWI-EAS443:3:61:1143:1867#0/1  
CCGATTTTTAAGGGTTAGAGATCAAAGAGGGAACGTACTA  
+HWI-EAS443:3:61:1143:1867#0/1  
abbbbb\_bbbbb¥¥bbab`bbbbab`a`a\_b`aaSa\_\_\_\_  
@HWI-EAS443:3:61:1223:382#0/1  
GCATCCTTTCCAAGAACTGTAAGTCGTTTGGTTGCCCTTGT  
+HWI-EAS443:3:61:1223:382#0/1  
a]R]^\_a\_\_\_\_\_]\_^`^`]UZ\_Z^aV]Y\_\_ZZ¥XXU[TW  
@HWI-EAS443:3:61:1235:1084#0/1  
GAAGATCCAGATGAAGGCACATCTGGGGTGGAGTCTGCTG  
+HWI-EAS443:3:61:1235:1084#0/1  
][ZaU]]¥[¥\_YS[W\_\_]\_`ZY\_¥XZZ]P]VOVQQUZWVR  
@HWI-EAS443:3:61:1237:178#0/1  
CTCGCGAGATACTCACTAAGACCACTGTGGACCATATGGC  
+HWI-EAS443:3:61:1237:178#0/1  
abbbabbabbb\_b\_babbbbbb`bbb]bbba]a`aaaSL  
@HWI-EAS443:3:61:125:1585#0/1  
GTCCCGTTTTCGTTTCATTACCAACTACGTCCCCTTGC  
+HWI-EAS443:3:61:125:1585#0/1  
a]a`^^PUXXWTY^^`]Y^\_]\_[WQ]^R^VUSUYBBBBBB  
@HWI-EAS443:3:61:1277:832#0/1  
TAATGTCGCAGTCCCGCACTCGCGAGATACTCACTAAGAC

+HWI-EAS443:3:61:1277:832#0/1  
aa\_aa¥a`^a^`\_a]\_\_\_\_a[Z^¥¥¥¥¥UW¥WWTTS  
@HWI-EAS443:3:61:1325:948#0/1  
TGCTGTAATTGGGTATCTCATTGCCATCATCCACTTCATT  
+HWI-EAS443:3:61:1325:948#0/1  
a`R]`〕` `` `aZM^aaab` ``aa\_Z\_a^[Z\_[Z\_^W[YU  
@HWI-EAS443:3:61:1345:1073#0/1  
GGTTGCCTTGTGTAATTGAATACTGGAGAATTGCCTCTT  
+HWI-EAS443:3:61:1345:1073#0/1  
aa¥aaaaaaa`a` `aaaa\_aaaaaa\_aaa`^]VW\_X\_^  
@HWI-EAS443:3:61:1378:1335#0/1  
CTCGCGAGATACTACTAAGACCACTGTGGACCATATGGC  
+HWI-EAS443:3:61:1378:1335#0/1  
a¥b\_bb^¥a¥Vb`^Y`bba^`a` `bab^^`Y`\_S\_a\_` []  
@HWI-EAS443:3:61:1388:1759#0/1  
AAAAGAAGTGAAGATCTAATGTCGCAGTCCCGCACTCGC  
+HWI-EAS443:3:61:1388:1759#0/1  
ababa\_a[bb\_aUZa\_Mabbbb[\_ab^bUY]UR]UY]TFS  
@HWI-EAS443:3:61:1408:971#0/1  
TCCTGATGTGACTTTTTGATTATGGCCATATGGTCCACA  
+HWI-EAS443:3:61:1408:971#0/1  
a`Z\_¥RY`¥]`VRaaab]WR^`]^[[a\_\_YZBBBBBBBBB  
@HWI-EAS443:3:61:1415:162#0/1  
AAAGAAGTGAAGATCTAATGTCGCAGTCCCGCACTCGCG  
+HWI-EAS443:3:61:1415:162#0/1  
aaab`aabbaaabaab`aab\_baaaa¥\_^^^UWV[W^VV  
@HWI-EAS443:3:61:141:1429#0/1  
GGGTTCACTTTCAAAAGGACAAGCGGATCATCAGTCAAGA  
+HWI-EAS443:3:61:141:1429#0/1  
aLaOUY^a` `〕`GXZUUY\_\_MX`\_\_Y]]\_] ^U[V^^]WW  
@HWI-EAS443:3:61:1449:1503#0/1  
AGGATTTCTCATTTTGGGCAAAGAAGACAAGAGATATGGC  
+HWI-EAS443:3:61:1449:1503#0/1  
]`X¥^^baaXa]a`a\_bbbbXL]`a¥a[L^baRY]`TQQL  
@HWI-EAS443:3:61:1453:760#0/1  
GATCTAATGTCGCAGTCCCGCACTCGCGAGATACTACTA  
+HWI-EAS443:3:61:1453:760#0/1  
a[] []a]a`¥VYaaV\_aa]YQ[ZWSY¥U[[^SU[NUSSQ  
@HWI-EAS443:3:61:1460:516#0/1  
CTCGGTCTGATCCAGCATCGTTTGTTCCTCCAGAGGGT  
+HWI-EAS443:3:61:1460:516#0/1  
ab\_`baabaababbbababbbbbbabbb` `aX\_b]aaa¥  
@HWI-EAS443:3:61:1481:1936#0/1  
CTGCTGCTGAGAGGATTTCTCATTTTGGGCAAAGAAGA  
+HWI-EAS443:3:61:1481:1936#0/1  
`HX¥Y`abaXWW`Z\_\_`VV\_a¥\_ZaZTabZZSIa` `^^b`  
@HWI-EAS443:3:61:1528:389#0/1  
GAGATTTCTCATTTTGGGCAAAGAAGACAAGAGATATGG  
+HWI-EAS443:3:61:1528:389#0/1  
a^\_a\_`b`^[[[ ` ` `a`\_^`\_`a\_`\_\_\_\_\_W\_X^UX[ZXX

@HWI-EAS443:3:61:1532:742#0/1  
AAAAGAACTGAGAGATCTAATGTTCGAGTCCCGCACTCGC  
+HWI-EAS443:3:61:1532:742#0/1  
abb^^^aabbbaaaa`abaaab\_baaaa^\_^`V^\_^^^YX  
@HWI-EAS443:3:61:1545:487#0/1  
ATGGCAATGAGATACCCAATTACAGCAGACAAGAGAATAA  
+HWI-EAS443:3:61:1545:487#0/1  
aabaaaaabaa`aa\_aababababaaaa`^^`\_]a]\_\_^^  
@HWI-EAS443:3:61:1575:1899#0/1  
GATGATGGCAATGAGATACCCAATTACAGCAGACAAGAGA  
+HWI-EAS443:3:61:1575:1899#0/1  
aa`\_\_\_\_^¥^\_aaY^¥\_\_a`a\_baaaba`^Z`XKDV^S[LR  
@HWI-EAS443:3:61:1579:390#0/1  
CCCCGTTTTCGTTTCATTACCAACTACGTCCCCTTGCCC  
+HWI-EAS443:3:61:1579:390#0/1  
abababbbbabbbabbbbbb]bbbbbab`ab\_\_aa]]¥V  
@HWI-EAS443:3:61:1583:457#0/1  
GTCCCGTTTTCGTTTCATTACCAACTACGTCCCCTTGCC  
+HWI-EAS443:3:61:1583:457#0/1  
¥SRKMWLUXVX^V[WXY\_^Y^]VYX^Y^]XOIMYYVXUVX  
@HWI-EAS443:3:61:1601:957#0/1  
TCCCGTTTTCGTTTCATTACCAACTACGTCCCCTTGCC  
+HWI-EAS443:3:61:1601:957#0/1  
aa[a`^aaaab\_aaY[aab]]¥U`^aaa`]]NRWZ^[TT  
@HWI-EAS443:3:61:1638:1279#0/1  
TTCACCTTTCAAAGGACAAGCGGATCATCAGTCAAGAAAG  
+HWI-EAS443:3:61:1638:1279#0/1  
aaaa\_aba`\_aa`a`\_`a]aaaa`^`a`\_`\_ZZ]Z\_]^[  
@HWI-EAS443:3:61:166:1356#0/1  
GGCCCAACAACAAGTACAGTTCATTACCCTAAGGTATATA  
+HWI-EAS443:3:61:166:1356#0/1  
aa^\_\_aa[a\_] [\_]S`\_]aS\_]XW\_^\_^^[Y]W]Z¥[]  
@HWI-EAS443:3:61:1698:1994#0/1  
GAATAAAGAACTGAGAGATCTAATGTTCGAGTCCCGCAC  
+HWI-EAS443:3:61:1698:1994#0/1  
\_`aa`^aaaaa`aaaaa`abbaab`\_`¥\_\_VY]VWWYX  
@HWI-EAS443:3:61:1721:1854#0/1  
CCCCGTTTTCGTTTCATTACCAACTACGTCCCCTTGCCC  
+HWI-EAS443:3:61:1721:1854#0/1  
`¥\_¥U`\_`¥\_\_\_\_`X`\_\_\_\_aaabbbba`XP\_KT^ZWNSP  
@HWI-EAS443:3:61:1764:1361#0/1  
AAAGAACTGAGAGATCTAATGTTCGAGTCCCGCACTCGCG  
+HWI-EAS443:3:61:1764:1361#0/1  
aaaa`aaaaaaaa`^aaaaa^babaa^^[^[WY¥WUWWW  
@HWI-EAS443:3:61:182:990#0/1  
TCCCGTTTTCGTTTCATTACCAACTACGTCCCCTTGCC  
+HWI-EAS443:3:61:182:990#0/1  
\_Y]aa\_\_¥¥]^ZZ^Z^]XP]¥WZWR`¥TYVOZWTX]XXVV  
@HWI-EAS443:3:61:219:365#0/1  
ATTTTACAATCCTGGAGCTCTTCTTTCTTCTTTTGTTA

+HWI-EAS443:3:61:219:365#0/1  
abb\_a^`\_V]a`¥¥¥X`X\_^¥\_\_[W``\_\_`^``\_\_\_\_Y¥W  
@HWI-EAS443:3:61:225:362#0/1  
CCGTTTTCGTTTCATTACCAACTACGTCCCCTTGCCCA  
+HWI-EAS443:3:61:225:362#0/1  
aababbbb\_bbbabbZbabb`^a`aa]Y`a\_`a¥U¥^WX  
@HWI-EAS443:3:61:254:774#0/1  
AAAGAAGTCTAATGTCGCAGTCCCCTGCGC  
+HWI-EAS443:3:61:254:774#0/1  
aa`a`^aaaaa\_`\_`a]^`aW\_\_`[¥WZ^[[[UWWSUUV  
@HWI-EAS443:3:61:275:1647#0/1  
ACTGCCTTGATCATGCAATCCTCTTGAGAATACCATGG  
+HWI-EAS443:3:61:275:1647#0/1  
aaa``aaaaa`aa^¥`^`aa^a\_`^`\_\_`\_]`^Z[WWU  
@HWI-EAS443:3:61:277:74#0/1  
AATAAAAGTCTAATGTCGCAGTCCCCTGCGC  
+HWI-EAS443:3:61:277:74#0/1  
aaba`¥¥aZ\_abb\_`\_`X`aaUN^a]^`a\_\_aWVZ\_\_SNS]  
@HWI-EAS443:3:61:281:1171#0/1  
TGCTGGATCAGACCGAGTGGTATCACCTCTGGCCGTA  
+HWI-EAS443:3:61:281:1171#0/1  
\_aba\_`\_``aaaa`¥`Xaa]^`TS]^`¥Y^ZXXY¥UR  
@HWI-EAS443:3:61:286:982#0/1  
GTTGCCTTGTGAATTGAATACTGGAGAATTGCCTCTTA  
+HWI-EAS443:3:61:286:982#0/1  
a`a[\_`]]\_X\_a^Y^^^[]W[M[\_¥^[[W\_^XXXXXZZZ  
@HWI-EAS443:3:61:30:45#0/1  
TCCCGTTTTCGTTTCATTACCAACTACGTCCCCTTGCC  
+HWI-EAS443:3:61:30:45#0/1  
aaaab\_\_aa`b\_\_`\_\_`\_\_`^[[¥S^W¥Y\_]\_XXV]XPP¥WW  
@HWI-EAS443:3:61:318:195#0/1  
AGAAGTCTAATGTCGCAGTCCCCTGCGGAG  
+HWI-EAS443:3:61:318:195#0/1  
aaaa`aaa``aa`\_aaaa¥`^^QXW^^`¥ZNSWVVUVY  
@HWI-EAS443:3:61:321:1167#0/1  
CACTCGCGAGATACTACTAAGACCACTGTGGACCATATG  
+HWI-EAS443:3:61:321:1167#0/1  
^¥ab`bbbX\_\_aaaabaa\_a``Vab¥¥¥¥WTS[^`^¥\_`^U  
@HWI-EAS443:3:61:337:978#0/1  
TGGGAGTAGATGAATACTCCAGCACGGAGAGTGGTAGT  
+HWI-EAS443:3:61:337:978#0/1  
`b`a`Y^^`^`^`aaaa^a\_J^`Y\_]`^Z\_Z[MBBBBBB  
@HWI-EAS443:3:61:348:1580#0/1  
AAACAAACGATGCTGGATCAGACCGAGTGGTATCACC  
+HWI-EAS443:3:61:348:1580#0/1  
aZbabba`aaa`aa`a``ab^aba¥T¥T`\_^]WN`WU\_WS  
@HWI-EAS443:3:61:395:913#0/1  
GCGGGATGTGCTTGGGACATTTGACACTGTCCAAATAATA  
+HWI-EAS443:3:61:395:913#0/1  
`\_`\_`¥QY\_]`^VU\_VNVYNONNVUTRY^¥VVNLNWUWYQY

@HWI-EAS443:3:61:484:1904#0/1  
CTGTAATTGGGTATCTCATTGCCATCATCCACTTCATTCT  
+HWI-EAS443:3:61:484:1904#0/1  
aaaabbbbba\_\_bbabbbbaabbbbaa[aaaaa\_\_^\_\_\_X\_  
@HWI-EAS443:3:61:485:522#0/1  
ATCCGCTTGTCTTTTAAAAGTGAACCCACCAAACTGAA  
+HWI-EAS443:3:61:485:522#0/1  
\_¥\_^`\_bba]\_\_\_aaaZXZa\_TVFP^a¥[^a¥]N\_`\_[WY  
@HWI-EAS443:3:61:487:67#0/1  
AAAGAAGTGAAGATCTAATGTGCGCAGTCCCGCACTCGCG  
+HWI-EAS443:3:61:487:67#0/1  
aaa```abaaaa`aa^`aa[``\_Y]TZ^]YRLRWW[W[  
@HWI-EAS443:3:61:490:1352#0/1  
AGAGAATAAAAGAACTGAGAGATCTAATGTGCGCAGTCCCG  
+HWI-EAS443:3:61:490:1352#0/1  
ab`¥``bb¥bbbaaaabbabbaabaaaa`aaa`a][[UY  
@HWI-EAS443:3:61:536:374#0/1  
CTGCTGTAATTGGGTATCTCATTGCCATCATCCACTTCAT  
+HWI-EAS443:3:61:536:374#0/1  
aabbab[`]bbaba\_`]bb`]\_`abb``]`aU\_]`\_^  
@HWI-EAS443:3:61:553:745#0/1  
TGGGAATGATCGGAATACTGCCCGACATGACCCCAAGCAC  
+HWI-EAS443:3:61:553:745#0/1  
a`X^a`ba`\_aa`^a¥a\_`aa^]a``\_\_^\_W¥[UUWWW  
@HWI-EAS443:3:61:608:925#0/1  
ACGACTTACAGTTCTTGGAAAGGATGCAGGTGCATTGACT  
+HWI-EAS443:3:61:608:925#0/1  
``b]^a`[^`\_`aaaab`\_\_a`X[Y`]^`[RN[U[]]\_XQY  
@HWI-EAS443:3:61:612:157#0/1  
CAGAGGTGATACCATCACTCGGTCTGATCCAGCATCGTTT  
+HWI-EAS443:3:61:612:157#0/1  
Zabb\_bLbaa¥]``^`\_\_VX\_TRa\_`X^a^X]R¥¥\_`V[¥  
@HWI-EAS443:3:61:636:1733#0/1  
AGAGAATAAAAGAACTGAGAGATCTAATGTGCGCAGTCCCG  
+HWI-EAS443:3:61:636:1733#0/1  
aa`]abaaba`aaaa`b\_baaaaabaaa^\_\_]`¥VX^\_Y  
@HWI-EAS443:3:61:710:670#0/1  
AAAGAAGTGAAGATCTAATGTGCGCAGTCCCGCACTCGCG  
+HWI-EAS443:3:61:710:670#0/1  
ababaaabbbbaabaaaaa]ab^baaba\_a``[^`\_`[XLQ[  
@HWI-EAS443:3:61:71:1176#0/1  
GAGAGATCTAATGTGCGCAGTCCCGCACTCGCGAGATACTC  
+HWI-EAS443:3:61:71:1176#0/1  
aaGYXaZ`a\_`\_\_Waa\_¥\_V\_VaU[GVV¥¥^SSTPTQWWW  
@HWI-EAS443:3:61:760:1020#0/1  
AAAGAAGTGAAGATCTAATGTGCGCAGTCCCGCACTCGCG  
+HWI-EAS443:3:61:760:1020#0/1  
a\_S\_`aaaaa```]``\_S¥aa^a```^^^`^[VYQ[[SUTQ  
@HWI-EAS443:3:61:778:1139#0/1  
AAAGAAGTGAAGATCTAATGTGCGCAGTCCCGCACTCGCG

+HWI-EAS443:3:61:778:1139#0/1  
`aa\_\_aaa\_a^`\_\_\_aaaXaaWa\_a`\_¥¥\_^¥¥U¥¥YWWY  
@HWI-EAS443:3:61:781:483#0/1  
AAAAGAAGTCTAATGTCGAGTCCCGCACTCGC  
+HWI-EAS443:3:61:781:483#0/1  
WWTRRYTX]W]¥WXX`\_¥X]¥¥UZ¥]Q^WZVYBBBBBB  
@HWI-EAS443:3:61:802:787#0/1  
AAGAAGTCTAATGTCGAGTCCCGCACTCGCGA  
+HWI-EAS443:3:61:802:787#0/1  
Za\_^aaabb\_bbaba`\_Q\_baba`\_]`[^aa]a^\_]¥^\_ZW  
@HWI-EAS443:3:61:803:402#0/1  
CCCGTTTTCGTTTCATTACCAACTACGTCCCCTTGCCC  
+HWI-EAS443:3:61:803:402#0/1  
abbbbbbbbabbbbbbbba`¥abbbabbaaa`aaaa¥ZZ  
@HWI-EAS443:3:61:820:1163#0/1  
CGCCACCATCAAGGGAGCAATTTTACAATCCTGGAGCTCT  
+HWI-EAS443:3:61:820:1163#0/1  
a\_bbbabba`\_`abbaabba^\_a\_a^b^aaa[[TTX\_X\_X¥  
@HWI-EAS443:3:61:82:1099#0/1  
CGTTTCATTACCAACTACGTCCCCTTGCCCAATTAGCA  
+HWI-EAS443:3:61:82:1099#0/1  
I\_aaaa`\_Y\_¥`\_X`aa\_^`¥P^Z]R[Z¥\_baY^`Z]OR¥  
@HWI-EAS443:3:61:833:415#0/1  
CGTCCCCTGGGTTAAGTGCAACTTCAATATAAACTG  
+HWI-EAS443:3:61:833:415#0/1  
abbbabbbb\_bababb\_baba\_Zaaaa\_aaaa`\_^`¥`\_`  
@HWI-EAS443:3:61:841:1067#0/1  
AAAGAAGTCTAATGTCGAGTCCCGCACTCGCG  
+HWI-EAS443:3:61:841:1067#0/1  
X¥aW\_]b```a```bbb\_Y^aVabbaV\_]V¥W[\_R[VL]  
@HWI-EAS443:3:61:847:1119#0/1  
CTAATGTCGAGTCCCGCACTCGCGAGATACTACTAAGA  
+HWI-EAS443:3:61:847:1119#0/1  
abbbbbbaba^aZ]aaabLb`aZab^ba\_RZ`OHV\_\_`^¥  
@HWI-EAS443:3:61:859:1545#0/1  
GTCCCCTTTTCGTTTCATTACCAACTACGTCCCCTTGC  
+HWI-EAS443:3:61:859:1545#0/1  
]\_`SSUNTZ]WYSZ¥ZZ]T`aa^\_UZX`YSFNQWUQW  
@HWI-EAS443:3:61:872:350#0/1  
AGAGAATAAAAGAAGTCTAATGTCGAGTCCCG  
+HWI-EAS443:3:61:872:350#0/1  
]`aa`bb`bba\_baaba`baaaa^]\_b^¥\_Vaa`U]^\_  
@HWI-EAS443:3:61:883:1160#0/1  
CTTATTTTCAGTGTGGAGGTTGCCCGTTAGCACTTCTT  
+HWI-EAS443:3:61:883:1160#0/1  
¥b\_aababbab\_]X^bbb`aa][Xbabbb`YZGR^aba`W  
@HWI-EAS443:3:61:898:1248#0/1  
GACCCATTAGCATCTCTTGGAAATGTGCCACAGCACAC  
+HWI-EAS443:3:61:898:1248#0/1  
\_aaaaabb`aaaaaaaa```a\_XI[a`^a`aW^a¥¥\_\_Y

@HWI-EAS443:3:61:898:598#0/1  
AAAGAAGTCTAATGTCGCAGTCCCGCACTCGCG  
+HWI-EAS443:3:61:898:598#0/1  
`[\_bZX]^WM^`]ZP]]U]XS]¥YV[YY]V¥MPYUPNMN  
@HWI-EAS443:3:61:89:1300#0/1  
AAAAGAAGTCTAATGTCGCAGTCCCGCACTCGCG  
+HWI-EAS443:3:61:89:1300#0/1  
`ba`]\`U`a^aa¥aZ¥a`a`\_Y`^`\_\_V[\_\_\_XZMWYUYV  
@HWI-EAS443:3:61:926:1789#0/1  
AAAGAAGTCTAATGTCGCAGTCCCGCACTCGCG  
+HWI-EAS443:3:61:926:1789#0/1  
X]^X\_]ZZRVORPR]^]W^`\_G\_^b\_Z[`BBBBBBBBBBBB  
@HWI-EAS443:3:61:978:957#0/1  
AGAGAATAAAAGAAGTCTAATGTCGCAGTCCCG  
+HWI-EAS443:3:61:978:957#0/1  
ababaabbbbababbbabbaabaXabbaaa\_aa\_^]\_¥  
@HWI-EAS443:3:61:999:1443#0/1  
AAAGAAGTCTAATGTCGCAGTCCCGCACTCGCG  
+HWI-EAS443:3:61:999:1443#0/1  
^\_TTVU\_a¥K¥a^]\_^]¥]\`¥U\_]`a\_\_a]ULRU\_[SLSP  
@HWI-EAS443:3:62:1015:517#0/1  
CAGAATGAAGTGGATGATGGCAATGAGATACCCAATTACA  
+HWI-EAS443:3:62:1015:517#0/1  
abbaabbb`babbabbaaaaaaaaa`aaaa`aa```aaa  
@HWI-EAS443:3:62:1023:1147#0/1  
AAAGAAGTCTAATGTCGCAGTCCCGCACTCGCG  
+HWI-EAS443:3:62:1023:1147#0/1  
]`a`Xabaaaaaaaa\_a`aabYa\_a`a`\_aa\_a\_\_Y^Za`  
@HWI-EAS443:3:62:1064:1490#0/1  
AAAAGAAGTCTAATGTCGCAGTCCCGCACTCGCG  
+HWI-EAS443:3:62:1064:1490#0/1  
`aab^aa]aa``aaaaaa`baUa]\_VVYa^`YV^Va]\_  
@HWI-EAS443:3:62:1075:44#0/1  
TAAAGAAGTCTAATGTCGCAGTCCCGCACTCGCG  
+HWI-EAS443:3:62:1075:44#0/1  
aaaaab``\_aa`a`a`\_a\_aaa]\_`W^\_Y`^^^UVW]^  
@HWI-EAS443:3:62:1119:136#0/1  
TTCCTGATGTGACTTTTTGATTATGGCCATATGGTCCAC  
+HWI-EAS443:3:62:1119:136#0/1  
aaaaaa`\_]a^\_a`aa`\_`\_`\_`^ZZZ^[X[XOQSSWJQ  
@HWI-EAS443:3:62:1123:253#0/1  
ATGCAATCCTCTTGTGAGAATACCATGGCCACAATTATTG  
+HWI-EAS443:3:62:1123:253#0/1  
aaa`a`a\_a`a`a`\_a]\_a]\_\_\_^[YYZZ^^\_X]VYUVVZU  
@HWI-EAS443:3:62:1126:523#0/1  
GGCCAGAGGTGATACCATCACTCGGTCTGATCCAGCATCG  
+HWI-EAS443:3:62:1126:523#0/1  
aaabba`ab¥a````aaaa`a^a\_aaQ[[PV^^[PYU][Z\_  
@HWI-EAS443:3:62:1158:695#0/1  
CCCGTTTTCGTTTTATTACCAACTACGTCCCCTTGCCC

+HWI-EAS443:3:62:1158:695#0/1  
aaab`]]b[¥V`\_]M[aa```b```\_aa^\_a`\_[\_]`Za  
@HWI-EAS443:3:62:1197:851#0/1  
AGTCGCTGGTTTGGCCCTATTGACAAAGTTCAGATCGCCCC  
+HWI-EAS443:3:62:1197:851#0/1  
`b``\_`^`\_\_`[`a``aa`aaa\_X[]a``Wa\_^Z\_[T]Vaa\_  
@HWI-EAS443:3:62:1198:1951#0/1  
AAAAGAAGTGGAGAGATCTAATGTCGCAGTCCCGCACTCGC  
+HWI-EAS443:3:62:1198:1951#0/1  
abaaS\_aaaabQaaaa\_baab¥XUXUYXVV`ZQWYVM\_\_a  
@HWI-EAS443:3:62:1199:1313#0/1  
GGAGAGACGAGCAGTCAATTGCTGAGGCAATAATTGTGGC  
+HWI-EAS443:3:62:1199:1313#0/1  
aa]`\_`aaa`[[`\_`^U\_a^```V^^Z^¥Z\_¥^`[¥X^Z\_[[  
@HWI-EAS443:3:62:1208:2042#0/1  
GAATGAAGTGGATGATGGCAATGAGATACCCAATTACAGC  
+HWI-EAS443:3:62:1208:2042#0/1  
a`aa¥aaa^```\_\_\_\_\_][FV`a¥\_\_ZX^\_\_\_\_`\_\_^^]\_^`  
@HWI-EAS443:3:62:1216:1336#0/1  
TTTCATTACCAACTACGTCCCCTTGCCCAATTAGCACA  
+HWI-EAS443:3:62:1216:1336#0/1  
\_a`aaa```¥^^a]a``a`[^`]^`^`][¥`aa`^^¥^¥a¥`  
@HWI-EAS443:3:62:1233:1316#0/1  
AAAGAAGTGGAGAGATCTAATGTCGCAGTCCCGCACTCGCG  
+HWI-EAS443:3:62:1233:1316#0/1  
`a`¥¥¥a``aPL]Zaaaa^`b[\_W\_UUU[^XWQ¥NVX\_IX  
@HWI-EAS443:3:62:1299:178#0/1  
TGCTGTAATTGGGTATCTCATTGCCATCATCCACTTCATT  
+HWI-EAS443:3:62:1299:178#0/1  
```bb¥]aabbba¥b`ababbab\_\_a`\_a^a[`Za`[\_`\_`\_`  
@HWI-EAS443:3:62:1302:625#0/1  
AGTTCTTGAAAGGATGCAGGTGCATTGACTGAAGATCCA  
+HWI-EAS443:3:62:1302:625#0/1  
\_^\_a`abbaaaabbaabaab`¥a\_aaa\_M]aaabb`\_aa]  
@HWI-EAS443:3:62:141:811#0/1  
CTGCTGTAATTGGGTATCTCATTGCCATCATCCACTTCAT  
+HWI-EAS443:3:62:141:811#0/1  
aabaab\_aaaaa`\_Vaaaa`^^`\_a`¥\_a`\_`^`\_`^^¥]¥  
@HWI-EAS443:3:62:1428:585#0/1  
AAAAGAAGTGGAGAGATCTAATGTCGCAGTCCCGCACTCGC  
+HWI-EAS443:3:62:1428:585#0/1  
aaaaaabaaaaaabaaaaabb`\_`^ab``a\_`]NU\_\_a  
@HWI-EAS443:3:62:1430:1194#0/1  
GTTCAAATTCATTTTGTGTATAACATTGTGGGATCTTG  
+HWI-EAS443:3:62:1430:1194#0/1  
a\_a`aaaaa\_```aaaaaaa\_aa```^`aaa`\_`\_]a`\_a\_a  
@HWI-EAS443:3:62:1437:667#0/1  
GTCCCCTTTTCGTTTCATTACCAACTACGTCCCCTTGC  
+HWI-EAS443:3:62:1437:667#0/1  
a[TWZYDXaVSaXSU[]aXUYT\_ZSUV[]^aWWUSVRTZL



@HWI-EAS443:3:62:145:1655#0/1  
CTTACAGTTCTTGAAAGGATGCAGGTGCATTGACTGAAG  
+HWI-EAS443:3:62:145:1655#0/1  
abbabaa`aaaa`\_]aaaa`\_^Z]\_Waa`a¥[\_^^Z\_\_Y  
@HWI-EAS443:3:62:145:76#0/1  
CTCAGAATGAAGTGGATGATGGCAATGAGATACCCAATTA  
+HWI-EAS443:3:62:145:76#0/1  
abaab`¥abbbbabbbbabbba\_aababaaaaabaa`[W  
@HWI-EAS443:3:62:1462:167#0/1  
CGTTTTCGTTTCATTACCAACTACGTCCCCTTGCCCAA  
+HWI-EAS443:3:62:1462:167#0/1  
a`]YV]Y`IUZIXZa]\_]`[T]]Q^Y\_Ia\_]YTVT\_GaW]  
@HWI-EAS443:3:62:1464:1571#0/1  
ATGGAGAGAATAAAAGAACTGAGAGATCTAATGTGCGCAGT  
+HWI-EAS443:3:62:1464:1571#0/1  
aaaaZa¥^`bbaaaaaaababaaa`a\_aaaaa¥\_`¥aa]  
@HWI-EAS443:3:62:1484:1330#0/1  
ATGGCCATATGGTCCACAGTGGTCTTAGTGAGTATCTCGC  
+HWI-EAS443:3:62:1484:1330#0/1  
`aa]aaa\_\_\_b`^`]U]¥XWab`\_\_]Z¥SX^]Ua`¥¥]]X  
@HWI-EAS443:3:62:1494:605#0/1  
TGCAACACTTCAATATAAACTGCCTGTTCCGCCGGCTA  
+HWI-EAS443:3:62:1494:605#0/1  
a`\_`aaaaaa`\_`aPa^aabb`a`aaa`a`b^^aa\_a]  
@HWI-EAS443:3:62:1521:438#0/1  
AAAGAACTGAGAGATCTAATGTGCGCAGTCCCGCACTCGCG  
+HWI-EAS443:3:62:1521:438#0/1  
aaaaaaaa`aaaaaaabaaa¥aa`a`\_`a\_]Y¥^[\_\_a  
@HWI-EAS443:3:62:1543:330#0/1  
GGGGTGGAGTCTGCTGTCCTGAGAGATTCTCATTGTTGG  
+HWI-EAS443:3:62:1543:330#0/1  
aa^[I[a`]`^]`\_\_Z\_`^^`Y`^`Z`a`\_a^Y\_\_\_¥VP  
@HWI-EAS443:3:62:1549:1309#0/1  
GGAGGTTGCCGTTAGCACTTCTTCTTCTTCTTCTGACTGA  
+HWI-EAS443:3:62:1549:1309#0/1  
`b`abNa\_\_aa[\_^^aZNU^b[aaSaa]aab]a`SY][L]  
@HWI-EAS443:3:62:1559:647#0/1  
CCCCTTTTCGTTTCATTACCAACTACGTCCCCTTGCCC  
+HWI-EAS443:3:62:1559:647#0/1  
aaa`abbaab^aa^aba`aa]aaa\_]^[a\_aa`YVV`\_a\_  
@HWI-EAS443:3:62:1568:1736#0/1  
GAAGGCACATCTGGGGTGGAGTCTGCTGTCCTGAGAGGAT  
+HWI-EAS443:3:62:1568:1736#0/1  
`Y`\_]Q¥JU¥Z^T\_\_^L\_Z¥PZOx^`]Z]YTY^^a\_aa\_  
@HWI-EAS443:3:62:1585:564#0/1  
AGGGGACGTAGTGTGGTAATGAAACGAAAACGGGACTCT  
+HWI-EAS443:3:62:1585:564#0/1  
abbbb`ab[`b`b\_bbaR\_ab`aaP]XaaaFZ]a¥Zaa^  
@HWI-EAS443:3:62:158:920#0/1  
CTAATGTGCGCAGTCCCGCACTCGCGAGATACTCACTAAGA

+HWI-EAS443:3:62:158:920#0/1  
aabbba`a`bbb\_abb`K^[aa\_ZP^YL^\_`¥Z]T[\_  
@HWI-EAS443:3:62:1598:710#0/1  
CTGCTCCCAGCACGTCCCTTGGGTAAAGTCAACACTTCA  
+HWI-EAS443:3:62:1598:710#0/1  
^a`\_`]b¥bb\_\_\_\_`^]a^aa\_^]a^P\_^¥`aa\_UX`\_W^  
@HWI-EAS443:3:62:1617:287#0/1  
GGGCGATCTGAACCTTGTCAATAGGGCAAACCAGCGACTG  
+HWI-EAS443:3:62:1617:287#0/1  
a\_\_aa`\_aaY`Uaaaa\_]\_\_`\_a^\_U`\_a\_¥\_\_^^^`\_  
@HWI-EAS443:3:62:1633:765#0/1  
CCCGTTTTCGTTTCATTACCAACACTACGTCCCCTTGCCC  
+HWI-EAS443:3:62:1633:765#0/1  
aabb`aab`b]bb`abbba\_baaa\_aa\_aY`aa\_\_[X`a\_  
@HWI-EAS443:3:62:1639:1001#0/1  
CATTATTCTCTGTCTGCTGTAATTGGGTATCTCATTGCC  
+HWI-EAS443:3:62:1639:1001#0/1  
abbbabbbbabbbabbbabbaabbba``abb`b`aaaabb  
@HWI-EAS443:3:62:1650:1267#0/1  
CGTTTTCGTTTCATTACCAACACTACGTCCCCTTGCCCAA  
+HWI-EAS443:3:62:1650:1267#0/1  
abbbbb`bUbbbbbabbbbbbabbba`aaa]baa\_aaaa  
@HWI-EAS443:3:62:1653:245#0/1  
AACTGGATCAATCTCCTGGTTGCCTTTCTGAGAATAGCTG  
+HWI-EAS443:3:62:1653:245#0/1  
aa`aaaabaaaa\_a````a\_aa\_[a`\_¥`\_`\_\_\_\_`^\_\_`  
@HWI-EAS443:3:62:168:1116#0/1  
GAATAAAAGAACTGAGAGATCTAATGTCGCAGTCCCGCAC  
+HWI-EAS443:3:62:168:1116#0/1  
aaa`a^`^`aaaa`^`aaa\_aa`])`aZaY`\_¥W^`^WZN^  
@HWI-EAS443:3:62:1725:1151#0/1  
TGCTAATTGGGCAAGGGGACGTAGTGTGGTAATGAAACG  
+HWI-EAS443:3:62:1725:1151#0/1  
aabaaba`abaa\_bb\_a`ab\_`^a\_bba[]`]TT]aU\_  
@HWI-EAS443:3:62:1754:1907#0/1  
AATTGGGCAAGGGGACGTAGTGTGGTAATGAAACGAAAA  
+HWI-EAS443:3:62:1754:1907#0/1  
aabb¥\_b\_a`aaaa\_aaa\_a¥W]aa`U\_a[^¥a¥FR]`a\_  
@HWI-EAS443:3:62:1775:1692#0/1  
GTCCCGTTTTCGTTTCATTACCAACACTACGTCCCCTTGC  
+HWI-EAS443:3:62:1775:1692#0/1  
^\_baab]X\_]\_b\_aaa^aab[N^a\_]Z]a`VY[YVYVY  
@HWI-EAS443:3:62:1784:824#0/1  
GTCCCGTTTTCGTTTCATTACCAACACTACGTCCCCTTGC  
+HWI-EAS443:3:62:1784:824#0/1  
a]\_`¥b[¥\_aa\_W^¥]\_]YLV¥YUX¥[[XOS[UYSV[  
@HWI-EAS443:3:62:203:463#0/1  
AATAAAAGAACTGAGAGATCTAATGTCGCAGTCCCGCACT  
+HWI-EAS443:3:62:203:463#0/1  
abbbab`aababbaabaaaaa]ab]ba\_aa]`\_`\_\_[a\_

@HWI-EAS443:3:62:209:996#0/1  
AGGGGACGTAGTGTGGTAATGAAACGAAAACGGGACTCT  
+HWI-EAS443:3:62:209:996#0/1  
\_U\_`a]ba^a¥[^Ya`aLG][¥`]WHT]\_\_ZNLZUFTL¥L  
@HWI-EAS443:3:62:214:1854#0/1  
AAAAGAAGTCTGAGATCTAATGTCGCAGTCCCGCACTCGC  
+HWI-EAS443:3:62:214:1854#0/1  
aaaa\_aaa`a\_a`a\_aaa`a`¥\_¥`V[\_\_\_^RZTUWZPX  
@HWI-EAS443:3:62:25:624#0/1  
GCATGTACGCCACCATCAAGGGAGCAATTTTACAATCCTG  
+HWI-EAS443:3:62:25:624#0/1  
¥^]ababbbbabWXa¥¥aa`\_`a]\_a`\_ba\_Z]aa]a  
@HWI-EAS443:3:62:279:334#0/1  
GTCCATTATTCTTGTCTGCTGTAATTGGGTATCTCATT  
+HWI-EAS443:3:62:279:334#0/1  
aaa\_ababbbbaaaaa`aaaaab`aaaa`aU^\_\_\_Z\_¥]  
@HWI-EAS443:3:62:27:1213#0/1  
AGAGAATAAAAGAACTGAGAGATCTAATGTCGCAGTCCCG  
+HWI-EAS443:3:62:27:1213#0/1  
R[\_]¥HP[[`b`WT^`S]TT¥][`^\_Yb]`a\_00TV\_^¥  
@HWI-EAS443:3:62:280:1133#0/1  
GAGAAATCCTCTCAGGACAGCAGACTCCACCCAGATGTG  
+HWI-EAS443:3:62:280:1133#0/1  
aa\_a]b`aaaaaaaa`a`aa¥aXa`a\_aaaZaVVQ¥¥W\_  
@HWI-EAS443:3:62:293:934#0/1  
GGGCCATTCTATTCCACCATGTTACGGCCAGAGGTGATA  
+HWI-EAS443:3:62:293:934#0/1  
a`ab\_a`aa`Ua^aa`aaa`a¥`¥\_Y`VN¥Y[S[[KP  
@HWI-EAS443:3:62:307:1837#0/1  
TGGGAGAAACCTTGTTTTACGGACCAATTCTCTTTCTAGC  
+HWI-EAS443:3:62:307:1837#0/1  
aa\_baaaababaaa`baaaa`^aa`b]aa`aa`\_\_^a\_a  
@HWI-EAS443:3:62:307:1884#0/1  
GCAGTGTTTATATTGAAGTGTGCACTTAACCCAAGGGAC  
+HWI-EAS443:3:62:307:1884#0/1  
a`aZ¥^\_baa`baa^\_]a¥^aaa`]]`aa`a^\_]X0^a  
@HWI-EAS443:3:62:319:1630#0/1  
CAGTGGTCTTAGTGAGTATCTCGCGAGTGCGGGACTGCGA  
+HWI-EAS443:3:62:319:1630#0/1  
a\_SV[TUaa`XYS¥Z]^]a¥¥Z¥W[[Z[\_[WNSZXRZZU  
@HWI-EAS443:3:62:344:959#0/1  
TATTCTTGCCCCACTTCATTTGGGAAAACAATTCCATA  
+HWI-EAS443:3:62:344:959#0/1  
`aba^]^`a`a`]aa````\_`a`^`\_P\_]`^]a\_a^Z  
@HWI-EAS443:3:62:374:810#0/1  
AGAGGATTGCATGATCAAGGCAGTTAGGGCGATCTGAAC  
+HWI-EAS443:3:62:374:810#0/1  
\_ba`abaa`aba`[ababaaaa]N\_N[`¥aa]ZXPTTVRN  
@HWI-EAS443:3:62:396:1408#0/1  
GGGTATCTCATTGCCATCATCCACTTCATTCTGAGTGCGG

+HWI-EAS443:3:62:396:1408#0/1  
`baU`a^ZU]^Xab^NW` [ZP\_R[\_]X]VaVTTSSS[[X  
@HWI-EAS443:3:62:434:451#0/1  
AGAGAATAAAAGAACTGAGAGATCTAATGTCGCAGTCCCG  
+HWI-EAS443:3:62:434:451#0/1  
ababa`ab`\_]\_^aaaabaaa\_[bba[ab[baa`\_¥`aa^  
@HWI-EAS443:3:62:441:1517#0/1  
CTGATGTCAGTATTCTTGCCCCACTTCATTTGGGAAAAC  
+HWI-EAS443:3:62:441:1517#0/1  
\_U^0^VQZZYW¥aRa]`Zaa`\_a\_ZY\_a`\_YZS^^YT\_``  
@HWI-EAS443:3:62:474:1540#0/1  
TGGCCGTAACATGGTGAATAGGAATGGCCCAACAACAAG  
+HWI-EAS443:3:62:474:1540#0/1  
`[`bbb^ab`aa`Xa[X`[````a``]aab^Y¥]a\_aa\_  
@HWI-EAS443:3:62:484:1258#0/1  
TTTCTGAAGTGGACAGGGCCGAAGGTACCATGTTTCAACC  
+HWI-EAS443:3:62:484:1258#0/1  
aa\_ba\_^^a`]ab`a^]`¥YY`^GS``\_a^`\_[a`]]  
@HWI-EAS443:3:62:50:444#0/1  
AGGGGACGTAGTGTGGTAATGAAACGAAAACGGGACTCT  
+HWI-EAS443:3:62:50:444#0/1  
Vbbbaab`\_aa]a¥b\_aS]a`a]`a`aTK]RWZ]^U\_[\_]  
@HWI-EAS443:3:62:517:1445#0/1  
AAAGAAGTGAAGATCTAATGTCGCAGTCCCGCACTCGCG  
+HWI-EAS443:3:62:517:1445#0/1  
a¥\_]`ab]]a\_Z]`aaaaaa`Z`^a`¥Y\_aaZa\_\_ZU[ ]V  
@HWI-EAS443:3:62:529:1812#0/1  
ATCAAACCTTTGGTCAACATCATCATTCTCACTTCTCCTC  
+HWI-EAS443:3:62:529:1812#0/1  
aaaaabbaaZ]`Zaaa^aaaaa`\_aY\_a]aa\_¥^YaVa\_`  
@HWI-EAS443:3:62:537:1085#0/1  
AAAAGAAGTGAAGATCTAATGTCGCAGTCCCGCACTCGC  
+HWI-EAS443:3:62:537:1085#0/1  
aabbabb`baaZ^aabb]]`b\_ba\_baNaa\_Za^\_aaZ^  
@HWI-EAS443:3:62:551:1540#0/1  
TGAACAAGGACAAACCCTCTGGAGCAAACAAACGATGCT  
+HWI-EAS443:3:62:551:1540#0/1  
abbbbbbb]Vabbb\_abbba`Y]aa`aabbaba`\_ab`  
@HWI-EAS443:3:62:565:232#0/1  
GAAACCTTGT TTTACGGACCAATTCTCTTTCTAGCATGTA  
+HWI-EAS443:3:62:565:232#0/1  
a\_^a`^`\_Z\_Y\_]\_\_\_\_[\_^^]]\_^^^]]]SZZZ^ZXZ  
@HWI-EAS443:3:62:572:515#0/1  
ATAAAAGAACTGAGAGATCTAATGTCGCAGTCCCGCACTC  
+HWI-EAS443:3:62:572:515#0/1  
^^^`^`aab\_aaa]aa`aaa^]ab^a`aa`Q]` [ZZP¥[^  
@HWI-EAS443:3:62:574:242#0/1  
CGCACTCGCGAGATACTCACTAAGACCACTGTGGACCATA  
+HWI-EAS443:3:62:574:242#0/1  
aaZSa\_UYPV^\_[UX]OZRRZ¥PYWGM^TRXKMONLQXL[

@HWI-EAS443:3:62:593:1550#0/1  
AGGGGACGTAGTGTGGTAATGAAACGAAAACGGGACTCT  
+HWI-EAS443:3:62:593:1550#0/1  
aa^[aaa\_^\\$^aaaaUX`aaYaab\_\_\_aa`\_^\_]Y]aX  
@HWI-EAS443:3:62:610:1741#0/1  
ATTCCATTTTGTGTATAACATTGTGGGATCTTGTGACCA  
+HWI-EAS443:3:62:610:1741#0/1  
\_ababbaabb`aa\_aaaa`aaaa^[\_a`a`^]]``a  
@HWI-EAS443:3:62:652:431#0/1  
GTCCCCTTTTCGTTTCATTACCAACTACGTCCCCCTTGC  
+HWI-EAS443:3:62:652:431#0/1  
aaaaaaaaabbab`aaaaaa`a^aa^a`aa`a]¥\_]T]]\_  
@HWI-EAS443:3:62:654:1394#0/1  
TGGAGAGAATAAAAGAACTGAGAGATCTAATGTCGCAGTC  
+HWI-EAS443:3:62:654:1394#0/1  
\_¥]DU]\_X¥`a\_^`\_P\_a`a\_aaX[`]^\`¥^[RZXUWVV`  
@HWI-EAS443:3:62:718:1437#0/1  
ATCTAATGTCGCAGTCCCGCACTCGCGAGATACTCACTAA  
+HWI-EAS443:3:62:718:1437#0/1  
aa`aYaaaVa^[\_¥```U\_Q^[VV¥WUW^WW^WZWWW¥¥  
@HWI-EAS443:3:62:736:345#0/1  
TTCCTGATGTGTACTTTTTGATTATGGCCATATGGTCCAC  
+HWI-EAS443:3:62:736:345#0/1  
`^`]a`]]a¥aWaaaba^`]]`Z^\_]ZYTRMNXYTZV]  
@HWI-EAS443:3:62:739:1191#0/1  
ACCATGGCCACAATTATTGCCTCAGCAATTGACTGCTCGT  
+HWI-EAS443:3:62:739:1191#0/1  
a`aa]Z]\_^Z`\_\_Z¥]]\_Saa``[[`¥Z[QXV\_]SYZWS  
@HWI-EAS443:3:62:73:467#0/1  
TTCCCATCACATTGTCGATGGATTCAATCCCCAGTTCTG  
+HWI-EAS443:3:62:73:467#0/1  
abbb¥`babbbab`b`TV[`]\_[X`aa\_a`a`T^X]a]`  
@HWI-EAS443:3:62:752:1233#0/1  
GCACTCGCGAGATACTACTAAGACCACTGTGGACCATAT  
+HWI-EAS443:3:62:752:1233#0/1  
ababbbbbbab`baabb`a]baaabaaaa]]]``aa]`  
@HWI-EAS443:3:62:789:1155#0/1  
CTGCTGCTCTGAGAGGATTTCTCATTTTGGGCAAAGAAGA  
+HWI-EAS443:3:62:789:1155#0/1  
`b```aJ[a\_]ZU`^bb]baabaZU\_a^Ya```Taaaa`  
@HWI-EAS443:3:62:794:1446#0/1  
AAAAGAACTGAGAGATCTAATGTCGCAGTCCCGCACTCGC  
+HWI-EAS443:3:62:794:1446#0/1  
¥a\_aaYa[¥^a]aa\_[Za^^`a^^`^`aaYaaaZWTUXXT`  
@HWI-EAS443:3:62:799:571#0/1  
CAGCACGTCCCTTGGGTTAAGTGCAACACTTCAATATAAA  
+HWI-EAS443:3:62:799:571#0/1  
aaaaaaaaabaaYaa`aaaQa`aa\_aaa^^``¥\_\_`]]]``a  
@HWI-EAS443:3:62:821:737#0/1  
CTGCTGCTCTGAGAGGATTTCTCATTTTGGGCAAAGAAGA

+HWI-EAS443:3:62:821:737#0/1  
abababaabbbaba\_babbaaabaaaaa`a`aa^]\_aa\_  
@HWI-EAS443:3:62:822:27#0/1  
AAAGAAGTCTAATGTCGCAGTCCCGCACTCGCG  
+HWI-EAS443:3:62:822:27#0/1  
abbba`aaaaaa`aaabaab\_a\_\_`aT^`\_\_[LRW]^]]  
@HWI-EAS443:3:62:831:1535#0/1  
GTGATTATGGAAGTTGTTTTCCCAAATGAAGTGGGGGCAA  
+HWI-EAS443:3:62:831:1535#0/1  
`]¥\_bbbbaba^bI`U¥a`]WZaUV^GMZYVLBBBBBBBB  
@HWI-EAS443:3:62:888:1578#0/1  
AAAAGAAGTCTAATGTCGCAGTCCCGCACTCGC  
+HWI-EAS443:3:62:888:1578#0/1  
¥U[VaXXWI`¥^¥UWZZ\_ba^^]\_YYV^]b\_Z[a]^NZN`  
@HWI-EAS443:3:62:904:1643#0/1  
GGGGACGTAGTGTGGTAATGAAACGAAAACGGGACTCTA  
+HWI-EAS443:3:62:904:1643#0/1  
abb`aab\_aa`\_aa\_X`a`\_aa\_^[a`a`\_`Z^NQYY`  
@HWI-EAS443:3:62:925:174#0/1  
AAAAGAAGTCTAATGTCGCAGTCCCGCACTCGC  
+HWI-EAS443:3:62:925:174#0/1  
ababbaaababaa`a`aa`aa¥`\_`a^\_\_^^[[W^^^V  
@HWI-EAS443:3:62:927:1114#0/1  
ATGGTATTCTCACAAGAGGATTGCATGATCAAGGCAGTTA  
+HWI-EAS443:3:62:927:1114#0/1  
`bb`V`bbab`¥]baaab^aa``]a`ba\_aba]¥^`aY]Z  
@HWI-EAS443:3:62:959:1367#0/1  
AAGAAGTCTAATGTCGCAGTCCCGCACTCGCGA  
+HWI-EAS443:3:62:959:1367#0/1  
aa\_^^aaaaa`aaaaaaa`[`a`a\_[^`¥^Y[[W]`][  
@HWI-EAS443:3:62:979:1795#0/1  
CTCCCCTTTGCTGCTGCTCCACCAGAACAGAGTAGGATGC  
+HWI-EAS443:3:62:979:1795#0/1  
abaa`aaaaa]aa^`aa\_aa`^^`a[\_\_\_\_`\_U¥\_^\_YYV  
@HWI-EAS443:3:63:1004:1733#0/1  
TCCCGTTTTCGTTTTATTACCAACTACGTCCCCTTGCC  
+HWI-EAS443:3:63:1004:1733#0/1  
[YSab\_WYZTa`aaa`a`a]Yabab]^\_\_¥ZY`\_^YV`\_`  
@HWI-EAS443:3:63:1032:850#0/1  
AAAAGAAGTCTAATGTCGCAGTCCCGCACTCGC  
+HWI-EAS443:3:63:1032:850#0/1  
VXUTVX`bb`¥¥\_¥Z\_\_a`^`]ZM]VZZ]\_[L¥N[]YO[  
@HWI-EAS443:3:63:1085:232#0/1  
GTCCCGTTTTCGTTTTATTACCAACTACGTCCCCTTGCC  
+HWI-EAS443:3:63:1085:232#0/1  
a]`\_\_b\_aaa\_b^\_a`aa\_a]\_a\_\_a\_a`\_`]^W^^\_]^V  
@HWI-EAS443:3:63:1105:464#0/1  
GTGGTCTTAGTGAGTATCTCGCGAGTGCGGGACTGCGACA  
+HWI-EAS443:3:63:1105:464#0/1  
aaaa\_abbbaa^aaa\_aa\_]^V`X[¥T\_\_^`\_¥\_]\_^\_S\_\_

@HWI-EAS443:3:63:1132:1296#0/1  
GTCCCCGTTTTCGTTTCATTACCAACTACGTCCCCCTTGC  
+HWI-EAS443:3:63:1132:1296#0/1  
`HZZ]]V¥]]aa]\_\_\_\_\_]\`\_Y¥]Y¥]\_¥[]\_Y^¥^^¥Z^Y  
@HWI-EAS443:3:63:1159:906#0/1  
CTCGCGAGATACTACTAAGACCACTGTGGACCATATGGC  
+HWI-EAS443:3:63:1159:906#0/1  
aab`aWX`[bY\_`\_\_`aa^a`¥a\_`^a\_\_\_\_[`aY]\_\_\_\_]Z  
@HWI-EAS443:3:63:121:557#0/1  
CACTTCTCCTCCTGGAGTGACATCTGCTCCCAGCACGTC  
+HWI-EAS443:3:63:121:557#0/1  
aa\_aabb`\_IRXV^^¥aY^WXYO^]\`aa[\_Z``ZUZZVEM  
@HWI-EAS443:3:63:1222:631#0/1  
GGTGGGTTCACTTTCAAAGGACAAGCGGATCATCAGTCA  
+HWI-EAS443:3:63:1222:631#0/1  
aaWa`aZ`\_\_\_\_aa[U][a`a\_`a\_Qa`a^\_X]\_`^\_\_X`\_  
@HWI-EAS443:3:63:1233:929#0/1  
GTTCTTGGAAAGGATGCAGGTGCATTGACTGAAGATCCAG  
+HWI-EAS443:3:63:1233:929#0/1  
a`aaa`a[``a`\_`aaaa`]aaa`a`^`\_`aa^¥^W^`  
@HWI-EAS443:3:63:1234:256#0/1  
GTCCATTATTCTTGTCTGCTGTAATTGGGTATCTCATT  
+HWI-EAS443:3:63:1234:256#0/1  
a``\_`aaaaa\_a\_aaa^`a^aaX\_^^`\_\_^X`\_[\_SX^^  
@HWI-EAS443:3:63:1253:1571#0/1  
GAAGTGGATGATGGCAATGAGATACCCAATTACAGCAGAC  
+HWI-EAS443:3:63:1253:1571#0/1  
a\_a`Vaa`a^`aa^`aaa]\`a\_a`\_`\_a]^aW``¥\_`a^  
@HWI-EAS443:3:63:1277:1763#0/1  
AAAAGAAGTGGAGATCTAATGTCGCAGTCCCGCACTCGC  
+HWI-EAS443:3:63:1277:1763#0/1  
`]\`\_bba\_`bM\_X`aaU`ab\_a\_Haaaa`GXHT¥N¥\_BBBB  
@HWI-EAS443:3:63:1290:790#0/1  
CTTCCTGATGTGACTTTTTGATTATGGCCATATGGTCCA  
+HWI-EAS443:3:63:1290:790#0/1  
abbaabb\_abab^a`bbbbbaabbaa`^Y¥Z]\`\_RTW[Y  
@HWI-EAS443:3:63:1293:757#0/1  
GTCCCCGTTTTCGTTTCATTACCAACTACGTCCCCCTTGC  
+HWI-EAS443:3:63:1293:757#0/1  
`L\_[\_`OQ\_\_Y]\_U\_YRZXXRW]¥\_[X\_`WXGGR^\_RNV¥  
@HWI-EAS443:3:63:12:649#0/1  
CCCCGTTTTCGTTTCATTACCAACTACGTCCCCCTTGGCC  
+HWI-EAS443:3:63:12:649#0/1  
aa]\`aY]^¥\_YaYaa¥USaaZZ^Z[[W^PPW]^[]V\_XNZ  
@HWI-EAS443:3:63:1311:261#0/1  
ATTCGTAAGGACACTGTTCCAGCAAATGCGGGATGTGCTT  
+HWI-EAS443:3:63:1311:261#0/1  
Zababaa`aZOWOQQaLa\_P`aaaY\_HYGZN¥¥RVQW]BB  
@HWI-EAS443:3:63:1321:2017#0/1  
CATTGACTGAAGATCCAGATGAAGGCACATCTGGGGTGGGA

+HWI-EAS443:3:63:1321:2017#0/1  
^\_^¥WabUbabbab]abbbbbaab¥¥\_b\_]b[a`a`SS\_`a  
@HWI-EAS443:3:63:1337:231#0/1  
CCCCTTTTCGTTTCATTACCAACTACGTCCCCTTGCCC  
+HWI-EAS443:3:63:1337:231#0/1  
aabbabbbababaaabbaaaba`a\_aa\_a\_\_`\_¥]`a¥`\_  
@HWI-EAS443:3:63:1343:288#0/1  
GGTTGCCCGTTAGCACTTCTTCTTCTTTCTTGACTGATGA  
+HWI-EAS443:3:63:1343:288#0/1  
ab\_baa``b`a`a^a\_ababaaaa\_aaa`aaa^`aa``a`  
@HWI-EAS443:3:63:1397:187#0/1  
GTCCCCTTTTTCGTTTCATTACCAACTACGTCCCCTTGCC  
+HWI-EAS443:3:63:1397:187#0/1  
aaaaab`aba`b\_^a`a`Va^\_aa^aa`a`]\_\_]Wa^``  
@HWI-EAS443:3:63:1397:675#0/1  
CGCACTCGCGAGATACTCACTAAGACCACTGTGGACCATA  
+HWI-EAS443:3:63:1397:675#0/1  
¥\_`\_`U[FY^\_b`a`¥Y`^¥\_bY`ZZWaW`XU]\_\_PW^aa  
@HWI-EAS443:3:63:1410:1071#0/1  
AAAGAAGTGAAGATCTAATGTGCGCAGTCCCGCACTCGCG  
+HWI-EAS443:3:63:1410:1071#0/1  
abbb\_a\_ab`^aa\_aaaaaaUa\_X`a\_U\_[^\_Z`XBBBB  
@HWI-EAS443:3:63:1483:1893#0/1  
AGAGAATAAAAGAAGTGAAGATCTAATGTGCGCAGTCCCG  
+HWI-EAS443:3:63:1483:1893#0/1  
ab``ba^abb\_]aXaab[\_Y^a\_aba``[[XX^`W[SY]  
@HWI-EAS443:3:63:1489:1072#0/1  
GGAAAAGCACTTTTGCATCTTTTTGGAAATGCCTCAAGAG  
+HWI-EAS443:3:63:1489:1072#0/1  
a^]¥]aY¥¥¥aZZYaWaTa``aa\_WYO¥W¥U[WTWVPY  
@HWI-EAS443:3:63:148:1087#0/1  
GGGACGTAGTGTGGTAATGAAACGAAAACGGGACTCTAG  
+HWI-EAS443:3:63:148:1087#0/1  
\_¥W`a[\_aX`\_\_`\_U¥H¥0^\_\_Z]`U\_^^^YRMN¥aY¥T  
@HWI-EAS443:3:63:1490:981#0/1  
TGATCATGCAATCCTCTTGTGAGAATACCATGGCCACAAT  
+HWI-EAS443:3:63:1490:981#0/1  
aaaaa````aaaaa\_ab`a`a\_aa^a^Y`]\_\_^\_\_a\_``  
@HWI-EAS443:3:63:1502:346#0/1  
CTTCCTGATGTGACTTTTTGATTATGGCCATATGGTCCA  
+HWI-EAS443:3:63:1502:346#0/1  
aaa^abbbb\_abababbbbabbbbbaaa`a\_``U[[X\_a  
@HWI-EAS443:3:63:1535:1763#0/1  
CAATGAGATACCCAATTACAGCAGACAAGAGAATAATGGA  
+HWI-EAS443:3:63:1535:1763#0/1  
`bZ]\_bb\_ab\_\_a`^bbab`abZ`Zb[\_aZ\_\_aaa``b`  
@HWI-EAS443:3:63:1643:877#0/1  
GTCCCCTTTTTCGTTTCATTACCAACTACGTCCCCTTGCC  
+HWI-EAS443:3:63:1643:877#0/1  
a\_a^aa[aaa¥aZaaaaaaa\_aaa\_aa`aa¥R[^]]\_\_``



@HWI-EAS443:3:63:1647:927#0/1  
GTCCCCGTTTTCGTTTCATTACCAACTACGTCCCCCTTGC  
+HWI-EAS443:3:63:1647:927#0/1  
a]\_a\_b` `aaaa\_a`aabaa]]aa\_a` \_\_\_\_` ]a`\_a]a[  
@HWI-EAS443:3:63:1700:1173#0/1  
CGCGAGATACTCACTAAGACCACTGTGGACCATATGGCCA  
+HWI-EAS443:3:63:1700:1173#0/1  
ab` `]bS]]baaaabaa^X[\_`b`\_TXYP^FXR^TYYBBB  
@HWI-EAS443:3:63:1705:1137#0/1  
GGGCGATCTGAACCTTGTCAATAGGGCAAACCAGCGACTG  
+HWI-EAS443:3:63:1705:1137#0/1  
aa¥^UX¥aa]Zaaaaabaa^Taa¥¥`^\_UaXU]Z\_\_\_\_T¥`  
@HWI-EAS443:3:63:1739:169#0/1  
GTTGCCCGTTAGCACTTCTTCTTCTTCTTCTTACTGATGAT  
+HWI-EAS443:3:63:1739:169#0/1  
a\_a\_X]]`T]¥\_WNQZ\_]ZU^^¥^`ZT]^]VZ^\_[ZZYU  
@HWI-EAS443:3:63:175:283#0/1  
GGGACGTAAGTGTGGTAATGAAACGAAACGGGACTCTA  
+HWI-EAS443:3:63:175:283#0/1  
abbb`\_b]`b¥`aab`Y^\_aa\_\_b^`\_`a\_\_`^¥X0^^XX  
@HWI-EAS443:3:63:1769:257#0/1  
GGCCGTAACATGGTGGGAATAGGAATGGCCCAACAACAAGT  
+HWI-EAS443:3:63:1769:257#0/1  
aba¥\_Z`^J\_Ya`W`aaa\_aa\_^`¥`^USZZSYaM\_]VN  
@HWI-EAS443:3:63:176:1925#0/1  
CACCTGCATCCTTTCCAAGAACTGTAAGTCGTTTGGTTGC  
+HWI-EAS443:3:63:176:1925#0/1  
aaab\_abb`baa`a`aaaa¥Y`\_W[\_\_\_\_Xa^]]\_ ^YZ]]\_  
@HWI-EAS443:3:63:1771:680#0/1  
GGAAAAGCACTTTTGCATCTTTTTGGAAATGCCTCAAGAG  
+HWI-EAS443:3:63:1771:680#0/1  
^]aa^Za\_a`aa^a`a`aaaaaa\_[\_\_^^]`\_[RV\_`  
@HWI-EAS443:3:63:1777:722#0/1  
CAGGTGCATTGACTGAAGATCCAGATGAAGGCACATCTGG  
+HWI-EAS443:3:63:1777:722#0/1  
aabb^a` `a^aa`ab]ba`^`\_`^`¥[a`\_]\_]^^[^^`a  
@HWI-EAS443:3:63:184:1282#0/1  
GACAAGAGACTGAAATGGTTCAAATTCCATTTTGTGTAT  
+HWI-EAS443:3:63:184:1282#0/1  
`bbbbbbabba\_`bbbbaaaabbaaaab`Yabaaa`a`aaa  
@HWI-EAS443:3:63:199:801#0/1  
GATGAAGGCACATCTGGGTGGAGTCTGCTGTCCTGAGAG  
+HWI-EAS443:3:63:199:801#0/1  
^\_a`¥\_\_\_\_`¥`¥`a\_]\_\_^S^]Z` `a]¥¥\_]¥Z\_ZYU\_^Y  
@HWI-EAS443:3:63:216:1083#0/1  
GGCGTACATGCTAGAAAGAGAATTGGTCCGTAACAAGG  
+HWI-EAS443:3:63:216:1083#0/1  
abbb`bbbaaaaaaaaa`a^` `aa¥[YV¥\_`Waaaa\_aa\_\_  
@HWI-EAS443:3:63:217:190#0/1  
AGAGAATAAAAAGAACTGAGAGATCTAATGTGCGCAGTCCCG

+HWI-EAS443:3:63:217:190#0/1  
V^]aKaaaabbb``a\_Z^`a`]^`^`[FU]^\_`a]]W]Z  
@HWI-EAS443:3:63:224:1345#0/1  
GTCCACTTCAGAAATCAAGTAAAATAAGGAGGAGAGTTG  
+HWI-EAS443:3:63:224:1345#0/1  
a\_aaaa]¥¥```YW\_a¥]]^]Q`]^]Y¥Z^^]a]`Y]]  
@HWI-EAS443:3:63:232:81#0/1  
TAATGTGCGAGTCCCGCACTCGCGAGATACTCACTAAGAC  
+HWI-EAS443:3:63:232:81#0/1  
aaa`S\_a`\_TUQW¥UPU[QR[VSZWSSWUMURWZTSWT  
@HWI-EAS443:3:63:237:699#0/1  
GAGAGATCTAATGTGCGAGTCCCGCACTCGCGAGATACTC  
+HWI-EAS443:3:63:237:699#0/1  
aaa^`bbabbbab\_``U^W`aa^a`aa`a```^Z¥W¥a  
@HWI-EAS443:3:63:252:718#0/1  
TAGTGAGTATCTCGCGAGTGC GGACTGCGACATTAGATC  
+HWI-EAS443:3:63:252:718#0/1  
]TNT]a`Vab\_Za]^W¥MW]]\_WVX[ZS¥WLGUVZ]UZY  
@HWI-EAS443:3:63:260:727#0/1  
GTCCCGTTTTCGTTTTATTACCAACTACGTCCCCTTGC  
+HWI-EAS443:3:63:260:727#0/1  
WV\_aaaXJX``¥XZZ^a^[]]XTY[``\_PULV][WBBBBB  
@HWI-EAS443:3:63:262:1113#0/1  
GGCAAGGGGACGTAGTGTGGTAATGAAACGAAAACGGGA  
+HWI-EAS443:3:63:262:1113#0/1  
a\_b\_[aab\_bab[¥b[a\_]\_bGTaaR\_a^^N¥a¥aJV`[T  
@HWI-EAS443:3:63:263:487#0/1  
ATCAACTCTCCTTATTTTAACTTGATTTCTGAAGTGG  
+HWI-EAS443:3:63:263:487#0/1  
a`^`[a\_P\_a`\_a`X]a`aaa```^V\_\_YXa^YRaZ\_\_  
@HWI-EAS443:3:63:268:488#0/1  
ATTCTTCATACCCTTCATGTACTCTTATTTTCAGTGTTTG  
+HWI-EAS443:3:63:268:488#0/1  
^bbbaa]babbbabbbbbbabbabbb`abbbb  
@HWI-EAS443:3:63:281:150#0/1  
TCCCGTTTTCGTTTTATTACCAACTACGTCCCCTTGCC  
+HWI-EAS443:3:63:281:150#0/1  
a`ZabTXPZ]b\_]`\_]Y`[a]Y\_^Y\_^]VXVVUV0]Y^  
@HWI-EAS443:3:63:288:1970#0/1  
GGAATAGGAATGGCCCAACAACAAGTACAGTTCATTACCC  
+HWI-EAS443:3:63:288:1970#0/1  
a\_^Y]¥RJZaWQY[Y\_TO^`ZX^¥PP¥]^`Z^\_^Z\_]Z  
@HWI-EAS443:3:63:306:937#0/1  
CGTACATGCTAGAAAGAGAATTGGTCCGTAACAAGGTT  
+HWI-EAS443:3:63:306:937#0/1  
^\_Y\_b`\_UaX]^`\_`a]^U`aaa\_[`^]¥aUa\_P¥XWXNN  
@HWI-EAS443:3:63:310:1193#0/1  
CCCGTTTTCGTTTTATTACCAACTACGTCCCCTTGCCC  
+HWI-EAS443:3:63:310:1193#0/1  
abb^JaWW^`aZZ]]a^Y]^`\_]Z\_WM]UOXY]\_TMNU]\_

@HWI-EAS443:3:63:322:276#0/1  
GTCCCCGTTTTTCGTTTCATTACCAACTACTCGTCCCCCTTGC  
+HWI-EAS443:3:63:322:276#0/1  
QRYQ\_baTXa[\_MVaVXZ`\_[W\_]aU^aaaZ``]XKKYR  
@HWI-EAS443:3:63:356:775#0/1  
AAAAGAAGTCTAATGTTCGAGTCCCCGACTCGC  
+HWI-EAS443:3:63:356:775#0/1  
aZQZ\_aaa]XX\_WZ]`^^\_Y\_¥U^Y^Z\_VV¥UOYV[ZBBB  
@HWI-EAS443:3:63:383:225#0/1  
GGCAACCAAACGACTTACAGTTCTTGAAAGGATGCAGGT  
+HWI-EAS443:3:63:383:225#0/1  
aaa`aaaa`a\_`a`a]`^``a`^`^`\_[]\_UZ^ZY  
@HWI-EAS443:3:63:385:1796#0/1  
AAAGAAGTCTAATGTTCGAGTCCCCGACTCGCG  
+HWI-EAS443:3:63:385:1796#0/1  
`^a`^\_WV\_TWR\_S`¥a`IaU`\_`VODPa]L]R¥TVHZW  
@HWI-EAS443:3:63:433:494#0/1  
CTCTTATTTTCAGTGTGGAGGTTGCCGTTAGCACTTC  
+HWI-EAS443:3:63:433:494#0/1  
aaVZ`baaab\_aMb[[XN[Y^`RV\_a[aaTR\_[MM]\_[W  
@HWI-EAS443:3:63:434:1101#0/1  
ATTGGGTATCTCATTGCCATCATCCACTTCATTCTGAGTG  
+HWI-EAS443:3:63:434:1101#0/1  
]ab`aV^UZTD[ZXSXa\_W¥Z¥VVZ^a\_Z¥^ZSVDDS  
@HWI-EAS443:3:63:491:2024#0/1  
GCTGACTTATCCCTCTCAGCGACATCTCCGTGCTTGGG  
+HWI-EAS443:3:63:491:2024#0/1  
]UYPZaaW`aSa`a¥Q`]\_a`\_VV¥\_¥ZBBBBBBBBBBB  
@HWI-EAS443:3:63:495:83#0/1  
CACCAGAAGAGTAGGATGCAATTTTCCTCATTGACTGT  
+HWI-EAS443:3:63:495:83#0/1  
`babbbbaabbaa`abaaababaaaa`a\_\_aaa`\_\_`Y  
@HWI-EAS443:3:63:503:991#0/1  
AAAAGAAGTCTAATGTTCGAGTCCCCGACTCGC  
+HWI-EAS443:3:63:503:991#0/1  
^`Y`^Z`aR`aaaa`aaa`a^`aY^[a\_a¥\_V[^U[`  
@HWI-EAS443:3:63:521:286#0/1  
CTAATGTTCGAGTCCCCGACTCGCGAGATACTCACTAAGA  
+HWI-EAS443:3:63:521:286#0/1  
aab^aa`]aa[Z\_a`¥\_I¥\_¥`a```\_\_a¥[a^YWX^S^  
@HWI-EAS443:3:63:52:1739#0/1  
GAAGTCTAATGTTCGAGTCCCCGACTCGCGAGA  
+HWI-EAS443:3:63:52:1739#0/1  
aYa`[¥aY`Za`aa^aR[U]K[^YV]\_]UVQ^W[WZ\_YVY  
@HWI-EAS443:3:63:573:1461#0/1  
GAGGATTTCTATTTTGGGCAAAGAAGACAAGAGATATGG  
+HWI-EAS443:3:63:573:1461#0/1  
^`b`bbbbbbbbbb`aa^bb`a\_b^aabbaa]aa`ba\_T  
@HWI-EAS443:3:63:595:334#0/1  
GATCAGGGTTGAGGATACTGGTAAGAGGCAATTCTCCAGT

+HWI-EAS443:3:63:595:334#0/1  
aaaaaaaa]a`\_`\_Z\_a\_]\_\_W\_a\_W]¥RY]]Y\_XY\_^]Y  
@HWI-EAS443:3:63:600:1353#0/1  
GGGTTCAGTCGCTGGTTTGCCTATTGACAAAGTTCAGAT  
+HWI-EAS443:3:63:600:1353#0/1  
[`aQK`a`Qbaa`^US^`Z]aa\_V]Xa¥W^ZZ]Va^ZR\_^  
@HWI-EAS443:3:63:619:553#0/1  
GTCCCGCACTCGCGAGATACTCACTAAGACCACTGTGGAC  
+HWI-EAS443:3:63:619:553#0/1  
\_abbbabbbaabaaaaa`ab^`\_aaa`aaabbaa¥a[]a  
@HWI-EAS443:3:63:627:875#0/1  
AATGTGCTAATTGGGCAAGGGGACGTAGTGTGGTAATGA  
+HWI-EAS443:3:63:627:875#0/1  
`aa\_SbbaVaaabaabbabaaaabaUaa^a\_aa\_FX`a[X  
@HWI-EAS443:3:63:630:1429#0/1  
CTGAGAATAGCTGTTGCTCTTCTCCCAACCATTGTGAATT  
+HWI-EAS443:3:63:630:1429#0/1  
a`aaa`\_ba]aa\_[aW`ZX[[WWa]^`UYUVRBBBBBBB  
@HWI-EAS443:3:63:643:713#0/1  
ATGTGCGAGTCCCGCACTCGCGAGATACTCACTAAGACCA  
+HWI-EAS443:3:63:643:713#0/1  
aab[a`^^\_Xa\_`Z\_\_^\_aa``\_a¥\_XUa\_W¥^^\_XUWZ\_  
@HWI-EAS443:3:63:646:562#0/1  
AAAGAAGTGAAGATCTAATGTGCGAGTCCCGCACTCGCG  
+HWI-EAS443:3:63:646:562#0/1  
aaaa]aaaabaaa\_`aa^aaa^a``a`[[^`^^Q^`\_`\_`\_`  
@HWI-EAS443:3:63:661:308#0/1  
AAAGAAGTGAAGATCTAATGTGCGAGTCCCGCACTCGCG  
+HWI-EAS443:3:63:661:308#0/1  
a]Za¥aa`[aa\_aaa`aa\_aaZaaa\_a^[[^R`[\_Z\_[\_]  
@HWI-EAS443:3:63:69:1048#0/1  
GCGAGATACTCACTAAGACCACTGTGGACCATATGGCCAT  
+HWI-EAS443:3:63:69:1048#0/1  
[``W\_b]aa`a`baaaVaa\_Za\_\_^¥^[\_a`^a\_`^]W\_¥  
@HWI-EAS443:3:63:704:1524#0/1  
CAGAATGAAGTGGATGATGGCAATGAGATACCCAATTACA  
+HWI-EAS443:3:63:704:1524#0/1  
`aX^aa`XSTXaa`a`\_X]aa``]QZ`a]a`[\_]aa[a]^  
@HWI-EAS443:3:63:712:331#0/1  
TCCCGTTTTCGTTTTATTACCAACTACTCGTCCCCTTGCC  
+HWI-EAS443:3:63:712:331#0/1  
a`\_[\_aba`b^aaa`a`a`]aaaa`a^a]````Y¥W^\_  
@HWI-EAS443:3:63:725:568#0/1  
CTTGTTCATTCTCTCTGGAATCATGTCCATTATTCTCTT  
+HWI-EAS443:3:63:725:568#0/1  
abbbbbbbbbbbbababbabbbbaabbabbbba`bbabbab  
@HWI-EAS443:3:63:726:212#0/1  
GTCCCGTTTTCGTTTTATTACCAACTACTCGTCCCCTTGCC  
+HWI-EAS443:3:63:726:212#0/1  
a^`\_aaW]aa`a[\_\_\_aa`a\_a^[^a`\_\_\_`S[]]¥¥YU

@HWI-EAS443:3:63:734:618#0/1  
AAGAAGTCTGAGATCTAATGTTCGAGTCCCGCACTCGCGA  
+HWI-EAS443:3:63:734:618#0/1  
`a`aaaaaaZ\_aa¥baaa\_\_`aaaXaU`¥[``\_`aXDX  
@HWI-EAS443:3:63:789:39#0/1  
AGCCGTAGACATATGCAAGGCAGCAATAGGGTTGAGGATT  
+HWI-EAS443:3:63:789:39#0/1  
ababb\_aaa\_aaa`a`^W]aa^`a\_\_`\_``V\_a^a^]]  
@HWI-EAS443:3:63:795:282#0/1  
GTCCCGTTTTCGTTTCATTACCAACTACGTCCCCTTGC  
+HWI-EAS443:3:63:795:282#0/1  
a\_aaab\_aaa`b``aaaa`a`^^`\_aa`a\_`]^`^\_\_Y¥^Z  
@HWI-EAS443:3:63:809:930#0/1  
GTCCCGTTTTCGTTTCATTACCAACTACGTCCCCTTGC  
+HWI-EAS443:3:63:809:930#0/1  
a\_aaaa¥`aa`a]^`a`aa`\_\_a\_\_`\_`^`^`]^`^^]W]W\_  
@HWI-EAS443:3:63:821:1701#0/1  
CTTGTTCATTCTCTCTGGAATCATGTCCATTATTCTCTT  
+HWI-EAS443:3:63:821:1701#0/1  
a`a¥¥`^`[````\_]`^`[0````a`Y`a]````]\_a¥Z\_Z``  
@HWI-EAS443:3:63:833:1819#0/1  
GTTTGGAGGTTGCCCGTTAGCACTTCTTCTTCTTCTTGA  
+HWI-EAS443:3:63:833:1819#0/1  
aZ¥aaab¥a]QF[¥aa^¥a`\_a`^^a]\_`^aJJ\_\_VSZ^\_]`  
@HWI-EAS443:3:63:845:214#0/1  
CTAATGTTCGAGTCCCGCACTCGCGAGATACTCACTAAGA  
+HWI-EAS443:3:63:845:214#0/1  
abbbbb`bbabbaaaa`Y\_aaaaa^`\_]Z¥``^^^^^Y  
@HWI-EAS443:3:63:859:279#0/1  
GTTTCATTACCAACTACGTCCCCTTGCCCAATTAGCAC  
+HWI-EAS443:3:63:859:279#0/1  
a¥aa`aaaa`a```a`a`Z`a\_\_`^`\_]`\_¥V^^U[Y  
@HWI-EAS443:3:63:888:349#0/1  
ATCATTCTCATTCTCCTCCTGGAGTGTACATCTGCTCC  
+HWI-EAS443:3:63:888:349#0/1  
aaaaaaabaaaaabaaaaababa`a\_a¥a`\_a``a`^`\_  
@HWI-EAS443:3:63:901:1516#0/1  
GCTGTAATTGGGTATCTCATTGCCATCATCCACTTCATTC  
+HWI-EAS443:3:63:901:1516#0/1  
VZ[`Ub]a\_W\_``a\_`]bbb[[]ab]babbb\_Za¥^`^aba  
@HWI-EAS443:3:63:904:1529#0/1  
AGAGAATAAAAGAACTGAGAGATCTAATGTTCGAGTCCCG  
+HWI-EAS443:3:63:904:1529#0/1  
aaaa\_baaabb`aaaaaaa`aaabaaaa\_]````]\_Q\_\_  
@HWI-EAS443:3:63:911:949#0/1  
ATTTGGGAAAACAACCTCCATAATCACATCCTGTGCCTCC  
+HWI-EAS443:3:63:911:949#0/1  
aaaa`aa`aaa]abaabaaaaaaa`a``^aa`aY\_`\_a  
@HWI-EAS443:3:63:936:399#0/1  
GGGCGATCTGAACCTTGTCAATAGGGCAAACCAGCGACTG

+HWI-EAS443:3:63:936:399#0/1  
aaabaaaabbaaaaaaa\_aaaaa`a`aaa`aaa`X¥W`a  
@HWI-EAS443:3:63:949:1589#0/1  
CCCGCACTCGCGAGATACTCACTAAGACCACTGTGGACCA  
+HWI-EAS443:3:63:949:1589#0/1  
]`Z¥`\_WZ`T\_VO\_WTXVHWXZW[Z^W[Z]XYT0aZ\_\_\_¥  
@HWI-EAS443:3:63:974:1207#0/1  
CGCACTCGCGAGATACTCACTAAGACCACTGTGGACCATA  
+HWI-EAS443:3:63:974:1207#0/1  
a`a`abaaaba\_^`aa`a\_a`Y¥Y\_aa\_]Y\_[¥^\_[Y]  
@HWI-EAS443:3:63:97:143#0/1  
GAACTGAGAGATCTAATGTCGCAGTCCCGCACTCGCGAGA  
+HWI-EAS443:3:63:97:143#0/1  
aaaaaaaaaaaa`\_aaaaa¥\_a\_]\_W^\_\_W\_V¥W]¥^¥WWY  
@HWI-EAS443:3:63:981:1076#0/1  
CTGCTGTCTGAGAGATTCTCATTCTTTGGGCAAAGAAGA  
+HWI-EAS443:3:63:981:1076#0/1  
a`\_a`b`bbaa\_bbbbabababb`baba^^aaaaa`X]a`  
@HWI-EAS443:3:63:981:1475#0/1  
CCCGTTTTCGTTTTATTACCAACTACGTCCCCTTGCCC  
+HWI-EAS443:3:63:981:1475#0/1  
aabb`baaab\_aa\_ababaaaa`ba`a][][]\_a`\_]`^a  
@HWI-EAS443:3:63:998:1193#0/1  
CTTGTTTTACGGACCAATTCTCTTTCTAGCATGTACGCCA  
+HWI-EAS443:3:63:998:1193#0/1  
abab¥bbaaabaa¥^babaaaaaaabaaaaaa`baa\_aa  
@HWI-EAS443:3:64:1004:943#0/1  
GAGAGATCTAATGTCGCAGTCCCGCACTCGCGAGATACTC  
+HWI-EAS443:3:64:1004:943#0/1  
`aaabaaabbaba\_``^a\_a```^Y\_\_\_^[`\_[Q]^ZZ^  
@HWI-EAS443:3:64:1036:355#0/1  
CTGCTGTAATTGGGTATCTCATTGCCATCATCCACTTCAT  
+HWI-EAS443:3:64:1036:355#0/1  
a\_a```^Y]a^a[`a¥Y`^a¥aa][^aXa\_aa\_\_a\_\_\_`  
@HWI-EAS443:3:64:1040:1468#0/1  
GGGACGTAGTGTGGTAATGAAACGAAAACGGGACTCTAG  
+HWI-EAS443:3:64:1040:1468#0/1  
aba``baab\_a`bbaV`aa]\_aaRa\_aa`)]`\_\_\_\_^`¥\_¥  
@HWI-EAS443:3:64:1055:1800#0/1  
AATAAAAGAACTGAGAGATCTAATGTCGCAGTCCCGCACT  
+HWI-EAS443:3:64:1055:1800#0/1  
Sa]a`^¥Y^ZS¥QZ¥\_Y`Z`X`[aZ``[^WKX^]YU[HJ  
@HWI-EAS443:3:64:1097:1924#0/1  
GTCCCGTTTTCGTTTTATTACCAACTACGTCCCCTTG  
+HWI-EAS443:3:64:1097:1924#0/1  
aRa^a¥¥`^\_¥^^^ [W]\_\_^\_Sa¥^^Z^`ZTQ]ZUU^SQS  
@HWI-EAS443:3:64:1120:433#0/1  
ACTAAGACCACTGTGGACCATATGGCCATAATCAAAAAGT  
+HWI-EAS443:3:64:1120:433#0/1  
aabbaaababaaa`a`^a`Z``aa\_\_\_\_\_Y[`\_]`a\_a`^M

@HWI-EAS443:3:64:1126:132#0/1  
CATCATCATTTCTCACTTCTCCTCCTGGAGTGTACATCTG  
+HWI-EAS443:3:64:1126:132#0/1  
]¥\_[\_a`b\_\_\_\_S^aZab`^aa\_\_TWaW^aa]bb`a]a\_``  
@HWI-EAS443:3:64:1130:281#0/1  
ATCTAATGTCGCAGTCCCGCACTCGCGAGATACTCACTAA  
+HWI-EAS443:3:64:1130:281#0/1  
aa`aabaa\_aaaaaZ[\_]STU]\_\_\_\_^ZZ\_^¥^W[^¥W[[[  
@HWI-EAS443:3:64:1132:1361#0/1  
TGTCTTCTTTGCCCAAATGAGAAATCCTCTCAGGACAGC  
+HWI-EAS443:3:64:1132:1361#0/1  
aaa^[aa^babbaa^M^baaa\_aaaa`\_a\_a\_a\_``\_a\_Z  
@HWI-EAS443:3:64:1169:1352#0/1  
CAGGATTGTAATAATTGCTCCCTTGATGGTGGCGTACATGC  
+HWI-EAS443:3:64:1169:1352#0/1  
aabb\_a\_baa]aaa`a`\_a\_a\_aaa]aaG`\_a`U`^\_\_\_\_  
@HWI-EAS443:3:64:1173:1143#0/1  
GGTGGTTCACTTTCAAAGGACAAGCGGATCATCAGTCA  
+HWI-EAS443:3:64:1173:1143#0/1  
\_Z]]ab^aaa\_aa]Y\_aaa`^X\_\_^[\_aaZ]T^Z[`^TX¥  
@HWI-EAS443:3:64:1175:531#0/1  
GGTGGTTCACTTTCAAAGGACAAGCGGATCATCAGTCA  
+HWI-EAS443:3:64:1175:531#0/1  
ab`bab\_aa`aaa\_aU]^aa\_[a`Z[Ya\_\_a\_``VR¥U]\_  
@HWI-EAS443:3:64:1211:478#0/1  
AAAGAAGTGAAGATCTAATGTCGCAGTCCCGCACTCGCG  
+HWI-EAS443:3:64:1211:478#0/1  
aaba^aab\_Zab`aa`a`aab`¥a¥``]VY][Y\_^¥\_^a  
@HWI-EAS443:3:64:1213:1455#0/1  
GTCCCGTTTTCGTTTTATTACCAACTACGTCCCTTGC  
+HWI-EAS443:3:64:1213:1455#0/1  
aababbabbbbabbb`bbbaaaba]a`aaaa`aaa\_\_\_\_[a  
@HWI-EAS443:3:64:1225:1322#0/1  
GAAGTGAAGATCTAATGTCGCAGTCCCGCACTCGCGAGA  
+HWI-EAS443:3:64:1225:1322#0/1  
a\_babba]abbbabaaabaaa`a`Z\_a^`\_a`\_\_^ZVPV¥  
@HWI-EAS443:3:64:1295:1426#0/1  
GGTTCCTTTCAAAGGACAAGCGGATCATCAGTCAAGAA  
+HWI-EAS443:3:64:1295:1426#0/1  
ab\_ba`\_`aaba\_\_baaa`YX`aaa\_\_a\_\_\_\_^\_bZ\_a`aa\_  
@HWI-EAS443:3:64:1296:616#0/1  
GTACTTTTTGATTATGGCCATATGGTCCACAGTGGTCTTA  
+HWI-EAS443:3:64:1296:616#0/1  
`\_]`aaaaa¥aa[\_]^]SV^W\_^[QV\_YZ]\_X¥\_YO]]Q  
@HWI-EAS443:3:64:1318:1091#0/1  
CGCACTCGCGAGATACTCACTAAGACCACTGTGGACCATA  
+HWI-EAS443:3:64:1318:1091#0/1  
abaY^bbb````[``a\_]a\_aaa]a`]]ON[a\_a^ZXKW``  
@HWI-EAS443:3:64:1347:1831#0/1  
GAGAATAATGGACATGATTCCAGAGAGGAATGAACAAGGA

+HWI-EAS443:3:64:1347:1831#0/1  
aa`aaaabaaa\_aa`aa]\_¥a^^^a^\_`^^^Wa\_\_X\_  
@HWI-EAS443:3:64:1360:362#0/1  
AAAGGATGCAGGTGCATTGACTGAAGATCCAGATGAAGGC  
+HWI-EAS443:3:64:1360:362#0/1  
aaaaaa\_b\_bba¥a`aab\_\_aaaa\_]`aa\_aa\_`\_`\_  
@HWI-EAS443:3:64:1393:42#0/1  
CCCCGTTTTTCGTTTCATTACCAACTACGTCCCCTTGCCC  
+HWI-EAS443:3:64:1393:42#0/1  
aa`babbbbaaab\_abbba\_baaa`\_a\_\_\_\_\_^[Z^T  
@HWI-EAS443:3:64:140:1099#0/1  
GTTGAGGATACTGGTAAGAGGCAATTCTCCAGTATTCAAT  
+HWI-EAS443:3:64:140:1099#0/1  
`S¥^a\_Y¥\_SYNRRYV\_U\_]SRRZTV0[aWZTKPO^]UXZ  
@HWI-EAS443:3:64:1420:1664#0/1  
AAAATGAGAAATCCTCTCAGGACAGCAGACTCCACCCAG  
+HWI-EAS443:3:64:1420:1664#0/1  
aaaaabaa\_aaa¥]`[\_`\_^`\_`\_Va\_]U¥X]`ZZZ¥^¥  
@HWI-EAS443:3:64:142:515#0/1  
AATAAAAGAACTGAGAGATCTAATGTCGCAGTCCCGCACT  
+HWI-EAS443:3:64:142:515#0/1  
aabaabaZ]`a`^^`\_b^\_^`a\_[a[aZ\_]\_Z^\_]X]YYX  
@HWI-EAS443:3:64:1450:285#0/1  
ATTAGCTCATCTTTCAGTTTTGGTGGGTTCACTTTCAAAA  
+HWI-EAS443:3:64:1450:285#0/1  
^bb\_baaaa^U[ba]a`^^`\_W\_[^^`S\_PQ[\_`V\_\_^\_  
@HWI-EAS443:3:64:1452:965#0/1  
GGCGTACATGCTAGAAAGAGAATTGGTCCGTAACAAGG  
+HWI-EAS443:3:64:1452:965#0/1  
a`aR\_Z\_bb`a`a^\_bb]b`]aaaaUYR`\_aa]]S\_^a[  
@HWI-EAS443:3:64:1467:1056#0/1  
AGAGAATAAAAGAACTGAGAGATCTAATGTCGCAGTCCCG  
+HWI-EAS443:3:64:1467:1056#0/1  
Y]Z`M`Xa¥¥`^^`b`bb]abbb[babbbX`abaaabbbb  
@HWI-EAS443:3:64:1507:729#0/1  
GATGGATTCAATCCCCAGTTCTGGAAAAGCACTTTTGCA  
+HWI-EAS443:3:64:1507:729#0/1  
a`aa`bba^Z`abbaab`^\_^¥aXT\_a\_aaa[\_a`aa0`  
@HWI-EAS443:3:64:1560:1141#0/1  
GTCCCGTTTTTCGTTTCATTACCAACTACGTCCCCTTGC  
+HWI-EAS443:3:64:1560:1141#0/1  
aaa]`baaaaa`\_\_a\_aaa]`P`¥\_¥V^]T]Z\_YU[UMZ[  
@HWI-EAS443:3:64:1595:1291#0/1  
GAGAGATCTAATGTCGCAGTCCCGCACTCGCGAGATACTC  
+HWI-EAS443:3:64:1595:1291#0/1  
`b`aaba^bbabbaabaa¥a`a`a[\_`aa\_a\_Y`\_^[\_`\_  
@HWI-EAS443:3:64:1607:1653#0/1  
CTTCCTGATGTGACTTTTTGATTATGGCCATATGGTCCA  
+HWI-EAS443:3:64:1607:1653#0/1  
abbaabbbabaa`aabbbba`baab`aa^a\_a^I`\_]\_a



@HWI-EAS443:3:64:1614:151#0/1  
CGCACTCAGAATGAAGTGGATGATGGCAATGAGATACCCA  
+HWI-EAS443:3:64:1614:151#0/1  
¥abb``Wa¥aaX^bTa``a]\_aa`\_`Z``Y]X¥¥]^  
@HWI-EAS443:3:64:1616:1397#0/1  
GAATCCAAGTGAAGCAAGCCGTAGACATATGCAAGGCA  
+HWI-EAS443:3:64:1616:1397#0/1  
¥¥ba^]b]^`\_¥\_[FRa[aa¥¥`[b]V\_aSZYU\_¥`^H\_  
@HWI-EAS443:3:64:1626:1577#0/1  
AATAAAAGAACTGAGAGATCTAATGTCGCAGTCCCGCACT  
+HWI-EAS443:3:64:1626:1577#0/1  
aabb^babbaZaaa\_`\_`a\_baa\_aa^^`^[]`L``[Y[]  
@HWI-EAS443:3:64:163:557#0/1  
ATCTCCTGGTTGCCTTTCTGAGAATAGCTGTTGCTCTTCT  
+HWI-EAS443:3:64:163:557#0/1  
a`aa`a`aa^aaa\_a\_\_a^`a^`\_\_]^`T^TWT]^ZVV  
@HWI-EAS443:3:64:164:1094#0/1  
GAGAGACGAGCAGTCAATTGCTGAGGCAATAATTGTGGCC  
+HWI-EAS443:3:64:164:1094#0/1  
`\_\_a`aa`aa\_aa]\_aa\_`¥aY]aVV[\_\_^b[]^]YZ¥]0  
@HWI-EAS443:3:64:1683:1556#0/1  
TCTAATGTCGCAGTCCCGCACTCGCGAGATACTACTAAG  
+HWI-EAS443:3:64:1683:1556#0/1  
¥a]^\_\_Z\_\_`¥¥VZ]^]QW¥Za\_Y\_`ZaX`^^`VXX\_RZU  
@HWI-EAS443:3:64:1696:1518#0/1  
CATTATTCTCTGTCTGTGTAATTGGGTATCTCATTGCC  
+HWI-EAS443:3:64:1696:1518#0/1  
aabbaaaab`bbaa\_a`a\_^\_a\_aa¥^XZa\_\_^¥`\_RYP  
@HWI-EAS443:3:64:1710:339#0/1  
TCCGCCGCTACTGGGAGAAACCTTGTTCCTTACGGACCAAT  
+HWI-EAS443:3:64:1710:339#0/1  
aaaaaabbbaaU`\_`aYa\_^aN`[`WV\_a`[[a]\_VY\_\_\_\_  
@HWI-EAS443:3:64:1713:712#0/1  
GTCCCGTTTTCTTTTATTACCAACTACTAGTCCCTTGC  
+HWI-EAS443:3:64:1713:712#0/1  
aaaaabaabbababa]aba`a`ba¥b¥aa^a[^W]¥`^XW  
@HWI-EAS443:3:64:1765:679#0/1  
TGCTAATTGGGCAAGGGGACGTAGTGTGGTAATGAAACG  
+HWI-EAS443:3:64:1765:679#0/1  
a`a¥[aaZ[aa¥GNab\_QVZQZ`Va¥]a[TLNXQWNZVS  
@HWI-EAS443:3:64:199:783#0/1  
TGGTCCGTAAAACAAGGTTTCTCCAGTAGCCGGCGGAAC  
+HWI-EAS443:3:64:199:783#0/1  
aa^T`a`[^ab`W``T[aaaa`V¥`P^\_\_`^^[[Z[^R  
@HWI-EAS443:3:64:262:441#0/1  
GAGAATAATGGACATGATTCCAGAGAGGAATGAACAAGGA  
+HWI-EAS443:3:64:262:441#0/1  
¥]NX\_Y```a`^¥^`a]WY[]^a]`\_aa\_``[]`Y¥]¥^\_  
@HWI-EAS443:3:64:263:104#0/1  
GCCGTAGACATATGCAAGGCAGCAATAGGGTTGAGGATTA

+HWI-EAS443:3:64:263:104#0/1  
aaaa^a`¥`aaaaa\_\_\_a`\_`a\_]`\_\_a`Z][Z`\_]Y]]  
@HWI-EAS443:3:64:265:1961#0/1  
GTTTTCGTTTCATTACCAACACTACGTCCCCTTGCCCAAT  
+HWI-EAS443:3:64:265:1961#0/1  
`aaLYaVHW`\_]\_\_`aaaZ^aW\_aY`]R^`¥RM^^Q^\_aQ  
@HWI-EAS443:3:64:293:1911#0/1  
GAATAAAAGAACTGAGAGATCTAATGTCGCAGTCCCGCAC  
+HWI-EAS443:3:64:293:1911#0/1  
Z`\_^abSW[¥aV`bZN¥U[FW`aaa`]aY^YX¥R[HL^X]  
@HWI-EAS443:3:64:300:1511#0/1  
AAAGAACTGAGAGATCTAATGTCGCAGTCCCGCACTCGCG  
+HWI-EAS443:3:64:300:1511#0/1  
^`^Zaa\_[a\_TH]`a`W]^aX]VY\_aZ[Z¥S]GYV\_Z[S  
@HWI-EAS443:3:64:322:1083#0/1  
GAACTGGGGAATTGAATCCATCGACAATGTGATGGGAATG  
+HWI-EAS443:3:64:322:1083#0/1  
aZZ\_ababbaabaaaaaa\_`\_]`\_^¥][`¥¥\_Z^^\_\_\_\_  
@HWI-EAS443:3:64:32:299#0/1  
CTTCAATATAAACACTGCCTGTTCCGCCGGCTACTGGGAG  
+HWI-EAS443:3:64:32:299#0/1  
abbbabbbbaaab`abaaaa\_`aaa`aaaaZVZ]`¥YTY  
@HWI-EAS443:3:64:378:756#0/1  
GAATAATGGACATGATTCCAGAGAGGAATGAACAAGGACA  
+HWI-EAS443:3:64:378:756#0/1  
\_aababbbbaaa\_¥]aaaaaaa\_a`a`PUWa]a`^[a^^]\_  
@HWI-EAS443:3:64:381:316#0/1  
GTCTGCTGTAATTGGGTATCTCATTGCCATCATCCACTTC  
+HWI-EAS443:3:64:381:316#0/1  
aPFU\_]aXRZ]a¥]^S¥0QX]¥]QNZUS\_¥VVHYXUS¥  
@HWI-EAS443:3:64:392:1662#0/1  
GGTGCATTGACTGAAGATCCAGATGAAGGCACATCTGGGG  
+HWI-EAS443:3:64:392:1662#0/1  
a^`a`babaaaa`bbaaa``aba`a`aaSaba\_\_aa`\_T  
@HWI-EAS443:3:64:40:348#0/1  
AAAGAACTGAGAGATCTAATGTCGCAGTCCCGCACTCGCG  
+HWI-EAS443:3:64:40:348#0/1  
\_`\_\_Z\_\_Z]a]aa[¥`¥W[```Va`]¥SR]¥[NYGXW\_¥YT  
@HWI-EAS443:3:64:434:208#0/1  
GGGACGTAGTGTGGTAATGAAACGAAAACGGGACTCTAG  
+HWI-EAS443:3:64:434:208#0/1  
aa\_\_`aXYa¥^^[``YUWaa]^aYUa]a`[^¥¥XXBBBBB  
@HWI-EAS443:3:64:553:1674#0/1  
CAGAATGAAGTGGATGATGGCAATGAGATACCCAATTACA  
+HWI-EAS443:3:64:553:1674#0/1  
a`^^ab^^```a[aaaa]a\_a`a```a\_\_`¥\_`\_``\_a^`  
@HWI-EAS443:3:64:572:86#0/1  
TTGCCTTGTTGTAATTGAATACTGGAGAATTGCCTCTTAC  
+HWI-EAS443:3:64:572:86#0/1  
a``¥ab\_^aababaaaa`aaa^aba\_aa`a`\_aT\_\_\_\_\_Z[

@HWI-EAS443:3:64:583:1006#0/1  
AAAGAACTGAGAGATCTAATGTCGCAGTCCCGCACTCGCG  
+HWI-EAS443:3:64:583:1006#0/1  
\_X`^S`aa`b`¥S`b`T^b`^b]aa^QZ]^aa]^`][  
@HWI-EAS443:3:64:605:2021#0/1  
CTGAGAATAGCTGTTGCTCTTCTCCCAACCATTGTGAATT  
+HWI-EAS443:3:64:605:2021#0/1  
\_^]a`^aQ\_ZX`^^^]ZVV````aaaT]P]]QW[M\_UV[[  
@HWI-EAS443:3:64:611:1750#0/1  
CTCGCGAGATACTCACTAAGACCACTGTGGACCATATGGC  
+HWI-EAS443:3:64:611:1750#0/1  
a`b`ba`]aabaaaaab\_\_^aaa\_a`\_a¥aaa\_\_`\_\_\_\_  
@HWI-EAS443:3:64:644:1858#0/1  
ATGACCCCAAGCACGGAGATGTCGCTGAGAGGGATAAGAG  
+HWI-EAS443:3:64:644:1858#0/1  
aaaa^a`aaa`a`\_^]\_Y`^`W`\_\_\_\_¥S`¥X^\_UV¥¥¥¥¥  
@HWI-EAS443:3:64:665:1254#0/1  
ATTCTGTCTAAGGATGTCCACCATCCTTACTCCTCCAATC  
+HWI-EAS443:3:64:665:1254#0/1  
abbaab\_a\_S\_]W^aaXabaaa^a\_aa\_aaa^b`aa\_\_a`  
@HWI-EAS443:3:64:742:1449#0/1  
GTCGCAGTCCCGCACTCGCGAGATACTCACTAAGACCACT  
+HWI-EAS443:3:64:742:1449#0/1  
a\_aaaaa`a`a`]a\_aY]¥^XZW¥¥¥¥UT]¥¥^`P]S]^Y  
@HWI-EAS443:3:64:756:1681#0/1  
GCAACAGCTATTCTCAGAAAGCAACCAGGAGATTGATCC  
+HWI-EAS443:3:64:756:1681#0/1  
Wa]a``\_a`a`a`aZZ\_b`aa\_\_\_aW\_a^^]]¥¥ab`}`a  
@HWI-EAS443:3:64:757:1290#0/1  
AAAGAACTGAGAGATCTAATGTCGCAGTCCCGCACTCGCG  
+HWI-EAS443:3:64:757:1290#0/1  
aaaa^`\_`aa\_aaa`]aa`aUa``\_]W]]\_Z`X]X^\_U^  
@HWI-EAS443:3:64:823:1422#0/1  
CTAGAGTCCCGTTTTTCGTTTCATTACCAACTACGTCCC  
+HWI-EAS443:3:64:823:1422#0/1  
aab`a`\_baba\_aaaa`Ybaaaa`a`[ba\_a`\_a`\_[-``  
@HWI-EAS443:3:64:853:304#0/1  
GGGACGTAGTGTGGTAATGAAACGAAAACGGGACTCTAG  
+HWI-EAS443:3:64:853:304#0/1  
`^[PXa¥a[[Z^^`UZ][`X[`a[^U``¥R^ZaSSYTXV  
@HWI-EAS443:3:64:855:1839#0/1  
TGGTTTGCCTATTGACAAAGTTCAGATCGCCCCTAACTG  
+HWI-EAS443:3:64:855:1839#0/1  
aaaU`aaa````aa\_aaZ`aYa¥`aa`a^\_\_\_\_]ZVaaaX\_\_  
@HWI-EAS443:3:64:863:219#0/1  
TAATGTCGCAGTCCCGCACTCGCGAGATACTCACTAAGAC  
+HWI-EAS443:3:64:863:219#0/1  
ab`ab^b`aaa\_\_aa[`0`a`[]a\_a¥\_TW`¥\_¥\_\_YUXS  
@HWI-EAS443:3:64:884:31#0/1  
ATCAAACCTTTGGTCAACATCATCATTCTCACTTCTCCTC

+HWI-EAS443:3:64:884:31#0/1  
\_aabZ¥ab`b`U`a^Ya^`aaaa`a`]aaa^^`Z[aV  
@HWI-EAS443:3:64:923:436#0/1  
TGTCGCAGTCCCGCACTCGCGAGATACTACTAAGACCAC  
+HWI-EAS443:3:64:923:436#0/1  
aa`ba`ba\_aaa^`]^`a]Ua\_a^`\_X`¥`UTa\_^^¥¥^X  
@HWI-EAS443:3:64:926:1277#0/1  
CCCGTTTTTCGTTTCATTACCAACTACGTCCCCTTGCCC  
+HWI-EAS443:3:64:926:1277#0/1  
a`aa\_aa`aa`a`aaaa\_aa\_a`a`\_\_`^`¥^^`\_\_Y[  
@HWI-EAS443:3:64:933:517#0/1  
CCCGTTTTTCGTTTCATTACCAACTACGTCCCCTTGCCC  
+HWI-EAS443:3:64:933:517#0/1  
aa`^GXP¥YaST¥\_Z¥RVS0a¥Z¥Z`a^ZMZ^OVUVTSFP  
@HWI-EAS443:3:64:944:1094#0/1  
CAGCAGTGTGCAGACCCATTAGCATCTCTCTTGAAAT  
+HWI-EAS443:3:64:944:1094#0/1  
a\_babaaabbbb]a^`baabbaa]aaaa`aaba`]aaaa  
@HWI-EAS443:3:64:945:1984#0/1  
AAAAGAAGTGGAGATCTAATGTCGCAGTCCCGCACTCGC  
+HWI-EAS443:3:64:945:1984#0/1  
aba[FN^a\_U]S`S\_X]XZYWWU^U`^G[NRGV\_ZGZVP  
@HWI-EAS443:3:64:953:1102#0/1  
AAAAGAAGTGGAGATCTAATGTCGCAGTCCCGCACTCGCG  
+HWI-EAS443:3:64:953:1102#0/1  
aaa`[[aaaaaaaaaba`aa^aa`aa^`\_`]^`[^`\_\_^^  
@HWI-EAS443:3:64:963:1711#0/1  
CTAATGTCGCAGTCCCGCACTCGCGAGATACTACTAAGA  
+HWI-EAS443:3:64:963:1711#0/1  
abaaaaababUaabbbbaa\_aU`HV\_bX`a`aa`a\_`  
@HWI-EAS443:3:64:983:1432#0/1  
AAAAGAAGTGGAGATCTAATGTCGCAGTCCCGCACTCGC  
+HWI-EAS443:3:64:983:1432#0/1  
aaba^`aaa`aabaaba\_aa`a`\_`^`\_\_¥^]]\_]V^  
@HWI-EAS443:3:64:984:1821#0/1  
AAAAGAAGTGGAGATCTAATGTCGCAGTCCCGCACTCGC  
+HWI-EAS443:3:64:984:1821#0/1  
aaba\_aa^`aZaaaZZ^^`\_`^`\_]`\_`HZ[\_]U]YVTTW  
@HWI-EAS443:3:64:987:466#0/1  
CGTTTTTCGTTTCATTACCAACTACGTCCCCTTGCCCAA  
+HWI-EAS443:3:64:987:466#0/1  
]aTZ`bb¥b\_]`¥`b]``]a`b`aaaa[YZSU``a¥Z¥  
@HWI-EAS443:3:64:996:1166#0/1  
GCGAGATACTACTAAGACCACTGTGGACCATATGGCCAT  
+HWI-EAS443:3:64:996:1166#0/1  
aSMJ^[abbab^¥Vb]a`b`\_`\_aP^]``]R]\_\_aa[\_]X  
@HWI-EAS443:3:65:1009:1065#0/1  
ACCCTCTGGAGCAAACAAACGATGCTGGATCAGACCGAG  
+HWI-EAS443:3:65:1009:1065#0/1  
Wab^\_a`\_¥`¥\_a¥Y]a`\_`¥a`Z\_^¥[¥]¥``]`¥X[^\_`

@HWI-EAS443:3:65:101:329#0/1  
GCCTTGATCATGCAATCCTTGTGAGAATACCATGGCCA  
+HWI-EAS443:3:65:101:329#0/1  
abbaa`baab\_abaaaa`a`b\_a\_a``a`aa^^Y\_]`  
@HWI-EAS443:3:65:1024:196#0/1  
GGCGTACATGCTAGAAAGAGAATTGGTCCGTAACAAGG  
+HWI-EAS443:3:65:1024:196#0/1  
aaaba\_aaabaab^`aaab^aa\_aa¥^`aY`a``[\_`\_`\_  
@HWI-EAS443:3:65:1026:312#0/1  
GCAATTTTCCTCATTGACTGTGAATGTGAGAGGATCAGGG  
+HWI-EAS443:3:65:1026:312#0/1  
aaa`aaaa`a]`aa\_a^VYY[¥`GVW[W]a]YRWZ¥V  
@HWI-EAS443:3:65:1051:1398#0/1  
AAAGAAGTCTAATGTCGAGTCCCGCACTCGCG  
+HWI-EAS443:3:65:1051:1398#0/1  
`^^Z`a]bb`aa^V\_]abaaa^a`a`^`¥^a`\_`\_`[XV  
@HWI-EAS443:3:65:1056:1956#0/1  
CTCTTGAAATGTGCCACAGCACAGATTGGAGGAGTAA  
+HWI-EAS443:3:65:1056:1956#0/1  
W[baa`abbabb^bY`abb\_`bbb`b`babbbb\_bba]ab  
@HWI-EAS443:3:65:105:1626#0/1  
AAAGAAGTCTAATGTCGAGTCCCGCACTCGCG  
+HWI-EAS443:3:65:105:1626#0/1  
abb[`aaa\_a\_\_Xa]\_`a^`¥W`T\_`¥Y`\_`¥`T¥W\_W¥Y  
@HWI-EAS443:3:65:1067:1051#0/1  
GTGCCACAGCACAGATTGGAGGAGTAAGGATGGTGGAC  
+HWI-EAS443:3:65:1067:1051#0/1  
a¥]a`babb\_abaa`¥`baaaa`ab[`a`a]\_aUa[`U  
@HWI-EAS443:3:65:1076:1802#0/1  
GGCCATGGTATTCTACAAGAGGATTGCATGATCAAGGCA  
+HWI-EAS443:3:65:1076:1802#0/1  
aY¥Ya[PSFR^Q]U¥¥UWUGT^[PRUFFJ][Z[WZRZBB  
@HWI-EAS443:3:65:1084:1078#0/1  
CTTATTTTCAGTGTGGAGTTGCCGTTAGCACTTCTT  
+HWI-EAS443:3:65:1084:1078#0/1  
a``[``a`ab]`ba\_`baab[V`a`bbb\_a^aa\_a]a¥`^  
@HWI-EAS443:3:65:1110:1423#0/1  
GAGATCTAATGTCGAGTCCCGCACTCGCGAGATACTCAC  
+HWI-EAS443:3:65:1110:1423#0/1  
`b\_abbaabbbbaaaaX\_```a]a^aaaaaaaa\_]`]a]a\_  
@HWI-EAS443:3:65:1126:837#0/1  
AATTGGGCAAGGGACGTAGTGTGGTAATGAAACGAAAA  
+HWI-EAS443:3:65:1126:837#0/1  
aabaaaaa`aaaa\_abZ\_b^a\_aaaU^aa`\_\_aY]]`\_]`  
@HWI-EAS443:3:65:1138:708#0/1  
CGCACTCAGAATGAAGTGGATGATGGCAATGAGATACCCA  
+HWI-EAS443:3:65:1138:708#0/1  
]UUZ`X`^`RUR\_PLRFVXPBBBBBBBBBBBBBBBBBB  
@HWI-EAS443:3:65:1172:120#0/1  
GAGAGATCTAATGTCGAGTCCCGCACTCGCGAGATACTC

+HWI-EAS443:3:65:1172:120#0/1  
`ba`a]abbbabba`baab\_`a\_aK\_a\_a^a`a\_\_XDWZ  
@HWI-EAS443:3:65:1179:387#0/1  
AAGGGAGCAATTTTACAATCCTGGAGCTCTTCTTCTCTCT  
+HWI-EAS443:3:65:1179:387#0/1  
aba¥a\_\_a¥Z\_baaaaa\_ZZ]a]Z`W^`X]a`Y]¥^^  
@HWI-EAS443:3:65:1219:1319#0/1  
CCCGTTTTTCGTTTCATTACCAACTACGTCCCCTTGCCC  
+HWI-EAS443:3:65:1219:1319#0/1  
aba`^\_bb\_aP\_bab`ab\_0\_bab`\_abYY]`a[]¥`X¥  
@HWI-EAS443:3:65:1221:19#0/1  
AAAAGAAGTGGAGATCTAATGTCGCAGTCCCGCACTCGC  
+HWI-EAS443:3:65:1221:19#0/1  
aa\_Za`b[b\_]bb`a]`a\_\_b¥S¥aaWXXL\_]X[ZVZG  
@HWI-EAS443:3:65:1226:844#0/1  
CCCAGTTCTGGAAAAGCACTTTTGCATCTTTTGGAAATG  
+HWI-EAS443:3:65:1226:844#0/1  
aaaaaaabbbbaaaaa`aaa\_\_aaa`a\_aaaaa`R^`aaa  
@HWI-EAS443:3:65:1227:889#0/1  
TGGCAATGAGATACCCAATTACAGCAGACAAGAGAATAAT  
+HWI-EAS443:3:65:1227:889#0/1  
aaa``]`\_bab^aabaaVbaa`aa```a\_ab^^^`aaa`  
@HWI-EAS443:3:65:1250:225#0/1  
CTTCTCCTCCTGGAGTGTACATCTGCTCCCAGCACGTCCC  
+HWI-EAS443:3:65:1250:225#0/1  
aaaUababbZbb`]a\_`abXbb`abb\_``\_`a``\_aW\_¥`  
@HWI-EAS443:3:65:1260:1520#0/1  
AAGAAGTGGAGATCTAATGTCGCAGTCCCGCACTCGCGA  
+HWI-EAS443:3:65:1260:1520#0/1  
^ZZH[[]XU\_P`[]\_R\_`P¥b] [0[aZVbYW0^`b[]a\_`V  
@HWI-EAS443:3:65:1278:1411#0/1  
CTGTGGACCATATGGCCATAATCAAAAAGTACACATCAGG  
+HWI-EAS443:3:65:1278:1411#0/1  
\_`]V]I]Y]¥WV\_Z[RZ\_] [S[RRP¥¥M[X[WXVQSOVOU  
@HWI-EAS443:3:65:1285:1572#0/1  
AGAGAATAAAAGAACTGAGAGATCTAATGTCGCAGTCCCG  
+HWI-EAS443:3:65:1285:1572#0/1  
\_aSUS`bb` [ `aaaa`aa`aa`abaaab`^ba\_a]\_XRS  
@HWI-EAS443:3:65:1294:1481#0/1  
CTCGGTCTGATCCAGCATCGTTTGTGTTTGTCTCCAGAGGGT  
+HWI-EAS443:3:65:1294:1481#0/1  
aab¥`\_abaaaaab`aaabaa`\_ba\_aa`aaaa\_\_a\_a\_\_U  
@HWI-EAS443:3:65:1298:483#0/1  
CCCGTTTTTCGTTTCATTACCAACTACGTCCCCTTGCCC  
+HWI-EAS443:3:65:1298:483#0/1  
ababTabb`b`aaa`baa^aaaa`a^\_] [[^]\_]Z]Y]  
@HWI-EAS443:3:65:129:1704#0/1  
AAAAGAAGTGGAGATCTAATGTCGCAGTCCCGCACTCGC  
+HWI-EAS443:3:65:129:1704#0/1  
aba]]\_]`a\_a`a\_````a]`]]\_`^\_]SV\_]`U^]VU]YZ



+HWI-EAS443:3:65:1475:271#0/1  
aba`aa`baabaaaa`]]a`¥\_\_a\_a[a`\_`XS[^Z[W[  
@HWI-EAS443:3:65:1477:855#0/1  
ATTGTCGATGGATTCAATCCCCAGTTCTGGAAAAGCACT  
+HWI-EAS443:3:65:1477:855#0/1  
aaba]\_aaS^^Y\_^U^a`aa[^aW¥Ya]a]Y^``\_`X[S\_  
@HWI-EAS443:3:65:147:239#0/1  
GTCCCCGTTTTTCGTTTCATTACCAACACTACGTCCCCTTGC  
+HWI-EAS443:3:65:147:239#0/1  
¥\_bVbbabba`b`abYY`]a`aabaYZ^aZXVZYaYVYY¥  
@HWI-EAS443:3:65:1497:2036#0/1  
GTCCCCGTTTTTCGTTTCATTACCAACACTACGTCCCCTTGC  
+HWI-EAS443:3:65:1497:2036#0/1  
aVZHWXYaaa`¥\_K[¥UT\_X[^SY\_\_`YZSNUXORIRP  
@HWI-EAS443:3:65:1516:1336#0/1  
GATGATGGCAATGAGATACCCAATTACAGCAGACAAGAGA  
+HWI-EAS443:3:65:1516:1336#0/1  
^MYOS\_S\_XX¥`ZJ[PY^^TJ¥¥]¥\_`¥`]a`Y\_`^^][U  
@HWI-EAS443:3:65:1519:310#0/1  
GCCATATGGTCCACAGTGGTCTTAGTGAGTATCTCGCGAG  
+HWI-EAS443:3:65:1519:310#0/1  
aa^)`ba]SZ[a\_\_]\_]¥UZa`S]ZaT`\_\_]SQSUKVfy  
@HWI-EAS443:3:65:1519:354#0/1  
GAATAAAAGAACTGAGAGATCTAATGTCGCAGTCCCGCAC  
+HWI-EAS443:3:65:1519:354#0/1  
aab]abaab\_`a`aaa\_a`a^a`a\_a``a\_aa\_\_XU\_`^\_  
@HWI-EAS443:3:65:1650:1582#0/1  
GATCTAATGTCGCAGTCCCGCACTCGCGAGATACTACTA  
+HWI-EAS443:3:65:1650:1582#0/1  
]\_bbbbaaaa\_X`b`b`baaaab\_bbba`\_aa[\_\_¥\_\_aa  
@HWI-EAS443:3:65:1699:1321#0/1  
GTGAATTCTTCATACCCTTCATGTACTCTTATTTTCAGTG  
+HWI-EAS443:3:65:1699:1321#0/1  
\_T\_VW`aZa\_a`\_X\_\_aa^^aa]`[\_`a\_```a\_Y\_]V[  
@HWI-EAS443:3:65:1733:1255#0/1  
AAAAGAACTGAGAGATCTAATGTCGCAGTCCCGCACTCGC  
+HWI-EAS443:3:65:1733:1255#0/1  
W¥VVa`^^`¥\_VV\_WWUaba^a\_VR¥S¥b\_Q\_ZWQUTOW[  
@HWI-EAS443:3:65:1764:320#0/1  
TGGCAATGAGATACCCAATTACAGCAGACAAGAGAATAAT  
+HWI-EAS443:3:65:1764:320#0/1  
\_b```\_`ababa`a`bbaYa`aa`\_`\_]a`\_\_XP[aaaab  
@HWI-EAS443:3:65:176:301#0/1  
AAAAGAACTGAGAGATCTAATGTCGCAGTCCCGCACTCGC  
+HWI-EAS443:3:65:176:301#0/1  
a`^¥V\_Y^ba`Z]baaaaa`abYa]Y]`Y`[\_Y\_Za]\_[R  
@HWI-EAS443:3:65:192:1348#0/1  
TAAGTTTTATATACCTTAGGGTAATGAACTGTACTTGTG  
+HWI-EAS443:3:65:192:1348#0/1  
aabaSab^¥abaa`aaab^a`Y\_Y\_`\_a]aaXa\_a^`¥^Y



@HWI-EAS443:3:65:215:1951#0/1  
AAAGAAGTCTAATGTCGAGTCCCGCACTCGCG  
+HWI-EAS443:3:65:215:1951#0/1  
aaaYabaaZa]a]a`aabaaa^aQaaa\_`ZaZ\_¥`W`W\_W  
@HWI-EAS443:3:65:24:616#0/1  
GTGGGTTCACTTTCAAAGGACAAGCGGATCATCAGTCAA  
+HWI-EAS443:3:65:24:616#0/1  
a\_aXFVX[RS¥]UZOLRUWTNWQOR^\_`VMSQQV^]WWPR  
@HWI-EAS443:3:65:259:1379#0/1  
AGCAGACAAGAGAATAATGGACATGATTCCAGAGAGGAAT  
+HWI-EAS443:3:65:259:1379#0/1  
`abaaa`W\_aY`\_\_a]aaaaaaaa\_a`a\_a`\_`\_\_^a`  
@HWI-EAS443:3:65:259:160#0/1  
AAAGAAGTCTAATGTCGAGTCCCGCACTCGCG  
+HWI-EAS443:3:65:259:160#0/1  
abaa`a`aa`aa`^a\_V\_aZ`\_¥`\_W¥^ZVYLV¥V¥UU  
@HWI-EAS443:3:65:26:67#0/1  
GTCTGCTGTAATTGGGTATCTCATTGCCATCATCCACTTC  
+HWI-EAS443:3:65:26:67#0/1  
aJa]]YUaRNYa]\_\_`SH¥Z^ZLLV^[Y[YVRVVIENSRV  
@HWI-EAS443:3:65:280:430#0/1  
AAAAGAAGTCTAATGTCGAGTCCCGCACTCGCG  
+HWI-EAS443:3:65:280:430#0/1  
ab`aaaaa`a`a`a`a`a]a\_\_`aY\_a^^```\_X]  
@HWI-EAS443:3:65:310:1200#0/1  
GCACTCGGAGATACTACTAAGACCACTGTGGACCATAT  
+HWI-EAS443:3:65:310:1200#0/1  
^aa`ba\_aa`]abbbb`bb\_UW^\_baX]aa\_^Z`a\_Y\_a`  
@HWI-EAS443:3:65:311:641#0/1  
CCGCACTCGGAGATACTACTAAGACCACTGTGGACCAT  
+HWI-EAS443:3:65:311:641#0/1  
ababaaaba`a\_aa\_\_\_\_`aa`aa]Y[a¥[\_[\_Y\_\_\_\_`\_UY  
@HWI-EAS443:3:65:322:495#0/1  
GGACATGATTCCAGAGAGGAATGAACAAGGACAAACCTC  
+HWI-EAS443:3:65:322:495#0/1  
abababa^\_aaaaa`]a`\_aaaaa`a]a`ab¥a\_a`\_]  
@HWI-EAS443:3:65:345:1542#0/1  
GTCCCGTTTTTCGTTTCATTACCAACTACGTCCCTTGC  
+HWI-EAS443:3:65:345:1542#0/1  
\_bbb`aJ`\_XYVT`^`bbaaa^¥Za``]SaXR]^`a^T^a  
@HWI-EAS443:3:65:356:1217#0/1  
AAAAGAAGTCTAATGTCGAGTCCCGCACTCGCG  
+HWI-EAS443:3:65:356:1217#0/1  
abaa\_a¥aa\_]aa\_a`\_`a`a]\_\_\_\_`\_X^\_\_Y^¥\_]Z]  
@HWI-EAS443:3:65:370:855#0/1  
CTCTTATTTTCAGTGTGGAGGTTGCCCGTTAGCACTTC  
+HWI-EAS443:3:65:370:855#0/1  
Yaa^\_Q\_bbb`a\_P\_bba¥`\_]SLZ`\_a¥ZWYJZ]TVZOX  
@HWI-EAS443:3:65:37:393#0/1  
TGCTAATTGGGCAAGGGGACGTAGTGTGGTAATGAAACG



@HWI-EAS443:3:65:705:519#0/1  
GTCCCCGTTTTTCGTTTCATTACCAACTACTCGTCCCCCTTGC  
+HWI-EAS443:3:65:705:519#0/1  
a]aaaa\_\_ab`b^a][^aaa\_XT[^`a`]aV\_`\_]ZZ^\_  
@HWI-EAS443:3:65:708:320#0/1  
AAAGAAGTGAAGATCTAATGTGCGCAGTCCCGCACTCGCG  
+HWI-EAS443:3:65:708:320#0/1  
aa`\_a[\_aaaaaaa\_\_a\_aaaZ`¥\_aa¥¥`^`¥T¥\_Z^\_  
@HWI-EAS443:3:65:71:1639#0/1  
CACATTTCCAAGAGAGATGCTAATGGGTCTGCTGACTG  
+HWI-EAS443:3:65:71:1639#0/1  
a^a``aaaab\_`a`aa`aa`]V]X^\_Va^^a\_``a\_¥¥  
@HWI-EAS443:3:65:731:1116#0/1  
CCTGAGTCAGTGCTAGTCAACTTATCAATGGATAATCA  
+HWI-EAS443:3:65:731:1116#0/1  
abbbbbbabab\_aaaaa`a`]]`aaaa`aaaa\_^`\_¥¥^^  
@HWI-EAS443:3:65:736:547#0/1  
TCCTTTTGAAGTGAACCCACCAAACTGAAAGATGAGCT  
+HWI-EAS443:3:65:736:547#0/1  
\_b`aabbbbaabUb^aa`^abb`Z`a`b^aaa`a`aaa  
@HWI-EAS443:3:65:746:241#0/1  
GACAAAGTTCAGATCGCCCCTAACTGCCTTGATCATGCAA  
+HWI-EAS443:3:65:746:241#0/1  
a`[aaba`a`bba`aa\_\_`\_a]a`]]`a\_\_^`\_`^`\_  
@HWI-EAS443:3:65:753:1535#0/1  
AAAAGAAGTGAAGATCTAATGTGCGCAGTCCCGCACTCGC  
+HWI-EAS443:3:65:753:1535#0/1  
a`aa\_\_aa`a`aX\_aaba]aa¥a`^`]Ya]aY]Y¥`]WZ  
@HWI-EAS443:3:65:764:1690#0/1  
GTGGTCTTAGTGAGTATCTCGCGAGTGCGGGACTGCGACA  
+HWI-EAS443:3:65:764:1690#0/1  
IS]a`a\_aaa`aZW]\_aVaT[\_H[Z¥IP\_U`^][Y]NOS  
@HWI-EAS443:3:65:771:871#0/1  
GTAGGATGCAATTTTCCTCATTGACTGTGAATGTGAGAGG  
+HWI-EAS443:3:65:771:871#0/1  
`Y`Za\_\_a`a`^a\_W`\_\_a`^^`YV`¥¥\_RZMOYR[Y  
@HWI-EAS443:3:65:780:1382#0/1  
CGCGAGATACTCACTAAGACCACTGTGGACCATATGGCCA  
+HWI-EAS443:3:65:780:1382#0/1  
aaa\_\_`aaaaaaa\_abbS\_a^aaa\_\_`¥`a`a`a\_¥\_^a  
@HWI-EAS443:3:65:793:682#0/1  
GAACCCCGCACTCAGAATGAAGTGGATGATGGCAATGAGA  
+HWI-EAS443:3:65:793:682#0/1  
a`^]]`baa^¥a`aVLZ\_[[U]][\_`X¥\_`LX¥^[VVU  
@HWI-EAS443:3:65:802:1719#0/1  
GTACTTTTTGATTATGGCCATATGGTCCACAGTGGTCTTA  
+HWI-EAS443:3:65:802:1719#0/1  
a`a`\_`abb\_babaa`bb`Y¥ZJY^aadW`]S`^Z\_\_aT  
@HWI-EAS443:3:65:811:466#0/1  
TGCTGTAATTGGGTATCTCATTGCCATCATCCACTTCATT

+HWI-EAS443:3:65:811:466#0/1  
WU\_ab\_^Va¥`ab\_`¥\_]Z`a`X``a\_aa\_Z\_aaX[Y`a  
@HWI-EAS443:3:65:819:1288#0/1  
CTGTAATTGGGTATCTCATTGCCATCATCCACTTCATTCT  
+HWI-EAS443:3:65:819:1288#0/1  
abb\_bbaaaaa]b`aaaba\_`aaaa`aaaaYa\_a`^a\_]a  
@HWI-EAS443:3:65:82:748#0/1  
ATCTGCTCCCAGCACGTCCCTTGGGTTAAGTGCAACACTT  
+HWI-EAS443:3:65:82:748#0/1  
]aa`aaaaaaa\_a`^U[a\_`¥^X^W]R[^W\_`^[WYZ[W  
@HWI-EAS443:3:65:832:1733#0/1  
AAAAGAAGTGGAGATCTAATGTCGCAGTCCCGCACTCGC  
+HWI-EAS443:3:65:832:1733#0/1  
abba`aaaaaaaa`aaaab``a¥`]aa][`a^V¥X]\_\_WZ  
@HWI-EAS443:3:65:842:1315#0/1  
GGTGGAGTCTGCTGTCCTGAGAGATTTCTCATTTTGGGC  
+HWI-EAS443:3:65:842:1315#0/1  
`]Q[X]W^`\_\_¥¥¥a`¥X¥¥Z[ZMY\_`^¥¥YN]Y^\_ZX[\_  
@HWI-EAS443:3:65:866:1865#0/1  
GTTTTCGTTTCATTACCAACTACGTCCCCTTGCCCAAT  
+HWI-EAS443:3:65:866:1865#0/1  
UY\_U\_bb¥¥¥bbaZ\_Zaaa]^aaaba`W¥\_SX`[\_`\_\_\_\_a\_  
@HWI-EAS443:3:65:867:799#0/1  
TCCCGTTTTCGTTTCATTACCAACTACGTCCCCTTGCC  
+HWI-EAS443:3:65:867:799#0/1  
¥Y`b¥0Z¥bb\_L[`]bb\_\_a]abVbabb``[aa``]YYa]  
@HWI-EAS443:3:65:888:1803#0/1  
AAAGAAGTGGAGATCTAATGTCGCAGTCCCGCACTCGCG  
+HWI-EAS443:3:65:888:1803#0/1  
ab\_S¥^`aaa`b\_a\_aaa\_a\_Wa\_\_a\_T[Za`Z¥W¥¥`]  
@HWI-EAS443:3:65:888:2035#0/1  
ATCAGACCGAGTGATGGTATCACCTCTGGCCGTAACATGG  
+HWI-EAS443:3:65:888:2035#0/1  
aWZ\_Z]aaXaaRZ`^]^[`TT¥`]N]Y^T¥^YNW]QYSRT  
@HWI-EAS443:3:65:890:1731#0/1  
CCCGTTTTCGTTTCATTACCAACTACGTCCCCTTGCCC  
+HWI-EAS443:3:65:890:1731#0/1  
a\_R[Hwa`\_]MZVXW\_a`a\_\_\_\_]X]SNDZ`¥aWMO[[^  
@HWI-EAS443:3:65:919:34#0/1  
CCCGTTTTCGTTTCATTACCAACTACGTCCCCTTGCCC  
+HWI-EAS443:3:65:919:34#0/1  
aa`b\_bbb\_aaab^]aaa`^a``\_R\_\_\_\_a]`\_^[^]a]WZ  
@HWI-EAS443:3:65:975:821#0/1  
GCCAGGGTTTGTATCAACTCTCCTCCTTATTTTAACTTGA  
+HWI-EAS443:3:65:975:821#0/1  
aaaa`a\_PZ`\_¥^VY\_`^aa]TZ\_`a[`]U^\_^[TW¥^Y`^  
@HWI-EAS443:3:66:1057:1867#0/1  
GGATTTCTCATTTTGGGCAAAGAAGACAAGAGATATGGCC  
+HWI-EAS443:3:66:1057:1867#0/1  
aa`aaaaaa`aaaaaa`aaa\_\_aa``\_\_``\_\_`^aX^^]S

@HWI-EAS443:3:66:1057:419#0/1  
AGGGGACGTAGTGTGGTAATGAAACGAAAACGGGACTCT  
+HWI-EAS443:3:66:1057:419#0/1  
[`Z\_babZF[]X`a\_b¥GU^aaZ\_`T`S\_a[Qa\_a]PR^V  
@HWI-EAS443:3:66:1062:1389#0/1  
AAAAGAAGTGGAGATCTAATGTCGCAGTCCCGCACTCGC  
+HWI-EAS443:3:66:1062:1389#0/1  
^baW^¥VbXWYaaa[aaaba¥aP\_V]a^^````\_`a`¥X[  
@HWI-EAS443:3:66:1076:1439#0/1  
AGAAGTGGAGATCTAATGTCGCAGTCCCGCACTCGCGAG  
+HWI-EAS443:3:66:1076:1439#0/1  
a`^`\_`Z`^W\_[¥`\_\_^`\_\_Z[GW^V¥WUWG\_]Y¥YY  
@HWI-EAS443:3:66:1121:126#0/1  
GTCCCGTTTTCGTTTCATTACCAACTACGTCCCCTTGC  
+HWI-EAS443:3:66:1121:126#0/1  
a)`]SaTaa\_ZaT\_PPU[U]RR[ZR\_V¥[X^S^YVU^YVY  
@HWI-EAS443:3:66:1178:1799#0/1  
AAGAAGTGGAGATCTAATGTCGCAGTCCCGCACTCGCGA  
+HWI-EAS443:3:66:1178:1799#0/1  
Z\_\_a`V\_V\_UaYa\_V¥¥\_TZU^LU\_^V^UUXWUYaQTVW  
@HWI-EAS443:3:66:1223:191#0/1  
CTTCCTGATGTGTACTTTTTGATTATGGCCATATGGTCCA  
+HWI-EAS443:3:66:1223:191#0/1  
abbbbbbb\_babababbbbbbabbbba`aaaa```[`YX^`  
@HWI-EAS443:3:66:1226:1552#0/1  
GTCCCGTTTTCGTTTCATTACCAACTACGTCCCCTTGC  
+HWI-EAS443:3:66:1226:1552#0/1  
a]aaaa[`aa^X``aa`\_a`\_a\_Va\_\_`^WU`]]^]YUZ  
@HWI-EAS443:3:66:1286:1651#0/1  
TTGCCTTGTTGTAATTGAATACTGGAGAATTGCCTTAC  
+HWI-EAS443:3:66:1286:1651#0/1  
IP\_\_]^Y`^QXa`aaa`^`^Ya`a¥a\_Y`WR\_WTa[¥^¥  
@HWI-EAS443:3:66:1302:13#0/1  
AAGAAGTGGAGATCTAATGTCGCAGTCCCGCACTCGCGA  
+HWI-EAS443:3:66:1302:13#0/1  
abb\_babb`b`aaa\_ba`bba`a\_aa[Za¥\_a`^UY¥`¥  
@HWI-EAS443:3:66:1317:128#0/1  
GTGGAGTCTGCTGTCCTGAGAGGATTTCTCATTTTGGGCA  
+HWI-EAS443:3:66:1317:128#0/1  
a^``]a`\_`aYa[T\_^]\_[\_Z`\_Q[`\_U`XX^[]\_\_\_\_TRU  
@HWI-EAS443:3:66:1331:620#0/1  
ATACCCAATTACAGCAGACAAGAGAATAATGGACATGATT  
+HWI-EAS443:3:66:1331:620#0/1  
aabaa\_aaaaaa``aa`\_a`aa``\_aaaaa`a`aa`\_\_\_\_  
@HWI-EAS443:3:66:1339:224#0/1  
CCCGTTTTCGTTTCATTACCAACTACGTCCCCTTGGCC  
+HWI-EAS443:3:66:1339:224#0/1  
a\_]XXab`ZZ`aa\_aaabaU]SW\_Ua`a]]][P`U`[QWP[  
@HWI-EAS443:3:66:1350:204#0/1  
AAAGGATGCAGGTGCATTGACTGAAGATCCAGATGAAGGC

+HWI-EAS443:3:66:1350:204#0/1  
aa`abaabaaaaWaaaaaba\_ab^aaa`\_`aaaa`\_`^N  
@HWI-EAS443:3:66:1350:626#0/1  
CCCGCACTCAGAATGAAGTGGATGATGGCAATGAGATACC  
+HWI-EAS443:3:66:1350:626#0/1  
aa`bbabaaababba`Y`]baaaa\_aaa\_\_a`a`a^\_`^`  
@HWI-EAS443:3:66:1366:616#0/1  
GAATAAAAGAAGTCTAATGTCGAGTCCCGCAC  
+HWI-EAS443:3:66:1366:616#0/1  
^\_]`a`a^a\_\_X`aVV`]`¥¥`aY^`R\_YXY]V¥[VVVLY  
@HWI-EAS443:3:66:1368:201#0/1  
CTCGGAGATACTACTAAGACCACTGTGGACCATATGGC  
+HWI-EAS443:3:66:1368:201#0/1  
aaaaa\_X\_\_a^`\_\_^`aaa]^\_a`aY`[\_\_\_]^^^]]U  
@HWI-EAS443:3:66:1377:276#0/1  
GAACTGTACTTGTGTTGGGCCATTCCTATTCACCATGT  
+HWI-EAS443:3:66:1377:276#0/1  
a[\_`a`^\_]aaa]a^\_a`\_\_Z^\_]`[[^^\_\_^[[QVT]¥U  
@HWI-EAS443:3:66:1389:907#0/1  
CTGGGGTGGAGTCTGCTGTCCTGAGAGATTTCTCATTTT  
+HWI-EAS443:3:66:1389:907#0/1  
Vbbbba`ba`]\_]b]bbb¥`bbb`abaaaabbab[\_aab\_  
@HWI-EAS443:3:66:1392:530#0/1  
GCTCCCTTGATGGTGGCGTACATGCTAGAAAGAGAATTGG  
+HWI-EAS443:3:66:1392:530#0/1  
`aaaa`¥b`ab\_R^aaa[\_Y\_aa]a¥Z]^\_a[\_`\_-]\_\_  
@HWI-EAS443:3:66:1413:271#0/1  
TGCTGGATCAGACCGAGTGGTATCACCTCTGGCCGTA  
+HWI-EAS443:3:66:1413:271#0/1  
abababa`abaaa`^a[a^aa\_U\_]RXUX\_\_¥^]WU]WZ  
@HWI-EAS443:3:66:1446:1325#0/1  
GATCTTGACCATTGAATTTTCAATTTCCAGTTCCT  
+HWI-EAS443:3:66:1446:1325#0/1  
^b^X`a`\_a`^baaaaaa`\_\_`Wa\_aaa^aZ``[\_WY`  
@HWI-EAS443:3:66:1458:369#0/1  
AAAAGAAGTCTAATGTCGAGTCCCGCACTCGC  
+HWI-EAS443:3:66:1458:369#0/1  
aaaa`]a`baaaaa\_\_`a\_aaa\_`^`a`a^V]\_\_^]XU]^]  
@HWI-EAS443:3:66:1484:766#0/1  
GCGAGATACTACTAAGACCACTGTGGACCATATGGCCAT  
+HWI-EAS443:3:66:1484:766#0/1  
ababbbbaabababaaaa`ab`\_^Zaaa`aaaa``^¥]]¥  
@HWI-EAS443:3:66:1496:1005#0/1  
CAGAATGAAGTGGATGATGGCAATGAGATACCCAATTACA  
+HWI-EAS443:3:66:1496:1005#0/1  
a\_¥¥\_QUWYXZTYZaXROXRVA¥`a\_ZLVSWTUV^^`PU^  
@HWI-EAS443:3:66:1501:406#0/1  
CTGCTGTCCTGAGAGATTTCTCATTTTGGGCAAAGAAGA  
+HWI-EAS443:3:66:1501:406#0/1  
aaabbbbbbbaaba`ba`baa[a\_babba¥¥bbbabaaaa\_

@HWI-EAS443:3:66:1576:410#0/1  
ATTGTCTCCCGAAGAAGTCAGTGAAACGCAAGGAACTGAG  
+HWI-EAS443:3:66:1576:410#0/1  
aaaaaaaa\_[X¥`[\_`¥^\_X[]aa\_a`^a\_T¥S¥Y¥\_  
@HWI-EAS443:3:66:1577:1609#0/1  
TCCCGTTTTCGTTTCATTACCAACTACGTCCCCTTGCC  
+HWI-EAS443:3:66:1577:1609#0/1  
a^`a``aaaSX\_^Z¥baaa`aaX^a[\_`]YX¥`TRWZWJ  
@HWI-EAS443:3:66:1583:1145#0/1  
TTTTCGTTTCATTACCAACTACGTCCCCTTGCCCAATT  
+HWI-EAS443:3:66:1583:1145#0/1  
aaaaaa\_aaaaba\_\_\_\_aa\_`T¥]Z¥¥\_\_\_\_\_ZYX¥¥^W]Z  
@HWI-EAS443:3:66:1586:1884#0/1  
CAACACTTCAATATAAACACTGCCTGTTCCGCCGGCTACT  
+HWI-EAS443:3:66:1586:1884#0/1  
aaba^]abb`ababbbbabaaaa\_`^\_aaabaa\_\_^`\_Z  
@HWI-EAS443:3:66:1621:400#0/1  
AAAAGAAGTGAAGATCTAATGTCGCAGTCCCGCACTCGC  
+HWI-EAS443:3:66:1621:400#0/1  
abb`a`a`baa`aab^bbYba\_]b\_a]YR¥]a\_`Na[X^  
@HWI-EAS443:3:66:1622:501#0/1  
GTTATTGTCAACTTCTCAGTTCCTTGCGTTTCACTGACTT  
+HWI-EAS443:3:66:1622:501#0/1  
aa`a\_aaWa`aU[a^a¥\_XW`\_¥`^\_X`¥\_TX^\_\_^Y]\_]\_  
@HWI-EAS443:3:66:1627:318#0/1  
CGGCTACTGGGAGAAACCTTGTTCACGGACCAATTCTCT  
+HWI-EAS443:3:66:1627:318#0/1  
abbabaZaaab\_b]`aY`aa^[a`aa[aa\_W^\_`a^KYT]  
@HWI-EAS443:3:66:1640:674#0/1  
GAACAAGGACAAACCCTCTGGAGCAAAACAAACGATGCTG  
+HWI-EAS443:3:66:1640:674#0/1  
aaaH¥\_a\_¥aa\_]NLTZ^VX\_^aU`\_[¥U¥Z\_N\_[W^U^\_  
@HWI-EAS443:3:66:1665:1199#0/1  
CTCTAACCTTAAAAATCGGTCAATACTCACTACCACTCT  
+HWI-EAS443:3:66:1665:1199#0/1  
`babbaaaabbabaaabaaa\_\_aaaaaaaa\_aa[\_a\_a`a  
@HWI-EAS443:3:66:1669:305#0/1  
TGCTGTAATTGGGTATCTCATTGCCATCATCCACTTCATT  
+HWI-EAS443:3:66:1669:305#0/1  
abaab\_aabaaba^aa\_a`aaa^`Z`aYa\_Zaa\_a`[Z``  
@HWI-EAS443:3:66:1705:982#0/1  
GGGAGATCAATGGCCCTGAGTCAGTGCTAGTCAACTTA  
+HWI-EAS443:3:66:1705:982#0/1  
aa`^a\_a``a``\_\_]\_`\_]`]^\_\_X\_]^Z^Z[[^][R[]]  
@HWI-EAS443:3:66:1780:1298#0/1  
GTCCCGTTTTCGTTTCATTACCAACTACGTCCCCTTGCC  
+HWI-EAS443:3:66:1780:1298#0/1  
Y]UJYY`a`]RY]¥YX^Z\_¥SQ]]¥^S[\_YRHOTPUVFOX  
@HWI-EAS443:3:66:1784:1822#0/1  
GAGAATAAAAGAACTGAGAGATCTAATGTCGCAGTCCCGC

+HWI-EAS443:3:66:1784:1822#0/1  
a^a[a`baa]YZ`^\_aaa`[][\_`\_\_aaZZN]^T^VVYYU  
@HWI-EAS443:3:66:178:1450#0/1  
GGAAAAGCACTTTTGCATCTTTTTGGAAATGCCTCAAGAG  
+HWI-EAS443:3:66:178:1450#0/1  
aaW\_]¥X\_[\_]ba`U^R]S`P`a`MLMJU]¥`[aZXJONP  
@HWI-EAS443:3:66:208:601#0/1  
CAATTACAGCAGACAAGAGAATAATGGACATGATTCCAGA  
+HWI-EAS443:3:66:208:601#0/1  
\_a`a\_Z¥aaa\_]TY¥]`M`a`[Z[aZTYaZ[[U]Z¥¥\_`^  
@HWI-EAS443:3:66:217:342#0/1  
ATAAAAGAACTGAGAGATCTAATGTCGCAGTCCCGCACTC  
+HWI-EAS443:3:66:217:342#0/1  
abbaabbaaaa`^]aaaaaa`aa\_`\_`a^`\_\_`^P¥^Z  
@HWI-EAS443:3:66:235:886#0/1  
CCCGTTTTTCGTTTCATTACCAACTACGTCCCTTGCCC  
+HWI-EAS443:3:66:235:886#0/1  
abaa`a[`aa^a\_¥Ta^aa`dM`^\_a\_]\_U`\_^XV]]^  
@HWI-EAS443:3:66:243:392#0/1  
AGAATAAAAGAACTGAGAGATCTAATGTCGCAGTCCCGCA  
+HWI-EAS443:3:66:243:392#0/1  
¥`^¥aa`¥Za``ab`^a¥^aaaaaaaa^`^aaa^aaa^aW  
@HWI-EAS443:3:66:245:407#0/1  
GCTGTAATTGGGTATCTCATTGCCATCATCCACTTCATTC  
+HWI-EAS443:3:66:245:407#0/1  
\_``¥WW\_a¥¥\_\_^b^`^aaa`]a\_]ab`a¥Z`]Z`a\_``  
@HWI-EAS443:3:66:295:1168#0/1  
TCCCGTTTTTCGTTTCATTACCAACTACGTCCCTTGCC  
+HWI-EAS443:3:66:295:1168#0/1  
aba\_¥Z`^`^aa^\_`\_`Y^ba`a\_aba`\_USaW¥]\_¥¥¥]  
@HWI-EAS443:3:66:301:723#0/1  
CAGAATGAAGTGGATGATGGCAATGAGATACCCAATTACA  
+HWI-EAS443:3:66:301:723#0/1  
aba`aab`ab]aa\_aa\_aaa\_`[aa\_aaa\_a`a`a`^\_  
@HWI-EAS443:3:66:319:1722#0/1  
ATGTGTACTTTTTGATTATGGCCATATGGTCCACAGTGGT  
+HWI-EAS443:3:66:319:1722#0/1  
aaa]a\_Y`aaaaaa\_aaa`¥¥a`\_Ta\_0]X``\_YYLS^WR  
@HWI-EAS443:3:66:326:1923#0/1  
CTGTGTGCTGTGGCACATTTCCAAGAGAGATGCTAATGGG  
+HWI-EAS443:3:66:326:1923#0/1  
a`\_^\_X```¥`X`^]`^`\_`a^¥`^^\_[W]^^^XUVV  
@HWI-EAS443:3:66:328:2012#0/1  
GTCCCGTTTTTCGTTTCATTACCAACTACGTCCCTTGCC  
+HWI-EAS443:3:66:328:2012#0/1  
a\_bbab`ab`a`^aaa`a\_aaab`aaa`aaSYaaa\_YXY^  
@HWI-EAS443:3:66:332:1276#0/1  
GGCGATCTGAACCTTGTCAATAGGGCAAACCAGCGACTGA  
+HWI-EAS443:3:66:332:1276#0/1  
aab\_``baXZaaZaaZYaS^aa^a`WaaaaZ`aa`a^^a



@HWI-EAS443:3:66:341:773#0/1  
GAGAGATCTAATGTGCGAGTCCCGCACTCGCGAGATACTC  
+HWI-EAS443:3:66:341:773#0/1  
ab\_[N]abaabab\_a`^]U[aa[ZH\_\_aaa`[aUZ`ZVZ  
@HWI-EAS443:3:66:34:1985#0/1  
AAAAGAACTGAGAGATCTAATGTGCGAGTCCCGCACTCGC  
+HWI-EAS443:3:66:34:1985#0/1  
aaaa\_``\_a\_a]aU`\_a`a`^\_Y^Xa`^U\_^\_Y]U]X]WX  
@HWI-EAS443:3:66:400:160#0/1  
AATGTGCGAGTCCCGCACTCGCGAGATACTCACTAAGACC  
+HWI-EAS443:3:66:400:160#0/1  
``\_a\_aa\_W]¥¥`^^aU\_ZZ¥WYQPRRYPUZQTZPVNUUW  
@HWI-EAS443:3:66:40:891#0/1  
GAGAAACCTTGTTTTACGGACCAATTCTTTCTAGCATG  
+HWI-EAS443:3:66:40:891#0/1  
W]¥\_Z`\_XXR\_abb\_WO\_T^¥`\_¥\_b^¥]b`^^ZZ`\_]a^  
@HWI-EAS443:3:66:424:1363#0/1  
GGAGTAAGGATGGTGGACATCCTTAGACAGAATCCAACCTG  
+HWI-EAS443:3:66:424:1363#0/1  
`\_aaabbbabaa`\_aaa`aaaaaa`\_[aaaa`a`Uaaa  
@HWI-EAS443:3:66:431:82#0/1  
GTTCTTGAAAGGATGCAGGTGCATTGACTGAAGATCCAG  
+HWI-EAS443:3:66:431:82#0/1  
a]a`a`^`aX`\_a`\_\_a^^`^Q]^¥`¥^\_¥^\_Y`^¥Y[WW¥  
@HWI-EAS443:3:66:454:1200#0/1  
ATCTGCTCCCAGCACGTCCCTTGGGTTAAGTGCAACACTT  
+HWI-EAS443:3:66:454:1200#0/1  
aaba\_a`bab`a`a`\_aa\_¥`¥[\_W\_aa\_QY\_\_¥`\_Z¥W  
@HWI-EAS443:3:66:467:496#0/1  
CCCGTTTTCGTTTTATTACCAACTACGTCCCTTGCCC  
+HWI-EAS443:3:66:467:496#0/1  
`babaaaaabaaaZY^aaaa\_aa``aaa[[`a\_\_]``¥`  
@HWI-EAS443:3:66:483:1040#0/1  
GTCCCGTTTTCGTTTTATTACCAACTACGTCCCTTGCC  
+HWI-EAS443:3:66:483:1040#0/1  
aSaabb^^abaaaa\_ab`aab^aa`aa]Z]^`^`^^¥¥U  
@HWI-EAS443:3:66:488:454#0/1  
AATTGGGCAAGGGGACGTAGTGTGGTAATGAAACGAAAA  
+HWI-EAS443:3:66:488:454#0/1  
¥¥\_abbab````baS\_ba`b\_a`b\_ZG\_aSR¥V`[`^]\_X  
@HWI-EAS443:3:66:533:890#0/1  
GCTGTAATTGGGTATCTCATTGCCATCATCCACTTCATTC  
+HWI-EAS443:3:66:533:890#0/1  
aba`YQa`a`aXNa`\_a`SXNN\_aY^a^[a[¥a\_`\_XW[\_  
@HWI-EAS443:3:66:568:624#0/1  
CTTAGTGAGTATCTCGCGAGTGGGGACTGCGACATTAGA  
+HWI-EAS443:3:66:568:624#0/1  
aa^aa\_\_aa\_]Za^¥TSTUZSX`]a]S]U\_\_YRUVVZY[V  
@HWI-EAS443:3:66:638:1825#0/1  
GTGGCGTACATGCTAGAAAGAGAATTGGTCCGTAACAA

+HWI-EAS443:3:66:638:1825#0/1  
a^[\_]VPY\_^¥^[YWZ^^`QZX`¥P[UL¥`V^¥¥`\_a^  
@HWI-EAS443:3:66:648:858#0/1  
CTTCCTGATGTGTACTTTTTGATTATGGCCATATGGTCCA  
+HWI-EAS443:3:66:648:858#0/1  
aabbbbaabVaaaaabbbbaabab\_]`bbb[`^JWQ`X^  
@HWI-EAS443:3:66:659:1039#0/1  
CTCGCGAGATACTCACTAAGACCACTGTGGACCATATGGC  
+HWI-EAS443:3:66:659:1039#0/1  
aa`[ba[aa`Y`aa`a\_aa`a\_a``\_aZ^¥¥\_\_V^`^\_\_^  
@HWI-EAS443:3:66:661:1831#0/1  
CGCACTCGCGAGATACTCACTAAGACCACTGTGGACCATA  
+HWI-EAS443:3:66:661:1831#0/1  
aaa\_aaa\_a\_\_\_a```a\_aa\_\_a^aaa`\_ZY`]^^\_]^^  
@HWI-EAS443:3:66:71:1040#0/1  
AGAGAATAAAAGAACTGAGAGATCTAATGTCGCAGTCCCG  
+HWI-EAS443:3:66:71:1040#0/1  
]aaaaabbaaa¥]aaaaaa`aa^aaa^a\_a``]``U  
@HWI-EAS443:3:66:724:1051#0/1  
CTCCAGGATTGTAATGCTCCCTTGATGGTGGCGTACA  
+HWI-EAS443:3:66:724:1051#0/1  
QY`aaYTW^abMSW[¥X\_VZ^Ta^\_U\_QX^[D]^`^U¥Z¥  
@HWI-EAS443:3:66:775:2006#0/1  
TGGTATTCTCACAAGAGGATTGCATGATCAAGGCAGTTAG  
+HWI-EAS443:3:66:775:2006#0/1  
`aYVa]\_a]aaa^a`¥baaaaaab\_\_a^[\_aa\_\_a\_0]^X  
@HWI-EAS443:3:66:779:294#0/1  
AAAAGAACTGAGAGATCTAATGTCGCAGTCCCGCACTCGC  
+HWI-EAS443:3:66:779:294#0/1  
^`\_`^^\_ba^Z]\_\_a]aa``\_FXa\_aa[¥Y`]YSU^Q]¥  
@HWI-EAS443:3:66:800:997#0/1  
ACTTCAATATAAACTGCCTGTTCCGCCGCTACTGGGA  
+HWI-EAS443:3:66:800:997#0/1  
Z\_`XVOXY)`ab\_]a`bb`b`UIR]\_¥W`aa¥IVTYQ[X  
@HWI-EAS443:3:66:812:1008#0/1  
AGAGAATAAAAGAACTGAGAGATCTAATGTCGCAGTCCCG  
+HWI-EAS443:3:66:812:1008#0/1  
aa\_aaaaaaba]\_aaaa`\_aa`\_\_aaa`a`a\_a`\_Z^^a^  
@HWI-EAS443:3:66:812:387#0/1  
GCTGGATCAGACCGAGTGATGGTATCACCTCTGGCCGTAA  
+HWI-EAS443:3:66:812:387#0/1  
aaaaaa`abaa^b\_a`\_a`¥aaZ^\_\_`[\_`YY¥¥`[\_W\_]`  
@HWI-EAS443:3:66:820:1076#0/1  
GTCCCGTTTTTCGTTTCATTACCAACTACGTCCCTTGC  
+HWI-EAS443:3:66:820:1076#0/1  
]F\_X\_] [a\_aaaPHXa]UXaaa]BBBBBBBBBBBBBBBB  
@HWI-EAS443:3:66:821:515#0/1  
GCCATATGGTCCACAGTGGTCTTAGTGAGTATCTCGCGAG  
+HWI-EAS443:3:66:821:515#0/1  
abaa`[\_`Y¥abaaaa¥`¥X[a`V^V]\_\_R^¥a`\_]\_YX¥

@HWI-EAS443:3:66:896:884#0/1  
AAGAACTGTAAGTCGTTTGGTTGCCTTGTTGTAATTGAAT  
+HWI-EAS443:3:66:896:884#0/1  
^`a]¥aab\_aaa\_`````^ [P^^`^`aa[a`M]Y[[a¥^`  
@HWI-EAS443:3:66:900:1387#0/1  
AGGGTTTGTATCAACTCTCCTCTTATTTTAACTTGATTT  
+HWI-EAS443:3:66:900:1387#0/1  
a``aX`bb[`aaaaabaaaaaaaaabaaaa`a`\_a`  
@HWI-EAS443:3:66:919:1490#0/1  
CACCATCCTTACTCCTCCAATCTGTGTGCTGTGGCACATT  
+HWI-EAS443:3:66:919:1490#0/1  
a^\_YX¥]^` [¥¥UT[¥RV\_¥][QaUZ^]UQ^YY]\_Z]\_Z¥  
@HWI-EAS443:3:66:938:1266#0/1  
CATATCTCTTGTCTTCTTTGCCAAAATGAGAAATCCTCT  
+HWI-EAS443:3:66:938:1266#0/1  
\_Yaaaa`a^`¥Z\_`¥`a`\_[]` `a^`]]` \_`Z\_`¥Z^`\_  
@HWI-EAS443:3:66:94:1083#0/1  
CTGCTGTAATTGGGTATCTCATTGCCATCATCCACTTCAT  
+HWI-EAS443:3:66:94:1083#0/1  
aabbaaW]\_baa`]Uaaab\_¥\_` `a]T\_`^V^` `a]Y]Z  
@HWI-EAS443:3:66:959:1516#0/1  
CTGCTGTCTGAGAGGATTTCTCATTGTTGGCAAAGAAGA  
+HWI-EAS443:3:66:959:1516#0/1  
aaaaa`^aaaaa`aa\_aa`Z^a`aa` `^`\_a`\_`a^`\_  
@HWI-EAS443:3:66:971:1054#0/1  
GTTGCCCGTTAGCACTTCTTCTTCTTCTTGACTGATGAT  
+HWI-EAS443:3:66:971:1054#0/1  
aZ]`^aa`\_a^`aa^aa`a`aaa\_a`a\_a^aa\_\_`^a`\_\_  
@HWI-EAS443:3:66:985:862#0/1  
GTGGAGTCTGCTGTCCTGAGAGGATTTCTCATTGTTGGGCA  
+HWI-EAS443:3:66:985:862#0/1  
aX` `¥^`[V` `][XR[V¥NTZ`]QX\_`¥Y^Z]¥]^X\_]VW  
@HWI-EAS443:3:67:1009:712#0/1  
GCCGTAGACATATGCAAGGCAGCAATAGGGTTGAGGATTA  
+HWI-EAS443:3:67:1009:712#0/1  
a`ab\_aaaa^¥aZ[ `\_\_a\_\_aaZ^a`a`\_T`^Va\_ZZ^[  
@HWI-EAS443:3:67:100:1995#0/1  
CAATGAGATACCCAATTACAGCAGACAAGAGAATAATGGA  
+HWI-EAS443:3:67:100:1995#0/1  
a`a]H^]a¥babaab` `[aV^` `a]a`\_`RTV]\_\_` [YPa  
@HWI-EAS443:3:67:1012:1196#0/1  
GTCCCCTTTTCGTTTCATTACCAACTACGTCCCCTTGC  
+HWI-EAS443:3:67:1012:1196#0/1  
^^ba`\_Zbaa`a`T]\_bbaa` `a[ ` [a\_Ua^a\_a\_]`a  
@HWI-EAS443:3:67:1012:663#0/1  
AAAGAACTGAGAGATCTAATGTGCGAGTCCCGCACTCGCG  
+HWI-EAS443:3:67:1012:663#0/1  
\_aa\_TU[a]aa`a[[`b`V` `P^]\_V¥S\_`aaTP¥¥WY]\_  
@HWI-EAS443:3:67:1022:416#0/1  
CTGCTGTAATTGGGTATCTCATTGCCATCATCCACTTCAT

+HWI-EAS443:3:67:1022:416#0/1  
abbbbbbabbbbabaaa`aba`aaaaaaaaaaaaaaaa  
@HWI-EAS443:3:67:1083:138#0/1  
TCCCGTTTTTCGTTTCATTACCAACTACGTCCCCTTGCC  
+HWI-EAS443:3:67:1083:138#0/1  
a`X`baaa`X`^a`^ab]a[Y^`V^aYa`^Z\_ZZ^\_TT]X  
@HWI-EAS443:3:67:1107:822#0/1  
ATAAAAGAAGTCTAATGTCGCAGTCCCGCACTC  
+HWI-EAS443:3:67:1107:822#0/1  
aa^^`a`baaaaaaaaa`aab^``aaa¥a`a\_^[[^^  
@HWI-EAS443:3:67:1113:603#0/1  
AAAAGAAGTCTAATGTCGCAGTCCCGCACTCGC  
+HWI-EAS443:3:67:1113:603#0/1  
a\_^`^\_¥a``b¥a``aabaa`b[Z]\_`¥X¥^^Y[T]\_[]]  
@HWI-EAS443:3:67:1119:1740#0/1  
CGTAGACATATGCAAGGCAGCAATAGGGTTGAGGATTAGC  
+HWI-EAS443:3:67:1119:1740#0/1  
a\_H\_VL]a]\_\_aa`¥[\_¥¥[a[Q\_^`\_\_VZYX\_^Z]\_`\_  
@HWI-EAS443:3:67:1138:1171#0/1  
GTAAGGATGGTGGACATCCTTAGACAGAATCCAAGTGG  
+HWI-EAS443:3:67:1138:1171#0/1  
aab]aaaaba¥aaa\_bbaaaaa`\_aaaa`\_a`\_aaaa  
@HWI-EAS443:3:67:1143:694#0/1  
CGCGAGATACTACTAAGACCACTGTGGACCATATGGCCA  
+HWI-EAS443:3:67:1143:694#0/1  
]L]a[¥Sa\_Sa\_]\_]\_a¥WL]P`VNYP SZ\_QFV\_JJ¥LPW  
@HWI-EAS443:3:67:1166:410#0/1  
TAATGTCGCAGTCCCGCACTCGCGAGATACTACTAAGAC  
+HWI-EAS443:3:67:1166:410#0/1  
^ZX\_\_R]a]¥aWaaaa``X`Z¥a[^¥¥\_^^¥SOX[XRWM  
@HWI-EAS443:3:67:1170:1882#0/1  
GTCCCGTTTTTCGTTTCATTACCAACTACGTCCCCTTGCC  
+HWI-EAS443:3:67:1170:1882#0/1  
aY`aba[\_a`\_a`\_`a`aaa`aa`\_`aa`aZ]¥\_^\_`\_`\_`  
@HWI-EAS443:3:67:118:89#0/1  
GTCCCGTTTTTCGTTTCATTACCAACTACGTCCCCTTGCC  
+HWI-EAS443:3:67:118:89#0/1  
a\_baab^aaa\_\_aaaa\_]`\_\_S\_\_[¥ZY]WZ]^WZU  
@HWI-EAS443:3:67:1196:1685#0/1  
CTCGAGATACTACTAAGACCACTGTGGACCATATGGC  
+HWI-EAS443:3:67:1196:1685#0/1  
aY]ZV`U`UU^a`¥SS^`aXa¥\_Q]]XYa\_aa`T[NN¥Y\_  
@HWI-EAS443:3:67:1301:918#0/1  
ATGGTATTCTCACAAGAGGATTGCATGATCAAGGCAGTTA  
+HWI-EAS443:3:67:1301:918#0/1  
^aba[`b``¥aaaa`aHaa[a`a`\_`aaY]\_a\_\_^WY]SOS  
@HWI-EAS443:3:67:1304:1344#0/1  
ATAAAAGAAGTCTAATGTCGCAGTCCCGCACTC  
+HWI-EAS443:3:67:1304:1344#0/1  
V]\_ZS\_`U^R\_ba^¥WZYZ\_^^\_Q\_]U`U^[T\_]b]W\_R

@HWI-EAS443:3:67:1331:21#0/1  
GAACTGAGAGATCTAATGTCGCAGTCCCGCACTCGCGAGA  
+HWI-EAS443:3:67:1331:21#0/1  
a[^`bbaaaaa`aa\_ab^[a^`\_P[^`^^^¥\_\_¥RP^¥[Y  
@HWI-EAS443:3:67:1334:1976#0/1  
AAGAAGTCTAATGTCGCAGTCCCGCACTCGCGA  
+HWI-EAS443:3:67:1334:1976#0/1  
]`\_]aQaa¥Xa^[`a^aPDU][]WT^^¥[aNUGT`V¥H  
@HWI-EAS443:3:67:1357:677#0/1  
GGCCATTCTATTCCACCATGTTACGCCAGAGGTGATAC  
+HWI-EAS443:3:67:1357:677#0/1  
aa\_aaaaaaaaa`¥^U`a\_aa\_aX\_\_aUYSVTa^Z]U  
@HWI-EAS443:3:67:1383:197#0/1  
GGGAGCAATTTTACAATCCTGGAGCTCTTCTTCTCTCT  
+HWI-EAS443:3:67:1383:197#0/1  
\_¥Z¥aXY^aaaVaaaa`\_]U]YX]¥YZ`]QPU\_X^U]NT  
@HWI-EAS443:3:67:1397:1302#0/1  
GAATAAAAGAAGTCTAATGTCGCAGTCCCGCAC  
+HWI-EAS443:3:67:1397:1302#0/1  
]ab`¥¥]\_QR\_bbV`[a]ba\_baa`ba``]baa``\_XY]Y  
@HWI-EAS443:3:67:1481:1507#0/1  
CTTCTTTGCCAAAATGAGAAATCCTCTCAGGACAGCAGA  
+HWI-EAS443:3:67:1481:1507#0/1  
`aabbba]abbb^^aabaaaaZ[] [aaaaUX`¥YVa``  
@HWI-EAS443:3:67:1485:1164#0/1  
ATCATTCTCATTCTCCTCCTGGAGTGACATCTGCTCC  
+HWI-EAS443:3:67:1485:1164#0/1  
\_SU¥bbbabba\_bbaab`aL`b`a`ab\_\_a]^aaa\_\_Z  
@HWI-EAS443:3:67:1485:952#0/1  
AGCATGTACGCCACCATCAAGGGAGCAATTTTACAATCCT  
+HWI-EAS443:3:67:1485:952#0/1  
aaaa`\_a\_\_aa\_aU\_^\_\_aa`a]a\_aaa`\_Z`\_V^\_  
@HWI-EAS443:3:67:1487:115#0/1  
AAAGAAGTCTAATGTCGCAGTCCCGCACTCGCG  
+HWI-EAS443:3:67:1487:115#0/1  
`aaa`\_aaa\_\_`a\_aUa`\_\_aX^`V\_a]^V]\_Z^XH]YX^  
@HWI-EAS443:3:67:1487:723#0/1  
AAAGAAGTCTAATGTCGCAGTCCCGCACTCGCG  
+HWI-EAS443:3:67:1487:723#0/1  
aaaa`a\_aaa\_aaa^\_]a\_aaX\_\_`Y\_X[X[Q]]]^\_  
@HWI-EAS443:3:67:1491:500#0/1  
TGATTATCCATTGATAAGTGTGACTAGCACTGACTCAGG  
+HWI-EAS443:3:67:1491:500#0/1  
^^ab^^a`^aabaZ¥\_a[a]`X`XaV^`\_XYNWU]  
@HWI-EAS443:3:67:1505:1073#0/1  
GGGCCATATCTTGTCTTCTTTGCCAAAATGAGAAATC  
+HWI-EAS443:3:67:1505:1073#0/1  
VXbbZVbaa`b`baa`[bbbbbb\_bb\_b]\_[bbbbbbbb\_  
@HWI-EAS443:3:67:1533:514#0/1  
TCCCGTTTTCGTTTCATTACCAACTACGTCCCCTTGCC

+HWI-EAS443:3:67:1533:514#0/1  
a``b`abbaa`aa`abaa^^`a\_aa`a\_a[\_^][WW\_\_`V  
@HWI-EAS443:3:67:1575:1374#0/1  
ATGGACATGATTCCAGAGAGGAATGAACAAGGACAAACCC  
+HWI-EAS443:3:67:1575:1374#0/1  
aa`Za\_aba`aa`[`Z[\_][a\_aa`a`\_\_\_\_\_]\_\_`]`]  
@HWI-EAS443:3:67:1583:1598#0/1  
AAAGAAGTCTAATGTCGCAGTCCCGCACTCGCG  
+HWI-EAS443:3:67:1583:1598#0/1  
a```[aaa\_\_``a^aaa^`\_aaa^`¥^\_`\_]U[X^^  
@HWI-EAS443:3:67:1600:1193#0/1  
TTCCTGATGTGTACTTTTTGATTATGGCCATATGGTCCAC  
+HWI-EAS443:3:67:1600:1193#0/1  
aaaabbXba]b\_¥aa`abbaaaa`¥`a\_\_WH]TFSYR  
@HWI-EAS443:3:67:1619:1306#0/1  
CCGCACTCAGAATGAAGTGGATGATGGCAATGAGATACCC  
+HWI-EAS443:3:67:1619:1306#0/1  
a``aaba]a\_aab`abZW`aa¥^aa`^`¥Z¥Y\_a\_a\_  
@HWI-EAS443:3:67:1631:1834#0/1  
AAGTGGATGATGGCAATGAGATACCCAATTACAGCAGACA  
+HWI-EAS443:3:67:1631:1834#0/1  
aa]¥\_a¥ab^aaa\_\_a`[`aa^a^`\_aaaa\_¥^VZ\_a\_^  
@HWI-EAS443:3:67:1638:1451#0/1  
TGAATTCTTCATACCCTTCATGTACTCTTATTTTCAGTGT  
+HWI-EAS443:3:67:1638:1451#0/1  
abSUaaGaaR^a`SP]aaa^aa\_\_\_`]`a]aaa``]a^a]  
@HWI-EAS443:3:67:1671:96#0/1  
ATCAAATTTGGTCAACATCATCTTTCTCACTTCTCCTC  
+HWI-EAS443:3:67:1671:96#0/1  
a`aa`aabbabb\_`aa`a`a`\_`aa`[\_^`\_a`\_a^¥`^  
@HWI-EAS443:3:67:1683:264#0/1  
GCTGTAATTGGGTATCTCATTGCCATCATCCACTTCATTC  
+HWI-EAS443:3:67:1683:264#0/1  
aa]aQWYT`a^a]\_\_Z`US\_]\_ZWMVU][UWRTUYUU]WU  
@HWI-EAS443:3:67:1690:712#0/1  
TCGCGAGATACTACTAAGACCACTGTGGACCATATGGCC  
+HWI-EAS443:3:67:1690:712#0/1  
aTaa^R^Xa```aXJX\_V`]\_Z^^¥RDZ`\_P¥¥^\_S`¥GV  
@HWI-EAS443:3:67:1723:607#0/1  
CTTGGGACATTTGACACTGTCCAAATAATAAACTTCTCC  
+HWI-EAS443:3:67:1723:607#0/1  
abbbbbbbbabbb`babb``\_aaabaabaaba\_baa  
@HWI-EAS443:3:67:1735:191#0/1  
GCCATATCTCTTGTCTTCTTTGCCAAAATGAGAAATCCT  
+HWI-EAS443:3:67:1735:191#0/1  
``aababaa]`ab`^ab^aba``^\_aaa¥aaaa\_a``PT¥  
@HWI-EAS443:3:67:178:802#0/1  
AAAAGAAGTCTAATGTCGCAGTCCCGCACTCGC  
+HWI-EAS443:3:67:178:802#0/1  
a\_`baaaaaaaaa`a\_a`aaaa¥\_\_aa\_W`\_`^`¥\_Y\_¥\_

@HWI-EAS443:3:67:210:162#0/1  
TGGGCCATATCTTGTCTTCTTTGCCCAAATGAGAAAT  
+HWI-EAS443:3:67:210:162#0/1  
a`Y\_aa^aZab`aaaa`aaa`a`aa`aaa`][`^[`^\_^  
@HWI-EAS443:3:67:221:446#0/1  
CTGTAATTGGGTATCTCATTGCCATCATCCACTTCATTCT  
+HWI-EAS443:3:67:221:446#0/1  
a^^IVW]¥YZ\_Wa\_`[^P^R][THW]OLYZP^]WYVRW\_  
@HWI-EAS443:3:67:22:1468#0/1  
AGAGAATAAAAGAACTGAGAGATCTAATGTCGCAGTCCCG  
+HWI-EAS443:3:67:22:1468#0/1  
T\_TV\_VX\_`¥YOW[^¥]Y¥]^W`\_Z`ba^]^aaXKUY]F  
@HWI-EAS443:3:67:243:1417#0/1  
GAATAAAAGAACTGAGAGATCTAATGTCGCAGTCCCGCAC  
+HWI-EAS443:3:67:243:1417#0/1  
aaaaaaaa\_aaa`a\_a\_`aa`\_a\_]aV`\_X\_`\_]\_Y]  
@HWI-EAS443:3:67:277:1908#0/1  
TTGCCCGTTAGCACTTCTTCTTTCTTTGACTGATGATC  
+HWI-EAS443:3:67:277:1908#0/1  
X`Zbbb`^a`aaa`\_`Z^ba¥\_a`aa`ZY^`^\_P^Y\_  
@HWI-EAS443:3:67:315:801#0/1  
AAAGAACTGAGAGATCTAATGTCGCAGTCCCGCACTCGCG  
+HWI-EAS443:3:67:315:801#0/1  
`a]S\_aa^^R0`a`\_`W¥a\_LX`]X^¥^`]^ZN]\_`^¥^W  
@HWI-EAS443:3:67:331:1139#0/1  
GTACTTTTTGATTATGGCCATATGGTCCACAGTGGTCTTA  
+HWI-EAS443:3:67:331:1139#0/1  
a[abb`bababa\_\_`]Y\_\_XW\_TWPY\_[H¥XOO\_XJY¥a[  
@HWI-EAS443:3:67:361:1024#0/1  
GTCCCGTTTTCGTTTCATTACCAACTACGTCCCTTGC  
+HWI-EAS443:3:67:361:1024#0/1  
a`bbbbaaaa`aaa`aaba\_a`ba`a`\_]aaa`\_]`  
@HWI-EAS443:3:67:362:423#0/1  
GGTCTTAGTGAGTATCTCGCGAGTGC GGGACTGCGACATT  
+HWI-EAS443:3:67:362:423#0/1  
a\_V\_b`b^baa^a]^`^V[X[VY``\_UZ]¥X^R[Z¥¥  
@HWI-EAS443:3:67:368:796#0/1  
TACTTTTTGATTATGGCCATATGGTCCACAGTGGTCTTAG  
+HWI-EAS443:3:67:368:796#0/1  
]\_bbbb`aVV`a\_a^aaa]\_\_WUMM\_aUYX¥ISZWa\_a`a  
@HWI-EAS443:3:67:432:373#0/1  
CTCAGAATGAAGTGGATGATGGCAATGAGATACCCAATTA  
+HWI-EAS443:3:67:432:373#0/1  
0]a`X`^a`[a`Y\_aa`a`^a`^a`[baY`]X\_b`^  
@HWI-EAS443:3:67:448:1274#0/1  
GAGAGATCTAATGTCGCAGTCCCGCACTCGCGAGATACTC  
+HWI-EAS443:3:67:448:1274#0/1  
aba`[^`abbbbab\_babaa^aab\_aR`\_a[a]`\_`^\_a`\_`  
@HWI-EAS443:3:67:464:1865#0/1  
GGGGACGTAGTGTGGTAATGAAACGAAAACGGGACTCTA

+HWI-EAS443:3:67:464:1865#0/1  
aa]V\_bbX^`\_]\_¥`WKYW¥X\_a^VX][\_`UV]W`ULY^^  
@HWI-EAS443:3:67:470:702#0/1  
GAGGATTTCTCATTTTGGGCAAAGAAGACAAGAGATATGG  
+HWI-EAS443:3:67:470:702#0/1  
aYa`a\_a`aaa`a\_a]]^`aa\_aY`\_\_\_\_[^``]a^^]  
@HWI-EAS443:3:67:483:321#0/1  
GCCGGCTACTGGGAGAAACCTTGTTTTACGGACCAATTCT  
+HWI-EAS443:3:67:483:321#0/1  
aaabaaa`X]^`a^`^^aHZ[`\_¥\_`a[^¥^[Y^[ZV\_[¥  
@HWI-EAS443:3:67:484:869#0/1  
ATGCAAGGCAGCAATAGGGTTGAGGATTAGCTCATCTTTC  
+HWI-EAS443:3:67:484:869#0/1  
a`aa`\_a`aaZ^]`a\_aa\_Xa]\_a\_]\_\_a\_\_\_\_a`\_\_`¥  
@HWI-EAS443:3:67:488:34#0/1  
GTCCCGTTTTCGTTTTATTACCAACTACGTCCCTTGC  
+HWI-EAS443:3:67:488:34#0/1  
\_V`¥aa¥aba¥\_`^`X¥`\_`¥X`^W[^\_a\_¥RXWZ[^¥[  
@HWI-EAS443:3:67:49:36#0/1  
CATTGTGGGATCTTGTGACCATTGAATTTTACAATTTCC  
+HWI-EAS443:3:67:49:36#0/1  
¥Q\_\_bT¥WZ\_aaaa`^`\_Y]a\_\_^VS^`a`a\_a`a`^^U  
@HWI-EAS443:3:67:508:1271#0/1  
GGGAGATCAATGGCCCTGAGTCAGTGCTAGTCAACACTTA  
+HWI-EAS443:3:67:508:1271#0/1  
\_[T``abaabb`a`Y`\_aba`\_`^`Ya\_a\_VZaaa\_aa¥a\_  
@HWI-EAS443:3:67:530:352#0/1  
GGATTTCTCATTTTGGGCAAAGAAGACAAGAGATATGGCC  
+HWI-EAS443:3:67:530:352#0/1  
abaa\_R\_VXba`P]Z\_]`\_a\_]Z][Xa\_P]a\_\_S\_Z`MX]  
@HWI-EAS443:3:67:679:266#0/1  
CCCGTTTTCGTTTTATTACCAACTACGTCCCTTGGCC  
+HWI-EAS443:3:67:679:266#0/1  
\_b`XVvb`YXYb`abaaZV```aaa`[^\_`PKU¥W¥¥S`  
@HWI-EAS443:3:67:711:1062#0/1  
AAAGAAGTCTAATGTGCGAGTCCCGCACTCGCG  
+HWI-EAS443:3:67:711:1062#0/1  
aaa]aa`a\_a\_```a\_aa`aUa\_`a\_W`Z[X`P]]]V]^  
@HWI-EAS443:3:67:743:1631#0/1  
CCCGTTTTCGTTTTATTACCAACTACGTCCCTTGGCC  
+HWI-EAS443:3:67:743:1631#0/1  
aaaa\_`aab`^aaa`a`aaaa`aaaa`^]`^a^]X\_[  
@HWI-EAS443:3:67:74:1292#0/1  
CCTGGAGTGACATCTGCTCCCAGCACGTCCCTTGGGTTA  
+HWI-EAS443:3:67:74:1292#0/1  
`]¥aXX\_[\_]aaa\_\_^`\_]\_\_]NR\_[WVX\_]`^VRNGWX[  
@HWI-EAS443:3:67:756:1212#0/1  
GAGAGATCTAATGTGCGAGTCCCGCACTCGCGAGATACTC  
+HWI-EAS443:3:67:756:1212#0/1  
a`WOXW\_ba¥a`UW]X\_^RJV[`Y¥SYS\_X]X\_[\_[Y^X[



@HWI-EAS443:3:67:808:773#0/1  
GTCCCCGTTTTCGTTTCATTACCAACTACGTCCCCCTTGC  
+HWI-EAS443:3:67:808:773#0/1  
^I\_T`aa`\_`\_\_\_aaa`a`Y\_VKU]^[]ZY[W\_^G]O]]\_  
@HWI-EAS443:3:67:826:633#0/1  
GGTCCACAGTGGTCTTAGTGAGTATCTCGCGAGTGCGGGA  
+HWI-EAS443:3:67:826:633#0/1  
a\_aV\_a\_aaSa^UXa\_RaV\_`a\_\_[Y¥KZY^0^HYS¥aVY  
@HWI-EAS443:3:67:841:1434#0/1  
AAAGAAGTGGAGATCTAATGTCGCAGTCCCGCACTCGCG  
+HWI-EAS443:3:67:841:1434#0/1  
]abaabbaabaaaaabaaab`b\_a\_a¥aaa^a\_a`a\_a`  
@HWI-EAS443:3:67:874:1150#0/1  
GGCCATATGGTCCACAGTGGTCTTAGTGAGTATCTCGCGA  
+HWI-EAS443:3:67:874:1150#0/1  
a^abaaaa`aVaaaaa\_a`]\_\_aaa`¥aa^\_a`\_]\_YN]T  
@HWI-EAS443:3:67:900:572#0/1  
CCCGTTTTCGTTTCATTACCAACTACGTCCCCCTTGGCC  
+HWI-EAS443:3:67:900:572#0/1  
a`bb\_aaaaa^`a\_a`a\_aa\_]\_\_a`\_]\_[\_^^[O¥RW[]  
@HWI-EAS443:3:67:904:617#0/1  
GTCCACAGTGGTCTTAGTGAGTATCTCGCGAGTGCGGGAC  
+HWI-EAS443:3:67:904:617#0/1  
aab\_bbbaa\_bb\_aabbb\_bbbabaa\_\_X¥aV\_RYX¥b`KV  
@HWI-EAS443:3:67:913:1076#0/1  
GTCCCCGTTTTCGTTTCATTACCAACTACGTCCCCCTTGC  
+HWI-EAS443:3:67:913:1076#0/1  
\_H\_`^RSXR]YPYQP^LS]N\_XW`Y^^`[V^UXZ^KHT  
@HWI-EAS443:3:67:916:985#0/1  
AAAGAAGTGGAGATCTAATGTCGCAGTCCCGCACTCGCG  
+HWI-EAS443:3:67:916:985#0/1  
]V]^X¥aaabaa]aa`a^a`]a¥^`]X]a\_`Y`SX``¥  
@HWI-EAS443:3:67:917:1346#0/1  
CCGTTTTCGTTTCATTACCAACTACGTCCCCCTTGGCCA  
+HWI-EAS443:3:67:917:1346#0/1  
abaa`\_`\_`¥a`^`^`^`^`^`aa[a¥XZ\_ZY]¥\_T[VQYS`\_  
@HWI-EAS443:3:67:946:246#0/1  
GGCCCAACAACAAGTACAGTTCATTACCCTAAGGTATATA  
+HWI-EAS443:3:67:946:246#0/1  
aababbbabaaaaab^aaaa`aaaaba`^aa^`aaYa`Yaa  
@HWI-EAS443:3:67:95:1784#0/1  
GGGAGAGACGAGCAGTCAATTGCTGAGGCAATAATTGTGG  
+HWI-EAS443:3:67:95:1784#0/1  
]¥]a`YaXa^`Z[^¥Xab]RZ\_a¥SRY`]a]a\_[BBBBB  
@HWI-EAS443:3:67:963:1204#0/1  
GAATAAAAGAAGTGGAGATCTAATGTCGCAGTCCCGCAC  
+HWI-EAS443:3:67:963:1204#0/1  
^W\_[^`¥QZ`a`SS]a^U]UWY]UZ¥¥aa]YU[`\_a`R^  
@HWI-EAS443:3:68:1046:1216#0/1  
GAGAAATCCTCTCAGGACAGCAGACTCCACCCAGATGTG

+HWI-EAS443:3:68:1046:1216#0/1  
ab`bbbaaaYa]a`]\`aa\_` `aSXaaZaa`aa[XVZ]HZ  
@HWI-EAS443:3:68:1052:1072#0/1  
AGGCAGTGTATTATATTGAAGTGTGCACTTAACCCAAGGG  
+HWI-EAS443:3:68:1052:1072#0/1  
abbb^`ab\_b¥¥^a^aabbbaa\_aabbba]`^` `]  
@HWI-EAS443:3:68:1067:1242#0/1  
GCTAGAGTCCCGTTTTTCGTTTCATTACCAACTACTCGTCC  
+HWI-EAS443:3:68:1067:1242#0/1  
ab[b]G]Z]¥`aUN\_¥^aX\_a^aa]`\_\_`\_TZ[VUZRR\_\_  
@HWI-EAS443:3:68:1078:800#0/1  
ATGATGGCAATGAGATACCCAATTACAGCAGACAAGAGAA  
+HWI-EAS443:3:68:1078:800#0/1  
`^]JYaa`S`ZZX¥`a[^^\_]ba^V¥^^Ua`a\_[D]aa^  
@HWI-EAS443:3:68:1085:2042#0/1  
CTTGAAATGTGCCACAGCACACAGATTGGAGGAGTAAGG  
+HWI-EAS443:3:68:1085:2042#0/1  
abaaa\_ba`a^aaa`aaaaaa\_aaa\_\_\_\_a\_`\_¥`W` `]`Z  
@HWI-EAS443:3:68:1128:154#0/1  
GGTGGTTCACTTTCAAAGGACAAGCGGATCATCAGTCA  
+HWI-EAS443:3:68:1128:154#0/1  
aaMa]]G]`\_T^YPN[^` `\_\_\_\_^\_S[X`SUVVOOXY`YW^  
@HWI-EAS443:3:68:1159:217#0/1  
GATCTAATGTGCGAGTCCCGCACTCGCGAGATACTCACTA  
+HWI-EAS443:3:68:1159:217#0/1  
a[abb` ` \_a\_]\_aTQOT[a\_aQ\_Ra\_YaQZNXSO^[WY¥^  
@HWI-EAS443:3:68:1168:35#0/1  
AAGTGAACCCACAAAACACTGAAAGATGAGCTAATCCTCAA  
+HWI-EAS443:3:68:1168:35#0/1  
aaT^baa`QZZU]a\_`\_Waa^\_\_a^¥`aYV[^]aZUZ]]^  
@HWI-EAS443:3:68:1205:312#0/1  
CGCACTCAGAATGAAGTGGATGATGGCAATGAGATACCCA  
+HWI-EAS443:3:68:1205:312#0/1  
abbabbbabbbbaababbbabbaaaaaabababa\_[ab  
@HWI-EAS443:3:68:1238:251#0/1  
CTAATGTGCGAGTCCCGCACTCGCGAGATACTCACTAAGA  
+HWI-EAS443:3:68:1238:251#0/1  
abbbbabbbab` `aabaaa^a`a\_` `aaaa\_a`a`a` `a`  
@HWI-EAS443:3:68:1255:1511#0/1  
CAGTATTCTTGCCCCACTTCATTTGGGAAAACAACTTCC  
+HWI-EAS443:3:68:1255:1511#0/1  
\_ababbbba`\_a\_ba]`bbaaaa]b^a[Ya[^`bbaaa\_aa  
@HWI-EAS443:3:68:1266:1198#0/1  
ATGGCCATATGGTCCACAGTGGTCTTAGTGAGTATCTCGC  
+HWI-EAS443:3:68:1266:1198#0/1  
¥\_\_`aaaa^`^XVXa^^`]SVa¥^`aa¥U` ` `YYXWBBBB  
@HWI-EAS443:3:68:1275:819#0/1  
AAGTCAGTGAACGCAAGGAAGTGAAGTTGACAATAAC  
+HWI-EAS443:3:68:1275:819#0/1  
SU¥\_a` `]aXY¥U\_^^^aaRWZ^XO]]L[[W¥]a`¥[\_^W

@HWI-EAS443:3:68:1284:1840#0/1  
GTCCCCGTTTTCGTTTCATTACCAACTACGTCCCCCTTGC  
+HWI-EAS443:3:68:1284:1840#0/1  
\_X`aaaV\_aaaa[a\_\_aa^a]`\_a^a^\_a\_^]]^\_Y¥YY[  
@HWI-EAS443:3:68:1298:952#0/1  
GCAGTGTATATTGAAGTGTGCACTTAACCCAAGGGAC  
+HWI-EAS443:3:68:1298:952#0/1  
aXQ]Na[VX¥\_YGVQHMT]QR¥VFQXUX]BBBBBBBBBB  
@HWI-EAS443:3:68:1309:495#0/1  
AAAGAAGTGAAGATCTAATGTCGCAGTCCCGCACTCGCG  
+HWI-EAS443:3:68:1309:495#0/1  
aX`Y]aYbbaaaaaaaa`aa\_^`[a\_¥`Y`Y^Z]\_\_\_\_\_`  
@HWI-EAS443:3:68:1370:1903#0/1  
GGAGGTTGCCCGTTAGCACTTCTTCTTCTTCTTCTTACTGA  
+HWI-EAS443:3:68:1370:1903#0/1  
`abbabbbbaa\_aaaaaaaaaabbaba`bab\_aaa\_Y\_a`  
@HWI-EAS443:3:68:1397:663#0/1  
AAAGAAGTGAAGATCTAATGTCGCAGTCCCGCACTCGCG  
+HWI-EAS443:3:68:1397:663#0/1  
a\_bbaa¥a]`]^bb[]`\_`aa\_aa¥\_bV^]Z^\_¥¥^¥`¥a  
@HWI-EAS443:3:68:1455:916#0/1  
CAATTACAGCAGACAAGAGAATAATGGACATGATTCCAGA  
+HWI-EAS443:3:68:1455:916#0/1  
T¥bbbab\_[ab^bab`a`aa\_ababbbabb`aab`[`aa  
@HWI-EAS443:3:68:1462:923#0/1  
GTGGAGTCTGCTGCTGCTGAGAGATTCTCATTGTTGGGCA  
+HWI-EAS443:3:68:1462:923#0/1  
aaaa]b`aba\_aaa^aa¥`aaa]^`bb¥a^`abaa\_]\_¥`  
@HWI-EAS443:3:68:1484:1317#0/1  
CCTGATGTGACTTTTTGATTATGGCCATATGGTCCACAG  
+HWI-EAS443:3:68:1484:1317#0/1  
aab\_abbabbbabbabbabbbaaab`a[a\_]a`]a^  
@HWI-EAS443:3:68:1498:304#0/1  
TAATTGGGTATCTCATTGCCATCATCCACTTCATTCTGAG  
+HWI-EAS443:3:68:1498:304#0/1  
]`Z^aa`X0]aa^R`b[aWIS]W]]`\_aY]aT^\_\_\_\_\_[[  
@HWI-EAS443:3:68:150:1222#0/1  
GTTGCTCTTCTCCAACCATTGTGAATTCTTCATACCCTT  
+HWI-EAS443:3:68:150:1222#0/1  
WX^Z¥[[WH]Z^a\_`¥`Xa\_¥WSI]PXWWF¥¥^\_Z`^R`  
@HWI-EAS443:3:68:1581:929#0/1  
TTTCTCATTTTGGGCAAAGAAGACAAGAGATATGGCCCAG  
+HWI-EAS443:3:68:1581:929#0/1  
abaa```a\_`aa\_aW\_\_`a\_¥XM\_```Z\_Z]\_\_\_\_^ZWZ^  
@HWI-EAS443:3:68:1598:54#0/1  
GTCCCCGTTTTCGTTTCATTACCAACTACGTCCCCCTTGC  
+HWI-EAS443:3:68:1598:54#0/1  
aa\_Y^b^\_aa\_a\_a`Z^aa\_YV`^X`X\_\_Y\_YVYVY]]X  
@HWI-EAS443:3:68:162:546#0/1  
AGGGGACGTAGTGTGGTAATGAAACGAAAACGGGACTCT

+HWI-EAS443:3:68:162:546#0/1  
ab[[a^ab\_aa¥aYab`\_] ^aaa`a^\_]aaaZ\_X`YRZZ]  
@HWI-EAS443:3:68:165:73#0/1  
GTCCCGTTTTCGTTTCATTACCAACACTACGCCCCCTTGC  
+HWI-EAS443:3:68:165:73#0/1  
aaaabb\_aaa`b`aa`[``\_ZX`\_]\_[\_] [^W^\_Z^[^U  
@HWI-EAS443:3:68:1677:297#0/1  
TTGTCTCCCGAAGAAGTCAGTGAAACGCAAGGAACTGAGA  
+HWI-EAS443:3:68:1677:297#0/1  
abbaaaaaababbaaba\_aa`]aaaab\_]\_a`¥` `aaa^`  
@HWI-EAS443:3:68:1712:316#0/1  
CGTTCCTCTTTGATCTCTAACCCTTAAAAATCGGTCAAT  
+HWI-EAS443:3:68:1712:316#0/1  
a`Z`b\_aabb`Z`\_aaaaa^]aabbaaaaaT^`Y]aaa  
@HWI-EAS443:3:68:1773:324#0/1  
CATTATTCTCTTGCTGCTGTAATTGGGTATCTCATTGCC  
+HWI-EAS443:3:68:1773:324#0/1  
abbbbabbb`bbaabbbb¥aabbababa^aaaa^baaa]a  
@HWI-EAS443:3:68:182:296#0/1  
GTTGTAATTGAATACTGGAGAATTGCCTCTTACCAGTATC  
+HWI-EAS443:3:68:182:296#0/1  
abbaabbbbb^¥`aaa\_^baaaaaa`aaaa\_aba]aaa  
@HWI-EAS443:3:68:195:520#0/1  
CTTATTTTAACCTTGATTTCTGAAGTGGACAGGGCCGAAGG  
+HWI-EAS443:3:68:195:520#0/1  
a¥`a^aaa^`\_a]aL`aa^aa`V^Y`^`\_]VSX¥\_\_\_\_]UX  
@HWI-EAS443:3:68:205:568#0/1  
GAGAGATCTAATGTGCGAGTCCCGCACTCGCGAGATACTC  
+HWI-EAS443:3:68:205:568#0/1  
\_\_ZZ]^)`aaaa]X^[]`Y`a`UZX[^a\_] ^OPFV]NNU  
@HWI-EAS443:3:68:222:1856#0/1  
CAACTCTCCTCTTATTTTAACTTGATTTCTGAAGTGGAC  
+HWI-EAS443:3:68:222:1856#0/1  
^¥K`a¥WaRL]X`S^WTRZZR\_Z[a¥Q¥U^XQOVHO]T¥a  
@HWI-EAS443:3:68:222:418#0/1  
GTCTGCTGTAATTGGGTATCTCATTGCCATCATCCACTTC  
+HWI-EAS443:3:68:222:418#0/1  
a\_aaaaa\_^]aaa`aWa`\_`\_`\_]\_\_`^] ^\_`^`\_]\_^^^  
@HWI-EAS443:3:68:241:43#0/1  
GTCCCGTTTTCGTTTCATTACCAACACTACGCCCCCTTGC  
+HWI-EAS443:3:68:241:43#0/1  
aY`¥¥`^ [Y\_¥\_P]WY\_R]^XS[[UZQTUQSQYUTRSVVY  
@HWI-EAS443:3:68:244:752#0/1  
GATTGGAGGAGTAAGGATGGTGGACATCCTTAGACAGAAT  
+HWI-EAS443:3:68:244:752#0/1  
aW\_aaaa`\_ [\_\_\_R^`a^`VY\_^¥`\_^Z^\_a\_\_^Z^T\_\_Z  
@HWI-EAS443:3:68:266:1093#0/1  
GCCCCGTAGCACTTCTTCTTTCTTGGACTGATGATCCG  
+HWI-EAS443:3:68:266:1093#0/1  
abbbbaabaabaaaaaaaaa]`aaaa^aaa`aaa` `aa

@HWI-EAS443:3:68:286:310#0/1  
TAGGGACAAGAGACTGAAATGGTTCAAATTCATTTTGTT  
+HWI-EAS443:3:68:286:310#0/1  
ab\_^bab¥Xabaa]`aaaa`^^¥aba``¥aaaaaaaa`^  
@HWI-EAS443:3:68:320:153#0/1  
AAAAGAAGTGGAGATCTAATGTCGCAGTCCCGCACTCGC  
+HWI-EAS443:3:68:320:153#0/1  
ab¥Xa¥[^a`aabZaaa¥`bb\_\_a`^`^`^^^UTZ^^^Z  
@HWI-EAS443:3:68:333:881#0/1  
GTACGCCACCATCAAGGGAGCAATTTTACAATCCTGGAGC  
+HWI-EAS443:3:68:333:881#0/1  
U\_¥ab^[ZSaba^¥bab^^`aS¥]bbb¥¥\_b[ab¥P\_\_a]  
@HWI-EAS443:3:68:341:1261#0/1  
AGGGGACGTAGTGTGGTAATGAAACGAAAACGGGACTCT  
+HWI-EAS443:3:68:341:1261#0/1  
aba]aabba`b^b\_bbbY\_aa^]abaaa]abaaaa\_`]a\_  
@HWI-EAS443:3:68:420:289#0/1  
ATCTAATGTCGCAGTCCCGCACTCGCGAGATACTCACTAA  
+HWI-EAS443:3:68:420:289#0/1  
abba\_ZX^G\_R]Z]\_[a`[[RXQRa^WH\_¥[PYS^ZRPZT  
@HWI-EAS443:3:68:43:1061#0/1  
GTCGCTGGTTTGGCCCTATTGACAAAGTTCAGATCGCCCT  
+HWI-EAS443:3:68:43:1061#0/1  
a^b]SQ]a[XX\_aWV^\_]`^¥SQGS][LU[^QULYYST]¥W  
@HWI-EAS443:3:68:441:508#0/1  
GACGAGCAGTCAATTGCTGAGGCAATAATTGTGGCCATGG  
+HWI-EAS443:3:68:441:508#0/1  
X^bbVa[M[¥b^^^`[a^`[VP\_bb¥`¥VSb\_[QW\_JTZZ  
@HWI-EAS443:3:68:44:510#0/1  
GTTTTATATACCTTAGGGTAATGAACTGTACTTGTTGTTG  
+HWI-EAS443:3:68:44:510#0/1  
]OVV¥\_¥UW\_\_\_¥Z`Z]XORTQ[VYZX^NSX]ZZRX]TT[  
@HWI-EAS443:3:68:468:432#0/1  
AAAGAAGTGGAGATCTAATGTCGCAGTCCCGCACTCGCG  
+HWI-EAS443:3:68:468:432#0/1  
abWX\_[aaaaaaaa``aaa\_aa[a\_\_adW[Y`¥`Z\_ZVRR¥  
@HWI-EAS443:3:68:471:1109#0/1  
CAACTCTCCTTATTTTAACTTGATTTCTGAAGTGGAC  
+HWI-EAS443:3:68:471:1109#0/1  
a]\_babaabaaa`aaaaabaabaa]aaa`aa\_\_\_]\_^Y^  
@HWI-EAS443:3:68:471:1576#0/1  
CTGGATCAGACCGAGTGATGGTATCACCTCTGGCCGTAAC  
+HWI-EAS443:3:68:471:1576#0/1  
aa¥]`ab`[\_a\_X`^^`\_`a\_Za``a``YbUUTNVUUS\_^  
@HWI-EAS443:3:68:476:1425#0/1  
GTTGCCCGTTAGCACTTCTTCTTCTTCTTCTGACTGATGAT  
+HWI-EAS443:3:68:476:1425#0/1  
[DXX\_aYa[[Z[\_T]VY¥N\_Y`Y]`YY^VTQFXVOVZZPL  
@HWI-EAS443:3:68:496:776#0/1  
GAATAAAAAGAAGTGGAGATCTAATGTCGCAGTCCCGCAC

+HWI-EAS443:3:68:496:776#0/1  
`¥\_a^\_^]`aa`a`aaa`a`Ya`a]a`aa`XT^`¥GX  
@HWI-EAS443:3:68:518:1404#0/1  
ATACTCACTACCACTCTCTCCGTGCTGGAGTATTCATCTA  
+HWI-EAS443:3:68:518:1404#0/1  
ZWTZN]¥aabaa`aaaQY`aa]XW\_XXY`aZ\_Y[[Z[Y[Y  
@HWI-EAS443:3:68:52:767#0/1  
AAACAAACGATGCTGGATCAGACCGAGTGATGGTATCACC  
+HWI-EAS443:3:68:52:767#0/1  
[baabaaaaaaaa`aa`^\_a`\_`¥a^W`\_`\_SZ\_T¥¥¥  
@HWI-EAS443:3:68:544:570#0/1  
GAGAGATCTAATGTCGCAGTCCCGCACTCGCGAGATACTC  
+HWI-EAS443:3:68:544:570#0/1  
[`bb^YWbbbb`b`a`bab\_abbaaWa[``\_]Zaa\_`]`a  
@HWI-EAS443:3:68:565:1565#0/1  
CTAATGTCGCAGTCCCGCACTCGCGAGATACTCACTAAGA  
+HWI-EAS443:3:68:565:1565#0/1  
a\_aa\_a^a\_a]`Qaaa\_a\_[¥¥^a\_X¥^]\_¥¥W^¥¥¥¥¥^  
@HWI-EAS443:3:68:578:1502#0/1  
ATCAACTCTCCTTATTTTAACTTGATTTCTGAAGTGG  
+HWI-EAS443:3:68:578:1502#0/1  
`]\_bab`\_`abaaa`aaa`aaa`\_a\_[a`^a`a^`^]\_Z]  
@HWI-EAS443:3:68:612:1128#0/1  
TAATGTGCTAATTGGGCAAGGGGACGTAGTGTGGTAATG  
+HWI-EAS443:3:68:612:1128#0/1  
aa`aa^abaaaaaaaa\_aaaaa\_aaa]\_aX`]aa[G[a\_  
@HWI-EAS443:3:68:615:1335#0/1  
GTCCCGTTTTCGTTTCATTACCAACTACGTCCCCTTGC  
+HWI-EAS443:3:68:615:1335#0/1  
`Paab\_¥a]a^ZY\_aa]^T¥]`\_`\_a\_¥\_`]`^\_^]XV\_  
@HWI-EAS443:3:68:615:144#0/1  
GGCAAGGGGACGTAGTGTGGTAATGAAACGAAAACGGGA  
+HWI-EAS443:3:68:615:144#0/1  
ab`\_`baba\_aa¥`aUa\_\_abVY\_`aZ`a[X]Z^\_Q]^¥]  
@HWI-EAS443:3:68:617:1120#0/1  
AAAGAAGTCTAATGTCGCAGTCCCGCACTCGCG  
+HWI-EAS443:3:68:617:1120#0/1  
`X^¥^aaa^¥\_aa\_\_a`aa`U`\_]`^Uaa\_^\_S\_V`]`^  
@HWI-EAS443:3:68:658:1356#0/1  
TGACCCCAAGCACGGAGATGTCGCTGAGAGGGATAAGAGT  
+HWI-EAS443:3:68:658:1356#0/1  
a`aaaa`a^aa^S^\_]\_Y\_\_\_\_`\_U]¥a][¥^¥]¥¥^Y  
@HWI-EAS443:3:68:708:129#0/1  
CTGCTGCTCTGAGAGGATTTCTCATTGTTGGGCAAAGA  
+HWI-EAS443:3:68:708:129#0/1  
aaaa`baaa[b\_b`ba`a`aaa`\_`aa`aaa^\_\_aa^`a\_  
@HWI-EAS443:3:68:714:2024#0/1  
AACTGTACTTGTGTTGGGCCATTCCCTATTCCACCATGTT  
+HWI-EAS443:3:68:714:2024#0/1  
aaaZ\_¥a`baa\_\_a[VU[`]``\_ab^`\_`a^a`^`\_aSQ

@HWI-EAS443:3:68:729:739#0/1  
CAGATGTGCCTTCATCTGGATCTTCAGTCAATGCACCTGC  
+HWI-EAS443:3:68:729:739#0/1  
[`aa¥`¥abbbb\_\_Z\_Z\_Zbbba`a]bX\_a\_`bbba`a  
@HWI-EAS443:3:68:740:707#0/1  
GGCTTGTTCCCTCAGTTGGATTCTGTCTAAGGATGTCCACC  
+HWI-EAS443:3:68:740:707#0/1  
¥K\_a\_a\_`a[aa¥\_Wa¥a[\_aa\_U[^¥`a`^`\_\_\_\_`^^X`  
@HWI-EAS443:3:68:747:946#0/1  
CGGCTACTGGGAGAAACCTTGTTTTACGGACCAATTCTCT  
+HWI-EAS443:3:68:747:946#0/1  
a`]aX`UVQ¥ZXZNLTYNPZ\_`¥[XXX]NFVQVK¥NQRZ  
@HWI-EAS443:3:68:752:1174#0/1  
GGTGGGTTCACTTTCAAAGGACAAGCGGATCATCAGTCA  
+HWI-EAS443:3:68:752:1174#0/1  
aaZaa¥\_`a`aaaa`a`a`\_`^YZ¥YY[¥\_\_\_\_]YYY\_\_  
@HWI-EAS443:3:68:805:1006#0/1  
CCCGTTTTCGTTTCATTACCAACACTACGTCCCCTTGCCC  
+HWI-EAS443:3:68:805:1006#0/1  
a`b\_]\_bb\_Z\_ba¥bb]b\_bbbba`b`]a^aaaaRaa\_]`  
@HWI-EAS443:3:68:830:49#0/1  
GACAAAGTTCAGATCGCCCCTAACTGCCTTGATCATGCAA  
+HWI-EAS443:3:68:830:49#0/1  
]\_Z\_^ZUOV\_`a`a\_]XUY¥¥¥VMY^YRST[[]UR]VYV^Z  
@HWI-EAS443:3:68:857:391#0/1  
GTCCCCTTTTCGTTTCATTACCAACACTACGTCCCCTTGCC  
+HWI-EAS443:3:68:857:391#0/1  
a]aa\_bYa[aaa]`\_\_\_\_\_a¥^]`^Zaa\_a]aPRW\_\_[TYY  
@HWI-EAS443:3:68:871:447#0/1  
GGCAAGGGGACGTAGTGTGGTAATGAAACGAAAACGGGA  
+HWI-EAS443:3:68:871:447#0/1  
aaaa`aaabaab[\_a\_baaaaU^]aa[a`U^X\_\_^T\_¥`V  
@HWI-EAS443:3:68:879:848#0/1  
TGCTGTAATTGGGTATCTCATTGCCATCATCCACTTCATT  
+HWI-EAS443:3:68:879:848#0/1  
aaab^aaZbaaa^\_baaabaaaa`ba\_aaaaa`aa\_\_a`  
@HWI-EAS443:3:68:892:1924#0/1  
CCTGAGAGGATTTCTCATTTTGGGCAAAGAAGACAAGAGA  
+HWI-EAS443:3:68:892:1924#0/1  
a`\_a¥`[Ya\_\_`SYWa]^`\_\_ZXVY[L]¥¥WVYX`UV\_\_^  
@HWI-EAS443:3:68:923:974#0/1  
AAAGAAGTTCAGATCTAATGTGCGAGTCCCCTCGCG  
+HWI-EAS443:3:68:923:974#0/1  
aaaaa`aaaaa]`aaaaaaaa\_aaa`\_W¥\_\_^`\_`^\_\_a\_  
@HWI-EAS443:3:68:924:1269#0/1  
GAATGAACAAGGACAAACCCTCTGGAGCAAAACAAACGAT  
+HWI-EAS443:3:68:924:1269#0/1  
abaaa`a\_aaa^aaaa\_`aaaa\_`^aa^\_aaa`b^^^\_`^  
@HWI-EAS443:3:68:928:847#0/1  
CTTGTTTCATTCTCTCTGGAATCATGTCCATTATTCTCTT

+HWI-EAS443:3:68:928:847#0/1  
abbbb`bbbab`b^aa\_`¥aaabbaa`aa^aa`aaaa\_``  
@HWI-EAS443:3:68:932:454#0/1  
AAAGAAGACTGAGAGATCTAATGTCGCAGTCCCGCACTCGCG  
+HWI-EAS443:3:68:932:454#0/1  
TTPX\_¥¥aTR\_V\_\_\_\_]¥Sa`^YRO`¥]¥^^VH]QOH]a\_\_\_  
@HWI-EAS443:3:68:944:158#0/1  
AAAAGAAGACTGAGAGATCTAATGTCGCAGTCCCGCACTCGCG  
+HWI-EAS443:3:68:944:158#0/1  
G]bba[`aabbbabbabb\_abbaabbb`bbaa`U]]Va`  
@HWI-EAS443:3:68:961:1087#0/1  
ATAAGAAGACTGAGAGATCTAATGTCGCAGTCCCGCACTC  
+HWI-EAS443:3:68:961:1087#0/1  
abaaaba]b`aab`aaaaaaaaa\_aa`\_`\_]`\_\_\_a^\_\_^  
@HWI-EAS443:3:68:980:1124#0/1  
GGCAAGGGGACGTAGTGTGGTAATGAAACGAAAACGGGA  
+HWI-EAS443:3:68:980:1124#0/1  
\_ab\_[\_\_\_`a\_aaUaa[a\_a[\_G^a\_X\_aaV[[]a^aYZ\_]Z  
@HWI-EAS443:3:68:983:706#0/1  
GTAAGTCGTTTGGTTGCCTTGTGTAATTGAATACTGGAG  
+HWI-EAS443:3:68:983:706#0/1  
aaa```a`aaa`¥]]\_a`aaaa`^aaa``\_``]]aYKX`  
@HWI-EAS443:3:69:1012:1311#0/1  
TCGCTGGTTTGCCTATTGACAAAGTTCAGATCGCCCCCTA  
+HWI-EAS443:3:69:1012:1311#0/1  
abW^a]a`a\_aa[\_aaaa``\_¥]`Ta````]`¥a\_`^`¥\_  
@HWI-EAS443:3:69:1014:282#0/1  
AAAAGAAGACTGAGAGATCTAATGTCGCAGTCCCGCACTCGCG  
+HWI-EAS443:3:69:1014:282#0/1  
aabbaaaaabb`abaa`ababb[`a`a¥^^W`\_W^^[W\_^  
@HWI-EAS443:3:69:102:78#0/1  
GCTGTAATTGGGTATCTCATTGCCATCATCCACTTCATTC  
+HWI-EAS443:3:69:102:78#0/1  
a\_aa¥`[aa\_]aW^`\_\_^`^`\_]W¥^¥¥¥WW¥W¥^WW]¥¥  
@HWI-EAS443:3:69:106:175#0/1  
ATCTAATGTCGCAGTCCCGCACTCGCGAGATACTCACTAA  
+HWI-EAS443:3:69:106:175#0/1  
aa^Z`a``Q\_¥a\_¥¥¥YSL\_VXRXPUTTQVWWTQULPW  
@HWI-EAS443:3:69:1103:791#0/1  
AAAGAAGACTGAGAGATCTAATGTCGCAGTCCCGCACTCGCG  
+HWI-EAS443:3:69:1103:791#0/1  
abbbbaaaaaaaaaaaaaaaaaa`a`a`a[a^`^a\_a^\_[`\_  
@HWI-EAS443:3:69:1110:1832#0/1  
CTGTAATTGGGTATCTCATTGCCATCATCCACTTCATTCT  
+HWI-EAS443:3:69:1110:1832#0/1  
Y`¥]¥R¥`¥[\_R]S¥`b[UZ\_b\_\_^``ab¥`^aab]]R¥a  
@HWI-EAS443:3:69:1145:1299#0/1  
TCCCGTTTTTCGTTTCATTACCAACTACGTCCCTTGCC  
+HWI-EAS443:3:69:1145:1299#0/1  
\_a`^YXYZJY`OXY`]SQ\_aaWZZWHW``\_S]YaLRLTa[



@HWI-EAS443:3:69:1160:1474#0/1  
CATGATTCCAGAGAGGAATGAACAAGGACAAACCCTCTGG  
+HWI-EAS443:3:69:1160:1474#0/1  
ababb`b`bbaa]bb`bbbbbaaba]bbaaaaaab\_a`a  
@HWI-EAS443:3:69:1194:1535#0/1  
CCCCTTTTTCGTTTCATTACCAACTACGTCCCCCTTGCCC  
+HWI-EAS443:3:69:1194:1535#0/1  
ababaaaab`abbaaabba``aababbba\_aab`\_a`aaa  
@HWI-EAS443:3:69:1201:858#0/1  
GCTGCTCCACCAGAACAGAGTAGGATGCAATTTTCCTCAT  
+HWI-EAS443:3:69:1201:858#0/1  
]b\_¥`aaZ\_\_]a`TVZ]¥U]\_a`\_^¥a`ZT^^a[X`\_\_[^  
@HWI-EAS443:3:69:1226:688#0/1  
AAAGAAGTGGAGATCTAATGTCGCAGTCCCGCACTCGCG  
+HWI-EAS443:3:69:1226:688#0/1  
aba``baabba`aaa`aaaaa\_aa``a`a[^`\_`¥¥`¥a  
@HWI-EAS443:3:69:1261:1051#0/1  
GCACTCGCGAGATACTACTAAGACCACTGTGGACCATAT  
+HWI-EAS443:3:69:1261:1051#0/1  
abaabbbbababbbbaaaaa\_aaaba`aa`\_aaaaaaa  
@HWI-EAS443:3:69:1295:32#0/1  
ACGGAGAGAGTGGTAGTGAGTATTGACCGATTTTAAAGGG  
+HWI-EAS443:3:69:1295:32#0/1  
aaba\_b\_b^a^aaY\_aMPU]HR^[RLGQSGQ^a\_\_YVQ\_Z  
@HWI-EAS443:3:69:1322:1210#0/1  
TAAAAATCGGTCAATACTACTACTACTCTCTCCGTGCTG  
+HWI-EAS443:3:69:1322:1210#0/1  
aabbbb\_aaaIabaaX`TY`\_[]¥¥aaa\_a\_\_\_aa]\_^  
@HWI-EAS443:3:69:1329:402#0/1  
AAGGGAGCAATTTTACAATCCTGGAGCTCTTCTTCTTCT  
+HWI-EAS443:3:69:1329:402#0/1  
Z^bbb`Z`b`bba[`aa`ab¥WY\_aaa]```bbbabUb  
@HWI-EAS443:3:69:1332:847#0/1  
GGGGACGTAGTGTGGTAATGAAACGAAAACGGGACTCTA  
+HWI-EAS443:3:69:1332:847#0/1  
aa\_a`bbYY]^^^a\_S]]X]XaZEXX[`\_VZ\_^ZX^^WU  
@HWI-EAS443:3:69:1336:404#0/1  
ATCTAATGTCGCAGTCCCGCACTCGCGAGATACTACTAA  
+HWI-EAS443:3:69:1336:404#0/1  
a^\_aaabbWS\_[X¥LU][`[QV¥R[VWFsRYZ]ULR^^[U  
@HWI-EAS443:3:69:1355:828#0/1  
GCAGCAATAGGGTTGAGGATTAGCTCATCTTTCAGTTTTG  
+HWI-EAS443:3:69:1355:828#0/1  
a``baba\_a]X^\_\_a\_aaa``a`aaa]a[aa\_X``^a``\_  
@HWI-EAS443:3:69:1373:1699#0/1  
GAATAAAAGAAGTGGAGATCTAATGTCGCAGTCCCGCAC  
+HWI-EAS443:3:69:1373:1699#0/1  
abbbabbbbabbbabab`bb`bbabba```ba`\_aa\_aa\_  
@HWI-EAS443:3:69:1379:1342#0/1  
GAATAAAAGAAGTGGAGATCTAATGTCGCAGTCCCGCAC

+HWI-EAS443:3:69:1379:1342#0/1  
`X]W]¥^U^XTVYZX¥U`a[\_\_a\_SXSP¥ZSZSRX\_VURQ  
@HWI-EAS443:3:69:138:493#0/1  
GTCGCAGTCCCGCACTCGCGAGATACTACTAAGACCACT  
+HWI-EAS443:3:69:138:493#0/1  
a^)^\_a][`\_a`^\_¥`[Y¥ZZUVQT¥UYWU[ZSSR^¥^U  
@HWI-EAS443:3:69:1432:1373#0/1  
GTTTGGTTGCCCTTGTGTAATTGAATACTGGAGAATTGCC  
+HWI-EAS443:3:69:1432:1373#0/1  
``aaa`\_aa\_aaaa`a`a`aa^`aaaXa`\_\_`\_`\_W¥Z  
@HWI-EAS443:3:69:1443:823#0/1  
ACCTTGTTTTACGGACCAATTCTCTTTCTAGCATGTACGC  
+HWI-EAS443:3:69:1443:823#0/1  
aa`bababbaa]aa`\_aa`aa¥b`bab\_baa^aaa\_a\_\_\_\_  
@HWI-EAS443:3:69:1444:1794#0/1  
AAAGAAGTGGAGATCTAATGTCGCAGTCCCGCACTCGCG  
+HWI-EAS443:3:69:1444:1794#0/1  
aaOM[]X[\_`\_]`J[Z\_]QY[XTWLY¥VW^U]GZP^WZ¥XT  
@HWI-EAS443:3:69:1469:744#0/1  
GATCTAATGTCGCAGTCCCGCACTCGCGAGATACTACTA  
+HWI-EAS443:3:69:1469:744#0/1  
abbabb`bb]aa`b``aaa\_¥]aaaaaWP]\_^Z^\_\_V``  
@HWI-EAS443:3:69:1518:1287#0/1  
ATTGTGGGATCTTGTGACCATTGAATTTTCACAATTTCCC  
+HWI-EAS443:3:69:1518:1287#0/1  
`¥`\_]ba\_VbbbbXa`aaba````\_a\_Z^b\_Zaaaa`\_\_  
@HWI-EAS443:3:69:153:811#0/1  
GTGGGTTCACTTTCAAAGGACAAGCGGATCATCAGTCAA  
+HWI-EAS443:3:69:153:811#0/1  
a\_a[\_[aba`aaab`\_aaa`\_aaPaaa\_\_`\_aaa^T^``\_  
@HWI-EAS443:3:69:1575:241#0/1  
GTTGAGGATTAGCTCATCTTTTCAGTTTTGGTGGGTTCACT  
+HWI-EAS443:3:69:1575:241#0/1  
`aa`\_aa`a¥a\_\_ZP^a[`a]W[\_Z\_`^[VUZ\_`OZLUXZ  
@HWI-EAS443:3:69:1612:132#0/1  
AAAGAAGTGGAGATCTAATGTCGCAGTCCCGCACTCGCG  
+HWI-EAS443:3:69:1612:132#0/1  
]R]VXabaaaa`a[]\_a^a\_[^VX\_]¥¥IR^\_XUQQZW^  
@HWI-EAS443:3:69:1622:1274#0/1  
AAAGAAGTGGAGATCTAATGTCGCAGTCCCGCACTCGCG  
+HWI-EAS443:3:69:1622:1274#0/1  
\_`¥HZ\_[a¥¥^`\_a`^aaaaUU\_\_Q\_\_W^^ZUUGV¥[ZV¥  
@HWI-EAS443:3:69:1637:1795#0/1  
CCCGTTTTCGTTTTATTACCAACTACGTCCCCTTGCCC  
+HWI-EAS443:3:69:1637:1795#0/1  
aaab]\_]aa]Ub`aaaa[[O^\_]`X]T]aUP[ZNPSXT]Y  
@HWI-EAS443:3:69:1656:439#0/1  
ACAGAGTAGGATGCAATTTTCCTCATTGACTGTGAATGTG  
+HWI-EAS443:3:69:1656:439#0/1  
aaab`a]aba`\_a\_aaaaa\_`¥`aa^[\_`a^a¥^\_¥L¥

@HWI-EAS443:3:69:1663:406#0/1  
GTTGTAATTGAATACTGGAGAATTGCCTCTTACCAGTATC  
+HWI-EAS443:3:69:1663:406#0/1  
a`bbbabb^`bba\_bbaaaaaaaaaaaba\_a[b\_\_aa^  
@HWI-EAS443:3:69:1701:1946#0/1  
GTGGAGTCTGCTGTCCTGAGAGATTCTCATTGTTGGCA  
+HWI-EAS443:3:69:1701:1946#0/1  
ISb]babbb\_babZYaa`Z]¥` `bbaR`ab`bbb\_]Zab  
@HWI-EAS443:3:69:1725:930#0/1  
AGAGAATAAAAGAACTGAGAGATCTAATGTCGCAGTCCCG  
+HWI-EAS443:3:69:1725:930#0/1  
¥\_b\_R\_babb`¥Z¥ba`aa`\_`bbbZbbb`^]`ab]X\_`  
@HWI-EAS443:3:69:1757:1431#0/1  
AAAGAAGTCTGAGAGATCTAATGTCGCAGTCCCGCACTCGCG  
+HWI-EAS443:3:69:1757:1431#0/1  
aZ`XYGMR`\_]\_V]Y^\_\_Q[Y]Q¥\_W[[SUR[PVLVWSUYT  
@HWI-EAS443:3:69:1768:422#0/1  
AATTGGGCAAGGGGACGTAGTGTGGTAATGAAACGAAAA  
+HWI-EAS443:3:69:1768:422#0/1  
abbbab]aaa`a\_aaab\_aa¥` `ab\_KXaY¥\_a`V¥W\_a¥  
@HWI-EAS443:3:69:1770:404#0/1  
GTCCCGTTTTTCGTTTCATTACCAACTACGTCCCTTGC  
+HWI-EAS443:3:69:1770:404#0/1  
aaVJYZ`aabSbJa^[W\_]\_a\_a\_ZZZ\_` `]`OJF[RRRYN  
@HWI-EAS443:3:69:179:1072#0/1  
GAATAAAAGAACTGAGAGATCTAATGTCGCAGTCCCGCAC  
+HWI-EAS443:3:69:179:1072#0/1  
a¥^\_a`¥R¥\_Z]a][`¥^¥Ya][`a^a]¥\_^[Q`YU^^[  
@HWI-EAS443:3:69:191:1478#0/1  
CTCGCGAGATACTCACTAAGACCACTGTGGACCATATGGC  
+HWI-EAS443:3:69:191:1478#0/1  
aabS`Wa`R]a\_ba¥¥a`Q]`aaa\_\_YUZT¥¥T¥NT[Y^  
@HWI-EAS443:3:69:19:1448#0/1  
AAAAGAACTGAGAGATCTAATGTCGCAGTCCCGCACTCGC  
+HWI-EAS443:3:69:19:1448#0/1  
aaaba`\_aaaa\_a\_a\_a`\_a` `¥a\_a^¥^`a`]VF^W^U\_  
@HWI-EAS443:3:69:209:1009#0/1  
CAATGGCCCTGAGTCAGTGCTAGTCAACACTTATCAATGG  
+HWI-EAS443:3:69:209:1009#0/1  
aaaaa`aaa[TS]V` `YS¥\_] [V^[^NZ[]][[ZZYRRQY  
@HWI-EAS443:3:69:265:189#0/1  
GAGATCTAATGTCGCAGTCCCGCACTCGCGAGATACTCAC  
+HWI-EAS443:3:69:265:189#0/1  
abaa`aaaaaa\_aa¥] `¥\_\_a\_\_Z^^^¥^W[¥XV¥W¥W¥V  
@HWI-EAS443:3:69:275:873#0/1  
ATCATCATTTCTCACTTCTCCTCCTGGAGTGTACATCTGC  
+HWI-EAS443:3:69:275:873#0/1  
Z\_b¥Z^Z\_bb`bbbbbb]\_a`ba[aXW]^` `^\_P¥\_aaa  
@HWI-EAS443:3:69:279:1800#0/1  
CACTGTGGACCATATGGCCATAATCAAAAAGTACACATCA

+HWI-EAS443:3:69:279:1800#0/1  
aaa\_\_U^[Y`aX¥YY]^`\_]\_Y`]W]^`\_\_\_\_Q0^]\_^\_V¥R  
@HWI-EAS443:3:69:291:552#0/1  
GGGCGATCTGAACCTTTGTCAATAGGGCAAACCAGCGACTG  
+HWI-EAS443:3:69:291:552#0/1  
aa^ba¥^a\_aaaaa`aW\_[SZZ]¥]^a¥]^```\_`\_Y\_\_  
@HWI-EAS443:3:69:297:846#0/1  
CGTTTTTCGTTTCATTACCAACACTACGTCCCCTTGCCCAA  
+HWI-EAS443:3:69:297:846#0/1  
a^]aaaaba`aaaa`^aaa\_a`a^\_`V`\_`^ZV^^`VNZ  
@HWI-EAS443:3:69:299:1609#0/1  
CTGTGGCACATTTCCAAGAGAGATGCTAATGGGTCTGCTG  
+HWI-EAS443:3:69:299:1609#0/1  
aa`V`\_`aab^aa^aaaa^a`\_`a`\_`\_]W^^¥[ZW\_[[^[WY  
@HWI-EAS443:3:69:308:568#0/1  
GAGAATAAAAGAACTGAGAGATCTAATGTCGCAGTCCCGC  
+HWI-EAS443:3:69:308:568#0/1  
aaaaaaaa[OXa\_aaa`[Z`\_a\_]aa`a]a\_\_\_\_\_ [Z^ZZ]  
@HWI-EAS443:3:69:310:400#0/1  
GGGGACGTAGTGTGGTAATGAAACGAAAACGGGACTCTA  
+HWI-EAS443:3:69:310:400#0/1  
¥a¥`Z`aaWSX`a\_bbV`\_`UQ\_aaU^W\_^\_S\_a`¥Z`Y\_^  
@HWI-EAS443:3:69:323:1964#0/1  
ACCCCGCACTCAGAATGAAGTGGATGATGGCAATGAGATA  
+HWI-EAS443:3:69:323:1964#0/1  
aaaa```]`a`a`aa`\_`a\_V\_\_Y`\_``]`]^`\_`\_Z[U\_X`  
@HWI-EAS443:3:69:32:476#0/1  
GTCCCGCACTCGCGAGATACTCACTAAGACCACTGTGGAC  
+HWI-EAS443:3:69:32:476#0/1  
aabab¥`Ya`aY`a\_a\_\_`\_`^VXaU¥XY]\_T[[[W[ZW\_  
@HWI-EAS443:3:69:334:1756#0/1  
CGCACTCGCGAGATACTCACTAAGACCACTGTGGACCATA  
+HWI-EAS443:3:69:334:1756#0/1  
\_¥`¥````a¥¥J]UR[U`\_`YXWY\_a[a`¥RXJN]]^LQQ  
@HWI-EAS443:3:69:362:1660#0/1  
GTCCCGTTTTTCGTTTCATTACCAACACTACGTCCCCTTGC  
+HWI-EAS443:3:69:362:1660#0/1  
U]`ba`¥W¥\_b`^aa]¥PY\_b`WWa\_aab^PMX\_\_^XSL^  
@HWI-EAS443:3:69:397:455#0/1  
GGGACGTAGTGTGGTAATGAAACGAAAACGGGACTCTAG  
+HWI-EAS443:3:69:397:455#0/1  
aaa\_aaT¥aVaUaa¥MX\_V`\_`\_`UaTT[`^]\_]ZUV[S^Z  
@HWI-EAS443:3:69:404:338#0/1  
ATTGCATCTACTCTGTTCTGGTGGAGCAGCAGCAAAGGG  
+HWI-EAS443:3:69:404:338#0/1  
¥¥I[¥[bbaabb`¥V¥R\_[\_])^a¥X`a`a^X¥0¥a``¥]  
@HWI-EAS443:3:69:427:761#0/1  
GTCCCGTTTTTCGTTTCATTACCAACACTACGTCCCCTTGC  
+HWI-EAS443:3:69:427:761#0/1  
`U^a\_bYaba`\_`P[^aaa[```¥Q¥aWL]ZVKWR^]R]UV

@HWI-EAS443:3:69:434:836#0/1  
GGTATCTCATTGCCATCATCCACTTCATTCTGAGTGCGGG  
+HWI-EAS443:3:69:434:836#0/1  
aaYaabbaTaa\_baabb]aa\_baaaaa`aaY]`\_]`\_a`\  
@HWI-EAS443:3:69:43:1054#0/1  
GAATAAAAGAACTGAGAGATCTAATGTCGCAGTCCCGCAC  
+HWI-EAS443:3:69:43:1054#0/1  
a^aaaa`T¥[`aaaY]W]\_Waaa\_aaV`\_]Z][\_]`^ZIZ  
@HWI-EAS443:3:69:444:1326#0/1  
GGCGTACATGCTAGAAAGAGAATTGGTCCGTAACAAGG  
+HWI-EAS443:3:69:444:1326#0/1  
[aa`\_bab`\_`\_`aa\_\_b`\_aaaa\_\_VW\_a\_N``aaV`\_a\_K  
@HWI-EAS443:3:69:44:807#0/1  
ACTCTTGAGGCATTTCCAAAAAGATGCAAAAGTCTTTTC  
+HWI-EAS443:3:69:44:807#0/1  
abaaaaabaaaaa`aaa\_]a`aa`aa`YU^Za`^`\_`\_`  
@HWI-EAS443:3:69:487:375#0/1  
AAGAAGTGAAGATCTAATGTCGCAGTCCCGCACTCGCGA  
+HWI-EAS443:3:69:487:375#0/1  
aa`a^`aaaabaa`aaaa`[```a\_[```W`[\_X^\_\_\_¥  
@HWI-EAS443:3:69:487:505#0/1  
CTTGCGTTTCACTGACTTCTTCGGGAGACAATAGTACGTT  
+HWI-EAS443:3:69:487:505#0/1  
\_aZ\_¥\_Q\_¥Wa]¥a¥\_X]Z\_aaa`\_a^`\_``aaa^Q`UFJR  
@HWI-EAS443:3:69:488:986#0/1  
GGAGAGAATAAAAGAACTGAGAGATCTAATGTCGCAGTCC  
+HWI-EAS443:3:69:488:986#0/1  
a`aa[`]aaba`\_`aa^aaa\_aa`\_a`aaaa^`\_a``V\_\_  
@HWI-EAS443:3:69:54:1503#0/1  
GTCTGCTGTAATTGGGTATCTCATTGCCATCATCCACTTC  
+HWI-EAS443:3:69:54:1503#0/1  
VRU\_^Wa^Q^[`aXP``aPZPZa]TS¥bY¥aa^`^[aU]Z  
@HWI-EAS443:3:69:575:1528#0/1  
AAAAGAACTGAGAGATCTAATGTCGCAGTCCCGCACTCGC  
+HWI-EAS443:3:69:575:1528#0/1  
^\_^\_\_a`a\_\_\_\_]\_[`aaaaaa^a¥aa`¥`\_`Z\_W\_\_a^`  
@HWI-EAS443:3:69:575:584#0/1  
AACAAGGACAAACCCTCTGGAGCAAAACAAACGATGCTGG  
+HWI-EAS443:3:69:575:584#0/1  
`S\_aRPRU]W^Z]a^YZU\_\_[]]]¥Q\_¥\_U\_a]````VY¥\_  
@HWI-EAS443:3:69:606:1041#0/1  
CTGCTGTAATTGGGTATCTCATTGCCATCATCCACTTCAT  
+HWI-EAS443:3:69:606:1041#0/1  
abaaab\_\_\_\_aaaaa[aaaa`aaa\_a`\_a\_aa\_a`\_a\_`\_\_\_\_  
@HWI-EAS443:3:69:607:101#0/1  
CTAATGTCGCAGTCCCGCACTCGCGAGATACTCACTAAGA  
+HWI-EAS443:3:69:607:101#0/1  
abbaabbbbbbb^bba`a`a\_\_b]a\_baaa`a[a\_aaa`\  
@HWI-EAS443:3:69:608:1955#0/1  
AAAAGAACTGAGAGATCTAATGTCGCAGTCCCGCACTCGC

+HWI-EAS443:3:69:608:1955#0/1  
aaa]\_`aa`aa¥]\_\_\_a\_`^UM[¥\_`VT``aZY[WMWN^  
@HWI-EAS443:3:69:629:1051#0/1  
CCCGTTTTTCGTTTCATTACCAACTACGTCCCCTTGCCC  
+HWI-EAS443:3:69:629:1051#0/1  
a```]aTab\_VZa`a\_RX[]b¥^Za`S][¥a`\_a^H[[a`  
@HWI-EAS443:3:69:658:1978#0/1  
TGGATGATGGCAATGAGATACCCAATTACAGCAGACAAGA  
+HWI-EAS443:3:69:658:1978#0/1  
]`YYb\_bUVUXbbU`VU]]aSaZ^b)`U)`]WU^bVM]Ua  
@HWI-EAS443:3:69:667:1987#0/1  
AAAAGAACTGAGAGATCTAATGTCGCAGTCCCGCACTCGC  
+HWI-EAS443:3:69:667:1987#0/1  
UYRX¥TWVa\_]ZVJZ]aT`¥X^Ya[^HUM^`\_N]ORJQFV  
@HWI-EAS443:3:69:677:471#0/1  
CAATTACAGCAGACAAGAGAATAATGGACATGATTCCAGA  
+HWI-EAS443:3:69:677:471#0/1  
abbaaabbbaa]aaaabab`\_aaabaaaaa\_a`a\_\_`a\_  
@HWI-EAS443:3:69:717:31#0/1  
GAGTACATGAAGGGTATGAAGAATTCACAATGGTTGGGAG  
+HWI-EAS443:3:69:717:31#0/1  
aab\_baaab\_\_baa[abaaaaaaa`\_a`a`aaa^\_a\_\_]`  
@HWI-EAS443:3:69:727:1548#0/1  
AAAAGAACTGAGAGATCTAATGTCGCAGTCCCGCACTCGC  
+HWI-EAS443:3:69:727:1548#0/1  
aaabaa`\_`\_a\_a\_aaaab\_aaZ^\_aa^¥\_``ZaSa\_aZa  
@HWI-EAS443:3:69:727:482#0/1  
GAGATACTACTAAGACCACTGTGGACCATATGGCCATAA  
+HWI-EAS443:3:69:727:482#0/1  
]]\_`¥aa```a\_`\_V¥a`a\_\_`¥`\_^^]NWW[^[WVYQKY  
@HWI-EAS443:3:69:730:1796#0/1  
CCCGCACTCGCGAGATACTACTAAGACCACTGTGGACCA  
+HWI-EAS443:3:69:730:1796#0/1  
aab^a]aW`[a]XVQDT¥¥a]\_T¥X0¥a`a¥UXPXP[^a\_  
@HWI-EAS443:3:69:730:875#0/1  
CTTCCTGATGTGTACTTTTTGATTATGGCCATATGGTCCA  
+HWI-EAS443:3:69:730:875#0/1  
aa\_`aa``aa`a`aaaaaaa]a`aa]V\_``^`WQ]U¥`X  
@HWI-EAS443:3:69:764:2011#0/1  
GAGAATAAAAGAACTGAGAGATCTAATGTCGCAGTCCCGC  
+HWI-EAS443:3:69:764:2011#0/1  
a`¥WZ[^XQ^`^a][YYY^aaaa\_aa`a^a[¥]T¥][]W¥  
@HWI-EAS443:3:69:783:921#0/1  
TCCCGTTTTTCGTTTCATTACCAACTACGTCCCCTTGCC  
+HWI-EAS443:3:69:783:921#0/1  
V\_[RZQ^VZW\_P]XRZa\_\_U]ZW¥\_YMQXVBBBBBBBBBB  
@HWI-EAS443:3:69:819:734#0/1  
CAACCCTGATCCTCTCACATTCACAGTCAATGAGGAAAAT  
+HWI-EAS443:3:69:819:734#0/1  
a``bb`]`a`aaaaaaaa`aa\_a`^aa`aa\_aa]\_]\_a

@HWI-EAS443:3:69:821:997#0/1  
AGTGCTAGTCAACACTTATCAATGGATAATCAGGAACTGG  
+HWI-EAS443:3:69:821:997#0/1  
a^0aaaaa`aaa`aaaa`a`\_`aa\_^]``Z^]\_^`X^\_\_  
@HWI-EAS443:3:69:824:951#0/1  
ATCTAATGTCGCAGTCCCGCACTCGCGAGATACTCACTAA  
+HWI-EAS443:3:69:824:951#0/1  
a`[````\_R\_ZZ`\_PV`\_aaY]V]XXVF\_YU¥YNYSQU¥[  
@HWI-EAS443:3:69:84:1909#0/1  
AATAAAAGAACTGAGAGATCTAATGTCGCAGTCCCGCACT  
+HWI-EAS443:3:69:84:1909#0/1  
`ba\_aa`[aab^Yb[XH\_Z``a\_\_\_G\_[aa\_W\_aaXYG[Z  
@HWI-EAS443:3:69:906:112#0/1  
GTCCCCTTTTCGTTTCATTACCAACTACGTCCCCTTGC  
+HWI-EAS443:3:69:906:112#0/1  
a`^aa\_aab`a^a`^ab`a\_\_a\_^`\_`^`^]XY¥]¥^^]  
@HWI-EAS443:3:69:959:616#0/1  
ATCTAATGTCGCAGTCCCGCACTCGCGAGATACTCACTAA  
+HWI-EAS443:3:69:959:616#0/1  
a`a`a`]Z[\_]\_\_^RV\_¥Q\_GZW\_QV^T^UTSMUZ[YW^Y  
@HWI-EAS443:3:69:961:739#0/1  
AGGAGTAAGGATGGTGGACATCCTTAGACAGAATCCA  
+HWI-EAS443:3:69:961:739#0/1  
aa\_HZQ`aaaT[Y]FQaZSXX¥]^`KZ]QY\_[YVW]V[LY  
@HWI-EAS443:3:69:965:346#0/1  
GTGGTCTTAGTGAGTATCTCGCGAGTGCGGGACTGCGACA  
+HWI-EAS443:3:69:965:346#0/1  
a`aa\_aabaa\_bab\_baa[ZEWa[XSaXS¥`ZZ^TXYPY  
@HWI-EAS443:3:6:1016:321#0/1  
AGAGGATTTCTCATTTTGGGCAAAGAAGACAAGAGATATG  
+HWI-EAS443:3:6:1016:321#0/1  
ababbaabbabaababaaa`^aaaa`ba\_`a\_a`a\_a  
@HWI-EAS443:3:6:1028:1140#0/1  
GTCTTCTTTGCCAAAATGAGAAATCCTCTCAGGACAGCA  
+HWI-EAS443:3:6:1028:1140#0/1  
`HVSaRGTSa]a]¥N]Y¥[`¥]T\_\_¥S[\_¥`\_\_aX¥\_^XB  
@HWI-EAS443:3:6:1082:787#0/1  
ATCTAATGTCGCAGTCCCGCACTCGCGAGATACTCACTAA  
+HWI-EAS443:3:6:1082:787#0/1  
`]\_a]^\_a^`^abWMQ^U^a^[SLK^V]`\_XVHQ]]BBB  
@HWI-EAS443:3:6:1125:1565#0/1  
GAACAAGGACAAACCTCTGGAGCAAACAAACGATGCTG  
+HWI-EAS443:3:6:1125:1565#0/1  
aaZH`¥`TURXY]`]XR`]]]VYXYU^]Ma^\_Z\_¥\_\_QY^  
@HWI-EAS443:3:6:1131:202#0/1  
TCCCGTTTTCGTTTCATTACCAACTACGTCCCCTTGCC  
+HWI-EAS443:3:6:1131:202#0/1  
a\_X¥\_Xa`^[X\_`¥G¥^¥¥POYHS¥R¥¥P\_YQPRV\_SVBB  
@HWI-EAS443:3:6:1167:1748#0/1  
ATCTAATGTCGCAGTCCCGCACTCGCGAGATACTCACTAA

+HWI-EAS443:3:6:1167:1748#0/1  
aaabaa`b¥[Xa`^^[^¥^¥Z[\_[^`\_][¥VWYVZY\_\_\_\_  
@HWI-EAS443:3:6:1180:518#0/1  
GTGGAGTCTGCTGTCCTGAGAGGATTTCTCATTTTGGGCA  
+HWI-EAS443:3:6:1180:518#0/1  
aZa\_]a^^aa¥``\_]\_`a]^`^a`]^`\_^\_¥^\_\_^a^ZZYZ  
@HWI-EAS443:3:6:1199:343#0/1  
ATCTGCTCCCAGCACGTCCCTTGGGTAAAGTCAACACTT  
+HWI-EAS443:3:6:1199:343#0/1  
ab\_ab¥a\_a^`P\_W`]R[\_\_\_`^^^`\_`U^R`\_Y\_W]B  
@HWI-EAS443:3:6:1206:1130#0/1  
AAAAGAAGTCTGAGATCTAATGTCGCAGTCCCGCACTCGC  
+HWI-EAS443:3:6:1206:1130#0/1  
ababb\_a\_bb\_a`a`a`aa`\_\_`\_`a\_X]Va\_]Z^`^  
@HWI-EAS443:3:6:1217:1498#0/1  
GAATGAAGTGGATGATGGCAATGAGATACCCAATTACAGC  
+HWI-EAS443:3:6:1217:1498#0/1  
]ZZaaT[b]baZY\_]a\_aRX^`b[aUZ[^]]`]]U`a\_`T  
@HWI-EAS443:3:6:122:1939#0/1  
CAGCAATAGGGTTGAGGATTAGCTCATCTTTTCAGTTTTGG  
+HWI-EAS443:3:6:122:1939#0/1  
ab`baaa`aa`^`\_\_\_`a\_aaa]`\_a¥]aa`\_a`^```]^  
@HWI-EAS443:3:6:1250:551#0/1  
GAATAAAAGAAGTCTGAGATCTAATGTCGCAGTCCCGCAC  
+HWI-EAS443:3:6:1250:551#0/1  
VOQ^`Zbba`b`R`]aabbaba[baRVb]ab^\_KN[Z[B  
@HWI-EAS443:3:6:1261:482#0/1  
CTAATGTCGCAGTCCCGCACTCGCGAGATACTCACTAAGA  
+HWI-EAS443:3:6:1261:482#0/1  
abbbabbbb]bbab``a\_aaa`a]babaaa\_aZaSaaa\_a  
@HWI-EAS443:3:6:1292:1214#0/1  
GGCAAGGGGACGTAGTGTGGTAATGAAACGAAAACGGGA  
+HWI-EAS443:3:6:1292:1214#0/1  
aa`]Zab]]Waa\_¥Qt\_b\_aabZ`a`HOT^FZY\_a[Ua`\_^  
@HWI-EAS443:3:6:1320:231#0/1  
ATCTAATGTCGCAGTCCCGCACTCGCGAGATACTCACTAA  
+HWI-EAS443:3:6:1320:231#0/1  
aa``aaaa¥`a^V^`\_\_¥`\_WU\_TX¥\_¥]TaZGVWSQV\_B  
@HWI-EAS443:3:6:1357:27#0/1  
ATCTAATGTCGCAGTCCCGCACTCGCGAGATACTCACTAA  
+HWI-EAS443:3:6:1357:27#0/1  
aaX\_]a]]V[YSQaWVBBBBBBBBBBBBBBBBBBBBBBB  
@HWI-EAS443:3:6:138:109#0/1  
CTCTTATTTTCAGTGTGGAGGTTGCCCGTTAGCACTTC  
+HWI-EAS443:3:6:138:109#0/1  
ab\_bbbbab`aa\_babbbb`aa^aa`¥aa`\_`a^`^\_a\_  
@HWI-EAS443:3:6:1406:1452#0/1  
AAAGAAGTCTGAGATCTAATGTCGCAGTCCCGCACTCGCG  
+HWI-EAS443:3:6:1406:1452#0/1  
[`aX\_a¥^abbb`\_]ab`W`aHMU\_b`IW\_[MOZFNlbBB



@HWI-EAS443:3:6:1444:64#0/1  
CCCCGTTTTCGTTTCATTACCAACTACTGCCCCCTTGCCC  
+HWI-EAS443:3:6:1444:64#0/1  
a`P\_\_`¥bbaZ`aPabaa¥T¥a`ZJ`]^aYH[Q¥a][BBB  
@HWI-EAS443:3:6:1461:437#0/1  
AGGGGACGTAGTGTGGTAATGAAACGAAAACGGGACTCT  
+HWI-EAS443:3:6:1461:437#0/1  
a`¥bb`ba\_WG¥bZabRGXaaaaaYDY\_aa^Gaa`ZUXHW  
@HWI-EAS443:3:6:147:1417#0/1  
GCCATGGTATTCTCACAAGAGATTGCATGATCAAGGCAG  
+HWI-EAS443:3:6:147:1417#0/1  
aaX^bb`^`bbaa`M]^a^]a`^`XbbaaXV^\_aa¥P^  
@HWI-EAS443:3:6:1510:195#0/1  
GAAACCTGTTTTACGGACCAATTCTCTTTCTAGCATGTA  
+HWI-EAS443:3:6:1510:195#0/1  
[aY\_\_^[`bYRX^XL¥aYS]]\_QDPO^¥a\_a[[BBBBBB  
@HWI-EAS443:3:6:1542:198#0/1  
CCCCGTTTTCGTTTCATTACCAACTACTGCCCCCTTGCCC  
+HWI-EAS443:3:6:1542:198#0/1  
a]baabbbbbbbaabbbbabbaa\_\_a`aaN`  
@HWI-EAS443:3:6:1558:1467#0/1  
AAAATTGCATCCTACTCTGTTCTGGTGGAGCAGCAGCAAA  
+HWI-EAS443:3:6:1558:1467#0/1  
```[aaa`aaU^aa\_`]aa\_`\_a`YX\_`U`U¥`X]^XZ^  
@HWI-EAS443:3:6:1566:1140#0/1  
AAAAGAAGTGGAGATCTAATGTCGCAGTCCCGCACTCGC  
+HWI-EAS443:3:6:1566:1140#0/1  
Yb` `bb\_Zb[abab`b]ab^bbJ\_]Ya`a\_aM]\_TGaa\_¥  
@HWI-EAS443:3:6:1593:1353#0/1  
AAGAAGTGGAGATCTAATGTCGCAGTCCCGCACTCGCGA  
+HWI-EAS443:3:6:1593:1353#0/1  
abbU\_\_` `abaaab`ba`bbH]bT^aVW\_\_a^R¥^T^]]\_  
@HWI-EAS443:3:6:1609:1442#0/1  
GGGACGTAGTGTGGTAATGAAACGAAAACGGGACTCTAG  
+HWI-EAS443:3:6:1609:1442#0/1  
¥^a`[bb]babaabbXaaV\_U\_`Qa\_aaa[[a`WG¥XT\_U  
@HWI-EAS443:3:6:1665:604#0/1  
ATAAAGAAGTGGAGATCTAATGTCGCAGTCCCGCACTC  
+HWI-EAS443:3:6:1665:604#0/1  
ab`b`[¥[^\_a``\_a]\_\_a^]` `UV\_^X^\_RS\_X[RV^B  
@HWI-EAS443:3:6:167:285#0/1  
GCAAAAGGAGAGAAGGCTAATGTGCTAATTGGGCAAGGGG  
+HWI-EAS443:3:6:167:285#0/1  
`\_RX[a`Q`U\_ZZ\_GX]RWYX]I¥MVN\_TIT¥T^U^` `BB  
@HWI-EAS443:3:6:1697:52#0/1  
AACTGAGAGATCTAATGTCGCAGTCCCGCACTCGCGAGAT  
+HWI-EAS443:3:6:1697:52#0/1  
`bSab`abbba\_aaabb`\_\_Wa`\_WUYZWYQ\_S\_W\_Z^BB  
@HWI-EAS443:3:6:197:646#0/1  
ATAGGGTTGAGGATTAGCTCATCTTTTCAGTTTTGGTGGGT

+HWI-EAS443:3:6:197:646#0/1  
abbaaa\_baaaaaaaabaa`a\_aa]aa\_aa`aaS\_]aG  
@HWI-EAS443:3:6:209:190#0/1  
AATAAAAGAACTGAGAGATCTAATGTCGCAGTCCCGCACT  
+HWI-EAS443:3:6:209:190#0/1  
aaaaaba`aaa`aaaaaaa`aa\_aa\_]`[^a^`  
@HWI-EAS443:3:6:21:86#0/1  
AAATCCTCTCAGGACAGCAGACTCCACCCAGATGTGCCT  
+HWI-EAS443:3:6:21:86#0/1  
aa`a`^`\_¥\_¥\_`[^[\_V\_\_¥¥\_W]W¥W¥¥¥W^YWUVY¥WB  
@HWI-EAS443:3:6:235:1770#0/1  
AAAGAACTGAGAGATCTAATGTCGCAGTCCCGCACTCGCG  
+HWI-EAS443:3:6:235:1770#0/1  
ababaa`aaaZa`aa[aaa^aUXW]`N\_[WZ\_Z]]^XUB  
@HWI-EAS443:3:6:255:1564#0/1  
GAGAATAAAAGAACTGAGAGATCTAATGTCGCAGTCCCGC  
+HWI-EAS443:3:6:255:1564#0/1  
Z\_¥Jaba\_]`baabaab`aYaZa\_a]b]bb^a]]^¥bZ\_  
@HWI-EAS443:3:6:268:1185#0/1  
CGCACTCGCGAGATACTACTAAGACCACTGTGGACCATA  
+HWI-EAS443:3:6:268:1185#0/1  
\_X^X^`aW\_WTQ¥KSF0]`\_[UV[^`[GSSYBBBBBBB  
@HWI-EAS443:3:6:317:184#0/1  
GGTATTCTCACAAGAGGATTGCATGATCAAGGCAGTTAGG  
+HWI-EAS443:3:6:317:184#0/1  
ab¥aaa\_aaaS\_¥aVaa]`^a\_\_`a¥^V\_\_a¥¥\_`W]VBB  
@HWI-EAS443:3:6:358:714#0/1  
ATAACATTGTGGGATCTTGTGACCATTGAATTTTACAAT  
+HWI-EAS443:3:6:358:714#0/1  
aaaa\_a`ab¥```a`aaa[\_\_\_\_`a`aaa\_a`a`¥a`a`\_`  
@HWI-EAS443:3:6:386:1450#0/1  
CCTTGTTTTACGGACCAATTCTCTTTCTAGCATGTACGCC  
+HWI-EAS443:3:6:386:1450#0/1  
abY^\_P\_b\_SS¥a][ab`VQ\_ZPQ¥\_Y]XJX`bbX`aBBB  
@HWI-EAS443:3:6:388:325#0/1  
GCATCCTTTCCAAGAACTGTAAGTCGTTTGGTTGCCTTGT  
+HWI-EAS443:3:6:388:325#0/1  
aa\_`Z^``[R`\_a^`X`a]\_[`ZX\_X^^\_UVa]S]^^T  
@HWI-EAS443:3:6:436:297#0/1  
CGCGAGATACTACTAAGACCACTGTGGACCATATGGCCA  
+HWI-EAS443:3:6:436:297#0/1  
abaa`b\_a\_\_`aa\_`a`a]VY``\_aVa\_\_\_\_\_``\_a^^Z\_  
@HWI-EAS443:3:6:445:526#0/1  
GTCGCTGGTTTGCCTATTGACAAAGTTCAGATCGCCCCT  
+HWI-EAS443:3:6:445:526#0/1  
a\_`baaaa`aaa^^`a`aaa`[a`aaW\_Zaa\_\_^¥¥¥^U^  
@HWI-EAS443:3:6:449:539#0/1  
GAATAAAAGAACTGAGAGATCTAATGTCGCAGTCCCGCAC  
+HWI-EAS443:3:6:449:539#0/1  
]¥a``XW]bbaab`aa\_`b[¥]a`ab```\_U`^`\_[^X^G

@HWI-EAS443:3:6:449:575#0/1  
GTCGCAGTCCCGCACTCGCGAGATACTCACTAAGACCACT  
+HWI-EAS443:3:6:449:575#0/1  
aVZYT^aVPZ[R[NZYWJRVPV^QLP¥TZFXYY^PBBBBB  
@HWI-EAS443:3:6:460:57#0/1  
GGGTTTGTCTTGTTCATTCCTCTCTGGAATCATGTCCAT  
+HWI-EAS443:3:6:460:57#0/1  
ab\_F]abZ[R`a\_\_]W`^^^X\_]OXaXU¥XU`WGS]¥  
@HWI-EAS443:3:6:474:1158#0/1  
GACTGAAGATCCAGATGAAGGCACATCTGGGGTGGAGTCT  
+HWI-EAS443:3:6:474:1158#0/1  
aaabba\_]\_aaaa`aa`Za\_\_a¥\_a\_aaa^¥N¥\_\_[TTa  
@HWI-EAS443:3:6:482:1323#0/1  
CCCTCTTTGATCTCTAACCTTAAAAATCGGTCAATACTC  
+HWI-EAS443:3:6:482:1323#0/1  
aba]aX`¥^W^SZ`b`P^\_aYaa\_]`aaaXZUa``bSa]  
@HWI-EAS443:3:6:503:701#0/1  
TTCTCTTTCTAGCATGTACGCCACCATCAAGGGAGCAATT  
+HWI-EAS443:3:6:503:701#0/1  
aaaaaaaa\_aa[\_aaa^a`^^`[^`\_\_`^a`\_\_V\_\_\_\_  
@HWI-EAS443:3:6:513:2002#0/1  
CGTTTTTCGTTTCATTACCAACTACGTCCCCTTGCCCAA  
+HWI-EAS443:3:6:513:2002#0/1  
^b¥^ab`\_LT]]VOWXRaaaLaa\_ab¥Xb`IS\_L^[PPTX  
@HWI-EAS443:3:6:541:1402#0/1  
ATCCGCTTGTCTTTTGAAGTGAACCCACAAAACCTGAA  
+HWI-EAS443:3:6:541:1402#0/1  
aa\_abaaa`WSZaaaaYaaa\_W\_aa]ZaaZ^aaa`V]\_`^`  
@HWI-EAS443:3:6:56:98#0/1  
GTCCCGTTTTTCGTTTCATTACCAACTACGTCCCCTTGC  
+HWI-EAS443:3:6:56:98#0/1  
a\_\_\_aa]`aa\_bX^`\_\_^a\_]\_\_^]\_^]\_V¥Y]XX]YYBB  
@HWI-EAS443:3:6:603:810#0/1  
GTCCCGTTTTTCGTTTCATTACCAACTACGTCCCCTTGC  
+HWI-EAS443:3:6:603:810#0/1  
a]`]aa\_\_aa`b]\_`\_]`^aTN]\_Y]V`[\_WV]SY^]U  
@HWI-EAS443:3:6:614:157#0/1  
AAAGAAGTGAAGATCTAATGTGCGAGTCCCGCACTCGCG  
+HWI-EAS443:3:6:614:157#0/1  
aaab`a`bbUaaaaa`abaaa`Za\_`¥GXY`a]NQ^RZBB  
@HWI-EAS443:3:6:692:826#0/1  
CAAGGACAAACCCTCTGGAGCAAAACAAACGATGCTGGAT  
+HWI-EAS443:3:6:692:826#0/1  
aaabaW\_abaX[X[``]`\_]¥¥]\_^\_a``aa`aa\_\_`W[  
@HWI-EAS443:3:6:700:1004#0/1  
ATCTGCATGGCCAGGTTTGTATCAACTCTCCTCCTTATT  
+HWI-EAS443:3:6:700:1004#0/1  
`bbabba`baaa`aab]aabZaa`aa\_a`\_\_\_\_`^a]a`\_  
@HWI-EAS443:3:6:700:532#0/1  
AAAGAAGTGAAGATCTAATGTGCGAGTCCCGCACTCGCG

+HWI-EAS443:3:6:700:532#0/1  
aaaa^aaaaaaaaa\_a`ab^`a]aa^X^Z^]WY]\_\_]\_  
@HWI-EAS443:3:6:708:451#0/1  
AAAGAAGTCTAATGTCGCAGTCCCGCACTCGCG  
+HWI-EAS443:3:6:708:451#0/1  
a[ababaabaab[bb`ab\_a[X[PIYb\_U\_\_NMX]\_\_\_BB  
@HWI-EAS443:3:6:716:1743#0/1  
AAGAAGTCTAATGTCGCAGTCCCGCACTCGCGA  
+HWI-EAS443:3:6:716:1743#0/1  
aZ[`a`aa\_aaa`\_¥\_aaa[W`\_¥¥\_¥\_¥`\_]¥YZ\_WBB  
@HWI-EAS443:3:6:755:16#0/1  
CGAGATACTACTAAGACCACTGTGGACCATATGGCCATA  
+HWI-EAS443:3:6:755:16#0/1  
abaaYaaa`\_]`aaa`^¥a\_aa]`\_`¥]`\_a\_U^\_]\_  
@HWI-EAS443:3:6:784:169#0/1  
AAAGAAGTCTAATGTCGCAGTCCCGCACTCGCG  
+HWI-EAS443:3:6:784:169#0/1  
a`b`a\_\_a`Ya`a`aa\_aa¥`\_U`\_UYYZTZUUQ^¥BB  
@HWI-EAS443:3:6:797:1094#0/1  
CTCTTTGATCTCTAACCTTAAAAATCGGTCAATACTCAC  
+HWI-EAS443:3:6:797:1094#0/1  
aaaaaaaa^baaaaaa`bba\_aa`a\_aa^`aa`\_aa\_]\_  
@HWI-EAS443:3:6:799:742#0/1  
AAAGAAGTCTAATGTCGCAGTCCCGCACTCGCG  
+HWI-EAS443:3:6:799:742#0/1  
¥\_]WS]abbabZb]`aba\_abUUaa`bT¥`\_a[\_\_\_a`¥Y[  
@HWI-EAS443:3:6:820:74#0/1  
AAAGAAGTCTAATGTCGCAGTCCCGCACTCGCG  
+HWI-EAS443:3:6:820:74#0/1  
abbbaa\_babaabaaaaaaaa¥¥a¥\_aZUW\_\_¥^¥^`\_U\_  
@HWI-EAS443:3:6:842:1621#0/1  
GGAGAGAATAAAAGAAGTCTAATGTCGCAGTCC  
+HWI-EAS443:3:6:842:1621#0/1  
`b[]aaSa`\_aaa^a[`a\_a¥`Z`ZXaaa`\_Q[[ZaBBBB  
@HWI-EAS443:3:6:846:715#0/1  
AGAATGAAGTGGATGATGGCAATGAGATACCCAATTACAG  
+HWI-EAS443:3:6:846:715#0/1  
aa`bbb`ababb\_bbabbbaaaab¥b\_aaa`]aaaaW\_a  
@HWI-EAS443:3:6:906:1234#0/1  
GGGGACGTAGTGTGGTAATGAAACGAAACGGGACTCTA  
+HWI-EAS443:3:6:906:1234#0/1  
abab`b]`b^baabbX^\_aa\_aY`¥^\_aUaaaUZ\_]`  
@HWI-EAS443:3:6:917:1907#0/1  
AAGAAGTCTAATGTCGCAGTCCCGCACTCGCGA  
+HWI-EAS443:3:6:917:1907#0/1  
aaab\_J\_[`R\_baa`aba]aUabUa\_VRX\_\_aabZ`[a\_a  
@HWI-EAS443:3:6:986:910#0/1  
ATACTACTACCACTCTCTCCGTGCTGGAGTATTCATCTA  
+HWI-EAS443:3:6:986:910#0/1  
a¥`^^`Y`aS`a\_a\_a`¥[a\_\_[Y\_a\_aV`\_aY`\_]`[^

@HWI-EAS443:3:70:1001:1289#0/1  
GGGGACGTAGTGTGGTAATGAAACGAAAACGGGACTCTA  
+HWI-EAS443:3:70:1001:1289#0/1  
`ba\_\_`b`ab`b`aabRa`W[`b^\_\_a`Z[¥a`[W\_\_a`  
@HWI-EAS443:3:70:1001:132#0/1  
CTGCTGTAATTGGGTATCTCATTGCCATCATCCACTTCAT  
+HWI-EAS443:3:70:1001:132#0/1  
abbaba]`\_bbbab¥aabb`aaaa\_aaa\_a\_\_``\_aa\_\_`  
@HWI-EAS443:3:70:1013:1671#0/1  
CACTTTTGCATCTTTTTGGAAATGCCTCAAGAGTTGGTGC  
+HWI-EAS443:3:70:1013:1671#0/1  
`^`\_^`a`aaa`a`\_\_`\_`aa\_]¥\_^`\_`\_\_\_\_V\_\_[W\_X  
@HWI-EAS443:3:70:1029:569#0/1  
TGTTCCCTCAGTTGGATTCTGTCTAAGGATGTCCACCATCC  
+HWI-EAS443:3:70:1029:569#0/1  
abaaa`aa`b]abbaaabbaabYaaa`\_`\_`\_`\_`\_]`  
@HWI-EAS443:3:70:1030:728#0/1  
CACGTCCCTTGGGTAAAGTGCAACACTTCAATATAAACAC  
+HWI-EAS443:3:70:1030:728#0/1  
\_`Z¥^aba`\_`X¥U\_baa]¥^^`\_`a`aa`ZR`aaa]]][[a  
@HWI-EAS443:3:70:1090:1849#0/1  
CTGAGAGATCTAATGTGCGAGTCCCGCACTCGCGAGATAC  
+HWI-EAS443:3:70:1090:1849#0/1  
abb\_Z`\_`a`aababa`\_`aaa`¥`b\_\_`X`a`^]\_¥]`\_`\_\_\_\_  
@HWI-EAS443:3:70:1102:1125#0/1  
CTAATGTGCGAGTCCCGCACTCGCGAGATACTCACTAAGA  
+HWI-EAS443:3:70:1102:1125#0/1  
a`\_`aZX\_]¥`\_R]^`H^`a\_a`a`[aa\_aaa\_ZU^a`a\_  
@HWI-EAS443:3:70:1103:642#0/1  
AGATGTGCCTTCATCTGGATCTTCAGTCAATGCACCTGCA  
+HWI-EAS443:3:70:1103:642#0/1  
a]\_YJ[\_a\_aaa^aVaa`\_`\_`\_`\_]`\_X`^`^`\_`\_`^X`\_Y\_  
@HWI-EAS443:3:70:112:1413#0/1  
GTTGAGGATTAGCTCATCTTTCAGTTTTGGTGGGTTCACT  
+HWI-EAS443:3:70:112:1413#0/1  
`a^a\_a\_T[\_Yaaa`X^`aa`\_U`^`\_`\_VZY\_[^R`\_XY]  
@HWI-EAS443:3:70:1144:248#0/1  
AGAGAATAAAAGAACTGAGAGATCTAATGTGCGAGTCCCG  
+HWI-EAS443:3:70:1144:248#0/1  
abab\_abbbaabaa\_babaabbaabaaaa`aa]aa\_a\_^  
@HWI-EAS443:3:70:1171:613#0/1  
GAGAGATCTAATGTGCGAGTCCCGCACTCGCGAGATACTC  
+HWI-EAS443:3:70:1171:613#0/1  
abbaabaabbaabaaa\_ba]\_\_a`a¥`\_`\_`\_`\_`a`\_¥[\_N`\_  
@HWI-EAS443:3:70:1188:796#0/1  
GGGCCATATCTTGTCTTCTTTGCCAAAATGAGAAATC  
+HWI-EAS443:3:70:1188:796#0/1  
aa\_baaaaabbaab`a\_aaaaabaaUa`a^abaaaa`]`  
@HWI-EAS443:3:70:1190:1286#0/1  
TGTGTACTTTTTGATTATGGCCATATGGTCCACAGTGGTC

+HWI-EAS443:3:70:1190:1286#0/1  
\_ba`NTW^abaabab]Z^\_X^V[¥RVZ`P`VSZ]P`\_LU  
@HWI-EAS443:3:70:1194:1775#0/1  
AAAGAAGTCTAATGTCGAGTCCCGCACTCGCG  
+HWI-EAS443:3:70:1194:1775#0/1  
TVWJR\_b\_Z¥[`aa\_aa`a\_\_¥¥`aZRIYa`YZQ^¥a^`]  
@HWI-EAS443:3:70:1199:851#0/1  
GTCTGCTGCTCTGAGAGGATTTCTCATTGCGCAAAGAA  
+HWI-EAS443:3:70:1199:851#0/1  
a`aa`SHU¥]]¥]YTO[a\_`\_\_^]a¥\_[\_[^¥¥ZZ]]¥P  
@HWI-EAS443:3:70:119:1714#0/1  
CTGCTGCTCTGAGAGGATTTCTCATTGCGCAAAGA  
+HWI-EAS443:3:70:119:1714#0/1  
a```aa[ba`^`a\_X]WU`aa`ba\_``\_\_`^`Y`¥Ya`^\_  
@HWI-EAS443:3:70:1297:471#0/1  
TGCTCCCTTGATGGTGGCGTACATGCTAGAAAGAGAATTG  
+HWI-EAS443:3:70:1297:471#0/1  
a]aaaaabab`aaa\_a`b\_aaaaa`a[\_a¥\_Za\_^Y  
@HWI-EAS443:3:70:1311:1099#0/1  
GGATGATGGCAATGAGATACCCAATTACAGCAGACAAGAG  
+HWI-EAS443:3:70:1311:1099#0/1  
YbaaZaab`]ba`aS]a]`\_abaaa¥¥^GVZUT\_^Y^a  
@HWI-EAS443:3:70:1313:1202#0/1  
CTCGGTCTGATCCAGCATCGTTTGTGTTGCTCCAGAGGGT  
+HWI-EAS443:3:70:1313:1202#0/1  
abaaaaabaabaaabbaaaaaaab`aaa^`a```a^`a^  
@HWI-EAS443:3:70:135:1495#0/1  
GTCTGCTGCTCTGAGAGGATTTCTCATTGCGCAAAGAA  
+HWI-EAS443:3:70:135:1495#0/1  
a\_a^`ba]T^aaa\_[a`V[^`a\_`a\_\_`JW^[^T`Za\_  
@HWI-EAS443:3:70:1366:1795#0/1  
GAATTGCCTCTTACCAGTATCCTCAACCCTGATCCTCTCA  
+HWI-EAS443:3:70:1366:1795#0/1  
^`a[Y`baabbbbaab`P`bababbb]aaaab``\_aaaaa  
@HWI-EAS443:3:70:1452:1005#0/1  
TGGGAGATCAATGGCCCTGAGTCACTAGTCAACACTT  
+HWI-EAS443:3:70:1452:1005#0/1  
aba]`b]aabaaa^`\_b]\_^]YV¥Q[G¥¥]UZ]ZXZQ¥X  
@HWI-EAS443:3:70:1492:651#0/1  
CTTTGCCAAAATGAGAAATCCTCTCAGGACAGCAGACTC  
+HWI-EAS443:3:70:1492:651#0/1  
`bbaba\_bbbbabbba`aaaaabaaa`a`aaa`aa`\_a¥  
@HWI-EAS443:3:70:1495:1797#0/1  
ATCTAATGTCGAGTCCCGCACTCGCGAGATACTCACTAA  
+HWI-EAS443:3:70:1495:1797#0/1  
``a`^a\_\_S]V]aaY`]b\_[^`\_`^W\_a¥[[PLGXWNW^  
@HWI-EAS443:3:70:1503:256#0/1  
CCCGTTTTCGTTTCATTACCAACTACGTCCCTTGCCC  
+HWI-EAS443:3:70:1503:256#0/1  
aaQ¥IY[\_aZ¥]Y¥\_YaYYS\_^]¥\_`W`^GY^\_VVSXPM

@HWI-EAS443:3:70:151:981#0/1  
AAGAAGTCTGAGATCTAATGTCGCAGTCCCGCACTCGCGA  
+HWI-EAS443:3:70:151:981#0/1  
``\_aabaa^a^`^`^`\_aa^aa`a\_¥\_`a\_\_U]¥aVZ^T  
@HWI-EAS443:3:70:152:342#0/1  
CCTGAGAGGATTTCTCATTTTGGGCAAAGAAGACAAGAGA  
+HWI-EAS443:3:70:152:342#0/1  
abaa\_a```aaaaaaaaa````\_````\_aa````^\_``^`^`  
@HWI-EAS443:3:70:1544:795#0/1  
GAATAAAAGAAGTCTAATGTCGCAGTCCCGCAC  
+HWI-EAS443:3:70:1544:795#0/1  
GY¥¥¥¥`aW¥b`aa¥X\_\_b]]]a`]aYSa[`Z]TS`[aV  
@HWI-EAS443:3:70:1660:1476#0/1  
TGATTTCTGAAGTGGACAGGGCCGAAGGTACCATGTTTCA  
+HWI-EAS443:3:70:1660:1476#0/1  
ab`\_[\_`aaaa\_]a]aW`\_`\_SF^¥T¥[YU`Y]^X]PV¥XX  
@HWI-EAS443:3:70:1662:721#0/1  
TTGGGTATCTCATTGCCATCATCCACTTCATTCTGAGTGC  
+HWI-EAS443:3:70:1662:721#0/1  
abbba^a`\_\_aaaa`a`````aa`\_`\_a^aaa^`\_¥`W\_U  
@HWI-EAS443:3:70:1671:1211#0/1  
ATTGACTGAAGATCCAGATGAAGGCACATCTGGGGTGGAG  
+HWI-EAS443:3:70:1671:1211#0/1  
`b`\_`aabbbb^Za^`\_bab¥¥¥`[\_`Z^aabaaa\_baV^  
@HWI-EAS443:3:70:1679:699#0/1  
ACCAATTCTCTTTCTAGCATGTACGCCACCATCAAGGGAG  
+HWI-EAS443:3:70:1679:699#0/1  
a`a`¥abababbaabaa`\_a^baa\_a\_\_a`\_a`\_ab`a`  
@HWI-EAS443:3:70:1681:22#0/1  
AGAGAATAAAAGAAGTCTAATGTCGCAGTCCCG  
+HWI-EAS443:3:70:1681:22#0/1  
]bX\_W`¥bbbababaabbababb`\_aab`\_aba`\_TX¥Y`  
@HWI-EAS443:3:70:174:893#0/1  
GTTTGGAGGTTGCCCGTTAGCACTTCTTCTTCTTCTTGA  
+HWI-EAS443:3:70:174:893#0/1  
aUbaUbaba]\_`aba`Sa`aa`aaa`a^a\_a`\_a\_Z`\_X^  
@HWI-EAS443:3:70:1760:1903#0/1  
TAAGTGCAACACTTCAATATAAACACTGCCTGTTCCGCCG  
+HWI-EAS443:3:70:1760:1903#0/1  
Z¥XWUZ`a```aaa[¥K^`V¥abba]TOXa]¥QZ]ZX]\_R  
@HWI-EAS443:3:70:1774:1388#0/1  
AAAAGAAGTCTAATGTCGCAGTCCCGCACTCGC  
+HWI-EAS443:3:70:1774:1388#0/1  
a]aaa^ba`\_aaab`a¥aaaaa\_a\_^Z]U]^a`\_`\_`^W[R  
@HWI-EAS443:3:70:1780:894#0/1  
CCCGTTTTCGTTTCATTACCAACTACGTCCCCTTGCCC  
+HWI-EAS443:3:70:1780:894#0/1  
aabb\_abbba`aaaa`aa`a`a`\_]a`\_W`\_]¥W¥[¥Z^  
@HWI-EAS443:3:70:1783:1169#0/1  
GGCAGCAATAGGGTTGAGGATTAGCTCATCTTTCAGTTTT

+HWI-EAS443:3:70:1783:1169#0/1  
¥F¥K[\`UX¥Z\_¥VPY[JZTLMZ^[M[ULZKX]RIWOY^\_R  
@HWI-EAS443:3:70:183:247#0/1  
ATCTAATGTCGCAGTCCCGCACTCGCGAGATACTCACTAA  
+HWI-EAS443:3:70:183:247#0/1  
Zaa[Z\_`Pa]aWTFP\_aa[NRQ`UaRTTSPUTS^^XUG^  
@HWI-EAS443:3:70:196:1998#0/1  
TCCCGTTTTTCGTTTCATTACCAACTACGTCCTTGCC  
+HWI-EAS443:3:70:196:1998#0/1  
]\_baRP]abbZY[\_XL`^aaYaY[a^F[YLP]`aa][\_^[  
@HWI-EAS443:3:70:200:581#0/1  
GCTAATTGGGCAAGGGGACGTAGTGTGGTAATGAAACGA  
+HWI-EAS443:3:70:200:581#0/1  
ab`¥\_`a`Z`^][^`abV[TD¥^\_`aNLTUNWQaXZY  
@HWI-EAS443:3:70:217:1846#0/1  
AAAAGAAGTCTAATGTCGCAGTCCCGCACTCGC  
+HWI-EAS443:3:70:217:1846#0/1  
ab]a¥\_a¥¥\_`Y`U]\_\_a`\_\_Z[QaZ[W\_`\_U\_¥WW¥T¥  
@HWI-EAS443:3:70:222:303#0/1  
AATGTCGCAGTCCCGCACTCGCGAGATACTCACTAAGACC  
+HWI-EAS443:3:70:222:303#0/1  
]a]\_\_V\_a¥VYKY^S^]¥YNVTX¥^^[RZSTNR[ZZPPU  
@HWI-EAS443:3:70:236:1550#0/1  
AAAAGAAGTCTAATGTCGCAGTCCCGCACTCGC  
+HWI-EAS443:3:70:236:1550#0/1  
abbb]Wab]\_a`a\_`aa^aaa¥b`aa\_¥aaa\_\_R`[\_¥\_  
@HWI-EAS443:3:70:256:1159#0/1  
GCACTCGCGAGATACTCACTAAGACCACTGTGGACCATAT  
+HWI-EAS443:3:70:256:1159#0/1  
ababbbab^ab\_a`aba\_ba`Raa`aabaaaa`\_aa]`a`  
@HWI-EAS443:3:70:265:829#0/1  
CTGTAATTGGGTATCTCATTGCCATCATCCACTTCATTCT  
+HWI-EAS443:3:70:265:829#0/1  
abb`]U`aa`aaaa]¥^aa`aaa`a`a\_`¥U]a\_\_]aaZa  
@HWI-EAS443:3:70:306:945#0/1  
GGAGTCTGCTGTCCTGAGAGGATTTCTCATTTTGGGCAAA  
+HWI-EAS443:3:70:306:945#0/1  
````W\_`a```Y`a¥]XYa`Z[````a\_^[[^^JW\_`[VV  
@HWI-EAS443:3:70:316:1910#0/1  
GTCCCGTTTTTCGTTTCATTACCAACTACGTCCTTGCC  
+HWI-EAS443:3:70:316:1910#0/1  
a`bb`^[aaab`\_\_ab^`a`b\_V`b`\_a^VL^aa\_`\_]a  
@HWI-EAS443:3:70:322:210#0/1  
CGCGAGATACTCACTAAGACCACTGTGGACCATATGGCCA  
+HWI-EAS443:3:70:322:210#0/1  
ababaa\_a`aaaaaaaaaaaa\_a\_aa¥a]\_^]`\_\_\_\_]^Z]  
@HWI-EAS443:3:70:391:1614#0/1  
AAGAAGTCTAATGTCGCAGTCCCGCACTCGCGA  
+HWI-EAS443:3:70:391:1614#0/1  
abaaab`ab`b`a^^aU\_a]`a`^[``b[b\_a¥`^\_`\_`





+HWI-EAS443:3:70:600:338#0/1  
\_\_Q[¥]b`\_U\_\_\_\_VT0]baa\_` `aYVX` `a]XR]Z]RZ[  
@HWI-EAS443:3:70:632:425#0/1  
GAATTGCCTCTTACCAGTATCCTCAACCCTGATCCTCTCA  
+HWI-EAS443:3:70:632:425#0/1  
a\_\_baUb`ab\_bb\_a\_b^aa¥^bb\_b\_aaa\_^aYX[[`¥`  
@HWI-EAS443:3:70:711:1724#0/1  
CTCTTGTCTTCTTTGCCAAAATGAGAAATCCTCTCAGGA  
+HWI-EAS443:3:70:711:1724#0/1  
abaaababbaabaa\_aabbbbaaababaaaaaaba\_`a  
@HWI-EAS443:3:70:734:138#0/1  
GGGACGTAGTGTGGTAATGAAACGAAAACGGGACTCTAG  
+HWI-EAS443:3:70:734:138#0/1  
aa\_[\_\_Q^\_S\_Y`a\_PSY[\_W[]Z\_UU^Z¥^ZRNLQUPTS  
@HWI-EAS443:3:70:73:548#0/1  
CCCCTTTTCGTTTTATTACCAACTACGTCCCCCTTGCCC  
+HWI-EAS443:3:70:73:548#0/1  
aaab\_\_aab]T`¥a`]¥^aYS]\_\_`^^`[V[¥[VRMW^]^  
@HWI-EAS443:3:70:749:1191#0/1  
CCATATGGTCCACAGTGGTCTTAGTGAGTATCTCGCGAGT  
+HWI-EAS443:3:70:749:1191#0/1  
abababb]`bbbaa` `aa^ab`]^`aa`\_baa\_V¥^a\_\_V  
@HWI-EAS443:3:70:76:474#0/1  
GTCCCCTTTTCGTTTTATTACCAACTACGTCCCCCTTGC  
+HWI-EAS443:3:70:76:474#0/1  
\_Y^^¥` `]]` `b[Z`a`\_[aa`[``aa]ZXRDX`¥VRPU^  
@HWI-EAS443:3:70:78:583#0/1  
GTTGCCCGTTAGCACTTCTTCTTCTTCTTCTTGACTGATGAT  
+HWI-EAS443:3:70:78:583#0/1  
\_`aaaaaaYUKaaaZ[\_¥\_Y\_a\_\_`a\_`^^ZP`\_` `¥\_^V  
@HWI-EAS443:3:70:799:1224#0/1  
GCATCCTTTCCAAGAAGTGTAAAGTCGTTTGGTTGCCTTGT  
+HWI-EAS443:3:70:799:1224#0/1  
abbK\_ba`¥`bV\_`]Y`bb`¥¥a\_aaa`a`^aaW`ZZb`a  
@HWI-EAS443:3:70:804:160#0/1  
TAAAAGAAGTGAAGATCTAATGTCGCAGTCCCGCACTCG  
+HWI-EAS443:3:70:804:160#0/1  
YaX^a[FRNSbbba`ZSO\_NT\_bTPSNZQ[LY^F¥` `BBB  
@HWI-EAS443:3:70:807:1571#0/1  
GAATAAAAGAAGTGAAGATCTAATGTCGCAGTCCCGCAC  
+HWI-EAS443:3:70:807:1571#0/1  
abbbbbbba`abbb`b\_baaaababbb\_a`aaa]aaa\_`Za  
@HWI-EAS443:3:70:812:1530#0/1  
AGAAGTGCTAACGGGCAACCTCCAAACTGAAAATAAGA  
+HWI-EAS443:3:70:812:1530#0/1  
\_Y\_aa\_`aa^baaa`baZ\_a\_aaaa¥a\_`a\_aaa`¥`^\_  
@HWI-EAS443:3:70:813:883#0/1  
CCACTGTGGACCATATGGCCATAATCAAAAAGTACACATC  
+HWI-EAS443:3:70:813:883#0/1  
\_b`baba^`]`\_RY]]]\_ab``¥`\_`a\_`^`aYO¥\_a]aWR

@HWI-EAS443:3:70:827:1476#0/1  
GGGACGTAGTGTGGTAATGAAACGAAAACGGGACTCTAG  
+HWI-EAS443:3:70:827:1476#0/1  
¥\_bb`a`¥0[Zab^]\_]ZZ¥`[¥UZ\_aaX¥`\_^a^a]  
@HWI-EAS443:3:70:844:840#0/1  
GGGACGTAGTGTGGTAATGAAACGAAAACGGGACTCTA  
+HWI-EAS443:3:70:844:840#0/1  
abbaaba`aa\_aaabb¥aa]VQ\_baaaaaaaa\_\_`\_a¥\_\_  
@HWI-EAS443:3:70:846:1099#0/1  
GGAGAATTGCCTCTTACCAGTATCCTCAACCCTGATCCTC  
+HWI-EAS443:3:70:846:1099#0/1  
abaa``aaaabaaaba]b\_a^aaaaaaaaaaaaaaaaa^a^  
@HWI-EAS443:3:70:847:901#0/1  
AAAAGAAGTGGAGATCTAATGTCGCAGTCCCGCACTCGC  
+HWI-EAS443:3:70:847:901#0/1  
abbaaab`baabaaaaa`aa```baW\_aa¥a][¥[\_a  
@HWI-EAS443:3:70:865:781#0/1  
GTTGCCCGTTAGCACTTCTTCTTCTTCTTGACTGATGAT  
+HWI-EAS443:3:70:865:781#0/1  
a[aaa\_a\_[TX`^X¥`^`\_\_\_\_\_`\_\_]\_\_^]\_`\_  
@HWI-EAS443:3:70:882:1101#0/1  
CGCACTCGCGAGATACTACTAAGACCACTGTGGACCATA  
+HWI-EAS443:3:70:882:1101#0/1  
aaa``abaaaZ`a`a`a`aaaa`^`^`a\_\_]¥¥¥\_\_a[\_]  
@HWI-EAS443:3:70:899:1298#0/1  
GCACTCGCGAGATACTACTAAGACCACTGTGGACCATAT  
+HWI-EAS443:3:70:899:1298#0/1  
^[Y`\_^X^aa^][R\_[Z^RSW\_XY`\_aaY\_KUQU\_]Y[R  
@HWI-EAS443:3:70:916:1985#0/1  
AAAAGAAGTGGAGATCTAATGTCGCAGTCCCGCACTCGC  
+HWI-EAS443:3:70:916:1985#0/1  
^^^[J`^`a\_bU`S¥^``aa``Ua[`^XM\_aaVa`aY`Q\_  
@HWI-EAS443:3:70:917:470#0/1  
TGACCATTGAATTTTCACAATTTCCAGTTCCTGATTATC  
+HWI-EAS443:3:70:917:470#0/1  
`ba\_abbabaabaaabaaa`aa`a`a`^aa\_aa``aa`\_  
@HWI-EAS443:3:70:918:715#0/1  
AGTGCTTTTCCAGAAGTGGGAATTGAATCCATCGACAAT  
+HWI-EAS443:3:70:918:715#0/1  
ab`aaaaba\_aZa`aaaaaaY\_baa``aa\_a\_\_a\_a\_\_a  
@HWI-EAS443:3:70:947:863#0/1  
AGATCAATGGCCCTGAGTCAGTGCTAGTCAACACTTATCA  
+HWI-EAS443:3:70:947:863#0/1  
]VXXa`^¥ZRa]`^Z¥a^¥]ZT¥`]UXQQS`^][¥¥\_]YZ  
@HWI-EAS443:3:70:952:1659#0/1  
CTGCCTTGATCATGCAATCCTCTTGTGAGAATACCATGGC  
+HWI-EAS443:3:70:952:1659#0/1  
aaab`aaaa`bb\_`aaaaa`a`a^Z``\_[a\_a```ZYT[  
@HWI-EAS443:3:70:992:660#0/1  
AAAGAAGTGGAGATCTAATGTCGCAGTCCCGCACTCGCG

+HWI-EAS443:3:70:992:660#0/1  
a]`a¥\_bbaab^baaaba`bb\_aaaW`^\_aa`a\_`\_a``  
@HWI-EAS443:3:70:993:636#0/1  
GAATCCAAGTGGGAACAAGCCGTAGACATATGCAAGGCA  
+HWI-EAS443:3:70:993:636#0/1  
abbaababababbaababb`abbaaaaaaaaaabababaa`  
@HWI-EAS443:3:70:99:1323#0/1  
TGCTGTCCTGAGAGGATTTCTCATTTTGGGCAAAGAAGAC  
+HWI-EAS443:3:70:99:1323#0/1  
`bb¥b`bbb¥¥bb\_\_aaabbb`\_b`abb]ab\_aaaa`aa  
@HWI-EAS443:3:71:1039:683#0/1  
CCCGCACTCGCGAGATACTACTAAGACCACTGTGGACCA  
+HWI-EAS443:3:71:1039:683#0/1  
a`aa]a``aaaa`\_\_a`aaaa`a¥`aaUaa`a`Za^^V`\_  
@HWI-EAS443:3:71:1088:213#0/1  
CGCACTCGCGAGATACTACTAAGACCACTGTGGACCATA  
+HWI-EAS443:3:71:1088:213#0/1  
]\_^)]a[`\_^a]Y[Q[\_[a`¥N\_^a¥^`b`Q]\_]a  
@HWI-EAS443:3:71:1090:735#0/1  
ATCAAATTTGGTCAACATCATCTTTCTCACTTCTCCTC  
+HWI-EAS443:3:71:1090:735#0/1  
`^ab[\_bbabb`¥bbaabbbba`abb`baa`abba\_Ta\_  
@HWI-EAS443:3:71:1148:1479#0/1  
TGCTGGATCAGACCGAGTGATGGTATCACCTCTGGCCGTA  
+HWI-EAS443:3:71:1148:1479#0/1  
aaaaaaaaabaaa\_aaa^a`aaaY`aaa]Z^`[\_^a¥\_  
@HWI-EAS443:3:71:1149:1033#0/1  
AGAGAATAAAAGAACTGAGAGATCTAATGTCGCAGTCCCG  
+HWI-EAS443:3:71:1149:1033#0/1  
`b]ZYbb`Z^abaaaa``aaaaaaaaab`aX`SXaaa^¥Q`\_  
@HWI-EAS443:3:71:1254:703#0/1  
AGAAGTGGAGATCTAATGTCGCAGTCCCGCACTCGCGAG  
+HWI-EAS443:3:71:1254:703#0/1  
aaababaaaaaaaa`\_bbabb`aa]ba`\_`a`\_\_aa`\_\_`\_`  
@HWI-EAS443:3:71:1271:1198#0/1  
GAATAAAAGAACTGAGAGATCTAATGTCGCAGTCCCGCAC  
+HWI-EAS443:3:71:1271:1198#0/1  
^W^ba`WF[P\_]a``\_VZ\_abaZ^`\_Saba`TWaaS[MPW  
@HWI-EAS443:3:71:1301:684#0/1  
GTCCCGTTTTTCGTTTCATTACCAACTACTCGTCCCTTGC  
+HWI-EAS443:3:71:1301:684#0/1  
aaaV^b[\_]X]aZaS\_aaaa`X^¥Xa`\_a[¥^UZZRX]]  
@HWI-EAS443:3:71:1336:984#0/1  
GAGAGATCTAATGTCGCAGTCCCGCACTCGCGAGATACTC  
+HWI-EAS443:3:71:1336:984#0/1  
aba`bbbabbbabaa\_^`b[aaaa\_baaaaaaaa`\_`N\_X  
@HWI-EAS443:3:71:1362:121#0/1  
GGAGATCAATGGCCCTGAGTCAGTGCTAGTCAACACTTAT  
+HWI-EAS443:3:71:1362:121#0/1  
abaaaaaaaaa^XZaa`a^^`aZ^Ta^a^Z`\_^\_H\_^^^

@HWI-EAS443:3:71:1363:1222#0/1  
CTGTAATTGGGTATCTCATTGCCATCATCCACTTCATTCT  
+HWI-EAS443:3:71:1363:1222#0/1  
abbabbbb`b¥baaabbaa`abbabbbbaaab\_aaa\_\_  
@HWI-EAS443:3:71:137:53#0/1  
CTGGGGTGGAGTCTGCTGTCCTGAGAGGATTTCTCATTTT  
+HWI-EAS443:3:71:137:53#0/1  
abbbbb`ab`a`aaaabb`aaaa^a\_aa\_]aa`a^`aaa  
@HWI-EAS443:3:71:1448:2003#0/1  
AAAAGAAGTGGAGATCTAATGTCGCAGTCCCGCACTCGC  
+HWI-EAS443:3:71:1448:2003#0/1  
aY^`\_]`aa[Vaa\_bT]`a`aX\_]a\_\_]\_]\_Z]HTV¥]V  
@HWI-EAS443:3:71:1469:376#0/1  
AAAGAAGTGGAGATCTAATGTCGCAGTCCCGCACTCGC  
+HWI-EAS443:3:71:1469:376#0/1  
\_b\_bbb`bbaabbaaab`V]]`bZ``\_\_`a\_^\_]Z\_  
@HWI-EAS443:3:71:1480:1913#0/1  
CATCATCATTTCTCACTTCTCCTCCTGGAGTGACATCTG  
+HWI-EAS443:3:71:1480:1913#0/1  
^a^[X\_a\_^\_YRbb¥ba\_b`bba¥R\_a`\_b\_b`aX^`¥^a  
@HWI-EAS443:3:71:1508:1610#0/1  
ACCCCGCACTCAGAATGAAGTGGATGATGGCAATGAGATA  
+HWI-EAS443:3:71:1508:1610#0/1  
aaa^`aba\_aaaaabbaa`Yaa\_aaa¥`[Y`aaa`a`\_^  
@HWI-EAS443:3:71:150:67#0/1  
TGGGTATCTCATTGCCATCATCCACTTATTCTGAGTGCG  
+HWI-EAS443:3:71:150:67#0/1  
a\_]Z^`aaa`a`X\_aa`\_\_\_\_``\_]`X\_\_]`^W^]]XX  
@HWI-EAS443:3:71:1566:1510#0/1  
ATCAACTCTCCTTATTTTAACTTGATTTCTGAAGTGG  
+HWI-EAS443:3:71:1566:1510#0/1  
abaaa`abaa`aa\_babababaa\_aaa`aaa\_baa`a^`\_  
@HWI-EAS443:3:71:1574:1708#0/1  
CGTAGACATATGCAAGGCAGCAATAGGGTTGAGGATTAGC  
+HWI-EAS443:3:71:1574:1708#0/1  
\_¥X`\_`\_aa\_b]]a\_]¥\_V¥b¥Y¥baXY`[a\_\_^]b[¥`YS  
@HWI-EAS443:3:71:1581:1217#0/1  
GGGGACGTAGTGTGGTAATGAAACGAAAACGGGACTCTA  
+HWI-EAS443:3:71:1581:1217#0/1  
\_]\_XOXabU`b[¥X`a^H`WHZ`a^N^U[a\_Z^R]^GX YRX  
@HWI-EAS443:3:71:1601:1122#0/1  
AAGCACTTTTGCATCTTTTTGGAAATGCCTCAAGAGTTGG  
+HWI-EAS443:3:71:1601:1122#0/1  
a]^S^\_aa[a\_G^¥Z]a^a`^\_¥`\_a]TV\_¥\_Y`[\_V``¥  
@HWI-EAS443:3:71:1615:1585#0/1  
GTCCCGTTTTCGTTTCATTACCAACTACGTCCCCTTGC  
+HWI-EAS443:3:71:1615:1585#0/1  
aZa^`N\_\_[Z[]Y`¥U`\_a]KTPN`\_^a\_¥Y`YZUUXUX  
@HWI-EAS443:3:71:1633:1272#0/1  
ATCTAATGTCGCAGTCCCGCACTCGCGAGATACTCACTAA



@HWI-EAS443:3:71:323:522#0/1  
CCGCACTCAGAATGAAGTGGATGATGGCAATGAGATACCC  
+HWI-EAS443:3:71:323:522#0/1  
abbaaaaba`\_aba`b\_aa`a`]^a\_^\_a\_`a`^Ya`\_\_  
@HWI-EAS443:3:71:338:852#0/1  
TACTACTAAGACCACTGTGGACCATATGGCCATAATCAA  
+HWI-EAS443:3:71:338:852#0/1  
abaabbbab`babaaaa`a]abaa`Yaaaaa\_`a\_\_\_\_`  
@HWI-EAS443:3:71:342:1351#0/1  
AAAAGAAGTGGAGATCTAATGTCGCAGTCCCGCACTCGC  
+HWI-EAS443:3:71:342:1351#0/1  
V¥\_XRU\_a^U`N]^`^^]b\_\_]aRaX^^^Haaaa]a]]YS  
@HWI-EAS443:3:71:38:568#0/1  
TGCTGTAATTGGGTATCTCATTGCCATCATCCACTTCATT  
+HWI-EAS443:3:71:38:568#0/1  
abaa`]QGxaaaaS`a^`^]\_\_\_\_[]WZ]S[[X[^`\_ZZ^  
@HWI-EAS443:3:71:399:1688#0/1  
CTGCTGTAATTGGGTATCTCATTGCCATCATCCACTTCAT  
+HWI-EAS443:3:71:399:1688#0/1  
UaKb`ab\_aVb`YYRaNb\_b[`bb\_¥S\_\_W\_b]`b[]]ba  
@HWI-EAS443:3:71:421:1493#0/1  
GGAACGTACTATTGTCTCCCGAAGAAGTCAGTGAAACGCA  
+HWI-EAS443:3:71:421:1493#0/1  
a`\_aaaJT[JXT[^V^Za\_`¥RVQVYJQVPRKTPR]ZJRY  
@HWI-EAS443:3:71:426:817#0/1  
GAACTGAGAGATCTAATGTCGCAGTCCCGCACTCGCGAGA  
+HWI-EAS443:3:71:426:817#0/1  
`XY\_\_\_\_\_`^]a`\_^]\_Z^¥\_]¥T`\_`\_Y^0[Z]]YZTXU  
@HWI-EAS443:3:71:440:767#0/1  
CTCACTAAGACCACTGTGGACCATATGGCCATAATCAAAA  
+HWI-EAS443:3:71:440:767#0/1  
`Z¥^abbZbb¥^a`ba\_ba¥bab\_a`Yabaaaaba``a`]  
@HWI-EAS443:3:71:452:279#0/1  
GTCCCGTTTTTCGTTTCATTACCAACTACGTCCCTTGC  
+HWI-EAS443:3:71:452:279#0/1  
aaa`abaaaaab`aaaababaaaa\_a\_\_a``^a\_`]^\_^^]  
@HWI-EAS443:3:71:552:768#0/1  
AAGAAGTGTAAAGTCGTTTGGTTGCCTTGTGTAATTGAAT  
+HWI-EAS443:3:71:552:768#0/1  
a`bY¥G^]N^VaZ]YT\_`^T\_¥\_\_\_\_[a¥a^Waaa^\_[a¥  
@HWI-EAS443:3:71:559:1031#0/1  
TGCCCGTTAGCACTTCTTCTTCTTCTTGACTGATGATCC  
+HWI-EAS443:3:71:559:1031#0/1  
Ua`¥\_WWZZZaX`bb`Zaab^baa[]Za]a\_`KXX¥¥RZV  
@HWI-EAS443:3:71:577:1099#0/1  
ATCATTCTCACTTCTCCTCCTGGAGTGTACATCTGCTCC  
+HWI-EAS443:3:71:577:1099#0/1  
W^VWT\_``[aa\_Z\_[`ab\_b`W^ES]XZS`aa¥aW¥UO\_R  
@HWI-EAS443:3:71:578:1412#0/1  
TAATGTCGCAGTCCCGCACTCGCGAGATACTACTAAGAC

+HWI-EAS443:3:71:578:1412#0/1  
a`^^X[a`ab`X`abaa`aaa`^^`aa`aa`]Z\_\_aa\_``  
@HWI-EAS443:3:71:580:175#0/1  
GGTGGGTTCACTTTCAAAGGACAAGCGGATCATCAGTCA  
+HWI-EAS443:3:71:580:175#0/1  
a`IU`^NY¥\_YX¥¥a\_]Xa]W¥a¥XLW\_]YT[\_]`XYZ  
@HWI-EAS443:3:71:589:816#0/1  
GAGGAGTAAGGATGGTGGACATCCTTAGACAGAATCCAAC  
+HWI-EAS443:3:71:589:816#0/1  
\_ZZ`a\_TQ`^^`^\_aW¥`W^W[^][VS]V\_]WQXY[Y¥V  
@HWI-EAS443:3:71:594:93#0/1  
TCCTCAGTTGGATTCTGTCTAAGGATGTCCACCATCCTTA  
+HWI-EAS443:3:71:594:93#0/1  
``[aa`X^`a\_`Va`RYa\_]a\_V]aW]UWT^`]QS]YT  
@HWI-EAS443:3:71:607:1773#0/1  
GAGAGATCTAATGTGCGAGTCCCGCACTCGCGAGATACTC  
+HWI-EAS443:3:71:607:1773#0/1  
¥a]abaUab``b]bba¥\_]^^`YH\_```aWI¥`T¥X`^  
@HWI-EAS443:3:71:642:602#0/1  
AAGAAGTGAAGATCTAATGTGCGAGTCCCGCACTCGCGA  
+HWI-EAS443:3:71:642:602#0/1  
aaaa`aa\_a\_baa`aa`¥`aUa\_`aa]\_\_\_S\_Va\_^^]\_]  
@HWI-EAS443:3:71:658:1257#0/1  
GAACTGTACTTGTGTTGGGCCATTCTATTCCACCATGT  
+HWI-EAS443:3:71:658:1257#0/1  
YI\_\_a\_V]^aa¥a\_U[T]U]\_aba\_aaaa]aaa^abaa`  
@HWI-EAS443:3:71:658:1302#0/1  
GTCCCGTTTTCGTTTTATTACCAACTACGTCCCCTTGC  
+HWI-EAS443:3:71:658:1302#0/1  
aabbbb`aabbb`babaaaba`bb\_aaaba`\_aaaa\_]`^a  
@HWI-EAS443:3:71:668:1741#0/1  
AACAAACGATGCTGGATCAGACCGAGTGATGGTATCACCT  
+HWI-EAS443:3:71:668:1741#0/1  
\_\_a`W`a]a^P^`a[\_S¥b`]a\_QSOZU¥VX`W`QUZYPP  
@HWI-EAS443:3:71:709:86#0/1  
GCCTTGCATATGTCTACGGCTTGTTCCTCAGTTGGATTCT  
+HWI-EAS443:3:71:709:86#0/1  
a^S]¥a]```V¥TXYW¥[WBBBBBBBBBBBBBBBBBBBB  
@HWI-EAS443:3:71:71:185#0/1  
CGCACTCGCGAGATACTACTAAGACCACTGTGGACCATA  
+HWI-EAS443:3:71:71:185#0/1  
a\_aa\_ab^aa[aYF\_`\_`]¥Y`^]UNXZW[W]]VSWXXY  
@HWI-EAS443:3:71:740:205#0/1  
CTCCAATCTGTGTGCTGTGGCACATTTCCAAGAGAGATGC  
+HWI-EAS443:3:71:740:205#0/1  
a]aY]^bba\_RY]`aa`aabab[]]aa\_Za`\_`a`a\_\_\_[  
@HWI-EAS443:3:71:760:1889#0/1  
AATGAAGTGGATGATGGCAATGAGATACCCAATTACAGCA  
+HWI-EAS443:3:71:760:1889#0/1  
[^ba\_\_^RVZ`^aa[Z]\_a`[XZT\_[]]a\_a^[^aaa[a\_



@HWI-EAS443:3:71:770:785#0/1  
GGGTTCACTTTCAAAGGACAAGCGGATCATCAGTCAAGA  
+HWI-EAS443:3:71:770:785#0/1  
a`aabbabbbaaab¥baaaba`abaaabab````a\_^`a  
@HWI-EAS443:3:71:771:270#0/1  
TAAGGATGGTGGACATCCTTAGACAGAATCCAACGAGGA  
+HWI-EAS443:3:71:771:270#0/1  
abb`a`ba\_aa^aa`aaa\_^\_a`\_`a]`\_a^a\_`\_\_\_\_  
@HWI-EAS443:3:71:781:1654#0/1  
AGGGGACGTAGTGTGGTAATGAAACGAAAACGGGACTCT  
+HWI-EAS443:3:71:781:1654#0/1  
^aZ¥¥Wa`ZVa]SD¥`U][TZW`a`]Zaa]`aaP^TYR  
@HWI-EAS443:3:71:798:467#0/1  
CTGCTCCACCAGAACAGAGTAGGATGCAATTTTCCTCATT  
+HWI-EAS443:3:71:798:467#0/1  
ababaab\_abaaaaabbaa\_bb`aaaaaaaa`^`aaaa  
@HWI-EAS443:3:71:903:540#0/1  
GAATAAAAGAAGACTGAGAGATCTAATGTCGCAGTCCCGCAC  
+HWI-EAS443:3:71:903:540#0/1  
a`baba]aaaXa\_a^`aaa\_aa\_\_aa`^`\_X^X¥]]^]  
@HWI-EAS443:3:71:912:786#0/1  
CACTCGCGAGATACTACTAAGACCACTGTGGACCATATG  
+HWI-EAS443:3:71:912:786#0/1  
`a^bb^ZZU`Wl¥SY\_[¥\_a]^]WT]Z^¥K^]\_HZJ\_¥\_]  
@HWI-EAS443:3:71:929:733#0/1  
AATTGGGCAAGGGGACGTAGTGTGGTAATGAAACGAAAA  
+HWI-EAS443:3:71:929:733#0/1  
a`\_`bbbaa`ab\_\_abaab\_a`aaaX[``]ba¥]Z`a  
@HWI-EAS443:3:71:962:54#0/1  
TGCCACAGCACACAGATTGGAGGAGTAAGGATGGTGGACA  
+HWI-EAS443:3:71:962:54#0/1  
Ya[W[\_S\_bb\_UaJaS\_\_a\_U\_aab`a[bb¥]bbP``GYX  
@HWI-EAS443:3:71:972:2031#0/1  
AAGAAGTGGAGATCTAATGTCGCAGTCCCGCACTCGCGA  
+HWI-EAS443:3:71:972:2031#0/1  
aaaaabaaaabab`baaaaa`baa`a]aaa`b\_\_a`\_  
@HWI-EAS443:3:71:976:1497#0/1  
CTAATGTCGCAGTCCCGCACTCGCGAGATACTACTAAGA  
+HWI-EAS443:3:71:976:1497#0/1  
`abb`b`ba`[aaabbaa\_b`\_`aa\_aX`aaaab``aaV]  
@HWI-EAS443:3:72:1068:322#0/1  
GCCGGTACTGGGAGAAACCTTGTTTTACGGACCAATTCT  
+HWI-EAS443:3:72:1068:322#0/1  
abaaaa^\_[a]abT¥G[a\_\_\_\_\_]¥`\_a^W]\_¥[U]UY\_N^  
@HWI-EAS443:3:72:1081:931#0/1  
CTGTCCACTTCAGAAATCAAGTAAAATAAGGAGGAGAGT  
+HWI-EAS443:3:72:1081:931#0/1  
aaaaaaaaababbbb`aaa]b\_aaa`aa`aaa`\_a^a^  
@HWI-EAS443:3:72:1117:695#0/1  
CACATCTGGGGTGGAGTCTGCTGCTCCTGAGAGGATTTCTC

+HWI-EAS443:3:72:1117:695#0/1  
`]abbaabbbb\_ba\_`\_abaaaa\_a¥X^`aaba^aaa`a^  
@HWI-EAS443:3:72:1125:836#0/1  
GGTCCGTAACAAGGTTTCTCCCAGTAGCCGGCGGAACA  
+HWI-EAS443:3:72:1125:836#0/1  
ab^a`baaaa`]baaa\_a`aa`aaaa¥`aa[`\_¥a\_Z`^^  
@HWI-EAS443:3:72:1149:1791#0/1  
CTGTGGACCATATGGCCATAATCAAAAAGTACACATCAGG  
+HWI-EAS443:3:72:1149:1791#0/1  
I¥[a`bb`¥W]¥\_\_¥^`\_I¥V\_b\_W`bYXW```dW]\_UY  
@HWI-EAS443:3:72:1158:1947#0/1  
TGGAAATGTGCCACAGCACACAGATTGGAGGAGTAAGGAT  
+HWI-EAS443:3:72:1158:1947#0/1  
[\_\_\_\_[FMR¥[WZa`]aS^`]Z\_UUH^`\_dWDXJUF]^LL  
@HWI-EAS443:3:72:1189:550#0/1  
ACAATTTCCCAGTTCCTGATTATCCATTGATAAGTGTGTA  
+HWI-EAS443:3:72:1189:550#0/1  
[\_¥`^^^aaYTVV^Z\_`¥a`a`a^`[\_ba^WM^[WXW  
@HWI-EAS443:3:72:1233:281#0/1  
CCCGCACTCAGAATGAAGTGGATGATGGCAATGAGATACC  
+HWI-EAS443:3:72:1233:281#0/1  
aaZbaba\_ab`QZbb`abbbbaaba`baUa`ba]a]RZYS  
@HWI-EAS443:3:72:1246:1283#0/1  
CCGCACTCAGAATGAAGTGGATGATGGCAATGAGATACCC  
+HWI-EAS443:3:72:1246:1283#0/1  
a``^ba]]\_[Zaa`VbV\_]¥¥a```a\_^R^`\_`¥¥\_[VY  
@HWI-EAS443:3:72:1246:313#0/1  
CCTTCATCTGGATCTTCAGTCAATGCACCTGCATCCTTTC  
+HWI-EAS443:3:72:1246:313#0/1  
aabbbbababbb`bbbaba`bbbabaYbb\_bba¥bba`  
@HWI-EAS443:3:72:1251:1962#0/1  
GGTGGAGTCTGCTGCTCCTGAGAGGATTTCTCATTTTGGGC  
+HWI-EAS443:3:72:1251:1962#0/1  
a\_Pa`a[Xaaaa`[aWV\_\_`a``]Z¥`[¥]^a`aa`\_^\_  
@HWI-EAS443:3:72:1297:1113#0/1  
CTGCTGCTCCTGAGAGGATTTCTCATTTTGGGCAAAGAAGA  
+HWI-EAS443:3:72:1297:1113#0/1  
^a\_bbbbbbbb]bba\_\_abb\_baabbbbab`a`bbb^`a  
@HWI-EAS443:3:72:1306:113#0/1  
TCCCGTTTTCGTTTCATTACCAACTACGTCCCCTTGCC  
+HWI-EAS443:3:72:1306:113#0/1  
abaUaUbb[¥\_¥]U[P]a\_[SOT\_]R¥^^^`^`R\_W\_a¥]  
@HWI-EAS443:3:72:130:366#0/1  
GAGAGATCTAATGTGCGAGTCCCGCACTCGCGAGATACTC  
+HWI-EAS443:3:72:130:366#0/1  
aaabaaabaaaaYaaaa^`aa[\_X`^a[^¥V]XY[[[  
@HWI-EAS443:3:72:1371:1476#0/1  
GTCCCGTTTTCGTTTCATTACCAACTACGTCCCCTTGCC  
+HWI-EAS443:3:72:1371:1476#0/1  
``aa`a[`[baaaa]a\_aaba`aa\_baaa]U^\_]R]W\_^

@HWI-EAS443:3:72:1373:304#0/1  
TCCAGATGAAGGCACATCTGGGGTGGAGTCTGCTGCCTG  
+HWI-EAS443:3:72:1373:304#0/1  
a`VS`Va`[^`PR^GXZ[^aaa\_X^]PUS\_^]UT[TPY[^  
@HWI-EAS443:3:72:1381:517#0/1  
CCGCTTGTCTTTTAAAAGTGAACCCACAAAAGTAAAG  
+HWI-EAS443:3:72:1381:517#0/1  
aabbbbbbbbabbbbabbaabbaaab\_bbbbabbbbb  
@HWI-EAS443:3:72:1386:1206#0/1  
GTCCCCTTTTCGTTTCATTACCAACTACGTCCCCCTTGC  
+HWI-EAS443:3:72:1386:1206#0/1  
aa^Z[`H¥Ta^Y]\_\_U\_`\_aY]¥\_VS^¥`X^BBBBBBBBB  
@HWI-EAS443:3:72:138:711#0/1  
AAAGAAGTGAAGATCTAATGTGCGAGTCCCGCACTCGCG  
+HWI-EAS443:3:72:138:711#0/1  
a]aa]\_`aaaZ]\_\_`a\_a\_aZ`[\_\_\_\_X^)`X^TZXX]X]  
@HWI-EAS443:3:72:1410:431#0/1  
GTCCCCTTTTCGTTTCATTACCAACTACGTCCCCCTTGC  
+HWI-EAS443:3:72:1410:431#0/1  
aXUQXbR`aa\_b`^Z^`\_¥^X\_Z^Z`X[\_\_\_\_]U^WSV\_WRU  
@HWI-EAS443:3:72:1421:1981#0/1  
TTCTCATTTTTGGGCAAAGAAGACAAGAGATATGGCCAGC  
+HWI-EAS443:3:72:1421:1981#0/1  
a`Ua^`V\_V]^QZI^H¥aa¥`^`^`][\_XM[a\_YTJQ[IW  
@HWI-EAS443:3:72:1434:325#0/1  
GCTAATGTGCTAATTGGGCAAGGGACGTAGTGTGGTAA  
+HWI-EAS443:3:72:1434:325#0/1  
a`aaaaaab`a\_abab]b¥\_`aa``Y^a\_^b^aYaaaUZZ  
@HWI-EAS443:3:72:1436:344#0/1  
GCCATGGTATTCTCACAAGAGATTGCATGATCAAGGCAG  
+HWI-EAS443:3:72:1436:344#0/1  
a`[aa`aZabbXaaa\_`^\_]aa\_a`]Y`a`]VV^)`Z]a  
@HWI-EAS443:3:72:1442:1015#0/1  
CCCCTTTTCGTTTCATTACCAACTACGTCCCCCTTGGCC  
+HWI-EAS443:3:72:1442:1015#0/1  
aa`b`a]aa]a``aaa¥^^aa`a\_\_a\_`^\_^`¥[Q`\_] ]  
@HWI-EAS443:3:72:1476:903#0/1  
GTCCCCTTTTCGTTTCATTACCAACTACGTCCCCCTTGC  
+HWI-EAS443:3:72:1476:903#0/1  
a^\_YaaHIza\_] ^TT]UV]¥PX\_]X]\_NSUP]UUTVZQV  
@HWI-EAS443:3:72:1492:898#0/1  
GAATAATGGACATGATTCCAGAGAGGAATGAACAAGGACA  
+HWI-EAS443:3:72:1492:898#0/1  
`aabaaaaaba\_`b\_aba\_aa\_a\_aa\_aaaa\_Z\_`a^^Z`  
@HWI-EAS443:3:72:1523:837#0/1  
CGTACATGCTAGAAAGAGAATTGGTCCGTAACAAGGTT  
+HWI-EAS443:3:72:1523:837#0/1  
\_]\_`[`ba`aaaa`[`a`abaaa\_¥\_a\_aa`b¥a^aaV`  
@HWI-EAS443:3:72:1556:876#0/1  
GGATGATGGCAATGAGATACCCAATTACAGCAGACAAGAG

+HWI-EAS443:3:72:1556:876#0/1  
\_XG\_WY[\_VSXW¥][[\_¥TLT^¥W[Z^WX¥OYZXUST\_X\_  
@HWI-EAS443:3:72:1568:708#0/1  
GCGGGGTTCTTCTCTTGCCTTCCTGATGTGTACTTTTTGA  
+HWI-EAS443:3:72:1568:708#0/1  
a`XR`UK[QU¥\_aV[a¥DNV^]\_`a]U`T`RZZ^^[¥^Y]  
@HWI-EAS443:3:72:1572:1984#0/1  
GAGAATAAAAGAACTGAGAGATCTAATGTCGCAGTCCCGC  
+HWI-EAS443:3:72:1572:1984#0/1  
aL00]¥ZYa¥VQXRPNa\_\_a\_TL[ZX][VRXNXBBBBBBB  
@HWI-EAS443:3:72:1588:989#0/1  
ATGTGCGAGTCCCGCACTCGCGAGATACTCACTAAGACCA  
+HWI-EAS443:3:72:1588:989#0/1  
a\_WKTY^a^¥a]YT]UZa]^Va`VFPQ[XOQUMR[VSSK^  
@HWI-EAS443:3:72:1594:1225#0/1  
GTTTTCGTTTCATTACCAACTACTCGTCCCCTTGCCCAAT  
+HWI-EAS443:3:72:1594:1225#0/1  
a]a`[J]^aa^`a`[U`\_]^^W]\_W\_WUWUYSWTOSSY^  
@HWI-EAS443:3:72:1611:1515#0/1  
GCCTTCATCTGGATCTTCAGTCAATGCACCTGCATCCTTT  
+HWI-EAS443:3:72:1611:1515#0/1  
a`I\_a`[]P`^L^Q][W\_LXZXWR¥R^[VXVZ[\_]TXXUY  
@HWI-EAS443:3:72:1615:719#0/1  
TGTGCTAATTGGGCAAGGGGACGTAGTGTGGTAATGAAA  
+HWI-EAS443:3:72:1615:719#0/1  
\_`Za\_babaabbb\_a`aa`a`aa\_\_aUa\_abaU^a`\_``a  
@HWI-EAS443:3:72:1632:1993#0/1  
ATCAAACCTTTGGTCAACATCATCATTCTCACTTCTCCTC  
+HWI-EAS443:3:72:1632:1993#0/1  
a]aaa[`aaa\_\_\_baa`b`a`a\_aa\_\_\_a`a^\_\_\_`¥\_^a  
@HWI-EAS443:3:72:1638:1975#0/1  
GACAAAGTTCAGATCGCCCCTAACTGCCTTGATCATGCAA  
+HWI-EAS443:3:72:1638:1975#0/1  
¥abbbbaabababbbabb\_abbababa`abbbb`baaaaa  
@HWI-EAS443:3:72:1644:329#0/1  
GTTGACTAGCACTGACTCAGGGCCATTGATCTCCACATC  
+HWI-EAS443:3:72:1644:329#0/1  
aaaaa`aaaa^aa`Zaa``^\_`¥`\_\_a`¥a]V¥^]`^Z  
@HWI-EAS443:3:72:1664:1650#0/1  
CAGTTCTTGAAAGGATGCAGGTGCATTGACTGAAGATCC  
+HWI-EAS443:3:72:1664:1650#0/1  
abaabbbabaaaabaabaa\_a````a\_aa\_aa`a`a`a`\_]  
@HWI-EAS443:3:72:1683:547#0/1  
GCAGACAAGAGAATAATGGACATGATTCCAGAGAGGAATG  
+HWI-EAS443:3:72:1683:547#0/1  
aa`a\_\_aaaa`a`a`a^^`\_\_`a¥UW^][`Xa`^`^\_  
@HWI-EAS443:3:72:16:865#0/1  
CTCGGTCTGATCCAGCATCGTTTGTGTTTGTCTCCAGAGGGT  
+HWI-EAS443:3:72:16:865#0/1  
abbbaVaaba]baaX`aa]\_\_`\_a`a^\_[`[\_Y\_\_\_Y^X

@HWI-EAS443:3:72:1715:133#0/1  
GTCCCCGTTTTCGTTTCATTACCAACTACTCGTCCCCCTTGC  
+HWI-EAS443:3:72:1715:133#0/1  
`¥[YRYZaaaWa\_a`Z^b\_\_UP\_`W^Z\_`W[^WVW]WWU  
@HWI-EAS443:3:72:1737:651#0/1  
CTAATGTCGCAGTCCCGCACTCGCGAGATACTCACTAAGA  
+HWI-EAS443:3:72:1737:651#0/1  
TQ¥[a\_W`\_T[¥\_]T]Z¥OWOTZU\_Z¥]XWWZWLZ^XX[\_  
@HWI-EAS443:3:72:1742:1758#0/1  
GCGAGATACTCACTAAGACCACTGTGGACCATATGGCCAT  
+HWI-EAS443:3:72:1742:1758#0/1  
\_aa¥]`abbbababaaab`aaaaVaa```Y]`\_aaaa`]  
@HWI-EAS443:3:72:175:1426#0/1  
GGTGGGTTCACTTTCAAAGGACAAGCGGATCATCAGTCA  
+HWI-EAS443:3:72:175:1426#0/1  
V[W0¥PZa`ab^abbbb^Y]a^Ya\_YZ]`ba`^`Y[]  
@HWI-EAS443:3:72:1761:579#0/1  
GTCCCCGTTTTCGTTTCATTACCAACTACTCGTCCCCCTTGC  
+HWI-EAS443:3:72:1761:579#0/1  
`VX\_Wa\_``^\_]V^YV¥aaa\_¥]Y^X¥]U\_¥¥R¥QUVOV  
@HWI-EAS443:3:72:1786:1928#0/1  
GAAAGGATGCAGGTGCATTGACTGAAGATCCAGATGAAGG  
+HWI-EAS443:3:72:1786:1928#0/1  
a[WT`````aa`ZPQSaaa^^^V`Z\_aa^]¥X`¥^\_`VVXQ  
@HWI-EAS443:3:72:1788:1704#0/1  
ATCCAGCATCGTTTGTGTTTGTCCAGAGGGTTTGTCCCTTG  
+HWI-EAS443:3:72:1788:1704#0/1  
ZH]]^]a]`Z¥U`ZX\_T\_YP`aR\_]RV`MWaZ[Z¥\_¥T  
@HWI-EAS443:3:72:191:338#0/1  
CCCCGTTTTCGTTTCATTACCAACTACTCGTCCCCCTTGCC  
+HWI-EAS443:3:72:191:338#0/1  
aaab`aaaab\_a`aaa````\_a\_``````^`]^\_^^¥^W^  
@HWI-EAS443:3:72:218:1685#0/1  
CGCTGGTTTGCCTATTGACAAAGTTCAGATCGCCCTAA  
+HWI-EAS443:3:72:218:1685#0/1  
\_[\_^^aa`\_^[abaaaaa``¥a`PFU\_aa^Y¥LZ`\_\_\_\_Z¥  
@HWI-EAS443:3:72:259:1375#0/1  
AAAAGAAGTGCAGATCTAATGTCGCAGTCCCGCACTCGC  
+HWI-EAS443:3:72:259:1375#0/1  
a`aa`]aa\_\_a]a\_a]a`a`\_Y`Z``^Y\_\_\_Y^^\_]^U]  
@HWI-EAS443:3:72:265:58#0/1  
CAATTACAGCAGACAAGAGAATAATGGACATGATTCCAGA  
+HWI-EAS443:3:72:265:58#0/1  
a\_babba^bb\_bab`abaaaaba^bbba`baaaaa^¥^a\_  
@HWI-EAS443:3:72:26:1101#0/1  
AAAGAAGTGCAGATCTAATGTCGCAGTCCCGCACTCGCG  
+HWI-EAS443:3:72:26:1101#0/1  
V[abaaaaa`¥[a]Zb\_Z^`a\_a\_`SW]`ab\_aQ`Z`W\_\_  
@HWI-EAS443:3:72:330:127#0/1  
AAAGAAGTGCAGATCTAATGTCGCAGTCCCGCACTCGCG

+HWI-EAS443:3:72:330:127#0/1  
ababaaaaaaaa`aa\_\_aa\_aa\_``\_`\_]^[^^^]]^X\_  
@HWI-EAS443:3:72:356:470#0/1  
CATGGTGAATAGGAATGGCCCAACAACAAGTACAGTTCA  
+HWI-EAS443:3:72:356:470#0/1  
`bb[a]bbab^a]aaa`aa`aa^aa^aadWaw\_aZ\_^\_  
@HWI-EAS443:3:72:379:1930#0/1  
CAGCACACAGATTGGAGGAGTAAGGATGGTGGACATCCTT  
+HWI-EAS443:3:72:379:1930#0/1  
ab`abbaabaaaa`a\_\_a\_Uaa\_\_`\_TZU^¥\_¥\_Z¥`^¥  
@HWI-EAS443:3:72:379:945#0/1  
TTCCCATCACATTGTCGATGGATTCAATCCCCAGTTCTG  
+HWI-EAS443:3:72:379:945#0/1  
`aaa^`\_`aaaa`a\_aaa\_^ZTX\_`¥¥Y\_\_a`YLY]\_\_^Z  
@HWI-EAS443:3:72:405:906#0/1  
CACGTCCCTTGGGTTAAGTGCAACACTTCAATATAAACAC  
+HWI-EAS443:3:72:405:906#0/1  
`b`bab`a\_\_\_\_U\_aaa`aa`````a¥^X\_`a\_a[^`\_`  
@HWI-EAS443:3:72:450:1895#0/1  
GAGAATAAAGAAGACTGAGAGATCTAATGTCGCAGTCCCGC  
+HWI-EAS443:3:72:450:1895#0/1  
`babbaaabba][aa`U`b^`aa`aRbaa\_Y[a\_a^\_  
@HWI-EAS443:3:72:477:1392#0/1  
GGTGCATTGACTGAAGATCCAGATGAAGGCACATCTGGGG  
+HWI-EAS443:3:72:477:1392#0/1  
a`Qaaaa`aaabab`^^baaa`\_a`^baaU`a`^a\_\_  
@HWI-EAS443:3:72:495:149#0/1  
AACAAGGACAAACCCTCTGGAGCAAAACAAACGATGCTGG  
+HWI-EAS443:3:72:495:149#0/1  
aa\_``\_aaabT\_\_`a`\_\_\_\_`Y\_¥\_W¥`^`¥\_]a]¥^PUZW  
@HWI-EAS443:3:72:497:565#0/1  
TCCCGTTTTCGTTTCATTACCAACACTACGTCCCCTTGCC  
+HWI-EAS443:3:72:497:565#0/1  
a``Y`[aaW¥ZYXX^a¥N¥Z¥\_`RaZWY]YW]RX[ZNR¥X  
@HWI-EAS443:3:72:520:1403#0/1  
TCGCGAGATACTACTAAGACCACTGTGGACCATATGGCC  
+HWI-EAS443:3:72:520:1403#0/1  
aabaabaa\_a^a]aaaaaaababbTP]\_aa^]\_`^Z\_\_a  
@HWI-EAS443:3:72:546:936#0/1  
AAAGAAGTGAAGATCTAATGTCGCAGTCCCGCACTCGCG  
+HWI-EAS443:3:72:546:936#0/1  
aaaaUa`\_`\_a`Z`aa^\_a^a\_a`aU^``Z\_X`Y`U^^  
@HWI-EAS443:3:72:550:1241#0/1  
TGCCCCGACATGACCCCAAGCACGGAGATGTCGCTGAGAGG  
+HWI-EAS443:3:72:550:1241#0/1  
a\_bbbab`aa[`aab]aaaaaa`X`a]aVa]a`aV`]aa  
@HWI-EAS443:3:72:563:416#0/1  
AGAGAATAAAGAAGACTGAGAGATCTAATGTCGCAGTCCCG  
+HWI-EAS443:3:72:563:416#0/1  
`aab\_`^^a\_`\_abb\_a\_X^]^\_b`b]aS]\_b`a\_S]\_`

@HWI-EAS443:3:72:563:81#0/1  
GAACAGAGTAGGATGCAATTTTCCTCATTGACTGTGAATG  
+HWI-EAS443:3:72:563:81#0/1  
a`T[\_\_\_^`GZ`aa`a¥aaaa\_`[]\_]XaY^`W\_`J`G^¥\_  
@HWI-EAS443:3:72:575:1140#0/1  
CCCCTAACTGCCTTGATCATGCAATCCTCTTGTGAGAATA  
+HWI-EAS443:3:72:575:1140#0/1  
abaaa^\_a``aaaaaaba`a`aa`a\_`\_a\_]¥```aa\_a  
@HWI-EAS443:3:72:593:572#0/1  
CCCCGTTTTCGTTTTATTACCAACTACGCCCCCTTGCCC  
+HWI-EAS443:3:72:593:572#0/1  
`¥ZPG¥\_\_¥`LR]V]a\_^S^\_\_`\_]`[Y¥¥[UVNM]]YOQ  
@HWI-EAS443:3:72:597:429#0/1  
GTCTGCTGCTCCTGAGAGGATTTCTCATTGTTGGCAAAGAA  
+HWI-EAS443:3:72:597:429#0/1  
^a`]abbbab`a`]aaaa\_aaaa]aaaaaaaaa\_`[\_`a\_  
@HWI-EAS443:3:72:603:142#0/1  
GGCATTTCAAAAAGATGCAAAAGTGCTTTCCAGAACTG  
+HWI-EAS443:3:72:603:142#0/1  
`Wa``Y^`^\_WZ^aZZa[\_\_\_\_]`Ra[T¥¥]X]]\_^^Z]^  
@HWI-EAS443:3:72:624:342#0/1  
CTGTAATTGGGTATCTCATTGCCATCATCCACTTCATTCT  
+HWI-EAS443:3:72:624:342#0/1  
aaa`baba`aa\_abaabb`aab]ababaaa^aaaaaaZ`a  
@HWI-EAS443:3:72:663:1003#0/1  
CAAGGACAAACCCTCTGGAGCAAAACAAACGATGCTGGAT  
+HWI-EAS443:3:72:663:1003#0/1  
]b]\_\_WaZ^\_b¥`\_`aabbbb[a^^^a`^aa`X`a`\_]\_]`  
@HWI-EAS443:3:72:690:1957#0/1  
CTTCCTGATGTGTACTTTTTGATTATGGCCATATGGTCCA  
+HWI-EAS443:3:72:690:1957#0/1  
aaabbbbaabaa[\_b`abbaba^Y[bb`[bab]b][U]]Ya  
@HWI-EAS443:3:72:690:331#0/1  
CCGTAAAACAAGGTTTCTCCAGTAGCCGGCGGAACAGGC  
+HWI-EAS443:3:72:690:331#0/1  
abbabbbbab\_b`W¥bbb`\_`[`QM\_aaX``T\_bZa¥Z^\_B  
@HWI-EAS443:3:72:73:1192#0/1  
TGAACAAGGACAAACCCTCTGGAGCAAAACAAACGATGCT  
+HWI-EAS443:3:72:73:1192#0/1  
ab`bbaZ¥¥K\_a¥Zbabaabaaabba^abbaaVaa[a`\_]`  
@HWI-EAS443:3:72:740:21#0/1  
GGATGATGGCAATGAGATACCCAATTACAGCAGACAAGAG  
+HWI-EAS443:3:72:740:21#0/1  
VYabbbbb`¥`bbb^\_`a\_]]]^`ba`[\_`b\_`b`YVSa`a  
@HWI-EAS443:3:72:744:1589#0/1  
GGATGATGGCAATGAGATACCCAATTACAGCAGACAAGAG  
+HWI-EAS443:3:72:744:1589#0/1  
a`\_`baaaabaabbaaaaaabaaaaa`aaaa`aa  
@HWI-EAS443:3:72:767:420#0/1  
GCGAGATACTCACTAAGACCACTGTGGACCATATGGCCAT

+HWI-EAS443:3:72:767:420#0/1  
abaaaaaaaa`aaaaaaa`a`aa\_a¥a`baa^`a]^Z^`  
@HWI-EAS443:3:72:772:394#0/1  
GTACTTTTTGATTATGGCCATATGGTCCACAGTGGTCTTA  
+HWI-EAS443:3:72:772:394#0/1  
aXWSYb\_\_VZ]¥``[YP\_^WU¥JOQN\_RQTV]TPXQTZ^R  
@HWI-EAS443:3:72:774:1301#0/1  
CTGTAATTGGGTATCTCATTGCCATCATCCACTTCATTCT  
+HWI-EAS443:3:72:774:1301#0/1  
aaa[bbba`ba\_bbbba`a[bbbaabaabaaaaaaaa  
@HWI-EAS443:3:72:807:696#0/1  
GTCCCCTTTTCGTTTCATTACCAACTACGTCCCCTTGC  
+HWI-EAS443:3:72:807:696#0/1  
a\_aaab`abaaa\_aaaaaaaa^aa`a``a``\_a^`\_^[V^  
@HWI-EAS443:3:72:809:1502#0/1  
GTCCCCTTTTCGTTTCATTACCAACTACGTCCCCTTGC  
+HWI-EAS443:3:72:809:1502#0/1  
]N\_aab`Xaa`a]a`aa`\_aaaa`Ua\_]a`\_VaU^`]]`X  
@HWI-EAS443:3:72:820:157#0/1  
CCGTTTTCGTTTCATTACCAACTACGTCCCCTTGCCCA  
+HWI-EAS443:3:72:820:157#0/1  
RY\_R\_[G]a^\_\_T\_^[\_PSZ]abb`Y\_] ^YZ^NVZFFTW  
@HWI-EAS443:3:72:823:1986#0/1  
GACATGATTCCAGAGAGGAATGAACAAGGACAAACCCTCT  
+HWI-EAS443:3:72:823:1986#0/1  
aaaa[`X]aa\_^`\_\_`^ZU]a\_]`][`\_a\_\_[[V[\_]  
@HWI-EAS443:3:72:836:361#0/1  
AGAGAATAAAAGAACTGAGAGATCTAATGTGCGAGTCCCG  
+HWI-EAS443:3:72:836:361#0/1  
abba`abbbbab`abbbba\_aaabaab\_aaaba]\_a`a  
@HWI-EAS443:3:72:844:170#0/1  
TGCCTCTTACCAGTATCCTCAACCCTGATCCTCTCACATT  
+HWI-EAS443:3:72:844:170#0/1  
ab`aa]a``abb`aaaa`aa`\_`a``a``a``^^^`\_\_^  
@HWI-EAS443:3:72:859:85#0/1  
CGCACTCAGAATGAAGTGGATGATGGCAATGAGATACCCA  
+HWI-EAS443:3:72:859:85#0/1  
aaab\_babbaabb`ababbabba`ba\_¥\_bb\_b^a`\_\_^a  
@HWI-EAS443:3:72:881:192#0/1  
AAAGAACTGAGAGATCTAATGTGCGAGTCCCGCACTCGCG  
+HWI-EAS443:3:72:881:192#0/1  
^bab]ab¥\_bb`baa^bb^\_\_`a``a¥T[a`]NU^W`\_[`  
@HWI-EAS443:3:72:883:1815#0/1  
GCCTTCATCTGGATCTTCAGTCAATGCACCTGCATCCTTT  
+HWI-EAS443:3:72:883:1815#0/1  
abbaabbabaaaaabbabaa[abaaaababaaaa`a`\_  
@HWI-EAS443:3:72:888:318#0/1  
GTCTGCTGTAATTGGGTATCTCATTGCCATCATCCACTTC  
+HWI-EAS443:3:72:888:318#0/1  
a¥``a`ab\_a\_aaaaaWa\_[`\_a^`Z¥^V\_¥\_¥QW^Y\_¥¥



@HWI-EAS443:3:72:921:739#0/1  
CCCCGCACTCAGAATGAAGTGGATGATGGCAATGAGATAC  
+HWI-EAS443:3:72:921:739#0/1  
aY`ba\_a¥^S[[¥Uaa^]Uaa[I]XT]a[XFU\_S¥Z\_YY  
@HWI-EAS443:3:72:928:581#0/1  
AATGAAGTGGATGATGGCAATGAGATACCCAATTACAGCA  
+HWI-EAS443:3:72:928:581#0/1  
aabbaa`]bb`ab^^a^a]a`a`¥`a`Y`aaa`a\_a^Y\_  
@HWI-EAS443:3:72:933:392#0/1  
AAATGTGCCACAGCACAGATTGGAGGAGTAAGGATGGT  
+HWI-EAS443:3:72:933:392#0/1  
aba`\_¥a`a^aa\_\_\_aaa\_^\_\_a\_^a^^`\_a\_\_`\_`\_\_X  
@HWI-EAS443:3:72:990:263#0/1  
TGGAGAGAATAAAAGAACTGAGAGATCTAATGTCGCAGTC  
+HWI-EAS443:3:72:990:263#0/1  
abaXb¥^S[a^aaa`Z]`baaaaaa\_a\_[\_aV][[YaV[  
@HWI-EAS443:3:73:1010:1563#0/1  
ATGGTATTCTCACAAGAGGATTGCATGATCAAGGCAGTTA  
+HWI-EAS443:3:73:1010:1563#0/1  
`ba\_ba`\_aaa\_\_baaTaY[aa]Saa^b`a^Y^aUWS  
@HWI-EAS443:3:73:1019:420#0/1  
ATGATGGCAATGAGATACCCAATTACAGCAGACAAGAGAA  
+HWI-EAS443:3:73:1019:420#0/1  
abbaabbaaab`b`aaaa]\_aa^`a`aaa`aaa\_^  
@HWI-EAS443:3:73:1023:483#0/1  
AATGAAGTGGATGATGGCAATGAGATACCCAATTACAGCA  
+HWI-EAS443:3:73:1023:483#0/1  
abaaa¥b`baaab^\_aaa\_\_ab`a`^aaa\_aaaaaX`^`  
@HWI-EAS443:3:73:1048:1675#0/1  
AAAGAACTGAGAGATCTAATGTCGCAGTCCCGCACTCGCG  
+HWI-EAS443:3:73:1048:1675#0/1  
abaaaa]aba`aaa`bb`^`a\_a\_a\_\_a^`a^^Qa\_\_]  
@HWI-EAS443:3:73:1075:139#0/1  
AAAAGAACTGAGAGATCTAATGTCGCAGTCCCGCACTCGC  
+HWI-EAS443:3:73:1075:139#0/1  
`bW[a\_ba]b^VZ[[[[aa\_`X]¥U]a^`T¥TPS[YTXP  
@HWI-EAS443:3:73:107:177#0/1  
AGGGGACGTAGTGTGGTAATGAAACGAAAACGGGACTCT  
+HWI-EAS443:3:73:107:177#0/1  
\_bba`^bbYSa[b\_aaaI[¥ZXU¥`]^YY\_\_PUYSFSSP[  
@HWI-EAS443:3:73:1092:1804#0/1  
ATGGTGGACATCCTTAGACAGAATCCAATGAGGAACAAG  
+HWI-EAS443:3:73:1092:1804#0/1  
]\_^aG\_aa`[Y\_aa`a]^aa\_aa\_a[^[]Z]\_a\_]\_\_a\_]`  
@HWI-EAS443:3:73:1100:1097#0/1  
GTGGACCATATGGCCATAATCAAAAAGTACACATCAGGAA  
+HWI-EAS443:3:73:1100:1097#0/1  
a\_¥X`^^`aaaa\_Xaa\_¥W^Y^\_adWQF^V\_]aa]`a`\_\_  
@HWI-EAS443:3:73:1102:1705#0/1  
CACAGTCAATGAGGAAAATTGCATCCTACTCTGTTCTGGT

+HWI-EAS443:3:73:1102:1705#0/1  
aab^VM#U\_\_aX`V]a\_`X]RZb`¥^`aa¥^[a^^Z`¥NN  
@HWI-EAS443:3:73:1105:402#0/1  
CTGTGGACCATATGGCCATAATCAAAAAGTACACATCAGG  
+HWI-EAS443:3:73:1105:402#0/1  
aa¥^bbbb`bbaabbba\_]a`baaa\_b]^]a`a`\_\_a¥  
@HWI-EAS443:3:73:110:1045#0/1  
GCTGTGGCACATTTCCAAGAGAGATGCTAATGGGTCTGCT  
+HWI-EAS443:3:73:110:1045#0/1  
aa`ZN`]V]```a\_SXZR]\_`YU]^Z^WQPVVJMXPRN  
@HWI-EAS443:3:73:1119:1264#0/1  
GGCCATGGTATTCTCACAAGAGGATTGCATGATCAAGGCA  
+HWI-EAS443:3:73:1119:1264#0/1  
a``bbb¥ZT`bababa`]`a¥aaaaa^^`aa\_`a\_`]`\_  
@HWI-EAS443:3:73:1124:1297#0/1  
AAAGAAGTGGAGAGATCTAATGTTCGAGTCCCGCACTCGCG  
+HWI-EAS443:3:73:1124:1297#0/1  
\_\_a¥W\_aaba[]ZZ¥b^a`ZSUR[V`N]```¥FZVYV[V  
@HWI-EAS443:3:73:1144:1264#0/1  
CACCATCAAGGGAGCAATTTTACAATCCTGGAGCTCTTCT  
+HWI-EAS443:3:73:1144:1264#0/1  
aba`^^`aa`b`\_`b[Y\_\_`bbaabbaa¥aaYb\_`Za^Z^  
@HWI-EAS443:3:73:1161:957#0/1  
GCAACACTTCAATATAAACACTGCCTGTTCCGCCGGCTAC  
+HWI-EAS443:3:73:1161:957#0/1  
``bbababaaaaaa`aa^^`aa`]aa```]`\_XaZ]^W  
@HWI-EAS443:3:73:1163:1291#0/1  
GCCCTGTCCACTTCAGAAATCAAGTTAAAATAAGGAGGAG  
+HWI-EAS443:3:73:1163:1291#0/1  
abbbaaaabbabbbbaa`aabababb`bbbaabaab`aa  
@HWI-EAS443:3:73:1210:100#0/1  
CCGCACTCAGAATGAAGTGGATGATGGCAATGAGATACCC  
+HWI-EAS443:3:73:1210:100#0/1  
ab\_b¥U[``a`bbb^SaabbbbaY`bbaaaaaX\_a¥`[^H  
@HWI-EAS443:3:73:1230:1704#0/1  
GAACCCCGCACTCAGAATGAAGTGGATGATGGCAATGAGA  
+HWI-EAS443:3:73:1230:1704#0/1  
abbaaabbbbaaaa`baaba`abUba`\_a\_``a\_``^aaa`  
@HWI-EAS443:3:73:123:682#0/1  
TGCTGTAATTGGGTATCTCATTGCCATCATCCACTTCATT  
+HWI-EAS443:3:73:123:682#0/1  
`aba`¥J\_a`a`[Xa\_aa`]^\_\_`]NY\_\_^`^X[^]Y¥Y  
@HWI-EAS443:3:73:1268:322#0/1  
CGTTTGTTTTGGCTCCAGAGGGTTTGTCTTGTTCATTCTCCT  
+HWI-EAS443:3:73:1268:322#0/1  
`babaabbbbaaaa`ababaaabbaa^¥aaa`a¥aaa]Y\_  
@HWI-EAS443:3:73:1302:1491#0/1  
AGAGAATAATGGACATGATTCCAGAGAGGAATGAACAAGG  
+HWI-EAS443:3:73:1302:1491#0/1  
\_`^^^abbaa`\_]aaaa[`a]]`a\_aa^`aaa`Wa`]X

@HWI-EAS443:3:73:1337:399#0/1  
TGGCAATGAGATACCCAATTACAGCAGACAAGAGAATAAT  
+HWI-EAS443:3:73:1337:399#0/1  
ab]S]Y]]\_\_a\_WZOMR^\_[ZTOS¥\_aYVXWX\_\_^Q[[\_  
@HWI-EAS443:3:73:1340:640#0/1  
GAAGTTTTATTATTTGGACAGTGTCAAATGTCCCAAGCAC  
+HWI-EAS443:3:73:1340:640#0/1  
a]\_a]a`aaa\_`^¥`\_`Z\_\_¥a]\_`^\_aZ]^W\_]\_W¥]  
@HWI-EAS443:3:73:1347:1246#0/1  
ACTGAAAATAAGAGTACATGAAGGGTATGAAGAATTCACA  
+HWI-EAS443:3:73:1347:1246#0/1  
a\_ba`ababa`a\_a``\_aaa`\_aaaYaaaa]a^\_a\_\_\_\_]\_  
@HWI-EAS443:3:73:1352:817#0/1  
GAATAAAAGAAGACTGAGAGATCTAATGTCGCAGTCCCGCAC  
+HWI-EAS443:3:73:1352:817#0/1  
aaaYba\_bbbbababbba`aab`bab`¥^aaa\_\_\_\_^baaZ  
@HWI-EAS443:3:73:1356:1513#0/1  
TACTCACTAAGACCACTGTGGACCATATGGCCATAATCAA  
+HWI-EAS443:3:73:1356:1513#0/1  
a\_\_\_\_aaaa\_a¥^a]a]a\_X\_W\_\_\_\_^`^\_U^¥^][\_`^U^S  
@HWI-EAS443:3:73:1381:1530#0/1  
CGGCTTCTGGTTGCCTTAGGGACAAGAGACTGAAATGGTT  
+HWI-EAS443:3:73:1381:1530#0/1  
`baabbabbaab\_aaab[aa`a¥aab\_aa`ab`\_`\_a\_[W^  
@HWI-EAS443:3:73:1388:1068#0/1  
GGATGATGGCAATGAGATACCCAATTACAGCAGACAAGAG  
+HWI-EAS443:3:73:1388:1068#0/1  
a`\_aaa\_a`\_[\_aa`````\_`^\_a`````\_][\_]\_\_\_\_  
@HWI-EAS443:3:73:1396:1149#0/1  
GTGTACTTTTTGATTATGGCCATATGGTCCACAGTGGTCT  
+HWI-EAS443:3:73:1396:1149#0/1  
a`^UZ[^`ba\_\_`aa`aa][ ]\_`^Z\_UZ^R[¥H]]Q]\_OY]  
@HWI-EAS443:3:73:1405:658#0/1  
ATCATCATTTCTCACTTCTCCTCCTGGAGTGTACATCTGC  
+HWI-EAS443:3:73:1405:658#0/1  
ababbaabbbbaa\_a`bbaaaUba[aaa^`\_a¥a]aa^```  
@HWI-EAS443:3:73:1411:1583#0/1  
CTGCTGTCTGAGAGGATTTCTCATTGTTGGGCAAAGAAGA  
+HWI-EAS443:3:73:1411:1583#0/1  
``\_a````Yaa\_a¥b`[ ]a`\_aaaaaa`b`]\_\_\_\_a\_\_`^  
@HWI-EAS443:3:73:1476:1251#0/1  
AAAAGAAGACTGAGAGATCTAATGTCGCAGTCCCGCACTCGC  
+HWI-EAS443:3:73:1476:1251#0/1  
\_abab)`abba\_aaaaaa`\_ab^`a\_aa\_\_a\_[\_XY^`\_\_  
@HWI-EAS443:3:73:1482:110#0/1  
GGAGTGTACATCTGCTCCCAGCACGTCCCTTGGGTTAAGT  
+HWI-EAS443:3:73:1482:110#0/1  
abaaabWbaaaZ^a`\_]\_X`\_]\_¥Z¥VZW`Z[a\_W\_^]^Z  
@HWI-EAS443:3:73:1500:1431#0/1  
CTGGATCAGACCGAGTGTGGTATCACCTCTGGCCGTAAC

+HWI-EAS443:3:73:1500:1431#0/1  
`\_T`K`]`a\_\_WW^b^b\_R¥]T]`^SZNVYNNXMM`^QPK  
@HWI-EAS443:3:73:1503:83#0/1  
ATTCAATTCCCCAGTTCTGGAAAAGCACTTTTGCATCTTT  
+HWI-EAS443:3:73:1503:83#0/1  
aaaR`a````SUQaaa`a\_a\_aa^bV\_Z\_``\_aIUYI]Z\_  
@HWI-EAS443:3:73:152:1725#0/1  
AAAAGAAGCTGAGAGATCTAATGTCGCAGTCCCGCACTCGC  
+HWI-EAS443:3:73:152:1725#0/1  
\_Z`Y\_aba`aYb``abaa\_aaZb¥aa^U\_\_a0aU`\_\_W^  
@HWI-EAS443:3:73:1531:1201#0/1  
GCTCCCTTGATGGTGGCGTACATGCTAGAAAGAGAATTGG  
+HWI-EAS443:3:73:1531:1201#0/1  
`¥]\_\_a\_`]a`]V\_\_^aZ\_Z¥` `[V]\_aa¥`a\_[^]\_U  
@HWI-EAS443:3:73:1589:1598#0/1  
AAAGAAGCTGAGAGATCTAATGTCGCAGTCCCGCACTCGCG  
+HWI-EAS443:3:73:1589:1598#0/1  
aa]aaaabaa^`]\_aaaa\_^\_Z^a\_aa¥X]^^`X[Y¥\_\_`  
@HWI-EAS443:3:73:1614:1012#0/1  
ATCTAATGTCGCAGTCCCGCACTCGCGAGATACTCACTAA  
+HWI-EAS443:3:73:1614:1012#0/1  
aab`ab`ba`a^aaa[`a\_¥X¥a^S\_a[a`¥^\_^\_^^\_]X  
@HWI-EAS443:3:73:1626:1206#0/1  
AAAAGAAGCTGAGAGATCTAATGTCGCAGTCCCGCACTCGC  
+HWI-EAS443:3:73:1626:1206#0/1  
VZ\_a`]bbbb`aa\_aaab`aabaaaaa]Y¥`Y[\_ZY\_YV^  
@HWI-EAS443:3:73:1634:1830#0/1  
AAAAGAAGCTGAGAGATCTAATGTCGCAGTCCCGCACTCGC  
+HWI-EAS443:3:73:1634:1830#0/1  
a``abaSaZaaSaabaa]^`U]U\_\_]XZZaYXZ[LX]TUZ  
@HWI-EAS443:3:73:1651:1747#0/1  
GTTAGCACTTCTTCTTCTTTCTTGACTGATGATCCGCTTG  
+HWI-EAS443:3:73:1651:1747#0/1  
a`a`a\_`aaa\_aa\_a``a\_a\_``\_^]\_```\_\_^]\_^]\_Z`  
@HWI-EAS443:3:73:1654:297#0/1  
CACTCGCGAGATACTCACTAAGACCACTGTGGACCATATG  
+HWI-EAS443:3:73:1654:297#0/1  
^babbabba`aaa`baaabaabbbbabaaa\_aaa\_aaaa  
@HWI-EAS443:3:73:1657:1229#0/1  
AAAAGAAGCTGAGAGATCTAATGTCGCAGTCCCGCACTCGC  
+HWI-EAS443:3:73:1657:1229#0/1  
Ua^YSR\_U^W\_`S])bab[^\_b\_Z\_R\_a¥ZPZ`¥`Z¥¥ZQ  
@HWI-EAS443:3:73:1692:1290#0/1  
GGTTGCCCGTTAGCACTTCTTCTTCTTTCTTGACTGATGA  
+HWI-EAS443:3:73:1692:1290#0/1  
`U]TabaUaaYa^WY[a`WVa`bZaa¥`^a`aa^`]a]aa  
@HWI-EAS443:3:73:1758:672#0/1  
AGCAGATGTACTCCAGGAGGAGAAGTGAGAAATGATGA  
+HWI-EAS443:3:73:1758:672#0/1  
\_]`babbab\_aa`¥]`a]R^b`aU\_`Y```a\_a`aa`a\_

@HWI-EAS443:3:73:1777:1830#0/1  
CACTGACTCAGGGCCATTGATCTCCCACATCATTGATGAC  
+HWI-EAS443:3:73:1777:1830#0/1  
^[aY`a`^`bYR]X]^I\_Z[WTXW\_ZRR]`ZX^U]Y  
@HWI-EAS443:3:73:182:1627#0/1  
AAAGAACTGAGAGATCTAATGTGCGCAGTCCCGCACTCGCG  
+HWI-EAS443:3:73:182:1627#0/1  
`aaQX`a``PR^`\_a^\_a\_[QaG\_\_]N]^UR^J^]]TVR  
@HWI-EAS443:3:73:205:100#0/1  
GGGTTCACTTTCAAAGGACAAGCGGATCATCAGTCAAGA  
+HWI-EAS443:3:73:205:100#0/1  
aab]baaaabbbbaaaaba`aabaaa[```a`aa^``\_aa  
@HWI-EAS443:3:73:218:442#0/1  
ATTTTCAGTGTGGAGGTTGCCCGTTAGCACTTCTTCTT  
+HWI-EAS443:3:73:218:442#0/1  
aabbbbXa\$\_\_ab`a`bVS[\_\_\_Sa[\_```a\_^a\_ZaaS\_`  
@HWI-EAS443:3:73:247:879#0/1  
GGGGACGTAGTGTGGTAATGAAACGAAACGGGACTCTA  
+HWI-EAS443:3:73:247:879#0/1  
aaba`bb\_ab`aabaa\$aaaa`b]a`aa`Za\_`[U`\$`\_^  
@HWI-EAS443:3:73:250:1753#0/1  
CAACCCTGATCCTCTCACATTCACAGTCAATGAGGAAAAT  
+HWI-EAS443:3:73:250:1753#0/1  
\_W`\_]a\_PU\_aa]WX`[]`[[```\_[RX`\_`PZRTZ]X`]U  
@HWI-EAS443:3:73:262:175#0/1  
GAGCAATTTTACAATCCTGGAGCTCTTCTTTCTTCTTT  
+HWI-EAS443:3:73:262:175#0/1  
abaaaaaaabaa`aaaa^`\_[a^`^`\_\_`^\_]```]-[\_\_^  
@HWI-EAS443:3:73:307:948#0/1  
CACTCGGTCTGATCCAGCATCGTTTGTGGTCCAGAGG  
+HWI-EAS443:3:73:307:948#0/1  
aVa`a\_\_U`\$^X^\$`]^a\$]\_`P`^`\_S[\_\_\_VLX\$ZQXYRY  
@HWI-EAS443:3:73:325:1278#0/1  
CTGCTGTAATTGGGTATCTCATTGCCATCATCCACTTCAT  
+HWI-EAS443:3:73:325:1278#0/1  
aa\$bb`aZ\_R`a\_\_]W`aaaa\_`Y`a\_\_`a\_\_`T`[^`\_\_[  
@HWI-EAS443:3:73:340:1822#0/1  
CCCGTTTTTCGTTTCATTACCAACTACGTCCCCTTGCCC  
+HWI-EAS443:3:73:340:1822#0/1  
aaa\_T\_`^a\_Y^\$W]^`^``\_]U]^`\_Y`\$]XY]^]WYY^]Z  
@HWI-EAS443:3:73:343:1182#0/1  
GTACTTTTTGATTATGGCCATATGGTCCACAGTGGTCTTA  
+HWI-EAS443:3:73:343:1182#0/1  
`aabbaaabbbbaa`\_ab\_JS^\_\_OT[a]aRXTX\_U\_\_\_\_  
@HWI-EAS443:3:73:369:168#0/1  
GTCTTAGTGAGTATCTCGCGAGTGGGGACTGCGACATTA  
+HWI-EAS443:3:73:369:168#0/1  
aaabbab\_aaaaaa\$XZ[\_`W`]\$^`\_S\$^YZ]ZZ[^Z]  
@HWI-EAS443:3:73:410:980#0/1  
GCACTCGCGAGATACTACTAAGACCACTGTGGACCATAT

+HWI-EAS443:3:73:410:980#0/1  
abUb\_b`b`ML¥NY\_`a\_YUaX[Xa\_]`VXGV`\_^^\_]  
@HWI-EAS443:3:73:412:2035#0/1  
AAGAAGTCTGAGATCTAATGTCGCAGTCCCGCACTCGCGA  
+HWI-EAS443:3:73:412:2035#0/1  
ab`a\_aaa`[bab\_`aY]`Ya]aa¥N`W\_S¥[\_W\_¥\_ZW  
@HWI-EAS443:3:73:418:489#0/1  
GGTGGGTTCACTTTCAAAGGACAAGCGGATCATCAGTCA  
+HWI-EAS443:3:73:418:489#0/1  
aa]aaa^`a`a`a`aa`\_`^\_a\_\_\_\_`^W¥^`^^\_X]\_  
@HWI-EAS443:3:73:447:1220#0/1  
GGATGATGGCAATGAGATACCCAATTACAGCAGACAAGAG  
+HWI-EAS443:3:73:447:1220#0/1  
Y`Zaa^abab`\_`\_bba`bab]bbbbaaa\_aaaabaaba  
@HWI-EAS443:3:73:454:221#0/1  
CTTTGATCTCTAACCTTAAAAATCGGTCAATACTCACTA  
+HWI-EAS443:3:73:454:221#0/1  
\_abb`b`a¥`Y¥V¥abb`a^a``aaMZ^`\_aba]\_`]ab  
@HWI-EAS443:3:73:459:335#0/1  
AATTGGGCAAGGGACGTAGTGTGGTAATGAAACGAAAA  
+HWI-EAS443:3:73:459:335#0/1  
aaab]bbb^[aaaa`a`ab`b\_aba^a`a\_IaaU[¥\_]\_  
@HWI-EAS443:3:73:466:536#0/1  
GTGGGTTCACTTTCAAAGGACAAGCGGATCATCAGTCAA  
+HWI-EAS443:3:73:466:536#0/1  
aUHGLTOZZa\_`PXY¥YUUN[YV[PY\_Y]TW\_PHSDRSY  
@HWI-EAS443:3:73:470:811#0/1  
AAAGAAGTCTGAGATCTAATGTCGCAGTCCCGCACTCGCG  
+HWI-EAS443:3:73:470:811#0/1  
^a\_ZYZ[a^a^a`ba`ab\_^Z¥a\_aaV\_a`¥T]V^WaT\_]\_  
@HWI-EAS443:3:73:474:50#0/1  
AAAAGAAGTCTGAGATCTAATGTCGCAGTCCCGCACTCGC  
+HWI-EAS443:3:73:474:50#0/1  
`abbaa`aaaaa\_\_a\_aa\_`a`\_`¥^aW]^\_\_\_\_^UVZ^]  
@HWI-EAS443:3:73:488:1765#0/1  
CCGTTTTCGTTTCATTACCAACTACGTCCCCTTGCCCA  
+HWI-EAS443:3:73:488:1765#0/1  
]\_PWa\_baa[\_¥ZY[`]b`G]b[a]]R`a``¥\_a^P^¥  
@HWI-EAS443:3:73:511:175#0/1  
CTAATGTCGCAGTCCCGCACTCGCGAGATACTCACTAAGA  
+HWI-EAS443:3:73:511:175#0/1  
`a]¥¥b`b`a[^]^¥a\_]`¥¥`X\_]aW]RER]`HY^RSX  
@HWI-EAS443:3:73:583:1789#0/1  
CTCGCGAGATACTCACTAAGACCACTGTGGACCATATGGC  
+HWI-EAS443:3:73:583:1789#0/1  
a\_b\_b`¥^^`^aaa^YaM]`aaa`VWTW^`\_`^\_^^^  
@HWI-EAS443:3:73:586:1602#0/1  
GATCCGCTTGTCTTTTGAAGTGAACCCACCAAACTGA  
+HWI-EAS443:3:73:586:1602#0/1  
ZYab`ba]¥¥¥Y`\_¥]baa`V^Z]V`a\_^\_aa`aaba`b

@HWI-EAS443:3:73:600:1274#0/1  
GTCCCGTTTTTCGTTTCATTACCAACTACGTCCCCCTTGC  
+HWI-EAS443:3:73:600:1274#0/1  
a\_abbb\_aaaa`a`\_aaaaaaaa`aaa]aa`\_\_\_\_a  
@HWI-EAS443:3:73:600:1346#0/1  
AGCGGATCATCAGTCAAGAAAGAAGAAGTGCTAACGG  
+HWI-EAS443:3:73:600:1346#0/1  
`]b`a^abaa\_¥¥Wbbaaa^[^Z`a¥W\_\_¥\_W`\_¥¥aa¥^  
@HWI-EAS443:3:73:622:641#0/1  
GCTAATGTGCTAATTGGGCAAGGGGACGTAGTGTGGTAA  
+HWI-EAS443:3:73:622:641#0/1  
a`a`^`aY`^a`aaa\_```[^`^YXRaa¥X^Sa\_aaaG]X  
@HWI-EAS443:3:73:674:1390#0/1  
AAAAGAAGTCTGAGATCTAATGTCGCAGTCCCGCACTCGC  
+HWI-EAS443:3:73:674:1390#0/1  
a]a`ZWVQYaL`a\_aa\_`¥]\_a^`¥\_adWam¥¥\_\_^^\_W\_  
@HWI-EAS443:3:73:689:302#0/1  
ATCAACTCTCCTCCTTATTTTAACTTGATTCTGAAGTGG  
+HWI-EAS443:3:73:689:302#0/1  
a\_¥T`\_`\_W\_]\_Y`\_`a\_\_\_^G[]`[\_\_\_\_]\_\_\_\_]X\_U  
@HWI-EAS443:3:73:716:1993#0/1  
GTCCCGTTTTTCGTTTCATTACCAACTACGTCCCCCTTGC  
+HWI-EAS443:3:73:716:1993#0/1  
aabbb\_[``^\_KZT]b`XbaaaW\_`a]]a^UZ]YaXUS^  
@HWI-EAS443:3:73:74:539#0/1  
AAAAGAAGTCTGAGATCTAATGTCGCAGTCCCGCACTCGC  
+HWI-EAS443:3:73:74:539#0/1  
\_¥¥]\_aaa`Z`^`\_\_aaa]aaW\_\_^[`X^]^W[LQ]\_W]  
@HWI-EAS443:3:73:762:665#0/1  
GTCCCGTTTTTCGTTTCATTACCAACTACGTCCCCCTTGC  
+HWI-EAS443:3:73:762:665#0/1  
aaaaab\_abaa\_\_aaa`aaaa`^aaaaa^a`a`\_\_\_\_`  
@HWI-EAS443:3:73:783:1991#0/1  
AAGAAGTCTGAGATCTAATGTCGCAGTCCCGCACTCGCGA  
+HWI-EAS443:3:73:783:1991#0/1  
\_WYZ\_¥ZTYFSZ`a`YZa]UVb]¥`TPX`¥NQHXGZSLVO  
@HWI-EAS443:3:73:795:1023#0/1  
CCCGTTTTTCGTTTCATTACCAACTACGTCCCCCTTGCC  
+HWI-EAS443:3:73:795:1023#0/1  
abba`bbbb`abbbbbbb`bbabbabba\_aabb`\_`aaa  
@HWI-EAS443:3:73:884:1331#0/1  
CAATTACAGCAGACAAGAGAATAATGGACATGATTCCAGA  
+HWI-EAS443:3:73:884:1331#0/1  
\_]`[`]bba^^a^aY^¥W[JL`]Z]Y[T^\_aR\_^a\_XY]^Z  
@HWI-EAS443:3:73:915:1628#0/1  
CAATTACAGCAGACAAGAGAATAATGGACATGATTCCAGA  
+HWI-EAS443:3:73:915:1628#0/1  
a\_S]S\_aY[aa\_TZYXXU\_TVa[Z`W`ZaR]K]SV[XPM  
@HWI-EAS443:3:73:926:1392#0/1  
AAAAGAAGTCTGAGATCTAATGTCGCAGTCCCGCACTCGC

+HWI-EAS443:3:73:926:1392#0/1  
aUaaUWaa[^a\_]aJG\_TX\_\_RN[a^a\_WO`\_O`YUBBBB  
@HWI-EAS443:3:73:928:1699#0/1  
AAACAAACGATGCTGGATCAGACCGAGTGATGGTATCACC  
+HWI-EAS443:3:73:928:1699#0/1  
`aa`aaa`\_\_^\_\_\_\_Z\_\_¥aT^\_UL^¥W]¥ZZYW^¥¥¥WT  
@HWI-EAS443:3:73:92:1998#0/1  
GAATAAAAGAAGACTGAGAGATCTAATGTCGCAGTCCCGCAC  
+HWI-EAS443:3:73:92:1998#0/1  
`^\_aa¥Q\_`RT\_aY`^Raaa`]``\_G\_]aaZVYa]W¥`\_  
@HWI-EAS443:3:73:935:795#0/1  
AAAAGAAGACTGAGAGATCTAATGTCGCAGTCCCGCACTCGC  
+HWI-EAS443:3:73:935:795#0/1  
a\_aaa¥¥¥a`\_`a`````WaaZ\_^`\_^\_`^¥^^SVW^[]  
@HWI-EAS443:3:73:951:636#0/1  
CTCAGAATGAAGTGGATGATGGCAATGAGATACCCAATTA  
+HWI-EAS443:3:73:951:636#0/1  
aa`[^¥`a``aZY^a`bYVX`a¥\_aaXaa`a]¥`a]`\_  
@HWI-EAS443:3:74:1051:1733#0/1  
CGTTTTCGTTTTATTACCAACTACGTCCCCTTGCCCAA  
+HWI-EAS443:3:74:1051:1733#0/1  
ab\_aa^baaaabbaabb]ba\_a[]a\_a\_\_aa\_\_¥^U¥\_\_  
@HWI-EAS443:3:74:1062:767#0/1  
TGGAGAATTGCCTCTTACCAGTATCCTCAACCCTGATCCT  
+HWI-EAS443:3:74:1062:767#0/1  
aaaX\_Z`bb\_\_\_\_`[\_]a`aa`S`\_\_^\_a^`WWZa\_XT^`\_  
@HWI-EAS443:3:74:1071:318#0/1  
GTCCCCTTTTTCGTTTTATTACCAACTACGTCCCCTTG  
+HWI-EAS443:3:74:1071:318#0/1  
``aabaabb\_a`aa[aaba`^a`[aaaaaa^\_`^a^[]R  
@HWI-EAS443:3:74:1096:988#0/1  
CTGAGAGATCTAATGTCGCAGTCCCGCACTCGCGAGATAC  
+HWI-EAS443:3:74:1096:988#0/1  
abaabbaaaba`bb\_aaaba\_aaa`a]`aa]a`]aaZ``  
@HWI-EAS443:3:74:110:318#0/1  
GAGTAAGGATGGTGGACATCCTTAGACAGAATCCAAGTGA  
+HWI-EAS443:3:74:110:318#0/1  
^WX`\_OV\_SSaZUaRRSVUWZ^RZ`]\_[^GQUP]SHXW¥^  
@HWI-EAS443:3:74:1130:1707#0/1  
AAAAGAAGACTGAGAGATCTAATGTCGCAGTCCCGCACTCGC  
+HWI-EAS443:3:74:1130:1707#0/1  
aaaaaabaaaa`a\_aabaaaa¥aZaadWaa^]`UYXZ^]  
@HWI-EAS443:3:74:1154:1364#0/1  
CCCCGCACTCAGAATGAAGTGGATGATGGCAATGAGATAC  
+HWI-EAS443:3:74:1154:1364#0/1  
aaaXRXR[[]H^`RQaaXP\_[TPYVU^^GGVL^`\_`VX\_]U  
@HWI-EAS443:3:74:1157:192#0/1  
CCGCACTCGCGAGATACTACTAAGACCACTGTGGACCAT  
+HWI-EAS443:3:74:1157:192#0/1  
aba[¥W`Z¥¥\_\_¥Z`[[[]¥aaaaa`\_\_`\_`aaW¥Z]]^[R



@HWI-EAS443:3:74:119:56#0/1  
AGCATGTACGCCACCATCAAGGGAGCAATTTTACAATCCT  
+HWI-EAS443:3:74:119:56#0/1  
\_^aa\_\_\_b^a^V`Y`aaa]Xa`X\_\_VT¥a\_a\_\_\_YS¥UWV  
@HWI-EAS443:3:74:1208:1202#0/1  
CAGAATGAAGTGGATGATGGCAATGAGATACCCAATTACA  
+HWI-EAS443:3:74:1208:1202#0/1  
aab]bab`aa]b`aa`]ab¥Z\_¥aa\_ba\_\_\_[¥aa`] `V`  
@HWI-EAS443:3:74:120:1811#0/1  
ATCACATTGTCGATGGATTCAATTCGCCAGTTCTGGAAAA  
+HWI-EAS443:3:74:120:1811#0/1  
a`aaa`\_\_¥^a`\_]SS`Z^a`[^\_a` `^XVZ\_WXX¥]\_\_  
@HWI-EAS443:3:74:1219:1998#0/1  
GAACTGAGAGATCTAATGTCGCAGTCCCGCACTCGCGAGA  
+HWI-EAS443:3:74:1219:1998#0/1  
aaa`b[a`a`Zaaaba\_b`a`^a\_¥[a\_YaWV`a`aaZ`\_  
@HWI-EAS443:3:74:1227:658#0/1  
CTGTAATTGGGTATCTCATTGCCATCATCCACTTCATTCT  
+HWI-EAS443:3:74:1227:658#0/1  
abb`bbbbbbabbabaabbaabbaabbaaaa^aa[aaa]a  
@HWI-EAS443:3:74:1248:1088#0/1  
CGGGTTCTTCTTGCCTTCCTGATGTGTACTTTTTGAT  
+HWI-EAS443:3:74:1248:1088#0/1  
abbab`a\_aaba^bb\_HZbaa^b^`Raaa\_]aaa\_a` ``  
@HWI-EAS443:3:74:1253:737#0/1  
AAAGAACTGAGAGATCTAATGTCGCAGTCCCGCACTCGCG  
+HWI-EAS443:3:74:1253:737#0/1  
a`ba`babbb` `aaa\_aabbb`\_b\_aa]\_`\_\_`QWV^`^X  
@HWI-EAS443:3:74:1270:822#0/1  
CGGCTACTGGGAGAAACCTTGTTTTACGGACCAATTCTCT  
+HWI-EAS443:3:74:1270:822#0/1  
````^PQUTaQ\_VN¥¥QXYQJ¥a` [UW]WQ[^`^\_U][¥  
@HWI-EAS443:3:74:1338:885#0/1  
TTCAATTCGCCAGTTCTGGAAAAGCACTTTTGCATCTTTT  
+HWI-EAS443:3:74:1338:885#0/1  
ab\_\_aba`\_]\_]¥`aa\_Y^\_\_Y`^U^aaaa`Z`a]baa]  
@HWI-EAS443:3:74:1347:1642#0/1  
GTCAGTGAACGCAAGGAACTGAGAAGTTGACAATAACTT  
+HWI-EAS443:3:74:1347:1642#0/1  
```bbbab`bbababbbaababb`aaaaZaaa\_aa^aa`a`  
@HWI-EAS443:3:74:1366:1566#0/1  
CCGGCTACTGGGAGAAACCTTGTTTTACGGACCAATTCTC  
+HWI-EAS443:3:74:1366:1566#0/1  
aa`a`aa[a]^]\_a`aU` ``\_[aaa\_K¥a[]\_a`aP]]  
@HWI-EAS443:3:74:1366:1834#0/1  
GAACCCCGCACTCAGAATGAAGTGGATGATGGCAATGAGA  
+HWI-EAS443:3:74:1366:1834#0/1  
aaa[``\_]VaaY]^Y]aa`a]a`\_]`^` [NZ[\_`W]]  
@HWI-EAS443:3:74:1386:720#0/1  
GGGTATCTCATTGCCATCATCCACTTCATTCTGAGTGCGG

+HWI-EAS443:3:74:1386:720#0/1  
]S^Xa`^^\_a]`^aY\_a\_¥\_^Z^M]]Z¥`\_X¥FYV[¥UUQ  
@HWI-EAS443:3:74:1407:537#0/1  
GAATAAAAGAACTGAGAGATCTAATGTCGCAGTCCCGCAC  
+HWI-EAS443:3:74:1407:537#0/1  
``aa`aY]aa]Zaaa`VY]aYaaaa`\_]aa\_Y\_V``Y^Z  
@HWI-EAS443:3:74:1433:763#0/1  
GTCCCGTTTTTCGTTTCATTACCAACTACGTCCCCTTGC  
+HWI-EAS443:3:74:1433:763#0/1  
a`a`\_baaabaa\_aa[aaaaaZa`Y`^a`a\_\_\_\_`UZ¥^\_[  
@HWI-EAS443:3:74:1450:523#0/1  
CATATCTCTTGTCTTCTTTGCCAAAATGAGAAATCCTCT  
+HWI-EAS443:3:74:1450:523#0/1  
abb\_\_¥`\_a`]Jaaaabbb\_a`a[[]a¥abaaaaa`Ta  
@HWI-EAS443:3:74:1455:1057#0/1  
GGGACGTAGTGTGGTAATGAAACGAAAACGGGACTCTAG  
+HWI-EAS443:3:74:1455:1057#0/1  
^YVNV`RO^YVW`]^JLVMSQ]]QZQZVS\_BBBBBBBBBB  
@HWI-EAS443:3:74:1485:1943#0/1  
GCCATGGTATTCTCACAAGAGATTGCATGATCAAGGCAG  
+HWI-EAS443:3:74:1485:1943#0/1  
aa^^`[Obaaa\_aa`^aa\_¥`^`]\_\_\_\_`^X^W`\_]^[`  
@HWI-EAS443:3:74:1501:298#0/1  
GTCCCGTTTTTCGTTTCATTACCAACTACGTCCCCTTGC  
+HWI-EAS443:3:74:1501:298#0/1  
a`[`[babbbab\_ba]`aaa¥P^`W`\_`^^`^V\_R^\_YVW  
@HWI-EAS443:3:74:1502:1016#0/1  
AGGGGACGTAGTGTGGTAATGAAACGAAAACGGGACTCT  
+HWI-EAS443:3:74:1502:1016#0/1  
^aX¥`^abaHaa`b`baXaa\_[R`Q¥W`ba\_¥aY\_^]X]  
@HWI-EAS443:3:74:1586:196#0/1  
AGAGAATAAAAGAACTGAGAGATCTAATGTCGCAGTCCCG  
+HWI-EAS443:3:74:1586:196#0/1  
ab\_]Tba\_baba`[Yb`]bbba\_aba`bb`X]¥b\_[¥\_\_S  
@HWI-EAS443:3:74:1595:57#0/1  
GAGGATTTCTCATTTTGGGCAAAGAAGACAAGAGATATGG  
+HWI-EAS443:3:74:1595:57#0/1  
a^bb^`aab^\_¥a]aab`W\_\_\_a`b\_R`\_a]a\_¥]Z^¥  
@HWI-EAS443:3:74:1607:1053#0/1  
AAAGAACTGAGAGATCTAATGTCGCAGTCCCGCACTCGCG  
+HWI-EAS443:3:74:1607:1053#0/1  
a\_baRJ`bbb`b]]`a\_bV]b^aaaab`Qa[RYa`WUaaT  
@HWI-EAS443:3:74:1608:955#0/1  
AAAAGAACTGAGAGATCTAATGTCGCAGTCCCGCACTCGC  
+HWI-EAS443:3:74:1608:955#0/1  
aaaaaYaaa^aaaa`aabaaba`a\_\_ba^a¥`aaQa\_^`\_`  
@HWI-EAS443:3:74:1628:1511#0/1  
TACTTTTTGATTATGGCCATATGGTCCACAGTGGTCTTAG  
+HWI-EAS443:3:74:1628:1511#0/1  
aa`aababaaaaaaaa`a\_\_Z[\_V]VW]\_S][Y]]IOX^W[

@HWI-EAS443:3:74:1634:287#0/1  
GGGGACGTAGTGTGGTAATGAAACGAAAACGGGACTCTA  
+HWI-EAS443:3:74:1634:287#0/1  
\_bbUMYUaaaSbSa^aFTU\_^0aYDDLaa`YRaMPXKMX  
@HWI-EAS443:3:74:1659:713#0/1  
GAGGAATGAACAAGGACAAACCCTCTGGAGCAAACAAAC  
+HWI-EAS443:3:74:1659:713#0/1  
\_^bbbababbbaba^a^`bba¥]aXb`a`baaaa\_aaaaT  
@HWI-EAS443:3:74:1667:437#0/1  
GGAGTGTACATCTGCTCCCAGCACGTCCCTTGGGTTAAGT  
+HWI-EAS443:3:74:1667:437#0/1  
`bbaabababbaabaaaaab\_a`a`a[Uaaaab\_b`^a^  
@HWI-EAS443:3:74:1694:1328#0/1  
CAAAATGAGAAATCCTCTCAGGACAGCAGACTCCACCCCA  
+HWI-EAS443:3:74:1694:1328#0/1  
]`]'Z`¥`¥]\_S`U\_bbbba^HQ`a^aa`W`\_[aYZ¥]a  
@HWI-EAS443:3:74:1701:884#0/1  
GTCCCGTTTTTCGTTTCATTACCAACACTACGTCCCTTGC  
+HWI-EAS443:3:74:1701:884#0/1  
aR[Z``Ya^a¥¥X^`Y^]`aa\_a`Xa\_^aaaYY\_Z][]RS  
@HWI-EAS443:3:74:1758:1581#0/1  
GCACTCGCGAGATACTACTAAGACCACTGTGGACCATAT  
+HWI-EAS443:3:74:1758:1581#0/1  
a`\_XTWYX`\_¥VW¥VOQZ¥\_^UY[ZZZTU`VQYSQUBBBB  
@HWI-EAS443:3:74:186:1513#0/1  
GTCCCGTTTTTCGTTTCATTACCAACACTACGTCCCTTGC  
+HWI-EAS443:3:74:186:1513#0/1  
`b¥`U[X\_^\_\_SZabaa\_aa\_]`\_]\_Z[aa\_]aYa\_PKKM  
@HWI-EAS443:3:74:187:1131#0/1  
AAGAAGTGAAGATCTAATGTCGCAGTCCCGCACTCGCGA  
+HWI-EAS443:3:74:187:1131#0/1  
aYOX^]aY`]^a\_\_`Z\_V``L¥ab\_aH`\_aYYG\_TZX^^¥  
@HWI-EAS443:3:74:191:223#0/1  
CTTCCTGATGTGACTTTTTGATTATGGCCATATGGTCCA  
+HWI-EAS443:3:74:191:223#0/1  
\_a¥^^XQX¥]¥[Y]^a\_`a^aaa]^a^baXG]SK[LQ¥^  
@HWI-EAS443:3:74:211:185#0/1  
AAAAGAAGTGAAGATCTAATGTCGCAGTCCCGCACTCGC  
+HWI-EAS443:3:74:211:185#0/1  
aaaaaaaa\_]`¥aa\_a]`\_\_\_aX\_\_ZZ]V]^]]`V¥VWR]  
@HWI-EAS443:3:74:277:307#0/1  
GCTAGAGTCCCGTTTTTCGTTTCATTACCAACACTACGTCC  
+HWI-EAS443:3:74:277:307#0/1  
\_\_Z`b\_ZWZaa\_[P¥a^¥]^a```a^TX`X[`]\_a`][[]  
@HWI-EAS443:3:74:28:1444#0/1  
CCGCACTCAGAATGAAGTGGATGATGGCAATGAGATACCC  
+HWI-EAS443:3:74:28:1444#0/1  
aa`aa\_\_aa\_W`\_`^TZW\_]\_]\_^ZU]\_UFS^SS^Z^^\_]  
@HWI-EAS443:3:74:294:1462#0/1  
AAAAGAAGTGAAGATCTAATGTCGCAGTCCCGCACTCGC

+HWI-EAS443:3:74:294:1462#0/1  
[^\_aaaab`¥]b\_]S\_aa¥\_aNARaR`VaaU\_U]V¥^]  
@HWI-EAS443:3:74:318:1361#0/1  
CATCAAGGGAGCAATTTTACAATCCTGGAGCTCTTCTTTC  
+HWI-EAS443:3:74:318:1361#0/1  
aa^aaaaa¥`aa`\_a`YaXQ]`a]]¥P\_\_]]^\_\_\_\_]^  
@HWI-EAS443:3:74:319:1135#0/1  
ACGACTTACAGTTCTTGGAAAGGATGCAGGTGCATTGACT  
+HWI-EAS443:3:74:319:1135#0/1  
aa`\_\_`a[`¥\_a`\_\_a`[^a^`\_`^`W^^\_XZ\_\_^\_  
@HWI-EAS443:3:74:363:1085#0/1  
ACTTAACCAAGGGACGTGCTGGGAGCAGATGTACACTCC  
+HWI-EAS443:3:74:363:1085#0/1  
aa`aaaaa`aa`\_`\_`[`¥\_\_\_\_\_`\_X\_\_¥\_¥W^]W]U  
@HWI-EAS443:3:74:373:696#0/1  
CTAATGTCGCAGTCCCGCACTCGCGAGATACTCACTAAGA  
+HWI-EAS443:3:74:373:696#0/1  
]`babbbbabababbb\_baaaaaaaa^ba]]XabaZa  
@HWI-EAS443:3:74:398:1105#0/1  
AAAAGAAGTGGAGATCTAATGTCGCAGTCCCGCACTCGC  
+HWI-EAS443:3:74:398:1105#0/1  
aaaaa\_a`aaa[aaa\_`\_`a`\_`\_^^]Z]a^`^a]`^^U]  
@HWI-EAS443:3:74:412:1448#0/1  
GTCCCGTTTTCGTTTTATTACCAACTACGTCCCTTGC  
+HWI-EAS443:3:74:412:1448#0/1  
^abbbb\_ab\_S¥\_b`abbabbbb]abbaab\_\_a`aaV^\_`  
@HWI-EAS443:3:74:481:1707#0/1  
GAATAATGGACATGATTCCAGAGAGGAATGAACAAGGACA  
+HWI-EAS443:3:74:481:1707#0/1  
aabbbb`aabbaa`aabaaaa\_aa]aaaaa`aa\_\_\_`a  
@HWI-EAS443:3:74:484:1552#0/1  
GAGAATAAAAGAACTGAGAGATCTAATGTCGCAGTCCCGC  
+HWI-EAS443:3:74:484:1552#0/1  
\_WTV[UYO^W^]``Y`a`^^aaa`S`S¥]^V]T[W]  
@HWI-EAS443:3:74:520:27#0/1  
TGGTCAACATCATCTTTCTCACTTCTCCTCCTGGAGTGT  
+HWI-EAS443:3:74:520:27#0/1  
abaW`^ba]a`a`\_a`a`^\_aW`^\_a\_T\_]\_\_\_Y`W`W  
@HWI-EAS443:3:74:553:38#0/1  
TAAAAGAACTGAGAGATCTAATGTCGCAGTCCCGCACTCG  
+HWI-EAS443:3:74:553:38#0/1  
aaababaa\_baaaaba`\_aa\_ab]\_aaa`^\_]^^¥QZZ]^  
@HWI-EAS443:3:74:598:1296#0/1  
GAGAATAAAAGAACTGAGAGATCTAATGTCGCAGTCCCGC  
+HWI-EAS443:3:74:598:1296#0/1  
a`a\_aaaaaa\_a`aaaa`a`\_\_`a`\_\_\_]a```\_U`\_AN¥  
@HWI-EAS443:3:74:607:660#0/1  
CGCGAGATACTCACTAAGACCACTGTGGACCATATGGCCA  
+HWI-EAS443:3:74:607:660#0/1  
Zba`Za¥`¥Z``SZ`bb^aZ`a``[¥`a]`VTL^^`XT]

@HWI-EAS443:3:74:623:630#0/1  
GTGGAGTCTGCTGTCCTGAGAGGATTTCTCATTTTGGGCA  
+HWI-EAS443:3:74:623:630#0/1  
a¥aa\_a]aa`aaa\_\_a`\_]``\_`aY\_a`^\_\_]\_a`\_]¥^\_Y  
@HWI-EAS443:3:74:625:1526#0/1  
ATCTGCTCCCAGCACGTCCCTTGGGTAAAGTGCAACACTT  
+HWI-EAS443:3:74:625:1526#0/1  
^X`WSZ`aa^ZP\_a\_]\_¥ab\_XSV]JYXQYO\_`\_\_a\_Y[X  
@HWI-EAS443:3:74:625:1925#0/1  
AAAGAAGTCTAATGTCGCAGTCCCGCACTCGCG  
+HWI-EAS443:3:74:625:1925#0/1  
a`UT^`]ZX¥RZU`^\_\_\_\_^YV^Z\_\_^YWa\_^^¥PV[U^V  
@HWI-EAS443:3:74:627:268#0/1  
GTCCACTTCAGAAATCAAGTTAAAATAAGGAGGAGAGTTG  
+HWI-EAS443:3:74:627:268#0/1  
^[aa`b\_```aaa[S``\_U]\_]``a^aa[`a¥\_W]a`aUa\_  
@HWI-EAS443:3:74:63:1959#0/1  
AGGGGACGTAGTGTGGTAATGAAACGAAACGGGACTCT  
+HWI-EAS443:3:74:63:1959#0/1  
`ZS\_\_\_baTNZG\_]\_a^U¥¥VV\_Y[[RDZa^XQRV]VX[P  
@HWI-EAS443:3:74:650:1695#0/1  
CGAATAAGTTATTGTCAACTTCTCAGTTCCTTGC GTTTCA  
+HWI-EAS443:3:74:650:1695#0/1  
ab\_aaab]`bb`aa[aba^a¥aaaaa^aab`^`b^Ua`\_\_  
@HWI-EAS443:3:74:650:656#0/1  
GAGAATAAAAGAACTGAGAGATCTAATGTCGCAGTCCCGC  
+HWI-EAS443:3:74:650:656#0/1  
`[b^b\_XabUH^`abb\_]`bYaa`bb[bP\_¥\_b^P`Q[Pa  
@HWI-EAS443:3:74:653:454#0/1  
GTTGCCCGTTAGCACTTCTTCTTCTTCTTCTTGACTGATGAT  
+HWI-EAS443:3:74:653:454#0/1  
aWX```aa]aY[Z^\_``^¥^[`\_\_^W¥¥\_`\_X^`WW[YU  
@HWI-EAS443:3:74:667:1643#0/1  
TGGGCCATATCTTGTCTTCTTTGCCCAAAATGAGAAAT  
+HWI-EAS443:3:74:667:1643#0/1  
aW\_```bb`bbbbbbbabbbbbbba`b\_a¥`aababbaa  
@HWI-EAS443:3:74:671:1255#0/1  
GGGGACGTAGTGTGGTAATGAAACGAAACGGGACTCTA  
+HWI-EAS443:3:74:671:1255#0/1  
aaaaaa\_VY^Za`aaaR^aaaaaaS\_aaaa[a\_\_\_\_]]^^`  
@HWI-EAS443:3:74:673:853#0/1  
AGATGCAAAAGTGTCTTTCCAGAACTGGGGAATTGAATCC  
+HWI-EAS443:3:74:673:853#0/1  
ab`aba`a¥a^aaaaaaaab]a`aaaa`^`aaaa`aa\_  
@HWI-EAS443:3:74:675:507#0/1  
TCGCGAGATACTACTAAGACCACTGTGGACCATATGGCC  
+HWI-EAS443:3:74:675:507#0/1  
a]b^XO\_KW]¥Z`^¥YQZ\_[`P`\_UTN\_\_\_\_[`^^¥^\_[PY  
@HWI-EAS443:3:74:682:691#0/1  
GAGAATAAAAGAACTGAGAGATCTAATGTCGCAGTCCCGC

+HWI-EAS443:3:74:682:691#0/1  
aaaa]ba`^a`a`a`aaaab\_aa^^aa^a^`\_a^a^^]\_  
@HWI-EAS443:3:74:79:305#0/1  
GGTGGGTTCACTTTCAAAGGACAAGCGATCATCAGTCA  
+HWI-EAS443:3:74:79:305#0/1  
`^¥`\_][a\_a]a][R\_]¥U`\_ZZ]Y[^a^¥¥W]VUX^W¥]  
@HWI-EAS443:3:74:800:138#0/1  
AAAAGAAGTCTAATGTCGCAGTCCCCTCGC  
+HWI-EAS443:3:74:800:138#0/1  
abaaaa\_a`aaaba`aa\_aa\_\_`\_a`^`^]X\_¥]YYXX  
@HWI-EAS443:3:74:802:1365#0/1  
CTGCTGTAATTGGGTATCTCATTGCCATCATCCACTTCAT  
+HWI-EAS443:3:74:802:1365#0/1  
````aaa[\_\_\_aaaaYa````a``\_\_aa\_aa\_``]X``^^\_  
@HWI-EAS443:3:74:814:786#0/1  
CTGTAATTGGGTATCTCATTGCCATCATCCACTTCATTCT  
+HWI-EAS443:3:74:814:786#0/1  
a`a[`]abaaa\_baababa`aa\_\_aa`^`baa\_a^^``]a  
@HWI-EAS443:3:74:825:520#0/1  
AGTGGATGATGGCAATGAGATACCCAATTACAGCAGACAA  
+HWI-EAS443:3:74:825:520#0/1  
\_b[bbabb[^baXaababbabaa`abbbb]a\_aaba\_a^  
@HWI-EAS443:3:74:866:1030#0/1  
GGGACGTAGTGTGGTAATGAAACGAAAACGGGACTCTAG  
+HWI-EAS443:3:74:866:1030#0/1  
ZW`Ta^Z\_WX\_¥aa^Q[ZX^a[`]Z\_]\_a`[][[[[[ZXZ  
@HWI-EAS443:3:74:919:590#0/1  
GGGACGTAGTGTGGTAATGAAACGAAAACGGGACTCTA  
+HWI-EAS443:3:74:919:590#0/1  
`bbb[``TVaV`WbaaWOb]baaY¥Q\_aaUabaa\_``aa  
@HWI-EAS443:3:74:95:335#0/1  
GCCCTGAGTCAGTGCTAGTCAACACTTATCAATGGATAAT  
+HWI-EAS443:3:74:95:335#0/1  
aaa`]V`a]aX`]\_\_U]YV^]]`\_T¥SUV¥Z^]]^WT^]Q  
@HWI-EAS443:3:74:964:1665#0/1  
CATCATTTCTCACTTCTCCTCCTGGAGTGACATCTGCTC  
+HWI-EAS443:3:74:964:1665#0/1  
`bbbbbaabaa`abaabaaa`aa\_a`\_a^a`aa^`a\_¥`  
@HWI-EAS443:3:74:989:613#0/1  
CACTCGCGAGATACTACTAAGACCACTGTGGACCATATG  
+HWI-EAS443:3:74:989:613#0/1  
^]¥YRU¥SV^`aaY`RX^ba]Z``abb¥YI^GX`QRYaZX  
@HWI-EAS443:3:74:998:554#0/1  
GAGAATAAAAGAAGTCTAATGTCGCAGTCCCCTCGC  
+HWI-EAS443:3:74:998:554#0/1  
`X`^aa``a^`\_aa\_`aaa`\_``a`]a`\_\_`\_]`]]`]]`]  
@HWI-EAS443:3:75:1027:463#0/1  
GAGAGATCTAATGTCGCAGTCCCCTCGCAGATACTC  
+HWI-EAS443:3:75:1027:463#0/1  
H\_]bbb`ababbbXaab`WXab`b^bZabbbababa[ba

@HWI-EAS443:3:75:103:373#0/1  
GATCTAATGTCGCAGTCCCGCACTCGCGAGATACTCACTA  
+HWI-EAS443:3:75:103:373#0/1  
aaaa^`aa¥aaa`\_¥\_aa[\_`a^\_¥`^¥\_]^VV^^¥¥W`  
@HWI-EAS443:3:75:1040:80#0/1  
CCCCGTTTTCGTTTTATTACCAACTACGTCCCCCTTGCCC  
+HWI-EAS443:3:75:1040:80#0/1  
a\_[aX\_aa`bN`^R^a[`YR`a]\_Za\_Q]]YXXXYW[UYY  
@HWI-EAS443:3:75:1042:1277#0/1  
CCCCGTTTTCGTTTTATTACCAACTACGTCCCCCTTGCCC  
+HWI-EAS443:3:75:1042:1277#0/1  
a\_a`^aabbb`^aabababb`\_baabb^\_aaaa`^a^¥a  
@HWI-EAS443:3:75:1044:1798#0/1  
GCTGTAATTGGGTATCTCATTGCCATCATCCACTTCATTC  
+HWI-EAS443:3:75:1044:1798#0/1  
`aaa\_a`baaaa]baa`aa\_a`^`aaaa[]a`aaa`a`^a  
@HWI-EAS443:3:75:1082:916#0/1  
CAACAAGGCAACCAAACGACTTACAGTTCTTGAAAGGAT  
+HWI-EAS443:3:75:1082:916#0/1  
`bbabb`bbba`abbbbaabbbbaabaababba^aa`aa  
@HWI-EAS443:3:75:1141:472#0/1  
AGCAGTGTGAGCAGACCCATTAGCATCTCTTGGAAATG  
+HWI-EAS443:3:75:1141:472#0/1  
aaaaa`b\_aa`aaa`\_\_\_aaaa\_\_`a[a^a¥`aa`a`\_`^`  
@HWI-EAS443:3:75:1158:2009#0/1  
ATGAAGTGGATGATGGCAATGAGATACCCAATTACAGCAG  
+HWI-EAS443:3:75:1158:2009#0/1  
T`bb`b`ab]`baa\_Y\_`^X\_bb^Vbabb`bbabbb`aba  
@HWI-EAS443:3:75:1159:268#0/1  
GGTTGCCCGTTAGCACTTCTTCTTCTTCTTCTTGACTGATGA  
+HWI-EAS443:3:75:1159:268#0/1  
aa[b\_W`]b^aaa\_^^a`\_a`Wa\_]aa^Vaa`^]\_a^^\_`^  
@HWI-EAS443:3:75:1172:575#0/1  
AAAAGAAGTGGAGATCTAATGTCGCAGTCCCGCACTCGC  
+HWI-EAS443:3:75:1172:575#0/1  
abbbb`baabb`b`ba`bbaabaabaaa^`^`a`\_[a`^a  
@HWI-EAS443:3:75:1201:1227#0/1  
CTCCCTTGATGGTGGCGTACATGCTAGAAAGAGAATTGGT  
+HWI-EAS443:3:75:1201:1227#0/1  
aabba]aVG[a\_HaU`XP^[\_`aaabaaaaa`^`ab^aa]  
@HWI-EAS443:3:75:120:2021#0/1  
AAAAGAAGTGGAGATCTAATGTCGCAGTCCCGCACTCGC  
+HWI-EAS443:3:75:120:2021#0/1  
\_[\_Yaaaaa`a\_a\_a`\_aa\_aYa]`Z^U`a\_Y^W[U\_U\_  
@HWI-EAS443:3:75:1247:1675#0/1  
GTCCCGCACTCGCGAGATACTCACTAAGACCACTGTGGAC  
+HWI-EAS443:3:75:1247:1675#0/1  
a`Z]Z]^`a`a`a`Z]Y[a\_\_¥`X\_[aa]¥U\_\_\_aYa[`¥  
@HWI-EAS443:3:75:1261:709#0/1  
TGATAAGTGTGACTAGCACTGACTCAGGGCCATTGATCT

+HWI-EAS443:3:75:1261:709#0/1  
a`^b¥¥¥Z`\_¥\_^]¥WZ¥]aaaaab[a]Ta\_Xaa`b[V]a  
@HWI-EAS443:3:75:1266:404#0/1  
CATCTCTCTTGGAAATGTGCCACAGCACACAGATTGGAGG  
+HWI-EAS443:3:75:1266:404#0/1  
`baababbbb]bbbbbbaba`bbabaa`aaaaabbbbaaaa  
@HWI-EAS443:3:75:1324:191#0/1  
GACATGATTCCAGAGAGGAATGAACAAGGACAAACCCTCT  
+HWI-EAS443:3:75:1324:191#0/1  
aabbbbbbb`¥`bbbabbbbbbaaababaaaaaba^¥aYa  
@HWI-EAS443:3:75:1335:161#0/1  
GCTTGTTCCTCAGTTGGATTCTGTCTAAGGATGTCCACCA  
+HWI-EAS443:3:75:1335:161#0/1  
`^T\_\_]\_TT]]a¥TXaa[W\_R]^YQ^[^]]U]Z[TLZSUY  
@HWI-EAS443:3:75:1362:997#0/1  
GGGCAAGGGGACGTAGTGTGGTAATGAAACGAAAACGGG  
+HWI-EAS443:3:75:1362:997#0/1  
`bbbbabbbba`b\_abababb`XaaaaabbIaabbaX`aa  
@HWI-EAS443:3:75:1384:1428#0/1  
TCTGATGTCAGTATTCTTGCCCCACTTCATTTGGGAAAA  
+HWI-EAS443:3:75:1384:1428#0/1  
aa¥baba\_\_ba[baaY^\_a`W^Wq]\_a`\_aa\_\_WZ^a`\_  
@HWI-EAS443:3:75:1408:1364#0/1  
ATAAAAGAAGACTGAGAGATCTAATGTCGCAGTCCCGCACTC  
+HWI-EAS443:3:75:1408:1364#0/1  
aaabab\_ab\_aaaa`aaaaaa`aa^\_a^a\_^\_]\_^[YS`]  
@HWI-EAS443:3:75:140:1959#0/1  
GATCTAATGTCGCAGTCCCGCACTCGCGAGATACTACTACTA  
+HWI-EAS443:3:75:140:1959#0/1  
`X[aabb\_a0`¥\_aX[\_ba\_`a]Y[`aZ]\_ZWZ¥Z^^ZZ\_  
@HWI-EAS443:3:75:1427:976#0/1  
ATCAAACCTTTGGTCAACATCATCATTCTCACTTCTCCTC  
+HWI-EAS443:3:75:1427:976#0/1  
abbbbaabbbbb`\_ababbaaaaabaab`aaba`b^`aa  
@HWI-EAS443:3:75:1442:660#0/1  
TTCCTGATGTGTACTTTTTGATTATGGCCATATGGTCCAC  
+HWI-EAS443:3:75:1442:660#0/1  
aa\_a[]`abWa`\_\_`bbaaa\_aaa^`]`\_`¥WTVaQsX[V  
@HWI-EAS443:3:75:1443:924#0/1  
TTGCCTTGTTGTAATTGAATACTGGAGAATTGCCTCTTAC  
+HWI-EAS443:3:75:1443:924#0/1  
abaaYbaaabbaaaaa`aaba^aaa\_aaaaa`\_\_a^aa\_\_  
@HWI-EAS443:3:75:1466:1237#0/1  
CTGATGTGTACTTTTTGATTATGGCCATATGGTCCACAGT  
+HWI-EAS443:3:75:1466:1237#0/1  
\_bbbbbbbabbbbbbaabbb`^a\_baa`J^X^\_a\_aT^  
@HWI-EAS443:3:75:146:334#0/1  
GTCCCCTTTTCGTTTCATTACCAACTACGTCCCCTTGC  
+HWI-EAS443:3:75:146:334#0/1  
a[``ab`aaaa\_\_a`U\_^`¥\_\_U[\_`^a\_`S¥Y]`TW¥Y



@HWI-EAS443:3:75:1474:1024#0/1  
TGGGTATCTCATTGCCATCATCCACTTCATTCTGAGTGCG  
+HWI-EAS443:3:75:1474:1024#0/1  
]bb`G`aabaababa^`aa\_\_a\_Wa`GXaa`[a][H\_Ga  
@HWI-EAS443:3:75:1502:890#0/1  
CACATCTGGGTGGAGTCTGCTGTCCTGAGAGGATTTCTC  
+HWI-EAS443:3:75:1502:890#0/1  
a``Saabb^^a\_bbabaabaLOZb`Y`a`^Zb`¥F\_¥R\_a  
@HWI-EAS443:3:75:1603:1522#0/1  
AAAGAAGTGGAGATCTAATGTCGCAGTCCCGCACTCGCG  
+HWI-EAS443:3:75:1603:1522#0/1  
aa`Y[\_[\_[RPR\_X[\_[\_a\_¥VV¥ZaQW^U\_¥¥Z^Q¥Y\_  
@HWI-EAS443:3:75:1605:826#0/1  
CACTAAGACCACTGTGGACCATATGGCCATAATCAAAAAG  
+HWI-EAS443:3:75:1605:826#0/1  
\_Y]``aaabb`\_P^]Za`¥XXYX\_Y\_VZYN[¥Z]¥\_`Sα¥  
@HWI-EAS443:3:75:160:783#0/1  
AGAGGATTTCTCATTTTGGGCAAAGAAGACAAGAGATATG  
+HWI-EAS443:3:75:160:783#0/1  
aabba[a`aabb\_aaaab^a\_]aaa`\_aa``\_a^a\_\_aZ\_  
@HWI-EAS443:3:75:160:95#0/1  
CAATGAGGAAAATTGCATCCTACTCTGTTCTGGTGGAGCA  
+HWI-EAS443:3:75:160:95#0/1  
ababb^bbb]Y`a`babbbaa^baaabab]abb^a`\_a\_\_  
@HWI-EAS443:3:75:1616:1481#0/1  
CAAGGACAAACCCTCTGGAGCAAACAAACGATGCTGGAT  
+HWI-EAS443:3:75:1616:1481#0/1  
`bbbbbb[bb\_abbabbbba`\_`ba``bbaabbbba```\_``  
@HWI-EAS443:3:75:164:268#0/1  
GTCCTTGTTCAATCCTCTCTGGAATCATGTCCATTATTCT  
+HWI-EAS443:3:75:164:268#0/1  
a`\_``\_`W`]\_aa\_```\_^`a]`a^Z`\_a\_\_`\_aTZ^^T]  
@HWI-EAS443:3:75:1676:1614#0/1  
CTGCTGTCCTGAGAGGATTTCTCATTTTGGGCAAAGAAGA  
+HWI-EAS443:3:75:1676:1614#0/1  
\_\_aba\_\_ba`b`baabUa\_a`^¥\_a`aa`aaba^a\_X\_a`  
@HWI-EAS443:3:75:1682:60#0/1  
AAAGAAGTGGAGATCTAATGTCGCAGTCCCGCACTCGCG  
+HWI-EAS443:3:75:1682:60#0/1  
abbbbaabb`babaa\_bbabb\_aa\_a`¥\_`\_\_\_`¥`]`¥`  
@HWI-EAS443:3:75:1741:1257#0/1  
CTGGGCCATATCTTGTCTTTTGGCCAAAATGAGAAA  
+HWI-EAS443:3:75:1741:1257#0/1  
\_\_`W[PTJ`Z¥XXQ\_]\_ba\_\_ZV¥^\_H\_VZ]\_\_a\_abaa[  
@HWI-EAS443:3:75:1746:809#0/1  
ATCATTTCTCACTTCTCCTCCTGGAGTGTACATCTGCTCC  
+HWI-EAS443:3:75:1746:809#0/1  
^\_abbbba\_`bb]^baba]a`]a^¥]a[]]a^[a[a^Y\_V]  
@HWI-EAS443:3:75:215:691#0/1  
GTCCCGTTTTCGTTTTATTACCAACTACGTCCCTTGC

+HWI-EAS443:3:75:215:691#0/1  
a\_bbaa\_abbba`aabba`ba^aa^aaaZaa^`a^`  
@HWI-EAS443:3:75:216:249#0/1  
GTCCCGTTTTCGTTTCATTACCAACTACGTCCCCTTGC  
+HWI-EAS443:3:75:216:249#0/1  
aWU`Q¥]Ka^Wa[TU\_`Y]¥NVX]RVYNW\_ZVZZ[ZBBBB  
@HWI-EAS443:3:75:26:937#0/1  
CGTTTGTTCCTCCAGAGGTTTGTCTTGTTCATTCCT  
+HWI-EAS443:3:75:26:937#0/1  
`TaZbW[^aa\_baV`JZSaL¥]ZWX\_N]RX¥^X¥R][[  
@HWI-EAS443:3:75:270:578#0/1  
CCCGTTTTCGTTTCATTACCAACTACGTCCCCTTGGCC  
+HWI-EAS443:3:75:270:578#0/1  
abbbbaabbbbabbbbbbabbababab\_aaaa]`\_a\_a  
@HWI-EAS443:3:75:296:328#0/1  
GAACTGAGAGATCTAATGTCGCAGTCCCGCACTCGCGAGA  
+HWI-EAS443:3:75:296:328#0/1  
^U]aaba^`b]`^a^ab\_`[\_W\_X]a\_¥W\_`^`  
@HWI-EAS443:3:75:300:111#0/1  
ACACTTCAATATAAACTGCCTGTTCCCGGGCTACTGG  
+HWI-EAS443:3:75:300:111#0/1  
`aaaa`aaaa`aaaa`a[\_a]¥]a]^`\_¥^\_U^]  
@HWI-EAS443:3:75:371:906#0/1  
GTGGATGATGGCAATGAGATACCCAATTACAGCAGACAAG  
+HWI-EAS443:3:75:371:906#0/1  
a^aa`a`a`a`U[Z]\_\_^a\_\_`^^`\_]Y`^^]]^W^  
@HWI-EAS443:3:75:381:182#0/1  
AATAAAAGAACTGAGAGATCTAATGTCGCAGTCCCGCACT  
+HWI-EAS443:3:75:381:182#0/1  
Q\_b`T¥`b`b\_Q\_bba^¥Ubbbab¥K\_[b\_YS`ZaZTa\_  
@HWI-EAS443:3:75:384:1583#0/1  
ATTCAATTCCCCAGTTCTGGAAAAGCACTTTTGCATCTTT  
+HWI-EAS443:3:75:384:1583#0/1  
]aababaaaaa^\_\_`aa`\_a^a``aa\_]^\_\_^]`\_\_  
@HWI-EAS443:3:75:394:249#0/1  
GAGAGATCTAATGTCGCAGTCCCGCACTCGCGAGATACTC  
+HWI-EAS443:3:75:394:249#0/1  
`abbbbaa`\_a^abaV`aaaaaKaa¥`\_a¥a\_`^]`]  
@HWI-EAS443:3:75:406:1962#0/1  
GTGAATTCTTCATACCCTTCATGTACTCTTATTTTCAGTG  
+HWI-EAS443:3:75:406:1962#0/1  
\_`^`T]aRaa`baaabbaaaaa`aaaaba]aaaaa`\_a  
@HWI-EAS443:3:75:417:1695#0/1  
GGGGACGTAGTGTGGTAATGAAACGAAACGGGACTCTA  
+HWI-EAS443:3:75:417:1695#0/1  
`Ua[bbbX\_b\_`Y`baXa\_]aa`b\_[¥`aa[VSX^`YTV\_  
@HWI-EAS443:3:75:432:1061#0/1  
GTTTGGAGGTTGCCGTTAGCACTTCTTCTTCTTCTTGA  
+HWI-EAS443:3:75:432:1061#0/1  
a^¥a`ZXa]PZ[aa`\_Y]\_TQ[Y¥\_^^][YUZ[^]¥]^`^`

@HWI-EAS443:3:75:437:1526#0/1  
GCTAGAGTCCCCTTTTCGTTTCATTACCAACTACTCGTCC  
+HWI-EAS443:3:75:437:1526#0/1  
ababZa^`abbbaaaab\_`aaba][bb`b\_aaaaaaaXaa  
@HWI-EAS443:3:75:43:328#0/1  
AACAAGGACAAACCCTCTGGAGCAAAACAAACGATGCTGG  
+HWI-EAS443:3:75:43:328#0/1  
aa`\_\_a\_\_a^`a^a``\_\_\_\_\_U^X`RZX\_``\_\_^^U\_]X^^  
@HWI-EAS443:3:75:442:1129#0/1  
AGAGAATAAAAGAACTGAGAGATCTAATGTCGCAGTCCCG  
+HWI-EAS443:3:75:442:1129#0/1  
a`]aaa[bbabaaaaaba`]aa`aaaa\_a`aaa^\_\_\_\_]  
@HWI-EAS443:3:75:446:721#0/1  
AAAAGAAGTCTGAGAGATCTAATGTCGCAGTCCCGCACTCGC  
+HWI-EAS443:3:75:446:721#0/1  
`WQ`baabaaaZZXa]a`aa`a^`[¥[a¥^a\_a`a^]`a\_`  
@HWI-EAS443:3:75:455:480#0/1  
GAGAGATCTAATGTCGCAGTCCCGCACTCGCGAGATACTC  
+HWI-EAS443:3:75:455:480#0/1  
a\_]\_ZZ[`a\_¥]\_WQaa\_a]Y]W][ZP`QX\_Z\_U[VX¥RPY  
@HWI-EAS443:3:75:468:605#0/1  
CGCACTCGCGAGATACTCACTAAGACCACTGTGGACCATA  
+HWI-EAS443:3:75:468:605#0/1  
ab\_K\_bbabb```aaaaabaaa]a\_`aab\_\_Pa`aa`a[`  
@HWI-EAS443:3:75:522:1917#0/1  
AAAAGAAGTCTGAGAGATCTAATGTCGCAGTCCCGCACTCGC  
+HWI-EAS443:3:75:522:1917#0/1  
a^KWXUab\_[a`aa`aaS[Ya^Ra^aa^ZY`aY[HVMW\_^  
@HWI-EAS443:3:75:563:292#0/1  
AATAAAAGAACTGAGAGATCTAATGTCGCAGTCCCGCACT  
+HWI-EAS443:3:75:563:292#0/1  
ab``bbaa`ab`abaa`YXaabaabX][[]a\_\_a\_\_a¥¥L  
@HWI-EAS443:3:75:634:1468#0/1  
GAAGATCCAGATGAAGGCACATCTGGGGTGGAGTCTGCTG  
+HWI-EAS443:3:75:634:1468#0/1  
`bba\_ababaaabbaabbaaaaa\_`a¥a¥\_a[aa``\_a  
@HWI-EAS443:3:75:658:689#0/1  
AAAAGAAGTCTGAGAGATCTAATGTCGCAGTCCCGCACTCGC  
+HWI-EAS443:3:75:658:689#0/1  
aaabaaaaaab`aa\_aaaa\_aa\_a]\_a\_]\_^\_\_`\_\_^\_^\_  
@HWI-EAS443:3:75:660:269#0/1  
CTTTTTGATTATGGCCATATGGTCCACAGTGGTCTTAGTG  
+HWI-EAS443:3:75:660:269#0/1  
aabbbbbbbbbbbbbbb\_baK\_bababb\_\_bb\_`abXYV]  
@HWI-EAS443:3:75:662:308#0/1  
TTTGTCTTGTTCATTCTCTCTGGAATCATGTCCATTAT  
+HWI-EAS443:3:75:662:308#0/1  
aaab`a`abaaa`aaa`aa```aa\_`\_a\_aaa^¥a`\_```  
@HWI-EAS443:3:75:735:250#0/1  
GGGCGATCTGAACCTTGTCAATAGGGCAAACCGACTG

+HWI-EAS443:3:75:735:250#0/1  
aabbaabab^ab\_bbbaaaa`aba\_aab`a`aaaa`\_aa  
@HWI-EAS443:3:75:747:1005#0/1  
TGGGTATCTCATTGCCATCATCCACTTCATTCTGAGTGCG  
+HWI-EAS443:3:75:747:1005#0/1  
aaab\_aa][`aba]`aa`]``U``[``\_aa\_\_a\_\_\_V^Z`  
@HWI-EAS443:3:75:775:690#0/1  
GTCCCGTTTTTCGTTTCATTACCAACTACGTCCCTTGC  
+HWI-EAS443:3:75:775:690#0/1  
a\_bb`baaba]aY¥`aa```^]a]Y]\_\_\_]¥VX\_\_[U[^[^  
@HWI-EAS443:3:75:839:820#0/1  
GCTGTAATTGGGTATCTCATTGCCATCATCCACTTCATTC  
+HWI-EAS443:3:75:839:820#0/1  
\_a^a[a]aaaa`aabaa]aaaa\_a^]aa`\_\_a^^X^^\_\_  
@HWI-EAS443:3:75:844:493#0/1  
AATAAAAGAACTGAGAGATCTAATGTCGCAGTCCCGCACT  
+HWI-EAS443:3:75:844:493#0/1  
`babbUb`V\_`aab\_b[\_aaaabb^aaabb\_\_^`aaaa^  
@HWI-EAS443:3:75:845:1620#0/1  
GATGATGGCAATGAGATACCCAATTACAGCAGACAAGAGA  
+HWI-EAS443:3:75:845:1620#0/1  
abaa`bbaabaa`aababba`baa`a`a``aa`\_a`^\_\_b  
@HWI-EAS443:3:75:880:1160#0/1  
GGTTCACCTTCAAAGGACAAGCGGATCATCAGTCAAGAA  
+HWI-EAS443:3:75:880:1160#0/1  
a^XZ\_^J\_[bV[^]YSPVRTJY^`]^Y\_]UPXaN^`\_aOD  
@HWI-EAS443:3:75:917:378#0/1  
TTCCTGATGTGTACTTTTTGATTATGGCCATATGGTCCAC  
+HWI-EAS443:3:75:917:378#0/1  
ababaaabbYb`a`ab`aaaaaa^\_\_\_`\_]`aZaXPP]T  
@HWI-EAS443:3:75:984:986#0/1  
CGAATAAGTTATTGTCAACTTCTCAGTTCCTTGCCTTCA  
+HWI-EAS443:3:75:984:986#0/1  
^¥ZYS^TQ¥aaa\_N¥`¥aaa[ab`XOV]aa]]¥RY\_[¥Y`  
@HWI-EAS443:3:75:994:1508#0/1  
ATCATTCTCCTTCTCCTCCTGGAGGTACATCTGCTCC  
+HWI-EAS443:3:75:994:1508#0/1  
¥[\_[abb¥aaabba[a``bbbba^]\_H\_QabZZ\_\_¥\_a¥W  
@HWI-EAS443:3:76:1003:1167#0/1  
ATGGTGGACATCCTTAGACAGAATCCAAGGAGGAACAAG  
+HWI-EAS443:3:76:1003:1167#0/1  
aa[b\_aa]\_ababbbbaabaaaaaabXaaabba`a``a  
@HWI-EAS443:3:76:1024:1743#0/1  
CTGCTGTAATTGGGTATCTCATTGCCATCATCCACTTCAT  
+HWI-EAS443:3:76:1024:1743#0/1  
aba^aa^aabbb\_b\_ba``aba`ab¥`aaa^]Y`^`[NYa  
@HWI-EAS443:3:76:1042:585#0/1  
GTCCCGCACTCGCGAGATACTACTAAGACCACTGTGGAC  
+HWI-EAS443:3:76:1042:585#0/1  
aP``Z¥UOYZYUY`ZY[XLX¥YWPWXX^]VT]RPLFTNTN

@HWI-EAS443:3:76:1052:1395#0/1  
GTTTGGTTGCCTTGTGTAATTGAATACTGGAGAATTGCC  
+HWI-EAS443:3:76:1052:1395#0/1  
aR¥ZZUKRZ^ZX^YXVOQWUSXYWUXYUUJTTXYRTZVS  
@HWI-EAS443:3:76:1053:969#0/1  
ATCTAATGTCGCAGTCCCGCACTCGCGAGATACTCACTAA  
+HWI-EAS443:3:76:1053:969#0/1  
a`a`aabaV]ZV]`S\_`a[Pa`YZ[[^NRZS[STW[V^  
@HWI-EAS443:3:76:1060:1214#0/1  
CTTGAAAGGATGCAGGTGCATTGACTGAAGATCCAGATG  
+HWI-EAS443:3:76:1060:1214#0/1  
^V\_aa[^R\_`¥^Z`Z^M`[Xa]Ya\_aaaa^\_ZNYaa^ZZ  
@HWI-EAS443:3:76:1081:1793#0/1  
CTGCTGTCCTGAGAGATTTCTCATTGTTGGCAAAGAAGA  
+HWI-EAS443:3:76:1081:1793#0/1  
`a`a`abb`bbb`^^\_ababa````aa`\_Z]``\_aa`a  
@HWI-EAS443:3:76:1110:1554#0/1  
AGAATTGCCTCTTACCAGTATCCTCAACCCTGATCCTCTC  
+HWI-EAS443:3:76:1110:1554#0/1  
`WGMT\_`a`a`][`aa`^^\_YY[`T¥\_^VSTVRFXW^XZZ  
@HWI-EAS443:3:76:1171:138#0/1  
AGAGAATAAAAGAACTGAGAGATCTAATGTCGCAGTCCCG  
+HWI-EAS443:3:76:1171:138#0/1  
ababbbbbbbbaab`bbbbbbbaa`ba`bb^\_a`aa\_]\_]\_Y  
@HWI-EAS443:3:76:117:1952#0/1  
GAGAGATCTAATGTCGCAGTCCCGCACTCGCGAGATACTC  
+HWI-EAS443:3:76:117:1952#0/1  
abb]\_`ab\_abb\_`bSbaa^aaaZaR^¥a[¥Q^[ZTXWS]  
@HWI-EAS443:3:76:119:1013#0/1  
TGATGATCCGCTTGTCTTTTGAAGTGAACCCACCAAAA  
+HWI-EAS443:3:76:119:1013#0/1  
abaa`Y`aa`aa\_a[a`\_a`a[a\_\_\_Y`\_`\_\_\_\_a[^^U  
@HWI-EAS443:3:76:1203:1040#0/1  
TCCCGTTTTCGTTTCATTACCAACTACGTCCCCTTGCC  
+HWI-EAS443:3:76:1203:1040#0/1  
`ba`^J\_bbab¥\_`Saaab`aaaXaV\_a^\_V]Z^WY\_\_]X  
@HWI-EAS443:3:76:1218:1154#0/1  
AAAAGAACTGAGAGATCTAATGTCGCAGTCCCGCACTCGC  
+HWI-EAS443:3:76:1218:1154#0/1  
``\_b]]abbbabbbababab`aab`^aa\_aaaa\_Wa`  
@HWI-EAS443:3:76:1229:848#0/1  
CAACACTTCAATATAAACACTGCCTGTTCCGCCGGCTACT  
+HWI-EAS443:3:76:1229:848#0/1  
aaaa`aaa`\_\_Y^`\_\_`¥¥L]aYQ^`¥^\_\_]YT\_]YUWRX  
@HWI-EAS443:3:76:122:889#0/1  
TGCTGTAATTGGGTATCTCATTGCCATCATCCACTTCATT  
+HWI-EAS443:3:76:122:889#0/1  
abbbb`\_Sabaaa\_bababaaaaaaaaa`Z^`a`\_`\_\_  
@HWI-EAS443:3:76:1261:1228#0/1  
GTACTATTGTCTCCCGAAGAAGTCAGTGAAACGCAAGGAA

+HWI-EAS443:3:76:1261:1228#0/1  
a\_aa\_a`a\_\_\_\_`[\_\_\_\_Z\_a¥V¥`\_X^`Z\_W\_^`\_]X^^  
@HWI-EAS443:3:76:1282:634#0/1  
CAAAATGAGAAATCCTCTCAGGACAGCAGACTCCACCCCA  
+HWI-EAS443:3:76:1282:634#0/1  
ab`\_`bbbbbbabab`baaaaaaa`aaaa`ab`]^\_a  
@HWI-EAS443:3:76:1284:1177#0/1  
AGTTTTGGTGGGTTCACTTTCAAAGGACAAGCGGATCAT  
+HWI-EAS443:3:76:1284:1177#0/1  
ab`b`aaa\_aaa\_aabaaaa\_aaaaa\_^^``\_`\_`\_Ra\_  
@HWI-EAS443:3:76:1286:140#0/1  
GACATATGCAAGGCAGCAATAGGGTTGAGGATTAGCTCAT  
+HWI-EAS443:3:76:1286:140#0/1  
a`\_\_\_\_aa\_^^a^]\_\_W[Za]`a`W¥`X``Z¥U]ZHYOZZ  
@HWI-EAS443:3:76:1343:2024#0/1  
AGAATAAAAGAACTGAGAGATCTAATGTCGCAGTCCCGCA  
+HWI-EAS443:3:76:1343:2024#0/1  
Z\_Z[¥`YS¥[aWG[S[aUW¥^¥a\_`Ua]\_ZSS]LVa]PG[  
@HWI-EAS443:3:76:1359:140#0/1  
TGGTATTCTACAAGAGATTGCATGATCAAGGCAGTTAG  
+HWI-EAS443:3:76:1359:140#0/1  
aba^a`^¥^`]^\_a^\_RTa\_¥KZ\_^Y]]¥]\_\_GXZFPBB  
@HWI-EAS443:3:76:1365:272#0/1  
GTCCCGTTTTCGTTTTATTACCAACTACGTCCCCTTGC  
+HWI-EAS443:3:76:1365:272#0/1  
aXYOU]]^ZVV[WYTVTVY]TYYVXVYXOXRYSNXYYX  
@HWI-EAS443:3:76:1407:871#0/1  
GAATAATGGACATGATTCCAGAGAGGAATGAACAAGGACA  
+HWI-EAS443:3:76:1407:871#0/1  
a`\_a\_^^a^]Z\_\_¥^^^MR]^\_O\_WW\_W\_¥ZXY^^OWXX  
@HWI-EAS443:3:76:1432:951#0/1  
AAAGAAGTGGAGATCTAATGTCGCAGTCCCGCACTCGCG  
+HWI-EAS443:3:76:1432:951#0/1  
`^ab[aabb```a`a\_aa\_ab`]W^a^UXVZ]Y^^]\_]\_  
@HWI-EAS443:3:76:1438:33#0/1  
AAAAGAAGTGGAGATCTAATGTCGCAGTCCCGCACTCGCG  
+HWI-EAS443:3:76:1438:33#0/1  
abab`\_babbaaaa`b\_baab`]aXaa[[WS]]\_]^X\_V  
@HWI-EAS443:3:76:1445:897#0/1  
ATGGGAGTAGATGAATACTCCAGCACGGAGAGAGTGGTAG  
+HWI-EAS443:3:76:1445:897#0/1  
]b\_bbaaaababa]]a`Zaaaab^`^ba[a\_`\_a[aaX^B  
@HWI-EAS443:3:76:1458:1743#0/1  
AATAAAAGAACTGAGAGATCTAATGTCGCAGTCCCGCACT  
+HWI-EAS443:3:76:1458:1743#0/1  
aabbaaaaa\_baa`aa`abaabbY``ZaaY^X\_\_\_\_[\_]  
@HWI-EAS443:3:76:1493:1601#0/1  
CAAACCTTTGGTCAACATCATCATTCTCACTTCTCCTCCT  
+HWI-EAS443:3:76:1493:1601#0/1  
`bbbabbbbabbbb`bbbbaabbbb^babaaaaba\_aa[a

@HWI-EAS443:3:76:1502:491#0/1  
GTGGGTTCACTTTCAAAGGACAAGCGGATCATCAGTCAA  
+HWI-EAS443:3:76:1502:491#0/1  
`¥a`]Y\_\_`[`a`W^\_``^¥\_\_Z\_X\_a]]MX\_TX^WRYZ  
@HWI-EAS443:3:76:1542:1081#0/1  
GAGAATAAAAGAACTGAGAGATCTAATGTCGCAGTCCCGC  
+HWI-EAS443:3:76:1542:1081#0/1  
^¥[YTXabXK\_`URaaaa]a]aZ`]Z`U¥YMEU`URVQQW  
@HWI-EAS443:3:76:1546:591#0/1  
GAATAAAAGAACTGAGAGATCTAATGTCGCAGTCCCGCAC  
+HWI-EAS443:3:76:1546:591#0/1  
a`^```\_a^\_PXY¥\_a\_a^a`PTYa[XVKTT^\_BBBBBB  
@HWI-EAS443:3:76:156:1119#0/1  
GGAGTAAGGATGGTGGACATCCTTAGACAGAATCCAAGT  
+HWI-EAS443:3:76:156:1119#0/1  
`aa\_\_V`a¥YXOXO\_XO[YT¥ZYS¥¥VXa\_¥WLW\_]URQ  
@HWI-EAS443:3:76:1599:1555#0/1  
AGGGGACGTAGTGTGGTAATGAAACGAAAACGGGACTCT  
+HWI-EAS443:3:76:1599:1555#0/1  
abaaaaabaab^b`bab\_aaa]aaaSa\_aaaVaaa\_R\_[\_`  
@HWI-EAS443:3:76:1614:841#0/1  
GTTTTCGTTTCATTACCAACTACGTCCCCTTGCCCAAT  
+HWI-EAS443:3:76:1614:841#0/1  
aTXQNX\_XVTPVZWRNNZZZZWZWMUOXSZXSXZZOWX  
@HWI-EAS443:3:76:161:1735#0/1  
GCAGGTGCATTGACTGAAGATCCAGATGAAGGCACATCTG  
+HWI-EAS443:3:76:161:1735#0/1  
a\_Z]VNV[FJQVZY¥[R]Y^XUYQZ¥RKWZOYXZS¥BBBB  
@HWI-EAS443:3:76:1620:357#0/1  
CTGGGGTGGAGTCTGCTGTCCTGAGAGGATTTCTCATTTT  
+HWI-EAS443:3:76:1620:357#0/1  
abb`bbbb`baa]baabaaabbabb\_bbaba`ababaaab  
@HWI-EAS443:3:76:163:1524#0/1  
ATTACAACAAGGCAACCAAACGACTTACAGTTCTTGAAA  
+HWI-EAS443:3:76:163:1524#0/1  
aaabbaa`Z\_]`^`\_V\_aaaZ]`\_`Z\_\_\_\_\_]]`\_^XY^^  
@HWI-EAS443:3:76:1648:1339#0/1  
AAAAGAACTGAGAGATCTAATGTCGCAGTCCCGCACTCGC  
+HWI-EAS443:3:76:1648:1339#0/1  
aabba`baba\_`aaaaaaa^bbaaa\_`a\_a`X``\_a[^a]  
@HWI-EAS443:3:76:1689:1462#0/1  
CACTCGCGAGATACTACTAAGACCACTGTGGACCATATG  
+HWI-EAS443:3:76:1689:1462#0/1  
abbbabaaababa\_aabaaaaba\_^a\_aaa\_\_a`\_aa````  
@HWI-EAS443:3:76:1706:1168#0/1  
CTAATGTCGCAGTCCCGCACTCGCGAGATACTACTAAGA  
+HWI-EAS443:3:76:1706:1168#0/1  
abbabbabbbba]abbaabb]a^a]aa`bWa]bab\_]T]  
@HWI-EAS443:3:76:1727:1387#0/1  
ATTTTCCTCATTGACTGTGAATGTGAGAGGATCAGGGTTG

+HWI-EAS443:3:76:1727:1387#0/1  
a^bbbaab\_aaab`bbbababab[[V\_¥`\_Ua]aaa]\_\_T  
@HWI-EAS443:3:76:1764:225#0/1  
CAGATCGCCCTAACTGCCTTGATCATGCAATCCTCTTGT  
+HWI-EAS443:3:76:1764:225#0/1  
``\_ZX¥X]]^\_``\_YYa`X]aX¥a\_aYVS\_\_\_\_]^`Y  
@HWI-EAS443:3:76:1780:694#0/1  
AAAGAAGTCTAATGTCGAGTCCCGCACTCGCG  
+HWI-EAS443:3:76:1780:694#0/1  
\_aaaS`a[XUSSVaTW^\_¥\_YLWa]]LFML¥RPDHS[UX  
@HWI-EAS443:3:76:185:781#0/1  
AACCAAACGACTTACAGTTCTTGAAAGGATGCAGGTGCA  
+HWI-EAS443:3:76:185:781#0/1  
]]abab]aaWa\_a\_a\_b\_aa^aa]a]\_\_a\_`a^\_YSW]\_  
@HWI-EAS443:3:76:195:235#0/1  
AGAAGAGCAGCAGTGTGAGACCCATTAGCATCTCTCT  
+HWI-EAS443:3:76:195:235#0/1  
aaabaaaabaabb\_`[``a\_\_\_^Z`^\_Z\_[WX`WY^^¥¥^  
@HWI-EAS443:3:76:270:1955#0/1  
CTAATGTCGAGTCCCGCACTCGCGAGATACTCACTAAGA  
+HWI-EAS443:3:76:270:1955#0/1  
abbbb`\_b\_bbbaabb]babababaW[a`aa]`aa^b`Y`  
@HWI-EAS443:3:76:283:1172#0/1  
CTAATGTCGAGTCCCGCACTCGCGAGATACTCACTAAGA  
+HWI-EAS443:3:76:283:1172#0/1  
a\_^¥\_]Y`^bbX`\_^\_bbb]\_\_a`P\_ZX\_Z`]`TX]ZX^  
@HWI-EAS443:3:76:294:729#0/1  
GCTGTAATTGGGTATCTCATTGCCATCATCCACTTCATTC  
+HWI-EAS443:3:76:294:729#0/1  
aa\_a\_a^``a`aW`^ZZ```¥^Z\_\_^Y¥]^`\_^`[]]¥W  
@HWI-EAS443:3:76:300:1302#0/1  
CCCGTTTTCGTTTCATTACCAACTACGTCCCCTTGCCC  
+HWI-EAS443:3:76:300:1302#0/1  
abaaabbbb`\_bab]bbbbabZb\_baab`\_abaaa\_`^a]  
@HWI-EAS443:3:76:309:74#0/1  
CCCCTTTGCTGCTGCCACCAGAACAGAGTAGGATGCAA  
+HWI-EAS443:3:76:309:74#0/1  
aabbbbbbaabaaaa\_\_a\_^`\_a\_\_YY`X`X[\_^]U¥R]Z  
@HWI-EAS443:3:76:313:1421#0/1  
AAAAGAAGTCTAATGTCGAGTCCCGCACTCGC  
+HWI-EAS443:3:76:313:1421#0/1  
aa]Z¥XWa^\_]`aa\_\_aa¥¥a^U`a\_a\_U``]^Z^ZU[W  
@HWI-EAS443:3:76:332:1112#0/1  
CCCGTTTTCGTTTCATTACCAACTACGTCCCCTTGCCC  
+HWI-EAS443:3:76:332:1112#0/1  
`\_`a¥^`a\_QEZXY][aa]S[\_`aVY]VF[a]SfVX`WY  
@HWI-EAS443:3:76:34:1066#0/1  
GAAGTCTAATGTCGAGTCCCGCACTCGCGAGA  
+HWI-EAS443:3:76:34:1066#0/1  
a]\_`a`aZ^SZ]\_[a\_\_`Wa^]JWN^\_\_¥¥MYV`UZVWWW



@HWI-EAS443:3:76:355:401#0/1  
AAAGAAGTCTAATGTCGCAGTCCCGCACTCGCG  
+HWI-EAS443:3:76:355:401#0/1  
]`b``aababbbbaaaabaaa`aaaaa[aaa`aa``a\_\_\_\_  
@HWI-EAS443:3:76:366:2030#0/1  
AAAAGAAGTCTAATGTCGCAGTCCCGCACTCGCG  
+HWI-EAS443:3:76:366:2030#0/1  
aa^a)`aaaa\_`^`^a`aa`Ya^aa]X``[P[L¥X^]]  
@HWI-EAS443:3:76:367:261#0/1  
ATGGCCCAACAACAAGTACAGTTCATTACCCTAAGGTATA  
+HWI-EAS443:3:76:367:261#0/1  
aaa`\_`ba`aaa\_a`a^a``^a\_`a`\_]\_\_\_\_\_Z\_\_X\_^`  
@HWI-EAS443:3:76:36:55#0/1  
CCCGTTTTCGTTTTATTACCAACTACGTCCCCTTGCCC  
+HWI-EAS443:3:76:36:55#0/1  
aaab\_`aaaa\_`¥[\_`^`aZ^^]^^\_W]U[SPTUUUR  
@HWI-EAS443:3:76:377:857#0/1  
GTTGCCTTAGGGACAAGAGACTGAAATGTTCAAATTCCA  
+HWI-EAS443:3:76:377:857#0/1  
a0\_`][YY^¥W^UX]][XYTXYVOLZZ^ZZXW]Z^XVZXX  
@HWI-EAS443:3:76:413:1732#0/1  
AAAGAAGTCTAATGTCGCAGTCCCGCACTCGCG  
+HWI-EAS443:3:76:413:1732#0/1  
a¥a^^a\_][a^\_]\_`a`\_\_a]a\_\_`[PS]\_Wa[a¥]X]N  
@HWI-EAS443:3:76:425:1682#0/1  
TAATGTCGCAGTCCCGCACTCGCGAGATACTACTAAGAC  
+HWI-EAS443:3:76:425:1682#0/1  
a`]¥]Sbabba^aaa[\_T^]a\_a^ZTZ¥``^X`¥^\_]NY]  
@HWI-EAS443:3:76:456:616#0/1  
CTAATGTGCTAATTGGGCAAGGGACGTAGTGTGGTAAT  
+HWI-EAS443:3:76:456:616#0/1  
ab\_`^`bZZWa`^`\_ZZabb¥baY\_]Sa`\_`T^¥]Z`[Q¥]  
@HWI-EAS443:3:76:501:1345#0/1  
GGATGATGGCAATGAGATACCCAATTACAGCAGACAAGAG  
+HWI-EAS443:3:76:501:1345#0/1  
aa[Ya]^\_\_\_\_ZZ\_QQ]\_Y\_\_`a`\_]\_]\_]^^R^XZ]]^  
@HWI-EAS443:3:76:502:1290#0/1  
CTGTAATTGGGTATCTCATTGCCATCATCCACTTCATTCT  
+HWI-EAS443:3:76:502:1290#0/1  
`\_\_L\_Ya\_\_¥]Ra[`^a^X¥aa``\_`aa`WZ]SP]^X[\_  
@HWI-EAS443:3:76:525:421#0/1  
TCCCGTTTTCGTTTTATTACCAACTACGTCCCCTTGCC  
+HWI-EAS443:3:76:525:421#0/1  
aa\_[]M¥aR`a]\_`^Ua^V^T]]^[a^]a`^GRYTMT^PM  
@HWI-EAS443:3:76:52:559#0/1  
TACGGACCAATTCTCTTTCTAGCATGTACGCCACCATCAA  
+HWI-EAS443:3:76:52:559#0/1  
a\_]a]\_a\_P^\_`\_`VRX\_] [a`¥^0^^[QW[[]^VWZ  
@HWI-EAS443:3:76:544:391#0/1  
GGGGACGTAGTGTGGTAATGAAACGAAAACGGGACTCTA

+HWI-EAS443:3:76:544:391#0/1  
^aa`^a\_P]a[`^a`^H¥\_\_X]aaP`^\_a^NX]aVQVVS  
@HWI-EAS443:3:76:563:124#0/1  
TCCCGTTTTCGTTTCATTACCAACTACGTCCCCTTGCC  
+HWI-EAS443:3:76:563:124#0/1  
aa`ab^`ab\_a\_aa``aaa\_\_aa^`]\_\_\_\_]]]]^]]ZXZ  
@HWI-EAS443:3:76:566:1786#0/1  
GCACGGAGATGTCGCTGAGAGGGATAAGAGTCAGCAAAAT  
+HWI-EAS443:3:76:566:1786#0/1  
a¥\_]`^N\_¥\_VS`\_\_[YNYQ\_¥ZX]X]VSRVWX\_RY^^YU  
@HWI-EAS443:3:76:585:1027#0/1  
GTCCCGCACTCGCGAGATACTACTAAGACCACTGTGGAC  
+HWI-EAS443:3:76:585:1027#0/1  
aQXYUZ¥WYPMRW¥S¥XTTPLWUWQLQNWVWQVQLRNUUU  
@HWI-EAS443:3:76:586:1886#0/1  
GCCTTGTTGTAATTGAATACTGGAGAATTGCCTCTTACCA  
+HWI-EAS443:3:76:586:1886#0/1  
a`a\_````[baa`\_bb`aa\_`¥aaa^`\_`]¥]a`^a\_\_a  
@HWI-EAS443:3:76:608:128#0/1  
TGGCAATGAGATACCCAATTACAGCAGACAAGAGAATAAT  
+HWI-EAS443:3:76:608:128#0/1  
`[`a]T^UZ^Y^¥`\_\_^W\_^Y^¥Y¥ZR\_\_]¥X[MUWWW]  
@HWI-EAS443:3:76:740:1286#0/1  
ATCCTTACTCCTCCAATCTGTGTGCTGTGGCACATTTCCA  
+HWI-EAS443:3:76:740:1286#0/1  
aaaaaa`aaaab]T`aaaaP^¥T]aa¥\_[\_a\_aaa\_^R`  
@HWI-EAS443:3:76:758:1736#0/1  
CGCACTCAGAATGAAGTGGATGATGGCAATGAGATACCCA  
+HWI-EAS443:3:76:758:1736#0/1  
abb`WT[¥a\_\_]\_W¥Y\_aXaZ^\_SIW\_ZW¥]Y^][ZDRVY  
@HWI-EAS443:3:76:777:657#0/1  
TCCTATTCCACCATGTTACGGCCAGAGGTGATACCATCAC  
+HWI-EAS443:3:76:777:657#0/1  
aa`W`aaa`\_aaa`[aa`aa`^\_Z[\_¥GVZVZPZTTPSR  
@HWI-EAS443:3:76:818:1446#0/1  
AAAAGAAGTGAAGATCTAATGTCGCAGTCCCGCACTCGC  
+HWI-EAS443:3:76:818:1446#0/1  
aa¥\_^aa¥aaaaaa\_aaaa`a]a`\_]ZTXXVa¥^[\_UPY  
@HWI-EAS443:3:76:821:322#0/1  
CTAGAGTCCCGTTTTCGTTTCATTACCAACTACGTCCC  
+HWI-EAS443:3:76:821:322#0/1  
]b`bbbab`ba^abaab¥aaba`bb\_abaaa¥`aa`^^[[  
@HWI-EAS443:3:76:844:1768#0/1  
GAGAATAAAAGAAGTGAAGATCTAATGTCGCAGTCCCGC  
+HWI-EAS443:3:76:844:1768#0/1  
aVaab[baWb^YaWaaaab\_T\_`^a[`\_^aG`aYMS\_TKM  
@HWI-EAS443:3:76:863:862#0/1  
CCCGTTTTCGTTTCATTACCAACTACGTCCCCTTGCCC  
+HWI-EAS443:3:76:863:862#0/1  
abbb``abbb`aaabaaba`a``a`ab^`^^]aa`\_`¥^\_

@HWI-EAS443:3:76:882:1021#0/1  
TAATGTGCGAGTCCCGCACTCGCGAGATACTCACTAAGAC  
+HWI-EAS443:3:76:882:1021#0/1  
aa\_`a^`^aaa``aa`P\_]\_]\_`¥^`\_`\_`^[\_`\_`\_`^`ZS  
@HWI-EAS443:3:76:886:344#0/1  
AAAGAACTGAGAGATCTAATGTGCGAGTCCCGCACTCGCG  
+HWI-EAS443:3:76:886:344#0/1  
^`\_`aaaabba\_`aaa\_`abbaaa[]`¥`a[^`\_`\_`¥^^[\_`¥Y\_  
@HWI-EAS443:3:76:88:1460#0/1  
CCCCGTTTTCGTTTTATTACCAACTACGTCCCCTTGCCC  
+HWI-EAS443:3:76:88:1460#0/1  
aaV\_RU]``WTW]]VTWX¥MP^[[WVPQTYBBBBBBBBB  
@HWI-EAS443:3:76:896:986#0/1  
AATAAAAGAACTGAGAGATCTAATGTGCGAGTCCCGCACT  
+HWI-EAS443:3:76:896:986#0/1  
U\_OZYROY¥WZ¥\_Z]aWQZX]Q\_Z[HR[\_]VOPU]UZSY[  
@HWI-EAS443:3:76:897:538#0/1  
AAAGAACTGAGAGATCTAATGTGCGAGTCCCGCACTCGCG  
+HWI-EAS443:3:76:897:538#0/1  
aaaa\_a]aa`]^]¥^W][[\_`\_`^`\_`Y¥Z`aZYZW[Z]ZV¥  
@HWI-EAS443:3:76:924:1158#0/1  
TGCCCGTTAGCACTTCTTCTTCTTCTTGACTGATGATCC  
+HWI-EAS443:3:76:924:1158#0/1  
aaba\_`aaaaa`aaaabaaaaaaaaa`a`aba`a``\_`^  
@HWI-EAS443:3:76:941:1370#0/1  
CTTCCTGATGTGACTTTTTGATTATGGCCATATGGTCCA  
+HWI-EAS443:3:76:941:1370#0/1  
U\_b``^a¥a`\_\_\_\_`bbbab`bbbb]`a\_]¥]]][P[PL[\_  
@HWI-EAS443:3:76:949:164#0/1  
CAACCATTGTGAATTCTTCATACCCTTCATGACTCTTAT  
+HWI-EAS443:3:76:949:164#0/1  
abbaabbbaaba¥ba^bba`ba\_\_`ba\_`aa\_a`a¥aaaa  
@HWI-EAS443:3:76:966:1033#0/1  
GGCGTACATGCTAGAAAGAGAATTGGTCCGTAACAAGG  
+HWI-EAS443:3:76:966:1033#0/1  
a\_aRGMZ[``¥VPZ[Q\_`Q[U^^¥^¥GSR[MV¥BBBBBBBB  
@HWI-EAS443:3:76:975:596#0/1  
ACAGCAGACTCCACCCAGATGTGCCTTCATCTGGATCTT  
+HWI-EAS443:3:76:975:596#0/1  
aaababbaaaaaa\_\_`a`b`aa\_a`¥aa`\_`¥\_\_`\_`^¥``  
@HWI-EAS443:3:77:1014:521#0/1  
AGGGGACGTAGTGTGGTAATGAAACGAAAACGGGACTCT  
+HWI-EAS443:3:77:1014:521#0/1  
abbbb`bbb`\_\_aabab^bbbU`b`Yb`aab]`aaaU`aa  
@HWI-EAS443:3:77:1055:1784#0/1  
ATTGACTGAAGATCCAGATGAAGGCACATCTGGGGTGGAG  
+HWI-EAS443:3:77:1055:1784#0/1  
]^]]``a`ab]``]¥`aX¥[¥X¥[\_`Za\_`^\_`WPY\_U\_\_^\_  
@HWI-EAS443:3:77:1061:339#0/1  
TCCCGTTTTCGTTTTATTACCAACTACGTCCCCTTGCC

+HWI-EAS443:3:77:1061:339#0/1  
aa\_`a\_aaaab^`a`aa`a`aa^`]aa\_`]X^]\_\_]\_^Z  
@HWI-EAS443:3:77:1102:41#0/1  
TCTGCTCCCAGCACGTCCCTTGGGTAAAGTGCAACACTTC  
+HWI-EAS443:3:77:1102:41#0/1  
K\_\_bbaa\_]ba^a^\_[[aaaaZaa`a\_bSb^a]`¥W`\_T  
@HWI-EAS443:3:77:1103:1922#0/1  
GTCCCCTTTTCGTTTCATTACCAACTACGTCCCCTTGC  
+HWI-EAS443:3:77:1103:1922#0/1  
\_aZ`aa¥¥a\_`^a¥a`^aa\_a\_\_aa^a`aa\_\_V¥\_\_¥\_`^¥a  
@HWI-EAS443:3:77:1168:1213#0/1  
GTCTTAGTGAGTATCTCGCGAGTGCGGGACTGCGACATTA  
+HWI-EAS443:3:77:1168:1213#0/1  
`\_`aa`R`a`R`][¥\_ZY][¥NWZ\_Z^WUR[¥VNW¥Z^S  
@HWI-EAS443:3:77:118:1253#0/1  
CGCACTCGCGAGATACTCACTAAGACCACTGTGGACCATA  
+HWI-EAS443:3:77:118:1253#0/1  
abb`bbb^abbba]abbb]abbaabbb[bab\_aaaa`a  
@HWI-EAS443:3:77:1195:1273#0/1  
GAGGATTTCTCATTTTGGGCAAAGAAGACAAGAGATATGG  
+HWI-EAS443:3:77:1195:1273#0/1  
`a¥¥][a¥bbaaaa\_`[\_`aa`K^aaaV\_``\_`\_]\_¥  
@HWI-EAS443:3:77:1270:530#0/1  
GCCTTGTTGTAATTGAATACTGGAGAATTGCCTCTTACCA  
+HWI-EAS443:3:77:1270:530#0/1  
aa\_[aaaaabaaaa\_aa`a\_0`b``\_ZYa\_a^G\_]\_a]]¥`  
@HWI-EAS443:3:77:1276:899#0/1  
GTGGAATAGGAATGGCCCAACAACAAGTACAGTTCATTAC  
+HWI-EAS443:3:77:1276:899#0/1  
\_`ab`aaabaa^\_a\_a^`^^aa\_`^`aW`[^\_[^\_\_\_^\_]`  
@HWI-EAS443:3:77:127:212#0/1  
GCCTTGTTGTAATTGAATACTGGAGAATTGCCTCTTACCA  
+HWI-EAS443:3:77:127:212#0/1  
aYaS[Z[ZZSUS[W]^ [NN[\_¥PTVXZZ]USZV^XZSX^  
@HWI-EAS443:3:77:1300:431#0/1  
GAATAAAAAGAACTGAGAGATCTAATGTCGCAGTCCCGCAC  
+HWI-EAS443:3:77:1300:431#0/1  
R\_bbabaab]bb\_ab]ba`]`bbaab`baa`¥¥a`a¥Xa\_  
@HWI-EAS443:3:77:1332:1428#0/1  
AGAGAATAAAAAGAACTGAGAGATCTAATGTCGCAGTCCCG  
+HWI-EAS443:3:77:1332:1428#0/1  
]\_`aa\_abZ`b`bbbb`aa`a`bba\_bXWbbba`abWa  
@HWI-EAS443:3:77:1348:1025#0/1  
CACTGCCTGTTCCGCCGCTACTGGGAGAAACCTTGTTTT  
+HWI-EAS443:3:77:1348:1025#0/1  
\_¥\_IVX\_``[\_PV\_ba\_^^R¥W[Z`a^TKa]ZPT`TRYRH  
@HWI-EAS443:3:77:134:797#0/1  
ATCTAATGTCGCAGTCCCGCACTCGCGAGATACTCACTAA  
+HWI-EAS443:3:77:134:797#0/1  
aa^`aaa¥^S\_a]U[\_aX\_J[N^RNHH\_UVU\_¥^^WV\_V



+HWI-EAS443:3:77:1753:1645#0/1  
]\_[aabbbba\_aabab`Zaabbbba¥abaaba^^bbaaaa  
@HWI-EAS443:3:77:1776:742#0/1  
AAAAGAAGTCTAATGTCGCAGTCCCCTCGC  
+HWI-EAS443:3:77:1776:742#0/1  
[\_`¥U`^a\_\_Z\_Va\_¥ZababaZZ]aXT¥¥Y[¥UXXX\_Q  
@HWI-EAS443:3:77:183:389#0/1  
GTCCCCTTTTCGTTTCATTACCAACTACGTTCCCTTGC  
+HWI-EAS443:3:77:183:389#0/1  
a]aaab`aaaab\_`aaaa`aaaa`^aa^]`\_]`\_]a]X^\_  
@HWI-EAS443:3:77:199:1045#0/1  
AGATCCCACAATGTTATACAACAAAATGGAATTTGAACCA  
+HWI-EAS443:3:77:199:1045#0/1  
¥\_a\_b[\_`abb\_[`aaa]^WZ`a\_PXZ[aaa\_`\_\_a^a`a  
@HWI-EAS443:3:77:209:1338#0/1  
TGTCAGCAGACCCATTAGCATCTCTCTTGGAAATGTGCCA  
+HWI-EAS443:3:77:209:1338#0/1  
aa\_ba^bb`a``aaaab\_aa`a`a\_aaa[\_`\_a]\_^\_\_`a  
@HWI-EAS443:3:77:221:1285#0/1  
CAGAGTAGGATGCAATTTTCCTCATTGACTGTGAATGTGA  
+HWI-EAS443:3:77:221:1285#0/1  
`^`a^a]a`aaaaaaaa`baa¥aaaaaab]\_\_\_\_`^¥^Z  
@HWI-EAS443:3:77:227:1894#0/1  
CTGCTCCACCAGAACAGAGTAGGATGCAATTTTCCTCATT  
+HWI-EAS443:3:77:227:1894#0/1  
a]Ra]aa\_aaQa\_[\_`Va¥VP\_Y\_]Y^\_[[WW^]]WZW¥W  
@HWI-EAS443:3:77:251:106#0/1  
CAAAATGAGAAATCCTCTCAGGACAGCAGACTCCACCCCA  
+HWI-EAS443:3:77:251:106#0/1  
ab\_abbbbbbbbabbbbabbbbaaab`aaa\_aa\_a\_`\_\_\_\_  
@HWI-EAS443:3:77:262:1504#0/1  
AAAGAAGTCTAATGTCGCAGTCCCCTCGCG  
+HWI-EAS443:3:77:262:1504#0/1  
aa`U¥aa`a]`]a^aaaYa`]a\_`^Za`^^`Z`Z^¥  
@HWI-EAS443:3:77:263:1564#0/1  
TGCTAATTGGGCAAGGGACGTAGTGTGGTAATGAAACG  
+HWI-EAS443:3:77:263:1564#0/1  
`baba]^[\_`bbaba^[^\_X\_`W¥a[\_[X]`R¥][X\_abZ^  
@HWI-EAS443:3:77:320:429#0/1  
GGGCCATATCTTGTCTTCTTTGCCAAAATGAGAAATC  
+HWI-EAS443:3:77:320:429#0/1  
\_b\_baab[]`b\_a]a^aaaabaa\_a]aa\_aVaa`a[aa]a  
@HWI-EAS443:3:77:368:1872#0/1  
GTTTGCCTATTGACAAAGTTCAGATCGCCCCTAACTGCC  
+HWI-EAS443:3:77:368:1872#0/1  
^`b\_baaW`aZaaabbaa]O[a\_`]¥YRaZ^aZ¥ZaWW\_Z  
@HWI-EAS443:3:77:373:1007#0/1  
ACCCCGCACTCAGAATGAAGTGGATGATGGCAATGAGATA  
+HWI-EAS443:3:77:373:1007#0/1  
abbbbaab`a`a\_^W]aaZZ^Ta\_aa]^`\_`¥]R\_\_`^P¥

@HWI-EAS443:3:77:43:1131#0/1  
GGGACGTAGTGTGGTAATGAAACGAAAACGGGACTCTAG  
+HWI-EAS443:3:77:43:1131#0/1  
`aa`ab^aa[aaaba[Y`\_Y¥a[\_¥Z\_XX\_]Z]^`\_^X  
@HWI-EAS443:3:77:486:483#0/1  
GTCCCCTTTTCGTTTCATTACCAACTACGTCCCCCTTGC  
+HWI-EAS443:3:77:486:483#0/1  
a]a\_]`R[a\_`¥^Y\_`\_a^`Y[^\_Y^^\_W]Y\_]LP[V  
@HWI-EAS443:3:77:48:43#0/1  
GTCCCCTTTTCGTTTCATTACCAACTACGTCCCCCTTGC  
+HWI-EAS443:3:77:48:43#0/1  
aYWR][VXY[]\_XYVVRXXVVRRXYYGXOVVOUXVUXVV  
@HWI-EAS443:3:77:495:1859#0/1  
CCCCGCACTCAGAATGAAGTGGATGATGGCAATGAGATAC  
+HWI-EAS443:3:77:495:1859#0/1  
abab`baaa`a\_aaa`\_[]\_^`]^\_\_^`\_`\_U\_]`\_`  
@HWI-EAS443:3:77:519:364#0/1  
GATCTAATGTGCGAGTCCCGCACTCGCGAGATACTACTA  
+HWI-EAS443:3:77:519:364#0/1  
abaaabaab\_aaa]a[\_aa\_a^^\_\_\_\_`\_a^^[Z`ZZW^\_  
@HWI-EAS443:3:77:562:1688#0/1  
CCCGTTTTTCGTTTCATTACCAACTACGTCCCCCTTGGCC  
+HWI-EAS443:3:77:562:1688#0/1  
aaaa^aaaaa\_aaaaaa`\_aaaa\_aa]Y`^`\_`^TU[\_\_\_  
@HWI-EAS443:3:77:619:1111#0/1  
GTCCCCTTTTTCGTTTCATTACCAACTACGTCCCCCTTGC  
+HWI-EAS443:3:77:619:1111#0/1  
aababbaaaba\_aabbabbaababaa`a`^aaa\_]^\_\_  
@HWI-EAS443:3:77:635:1223#0/1  
AGAACCCCGCACTCAGAATGAAGTGGATGATGGCAATGAG  
+HWI-EAS443:3:77:635:1223#0/1  
¥`\_`\_aa`\_Z\_^a\_]a¥`]a]\_`[]^]¥TZ\_]URYW]]¥  
@HWI-EAS443:3:77:639:315#0/1  
CTCCGTGCTTGGGGTCATGTGCGGCAGTATTCCGATCATT  
+HWI-EAS443:3:77:639:315#0/1  
abbaa`aaaabaaa\_aaaa\_aaa\_a`Waaa`¥^`\_`a`  
@HWI-EAS443:3:77:649:1665#0/1  
AAAGAAGTGAAGATCTAATGTGCGAGTCCCGCACTCGCG  
+HWI-EAS443:3:77:649:1665#0/1  
aaaX`\_`\_ab\_a`^\_¥a`aa`]a\_aa\_Y`\_`\_[]`T\_^^^  
@HWI-EAS443:3:77:696:2008#0/1  
AGAGCTCCAGGATTGTAATGCTCCCTTGATGGTGGCG  
+HWI-EAS443:3:77:696:2008#0/1  
aXSPZ\_aUaa`\_\_\_`PW`V[\_]XaVTW\_[\_\_\_\_O\_[U\_U^]  
@HWI-EAS443:3:77:719:754#0/1  
TTGTCTGCTGTAATTGGGTATCTCATTGCCATCATCCACT  
+HWI-EAS443:3:77:719:754#0/1  
aab\_\_abaaaWWaaaa]WNaaa\_Xaa^[a\_`\_^``]Y[]a  
@HWI-EAS443:3:77:722:108#0/1  
ATTTCTCACTTCTCCTCCTGGAGTGTACATCTGCTCCCAG

+HWI-EAS443:3:77:722:108#0/1  
aaaaaZX\_b`baa]ab]b\_b`Zb\_b^a\_¥]¥¥b]OK¥M]Y  
@HWI-EAS443:3:77:766:1717#0/1  
TGGCAATGAGATACCCAATTACAGCAGACAAGAGAATAAT  
+HWI-EAS443:3:77:766:1717#0/1  
a\_\_ba¥^a]a[`¥bbaaaaaaaaaaba^aba]¥aaa`aaa  
@HWI-EAS443:3:77:778:1880#0/1  
TGATGTGTACTTTTTGATTATGGCCATATGGTCCACAGTG  
+HWI-EAS443:3:77:778:1880#0/1  
]`a`^XXabbbba`^XaaaW¥V¥bZT]ZQXMVZZ`]QFX  
@HWI-EAS443:3:77:780:1674#0/1  
AAAGAAGTCTAATGTCGCAGTCCCGCACTCGCG  
+HWI-EAS443:3:77:780:1674#0/1  
]`aa^`b`a`Z`]Z[b`a]ab]a`aaaP[¥¥\_a`a^T]\_\_  
@HWI-EAS443:3:77:785:1531#0/1  
GAGGATTTCTCATTTTGGGCAAAGAAGACAAGAGATATGG  
+HWI-EAS443:3:77:785:1531#0/1  
a`bbababbaaaaaaba`baa`aa\_aaaa`aaaa\_a^a\_  
@HWI-EAS443:3:77:793:57#0/1  
CATTTCTCACTTCTCCTCCTGGAGTGTACATCTGCTCCCA  
+HWI-EAS443:3:77:793:57#0/1  
`\_bba\_b^bZba^\_T]baZab\_Z^¥b`b\_bUbbab\_a`S  
@HWI-EAS443:3:77:811:1773#0/1  
CTGCTGTAATTGGGTATCTCATTGCCATCATCCACTTCAT  
+HWI-EAS443:3:77:811:1773#0/1  
]\_\_\_a¥\_¥Zabb]a¥^\_\_a¥b`b\_\_Xaab`a`a`\_`aaba  
@HWI-EAS443:3:77:817:1536#0/1  
CTAGCACTGACTCAGGGCCATTGATCTCCACATCATTGA  
+HWI-EAS443:3:77:817:1536#0/1  
a`]aa^^\_ZabaZHYQ¥[aU\_\_aaa`\_`a\_aaaa^aY`X\_  
@HWI-EAS443:3:77:880:1963#0/1  
ATCTAATGTCGCAGTCCCGCACTCGCGAGATACTCACTAA  
+HWI-EAS443:3:77:880:1963#0/1  
X\_`[`baba`W`a`WT`ba¥W¥XaZ`aa]a\_a``]``Xb]  
@HWI-EAS443:3:77:895:91#0/1  
CAAGGACAAACCCTCTGGAGCAAACAAACGATGCTGGAT  
+HWI-EAS443:3:77:895:91#0/1  
`bbbbabababa`abbab`bab\_aa]b`bab\_aaaabb`a  
@HWI-EAS443:3:77:905:1280#0/1  
GGGACGTAGTGTGGTAATGAAACGAAAACGGGACTCTAG  
+HWI-EAS443:3:77:905:1280#0/1  
`a]Y\_a`aa\_b\_aa¥^a`a^aaaSa\_aaaZ\_``\_]\_[\_\_\_\_  
@HWI-EAS443:3:77:913:972#0/1  
GGGACGTAGTGTGGTAATGAAACGAAAACGGGACTCTA  
+HWI-EAS443:3:77:913:972#0/1  
abaa`ab\_aa`a`aaaUa¥]¥`a`TY^a\_`PY`^^¥^¥¥\_  
@HWI-EAS443:3:77:923:754#0/1  
CGCACTCAGAATGAAGTGGATGATGGCAATGAGATACCCA  
+HWI-EAS443:3:77:923:754#0/1  
U\_b¥`\_\_bbbab¥`b^`b]aS\_X`aa^U^`[``U^b





+HWI-EAS443:3:78:1320:544#0/1  
V^a`^`bZ`¥\_\_`b\_]a`ba¥Q`a]]b`a¥^a`aa]  
@HWI-EAS443:3:78:1327:366#0/1  
CATTATTCTCTGTCTGCTGTAATTGGGTATCTCATTGCC  
+HWI-EAS443:3:78:1327:366#0/1  
`baabb`PaVbbbbabaV`b\_\_¥`babaaNbbba\_`aaa¥  
@HWI-EAS443:3:78:1355:1743#0/1  
GAATGATCGGAATACTGCCCCGACATGACCCCAAGCACGGA  
+HWI-EAS443:3:78:1355:1743#0/1  
`babaaab`abb^bbaaa¥aaa\_baa`abZaaa`\_Z\_aQZ  
@HWI-EAS443:3:78:1359:380#0/1  
GGAGTCTGCTGCCTGAGAGGATTTCTCATTTTGGGCAAA  
+HWI-EAS443:3:78:1359:380#0/1  
aa]a]^`a]aa]¥XW`U^V`¥S\_[W\_^^^Z\_]`^WZFQVG  
@HWI-EAS443:3:78:1409:352#0/1  
AAAGAAGTCTGAGATCTAATGTCGCAGTCCCGCACTCGCG  
+HWI-EAS443:3:78:1409:352#0/1  
aaba`a]baaaaaaa^ba\_aa]Y`^]a]TW`^^\_T`]]]\_  
@HWI-EAS443:3:78:1421:503#0/1  
TGCTGTAATTGGGTATCTCATTGCCATCATCCACTTCATT  
+HWI-EAS443:3:78:1421:503#0/1  
ab\_aa`\_aaaaa]]`\_^`U^\_]\_UZ]^X]^`[R^W\_`Z]`]  
@HWI-EAS443:3:78:1482:1476#0/1  
AAAAGAAGTCTGAGATCTAATGTCGCAGTCCCGCACTCGCG  
+HWI-EAS443:3:78:1482:1476#0/1  
aa`ba\_aaaa`aaa``aaaa`ZMW\_W\_]U]\_a]WXYW]X  
@HWI-EAS443:3:78:1542:686#0/1  
AAAAGAAGTCTGAGATCTAATGTCGCAGTCCCGCACTCGCG  
+HWI-EAS443:3:78:1542:686#0/1  
aa`a``aaa`a``]^aaaaa\_^\_[Na\_¥^`T]a]X]X^Y  
@HWI-EAS443:3:78:1606:833#0/1  
CAGGTGCATTGACTGAAGATCCAGATGAAGGCACATCTGG  
+HWI-EAS443:3:78:1606:833#0/1  
aabb]baabbba^bbabbaba^ababbaaaa`aaaaaaa  
@HWI-EAS443:3:78:1611:234#0/1  
GTGGGTTCACTTTCAAAGGACAAGCGGATCATCAGTCAA  
+HWI-EAS443:3:78:1611:234#0/1  
a`aaa`\_`\_0aa\_^\_a`\_`^Z^Z\_¥\_]¥]\_\_^^\_WXZ[  
@HWI-EAS443:3:78:1622:1256#0/1  
ATCTGCTCCCAGCACGTCCCTTGGGTTAAGTGCAACACTT  
+HWI-EAS443:3:78:1622:1256#0/1  
a`¥a`\_Z[U^\_`ZaM]RZ]¥L¥[VYP¥UVVV[T[GFPTRM  
@HWI-EAS443:3:78:1636:1168#0/1  
CCCGTTTTCGTTTTCACTACCAACTACGTCCCTTGCCC  
+HWI-EAS443:3:78:1636:1168#0/1  
^^`bT¥Waba^ba\_bbaba`bbaa\_bb^a`^aa[a\_b¥^\_  
@HWI-EAS443:3:78:1657:677#0/1  
ACATTGTCGATGGATTCAATTCCTCCAGTTCTGGAAAAGCA  
+HWI-EAS443:3:78:1657:677#0/1  
a]`baa¥ab`ab]`baaab^[OZV[aUa0aa`a¥``aOX

@HWI-EAS443:3:78:1692:926#0/1  
TGCTGTAATTGGGTATCTCATTGCCATCATCCACTTCATT  
+HWI-EAS443:3:78:1692:926#0/1  
`V`a\_PT\_\_`aa\_U\_]V`Y``]VFL¥\_S[U^Q]^`]RRX]  
@HWI-EAS443:3:78:1728:1234#0/1  
GTTGGGCCATTCTATTCCACCATGTTACGGCCAGAGGTG  
+HWI-EAS443:3:78:1728:1234#0/1  
a[R^aaS`^a\_^`Saa\_¥a^¥a\_\_\_\_\_^`ZSUBBBBBB  
@HWI-EAS443:3:78:173:767#0/1  
CAGAGTAGGATGCAATTTTCCTCATTGACTGTGAATGTGA  
+HWI-EAS443:3:78:173:767#0/1  
a[a\_]``aa]aaa]aa\_\_\_aaaa\_`aa\_^`bY`¥\_]XYUV  
@HWI-EAS443:3:78:1741:704#0/1  
CAATATAAACACTGCCTGTTCCGCCGCTACTGGGAGAAA  
+HWI-EAS443:3:78:1741:704#0/1  
aaabaaa^a`aa`^Z`VZV¥\_a`Z\_a[\_]L[Y\_ZS[QTY  
@HWI-EAS443:3:78:1749:969#0/1  
CATTGATAAGTGTGACTAGCACTGACTCAGGGCCATTGA  
+HWI-EAS443:3:78:1749:969#0/1  
]abb`Z¥b\_aYaYabbaaaaa[\_ZZ\_a¥aaa`YSP¥T]W  
@HWI-EAS443:3:78:177:1729#0/1  
ATCTAATGTCGCAGTCCCGCACTCGCGAGATACTCACTAA  
+HWI-EAS443:3:78:177:1729#0/1  
aab^a`ZMTWS`[[LW\_]R]Z]OZRZTX^¥UZPSYTRMBB  
@HWI-EAS443:3:78:197:999#0/1  
AAGAAGTGAAGATCTAATGTCGCAGTCCCGCACTCGCGA  
+HWI-EAS443:3:78:197:999#0/1  
T^aJU\_aa`^\_```aaa`aYU\_]\_\_]N)`\_``P^]VT[\_^  
@HWI-EAS443:3:78:204:889#0/1  
GCAACACTTCAATATAAACACTGCCTGTTCCGCCGCTAC  
+HWI-EAS443:3:78:204:889#0/1  
a`baaaaaaaaaaaaa`¥^a\_a`\_\_`a^\_``aa`[^\_^]R  
@HWI-EAS443:3:78:236:1140#0/1  
ATCTAATGTCGCAGTCCCGCACTCGCGAGATACTCACTAA  
+HWI-EAS443:3:78:236:1140#0/1  
a`\_\_aa\_aW\_W``\_W¥`aW`¥\_W]¥^¥VW¥WWW^WWWXWWW  
@HWI-EAS443:3:78:260:478#0/1  
GGGACGTAGTGTGGTAATGAAACGAAAACGGGACTCTAG  
+HWI-EAS443:3:78:260:478#0/1  
`a`aab\_`a`aaaba^a\_P\_a^\_a```]\_W`^`Z]]`^^^  
@HWI-EAS443:3:78:261:618#0/1  
GAATAAAAGAACTGAGAGATCTAATGTCGCAGTCCCGCAC  
+HWI-EAS443:3:78:261:618#0/1  
aaa¥aba`aaaa`\_`a\_a\_``a`Z`a]a]\_\_\_Z^\_^]]N¥  
@HWI-EAS443:3:78:261:884#0/1  
AAAGAAGTGAAGATCTAATGTCGCAGTCCCGCACTCGCG  
+HWI-EAS443:3:78:261:884#0/1  
abbaa\_aa\_a`a``aa[aaabVa\_\_`\_[\_¥Q]RY]\_R^]  
@HWI-EAS443:3:78:281:773#0/1  
TTGGGTATCTCATTGCCATCATCCACTTCATTCTGAGTGC

+HWI-EAS443:3:78:281:773#0/1  
a]a¥FP\_^\_abU¥\_aab`ab`aa]`^a\_YZ¥a\_a\_Ta]aQ  
@HWI-EAS443:3:78:327:77#0/1  
TGCCCCACTTCATTTGGGAAAACAATTCCATAATCACA  
+HWI-EAS443:3:78:327:77#0/1  
aba¥V^\_a`Y`^¥]U¥]\_Z^X¥R]]Y\_ZZR[^ZN^TTSX  
@HWI-EAS443:3:78:347:1150#0/1  
TAATGTCGCAGTCCCGCACTCGCGAGATACTCACTAAGAC  
+HWI-EAS443:3:78:347:1150#0/1  
aa`abaa¥`b^\_`abab`bab]aaaaaaaa^^aa`aaa¥`^  
@HWI-EAS443:3:78:379:332#0/1  
CCGCACTCGCGAGATACTCACTAAGACCACTGTGGACCAT  
+HWI-EAS443:3:78:379:332#0/1  
```a```\_a\_a`[VRFO[UYQS[TQ]HUWN[TISRQUUUT  
@HWI-EAS443:3:78:430:451#0/1  
TCCCGTTTTCGTTTTATTACCAACTACGTCCCCTTGCC  
+HWI-EAS443:3:78:430:451#0/1  
aaaab\_`aaab\_`aa\_a`a`^aa\_`\_```\_\_^\_\_^U^^  
@HWI-EAS443:3:78:435:722#0/1  
GAATAAAAGAACTGAGAGATCTAATGTCGCAGTCCCGCAC  
+HWI-EAS443:3:78:435:722#0/1  
a\_UZ]VT¥XZ`Z]TV¥¥X¥]Z[^¥[`Y¥[L[XEVRVSYYZ  
@HWI-EAS443:3:78:441:1202#0/1  
GAATAAAAGAACTGAGAGATCTAATGTCGCAGTCCCGCAC  
+HWI-EAS443:3:78:441:1202#0/1  
aW`¥Xa[[]]aab`a^[aT\_Sa¥S]YaRb¥ab^^\_aaUSNZ  
@HWI-EAS443:3:78:454:701#0/1  
GATCTTGTGACCATTGAATTTTCAATTTCCAGTTCCT  
+HWI-EAS443:3:78:454:701#0/1  
a\_a]]aaUa\_\_`¥aaa\_]WW]``¥\_R\_^\_\_^VYY^\_W  
@HWI-EAS443:3:78:465:118#0/1  
CCAGGATTGTAATAATTGCTCCCTTGATGGTGGCGTACATG  
+HWI-EAS443:3:78:465:118#0/1  
aabb`aab`aaaaabbba``\_```\_]`a0a\_Qa[^Z^Z`  
@HWI-EAS443:3:78:46:17#0/1  
AAAAGAACTGAGAGATCTAATGTCGCAGTCCCGCACTCGC  
+HWI-EAS443:3:78:46:17#0/1  
W^¥aaW¥`a`^\_`aaY^```a\_V[baa¥FTR\_a0DV^YPT  
@HWI-EAS443:3:78:51:1178#0/1  
CTGTGGACCATATGGCCATAATCAAAAAGTACACATCAGG  
+HWI-EAS443:3:78:51:1178#0/1  
aa`)]`[G[]XY[VSV^^¥UNOVVVZZWVVU^XUVVYVVV  
@HWI-EAS443:3:78:526:1598#0/1  
AATGAAGTGGATGATGGCAATGAGATACCCAATTACAGCA  
+HWI-EAS443:3:78:526:1598#0/1  
`VYa`Y[^a]]\_`\_Z`a`\_a^a``^Xa`aN`[]X`\_\_Z^]  
@HWI-EAS443:3:78:528:1882#0/1  
CCTTGTTTTACGGACCAATTCTCTTTCTAGCATGTACGCC  
+HWI-EAS443:3:78:528:1882#0/1  
`a`OIPX^]\_aY^`YYa``\_U^\_\_Y]`]a\_Y`UQZ`UY^T

@HWI-EAS443:3:78:547:1849#0/1  
AACTGAGAGATCTAATGTCGCAGTCCCGCACTCGCGAGAT  
+HWI-EAS443:3:78:547:1849#0/1  
U\_`]bbaaabaaa`a¥]U\_]\_^XQN\_`bab]`VZT`ZW]TL  
@HWI-EAS443:3:78:562:1436#0/1  
CGTTTTCGTTTTATTACCAACTACGTCCCCTTGCCCAA  
+HWI-EAS443:3:78:562:1436#0/1  
ab`bbbb`bbbaabb`baab\_aaa\_^a^aaa\_^aaa` [  
@HWI-EAS443:3:78:564:1191#0/1  
GAGAATAAAGAAGACTGAGAGATCTAATGTCGCAGTCCCGC  
+HWI-EAS443:3:78:564:1191#0/1  
`Za]]]]^U^a¥a````[``WW[aaZWWa]`Z``^LFTVV]  
@HWI-EAS443:3:78:580:1667#0/1  
TCCCGTTTTCGTTTTATTACCAACTACGTCCCCTTGCC  
+HWI-EAS443:3:78:580:1667#0/1  
¥a¥U\_Ma¥`S\_RZ¥\_¥[NZ\_¥[\_Za]\_¥UXO\_VX\_]H¥WR  
@HWI-EAS443:3:78:593:1726#0/1  
CGCACTCGCGAGATACTACTAAGACCACTGTGGACCATA  
+HWI-EAS443:3:78:593:1726#0/1  
a\_\_Z]aa^a\_\_\_`\_\_`\_a`\_a\_W\_\_\_\_\_^YWYX\_^]  
@HWI-EAS443:3:78:648:1841#0/1  
TAATGTCGCAGTCCCGCACTCGCGAGATACTACTAAGAC  
+HWI-EAS443:3:78:648:1841#0/1  
aba\_\_Ra^aba\_ba``babaa`aa`aa\_aZaaaa\_a`\_\_\_\_  
@HWI-EAS443:3:78:667:601#0/1  
CGTACATGCTAGAAAGAGAATTGGTCCGTAACAAGGTT  
+HWI-EAS443:3:78:667:601#0/1  
¥\_I\_aa`\_¥]¥\_¥ZS]^a¥``VSZYGO¥[X\_\_U¥^]a`RV  
@HWI-EAS443:3:78:675:1155#0/1  
CCCGTTTTCGTTTTATTACCAACTACGTCCCCTTGCCC  
+HWI-EAS443:3:78:675:1155#0/1  
a```¥\_aaba`aaaa`b`a``aa`\_T\_^Za\_\_\_\_\_a^]a\_  
@HWI-EAS443:3:78:68:911#0/1  
CGTTTTCGTTTTATTACCAACTACGTCCCCTTGCCCAA  
+HWI-EAS443:3:78:68:911#0/1  
ab`aaabb`aaaa`baY\_aaa`aba\_]aa\_\_^`\_`]^`\_  
@HWI-EAS443:3:78:690:380#0/1  
CGTTTTCGTTTTATTACCAACTACGTCCCCTTGCCCAA  
+HWI-EAS443:3:78:690:380#0/1  
ababbbab`bb`bbabaaabab`ab^aaa\_aa\_\_a\_`^`\_  
@HWI-EAS443:3:78:692:872#0/1  
AAAAGAAGACTGAGAGATCTAATGTCGCAGTCCCGCACTCGC  
+HWI-EAS443:3:78:692:872#0/1  
aaaaa`aaa`aaaa`\_`a`aa]`\_`[\_`^]\_\_Xa^^^]]X  
@HWI-EAS443:3:78:699:1178#0/1  
AAAGAAGACTGAGAGATCTAATGTCGCAGTCCCGCACTCGCG  
+HWI-EAS443:3:78:699:1178#0/1  
aa\_U\_]\_a¥T`\_a\_¥[\_\_Xaa[¥V[``M^`b^XOV^aZ]^  
@HWI-EAS443:3:78:752:149#0/1  
GTCCCGTTTTCGTTTTATTACCAACTACGTCCCCTTGCC

+HWI-EAS443:3:78:752:149#0/1  
a^\_[RbWQ^\_W¥^\_]\_^[\_V]^X^XW¥X^RVXYXOLQX  
@HWI-EAS443:3:78:765:153#0/1  
CCCCTTTTCGTTTCATTACCAACTACTGCCCTTGCCC  
+HWI-EAS443:3:78:765:153#0/1  
``ab\_aabab\_aaaa`a\_\_`\_]a\_\_\_\_]a]\_\_\_\_]\_^]\_]XU  
@HWI-EAS443:3:78:768:1838#0/1  
GGGCGATCTGAACCTTTGTCAATAGGGCAAACCAGCGACTG  
+HWI-EAS443:3:78:768:1838#0/1  
a\_`baa[ab]ab\_bb\_¥\_a]aab`Y`^bbbab\_aaaa\_a`  
@HWI-EAS443:3:78:774:1217#0/1  
CTGGGGTGGAGTCTGCTGCTCCTGAGAGATTCTCATT  
+HWI-EAS443:3:78:774:1217#0/1  
aba\_X\_¥baaa[aaaaa]`aaaaaab`\_\_`a`a`aa`a`  
@HWI-EAS443:3:78:778:1231#0/1  
TGCCCGTTAGCACTTCTTCTTCTTCTTGACTGATGATCC  
+HWI-EAS443:3:78:778:1231#0/1  
`abb^a\_\_`aa\_`aa`baaba`aa`aaaaaaaa\_\_`Z^  
@HWI-EAS443:3:78:792:802#0/1  
CTAATGTCGCAGTCCCGCACTCGCGAGATACTCACTAAGA  
+HWI-EAS443:3:78:792:802#0/1  
a`XZaa^`a^X`R^`\_\_\_\_[\_\_¥``aR`S¥¥V]Z\_¥^YOU[  
@HWI-EAS443:3:78:80:1353#0/1  
GTCCCGTTTTCGTTTCATTACCAACTACTGCCCTTGCC  
+HWI-EAS443:3:78:80:1353#0/1  
``bbbbYa^bbaX`aa]aaabb`^`ba^\_``^``]`\_\_`]  
@HWI-EAS443:3:78:864:1380#0/1  
ATCATTCTCATTCTCCTCCTGGAGTGTACATCTGCTCC  
+HWI-EAS443:3:78:864:1380#0/1  
UZba`)]`baX[]\_aa`TVZSX^\_\_\_\_]Qaa^M\_Ra\_`US  
@HWI-EAS443:3:78:921:1430#0/1  
CTGCTGCTCCTGAGAGATTCTCATTCTTGGCAAAGAAGA  
+HWI-EAS443:3:78:921:1430#0/1  
X`a^¥\_0\_¥``bY\_`^Zab`YaaX^b`^VHWaX^Z]aabX  
@HWI-EAS443:3:78:937:239#0/1  
GAGAATAAAAGAACTGAGAGATCTAATGTCGCAGTCCCGC  
+HWI-EAS443:3:78:937:239#0/1  
a`ba`aaaa`a^aaaa`a`^aa\_`a]Z````^V^XY]  
@HWI-EAS443:3:78:95:1115#0/1  
TTGGGTATCTCATTGCCATCATCCACTTCATTCTGAGTGC  
+HWI-EAS443:3:78:95:1115#0/1  
`\_^aXbab\_ba``abaZ^aa\_aa¥a\_\_X^^^`]\_¥`W`^  
@HWI-EAS443:3:78:988:1372#0/1  
AGAACTGAGAGATCTAATGTCGCAGTCCCGCACTCGCGAG  
+HWI-EAS443:3:78:988:1372#0/1  
aa`a¥aa\_\_a^a`^`a`\_aW\_¥\_]`W¥^\_V`S\_¥¥\_¥\_W^  
@HWI-EAS443:3:78:990:1048#0/1  
GTTGCTCTTCTCCAACCATTGTGAATTCTTCATACCCTT  
+HWI-EAS443:3:78:990:1048#0/1  
a`abaaaabaa`a\_aa``¥`\_R¥`XX\_dWaa\_\_`^^Z]`^

@HWI-EAS443:3:79:1005:1277#0/1  
TTGGGTATCTCATTGCCATCATCCACTTCATTCTGAGTGC  
+HWI-EAS443:3:79:1005:1277#0/1  
¥\_VYO^VT\_X^`a`\_¥\_\_[^\_P]]\_a^^]]¥^`^\_QW]`Z  
@HWI-EAS443:3:79:1075:1236#0/1  
GTCGCAGTCCCGCACTCGCGAGATACTCACTAAGACCACT  
+HWI-EAS443:3:79:1075:1236#0/1  
a\_`^`¥¥`aa\_\_^\_\_\_`\_¥¥\_¥\_¥¥^V¥¥\_`^U¥¥^¥\_¥  
@HWI-EAS443:3:79:1081:1918#0/1  
GTGGGTTCACCTTCAAAAAGGACAAGCGGATCATCAGTCAA  
+HWI-EAS443:3:79:1081:1918#0/1  
a[aa]XY[T]aaX`[\_Z]`V^`\_^`\_[[^WZ]]^ZWR¥R  
@HWI-EAS443:3:79:1084:2008#0/1  
CATGATTCCAGAGAGGAATGAACAAGGACAAACCTCTGG  
+HWI-EAS443:3:79:1084:2008#0/1  
a`]bbbbbb`\_ab^¥aaba]aaaa¥V\_ab`\_UP]Z\_]aa  
@HWI-EAS443:3:79:108:530#0/1  
ACTGAAGATCCAGATGAAGGCACATCTGGGGTGGAGTCTG  
+HWI-EAS443:3:79:108:530#0/1  
a^`][`¥a][[]][T]YVNX[XXQN^Y``[¥[M^`¥¥MSWY  
@HWI-EAS443:3:79:1153:570#0/1  
AAACGACTTACAGTTCTTGAAAGGATGCAGGTGCATTGA  
+HWI-EAS443:3:79:1153:570#0/1  
]bbbbaaaa¥aa`^\_[a^\_\_a`Za`a\_U^][M`[\_aX[\_  
@HWI-EAS443:3:79:1157:1862#0/1  
CCCAGTTCTGGAAAAGCACTTTTGCATCTTTTTGGAAATG  
+HWI-EAS443:3:79:1157:1862#0/1  
aba^a\_]\_aZZ\_a`\_[^^ZaYX[`[a]\_aaaa]S`Z`¥MM  
@HWI-EAS443:3:79:1194:809#0/1  
CTGCTGTCTGAGAGGATTTCTCATTGTTGGGCAAAGAAGA  
+HWI-EAS443:3:79:1194:809#0/1  
HT`¥W\_QY\_\_V`¥WZTZ`a¥IQNO\_a`S[[[FZa`¥SS[a  
@HWI-EAS443:3:79:1256:437#0/1  
CAATGAGATACCCAATTACAGCAGACAAGAGAATAATGGA  
+HWI-EAS443:3:79:1256:437#0/1  
abbbbbb`aaaa`babbbabbaabb`b`bbaabab`ba`b  
@HWI-EAS443:3:79:1262:422#0/1  
AGGGTATGAAGAATTCACAATGGTTGGGAGAAGAGCAACA  
+HWI-EAS443:3:79:1262:422#0/1  
abbb\_bbbbbabaabbaabb\_abaaaa]aaaa`b\_b]a\_^a  
@HWI-EAS443:3:79:1292:1757#0/1  
AAAGAAGTCTGAGAGATCTAATGTGCGAGTCCCGCACTCGCG  
+HWI-EAS443:3:79:1292:1757#0/1  
[`baJaaa]a`a\_b[abb\_``[\_a\_a\_ZU]NZaUaU^VLU  
@HWI-EAS443:3:79:1298:946#0/1  
GCAGTGTGAGCAGACCCATTAGCATCTCTCTTGGAAATGT  
+HWI-EAS443:3:79:1298:946#0/1  
a`bbbbbaabbbababaaaabb`bbabbbabba^abb`U`  
@HWI-EAS443:3:79:129:739#0/1  
ATGCACCAACTCTTGAGGCATTTCCAAAAAGATGCAAAAAG

+HWI-EAS443:3:79:129:739#0/1  
a\_aaX^aY]\_\_a\_\_aaaa`\_\_`a`\_Y^`\_Z`^a`YN]  
@HWI-EAS443:3:79:1378:1808#0/1  
CGCACTCAGAATGAAGTGGATGATGGCAATGAGATACCCA  
+HWI-EAS443:3:79:1378:1808#0/1  
Yb`bbbbbbbbbbab¥bababb`b``babaabaab\_]\_a  
@HWI-EAS443:3:79:1392:1143#0/1  
AACTGGATCAATCTCCTGGTTGCCTTTCTGAGAATAGCTG  
+HWI-EAS443:3:79:1392:1143#0/1  
ab`\_abba`[QaUa^^¥ba]`b]`aa`VaY\_a`aaaZ5]a  
@HWI-EAS443:3:79:1417:1089#0/1  
ATTGACTGAAGATCCAGATGAAGGCACATCTGGGGTGGAG  
+HWI-EAS443:3:79:1417:1089#0/1  
ab\_ababaaabaaaQb[a`aa\_[`a\_\_`\_[\_]a¥aST^R]  
@HWI-EAS443:3:79:1448:1715#0/1  
ACTAAGACCACTGTGGACCATATGGCCATAATCAAAAAGT  
+HWI-EAS443:3:79:1448:1715#0/1  
`aaaaaa\_aaaaaUU^aa`a^]`¥]X`\_`ZW]Wa¥\_XKE  
@HWI-EAS443:3:79:1448:868#0/1  
GGGCGATCTGAACCTTGTCAATAGGGCAAACCAGCGACTG  
+HWI-EAS443:3:79:1448:868#0/1  
aa`\_]ab`aba`\_babaa```a^`^¥^a\_V[a`]`\_U[a  
@HWI-EAS443:3:79:1490:1769#0/1  
CTGTAATTGGGTATCTCATTGCCATCATCCACTTCATTCT  
+HWI-EAS443:3:79:1490:1769#0/1  
aba\_aabbbb\_ab`baba`a\_¥ab`ba^[aaba`\_a``a  
@HWI-EAS443:3:79:1599:742#0/1  
GGACAAGAGACTGAAATGGTTCAAATCCATTTTGTGTA  
+HWI-EAS443:3:79:1599:742#0/1  
abaabbbabaaaba^abba\_ba`babbWVaababaaa`a  
@HWI-EAS443:3:79:1635:47#0/1  
TGGTATTCTCACAAGAGGATTGCATGATCAAGGCAGTTAG  
+HWI-EAS443:3:79:1635:47#0/1  
aaX[^\_aY`[\_VYaX\_aaZ]Y`R`aa^WRWYa]RTQUWW[  
@HWI-EAS443:3:79:170:1835#0/1  
AATTGGGCAAGGGGACGTAGTGTGGTAATGAAACGAAAA  
+HWI-EAS443:3:79:170:1835#0/1  
¥¥aaa`abaaa`a¥^a][``[a]``¥T`\_ZX``a¥XS\_] ]  
@HWI-EAS443:3:79:1710:908#0/1  
CTCATTGCCATCATCCACTTCATTCTGAGTGCGGGGTTCT  
+HWI-EAS443:3:79:1710:908#0/1  
abbbbaaaba`a]aaabbabbabbabb]baa\_a¥``Zaab  
@HWI-EAS443:3:79:1767:340#0/1  
AAAGAAGTGAAGATCTAATGTCGCAGTCCCGCACTCGCG  
+HWI-EAS443:3:79:1767:340#0/1  
\_Z]\_¥\_¥ZaX`\_a`ZXY]\_V¥SYY^P`P[SYS¥[ZSRRT[  
@HWI-EAS443:3:79:17:222#0/1  
ATCTAATGTCGCAGTCCCGCACTCGCGAGATACTCACTAA  
+HWI-EAS443:3:79:17:222#0/1  
aaaaa\_a`¥\_\_¥¥¥Y\_\_^W[H[Y^¥WZSZYWWWZUTY¥Y







@HWI-EAS443:3:79:654:1382#0/1  
AAAGAAGTCTAATGTTCGAGTCCCGCACTCGCG  
+HWI-EAS443:3:79:654:1382#0/1  
a]L\_`bbaa`]Y[\_aa]a¥`P`a`][UaX`\_`T\_¥[Xa¥  
@HWI-EAS443:3:79:667:913#0/1  
AAAAGAAGTCTAATGTTCGAGTCCCGCACTCGCG  
+HWI-EAS443:3:79:667:913#0/1  
\_W\_aZG]^a`aa^aa`a\_S]aZa`a`\_V\_\_^[^]\_Y`]]  
@HWI-EAS443:3:79:691:739#0/1  
CGCACTCGGAGATACTCACTAAGACCACTGTGGACCATA  
+HWI-EAS443:3:79:691:739#0/1  
aba`aaaaba\_¥¥aa\_bb\_\_^\_`aaaaaa¥Y]a`[] []\_P  
@HWI-EAS443:3:79:717:133#0/1  
CCCGTTTTCGTTTTATTACCAACTACGTCCCCTTGCCC  
+HWI-EAS443:3:79:717:133#0/1  
aa^b]aabab`aaaba`[\_a\_Waa`a\_a¥^^`][ ]W^\_  
@HWI-EAS443:3:79:802:599#0/1  
GCTGCTCTGAGAGGATTTCTCATTGTTGGCAAAGAAGACA  
+HWI-EAS443:3:79:802:599#0/1  
aa\_SS]`b`aPX\_[\_a`\_aa`a`aaa`a\_aa`[\_`^`^  
@HWI-EAS443:3:79:805:918#0/1  
GTCCCGCACTCGGAGATACTCACTAAGACCACTGTGGAC  
+HWI-EAS443:3:79:805:918#0/1  
^UTUYX\_MQTbbX`Q\_[YMW¥`WNTYZWW`]\_XTXQX¥PZ  
@HWI-EAS443:3:79:807:283#0/1  
GTCCCGTTTTCGTTTTATTACCAACTACGTCCCCTTGCC  
+HWI-EAS443:3:79:807:283#0/1  
a`aaab¥aa\_\_\_R\_aaaa]\_^U^`\_a`aa\_aTα]\_]\_\_`\_  
@HWI-EAS443:3:79:807:533#0/1  
GTACTCTTATTTTCAGTGTGGAGGTTGCCCGTTAGCAC  
+HWI-EAS443:3:79:807:533#0/1  
aaaabbababbbbaa`aaaaaaaa^aa`^aaaa\_\_TYZ  
@HWI-EAS443:3:79:824:622#0/1  
ATAAAGAAGTCTAATGTTCGAGTCCCGCACTC  
+HWI-EAS443:3:79:824:622#0/1  
aba]babaaabbab\_^aaaa`^`bXaa^Ya`^`\_VUS¥Y  
@HWI-EAS443:3:79:82:1660#0/1  
CTGTAATTGGGTATCTCATTGCCATCATCCACTTCATTCT  
+HWI-EAS443:3:79:82:1660#0/1  
a\_^¥a]aa`^R¥a\_aaa]\_^\_a`Z]`^aa¥\_\_^^Z^\_\_^  
@HWI-EAS443:3:79:837:1663#0/1  
GCGAGATACTCACTAAGACCACTGTGGACCATATGGCCAT  
+HWI-EAS443:3:79:837:1663#0/1  
R\_¥L\_R¥U`b^]bb``¥¥b`aaZ\_QR]bbbUbbaa^^b`^  
@HWI-EAS443:3:79:837:289#0/1  
CTTCATTTGGGAAAACAACCTCCATAATCACATCCTGTGC  
+HWI-EAS443:3:79:837:289#0/1  
aaba`\_U¥a¥^`^`^`aa¥\_a^^Q^aaZ\_aaaa`ZSaa`a¥  
@HWI-EAS443:3:79:878:918#0/1  
CAAGGGAGCAATTTTACAATCCTGGAGCTCTTCTTCTTC

+HWI-EAS443:3:79:878:918#0/1  
aaba`bbbbaabbabbababbbbaa`abYb`baabab`aaa  
@HWI-EAS443:3:79:905:373#0/1  
GTCCCGTTTTTCGTTTCATTACCAACTACGTCCCCTTGC  
+HWI-EAS443:3:79:905:373#0/1  
`Zaaa¥MT\_``X\_\_``\_`X\_`^\_\_`a]XY\_]SYY\_  
@HWI-EAS443:3:79:908:1516#0/1  
AAAAGAAGTCTGAGATCTAATGTCGCAGTCCCGCACTCGC  
+HWI-EAS443:3:79:908:1516#0/1  
abbbbaabbbbab\_aaaaaab`aaaa\_aa\_\_\_a`]\_\_\_\_``]a  
@HWI-EAS443:3:79:914:270#0/1  
CTGGTAAGAGGCAATTCTCCAGTATTCAATTACAACAAGG  
+HWI-EAS443:3:79:914:270#0/1  
\_`b`ab^`aabbbbbbabb`a`^bbbbbbbbbbbbbYbaba  
@HWI-EAS443:3:79:916:1687#0/1  
AAGAAGTCTGTAAGTCTGTTGGTTGCCTTGTGTAATTGAAT  
+HWI-EAS443:3:79:916:1687#0/1  
aa^`\_`a`[aaaXa`¥^`UYU`aZ]^`]``X]\_\_]  
@HWI-EAS443:3:79:919:894#0/1  
CAGAGAGGAATGAACAAGGACAAACCCTCTGGAGCAAAAC  
+HWI-EAS443:3:79:919:894#0/1  
aaabaabbbbbbbaabbbbaaab]baaaaa\_Z`aa\_`^a\_  
@HWI-EAS443:3:79:91:1943#0/1  
CTAGCACTGACTCAGGGCCATTGATCTCCACATCATTGA  
+HWI-EAS443:3:79:91:1943#0/1  
aZYY`a`[P`\_YUUULTRU\_SMP[N[Z¥UWT\_¥VYRSQTO  
@HWI-EAS443:3:79:934:622#0/1  
ATCTAATGTCGCAGTCCCGCACTCGCGAGATACTCACTAA  
+HWI-EAS443:3:79:934:622#0/1  
aaaaaXa`M`[X¥\_ZZYXPVNQZVNT¥V¥W¥VVQUQUV¥Z  
@HWI-EAS443:3:79:976:571#0/1  
AGATACTCACTAAGACCACTGTGGACCATATGGCCATAAT  
+HWI-EAS443:3:79:976:571#0/1  
ab`aaaa\_aaa\_a\_a\_\_aaa^\_aa`````a^\_\_\_\_]a]  
@HWI-EAS443:3:7:1015:1087#0/1  
AGGCAGTGTTTATATTGAAGTGTGCACTTAACCCAAGGG  
+HWI-EAS443:3:7:1015:1087#0/1  
abba`b]a]abaa`bbba\_]a^aa\_\_\_\_`ba`[\_Y\_aaaa  
@HWI-EAS443:3:7:1026:434#0/1  
GTCCCGTTTTTCGTTTCATTACCAACTACGTCCCCTTGC  
+HWI-EAS443:3:7:1026:434#0/1  
aa\_a\_b`aa`a[^`[\_aaa\_[\_\_^X`\_]\_Y^XUU\_X\_P  
@HWI-EAS443:3:7:103:454#0/1  
GGCCATATCTTGTCTTCTTTGCCAAAATGAGAAATC  
+HWI-EAS443:3:7:103:454#0/1  
aX\_\_Va\_\_\_\_a`aa\_]\_\_]V^aa]R\_]`S¥Z]\_`\_]\_\_`0  
@HWI-EAS443:3:7:1070:1684#0/1  
GAATAAAGAAGTCTGAGATCTAATGTCGCAGTCCCGCAC  
+HWI-EAS443:3:7:1070:1684#0/1  
a]ZV\_a``\_a\_abaaa\_bb`T`b\_ab[aa`a`\_`^]`[\_BB

@HWI-EAS443:3:7:1092:862#0/1  
CTTTTGCATCTTTTTGGAAATGCCTCAAGAGTTGGTGCAT  
+HWI-EAS443:3:7:1092:862#0/1  
`aa`aWaa]]]ba]`a`a^^ba`baa]baa\_```\_\_\_aa  
@HWI-EAS443:3:7:111:206#0/1  
AGAGAATAAAAGAACTGAGAGATCTAATGTCGCAGTCCCG  
+HWI-EAS443:3:7:111:206#0/1  
\_aa`aaaab]baaa`aaaaa\_\_aaa¥\_a[^\_\_\_`X\_VV\_  
@HWI-EAS443:3:7:1134:166#0/1  
GTCTGCTGTCTGAGAGATTCTCATTCTTTGGGCAAAGAA  
+HWI-EAS443:3:7:1134:166#0/1  
\_LRRSJ]ZZ¥LXVP]Z[[NX`XQZVR^ZUMUVNQST]^BB  
@HWI-EAS443:3:7:114:901#0/1  
CGCTGGTTTGCCTATTGACAAAGTTCAGATCGCCCCTAA  
+HWI-EAS443:3:7:114:901#0/1  
\_bb\_¥]aS^^abaaZ\_baaa`a[][\_`\_b```\_`\_`\_a`\_`  
@HWI-EAS443:3:7:1175:992#0/1  
GAGATCTAATGTCGCAGTCCCGCACTCGCGAGATACTCAC  
+HWI-EAS443:3:7:1175:992#0/1  
`aaa``bbba]baaa`]a`aa`\_\_aaa\_a\_b^a[Ta[]U  
@HWI-EAS443:3:7:1207:676#0/1  
ACAAAAGAGAAGAAAGAAGAGCTCCAGGATTGAAAAATTG  
+HWI-EAS443:3:7:1207:676#0/1  
a]a]b^`Za`\_aaaa`\_`[X]RaPH^aa`aYaPZW\_Z\_\_]  
@HWI-EAS443:3:7:1218:338#0/1  
ATGGCCATATGGTCCACAGTGGTCTTAGTGAGTATCTCGC  
+HWI-EAS443:3:7:1218:338#0/1  
`^S^aSUZabaaRVa[Raa\_a`PVR¥XIX¥P¥]^SM^W¥W  
@HWI-EAS443:3:7:1224:1492#0/1  
CTTTCAAAGGACAAGCGGATCATCAGTCAAGAAAGAAGA  
+HWI-EAS443:3:7:1224:1492#0/1  
aaU`Z]^¥`aa¥aTFW^T^¥^Y\_a\_\_`bYb`bbXb`R`bX  
@HWI-EAS443:3:7:1243:1164#0/1  
GTGCTAATTGGGCAAGGGGACGTAGTGTGGTAATGAAAC  
+HWI-EAS443:3:7:1243:1164#0/1  
a`aa^aaaab`aaa\_[a`\_]UaUYaU`]]`[UU^Z^X]^S  
@HWI-EAS443:3:7:1268:822#0/1  
AAAAGAACTGAGAGATCTAATGTCGCAGTCCCGCACTCGC  
+HWI-EAS443:3:7:1268:822#0/1  
]aabaab`baa`b\_aa`baaaa`^\_[aa\_¥¥`[^Z¥\_]\_¥  
@HWI-EAS443:3:7:128:842#0/1  
CGCGAGATACTACTAAGACCACTGTGGACCATATGGCCA  
+HWI-EAS443:3:7:128:842#0/1  
Yabbb\_IYabbaabaY¥abbaaZZa^R]aab`bb¥]^OG  
@HWI-EAS443:3:7:1293:1971#0/1  
AAAGAACTGAGAGATCTAATGTCGCAGTCCCGCACTCGCG  
+HWI-EAS443:3:7:1293:1971#0/1  
aaa\_]`\_a`\_`\_a\_\_Ua`Z`aUX¥]^\_YUWUBBBBBBBBBB  
@HWI-EAS443:3:7:1322:759#0/1  
AAGAACTGAGAGATCTAATGTCGCAGTCCCGCACTCGCGA

+HWI-EAS443:3:7:1322:759#0/1  
aabab`aa```baa`aa\_aaZ^a¥``]N^¥\_\_^`WTVVWB  
@HWI-EAS443:3:7:1329:690#0/1  
CGCAAGGAAGTGAAGTTGACAATAACTTATTCGTCATC  
+HWI-EAS443:3:7:1329:690#0/1  
a\_`ababababbbbbb`aaa\_a\_b\_a^ba\_ab`^`\_`aa\_  
@HWI-EAS443:3:7:1339:615#0/1  
GTCCATTATTCTTGTCTGCTGTAATTGGGTATCTCATT  
+HWI-EAS443:3:7:1339:615#0/1  
\_`^JZ¥aabb¥W\_0[\_aT[bb`a\_`\_`ababaXaYEUa\_\_\_\_  
@HWI-EAS443:3:7:134:1520#0/1  
AAAAGAAGTGAAGATCTAATGTCGCAGTCCCGCACTCGC  
+HWI-EAS443:3:7:134:1520#0/1  
aaa`U¥aa``aaaa`a]aa\_\_aW\_\_\_\_\_UV^[[Y[ZZZ^\_  
@HWI-EAS443:3:7:1373:381#0/1  
AAAGAAGTGAAGATCTAATGTCGCAGTCCCGCACTCGCG  
+HWI-EAS443:3:7:1373:381#0/1  
aVaaab]\_WY\_U]\_a\_Z]aba^X[]\_`¥`X[[PURNX]\_B  
@HWI-EAS443:3:7:1386:983#0/1  
GAATGATCGGAATACTGCCCGACATGACCCCAAGCACGGA  
+HWI-EAS443:3:7:1386:983#0/1  
aaZ]a`)]`¥¥`\_ZY\_¥XZWY[[¥\_SZW¥¥W¥¥¥PUP^BB  
@HWI-EAS443:3:7:1404:418#0/1  
ACTCACTAAGACCACTGTGGACCATATGGCCATAATCAAA  
+HWI-EAS443:3:7:1404:418#0/1  
aaaaa`ab\_aa`Xa\_aa\_aa`^`\_a¥\_a`TX]^]\_ZSZ\_`  
@HWI-EAS443:3:7:1413:111#0/1  
AAAAGAAGTGAAGATCTAATGTCGCAGTCCCGCACTCGC  
+HWI-EAS443:3:7:1413:111#0/1  
¥UV\_bWUHT\_\_^Q[QUW¥TWXYWWVBBBBBBBBBBBB  
@HWI-EAS443:3:7:1416:679#0/1  
AGGAATGAACAAGGACAAACCCTCTGGAGCAAAACAAACG  
+HWI-EAS443:3:7:1416:679#0/1  
aa\_bbbba\_baa^baaaaaaPZ[b[aaa\_]Za\_\_U```Wa  
@HWI-EAS443:3:7:1428:1555#0/1  
TTGCGTTTCACTGACTTCTTCGGGAGACAATAGTACGTTC  
+HWI-EAS443:3:7:1428:1555#0/1  
`aa]`\_aa^aWaa\_`^`a¥``]\_]Z\_^Z\_^`^X]X^WYG  
@HWI-EAS443:3:7:1438:1071#0/1  
AAAGAAGTGAAGATCTAATGTCGCAGTCCCGCACTCGCG  
+HWI-EAS443:3:7:1438:1071#0/1  
IP]ba\_ab[XX\_bV\_^baa`]SHR¥¥aY\_a^]]VGUX\_LZ  
@HWI-EAS443:3:7:1477:247#0/1  
AAAAGAAGTGAAGATCTAATGTCGCAGTCCCGCACTCGC  
+HWI-EAS443:3:7:1477:247#0/1  
Ub`¥Sub\_`]ab`aYaSa`aaa[``]aa][\_]\_[PPS[SaB  
@HWI-EAS443:3:7:1484:810#0/1  
GTTGAAACATGGTACCTTCGGCCCTGTCCACTTCAGAAAT  
+HWI-EAS443:3:7:1484:810#0/1  
aXa^`]\_^\_aa`ZZ^X\_\_\_U\_]QMRONIMKMKZZZBBBBB

@HWI-EAS443:3:7:1502:1044#0/1  
AGAAGTCTAATGTCGCAGTCCCGCACTCGCGAG  
+HWI-EAS443:3:7:1502:1044#0/1  
aaZ]^`a]Ya`]aN\_¥`\_[SN\_V`¥MT^Z\_SUVSWSTBBB  
@HWI-EAS443:3:7:1502:729#0/1  
GCGAGATACTACTAAGACCACTGTGGACCATATGGCCAT  
+HWI-EAS443:3:7:1502:729#0/1  
Z^`bb]baab`baba¥¥`a`\_aYY¥`aa`¥a`\_`TIUa]  
@HWI-EAS443:3:7:1509:1248#0/1  
AAAAGAAGTCTAATGTCGCAGTCCCGCACTCGC  
+HWI-EAS443:3:7:1509:1248#0/1  
aaaaaZaaaa`aa]^`aaaa¥¥`S`a\_SZU^¥TW¥U`B  
@HWI-EAS443:3:7:1512:1027#0/1  
GAATAAAGAAGTCTAATGTCGCAGTCCCGCAC  
+HWI-EAS443:3:7:1512:1027#0/1  
aa`aaaaaaaa`baaaaa\_\_\_\_a`\_aa]\_\_\_\_`a^YUX\_]YY  
@HWI-EAS443:3:7:1547:1857#0/1  
CTGGATCAGACCGAGTGATGGTATCACCTCTGGCCGTAAC  
+HWI-EAS443:3:7:1547:1857#0/1  
`b\_\_aba`^`baSa][aa[ab^aa^a`Ha`\_RaZ[aQ  
@HWI-EAS443:3:7:1568:996#0/1  
AGGACAGCAGACTCCACCCAGATGTGCCTTCATCTGGAT  
+HWI-EAS443:3:7:1568:996#0/1  
a`b`\_`T^aaaaa`]aR\_\_¥a\_¥]ZW`^¥`\_P¥]M¥^¥¥¥  
@HWI-EAS443:3:7:1641:869#0/1  
CAGAGGGTTTGCCTTGTTCATTCTCTCTGGAATCATGT  
+HWI-EAS443:3:7:1641:869#0/1  
aabZbba[bbba`abbabbabb¥`a`baaab`aaWabaa  
@HWI-EAS443:3:7:165:1275#0/1  
ATTATGGCCATATGGTCCACAGTGGTCTTAGTGAGTATCT  
+HWI-EAS443:3:7:165:1275#0/1  
aa\_a¥Vaa[`¥VYW][[ `[UTVRZ]UM^\_^UGZYUN^RBB  
@HWI-EAS443:3:7:1664:1775#0/1  
TGCTGTAATTGGGTATCTCATTGCCATCATCCACTTCATT  
+HWI-EAS443:3:7:1664:1775#0/1  
a\_bbbK[Vabb^^\_b\_bbV\_^baaab^b^a]\_\_bb]\_aa  
@HWI-EAS443:3:7:1735:609#0/1  
GTCCACTTCAGAAATCAAGTTAAAATAAGGAGGAGAGTTG  
+HWI-EAS443:3:7:1735:609#0/1  
aa`\_YK`a[aaaa\_\_^\_a\_`\_^Z^\_S¥a^X`^Z^Z\_ZXa  
@HWI-EAS443:3:7:193:728#0/1  
GTAATTGGGTATCTCATTGCCATCATCCACTTCATTCTGA  
+HWI-EAS443:3:7:193:728#0/1  
S\_b`\_`abbb]bbbZU\_[`b¥`aa]\_`a`aaa]aa^aaa`\_  
@HWI-EAS443:3:7:218:742#0/1  
TGGATGATGGCAATGAGATACCCAATTACAGCAGACAAGA  
+HWI-EAS443:3:7:218:742#0/1  
ab`\_a`Va\_VaZ]^`^]b`a`Z`aXZY^a^aa\_a`\_^R]\_  
@HWI-EAS443:3:7:262:563#0/1  
CTTGTCTCTTTGCCAAAATGAGAAATCCTCTCAGGACA

+HWI-EAS443:3:7:262:563#0/1  
abUb]ab^a\_\_bab\_\_a]ZWQ]^]a\_N\_`]aSaHa]^`Y\_  
@HWI-EAS443:3:7:346:785#0/1  
AGAGTCCCGTTTTTCGTTTCATTACCAACTACGTCCT  
+HWI-EAS443:3:7:346:785#0/1  
`aaaa^^baUa`a[bTaa]a^abXab`^`]ZaXaR\_\_]^]  
@HWI-EAS443:3:7:372:329#0/1  
AAAAGAAGTCTGAGAGATCTAATGTCGCAGTCCCGCACTCGC  
+HWI-EAS443:3:7:372:329#0/1  
aa\_]``aa`aaaa`a`\_Uaa¥^`[\_aV¥^^W\_XT¥¥^W  
@HWI-EAS443:3:7:373:1319#0/1  
AAAGAAGTCTGAGAGATCTAATGTCGCAGTCCCGCACTCGCG  
+HWI-EAS443:3:7:373:1319#0/1  
ab¥aab`bbbb`aaaabbabb]^`aaa\_^\_\_a\_SH^Qaa\_a  
@HWI-EAS443:3:7:378:1405#0/1  
AAAGAAGTCTGAGAGATCTAATGTCGCAGTCCCGCACTCGCG  
+HWI-EAS443:3:7:378:1405#0/1  
`]U`\_]`aaaa`^aX¥`L]\_a`X\_aXZZ^]]\_X[\_  
@HWI-EAS443:3:7:383:492#0/1  
TTGTAATTGAATACTGGAGAATTGCCTCTTACCAGTATCC  
+HWI-EAS443:3:7:383:492#0/1  
ab``a`V^a]a`aa\_aaaaa\_]W]a[aa`ZDXa``RS  
@HWI-EAS443:3:7:411:131#0/1  
CACTTCAATATAAACACTGCCTGTTCCGCCGGCTACTGGG  
+HWI-EAS443:3:7:411:131#0/1  
V[abaaaaabaaaa`a`bY[aa\_\_^abaUZa]GYXJMUB  
@HWI-EAS443:3:7:432:586#0/1  
GTGCATTGACTGAAGATCCAGATGAAGGCACATCTGGGGT  
+HWI-EAS443:3:7:432:586#0/1  
a\_aa\_aaaa`aa\_a\_\_aa]\_a`^`¥\_\_\_\_`¥\_\_W\_a`[\_W  
@HWI-EAS443:3:7:441:990#0/1  
ATCATTCTCACTTCTCCTCCTGGAGTGTACATCTGCTCC  
+HWI-EAS443:3:7:441:990#0/1  
aa`WPZOZ\_`aaW^R]RTS[KKMPNYJYGXZ]TORU`Q¥B  
@HWI-EAS443:3:7:46:1333#0/1  
AGTCAATGCACCTGCATCCTTTCCAAGAACTGTAAGTCGT  
+HWI-EAS443:3:7:46:1333#0/1  
ababb^aabba``abbabaaaaaaa\_aa\_aa`baa¥[a\_  
@HWI-EAS443:3:7:472:1788#0/1  
AAAGAAGTCTGAGAGATCTAATGTCGCAGTCCCGCACTCGCG  
+HWI-EAS443:3:7:472:1788#0/1  
`aaaa\_[[aa\_[U\_aaaa`aaUR]\_aaX^\_]X]\_\_UUZ]^`  
@HWI-EAS443:3:7:482:604#0/1  
AAAAGAAGTCTGAGAGATCTAATGTCGCAGTCCCGCACTCGC  
+HWI-EAS443:3:7:482:604#0/1  
SZ¥TXI\_\_¥[baabaaaZ`P\_\_FTRa``ZaX`\_a`\_\_\_\_`Y  
@HWI-EAS443:3:7:484:455#0/1  
AAAGAAGTCTGAGAGATCTAATGTCGCAGTCCCGCACTCGCG  
+HWI-EAS443:3:7:484:455#0/1  
aa]a^]aaaab`a`U\_`aabXS\_\_a\_¥`]^`^UZ]^`a]\_



@HWI-EAS443:3:7:507:1357#0/1  
GTCCCCGTTTTTCGTTTCATTACCAACTACTCGTCCCCCTTGC  
+HWI-EAS443:3:7:507:1357#0/1  
aU]Zab`QUa`bS\_a[\_aZa^U^a`a^Z]\_[UYPYXYH^N  
@HWI-EAS443:3:7:551:684#0/1  
CAAGGGAGCAATTTTACAATCCTGGAGCTCTTCTTTCTTC  
+HWI-EAS443:3:7:551:684#0/1  
`baababbbX]\_baa]aaa`a¥` ``Z`UaWaaVa]`Na¥]  
@HWI-EAS443:3:7:557:480#0/1  
GGGACGTAGTGTGGTAATGAAACGAAAACGGGACTCTA  
+HWI-EAS443:3:7:557:480#0/1  
abba`abaab\_a`aaaSa\_aa\_aa¥\_^\_\_a]` ``YX\_^\_\_  
@HWI-EAS443:3:7:584:799#0/1  
GAGGATTTCTCATTGTTGGCAAAGAAGACAAGAGATATGG  
+HWI-EAS443:3:7:584:799#0/1  
aa]a`Y`Y`Q`^`^`[[Z^\_\_Z]\_\_ZW`\_]¥[\_[^]]]Z]B  
@HWI-EAS443:3:7:593:926#0/1  
CTGTAATTGGGTATCTCATTGCCATCATCCACTTCATTCT  
+HWI-EAS443:3:7:593:926#0/1  
N]\_\_ab` `¥`ab`Wa`¥¥¥a¥a`\_\_¥b¥¥ab` `a`aT`  
@HWI-EAS443:3:7:601:1237#0/1  
GAATAAAAGAAGACTGAGAGATCTAATGTCGCAGTCCCGCAC  
+HWI-EAS443:3:7:601:1237#0/1  
abbaaab^aaaabZaaa[a`Ya`abaY`[a`a`\_`\_]]\_`  
@HWI-EAS443:3:7:621:815#0/1  
GTGGGAGATCAATGGCCCTGAGTCAGTGCTAGTCAACACT  
+HWI-EAS443:3:7:621:815#0/1  
^Ra` [JYPUZH\_\_ [NXVRVU¥PQWUUYUULRRRURUBBB  
@HWI-EAS443:3:7:683:318#0/1  
AAAGAAGTCTAATGTCGCAGTCCCGCACTCGCG  
+HWI-EAS443:3:7:683:318#0/1  
`Q]`P^Y¥P`aZ¥\_aV\_WMO`PRR[HVWZQ^^BBBBBBBB  
@HWI-EAS443:3:7:687:1241#0/1  
GAGAGATCTAATGTCGCAGTCCCGCACTCGCGAGATACTC  
+HWI-EAS443:3:7:687:1241#0/1  
ababaaaaab]b\_Z]^\_ZbY[¥`V][\_¥Y^` `\_\_¥\_\_WB  
@HWI-EAS443:3:7:722:788#0/1  
AGAATAAAAGAAGTCTAATGTCGCAGTCCCGCA  
+HWI-EAS443:3:7:722:788#0/1  
ab`\_aabbbbaabbbbababbabaaab\_aa[a\_\_U\_]aa[  
@HWI-EAS443:3:7:734:924#0/1  
GGGACGTAGTGTGGTAATGAAACGAAAACGGGACTCTAG  
+HWI-EAS443:3:7:734:924#0/1  
abb`]b\_aaab`bba¥\_aa`aaa]`\_^`a¥`a\_\_V\_¥^`\_  
@HWI-EAS443:3:7:744:824#0/1  
CAGTGGTCTTAGTGAGTATCTCGCGAGTGCGGGACTGCGA  
+HWI-EAS443:3:7:744:824#0/1  
aa`Mab\_abb`a]aaa\_a`^^aU]W\_V`ZZ\_\_XSWST^¥  
@HWI-EAS443:3:7:763:894#0/1  
GTCCCCGTTTTTCGTTTCATTACCAACTACTCGTCCCCCTTGC

+HWI-EAS443:3:7:763:894#0/1  
aXaV¥b[Q]a`P^[\_T\_`VTPX¥W`T`V\_\_ [MZGYZVBB  
@HWI-EAS443:3:7:804:589#0/1  
TCCCGTTTTCGTTTCATTACCAACTACGTCCCCTTGCC  
+HWI-EAS443:3:7:804:589#0/1  
[^`^Q\_ [[ [¥` \_\_S]\_ [\_\_ `UZ\_ [^ [ ` [\_\_ [QW]VWWW [ ]P  
@HWI-EAS443:3:7:83:403#0/1  
CTTCTCCAACCATTGTGAATTCTTCATACCCTTCATGTA  
+HWI-EAS443:3:7:83:403#0/1  
`Q¥aSVT\_TV¥QUaa]\_ LNV¥¥ [WLMaPL [W[^\_]YPK]  
@HWI-EAS443:3:7:850:1445#0/1  
AAAAGAAGTGGAGATCTAATGTCGCAGTCCCGCACTCGC  
+HWI-EAS443:3:7:850:1445#0/1  
ababaZ] ]aa`^\_aa^Za\_aaaZZ¥Ya^U^Y¥¥XQL^W¥¥  
@HWI-EAS443:3:7:853:1509#0/1  
GCCGTAACATGGTGAATAGGAATGGCCCAACAACAAGTA  
+HWI-EAS443:3:7:853:1509#0/1  
abbbabbbabbb^abbbbaabaaaaa`aaa`abWaaaVa  
@HWI-EAS443:3:7:854:1567#0/1  
ATGAAGTGGGGCAAGAATACTGACATCAGAGTCACAGCT  
+HWI-EAS443:3:7:854:1567#0/1  
ab`abb\_bab`aabbaaaaa¥baaaaa\_aaaaX\_\_\_\_\_U\_  
@HWI-EAS443:3:7:86:1133#0/1  
AGAAGTGGAGATCTAATGTCGCAGTCCCGCACTCGCGAG  
+HWI-EAS443:3:7:86:1133#0/1  
a\_aaaaa`aa]a\_aaa`\_aZX`ZWa¥\_Z]Z`RS]\_]\_VZ\_  
@HWI-EAS443:3:7:907:794#0/1  
CTGGGAGAAACCTTGTTTTACGGACCAATTCTCTTTCTAG  
+HWI-EAS443:3:7:907:794#0/1  
Sa¥X\_Z`\_\_aWZ¥a¥a`bb`Xaba^[a\_\_¥`bab\_` `ab^  
@HWI-EAS443:3:7:913:1799#0/1  
TGGGAGTAGATGAATACTCCAGCACGGAGAGAGTGGTAGT  
+HWI-EAS443:3:7:913:1799#0/1  
U`\_¥¥[[[bbbaa]abbS`^\_b\_]`\_aa`b^aabNbaHSZB  
@HWI-EAS443:3:7:931:106#0/1  
GAAAGAAGAGCTCCAGGATTGAAAATTGCTCCCTTGATG  
+HWI-EAS443:3:7:931:106#0/1  
abbb\_aab[^ab[bbb^VWbbaaabababUaU` `b`bWbb  
@HWI-EAS443:3:7:937:1805#0/1  
AAAAGAAGTGGAGATCTAATGTCGCAGTCCCGCACTCGC  
+HWI-EAS443:3:7:937:1805#0/1  
ab`Ua\_aSaaaaa`S^^`\_`G¥ZQ`¥]W¥WU^YWBBBB  
@HWI-EAS443:3:7:939:1850#0/1  
ATCTGCTCCCAGCACGTCCCTTGGGTTAAGTGAACACTT  
+HWI-EAS443:3:7:939:1850#0/1  
aa]]b^¥^Q^baaaaa]a` [ ]¥Z [ ` J ` ` ^U` G` YU` Z\_\_  
@HWI-EAS443:3:7:966:1804#0/1  
AAAGAAGTGGAGATCTAATGTCGCAGTCCCGCACTCGCG  
+HWI-EAS443:3:7:966:1804#0/1  
aaaa\_a` ` \_a`aSaTT^a` `a\_\_\_\_\_Y` ]TT^\_TWTW]¥Y\_

@HWI-EAS443:3:7:987:970#0/1  
CTTCATACCCTTCATGTACTCTTATTTTCAGTGTGGAG  
+HWI-EAS443:3:7:987:970#0/1  
V`b`baabb\_bbbbbbabab[bbbabbabbbbbbbbbbb  
@HWI-EAS443:3:80:1000:785#0/1  
CTCATTGCCATCATCCACTTCATTCTGAGTGCGGGTTCT  
+HWI-EAS443:3:80:1000:785#0/1  
abbbbabababbbabaabbbabbbabaab`bababa^a`a  
@HWI-EAS443:3:80:1029:434#0/1  
GTGGCGTACATGCTAGAAAGAGAATTGGTCCGTAACAA  
+HWI-EAS443:3:80:1029:434#0/1  
aZY]aa`a\_aaa]a^a\_\_\_a\_a`a`\_`^W¥`¥^\_`¥\_`^  
@HWI-EAS443:3:80:1038:1578#0/1  
AAACTTTGGTCAACATCATCTTTCTCACTTCTCCTCCTG  
+HWI-EAS443:3:80:1038:1578#0/1  
aaaaaab\_\_abaa`aaaaaaa\_V]\_a\_aaa\_\_a\_aa\_\_`\_  
@HWI-EAS443:3:80:103:778#0/1  
GGAGAAGTGAGAAATGATGATGTTGACCAAAGTTTGATTA  
+HWI-EAS443:3:80:103:778#0/1  
a\_VWNXXMP¥HWHV]]S)`aV\_a`\_a`QH^N]VYYS LX  
@HWI-EAS443:3:80:1044:1432#0/1  
TCCCGTTTTCGTTTTATTACCAACTACGTCCCCTTGCC  
+HWI-EAS443:3:80:1044:1432#0/1  
Y¥W¥`]abb\_VRO`WF]^aRR¥aV][OYVXRWS]YW[\_\_\_^  
@HWI-EAS443:3:80:107:1323#0/1  
GAATAAAAGAACTGAGAGATCTAATGTCGCAGTCCCGCAC  
+HWI-EAS443:3:80:107:1323#0/1  
ab\_bbbab``bbbab^Y^baaab`ab\_a\_aaa^aba^aS`  
@HWI-EAS443:3:80:1104:403#0/1  
GTCGGCAGTATTCCGATCATTCCCATCACATTGTCGATG  
+HWI-EAS443:3:80:1104:403#0/1  
aaaaaaaaab\_aaa\_\_a`a]`aa`]\_^a\_a^`a`^^^X\_  
@HWI-EAS443:3:80:111:293#0/1  
AAATGTGCCACAGCACAGATTGGAGGAGTAAGGATGGT  
+HWI-EAS443:3:80:111:293#0/1  
SW\_^Y^aa`a^aa]a]\_aa\_\_`a]\_]\_^T¥[aZXU\_YN  
@HWI-EAS443:3:80:1188:824#0/1  
CTCACTAAGACCACTGTGGACCATATGGCCATAATCAAAA  
+HWI-EAS443:3:80:1188:824#0/1  
aab\_[aaabaaa\_a¥aWTXGQb\_a^\_W]]ZYOW^¥JV`]^  
@HWI-EAS443:3:80:1189:1335#0/1  
CCACAGTGGTCTTAGTGAGTATCTCGCGAGTGCGGGACTG  
+HWI-EAS443:3:80:1189:1335#0/1  
abaab`X^\_abbaV`\_ba]\_aY`XZGYZMK[U]aVPTTY  
@HWI-EAS443:3:80:1245:1090#0/1  
TATCTCTTGTCTTCTTTGCCAAAATGAGAAATCCTCTCA  
+HWI-EAS443:3:80:1245:1090#0/1  
aaa`aaaa`\_`aa^aba`\_\_aa`\_\_\_\_\_`a`a]Y\_¥`]\_  
@HWI-EAS443:3:80:1250:1106#0/1  
ACAGCACACAGATTGGAGGAGTAAGGATGGTGGACATCCT

+HWI-EAS443:3:80:1250:1106#0/1  
a`baaa\_\_aba\_aaaa`\_^a\_a\_\_\_^`¥T]`^U\_^UX^  
@HWI-EAS443:3:80:1282:698#0/1  
CTCGCGAGATACTCACTAAGACCACTGTGGACCATATGGC  
+HWI-EAS443:3:80:1282:698#0/1  
aa`bbbbabaabaabbZV`aaaaa^a^a\_a]a\_`a\_W  
@HWI-EAS443:3:80:1298:1573#0/1  
ATTTCTCACTTCTCCTCCTGGAGTGACATCTGCTCCCAG  
+HWI-EAS443:3:80:1298:1573#0/1  
aaaaUaaa^a^^a¥¥`¥\_a¥aY^\_¥^¥aUM^YW`\_U¥]^  
@HWI-EAS443:3:80:1402:121#0/1  
AAAAGAAGTGAAGATCTAATGTCGCAGTCCCGCACTCGC  
+HWI-EAS443:3:80:1402:121#0/1  
abbaa\_a^ab`aa\_]aa\_aa]^ZHY^\_YTKWY^X]BBB  
@HWI-EAS443:3:80:1415:106#0/1  
CCCGCACTCAGAATGAAGTGGATGATGGCAATGAGATACC  
+HWI-EAS443:3:80:1415:106#0/1  
^`ab`aaababaaaa^b`ab`a\_aaaSWXa`\_[UEaKE  
@HWI-EAS443:3:80:1459:1416#0/1  
CCCGTTTTTCGTTTCATTACCAACTACGTCCCCTTGCCC  
+HWI-EAS443:3:80:1459:1416#0/1  
W\_bb`bbbaa`bb`bbbaa¥Vaab`aa`aa[Y\_a\_aa[\_`\_  
@HWI-EAS443:3:80:1466:1259#0/1  
CTAATGTCGCAGTCCCGCACTCGCGAGATACTCACTAAGA  
+HWI-EAS443:3:80:1466:1259#0/1  
abbbb]bbbbaaa`ba`aWbaba`ababaZbaa]aa`\_`  
@HWI-EAS443:3:80:1509:1351#0/1  
AGAGTCCCGTTTTTCGTTTCATTACCAACTACGTCCCCT  
+HWI-EAS443:3:80:1509:1351#0/1  
¥aX\_YZ\_^aaa`Y\_0\_a^a`\_]T¥a\_^V^ZQY\_RUQ[Z  
@HWI-EAS443:3:80:1536:758#0/1  
AGACAGAATCCAAGTGAAGCAAGCCGTAGACATATGCA  
+HWI-EAS443:3:80:1536:758#0/1  
\_¥]WZH]\_XXQQXY]T^aa¥aaa^XYJ^a^aV¥V¥UN  
@HWI-EAS443:3:80:1597:1309#0/1  
CTGCTGTCTGAGAGGATTTCTCATTTTGGGCAAAGAAGA  
+HWI-EAS443:3:80:1597:1309#0/1  
[F^aab`[aababaaba\_baaba`aaaaaa\_a`aaaa\_  
@HWI-EAS443:3:80:1623:68#0/1  
ATACTCACTAAGACCACTGTGGACCATATGGCCATAATCA  
+HWI-EAS443:3:80:1623:68#0/1  
^b`F`\_a¥baaba¥0¥K`[Ua`[\_]^`aaXO^^a]\_\_UW  
@HWI-EAS443:3:80:1669:1081#0/1  
GTCCCGTTTTTCGTTTCATTACCAACTACGTCCCCTTGC  
+HWI-EAS443:3:80:1669:1081#0/1  
a\_]a`Q^aW¥]`aYS]FXRH\_UUVMR\_R^UXRQRGUUN  
@HWI-EAS443:3:80:170:1908#0/1  
CAACCCTGATCCTCTCACATTCACAGTCAATGAGGAAAAT  
+HWI-EAS443:3:80:170:1908#0/1  
a[aaaa`a\_¥`[ZZa`aT^[\_]WUZ^^\_AZ^^]\_`^V

@HWI-EAS443:3:80:1740:1552#0/1  
AGTGGATGATGGCAATGAGATACCCAATTACAGCAGACAA  
+HWI-EAS443:3:80:1740:1552#0/1  
\_`]b`a[aYa¥^`Xba]M]^`aa]aaaab`W^b[aa\_Ia`  
@HWI-EAS443:3:80:1749:1347#0/1  
AAAGAACTGAGAGATCTAATGTGCGCAGTCCCGCACTCGCG  
+HWI-EAS443:3:80:1749:1347#0/1  
aaaaaaababaaa````aaaa````^``[¥]¥X[R[^]X[^  
@HWI-EAS443:3:80:249:1387#0/1  
CTGTAATTGGGTATCTCATTGCCATCATCCACTTCATTCT  
+HWI-EAS443:3:80:249:1387#0/1  
a^ZU\_abb`¥WJ`YX\_V^aaaUVW\_aY`][TVTZ[V^X  
@HWI-EAS443:3:80:250:2032#0/1  
TGACTCTGATGTCAGTATTCTTGCCCCACTTCATTTGGG  
+HWI-EAS443:3:80:250:2032#0/1  
¥bbba¥aWaJXabYQba^aaa\_ab\_^`S¥\_`aa^\_VMFP  
@HWI-EAS443:3:80:259:1218#0/1  
GGAAAAGCACTTTTGCATCTTTTGGAAATGCCTCAAGAG  
+HWI-EAS443:3:80:259:1218#0/1  
Z^Zaa`a[aaa\_`bb¥[\_`aaaba^a````aaa\_W\_Y]  
@HWI-EAS443:3:80:275:681#0/1  
GCTGGATCAGACCGAGTGATGGTATCACCTCTGGCCGTAA  
+HWI-EAS443:3:80:275:681#0/1  
a\_I^^ZVU\_[TZZZ\_\_W^VSV[NVZTVXLLVHRYVYBBBB  
@HWI-EAS443:3:80:290:491#0/1  
ATTCAATTCAGTTCTGGAAAAGCACTTTTGCATCTTT  
+HWI-EAS443:3:80:290:491#0/1  
a^aaVaa`aaaa\_a\_`\_`^¥0^aaa\_````^^`\_`\_\_\_\_  
@HWI-EAS443:3:80:308:1295#0/1  
GGCCATTCTATTCCACCATGTTACGCCAGAGGTGATAC  
+HWI-EAS443:3:80:308:1295#0/1  
abaaaa``aaaWG\_^V\_a`a`a`a\_`^a\_XP]^S\_][^Y  
@HWI-EAS443:3:80:326:30#0/1  
CAGCACACAGATTGGAGGAGTAAGGATGGTGGACATCCTT  
+HWI-EAS443:3:80:326:30#0/1  
abbaa\_aa`baaaa````\_`a\_a\_`a\_`^a`S\_^ZZ[^Y[T]  
@HWI-EAS443:3:80:337:1086#0/1  
GGAGAAACCTTGTTTTACGGACCAATTCTTTTCTAGCAT  
+HWI-EAS443:3:80:337:1086#0/1  
¥`Taa¥b`abaa`ab`aa\_¥aba`aa^aaa`\_`a````\_]  
@HWI-EAS443:3:80:355:594#0/1  
GCTGTAATTGGGTATCTCATTGCCATCATCCACTTCATTC  
+HWI-EAS443:3:80:355:594#0/1  
aZ\_aX\_]VX\_a\_R[\_\_\_\_a^^[^^^\_]^[^ZZV\_^][U^`X^  
@HWI-EAS443:3:80:366:223#0/1  
CAGGTGCATTGACTGAAGATCCAGATGAAGGCACATCTGG  
+HWI-EAS443:3:80:366:223#0/1  
abbbYbaabbbabbabbaa\_^b`aaa`aaa`a`^aaa  
@HWI-EAS443:3:80:388:1703#0/1  
GTCAATACTCACTACCACTCTCTCCGTGCTGGAGTATTCA

+HWI-EAS443:3:80:388:1703#0/1  
aTaZaaa^QYaa\_]`a^\_\_a\_`XM\_]\_VV[R\_\_^^[  
@HWI-EAS443:3:80:396:1765#0/1  
GTCGATGGATTCAATTCCCCAGTTCTGGAAAAGCACTTTT  
+HWI-EAS443:3:80:396:1765#0/1  
`]`bbaa`\_````b```aaaa\_\_aa¥aa`a`¥aaZa\_¥]  
@HWI-EAS443:3:80:403:509#0/1  
GAATAATGGACATGATTCCAGAGAGGAATGAACAAGGACA  
+HWI-EAS443:3:80:403:509#0/1  
a`X^^¥\_aa\_aaaaa\_`\_[]^`a`\_aa\_a`aaaa\_`^a  
@HWI-EAS443:3:80:438:1807#0/1  
GAGGATTTCTCATTGGGCAAAGAAGACAAGAGATATGG  
+HWI-EAS443:3:80:438:1807#0/1  
a^Za\_aaa`]aa`aa\_a\_Xa`baa`^Xaaa^`aaa`aYWZ  
@HWI-EAS443:3:80:469:1328#0/1  
GCGAGATACTACTAAGACCACTGTGGACCATATGGCCAT  
+HWI-EAS443:3:80:469:1328#0/1  
`a`aababbbbbbaU`bbbbba`\_a\_abab`aaa¥^aaa  
@HWI-EAS443:3:80:491:1369#0/1  
GTGGATGATGGCAATGAGATACCCAATTACAGCAGACAAG  
+HWI-EAS443:3:80:491:1369#0/1  
a^\_`]`a`a`]\_^W¥`YU\_\_^a`\_`\_^`RY\_^`\_\_`^\_\_W  
@HWI-EAS443:3:80:518:1500#0/1  
CTAATGTGCTAATTGGGCAAGGGGACGTAGTGTGGTAAT  
+HWI-EAS443:3:80:518:1500#0/1  
¥Z\_`W\_]\_]\_bbbb\_RUYYL¥S\_]Za`¥`]Y``\_bXI\_QP  
@HWI-EAS443:3:80:553:1850#0/1  
CGTTTTCGTTTCATTACCAACTACGTCCCCTTGCCCAA  
+HWI-EAS443:3:80:553:1850#0/1  
`\_^a¥Y\_WRb`\_ab\_\_babaab`b]^¥]¥ab]T`]Z`]`  
@HWI-EAS443:3:80:557:21#0/1  
TGGTCTTAGTGAGTATCTCGCGAGTGCGGGACTGCGACAT  
+HWI-EAS443:3:80:557:21#0/1  
`bb`ab^a^aa^Zb`¥`]a[¥UZLXT\_b]FQTRR]SUV]  
@HWI-EAS443:3:80:561:857#0/1  
CTTTCTTGACTGATGATCCGCTTGCTTTTCAAAGTGAA  
+HWI-EAS443:3:80:561:857#0/1  
`baa`a¥ZYaba]\_\_QHY¥¥^aaXR\_^\_aa\_a`ZZYNPR\_  
@HWI-EAS443:3:80:562:640#0/1  
GGTGGAGTCTGCTGCTGAGAGGATTTCTCATTGGGC  
+HWI-EAS443:3:80:562:640#0/1  
a\_V¥a``\_aa`a`\_`[¥¥a\_a¥\_^[]^\_Z[¥T^a``]]TT  
@HWI-EAS443:3:80:601:231#0/1  
GGCGTACATGCTAGAAAGAGAATTGGTCCGTAACAAGG  
+HWI-EAS443:3:80:601:231#0/1  
abbbabaababa\_a`aa\_a\_aaaa\_Z[a^Z]\_aa\_a\_\_\_\_  
@HWI-EAS443:3:80:626:1885#0/1  
TTCATACCCTTCATGTACTCTTATTTTCAGTGTGGAGG  
+HWI-EAS443:3:80:626:1885#0/1  
aaaaaaaa`aaaaaaaa[aaa`aaaaaaaa`\_YT[^aa`\_`aM

@HWI-EAS443:3:80:633:911#0/1  
TCTCATTGCCATCATCCACTTCATTCTGAGTGCGGGGTTC  
+HWI-EAS443:3:80:633:911#0/1  
S\_a]`Q`S\_\_XX¥\_UY]`^]WQWX]W\_UWF[aaaaXVLP  
@HWI-EAS443:3:80:666:1780#0/1  
GATTTCTCATTTTGGGCAAAGAAGACAAGAGATATGGCCC  
+HWI-EAS443:3:80:666:1780#0/1  
`^aba`b`^aa`X^^\_b`a\_¥\_^aadW^aYaa^^`\_aX`  
@HWI-EAS443:3:80:68:91#0/1  
GTCCCCTTTTCGTTTTATTACCAACTACTCGTCCCCTTGC  
+HWI-EAS443:3:80:68:91#0/1  
a^a`bYV\_\_[a\_^\_SY]\_`W`\_¥V[Y]TUWPSWQVRVXY  
@HWI-EAS443:3:80:695:19#0/1  
GTCCCCTTTTCGTTTTATTACCAACTACTCGTCCCCTTGC  
+HWI-EAS443:3:80:695:19#0/1  
a\_a\_\_b`aa^a`^`a`^`a\_V^W^\_Y\_WWV]Y^^[P  
@HWI-EAS443:3:80:729:649#0/1  
GTGGACCATATGGCCATAATCAAAAAGTACACATCAGGAA  
+HWI-EAS443:3:80:729:649#0/1  
a)`a`Yabaaa`\_a]aaaa`b`aZK[¥a\_\_[[aaaaa  
@HWI-EAS443:3:80:72:1278#0/1  
CTGTGGACCATATGGCCATAATCAAAAAGTACACATCAGG  
+HWI-EAS443:3:80:72:1278#0/1  
a]XZZZ`ab`S^^Xa`]^\_[W\_^^`^`[¥T`¥[[YZY\_¥a`  
@HWI-EAS443:3:80:784:521#0/1  
ATGGATTCAATTCAGTTCTGGAAAAGCACTTTTGCAT  
+HWI-EAS443:3:80:784:521#0/1  
a`\_bab`b`a¥`Y`a`a^a`¥a`b]Z]aaaa¥\_a  
@HWI-EAS443:3:80:790:1341#0/1  
TAATGTCGCAGTCCCGCACTCGCGAGATACTCACTAAGAC  
+HWI-EAS443:3:80:790:1341#0/1  
\_baab¥b\_Z\_a`]`aaaaaaaa^a`Y¥\_a^\_Xa\_¥X`UUT  
@HWI-EAS443:3:80:804:1563#0/1  
GTCCCCTTTTCGTTTTATTACCAACTACTCGTCCCCTTGC  
+HWI-EAS443:3:80:804:1563#0/1  
V`baa¥F\_]`^YZaa]a`\_`a][[\_aa\_\_^UF\_\_`SSR^`  
@HWI-EAS443:3:80:806:371#0/1  
AGAGAATAAAAGAACTGAGAGATCTAATGTCGCAGTCCCG  
+HWI-EAS443:3:80:806:371#0/1  
aaabaabbab`aa`aabaabaaaa`ab\_aaaaa\_\_\_\_^  
@HWI-EAS443:3:80:846:739#0/1  
AGCGGATCATCAGTCAAGAAAGAAGAAGTGCTAACGG  
+HWI-EAS443:3:80:846:739#0/1  
\_\_`\_ZUaY]\_aZZHV\_Y]V^^V]aWXZYTXTO[QU[[[S\_  
@HWI-EAS443:3:80:861:2045#0/1  
CTGGATCAGACCGAGTGATGGTATCACCTCTGGCCGTAAC  
+HWI-EAS443:3:80:861:2045#0/1  
abbbabaabbb\_b`aba`a¥aa`a\_\_aV\_Zaa`aUZ\_]`  
@HWI-EAS443:3:80:872:310#0/1  
GGGCAAGGGGACGTAGTGTGGTAATGAAACGAAAACGGG

+HWI-EAS443:3:80:872:310#0/1  
a`b[aa^\_a[[\_b]ab\_a`aba^^\_[X]¥ZSW¥¥]^GYPZ  
@HWI-EAS443:3:80:897:417#0/1  
GAATAAAAGAAGTCTAATGTCGAGTCCCGCAC  
+HWI-EAS443:3:80:897:417#0/1  
aaaaaa`ab\_aaa`aaaa\_a\_aaa\_a^\_a^`a]\_Y^]`^]  
@HWI-EAS443:3:80:921:1110#0/1  
AGGGGACGTAGTGTGGTAATGAAACGAAAACGGGACTCT  
+HWI-EAS443:3:80:921:1110#0/1  
abb`bW¥¥NR\_`aaaa]\_bba`aabQX^`ba\_\_aa\_]Y[V  
@HWI-EAS443:3:80:923:1281#0/1  
CCGCACTCGCGAGATACTCACTAAGACCACTGTGGACCAT  
+HWI-EAS443:3:80:923:1281#0/1  
ab\_aaaaaaaaa\_``aaa\_aaaa\_a`aaaa`]`\_\_^`]-  
@HWI-EAS443:3:80:928:1090#0/1  
ATCTAATGTCGAGTCCCGCACTCGCGAGATACTCACTAA  
+HWI-EAS443:3:80:928:1090#0/1  
\_\_aW^aZRW¥\_`^Q[\_\_\_X^HY¥]TLXTX[SNV[UUU^V\_  
@HWI-EAS443:3:80:961:969#0/1  
GCGGGATGTGCTTGGGACATTTGACACTGTCCAAATAATA  
+HWI-EAS443:3:80:961:969#0/1  
a\_baa\_aaVaaXSa\_\_\_\_\_a]`[a\_\_^^`a]\_\_\_\_\_^]`\_`\_  
@HWI-EAS443:3:81:102:1122#0/1  
GCCGTAACATGGTGAATAGGAATGGCCCAACAACAAGTA  
+HWI-EAS443:3:81:102:1122#0/1  
aa``Z¥`\_QX\_[Y\_^]HYa`[`a^\_V^V[ZUXZX^XT[WZ  
@HWI-EAS443:3:81:1053:1667#0/1  
CAATCCCCAGTTCTGGAAAAGCACTTTTGCATCTTTTTG  
+HWI-EAS443:3:81:1053:1667#0/1  
a`^a^^`a^`¥VYTOSX]`a]a`^M[a`X`[`]V¥`^Za]  
@HWI-EAS443:3:81:1099:1685#0/1  
ATCACTCGGTCTGATCCAGCATCGTTTGTGGTCCAGA  
+HWI-EAS443:3:81:1099:1685#0/1  
Z¥`b`UZT^T^U\_]\_W\_^a\_]\_aa^aaa``\_`[[^UXTWP  
@HWI-EAS443:3:81:1129:1092#0/1  
GGGCAAGGGGACGTAGTGTGGTAATGAAACGAAAACGGG  
+HWI-EAS443:3:81:1129:1092#0/1  
aaaaa^aaaa^`a^¥b\_`[aaaT^^a][]^N]YZa`YY¥\_  
@HWI-EAS443:3:81:1142:1508#0/1  
ATTCCATTTTGTGTATAACATTGTGGGATCTTGTGACCA  
+HWI-EAS443:3:81:1142:1508#0/1  
aab`aabbaabaaa]a`aaa`a`a^`\_\_`\_^`\_a^\_a^Wa  
@HWI-EAS443:3:81:1149:1681#0/1  
AAAAGAAGTCTAATGTCGAGTCCCGCACTCGC  
+HWI-EAS443:3:81:1149:1681#0/1  
abaaa^a\_baa`aa\_a`ba`aa]``]`\_X\_\_\_a¥`]-Y\_W  
@HWI-EAS443:3:81:1161:1089#0/1  
AGGGGACGTAGTGTGGTAATGAAACGAAAACGGGACTCT  
+HWI-EAS443:3:81:1161:1089#0/1  
ab`T¥^SaaaR`ab`aP[aa`¥``L^`\_a`a`a`]^a\_]`



@HWI-EAS443:3:81:1161:89#0/1  
AAAGAAGTCTAATGTTCGAGTCCCGCACTCGCG  
+HWI-EAS443:3:81:1161:89#0/1  
]`\_]U]Y\_aaa]\_Q\_a`aa]YYJS\_Y\_¥\_]¥\_`¥PNQ  
@HWI-EAS443:3:81:1163:157#0/1  
CCTTGATCATGCAATCCTCTTGTGAGAATACCATGGCCAC  
+HWI-EAS443:3:81:1163:157#0/1  
a`\_a¥L\_bb\_a¥¥Z^aababb\_V^a``a`aX`aaa`\_U\_]  
@HWI-EAS443:3:81:1174:1312#0/1  
GTCATGTGCGGCAGTATTCCGATCATTCCCATCACATTGT  
+HWI-EAS443:3:81:1174:1312#0/1  
```a`V^aYa\_a\_P\_a\_Y]^\_Z^X^^`\_]^^\_\_ZW\_U^S  
@HWI-EAS443:3:81:1181:695#0/1  
AAAGAAGTCTAATGTTCGAGTCCCGCACTCGCG  
+HWI-EAS443:3:81:1181:695#0/1  
aa^OUbRUR\_\_\_^b^^XXXbaa]ZU``]N`X\_aQZ^TJJT  
@HWI-EAS443:3:81:1193:1135#0/1  
AAAAGAAGTCTAATGTTCGAGTCCCGCACTCGC  
+HWI-EAS443:3:81:1193:1135#0/1  
a\_`¥`aaa`a^H\_TW¥`\_\_ [X`\_]^[^\_ZNR]PXLN[ZBBBB  
@HWI-EAS443:3:81:1194:1285#0/1  
CAATTTCCCAGTTCTGATTATCCATTGATAAGTGTGAC  
+HWI-EAS443:3:81:1194:1285#0/1  
ab`bbabbabbabaabbaaab`abaaa`bbab¥b\_aaa\_  
@HWI-EAS443:3:81:1205:1967#0/1  
CGTTTTCGTTTCATTACCAACTACGTCCCCTTGCCCAA  
+HWI-EAS443:3:81:1205:1967#0/1  
ab[ ]bb\_bXNS^`\_]ba`aa]^`^^`\_]\_Na\_\_\_`[^]WPG]  
@HWI-EAS443:3:81:1232:1074#0/1  
AGAAGTCTAATGTTCGAGTCCCGCACTCGCGAG  
+HWI-EAS443:3:81:1232:1074#0/1  
aaab`baababab\_baaba\_`aa`a\_a`]a\_`\_\_`\_\_``a  
@HWI-EAS443:3:81:1243:1139#0/1  
TGTGGACCATATGGCCATAATCAAAAAGTACACATCAGGA  
+HWI-EAS443:3:81:1243:1139#0/1  
a]]\_\_`]`[[a^\_^\_\_a\_]\_]Y[`\_\_^W\_]`^S\_]W^UZ  
@HWI-EAS443:3:81:1258:584#0/1  
GGATGATGGCAATGAGATACCCAATTACAGCAGACAAGAG  
+HWI-EAS443:3:81:1258:584#0/1  
`b`aaaaba[ `aabaa`abaa`aaaab^ab\_abaaaaaaa  
@HWI-EAS443:3:81:125:235#0/1  
GTCCCCTTTTTCATTACCAACTACGTCCCCTTGCCCAA  
+HWI-EAS443:3:81:125:235#0/1  
a^a`aa^^`a`a^`\_`\_]`\_\_a^`]^[^\_X]]^^YY]X  
@HWI-EAS443:3:81:1261:442#0/1  
GGCCATATCTTGTCTTCTTTGCCAAAATGAGAAATCC  
+HWI-EAS443:3:81:1261:442#0/1  
a¥PXQaT]G]^`\_]UMa^LY`\_\_PP]]`¥QXP^Z`^ZUQG  
@HWI-EAS443:3:81:1274:1491#0/1  
CACTCGGAGATACTACTAAGACTGTGGACCATATG

+HWI-EAS443:3:81:1274:1491#0/1  
aUMYO[]VaYP¥N\_a]^¥\_XHRMW¥^XFD\_¥^V` [R]OW  
@HWI-EAS443:3:81:128:204#0/1  
TGCTGTAATTGGGTATCTCATTGCCATCATCCACTTCATT  
+HWI-EAS443:3:81:128:204#0/1  
aaaaa\_`aaaaa`]^`^¥[¥\_\_[^V^\_Y[\_]]TW\_^U[X  
@HWI-EAS443:3:81:1325:1738#0/1  
CACATCTGGGTGGAGTCTGCTGTCCTGAGAGGATTTCTC  
+HWI-EAS443:3:81:1325:1738#0/1  
aa[^\_Z\_¥aa]XaXaaaaa`^`a`^U]]^aa\_a^a¥[Z\_T  
@HWI-EAS443:3:81:1440:469#0/1  
AGAGAATAAAAGAACTGAGAGATCTAATGTCGCAGTCCCG  
+HWI-EAS443:3:81:1440:469#0/1  
abababbbbaabababbbabbba^bb^bba[\_abb`¥^^`  
@HWI-EAS443:3:81:1474:1230#0/1  
GGAAAAGCACTTTTGCATCTTTTTGGAAATGCCTCAAGAG  
+HWI-EAS443:3:81:1474:1230#0/1  
^Xa]aa¥]^\_bb``¥^`a^aaaa¥a``\_]VR^]\_` [ZX\_  
@HWI-EAS443:3:81:1572:1386#0/1  
GTACGCCACCATCAAGGGAGCAATTTTACAATCCTGGAGC  
+HWI-EAS443:3:81:1572:1386#0/1  
`¥``aaa` [W]^\_Y]\_XVYa¥ZL]`a\_NUTS\_QJXU[W`M  
@HWI-EAS443:3:81:1576:643#0/1  
CCCCTTTTCGTTTTATTACCAACTACGTCCCCTTGCCC  
+HWI-EAS443:3:81:1576:643#0/1  
a\_Ybabba`aaab`abba`¥ba\_aaaa\_\_^\_X\_¥^¥aLTQ  
@HWI-EAS443:3:81:1584:450#0/1  
AAAAGAAGCTGAGAGATCTAATGTCGCAGTCCCGCACTCGC  
+HWI-EAS443:3:81:1584:450#0/1  
Wbbbb]``b]aa`bababbabb`\_a^aaa\_\_\_\_`\_`^a[¥W  
@HWI-EAS443:3:81:1652:1405#0/1  
AAAAGAAGCTGAGAGATCTAATGTCGCAGTCCCGCACTCGC  
+HWI-EAS443:3:81:1652:1405#0/1  
aa`^]aabba^Z^]^b`baabba[a\_[aONVR¥^]S\_Y]¥  
@HWI-EAS443:3:81:167:1952#0/1  
GGGGACGTAGTGTGGTAATGAAACGAAAACGGGACTCTA  
+HWI-EAS443:3:81:167:1952#0/1  
a\_V[]aZV^`[^X]]YQ[] [Y]]\_¥X[`\_ZVRVS[\_WZSY  
@HWI-EAS443:3:81:1680:1396#0/1  
CTGTTGCCTTAGGGACAAGAGACTGAAATGGTTCAAATT  
+HWI-EAS443:3:81:1680:1396#0/1  
abb`Sabb`bbb``ab^^^ba\_aabaaabbbaba\_a`aa  
@HWI-EAS443:3:81:1725:1374#0/1  
GTCCCCTTTTCGTTTTATTACCAACTACGTCCCCTTGC  
+HWI-EAS443:3:81:1725:1374#0/1  
a`\_a]baaab\_a\_aa`aa`a\_^a`^a\_a`^\_\_^X\_\_`]Y]  
@HWI-EAS443:3:81:1726:520#0/1  
CTGCTGTCCTGAGAGATTTCTCATTTTGGGCAAAGAAGA  
+HWI-EAS443:3:81:1726:520#0/1  
HQ¥¥¥\_\_X\_W\_N[[¥¥Z[^]V^a`b\_Va¥\_XT¥bbZK^bZ

@HWI-EAS443:3:81:198:1836#0/1  
AGAGAATAAAAGAACTGAGAGATCTAATGTCGCAGTCCCG  
+HWI-EAS443:3:81:198:1836#0/1  
abbaaababaab^\_`a]Z`b`\_`aaba\_aYa`a\_[VN\_`Z  
@HWI-EAS443:3:81:201:2023#0/1  
GAATAAAAGAACTGAGAGATCTAATGTCGCAGTCCCGCAC  
+HWI-EAS443:3:81:201:2023#0/1  
]H]aab]a¥]`a\_a¥U\_]¥]\_a[[`aW\_G`\_\_Z]\_\_ZONN  
@HWI-EAS443:3:81:228:408#0/1  
CAATCCCCAGTTCTGGAAAAGCACTTTTGCATCTTTTGTG  
+HWI-EAS443:3:81:228:408#0/1  
aab\_babbaab\_a`b\_aaba^^a\_\_a\_baaaa`aaa^aaa  
@HWI-EAS443:3:81:22:1497#0/1  
ATGGCAATGAGATACCCAATTACAGCAGACAAGAGAATAA  
+HWI-EAS443:3:81:22:1497#0/1  
^a\_ab\_\_aaa`X`aba`]Ya`\_a^^a`Z^a``[\_`\_\_a\_  
@HWI-EAS443:3:81:271:290#0/1  
ATCTAATGTCGCAGTCCCGCACTCGCGAGATACTCACTAA  
+HWI-EAS443:3:81:271:290#0/1  
\_``XZZ`¥XYZ^ZSZX[^NVPPTZ[U¥KPTPST[URWR  
@HWI-EAS443:3:81:329:52#0/1  
ATTCTCCAGTATTCAATTACAACAAGGCAACCAAACGACT  
+HWI-EAS443:3:81:329:52#0/1  
a\_baaa`bb\_abb^`a`ab`a¥``aaa`a`\_\_\_\_`][a]]\_  
@HWI-EAS443:3:81:374:1772#0/1  
GTGAGTATTGACCGATTTTTAAGGGTTAGAGATCAAAGAG  
+HWI-EAS443:3:81:374:1772#0/1  
W`]``abbbaabb¥^abbbbbbbaa\_aabb`^`abaaaaa  
@HWI-EAS443:3:81:375:397#0/1  
TGTCTGCTGTAATTGGGTATCTCATTGCCATCATCCACTT  
+HWI-EAS443:3:81:375:397#0/1  
ab^`b`^b^[aaa\_\_Z`^^]\_a`a`Y`aa`^`¥^`\_  
@HWI-EAS443:3:81:397:292#0/1  
TCCGATCATTCCCATCACATTGTCGATGGATTCAATTCCC  
+HWI-EAS443:3:81:397:292#0/1  
aaa\_a\_aa`a`a```a^^`a`¥]\_\_][[Z^ZZRXYWXS  
@HWI-EAS443:3:81:405:1046#0/1  
ACAGAATCCAAGTGAAGCAAGCCGTAGACATATGCAAG  
+HWI-EAS443:3:81:405:1046#0/1  
ab`ab[aaba[^aa^a^Jaa`b`baab]aa\_aaa\_^a`[\_`\_  
@HWI-EAS443:3:81:449:1579#0/1  
AAAGAACTGAGAGATCTAATGTCGCAGTCCCGCACTCGCG  
+HWI-EAS443:3:81:449:1579#0/1  
aaaaZa`aaa\_b``\_b`aaaaY`]¥¥[W\_\_aZ^W\_Z`Z\_^  
@HWI-EAS443:3:81:455:906#0/1  
CCGCACTCAGAATGAAGTGGATGATGGCAATGAGATACCC  
+HWI-EAS443:3:81:455:906#0/1  
aaaa\_]\_a\_a\_\_`\_SL¥^`\_]Y\_TX`a\_NRV^VV]V\_]U  
@HWI-EAS443:3:81:486:1052#0/1  
CTGCTGTAATTGGGTATCTCATTGCCATCATCCACTTCAT

+HWI-EAS443:3:81:486:1052#0/1  
a`]^bb\_`aabaaa[aaba\_]aa\_\_aaaaa`````a\_\_\_```  
@HWI-EAS443:3:81:500:764#0/1  
ATGTCAGTATTCTTGCCCCACTTCATTTGGGAAAACAAC  
+HWI-EAS443:3:81:500:764#0/1  
aaa\_aaa[``\_a\_`]¥^\_a`]T]``\_Y^^`\_\_X][``\_¥¥^W  
@HWI-EAS443:3:81:507:1638#0/1  
AGGATGGTGGACATCCTTAGACAGAATCCAACGAGGAAC  
+HWI-EAS443:3:81:507:1638#0/1  
V]\_aa¥YQT¥\_``Z^]X\_\_T\_a`WQP]a^[aYWL]YQ[^X  
@HWI-EAS443:3:81:513:1004#0/1  
AGGGGACGTAGTGTGGTAATGAAACGAAAACGGGACTCT  
+HWI-EAS443:3:81:513:1004#0/1  
````\_babb\_]\_GZ\_ab^V]]^U]^JWUWV^W[``SNV\_[  
@HWI-EAS443:3:81:533:588#0/1  
TGGCAATGAGATACCCAATTACAGCAGACAAGAGAATAAT  
+HWI-EAS443:3:81:533:588#0/1  
[aaaa¥abbaaaabb`¥`bbbba`^\_b`abababaabaaa  
@HWI-EAS443:3:81:551:516#0/1  
GTTTTCGTTTCATTACCAACTACGTCCCCTTGCCCAAT  
+HWI-EAS443:3:81:551:516#0/1  
ZFSYNQ\_H¥VYX`\_[``WZW`^W^W]VRWWYSNLPNURPP  
@HWI-EAS443:3:81:568:1734#0/1  
GTCGCAGTCCCGCACTCGCGAGATACTCACTAAGACCACT  
+HWI-EAS443:3:81:568:1734#0/1  
aY`aab]Sb\_aX]¥b`b`aa\_PXZ`^`Y````aaM`^¥]`U  
@HWI-EAS443:3:81:569:1135#0/1  
ATCTAATGTCGCAGTCCCGCACTCGCGAGATACTCACTAA  
+HWI-EAS443:3:81:569:1135#0/1  
a]\_[^T^a¥a¥^Y^TX`aX¥U¥W`T`^ZVDL[¥Z^ZR\_V[  
@HWI-EAS443:3:81:591:697#0/1  
TGGTATTCTCACAAGAGGATTGCATGATCAAGGCAGTTAG  
+HWI-EAS443:3:81:591:697#0/1  
aaa¥a`aa`a¥a`^a\_aa\_``\_``````\_\_^^^\_^\_VY]]  
@HWI-EAS443:3:81:599:1249#0/1  
ACTTGATTTCTGAAGTGGACAGGGCCGAAGGTACCATGTT  
+HWI-EAS443:3:81:599:1249#0/1  
a```\_\_Z[R`\_]RQNOW^^^\_V^L[RR]VNTZH]]^VPVXV  
@HWI-EAS443:3:81:60:559#0/1  
AAAGAAGTGAAGATCTAATGTCGCAGTCCCGCACTCGCG  
+HWI-EAS443:3:81:60:559#0/1  
aaaaaaaa`aa[Xa\_\_`aa\_`aX```\_`Y\_]\_^\_U^¥]^^^  
@HWI-EAS443:3:81:612:891#0/1  
ACCAGAACAGAGTAGGATGCAATTTTCCTCATTGACTGTG  
+HWI-EAS443:3:81:612:891#0/1  
[aaba`\_aa\_V^^a`^¥`\_a`^aa`\_]\_\_W]\_a\_Z^aWY  
@HWI-EAS443:3:81:617:1462#0/1  
GTCCCCTTTTCGTTTCATTACCAACTACGTCCCCTTG  
+HWI-EAS443:3:81:617:1462#0/1  
a[aaab```aaaa\_`aa¥a`aaaaaaa\_\_a\_Xa```a\_U\_\_

@HWI-EAS443:3:81:621:617#0/1  
TGCAGGTGCATTGACTGAAGATCCAGATGAAGGCACATCT  
+HWI-EAS443:3:81:621:617#0/1  
abaa` `Sb`a` ]]a]aaaba^`a^a\_\_a^a^]¥]]¥aa]a  
@HWI-EAS443:3:81:645:1370#0/1  
GGCCATGGTATTCTCACAAGAGGATTGCATGATCAAGGCA  
+HWI-EAS443:3:81:645:1370#0/1  
`bbbbbb` `babaabbbbbaaa\_\_a` `bbba\_abab`aa  
@HWI-EAS443:3:81:648:1815#0/1  
AAAGAAGTGAAGATCTAATGTCGCAGTCCCGCACTCGCG  
+HWI-EAS443:3:81:648:1815#0/1  
[a`RU]\_] [\_aa`b`bab`a^^a`aaa\_aab\_b\_a]^Z`\_  
@HWI-EAS443:3:81:658:247#0/1  
CTCTTGTCTGCTGTAATTGGGTATCTCATTGCCATCATCC  
+HWI-EAS443:3:81:658:247#0/1  
abbabb`abbb`b^aabbbbb]baaa`aaaaaaaa\_a\_\_\_\_  
@HWI-EAS443:3:81:689:120#0/1  
TGGCCCAACAACAAGTACAGTTCATTACCCTAAGGTATAT  
+HWI-EAS443:3:81:689:120#0/1  
aaaaabbbabbabb`baab\_baabaaa`\_a`baY\_a`a  
@HWI-EAS443:3:81:693:362#0/1  
CGGAGATGTCGCTGAGAGGGATAAGAGTCAGCAAAATGGG  
+HWI-EAS443:3:81:693:362#0/1  
a`\_Lb[aa[\_bVZb`]^a[\_`a`¥`N\_a`N]^V^\_AY`  
@HWI-EAS443:3:81:699:1299#0/1  
CCCGTTTTCGTTTTATTACCAACTACGTCCCCTTGCCC  
+HWI-EAS443:3:81:699:1299#0/1  
a`^]\_\_a`aaX`\_a\_a`\_`a]\_a^\_\_]]^]\_WW[]\_]`  
@HWI-EAS443:3:81:711:1370#0/1  
GTGGATGATGGCAATGAGATACCCAATTACAGCAGACAAG  
+HWI-EAS443:3:81:711:1370#0/1  
[]`]V[\_X`a`\_`a`a\_]`abaaaa]]Z[][\_`¥^V[YZ  
@HWI-EAS443:3:81:748:1477#0/1  
ATCAAACCTTTGGTCAACATCATCTTTCTCACTTCTCCTC  
+HWI-EAS443:3:81:748:1477#0/1  
¥^\_L^ZZ^¥]YX[X\_Z^^^][`aaZZSZ^`X`a]`\_` `UP  
@HWI-EAS443:3:81:753:240#0/1  
AAATGAAGTGGGGCAAGAATACTGACATCAGAGTCACAG  
+HWI-EAS443:3:81:753:240#0/1  
`^bbbabbbab`aaaabbaaabbbaaa` `aaaa^^`aa`aa  
@HWI-EAS443:3:81:762:1691#0/1  
AAGAAGTGAAGATCTAATGTCGCAGTCCCGCACTCGCGA  
+HWI-EAS443:3:81:762:1691#0/1  
QZ\_ba^\_]\_\_b\_Sa\_\_^`a`^b¥ZaaU` `a\_\_OZ` `\_^\_\_  
@HWI-EAS443:3:81:79:682#0/1  
TGCTAATTGGGCAAGGGGACGTAGTGTGGTAATGAAACG  
+HWI-EAS443:3:81:79:682#0/1  
aaa`aaa`aa\_a`b][a]\_a[[a[`^`a`R^\_^XLY^VX  
@HWI-EAS443:3:81:809:1886#0/1  
GAGAATAGCTGTTGCTCTTCTCCCAACCATTGTGAATTCT

+HWI-EAS443:3:81:809:1886#0/1  
`babaabaa\_b\_bababa`X¥babaa\_a^a`^^a\_Z``]`  
@HWI-EAS443:3:81:821:1543#0/1  
AAAAGAAGTCTGAGAGATCTAATGTCGCAGTCCCCGACTCGC  
+HWI-EAS443:3:81:821:1543#0/1  
`a`a\_aaaa\_]a`aaaaaaa`aW\_S¥a[Y\_a\_\_`T`Y^VW  
@HWI-EAS443:3:81:841:100#0/1  
ATCTAATGTCGCAGTCCCCGACTCGCGAGATACTCACTAA  
+HWI-EAS443:3:81:841:100#0/1  
ab^]ZaabT`a^V¥K]^a\_WPZ`¥¥P¥NXRUU[UQZU[[U  
@HWI-EAS443:3:81:845:1657#0/1  
TGATTCCAGAGAGGAATGAACAAGGACAAACCCTCTGGAG  
+HWI-EAS443:3:81:845:1657#0/1  
\_Z¥SYaU\_X]aW¥\_]Z\_]a\_aa`W`aa`^¥ZZ`ZX][  
@HWI-EAS443:3:81:858:705#0/1  
AGCTCATCTTTTCAGTTTTGGTGGGTTCACTTTCAAAGGA  
+HWI-EAS443:3:81:858:705#0/1  
aabaabbabbbbbb\_a`\_aa\_aaa\_\_`a[bbaa[S`]^a^  
@HWI-EAS443:3:81:868:919#0/1  
AAAAGAAGTCTGAGAGATCTAATGTCGCAGTCCCCGACTCGC  
+HWI-EAS443:3:81:868:919#0/1  
aa[b^UY\_a`aa`a`ababb\_a]]¥\_]\_ab``[W¥\_\_^  
@HWI-EAS443:3:81:875:1115#0/1  
AAAGAAGTCTGAGAGATCTAATGTCGCAGTCCCCGACTCGCG  
+HWI-EAS443:3:81:875:1115#0/1  
^PPRVZ]`W[YO[S`\_XZZTVN\_^]URNT^VFQPVR[ZVB  
@HWI-EAS443:3:81:883:1474#0/1  
ATGCAATTTTCCTCATTGACTGTGAATGTGAGAGGATCAG  
+HWI-EAS443:3:81:883:1474#0/1  
aaa`aa`aa\_a`\_`aa`\_`\_`\_W\_Z`¥\_SWSUYWYWZU^V  
@HWI-EAS443:3:81:92:1561#0/1  
CACCATCAAGGGAGCAATTTTACAATCCTGGAGCTCTTCT  
+HWI-EAS443:3:81:92:1561#0/1  
aaab`\_\_^Sa\_]a`]]Q\_a¥\_aaa¥`a^]^\_UWX]G]]]]  
@HWI-EAS443:3:81:953:899#0/1  
TCCGATCATTCCCATCACATTGTCGATGGATTCAATCCC  
+HWI-EAS443:3:81:953:899#0/1  
aab`aaabbabaaaab`\_\_\_\_\_a]\_XYP^[SV¥]¥[¥\_]Y]  
@HWI-EAS443:3:81:972:1234#0/1  
CTAATGTGCTAATTGGGCAAGGGGACGTAGTGTGGTAAT  
+HWI-EAS443:3:81:972:1234#0/1  
abaabbababaa`bbbbbbabbb`aabaab`b^VaaYaaa  
@HWI-EAS443:3:81:974:1407#0/1  
TGCCCGTTAGCACTTCTTCTTCTTCTTGGACTGATGATCC  
+HWI-EAS443:3:81:974:1407#0/1  
ab]b^^aa`aa^Wab`a\_`b^\_bbaaaba`b^ba`\_¥`WS  
@HWI-EAS443:3:82:1004:733#0/1  
GGGTGGAGTCTGCTGTCTGAGAGGATTTCTCATTTTGGG  
+HWI-EAS443:3:82:1004:733#0/1  
a]aT\_]R\_T\_aa``[[\_``\_VaU``S^\_XQ¥U^aa^\_]`W

@HWI-EAS443:3:82:1032:562#0/1  
GATGTGCCTTCATCTGGATCTTCAGTCAATGCACCTGCAT  
+HWI-EAS443:3:82:1032:562#0/1  
^W`\_L\_^aaWa`b^0Z\_] ^S]aa^`Q¥aaaa`\_N¥NWF¥]  
@HWI-EAS443:3:82:1067:1599#0/1  
AAGGCACATCTGGGGTGGAGTCTGCTGTCCTGAGAGGATT  
+HWI-EAS443:3:82:1067:1599#0/1  
a¥[Za`a`Z]^\_KXXW¥U`aRaZ^X¥VN¥`X^^[]ZZa\_`  
@HWI-EAS443:3:82:1087:2038#0/1  
GAGAATAAAAGAACTGAGAGATCTAATGTCGCAGTCCCGC  
+HWI-EAS443:3:82:1087:2038#0/1  
ababbbbbba`baabbaa`b`aaaa`[^`ab`a\_\_\_`  
@HWI-EAS443:3:82:1091:151#0/1  
CTTGTCTGCTGTAATTGGGTATCTCATTGCCATCATCCAC  
+HWI-EAS443:3:82:1091:151#0/1  
a``aa\_bbbb]¥Xaba]XZZabb\_Zba\_¥W`baa\_\_TN¥N  
@HWI-EAS443:3:82:1117:682#0/1  
GTGGAGTCTGCTGTCCTGAGAGATTTCTCATTTTGGGCA  
+HWI-EAS443:3:82:1117:682#0/1  
a`a\_Za`\_aa\_aa\_\_\_aa\_] [aa¥`a`¥`^^aaa``\_`\_\_  
@HWI-EAS443:3:82:1120:1319#0/1  
CTTCTTTGCCAAAATGAGAAATCCTCTCAGGACAGCAGA  
+HWI-EAS443:3:82:1120:1319#0/1  
`bbbbbaaaaab\_bababbaabb`babaaaa`aaa\_aaa  
@HWI-EAS443:3:82:1154:960#0/1  
TGGGAATGATCGGAATACTGCCCCGACATGACCCCAAGCAC  
+HWI-EAS443:3:82:1154:960#0/1  
]ba^]ba^ab^ba\_¥Y¥aaXab^¥a]`aabaa`aaaa^a`  
@HWI-EAS443:3:82:1166:296#0/1  
AGAGATCTAATGTCGCAGTCCCGCACTCGCGAGATACTCA  
+HWI-EAS443:3:82:1166:296#0/1  
aaaaaa\_aaaba\_\_a^aa\_\_¥a`\_\_¥a¥\_Wa\_`\_^]W^¥`  
@HWI-EAS443:3:82:119:1441#0/1  
AACAAGTACAGTTCATTACCCTAAGGTATATAAACTTAT  
+HWI-EAS443:3:82:119:1441#0/1  
`Z`YX`\_a^VSQ[\_S]aa`^R]¥¥` [XbZ]^`QX\_¥PRY\_  
@HWI-EAS443:3:82:1222:1355#0/1  
CTCCCCTTTGCTGCTGCTCCACCAGAACAGAGTAGGATGC  
+HWI-EAS443:3:82:1222:1355#0/1  
`abaaabbbbaab`abaa`a\_aaaaaTaaaa\_a\_a\_\_a\_  
@HWI-EAS443:3:82:1246:757#0/1  
AAAAGAACTGAGAGATCTAATGTCGCAGTCCCGCACTCGC  
+HWI-EAS443:3:82:1246:757#0/1  
]b`b`\_b\_Za`a`a\_X\_`aab``aa[a\_^`]aPQ[`Y^^  
@HWI-EAS443:3:82:124:1213#0/1  
GTGGATGATGGCAATGAGATACCCAATTACAGCAGACAAG  
+HWI-EAS443:3:82:124:1213#0/1  
]aXUFPT`Z^X\_XU[a^\_Y¥\_]a``a`W]\_``¥``X¥^  
@HWI-EAS443:3:82:1271:706#0/1  
CTCGCGAGATACTCACTAAGACCACTGTGGACCATATGGC

+HWI-EAS443:3:82:1271:706#0/1  
Ybaa¥bb\_a¥`\_bab`bb\_aZ`ab`bbaabbab`b¥\_\_V  
@HWI-EAS443:3:82:1272:2044#0/1  
CATCATTGATGACGAATAAGTTATTGTCAACTTCTCAGTT  
+HWI-EAS443:3:82:1272:2044#0/1  
`^^b]W\_``\_RT¥Y`a¥Z¥YT\_¥X]XFZ]T]¥WXZ\_XUP  
@HWI-EAS443:3:82:127:305#0/1  
GAGAGAATAAAAGAACTGAGAGATCTAATGTCGCAGTCCC  
+HWI-EAS443:3:82:127:305#0/1  
`X`Pa]`X]Z]]aZR\_aaaa\_`[^aa^`\_a^`[^Z\_0\_¥P  
@HWI-EAS443:3:82:1323:240#0/1  
AAAAGAACTGAGAGATCTAATGTCGCAGTCCCGCACTCGC  
+HWI-EAS443:3:82:1323:240#0/1  
aab[ab\_Ubb`aaaYa\_ba`abXa`\_aa\_]Za`N^^aR  
@HWI-EAS443:3:82:1339:1760#0/1  
GGAGACAATAGTACGTTCCCTCTTTGATCTCTAACCTTA  
+HWI-EAS443:3:82:1339:1760#0/1  
abaa`^^ba\_bGa\_\_`a\_`\_a\_`aa\_\_\_^aW`aaW¥\_`a  
@HWI-EAS443:3:82:1420:1342#0/1  
CTGTAATTGGGTATCTCATTGCCATCATCCACTTCATTCT  
+HWI-EAS443:3:82:1420:1342#0/1  
]\_a][ab`aab\_aabb¥ba`a]\_abaa[X^`[b\_IabU` [  
@HWI-EAS443:3:82:1533:481#0/1  
CCTTGTTTTACGGACCAATTCTCTTTCTAGCATGTACGCC  
+HWI-EAS443:3:82:1533:481#0/1  
`a^a^`bb`abbbZ^^aab\_U\_bb`aabb\_abb```aaa`  
@HWI-EAS443:3:82:1543:21#0/1  
ACCATCCTTACTCCTCCAATCTGTGTGCTGTGGCACATTT  
+HWI-EAS443:3:82:1543:21#0/1  
`¥U\_¥Za\_bbabWXaX0]abYbbaaa`[ab]b\_YW[[Za`  
@HWI-EAS443:3:82:1556:1514#0/1  
AAAGAACTGAGAGATCTAATGTCGCAGTCCCGCACTCGCG  
+HWI-EAS443:3:82:1556:1514#0/1  
`bbbabab¥baaba`aabbbaa]aaaaGTaa\_`¥¥][\_a  
@HWI-EAS443:3:82:1564:181#0/1  
TAAAAGAACTGAGAGATCTAATGTCGCAGTCCCGCACTCG  
+HWI-EAS443:3:82:1564:181#0/1  
abbbbababbaaa``aabaab]Ya\_]`Z]¥`XU`MZRS  
@HWI-EAS443:3:82:1590:1316#0/1  
GTCGATGGATTCAATCCCCAGTTCTGGAAAAGCACTTTT  
+HWI-EAS443:3:82:1590:1316#0/1  
a^G¥\_bbaaab`aab\_\_ba^`[^aa^][^\_ab^`\_X\_^`a`  
@HWI-EAS443:3:82:1690:1196#0/1  
ATCTCTTGTCTTTTGGCCAAAATGAGAAATCCTCTCAG  
+HWI-EAS443:3:82:1690:1196#0/1  
[U^b`b`b^Za^U¥b¥\_\_¥]bbaa^\_abbbba¥b¥aRa\_  
@HWI-EAS443:3:82:1696:1467#0/1  
ACGACTTACAGTTCTTGAAAGGATGCAGGTGCATTGACT  
+HWI-EAS443:3:82:1696:1467#0/1  
a`baabb^aaa^Y\_bba`\_`a`aaa]``\_V`\_````]L¥



@HWI-EAS443:3:82:1737:768#0/1  
AAAGAACTGAGAGATCTAATGTCGCAGTCCCGCACTCGCG  
+HWI-EAS443:3:82:1737:768#0/1  
`bb`aa\_`baa`a`\_`baa\_U\_`Z`aN¥\_`^`^W\_ZZ^^  
@HWI-EAS443:3:82:1777:1759#0/1  
AAAGAACTGAGAGATCTAATGTCGCAGTCCCGCACTCGCG  
+HWI-EAS443:3:82:1777:1759#0/1  
\_bb`b`baa`baaa`aaaa`^aa`WY[^`[^]^[Y[  
@HWI-EAS443:3:82:182:439#0/1  
AAAAGAACTGAGAGATCTAATGTCGCAGTCCCGCACTCGC  
+HWI-EAS443:3:82:182:439#0/1  
aaa`aa`aba\_bbaaaaa\_aa\_aaaa\_Y\_\_\_\_^`\_`^U\_\_X  
@HWI-EAS443:3:82:197:963#0/1  
CCCGTTTTCGTTTTATTACCAACTACGTCCCCTTGCCC  
+HWI-EAS443:3:82:197:963#0/1  
aZ]^GMa¥aYU^a]P]Y`\_\_`XST`]^`XWS`a^W[TMOX[  
@HWI-EAS443:3:82:212:386#0/1  
CTCACTAAGACCACTGTGGACCATATGGCCATAATCAAAA  
+HWI-EAS443:3:82:212:386#0/1  
H^bbb\_[`b`U`bba\_\_U\_]`b]b]a¥¥[UW¥\_¥\_[b`  
@HWI-EAS443:3:82:253:929#0/1  
CGCACTCAGAATGAAGTGGATGATGGCAATGAGATACCCA  
+HWI-EAS443:3:82:253:929#0/1  
aababa`[`abab\_aa\_aaaaba`aa`TZ``Xa[\_a``\_a  
@HWI-EAS443:3:82:260:572#0/1  
AAAGGATGCAGGTGCATTGACTGAAGATCCAGATGAAGGC  
+HWI-EAS443:3:82:260:572#0/1  
a^`baaabaaaa¥\_aaaa¥\_aabaa\_\_^^^\_\_a\_\_\_ZZ  
@HWI-EAS443:3:82:296:1207#0/1  
GAACTGTAAGTCGTTTGGTTGCCTTGTGTAATTGAATAC  
+HWI-EAS443:3:82:296:1207#0/1  
aabbbaa^`a]a^\_aab`a`bba^a\_aa\_b\_a^aa\_a\_  
@HWI-EAS443:3:82:300:796#0/1  
CCCGTTTTCGTTTTATTACCAACTACGTCCCCTTGCCC  
+HWI-EAS443:3:82:300:796#0/1  
aabb`aabb`^`^`aabaaaaaa`^\_\_Y`a`\_`^^^]  
@HWI-EAS443:3:82:332:614#0/1  
GGCCATATCTCTTGTCTTCTTTGCCAAAATGAGAAATC  
+HWI-EAS443:3:82:332:614#0/1  
abbbbababbababbaaaabbabab`aaaaabbbbaaaaa  
@HWI-EAS443:3:82:419:59#0/1  
CACTTTCAAAGGACAAGCGGATCATCAGTCAAGAAAGAA  
+HWI-EAS443:3:82:419:59#0/1  
H^\_b[``Xbb`aabb\_ba\_bbbba\_bbbbZaabbaa\_a`a  
@HWI-EAS443:3:82:447:1206#0/1  
ATCATTCTCACTTCTCCTCCTGGAGTGATACATCTGCTCC  
+HWI-EAS443:3:82:447:1206#0/1  
aa`\_aabbabaaaaabaabaa`¥`\_\_a^^`aaa`a\_\_a`  
@HWI-EAS443:3:82:498:1072#0/1  
GTGGAGTCTGCTGTCCTGAGAGGATTTCTCATTTTGGGCA

+HWI-EAS443:3:82:498:1072#0/1  
aR[TP[\_Z\_\_U[QXaR^[^\_\_X\_]XSTZ^[Z]]\_V]  
@HWI-EAS443:3:82:504:995#0/1  
CTAATGTCGCGAGTCCCGCACTCGCGAGATACTACTAAGA  
+HWI-EAS443:3:82:504:995#0/1  
aaba`W^\_T¥`WQa¥\_VXW]^]^XXX¥\_UNTT¥\_VZ]QJ]  
@HWI-EAS443:3:82:514:847#0/1  
GCAGACCCATTAGCATCTCTCTTGAAATGTGCCACAGCA  
+HWI-EAS443:3:82:514:847#0/1  
aabba`abba`bab`aaabaabbbbaabb`a^aaaaaa^¥  
@HWI-EAS443:3:82:556:902#0/1  
AGAGAATAAAAGAACTGAGAGATCTAATGTCGCGAGTCCCG  
+HWI-EAS443:3:82:556:902#0/1  
aaZ`\_ZbU[aab\_Q\_Zab`baaab``aaa^¥\_baa`\_a\_\_  
@HWI-EAS443:3:82:558:290#0/1  
CCCCGTTTTCGTTTCATTACCAACTACGTCCCCTTGCCC  
+HWI-EAS443:3:82:558:290#0/1  
abbb^abbbabb``bbbabaaaaabaa\_aaaa`¥a`\_a  
@HWI-EAS443:3:82:562:72#0/1  
AAAGAACTGAGAGATCTAATGTCGCGAGTCCCGCACTCGCG  
+HWI-EAS443:3:82:562:72#0/1  
aa`\_a\_aZabaY`bZbZba`aaW\_\_Z`a]YU]]]]UY]^Y]  
@HWI-EAS443:3:82:565:57#0/1  
GAAGGCACATCTGGGGTGGAGTCTGCTGCTCCTGAGAGGAT  
+HWI-EAS443:3:82:565:57#0/1  
a`\_a\_[¥`\_a¥`\_\_¥`Qa\_¥`XZ\_`^Z[W¥^WZ[ZZ\_¥V¥  
@HWI-EAS443:3:82:572:1379#0/1  
GTCCCGTTTTCGTTTCATTACCAACTACGTCCCCTTGCC  
+HWI-EAS443:3:82:572:1379#0/1  
]abb¥[XLa[aa^Q\_a^]¥aUJVabaabaXFZba]`\_aa  
@HWI-EAS443:3:82:599:1643#0/1  
TCCCGTTTTCGTTTCATTACCAACTACGTCCCCTTGCC  
+HWI-EAS443:3:82:599:1643#0/1  
]^`\_aabb`b`a¥\_bbabb\_bba\_aab`\_a\_baa¥\_aa[  
@HWI-EAS443:3:82:624:1970#0/1  
CGTTTTCGTTTCATTACCAACTACGTCCCCTTGCCAA  
+HWI-EAS443:3:82:624:1970#0/1  
aZRZ]¥baYaaaa\_b`aaa`ba`ba`^aaaa\_^]`PYa`  
@HWI-EAS443:3:82:625:37#0/1  
GTCTTAGTGAGTATCTCGCGAGTGCGGACTGCGACATTA  
+HWI-EAS443:3:82:625:37#0/1  
aa`bbabababab^^X¥aa`H¥Ya\_a^`YY[\_Y]YZ`\_V  
@HWI-EAS443:3:82:667:1471#0/1  
AAAGAACTGAGAGATCTAATGTCGCGAGTCCCGCACTCGCG  
+HWI-EAS443:3:82:667:1471#0/1  
UPYb`a]aa\_\_ababb```baaaVa`a^baZX``]`\_`aa¥  
@HWI-EAS443:3:82:68:885#0/1  
CCCGCACTCAGAATGAAGTGGATGATGGCAATGAGATACC  
+HWI-EAS443:3:82:68:885#0/1  
abbbbaaabaY````\_aV``````\_\_^^^`\_`¥^`]R

@HWI-EAS443:3:82:714:1771#0/1  
AGAGAATAAAAGAACTGAGAGATCTAATGTCGCAGTCCCG  
+HWI-EAS443:3:82:714:1771#0/1  
T^`^`^`\_a\_aa`]^\_[¥`^ab`ZX[\_\_\_T\_`aZ¥VMX[`  
@HWI-EAS443:3:82:723:1104#0/1  
GGATGATGGCAATGAGATACCCAATTACAGCAGACAAGAG  
+HWI-EAS443:3:82:723:1104#0/1  
ab\_]a¥]b]^aXaa]^a^]aa`a\_aaaa``\_aa``a\_aaa  
@HWI-EAS443:3:82:744:207#0/1  
AAAGAAGTGGAGATCTAATGTCGCAGTCCCGCACTCGCG  
+HWI-EAS443:3:82:744:207#0/1  
]aW¥^a`a``]abaaa`a`aUR^bYaTMYLWaYLPVP\_\_\_  
@HWI-EAS443:3:82:750:357#0/1  
CTGGAAAAGCACTTTTGCATCTTTTGGAAATGCCTCAAG  
+HWI-EAS443:3:82:750:357#0/1  
ababbbbaabbbbbbbb`bb\_bbabbbbbbbb`abaaab  
@HWI-EAS443:3:82:759:837#0/1  
GTGGATGATGGCAATGAGATACCCAATTACAGCAGACAAG  
+HWI-EAS443:3:82:759:837#0/1  
a\_``\_a\_P¥aaRP^a]Wa\_[`a`]aa`^V]^Z¥a\_]a`\_\_  
@HWI-EAS443:3:82:777:294#0/1  
GGAAAGGATGCAGGTGCATTGACTGAAGATCCAGATGAAG  
+HWI-EAS443:3:82:777:294#0/1  
ab`aabaabaaa\_Va`aa\_¥a^`aab\_```¥a`\_``\_`\_  
@HWI-EAS443:3:82:829:1606#0/1  
AAAAGAAGTGGAGATCTAATGTCGCAGTCCCGCACTCGC  
+HWI-EAS443:3:82:829:1606#0/1  
aaabaabbbababaaaaabaaa\_``aa\_`aaaaa[``^`Xa  
@HWI-EAS443:3:82:830:1783#0/1  
CTTGTCTGCTGTAATTGGGTATCTCATTGCCATCATCCAC  
+HWI-EAS443:3:82:830:1783#0/1  
abbbb^bbb]IZbbabab`LaS]\_bbba\_bab```]a`ba  
@HWI-EAS443:3:82:835:2011#0/1  
CACTTTTGCATCTTTTGGAAATGCCTCAAGAGTTGGTGC  
+HWI-EAS443:3:82:835:2011#0/1  
abbaaababb`aabaaaa`aaaaa¥a^bab[aaTS^a  
@HWI-EAS443:3:82:844:587#0/1  
GTCTGCTGTCTGAGAGATTCTCATTCTTGGGCAAAGAA  
+HWI-EAS443:3:82:844:587#0/1  
aaabbabbaababaaaaabaaabba`aabababaaaaaa`  
@HWI-EAS443:3:82:856:951#0/1  
GTCTGCTGTAATTGGGTATCTCATTGCCATCATCCACTTC  
+HWI-EAS443:3:82:856:951#0/1  
a`^Z]a\_RX^^\_\_\_\_L¥\_`^`a]Z\_ZZ[```Z¥]¥`^^^  
@HWI-EAS443:3:82:875:419#0/1  
AAAGAAGTGGAGATCTAATGTCGCAGTCCCGCACTCGCG  
+HWI-EAS443:3:82:875:419#0/1  
aabbaaabbbbaaaaaaa`aa`aaaab]aa`a`W`\_a`^a  
@HWI-EAS443:3:82:888:281#0/1  
TGTCGATGGATTCAATCCCGAGTTCTGAAAAGCACTTT

+HWI-EAS443:3:82:888:281#0/1  
ababbaabbaaaaa¥aaaaa¥¥\_\_a`aaaaaa`]a\_a\_`  
@HWI-EAS443:3:82:897:321#0/1  
GCTGTAATTGGGTATCTCATTGCCATCATCCACTTCATTC  
+HWI-EAS443:3:82:897:321#0/1  
aaaa[^`aba^Zaa\_a`\_\_`^]\_`\_\_[¥¥^``\_Z^a\_^  
@HWI-EAS443:3:82:921:1075#0/1  
AAAGAAGTCTAATGTCGCAGTCCCGCACTCGCG  
+HWI-EAS443:3:82:921:1075#0/1  
aaZa\_a\_b^[a`a`abaaaa\_a¥`¥a¥¥``\_`V^`Z^[\_  
@HWI-EAS443:3:82:941:20#0/1  
TCCCCTTTGCTGCTGCCACAGAGTAGGATGCA  
+HWI-EAS443:3:82:941:20#0/1  
aaaa\_aabb`aa^aa\_\_\_a`Z`aa^`[^a\_aV\_`[[`T^  
@HWI-EAS443:3:82:942:1091#0/1  
AAAAGAAGTCTAATGTCGCAGTCCCGCACTCGC  
+HWI-EAS443:3:82:942:1091#0/1  
`\_bbba`b\_V\_XY\_`baaab`bRV]aaX^\_Y\_Y\_[\_W\_Y\_  
@HWI-EAS443:3:82:943:1007#0/1  
GAGAGATCTAATGTCGCAGTCCCGCACTCGCGAGATACTC  
+HWI-EAS443:3:82:943:1007#0/1  
`ZS^`¥`a`YUXa¥a\_\_V[Z¥XVDMW¥ST¥\_\_V[RVWY¥Q  
@HWI-EAS443:3:82:965:588#0/1  
GATCGGAATACTGCCCGACATGACCCCAAGCACGGAGATG  
+HWI-EAS443:3:82:965:588#0/1  
\_`a``abaaa\_]aaaa^aaa`Y¥^a`aa``aa``^^`  
@HWI-EAS443:3:82:971:889#0/1  
CTGTAATTGGGTATCTCATTGCCATCATCCACTTCATTCT  
+HWI-EAS443:3:82:971:889#0/1  
\_b^^`U`¥bbb`b¥`aW``¥U`b`b\_bba\_U^bbbbb\_[a  
@HWI-EAS443:3:83:1015:1221#0/1  
ATCAGACCGAGTGATGGTATCACCTCTGGCCGTAACATGG  
+HWI-EAS443:3:83:1015:1221#0/1  
a\_a``aa]aaaX`\_Y^`V\_a¥RRX\_^[VU^¥`VU[Z¥^X0  
@HWI-EAS443:3:83:1023:1868#0/1  
GGGCGATCTGAACCTTGTCAATAGGGCAAACCAGCGACTG  
+HWI-EAS443:3:83:1023:1868#0/1  
a`¥YaZa\_[XZa[^^HWY]¥^`[^ZWa\_aZZ\_^a\_\_¥¥\_  
@HWI-EAS443:3:83:1058:331#0/1  
AAAAGAAGTCTAATGTCGCAGTCCCGCACTCGC  
+HWI-EAS443:3:83:1058:331#0/1  
aaaaaaaaabbaaa\_aa^aa`b\_^\_¥`^]\_^Y^X^^]V  
@HWI-EAS443:3:83:107:360#0/1  
GGAAAAGCACTTTTGCATCTTTTGGAAATGCCTCAAGAG  
+HWI-EAS443:3:83:107:360#0/1  
ababbbab`abaaababbabbaabaaa`aaa]aaaa`aaa  
@HWI-EAS443:3:83:1125:1930#0/1  
GAATTGCCTCTTACCAGTATCCTCAACCCTGATCCTCTCA  
+HWI-EAS443:3:83:1125:1930#0/1  
aK^W¥b\_I00¥`^`\_]V]b`0^`b¥a\_]a¥b\_XSTZ¥\_]

@HWI-EAS443:3:83:1133:1268#0/1  
AAAGAAGTCTAATGTTCGAGTCCCGCACTCGCG  
+HWI-EAS443:3:83:1133:1268#0/1  
aa\_T\_aXaaa\_aYNP` [\_\_^bX\_Ta\_ZG[]\_^Q¥^USUX  
@HWI-EAS443:3:83:115:178#0/1  
CCCCGTTTTCGTTTCATTACCAACTACGTCCCCTTGCCC  
+HWI-EAS443:3:83:115:178#0/1  
aY\_¥L[Z¥^`U][W^^¥Y¥W]TUY^Y^]ZYVV[YWUVWTW  
@HWI-EAS443:3:83:1162:201#0/1  
ACTCACTAAGACCACTGTGGACCATATGGCCATAATCAAA  
+HWI-EAS443:3:83:1162:201#0/1  
abb`bbbbbaaaaabbaa`b`]\_aaaaY]a`\_\_[^\_\_`  
@HWI-EAS443:3:83:1172:696#0/1  
CAATAACAAAAGAGAAGAAAGAAGAGCTCCAGGATTGTAA  
+HWI-EAS443:3:83:1172:696#0/1  
abbbbaabbbbaabaabbaabaaba`aaaaba`aab`a\_  
@HWI-EAS443:3:83:1210:1152#0/1  
GTCCCGTTTTCGTTTCATTACCAACTACGTCCCCTTGC  
+HWI-EAS443:3:83:1210:1152#0/1  
a\_`````aaaa`aZ`````a`\_^`Z`\_^`^YZ\_ZX^R]XZ  
@HWI-EAS443:3:83:1211:1311#0/1  
CATTATTCTTGTCTGTCTGTAATTGGGTATCTCATTGCC  
+HWI-EAS443:3:83:1211:1311#0/1  
a^bbba\_]`]b`VL\_aaY`\_Z`\_¥`Z`aS`a]a0\_[Z]\_W  
@HWI-EAS443:3:83:1212:891#0/1  
CAATGAGATACCAATTACAGCAGACAAGAGAATAATGGA  
+HWI-EAS443:3:83:1212:891#0/1  
abbbbbbbbbbbbbabbbabbbbaabaabbabbbabbaa  
@HWI-EAS443:3:83:1229:1447#0/1  
ATCTAATGTTCGAGTCCCGCACTCGCGAGATACTCACTAA  
+HWI-EAS443:3:83:1229:1447#0/1  
aa`]aa`^`^`\_] [G^¥`V\_^VZWYQ[^¥¥UQZSW¥QWW  
@HWI-EAS443:3:83:1229:147#0/1  
AAACGACTTACAGTTCTTGAAAGGATGCAGGTGCATTGA  
+HWI-EAS443:3:83:1229:147#0/1  
aaa\_a\_\_bb\_ba`\_babbab]\_]aa`ab^\_a^VZ\_Za^`  
@HWI-EAS443:3:83:1237:293#0/1  
AAAGAAGTCTAATGTTCGAGTCCCGCACTCGCG  
+HWI-EAS443:3:83:1237:293#0/1  
a` [ `WV`bbabab`\_`\_ba\_a`XFV`\_`b`TMR`\_]`\_T¥[]  
@HWI-EAS443:3:83:1237:512#0/1  
GTCCCGTTTTCGTTTCATTACCAACTACGTCCCCTTGC  
+HWI-EAS443:3:83:1237:512#0/1  
aZ[U\_baaaa`a`\_a]\_`[^]^\_Y^\_]\_[LVY^UUV¥Y]Y  
@HWI-EAS443:3:83:126:1804#0/1  
ATGGCCATATGGTCCACAGTGGTCTTAGTGAGTATCTCGC  
+HWI-EAS443:3:83:126:1804#0/1  
a[]^abaYZYY[T^`¥^`^WZ`\_S¥¥^¥]UV¥^W^¥WWW¥UW  
@HWI-EAS443:3:83:1279:963#0/1  
CCCCGTTTTCGTTTCATTACCAACTACGTCCCCTTGCCC

+HWI-EAS443:3:83:1279:963#0/1  
U\_abaXa\_¥¥a`¥¥`^^¥aababbUY`N^\_HV`^`aa  
@HWI-EAS443:3:83:1284:1744#0/1  
GAGGATTTCTCATTTTGGGCAAAGAAGACAAGAGATATGG  
+HWI-EAS443:3:83:1284:1744#0/1  
aaaa`aa`aa`a\_P\_aa`]a\_aaaaa`[^\_`^`\_a]\_Z  
@HWI-EAS443:3:83:1336:531#0/1  
AGAAGTCTGAGAGATCTAATGTTCGAGTCCCGCACTCGCGAG  
+HWI-EAS443:3:83:1336:531#0/1  
^^TWPQ`TPW¥aW^a¥U\_bY\_a]\_^VN^a]P]XH\_]¥W]S  
@HWI-EAS443:3:83:1370:1353#0/1  
GCACTCGCGAGATACTACTAAGACCACTGTGGACCATAT  
+HWI-EAS443:3:83:1370:1353#0/1  
H^`V^\_TY¥¥\_¥aabbbb\_bbaba\_¥\_\_QI¥abbbbb`ab  
@HWI-EAS443:3:83:1397:416#0/1  
AAAGAAGTCTGAGAGATCTAATGTTCGAGTCCCGCACTCGCG  
+HWI-EAS443:3:83:1397:416#0/1  
abb\_ababbbbaaaaaabbabb\_^`aa`^\_a]^`^aa`\_`  
@HWI-EAS443:3:83:144:1662#0/1  
CTGCTGTCTGAGAGATTTCTCATTTTGGGCAAAGAAGA  
+HWI-EAS443:3:83:144:1662#0/1  
a\_\_\_\_^`^aa`\_`[\_`¥]X`\_]^^^]`^]\_]WU¥^`^P[][\_]  
@HWI-EAS443:3:83:1622:1741#0/1  
ACGACTTACAGTTCTTGAAAGGATGCAGGTGCATTGACT  
+HWI-EAS443:3:83:1622:1741#0/1  
a^WUTa\_a\_aa]\_]aa`\_`W^^¥\_\_a^`¥]Y`W\_\_Z`^Z`  
@HWI-EAS443:3:83:1657:430#0/1  
AGAAGAGCTCCAGGATTGTAATAATTGCTCCCTTGATGGTG  
+HWI-EAS443:3:83:1657:430#0/1  
aa`\_`aWaXaXaU\_V]aaaU]^\_U^aZS^NTLV[[U^XPR^  
@HWI-EAS443:3:83:1773:848#0/1  
AAAAGAAGTCTGAGAGATCTAATGTTCGAGTCCCGCACTCGC  
+HWI-EAS443:3:83:1773:848#0/1  
a]a`\_`[\_`¥`\_`aa`¥`\_]ba]a`\_\_\_\_`VNO]aVTV[^NL  
@HWI-EAS443:3:83:183:182#0/1  
ACTCACTAAGACCACTGTGGACCATATGGCCATAATCAAA  
+HWI-EAS443:3:83:183:182#0/1  
aababbaab`aa]\_\_a\_\_`\_¥`a`a]`aa\_\_aXZ`]¥^`\_`  
@HWI-EAS443:3:83:189:246#0/1  
GACTCTGATGTCAGTATTCTTGCCCCACTTCATTTGGGA  
+HWI-EAS443:3:83:189:246#0/1  
^]ZaJaWWb\_ba`^]TV`\_\_a^¥[`]\_]YT]NY]^`^^Z  
@HWI-EAS443:3:83:199:801#0/1  
TCCCGTTTTCGTTTCATTACCAACTACGTCCTTCCCTTGCC  
+HWI-EAS443:3:83:199:801#0/1  
^W[N¥J[``aaJ][bY^abW^XYZa`^L` `[`\_`[XYaa`  
@HWI-EAS443:3:83:201:1124#0/1  
CTTCCTGATGTGTACTTTTTGATTATGGCCATATGGTCCA  
+HWI-EAS443:3:83:201:1124#0/1  
aa`\_a\_¥Y]aX\_^^`\_`^¥^aa¥V¥\_`[^`\_YPVNLULYYX

@HWI-EAS443:3:83:202:1959#0/1  
CTAATGTCGCAGTCCCGCACTCGCGAGATACTCACTAAGA  
+HWI-EAS443:3:83:202:1959#0/1  
aaa`\_`¥]T\_\_\_Ha`\_S\_TNY]^]W¥RVVHX^^]YR`^P¥  
@HWI-EAS443:3:83:208:609#0/1  
AAAAGAAGTGGAGATCTAATGTCGCAGTCCCGCACTCGC  
+HWI-EAS443:3:83:208:609#0/1  
ab[aa`\_a\_a`^`\_\_`a\_a`]^`^`\_`[\_VaX^¥`W\_^^  
@HWI-EAS443:3:83:233:400#0/1  
TGCCCCGTTAGCACTTCTTCTTTCTTGGACTGATGATCC  
+HWI-EAS443:3:83:233:400#0/1  
\_Za\_\_¥`\_`[a^[]^`^`aaa]a`aa^^¥UX`a`\_]`[[Z¥  
@HWI-EAS443:3:83:252:1671#0/1  
ATCTAATGTCGCAGTCCCGCACTCGCGAGATACTCACTAA  
+HWI-EAS443:3:83:252:1671#0/1  
aa\_¥\_]`\_`¥]OY\_ML¥\_TXYMZTPXUQUPKJTVLSXSSTQ  
@HWI-EAS443:3:83:252:74#0/1  
GGATCAGACCGAGTGATGGTATCACCTCTGGCCGTAACAT  
+HWI-EAS443:3:83:252:74#0/1  
abaaaba\_\_a`aaZa````S`^]^^^¥¥¥\_`^¥¥`HW[OTW  
@HWI-EAS443:3:83:286:840#0/1  
TTCCTGATGTGTACTTTTTGATTATGGCCATATGGTCCAC  
+HWI-EAS443:3:83:286:840#0/1  
a`aaa\_\_^a]\_PL]aaa`aa\_\_`\_\_^¥\_\_^X]XHPUZHWV  
@HWI-EAS443:3:83:291:1874#0/1  
CGTCCCTTGGGTAAAGTGCAACACTTCAATATAAAACTG  
+HWI-EAS443:3:83:291:1874#0/1  
aa`aab^a\_`\_¥]a`ORRaaa`\_`¥¥\_a\_\_\_\_`a\_a\_aaV\_  
@HWI-EAS443:3:83:297:1236#0/1  
CAACAACAAGTACAGTTCATTACCCTAAGGTATATAAAAC  
+HWI-EAS443:3:83:297:1236#0/1  
^WWQQR]^]ZU¥FV\_^\_`^¥U`\_YMVZGT\_\_LYV]XXBBBB  
@HWI-EAS443:3:83:305:520#0/1  
CTTGTGACCATTGAATTTTCAATTTCCCAGTTCCTGAT  
+HWI-EAS443:3:83:305:520#0/1  
aaaa\_aa`[aa`bb`a`aaaaaa\_aa¥\_aa\_Z]a````^\_  
@HWI-EAS443:3:83:326:660#0/1  
GGGCAAGGGGACGTAGTGTGGTAATGAAACGAAAACGGG  
+HWI-EAS443:3:83:326:660#0/1  
abba\_`^`^`X^aX`b]bXbaaP¥``aX``P]]^J[a]¥]  
@HWI-EAS443:3:83:364:2030#0/1  
ACCATCCTTACTCCTCCAATCTGTGTGCTGTGGCACATTT  
+HWI-EAS443:3:83:364:2030#0/1  
TT¥^`\_`bb\_V^aX0`\_]`\_`^a\_¥J`RU`\_]\_XYT\_`^`]¥X]  
@HWI-EAS443:3:83:369:313#0/1  
TCCCGTTTTCGTTTCATTACCAACTACGTCCCCTTGCC  
+HWI-EAS443:3:83:369:313#0/1  
aaaab`aa`\_a\_a``aaaa\_\_a\_]a`\_\_\_\_]Z`]^\_]U^WZ  
@HWI-EAS443:3:83:380:199#0/1  
AAACGACTTACAGTTCCTGGAAAGGATGCAGGTGCATTGA

+HWI-EAS443:3:83:380:199#0/1  
^`a\_\_\_\_¥b¥b^Zaa^]\_`a]aXaaa\_aYZW^J`VV¥W\_]`  
@HWI-EAS443:3:83:386:151#0/1  
TGCTGTAATTGGGTATCTCATTGCCATCATCCACTTCATT  
+HWI-EAS443:3:83:386:151#0/1  
abaabaXaaabaa\_aaaa`aa`a`a\_a`aa`\_a^\_\_`\_`\_`\_`  
@HWI-EAS443:3:83:391:1017#0/1  
AAAGAAGTGGAGATCTAATGTCGCAGTCCCGCACTCGCG  
+HWI-EAS443:3:83:391:1017#0/1  
abaaabaa\_aaaa`a`\_`aa\_a^`]`^^`\_`¥HZ`^`^`  
@HWI-EAS443:3:83:392:1992#0/1  
GTCCCGCACTCGCGAGATACTCACTAAGACCACTGTGGAC  
+HWI-EAS443:3:83:392:1992#0/1  
aJbb\_N`\_`aaabX`^b`\_b`a]\_a`aZP]a]a^UN`T\_Z  
@HWI-EAS443:3:83:395:986#0/1  
CGCACTCGCGAGATACTCACTAAGACCACTGTGGACCATA  
+HWI-EAS443:3:83:395:986#0/1  
a`aYa`a\_a\_[Y\_^\_^`^^`\_`\_`\_]`^`\_`\_`^X]Y^^]`^`\_`  
@HWI-EAS443:3:83:405:310#0/1  
GCAAGGGGACGTAGTGTGGTAATGAAACGAAAACGGGAC  
+HWI-EAS443:3:83:405:310#0/1  
a\_W]`ba0abYYWR`X`]VRTVYYZ[`W]XRHZX\_]XX  
@HWI-EAS443:3:83:423:1620#0/1  
GTACTTTTTGATTATGGCCATATGGTCCACAGTGGTCTTA  
+HWI-EAS443:3:83:423:1620#0/1  
aH`aa[aaV[^`]]aXUb`\_`¥PHXU\_\_T\_a\_W[][\_]TF  
@HWI-EAS443:3:83:438:1213#0/1  
GCCAGGGTTTGTATCAACTCTCCTCCTTATTTTAACTTGA  
+HWI-EAS443:3:83:438:1213#0/1  
Zb`\_`\_`\_`J[^ZXaY\_QY\_\_^^`]aab`Qaab`\_`Z¥`a\_  
@HWI-EAS443:3:83:438:464#0/1  
GTGAGTATCTCGCGAGTGCAGGACTGCGACATTAGATCTC  
+HWI-EAS443:3:83:438:464#0/1  
aT`]YS]\_`U]WX¥N\_Y]WY`TZ^LJV¥WZ^ZQPQGSU¥H  
@HWI-EAS443:3:83:443:914#0/1  
AAAGAAGTGGAGATCTAATGTCGCAGTCCCGCACTCGCG  
+HWI-EAS443:3:83:443:914#0/1  
a`a\_aa^`][[`¥LTa`[V\_a^a`\_`aW¥Z^[\_T¥Va]\_¥  
@HWI-EAS443:3:83:44:1475#0/1  
AGAAGAGCAACAGCTATTCTCAGAAAGGCAACCAGGAGAT  
+HWI-EAS443:3:83:44:1475#0/1  
aaa`a^`\_a[aa]a\_\_\_\_\_a`a`]T¥]^`\_`[X^^W^XZUZ  
@HWI-EAS443:3:83:455:1140#0/1  
AATAAAAGAAGTGGAGATCTAATGTCGCAGTCCCGCACT  
+HWI-EAS443:3:83:455:1140#0/1  
aaaaa^Va\_Y`ba`aaa]a\_\_\_aaa¥]a^aaY`\_`^`\_¥a¥  
@HWI-EAS443:3:83:46:268#0/1  
AAAGAAGTGGAGATCTAATGTCGCAGTCCCGCACTCGCG  
+HWI-EAS443:3:83:46:268#0/1  
aaaa\_\_\_\_\_^^¥`\_`\_]a`YV`^S]\_^`][U^]YPSRX]]TS^



@HWI-EAS443:3:83:508:1677#0/1  
AAAGAAGTCTAATGTTCGAGTCCCGCACTCGCG  
+HWI-EAS443:3:83:508:1677#0/1  
^^`aaba`a^`Za`a`^]¥b]YR\_b^WVU[^HV[RJYU  
@HWI-EAS443:3:83:527:1394#0/1  
GTTGAGGATACTGGTAAGAGGCAATTCTCCAGTATTCAAT  
+HWI-EAS443:3:83:527:1394#0/1  
aaaaaaa`aaaa\_^[¥V[^^^aaa`a¥^a`a\_V[^``aa\_  
@HWI-EAS443:3:83:577:445#0/1  
GGAAAAGCACTTTTGCATCTTTTTGGAAATGCCTCAAGAG  
+HWI-EAS443:3:83:577:445#0/1  
aba`a`a\_a`a`a\_a`\_a\_a`\_a`aZ\_````Z`]`\_\_a¥a  
@HWI-EAS443:3:83:586:933#0/1  
GGCGATCTGAACCTTGTCAATAGGGCAAACCAGCGACTG  
+HWI-EAS443:3:83:586:933#0/1  
ab`abbabbbabbab`abbaaaabaaaab\_aa`a`a  
@HWI-EAS443:3:83:601:1951#0/1  
CACTTCAATATAAACACTGCCTGTTCCGCCGCTACTGGG  
+HWI-EAS443:3:83:601:1951#0/1  
aa\_]bY[Xa`a\_^^`\_[VY`]VQYa`^`^VUZ¥]LLRUQ  
@HWI-EAS443:3:83:628:1356#0/1  
GTCCCGTTTTTCGTTTCATTACCAACTACGTCCCTTGC  
+HWI-EAS443:3:83:628:1356#0/1  
a\_b``b\_aaab`\_^aaaaaaa`a`a`a\_[Wa\_]`[`[¥¥  
@HWI-EAS443:3:83:641:670#0/1  
TCCTGATGTGACTTTTTGATTATGGCCATATGGTCCACA  
+HWI-EAS443:3:83:641:670#0/1  
aab`\_[^b`ZH[^aaa`\_[]^RUX]Z[^WPU[¥G]^TXZ  
@HWI-EAS443:3:83:670:1012#0/1  
CCCGTTTTTCGTTTCATTACCAACTACGTCCCTTGGCC  
+HWI-EAS443:3:83:670:1012#0/1  
Zaa¥¥\_[\_\_\_W¥a`\_]R]aababba[`aZTa\_b\_PZZa\_X  
@HWI-EAS443:3:83:684:1192#0/1  
CTGCTGTAATTGGGTATCTCATTGCCATCATCCACTTCAT  
+HWI-EAS443:3:83:684:1192#0/1  
aaZU^LPJ`a`\_[`]Yba`[aa``aa\_aaaaZa]`\_Qaa^a  
@HWI-EAS443:3:83:689:1384#0/1  
ATTACAACAAGGCAACCAAACGACTTACAGTTCTTGAAA  
+HWI-EAS443:3:83:689:1384#0/1  
aa``¥`\_[^T¥WY][aZ`\_\_\_]^ [TZ\_`]¥XU¥XY[^Z]Y  
@HWI-EAS443:3:83:719:1706#0/1  
GAGAGATCTAATGTTCGAGTCCCGCACTCGCGAGATACTC  
+HWI-EAS443:3:83:719:1706#0/1  
aabaZbbbabbabbaba\_\_aab^a]a[a`aa`\_\_Za]  
@HWI-EAS443:3:83:743:1926#0/1  
ACACTTCAATATAAACACTGCCTGTTCCGCCGCTACTGG  
+HWI-EAS443:3:83:743:1926#0/1  
`a¥\_^aa]a]Y]aaaba\_T\_`\_XQL^`]QR^¥XO[¥QGNZ  
@HWI-EAS443:3:83:755:1730#0/1  
CAAGGACAAACCCTCTGGAGCAAAACAAACGATGCTGGAT

+HWI-EAS443:3:83:755:1730#0/1  
`Z`a`aaa¥`a¥]Y¥¥V[a\_a\_a]aa[a^^a\_[\_\_`\_[Z  
@HWI-EAS443:3:83:757:757#0/1  
GGGCCATATCTTGTCTTCTTTGCCAAAATGAGAAATC  
+HWI-EAS443:3:83:757:757#0/1  
aaaaaabbbbbabaa`bbbabbbbbaaababaabaa^aaa  
@HWI-EAS443:3:83:762:772#0/1  
ATACTCACTACCACTCTCTCCGTGCTGGAGTATTCATCTA  
+HWI-EAS443:3:83:762:772#0/1  
V^\_^Z`^b\_`aa¥[\_\_a`^[^ZaWY¥abS\_XbTb\_aa\_  
@HWI-EAS443:3:83:764:799#0/1  
GAATAAAAGAACTGAGAGATCTAATGTCGCAGTCCCGCAC  
+HWI-EAS443:3:83:764:799#0/1  
aU¥`XZ[^]Z`^YZ^aaaaX`aa`X`a\_`aR¥]XU\_YY  
@HWI-EAS443:3:83:772:886#0/1  
AAAGAACTGAGAGATCTAATGTCGCAGTCCCGCACTCGCG  
+HWI-EAS443:3:83:772:886#0/1  
a`a`a[a]`\_a`W[]a`]a\_^\_¥aa`PX^`Z`V\_\_`\_W^  
@HWI-EAS443:3:83:79:1358#0/1  
CGTACATGCTAGAAAGAGAATTGGTCCGTAACAAGGTT  
+HWI-EAS443:3:83:79:1358#0/1  
abVbaaaab\_]^a`]^`]]`aa\_\_S`Y]¥\_\_`NT]a\_\_Y  
@HWI-EAS443:3:83:815:537#0/1  
GCTAATGTGCTAATTGGGCAAGGGGACGTAGTGTGGTAA  
+HWI-EAS443:3:83:815:537#0/1  
aaa`^[aW]^`\_`a`Taa\_Z[[^`U^aV¥`Y^¥W`[VV^  
@HWI-EAS443:3:83:821:195#0/1  
CGAGATACTCACTAAGACCACTGTGGACCATATGGCCATA  
+HWI-EAS443:3:83:821:195#0/1  
abababa`abaaaba`aaaaaa^aa\_`^a\_\_aa^\_\_^^  
@HWI-EAS443:3:83:836:1475#0/1  
GCACTCGCGAGATACTCACTAAGACCACTGTGGACCATAT  
+HWI-EAS443:3:83:836:1475#0/1  
`\_RZ`a`a]\_\_]Zaa`Z`\_a`aaaa`U]]`a\_]Z`W  
@HWI-EAS443:3:83:842:424#0/1  
AAAGAACTGAGAGATCTAATGTCGCAGTCCCGCACTCGCG  
+HWI-EAS443:3:83:842:424#0/1  
abbaababbaab[aa`ababb\_aa\_aa¥`a\_a\_YaY\_a]\_  
@HWI-EAS443:3:83:879:349#0/1  
GAGAGATCTAATGTCGCAGTCCCGCACTCGCGAGATACTC  
+HWI-EAS443:3:83:879:349#0/1  
a\_a\_a\_\_`\_`ba\_¥`a`\_`[\_^Z[\_W\_\_a¥[\_`¥¥[WZW  
@HWI-EAS443:3:83:898:897#0/1  
GGGGACGTAGTGTGGTAATGAAACGAAACGGGACTCTA  
+HWI-EAS443:3:83:898:897#0/1  
`^`aZa¥]a^R]¥ab]^aaa\_`^a`b\_aaa`¥a`]a``]  
@HWI-EAS443:3:83:913:190#0/1  
GTCTGCTGTCTGAGAGGATTTCTCATTGTTGGGCAAAGAA  
+HWI-EAS443:3:83:913:190#0/1  
a\_`aa`aa\_]`a[a`aa[\_`a]`^^\_\_`\_^]\_Y\_\_X^

@HWI-EAS443:3:83:914:1890#0/1  
CAATGAGATACCCAATTACAGCAGACAAGAGAATAATGGA  
+HWI-EAS443:3:83:914:1890#0/1  
abbabbbaabbaabaaaba`]a`aabaaaaa`aba[a  
@HWI-EAS443:3:83:928:1561#0/1  
AGTCGTTTGGTTGCCTTGTGTAATTGAATACTGGAGAAT  
+HWI-EAS443:3:83:928:1561#0/1  
aaa^``aaaa[aaaaaa`aa^Yaaa`Taaaa\_^YWZ]a\_X  
@HWI-EAS443:3:83:943:90#0/1  
GTCCCCGTTTTCGTTTCATTACCAACTACGTCCCCTTGC  
+HWI-EAS443:3:83:943:90#0/1  
aa\_`¥b`\_\_abaaa\_\_aa\_aRPTZ]`XaLLaYXZYPW\_`T  
@HWI-EAS443:3:84:100:1998#0/1  
GGGGCAAGAATACTGACATCAGAGTCACAGCTGACAATAA  
+HWI-EAS443:3:84:100:1998#0/1  
abY`\_\_]PY`^`[aaaaaaYUYNa0`aabZWG¥F\_a`\_a\_  
@HWI-EAS443:3:84:1092:491#0/1  
CTTGTGACCATTGAATTTTACAATTTCCCAGTTCCTGAT  
+HWI-EAS443:3:84:1092:491#0/1  
abab^]W^a`a`ba`^``aaaaU\_]IM`QOSRa¥\_aW\_  
@HWI-EAS443:3:84:1108:1477#0/1  
AAAAGAAGACTGAGAGATCTAATGTCGCAGTCCCGCACTCGC  
+HWI-EAS443:3:84:1108:1477#0/1  
0[\_`¥U¥YHWZ^aPVWbU\_\_aRa`P`UW\_W¥U^L\_baa^  
@HWI-EAS443:3:84:1110:634#0/1  
CCGTTTTCGTTTCATTACCAACTACGTCCCCTTGCCCA  
+HWI-EAS443:3:84:1110:634#0/1  
a`b^a`bbb]``\_`````aa^Z``aaaXY`TW^``a]YYa  
@HWI-EAS443:3:84:1129:520#0/1  
GCTAATGTGCTAATTGGGCAAGGGGACGTAGTGTGGTAA  
+HWI-EAS443:3:84:1129:520#0/1  
a`aa\_ab^`X`^`\_\_Z[\_^a\_\_a^Xa]]aX`X^^\_OTZ  
@HWI-EAS443:3:84:1130:266#0/1  
GAAGAGCAACAGCTATTCTCAGAAAGGCAACCAGGAGATT  
+HWI-EAS443:3:84:1130:266#0/1  
`OY\_]¥¥X^WW^P[]^\_W\_¥[`ZWUYZ[Y[YYQ¥TSYX]¥  
@HWI-EAS443:3:84:1153:1838#0/1  
AAAAGAAGACTGAGAGATCTAATGTCGCAGTCCCGCACTCGC  
+HWI-EAS443:3:84:1153:1838#0/1  
[`^`\_[`ba]`b`a\_a¥X¥\_ba\_aa]aaY\_[U\_a`NXUZP  
@HWI-EAS443:3:84:1225:1197#0/1  
CAGGTGCATTGACTGAAGATCCAGATGAAGGCACATCTGG  
+HWI-EAS443:3:84:1225:1197#0/1  
ababX\_]abbbaaaabbaaaaaabaaaaabaaa]\_a`aaa  
@HWI-EAS443:3:84:1233:147#0/1  
GAACTGTACTTGTGTTGGCCATTCCATTCCACCATGT  
+HWI-EAS443:3:84:1233:147#0/1  
aab\_bbYa\_babaaa\_b`N`¥¥`aa`Ya\_a`T[]ZV`aa\_  
@HWI-EAS443:3:84:1237:896#0/1  
AGAGAATAAAAAGAACTGAGAGATCTAATGTCGCAGTCCCG

+HWI-EAS443:3:84:1237:896#0/1  
`a\_b``a\_babababbbabaabababbbbaa`a`a`]\_\_\_\_  
@HWI-EAS443:3:84:1265:1097#0/1  
GGGGACGTAGTGTGGTAATGAAACGAAAACGGGACTCTA  
+HWI-EAS443:3:84:1265:1097#0/1  
abaaaab`aa^b`bb`S\_`aa`ab\_a\_a`aZaaa\_Z`^`\_  
@HWI-EAS443:3:84:1269:954#0/1  
CAAACCTTTGGTCAACATCATCATTCTCACTTCTCCTCCT  
+HWI-EAS443:3:84:1269:954#0/1  
aaaaabbbb`aaaa\_aaaa\_aaab\_baaaba\_aa^aa^`  
@HWI-EAS443:3:84:126:2021#0/1  
GTGGACCATATGGCCATAATCAAAAAGTACACATCAGGAA  
+HWI-EAS443:3:84:126:2021#0/1  
a\_\_^aaaW\_aY\_[`aa^`aZ]]Z\_aaWXaa`\_\_]\_`]V[^  
@HWI-EAS443:3:84:1296:540#0/1  
GGGACGTAGTGTGGTAATGAAACGAAAACGGGACTCTAG  
+HWI-EAS443:3:84:1296:540#0/1  
aaaV`\_H¥aG]aaaaVaWNX\_\_`W]\_aU\_]a\_`¥¥T¥TZV  
@HWI-EAS443:3:84:1302:1146#0/1  
ATCTGCTCCCAGCACGTCCCTTGGGTTAAGTGCAACACTT  
+HWI-EAS443:3:84:1302:1146#0/1  
aaaabaaab`¥`]]TXHXV[^^]aZW\_\_aa]`Y¥a]\_\_aZ  
@HWI-EAS443:3:84:1341:97#0/1  
CCCCTTTTCGTTTTATTACCAACTACGTCCCCTTGCCC  
+HWI-EAS443:3:84:1341:97#0/1  
\_`Q\_ST`bab¥a]LUba¥SS[[\_]W\_a\_a[SJV]\_^a]]Y  
@HWI-EAS443:3:84:1446:1003#0/1  
CAACACTTCAATATAAACACTGCCTGTTCCGCCGGCTACT  
+HWI-EAS443:3:84:1446:1003#0/1  
a^^ab``a]`a\_aa[baTaabb^[`b[^SbbaUa\_S`^GG  
@HWI-EAS443:3:84:1450:147#0/1  
AAAATTGCATCCTACTCTGTTCTGGTGGAGCAGCAGCAAA  
+HWI-EAS443:3:84:1450:147#0/1  
`aa`a\_bXa^`X`a\_`U^``\_Zaaa]a\_UaY^¥X¥[KXWS  
@HWI-EAS443:3:84:1483:321#0/1  
GAATGATCGGAATACTGCCCCGACATGACCCCAAGCACGGA  
+HWI-EAS443:3:84:1483:321#0/1  
aZ``]]aabbH`X\_G\_`TMY^ZGWO^YUPXW¥^ZXRLU\_B  
@HWI-EAS443:3:84:1496:303#0/1  
ATCTAATGTCGAGTCCCGCACTCGCGAGATACTCACTAA  
+HWI-EAS443:3:84:1496:303#0/1  
Sa\_Y`a¥Q[MQ\_`¥]``VXWVX[SXGNZX`H[BBBBBBBB  
@HWI-EAS443:3:84:151:461#0/1  
CGCGAGATACTCACTAAGACCACTGTGGACCATATGGCCA  
+HWI-EAS443:3:84:151:461#0/1  
a\_bbaaaa`aa`\_`aaa`aa\_a`[¥\_\_Z``\_S]^\_^]  
@HWI-EAS443:3:84:1521:727#0/1  
TAATGTGCGAGTCCCGCACTCGCGAGATACTCACTAAGAC  
+HWI-EAS443:3:84:1521:727#0/1  
aaaab\_`^`a`a`\_\_\_`a\_\_\_[``a¥a\_\_\_¥\_\_\_V`\_\_Z[W

@HWI-EAS443:3:84:1556:174#0/1  
TTCTCACTTCTCCTCCTGGAGTGTACATCTGCTCCCAGCA  
+HWI-EAS443:3:84:1556:174#0/1  
aaXa\_a]bbZa`¥\_\_[\_¥\_\_¥` ]`U\_\_N`W¥VQUUZWW  
@HWI-EAS443:3:84:1576:1687#0/1  
CGTTTTCGTTTTATTACCAACTACGTCCCCTTGCCCAA  
+HWI-EAS443:3:84:1576:1687#0/1  
`bbaaa^`bbb`abab\_[^aabbbbab`TVUZaaa\_]X^a  
@HWI-EAS443:3:84:1606:1123#0/1  
CCTGCATCCTTTCCAAGAACTGTAAGTCGTTTGGTTGCCT  
+HWI-EAS443:3:84:1606:1123#0/1  
aabb]bbbaabb]YabaaK¥bbaaYa`abab\_bba`b\_Y\_  
@HWI-EAS443:3:84:1612:1391#0/1  
GCCACAGCACAGATTGGAGGAGTAAGGATGGTGGACAT  
+HWI-EAS443:3:84:1612:1391#0/1  
`^` [ `bba`H`XaV\_¥]X[a]b^YaaWaa\_`a`Q]Z^\_Y^  
@HWI-EAS443:3:84:1626:66#0/1  
AAAAGAAGTGGAGATCTAATGTCGCAGTCCCCTGCTCGC  
+HWI-EAS443:3:84:1626:66#0/1  
[bbab`a`bbVaaaaaab\_bbaaaaa]\_U^\_X\_X]]YU  
@HWI-EAS443:3:84:1645:1576#0/1  
AACTGTACTTGTGTTGGGCCATTCTATTCCACCATGTT  
+HWI-EAS443:3:84:1645:1576#0/1  
XT^a¥[ba^`a]a[aaY``\_aa`\_`^`a^^U`¥Zaab`\_  
@HWI-EAS443:3:84:1650:1312#0/1  
TGCTGCTCCACCAGAACAGAGTAGGATGCAATTTTCCTCA  
+HWI-EAS443:3:84:1650:1312#0/1  
ZXOZNTT\_W]Y¥G[U\_[]aSaVU\_[VRFK¥I\_[^\_UYXU  
@HWI-EAS443:3:84:1659:117#0/1  
GTCCCCTTTTCGTTTCATTACCAACTACGTCCCCTTGCC  
+HWI-EAS443:3:84:1659:117#0/1  
¥ZYFU[W[]PWZabUXLKaYPPXYLYBBBBBBBBBBBBBB  
@HWI-EAS443:3:84:168:552#0/1  
CCCCTTTTCGTTTCATTACCAACTACGTCCCCTTGCCC  
+HWI-EAS443:3:84:168:552#0/1  
aaba[aaaaa\_a``aa`` ]`aa`a`^`\_`V^^`^^W^] ^\_  
@HWI-EAS443:3:84:1697:1292#0/1  
GAATAAAAGAAGTGGAGATCTAATGTCGCAGTCCCCTGAC  
+HWI-EAS443:3:84:1697:1292#0/1  
a`^aaaaabZ\_`ba`\_`\_^]aa\_aa^\_¥^`\_]X^X^\_XU  
@HWI-EAS443:3:84:1699:1139#0/1  
GTCCCCTTTTCGTTTCATTACCAACTACGTCCCCTTGCC  
+HWI-EAS443:3:84:1699:1139#0/1  
a[[P¥a¥VZaT^[ZWF[\_]^RNJY\_^WG[PTQVSULFOWU  
@HWI-EAS443:3:84:169:1983#0/1  
CGCACTCGCGAGATACTCACTAAGACCACTGTGGACCATA  
+HWI-EAS443:3:84:169:1983#0/1  
a`a[a\_`¥aR]Y^V\_\_]]\_\_^\_X\_`][VXUXYY]`][X\_  
@HWI-EAS443:3:84:1709:488#0/1  
TCCCCTTTTCGTTTCATTACCAACTACGTCCCCTTGCC

+HWI-EAS443:3:84:1709:488#0/1  
a`\_`baaa`Ta\_aaX¥a^a\_Z``]a\_a`\_a^[\_XZ[V[L0  
@HWI-EAS443:3:84:1768:1027#0/1  
CCCGTTTTTCGTTTCATTACCAACTACTGCCCCCTTGCCC  
+HWI-EAS443:3:84:1768:1027#0/1  
aaaa`aabaa`baaaaab`\_aa`a\_aa``\_\_\_\_[`^`\_\_^`\_  
@HWI-EAS443:3:84:1786:201#0/1  
CACTGACTCAGGGCCATTGATCTCCCACATCATTGATGAC  
+HWI-EAS443:3:84:1786:201#0/1  
aa`bb\_bba`\_baa`¥abbabaaZbab¥abZbbbbb^ab]H  
@HWI-EAS443:3:84:182:225#0/1  
GTCCCGTTTTTCGTTTCATTACCAACTACTGCCCCCTTGC  
+HWI-EAS443:3:84:182:225#0/1  
a^aaa`]aa`¥^`^`\_^]`^`^`^X^]`^`\_¥0]Y^VXYXX  
@HWI-EAS443:3:84:226:1294#0/1  
ATGTGCGAGTCCCGCACTCGCGAGATACTCACTAAGACCA  
+HWI-EAS443:3:84:226:1294#0/1  
¥¥XT\_U\_K]0[aaa^L^`a¥a\_QZ`\_aa^¥`PK¥`\_`]^^  
@HWI-EAS443:3:84:254:60#0/1  
AAAAGAAGTGAAGATCTAATGTCGCGAGTCCCGCACTCGC  
+HWI-EAS443:3:84:254:60#0/1  
¥V\_a¥b^aa`\_\_WW`UU\_aa¥[[Q]\_R¥``[VSXGVFYXU  
@HWI-EAS443:3:84:25:1355#0/1  
CAGTGGTCTTAGTGAGTATCTCGCGAGTGCGGGACTGCGA  
+HWI-EAS443:3:84:25:1355#0/1  
`\_`^aa¥a`aaa^\_a`^`[a\_\_\_\_`]UTPXYYYYTSTRUXW  
@HWI-EAS443:3:84:265:169#0/1  
GGGGACGTAGTGTGGTAATGAAACGAAAACGGGACTCTA  
+HWI-EAS443:3:84:265:169#0/1  
aaaa\_aaZ¥^Za\_aa^T¥R`[^`^`^WV]XZ^\_[WZWWVW  
@HWI-EAS443:3:84:269:573#0/1  
GTCAATGAGGAAAATTGCATCCTACTCTGTTCTGGTGGAG  
+HWI-EAS443:3:84:269:573#0/1  
a`aa[ab`baaX^\_\_a`\_]`\_ZSZ`^¥W\_\_a¥W[QQ\_  
@HWI-EAS443:3:84:352:1288#0/1  
ATGGTATTCTCACAAGAGGATTGCATGATCAAGGCAGTTA  
+HWI-EAS443:3:84:352:1288#0/1  
`\_\_bZaaaaaaa`T^a\_Wa`^a\_b`a^\_Yb`^aaaaaG[\_  
@HWI-EAS443:3:84:353:1026#0/1  
ATCATTCTCATTCTCCTCCTGGAGTGACATCTGCTCC  
+HWI-EAS443:3:84:353:1026#0/1  
`[[[Z\_a`aa````\_\_a`aa¥a[Z^¥a[Q`\_\_Z^^¥^W\_  
@HWI-EAS443:3:84:386:1237#0/1  
TCCCGTTTTTCGTTTCATTACCAACTACTGCCCCCTTGCC  
+HWI-EAS443:3:84:386:1237#0/1  
aabb`\_`aabbaaaaaaa`\_`aabbaaaa`aa\_a`aaa^`\_`\_  
@HWI-EAS443:3:84:387:426#0/1  
GGATGATGGCAATGAGATACCCAATTACAGCAGACAAGAG  
+HWI-EAS443:3:84:387:426#0/1  
aa\_ab^a¥^X`aa]a`]^aa\_\_a\_aa\_\_\_\_`\_a`\_\_`a¥a

@HWI-EAS443:3:84:396:1176#0/1  
ATCCTTACTCCTCCAATCTGTGTGCTGTGGCACATTTCCA  
+HWI-EAS443:3:84:396:1176#0/1  
aaaa\_a]`\_a`aa¥a[[\_\_\_\_Z`Q``\_\_¥^T`\_V\_¥\_¥\_^\_  
@HWI-EAS443:3:84:434:1219#0/1  
CTTGTTTTACGGACCAATTCTCTTTCTAGCATGTACGCCA  
+HWI-EAS443:3:84:434:1219#0/1  
aba` [[]aZ^W[a\_Qaa]aaaab``aa]^a\_`a]aa\_`a`  
@HWI-EAS443:3:84:45:1120#0/1  
AGGGGACGTAGTGTGGTAATGAAACGAAAACGGGACTCT  
+HWI-EAS443:3:84:45:1120#0/1  
S¥Za¥S¥a`X`\_]\_X¥ZTOZ\_\_W]^Z\_¥Z¥SZ[UV¥Z\_X]V  
@HWI-EAS443:3:84:473:709#0/1  
ATCCTACTCTGTTCTGGTGGAGCAGCAGCAAAGGGGAGAA  
+HWI-EAS443:3:84:473:709#0/1  
aaabaaaaaab`aaaabR\_a\_a`aa[`````\_\_aaaa\_aS\_  
@HWI-EAS443:3:84:47:638#0/1  
ATTACCAACACTACGTCCCCTTGCCCAATTAGCACATTAG  
+HWI-EAS443:3:84:47:638#0/1  
`[``\_a]K\_a`Z`a^a```ZTZ``aXSUYU[`Za`Y[¥X  
@HWI-EAS443:3:84:482:294#0/1  
CTGGGGTGGAGTCTGCTGTCCTGAGAGGATTTCTCATTTT  
+HWI-EAS443:3:84:482:294#0/1  
aa\_abbUb`aaab`a]^b\_aa`a^a`aa\_a`^a\_] [````\_  
@HWI-EAS443:3:84:492:1301#0/1  
CACTCGGTCTGATCCAGCATCGTTTGTGTTTGCTCCAGAGG  
+HWI-EAS443:3:84:492:1301#0/1  
¥V\_]aa`aa[aaa`]^aa`a`a^`^\_¥aa\_¥\_[[\_]YU¥¥  
@HWI-EAS443:3:84:494:707#0/1  
CCATTGATAAGTGTGACTAGCACTGACTCAGGGCCATTG  
+HWI-EAS443:3:84:494:707#0/1  
aa`aabaa]]`Ua[`a`\_`\_\_aa`\_a\_a\_aV]\_\_a`\_`\_`  
@HWI-EAS443:3:84:507:1158#0/1  
GTACTCTTATTTTCAGTGTGTTGGAGGTTGCCCGTTAGCAC  
+HWI-EAS443:3:84:507:1158#0/1  
a^X]]`U¥`^`ZaZ\_ZX¥W]^a\_P¥\_]aYaa¥^a¥\_T\_V[  
@HWI-EAS443:3:84:561:248#0/1  
GGAGGTTGCCCGTTAGCACTTCTTCTTCTTCTTCTGACTGA  
+HWI-EAS443:3:84:561:248#0/1  
ababb\_aabaa`abaaa\_aaa`bbaab`baaaaaa\_\_aa\_  
@HWI-EAS443:3:84:585:1871#0/1  
GTTGAAACATGGTACCTTCGGCCCTGTCCACTTCAGAAAT  
+HWI-EAS443:3:84:585:1871#0/1  
aQ`\_`YWa]I]SX\_XIT[`a\_]L^^`RW]]WHY^[QX\_TK  
@HWI-EAS443:3:84:588:1154#0/1  
AGTTCTTGAAAAGGATGCAGGTGCATTGACTGAAGATCCA  
+HWI-EAS443:3:84:588:1154#0/1  
`[^[a\_aa^a^`]a]^a`a``````^YW]\_a[``\_]]]\_aXa  
@HWI-EAS443:3:84:589:723#0/1  
TGGTATTCTACAAGAGGATTGCATGATCAAGGCAGTTAG

+HWI-EAS443:3:84:589:723#0/1  
aaaG\_aa`a`aaa\_aYaa\_\_\_\_`V`a^\_[a``a¥V\_RYUR  
@HWI-EAS443:3:84:589:728#0/1  
ATGTGTACTTTTTGATTATGGCCATATGGTCCACAGTGGT  
+HWI-EAS443:3:84:589:728#0/1  
¥aa[\_Y¥^a`bbba`][\_¥`b`[XOW¥XN\_¥FRWZN\_]P  
@HWI-EAS443:3:84:626:1544#0/1  
GAATAAAAGAAGACTGAGAGATCTAATGTCGCAGTCCCGCAC  
+HWI-EAS443:3:84:626:1544#0/1  
[XX`\_¥Z¥Ka[]\_0^U`abaa`\_]Wa`baa^aa\_H\_[a  
@HWI-EAS443:3:84:639:364#0/1  
ACTTGTGTGGGCCATTCTATTCCACCATGTTACGGCC  
+HWI-EAS443:3:84:639:364#0/1  
^a]VaW¥ZSSZQ00ZFVUQO`\_R[Y¥ZUQWZaUIZMZYU]  
@HWI-EAS443:3:84:640:999#0/1  
GTCCCGTTTTCGTTTCATTACCAACTACGTCCCTTGC  
+HWI-EAS443:3:84:640:999#0/1  
\_J\_NZ\_Saaa`\_[a^\_aY[\_a]a`[ba\_[a`\_]\_^a`^¥\_^  
@HWI-EAS443:3:84:67:1702#0/1  
ATCTGCTCCCAGCACGTCCCTTGGGTTAAGTGCAACTT  
+HWI-EAS443:3:84:67:1702#0/1  
\_`b\_Y`\_aaaZF^`^[]aa]`[LRY\_\_¥VS^`^WYYQV  
@HWI-EAS443:3:84:693:411#0/1  
GTCCCGTTTTCGTTTCATTACCAACTACGTCCCTTGC  
+HWI-EAS443:3:84:693:411#0/1  
]aaa`\_[aabab^a\_Wa]baaaaa\_aa\_a`][a`\_`¥^\_X  
@HWI-EAS443:3:84:726:1842#0/1  
ATCTAATGTCGCAGTCCCGCACTCGCGAGATACTCACTAA  
+HWI-EAS443:3:84:726:1842#0/1  
aa\_¥a`¥aS`[\_\_Y¥YUTU]GNSPPYSVSRQU¥Q`¥VTWW  
@HWI-EAS443:3:84:799:1519#0/1  
CTAATGTGCTAATTGGGCAAGGGACGTAGTGTGGTAAT  
+HWI-EAS443:3:84:799:1519#0/1  
^¥]abaabb``¥Sab]`[a`abVG]`a^`\_`^a\_bbWaaV  
@HWI-EAS443:3:84:812:770#0/1  
ATCTAATGTCGCAGTCCCGCACTCGCGAGATACTCACTAA  
+HWI-EAS443:3:84:812:770#0/1  
`X`aa^`V^]aV[^X`\_ZSNZ^V`¥ZVXTV^^\_\_YZ\_[[  
@HWI-EAS443:3:84:816:1193#0/1  
ACAGCACACAGATTGGAGGAGTAAGGATGGTGGACATCCT  
+HWI-EAS443:3:84:816:1193#0/1  
aaaaX¥W`]Z]]X`\_[V`^aY```VRQ`VNT[WYQWXV]  
@HWI-EAS443:3:84:822:573#0/1  
GTCCACAGTGGTCTTAGTGAGTATCTCGCGAGTGCGGGAC  
+HWI-EAS443:3:84:822:573#0/1  
aababbbbaa`a\_\_aaaaVaaa\_aaa`¥`[a\_\_Z`TV\_¥¥R  
@HWI-EAS443:3:84:835:944#0/1  
CTGCTGTAATTGGGTATCTCATTGCCATCATCCACTTCAT  
+HWI-EAS443:3:84:835:944#0/1  
abbaa¥V¥\_\_`^S]JZ]]\_ZZ¥aa¥TWYP\_X]]^\_YZ¥`X



@HWI-EAS443:3:84:873:1899#0/1  
GGCGTACATGCTAGAAAGAGAATTGGTCCGTAACAAGG  
+HWI-EAS443:3:84:873:1899#0/1  
a`aa]a`\_a^a^\_a^aS`\_\_a`\_\_[Z`\_aV```a^a\_^R  
@HWI-EAS443:3:84:873:2032#0/1  
ACTGAAGATCCAGATGAAGGCACATCTGGGGTGGAGTCTG  
+HWI-EAS443:3:84:873:2032#0/1  
Kaa¥a¥K\_Xa`\_XZT^W[WRa¥a\_a\_^[\_aPYa¥\_aUTV[  
@HWI-EAS443:3:84:927:1655#0/1  
GTCCCCGTTTTCGTTTCATTACCAACTACGTCCCCCTTGC  
+HWI-EAS443:3:84:927:1655#0/1  
]FTNT[XXU]P\_KZJJYTRQPQXVLWQRS^NNMNVBBBB  
@HWI-EAS443:3:84:939:540#0/1  
GGGGACGTAGTGTGGTAATGAAACGAAAACGGGACTCTA  
+HWI-EAS443:3:84:939:540#0/1  
aabb`bb\_ab\_bbbab]^\_a`aaa]ba]aa\_aaa^\_\_\_\_`  
@HWI-EAS443:3:84:958:1937#0/1  
GTGTCAGCAGACCCATTAGCATCTCTCTTGAAATGTGCC  
+HWI-EAS443:3:84:958:1937#0/1  
]M]Y[abbbZ¥TZa`Z`baV¥ba^X^ab^W¥baba^U[aa  
@HWI-EAS443:3:84:977:1281#0/1  
AAAAGAAGTGGAGATCTAATGTCGCAGTCCCGCACTCGC  
+HWI-EAS443:3:84:977:1281#0/1  
aabY`aa`a[a`aaa\_\_a\_\_`^aa¥^`Z\_]`\_`[`]\_] ]  
@HWI-EAS443:3:84:977:797#0/1  
AGGATGTCCACCATCCTTACTCCTCCAATCTGTGTGCTGT  
+HWI-EAS443:3:84:977:797#0/1  
T¥¥Sa`a\_aX][Z`USTWaRTX[[SKZ\_\_a`^^``]SaaY  
@HWI-EAS443:3:85:1007:1300#0/1  
CCCCGTTTTCGTTTCATTACCAACTACGTCCCCCTTGCCC  
+HWI-EAS443:3:85:1007:1300#0/1  
a\_aa\_ba`aa\_abaabba`a^bab`abZJ`]^aa`\_aa\_  
@HWI-EAS443:3:85:100:556#0/1  
ATGTACTCTTATTTTCAGTGTGGAGGTTGCCCGTTAGC  
+HWI-EAS443:3:85:100:556#0/1  
abaSY`aabb^)`bbaZ`Yb¥bab`ZaaY[ ]a`^`^\_][  
@HWI-EAS443:3:85:1011:1391#0/1  
ATGCAATTTTCCTCATTGACTGTGAATGTGAGAGGATCAG  
+HWI-EAS443:3:85:1011:1391#0/1  
`YPV`[\_¥\_^WY\_``\_XX\_¥]aURHOZ]FWV]¥]VOQ[UV  
@HWI-EAS443:3:85:1021:760#0/1  
CTGCTGTAATTGGGTATCTCATTGCCATCATCCACTTCAT  
+HWI-EAS443:3:85:1021:760#0/1  
a```bba`aababa\_baaba\_baa`\_]aabb\_]aabaaaa  
@HWI-EAS443:3:85:1049:1520#0/1  
GAATAAAAGAAGTGGAGATCTAATGTCGCAGTCCCGCAC  
+HWI-EAS443:3:85:1049:1520#0/1  
abbabbbb]`aabaa¥baba`bbaa\_]```ba\_a\_a\_^\_  
@HWI-EAS443:3:85:1067:464#0/1  
GTCCCCGTTTTCGTTTCATTACCAACTACGTCCCCCTTGC

+HWI-EAS443:3:85:1067:464#0/1  
a\_\_`ab`aaa\_b`\_`\_aa`a`^`a`\_`^`a`\_`\_`¥^¥\_a]a\_  
@HWI-EAS443:3:85:1068:718#0/1  
TTGCTCCAGAGGGTTTGCCTTGTTCATTCCTCTCTGGAA  
+HWI-EAS443:3:85:1068:718#0/1  
]VX\_\_`\_]T[¥ZS\_¥\_`^P]bb`a]Y`[EZ^a][`\_]U[  
@HWI-EAS443:3:85:1084:450#0/1  
CTCAGAATGAAGTGGATGATGGCAATGAGATACCCAATTA  
+HWI-EAS443:3:85:1084:450#0/1  
abbbbbbbbaababbabbaabbaaaababababababaaaa  
@HWI-EAS443:3:85:1091:664#0/1  
GGGACGTAGTGTGGTAATGAAACGAAACGGGACTCTAG  
+HWI-EAS443:3:85:1091:664#0/1  
aa`\_`b\_ab\_b[aa\_Z\_`^`a\_a\_S^]^`\_`\_`\_`\_]Y\_^  
@HWI-EAS443:3:85:1100:1441#0/1  
AAAAGAACTGAGAGATCTAATGTCGCAGTCCCGCACTCGC  
+HWI-EAS443:3:85:1100:1441#0/1  
abaaaa^`Y]ab`\_`\_aa`\_a]a`W^[W\_^Z¥T\_V\_^Y  
@HWI-EAS443:3:85:1120:736#0/1  
CAGACCCATTAGCATCTCTCTTGAAATGTGCCACAGCAC  
+HWI-EAS443:3:85:1120:736#0/1  
\_Z^Y`Z\_UZ¥^`a^aR^`a`\_`\_`Z\_a]^`[LT]RXYaaVTa  
@HWI-EAS443:3:85:1121:204#0/1  
AAAGAACTGAGAGATCTAATGTCGCAGTCCCGCACTCGCG  
+HWI-EAS443:3:85:1121:204#0/1  
a^]a¥`aa`aa^`a\_\_aa`aa\_\_`\_`^¥ZU^VZV^^W^  
@HWI-EAS443:3:85:1166:1701#0/1  
GCCATATCTCTTGCTTTTGGCCAAAATGAGAAATCCT  
+HWI-EAS443:3:85:1166:1701#0/1  
``\_`¥TYX^^Q]^`^Z^\_SUZVra^`\_`\_`\_`\_`\_]XUX  
@HWI-EAS443:3:85:1205:70#0/1  
GAACTGAGAGATCTAATGTCGCAGTCCCGCACTCGCGAGA  
+HWI-EAS443:3:85:1205:70#0/1  
aaaKaaaa`\_a]a`\_`aa`\_a`\_a¥SVTZ[YX¥T`]\_U`W  
@HWI-EAS443:3:85:1255:826#0/1  
GGAAAAGCACTTTTGCATCTTTTGGAAATGCCTCAAGAG  
+HWI-EAS443:3:85:1255:826#0/1  
abaa`ab`a\_abaaaaa\_babbaabaaaa]\_aaa¥a`a  
@HWI-EAS443:3:85:1269:814#0/1  
GGTCTTAGTGAGTATCTCGCGAGTGGGGACTGCGACATT  
+HWI-EAS443:3:85:1269:814#0/1  
`a\_aa`\_U^ab\_b^`¥`a^\_V^¥`Ha\_]¥NX[Xa`\_a`¥  
@HWI-EAS443:3:85:1274:89#0/1  
ATGATCCGCTTGTCCTTTTGAAGTGAACCCACCAAAACT  
+HWI-EAS443:3:85:1274:89#0/1  
a`aaa`abaaaa\_]aaaa`\_a`\_W`\_`\_`\_`\_`]^`^`\_Z\_  
@HWI-EAS443:3:85:127:628#0/1  
AAAAGAACTGAGAGATCTAATGTCGCAGTCCCGCACTCGC  
+HWI-EAS443:3:85:127:628#0/1  
aaS`a^JUa\_UUTVVS^]Y^[YPHZPWBBBBBBBBBBBBB

@HWI-EAS443:3:85:1299:1475#0/1  
AAAGAAGTCTAATGTCGCAGTCCCGCACTCGCG  
+HWI-EAS443:3:85:1299:1475#0/1  
`^^ba` `aaaaaaaaabaaa` ZT\_\_aaZ^Z\_\_\_\_` ]Z\_]Y[  
@HWI-EAS443:3:85:1315:209#0/1  
GGGACGTAGTGTGGTAATGAAACGAAAACGGGACTCTAG  
+HWI-EAS443:3:85:1315:209#0/1  
`a\_]`b[\_\_\_T\_]``\_H¥W^a\_a\_U]R]^]OX¥\_LLVV^¥[  
@HWI-EAS443:3:85:1371:1376#0/1  
AAAAGAAGTCTAATGTCGCAGTCCCGCACTCGCG  
+HWI-EAS443:3:85:1371:1376#0/1  
a`bb\_`aaa^`bab`aaaaabb`X`\_a`\_\_^a\_`\_\_\_\_V¥^  
@HWI-EAS443:3:85:1396:686#0/1  
CCCGTTTTCGTTTTATTACCAACTACGTCCCCTTGCCC  
+HWI-EAS443:3:85:1396:686#0/1  
abY` `bababaa`aabbaaa]`\_abaaW\_\_UUZYa\_aNRV  
@HWI-EAS443:3:85:1397:1893#0/1  
CAGTCAATGCACCTGCATCCTTTCCAAGAAGTGTAAAGTCG  
+HWI-EAS443:3:85:1397:1893#0/1  
]b`\_`bbbaWa\_babbbba`bbaa`abaabaababbbbaYa  
@HWI-EAS443:3:85:143:405#0/1  
CCGATTTTTAAGGGTTAGAGATCAAAGAGGGAACGTACTA  
+HWI-EAS443:3:85:143:405#0/1  
abaZ`bbbb]bbbaabbb`bbbabaababababab\_a`ab  
@HWI-EAS443:3:85:1443:881#0/1  
AACGACTTACAGTTCTTGAAAGGATGCAGGTGCATTGAC  
+HWI-EAS443:3:85:1443:881#0/1  
a[W`^\_baa`][`V`aa¥\_S\_aaa`aUaW\_X\_R\_]`^`Z  
@HWI-EAS443:3:85:1491:542#0/1  
AAGAAGTCTAATGTCGCAGTCCCGCACTCGCGA  
+HWI-EAS443:3:85:1491:542#0/1  
aab`ba`a` `]ba^Xba[`aabb[aaa\_\_[aY[\_aabZ`\_`  
@HWI-EAS443:3:85:1492:1043#0/1  
CCCGTTTTCGTTTTATTACCAACTACGTCCCCTTGCCC  
+HWI-EAS443:3:85:1492:1043#0/1  
aaababbbbbb`ab\_bbaaaaa`aa\_b^\_\_\_\_`^^a`a^YV  
@HWI-EAS443:3:85:1524:845#0/1  
GTCCCGTTTTCGTTTTATTACCAACTACGTCCCCTTG  
+HWI-EAS443:3:85:1524:845#0/1  
^EW^]a¥a[`Z\_X`a\_]X`UY]]^[W\_\_PX\_YWVZRZ^X  
@HWI-EAS443:3:85:154:1091#0/1  
TTCTTCTTCTTCTTGACTGATGATCCGCTTGTCTTTTG  
+HWI-EAS443:3:85:154:1091#0/1  
abaabb\_babaabaaa\_bbbbaababba`aaY¥aaaaab`  
@HWI-EAS443:3:85:1728:1386#0/1  
CTAATGTCGCAGTCCCGCACTCGCGAGATACTACTAAGA  
+HWI-EAS443:3:85:1728:1386#0/1  
`bbabb¥aa`aa`Naa` `\_a` `a^^^`\_\_`¥aV\_]`\_\_`¥  
@HWI-EAS443:3:85:1737:618#0/1  
AATGTCGCAGTCCCGCACTCGCGAGATACTACTAAGACC

+HWI-EAS443:3:85:1737:618#0/1  
`aa` ``\_\_aa^\_aYR]\_\_¥Z`aV`¥¥V¥\_^^X^^\_¥^UW  
@HWI-EAS443:3:85:1740:1597#0/1  
AAAGAAGTCTAATGTCGAGTCCCCTCGCG  
+HWI-EAS443:3:85:1740:1597#0/1  
aaaaVRXaaa`a\_\_Za`^aa^Y\_]\_\_UU\_[^0]\_]¥`R\_  
@HWI-EAS443:3:85:1759:765#0/1  
CAAGGACAAACCCTCTGGAGCAAACAAACGATGCTGGAT  
+HWI-EAS443:3:85:1759:765#0/1  
[b`bbabb`Zaaabaa\_baabbab`bbaa`aba\_a`aY[  
@HWI-EAS443:3:85:1777:1511#0/1  
CGCGAGATACTACTAAGACCACTGTGGACCATATGGCCA  
+HWI-EAS443:3:85:1777:1511#0/1  
`b¥\_ab\_`^a]`a\_abaa\_`\_a`^]S`\_`\_aR^`]a^P`\_  
@HWI-EAS443:3:85:183:763#0/1  
GCTGTAATTGGGTATCTCATTGCCATCATCCACTTCATTC  
+HWI-EAS443:3:85:183:763#0/1  
abbb\_aaaabaa]aaaaaa]`aaa\_`a`aQJ^a`a`a\_\_  
@HWI-EAS443:3:85:186:1236#0/1  
GGACGTAGTGTGGTAATGAAACGAAACGGGACTCTAGC  
+HWI-EAS443:3:85:186:1236#0/1  
^`]b]Y`a¥aZbaa¥[bZ\_Zbb]\_¥\_Y`S]Z]\_]`^¥^W]  
@HWI-EAS443:3:85:292:634#0/1  
AAAAGAAGTCTAATGTCGAGTCCCCTCGCG  
+HWI-EAS443:3:85:292:634#0/1  
\_aabb`X\_^Z\_aZN\_]a`ZPW^S\_V¥[bSSQ^]`KTK``\_  
@HWI-EAS443:3:85:321:283#0/1  
GTGGAGTCTGCTGTCTGAGAGGATTTCTCATTTTGGGCA  
+HWI-EAS443:3:85:321:283#0/1  
a`]bR`^¥\_aa]¥]X[P[N]^aTIR\_]UV^^[a^^\_]YYV  
@HWI-EAS443:3:85:332:1248#0/1  
CGCACTCGGAGATACTACTAAGACCACTGTGGACCATA  
+HWI-EAS443:3:85:332:1248#0/1  
a`b\_``bUba`^`\_aaabaaaa`a\_aa``a]\_\_[aaa\_`  
@HWI-EAS443:3:85:347:695#0/1  
GCCCTATTGACAAAGTTCAGATCGCCCCTAACTGCCTTGA  
+HWI-EAS443:3:85:347:695#0/1  
abba\_Z\_aaaa`QZa[aaaa\_a\_aa\_``a`\_`a`a\_\_]\_  
@HWI-EAS443:3:85:353:1617#0/1  
GCTCCCTTGATGGTGGCGTACATGCTAGAAAGAGAATTGG  
+HWI-EAS443:3:85:353:1617#0/1  
aa\_aa`[Z]¥^VFSZa`U]^T^`\_`\_]\_]\_\_\_\_]¥[¥Y]  
@HWI-EAS443:3:85:384:1230#0/1  
GTCCCGTTTTCGTTTTATTACCAACTACGTCCCTTGC  
+HWI-EAS443:3:85:384:1230#0/1  
aabbab``a[^\_]a`[aaa`a`aa`aaa`a\_^`\_`a`\_]\_  
@HWI-EAS443:3:85:385:561#0/1  
ATTCTCCAGTATTCAATTACAACAAGGCAACCAACGACT  
+HWI-EAS443:3:85:385:561#0/1  
]\_`abb\_`[W¥babb^baabb]\_WVY`bbaabbbbaa¥`a

@HWI-EAS443:3:85:397:1604#0/1  
AAACAAACGATGCTGGATCAGACCGAGTGATGGTATCACC  
+HWI-EAS443:3:85:397:1604#0/1  
a^ab^]ba¥¥\_a\_aUFRa\_aaaa\_]\_aZMY\_VO[R\_¥¥]S  
@HWI-EAS443:3:85:406:1948#0/1  
AAGAAGTCTGAGATCTAATGTCGCAGTCCCGCACTCGCGA  
+HWI-EAS443:3:85:406:1948#0/1  
aaa¥aa\_\_`\_]a[\_Y\_`aV^`XaU]a]U¥`\_YXZYU\_W^XX  
@HWI-EAS443:3:85:416:1178#0/1  
GTCCCGTTTTCGTTTTATTACCAACTACGTCCCCTTGC  
+HWI-EAS443:3:85:416:1178#0/1  
`¥H]YbR^^bQ\_NR\_PSW`\_\_\_\_`aU`\_]`\_]Z]\_¥QPQLU  
@HWI-EAS443:3:85:42:821#0/1  
CATTTCTCACTTCTCCTCCTGGAGTGACATCTGCTCCCA  
+HWI-EAS443:3:85:42:821#0/1  
aabba^^^\_W^a`]b^Z][`RaYaVaaa`^^`aY¥`[O  
@HWI-EAS443:3:85:531:833#0/1  
GAACTGAGAGATCTAATGTCGCAGTCCCGCACTCGCGAGA  
+HWI-EAS443:3:85:531:833#0/1  
aaaa]aaa`aaaa]a\_a\_a`aaa^`\_`\_U`\_\_\_\_aa\_`\_`  
@HWI-EAS443:3:85:551:1034#0/1  
CTGAGAGATCTAATGTCGCAGTCCCGCACTCGCGAGATAC  
+HWI-EAS443:3:85:551:1034#0/1  
ab\_`aa\_`aaab\_`\_`[a`bb¥M]a`^\_X``¥baa^a¥Y]a  
@HWI-EAS443:3:85:576:812#0/1  
TTAACTTGATTTCTGAAGTGGACAGGGCCGAAGGTACCAT  
+HWI-EAS443:3:85:576:812#0/1  
aaaaaa`a\_`aa`a`\_\_\_\_\_]`[a]a\_`^`^`^`\_\_\_\_Y^]]^\_`  
@HWI-EAS443:3:85:600:1989#0/1  
GTCCATTATTCTTTGTCTGCTGTAATTGGGTATCTCATT  
+HWI-EAS443:3:85:600:1989#0/1  
a]a\_`^PQVaa\_aaaa[^0^\_a\_Y]`\_`\_]`U`\_TX^[]P  
@HWI-EAS443:3:85:670:421#0/1  
CCCGTTTTCGTTTTATTACCAACTACGTCCCCTTGCCC  
+HWI-EAS443:3:85:670:421#0/1  
[`S`Ja\_¥¥aUWWW\_ab¥W^^bbZWZaa`KXYa`bXU]a\_  
@HWI-EAS443:3:85:680:483#0/1  
GTCCCGTTTTCGTTTTATTACCAACTACGTCCCCTTGC  
+HWI-EAS443:3:85:680:483#0/1  
a\_b`^\_U`b\_`bY\_\_`]¥^a^`aaZX^Uaa`\_aZZZX\_W  
@HWI-EAS443:3:85:726:1341#0/1  
GTGGAGTCTGCTGTCTGAGAGGATTTCTCATTTTGGGCA  
+HWI-EAS443:3:85:726:1341#0/1  
`\_abaa`aba\_`]`bbaaa`aaa\_aaa\_a\_aaaaaa¥a¥`  
@HWI-EAS443:3:85:731:783#0/1  
AAAGAAGTCTGAGAGATCTAATGTCGCAGTCCCGCACTCGCG  
+HWI-EAS443:3:85:731:783#0/1  
a\_`^a]a¥aaaaaa[aaaa\_aa[\_aa`X\_[\_¥`X`^`\_\_\_\_  
@HWI-EAS443:3:85:795:283#0/1  
TGCCTTGTGTAATTGAATACTGGAGAATTGCCTTACC

+HWI-EAS443:3:85:795:283#0/1  
a\_]a]ab\_]aaaZZZb]Q][\_aaaS\_^\_W^¥XYW\_]PN  
@HWI-EAS443:3:85:803:1460#0/1  
TGCATTGACTGAAGATCCAGATGAAGGCACATCTGGGGTG  
+HWI-EAS443:3:85:803:1460#0/1  
[`baabab\_a\_ab`ba^aZ^b\_bba\_babbb`b`baa]\_a  
@HWI-EAS443:3:85:850:1081#0/1  
TAATGTCGAGTCCCGCACTCGCGAGATACTCACTAAGAC  
+HWI-EAS443:3:85:850:1081#0/1  
abbaaUZS`aaY`a\_S^¥aaaaaT`\_`\_Y`X`Z^^[[\_Y  
@HWI-EAS443:3:85:850:495#0/1  
GGGACGTAGTGTGGTAATGAAACGAAAACGGGACTCTAG  
+HWI-EAS443:3:85:850:495#0/1  
aaaa`b\_\_b\_a`aa`R\_[\_a^aa\_a^a\_`\_a\_] ]^Y\_^  
@HWI-EAS443:3:85:859:916#0/1  
ACCCCAAGCACGGAGATGTCGCTGAGAGGGATAAGAGTCA  
+HWI-EAS443:3:85:859:916#0/1  
abba\_abaaaaa\_`a`^`aa`\_\_a\_\_\_a]\_`\_a]a¥]^  
@HWI-EAS443:3:85:889:1550#0/1  
CCTGAGAGGATTTCTCATTTTGGGCAAAGAAGACAAGAGA  
+HWI-EAS443:3:85:889:1550#0/1  
\_a\_]\_b`bbaZaa^^^¥^¥[¥\_`\_aa`] ]bbbabbb\_b\_  
@HWI-EAS443:3:85:911:244#0/1  
CAAACGACTTACAGTTCTTGAAAGGATGCAGGTGCATTG  
+HWI-EAS443:3:85:911:244#0/1  
abbbabbbbaa`bbbaabbbbbbabbabab`aa^b^aaaa  
@HWI-EAS443:3:85:918:946#0/1  
GTCCCGTTTTCGTTTCATTACCAACTACGTCCCTTGC  
+HWI-EAS443:3:85:918:946#0/1  
a\_`Z^aZ\_`]Xb^^a[][\_`\_`\_\_\_\_[¥V]`[¥X\_]^^ZWZV  
@HWI-EAS443:3:85:947:1720#0/1  
TCTGCTCCCAGCACGTCCCTTGGGTTAAGTGCAACTTC  
+HWI-EAS443:3:85:947:1720#0/1  
aabb^`aaaa`\_] [\_X^ZUaaa[a^\_aaV[\_]`a`\_¥\_\_\_\_  
@HWI-EAS443:3:86:1020:739#0/1  
GGTTGAAACATGGTACCTTCGGCCCTGTCCACTTCAGAAA  
+HWI-EAS443:3:86:1020:739#0/1  
`b\_bbabbaaaa¥aaaba¥a`a]aa^a`aVaa\_a`aa\_  
@HWI-EAS443:3:86:1058:277#0/1  
AAAGGATGCAGGTGCATTGACTGAAGATCCAGATGAAGGC  
+HWI-EAS443:3:86:1058:277#0/1  
abbbba]abaaa^J\_]Za¥\_\_\_\_]b¥aa^R]¥\_a[]aaU`\_X  
@HWI-EAS443:3:86:1068:208#0/1  
ATAAAAGAAGTGAAGATCTAATGTCGAGTCCCGCACTC  
+HWI-EAS443:3:86:1068:208#0/1  
ab]^aa\_]Xaba`aa`b^aa\_ba\_\_XZ\_b\_X`OWRJQ¥N  
@HWI-EAS443:3:86:107:1107#0/1  
GCCATATCTTGTCTTCTTTGCCAAAATGAGAAATCCT  
+HWI-EAS443:3:86:107:1107#0/1  
X¥`aabbbba\_`baaaaabb`U``Z``Ta\_]aba``a\_]\_

@HWI-EAS443:3:86:1090:962#0/1  
GGGTGGAGTCTGCTGTCCTGAGAGGATTTCTCATTTTGGG  
+HWI-EAS443:3:86:1090:962#0/1  
``\_Q]Z``aaa`^`\_\_X^a`a`aa`¥``¥a]Uaaaaaaaa  
@HWI-EAS443:3:86:1127:828#0/1  
AATGTCGCAGTCCCGCACTCGCGAGATACTCACTAAGACC  
+HWI-EAS443:3:86:1127:828#0/1  
aabbabbaaa``aaaaZ`a]a`bab\_a\_¥``aY`aa`\_`Y  
@HWI-EAS443:3:86:1131:1046#0/1  
CTCTTGTCTGCTGTAATTGGGTATCTCATTGCCATCATCC  
+HWI-EAS443:3:86:1131:1046#0/1  
ababbaabbbbbbb\_aabbaba[bb]aabba^``aaaba`Z  
@HWI-EAS443:3:86:1132:39#0/1  
CTGTAATTGGGTATCTCATTGCCATCATCCACTTCATTCT  
+HWI-EAS443:3:86:1132:39#0/1  
`bbbabbbbbbbabba]QYbbbaa`b`aaX\_aVab\_aaa\_a  
@HWI-EAS443:3:86:1139:379#0/1  
GAGAATAATGGACATGATTCCAGAGAGGAATGAACAAGGA  
+HWI-EAS443:3:86:1139:379#0/1  
aabaabb\_bZaY]a`]aaa[NUa`a`a^ba```Z\_\_\_\_\_`  
@HWI-EAS443:3:86:1162:604#0/1  
GGGACGTAGTGTGGTAATGAAACGAAAACGGGACTCTAG  
+HWI-EAS443:3:86:1162:604#0/1  
\_ab]ab\_aaabaabb\_aaab`a`b`aaa`aaa`^¥\_`[a  
@HWI-EAS443:3:86:117:725#0/1  
AGAGAATAATGGACATGATTCCAGAGAGGAATGAACAAGG  
+HWI-EAS443:3:86:117:725#0/1  
`a[aY`aa`aa[a`a```\_aaa\_\_^a^a\_\_a`^[\_[\_^\_`^  
@HWI-EAS443:3:86:1192:876#0/1  
GAGGAACAAGCCGTAGACATATGCAAGGCAGCAATAGGGT  
+HWI-EAS443:3:86:1192:876#0/1  
^^XW`bbbaa]T¥ab¥¥^Zaabb`a\_]a^aa\_a`aaaa`X  
@HWI-EAS443:3:86:148:1575#0/1  
GTCCATTATTCTTGTCTGCTGTAATTGGGTATCTCATT  
+HWI-EAS443:3:86:148:1575#0/1  
aa`a`aaaaaaa``aa`aaa\_a^]``\_a\_]`0a\_]a^\_\_^  
@HWI-EAS443:3:86:1541:312#0/1  
CCCCTTTTTCGTTTCATTACCAACTACGTCCCCCTTGCCC  
+HWI-EAS443:3:86:1541:312#0/1  
a`abbabbaa``b[bbbbba\_ab^babbabaa\_a[a\_a`\_]  
@HWI-EAS443:3:86:1561:1096#0/1  
AAAGAAGTGCAGATCTAATGTCGCAGTCCCGCACTCGCG  
+HWI-EAS443:3:86:1561:1096#0/1  
abba]bb```aabababbabba]aa`\_`W`[T[^\_aZ\_\_[  
@HWI-EAS443:3:86:158:435#0/1  
TAAAGAAGTGCAGATCTAATGTCGCAGTCCCGCACTCG  
+HWI-EAS443:3:86:158:435#0/1  
¥^]^^`R``\_]\_Wa]Z]Z]a`\_`[\_[^aUT^L][Y¥WDH¥VT  
@HWI-EAS443:3:86:1590:588#0/1  
GAATAAAAAGAACTGAGAGATCTAATGTCGCAGTCCCGCAC

+HWI-EAS443:3:86:1590:588#0/1  
`YaUXbV¥SXZa`ba`]^ZaabUba^UJKZ\_^]HG]BBBB  
@HWI-EAS443:3:86:1670:1061#0/1  
TAAAAGAAGACTGAGAGATCTAATGTCGCAGTCCCGCACTCG  
+HWI-EAS443:3:86:1670:1061#0/1  
aaa`ba\_a]ba\_a`aabaa``aa]RaV`\_]XPP\_UZVYS\_  
@HWI-EAS443:3:86:1671:1198#0/1  
AGGATTTCTCATTTTGGGCAAAGAAGACAAGAGATATGGC  
+HWI-EAS443:3:86:1671:1198#0/1  
a\_bbabb`baabbba`aa`a]`VaY]^a`a\_`a\_`a\_^\_Z  
@HWI-EAS443:3:86:172:1875#0/1  
GATTCAATCCCCAGTTCTGGAAAAGCACTTTTGCATCTT  
+HWI-EAS443:3:86:172:1875#0/1  
W\_`a`^`^`[^abb\_W[bbba^^`a`V`baaabba]`\_`a`  
@HWI-EAS443:3:86:1755:159#0/1  
GAATAAAGAAGACTGAGAGATCTAATGTCGCAGTCCCGCAC  
+HWI-EAS443:3:86:1755:159#0/1  
aa`abbb`a`\_\_aaaa`a\_ba\_^`\_]^^`XX]]U]Y  
@HWI-EAS443:3:86:19:558#0/1  
CTCGCGAGATACTACTAAGACCACTGTGGACCATATGGC  
+HWI-EAS443:3:86:19:558#0/1  
`bLaZ\_QWZYaa`[LR[¥[QP¥R]R]UP^VWYVW\_`YPWO  
@HWI-EAS443:3:86:257:366#0/1  
CTCGCGAGATACTACTAAGACCACTGTGGACCATATGGC  
+HWI-EAS443:3:86:257:366#0/1  
`^a]W]^\_¥\_a`^bY\_Y`¥aaaaa^]^^a]aaa`a`^][\_  
@HWI-EAS443:3:86:285:794#0/1  
GCGAGATACTACTAAGACCACTGTGGACCATATGGCCAT  
+HWI-EAS443:3:86:285:794#0/1  
abbbbaaabbaaaaa`aabbaaaa\_aa]aaS`a`a`\_`a\_  
@HWI-EAS443:3:86:343:1509#0/1  
CCCGCACTCAGAATGAAGTGGATGATGGCAATGAGATACC  
+HWI-EAS443:3:86:343:1509#0/1  
aababaa\_bbbaab`a^aY`a`a`a]\_aaaaUa\_a\_a``  
@HWI-EAS443:3:86:34:461#0/1  
ATGAAGTGGATGATGGCAATGAGATACCCAATTACAGCAG  
+HWI-EAS443:3:86:34:461#0/1  
aaaa`a^ba`aa¥\_aa`\_`\_\_\_\_RY\_^`a`\_`\_^\_]\_\_^^\_  
@HWI-EAS443:3:86:353:30#0/1  
ACAGTTCTTGGAAAGGATGCAGGTGCATTGACTGAAGATC  
+HWI-EAS443:3:86:353:30#0/1  
````\_M\_R\_X`\_0[\_SaWaZ¥\_Z¥Z`\_]Z^Z]F[ZH^X\_]W  
@HWI-EAS443:3:86:371:359#0/1  
GTCCCGTTTTTCGTTTTATTACCAACTACGTCCCTTGC  
+HWI-EAS443:3:86:371:359#0/1  
¥H\_Saa`]`^\_^V]^a[aaa\_```aaY^[J\_NZ[S\_\_^\_I  
@HWI-EAS443:3:86:421:1252#0/1  
TGAGTATTGACCGATTTTTAAGGGTTAGAGATCAAAGAGG  
+HWI-EAS443:3:86:421:1252#0/1  
`aaa¥\_^`\_]Ya\_[aaaa^a[]ZW\_a\_]a\_\_\_^\_^^\_aW



@HWI-EAS443:3:86:424:683#0/1  
AATAAAAGAACTGAGAGATCTAATGTCGCAGTCCCGCACT  
+HWI-EAS443:3:86:424:683#0/1  
a`a\_aa¥aaababaaabaabaabb\_`aa`a]a^`\_^Q\_^  
@HWI-EAS443:3:86:450:1007#0/1  
AGAGAATAAAAGAACTGAGAGATCTAATGTCGCAGTCCCG  
+HWI-EAS443:3:86:450:1007#0/1  
ab]aabaa`baa[aaaaa\_aaa\_aaaaaa^a\_aaa^`\_^  
@HWI-EAS443:3:86:454:1454#0/1  
GGGGTGGAGTCTGCTGTCCTGAGAGATTCTCATTG  
+HWI-EAS443:3:86:454:1454#0/1  
¥¥a^H¥¥WZWSZ\_a^[]a]aV0]]XSY¥]a`¥[]Ya[YV  
@HWI-EAS443:3:86:482:1165#0/1  
AATGTCGCAGTCCCGCACTCGCGAGATACTACTAAGACC  
+HWI-EAS443:3:86:482:1165#0/1  
aaba`aab`a^b`a]^¥[T`^^^TXYSUT¥\_`¥\_S^Y¥W¥  
@HWI-EAS443:3:86:483:1831#0/1  
AAGAAGTGGAGATCTAATGTCGCAGTCCCGCACTCGCGA  
+HWI-EAS443:3:86:483:1831#0/1  
`\_¥X`\_`\_aabababa[aaa^`XaaZ]]`X`^`[^`^[\_  
@HWI-EAS443:3:86:496:1347#0/1  
GGTGGTTCACTTTCAAAGGACAAGCGGATCATCAGTCA  
+HWI-EAS443:3:86:496:1347#0/1  
SaMIW]JV`]V^]a`^Za]aa^¥¥a```]aaa¥\_`^¥^SV^  
@HWI-EAS443:3:86:511:1124#0/1  
GTCCCGTTTTCGTTTTATTACCAACTACGTCCCCTTGC  
+HWI-EAS443:3:86:511:1124#0/1  
[bbbbbaabbbaabbabbabbbbbbabaabbU```baaaaa  
@HWI-EAS443:3:86:516:1132#0/1  
AAAGAAGTGGAGATCTAATGTCGCAGTCCCGCACTCGCG  
+HWI-EAS443:3:86:516:1132#0/1  
aa\_a`aababa`aaaaa\_\_a\_aaaa]Xaa^^`^`WX¥U  
@HWI-EAS443:3:86:530:906#0/1  
GTCGCAGTCCCGCACTCGCGAGATACTACTAAGACCACT  
+HWI-EAS443:3:86:530:906#0/1  
a¥aaaaa¥a`^Ua`a]a^`^R]V^VU¥]¥¥¥^`^¥\_¥]¥  
@HWI-EAS443:3:86:576:615#0/1  
GTCCCGTTTTCGTTTTATTACCAACTACGTCCCCTTGC  
+HWI-EAS443:3:86:576:615#0/1  
]G\_aaaZaa]aa]aa\_aaaaa\_]Xaa\_¥`a]\_\_[]RU^X  
@HWI-EAS443:3:86:580:723#0/1  
CAAACCTTTGGTCAACATCATCTTTCTCACTTCTCCTCCT  
+HWI-EAS443:3:86:580:723#0/1  
Uabb\_\_WY¥]WRXab`KbW[Waabab`abbaaab\_bba^b  
@HWI-EAS443:3:86:588:1524#0/1  
GAATGAACAAGGACAAACCCTCTGGAGCAAAACAAACGAT  
+HWI-EAS443:3:86:588:1524#0/1  
a][TWWbZT]b^`^aaV`bbTb^Z[]aaabV\_aaGa[`ZY  
@HWI-EAS443:3:86:589:29#0/1  
TCATTTCTCACTTCTCCTCCTGGAGTGACATCTGCTCCC

+HWI-EAS443:3:86:589:29#0/1  
^`ba`bXa``abbba`aa`\_abba]L\_¥a`a``ab`a[\_]  
@HWI-EAS443:3:86:593:572#0/1  
ATGTCGCAGTCCCGCACTCGCGAGATACTACTAAGACCA  
+HWI-EAS443:3:86:593:572#0/1  
aa`[`aaa`^aaaX\_V\_a```a[a^`a\_```^````]¥^`  
@HWI-EAS443:3:86:598:523#0/1  
GGCCATGGTATTCTCACAAGAGGATTGCATGATCAAGGCA  
+HWI-EAS443:3:86:598:523#0/1  
aabbbbbb\_`bbba`aabaabba`baaabaaa``a`\_]a`  
@HWI-EAS443:3:86:613:353#0/1  
AGAATAATGGACATGATTCCAGAGAGGAATGAACAAGGAC  
+HWI-EAS443:3:86:613:353#0/1  
abaababa]ba`abaaaa\_aa\_]`ba\_`aaaaaaaa```\_  
@HWI-EAS443:3:86:620:1750#0/1  
CAAACCTTTGGTCAACATCATCATTCTCACTTCTCCTCCT  
+HWI-EAS443:3:86:620:1750#0/1  
¥^ZWa[a`[^]Ta¥\_WaYbabbbb]`Z¥aZ`aa]Z`YZ^b  
@HWI-EAS443:3:86:649:663#0/1  
AAAAGAAGTGGAGATCTAATGTCGCAGTCCCGCACTCGC  
+HWI-EAS443:3:86:649:663#0/1  
aabbbbaabbaaabaabaabb\_aaaa\_````aZa\_\_^\_  
@HWI-EAS443:3:86:669:2045#0/1  
GGGCAAGGGGACGTAGTGTGGTAATGAAACGAAAACGGG  
+HWI-EAS443:3:86:669:2045#0/1  
ab[\_]W^]aaVabVV¥L\_X\_aX]Xaa`X`\_JTWa[\_QUWF  
@HWI-EAS443:3:86:675:662#0/1  
TCCCGTTTTCGTTTCATTACCAACTACGTCCCCTTGCC  
+HWI-EAS443:3:86:675:662#0/1  
`a]^\_Q[``VZGW\_S\_]WZ¥]^``][S`¥RX\_SXPKY¥T  
@HWI-EAS443:3:86:696:1093#0/1  
GAATAAAAAGTGGAGATCTAATGTCGCAGTCCCGCAC  
+HWI-EAS443:3:86:696:1093#0/1  
aa`a`aaaa¥`a`a``aaa^aa\_aa^`^a`]]\_`^`\_]`^  
@HWI-EAS443:3:86:701:1342#0/1  
TCGGAATACTGCCCCGACATGACCCCAAGCACGGAGATGTC  
+HWI-EAS443:3:86:701:1342#0/1  
aaaabbbbbbb^aa`^bbbbabaaa\_aaa^b`aa`a`aa\_`^  
@HWI-EAS443:3:86:703:212#0/1  
TCCCGTTTTCGTTTCATTACCAACTACGTCCCCTTGCC  
+HWI-EAS443:3:86:703:212#0/1  
`bb`b^]]bbb[S]aab\_b`Y`a¥aVa`\_`RP^ZZP]a[¥  
@HWI-EAS443:3:86:704:1406#0/1  
AAAGAAGTGGAGATCTAATGTCGCAGTCCCGCACTCGCG  
+HWI-EAS443:3:86:704:1406#0/1  
aab[aaaaaa\_`\_`a`aa`a\_\_a\_^`ZW^`\_U]^`ZX[X\_  
@HWI-EAS443:3:86:708:1277#0/1  
CAAGGACAAAACCTCTGGAGCAAACAAACGATGCTGGAT  
+HWI-EAS443:3:86:708:1277#0/1  
`a\_\_¥X\_aXT¥^Z`b``a^\_]`\_¥¥\_`Y¥aaa`a`a\_V]`

@HWI-EAS443:3:86:736:427#0/1  
ATTTCTCACTTCTCCTCCTGGAGTGACATCTGCTCCCAG  
+HWI-EAS443:3:86:736:427#0/1  
^aaabaaa\_ba\_a^^`a]`a`aa¥\_¥`\_`\_\_\_a[YZZW\_  
@HWI-EAS443:3:86:741:109#0/1  
GCTGTAATTGGGTATCTCATTGCCATCATCCACTTCATTC  
+HWI-EAS443:3:86:741:109#0/1  
a^]S]^`^`^`a¥LZY[``\_\_\_`a][^\_]X]SV¥V^^VO]MP  
@HWI-EAS443:3:86:768:1346#0/1  
TCGGGAGACAATAGTACGTTCCCTCTTTGATCTCTAACCC  
+HWI-EAS443:3:86:768:1346#0/1  
ab]\_````aabbbaaY`]Z[^]a]]\_``]T]`X]``^\_[[`  
@HWI-EAS443:3:86:786:102#0/1  
CGCACTCGCGAGATACTCACTAAGACCACTGTGGACCATA  
+HWI-EAS443:3:86:786:102#0/1  
]]YK¥^`bbb\_b[ba`b^aa`bb\_bV\_b[[baaXb`\_X`\_  
@HWI-EAS443:3:86:798:263#0/1  
CACCATCAAGGGAGCAATTTTACAATCCTGGAGCTCTTCT  
+HWI-EAS443:3:86:798:263#0/1  
aaaa`bbabba]ababbbbbb`aaaa]aaaaZb¥b\_a^a  
@HWI-EAS443:3:86:828:520#0/1  
ATAAAAAGAACTGAGAGATCTAATGTCGCAGTCCCGCACTC  
+HWI-EAS443:3:86:828:520#0/1  
a\_]\_aa]¥WY``[a^a`U`a^`aZ^XU\_XQ]UZ^^]VU^  
@HWI-EAS443:3:86:846:1357#0/1  
GTCGCAGTCCCGCACTCGCGAGATACTCACTAAGACCACT  
+HWI-EAS443:3:86:846:1357#0/1  
`]a]^b¥Ya^XV[LR\_a`X^[^V`\_`¥^^Ya[^Z¥[¥[  
@HWI-EAS443:3:86:846:768#0/1  
GAATAAAAAGAACTGAGAGATCTAATGTCGCAGTCCCGCAC  
+HWI-EAS443:3:86:846:768#0/1  
aaaa^aaaa\_a`b`a`aa\_a\_aaaab^\_aa`a^\_^\_\_\_^^  
@HWI-EAS443:3:86:86:1151#0/1  
GAATAAAAAGAACTGAGAGATCTAATGTCGCAGTCCCGCAC  
+HWI-EAS443:3:86:86:1151#0/1  
\_¥P¥W\_]aZ]X^`\_a`Xaa\_^¥`R\_\_V\_N[ZZGYY¥NVZY  
@HWI-EAS443:3:86:899:1410#0/1  
GCTGTAATTGGGTATCTCATTGCCATCATCCACTTCATTC  
+HWI-EAS443:3:86:899:1410#0/1  
ab]ZLR]]^`\_UZ\_\_^\_TXXP]¥Y[]`aYa\_Y]a`]X]ZP  
@HWI-EAS443:3:86:902:462#0/1  
AAAGAAGTGGATGATGGCAATGAGATACCCAATTACA  
+HWI-EAS443:3:86:902:462#0/1  
aaa`aaabab`aaaa\_aaaaa\_`\_]`R^]\_Y\_^]\_^[^\_  
@HWI-EAS443:3:86:908:462#0/1  
CAGAATGAAGTGGATGATGGCAATGAGATACCCAATTACA  
+HWI-EAS443:3:86:908:462#0/1  
abbbbbbba\_baabbbbbbabbbbbbbaabbbbaabbbbbbab  
@HWI-EAS443:3:86:92:814#0/1  
AGCAAAAACAAACGATGCTGGATCAGACCGAGTGATGGTAT

+HWI-EAS443:3:86:92:814#0/1  
`\_T][¥WU\_¥^]¥[[U\_\_`\_]\_¥R¥\_X[KXZL\_WX\_SV]O  
@HWI-EAS443:3:86:934:1375#0/1  
AAAAGAAGACTGAGAGATCTAATGTCGCAGTCCCGCACTCGC  
+HWI-EAS443:3:86:934:1375#0/1  
a\_^`aXaaaa`^`[¥aabaaaa\_]`aaba`^a^`^]]XV  
@HWI-EAS443:3:86:937:1750#0/1  
GTAGTGAGTATTGACCGATTTTTAAGGGTTAGAGATCAAA  
+HWI-EAS443:3:86:937:1750#0/1  
`[]`ab`a^aaa¥`¥ab[\_aaba`¥\_aaRU`\_`aS]G]]¥  
@HWI-EAS443:3:86:963:526#0/1  
CTCACTAAGACCACTGTGGACCATATGGCCATAATCAAAA  
+HWI-EAS443:3:86:963:526#0/1  
]^\_ZYabbb`[Y\_`^`[a`]]baaaab\_]ab]^WVIX^b\_  
@HWI-EAS443:3:86:971:936#0/1  
GAATAAAGAAGACTGAGAGATCTAATGTCGCAGTCCCGCAC  
+HWI-EAS443:3:86:971:936#0/1  
aaabbbbbb`aaabbbabaababbabb`a`aa`a`\_`\_`a  
@HWI-EAS443:3:86:980:726#0/1  
AGAAGACTGAGAGATCTAATGTCGCAGTCCCGCACTCGCGAG  
+HWI-EAS443:3:86:980:726#0/1  
ab`babbbbaaaaa`baabbaaabbbba^aaaa^aa`X`^`  
@HWI-EAS443:3:87:1002:527#0/1  
AGAAGAGCTCCAGGATTGTAAAATTGCTCCCTTGATGGTG  
+HWI-EAS443:3:87:1002:527#0/1  
Q\_\_\_U¥^\_ZZ\_Q\_\_\_ZaV[F[ZORYZTXaZW]\_`W^^¥ZW^  
@HWI-EAS443:3:87:1010:1603#0/1  
AAAAGAAGACTGAGAGATCTAATGTCGCAGTCCCGCACTCGC  
+HWI-EAS443:3:87:1010:1603#0/1  
abaaaaa¥a\_aa\_\_`a\_aaaaa^]]S\_[N`RTYX¥\_UZ¥[  
@HWI-EAS443:3:87:1024:1287#0/1  
GTCCCGTTTTTCGTTTCATTACCAACTACGTCCCTTGC  
+HWI-EAS443:3:87:1024:1287#0/1  
aa`aabaaba\_baaXQ^baaaaa`Za\_aa`aZa`\_\_\_[]\_\_\_  
@HWI-EAS443:3:87:1024:1800#0/1  
GTCCCGTTTTTCGTTTCATTACCAACTACGTCCCTTGC  
+HWI-EAS443:3:87:1024:1800#0/1  
a`\_\_b\_aba]b^aa`ba^a^X`a^AT`\_Y[^\_^VW^[\_a  
@HWI-EAS443:3:87:1049:1815#0/1  
CTCGCGAGATACTCACTAAGACCACTGTGGACCATATGGC  
+HWI-EAS443:3:87:1049:1815#0/1  
`\_]^[^Y^`¥¥[]XR`a]¥QZX¥\_\_`X`]]Y[^`^W]YY  
@HWI-EAS443:3:87:1070:1099#0/1  
GTCCCGTTTTTCGTTTCATTACCAACTACGTCCCTTGC  
+HWI-EAS443:3:87:1070:1099#0/1  
a`¥\_a^[¥aaaa`a[\_aaaaSQ¥`\_a\_\_\_\_`]Q]ZW^[\_Z  
@HWI-EAS443:3:87:1114:1454#0/1  
GGCCATATCTCTTGCTTCTTTGCCCAAAATGAGAAATCC  
+HWI-EAS443:3:87:1114:1454#0/1  
`Y`baa]YOW]`aaa`a`][aa¥RY^aa\_\_baaa```S¥

@HWI-EAS443:3:87:1115:660#0/1  
CTGATCCAGCATCGTTTGTGGTCCAGAGGGTTTGTCC  
+HWI-EAS443:3:87:1115:660#0/1  
aba\_Z\_a\$Xaa`aQabb`baaaaa`aaa^a]LZa^^Y^`  
@HWI-EAS443:3:87:1205:505#0/1  
GTCCCCTTTTCGTTTCATTACCAACTACGTCCCCCTTGC  
+HWI-EAS443:3:87:1205:505#0/1  
`¥¥]\_b`aab¥a`aa^aaa`\_`\_\_a]a`\_aT^[]^\_¥\_[  
@HWI-EAS443:3:87:1210:284#0/1  
GAGAGAATAAAAGAACTGAGAGATCTAATGTCGCAGTCCC  
+HWI-EAS443:3:87:1210:284#0/1  
a`a\_b]aaa``aZa¥a^`aa\_`a`\_`a¥¥aZ\_\_¥¥V¥  
@HWI-EAS443:3:87:121:692#0/1  
CGTTTTCGTTTCATTACCAACTACGTCCCCCTTGCCCAA  
+HWI-EAS443:3:87:121:692#0/1  
abab]\_baQaWSwab`]WW]`aYaa[[]a]Y]NYaZYWZ  
@HWI-EAS443:3:87:1231:196#0/1  
AAAAGAACTGAGAGATCTAATGTCGCAGTCCCGCACTCGC  
+HWI-EAS443:3:87:1231:196#0/1  
\_aaabUb`bbaa¥b¥]`baaab^V\_¥VaZX\_U`\_\_Z¥V]\_  
@HWI-EAS443:3:87:1242:93#0/1  
ATCTAATGTCGCAGTCCCGCACTCGCGAGATACTCACTAA  
+HWI-EAS443:3:87:1242:93#0/1  
abVaaaabaa`W\_a^T¥^`]\_W\_¥`¥^^\_\_¥S¥Y\_T^¥Q  
@HWI-EAS443:3:87:1276:763#0/1  
CTGTAATTGGGTATCTCATTGCCATCATCCACTTCATTCT  
+HWI-EAS443:3:87:1276:763#0/1  
abba`aabbbb\_bbab\_bbababaaaaaaaa\_ba``ba\_b  
@HWI-EAS443:3:87:1282:798#0/1  
AGGTGATACCATCACTCGGTCTGATCCAGCATCGTTTGT  
+HWI-EAS443:3:87:1282:798#0/1  
aa\_NI^aaaUa\_a`aY¥ZTU^`Z\_UZ\_a\_\_\_\_[]G]a`[a  
@HWI-EAS443:3:87:1290:928#0/1  
AAAGAACTGAGAGATCTAATGTCGCAGTCCCGCACTCGCG  
+HWI-EAS443:3:87:1290:928#0/1  
aaaa[\_aaa`aab\_a\_aaZaa¥¥a`\_\_^\_\_^\_Y¥\_¥]W^  
@HWI-EAS443:3:87:1311:1823#0/1  
ATTCTACAAGAGATTGCATGATCAAGGCAGTTAGGGGC  
+HWI-EAS443:3:87:1311:1823#0/1  
a`aY^aa`aaaUa]`aaaGaaa``]a^`aXVXI^]O\_Z\_Q  
@HWI-EAS443:3:87:1356:427#0/1  
ATCTAATGTCGCAGTCCCGCACTCGCGAGATACTCACTAA  
+HWI-EAS443:3:87:1356:427#0/1  
`a`a`]^a^a`¥]a\_^^^`^TR¥\_\_`Y`¥]^ZP\_[W\_T[¥`  
@HWI-EAS443:3:87:1373:346#0/1  
GTCCCCTTTTCGTTTCATTACCAACTACGTCCCCCTTGC  
+HWI-EAS443:3:87:1373:346#0/1  
`W]^S\_F^aaT[X`\_U`^\_\_R`^N^U]^GXXUXRZ^UNX  
@HWI-EAS443:3:87:1382:1005#0/1  
AAAGAACTGAGAGATCTAATGTCGCAGTCCCGCACTCGCG

+HWI-EAS443:3:87:1382:1005#0/1  
^H^`^`^`^`aa\_aa`a^baWaaU]¥¥[¥RU[Z^YPZ][YS`  
@HWI-EAS443:3:87:1383:704#0/1  
GGGACGTAGTGTGGTAATGAAACGAAAACGGGACTCTAG  
+HWI-EAS443:3:87:1383:704#0/1  
^^aXPaxZW¥^Kaa`NN\_]][aXJ¥R¥aa]USZPXPTTVa  
@HWI-EAS443:3:87:1439:793#0/1  
CATCATTTCTCACTTCTCCTCCTGGAGTGACATCTGCTC  
+HWI-EAS443:3:87:1439:793#0/1  
I¥a\_`bbb`baaTa```]abbab]b`babb`][bba`a`]  
@HWI-EAS443:3:87:1476:1225#0/1  
ATGAAGTGGATGATGGCAATGAGATACCCAATTACAGCAG  
+HWI-EAS443:3:87:1476:1225#0/1  
abbaN\_`^`bb`b\_U¥VXYba\_]\_aYa]bWaa]]a\_aab  
@HWI-EAS443:3:87:1520:751#0/1  
TCCCGTTTTCGTTTTATTACCAACTACGTCCTCCCTGCC  
+HWI-EAS443:3:87:1520:751#0/1  
ab``a\_aba\_a\_aa`ab]\_`P`aYa`a^a[W`Y[V\_\_]V  
@HWI-EAS443:3:87:152:450#0/1  
GGCAAGGGGACGTAGTGTGGTAATGAAACGAAAACGGGA  
+HWI-EAS443:3:87:152:450#0/1  
ab¥[`^¥`a^`aMDYZYP``ULTQYVSXXPZBBBBBBBBB  
@HWI-EAS443:3:87:1608:591#0/1  
CTGGGGAATTGAATCCATCGACAATGTGATGGGAATGATC  
+HWI-EAS443:3:87:1608:591#0/1  
`[bbbaW\_]Y`ba\_[KaaWba]aW[a^bUISaWb\_\_a^\_G  
@HWI-EAS443:3:87:163:642#0/1  
GATTAGCTCATCTTTCAGTTTTGGTGGGTTCACTTTCAAA  
+HWI-EAS443:3:87:163:642#0/1  
aab\_`\_baaaaaaaaaa\_a`^aaY)`]U\_`^]\_`^`¥Q¥`  
@HWI-EAS443:3:87:165:503#0/1  
ATATAAACTGCCTGTCCCGCGCTACTGGGAGAAACC  
+HWI-EAS443:3:87:165:503#0/1  
abaa`aa`abZXaaaa`a``\_\_a\_a^`PZ[Q\_YTNT]WL  
@HWI-EAS443:3:87:1685:1470#0/1  
CATTCACAGTCAATGAGGAAAATTGCATCCTACTCTGTTC  
+HWI-EAS443:3:87:1685:1470#0/1  
`ab\_Wa`[aZ[bbbbabba`bbb`b\_bb\_Z\_bbbabbabb  
@HWI-EAS443:3:87:1745:1284#0/1  
GACCCATTAGCATCTCTTGGAAATGTGCCACAGCACAC  
+HWI-EAS443:3:87:1745:1284#0/1  
aabaab`bba`abbaZ``Qaaba^]\_^^`\_a\_Ua\_``  
@HWI-EAS443:3:87:180:189#0/1  
CATCATTTCTCACTTCTCCTCCTGGAGTGACATCTGCTC  
+HWI-EAS443:3:87:180:189#0/1  
Xabbbba]¥`a\_aabbb`abaaaa`aaYbX]Zaa\_a\_^a[  
@HWI-EAS443:3:87:199:1855#0/1  
GAATAAAAGAACTGAGAGATCTAATGTCGCAGTCCCGCAC  
+HWI-EAS443:3:87:199:1855#0/1  
ab\_bbbbaabaaaa`aa`ababb`a`abU\_aaa[`]a

@HWI-EAS443:3:87:206:696#0/1  
CTCTTGTCTTCTTTGCCCAAATGAGAAATCCTCTCAGGA  
+HWI-EAS443:3:87:206:696#0/1  
abaaa`\_baaaaaaaaaa`a]`aaaaa^^`\_`a``\_\_\_\_  
@HWI-EAS443:3:87:226:405#0/1  
CTCCCAGTAGCCGCGGAACAGGCAGTGTATATTGAAG  
+HWI-EAS443:3:87:226:405#0/1  
ababbba¥ba[abbab\_a`a`b`a`aS\_N\_`Q\_]`[`JQ\_\_  
@HWI-EAS443:3:87:260:1500#0/1  
GGGACGTAGTGTGGTAATGAAACGAAAACGGGACTCTAG  
+HWI-EAS443:3:87:260:1500#0/1  
aa¥RaaUU[JU`\_\_a]aX`\_``XR¥\_Z\_`\_]`^N]W^`]\_\_  
@HWI-EAS443:3:87:271:1545#0/1  
AAAAGAAGTCTAATGTCGAGTCCCGCACTCGC  
+HWI-EAS443:3:87:271:1545#0/1  
Z[\_b¥]X`aX`T`Z`Vaaa\_`\_]YaT^XVZ\_`\_`SYJYX]]^  
@HWI-EAS443:3:87:304:640#0/1  
TGCTAATTGGGCAAGGGACGTAGTGTGGTAATGAAACG  
+HWI-EAS443:3:87:304:640#0/1  
\_aaaaa`bab`a[[aa`\_ab\_`a]a]`aaU^^[Y¥`a^`  
@HWI-EAS443:3:87:304:66#0/1  
ATCATCTTTCTCACTTCTCCTCCTGGAGTGTACATCTGC  
+HWI-EAS443:3:87:304:66#0/1  
`[L[\_Ubb]\_Xb]W]Uaab`V\_\_aabPW^M]U]I^ZRZaR  
@HWI-EAS443:3:87:338:907#0/1  
CCCGTTTTCGTTTCATTACCAACTACGTCCCCTTGCCC  
+HWI-EAS443:3:87:338:907#0/1  
a`aa]]^\_aaQ]`\_`\_`\_`a`\_`\_`^`\_`\_`Y^]`\_`^YV¥\_W^  
@HWI-EAS443:3:87:342:926#0/1  
GTACACTCCAGGAGAGAAGTGAGAAATGATGATGTTGAC  
+HWI-EAS443:3:87:342:926#0/1  
aaaaa`aaa^a\_U`a^`Y\_aX\_Ya]\_W`\_]W\_]`\_`^Z^^^]  
@HWI-EAS443:3:87:356:1281#0/1  
CCCGTTTTCGTTTCATTACCAACTACGTCCCCTTGCCC  
+HWI-EAS443:3:87:356:1281#0/1  
a`UXGZKb\_]a¥Yb[\_`S[\_``[SZR\_`WPSG`\_`\_a]G\_Ya  
@HWI-EAS443:3:87:365:83#0/1  
AAAGAAGTCTAATGTCGAGTCCCGCACTCGCG  
+HWI-EAS443:3:87:365:83#0/1  
\_Z^a[¥^ab\_bYa\_a]a\_aaa[\_a\_\_aT\_\_¥\_ZQ\_W¥\_W\_  
@HWI-EAS443:3:87:384:2040#0/1  
TAAGGACTGTCCAGCAAATGCGGGATGTGCTTGGGAC  
+HWI-EAS443:3:87:384:2040#0/1  
abaaabb`\_bb¥aabbab^bbaaaaaaaa`]aa^`\_`\_`^aa  
@HWI-EAS443:3:87:38:610#0/1  
AATAAAGAAGTCTAATGTCGAGTCCCGCACT  
+HWI-EAS443:3:87:38:610#0/1  
aaaaaaabaaaaa\_a`\_`\_`aa[\_`aW\_a[\_`XZ\_`^`^VYW  
@HWI-EAS443:3:87:400:1128#0/1  
GTCCCCTTTTCGTTTCATTACCAACTACGTCCCCTTGCC

+HWI-EAS443:3:87:400:1128#0/1  
aXa[ ` \_PZ[]\_]¥\_\_\_`a`[^]^^`Z¥^\_a\_`V^Z`^UQU[  
@HWI-EAS443:3:87:420:1489#0/1  
AGATCAATGGCCCTGAGTCAGTGCTAGTCAACACTTATCA  
+HWI-EAS443:3:87:420:1489#0/1  
Zb]`^a\_Z^a¥ELUXW¥V]^UVYUTXNW\_[¥F[R]\_^Z¥T  
@HWI-EAS443:3:87:442:1435#0/1  
AAAGAAGTCTAATGTCGCAGTCCCGCACTCGCG  
+HWI-EAS443:3:87:442:1435#0/1  
Y\_\_a`U[ `T`a`]aabaa]^UGZXa\_X\_\_a¥HZGTSTL]Z  
@HWI-EAS443:3:87:453:1362#0/1  
AGAGAATAAAAGAACTGAGAGATCTAATGTCGCAGTCCCG  
+HWI-EAS443:3:87:453:1362#0/1  
[a]aabaababababababab`aaaa^ab\_\_\_aaa¥aaa\_  
@HWI-EAS443:3:87:481:1299#0/1  
AAAGAAGTCTAATGTCGCAGTCCCGCACTCGCG  
+HWI-EAS443:3:87:481:1299#0/1  
]^`XUQ\_`a`aZZZ^aaa`a`aZ\_]`^ZY]b¥a`a\_\_U`^R`  
@HWI-EAS443:3:87:508:454#0/1  
GAGAATAAAAGAACTGAGAGATCTAATGTCGCAGTCCCGC  
+HWI-EAS443:3:87:508:454#0/1  
aa^0]\_a^Z`\_]\_]\_b]`]^`aYaaaa\_`b]`aa\_\_Z[\_a[\_  
@HWI-EAS443:3:87:513:918#0/1  
ACTGTACTTGTGTTGGGCCATTCCTATTCCACCATGTTA  
+HWI-EAS443:3:87:513:918#0/1  
aaaa\_aaaa`a`Y[ `\_\_aaaaaaaa\_\_a\_aaaaa`\_a\_\_`  
@HWI-EAS443:3:87:514:1196#0/1  
AAAAGAAGTCTAATGTCGCAGTCCCGCACTCGC  
+HWI-EAS443:3:87:514:1196#0/1  
a\_bb[aabbabababababab`baaa`ba\_aa`\_baaa\_`a  
@HWI-EAS443:3:87:539:1436#0/1  
TCTGCTCCCAGCACGTCCCTTGGGTTAAGTGCAACACTTC  
+HWI-EAS443:3:87:539:1436#0/1  
aaaU` ``aaaY[ba\_`^`aa\_\_^[ZX\_^YY\_\_VZS^^U`\_¥  
@HWI-EAS443:3:87:54:774#0/1  
GATTCAATTCAGTCTGGAAAAGCACTTTTGCATCTT  
+HWI-EAS443:3:87:54:774#0/1  
a`aab`Z\_aaa\_a\_a]aa`\_\_YX]Z`^V^\_¥\_]\_^]`V`]  
@HWI-EAS443:3:87:584:827#0/1  
CTAATGTCGCAGTCCCGCACTCGCGAGATACTCACTAAGA  
+HWI-EAS443:3:87:584:827#0/1  
abbbbaaaa`VZ`babaa]aaa`\_\_^`V[a^a` `¥`aa`]  
@HWI-EAS443:3:87:585:1476#0/1  
GAATAAAAGAACTGAGAGATCTAATGTCGCAGTCCCGCAC  
+HWI-EAS443:3:87:585:1476#0/1  
QZbb`bbbb[b^bbb\_aab[[ba\_bbHbaabbSaababab  
@HWI-EAS443:3:87:588:150#0/1  
ATCTAATGTCGCAGTCCCGCACTCGCGAGATACTCACTAA  
+HWI-EAS443:3:87:588:150#0/1  
aa` ``a\_aY`]T¥aVYZ[^XYVZW¥Z[L¥MLTSWWWUVZW



@HWI-EAS443:3:87:620:944#0/1  
GTCTGCTGTAATTGGGTATCTCATTGCCATCATCCACTTC  
+HWI-EAS443:3:87:620:944#0/1  
a\_aabbbb`a`aa^bb[aaaab`aaba^aa^a^aaaa^aa  
@HWI-EAS443:3:87:623:390#0/1  
GTCCCCGTTTTCGTTTCATTACCAACTACGTCCCCCTTGC  
+HWI-EAS443:3:87:623:390#0/1  
`0``]aV``a^a^``\_``[^``a^[^^^\_]V¥^VS¥W^Y  
@HWI-EAS443:3:87:639:433#0/1  
GTTGCCCGTTAGCACTTCTTCTTTCTTGGACTGATGAT  
+HWI-EAS443:3:87:639:433#0/1  
aa\_aa]aaX]^`a\_\_^YZ\_ZY`a]`\_¥Y`\_\_¥V^\_[Z^a^  
@HWI-EAS443:3:87:662:1217#0/1  
GGTGGGTTCACTTTCAAAGGACAAGCGGATCATCAGTCA  
+HWI-EAS443:3:87:662:1217#0/1  
a]M]`\_RZaaaa`a]`¥LZa\_\_a\_\_\_[``\_\_a\_\_`aXY\_  
@HWI-EAS443:3:87:667:1615#0/1  
TAATGTGCGAGTCCCGCACTCGCGAGATACTCACTAAGAC  
+HWI-EAS443:3:87:667:1615#0/1  
abbaaa`X\_baZabba`a`Y\_a]SXa]aaaaa^]aaU`a  
@HWI-EAS443:3:87:66:642#0/1  
TGCTGTCCTGAGAGGATTTCTCATTTTGGGCAAAGAAGAC  
+HWI-EAS443:3:87:66:642#0/1  
`Y\_a`V`a`\_[a\_aa\_[\_[Za]Z^^``\_[^X]^U¥^  
@HWI-EAS443:3:87:689:886#0/1  
AGTGTGAGCAGACCCATTAGCATCTCTTGGAAATGTGC  
+HWI-EAS443:3:87:689:886#0/1  
aa[`abbb\_¥`¥`X[a\_[ZU`a]\_Z]`aaZ\_]^\_[]V^`  
@HWI-EAS443:3:87:68:95#0/1  
GCTGTCCTGAGAGGATTTCTCATTTTGGGCAAAGAAGACA  
+HWI-EAS443:3:87:68:95#0/1  
a`ab```aa\_b[aa\_\_a`a\_Raaaa\_\_\_]^\_[^¥\_]X^  
@HWI-EAS443:3:87:696:1406#0/1  
AAATGAGAAATCCTCTCAGGACAGCAGACTCCACCCAGA  
+HWI-EAS443:3:87:696:1406#0/1  
\_`babb[]]bbab[aaba[aab`ba\_aaa]ab`]¥ab\_a  
@HWI-EAS443:3:87:702:761#0/1  
TGCCTTTCTGAGAATAGCTGTTGCTCTTCTCCCAACCATT  
+HWI-EAS443:3:87:702:761#0/1  
abbbbbbaaa^[Yaaa\_aaaa^a`aa`a\_a\_\_a^a\_]Ua  
@HWI-EAS443:3:87:70:149#0/1  
AAAGAAGTGAAGATCTAATGTGCGAGTCCCGCACTCGCG  
+HWI-EAS443:3:87:70:149#0/1  
aa\_U]^aaaaaaa`aa`¥`aaUa\_\_\_`^¥]XWWWXYWW  
@HWI-EAS443:3:87:746:437#0/1  
ATTAGCTCATCTTTCAGTTTTGGTGGGTTCACTTTCAAAA  
+HWI-EAS443:3:87:746:437#0/1  
^^Z\_[F[`a^¥^aa^TY\_Y\_]b^a\_`FTZSL]\_\_V^``\_  
@HWI-EAS443:3:87:74:498#0/1  
GTCCCCGTTTTCGTTTCATTACCAACTACGTCCCCCTTGC

+HWI-EAS443:3:87:74:498#0/1  
aWa[]aQYUZ\_aR\_\_\_\_[`^^R¥`¥U^)`^¥XVYU]URY\_]  
@HWI-EAS443:3:87:772:1037#0/1  
GTTTGTTCCTCCAGAGGGTTTGTCCCTTGTTCATTCCCTC  
+HWI-EAS443:3:87:772:1037#0/1  
a`a`WTY`]PY\_\_\_\_^]RWW]P[`aUWFYT¥Z^¥U[W¥\_RM  
@HWI-EAS443:3:87:783:1416#0/1  
CAAGGACAAACCCTCTGGAGCAAACAAACGATGCTGGAT  
+HWI-EAS443:3:87:783:1416#0/1  
abbb]abbbbaa`abbbbaaababaaabbbbaabbbab`a`  
@HWI-EAS443:3:87:784:568#0/1  
GTCCCCTTTTCGTTTCATTACCAACTACGTCCCCTTGC  
+HWI-EAS443:3:87:784:568#0/1  
aaababaabbababbbbbbbbaaaaaabbaa\_\_])`aaa`\_  
@HWI-EAS443:3:87:830:636#0/1  
CCTGATTATCCATTGATAAGTGTGACTAGCACTGACTCA  
+HWI-EAS443:3:87:830:636#0/1  
aabbbbbbbbabbbbbabbbabbbbbbbbabbbbbabab  
@HWI-EAS443:3:87:837:890#0/1  
GTCCTGAGAGGATTTCTCATTTTGGGCAAAGAAGACAAGA  
+HWI-EAS443:3:87:837:890#0/1  
aaaaaaZ[`Z[Taa\_a`aaa`\_a``\_¥¥UR[\_¥[^Z[\_^  
@HWI-EAS443:3:87:856:1538#0/1  
AAAAGAGAAGAAAGAAGAGCTCCAGGATTGTAATTTGCT  
+HWI-EAS443:3:87:856:1538#0/1  
abbabaaaaaabbab`aa`aaaaaaaaa\_aaaaaa`a  
@HWI-EAS443:3:87:873:830#0/1  
GACCGATTTTAAAGGTTAGAGATCAAAGAGGGAACGTAC  
+HWI-EAS443:3:87:873:830#0/1  
ababbbabbbb`abba]abbaabaaa`a`abbabbab\_aa  
@HWI-EAS443:3:87:892:796#0/1  
CATATCTCTTGTCTTCTTTGCCAAAATGAGAAATCCTCT  
+HWI-EAS443:3:87:892:796#0/1  
abbbbbbbbaababbbbbbb`bbbabbbbbbaba\_\_b\_b  
@HWI-EAS443:3:87:913:457#0/1  
AACAGAGTAGGATGCAATTTTCTCATTGACTGTGAATGT  
+HWI-EAS443:3:87:913:457#0/1  
aaa`babXabaaaa`a\_a`aaa^a\_\_aaa`\_ab]^^\_a\_X  
@HWI-EAS443:3:87:916:1560#0/1  
GTCCCCTTTTCGTTTCATTACCAACTACGTCCCCTTGC  
+HWI-EAS443:3:87:916:1560#0/1  
aa`\_^b^^bb`^`aaaabaa\_aaaa\_aaaa\_\_^^\_`\_  
@HWI-EAS443:3:87:927:1898#0/1  
CCCGTTTTTCGTTTCATTACCAACTACGTCCCCTTGGCC  
+HWI-EAS443:3:87:927:1898#0/1  
abaa¥`bba`aa`[bbaba`bbaaaba\_a\_a¥^[a`a\_[]`  
@HWI-EAS443:3:87:941:1041#0/1  
CTCTTGTCTTCTTTGCCAAAATGAGAAATCCTCTCAGGA  
+HWI-EAS443:3:87:941:1041#0/1  
QZUU¥a``][¥[\_\_\_\_aU\_^`\_`b`b\_\_^\_abbbb\_bbb¥

@HWI-EAS443:3:88:1028:854#0/1  
TGGGTTCACTTTCAAAGGACAAGCGGATCATCAGTCAAG  
+HWI-EAS443:3:88:1028:854#0/1  
a`Z^[\_b`abaabYS`ab^`aa]¥Y^VYaa^\_]Ta\_\_a^a  
@HWI-EAS443:3:88:1039:306#0/1  
AGAGCAGCAGTGTGAGCAGACCCATTAGCATCTCTCTTGG  
+HWI-EAS443:3:88:1039:306#0/1  
]bbb`bb`\_aP\_Z\_¥^R^`U]\_]aaba`^Z``a[\_¥]````  
@HWI-EAS443:3:88:1115:1292#0/1  
TCGCGAGATACTACTAAGACCACTGTGGACCATATGGCC  
+HWI-EAS443:3:88:1115:1292#0/1  
`b]aW\_Wa`S`a¥]VZX```Z¥^aQaZa]Ya\_\_`^]a\_TU  
@HWI-EAS443:3:88:1122:1288#0/1  
AATGAACAAGGACAAACCCTCTGGAGCAAAACAAACGATG  
+HWI-EAS443:3:88:1122:1288#0/1  
[aa¥aZS[Ubab]W\_^\_]`Y^^`bRbabb^a`M[`^Xa  
@HWI-EAS443:3:88:1128:1472#0/1  
GAGCAAAACAAACGATGCTGGATCAGACCGAGTGATGGTA  
+HWI-EAS443:3:88:1128:1472#0/1  
abbabbb`abbbabaabbabaaaa`a\_a\_\_`a\_aa\_aa\_a  
@HWI-EAS443:3:88:1171:625#0/1  
CCGTTTTTCGTTTCATTACCAACTACGTCCCCTTGCCCA  
+HWI-EAS443:3:88:1171:625#0/1  
aab`^abbbb`aaaabb^aaabSb\_baRb^aa]aaaa¥\_Ra  
@HWI-EAS443:3:88:1177:581#0/1  
ATTCCATTTTGTGTATAACATTGTGGGATCTTGTGACCA  
+HWI-EAS443:3:88:1177:581#0/1  
abbbbbbbbbbbbbabbbbbabbbbbababbbabaaVb  
@HWI-EAS443:3:88:1185:163#0/1  
GTCCCCTTTTCGTTTCATTACCAACTACGTCCCCTTGC  
+HWI-EAS443:3:88:1185:163#0/1  
aa\_a\_b\_aaa`a^ab`abaa\_]aaaa¥aaaa¥`¥U\_\_^^¥  
@HWI-EAS443:3:88:1197:698#0/1  
CACTCGGAGATACTACTAAGACCACTGTGGACCATATG  
+HWI-EAS443:3:88:1197:698#0/1  
ababbbbbbbbbababbbbabababaa¥`ab\_bbaabbb  
@HWI-EAS443:3:88:1199:52#0/1  
CATTATTCTCTGTCTGCTGTAATTGGGTATCTCATTGCC  
+HWI-EAS443:3:88:1199:52#0/1  
ab\_ba\_b\_b^babaabbaaba`aaaaabZaa^aU[aaa]W  
@HWI-EAS443:3:88:1242:1022#0/1  
GAATAATGGACATGATTCCAGAGAGGAATGAACAAGGACA  
+HWI-EAS443:3:88:1242:1022#0/1  
U\_^[\_M`^ZZ\_bb`bb``b]X¥a]^Z[```aWa\_aba`aa  
@HWI-EAS443:3:88:1260:371#0/1  
GGGAGATCAATGGCCCTGAGTCAGTGCTAGTCAACACTTA  
+HWI-EAS443:3:88:1260:371#0/1  
aabaababaaaaa`¥ab`ba^aa\_a^`\_a^^`X`^\_aS  
@HWI-EAS443:3:88:1284:280#0/1  
CAAGGACAAACCCTCTGGAGCAAAACAAACGATGCTGGAT

+HWI-EAS443:3:88:1284:280#0/1  
abbabaabbbbaababbbbaa`bbbb\_babababaabbaaa  
@HWI-EAS443:3:88:1333:415#0/1  
CTCCCTTGATGGTGGCGTACATGCTAGAAAGAGAATTGGT  
+HWI-EAS443:3:88:1333:415#0/1  
a^aa`bbbbbb^P\_bTb`aa`aab`a\_`]\_\_`aa`aYT  
@HWI-EAS443:3:88:1352:155#0/1  
CAGAATGAAGTGGATGATGGCAATGAGATACCCAATTACA  
+HWI-EAS443:3:88:1352:155#0/1  
`ab¥\_Zb`bbY`¥abaa[^¥U\_UK¥`\_a]^YY`a``]]L¥  
@HWI-EAS443:3:88:1357:1721#0/1  
AGAGAATAAAAGAACTGAGAGATCTAATGTCGCAGTCCCG  
+HWI-EAS443:3:88:1357:1721#0/1  
a\_]bbbb[b]\_¥abb\_[\_aaaa`baaabXV`\_a`GW^00  
@HWI-EAS443:3:88:1358:502#0/1  
GAATAATGGACATGATTCCAGAGAGGAATGAACAAGGACA  
+HWI-EAS443:3:88:1358:502#0/1  
^`b\_]`\_\_`a]b[`aaaZa`a]a[^aa\_Y`aa\_aaaXa  
@HWI-EAS443:3:88:1372:84#0/1  
ATTTTGCTGACTCTTATCCCTCTCAGCGACATCTCCGTGC  
+HWI-EAS443:3:88:1372:84#0/1  
ab\_]abbSb`¥^abbbbX\_]S`H\_^G`N`S[NNa\_¥V  
@HWI-EAS443:3:88:1393:867#0/1  
GTCCCGTTTTCGTTTTATTACCAACTACGTCCCCTTGC  
+HWI-EAS443:3:88:1393:867#0/1  
`[^Y\_b¥`aaZa[`\_RZa[`aV`^R`N]\_\_\_Z\_[[[^W^¥  
@HWI-EAS443:3:88:1394:929#0/1  
AAGAAGTGGAGATCTAATGTCGCAGTCCCGCACTCGCGA  
+HWI-EAS443:3:88:1394:929#0/1  
`baabbbbbbbbbbb\_bbaabaa]\_bb\_^\_a`a]\_aaa^aa  
@HWI-EAS443:3:88:1405:1439#0/1  
ATAAAAGAACTGAGAGATCTAATGTCGCAGTCCCGCACTC  
+HWI-EAS443:3:88:1405:1439#0/1  
abbaba[`babbabbabaIab`bb`Za\_a\_[`^^a\_aZYa  
@HWI-EAS443:3:88:144:257#0/1  
ATGAACTGTACTTGTGTTGGGCCATTCCCTATTCCACCAT  
+HWI-EAS443:3:88:144:257#0/1  
¥¥\_aa]WRY¥a¥Z```XJU`a`]Z]\_VWWT]Z^Y``^`\_V  
@HWI-EAS443:3:88:1457:1281#0/1  
GTCCCGTTTTCGTTTTATTACCAACTACGTCCCCTTGC  
+HWI-EAS443:3:88:1457:1281#0/1  
aababbabbbbaababbbbaa\_bb`aabbaa`a\_aaaaaa  
@HWI-EAS443:3:88:1502:902#0/1  
TAGCACTGACTCAGGGCCATTGATCTCCACATCATTGAT  
+HWI-EAS443:3:88:1502:902#0/1  
aa¥a^W`\_a]baaSQY¥\_]baQP`[aF[XXQR`abaaa\_]`  
@HWI-EAS443:3:88:1513:147#0/1  
CCACTGTGGACCATATGGCCATAATCAAAAAGTACACATC  
+HWI-EAS443:3:88:1513:147#0/1  
ababbbbbba\_¥bbabbbabb`a`^\_baba]¥a\_a`a`X

@HWI-EAS443:3:88:1521:239#0/1  
CTGGGGTGGAGTCTGCTGTCCTGAGAGGATTTCTCATTTT  
+HWI-EAS443:3:88:1521:239#0/1  
VbbbabUb`bb`abb\_bb^a\_bb`bVb[`bbbab`babab  
@HWI-EAS443:3:88:1535:466#0/1  
GTCTTAGTGAGTATCTCGCGAGTGC GGACTGCGACATTA  
+HWI-EAS443:3:88:1535:466#0/1  
``][a^``^^aa\_\_a^]G]``R]]`a`RHRWJ[GS[[[]]  
@HWI-EAS443:3:88:1540:95#0/1  
AAAAGAAGTGGAGATCTAATGTCGCAGTCCCGCACTCGC  
+HWI-EAS443:3:88:1540:95#0/1  
aaabbab``bbba\_ba\_`b\_b¥M`bY`Y\_`¥¥U]aR]T\_Y  
@HWI-EAS443:3:88:1567:215#0/1  
GTCTGCTGTAATTGGGTATCTCATTGCCATCATCCACTTC  
+HWI-EAS443:3:88:1567:215#0/1  
]Z`a\_¥b¥Y^]\_`]a`X^a]aa\_Z¥aSDZa\_\_a\_Y[VX\_  
@HWI-EAS443:3:88:1580:135#0/1  
AAAGAAGTGGAGATCTAATGTCGCAGTCCCGCACTCGCG  
+HWI-EAS443:3:88:1580:135#0/1  
a\_`aaa`aa`[W[¥`¥a`\_aVWR\_\_``¥W¥N¥SUBBBBBB  
@HWI-EAS443:3:88:1582:1729#0/1  
AAAAGAAGTGGAGATCTAATGTCGCAGTCCCGCACTCGC  
+HWI-EAS443:3:88:1582:1729#0/1  
a`R[[`\_G\_]`Ra`\_]b`Z`[BBBBBBBBBBBBBBBB  
@HWI-EAS443:3:88:1757:192#0/1  
GTCTGCTGTAATTGGGTATCTCATTGCCATCATCCACTTC  
+HWI-EAS443:3:88:1757:192#0/1  
]`aab\_aa`^`bbab`^^b\_a`aa`a0a`aUa\_VM\_Raa\_  
@HWI-EAS443:3:88:1769:1704#0/1  
CCCGTTTTCGTTTTATTACCAACTACGTCCCTTGCCC  
+HWI-EAS443:3:88:1769:1704#0/1  
OP`¥X¥¥bU``]`^bb\_\_\_\_]b`¥S]bbb\_Z¥[\_a[^]\_`[I  
@HWI-EAS443:3:88:197:1958#0/1  
ACTTCAATATAAAGTGCCTGTTCCGCCGGCTACTGGGA  
+HWI-EAS443:3:88:197:1958#0/1  
abbaababbaaaab^`a]aaaa\_\_a`[a\_]Y`^X[W¥X¥[  
@HWI-EAS443:3:88:207:400#0/1  
ATTGAAGTGTGCACTTAACCCAAGGGACGTGCTGGGAGC  
+HWI-EAS443:3:88:207:400#0/1  
aaaaUZa[aXYa]\_\_\_\_¥P^^`W^X^YXZ`[S[R[¥W¥¥XZ  
@HWI-EAS443:3:88:220:1370#0/1  
ATAAAAAGTGGAGATCTAATGTCGCAGTCCCGCACTC  
+HWI-EAS443:3:88:220:1370#0/1  
a`Y`bba\_`baaa]abaaaabaaaY`¥a\_a]`\_b^YU`Y]  
@HWI-EAS443:3:88:250:733#0/1  
AATTGGGCAAGGGACGTAGTGTGGTAATGAAACGAAAA  
+HWI-EAS443:3:88:250:733#0/1  
aab]aaaa[aaaa`V^aY\_aY\_\_`a`HZ^X[0¥[L¥NPV\_  
@HWI-EAS443:3:88:256:745#0/1  
CTGAGAATAGCTGTTGCTCTTCTCCCAACCATTGTGAATT

+HWI-EAS443:3:88:256:745#0/1  
a\_aaa` ``Za\_aa¥\_ ^a` `¥\_\_\_\_\_ ` `^^\_¥\_ ^X¥UV^\_  
@HWI-EAS443:3:88:26:1912#0/1  
GTCCCGTTTTTCGTTTCATTACCAACTACTCGTCCCTTGC  
+HWI-EAS443:3:88:26:1912#0/1  
a]aa`] ` `aaa\_` \_aaaaba\_aa` a\_\_a]¥Y\_¥` \_ ^WZY  
@HWI-EAS443:3:88:278:98#0/1  
GAGAGATCTAATGTTCGAGTCCCGCACTCGCGAGATACTC  
+HWI-EAS443:3:88:278:98#0/1  
a[a^` ¥Z[] ` ` [a\_` \_` \_^U[ ` W^VGZQ^XW¥U^SSNQUZ  
@HWI-EAS443:3:88:298:1090#0/1  
TGCTAATTGGGCAAGGGGACGTAGTGTGGTAATGAAACG  
+HWI-EAS443:3:88:298:1090#0/1  
a\_aabaabab[aaabbaa\_\_b\_\_a^aXaa[N\_\_YX\_aZG^  
@HWI-EAS443:3:88:30:474#0/1  
GCCCGTTAGCACTTCTTCTTTCTTGACTGATGATCCG  
+HWI-EAS443:3:88:30:474#0/1  
ab]aaY\_^S^]¥^¥aaaa\_aa` \_aa`] `Ya\_` `] `X` ` `¥  
@HWI-EAS443:3:88:383:445#0/1  
GTCCCGTTTTTCGTTTCATTACCAACTACTCGTCCCTTGC  
+HWI-EAS443:3:88:383:445#0/1  
aSb`aa[[Z]^ba\_a\_UX] `QFZaS]a` [Y]W\_YT\_\_ [a^  
@HWI-EAS443:3:88:388:738#0/1  
ATCTAATGTTCGAGTCCCGCACTCGCGAGATACTCACTAA  
+HWI-EAS443:3:88:388:738#0/1  
aab`aaaaU¥` a]a^aa` `^WW^^\_Z\_U^T]¥V^XRX^` \_  
@HWI-EAS443:3:88:395:679#0/1  
ATAAAAAGAACTGAGAGATCTAATGTTCGAGTCCCGCACTC  
+HWI-EAS443:3:88:395:679#0/1  
aaaaab^^a\_` aa` a` `aaaa\_aa^` ` ` a]\_` ` `^^Z\_^\_  
@HWI-EAS443:3:88:415:380#0/1  
GGAAAAGCACTTTTGCATCTTTTGGAAATGCCTCAAGAG  
+HWI-EAS443:3:88:415:380#0/1  
ab`Uaab^a\_baaaba` a^baaaaaa` aaa` \_` `aa¥a\_a  
@HWI-EAS443:3:88:438:1057#0/1  
GGGGACGTAGTGTGGTAATGAAACGAAAACGGGACTCTA  
+HWI-EAS443:3:88:438:1057#0/1  
aaa]a[a\_ab^bZaaa[ ` `a` [\_aa\_\_Z^¥\_Q\_\_ `ZY]^]\_  
@HWI-EAS443:3:88:439:727#0/1  
ACATCATCATTTCTCACTTCTCCTCCTGGAGGTACATCT  
+HWI-EAS443:3:88:439:727#0/1  
a[FY]U¥J^ba\_SX` ^OW¥^ZU\_[¥WL^VaaUZ[ ^` \_]SR  
@HWI-EAS443:3:88:448:207#0/1  
CCCAATTACAGCAGACAAGAGAATAATGGACATGATTCCA  
+HWI-EAS443:3:88:448:207#0/1  
aabaa`babb[J[baXa`b\_\_ [Jaa\_`ba`aaa`ZHXLWa  
@HWI-EAS443:3:88:449:22#0/1  
GGCGATCTGAACCTTGTCAATAGGGCAAACCAGCGACTGA  
+HWI-EAS443:3:88:449:22#0/1  
abab`a^¥a^\_V[ `aa\_` \_[\_^` \_\_^Z\_^UV^` ¥\_ZZWYV

@HWI-EAS443:3:88:477:1524#0/1  
AAAGAACTGAGAGATCTAATGTCGCAGTCCCGCACTCGCG  
+HWI-EAS443:3:88:477:1524#0/1  
`] `aaaabba]aYaaaaaaa]a\_aa]Zaa^U]H^\_U  
@HWI-EAS443:3:88:479:42#0/1  
GTGAGAAATGATGATGTTGACCAAAGTTTGATTATCGCTG  
+HWI-EAS443:3:88:479:42#0/1  
a\_]0¥U^`a¥\_a^]a] `^V]ZZ[\_Y^`YZ]\_YV]WZ^  
@HWI-EAS443:3:88:561:1880#0/1  
TAATGTCGCAGTCCCGCACTCGCGAGATACTCACTAAGAC  
+HWI-EAS443:3:88:561:1880#0/1  
`ba`[aZFYba]bba^bab]aaaH¥`Ra¥`a\_`a^aaSaZ  
@HWI-EAS443:3:88:571:679#0/1  
GTGGCGTACATGCTAGAAAGAGAATTGGTCCGTAACAA  
+HWI-EAS443:3:88:571:679#0/1  
a\_\_Z\_a^`\_a\_a` ``\_a`a` ``\_a` `a^V^^a[¥]a[R]\_  
@HWI-EAS443:3:88:582:1445#0/1  
CTTGTTTTACGGACCAATTCTTTCTAGCATGTACGCCA  
+HWI-EAS443:3:88:582:1445#0/1  
`b\_T[\_ba`^\_U¥abb\_^a]aaab]a`[a`aab]baa`aa  
@HWI-EAS443:3:88:604:637#0/1  
CCCGTTTTCGTTTTATTACCAACTACGTCCCCTTGCCC  
+HWI-EAS443:3:88:604:637#0/1  
aaab`a`aba\_\_aaaaab^`a^aaaa` `Z`\_\_^\_`¥` ``  
@HWI-EAS443:3:88:621:452#0/1  
AAAGAACTGAGAGATCTAATGTCGCAGTCCCGCACTCGCG  
+HWI-EAS443:3:88:621:452#0/1  
abbbbaabaaababa`bbaaa^`aa`a¥a`\_a`Y`\_a\_\_a  
@HWI-EAS443:3:88:629:1412#0/1  
TGTACTTTATTTTTCAGTGTGGAGGTTGCCGTTAGCA  
+HWI-EAS443:3:88:629:1412#0/1  
aa\_aaaaaaaaa`a][a] ` ` `a¥RY`S` `Z` `^W`  
@HWI-EAS443:3:88:631:1044#0/1  
GCCCCGTTAGCACTTCTTCTTTCTTGACTGATGATCCG  
+HWI-EAS443:3:88:631:1044#0/1  
abaaaWaW\_\_aaaaa\_a`abbaa`aaa^\_\_a¥\_a`^Z¥a  
@HWI-EAS443:3:88:659:66#0/1  
AATAAAAGAACTGAGAGATCTAATGTCGCAGTCCCGCACT  
+HWI-EAS443:3:88:659:66#0/1  
]`¥UQQ` `R¥`bb[b]b`]]][W`ZFY¥a]¥VZZ\_[ ]UV  
@HWI-EAS443:3:88:681:1221#0/1  
GAATAAAAGAACTGAGAGATCTAATGTCGCAGTCCCGCAC  
+HWI-EAS443:3:88:681:1221#0/1  
aa]bbbbbbbaa\_bbb^b`\_abb\_aba^`a` ` ` `aaa`]a  
@HWI-EAS443:3:88:720:56#0/1  
GTCCCCGTTTTCGTTTTATTACCAACTACGTCCCCTTGC  
+HWI-EAS443:3:88:720:56#0/1  
a\_\_`\_b¥` `a\_aWa`\_\_` `[W\_\_¥^W`^¥¥WYVW¥WU¥Y  
@HWI-EAS443:3:88:734:1202#0/1  
CGTTTTCGTTTTATTACCAACTACGTCCCCTTGCCCAA

+HWI-EAS443:3:88:734:1202#0/1  
`a`]aabbbbbbb`bbbb`Sabbab`aa\_\_^b^F\_ba  
@HWI-EAS443:3:88:747:1194#0/1  
AAAGAACTGAGAGATCTAATGTCGAGTCCCGCACTCGCG  
+HWI-EAS443:3:88:747:1194#0/1  
aaa\_aaaab`aaaaa`aaa\_a`a`¥\_`a^a[\_\_^\_^`  
@HWI-EAS443:3:88:77:1477#0/1  
GGCCCTGAGTCAGTGCTAGTCAACACTTATCAATGGATAA  
+HWI-EAS443:3:88:77:1477#0/1  
¥\_bbbbbb¥Ua`abb]b\_abb`[^\_]\_ba\_b]Z]a`Saa  
@HWI-EAS443:3:88:801:931#0/1  
ATTCTTCATACCCTTCATGTACTCTTATTTTCAGTGTTTG  
+HWI-EAS443:3:88:801:931#0/1  
abbaa`bbba`a`bbbbbb`aababaaabbaaaa\_b\_aaa  
@HWI-EAS443:3:88:804:320#0/1  
CCTGTCCACTTCAGAAATCAAGTTAAAATAAGGAGGAGAG  
+HWI-EAS443:3:88:804:320#0/1  
`Z]`SXYaYWYSZ`Z\_YH¥UT]^Y[¥`\_aU^\_]W`aYaX]  
@HWI-EAS443:3:88:809:248#0/1  
AAAGAACTGAGAGATCTAATGTCGAGTCCCGCACTCGCG  
+HWI-EAS443:3:88:809:248#0/1  
aaaa`aaaab``aaaaaaaaa^`aaa\_¥^\_]¥W¥YUU\_  
@HWI-EAS443:3:88:819:1322#0/1  
GGCATTTCACAAAAGATGCAAAAGTGCTTTTCCAGAACTG  
+HWI-EAS443:3:88:819:1322#0/1  
abbbbbbbabbab`ababbbbba`a^aaabaa\_`abaa`ba  
@HWI-EAS443:3:88:874:155#0/1  
ATGACCCCAAGCACGGAGATGTGCTGAGAGGGATAAGAG  
+HWI-EAS443:3:88:874:155#0/1  
aab^XS[baaUDTX^a\_]XV`Y\_^[a`XRT`^TYW]Z^\_\_  
@HWI-EAS443:3:88:877:955#0/1  
GTCTTAGTGAGTATCTCGGAGTGCGGGACTGCGACATTA  
+HWI-EAS443:3:88:877:955#0/1  
a^`U]\_VLYZ¥P¥X`Z[a\_ZRWJZ\_^UVLU\_]T]NQ]¥[S  
@HWI-EAS443:3:88:889:1527#0/1  
GAATAAAAGAACTGAGAGATCTAATGTCGAGTCCCGCAC  
+HWI-EAS443:3:88:889:1527#0/1  
aabbb\_bbb\_baaaaababaaaa\_ba\_`a`a\_\_Qaa¥\_]¥  
@HWI-EAS443:3:88:893:1343#0/1  
GAGAGGATTTCTCATTTTGGCAAAGAAGACAAGAGATAT  
+HWI-EAS443:3:88:893:1343#0/1  
]^b`¥\_[babaaa¥baaab^^`bbaabbaabbbbaaab\_  
@HWI-EAS443:3:89:1016:748#0/1  
CCCGTTTTCGTTTCATTACCAACTACGTCCCTTGCCC  
+HWI-EAS443:3:89:1016:748#0/1  
a`baabbbabbbbaabbbbbbbabbbb`[ababb``ab\_  
@HWI-EAS443:3:89:1032:324#0/1  
TACTTTTTGATTATGGCCATATGGTCCACAGTGGTCTTAG  
+HWI-EAS443:3:89:1032:324#0/1  
aaabbbb\_babaaaaaaaa[[]]X]^aVZ\_Wa\_KR^]U]



@HWI-EAS443:3:89:1083:550#0/1  
CGAGATACTACTAAGACCACTGTGGACCATATGGCCATA  
+HWI-EAS443:3:89:1083:550#0/1  
aabbabbabbabbabbbaaabbabaaba^abbba\_\_a` ]  
@HWI-EAS443:3:89:1089:1132#0/1  
ACCGATTTTTAAGGGTTAGAGATCAAAGAGGGAACGTACT  
+HWI-EAS443:3:89:1089:1132#0/1  
aaabaaabbba`aaa`bbaaaaaaaaaa` `a`aa\_a\_`\_ ]  
@HWI-EAS443:3:89:1142:196#0/1  
CGCACTCAGAATGAAGTGGATGATGGCAATGAGATACCCA  
+HWI-EAS443:3:89:1142:196#0/1  
abba`bbababb`ab[bbabbaaba\_` `b`a`\_aa\_`aa  
@HWI-EAS443:3:89:1142:523#0/1  
TGGAGAGAATAAAAGAACTGAGAGATCTAATGTCGCAGTC  
+HWI-EAS443:3:89:1142:523#0/1  
[^\_P`R\_S\_a]a¥VZW`Yba\_aTa\_a]aXaaaX[^` `aRS  
@HWI-EAS443:3:89:1161:134#0/1  
GTTTTCGTTTCATTACCAACACTACGTCCCCTTGCCCAAT  
+HWI-EAS443:3:89:1161:134#0/1  
aab\_\_ba^]aZ^a¥]\_\_`^Ya[^`\_ZaX]\_]`XRSUV[^`  
@HWI-EAS443:3:89:1168:1451#0/1  
GGGGTGGAGTCTGCTGTCCTGAGAGATTCTCATTGTTGG  
+HWI-EAS443:3:89:1168:1451#0/1  
aa`^S^aZa\_^ [a\_a`Z\_]^^\_T\_`¥¥\_ZY[TR\_T[\_¥^  
@HWI-EAS443:3:89:1216:764#0/1  
AAGAACTGAGAGATCTAATGTCGCAGTCCCGCACTCGCGA  
+HWI-EAS443:3:89:1216:764#0/1  
a`]^a¥aaaaa\_a` `a\_aaa¥`¥aaT\_aYU¥T^^]W`¥  
@HWI-EAS443:3:89:1225:587#0/1  
GTGCATTGACTGAAGATCCAGATGAAGGCACATCTGGGGT  
+HWI-EAS443:3:89:1225:587#0/1  
^U¥OTTWaZaaa¥]\_UZWQ\_a^]RV[PNJPHQF^a`PUQ  
@HWI-EAS443:3:89:1235:953#0/1  
TGCATCCTTTCCAAGAACTGTAAGTCGTTTGGTTGCCTTG  
+HWI-EAS443:3:89:1235:953#0/1  
abab`babab`aa\_\_bbabbab¥baab`aaba`aa]`aaa  
@HWI-EAS443:3:89:1275:201#0/1  
AGAGGTGATACCATCACTCGGTCTGATCCAGCATCGTTTG  
+HWI-EAS443:3:89:1275:201#0/1  
\_aaba¥baaaa^`\_`a[^`\_aaWH^aT\_S[¥^Q[^S\_W¥¥^  
@HWI-EAS443:3:89:1306:373#0/1  
GTCCCCTTTTCGTTTCATTACCAACACTACGTCCCCTTG  
+HWI-EAS443:3:89:1306:373#0/1  
a]`WT]]\_` [IV¥a¥U`]S[RQY\_\_ZP]Y^\_MTLONVWWL  
@HWI-EAS443:3:89:1351:852#0/1  
CAGCAGCAAAGGGGAGAAGTTTTATTATTGGACAGTGTC  
+HWI-EAS443:3:89:1351:852#0/1  
\_`abb]baa¥bb`]ba` `abbababbbbbbWbbaaa\_WO  
@HWI-EAS443:3:89:1381:128#0/1  
GTGTACTTTTTGATTATGGCCATATGGTCCACAGTGGTCT

+HWI-EAS443:3:89:1381:128#0/1  
a]aZ^X`ababa\_a\_\_a[\_`R\_¥U`YKNOV[R\_]VXVGM]  
@HWI-EAS443:3:89:1387:245#0/1  
GTCCCGTTTTTCGTTTCATTACCAACTACTCGTCCCCTTGC  
+HWI-EAS443:3:89:1387:245#0/1  
aaa\_^baaba¥^`aa]ab`a\_Ua\_Y`Y`^V\_YYUYVYV]X  
@HWI-EAS443:3:89:1392:979#0/1  
GAAAGAAGAGCTCCAGGATTGAAAATTGCTCCCTTGATG  
+HWI-EAS443:3:89:1392:979#0/1  
]aa\_a\_aa``a\_aa]¥a)`Ya`\_[a^`^a\_XH¥L[YY^``  
@HWI-EAS443:3:89:139:1898#0/1  
ATCTAATGTCGCAGTCCCGCACTCGCGAGATACTCACTAA  
+HWI-EAS443:3:89:139:1898#0/1  
aaaaa`a[[\_a`\_]U`\_a[YJ^^WZV^¥ZSU¥\_US]^W¥\_  
@HWI-EAS443:3:89:1404:1254#0/1  
AAAAGAAGACTGAGAGATCTAATGTCGCAGTCCCGCACTCGC  
+HWI-EAS443:3:89:1404:1254#0/1  
a\_a]^Taa`bbbbbb`b\_\_aba\_a`baa][``[\_Xa]aG  
@HWI-EAS443:3:89:1491:810#0/1  
GCTGTAATTGGGTATCTCATTGCCATCATCCACTTCATTC  
+HWI-EAS443:3:89:1491:810#0/1  
a\_bb`\_\_aaaa\_^aa]\_¥^`\_\_Y``V\_^\_^`[\_]V\_\_^V  
@HWI-EAS443:3:89:1517:810#0/1  
AAAAGAAGACTGAGAGATCTAATGTCGCAGTCCCGCACTCGC  
+HWI-EAS443:3:89:1517:810#0/1  
`abbbababbb`abbaba\_`bb``a\_abX\_]`\_a\_Y]^\_^  
@HWI-EAS443:3:89:1520:909#0/1  
GCTGTAATTGGGTATCTCATTGCCATCATCCACTTCATTC  
+HWI-EAS443:3:89:1520:909#0/1  
`^])GST]X^[\_VT]YXXYOFPTU[XUNQ^UVUTYV]USG  
@HWI-EAS443:3:89:1522:166#0/1  
CTCTGGAGCAAAACAAACGATGCTGGATCAGACCGAGTGA  
+HWI-EAS443:3:89:1522:166#0/1  
aba^`aSa^`bb\_[abbaba]a^`ba``T`aaYH[aaZ``  
@HWI-EAS443:3:89:1527:695#0/1  
GAATAAAAGAAGACTGAGAGATCTAATGTCGCAGTCCCGCAC  
+HWI-EAS443:3:89:1527:695#0/1  
a\_`aaaZ]a[^V^a`a\_a]a\_a`aaaV^^[\_^][YZ]XVY  
@HWI-EAS443:3:89:1560:313#0/1  
CACGGAGATGTCGCTGAGAGGGATAAGAGTCAGCAAAATG  
+HWI-EAS443:3:89:1560:313#0/1  
aU[a]Z`\_a\_VT`a\_aX¥Y^`a\_a^\_aJ`Qa\_bY`Z¥\_`^a  
@HWI-EAS443:3:89:167:346#0/1  
TCTGTCTAAGGATGTCCACCATCCTTACTCCTCCAATCTG  
+HWI-EAS443:3:89:167:346#0/1  
aaab\_]PWa^X¥VaXYR[\_JX^\_¥U\_^YR¥ZSYX[[YSZ]  
@HWI-EAS443:3:89:1681:975#0/1  
AAAGAAGACTGAGAGATCTAATGTCGCAGTCCCGCACTCGCG  
+HWI-EAS443:3:89:1681:975#0/1  
]a\_\_W`ab[`Za]¥`X`\_VXba``T^¥[[R^\_S]`aUVVa

@HWI-EAS443:3:89:1712:1985#0/1  
CATGACCCCAAGCACGGAGATGTCGCTGAGAGGGATAAGA  
+HWI-EAS443:3:89:1712:1985#0/1  
R`^a^ba\_aabb]`bbbbbb\_]U\_\_ab`ba\_W\_aab`a`  
@HWI-EAS443:3:89:1750:1686#0/1  
GAGAGATCTAATGTCGAGTCCCGCACTCGCGAGATACTC  
+HWI-EAS443:3:89:1750:1686#0/1  
`bb`bbbbbbbaa\_babbb¥`abTaaaaa```a`\_a\_^  
@HWI-EAS443:3:89:1761:131#0/1  
CTCGGTCTGATCCAGCATCGTTTGTGTTTGTCCAGAGGGT  
+HWI-EAS443:3:89:1761:131#0/1  
ababbababbb`aab\_ab\_baabaaaab`a\_\_`a]a``]  
@HWI-EAS443:3:89:207:187#0/1  
ATCTAATGTCGAGTCCCGCACTCGCGAGATACTCACTAA  
+HWI-EAS443:3:89:207:187#0/1  
a`]^aaaaU][¥P¥NX^ZWPJPUWUWWTWPQWWRUUSSU  
@HWI-EAS443:3:89:222:966#0/1  
AGAGAATAAAAGAACTGAGAGATCTAATGTCGAGTCCCG  
+HWI-EAS443:3:89:222:966#0/1  
`bab]bbY[¥a```aaaa]UaZaaa\_ab]`aa]a[[`^^  
@HWI-EAS443:3:89:265:1241#0/1  
CACTTCAGAAATCAAGTTAAAATAAGGAGGAGAGTTGATA  
+HWI-EAS443:3:89:265:1241#0/1  
a]bba`\_UaV\_ba\_PZH\_V¥aMa[]abR¥¥Pa`Xa\_baa\_  
@HWI-EAS443:3:89:273:32#0/1  
TGGCCATGGTATTCTCACAAGAGGATTGCATGATCAAGGC  
+HWI-EAS443:3:89:273:32#0/1  
abaa`aaaaYaaa\_a\_Xa\_\_a^aa[``a^``V^`]V]\_^  
@HWI-EAS443:3:89:329:455#0/1  
CATCTGCTCCCAGCACGTCCCTTGGGTAAAGTGCAACACT  
+HWI-EAS443:3:89:329:455#0/1  
abbbba]a`]\_¥`aaaaa]\_]\_[`W`aa^\_\_aa^Z\_  
@HWI-EAS443:3:89:333:473#0/1  
GAGAGATCTAATGTCGAGTCCCGCACTCGCGAGATACTC  
+HWI-EAS443:3:89:333:473#0/1  
abaaba`aa`aab`aaaa^aaaV`W`X```]T]YU^¥¥^  
@HWI-EAS443:3:89:353:879#0/1  
GGTGCATTGACTGAAGATCCAGATGAAGGCACATCTGGGG  
+HWI-EAS443:3:89:353:879#0/1  
a`^a`aaba`aa]bbaaaaaaaa`a\_aabaaaa`a`aa  
@HWI-EAS443:3:89:361:1246#0/1  
AATGTCGAGTCCCGCACTCGCGAGATACTCACTAAGACC  
+HWI-EAS443:3:89:361:1246#0/1  
\_V`\_Ya[`aaY^a\_Y\_[\_^][YXP]M¥SQZ\_^^[^^^UY  
@HWI-EAS443:3:89:363:461#0/1  
GCCCTGAGTCAGTGCTAGTCAACACTTATCAATGGATAAT  
+HWI-EAS443:3:89:363:461#0/1  
abababaa\_babXbbaaa]``aa`\_]aa```aaaa`aa\_  
@HWI-EAS443:3:89:402:765#0/1  
CTGCTGTAATTGGGTATCTCATTGCCATCATCCACTTCAT

+HWI-EAS443:3:89:402:765#0/1  
abaabb`aaaaaab¥aaaba]aaa`a`aaa\_aa¥`\_`a\_\_a  
@HWI-EAS443:3:89:461:1124#0/1  
ACTCGGTCTGATCCAGCATCGTTTGTTCCTCCAGAGGG  
+HWI-EAS443:3:89:461:1124#0/1  
V[Ya`^bb^\_\_UXa^^\_^`^bab`YXb^aUaa\_\_]^¥\_U\_  
@HWI-EAS443:3:89:46:1266#0/1  
AGTATTCTTGCCCCACTTCATTTGGGAAAACAATTCCA  
+HWI-EAS443:3:89:46:1266#0/1  
^`¥R]aaV\_aaaaaaaaa\_aaa\_^[]VY^`]YY``¥[`[\_  
@HWI-EAS443:3:89:478:531#0/1  
GAGATCTAATGTCGAGTCCCGCACTCGCGAGATACTCAC  
+HWI-EAS443:3:89:478:531#0/1  
`b`aaaababb`abbbaabb`T`\_`aaab`aaa``````\_  
@HWI-EAS443:3:89:483:250#0/1  
GGATTCAATTCCCCAGTTCTGGAAAAGCACTTTTGCATCT  
+HWI-EAS443:3:89:483:250#0/1  
aaaaaaaaaa^`\_]`^a^a`ab`\_`\_\_a^\_]`\_]`^`\_\_¥\_  
@HWI-EAS443:3:89:496:441#0/1  
TGCTGTGGCACATTTCCAAGAGAGATGCTAATGGGTCTGC  
+HWI-EAS443:3:89:496:441#0/1  
^b[bb]a]\_aa^babbaaaaa\_[a^^\_aaa^`\_`a¥N\_¥\_`^  
@HWI-EAS443:3:89:496:543#0/1  
GTATCTCATTGCCATCATCCACTTCATTCTGAGTGCGGGG  
+HWI-EAS443:3:89:496:543#0/1  
a¥\_VX^UZ\_\_^\_Y]SZ\_\_^`^Ya\_`\_\_^[ZUXXR[Y¥[`^  
@HWI-EAS443:3:89:504:1440#0/1  
AGTTATTGTCAACTTCTCAGTTCCTTGCCTTCACTGACT  
+HWI-EAS443:3:89:504:1440#0/1  
a`aabbab`aaaaaa`aaaaXaa\_aa\_`aXaa[a^\_\_`\_`\_`  
@HWI-EAS443:3:89:526:1139#0/1  
AAGTGCAACTTCAATATAAACTGCCTGTTCCGCCGG  
+HWI-EAS443:3:89:526:1139#0/1  
aba\_^abbba`baaa\_aab`ab`\_^aaaaaa^^a\_^[]`a^  
@HWI-EAS443:3:89:537:794#0/1  
GGGACGTAGTGTGGTAATGAAACGAAAACGGGACTCTAG  
+HWI-EAS443:3:89:537:794#0/1  
V\_bbbba\_b\_bab`^Ubb^`abaYaab`baaa]¥[aaa`\_  
@HWI-EAS443:3:89:549:841#0/1  
GAGGAACAAGCCGTAGACATATGCAAGGCAGCAATAGGGT  
+HWI-EAS443:3:89:549:841#0/1  
\_ab¥bbbb`a]abb`aaaba[Ya^aX^ab¥a\_aa`aaU  
@HWI-EAS443:3:89:554:172#0/1  
GTCCCCTTTTCGTTTCATTACCAACTACGTCCCCTTGC  
+HWI-EAS443:3:89:554:172#0/1  
aa\_aa`Z^bb``abb`baaaaa`\_`\_a\_aa\_a`\_]`[^X`]  
@HWI-EAS443:3:89:55:1118#0/1  
AATAAAAGAACTGAGAGATCTAATGTCGAGTCCCGCACT  
+HWI-EAS443:3:89:55:1118#0/1  
aaaaaaaaaaaaa`\_aaa`\_aa^`a¥`\_^\_\_W^\_\_V`V]Y

@HWI-EAS443:3:89:595:690#0/1  
CTTCCTGATGTGACTTTTTGATTATGGCCATATGGTCCA  
+HWI-EAS443:3:89:595:690#0/1  
abb]ba``ba`[\_abaaaaabaa`\_W\_a\_Q^]SZ[\_`Z  
@HWI-EAS443:3:89:615:387#0/1  
CCCCTTTTCGTTTCATTACCAACTACGTCCCCCTTGCCC  
+HWI-EAS443:3:89:615:387#0/1  
a^\_VRW]U\_]I]aZ^`XP]^\_V^^`[[`W[[[YXYVOOV  
@HWI-EAS443:3:89:622:1379#0/1  
ATCTAATGTCGCAGTCCCGCACTCGCGAGATACTCACTAA  
+HWI-EAS443:3:89:622:1379#0/1  
aaaaa\_X^Q`V`XXS\_]aU\_¥`ZZ^\_TFUZ^¥YXYT¥]¥Z  
@HWI-EAS443:3:89:70:936#0/1  
GTCTGCTGCTCGAGAGATTTCTCATTGTTGGCAAAGAA  
+HWI-EAS443:3:89:70:936#0/1  
¥]b¥`aababb`a`[aZQ^a]`\_^aaaaa]\_aaa]\_``  
@HWI-EAS443:3:89:738:120#0/1  
AAAAGAAGTGAAGATCTAATGTCGCAGTCCCGCACTCGC  
+HWI-EAS443:3:89:738:120#0/1  
`bbba`abb`abb`aabaab]\_a\_aa``]``X]\_^`]  
@HWI-EAS443:3:89:763:552#0/1  
GAATAAAAGAAGTGAAGATCTAATGTCGCAGTCCCGCAC  
+HWI-EAS443:3:89:763:552#0/1  
aaaaaaaaaaaa`aaaaaaaa`aa`aa\_a``aa]\_[^`\_[]  
@HWI-EAS443:3:89:778:1405#0/1  
GAATAAAAGAAGTGAAGATCTAATGTCGCAGTCCCGCAC  
+HWI-EAS443:3:89:778:1405#0/1  
`\_\_\_\_ZTTZ\_PR]^`^a¥]U^baa`XFOXV`\_PQWQXUYV  
@HWI-EAS443:3:89:787:516#0/1  
CTTGATTTCTGAAGTGGACAGGGCCGAAGTACCATGTTT  
+HWI-EAS443:3:89:787:516#0/1  
^¥WT`bbYR¥b¥^[F[\_a\_T\_HXT^baab`ZOWa`]XLZ¥  
@HWI-EAS443:3:89:803:101#0/1  
AGAGAATAAAAGAAGTGAAGATCTAATGTCGCAGTCCCG  
+HWI-EAS443:3:89:803:101#0/1  
abababbbbabaababaa`aaaa`ababb]aa`a`]^\_]a  
@HWI-EAS443:3:89:816:1558#0/1  
TGCTAATTGGGCAAGGGGACGTAGTGTGGTAATGAAACG  
+HWI-EAS443:3:89:816:1558#0/1  
aba]Q]][]`aS^¥¥Y^SVa`NR]V^S^`aWVW¥N\_X^NS  
@HWI-EAS443:3:89:838:1482#0/1  
ATCACATTGTCGATGGATTCAATCCCCAGTTCTGGAAAA  
+HWI-EAS443:3:89:838:1482#0/1  
`]`baba^^]]b[`]``\_X¥aa`^a`\_\_¥a^`a`[]\_`a`  
@HWI-EAS443:3:89:848:376#0/1  
CTCAGAATGAAGTGGATGATGGCAATGAGATACCCAATTA  
+HWI-EAS443:3:89:848:376#0/1  
¥Saabbbab\_^babbZ¥b]G\_bb^a\_aX¥[a`P`Vaaab`  
@HWI-EAS443:3:89:872:1592#0/1  
GAGAATAAAAGAAGTGAAGATCTAATGTCGCAGTCCCGC

+HWI-EAS443:3:89:872:1592#0/1  
aba`baabba`aa`aaaaaaaa`abaa`S`aab`\_^\_\_^W  
@HWI-EAS443:3:89:906:39#0/1  
GGGAAAACAACCTCCATAATCACATCCTGTGCCTCCTTGG  
+HWI-EAS443:3:89:906:39#0/1  
a`a]a[Sa`MbaXHYSSaa`\_aXaNZ`a¥bV^aHV]]\_V  
@HWI-EAS443:3:89:909:446#0/1  
GACTGAAGATCCAGATGAAGGCACATCTGGGGTGGAGTCT  
+HWI-EAS443:3:89:909:446#0/1  
ab`bbabbaaaa`baaaa`aaaa`aa`aaba`[aa`a`\_`  
@HWI-EAS443:3:89:948:1972#0/1  
CTCAGAATGAAGTGGATGATGGCAATGAGATACCCAATTA  
+HWI-EAS443:3:89:948:1972#0/1  
abb`^^ba`[VWU`X`\_`aaa`X`a`^^`\_]^^`a`^aaa`^`T  
@HWI-EAS443:3:89:949:1045#0/1  
CATTGTGAATTCTTCATACCCTTCATGTACTCTTATTTTC  
+HWI-EAS443:3:89:949:1045#0/1  
abbbbaabaabbXbbbab¥a`abaabbb]aab`ababbbba  
@HWI-EAS443:3:89:94:1106#0/1  
AAAAGAAGTGAAGATCTAATGTCGCAGTCCCGCACTCGC  
+HWI-EAS443:3:89:94:1106#0/1  
`bb`\_`Yab`¥^X]aaa]]\_]a^`X^`¥Uaaa`\_^[UZZ[  
@HWI-EAS443:3:89:965:1188#0/1  
ACGAGCAGTCAATTGCTGAGGCAATAATTGTGGCCATGGT  
+HWI-EAS443:3:89:965:1188#0/1  
aaa`aaaa`\_a`aaa`aYaaaaaaaa`b`a`\_`\_`\_\_SPXH  
@HWI-EAS443:3:89:970:2029#0/1  
ACTGTACTTGTGTTGGGCCATTCCCTATTCCACCATGTTA  
+HWI-EAS443:3:89:970:2029#0/1  
¥¥`\_`UXPaa`[ab¥`\_`^VX`a`\_`\_]`a`\_`a][a\_]¥]^`  
@HWI-EAS443:3:89:97:1406#0/1  
GTCCATTATTCTTGTCTGCTGTAATTGGGTATCTCATT  
+HWI-EAS443:3:89:97:1406#0/1  
`XJ`bba`^`a\_]baaY^a`\_U]a¥`\_`\_`\_`Y[UW`\_T^X  
@HWI-EAS443:3:89:983:456#0/1  
CAAAATGAGAAATCCTCTCAGGACAGCAGACTCCACCCCA  
+HWI-EAS443:3:89:983:456#0/1  
abb`abbabababbabbaa`ba`baaab`ba`aa`\_`^a  
@HWI-EAS443:3:89:986:675#0/1  
AAAGAAGTGAAGATCTAATGTCGCAGTCCCGCACTCGCG  
+HWI-EAS443:3:89:986:675#0/1  
a`^`ababbbba]]`aZ`\_]ab`\_`Vaa[`\_`\_`^0[\_]`T]  
@HWI-EAS443:3:89:98:517#0/1  
GTCCCGTTTTTCGTTTCATTACCAACTACGTCCCTTGC  
+HWI-EAS443:3:89:98:517#0/1  
`H`USa`^TX`[XSYU¥WYSU¥^ZR^^[NUZGLYU]SPWW  
@HWI-EAS443:3:89:993:1954#0/1  
CAGTGTGAGCAGACCCATTAGCATCTCTTGGAAATGTG  
+HWI-EAS443:3:89:993:1954#0/1  
`\_`aaba`\_HZ`^`\_`bbbb`\_`bbZ]Z]a`b[b¥abbbY^[\_`

@HWI-EAS443:3:8:1001:2043#0/1  
AAGCACTTTTGCATCTTTTTGGAAATGCCTCAAGAGTTGG  
+HWI-EAS443:3:8:1001:2043#0/1  
a`aX\_] ^Z` ]^^X\_\_\_^\_\_Z¥Z^Z[ZW]WZ]]XRKMXB  
@HWI-EAS443:3:8:1028:113#0/1  
GTCCATTATTCTTGTCTGCTGTAATTGGGTATCTCATT  
+HWI-EAS443:3:8:1028:113#0/1  
a^^^aaaaa]] [aaaa^`a^a`^^^a` `a\_Z]\_W^Z]\_^  
@HWI-EAS443:3:8:1041:1851#0/1  
TAAGACCACTGTGGACCATATGGCCATAATCAAAAAGTAC  
+HWI-EAS443:3:8:1041:1851#0/1  
]bb¥`bbbb[ZM`¥b` ]`RXRY]SaYOY`QFW`^W¥\_GUW  
@HWI-EAS443:3:8:1042:828#0/1  
CAAGAAGTGTAAAGTCGTTTGGTTGCCTTGTGTAATTGAA  
+HWI-EAS443:3:8:1042:828#0/1  
Yabb¥`¥^b\_]Y` \_\_[\_a`a]^b`^bbaabba``\_aV\_a  
@HWI-EAS443:3:8:1076:417#0/1  
AGAACCCCGCACTCAGAATGAAGTGGATGATGGCAATGAG  
+HWI-EAS443:3:8:1076:417#0/1  
]]\_Z`^`ba]V]\_`ZHT¥\_OVT0`\_\_¥]Y\_a^JF\_[]BB  
@HWI-EAS443:3:8:1129:1184#0/1  
GATGATCCGCTTGTCTTTTTGAAAGTGAACCCACCAAAAC  
+HWI-EAS443:3:8:1129:1184#0/1  
a\_\_`OZXWTPGN\_^]]ZYXBBBBBBBBBBBBBBBBBBBB  
@HWI-EAS443:3:8:1167:307#0/1  
TGCTAATTGGGCAAGGGACGTAGTGTGGTAATGAAACG  
+HWI-EAS443:3:8:1167:307#0/1  
a`]]\_]aa`a]R[X`V^a^U¥SU\_[a¥\_a^TT[QYS\_XKB  
@HWI-EAS443:3:8:1168:476#0/1  
GAATAATGGACATGATTCCAGAGAGGAATGAACAAGGACA  
+HWI-EAS443:3:8:1168:476#0/1  
aaaba]aabaYaaa]aa]]aaSa^a`¥a\_a`\_X`]]V\_Y^  
@HWI-EAS443:3:8:1188:596#0/1  
AAAAGAAGTGGAGATCTAATGTCGCAGTCCCGCACTCGC  
+HWI-EAS443:3:8:1188:596#0/1  
aaaa]\_a\_baaa`aaaaba`bb\_UaW` `]RYZ\_^X]Y\_]`  
@HWI-EAS443:3:8:1201:42#0/1  
AACGACTTACAGTTCTTGGAAAGGATGCAGGTGCATTGAC  
+HWI-EAS443:3:8:1201:42#0/1  
aa]a^\_aa^^\_b`a^aaaa\_^\_a` \_\_`[\_a\_Z\_Z]]^^^Z  
@HWI-EAS443:3:8:1261:1617#0/1  
AATAAAAGAAGTGGAGATCTAATGTCGCAGTCCCGCACT  
+HWI-EAS443:3:8:1261:1617#0/1  
aab`b`aab`aaba[aaa\_aaa\_bW]\_^` `]¥WVZXU]  
@HWI-EAS443:3:8:1325:2018#0/1  
CGCACTCGCGAGATACTCACTAAGACCACTGTGGACCATA  
+HWI-EAS443:3:8:1325:2018#0/1  
aa\_SUR]\_]a^aQU`RH`¥FX]YUVRJYQ[ `X[]UUMGQ]  
@HWI-EAS443:3:8:1334:704#0/1  
AAAAGAAGTGGAGATCTAATGTCGCAGTCCCGCACTCGC

+HWI-EAS443:3:8:1334:704#0/1  
[aa`M`ba\_\_¥a`b`a[aa¥ab[Y^Z^\_ ^VGX`]YURGVZ  
@HWI-EAS443:3:8:1349:411#0/1  
AAAGAAGTGAAGATCTAATGTCGCAGTCCCGCACTCGCG  
+HWI-EAS443:3:8:1349:411#0/1  
``\_a^`V\_\_aZaaa]W\_\_[a\_P]TRS[NUURTXR]N\_\_¥\_  
@HWI-EAS443:3:8:1350:996#0/1  
CGCGAGATACTCACTAAGACCACTGTGGACCATATGGCCA  
+HWI-EAS443:3:8:1350:996#0/1  
abba[bbab]`ba`\_^`ba`V\_^`^Waaa^¥Y`aaa`YGY  
@HWI-EAS443:3:8:1367:1510#0/1  
TAATGTCGCAGTCCCGCACTCGCGAGATACTCACTAAGAC  
+HWI-EAS443:3:8:1367:1510#0/1  
aaaaa`a\_¥a\_\_¥¥^`\_]^[\_] []\_¥¥[¥]U]MW\_¥ZU^V  
@HWI-EAS443:3:8:1370:1025#0/1  
CTCGGTCTGATCCAGCATCGTTTGTGTTTGTCTCCAGAGGGT  
+HWI-EAS443:3:8:1370:1025#0/1  
U[baaaba\_\_\_\_`\_\_`aabab`\_\_\_\_\_^`ba`[^\_baa]a[  
@HWI-EAS443:3:8:143:1832#0/1  
GCAATGAGATACCCAATTACAGCAGACAAGAGAATAATGG  
+HWI-EAS443:3:8:143:1832#0/1  
^baab]]ababb`abbaababaabbaab`aaa\_aaaa\_a\_  
@HWI-EAS443:3:8:1440:2031#0/1  
TGGATGATGGCAATGAGATACCCAATTACAGCAGACAAGA  
+HWI-EAS443:3:8:1440:2031#0/1  
abaG¥¥Z^`HWU`GUU^\_XS¥RWaV^XW\_^] ^MDP^BB  
@HWI-EAS443:3:8:1450:493#0/1  
AAACGACTTACAGTTCTTGAAAGGATGCAGGTGCATTGA  
+HWI-EAS443:3:8:1450:493#0/1  
\_abTaaXaa]\_`b`a^aaba]\_\_aa\_aaZ`a`[^P[^\_^`  
@HWI-EAS443:3:8:1479:516#0/1  
TATCTCTTGTCTTCTTTGCCAAAATGAGAAATCCTCTCA  
+HWI-EAS443:3:8:1479:516#0/1  
aaaaa^aa`\_`aa]aa`a^\_]\_\_a\_¥V¥a`\_`^^O\_W^W^  
@HWI-EAS443:3:8:1496:816#0/1  
CCCGTTTTTCGTTTCATTACCAACTACGTCCCCTTGCCC  
+HWI-EAS443:3:8:1496:816#0/1  
]SZ]QaX\_QSYUXHT][U^BBBBBBBBBBBBBBBBBBBB  
@HWI-EAS443:3:8:1525:1153#0/1  
GAGAATAAAAGAACTGAGAGATCTAATGTCGCAGTCCCGC  
+HWI-EAS443:3:8:1525:1153#0/1  
aab\_abaaaab[b\_aaaabaaa]aaaab]Za^[`]]Z]\_Y  
@HWI-EAS443:3:8:1566:902#0/1  
AAAGAAGTGAAGATCTAATGTCGCAGTCCCGCACTCGCG  
+HWI-EAS443:3:8:1566:902#0/1  
a````aaaaa`aaaa\_a`\_aa^Z\_^¥aW¥¥UYWXWW[ZV\_  
@HWI-EAS443:3:8:1570:331#0/1  
AAAAGAAGTGAAGATCTAATGTCGCAGTCCCGCACTCGC  
+HWI-EAS443:3:8:1570:331#0/1  
abba`\_`abaa[^^a`ba[aa¥0aV[a[^G¥KLVO\_IRM



@HWI-EAS443:3:8:157:1770#0/1  
AAAGAAGTCTAATGTTCGAGTCCCGCACTCGCG  
+HWI-EAS443:3:8:157:1770#0/1  
aZ]Zaaa^UVa\_aU`b`]^`aY`aaa\_Wa\_]QSP`TQF[^  
@HWI-EAS443:3:8:1752:624#0/1  
GAAGTCTAATGTTCGAGTCCCGCACTCGCGAGA  
+HWI-EAS443:3:8:1752:624#0/1  
aab\_aa^a]baa\_a`¥ab\_T^U\_a\_ZXV\_¥¥T[Q`¥`W`¥  
@HWI-EAS443:3:8:178:1173#0/1  
TAAAGAAGTCTAATGTTCGAGTCCCGCACTCG  
+HWI-EAS443:3:8:178:1173#0/1  
abbbbbaa`a`aaaa\_`a^aaaZaa^`YM[^Z^\_Y\_]B  
@HWI-EAS443:3:8:1790:888#0/1  
GGGGCATCTGAACCTTGTCAATAGGGCAAACCAGCGACT  
+HWI-EAS443:3:8:1790:888#0/1  
ab`^`bbZ¥W]Q`OV]a^WH]^\_[¥G\_UT]ZBBBBBBBB  
@HWI-EAS443:3:8:192:1636#0/1  
AGTCAATGCACCTGCATCCTTCCAAGAAGTAAAGTCGT  
+HWI-EAS443:3:8:192:1636#0/1  
a`Zbaa^baa`a^`aa`aaa\_\_a``\_\_a`]^\_U^RZ^U]]  
@HWI-EAS443:3:8:211:2045#0/1  
AGAAAGAAGAGCTCCAGGATTGAAAATTGCTCCCTTGAT  
+HWI-EAS443:3:8:211:2045#0/1  
a`Ybabbbbaa\_b\_abaTaaa`a^a^`aa`abaa]Z`Vaa^  
@HWI-EAS443:3:8:233:1289#0/1  
GTCCCGTTTTCGTTTTATTACCAACTACGTCCTTGC  
+HWI-EAS443:3:8:233:1289#0/1  
a]N^aaSZ¥Wa[ZV\_¥aa^¥P]aRT¥EXaP^Q[V]Z]GT[  
@HWI-EAS443:3:8:262:1985#0/1  
GCTGTAATTGGGTATCTCATTGCCATCATCCACTTCATTC  
+HWI-EAS443:3:8:262:1985#0/1  
abbbabbbbaa\_\_bbabbbbaababaabaa`b\_aaZaaaa  
@HWI-EAS443:3:8:267:1145#0/1  
AGAGAATAAAAGAAGTCTAATGTTCGAGTCCCG  
+HWI-EAS443:3:8:267:1145#0/1  
ZW`baabZ]Zba\_ba`a\_`aa`\_`a`ab[``aa\_Z`¥¥`  
@HWI-EAS443:3:8:283:912#0/1  
GCCCTATTGACAAAGTTCAGATCGCCCCTAACTGCCTTGA  
+HWI-EAS443:3:8:283:912#0/1  
a`V¥XZ`RQZ[\_QZa\_V`a[Z\_XPL\_U\_]a^QQSYX[BB  
@HWI-EAS443:3:8:354:1490#0/1  
AAAGAAGTCTAATGTTCGAGTCCCGCACTCGCG  
+HWI-EAS443:3:8:354:1490#0/1  
[[`aa^aaa]]V`aaaaa\_\_¥`\_^a[``S]U[\_\_\_]  
@HWI-EAS443:3:8:365:518#0/1  
GGACGTAGTGTGGTAATGAAACGAAACGGGACTCTAGC  
+HWI-EAS443:3:8:365:518#0/1  
^aabb`ab\_b^]aaU^a`aa\_S\_\_`aa\_a`\_W]\_`\_^\_¥  
@HWI-EAS443:3:8:382:1757#0/1  
ATAATGGACATGATTCCAGAGAGGAATGAACAAGGACAAA



@HWI-EAS443:3:8:715:1617#0/1  
GAGTAAGGATGGTGGACATCCTTAGACAGAATCCAACCTGA  
+HWI-EAS443:3:8:715:1617#0/1  
`[]\_bba]b`a\_QU`aaaaZSaa\_[\_W`aa\_a¥\_[a\_\_`  
@HWI-EAS443:3:8:716:318#0/1  
AAGAAGTGCTAACGGCAACCTCCAAACACTGAAAATAAG  
+HWI-EAS443:3:8:716:318#0/1  
\_Z\_`^\_G\_\_\_a`^a`Z``ZO¥^OXZZ[ZO]\_]XZZ]WVX  
@HWI-EAS443:3:8:748:416#0/1  
CAATTACAGCAGACAAGAGAATAATGGACATGATTCCAGA  
+HWI-EAS443:3:8:748:416#0/1  
abbba\_T```aaa]babaaaaaaaaaVaY\_a\_a`MX\_a\_  
@HWI-EAS443:3:8:850:941#0/1  
CTTGTGACCATTGAATTTTCACAATTTCCCAGTTCCTGAT  
+HWI-EAS443:3:8:850:941#0/1  
a\_YaYXY¥]Vaa]^U^`\_]W`[VS[[[\_PX¥[ZXWI¥`]Z  
@HWI-EAS443:3:8:868:545#0/1  
GCACTCAGAATGAAGTGGATGATGGCAATGAGATACCCAA  
+HWI-EAS443:3:8:868:545#0/1  
aaaaaaaaab`aa`ab¥aa`a`\_\_a`\_`\_`a^\_aZ]X^^  
@HWI-EAS443:3:8:878:1304#0/1  
GTGCTAATTGGCAAGGGGACGTAGTGTGGTAATGAAAC  
+HWI-EAS443:3:8:878:1304#0/1  
`)`aaaabaaa`\_a`abba^[a¥`aUa`\_a`R[`[[\_a¥]  
@HWI-EAS443:3:8:91:487#0/1  
AAAAGAAGTCTAATGTCGCAGTCCCGCACTCGC  
+HWI-EAS443:3:8:91:487#0/1  
aaaaaaaa`a`aaba`aaa\_aa]\_`Xa\_Y\_\_\_W\_[\_`^`\_\_\_  
@HWI-EAS443:3:8:948:1311#0/1  
ATCACATTGTCGATGGATTCAATTCAGTTCTGGAAAA  
+HWI-EAS443:3:8:948:1311#0/1  
aaa]]^^a`R]a\_[``]`^W`X¥\_[[[UR]]\_]X\_]¥\_^R  
@HWI-EAS443:3:8:949:1259#0/1  
GGATTTCTCATTGTTGGCAAAGAAGACAAGAGATATGGCC  
+HWI-EAS443:3:8:949:1259#0/1  
a\_\_`a`aa`\_a`\_`\_`\_`\_]\_\_\_\_\_]^`^`^¥\_ZZ]^U  
@HWI-EAS443:3:8:950:1992#0/1  
AAAGAAGTCTAATGTCGCAGTCCCGCACTCGCG  
+HWI-EAS443:3:8:950:1992#0/1  
^a`a`a`a`aaa\_`U`[\_`\_`Uaa]ZYX\_\_VPP]XWQNRB  
@HWI-EAS443:3:8:955:2002#0/1  
AAAAGAAGTCTAATGTCGCAGTCCCGCACTCGC  
+HWI-EAS443:3:8:955:2002#0/1  
aa`\_aaa\_\_`^`a`[]^Y`\_`\_`¥`VQ\_\_Y\_PT[V¥VX^^]  
@HWI-EAS443:3:8:985:788#0/1  
AAAGAAGTCTAATGTCGCAGTCCCGCACTCGCG  
+HWI-EAS443:3:8:985:788#0/1  
\_XZYab[a^Z]aaJ\_T`\_V^bQbUSXaPXH]JYNONFOS]  
@HWI-EAS443:3:90:1004:1216#0/1  
TGAGGATTAGCTCATCTTTCAGTTTTGGTGGGTTCACTTT

+HWI-EAS443:3:90:1004:1216#0/1  
a`a`aaabaa\_]`a^Ybaaaaaa\_a`ZabaZ^Za]`a`  
@HWI-EAS443:3:90:1015:520#0/1  
GTCCCGTTTTTCGTTTCATTACCAACTACGTCCTTGC  
+HWI-EAS443:3:90:1015:520#0/1  
a\_a\_\_a\_a`a`a]a`\_`\_`^\_a`\_]`\_]`\_`^[V^U]]]V  
@HWI-EAS443:3:90:1026:1076#0/1  
AGAGAATAAAAGAACTGAGAGATCTAATGTCGCAGTCCCG  
+HWI-EAS443:3:90:1026:1076#0/1  
ababa^a^```]aa`aab`baa`aaabbZ\_aa\_a^\_a\_  
@HWI-EAS443:3:90:1027:1318#0/1  
CAAACGATGCTGGATCAGACCGAGTGATGGTATCACCTCT  
+HWI-EAS443:3:90:1027:1318#0/1  
aabbabbbbabbb^aaababbab\_aaabaZbaY\_\_\_aa`  
@HWI-EAS443:3:90:1041:1830#0/1  
CAAATGCGGGATGTGCTTGGGACATTTGACACTGTCCAAA  
+HWI-EAS443:3:90:1041:1830#0/1  
¥bab^¥bbaaaaa`a`aa^`\_babb¥baaaaab\_^`\_a^a  
@HWI-EAS443:3:90:1138:353#0/1  
ATCTCTCTTGAAATGTGCCACAGCACACAGATTGGAGGA  
+HWI-EAS443:3:90:1138:353#0/1  
ab\_aababbbbaa`b\_baaaaa`a`\_`ab`\_`aa\_a`]  
@HWI-EAS443:3:90:1142:781#0/1  
ATCAACTCTCCTTATTTTAACTTGATTTCTGAAGTGG  
+HWI-EAS443:3:90:1142:781#0/1  
aaabaabaaaaaabbabbbba\_baa`aaa\_aa\_^a^`\_  
@HWI-EAS443:3:90:1217:265#0/1  
GCGAGATACTACTAAGACCACTGTGGACCATATGGCCAT  
+HWI-EAS443:3:90:1217:265#0/1  
aabbababbbbaaabaabbbbb`ba\_aaaaa`aaa\_``  
@HWI-EAS443:3:90:1245:909#0/1  
ATTGGGTATCTCATTGCCATCATCCACTTCATTCTGAGTG  
+HWI-EAS443:3:90:1245:909#0/1  
]`[bbbab`¥`[\_[Oaaa\_ba`S`\_T¥a`aaabMZ]`aY`  
@HWI-EAS443:3:90:1259:249#0/1  
GTCTGATCCAGCATCGTTTGTGGTCCAGAGGGTTTGT  
+HWI-EAS443:3:90:1259:249#0/1  
aZ\_W^a`^a`\_SVTY[J^[^U`Y[US[WXKZNW]RQ\_^^S  
@HWI-EAS443:3:90:1259:690#0/1  
ACTTTTTGATTATGGCCATATGGTCCACAGTGGTCTTAGT  
+HWI-EAS443:3:90:1259:690#0/1  
`a`abbaaa\_baaaaX^`aYW\_]V]]Zb¥SabST`a[WG  
@HWI-EAS443:3:90:1259:956#0/1  
AAAGAACTGAGAGATCTAATGTCGCAGTCCCGCACTCGCG  
+HWI-EAS443:3:90:1259:956#0/1  
abba`b`baab^^`aaabbb`aaa`\_`a`a^aR\_\_\_\_[\_\_\_\_  
@HWI-EAS443:3:90:1285:1102#0/1  
AGGCAGTGGTTATATTGAAGTGTGCACTTAACCCAAGGG  
+HWI-EAS443:3:90:1285:1102#0/1  
^aabbbaQa^¥\_U`U[ab¥Ta[b¥a^\_`^]abb`X`b]aaa

@HWI-EAS443:3:90:1296:1815#0/1  
AAAAGAAGTCTAATGTCGCAGTCCCGCACTCGC  
+HWI-EAS443:3:90:1296:1815#0/1  
a`aaV0\_`^`b\_a`[\_baa\_a`a\_\_b\_\_][Q[P\_SZ]^  
@HWI-EAS443:3:90:1298:457#0/1  
ATTCTACAAGAGATTGCATGATCAAGGCAGTTAGGGGC  
+HWI-EAS443:3:90:1298:457#0/1  
aaaabbabbabb`]babaaaaa`\_b`aab¥[]`¥aBB  
@HWI-EAS443:3:90:1388:1853#0/1  
CGGTCTGATCCAGCATCGTTTGTGTTTGTCCAGAGGGTTT  
+HWI-EAS443:3:90:1388:1853#0/1  
`bb`^bbaa`bbaaaabaabbaba`baba]`[[Wb]LYa  
@HWI-EAS443:3:90:1477:62#0/1  
GTCCCCTTTTCGTTTCATTACCAACTACGTCCCCTTGC  
+HWI-EAS443:3:90:1477:62#0/1  
`XZ[SY00^`Y\_N]¥V`a`[VX`]¥XU[H^ZZVQ]SUXJ  
@HWI-EAS443:3:90:1498:157#0/1  
ACTGAAGATCCAGATGAAGGCACATCTGGGGTGGAGTCTG  
+HWI-EAS443:3:90:1498:157#0/1  
QWWb`WQ¥]T[`ba`¥IUaba`[[¥aa`QF¥ZTNS¥\_  
@HWI-EAS443:3:90:1503:1311#0/1  
ATCTAATGTCGCAGTCCCGCACTCGCGAGATACTCACTAA  
+HWI-EAS443:3:90:1503:1311#0/1  
aaaaaabb¥Za]`a¥`aZ[Q`\_YYY\_]`\_^^¥¥W^¥WSW  
@HWI-EAS443:3:90:157:996#0/1  
AATGTCGCAGTCCCGCACTCGCGAGATACTCACTAAGACC  
+HWI-EAS443:3:90:157:996#0/1  
aaab\_aaa[[[a\_a\_\_\_a¥aX^`\_¥\_[`]^\_\_¥¥`VMW\_¥  
@HWI-EAS443:3:90:1657:174#0/1  
AAAAGAAGTCTAATGTCGCAGTCCCGCACTCGC  
+HWI-EAS443:3:90:1657:174#0/1  
abaa]aa^baaaab\_a\_ba^ab\_Z`\_`a`]\_V`ZZZ\_]`^Z  
@HWI-EAS443:3:90:1657:341#0/1  
CTCTTGTCTTCTTTGCCAAAATGAGAAATCCTCTCAGGA  
+HWI-EAS443:3:90:1657:341#0/1  
T\_bbbb`baa`a`a^¥^¥abba^]^bbb`\_`^¥`ZaV^b\_]`  
@HWI-EAS443:3:90:1787:978#0/1  
ATGTCGCAGTCCCGCACTCGCGAGATACTCACTAAGACCA  
+HWI-EAS443:3:90:1787:978#0/1  
a`\_WY\_]`^X\_]\_W\_a^b[WZQ[YX]\_ZZ][a`]YZ]VYa  
@HWI-EAS443:3:90:180:1007#0/1  
GTCCCCTTTTCGTTTCATTACCAACTACGTCCCCTTGC  
+HWI-EAS443:3:90:180:1007#0/1  
`¥aaabX\_a`aZ`a\_aa\_\_\_\_\_`\_\_`\_`^`\_`^U\_X\_^XYY]  
@HWI-EAS443:3:90:205:245#0/1  
AAAAGAAGTCTAATGTCGCAGTCCCGCACTCGC  
+HWI-EAS443:3:90:205:245#0/1  
aaaaa\_\_\_a\_a\_\_`^\_a`a^a`V`^`\_]V\_]`^Y^^YXY  
@HWI-EAS443:3:90:207:1290#0/1  
GTCCCCTTTTCGTTTCATTACCAACTACGTCCCCTTGC

+HWI-EAS443:3:90:207:1290#0/1  
a\_aaaa[\_^`aaWWY`a\_]aaa```a`^^a\_W`^`^`¥[^`  
@HWI-EAS443:3:90:220:1120#0/1  
CACATCCCGCATTTGCTGGAACAGTGCCTTACGAATCCA  
+HWI-EAS443:3:90:220:1120#0/1  
abbbabbaaaaaa[a\_\_aa\_aaa¥Sa¥a`\_]a^Xa\_\_`\_  
@HWI-EAS443:3:90:255:85#0/1  
AAGGGAGCAATTTTACAATCCTGGAGCTCTTCTTCTTCT  
+HWI-EAS443:3:90:255:85#0/1  
¥¥a\_ab]Paab¥bb¥RVaaSZ¥XZ^YMGGXPQ[PPW[OFY  
@HWI-EAS443:3:90:259:460#0/1  
TGCTGTAATTGGGTATCTCATTGCCATCATCCACTTCATT  
+HWI-EAS443:3:90:259:460#0/1  
]P^T`L`¥VvaPUS\_YVZ`UVY\_```[P`^`\_URPYTPUWZ  
@HWI-EAS443:3:90:275:1970#0/1  
ATCAAACCTTTGGTCAACATCATCATTCTCACTTCTCCTC  
+HWI-EAS443:3:90:275:1970#0/1  
\_a\_R`\_b^^```¥Z\_`a``¥]\_aa¥T¥WZaaa`¥TY\_```\_  
@HWI-EAS443:3:90:280:326#0/1  
GAGGATTTCTCATTGGGCAAAGAAGACAAGAGATATGG  
+HWI-EAS443:3:90:280:326#0/1  
[[`bbabbabbaa^aab\_Z\_`^`a````aa`¥]aa``a¥]^`  
@HWI-EAS443:3:90:286:1235#0/1  
AAGAAAGAAGAGCTCCAGGATTGTAATAATTGCTCCCTTGA  
+HWI-EAS443:3:90:286:1235#0/1  
]^b^abaZS¥\_`a`aa`Y`aaa\_aaa]^`^`]^`\_\_^aaa`  
@HWI-EAS443:3:90:29:982#0/1  
GGTGGGTTCACTTTCAAAGGACAAGCGGATCATCAGTCA  
+HWI-EAS443:3:90:29:982#0/1  
``MVZ[\_`Y\_```Y\_]a\_^VPX[¥\_`\_]a]^`¥¥\_]Z`V[\_  
@HWI-EAS443:3:90:378:479#0/1  
GGTGATACCATCACTCGGTCTGATCCAGCATCGTTTGT  
+HWI-EAS443:3:90:378:479#0/1  
ab\_aabaabbaaaaaa^`aaa\_\_aaaaa`¥a\_a``a  
@HWI-EAS443:3:90:381:1310#0/1  
GAGTCTGCTGTCTGAGAGGATTTCTCATTGGGCAAAG  
+HWI-EAS443:3:90:381:1310#0/1  
a`a]babaaaaa`aab]aaYaaaa`T``a````a`a\_^`  
@HWI-EAS443:3:90:387:1608#0/1  
GCTGGATCAGACCGAGTGATGGTATCACCTCTGGCCGTAA  
+HWI-EAS443:3:90:387:1608#0/1  
ab¥]a]\_`b]a^¥\_`X[```\_]`W^``a]^`^^^[\_ZXM[^`  
@HWI-EAS443:3:90:393:200#0/1  
GCAAGGGGACGTAGTGTGGTAATGAAACGAAACGGGAC  
+HWI-EAS443:3:90:393:200#0/1  
``]^`abba`b\_\_a¥b\_abaP[^``UaaZ`X````^^a`[U  
@HWI-EAS443:3:90:409:1104#0/1  
AGAGAATAAAAGAACTGAGAGATCTAATGTCCGAGTCCCG  
+HWI-EAS443:3:90:409:1104#0/1  
`^R[abb]¥V\_`^``aaa`S^]¥`aaa`aU`aa`]S[\_`¥^`

@HWI-EAS443:3:90:422:73#0/1  
CCCCTTTTCGTTTCATTACCAACTACGTCCCCCTTGCCC  
+HWI-EAS443:3:90:422:73#0/1  
`a`b^\_\_a\_b\_\_\_^aaaa\_\_\_`\_aa]¥X\_XY]^XXX\_VOY  
@HWI-EAS443:3:90:444:1055#0/1  
GTTCTTGAAAGGATGCAGGTGCATTGACTGAAGATCCAG  
+HWI-EAS443:3:90:444:1055#0/1  
aa`babbb\_aaba]\_`aaa^Tab\_``a`\_`a\_W\_[^]\_¥\_  
@HWI-EAS443:3:90:465:39#0/1  
GGCCACAATTATTGCCTCAGCAATTGACTGCTCGTCTCTC  
+HWI-EAS443:3:90:465:39#0/1  
aaa`a`^\_ab`aaa]\_a``aa^`a^`^[\_a`\_^\_]`^V]]  
@HWI-EAS443:3:90:532:625#0/1  
GTTTGGTTGCCTTGTTGTAATTGAATACTGGAGAATTGCC  
+HWI-EAS443:3:90:532:625#0/1  
aaaXZ]M`aaaa`aYaaY\_aa`a^[\_a]`\_a\_`\_U\_]\_¥¥  
@HWI-EAS443:3:90:558:1694#0/1  
GAATAAAAGAACTGAGAGATCTAATGTCGCAGTCCCGCAC  
+HWI-EAS443:3:90:558:1694#0/1  
aa`^]b[`QZ`X```\_aY`aaT\_[[R[`ZU\_LYYZ[^JV  
@HWI-EAS443:3:90:594:1270#0/1  
GAATAAAAGAACTGAGAGATCTAATGTCGCAGTCCCGCAC  
+HWI-EAS443:3:90:594:1270#0/1  
¥[^`b`\_\_aaaa\_OV`U`Y[\_`^`ba¥[`b`b`[a[`aKa  
@HWI-EAS443:3:90:682:114#0/1  
GAATAAAAGAACTGAGAGATCTAATGTCGCAGTCCCGCAC  
+HWI-EAS443:3:90:682:114#0/1  
a``aa\_SZ]X`\_`aaabYa^\_Yb¥Y]a]\_\_`\_aYU^]`^VY  
@HWI-EAS443:3:90:691:1535#0/1  
GAGAATAAAAGAACTGAGAGATCTAATGTCGCAGTCCCGC  
+HWI-EAS443:3:90:691:1535#0/1  
`PSZa`S]Z``V`a\_a\_NZ]a\_[`¥0¥¥UaU\_]UO\_\_^^`  
@HWI-EAS443:3:90:709:1302#0/1  
AATTTTACAATCCTGGAGCTCTTCTTTCTTCTTTTGT  
+HWI-EAS443:3:90:709:1302#0/1  
ab`[aaU`[[``\_``^[[a\_`[\_Y\_]`\_`^a\_]\_\_`X^  
@HWI-EAS443:3:90:736:1542#0/1  
AAAAGAACTGAGAGATCTAATGTCGCAGTCCCGCACTCGC  
+HWI-EAS443:3:90:736:1542#0/1  
Y\_ZabbbbaYabbbbaaab`\_a`b]aaa`b\_aaaa\_\_\_aWYT  
@HWI-EAS443:3:90:740:924#0/1  
CATATGCAAGGCAGCAATAGGGTTGAGGATTAGCTCATCT  
+HWI-EAS443:3:90:740:924#0/1  
^bba`\_bbbbababbaaa^bab\_`aabb`b\_aa\_`Yaa[a  
@HWI-EAS443:3:90:770:979#0/1  
CTTATTTTCAGTGTGGAGGTTGCCCGTTAGCACTTCTT  
+HWI-EAS443:3:90:770:979#0/1  
QY]Q^`^aab`\_S^a^^abbV`]Va`]PX``VSYZaaba  
@HWI-EAS443:3:90:830:124#0/1  
GATCTAATGTCGCAGTCCCGCACTCGCGAGATACTACTA

+HWI-EAS443:3:90:830:124#0/1  
\_`baa`bb`bba\_] [\_aXaaX`aZ`\_aXaZQ^N\_VZ\_\_`  
@HWI-EAS443:3:90:839:289#0/1  
CAATGAGATACCCAATTACAGCAGACAAGAGAATAATGGA  
+HWI-EAS443:3:90:839:289#0/1  
\_\_a`aWa`¥Zb¥[bbaa`aa\_`aa]`bab`\_]b`a`aaXa  
@HWI-EAS443:3:90:904:1440#0/1  
GAATAAAAGAACTGAGAGATCTAATGTCGCAGTCCCGCAC  
+HWI-EAS443:3:90:904:1440#0/1  
U\_ba`a\_`b^baU^`^`^\_¥a\_b`Zba`Yb`aaaSYa`b``  
@HWI-EAS443:3:90:90:1086#0/1  
GTCTTCTTTGCCAAAATGAGAAATCCTCTCAGGACAGCA  
+HWI-EAS443:3:90:90:1086#0/1  
a]\_[S\_ZRZ¥YW\_\_^RV[`\_\_\_\_\_]^[^]]XW\_^]YY]OW\_]`  
@HWI-EAS443:3:90:92:1455#0/1  
CAAGGGAGCAATTTTACAATCCTGGAGCTCTTCTTTCTTC  
+HWI-EAS443:3:90:92:1455#0/1  
aL^YZTaaab``]`^`aaT]`\_¥UZ^SZSXS^¥X^Z¥^USO  
@HWI-EAS443:3:90:92:1636#0/1  
AAAAGAACTGAGAGATCTAATGTCGCAGTCCCGCACTCGC  
+HWI-EAS443:3:90:92:1636#0/1  
aba]X\_aba`aa`\_\_a\_\_`adW\_\_^\_]`^aRNWXVX]^`  
@HWI-EAS443:3:90:935:797#0/1  
GTACATCTGCTCCCAGCACGTCCCTTGGGTAAAGTGCAAC  
+HWI-EAS443:3:90:935:797#0/1  
`baaababbaa]W\_`^^`\_\_\_\_]Y\_aa`¥`]a`a`Z\_[a\_^`  
@HWI-EAS443:3:90:93:1521#0/1  
CTAATGTCGCAGTCCCGCACTCGCGAGATACTCACTAAGA  
+HWI-EAS443:3:90:93:1521#0/1  
XQW\_Z`bbaaXW^^^UZFZ¥a`^RQ]`a¥\_`aaYFZ^TX  
@HWI-EAS443:3:90:943:1319#0/1  
GAGAATAAAAGAACTGAGAGATCTAATGTCGCAGTCCCGC  
+HWI-EAS443:3:90:943:1319#0/1  
``^]a`a`a¥X\_]W¥a¥aa`a`a\_^]Xa`\_`^U^Z^]\_`  
@HWI-EAS443:3:90:988:1000#0/1  
GCTGTAATTGGGTATCTCATTGCCATCATCCACTTCATTC  
+HWI-EAS443:3:90:988:1000#0/1  
aa^\_U¥[aaaa\_X`\_a\_[¥``\_]Y^\_\_`\_`^`\_`^\_]¥WS  
@HWI-EAS443:3:90:992:1028#0/1  
TGGAGAGAATAAAAGAACTGAGAGATCTAATGTCGCAGTC  
+HWI-EAS443:3:90:992:1028#0/1  
abaWb\_b]`aa``]a]\_`a]a]a``aa¥aaa[T\_¥a\_]`  
@HWI-EAS443:3:90:992:961#0/1  
GTCTGCTGTAATTGGGTATCTCATTGCCATCATCCACTTC  
+HWI-EAS443:3:90:992:961#0/1  
a`aaaa`Z`\_aZJY`LY^`¥^]U]]\_[\_]ZZ[XNNR\_XU  
@HWI-EAS443:3:91:1027:425#0/1  
ATAAAAGAACTGAGAGATCTAATGTCGCAGTCCCGCACTC  
+HWI-EAS443:3:91:1027:425#0/1  
aaba`abaa`baababa`\_baabb\_^`aab^\_\_Zaa`\_\_^`



@HWI-EAS443:3:91:1060:2042#0/1  
ATCTGCTCCCAGCACGTCCCTTGGGTAAAGTGCAACTT  
+HWI-EAS443:3:91:1060:2042#0/1  
abaaaa`a`aa¥Ya\_\_W\_¥^^a[\_\_S¥a\_\_U]\_``\_`U¥^  
@HWI-EAS443:3:91:1077:444#0/1  
AAACGATGCTGGATCAGACCGAGTGATGGTATCACCTCTG  
+HWI-EAS443:3:91:1077:444#0/1  
\_]aWa]W\_TZ```]ZO\_\_\_OWOZ¥G`ZNWRFVW^^\_\_YFZ  
@HWI-EAS443:3:91:1116:1063#0/1  
GAATAAAAGAACTGAGAGATCTAATGTCGCAGTCCCGCAC  
+HWI-EAS443:3:91:1116:1063#0/1  
aX`\_YRZ\_\_PXY^`ZZ\_^]\_^\_]`]]]QUUW^XVTV^Y]VS  
@HWI-EAS443:3:91:1135:242#0/1  
CCCCACTTCATTTGGGAAAACAACTTCCATAATCACATCC  
+HWI-EAS443:3:91:1135:242#0/1  
`Z\_¥\_ZWY]Y¥`aabaaa`^\_[[]`ZVU\_]`^a[MW]a[NP  
@HWI-EAS443:3:91:1176:79#0/1  
CCCGTTTTCGTTTCATTACCAACTACGTCCCCTTGCCC  
+HWI-EAS443:3:91:1176:79#0/1  
abbbbbbbabbbbbbbbaabbab`ba`baa\_\_]aab\_Z^  
@HWI-EAS443:3:91:1221:1317#0/1  
GGATCAGACCGAGTGATGGTATCACCTCTGGCCGTAACAT  
+HWI-EAS443:3:91:1221:1317#0/1  
aaHXS\_QKV^Y`XMYPT`BBBBBBBBBBBBBBBBBBBB  
@HWI-EAS443:3:91:1284:801#0/1  
GGGTTAGAGATCAAAGAGGGAACGTACTATTGTCTCCCGA  
+HWI-EAS443:3:91:1284:801#0/1  
abaUaa\_T[aaYZ\_]a\_``\_¥`Y\_X\_]\_]\_``]]\_YSYZY  
@HWI-EAS443:3:91:1294:1162#0/1  
CACTTTTGCATCTTTTGGAAATGCCTCAAGAGTTGGTGC  
+HWI-EAS443:3:91:1294:1162#0/1  
WX[¥aba[R\_bb\_\_bbbZbaaa`[^U^ZZb]]abba\_¥`  
@HWI-EAS443:3:91:1306:521#0/1  
TGGCCATGGTATTCTCACAAGAGGATTGCATGATCAAGGC  
+HWI-EAS443:3:91:1306:521#0/1  
]\_¥R`aabb\_bbbb`a`\_aba]baaab`aa`a\_\_^`a^^  
@HWI-EAS443:3:91:1326:1558#0/1  
TCCAGATGAAGGCACATCTGGGGTGGAGTCTGCTGTCCTG  
+HWI-EAS443:3:91:1326:1558#0/1  
abb[\_`ab`aba\_a\_``\_aaaaWa`\_a^^aa\_\_aV¥K¥a  
@HWI-EAS443:3:91:1334:703#0/1  
AAAGAAGTGAAGATCTAATGTCGCAGTCCCGCACTCGCG  
+HWI-EAS443:3:91:1334:703#0/1  
abab\_babbbbaaaaa`b`abb`aa]a`]¥`W`a[¥]N\_Y\_  
@HWI-EAS443:3:91:1387:1153#0/1  
CCCTCTTTGATCTCTAACCTTAAAAATCGGTCAATACTC  
+HWI-EAS443:3:91:1387:1153#0/1  
abbbabbbababbbbb[abbbbbbb]ab`bbabb\_a^  
@HWI-EAS443:3:91:1410:1976#0/1  
CTAATGTCGCAGTCCCGCACTCGCGAGATACTCACTAAGA

+HWI-EAS443:3:91:1410:1976#0/1  
]babbbba`bba]aabb\_]aa\_abb^ba`aaaaUYaaaa  
@HWI-EAS443:3:91:1424:496#0/1  
TTCCTGATGTGACTTTTTGATTATGGCCATATGGTCCAC  
+HWI-EAS443:3:91:1424:496#0/1  
^`ab`^]][^]`abbbbab`a`a\_a\_\_Xa\_a^P]QYT]I  
@HWI-EAS443:3:91:1434:625#0/1  
AATAAAAGAAGTCTAATGTCGCAGTCCCGCACT  
+HWI-EAS443:3:91:1434:625#0/1  
aab^\_bba^aa`T\_aaa`ab`aa^¥a^`aWZW]^`^R]  
@HWI-EAS443:3:91:144:1604#0/1  
TAATGTCGCAGTCCCGCACTCGCGAGATACTCACTAAGAC  
+HWI-EAS443:3:91:144:1604#0/1  
abaaa¥aa`^a^aa`aa^^^[\`¥]^Y¥`\_^\_\_U¥¥PUVY  
@HWI-EAS443:3:91:1476:2024#0/1  
ACCCAATTACAGCAGACAAGAGAATAATGGACATGATTCC  
+HWI-EAS443:3:91:1476:2024#0/1  
a\_\_\_baaaa`Ua`a`\_a\_a^a[\_`]]`W`\_^`^\_WS  
@HWI-EAS443:3:91:1493:885#0/1  
TGTCCACCATCCTTACTCCTCCAATCTGTGTGCTGTGGCA  
+HWI-EAS443:3:91:1493:885#0/1  
^\_ZZXa\_]aa\_\_aa`aa\_]a`\_\_`a\_aa\_\_^¥V\_\_Va^R]  
@HWI-EAS443:3:91:1548:1096#0/1  
AGAACCCCGCACTCAGAATGAAGTGGATGATGGCAATGAG  
+HWI-EAS443:3:91:1548:1096#0/1  
```]`^]Zaaa^a\_R^Y\_aa[[¥P`]Z\_bZab]GY]WZ\_a  
@HWI-EAS443:3:91:1549:1629#0/1  
AAGAAGTCTAATGTCGCAGTCCCGCACTCGCGA  
+HWI-EAS443:3:91:1549:1629#0/1  
aa`ababbbbaa`aaabaabb`aSaa\_X]`\_\_`^`Za^]]  
@HWI-EAS443:3:91:1562:1983#0/1  
AAAGAAGTCTAATGTCGCAGTCCCGCACTCGCG  
+HWI-EAS443:3:91:1562:1983#0/1  
abaaaa`Y`a^`aa\_\_a[YWa`¥\_\_`YLKS\_BBBBBBBBB  
@HWI-EAS443:3:91:1567:221#0/1  
AAAGAAGTCTAATGTCGCAGTCCCGCACTCGCG  
+HWI-EAS443:3:91:1567:221#0/1  
abaa`b\_baa`aa\_a\_aa`ab`a¥`a`^¥¥W\_Y¥¥X^W¥  
@HWI-EAS443:3:91:159:1947#0/1  
CTAGAGTCCCGTTTTCGTTTCATTACCAACTACGTCCC  
+HWI-EAS443:3:91:159:1947#0/1  
`b`\_bbSaL]OV]ZWUa[\_abaZ]`a]^a\_]N[]][XP][SV  
@HWI-EAS443:3:91:1600:1372#0/1  
CTAATGTCGCAGTCCCGCACTCGCGAGATACTCACTAAGA  
+HWI-EAS443:3:91:1600:1372#0/1  
Zbbbbbbbbbbbbbb`bbb`aba`baababaabb`¥bab`  
@HWI-EAS443:3:91:1611:878#0/1  
CAGATGAAGGCACATCTGGGGTGGAGTCTGCTGTCTGAG  
+HWI-EAS443:3:91:1611:878#0/1  
`]ZWX\_U]aTGUVPb]babZ^b\_[b[[bb]V\_Z\_IU`Va

@HWI-EAS443:3:91:1616:1490#0/1  
GAACCCCGCACTCAGAATGAAGTGGATGATGGCAATGAGA  
+HWI-EAS443:3:91:1616:1490#0/1  
abb[]\_`a]a]a\_`[]`aa^aa]aa\_aa\_`\_a[\_^]]`[]  
@HWI-EAS443:3:91:1711:1137#0/1  
GCGATCTGAACCTTTGTCAATAGGGCAAACCAGCGACTGAA  
+HWI-EAS443:3:91:1711:1137#0/1  
]H]FU[`ZP¥M[] []ZR¥VR^] ^¥NZNXMOSWJQZRY]BB  
@HWI-EAS443:3:91:1731:685#0/1  
AAAAGAAGTGAAGATCTAATGTCGCAGTCCCGCACTCGC  
+HWI-EAS443:3:91:1731:685#0/1  
`a`Yabbaa^\_U\_bbbbababa`V[X\_^a]]`\_RX¥`X\_H  
@HWI-EAS443:3:91:1731:910#0/1  
CACTGACTCAGGGCCATTGATCTCCACATCATTGATGAC  
+HWI-EAS443:3:91:1731:910#0/1  
¥a`Vb^`aba^`b`^`aa\_\_b`baaab\_bbaaaababaaW  
@HWI-EAS443:3:91:199:1250#0/1  
TCCCGTTTTCGTTTCATTACCAACTACGTCCCCTTGCC  
+HWI-EAS443:3:91:199:1250#0/1  
ab\_\_b[\_\_\_a]a\_`a¥Y` `a`X` `a`]\_\_\_^Y]\_] ^]]XX\_  
@HWI-EAS443:3:91:202:1162#0/1  
AAACAAACGATGCTGGATCAGACCGAGTGATGGTATCACC  
+HWI-EAS443:3:91:202:1162#0/1  
a`ba[aaaaaa`\_`[a\_\_`a^\_a^a\_¥^aa^W\_`V[WW  
@HWI-EAS443:3:91:209:469#0/1  
AGAGAATAAAAGAAGTGAAGATCTAATGTCGCAGTCCCG  
+HWI-EAS443:3:91:209:469#0/1  
aaaaababaa[b`aa`aa\_`aaaaaaaaa¥aa`\_a]`[\_^  
@HWI-EAS443:3:91:227:867#0/1  
GCACTTCTTCTTCTTCTTGGACTGATGATCCGCTTGCTCCT  
+HWI-EAS443:3:91:227:867#0/1  
aa]^`a` `a`aa\_aaaWa` `a\_aa` `a\_\_X\_\_\_^`YVW\_  
@HWI-EAS443:3:91:256:1398#0/1  
GCACTCGCGAGATACTACTAAGACCACTGTGGACCATAT  
+HWI-EAS443:3:91:256:1398#0/1  
ab]^`X^` []W[ [¥ZTQVPSWSW[XZQSPWSW]TWZS]V  
@HWI-EAS443:3:91:305:563#0/1  
AAAGAAGTGAAGATCTAATGTCGCAGTCCCGCACTCGCG  
+HWI-EAS443:3:91:305:563#0/1  
^VOZWR[ `aRX` `[X]` [ST`S`^S][RVUYTLLMVWTWZ  
@HWI-EAS443:3:91:312:650#0/1  
AAGAGAGATGCTAATGGGTCTGCTGACACTGCTGCTCTTC  
+HWI-EAS443:3:91:312:650#0/1  
YW[¥\_SW`bb` `SZ` `UW` `XSa^^] `bbU^Y^MXUO` `a  
@HWI-EAS443:3:91:313:138#0/1  
CTAATGTGCTAATTGGGCAAGGGGACGTAGTGTGGTAAT  
+HWI-EAS443:3:91:313:138#0/1  
abbbbbbbaabbbbbbba\_bbbba]\_bY\_aVa`aa\_HYV\_  
@HWI-EAS443:3:91:31:380#0/1  
ATAAAAGAAGTGAAGATCTAATGTCGCAGTCCCGCACTC

+HWI-EAS443:3:91:31:380#0/1  
a`\_V¥`\_Z\_ab\_\_^`aaa[F[b¥V\_[`]Y\_aa`^\_ZN  
@HWI-EAS443:3:91:329:696#0/1  
GGCGATCTGAACCTTTGTCAATAGGGCAAACCAGCGACTGA  
+HWI-EAS443:3:91:329:696#0/1  
a]^\_WJW]X]^\_][N]]XWWU]¥^[SR¥][^\_AY[XYYVX  
@HWI-EAS443:3:91:356:837#0/1  
CTGAAGTGGACAGGGCCGAAGTACCATGTTTCAACCTTT  
+HWI-EAS443:3:91:356:837#0/1  
ab`aYa`\_a\_^b`a]^`aa\_]VaG`\_¥U`aT¥`\_`\_]\_a\_¥  
@HWI-EAS443:3:91:370:1224#0/1  
TCCTGATGTGTACTTTTTGATTATGGCCATATGGTCCACA  
+HWI-EAS443:3:91:370:1224#0/1  
ab`bb`bb¥aVabbbabbaaaabba]a`aSY]RXOZ\_PRU  
@HWI-EAS443:3:91:395:1762#0/1  
ATTGAATACTGGAGAATTGCCTCTTACCAGTATCCTCAAC  
+HWI-EAS443:3:91:395:1762#0/1  
a^]Z\_^`bZTG[P]]`P[UYaY\_ZZW][][RZ¥T^X^]]X  
@HWI-EAS443:3:91:401:1821#0/1  
TTCTCATTTTTGGGCAAAGAAGACAAGAGATATGGCCCAGC  
+HWI-EAS443:3:91:401:1821#0/1  
`aba]]a\_aa[VHZ`\_baaaaa\_a[```\_[a]XD[\_^`[]  
@HWI-EAS443:3:91:414:1315#0/1  
CTAATGTCGCAGTCCCGCACTCGCGAGATACTCACTAAGA  
+HWI-EAS443:3:91:414:1315#0/1  
T\_\_Zba][b``¥bbb```Tbaab]b^aaabaaaabaaaab  
@HWI-EAS443:3:91:43:929#0/1  
AAATGCGGGATGTGCTTGGGACATTTGACACTGTCCAAAT  
+HWI-EAS443:3:91:43:929#0/1  
¥\_Y`\_¥`^¥]^b^`[¥R`b\_^bba``b^Y`aaa`[``\_Q\_  
@HWI-EAS443:3:91:484:18#0/1  
GAGAGATCTAATGTCGCAGTCCCGCACTCGCGAGATACTC  
+HWI-EAS443:3:91:484:18#0/1  
\_X[Q^YaVaUZ¥aX^XS[\_XU¥\_¥WRVWV]VSJVWVPPRG  
@HWI-EAS443:3:91:498:150#0/1  
CAGATTGGAGGAGTAAGGATGGTGGACATCCTTAGACAGA  
+HWI-EAS443:3:91:498:150#0/1  
abbaabbbbabababbbbbbbbabaa`bbaabbbbaabbb  
@HWI-EAS443:3:91:595:248#0/1  
CGTAAAACAAGTTTTCTCCAGTAGCCGCGGAACAGGCA  
+HWI-EAS443:3:91:595:248#0/1  
aa[a\_`ba[\_baUaY[`¥¥S¥b\_¥bWZabba`]^`abaaT\_  
@HWI-EAS443:3:91:640:1109#0/1  
AATGAAGTGGATGATGGCAATGAGATACCCAATTACAGCA  
+HWI-EAS443:3:91:640:1109#0/1  
abbaaaaabaaababa`aa\_aaaa\_aaa`baaaaab^aa  
@HWI-EAS443:3:91:673:1439#0/1  
ATTTTAACCTTGATTTCTGAAGTGGACAGGGCCGAAGGTAC  
+HWI-EAS443:3:91:673:1439#0/1  
aabbb\_aabaaaaabaaaa`^a\_a`\_\_aa`\_^]``U`\_

@HWI-EAS443:3:91:681:1518#0/1  
CTCCCTTGATGGTGGCGTACATGCTAGAAAGAGAATTGGT  
+HWI-EAS443:3:91:681:1518#0/1  
a]aa\_[ba^¥ab`babbVZT^ab^`aaa`ab\_aabaaaa^  
@HWI-EAS443:3:91:699:428#0/1  
AGAAGTGAAGATCTAATGTCGCAGTCCCGCACTCGCGAG  
+HWI-EAS443:3:91:699:428#0/1  
aaaa`abaabbaa`aaaa¥aaaa¥\_\_\_aa\_`\_\_a\_`\_`  
@HWI-EAS443:3:91:723:656#0/1  
TTCCCATCACATTGTCGATGGATTCAATCCCGAGTTCTG  
+HWI-EAS443:3:91:723:656#0/1  
aab¥baaaaaaaaa^aa`^a]]]aa`a\_``a\_\_^^X\_\_\_]  
@HWI-EAS443:3:91:723:96#0/1  
CTGCTGTAATTGGGTATCTCATTGCCATCATCCACTTCAT  
+HWI-EAS443:3:91:723:96#0/1  
X^babaab\_bbbbbabbabbab`bbaa\_abaaaabb`aa  
@HWI-EAS443:3:91:733:1325#0/1  
TGCTAATTGGGCAAGGGGACGTAGTGTGGTAATGAAACG  
+HWI-EAS443:3:91:733:1325#0/1  
``bbbbbbbabbbbaabaabaaa`b`bbWEW`][`Y]  
@HWI-EAS443:3:91:740:1041#0/1  
CAGGTGCATTGACTGAAGATCCAGATGAAGGCACATCTGG  
+HWI-EAS443:3:91:740:1041#0/1  
V`abaa]]Tbb]ba\_\_babaabaabbbabb`]abb\_aba  
@HWI-EAS443:3:91:748:1807#0/1  
ATGCAAGGCAGCAATAGGGTTGAGGATTAGCTCATCTTTC  
+HWI-EAS443:3:91:748:1807#0/1  
]]ZYbbb\_aaa\_]`aaa`\_\_a\_aa````a^\_\_\_\_`\_\_\_\_Z  
@HWI-EAS443:3:91:763:1893#0/1  
TAAAGAAGTGAAGATCTAATGTCGCAGTCCCGCACTCG  
+HWI-EAS443:3:91:763:1893#0/1  
a`\_T`a¥aaa^^Q¥`a`aaa``aV\_\_``\_T\_a`¥^TZWW^  
@HWI-EAS443:3:91:765:1547#0/1  
AAAAGAGAAGAAAGAAGAGCTCCAGGATTGAAAATTGCT  
+HWI-EAS443:3:91:765:1547#0/1  
a`U^a`aY\_`\_Z¥¥¥aa`aa`a```^a\_a^]W¥Ya^`[W  
@HWI-EAS443:3:91:782:426#0/1  
ATGTCGCAGTCCCGCACTCGCGAGATACTACTAAGACCA  
+HWI-EAS443:3:91:782:426#0/1  
ZaaJbaTb^^aa`a^^^Y\_aaaaZ]RXaZa`Z¥]`\_^S]  
@HWI-EAS443:3:91:792:406#0/1  
ATGCAAGGCAGCAATAGGGTTGAGGATTAGCTCATCTTTC  
+HWI-EAS443:3:91:792:406#0/1  
U¥^¥b¥X\_WR`¥T`[U\_¥`N^¥]`^T^^bba\_SZ^P\_aZS  
@HWI-EAS443:3:91:83:743#0/1  
AGAGAATAAAAGAAGTGAAGATCTAATGTCGCAGTCCCG  
+HWI-EAS443:3:91:83:743#0/1  
Q\_Y\_X\_a`¥aYZ]¥ZbaW]`^`\_\_b`^`[b`^a]]]`a  
@HWI-EAS443:3:91:845:1073#0/1  
GATTAGCTCATCTTTCAGTTTTGGTGGGTTCACTTTCAAA

+HWI-EAS443:3:91:845:1073#0/1  
a^]VYZZ¥YT¥U]]W[Y`WZ^]YYT[Y¥S[VJOTYXRNR  
@HWI-EAS443:3:91:848:32#0/1  
GCTGTAATTGGGTATCTCATTGCCATCATCCACTTCATTC  
+HWI-EAS443:3:91:848:32#0/1  
a\_`RQJPX\_WaXVVNT]]UVV[UVX¥SUXU¥NUUYUUVSU  
@HWI-EAS443:3:91:858:1900#0/1  
GTCCTGAGAGGATTTCTCATTTTGGGCAAAGAAGACAAGA  
+HWI-EAS443:3:91:858:1900#0/1  
`[W^\_a`a^`a^Z\_\_^^\_¥X\_YUY^W\_^\_¥S\_[\_\_U^ZXZ  
@HWI-EAS443:3:91:895:853#0/1  
AATAAAAGAAGACTGAGAGATCTAATGTCGCAGTCCCGCACT  
+HWI-EAS443:3:91:895:853#0/1  
]aa[a`abababbba\_ababbabb`ababaXaaa`a\_\_\_\_  
@HWI-EAS443:3:91:914:991#0/1  
GAGAATAATGGACATGATTCCAGAGAGGAATGAACAAGGA  
+HWI-EAS443:3:91:914:991#0/1  
a``\_aaaa\_`a\_`a\_`\_`^X^^`\_aZ^a\_¥\_\_\_\_^^]Y^^  
@HWI-EAS443:3:91:934:1715#0/1  
ATGGAGAGAATAAAAGAAGACTGAGAGATCTAATGTCGCAGT  
+HWI-EAS443:3:91:934:1715#0/1  
abbab¥W`QH\_a\_bb]baab[bbb\_a`^\_baa`\_a\_[aa¥  
@HWI-EAS443:3:91:958:96#0/1  
AGGAAGTGGAAATTGTGAAAATTCAATGGTCACAAGATC  
+HWI-EAS443:3:91:958:96#0/1  
¥aaaa\_bbbbaaababab`aa\_ab^a\_bbaa\_a]aab`a[  
@HWI-EAS443:3:91:973:664#0/1  
CCGGCTACTGGGAGAAACCTTGTTTTACGGACCAATTCTC  
+HWI-EAS443:3:91:973:664#0/1  
U`bba[aVTZ\_Q¥\_Z^`bUXZ¥¥ab¥0^aaP¥]Xaa^P]H  
@HWI-EAS443:3:91:977:475#0/1  
ATCTAATGTCGCAGTCCCGCACTCGCGAGATACTCACTAA  
+HWI-EAS443:3:91:977:475#0/1  
aa]`aaaa^^`^^`Z\_a`^]W\_[`^Z¥W\_¥¥\_XZWZ¥¥¥\_  
@HWI-EAS443:3:92:1029:929#0/1  
GAGAATAAAAGAAGACTGAGAGATCTAATGTCGCAGTCCCGC  
+HWI-EAS443:3:92:1029:929#0/1  
``a`aa`Rw`\_\_R`]\_\_Z`^a^]a`aU^\_\_`Y^X0`^  
@HWI-EAS443:3:92:1040:378#0/1  
GCGAGATACTCACTAAGACCACTGTGGACCATATGGCCAT  
+HWI-EAS443:3:92:1040:378#0/1  
aa`a`a[`\_^¥a^aa\_`\_^\_a¥`^)`\_W``]\_\_\_\_]]^V[U  
@HWI-EAS443:3:92:1097:147#0/1  
TGATTCCAGAGAGGAATGAACAAGGACAAACCCTCTGGAG  
+HWI-EAS443:3:92:1097:147#0/1  
abaaa`aa\_a^a[\_aaa`^^\_\_a¥\_W`¥\_WSS^]a`¥Z^  
@HWI-EAS443:3:92:1102:1717#0/1  
AAAAGAAGACTGAGAGATCTAATGTCGCAGTCCCGCACTCGC  
+HWI-EAS443:3:92:1102:1717#0/1  
abbWZ]`^babaaa`a`abaa`^aaaaa\_\_[\_`^aaVQ`]

@HWI-EAS443:3:92:1126:1297#0/1  
GCTGTCCTGAGAGATTTCTCATTGTTGGGCAAAGAAGACA  
+HWI-EAS443:3:92:1126:1297#0/1  
ab\_]Za`a`¥`aa\_`aaaV`\_^a\_\_`]^`X]]a``\_Za^^  
@HWI-EAS443:3:92:1127:1044#0/1  
TCCCGTTTTTCGTTTCATTACCAACTACGTCCCCTTGCC  
+HWI-EAS443:3:92:1127:1044#0/1  
\_^aZULXU\_aba]^`a[baaaa^^`\_]aa^¥`P`a\_\_NUH  
@HWI-EAS443:3:92:1141:1624#0/1  
AAAAGAAGACTGAGAGATCTAATGTCGCAGTCCCGCACTCGC  
+HWI-EAS443:3:92:1141:1624#0/1  
^b^UY[bSbabaabab`bb[]a`\_bbba^[^aaaK\_\_bba  
@HWI-EAS443:3:92:1184:1976#0/1  
ATAAAAAGAACTGAGAGATCTAATGTCGCAGTCCCGCACTC  
+HWI-EAS443:3:92:1184:1976#0/1  
[aab\_b\_]aN`TJ`\_`LYaabbU`a]aZHOF0aK]G[S  
@HWI-EAS443:3:92:1190:1863#0/1  
ACTCACTAAGACCACTGTGGACCATATGGCCATAATCAAA  
+HWI-EAS443:3:92:1190:1863#0/1  
aa\_\_``aba\_aaaaaaWF\_\_^^^`\_`Va`ZX¥^`\_[Z`\_\_  
@HWI-EAS443:3:92:1247:1101#0/1  
CAACCCTGATCCTCTCACATTCACAGTCAATGAGGAAAAT  
+HWI-EAS443:3:92:1247:1101#0/1  
abba`aaaaa\_\_a`\_aa\_aaa\_a`b^\_aaaaaaa\_`^`\_a  
@HWI-EAS443:3:92:1439:644#0/1  
GTCCCGTTTTTCGTTTCATTACCAACTACGTCCCCTTGCC  
+HWI-EAS443:3:92:1439:644#0/1  
aaa\_]b`\_`a\_b`aa\_aa`a]Y`a]a^`a]\_^]^^^X]¥  
@HWI-EAS443:3:92:144:1952#0/1  
AAAAGAAGACTGAGAGATCTAATGTCGCAGTCCCGCACTCGC  
+HWI-EAS443:3:92:144:1952#0/1  
abb^V\_a\_\_\_aT`Y\_aa\_\_a`Y`\_]`[R\_\_RX^ZUVGVN  
@HWI-EAS443:3:92:1454:1686#0/1  
CATCTCCGTGCTTGGGGTCATGTCGGGCAGTATTCCGATC  
+HWI-EAS443:3:92:1454:1686#0/1  
¥`\_\_¥\_\_b\_WNY`RRZba`\_\_]X\_]NXW`X`^XK\_^YX  
@HWI-EAS443:3:92:1478:1225#0/1  
AAGGATGCAGGTGCATTGACTGAAGATCCAGATGAAGGCA  
+HWI-EAS443:3:92:1478:1225#0/1  
^ab`\_`a`a`bW```\_NZZ`bbZbaa\_]`[]\_aa`aa\_a  
@HWI-EAS443:3:92:1552:1405#0/1  
GTCCCGTTTTTCGTTTCATTACCAACTACGTCCCCTTGCC  
+HWI-EAS443:3:92:1552:1405#0/1  
`a^\_\_b\_\_aa\_a\_aa\_a\_aa^]a`Xa¥aa\_\_\_\_]]]\_^`X  
@HWI-EAS443:3:92:156:548#0/1  
GGGGACGTAGTGTGGTAATGAAACGAAAACGGGACTCTA  
+HWI-EAS443:3:92:156:548#0/1  
aaa]`aa^`aYa]aaaS]`\_aX`aZ\_Q¥`Y^X^ZV[VVV  
@HWI-EAS443:3:92:1577:405#0/1  
CACTCCAGGAGGAGAAGTGAGAAATGATGATGTTGACCAA

+HWI-EAS443:3:92:1577:405#0/1  
]abbbba¥abb`ab`bb\_bbaaabbbabbabbabba[L`\_`  
@HWI-EAS443:3:92:158:616#0/1  
GTCCCGTTTTTCGTTTCATTACCAACTACTCGTCCCCTTGC  
+HWI-EAS443:3:92:158:616#0/1  
aXa`b\_a\_a\_a^a`a`\_`\_`^`[Y\_]`\_`\_]`^U^X^X^Y  
@HWI-EAS443:3:92:1627:1091#0/1  
AAAAGAAGTGGAGATCTAATGTCGCAGTCCCGCACTCGC  
+HWI-EAS443:3:92:1627:1091#0/1  
aaabaa\_\_baa`aaaa`aaaa[^¥¥`a[^¥Z^\_\_VL]]  
@HWI-EAS443:3:92:162:406#0/1  
CAGTGGTCTTAGTGAGTATCTCGCGAGTGCGGGACTGCGA  
+HWI-EAS443:3:92:162:406#0/1  
abb\_bba`aaab¥bab]`aa\_^`\_`\_`U\_[``\_¥^¥US¥¥  
@HWI-EAS443:3:92:1642:605#0/1  
GAGAATAAAGAAGTGGAGATCTAATGTCGCAGTCCCGC  
+HWI-EAS443:3:92:1642:605#0/1  
abb^bbaabaaaa¥bbaaaba`abb\_`a`aa`aa]`¥^a\_  
@HWI-EAS443:3:92:184:1929#0/1  
AAAAGAAGTGGAGATCTAATGTCGCAGTCCCGCACTCGC  
+HWI-EAS443:3:92:184:1929#0/1  
aaa]T[aa¥F\_[a\_Y`a`¥HPaV`V``WN`Wa`XUSTRNB  
@HWI-EAS443:3:92:187:511#0/1  
AACACTTCAATATAAAGTGGAGTCCCGCGGCTACTG  
+HWI-EAS443:3:92:187:511#0/1  
]XUZT\_[\_a\_Ubaa¥IZ]aa`a`Wa\_[][`^YX]]aSS]F  
@HWI-EAS443:3:92:192:1684#0/1  
CAAGGGAGCAATTTTACAATCCTGGAGCTCTTCTTTCTTC  
+HWI-EAS443:3:92:192:1684#0/1  
`¥aaa`a`X[X`a\_VR][]^X[XNTT`^U¥¥S^UU¥^[]  
@HWI-EAS443:3:92:215:414#0/1  
AAGGCAACCAGAAGCCGGTACAGTGGATTGTAAGGACAC  
+HWI-EAS443:3:92:215:414#0/1  
\_`baa\_¥aaaa\_a^^^USU\_aUZZ[[[W\_Z[Z\_Y\_`^V¥W  
@HWI-EAS443:3:92:222:1104#0/1  
AAAGAAGTGGAGATCTAATGTCGCAGTCCCGCACTCGCG  
+HWI-EAS443:3:92:222:1104#0/1  
\_¥`\_¥\_¥\_¥a\_ZXW]a\_aa`^V`aaa^`a`[^`[`¥XV[Y  
@HWI-EAS443:3:92:249:513#0/1  
AATGGATAATCAGGAAGTGGAAATTGTGAAAATTCAATG  
+HWI-EAS443:3:92:249:513#0/1  
abaaaaaaa\_`aa^aa`aa^`\_`a`\_]a^\_\_`a`^`^`  
@HWI-EAS443:3:92:250:1736#0/1  
GGTGGTTCACTTTCAAAGGACAAGCGGATCATCAGTCA  
+HWI-EAS443:3:92:250:1736#0/1  
aaP`a`\_aaa]aaabaaaa\_`\_`a]\_]`a^aaaa`W\_`  
@HWI-EAS443:3:92:262:1525#0/1  
ATTCTCAGAAAGGCAACCAGGAGATTGATCCAGTTGATAG  
+HWI-EAS443:3:92:262:1525#0/1  
a[a\_a\_]aZ[\_¥][a¥S^\_Y^\_ZYX^]QY]]YVR`UG^B



@HWI-EAS443:3:92:330:1928#0/1  
CGCACTCGCGAGATACTCACTAAGACCACTGTGGACCATA  
+HWI-EAS443:3:92:330:1928#0/1  
````aaaab^`aa\_aa\_[aa¥baa\_aPaa^`W\_¥`aa\_^a  
@HWI-EAS443:3:92:350:152#0/1  
TGCTGTAATTGGGTATCTCATTGCCATCATCCACTTCATT  
+HWI-EAS443:3:92:350:152#0/1  
ab\_ab^`^b]aa\_T``]a]a```[Z\_\_\_\_`^XU^Y^^YY^^  
@HWI-EAS443:3:92:356:652#0/1  
AAAAGAAGTGGAGATCTAATGTCGCAGTCCCGCACTCGC  
+HWI-EAS443:3:92:356:652#0/1  
aaZQ```a\_aaa[][^`X[aa^\_\_\_\_`P]YY¥ZNR[¥QL  
@HWI-EAS443:3:92:384:1123#0/1  
CACCATCAAGGGAGCAATTTTACAATCCTGGAGCTCTTCT  
+HWI-EAS443:3:92:384:1123#0/1  
a\_OVX[NYaa`\_X]a`a`¥Y]\_^[\_Y\_a][¥[`\_\_T^YN`  
@HWI-EAS443:3:92:386:251#0/1  
GCAGTGTATTATATTGAAGTGTGCACTTAACCCAAGGGAC  
+HWI-EAS443:3:92:386:251#0/1  
`a]aZ`^aa]a`aaa]^`X`^aa¥\_Y`^`\_] ]^]\_Y^Y]  
@HWI-EAS443:3:92:402:1468#0/1  
ATCTGCTCCCAGCACGTCCCTTGGGTAAAGTGCAACACTT  
+HWI-EAS443:3:92:402:1468#0/1  
abaa\_`a^a`aa`\_a¥Y^^^\_Y]T¥¥`aXKOX\_a¥^]`\_  
@HWI-EAS443:3:92:420:1806#0/1  
AGCACTTTTGCATCTTTTTGGAAATGCCTCAAGAGTTGGT  
+HWI-EAS443:3:92:420:1806#0/1  
]ZZ]\_`aba^ZSUJ`abaa\_X]`\_\_[OP¥a`J]ZaOG^aW  
@HWI-EAS443:3:92:471:1046#0/1  
CTGTAATTGGGTATCTCATTGCCATCATCCACTTCATTCT  
+HWI-EAS443:3:92:471:1046#0/1  
\_]QKV]Z^YZ]\_\_XTa¥NX¥`[XUSSVZ`VXW\_\_]^\_X]¥  
@HWI-EAS443:3:92:47:703#0/1  
ACAGCACACAGATTGGAGGAGTAAGGATGGTGGACATCCT  
+HWI-EAS443:3:92:47:703#0/1  
WZ\_`^`a¥QU\_baa``WNX]Z¥\_\_Q¥\_\_YWOFF]X]VWL[T`  
@HWI-EAS443:3:92:509:1179#0/1  
AAGAAGTGGAGATCTAATGTCGCAGTCCCGCACTCGCGA  
+HWI-EAS443:3:92:509:1179#0/1  
¥abMb`b]bRaaV\_\_SaaYbWq]\_b^HS^aV[\_`0`\_\_Y]  
@HWI-EAS443:3:92:51:571#0/1  
GAATAAAAAGAAGTGGAGATCTAATGTCGCAGTCCCGCAC  
+HWI-EAS443:3:92:51:571#0/1  
aa```^`¥Sa\_\_Yaa`a`\_`aa\_[V`a]\_]\_\_a]\_]\_]^^]  
@HWI-EAS443:3:92:547:1262#0/1  
GTCGCAGTCCCGCACTCGCGAGATACTCACTAAGACCACT  
+HWI-EAS443:3:92:547:1262#0/1  
¥X`^^`[``]Ya`\_¥\_X`^^]`ZX]SY¥\_¥^^\_]`^¥W¥¥^  
@HWI-EAS443:3:92:632:1670#0/1  
GGGGACGTAGTGTGGTAATGAAACGAAAACGGGACTCTA

+HWI-EAS443:3:92:632:1670#0/1  
^^WWW\_WX]`I]^\_\_XN]X^\_Y`a\_WZ\_Z]X^TX¥VTXV]  
@HWI-EAS443:3:92:638:1076#0/1  
TGCCCGTTAGCACTTCTTCTTTCTTGACTGATGATCC  
+HWI-EAS443:3:92:638:1076#0/1  
`^`aY]DPW[Y\_[\_aa`Z`a¥^YX[aa\_a\_a`Y]^aUZ^  
@HWI-EAS443:3:92:682:1256#0/1  
TAAAAGAAGTCTAATGTCGCAGTCCCGCACTCG  
+HWI-EAS443:3:92:682:1256#0/1  
^`ZW[IW\_ZRW\_YU]aa]`b]a`¥Sxa`YQ]`\_aZ[]XP  
@HWI-EAS443:3:92:723:1992#0/1  
ATCATTCTCATTCTCCTCCTGGAGTGACATCTGCTCC  
+HWI-EAS443:3:92:723:1992#0/1  
aaaaaXYT\_aa`aXa\_a`\_a[¥`¥\_]W`¥aV`¥Z¥\_NU¥]  
@HWI-EAS443:3:92:743:1369#0/1  
AAAAGAAGTCTAATGTCGCAGTCCCGCACTCGC  
+HWI-EAS443:3:92:743:1369#0/1  
`¥Z\_\_W^\_a]abbabaaaaab`a¥aaaa`\_\_aa`¥Zaa  
@HWI-EAS443:3:92:809:603#0/1  
AAAAGAAGTCTAATGTCGCAGTCCCGCACTCGC  
+HWI-EAS443:3:92:809:603#0/1  
`b[^ab^abbaba`babbabbUa^a```\_aab`\_aa\_\_]  
@HWI-EAS443:3:92:810:1652#0/1  
CTTCCTGATGTGACTTTTTGATTATGGCCATATGGTCCA  
+HWI-EAS443:3:92:810:1652#0/1  
[Uba^`¥bb¥^\_`ba^b[aaaaabba`Y\_ba``^JQJFL]  
@HWI-EAS443:3:92:813:1006#0/1  
AAGGATGGTGGACATCCTTAGACAGAATCCAAGTGGAA  
+HWI-EAS443:3:92:813:1006#0/1  
^aa]aab]L\_aaaa`]]^`a`\_a\_V[]aa`]`\_`aa\_a]  
@HWI-EAS443:3:92:828:1580#0/1  
GTCCCGTTTTTCGTTTCATTACCAACTACGTCCCCTTGC  
+HWI-EAS443:3:92:828:1580#0/1  
a`]aa^[aaaabVaa```aaZ\_\_aaa¥`a`\_Z¥\_[YY]^  
@HWI-EAS443:3:92:82:681#0/1  
CTTCCTGATGTGACTTTTTGATTATGGCCATATGGTCCA  
+HWI-EAS443:3:92:82:681#0/1  
aaa`aa]^`a^a]\_aaa\_aaaa\_\_Xa[]`\_^\_UVUVX]^  
@HWI-EAS443:3:92:864:641#0/1  
GCCGGCTACTGGGAGAAACCTTGTTTTACGGACCAATTCT  
+HWI-EAS443:3:92:864:641#0/1  
aba\_X]a¥NT^a\_R¥Q`X^S\_^`aadWUYUYSRYPX^¥\_  
@HWI-EAS443:3:92:878:1980#0/1  
AAAAGAAGTCTAATGTCGCAGTCCCGCACTCGC  
+HWI-EAS443:3:92:878:1980#0/1  
abab`\_a\_RS\_\_a]a`aaaa^a`\_a`Ua\_Z[`\_`[R]\_  
@HWI-EAS443:3:92:911:142#0/1  
ATGGCCATATGGTCCACAGTGGTCTTAGTGAGTATCTCGC  
+HWI-EAS443:3:92:911:142#0/1  
`[]abaa]a`V¥``ab¥]a`\_¥\_Za\_\_a`a^XVaZKTTSS

@HWI-EAS443:3:92:912:901#0/1  
CAAGAAAGAAGAAGAAGTGCTAACGGGCAACCTCCAAACA  
+HWI-EAS443:3:92:912:901#0/1  
Y]P\_¥Y]0¥ZaX]b`\_\_U\_aaa`YW]\_^¥`\_Y\_a`^]W^¥  
@HWI-EAS443:3:92:934:1852#0/1  
GGAGAAACCTTGTTTTACGGACCAATTCTCTTTCTAGCAT  
+HWI-EAS443:3:92:934:1852#0/1  
aaWW[X`a\_bbbL\_\_aRaaa^aba`\_]``\_b`\_ab`^ba  
@HWI-EAS443:3:92:944:428#0/1  
CGCGAGATACTCACTAAGACCACTGTGGACCATATGGCCA  
+HWI-EAS443:3:92:944:428#0/1  
aba`a^\_¥Xa``\_a`a\_\_aaa`a^a\_\_`ZSa\_Ya`]`^  
@HWI-EAS443:3:92:992:977#0/1  
CTCACTAAGACCACTGTGGACCATATGGCCATAATCAAAA  
+HWI-EAS443:3:92:992:977#0/1  
ab`abbba`ZTW`a`Y`aYXaa`\_]`Xaaa\_^`]PT`a`¥  
@HWI-EAS443:3:92:994:1364#0/1  
CAACACTTCAATATAAACTGCCTGTTCCGCCGCTACT  
+HWI-EAS443:3:92:994:1364#0/1  
aaaT`b`baaaba\_b\_ab\_R¥aaV]U\_b^`Y^`]a`W]  
@HWI-EAS443:3:93:1003:191#0/1  
GGCCATATGGTCCACAGTGGTCTTAGTGAGTATCTCGCGA  
+HWI-EAS443:3:93:1003:191#0/1  
aV]`VYX\_a]T¥^YX`a^]Y[^aYQVQUYSTVB BBBB  
@HWI-EAS443:3:93:1017:1823#0/1  
ATCTCTTGCTCTTTGCCAAAATGAGAAATCCTCTCAG  
+HWI-EAS443:3:93:1017:1823#0/1  
ab`b`Ubb¥^`YG\_\_^aZMJ\_^aaZS]aaaaXIZFOUaa  
@HWI-EAS443:3:93:1176:1092#0/1  
AGAATAAAAGAACTGAGAGATCTAATGTCGCAGTCCCGCA  
+HWI-EAS443:3:93:1176:1092#0/1  
`aabb`aab]bba`]`abbab^a`\_ab^`\_aa`[¥][\_]X  
@HWI-EAS443:3:93:1196:1273#0/1  
GGATTTCTCATTGTTGGCAAAGAAGACAAGAGATATGGCC  
+HWI-EAS443:3:93:1196:1273#0/1  
`W]T¥Y`a\_\_\_\_[\_\_\_\_aZYV]PZ^[[\_\_\_\_]]YY¥Y[[YXYV  
@HWI-EAS443:3:93:1197:1382#0/1  
ATGTGTACTTTTTGATTATGGCCATATGGTCCACAGTGGT  
+HWI-EAS443:3:93:1197:1382#0/1  
a\_^]a^a`aba`^a`\_`a^`XZU¥ZSU]^S]]W]\_G  
@HWI-EAS443:3:93:1224:1954#0/1  
CATCTCTCTTGAAATGTGCCACAGCACACAGATTGGAGG  
+HWI-EAS443:3:93:1224:1954#0/1  
`baXS^W]Q]aaJ[\_^aNal]``\_a¥`S\_W\_\_OS¥^`Q^V  
@HWI-EAS443:3:93:1224:560#0/1  
GGAAAAGCACTTTTGATCTTTTTGGAAATGCCTCAAGAG  
+HWI-EAS443:3:93:1224:560#0/1  
a[`a`aa\_a]a`a^a`a\_Z`aa`\_`aW\_]`\_]\_Z^]\_`^`  
@HWI-EAS443:3:93:1229:1032#0/1  
GAATAAAAGAACTGAGAGATCTAATGTCGCAGTCCCGCAC

+HWI-EAS443:3:93:1229:1032#0/1  
a\_ba`abbaa`^a\_ba`aababbaaaa`aV`b^\_]¥\_\_R¥  
@HWI-EAS443:3:93:1269:1452#0/1  
CGCGAGATACTCACTAAGACCACTGTGGACCATATGGCCA  
+HWI-EAS443:3:93:1269:1452#0/1  
^a[]\_`SZ`^)^`Q`a`\_WP^b]a[G]T\_`^aa` `a\_HWa  
@HWI-EAS443:3:93:1272:464#0/1  
GAAGAGCAGCAGTGTTCAGCAGACCCATTAGCATCTCTCTT  
+HWI-EAS443:3:93:1272:464#0/1  
a¥aa` ]^aa¥a`0`\_X[Z^[SZQ¥G^[^¥S^]\_U^TTGY\_  
@HWI-EAS443:3:93:1280:1521#0/1  
GAACTGAGAGATCTAATGTCGCAGTCCCGCACTCGCGAGA  
+HWI-EAS443:3:93:1280:1521#0/1  
a¥` ` `b\_]a[^[G^a^` `S¥X^` `¥SYN[TZ^^ZUSSW¥¥  
@HWI-EAS443:3:93:1355:290#0/1  
AGAGAATAAAAGAACTGAGAGATCTAATGTCGCAGTCCCG  
+HWI-EAS443:3:93:1355:290#0/1  
\_\_ab`ab¥` `b]aaab`baaaa`aaaabb]\_b[aa]ZN^a  
@HWI-EAS443:3:93:1359:718#0/1  
ACATGACCCCAAGCACGGAGATGTTCGCTGAGAGGGATAAG  
+HWI-EAS443:3:93:1359:718#0/1  
aY` \_`aX^^^\_aaR`^a\_\_\_\_\_aU¥¥¥^a¥¥¥a^`\_¥¥WY\_  
@HWI-EAS443:3:93:1363:742#0/1  
GATCTAATGTCGCAGTCCCGCACTCGCGAGATACTCACTA  
+HWI-EAS443:3:93:1363:742#0/1  
aaba`abbb`aaaab`a`\_aa^aa`\_`^`a\_a\_ZVX¥W¥a  
@HWI-EAS443:3:93:1428:1710#0/1  
AGAGAATAAAAGAACTGAGAGATCTAATGTCGCAGTCCCG  
+HWI-EAS443:3:93:1428:1710#0/1  
aaab` `baa`b`aa\_aZ^\_aaaa`a^aaa[[aV\_] [RRV\_  
@HWI-EAS443:3:93:1479:993#0/1  
GTCGCTGAGAGGGATAAGAGTCAGCAAAATGGGAGTAGAT  
+HWI-EAS443:3:93:1479:993#0/1  
a)`a]aa\_\_\_\_`\_PUa]]Z\_Y`¥WRH]X\_\_Y][XV\_R¥VY^  
@HWI-EAS443:3:93:1493:467#0/1  
GTCCCGTTTTTCGTTTTATTACCAACTACGTCCCTTGC  
+HWI-EAS443:3:93:1493:467#0/1  
a`\_¥¥b`\_` `^a]` `a` ` `Za`W`W^`W\_¥¥WSW¥ZBB  
@HWI-EAS443:3:93:1506:861#0/1  
TAATGTCGCAGTCCCGCACTCGCGAGATACTCACTAAGAC  
+HWI-EAS443:3:93:1506:861#0/1  
a[XbX^¥aaab¥^^aa`\_UXZ¥]`XaWWGT\_\_]¥\_\_]BBB  
@HWI-EAS443:3:93:1558:567#0/1  
GGGACGTAGTGTGGTAATGAAACGAAAACGGGACTCTAG  
+HWI-EAS443:3:93:1558:567#0/1  
]S[NR¥]\_\_V\_U[\_^UY[TXYaXFQX^XFVZ^XUQNPV  
@HWI-EAS443:3:93:1570:1904#0/1  
TCCCGTTTTTCGTTTTATTACCAACTACGTCCCTTGCC  
+HWI-EAS443:3:93:1570:1904#0/1  
[a\_a`V`X]Xb^\_aTa¥` `XP\_aQ\_a[a0a0\_]V[UMUU

@HWI-EAS443:3:93:1631:1346#0/1  
GCACTCGCGAGATACTACTAAGACCACTGTGGACCATAT  
+HWI-EAS443:3:93:1631:1346#0/1  
aaaa\_a`ab`b]^`a`^PV]a]XZ^VUa\$DU[\_\_\_YZ\_¥Y  
@HWI-EAS443:3:93:1677:149#0/1  
GACTTCTTCGGGAGACAATAGTACGTTCCCTCTTTGATCT  
+HWI-EAS443:3:93:1677:149#0/1  
aa\_aa[aa]aaa]\_`\_`\_]a^\_]W^X[W][^Z]WZR^  
@HWI-EAS443:3:93:1733:133#0/1  
AATGAAGTGGATGATGGCAATGAGATACCCAATTACAGCA  
+HWI-EAS443:3:93:1733:133#0/1  
aaba\_\_`Zaa\_aaZabaZ\_^aa\_a^^\_ZZU\_\_`\_^X]^Z]  
@HWI-EAS443:3:93:178:734#0/1  
GTCCCCTTTTCGTTTCATTACCAACTACGTTCCCTTGC  
+HWI-EAS443:3:93:178:734#0/1  
aX`\_\_a^````a\_\_\_^U[a`\_`a`^`\_¥a¥\_^U[\_W¥W^¥  
@HWI-EAS443:3:93:198:638#0/1  
GTCTGCTGTAATTGGGTATCTCATTGCCATCATCCACTTC  
+HWI-EAS443:3:93:198:638#0/1  
a^aaaaab^[V]aaa\_V[]\_a^VZ\_\_\_ZS]Y^WTSMPYY]  
@HWI-EAS443:3:93:205:555#0/1  
TATCTCGCGAGTGC GGACTGCGACATTAGATCTCTCAGT  
+HWI-EAS443:3:93:205:555#0/1  
aaaa\_aaaa^a\_a^aaa\_\_`a\_a^\_`^````\_]`^\_^]\_X  
@HWI-EAS443:3:93:212:434#0/1  
ATGCAAGGCAGCAATAGGGTTGAGGATTAGCTCATCTTTC  
+HWI-EAS443:3:93:212:434#0/1  
][Y\_]`P¥V`a\_¥VZ]Xa]aa]Za]^]a^Z[\_\_\_ZH¥`a  
@HWI-EAS443:3:93:235:560#0/1  
GGGAGATCAATGGCCCTGAGTCAGTGCTAGTCAACACTTA  
+HWI-EAS443:3:93:235:560#0/1  
^ab^^`b\_HY\_\_[Yaa]\_[`a¥aUa]]]`VXYH¥`SVY\_  
@HWI-EAS443:3:93:240:1366#0/1  
GTCCCCTTTTCGTTTCATTACCAACTACGTTCCCTTGC  
+HWI-EAS443:3:93:240:1366#0/1  
`\_b\_XaG¥SXS¥[U]\_P]\_\_\_`\_[`H¥¥U^H^U`¥¥[GRNN  
@HWI-EAS443:3:93:241:787#0/1  
CTGTGGACCATATGGCCATAATCAAAAAGTACACATCAGG  
+HWI-EAS443:3:93:241:787#0/1  
^UZN\_U]]WUTSX]\_\_\_]ZVLYZPQGOXNRVSVUXWXQZB  
@HWI-EAS443:3:93:245:936#0/1  
ACAAGGACAAACCCTCTGGAGCAAAACAAACGATGCTGGA  
+HWI-EAS443:3:93:245:936#0/1  
`\_TV\_\_\_ba\_^^`abb`]a]bab¥V[aaaa^a`aaV^PJV  
@HWI-EAS443:3:93:250:413#0/1  
CCCCTTTTCGTTTCATTACCAACTACGTTCCCTTGGCC  
+HWI-EAS443:3:93:250:413#0/1  
^a¥a[\_a`a¥Z`a\_\_abb\_]`baY¥a^aR`[¥X]VYT]]  
@HWI-EAS443:3:93:257:376#0/1  
TTGCACTTAACCAAGGGACGTGCTGGGAGCAGATGTACA

+HWI-EAS443:3:93:257:376#0/1  
`]abaaba]aaa\_`Z`Y¥]^aPa]¥\_TVS^¥¥`^¥]U¥W¥  
@HWI-EAS443:3:93:266:216#0/1  
CTGAGAGATCTAATGTCGCAGTCCCGCACTCGCGAGATAC  
+HWI-EAS443:3:93:266:216#0/1  
abbbaabbbbbbbaaa`b`T`b\_``^W`^`^`^`U`ZR^W  
@HWI-EAS443:3:93:269:246#0/1  
GGCGTACATGCTAGAAAGAGAATTGGTCCGTAACAAGG  
+HWI-EAS443:3:93:269:246#0/1  
aa¥^OY[Taa\_]`UXRUV`a\_YY]TXRR¥SSWUTQZV\_^  
@HWI-EAS443:3:93:292:636#0/1  
AAAAGAAGTCTAATGTCGCAGTCCCGCACTCGC  
+HWI-EAS443:3:93:292:636#0/1  
``\_`b\_Z¥`^^`Wa\_]^XU\_\_`[^a¥^UNY`ZV]V^VY[\_  
@HWI-EAS443:3:93:309:1349#0/1  
GTCCCGTTTTCGTTTCATTACCAACTACGTCCCTTGC  
+HWI-EAS443:3:93:309:1349#0/1  
VVb`U\_V[bYbaZaaZ¥b``bbab¥][baab¥U\_aaa^aa  
@HWI-EAS443:3:93:31:2027#0/1  
TGTGTACTTTTTGATTATGGCCATATGGTCCACAGTGGTC  
+HWI-EAS443:3:93:31:2027#0/1  
`b`b^\_aa`baaaaaaaaa`aaa\_`[^\_VSQPW`[U\_[I¥  
@HWI-EAS443:3:93:320:1158#0/1  
GAGGATTTCTCATTGTTTGGGCAAAGAAGACAAGAGATATGG  
+HWI-EAS443:3:93:320:1158#0/1  
aaabY`aa]aaa\_aaa`^`^`aaa\_\_a^`^`a\_a\_`^`^`  
@HWI-EAS443:3:93:365:1023#0/1  
CAGACCCATTAGCATCTCTTGGAAATGTGCCACAGCAC  
+HWI-EAS443:3:93:365:1023#0/1  
aaa^aaaaaa\_`aaaaa``aaaaa\_\_`a^````^a`]\_¥  
@HWI-EAS443:3:93:368:578#0/1  
GAATAAAAGAAGTCTAATGTCGCAGTCCCGCAC  
+HWI-EAS443:3:93:368:578#0/1  
aYYaabaab]]a`aa^Z`\_\_a\_a\_`a\_`a]a\_RNPYT]V`  
@HWI-EAS443:3:93:36:194#0/1  
CTGTAATTGGGTATCTCATTGCCATCATCCACTTCATTCT  
+HWI-EAS443:3:93:36:194#0/1  
`¥\_]`^Z^aaa]Ta\_]ZUQW¥¥T¥SYP^\_RLSNFXUTYSLS  
@HWI-EAS443:3:93:380:1352#0/1  
GTCCCGTTTTCGTTTCATTACCAACTACGTCCCTTGC  
+HWI-EAS443:3:93:380:1352#0/1  
aZ\_U]aQRJ][\_\_¥^ZU\_]X¥`XZQ[\_[XPXR^YSPMMXZ  
@HWI-EAS443:3:93:386:441#0/1  
ACTTTCAAAGGACAAGCGGATCATCAGTCAAGAAAGAAG  
+HWI-EAS443:3:93:386:441#0/1  
a\_aaa`aa^Wba^`\_`a\_b`\_\_a`^`a^`\_\_a\_\_`a\_]\_  
@HWI-EAS443:3:93:421:1315#0/1  
GAGAGATCTAATGTCGCAGTCCCGCACTCGCGAGATACTC  
+HWI-EAS443:3:93:421:1315#0/1  
aba\_`babbabab]baaaaUbaaXaaa\_a¥\_`\_`[^^^MZ\_

@HWI-EAS443:3:93:42:847#0/1  
AAAGAAGTCTAATGTCGCAGTCCCGCACTCGCG  
+HWI-EAS443:3:93:42:847#0/1  
VX^\_RU[Yaaba`aaWaa\_b`aWxa[¥GSQS\_HYRINXSV  
@HWI-EAS443:3:93:438:1617#0/1  
GGAGGAGTAAGGATGGTGGACATCCTTAGACAGAATCCAA  
+HWI-EAS443:3:93:438:1617#0/1  
a`Z`baXN]aZWXyb^UPQa`\_`Xa¥``XZ¥[XTa[W¥HX  
@HWI-EAS443:3:93:449:476#0/1  
TGTCCTTGTTTCATTCTCTCTGGAATCATGTCCATTATTC  
+HWI-EAS443:3:93:449:476#0/1  
YZ\_`XZ[U]aX¥[`¥\_a\_aa\_S]\_`a\_a^a`]M^V^[]WN  
@HWI-EAS443:3:93:457:353#0/1  
AATTGGGCAAGGGGACGTAGTGTGGTAATGAAACGAAAA  
+HWI-EAS443:3:93:457:353#0/1  
ZTQ¥\_`^Y^``¥Z\_OI\_NS\_L\_O]\_\_LNVQRKXPXDLUaB  
@HWI-EAS443:3:93:470:1342#0/1  
TCCCGTTTTCGTTTCATTACCAACACTACGTCCCCTTGCC  
+HWI-EAS443:3:93:470:1342#0/1  
^a)`]FVV¥SbYOXW¥XQ`[WR¥]\_[^]\_HX\_XNXXYP]B  
@HWI-EAS443:3:93:471:368#0/1  
GAATAAAAGAACTGAGAGATCTAATGTCGCAGTCCCGCAC  
+HWI-EAS443:3:93:471:368#0/1  
`P\_`aaa`a\_a[b`aaaa\_`aaaaa]]\_X\_a^]]^WZ]  
@HWI-EAS443:3:93:482:1067#0/1  
AAAAGAACTGAGAGATCTAATGTCGCAGTCCCGCACTCGC  
+HWI-EAS443:3:93:482:1067#0/1  
aaa\_`^aaa]`a\_aZ`aaa\_aa¥\_`\_`a¥^\_`P^N[VURY  
@HWI-EAS443:3:93:503:1091#0/1  
TTTTCGTTTCATTACCAACACTACGTCCCCTTGCCCAATTA  
+HWI-EAS443:3:93:503:1091#0/1  
aaaaa]aa\_`a¥a[aaa\_aVa]aa\_FS[aX[¥X][[]]\_`  
@HWI-EAS443:3:93:505:457#0/1  
GAGAATAATGGACATGATTCCAGAGAGGAATGAACAAGGA  
+HWI-EAS443:3:93:505:457#0/1  
a`bbbbZbbbaabbbabab`aab]a`aaaaa`a^aaa`a  
@HWI-EAS443:3:93:54:1529#0/1  
GAATAAAAGAACTGAGAGATCTAATGTCGCAGTCCCGCAC  
+HWI-EAS443:3:93:54:1529#0/1  
a]]^a`]]]Va`^^`Y]Xa[^a\_\_\_VZZT\_`V[PRY]XU  
@HWI-EAS443:3:93:558:813#0/1  
GGTCTTAGTGAGTATCTCGCGAGTGC GGACTGCGACATT  
+HWI-EAS443:3:93:558:813#0/1  
U\_Zab\_V\_`\_`ba\_QW¥TW^¥QOQV^T]bNO¥a]V`]XZ]  
@HWI-EAS443:3:93:623:597#0/1  
GTCCCGTTTTCGTTTCATTACCAACACTACGTCCCCTTGCC  
+HWI-EAS443:3:93:623:597#0/1  
aabaab`aaabb`aaaaba`b`^^Yaa`a\_\_\_`aaWNU^Z¥  
@HWI-EAS443:3:93:695:87#0/1  
GGGAGATCAATGGCCCTGAGTCAGTGCTAGTCAACACTTA

+HWI-EAS443:3:93:695:87#0/1  
aaa\_a^a`a\_aa\_^]\_`a\_]Y^\_aW`]Y^^U^]YV]VY^Y  
@HWI-EAS443:3:93:718:1754#0/1  
TGACACTGTCCAAATAATAAACTTCTCCCCTTGCTGCT  
+HWI-EAS443:3:93:718:1754#0/1  
abaabaaa[aaaa`a`]aaaa`a`aa]`W\_^````\_a\_^  
@HWI-EAS443:3:93:730:521#0/1  
AGAGAATAAAAGAACTGAGAGATCTAATGTCGCAGTCCCG  
+HWI-EAS443:3:93:730:521#0/1  
ab\_b`bbbaa^\_aaabba`baaaaa`bb\_aba`a]Xa\_`  
@HWI-EAS443:3:93:742:1116#0/1  
AAAAGAACTGAGAGATCTAATGTCGCAGTCCCGCACTCGC  
+HWI-EAS443:3:93:742:1116#0/1  
^W]¥`U¥WP[b`RG[QT]UZ^ZT]ZIX^HU¥\_VZZUNXY¥  
@HWI-EAS443:3:93:782:1980#0/1  
GAAGGCACATCTGGGGTGGAGTCTGCTGCTCCTGAGAGGAT  
+HWI-EAS443:3:93:782:1980#0/1  
a^`a`babaa`ab[X\_U^]XaYa\_a\_^\_ZTVL`^a\_\_`VZ  
@HWI-EAS443:3:93:816:157#0/1  
GTATCTCATTGCCATCATCCACTTCATTCTGAGTGCGGGG  
+HWI-EAS443:3:93:816:157#0/1  
aX]ZNR\_POS[UWQ\_QS`SUGNRMNQVRRP^V\_BBBBBBB  
@HWI-EAS443:3:93:822:1385#0/1  
CCCCTTTTCGTTTTATTACCAACTACGTCCCCTTGCCC  
+HWI-EAS443:3:93:822:1385#0/1  
a\_``\_`\_a`¥Z`a\_aaabZWZ````^¥aYaT^0\_TY[[VS]  
@HWI-EAS443:3:93:824:311#0/1  
AAAGAACTGAGAGATCTAATGTCGCAGTCCCGCACTCGCG  
+HWI-EAS443:3:93:824:311#0/1  
a`aa`a\_aa`aa````a```a^`¥`a]WV^^X]]]X]X`  
@HWI-EAS443:3:93:837:1096#0/1  
AATAAAAGAACTGAGAGATCTAATGTCGCAGTCCCGCACT  
+HWI-EAS443:3:93:837:1096#0/1  
a\_aaaaa`[`aaa\_a\_a^`\_a¥^aa^^`a\_\_\_\_\_^]\_^]Y\_`  
@HWI-EAS443:3:93:841:1428#0/1  
AATAAAAGAACTGAGAGATCTAATGTCGCAGTCCCGCACT  
+HWI-EAS443:3:93:841:1428#0/1  
^``Ja\_`a`\_\_\_\_UZ\_a\_]`bb[a`a\_X``ROX]^VX[`  
@HWI-EAS443:3:93:861:295#0/1  
GATCTTGACCATTGAATTTTACAATTTCCAGTTCCT  
+HWI-EAS443:3:93:861:295#0/1  
aaaaaab^aa\_\_aaaa`aaaa`a\_a\_aa^[\_^]a\_]Y¥a  
@HWI-EAS443:3:93:888:1541#0/1  
GGGGACGTAGTGTGGTAATGAAACGAAACGGGACTCTA  
+HWI-EAS443:3:93:888:1541#0/1  
aZ¥ZYZJR¥XJRVZFLWa`RRXYXQVBBBBBBBBBBBB  
@HWI-EAS443:3:93:889:1103#0/1  
GAGACGAGCAGTCAATTGCTGAGGCAATAATTGTGGCCAT  
+HWI-EAS443:3:93:889:1103#0/1  
aaa``aaaaaa`baaa\_\_a```\_\_`aaa]a\_a]¥aUU¥V



@HWI-EAS443:3:93:889:1165#0/1  
GGAGTCTGCTGTCCTGAGAGGATTTCTCATTTTGGGCAAA  
+HWI-EAS443:3:93:889:1165#0/1  
¥¥ZWP\_`\_00\_R`]a^`a^YP[ `[VZ[X]Raa]¥]]¥TW  
@HWI-EAS443:3:93:913:730#0/1  
CAAAATGAGAAATCCTCTCAGGACAGCAGACTCCACCCCA  
+HWI-EAS443:3:93:913:730#0/1  
abb]bbbbbbbaaab^bbbbbabbb`bbaabaab`a\_`a  
@HWI-EAS443:3:93:966:954#0/1  
GTACATGAAGGGTATGAAGAATTCACAATGGTTGGGAGAA  
+HWI-EAS443:3:93:966:954#0/1  
a¥a\_`aaY\_\_a\_X¥``¥``\_\_``^^a^\_\_[U\_^`XX\_^¥  
@HWI-EAS443:3:94:1005:143#0/1  
CCCGCACTCAGAATGAAGTGGATGATGGCAATGAGATACC  
+HWI-EAS443:3:94:1005:143#0/1  
aa`bab\_baaaaabbaabYbbabb`aaaa`]^b\_a\_]VV  
@HWI-EAS443:3:94:1006:181#0/1  
CGCGAGATACTACTAAGACCACTGTGGACCATATGGCCA  
+HWI-EAS443:3:94:1006:181#0/1  
a^aba\_baa¥baa\_bbaaaZ¥``a\_^a^a\_[\_aa\_aWRFX  
@HWI-EAS443:3:94:101:1056#0/1  
GAGGATTTCTCATTTTGGGCAAAGAAGACAAGAGATATGG  
+HWI-EAS443:3:94:101:1056#0/1  
Y^aaaZabbb¥ab`b\_\_aaaaba^Laaa`ZaW^baaa\_a`  
@HWI-EAS443:3:94:1030:1355#0/1  
CCCGTTTTCGTTTTATTACCAACTACGTCCCCTTGCCC  
+HWI-EAS443:3:94:1030:1355#0/1  
`KXWS\_ab`X]ZZY`[``XXa]]WV\_¥RWZXNRYV\_\_XYV  
@HWI-EAS443:3:94:1030:1453#0/1  
GGAAAAGCACTTTTGCATCTTTTGGAAATGCCTCAAGAG  
+HWI-EAS443:3:94:1030:1453#0/1  
a\_¥OW¥X¥XN]V¥Z]ZW\_Ra\_QZ¥NNNYUUNO^VJYG^UV  
@HWI-EAS443:3:94:1051:2003#0/1  
AGTGGTCTTAGTGAGTATCTCGCGAGTGCGGGACTGCGAC  
+HWI-EAS443:3:94:1051:2003#0/1  
`PTLUDVa]UQQ¥Y[WaZWWTW\_] ]TOH^SW^BBBBBBBB  
@HWI-EAS443:3:94:1057:939#0/1  
GTTCTTGAAAGGATGCAGGTGCATTGACTGAAGATCCAG  
+HWI-EAS443:3:94:1057:939#0/1  
a¥¥abaYb`\_aaaX^]]`aa]`a\_a¥b[``aa]aaR\_] ]\_  
@HWI-EAS443:3:94:1095:1330#0/1  
GGGGACGTAGTGTGGTAATGAAACGAAACGGGACTCTA  
+HWI-EAS443:3:94:1095:1330#0/1  
`aba]`b``a]``aaa0`\_\_`ba]`\_aaa[^]`^Y\_Y^]  
@HWI-EAS443:3:94:1096:626#0/1  
AAAGAAGTGAAGATCTAATGTCGCAGTCCCGCACTCGCG  
+HWI-EAS443:3:94:1096:626#0/1  
aaaaaa\_aa`aaa\_aaaaa\_b\_^a\_\_aU^\_^\_¥W\_^\_¥`  
@HWI-EAS443:3:94:1133:1599#0/1  
AAAGAAGTGAAGATCTAATGTCGCAGTCCCGCACTCGCG

+HWI-EAS443:3:94:1133:1599#0/1  
aaaaaaaa`a\_a`a\_\_`aaaa\_a`V^`Y]W]W\_¥¥]XWWB  
@HWI-EAS443:3:94:1144:705#0/1  
TGGGTATCTCATTGCCATCATCCACTTCATTCTGAGTGCG  
+HWI-EAS443:3:94:1144:705#0/1  
\_`^`\_H]`aa[U¥QX¥^TV¥a`]^¥¥UP`U\_X`^Y¥`S\_Q\_  
@HWI-EAS443:3:94:1150:1295#0/1  
TGGGTATCTCATTGCCATCATCCACTTCATTCTGAGTGCG  
+HWI-EAS443:3:94:1150:1295#0/1  
aa`ZQW[[[Z]`aYFWL[aVZ^[Q\_^SV\_\_V^ZTLQ Nus  
@HWI-EAS443:3:94:1150:991#0/1  
CGTTTTCGTTTTCATTACCAACTACGTCCCCTTGCCCAA  
+HWI-EAS443:3:94:1150:991#0/1  
^b^`aa`bS\_aaaa\_a\_^\_aaa`a`^`W]Z]Z`Z^¥X¥^\_  
@HWI-EAS443:3:94:1244:1460#0/1  
GGCAGCAATAGGGTTGAGGATTAGCTCATCTTTCAGTTTT  
+HWI-EAS443:3:94:1244:1460#0/1  
a\_`¥[P[^RP¥KUU\_\_WaZ[^\_\_`N[^¥\_^\_\_¥KX^^¥^]  
@HWI-EAS443:3:94:125:751#0/1  
AAAAGAAGTGGAGATCTAATGTCGCAGTCCCGCACTCGC  
+HWI-EAS443:3:94:125:751#0/1  
aaaaa^`\_`aaabaaaaaa]```a`\_\_a^\_^\_\_\_[XY[\_^  
@HWI-EAS443:3:94:1276:328#0/1  
ATAAAGAAGTGGAGATCTAATGTCGCAGTCCCGCACTC  
+HWI-EAS443:3:94:1276:328#0/1  
`baaaba`a^baa`baaa\_ba^ab\_]a^aa\_V`]^ZZ¥V  
@HWI-EAS443:3:94:1300:333#0/1  
GGGACGTAGTGTGGTAATGAAACGAAAACGGGACTCTAG  
+HWI-EAS443:3:94:1300:333#0/1  
a¥a^^`¥`b^^aaY`\_aa\_abZ\_Y^`S\_`^]QZMV[[  
@HWI-EAS443:3:94:1302:422#0/1  
AAAAGAAGTGGAGATCTAATGTCGCAGTCCCGCACTCGC  
+HWI-EAS443:3:94:1302:422#0/1  
aaabaaaaaaa`aaaaba`ba\_`^aa^\_\_\_a\_\_^\_¥\_V  
@HWI-EAS443:3:94:1312:1150#0/1  
AAAGAAGTGGAGATCTAATGTCGCAGTCCCGCACTCGCG  
+HWI-EAS443:3:94:1312:1150#0/1  
^`Ua^b][S]`\_[^J^aaabb`Paa`]¥]UVR[^GZ[`T\_  
@HWI-EAS443:3:94:1359:237#0/1  
GCTGTAATTGGGTATCTCATTGCCATCATCCACTTCATTC  
+HWI-EAS443:3:94:1359:237#0/1  
a^baVXabababV\_a[a`\_bb`ZNV[^`^P[^¥\_\_TZ`^V  
@HWI-EAS443:3:94:1362:26#0/1  
AAAAGAAGTGGAGATCTAATGTCGCAGTCCCGCACTCGC  
+HWI-EAS443:3:94:1362:26#0/1  
``]\_`\_`\_a`\_`aaaY`a`^`a\_^VN\_`[^\_U`XXNUS^X  
@HWI-EAS443:3:94:1401:1810#0/1  
AATGTCGCAGTCCCGCACTCGCGAGATACTCACTAAGACC  
+HWI-EAS443:3:94:1401:1810#0/1  
``\_Z`T\_RH¥aa\_Z\_R`a\_Q[R\_U\_U[^V```V`¥H\_\_WF

@HWI-EAS443:3:94:1415:1458#0/1  
TGCTGTAATTGGGTATCTCATTGCCATCATCCACTTCATT  
+HWI-EAS443:3:94:1415:1458#0/1  
aaaaaTa]¥a`a\_R`a\_\_\_`\_aNU\_\_Va^^R`^^^O]\_\_\_  
@HWI-EAS443:3:94:1441:1199#0/1  
ATCCAGATGAAGGCACATCTGGGGTGGAGTCTGCTGTCCT  
+HWI-EAS443:3:94:1441:1199#0/1  
``aa\_]baaabb``b^aaZbaaQ¥Qa\_^\_¥`a`^`a¥WT]  
@HWI-EAS443:3:94:1456:318#0/1  
AAAAGAAGTGAAGATCTAATGTCGCAGTCCCGCACTCGC  
+HWI-EAS443:3:94:1456:318#0/1  
`]baaaa\_aaaa\_]aaabaabb^U\_¥aaUVXP¥LU]\_S]O  
@HWI-EAS443:3:94:1546:1445#0/1  
ATCTCATTGCCATCATCCACTTCATTCTGAGTGC GGGGTT  
+HWI-EAS443:3:94:1546:1445#0/1  
aa]a\_aa`aY\_aa\_aa\_Ya\_`a`^a`Yaa`aX\_Va\_\_\_^Y`  
@HWI-EAS443:3:94:154:1334#0/1  
GAGACGAGCAGTCAATTGCTGAGGCAATAATTGTGGCCAT  
+HWI-EAS443:3:94:154:1334#0/1  
a`abb`a^b`\_\_`aa`aa\_]a`S]aaa`baa]a¥¥\_\_\_^T  
@HWI-EAS443:3:94:1565:1552#0/1  
CACTTCTCCTCCTGGAGTGTACATCTGCTCCCAGCACGTC  
+HWI-EAS443:3:94:1565:1552#0/1  
a`^aa`aaa`¥aa\_a]a^a\_a^aaMaa¥]XXW^\_]^^SU  
@HWI-EAS443:3:94:1566:2041#0/1  
AAATGGAATTTGAACCATTTAGTCTCTTGTCCCTAAGGC  
+HWI-EAS443:3:94:1566:2041#0/1  
aabaa`aaa¥a`a¥S``\_\_W\_a^G^¥`\_^Z^XW]^`^W  
@HWI-EAS443:3:94:1576:1012#0/1  
CATCATCATTTCTCACTTCTCCTCCTGGAGTGTACATCTG  
+HWI-EAS443:3:94:1576:1012#0/1  
^bb`bb`bbbbbb^babb`bb^b\_abbbbb`baa^bb^ab  
@HWI-EAS443:3:94:1629:959#0/1  
CGCACTCGGAGATACTACTAAGACCACTGTGGACCATA  
+HWI-EAS443:3:94:1629:959#0/1  
N^Z`b^b`UbU\_`b[`Y\_`Vbb]`^a`bb`b]aa]`b^aa  
@HWI-EAS443:3:94:162:1615#0/1  
GCACCTCGGAGATACTACTAAGACCACTGTGGACCATAT  
+HWI-EAS443:3:94:162:1615#0/1  
a^Zbaa^\_bba]Z`aa^aaa\_baaa[a`XaPX`a\_a\_`a\_  
@HWI-EAS443:3:94:1651:1210#0/1  
GGACGTAGTGTGGTAATGAAACGAAAACGGGACTCTAGC  
+HWI-EAS443:3:94:1651:1210#0/1  
aba]^^abY\_`[`b¥[¥]bba`\_P`¥a\_\_Paaa[R`]]^[R  
@HWI-EAS443:3:94:1701:570#0/1  
GATGGCAATGAGATACCCAATTACAGCAGACAAGAGAATA  
+HWI-EAS443:3:94:1701:570#0/1  
`ab`\_Pab`aba`bb`]\_aababZaaaaba`^aa\_``^aa  
@HWI-EAS443:3:94:1724:961#0/1  
AATGAAGTGGATGATGGCAATGAGATACCCAATTACAGCA

+HWI-EAS443:3:94:1724:961#0/1  
`¥aYZaZHbbb^]\_b\_U\_\_aaabZa^XPNaaXa\_U\_UNa  
@HWI-EAS443:3:94:1732:816#0/1  
GGTGGAAATAGGAATGGCCCAACAACAAGTACAGTTCATTA  
+HWI-EAS443:3:94:1732:816#0/1  
a[HY`\_`aa¥a[PZ]a]U\_\_aSa¥P\_]ZM]\_\_\_\_Y]V][R\_  
@HWI-EAS443:3:94:1738:1955#0/1  
AACAAGGACAAACCCTCTGGAGCAAAACAAACGATGCTGG  
+HWI-EAS443:3:94:1738:1955#0/1  
aa^`\_\_aa\_aaaU¥\_`[aa`Za`a\_\_\_Xab]XY]^\_[\_`^X  
@HWI-EAS443:3:94:1764:662#0/1  
GCTCCCAGCACGTCCCTTGGGTTAAGTGCAACACTTCAAT  
+HWI-EAS443:3:94:1764:662#0/1  
aVYUZ\_\_TF¥]¥NQ\_¥\_\_[VTU¥¥X^PGSYUVTVQ[IUYT  
@HWI-EAS443:3:94:1785:1087#0/1  
CCCATTAGCATCTCTCTTGGAAATGTGCCACAGCACACAG  
+HWI-EAS443:3:94:1785:1087#0/1  
a`bYa[[ab\_\_\_\_`\_]`bbb^aa`\_ZaZ¥^^[`abbaaa^]b  
@HWI-EAS443:3:94:185:462#0/1  
GAGAGAATAAAAGAACTGAGAGATCTAATGTCGCAGTCCC  
+HWI-EAS443:3:94:185:462#0/1  
\_^baaU^bbaZabababb]\_aa\_aaa\_]a\_^a[\_\_\_ZY]Z  
@HWI-EAS443:3:94:204:816#0/1  
GGTTGAAACATGGTACCTTCGGCCCTGTCCACTTCAGAAA  
+HWI-EAS443:3:94:204:816#0/1  
abXI\_[V]\_\_T`bR^\_```aaa\_\_^[]^W[]`\_¥Y[^YO  
@HWI-EAS443:3:94:210:1135#0/1  
AGGGAACGTACTATTGTCTCCCGAAGAAGTCAGTGAAACG  
+HWI-EAS443:3:94:210:1135#0/1  
aa`a`baaQ\_aaaa`a\_aaaa\_a^a`^`^\_V`aa\_a`a\_]a  
@HWI-EAS443:3:94:231:15#0/1  
TGGTCCGTAAAACAAGGTTTCTCCAGTAGCCGGCGGAAC  
+HWI-EAS443:3:94:231:15#0/1  
abaZa]a\_`\_aa\_a\_aaU\_\_`a\_¥Z^W]^Z^^`Z\_YS¥W  
@HWI-EAS443:3:94:231:692#0/1  
CAAGGACAAACCCTCTGGAGCAAAACAAACGATGCTGGAT  
+HWI-EAS443:3:94:231:692#0/1  
a`b`b`aa^\_`]\_Xaa^[[]aaaa`]aa]a`ZBBBBBBB  
@HWI-EAS443:3:94:243:1814#0/1  
ATAAAAGAACTGAGAGATCTAATGTCGCAGTCCCGCACTC  
+HWI-EAS443:3:94:243:1814#0/1  
aa`babaa^`a`b\_aaaaa\_a```Wa`\_a\_Z\_^^¥`W^X]  
@HWI-EAS443:3:94:263:1742#0/1  
TTTATATTGAAGTGTGCACTTAACCCAAGGGACGTGCTG  
+HWI-EAS443:3:94:263:1742#0/1  
aaZ]ZOQW[]WZW]^W^Z]a`YW\_WY[X[```YYOQaYZ`  
@HWI-EAS443:3:94:265:225#0/1  
TTGATTTCTGAAGTGGACAGGGCCGAAGGTACCATGTTTC  
+HWI-EAS443:3:94:265:225#0/1  
aab\_aaaa`a`^`¥a\_`\_^\_``\_]\_W^`\_V]YW^^\_X^^X

@HWI-EAS443:3:94:277:1936#0/1  
GAAAGAAGAAGAAGTGTAAACGGGCAACCTCCAAACACTG  
+HWI-EAS443:3:94:277:1936#0/1  
ab¥U¥V\_YT¥b^X¥`bbaa]Z`]U[\_baa^`a¥ZZ¥a^`a  
@HWI-EAS443:3:94:28:1976#0/1  
AAAAGAAGTGTGAGATCTAATGTTCGCAGTCCCGCACTCGC  
+HWI-EAS443:3:94:28:1976#0/1  
aa`]NRW[ZNYJ\_PVPaYP[\_`Y\_^^^XV]^\_XZX]RVUT  
@HWI-EAS443:3:94:28:508#0/1  
GGGCGATCTGAAC TTTGTCAATAGGGCAAACCAGCGACTG  
+HWI-EAS443:3:94:28:508#0/1  
aaa`\_a[aaa\_¥`X`\_a]J[¥^`\_`VUQ\_\_`\_\_\_W¥¥V  
@HWI-EAS443:3:94:310:982#0/1  
TCCCGTTTTCGTTTTATTACCAACTACGTCCCTTGCC  
+HWI-EAS443:3:94:310:982#0/1  
a^aaa^aaaab`\_aaaaa\_`a`\_a`\_a\_aY^\_^]\_^]VY  
@HWI-EAS443:3:94:323:427#0/1  
CTGCTGTAATTGGGTATCTCATTGCCATCATCCACTTCAT  
+HWI-EAS443:3:94:323:427#0/1  
abbbbb`\_ba[¥[\_a\_aa`\_a`a`[\_`aaa]\_aYa\_Va`  
@HWI-EAS443:3:94:36:435#0/1  
AAAAGAAGTGTGAGATCTAATGTTCGCAGTCCCGCACTCGC  
+HWI-EAS443:3:94:36:435#0/1  
aba`aa`\_aa`a\_a\_a`a`\_aaY\_a`\_`Y\_`^`\_`^X^`^`  
@HWI-EAS443:3:94:376:1420#0/1  
CTCTGGAATCATGTCCATTATTCTCTTGTCTGCTGTAATT  
+HWI-EAS443:3:94:376:1420#0/1  
`¥aWКУ\_aa`\_WT^]^\_a^]^¥¥^]\_V`X^]]^WW]]U  
@HWI-EAS443:3:94:37:1110#0/1  
AATAAAGAAGTGTGAGATCTAATGTTCGCAGTCCCGCACT  
+HWI-EAS443:3:94:37:1110#0/1  
^`bbbaaaaa\_¥`aaaaabaaaa\_a^`aaWa\_a]\_\_^\_  
@HWI-EAS443:3:94:403:317#0/1  
TTCTTGACTGATGATCCGCTTGTCTTTTGAAAGTGAACC  
+HWI-EAS443:3:94:403:317#0/1  
abaaaaaaaa`aaaa\_\_a`\_aa^^^a]a`a`\_`\_Z``\_Y]  
@HWI-EAS443:3:94:418:669#0/1  
CTGACTTCTTCGGGAGACAATAGTACGTTCCCTCTTTGAT  
+HWI-EAS443:3:94:418:669#0/1  
a\_bbabbabbaaa[ab]aa\_aa^^]Pa¥\_^`\_`\_a`a^X^  
@HWI-EAS443:3:94:480:416#0/1  
CACAGATTGGAGGAGTAAGGATGGTGGACATCCTTAGACA  
+HWI-EAS443:3:94:480:416#0/1  
abbaa`\_bbb^aaab\_bab`aaaa]`aa\_a¥`aaa\_a`^a  
@HWI-EAS443:3:94:485:207#0/1  
AGAGAATAAAGAAGTGTGAGATCTAATGTTCGCAGTCCCG  
+HWI-EAS443:3:94:485:207#0/1  
ab\_b\_aaa`aaaa`aaa`\_aaa]aa]ab^\_[^`\_`^YV^^  
@HWI-EAS443:3:94:485:416#0/1  
AAAGAAGTGTGAGATCTAATGTTCGCAGTCCCGCACTCGCG

+HWI-EAS443:3:94:485:416#0/1  
aaba^aabaa\_aa\_`aaa^ab\_a\_]a`]¥\_\_\_\_[P^`\_^Y\_  
@HWI-EAS443:3:94:48:418#0/1  
GGGCGATCTGAACCTTGTCAATAGGGCAAACCAGCGACTG  
+HWI-EAS443:3:94:48:418#0/1  
aaa`a`aa`aaaaa^`aa^X`\_a[a`a[Z\_a\_`^^\_\_  
@HWI-EAS443:3:94:511:1808#0/1  
GGGTATCTCATTGCCATCATCCACTTCATTCTGAGTGCGG  
+HWI-EAS443:3:94:511:1808#0/1  
aaaYaaaaaaa`\_`aaa\_aaa\_b`a`a\_\_`¥\_``\_Y`[^`^  
@HWI-EAS443:3:94:51:971#0/1  
CGCACTCGCGAGATACTACTAAGACCACTGTGGACCATA  
+HWI-EAS443:3:94:51:971#0/1  
abbaa\_baaaaba\_a\_^]aZaaU`\_`aaa\_aN`a`¥]^X\_  
@HWI-EAS443:3:94:531:742#0/1  
ATGTGCGAGTCCCGCACTCGCGAGATACTACTAAGACCA  
+HWI-EAS443:3:94:531:742#0/1  
a\_W`Z`T`X\_^ZT]V][[]]¥P]]^`aZ]S^W\_`ZQQZ  
@HWI-EAS443:3:94:548:127#0/1  
GTCCCCTTTTCGTTTCATTACCAACTACGTCCCCTTGC  
+HWI-EAS443:3:94:548:127#0/1  
WL^a[\_abbbbababaZ[`aaaabaa\_[^a`]^\_XPQ\_^`Y  
@HWI-EAS443:3:94:550:776#0/1  
AATAAAAGAACTGAGAGATCTAATGTGCGAGTCCCGCACT  
+HWI-EAS443:3:94:550:776#0/1  
^`bbbb\_baabbbab^bbaabaaba`aaa`^[aaaaaXa`  
@HWI-EAS443:3:94:569:706#0/1  
GTCCCCTTTTCGTTTCATTACCAACTACGTCCCCTTGC  
+HWI-EAS443:3:94:569:706#0/1  
`\_babbabbbabaababbbbbbabbabaab`a\_a\_\_`aaa`  
@HWI-EAS443:3:94:573:27#0/1  
GTTTTCGTTTCATTACCAACTACGTCCCCTTGCCCAAT  
+HWI-EAS443:3:94:573:27#0/1  
`W^Z\_]\_W\_aa^]\_¥XOY^Z\_V`¥VYWVYUYW[ZUUYYTTT  
@HWI-EAS443:3:94:574:649#0/1  
GAATTCTTCATACCCTTCATGTACTCTTATTTTCAGTGTT  
+HWI-EAS443:3:94:574:649#0/1  
aZM¥a]aaa\_a\_]Z```aaa^a¥a`\_`aa\_a`\_WZYa]\_  
@HWI-EAS443:3:94:582:416#0/1  
CTGCTGTAATTGGGTATCTCATTGCCATCATCCACTTCAT  
+HWI-EAS443:3:94:582:416#0/1  
``abbaZ^baaa\_b`a`^`aa`\_]\_a`a\_[`¥U\_aZaa  
@HWI-EAS443:3:94:584:120#0/1  
AAAGAACTGAGAGATCTAATGTGCGAGTCCCGCACTCGCG  
+HWI-EAS443:3:94:584:120#0/1  
aaaa\_a`aaaa\_\_\_\_`^`a\_`a¥`^¥¥\_Y¥W¥¥¥W¥¥Y¥Y¥  
@HWI-EAS443:3:94:616:837#0/1  
CAACCCTGATCCTCTCACATTCACAGTCAATGAGGAAAAT  
+HWI-EAS443:3:94:616:837#0/1  
abbab]a\_aaaba`aaa\_aa\_X]^]a]`\_aaa\_a¥\_\_`a

@HWI-EAS443:3:94:61:520#0/1  
GAGAATAGCTGTTGCTCTTCTCCCAACCATTGTGAATTCT  
+HWI-EAS443:3:94:61:520#0/1  
aa^a`YJYa[\_Z^^]¥[\_a]Q\_aZZJVJTWVPOSJQTG^  
@HWI-EAS443:3:94:628:1456#0/1  
GTGCCACAGCACACAGATTGGAGGAGTAAGGATGGTGGAC  
+HWI-EAS443:3:94:628:1456#0/1  
aUaaaa\_``baa`aa\_aaaa`ba^a\_aa\_]\_\_`aW\_\_`W  
@HWI-EAS443:3:94:657:1480#0/1  
CTTTGATCTCTAACCCCTTAAAAATCGGTCAATACTCACTA  
+HWI-EAS443:3:94:657:1480#0/1  
abbaa`bababbbbaabbabbaabaaa]abaabaa`b\_ab  
@HWI-EAS443:3:94:658:1679#0/1  
AAAAGATGCAAAAAGTCTTTTCCAGAACTGGGAATTGAA  
+HWI-EAS443:3:94:658:1679#0/1  
`]¥a` `[bbbb\_aa\_aaaaa`abaa`a`ba]]\_aaaaaa  
@HWI-EAS443:3:94:688:239#0/1  
AATAAAAGAACTGAGAGATCTAATGTCGCAGTCCCGCACT  
+HWI-EAS443:3:94:688:239#0/1  
¥a\_aVa[YSbRSZ]GSU\_^ZXOXa¥T^F[\_SSLW¥PM]B  
@HWI-EAS443:3:94:712:1362#0/1  
GGCTTGTTCCTCAGTTGGATTCTGTCTAAGGATGTCCACC  
+HWI-EAS443:3:94:712:1362#0/1  
`babba[abaaa^aabb` `\_aab]]a\_^aaaa`a^\_Z`Z\_  
@HWI-EAS443:3:94:769:600#0/1  
CCCGCACTCAGAATGAAGTGGATGATGGCAATGAGATACC  
+HWI-EAS443:3:94:769:600#0/1  
aa`aaa¥aa`b\_\_a^\_YZ^\_a^`a^\_aaa[\_a` `a^^`^M  
@HWI-EAS443:3:94:788:356#0/1  
GTCCCGTTTTTCGTTTCATTACCAACTACGTCCCTTGC  
+HWI-EAS443:3:94:788:356#0/1  
aZ[a\_aZaa]aaY`\_\_Z\_]aa\_aY]^]]`]]Y^YU]XQVW  
@HWI-EAS443:3:94:788:819#0/1  
GTCCCGTTTTTCGTTTCATTACCAACTACGTCCCTTGC  
+HWI-EAS443:3:94:788:819#0/1  
a^YYRaQ^\_W\_¥P`][`aa^a[Z[G^V[a` `^¥QQY^¥YR  
@HWI-EAS443:3:94:788:908#0/1  
AAAAGAAGTGGAGATCTAATGTCGCAGTCCCGCACTCGC  
+HWI-EAS443:3:94:788:908#0/1  
ab\_baaaaaaaaaaaaaaaaaaaaa\_\_`\_aa\_\_\_\_\_`\_\_\_\_Z\_V  
@HWI-EAS443:3:94:800:1878#0/1  
GAAACCTTGTTCCTACGGACCAATTCTCTTTCTAGCATGTA  
+HWI-EAS443:3:94:800:1878#0/1  
a` `a]]]``[aaa`a`Y\_`a` `aZY\_\_aaaa`aYVa¥¥Wa  
@HWI-EAS443:3:94:802:981#0/1  
GTGAGTATTGACCGATTTTTAAGGGTTAGAGATCAAAGAG  
+HWI-EAS443:3:94:802:981#0/1  
[^`]a[Y`a^]X¥X\_¥aaa\_N¥]]`\_\_[^N^[]R]\_\_\_\_WV  
@HWI-EAS443:3:94:804:1569#0/1  
ATTCCAGAGAGGAATGAACAAGGACAAACCCTCTGGAGCA

+HWI-EAS443:3:94:804:1569#0/1  
`\_ba^ZZV¥]^ ^^ ^ba]`U¥W]\_\_aaa\_S[¥a`^\_`¥a  
@HWI-EAS443:3:94:839:1082#0/1  
ATTTCCCAGTTCCTGATTATCCATTGATAAGTGTGACTA  
+HWI-EAS443:3:94:839:1082#0/1  
a`aaaa`aa^`^`\_`\_aaaa\_aa\_`\_`\_a\_^Za]^ ^^\_X\_`  
@HWI-EAS443:3:94:842:1200#0/1  
CCCGTTTTTCGTTTCATTACCAACTACGTCCCCTTGCCC  
+HWI-EAS443:3:94:842:1200#0/1  
aaaa\_aa`[ `[]\_Y]a` ` `aaaa` `aU^T]\_`¥[\_Z\_T  
@HWI-EAS443:3:94:904:1056#0/1  
ATCTAATGTCGCAGTCCCGCACTCGCGAGATACTCACTAA  
+HWI-EAS443:3:94:904:1056#0/1  
a\_\_`a\_aa^\_\_`\_`\_]a^]XV[^¥¥\_W\_¥¥SX¥WUS¥S¥WW  
@HWI-EAS443:3:94:909:1130#0/1  
TAATGTCGCAGTCCCGCACTCGCGAGATACTCACTAAGAC  
+HWI-EAS443:3:94:909:1130#0/1  
a\_aab[aaaa`\_\_`]]`Z\_\_a\_`^[\_Z^XR\_Z\_V[\_\_\_Z[V  
@HWI-EAS443:3:94:923:167#0/1  
GCACTTTTGCATCTTTTTGGAAATGCCTCAAGAGTTGGTG  
+HWI-EAS443:3:94:923:167#0/1  
a`a\_aaaaa^`^`^aaa` `a\_\_\_` \_\_ZY\_\_]^ \_]\_Y^`^Y`  
@HWI-EAS443:3:94:946:351#0/1  
GTCGCAGTCCCGCACTCGCGAGATACTCACTAAGACCACT  
+HWI-EAS443:3:94:946:351#0/1  
a^aa¥aaY\_^a`^]`\_\_^` ` ` \_^^^¥\_¥^^^\_¥WY]¥¥  
@HWI-EAS443:3:94:974:559#0/1  
CCCGTTTTTCGTTTCATTACCAACTACGTCCCCTTGCCC  
+HWI-EAS443:3:94:974:559#0/1  
aabbaabbababbabbbbaabaaaaaa`aa`a`aaa\_^^  
@HWI-EAS443:3:95:1019:1256#0/1  
AAAAGAAGTGAAGATCTAATGTCGCAGTCCCGCACTCGC  
+HWI-EAS443:3:95:1019:1256#0/1  
[UZWXTXU¥aaX[Ua\_Ua^`aUT¥^` `VG¥[Z`]OZXa`X  
@HWI-EAS443:3:95:1025:420#0/1  
CCGCTTGCTTTTTGAAAGTGAACCCACAAAAGTGAAG  
+HWI-EAS443:3:95:1025:420#0/1  
]aab`aa^a¥abbb` ` ` `]baU]¥\_¥\_Vabbb`\_bb\_baa  
@HWI-EAS443:3:95:1044:702#0/1  
CACATTCACAGTCAATGAGGAAAATTGCATCCTACTCTGT  
+HWI-EAS443:3:95:1044:702#0/1  
` `bbb¥]bbbbaXa`bb`baba`abbbbbbb¥baaa[bba  
@HWI-EAS443:3:95:1086:1908#0/1  
GGTGGTTCACTTTCAAAGGACAAGCGGATCATCAGTCA  
+HWI-EAS443:3:95:1086:1908#0/1  
OaIS\_aU`UaK`b[bb\_bbaaaba\_a` `Y\_aY[bbab^a[  
@HWI-EAS443:3:95:1086:544#0/1  
AGAGAATAATGGACATGATTCCAGAGAGGAATGAACAAGG  
+HWI-EAS443:3:95:1086:544#0/1  
aa`b\_abaabba\_[[abaaaa`aa`b^b` ` ` `a` `S]L]`



@HWI-EAS443:3:95:1098:1493#0/1  
AAGAAGTCTAATGTCGCAGTCCCCTCGCGA  
+HWI-EAS443:3:95:1098:1493#0/1  
]XZPH[ZSVZX\_[^U[Z]\_aUZZ]]`U\_UY¥QZ[XKTFVV  
@HWI-EAS443:3:95:1169:1409#0/1  
AGCAGACCCATTAGCATCTCTTGGAAATGTGCCACAGC  
+HWI-EAS443:3:95:1169:1409#0/1  
a^]ab^^`ab`]`aY\_b\_baaa`b`]aaaab\_aaaa`a`\_  
@HWI-EAS443:3:95:1188:1381#0/1  
GAAGAAAGAAGAGCTCCAGGATTGAAAATTGCTCCCTTG  
+HWI-EAS443:3:95:1188:1381#0/1  
aaaba`b`\_aa`a`\_aa\_aa`aaa\_]a```aa]\_\_^^\_``  
@HWI-EAS443:3:95:1193:1897#0/1  
AATGAACAAGGACAAACCCTCTGGAGCAAAACAAACGATG  
+HWI-EAS443:3:95:1193:1897#0/1  
aba\_aa\_a][\_]Na\_dNJ`Wq]^^a^[\_aR\_^YOW^\_B  
@HWI-EAS443:3:95:121:2022#0/1  
ACATTTGACTGTCCAAATAATAAACTTCTCCCCTTTG  
+HWI-EAS443:3:95:121:2022#0/1  
`a`J^\_]a`Z]`baaXaa]W]`baXaX0\_\_```0][¥`  
@HWI-EAS443:3:95:124:1813#0/1  
GTTCTGGAAAAGCACTTTTGCATCTTTTGGAAATGCCTC  
+HWI-EAS443:3:95:124:1813#0/1  
a\_]PTSPUUHT^Va\_\_[SS[a[UNWU\_`TM¥`SVVW\_TQ\_  
@HWI-EAS443:3:95:1383:1700#0/1  
AGAGATCTAATGTCGCAGTCCCCTCGCGAGATACTCA  
+HWI-EAS443:3:95:1383:1700#0/1  
`J\_`aa^b`abba]aaaS[¥\_G\_NQ]¥]\_`ZTYZPMVS]  
@HWI-EAS443:3:95:1384:243#0/1  
GAACTGAGAGATCTAATGTCGCAGTCCCCTCGCGAGA  
+HWI-EAS443:3:95:1384:243#0/1  
`aa\_aaY`ababZb`aab\_\_`\_a`T¥¥`¥\_TZQ\_W¥U\_W  
@HWI-EAS443:3:95:1403:755#0/1  
CCCCAGTTCTGGAAAAGCACTTTTGCATCTTTTGGAAAT  
+HWI-EAS443:3:95:1403:755#0/1  
aSZ[bb[a`¥\_¥`\_aaa`ba\_[b\_\_¥bbVbbab^bbbbbb  
@HWI-EAS443:3:95:1444:1906#0/1  
GAGATCTAATGTCGCAGTCCCCTCGCGAGATACTCAC  
+HWI-EAS443:3:95:1444:1906#0/1  
`baababb`b^bUaabbbbababbZbZZabZUba¥JZD^D  
@HWI-EAS443:3:95:153:199#0/1  
TTCTCATTTTGGGCAAAGAAGACAAGAGATATGGCCCAGC  
+HWI-EAS443:3:95:153:199#0/1  
[\_`S]¥abZaZZ]^YY]a][XXWP]NWW`\_Z^RQKIT¥X  
@HWI-EAS443:3:95:1575:1768#0/1  
CATCATTTCTCACTTCTCCTCCTGGAGTGACATCTGCTC  
+HWI-EAS443:3:95:1575:1768#0/1  
aab]aabababb\_[abbU^aa[abb`aabaa\_abbUa\_\_V  
@HWI-EAS443:3:95:1727:1411#0/1  
ATTTTGTGACTCTTATCCCTCTCAGCGACATCTCCGTGC

+HWI-EAS443:3:95:1727:1411#0/1  
\_baaa`aba`baa`a\_Z`¥`Saaa\_aba[aa\_aUV[^ZH  
@HWI-EAS443:3:95:257:86#0/1  
GAACTGTAAGTCGTTTGGTTGCCTTGTGTAATTGAATAC  
+HWI-EAS443:3:95:257:86#0/1  
a\_]b\_VRXa^\_X^`XM^\_]\_\_a]^[[¥^\_]SQ]]  
@HWI-EAS443:3:95:270:57#0/1  
AAAAGAAGTCTAATGTCGCAGTCCCGCACTCGC  
+HWI-EAS443:3:95:270:57#0/1  
`aabbaaaabaa[ba`]aa\_bb`\_b`a\_Z[]a^^¥^U\_]  
@HWI-EAS443:3:95:273:1678#0/1  
CCACTGTGGACCATATGCCATAATCAAAAAGTACACATC  
+HWI-EAS443:3:95:273:1678#0/1  
aaaa^Za]aaa]aa\_aa`a`\_\_`¥T^^`\_R\_¥\_R`^0  
@HWI-EAS443:3:95:274:1962#0/1  
AAAATTGCATCCTACTCTGTTCTGGTGGAGCAGCAGCAA  
+HWI-EAS443:3:95:274:1962#0/1  
a]^a\_PU\_a\_\_`Y`ZR]\_aY^a^\_Qs]^`\_\_^][0^Y]  
@HWI-EAS443:3:95:308:556#0/1  
GAATGATCGGAATACTGCCGACATGACCCCAAGCACGGA  
+HWI-EAS443:3:95:308:556#0/1  
a^\_`^aa`a¥aaaa`a`]¥Y]`aaaa`\_VYW^^`a[¥^`¥  
@HWI-EAS443:3:95:361:259#0/1  
AAAAGAAGTCTAATGTCGCAGTCCCGCACTCGC  
+HWI-EAS443:3:95:361:259#0/1  
aa`baa`aabaaaa`a\_aa\_ab]^aZaaX][`¥NY^^]]  
@HWI-EAS443:3:95:377:843#0/1  
ATGTCGCAGTCCCGCACTCGCGAGATACTACTAAGACCA  
+HWI-EAS443:3:95:377:843#0/1  
aab\_aabb`\_a````aa`a`aa[\_```]`\_Va\_a[\_`¥^\_  
@HWI-EAS443:3:95:379:808#0/1  
GGCCCAACAACAAGTACAGTTCATTACCCTAAGGTATATA  
+HWI-EAS443:3:95:379:808#0/1  
a¥TFUXS]¥YJ[aYWZN]\_S[PV`U^[]`XRXS^`Z[]W\_V  
@HWI-EAS443:3:95:400:261#0/1  
GTCCCGTTTTTCGTTTCATTACCAACTACGTCCTTGC  
+HWI-EAS443:3:95:400:261#0/1  
^U`aaa^`a^b```]\_\_aa`\_]`]`\_\_`^]^XY^XR]XXX  
@HWI-EAS443:3:95:405:1645#0/1  
GAACTGAGAGATCTAATGTCGCAGTCCCGCACTCGCGAGA  
+HWI-EAS443:3:95:405:1645#0/1  
]```a]]`a`[bbabbab^`baaa^`aa\_a\_\_\_aa`\_\_\_`  
@HWI-EAS443:3:95:430:828#0/1  
AGCACACAGATTGGAGGAGTAAGGATGGTGGACATCCTTA  
+HWI-EAS443:3:95:430:828#0/1  
`babba\_ba^aab`Zb\_\_a^aaaa^`\_`X\_V\_^^`\_¥`\_`  
@HWI-EAS443:3:95:453:2026#0/1  
AAAGAAGTCTAATGTCGCAGTCCCGCACTCGCG  
+HWI-EAS443:3:95:453:2026#0/1  
WT^^¥\_bbb[X¥\_b[baabUb`\_¥a^¥ZZWRFUOQPPP\_[]

@HWI-EAS443:3:95:465:38#0/1  
AGAATAAAAGAACTGAGAGATCTAATGTCGCAGTCCCGCA  
+HWI-EAS443:3:95:465:38#0/1  
abbbbabbbbabab`baaabaab`ab\_]`^Z\_^  
@HWI-EAS443:3:95:47:199#0/1  
GGGAGATCAATGGCCCTGAGTCAGTGCTAGTCAACACTTA  
+HWI-EAS443:3:95:47:199#0/1  
ab]Ta\_\_\_\_\_`aX]\_`\_]aWW[\_V\_Z]^\_YZVYXZWZYX  
@HWI-EAS443:3:95:501:751#0/1  
AGAACCCCGCACTCAGAATGAAGTGGATGATGGCAATGAG  
+HWI-EAS443:3:95:501:751#0/1  
Q\_¥X]Ybbaa[IV]MT¥^`b\_a`Qbb\_^¥N[b\_\_0^X^^a  
@HWI-EAS443:3:95:565:370#0/1  
CTTCTGATGTGTACTTTTTGATTATGGCCATATGGTCCA  
+HWI-EAS443:3:95:565:370#0/1  
abbbbababbaaabbbbbaaaab`ab`b\_]aa  
@HWI-EAS443:3:95:585:506#0/1  
CTGTAATTGGGTATCTCATTGCCATCATCCACTTCATTCT  
+HWI-EAS443:3:95:585:506#0/1  
abaaabbbbaa`bb`abab`b^aa`a`aa`\_`b\_\_aa`\_  
@HWI-EAS443:3:95:605:1329#0/1  
TGAAACGCAAGGAACTGAGAAGTTGACAATAACTTATTCG  
+HWI-EAS443:3:95:605:1329#0/1  
a¥\_`bYaWb]\_]`^a\_aaaaa`aT]a]\_\_^aaa\_a^`^`\_  
@HWI-EAS443:3:95:608:318#0/1  
GGCGATCTGAACTTTGTCAATAGGGCAAACCAGCGACTGA  
+HWI-EAS443:3:95:608:318#0/1  
ab`aaa\_aa`a`aabb\_`baaabaab`aXb\_ab\_Vaa`  
@HWI-EAS443:3:95:615:1299#0/1  
CGCACTCGCGAGATACTACTAAGACCACTGTGGACCATA  
+HWI-EAS443:3:95:615:1299#0/1  
ab`[^b`TYO\_Z^UWH[Y]]\_b\_WX^J]X`Q[[]aVa]`[  
@HWI-EAS443:3:95:622:1613#0/1  
GAATAAAAGAACTGAGAGATCTAATGTCGCAGTCCCGCAC  
+HWI-EAS443:3:95:622:1613#0/1  
abbb\_aaababbbabbaa\_bbabbaaaaa[[\_`\_a^`  
@HWI-EAS443:3:95:624:1245#0/1  
ATAAAAGAACTGAGAGATCTAATGTCGCAGTCCCGCACTC  
+HWI-EAS443:3:95:624:1245#0/1  
aaa[aaaUa`\_aY\_aaa¥\_\_a`b]``\_`aX^\_aU\_^¥]V  
@HWI-EAS443:3:95:642:876#0/1  
GTGGTCTTAGTGAGTATCTCGCGAGTGCGGGACTGCGACA  
+HWI-EAS443:3:95:642:876#0/1  
aaba^`a`a`a[a`bbaa]^]a]\_]`aaaa¥¥`a\_a^[\_  
@HWI-EAS443:3:95:644:514#0/1  
GGGACGTAGTGTGGTAATGAAACGAAAACGGGACTCTAG  
+HWI-EAS443:3:95:644:514#0/1  
abbaba`aa\_b`aaa`a`a`\_aa\_a\_a`a`\_`^^`\_`a`\_  
@HWI-EAS443:3:95:661:574#0/1  
GAATAAAAGAACTGAGAGATCTAATGTCGCAGTCCCGCAC

+HWI-EAS443:3:95:661:574#0/1  
aaaaa`^\_a]]X`aa^^aaa`\_a\_aaXa`¥[\_X\_X[\_^YY  
@HWI-EAS443:3:95:664:614#0/1  
GGCGATCTGAACTTTGTCAATAGGGCAAACCAGCGACTGA  
+HWI-EAS443:3:95:664:614#0/1  
abbbba^a\_ba^bbab¥`aaaaabb`bbbb\_aaaba`aaa  
@HWI-EAS443:3:95:679:387#0/1  
AGCACATCCCGCATTTGCTGGAACAGTGCCTTACGAATC  
+HWI-EAS443:3:95:679:387#0/1  
aaaaaa`aa]aaaa``a\_a`]a[aa\_a]\_Wa\_a\_\_\_\_`\_Q  
@HWI-EAS443:3:95:723:386#0/1  
CTGCTGTAATTGGGTATCTCATTGCCATCATCCACTTCAT  
+HWI-EAS443:3:95:723:386#0/1  
abbbbaaaaa`bbb\_baabaabaa`aabXbaabaab]ab  
@HWI-EAS443:3:95:778:410#0/1  
AACTGAGAGATCTAATGTCGCAGTCCCGCACTCGCGAGAT  
+HWI-EAS443:3:95:778:410#0/1  
ab`bbababbaabbabbaaaaaab`\_\_```\_aa\_a\_a\_a`¥  
@HWI-EAS443:3:95:780:1604#0/1  
ATGTGCCTTCATCTGGATCTTCAGTCAATGCACCTGCATC  
+HWI-EAS443:3:95:780:1604#0/1  
JW```a`bbabbbbaaaaaabaa]^X\_b\_Ta[```] ^aaaX  
@HWI-EAS443:3:95:790:844#0/1  
GAATAAAAGAACTGAGAGATCTAATGTCGCAGTCCCGCAC  
+HWI-EAS443:3:95:790:844#0/1  
a`bb\_aaba\_a`aa]aaba\_\_aa\_bb\_aa`\_aY`]]`\_\_  
@HWI-EAS443:3:95:790:949#0/1  
GCACTCGCGAGATACTCACTAAGACCACTGTGGACCATAT  
+HWI-EAS443:3:95:790:949#0/1  
[^`^^[^`^¥a`aa`^Wa¥aaa[`]aaaba\_\_P`aX]\_S\_  
@HWI-EAS443:3:95:792:1250#0/1  
AGTCAATGCACCTGCATCCTTTCCAAGAACTGTAAGTCGT  
+HWI-EAS443:3:95:792:1250#0/1  
[a]abbabab\_a]b]aa`^aaaa`aa`b`aa`aaa]Wa\_  
@HWI-EAS443:3:95:832:1064#0/1  
CTAATGTCGCAGTCCCGCACTCGCGAGATACTCACTAAGA  
+HWI-EAS443:3:95:832:1064#0/1  
abbbb]abaaab`aabaaaabaababbaa`aaa`baaa\_  
@HWI-EAS443:3:95:845:1694#0/1  
CGGCGGAACAGGCAGTGTATATTGAAGTGTGCACTTA  
+HWI-EAS443:3:95:845:1694#0/1  
]\_¥`b`[a[[aba]\_TaT¥]aa`¥\_HX\_]H^¥XSHXFQ¥¥  
@HWI-EAS443:3:95:885:1715#0/1  
ATTCTCTTTCTAGCATGTACGCCACCATCAAGGGAGCAAT  
+HWI-EAS443:3:95:885:1715#0/1  
abaa\_``a\_\_^\_YaXaWM]¥¥QDYa¥a^R\_Wa^ZaX^\_^a  
@HWI-EAS443:3:95:914:1554#0/1  
ATACCATCACTCGGTCTGATCCAGCATCGTTTTGTTTGCT  
+HWI-EAS443:3:95:914:1554#0/1  
aab`^baabba`ba^baaaaa\_aabaab]aab`aaa`\_`\_`

@HWI-EAS443:3:95:923:1568#0/1  
AGAGGATTTCTCATTTTGGGCAAAGAAGACAAGAGATATG  
+HWI-EAS443:3:95:923:1568#0/1  
aab¥aaaabaa`ababaaa`\_aaaaaaaa`a`aaa`\_\_\_\_  
@HWI-EAS443:3:95:928:921#0/1  
CTGTAATTGGGTATCTCATTGCCATCATCCACTTCATTCT  
+HWI-EAS443:3:95:928:921#0/1  
abbbbbbbbab¥bbbbbbba`aababaabbabbabaab  
@HWI-EAS443:3:95:92:672#0/1  
GTCCCCTTTTCGTTTCATTACCAACTACGTCCCCTTGC  
+HWI-EAS443:3:95:92:672#0/1  
a`¥`ab\_]XaaZ\_[¥Za`\_ZYa[\_\_\_\_`\_Z[V]V\_U]UU¥  
@HWI-EAS443:3:95:935:382#0/1  
TCAGAAAGGCAACCAGGAGATTGATCCAGTTGATAGTAAG  
+HWI-EAS443:3:95:935:382#0/1  
`abaaaaaaaa`^`ba`^aaaaa^`\_a\_aa\_a`\_]\_^Z  
@HWI-EAS443:3:95:949:757#0/1  
GCTGTCTGAGAGATTTCTCATTTTGGGCAAAGAAGACA  
+HWI-EAS443:3:95:949:757#0/1  
]`bbaa`abbaaab^b```aa\_abaaabba`aaa`ab^^`  
@HWI-EAS443:3:95:950:332#0/1  
GGGGACGTAGTGTGGTAATGAAACGAAAACGGGACTCTA  
+HWI-EAS443:3:95:950:332#0/1  
abaa^^b`aa]aaaaV`\_¥\_aaa¥]aaaU\_a`^[\`R¥\_  
@HWI-EAS443:3:96:1011:1023#0/1  
AGAAAGAAGAGCTCCAGGATTGAAAATTGCTCCCTTGAT  
+HWI-EAS443:3:96:1011:1023#0/1  
aaaaaa\_aaaa^\_a^aa\_\_a`a^`\_`\_aa\_X``^¥`\_`\_\_\_\_  
@HWI-EAS443:3:96:103:1391#0/1  
GATTAGCTCATCTTTCAGTTTTGGTGGGTTCACTTTCAAA  
+HWI-EAS443:3:96:103:1391#0/1  
^ZTZV\_a[\_Z`]T\_a[WZN]]Y``GRW^^Y[aPZZ^^UZa  
@HWI-EAS443:3:96:1040:1692#0/1  
ATTGCCTCTTACCAGTATCCTCAACCCTGATCCTCTCACA  
+HWI-EAS443:3:96:1040:1692#0/1  
aWa\_]Wa^b\_\_VV`aJ]ZWY^^[a]L]][[aTHVG]SRM^  
@HWI-EAS443:3:96:1059:394#0/1  
AAGACCACTGTGGACCATATGGCCATAATCAAAAAGTACA  
+HWI-EAS443:3:96:1059:394#0/1  
aaaa]aa`ba[``a\_\_^`\_`\_ZX\_^X^^]]\_a\_^TRS0`  
@HWI-EAS443:3:96:1061:735#0/1  
TCCTATTCCACCATGTTACGGCCAGAGGTGATACCATCAC  
+HWI-EAS443:3:96:1061:735#0/1  
aa`aaba\_\_a\_Z`ab`aa\_\_`\_\_`¥Z\_Y]Y]\_N¥S\_SYS  
@HWI-EAS443:3:96:1073:1153#0/1  
GAATAAAAGAAGACTGAGAGATCTAATGTCGCAGTCCCGCAC  
+HWI-EAS443:3:96:1073:1153#0/1  
aa\_]`[[[]aa]M`][`\_`^MZa`\_]YH¥N`TMYMU^NBB  
@HWI-EAS443:3:96:1087:1786#0/1  
ATCTAATGTCGCAGTCCCGCACTCGCGAGATACTCACTAA

+HWI-EAS443:3:96:1087:1786#0/1  
aa`\_`Z\_a[[Za^`S¥¥a^T\_W^XXW^¥TYUVRUWWNW¥¥  
@HWI-EAS443:3:96:1099:310#0/1  
GGTGATACCATCACTCGGTCTGATCCAGCATCGTTTGT  
+HWI-EAS443:3:96:1099:310#0/1  
aa\_babb[[aa¥`^`^ba¥\_aa[¥¥YT`U`NbR\_¥aN\_B  
@HWI-EAS443:3:96:1103:304#0/1  
GAACTGAGAGATCTAATGTCGCAGTCCCGCACTCGCGAGA  
+HWI-EAS443:3:96:1103:304#0/1  
aaa¥`aababaa]bb[ab¥Za[a\_[W\_]]\_¥Y`^¥^`¥W¥  
@HWI-EAS443:3:96:1119:254#0/1  
GTCCCGTTTTCGTTTCATTACCAACTACGTCCCTTGC  
+HWI-EAS443:3:96:1119:254#0/1  
a\_aZZ\_¥\_aa`aM`¥SYa^XSY`\_N\_U\_\_YX]ULNUZBBB  
@HWI-EAS443:3:96:1167:40#0/1  
AGGCAGCAATAGGGTTGAGGATTAGCTCATCTTTCAGTTT  
+HWI-EAS443:3:96:1167:40#0/1  
abb`ba\_aabaa^aa`aa^`a`aVaU\_\_Y`aR`X`  
@HWI-EAS443:3:96:1168:946#0/1  
CTTCTGATGTGACTTTTTGATTATGGCCATATGGTCCA  
+HWI-EAS443:3:96:1168:946#0/1  
Xa\_Y^`bbbaZJ¥¥abbbbZ`babb^Z`aa\_a`bV]YT`  
@HWI-EAS443:3:96:1179:1819#0/1  
ACGCCACCATCAAGGGAGCAATTTTACAATCCTGGAGCTC  
+HWI-EAS443:3:96:1179:1819#0/1  
`\_\_aZ\_ZZaXNR\_\_\_]Xa\_\_\_]\_\_^]R\_\_^UN\_]X\_\_RUX  
@HWI-EAS443:3:96:1180:1580#0/1  
GATCTTGTGACCATTGAATTTTACAATTTCCCAGTTCCT  
+HWI-EAS443:3:96:1180:1580#0/1  
X[^^bbb]ba^Pabbbbbbbabbaa`aaa`aWY`a\_^a[\_a  
@HWI-EAS443:3:96:121:1397#0/1  
CCCGTTTTCGTTTCATTACCAACTACGTCCCTTGTCCC  
+HWI-EAS443:3:96:121:1397#0/1  
[ab]VZ¥¥\_`[[bb[a`ab\_N`b[aaU¥aaaaVH^]\_`  
@HWI-EAS443:3:96:122:399#0/1  
AGAATAATGGACATGATTCCAGAGAGGAATGAACAAGGAC  
+HWI-EAS443:3:96:122:399#0/1  
`^^baa¥abb^`aa\_\_aaaaOZ¥]Ua\_aYGW\_N[^`^¥  
@HWI-EAS443:3:96:1297:325#0/1  
TACTTTTTGATTATGGCCATATGGTCCACAGTGGTCTTAG  
+HWI-EAS443:3:96:1297:325#0/1  
aa\_bababbaaa\_a\_`¥a`Y`][UNY^Z\_aZ\_\_VS\_\_Xa  
@HWI-EAS443:3:96:1315:609#0/1  
AGAAGAGCTCCAGGATTGTAATAATTGCTCCCTTGATGGTG  
+HWI-EAS443:3:96:1315:609#0/1  
aaaaa\_a`a[a]\_b`aab`]\_\_\_a\_\_\_\_ZRU\_aaU`^¥Ya  
@HWI-EAS443:3:96:1361:1383#0/1  
AAGAAGCTGAGAGATCTAATGTCGCAGTCCCGCACTCGCGA  
+HWI-EAS443:3:96:1361:1383#0/1  
aVa[\_]baT`^b]ab`[Y\_aX\_aYFUPT^aZ¥`YPYZ

@HWI-EAS443:3:96:1424:1636#0/1  
GGGACGTAGTGTGGTAATGAAACGAAAACGGGACTCTAG  
+HWI-EAS443:3:96:1424:1636#0/1  
aZ[ZWaZ]aZ\_Z\_a`Z[\_P]]\_¥R^UR^]GXZ^ROXWX^B  
@HWI-EAS443:3:96:1437:1921#0/1  
AAGAAGTGTAGAGATCTAATGTCGCAGTCCCGCACTCGCGA  
+HWI-EAS443:3:96:1437:1921#0/1  
a^`\_`\_aaY\_\_^Za\_a\_\_`\_^^\_]\_YXHXV^0^[XBBBBB  
@HWI-EAS443:3:96:1472:406#0/1  
AAAAGAAGTGTAGAGATCTAATGTCGCAGTCCCGCACTCGC  
+HWI-EAS443:3:96:1472:406#0/1  
abbbba`¥aa`^VaaabaQab`\_`Ya[W\_HSaQV]¥N`Z  
@HWI-EAS443:3:96:1588:971#0/1  
CACTCGCGAGATACTCACTAAGACCACTGTGGACCATATG  
+HWI-EAS443:3:96:1588:971#0/1  
\_Z]`\_`Va^Y`V[[\_a`X`X`\_VVLVVPVSX^UW^]^^`  
@HWI-EAS443:3:96:161:162#0/1  
GTCCCGTTTTTCGTTTCATTACCAACACTACGTCCCCTTGC  
+HWI-EAS443:3:96:161:162#0/1  
\_NZ\_S\_GQ`¥V`Ta¥U[``NLT¥\_Q¥]]]ZTQ\_TPYUBBB  
@HWI-EAS443:3:96:1645:1190#0/1  
AATGGACATGATTCCAGAGAGGAATGAACAAGGACAAACC  
+HWI-EAS443:3:96:1645:1190#0/1  
a`b`a`^a`b`\_`\_`\_`¥a`\_`a`aa¥`^W`\_]`\_]`[\_G]  
@HWI-EAS443:3:96:1658:1635#0/1  
AAAAGAAGTGTAGAGATCTAATGTCGCAGTCCCGCACTCGC  
+HWI-EAS443:3:96:1658:1635#0/1  
aaaaa`aabb[aaaba^ba`aa\_^`Ya\_a¥UUa]]LYV`B  
@HWI-EAS443:3:96:1698:1464#0/1  
AAAAGAAGTGTAGAGATCTAATGTCGCAGTCCCGCACTCGC  
+HWI-EAS443:3:96:1698:1464#0/1  
aaaaa`a\_bbaaaaa`ba`aa\_\_a¥`a`WW¥aWV^\_W]¥  
@HWI-EAS443:3:96:232:1089#0/1  
AAATCCTCTCAGGACAGCAGACTCCACCCAGATGTGCCT  
+HWI-EAS443:3:96:232:1089#0/1  
aa\_a]aa\_\_a`\_a`\_`\_`\_`¥T^^¥^¥ZUUS^VVVSU¥  
@HWI-EAS443:3:96:241:1955#0/1  
AACAAGGACAAACCCTCTGGAGCAAACAACGATGCTGG  
+HWI-EAS443:3:96:241:1955#0/1  
a`aXQWFN^Q]SN[`OUSPOV[YRRYXKRVPVYXXXRBBB  
@HWI-EAS443:3:96:275:1658#0/1  
CCTGAGAGGATTTCTCATTTTGGGCAAAGAAGACAAGAGA  
+HWI-EAS443:3:96:275:1658#0/1  
a\_]\_aaaa`Raaaa\_\_Y`\_`\_`a\_]`^]`a`\_]`a`\_`\_`^]\_\_  
@HWI-EAS443:3:96:302:18#0/1  
CACATTACAGTCAATGAGGAAAATTGCATCCTACTCTGT  
+HWI-EAS443:3:96:302:18#0/1  
aa`W¥a[Ua`b\_aaa`\_Zab`\_aaa`\_W`YTQ`ZLS[UYB  
@HWI-EAS443:3:96:353:1613#0/1  
GGCAACCAGAAGCCGGTACAGTGGATTTCGTAAGGACTG

+HWI-EAS443:3:96:353:1613#0/1  
aZWRYLUMU^`\_ZVRPRN\_P[[U[VTNPXPGQGT]YBBBBB  
@HWI-EAS443:3:96:461:20#0/1  
TGGGTATCTCATTGCCATCATCCACTTCTGAGTGCG  
+HWI-EAS443:3:96:461:20#0/1  
]baa0¥ZOYNZZY¥\_\_\_\_\_ZaYRR\_\_NV`\_^W`^Y\_X`BB  
@HWI-EAS443:3:96:521:1261#0/1  
GAATAAAAGAACTGAGAGATCTAATGTCGCAGTCCCGCAC  
+HWI-EAS443:3:96:521:1261#0/1  
a)`babaaaa]aZaaaa\_`aaaa\_¥Z[ ]\_\_UTXT]Y[\_  
@HWI-EAS443:3:96:521:1302#0/1  
GGCGATCTGAAC TTTGTCAATAGGGCAAACCAGCGACTGA  
+HWI-EAS443:3:96:521:1302#0/1  
aXV¥T`WLQZSVa`\_[\_UXX[[\_[\_NS^\_VYN¥SRRSU¥¥  
@HWI-EAS443:3:96:528:327#0/1  
GGCCCAACAACAAGTACAGTTCATTACCCTAAGGTATATA  
+HWI-EAS443:3:96:528:327#0/1  
aabaabbabbba`bMaaaa`a\_bb[a\_`\_`a\_aaYbaaab  
@HWI-EAS443:3:96:528:419#0/1  
TGAAGATCCAGATGAAGGCACATCTGGGGTGGAGTCTGCT  
+HWI-EAS443:3:96:528:419#0/1  
abZ\_UUQT^`a¥SZZa]¥aTTV[NT` `a\_Ua¥W\_WQ\_`N\_  
@HWI-EAS443:3:96:557:183#0/1  
AAAGAAGTGAAGATCTAATGTCGCAGTCCCGCACTCGCG  
+HWI-EAS443:3:96:557:183#0/1  
aaab\_aaaabaaaa[a\_S\_`^Y\_\_ZYVSXXR^WUVW]BB  
@HWI-EAS443:3:96:602:779#0/1  
AAAAGAACTGAGAGATCTAATGTCGCAGTCCCGCACTCGC  
+HWI-EAS443:3:96:602:779#0/1  
ab[[^UaabaUZa¥P\_ba\_\_^]U`\_[\_aW¥[a\_PDS\_[¥\_  
@HWI-EAS443:3:96:605:1858#0/1  
ACTGGTAAGAGGCAATTCTCCAGTATTCAATTACAACAAG  
+HWI-EAS443:3:96:605:1858#0/1  
ab``\_X\_¥Y]SX]`aa`¥V\_] ^ZWW]X]^a]a]\_Z`a`¥  
@HWI-EAS443:3:96:643:213#0/1  
TGGTGGGTTCACTTTCAAAGGACAAGCGGATCATCAGTC  
+HWI-EAS443:3:96:643:213#0/1  
SY\_Q\_a^\_a]YV` `bb]`W\_` `a[[V\_¥a^X[\_`\_[] []  
@HWI-EAS443:3:96:657:209#0/1  
GGCGATCTGAAC TTTGTCAATAGGGCAAACCAGCGACTGA  
+HWI-EAS443:3:96:657:209#0/1  
abab`aa\_\_Z`W^a¥¥^`aa`a`]¥NW\_YPF^\_V^^W\_[B  
@HWI-EAS443:3:96:687:968#0/1  
GGGCAAGGGGACGTAGTGTGGTAATGAAACGAAAACGGG  
+HWI-EAS443:3:96:687:968#0/1  
a^W¥TP\_]Y¥UZ\_UZULWX]W]PVQUXTVXMIIXZXZLUBB  
@HWI-EAS443:3:96:729:1611#0/1  
CCCTGATCCTCTCACATTCACAGTCAATGAGGAAAATTGC  
+HWI-EAS443:3:96:729:1611#0/1  
]bbbb`abbaab\_` `baaab\_aabba]` `a`a\_aa\_



@HWI-EAS443:3:96:774:951#0/1  
AAAAGAAGTCTAATGTCGCAGTCCCGCACTCGC  
+HWI-EAS443:3:96:774:951#0/1  
`\_PX]]`\_a]0[[a[[^X[ZUUFY^U]\_V^S^T^RBBBB  
@HWI-EAS443:3:96:792:1076#0/1  
GGGTTCACTTTCAAAGGACAAGCGGATCATCAGTCAAGA  
+HWI-EAS443:3:96:792:1076#0/1  
`baG\_bRN¥ab\_a`baabU\_`^`\_`\_a[Z^a`\_`\_aZ\_aa`\_`  
@HWI-EAS443:3:96:824:406#0/1  
CAGATGTGCCTTCATCTGGATCTTCAGTCAATGCACCTGC  
+HWI-EAS443:3:96:824:406#0/1  
aab`bb`^a`ab[aaa¥aaaa\_baa`a]\_a]]a^``]\_`Y  
@HWI-EAS443:3:96:842:852#0/1  
TGCTAATTGGGCAAGGGGACGTAGTGTGGTAATGAAACG  
+HWI-EAS443:3:96:842:852#0/1  
ab`]ZbbVa`Yabaa`a`\_`\_a`\_`¥YQ`a`LH\_\_X\_\_]GT  
@HWI-EAS443:3:96:843:693#0/1  
AGGGGACGTAGTGTGGTAATGAAACGAAACGGGACTCT  
+HWI-EAS443:3:96:843:693#0/1  
``¥`]\_\_ba`¥]\_`a`Z]^^^]Y\_]G]Xaba[`a\_\_]aa`  
@HWI-EAS443:3:96:869:1021#0/1  
GCCCTGAGTCAGTGTAGTCAACACTTATCAATGGATAAT  
+HWI-EAS443:3:96:869:1021#0/1  
aaa`¥baaPY`a]\_\_Y\_aP¥W\_]\_V\_]U¥S¥X[XHXTYYY  
@HWI-EAS443:3:96:887:2024#0/1  
AAAAGAAGTCTAATGTCGCAGTCCCGCACTCGC  
+HWI-EAS443:3:96:887:2024#0/1  
a`aaaZa]\_`\_a`[a^Za\_]`^\_UZ\_H]\_XUZ]X\_^]XUUS  
@HWI-EAS443:3:96:900:1280#0/1  
GAATAAAGAAGTCTAATGTCGCAGTCCCGCAC  
+HWI-EAS443:3:96:900:1280#0/1  
``abab[ab`\_`a\_]b`a`\_]`^abUabZ[\_\_\_]aZUV\_U¥\_`  
@HWI-EAS443:3:96:918:641#0/1  
ACACTTCAATATAAACAAGTGCCTGTTCCCGGGCTACTGG  
+HWI-EAS443:3:96:918:641#0/1  
aXQTa]\_`¥aaa`\_`aa[¥Ya\_V`aaW^aYY[¥Z`RN^BBBB  
@HWI-EAS443:3:96:91:598#0/1  
AAAAGAAGTCTAATGTCGCAGTCCCGCACTCGC  
+HWI-EAS443:3:96:91:598#0/1  
aabba]a`baaaaa\_aaaa`ab`\_`a\_aa¥\_¥\_`^`\_`\_Z\_`  
@HWI-EAS443:3:96:950:324#0/1  
GGGGACGTAGTGTGGTAATGAAACGAAACGGGACTCTA  
+HWI-EAS443:3:96:950:324#0/1  
abba\_`\_a\_ab\_a]ab`P]aaZY`^P]^aU\_H^]\_QNYX\_\_  
@HWI-EAS443:3:96:952:1573#0/1  
CAGAGAGGAATGAACAAGGACAAACCTCTGGAGCAAAC  
+HWI-EAS443:3:96:952:1573#0/1  
^aab\_UQL]b]\_`Ua`\_Z][Xaaba^I\_Hbab`SUR¥Z\_  
@HWI-EAS443:3:96:973:1373#0/1  
GTCCCGTTTTTCGTTTCATTACCAACTACGTCCTTGC

+HWI-EAS443:3:96:973:1373#0/1  
a[a`\_b[aa`ab\_`aa\_X^\_W^a\_¥^)`\_YZ[`SP]X][R  
@HWI-EAS443:3:96:989:1681#0/1  
GTCCCGTTTTTCGTTTCATTACCAACTACTCGTCCCCTTGC  
+HWI-EAS443:3:96:989:1681#0/1  
^`baab\_]abab\_aaaaaaabaababba\_[]YY^`]]`  
@HWI-EAS443:3:97:1043:1455#0/1  
ATCACATTGTCGATGGATTCAATTCCTCCAGTTCTGGAAAA  
+HWI-EAS443:3:97:1043:1455#0/1  
a\_a¥^bb\_a`b^aaUV\_aaZN^bZRL^VZ[\_]SU^\_`a`  
@HWI-EAS443:3:97:1057:1281#0/1  
AAAAGAAGTGGAGATCTAATGTCGCAGTCCCGCACTCGC  
+HWI-EAS443:3:97:1057:1281#0/1  
aaa\_a\_`]b``baa]a`b`aaa¥^a¥\_aX\_]T]¥\_X\_U  
@HWI-EAS443:3:97:1104:621#0/1  
GAAGGCACATCTGGGGTGGAGTCTGCTGCTCCTGAGAGGAT  
+HWI-EAS443:3:97:1104:621#0/1  
aa`aa`a^aa¥aaaa\_\_aa`a`¥aa\_aa¥]^\_a¥a^a\_¥\_  
@HWI-EAS443:3:97:1130:781#0/1  
GCCACAGCACAGATTGGAGGAGTAAGGATGGTGGACAT  
+HWI-EAS443:3:97:1130:781#0/1  
aa`\_\_bbab`aaabX]aaa^ba^aHX^aa\_^\_a¥\_a`N\_V  
@HWI-EAS443:3:97:1197:730#0/1  
GGGTTCACTTTCAAAAGGACAAGCGGATCATCAGTCAAGA  
+HWI-EAS443:3:97:1197:730#0/1  
aba¥¥Vaabaa^Q^baaaaJ\_]a`bb`^^`aa\_a]]a^``  
@HWI-EAS443:3:97:1205:358#0/1  
CCCGTTTTTCGTTTCATTACCAACTACTCGTCCCCTTGGCC  
+HWI-EAS443:3:97:1205:358#0/1  
]`bbbbbbbbbaabbaba^babbabbbbaaR`^`baa[`  
@HWI-EAS443:3:97:1291:1189#0/1  
AAAGAAGTGGAGATCTAATGTCGCAGTCCCGCACTCGCG  
+HWI-EAS443:3:97:1291:1189#0/1  
abaa`a`aaa`aaaa¥aa\_aa\_aa¥a`]¥^\_[¥¥^`^WW]  
@HWI-EAS443:3:97:1330:454#0/1  
GTCCCGTTTTTCGTTTCATTACCAACTACTCGTCCCCTTGC  
+HWI-EAS443:3:97:1330:454#0/1  
a[]]^a\_`aa]b\_a`]aa`^U\_^Y`Xa`Y`]YYX]\_XZX  
@HWI-EAS443:3:97:1331:1734#0/1  
AAAGAAGTGGAGATCTAATGTCGCAGTCCCGCACTCGCG  
+HWI-EAS443:3:97:1331:1734#0/1  
aa\_``^\_[aa\_a`a`a¥a`aa^Y`\_\_a^Y`SWY¥¥\_WZ¥^  
@HWI-EAS443:3:97:1382:1159#0/1  
CATCATTTCTCACTTCTCCTCCTGGAGTGTACATCTGCTC  
+HWI-EAS443:3:97:1382:1159#0/1  
aaXXabT^]aWaabZY^QP\_P`]`a^Zb\_\_QabU\_TQaR  
@HWI-EAS443:3:97:1409:340#0/1  
CAAGCCGTAGACATATGCAAGGCAGCAATAGGGTTGAGGA  
+HWI-EAS443:3:97:1409:340#0/1  
aa]a¥baaaa\_Vabbbbaa`aa[a`J`aba^VW`b`aba`

@HWI-EAS443:3:97:140:881#0/1  
GATCTTGTGACCATTGAATTTTCACAATTTCCCAGTTCCT  
+HWI-EAS443:3:97:140:881#0/1  
abbbbbbb^a`aabaabaQabbaa`aaabaa``a`a^`]\_`  
@HWI-EAS443:3:97:1429:757#0/1  
TAATGTGCGAGTCCCGCACTCGCGAGATACTCACTAAGAC  
+HWI-EAS443:3:97:1429:757#0/1  
`aaa]]S`Va]^ZYZYQYG^YXPaYWWV]P#U#BBBBB  
@HWI-EAS443:3:97:1476:817#0/1  
GAGATCTAATGTGCGAGTCCCGCACTCGCGAGATACTCAC  
+HWI-EAS443:3:97:1476:817#0/1  
``baaabbab^aaa\_`baH^`^#\_aaZ\_Yb`Y#`YTXMXM  
@HWI-EAS443:3:97:1493:1598#0/1  
GTCTGCTGCTCCTGAGAGATTTCTCATTGTTGGCAAAGAA  
+HWI-EAS443:3:97:1493:1598#0/1  
aPT#b[aa][ ]\_#0^\_aa`a`XZZ^`aa``\_\_V`aa\_\_^  
@HWI-EAS443:3:97:168:136#0/1  
CTGTAATTGGGTATCTCATTGCCATCATCCACTTCATTCT  
+HWI-EAS443:3:97:168:136#0/1  
abbbbaabbbab`bb`babbab\_`aa\_aa#aa\_a\_]`a`\_a  
@HWI-EAS443:3:97:1690:1572#0/1  
GGTGGTTCACTTTCAAAGGACAAGCGGATCATCAGTCA  
+HWI-EAS443:3:97:1690:1572#0/1  
`b]YYZUa#`\_bbbZV^^bab`#^a`UK\_a\_Z``[a`LRY  
@HWI-EAS443:3:97:1699:58#0/1  
GAGAATAAAAGAACTGAGAGATCTAATGTGCGAGTCCCGC  
+HWI-EAS443:3:97:1699:58#0/1  
a`\_`ab`aaa\_\_a^aaa`aYUX\_aa`aa^XXLSXKKRUXB  
@HWI-EAS443:3:97:171:89#0/1  
TGCTGCTCCTGAGAGGATTTCTCATTGTTGGCAAAGAAGAC  
+HWI-EAS443:3:97:171:89#0/1  
ab\_aa\_\_Z]aUaZ`\_U\_\_YZ[T]\_\_a\_a`\_WW^]Y[N^X]  
@HWI-EAS443:3:97:1725:878#0/1  
GTTTTCGTTTCATTACCAACTACGTCCCCTTGCCCAAT  
+HWI-EAS443:3:97:1725:878#0/1  
aYa\_\_\_aX\_aVa\_`aV#\_\_[`U`^X^YXVVG^VZRRVYYY  
@HWI-EAS443:3:97:175:1661#0/1  
GTTCACTTTCAAAGGACAAGCGGATCATCAGTCAAGAAA  
+HWI-EAS443:3:97:175:1661#0/1  
aXaaaaaa`a`V^`]\_]W^V^b`XZQ]`ab][Za\_\_a\_\_[  
@HWI-EAS443:3:97:1765:1530#0/1  
AGAGAATAAAAGAACTGAGAGATCTAATGTGCGAGTCCCG  
+HWI-EAS443:3:97:1765:1530#0/1  
`b`ba`baab[aaa`bb``aa\_aNaa[\_#\_I\_Qaa^X\_aV  
@HWI-EAS443:3:97:196:1512#0/1  
GTGTACTTTTTGATTATGGCCATATGGTCCACAGTGGTCT  
+HWI-EAS443:3:97:196:1512#0/1  
a\_a\_^abaaaaaaaaaaaa`\_\_\_Na\_H\_X^[\_`^V`\_0#\_  
@HWI-EAS443:3:97:276:1123#0/1  
AAAGAAGTGAAGATCTAATGTGCGAGTCCCGCACTCGCG

+HWI-EAS443:3:97:276:1123#0/1  
Ybba`a[b`Pab`\_\_ab^abZ`¥¥a\_\_^ZNH]`V^aYLN  
@HWI-EAS443:3:97:297:851#0/1  
ATCAAAGAGGGAACGTACTATTGTCTCCCGAAGAAGTCAG  
+HWI-EAS443:3:97:297:851#0/1  
aaaaaab\_aaaaa`a^aaa`a\_`\_\_`\_]a\_\_\_\_\_]\_\_a  
@HWI-EAS443:3:97:336:545#0/1  
TACTTTTTGATTATGGCCATATGGTCCACAGTGGTCTTAG  
+HWI-EAS443:3:97:336:545#0/1  
aa^aaabbaabb]\_ZaW\_a¥NTVa^TYY^WNR]¥FNY]YY  
@HWI-EAS443:3:97:34:99#0/1  
GTCCCCTTTTCGTTTCATTACCAACACTACGTCCCCTTGC  
+HWI-EAS443:3:97:34:99#0/1  
aa]a\_b`aba\_aaaa\_\_baa]a`^U`^`\_ZaU]]X¥^UUU  
@HWI-EAS443:3:97:350:868#0/1  
GGAGGTTGCCGTTAGCACTTCTTCTTCTTCTTGACTGA  
+HWI-EAS443:3:97:350:868#0/1  
ab\_a\_F[a\_aabY`a`¥¥a`a\_ab\_aa````Sa\_`\_]\_\_[  
@HWI-EAS443:3:97:350:883#0/1  
CCACTGTGGACCATATGGCCATAATCAAAAAGTACACATC  
+HWI-EAS443:3:97:350:883#0/1  
aa]`^`QY]SNa[a]Y\_SSH\_TP¥VMS`]a]PDXZ^^QV  
@HWI-EAS443:3:97:35:1278#0/1  
AAAGAAGTACTGAGATCTAATGTGCGAGTCCCGCACTCGCG  
+HWI-EAS443:3:97:35:1278#0/1  
a]]b]\_^\_]ab]`aUb\_aWa^MXZ]a\_\_^`RS¥FM¥Z\_¥\_  
@HWI-EAS443:3:97:361:378#0/1  
CCCCTTTTCGTTTCATTACCAACACTACGTCCCCTTGGCC  
+HWI-EAS443:3:97:361:378#0/1  
ab\_b[[]`ZaG\_`aa\_aa\_`aaV\_`^\_\_a`^[X\_]Y\_UN\_  
@HWI-EAS443:3:97:367:1258#0/1  
TCGCGAGATACTACTAAGACCACTGTGGACCATATGGCC  
+HWI-EAS443:3:97:367:1258#0/1  
aaaa````\_^^^)`\_`a\_`\_`\_\_\_`[R`[\_YV]`)]`\_[YV  
@HWI-EAS443:3:97:389:1616#0/1  
AAAGAAGTACTGAGATCTAATGTGCGAGTCCCGCACTCGCG  
+HWI-EAS443:3:97:389:1616#0/1  
a`^Z[`baabRaaa``aaa\_aZaZ[\_YXZ[SVS]\_]\_[QB  
@HWI-EAS443:3:97:421:1987#0/1  
TGTACTCTTATTTTCAGTGTGGAGGTTGCCGTTAGCA  
+HWI-EAS443:3:97:421:1987#0/1  
W]RYXZ`\_\_\_\_\_¥`a`\_`Z\_T\_`ab\_a\_VY\_W]aaWW\_Wa]  
@HWI-EAS443:3:97:421:480#0/1  
TGTGCGAGTCCCGCACTCGCGAGATACTACTAAGACCAC  
+HWI-EAS443:3:97:421:480#0/1  
a`X`[[U^¥]]^)`Y[Z¥¥`Y¥0QYJVT]UY^ZOPDWZB  
@HWI-EAS443:3:97:423:678#0/1  
ATGTGCGAGTCCCGCACTCGCGAGATACTACTAAGACCA  
+HWI-EAS443:3:97:423:678#0/1  
a\_b]a]aa`U[aaaa]^]aaa¥aaTP]\_\_Q`U]```\_¥[\_

@HWI-EAS443:3:97:463:427#0/1  
CGCACTCGCGAGATACTCACTAAGACCACTGTGGACCATA  
+HWI-EAS443:3:97:463:427#0/1  
abba`bbba\_ZW[a\_`aa\_aaaaU`aa\_a\_\_aaa\_a^a[  
@HWI-EAS443:3:97:465:1072#0/1  
CAGTGGTCTTAGTGAGTATCTCGCGAGTGC GGACTGCGA  
+HWI-EAS443:3:97:465:1072#0/1  
a\_b¥YbUbbabbTbbb^^`aUbaS`abVbb`a^`I\_[Ra[  
@HWI-EAS443:3:97:470:1840#0/1  
CCAACAACAAGTACAGTTCATTACCCTAAGGTATATAAAA  
+HWI-EAS443:3:97:470:1840#0/1  
^RNUU]¥]^¥S¥]OSMSTWZ\_YUV\_¥YNM¥VOUSXBBBBB  
@HWI-EAS443:3:97:492:1668#0/1  
CAGACCCATTAGCATCTCTTGGAAATGTGCCACAGCAC  
+HWI-EAS443:3:97:492:1668#0/1  
aa[`[abbab\_a\_`a`aaaab`aaaa\_a\_Vb¥U`aaa[\_U  
@HWI-EAS443:3:97:54:857#0/1  
GTCTGCTGTAATTGGGTATCTCATTGCCATCATCCACTTC  
+HWI-EAS443:3:97:54:857#0/1  
^R^)`¥`^`^[\_]^aZYYXY^]]Y[YVVVVQTQNXZ]T  
@HWI-EAS443:3:97:574:113#0/1  
AAAAGAGAAGAAAGAAGAGCTCCAGGATTGAAAATTGCT  
+HWI-EAS443:3:97:574:113#0/1  
aaa`aaaSZ]X`aa^[[R\_I\_]XZ``¥¥[aS]U^^[`a0X  
@HWI-EAS443:3:97:624:17#0/1  
CAATGAGATACCCAATTACAGCAGACAAGAGAATAATGGA  
+HWI-EAS443:3:97:624:17#0/1  
aa`bbab`bb`aabaaaba`babba^baaaba`aaaa\_a  
@HWI-EAS443:3:97:672:1850#0/1  
CGTTTTCGTTTTATTACCAACTACGTCCCCTTGCCCAA  
+HWI-EAS443:3:97:672:1850#0/1  
abWaba\_aa`bbbbbababb^bbba\_aY\_aa`a¥`^`Oba  
@HWI-EAS443:3:97:700:108#0/1  
GGGCGATCTGAACCTTTGTCAATAGGGCAAACCAGCGACTG  
+HWI-EAS443:3:97:700:108#0/1  
ab`Q^``¥`aVaVaa¥a`P^`\_¥`\_`^a`\_PQV^U^^Y¥`  
@HWI-EAS443:3:97:731:855#0/1  
ATGGTCCACAGTGGTCTTAGTGAGTATCTCGCGAGTGCGG  
+HWI-EAS443:3:97:731:855#0/1  
aaaa]abb`ba`b\_\_ba\_a\_aaa\_a`\_a¥a¥`\_`S^Y[`  
@HWI-EAS443:3:97:757:859#0/1  
GTGCGAGTCCCGCACTCGCGAGATACTCACTAAGACCACT  
+HWI-EAS443:3:97:757:859#0/1  
a^`aX^RUZ¥\_a`TY`[V¥][`^^XPT[^S^^]^¥^GYW^  
@HWI-EAS443:3:97:766:1424#0/1  
AAAGAAGTGAAGATCTAATGTGCGAGTCCCGCACTCGCG  
+HWI-EAS443:3:97:766:1424#0/1  
`bab`U]ab`^ba`aUbaaaa\_a[]b`Y¥^a\_QKX`ZaR¥  
@HWI-EAS443:3:97:772:1667#0/1  
AGAGAATAAAAAGAACTGAGAGATCTAATGTGCGAGTCCCG

+HWI-EAS443:3:97:772:1667#0/1  
aaabaY`aaa`\_Yba`a\_[] [T[G`\_]ab^Z\_]aa]UXXX  
@HWI-EAS443:3:97:784:364#0/1  
TGTGACCATTGAATTTTCACAATTTCCCAGTTCCTGATTA  
+HWI-EAS443:3:97:784:364#0/1  
ab\_a`^abaaaa`a`a\_``]a`a`^`[[``]^U^`¥`\_a  
@HWI-EAS443:3:97:79:603#0/1  
CTAATGTCGCAGTCCCGCACTCGCGAGATACTCACTAAGA  
+HWI-EAS443:3:97:79:603#0/1  
aR`¥ab\_aa`R`P[[]]Y\_Q[^[YaYYTW¥^¥¥¥¥SW¥U  
@HWI-EAS443:3:97:858:121#0/1  
TGGATGATGGCAATGAGATACCCAATTACAGCAGACAAGA  
+HWI-EAS443:3:97:858:121#0/1  
aaa`\_a`\_a]S]^`a]a`^`TPW]]\_`^]Y^\_SY\_¥Y¥^]\_  
@HWI-EAS443:3:97:920:1120#0/1  
CCCCGTTTTCGTTTTATTACCAACTACGTCCCCCTTGCCC  
+HWI-EAS443:3:97:920:1120#0/1  
K\_abaa¥aab`]bbb`\_b¥aabab]ba]\_MXaababba\_a  
@HWI-EAS443:3:97:973:1674#0/1  
AAAAGAAGTGAAGATCTAATGTCGCAGTCCCGCACTCGC  
+HWI-EAS443:3:97:973:1674#0/1  
a`\_b`])`a`¥¥aaa^a\_aaaaYV``aYU]Q]\_[R]ZY\_0  
@HWI-EAS443:3:98:1005:298#0/1  
CTGGGGTGGAGTCTGCTGTCCTGAGAGATTCTCATT  
+HWI-EAS443:3:98:1005:298#0/1  
abbbbb\_bbaba`bbab`\_a`bbab\_bb`aaa[aaabaaa  
@HWI-EAS443:3:98:1043:411#0/1  
AGCAGACAAGAGAATAATGGACATGATTCCAGAGAGGAAT  
+HWI-EAS443:3:98:1043:411#0/1  
Yaa\_bbbbbVb\_bb\_baabbbba`bWaab]bbb`baa  
@HWI-EAS443:3:98:1075:1272#0/1  
AGAGAATAAAAGAACTGAGAGATCTAATGTCGCAGTCCCG  
+HWI-EAS443:3:98:1075:1272#0/1  
Wa`abaabbaa\_bbbbbbaabbb\_`aaa\_ba`ab^ab[\_`bb  
@HWI-EAS443:3:98:116:971#0/1  
GTCCCGTTTTCGTTTTATTACCAACTACGTCCCCCTTGC  
+HWI-EAS443:3:98:116:971#0/1  
`a`aab\_aab`b\_aa`\_a`aa[a`\_`\_a`])`¥¥`Y]X\_]`  
@HWI-EAS443:3:98:1239:1053#0/1  
GGCGTACATGCTAGAAAGAGAATTGGTCCGTAACAAGG  
+HWI-EAS443:3:98:1239:1053#0/1  
aa]\_X¥bbaaaaababbbababb`aaUaaa`\_`abY`aba  
@HWI-EAS443:3:98:1256:470#0/1  
GGATTTCTCATTTTGGGCAAAGAAGACAAGAGATATGGCC  
+HWI-EAS443:3:98:1256:470#0/1  
ab\_aaTX]Yab^b¥baba^`\_`\_a```^`^a`\_`\_`^UTY  
@HWI-EAS443:3:98:1268:720#0/1  
ATTATGGCCATATGGTCCACAGTGGTCTTAGTGAGTATCT  
+HWI-EAS443:3:98:1268:720#0/1  
abaaa`aa`a]`[VaX`\_`R\_\_QaaV¥a\_[XSUXaX¥RGS

@HWI-EAS443:3:98:1287:390#0/1  
AAAAGAAGTCTAATGTTCGAGTCCCGCACTCGC  
+HWI-EAS443:3:98:1287:390#0/1  
aaabbaa\_baabaababaaba`\_a`aa¥[]X`\_`\_`ZaZ  
@HWI-EAS443:3:98:1312:1184#0/1  
TGTACTCTTATTTTCAGTGTGGAGGTTGCCGTTAGCA  
+HWI-EAS443:3:98:1312:1184#0/1  
aa`\_\_a`baaaaa`\_]b]aXa^`\_`\_]¥\_^VXT^\_\_^RZ^  
@HWI-EAS443:3:98:1320:562#0/1  
GTCCCGTTTTCGTTTCATTACCAACTACGTCCCCTTGC  
+HWI-EAS443:3:98:1320:562#0/1  
aZ^`\_b]T`Z`^`\_`\_[aa\_\_X`]]\_`^`^]\_XTUZUXYYZ  
@HWI-EAS443:3:98:1338:734#0/1  
CCCAAAATGAGAAATCCTCTCAGGACAGCAGACTCCACCC  
+HWI-EAS443:3:98:1338:734#0/1  
I\_bbbbaabbbbbbb`\_aabaa`abbbababbbba\_abb\_b  
@HWI-EAS443:3:98:1394:195#0/1  
AGATGAAGGCACATCTGGGGTGGAGTCTGCTGTCCTGAGA  
+HWI-EAS443:3:98:1394:195#0/1  
aaU`aba[\_P\_\_`aaabba`N`\_[aN^\_V¥aaZTH^`Q\_U  
@HWI-EAS443:3:98:1419:987#0/1  
CGTTTTCGTTTCATTACCAACTACGTCCCCTTGCCCAA  
+HWI-EAS443:3:98:1419:987#0/1  
ab``bba`abbbabbbb\_baabaabZ`a]]`\_`aaXU\_ab  
@HWI-EAS443:3:98:1452:590#0/1  
GTCCCGCACTCGCGAGATACTACTAAGACCACTGTGGAC  
+HWI-EAS443:3:98:1452:590#0/1  
`MWJ\_aU`¥XDOX`X\_SUZG¥W¥¥¥¥Q¥SVS[S\_\_SUQBB  
@HWI-EAS443:3:98:151:446#0/1  
GAACAGAGTAGGATGCAATTTTCCTCATTGACTGTGAATG  
+HWI-EAS443:3:98:151:446#0/1  
abbU^\_Wa`abb`Za`^`Z\_¥aaa`^]]Ya^]¥^U`TS][  
@HWI-EAS443:3:98:153:51#0/1  
AGAAGTCTAATGTTCGAGTCCCGCACTCGCGAG  
+HWI-EAS443:3:98:153:51#0/1  
a``\_aaaaX`^`^`\_¥`\_aaX\_a]¥]YTYXRZQ¥PSZR\_XW\_  
@HWI-EAS443:3:98:156:689#0/1  
GCTAGTCAACACTTATCAATGGATAATCAGGAACTGGGAA  
+HWI-EAS443:3:98:156:689#0/1  
aaaaa`aaaaaaaa`a```\_N\_``````\_``\_XY^\_\_[[V  
@HWI-EAS443:3:98:161:1392#0/1  
ATTCATTCCCCAGTTCTGGAAAAGCACTTTTGCATCTTT  
+HWI-EAS443:3:98:161:1392#0/1  
aabbabbab\_ab]T[aa`a]aaaaa`\_¥a\_a^````]a^a  
@HWI-EAS443:3:98:1725:665#0/1  
GATTATGGCCATATGGTCCACAGTGGTCTTAGTGAGTATC  
+HWI-EAS443:3:98:1725:665#0/1  
]bba^bbaaa`\_^Waa`\_aSa\_aaa`\_abVXTaX`¥a\_L  
@HWI-EAS443:3:98:1752:1054#0/1  
ATCCTTAGACAGAATCCAAGGAGGAAACAAGCCGTAGACA

+HWI-EAS443:3:98:1752:1054#0/1  
aaTYab`^`aaa\_aa\_\_[\_[]aa`a`a)`aZZXWDL\_¥Ra  
@HWI-EAS443:3:98:1782:1388#0/1  
GGAAAACAACCTCCATAATCACATCCTGTGCCTCCTTGGC  
+HWI-EAS443:3:98:1782:1388#0/1  
abbbaaba\_]aa\_`babaa`aaa`^a`b\_b`[aRa¥\_`a^  
@HWI-EAS443:3:98:1790:102#0/1  
GATCAGGGTTGAGGATACTGGTAAGAGGCAATTCTCCAGT  
+HWI-EAS443:3:98:1790:102#0/1  
`b¥baba\_bbbabbbbabb]T]bbaba`bbaa¥a\_Ybaa  
@HWI-EAS443:3:98:1791:686#0/1  
AAAAGAAGTCTAATGTCGCAGTCCCGCACTCGC  
+HWI-EAS443:3:98:1791:686#0/1  
`W`¥`[a[`b`ZZ`]S]abVV[^Y[W^\_Xabaaa¥^^¥HM  
@HWI-EAS443:3:98:180:1210#0/1  
AGAAGTGTAAAGTGGTTGGCTTGTGTAATTGAATA  
+HWI-EAS443:3:98:180:1210#0/1  
aa`a`aa]a^a^^a`\_\_^`\_Za[a\_a]aa\_a¥a^`Y\_`  
@HWI-EAS443:3:98:262:868#0/1  
TAATGTCGCAGTCCCGCACTCGCGAGATACTCACTAAGAC  
+HWI-EAS443:3:98:262:868#0/1  
^[^\_V\_``[[]aa`\_P^``ZSZ^aNR[R[¥S^PU^]SW  
@HWI-EAS443:3:98:265:1522#0/1  
GCTGGGAGCAGATGTACTCCAGGAGGAGAAGTGAGAAA  
+HWI-EAS443:3:98:265:1522#0/1  
aa^\_[`])^¥\_¥^`Y`¥[V¥¥U][[¥TXTaZVVJYP`ZUZ  
@HWI-EAS443:3:98:268:325#0/1  
AAAAGAAGTCTAATGTCGCAGTCCCGCACTCGC  
+HWI-EAS443:3:98:268:325#0/1  
aaabb`\_aabaaaaa\_aa`\_aY\_U^`aU\_\_X\_Y^¥^]\_U  
@HWI-EAS443:3:98:271:1907#0/1  
ATCTAATGTCGCAGTCCCGCACTCGCGAGATACTCACTAA  
+HWI-EAS443:3:98:271:1907#0/1  
`aa]a\_b`VQ\_`a\_Y[`\_\_\_¥Y[V[^ZWXUTRRU\_W¥¥Z  
@HWI-EAS443:3:98:281:247#0/1  
AAAGAAGTCTAATGTCGCAGTCCCGCACTCGCG  
+HWI-EAS443:3:98:281:247#0/1  
^`^b]YX¥a^¥ZU`Y`a^HR`¥WZR)`HG[YT¥TYBBBBB  
@HWI-EAS443:3:98:297:17#0/1  
GAACCCCGCACTCAGAATGAAGTGGATGATGGCAATGAGA  
+HWI-EAS443:3:98:297:17#0/1  
¥EXQTYaY¥M]QXVYP¥SR]R[¥URXQVYUUVBBBB  
@HWI-EAS443:3:98:303:125#0/1  
CAATTACAACAAGGCAACCAAACGACTTACAGTTCTTGGGA  
+HWI-EAS443:3:98:303:125#0/1  
``ab]^Q\_]W\_Yaa\_YWa`Ua^a]H\_YY^]\_RT[\_^^\_Y  
@HWI-EAS443:3:98:307:1123#0/1  
GAATAAAGAAGTCTAATGTCGCAGTCCCGCAC  
+HWI-EAS443:3:98:307:1123#0/1  
aa`b[[]aa\_a\_a\_\_a\_aa\_\_`\_`^`V[^^^\_Z^\_YU]YY



@HWI-EAS443:3:98:329:778#0/1  
CACAAAGAGATTGCATGATCAAGGCAGTTAGGGGCGATCT  
+HWI-EAS443:3:98:329:778#0/1  
[W¥[^]X^WWU\_]J[a^XZWRMR[\_T[HUZT^`BBBBBBB  
@HWI-EAS443:3:98:348:1460#0/1  
CAATGAGATACCCAATTACAGCAGACAAGAGAATAATGGA  
+HWI-EAS443:3:98:348:1460#0/1  
aaa\_aababb\_]a¥aba`aab^\_b`aa`\_\_a\_aaa`^\_\_`  
@HWI-EAS443:3:98:348:1511#0/1  
AATGGTCACAAGATCCCACAATGTTATACAACAAAATGGA  
+HWI-EAS443:3:98:348:1511#0/1  
abaa\_Jaab`aa`ab`aa^aab]a`aaYa`^\_\_a`a`  
@HWI-EAS443:3:98:462:983#0/1  
ATTCTCTTTCTAGCATGTACGCCACCATCAAGGGAGCAAT  
+HWI-EAS443:3:98:462:983#0/1  
`aa`ab`babba\_a[aa`a]\_^`a`^a]¥Y\_a`¥ab\_a`\_  
@HWI-EAS443:3:98:481:1094#0/1  
AAAGATGCAAAAAGTGCTTTTCCAGAAGTGGGAATTGAAT  
+HWI-EAS443:3:98:481:1094#0/1  
`^`aaaa^X^aaaZbaaaa^YaY^\_\_aaaY\_^a^\_\_^\_  
@HWI-EAS443:3:98:500:2031#0/1  
AAAGAAGTGGAGATCTAATGTCGCAGTCCCGCACTCGCG  
+HWI-EAS443:3:98:500:2031#0/1  
aaa\_aa^`aa\_aa\_`abaaa\_^^a\_ZLZ¥`Z\_\_Y^T\_W]  
@HWI-EAS443:3:98:510:572#0/1  
TTATTTTCAGTGTTTGGAGGTTGCCCGTTAGCACTTCTTC  
+HWI-EAS443:3:98:510:572#0/1  
aaS\_Q¥Z^W]M^^YX\_]S`¥X\_[Q[\_^OWX¥VKWTY¥`YQ  
@HWI-EAS443:3:98:516:245#0/1  
TGGGGTGGAGTCTGCTGTCCTGAGAGGATTTCTCATTTTG  
+HWI-EAS443:3:98:516:245#0/1  
`baabWaQ¥aU¥aaPaa\_¥\_\_\_U\_¥`aW]\_aWU[¥`\_  
@HWI-EAS443:3:98:522:910#0/1  
GTAAGGATGGTGGACATCCTTAGACAGAATCCAAGTGGG  
+HWI-EAS443:3:98:522:910#0/1  
\_QQ^baaaba]^X^a`aX[a\_\_\_\_\_`a`\_WT[\_\_\_\_`^^  
@HWI-EAS443:3:98:536:371#0/1  
ATAAAAGAAGTGGAGATCTAATGTCGCAGTCCCGCACTC  
+HWI-EAS443:3:98:536:371#0/1  
X`[a^[WR¥]b`baa\_a`bb\_\_\_Y]baba¥¥Vba]ZYXV  
@HWI-EAS443:3:98:547:996#0/1  
TGTCGCAGTCCCGCACTCGCGAGATACTCACTAAGACCAC  
+HWI-EAS443:3:98:547:996#0/1  
ab^aaabX[[Z^`aaaa`a^a[X[\_`\_R\_aa\_Ua`¥W¥^¥  
@HWI-EAS443:3:98:548:1177#0/1  
AAAAGAAGTGGAGATCTAATGTCGCAGTCCCGCACTCGC  
+HWI-EAS443:3:98:548:1177#0/1  
aa\_TaWWR^\_NG]]aaR[Y`^a^`^`XWN]`¥\_RX]Z]PX  
@HWI-EAS443:3:98:565:802#0/1  
TAATTGTGGCCATGGTATTCTCACAAGAGGATTGCATGAT

+HWI-EAS443:3:98:565:802#0/1  
```bbb`]a`aa\_Y[L^^¥QVVDW^ZZ[a`X^^]ZY]`YX  
@HWI-EAS443:3:98:579:425#0/1  
ATTCTCAACAAGAGATTGCATGATCAAGGCAGTTAGGGGC  
+HWI-EAS443:3:98:579:425#0/1  
abaaab\_a`^^^ba`aa`aaa`a`¥]a`^^P[^W[^¥B  
@HWI-EAS443:3:98:640:788#0/1  
AAAGAAGTCTAATGTCGCAGTCCCGCACTCGCG  
+HWI-EAS443:3:98:640:788#0/1  
aaabbabbabUabbaabaabbab`abaa\_aaa`a\_aa`a  
@HWI-EAS443:3:98:646:1449#0/1  
AAAGAAGTCTAATGTCGCAGTCCCGCACTCGCG  
+HWI-EAS443:3:98:646:1449#0/1  
ababbbbaa\_bbb¥aaabba[a\_\_aY`a¥\_aaa\_\_\_Z\_\_\_\_  
@HWI-EAS443:3:98:651:1873#0/1  
GAAAATTGCATCCTACTCTGTTCTGGTGGAGCAGCAGCAA  
+HWI-EAS443:3:98:651:1873#0/1  
aa\_aa[V```\_WT\_\_[\_]\_\_X^]`]OMZYX]X^^]]\_U]^  
@HWI-EAS443:3:98:670:237#0/1  
GAGATCTAATGTCGCAGTCCCGCACTCGCGAGATACTCAC  
+HWI-EAS443:3:98:670:237#0/1  
abbbbbbbbbV`ba`a]a[aa`a`a^a`a\_`S¥Z^\_^  
@HWI-EAS443:3:98:675:1772#0/1  
GGGTGGAGTCTGCTGTCCTGAGAGGATTTCTCATTTTGGG  
+HWI-EAS443:3:98:675:1772#0/1  
abb]aba\_Xbaa`aP\_aaa\_a`aa\_aa``\_aaa\_aV`  
@HWI-EAS443:3:98:693:806#0/1  
ATAAAAAGAACTGAGAGATCTAATGTCGCAGTCCCGCACTC  
+HWI-EAS443:3:98:693:806#0/1  
abbab\_^`a`abaaaaaaba`aa]aa\_`a^]^^^`\_^\_\_  
@HWI-EAS443:3:98:697:580#0/1  
GAGAATAAAAAGAACTGAGAGATCTAATGTCGCAGTCCCGC  
+HWI-EAS443:3:98:697:580#0/1  
``X0]aa^^`]U`^ab^\_a`PZ¥a`aabV¥^]]¥LNZZ[]  
@HWI-EAS443:3:98:72:247#0/1  
ATCAAATTTGGTCAACATCATCATTTTCTCACTTCTCCTC  
+HWI-EAS443:3:98:72:247#0/1  
abaaa`aaaaaa\_aaa\_a`aaaaaaa\_a``\_`\_`a\_\_`^  
@HWI-EAS443:3:98:731:1818#0/1  
TAATGTCGCAGTCCCGCACTCGCGAGATACTACTAAGAC  
+HWI-EAS443:3:98:731:1818#0/1  
ab]ba¥aaabZ]a`\_¥`\_aaa\_a\_a\_\_¥\_a`¥\_\_]`V\_\_\_\_  
@HWI-EAS443:3:98:749:1277#0/1  
CCCGTTTTCGTTTTATTACCAACTACGTCCCTTGCCC  
+HWI-EAS443:3:98:749:1277#0/1  
abab\_abbbbaaaaababa\_ba\_aaba^]\_[]\_\_]]]¥^  
@HWI-EAS443:3:98:769:596#0/1  
TTCCTGATGTGTACTTTTTGATTATGGCCATATGGTCCAC  
+HWI-EAS443:3:98:769:596#0/1  
abaaabaab\_a`^\_aaaa`aa`a`\_Y`\_`¥S¥WW]]]

@HWI-EAS443:3:98:789:855#0/1  
AAAGAAGTGGAGATCTAATGTCGCAGTCCCGCACTCGCG  
+HWI-EAS443:3:98:789:855#0/1  
`b^WPZaabab\_ZX^a\_\_T`[aa`ab^]]¥^]JZXT[PV  
@HWI-EAS443:3:98:844:1253#0/1  
ACCCAATTACAGCAGACAAGAGAATAATGGACATGATTCC  
+HWI-EAS443:3:98:844:1253#0/1  
\_`[aaY\_^¥S`ab``aaaabaa^b`^aaZ`a\_aaa\_a¥UV  
@HWI-EAS443:3:98:863:1363#0/1  
AAGAAGTGGAGATCTAATGTCGCAGTCCCGCACTCGCGA  
+HWI-EAS443:3:98:863:1363#0/1  
aaaaaaaaaaaa\_aa\_aaaa^U`])`a¥]T\_\_[U\_`^]`^`^  
@HWI-EAS443:3:98:880:782#0/1  
CCCGTTAGCACTTCTTCTTTCTTGACTGATGATCCGC  
+HWI-EAS443:3:98:880:782#0/1  
abababbaaa]bbbbabb`baa\_babaabbaabaa¥\_b^  
@HWI-EAS443:3:98:924:1065#0/1  
GTAATTGGGTATCTCATTGCCATCATCCACTTCATTCTGA  
+HWI-EAS443:3:98:924:1065#0/1  
a`a`bbabb]aaaa\_baab])`a^a`a\_\_¥ba^`a`^aa\_  
@HWI-EAS443:3:98:947:1045#0/1  
GAATGAAGTGGATGATGGCAATGAGATACCCAATTACAGC  
+HWI-EAS443:3:98:947:1045#0/1  
a\_`aaa\_bXaa`a`\_aa^]`^`\_X\_\_^`¥Z]\_`[\_`^^`X  
@HWI-EAS443:3:98:951:357#0/1  
CATTGACTGTGAATGTGAGAGGATCAGGGTTGAGGATACT  
+HWI-EAS443:3:98:951:357#0/1  
`bbbbabbbabaabbaabb`aa[b`abbb[b`\_bba`b\_b  
@HWI-EAS443:3:98:969:1083#0/1  
AGGGGACGTAGTGTGGTAATGAAACGAAACGGGACTCT  
+HWI-EAS443:3:98:969:1083#0/1  
`babaXabTWb`b[baaZaab`^aaSba``aZZa[WYa\_\_  
@HWI-EAS443:3:99:1008:402#0/1  
ATGGTATTCTCACAAAGAGGATTGCATGATCAAGGCAGTTA  
+HWI-EAS443:3:99:1008:402#0/1  
`bbbZa``aaaabaaaabb^abaabbb`aaaa[a\_`bUa\_  
@HWI-EAS443:3:99:1030:1579#0/1  
AAAGAAGTGGAGATCTAATGTCGCAGTCCCGCACTCGCG  
+HWI-EAS443:3:99:1030:1579#0/1  
abaa^a^bbaa\_baa`aabab\_^a\_`aZVS`\_\_^a\_N\_X\_  
@HWI-EAS443:3:99:1051:1571#0/1  
GGGCAAGGGGACGTAGTGTGGTAATGAAACGAAACGGG  
+HWI-EAS443:3:99:1051:1571#0/1  
a\_aY\_\_a`a`\_UaZ`ZaUa`aN]]\_H][X[X\_]U]\_B  
@HWI-EAS443:3:99:1113:1555#0/1  
AAACTTCTCCCCTTTGCTGCTGCTCCACCAGAACAGAGTA  
+HWI-EAS443:3:99:1113:1555#0/1  
aaa]ab``^`\_Zaaaa\_aa^]a]a\_V`]U]]Z`U\_a^UMR  
@HWI-EAS443:3:99:1115:1835#0/1  
CACCATCAAGGGAGCAATTTTACAATCCTGGAGCTCTTCT

+HWI-EAS443:3:99:1115:1835#0/1  
0`Kaa\_bbVbaabbbbbbbb\_b¥b\_b¥a`\_L[`U`babYb  
@HWI-EAS443:3:99:1141:1428#0/1  
GGAGTCTGCTGCCTGAGAGGATTTCTCATTGTTGGGCAAA  
+HWI-EAS443:3:99:1141:1428#0/1  
Ub]aa`bb`VXHT]bb````^`Xaa`b]Vbbbbbb`[aaa  
@HWI-EAS443:3:99:1191:358#0/1  
GTCCCGTTTTTCGTTTCATTACCAACTACGTCCCTTGC  
+HWI-EAS443:3:99:1191:358#0/1  
aXLVSa¥aaaGa`a¥\_aabaVN\_VZa¥`\_Y`R]U]]\_Y[`  
@HWI-EAS443:3:99:1240:172#0/1  
GCCATTCTATTCCACCATGTTACGCCAGAGGTGATACC  
+HWI-EAS443:3:99:1240:172#0/1  
a`abbb``bbabaaba^bbabb`^a\_^`ZZ[`Na[]PBB  
@HWI-EAS443:3:99:1249:689#0/1  
GTCCCGTTTTTCGTTTCATTACCAACTACGTCCCTTGC  
+HWI-EAS443:3:99:1249:689#0/1  
a``Zaba\_Ya\_ba]b\_]abaZY]`\_`\_a^¥a`¥U¥P\_^¥Y  
@HWI-EAS443:3:99:1267:1370#0/1  
CAAGGGAGCAATTTTACAATCCTGGAGCTCTTCTTCTTC  
+HWI-EAS443:3:99:1267:1370#0/1  
`a\_aXab\_b`\_¥baaa^ab`^^ba^^\_YaGaaXaa`¥b``  
@HWI-EAS443:3:99:1278:1599#0/1  
AGAGAATAATGGACATGATTCCAGAGAGGAATGAACAAGG  
+HWI-EAS443:3:99:1278:1599#0/1  
^bWbWbbbbbbbb\_bbbbbaaa`[a`b\_a\_aa`ba^V`a`a  
@HWI-EAS443:3:99:1294:170#0/1  
CTAATGTCGAGTCCCGCACTCGCGAGATACTCACTAAGA  
+HWI-EAS443:3:99:1294:170#0/1  
abaabbb\_a\_bT[ZTTb]\_`a`bV`bZLbbX]`¥R\_Waaa  
@HWI-EAS443:3:99:1340:792#0/1  
CTCCTGGTTGCCTTCTGAGAATAGCTGTTGCTCTTCTCC  
+HWI-EAS443:3:99:1340:792#0/1  
abbbbbbbabb`aabababab`abbbabbYb\_Xaa`b[aRa  
@HWI-EAS443:3:99:1370:1291#0/1  
CCACAGTGGTCTTAGTGAGTATCTCGCGAGTGGGGACTG  
+HWI-EAS443:3:99:1370:1291#0/1  
a]]abaabaa]aababbabbbbab`bIbbbSbZa`a\_G¥]  
@HWI-EAS443:3:99:1501:1099#0/1  
GAAAGAGAATTGGTCCGTAACAAGTTTCTCCAGTAG  
+HWI-EAS443:3:99:1501:1099#0/1  
`abaaabaaabb`^^b`a^`baaab[HP[NWNUUZXP[a  
@HWI-EAS443:3:99:1536:2004#0/1  
AAAAGAAGTGGAGATCTAATGTCGAGTCCCGCACTCGC  
+HWI-EAS443:3:99:1536:2004#0/1  
`\_a`aaaQ\_aa[aaa\_\_`a^`a¥NaUa\_UXYXYW]WUX]U  
@HWI-EAS443:3:99:165:666#0/1  
ATTGGGTATCTCATTGCCATCATCCACTTCATTCTGAGTG  
+HWI-EAS443:3:99:165:666#0/1  
aaba`aVa``a^\_a`aaa`\_a\_W\_YVK[\_^aa\_a\_^`^^

@HWI-EAS443:3:99:173:502#0/1  
TTCTCATTTTGGGCAAAGAAGACAAGAGATATGGCCCAGC  
+HWI-EAS443:3:99:173:502#0/1  
`^`Wb`bbb`aab`^V^b`aaa`aa`a\_aa^\_WaSO\_a\_  
@HWI-EAS443:3:99:1751:380#0/1  
CGCACTCGCGAGATACTACTAAGACCACTGTGGACCATA  
+HWI-EAS443:3:99:1751:380#0/1  
`a`\_`bbaa`babbabbbb[bbbb]abZbb`aabYaab  
@HWI-EAS443:3:99:1755:987#0/1  
ATAAAAGAAGACTGAGAGATCTAATGTCGCAGTCCCGCACTC  
+HWI-EAS443:3:99:1755:987#0/1  
aaaa`a`a`b[aaaaaa\_aa`aa\_Z\_]`\_^XX\_^\_\_^]\_  
@HWI-EAS443:3:99:1756:646#0/1  
AAAAGAAGACTGAGAGATCTAATGTCGCAGTCCCGCACTCGC  
+HWI-EAS443:3:99:1756:646#0/1  
abaa`a\_b]a`aaaa\_aaaa]]\_U\_aXX]\_X`\_^YT]X  
@HWI-EAS443:3:99:1761:2016#0/1  
TGCAGGTGCATTGACTGAAGATCCAGATGAAGGCACATCT  
+HWI-EAS443:3:99:1761:2016#0/1  
abVbaaNa^`aaaaU`baba`^IMV^TQZ¥\_a]]\_¥aXD[  
@HWI-EAS443:3:99:179:860#0/1  
GGGGTGGAGTCTGCTGTCCTGAGAGATTCTCATTTTGG  
+HWI-EAS443:3:99:179:860#0/1  
aa`aU`\_U¥W^aa\_\_a¥]\_\_\_\_[`^`T``\_¥\_¥S¥`¥^¥\_  
@HWI-EAS443:3:99:197:718#0/1  
CACGTCCCTTGGGTAAAGTGCAACACTTCAATATAAACAC  
+HWI-EAS443:3:99:197:718#0/1  
\_SWa\_aa]`XWROR]`¥DR¥W^VOG[^`\_\_UTZGXBBBB  
@HWI-EAS443:3:99:203:46#0/1  
ATTTCTCACTTCTCCTCCTGGAGTGTACATCTGCTCCCAG  
+HWI-EAS443:3:99:203:46#0/1  
`abb`aa\_\_a`a`a]````]`Za[`````\_a`PTXBBBB  
@HWI-EAS443:3:99:217:1095#0/1  
CAGCACACAGATTGGAGGAGTAAGGATGGTGGACATCCTT  
+HWI-EAS443:3:99:217:1095#0/1  
abbbbaba\_a``abbab`aa^]aaaa`a`Xaaa[`Y[\_]a  
@HWI-EAS443:3:99:233:637#0/1  
GTTCACTTTCAAAAGGACAAGCGGATCATCAGTCAAGAAA  
+HWI-EAS443:3:99:233:637#0/1  
`F¥YX¥aY¥^aVMVaXG`^`aT^\_RNWX]Z[`VY¥Z^^ZX  
@HWI-EAS443:3:99:235:610#0/1  
TGGCCATATGGTCCACAGTGGTCTTAGTGAGTATCTCGCG  
+HWI-EAS443:3:99:235:610#0/1  
aabaa`aaba`aaaaaa`aa¥\_aa`a¥aadW``]`^`^U`  
@HWI-EAS443:3:99:245:210#0/1  
ACTAAGACCACTGTGGACCATATGGCCATAATCAAAAAGT  
+HWI-EAS443:3:99:245:210#0/1  
aabaWba`a\_]aba`a`Z\_\_`\_a`XZ\_¥^^^X]]^S^UW  
@HWI-EAS443:3:99:288:1129#0/1  
GATGAAGGCACATCTGGGGTGGAGTCTGCTGTCCTGAGAG

+HWI-EAS443:3:99:288:1129#0/1  
aabaaaaab`a\_aabba`] ^aa`a^aa`\_ ^a\_¥`\_\_ ^`¥`  
@HWI-EAS443:3:99:290:835#0/1  
GGGACGTAGTGTGGTAATGAAACGAAAACGGGACTCTAG  
+HWI-EAS443:3:99:290:835#0/1  
``]\_ba[Z`[YH[baT0Zb[Xa^PaRZU``a``U\_`[^`b  
@HWI-EAS443:3:99:307:709#0/1  
AAAGAAGTCTAATGTCGCAGTCCCGCACTCGCG  
+HWI-EAS443:3:99:307:709#0/1  
aa``]abb¥aaaa\_aaZY\_bQV[¥^Z¥XV^]]`^ZaRT^  
@HWI-EAS443:3:99:322:1995#0/1  
CCTTGTGTAATTGAATACTGGAGAATTGCCTCTTACCAG  
+HWI-EAS443:3:99:322:1995#0/1  
ab`bbbbbabbbbab`aba`^`aaabaaab```aaa`^aa  
@HWI-EAS443:3:99:333:1625#0/1  
AGAGAATAAAAGAACTGAGAGATCTAATGTCGCAGTCCCG  
+HWI-EAS443:3:99:333:1625#0/1  
ab\_aaabab`bb`babab\_baba^ab`aa^a`Ua`P`^\_]`  
@HWI-EAS443:3:99:358:271#0/1  
CTAATGTCGCAGTCCCGCACTCGCGAGATACTCACTAAGA  
+HWI-EAS443:3:99:358:271#0/1  
aba]bb`bbabbaaXZ\_\_a``XaXb``¥`^]\_\_\_U`\_`^^  
@HWI-EAS443:3:99:373:625#0/1  
GAGGCATTTCCAAAAGATGCAAAAGTGCTTTTCCAGAAC  
+HWI-EAS443:3:99:373:625#0/1  
aabba\_aa\_aaaa`a`b\_\_aaa^`\_aZa`^\_``aa\_a]`^  
@HWI-EAS443:3:99:393:1260#0/1  
CATTTCTCACTTCTCCTCCTGGAGTGTACATCTGCTCCCA  
+HWI-EAS443:3:99:393:1260#0/1  
`bbbaab]babbbba\_abb`\_`babab]b``b]Vba`ZZ^`  
@HWI-EAS443:3:99:395:1774#0/1  
AAGAAGTCTAATGTCGCAGTCCCGCACTCGCGA  
+HWI-EAS443:3:99:395:1774#0/1  
I¥a^ZOU]bb`b`Z¥]\_[\_bb`T```P¥PXTH¥T¥\_XW\_]`  
@HWI-EAS443:3:99:408:896#0/1  
TGGCAATGAGATACCCAATTACAGCAGACAAGAGAATAAT  
+HWI-EAS443:3:99:408:896#0/1  
abaaaaababaab```abaaa```]`aa```a\_a\_a\_`^a  
@HWI-EAS443:3:99:437:945#0/1  
TGAGAAATCCTCTCAGGACAGCAGACTCCACCCAGATGT  
+HWI-EAS443:3:99:437:945#0/1  
a`Q\_`^^Zb`aabTbbaaaX`aaZaaa^¥bZ`U]TX\_[]`  
@HWI-EAS443:3:99:496:1689#0/1  
GAATAAAAGAACTGAGAGATCTAATGTCGCAGTCCCGCAC  
+HWI-EAS443:3:99:496:1689#0/1  
aaababbbbababababaaa\_abbba\_aa]aa]\_\_\_^VS\_  
@HWI-EAS443:3:99:508:476#0/1  
GGCGTACATGCTAGAAAGAGAATTGGTCCGTAACAAGG  
+HWI-EAS443:3:99:508:476#0/1  
a`\_ba`\_`^`ba`\_`a^aa`ab¥^aa```a]XaZ`aa\_L¥]b`

@HWI-EAS443:3:99:523:1987#0/1  
CCACCATCAAGGGAGCAATTTTACAATCCTGGAGCTCTTC  
+HWI-EAS443:3:99:523:1987#0/1  
aba`ZZaabaa`baababa`babab\_aa\_`ZNX`^`G\_\_X  
@HWI-EAS443:3:99:559:1491#0/1  
GGCCGTAACATGGTGAATAGGAATGGCCCAACAACAAGT  
+HWI-EAS443:3:99:559:1491#0/1  
\_^`bbbbbbbababa`bbabba``abaaaaaabb`ba\_ba\_\_  
@HWI-EAS443:3:99:560:1975#0/1  
AAACGACTTACAGTTCTTGAAAGGATGCAGGTGCATTGA  
+HWI-EAS443:3:99:560:1975#0/1  
`\_a\_ZZ]\_\_¥XZ\_VS¥]¥`Y\_VVb``Tq]a^UO\_X\_\_[[Y  
@HWI-EAS443:3:99:570:299#0/1  
GAATAAAAGAACTGAGAGATCTAATGTCGCAGTCCCGCAC  
+HWI-EAS443:3:99:570:299#0/1  
aaaa[`^`a\_\_¥````\_\_]```a^aaX]\_]`QTPXZUWY  
@HWI-EAS443:3:99:660:463#0/1  
AAAAGAACTGAGAGATCTAATGTCGCAGTCCCGCACTCGC  
+HWI-EAS443:3:99:660:463#0/1  
aaX^aa`````abaaba`aabb`]a^a`]a`a^a\_`ZYa\_  
@HWI-EAS443:3:99:724:1376#0/1  
ATCTCTTGCTCTTCTTTGCCAAAATGAGAAATCCTCTCAG  
+HWI-EAS443:3:99:724:1376#0/1  
a\_a``aba¥`aa`aa`\_a\_\_a`ba`\_aaa\_a`¥\_\_\_`]a`  
@HWI-EAS443:3:99:789:123#0/1  
GTCCTTGTTCAATCCTCTCTGGAATCATGTCCATTATTCT  
+HWI-EAS443:3:99:789:123#0/1  
`[U`abaX^`\_aaX`a`aa`a[\_\_\_`\_``\_^^]\_^`^`^^]  
@HWI-EAS443:3:99:855:1049#0/1  
AAACGATGCTGGATCAGACCGAGTGATGGTATCACCTCTG  
+HWI-EAS443:3:99:855:1049#0/1  
aba\_b`¥babaa¥Y^ba¥¥\_T`aV\_^\_\_\_W\_¥^¥YG¥XBB  
@HWI-EAS443:3:99:859:1261#0/1  
TGCTGTCCTGAGAGGATTTCTCATTTTGGGCAAAGAAGAC  
+HWI-EAS443:3:99:859:1261#0/1  
a\_R\_a]abbaa`abaaba\_babb`aa`\_a`aaaa\_aaa  
@HWI-EAS443:3:99:870:799#0/1  
GGTGGAGTCTGCTGTCCTGAGAGGATTTCTCATTTTGGGC  
+HWI-EAS443:3:99:870:799#0/1  
V\_I\_\_SaaW\_b][\_SaYSW¥ZZb`T`][ab`a`Z]]aaaa  
@HWI-EAS443:3:99:882:404#0/1  
CTCAGAATGAAGTGGATGATGGCAATGAGATACCCAATTA  
+HWI-EAS443:3:99:882:404#0/1  
`aaba]``baab[baabba]ab^¥a`¥```aaa\_a[aaaab  
@HWI-EAS443:3:99:908:1244#0/1  
AGAGAATAAAAGAACTGAGAGATCTAATGTCGCAGTCCCG  
+HWI-EAS443:3:99:908:1244#0/1  
]W¥¥¥\_V¥YYR¥XH\_b\_Ybaab`Z`babbTVbIb`HXa`]  
@HWI-EAS443:3:99:92:1455#0/1  
AATGTCGCAGTCCCGCACTCGCGAGATACTACTAAGACC

+HWI-EAS443:3:99:92:1455#0/1  
aT\_a`a`aUS^`a\_\_[0`¥]`XTP^UTP¥¥W¥\_¥]XSBBB  
@HWI-EAS443:3:99:936:1351#0/1  
GCTGTAATTGGGTATCTCATTGCCATCATCCACTTCATTC  
+HWI-EAS443:3:99:936:1351#0/1  
aa\_`[\_]aa]Ya0\_\_a\_Sa`a¥\_¥[YX\_Z¥\_`PX]\_^]`\_  
@HWI-EAS443:3:99:963:515#0/1  
GATGATGGCAATGAGATACCCAATTACAGCAGACAAGAGA  
+HWI-EAS443:3:99:963:515#0/1  
aYO¥RW`bVM[b]^M]^b\_V]^W\_\_Z¥`^aa]\_a[a`a`  
@HWI-EAS443:3:99:980:441#0/1  
CACGGAGATGTCGCTGAGAGGGATAAGAGTCAGCAAAATG  
+HWI-EAS443:3:99:980:441#0/1  
abaaa¥bbbbbaab[bbabaabbaaaa`aaa\_aZ``a`a`  
@HWI-EAS443:3:99:982:463#0/1  
AGAGAATAAAAGAACTGAGAGATCTAATGTCGCAGTCCCG  
+HWI-EAS443:3:99:982:463#0/1  
[b[TaZZaU¥^`abJbZYb]b]bKa`bbb\_bUHUbZWFH`  
@HWI-EAS443:3:99:991:113#0/1  
CTGTAATTGGGTATCTCATTGCCATCATCCACTTCATTCT  
+HWI-EAS443:3:99:991:113#0/1  
aV`aabb\_[¥YbVVX[UZ¥ZZ]Xab^Ub\_\_\_NTaGSZYF]  
@HWI-EAS443:3:9:1005:1248#0/1  
TGGTCTTAGTGAGTATCTCGCGAGTGCGGGACTGCGACAT  
+HWI-EAS443:3:9:1005:1248#0/1  
`ab\_`a^ab[\_`baa\_]\_[`]\_[aRXO¥¥aQR^ZZ\_ZPY`  
@HWI-EAS443:3:9:1008:485#0/1  
AAGAACTGAGAGATCTAATGTCGCAGTCCCGCACTCGCGA  
+HWI-EAS443:3:9:1008:485#0/1  
`b`V`¥\_aa\_baaaYbbaab\_Zb^\_aJ]aV]XL¥UN]]aZ  
@HWI-EAS443:3:9:1013:2020#0/1  
GGGAGATCAATGGCCCTGAGTCAGTGCTAGTCAACACTTA  
+HWI-EAS443:3:9:1013:2020#0/1  
aaa`a``aaaaa\_a]``aaY\_a`^\_\_`^\_Y]\_]N\_J\_W^  
@HWI-EAS443:3:9:1021:1244#0/1  
CTTTTTGATTATGGCCATATGGTCCACAGTGGTCTTAGTG  
+HWI-EAS443:3:9:1021:1244#0/1  
Y`aa`¥Ybbbb\_baa\_`TXSRY]YW`ZR]\_GK\_\_VUDS  
@HWI-EAS443:3:9:1027:751#0/1  
CCCGTTTTCGTTTTATTACCAACTACGTCCCCTTGCCC  
+HWI-EAS443:3:9:1027:751#0/1  
aaaaVO^Ya^PW¥RZZ^`ZQV\_^`\_]R[ZQS]]VP[]XZQ  
@HWI-EAS443:3:9:1028:1337#0/1  
CCCGTTTTCGTTTTATTACCAACTACGTCCCCTTGCCC  
+HWI-EAS443:3:9:1028:1337#0/1  
a\_aa\_aabaa\_aaP`aaaa`a\_\_a^`a^a^]`R^]\_^\_]U  
@HWI-EAS443:3:9:1052:279#0/1  
GTGGATGATGGCAATGAGATACCCAATTACAGCAGACAAG  
+HWI-EAS443:3:9:1052:279#0/1  
a[`^R[^Y]^a]W^^`R]^Z^X^Z]^Z^ZGXZW]^Z^Z]]



@HWI-EAS443:3:9:106:470#0/1  
GAATAAAAGAAGACTGAGAGATCTAATGTCGCAGTCCCGCAC  
+HWI-EAS443:3:9:106:470#0/1  
a`aaabbbbaaaaaaaaaaba\_`H`a`b]]``^`V`\_\_\_^R¥  
@HWI-EAS443:3:9:1070:462#0/1  
AGAGGATTTCTCATTTTGGGCAAAGAAGACAAGAGATATG  
+HWI-EAS443:3:9:1070:462#0/1  
a]^`aabb`aaaabaaab`a\_aV¥\_aa```aaa`\_\_aa  
@HWI-EAS443:3:9:1072:1674#0/1  
TAAACACTGCCTGTTCCGCCGGCTACTGGGAGAAACCTTG  
+HWI-EAS443:3:9:1072:1674#0/1  
aaba`a\_aa`\_ab\_aa`aa¥`X]a\_G^[a^QaT\_`WNQ¥`  
@HWI-EAS443:3:9:1079:657#0/1  
TGCTGTAATTGGGTATCTCATTGCCATCATCCACTTCATT  
+HWI-EAS443:3:9:1079:657#0/1  
a\_\_ab\_`¥\_aaaa)``Y\_\_aa\_Z[]``UY^ZUYV\_^Y]`^  
@HWI-EAS443:3:9:1089:932#0/1  
CCCGTTTTTCGTTTCATTACCAACTACGTCCCCTTGCCC  
+HWI-EAS443:3:9:1089:932#0/1  
`[aaLQ[`\_Va\_ZU\_\_\_^`Ua`\_^]\_aSPL[]ZR^V^PPS  
@HWI-EAS443:3:9:1112:603#0/1  
GGGTTTGTCTTGTTCATTCTCTCTGGAATCATGTCCAT  
+HWI-EAS443:3:9:1112:603#0/1  
aaa]aaa¥[\_aaa^`\_\_a`a^\_^^^`\_\_^``Z^\_`]WZ^]  
@HWI-EAS443:3:9:111:1689#0/1  
GTCCCCTTTTCGTTTCATTACCAACTACGTCCCCTTGCC  
+HWI-EAS443:3:9:111:1689#0/1  
a^`¥Z\_OS^aa\_ZY\_X\_`]WZTX^¥`Y¥`OQNQP[VYV¥Y  
@HWI-EAS443:3:9:1125:913#0/1  
GGATGATGGCAATGAGATACCCAATTACAGCAGACAAGAG  
+HWI-EAS443:3:9:1125:913#0/1  
ab]^`Z`¥`]X\_Z\_]`a]`¥¥\_`^[\_^`X\_\_^`^^¥\_a  
@HWI-EAS443:3:9:115:1906#0/1  
AAAGAAGACTGAGAGATCTAATGTCGCAGTCCCGCACTCGCG  
+HWI-EAS443:3:9:115:1906#0/1  
aa`^`\_\_`aaYa^^W\_^a]\_^W`O\_^OTTU`OXR\_Z]WXB  
@HWI-EAS443:3:9:1195:1518#0/1  
GAATAAAAGAAGACTGAGAGATCTAATGTCGCAGTCCCGCAC  
+HWI-EAS443:3:9:1195:1518#0/1  
`aabaabab\_a\_aaa`aaaa\_ba\_aa^W`\_`aYV\_]`^Y¥¥  
@HWI-EAS443:3:9:1211:1507#0/1  
GAGAATAAAAGAAGACTGAGAGATCTAATGTCGCAGTCCCGC  
+HWI-EAS443:3:9:1211:1507#0/1  
a^a\_^a\_Y[\_^\_VP\_`\_a`\_^]VY\_]`¥¥Y¥^]`^UTOFOR  
@HWI-EAS443:3:9:1228:549#0/1  
GAGAATAAAAGAAGACTGAGAGATCTAATGTCGCAGTCCCGC  
+HWI-EAS443:3:9:1228:549#0/1  
a¥Y[\_\_\_\_[`\_\_\_\_U`a]\_\_Z\_\_[\_]^`Y^^^`YYVV]]  
@HWI-EAS443:3:9:1271:680#0/1  
GTACTTTTTGATTATGGCCATATGGTCCACAGTGGTCTTA

+HWI-EAS443:3:9:1271:680#0/1  
`HRV¥` `¥SZ` `X\_X[UW¥PVRNQMFQ[XPSJY[GQVBB  
@HWI-EAS443:3:9:1321:614#0/1  
AAAGAAGTCTAATGTTCGAGTCCCGCACTCGCG  
+HWI-EAS443:3:9:1321:614#0/1  
\_abaaaababbbbaaZb`bbb` `^ab\_^\_Ua` `\_\_aX^\_a  
@HWI-EAS443:3:9:133:277#0/1  
AGGGGACGTAGTGTGGTAATGAAACGAAACGGGACTCT  
+HWI-EAS443:3:9:133:277#0/1  
abab\_` `bOX^I^\_ab^0[ ]\_\_VZ[JZX¥`XU]]a]UTXB  
@HWI-EAS443:3:9:1346:205#0/1  
AGCAGTGTGAGACCCATTAGCATCTCTCTTGAAATG  
+HWI-EAS443:3:9:1346:205#0/1  
aa`aa[\_X¥aa\_a`V` `aaa\_\_Q]\_\_U` ¥`N` aY\_\_¥¥^`  
@HWI-EAS443:3:9:1388:1643#0/1  
GCCCCTAAGTCTGATCATGCAATCCTCTTGAGAAAT  
+HWI-EAS443:3:9:1388:1643#0/1  
\_\_b^Rbb\_Z[b^]bbab¥ZaaY^aa`^]a`aaba`aa\_aa  
@HWI-EAS443:3:9:1400:1304#0/1  
CGCACTCGGAGATACTACTAAGACCACTGTGGACCATA  
+HWI-EAS443:3:9:1400:1304#0/1  
[a\_aV`abbb^baL\_`b[a]aa`aaYS\_a\_aN[aWW\_\_Va  
@HWI-EAS443:3:9:1405:1454#0/1  
AAAAGAAGTCTAATGTTCGAGTCCCGCACTCGCG  
+HWI-EAS443:3:9:1405:1454#0/1  
`aaaaabababQ\_LXa]`baaa[\_aa\_aaUS\_]S]W`G]¥  
@HWI-EAS443:3:9:1459:509#0/1  
GCGAGATACTACTAAGACCACTGTGGACCATATGGCCAT  
+HWI-EAS443:3:9:1459:509#0/1  
a\_\_\_\_` `a\_\_a` `aaaa\_XZa¥\_aY\_\_¥^^]a` ` `RS\_Y  
@HWI-EAS443:3:9:1492:1513#0/1  
CCCGTTTTCTTTCATTACCAACTACGTCCCCTTGCCC  
+HWI-EAS443:3:9:1492:1513#0/1  
YJU`Y`S` `aaaaYa]]\_\_XX[\_^[\_a`V`UO[SMZ\_^FFQ  
@HWI-EAS443:3:9:1557:1208#0/1  
GCACTCGGAGATACTACTAAGACCACTGTGGACCATAT  
+HWI-EAS443:3:9:1557:1208#0/1  
aaaabab` `abaa` `aaa\_aaaaa]aa\_aa]` `\_\_^` `\_\_`  
@HWI-EAS443:3:9:1575:1297#0/1  
TGGGGTCATGTGCGGCAGTATTCCGATCATTCCCATCACA  
+HWI-EAS443:3:9:1575:1297#0/1  
aaaaa]`abaaaa\_\_¥aaZaa`¥¥` `]¥\_\_aZUX\_¥^W\_  
@HWI-EAS443:3:9:1631:537#0/1  
CTCGGTCTGATCCAGCATCGTTTGTGCTCCAGAGGGT  
+HWI-EAS443:3:9:1631:537#0/1  
`baab`]^` ` \_0\_¥\_]b]Xa`a[ ` `ab`XT00VZ`P]`X^  
@HWI-EAS443:3:9:1641:1252#0/1  
CGCACTCGGAGATACTACTAAGACCACTGTGGACCATA  
+HWI-EAS443:3:9:1641:1252#0/1  
^`\_LWa`b]aabaa` `baabaaa[T[a^`a[ ` `ZWY\_`¥

@HWI-EAS443:3:9:187:1192#0/1  
GCTGTAATTGGGTATCTCATTGCCATCATCCACTTCATTC  
+HWI-EAS443:3:9:187:1192#0/1  
abaa]]]aba`a\_]`^aaaa`aa``aaa\_aaa`a`a\_`\_\_  
@HWI-EAS443:3:9:192:222#0/1  
CTCTTATTTTCAGTGTGGAGGTTGCCGTTAGCACTTC  
+HWI-EAS443:3:9:192:222#0/1  
abababaabab^`^aXaaaa[a\_\_`a``aW\_]`ZZY\_\_Y  
@HWI-EAS443:3:9:224:1439#0/1  
AGCACTTTTGCATCTTTTGGAAATGCCTCAAGAGTTGGT  
+HWI-EAS443:3:9:224:1439#0/1  
^aa`Y^^^aa``aaa^¥YU]\_`aZ[aZZ`a]`W`Z^R  
@HWI-EAS443:3:9:224:263#0/1  
TGCTGTAATTGGGTATCTCATTGCCATCATCCACTTCATT  
+HWI-EAS443:3:9:224:263#0/1  
IaZX[OQXU[[¥VP[^aS]aWV`TaZZ\_aTa`U``\_a\_Y\_  
@HWI-EAS443:3:9:233:475#0/1  
GTCCCGTTTTCGTTTCATTACCAACACTACGTTCCCTTGC  
+HWI-EAS443:3:9:233:475#0/1  
a]XX\_aX\_]\_]\_X\_\_X¥\_`^`\_]`^\_¥]]]ZWRU^UY^Y  
@HWI-EAS443:3:9:246:848#0/1  
AAAGAAGTGAAGATCTAATGTCGCAGTCCCGCACTCGCG  
+HWI-EAS443:3:9:246:848#0/1  
ab`a`aab`aaaa^baaab^\_a`aaXaa`\_\_Q\_X\_^[\_  
@HWI-EAS443:3:9:259:1687#0/1  
AAAGAAGTGAAGATCTAATGTCGCAGTCCCGCACTCGCG  
+HWI-EAS443:3:9:259:1687#0/1  
aaaZOV`aaa\_b]aa^\_abaa^]Z^a\_Z\_^YW^H\_Y[X\_^  
@HWI-EAS443:3:9:337:842#0/1  
GAATAAAGAAGTGAAGATCTAATGTCGCAGTCCCGCAC  
+HWI-EAS443:3:9:337:842#0/1  
aZaaa]aa`aaaaZa`aa[]aaa\_]`^a\_abaW\_\_\_¥\_¥^  
@HWI-EAS443:3:9:373:209#0/1  
AAAGAAGTGAAGATCTAATGTCGCAGTCCCGCACTCGCG  
+HWI-EAS443:3:9:373:209#0/1  
UR¥baa\_Z\_[aaa`aabaab¥aa\_ab\_a\_\_a¥\_\_V\_]\_`  
@HWI-EAS443:3:9:378:613#0/1  
ATAAAGAAGTGAAGATCTAATGTCGCAGTCCCGCACTC  
+HWI-EAS443:3:9:378:613#0/1  
ab`a[\_ba`ab`a\_Xb`a]`aaa`[\_aaaZP¥`\_\_\_NS\_`  
@HWI-EAS443:3:9:428:552#0/1  
CAAGAAGTGAAGTGGTTGGTTGCCTTGTGTAATTGAA  
+HWI-EAS443:3:9:428:552#0/1  
a`\_`babaababab\_abaabbba``aa\_ab`a`¥baa`a`a  
@HWI-EAS443:3:9:443:1394#0/1  
GTCGCAGTCCCGCACTCGCGAGATACTACTAAGACCACT  
+HWI-EAS443:3:9:443:1394#0/1  
a^`\_`aa^aa`^`^^\_\_¥`¥Y]^[]U[\_`^YW]^¥UbXUB  
@HWI-EAS443:3:9:449:328#0/1  
GTCCCGTTTTCGTTTCATTACCAACACTACGTTCCCTTGC

+HWI-EAS443:3:9:449:328#0/1  
]OQEVVYX\_abXXN]XX^UJUPSXSBBBBBBBBBBBBBBB  
@HWI-EAS443:3:9:479:47#0/1  
AAAGAAGTCTAATGTCGCAGTCCCGCACTCGCG  
+HWI-EAS443:3:9:479:47#0/1  
aaaa]¥^aa`\_\_a`\_]\_`\_`Y^\_]\_^V]YXXYYXXYYY  
@HWI-EAS443:3:9:498:969#0/1  
AAAAGAAGTCTAATGTCGCAGTCCCGCACTCGCG  
+HWI-EAS443:3:9:498:969#0/1  
abbbaaa\_aaaa\_a`\_\_abaaa\_a\_\_aaU\_Za\_^^\_^\_]\_]  
@HWI-EAS443:3:9:49:429#0/1  
CAAGGGAGCAATTTTACAATCCTGGAGCTCTTCTTCTTC  
+HWI-EAS443:3:9:49:429#0/1  
a`[baaaaa]a`a`¥aaaa\_`\_^MaU`^`a^`a\_````]  
@HWI-EAS443:3:9:502:952#0/1  
GAATAAAGAAGTCTAATGTCGCAGTCCCGCAC  
+HWI-EAS443:3:9:502:952#0/1  
aaabbabbbaa`baaaaa`aba\_`a\_a`\_`aY\_]\_[\_X  
@HWI-EAS443:3:9:516:1372#0/1  
ATACTACTAAGACCACTGTGGACCATATGGCCATAATCA  
+HWI-EAS443:3:9:516:1372#0/1  
a^a]]aZ¥`a]]^`^`X\_`]a`\_`^X]a]\_^ZZMX^  
@HWI-EAS443:3:9:51:1254#0/1  
GGCCATATGGTCCACAGTGGTCTTAGTGAGTATCTCGCGA  
+HWI-EAS443:3:9:51:1254#0/1  
`bbbbabbbaa¥bba^^^```aabaa`aba]`a`¥Y\_]\_X  
@HWI-EAS443:3:9:554:667#0/1  
ATCTAATGTCGCAGTCCCGCACTCGCGAGATACTCACTAA  
+HWI-EAS443:3:9:554:667#0/1  
aaaaa^aa\_`a\_Z`Z`aa[^S\_]^W\_\_V^WS]S^¥¥WU¥¥  
@HWI-EAS443:3:9:581:564#0/1  
GTCCCGTTTTTCGTTTCATTACCAACTACGTCCTTGC  
+HWI-EAS443:3:9:581:564#0/1  
a]]VJHLQXV]NYVZa¥JQU[\_\_\_ZU[RRURYLLTYRLFVS  
@HWI-EAS443:3:9:656:521#0/1  
GAACAAGGACAAACCCTCTGGAGCAAACAAACGATGCTG  
+HWI-EAS443:3:9:656:521#0/1  
\_I`T^]]Z[^[PV¥Xa`X]]Ya\_`[[R¥\_a¥\_Ia¥RUUT\_  
@HWI-EAS443:3:9:67:1479#0/1  
CTAATGTGCTAATTGGGCAAGGGACGTAGTGTGGTAAT  
+HWI-EAS443:3:9:67:1479#0/1  
aaa`a`¥a\_aa`a\_\_aa`a\_a\_\_Z]\_a\_[`]a^`a[OZ`U  
@HWI-EAS443:3:9:724:995#0/1  
AAAGAAGTCTAATGTCGCAGTCCCGCACTCGCG  
+HWI-EAS443:3:9:724:995#0/1  
^`[a`\_V]b^`b\_]XZ\_^]Z]NRQLQOQY¥[GTRWKT  
@HWI-EAS443:3:9:728:987#0/1  
CCGCACTCAGAATGAAGTGGATGATGGCAATGAGATACCC  
+HWI-EAS443:3:9:728:987#0/1  
abbaa¥aaba[\_`RZab^a¥¥`a¥M[\_`\_`aaa^\_\_[\_R¥[

@HWI-EAS443:3:9:729:259#0/1  
AAGAAGTCTAATGTCGCAGTCCCGCACTCGCGA  
+HWI-EAS443:3:9:729:259#0/1  
\_^\\$W\$a\_W\_U\_bab]bbaa\_LTb[bb`]aY]][V\_TXXaW  
@HWI-EAS443:3:9:733:361#0/1  
AGAGAATAATGGACATGATTCCAGAGAGGAATGAACAAGG  
+HWI-EAS443:3:9:733:361#0/1  
aaaa\_\_a`aaa]^`^aaaaa`[]`\_^a\_\_\_\_```\_¥^^^\_  
@HWI-EAS443:3:9:756:1147#0/1  
GTCTGCTGTAATTGGGTATCTCATTGCCATCATCCACTTC  
+HWI-EAS443:3:9:756:1147#0/1  
a[]`aaa]PXV]a^^\_GPX\_[\_V]\_TV\_^^`]^\_U]UP[^Z  
@HWI-EAS443:3:9:767:1163#0/1  
AAAAGAAGTCTAATGTCGCAGTCCCGCACTCGC  
+HWI-EAS443:3:9:767:1163#0/1  
a\_` `[aY\_a\_[\_a[\_\_\_Z\_\_\_\_\_aUN\_X]^]RLSXU^]]WWU  
@HWI-EAS443:3:9:811:400#0/1  
CTCTTATCCCTCTCAGCGACATCTCCGTGCTTGGGGTCAT  
+HWI-EAS443:3:9:811:400#0/1  
ab`b]baYbaba`a`^Xa^aa]a^]`aaYaaa\_a`U¥\_a  
@HWI-EAS443:3:9:840:378#0/1  
ATTTTCACAATTTCCAGTTCCTGATTATCCATTGATAAG  
+HWI-EAS443:3:9:840:378#0/1  
¥\_`Vb`¥G\_¥¥¥UR\_ZRV^¥T]^`ZTPZ]^`\_XTX`[Ra```  
@HWI-EAS443:3:9:860:521#0/1  
GGAAAAGCACTTTTGCATCTTTTTGGAAATGCCTCAAGAG  
+HWI-EAS443:3:9:860:521#0/1  
Y\_RW`]^`¥ZMPZ]^`Q^`^a\_]ZW¥`]X`a[GU]^W]XB  
@HWI-EAS443:3:9:913:159#0/1  
ACTGAAGATCCAGATGAAGGCACATCTGGGGTGGAGTCTG  
+HWI-EAS443:3:9:913:159#0/1  
aabbabaaa`aaaaaaaaaaa\_\_\_\_`¥aa```\_W\_^¥`WW]^`  
@HWI-EAS443:3:9:928:1803#0/1  
AAGAAGTCTAATGTCGCAGTCCCGCACTCGCGA  
+HWI-EAS443:3:9:928:1803#0/1  
a\_\_a\_ab```aaVaU\_Xaa\_aNHSS\_UFFKXNZ\_XZVWPUQ  
@HWI-EAS443:3:9:92:739#0/1  
GAGAGATCTAATGTCGCAGTCCCGCACTCGCGAGATACTC  
+HWI-EAS443:3:9:92:739#0/1  
]^b`bb]^aaZ^bVaaaab¥¥¥`\_aT]^`a`]]XW\_^ZU[\_  
@HWI-EAS443:3:9:961:592#0/1  
GCTGGATCAGACCGAGTGTGGTATCACCTCTGGCCGTAA  
+HWI-EAS443:3:9:961:592#0/1  
aabbbaa\_baa\_\_aaaVa`\_aaV\_^U]NW\_S^a\_¥U`RV¥  
@HWI-EAS443:3:9:969:976#0/1  
TACTGGTAAGAGGCAATTCTCCAGTATTCAATTACAACAA  
+HWI-EAS443:3:9:969:976#0/1  
aba`b`U\_a]^a`]^`]¥T¥\_YaZGZ``Y¥U\_\_aX^\_S]\_  
@HWI-EAS443:3:19:1501:63#0/1  
ATGGTTTCTGGACATTTGGACTTACAATGCCGAAATGTT

+HWI-EAS443:3:19:1501:63#0/1  
aa^aZRZ[Y\_^`a\_¥]^ZRLX¥YXTGMZ^SUMT^GY]]B  
@HWI-EAS443:3:26:887:1461#0/1  
CACAAATTCAAACGAGAAGATCATTTGAGTTAAAGAAACT  
+HWI-EAS443:3:26:887:1461#0/1  
abababbbabaaa^aaabaa`baaa^^\_aYaabaaaa\_a  
@HWI-EAS443:3:35:1172:1839#0/1  
CGGGGGGAGACACACAAATTCAAACGAGAAGATCATTTGA  
+HWI-EAS443:3:35:1172:1839#0/1  
\_`ab]XXGYa]\_a`¥^`\_[]`¥Y[Y``SJJ]^`\_`\_]\_U  
@HWI-EAS443:3:50:314:1660#0/1  
CGGGCTTCTTTAACTCAAATGATCTTCTCGTTTGAATTTG  
+HWI-EAS443:3:50:314:1660#0/1  
U[¥aa`^`\_\_ab`]a¥`ZZ`\_¥\_bab^]^¥baa]aa`ba^^  
@HWI-EAS443:3:54:1176:1876#0/1  
CAAACGAGAAGATAATTTGAGTTAAAGAAGCTGTGGGATC  
+HWI-EAS443:3:54:1176:1876#0/1  
abaabaaa`\_`\_W\_¥abbKab`bbbababbb`baa]\_[  
@HWI-EAS443:3:7:783:1754#0/1  
CATACAAATTCAAACGAGAAGATCATTTGAGTTAAAGAAG  
+HWI-EAS443:3:7:783:1754#0/1  
\_]SaX¥¥WTPNab]ab\_bUaa\_WG`[Xa[TIX``Yaaa\_B  
@HWI-EAS443:3:15:1412:1409#0/1  
ATAGGGGAGACACACAAATTCAAACGAGAANATCATTTGA  
+HWI-EAS443:3:15:1412:1409#0/1  
ab```Y[ab]\_Y``U¥[aR``\_\_\_aT\_^[D]][[`^UX\_  
@HWI-EAS443:3:17:1087:538#0/1  
CATAGGGGANACACACAAATTCAAACGAGAAGATCATTTG  
+HWI-EAS443:3:17:1087:538#0/1  
aababbbbVDWaabbaaa\_aaaaba`b`aa`baa^aaaaa  
@HWI-EAS443:3:1:1213:324#0/1  
CACAAATTCAAACGAGAAGATCNTTTGAGTTAAAGAAGCT  
+HWI-EAS443:3:1:1213:324#0/1  
a\_]aaVaaX\_Q]WaZ[[N\_\_ZWDV^^ZV\_]\_^`\_]X\_BB  
@HWI-EAS443:3:32:1248:1026#0/1  
CACAAATTCAAACGAGAAGATCATTTGANTTAAAGAAGCT  
+HWI-EAS443:3:32:1248:1026#0/1  
abababbbbaabaabaa`abaa``aaa`UDSaaa`a\_aaa\_  
@HWI-EAS443:3:45:1082:1671#0/1  
GTGCCATAGGGGAGACACACAAATTCAAACNGAAGATCA  
+HWI-EAS443:3:45:1082:1671#0/1  
a]aa\_aaaa`a`a\_^\_]aZaa\_a\_\_aa`\_[DW\_``\_\_\_^  
@HWI-EAS443:3:47:1449:278#0/1  
GGGGAGACACACAAATTCAAACGAGAAGNTCATTTGAGTT  
+HWI-EAS443:3:47:1449:278#0/1  
aaaa]`]Z\_^`^`\_`\_]^\_VUZ]\_ZUUDTX]]\_]Y^Y]  
@HWI-EAS443:3:66:1182:1551#0/1  
GGGGAGACACACAAATTCAAACGAGAAGANCATTTGAGTT  
+HWI-EAS443:3:66:1182:1551#0/1  
aa[``a`¥`ab\_^]¥`][\_aaY]]a`^\_ZDR``\_``]¥S[

@HWI-EAS443:3:81:1117:1770#0/1  
CACACAAATTCAAACGAGAAGATCATTTNAGTTAAAGAAG  
+HWI-EAS443:3:81:1117:1770#0/1  
aa^Z¥X\_aT`a]U\_[^aZF¥Z[VP^\_WDR]]\_`^¥[SXRT  
@HWI-EAS443:3:97:1330:1555#0/1  
ATAGGTGCCNTAGGGGAGACACACAAATTCAAACGAGAAG  
+HWI-EAS443:3:97:1330:1555#0/1  
aa`\_[Wa^VDWa\_aaa\_a\_0a[a\_a\_^a\_`^WN[\_[VX[  
@HWI-EAS443:3:19:1733:61#0/1  
ATAGGTGCCATAGGGGAGACACACAAATTCAAACGAGAGA  
+HWI-EAS443:3:19:1733:61#0/1  
a\_a\_¥Za^X^^\_a\_`^^¥^Z^S[W]W^]XWXZZZ\_ZZZBB  
@HWI-EAS443:3:39:316:1816#0/1  
CGGGGAGACACACAAATTCAAACGAGAAGATCATTTGAG  
+HWI-EAS443:3:39:316:1816#0/1  
aaaaXWU]LNSWZZZQF]]M^X]QP\_W\_\_a]\_a¥VPHRP  
@HWI-EAS443:3:50:1139:1997#0/1  
CACAAATTCAAACGAGAAGATCATTTGAGTTAAAGAAGAT  
+HWI-EAS443:3:50:1139:1997#0/1  
]aXXZ``bbab`[[ab¥`V\_¥¥]bb`bT`GHV\_^`a\_YNG  
@HWI-EAS443:3:66:315:892#0/1  
GGGGGAGACACACAAATTCAAACGAGAAGATCATTTGAG  
+HWI-EAS443:3:66:315:892#0/1  
ab\_`bb`a`abaaa¥^0^aaaaa``a\_aa``a\_a\_\_a\_`  
@HWI-EAS443:3:79:101:193#0/1  
CNGGGAGACACACAAATTCAAACGAGAAGATCATTTGAGT  
+HWI-EAS443:3:79:101:193#0/1  
[DYabbb]`abZa`¥\_aabaa\_b\_aaaaa\_`a`aa[\_`\_  
@HWI-EAS443:3:92:1619:1647#0/1  
CACAAATTCAAACGAGAAGATCATTTGAGTTAAAGAAGAT  
+HWI-EAS443:3:92:1619:1647#0/1  
`b`b`Uaa\_\_b\_¥b`aa[aaa^\_ba``\_\_a``\_aaaZVD[  
@HWI-EAS443:3:29:1553:527#0/1  
CGAGAAGATCATTTGAGTTAAAGAAGCTGTGGGATAAAAG  
+HWI-EAS443:3:29:1553:527#0/1  
aaP^a]]HYU``a¥]T\_RV\_]¥baZ[SJ¥GJ`^XBBBBBB  
@HWI-EAS443:3:24:1126:2047#0/1  
NAGACACACAAATTCAAACGAGAAGATCATTTGAGTTAAA  
+HWI-EAS443:3:24:1126:2047#0/1  
DM[YV[[Y[Y[SX[WZ[[[V[[Z[[[[P[Y[Y][ZZS[[Z  
@HWI-EAS443:3:5:561:1593#0/1  
CGGGGAGACACACAAATTCAAACGAGAAGATCATTTGAGT  
+HWI-EAS443:3:5:561:1593#0/1  
^a^¥b\_b¥¥R`a¥b^^^`a¥`ZXbaa^``aaa\_VXVa\_bB  
@HWI-EAS443:3:5:707:302#0/1  
AACAAATTCAAACGAGAAGATCATTTGAGTTAAAGAAGCT  
+HWI-EAS443:3:5:707:302#0/1  
LUT¥baaX[^aaKaKbbab`VTbZ`baa¥KbWX\_¥b[ba`  
@HWI-EAS443:3:66:1258:380#0/1  
CGGGGAGACACACAAATTCAAACGAGAAGATCATTTGAGT

+HWI-EAS443:3:66:1258:380#0/1  
\_abbbbb\_bbababbbbabbaababbabaa\_abbbb`ba  
@HWI-EAS443:3:83:873:694#0/1  
AAATGATCTTCTCGTTTGAATTTGTGTGTCTCCCCTATGA  
+HWI-EAS443:3:83:873:694#0/1  
VVZZ\_Ua^`a^b¥`¥`¥`YbbbaY`]b^^`baWa`^\_\_G  
@HWI-EAS443:3:89:1358:1119#0/1  
GGGGGAGACACACAAATTCAAACGAGAAGATCATTGAGT  
+HWI-EAS443:3:89:1358:1119#0/1  
`^\_\_V[^M¥a`]Y^a¥`VY`^^`^Y]a`]YP[XVXaX`W  
@HWI-EAS443:3:100:1207:1867#0/1  
CACAAATTCAAACGAGAAGATCATTGAGTTAAAGAAGCT  
+HWI-EAS443:3:100:1207:1867#0/1  
Yb`bbaaabbb¥bbb`aba`\_\_bba]]bb[[^bba`I`  
@HWI-EAS443:3:100:1512:1403#0/1  
CACAAATTCAAACGAGAAGATCATTGAGTTAAAGAAGCT  
+HWI-EAS443:3:100:1512:1403#0/1  
aaba```JYa`Y`bbb¥`ab]N^b¥b\_`bbaab¥bbbb^¥  
@HWI-EAS443:3:100:347:1047#0/1  
CATATAGGTGCCATAGGGGAGACACACAAATTCAAACGAG  
+HWI-EAS443:3:100:347:1047#0/1  
a\_b^`¥TaVa[G\_]Vaaa`R^a]PV]UH\_T]\_]Xaa`¥[B  
@HWI-EAS443:3:100:481:1413#0/1  
GGGGAGACACACAAATTCAAACGAGAAGATCATTGAGTT  
+HWI-EAS443:3:100:481:1413#0/1  
Za¥`bba\_aa`bbbVba\_ba\_`^Zb\_`\_¥aaaaba¥\_\_X^  
@HWI-EAS443:3:100:702:1298#0/1  
CACAAATTCAAACGAGAAGATCATTGAGTTAAAGAAGCT  
+HWI-EAS443:3:100:702:1298#0/1  
`aa`\_bba^bbbbb^`\_Y`ababab`b\_bbabaaaaaaaa  
@HWI-EAS443:3:10:1049:227#0/1  
CACACAAATTCAAACGAGAAGATCATTGAGTTAAAGAAG  
+HWI-EAS443:3:10:1049:227#0/1  
a\_bbaabbbbbbabaabbaabaa\_abbbbaaabbbbbbab  
@HWI-EAS443:3:10:1652:1253#0/1  
CACAAATTCAAACGAGAAGATCATTGAGTTAAAGAAGCT  
+HWI-EAS443:3:10:1652:1253#0/1  
a¥]babbb\_babV¥b\_]abb^Yb]abbab`aa`aa^bX[b  
@HWI-EAS443:3:10:735:1025#0/1  
CACAAATTCAAACGAGAAGATCATTGAGTTAAAGAAGCT  
+HWI-EAS443:3:10:735:1025#0/1  
abbb\_a\_abbbbaaab^aa\_]a]aaaa`\_a`a`\_b\_a¥a  
@HWI-EAS443:3:10:996:738#0/1  
GTGCCATAGGGGAGACACACAAATTCAAACGAGAAGATCA  
+HWI-EAS443:3:10:996:738#0/1  
aS`^¥Y[Q]a`WV^ZRUXWNSVW^ZNQZWR]Y¥¥XVUNFT  
@HWI-EAS443:3:11:1585:1467#0/1  
CACACAAATTCAAACGAGAAGATCATTGAGTTAAAGAAG  
+HWI-EAS443:3:11:1585:1467#0/1  
abab\_Labbaabba^babaabaa^aabaa\_b\_aaa`aa`a



@HWI-EAS443:3:11:278:1709#0/1  
CACAAATTCAAACGAGAAGATCATTTGAGTTAAAGAAGCT  
+HWI-EAS443:3:11:278:1709#0/1  
`a]\_LZaabbbb¥b`a\_`ba]`YY\_\_\_^^^a`a`aa\_\_^^  
@HWI-EAS443:3:11:557:347#0/1  
CACAAATTCAAACGAGAAGATCATTTGAGTTAAAGAAGCT  
+HWI-EAS443:3:11:557:347#0/1  
a```bbbb`aaab`baaaaa`aaaa`aa^a`aabaaS\_  
@HWI-EAS443:3:12:1125:74#0/1  
GGGAGACACACAAATTCAAACGAGAAGATCATTTGAGTTA  
+HWI-EAS443:3:12:1125:74#0/1  
aaa`a`]`\_a\_a`a`a`]^`^Za^\_]`]^`^W]\_```Z\_Z`Z  
@HWI-EAS443:3:12:1306:204#0/1  
CATATAGGTGCCATAGGGGAGACACACAAATTCAAACGAG  
+HWI-EAS443:3:12:1306:204#0/1  
aabbaaaa]ba\_`a\_a`aa```^\_X\_`\_\_\_\_\_a]\_`\_Z\_^\_  
@HWI-EAS443:3:12:1425:513#0/1  
CACAAATTCAAACGAGAAGATCATTTGAGTTAAAGAAGCT  
+HWI-EAS443:3:12:1425:513#0/1  
ababbbb\_K`abbaabbaaaaabbb`baaaaabbab\_a  
@HWI-EAS443:3:12:1661:1960#0/1  
CATATAGGTGCCATAGGGGAGACACACAAATTCAAACGAG  
+HWI-EAS443:3:12:1661:1960#0/1  
^bbabbababaabb`a`bababab^aabba`][abb]aaW  
@HWI-EAS443:3:12:264:852#0/1  
GGGAGACACACAAATTCAAACGAGAAGATCATTTGAGTTA  
+HWI-EAS443:3:12:264:852#0/1  
U\_`X¥`\_aZ```R¥``U\_``^\_W¥[O\_`^`^Z¥V^`\_`UZY  
@HWI-EAS443:3:12:608:1734#0/1  
CACACAAATTCAAACGAGAAGATCATTTGAGTTAAAGAAG  
+HWI-EAS443:3:12:608:1734#0/1  
a\_^ba`aabba`abbabaabbaabab^aaaaababaa  
@HWI-EAS443:3:13:1407:1012#0/1  
GGGAGACACACAAATTCAAACGAGAAGATCATTTGAGTT  
+HWI-EAS443:3:13:1407:1012#0/1  
JPQaaTY`aV¥Q`^ZY\_Y^\_YQaa^`UOXaP^a\_a\_\_aUW  
@HWI-EAS443:3:13:1445:241#0/1  
CATATAGGTGCCATAGGGGAGACACACAAATTCAAACGAG  
+HWI-EAS443:3:13:1445:241#0/1  
a`bbbbbbbaa\_a\_aTOTR\_`^`[`X\_`\_`a\_^\_`^aa¥]a\_a  
@HWI-EAS443:3:13:148:1721#0/1  
CACAAATTCAAACGAGAAGATCATTTGAGTTAAAGAAGCT  
+HWI-EAS443:3:13:148:1721#0/1  
a`V¥`TaaXa`]aaaa[¥^`aZa`X\_baaX\_aaT]aa¥a\_  
@HWI-EAS443:3:13:611:1460#0/1  
CATATAGGTGCCATAGGGGAGACACACAAATTCAAACGAG  
+HWI-EAS443:3:13:611:1460#0/1  
aaabZ^ZRE¥`a`\_aaaV`W`\_\_`\_`a\_a\_\_\_\_\_W`^\_  
@HWI-EAS443:3:14:1358:1482#0/1  
CACAAATTCAAACGAGAAGATCATTTGAGTTAAAGAAGCT

+HWI-EAS443:3:14:1358:1482#0/1  
abbbbaa`abbaababaaab`a\_baba\_b`a`\_\_a\_b^a  
@HWI-EAS443:3:14:1557:63#0/1  
CACAAATTCAAACGAGAAGATCATTTGAGTTAAAGAAGCT  
+HWI-EAS443:3:14:1557:63#0/1  
aabbbbaabaaa`¥a`a`b`\_`aa`aXa`\_`^]a`]aW`  
@HWI-EAS443:3:14:262:2008#0/1  
CATAGGGGAGACACACAAATTCAAACGAGAAGATCATTTG  
+HWI-EAS443:3:14:262:2008#0/1  
aa`aa]\_¥aW[Uaaa`a\_\_]a`\_`\_^`^^`\_^aW`\_^Z]^  
@HWI-EAS443:3:14:775:44#0/1  
CACAAATTCAAACGAGAAGATCATTTGAGTTAAAGAAGCT  
+HWI-EAS443:3:14:775:44#0/1  
aba\_b`^aaabaab\_a`a`\_`\_^a`^\_a\_aZa`^^aa]^`\_  
@HWI-EAS443:3:15:134:554#0/1  
AGGGGAGACACACAAATTCAAACGAGAAGATCATTTGAGT  
+HWI-EAS443:3:15:134:554#0/1  
`aZabb\_bab\_ba`b¥aaabbaaaaa\_aa`W¥aaa\_Ya`  
@HWI-EAS443:3:15:1442:2017#0/1  
ATATAGGTGCCATAGGGGAGACACACAAATTCAAACGAGA  
+HWI-EAS443:3:15:1442:2017#0/1  
\_`^a[`\_PTTDWbX`^`aa]a¥KRTYM]\_]a\_a`\_`¥WY¥W\_  
@HWI-EAS443:3:15:457:1676#0/1  
CACAAATTCAAACGAGAAGATCATTTGAGTTAAAGAAGCT  
+HWI-EAS443:3:15:457:1676#0/1  
\_`bbbbbbbbbbbab`bb\_bab`baa¥a[ababaabbaa`  
@HWI-EAS443:3:15:54:1677#0/1  
ATAGGGGAGACACACAAATTCAAACGAGAAGATCATTTGA  
+HWI-EAS443:3:15:54:1677#0/1  
]\_¥¥`bb\_V\_aa`\_`\_Q`\_`\_`^abbb^a`\_`¥`\_P`^`aaa  
@HWI-EAS443:3:15:591:807#0/1  
GGGGAGACACACAAATTCAAACGAGAAGATCATTTGAGTT  
+HWI-EAS443:3:15:591:807#0/1  
aaaa`\_`^`a`a`a`\_a`\_a`¥`^`\_`\_Z`^`Z]]`\_`\_`Z¥  
@HWI-EAS443:3:15:77:1891#0/1  
TATAGGTGCCATAGGGGAGACACACAAATTCAAACGAGAA  
+HWI-EAS443:3:15:77:1891#0/1  
ababa`Zbbb`^`baa`\_`aaaababa]ab`ababa`aaa`a  
@HWI-EAS443:3:16:1063:1839#0/1  
CATATAGGTGCCATAGGGGAGACACACAAATTCAAACGAG  
+HWI-EAS443:3:16:1063:1839#0/1  
\_`U^Z`^`R`^`aa¥P\_ZV\_aaab`Z`aa`a`^`\_`a\_a`¥  
@HWI-EAS443:3:16:337:952#0/1  
CACAAATTCAAACGAGAAGATCATTTGAGTTAAAGAAGCT  
+HWI-EAS443:3:16:337:952#0/1  
ab`^a[^ba\_aS\_baaaab`\_aa`\_`^P`\_`\_aaa`^`a[aa\_  
@HWI-EAS443:3:16:538:1360#0/1  
TAGGGGAGACACACAAATTCAAACGAGAAGATCATTTGAG  
+HWI-EAS443:3:16:538:1360#0/1  
YYX¥Y\_UXU`\_`aab]aab\_aWaVY`¥^`X\_a\_LVUPZ\_a\_

@HWI-EAS443:3:16:813:699#0/1  
CAAATTCAAACGAGAAGATCATTTGAGTTAAAGAAGCTGT  
+HWI-EAS443:3:16:813:699#0/1  
ab\_bbabbbb\_ba\_aabab`YababYa\_aa`aab`a`^`I  
@HWI-EAS443:3:17:131:892#0/1  
GGGAGACACACAAATTCAAACGAGAAGATCATTTGAGTTA  
+HWI-EAS443:3:17:131:892#0/1  
¥bWab¥baaS¥\_¥¥`]¥babbb\_b¥^¥K¥a[¥¥^[Vaa`a  
@HWI-EAS443:3:17:71:926#0/1  
GGGAGACACACAAATTCAAACGAGAAGATCATTTGAGTTA  
+HWI-EAS443:3:17:71:926#0/1  
aa`aaaabbbbabaaaaabaaa`aabaaaaaaaa`a`aa  
@HWI-EAS443:3:18:1034:1332#0/1  
GAGACACACAAATTCAAACGAGAAGATCATTTGAGTTAAA  
+HWI-EAS443:3:18:1034:1332#0/1  
[[`a`¥`\_\_XL[baa\_aa`\_[`\_a[\_Yaa]\_`Za0^\_^`  
@HWI-EAS443:3:18:1450:144#0/1  
CACAAATTCAAACGAGAAGATCATTTGAGTTAAAGAAGCT  
+HWI-EAS443:3:18:1450:144#0/1  
[X`¥a`Z¥bX`b\_baa\_¥aa¥bbab¥b`abbbbaa]¥  
@HWI-EAS443:3:19:175:1132#0/1  
GGGGAGACACACAAATTCAAACGAGAAGATCATTTGAGTT  
+HWI-EAS443:3:19:175:1132#0/1  
\_a\_YU`\_^`\_W¥a\_^a^aaY]]^`\_]\_\_`a`aaaa`^a  
@HWI-EAS443:3:19:187:1325#0/1  
ATAGGGGAGACACACAAATTCAAACGAGAAGATCATTTGA  
+HWI-EAS443:3:19:187:1325#0/1  
ZVV¥^ba^R`]^¥^a]HXUZb¥]^`aa\_b¥OR[ZY]\_YVTT  
@HWI-EAS443:3:19:573:811#0/1  
CATATAGGTGCCATAGGGGAGACACACAAATTCAAACGAG  
+HWI-EAS443:3:19:573:811#0/1  
``abb^\_bYbabba`baaaba^ababbbabba`babaa\_b  
@HWI-EAS443:3:19:794:1183#0/1  
CACAAATTCAAACGAGAAGATCATTTGAGTTAAAGAAGCT  
+HWI-EAS443:3:19:794:1183#0/1  
abaabaaa`aaa\_baa`aa\_a`a`a`a`a`\_\_aaaa]\_\_\_\_  
@HWI-EAS443:3:1:482:1080#0/1  
ATAGGTGCCATAGGGGAGACACACAAATTCAAACGAGAAG  
+HWI-EAS443:3:1:482:1080#0/1  
a\_aa]¥b`\_\_^\_aaaa\_a`¥`\_a\_\_a`a[`\_`^`[\_\_BB  
@HWI-EAS443:3:20:1166:127#0/1  
TAGGGGAGACACACAAATTCAAACGAGAAGATCATTTGAG  
+HWI-EAS443:3:20:1166:127#0/1  
a^\_a`aW`\_V\_S\_\_^aZ\_\_`\_\_]\_^ZXMaX\_ZX^\_\_WMP  
@HWI-EAS443:3:21:906:37#0/1  
GGGGAGACACACAAATTCAAACGAGAAGATCATTTGAGTT  
+HWI-EAS443:3:21:906:37#0/1  
aaa]]^\_\_\_\_]\_¥\_\_\_\_[Y]]V¥^Z]ZX^ZWZZ]]]^WZZV  
@HWI-EAS443:3:21:953:824#0/1  
GGGAGACACACAAATTCAAACGAGAAGATCATTTGAGTTA

+HWI-EAS443:3:21:953:824#0/1  
a]UZPNZV[Wa]R[`ZZa^U¥XPPR^UOKDEQ[`]S]¥]0  
@HWI-EAS443:3:22:1013:1208#0/1  
ATATAGGTGCCATAGGGGAGACACACAAATTCAAACGAGA  
+HWI-EAS443:3:22:1013:1208#0/1  
a^a\_^\_\_X\_\_][`\_\_\_\_`\_¥]\_\_^\_^\_`]^\_W\_\_^^\_X]^  
@HWI-EAS443:3:22:1696:1047#0/1  
CACAAATTCAAACGAGAAGATCATTGAGTTAAAGAAGCT  
+HWI-EAS443:3:22:1696:1047#0/1  
aab\_b`ba\_bba¥bYbY`a[a`aa`[^`baa`^^`]aSa  
@HWI-EAS443:3:22:47:1660#0/1  
GGGGAGACACACAAATTCAAACGAGAAGATCATTGAGTT  
+HWI-EAS443:3:22:47:1660#0/1  
]bb\_ab`^Y^b`bbbababab`aaVZ^aa^ba`¥aaa  
@HWI-EAS443:3:22:532:655#0/1  
CATATAGGTGCCATAGGGGAGACACACAAATTCAAACGAG  
+HWI-EAS443:3:22:532:655#0/1  
abab`a`aVaa`a`a\_aaa]aY^a`aaa\_\_\_\_]`a`]\_`\_  
@HWI-EAS443:3:22:942:1747#0/1  
CATATAGGTGCCATAGGGGAGACACACAAATTCAAACGAG  
+HWI-EAS443:3:22:942:1747#0/1  
^ba`M\_W¥Yb`ba^`¥a\_VSY`bbbab`Y\_ZVaa^W\_¥\_  
@HWI-EAS443:3:23:830:1982#0/1  
CACAAATTCAAACGAGAAGATCATTGAGTTAAAGAAGCT  
+HWI-EAS443:3:23:830:1982#0/1  
abbbbbbbbbbbbaabbbabbabbbbabababbbabbb^b  
@HWI-EAS443:3:24:1034:322#0/1  
CACAAATTCAAACGAGAAGATCATTGAGTTAAAGAAGCT  
+HWI-EAS443:3:24:1034:322#0/1  
a\_SWXba`ZZ]ZO\_\_\_\_`V]JT]ST`^UWG¥]`¥U[[¥[Z  
@HWI-EAS443:3:24:1474:1749#0/1  
CACAAATTCAAACGAGAAGATCATTGAGTTAAAGAAGCT  
+HWI-EAS443:3:24:1474:1749#0/1  
abbbb`\_babababababbab^abbaaababbbbaa\_a  
@HWI-EAS443:3:24:220:1421#0/1  
GGGAGACACACAAATTCAAACGAGAAGATCATTGAGTTA  
+HWI-EAS443:3:24:220:1421#0/1  
Y¥a¥`abbbbaTaabbbbbbbaaabaabbbbbbbaaab  
@HWI-EAS443:3:24:922:667#0/1  
GGGGAGACACACAAATTCAAACGAGAAGATCATTGAGTT  
+HWI-EAS443:3:24:922:667#0/1  
¥\_¥abba\_a^`a`a^baabba\_b^ba``a`\_^aa\_baa\_a  
@HWI-EAS443:3:25:781:141#0/1  
CACAAATTCAAACGAGAAGATCATTGAGTTAAAGAAGCT  
+HWI-EAS443:3:25:781:141#0/1  
¥aUa\_`bb¥[ab^bb^bb^aWXa[`]bZbabaaYabV^¥[  
@HWI-EAS443:3:26:1122:240#0/1  
CATATAGGTGCCATAGGGGAGACACACAAATTCAAACGAG  
+HWI-EAS443:3:26:1122:240#0/1  
ababa^a`]aabaaba`a`^`\_^aZaababa¥aaa\_aaa

@HWI-EAS443:3:26:1169:1044#0/1  
ATAGGGGAGACACACAAATTCAAACGAGAAGATCATTTGA  
+HWI-EAS443:3:26:1169:1044#0/1  
`a```aaabaaaaaa\_abaaaaaaab`ab`\_aaaa`a]  
@HWI-EAS443:3:26:1372:1093#0/1  
AGGGGAGACACACAAATTCAAACGAGAAGATCATTTGAGT  
+HWI-EAS443:3:26:1372:1093#0/1  
abbbb\_aa`abbaaababbbbaababaaaaa\_aba`b``^  
@HWI-EAS443:3:26:1734:1287#0/1  
GGGGAGACACACAAATTCAAACGAGAAGATCATTTGAGTT  
+HWI-EAS443:3:26:1734:1287#0/1  
a¥baW\_aX^]\_^^a`a^aaaWU\_¥aa`[ZZLVaaaa^^^]  
@HWI-EAS443:3:27:1212:1956#0/1  
AGGGGAGACACACAAATTCAAACGAGAAGATCATTTGAGT  
+HWI-EAS443:3:27:1212:1956#0/1  
a^`a]aaaab\_a\_aaaa\_aaa¥`a\_a\_\_\_\_\_S\_^^`\_Z\_¥  
@HWI-EAS443:3:27:487:515#0/1  
CATATAGGTGCCATAGGGGAGACACACAAATTCAAACGAG  
+HWI-EAS443:3:27:487:515#0/1  
abbb`\_Y\_V`¥^X¥]¥Y]\_a^a`aba`R\_X\_]``^a^¥`  
@HWI-EAS443:3:27:710:932#0/1  
GGGAGACACACAAATTCAAACGAGAAGATCATTTGAGTTA  
+HWI-EAS443:3:27:710:932#0/1  
aaaaaaabaaaabaaaaaaa`aaaa]a`aaaa\_aa\_a\_``  
@HWI-EAS443:3:27:817:1269#0/1  
GGGGAGACACACAAATTCAAACGAGAAGATCATTTGAGTT  
+HWI-EAS443:3:27:817:1269#0/1  
aa^^a`aaaabaaaaaaaaba\_a\_\_\_\_`a\_a``\_a\_\_`]a  
@HWI-EAS443:3:27:970:242#0/1  
ATAGGTGCCATAGGGGAGACACACAAATTCAAACGAGAAG  
+HWI-EAS443:3:27:970:242#0/1  
a\_^``Ya`a`W^\_]\_]^[\_]\_X`]Y][U^^X^Z\_]Z]  
@HWI-EAS443:3:28:116:692#0/1  
CACAAATTCAAACGAGAAGATCATTTGAGTTAAAGAAGCT  
+HWI-EAS443:3:28:116:692#0/1  
^`ab\_b`a\_b^Z\_aaaTIXaa^]bVb^[\_aaa]YaaaZ\_a  
@HWI-EAS443:3:28:1297:1224#0/1  
ATAGGTGCCATAGGGGAGACACACAAATTCAAACGAGAAG  
+HWI-EAS443:3:28:1297:1224#0/1  
aa¥a`Tb^Y¥aa]`a`\_a\_[`]]]a\_Xa\_¥\_``^a^a^\_a  
@HWI-EAS443:3:28:1539:1104#0/1  
ATAGGTGCCATAGGGGAGACACACAAATTCAAACGAGAAG  
+HWI-EAS443:3:28:1539:1104#0/1  
aaaa\_Xa```a\_aaa`a]\_`^`\_\_`\_a\_]`^a\_Za]`¥]\_  
@HWI-EAS443:3:28:1744:1178#0/1  
CACACAAATTCAAACGAGAAGATCATTTGAGTTAAAGAAG  
+HWI-EAS443:3:28:1744:1178#0/1  
ab]abbbbbbaabaa\_ababaab`ba`b¥b`a`\_aaa\_\_  
@HWI-EAS443:3:28:1766:551#0/1  
CACAAATTCAAACGAGAAGATCATTTGAGTTAAAGAAGCT

+HWI-EAS443:3:28:1766:551#0/1  
\_¥¥bbb\_[Yaaabaa`a`bbVbbabb`bbb`abbbb`^^  
@HWI-EAS443:3:28:208:1297#0/1  
CATATAGGTGCCATAGGGGAGACACACAAATTCAAACGAG  
+HWI-EAS443:3:28:208:1297#0/1  
aabbaba`\_baba\_aaaYaaa\_aa`aabbaa``aaba`^a  
@HWI-EAS443:3:28:404:534#0/1  
TAGGGGAGACACACAAATTCAAACGAGAAGATCATTGAG  
+HWI-EAS443:3:28:404:534#0/1  
a^0Za\_S\_`aaa`a`Paaa`ab\_aaa^`\_\_\_\_`^`\_\_\_\_¥  
@HWI-EAS443:3:28:486:278#0/1  
CACAAATTCAAACGAGAAGATCATTGAGTTAAAGAAGCT  
+HWI-EAS443:3:28:486:278#0/1  
aaab`bbab`\_`ba`\_`abb\_aaaa`a\_b\_a`^`b`a^\_  
@HWI-EAS443:3:29:159:1370#0/1  
GGGGAGACACACAAATTCAAACGAGAAGATCATTGAGTT  
+HWI-EAS443:3:29:159:1370#0/1  
^Y][LY`\_\_a`b`a`\_\_`aa`\_`\_]`\_a`^`a`^`\_`\_`]  
@HWI-EAS443:3:29:987:544#0/1  
TATAGGTGCCATAGGGGAGACACACAAATTCAAACGAGAA  
+HWI-EAS443:3:29:987:544#0/1  
¥`a¥`^0`Y^\_aaaaX\_X[`W````a`[\_`\_Y\_``aa¥X  
@HWI-EAS443:3:2:425:1251#0/1  
AGGTGCCATAGGGGAGACACACAAATTCAAACGAGAAGAT  
+HWI-EAS443:3:2:425:1251#0/1  
aa]Ma\_\_Yaaba`[\_`\_`a\_a``\_\_aa`\_\_a^a\_a`\_\_`^  
@HWI-EAS443:3:30:1050:1717#0/1  
CACAAATTCAAACGAGAAGATCATTGAGTTAAAGAAGCT  
+HWI-EAS443:3:30:1050:1717#0/1  
ab`aa[ ]a`aaaaa`Z`^^`\_``^¥]`^\_aaa\_a\_Z`\_\_  
@HWI-EAS443:3:30:1562:461#0/1  
CACAAATTCAAACGAGAAGATCATTGAGTTAAAGAAGCT  
+HWI-EAS443:3:30:1562:461#0/1  
`babbbbbbbbaabbbbbbaababbbba`abbbb[a\_a[\_  
@HWI-EAS443:3:30:1596:1508#0/1  
GGGAGACACACAAATTCAAACGAGAAGATCATTGAGTTA  
+HWI-EAS443:3:30:1596:1508#0/1  
\_¥¥^`¥Z\_P\_`^`a]aaSa^`abaaa`ba^Q]abba[aa^`  
@HWI-EAS443:3:31:1066:847#0/1  
CACAAATTCAAACGAGAAGATCATTGAGTTAAAGAAGCT  
+HWI-EAS443:3:31:1066:847#0/1  
abbaa`abbbb`b`ba`aaaaaaba^a`baa^`\_Z`aa  
@HWI-EAS443:3:31:264:143#0/1  
GGGGAGACACACAAATTCAAACGAGAAGATCATTGAGTT  
+HWI-EAS443:3:31:264:143#0/1  
\_`baa``abaaaaQ`aaaa`aaa]\_a`\_`^^a^`a[a^^  
@HWI-EAS443:3:32:1470:487#0/1  
CACACAAATTCAAACGAGAAGATCATTGAGTTAAAGAAG  
+HWI-EAS443:3:32:1470:487#0/1  
aaabaaaaaaaa`aaaaaaaa`a`\_\_a`aa]``a\_a`aaaa

@HWI-EAS443:3:32:243:1374#0/1  
CAAATTCAAACGAGAAGATCATTTGAGTTAAAGAAGCTGT  
+HWI-EAS443:3:32:243:1374#0/1  
`¥¥Z\_aaa\_`a`]]^`\_`^`[\_¥\_\_\_[\_]^a\_`Z`Z¥\_^^R  
@HWI-EAS443:3:32:950:476#0/1  
TCTCGTTTGAATTTGTGTGTCTCCCCTATGGCACCTATAT  
+HWI-EAS443:3:32:950:476#0/1  
a[a\_a^aaaaa`][¥a]a\_\_`]^¥S¥`\_\_`]^SY[OXY¥  
@HWI-EAS443:3:33:1196:406#0/1  
CACAAATTCAAACGAGAAGATCATTTGAGTTAAAGAAGCT  
+HWI-EAS443:3:33:1196:406#0/1  
¥`a```bbbbbbba`Vbbbb\_bb````^b`^ba`aa\_`  
@HWI-EAS443:3:33:1735:375#0/1  
GGGGAGACACACAAATTCAAACGAGAAGATCATTTGAGTT  
+HWI-EAS443:3:33:1735:375#0/1  
abSaab\_\_\_\_\_ba`a`baa`a\_`^a`W\_¥¥Y]U`^\_¥]^\_  
@HWI-EAS443:3:33:289:1484#0/1  
CACAAATTCAAACGAGAAGATCATTTGAGTTAAAGAAGCT  
+HWI-EAS443:3:33:289:1484#0/1  
a\_b`R\_abaaba`aa^a^a\_aaa`a\_XX\_`a\_a[a`W]]  
@HWI-EAS443:3:33:40:659#0/1  
CACAAATTCAAACGAGAAGATCATTTGAGTTAAAGAAGCT  
+HWI-EAS443:3:33:40:659#0/1  
abaV`U`aba`a`a\_`]^`a^`\_aaa`¥G^\_\_`¥T`\_¥\_\_]  
@HWI-EAS443:3:33:665:1450#0/1  
CACAAATTCAAACGAGAAGATCATTTGAGTTAAAGAAGCT  
+HWI-EAS443:3:33:665:1450#0/1  
]b^^\_X^baaX``b`a\_Q]\_`bbaa]aab^a¥X^a^dWY\_  
@HWI-EAS443:3:33:776:1817#0/1  
GAGACACACAAATTCAAACGAGAAGATCATTTGAGTTAAA  
+HWI-EAS443:3:33:776:1817#0/1  
a¥\_Z\_aa^\_^\_V[Zb\_aaaa^a`a\_TVa\_^¥`X][S¥\_a`  
@HWI-EAS443:3:34:1035:1926#0/1  
GGGAGACACACAAATTCAAACGAGAAGATCATTTGAGTTA  
+HWI-EAS443:3:34:1035:1926#0/1  
aa\_aYa\_`aa`aaX`]^`aa`T¥[\_^¥¥^^^\_])^^¥YUZX  
@HWI-EAS443:3:34:1745:1699#0/1  
GTGCCATAGGGGAGACACACAAATTCAAACGAGAAGATCA  
+HWI-EAS443:3:34:1745:1699#0/1  
a`aa\_```\_aaa\_\_`\_\_a\_a^`\_`\_])^^a`¥]X]X]^ZZHU  
@HWI-EAS443:3:34:925:1492#0/1  
CACAGCTTCTTAACTCAAATGATCTTCTCGTTTGAATTT  
+HWI-EAS443:3:34:925:1492#0/1  
aba`a^R[VSMTaaaZSXWR]]XPZPTP\_`ZPUSZRBBBB  
@HWI-EAS443:3:35:1271:1250#0/1  
GCCATAGGGGAGACACACAAATTCAAACGAGAAGATCATT  
+HWI-EAS443:3:35:1271:1250#0/1  
aa^[^]VYXS^\_[]\_V[]^WWZVWZZWU\_[]`¥YZXOT^¥\_  
@HWI-EAS443:3:35:1718:1119#0/1  
TATAGGTGCCATAGGGGAGACACACAAATTCAAACGAGAA

+HWI-EAS443:3:35:1718:1119#0/1  
`aaa`ZH]baababaabaa`a`aa]a`¥aaaaaa^`Za^a  
@HWI-EAS443:3:35:410:930#0/1  
GGGAGACACACAAATTCAAACGAGAAGATCATTTGAGTTA  
+HWI-EAS443:3:35:410:930#0/1  
H\_ZaaaYya`¥VUYX¥^`[]^`\_V^VYa]aXa¥W[^M  
@HWI-EAS443:3:36:1162:501#0/1  
CACACAAATTCAAACGAGAAGATCATTTGAGTTAAAGAAG  
+HWI-EAS443:3:36:1162:501#0/1  
abbbab¥YZ`a^]R]Xb`aa^bV]`aa\_aZZ]\_a]\_¥a^  
@HWI-EAS443:3:36:1278:1449#0/1  
GGGAGACACACAAATTCAAACGAGAAGATCATTTGAGTT  
+HWI-EAS443:3:36:1278:1449#0/1  
abaaaa`aaaaaaaaaaaa`]^a`a\_a\_\_\_a\_\_aa`\_`\_]  
@HWI-EAS443:3:36:522:1614#0/1  
CACAAATTCAAACGAGAAGATCATTTGAGTTAAAGAAGCT  
+HWI-EAS443:3:36:522:1614#0/1  
^`ba[¥abbaa[`YZXa`aaaa`[]^`\_]PZ^^baYJV`  
@HWI-EAS443:3:36:708:911#0/1  
CACAAATTCAAACGAGAAGATCATTTGAGTTAAAGAAGCT  
+HWI-EAS443:3:36:708:911#0/1  
Xa\_¥Y¥b^^`Z^]baV`[\_V\_aSXb`a[¥N\_]\_a[^`[a^  
@HWI-EAS443:3:37:1738:1016#0/1  
CACAAATTCAAACGAGAAGATCATTTGAGTTAAAGAAGCT  
+HWI-EAS443:3:37:1738:1016#0/1  
a^NZU`b\_\_UX^Za\_a]a\_b^`^`b\_IbY^`\_Vb\_U`\_a  
@HWI-EAS443:3:37:193:1356#0/1  
CGAGAAGATCATTTGAGTTAAAGAAGCTGTGGGCTCAAAC  
+HWI-EAS443:3:37:193:1356#0/1  
aaY^IJ[Z[\_V\_`¥[ZXY^aa\_W\_`Sa\_ULQ^RFEN[JYX  
@HWI-EAS443:3:37:731:773#0/1  
CATAGGGGAGACACACAAATTCAAACGAGAAGATCATTTG  
+HWI-EAS443:3:37:731:773#0/1  
aba`baaaaa\_aaa^`X\_\_\_^aa`a`a\_aVG^S[a\_\_\_]aa  
@HWI-EAS443:3:37:758:1388#0/1  
CATATAGGTGCCATAGGGGAGACACACAAATTCAAACGAG  
+HWI-EAS443:3:37:758:1388#0/1  
`¥\_bbb¥¥ZZb^bb`\_`[SZbabbab\_]IVVO```a]aaa  
@HWI-EAS443:3:38:1274:495#0/1  
ATAGGTGCCATAGGGGAGACACACAAATTCAAACGAGAAG  
+HWI-EAS443:3:38:1274:495#0/1  
aa]`a`[b¥Z\_Z`]abaa¥P`[```aY]]LQ[UUY^aX]V  
@HWI-EAS443:3:38:1336:563#0/1  
AGGGGAGACACACAAATTCAAACGAGAAGATCATTTGAGT  
+HWI-EAS443:3:38:1336:563#0/1  
`bb``aaaaa\_a\_\_^[aa```\_\_aa\_RY`]TLX\_```a]aW  
@HWI-EAS443:3:38:904:1375#0/1  
CACAAATTCAAACGAGAAGATCATTTGAGTTAAAGAAGCT  
+HWI-EAS443:3:38:904:1375#0/1  
a\_b^\_[ZZaaaa¥¥[aZ[[W`\_`a`¥[[]\_[]XX][`]V¥W



@HWI-EAS443:3:39:1558:216#0/1  
CACAAATTCAAACGAGAAGATCATTTGAGTTAAAGAAGCT  
+HWI-EAS443:3:39:1558:216#0/1  
`bbba`ababbabbaba^baa`aabb``\_ab]aZ^^a`¥¥  
@HWI-EAS443:3:39:1586:847#0/1  
GGGAGACACACAAATTCAAACGAGAAGATCATTTGAGTTA  
+HWI-EAS443:3:39:1586:847#0/1  
a^`]b]]a\_a¥^^`a`^¥\_WT`^^][¥][^¥]¥^]T¥T\_X  
@HWI-EAS443:3:39:1764:1144#0/1  
CATATAGGTGCCATAGGGGAGACACACAAATTCAAACGAG  
+HWI-EAS443:3:39:1764:1144#0/1  
abbbbbbbbbbb\_bbbabbbab`bbaaabbb\_Zbba\_aa`  
@HWI-EAS443:3:39:235:1757#0/1  
ATATAGGTGCCATAGGGGAGACACACAAATTCAAACGAGA  
+HWI-EAS443:3:39:235:1757#0/1  
a]b`a\_WX[a^¥`T\_Y\_`[[]`[¥^aa[[¥Gaa\_XX^S[  
@HWI-EAS443:3:39:461:1845#0/1  
TATAGGTGCCATAGGGGAGACACACAAATTCAAACGAGAA  
+HWI-EAS443:3:39:461:1845#0/1  
V\_TX^Z^Xa`\_¥aT^WX¥`aab`aa`a\_a``^abbaaaT  
@HWI-EAS443:3:3:290:245#0/1  
CCATAGGGGAGACACACAAATTCAAACGAGAAGATCATTT  
+HWI-EAS443:3:3:290:245#0/1  
aaaaTRQab`a`¥a\_bVbaaaST¥]YS[]`^`\_`\_\_WZa\_\_  
@HWI-EAS443:3:3:351:697#0/1  
AGGTGCCATAGGGGAGACACACAAATTCAAACGAGAAGAT  
+HWI-EAS443:3:3:351:697#0/1  
a`^X¥\_\_\_\_\_a\_W]`Z`^a\_\_Z`^^\_\_^Z`¥RPOa^B  
@HWI-EAS443:3:3:557:427#0/1  
CAAATTCAAACGAGAAGATCATTTGAGTTAAAGAAGCTGT  
+HWI-EAS443:3:3:557:427#0/1  
aababbbb`b]ba\_U^a\_abaaa\_a[abaa`aaL\_bY  
@HWI-EAS443:3:40:1202:370#0/1  
CACAAATTCAAACGAGAAGATCATTTGAGTTAAAGAAGCT  
+HWI-EAS443:3:40:1202:370#0/1  
\_bbbbabbbbbbbaababbbbababababababab  
@HWI-EAS443:3:40:1481:569#0/1  
CACAAATTCAAACGAGAAGATCATTTGAGTTAAAGAAGCT  
+HWI-EAS443:3:40:1481:569#0/1  
T`baabbbbababbbbbaabbaabbbbababb`T\_\_\_\_\_ba  
@HWI-EAS443:3:40:309:329#0/1  
CATAGGGGAGACACACAAATTCAAACGAGAAGATCATTTG  
+HWI-EAS443:3:40:309:329#0/1  
aab¥bbba^]aaaaba\_Y\_a`aaaa^[^^^Z`^a\_\_\_\_^`  
@HWI-EAS443:3:40:401:245#0/1  
CACAAATTCAAACGAGAAGATCATTTGAGTTAAAGAAGCT  
+HWI-EAS443:3:40:401:245#0/1  
abaab^aaabbaab`ba^b\_aa`aaa]^\_`a`]W\_\_\_\_  
@HWI-EAS443:3:40:966:1301#0/1  
ATAGGGGAGACACACAAATTCAAACGAGAAGATCATTTGA

+HWI-EAS443:3:40:966:1301#0/1  
`baY`aabaaa`\_a\_aa\_a\_aabaa`Ua`a\_a^^aaY`a\_  
@HWI-EAS443:3:42:1638:520#0/1  
ATAGGTGCCATAGGGGAGACACACAAATTCAAACGAGAAG  
+HWI-EAS443:3:42:1638:520#0/1  
aaaab^ba\_`a`baa`^aa^`]aZ`a````a\_\_^`\_a\_^\_  
@HWI-EAS443:3:42:166:1926#0/1  
ACAAATTCAAACGAGAAGATCATTGAGTTAAAGAAGCTG  
+HWI-EAS443:3:42:166:1926#0/1  
aab\_QWS[aa\_Q¥WZUZb\_Ua\_\_Va`\_[RaXZI]a`¥a^R  
@HWI-EAS443:3:42:548:1596#0/1  
GGGGAGACACACAAATTCAAACGAGAAGATCATTGAGTT  
+HWI-EAS443:3:42:548:1596#0/1  
a\_aa`ab`babaabaaaaabbaaaaaaaaaaaaaaaaa\_a^a  
@HWI-EAS443:3:42:76:21#0/1  
CACAAATTCAAACGAGAAGATCATTGAGTTAAAGAAGCT  
+HWI-EAS443:3:42:76:21#0/1  
`[\_`\_¥^aaaaaaaaaba\_aa\_`a\_aa[a]\_a\_V¥a[\_`\_]  
@HWI-EAS443:3:43:1032:1710#0/1  
CACAAATTCAAACGAGAAGATCATTGAGTTAAAGAAGCT  
+HWI-EAS443:3:43:1032:1710#0/1  
abbbbabbbbbbbbabbbba`bbbbbabbb`aabbaa`b  
@HWI-EAS443:3:43:1495:1745#0/1  
GAGACACACAAATTCAAACGAGAAGATCATTGAGTTAAA  
+HWI-EAS443:3:43:1495:1745#0/1  
ab[aab`aabba`b\_ab^`a[```a\_a\_``a``^b^\_`]a  
@HWI-EAS443:3:43:192:994#0/1  
CACAAATTCAAACGAGAAGATCATTGAGTTAAAGAAGCT  
+HWI-EAS443:3:43:192:994#0/1  
ababb`ababbaa`aaa`]a\_aaaabaa]\_a`ba¥aaa^^  
@HWI-EAS443:3:43:32:181#0/1  
CACAAATTCAAACGAGAAGATCATTGAGTTAAAGAAGCT  
+HWI-EAS443:3:43:32:181#0/1  
a\_bbb`bbabbaababaaaaaaaaabb[``aa^aaaaaaa  
@HWI-EAS443:3:43:356:1932#0/1  
CACAAATTCAAACGAGAAGATCATTGAGTTAAAGAAGCT  
+HWI-EAS443:3:43:356:1932#0/1  
a`\_b][a¥RbaaG]Z`a\_\_Y[Z`Y\_U]NY`¥^¥`a\_]`^  
@HWI-EAS443:3:43:361:1487#0/1  
TAGGGGAGACACACAAATTCAAACGAGAAGATCATTGAG  
+HWI-EAS443:3:43:361:1487#0/1  
`abbaabbbbbbb`bbbabbabbaababaaaaaa]`\_  
@HWI-EAS443:3:43:828:865#0/1  
AGGGGAGACACACAAATTCAAACGAGAAGATCATTGAGT  
+HWI-EAS443:3:43:828:865#0/1  
ab]a][`aaa`b\_aaaa\_aa\_\_aa``\_a``````\_a\_\_\_\_  
@HWI-EAS443:3:44:145:1296#0/1  
CACACAAATTCAAACGAGAAGATCATTGAGTTAAAGAAG  
+HWI-EAS443:3:44:145:1296#0/1  
abbbbbbbbaabb\_\_aabaaba`\_aaaaa``aaaaaa\_\_

@HWI-EAS443:3:45:1220:1967#0/1  
CTTTAACTCAAATGATCTTCTCGTTTGAATTTGTGTGTCT  
+HWI-EAS443:3:45:1220:1967#0/1  
abba^¥baV`baaa`]aba]b\_Z¥``baa``^`aa\_[U[  
@HWI-EAS443:3:45:1446:1513#0/1  
ATAGGGGAGACACACAAATTCAAACGAGAAGATCATTTGA  
+HWI-EAS443:3:45:1446:1513#0/1  
`\_\_a`\_a^^\_\_a`a`a`baYab^¥``baaaaa]\_aaab\_  
@HWI-EAS443:3:46:1216:448#0/1  
GGGAGACACACAAATTCAAACGAGAAGATCATTTGAGTTA  
+HWI-EAS443:3:46:1216:448#0/1  
abaZWT]``^a`XW`\_`a`\_`¥Q[ZY`TTVOZ^`¥V`X^Z  
@HWI-EAS443:3:46:1321:1013#0/1  
TATAGGTGCCATAGGGGAGACACACAAATTCAAACGAGAA  
+HWI-EAS443:3:46:1321:1013#0/1  
a\_UUV[G[^V¥¥OW][RS\_¥]^\_][^¥`\_^[]`X]V\_]Y  
@HWI-EAS443:3:46:1749:350#0/1  
CACAAATTCAAACGAGAAGATCATTTGAGTTAAAGAAGCT  
+HWI-EAS443:3:46:1749:350#0/1  
abbab¥baabbaab`aaa\_a`^`aa[a\_a`\_`a\_Y`^`  
@HWI-EAS443:3:46:360:1959#0/1  
CTCGTTTGAATTTGTGTGTCTCCCCTATGGCACCTATATG  
+HWI-EAS443:3:46:360:1959#0/1  
`a``aaa`^bbbb`V\_\_ba`\_]aaba\_V\_¥`]``]aab^  
@HWI-EAS443:3:46:43:762#0/1  
TAGGGGAGACACACAAATTCAAACGAGAAGATCATTTGAG  
+HWI-EAS443:3:46:43:762#0/1  
aabaababaaaa`a\_\_`aa^a`^]a[a`^^\_^^`VPQ  
@HWI-EAS443:3:46:541:2045#0/1  
CACAAATTCAAACGAGAAGATCATTTGAGTTAAAGAAGCT  
+HWI-EAS443:3:46:541:2045#0/1  
YX¥abbbbaba¥0b`bb\_baaabbbb¥abaabba`ba`¥a  
@HWI-EAS443:3:46:867:613#0/1  
CATATAGGTGCCATAGGGGAGACACACAAATTCAAACGAG  
+HWI-EAS443:3:46:867:613#0/1  
abbbabba`bba\_a¥bbaaabaaba\_abaabbaabaabaa  
@HWI-EAS443:3:47:1019:1648#0/1  
GACACACAAATTCAAACGAGAAGATCATTTGAGTTAAAGA  
+HWI-EAS443:3:47:1019:1648#0/1  
a\_`b`b]b\_`abVbbbWb`b`bba^U\_baabYa\_aababa  
@HWI-EAS443:3:47:1264:1184#0/1  
GGGAGACACACAAATTCAAACGAGAAGATCATTTGAGTTA  
+HWI-EAS443:3:47:1264:1184#0/1  
^\_bb¥`abbbb\_babbabb`abaaaaaa^abbab^b\_b^  
@HWI-EAS443:3:47:167:342#0/1  
CACAAATTCAAACGAGAAGATCATTTGAGTTAAAGAAGCT  
+HWI-EAS443:3:47:167:342#0/1  
a\_bbabbbbaa^ZU^aa`ab`\_`abbaa`a\_aa]ab`ab[\_  
@HWI-EAS443:3:47:286:1617#0/1  
GGGGAGACACACAAATTCAAACGAGAAGATCATTTGAGTT

+HWI-EAS443:3:47:286:1617#0/1  
aba\_aab\_b`a\_aaaa`Zaa`]a^`^`^`^`a^^aa`\_\_\_\_¥\_  
@HWI-EAS443:3:47:602:1004#0/1  
CATATAGGTGCCATAGGGGAGACACACAAATTCAAACGAG  
+HWI-EAS443:3:47:602:1004#0/1  
`abbbbbbb`abbabXbbbbbaabaabbba`\_b`aa`\_a  
@HWI-EAS443:3:47:794:1649#0/1  
ATAGGGGAGACACACAAATTCAAACGAGAAGATCATTGA  
+HWI-EAS443:3:47:794:1649#0/1  
ababab\_abbabaa`bbab``aba\_a`a`aaa¥`\_aaa`  
@HWI-EAS443:3:47:980:864#0/1  
CAAATTCAAACGAGAAGATCATTGAGTTAAAGAAGCTGT  
+HWI-EAS443:3:47:980:864#0/1  
ab`^bab\_baaa\_]a\_a`[\_¥aaaY]a[aa^Ya`\_]V`T  
@HWI-EAS443:3:48:1632:1760#0/1  
AGGTGCCATAGGGGAGACACACAAATTCAAACGAGAAGAT  
+HWI-EAS443:3:48:1632:1760#0/1  
a\_]¥`¥\_NU[a`\_Z\_[YXX\_^aY`\_X\_^X]X\_[ ]WZ  
@HWI-EAS443:3:48:1788:1730#0/1  
CACAAATTCAAACGAGAAGATCATTGAGTTAAAGAAGCT  
+HWI-EAS443:3:48:1788:1730#0/1  
TQ\_b]U\_aY^b]0]\_V¥RY`\_I`\_^a^W[S^[\_a\_a¥WV]  
@HWI-EAS443:3:48:611:1105#0/1  
AGGTGCCATAGGGGAGACACACAAATTCAAACGAGAAGAT  
+HWI-EAS443:3:48:611:1105#0/1  
a\_XUaXa\_[[\_WYQY\_\_[^\_R\_SZ[WXZWN^X]XW]ZZ  
@HWI-EAS443:3:48:752:11#0/1  
CACAAATTCAAACGAGAAGATCATTGAGTTAAAGAAGCT  
+HWI-EAS443:3:48:752:11#0/1  
a\_bb[\_X\_abb¥\_bab`\_ba`]]^¥ba\_^b\_^a^\_\_R^^  
@HWI-EAS443:3:48:807:543#0/1  
CACAAATTCAAACGAGAAGATCATTGAGTTAAAGAAGCT  
+HWI-EAS443:3:48:807:543#0/1  
ababbbbabbaaaaaaba\_\_aaaa^`\_aaaa`\_`a\_a  
@HWI-EAS443:3:49:1462:1560#0/1  
TAGGTGCCATAGGGGAGACACACAAATTCAAACGAGAAGA  
+HWI-EAS443:3:49:1462:1560#0/1  
aa`a[baa`bbb`X]aba`b`baaaaa`baa`a\_aa`\_`  
@HWI-EAS443:3:49:18:760#0/1  
CACACAAATTCAAACGAGAAGATCATTGAGTTAAAGAAG  
+HWI-EAS443:3:49:18:760#0/1  
ababbb^bbbababababababaa`aa\_VXb\_aaaa^aa]  
@HWI-EAS443:3:49:37:594#0/1  
GGGAGACACACAAATTCAAACGAGAAGATCATTGAGTTA  
+HWI-EAS443:3:49:37:594#0/1  
^^`bbaababababaaa`bbb`baaaaa`aa`abaYZa`aa  
@HWI-EAS443:3:49:494:1630#0/1  
CACAAATTCAAACGAGAAGATCATTGAGTTAAAGAAGCT  
+HWI-EAS443:3:49:494:1630#0/1  
^`a`\_`[\_Z`bb`aaaa`a\_ba`abbabababbbbaabb^b

@HWI-EAS443:3:49:795:349#0/1  
CACAAATTCAAACGAGAAGATCATTTGAGTTAAAGAAGCT  
+HWI-EAS443:3:49:795:349#0/1  
abbbbbbbbaabaa\_bbb^Zaabbabababaabaa^a  
@HWI-EAS443:3:49:863:250#0/1  
TAGGTGCCATAGGGGAGACACAAAATTCAAACGAGAAGA  
+HWI-EAS443:3:49:863:250#0/1  
Vbba]a)`ab\_babaaY^aa`aabaaaa^a\_a¥\_\_`\_Waa  
@HWI-EAS443:3:4:1540:188#0/1  
CACAAATTCAAACGAGAAGATCATTTGAGTTAAAGAAGCT  
+HWI-EAS443:3:4:1540:188#0/1  
^\_`Za`YI\_WWZ¥TaR¥]\_`PY]\_`Yaa^^`\_`[a]\_BB  
@HWI-EAS443:3:4:1742:777#0/1  
GTGCCATAGGGGAGACACAAAATTCAAACGAGAAGATCA  
+HWI-EAS443:3:4:1742:777#0/1  
aYVD[O^WY]\_]P^RPXV^WUJUUZ\_¥\_\_U^^]VSVXWSX  
@HWI-EAS443:3:4:446:123#0/1  
CACAAATTCAAACGAGAAGATCATTTGAGTTAAAGAAGCT  
+HWI-EAS443:3:4:446:123#0/1  
`babbbba`bbbabaaaaaaa`aaaa\_b\_aa`aaa^aW\_  
@HWI-EAS443:3:4:952:70#0/1  
ACAAATTCAAACGAGAAGATCATTTGAGTTAAAGAAGCTG  
+HWI-EAS443:3:4:952:70#0/1  
a¥aa^^TX^XWWb\_[\_`b`XNZ\_aaZ¥X^]WUa^Wa]\_B  
@HWI-EAS443:3:50:1320:330#0/1  
CATATAGGTGCCATAGGGGAGACACAAAATTCAAACGAG  
+HWI-EAS443:3:50:1320:330#0/1  
R`aaaab`^a`aa`a`\_Q\_b`^aabbabbaa`babbbbb  
@HWI-EAS443:3:50:461:1968#0/1  
TATAGGTGCCATAGGGGAGACACAAAATTCAAACGAGAA  
+HWI-EAS443:3:50:461:1968#0/1  
Ta`Xbb`aba\_¥b¥ZXY^`ba`X`X\_bbbaXbbaXb\_a`^  
@HWI-EAS443:3:51:1232:477#0/1  
CATATAGGTGCCATAGGGGAGACACAAAATTCAAACGAG  
+HWI-EAS443:3:51:1232:477#0/1  
abbbbbbab`bbbbbabbbbababbbbbbb`b`aa^bb  
@HWI-EAS443:3:51:1396:1375#0/1  
GGGAGACACAAAATTCAAACGAGAAGATCATTTGAGTTA  
+HWI-EAS443:3:51:1396:1375#0/1  
^bb`aaabaa\_ab^aa`aaa\_aaaa\_a\_a``aaaa`b\_aa  
@HWI-EAS443:3:51:1539:841#0/1  
ACAAATTCAAACGAGAAGATCATTTGAGTTAAAGAAGCTG  
+HWI-EAS443:3:51:1539:841#0/1  
a\_baaba\_aXa\_a``aa``\_]\_`aa`^a\_\_`a`^a\_]X`\_  
@HWI-EAS443:3:51:452:1012#0/1  
GCCATAGGGGAGACACAAAATTCAAACGAGAAGATCATT  
+HWI-EAS443:3:51:452:1012#0/1  
``\_¥ZaaaaabX]a`baa\_\_a`\_aaa`a¥a\_`a[\_[^^]  
@HWI-EAS443:3:51:612:857#0/1  
GGGGAGACACAAAATTCAAACGAGAAGATCATTTGAGTT

+HWI-EAS443:3:51:612:857#0/1  
`[^YLS¥XS¥YZ]a\_aa`ZTVKV¥aST[XVNR```aOWQ¥  
@HWI-EAS443:3:52:108:1417#0/1  
CATATAGGTGCCATAGGGGAGACACACAAATTCAAACGAG  
+HWI-EAS443:3:52:108:1417#0/1  
abbaaaa`V`a`aa`a^`\_\_S\_a^`b]a\_V^aV\_`^`a[a  
@HWI-EAS443:3:52:158:315#0/1  
ATAGGTGCCATAGGGGAGACACACAAATTCAAACGAGAAG  
+HWI-EAS443:3:52:158:315#0/1  
aaa`a^a\_a\_`a`a`^a\_`\_`^`\_]`[\_`\_U`]^`^^\_  
@HWI-EAS443:3:52:1749:1333#0/1  
GCCATAGGGGAGACACACAAATTCAAACGAGAAGATCATT  
+HWI-EAS443:3:52:1749:1333#0/1  
Zaa`¥aa\_`V`V`Z`¥`\_b\_ba\_a\_]aUOMZJW\_¥`^XZaa  
@HWI-EAS443:3:52:1785:1293#0/1  
CACAAATTCAAACGAGAAGATCATTTGAGTTAAAGAAGCT  
+HWI-EAS443:3:52:1785:1293#0/1  
\_`^`\_`abbababaaa\_Z\_\_\_aWO[]\_`OUS¥`\_`\_]^^]ZZZ  
@HWI-EAS443:3:52:204:1432#0/1  
GGGAGACACACAAATTCAAACGAGAAGATCATTTGAGTTA  
+HWI-EAS443:3:52:204:1432#0/1  
ab`aa\_baaabaa`aaaabaab\_a\_aa\_`X]a`aa[`^aa  
@HWI-EAS443:3:52:247:1505#0/1  
CACAAATTCAAACGAGAAGATCATTTGAGTTAAAGAAGCT  
+HWI-EAS443:3:52:247:1505#0/1  
abbb\_bbbbbbaabb\_baT\_a\_`aaba`babaabb\_a\_a  
@HWI-EAS443:3:52:301:672#0/1  
GTGCCATAGGGGAGACACACAAATTCAAACGAGAAGATCA  
+HWI-EAS443:3:52:301:672#0/1  
a\_aa`\_aaaaaaa`\_a`aaaa[\_a^`a\_\_a\_a^¥a`\_TZ  
@HWI-EAS443:3:52:408:1641#0/1  
GGGAGACACACAAATTCAAACGAGAAGATCATTTGAGTTA  
+HWI-EAS443:3:52:408:1641#0/1  
`a\_aaaabaab]bb`\_aaba^a`^¥aaa¥`\_bbab^ba\_a  
@HWI-EAS443:3:52:458:306#0/1  
GGGGAGACACACAAATTCAAACGAGAAGATCATTTGAGTT  
+HWI-EAS443:3:52:458:306#0/1  
^bbaaba`W]a`b`Y`ab\_\_\_^`\_Ya\_\_a\_]X^aa`^Y\_]`  
@HWI-EAS443:3:52:88:2011#0/1  
GGGAGACACACAAATTCAAACGAGAAGATCATTTGAGTTA  
+HWI-EAS443:3:52:88:2011#0/1  
aa]aaa`aa`aa\_\_^`Y¥^\_]W]]W^ZX^^^^\_]WZ^  
@HWI-EAS443:3:53:1082:1207#0/1  
GGGAGACACACAAATTCAAACGAGAAGATCATTTGAGTTA  
+HWI-EAS443:3:53:1082:1207#0/1  
H\_babab\_\_bba`aa`aab\_\_^`\_b]`aaab`\_\_La`ba  
@HWI-EAS443:3:53:1272:1529#0/1  
CACAAATTCAAACGAGAAGATCATTTGAGTTAAAGAAGCT  
+HWI-EAS443:3:53:1272:1529#0/1  
a`bbb¥baabb`ababaaa^aabbbbb\_baaaababT`YR

@HWI-EAS443:3:53:1396:730#0/1  
CACAAATTCAAACGAGAAGATCATTTGAGTTAAAGAAGCT  
+HWI-EAS443:3:53:1396:730#0/1  
a\_¥¥W[^^^[aVUWZb¥`\_SY^a`[^`aX^`Z]aaa¥aX^  
@HWI-EAS443:3:53:1486:199#0/1  
CTCGTTTGAATTTGTGTGTCTCCCCTATGGCACCTATATG  
+HWI-EAS443:3:53:1486:199#0/1  
``^b]a`a¥bba¥`aZ¥\_\_WT]a]``ab^]`TT`¥`a\_  
@HWI-EAS443:3:53:1528:583#0/1  
CACAAATTCAAACGAGAAGATCATTTGAGTTAAAGAAGCT  
+HWI-EAS443:3:53:1528:583#0/1  
``bbb`b\_¥\_abYbUY```b`abbaaa\_a^Vaaab]a[`  
@HWI-EAS443:3:53:1577:92#0/1  
CTCGTTTGAATTTGTGTGTCTCCCCTATGGCACCTATATG  
+HWI-EAS443:3:53:1577:92#0/1  
[b\_a\_bbb^X^bbb^\_¥Ya\_\_W¥aaaba``^Z^¥^`Y^^  
@HWI-EAS443:3:53:237:1826#0/1  
GGGAGACACACAAATTCAAACGAGAAGATCATTTGAGTTA  
+HWI-EAS443:3:53:237:1826#0/1  
S\_b``[Yabbabb^ba`bb`b`baaaaaaba`a]a[a`  
@HWI-EAS443:3:53:302:899#0/1  
CACAAATTCAAACGAGAAGATCATTTGAGTTAAAGAAGCT  
+HWI-EAS443:3:53:302:899#0/1  
\_WZ``Va`\_TZ]\_b^URN\_WJYZZaX[Y]Y`ZV^[aa\_W¥  
@HWI-EAS443:3:53:422:737#0/1  
GGGAGACACACAAATTCAAACGAGAAGATCATTTGAGTTA  
+HWI-EAS443:3:53:422:737#0/1  
aba¥[YX^\_b¥V]a]a`V`\_OTY^\_XbZ``^\_aa[a\_a\_  
@HWI-EAS443:3:54:1171:133#0/1  
GCCATAGGGGAGACACACAAATTCAAACGAGAAGATCATT  
+HWI-EAS443:3:54:1171:133#0/1  
a`ababbaXZ¥SNRWYNV\_^aUPZPWN[T[OKZLUKL[^  
@HWI-EAS443:3:54:1674:384#0/1  
GGGAGACACACAAATTCAAACGAGAAGATCATTTGAGTT  
+HWI-EAS443:3:54:1674:384#0/1  
\_]ba^\_aab^b\_babbb`a`aSa]aa¥bbaabbabZ^aa  
@HWI-EAS443:3:54:1753:1426#0/1  
AGGGGAGACACACAAATTCAAACGAGAAGATCATTTGAGT  
+HWI-EAS443:3:54:1753:1426#0/1  
\_`¥^`bb]Z¥¥a]`^Y]\_Yaaa^YKa^a]RXZa¥Yba\_a¥  
@HWI-EAS443:3:54:408:1797#0/1  
CACAAATTCAAACGAGAAGATCATTTGAGTTAAAGAAGCT  
+HWI-EAS443:3:54:408:1797#0/1  
aa]^a`]]`W^URRUZWV¥S^`[QV]SY¥XOQ\_WTQV  
@HWI-EAS443:3:55:1063:997#0/1  
CACAAATTCAAACGAGAAGATCATTTGAGTTAAAGAAGCT  
+HWI-EAS443:3:55:1063:997#0/1  
ababbabbaaba\_bab`abaa\_aaaaa\_a`aa\_aaa`\_a  
@HWI-EAS443:3:55:164:2006#0/1  
CATATAGGTGCCATAGGGGAGACACACAAATTCAAACGAG

+HWI-EAS443:3:55:164:2006#0/1  
abaaaa`][aaZ]^Y\_a^\_¥][a^`\_`a``]aa\_\_\_Z\_\_\_  
@HWI-EAS443:3:55:556:1020#0/1  
ATAGGGGAGACACACAAATTCAAACGAGAAGATCATTGGA  
+HWI-EAS443:3:55:556:1020#0/1  
aaY\_``\_¥\_``a`a`a`abaaaa`b``\_[`aa]`a``a^  
@HWI-EAS443:3:56:99:1369#0/1  
GACACACAAATTCAAACGAGAAGATCATTGAGTTAAAGA  
+HWI-EAS443:3:56:99:1369#0/1  
aaaYababa`aabba`a^X`\_\_a^aaaa``a]`¥aa\_\_  
@HWI-EAS443:3:57:1174:1393#0/1  
CATATAGGTGCCATAGGGGAGACACACAAATTCAAACGAG  
+HWI-EAS443:3:57:1174:1393#0/1  
H\_Z\_aaa`Vbbaababb]bbbba\_baaba``ba`baabaa  
@HWI-EAS443:3:57:1399:1639#0/1  
CACAAATTCAAACGAGAAGATCATTGAGTTAAAGAAGCT  
+HWI-EAS443:3:57:1399:1639#0/1  
V^b^bb^b`baaa`Xbbaaa`\_abXb\_a]abb`^a^aa^b  
@HWI-EAS443:3:57:743:1733#0/1  
GGGAGACACACAAATTCAAACGAGAAGATCATTGAGTT  
+HWI-EAS443:3:57:743:1733#0/1  
a\_YZ`¥MV^a^`aa\_a`\_aaa¥[[\_`\_a``\_^]^a^Z`^^  
@HWI-EAS443:3:57:906:993#0/1  
GGGAGACACACAAATTCAAACGAGAAGATCATTGAGTT  
+HWI-EAS443:3:57:906:993#0/1  
a]L[abaa`Q]]X]\_a¥\_a`a```a^W`\_^Z`aT`a[\_]^  
@HWI-EAS443:3:59:1691:1151#0/1  
GGGAGACACACAAATTCAAACGAGAAGATCATTGAGTTA  
+HWI-EAS443:3:59:1691:1151#0/1  
aaa`aa`a`a`aa`aa`aa`¥a`aa`aaa``Y`a`XV]^X  
@HWI-EAS443:3:59:211:1840#0/1  
CACAAATTCAAACGAGAAGATCATTGAGTTAAAGAAGCT  
+HWI-EAS443:3:59:211:1840#0/1  
`abba\_T\_bbba`^`aba`a[aaababaaa\_aaaWSPWP]  
@HWI-EAS443:3:59:420:1225#0/1  
GGGAGACACACAAATTCAAACGAGAAGATCATTGAGTTA  
+HWI-EAS443:3:59:420:1225#0/1  
^bb\_ab`b\_bb\_bbbaabab```a`]^\_b^]^\_U]]` [   
@HWI-EAS443:3:59:551:1402#0/1  
CTTCTCGTTTGAATTTGTGTGTCTCCCCTATGGCACCTAT  
+HWI-EAS443:3:59:551:1402#0/1  
abbbbbbbabbaaaaaaaaaaaaaababba^aY`aaUS`\_]\_  
@HWI-EAS443:3:59:551:1652#0/1  
CACAAATTCAAACGAGAAGATCATTGAGTTAAAGAAGCT  
+HWI-EAS443:3:59:551:1652#0/1  
ab\_bba`abbbbab^bb`ababa`a\_aa``\_\_aa`WY]\_  
@HWI-EAS443:3:59:836:1127#0/1  
ACATATAGGTGCCATAGGGGAGACACACAAATTCAAACGA  
+HWI-EAS443:3:59:836:1127#0/1  
aaabaaaa`[^a¥aaaa\_aa\_a`aaaabaa`\_a\_aZZ]\_]



@HWI-EAS443:3:59:874:1005#0/1  
CACAAATTCAAACGAGAAGATCATTTGAGTTAAAGAAGCT  
+HWI-EAS443:3:59:874:1005#0/1  
abb`ba][`^bb[`^¥]VZ^a\_`bba\_X^HTQH^\_\_VV\_\_  
@HWI-EAS443:3:5:122:1642#0/1  
ATATAGGTGCCATAGGGGAGACACACAAATTCAAACGAGA  
+HWI-EAS443:3:5:122:1642#0/1  
aaaaa\_`Za\_\_aa\_\_\_\_\_``\_]\_Wa^`a]\_\_]``^\_^\_\_  
@HWI-EAS443:3:5:591:1550#0/1  
TAGGTGCCATAGGGGAGACACACAAATTCAAACGAGAAGA  
+HWI-EAS443:3:5:591:1550#0/1  
`bb`U`baabb^`aaaa\_aaa`bb^aa¥babZa`aaa``  
@HWI-EAS443:3:5:804:1537#0/1  
ATAGGGGAGACACACAAATTCAAACGAGAAGATCATTTGA  
+HWI-EAS443:3:5:804:1537#0/1  
```]abb``aY\_`aVab¥bba`a^Zb[ba]aaaaabYb`S  
@HWI-EAS443:3:60:11:251#0/1  
CATATAGGTGCCATAGGGGAGACACACAAATTCAAACGAG  
+HWI-EAS443:3:60:11:251#0/1  
a^V^]MZSQaZ¥W][\_`^`U`X[^\_\_^WY¥WV[[UWZWZ  
@HWI-EAS443:3:60:1694:634#0/1  
GGGAGACACACAAATTCAAACGAGAAGATCATTTGAGTTA  
+HWI-EAS443:3:60:1694:634#0/1  
aaa^a\_\_`\_a^a`\_a`\_aa^Za^\_\_^aZ\_\_¥`\_\_`]\_Y\_]`  
@HWI-EAS443:3:60:27:283#0/1  
CACACAAATTCAAACGAGAAGATCATTTGAGTTAAAGAAG  
+HWI-EAS443:3:60:27:283#0/1  
aaaaa\_b^`^aaa^aaaa\_\_\_Y`]¥\_^^\_X¥]^`\_\_¥\_]`  
@HWI-EAS443:3:60:338:1848#0/1  
GGGAGACACACAAATTCAAACGAGAAGATCATTTGAGTTA  
+HWI-EAS443:3:60:338:1848#0/1  
a^[bbaababbaabaaabbaa`aaaa`a^\_```SX\_\_Y\_a  
@HWI-EAS443:3:60:346:359#0/1  
CACAAATTCAAACGAGAAGATCATTTGAGTTAAAGAAGCT  
+HWI-EAS443:3:60:346:359#0/1  
a\_X`]P\_\_\_aa^`¥b^P¥aa^aa````a]aaa`aa^^¥a  
@HWI-EAS443:3:61:1474:797#0/1  
CACAAATTCAAACGAGAAGATCATTTGAGTTAAAGAAGCT  
+HWI-EAS443:3:61:1474:797#0/1  
`bbbbbbbabbbbbb`bbbbbba\_bbbbbbabbbbababW]  
@HWI-EAS443:3:61:502:1774#0/1  
CACAAATTCAAACGAGAAGATCATTTGAGTTAAAGAAGCT  
+HWI-EAS443:3:61:502:1774#0/1  
ababb\_babb\_a`^aa[\_`ba\_Z`aaa¥a^`a\_\_\_a¥UV^  
@HWI-EAS443:3:61:62:401#0/1  
CACACAAATTCAAACGAGAAGATCATTTGAGTTAAAGAAG  
+HWI-EAS443:3:61:62:401#0/1  
X`^Wab``bbabbaa`abbbaT\_`[a^\_aZa¥aabaab^a  
@HWI-EAS443:3:61:793:1846#0/1  
GGGGAGACACACAAATTCAAACGAGAAGATCATTTGAGTT

+HWI-EAS443:3:61:793:1846#0/1  
¥`a`\_¥Za¥¥YVXa\_]¥a\_\_\_b^SY\_b`^\_a]`\_\_¥USZ  
@HWI-EAS443:3:62:174:589#0/1  
GGGAGACACACAAATTCAAACGAGAAGATCATTTGAGTTA  
+HWI-EAS443:3:62:174:589#0/1  
abaS^^aa\_aa\_`aaaaaaaa\_`a\_`a^^^[\_]\_\_¥[W¥Y  
@HWI-EAS443:3:63:1283:1421#0/1  
ATAGGGGAGACACACAAATTCAAACGAGAAGATCATTTGA  
+HWI-EAS443:3:63:1283:1421#0/1  
]`Y\_`¥a[a^Z¥¥Ya`^aX]W^`TQ`a\_XVJ[^]Y¥^[``  
@HWI-EAS443:3:63:555:1502#0/1  
TATAGGTGCCATAGGGGAGACACACAAATTCAAACGAGAA  
+HWI-EAS443:3:63:555:1502#0/1  
T\_Y¥¥[M]``a\_]\_aZX]]a¥U`\_¥a\_\_\_abb\_T\_\_X`\_X  
@HWI-EAS443:3:63:600:1705#0/1  
CACAAATTCAAACGAGAAGATCATTTGAGTTAAAGAAGCT  
+HWI-EAS443:3:63:600:1705#0/1  
a`aX\_¥]aaaa¥`]aa[¥W`]`^[^`\_Q\_W^[a\_\_a\_]W  
@HWI-EAS443:3:63:721:476#0/1  
CACAAATTCAAACGAGAAGATCATTTGAGTTAAAGAAGCT  
+HWI-EAS443:3:63:721:476#0/1  
abbbbbbbba`bbaabbabbbba^bbabaa`bbabbabaaa  
@HWI-EAS443:3:64:64:1187#0/1  
CATATAGGTGCCATAGGGGAGACACACAAATTCAAACGAG  
+HWI-EAS443:3:64:64:1187#0/1  
ab```¥[WI]`b``\_b`ZVaa]baab^U`]aaa`aa`a\_a  
@HWI-EAS443:3:64:664:1276#0/1  
CACACAAATTCAAACGAGAAGATCATTTGAGTTAAAGAAG  
+HWI-EAS443:3:64:664:1276#0/1  
`\_bbab¥`\_bbabbbbbb\_baaaaabbbba]`abb`a`ab`  
@HWI-EAS443:3:65:1133:38#0/1  
GAGACACACAAATTCAAACGAGAAGATCATTTGAGTTAAA  
+HWI-EAS443:3:65:1133:38#0/1  
``¥¥Jbab¥a`a`aXabaaa^a\_\_\_\_\_a\_[Z`aaV\_[a`^\_  
@HWI-EAS443:3:65:1563:1745#0/1  
CACAAATTCAAACGAGAAGATCATTTGAGTTAAAGAAGCT  
+HWI-EAS443:3:65:1563:1745#0/1  
a\_`^^\_\_`a`a`ababb`baXa`ba`^\_b]bbaab^[X`  
@HWI-EAS443:3:65:1601:1319#0/1  
GGGAGACACACAAATTCAAACGAGAAGATCATTTGAGTTA  
+HWI-EAS443:3:65:1601:1319#0/1  
abbaaabab`baabbaaba\_aaaaaaaa]aaaa^a¥a`  
@HWI-EAS443:3:65:305:1872#0/1  
CACAAATTCAAACGAGAAGATCATTTGAGTTAAAGAAGCT  
+HWI-EAS443:3:65:305:1872#0/1  
aaab¥baaabba`aaaa^a\_^]^^``\_YQY\_`b[aa\_\_]  
@HWI-EAS443:3:65:826:377#0/1  
CACAAATTCAAACGAGAAGATCATTTGAGTTAAAGAAGCT  
+HWI-EAS443:3:65:826:377#0/1  
aabaa^`J`[a`Va[a\_\_aa`X`]b`\_a\_^a^aaa^a`a

@HWI-EAS443:3:65:951:918#0/1  
GGGAGACACACAAATTCAAACGAGAAGATCATTTGAGTTA  
+HWI-EAS443:3:65:951:918#0/1  
W\_a`bb\_`bbbabb`bbbbbbabbabbbb``abbb`]¥ab  
@HWI-EAS443:3:66:1368:42#0/1  
GGGAGACACACAAATTCAAACGAGAAGATCATTTGAGTT  
+HWI-EAS443:3:66:1368:42#0/1  
^abbV`¥^aX`]a`XX]aaaY¥a[Y]V````\_``VWa^`\_W  
@HWI-EAS443:3:66:1415:1411#0/1  
AGGGGAGACACACAAATTCAAACGAGAAGATCATTTGAGT  
+HWI-EAS443:3:66:1415:1411#0/1  
^\_a^^`aaaaa`Z¥aa`aa[`WSXa\_a¥````a\_a\_^`X  
@HWI-EAS443:3:66:1461:188#0/1  
CACAAATTCAAACGAGAAGATCATTTGAGTTAAAGAAGCT  
+HWI-EAS443:3:66:1461:188#0/1  
abbbb`bbabbbabab`a`aa`aaaba\_baaaaaaa`a[a  
@HWI-EAS443:3:66:224:856#0/1  
GAGACACACAAATTCAAACGAGAAGATCATTTGAGTTAAA  
+HWI-EAS443:3:66:224:856#0/1  
aab¥aaaaaa\_^aa`aaaa^a\_Xa``aa`aa\_Ya\_\_`\_`  
@HWI-EAS443:3:66:513:354#0/1  
GGGAGACACACAAATTCAAACGAGAAGATCATTTGAGTTA  
+HWI-EAS443:3:66:513:354#0/1  
abaaabaabba`bYaaaaababab\_aaa\_\_aa`a\_[a\_aa  
@HWI-EAS443:3:66:819:358#0/1  
AGGGGAGACACACAAATTCAAACGAGAAGATCATTTGAGT  
+HWI-EAS443:3:66:819:358#0/1  
]b`[a`bbaabbbababa`abb\_b\_b]abaZa¥aaaa\_a`  
@HWI-EAS443:3:67:1363:323#0/1  
CACAAATTCAAACGAGAAGATCATTTGAGTTAAAGAAGCT  
+HWI-EAS443:3:67:1363:323#0/1  
``\_`aa`aaaTa\_a\_]a\_a^^aYaaSb]\_`\_]a`UW\_^  
@HWI-EAS443:3:67:1413:587#0/1  
CAAATTCAAACGAGAAGATCATTTGAGTTAAAGAAGCTGT  
+HWI-EAS443:3:67:1413:587#0/1  
abbabaaaaaaa\_a^aaa`a\_a\_aa^b\_aaa``a\_a^`aR  
@HWI-EAS443:3:67:1672:1025#0/1  
CACAAATTCAAACGAGAAGATCATTTGAGTTAAAGAAGCT  
+HWI-EAS443:3:67:1672:1025#0/1  
abb`a`baaaabWb\_baa[Z]`aaaa`WV]aa\_]U``[]`  
@HWI-EAS443:3:67:1741:418#0/1  
ATTCAAACGAGAAGATCATTTGAGTTAAAGAAGCTGTGGG  
+HWI-EAS443:3:67:1741:418#0/1  
abbabbaabbbb`ab`aa`aaaa`aaba\_aaa`\_^aa^\_\_`  
@HWI-EAS443:3:67:282:1146#0/1  
GGGAGACACACAAATTCAAACGAGAAGATCATTTGAGTTA  
+HWI-EAS443:3:67:282:1146#0/1  
a\_ab`ab]bbbb`N`abbabab`aVaba\_\_aaa\_a\_^\_a`  
@HWI-EAS443:3:67:382:1879#0/1  
GGGAGACACACAAATTCAAACGAGAAGATCATTTGAGTTA

+HWI-EAS443:3:67:382:1879#0/1  
aa¥^^\_\_aabab]]¥\_a`ba\_][]\_``^`a\_\_\_\_\_^Y]`  
@HWI-EAS443:3:67:739:1904#0/1  
GTGCCATAGGGGAGACACACAAATTCAAACGAGAAGATCA  
+HWI-EAS443:3:67:739:1904#0/1  
`aababbaba[babbbbaabbbbabbbb`\_b\_aaaaa\_a  
@HWI-EAS443:3:68:1015:1057#0/1  
CACAAATTCAAACGAGAAGATCATTTGAGTTAAAGAAGCT  
+HWI-EAS443:3:68:1015:1057#0/1  
abbbb¥a`bb\_^`ba`abbabba`abaaaaab`aa`a`b  
@HWI-EAS443:3:68:567:50#0/1  
CACACAAATTCAAACGAGAAGATCATTTGAGTTAAAGAAG  
+HWI-EAS443:3:68:567:50#0/1  
a¥^Z]baaba]bab`\_\_baab]\_a^aa`a`a\_aa\_a`a`  
@HWI-EAS443:3:68:68:1318#0/1  
CACAAATTCAAACGAGAAGATCATTTGAGTTAAAGAAGCT  
+HWI-EAS443:3:68:68:1318#0/1  
\_Xa^W^a`a`\_a\_]`\_]\_aa`^]^^`a\_^]````^[\_]  
@HWI-EAS443:3:69:1399:1013#0/1  
CACAAATTCAAACGAGAAGATCATTTGAGTTAAAGAAGCT  
+HWI-EAS443:3:69:1399:1013#0/1  
a```\_[^a\_W^\_GYa^¥\_a¥\_0^`\_\_\_\_SU¥]S`\_`X¥^\_  
@HWI-EAS443:3:69:145:925#0/1  
CACAAATTCAAACGAGAAGATCATTTGAGTTAAAGAAGCT  
+HWI-EAS443:3:69:145:925#0/1  
aaa^\_]`\_`aa`\_a`\_`^\_^^]S]^`^]\_^^]\_\_\_\_^\_^]¥]  
@HWI-EAS443:3:69:56:1201#0/1  
ATAGGTGCCATAGGGGAGACACACAAATTCAAACGAGAAG  
+HWI-EAS443:3:69:56:1201#0/1  
a`a``X^a````a`]Y[¥W`\_]W`YR]]]a^Q`\_^]]]^  
@HWI-EAS443:3:6:1234:1802#0/1  
CACAAATTCAAACGAGAAGATCATTTGAGTTAAAGAAGCT  
+HWI-EAS443:3:6:1234:1802#0/1  
Yb\_\_baa][`aaaabaabba[babbbb¥`babbbba\_b\_0\_  
@HWI-EAS443:3:70:431:1582#0/1  
AGGTGCCATAGGGGAGACACACAAATTCAAACGAGAAGAT  
+HWI-EAS443:3:70:431:1582#0/1  
`\_\_^aab¥`aaa``YX`aa\_aaa`\_]aa`\_\_Y\_]QR[S  
@HWI-EAS443:3:70:502:1104#0/1  
ATAGGTGCCATAGGGGAGACACACAAATTCAAACGAGAAG  
+HWI-EAS443:3:70:502:1104#0/1  
^Z^QTY\_\_ZT`aZOMW]X`U\_^`]\_U]Vbaa`][U`\_^Z  
@HWI-EAS443:3:71:1169:524#0/1  
GGGAGACACACAAATTCAAACGAGAAGATCATTTGAGTT  
+HWI-EAS443:3:71:1169:524#0/1  
a^a\_\_a\_]`[]`U``a`aa\_^a^a]\_`\_^]¥\_a¥`W\_ZV  
@HWI-EAS443:3:71:1432:2006#0/1  
CTTCTCGTTTGAATTTGTGTGTCTCCCCTATGGCACCTAT  
+HWI-EAS443:3:71:1432:2006#0/1  
Y¥¥R[b`b¥a^^a]``aZb\_\_^^\_\_aa^]¥RR¥a\_b[T`

@HWI-EAS443:3:71:271:266#0/1  
ATAGGGGAGACACACAAATTCAAACGAGAAGATCATTTGA  
+HWI-EAS443:3:71:271:266#0/1  
aa[`aVVR^ZTTa^¥[0Q[XZa[N]]\_]\_\_Y[LSPYY[TQ  
@HWI-EAS443:3:71:512:284#0/1  
GTGCCATAGGGGAGACACACAAATTCAAACGAGAAGATCA  
+HWI-EAS443:3:71:512:284#0/1  
a\_`^Z[\_a]\_\_YRXU`W^`]W[[^`X\_U¥UJ^Z^^^VSZ  
@HWI-EAS443:3:71:703:1170#0/1  
CATATAGGTGCCATAGGGGAGACACACAAATTCAAACGAG  
+HWI-EAS443:3:71:703:1170#0/1  
\_`^a]^Z]PabbaXZaba\_a^Y`^bbbbb\_`Y^]\_aaYYX  
@HWI-EAS443:3:71:74:546#0/1  
CACACAAATTCAAACGAGAAGATCATTTGAGTTAAAGAAG  
+HWI-EAS443:3:71:74:546#0/1  
\_[abbaUa`b`b\_bbb`\_`baaaaaa^`[\_`aa\_a`abaa  
@HWI-EAS443:3:72:1427:592#0/1  
GGGGAGACACACAAATTCAAACGAGAAGATCATTTGAGTT  
+HWI-EAS443:3:72:1427:592#0/1  
aa`aZVT]T]a\_\_VLLN^\_\_PPa\_\_MJW^OQL[WXXU[SV  
@HWI-EAS443:3:72:1603:584#0/1  
CACAAATTCAAACGAGAAGATCATTTGAGTTAAAGAAGCT  
+HWI-EAS443:3:72:1603:584#0/1  
K`bb^Xbbbabab\_b\_bbabaaabb`babb`ababb¥aa\_  
@HWI-EAS443:3:72:668:61#0/1  
AGGGGAGACACACAAATTCAAACGAGAAGATCATTTGAGT  
+HWI-EAS443:3:72:668:61#0/1  
abbbbaabaaaa`aaaa\_aa`\_a\_a\_\_a\_\_`\_a`a^a]  
@HWI-EAS443:3:72:751:1799#0/1  
TAGGTGCCATAGGGGAGACACACAAATTCAAACGAGAAGA  
+HWI-EAS443:3:72:751:1799#0/1  
aaa^]`aaaa\_]\_\_aaaaaaa`\_`aaaa\_a¥`a\_a  
@HWI-EAS443:3:73:1144:1699#0/1  
CACAAATTCAAACGAGAAGATCATTTGAGTTAAAGAAGCT  
+HWI-EAS443:3:73:1144:1699#0/1  
abK^aa`¥Y^bTRTUbaW¥^UNOaa`WUZW`\_`\_`X^a]I  
@HWI-EAS443:3:73:1613:1444#0/1  
ACAAATTCAAACGAGAAGATCATTTGAGTTAAAGAAGCTG  
+HWI-EAS443:3:73:1613:1444#0/1  
a`aaaaaaaa`^a`a`\_a^\_W\_a`\_]`^a`\_`\_`]^`^`\_`  
@HWI-EAS443:3:73:1759:971#0/1  
CACAAATTCAAACGAGAAGATCATTTGAGTTAAAGAAGCT  
+HWI-EAS443:3:73:1759:971#0/1  
`bbabbbbbbabbba`\_aaaabbbb`bab`bbaaaa\_a  
@HWI-EAS443:3:73:435:234#0/1  
CACAAATTCAAACGAGAAGATCATTTGAGTTAAAGAAGCT  
+HWI-EAS443:3:73:435:234#0/1  
TXXZ\_Lab¥bb^[\_`baY¥Vb`ba^\_\_^S¥bb`Y[\_^N\_Ia  
@HWI-EAS443:3:73:85:1547#0/1  
CACAAATTCAAACGAGAAGATCATTTGAGTTAAAGAAGCT

+HWI-EAS443:3:73:85:1547#0/1  
abba¥I`abaa`^aa`¥`baaaaY\_Y\_aa`aa`a^  
@HWI-EAS443:3:73:920:166#0/1  
GGGGAGACACACAAATTCAAACGAGAAGATCATTTGAGTT  
+HWI-EAS443:3:73:920:166#0/1  
aabaaba`a`a\_aa`aa`\_a`\_a^a\_\_a\_\_]`aaa`^a`  
@HWI-EAS443:3:74:1248:310#0/1  
CACAAATTCAAACGAGAAGATCATTTGAGTTAAAGAAGCT  
+HWI-EAS443:3:74:1248:310#0/1  
ababbbababbbababaabaaaabbbb`baaab`b`aZa  
@HWI-EAS443:3:74:1559:919#0/1  
TAGGTGCCATAGGGGAGACACACAAATTCAAACGAGAAGA  
+HWI-EAS443:3:74:1559:919#0/1  
]`a`P`^`\_X`\_`\_W`baaa]^`a`\_`\_]ba^aa`b`\_dW`^`Y  
@HWI-EAS443:3:74:374:1521#0/1  
CACAAATTCAAACGAGAAGATCATTTGAGTTAAAGAAGCT  
+HWI-EAS443:3:74:374:1521#0/1  
\_Ta]ZSZ]a`^`XQ]Yb`a``[aUWU\_QTZY`^`YVW]^`^`YW  
@HWI-EAS443:3:75:1147:834#0/1  
CATATAGGTGCCATAGGGGAGACACACAAATTCAAACGAG  
+HWI-EAS443:3:75:1147:834#0/1  
abbbabaa]baaaaabaaaa`abaaaa`aa\_aa````a  
@HWI-EAS443:3:75:1238:1627#0/1  
GGGGAGACACACAAATTCAAACGAGAAGATCATTTGAGTT  
+HWI-EAS443:3:75:1238:1627#0/1  
¥^^`^a`\_`ZY`bb`bY]bb]^`[`aX^Za`aaZH¥a`a  
@HWI-EAS443:3:75:1313:1054#0/1  
CACAAATTCAAACGAGAAGATCATTTGAGTTAAAGAAGCT  
+HWI-EAS443:3:75:1313:1054#0/1  
`^`\_Z`aabb^bZ[``a````\_]`\_`\_¥Y[^aa```bY`^`  
@HWI-EAS443:3:75:1412:1606#0/1  
CACAAATTCAAACGAGAAGATCATTTGAGTTAAAGAAGCT  
+HWI-EAS443:3:75:1412:1606#0/1  
aabbbabab`\_aa\_aba`aababbbbababab\_bba]]a  
@HWI-EAS443:3:75:1418:561#0/1  
CACAAATTCAAACGAGAAGATCATTTGAGTTAAAGAAGCT  
+HWI-EAS443:3:75:1418:561#0/1  
abbabbbbababbbabbaabbbbabababbbbaa^b  
@HWI-EAS443:3:75:577:1049#0/1  
TAGGTGCCATAGGGGAGACACACAAATTCAAACGAGAAGA  
+HWI-EAS443:3:75:577:1049#0/1  
XIY¥W`\_bb^]aZ`aSS¥b¥`\_bbbbbbaaK^]bba`a^Vaba  
@HWI-EAS443:3:75:645:1387#0/1  
CACACAAATTCAAACGAGAAGATCATTTGAGTTAAAGAAG  
+HWI-EAS443:3:75:645:1387#0/1  
a^a\_aa`]b`^aba^^a^U¥aaa^V^aaba\_aa`]`a`a  
@HWI-EAS443:3:75:692:1399#0/1  
CACAAATTCAAACGAGAAGATCATTTGAGTTAAAGAAGCT  
+HWI-EAS443:3:75:692:1399#0/1  
\_aabb`\_bbabbb\_F¥\_ZVbYaa`bb¥WUaaa`V`\_\_`a

@HWI-EAS443:3:76:1189:1805#0/1  
CACACAAATTCAAACGAGAAGATCATTTGAGTTAAAGAAG  
+HWI-EAS443:3:76:1189:1805#0/1  
abbbabaZ\_a`aaaaa`]bbabaabbbbbb`]baaaaaa  
@HWI-EAS443:3:76:1662:1996#0/1  
GAGACACACAAATTCAAACGAGAAGATCATTTGAGTTAAA  
+HWI-EAS443:3:76:1662:1996#0/1  
\_a\_aaa`b`aba`a¥`ab¥`\_ba\_a`a]\_baaa`a]a`^`  
@HWI-EAS443:3:76:616:735#0/1  
ATAGGGGAGACACACAAATTCAAACGAGAAGATCATTTGA  
+HWI-EAS443:3:76:616:735#0/1  
abbbabbbbaabaabbaaaaaabaab`]aaaaaaaa`  
@HWI-EAS443:3:76:65:685#0/1  
CACAAATTCAAACGAGAAGATCATTTGAGTTAAAGAAGCT  
+HWI-EAS443:3:76:65:685#0/1  
`a`¥J¥a¥bbb`^bab¥Z`^`b^babbab``Yaab¥\_\_Xa  
@HWI-EAS443:3:77:360:270#0/1  
CACACAAATTCAAACGAGAAGATCATTTGAGTTAAAGAAG  
+HWI-EAS443:3:77:360:270#0/1  
abbabababbabbabbbaaaba`ababa[ba`aaaaba  
@HWI-EAS443:3:77:649:724#0/1  
CACAAATTCAAACGAGAAGATCATTTGAGTTAAAGAAGCT  
+HWI-EAS443:3:77:649:724#0/1  
a^a`¥[\_bb`¥^aa^a`]^aabZaaaaaaaa`aaba`a  
@HWI-EAS443:3:78:1638:976#0/1  
CACACAAATTCAAACGAGAAGATCATTTGAGTTAAAGAAG  
+HWI-EAS443:3:78:1638:976#0/1  
abab`b^¥\_WOQVa`X¥Zab^W][U]YUG`^`\_¥¥Y\_a  
@HWI-EAS443:3:78:256:947#0/1  
CATATAGGTGCCATAGGGGAGACACACAAATTCAAACGAG  
+HWI-EAS443:3:78:256:947#0/1  
a\_`aaa``Ga¥]aaa`aa`\_`Z`a\_a`aaa\_[aaaa`\_`\_`  
@HWI-EAS443:3:78:58:1521#0/1  
GCCATAGGGGAGACACACAAATTCAAACGAGAAGATCATT  
+HWI-EAS443:3:78:58:1521#0/1  
U\_bbba``aZZaba`abbbbaaababbaba^¥\_aaa```  
@HWI-EAS443:3:79:1144:1819#0/1  
AGGTGCCATAGGGGAGACACACAAATTCAAACGAGAAGAT  
+HWI-EAS443:3:79:1144:1819#0/1  
aTaQaaba``S]\_a^a\_aaa```aa`^aa\_]a^`\_`^`]  
@HWI-EAS443:3:79:186:1030#0/1  
GTGCCATAGGGGAGACACACAAATTCAAACGAGAAGATCA  
+HWI-EAS443:3:79:186:1030#0/1  
a`^aaaa^a``]aaaaaaaa`\_`a\_a``aaa\_`]`\_`[``  
@HWI-EAS443:3:79:320:1018#0/1  
GGTGCCATAGGGGAGACACACAAATTCAAACGAGAAGATC  
+HWI-EAS443:3:79:320:1018#0/1  
ab`bbb`b]bbba^baa`aba`¥a`abaaaa`a]aaa`\_`  
@HWI-EAS443:3:79:849:180#0/1  
CACAAATTCAAACGAGAAGATCATTTGAGTTAAAGAAGCT

+HWI-EAS443:3:79:849:180#0/1  
`b`bbbba`ababbaa``abb\_aab^a^baaaaa  
@HWI-EAS443:3:7:1105:374#0/1  
CACAAATTCAAACGAGAAGATCATTTGAGTTAAAGAAGCT  
+HWI-EAS443:3:7:1105:374#0/1  
ababba`aabbba^b`babaaa`aa`baaa`\_\_a[^a  
@HWI-EAS443:3:7:836:991#0/1  
CACACAAATTCAAACGAGAAGATCATTTGAGTTAAAGAAG  
+HWI-EAS443:3:7:836:991#0/1  
abbb`bb\_b`\_bb\_aTP`XRvVa\_Xbbbaa`Z\_`\_a`aa  
@HWI-EAS443:3:80:229:758#0/1  
CACAAATTCAAACGAGAAGATCATTTGAGTTAAAGAAGCT  
+HWI-EAS443:3:80:229:758#0/1  
\_`b`\_^`bbbba`\_`^T`aaabaaaab\_a\_S`^aa`\_`\_  
@HWI-EAS443:3:81:1372:83#0/1  
ACAAATTCAAACGAGAAGATCATTTGAGTTAAAGAAGCTG  
+HWI-EAS443:3:81:1372:83#0/1  
aX]b[b\_Vab\_`aWa\_aa¥aal`aa\_ZV[``\_Ya^aH[a  
@HWI-EAS443:3:81:1492:1415#0/1  
CATATAGGTGCCATAGGGGAGACACACAAATTCAAACGAG  
+HWI-EAS443:3:81:1492:1415#0/1  
Yab`ab\_b¥`¥a\_ba]P\_bababaa¥]¥b\_bb\_\_bb[a`b  
@HWI-EAS443:3:81:592:558#0/1  
CACACAAATTCAAACGAGAAGATCATTTGAGTTAAAGAAG  
+HWI-EAS443:3:81:592:558#0/1  
aaaa^aa`]aaaa\_\_a\_]`T^\_a¥R[``VQa[Z\_]`[\_]Y¥  
@HWI-EAS443:3:82:255:731#0/1  
CACACAAATTCAAACGAGAAGATCATTTGAGTTAAAGAAG  
+HWI-EAS443:3:82:255:731#0/1  
abaaaaa\_babbbbaaaaa]aa`aa]aaaa\_a\_a\_aaaaa^a  
@HWI-EAS443:3:83:1000:274#0/1  
CACAGCTTCTTAACTCAAATGATCTTCTCGTTTGAATTT  
+HWI-EAS443:3:83:1000:274#0/1  
Z``abbbbabbbbbbbbababa`a`bbbab`babbb\_\_aba  
@HWI-EAS443:3:83:1192:290#0/1  
CACAAATTCAAACGAGAAGATCATTTGAGTTAAAGAAGCT  
+HWI-EAS443:3:83:1192:290#0/1  
X\_Xb^`b`Oba^a`b¥^`abPN\_ZV^`\_`b]b\_`aaba`  
@HWI-EAS443:3:83:1418:1778#0/1  
CATATAGGTGCCATAGGGGAGACACACAAATTCAAACGAG  
+HWI-EAS443:3:83:1418:1778#0/1  
aaaaa`abZ`aV`aa]V\_\_Y^\_Xa[a\_a\_`XPP[`¥^]`^`  
@HWI-EAS443:3:83:395:281#0/1  
CACAAATTCAAACGAGAAGATCATTTGAGTTAAAGAAGCT  
+HWI-EAS443:3:83:395:281#0/1  
a`\_¥`\_`Ya`a^bbb¥Va`¥Z¥aaab¥^aaaa`a\_aa\_`  
@HWI-EAS443:3:83:873:857#0/1  
CACACAAATTCAAACGAGAAGATCATTTGAGTTAAAGAAG  
+HWI-EAS443:3:83:873:857#0/1  
abbbabbabbbbbbababa`aaaaabbbaaa\_aaaaabaaa



@HWI-EAS443:3:84:1769:131#0/1  
ATAGGTGCCATAGGGGAGACACACAAATTCAAACGAGAAG  
+HWI-EAS443:3:84:1769:131#0/1  
a^]aaYa^`^a\_aa`^`^\_\_W^X`X\_Y^\_^]\_\_\_Wa]\_]Z\_  
@HWI-EAS443:3:84:265:148#0/1  
TTCTCGTTTGAATTTGTGTGTCTCCCCTATGGCACCTATA  
+HWI-EAS443:3:84:265:148#0/1  
a`aab¥aab\_Z\_aaaZa]a^a\_`^\_]WX\_`^^]¥XZXZX  
@HWI-EAS443:3:84:906:1089#0/1  
GGGGAGACACACAAATTCAAACGAGAAGATCATTGAGTT  
+HWI-EAS443:3:84:906:1089#0/1  
a\_\_V\_\_\_Y\_\_\_`\_]US0a^^]aZa^^^^^SY^^\_\_V\_]X  
@HWI-EAS443:3:85:232:1508#0/1  
ATAGGTGCCATAGGGGAGACACACAAATTCAAACGAGAAG  
+HWI-EAS443:3:85:232:1508#0/1  
\_[]`XTa`^\_\_¥X¥ZY[[R[]`^ZVY]^^^\_\_¥ST[VY  
@HWI-EAS443:3:85:467:1547#0/1  
CTCGTTTGAATTTGTGTGTCTCCCCTATGGCACCTATATG  
+HWI-EAS443:3:85:467:1547#0/1  
abbb^T^SZaba\_\_a0¥bab[b`^a`^^\_]`bbaa\_babZ  
@HWI-EAS443:3:85:829:1394#0/1  
CACAAATTCAAACGAGAAGATCATTGAGTTAAAGAAGCT  
+HWI-EAS443:3:85:829:1394#0/1  
U`b\_bababb^`bb`bbb`ab`b`bbbaabbbbaabbbbaa  
@HWI-EAS443:3:86:112:1385#0/1  
CACACAAATTCAAACGAGAAGATCATTGAGTTAAAGAAG  
+HWI-EAS443:3:86:112:1385#0/1  
`aababababba^aaZ`a`]a\_a`a`^`^a\_``\_]\_[a\_]`  
@HWI-EAS443:3:86:1203:1423#0/1  
TATAGGTGCCATAGGGGAGACACACAAATTCAAACGAGAA  
+HWI-EAS443:3:86:1203:1423#0/1  
ababa\_Ybaaaaaaaaa\_a`^a\_a\_baaa`\_aaa]a\_a\_¥  
@HWI-EAS443:3:86:1395:999#0/1  
TAGGGGAGACACACAAATTCAAACGAGAAGATCATTGAG  
+HWI-EAS443:3:86:1395:999#0/1  
a\_bbbb`\_babYbV`^\_b`K`bb`aabWab¥b`ba¥\_Sa  
@HWI-EAS443:3:86:1423:696#0/1  
CACAAATTCAAACGAGAAGATCATTGAGTTAAAGAAGCT  
+HWI-EAS443:3:86:1423:696#0/1  
Q¥¥V^aaaa`b`a`a`a`\_a\_[]\_a¥YY\_`^a`^aZ¥¥\_  
@HWI-EAS443:3:86:1589:35#0/1  
AGGGGAGACACACAAATTCAAACGAGAAGATCATTGAGT  
+HWI-EAS443:3:86:1589:35#0/1  
\_aa\_[]\_bb\_aababb¥ba\_bbbab^^[¥aaYJXaa\_[]TR]  
@HWI-EAS443:3:87:1679:905#0/1  
ATAGGGGAGACACACAAATTCAAACGAGAAGATCATTGA  
+HWI-EAS443:3:87:1679:905#0/1  
a\_]¥\_[abaaa^\_b\_bb`ab\_\_abIb]ba`a\_aaaa\_]Za  
@HWI-EAS443:3:87:924:843#0/1  
CACAAATTCAAACGAGAAGATCATTGAGTTAAAGAAGCT

+HWI-EAS443:3:87:924:843#0/1  
ababbbbabbbbabbaaababab`aaabbaaba`a\_a  
@HWI-EAS443:3:88:1461:859#0/1  
ATATAGGTGCCATAGGGGAGACACACAAATTCAAACGAGA  
+HWI-EAS443:3:88:1461:859#0/1  
aabaaaa^aa^\_aaa\_a[\_a^`^]a]aa\_a\_^a`\_Za\_\_\_\_  
@HWI-EAS443:3:89:506:976#0/1  
TATAGGTGCCATAGGGGAGACACACAAATTCAAACGAGAA  
+HWI-EAS443:3:89:506:976#0/1  
abaa]b\_babaaaa`aaaa[aa]aaa`aaVaaa]a^\_\_\_\_  
@HWI-EAS443:3:89:64:984#0/1  
CACACAAATTCAAACGAGAAGATCATTGAGTTAAAGAAG  
+HWI-EAS443:3:89:64:984#0/1  
¥a`a[[\_`\_U\_Z`[^`\_`^`¥V¥¥`¥aaZa]]^\_]`V`  
@HWI-EAS443:3:8:1117:495#0/1  
CACAAATTCAAACGAGAAGATCATTGAGTTAAAGAAGCT  
+HWI-EAS443:3:8:1117:495#0/1  
R`^¥`^bbbaabbb¥abab`N`aaabbbab`bbbbbbab  
@HWI-EAS443:3:8:1184:364#0/1  
AGGGGAGACACACAAATTCAAACGAGAAGATCATTGAGT  
+HWI-EAS443:3:8:1184:364#0/1  
`baaaaba`^\_aXaaaa\_Waaa\_\_^\_]\_[[ZV¥a\_^YOW]  
@HWI-EAS443:3:8:1497:584#0/1  
ATATAGGTGCCATAGGGGAGACACACAAATTCAAACGAGA  
+HWI-EAS443:3:8:1497:584#0/1  
]Ua`b\_b]baa\_]\_Yaa^Ybaa`\_aQaXQ\_aY``\_^aQ]\_  
@HWI-EAS443:3:8:1604:779#0/1  
CAAATTCAAACGAGAAGATCATTGAGTTAAAGAAGCTGT  
+HWI-EAS443:3:8:1604:779#0/1  
aababbabab[ba`aabab¥aaabb\_b\_aa`aaa`¥\_aY  
@HWI-EAS443:3:8:262:808#0/1  
GCCATAGGGGAGACACACAAATTCAAACGAGAAGATCATT  
+HWI-EAS443:3:8:262:808#0/1  
aaaa`aaaa\_aa\_`a`aa\_a\_]`\_`a]\_\_^\_^]]\_`^  
@HWI-EAS443:3:8:623:1127#0/1  
CACACAAATTCAAACGAGAAGATCATTGAGTTAAAGAAG  
+HWI-EAS443:3:8:623:1127#0/1  
aa¥b`b`b^bb]a]bbb[[aababa`\_b\_a\_a¥`aaaa  
@HWI-EAS443:3:8:726:1538#0/1  
GGGAGACACACAAATTCAAACGAGAAGATCATTGAGTTA  
+HWI-EAS443:3:8:726:1538#0/1  
abaababbbba\_a`aa`abb¥baYZa`¥\_\_a\_a\_^`^aa  
@HWI-EAS443:3:90:1323:1124#0/1  
GGGAGACACACAAATTCAAACGAGAAGATCATTGAGTTA  
+HWI-EAS443:3:90:1323:1124#0/1  
`ababbabab^^bbbaa`b`ba\_babaabbaaab`aa  
@HWI-EAS443:3:90:1648:1231#0/1  
AGGGGAGACACACAAATTCAAACGAGAAGATCATTGAGT  
+HWI-EAS443:3:90:1648:1231#0/1  
¥aabaaba`Jba]ba`baaa`¥\_a^XT^b`aSa\_aa`Waa

@HWI-EAS443:3:90:442:1699#0/1  
AGGTGCCATAGGGGAGACACACAAATTCAAACGAGAAGAT  
+HWI-EAS443:3:90:442:1699#0/1  
aZYPX\_b[`baa¥aaaaaaaa`aaa```aaa`a\_`Va^`\_  
@HWI-EAS443:3:91:188:361#0/1  
TATAGGTGCCATAGGGGAGACACACAAATTCAAACGAGAA  
+HWI-EAS443:3:91:188:361#0/1  
ab^]\_Zabaaa^[Z`^Z`^Y^a\_`¥W\_^\_^Y\_\_`\_]\_Y`X^  
@HWI-EAS443:3:91:274:1415#0/1  
ACAAATTCAAACGAGAAGATCATTTGAGTTAAAGAAGCTG  
+HWI-EAS443:3:91:274:1415#0/1  
¥a\_^]\_ba]a¥`^`^`^`^`aaaa\_aa\_\_\_\_^aaa\_a``\_`^  
@HWI-EAS443:3:91:287:479#0/1  
ACACAAATTCAAACGAGAAGATCATTTGAGTTAAAGAAGC  
+HWI-EAS443:3:91:287:479#0/1  
X^a\_V\_XY¥U`WUWa`X^]UZ`^aa^^][Z` [U^aa^a\_  
@HWI-EAS443:3:91:510:602#0/1  
CATATAGGTGCCATAGGGGAGACACACAAATTCAAACGAG  
+HWI-EAS443:3:91:510:602#0/1  
aabbbabb\_bbbbbbbbbbabbbbbbbbbbabbbb\_bab  
@HWI-EAS443:3:91:592:425#0/1  
CTCGTTTGAATTTGTGTGTCTCCCCTATGGCACCTATATG  
+HWI-EAS443:3:91:592:425#0/1  
`bbaaabbbbbb`a`babbbbbaaaabab^]baaaa`  
@HWI-EAS443:3:92:1467:1070#0/1  
GGGGAGACACACAAATTCAAACGAGAAGATCATTTGAGTT  
+HWI-EAS443:3:92:1467:1070#0/1  
\_P^^Ua`\_XK¥]NPTX]]`\_USa^a\_W^`XFV\_]X\_V^¥W  
@HWI-EAS443:3:92:1534:417#0/1  
ACAAATTCAAACGAGAAGATCATTTGAGTTAAAGAAGCTG  
+HWI-EAS443:3:92:1534:417#0/1  
VbYbb`^ab`a\_a\_a`W`\_a`^`\_`^`Sb¥]a^Y^a\_`P``  
@HWI-EAS443:3:92:681:173#0/1  
CACAAATTCAAACGAGAAGATCATTTGAGTTAAAGAAGCT  
+HWI-EAS443:3:92:681:173#0/1  
aabbbbbbbbbbbbbbbbbbbbbbbbbbabbbbababab  
@HWI-EAS443:3:92:735:145#0/1  
CATAGGGGAGACACACAAATTCAAACGAGAAGATCATTTG  
+HWI-EAS443:3:92:735:145#0/1  
abbabbbbabababbbbaab``\_^Yaaba\_b`Yaa`aaa  
@HWI-EAS443:3:93:1145:170#0/1  
GTTTGATCCCACAGCTTCTTAACTAAAATGATCTTCTCG  
+HWI-EAS443:3:93:1145:170#0/1  
\_SX` [ [ ] P ] M ` Y L ] ] ^ Z T ^ ] SVPWVKTPX [ VPVV ¥ WG ] G\_  
@HWI-EAS443:3:93:1297:933#0/1  
AGGTGCCATAGGGGAGACACACAAATTCAAACGAGAAGAT  
+HWI-EAS443:3:93:1297:933#0/1  
\_X`Y\_V [ ] `T\_aba]a\_\_\_\_QV[W`\_`R]aaY¥^`]S\_]a  
@HWI-EAS443:3:93:1476:1042#0/1  
TATAGGTGCCATAGGGGAGACACACAAATTCAAACGAGAA

+HWI-EAS443:3:93:1476:1042#0/1  
¥]]]]UI\_YPRQUQ^G[TTU¥WZ^P[DLSZ^`\_USZYUST  
@HWI-EAS443:3:93:860:1156#0/1  
GGGAGACACACAAATTCAAACGAGAAGATCATTGAGTTA  
+HWI-EAS443:3:93:860:1156#0/1  
\_]^^U\_aabba` `b` `aaaaaa` `a` `]Z` `aa` `¥`\_]^Z  
@HWI-EAS443:3:94:661:671#0/1  
CATATAGGTGCCATAGGGGAGACACACAAATTCAAACGAG  
+HWI-EAS443:3:94:661:671#0/1  
abbaaba^Uaba^a\_a` babbaab` aaaa^aa` `a` `^aa  
@HWI-EAS443:3:94:922:1273#0/1  
TAGGTGCCATAGGGGAGACACACAAATTCAAACGAGAAGA  
+HWI-EAS443:3:94:922:1273#0/1  
abaaYbaaaaa\_aY` `R` `Oaa` `aa` `a` `^` `]` `a` `]  
@HWI-EAS443:3:95:694:1270#0/1  
CACAAATTCAAACGAGAAGATCATTGAGTTAAAGAAGCT  
+HWI-EAS443:3:95:694:1270#0/1  
`bbabbbbbaabaabb` `aabaabbabaabbaabbab\_a  
@HWI-EAS443:3:96:1390:768#0/1  
CACAAATTCAAACGAGAAGATCATTGAGTTAAAGAAGCT  
+HWI-EAS443:3:96:1390:768#0/1  
ab^bbabbbbbaa\_b` `b^bbba` `bbbbaaaab^b\_ba` `^W\_  
@HWI-EAS443:3:96:355:604#0/1  
CATATAGGTGCCATAGGGGAGACACACAAATTCAAACGAG  
+HWI-EAS443:3:96:355:604#0/1  
^a¥a^` \_aaaXaaXXa` \_\_Xaa[a` `abb]a^a\_ba¥baa  
@HWI-EAS443:3:96:432:1744#0/1  
TAGGGGAGACACACAAATTCAAACGAGAAGATCATTGAG  
+HWI-EAS443:3:96:432:1744#0/1  
aa^Z¥^a` aba` bab` aaaaaba\_a` `^` `^` `^` `^` `^` `^` a` `a` `^` `^` a  
@HWI-EAS443:3:96:564:538#0/1  
CAAATTCAAACGAGAAGATCATTGAGTTAAAGAAGCTGT  
+HWI-EAS443:3:96:564:538#0/1  
aabaab` bbbba` ba` baa\_aaba\_a` aa` `aa` a¥]a^  
@HWI-EAS443:3:96:78:412#0/1  
CATATAGGTGCCATAGGGGAGACACACAAATTCAAACGAG  
+HWI-EAS443:3:96:78:412#0/1  
P`\_abbbab]` `bbba` `a` `¥bba` \_babbbbababbbbabbb  
@HWI-EAS443:3:97:1389:1991#0/1  
CACACAAATTCAAACGAGAAGATCATTGAGTTAAAGAAG  
+HWI-EAS443:3:97:1389:1991#0/1  
`a\_bQbbXbbKa` `bYa` \_ba` `bU^JW¥b` `^abU^ba` `bbaa  
@HWI-EAS443:3:97:1512:853#0/1  
CACAAATTCAAACGAGAAGATCATTGAGTTAAAGAAGCT  
+HWI-EAS443:3:97:1512:853#0/1  
`aX^bba` \_X^baab^b]a\_a\_Q` `bbb[Lb` `aWaa` \_b` `aG¥  
@HWI-EAS443:3:97:655:1832#0/1  
CACAAATTCAAACGAGAAGATCATTGAGTTAAAGAAGCT  
+HWI-EAS443:3:97:655:1832#0/1  
aa` bbbbaabbaaaaaYaa` a\_aaa^a` \_[\_a\_aa` `]^` `^` `^`

@HWI-EAS443:3:97:996:229#0/1  
CACAAATTCAAACGAGAAGATCATTTGAGTTAAAGAAGCT  
+HWI-EAS443:3:97:996:229#0/1  
S^a``aba\_aa^Y\_bbabbbba^bbbbbabb`bbbba`b  
@HWI-EAS443:3:98:1615:1359#0/1  
ATATAGGTGCCATAGGGGAGACACAAATTCAAACGAGA  
+HWI-EAS443:3:98:1615:1359#0/1  
`aaa\_a\_Vb`^Xa`a\_`aWa`[\_`a\_\_`\_]\_`Y\_a`XMX]  
@HWI-EAS443:3:98:1722:1407#0/1  
AGGGGAGACACACAAATTCAAACGAGAAGATCATTTGAGT  
+HWI-EAS443:3:98:1722:1407#0/1  
`a\_babba]a0aaabba`aa`Zb`a\_^ba0`aa\_a^a\_  
@HWI-EAS443:3:98:282:301#0/1  
GGGAGACACACAAATTCAAACGAGAAGATCATTTGAGTTA  
+HWI-EAS443:3:98:282:301#0/1  
aaWRUV\_PPZW^]GXY]Z\_aaYJ[]¥`^PX¥`aY¥WY`¥]  
@HWI-EAS443:3:98:494:1207#0/1  
CACAAATTCAAACGAGAAGATCATTTGAGTTAAAGAAGCT  
+HWI-EAS443:3:98:494:1207#0/1  
abaa`^bbabaaab^ba^aaa]aaaa\_aaaaaaba`aaa  
@HWI-EAS443:3:98:871:1337#0/1  
ATATAGGTGCCATAGGGGAGACACACAAATTCAAACGAGA  
+HWI-EAS443:3:98:871:1337#0/1  
aaaaaaaaUb\_¥a`aa[aaa¥a^a`aaa[]a\_`a`\_W`]a`  
@HWI-EAS443:3:99:1495:374#0/1  
AGGGGAGACACACAAATTCAAACGAGAAGATCATTTGAGT  
+HWI-EAS443:3:99:1495:374#0/1  
ab^`b\_^b^b`a]^bb^¥aaa^a`]^aab\_TYaa`a¥a^  
@HWI-EAS443:3:99:290:494#0/1  
AGGGGAGACACACAAATTCAAACGAGAAGATCATTTGAGT  
+HWI-EAS443:3:99:290:494#0/1  
abbabbbbbbbabbabaaaab\_babaabaa^abaaaa`  
@HWI-EAS443:3:99:381:1867#0/1  
CATATAGGTGCCATAGGGGAGACACACAAATTCAAACGAG  
+HWI-EAS443:3:99:381:1867#0/1  
abbaaabbb^babbbabbabbaababababababbaa¥\_b  
@HWI-EAS443:3:99:767:846#0/1  
GGTGCATAGGGGAGACACACAAATTCAAACGAGAAGATC  
+HWI-EAS443:3:99:767:846#0/1  
ab\_bbbab[bbaaabaab\_bbabbbbaaab\_aaaaab\_a\_  
@HWI-EAS443:3:99:946:767#0/1  
CACAAATTCAAACGAGAAGATCATTTGAGTTAAAGAAGCT  
+HWI-EAS443:3:99:946:767#0/1  
a\_bbbbbbbbbbbabbabbbb`bbbb`abbabbbbb^b  
@HWI-EAS443:3:9:1307:134#0/1  
CACAAATTCAAACGAGAAGATCATTTGAGTTAAAGAAGCT  
+HWI-EAS443:3:9:1307:134#0/1  
`bbabbaabbb]`bbbbbab`abbb``aabaabbb¥aaa  
@HWI-EAS443:3:9:1320:308#0/1  
TAGGGGAGACACACAAATTCAAACGAGAAGATCATTTGAG

+HWI-EAS443:3:9:1320:308#0/1  
a[ab`a`a^`\_a`a`aa^aa\_[a^a\_\_a\_]`][a`a^a  
@HWI-EAS443:3:9:1557:1111#0/1  
CACACAAATTCAAACGAGAAGATCATTTGAGTTAAAGAAG  
+HWI-EAS443:3:9:1557:1111#0/1  
`]\_]baW`\_^`]aab\_aaaU]V`a^aa\_a¥`Z``a`\_`  
@HWI-EAS443:3:9:1729:1020#0/1  
CACAAATTCAAACGAGAAGATCATTTGAGTTAAAGAAGCT  
+HWI-EAS443:3:9:1729:1020#0/1  
^aabaa`\_\_abba\_a`abbab[ab]bb]\_abaababaa`a  
@HWI-EAS443:3:9:594:473#0/1  
CACAAATTCAAACGAGAAGATCATTTGAGTTAAAGAAGCT  
+HWI-EAS443:3:9:594:473#0/1  
aba]^baa]U]b^`[\_K\_a\_]¥`aaa\_\_`\_a`\_\_a^Ya^a  
@HWI-EAS443:3:9:979:618#0/1  
TAGGTGCCATAGGGGAGACACACAAATTCAAACGAGAAGA  
+HWI-EAS443:3:9:979:618#0/1  
aa`^`ba\_aaaa`a`aa\_^`\_a\_a\_\_a`aa`Wa^\_]`a^  
@HWI-EAS443:3:7:138:1213#0/1  
GATCCACAGCTTCTTTAACTCAAATGATCTTCTCGTTTG  
+HWI-EAS443:3:7:138:1213#0/1  
`bbbbbb`ZZaaaaababbabababa\_`aaaaaaaa^`^`  
@HWI-EAS443:3:90:463:749#0/1  
GATCCACAGCTTCTTTAACTCAAATGATCTTCTCGTTTG  
+HWI-EAS443:3:90:463:749#0/1  
\_`a\_Y[[\_]Z\_aa^`a]UZaaa\_a\_aY^Ya`[^a^`\_`  
@HWI-EAS443:3:56:102:504#0/1  
AAACGAGAAGATCATTTGAGTTAAAGAAGCTGTGGGATCA  
+HWI-EAS443:3:56:102:504#0/1  
^aabaab\_ab`aaaaaab`a`aaaa`¥```\_a\_aa\_^ZY  
@HWI-EAS443:3:36:1694:1657#0/1  
CGAGAAGATCATTTGAGTTAAAGAAGCTGTGGGATCAAAC  
+HWI-EAS443:3:36:1694:1657#0/1  
H\_ab\_Xba`[S`baabb`\_Za¥bbbbba¥¥Ja[¥V\_]H\_]b  
@HWI-EAS443:3:40:860:1562#0/1  
GTTTGATCCACAGCTTCTTTAACTCAAATGATCTTCTCG  
+HWI-EAS443:3:40:860:1562#0/1  
a`a`]```a]T]^a\_```\_`\_¥¥V¥00YRWU¥¥\_]``\_X  
@HWI-EAS443:3:89:651:1429#0/1  
CGAGAAGATCATTTGAGTTAAAGAAGCTGTGGGATCAAAC  
+HWI-EAS443:3:89:651:1429#0/1  
ab]aaaaaab^bbbbbbabbbbbbbbabXa[a\_]\_aab`  
@HWI-EAS443:3:89:761:1241#0/1  
CGAGAAGATCATTTGAGTTAAAGAAGCTGTGGGATCAAAC  
+HWI-EAS443:3:89:761:1241#0/1  
ab]b[^`S¥a\_`ab[a]`W`\_]a`a¥I¥`]NN^``[M  
@HWI-EAS443:3:42:771:553#0/1  
AGCGCTTGTTTCGCACCGAATGGATCCCAGAATNTGTTCT  
+HWI-EAS443:3:42:771:553#0/1  
abaaa\_aaaaaaab`aaa\_a\_a\_Y`````\_aQQUDNa\_`\_\_

@HWI-EAS443:3:51:884:453#0/1  
GGATGGTCTTTCTGCTTTTGATGAGAGAAGAAGGCTTCA  
+HWI-EAS443:3:51:884:453#0/1  
aaaaa\_N\_]abb¥ab¥aaaba`aa`a\_a¥`aa`a][`a^`  
@HWI-EAS443:3:64:231:1562#0/1  
GTTTCAGCTTTCTTACTTGATCCATCATTGCCCTCTGG  
+HWI-EAS443:3:64:231:1562#0/1  
a`aaabaaaaaaaaaaaaaaaa`aaa`\_a`\_\_a\_``a]X]  
@HWI-EAS443:3:80:340:140#0/1  
GTGGTCAGCCTGATGAGACCAAATGAAAACCCAACTCCAG  
+HWI-EAS443:3:80:340:140#0/1  
a[¥` []YY]U)^SZ[Y[Y[¥[\_YYYZSY¥UVT]XYV¥SPP  
@HWI-EAS443:3:90:984:1899#0/1  
ATTTGGTCTCATCAGGCTGACCACTTGGCTGTTGTGTGGT  
+HWI-EAS443:3:90:984:1899#0/1  
Oaa¥SSab^ZaWWaab`]^a]V¥P^V^baaBBBBBBBBBB  
@HWI-EAS443:3:46:766:1825#0/1  
CTAATNCAGAATAGCATAACAATAGAGAGGATGGTGATTT  
+HWI-EAS443:3:46:766:1825#0/1  
abbb]DZb\_ab`¥a[`a\_\_W^`aabaaa^YRa\_P^JOX\_  
@HWI-EAS443:3:16:1463:97#0/1  
GGTCTTTCTGCTTTTGATGAGGGAAGAAATAAATACGTA  
+HWI-EAS443:3:16:1463:97#0/1  
[b\_b^abbabb`T]^`[ZQVRMOGZXK`N]]UYXLN]HDO[  
@HWI-EAS443:3:17:518:1418#0/1  
CTCGGGATCCCTCCGGTGCGAACAAGCGCTCTTGTTC  
+HWI-EAS443:3:17:518:1418#0/1  
RZ]Tab\_\_bRKRabbb]WbbT]bb\_b`b`bIGX]a\_aa^`  
@HWI-EAS443:3:26:1026:1600#0/1  
ATTTTGTCTCATCAGGCTGACCACTTGGCTGTTTTGGGGT  
+HWI-EAS443:3:26:1026:1600#0/1  
`\_`ab^¥baa]Y```Y[\_a[¥a\_\_`Y]Z]]HP¥aBBBBBB  
@HWI-EAS443:3:42:798:1700#0/1  
CCGGGTCGGGATAGACCCATTCAAATTACTCCAATACAGC  
+HWI-EAS443:3:42:798:1700#0/1  
T\_VY]Xba`[ZZ^\_W¥U]\_\_`\_^a`UZZ\_\_[RZ\_YW`[O[  
@HWI-EAS443:3:47:1639:1713#0/1  
ATTTGGTCTCATCAGGCTGACCACTTGGCTGTTTTGGGGG  
+HWI-EAS443:3:47:1639:1713#0/1  
aa\_[Za\_a\_Q^`\_[]P]\_``YWT^\_\_]`P¥XP`RBBBBBB  
@HWI-EAS443:3:54:1257:1357#0/1  
GACGGTCCTGCTGTTTTCTTAGGGTCCTTCCCAGCACTG  
+HWI-EAS443:3:54:1257:1357#0/1  
U\_S\_T^U\_¥[F[bb`bba`b\_TX^WZZPXa[UP¥V\_`aaa  
@HWI-EAS443:3:80:266:1903#0/1  
GAACAATACCCTCAAAGGAAAATTTCAAACAGCTGCCAG  
+HWI-EAS443:3:80:266:1903#0/1  
TRH\_WXS^T]a[QTX`¥bbb\_W\_\_baa`aLa``Q`\_`P[  
@HWI-EAS443:3:81:1161:1337#0/1  
AGGGAGTACCCTTCCCTTTCAAAGTGATGCCCACTTGCTA

+HWI-EAS443:3:81:1161:1337#0/1  
`aPT`\_JaP`\_`a\_\_\_\_aaa]ba`bRL\_aaZ]aQaaU\_X]\_  
@HWI-EAS443:3:86:318:753#0/1  
ATTTGGTCTCATCAGGCTGACCACTTGGCTGGTTTGGGGT  
+HWI-EAS443:3:86:318:753#0/1  
R\_\_UZ[ab`[a\_ba]^aaaa[aa]a`]aaa\_00^^KZH¥X  
@HWI-EAS443:3:87:1685:1871#0/1  
ACACGCCATTGTTTGGCTTGGCGCCAACTCTGCTTATTTTC  
+HWI-EAS443:3:87:1685:1871#0/1  
^P^Ua\_Y`^a^R\_`WP^U`¥]Z¥UUXGOWSSMPZ^ZUZWW  
@HWI-EAS443:3:96:1027:1380#0/1  
ATTTGGACTCATCAGGCTGACCACTTGGCTGTTTGGGGT  
+HWI-EAS443:3:96:1027:1380#0/1  
\_abaa]JU`aW¥\_`^aJ^aZ\_R\_GYTa`N\_]G¥^\_]BBBB  
@HWI-EAS443:3:11:1488:927#0/1  
CCGGAATGGATCCCAGAANGTGTCTCTAATGCAAGGTTTC  
+HWI-EAS443:3:11:1488:927#0/1  
abbbbbbbba`^]aaaYD]ababababaaaa`a\_aaYa`  
@HWI-EAS443:3:19:1647:351#0/1  
GCATCCCAGTGCTNGGAAGGACCCTAAGAAAGCAGGAGGA  
+HWI-EAS443:3:19:1647:351#0/1  
a[UZ]¥YVaQ\_RODPNVP[ORRNTVSKZ¥[S^Q¥¥TGTUV  
@HWI-EAS443:3:31:1230:1017#0/1  
ATGACTTTGAAAGGAAGGGTACTNACTGGGCGGGATAGA  
+HWI-EAS443:3:31:1230:1017#0/1  
\_¥¥`abbaaaa^bba\_]R\_ZFP^LDWO[aYF[Ya\_NS[aU  
@HWI-EAS443:3:33:744:266#0/1  
TGCACATTTGGATGTAGAATCTCCCGATTNCAACAATCAT  
+HWI-EAS443:3:33:744:266#0/1  
Z[^b`b`a^\_LY^a\_a`^ZV[S^¥`X[\_ZDX]YOZUDHXU  
@HWI-EAS443:3:70:988:787#0/1  
CCAGAAAACGCTGAGATTGAAGACCTCATTTNCCTGGCAC  
+HWI-EAS443:3:70:988:787#0/1  
ababaabbabababbaabb`¥\_aaab]aab^DTZa]]\_a`  
@HWI-EAS443:3:97:1023:1158#0/1  
GAGGGGCGAAAATGGACGAAGGNCAAGGGTTGCTTATGAA  
+HWI-EAS443:3:97:1023:1158#0/1  
aab\_aaGaRUPUP¥a]a\_RYaUDR^`U`G[\_Z\_V]Q]\_]\_  
@HWI-EAS443:3:47:1217:1140#0/1  
GCTGGGTTTTCATTTGGTCTCATCAGGCTGACACTTGGCT  
+HWI-EAS443:3:47:1217:1140#0/1  
aaaaa\_N\_aaa\_\_\_\_`XX\_`[^a^\_\_\_\_^\_`^[TKP¥BBBB  
@HWI-EAS443:3:92:1358:403#0/1  
GACTTTGAAAGGAAGGGTACTCACTGTCCGGATAGACCC  
+HWI-EAS443:3:92:1358:403#0/1  
ab^abbbbaabaabbab¥a`aab`bb\_aaba\_``aYFW\_  
@HWI-EAS443:3:14:1193:291#0/1  
CCCCATCAGAATGAGTGCTGACCGTGCCAGGAAAATGAG  
+HWI-EAS443:3:14:1193:291#0/1  
aaaaW`aaaa[\_`L`V`XW]^P\_`O^[[^]`[\_¥¥[aX[



@HWI-EAS443:3:33:1419:1863#0/1  
CGCTGAGATTGAAGACCTCATTTTCCTGGCACGGACAGAA  
+HWI-EAS443:3:33:1419:1863#0/1  
^b^`abV\_XWZa\_U¥bb^`abaaSa`^aaab[S¥G¥``GL  
@HWI-EAS443:3:39:65:200#0/1  
TGGTCAGCCTGATGAGACCAAATGAAAACCCAGCCAGAGA  
+HWI-EAS443:3:39:65:200#0/1  
\_`babbbbbbba````aaaab\_L^aabbbaaaab`Zaaba  
@HWI-EAS443:3:47:1665:11#0/1  
ATCCAGAATAGCATAACAATAGAGAGGATGGTGCNTNCTG  
+HWI-EAS443:3:47:1665:11#0/1  
aa`aaa`b]b\_a`````\_a]`[`[aa¥W¥NMXTDZDDSR  
@HWI-EAS443:3:47:186:719#0/1  
CGATACGGTCCTCCTGTTTTCTTAGGGTCCTTCCCAGCAC  
+HWI-EAS443:3:47:186:719#0/1  
aabbbaa`aQaa\_\_a]¥)`aaV`X^^[P\_`\_Ya\_`YRY^Z  
@HWI-EAS443:3:52:650:698#0/1  
GAGAGAAGAAAAGCACCATCCTCTCTATTGTTATGCTATTC  
+HWI-EAS443:3:52:650:698#0/1  
\_`bXa^a[HYXZa\_[^]YR]`[`]\_\_`^X[\_]SVa\_`]]  
@HWI-EAS443:3:56:78:439#0/1  
CATAATCACTGAGTTTGAGTTCAGTGCACATTTGATGTAG  
+HWI-EAS443:3:56:78:439#0/1  
PR\_a\_Z\_Y¥b\_V^abaZW]aaYZb\_aa]``\_[]`^[^V[]  
@HWI-EAS443:3:86:1363:519#0/1  
GCGCCAAGCAAACANTGGCGAAGATGCAACAGCAGGTGTT  
+HWI-EAS443:3:86:1363:519#0/1  
Y¥\_a`abbbbaa^DSab¥baaaa`aa]a`a`¥aaaQF[`  
@HWI-EAS443:3:11:1789:1654#0/1  
ACGGGTCCTCCTGTTTTATTAGGGTCCTTCCCAGCACTGG  
+HWI-EAS443:3:11:1789:1654#0/1  
\_`b^^SHaaVbUa`^ZbGaaZBBBBBBBBBBBBBBBBBBB  
@HWI-EAS443:3:12:1597:1646#0/1  
ACGGGGAGCGCCAGGATGCCACAGAAAGCAGAGCATCTGT  
+HWI-EAS443:3:12:1597:1646#0/1  
T]QY]`¥``aJSZaaXGaTN¥V`a`XHIUXbVaJV¥G]ZB  
@HWI-EAS443:3:35:1487:1400#0/1  
GAGGTCCTCCTGTTCTCTTAGGGTCCTTCCCAGCACTGGG  
+HWI-EAS443:3:35:1487:1400#0/1  
Z^``¥bbbaaabbab`Z`a]W^aaabbaab^Ya`Xa  
@HWI-EAS443:3:51:1178:722#0/1  
CCGGGTCCTCCTGTCTTCTTAGGGTCCTTCCCAGCACTGG  
+HWI-EAS443:3:51:1178:722#0/1  
aaabbabbb`abba\_`babbbab^`abbb`aaaaa`bb]  
@HWI-EAS443:3:55:1237:377#0/1  
CGGGCAGGCAGGATTTATGTGCAACTGATCCTCTCAGAAT  
+HWI-EAS443:3:55:1237:377#0/1  
[\_`bTbb`bbbaabbb`baab`bb\_bbbbab\_ba\_ba\_b  
@HWI-EAS443:3:55:714:930#0/1  
GNCGAAGATGCGACAGCAGGTCTTACTCATATCATGATTT

+HWI-EAS443:3:55:714:930#0/1  
¥DZ\_[aaa`a]Va\_\_a[ZYYZ\_^`^^X`\_``\_[aa\_\_^\_  
@HWI-EAS443:3:1:1052:1514#0/1  
CAGCCCCATTGCTATTGTTCCAACCTCTTTCACCGCAGCA  
+HWI-EAS443:3:1:1052:1514#0/1  
`ab`ba¥b\_\_bab`aaaWbZXbXaaa]b\_``a`^aMa`\_B  
@HWI-EAS443:3:22:523:1648#0/1  
CAAACCTCAGTGCACATTTGGATGTAGAATCTCCCGATTCC  
+HWI-EAS443:3:22:523:1648#0/1  
aa^`\_YaaYEWbaaaa]N]Z¥Z\_UVS`^^TXZSX\_Y]LP`  
@HWI-EAS443:3:26:826:349#0/1  
GATCCATTCAAATTACTCCAAAACAGCCAAGTGGTCAGAG  
+HWI-EAS443:3:26:826:349#0/1  
¥TMZ¥I[abbWa¥W\_Zb¥aaaIb`\_a`Zb`¥\_U^YQa\_GW  
@HWI-EAS443:3:31:1120:1494#0/1  
CAAGTGGTCAGCCTGATGAGACCAAATGAAAACCCCGCAGC  
+HWI-EAS443:3:31:1120:1494#0/1  
aba`U``[¥^Z`W\_\_[^`a\_[\_`\_`V`^`^`\_[]a]\_T  
@HWI-EAS443:3:60:1417:569#0/1  
ACGCGGAGCGCCAGGATGCCACAGAAATCAGAGCATCTGA  
+HWI-EAS443:3:60:1417:569#0/1  
\_O[MTKU¥]a`Q¥]\_U[XPXZZ¥X[Z^[¥¥UJWPQZP¥¥P  
@HWI-EAS443:3:76:1136:623#0/1  
ATGGATCAAGTAAGAGAAAGTCGAAACCCAGGAAAAGATG  
+HWI-EAS443:3:76:1136:623#0/1  
a]\_a[aa`^^]`\_]YUYa`\_^RG]¥NBBBBBBBBBBBBBB  
@HWI-EAS443:3:85:729:513#0/1  
CAAACCTCAGTGCACATTTGGATGTAGAATCTCCCGATTCC  
+HWI-EAS443:3:85:729:513#0/1  
a`X[babab[\_a`bXbbabXa`aVa]`Y^a`\_]\_SX]a``  
@HWI-EAS443:3:85:731:1855#0/1  
CGCCAAGCAAACAATGGCGAAGATGCAACAGCAGGACCTA  
+HWI-EAS443:3:85:731:1855#0/1  
ab\_`a[TbaJaHW]YY`JT^]Z`Z\_N\_a0aYT\_GJUJJ¥^  
@HWI-EAS443:3:90:767:1060#0/1  
CAAACCTCAGTGCACATTTGGATGTAGAATCTCCCGATTCC  
+HWI-EAS443:3:90:767:1060#0/1  
Y[RU\_Z\_^`aYZ¥bb¥¥]`ZabODYQGUJ\_G¥^a`¥VZZX  
@HWI-EAS443:3:91:250:784#0/1  
AGGACCCTAAGAAAACAGGAGGCCATATATAGAGAGAC  
+HWI-EAS443:3:91:250:784#0/1  
a]`\_aa`bV`b``a^a^`\_aa]\_^aa\_a`a`\_[a^`\_Z  
@HWI-EAS443:3:50:1402:1191#0/1  
GAGGGGATCAGTTGCACATAAATCCTGCCTGCCTNCTTAG  
+HWI-EAS443:3:50:1402:1191#0/1  
aaabVbba^YbZab`a]a`bbba`Q`¥SZ[aaWPDPa\_¥Q  
@HWI-EAS443:3:79:1433:1275#0/1  
ACCCCGACCAGTGAAGTACCCTTCCCTTTCAAAGTCNTGCC  
+HWI-EAS443:3:79:1433:1275#0/1  
a¥PU`U]aU\_bGaZN¥a^GVa\_Z^`^a^Ua]^]KQDX^FJ

@HWI-EAS443:3:15:1522:780#0/1  
AAGAGCGCTTGATCGCACCGGAATGGATCCCAGAATGTGT  
+HWI-EAS443:3:15:1522:780#0/1  
[\_b\_\_abab^¥IZI`aaY`Z\_LV^\_aYUXRX\_\_XY`a¥aZ  
@HWI-EAS443:3:17:1401:1403#0/1  
TTGGGTCCTCCTGTTTTCTTAGGGCCCTTCCCAGCACTGG  
+HWI-EAS443:3:17:1401:1403#0/1  
`^^^aX`Zba]^]MOX`ZYYaWXWFSYXMX]TPOILLTZP  
@HWI-EAS443:3:24:650:776#0/1  
GTCGGAAGAATGATTGGTGAATCGGGAGATTCCACATCT  
+HWI-EAS443:3:24:650:776#0/1  
a\_aaa```aa`^\_\_a\_U\_\_\_\_\_^\_\_`^Z^¥[¥`^]]Y  
@HWI-EAS443:3:52:955:1699#0/1  
ATCAGTTGCACGTAAATCCTGCCTGCCTGCTGTGTGTAG  
+HWI-EAS443:3:52:955:1699#0/1  
`bYWRH¥IZ[[NN]PXXVKQ^WYYBBBBBBBBBBBBBBBB  
@HWI-EAS443:3:60:454:191#0/1  
AGCTTGTTTCGCACCGGAATGGATCCCAGAATGTGTTCTCT  
+HWI-EAS443:3:60:454:191#0/1  
K\_bYY[aYIXZ¥\_Zab\_]`K]aQWU¥\_WGO]XF¥FWZXT¥  
@HWI-EAS443:3:6:770:664#0/1  
GGGTTTTCATTTGGTCTCATCAGGATGACCACTTGGCTGG  
+HWI-EAS443:3:6:770:664#0/1  
\_¥Y`YRY`]Z[PZS][Z]^U\_TKGW\_VaWTP[\_BBBBBB  
@HWI-EAS443:3:76:1171:304#0/1  
TGCTGGGTTTTCATTTGGACTCATCAGGCTGACCACTTGG  
+HWI-EAS443:3:76:1171:304#0/1  
ab\_abbbaaaa`aaaaab[aa`a`^`aa\_\_aW\_Z]U`]aa  
@HWI-EAS443:3:79:1292:792#0/1  
ATTACTCCAAAACAGCCAAGTGGTCAGCCTGATAAGACCT  
+HWI-EAS443:3:79:1292:792#0/1  
abaaaba`baaaaaab^a]a^a^[aaa`\_aa`a\_\_a`^\_a  
@HWI-EAS443:3:82:1550:938#0/1  
GCCCTTTCCTTTCAAAGTCATGCCCACTTGCTACTGCAAG  
+HWI-EAS443:3:82:1550:938#0/1  
`b^``bb\_X`bba`\_`bbSba^^SPa\_bbbab\_P^a]a`a  
@HWI-EAS443:3:86:191:1056#0/1  
GCTGGGTCCTCATTGGTCTCATCAGGCTGACCACTTGGG  
+HWI-EAS443:3:86:191:1056#0/1  
a`URG¥QPYPaT\_¥KSNYL VU[P^Y\_TZBBBBBBBBBBBB  
@HWI-EAS443:3:91:1606:588#0/1  
GATCATAATCAGTGAGTTTGAGTTCAGTGCACATTTGGAT  
+HWI-EAS443:3:91:1606:588#0/1  
W`R¥a[\_bV\_H\_W^b````a\_abY`b\_]L]T\_a¥abaaB  
@HWI-EAS443:3:92:508:1466#0/1  
ACGCTTGTTTCGCACCGGAATGGATCCCAGAATGTGTTCTC  
+HWI-EAS443:3:92:508:1466#0/1  
aa\_aaaaX\_X`a\_\_\_\_\_^WZ\_\_¥\_U\_]X\_]U]]Y¥  
@HWI-EAS443:3:100:426:679#0/1  
AGCGCTTGTTTCGCACCGGAATGGATCCCAGAATGTGTTCT

+HWI-EAS443:3:100:426:679#0/1  
`aaaaaVba\_Vbba`Zaaaa\_\_a^a^]U`\_\_¥`a\_aQ\_T\_  
@HWI-EAS443:3:100:803:1603#0/1  
AGCGCTTGTTCGCACCGGAATGGATCCCAGAATGTGTTCT  
+HWI-EAS443:3:100:803:1603#0/1  
a\_``\_aaa¥aa``^Za`a``\_a`W]W\_XZV\_\_W^^¥TB  
@HWI-EAS443:3:10:1785:90#0/1  
GACTAATCCAGAATAGCATAACAATAGAGAGGATGGGGCT  
+HWI-EAS443:3:10:1785:90#0/1  
a^)\_`\_]PNZa]Y\_]UR[`Y]HZY[W]W]Y¥WW[ZWWBBB  
@HWI-EAS443:3:13:1572:281#0/1  
GTTGCATCTTCGCCATTGTTTGCTTGGCGCCAAACTATCC  
+HWI-EAS443:3:13:1572:281#0/1  
`\_a]S\_XXaa`W\_¥\_V]Q¥`¥[ZX^)`YW¥^S[TRXXWRX  
@HWI-EAS443:3:18:1235:1564#0/1  
AGAACACATTCTGGGATCCATTCCGGTGCGAACAAGCGCT  
+HWI-EAS443:3:18:1235:1564#0/1  
[]V]V`b\_a\_a[aV`JV[Y`¥^`¥[\_Ga`\_\_a\_\_W\_Z^W  
@HWI-EAS443:3:21:588:1147#0/1  
TCCAGAATAGCATAACAATAGAGAGGATGGTGCTTTTTGC  
+HWI-EAS443:3:21:588:1147#0/1  
R`bVWWK`V]baY^b^Yb`abb^W\_ab]UVGY`aa¥D¥YV  
@HWI-EAS443:3:22:684:1972#0/1  
GGAGAGTTTGGCGCCAAGCAAACAATGGCGAAGATGTAAC  
+HWI-EAS443:3:22:684:1972#0/1  
ab``aa]a\_a\_aZ\_VZ\_RZ\_aVG^aU[UG]\_X]^H[X]\_U  
@HWI-EAS443:3:34:739:1826#0/1  
ATTGGTCTCTCTGTTTTCTTAGGGTCTTCCCAGCAATGG  
+HWI-EAS443:3:34:739:1826#0/1  
`a`X[JZaaaa\_Z`a`H`S^\_N^`\_][Y`BBBBBBBB  
@HWI-EAS443:3:35:248:1397#0/1  
AGCGCTTGTTCGCACCGGAATGGATCCCAGAATGTGTTCT  
+HWI-EAS443:3:35:248:1397#0/1  
]\_a`aba^ZaaZabbbaa`]\_]\_a`ab]XZ]Z]YNY[QQY  
@HWI-EAS443:3:40:591:1038#0/1  
ATTGGTGAATCGGGAGATTCTACATCCAAATGTGCCCTA  
+HWI-EAS443:3:40:591:1038#0/1  
abaaa\_aaaa\_aaaaWaaaa`aaaa\_\_`V¥[^\_W¥aa\_\_a  
@HWI-EAS443:3:43:717:266#0/1  
AGGTTCAACTTCCCAGAAGTCTGGTGCCGCAGGCGCT  
+HWI-EAS443:3:43:717:266#0/1  
aab^abbba`aa`aaa`b^\_baW\_baaZa]\_\_^^`¥bXTW  
@HWI-EAS443:3:47:877:1013#0/1  
AGAACACATTCTGGGATCCATTCCGGTGCGAACAAGCGCT  
+HWI-EAS443:3:47:877:1013#0/1  
\_`[a]b^Raa`[]aa`Z\_Y\_\_`\_Ha\_Q\_\_a¥`¥^[US\_UY  
@HWI-EAS443:3:51:535:1341#0/1  
GTGGTTTCTGCTTTTGATGAGAGAAGAAATAAATACCTAG  
+HWI-EAS443:3:51:535:1341#0/1  
a`[G¥aaa`]aaaa`aa\_a``aaa`a``a````\_a`

@HWI-EAS443:3:52:1510:2007#0/1  
GGTGCTTTCTGCTTTTGATGAGAGAAGAAATAAATAGCTA  
+HWI-EAS443:3:52:1510:2007#0/1  
U]F]`¥]U[bYb`X¥Sa`aUYT`K\_]`¥\_aa`b`HDZb  
@HWI-EAS443:3:52:59:522#0/1  
AGCGCTTGTTTCGCACCGAATGGATCCCAGAATGTGTTCT  
+HWI-EAS443:3:52:59:522#0/1  
aaaaaaaaa`a`a`abb^\_\_aaa\_\_\_^Z^^[`aYa¥^T]  
@HWI-EAS443:3:54:759:918#0/1  
AAGAATGTGGCATCATTGAGTTGGAATGCCAAATCATGA  
+HWI-EAS443:3:54:759:918#0/1  
`^bbbaaab`bbabbbbab`a]]\_aab\_a\_Q]aa\_ab`  
@HWI-EAS443:3:56:1090:638#0/1  
TGCTTTCTGCTTTTGATGAGAGAAGAAATAAATACCATGA  
+HWI-EAS443:3:56:1090:638#0/1  
aa¥`]^`[^`^`^`]]a`aaaVaa[``]b\_Y]\_VWaab`  
@HWI-EAS443:3:59:1576:815#0/1  
CCTGTTTTCTTAGGGTCCTTCCCAGCACTGGGATGCCCTT  
+HWI-EAS443:3:59:1576:815#0/1  
¥]\_b`b[Yb]a`\_]Sa`a`aQ¥XaaBBBBBBBBBBBBB  
@HWI-EAS443:3:59:1605:975#0/1  
GACTTTGAAAGGAAGGGTACTCACTGGTCGGGATATACC  
+HWI-EAS443:3:59:1605:975#0/1  
Vbabbabaa[Z[a`b`a]Xbbbbbbbaa\_b`S``bYG\_]\_  
@HWI-EAS443:3:59:228:1373#0/1  
GGTGCTTTCTGCTTTTGATGAGAGAAGAAATAAATAGCTA  
+HWI-EAS443:3:59:228:1373#0/1  
`b`\_ba`aabbba\_b``bb`bbbaaa\_bbbbabbZG`aa  
@HWI-EAS443:3:59:793:336#0/1  
ATCATAATCACTGAGTTTGAGTTCAGTGCACATTTGTATG  
+HWI-EAS443:3:59:793:336#0/1  
^^`IV\_]Y\_abba\_^`ab¥¥aabbbaaaaa\_YX¥]GXYX  
@HWI-EAS443:3:59:863:389#0/1  
CACTTGGCTGTTTTGGAGTAATTTGAATGGGTCTATACCG  
+HWI-EAS443:3:59:863:389#0/1  
abbb^a¥a^^T\_a`Ya¥aUZ^N]`JY\_QR^b00[]MDWTK  
@HWI-EAS443:3:61:114:959#0/1  
CACTTCCCAGAAGGTCTGGTGCCGCAGGTGCTGCGGGGAA  
+HWI-EAS443:3:61:114:959#0/1  
^ababababbbbab\_baba`baaaaaaUP¥TZPQQYETMP  
@HWI-EAS443:3:61:1670:1994#0/1  
GCAGCATCTCTCTATTGTTATGCTATTCTGGATTAGTCG  
+HWI-EAS443:3:61:1670:1994#0/1  
[P]IYaa\_ZbaaVa^bb)`[bba\_ZV\_XN[Z\_UXTV`TEL  
@HWI-EAS443:3:62:1264:443#0/1  
AGCGCTTGTTTCGCACCGAATGGATCCCAGAATGTGTTCT  
+HWI-EAS443:3:62:1264:443#0/1  
aa\_X]]aa^`^Y\_^^^a^`\_\_^^XQQSZ¥`\_Z\_^^^Z  
@HWI-EAS443:3:62:649:323#0/1  
AGCCGGCAGGCAGGATTTATGTGCAACTGATCCCCTCAGA

+HWI-EAS443:3:62:649:323#0/1  
XVM¥ZZ\_R\_]`[aa]ZX)`RW¥¥Y^R^aa`HZ\_^¥VW]aa  
@HWI-EAS443:3:63:475:1096#0/1  
CTCGTTCTGAGGGGATCAGTTGCACATAAAATCCTGCCTGC  
+HWI-EAS443:3:63:475:1096#0/1  
[^UGV^a`\_[Q\_¥PXWZT¥^baXaX`\_b]WP^\_Q\_[]`aa  
@HWI-EAS443:3:64:681:646#0/1  
AGCGCTTGTTTCGCACCGGAATGGATCCCAGAATGTGTTCT  
+HWI-EAS443:3:64:681:646#0/1  
\_]ab`])`b`a`baa¥ZZTY\_a`aX[a`^XX^VFT]¥S¥  
@HWI-EAS443:3:67:437:1571#0/1  
AGCGCTTGTTTCGCACCGGAATGGATCCCAGAATGTGTTCT  
+HWI-EAS443:3:67:437:1571#0/1  
a\_aYa`a¥`b\_aa^a^a[a\_`W^W\_`^¥S¥¥¥S[¥[WU  
@HWI-EAS443:3:68:902:1538#0/1  
CAAGTGGTCAGCCTGATGAGACCAAATGAAAACCCAAGGC  
+HWI-EAS443:3:68:902:1538#0/1  
ab^a¥`aYa\_`^]aa`aa\_\_\_^`aaa^Y\_aa`\_[¥\_`\_^¥  
@HWI-EAS443:3:72:801:223#0/1  
TTTGGTCTCATCAGGCTGACCACTTGGCTGTTTTGGTGAA  
+HWI-EAS443:3:72:801:223#0/1  
[OS\_OHMK]a`)]\_\_YK[TLTX^^QFWBBBBBBBBBBBBBB  
@HWI-EAS443:3:73:1108:1733#0/1  
AGCGCTTGTTTCGCACCGGAATGGATCCCAGAATGTGTTCT  
+HWI-EAS443:3:73:1108:1733#0/1  
a[aUaa^a]^`^`bb^\_[\_W]\_Y\_`^`^U\_aX\_UX[^]`  
@HWI-EAS443:3:73:444:259#0/1  
GATGCCACATATCAGAGAACAAGAGCGCTTGTTCGCGCCG  
+HWI-EAS443:3:73:444:259#0/1  
`TY¥^aXVT[]`[QY]TWEKMWQLP^^NNTZFRTBBBBBB  
@HWI-EAS443:3:74:331:179#0/1  
AGCGCTTGTTTCGCACCGGAATGGATCCCAGAATGTGTTCT  
+HWI-EAS443:3:74:331:179#0/1  
aaaaaa]a[``aaa`Va^^¥^\_Y]^[^YRRVZ[^RWPUSS  
@HWI-EAS443:3:78:930:1702#0/1  
AGCGCTTGTTTCGCACCGGAATGGATCCCAGAATGTGTTCT  
+HWI-EAS443:3:78:930:1702#0/1  
a`a\_\_aa^Z])a`a`a`\_`Z¥WY]SYZ\_[`^^\_WXU\_\_]  
@HWI-EAS443:3:7:1404:912#0/1  
AGCGCTTGTTTCGCACCGGAATGGATCCCAGAATGTGTTCT  
+HWI-EAS443:3:7:1404:912#0/1  
]babb^H\_aba[b[a]`bbbb`aSaX¥¥bY\_ba\_[\_[L\_  
@HWI-EAS443:3:80:733:26#0/1  
AGCGCTTGTTTCGCACCGGAATGGATCCCAGAATGTGTTCT  
+HWI-EAS443:3:80:733:26#0/1  
XR\_ZX`b[¥`ZXV[aaSa\_a\_^`SZ`¥Z¥YSZZ^^U  
@HWI-EAS443:3:80:760:1924#0/1  
CTGATTTGGAGTAATTTGAATGGGTCTATCCCGACCAGTG  
+HWI-EAS443:3:80:760:1924#0/1  
a`b¥abb[ab`\_bba\_¥]\_`aaa\_S`aa`[``aa¥a\_]W

@HWI-EAS443:3:84:872:521#0/1  
TTTTGGTCTCATCAGGCTGACCACTTGGCTGTTTTGGGGTA  
+HWI-EAS443:3:84:872:521#0/1  
aaaaaX^aa`aba^^]`a¥`\_`^`aaaa^LS[¥BBBBBB  
@HWI-EAS443:3:85:1055:541#0/1  
CGCGATATCCTCAAAGGAAAATTTCAAACAGCTGCCAGA  
+HWI-EAS443:3:85:1055:541#0/1  
ababbbabbababbbb]bababbbaaa\_`ab``ba\_\_`a^  
@HWI-EAS443:3:85:359:886#0/1  
GAGCAAGACCTGCTGTTGCATCTTCGCCATTGTTTGCTTG  
+HWI-EAS443:3:85:359:886#0/1  
aa\_aZ\_\_a\_`^aaaaQ\_ZYRMM^\_VU^`¥¥^IU\_\_FONU  
@HWI-EAS443:3:88:1352:893#0/1  
AGCGCTTGTTTCGCACCGAATGGATCCCAGAATGTGTTCT  
+HWI-EAS443:3:88:1352:893#0/1  
a``\_OZ^W`aU`] []ZabY^^\_a¥¥VY`¥^U[a¥`` [ `N]  
@HWI-EAS443:3:93:826:920#0/1  
AGCGCTTGTTTCGCACCGAATGGATCCCAGAATGTGTTCT  
+HWI-EAS443:3:93:826:920#0/1  
a¥a]`^¥a^]a\_]``aaa¥Y]\_```Z\_ZVXZ```V\_Y¥^a  
@HWI-EAS443:3:94:148:367#0/1  
GGCCGACTTTGAAAGGGAAGGGTACTCACTGGTCGGGATA  
+HWI-EAS443:3:94:148:367#0/1  
¥babb`b`abbaaU\_]babbbbZa\_abaaba[aaba\_\_a  
@HWI-EAS443:3:95:601:818#0/1  
AGCGCTTGTTTCGCACCGAATGGATCCCAGAATGTGTTCT  
+HWI-EAS443:3:95:601:818#0/1  
aa`VZbbbV\_]ba`\_a`\_a\_a¥a[ `Y^X` `U¥`ba`\_`\_\_  
@HWI-EAS443:3:99:127:1133#0/1  
ATCGGGGTTTCGACTTTCTTACTTGATCCATCATTGCC  
+HWI-EAS443:3:99:127:1133#0/1  
M\_^bbaa]a`abb^ba`T`b`a^`baa^bbaVa`U[Q^¥X  
@HWI-EAS443:3:9:1164:960#0/1  
GTGGTTTCTGCTTTTGATGAGAGAAGAAATAAATACCTAG  
+HWI-EAS443:3:9:1164:960#0/1  
a\_¥Y^aa\_a^\_aaaa`aa\_`\_`\_`a`a`aaa```X]¥a\_  
@HWI-EAS443:3:9:952:649#0/1  
TCCAGAATAGCATAACAATAGAGAGGATGGTGCTTTGTGG  
+HWI-EAS443:3:9:952:649#0/1  
^ab^bTVS[\_S\_¥XXRX¥baVW]IbZXUaUGS[\_aUDIOK  
@HWI-EAS443:3:32:1128:849#0/1  
CATGGTCTCCTGTTTTCTTAGGGTCTTCCCAGCNCTG  
+HWI-EAS443:3:32:1128:849#0/1  
a^ab[[ZW`]W]ab¥Q¥][a¥]aXVP]a`[\_`\_R` [DOZa  
@HWI-EAS443:3:55:838:1582#0/1  
CGGGCATGACTTTGAAAGGNAAGGGTACTCACTGGTCGGG  
+HWI-EAS443:3:55:838:1582#0/1  
abb`abbabbbbbbab[DZbbbb\_babbbaab[ `bbbb  
@HWI-EAS443:3:100:480:1524#0/1  
ACTTCCCAGAAGGTCTGGTGCCGAGGTGCTGCGGGGAAA

+HWI-EAS443:3:100:480:1524#0/1  
`a¥X` [ ` [a¥]¥\_\_^`Z`^`aR\_\_¥R¥[XTS¥^BBBBB  
@HWI-EAS443:3:100:518:1025#0/1  
ATCCCCTCAGAATGAGTGCTGACGGTGCCAGGAAAATGAG  
+HWI-EAS443:3:100:518:1025#0/1  
SP`X\_ba`YU[X[`¥PHbaaaRUP^G^a\_\_]\_\_a]]aU`  
@HWI-EAS443:3:100:806:1688#0/1  
GTCGGAAGAATGATTGATGGAATCGGGAGATTCTACATCC  
+HWI-EAS443:3:100:806:1688#0/1  
`ZaaaGSa\_` `aX[¥a\_Q\_[XXUKbZ\_ZZSYZWOWOX^BB  
@HWI-EAS443:3:100:823:1472#0/1  
ATAGAGAGGATGGGGCTTTCTGCTTTTGATGAGAGAAGAA  
+HWI-EAS443:3:100:823:1472#0/1  
Y¥`¥` `a`bab¥b00ZJab\_\_b[0\_a`¥]a`W[`Y` `a`  
@HWI-EAS443:3:10:1110:1129#0/1  
TGACCGTGCCAGGAAAATGAGGCCTTCAATCTCAGCGTTT  
+HWI-EAS443:3:10:1110:1129#0/1  
aZ^¥Qa` `][\_`\_^[U¥\_\_[XTGQ^\_\_`^¥NXU\_VR\_W[R  
@HWI-EAS443:3:11:337:1519#0/1  
CTAATCCAGAATAGCATAACAATAGAGAGGATGGAGCTTT  
+HWI-EAS443:3:11:337:1519#0/1  
X`b`¥bab¥aU¥`^a\_\_babbbba^`bb^[aYa]D^`a`b  
@HWI-EAS443:3:11:872:1497#0/1  
CGACCAGTGAGTACCCTTCCCTTTCAAAGTCATGCGCACT  
+HWI-EAS443:3:11:872:1497#0/1  
V`b`¥SZ[¥abWI`¥`^a^TWa\_\_`]ab]WWa\_aTDNS[U  
@HWI-EAS443:3:12:1641:207#0/1  
CTCTCATCAAAAAGCAGAAAGGACCATCCTCTCTATTGTTA  
+HWI-EAS443:3:12:1641:207#0/1  
YQQ\_bab]]TX\_¥TY0^abVNRYOYZ[GylU[][^Y`QYU  
@HWI-EAS443:3:12:191:488#0/1  
CTTCCCTTTCAAAGTCATCCCCACTTGCTACTGCAAGCCC  
+HWI-EAS443:3:12:191:488#0/1  
aaabbaaaaaaab^aa`P^aa\_aa¥aa` ` `]a`¥\_VS¥  
@HWI-EAS443:3:14:1324:1245#0/1  
GGGGAGCGCCAGGATGCCACAGGAATCAGAGCATCTGTGCG  
+HWI-EAS443:3:14:1324:1245#0/1  
¥]`\_ZZ\_a^TV¥T\_Y[S`[XZ]HZTY^YVX¥NS[JGZQLB  
@HWI-EAS443:3:14:148:1388#0/1  
GTCGGAAGAATGATCGGTGGAATCGGGAGATTCTACATCC  
+HWI-EAS443:3:14:148:1388#0/1  
a¥¥`\_a]abbaaa`UX^W¥]\_` ` `\_\_^\_\_U\_\_[^US]]  
@HWI-EAS443:3:15:1150:1207#0/1  
CACGGTCAGCACTCATTCTGAGGGGATCAGTCGCACATAA  
+HWI-EAS443:3:15:1150:1207#0/1  
X`ab`XT¥[[OR[a` ` `b` `a`T]WR\_Z¥bOFMW\_]b]^R  
@HWI-EAS443:3:15:1419:634#0/1  
TGTTGCATCTTCGCCATTGTTTGCTTGCGGACAACTCTC  
+HWI-EAS443:3:15:1419:634#0/1  
]aZZ`¥` `SSabTX]NY^`S\_a\_SS]RW\_YJI]^FHS\_P



@HWI-EAS443:3:15:1496:1768#0/1  
CTGCTGTTGCATCTTCGCCATTGTTTGATTGGCGCCAAAC  
+HWI-EAS443:3:15:1496:1768#0/1  
a]b^Q\_SS^IPRO^V[a]S]abaTWY^JN]^\_QV^RaVWD  
@HWI-EAS443:3:15:450:790#0/1  
CTCCATTGCTATTGTTCCAGCTCCTTTCACCGCAGCACCT  
+HWI-EAS443:3:15:450:790#0/1  
Z\_I[bbbb\_`bbZb` `abXTV]aababbabaa\_abaaaa^  
@HWI-EAS443:3:15:554:1120#0/1  
ACTTCCCAGAAGGTCTGGTGCCGAGGTGCTGCGGGGAAA  
+HWI-EAS443:3:15:554:1120#0/1  
abZa`a\_] ^U]YS[]`]G¥` `¥Y`VPP\_VMX^¥GXNPY  
@HWI-EAS443:3:16:1375:1413#0/1  
CTAATCCAGAATAGCATAACAATAGAGAGGATGGGGCTTT  
+HWI-EAS443:3:16:1375:1413#0/1  
abbbbaababbbabbbbbbba`babaa`bababaG\_\_`aa  
@HWI-EAS443:3:16:1757:293#0/1  
GTGGAATCGGGAGATTCTACATCCAAATGTGCGCTGAACT  
+HWI-EAS443:3:16:1757:293#0/1  
`^]\_aa`F¥b¥Q`\_`\_`\_[Y\_¥]XVRY[UaJFQZ]^MBB  
@HWI-EAS443:3:16:677:114#0/1  
ATGGGCTTACAGTAGCAAGTGGGCATGACTTTGAAAGGGA  
+HWI-EAS443:3:16:677:114#0/1  
aaaabaa`G¥`a¥aaaa\_a^`aa` `a`^¥a`\_U¥^`^`Z  
@HWI-EAS443:3:16:706:1790#0/1  
CTTCGCCATTGTTTGCTTGGCGCCAAACTGTCCTTATTTTC  
+HWI-EAS443:3:16:706:1790#0/1  
abba]Xa^¥a` `\_] [^XU¥¥a[JSY¥]TTFX] []¥O[[^X  
@HWI-EAS443:3:16:902:930#0/1  
GCATTAGAGAACACATTCTGGGATCCATTCCGGTGCGAAC  
+HWI-EAS443:3:16:902:930#0/1  
aaabaaaaaaaaabaaaaa`\_`]a`a\_\_`a\_aa`¥\_\_\_\_\_¥  
@HWI-EAS443:3:17:1749:1317#0/1  
GTTCGCACCGGAATGGATCCCAGAATGTGTTCTCTAATGC  
+HWI-EAS443:3:17:1749:1317#0/1  
\_\_]Za` `] ` `QYVYUYPWYMF^R]VZN]RZ¥MDMXLSVB  
@HWI-EAS443:3:17:210:951#0/1  
CAGAAGGTCTGGTGCCGAGGTGCTGCGGTGCAAGGAGTT  
+HWI-EAS443:3:17:210:951#0/1  
a`bTJ]aM`ab^Ma]^¥W^`ZW\_^^`Q`GMDD`Y^UUW\_  
@HWI-EAS443:3:17:491:995#0/1  
GTCTCATCAGGCTGACCACTTGGCTGTTTTGGAGCAATTT  
+HWI-EAS443:3:17:491:995#0/1  
a` `a]\_aaYV`a` `aaa\_\_aa]^`^XDL`]UOYWOR]GT[  
@HWI-EAS443:3:18:1016:969#0/1  
TAATCACTGAGATTGAGTTCAGTGCACATTTGGATGTAGA  
+HWI-EAS443:3:18:1016:969#0/1  
`ZY^UQ]b¥¥XGaa¥VaaabTY^R\_a]XaX¥VITQaSPT¥  
@HWI-EAS443:3:18:1289:977#0/1  
CTAATCCAGAATAGCATAACAATAGAGAGGATGGGGCTTT

+HWI-EAS443:3:18:1289:977#0/1  
aaWabbabaaa`X^[ZaZ[JT[`SWL\_Ta^Y\_\_BBBBBBB  
@HWI-EAS443:3:18:778:1408#0/1  
CAATAGAGAGGATGGGGCTTTCTGCTTTTGATGAGAGAAG  
+HWI-EAS443:3:18:778:1408#0/1  
^`Zb`abaabb`ZF¥ba`\_a¥SQ^aa`PX¥W]^`[\_a\_  
@HWI-EAS443:3:19:1217:819#0/1  
GCACATTTTGATGTAGAATCTCCCGATTCCACCAATCATT  
+HWI-EAS443:3:19:1217:819#0/1  
aa`[\_`bba]abaa]aaaa\_a``¥]^a`\_a`[\_`a\_\_W\_\_\_\_  
@HWI-EAS443:3:19:1381:1532#0/1  
ACTTCCCAGAAGGTCTGGTGCAGGTGCTGCGGTGAAA  
+HWI-EAS443:3:19:1381:1532#0/1  
aa`\_Z^]U^^]¥^QTaa^QaSFUZ\_aUQa¥YXGPXGXB  
@HWI-EAS443:3:19:1544:1762#0/1  
ACTTCCCAGAAGGTCTGGTGCCGAGGTTCTGCGGTGAAA  
+HWI-EAS443:3:19:1544:1762#0/1  
]aa\_ZX¥]b\_baa^¥ba]ab`\_]¥VT^BBBBBBBBBBBB  
@HWI-EAS443:3:19:601:166#0/1  
GGGTTCTCCTGTTTTCTTAGGGTCCTTCCCAGCACTGGGA  
+HWI-EAS443:3:19:601:166#0/1  
\_baXaababaa\_abb`aaaaa\_\_aaa`\_Z`a````\_^^^  
@HWI-EAS443:3:19:768:1942#0/1  
GCTGTTTTGGAGTAATTTGAACGGGTCTATCCCGACCACT  
+HWI-EAS443:3:19:768:1942#0/1  
`aab\_aaa`]ba`b]aaaaaaa¥Z\_R`]aa]a\_\_a\_Za\_X  
@HWI-EAS443:3:1:1035:1277#0/1  
GGAGGGGCGAAAATGGACGAAGGACAAGGTTGCTTATGA  
+HWI-EAS443:3:1:1035:1277#0/1  
a`S[aa[DSZ¥\_^[aX]PaZ\_N\_¥¥[]S¥UVV]L[[]`BB  
@HWI-EAS443:3:1:1180:867#0/1  
GCCAATCATGATATGAGCAAGACCTGCTGTTGCATCTTC  
+HWI-EAS443:3:1:1180:867#0/1  
aab\_aaaaabaa`babaa`ab``¥aa\_ba\_a\_S]XU`BB  
@HWI-EAS443:3:1:1371:357#0/1  
GAGAACACATTCTGGGATCCATTCCGGTGCGAACAAGCGC  
+HWI-EAS443:3:1:1371:357#0/1  
aa`aa\_a^`\_]aa\_^[\_¥S\_a\_^¥`TZV\_]¥¥^¥^SBB  
@HWI-EAS443:3:1:1688:1214#0/1  
AACAATAGAGAGGATGGTGGTTTCTGCTTTTGATGAGAGA  
+HWI-EAS443:3:1:1688:1214#0/1  
a¥WYab\_\_T¥JOZ`\_¥DHOJO[\_\_¥`TR^`¥XBBBBBBBB  
@HWI-EAS443:3:1:486:1121#0/1  
TAACAATAGAGAGGATGGGGCTTTCTGCTTTTGATGAGAG  
+HWI-EAS443:3:1:486:1121#0/1  
\_SVWa]XW[X^^[]PU[YJZLXYTF^YRUUVU[YSBBBBB  
@HWI-EAS443:3:1:991:1856#0/1  
CATCCTCTCTATTGTTATGCTATTCTGGATTAGTAGTCCA  
+HWI-EAS443:3:1:991:1856#0/1  
`b\_G^X^\_X\_Yba¥`a`^S^aK`V`aa`¥[`BBBBBBBB

@HWI-EAS443:3:20:1648:740#0/1  
CACCATCCTCTATTGTTACGCTATTCTGGATTAGTCGT  
+HWI-EAS443:3:20:1648:740#0/1  
X`aabbbbbbbabbbbbbbabbbbb`^bbbabaaa^YS\_  
@HWI-EAS443:3:20:1678:1794#0/1  
CTTGCAATTAGAGAACACATTCTGGGATCCATTCCGGTGCG  
+HWI-EAS443:3:20:1678:1794#0/1  
`aaM[babZb]^baab\_\_a` `aY`\_\_a` [a`\_[aaWa`a  
@HWI-EAS443:3:20:427:1116#0/1  
CATAAATCCTGGCTGCCTGCTTGTGTGTATGGGCTTGCGAG  
+HWI-EAS443:3:20:427:1116#0/1  
aaaa[X^bbaaa]Q[]`\_\_^\_a`\_aZ\_ZZ^\_¥S¥YZ\_Q¥]  
@HWI-EAS443:3:20:892:1042#0/1  
GGTGCTTTTTGCTTTTGATGAGAGAAGAAATAAATACCTA  
+HWI-EAS443:3:20:892:1042#0/1  
Za^bbaa\_U¥X^\_abbaa`a`^b\_W` `N` `aba`aa¥^b  
@HWI-EAS443:3:21:715:504#0/1  
GGGAAGAACCCTAAGAAAACAGGAGGACCCATATATAGAA  
+HWI-EAS443:3:21:715:504#0/1  
aba[bTFZb`\_a[Zaaa\_a\_a`^^a^\_\_¥\_^^a`Y\_aZ^  
@HWI-EAS443:3:22:99:320#0/1  
CAGGAAACGCTGAGATTGAAGACCTCATTTTCCAGGCACG  
+HWI-EAS443:3:22:99:320#0/1  
abaaaabbbbaa`\_\_^a^a`aa`\_`^`aaa`^^]a\_adWa  
@HWI-EAS443:3:23:1040:1018#0/1  
TGGGATTCGACTTTCTTACTTGATCCATCATTGCCCTC  
+HWI-EAS443:3:23:1040:1018#0/1  
aba`G`[bKWaaU`^`VLZRZMV\_\_`a`^aU\_\_Q`^]U]\_  
@HWI-EAS443:3:23:692:844#0/1  
GGTACTCACTGCTCGGATAGACCCATTCAAATTACTCCA  
+HWI-EAS443:3:23:692:844#0/1  
^[X`aa\_¥^a[F[baa\_W^a\_]a`a[a¥a^[X]\_]`¥^Q`  
@HWI-EAS443:3:23:778:45#0/1  
CAGGCAGGCAGGATTTATGTGCAACTGATCCTCTCAGAAT  
+HWI-EAS443:3:23:778:45#0/1  
abbaa` `ba]a^`a\_a`\_Va` ``¥aaa`¥\_\_^\_¥a`\_^ [  
@HWI-EAS443:3:24:1074:1146#0/1  
GAGGGGGGAAAATGGACGAAGGACAAGGGTTGCTTATGAA  
+HWI-EAS443:3:24:1074:1146#0/1  
aaa` `^H¥aa^Z\_a` `[`` `aWU¥\_Qa`\_V`a^a]\_`a^^  
@HWI-EAS443:3:24:328:318#0/1  
GTGCTTTCTGCTTTTGATGAGAGAAGAAACAAATACCTAG  
+HWI-EAS443:3:24:328:318#0/1  
^a]b`bbaaaaaa`b`aa]\_\_aaaa\_a¥K]`\_``a` ``¥  
@HWI-EAS443:3:24:753:2040#0/1  
ATCCAGAATAGCATAACAATAGAGAGGATGGTGGTTTCTG  
+HWI-EAS443:3:24:753:2040#0/1  
¥WBBBBBBBBBBBBBBBBBBBBBBBBBBBBBBBBBBBB  
@HWI-EAS443:3:24:851:1830#0/1  
AACCCAGGGAACGCTGAGATTGAAGACCTCATTTTCTGG

+HWI-EAS443:3:24:851:1830#0/1  
aaaaV]¥[GRa]` `)\_W¥SUKW¥XWWS¥Z\_US¥TLVB BBB  
@HWI-EAS443:3:25:1115:99#0/1  
GTGCTTTCTGCTTTTGATGAGAGAAGAAGTAAATACCTAG  
+HWI-EAS443:3:25:1115:99#0/1  
aX^Waa^OaaZaa\_aXSZ`U^S^V[¥XSM[UXW\_\_OG^X^  
@HWI-EAS443:3:25:540:478#0/1  
CTTGCAGTAGCAAGTGGGCATGACTTTGAAACGGAAGGGT  
+HWI-EAS443:3:25:540:478#0/1  
`U[a[XM¥U`W\_¥\_MT\_bYbbWXUVUa¥TUQD[]R`a[aU  
@HWI-EAS443:3:26:1732:1703#0/1  
GGAATCGGGAGATTCTACATCCAAATGTGCAATGAACTCA  
+HWI-EAS443:3:26:1732:1703#0/1  
abbbbaaaab`aaa\_aabaa`aaaa]aY\_a`a\_a`\_\_\_\_  
@HWI-EAS443:3:26:468:975#0/1  
GACTAATCCAGAATAGCATAACGATAGAGAGGATGGTGCT  
+HWI-EAS443:3:26:468:975#0/1  
aabaa`\_]Q¥a\_¥ZU[^a\_a[\_\_^\_[\_]ZZ[UYL¥NFVTL  
@HWI-EAS443:3:27:200:1726#0/1  
GACCCATTCAAATTACTCCAAAACAGCCAAGTGGACAGCC  
+HWI-EAS443:3:27:200:1726#0/1  
aabab`aRWa[]aSJ^TZUZ`^SW`GaU`a[aPLF¥`\_\_\_\_  
@HWI-EAS443:3:27:977:1996#0/1  
ATGCAAGGTTCAACACTTCCCAGAAGGACTGGTGCCGCAG  
+HWI-EAS443:3:27:977:1996#0/1  
L^aaaa¥^X[\_`aX0[`ZZ`Z¥PWZZMG]U^¥F¥^SYRXT  
@HWI-EAS443:3:28:1177:347#0/1  
GGACGAAGGACAAGGGCTGCTTATGAAAGAATGTGCAATA  
+HWI-EAS443:3:28:1177:347#0/1  
`aaa` `bbaaaaaa[F[b`aaaaa` `aa`\_aa]a]aa`a  
@HWI-EAS443:3:29:1184:522#0/1  
GGTTTTCATTTGGTCTCACCAGGCTGACCACTTGGCTGTT  
+HWI-EAS443:3:29:1184:522#0/1  
a`^a`a` ` ` ` ` \_a\_Y]\_Y` `]\_\_\_\_]`\_^VY^X\_\_\_\_^Y\_BBB  
@HWI-EAS443:3:2:1057:259#0/1  
GAATAGCATAACAATAGAGAGGATGGGGCTTTCTGCTTTT  
+HWI-EAS443:3:2:1057:259#0/1  
aaaaaa` `a`a`a`\_a` ` ` ` ^aa\_Z\_[GTTS^RFSVRBBBB  
@HWI-EAS443:3:2:1156:1862#0/1  
ATTTGGATGTAGAATCTCCCGATTCCACTAATCATTCTTC  
+HWI-EAS443:3:2:1156:1862#0/1  
aaaa^ZaaaI]a]aaaa`Ra]P¥]\_a[F[\_YZ\_\_¥ZS]V  
@HWI-EAS443:3:2:1457:55#0/1  
GCAAACAATGGCGAAGATGCAACAGCAGGGCTTACTCATA  
+HWI-EAS443:3:2:1457:55#0/1  
a`a¥H]a]ZUXTY¥Y\_LT[FYRL[VRNZ[KR[TKRXBBBB  
@HWI-EAS443:3:2:288:1388#0/1  
GGAGGGGTGAAAATGGACGAAGGACAAGGGTGGCTTATGA  
+HWI-EAS443:3:2:288:1388#0/1  
aaWa` `YGT\_¥NY`a[LQZV¥\_[SWWV\_WWRH[Z[VXV]H

@HWI-EAS443:3:2:38:340#0/1  
GGAGGGGTGAAAATGGACGAAGGACAAGGGTTGGTTATGA  
+HWI-EAS443:3:2:38:340#0/1  
abb`\_b`La`aabaa\_VYaZ¥`YXS]^\_R\_TIYEX\_\_a`S  
@HWI-EAS443:3:31:1114:1701#0/1  
GATTAGTCATCCATCATAATCACTGAGTTTGGAGTTCAGTG  
+HWI-EAS443:3:31:1114:1701#0/1  
\_\_bba``aab^bbbbbb`abba\_babbaaba`M]abbXP¥  
@HWI-EAS443:3:31:181:1234#0/1  
GATTGGGGGAATCGGGAGATTCTACATCCAAATGTGCACT  
+HWI-EAS443:3:31:181:1234#0/1  
a``[YUDWTTX[``XNUY¥N^RZVW]Y¥^Y[LVTLV[YO  
@HWI-EAS443:3:31:268:2012#0/1  
TCGCACCGGAATGGATCCCAGAATGTGTTCTCTAATGCAA  
+HWI-EAS443:3:31:268:2012#0/1  
`\_X\_[aa\_TWZZVXUH\_b¥`¥^`XPORYYU¥aV\_ZTGTZH  
@HWI-EAS443:3:32:1035:1894#0/1  
ATTTGGTCTCATCAGGCTGACCACTTGGCTGGTTTGGAGT  
+HWI-EAS443:3:32:1035:1894#0/1  
aa`\_a]]\_``a\_X\_]`\_]`X^\_XX]]XX^XHR]VHNUBB  
@HWI-EAS443:3:32:591:1338#0/1  
CTGGTCGGGGTAGACCCATTCAAATTACTCCAAAACAGCC  
+HWI-EAS443:3:32:591:1338#0/1  
aX^]Q¥\_Z\_YN]``^`\_``aaa`a[¥\_a^a\_0¥\_^aV`Y  
@HWI-EAS443:3:32:665:501#0/1  
ATGGTGCTTTCAGCTTTTGGATGAGAGAAGAAATAAATACC  
+HWI-EAS443:3:32:665:501#0/1  
¥¥\_\_L`a`aa\_H^baaa`^`ab`^[\_^\_aa``a\_[`aa`  
@HWI-EAS443:3:33:1260:247#0/1  
TGGCGCCAAGCAAACAATGGCGAAGATGCAACAGTAGGTC  
+HWI-EAS443:3:33:1260:247#0/1  
U\_W¥a`^\_U`\_\_Z^P]¥X\_¥OX¥aaXLY]PXDNRHMVTLJ  
@HWI-EAS443:3:33:1473:606#0/1  
CAGAGGGCAATGATGGATCAAGTAAGAGAAAGTCTAAACC  
+HWI-EAS443:3:33:1473:606#0/1  
a`¥¥HUS`\_]aaaa[G¥MXV¥V`[[[`Z^WRDKFSZ¥RL  
@HWI-EAS443:3:33:1490:116#0/1  
CAGGCAGGCAGGATTTATGTGCAACTGATCCCATCAGAAT  
+HWI-EAS443:3:33:1490:116#0/1  
a``a\_bb``aab`abbaaa\_`]`]Va\_a¥`XRKRLWXS\_`  
@HWI-EAS443:3:33:1517:1825#0/1  
ATCCAGAATAGCATAACAATAGAGAGGATGGTGGTTTCTG  
+HWI-EAS443:3:33:1517:1825#0/1  
\_]Z``a\_\_\_aa]\_]```a```]``^]PYX]WWQMM¥^VVS  
@HWI-EAS443:3:33:1712:590#0/1  
GCCGCAGGTGCTGCGGTGAAAGGAGTTGGGACAATAGCAA  
+HWI-EAS443:3:33:1712:590#0/1  
^aWYXXa`G``a`V]`GVV\_BBBBBBBBBBBBBBBBBBBB  
@HWI-EAS443:3:33:696:842#0/1  
CTCCTGTTTTCTTAGGGTCCTTCCCCGCACTGGGATGCTC

+HWI-EAS443:3:33:696:842#0/1  
aaaHW`Y\_]¥]]X`]YZMb¥P[]aUDN\_U`QYUQNL\_LQY  
@HWI-EAS443:3:34:1164:303#0/1  
GCACATTTGGATGTTGAATCTCCCGATTCCACCAATCATT  
+HWI-EAS443:3:34:1164:303#0/1  
a`Yba`b¥b`[]`YXa\_^]U¥\_[Z¥OTZ^ZJJVWWWBBBB  
@HWI-EAS443:3:34:1385:338#0/1  
GTTGCATCTTCGCCATTGTTTGTGCTTGGCGCAAAGTCTCC  
+HWI-EAS443:3:34:1385:338#0/1  
a`aa¥aa¥a`aZ[`a^MYa`XY^`\_aZ^¥Y^^TDMG[VB  
@HWI-EAS443:3:35:66:1492#0/1  
ATTTGGTCTCATCAGGCTGACCACTTGGCTGTTTTTGAGT  
+HWI-EAS443:3:35:66:1492#0/1  
aaaa\_PZa\_ab\_ba\_\_aWW]a`^^\_¥^P`\_BBBBBBBBBB  
@HWI-EAS443:3:36:1235:1873#0/1  
ATCGGGAGATTCCACATCCAAATGTGCACTGAACTCAAAC  
+HWI-EAS443:3:36:1235:1873#0/1  
a¥` `[W[P\_a[ZG^[\_]\_]\_^G[\_Oaa]`Z`¥TWZS¥a[[  
@HWI-EAS443:3:36:1589:554#0/1  
AGACTGGTGAGGAGCGCCAGGATGCCACAGAAATCAGAGC  
+HWI-EAS443:3:36:1589:554#0/1  
abbbabb\_a`b^aa`^a^Y`V\_Qa\_aaSaaa`]Z`aa[Za  
@HWI-EAS443:3:36:1598:625#0/1  
CACTTCCCAGAAGGTCTGGCGCCGCAGGTGCTGCGGTGAA  
+HWI-EAS443:3:36:1598:625#0/1  
a^a^a`]b`abaaV¥Z¥]E] []a¥T`ZU`PYS^YNZPV  
@HWI-EAS443:3:36:624:127#0/1  
ATGGGTCTCTCTGTTTTCTTAGGGACCTTCCCAGCACTGG  
+HWI-EAS443:3:36:624:127#0/1  
^`a[`¥^`aabZZabTa]¥Yaaa`UWRTY``]P\_`U`S[¥  
@HWI-EAS443:3:36:994:1076#0/1  
GAGAACACATTCTGGGATCCATTCCGGTGCGAACAAGCGC  
+HWI-EAS443:3:36:994:1076#0/1  
HX¥aaa\_^a]bbU\_Z\_[b`^`\_aaa\_aPabb`aab\_Z\_ba  
@HWI-EAS443:3:37:1186:750#0/1  
TTCTGAGGGTTTCAGTTGCACATAAATCCTGCCTGCCTGC  
+HWI-EAS443:3:37:1186:750#0/1  
aa`a`aa¥`]G]`\_a¥aa`^a`^X`]aQ^aa¥`¥`¥`Z  
@HWI-EAS443:3:37:1463:726#0/1  
TAGAGAACACATTCTGGGATCCATTCCGGTGCGAACAAGC  
+HWI-EAS443:3:37:1463:726#0/1  
a\_\_aaba^b^a`a`]a`a`\_`aaaab[a^MYa`a`a]a\_  
@HWI-EAS443:3:37:1667:1214#0/1  
GATTGGTGAATCGGGAGATTCTACATCCGAATGTGCACT  
+HWI-EAS443:3:37:1667:1214#0/1  
aaaaaa\_U\_aa\_^a\_\_X\_\_`a^a\_[`\_[¥DGZZXY[TZY\_  
@HWI-EAS443:3:37:1714:174#0/1  
GCAGGATTTATGTGCTACTGATCCCCTCAGAATGAGTGCT  
+HWI-EAS443:3:37:1714:174#0/1  
a\_V`XL\_\_`S`a¥YQ^U^]`\_\_^GUU¥WPRGU¥]STWRLT

@HWI-EAS443:3:37:672:377#0/1  
GCTGACCGTGCCAGGAAAATGAGGTCTTCACTCTCAGCGT  
+HWI-EAS443:3:37:672:377#0/1  
abaaaaaa`aa`a`a`]`ba`aaaa¥a`aaQG¥a`\_a`a`][  
@HWI-EAS443:3:38:153:121#0/1  
CACTTGGCTGTTTTGGAGTAATTTTAATGGGTCTATCCCG  
+HWI-EAS443:3:38:153:121#0/1  
a`abbbbaaTbaaTa¥aP]^`a\_FX`MPa`TUU\_]`\_]Q  
@HWI-EAS443:3:38:1668:205#0/1  
CAGGCAGGCAGGATTTATGTGCAACTGATCCCCACAGAAT  
+HWI-EAS443:3:38:1668:205#0/1  
abb`aabaabaa\_`ababa]`aa]aa`aSPUUSW¥\_¥¥W  
@HWI-EAS443:3:38:1697:1069#0/1  
GAGTACCCTTCCCTTTCAAAGTCATGCCCAGTTGCTACTG  
+HWI-EAS443:3:38:1697:1069#0/1  
^Xb`bb]^`b`]aabaabaa`V`aaaa¥aUNYLSMS`Y¥N  
@HWI-EAS443:3:38:1714:588#0/1  
GTCTCATCAGGCTGACCACTTGGCTGTTTTTGGTAATTT  
+HWI-EAS443:3:38:1714:588#0/1  
`[aba`b`b\_¥T\_```aa`aaaa¥a`Q`aTDOFYSXVVZV  
@HWI-EAS443:3:39:893:1525#0/1  
TAACAATAGAGAGGATGGGGCTTTCTGCTTTTGATGAGAG  
+HWI-EAS443:3:39:893:1525#0/1  
\_¥aa\_Ya]`aa[a\_`ab\_N][Y`a`^T`a]XZPZX`T\_  
@HWI-EAS443:3:3:1187:1005#0/1  
CGAAGAACAAGGTTGCTTATGAAAGAATGTGCAATATCC  
+HWI-EAS443:3:3:1187:1005#0/1  
abbbbabbbbbbabb`bbbbbbbbbbbb`bbabbbb`\_  
@HWI-EAS443:3:40:515:69#0/1  
CGCCGAGCAAACAATGGCGAAGATGCAACAGCAGGTCTTA  
+HWI-EAS443:3:40:515:69#0/1  
aabbbaaabababaa^bab`abbaaZH]]^`¥\_\_^P]`\_]\_  
@HWI-EAS443:3:40:597:811#0/1  
GTCCTCTGTTTTCTTAGGGTCTTCCCCGCACTGGGATG  
+HWI-EAS443:3:40:597:811#0/1  
a\_aaaa]a\_\_\_\_aa`a`a]¥Y\_\_`\_\_^GW\_T^]\_]\_]V\_  
@HWI-EAS443:3:42:1064:1267#0/1  
AATTTCTGGAGGGTGAAAAAGGACGAAGGACAAGGGTTG  
+HWI-EAS443:3:42:1064:1267#0/1  
`¥\_^Zbbb`QZ¥b¥L^S^[¥0^\_\_Z[][^\_`^]V`\_`\_]\_a  
@HWI-EAS443:3:42:1096:295#0/1  
CGCTCTTATTCTCTGATATGTGGCATCATTAGGTTGGAA  
+HWI-EAS443:3:42:1096:295#0/1  
abab\_`^`aaaa`aZb`a`X\_U]YZZ```\_`a\_P\_[Q```\_¥`  
@HWI-EAS443:3:42:132:1859#0/1  
ATCCATTCCGCTGCGAACAAGCGCTCTTGTCTCTGATAT  
+HWI-EAS443:3:42:132:1859#0/1  
ZT\_¥a\_`^a[YNZTW`aaa\_]`^¥\_]Y]^`XWX\_aa¥U¥\_¥Z  
@HWI-EAS443:3:42:1455:398#0/1  
CTCTTCTAGGGATTTATTTCTTCTCTCATCAAAGCAGAA

+HWI-EAS443:3:42:1455:398#0/1  
aaaa]bbXb¥G^`a`abb¥bb])aabbb\_ba` `aaaa\_a  
@HWI-EAS443:3:43:1114:1611#0/1  
TTGGTCTCATCAGGCTGACCACTTGGCTGTTTTGAGTAA  
+HWI-EAS443:3:43:1114:1611#0/1  
ab^a¥¥aaaa\_a¥^Y\_` `\_^]a`\_`Z`¥NY\_]FMFVUVV  
@HWI-EAS443:3:43:1152:1449#0/1  
TTTCATTTGGTCTCATCAGGCTGACCACTTGGCTGGTTTG  
+HWI-EAS443:3:43:1152:1449#0/1  
a[[aZa` `` \_[^a]a` [aR`ZXaab\_aaYZ^`¥`HL^[H  
@HWI-EAS443:3:43:1457:1151#0/1  
GCGCTTGTTCGCACCGAATGGATCCCAGAATGTGTTCTC  
+HWI-EAS443:3:43:1457:1151#0/1  
^a\_ZZa¥]\_¥\_aUXW\_¥U¥]a^` `WZ^\_ZSV]aY\_PWLY¥  
@HWI-EAS443:3:43:890:1735#0/1  
AATTTGAATGGGTCTATCCCGACCAGTGAGTACCGTTCCC  
+HWI-EAS443:3:43:890:1735#0/1  
¥\_b]abbbM`QYK[]`aaVX]VaU¥UGXWWWIRV¥G¥¥PLF  
@HWI-EAS443:3:44:1531:1016#0/1  
ATAACAATAGAGAGGATGGGGCTTTCTGCTTTTGATGAGA  
+HWI-EAS443:3:44:1531:1016#0/1  
aa\_^^V\_¥¥`aaY¥b^`ZWIZU^XEXWXX^a^SV^LI[J  
@HWI-EAS443:3:44:958:1386#0/1  
AAGTGGTCAGCCTGATGAGACCAAATGAAAACCCAACTCA  
+HWI-EAS443:3:44:958:1386#0/1  
^a^PZ]XU\_¥YZ^XNU]\_Z`X¥\_]^[¥\_]`¥TY][VPPX  
@HWI-EAS443:3:45:1782:1251#0/1  
GTCTCATCAGGCTGACCACTTGGCTGTTTTGGAGGAATTT  
+HWI-EAS443:3:45:1782:1251#0/1  
OPPP`X`aa^Y`Z^¥`]XSa¥a^^`]RY^BBBBBBBBBBB  
@HWI-EAS443:3:45:302:915#0/1  
ATCATAATCACTGAGTTTGAGTTCAGTGCACATTTTGATG  
+HWI-EAS443:3:45:302:915#0/1  
a^`ZT¥a^\_aY\_\_X[Y\_\_\_\_\_U\_`]\_Y\_P^[¥UUZDK\_]Y  
@HWI-EAS443:3:45:353:1170#0/1  
ATCAGGCTGACCACTTGGCTGGTTTGGAGTAATTTGAATG  
+HWI-EAS443:3:45:353:1170#0/1  
a`ZJU¥aab^Y\_`\_a\_[[`aLYaaSHO\_Y]`XS¥GY]PU  
@HWI-EAS443:3:46:1417:1683#0/1  
GGAGGGGTGAAAATGGACGAAGGACAAGGCTTGCTTATGA  
+HWI-EAS443:3:46:1417:1683#0/1  
a`^a\_\_aZa]Y]Za]) [N^W¥\_ZZZ\_]\_QURW]W^^Z][V  
@HWI-EAS443:3:46:56:29#0/1  
GTCAGCACTCATTCTGAGGGGATCAGATGCACATAAATCC  
+HWI-EAS443:3:46:56:29#0/1  
a\_aaa` \_\_\_\_ `V\_[[` `[a^a\_`RS^`Z[`W[[Z¥Z[[YVU  
@HWI-EAS443:3:46:831:1589#0/1  
CAACCCTTGTCTTCCGTCATTTTACCCCCCAGAAATT  
+HWI-EAS443:3:46:831:1589#0/1  
a\_XZa`bb¥QaGa\_\_a[`RJ\_baa[``R])FZ[G^Va\_Y¥



@HWI-EAS443:3:47:1580:1417#0/1  
ACAATAGAGAGGATGGTGCTTTCTGCTTTTTATGAGAGAA  
+HWI-EAS443:3:47:1580:1417#0/1  
^`bXaaa^aaa¥J]^`\_M¥aa`\_PZ\_W[\_I]TDR]XX\_\_  
@HWI-EAS443:3:47:1646:1314#0/1  
GGCTTGCAGTAGCAAGTGGGGATGACTTTGAAAGGGAAGG  
+HWI-EAS443:3:47:1646:1314#0/1  
a`aZ\_RQY^Q[W^[OVHR\_WDRX\_[[ZV¥¥RLVYSSBBB  
@HWI-EAS443:3:47:218:1176#0/1  
GGCAGGCAGGATTTATGTGCAAATGATCCCCTCAGAATGA  
+HWI-EAS443:3:47:218:1176#0/1  
^\_]\_b[Z\_ba[\_b`UaUS\_\_]\_H[]\_]R\_aa[Y]baabaV  
@HWI-EAS443:3:47:456:310#0/1  
GGAGGGGTGAAAATGGACGAAGGAGAAGGGTTGCTTATGA  
+HWI-EAS443:3:47:456:310#0/1  
U`Mbb]b¥baUUK`[UT\_b¥P`YLJIH``bNY\_FXX\_]a]  
@HWI-EAS443:3:48:192:1971#0/1  
ATCTTCGCCATTGTTTGCTTGGCGCCAAAATCTCCTTATT  
+HWI-EAS443:3:48:192:1971#0/1  
\_ab`abaZXab¥¥a¥VX\_aNP¥W`Z¥\_ODEG\_SW\_^PV`  
@HWI-EAS443:3:49:134:804#0/1  
AATTTGAATGGGTCTATCCCGACCAGTGAGTAACCTTCCC  
+HWI-EAS443:3:49:134:804#0/1  
V¥]b``abba`Z]a`T`bZb\_`WWaSXZ```aJ\_`I`abb  
@HWI-EAS443:3:49:748:783#0/1  
GGCATCCTGGCGCTCCTCACCAGTCTCCATTTGTTTCATAT  
+HWI-EAS443:3:49:748:783#0/1  
`aa^`a^ab`Za\_]a^]¥T¥`aVY`Q\_^[\_aX\_V¥`RZ  
@HWI-EAS443:3:49:894:423#0/1  
CTTCCCAGAAGGTCTGGTGCCGCAGGTGCTGCGGGGAAAG  
+HWI-EAS443:3:49:894:423#0/1  
a^\_\_PXXXXJYWZT^a^`]XZU``^HY]aYR]]EZEHU¥  
@HWI-EAS443:3:49:993:1921#0/1  
CGGAATGGATCCCAGAATGTGTTCTCTAATGCAAGGTTCA  
+HWI-EAS443:3:49:993:1921#0/1  
`bbbbbbabb\_]ba\_bab^``a¥U\_Yaab¥\_P\_a`a]a^a  
@HWI-EAS443:3:4:1575:140#0/1  
AAACGCTGAGATTGAAGACCTCATTTTACTGGCACGGTCA  
+HWI-EAS443:3:4:1575:140#0/1  
a[babYab]¥]\_\_`V`aY[G\_P^a``[KSYZ]]R^`[UUB  
@HWI-EAS443:3:4:90:1934#0/1  
GGAGGGGTGAAAATGGACGAAGGACAAGGGATGCTTATGA  
+HWI-EAS443:3:4:90:1934#0/1  
]b[b\_¥`\_ba`J¥MUUybYJMTabb^bbab\_G`^RWMRXBB  
@HWI-EAS443:3:50:1106:263#0/1  
GCTTGCAGTAGGAAGTGGGCATGACTTTGAAAGGGAAGGG  
+HWI-EAS443:3:50:1106:263#0/1  
aaab`b`[\_`¥Mza`aabaWQaaa\_aZaa`\_\_[QJ[]VGJ  
@HWI-EAS443:3:50:698:1264#0/1  
GCATCTTCGCCATTGTTTGCTTGGCGCCAAAATCTCCTTA

+HWI-EAS443:3:50:698:1264#0/1  
abb¥ab`abZ¥Zb^\_abb[``^aZUW`TRTUG\_S^VYQZX  
@HWI-EAS443:3:51:1606:98#0/1  
CGTCCATCATAATGACTGAGTTTGAGTTCAGTGCACATTT  
+HWI-EAS443:3:51:1606:98#0/1  
0a^N\_ZJ`b`aZJ`b`aVa¥aaa`a¥\_\_^Z¥^Ia\_bbbZ  
@HWI-EAS443:3:51:928:1307#0/1  
GTCCTCCTGTTTTCTTAGGGTCCTTCCCGGCACTGGGATG  
+HWI-EAS443:3:51:928:1307#0/1  
a\_¥Q]\_S\_^XZUV]XQ¥^¥aQ\_\_\_\_`]¥¥¥[^\_Z``a\_W\_a  
@HWI-EAS443:3:52:1602:293#0/1  
GGTTGCTTATGAAAGAATGTGCAATATCCTCAGAGGAAAA  
+HWI-EAS443:3:52:1602:293#0/1  
`aabb`bbaab\_aaaa\_bb\_aaa`a\_a\_]a^^H\_aaa`a\_  
@HWI-EAS443:3:52:212:210#0/1  
ACCGGAATGGATCCCAGAATGTGTTCTCTAATGCAAGGTT  
+HWI-EAS443:3:52:212:210#0/1  
aaaaXQVaba]Y\_`^W``\_a`N]Y`Y`[a[^`¥NX[XIM\_  
@HWI-EAS443:3:52:568:1978#0/1  
GAGGATGGTGCGTTCTGCTTTTGATGAGAGAAGAAATAAA  
+HWI-EAS443:3:52:568:1978#0/1  
a\_X\_]a\_R\_`[PV]\_``[\_^aX]^`\_^[R^\_a]`^^^]]  
@HWI-EAS443:3:52:737:1256#0/1  
AGAGGATGGTGCGTTCTGCTTTTGATGAGAGAAGAAATAA  
+HWI-EAS443:3:52:737:1256#0/1  
ababb`aba]aN^`\_\_`a^`\_aa]]`a\_\_\_\_^\_``\_a`\_]\_a  
@HWI-EAS443:3:53:1373:1061#0/1  
AATAGAGAGGATGGTGCTTTCTGCTTTTGATGAGAGAAGA  
+HWI-EAS443:3:53:1373:1061#0/1  
`X[I[¥`¥abba\_`aR`\_a`[Y\_bWNG¥`^GZ^Sa0aI]\_¥  
@HWI-EAS443:3:53:1745:1415#0/1  
GCAATGATGGATCAAGTAAGAGAAAGACGAAACCCAGGAA  
+HWI-EAS443:3:53:1745:1415#0/1  
\_a`]ab^Z][URR`¥UHVT`X``\_V\_GN\_a[HGV^¥UOU[  
@HWI-EAS443:3:53:1783:724#0/1  
GCTTTCTGCTTTTGATTAGAGAAGAAATAAATACCTAGAA  
+HWI-EAS443:3:53:1783:724#0/1  
a\_SZ`XRXTZZ^TT[]HX¥U¥\_¥\_WY\_\_^a^\_RQLY\_Z`¥  
@HWI-EAS443:3:53:300:1713#0/1  
GTCTCATCAGGCTGACCACTTGGCTGGTTTGGAGTAATTT  
+HWI-EAS443:3:53:300:1713#0/1  
a^ZGV`Ua^HWG^TV\_TPTSTW`\_][JWaUGPDVMBBBB  
@HWI-EAS443:3:53:373:517#0/1  
GCCACATATCAGAGAACAAGAGCGCTTGTACGCACCCGAA  
+HWI-EAS443:3:53:373:517#0/1  
\_Z\_ZTUTQ\_V`baa`X[S^G¥`VXXBBBBBBBBBBBBBBBB  
@HWI-EAS443:3:53:610:879#0/1  
TAGAGAACACATTCTGGGATCCATTCGGTGCGAACAAGC  
+HWI-EAS443:3:53:610:879#0/1  
X¥¥¥J[\_WW¥]]a\_]baa¥¥a^^^]\_S\_]OZ`aZ[aa¥Z\_

@HWI-EAS443:3:53:735:1152#0/1  
CAATAGAGAGGATGGCGCTTTCTGCTTTTGATGAGAGAAG  
+HWI-EAS443:3:53:735:1152#0/1  
\_^]Kb`\_YY]a\_babG`W\_a¥JW]Nba\_`IU`^¥\_baX¥  
@HWI-EAS443:3:54:172:854#0/1  
CTGTTTTGGAGTAATTTGAATGGGTCTATCCCGTCCAGTG  
+HWI-EAS443:3:54:172:854#0/1  
`¥aX`b\_^\_Z`]aV\_ba`^b¥X`Yaa`a`U`a]b\_\_  
@HWI-EAS443:3:54:311:455#0/1  
GGCATCATTCAGGTTGGGATGCCAAATCATGATATGAGTA  
+HWI-EAS443:3:54:311:455#0/1  
aa`SUaa\_[aW]a\_\_a]PP]PZ]`OPZ¥U`\_G[Q``¥\_FP  
@HWI-EAS443:3:54:483:233#0/1  
GAATGATTGGTGAATCGGGAGATTCTACATCCACATGTG  
+HWI-EAS443:3:54:483:233#0/1  
\_V]^^WZaa[W]Y`]aa]O]W[TUVPT^OMW[LSW[OV  
@HWI-EAS443:3:54:839:200#0/1  
ACTAATCCAGAATAGCATAACAATAGAGAGGATGGGGCTT  
+HWI-EAS443:3:54:839:200#0/1  
a]\_[[[]WZa`Z`\_a[^[¥WW¥MW\_YY`Waa[S`WDVORW  
@HWI-EAS443:3:55:131:838#0/1  
GTTCGCACCGGAATGGATCCCAGAATGTGTTCTCTAATGC  
+HWI-EAS443:3:55:131:838#0/1  
a\_aaa\_a\_]a`[[[]a`Z^^Z^]SQXYVUZUVQVRZRLPYT  
@HWI-EAS443:3:55:1343:499#0/1  
TGCTTTCTGCTTTTGATGAGAGAAGAAGTAAATACCTAGA  
+HWI-EAS443:3:55:1343:499#0/1  
`bababab`]abbbaba\_ba]¥`\_`¥V]aaaaa]W\_`ba  
@HWI-EAS443:3:55:1432:1905#0/1  
CACTTGGCTGTTTTGGAGTAATTTAATGGGTCTATCCCG  
+HWI-EAS443:3:55:1432:1905#0/1  
abaaabbSab^babV`T[a`¥`b]JP^S^`a[UQPL]N\_\_  
@HWI-EAS443:3:55:1442:489#0/1  
CATTTTCCTGGCACGGTCAGCACTTTTCTGAGGGGATCA  
+HWI-EAS443:3:55:1442:489#0/1  
^baa\_ZZ¥\_X\_¥[U[U]^\_]RZP^L FV¥G]XGVO[RXQWN  
@HWI-EAS443:3:55:1789:1316#0/1  
GCTGTTTTGGAGTAATTTGGATGGGTCTATCCCGACCACT  
+HWI-EAS443:3:55:1789:1316#0/1  
`bb^Uabbaaaa[\_`aaa\_^a^QRYHP¥a\_XUTU]]\_¥[V  
@HWI-EAS443:3:56:1021:522#0/1  
GAGAGGATGGTCTTTCTGCTTTTGGTGGAGAGAAGAAATA  
+HWI-EAS443:3:56:1021:522#0/1  
\_P[J[`a`\_¥W^KY\_XDT\_^aaa^UDU`P¥F¥^\_[L[YXM  
@HWI-EAS443:3:56:1475:537#0/1  
CACCGGAATGGATCCCAGAATGTGTTCTCTAATGCAAGGT  
+HWI-EAS443:3:56:1475:537#0/1  
``\_`bbabbbaba`a`^a\_^U^aab\_`ZbZ[`]G\_a[]]  
@HWI-EAS443:3:57:265:1024#0/1  
CAACCCTTGCCTTCGTCCATTTTACCCCCCAGAAATT

+HWI-EAS443:3:57:265:1024#0/1  
`Yabbb`¥]aW^a\_\_`\_`UF¥a`a[`^]a^T]\_UXR¥T¥Y  
@HWI-EAS443:3:57:803:1395#0/1  
GTGGCATCCTGGCGCTCCTCACCAGTCTCCATTTGTTTCAT  
+HWI-EAS443:3:57:803:1395#0/1  
`^`a\_]\_b`b`]aZ`UZMVTV^[VRXZ]`\_V\_`\_N]]W]  
@HWI-EAS443:3:58:957:1420#0/1  
GACTAATCCAGAATAGCATAACAATAGAGAGGATGCTGCT  
+HWI-EAS443:3:58:957:1420#0/1  
aaaaaa¥`a`aaaaaa^aa````\_a`a`\_`^a`\_]HFPLW  
@HWI-EAS443:3:59:1360:1988#0/1  
GGGCAATGATGGATCAAGTAAGAGAAAGTCGAAAACCAGG  
+HWI-EAS443:3:59:1360:1988#0/1  
H\_ababa`a]]]bab]`bVb`bbabba`Y`aab`TPRXW^  
@HWI-EAS443:3:59:783:816#0/1  
GGATGGTGTCTTTCTGCTTTTGTGAGGGAAGAAATAAATA  
+HWI-EAS443:3:59:783:816#0/1  
a[QR¥bXbTZUYORbI\_aab]R]YFZF^BBBBBBBBBBBB  
@HWI-EAS443:3:59:938:704#0/1  
CAACACTTCCCAGAAGGTCTGGTGCCGCAGGGGCTGCGGT  
+HWI-EAS443:3:59:938:704#0/1  
\_\_\_aIUaZaaLJ\_R¥P\_KXXa\_Qa`\_¥Z```F`]BBBBBB  
@HWI-EAS443:3:5:1293:346#0/1  
CTCTGATTTCTGTGGCATCCTGGCGCTCCTCACCAGTCTC  
+HWI-EAS443:3:5:1293:346#0/1  
abbababbabbbbaabaabbbb`b`bb\_a\_aN\_aaaVaX  
@HWI-EAS443:3:5:1637:832#0/1  
TAACAATAGAGAGGATGGTGTCTTTCTGCCTTTGATGAGAG  
+HWI-EAS443:3:5:1637:832#0/1  
aaaaaabaa^a``\_`baY`Y[a`¥`¥WY`aa[XX`Za^^  
@HWI-EAS443:3:60:1290:740#0/1  
GCGCTTGTTCGCACCGAATGGATCCCAGAATGTGTTCTC  
+HWI-EAS443:3:60:1290:740#0/1  
a\_a\_]aa\_a\_a^\_¥\_a`^`W\_¥¥WWWY[¥¥¥U¥¥¥VWW¥W  
@HWI-EAS443:3:60:1374:618#0/1  
GGGTTGCTTATGAAAGAATGTGCAATATACTCAAAGGAAA  
+HWI-EAS443:3:60:1374:618#0/1  
`[OQ¥\_W^R^]^WVW[T`UVTZVT\_S]PFPV^PZ]ZZ\_XY  
@HWI-EAS443:3:60:196:1359#0/1  
CACCGAATGGATCCCAGAATGTGTTCTCTAATGCAAGGT  
+HWI-EAS443:3:60:196:1359#0/1  
abbbbabba`^`[¥```\_T\_]Z`\_a[`^a\_``^`[\_T  
@HWI-EAS443:3:60:518:1023#0/1  
ACCTGCTGTTGCATCTTCGCCATTGTTTTCTTGGCGCCAA  
+HWI-EAS443:3:60:518:1023#0/1  
aa`aa`a`]^][MX¥\_\_\_\_]^][^][GW\_^GRU^PPVZVTKP  
@HWI-EAS443:3:60:985:266#0/1  
CCTGGGTTTCGACTTACTCTTACTTGATCCATCATTGCCC  
+HWI-EAS443:3:60:985:266#0/1  
a^00Y\_K\_aPMYPUODSXQNUNS[Y]`ZLX[\_YU[NQSQX

@HWI-EAS443:3:61:17:1227#0/1  
CTTGCATTAGAGAACACATTCTGGGATCCATTCCGGTGCG  
+HWI-EAS443:3:61:17:1227#0/1  
UWU\_`b\_[Y\_Q^]\_X^T\_T\_[QJ¥T0aTSUUa\_\_]Q[N\_  
@HWI-EAS443:3:62:1625:740#0/1  
GCATGACTTTGAAAGGGAAGGGTACTCACTGTTCGGGATA  
+HWI-EAS443:3:62:1625:740#0/1  
]`\_`\_XS[aX]VIT]SZ`\_`aTSZ\_a^a\_^P\_HZL^\_\_X\_X  
@HWI-EAS443:3:63:1165:1593#0/1  
AGAAGGTCTGGTGCCGCAGGTGCTGCGGTGAAAGGGGTTG  
+HWI-EAS443:3:63:1165:1593#0/1  
aaa`b^Ya¥WVGa`aP][XSJQRO^aa\_G^UYTDSG]P¥]  
@HWI-EAS443:3:63:1564:1968#0/1  
GCGCCAGGATGCCACAGAAATCAGAGCATCTGGCGGAAGA  
+HWI-EAS443:3:63:1564:1968#0/1  
a[\_\_\_X\_\_\_VXZ\_KY^Q`^`^UZ[¥U^PRQ]W¥FKXWYWB  
@HWI-EAS443:3:64:144:1733#0/1  
GGCTGGTTTGGAGTAATTTGAATGGGTCTATCCCGACCAG  
+HWI-EAS443:3:64:144:1733#0/1  
^baaaKbbb`ab¥\_aa^baYaaGH^UDQ`a`\_a]V¥^^\_[  
@HWI-EAS443:3:64:78:424#0/1  
AAGGTCTGGTGCCGCAGGTGCTGCGGTGAAAGGGGTTGGA  
+HWI-EAS443:3:64:78:424#0/1  
V\_¥GV\_ZZ¥`Z]T\_¥Z`\_Q\_RW[^V[V`]BBBBBBBBBBB  
@HWI-EAS443:3:65:1378:757#0/1  
CAGGAAACGCTGAGATTGAAGACCTCATTTTACTGGCACG  
+HWI-EAS443:3:65:1378:757#0/1  
\_VXU[VH\_U^Q[W[TVW\_^]\_Z[YYN[bb¥MGZ^Va^\_a¥  
@HWI-EAS443:3:65:1482:92#0/1  
TTCATTTGGTCTCATCACGCTGACCACTTGGCTGTTTTGG  
+HWI-EAS443:3:65:1482:92#0/1  
aa\_aba^`aY`a]\_a¥`M]¥]`^^^\_¥`\_`[[`ZMV\_^BB  
@HWI-EAS443:3:65:895:1981#0/1  
GAATAGCATAACAATAGAGAGGATGGTGCTTTCTGGTTTT  
+HWI-EAS443:3:65:895:1981#0/1  
abb[aa`ZZaU`SX¥P[`[Y[NZPZXLNXPHW^IZFQ¥¥^  
@HWI-EAS443:3:66:678:795#0/1  
GGGCTTGCACTAGCAGGTGGGCATGACTTTGAAAGGGAAG  
+HWI-EAS443:3:66:678:795#0/1  
aaaaV¥```aZa`]ZH`YSZa]UZ]Z][UL^^KQ]^QV\_  
@HWI-EAS443:3:66:977:776#0/1  
GGAGGGGTGAAAATGGACGAAGGAAAAGGGTTGCTTATGA  
+HWI-EAS443:3:66:977:776#0/1  
\_RT`bbb0`^^ROZa`]V]\_N\_aVFHTa`XRP````\_S`^W  
@HWI-EAS443:3:67:1211:1073#0/1  
CGACTTTCTCTTACTTGATCCATCATTGGCCTCTGGGCAG  
+HWI-EAS443:3:67:1211:1073#0/1  
\_YWaY``aV`UZJ\_S^X]`S]^]SKZ\_GF]¥\_[\_a¥FOW  
@HWI-EAS443:3:67:1610:1391#0/1  
GGAAGAATGATTGGTGAATCGGGAGATTCTATATCCAAA

+HWI-EAS443:3:67:1610:1391#0/1  
ab^QVQbab]\_`b][`a[RJb[MOaaaLJ^aBBBBBBBB  
@HWI-EAS443:3:67:733:1563#0/1  
GCATGACTTTGAAAGGAAGGGTACTCACTGGCGGGATA  
+HWI-EAS443:3:67:733:1563#0/1  
a\_VZ]`^ZaRXPX\_00¥V[T\_RNQWZ\_\_aXWYFY\_[LTI\_  
@HWI-EAS443:3:68:1487:1131#0/1  
GCACATTCTTTCATAAGCCACCCTTGCCTTCGCCATTT  
+HWI-EAS443:3:68:1487:1131#0/1  
aaaaabaabaaa`a]\_aXWYUU]^]YV]Y^^V]X]YYYY^  
@HWI-EAS443:3:68:34:1687#0/1  
TGCTTTCTGCTTTTGATGAGAGCAGAAATAAATACCTAGA  
+HWI-EAS443:3:68:34:1687#0/1  
`]baa`ba\_ba`aaa`^a\_\_a[H^X\_a^`aaa\_`a\_\_dW\_  
@HWI-EAS443:3:69:136:1430#0/1  
CTAATCCAGAATAGCATAACAACAGAGAGGATGGTGCTTT  
+HWI-EAS443:3:69:136:1430#0/1  
a`a````¥^^\_]````]aaa^\_[[^^^]]^^QYSHKJPXX  
@HWI-EAS443:3:70:1124:209#0/1  
TGCTGTTGCATCTTCGCCATTGTTTGCTTGGCGCTAAACT  
+HWI-EAS443:3:70:1124:209#0/1  
Xb`LSQYbYY[Yaa`aT`P^^W^\_VX^YYYYTT¥YFPRMOY  
@HWI-EAS443:3:70:535:1401#0/1  
GGAAAATGAGGTCTTCAATCTCAGCGTTTCCTGGGATTCG  
+HWI-EAS443:3:70:535:1401#0/1  
aaba]^YTa]aJb\_GWaaa`\_RSX[[]SS]aaYHXaFNYa]  
@HWI-EAS443:3:70:797:52#0/1  
AGAGGATGGTGCTTTTTGCTTTTGATGAGAGAAGAAATAA  
+HWI-EAS443:3:70:797:52#0/1  
U^^aba]¥Y\_\_QYQ\_HS\_0^^¥^Y¥\_P^¥W\_I¥`Y\_a`]]  
@HWI-EAS443:3:71:1026:79#0/1  
CGCTTGTTCCGACCCGAATGGATCCCAGAATGTGTTCTCT  
+HWI-EAS443:3:71:1026:79#0/1  
abbbbbbbbaaaabbabbbbaa`^\_`aaa`a````a\_a]`  
@HWI-EAS443:3:71:1522:207#0/1  
GGTTCAACACTTCCCAGAAGGTCTGGTGCCGAGGGGCTG  
+HWI-EAS443:3:71:1522:207#0/1  
X\_JZ\_aaaa]``YQ0\_^^\_\_OR\_V¥T\_`¥]GV¥ZF\_QHQ  
@HWI-EAS443:3:71:54:95#0/1  
TGCTGTTGCATCTCCGCCATTGTTTGCTTGGCGCCAAACT  
+HWI-EAS443:3:71:54:95#0/1  
abaaa`aa`a`\_`^\_\_\_\_`aY\_^`UZ^YTVU[YYVXRWS  
@HWI-EAS443:3:71:573:1088#0/1  
CTAATGCAAGGTTCAACACTTCCCAGCAGGTCTGGTGCCG  
+HWI-EAS443:3:71:573:1088#0/1  
aaZNRVZ^0]WJ0Z¥b¥[^TXa`a\_^I¥^]Ga\_Y¥TU¥`Z  
@HWI-EAS443:3:72:752:1664#0/1  
GCTGTTTTGGAGTAATTTGAATGGGTCTACCCCGACCAGT  
+HWI-EAS443:3:72:752:1664#0/1  
^a`\_R]]^¥]Z¥[a^`[^Ubb\_]YSV¥``¥][a`b\_[a\_^

@HWI-EAS443:3:72:95:1299#0/1  
CGCAGGTGCTGCGGTGAAAGGAGTTGGCACAATAGCAATG  
+HWI-EAS443:3:72:95:1299#0/1  
aaaa`aY]\_\_Zaa]VPJL[SOZBBBBBBBBBBBBBBBB  
@HWI-EAS443:3:73:1483:859#0/1  
GTCGGAAGAATGATTGGTGAATCGGGAGATTCTAGATCC  
+HWI-EAS443:3:73:1483:859#0/1  
\_TR`V`[[XZPYRTXK`RMPPX^P]^`U^VSV¥XGFOSUH  
@HWI-EAS443:3:73:1783:427#0/1  
CGCAGGTGCTGCGGTGAAAGGAGGTGGAACAATAGCAATG  
+HWI-EAS443:3:73:1783:427#0/1  
aba\_\_aUab]ZaaaLUU]¥UUUZEWPWOT[Y]ZVX[Y[ZP  
@HWI-EAS443:3:73:613:378#0/1  
CTCCTGTTTTCTTAGGGTCCTCACAGCACTGGGATGCTC  
+HWI-EAS443:3:73:613:378#0/1  
abaa`a]aab]aaaa¥`¥``a\_[KX\_\_a`\_\_``\_X^\_]a^  
@HWI-EAS443:3:74:1236:1926#0/1  
ATCATGATTTGCCATTCCAACCTGAATGATGCCACATATC  
+HWI-EAS443:3:74:1236:1926#0/1  
abababaab`RH¥b`aaaa^\_aaaaaa]\_``aaaa`a]`  
@HWI-EAS443:3:74:628:970#0/1  
ACTTGGCTGTCTTGGAGTAATTTGAATGGGTCTATCCCGA  
+HWI-EAS443:3:74:628:970#0/1  
abaaaaaba]a`a]\_^a]aZ^a``\_\_QN]`X\_]\_]\_]UR  
@HWI-EAS443:3:74:668:1969#0/1  
CTCTAATGCAAGTTCAACACTTCCCAGATGGTCTGGTGC  
+HWI-EAS443:3:74:668:1969#0/1  
Z¥WS\_ZZLVZGJRP]Xa`aa[FZTSV^]ZDIFN`M`BBBB  
@HWI-EAS443:3:75:1019:268#0/1  
ACCGGAATGGATCCCAGAATGTGTTCTCTAATGCAAGGTT  
+HWI-EAS443:3:75:1019:268#0/1  
abbbbb\_abbaa]a`bb``aa\_aaaa`aa`]`b[]\_aa]`  
@HWI-EAS443:3:75:1378:1632#0/1  
CCGGAATGGATCCCAGAATGTGTTCTCTAATGCAAGGTT  
+HWI-EAS443:3:75:1378:1632#0/1  
a`RWWZbY`ba]aaW^¥]aXF0`ba\_NWa[abaaba\_Pa[  
@HWI-EAS443:3:76:103:924#0/1  
CTCTGGGCAGCTGTTTGAATTTTCTTTGAGGCTATTGC  
+HWI-EAS443:3:76:103:924#0/1  
abbbbaU]Z]`[\_0Qbabaa``\_Uab¥SV^bXYGUSYa^P  
@HWI-EAS443:3:76:316:1012#0/1  
ATTTCAAACAACCTGCCAGAGGGCAATGATGGATCAAGTA  
+HWI-EAS443:3:76:316:1012#0/1  
aaaaabaZb]E[a\_a`aRaXa`\_\_\_Y\_\_`¥\_¥¥^`¥^\_¥]  
@HWI-EAS443:3:78:1005:394#0/1  
GTTGCACATAAATCCTGCCTGCCTGATTGTGTGTATGGGC  
+HWI-EAS443:3:78:1005:394#0/1  
aa^NV[W`aZ\_a\_¥R¥aW^\_JVN[]R[QaX`NUU^R\_YUB  
@HWI-EAS443:3:78:1712:1309#0/1  
ACCTTGCATTAGAGAACACATTCTGGGATCCATTCCGGTG

+HWI-EAS443:3:78:1712:1309#0/1  
aZ¥a`aQaaaa`^W\_\_`YPXYWIKOZXTNHH\_`BBBBBBB  
@HWI-EAS443:3:78:594:528#0/1  
GAATCTCCCGATTCCACCAATCATTCCCTCCGACAGATGCT  
+HWI-EAS443:3:78:594:528#0/1  
aaa\_]`aa\_N\_¥a`aa\_a¥a\_\_\_X\_a`\_`a^Z`[Z\_]\_  
@HWI-EAS443:3:78:872:450#0/1  
CACTTGGCTGTTTTGGGGTAATTTGAATGGGTCTATCCCG  
+HWI-EAS443:3:78:872:450#0/1  
abbaabbWb¥YaaaSUF^XP\_¥aaOFLDDX[PWWXNUTSB  
@HWI-EAS443:3:79:106:797#0/1  
GCTGTTTTGAGTAATTTGAATGGGTCTATCCCGACCAGT  
+HWI-EAS443:3:79:106:797#0/1  
^\_`^OYY`HLO`]¥¥W[`ZOWYX\_ZDUUPXTZ]YUNOUOK  
@HWI-EAS443:3:79:858:767#0/1  
ACCGGAATGGATCCCAGAATGTGTTCTCTAATGCAAGGTT  
+HWI-EAS443:3:79:858:767#0/1  
aa``aaa`aaa`\_a¥\_a^\_aa\_`a`Z\_^a`\_`^R^\_^`^^  
@HWI-EAS443:3:7:1335:518#0/1  
GCGCTTGTTCGCACCGGAATGGATCCCAGAATGTGTTCTC  
+HWI-EAS443:3:7:1335:518#0/1  
T¥bbbaba[MabbbaaYab[^`\_b`\_H]ba`bb\_babZaa  
@HWI-EAS443:3:7:1685:1159#0/1  
GGAAGGGGACTCACTGGTCGGGATAGACCCATTCAAATTA  
+HWI-EAS443:3:7:1685:1159#0/1  
Z\_aQQ\_YDYOWX¥T]ZY^\_ab`V^UaPNGHO]XRPSXaY¥  
@HWI-EAS443:3:7:228:1362#0/1  
CGCTTGTTCGCACCGGAATGGATCCCAGAATGTGTTCTCT  
+HWI-EAS443:3:7:228:1362#0/1  
`abbb^`\_`bbbaa`\_aa`aaa\_aa`aa\_\_aa^a¥\_a`\_a  
@HWI-EAS443:3:80:1665:739#0/1  
AACCCAGGAAACGCTGAGATTGAAGAGCTCATTTTCCTGG  
+HWI-EAS443:3:80:1665:739#0/1  
aaa[\_U`0¥`a\_^K¥a¥\_¥^Y`\_]XFF¥T\_`a\_aPF[WS  
@HWI-EAS443:3:80:528:1008#0/1  
TGGGCTTGCAGCAGCAAGTGGGCATGACTTTGAAAGGGAA  
+HWI-EAS443:3:80:528:1008#0/1  
`RT`WPaZT`Ia`]Z]YZSSUab¥\_P\_T¥^aX\_]a[]T`  
@HWI-EAS443:3:81:541:1505#0/1  
CACTTCCCAGAAGGTCTGGTGCCGCAGGAGCTGCGGTGAA  
+HWI-EAS443:3:81:541:1505#0/1  
ab`ZWbab]aaa`^Gbaa\_Wa¥^a`]X^G`]Za`a^BBBB  
@HWI-EAS443:3:82:122:1580#0/1  
ACCGGAATGGATCCCAGAATGTGTTCTCTAATGCAAGGTT  
+HWI-EAS443:3:82:122:1580#0/1  
aaba\_aa]``a\_aaa[\_¥\_¥YNZZ]^¥Z^\_X¥Y\_\_\_YNMN  
@HWI-EAS443:3:83:1557:43#0/1  
CAAACCTCAGTGATTATGATGGAGGACTAATCCAGAATAGC  
+HWI-EAS443:3:83:1557:43#0/1  
`a]\_\_baS``b`aaaba`aa`XFZ^Ta\_\_^MG\_]Z]Z]T



@HWI-EAS443:3:84:1040:1046#0/1  
CCCTTGCCCTTCGTCCATTTTCACCCCTCCAGAAATTTTCG  
+HWI-EAS443:3:84:1040:1046#0/1  
]\_Z[ZZHL]^`TXOUW\_abbMZb¥V[NQ\_U¥a^T`aaa¥\_  
@HWI-EAS443:3:84:88:1880#0/1  
ATTCTGGATTAGTCGCCATCATAATCACTGAGTTTGAGT  
+HWI-EAS443:3:84:88:1880#0/1  
]SR\_TZ]WUVYJDU[NZR]RW\_YWYM[¥¥ZBBBBBBBBBB  
@HWI-EAS443:3:85:987:2001#0/1  
CTCCTATTTTCTTAGGGTCCTTCCCAGCACTGGGATGCTC  
+HWI-EAS443:3:85:987:2001#0/1  
^Yaa][\_aa\_`\_`a]PLXNZ[`S\_XTW[¥W\_^\_[X^R\_S  
@HWI-EAS443:3:86:1352:1974#0/1  
AGGGTTGCTTATGAAAGAATGTGCAATATCGTCAAAGGAA  
+HWI-EAS443:3:86:1352:1974#0/1  
¥\_¥bY¥Z`b^a^`a¥U``UZ`[^`WabW[DRa¥a\_baaa  
@HWI-EAS443:3:86:1378:1974#0/1  
GGTCCTCCTGTTTTCTTAGGGTCGTTCCCAGCACTGGGAT  
+HWI-EAS443:3:86:1378:1974#0/1  
abPQ]]\_W[`¥a\_a]abaaQ`XZQ¥¥M¥Qaa]UJV\_I¥W`  
@HWI-EAS443:3:86:1399:1164#0/1  
CAAGCAAACAATGTGCAAGATGCAACAGCAGGTCTTACTC  
+HWI-EAS443:3:86:1399:1164#0/1  
ab\_ab\_aaKbV]\_VRZZ`SZXT`^¥\_KaabH¥b`JGaW  
@HWI-EAS443:3:86:88:975#0/1  
AAACGCTGCGATTGAAGACCTCATTTTCTGGCACGGTCA  
+HWI-EAS443:3:86:88:975#0/1  
]^]Za``¥I`[aaaaSaX[[]\_\_`aa^a`¥\_^ZY`\_Q^L  
@HWI-EAS443:3:87:1109:1755#0/1  
CCGGAATGGATCCCAGAATGTGTTCTCTAATGCAAGGTTTC  
+HWI-EAS443:3:87:1109:1755#0/1  
abab`a`aaaY^]`¥][a`S``a\_]Y\_aa^Vaa`[[W]V  
@HWI-EAS443:3:87:1225:702#0/1  
CTCATATCATGATTTGGCATTCCAACGTGAATGATGCCAC  
+HWI-EAS443:3:87:1225:702#0/1  
\_Z`ba^\_R¥b``\_baX]R[^¥¥YUWMG¥\_``ab¥b[\_`¥a  
@HWI-EAS443:3:87:1488:1119#0/1  
ACTTCCCAGAAGGTCTGGTGCCGAGGTGCTGCGGGGAAA  
+HWI-EAS443:3:87:1488:1119#0/1  
`[\_aa``\_RZ`X^^`\_^Z¥THU\_X`X\_Z]Y\_QBBBBBBBB  
@HWI-EAS443:3:87:1725:1311#0/1  
GAACAAGCGCTCTTGTCTCTGATATGTGGCATAATTCAG  
+HWI-EAS443:3:87:1725:1311#0/1  
a\_abbaaa`^U^[\_`aYaa[aa\_``\_XNS\_\_\_\_`H`^NXS\_  
@HWI-EAS443:3:87:584:409#0/1  
CTTGCATTAGAGAACACATTCTGGGATCCATTCCGGTGCG  
+HWI-EAS443:3:87:584:409#0/1  
ZS¥[`abbb\_¥a`bbb]bb^^^bbaa`\_\_babaabVV`]a  
@HWI-EAS443:3:87:834:1918#0/1  
ACTTGGCTGTTTTGGAGGAATTTGAATGGGTCTATCCCGA

+HWI-EAS443:3:87:834:1918#0/1  
¥SKaba\_^\_V]R^RbPQL[aY^¥X[aV[^]GR[ZXMUYLa  
@HWI-EAS443:3:87:994:235#0/1  
AATGATTGGTGAATCGGGAGATTCTACATCAAATGTGC  
+HWI-EAS443:3:87:994:235#0/1  
aaba]abab^a\_`a`aa^`a``[SV\_U[`WG^\_ZY¥XZM  
@HWI-EAS443:3:88:441:2039#0/1  
TAATTTGAATGGGTCTACCCCGACCAGTGAGTACCCTTCC  
+HWI-EAS443:3:88:441:2039#0/1  
ab]`aaabb`a``Ga[ababa\_aa``[W`aXF`\_`¥`Y¥\_  
@HWI-EAS443:3:88:812:1052#0/1  
ACTTCCCAGAAGGTCTGGTGCCGAGGTGCTGCGGGGAAA  
+HWI-EAS443:3:88:812:1052#0/1  
L^^`aa^R^\_P\_¥¥`\_`\_Z\_¥¥^ZYQMJM\_]V]Q]YETJR\_  
@HWI-EAS443:3:89:1449:1308#0/1  
GCTGTTTTGGAGTAATTTGAATGGGTCTACCCCGACCAGT  
+HWI-EAS443:3:89:1449:1308#0/1  
aa]b[aaaZa`bZ\_¥XXS]Pa^b¥XTMFOP]`T]]VRH¥U  
@HWI-EAS443:3:89:254:471#0/1  
ATGACTTTGAAAGGGACGGGTACTCACTGGTCGGGATAGA  
+HWI-EAS443:3:89:254:471#0/1  
^Za¥baa``[``YOZWX\_VN`\_`[¥[[T[^R\_\_TV]]]\_Y  
@HWI-EAS443:3:8:1010:1964#0/1  
CAGAGGGCAATGATGGATCAAGTAAGAGAAAGTTGAAACC  
+HWI-EAS443:3:8:1010:1964#0/1  
ab`aabbb`aba`bbba`\_bab\_a[a\_aaaa\_SFM`a\_WW  
@HWI-EAS443:3:8:198:351#0/1  
CTGGGTTTTCATTTGGTCTCATCAGGCCGACCACTTGGCT  
+HWI-EAS443:3:8:198:351#0/1  
\_\_\_\_UYFR`]aaa\_a\_Y`a`^]aa\_UDW\_\_¥¥Z\_a^VBB  
@HWI-EAS443:3:90:1403:68#0/1  
AGACCTGCTGTTGCATCTTCGCCATTGTTTGCTTTGCGCC  
+HWI-EAS443:3:90:1403:68#0/1  
^\_a`bb`b`]a]Q]^^Ya]¥JZ`Za\_`abTS¥ZF]P^SG  
@HWI-EAS443:3:90:203:99#0/1  
AGGCTGACCACTTGGCTGTTTTGGAGGAATTTGAATGGGT  
+HWI-EAS443:3:90:203:99#0/1  
a\_``¥a]T^¥\_\_[\_^V¥]XVY^UYRRHHYWB BBBB BBBB  
@HWI-EAS443:3:90:255:549#0/1  
GTCGAAACCCAGGAAACGCTGAGATTGAAGACCTCCTTTT  
+HWI-EAS443:3:90:255:549#0/1  
a[X^YZa`VQZJ[]a^¥]OYXWZa\_UFWZVPQLHU]WT  
@HWI-EAS443:3:90:387:1364#0/1  
GCACATAAATCCTACCTGCCTGCTTGTGTGTATGGGCTTG  
+HWI-EAS443:3:90:387:1364#0/1  
aaa`a]HW`aa]]Z\_\_\_\_aa\_\_aa[XZR\_S¥KZ[^Q[UUW[  
@HWI-EAS443:3:90:640:1953#0/1  
ACCACTTGGCTGTTTTGGAGTAATTTGAATGGGGCTATCC  
+HWI-EAS443:3:90:640:1953#0/1  
TabbbaabaZ¥\_Q¥a^YIMMUY\_`\_`¥HaYF¥¥YH[UaU\_`

@HWI-EAS443:3:91:1028:813#0/1  
GAGAGGAGAAATAATACCTAGAAGAGCATCCCAGTGCTG  
+HWI-EAS443:3:91:1028:813#0/1  
aaaa[HX\_XW^ZV[`abIGaaUW^a^aZaa[SW]SSa\_``  
@HWI-EAS443:3:91:167:476#0/1  
GTCCTCCTGATTTCTTAGGGTCCTTCCCAGCACTGGGATG  
+HWI-EAS443:3:91:167:476#0/1  
^IVZIZ¥`¥HS`\_Y^\_X¥\_VOXY^R¥R]GYVBBBBBBBBB  
@HWI-EAS443:3:91:386:897#0/1  
GGGTTTCGACTTTCCTTACTTGATCCATCATTGCCCTCT  
+HWI-EAS443:3:91:386:897#0/1  
`Y¥MW¥` [^W^ZP]W[¥\_]^^ZZ]^^Z]^RY¥Z]V^Y  
@HWI-EAS443:3:91:770:864#0/1  
ACTCCTTTCACCGCAGCACCTGCGGGACCAGACCTTCTGG  
+HWI-EAS443:3:91:770:864#0/1  
a]U]R`ZX¥R`Wa`^[\_YT`]XVL^QZYW`HQWTT¥Sb  
@HWI-EAS443:3:91:834:781#0/1  
CACGGTCAGCACTTATTCTGAGGGGATCAGTTGCACATAA  
+HWI-EAS443:3:91:834:781#0/1  
abbbbabbaabbbbbbabbbaabaaaabaab`a\_aaaa  
@HWI-EAS443:3:92:1459:1776#0/1  
CATGACTCTGAAAGGGAAGGGTACTCACTGGTCGGGATAG  
+HWI-EAS443:3:92:1459:1776#0/1  
\_bbRb¥JOW`\_WbaaUb[`YYLW¥[L^J` ``0^IaaROPH  
@HWI-EAS443:3:92:1465:240#0/1  
ATGGGCTTGCAGTAGCAAGTGGGGATGACTTTGAAAGGGA  
+HWI-EAS443:3:92:1465:240#0/1  
¥]Y[X¥WZ[[Y[PM\_RWPYP¥¥UGW[ZOGX]P]NUWZQ^V  
@HWI-EAS443:3:92:581:992#0/1  
TTGCACATTCTCCATAAGCAACCCTTGCCTTCGTCCAT  
+HWI-EAS443:3:92:581:992#0/1  
aa^abaaaaaaaaaaaa`^aa`^a` `aa\_`]aa\_`[^\_a`  
@HWI-EAS443:3:93:1198:296#0/1  
AGGCTGACCACTTGGCTGTTTTGGAGGAATTTGAATGGGT  
+HWI-EAS443:3:93:1198:296#0/1  
ZQ`[[`^aa\_a\_\_\_baa`GN`\_P]FUFSZY`\_PHZW¥BBB  
@HWI-EAS443:3:93:1406:2011#0/1  
AACCCTTGTCTTCGTCCATTTTCACCCACCAGAAATTT  
+HWI-EAS443:3:93:1406:2011#0/1  
a[[aNa`a\_NSaa^a\_\_Y^aa\_W]U^YDDR`]^QZ\_^BB  
@HWI-EAS443:3:93:507:264#0/1  
GTTCAGTGCACATTTGGATGTAGAATCTCCCGGTTCCACC  
+HWI-EAS443:3:93:507:264#0/1  
a0¥GL¥K^ZZNU[\_\_\_`\_YSYRQ[]UTVTTTUTDNBBBBBB  
@HWI-EAS443:3:94:1402:1953#0/1  
AGAATCTCCAGATTCCACCAATCATTCTCCGACAGATGC  
+HWI-EAS443:3:94:1402:1953#0/1  
a^K\_ZP` `UDW]^0]S]GS¥XG\_YOMUWWKDO\_KXM\_BBB  
@HWI-EAS443:3:94:1481:1377#0/1  
CATCAGGCTGACCACTTGGCTGTTTTGGGGTAATTTGAAT

+HWI-EAS443:3:94:1481:1377#0/1  
abaaaaabababa]aaabaa\_b`F\_aa¥`XaHY\_\_^a¥^\_V  
@HWI-EAS443:3:95:1369:181#0/1  
CAAGAGCGCTTGTTCGCAACGGAATGGATCCCAGAATGTG  
+HWI-EAS443:3:95:1369:181#0/1  
Ubab`bb`Xaab[babbbGaabbbba`b``abbaaba`\_  
@HWI-EAS443:3:95:1400:2022#0/1  
GGGGTGAAAATGGAAGAAGGACAAGGGTTGCTTATGAAAG  
+HWI-EAS443:3:95:1400:2022#0/1  
`a\_bGG]XXab\_^aR`]¥aa]^bbb`aa`]S`b]bbW`^a  
@HWI-EAS443:3:95:674:1196#0/1  
CTGCTGTTGCATCTTCGCCATTGTTTGCTTGGCGCAAAC  
+HWI-EAS443:3:95:674:1196#0/1  
aaV\_a¥DVbb`a¥][a`[ZYY]`\_MaTa\_\_X`Xa]G]aUY  
@HWI-EAS443:3:96:1172:1386#0/1  
GAAGAGCATCCCAGTGCTGGGAAGGACCGTAAGAAAACAG  
+HWI-EAS443:3:96:1172:1386#0/1  
¥U¥X^R^]QXIU^UVaUXJ\_Z¥\_XZDD¥GQ\_]SYX\_[-  
@HWI-EAS443:3:96:123:1949#0/1  
CGGAAGAATGATTGGTGAATCGAGAGATTCTACATCCAA  
+HWI-EAS443:3:96:123:1949#0/1  
aaa]^aaa`a\_\_^Y¥a`aa`a\_\_`\_Z^\_^\_\_X\_^¥^  
@HWI-EAS443:3:96:1766:1408#0/1  
ATTTGGTCTCATCAGGCTGACCACTTGGCTGTTTTTGAGT  
+HWI-EAS443:3:96:1766:1408#0/1  
ab`bbb`a\_[-^]a`]Naa^T^a\_a``[VaWFWBBBBBBB  
@HWI-EAS443:3:97:1154:93#0/1  
CTCTGATTTCTGTGGCATCCTGGCGCTCCTCACCAGTCTC  
+HWI-EAS443:3:97:1154:93#0/1  
a\_]\_bbbaaLWbaababb^ab[bZa\_aYNXG\_[Zaa\_S[G  
@HWI-EAS443:3:97:1362:1043#0/1  
TAACAATAGAGAGGATGGGGCTTTCTGCTTTTGATGAGAG  
+HWI-EAS443:3:97:1362:1043#0/1  
abaa`[a\_\_a^[bYa\_bRESNNSTI[a\_\_^\_\_JNS]]Q0a  
@HWI-EAS443:3:97:1735:1708#0/1  
GACCGATTCAAATTACTCCAAAACAGCCAAGTGGTCAGCC  
+HWI-EAS443:3:97:1735:1708#0/1  
`\_R]Gbbbb`abbbab]K]bababbaVY]a¥b^^WTYYG  
@HWI-EAS443:3:97:847:1499#0/1  
TCGTGCATCATAATCACTGAGTTTGAGTTCAGTGCACATT  
+HWI-EAS443:3:97:847:1499#0/1  
TW[\_HY\_UZ]SZRYa\_WTZXQW]a`aX\_[UWIO\_\_[]ZBB  
@HWI-EAS443:3:98:1652:21#0/1  
AACCTGAATGATGCCACATATAAGAGAACAAGAGCGCTTG  
+HWI-EAS443:3:98:1652:21#0/1  
`a0aa\_\_WL\_a¥a`\_]¥a\_]\_Ga]aGX]W\_\_`X]VBBBBB  
@HWI-EAS443:3:99:1341:1012#0/1  
GCACATTCTCCATAAGCAACCCTTGTCCCTTCGTCATTT  
+HWI-EAS443:3:99:1341:1012#0/1  
aR¥^X\$¥\$XDKOX`Z][UPUa[\_YaJ\_Y¥\_]UV\_UBBBB

@HWI-EAS443:3:99:238:2041#0/1  
AGGCTGACCACTTGGCTGTTTTGGAGTAATTTAATGGGT  
+HWI-EAS443:3:99:238:2041#0/1  
^b^`\_\_`a`Z¥]a]\_`XXZ\_V¥OLQVQSYZBBBBBBBB  
@HWI-EAS443:3:9:1482:180#0/1  
AAATTTCTGGAGGGGTGAAAACGGACGAAGGACAAGGGTT  
+HWI-EAS443:3:9:1482:180#0/1  
]]aaaa]aaa¥`aa`Ua\_\_`V`¥^Xa^S]\_\_^^)`\_^XZ  
@HWI-EAS443:3:9:1695:1049#0/1  
GAGAGGATGGGGCTTTCTGCTTTTGATGAGAGAAGAAATA  
+HWI-EAS443:3:9:1695:1049#0/1  
¥Va`\_\_¥`\_SDWZW^`¥S\_R`a]Z\_WY][][`^U\_]W\_\_[  
@HWI-EAS443:3:100:159:209#0/1  
GGCGGCATGACTTTGAAAGGGAAGGGTACTCACTGGTCGG  
+HWI-EAS443:3:100:159:209#0/1  
W]HX^^^]bbb`b^baaba^b]^a]bS]U`\_]¥^aaXMa^  
@HWI-EAS443:3:100:979:1636#0/1  
GACAGACCCATTCAAATTACTCCAAAACAGCCAAGTGGTC  
+HWI-EAS443:3:100:979:1636#0/1  
`SM`\_a^a^\_SXa]YO\_R`QGWOUYG\_^ZO¥`VBBBBB  
@HWI-EAS443:3:15:1253:1561#0/1  
GAACACATTCTGGGATCCATTCCGGTGCGAACAAGCGCTC  
+HWI-EAS443:3:15:1253:1561#0/1  
¥\_¥\_[a[bbb^[T[]a\_abb`\_PY`X]aS^ZZ\_WZa[\_a\_  
@HWI-EAS443:3:16:1599:1378#0/1  
ATTTGGTCTCATCAGGCTGACCACTTGGCTGTTTTGGGGT  
+HWI-EAS443:3:16:1599:1378#0/1  
abbbb\_[ababb\_aaaaa`\_^a^a\_]a\_`aW\_\_BBBBBB  
@HWI-EAS443:3:16:649:1961#0/1  
GGGGGGGTGAAAATGGACGAAGGACAAGGGTTGCTTATGA  
+HWI-EAS443:3:16:649:1961#0/1  
Q\_bbb[[]]b\_X`abb\_WYS\_[UW]\_YL¥^RY\_Raa^  
@HWI-EAS443:3:17:1070:163#0/1  
CGCTGTTGCATCTTCGCCATTGTTTGCTTGGCGCCAAAGT  
+HWI-EAS443:3:17:1070:163#0/1  
^b`^^`^`^a^a¥`]aa]¥a`[Va`[`]VYU]BBBBBBBB  
@HWI-EAS443:3:17:329:1634#0/1  
CGTGATCCATTCCGGTGCGAACAAGCGCTCTTGTTCTCTG  
+HWI-EAS443:3:17:329:1634#0/1  
a^NWS¥¥a\_`\_\_Z^[N¥aZVZX\_¥U`[RURO^ZUNZ^NGZ  
@HWI-EAS443:3:19:513:731#0/1  
ACTTGGCTGTTTTGGAGTAATTTGAATGGGTCTATCCAGA  
+HWI-EAS443:3:19:513:731#0/1  
`abaaaa`^Uab`Z]SUP\_¥aa`\_YF[`]P^^]OY]FOT  
@HWI-EAS443:3:21:702:1134#0/1  
GGGGCTTTCTGCTTTTGATGAGAGAAGAAATAAATACCTA  
+HWI-EAS443:3:21:702:1134#0/1  
a\_H^aTY`\_`aa[P`a`W`U\_[`^`¥^^^`\_`X\_ZSY]  
@HWI-EAS443:3:23:1075:65#0/1  
AGAGAGGATGGTGCTTTCTGCTTTTGATGAGAGAAGAGAT

+HWI-EAS443:3:23:1075:65#0/1  
H\_Z`\_b`¥Ta^M¥HL[`]^Tsy]ab]MG^^aIaTW`WGF^  
@HWI-EAS443:3:23:1129:1519#0/1  
GGTGCCGCAGGTGCTGCGGTGAAAGGAGTTGGAACAAAAG  
+HWI-EAS443:3:23:1129:1519#0/1  
^aY^[^[^a`^I`\_RXb\_VZP\_BBBBBBBBBBBBBBBB  
@HWI-EAS443:3:24:1443:1812#0/1  
GAGCGCTTGTTCGCACCGGAATGGATCCCAGAATGTGTTC  
+HWI-EAS443:3:24:1443:1812#0/1  
aba^b`bbb`abbaa\_b`b`\_a]a`\_XYaaaa`T^ab]  
@HWI-EAS443:3:26:653:624#0/1  
GATGTGCTGACCGTGCCAGGAAAATGAGGTCTTCAATCTC  
+HWI-EAS443:3:26:653:624#0/1  
abbb\_bab`bab`a`aaaa^V`aa\_\_^aXS\_aa^```\_\_\_\_  
@HWI-EAS443:3:2:1240:332#0/1  
CAGAGAACAAGAGCGCTTGTTCGCACCGGAATGGATCACA  
+HWI-EAS443:3:2:1240:332#0/1  
a]b]XZ^¥aaaa`Qa[a\_b\_a]a^`ZF\_¥V\_¥a^^ZNHS\_  
@HWI-EAS443:3:33:1632:577#0/1  
AATTTCTGGAGGGGTGAAAATGGACGAAGGACAAGGGATG  
+HWI-EAS443:3:33:1632:577#0/1  
`aaab```]aSbb]bUa\_¥]\_^a¥Ra]Zaa`OG\_S\_UH`a  
@HWI-EAS443:3:33:564:939#0/1  
CCCCGGGAGATTCTACATCCAAATGTGCACTGAACTCAA  
+HWI-EAS443:3:33:564:939#0/1  
abbab\_]\_aa``aaa\_Y\_]a`]^S[a``ZYUa]^^^Y[  
@HWI-EAS443:3:33:884:1011#0/1  
CACATATCTCAAAGGAAAATTTCAAACAGCTGCCAGAG  
+HWI-EAS443:3:33:884:1011#0/1  
aaaa[MZaaaaaVab\_b\_aaaYT^``\_^a]a^^\_V\_Z\_^`  
@HWI-EAS443:3:34:1666:2012#0/1  
AACACTTCCCAGAAGGTCTGGTGCCGCAGGTGCTGCGTTT  
+HWI-EAS443:3:34:1666:2012#0/1  
abab`aa```^`U¥aa¥`a^USaWONBBBBBBBBBBBBBB  
@HWI-EAS443:3:34:519:1469#0/1  
GGCCAGCACTCATTCTGAGGGGATCAGTTGCACATAAATC  
+HWI-EAS443:3:34:519:1469#0/1  
a]RZb\_bZ\_a¥PX``bLbRa0QTZXXZZaV¥^a]JaQ`PB  
@HWI-EAS443:3:36:189:1313#0/1  
GACATAAGGAGAGTTTGGCGCCAAGCAAACAATGGCGAAG  
+HWI-EAS443:3:36:189:1313#0/1  
\_]I\_0]Z`\_U^`[]¥][\_]`bb¥a\_ZU\_URNZGI[a]V[W  
@HWI-EAS443:3:36:768:261#0/1  
GTGGGGGTGAAAATGGACGAAGGACAAGGGTTGCTTATGA  
+HWI-EAS443:3:36:768:261#0/1  
aV\_]`aaVaZ[``aa`a\_\_\_\_]a\_\_V^```[U[^V][RTXY  
@HWI-EAS443:3:40:1191:1816#0/1  
GAGCGCTTGTTCGCACCGGAATGGATCCCAGAATGTGTTC  
+HWI-EAS443:3:40:1191:1816#0/1  
a^RaVMa[a¥PH[YUSURRa`[SIKU¥ab`ULNWPYa\_]\_

@HWI-EAS443:3:43:1175:1129#0/1  
ATTTGGTCTCATCAGGCTGACCACTTGGCTGTTTTGGGGT  
+HWI-EAS443:3:43:1175:1129#0/1  
abbaaaaaaaaaa`baaa`\_a`aaaa`a`GYa\_UQDRY  
@HWI-EAS443:3:44:1570:194#0/1  
GAGTGATTGGTGAATCGGGAGATTCTACATCCAAATGTG  
+HWI-EAS443:3:44:1570:194#0/1  
\_X\_N```a`\_T`¥P¥ZT\_¥ZO`W[WYVWOKXRVTNUUQR  
@HWI-EAS443:3:46:677:1013#0/1  
CAATGATGGATCAAGTAAGAGAAAGTCGAAACCCAGGTGC  
+HWI-EAS443:3:46:677:1013#0/1  
aaa¥NY`\_ba`YYWQ[`Y`X\_Y`a`VW]XW]QROOYPDTU  
@HWI-EAS443:3:48:454:1827#0/1  
GAGCGCTTGTTCGCACCGAATGGATCCCAGAATGTGTTC  
+HWI-EAS443:3:48:454:1827#0/1  
]baaVbababaa\_baabbabbb[aba^U\_bbaa\_aN`b`H  
@HWI-EAS443:3:49:1502:1257#0/1  
ACGGGGAGCGCCAGGATGCCACAGAAATCAGAGCATCTGG  
+HWI-EAS443:3:49:1502:1257#0/1  
^[ab`a¥UUQ¥`baaZ]aP¥OY\_a`P\_UZU`XZ\_[XR]BB  
@HWI-EAS443:3:4:1657:1949#0/1  
CATAAATCCTGCCTGCCTGCTTGTGTGTATGGGCTTGGAG  
+HWI-EAS443:3:4:1657:1949#0/1  
`bbbaaaVKbUa\_a`Ya`\_\_b¥\_[[V[`K`bQaUUa`BBB  
@HWI-EAS443:3:53:25:1446#0/1  
GGCGAGTGCTGACCGTGCCAGGAAAATGAGGTCTTCAATC  
+HWI-EAS443:3:53:25:1446#0/1  
a`\_bababa`aa`aa\_a`W]a^[a`\_\_XX[¥Q^`\_`\_V¥T  
@HWI-EAS443:3:56:1152:1254#0/1  
ATCCAGAATAGCATAACAATAGAGAGGATGGTGTCTTATG  
+HWI-EAS443:3:56:1152:1254#0/1  
¥\_\_`]P]`b[Z[Y`X^PWZ^Y`V^\_¥PZ[]WRZNV¥WDLJ  
@HWI-EAS443:3:56:518:882#0/1  
GGTGCTTTCTGCTTTTGATGAGAGAAGAAATAAATACATA  
+HWI-EAS443:3:56:518:882#0/1  
]YZ^\_a¥^bZXTTYb^^a\_YS^I^Q\_abXTaba^]]\_G\_¥  
@HWI-EAS443:3:59:631:183#0/1  
GACGGGGAGCGCCAGGATGCCACAGAAATCAGAGCATCTG  
+HWI-EAS443:3:59:631:183#0/1  
W¥a`aa\_^aaa[bbbb¥Z¥a^Uaab[b`abaa`\_]S`a\_  
@HWI-EAS443:3:61:19:803#0/1  
GAGCGCTTGTTCGCACCGAATGGATCCCAGAATGTGTTC  
+HWI-EAS443:3:61:19:803#0/1  
a``aba`bb`aba]^\_aaa[X[\_\_\_TV`a[XV[UX]MUJ]Y  
@HWI-EAS443:3:63:573:1161#0/1  
GAACACATTCTGGGATCCATTCCGGTGCGAACAAGCGCTC  
+HWI-EAS443:3:63:573:1161#0/1  
``abbbababaa\_a``aaaaaa[`W]`\_a\_\_`^]¥^¥\_a  
@HWI-EAS443:3:65:133:873#0/1  
CGTCGCTCTTGTCTCTGATATGTGGCATCATTCAGGTTG

+HWI-EAS443:3:65:133:873#0/1  
ab`bab`Z\_JP\_````]VY`WY]W^[TW[V]W  
@HWI-EAS443:3:66:378:127#0/1  
CACAACTACTGAGTTTGCAGTTCAGTGCACATTTGGATGTA  
+HWI-EAS443:3:66:378:127#0/1  
abaXbbS^U[\_NRaaa^YaQZWP`]a\_a^\_a\_]VV`V`\_`  
@HWI-EAS443:3:67:712:790#0/1  
GAGCGCTTGTTCGCACCCGAATGGATCCCAGAATGTGTTC  
+HWI-EAS443:3:67:712:790#0/1  
abaabbbbabbb\_bbbbaababbbbbb]ZX]b^babaaa  
@HWI-EAS443:3:70:854:1109#0/1  
AGGGGTCAGCACTCATTCTGAGGGGATCAGTTGCACATAA  
+HWI-EAS443:3:70:854:1109#0/1  
T\_YQ\_V`W\_`Z`^`T`]`b`a^XQWW^[^\_Y]Y\_]X`^`W`  
@HWI-EAS443:3:71:237:1783#0/1  
GAAGGACCCTAAGAAAACAGGAGGCCATATATAGAGAC  
+HWI-EAS443:3:71:237:1783#0/1  
\_bb\_`[bab\_bbbabbabab`a`a\_babb`bbbabaaaba  
@HWI-EAS443:3:72:1044:1617#0/1  
GAGCGCTTGTTCGCACCCGAATGGATCCCAGAATGTGTTC  
+HWI-EAS443:3:72:1044:1617#0/1  
[\_bbbbb`\_`bbbb`b[T\_b`bbb\_bba`a`aa]]`a[  
@HWI-EAS443:3:72:981:1612#0/1  
AATTTCTGGAGGGGTGAAAATGGACGAAGGACAAGGGACC  
+HWI-EAS443:3:72:981:1612#0/1  
]TZ]\_]WY`WZ\_ZRDSXTPU`YVT`a`Y`YUWRQQ`UY`SJ  
@HWI-EAS443:3:75:383:67#0/1  
GACCTGCTGTTGCATCTTCGCCATTGTTTGCTTGGCGGCA  
+HWI-EAS443:3:75:383:67#0/1  
`bbb\_\_bb^`b`PaZSSUWaGQYa`N]aa]YR^0`U^DKI  
@HWI-EAS443:3:78:1020:1033#0/1  
GCTCCAAGCAAACAATGGCGAAGATGCAACAGCAGGTCTT  
+HWI-EAS443:3:78:1020:1033#0/1  
aa\_a\_a`Ya`QXSa`Y`Y]aXYUZ\_VRWRN\_\_[\_`MMMS  
@HWI-EAS443:3:7:1508:1742#0/1  
GAGCGCTTGTTCGCACCCGAATGGATCCCAGAATGTGTTC  
+HWI-EAS443:3:7:1508:1742#0/1  
Zab`babbb\_bbbbaabbb[Y[abaab^`P^^[YaZKUPKK  
@HWI-EAS443:3:7:450:1029#0/1  
GCGTGCCACATATCAGAGAACAAGAGCGCTTGTTCGCACC  
+HWI-EAS443:3:7:450:1029#0/1  
ab``aaa`aaaaa^a\_a\_a^`\_]``\_aa\_`V`VW^^\_W^  
@HWI-EAS443:3:81:1136:364#0/1  
ATTTGGTCTCATCAGGCTGACCACTTGGCTGTTTTGGGGN  
+HWI-EAS443:3:81:1136:364#0/1  
``^aaa`ZaKW^]aaa``[Z[^]`]\_a\_\_\_`G`\_]BBBB  
@HWI-EAS443:3:83:593:1752#0/1  
AACGCTGAGATTGAAGACCTCATTTCCTGGCACGGTTAG  
+HWI-EAS443:3:83:593:1752#0/1  
aa\_\_`\_]`\_^\_^\_Z\_\_`]`^`^]\_^Z\_]X SX]] [RXX^\_`



@HWI-EAS443:3:84:730:584#0/1  
TGTTTTCTGCTTTTGATGAGAGAAGAAATAAATACCTAGA  
+HWI-EAS443:3:84:730:584#0/1  
aWDYaYU]QXZWW`\_a\_W^P]X`VX^`\_\_\_\_\_`¥\_W\_\_\_\_  
@HWI-EAS443:3:85:1692:1556#0/1  
ATTTGGTCTCATCAGGCTGACCACTTGGCTGTTTTGGGGG  
+HWI-EAS443:3:85:1692:1556#0/1  
aaa`b\_0`a[aaa`a¥HX`^aI[\_adW^Tq]\_^BBBBBB  
@HWI-EAS443:3:8:853:1250#0/1  
GTTTTCATTTGGTCTCATCAGGCTGACCACTTGGCTGGTT  
+HWI-EAS443:3:8:853:1250#0/1  
aYZPZ\_XZVU[]P[^^^^]ZQLYQIHHSVQUUZBBBBBB  
@HWI-EAS443:3:91:420:779#0/1  
CANTGCTGGGAAGGACCCTAAGAAAACAGGAGGCCATA  
+HWI-EAS443:3:91:420:779#0/1  
aZD^ababbbbUbaba`aab^a`aba`abaaaaa\_\_aaa  
@HWI-EAS443:3:91:460:940#0/1  
GACGGTCTCCTGTTTTCTTAGGGTCTTCCCAGCACTG  
+HWI-EAS443:3:91:460:940#0/1  
aba]aaXX^`^a\_a^Q\_\_¥\_V`\_X]¥\_\_¥\_\_^¥UX^VVV^  
@HWI-EAS443:3:93:450:1313#0/1  
ACCATAGAGAGGATGGTGCTTTCTGCTTTTGATGAGAGAA  
+HWI-EAS443:3:93:450:1313#0/1  
Z]H]TX\_QTX\_¥\_`aa\_ZWN[W[WRRYBBBBBBBBBBBB  
@HWI-EAS443:3:94:390:1515#0/1  
GGCGCTTTCTGCTTTTGATGAGAGAAGAAATAAATACCTA  
+HWI-EAS443:3:94:390:1515#0/1  
\_`L[WUZ¥`^ba]bY`^aa^Taaa]\_`a`^a`aaa`a]ab  
@HWI-EAS443:3:9:1416:928#0/1  
GAGCGCTTGTTCGACCCGAATGGATCCCAGAATGTGTTC  
+HWI-EAS443:3:9:1416:928#0/1  
a\_a`a`^aa\_a\_a^a\_X`\_\_Za^¥]U\_]W\_]¥a`¥\_`^\_Q  
@HWI-EAS443:3:11:668:1400#0/1  
AGCCCATACACACAAGCAGGCNGGCAGGATTTATGTGCAA  
+HWI-EAS443:3:11:668:1400#0/1  
a`S`\_ababbb`aZaaa]aa\_KDSW¥bXaT¥\_\_QBBBBBB  
@HWI-EAS443:3:11:804:126#0/1  
TGCTGTTNCATCTTCGCCATTGTTTGCTTGGCGCCAACT  
+HWI-EAS443:3:11:804:126#0/1  
abaab[WD^aaa`\_a\_]aa]]a]Y``[\_`^`QQOYWPW  
@HWI-EAS443:3:13:1526:420#0/1  
CATTGCCCTCTGGCAGCTGTTNGAAATTTTCCTTTGAGG  
+HWI-EAS443:3:13:1526:420#0/1  
abbaa`a`aaa`a`\_`aa`aba¥D]`^aaaaa¥Zaa\_`^`\_  
@HWI-EAS443:3:14:1173:267#0/1  
TGGGCATGACTNTGAAAGGGAAGGTACTIONACTGGTCGGG  
+HWI-EAS443:3:14:1173:267#0/1  
a[\_[`^`\_\_^VDZa\_YZ\_¥aW¥``\_Q¥¥Z[TZ¥\_¥W¥^¥^  
@HWI-EAS443:3:14:921:367#0/1  
GGTGCNGCAGGTGCTGCGGTGAAAGGAGTTGGAACAATAG

+HWI-EAS443:3:14:921:367#0/1  
aa\_b[D[a\_a`¥a`\_aR`aUaY\_\_\_\_N\_Y\_^]Y^W\_YZY^  
@HWI-EAS443:3:20:1630:1767#0/1  
CAAGTGGTCAGCCTGATGNGACCAAATGAAAACCCAGCTC  
+HWI-EAS443:3:20:1630:1767#0/1  
Zab`Z`bRa``babbb`YDY`Yba\_aa`aaa[X[`\_[[\_  
@HWI-EAS443:3:22:76:891#0/1  
GGTGTCTTCTGCTTTTATGAGAGAAGAAATAAATACCTA  
+HWI-EAS443:3:22:76:891#0/1  
a`\_bbaabb`[`abb]D¥ab`aaaa`aa`aaaaaa``b  
@HWI-EAS443:3:25:630:534#0/1  
TAACAATAGAGAGGATGGTGCTTTCTGCTTNTGATGAGAG  
+HWI-EAS443:3:25:630:534#0/1  
abb`aababaaabaaaa\_W\_[]aa\_a`Ua^D^a\_aa\_`]  
@HWI-EAS443:3:25:896:1712#0/1  
CTGCTGTTGCATNTTCGCCATTGTTTGCTTGGCGCCAAAC  
+HWI-EAS443:3:25:896:1712#0/1  
`\_ba```[¥`^D^`^aa`\_b`aaa]\_\_\_\_^```^G^ba  
@HWI-EAS443:3:26:1372:1437#0/1  
GGCTTGCAGTAGCAAGTGGGNATGACTTTGAAAGGGAAGG  
+HWI-EAS443:3:26:1372:1437#0/1  
a\_a`a`aV`a`\_aU^\_WDV^a¥\_W```¥¥^```\_¥¥¥  
@HWI-EAS443:3:28:708:292#0/1  
GAGCATCTGTCCGAAGAATGATNGGTGGAATCGGGAGATT  
+HWI-EAS443:3:28:708:292#0/1  
`\_O\_[]WX\_[V¥QOQM\_L^YQZDV`GZQ]BBBBBBBBBBB  
@HWI-EAS443:3:29:1140:1268#0/1  
TGGGTTTTTATTGTTGCTCATCAGGCTGACCACTTNGCTG  
+HWI-EAS443:3:29:1140:1268#0/1  
abab\_baababbabaaabbbbabaaaabaaaaab[DZ\_aa  
@HWI-EAS443:3:29:1514:794#0/1  
AAGTGGTCAGCCTGANGAGACCAAATGAAAACCCAGCTCA  
+HWI-EAS443:3:29:1514:794#0/1  
`bb\_a`[abaWT\_]LDS¥b^\_\_aa\_\_aa`a`^^`\_a^^¥0  
@HWI-EAS443:3:29:573:120#0/1  
GACTAATCCAGAATAGCATAACANTAGAGAGGATGGTGCT  
+HWI-EAS443:3:29:573:120#0/1  
abababaa`]b`baab]ab`aa¥D¥`a`^\_a[a]a`¥]BB  
@HWI-EAS443:3:30:1792:350#0/1  
CATAATCACTGAGTTTGAGTTGAGTGCACATTTGGNTGTA  
+HWI-EAS443:3:30:1792:350#0/1  
a^`b`¥¥aabbbbaabb`bVbb``W]^`^abbbabJDZa¥a  
@HWI-EAS443:3:33:1587:301#0/1  
AATTTCTGGAGGNTGAAAATGGACGAAGGACAAGGGTTG  
+HWI-EAS443:3:33:1587:301#0/1  
abaabaaaa^aa¥DLa^XY^^a\_`]b^]\_^]KKTU\_OGX\_  
@HWI-EAS443:3:35:494:834#0/1  
GATTGGTGAATCGGGAGATTCTACANCCAAATGTGCACT  
+HWI-EAS443:3:35:494:834#0/1  
a]X\_``Ua\_a`\_\_X0]V`Z¥`\_`^QUDW\_X^`RNUX]]XX

@HWI-EAS443:3:36:1160:251#0/1  
CCTCTCTATTGTTNTGCTATTCTGGATTAGTCGTCATCA  
+HWI-EAS443:3:36:1160:251#0/1  
a¥¥\_]^\`UYZZ^SDLUZ^TVZTTQ[GOT[[RWUNY¥RQQP  
@HWI-EAS443:3:39:862:244#0/1  
CGGTCAGCACTCATTCTGAGGGGNTCAGTTGCACATAAAT  
+HWI-EAS443:3:39:862:244#0/1  
a\_^aabaabbaa`aaaa`^a¥YDQa]aVaaUaU`^a\_\_¥  
@HWI-EAS443:3:40:1328:1334#0/1  
CACTTGGCTGTTTTGGAGTAATTTGAANGGGTCTATCCCG  
+HWI-EAS443:3:40:1328:1334#0/1  
aababbbabb^aab]aS^L\_a\_aaYXUDVa\_J\_a`Z^[bZ  
@HWI-EAS443:3:40:1402:1012#0/1  
GAAAGAATGTGCAATATCCTCAAAGGAAAATNTCAAACAG  
+HWI-EAS443:3:40:1402:1012#0/1  
aa^a^`aa`Y¥QZ```a`Z``\_`¥QO\_W^WD[]^Z^X¥Y  
@HWI-EAS443:3:40:596:880#0/1  
TAGTCGTCATCATAATCACTGAGTTTGAGTNCAGTGCAC  
+HWI-EAS443:3:40:596:880#0/1  
\_b^`a\_¥\_b]`\_aab¥abaaaaW\_¥`V\_UYVD¥V[0]YQO  
@HWI-EAS443:3:40:726:1159#0/1  
ATTTGGTCTCATCAGGCTGACCACTTGGCTNTTTTGGAGT  
+HWI-EAS443:3:40:726:1159#0/1  
ababba\_`aaaa`aa`aaaaaa```^`YDJX^\_YVKZP  
@HWI-EAS443:3:45:1551:1269#0/1  
AACAATAGAGAGGATGGTGCTTTCTGCTTTTGATNAGAGA  
+HWI-EAS443:3:45:1551:1269#0/1  
aa`a^bababaaba`baNY^\_aa`a[¥``aa\_\_YDF\_X^[  
@HWI-EAS443:3:46:940:256#0/1  
GGTNCTTTCTGCTTTTGATGAGAGAAGAAATAAATACCTA  
+HWI-EAS443:3:46:940:256#0/1  
a`KDX`¥]¥\_Z\_`aa`a`^a]a]\_a[\_`\_^\_\_\_YT[`  
@HWI-EAS443:3:47:251:212#0/1  
GTTCAGTGCACATNTGGATGTAGAATCTCCCGATTCCACC  
+HWI-EAS443:3:47:251:212#0/1  
aaba^b\_baaaa^D^`aaaa]`aa`aV\_Z^\_aV¥\_R[¥PW  
@HWI-EAS443:3:49:1725:875#0/1  
ATAACAATAGAGAGGATGGTGCTTTTCNGCTTTTGATGAGA  
+HWI-EAS443:3:49:1725:875#0/1  
VZZXY[¥aV[b\_aba\_aSNSY]ZDDLp^Z\_a^aa[HU]  
@HWI-EAS443:3:4:1308:200#0/1  
GCACCATCTCTATTGTTATGCTATNCTGGATTAGTCG  
+HWI-EAS443:3:4:1308:200#0/1  
aa\_]`^aaaa^¥X\_```b[\_a\_a\_`¥DEZ]`W\_`\_]V]  
@HWI-EAS443:3:50:1085:1274#0/1  
TGACTTNGAAAGGAAGGGTACTCACTGGTCGGGATAGAC  
+HWI-EAS443:3:50:1085:1274#0/1  
\_Z\_¥]¥D¥`YL]WVXQ`\_ZG\_R]Y[^a¥WN[¥Y¥\_]\_]Y  
@HWI-EAS443:3:53:412:815#0/1  
AACAGCCAAGTGGTCAGCCNGATGAGACCAAATGAAAACC

+HWI-EAS443:3:53:412:815#0/1  
ab`baaabab^a\_X`a\_XDZ`\_^`a\_\_aa`a`\_`a\_^  
@HWI-EAS443:3:54:1135:1303#0/1  
ATGACTTTGAAAGGGAAGGGTACTCANTGGTCGGGATAGA  
+HWI-EAS443:3:54:1135:1303#0/1  
]\_\_aabbbba[\_`YY]\_]\_\_a\_aaUDZaaY\_aa`a^aa\_  
@HWI-EAS443:3:55:1545:172#0/1  
GTTTGAATNTTCCTTTGAGGATATTGCACATTCTTTCAT  
+HWI-EAS443:3:55:1545:172#0/1  
U`a[\_`¥`[D]a`Z`^ab`a`^`\_X[¥`a\_X`[VZa  
@HWI-EAS443:3:57:1656:964#0/1  
GCTTTCTGCTTTTGATGAGAGAAGAAATAAATNCCTAGAA  
+HWI-EAS443:3:57:1656:964#0/1  
a^aa][ab\_bbaa]^aa`[a`\_`a\_\_aa\_a[DKWaaa\_\_  
@HWI-EAS443:3:59:1052:322#0/1  
TCATAATCACTGAGTTTGAGNTCAGTGCACATTTGGATGT  
+HWI-EAS443:3:59:1052:322#0/1  
aaaa`abaa\_ab\_a[aab`WDYa`\_]aa`a`]^`a`XX^^X  
@HWI-EAS443:3:59:1323:333#0/1  
GACGAAGGACAANGGTTGCTTATGAAAGAATGTGCAATAT  
+HWI-EAS443:3:59:1323:333#0/1  
aa`a`aa\_\_aXD^a^aaZ\_a\_aa^\_aa`a`XX`WWW\_^]  
@HWI-EAS443:3:62:705:831#0/1  
ACANAAGCAGGCAGGCAGGATTTATGTGCAACTGATCCCC  
+HWI-EAS443:3:62:705:831#0/1  
\_`ZD¥[Z`\_a^^]^`a\_P`Z]^`\_V\_ZP[SOX]X\_¥WR^`[  
@HWI-EAS443:3:64:696:1434#0/1  
CCTCTCTATTGTTATGCTATTCTGGATTANTCGTCCATCA  
+HWI-EAS443:3:64:696:1434#0/1  
aaaa`aaaa`¥aaa\_aaaa`\_]`\_`][DWa^]^`\_`\_\_\_\_  
@HWI-EAS443:3:65:1245:190#0/1  
CGACTTTCTCTTACTNGATCCATCATTGCCCTCTGGGCAG  
+HWI-EAS443:3:65:1245:190#0/1  
abb\_bbbababbb`¥D[bba`ab¥bba`\_`a\_aaaa`aY]a  
@HWI-EAS443:3:68:1297:392#0/1  
GCAGGTGCTGCGGTGAAAGGAGTTGGAACANTAGCAATGG  
+HWI-EAS443:3:68:1297:392#0/1  
`ab`¥b`aa`aaYa[]\_\_a[^`a`aX\_[WDW¥ZYZZ¥\_\_  
@HWI-EAS443:3:69:1506:525#0/1  
TCCAAATGTGCACTGAACTCAAACCTCAGTGATTATNATGG  
+HWI-EAS443:3:69:1506:525#0/1  
aaaaabab`ba\_[`aaa`a\_a]a\_a`\_`a^a^aaZDT^a]  
@HWI-EAS443:3:69:718:626#0/1  
ATGAGAGAAGAAATAAANACCTAGAAGAGCATCCCAGTGC  
+HWI-EAS443:3:69:718:626#0/1  
aab]aWTQVbS\_^YZRD^a^a`TV¥Y`WT^Y`aU[¥U\_a  
@HWI-EAS443:3:6:282:1103#0/1  
GATGGTGCTTTCTGCTTTTGATNAGAGAAGAAATAAATAC  
+HWI-EAS443:3:6:282:1103#0/1  
aa^aZ[aaa`a`]^`aaaa`^VDW]]^a`^`\_\_\_\_a\_a^\_X

@HWI-EAS443:3:70:1402:363#0/1  
ATAACAATAGAGAGGATGGTGCTTTNTGCTTTTGATGAGA  
+HWI-EAS443:3:70:1402:363#0/1  
a\_a\_a`\_a\_a[b¥b^a^ba]a`a]TDZa0``a`\_Z^`X\_X  
@HWI-EAS443:3:72:1221:1023#0/1  
CCTGGGTTTCGACTTTCTTACTTGATCCATCNTTGCCC  
+HWI-EAS443:3:72:1221:1023#0/1  
aabbUaTaSU\_XXSaa\_X]^^[¥NZYWaBBBBBBBBBBBB  
@HWI-EAS443:3:73:1175:1336#0/1  
GCGCCAAGNAAACAATGGCGAAGATGCAACAGCAGGTCTT  
+HWI-EAS443:3:73:1175:1336#0/1  
aaaaaa\_ZD[`]^aa[R`Z^[]`XT^\_[a^`P^ZUSVW^^  
@HWI-EAS443:3:73:808:1177#0/1  
AGGGTTGCTTNTGAAAGAATGTGCAATATCCTCAAAGGAA  
+HWI-EAS443:3:73:808:1177#0/1  
ab``aabbb]D^bababa]bbaaabababaaabba`aaaa  
@HWI-EAS443:3:75:937:1387#0/1  
CGAAACCCAGGAAACGCTGANATTGAAGACCTCATTTTCC  
+HWI-EAS443:3:75:937:1387#0/1  
aababbbbbbbbbbabab^D[babbabab`bbbbabb`b  
@HWI-EAS443:3:76:1594:1433#0/1  
CATGACTTTGAAAGGGAAGGTNCTCACTGGTCGGGATAG  
+HWI-EAS443:3:76:1594:1433#0/1  
a^^````ab`[a``Zaaaa¥KDVa\_aa\_]aWaa`R]\_\_  
@HWI-EAS443:3:76:1704:1580#0/1  
CAACACTTCCCAGAAGGTCTGGNGCCGCAGGTGCTGCGGT  
+HWI-EAS443:3:76:1704:1580#0/1  
abba^ab`^b`ab]\_^a\_aba¥DZa``a``Pbaab``^U  
@HWI-EAS443:3:76:472:1038#0/1  
CCTGCTGTTGCATCTTCGCCATTGTTTGCTTGNCGCCAAA  
+HWI-EAS443:3:76:472:1038#0/1  
abbbbbbb`a`aW`aaabaaa]aa`\_aa[a`\_UDPZ\_\_WWS  
@HWI-EAS443:3:77:769:1709#0/1  
CTAATCNAGAATAGCATAACAATAGAGAGGATGGTGCTTT  
+HWI-EAS443:3:77:769:1709#0/1  
a^^^^]D^abaaaaaaaa]aaa[aYa\_a\_`^`H`YUX`  
@HWI-EAS443:3:79:1294:1122#0/1  
GTGCACATTTGGATGTAGAATCNCCCGATTCCACCAATCA  
+HWI-EAS443:3:79:1294:1122#0/1  
¥Za¥``bbb`¥^`Z¥Z]¥\_\_a^DP¥a`P`a]``WZ`Y`\_\_  
@HWI-EAS443:3:79:1352:517#0/1  
GTTTTGGAGTAATTTGAANGGTCTATCCCGACCAGTGAG  
+HWI-EAS443:3:79:1352:517#0/1  
aabaab[ab\_aX`aaaa^D^`]SW\_a``\_\_a`aGa`^\_[`  
@HWI-EAS443:3:80:1266:1753#0/1  
GCAGAAANCACCATCCTCTCTATTGTTATGCTATTCTGGA  
+HWI-EAS443:3:80:1266:1753#0/1  
a``¥`aYD¥a[a``XXa^`^a``[[^\_\_a\_U^[^\_]]¥^¥  
@HWI-EAS443:3:81:1042:1023#0/1  
CTGAACTCAAACCTCAGTGANTATGATGGACGACTAATCCA

+HWI-EAS443:3:81:1042:1023#0/1  
\_`¥]Z`\_a`[¥`^`^[\_aWD]a[a]aa\_P^¥`aa`\_\_N]a  
@HWI-EAS443:3:8:1212:1519#0/1  
GAATGTGCAATATCNTCAAAGGAAAATTTCAAACAGCTGC  
+HWI-EAS443:3:8:1212:1519#0/1  
X¥b\_bYabbbbb]DZabb`bbbbbaaab`aaa`aaaaa¥  
@HWI-EAS443:3:8:1694:1202#0/1  
TAACAATAGAGAGGATGGTGCNTTCTGCTTTTGATGAGAG  
+HWI-EAS443:3:8:1694:1202#0/1  
aaa``aba\_\_b^aa`^Y][aODY\_W[\_Y\_^a`\_U]^Y^P^  
@HWI-EAS443:3:92:1336:1233#0/1  
GTGCAATATCCTCAAAGGAAAATTTCAACAGCTGCCAG  
+HWI-EAS443:3:92:1336:1233#0/1  
a`aababa`\_\_a\_]aaaaaa\_baaVD¥a``a[```^0^V  
@HWI-EAS443:3:92:980:643#0/1  
ACGACTAATCCAGAATAGCATNACAATAGAGAGGATGGTG  
+HWI-EAS443:3:92:980:643#0/1  
abbaba`aa^`bb`a`a``^D¥`a`aaa\_a`aa`a`[R`  
@HWI-EAS443:3:94:503:1837#0/1  
ATGGTCTTTCTGCTTTTATGAGAGAAGAAATAAATACC  
+HWI-EAS443:3:94:503:1837#0/1  
aa`\_W`baaa^a`\_ba\_PDT`\_`a`a^`\_aaa`aaa\_aa0  
@HWI-EAS443:3:98:626:462#0/1  
CACTTCCCAGAAGGTCTGGTGCCGCGGGTCTGCGGTGAA  
+HWI-EAS443:3:98:626:462#0/1  
aaaa`a`]`a``aa¥\_aaa]a^``YD[aZa^¥`¥aaR`VZ  
@HWI-EAS443:3:98:761:1796#0/1  
CGAAGGACAAGGGTTGCTTATGAAAGAANGTCAATATCC  
+HWI-EAS443:3:98:761:1796#0/1  
abYS¥baa`aRY`\_]`\_]\_a]¥]abaXRD]^`[Z^\_a^\_a  
@HWI-EAS443:3:11:608:654#0/1  
TAACAATAGAGAGGATGGTCTTTCTGCTTTTGATGAGGG  
+HWI-EAS443:3:11:608:654#0/1  
`a`\_a¥`U¥a]RVaaZa^M[N]aa`[^JU\_aaVLSUNIQa  
@HWI-EAS443:3:12:917:1428#0/1  
GCGCTTTCTGCTTTTGATGAGAGAAGAAATAAATACCTAG  
+HWI-EAS443:3:12:917:1428#0/1  
^F¥]XYX^]`¥\_^\_]RW\_a]aU\_UX^XX^X^`¥\_aS\_Q\_^^  
@HWI-EAS443:3:14:303:2029#0/1  
ACGGGCTTGCAAGTGGGCATGACTTTGAAAGGGA  
+HWI-EAS443:3:14:303:2029#0/1  
a`W[`aWZ]Va\_WaZTW\_[S^¥¥`\_ZZ[NW^`Y^`\_¥¥¥\_  
@HWI-EAS443:3:17:145:1947#0/1  
GCGTTCAGTGCACATTTGGATGTAGAATCTCCCGATTCCA  
+HWI-EAS443:3:17:145:1947#0/1  
^K\_Q¥`S]ZU`aa¥^]HYa\_[Z^ZZ\_Z][ ]\_^THYX\_]`  
@HWI-EAS443:3:17:169:1091#0/1  
TGGGGATCCATTCCGGTGCGAACAAGCGCTCTTGTCTCT  
+HWI-EAS443:3:17:169:1091#0/1  
a`X\_S\_^a`a]`\_\_a\_[^`\_^¥```¥¥\_\_¥¥\_ZBBBBBBB

@HWI-EAS443:3:17:356:1882#0/1  
AATTACTCCAAAACAGCCAAGTGGTCAGCCTGATGAGAGC  
+HWI-EAS443:3:17:356:1882#0/1  
a^^^QW^]YV[GQ`X\_YT\_^ZWO^RaBBBBBBBBBBBBBB  
@HWI-EAS443:3:18:228:1379#0/1  
CGGGCAGGCAGGATTTATGTGCAACTGATCCCCTCAGAAT  
+HWI-EAS443:3:18:228:1379#0/1  
a`\_]\_\_]]S\_¥Y]OJM[LMYGX^]a^KZQNLXX[SS]X^R^  
@HWI-EAS443:3:21:1582:413#0/1  
GGGGTCAGCACTCATTCTGAGGGGATCAGTTGCACATAAA  
+HWI-EAS443:3:21:1582:413#0/1  
¥TW]TPDPQ`KPN¥VPQM\_MNBBBBBBBBBBBBBBBBBB  
@HWI-EAS443:3:21:214:1893#0/1  
AACACATTCTGGGATCCATTCCGGTGCGAACAAGCGCTCT  
+HWI-EAS443:3:21:214:1893#0/1  
[\_`baa`a`\_`\_a\_a`^^`\_W][V^]¥a¥^a`\_aZ^`^  
@HWI-EAS443:3:21:369:1981#0/1  
GGTTTCTGCTTTTGATGAGAGAAGAAATAAATACCTAGAA  
+HWI-EAS443:3:21:369:1981#0/1  
a\_N]`b¥`aaa`\_V[^^^aa`aaaaaaaaa^aZ^`a`\_`  
@HWI-EAS443:3:22:853:1586#0/1  
TGGGGAGCGCCAGGATGCCACAGAAATCAGAGCATCTGGC  
+HWI-EAS443:3:22:853:1586#0/1  
ZTUMXYW[ZTZW^[^^a^]Paa]R`VZXXHNSWLUSVGZ  
@HWI-EAS443:3:23:1095:99#0/1  
CNAATCCAGAATAGCATAACAATAGAGAGGATGGTGCTTT  
+HWI-EAS443:3:23:1095:99#0/1  
YD^abbabbaababaabbaa\_\_babab`bb`^aaZaS\_aa  
@HWI-EAS443:3:24:799:1236#0/1  
GCTGCTTATGAAAGAATGTGCAATATCCTCAAAGGAAAAT  
+HWI-EAS443:3:24:799:1236#0/1  
`baabbbabbab`aabbaabaabaabaabaabaabbbbaa  
@HWI-EAS443:3:27:1232:2020#0/1  
CATAATCACTGAGTTTGAGTTCAGTGACATTTGGATGNA  
+HWI-EAS443:3:27:1232:2020#0/1  
a`\_aa`aa`a\_a\_a`a`aa`a`\_Xaa`\_aa^`^^^XDX  
@HWI-EAS443:3:29:1399:446#0/1  
AACACATTCTGGGATCCATTCCGGTGCGAACAAGCGCTCT  
+HWI-EAS443:3:29:1399:446#0/1  
^R]aaabaaabaa^SXZaaa`[a\_^a`Y¥Y`^`X]¥]T\_  
@HWI-EAS443:3:2:185:1761#0/1  
GCGCGAACAAGCGCTCTTGTCTCTGATATGTGGCATCAT  
+HWI-EAS443:3:2:185:1761#0/1  
aH[P`Y\_\_`\_T\_\_X\_]HX^U\_^`[V¥X[S^\_H^UG]B  
@HWI-EAS443:3:2:673:173#0/1  
CCGGGATCCATTCCGGTGCGAACAAGCGCTCTTGTCTCT  
+HWI-EAS443:3:2:673:173#0/1  
a\_abb¥]\_]^`¥a`^U¥V][YPY¥]PZSUPSU¥WSWSBB  
@HWI-EAS443:3:30:1230:1204#0/1  
GTGGTCCTCCTGTTTTCTTAGGGTCCTTCCCAGCACTGGG

+HWI-EAS443:3:30:1230:1204#0/1  
¥YbaT]ba¥[[[]baabZ\_\_\_\_][F^X`L`a`TV]]¥aa[a  
@HWI-EAS443:3:30:210:1319#0/1  
CAGCATCTTCGCCATTGTTTGCTTGGCGCCAAACTCTCCT  
+HWI-EAS443:3:30:210:1319#0/1  
aaaba\_a`aa^ab`aa[\_a`^b``\_Zb¥aaa`Xa\_a\_a]\_  
@HWI-EAS443:3:31:1375:366#0/1  
CTTCCTGTTTTCTTAGGGTCCTTCCCAGCACTGGGATGCT  
+HWI-EAS443:3:31:1375:366#0/1  
abbX^a`abaaaaa[`a`aa\_a`[^[a\_]a\_a`^¥Z^aZ^  
@HWI-EAS443:3:32:1410:568#0/1  
GCGAGTGCTGACCGTGCCAGGAAAATGAGGTCTTCAATCT  
+HWI-EAS443:3:32:1410:568#0/1  
abaaa[baaaaa\_^ZSTQXaa¥`^Z[M[Y[VV¥¥^ZX`¥\_  
@HWI-EAS443:3:32:398:1420#0/1  
CCGGGAGCGCCAGGATGCCACAGAAATCAGAGCATCTGT  
+HWI-EAS443:3:32:398:1420#0/1  
ab]a`a`b`aa¥[\_^¥]\_aa`a]\_`^`a]\_Y^^^\_W¥S  
@HWI-EAS443:3:33:1253:1054#0/1  
GGGCTGGGTTTTTCATTTGGTCTCATCAGGCTGACCACTTG  
+HWI-EAS443:3:33:1253:1054#0/1  
ZX\_\_^aa`\_bbb][``]Z^V[R^`\_aaa`\_Z]TYQWY`^F  
@HWI-EAS443:3:33:1638:857#0/1  
AGGATGCCACATATCAGAGAACAAGAGCGCTTGTTCGCAC  
+HWI-EAS443:3:33:1638:857#0/1  
]HXQ][WVTY\_^]STaZZZ[[aR]SZaaZYLDMTSXW\_Q  
@HWI-EAS443:3:33:170:993#0/1  
GCGGTCTCCTGTTTTCTTAGGGTCCTTCCCAGCACTGGG  
+HWI-EAS443:3:33:170:993#0/1  
`bbTF\_a`aa`\_`a[abaaaW[Qaaa]\_aULTU\_¥\_Za^  
@HWI-EAS443:3:34:1104:1134#0/1  
GAATTAGTCGTCCATCATAATCACTGAGTTTGAGTTCAGT  
+HWI-EAS443:3:34:1104:1134#0/1  
aaa`X¥aaaaaa[¥`\_a^^^aaY[Y\_Y]Uaa^U^V^NQRN  
@HWI-EAS443:3:34:1599:2036#0/1  
GCTGAGAGAAGAAATAAATACCTAGAAGAGCATCCCAGTG  
+HWI-EAS443:3:34:1599:2036#0/1  
a`a\_Va\_S[aW^`\_]^\_]^]T[Y^X]¥¥XVVYUUNWWBB  
@HWI-EAS443:3:34:632:1343#0/1  
ATAGCATCCCAGTGCTGGGAAGACCCTAAGAAAACAGGA  
+HWI-EAS443:3:34:632:1343#0/1  
aaZ]a`aaaaa[\_``\_\_\_a`¥¥`¥]\_\_`][`¥`^¥¥^Y¥  
@HWI-EAS443:3:35:979:576#0/1  
GTTCCAACCTTTTACCAGCAGCACCTGCGGCACCAGAAC  
+HWI-EAS443:3:35:979:576#0/1  
`]a^Y¥¥]`X\_\_^V\_]`XWU\_a\_XYVY]YTMWV¥BBBBBB  
@HWI-EAS443:3:37:514:84#0/1  
GACTAATCCAGAATAGCATAACAATAGAGAGGATGGTGGT  
+HWI-EAS443:3:37:514:84#0/1  
a\_a``¥a``]aa`^`^`\_`WX`a`]¥aO\_¥WW``]ZDH



@HWI-EAS443:3:42:1782:780#0/1  
GCGGTCCTCCTGTTTTCTTAGGGTCCTTCCCAGCACTGGG  
+HWI-EAS443:3:42:1782:780#0/1  
abba^`abaa\_¥]aaa\_`ba^aa^`abaaa^^Y]\_\_^]a^  
@HWI-EAS443:3:44:1462:945#0/1  
TGCTGCTGTTGCATCTTCGCCATTGTTTGCTTGGCGCCAA  
+HWI-EAS443:3:44:1462:945#0/1  
a^abbabb]`\_]\_\_^aa]`^`¥¥a]`a^HY\_\_H¥Y]YWSV  
@HWI-EAS443:3:46:847:1498#0/1  
TCGGGTCCTCCTGTTTTCTTAGGGTCCTTCCCAGCACTGG  
+HWI-EAS443:3:46:847:1498#0/1  
aa^a`RaaaaYa`aab`aa¥]W\_¥a\_```[\_a[^^]`\_\_  
@HWI-EAS443:3:4:1169:88#0/1  
TGCAACAGCAGGTCTTACTCATATCATGATTTGGCATTAC  
+HWI-EAS443:3:4:1169:88#0/1  
¥a¥`aa\_¥`\_baaab]V¥\_ZQa^G[\_aJZIXGZabT^HG  
@HWI-EAS443:3:4:1203:1910#0/1  
ACCCCGACCAGTGAGTACCCTTCCCTTTCAAAGTCATGCC  
+HWI-EAS443:3:4:1203:1910#0/1  
a`[\_¥^b^^aa¥Z^aW\_PP^a¥WS¥a\_\_Y]^SUSW¥¥UWU  
@HWI-EAS443:3:4:83:1099#0/1  
AACACATTCTGGGATCCATTCCGGTGCGAACAAGCGCTCT  
+HWI-EAS443:3:4:83:1099#0/1  
ababa\_aabaaaaa\_`a`\_\_`aa^````aa\_\_\_\_V\_\_\_\_U`  
@HWI-EAS443:3:54:1252:1856#0/1  
TTTGGATGTAGAATCTCCCGATTCCACCAATCATTCTTAC  
+HWI-EAS443:3:54:1252:1856#0/1  
\_bbZbbb[UI\_a]a^\_XY¥aab]UY`S\_a\_UL`JODK[G¥  
@HWI-EAS443:3:5:1378:1494#0/1  
GACCTCTCTATTGTTATGCTATTCTGGATTAGTCGCCAT  
+HWI-EAS443:3:5:1378:1494#0/1  
aYRK\_X¥¥V^a`[^0\_]``Ya^Z¥XMU¥aZ¥RUaGZBBB  
@HWI-EAS443:3:5:993:172#0/1  
CCTCTGGGCAGCTGTTTCAAATTTTCCTTTGAGGATATNG  
+HWI-EAS443:3:5:993:172#0/1  
aab`b`b`\_`abbbbbbb\_bbbbab\_`bbb`bbaaab^DY  
@HWI-EAS443:3:60:1295:1158#0/1  
GGGGAAGGGTACTCACTGGTCGGGATAGACCCATTCAAAC  
+HWI-EAS443:3:60:1295:1158#0/1  
a^`a\_aa`Za\_`\_`\_`a`W^a\_\_¥¥```\_V`^^^U¥¥\_W  
@HWI-EAS443:3:61:1020:1698#0/1  
CACCTTCCCAGCACTGGGATGCTCTTCTAGGTATTTATTT  
+HWI-EAS443:3:61:1020:1698#0/1  
aaabbbbbabbbaa\_`[\_Zaaabaaaa`a\_[QG^^aSW¥V]  
@HWI-EAS443:3:62:1137:769#0/1  
TTTATGTGCAACTGATCCCCTCAGAATGAGTGCTGACCCA  
+HWI-EAS443:3:62:1137:769#0/1  
abbb`b\_aaaaa`bba`aaaaaa`^a`aaZaa`]b\_aaa  
@HWI-EAS443:3:63:318:615#0/1  
AACACATTCTGGGATCCATTCCGGTGCGAACAAGCGCTCT

+HWI-EAS443:3:63:318:615#0/1  
aaaba` [ [ ` a ` baaaa\_T\_aa ` ` Xaaa\_¥WZZ^` [\_\_YY  
@HWI-EAS443:3:64:1534:1004#0/1  
TTGCAGTAGCAAGTGGGCATGACTTTGAAAGGGAAGGGCA  
+HWI-EAS443:3:64:1534:1004#0/1  
aaaaaaba` \_ ` \_ ` ] aV\_\_a` \_a` aa^^Z\_\_a\_\_aYVFZ  
@HWI-EAS443:3:65:1212:943#0/1  
GCGGTTGCTTATGAAAGAATGTGCAATATCCTCAAAGGAA  
+HWI-EAS443:3:65:1212:943#0/1  
aa\_\_\_\_\_ ` ] ^ [ ^ ¥ LW ` a ` [ ZTLYOQ¥U ` ] SLL [ SPW ` X ¥ U  
@HWI-EAS443:3:65:900:187#0/1  
GTGCTTTCTGCTTTTGATGAGAGAAGAAATAAATACCTGG  
+HWI-EAS443:3:65:900:187#0/1  
a ` b ` aa^aaa\_aaaaa\_ ` a ] ` ] a\_\_a` \_ ` ` ` \_ ` \_ ^ T ^ GZ  
@HWI-EAS443:3:67:242:1561#0/1  
AGCCCTTGCTTCCTCGTCCATTTTCACCCCTCCAGAAATTT  
+HWI-EAS443:3:67:242:1561#0/1  
\_X ` ` \_ V ¥ a ¥ \_X\_abZQabaaa [ ¥ aa\_X\_ ` ^ ` baa ¥ a ` \_\_\_\_\_  
@HWI-EAS443:3:68:977:1860#0/1  
TATGAGTAAGACCTGCTGTTGCATCTTCGCCATTGTTTTTC  
+HWI-EAS443:3:68:977:1860#0/1  
[a\_[\_b`bbaaaa^aa\_Y^¥]XZ\_a`ZG[\_GLWTKW^GX  
@HWI-EAS443:3:69:429:728#0/1  
GTTGCTGCGGTGAAAGGAGTTGGAACAATAGCAATGGAGT  
+HWI-EAS443:3:69:429:728#0/1  
a^\_aa\_ ` \_ ` ¥ V V U \_ ¥ W W Z [ V ^ ] Z U ^ N R Y Z W S V N U ] \_ Y O Z L  
@HWI-EAS443:3:69:665:468#0/1  
GCTTGCAGTAGCAAGTGGGCATGACTTTGAAAGGGAAGAC  
+HWI-EAS443:3:69:665:468#0/1  
ab ` a ` bbb ` bbaa ] ` \_ a ` baaaa ` aaaaaa\_Va^a^a [   
@HWI-EAS443:3:70:106:297#0/1  
CGCTTCGCCATTGTTTGCTTGGCGCCAAACTCTCCTTATT  
+HWI-EAS443:3:70:106:297#0/1  
abbbbaabbb\_aab ` a ` bbaa ] abaa\_U ` \_ a ] ¥ V ` \_ ¥ \_ aa  
@HWI-EAS443:3:70:1181:362#0/1  
GCGGGGAGCGCCAGGATGCCACAGAAATCAGAGCATCTGT  
+HWI-EAS443:3:70:1181:362#0/1  
^E]W]Z¥ ` ^aZP]\_ ` TU ` ] ] X [ a ^ ¥ ¥ ¥ ^ S ] PPWENVUS ¥ S  
@HWI-EAS443:3:73:1084:557#0/1  
GGGGGGTAAAAATGGACGAAGGACAAGGGTTGCTTATGAA  
+HWI-EAS443:3:73:1084:557#0/1  
abbb\_b¥baa ` abaaa\_a\_aaa ` ` aaaaa ¥ \_ a \_ ` a ` ` ` ^ \_  
@HWI-EAS443:3:74:769:1255#0/1  
TGGGAGGGGTGAAAATGGACGAAGGACAAGGGTTGCTTAT  
+HWI-EAS443:3:74:769:1255#0/1  
ab^[\_bbbaW ` \_aVb]\_\_aX¥] ` ¥ Wa ` a \_ ` ` aG]aZ\_a\_ `   
@HWI-EAS443:3:75:1016:367#0/1  
TCTGGTCTCCTGTTTTCTTAGGGTCTTCCCAGCACTG  
+HWI-EAS443:3:75:1016:367#0/1  
aabbbbXaaaaaba ` bbbbaa\_ab^^ [ a ` aa^ ` \_ ` a ` a^\_a

@HWI-EAS443:3:75:1524:434#0/1  
CTGAACTCAAACCTCAGTGATTATGATGGACGACTAATCAA  
+HWI-EAS443:3:75:1524:434#0/1  
abbbb¥b¥bbb¥b\_^b]abb`]bbaabaa`ba\_\_baaYFX  
@HWI-EAS443:3:75:1609:1923#0/1  
GGTTTTTCATTTGGTCTCATCAGGCTGACCACTTGGCTGCT  
+HWI-EAS443:3:75:1609:1923#0/1  
aa^bbbbb^aabaaaaab\_aa`\_\_a`aaa\_a`aUa  
@HWI-EAS443:3:76:36:1088#0/1  
TGCCTCTCTATTGTTATGCTATTCTGGATTAGTCGTCCAT  
+HWI-EAS443:3:76:36:1088#0/1  
a`aaaa\_b\_\_a`a]a`a^`````\_a\_`^``\_`^\_Z\_]XZX^^  
@HWI-EAS443:3:78:1790:1184#0/1  
GGGAGGATGGTCTTTCTGCTTTTGATGAGAGAAGAAATA  
+HWI-EAS443:3:78:1790:1184#0/1  
aaa`a^a]a\_Za\_\_Ya`\_a`a^Y^`^W[[^``][\_`^  
@HWI-EAS443:3:78:734:1520#0/1  
CATGACTTTGAAAGGGAAGGTTACTCACTGGTCGGGATGG  
+HWI-EAS443:3:78:734:1520#0/1  
aabbb^abab`\_[[\_aa]aa¥Va`\_\_a`aa`Uaa\_\_a]`\_  
@HWI-EAS443:3:7:1271:1317#0/1  
GCGGGTCCTCCTGTTTTCTTAGGGTCCTTCCCAGCACTGG  
+HWI-EAS443:3:7:1271:1317#0/1  
`aabaT\_``Uaaa^aaa]aaVa\_`¥¥^`^\_Y]T]W]¥^a¥  
@HWI-EAS443:3:83:1079:1228#0/1  
GNTCAACACTTCCCAGAAGGTCTGGTCCCGCAGGTGCTGC  
+HWI-EAS443:3:83:1079:1228#0/1  
YDW¥]]`^\_a`^Y^]YY¥^U]^`^U`^^^YU`YSY[U[U  
@HWI-EAS443:3:84:499:512#0/1  
ACGGGTCCTCCTGTTTTCTTAGGGTCCTTCCCAGCACTGG  
+HWI-EAS443:3:84:499:512#0/1  
aV``aZ``^VXa\_[S\_a`a¥X¥aX\_]¥a[`]VVa\_ZZPZ[  
@HWI-EAS443:3:87:915:301#0/1  
GCGGGCATGACTTTGAAAGGGAAGGTTACTCACTGGTCGG  
+HWI-EAS443:3:87:915:301#0/1  
a`b\_a\_ba^a\_aaa^]¥Z\_\_]^\_a[\_Qa¥a`^`\_`\_W]\_\_  
@HWI-EAS443:3:8:1771:601#0/1  
ANGCCCATACACACAAGCAGGCAGGCAGGATTTATGTGCA  
+HWI-EAS443:3:8:1771:601#0/1  
VD^aaaaba`b`a^aaa`aaa\_a`aS^\_a¥¥a\_\_¥QU\_V¥  
@HWI-EAS443:3:93:1656:992#0/1  
GGGGGGTAAAAATGGACGAAGGACAAGGGTTGCTTATGAA  
+HWI-EAS443:3:93:1656:992#0/1  
aaa\_aaN\_RLSV]ZW^X\_¥WaaYS^N[Y\_HV\_NX\_VQXVV  
@HWI-EAS443:3:95:1576:297#0/1  
GAGCATCCCAGTGCTGGGAAGGACCCTAAGAAAACAGGGG  
+HWI-EAS443:3:95:1576:297#0/1  
`XbX]^a`aabaaWZRV`^Zaa\_ZWG]XZb^```¥^^`\_]`  
@HWI-EAS443:3:96:1640:1600#0/1  
CAAGTGGTCAGCCTGATGAGACCAAATGAAAACCCAGCCA

+HWI-EAS443:3:96:1640:1600#0/1  
aabb[b]aaab]VbY^aba¥aaTaaaaa`a\_a^\_a¥GVa  
@HWI-EAS443:3:98:1085:1688#0/1  
CGTTCCTTTCAAAGTCATGCCACTTGCTACTGCAAGCC  
+HWI-EAS443:3:98:1085:1688#0/1  
aTRYO\_]¥bbabbaba]\_^[¥Mza]aXVa¥PV`QRaaX^  
@HWI-EAS443:3:98:1315:1066#0/1  
GTGGTCTCCTGTTTTCTTAGGGTCCTCCCAGCACTGGG  
+HWI-EAS443:3:98:1315:1066#0/1  
\_O¥YYOPOG[WWR]Y]¥YLR\_[YQZYXVMQXZ\_^QPWNBB  
@HWI-EAS443:3:98:305:1207#0/1  
ATGATGGATCAAGTAAGAGAAAGTCGAAACCCAGGAAAGG  
+HWI-EAS443:3:98:305:1207#0/1  
a¥bbbbbbabWb\_a0\_HQ\_\_XJ]bLWZTa`a\_a^baaa¥GX  
@HWI-EAS443:3:100:710:1799#0/1  
CGTGAGCTGGGTTTTCATTTGGTCTCATCAGGCTGACCAC  
+HWI-EAS443:3:100:710:1799#0/1  
Zaa`ab`bb\_[YabUabb^babbaaaa`abaZbbbb^U`  
@HWI-EAS443:3:10:1652:422#0/1  
CGGGATCCATTCCGGTGCGAACAAGCGCTCTTGTCTCTG  
+HWI-EAS443:3:10:1652:422#0/1  
`bbbbbbaba\_]^^`b`baa`\_Za`\_[aZa`a[Z`^VZ`  
@HWI-EAS443:3:10:62:1190#0/1  
CGGGTCTCCTGTTTTCTTAGGGTCCTCCCAGCACTGGG  
+HWI-EAS443:3:10:62:1190#0/1  
abb`\_bb\_a`bbWaaa`aa`[\_Waaa\_a\_\_\_\_]`^\_^`\_\_  
@HWI-EAS443:3:10:791:275#0/1  
GGGTTTTCATTTGGTCTCATCAGGCTGACCACTTGGCTGG  
+HWI-EAS443:3:10:791:275#0/1  
a[VKXK¥LVSyVLVLUXRXVUURLP]OLQnQVBBBBBBB  
@HWI-EAS443:3:10:870:494#0/1  
ACCTGGGTTTCGACTTTCTTTACTTGATCCATCATTGCC  
+HWI-EAS443:3:10:870:494#0/1  
aaaaaaaX`aaaa\_a\_\_`^a`\_\_^aa^^`^[\_]`¥Z  
@HWI-EAS443:3:11:1050:861#0/1  
GTGGGTTTCGACTTTCTTTACTTGATCCATCATTGCCCT  
+HWI-EAS443:3:11:1050:861#0/1  
G[Tab[[\_`Y[\_a]Vbbbbbbababa\_¥XbU[a[\_bYbb\_  
@HWI-EAS443:3:11:1374:239#0/1  
AGGGCTTGCAGTAGCAAGTGGGCATGACTTTGAAAGGGAA  
+HWI-EAS443:3:11:1374:239#0/1  
]a\_\_^]]`^]baa`^a^bV`RZ`\_Ua][aa`a¥^Z^^`¥¥  
@HWI-EAS443:3:11:668:2039#0/1  
ATGGGTTTCGACTTTCTTTACTTGATCCATCATTGCCCT  
+HWI-EAS443:3:11:668:2039#0/1  
a`[Z\_FWa`a\_LZaQY[^aaaaa¥a`^a`\_`a`aU]\_\_SR[  
@HWI-EAS443:3:11:803:1972#0/1  
GCTTGGCTGTTTTGGAGTAATTTGAATGGGTCTATCCCGA  
+HWI-EAS443:3:11:803:1972#0/1  
a]aa\_\_`^aYZ¥`aRGNQ\_\_QW¥VY\_WMP¥GWWWsQTBBB

@HWI-EAS443:3:11:956:182#0/1  
TTGGGGAGCGCCAGGATGCCACAGAAATCAGAGCATCTGT  
+HWI-EAS443:3:11:956:182#0/1  
`bbba\_]aaa¥ZZ\_aZZaTXZNZZXS¥YRWZU¥TBDDDDDD  
@HWI-EAS443:3:12:1086:1442#0/1  
CGGAGGGGTGAAAATGGACGAAGGACAAGGGTTGCTTATG  
+HWI-EAS443:3:12:1086:1442#0/1  
`bb\_¥Z`a\_```baaaaa`aaaa`\_a]\_]\_^U[a`\_a\_aa  
@HWI-EAS443:3:13:183:366#0/1  
CGGGTCTCCTGTTTTCTTAGGGTCCTTCCCAGCACTGGG  
+HWI-EAS443:3:13:183:366#0/1  
aaa`^aaaa`aa]a```aaX]aa^aaa`]^`¥``````^`  
@HWI-EAS443:3:14:1151:725#0/1  
AGGGCTTGCAGTAGCAAGTGGGCATGACTTTGAAAGGGAA  
+HWI-EAS443:3:14:1151:725#0/1  
^^abb\_ba^`¥`^`]Qa[``^]\_`a\_Y``aaa]^XZ¥\_  
@HWI-EAS443:3:14:351:1591#0/1  
TTCCCCTCAGAATGAGTGCTGACCGTGCCAGGAAAATGAG  
+HWI-EAS443:3:14:351:1591#0/1  
aaabaa\_\_`a[\_a\_\_Ta`\_]`\_`\_W^]¥T`¥``VWW\_¥  
@HWI-EAS443:3:14:415:1681#0/1  
CAACACTTCCCAGAAGGTCTGGTGCCGAGGTGCTGCGGG  
+HWI-EAS443:3:14:415:1681#0/1  
a]aaab^^`TT`\_XVTYUX^YHUXY`¥¥QXBBBBBBBBBB  
@HWI-EAS443:3:15:613:266#0/1  
ATTCCGACAGATGCTCTGATTTCTGTGGCATCCTGGCGCT  
+HWI-EAS443:3:15:613:266#0/1  
TbZa\_H\_WaXW¥a^Zb]¥M`\_XaVb¥aV`]RH\_OKXaZVN  
@HWI-EAS443:3:16:1676:1328#0/1  
TGGAGAGTTTGGCGCCAAGCAAACAATGGCGAAGATGCAA  
+HWI-EAS443:3:16:1676:1328#0/1  
abaaaa`aa`S`ZT`¥a¥¥\_`Q\_\_`\_ZT^^^`¥T¥XXR  
@HWI-EAS443:3:17:1096:1601#0/1  
CGGAGGGGTGAAAATGGACGAAGGACAAGGGTTGCTTATG  
+HWI-EAS443:3:17:1096:1601#0/1  
ab\_S[abb\_baaaaabababW`XLY¥^Ua`\_U\_aX``^aa  
@HWI-EAS443:3:17:1167:943#0/1  
CATAATCACTGAGTTTGAGTTCAGTGCACATTTGGATGTG  
+HWI-EAS443:3:17:1167:943#0/1  
`bbbab\_abab`b`abba`]`aa`R``a^aa\_`][a^^Y\_  
@HWI-EAS443:3:17:1431:2044#0/1  
CTCCTGTTTTCTTAGGGTCCTTCCCAGCACTGGGATGCTG  
+HWI-EAS443:3:17:1431:2044#0/1  
`aW`^bX¥Za`]\_aYP]]S\_X¥NUNNa\_YZ`\_]`\_`a^XD  
@HWI-EAS443:3:17:1619:1002#0/1  
GGAGCGCCAGGATGCCACAGAAATCAGAGCATCTGTGGG  
+HWI-EAS443:3:17:1619:1002#0/1  
aaa^`aaa`a`][aV^\_[a\_ZSZ^X^a^^RZ\_V^`PWBBB  
@HWI-EAS443:3:17:1787:1374#0/1  
CGGAGGGGTGAAAATGGACGAAGGACAAGGGTTGCTTATG

+HWI-EAS443:3:17:1787:1374#0/1  
a`Y`aaaa\_a`[¥\_ab`^[aY\_]`\_Q\_\_aaaU\_UX]¥Ya]  
@HWI-EAS443:3:17:193:1260#0/1  
CAGCAACCCTTGTCTTCGTCATTTTCACCCCTCCAGAA  
+HWI-EAS443:3:17:193:1260#0/1  
aZabbbabaaaa`a`b`aa]aa\_aaa\_aaaa`\_\_`a\_\_\_\_  
@HWI-EAS443:3:1:253:997#0/1  
GCCTGGGTTTCGACTTTCTTACTTGATCCATCATTGCC  
+HWI-EAS443:3:1:253:997#0/1  
aaaVbbaa\_`[`aTa`a^bZ`aa]`aa`a¥[\_\_[\_`PVBB  
@HWI-EAS443:3:1:32:918#0/1  
ACACATTCTGGGATCCATTCCGGTGCGAACAAGCGCTCTT  
+HWI-EAS443:3:1:32:918#0/1  
a\_aZ`aWX\_a\_\_`^a]aa¥NQ\_^¥`a¥\_\_\_\_\_XUT[BBB  
@HWI-EAS443:3:1:648:777#0/1  
AGGTCCTCTGTTTTCTTAGGGTCCTTCCCAGCACTGGGA  
+HWI-EAS443:3:1:648:777#0/1  
a\_a`aX`aa\_aabaZa\_b\_]\_Z[\_a\_a^V\_`][\_\_\_\_BBB  
@HWI-EAS443:3:20:117:428#0/1  
AGGAGCGCCAGGATGCCACAGAAATCAGAGCATCTGTCCG  
+HWI-EAS443:3:20:117:428#0/1  
aa`aab¥a`\_aa\_]Z[X^a\_Z]`V\_\_`Y\_\_\_¥^XTRVZY  
@HWI-EAS443:3:20:473:857#0/1  
ATGGGCATGACTTTGAAAGGGAAGGGTACTCACTGGTCCG  
+HWI-EAS443:3:20:473:857#0/1  
\_aaaaaaaaabbabab```aa`aaa`Xaaaaa````]\_^`  
@HWI-EAS443:3:22:1040:1142#0/1  
CGGCGCCAAGCAAACAATGGCGAAGATGCAACAGCAGGTC  
+HWI-EAS443:3:22:1040:1142#0/1  
aabVa[aZ¥`[XaT]]YY```\_^¥`QVSVS`[[W^W][HZ  
@HWI-EAS443:3:23:1198:2046#0/1  
NCGCTCTTGTCTCTGATATGTGGCATCATTGAGTTGGA  
+HWI-EAS443:3:23:1198:2046#0/1  
DNSUSWXQXYYZXTMXUXXYVTWXYUYXYWWYXYRUXS  
@HWI-EAS443:3:23:406:1210#0/1  
TTGGCGCCAAGCAAACAATGGCGAAGATGCAACAGCAGGG  
+HWI-EAS443:3:23:406:1210#0/1  
]`Z`\_^a¥Q`\_`\_`aaabaaa\_Y]]]a]ZTab```¥^[RTP  
@HWI-EAS443:3:24:400:452#0/1  
GTGGGCTTGCAGTAGCAAGTGGGCATGACTTTGAAAGGGA  
+HWI-EAS443:3:24:400:452#0/1  
aZ`aa`\_\_\_\_^\_a¥\_\_\_\_a\_W¥ZZ[Z`\_`¥`\_`\_\_\_\_^¥W¥¥¥  
@HWI-EAS443:3:25:1016:1952#0/1  
ACTGGGTTTCGACTTTCTTACTTGATCCATCATTGCCC  
+HWI-EAS443:3:25:1016:1952#0/1  
`Y`a^T¥^X`¥T[N^^LNVYX¥PHXS]SLP[\_\_\_\_VPPLLS  
@HWI-EAS443:3:25:672:385#0/1  
GTGGGCTTGCAGTAGCAAGTGGGCATGACTTTGAAAGGGA  
+HWI-EAS443:3:25:672:385#0/1  
aY^]a`¥`\_`[`a¥a`\_\_aZ\_]VW\_]Z^^`\_¥\_¥Z\_\_[

@HWI-EAS443:3:26:1090:1327#0/1  
TCCCTTGTCTTCGTCCATTTTCACCCCTCCAGAAATTC  
+HWI-EAS443:3:26:1090:1327#0/1  
`aa`aWbT¥T¥]aa\_aP]``R0¥]Ta`^a\_PW¥\_^Y^]\_  
@HWI-EAS443:3:26:175:605#0/1  
AACCATCCTCTCTATTGTTATGCTATTCTGGATTAGTCGT  
+HWI-EAS443:3:26:175:605#0/1  
``bbbaY\_aa^b\_aa`b\_`b`ab`^]X¥`b^^ZR`\_Va[U  
@HWI-EAS443:3:26:340:430#0/1  
GGGTGGAATCGGGAGATTCTACATCCAAATGTGCACTGAA  
+HWI-EAS443:3:26:340:430#0/1  
H\_V[RyVa\_Y\_\_¥^\_¥\_W¥\_`¥Z\_¥`aZOX]QW][0]ZSS  
@HWI-EAS443:3:27:1793:998#0/1  
NTCCTGTTTTCTTAGGGTCCTTCCCAGCACTGGGATGCTC  
+HWI-EAS443:3:27:1793:998#0/1  
DMUQXXWWWUWWZZZWTWOZXZUSWWWSSOXXWWWZYQYR  
@HWI-EAS443:3:28:1113:854#0/1  
CGGTGCTTTCTGCTTTTGATGAGAGAAGAAATAAATACCT  
+HWI-EAS443:3:28:1113:854#0/1  
aZQU`^^¥R\_^a\_\_a]ba¥aa¥ZVZW¥XQ\_W`\_Ta`XEV`  
@HWI-EAS443:3:28:267:1544#0/1  
AGGGCTTGCAGTAGCAAGTGGGCATGACTTTGAAAGGGAA  
+HWI-EAS443:3:28:267:1544#0/1  
Z[S¥aS]J`^`ZSX^b¥PT]]¥\_`WV[¥^a0^`[¥VNV^¥  
@HWI-EAS443:3:29:1259:352#0/1  
CGGGTCCTCCTGTTTTCTTAGGGTCCTTCCCAGCACTGGG  
+HWI-EAS443:3:29:1259:352#0/1  
ab]ba`bbbbbb`bbbWabaaaa]a`ba\_`^`aaaa`aaaa  
@HWI-EAS443:3:29:71:41#0/1  
TTGGCGCCAAGCAAACAATGGCGAAGATGCAACAGCAGGG  
+HWI-EAS443:3:29:71:41#0/1  
aWS\_b\_b]V]`¥^`^W^\_UT¥VZ^UPYYXY[\_ZTB BBBB  
@HWI-EAS443:3:31:1182:1448#0/1  
GCGCCATTGTTTGCTTGGCGCCAAACTCTCCTTATTTCTT  
+HWI-EAS443:3:31:1182:1448#0/1  
ab`bbbb]baab\_baaaa`a\_aaa\_`\_`[^aaaa`Ua`  
@HWI-EAS443:3:32:1193:759#0/1  
GGGGTCCTCCTGTTTTCTTAGGGTCCTTCCCAGCACTGGG  
+HWI-EAS443:3:32:1193:759#0/1  
aa^b]baaaaa\_baa¥aaa`X`^]aa\_^\_\_a¥`¥\_a`  
@HWI-EAS443:3:32:857:521#0/1  
CGGTGCTTTCTGCTTTTGATGAGAGAAGAAATAAATACCT  
+HWI-EAS443:3:32:857:521#0/1  
abb`babbbbaa`aaaa``aaaa`a`aaaaa¥aZaaa  
@HWI-EAS443:3:32:966:369#0/1  
TGCTGGGTTTTCATTTGGTCTCATCAGGCTGACCACTTGG  
+HWI-EAS443:3:32:966:369#0/1  
aba`aaa\_baaaaa`a\_\_a^aa`\_a\_\_^a[¥ZUT\_\_a`  
@HWI-EAS443:3:33:841:1744#0/1  
CGGGTCCTCCTGTTTTCTTAGGGTCCTTCCCAGCACTGGG

+HWI-EAS443:3:33:841:1744#0/1  
ab`\_\_baabab^abaabaaba\_`]bba`aaaa]]a\_^\_a^  
@HWI-EAS443:3:35:1118:1548#0/1  
CAACTCCTTTCACCGCAGCACCTGCGGCACCAGACCTTCA  
+HWI-EAS443:3:35:1118:1548#0/1  
aababaaabaabba`abaabaa`a`\_^¥b]aZaaa]\_T^  
@HWI-EAS443:3:35:398:1814#0/1  
GGGCGCCAAGCAAACAATGGCGAAGATGCAACAGCAGGTC  
+HWI-EAS443:3:35:398:1814#0/1  
abb¥Qaa\_\_¥b]a]aaYQIZS\_UX¥¥N]aX^]UMa¥UUSU  
@HWI-EAS443:3:35:580:1140#0/1  
AGAGGATGGTGCTTTCTGCTTTTGATGAGAGAAGAAATAN  
+HWI-EAS443:3:35:580:1140#0/1  
][Z\_\_\_\_aa`NW\_X[X`\_Y^[aaa`][ZP[¥][VZ`YVD  
@HWI-EAS443:3:36:1729:1612#0/1  
ACCTGGGTTTCGACTTTCTTACTTGATCCATCATTGCC  
+HWI-EAS443:3:36:1729:1612#0/1  
SaZaabb\_bb]bYQ\_baa`[XVa^Vab\_a^aa]Y\_`abQa  
@HWI-EAS443:3:38:1345:1886#0/1  
CGTCCTCCTGTTTTCTTAGGGTCCTTCCCAGCACTGGGAT  
+HWI-EAS443:3:38:1345:1886#0/1  
aaa`ababbbbaabaababa\_`\_aaaaa^`^¥UZX\_[\_\_¥X  
@HWI-EAS443:3:39:1054:788#0/1  
CGGGAGCGCCAGGATGCCACAGAAATCAGAGCATCTGTGCG  
+HWI-EAS443:3:39:1054:788#0/1  
abbaabbb]`b\_W[b`X¥aaa¥`Z`]]\_X[T[``a\_MUU  
@HWI-EAS443:3:40:126:1528#0/1  
GACCCTTCCCTTCAAAGTCATGCCCACTTGCTACTGCAA  
+HWI-EAS443:3:40:126:1528#0/1  
aabba¥abaaaaa]Z^`ZN\_a\_^aaaRa[¥[``\_aW\_^^\_  
@HWI-EAS443:3:40:429:14#0/1  
CGGGATCCATTCCGGTGCGAACAAGCGCTCTTGTCTCTG  
+HWI-EAS443:3:40:429:14#0/1  
\_aababb]a`baaZRSbbaWYX]W`a[`U]aaaT\_`\_a¥a  
@HWI-EAS443:3:40:49:194#0/1  
GGGTTTTCATTTGGTCTCATCAGGCTGACCACTTGCTGG  
+HWI-EAS443:3:40:49:194#0/1  
abaU\_^^¥¥a\_\_\_\_Za`\_`^^Q]W`¥VZ[\_¥^WWVY^BBB  
@HWI-EAS443:3:43:1474:1702#0/1  
AGCTGTTGCATCTTCGCCATTGTTTGCTTGGCGCCAAACT  
+HWI-EAS443:3:43:1474:1702#0/1  
``aaa¥aY`ba`\_aaR`a`aaX]a\_I]a\_VVU]]P]\_\_G[  
@HWI-EAS443:3:43:1749:1679#0/1  
ATCCAGAATAGCATAACAATAGAGAGGATGGTGCTTTCTT  
+HWI-EAS443:3:43:1749:1679#0/1  
a`W^¥T\_\_S\_UUR`]¥`T`^Z¥^a`]^`N\_[`¥MJ]W^ZG  
@HWI-EAS443:3:43:456:460#0/1  
CGGAGGGGTGAAAATGGACGAAGGACAAGGGTTGCTTATG  
+HWI-EAS443:3:43:456:460#0/1  
aabababb\_baaaabbbbaabaaaaaaa`aba\_ab\_a`\_ab



@HWI-EAS443:3:44:1239:459#0/1  
CGGGATCAGTTGCACATAAATCCTGCCTGCCTGCTTGTGT  
+HWI-EAS443:3:44:1239:459#0/1  
abbaa\_bbbbaab`abb\_\_babbaaa^aaaaaab`b[a\_a\_  
@HWI-EAS443:3:44:502:1900#0/1  
TGCTGGGTTTTTCATTTGGTCTCATCAGGCTGACCACTTGG  
+HWI-EAS443:3:44:502:1900#0/1  
aababa`Yabababaa\_a`a``aa\_aXa\_\_`a^^a`\_a]]  
@HWI-EAS443:3:47:1152:833#0/1  
GTTCTATATATGGGTCCTCCTGTTTTCTTAGGGTCCTTCC  
+HWI-EAS443:3:47:1152:833#0/1  
aba\_\_\_\_\_bbb\_aW¥b`babbbabbbb]bb\_aW¥[^\_[`[U  
@HWI-EAS443:3:47:665:1645#0/1  
ATCCGACAGATGCTCTGATTTCTGTGGCATCCTGGCGCT  
+HWI-EAS443:3:47:665:1645#0/1  
abbaa^`Y^a]\_a\_a^aa`aadWa\_UH`^^]UTXR\_YBBB  
@HWI-EAS443:3:48:1208:1293#0/1  
TGGGGTGAAAATGGACGAAGGACAAGGGTTGCTTATGAAA  
+HWI-EAS443:3:48:1208:1293#0/1  
aa`aaSa`a\_aaaaa`a```^^\_¥`\_\_]\_`[\_]``^^\_  
@HWI-EAS443:3:49:1370:1234#0/1  
TGGGGTGAAAATGGACGAAGGACAAGGGTTGCTTATGAAA  
+HWI-EAS443:3:49:1370:1234#0/1  
abbaYP¥QU\_ab]XV¥SWWa]V]a\_PDGII^HRHR[a\_R¥  
@HWI-EAS443:3:49:1383:387#0/1  
ATCTTCTCTCATCAAAAGCAGAAAGCACCATCCTCTCTAT  
+HWI-EAS443:3:49:1383:387#0/1  
ab]bbaabbabb\_bbbbbbbbabbbabb\_bb\_abababbb  
@HWI-EAS443:3:49:254:674#0/1  
GGGTCAGCACTCATTCTGAGGGGATCAGTTGCACATAAAT  
+HWI-EAS443:3:49:254:674#0/1  
`UVYO¥XYVL SX¥UWYSMOXZWWYOFWXL¥\_Y]N]XV¥UV  
@HWI-EAS443:3:4:1110:559#0/1  
TGGTCCTCCTGTTTTCTTAGGGTCCTTCCCAGCACTGGGA  
+HWI-EAS443:3:4:1110:559#0/1  
aaa\_a[a\_`abaa`a¥aa`aa]X`[aa\_^Z``¥\_¥\_a\_\_W  
@HWI-EAS443:3:50:1401:793#0/1  
ATCCTCCTGTTTTCTTAGGGTCCTTCCCAGCACTGGGATG  
+HWI-EAS443:3:50:1401:793#0/1  
ab`bbbb`b\_bbbabb`aaa``aabab^abTaaabaa`aa  
@HWI-EAS443:3:51:1559:1309#0/1  
GCCTGGGTTTCGACTTTCTTACTTGATCCATCATTGCC  
+HWI-EAS443:3:51:1559:1309#0/1  
a\_[UaaY]`\_`]`\_aabS\_¥aa\_Va\_^¥aYGYaYa]^\_X[  
@HWI-EAS443:3:51:1634:1155#0/1  
CTGGGCATGACTTTGAAAGGAAGGGTACTCACTGGTCGG  
+HWI-EAS443:3:51:1634:1155#0/1  
abaaaabbababbbba`bbaaababaa\_aab`bbbbba`\_\_b  
@HWI-EAS443:3:51:478:782#0/1  
AGTCCTCCTGTTTTCTTAGGGTCCTTCCCAGCACTGGGAT

+HWI-EAS443:3:51:478:782#0/1  
^\_\_aabaabb[bba\_bbaa`[XXaaa\_a\_[b`\_^a`¥`Qa  
@HWI-EAS443:3:53:1411:1736#0/1  
ATCCTCCTGTTTTCTTAGGGTCCTCCCAGCACTGGGATG  
+HWI-EAS443:3:53:1411:1736#0/1  
ab`abaabbabbb\_bbbbaUZSaaba\_ab``^baaa^`\_  
@HWI-EAS443:3:53:17:710#0/1  
TCTGGGTTTTTCATTTGGTCTCATCAGGCTGACCACTTGGC  
+HWI-EAS443:3:53:17:710#0/1  
J`\_W[\_aU¥\_Sabb^^^Y¥]a[[[aUZZZVQ\_^Z\_¥\_]HG  
@HWI-EAS443:3:54:1563:538#0/1  
TGGGGTGAAAATGGACGAAGGACAAGGGTTGCTTATGAAA  
+HWI-EAS443:3:54:1563:538#0/1  
a`V¥]\_ba`]aaa]\_WT`\_S]]]\_`]X[]`\_]a`\_a]X^Z  
@HWI-EAS443:3:55:334:878#0/1  
GGGGTCCTCCTGTTTTCTTAGGGTCCTCCCAGCACTGGG  
+HWI-EAS443:3:55:334:878#0/1  
aaa\_X`a`a`a`a`a`a`a`XV¥WU`\_``\_V][U[]\_]`]  
@HWI-EAS443:3:55:401:951#0/1  
CGGGGAGCGCCAGGATGCCACAGAAATCAGAGCATCTGTC  
+HWI-EAS443:3:55:401:951#0/1  
a`\_\_a`Z]¥`\_]`a`¥X\_VZ]Ua]^]`aXaaaa]\_`¥Z]VE  
@HWI-EAS443:3:56:266:1692#0/1  
TGTCCTCCTGTTTTCTTAGGGTCCTCCCAGCACTGGGAT  
+HWI-EAS443:3:56:266:1692#0/1  
`a\_a`baaaaabba\_ba`a¥^\_a^aaa\_\_a\_Ua^``]]]`  
@HWI-EAS443:3:56:41:145#0/1  
GGGGGAGCGCCAGGATGCCACAGAAATCAGAGCATCTGTC  
+HWI-EAS443:3:56:41:145#0/1  
``^a¥U`^^[VYVZQP¥]PZWQVPSXUSNSSOMOTTOSTNS  
@HWI-EAS443:3:57:1106:1459#0/1  
CGGGTCCTCCTGTTTTCTTAGGGTCCTCCCAGCACTGGG  
+HWI-EAS443:3:57:1106:1459#0/1  
aabaYa\_Z\_a`bZbaa^bb\_b\_aG`U^aa]XaaYaWaaba  
@HWI-EAS443:3:57:1245:109#0/1  
GTGGAATCGGGAGATTCTACATCCAAATGTGCACTGAACA  
+HWI-EAS443:3:57:1245:109#0/1  
a^aa`aa\_aa\_Y`][`^`\_U[^XZ^^XZ[Z]RZY\_\_Y]YB  
@HWI-EAS443:3:58:1330:178#0/1  
TGTCCATCATAATCACTGAGTTTGAGTTCAGTGCACATTT  
+HWI-EAS443:3:58:1330:178#0/1  
aa\_a[a`\_aaa\_aaa]aa]a^\_aa`a^\_\_\_\_\_`Y\_^`\_a  
@HWI-EAS443:3:5:1635:955#0/1  
ATCCCAGCAGTGAGTACCCTTCCCTTTCAAAGTCATGCN  
+HWI-EAS443:3:5:1635:955#0/1  
`bZXbb^R[V\_¥\_\_UZNJWa^\_NY^][KS¥¥BBBBBBBB  
@HWI-EAS443:3:5:270:481#0/1  
GGGAGGGGTGAAAATGGACGAAGGACAAGGGTTGCTTATG  
+HWI-EAS443:3:5:270:481#0/1  
abb^aabaVaaa`aabaa\_baaaaa^a\_aaa]\_a^`\_`aa

@HWI-EAS443:3:5:997:466#0/1  
CATCCCCTCAGAATGAGTGCTGACCGTGCCAGGAAAATGA  
+HWI-EAS443:3:5:997:466#0/1  
abbbbb`b`b^bababaaabbba\_bab`^`ba\_`aaa`a  
@HWI-EAS443:3:63:450:1670#0/1  
NGCTTGCAGTAGCAAGTGGGCATGACTTTGAAAGGGAAGG  
+HWI-EAS443:3:63:450:1670#0/1  
DLUUTTTUSWSNTVUSUSOPKTTVUUTWWWUREMSUUGT  
@HWI-EAS443:3:63:619:659#0/1  
CGCTGGGTTTTCATTTGGTCTCATCAGGCTGACCACTTGG  
+HWI-EAS443:3:63:619:659#0/1  
aababb`¥a`aa^`aba\_a`baa`^`aa`]a\_TX\_¥BB  
@HWI-EAS443:3:63:708:148#0/1  
AGGAAGGGTACTCACTGGTCCGGATAGACCCATTCAAATT  
+HWI-EAS443:3:63:708:148#0/1  
abbbaaaa`\_\_bbaa`b]a`baaaaba\_a``aaa¥¥¥`a  
@HWI-EAS443:3:63:786:115#0/1  
GCTGGGTTTCGACTTTCTTACTTGATCCATCATTGCCC  
+HWI-EAS443:3:63:786:115#0/1  
abbbbb^abbbbaaaba¥aaaaaaa\_a`\_a`\_`\_\_\_\_  
@HWI-EAS443:3:64:1360:314#0/1  
ATCCGACAGATGCTCTGATTTCTGTGGCATCCTGGCGCTC  
+HWI-EAS443:3:64:1360:314#0/1  
abb¥]\_T\_aba\_Q\_a[^a]baaa]aaZ¥a[[]]YT[¥¥UP  
@HWI-EAS443:3:64:899:171#0/1  
CTCCATTCCGGTGCGAACAAGCGCTCTTGTCTCTGATAT  
+HWI-EAS443:3:64:899:171#0/1  
abaababbaba`babbaababaaaa\_abb`a\_a\_baaaaa  
@HWI-EAS443:3:65:149:119#0/1  
ATCGGGATAGACCCATTCAAATTACTCCAAAACAGCCAAG  
+HWI-EAS443:3:65:149:119#0/1  
a^`\_a`^^`\_]^[^^¥WV]]Z\_]Z]Y[[]YY^Z]X]WW  
@HWI-EAS443:3:66:1194:1510#0/1  
TTCCCCTCAGAATGAGTGCTGACCGTGCCAGGAAAATGAG  
+HWI-EAS443:3:66:1194:1510#0/1  
a^U\_a^`a\_\_\_\_a``[`T\_\_Z`Y¥T\_^`¥¥¥XX¥\_^RUP¥\_  
@HWI-EAS443:3:67:327:151#0/1  
CCAGCACTCATTCTGAGGGGATCAGTTGCACATAAATCCT  
+HWI-EAS443:3:67:327:151#0/1  
aaaba[a`a\_aa`X`^\_]¥[¥WW\_[[\_^¥\_¥¥Z¥¥  
@HWI-EAS443:3:68:1190:394#0/1  
ACACATTCTGGGATCCATTCCGGTGCGAACAAGCGCTCTT  
+HWI-EAS443:3:68:1190:394#0/1  
aab\_abaaa\_aaaaa`aa`¥¥\_a¥`aa`^a\_\_`a\_^W`\_  
@HWI-EAS443:3:68:1438:476#0/1  
CGCTCTGATTTCTGTGGCATCCTGGCGCTCCCCACCAGTC  
+HWI-EAS443:3:68:1438:476#0/1  
aaJ^^`]a[b\_a^V]`\_`\_\_Za`^a\_V\_QN\_VBBBBBB  
@HWI-EAS443:3:68:723:1576#0/1  
CGCCACATATCAGAGAACAAGAGCGCTTGTTCCGACCGGA

+HWI-EAS443:3:68:723:1576#0/1  
abaY`b\_W^fZX]X[P`aa`X[baaa[V[Ua]YXYZ[V`  
@HWI-EAS443:3:69:670:755#0/1  
GGGTGCTTTCTGCTTTTGATGAGAGAAGAAATAAATACCT  
+HWI-EAS443:3:69:670:755#0/1  
aba\_abaaababaabbbbaaa`a\_a\_aaaaaaaaa`aa\_a  
@HWI-EAS443:3:6:481:942#0/1  
CGGGTCCTCCTGTTTTCTTAGGGTCCTTCCCAGCACTGGG  
+HWI-EAS443:3:6:481:942#0/1  
aa¥b¥abba`abaaab]ba]bZ]^\_Zaaa¥`aa]a^aa]a  
@HWI-EAS443:3:70:136:1816#0/1  
CACTTGGCTGTTTTGGAGTAATTTGAATGGGTCTATCCCC  
+HWI-EAS443:3:70:136:1816#0/1  
a[aZ\_Y\_a\_UN`[ZNUPVT^]NVVJV]BBBBBBBBBBBBB  
@HWI-EAS443:3:70:1385:1560#0/1  
GGGGGATCAGTTGCACATAAATCCTGCCTGCCTGCTTG  
+HWI-EAS443:3:70:1385:1560#0/1  
\_a`a`¥ba]aabbbaaa[aba]aa`Zaaaaaa[a]a^a  
@HWI-EAS443:3:71:1563:137#0/1  
AAACAAGCGCTCTTGTCTCTGATATGTGGCATCATT  
+HWI-EAS443:3:71:1563:137#0/1  
aab`aaabaS`SY`\_\_`\_]\_]\_[W]\_\_VXR\_UTaX]a^HUW  
@HWI-EAS443:3:71:229:610#0/1  
CAGCTGGGTTTTTATTGTTCTCATCAGGCTGACCACTTG  
+HWI-EAS443:3:71:229:610#0/1  
a¥^baa`bZ`^aa`Z]\_aa\_a\_ba\_aaYaa\_`aaa`^\_\_`  
@HWI-EAS443:3:72:1559:1108#0/1  
CGCGCTCTTGTCTCTGATATGTGGCATCATT  
+HWI-EAS443:3:72:1559:1108#0/1  
a`TZ`\_¥Yab]`\_WR]\_^`aa\_[\_\_\_\_^\_a^Z¥`Y¥a¥Y  
@HWI-EAS443:3:72:1596:890#0/1  
GAATGGGTCTATCCCGACCAGTGAGTACCCTTCCCTTCN  
+HWI-EAS443:3:72:1596:890#0/1  
`aaaba\_a`bab^U`ab^^aa]\_]b\_aaYU\_a`QQa\_\_PD  
@HWI-EAS443:3:72:33:239#0/1  
GGGCGCCAAGCAAACAATGGCGAAGATGCAACAGCAGGTC  
+HWI-EAS443:3:72:33:239#0/1  
aaabbaa`^aa`aaa]a`aaaa]a`¥¥\_\_`\_^`^`^`^U\_  
@HWI-EAS443:3:74:1029:1506#0/1  
CTCGGAAGAATGATTGGTGAATCGGGAGATTCTACATCC  
+HWI-EAS443:3:74:1029:1506#0/1  
^\_^Z¥b]RX\_aTR\_\_`]Z]S¥a]Y]R]YQT]X^`\_]a¥VY  
@HWI-EAS443:3:74:1561:1743#0/1  
GGGGTCCTCCTGTTTTCTTAGGGTCCTTCCCAGCACTGGG  
+HWI-EAS443:3:74:1561:1743#0/1  
Z`a\_Q\_\_\_\_]abaaaa`abbabaaab`aa`]P]aa\_\_]a`a  
@HWI-EAS443:3:74:485:1060#0/1  
AGGGTCCTCCTGTTTTCTTAGGGTCCTTCCCAGCACTGGG  
+HWI-EAS443:3:74:485:1060#0/1  
aa]TS\_aaaa^RS\_\_`]a`T][aXV`\_`^`^`^`^`WR

@HWI-EAS443:3:75:1031:1166#0/1  
CCCTGCTGTTGCATCTTCGCCATTGTTTGCTTGGCGCCAA  
+HWI-EAS443:3:75:1031:1166#0/1  
ab^a^¥ba0\_][^`X`YYZPS0^`]\_ab`^W¥a]V^[U[[  
@HWI-EAS443:3:75:1434:907#0/1  
GCCTGGGTTTCGACTTTCTTACTTGATCCATCATTGCC  
+HWI-EAS443:3:75:1434:907#0/1  
HWZ\_a\_^bbb\_`bbbab\_a[ab```a\_YaZ^\_babbbbaS\_  
@HWI-EAS443:3:75:1565:1014#0/1  
GGGTCAGCACTCATTCTGAGGGGATCAGTTGCACATAAAT  
+HWI-EAS443:3:75:1565:1014#0/1  
aa\_YXZa^`¥UN\_^M[Y\_aPaa^UJQ^a\_RQPW¥LGN\_  
@HWI-EAS443:3:75:210:1327#0/1  
ACCAGACCTTCTGGGAAGTGTGAACCTTGCATTAGAGAA  
+HWI-EAS443:3:75:210:1327#0/1  
aaaa`aaaa`a``\_aYW\_X\_]^\_\_`\_]^`^`\_`\_`^]\_^  
@HWI-EAS443:3:75:782:1757#0/1  
CGGTGCTTTCTGCTTTTGATGAGAGAAGAAATAAATACCT  
+HWI-EAS443:3:75:782:1757#0/1  
I]¥T`^S\_aa`S``^`a`b^`\_[[¥\_a`^`[ZbbZba`]  
@HWI-EAS443:3:76:1437:127#0/1  
TCTCCTGTTTTCTTAGGGTCCTTCCCAGCACTGGGATGCT  
+HWI-EAS443:3:76:1437:127#0/1  
Vb]Zabbaba`]aa]a`\_M`Xa\_Z¥^¥a\_^]\_^`W¥\_Z\_  
@HWI-EAS443:3:76:455:1959#0/1  
CGGGGAGCGCCAGGATGCCACAGAAATCAGAGCATCTGTC  
+HWI-EAS443:3:76:455:1959#0/1  
a`ab]b^b``a¥[``\_Va`a`b^``YX`a^^^\_aVY[XUS  
@HWI-EAS443:3:77:1277:530#0/1  
GAGGAAACGCTGAGATTGAAGACCTCATTTTCCTGGCACG  
+HWI-EAS443:3:77:1277:530#0/1  
Q\_`\_UZbbb\_]abb]Ub\_T]QK\_SZaTbbU]ab\_`T^b[b  
@HWI-EAS443:3:77:1421:290#0/1  
CGGGTCCTCCTGTTTTCTTAGGGTCCTTCCCAGCACTGGG  
+HWI-EAS443:3:77:1421:290#0/1  
abb`Y^a^\_Tbba`bababZ`T`^ZE^XMQS`]`]¥aa`b  
@HWI-EAS443:3:78:64:891#0/1  
TGGGTTGCTTATGAAAGAATGTGCAATATCCTCAAAGGAA  
+HWI-EAS443:3:78:64:891#0/1  
abaa]abaa`a`b]aa\_`aab¥baaYa`\_aa`aaa]a\_aa  
@HWI-EAS443:3:79:1705:453#0/1  
TGCAGGATTTATGTGCAACTGATCCCCTCAGAATGAGTGC  
+HWI-EAS443:3:79:1705:453#0/1  
\_b\_^\_¥ababb\_V]\_\_^a`aaaa\_]XX\_ZaaV^``[aYaR  
@HWI-EAS443:3:79:471:1782#0/1  
CCTGGGATCCATTCCGGTGCGAACAAGCGCTCTTGTTC  
+HWI-EAS443:3:79:471:1782#0/1  
aa^\_\_Z`¥a```\_a``¥U\_a¥\_`^X^T^¥`¥`¥^¥^W¥^^  
@HWI-EAS443:3:80:177:453#0/1  
AGAGGATATTGCACATTCTTTCATAAGCAACCCTTGTCT

+HWI-EAS443:3:80:177:453#0/1  
aa`VX]XKZ]Z\_¥ZTUYaZY]aZYWY\_`W]UY¥HSYN^UG  
@HWI-EAS443:3:80:189:22#0/1  
CGGGTCCTCCTGTTTTCTTAGGGTCCTCCCAGCACTGGG  
+HWI-EAS443:3:80:189:22#0/1  
aaaa\_a`[^aab[aa`aa`aaZV`\_a`\_¥¥¥\_\_\_V^\_\_^  
@HWI-EAS443:3:81:180:445#0/1  
AATGGGTCCTCCTGTTTTCTTAGGGTCCTCCCAGCACTG  
+HWI-EAS443:3:81:180:445#0/1  
aVaa`aVaaaaaaa\_aa`aa`¥¥`[Wa`\_\_a¥\_\_\_¥¥[\_\_\_  
@HWI-EAS443:3:81:718:620#0/1  
CGGGCATGACTTTGAAAGGGAAGGGTACTCACTGGTCGGG  
+HWI-EAS443:3:81:718:620#0/1  
a\_aa\_aaaaaabaaa`aaaa`aaa[\_Y`^aUa`\_a\_¥^¥\_\_\_  
@HWI-EAS443:3:82:1058:2010#0/1  
GGGTGCTTTCTGCTTTTGATGAGAGAAGAAATAAATACCT  
+HWI-EAS443:3:82:1058:2010#0/1  
`[^T[WW]aa\_\_\_baa^]aa\_Z]a`\_`^a`aa`aaaWW\_  
@HWI-EAS443:3:83:1031:1447#0/1  
ATTGCCCTCTGGGCAGCTGTTTGAATTTTCTTTGAGGG  
+HWI-EAS443:3:83:1031:1447#0/1  
^]Y]aaa]`\_aZZTY`^XMZ^a`a]`aa]^UX\_\_H¥WYG  
@HWI-EAS443:3:83:543:844#0/1  
GCTGTTTTGGAGTAATTTGAATGGGTCTATCCCGACCAGC  
+HWI-EAS443:3:83:543:844#0/1  
`V\_\_PVR]¥\_HOF[TV`][aVNXMXQOQZUZ[RDUY]BBB  
@HWI-EAS443:3:84:309:2034#0/1  
CGTGCTGACCGTGCCAGGAAAATGAGGTCTTCAATCTCAG  
+HWI-EAS443:3:84:309:2034#0/1  
aa^Qa`aa`\_Y`Y^`^U``Z\_\_V^PU¥¥\_\_\_¥[T[^¥V  
@HWI-EAS443:3:85:1427:1283#0/1  
TTCCCCTCAGAATGAGTGCTGACCGTGCCAGGAAAATGAG  
+HWI-EAS443:3:85:1427:1283#0/1  
aaaa^`aaa[Vaaa\_a¥aU\_\_\_W\_Y\_Q^\_a]\_¥\_W¥¥^S  
@HWI-EAS443:3:85:1529:737#0/1  
GTCCTGTTTTCTTAGGGTCCTCCCAGCACTGGGATGCTC  
+HWI-EAS443:3:85:1529:737#0/1  
L¥\_¥Ya`a`baa`\_XYX`\_a\_\_W^U\_ZXaaaa`\_a]PZQ  
@HWI-EAS443:3:85:499:925#0/1  
CGGGTCCTCCTGTTTTCTTAGGGTCCTCCCAGCACTGGG  
+HWI-EAS443:3:85:499:925#0/1  
abbaQbaaa^abZaaaaaaZaaa^a\_a\_aaaXaaa\_a\_PY  
@HWI-EAS443:3:86:1369:1384#0/1  
GGGAGACTGGTGGGGAGCGCCAGGATGCCACAGAAATCAG  
+HWI-EAS443:3:86:1369:1384#0/1  
R]]R^aabbV¥bbbaZRYTM\_]T]YbXHaa¥a^PaJN]¥  
@HWI-EAS443:3:87:896:688#0/1  
AGGCGCCAAGCAAACAATGGCGAAGATGCAACAGCAGGTC  
+HWI-EAS443:3:87:896:688#0/1  
`bb]ba`baa`¥ba\_bbaaaYVR`aaRO^\_aWaYZ[a`]]

@HWI-EAS443:3:88:1350:976#0/1  
AGCTACTGCAAGCCCATACACACAAGCAGGCAGGCAGGAT  
+HWI-EAS443:3:88:1350:976#0/1  
`Ua]abbbabbb\_b^`bbaaaba`\_]TbR^aaa^P\_baP^  
@HWI-EAS443:3:89:848:1393#0/1  
AGGGTCCTCCTGTTTTCTTAGGGTCCTTCCCAGCACTGGG  
+HWI-EAS443:3:89:848:1393#0/1  
aa\_\_Vbaaaaa`bbaaaaaaaaa\_aaaa\_aaa``\_\_a\_¥  
@HWI-EAS443:3:89:892:1710#0/1  
CGTCGTCATCATAATCACTGAGTTTGAGTTCAGTGCACA  
+HWI-EAS443:3:89:892:1710#0/1  
a`\_XZ`^ba`\_aZaa]]b\_\_QTY[a\_^^`^\_\_a]W]Z¥\_^  
@HWI-EAS443:3:8:126:904#0/1  
GCCATCCTCTATTGTTATGCTATTCTGGATTAGTCGTC  
+HWI-EAS443:3:8:126:904#0/1  
`abbbbbbaaaabbbbbbaabbbbbabba`abab`ab^a`  
@HWI-EAS443:3:8:540:653#0/1  
ACACATTCTGGGATCCATTCCGGTGCGAACAAGCGCTCTT  
+HWI-EAS443:3:8:540:653#0/1  
abaaa`^`Q¥a¥QZ[a\_\_`\_\_aZ][\_a\_Q\_¥\_\_^U^¥^^  
@HWI-EAS443:3:90:1600:79#0/1  
CGTGGGCATGACTTTGAAAGGGAAGGGTACTCACTGGTCG  
+HWI-EAS443:3:90:1600:79#0/1  
\_`b]J]`baba^abbbb\_]U\_¥bbb`bJa\_aZbZWbaSaU  
@HWI-EAS443:3:90:1793:486#0/1  
NAGGGGTGAAAATGGACGAAGGACAAGGGTTGCTTATGAA  
+HWI-EAS443:3:90:1793:486#0/1  
DMYYYYSSYZYXXWWUXZZYXXWXWVZXXYYYYZZXXY  
@HWI-EAS443:3:93:1185:2046#0/1  
NAGAGTTTGGCGCCAAGCAAACAATGGCGAAGATGCAACA  
+HWI-EAS443:3:93:1185:2046#0/1  
DIWUUUVSWWYUUYWYSWWYWWWWWYHWWWUWUWWWBBB  
@HWI-EAS443:3:95:1010:1560#0/1  
GATTACTCCAAAACAGCCAAGTGGTCAGCCTGATGAGACC  
+HWI-EAS443:3:95:1010:1560#0/1  
SWROOWX\_bbbazH]b\_W]I^X\_TW`YWXaS`[``¥]¥T]  
@HWI-EAS443:3:96:1243:1940#0/1  
AGGGTTTTCGACTTTCTTACTTGATCCATCATTGCCCTC  
+HWI-EAS443:3:96:1243:1940#0/1  
aaa\_T`aaba`\_aaa]aa`\_a`^a\_`NaaZ`\_\_`\_\_S\_`  
@HWI-EAS443:3:96:1264:1758#0/1  
GGCTATTCTGGATTAGTCGTCATCATAATCACTGAGTTT  
+HWI-EAS443:3:96:1264:1758#0/1  
aa^aX]a[V^[NZa\_]H`\_V^0\_ZUR¥¥\_YOVR¥]T^QQ\_  
@HWI-EAS443:3:97:1206:1067#0/1  
CGGGTTGCTTATGAAAGAATGTGCAATATCCTCAAAGGAA  
+HWI-EAS443:3:97:1206:1067#0/1  
abaaabbbbbbbbabbbbb`babbbbb`\_`babbbbbabb  
@HWI-EAS443:3:97:1416:347#0/1  
CGGGGAGCGCCAGGATGCCACAGAAATCAGAGCATCTGTC

+HWI-EAS443:3:97:1416:347#0/1  
abab¥[[\_HF^Q\_aROLVZabaaaXaVIb\_bV\_^Q`VS  
@HWI-EAS443:3:97:422:1304#0/1  
AGCTGTTGCATCTTCGCCATTGTTTGCTTGGCGCCAAACT  
+HWI-EAS443:3:97:422:1304#0/1  
abb^^`UZ\_`aa¥Y]^\_a[]]V[adW]¥\_X^YYYa^^[UK  
@HWI-EAS443:3:98:1451:1287#0/1  
GGAGAGTTTGGCGCCAAGCAAACAATGGCGAAGATGCAAG  
+HWI-EAS443:3:98:1451:1287#0/1  
a\_Jbabbbb\_^bbTTbabaabaGba`aGbaa\_`a]SX[B  
@HWI-EAS443:3:99:793:1265#0/1  
TGCAGGTCTTACTCATATCATGATTTGGCATTCCAACCTG  
+HWI-EAS443:3:99:793:1265#0/1  
aaaaab\_abaaaaaaaaaaaaabaaaa`^\_aaa[]a\_^^`a  
@HWI-EAS443:3:9:1060:207#0/1  
CGATCCATTCCGGTGCGAACAAGCGCTCTTGTCTCTGAT  
+HWI-EAS443:3:9:1060:207#0/1  
aaaa`]bbb^`ba`aabaa^a][U`]^`\_\_`[\_GZ[^`  
@HWI-EAS443:3:100:1017:1091#0/1  
GAGGATGGTGCTTTCTGCTTTTGATGAGAGAAGAAATAAA  
+HWI-EAS443:3:100:1017:1091#0/1  
^aabaaa`\_\_a`b\_aabaaba`aa\_a`aa`a`\_`a`\_a  
@HWI-EAS443:3:100:1032:1493#0/1  
CACATAAATCCTGCCTGCCTGCTTGTGTGTATGGGCTTGC  
+HWI-EAS443:3:100:1032:1493#0/1  
ab^bbaabba`b`\_`aabaabaabbababbbbaI`abB  
@HWI-EAS443:3:100:1197:1239#0/1  
GAGCATCCCAGTGCTGGGAAGGACCCTAAGAAAACAGGAG  
+HWI-EAS443:3:100:1197:1239#0/1  
^a`^]a\_b`]b`b]aaaaba^¥]a`]ba`aba]aYaaaaa  
@HWI-EAS443:3:100:1232:323#0/1  
GCGCCAAGCAAACAATGGCGAAGATGCAACAGCAGGTCTT  
+HWI-EAS443:3:100:1232:323#0/1  
a\_aT^X`a¥[S[S\_\_MDP¥YZZ\_¥^¥N]VW¥WQU^BBBBB  
@HWI-EAS443:3:100:1262:926#0/1  
AGATGCAACAGCAGGTCTTACTCATATCATGATTTGGCAT  
+HWI-EAS443:3:100:1262:926#0/1  
]Y`\_H^bb`bb`ab`bbbaZ`ba[aaX\_Z`babbbba]UaB  
@HWI-EAS443:3:100:1273:1072#0/1  
ATAATCACTGAGTTTGAGTTCAGTGCACATTTGGATGTAG  
+HWI-EAS443:3:100:1273:1072#0/1  
]\_¥ab¥¥VbbZa`aa\_a]a]ZZV¥N¥`aa`a`a\_\_]]B  
@HWI-EAS443:3:100:1303:648#0/1  
AGCAAGTGGGCATGACTTTGAAAGGGAAGGGTACTCACTG  
+HWI-EAS443:3:100:1303:648#0/1  
aba`aaXaaa^\_aaaaabaa^a\_b`a\_\_[a¥NY\_^Qa]``  
@HWI-EAS443:3:100:1563:45#0/1  
GGATGGTGCTTTCTGCTTTTGATGAGAGAAGAAATAAATA  
+HWI-EAS443:3:100:1563:45#0/1  
`b^`a`\_a`abaWaa¥aabaa\_aa^a^a]\_\_\_\_\_a[\_\_a`



@HWI-EAS443:3:100:1576:783#0/1  
ATGGGTCCTCTGTTTTCTTAGGGTCCTTCCCAGCACTGG  
+HWI-EAS443:3:100:1576:783#0/1  
aaa`T]Ya[G^b`aba¥`aa[¥a]^]a\_Y^¥SaM^¥`^B  
@HWI-EAS443:3:100:338:572#0/1  
CCTGGGTTTTCGACTTTCTTACTTGATCCATCATTGCCC  
+HWI-EAS443:3:100:338:572#0/1  
aab\_aaaaabbY\_abb^abbb`bbbbba^`bbbb[a\_a\_  
@HWI-EAS443:3:100:417:1017#0/1  
TCAACACTTCCCAGAAGGTCTGGTGCCGCAGGTGCTGCGG  
+HWI-EAS443:3:100:417:1017#0/1  
\_a\_XR`\_`\_Z]]a¥`\_\_\_¥^`\_XX]\_````\_¥JYR[`^BB  
@HWI-EAS443:3:100:533:478#0/1  
CTGCTGTTGCATCTTCGCCATTGTTTGCTTGCGCCAAAC  
+HWI-EAS443:3:100:533:478#0/1  
abba\_baa^R^b^`aab¥\_P\_]ab`b\_]¥`a\_[MT\_\_\_V  
@HWI-EAS443:3:100:638:1667#0/1  
AGTGAGTACCCTTCCCTTTCAAAGTCATGCCCACTTGCTA  
+HWI-EAS443:3:100:638:1667#0/1  
`U[`\_\_\_`^a\_a\_XZ`a\_Y\_a`aZ\_a\_¥\_\_N\_aKZ\_\_^B  
@HWI-EAS443:3:100:693:339#0/1  
CGCCAAGCAAACAATGGCGAAGATGCAACAGCAGGTCTTA  
+HWI-EAS443:3:100:693:339#0/1  
¥`b`b¥YX\_Ub\_abba`bb]]baa`ZZa)`bY`¥PU^\_aB  
@HWI-EAS443:3:100:735:1036#0/1  
ATTAGTCGTCCATCATAATCACTGAGTTTGAGTTCAGTGC  
+HWI-EAS443:3:100:735:1036#0/1  
a^aa\_U[b^\_\_a\_\_\_[a`S[aa]a^a\_a)`]\_`^^Z\_^  
@HWI-EAS443:3:100:751:1069#0/1  
CATTCCGGTGCGAACAAGCGCTCTTGTTCTCTGATATGTG  
+HWI-EAS443:3:100:751:1069#0/1  
\_bababba\_abab]¥aabab^`abaaaaaaa`a\_a\_WY  
@HWI-EAS443:3:100:811:1075#0/1  
ATCAGTTGCACATAAATCCTGCCTGCCTGCTTGTGTGTAT  
+HWI-EAS443:3:100:811:1075#0/1  
a\_aabSa]\_aVaa[UaaW`^[a\_\_aZYa\_Y^Ra\_aZaVX\_  
@HWI-EAS443:3:100:95:816#0/1  
CATTCCGGTGCGAACAAGCGCTCTTGTTCTCTGATATGTG  
+HWI-EAS443:3:100:95:816#0/1  
\_U\_bbaa\_[bab`^a`a````aY\_`[`a\_a`aa`a`aa`]  
@HWI-EAS443:3:10:1031:165#0/1  
TGTTGCATCTTCGCCATTGTTTGCTTGCGCCAAACTCTC  
+HWI-EAS443:3:10:1031:165#0/1  
a]]\_]\_Ya`aZ¥¥RY[a^Y]\_¥^UW]¥ZW[XWVPSUTKTT  
@HWI-EAS443:3:10:1107:130#0/1  
ATCATAATCACTGAGTTTGAGTTCAGTGCACATTTGGATG  
+HWI-EAS443:3:10:1107:130#0/1  
aaaaaaaa`^aa\_a^a`\_`^\_\_^`^`V^]`^`^`\_W[Z]  
@HWI-EAS443:3:10:1125:1922#0/1  
CAAACAGCTGCCAGAGGGCAATGATGGATCAAGTAAGAG

+HWI-EAS443:3:10:1125:1922#0/1  
abba\_b`^[a^`]baaabaaaY\_ab\_ab\_QXa`aUaa``\_  
@HWI-EAS443:3:10:1137:1275#0/1  
GCACCATCCTCTCTATTGTTATGCTATTCTGGATTAGTCG  
+HWI-EAS443:3:10:1137:1275#0/1  
a`\_`¥\_]\_\_^\_[F[¥WU[[\_]TYZ]^ZX]VW[^ZW¥ZZX  
@HWI-EAS443:3:10:1144:1031#0/1  
CACACAAGCAGGCAGGCAGGATTTATGTGCAACTGATCCC  
+HWI-EAS443:3:10:1144:1031#0/1  
Tabbbbbbbab`babbbbbbb`abbb\_\_Wa\_Y\_W`\_a[]Z`  
@HWI-EAS443:3:10:1146:1409#0/1  
GGCAGGCAGGATTTATGTGCAACTGATCCCCTCAGAATGA  
+HWI-EAS443:3:10:1146:1409#0/1  
aa^aU`GX`a[]]N`XZTNZRQZIWUOVBBBBBBBBBBBB  
@HWI-EAS443:3:10:122:2030#0/1  
GGGTCCTCTGTTTTCTTAGGGTCCTTCCCAGCACTGGGA  
+HWI-EAS443:3:10:122:2030#0/1  
a`SR`a\_`a\_¥]\_^\_\_¥\_]^^^QYVZG`]V]^\_^V[UW]  
@HWI-EAS443:3:10:1256:1255#0/1  
GCTGCGGTGAAAGGAGTTGGAACAATAGCAATGGAGTTAA  
+HWI-EAS443:3:10:1256:1255#0/1  
`\_a\_^`aUaPMT^\_X\_X`]UUZZ¥]ZZSVOZVWWPHPUX  
@HWI-EAS443:3:10:1269:1833#0/1  
TGGACGACTAATCCAGAATAGCATAACAATAGAGAGGATG  
+HWI-EAS443:3:10:1269:1833#0/1  
X]^YS^^YP¥[QYZ\_aTXVWT]UZ\_\_\_^SZ\_\_\_^Y^\_¥U]  
@HWI-EAS443:3:10:1301:1456#0/1  
TGATTGGTGAATCGGGAGATTCTACATCCAAATGTGCAC  
+HWI-EAS443:3:10:1301:1456#0/1  
ab^XO\_aRa\_aaYZ]]``[a`WZ¥a[\_aHHV`a¥ZT[Q`U  
@HWI-EAS443:3:10:1538:375#0/1  
ATCCAGAATAGCATAACAATAGAGAGGATGGTGCTTTCTG  
+HWI-EAS443:3:10:1538:375#0/1  
`^^`^^``[\_a`\_a`Z¥^\_^^[`Za`]¥\_^WXTR^VMVS  
@HWI-EAS443:3:10:154:150#0/1  
GATGGTGCTTTCTGCTTTTGATGAGAGAAGAAATAAATAC  
+HWI-EAS443:3:10:154:150#0/1  
a\_Z]UR]VWRYYS[XY]VYXU]Y^Y]XV]XYXVVXYXX  
@HWI-EAS443:3:10:1575:386#0/1  
GAAAGCACCATCCTCTCTATTGTTATGCTATTCTGGATTA  
+HWI-EAS443:3:10:1575:386#0/1  
a^]]^O^XW]ZVZ]XXZ¥ZXRXPZWZUSWWZIDOVBBBB  
@HWI-EAS443:3:10:1639:1018#0/1  
TGAACCAAACAGTGATTATGATGGACGACTAATCCAG  
+HWI-EAS443:3:10:1639:1018#0/1  
aaaa\_a\_a^^`T^\_]a]``\_]\_\_]^\_\_YV¥[X¥^Y¥PP¥]  
@HWI-EAS443:3:10:1673:1504#0/1  
GAAGAATGATTGGTGAATCGGGAGATTCTACATCCAAAT  
+HWI-EAS443:3:10:1673:1504#0/1  
`BBBBBBBBBBBBBBBBBBBBBBBBBBBBBBBBBBBB

@HWI-EAS443:3:10:1691:334#0/1  
CGCAGCACCTGCGGCACCAGACCTTCTGGGAAGTGTGAA  
+HWI-EAS443:3:10:1691:334#0/1  
\_ba]baabaaaab]a[]bb¥bUUb[T`b[b]abJ`a^a[S  
@HWI-EAS443:3:10:1714:371#0/1  
TGGGTTTTCGACTTTCTTACTTGATCCATCATTGCCCTC  
+HWI-EAS443:3:10:1714:371#0/1  
ZW`a`bb\_aaYba^^b\_aa^Ta`aa` `] ` ` \_aW]R\_W  
@HWI-EAS443:3:10:179:714#0/1  
CAGGAAACGCTGAGATTGAAGACCTCATTTTCCTGGCAGC  
+HWI-EAS443:3:10:179:714#0/1  
ab` `abbaaa\_a`a\_a\_a\_ ` ` \_\_a¥` ` ` \_\_¥¥]Y\_]]  
@HWI-EAS443:3:10:201:1715#0/1  
ATCCATTCCGGTGCGAACAAGCGCTCTTGTCTCTGATAT  
+HWI-EAS443:3:10:201:1715#0/1  
a[b`a\_aab\_\_WSbG\_aaa\_a]V\_\_\_\_[^Y¥^¥¥¥\_¥¥¥^^  
@HWI-EAS443:3:10:22:268#0/1  
TGGTGGGGAGCGCCAGGATGCCACAGAAATCAGAGCATCT  
+HWI-EAS443:3:10:22:268#0/1  
abb¥bba`aaaa\_KY\_^^¥\_^]`^a^`¥]]^\_\_^¥\_¥WU]  
@HWI-EAS443:3:10:581:328#0/1  
CTGGGTTTTCATTTGGTCTCATCAGGCTGACCACTTGGCT  
+HWI-EAS443:3:10:581:328#0/1  
\_baab`bbbbbbbabbbbabaaaaabaab`babb\_a  
@HWI-EAS443:3:10:668:751#0/1  
TGGGTTTTCGACTTTCTTACTTGATCCATCATTGCCCTC  
+HWI-EAS443:3:10:668:751#0/1  
abbbabaabababba`aaaa\_a`aaa`a`aa`\_\_`\_`¥`\_  
@HWI-EAS443:3:10:748:1215#0/1  
ATGCAACAGCAGGTCTTACTCATATCATGATTTGGCATT  
+HWI-EAS443:3:10:748:1215#0/1  
aa`aaaaa\_a`Z^`a` `^`\_`a`^`\_`\_a`^`\_`\_`^`^X  
@HWI-EAS443:3:10:756:1272#0/1  
CAACCTGAATGATGCCACATATCAGAGAACAAGAGCGCTT  
+HWI-EAS443:3:10:756:1272#0/1  
^T¥`aaX^bbb¥\_WbXabaaUaLb` `Z]^aTb`aa[bZ[\_  
@HWI-EAS443:3:10:929:679#0/1  
ATGACTTTGAAAGGAAGGGTACTCACTGGTCGGGATAGA  
+HWI-EAS443:3:10:929:679#0/1  
abbaabbab`aaaaaaaa`Z`\_a` `\_\_a`^¥a`\_`^`\_`\_`  
@HWI-EAS443:3:10:936:1046#0/1  
TTGGTCTCATCAGGCTGACCACTTGGCTGTTTTGGAGTAA  
+HWI-EAS443:3:10:936:1046#0/1  
aaaa\_abaabaaaa`aa`a` `^aaaa` `G`\_`aPXFVJOV  
@HWI-EAS443:3:10:93:764#0/1  
CGTCCATCATAATCACTGAGTTTGGATTGAGTGCACATTT  
+HWI-EAS443:3:10:93:764#0/1  
^`J`b`X¥¥`¥]X]\_ZXbbaaZYaab\_baaaa` [ `¥a`ba  
@HWI-EAS443:3:10:973:640#0/1  
TATCCTCAAAGGAAAATTTCAAACAGCTGCCAGAGGGCA

+HWI-EAS443:3:10:973:640#0/1  
aaa`\_aaa`aaa`a`\_aa`\_a`\_a`^a^^[^a]``]^Z  
@HWI-EAS443:3:10:999:1153#0/1  
ATCAGTTGCACATAAATCCTGCCTGCCTGCTTGTGTGTAT  
+HWI-EAS443:3:10:999:1153#0/1  
aX[``Wa``a`a`a`\_Y\_¥\_UT^\_¥¥\_`W^`^Y\_W¥W¥]  
@HWI-EAS443:3:11:1040:216#0/1  
GGATCAGTTGCACATAAATCCTGCCTGCCTGCTTGTGTGT  
+HWI-EAS443:3:11:1040:216#0/1  
ab``aabZ``a`]aa`baa]X[a\_]\_]\_]``\_a^\_]a]  
@HWI-EAS443:3:11:1076:1957#0/1  
GCACCAGACCTTCTGGGAAGTGTGAACCTTGATTAGAG  
+HWI-EAS443:3:11:1076:1957#0/1  
aa\_X`ab`\_\_ZMFU`\_bI\_aV`Y``^aWVP^\_N\_]a\_[B  
@HWI-EAS443:3:11:1208:487#0/1  
CTCTAATGCAAGTTCAACACTTCCCAGAAGTCTGGTGC  
+HWI-EAS443:3:11:1208:487#0/1  
`Z`¥`XV`Y]PWWT[``\_Z\_^U[bTWHYZZX]]¥`aZVYa¥  
@HWI-EAS443:3:11:1213:1513#0/1  
TGTCGGAAGAATGATTGGTGAATCGGGAGATTCTACATC  
+HWI-EAS443:3:11:1213:1513#0/1  
`b^¥\_¥YP¥b[Z`Wb`aZP]aW`[Wa¥ZX][WYRPWMXRB  
@HWI-EAS443:3:11:1241:601#0/1  
TAGCAAGTGGGCATGACTTTGAAAGGGAAGGGTACTCACT  
+HWI-EAS443:3:11:1241:601#0/1  
\_Z\_^0^`X\_Z\_TZ\_]`^aa\_\_Z\_``^`XaVaYXPaG^RQ  
@HWI-EAS443:3:11:1287:1811#0/1  
TGCGGTGAAAGGAGTTGGAACAATAGCAATGGAGTTAATC  
+HWI-EAS443:3:11:1287:1811#0/1  
¥¥abbWa^aaaa\_aR\_aaa[]\_\_`[[W[``\_a`^a¥X`aY^  
@HWI-EAS443:3:11:1426:686#0/1  
TGGACGACTAATCCAGAATAGCATAACAATAGAGAGGATG  
+HWI-EAS443:3:11:1426:686#0/1  
a[aa\_bb^aZaa^\_\_a`a`a`a`aa`^a`a```\_\_\_\_]B  
@HWI-EAS443:3:11:1475:592#0/1  
GTCCGAAGAATGATTGGTGAATCGGGAGATTCTACATCC  
+HWI-EAS443:3:11:1475:592#0/1  
aW`a`\_a\_\_aa^^]\_\_X`Y]^Z\_Y^Y^VVY¥RVXTV  
@HWI-EAS443:3:11:155:332#0/1  
GTGGTCAGCCTGATGAGACCAAATGAAAACCCAGCTCACA  
+HWI-EAS443:3:11:155:332#0/1  
a^aa[aaa``aaa`a`aab`\_`\_``\_Z`^^^U`Y[]^X^  
@HWI-EAS443:3:11:1587:167#0/1  
TCCCAGTGCTGGGAAGGACCCTAAGAAAACAGGAGGACCC  
+HWI-EAS443:3:11:1587:167#0/1  
\_¥a\_\_^LaT^ZaVX¥^ZWUJZ^]]\_`^XHVRX]YUZUWLPS  
@HWI-EAS443:3:11:1588:1101#0/1  
TCCAAATGTGCACTGAACTCAAACCTCAGTGATTATGATGG  
+HWI-EAS443:3:11:1588:1101#0/1  
U``aaVaaaba`a`b`\_\_aVbW\_YbQ`b]aWa^R`aZ`aa

@HWI-EAS443:3:11:164:1049#0/1  
GTGCCGCAGGTGCTGCGGTGAAAGGAGTTGGAACAATAGC  
+HWI-EAS443:3:11:164:1049#0/1  
aZa`X[\_R\_[[a\_``\_aaSYV\_U[\_UZSZS[S\_¥^VVVBB  
@HWI-EAS443:3:11:1774:1494#0/1  
CAAACCTCAGTGATTATGATGGACGACTAATCCAGAATAGC  
+HWI-EAS443:3:11:1774:1494#0/1  
aVaaab`\_bZaTba`aa^]]Qa]`aa`\_]\_¥FT¥]X``YY  
@HWI-EAS443:3:11:1782:885#0/1  
GGAGATTCTACATCCAAATGTGCACTGAACTCAAACCTCAG  
+HWI-EAS443:3:11:1782:885#0/1  
¥QY[WX\_^VOZZ^\_^]Z^^]\_]P¥^ZXZXUXUZZWZB  
@HWI-EAS443:3:11:183:840#0/1  
TGGGCTTGCAGTAGCAAGTGGGCATGACTTTGAAAGGGAA  
+HWI-EAS443:3:11:183:840#0/1  
`[Zaa]^aaa`\_aaa`\_Na\_``a`a`^\_a\_a[UU^`]¥T  
@HWI-EAS443:3:11:198:1205#0/1  
CTGCGGTGAAAGGAGTTGGAACAATAGCAATGGAGTTAAT  
+HWI-EAS443:3:11:198:1205#0/1  
aa\_aaaZa`]`^a\_`Z`\_`^\_`^``\_\_\_\_^`^`\_\_`YU`^^  
@HWI-EAS443:3:11:263:877#0/1  
GAGGGCAATGATGGATCAAGTAAGAGAAAGTCGAAACCCA  
+HWI-EAS443:3:11:263:877#0/1  
HU¥[ORUIX¥¥Ybb```\_\_aV¥¥aaN`aZTZWK¥`\_ZNS  
@HWI-EAS443:3:11:289:1211#0/1  
TGAGAGAAGAAATAAATACCTAGAAGAGCATCCCAGTGCT  
+HWI-EAS443:3:11:289:1211#0/1  
`ab]`U`aa`aaaaaabaaa`a\_a``a``\_^a^`bX`W^  
@HWI-EAS443:3:11:292:1803#0/1  
GAAATAAATACCTAGAAGAGCATCCCAGTGCTGGGAAGGA  
+HWI-EAS443:3:11:292:1803#0/1  
abbbaaaaabaaab]\_¥a]abbaba^baR^a`a\_aaa\_\_`  
@HWI-EAS443:3:11:312:122#0/1  
TAACAATAGAGAGGATGGTGCTTTCTGCTTTTGATGAGAG  
+HWI-EAS443:3:11:312:122#0/1  
aaaaaab\_b`aaa`a\_adWa^\_^]\_]Y]Ya`\_RY^\_V][^  
@HWI-EAS443:3:11:330:1490#0/1  
TTTGAATGGGTCTATCCCGACCAGTGAGTACCCTTCCCTT  
+HWI-EAS443:3:11:330:1490#0/1  
abWI¥UUYbaQb\_`XV]`^`SSSX\_\_XSQ`PV]SFOPSB  
@HWI-EAS443:3:11:383:604#0/1  
AGCGTTTCTGCGGTTTTCGACTTTCTCTTACTTGATCCATC  
+HWI-EAS443:3:11:383:604#0/1  
aabbababb`RXU`aaU]a`aaaaa``aaaa``]\_\_¥  
@HWI-EAS443:3:11:464:416#0/1  
ATGACTTTGAAAGGGAAGGGTACTCACTGGTCGGGATAGA  
+HWI-EAS443:3:11:464:416#0/1  
]bb[babba^b`]a``^YOY\_\_a]b^¥Wa^PZa`aa`a[  
@HWI-EAS443:3:11:472:54#0/1  
GTTTTGGAGTAATTTGAATGGGTCTATCCCGACCAGTGAG



@HWI-EAS443:3:11:960:1744#0/1  
CAGAGGGCAATGATGGATCAAGTAAGAGAAAGTCGAAACC  
+HWI-EAS443:3:11:960:1744#0/1  
ab^a¥]]b`aba[aaaaZU\_`aZaa]`\_aaa`YX^``a`a  
@HWI-EAS443:3:11:993:637#0/1  
CAGCAGGTCTTACTCATATCATGATTTGGCATTCCAACCT  
+HWI-EAS443:3:11:993:637#0/1  
aabaaba^abaaaaaaaaaaaa`\_\_aaa\_]``\_\_]a\_]\_`  
@HWI-EAS443:3:12:1043:661#0/1  
GAGAGGATGGTGCTTTCTGCTTTTGATGAGAGAAGAAATA  
+HWI-EAS443:3:12:1043:661#0/1  
``b[bbaaa^Ra`aa`Y\_\_W\_aaaa\_aa]`T`]`a^\_[^a  
@HWI-EAS443:3:12:1170:1254#0/1  
GCTGTTTTGGAGTAATTTGAATGGGTCTATCCCGACCAGT  
+HWI-EAS443:3:12:1170:1254#0/1  
abaa\_aaaa`\_a¥a`aaaa`aaa\_U`aa\_\_[a\_a^\_\_\_\_]  
@HWI-EAS443:3:12:1175:1170#0/1  
GAAATAAATACCTAGAAGAGCATCCAGTGCTGGGAAGGA  
+HWI-EAS443:3:12:1175:1170#0/1  
a\_]\_W]aaaa[a\_aaa\_aaa]Y`^\_\_\_\_a0a`^ZJ[W``^\_  
@HWI-EAS443:3:12:1240:1658#0/1  
GAAAGCACCATCCTCTCTATTGTTATGCTATTCTGGATTA  
+HWI-EAS443:3:12:1240:1658#0/1  
SabX¥`a¥```bbb¥`[``¥]ab`VaVVY`]a\_MIPaaaa  
@HWI-EAS443:3:12:1282:362#0/1  
GTCCATCATAATCACTGAGTTTGAGTTCAGTGACATTTG  
+HWI-EAS443:3:12:1282:362#0/1  
aaa[ababbbba`a\_bbaaabaabaaaaa^a^a\_abaaa  
@HWI-EAS443:3:12:1345:485#0/1  
CAAAGCAGAAAGCACCATCCTCTCTATTGTTATGCTATT  
+HWI-EAS443:3:12:1345:485#0/1  
abbba`abaaaa]a^aba`\_a^a`aaa`a^aa`][^a`^  
@HWI-EAS443:3:12:1463:810#0/1  
GAAACGCTGAGATTGAAGACCTATTTTCCTGGCACGGTC  
+HWI-EAS443:3:12:1463:810#0/1  
a\_Y]`]PX`][Ma`¥¥MV\_V\_NUR^[ZMMPGZZVQPRZBB  
@HWI-EAS443:3:12:1463:955#0/1  
CACAAGCAGGCAGGCAGGATTTATGTGCAACTGATCCCCCT  
+HWI-EAS443:3:12:1463:955#0/1  
\_\_`V[X``^H[\_\_QR]ba^\_XZZaZS\_\_QWYa^^``BBBB  
@HWI-EAS443:3:12:1507:619#0/1  
CAATAGAGAGGATGGTGCTTTCTGCTTTTGATGAGAGAAG  
+HWI-EAS443:3:12:1507:619#0/1  
\_SXXT`¥¥P\_V^V]`QW¥Y`a¥MPV^VTUYL[UYaY]GOP  
@HWI-EAS443:3:12:1575:803#0/1  
TTTATGTGCAACTGATCCCCCTCAGAATGAGTGCTGACCGT  
+HWI-EAS443:3:12:1575:803#0/1  
abbaaa`\_¥^\_N\_X]aaa^P``V^PLRML^Ua^[aVPSBB  
@HWI-EAS443:3:12:1619:923#0/1  
GGAGGGGTGAAAATGGACGAAGGACAAGGGTTGCTTATGA

+HWI-EAS443:3:12:1619:923#0/1  
a[Za`a\_]a\_^Y]a`V[^a^^`^QPS]\_^UY\_V]^V^^Y  
@HWI-EAS443:3:12:1620:1245#0/1  
GGGTTGCTTATGAAAGAATGTGCAATATCCTCAAAGGAAA  
+HWI-EAS443:3:12:1620:1245#0/1  
aba\_]¥UabSab\_]Ra\_Y^TW\_]a^a\_]X[aYQ\_\_\_T\_¥^  
@HWI-EAS443:3:12:1635:349#0/1  
GCAATATCCTCAAAGGAAAATTTCAAACAGCTGCCAGAG  
+HWI-EAS443:3:12:1635:349#0/1  
aababa¥¥` `Z[]aaaa]¥]^]a]]Za`Q^`^SJYY[¥  
@HWI-EAS443:3:12:212:1854#0/1  
GAGGGGTGAAAATGGACGAAGGACAAGGGTTGCTTATGAA  
+HWI-EAS443:3:12:212:1854#0/1  
^T`Z^¥]b¥R\_baa\_aabb]aa\_aba`aa]^`[Z`aaaa\_a  
@HWI-EAS443:3:12:231:190#0/1  
TGCTACTGCAAGCCCATACACACAAGCAGGCAGGCAGGAT  
+HWI-EAS443:3:12:231:190#0/1  
abab\_ZV`bZ]b`a\_a`a\_Y]aa\_Zabab`R]a\_X`]aZ¥  
@HWI-EAS443:3:12:559:946#0/1  
CTGGGTTTTCATTTGGTCTCATCAGGCTGACCACTTGGCT  
+HWI-EAS443:3:12:559:946#0/1  
a\_\_\_¥Zbaba[a¥^a¥Vb`]aa^a[`aZ``\_]`\_¥\_`\_`  
@HWI-EAS443:3:12:64:232#0/1  
AAGATGCAACAGCAGGTCTTACTCATATCATGATTTGGCA  
+HWI-EAS443:3:12:64:232#0/1  
\_\_aa`ba^S\_aaa\_\_`^aa`a`\_\_```\_a`^\_^\_Z\_\_\_^^  
@HWI-EAS443:3:12:650:537#0/1  
ATTGCCCTCTGGGCAGCTGTTTCAAATTTTCCTTTGAGGA  
+HWI-EAS443:3:12:650:537#0/1  
^`abaaaaaaaaaaaa`Z```aa]W^a\_aa\_`a`a]```^  
@HWI-EAS443:3:12:704:426#0/1  
GATTTATGTGCAACTGATCCCCTCAGAATGAGTGCTGACC  
+HWI-EAS443:3:12:704:426#0/1  
`¥XX¥¥[WY` `X]S]Z¥\_Z¥XY\_\_`U[\_^Z^W`Q[[[[Z  
@HWI-EAS443:3:12:70:1805#0/1  
GTTTCAAATTTTCCTTTGAGGATATTGCACATTCTTTCAT  
+HWI-EAS443:3:12:70:1805#0/1  
`aab`bbbbbbbaaaba`\_abaaa\_W\_aaaaaaaaa\_a`  
@HWI-EAS443:3:12:781:679#0/1  
GTTGCACATAAATCCTGCCTGCCTGCTTGTGTGTATGGGC  
+HWI-EAS443:3:12:781:679#0/1  
[DQOS^PUQVUTXXT\_\_ZP[ZYPNZYOX]PVO[FSKB BBB  
@HWI-EAS443:3:12:799:563#0/1  
GCAATATCCTCAAAGGAAAATTTCAAACAGCTGCCAGAG  
+HWI-EAS443:3:12:799:563#0/1  
a`aaab^a^aa` [ `a[Z^V]^a[^a`a` ``Y¥` \_[WZ[]\_  
@HWI-EAS443:3:12:887:1159#0/1  
GGATTAGTCGTCCATCATAATCACTGAGTTTGAGTTCAGT  
+HWI-EAS443:3:12:887:1159#0/1  
^aZXXb`abZS][^\_Q]aW\_¥a\_\_aa`a^^¥a`aRY` ` `S



@HWI-EAS443:3:13:1113:691#0/1  
GGAGAGTTTGGCGCCAAGCAAACAATGGCGAAGATGCAAC  
+HWI-EAS443:3:13:1113:691#0/1  
a¥V¥¥`[^aZ[\_WLVX[[¥RYP^^YU]Q^Z[VYU¥R[ZB  
@HWI-EAS443:3:13:1229:1618#0/1  
AGAATGTGCAATATCCTCAAAGGAAAATTTCAAACAGCTG  
+HWI-EAS443:3:13:1229:1618#0/1  
`]X^a^QQ^[^ZQ]\_S\_aJ^a\_a\_aa`aWYZ\_[\_Za^ZBB  
@HWI-EAS443:3:13:1270:1034#0/1  
CATTGCCCTCTGGGCAGCTGTTTCAAATTTTCCTTTGAGG  
+HWI-EAS443:3:13:1270:1034#0/1  
Sa`S`ZX\_a]¥^\_a]^`\_\_ZWYbaa]^`¥`\_X\_a```[\_Z  
@HWI-EAS443:3:13:139:872#0/1  
GAGGTCTTCAATCTCAGCGTTTCCTGGGTTTCGACTTTCT  
+HWI-EAS443:3:13:139:872#0/1  
[`bb[aaaa[baab`a`a\_\_YJ[`\_\_Ua¥\_]aaa^^\_Z`  
@HWI-EAS443:3:13:1420:183#0/1  
GAGTTCAGTGCACATTTGGATGTAGAATCTCCCGATTCCA  
+HWI-EAS443:3:13:1420:183#0/1  
]K`]aa]Z¥X^T^a\_WS[RLNNU]\_^UY]¥STUV^UYWY  
@HWI-EAS443:3:13:1429:1633#0/1  
CAGGAAACGCTGAGATTGAAGACCTCATTTTCCTGGCAGC  
+HWI-EAS443:3:13:1429:1633#0/1  
]¥`Z`\_I¥]aaa`¥0\_baaZ]]`¥\_]^^`QVabbUW^¥  
@HWI-EAS443:3:13:1479:1143#0/1  
GGAGGGGTGAAAATGGACGAAGGACAAGGGTTGCTTATGA  
+HWI-EAS443:3:13:1479:1143#0/1  
ab\_ba`\_Rba\_```aa`^a`\_a`^^a`^a`]]a^a^[\_`Y  
@HWI-EAS443:3:13:1621:954#0/1  
CTGGGTTTCGACTTTCTTACTTGATCCATCATTGCCCT  
+HWI-EAS443:3:13:1621:954#0/1  
]Zaa`Q`a^]]aa\_ZT`[N¥\_ZZ\_S]W]ZJW[V\_QZNT  
@HWI-EAS443:3:13:1641:1227#0/1  
TAATCACTGAGTTTGGATTCAGTGCACATTTGGATGTAGA  
+HWI-EAS443:3:13:1641:1227#0/1  
¥X¥`¥\_Y[aHXU^Z^Ua`PX^^ZR]YZaa`PPW`\_H]BB  
@HWI-EAS443:3:13:1676:1894#0/1  
TTTCTGGAGGGGTGAAAATGGACGAAGGACAAGGGTTGCT  
+HWI-EAS443:3:13:1676:1894#0/1  
abaZZb¥Ub\_ab\_a`¥`aaaa`Xa`^aQ]W`^`R¥aV^  
@HWI-EAS443:3:13:1679:1255#0/1  
TGAGGGGATCAGTTGCACATAAATCCTGCCTGCCTGCTTG  
+HWI-EAS443:3:13:1679:1255#0/1  
]W¥¥VU`^ba]¥]¥aRWaa`aa^a[aaaYXUaHX`\_Haaa  
@HWI-EAS443:3:13:1706:989#0/1  
GCATGACTTTGAAAGGGAAGGGTACTCACTGGTCGGGATA  
+HWI-EAS443:3:13:1706:989#0/1  
a`a`aa`aabb\_aaaa`\_``\_V`]^\_`\_a]YU\_\_^\_]`  
@HWI-EAS443:3:13:1762:446#0/1  
GAAGGACCCTAAGAAAACAGGAGGACCCATATATAGAAGA

+HWI-EAS443:3:13:1762:446#0/1  
aX` [ZTZ^¥¥RU]GO^]UW\_OXUWYUOSU^WWY^VXBBBB  
@HWI-EAS443:3:13:1776:295#0/1  
ATCCAGAATAGCATAACAATAGAGAGGATGGTGCTTTCTG  
+HWI-EAS443:3:13:1776:295#0/1  
aa^`^`a\_\_SYOYa\_\_¥a`\_a¥]Z`aW` `WV^PW¥ZN[V  
@HWI-EAS443:3:13:202:1477#0/1  
CTGTTGCATCTTCGCCATTGTTTGCTTGGCGCCAAACTCT  
+HWI-EAS443:3:13:202:1477#0/1  
aaa¥aaaba`\_a]\_^` `^`\_\_Q\_X\_S[^`^W[ZYYV]X^  
@HWI-EAS443:3:13:226:358#0/1  
CAGCTGCCAGAGGGCAATGATGGATCAAGTAAGAGAAAG  
+HWI-EAS443:3:13:226:358#0/1  
a[aa`baaa\_a\_a`a`\_¥aaa\_\_^Y\_^[aY`^a^a\_V^\_  
@HWI-EAS443:3:13:304:1009#0/1  
CACCATCCTCTCTATTGTTATGCTATTCTGGATTAGTCGT  
+HWI-EAS443:3:13:304:1009#0/1  
\_`abb`ba\_a]\_]\_¥\_baabbbb`aaaaaab\_aaa^\_[\_\_  
@HWI-EAS443:3:13:338:243#0/1  
CAACACTTCCCAGAAGGTCTGGTGCCGCAGGTGCTGCGGT  
+HWI-EAS443:3:13:338:243#0/1  
`aa`aaa`\_a`\_a¥^\_\_S`^`^Z` `]`RZZ¥R¥TS[BBBB  
@HWI-EAS443:3:13:360:1088#0/1  
ATCCCCTCAGAATGAGTGCTGACCGTGCCAGGAAAATGAG  
+HWI-EAS443:3:13:360:1088#0/1  
\_^ZVPR\_J^]`aa[P]GaQQ[I\_` [Q` [[¥\_\_¥¥¥^KKS  
@HWI-EAS443:3:13:371:1552#0/1  
CTTCTCTCATCAAAAGCAGAAAGCACCATCCTCTCTATTG  
+HWI-EAS443:3:13:371:1552#0/1  
aabb`bbabbb` `a\_\_abbaa`babaabbaaaabbbabaa  
@HWI-EAS443:3:13:388:985#0/1  
GGCTTGCAAGTGGGCATGACTTTGAAAGGGAAGG  
+HWI-EAS443:3:13:388:985#0/1  
[\_a[]W^aaYM[W`\_¥V^`\_V`]YX]^ [RTXZRa`\_`\_\_B  
@HWI-EAS443:3:13:42:1778#0/1  
ATTGTTCCAACCTTTTACCAGCACCTGCGGCACCAG  
+HWI-EAS443:3:13:42:1778#0/1  
^^]YW`\_aa`^`\_` `ba^` `a^a\_X`\_aaa\_]a`ZPZ\_\_  
@HWI-EAS443:3:13:470:1317#0/1  
AGTGGTCAGCCTGATGAGACCAAATGAAAACCCAGCTCAC  
+HWI-EAS443:3:13:470:1317#0/1  
ZTW`^Z\_VT\_QRU]]\_`]]`ab`aa[ `X][UZ` [Y\_`]Q  
@HWI-EAS443:3:13:473:492#0/1  
TCATAATCACTGAGTTTGAGTTCAGTGCACATTTGGATGT  
+HWI-EAS443:3:13:473:492#0/1  
aaaaaaaa` `a` [a]^`\_^aZ¥^¥\_W\_\_^`\_^ [Z`X\_W\_V  
@HWI-EAS443:3:13:715:1849#0/1  
CTGTTTTCTTAGGGTCTTCCCAGCACTGGGATGCTCTTC  
+HWI-EAS443:3:13:715:1849#0/1  
ab`abbbbbbba` [aa`bbaabbbbbbbbaaa[aaaa`aa`a

@HWI-EAS443:3:13:776:703#0/1  
CACCATCCTCTCTATTGTTATGCTATTCTGGATTAGTCGT  
+HWI-EAS443:3:13:776:703#0/1  
I[a`R`¥SZ\_]`^abbabVb¥\_a`]¥`RaZ`aT¥baM^`L¥  
@HWI-EAS443:3:13:792:469#0/1  
GGTTTTTCATTTGGTCTCATCAGGCTGACCACTTGGCTGTT  
+HWI-EAS443:3:13:792:469#0/1  
aa]aa`a`a`\_aa^^^`\_`\_`\_`\_¥\_\_\_\_]^^]\_`^X\_`HW  
@HWI-EAS443:3:13:795:697#0/1  
ATGCCACATATCAGAGAACAAGAGCGCTTGTTCGCACCGG  
+HWI-EAS443:3:13:795:697#0/1  
a`a]aba\_\_\_\_]\_\_aa`\_`\_a\_aa]¥^\_\_^¥^`Y¥]\_\_\_\_^¥\_¥  
@HWI-EAS443:3:13:859:1778#0/1  
ATGACTTTGAAAGGGAAGGGTACTCACTGGTCGGGATAGA  
+HWI-EAS443:3:13:859:1778#0/1  
aaaaaaaaaaaa`a`\_aaaa`Wa\_\_[a`\_`^WV`\_`]^`^`\_  
@HWI-EAS443:3:13:85:529#0/1  
GCTGACCGTGCCAGGAAAATGAGGTCTTCAATCTCAGCGT  
+HWI-EAS443:3:13:85:529#0/1  
``\_a^]`\_0\_^U`\_XU]YY¥PZZK¥aaa\_XW¥]``a[UV  
@HWI-EAS443:3:13:897:549#0/1  
TGGCGCCAAGCAAACAATGGCGAAGATGCAACAGCAGGTC  
+HWI-EAS443:3:13:897:549#0/1  
]]\_`aaa`^a\_aa`\_a`aa\_\_\_\_\_a^ZY^`^M^`^^`\_RV  
@HWI-EAS443:3:13:922:466#0/1  
TAATCACTGAGTTTGAGTTCAGTGCACATTTGGATGTAGA  
+HWI-EAS443:3:13:922:466#0/1  
`bb`]]]baV`babab`b\_aa\_\_UZa]aaW`]`a\_¥RIY  
@HWI-EAS443:3:13:970:1003#0/1  
CGCAGGTGCTGCGGTGAAAGGAGTTGGAACAATAGCAATG  
+HWI-EAS443:3:13:970:1003#0/1  
Yabbb\_J\_aaaaaaHaYa\_a\_Z^Ta`RXHW[`\_aVYX\_[  
@HWI-EAS443:3:14:1004:753#0/1  
AGAATGTGCAATATCCTCAAAGGAAAATTTCAAACAGCTG  
+HWI-EAS443:3:14:1004:753#0/1  
a[NIL][UTY¥\_VTMNMX¥TP¥\_WOLHQWXX]LXYRYLU¥  
@HWI-EAS443:3:14:1021:1326#0/1  
GAAATAAATACCTAGAAGAGCATCCCAGTGCTGGGAAGGA  
+HWI-EAS443:3:14:1021:1326#0/1  
ZOZ]]]b\_\_¥Pxa`aa`aa`aa\_[V^[a]a^YV[[\_]`^WZ  
@HWI-EAS443:3:14:104:733#0/1  
TTAGTCGTCCATCATAATCACTGAGTTTGAGTTCAGTGCA  
+HWI-EAS443:3:14:104:733#0/1  
]bb`[\_U\_abaa[W`]`a]a]a¥^a\_aaX]aX``aa^\_Y`  
@HWI-EAS443:3:14:1081:1051#0/1  
AATTTCTGGAGGGTGAATAATGGACGAAGGACAAGGGTTG  
+HWI-EAS443:3:14:1081:1051#0/1  
abbaa`bab`ba\_aZa\_a\_aaaZ^`a]\_\_]Va\_a^\_Z\_a  
@HWI-EAS443:3:14:1147:1673#0/1  
AATTTCTGGAGGGTGAATAATGGACGAAGGACAAGGGTTG

+HWI-EAS443:3:14:1147:1673#0/1  
a`aaa`aaa^[Y]\_U¥¥a[S]`^]X¥]\_\_\_\_]0\_\_\_UYVZ\_  
@HWI-EAS443:3:14:1247:724#0/1  
AAGTGGGCATGACTTTGAAAGGGAAGGGTACTCACTGGTC  
+HWI-EAS443:3:14:1247:724#0/1  
aaa0baa`ab`[aa¥a¥`a]P^`[a`aW\_Z\_[\_V^`\_VX  
@HWI-EAS443:3:14:1270:1080#0/1  
GAGGGGTGAAAATGGACGAAGGACAAGGGTTGCTTATGAA  
+HWI-EAS443:3:14:1270:1080#0/1  
\_NZ¥XT^VX[]^Z^Z]a^Y[YUUU[^RVNVVVZUUUV]WU  
@HWI-EAS443:3:14:1279:1918#0/1  
GAAATAAATACCTAGAAAGAGCATCCCAGTGCTGGGAAGGA  
+HWI-EAS443:3:14:1279:1918#0/1  
¥Va^¥aY`¥`^`[[aKZVTZaa`bb¥U`^Z\_[ZZTT`¥`[\_  
@HWI-EAS443:3:14:1428:1423#0/1  
ATTGCCCTCTGGGCAGCTGTTTGAATTTTCCTTTGAGGA  
+HWI-EAS443:3:14:1428:1423#0/1  
aaUa\_\_\_a\_\_SY¥\_[`^\_\_]]\_a^^Z^\_\_^XI\_\_\_^^^  
@HWI-EAS443:3:14:1667:1876#0/1  
CTGATTAACCTCATTGCTATTGTTCCAACCTTCCTTCACCG  
+HWI-EAS443:3:14:1667:1876#0/1  
aa\_TT[[]\_¥NZ^GPQZ\_^UPRZBBBBBBBBBBBBBBBB  
@HWI-EAS443:3:14:167:1806#0/1  
AGGTGCTGCGGTGAAAGGAGTTGGAACAATAGCAATGGAG  
+HWI-EAS443:3:14:167:1806#0/1  
aa]Vbaaa`\_`Xaaa\_\_¥X\_Za\_^\_W¥`\_`a\_a`¥Y[`  
@HWI-EAS443:3:14:1760:1101#0/1  
ATCCCAGCAGTGAGTACCCTTCCCTTTCAAAGTCATGCC  
+HWI-EAS443:3:14:1760:1101#0/1  
[UZS\_Va`bb`a`[^\_^^^`\_`Y]a\_\_\_\_\_`M^`^¥W  
@HWI-EAS443:3:14:203:1511#0/1  
ACACAAGCAGGCAGGCAGGATTTATGTGCAACTGATCCCC  
+HWI-EAS443:3:14:203:1511#0/1  
aaR`\_`aXS][\_ULZ\_¥¥¥XW[[[MZOU[VUZX\_¥[USZ  
@HWI-EAS443:3:14:223:308#0/1  
GGGGAGCGCCAGGATGCCACAGAAATCAGAGCATCTGTGC  
+HWI-EAS443:3:14:223:308#0/1  
a`aaaaa\_\_`^`^SH\_^`Ua\_¥\_¥¥¥[ZS^¥¥WQZ^SNW  
@HWI-EAS443:3:14:420:983#0/1  
GTGAAAATGGACGAAGGACAAGGGTTGCTTATGAAAGAAT  
+HWI-EAS443:3:14:420:983#0/1  
aZa¥X^]Y^`]W^]U[\_\_\_a^WW\_^W[^^W]¥]\_^TXTV^  
@HWI-EAS443:3:14:430:832#0/1  
CAAGAGCGCTTGTTCGCACCGGAATGGATCCCAGAATGTG  
+HWI-EAS443:3:14:430:832#0/1  
a`\_`Q]VXa\_aVTU¥\_TTZV¥WYTWTWTZNVTVWWWUHW  
@HWI-EAS443:3:14:517:988#0/1  
GAGAGGATGGTCTTTCTGCTTTTGTGATGAGAGAAGAAATA  
+HWI-EAS443:3:14:517:988#0/1  
aXa^`YT[`]Wa¥^\_\_`¥¥]\_`\_`\_`^\_\_\_\_]XKZ`Z\_\_\_\_\_

@HWI-EAS443:3:14:519:87#0/1  
CTGCTGTTGCATCTTCGCCATTGTTTGCTTGGCGCCAAAC  
+HWI-EAS443:3:14:519:87#0/1  
abbaaa[`aa\_a\_aa`a\_\_^]a\_\_`\_\_\_^]]YY^YSYYR  
@HWI-EAS443:3:14:535:951#0/1  
GGCAGGATTTATGTGCAACTGATCCCCTCAGAATGAGTGC  
+HWI-EAS443:3:14:535:951#0/1  
\_`a\_`]WT\_`¥]^]¥¥`a\_^]0[a\_U\_T``^[Z]aaaS`a  
@HWI-EAS443:3:14:549:1547#0/1  
CTCCTGTTTTCTTAGGGTCCTTCCCAGCACTGGGATGCTC  
+HWI-EAS443:3:14:549:1547#0/1  
aa[`Q`0]Z¥`\_aaa[LGaa]T^]GN[J¥\_Z[P[^0` []X  
@HWI-EAS443:3:14:597:925#0/1  
AGCAGGTCTTACTCATATCATGATTTGGCATTCCAACCTG  
+HWI-EAS443:3:14:597:925#0/1  
\_T`a`U^^\_aa\_]a^\_^]Y]¥\_^¥[[QW^LZYUaZ\_]Y]  
@HWI-EAS443:3:14:636:315#0/1  
AGGCAGGCAGGATTTATGTGCAACTGATCCCCTCAGAATG  
+HWI-EAS443:3:14:636:315#0/1  
T[]Tbb``X`a]^¥\_X¥^Z]Z\_dW[`a^V^aa\_]aa]S^]  
@HWI-EAS443:3:14:63:1874#0/1  
GCTGTTGCATCTTCGCCATTGTTTGCTTGGCGCCAAACTC  
+HWI-EAS443:3:14:63:1874#0/1  
abbaY`\_]b``aaa`a`^aJZ``Xa\_`[^\_]`^XR]¥X]  
@HWI-EAS443:3:14:641:1156#0/1  
CATGACTTTGAAAGGAAGGGTACTCACTGGTCGGGATAG  
+HWI-EAS443:3:14:641:1156#0/1  
\_UZ^¥]]^`\_WWU^^T[T]YPDT[\_aa[`b[V^\_\_`V`Z  
@HWI-EAS443:3:14:663:1742#0/1  
ACTCATTCTGAGGGGATCAGTTGCACATAAATCCTGCCTG  
+HWI-EAS443:3:14:663:1742#0/1  
aaaabb¥¥`a`a\_Xa^aa`\_\_aabbaaaaaaaaaY`a]]``  
@HWI-EAS443:3:14:80:1235#0/1  
GCATCCCAGTGCTGGGAAGGACCCTAAGAAAACAGGAGGA  
+HWI-EAS443:3:14:80:1235#0/1  
aabaaa\_0]]a]aaa`a]a\_a`a`aa`\_¥]a\_a\_\_\_\_\_^  
@HWI-EAS443:3:14:889:157#0/1  
CAGGATTTATGTGCAACTGATCCCCTCAGAATGAGTGCTG  
+HWI-EAS443:3:14:889:157#0/1  
aaba`\_aaV`b`aZaa^`a\_\_Y]]\_`aa`a^\_a\_aS`VN\_  
@HWI-EAS443:3:14:917:1321#0/1  
GAGAGGATGGTCTTTCTGCTTTTGATGAGAGAAGAAATA  
+HWI-EAS443:3:14:917:1321#0/1  
\_OZN\_W¥YaZO]WZVWSZ¥^WS\_\_YXVUU¥W[O[S¥^^XY  
@HWI-EAS443:3:15:1017:1477#0/1  
GATGCAACAGCAGGTCTTACTCATATCATGATTTGGCATT  
+HWI-EAS443:3:15:1017:1477#0/1  
`aab\_b`Y`\_`ab\_FTa^Zbabb^`aba\_]`aaaa`aW  
@HWI-EAS443:3:15:1100:869#0/1  
ATGCAACAGCAGGTCTTACTCATATCATGATTTGGCATT

+HWI-EAS443:3:15:1100:869#0/1  
`ababaa`aaSY^aaa`a\_\_aaa^^a\_a`\_a\_^`\_`¥Z  
@HWI-EAS443:3:15:134:124#0/1  
GGTGCTTTCTGCTTTTGATGAGAGAAGAAATAAATACCTA  
+HWI-EAS443:3:15:134:124#0/1  
ab\_aba`aaabZaaaa]`a\_a^a`b\_`aaaa```\_\_aa  
@HWI-EAS443:3:15:1390:116#0/1  
CTGATATGTGGCATCATTGAGTTGGAATGCCAAATCATG  
+HWI-EAS443:3:15:1390:116#0/1  
`bb`XX\_HPXbb\_aXbX\_`aab[\_b`a[````\_a`aa`aab  
@HWI-EAS443:3:15:1446:1410#0/1  
CTGTTTTGGAGTAATTTGAATGGTCTATCCCGACCAGTG  
+HWI-EAS443:3:15:1446:1410#0/1  
¥^^]baa¥`\_bbb`bbbabbba[at`abZ`abb`bbbb]`  
@HWI-EAS443:3:15:169:894#0/1  
CGCTGAGATTGAAGACCTCATTTTCCTGGCACGGTCAGCA  
+HWI-EAS443:3:15:169:894#0/1  
`a`a^]b\_aUQV^baaaaXaba]aaaab^`]R\_\_\_a¥\_\_a  
@HWI-EAS443:3:15:1740:607#0/1  
CTTTCTTACTTGATCCATCATTGCCCTCTGGGCAGCTG  
+HWI-EAS443:3:15:1740:607#0/1  
X`V[XSVbaabba\_a`^ZZ¥N^bV\_b`bbabbba```a\_\_  
@HWI-EAS443:3:15:1765:876#0/1  
GAGGGCAATGATGGATCAAGTAAGAGAAAGTCGAAACCCA  
+HWI-EAS443:3:15:1765:876#0/1  
a\_aa\_]T\_]`a`\_]\_^\_Y\_¥`^^Y^¥\_PWZU^]RRV]  
@HWI-EAS443:3:15:328:669#0/1  
ACAATAGAGAGGATGGTGCTTTCTGCTTTTGATGAGAGAA  
+HWI-EAS443:3:15:328:669#0/1  
a]aaa\_aaa`[aaZ`[LTLO\_\_MROO¥Q[aXY\_[L`SaY`  
@HWI-EAS443:3:15:343:1270#0/1  
CTGCTGTTGCATCTTCGCCATTGTTTGCTTGCGCCAAAC  
+HWI-EAS443:3:15:343:1270#0/1  
a\_U\_bVT`L`b`baa`]`\_a[aa\_\_bU]Y¥ZRT^PR[b\_`  
@HWI-EAS443:3:15:389:221#0/1  
CCCAGTGCTGGGAAGGACCCTAAGAAAACAGGAGGACCCA  
+HWI-EAS443:3:15:389:221#0/1  
\_Z]Y\_\_\_OZaba`Y\_Q\_`^[`]P\_a\_\_XY\_]`[¥GSQLM[  
@HWI-EAS443:3:15:43:208#0/1  
CAAAAGCAGAAAGCACCATCCTCTCTATTGTTATGCTATT  
+HWI-EAS443:3:15:43:208#0/1  
a\_VS\_abaaaaYaaa\_¥[XY^V[YY\_Y\_\_\_¥\_\_^¥[Z^W  
@HWI-EAS443:3:15:667:168#0/1  
AACAATAGAGAGGATGGTGCTTTCTGCTTTTGATGAGAGA  
+HWI-EAS443:3:15:667:168#0/1  
`a`X^`aaTa`b^`R`\_ZTLU\_]U¥^TLX\_]aZ`a^a[a]  
@HWI-EAS443:3:15:682:1030#0/1  
AGCAGGTCTTACTCATATCATGATTTGGCATTCCAACCTG  
+HWI-EAS443:3:15:682:1030#0/1  
G^^^]TPa`¥```Z[Sbb`\_^\_^VSZ\_`Y]Y¥aZaaaT¥\_



+HWI-EAS443:3:16:1195:1329#0/1  
aYb\_bbbbbbaa^baaaa`a``aaaaSaa]a^\_``\_a  
@HWI-EAS443:3:16:1216:424#0/1  
CTGCGGCACCAGACCTTCTGGGAAGTGTGAACCTTGCAT  
+HWI-EAS443:3:16:1216:424#0/1  
¥\_`W]\_¥¥^¥^a^\_\_\_a]baWL¥P¥VXaZ¥W\_R]W¥¥]]\_`  
@HWI-EAS443:3:16:1296:1539#0/1  
GGGGAGCGCCAGGATGCCACAGAAATCAGAGCATCTGTCCG  
+HWI-EAS443:3:16:1296:1539#0/1  
ababa`bZa]a^a`S\_``]\_aaa\_]aZ`WS]`QY[EOW  
@HWI-EAS443:3:16:1426:1610#0/1  
AGCAACCCTTGCCTTCGTCCATTTTACCCTCCAGAAA  
+HWI-EAS443:3:16:1426:1610#0/1  
a][abS^XZaaa]UWa\_a\_XL`a`a\_]aUT¥¥a¥`¥¥\_\_`  
@HWI-EAS443:3:16:1450:1338#0/1  
GTGCTTTCTGCTTTTGATGAGAGAAGAAATAAATACCTAG  
+HWI-EAS443:3:16:1450:1338#0/1  
^FVZ\_]YMS\_`a`\_PNX]aU^\_a^a[VUXX[OV[[[WY¥X  
@HWI-EAS443:3:16:1556:1246#0/1  
ATTGCCCTCTGGGCAGCTGTTTAAAATTTTCTTTGAGGA  
+HWI-EAS443:3:16:1556:1246#0/1  
a`ZX^`b^0^P]^]]^aYU`aaa¥`Pa\_a\_W^`\_¥[`^\_`  
@HWI-EAS443:3:16:172:879#0/1  
ATCCAGAATAGCATAACAATAGAGAGGATGGTGCTTTCTG  
+HWI-EAS443:3:16:172:879#0/1  
aTb]¥]]P]YT\_V^Z^¥0^\_V\_\_a\_ZZ]XaVVVTTWXRBB  
@HWI-EAS443:3:16:175:754#0/1  
AGAGCATCTGTGGAAGAATGATTGGTGAATCGGGAGAT  
+HWI-EAS443:3:16:175:754#0/1  
aa`^b``aaaU¥`a[V\_][XX`ZWW^^X\_]^[^[[[[]^]  
@HWI-EAS443:3:16:228:1880#0/1  
CAATAGAGAGGATGGTGCTTTCTGCTTTTGATGAGAGAAG  
+HWI-EAS443:3:16:228:1880#0/1  
aabba¥]aa\_a`aYPL¥a\_Z\_\_Y\_U¥`^HDTY]PW``\_YR  
@HWI-EAS443:3:16:229:829#0/1  
TGGGCATGACTTTGAAAGGGAAGGGTACTCACTGGTCGGG  
+HWI-EAS443:3:16:229:829#0/1  
a\_[¥\_\_\_b\_\_b\_¥\_a¥\_b[`]]]bbbRX`bbabTbaG`bba  
@HWI-EAS443:3:16:255:1610#0/1  
ATGGGCTTGCAGTAGCAAGTGGGCATGACTTTGAAAGGGA  
+HWI-EAS443:3:16:255:1610#0/1  
aaaa`b`\_`\_\_aaS^¥XY``UGL\_\_\_[R¥\_]`^X`\_^YWUT  
@HWI-EAS443:3:16:281:1652#0/1  
ATCTGTGCGGAAGAATGATTGGTGAATCGGGAGATTCTAC  
+HWI-EAS443:3:16:281:1652#0/1  
a`a^aV`ba\_ab\_\_[[`a¥XXS[`GXM\_PXRS\_WTT]`0  
@HWI-EAS443:3:16:370:674#0/1  
CGAAGATGCAACAGCAGGTCTTACTCATATCATGATTTGG  
+HWI-EAS443:3:16:370:674#0/1  
aba\_]b\_¥\_aaab`^]]XV^a\_aaaa`aaaaaaaa¥¥\_`]





+HWI-EAS443:3:16:862:1244#0/1  
aaa`]aaaaaa\_`a`a`a^`]\_\_a\_a`]\_a`\_`][^^]`  
@HWI-EAS443:3:16:881:374#0/1  
GAGCATCCCAGTGCTGGGAAGGACCCTAAGAAAACAGGAG  
+HWI-EAS443:3:16:881:374#0/1  
¥V^ababaa[\_V\_a`\_^F[aa`W\_a`\_a\_a^a¥`[aa\_^`  
@HWI-EAS443:3:16:998:1869#0/1  
AAATAAATACCTAGAAGAGCATCCCAGTGCTGGGAAGGAC  
+HWI-EAS443:3:16:998:1869#0/1  
aba`aaaaaa\_ab`aa\_aaa`\_]\_]VZa¥V\_^`\_\_`^^^  
@HWI-EAS443:3:17:1156:1512#0/1  
ATGGGCTTGCAGTAGCAAGTGGGCATGACTTTGAAAGGGA  
+HWI-EAS443:3:17:1156:1512#0/1  
aaa`baa\_aa]\_V`\_^`]XSY\_\_\_`\_`\_`\_a\_aaX\_]YY]W  
@HWI-EAS443:3:17:1163:1417#0/1  
CCATCCTCTCTATTGTTATGCTATTCTGGATTAGTCGTCC  
+HWI-EAS443:3:17:1163:1417#0/1  
I\_¥^ba\_Vbb\_a¥Xabbbbbbba\_bbab`X¥b`¥\_aaa`bb  
@HWI-EAS443:3:17:1206:387#0/1  
GAGAGGATGGTCTTTCTGCTTTTGATGAGAGAAGAAATA  
+HWI-EAS443:3:17:1206:387#0/1  
aaa`aaa`aaVTT`\_a\_\_aZaaa`a]a\_]\_Y`\_\_\_^\_\_`\_`  
@HWI-EAS443:3:17:1216:1283#0/1  
TAACAATAGAGAGGATGGTCTTTCTGCTTTTGATGAGAG  
+HWI-EAS443:3:17:1216:1283#0/1  
a\_aaaaaabaa`\_b\_\_a^K¥R¥`[RYYL]\_`aST\_URXSZ  
@HWI-EAS443:3:17:1403:240#0/1  
TTTCGACTTTCTCTTACTTGATCCATCATTGCCCTCTGGG  
+HWI-EAS443:3:17:1403:240#0/1  
]¥YLTZaZ]PaaZUVPO`\_`U]PORZSXTG[XRKUU¥UKR  
@HWI-EAS443:3:17:1480:614#0/1  
CGCCAAGCAAACAATGGCGAAGATGCAACAGCAGGTCTTA  
+HWI-EAS443:3:17:1480:614#0/1  
\_bbabbbbbbabaabbab]`a\_]a```a`a`X``a¥U^`a  
@HWI-EAS443:3:17:1489:212#0/1  
GGTGAATGGACGAAGGACAAGGGTTGCTTATGAAAGAA  
+HWI-EAS443:3:17:1489:212#0/1  
a`I][a]`VW¥a`ba`\_a`^PWQO]XTJSZXZ¥UPVTTOR  
@HWI-EAS443:3:17:1498:1089#0/1  
CACTCATTCTGAGGGGATCAGTTGCACATAAATCCTGCCT  
+HWI-EAS443:3:17:1498:1089#0/1  
a[[\_W^abbbbaab]UX`\_aa`\_]`^X]aaXYWa`^a\_Y\_\_  
@HWI-EAS443:3:17:1569:479#0/1  
GTCCGAAGAATGATTGGTGAATCGGGAGATTCTACATCC  
+HWI-EAS443:3:17:1569:479#0/1  
a[]^ZZ\_]`\_^\_XZZY^YS^[V[YJ[XVQ[TUNKXR[YUQB  
@HWI-EAS443:3:17:1574:1919#0/1  
AAGCAACCCTTGTCCTTCGTCCATTTTCACCCCTCCAGAA  
+HWI-EAS443:3:17:1574:1919#0/1  
]^X`^`^YW`]aRYN]YV`YZ[R¥Q\_`aaa\_SOPW`\_^`^Z

@HWI-EAS443:3:17:1593:1047#0/1  
CAATCTCAGCGTTTCCTGGGTTTCGACTTTCTCTTACTTG  
+HWI-EAS443:3:17:1593:1047#0/1  
`baaaaba`abaaa^\_aaaa\_aa\_a`aa^a\_a`\_^a`\_  
@HWI-EAS443:3:17:1668:173#0/1  
GGCTTGCAGTAGCAAGTGGGCATGACTTTGAAAGGGAAGG  
+HWI-EAS443:3:17:1668:173#0/1  
abb[aa`aa\_aa]`[\_UaaaW\_\_`[W`\_a^¥\_¥\_¥\_¥W^W  
@HWI-EAS443:3:17:265:1050#0/1  
TTCCTGGGTTTCGACTTTCTCTTACTTGATCCATCATTGC  
+HWI-EAS443:3:17:265:1050#0/1  
aabb^]]a`ba``\_aaaaaaaa\_a`aaa\_aa\_\_a`\_a`  
@HWI-EAS443:3:17:286:1639#0/1  
GCTGTTGCATCTTCGCCATTGTTGCTTGGCGCCAAACTC  
+HWI-EAS443:3:17:286:1639#0/1  
`baY^a`aaaa\_aaY`¥WY\_QQ`aU`¥`[T^T^V[¥]SVX  
@HWI-EAS443:3:17:335:1515#0/1  
GGATGGTGCTTTCTGCTTTTGATGAGAGAAGAAATAAATA  
+HWI-EAS443:3:17:335:1515#0/1  
]UX`Y\_VR[X`]XYNV]a`YJOU[XNKZ`UYURLS¥Y]ZG  
@HWI-EAS443:3:17:379:1789#0/1  
GCTGGGTTTTCATTTGGTCTCATCAGGCTGACCACTTGGC  
+HWI-EAS443:3:17:379:1789#0/1  
^]]^\_M[[XRZ\_Y\_T\_RX[H\_[V`\_ZVRZXXG[K[SYPB  
@HWI-EAS443:3:17:401:1996#0/1  
ACTTCCCAGAAGGTCTGGTGCCGCAGGTGCTGCGGTGAAA  
+HWI-EAS443:3:17:401:1996#0/1  
abaaaa```RWaP[``[Ta\_a`]TXLQ]RVPZ]NENNPX  
@HWI-EAS443:3:17:465:1200#0/1  
GGGAAGGGTACTCACTGGTCCGGATAGACCCATTCAAATT  
+HWI-EAS443:3:17:465:1200#0/1  
aaabb`bbWaaa`b``aaXaa\_a``aaa`a`aaa\_aaYa`  
@HWI-EAS443:3:17:530:1223#0/1  
GACTAATCCAGAATAGCATAACAATAGAGAGGATGGTGCT  
+HWI-EAS443:3:17:530:1223#0/1  
a`]¥`a\_aa`^```aaa^Y^^\_\_`\_\_\_`\_`^^]^^G[VV  
@HWI-EAS443:3:17:533:728#0/1  
CACTTGGCTGTTTTGGAGTAATTTGAATGGGTCTATCCCG  
+HWI-EAS443:3:17:533:728#0/1  
abaaaa`aabI\_``UTP]H`]`\_\_^\_a]S[aZYVYSSW\_W  
@HWI-EAS443:3:17:568:1137#0/1  
CTGTTTTGGAGTAATTTGAATGGGTCTATCCCGACCAGTG  
+HWI-EAS443:3:17:568:1137#0/1  
aaa)`T`W[`^¥RR`\_a`a`]\_a[G^^`[aU\_]\_U]`^^^  
@HWI-EAS443:3:17:572:1771#0/1  
ATCACTGAGTTTGAGTTCAGTGCACATTTGGATGTAGAAT  
+HWI-EAS443:3:17:572:1771#0/1  
aaaa\_``\_a`aaaa[^\_a^Z`\_```^^U`\_]R\_]^\_X  
@HWI-EAS443:3:17:62:1639#0/1  
TGCTTATGAAAGAATGTGCAATATCCTCAAAGGAAAATTT

+HWI-EAS443:3:17:62:1639#0/1  
Yabb\_^SS\_¥]¥aa\_bVS^b¥\_`b¥bbb`aba`T¥ba¥¥  
@HWI-EAS443:3:17:642:1800#0/1  
TCTGGGCAGCTGTTTCAAATTTTCCTTTGAGGATATTGCA  
+HWI-EAS443:3:17:642:1800#0/1  
aa^aaaabba¥¥¥a\_ba`^aab`^`\_\_a\_a`]``STDT  
@HWI-EAS443:3:17:71:1244#0/1  
CTGCTGTTGCATCTTCGCCATTGTTTGCTTGGCGCCAAAC  
+HWI-EAS443:3:17:71:1244#0/1  
a¥V]``[^\_¥¥^]VY\_YV[Y[YPTQ]\_VYVXV^Z[JFYNV  
@HWI-EAS443:3:17:74:1968#0/1  
CAGGAAACGCTGAGATTGAAGACCTCATTTTCCTGGCACG  
+HWI-EAS443:3:17:74:1968#0/1  
a``abab^Zaaaa`aaa`ba\_a\_[aaaaa`a[\_`\_aadU  
@HWI-EAS443:3:17:752:1869#0/1  
ATCATAATCACTGAGTTTGAGTTCAGTGCACATTTGGATG  
+HWI-EAS443:3:17:752:1869#0/1  
^¥Xa`b`a`^`¥S\_a\_`^`\_WXRa¥\_Z¥\_`]`[WG\_\_\_SW  
@HWI-EAS443:3:17:867:879#0/1  
ATGCAACAGCAGGTCTTACTCATATCATGATTTGGCATTTC  
+HWI-EAS443:3:17:867:879#0/1  
aaaaaaaa\_baa^]`aaa`aaaa``aa``\_\_^W`^\_X¥  
@HWI-EAS443:3:17:885:586#0/1  
GTCTGGGATAGACCCATTCAAATTACTCCAAAACAGCCAAG  
+HWI-EAS443:3:17:885:586#0/1  
a\_aaaa``aaa`a¥`a^aa\_`\_]\_a^]\_\_`^^Z``\_\_  
@HWI-EAS443:3:17:904:1317#0/1  
CATAACAATAGAGAGGATGGTGCTTTCTGCTTTTGATGAG  
+HWI-EAS443:3:17:904:1317#0/1  
aabbbbbbbbababaa`aaSaa\_`aaa`QX`b`U[\_Z¥\_  
@HWI-EAS443:3:17:905:1289#0/1  
CACATTCTGGGATCCATTCCGGTGCGAACAAGCGCTCTTG  
+HWI-EAS443:3:17:905:1289#0/1  
aaa\_]`b`^V\_a`a]`a\_`¥Y[U^`\_\_`\_`^]^^\_\_^^[  
@HWI-EAS443:3:17:910:1677#0/1  
CTCACTGGTCGGGATAGACCCATTCAAATTACTCCAAAAC  
+HWI-EAS443:3:17:910:1677#0/1  
]abZTT^]\_[\_\_^X\_abb\_]`aaaa]b]```^aaba``\_  
@HWI-EAS443:3:18:1011:1621#0/1  
GATTTATGTGCAACTGATCCCCTCAGAATGAGTGCTGACC  
+HWI-EAS443:3:18:1011:1621#0/1  
aaaaab\_\_^`ba\_^\_a`\_\_`a^`\_\_`\_\_XMY]\_\_^Y¥  
@HWI-EAS443:3:18:1074:1642#0/1  
CTCATATCATGATTTGGCATTCCAACCTGAATGATGCCAC  
+HWI-EAS443:3:18:1074:1642#0/1  
`¥a\_UU[¥W\_a`^]`^OTXYOY]]^VQUUZNW]^`\_XT]X  
@HWI-EAS443:3:18:1182:1375#0/1  
CGCCAAGCAAACAATGGCGAAGATGCAACAGCAGGTCTTA  
+HWI-EAS443:3:18:1182:1375#0/1  
aaa`aaba]aa[aaX[T\_]WLaZZUFZa¥\_\_VXXYYYQ¥Y

@HWI-EAS443:3:18:1184:216#0/1  
GGAAGAATGATTGGTGAATCGGGAGATTCTACATCCAAA  
+HWI-EAS443:3:18:1184:216#0/1  
`aI]b^` [ `Zaa` ] ^ ` Y ` P \_ ` ^ ` T ` ¥X [ ¥P ¥WQTKNRY \_ ]  
@HWI-EAS443:3:18:1197:232#0/1  
CGTCCATCATAATCACTGAGTTTGAGTTCAGTGCACATTT  
+HWI-EAS443:3:18:1197:232#0/1  
]ROVLRZX¥WXYSVGY] [ J ¥S ¥W ¥MTUUWWMVMPXPOSS  
@HWI-EAS443:3:18:1213:853#0/1  
GGCTGTTTTGGAGTAATTTGAATGGGTCTATCCCGACCAG  
+HWI-EAS443:3:18:1213:853#0/1  
`U] [ \_QR^` [ ¥RXNZZ^^\_^^\_SNYVQVPYQX[V\_PSLQ  
@HWI-EAS443:3:18:1267:1516#0/1  
GAAAGCACCATCCTCTATTGTTATGCTATTCTGGATTA  
+HWI-EAS443:3:18:1267:1516#0/1  
\_ [ \_bbbb ] ` a ` ^ ` WW ` ` a ` ¥ ¥ Va ^ ab ] ] ¥ ^ [ ` ` N ] Z ] Z ¥  
@HWI-EAS443:3:18:1297:120#0/1  
GAATGATTGGTGAATCGGGAGATTCTACATCCAAATGTG  
+HWI-EAS443:3:18:1297:120#0/1  
aaaaaaaa ` aa ` ` ` aa ¥ \_\_ ^ ^ W \_\_ ] ^ ^ W ] ^ ] Z \_ ^ Z \_  
@HWI-EAS443:3:18:1342:1084#0/1  
AGTCGTCATCATAATCACTGAGTTTGAGTTCAGTGCACA  
+HWI-EAS443:3:18:1342:1084#0/1  
Y ` [ ` aYa ] \_ ] \_Y ¥RZXZVZ\_ZXMY^ ^ ^ \_VZ] [ ZT ¥ \_\_ ¥  
@HWI-EAS443:3:18:1364:1271#0/1  
CGGTGAAAGGAGTTGGAACAATAGCAATGGAGTTAATCAG  
+HWI-EAS443:3:18:1364:1271#0/1  
ab\_\_b^bbba ` \_ ` baa ` a^aYaa ` ` ` ` aaX ` a ` ` ` a\_Zaa  
@HWI-EAS443:3:18:1440:1780#0/1  
CAGTTGCACATAAATCCTGCCTGCCTGCTTGTGTGTATGG  
+HWI-EAS443:3:18:1440:1780#0/1  
`bbX¥] b ` ^ b ` baaaa ` \_aaZ ` a \_\_\_ ` ` ` ` ` ^ a ¥ \_ U \_\_ [ Z  
@HWI-EAS443:3:18:1474:998#0/1  
TAGAGAGGATGGTCTTTCTGCTTTTGATGAGAGAAGAAA  
+HWI-EAS443:3:18:1474:998#0/1  
aab\_a ` aa^ ` aaS ` P [ ] ` Y ] ^ [ ] a ` \_ ¥ ] \_ [ V ^ ] ` [ [ \_ [ ^ ^  
@HWI-EAS443:3:18:1679:1958#0/1  
GACTTTGAAAGGAAGGGTACTCACTGGTCCGGATAGACC  
+HWI-EAS443:3:18:1679:1958#0/1  
abbbb ` W ^ ` baaba\_ab^VaRa ` aZab\_0Sba ` \_aa\_\_S¥  
@HWI-EAS443:3:18:1751:622#0/1  
CGGTCAGCACTCATTCTGAGGGGATCAGTTGCACATAAAT  
+HWI-EAS443:3:18:1751:622#0/1  
] a \_aaa ` Z ` abaaba ` bba \_Z \_aY \_ ¥ ] ^ Uaa \_\_ ^ ¥ ` aaa \_  
@HWI-EAS443:3:18:1755:1417#0/1  
ATCAAAAAGCAGAAAGCACCATCCTCTCTATTGTTATGCTA  
+HWI-EAS443:3:18:1755:1417#0/1  
a ¥ ` a ` \_a\_a^YY\_ ¥XW ` Y ^ \_XXZ] W ¥ W ^ \_ ^ \_Z ^ ] ^ ^ Z ^ \_  
@HWI-EAS443:3:18:383:1558#0/1  
ATGGTCTTTCTGCTTTTGATGAGAGAAGAAATAAATACC

+HWI-EAS443:3:18:383:1558#0/1  
`YaVKYaaaa`aa`a`aa\_\_a^U`Z\_\_`\_`a`\_`^`\_\_]Z  
@HWI-EAS443:3:18:384:2015#0/1  
GAATGATTGGTGAATCGGGAGATTCTACATCCAAATGTG  
+HWI-EAS443:3:18:384:2015#0/1  
\_bba`baab^^a[ababa\_Y`a`aaaa`a```aaa]¥Wa  
@HWI-EAS443:3:18:429:1627#0/1  
GATGCAACAGCAGGTCTTACTCATATCATGATTTGGCATT  
+HWI-EAS443:3:18:429:1627#0/1  
aaaa\_bb`aXaaY\_TXa\_a`\_a¥`a\_^a`\_\_Z\_\_]U¥\_^^  
@HWI-EAS443:3:18:447:673#0/1  
GGGGTGAAAATGGACGAAGGACAAGGGTTGCTTATGAAAG  
+HWI-EAS443:3:18:447:673#0/1  
a`aaWba]`aaa\_a`aa`a¥Y\_\_aa\_\_^^a[\_\_\_T\_`]Ua  
@HWI-EAS443:3:18:520:210#0/1  
CGCAGGTGCTGCGGTGAAAGGAGTTGGAACAATAGCAATG  
+HWI-EAS443:3:18:520:210#0/1  
aaa]`a]aaaaa`Ya^\_^[\_[\_U^]`U\_X^V]]YVVYX]  
@HWI-EAS443:3:18:735:1834#0/1  
ATCCATTCCGGTGCGAACAAGCGCTCTTGTCTCTGATAT  
+HWI-EAS443:3:18:735:1834#0/1  
a[^`W``\_]``GJ^Z\_a¥¥¥\_``ZPU[XXNW\_X\_¥^XX^Y  
@HWI-EAS443:3:18:868:354#0/1  
ATATCCTCAAAGGAAAATTTCAAACAGCTGCCAGAGGGC  
+HWI-EAS443:3:18:868:354#0/1  
`\_``\_`^``\_`^aaaa\_a\_a^^^\_]^^^\_`^`^`[HW`W^]\_X  
@HWI-EAS443:3:18:885:632#0/1  
GTGCTTTCTGCTTTTGATGAGAGAAGAAATAAATACCTAG  
+HWI-EAS443:3:18:885:632#0/1  
aJ\_^RT\_Y]S[\_Taa`¥S]]\_V]XQ]\_a`^`\_`[\_SSSO\_\_  
@HWI-EAS443:3:18:94:361#0/1  
TGCTGACCGTGCCAGGAAAATGAGGTCTTCAATCTCAGCG  
+HWI-EAS443:3:18:94:361#0/1  
abbaabbba\_\_aZWaaa^aa`\_]`]S]a`^`a]\_`ZU¥a  
@HWI-EAS443:3:19:1009:1503#0/1  
AGGAAACGCTGAGATTGAAGACCTCATTTTCCTGGCACGG  
+HWI-EAS443:3:19:1009:1503#0/1  
abb`aa`[aab\_]bbaaab````aa`b\_]a`\_aa`\_a¥\_a  
@HWI-EAS443:3:19:1039:1617#0/1  
GGTGCTTTCTGCTTTTGATGAGAGAAGAAATAAATACCTA  
+HWI-EAS443:3:19:1039:1617#0/1  
ab\_a`baaaa`baa`a[aa`a`a]aaaa\_aa\_a`a^T`a  
@HWI-EAS443:3:19:103:1836#0/1  
CGTCCATCATAATCACTGAGTTTGAGTTCAGTGCACATTT  
+HWI-EAS443:3:19:103:1836#0/1  
`VXaaaaaaaaaaaa``]XVZ\_`]`[¥[`X[^`\_aa`\_\_Z  
@HWI-EAS443:3:19:1154:129#0/1  
CACATATCAGAGAACAAGAGCGCTTGTTCGCACCGGAATG  
+HWI-EAS443:3:19:1154:129#0/1  
ababbbbaabaaaabaabaab\_`aaabab^a`[[a`^^`a



+HWI-EAS443:3:19:564:1105#0/1  
^a^a`a\_W^` ` \_KU]]`^a]]YYX`^VLQBBBBBBBBBB  
@HWI-EAS443:3:19:580:727#0/1  
CAGGAAAATGAGGTCTTCAATCTCAGCGTTTCCTGGGTTT  
+HWI-EAS443:3:19:580:727#0/1  
aa` ` \_¥\_Z]` ` ^^ [baaaaa[^]\_Zaa]aa^a]^0^` [ `   
@HWI-EAS443:3:19:608:878#0/1  
CGAAGGACAAGGGTTGCTTATGAAAGAATGTGCAATATCC  
+HWI-EAS443:3:19:608:878#0/1  
abaaba`aaaa^\_W`baaa`aaa\_aa`X`a\_a`aa` ` \_]  
@HWI-EAS443:3:19:652:1562#0/1  
CACTCATTCTGAGGGATCAGTTGCACATAAATCCTGCCT  
+HWI-EAS443:3:19:652:1562#0/1  
aaaaaba`aaa^a`a\_a`aa\_V[a`a^`\_a` ` ` \_V\_dWU  
@HWI-EAS443:3:19:660:773#0/1  
CCCTTGTCCTTCGTCCATTTTCACCCCTCCAGAAATTCG  
+HWI-EAS443:3:19:660:773#0/1  
Ubb` [^S¥\_\_¥\_a\_\_a^a^XZbb[ ` ZYZ¥QT\_Za]UH` [  
@HWI-EAS443:3:19:695:1588#0/1  
AGAGGATGGTGCTTTCTGCTTTTGATGAGAGAAGAAATAA  
+HWI-EAS443:3:19:695:1588#0/1  
ab^^aaaaa\_a`aba`a`\_aaaa` ` \_a^aYa^^¥XWa^` `   
@HWI-EAS443:3:19:731:966#0/1  
TGGGCATGACTTTGAAAGGGAAGGGTACTCACTGGTCGGG  
+HWI-EAS443:3:19:731:966#0/1  
\_\_bbbab\_Vabbbb\_X]aaa` [\_bUF^` ` ` ` \_a[\_Z\_a\_\_  
@HWI-EAS443:3:19:749:1345#0/1  
ATGGTGCTTTCTGCTTTTGATGAGAGAAGAAATAAATACC  
+HWI-EAS443:3:19:749:1345#0/1  
a`^` ]\_a` ` \_a` ` ` ` ` ` a` ` \_\_\_\_\_ ` ` ` ` a` a` \_^\_[^  
@HWI-EAS443:3:19:880:174#0/1  
GATGGATCAAGTAAGAGAAAGTCAAACCCAGGAAACGCT  
+HWI-EAS443:3:19:880:174#0/1  
YVYX[YY][[ ` TY[VM` ^a` \_QO^][X[WQZ\_\_XPXQTX¥  
@HWI-EAS443:3:19:911:257#0/1  
GACAAGGGTTGCTTATGAAAGAATGTGCAATATCCTCAAA  
+HWI-EAS443:3:19:911:257#0/1  
aab^Z^^aX\_b`abaa[\_aa`aaaa^`Yb`aa` ` \_a\_aa`  
@HWI-EAS443:3:19:962:887#0/1  
AGGGTTGCTTATGAAAGAATGTGCAATATCCTCAAAGGAA  
+HWI-EAS443:3:19:962:887#0/1  
aaba\_aaaaaabbaabaaaa\_a\_aaaaa`\_aa`a`a\_a`  
@HWI-EAS443:3:19:986:1199#0/1  
GGTGCTTTCTGCTTTTGATGAGAGAAGAAATAAATACCTA  
+HWI-EAS443:3:19:986:1199#0/1  
a`abbabaaabaabaab\_ab` `abbab^baa]aaa`a`ab  
@HWI-EAS443:3:1:1034:300#0/1  
GATTGGTGAATCGGGAGATTCTACATCCAAATGTGCACT  
+HWI-EAS443:3:1:1034:300#0/1  
a`\_`aa[\_a\_]`^`\_`¥U^^^`\_`^Z\_[RU[]W]]Z^WBBB



@HWI-EAS443:3:1:1105:639#0/1  
GCTGTTTGAATTTTCCTTTGAGGATATTGCACATTCTTT  
+HWI-EAS443:3:1:1105:639#0/1  
`LYVXU¥BBBBBBBBBBBBBBBBBBBBBBBBBBBBBBBB  
@HWI-EAS443:3:1:1149:1387#0/1  
GCACCATCCTCTATTGTTATGCTATTCTGGATTAGTCG  
+HWI-EAS443:3:1:1149:1387#0/1  
a`aTa\_a]\_baaSbabbbaabbbU`abb\_b\_`\_aaa][[B  
@HWI-EAS443:3:1:125:970#0/1  
ACTTCCCAGAAGGTCTGGTGCCGAGGTGCTGCGGTGAAA  
+HWI-EAS443:3:1:125:970#0/1  
\_\_`¥`Y¥aa¥Ra¥SX¥^`R`UY`T^[XP]K^BBBBBBBB  
@HWI-EAS443:3:1:1263:1026#0/1  
GGTCCTCCTGTTTTCTTAGGGTCTTCCCAGCACTGGGAT  
+HWI-EAS443:3:1:1263:1026#0/1  
aba`ab``bb`bbbaabaaaa`]aaaa¥^ab\_a\_aaaa`B  
@HWI-EAS443:3:1:1289:1321#0/1  
CAATAGAGAGGATGGTGCTTTCTGCTTTTGATGAGAGAAG  
+HWI-EAS443:3:1:1289:1321#0/1  
abba`b``abbaaaW]aabbab¥S¥b`a^Zaa`\_[a`bB  
@HWI-EAS443:3:1:1418:697#0/1  
ATGGACGAAGGACAAGGGTTGCTTATGAAAGAATGTGCAA  
+HWI-EAS443:3:1:1418:697#0/1  
abaaa]ba`a`^[`^¥V\_Xaa]a``aa`\_`a`\_a`[\_SBB  
@HWI-EAS443:3:1:1444:1258#0/1  
GGAGATTCTACATCCAAATGTGCACTGAACTCAAACCTCAG  
+HWI-EAS443:3:1:1444:1258#0/1  
\_`\_^]aa\_ba\_a\_TX`\_aa`YaY`Xaa\_a`\_X`\_U^XaB  
@HWI-EAS443:3:1:1451:448#0/1  
GAGGTCTTCAATCTCAGCGTTTCCTGGGTTTCGACTTTCT  
+HWI-EAS443:3:1:1451:448#0/1  
aa[GQW^aYaaa]aa\_VYZ¥`a]Sa^`aYa`¥X^Z`[\_ZB  
@HWI-EAS443:3:1:1529:296#0/1  
GGGTCTCCTGTTTTCTTAGGGTCTTCCCAGCACTGGGA  
+HWI-EAS443:3:1:1529:296#0/1  
abXVX`\_`^a``aa`G^`\_`\_V`Z`^¥SQ¥`VWUVZBBB  
@HWI-EAS443:3:1:1731:557#0/1  
CCGACCAGTGAGTACCCTTCCCTTTCAAAGTCATGCCAC  
+HWI-EAS443:3:1:1731:557#0/1  
]abbaaaa`a]a]]V]`aGMOaa\_`^`\_`aU^`¥^XBBBB  
@HWI-EAS443:3:1:387:784#0/1  
GTGGAATCGGGAGATTCTACATCCAAATGTGCACTGAACT  
+HWI-EAS443:3:1:387:784#0/1  
aaa\_¥]^¥aaa\_\_a]`\_`a\_]\_aZ`\_`^`aNaQ\_`\_`\_`^B  
@HWI-EAS443:3:1:391:1103#0/1  
CTGGGTTTCGACTTTCTTACTTGATCCATCATTGCCCT  
+HWI-EAS443:3:1:391:1103#0/1  
^bXQ`\_`^YaZ^\_a`ab`YWNGZa]ab`Ja\_HRZG¥¥ZBB  
@HWI-EAS443:3:1:395:905#0/1  
GGTGCTTTCTGCTTTTGATGAGAGAAGAAATAAATACCTA

+HWI-EAS443:3:1:395:905#0/1  
Y[F]\_\_bb¥baaaabab]`b`a\_baab`]ab`a\_WaUSaB  
@HWI-EAS443:3:1:402:357#0/1  
GCTGTTTGAATTTTCCTTTGAGGATATTGCACATTCTTT  
+HWI-EAS443:3:1:402:357#0/1  
a``a``\_\_a`\_aaaW]`a\_^\_\_\_\_]\_^\_¥[^[^]^W\_BB  
@HWI-EAS443:3:1:433:931#0/1  
CGGTGAAAGGAGTTGGAACAATAGCAATGGAGTTAATCAG  
+HWI-EAS443:3:1:433:931#0/1  
`bb`b^aaaa`b\_aaa¥a\_T`b^\_¥b`bba`aabab[MBB  
@HWI-EAS443:3:1:530:402#0/1  
CGCTGAGATTGAAGACCTCATTTCCTGGCACGGTCAGCA  
+HWI-EAS443:3:1:530:402#0/1  
abbbbabbbabbbba]ab`bbbbb^]baaXb`bbZ\_aaab  
@HWI-EAS443:3:1:612:1062#0/1  
ATGACTTTGAAAGGAAGGGTACTCACTGGTCGGGATAGA  
+HWI-EAS443:3:1:612:1062#0/1  
\_``^^[abaaa`aW\_\_¥\_b\_Ga\_a\_S`Z`^[V\_`[]¥BBB  
@HWI-EAS443:3:1:632:947#0/1  
CAGGCAGGCAGGATTTATGTGCAACTGATCCCCTCAGAAT  
+HWI-EAS443:3:1:632:947#0/1  
aaba[aaaaab``a¥```VZZ``a`\_X`\_ZN\_V]X`^BB  
@HWI-EAS443:3:1:759:1999#0/1  
AGCATAACAATAGAGAGGATGGTGCTTTCTGCTTTTGATG  
+HWI-EAS443:3:1:759:1999#0/1  
\_b¥aa`^G`N\_¥abb\_baaa]^YaaM\_`[`a[\_S`a\_]bB  
@HWI-EAS443:3:1:80:345#0/1  
AGCAGGTCTTACTCATATCATGATTTGGCATTCCAACCTG  
+HWI-EAS443:3:1:80:345#0/1  
a\_bbab``aabbab\_b\_aab`b`aab\_aaa\_``\_ab[\_a`  
@HWI-EAS443:3:20:1012:1503#0/1  
GAATGATTGGTGAATCGGGAGATTCTACATCCAAATGTG  
+HWI-EAS443:3:20:1012:1503#0/1  
a\_\_[]P`XR^G\_¥[ZYGUXTY\_UX¥TUSMRW[TTWQW¥GU  
@HWI-EAS443:3:20:1037:357#0/1  
ATCATAATCACTGAGTTTGAGTTCAGTGCACATTTGGATG  
+HWI-EAS443:3:20:1037:357#0/1  
a`[^]Z\_\_ZPPYY]\_\_aa]ULPZ^M]L]P^^^Z]^\_YY  
@HWI-EAS443:3:20:1048:626#0/1  
GTTCCAACCTCTTTCACCGCAGCACCTGCGGCACCAGACC  
+HWI-EAS443:3:20:1048:626#0/1  
a\_a`^aaaa^\_```\_`adWZ]^\_¥^^¥\_^]¥¥W¥^WWW  
@HWI-EAS443:3:20:1093:991#0/1  
GAGGTCTTCAATCTCAGCGTTTCCTGGGTTTCGACTTTCT  
+HWI-EAS443:3:20:1093:991#0/1  
`^¥WJ[LO``aa]a^aaa`^a\_\_aa\_]Va``VY\_\_a`Z`  
@HWI-EAS443:3:20:1117:364#0/1  
GTTGCATCTTCGCCATTGTTTGCTTGGCGCCAAACTCTCC  
+HWI-EAS443:3:20:1117:364#0/1  
a\_aa`a`\_a\_`a^^`\_\_a\_a¥Z^\_\_\_\_Z[[]]]]WW^W]VW

@HWI-EAS443:3:20:1122:285#0/1  
GTGCTTTCTGCTTTTGATGAGAGAAGAAATAAATACCTAG  
+HWI-EAS443:3:20:1122:285#0/1  
a`a`a\_\_aaa\_\_aaa`]aaX\_\_a[`]^P[^[G]^WZ^¥\_  
@HWI-EAS443:3:20:1131:1626#0/1  
GGGTCCTCCTGTTTTCTTAGGGTCCTTCCCAGCACTGGGA  
+HWI-EAS443:3:20:1131:1626#0/1  
ab`]aaba\_aa`bbaabbbb\_\_a^babbaY`\_aZa``a\_  
@HWI-EAS443:3:20:1211:148#0/1  
CCTGGGTTTCGACTTTCTTACTTGATCCATCATTGCC  
+HWI-EAS443:3:20:1211:148#0/1  
abbbbb`bb^bbabaaab`ab`\_aa`aa]\_aaa\_a`a\_]¥  
@HWI-EAS443:3:20:1259:604#0/1  
CAGCACTCATTCTGAGGGGATCAGTTGCACATAAATCCTG  
+HWI-EAS443:3:20:1259:604#0/1  
aa¥`baa\_babaabXb`bbaaaaa\_ab\_aaaba\_aaZ^^`  
@HWI-EAS443:3:20:1266:1670#0/1  
ATCAGTTGCACATAAATCCTGCCTGCCTGCTTGTGTGTAT  
+HWI-EAS443:3:20:1266:1670#0/1  
aab`a[¥\_b\_`¥`\_\_`[]\_\_[]`¥^Xa`a`\_WU\_\_Z\_  
@HWI-EAS443:3:20:1366:654#0/1  
GAAGAGCATCCCAGTGCTGGGAAGGACCCTAAGAAAACAG  
+HWI-EAS443:3:20:1366:654#0/1  
]¥V\_b`PX]]UTVKYWQ[`ZYT[TZ\_[]XQY`¥MDTLQ^  
@HWI-EAS443:3:20:1465:1029#0/1  
GCAGGCAGGATTTATGTGCAACTGATCCCCTCAGAATGAG  
+HWI-EAS443:3:20:1465:1029#0/1  
a\_aa\_\_a`a^\_a\_\_`\_YXY^¥Y^¥Z[ZZ^¥XWUW¥YY  
@HWI-EAS443:3:20:146:520#0/1  
GCTGTTTTGGAGTAATTTGAATGGGTCTATCCCGACCAGT  
+HWI-EAS443:3:20:146:520#0/1  
`abaHa``baT]QXPWaTJ\_]TQVZ]a^a^`]``^X[`ZZ  
@HWI-EAS443:3:20:1485:493#0/1  
TGACTTTGAAAGGGAAGGGTACTCACTGGTCGGGATAGAC  
+HWI-EAS443:3:20:1485:493#0/1  
\_Z[`aaaa]\_aaaa\_\_a`dW\_^`^a^^a\_Y]a^^^^`]`^Y  
@HWI-EAS443:3:20:1543:1411#0/1  
GGGCAATGATGGATCAAGTAAGAGAAAGTCGAAACCCAGG  
+HWI-EAS443:3:20:1543:1411#0/1  
aa^[\_X^¥XaaaX\_NU¥a``]ZNZ¥XT]¥R¥^`XPZR¥WF  
@HWI-EAS443:3:20:1598:1258#0/1  
GTTTCGACTTTCTTACTTGATCCATCATTGCCCTCTGG  
+HWI-EAS443:3:20:1598:1258#0/1  
aSZZSP¥TXQ¥NRSLXOX[VZV[]YYW]YWY]WSUULSHL  
@HWI-EAS443:3:20:1598:971#0/1  
AGAAGAAATAAATACCTAGAGAGCATCCCAGTGCTGGGA  
+HWI-EAS443:3:20:1598:971#0/1  
aaX`abbababbV^Yabba`aaaaa^\_[a`¥aa]a]^\_  
@HWI-EAS443:3:20:161:845#0/1  
CAACACTTCCCAGAAGGTCTGGTGCCGAGGTGCTGCGGT

+HWI-EAS443:3:20:161:845#0/1  
abbbbbbaabbbbaZba`abb\_Xbaab` `baMaa`a^a`M  
@HWI-EAS443:3:20:1630:717#0/1  
CGCAGGTGCTGCGGTGAAAGGAGTTGGAACAATAGCAATG  
+HWI-EAS443:3:20:1630:717#0/1  
ab`abb`aabb`ba^b^aaaa¥`\_a[aY`^`a\_`a]]\_\_`  
@HWI-EAS443:3:20:1652:710#0/1  
CGACTAATCCAGAATAGCATAACAATAGAGAGGATGGTGC  
+HWI-EAS443:3:20:1652:710#0/1  
abb`bbba^abbaabab\_G\_```a`aaa`aaaaaa\_NUQ  
@HWI-EAS443:3:20:1747:649#0/1  
GCTTTCTGCTTTTGATGAGAGAAGAAATAAATACCTAGAA  
+HWI-EAS443:3:20:1747:649#0/1  
`W]a^^`T`aaaa\_aa]\_^a^Z`[¥`a\_`^``YTOZ][Z^  
@HWI-EAS443:3:20:29:1492#0/1  
CTAATCCAGAATAGCATAACAATAGAGAGGATGGTGCTTT  
+HWI-EAS443:3:20:29:1492#0/1  
ab``\_aa^^`aa]aa`a¥aaa\_\_\_```a`][a\_a`T¥¥OFX  
@HWI-EAS443:3:20:301:545#0/1  
GTGCTTTCTGCTTTTGATGAGAGAAGAAATAAATACCTAG  
+HWI-EAS443:3:20:301:545#0/1  
`aaaa[abaU]a]aaa\_`a`a^]W\_aW`\_\_a\_[-^\_Y^\_\_  
@HWI-EAS443:3:20:381:599#0/1  
GGATGGTGCTTTCTGCTTTTGATGAGAGAAGAAATAAATA  
+HWI-EAS443:3:20:381:599#0/1  
ZXPNRZT^¥OZT^Z`UVYU^¥Q¥ZOUNY[Z][S[¥WHUOM  
@HWI-EAS443:3:20:406:1946#0/1  
ATGATGCCACATATCAGAGAACAAGAGCGCTTGTTCGCAC  
+HWI-EAS443:3:20:406:1946#0/1  
a\_a`\_\_`aa``\_a]Xa]aXaa\_aa]`Z\_Q\_XXUYX]Z\_^X  
@HWI-EAS443:3:20:477:606#0/1  
TCCCCTCAGAATGAGTGCTGACCGTGCCAGGAAAATGAGG  
+HWI-EAS443:3:20:477:606#0/1  
^````a]Y]W^a`[\_¥^a]^VYQWW`[J[\_^]¥\_[ZQ¥Y¥  
@HWI-EAS443:3:20:491:1285#0/1  
ACTCACTGGTGGGATAGACCCATTCAAATTACTCCAAAA  
+HWI-EAS443:3:20:491:1285#0/1  
]\_] [`\_U\_^X^]aa\_VVaY` `^a\_a¥Z¥`Zaba`[\_a\_¥K  
@HWI-EAS443:3:20:587:1562#0/1  
GGGCATGACTTTGAAAGGAAGGGTACTCACTGGTCCGGGA  
+HWI-EAS443:3:20:587:1562#0/1  
aa`aaaaba`aaaa` `aaaa` `a]Ya]^aaa¥a\_Y\_`¥\_Z  
@HWI-EAS443:3:20:592:991#0/1  
AGAAGAAATAAATACCTAGAAGAGCATCCCAGTGCTGGGA  
+HWI-EAS443:3:20:592:991#0/1  
abbabbbbbbb`abbabbaaaaaabaaa\_aa^a`\_a`\_`  
@HWI-EAS443:3:20:690:1041#0/1  
ATATCATGATTTGGCATTCCAACCTGAATGATGCCACATA  
+HWI-EAS443:3:20:690:1041#0/1  
¥aVaba\_a^``aa[a`a`\_Ya^a\_\_^aa\_a]\_\_`X\_^a`\_`

@HWI-EAS443:3:20:736:1576#0/1  
GGACGAAGGACAAGGGTTGCTTATGAAAGAATGTGCAATA  
+HWI-EAS443:3:20:736:1576#0/1  
Zaa\_abb`^a^`abaa\_bbabbaba`b`ba`bYa\_aaab  
@HWI-EAS443:3:20:753:385#0/1  
GGGATCAGTTGCACATAAATCCTGCCTGCCTGCTTGTGTG  
+HWI-EAS443:3:20:753:385#0/1  
abaaaa`a\_aba`aaaaaaaaZa`a]aa^`a`\_aab¥aX`  
@HWI-EAS443:3:20:770:807#0/1  
AGCAGGTCTTACTCATATCATGATTTGGCATTCCAACCTG  
+HWI-EAS443:3:20:770:807#0/1  
^ZX]`]NWY[TXY\_a`W\_TV¥¥UZWUPGa\_¥XY\_]WWY\_  
@HWI-EAS443:3:20:780:237#0/1  
GATAGACCCATTCAAATTACTCCAAAACAGCCAAGTGGTC  
+HWI-EAS443:3:20:780:237#0/1  
a\_QUZ^GWTQ`ZUUWYZYPP[OR\_SVOSXWYUPLDSXVW  
@HWI-EAS443:3:20:809:363#0/1  
GGAGGGGTGAAAATGGACGAAGGACAAGGGTTGCTTATGA  
+HWI-EAS443:3:20:809:363#0/1  
aa\_b`a`Ua`\_`a`^`\_`^a`\_`^U¥]ZVV^X\_YY^VY  
@HWI-EAS443:3:20:812:1579#0/1  
GAATGATGCCACATATCAGAGAACAAGAGCGCTTGTTCGC  
+HWI-EAS443:3:20:812:1579#0/1  
YO[^\_]X^\_NTU`WPQ¥]Z¥[^`Z`aa`[^a[^`\_][RZ]]  
@HWI-EAS443:3:20:820:477#0/1  
GACTTTGAAAGGAAGGGTACTCACTGGTCGGGATAGACC  
+HWI-EAS443:3:20:820:477#0/1  
aaabbaa`\_`ba`a\_aaaGaa`\_`\_`aR^aa`^]¥\_\_]]  
@HWI-EAS443:3:20:822:603#0/1  
ACCTGAATGATGCCACATATCAGAGAACAAGAGCGCTTGT  
+HWI-EAS443:3:20:822:603#0/1  
a`bababbaabaaaabaaa`a]aa\_a`\_`\_`aa[b`[¥a¥  
@HWI-EAS443:3:20:843:589#0/1  
GGAGGGGTGAAAATGGACGAAGGACAAGGGTTGCTTATGA  
+HWI-EAS443:3:20:843:589#0/1  
aXG`a\_aUa[\_\_\_\_`a`\_`\_`^\_]Y]^Y]Y]RX\_YXVY]]]  
@HWI-EAS443:3:20:848:651#0/1  
CAGGCAGGCAGGATTTATGTGCAACTGATCCCCTCAGAAT  
+HWI-EAS443:3:20:848:651#0/1  
aabbabb¥ba`baaba`T`¥aW\_aaa`]a\_aaa\_Xaa\_^¥  
@HWI-EAS443:3:20:908:173#0/1  
ATCATAATCACTGAGTTTGAGTTCAGTGCACATTTGGATG  
+HWI-EAS443:3:20:908:173#0/1  
a]Y^]Y\_T\_`]]]¥MYS[V[Y]QQQWSS[JSWWWLTSRUY  
@HWI-EAS443:3:20:959:246#0/1  
GTCCTCCTGTTTTCTTAGGGTCCTTCCCAGCACTGGGATG  
+HWI-EAS443:3:20:959:246#0/1  
aaa`XX]aa^aa]0]\_\_][UNVJ[\_[XVYU¥\_¥¥`P[¥¥\_  
@HWI-EAS443:3:21:1049:1970#0/1  
CAAACAATGGCGAAGATGCAACAGCAGGTCTTACTCATAT



@HWI-EAS443:3:21:676:1243#0/1  
TAGACCCATTCAAATTACTCCAAAACAGCCAAGTGGTCAG  
+HWI-EAS443:3:21:676:1243#0/1  
aaabbbb`bab`\_ababbaabaaaaabaabba^a\_]`aa  
@HWI-EAS443:3:21:759:501#0/1  
AGAATGTGCAATATCCTCAAAGGAAAATTTCAAACAGCTG  
+HWI-EAS443:3:21:759:501#0/1  
aa]a¥]0`aaa`a\_]`^a\_¥]Z\_a`\_a`a\_\_\_\_\_¥[]^XW`  
@HWI-EAS443:3:21:767:363#0/1  
CCCTTGTCTTCGTCCATTTTCACCCCTCCAGAAATTCG  
+HWI-EAS443:3:21:767:363#0/1  
U\_ba\_\_abbabba`[aWbbb`b^aaSaa[]bb\_\_`a\_\_\_\_]  
@HWI-EAS443:3:21:773:937#0/1  
GATGGATCAAGTAAGAGAAAGTCGAAACCCAGGAAACGCT  
+HWI-EAS443:3:21:773:937#0/1  
a¥aaa`a¥SZVQ\_\_VZ[aa``Y[]\_a\_Y\_Y[\_^]]\_Y^U]  
@HWI-EAS443:3:21:798:351#0/1  
ATTGCCCTCTGGGCAGCTGTTTCAAATTTTCCTTTGAGGA  
+HWI-EAS443:3:21:798:351#0/1  
a\_]U\_``SWMOT`TQ[\_^PS]YUSRMVRXVTS¥Z]XSVTB  
@HWI-EAS443:3:21:992:918#0/1  
CAAACAATGGCGAAGATGCAACAGCAGGTCTTACTCATAT  
+HWI-EAS443:3:21:992:918#0/1  
[[R`Ya\_¥bb[a¥a`ZU^[Z¥P]XFY[`FPT\_\_\_WP[]][  
@HWI-EAS443:3:22:1023:834#0/1  
GGATCCATTCCGGTGCGAACAAGCGCTCTTGTCTCTGAT  
+HWI-EAS443:3:22:1023:834#0/1  
aaba`^^\_aZWSUT``aaaaa\_aa¥a[a^a¥aZa\_aa\_[  
@HWI-EAS443:3:22:1030:1370#0/1  
ACATCCAAATGTGCACTGAACTCAAACCTCAGTGATTATGA  
+HWI-EAS443:3:22:1030:1370#0/1  
aa```aab`a[baaaaaabaa`aa`aa\_\_\_\_]a\_`\_`\_`a  
@HWI-EAS443:3:22:1047:791#0/1  
ATGGGTCTCTCTGTTTTCTTAGGGTCTTCCCAGCACTGG  
+HWI-EAS443:3:22:1047:791#0/1  
Y^¥`¥M][ZVUZ¥aaa\_aaa\_a`¥^]`^`XXa][`\_VZa^^  
@HWI-EAS443:3:22:1186:1573#0/1  
TCGGAAGAATGATTGGTGAATCGGGAGATTCTACATCCA  
+HWI-EAS443:3:22:1186:1573#0/1  
aaaa`a\_YZaa`¥¥X^[]\_^\_]X\_\_[][^`Z^]VYZ[Z\_  
@HWI-EAS443:3:22:1253:706#0/1  
GTTCAGTGCACATTTGGATGTAGAATCTCCCGATTCCACC  
+HWI-EAS443:3:22:1253:706#0/1  
a``\_a`Za`\_a`^`aa^a`Z\_\_\_\_`^W\_WY¥`Z]aVWYWG  
@HWI-EAS443:3:22:1269:1305#0/1  
CAGGAAACGCTGAGATTGAAGACCTCATTTTCTGACG  
+HWI-EAS443:3:22:1269:1305#0/1  
MW]ababa^`b\_bbbZabbbbab`babba^aa^aabbbbb  
@HWI-EAS443:3:22:1367:1225#0/1  
ATTAGTCGTCCATCATAATCACTGAGTTTGAGTTCAGTGC





@HWI-EAS443:3:23:1161:219#0/1  
GCAGGATTTATGTGCAACTGATCCCCTCAGAATGAGTGCT  
+HWI-EAS443:3:23:1161:219#0/1  
abba\_aababa`¥b`aaaaaaaa^`^`\_]`\_\_a\_\_\_VaVX  
@HWI-EAS443:3:23:1211:235#0/1  
GCTTTCTGCTTTTGATGAGAGAAGAAATAAATACCTAGAA  
+HWI-EAS443:3:23:1211:235#0/1  
aa\_\_`^ab^`a`aa^aa^a\_`^^`^¥`\_\_`\_]`]0^a`^^  
@HWI-EAS443:3:23:1212:592#0/1  
GCTGACCGTGCCAGGAAAATGAGGTCTTCAATCTCAGCGT  
+HWI-EAS443:3:23:1212:592#0/1  
a```\_U`a\_a^U\_a\_Y\_\_a]]¥a¥T¥\_a¥\_]`Q\_W¥aS\_Z  
@HWI-EAS443:3:23:1273:1313#0/1  
GGAGAGTTTGGCGCCAAGCAAACAATGGCGAAGATGCAAC  
+HWI-EAS443:3:23:1273:1313#0/1  
abb`abYbb`\_U`aa\_a^`aaaa\_b]U`U[]`[[Y¥Q``H  
@HWI-EAS443:3:23:1301:1431#0/1  
CTTACTCATATCATGATTTGGCATTCCAACCTGAATGATG  
+HWI-EAS443:3:23:1301:1431#0/1  
``baU^bbbbbabbbbabbbbabba`abbababbbbaa`b  
@HWI-EAS443:3:23:1346:857#0/1  
GCACATTCTTTCATAAGCAACCCTTGCCTTCGCCATTT  
+HWI-EAS443:3:23:1346:857#0/1  
aabbbbabbb]abaaa`aa^`a\_a`YY`a]]^\_Z\_aa`  
@HWI-EAS443:3:23:1351:1752#0/1  
GAATGATTGGTGAATCGGGAGATTCTACATCCAAATGTG  
+HWI-EAS443:3:23:1351:1752#0/1  
ab\_\_`X\_a^Y`b`Z\_]aX^`^X^Z^]¥P]^`^`X\_  
@HWI-EAS443:3:23:1397:1938#0/1  
AGAGGATGGTGCTTTCTGCTTTTGATGAGAGAAGAAATAA  
+HWI-EAS443:3:23:1397:1938#0/1  
`aaaaaaaaN`¥aa`]Q[\_aa\_\_\_^U`Qa\_`W``\_\_`  
@HWI-EAS443:3:23:1462:1048#0/1  
TGCTTTCTGCTTTTGATGAGAGAAGAAATAAATACCTAGA  
+HWI-EAS443:3:23:1462:1048#0/1  
U``¥RZ```[\_¥b\_b\_^\_S\_[baZT`aX`\_PPbXDR¥a^\_  
@HWI-EAS443:3:23:1478:2014#0/1  
GAAGGTCTGGTGCCGAGGTGCTGCGGTGAAAGGAGTTGG  
+HWI-EAS443:3:23:1478:2014#0/1  
`a`aYWZbbbU]`Zaa`aMSX¥`S\_]`^I[Z\_aVRJZMTBB  
@HWI-EAS443:3:23:1493:1597#0/1  
GGGCATGACTTTGAAAGGAAGGGTACTCACTGGTCGGGA  
+HWI-EAS443:3:23:1493:1597#0/1  
K`Y[ba[abbbba\_aZ`\_``bbaa`¥aab]baab]^`^X]\_  
@HWI-EAS443:3:23:1697:865#0/1  
GGAGGGGTGAAAATGGACGAAGGACAAGGGTTGCTTATGA  
+HWI-EAS443:3:23:1697:865#0/1  
ab]Z`a]b\_a¥`a`^[Xa\_PQZ¥V¥S\_¥¥WU]NY[U^\_U  
@HWI-EAS443:3:23:1740:117#0/1  
TGATGGATCAAGTAAGAGAAAGTCGAAACCCAGGAAACGC

+HWI-EAS443:3:23:1740:117#0/1  
ab\_aba^YO\_[a^]^\_W^\_Z`ZWW\_]ZUXOZ]ZXXUGXO  
@HWI-EAS443:3:23:251:1054#0/1  
GGGTCCTCCTGTTTTCTTAGGGTCCTCCCAGCACTGGGA  
+HWI-EAS443:3:23:251:1054#0/1  
abb]abaaaa^abaaaa`a^`baaabbaa`a`\_aaaa`  
@HWI-EAS443:3:23:371:1124#0/1  
CGACTTCTCTTACTTGATCCATCATTGCCCTCTGGGCAG  
+HWI-EAS443:3:23:371:1124#0/1  
abaabababaaaaabbaaaa`aa`a`^^`]aaaa`P\_^\_\_  
@HWI-EAS443:3:23:373:2010#0/1  
ATTCTTTCATAAGCAACCCTTGTCCTTCGCCATTTTCAC  
+HWI-EAS443:3:23:373:2010#0/1  
^[\_bVaab`a\_ZW`a]\_`aaY\_¥`aaa\_\_\_aaaa`\_aaa^  
@HWI-EAS443:3:23:393:834#0/1  
GACGACTAATCCAGAATAGCATAACAATAGAGAGGATGGT  
+HWI-EAS443:3:23:393:834#0/1  
ab```ab^aaaa`a`]`aaaaW]^Y\_aa\_aZ`^\_]\_^T  
@HWI-EAS443:3:23:407:300#0/1  
CGACTTCTCTTACTTGATCCATCATTGCCCTCTGGGCAG  
+HWI-EAS443:3:23:407:300#0/1  
abaabbbbabbaabbbbaa`baaa^^aaa`\_a\_a\_aa\_a  
@HWI-EAS443:3:23:517:168#0/1  
TAACAATAGAGAGGATGGTGCTTTCTGCTTTTGATGAGAG  
+HWI-EAS443:3:23:517:168#0/1  
abaaaaa[b`b\_aba\_\_aXa\_]`^Z^¥^\_^]\_S]\_W\_¥]^  
@HWI-EAS443:3:23:565:164#0/1  
AATGGCGAAGATGCAACAGCAGGTCTTACTCATATCATGA  
+HWI-EAS443:3:23:565:164#0/1  
[¥^`ZYb¥Y¥bY¥XV`Y[X[Z`aLDTaaSNY```M¥\_¥a]  
@HWI-EAS443:3:23:635:1088#0/1  
GGGTGAAAATGGACGAAGGACAAGGGTTGCTTATGAAAGA  
+HWI-EAS443:3:23:635:1088#0/1  
aaa[aa`aaaa`a`^\_\_`\_\_^`\_`\_`\_V\_a\_\_^\_X\_\_`\_^^  
@HWI-EAS443:3:23:664:747#0/1  
GTGCTTCTGCTTTTGATGAGAGAAGAAATAAATACCTAG  
+HWI-EAS443:3:23:664:747#0/1  
aaabbbabbbbbbabbababaabaaabbaabaaabb  
@HWI-EAS443:3:23:668:721#0/1  
GTGGCATCATTGAGTTGGAATGCCAAATCATGATATGAG  
+HWI-EAS443:3:23:668:721#0/1  
VaX^`\_`\_¥\_b]b^aVP\_aaUaZa]\_]\_¥ZXS¥baadW`Y`  
@HWI-EAS443:3:23:72:1923#0/1  
CGCCAAGCAAACAATGGCGAAGATGCAACAGCAGGTCTTA  
+HWI-EAS443:3:23:72:1923#0/1  
`\_`\_a\_\_\_^¥¥`\_¥a]P¥\_P\_``]SV[Y^¥`Y^X^PDX^VU  
@HWI-EAS443:3:23:755:1421#0/1  
GCTTCTGCTTTTGATGAGAGAAGAAATAAATACCTAGAA  
+HWI-EAS443:3:23:755:1421#0/1  
a¥a`aa`\_aa]``\_aaaaa`aa\_aa`\_b`aaaS\_aa\_a\_

@HWI-EAS443:3:23:840:1048#0/1  
GGGTCCTCCTGTTTTCTTAGGGTCCTTCCCAGCACTGGGA  
+HWI-EAS443:3:23:840:1048#0/1  
aa]Xaaaaaaaa\_baaabaaa]\_^`aaa`a`Y`\_\_`\_^^^  
@HWI-EAS443:3:23:896:152#0/1  
GAGAGGATGGTGCTTTCTGCTTTTGATGAGAGAAGAAATA  
+HWI-EAS443:3:23:896:152#0/1  
aaaaaaaa^a`P[Z^^\_YZUYY]\_\_ZZ]\_^Z^Z]¥]^W  
@HWI-EAS443:3:24:104:1610#0/1  
AGGTTCAACACTTCCCAGAAGGTCTGGTGCCGCAGGTGCT  
+HWI-EAS443:3:24:104:1610#0/1  
`VU]bb`¥\_]a\_`[`a`\_¥YSZb``XY\_\_`¥]UZLL[`B  
@HWI-EAS443:3:24:1163:247#0/1  
CACATATCAGAGAACAAGAGCGCTTGTTCGCACCGGAATG  
+HWI-EAS443:3:24:1163:247#0/1  
`babaZbb`baa\_¥\_aaabbb]U\_b\_bab\_aa`baa`ab  
@HWI-EAS443:3:24:1269:1248#0/1  
GCTGTTTTGGAGTAATTTGAATGGGTCTATCCCGACCAGT  
+HWI-EAS443:3:24:1269:1248#0/1  
`¥baI\_aa¥\_`bababababa¥]aa\_`\_^`\_[YZ\_]W\_`U  
@HWI-EAS443:3:24:1272:1653#0/1  
GGTGAAAGGAGTTGGAACAATAGCAATGGAGTTAATCAGA  
+HWI-EAS443:3:24:1272:1653#0/1  
aa\_aaa¥aa\_`]a\_`\_`\_`\_`^a\_`\_`\_`^]]Z^\_\_\_`\_^^  
@HWI-EAS443:3:24:1279:1260#0/1  
TTCCAACCTGAATGATGCCACATATCAGAGAACAAGAGCG  
+HWI-EAS443:3:24:1279:1260#0/1  
]^\_U]a[`JZ^aa\_]ba[`]¥Ya^`\_Z^`\_a\_a`\_`\_Ya  
@HWI-EAS443:3:24:1301:380#0/1  
CATGATTTGGCATTCCAACCTGAATGATGCCACATATCAG  
+HWI-EAS443:3:24:1301:380#0/1  
abbbabbbb`abba\_`ab^`aaaaabaaaa]a`aaaa\_a`  
@HWI-EAS443:3:24:1318:986#0/1  
AATTTCTGGAGGGGTGAAAATGGACGAAGGACAAGGGTTG  
+HWI-EAS443:3:24:1318:986#0/1  
`bbabbbbbb`babaGaTbaaaba\_\_b\_ab]T[a\_aaa]Xa  
@HWI-EAS443:3:24:1326:1018#0/1  
CTCAGAATGAGTGCTGACCGTGCCAGGAAAATGAGGTCTT  
+HWI-EAS443:3:24:1326:1018#0/1  
aZ][abbaba]ZU\_aa^`[Y¥\_`Z^aba]¥aZ]]^^¥\_  
@HWI-EAS443:3:24:1430:655#0/1  
GGGTCCTCCTGTTTTCTTAGGGTCCTTCCCAGCACTGGGA  
+HWI-EAS443:3:24:1430:655#0/1  
ab¥UU`\_`\_¥Xaaaa]V¥\_]`^^OQ`XTNTO^^^PZYPUM  
@HWI-EAS443:3:24:1487:556#0/1  
CAAGCAGGCAGGCAGGATTTATGTGCAACTGATCCCCTCA  
+HWI-EAS443:3:24:1487:556#0/1  
^b\_bTa^[\_a\_WT¥[\_\_abb`a`ZZS`\_P`\_]ZZU^¥a\_\_  
@HWI-EAS443:3:24:1595:840#0/1  
CAAACAATGGCGAAGATGCAACAGCAGGTCTTACTCATAT

+HWI-EAS443:3:24:1595:840#0/1  
ababbbbb^`abb\_a`Yb^ab]``\_aabWa\_``\_]`^W`\_¥  
@HWI-EAS443:3:24:1656:937#0/1  
ATCCCCGACCAGTGAGTACCCTTCCCTTTCAAAGTCATGCC  
+HWI-EAS443:3:24:1656:937#0/1  
abaa\_bba]aaaba`\_\_\_\_\_aaX[[\_a\_T\_``\_Q[aWWWWS  
@HWI-EAS443:3:24:1670:1303#0/1  
GTTCAGTGCACATTTGGATGTAGAATCTCCCGATTCCACC  
+HWI-EAS443:3:24:1670:1303#0/1  
ab\_`¥¥Qb^a^`\_a\_`]\_^\_L]a]`X\_\_XZ¥a[`¥U¥^XY  
@HWI-EAS443:3:24:1774:553#0/1  
AGAGGATGGTGCTTTCTGCTTTTGATGAGAGAAGAAATAA  
+HWI-EAS443:3:24:1774:553#0/1  
¥b¥```H\_`¥\_ZT``¥TR[``Y]V\_^US]\_aR`a`a\_\_aa  
@HWI-EAS443:3:24:17:308#0/1  
ACTTCCCAGAAGGTCTGGTGCCGCAGGTGCTGCGGTGAAA  
+HWI-EAS443:3:24:17:308#0/1  
abbabbbbaaZ\_``V`aaaYaa^``¥``U^]¥````[DXMXB  
@HWI-EAS443:3:24:201:522#0/1  
GAGCATCTGTCCGAAGAATGATTGGTGAATCGGGAGATT  
+HWI-EAS443:3:24:201:522#0/1  
XVaaaab``]a`a¥aa`^\_`W¥H^aU^```a\_a`a\_\_a\_]\_  
@HWI-EAS443:3:24:203:402#0/1  
TGCTTTCTGCTTTTGATGAGAGAAGAAATAAATACCTAGA  
+HWI-EAS443:3:24:203:402#0/1  
aaa^aaaaa¥aaaaa^a``a````\_a\_aa`a\_\_aa^\_\_a\_\_  
@HWI-EAS443:3:24:232:968#0/1  
CTGGGTTTTCGACTTTCTTACTTGATCCATCATTGCCCT  
+HWI-EAS443:3:24:232:968#0/1  
^ba^b\_ab`¥\_bbabaaabaa`baaWa\_YW\_b\_Vaab`aa  
@HWI-EAS443:3:24:241:1161#0/1  
GGGCTTGCAAGTGGGCATGACTTTGAAAGGGAAG  
+HWI-EAS443:3:24:241:1161#0/1  
a[U^\_R``\_¥X`aa\_]YN[``X`¥X¥VY`a]¥QRT[^`\_^  
@HWI-EAS443:3:24:327:106#0/1  
TCTACATCCAAATGTGCACTGAACTCAAACCTCAGTGATTA  
+HWI-EAS443:3:24:327:106#0/1  
aaaYS\_aZ`YUW`^TZXX¥PYa^¥SWS]Z^YZ¥X^GYPY  
@HWI-EAS443:3:24:376:1773#0/1  
AGGGTACTCACTGGTCGGGATAGACCATTCAAATTACTC  
+HWI-EAS443:3:24:376:1773#0/1  
]]]^Uaaa``¥\_\_\_W\_aaVa`a\_a\_]`^X\_\_\_a^]a^\_`  
@HWI-EAS443:3:24:423:1678#0/1  
GATGGTGCTTTCTGCTTTTGATGAGAGAAGAAATAAATAC  
+HWI-EAS443:3:24:423:1678#0/1  
`bbba^bbaabba`a\_aba\_abba`baaaabbb\_bbaaba  
@HWI-EAS443:3:24:489:1394#0/1  
CACTCATTCTGAGGGATCAGTTGCACATAAATCCTGCCT  
+HWI-EAS443:3:24:489:1394#0/1  
a\_\_``U^`^TOTS\_a``XX[``Y\_\_`[V[``]¥^]a\_U\_Y¥^

@HWI-EAS443:3:24:593:1206#0/1  
ATGACTTTGAAAGGAAGGGTACTCACTGGTCGGGATAGA  
+HWI-EAS443:3:24:593:1206#0/1  
[aX]a`\_ba^ba^Z]V\_a\_XS]a)`a¥¥¥W]^^[\_^`]]  
@HWI-EAS443:3:24:640:167#0/1  
TGCTGTTGCATCTTCGCCATTGTTTGCTTGGCGCCAAACT  
+HWI-EAS443:3:24:640:167#0/1  
a`a`a]a\_aa]X[\_^X[``aaaZ``UX^\_\_`\_\_\_\_S\_]^[  
@HWI-EAS443:3:24:647:721#0/1  
GGCAGATTATGTGCAACTGATCCCCTCAGAATGAGTGC  
+HWI-EAS443:3:24:647:721#0/1  
abbbbb`abbabbaaba\_aaaa`aa\_aa\_b^aaaaUb^  
@HWI-EAS443:3:24:653:1783#0/1  
CATTCCGGTGCGAACAAGCGCTCTTGTCTCTGATATGTG  
+HWI-EAS443:3:24:653:1783#0/1  
^`\_VaaXYW]]Ta\_^^^`\_^^\_YY]WQV^U\_X]N]X¥YXYX  
@HWI-EAS443:3:24:660:1343#0/1  
CCCTTGCTTCGTCATTTTCACCCCTCCAGAAATTCG  
+HWI-EAS443:3:24:660:1343#0/1  
W[b\_¥W[TTN[aY^[]J\_]SS^\_aba[MZOV^WITaaV]M  
@HWI-EAS443:3:24:710:555#0/1  
TGCAGTAGCAAGTGGGCATGACTTTGAAAGGAAGGGTAC  
+HWI-EAS443:3:24:710:555#0/1  
aaaaa^ba`a^a`a`b\_bbba`a`ba`aaaaaaaa\_[MW\_  
@HWI-EAS443:3:24:748:274#0/1  
CGACTAATCCAGAATAGCATAACAATAGAGAGGATGGTGC  
+HWI-EAS443:3:24:748:274#0/1  
ab``abbbbaa`\_]\_babV]b\_¥PZaab\_baaaa\_aBBBB  
@HWI-EAS443:3:24:754:645#0/1  
ATGCAAGTTCAACACTTCCCAGAAGGTCTGGTGCCGCAG  
+HWI-EAS443:3:24:754:645#0/1  
aa]a[WaaT``aZ¥\_^^X¥0^[Y¥^T^S`^^\_W]U^RPVU  
@HWI-EAS443:3:24:787:1204#0/1  
CTCTCTATTGTTATGCTATTCTGGATTAGTCGTCATCAT  
+HWI-EAS443:3:24:787:1204#0/1  
a`\_a]Z]¥\_`]^\_`\_]b\_a^aaa]¥^^a]a\_]\_Ya[V\_\_  
@HWI-EAS443:3:24:790:1477#0/1  
CATCATAATCACTGAGTTTGAGTTCAGTGCACATTTGGAT  
+HWI-EAS443:3:24:790:1477#0/1  
UZ^a^`¥b]aaT\_SYZWZ\_UVPZb`abW`abba`P]¥¥ba  
@HWI-EAS443:3:24:792:131#0/1  
AGAAAGCACCATCCTCTCTATTGTTATGCTATTCTGGATT  
+HWI-EAS443:3:24:792:131#0/1  
a``ab^aba¥aa¥aa[a```¥`]V]\_\_aY]\_]¥[Z\_`¥¥S  
@HWI-EAS443:3:24:795:220#0/1  
CCCAGTGCTGGGAAGGACCCTAAGAAAACAGGAGGCCCA  
+HWI-EAS443:3:24:795:220#0/1  
abbbbaabbb`^^`bbbaaaaa¥X\_a`aa]\_`a\_a`[NZ¥\_  
@HWI-EAS443:3:24:814:97#0/1  
GGGTCCTCCTGTTTTCTTAGGGTCCTTCCCAGCACTGGGA

+HWI-EAS443:3:24:814:97#0/1  
a^\_X¥^ZX^` ]¥^^^T\_^¥`VSVUU¥¥UUUWWWS¥W¥¥W  
@HWI-EAS443:3:24:86:1171#0/1  
CTGAACTCAAACCTCAGTGATTATGATGGACGACTAATCCA  
+HWI-EAS443:3:24:86:1171#0/1  
aaabbbba^aabaaaa]aaa`aa`aa]\_`aaaa`aaa``a  
@HWI-EAS443:3:24:957:1095#0/1  
GGTCCTCCTGTTTTCTTAGGGTCCTTCCCAGCACTGGGAT  
+HWI-EAS443:3:24:957:1095#0/1  
a]¥]bb\_aab`b`b`aaa^\_a¥aaaaaaa\_`^`\_\_aZaW¥  
@HWI-EAS443:3:24:99:1334#0/1  
GCTTATGAAAGAATGTGCAATATCCTCAAAGGAAAATTC  
+HWI-EAS443:3:24:99:1334#0/1  
aba`aba^^``aa``YX¥abaaaa]`aa```Saab]aa\_  
@HWI-EAS443:3:25:1002:1046#0/1  
ATGGGTCCTCCTGTTTTCTTAGGGTCCTTCCCAGCACTGG  
+HWI-EAS443:3:25:1002:1046#0/1  
abba`[`b\_bbbb]bbbb`a`b`[^`ba^ab\_a`Z^`aa  
@HWI-EAS443:3:25:1118:1041#0/1  
CTCCTGTTTTCTTAGGGTCCTTCCCAGCACTGGGATGCTC  
+HWI-EAS443:3:25:1118:1041#0/1  
a`ab``W[abaa`\_¥\_a^^`baba`¥X`bba`ab]ab]a\_  
@HWI-EAS443:3:25:1176:561#0/1  
CAGCACTCATTCTGAGGGGATCAGTTGCACATAAATCCTG  
+HWI-EAS443:3:25:1176:561#0/1  
a¥\_\_\_\_`baabbbbabbb¥a\_b]\_aabbb`\_a[aaaa^\_b\_b  
@HWI-EAS443:3:25:1192:2039#0/1  
CAGAGGGCAATGATGGATCAAGTAAGAGAAAGTCGAAACC  
+HWI-EAS443:3:25:1192:2039#0/1  
HY\_Xb¥¥¥`ba`b\_bZ`T^`ab]ababbb[baT]\_`¥¥\_[  
@HWI-EAS443:3:25:1205:1465#0/1  
GAGCATCCCAGTGCTGGGAAGGACCCTAAGAAAACAGGAG  
+HWI-EAS443:3:25:1205:1465#0/1  
\_RLV^`aZQY[VWT¥aba^]]¥TQRZWZ]^TQSVY[ZSZ[  
@HWI-EAS443:3:25:1235:789#0/1  
GTTGCTTATGAAAGAATGTGCAATATCCTCAAAGGAAAAT  
+HWI-EAS443:3:25:1235:789#0/1  
a]^\_WW\_]\_]S\_^W^]U`PZ]]][W[Y[¥][[]S[W  
@HWI-EAS443:3:25:1298:1526#0/1  
GCTTTCTGCTTTTGATGAGAGAAGAAATAAATACCTAGAA  
+HWI-EAS443:3:25:1298:1526#0/1  
a^`a\_\_\_\_]``^`aW`[WWY`^][W`\_^`\_¥\_XV]`\_Z\_  
@HWI-EAS443:3:25:1368:148#0/1  
CCCTTGTCCTTCGTCATTTTCACCCCTCCAGAAATTCG  
+HWI-EAS443:3:25:1368:148#0/1  
ab[b\_ba`\_aa`bYH\_aab\_\_Ya[[UPaGUZa¥]\_\_``]  
@HWI-EAS443:3:25:1412:1373#0/1  
CACATTCTGGGATCCATTCCGGTGCGAACAAGCGCTCTTG  
+HWI-EAS443:3:25:1412:1373#0/1  
[bb[bbbbbb[bbab`[b[\_Ib`Yb[a\_a`V`[\_^^aV`ab

@HWI-EAS443:3:25:147:767#0/1  
TCCTGGGTTTCGACTTTCTTACTTGATCCATCATTGCC  
+HWI-EAS443:3:25:147:767#0/1  
abaabbb\_bbbba`aaaabaaaa\_aaa`aaaaaaaa\_aa\_  
@HWI-EAS443:3:25:153:597#0/1  
GCACATTCTTTCATAAGCAACCCTTGCCTTCGTCCATTT  
+HWI-EAS443:3:25:153:597#0/1  
aaa\_`a`a^Y]aa^`\_]a\_\_\_^`^`\_[\_]`\_]^`^^^  
@HWI-EAS443:3:25:157:383#0/1  
AGAATCTCCCGATTCCACCAATCATTCTCCGACAGATGC  
+HWI-EAS443:3:25:157:383#0/1  
aaaaaa^aa`\_L]`\_`\_\_\_`\_`\_ZX^`\_`\_WV^¥^UZWWW  
@HWI-EAS443:3:25:1782:1586#0/1  
CCCTTGCTTCGTCATTTTCCACCCCTCCAGAAATTCG  
+HWI-EAS443:3:25:1782:1586#0/1  
^`bb`bVvabba¥ISSbba`b^\_ISW`S`Ubbab]¥^  
@HWI-EAS443:3:25:180:1490#0/1  
TGGGTTTCGACTTTCTTACTTGATCCATCATTGCCCTC  
+HWI-EAS443:3:25:180:1490#0/1  
abb`^bbbbbb`babbbabababaabba`aaaa`aaa  
@HWI-EAS443:3:25:201:1076#0/1  
TGCTTTCTGCTTTTGATGAGAGAAGAAATAAATACCTAGA  
+HWI-EAS443:3:25:201:1076#0/1  
^bb\_abbab`b`ba`ab`bbaabb`a`aba^ababab^¥  
@HWI-EAS443:3:25:240:993#0/1  
GGGGAGCGCCAGGATGCCACAGAAATCAGAGCATCTGTCG  
+HWI-EAS443:3:25:240:993#0/1  
aa]a^aa`]`Q]`RS`\_]`^¥¥¥^PQU]S^¥Z^SSP¥RMU  
@HWI-EAS443:3:25:335:1873#0/1  
GACTTTGAAAGGAAGGGTACTCACTGGTCGGGATAGACC  
+HWI-EAS443:3:25:335:1873#0/1  
`a`\_\_\_^\_\_U\_\_[]\_¥]RHX]R\_\_^XXKIX]XX]X^UYXX  
@HWI-EAS443:3:25:374:344#0/1  
CAGCTGTTTGAATTTTCTTTGAGGATATTGCACATTCT  
+HWI-EAS443:3:25:374:344#0/1  
a^abababbbbaabbbbbbbaa\_babbbb`aaaaaaaaab\_a  
@HWI-EAS443:3:25:450:44#0/1  
CCTCTCTATTGTTATGCTATTCTGGATTAGTCGTCCATCA  
+HWI-EAS443:3:25:450:44#0/1  
aabbb`babbbabbbbaaaba\_aaa`aba`Y`a\_Z\_a`¥a  
@HWI-EAS443:3:25:518:228#0/1  
GAATGAGTGCTGACCGTGCCAGGAAAATGAGGTCTTCAAT  
+HWI-EAS443:3:25:518:228#0/1  
`bba`aa[baabb`aa[b``]a\_Y\_a`^a^aXMU`¥^`¥^  
@HWI-EAS443:3:25:630:319#0/1  
ATTTGGATGTAGAATCTCCCGATTCCACCAATCATTCTTC  
+HWI-EAS443:3:25:630:319#0/1  
abbaabbabaababaaaaaa]``aaaa`^^^]\_\_\_\_  
@HWI-EAS443:3:25:714:1266#0/1  
CAGGATTTATGTGCAACTGATCCCCTCAGAATGAGTGCTG

+HWI-EAS443:3:25:714:1266#0/1  
ab`^bbabbbbababbbb\_abaabbbabbbb`b][^bab  
@HWI-EAS443:3:25:745:1838#0/1  
TAACAATAGAGAGGATGGTGCTTTCTGCTTTTGATGAGAG  
+HWI-EAS443:3:25:745:1838#0/1  
a`^^`Z)`^baa^a\_`PD[NY]`¥\_]ZZ^\_]QVW[TT`¥  
@HWI-EAS443:3:25:78:243#0/1  
ACTCCTTTCACCGCAGCACCTGCGGCACCAGACCTTCTGG  
+HWI-EAS443:3:25:78:243#0/1  
\_]babbbabba^\_` `[^`ba[aa]a]aa`\_]\_YV\_  
@HWI-EAS443:3:25:794:416#0/1  
AATTTCTGGAGGGTGAAAATGGACGAAGGACAAGGGTTG  
+HWI-EAS443:3:25:794:416#0/1  
a`bbbbbbbabbbb^baaaabaaaab`aaa` `a`a`aX\_a  
@HWI-EAS443:3:25:810:1660#0/1  
CACTTGGCTGTTTTGGAGTAATTTGAATGGGTCTATCCCG  
+HWI-EAS443:3:25:810:1660#0/1  
aabbbbbbbVabaKXYaXbbaaa]ab^`aXF¥^aY][`V  
@HWI-EAS443:3:25:834:1476#0/1  
GAGAGGATGGTGCTTTCTGCTTTTGATGAGAGAAGAAATA  
+HWI-EAS443:3:25:834:1476#0/1  
a`]OSTNRYZOW\_\_\_\_[OP¥\_\_a]RZ[[V\_RZVXU^Y]S]  
@HWI-EAS443:3:25:848:294#0/1  
AACACTTCCCAGAAGGTCTGGTGCCGCAGGTGCTGCGGTG  
+HWI-EAS443:3:25:848:294#0/1  
abbbbbbbbab]b` `Zabaa\_baaaZ¥a\_U^T[ `W` ¥FR  
@HWI-EAS443:3:25:85:1576#0/1  
GGCAGCTGTTTGAATTTTCTTTGAGGATATTGCACATT  
+HWI-EAS443:3:25:85:1576#0/1  
aab`\_aaU\_`aW\_aaaabaaa\_aaJ`a¥a]Z]aUV`^`a`  
@HWI-EAS443:3:25:902:1026#0/1  
CAGTGATTATGATGGACGACTAATCCAGAATAGCATAACA  
+HWI-EAS443:3:25:902:1026#0/1  
abb]bbbbbbabbbbabbaaaaabab`aaababa`aa\_a  
@HWI-EAS443:3:25:91:1173#0/1  
CATAATCACTGAGTTTGAGTTCAGTGCACATTTGGATGTA  
+HWI-EAS443:3:25:91:1173#0/1  
abbbbbbbabbbbaabb`b`baaaabababbaaa`aaa`^  
@HWI-EAS443:3:25:942:1314#0/1  
TGCTGTTGCATCTTCGCCATTGTTTGCTTGGCGCCAAACT  
+HWI-EAS443:3:25:942:1314#0/1  
`S` `^ [Y[Y`a\_TU¥R\_`U[SYRYLFLQ[WT^[[¥WWSJS  
@HWI-EAS443:3:25:973:831#0/1  
CAGATGCTCTGATTTCTGTGGCATCCTGGCGCTCCCCACC  
+HWI-EAS443:3:25:973:831#0/1  
aXa[aW0][WPHW]^Q[^`U^P¥]\_[WQLV¥VYFO^WHKT  
@HWI-EAS443:3:26:100:494#0/1  
TGTTTTCTTAGGGTCTTCCCAGCACTGGGATGCTCTTCT  
+HWI-EAS443:3:26:100:494#0/1  
^ba^`^babbaab[b\_^Y`¥`\_]Zaa[aZ`¥[aaa`a]` `



@HWI-EAS443:3:26:1044:1277#0/1  
GACAAGGGTTGCTTATGAAAGAATGTGCAATATCCTCAAA  
+HWI-EAS443:3:26:1044:1277#0/1  
a`W¥\_`]^\_aba^¥Ysa^aaa`\_\_]a]¥^`a^Z[`\_\_\_Z  
@HWI-EAS443:3:26:1280:1359#0/1  
GACTTTCTTACTTGATCCATCATTGCCCTCTGGGCAGC  
+HWI-EAS443:3:26:1280:1359#0/1  
aaaaaa`a\_aaa`\_aaaa^\_aaa`a\_`^`^`[a\_\_\_Y`X`\_V  
@HWI-EAS443:3:26:1332:767#0/1  
GGTGCTTTCTGCTTTTGATGAGAGAAGAAATAAATACCTA  
+HWI-EAS443:3:26:1332:767#0/1  
aa]RPZYRXZ¥Sa[[a`USaU\_\_\_X\_]U\_[\_]XU\_XLTU^  
@HWI-EAS443:3:26:1409:773#0/1  
CATAATCACTGAGTTTGAGTTCAGTGCACATTTGGATGTA  
+HWI-EAS443:3:26:1409:773#0/1  
abbbabaaabb`^`b`U^baaabb``abb\_bbaaa`\_a\_`  
@HWI-EAS443:3:26:1495:639#0/1  
ATAGAGAGGATGGTGCTTTCTGCTTTTGATGAGAGAAGAA  
+HWI-EAS443:3:26:1495:639#0/1  
a`Y`]`V]\_`a\_`H\_]U\_WZW\_[`aaa\_¥`^a[`Z`^W¥  
@HWI-EAS443:3:26:166:1898#0/1  
GATTAGTCGTCATCATAATCACTGAGTTTGAGTTCAGTG  
+HWI-EAS443:3:26:166:1898#0/1  
aYS^U]I[VL`]WXXOWQVZb¥NW]X¥[a^¥V]UTY\_XUN  
@HWI-EAS443:3:26:219:938#0/1  
TGCTTTCTGCTTTTGATGAGAGAAGAAATAAATACCTAGA  
+HWI-EAS443:3:26:219:938#0/1  
Vaba\_\_bb\_`¥X\_`b\_`b\_aa`]]^a¥¥a^`aaa\_¥abba  
@HWI-EAS443:3:26:366:1374#0/1  
GACTTTGAAAGGAAGGGTACTCACTGGTCCGGGATAGACC  
+HWI-EAS443:3:26:366:1374#0/1  
ababaab\_\_`U`a`\_]`Ra\_aaa```\_X\_\_^`\_`^a¥¥]^  
@HWI-EAS443:3:26:496:1025#0/1  
GCAGGTCTTACTCATATCATGATTTGGCATTCCAACCTGA  
+HWI-EAS443:3:26:496:1025#0/1  
aa^]X0[Z^`¥V^ZW`]aab^^a`[aaa`]S\_R`Z[`WX¥  
@HWI-EAS443:3:26:77:289#0/1  
CTAATCCAGAATAGCATAACAATAGAGAGGATGGTGCTTT  
+HWI-EAS443:3:26:77:289#0/1  
aaaaaaaa`^TXa\_\_a`[[a]^`\_\_`a\_\_]\_Z\_]0[Y¥]]  
@HWI-EAS443:3:26:803:273#0/1  
CTCCTGTTTTCTTAGGGTCCTTCCCAGCACTGGGATGCTC  
+HWI-EAS443:3:26:803:273#0/1  
aabaa`aaaaa`abaa`Za`a`aaZ`a`a\_`\_\_\_\_]^aVXX  
@HWI-EAS443:3:26:828:1971#0/1  
GACCCATTCAAATTACTCCAAAACAGCCAAGTGGTCAGCC  
+HWI-EAS443:3:26:828:1971#0/1  
`bZabbaabbb`bbbababb\_baabbabba`^aULYbaaa  
@HWI-EAS443:3:26:885:347#0/1  
GACTAATCCAGAATAGCATAACAATAGAGAGGATGGTGCT

+HWI-EAS443:3:26:885:347#0/1  
aa`aa`a`a`a`a`\_`\_`Y`\_`\_`¥[Q]`\_`a`\_`^^`¥GTLT  
@HWI-EAS443:3:26:941:173#0/1  
GTGCTTTCTGCTTTTGATGAGAGAAGAAATAAATACCTAG  
+HWI-EAS443:3:26:941:173#0/1  
a\_baaba\_b`babaa\_ba\_a\_aaaaa`aaaaaaaaZL\_aa  
@HWI-EAS443:3:26:976:1231#0/1  
TCTGGGATCCATTCCGGTGCGAACAAGCGCTCTTGTTC  
+HWI-EAS443:3:26:976:1231#0/1  
`bSa`ab`\_b`aaaa\_Ya`\_a`Qa\_Za\_Z`aa`\_]\_\_\_\_  
@HWI-EAS443:3:27:1017:1378#0/1  
GTGCTTTCTGCTTTTGATGAGAGAAGAAATAAATACCTAG  
+HWI-EAS443:3:27:1017:1378#0/1  
aa`aabbbaaaabaaaaaaa`aaaaaaaa`aaaaa`\_`aaa  
@HWI-EAS443:3:27:1116:1775#0/1  
GCTGTTGCATCTTCGCCATTGTTTGTGCTTGGCGCCAACTC  
+HWI-EAS443:3:27:1116:1775#0/1  
aabaV`aaaa`^`a`\_]\_\_]\_\_P[W`\_¥]YT`NFQU  
@HWI-EAS443:3:27:1150:2035#0/1  
CGGAAGAATGATTGGTGAATCGGGAGATTCTACATCCAA  
+HWI-EAS443:3:27:1150:2035#0/1  
\_baabbababaaaa¥]aaaa`aa`aa`a`^`\_`\_`^^\_a\_  
@HWI-EAS443:3:27:1158:36#0/1  
CTTCCCTTTCAAAGTCATGCCACTTGCTACTGCAAGCCC  
+HWI-EAS443:3:27:1158:36#0/1  
Q\_bbZMa^U`]aba`a]b¥¥]X][\_JSU^Sb]XXZ\_Y\_U  
@HWI-EAS443:3:27:1302:858#0/1  
CAGGAAACGCTGAGATTGAAGACCTCATTTTCCTGGCACG  
+HWI-EAS443:3:27:1302:858#0/1  
`babbababbbbabbabaa]bba\_bbabaabaabba`a\_b  
@HWI-EAS443:3:27:1312:170#0/1  
GAGCGCCAGGATGCCACAGAAATCAGAGCATCTGTCGGAA  
+HWI-EAS443:3:27:1312:170#0/1  
aaa`ZGVba^]ZX\_aRa¥`a`a`\_`a`a`a`SNVaTW`aNZ  
@HWI-EAS443:3:27:1423:725#0/1  
GGCATCATTCAGGTTGGAATGCCAAATCATGATATGAGTA  
+HWI-EAS443:3:27:1423:725#0/1  
^\_^`W[b`Z¥^^TFW`\_`^`^`\_`TZa[`^aa^Z[aaZ\_]S`  
@HWI-EAS443:3:27:1430:775#0/1  
GAAGGACCCTAAGAAAACAGGAGGACCCATATATAGAAGA  
+HWI-EAS443:3:27:1430:775#0/1  
aaa`^aaa`aa]^^\_aaa]`^`\_][¥VZU`a\_a`a`a]]a^  
@HWI-EAS443:3:27:1471:485#0/1  
CCCTCAGAATGAGTGCTGACCGTGCCAGGAAAATGAGGTC  
+HWI-EAS443:3:27:1471:485#0/1  
a[P[X`\_`abbbab`^`ab^[Y`\_`^`\_`0`]a`\_`U`aa\_a[NX  
@HWI-EAS443:3:27:1586:1252#0/1  
GTAATTTGAATGGGTCTATCCCGACCAGTGAGTACCCTTC  
+HWI-EAS443:3:27:1586:1252#0/1  
aYa[\_`a[^S]`\_¥V\_]ZUQO¥^RNYW]Z[XOVHVOXYX

@HWI-EAS443:3:27:1592:244#0/1  
GCCGCAGGTGCTGCGGTGAAAGGAGTTGGAACAATAGCAA  
+HWI-EAS443:3:27:1592:244#0/1  
a^Qb]¥]ZS^Z\_Z¥`^HZVW\_¥¥G¥W\_]VDKGR¥NWUWWY  
@HWI-EAS443:3:27:1641:1699#0/1  
CAAATGTGCACTGAACTCAAACCTCAGTGATTATGATGGAC  
+HWI-EAS443:3:27:1641:1699#0/1  
a``bbb^`ab`¥`\_a\_0¥a`Z\_b[baPaaa\_`aaaaa`^]  
@HWI-EAS443:3:27:265:1924#0/1  
GCAATATCCTCAAAGGAAAATTTCAAACAGCTGCCAGAG  
+HWI-EAS443:3:27:265:1924#0/1  
0]¥\_\_¥^aaa^XW\_a`¥`\_W\_bba\_\_^]`a`]\_`b^^`¥Z  
@HWI-EAS443:3:27:277:322#0/1  
GATGGTGCTTTCTGCTTTTGATGAGAGAAGAAATAAATAC  
+HWI-EAS443:3:27:277:322#0/1  
aZaba`\_ba`a`aaaaaaaa\_aa`a`\_aa`a[`\_aa\_a^  
@HWI-EAS443:3:27:322:664#0/1  
ATCAGTTGCACATAAATCCTGCCTGCCTGCTTGTGTGTAT  
+HWI-EAS443:3:27:322:664#0/1  
\_¥`\_`[\_aaaaa`S\_[ba\_aa`U[aa^]`\_`[YZLZ^[\_  
@HWI-EAS443:3:27:341:521#0/1  
ATGACTTTGAAAGGGAAGGGTACTCACTGGTCGGGATAGA  
+HWI-EAS443:3:27:341:521#0/1  
aUbbabaaU`a`Vaaaa]b`L`aa``\_a]N]`aa``YXa  
@HWI-EAS443:3:27:381:2039#0/1  
ATAATCACTGAGTTTGAGTTCAGTGCACATTTGGATGTAG  
+HWI-EAS443:3:27:381:2039#0/1  
abbaaa\_a^aZ`^`SZ`aT`a`a]^a`aa\_`^`\_W^^`0\_]`  
@HWI-EAS443:3:27:434:407#0/1  
GAATGATTGGTGAATCGGGAGATTCTACATCCAAATGTG  
+HWI-EAS443:3:27:434:407#0/1  
¥VaVTOV``]````]M\_RFUS`ZZT¥`T`ZQ[aY^¥Y\_[  
@HWI-EAS443:3:27:513:550#0/1  
GGGTCCTCCTGTTTTCTTAGGGTCCTTCCCAGCACTGGGA  
+HWI-EAS443:3:27:513:550#0/1  
\_a^\_bbbbbbb`\_`abba`abababbbababbbb`bbaaa  
@HWI-EAS443:3:27:639:482#0/1  
ATTCAGGTTGGAATGCCAAATCATGATATGAGTAAGACCT  
+HWI-EAS443:3:27:639:482#0/1  
aaaa`aa\_aaa`aaaaa``aa`aa\_aaaa`a\_a\_aa^Za  
@HWI-EAS443:3:27:647:125#0/1  
CATTGCCCTCTGGGCAGCTGTTTCAAATTTTCCTTTGAGG  
+HWI-EAS443:3:27:647:125#0/1  
ababaaaaa`babaa`aaab\_baa^aaaaa\_Yaaa`aaa  
@HWI-EAS443:3:27:72:1782#0/1  
ACTTCCCAGAAGGTCTGGTGCCGAGGTGCTGCGGTGAAA  
+HWI-EAS443:3:27:72:1782#0/1  
`b`abbaW\_]^`[G`aa`P`aaaXU\_TFZaY^^`^GPQZU  
@HWI-EAS443:3:27:746:1840#0/1  
AAATGGACGAAGGACAAGGGTTGCTTATGAAAGAATGTGC

+HWI-EAS443:3:27:746:1840#0/1  
¥X`´YUa¥^`^`[^`^`][S[V]¥a`´\_a^\_\_aV\_a\_VT^a  
@HWI-EAS443:3:27:796:757#0/1  
TTTCAAACAGCTGCCAGAGGGCAATGATGGATCAAGTAA  
+HWI-EAS443:3:27:796:757#0/1  
aabaaaaabbaba`a`a]aaa`\_¥aaaaa^`´\_`\_aX`´  
@HWI-EAS443:3:27:886:522#0/1  
CACTGGTCGGGATAGACCCATTCAAATTACTCCAAAACAG  
+HWI-EAS443:3:27:886:522#0/1  
aNf[bb`HTX\_aa\_baXVRU^VvXaaa`]GSTNX]P[NZ]  
@HWI-EAS443:3:27:966:1453#0/1  
CAACTGATCCCCTCAGAATGAGTGCTGACCGTGCCAGGAA  
+HWI-EAS443:3:27:966:1453#0/1  
abbab`\_aa\_abbaaaa`aaaa^aa`aaa`^`\_`aa[\_\_^`  
@HWI-EAS443:3:27:995:1553#0/1  
ATTCCGGTGCGAACAAGCGCTCTTGTCTCTGATATGTGG  
+HWI-EAS443:3:27:995:1553#0/1  
a`a[abaIUa`´a\_a`\_a\_]\_`X\_a\_TSa\_Ya\_aaZ¥G\_N  
@HWI-EAS443:3:28:1015:148#0/1  
GTGGTCAGCCTGATGAGACCAAATGAAAACCCAGCTCACA  
+HWI-EAS443:3:28:1015:148#0/1  
aV[VWXQHOLVVFZXRPRQZ¥^[^U[¥VRPUUUUUUQRQ  
@HWI-EAS443:3:28:1046:129#0/1  
ACAAGGGTTGCTTATGAAAGAATGTGCAATATCCTCAAAG  
+HWI-EAS443:3:28:1046:129#0/1  
\_aaT[ababbabb`bba`abaaaa\_aab`aaa\_^a[a`aa  
@HWI-EAS443:3:28:1116:463#0/1  
GTGCTTTCTGCTTTTGATGAGAGAAGAAATAAATACCTAG  
+HWI-EAS443:3:28:1116:463#0/1  
HQ`a`\_`Ub¥`¥¥abbb¥Z`ba\_bbb`bb]ba`bbaW0¥ab  
@HWI-EAS443:3:28:1123:372#0/1  
GACTTTCTTTACTTGATCCATCATTGCCCTCTGGGCAGC  
+HWI-EAS443:3:28:1123:372#0/1  
ababbbbabba\_bbabbabbaabab`a\_\_a^a\_\_a^aa¥  
@HWI-EAS443:3:28:1139:353#0/1  
ATCCATTCCGGTGCGAACAAGCGCTCTTGTCTCTGATAT  
+HWI-EAS443:3:28:1139:353#0/1  
aa`aaa`´]`a\_a^\_`a\_a\_\_\_\_`\_\_]aa`\_]Q\_`\_`´]\_¥]  
@HWI-EAS443:3:28:1181:852#0/1  
CTAATCCAGAATAGCATAACAATAGAGAGGATGGTGCTTT  
+HWI-EAS443:3:28:1181:852#0/1  
`b\_]`b`]´^bba[abaaabab`b\_b`aaaaYD¥Taaa  
@HWI-EAS443:3:28:1251:293#0/1  
TAACAATAGAGAGGATGGTGCTTTCTGCTTTTGATGAGAG  
+HWI-EAS443:3:28:1251:293#0/1  
a\_a\_^[\_ab`´´´\_\_`a¥¥ZVU`aG\_WZ\_´´`¥PS\_[S]QX  
@HWI-EAS443:3:28:1352:1718#0/1  
GCAGAAAGCACCATCCTCTCTATTGTTATGCTATTCTGGA  
+HWI-EAS443:3:28:1352:1718#0/1  
]`Z\_RY`b`SXT]VSZYa`]XR^[¥G¥bbYYZUX¥`QSLY



+HWI-EAS443:3:28:394:754#0/1  
abb`bbaab`a`ba`aaa`baa`aaa`aaa`\_¥`\_\_`\_]`a`  
@HWI-EAS443:3:28:424:332#0/1  
GAGGATGGTCTTTCTGCTTTTGATGAGAGAAGAAATAAA  
+HWI-EAS443:3:28:424:332#0/1  
La\_b^\_bYNaYY`aaXaa`aVaabaW``[a]aY]aa``¥  
@HWI-EAS443:3:28:434:853#0/1  
GACCACTTGGCTGTTTTGGAGTAATTTGAATGGGTCTATC  
+HWI-EAS443:3:28:434:853#0/1  
abab]`aaaaaa[Q`ba]XN¥S`\_\_`^GVYNT]SFNZZ[U  
@HWI-EAS443:3:28:469:82#0/1  
GTGCAATATCCTCAAAGGAAAATTTCAAACAGCTGCCAG  
+HWI-EAS443:3:28:469:82#0/1  
a\_a^abaaaa`¥Z`aaa`aaaa¥^^a^`\_`\_^]aZUWZ\_  
@HWI-EAS443:3:28:498:1993#0/1  
CTGATTTCTGTGGCATCCTGGCGCTCCCCACCAGTCTCCA  
+HWI-EAS443:3:28:498:1993#0/1  
a¥\_]`aa`[XG¥Y]\_`^`ZVY\_a[`G^¥a`BBBBBBBBBBB  
@HWI-EAS443:3:28:519:241#0/1  
GCATGACTTTGAAAGGAAGGGTACTCACTGGTCGGGATA  
+HWI-EAS443:3:28:519:241#0/1  
aaaaaaaabab`a`baa`\_aa\_V`\_a^`\_\_`a`X^a\_a]X\_  
@HWI-EAS443:3:28:588:964#0/1  
GCAAACAATGGCGAAGATGCAACAGCAGGTCTTACTCATA  
+HWI-EAS443:3:28:588:964#0/1  
aabb``bbbaabaa\_S¥a¥^a]]a`]¥¥`^aZ`aa\_aa^\_  
@HWI-EAS443:3:28:598:826#0/1  
CACTTGGCTGTTTTGGAGTAATTTGAATGGGTCTATCCCG  
+HWI-EAS443:3:28:598:826#0/1  
abbabbbba\_H\_abM`\_`RW`Y^a]\_aV`VYSOWQW]X`]  
@HWI-EAS443:3:28:640:118#0/1  
GGGTTTTCATTTGGTCTCATCAGGCTGACCACTTGGCTGT  
+HWI-EAS443:3:28:640:118#0/1  
abb¥aabaaaaa`\_`aaaa`\_`a^`\_`\_]`^`^a`\_`\_`0  
@HWI-EAS443:3:28:717:1497#0/1  
TAACAATAGAGAGGATGGTCTTTCTGCTTTTGATGAGAG  
+HWI-EAS443:3:28:717:1497#0/1  
a`^`\_aaZU¥G`¥ST`R`\_`Z¥`^Q`\_TQZY¥`[Z¥¥^P[Z¥  
@HWI-EAS443:3:28:718:404#0/1  
GGGGTAAAAATGGACGAAGGACAAGGGTTGCTTATGAAAG  
+HWI-EAS443:3:28:718:404#0/1  
abbb`baa`abba^`aa\_a`[\_`\_`\_baaWaa]\_\_^aa]\_\_`  
@HWI-EAS443:3:28:737:532#0/1  
AGAAGAAATAAGGAGAGTTTGGCGCCAAGCAAACAATGGC  
+HWI-EAS443:3:28:737:532#0/1  
`bVUbaababbaZab\_]aaaa`Ya`\_`a`a`a`a`¥ba\_[^U  
@HWI-EAS443:3:28:783:23#0/1  
AGAGCATCCCAGTGCTGGGAAGGACCCTAAGAAAACAGGA  
+HWI-EAS443:3:28:783:23#0/1  
abab]aaa`b`aXV^]aaaa`a`[V`W`\_`\_`\_]T`W\_a]^

@HWI-EAS443:3:28:854:203#0/1  
AATTTCTGGAGGGGTGAAAATGGACGAAGGACAAGGGTTG  
+HWI-EAS443:3:28:854:203#0/1  
abbbbbbbb`bbbb]aa`aaba`\_b\_\_`\_¥\_`\_`a\_W[`  
@HWI-EAS443:3:28:855:1268#0/1  
AATTTCTGGAGGGGTGAAAATGGACGAAGGACAAGGGTTG  
+HWI-EAS443:3:28:855:1268#0/1  
^Zbbabbb`ab\_aa]``aaaaa`aa\_`\_`^`\_\_\_\_ZUa  
@HWI-EAS443:3:28:864:1502#0/1  
CAGAGGGCAATGATGGATCAAGTAAGAGAAAGTCGAAACC  
+HWI-EAS443:3:28:864:1502#0/1  
]ab[bbabbabbbabb\_`bbbb\_bababbbbZ[Zabab`a  
@HWI-EAS443:3:28:883:1012#0/1  
ATGCAACAGCAGGTCTTACTCATATCATGATTTGGCATTG  
+HWI-EAS443:3:28:883:1012#0/1  
`[a¥]\_\_Z\_W`VTP\_]a\_W¥^ab[]Y]^`\_`XW[^`¥ZO  
@HWI-EAS443:3:29:1019:1048#0/1  
CAATAGAGAGGATGGTGCTTTCTGCTTTTGATGAGAGAAG  
+HWI-EAS443:3:29:1019:1048#0/1  
aa`baaaaaaaaa`Xa\_\_aa[`]Y¥aaa\_\_^[W`Sa¥\_[  
@HWI-EAS443:3:29:1095:801#0/1  
CACTTGGCTGTTTTGGAGTAATTTGAATGGGTCTATCCCG  
+HWI-EAS443:3:29:1095:801#0/1  
]baabbbabbMZ\_a]\_¥U\_^¥¥]bZ^aVRZaIaaa[a[aZ  
@HWI-EAS443:3:29:1144:1214#0/1  
TAACAATAGAGAGGATGGTGCTTTCTGCTTTTGATGAGAG  
+HWI-EAS443:3:29:1144:1214#0/1  
R^\_Q^W[¥¥X`Ua^VV^\_MS^^¥TRSZIY]Z¥ZZ\_[L]T]  
@HWI-EAS443:3:29:1199:994#0/1  
AAGAGAAAGTCGAAACCCAGGAAACGCTGAGATTGAAGAC  
+HWI-EAS443:3:29:1199:994#0/1  
a^a^P[`aa\_`Z¥`a0\_¥\_[`\_`aa\_\_\_^U¥X\_Y\_^`[U^W  
@HWI-EAS443:3:29:119:674#0/1  
CACTTGGCTGTTTTGGAGTAATTTGAATGGGTCTATCCCG  
+HWI-EAS443:3:29:119:674#0/1  
a]aaaSaaa`V]a^Z^X`QX¥[`\_MM[RRUVH[SYJS`BB  
@HWI-EAS443:3:29:1220:1134#0/1  
TAACAATAGAGAGGATGGTGCTTTCTGCTTTTGATGAGAG  
+HWI-EAS443:3:29:1220:1134#0/1  
aaaaa\_b\_a\_^\_aa\_\_[Y]a^^a\_Ya[\_`\_a`ZY\_[W^]\_  
@HWI-EAS443:3:29:1262:428#0/1  
GGGCAATGATGGATCAAGTAAGAGAAAGTCGAAACCCAGG  
+HWI-EAS443:3:29:1262:428#0/1  
^J¥aa]]baa^`T\_^aX`U`\_`a¥a\_a]`SMVVQYVVM0^]  
@HWI-EAS443:3:29:1291:1601#0/1  
GTCCATCATAATCACTGAGTTTGAGTTCAGTGCACATTTG  
+HWI-EAS443:3:29:1291:1601#0/1  
\_[]S]]\_`U\_^¥^]R[aX`SaWY\_[\_\_NRPSX]Z`XYYYB  
@HWI-EAS443:3:29:1297:1806#0/1  
CTGGGTTTTCTATTTGGTCTCATCAGGCTGACCACTTGGCT

+HWI-EAS443:3:29:1297:1806#0/1  
a`XTbH[a\_b\_¥aWbb\_ba`ba]^a^QY]ZVYaY]aa\_\_B  
@HWI-EAS443:3:29:1330:1348#0/1  
ATTCTTTCATAAGCAACCCTTGCCTTCGTCCATTTTCAC  
+HWI-EAS443:3:29:1330:1348#0/1  
abbaab]bab`ZZ¥]a]a]^a`[Y¥a`¥¥\_`^`a`\_a\_Y\_V  
@HWI-EAS443:3:29:1350:213#0/1  
TTTATGTGCAACTGATCCCCTCAGAATGAGTGCTGACCGT  
+HWI-EAS443:3:29:1350:213#0/1  
abaaa`^Z^ba\_a`\_\_\_\_`\_¥\_¥`a\_\_`a\_a¥¥^^`^¥W^V  
@HWI-EAS443:3:29:1391:1157#0/1  
TCTGGGATCCATTCCGGTGCGAACAAGCGCTCTTGTTC  
+HWI-EAS443:3:29:1391:1157#0/1  
Vaa\_Z^[WaabT\_\_\_aa]a^YZZ\_\_`UMW¥PR]¥`^RQZS  
@HWI-EAS443:3:29:1405:975#0/1  
TGCCCTCTGGGCAGCTGTTTAAAATTTTCCTTTGAGGATA  
+HWI-EAS443:3:29:1405:975#0/1  
aaaaaa`b`^`a`b\_abaabb\_a`abaa\_\_aaa`\_aa`aa  
@HWI-EAS443:3:29:1423:1473#0/1  
AGTAATTTGAATGGGTCTATCCCGACCAGTGAGTACCCTT  
+HWI-EAS443:3:29:1423:1473#0/1  
aa¥aaaa`bba¥aaa^`aaa]Ya\_a`\_`\_]a\_XaV\_V`\_  
@HWI-EAS443:3:29:1502:885#0/1  
AGAGGATGGTGCTTTCTGCTTTTGGTGGAGAGAAGAAATAA  
+HWI-EAS443:3:29:1502:885#0/1  
`[]`\_`\_`[U¥aa¥^OUXVS¥`a^ZZ\_[WW\_HWT¥^aaaV  
@HWI-EAS443:3:29:1608:1353#0/1  
GCTGTTTTGGAGTAATTTGAATGGGTCTATCCCGACCAGT  
+HWI-EAS443:3:29:1608:1353#0/1  
`Ua\_a`a`\_`N\_a`¥[WZ[X\_XUU\_W\_^U¥^UUUVV\_B  
@HWI-EAS443:3:29:164:240#0/1  
CACATATCAGAGAACAAGAGCGCTTGTTCGCACCGGAATG  
+HWI-EAS443:3:29:164:240#0/1  
a\_a^aba^`]bbaaaaa\_a`\_`Xaa\_baWRa^`^`]`¥Za  
@HWI-EAS443:3:29:1670:501#0/1  
GGCATGACTTTGAAAGGGAAGGGTACTCACTGGTCGGGAT  
+HWI-EAS443:3:29:1670:501#0/1  
a`Uaaaa[aa`a`\_`¥^^`^¥¥`\_Y\_¥¥¥YW¥a`WU`\_a]B  
@HWI-EAS443:3:29:1694:1235#0/1  
ATATGGGTCTCCTGTTTTCTTAGGGTCCTTCCCAGCACT  
+HWI-EAS443:3:29:1694:1235#0/1  
aVb`PXR`aa]\_`baa`b\_bbbaaa\_\_aaaa\_\_aaa\_]`  
@HWI-EAS443:3:29:1731:1773#0/1  
GAAGGACCCTAAGAAAACAGGAGGACCCATATATAGAAGA  
+HWI-EAS443:3:29:1731:1773#0/1  
a`bba`a¥aa\_\_aa\_[a[aa`a\_\_\_\_]^`\_`\_\_\_\_^`\_  
@HWI-EAS443:3:29:178:331#0/1  
CCTGCTGTTGCATCTTCGCCATTGTTTGGCTTGGCGCCAAA  
+HWI-EAS443:3:29:178:331#0/1  
aaaaaaaa\_aaa`a`a\_a[aa\_aaV^a\_Q^\_\_Y¥`¥¥[TTT



@HWI-EAS443:3:29:185:703#0/1  
ATTCAGGTTGGAATGCCAAATCATGATATGAGTAAGACCT  
+HWI-EAS443:3:29:185:703#0/1  
aaaaYa` ]`aa\_aa`ab\_a`aaaaa\_`\_a^\_Za¥\_\_`\_Z  
@HWI-EAS443:3:29:194:707#0/1  
TCCTGGGTTTCGACTTTCTTACTTGATCCATCATTGCC  
+HWI-EAS443:3:29:194:707#0/1  
abbabaa\_\_`U]` ]`aa]a`aaa`a`\_`a`\_a`^V\_\_\_\_  
@HWI-EAS443:3:29:229:1435#0/1  
GAATCTCCCATTCCACCAATCATTCTCCGACAGATGCT  
+HWI-EAS443:3:29:229:1435#0/1  
```]aabab`aaaabaaa`a`aa\_a`\_a`\_[a\_^`\_]\_B  
@HWI-EAS443:3:29:237:782#0/1  
TAGCATAACAATAGAGAGGATGGTGCTTTCTGCTTTTGAT  
+HWI-EAS443:3:29:237:782#0/1  
\_\_]b¥baaa]Q\_aaaa\_]ba` ``\_] [[ ]0]^^Ya\_a\_\_ [  
@HWI-EAS443:3:29:250:110#0/1  
GGGTCCTCCTGTTTTCTTAGGGTCCTTCCCAGCACTGGGA  
+HWI-EAS443:3:29:250:110#0/1  
]aUIaaba`\_ba\_baabbbb[a`babab]¥Sabba`ba`]  
@HWI-EAS443:3:29:344:1602#0/1  
GAAATTTCTGGAGGGGTGAAAATGGACGAAGGACAAGGGT  
+HWI-EAS443:3:29:344:1602#0/1  
a`Zaaabaa`aaaaYa`aa][`aa]` ]^`^`\_Y¥XYW  
@HWI-EAS443:3:29:34:1277#0/1  
TGGGCTTGCAGTAGCAAGTGGGCATGACTTTGAAAGGGAA  
+HWI-EAS443:3:29:34:1277#0/1  
````^a¥^` [a^`[\_^T\_R]YVZa\_aa^` `a^0¥]`` [[B  
@HWI-EAS443:3:29:428:703#0/1  
GGCTTGCAGTAGCAAGTGGGCATGACTTTGAAAGGGAAGG  
+HWI-EAS443:3:29:428:703#0/1  
^¥]b\_X\_\_b`U`aaaaQb`a`baba`aaa]\_bab`\_`\_aa\_  
@HWI-EAS443:3:29:455:1394#0/1  
GTGAAAATGGACGAAGGACAAGGGTTGCTTATGAAAGAAT  
+HWI-EAS443:3:29:455:1394#0/1  
aa\_]aaaaaaaa`\_`\_a\_\_aa`¥Z`\_`\_`\_]\_a`^`\_`^  
@HWI-EAS443:3:29:483:1840#0/1  
GATGCAACAGCAGGTCTTACTCATATCATGATTTGGCATT  
+HWI-EAS443:3:29:483:1840#0/1  
`b\_abbaaaaa`^Z\_\_\_b`\_`a]a\_aa^\_] ^Y^\_Xa\_]X  
@HWI-EAS443:3:29:643:1656#0/1  
CAAATCATGATATGAGTAAGACCTGCTGTTGCATCTTCGC  
+HWI-EAS443:3:29:643:1656#0/1  
a`Z^aaaa` `aaa^a[[ab\_a`^^aa`]LZFW\_VOW[BBB  
@HWI-EAS443:3:29:695:911#0/1  
GGGATCAGTTGCACATAAATCCTGCCTGCCTGCTTGTGTG  
+HWI-EAS443:3:29:695:911#0/1  
ababbabaabbbbabbbbbaaaabaaa`aaaaa`a\_a` `  
@HWI-EAS443:3:29:701:1396#0/1  
CATAATCACTGAGTTTGAGTTCAGTGCACATTTGGATGTA

+HWI-EAS443:3:29:701:1396#0/1  
`^WX\_a\_X]`b\_¥Z`^`\_\_XYa]XW^`\_UZ^` ``Y^Z¥[^  
@HWI-EAS443:3:29:704:781#0/1  
GAGGATGGTCTTTCTGCTTTTGATGAGAGAAGAAATAAA  
+HWI-EAS443:3:29:704:781#0/1  
aa`aUaWRU`a`aaa\_a`a\_`^¥aa¥]¥a\_aa^Y^\_aa`  
@HWI-EAS443:3:29:707:1454#0/1  
ATGACTTTGAAAGGAAGGGTACTCACTGGTCGGGATAGA  
+HWI-EAS443:3:29:707:1454#0/1  
aa^¥b`ba\_\_baaaa`\_X]aVaa` `a\_Xa¥M`\_aZ`\_Y`\_`  
@HWI-EAS443:3:29:719:145#0/1  
ACATATCAGAGAACAAGAGCGCTTGTTCGCACCGGAATGG  
+HWI-EAS443:3:29:719:145#0/1  
^¥VZ\_Wa\_`\_`¥\_\_^RUZ`W\_¥¥¥^WWZYVW¥W¥ZTZYBB  
@HWI-EAS443:3:29:728:212#0/1  
CGGGAGATTCTACATCCAAATGTGCACTGAACTCAAATC  
+HWI-EAS443:3:29:728:212#0/1  
abbbabbababaabaaaababa`aaa`ba\_aa`aaa¥Za\_  
@HWI-EAS443:3:29:784:912#0/1  
ACTTCCCAGAAGGTCTGGTGCCGCAGGTGCTGCGGTGAAA  
+HWI-EAS443:3:29:784:912#0/1  
`\_a` `^aZa[¥^¥T¥` `ZX¥¥Z`ZW^¥N[ZZSSXZRBBBB  
@HWI-EAS443:3:29:83:1077#0/1  
CCCTTGTCTTCGTCATTTTCACCCCTCCAGAAATTTTCG  
+HWI-EAS443:3:29:83:1077#0/1  
aabaab¥aaa\_a` [aa[[`^`^`a\_Y\_]Za\_YYIYZZ¥¥^`  
@HWI-EAS443:3:29:852:780#0/1  
CAATAGAGAGGATGGTGCTTTCTGCTTTTGATGAGAGAAG  
+HWI-EAS443:3:29:852:780#0/1  
aY^`aXMa\_aaa] []GUY^`\_\_^\_WT^\_]` `\_\_[ZQZaTYB  
@HWI-EAS443:3:29:963:1692#0/1  
AATCACTGAGTTTGAGTTCAGTGCACATTTGGATGTAGAA  
+HWI-EAS443:3:29:963:1692#0/1  
Z\_a`^aVa]`^aaaV` `¥a]`\_a`\_]`a`^` `Za\_aXZ]^`  
@HWI-EAS443:3:2:1030:1340#0/1  
GTGCTTTCTGCTTTTGATGAGAGAAGAAATAAATACCTAG  
+HWI-EAS443:3:2:1030:1340#0/1  
\_Ibabab` `a` `babbabb`b\_a`aba`aa`\_aaa¥Gaaa  
@HWI-EAS443:3:2:1144:492#0/1  
ATCATAATCACTGAGTTTGAGTTCAGTGCACATTTGGATG  
+HWI-EAS443:3:2:1144:492#0/1  
^`\_[b^X\_ZaX` `\_\_`Yaaa]] [a]X`\_N¥^` `Z`^ [X^  
@HWI-EAS443:3:2:1202:1042#0/1  
ACACAAGCAGGCAGGCAGGATTTATGTGCACTGATCCCC  
+HWI-EAS443:3:2:1202:1042#0/1  
\_X¥aba\_]abbZ`a` ¥ab\_QWaaa¥a^`^V\_Y` `` `] [\_aV  
@HWI-EAS443:3:2:1350:1023#0/1  
GGGCTTGCAAGTGGGCATGACTTTGAAAGGGAAG  
+HWI-EAS443:3:2:1350:1023#0/1  
a\_`X¥` `aa]\_a^^¥a^Z` `¥X` ¥^Sa^` ` `¥¥` `^V¥`

@HWI-EAS443:3:2:1368:455#0/1  
AAGCGCTCTTGTCTCTGATATGTGGCATCATTCAGGTTG  
+HWI-EAS443:3:2:1368:455#0/1  
a`¥Xaa`PbaXS¥¥]¥aba`V`aQ`X¥[aS\_^\_W\_a`]aa  
@HWI-EAS443:3:2:1426:1280#0/1  
GCTTTCTGCTTTTGATGAGAGAAGAAATAAATACCTAGAA  
+HWI-EAS443:3:2:1426:1280#0/1  
[Yaaa^a\_FTZa\_\_`¥¥Z`S[\_\_a^^^`\_]X\_^WS[\_\_\_Y  
@HWI-EAS443:3:2:142:934#0/1  
CTCCTGTTTTCTTAGGGTCCTTCCCAGCACTGGGATGCTC  
+HWI-EAS443:3:2:142:934#0/1  
aa`^ab¥\_`bMaaaa¥¥a\_`a^M\_`]\_a^aa[\_¥a`W`Q  
@HWI-EAS443:3:2:1463:482#0/1  
CCAACCTGAATGATGCCACATATCAGAGAACAAGAGCGCT  
+HWI-EAS443:3:2:1463:482#0/1  
aabb`Xaa`a]a]aaU^a\_]a`\_\_`\_]\_[UN[^¥\_T^¥B  
@HWI-EAS443:3:2:1678:1289#0/1  
GGGTCCTCCTGTTTTCTTAGGGTCCTTCCCAGCACTGGGA  
+HWI-EAS443:3:2:1678:1289#0/1  
aab¥a\_a`\_ba\_bba¥abaa^`^aXa\_^Z]\_`\_\_¥a`ZW  
@HWI-EAS443:3:2:1743:1104#0/1  
AAATTTCTGGAGGGGTGAAAATGGACGAAGGACAAGGGTT  
+HWI-EAS443:3:2:1743:1104#0/1  
ababa^]aaUV\_]ZN[^\_\_^a\_]`\_¥`\_X\_]¥^U\_]aZY  
@HWI-EAS443:3:2:1771:603#0/1  
GAGGATGGTGCTTTCTGCTTTTGATGAGAGAAGAAATAAA  
+HWI-EAS443:3:2:1771:603#0/1  
^aa^^abaa[aaba^`a`bba``^ab\_ba`\_`baa\_aaa`  
@HWI-EAS443:3:2:185:259#0/1  
GTCCTCCTGTTTTCTTAGGGTCCTTCCCAGCACTGGGATG  
+HWI-EAS443:3:2:185:259#0/1  
a[a\_a]\_\_b\_aa`\_`\_a[\_W\_a\_\_\_S¥Z^]`^`a^U¥]`  
@HWI-EAS443:3:2:194:722#0/1  
TTGAAGACCTCATTTTCTGGCACGGTCAGCACTCATTCT  
+HWI-EAS443:3:2:194:722#0/1  
aaaZ\_XU[ZU\_W^aa\_W¥`a`[Y[\_^SNYOMOPTZP^LLS  
@HWI-EAS443:3:2:430:1256#0/1  
GCTTATGAAAGAATGTGCAATATCCTCAAAGGAAAATTC  
+HWI-EAS443:3:2:430:1256#0/1  
`P\_U¥V\_LP¥XW\_[\_WYZZ[ZUTVGMXP[[[^Z\_\_VUZBB  
@HWI-EAS443:3:2:440:814#0/1  
GCTGCGGTGAAAGGAGTTGGAACAATAGCAATGGAGTTAA  
+HWI-EAS443:3:2:440:814#0/1  
a\_ab`bb\_b``a`a\_a\_aaa¥`\_aa`\_a\_^a\_`^]aZa`a  
@HWI-EAS443:3:2:441:457#0/1  
GAATCTCCCGATTCCACCAATCATTCTCCGACAGATGCT  
+HWI-EAS443:3:2:441:457#0/1  
aa]`a]LI¥`ZPZUXSWXaa^ZX\_^`¥XWS¥RQY\_\_Q]RU  
@HWI-EAS443:3:2:503:1525#0/1  
CAAAAGCAGAAAGCACCATCCTCTCTATTGTTATGCTATT

+HWI-EAS443:3:2:503:1525#0/1  
aa\_a`W[^`Ya^ZOY[R[[]\_WSU]\_W\_¥U[]][Y[XOX^B  
@HWI-EAS443:3:2:526:303#0/1  
GCACATTTGGATGTAGAATCTCCCGATTCCACCAATCATT  
+HWI-EAS443:3:2:526:303#0/1  
a`a^[aaa`\_a\_a]\_\_^\_\_^]¥^[]]X\_U[^YX^^ZPWXB  
@HWI-EAS443:3:2:542:1477#0/1  
TGGGTTTTCGACTTTCTTACTTGATCCATCATTGCCCTC  
+HWI-EAS443:3:2:542:1477#0/1  
aaa`[aa`ba^aaa\_a\_aa`¥aaaaa[\_a`\_a`Z\_ZXU\_W  
@HWI-EAS443:3:2:558:1721#0/1  
ATATCCTCAAAGGAAAATTTCAAACAGCTGCCAGAGGGC  
+HWI-EAS443:3:2:558:1721#0/1  
a\_]a\_H\_Sa\_aaaa\_^Wa\_`\_`\_^`WX`^¥V]aS\_^`0  
@HWI-EAS443:3:2:699:403#0/1  
CGCCAAGCAAACAATGGCGAAGATGCAACAGCAGGTCTTA  
+HWI-EAS443:3:2:699:403#0/1  
abaY^`ba`^ba`ZX\_a`\_Sa`]ZVZ[aY\_\_\_X]]Z\_  
@HWI-EAS443:3:2:706:686#0/1  
TGGACGACTAATCCAGAATAGCATAACAATAGAGAGGATG  
+HWI-EAS443:3:2:706:686#0/1  
`baa`baaaaaa^aa`]a`b`aa`a\_a`\_\_`]\_`a]^\_\_  
@HWI-EAS443:3:2:716:1870#0/1  
ATGCCACATATCAGAGAACAAGAGCGCTTGTTCCGACCCGG  
+HWI-EAS443:3:2:716:1870#0/1  
aaaa[aa\_\_aa`a`aa`a\_\_`aa\_]¥¥\_]`¥\_Z]\_^Y¥¥\_  
@HWI-EAS443:3:2:738:575#0/1  
CTGGAGGGGTGAAAATGGACGAAGGACAAGGGTTGCTTAT  
+HWI-EAS443:3:2:738:575#0/1  
abbb\_`bbb^a\_aa`bbaa`ba\_ba\_`a\_a`^`^\_a\_a``a  
@HWI-EAS443:3:2:855:522#0/1  
GTGCTTTCTGCTTTTGTATGAGAGAAGAAATAAATACCTAG  
+HWI-EAS443:3:2:855:522#0/1  
aXZSQ¥]^¥[G^¥\_\_]V`\_P]U\_WTVW^¥]^¥[V]]UVY`\_  
@HWI-EAS443:3:2:931:1667#0/1  
GGTCCTCCTGTTTTCTTAGGGTCCTTCCCAGCACTGGGAT  
+HWI-EAS443:3:2:931:1667#0/1  
ab^]YZb`aa[aMa\_a]`baaHa`\_\_\_\_a`^`]\_^a^V^]  
@HWI-EAS443:3:2:957:955#0/1  
AATCCAGAATAGCATAACAATAGAGAGGATGGTGCTTTCT  
+HWI-EAS443:3:2:957:955#0/1  
\_aaaaab^aabba`bab`a`bab\_babaaaa`Y][¥[aX\_  
@HWI-EAS443:3:2:985:163#0/1  
GGGTCCTCCTGTTTTCTTAGGGTCCTTCCCAGCACTGGGA  
+HWI-EAS443:3:2:985:163#0/1  
aa¥IV``¥`ab^a]a`^aT\_P^¥a``]¥RY¥`XU^^XX`¥  
@HWI-EAS443:3:30:1015:1270#0/1  
GGCTTGCACTAGCAAGTGGGCATGACTTTGAAAGGGAAGG  
+HWI-EAS443:3:30:1015:1270#0/1  
Za\_oQT\_[ZRV`XZZYMSR\_^]]`aa`a]]V\_Sb][UQ^a

@HWI-EAS443:3:30:1082:1141#0/1  
GCAATATCCTCAAAGGAAAATTTCAAACAGCTGCCAGAG  
+HWI-EAS443:3:30:1082:1141#0/1  
`a`a`aaaaaaaaaaaa`aa`aaa`a\_\_\_a`Y^`^\_  
@HWI-EAS443:3:30:1129:1391#0/1  
AGAGAGGATGGTGCTTTCTGCTTTTGATGAGAGAAGAAAT  
+HWI-EAS443:3:30:1129:1391#0/1  
ab]`aaa^ab]Y¥``baaa[]`ab^LPa^WaZ`^Y]Wa`^  
@HWI-EAS443:3:30:1194:1436#0/1  
GGGATCAGTTGCACATAAATCCTGCCTGCCTGCTTGTGT  
+HWI-EAS443:3:30:1194:1436#0/1  
H\_aWa^VY¥¥[bb```a`Z¥^\_\_]`b``ba`\_a]bVb\_  
@HWI-EAS443:3:30:1364:390#0/1  
GTGGAATCGGGAGATTCTACATCCAAATGTGCACTGAACT  
+HWI-EAS443:3:30:1364:390#0/1  
a¥U``\_ZW`aa\_aX^WYY\_[Y\_U]\_\_]\_\_N¥R^PY\_ZRHZ  
@HWI-EAS443:3:30:1381:1324#0/1  
CATAATCACTGAGTTTGAGTTCAGTGCACATTTGGATGTA  
+HWI-EAS443:3:30:1381:1324#0/1  
aabbabaaaba\_^]aaaa\_aa`^¥a¥a```aa^V\_Z[QZ  
@HWI-EAS443:3:30:1388:899#0/1  
TGGGCTTGCAGTAGCAAGTGGGCATGACTTTGAAAGGGAA  
+HWI-EAS443:3:30:1388:899#0/1  
]]Za]``aa^]Z¥`\_¥Y`X\_]¥QQTYY[V^^\_SVS[V\_XY  
@HWI-EAS443:3:30:1405:558#0/1  
GGGATCAGTTGCACATAAATCCTGCCTGCCTGCTTGTGTG  
+HWI-EAS443:3:30:1405:558#0/1  
abbaaaaaaaaaaaaaabaa`aaaa\_aa^`b```\_¥aUa  
@HWI-EAS443:3:30:1455:892#0/1  
CATTCTGGGATCCATTCCGGTGCGAACAAGCGCTCTTGTT  
+HWI-EAS443:3:30:1455:892#0/1  
]`b^W¥¥Rab`aababSb\_aZ¥W¥S[VaS¥[U]aZZaa`b  
@HWI-EAS443:3:30:1551:1058#0/1  
CGCCAAGCAAACAATGGCGAAGATGCAACAGCAGGTCTTA  
+HWI-EAS443:3:30:1551:1058#0/1  
aabb`bbbbbabb^F]abbabaababaaaaaaaa`^Za\_  
@HWI-EAS443:3:30:1552:1022#0/1  
ATTCAGGTTGGAATGCCAAATCATGATATGAGTAAGACCT  
+HWI-EAS443:3:30:1552:1022#0/1  
aaa\_\_`b\_aab\_\_\_aaa`a^```aa`a`aa\_a]`\_\_\_WU^  
@HWI-EAS443:3:30:1570:14#0/1  
CATTGCCCTCTGGGCAGCTGTTTCAAATTTTCCTTTGAGG  
+HWI-EAS443:3:30:1570:14#0/1  
aa`bb```^`¥`a`[\_baa`]\_¥Y\_babbb`\_`b``YSZa  
@HWI-EAS443:3:30:1579:328#0/1  
AGAAGGTCTGGTGCCGAGGTGCTGCGGTGAAAGGAGTTG  
+HWI-EAS443:3:30:1579:328#0/1  
ab\_bba`bbabXb^a`\_aaaZ]W^aYa`H¥V\_\_\_\_HYNV\_  
@HWI-EAS443:3:30:1600:406#0/1  
GAAGAAATAAATACCTAGAAGAGCATCCCAGTGCTGGGAA



@HWI-EAS443:3:30:678:970#0/1  
CGACTTTCTTACTTGATCCATCATTGCCCTCTGGGCAG  
+HWI-EAS443:3:30:678:970#0/1  
abaaaabaabaaaaaaaa`a`]]^`a\_a`\_¥^W^U  
@HWI-EAS443:3:30:732:499#0/1  
TGCTTTCTGCTTTTGATGAGAGAAGAAATAAATACCTAGA  
+HWI-EAS443:3:30:732:499#0/1  
¥\_TQU¥Ua]SWVQW¥`aV¥YSZU¥\_YF]ZS[ZTYQT^^X  
@HWI-EAS443:3:30:782:1025#0/1  
AATTTTCTTTGAGGATATTGCACATTCTTTCATAAGCAA  
+HWI-EAS443:3:30:782:1025#0/1  
`]aaaaaaaaa\_\_\_\_\_`\_]\_¥`Y`\_a^`\_`\_\_^V^\_S]\_  
@HWI-EAS443:3:30:838:101#0/1  
GGACGAAGGACAAGGGTTGCTTATGAAAGAATGTGCAATA  
+HWI-EAS443:3:30:838:101#0/1  
abb¥aa`ba\_aaabb`a`\_b^aa¥\_a`\_]aaR\_]¥¥\_\_  
@HWI-EAS443:3:30:951:216#0/1  
AAGCAGGCAGGCAGGATTTATGTGCAACTGATCCCCTCAG  
+HWI-EAS443:3:30:951:216#0/1  
`\_W\_]b)`aaa]a[`]aa^aVWaa`a`\_]RHPVFYQS[  
@HWI-EAS443:3:31:1039:58#0/1  
ACTTCCCAGAAGGTCTGGTGCCGAGGTGCTGCGGTGAAA  
+HWI-EAS443:3:31:1039:58#0/1  
`bbbb`\_bbaabb\_abba¥b\_\_a\_\_abV¥]aa^a`G`SYY  
@HWI-EAS443:3:31:1093:1168#0/1  
GGTGCTTTCTGCTTTTGATGAGAGAAGAAATAAATACCTA  
+HWI-EAS443:3:31:1093:1168#0/1  
\_XUbbaaab^)]abaaaaa`a`a\_aaaaaaaaaa^\_a\_  
@HWI-EAS443:3:31:1115:1864#0/1  
AATGATTGGTGAATCGGGAGATTCTACATCCAAATGTGC  
+HWI-EAS443:3:31:1115:1864#0/1  
a]aabX`\_]PUaa`aa`Z^\_]\_a``\_\_\_Z```\_`^W¥X  
@HWI-EAS443:3:31:118:915#0/1  
GGGCATGACTTTGAAAGGAAGGGTACTCACTGGTCGGGA  
+HWI-EAS443:3:31:118:915#0/1  
ZX`\_\_`babba¥a[\_baa`a``]a\_ababbbaaa^b`\_]`  
@HWI-EAS443:3:31:1319:437#0/1  
CTTCCGACAGATGCTCTGATTTCTGTGGCATCCTGGCGCT  
+HWI-EAS443:3:31:1319:437#0/1  
```¥]a\_\_^]Q¥`\_R\_^bb\_\_[SZb`^^^bTVES\_VBBBB  
@HWI-EAS443:3:31:14:80#0/1  
CTGTCCGAAGAATGATTGGTGAATCGGGAGATTCTACAT  
+HWI-EAS443:3:31:14:80#0/1  
abbabba\_bbbabaabab\_aaaaa\_bb`aaa\_]aa``  
@HWI-EAS443:3:31:1583:930#0/1  
CTGTTTTGGAGTAATTTGAATGGGTCTATCCCGACCAGTG  
+HWI-EAS443:3:31:1583:930#0/1  
abb`bbbbbb`ba`ab``Z¥aaaUZaab\_\_ab`V`bW`  
@HWI-EAS443:3:31:1661:818#0/1  
TGGGGAGCGCCAGGATGCCACAGAAATCAGAGCATCTGTC

+HWI-EAS443:3:31:1661:818#0/1  
abbaa^aaX`a`\_aQ[\_\_\_Z\_Saa^^¥\_U`aW¥¥^WIW[UW  
@HWI-EAS443:3:31:1668:861#0/1  
GAGAAGAAATAAATACCTAGAAGAGCATCCCAGTGCTGGG  
+HWI-EAS443:3:31:1668:861#0/1  
abbbbaaaaaabaaa\_baa\_aaaa\_aa]`^aa\_a]`aaX  
@HWI-EAS443:3:31:1674:344#0/1  
CTGGGTTTCGACTTTCTTACTTGATCCATCATTGCCCT  
+HWI-EAS443:3:31:1674:344#0/1  
abbbbaXabbbabbba^babbb`aa`b`aa\_a`\_a\_aa`\_\_  
@HWI-EAS443:3:31:1771:1287#0/1  
CATAATCACTGAGTTTGAGTTCAGTGCACATTTGGATGTA  
+HWI-EAS443:3:31:1771:1287#0/1  
a`bbbbbb]bb`aabbba`Y\_a`\_`aab`bbba¥ab``a  
@HWI-EAS443:3:31:22:1578#0/1  
TCCTGTTTTCTTAGGGTCCTTCCCAGCACTGGGATGCTCT  
+HWI-EAS443:3:31:22:1578#0/1  
Y¥¥¥¥Va`[aZaa\_¥PH]]`R¥HQROYJSBBBBBBBBBBB  
@HWI-EAS443:3:31:238:826#0/1  
CAGCAGGTCTTACTCATATCATGATTTGGCATTCCAACCT  
+HWI-EAS443:3:31:238:826#0/1  
a`]aV]`\_`\_aab\_¥Z^Uaa`a\_J]\_\_\_\_`aa\_¥^\_\_Ta¥^  
@HWI-EAS443:3:31:242:1237#0/1  
ATCCATTCCGGTGCGAACAAGCGCTCTTGTTCTCTGATAT  
+HWI-EAS443:3:31:242:1237#0/1  
^¥\_b`aaa^ZQK]aa]¥aaa^¥^`¥^S¥YZ\_`\_¥¥[UYNS  
@HWI-EAS443:3:31:266:1650#0/1  
TGGGTTTCGACTTTCTTACTTGATCCATCATTGCCCTC  
+HWI-EAS443:3:31:266:1650#0/1  
aa`\_¥aaba``aaababaaaaaa\_\_aaaaaa`a]^aaa\_\_  
@HWI-EAS443:3:31:279:242#0/1  
ACAATAGAGAGGATGGTGCTTTCTGCTTTTGATGAGAGAA  
+HWI-EAS443:3:31:279:242#0/1  
aaaaaa^^a¥aaa^a]Za`\_`\_][Z¥^\_``V[]\_Z^][X¥  
@HWI-EAS443:3:31:341:119#0/1  
GCATAACAATAGAGAGGATGGTGCTTTCTGCTTTTGATGA  
+HWI-EAS443:3:31:341:119#0/1  
\_[R^\_aPP\_^]¥]\_YWUQW`^SXS[V[OJLQGOXXXMMRY  
@HWI-EAS443:3:31:35:1771#0/1  
TATGAAAGAATGTGCAATATCCTCAAAGGAAAATTTCAAA  
+HWI-EAS443:3:31:35:1771#0/1  
``]^\_V¥\_`^`\_`\_`a``aaaa```]\_`^`\_¥\_a\_a`\_\_  
@HWI-EAS443:3:31:391:1549#0/1  
GCTTTCTGCTTTTGATGAGAGAAGAAATAAATACCTAGAA  
+HWI-EAS443:3:31:391:1549#0/1  
abbb`a`bbaaaaa]\_a]`a\_a\_¥]a``Ya[`aa`\_a`^]  
@HWI-EAS443:3:31:539:639#0/1  
GAGGATGGTGCTTTCTGCTTTTGATGAGAGAAGAAATAAA  
+HWI-EAS443:3:31:539:639#0/1  
a]^\_aa¥XNZZa`a`]\_````]```a`]]]]\_]`[[a][]`



@HWI-EAS443:3:31:615:395#0/1  
GGAGCGCCAGGATGCCACAGAAATCAGAGCATCTGTCCGGA  
+HWI-EAS443:3:31:615:395#0/1  
[babbbaaabaaaa¥aa\_ab`aaaaaa[a\_a\_Va`SY¥a^  
@HWI-EAS443:3:31:652:1568#0/1  
GAATGATTGGTGAATCGGGAGATTCTACATCCAAATGTG  
+HWI-EAS443:3:31:652:1568#0/1  
`\_Y¥`]]aaaW`aaa`aZ¥]\_^`\_a^`a^X][Yaa]XZ\_  
@HWI-EAS443:3:31:708:1601#0/1  
CTCCTGTTTTCTTAGGGTCCTTCCCAGCACTGGGATGCTC  
+HWI-EAS443:3:31:708:1601#0/1  
abbbbabbbbbbbaa[abbbabbab\_bbaaa`aa\_aaa`  
@HWI-EAS443:3:31:761:1957#0/1  
AGCAGGTCTTACTCATATCATGATTTGGCATTCCAACCTG  
+HWI-EAS443:3:31:761:1957#0/1  
aaab\_ZOTXX^\_QZ\_Y`\_]a`a]X\_ZPa][X\_\_a`a`]]  
@HWI-EAS443:3:31:770:1705#0/1  
GCAGTAGCAAGTGGGCATGACTTTGAAAGGGAAGGGTACT  
+HWI-EAS443:3:31:770:1705#0/1  
`bb^]b`b\_b\_\_Y\_[aa`aaa`aa\_\_a`^¥^^\_\_Z\_W¥\_]`  
@HWI-EAS443:3:31:79:473#0/1  
CTTCAATCTCAGCGTTTCCTGGGTTTCGACTTTCTCTTAC  
+HWI-EAS443:3:31:79:473#0/1  
aab``\_bbabY^[b\_ab``Z]\_\_Q`aaa\_a`\_]aaaa`Y  
@HWI-EAS443:3:31:805:510#0/1  
GTAATTTGAATGGGTCTATCCCGACCAGTGAGTACCCTTC  
+HWI-EAS443:3:31:805:510#0/1  
aY\_V\_U]UX\_Va\_SQV¥YUaZ]]\_¥Z^\_U]]TSVTV]UQQ  
@HWI-EAS443:3:31:814:1038#0/1  
CACTTGGCTGTTTTGGAGTAATTTGAATGGGTCTATCCCG  
+HWI-EAS443:3:31:814:1038#0/1  
^T^^]aaa\_]N^\_ZOS`aFDXV`XU¥]YNTBBBBBBBBBB  
@HWI-EAS443:3:31:821:1303#0/1  
ACCATCCTCTCTATTGTTATGCTATTCTGGATTAGTCGTC  
+HWI-EAS443:3:31:821:1303#0/1  
aba^Ra`]a]baba````^a]aaaY\_¥`\_Y¥`aaW`]Z\_  
@HWI-EAS443:3:31:831:839#0/1  
CTAATCCAGAATAGCATAACAATAGAGAGGATGGTGCTTT  
+HWI-EAS443:3:31:831:839#0/1  
a¥b\_b^`abbbb\_babbb`aaaba][^`bXb\_b\_PZ^]aa  
@HWI-EAS443:3:31:842:1047#0/1  
GTCCTCCTGTTTTCTTAGGGTCCTTCCCAGCACTGGGATG  
+HWI-EAS443:3:31:842:1047#0/1  
a]aaaaaaaa\_aaaaaa\_a^aa```aa]``^`\_`\_\_\_\_]^`  
@HWI-EAS443:3:31:865:52#0/1  
GGGTCCTCCTGTTTTCTTAGGGTCCTTCCCAGCACTGGGA  
+HWI-EAS443:3:31:865:52#0/1  
\_¥\_W^`a`[b]]¥\_`^`]^`¥\_\_[¥RY¥U¥^````Za]Z`N  
@HWI-EAS443:3:31:938:861#0/1  
AAAATGGACGAAGGACAAGGGTTGCTTATGAAAGAATGTG

+HWI-EAS443:3:31:938:861#0/1  
abbbbbbbbaaaba\_aaa^aa^aaaaba\_aa`a\_\_U^  
@HWI-EAS443:3:32:1073:632#0/1  
CGCCAAGCAAACAATGGCGAAGATGCAACAGCAGGTCTTA  
+HWI-EAS443:3:32:1073:632#0/1  
a`UT¥W\_`ba¥\_aa\_`aa`¥Y`[¥JTY^W^`P¥[\_S^Y^`  
@HWI-EAS443:3:32:1088:1549#0/1  
CACCATCCTCTCTATTGTTATGCTATTCTGGATTAGTCGT  
+HWI-EAS443:3:32:1088:1549#0/1  
`b\_bbb]ab]^aa`aab\_aa¥``aaa\_a`a\_\_a]\_T\_aa^  
@HWI-EAS443:3:32:1153:95#0/1  
GCATGACTTTGAAAGGAAGGGTACTCACTGGTCGGGATA  
+HWI-EAS443:3:32:1153:95#0/1  
a`a`b`^bbaa`a`a`Zaa`\_X\_]`^`\_X^^GNa^]Z\_`  
@HWI-EAS443:3:32:1254:279#0/1  
CACATATCAGAGAACAAGAGCGCTTGTTCCGCACCGGAATG  
+HWI-EAS443:3:32:1254:279#0/1  
a\_\_aa`a`[Z``\_\_^^\_\_TZS\_¥¥^`¥ZT¥W¥¥T^U\_¥Q^  
@HWI-EAS443:3:32:1381:1218#0/1  
CAGCTGTTTGAATTTTCTTTGAGGATATTGCACATTCT  
+HWI-EAS443:3:32:1381:1218#0/1  
`aaaaaaab`aa\_aaaaaaaaaa^]a``\_^aWW[\_\_\_`a`a  
@HWI-EAS443:3:32:1532:268#0/1  
GAAAGAATGTGCAATATCCTCAAAGGAAAATTTCAAACAG  
+HWI-EAS443:3:32:1532:268#0/1  
[S¥aaa``^a\_\_`a\_^ZT`P\_^[]`aa\_N\_\_`0\_VXUaa  
@HWI-EAS443:3:32:1600:31#0/1  
CACTTCCCAGAAGGTCTGGTGCCGCAGGTGCTGCGGTGAA  
+HWI-EAS443:3:32:1600:31#0/1  
`\_T`aaaaaaaXaa^¥\_aa`a`aW¥\_\_SX¥^\_N`^N^BB  
@HWI-EAS443:3:32:1606:1562#0/1  
CTGAACTCAAACACTCAGTGATTATGATGGACGACTAATCCA  
+HWI-EAS443:3:32:1606:1562#0/1  
a\_bbbbaaabba\_aaa`\_abbaaba^Yaa`aa`a`aa  
@HWI-EAS443:3:32:1609:416#0/1  
TGCTTATGAAAGAATGTGCAATATCCTCAAAGGAAAATTT  
+HWI-EAS443:3:32:1609:416#0/1  
¥\_TX`V\_W^YZa]Z]bZaZa`bb¥PYa¥a]]\_b\_aabb``  
@HWI-EAS443:3:32:1648:582#0/1  
ATGGACGACTAATCCAGAATAGCATAACAATAGAGAGGAT  
+HWI-EAS443:3:32:1648:582#0/1  
a``aaabaabba`¥a^]¥babaaa`a\_a^bab\_b\_abb`  
@HWI-EAS443:3:32:1673:272#0/1  
GAAAGAATGTGCAATATCCTCAAAGGAAAATTTCAAACAG  
+HWI-EAS443:3:32:1673:272#0/1  
¥Z\_XXNWS\_GY]X\_]V\_¥HRY\_]XZHYY]]¥KWO¥F¥\_  
@HWI-EAS443:3:32:1719:837#0/1  
AGGTTCAACACTTCCCAGAAGGTCTGGTGCCGCAGGTGCT  
+HWI-EAS443:3:32:1719:837#0/1  
aabSb`bb`a]baaa^Xa]a`bWS\_`a``U^`^UbKH¥\_a

@HWI-EAS443:3:32:216:1287#0/1  
AGGCAGGCAGGATTTATGTGCAACTGATCCCCCTCAGAATG  
+HWI-EAS443:3:32:216:1287#0/1  
R^abbaabb`a]`aaa\_]V]`aa]`^a]aaaa`a¥KNaZZ  
@HWI-EAS443:3:32:28:389#0/1  
GTGCTGACCGTGCCAGGAAAATGAGGTCTTCAATCTCAGC  
+HWI-EAS443:3:32:28:389#0/1  
`abbbaabba\_a^YM[^M^`a\_\_\_aVR`\_a^Z]\_]`\_[Z\_  
@HWI-EAS443:3:32:290:1643#0/1  
AACAAATAGAGAGGATGGTGCTTTCTGCTTTTGATGAGAGA  
+HWI-EAS443:3:32:290:1643#0/1  
`a\_aaba\_\_aY^^]\_]S]\_[^]^[W\_X^\_]PZ]^U¥TPR  
@HWI-EAS443:3:32:388:1128#0/1  
CCCTTGCTCCTTCGTCCATTTTCACCCCTCCAGAAATTCG  
+HWI-EAS443:3:32:388:1128#0/1  
abbabbUb]Vaa[H[TZ`a`X[[\_`]UQ][NX]H[aNQTZ  
@HWI-EAS443:3:32:418:1799#0/1  
GGCATGACTTTGAAAGGGAAGGGTACTCACTGGTCGGGAT  
+HWI-EAS443:3:32:418:1799#0/1  
``abbabbabZaa`aab]bb^aaG``]``PXUaZ``\_aa^  
@HWI-EAS443:3:32:419:714#0/1  
GATAGACCCATTCAAATTACTCCAAAACAGCCAAGTGGTC  
+HWI-EAS443:3:32:419:714#0/1  
Z\_U`\_a\_b`Y\_^b`]Y[]^`aaa\_R¥¥`\_Y^aa`\_U`ZW]  
@HWI-EAS443:3:32:420:1423#0/1  
CTGAGTTTGAGTTCAGTGCACATTTGGATGTAGAATCTCC  
+HWI-EAS443:3:32:420:1423#0/1  
a\_Z]a\_aa`\_a^a^LX^a`````\_\_\_\_\_a^\_]`Y^a^a]\_\_\_  
@HWI-EAS443:3:32:536:892#0/1  
TGGGCATGACTTTGAAAGGGAAGGGTACTCACTGGTCGGG  
+HWI-EAS443:3:32:536:892#0/1  
\_P¥^aa^UT\_]\_]\_QVfU`W`\_TY`R\_\_^U`¥X`[U`TST  
@HWI-EAS443:3:32:727:437#0/1  
TTCCTGGGTTTCGACTTTCTTACTTGATCCATCATTGC  
+HWI-EAS443:3:32:727:437#0/1  
abbaa``b[bbba\_\_aa`baaaaa`\_[aaaaaa`\_\_a\_\_  
@HWI-EAS443:3:32:737:542#0/1  
TTCCCTTTCAAAGTCATGCCACTTGCTACTGCAAGCCCA  
+HWI-EAS443:3:32:737:542#0/1  
[[UZ\_a\_Ua^SaRUa`YGX\_[Ya[Taa]W\_RYS]R]aTPZ  
@HWI-EAS443:3:32:764:900#0/1  
TAACAATAGAGAGGATGGTGCTTTCTGCTTTTGATGAGAG  
+HWI-EAS443:3:32:764:900#0/1  
aabaaaa]b^a\_\_a`\_a\_Ia¥^aa^^X¥\_a`\_[N^RHYO¥  
@HWI-EAS443:3:32:79:1233#0/1  
GGTAAAATGGACGAAGGACAAGGGTTGCTTATGAAAGAA  
+HWI-EAS443:3:32:79:1233#0/1  
``[a]aaaa`]aa`a``````\_\_^\_Z^`\_\_\_\_``]]¥IVTN  
@HWI-EAS443:3:32:882:57#0/1  
GGCATGACTTTGAAAGGGAAGGGTACTCACTGGTCGGGAT

+HWI-EAS443:3:32:882:57#0/1  
aa`[[`X]Xa\_aXXY`\_\_\_\_ZQ]RLZV[\_^VZ\_¥UZU[VVT  
@HWI-EAS443:3:32:968:1373#0/1  
ATCATAATCACTGAGTTTGAGTTCAGTGCACATTTGGATG  
+HWI-EAS443:3:32:968:1373#0/1  
`a^\_abb`a[`¥`aWa`a\_SP[a`\_XHUY]aa\_\_^Y`\_\_  
@HWI-EAS443:3:33:1001:821#0/1  
CACATTCTTTCATAAGCAACCCTTGCCTTCGTCCATTTT  
+HWI-EAS443:3:33:1001:821#0/1  
^^`Ua`\_b`bbbaX^`\_bb`]`b\_V¥]\_bb`Ya[Y]aa\_  
@HWI-EAS443:3:33:1011:1312#0/1  
ATAACAATAGAGAGGATGGTGCCTTCTGCTTTTGATGAGA  
+HWI-EAS443:3:33:1011:1312#0/1  
ababba`^`aba`\_`a\_aa\_]`aa`\_`aaa`\_]¥Z^`W  
@HWI-EAS443:3:33:1081:1427#0/1  
GGAAGAATGATTGGTGAATCGGGAGATTCTACATCCAAA  
+HWI-EAS443:3:33:1081:1427#0/1  
aaaaaaaaaaaaa`Y`a`aa`^`^`\_\_^`\_U\_^]Z`\_\_^`  
@HWI-EAS443:3:33:1113:522#0/1  
GTGCTTTCTGCTTTTGATGAGAGAAGAAATAAATACCTAG  
+HWI-EAS443:3:33:1113:522#0/1  
\_HYQXaX\_R]LZ`^Z]YM^[WQ`SR`RQY]`\_KPKS[X\_\_  
@HWI-EAS443:3:33:1161:1317#0/1  
ATCCAGAATAGCATAACAATAGAGAGGATGGTGCCTTCTG  
+HWI-EAS443:3:33:1161:1317#0/1  
a¥aYTWa`^^a`^aaaa`X`\_`a\_\_V][^XPPXU^XUZQ  
@HWI-EAS443:3:33:1253:1221#0/1  
GTGCTTTCTGCTTTTGATGAGAGAAGAAATAAATACCTAG  
+HWI-EAS443:3:33:1253:1221#0/1  
aPZaYU`TL]¥aY^Z[WaYPT`a[UU\_XTS[GWXQYWY\_X  
@HWI-EAS443:3:33:1309:1544#0/1  
AGGAAACGCTGAGATTGAAGACCTCATTTCCTGGCACGG  
+HWI-EAS443:3:33:1309:1544#0/1  
a^^abbab\_X]\_]`aa]YZ[\_Z[a]`a`[\_W¥PU¥Y\_\_  
@HWI-EAS443:3:33:1391:789#0/1  
GTCCGAAGAATGATTGGTGAATCGGGAGATTCTACATCC  
+HWI-EAS443:3:33:1391:789#0/1  
\_Uaab^a¥aaa]WX0¥JWaa¥X`^a`]`\_`YYVG[]TX]WN  
@HWI-EAS443:3:33:1427:1133#0/1  
GGGGATCAGTTGCACATAAATCCTGCCTGCCTGCTTGTGT  
+HWI-EAS443:3:33:1427:1133#0/1  
aaaaaaaa`\_ab]a\_aa`aaa^^`\_]P`^^`\_\_¥\_]`^W`¥  
@HWI-EAS443:3:33:1459:53#0/1  
GATTTATGTGCAACTGATCCCCTCAGAATGAGTGCTGACC  
+HWI-EAS443:3:33:1459:53#0/1  
aaa`aaa^[a[a`\_`aa`\_Y^`\_`\_\_aW¥a`^TW^PU[UPU  
@HWI-EAS443:3:33:1538:1380#0/1  
GGGTCTCTCTGTTTCTTAGGGTCTTCCCAGCACTGGGA  
+HWI-EAS443:3:33:1538:1380#0/1  
a\_\_IbSU\_aaa^abaa¥Y\_a`\_`U^aa^a`^]\_U\_V`aV]T

@HWI-EAS443:3:33:1608:1026#0/1  
TCACTGGTCGGATAGACCCATTCAAATTACTCCAAAACA  
+HWI-EAS443:3:33:1608:1026#0/1  
aa`W\_`¥b\_ba`aa`b`Sa`\_\_\_\_[a]a[^GU[\_[RT^  
@HWI-EAS443:3:33:197:773#0/1  
TTTCATTTGGTCTCATCAGGCTGACCACTTGGCTGTTTTG  
+HWI-EAS443:3:33:197:773#0/1  
ababbaaaaa\_baaaabaa\_aa\_aaa\_``\_a\_Y^aW\_^`R  
@HWI-EAS443:3:33:208:427#0/1  
ATCAAGTAAGAGAAAGTCGAAACCCAGGAAACGCTGAGAT  
+HWI-EAS443:3:33:208:427#0/1  
aabY\_^ZYVRT][^a[Xb^`VYa\_a`\_[QWNTWTL SHTZX  
@HWI-EAS443:3:33:218:263#0/1  
CGCTGAGATTGAAGACCTCATTTTCCTGGCACGGTCAGCA  
+HWI-EAS443:3:33:218:263#0/1  
aaba`\_aaaaa\_a`aaa`baaaaaa\_a¥aa\_\_^V¥ZZVU  
@HWI-EAS443:3:33:240:342#0/1  
CTAATCCAGAATAGCATAACAATAGAGAGGATGGTGCTTT  
+HWI-EAS443:3:33:240:342#0/1  
aVa`\_a\_aS`a[^X`\_Z`a\_]`^\_`^`[]XPXWW][  
@HWI-EAS443:3:33:247:1671#0/1  
CCTCTCTATTGTTATGCTATTCTGGATTAGTCGCCATCA  
+HWI-EAS443:3:33:247:1671#0/1  
ab\_baba^`a¥Waa`\_baaa`a`\_`\_a`\_aZ]`[]`\_\_\_\_  
@HWI-EAS443:3:33:258:760#0/1  
AACAAATAGAGAGGATGGTGCTTTCTGCTTTTGATGAGAGA  
+HWI-EAS443:3:33:258:760#0/1  
aXba\_aaabaaaXa`b`Gaa`aa`a^^^aadW]\_^]Y]¥  
@HWI-EAS443:3:33:282:1618#0/1  
AGGCAGGCAGGATTTATGTGCAACTGATCCCCTCAGAATG  
+HWI-EAS443:3:33:282:1618#0/1  
a`bbaaabY`\_\_`\_`\_Y^aaa`\_¥a`\_a`¥\_Z¥^¥¥  
@HWI-EAS443:3:33:339:872#0/1  
ATTTGGTCTCATCAGGCTGACCACTTGGCTGTTTTGGAGT  
+HWI-EAS443:3:33:339:872#0/1  
W`bbaa\_bbbbbbaaaabbbab`a`b`¥Z`b\_G¥a`JTXVP  
@HWI-EAS443:3:33:423:1848#0/1  
GGCATGACTTTGAAAGGGAAGGGTACTCACTGGTCGGGAT  
+HWI-EAS443:3:33:423:1848#0/1  
``a[\_abaabb\_]b`aa`ab`aaSabab`a\_\_^MZ`Z\_\_\_\_  
@HWI-EAS443:3:33:469:377#0/1  
TCATCAGGCTGACCACTTGGCTGTTTTGGAGTAATTTGAA  
+HWI-EAS443:3:33:469:377#0/1  
a`X^`\_\_R\_aa^`^`a^RYZUM`ZWTXFKHMMVXBBBB  
@HWI-EAS443:3:33:565:1272#0/1  
AAACGCTGAGATTGAAGACCTCATTTTCCTGGCACGGTCA  
+HWI-EAS443:3:33:565:1272#0/1  
a\_S`aa^X`\_a\_aa`a^a`Xaaaa`\_`\_`\_[QT\_¥^NP]]  
@HWI-EAS443:3:33:701:1255#0/1  
GTGCTTTCTGCTTTTGATGAGAGAAGAAATAAATACCTAG

+HWI-EAS443:3:33:701:1255#0/1  
\_`ba^abbaaaa`aaa^aaa`aa`^`\_`\_`^\_a\_\_\_aW  
@HWI-EAS443:3:33:722:1590#0/1  
CTGAGTTTGGAGTTCAGTGCACATTTGGATGTAGAATCTCC  
+HWI-EAS443:3:33:722:1590#0/1  
aaUV]PXa^^^`\_^\_Maa]`aY\_a^Z`Z]TZQY^XXX¥X  
@HWI-EAS443:3:33:724:119#0/1  
GCAAACAATGGCGAAGATGCAACAGCAGGTCTTACTCATA  
+HWI-EAS443:3:33:724:119#0/1  
aabbbabaabbaaaaaa]a\_aa`\_`\_`\_`X¥[^W^¥^^^  
@HWI-EAS443:3:33:810:163#0/1  
CGAAGGACAAGGGTTGCTTATGAAAGAATGTGCAATATCC  
+HWI-EAS443:3:33:810:163#0/1  
\_bbbb`babba\_abbbbabaaabbaaabaVaaaa\_¥  
@HWI-EAS443:3:33:830:1766#0/1  
CGACTTCTCTTACTTGATCCATCATTGCCCTCTGGGCAG  
+HWI-EAS443:3:33:830:1766#0/1  
ababbbabbbabaaabaaaaabaaaa^`a`V\_]`^\_a¥  
@HWI-EAS443:3:33:92:140#0/1  
GGTTTTCATTTGGTCTCATCAGGCTGACCACTTGGCTGTT  
+HWI-EAS443:3:33:92:140#0/1  
ab]RWI`^`aa¥^L¥\_a\_aa\_V]a^^\_a¥^\_aX`BBBBB  
@HWI-EAS443:3:33:97:861#0/1  
TCGACTTCTCTTACTTGATCCATCATTGCCCTCTGGGCA  
+HWI-EAS443:3:33:97:861#0/1  
ab`\_`¥ZWaabWR`aa\_W`^^^^`b`[``a^[\_`\_`\_]`  
@HWI-EAS443:3:34:1059:1012#0/1  
GAGAGGATGGTCTTTCTGCTTTTGGATGAGAGAAGAAATA  
+HWI-EAS443:3:34:1059:1012#0/1  
a\_\_¥Y][\_a\_Y\_¥[\_\_\_`\_WP]`\_\_Y]`^^Y\_XT¥XU]VB  
@HWI-EAS443:3:34:105:2030#0/1  
GGACGACTAATCCAGAATAGCATAACAATAGAGAGGATGG  
+HWI-EAS443:3:34:105:2030#0/1  
OOYa`b\_¥W¥¥ab\_a`¥^ba¥``[a`ba^`aabRRWQJW  
@HWI-EAS443:3:34:1096:1704#0/1  
CTGGGATCCATTCCGGTGCGAACAAGCGCTCTTGTCTCT  
+HWI-EAS443:3:34:1096:1704#0/1  
a`]`aabbbba]a\_\_Naba]aaaaaa`a¥\_aa\_\_Y`N\_  
@HWI-EAS443:3:34:1100:1262#0/1  
TGGACGACTAATCCAGAATAGCATAACAATAGAGAGGATG  
+HWI-EAS443:3:34:1100:1262#0/1  
S\_Z\_WUO\_SWX`\_]Y]0^XS\_YUZXYZ[J^¥]P]RVU]¥B  
@HWI-EAS443:3:34:1111:1620#0/1  
CATAACAATAGAGAGGATGGTCTTTCTGCTTTTGGATGAG  
+HWI-EAS443:3:34:1111:1620#0/1  
`^T^`\_U\_a\_^`a^`\_]`^^Q]SY^[SVXVWSGXSFSL]  
@HWI-EAS443:3:34:1123:241#0/1  
ATGGTCTTTCTGCTTTTGGATGAGAGAAGAAATAAATACC  
+HWI-EAS443:3:34:1123:241#0/1  
[T¥YX¥[S]¥^SUU]¥```aa]aY^¥\_`¥¥[[]]U¥BBBB

@HWI-EAS443:3:34:1189:234#0/1  
GCTGTTTTGGAGTAATTTGAATGGGTCTATCCCGACCAGT  
+HWI-EAS443:3:34:1189:234#0/1  
U\_`Y[b\_``\_bb`bb``[H[``bbb\_aba``^ZX]`PW^W  
@HWI-EAS443:3:34:1294:904#0/1  
TGAAAATGGACGAAGGACAAGGGTTGCTTATGAAAGAATG  
+HWI-EAS443:3:34:1294:904#0/1  
``Z[L[^bb`a`\_]¥^^a]P`\_^N`bXa`Z\_]XX[\_]^Z^  
@HWI-EAS443:3:34:1327:648#0/1  
CCCTTGTCCTTCGTCCATTTTCACCCCTCCAGAAATTCG  
+HWI-EAS443:3:34:1327:648#0/1  
ababbb`aabaab`aaaabaaaa\_`¥`^`a\_`\_\_^`]^U[  
@HWI-EAS443:3:34:1405:1871#0/1  
GCTGTTTTGGAGTAATTTGAATGGGTCTATCCCGACCAGT  
+HWI-EAS443:3:34:1405:1871#0/1  
]]O¥Q]UMNNVWJ[aX]P]PZTZ^]BBBBBBBBBBBBBBB  
@HWI-EAS443:3:34:1428:577#0/1  
GTCTTCAATCTCAGCGTTTCCTGGGTTTCGACTTCTCTT  
+HWI-EAS443:3:34:1428:577#0/1  
aSWZaQYXTTZW`^L^RYRRFW`^PT`TSSJJ¥OGBBBBB  
@HWI-EAS443:3:34:1438:62#0/1  
ATAATCACTGAGTTTGAGTTCAGTGCACATTTGGATGTAG  
+HWI-EAS443:3:34:1438:62#0/1  
aa]aaa`aaa[b^^aa^\_\_^\_RYO^X¥M[\_\_^XPXXZBB  
@HWI-EAS443:3:34:1687:775#0/1  
CTCCTGTTTTCTTAGGGTCCTTCCCAGCACTGGGATGCTC  
+HWI-EAS443:3:34:1687:775#0/1  
Ta¥```¥ab`\_ab\_]\_]a\_^^b`^`bb`aT`b[¥]a\_0\_]`  
@HWI-EAS443:3:34:1721:1270#0/1  
CTGCGGTGAAAGGAGTTGGAACAATAGCAATGGAGTTAAT  
+HWI-EAS443:3:34:1721:1270#0/1  
abb`bb`bbbbbbababbbbaabaa`aaaaba`\_a^\_]X  
@HWI-EAS443:3:34:239:1615#0/1  
ATGACTTTGAAAGGAAGGGTACTCACTGGTCCGGGATAGA  
+HWI-EAS443:3:34:239:1615#0/1  
^T^\_`\_`UW¥][Y\_ZZTQ¥V``]aa^T¥UR[WTZ^VTG^  
@HWI-EAS443:3:34:260:1548#0/1  
GCTTTCTGCTTTTGTAGAGAGAAGAAATAAATACCTAGAA  
+HWI-EAS443:3:34:260:1548#0/1  
abaabbbabbbabbbbab`a`abaabbaaXaabbaab\_aa  
@HWI-EAS443:3:34:300:827#0/1  
TGGGGAGCGCCAGGATGCCACAGAAATCAGAGCATCTGTC  
+HWI-EAS443:3:34:300:827#0/1  
aa\_`a\_Uaa[a¥\_a\_\_aa\_\_[\_^^^Z^^WU[¥¥¥¥SV  
@HWI-EAS443:3:34:316:145#0/1  
GAAATAAATACCTAGAAGAGCATCCCAGTGCTGGGAAGGA  
+HWI-EAS443:3:34:316:145#0/1  
aaWM[^WZWUaa`aa]¥aa`a]^[\_UZ`MY^Y]X¥]^]¥  
@HWI-EAS443:3:34:318:1970#0/1  
AGAAGAAATAAATACCTAGAAGAGCATCCCAGTGCTGGGA

+HWI-EAS443:3:34:318:1970#0/1  
a^\_WOY\_ZV`ZI^]abY`^[Q00]a[QY\_`VRF\_`N\_BBB  
@HWI-EAS443:3:34:322:813#0/1  
AATGGGTCTATCCCGACCAGTGAGTACCCTTCCCTTTCAA  
+HWI-EAS443:3:34:322:813#0/1  
¥^RW\_ZWTUZ]¥T¥]\_Y\_YU¥[[XJU^`¥XUTYZ`S\_RBB  
@HWI-EAS443:3:34:383:781#0/1  
CAAATGTGCACTGAACTCAAACCTCAGTGATTATGATGGAC  
+HWI-EAS443:3:34:383:781#0/1  
a^aaaa¥abab^`[^`aaa^`aaaa\_`a`\_aaaa\_``^]`^  
@HWI-EAS443:3:34:391:1645#0/1  
ATCAGTTGCACATAAATCCTGCCTGCCTGCTTGTGTGTAT  
+HWI-EAS443:3:34:391:1645#0/1  
\_XL\_a^U``Y`U`¥Saaba]]bbaaba\_`baa\_¥`U`¥aa  
@HWI-EAS443:3:34:395:474#0/1  
AAAGCAGAAAGCACCATCCTCTCTATTGTTATGCTATTCT  
+HWI-EAS443:3:34:395:474#0/1  
a^\_a`Z]\_`\_]a`\_`a\_\_`^\_]^^¥^]Z]]^^Z]X^XWX  
@HWI-EAS443:3:34:417:1789#0/1  
TGCTTTCTGCTTTTGATGAGAGAAGAAATAAATACCTAGA  
+HWI-EAS443:3:34:417:1789#0/1  
aabbabbabbbbaS`bb`aba`bbbbbbabbbbaa\_\_abaa  
@HWI-EAS443:3:34:426:574#0/1  
CTAATCCAGAATAGCATAACAATAGAGAGGATGGTGCTTT  
+HWI-EAS443:3:34:426:574#0/1  
\_¥bbbbZ^T¥\_]N¥ab^[H¥bbb]aaaY^BBBBBBBBBBBB  
@HWI-EAS443:3:34:539:1992#0/1  
CTGGAGGGGTGAAAATGGACGAAGGACAAGGGTTGCTTAT  
+HWI-EAS443:3:34:539:1992#0/1  
aaaa`abaU``aabaa`a\_a`a``\_\_a\_\_]]YY`[W]\_X  
@HWI-EAS443:3:34:550:877#0/1  
CAATGATGGATCAAGTAAGAGAAAGTCGAAACCCAGGAAA  
+HWI-EAS443:3:34:550:877#0/1  
R\_¥Q^b`aXQ\_[XORP`^`]^`¥S^[LZSPMRLVZUXYa  
@HWI-EAS443:3:34:562:954#0/1  
CTGGGTTTCGACTTTCTTTACTTGATCCATCATTGCCCT  
+HWI-EAS443:3:34:562:954#0/1  
abb]a\_bababaaaaaa`aaa\_aabaa`aaUa\_Y\_T¥Q\_  
@HWI-EAS443:3:34:625:280#0/1  
ATATCCTCAAAGGAAAATTTCAAACAGCTGCCAGAGGGC  
+HWI-EAS443:3:34:625:280#0/1  
a`^a[YZ^^\_\_ZX\_W\_a`V\_aZUW```a\_a^Z[Z\_¥Z¥]]  
@HWI-EAS443:3:34:678:1164#0/1  
TAACAATAGAGAGGATGGTGCTTTCTGCTTTTGATGAGAG  
+HWI-EAS443:3:34:678:1164#0/1  
a`¥a\_aaaaa^^`^`\_\_YY\_]a\_]`^PV^^`^¥\_]`[S¥Y]  
@HWI-EAS443:3:34:702:812#0/1  
CTGTTTTCTTAGGGTCTTCCCAGCACTGGGATGCTCTTC  
+HWI-EAS443:3:34:702:812#0/1  
abb\_aaa[abaa[a`a`aabaaa`a`^Ya\_[R``VaX^^^



@HWI-EAS443:3:34:750:815#0/1  
AGAGGATGGTCTTTCTGCTTTTGATGAGAGAAGAAATAA  
+HWI-EAS443:3:34:750:815#0/1  
`\_¥^`a`a`W`X]\_^\_U\_^¥a]0[¥UX][Z]`\_\_\_\_]]]]  
@HWI-EAS443:3:34:75:1980#0/1  
GGAGGGGTGAAAATGGACGAAGGACAAGGGTTGCTTATGA  
+HWI-EAS443:3:34:75:1980#0/1  
aa`^`^aaYa`^`^aa]`aa\_\_Z\_\_aa`Z]Z`]a[`^^^`W[  
@HWI-EAS443:3:34:780:1900#0/1  
CATTCCGGTGCGAACAAGCGCTCTTGTCTCTGATATGTG  
+HWI-EAS443:3:34:780:1900#0/1  
a\_QRaaZNQH^\_\_\_\_aa\_`¥Z^V¥¥[XNV¥XUVSYRUBBB  
@HWI-EAS443:3:34:78:522#0/1  
AAGCACCATCCTCTCTATTGTTATGCTATTCTGGATTAGT  
+HWI-EAS443:3:34:78:522#0/1  
\_SXbaaaa`aaaa```\_a`\_]`\_`^`^]`\_`\_\_[¥Z^^\_YU  
@HWI-EAS443:3:34:830:1214#0/1  
GCGGCACCAGACCTTCTGGGAAGTGTGAACCTTGCATTA  
+HWI-EAS443:3:34:830:1214#0/1  
aaa\_bbbb\_aaaaaaaaa`R^X[`Xa`aUZ]a\_¥]SS^[[Q  
@HWI-EAS443:3:34:849:1282#0/1  
GATGCAACAGCAGGTCTTACTCATATCATGATTTGGCATT  
+HWI-EAS443:3:34:849:1282#0/1  
a]\_[^\_¥^^W^NFRVWUa]a]^a\_[a`a\_a[^`\_`SPZ\_ZQ  
@HWI-EAS443:3:34:872:878#0/1  
GAAAGAATGTGCAATATCCTCAAAGGAAAATTTCAAACAG  
+HWI-EAS443:3:34:872:878#0/1  
\_Zabb`\_¥bYab`¥\_\_\_\_a]aaba\_]baa`a`aa\_\_\_\_\_`  
@HWI-EAS443:3:34:879:408#0/1  
CAAACACTCAGTGATTATGATGGACGACTAATCCAGAATAGC  
+HWI-EAS443:3:34:879:408#0/1  
a`W[[]aaaaZ`]a`Vaa\_aaa]\_`\_`[a`\_\_\_\_]\_^][Y]Z  
@HWI-EAS443:3:34:884:1862#0/1  
ATCATAATCACTGAGTTTGAGTTCAGTGCACATTTGGATG  
+HWI-EAS443:3:34:884:1862#0/1  
`baa^b]aaZ¥\_XLY]`a]¥VX`¥]WX\_\_aS\_YW\_]\_]\_WT  
@HWI-EAS443:3:34:945:1183#0/1  
GTGCCGCAGGTGCTGCGGTGAAAGGAGTTGGAACAATAGC  
+HWI-EAS443:3:34:945:1183#0/1  
aaaabaa\_U\_[^^[[`TYYP¥`[YRW^PZ^[TTV[RVBB  
@HWI-EAS443:3:34:954:902#0/1  
TGCATCTTCGCCATTGTTTGTGCTTGGCGCCAAACTCTCCTT  
+HWI-EAS443:3:34:954:902#0/1  
ababbbbbbaabbb[abb^`aaa`aaaaba\_R`]\_RZZ^  
@HWI-EAS443:3:34:958:184#0/1  
GGATCAGTTGCACATAAATCCTGCCTGCCTGCTTGTGTGT  
+HWI-EAS443:3:34:958:184#0/1  
aaa`]a\_TW]V¥V¥¥\_VWTMU]YNPWZ^^^]UZBBBBBBBB  
@HWI-EAS443:3:35:1126:691#0/1  
CCCCTCAGAATGAGTGCTGACCGTGCCAGGAAAATGAGGT



@HWI-EAS443:3:35:1718:1012#0/1  
ATAACAATAGAGAGGATGGTGCTTTCTGCTTTTGATGAGA  
+HWI-EAS443:3:35:1718:1012#0/1  
`baabaabbaababaaab`UaW[a`Xb\_aaba`XXaa\_RZ  
@HWI-EAS443:3:35:1730:1066#0/1  
GGCGAAGATGCAACAGCAGGTCTTACTCATATCATGATTT  
+HWI-EAS443:3:35:1730:1066#0/1  
a^`ZHZ¥\_^[]¥[WZ]a`^¥RV]\_\_\_KQ]a`^a¥XU`W`  
@HWI-EAS443:3:35:1771:2041#0/1  
CAGATGCTCTGATTTCTGTGGCATCCTGGCGCTCCCCACC  
+HWI-EAS443:3:35:1771:2041#0/1  
``aX`aa\_\_`\_`\_`¥RVZMU[``¥¥SQU^`¥^¥\_BBBBBB  
@HWI-EAS443:3:35:1776:977#0/1  
AAAGCACCATCCTCTCTATTGTTATGCTATTCTGGATTAG  
+HWI-EAS443:3:35:1776:977#0/1  
aaaabaaaaaaa]`W`\_a`\_\_`\_`¥]\_aaa]`a\_X``U¥  
@HWI-EAS443:3:35:179:489#0/1  
CCATTCCGGTGCGAACAAGCGCTCTTGTCTCTGATATGT  
+HWI-EAS443:3:35:179:489#0/1  
ab^[¥a^P^UaaZVY¥NY^`VYU[[ZZ[W^ZZQNQXZU[N  
@HWI-EAS443:3:35:189:1060#0/1  
CAGGATTTATGTGCAACTGATCCCCTCAGAATGAGTGCTG  
+HWI-EAS443:3:35:189:1060#0/1  
\_ZTY[]a`[[Z[`aaaa[\_`\_`a`Y[]NT[WX\_`]L\_a¥[  
@HWI-EAS443:3:35:221:422#0/1  
ATCAGGCTGACCACTTGGCTGTTTTGGAGTAATTTGAATG  
+HWI-EAS443:3:35:221:422#0/1  
aaaaaaaa\_[V\_a\_¥\_a`\_\_\_`NVa]IVLMJO¥UU¥LTNNR  
@HWI-EAS443:3:35:304:312#0/1  
GAGAACAAGAGCGCTTGTTCGCACCGGAATGGATCCCAGA  
+HWI-EAS443:3:35:304:312#0/1  
aa]¥[a\_]`a`bbbaa¥V`aaaaaa]Y]`W]Xa¥\_[]J  
@HWI-EAS443:3:35:35:760#0/1  
CCTGGGTTTCGACTTTCTTACTTGATCCATCATTGCCC  
+HWI-EAS443:3:35:35:760#0/1  
abaaaa\_aaa`Q`\_`aaaaaaZaa`\_`aaaa\_aZ]¥a`¥`  
@HWI-EAS443:3:35:413:1076#0/1  
AATTTCTGGAGGGGTGAAAATGGACGAAGGACAAGGGTTG  
+HWI-EAS443:3:35:413:1076#0/1  
¥`baab]baabbab[baababa]a]aa\_\_`aa`Z`aaX\_\_  
@HWI-EAS443:3:35:414:1870#0/1  
GGGGAGCGCCAGGATGCCACAGAAATCAGAGCATCTGTGCG  
+HWI-EAS443:3:35:414:1870#0/1  
Q¥[¥ZW\_Q\_\_¥VX^TW\_\_ba`]]bbab^[\_ba[`\_T¥OH  
@HWI-EAS443:3:35:416:650#0/1  
GTCCATCATAATCACTGAGTTTGAGTTCAGTGACATTTG  
+HWI-EAS443:3:35:416:650#0/1  
ababbbb`baaaabaaba\_`aaaab`aZ[Yaaaaaa\_a^  
@HWI-EAS443:3:35:471:507#0/1  
GATCCATTCCGGTGCGAACAAGCGCTCTTGTCTCTGATA

+HWI-EAS443:3:35:471:507#0/1  
\_¥\_a\_X`]`aa`TW^` `a^S]]^¥^ZZY`¥V¥RYVUJNI  
@HWI-EAS443:3:35:541:428#0/1  
GAAATAAATACCTAGAAGAGCATCCCAGTGCTGGGAAGGA  
+HWI-EAS443:3:35:541:428#0/1  
a¥a^`\_]`[^]aa`aa^]\_aaaaa`\_`¥[\_a[`¥¥Y`]ZX  
@HWI-EAS443:3:35:605:181#0/1  
CAACCCTTGCCTTCGTCCATTTTCACCCCTCCAGAAATT  
+HWI-EAS443:3:35:605:181#0/1  
abbbab\_¥baaabaaa\_aa`b]aa`\_`\_aa]aaa`a\_a\_^  
@HWI-EAS443:3:35:659:539#0/1  
GTGGGCATGACTTTGAAAGGAAGGGTACTCACTGGTCGG  
+HWI-EAS443:3:35:659:539#0/1  
`YYXKX]UTSZW\_XY[`W[[[RP[[RIMZRXX]RZYW\_TR  
@HWI-EAS443:3:35:692:709#0/1  
AAACGCTGAGATTGAAGACCTCATTTTCCTGGCACGGTCA  
+HWI-EAS443:3:35:692:709#0/1  
\_\_` `a` ` \_aaa\_ab^` `[[U`aa^a\_^Z\_V^¥¥HR^^SPN  
@HWI-EAS443:3:35:742:349#0/1  
CAATAGAGAGGATGGTGCTTTCTGCTTTTGATGAGAGAAG  
+HWI-EAS443:3:35:742:349#0/1  
a\_b^Y`\_^0\_\_¥\_abS¥VYa\_Yaa\_\_aaa][]^`^`\_`\_`\_`  
@HWI-EAS443:3:35:806:481#0/1  
GGTGAATGGACGAAGGACAAGGGTTGCTTATGAAAGAA  
+HWI-EAS443:3:35:806:481#0/1  
a^\_aaaaabaa\_aa`aaa`\_\_T^`\_Z\_aa`a\_aa`¥]`^R  
@HWI-EAS443:3:35:856:1890#0/1  
GGTGCTTTCTGCTTTTGATGAGAGAAGAAATAAATACCTA  
+HWI-EAS443:3:35:856:1890#0/1  
¥V]aba^aaaaa`aaaa\_a`^a\_\_\_[YQ^aaaaW`[a^a  
@HWI-EAS443:3:35:865:787#0/1  
GATTTATGTGCAACTGATCCCCTCAGAATGAGTGCTGACC  
+HWI-EAS443:3:35:865:787#0/1  
`b]bbb¥¥Yaa]aa¥aaabbaaba`a`aaa\_^`aaa]Ua  
@HWI-EAS443:3:35:903:927#0/1  
CTGCTGTTGCATCTTCGCCATTGTTTGCTTGCGCCAAAC  
+HWI-EAS443:3:35:903:927#0/1  
XW`a`^` `¥]\_W\_W\_a\_ab¥¥\_Z`b¥¥\_ZZZaaZNSSLPa  
@HWI-EAS443:3:35:956:2021#0/1  
GAGAGGATGGTGCTTTCTGCTTTTGATGAGAGAAGAAATA  
+HWI-EAS443:3:35:956:2021#0/1  
^b\_V¥¥VRa¥PS^YWXUaIQY`\_VZWaPNX`aaaUa\_]L\_  
@HWI-EAS443:3:36:1027:2044#0/1  
GGCTTGCACTAGCAAGTGGGCATGACTTTGAAAGGGAAGG  
+HWI-EAS443:3:36:1027:2044#0/1  
Z]bYW`bb`]b\_Z¥^`S]]MbZ[W^^^]W`b\_]`¥aT`aa  
@HWI-EAS443:3:36:1074:152#0/1  
AAATGGACGAAGGACAAGGGTTGCTTATGAAAGAATGTGC  
+HWI-EAS443:3:36:1074:152#0/1  
abbbbbbbbaaab`abab\_¥\_b`aaa\_a`^`\_]aaaZaa

@HWI-EAS443:3:36:1136:866#0/1  
AACTCCTTTACCCGACCTGCGGCACCAGACCTTCTG  
+HWI-EAS443:3:36:1136:866#0/1  
aa^J[^aa`^`a^a\_[¥aa^XVYU`][[PFHTXK^`U^\_  
@HWI-EAS443:3:36:1155:336#0/1  
CGCTCTTGTCTCTGATATGTGGCATCATTGAGTTGGAA  
+HWI-EAS443:3:36:1155:336#0/1  
`babbbbabbbbaabb\_abb^bbbaa\_babaa\_`baaaa  
@HWI-EAS443:3:36:1180:1762#0/1  
CTCTAATGCAAGGTTCAACACTTCCCAGAAGTCTGGTGC  
+HWI-EAS443:3:36:1180:1762#0/1  
aX^X`^^^aa¥\_¥XaXa]Ya`^a\_\_]`\_^]¥T¥\_¥VU[\_  
@HWI-EAS443:3:36:1222:1443#0/1  
AGAGGGCAATGATGGATCAAGTAAGAGAAAGTCGAAACCC  
+HWI-EAS443:3:36:1222:1443#0/1  
]aaabab`aaa^^^YZ^aa\_`]a\_aaa¥aa^VVXa\_aYU`  
@HWI-EAS443:3:36:1367:131#0/1  
ATTGCCCTCTGGGAGCTGTTTGAATTTTCTTTGAGGA  
+HWI-EAS443:3:36:1367:131#0/1  
aa]aba`\_]`aa`\_[aaa]YaaS`\_^\_\_a\_^JV]a¥¥¥U[  
@HWI-EAS443:3:36:1415:722#0/1  
GTGAAAATGGACGAAGGACAAGGGTTGCTTATGAAAGAAT  
+HWI-EAS443:3:36:1415:722#0/1  
a¥a¥0¥a^a`Xa^[\_¥]^\_^^\_X[aY`¥]¥^]\_¥\_^U^  
@HWI-EAS443:3:36:1431:597#0/1  
TGGGGAGCGCCAGGATGCCACAGAAATCAGAGCATCTGTC  
+HWI-EAS443:3:36:1431:597#0/1  
abbbb\_b`]^^^\_S\_a\_]¥¥a`^^`\_S^\_XSW¥^T¥[S[  
@HWI-EAS443:3:36:1481:1257#0/1  
TCGACTTTCTTACTTGATCCATCATTGCCCTCTGGGCA  
+HWI-EAS443:3:36:1481:1257#0/1  
UYI¥a^Z\_a`SXY\_¥\_¥]]]a`a¥QZTY[bU`¥a[RLUO  
@HWI-EAS443:3:36:1499:715#0/1  
GGACGAAGGACAAGGGTTGCTTATGAAAGAATGTGCAATA  
+HWI-EAS443:3:36:1499:715#0/1  
aU^Ta`\_PYYZWYHZ^XSOP^Y]\_[RVV¥SYSRX^[¥YZ]  
@HWI-EAS443:3:36:1586:1103#0/1  
ATGACTTTGAAAGGAAGGGTACTCACTGGTCCGGGATAGA  
+HWI-EAS443:3:36:1586:1103#0/1  
aaaa\_abab`aaa\_WX\_a^]X\_^a\_`]\_\_YR XR[X^\_]`^  
@HWI-EAS443:3:36:1672:1182#0/1  
CATGACTTTGAAAGGAAGGGTACTCACTGGTCCGGGATAG  
+HWI-EAS443:3:36:1672:1182#0/1  
abbbbbbb\_babba`abb`a\_a`\_^bX^a`YV`a]a`\_a  
@HWI-EAS443:3:36:1688:1067#0/1  
CGTCCATCATAATCACTGAGTTTGAGTTCAGTGCACATTT  
+HWI-EAS443:3:36:1688:1067#0/1  
```a\_]```aa`\_W¥Z\_aa\_]abaaba\_baa\_¥M`ba]a  
@HWI-EAS443:3:36:174:663#0/1  
CATGATTTGGCATTCCAACCTGAATGATGCCACATATCAG

+HWI-EAS443:3:36:174:663#0/1  
V¥Z\_\_\_WYS\_\_\_WW`\_\_\_\_\_`KU]YZa\_R¥baaaXZ`L¥¥V  
@HWI-EAS443:3:36:284:760#0/1  
GTGAAAATGGACGAAGGACAAGGGTTGCTTATGAAAGAAT  
+HWI-EAS443:3:36:284:760#0/1  
Y`b^[^W^aaaa`\_Z\_a`aa`^aa]aa```^aaaYaaa¥^  
@HWI-EAS443:3:36:285:288#0/1  
GGTTTTTCATTTGGTCTCATCAGGCTGACCACTTGGCTGTT  
+HWI-EAS443:3:36:285:288#0/1  
ab^aaabaaaa`^a`ba\_\_a\_^a\_\_\_\_`\_\_`\_^\_]^Z`HY  
@HWI-EAS443:3:36:391:1765#0/1  
AGGGGTGAAAATGGACGAAGGACAAGGGTTGCTTATGAAA  
+HWI-EAS443:3:36:391:1765#0/1  
\_\_V\_[Y¥Y^\_bYVWaUXYZSVa`\_ZUWOVX]U\_]aWLP\_Z  
@HWI-EAS443:3:36:50:1764#0/1  
ATCATAATCACTGAGTTTGAGTTCAGTGCACATTTGGATG  
+HWI-EAS443:3:36:50:1764#0/1  
aabba]aab\_a`a[a^a`\_`a\_^aa\_XZ`aa```^^UY^^  
@HWI-EAS443:3:36:533:327#0/1  
ATAACAATAGAGAGGATGGTGCTTTCTGCTTTTGATGAGA  
+HWI-EAS443:3:36:533:327#0/1  
`^a`b\_Z`baaaaba`^aZFYZMTYVSV[^]^aZSVYQYX  
@HWI-EAS443:3:36:571:1607#0/1  
ACTTCCCAGAAGGTCTGGTGCCGAGGTGCTGCGGTGAAA  
+HWI-EAS443:3:36:571:1607#0/1  
aa\_\_aba`\_`aV\_Waa\_YY`]\_\_¥\_NQSZ\_^YUQYSWZ¥  
@HWI-EAS443:3:36:591:1667#0/1  
GAAAATGGACGAAGGACAAGGGTTGCTTATGAAAGAATGT  
+HWI-EAS443:3:36:591:1667#0/1  
^abbbbaa\_a``^babb\_bbaa\_aaba`babaaba\_Z\_a[  
@HWI-EAS443:3:36:729:567#0/1  
GAAGAAATAAATACCTAGAAGAGCATCCCAGTGCTGGGAA  
+HWI-EAS443:3:36:729:567#0/1  
a]`^Y`\_aaaa^aa`ab\_`a`a`a`]\_\_\_Za\_\_a\_`\_`\_`  
@HWI-EAS443:3:36:772:1672#0/1  
CTGAACTCAAACCTCAGTGATTATGATGGACGACTAATCCA  
+HWI-EAS443:3:36:772:1672#0/1  
aa^)`b`¥¥`\_]`\_^VXTT\_a¥Q]IS`)]`Z[`Y^^\_`^¥MQ  
@HWI-EAS443:3:36:787:1517#0/1  
AATCCAGAATAGCATAACAATAGAGAGGATGGTGCTTTCT  
+HWI-EAS443:3:36:787:1517#0/1  
aa`babaaa`a]a^`)]`\_\_Y`\_\_`\_\_aSY]SVSWNV  
@HWI-EAS443:3:36:880:1428#0/1  
ACCTGCTGTTGCATCTTCGCCATTGTTTGCTTGGCGCCAA  
+HWI-EAS443:3:36:880:1428#0/1  
a`aaaba\_U]\_VJS\_\_\_VU]¥^]¥LPY\_OVGWHUSRZ]NR  
@HWI-EAS443:3:36:943:71#0/1  
TGCTGACCGTGCCAGGAAAATGAGGTCTTCAATCTCAGCG  
+HWI-EAS443:3:36:943:71#0/1  
abaabaaaa]b\_\_aaa^a`\_\_a^a\_U`aUZ\_[^W`YS¥¥\_`

@HWI-EAS443:3:36:986:886#0/1  
TGGGTTTTTCATTTGGTCTCATCAGGCTGACCACTTGGCTG  
+HWI-EAS443:3:36:986:886#0/1  
abab^abbbbaab`^aaaa`aa`Yaa`^a\_\_\_\_\_`^`a]  
@HWI-EAS443:3:37:1062:1120#0/1  
ATAGAGAGGATGGTGCTTTCTGCTTTTGATGAGAGAAGAA  
+HWI-EAS443:3:37:1062:1120#0/1  
Z`a`YS\_^^^¥¥^\_\_\_\_\_¥¥¥W\_\_bb\_WQDO]¥^^[S[W¥  
@HWI-EAS443:3:37:1088:1331#0/1  
CGCCAAGCAAACAATGGCGAAGATGCAACAGCAGGTCTTA  
+HWI-EAS443:3:37:1088:1331#0/1  
a`babbabbbbaabaaa`babaaa]bbabX`XV\_aZ\_aa\_  
@HWI-EAS443:3:37:1133:1355#0/1  
GTGCTTTCTGCTTTTGATGAGAGAAGAAATAAATACCTAG  
+HWI-EAS443:3:37:1133:1355#0/1  
\_V¥IKb[b\_babbabb[ab¥]ba\_¥R[`]ZZ¥TWVaaabN  
@HWI-EAS443:3:37:1150:1143#0/1  
GGGGAGCGCCAGGATGCCACAGAAATCAGAGCATCTGTCTG  
+HWI-EAS443:3:37:1150:1143#0/1  
``^aa`\_`aaa[`\_W`\_^`¥0`a`[^]PMYW^]]YQ TZ  
@HWI-EAS443:3:37:1212:1481#0/1  
CTCCTGTTTTCTTAGGGTCCTTCCCAGCACTGGGATGCTC  
+HWI-EAS443:3:37:1212:1481#0/1  
`¥Y]Z¥a`bYbaK`]``V¥abb`aaaaY`SaL`a`S^AY  
@HWI-EAS443:3:37:1319:1021#0/1  
ATGACTTTGAAAGGAAGGGTACTCACTGGTCCGGGATAGA  
+HWI-EAS443:3:37:1319:1021#0/1  
\_\_`Y^a[`baa]aaa`Z`a]a[```Y^aOF[aa\_YU`¥¥  
@HWI-EAS443:3:37:1384:1254#0/1  
AAAGCAGAAAGCACCATCCTCTCTATTGTTATGCTATTCT  
+HWI-EAS443:3:37:1384:1254#0/1  
YYZabbbVRVa¥\_`bb^a^Z`ab^\_`b\_RQ]bbbaa`TY  
@HWI-EAS443:3:37:138:1859#0/1  
GGTCTCCTGTTTTCTTAGGGTCCTTCCCAGCACTGGGAT  
+HWI-EAS443:3:37:138:1859#0/1  
aaabbaab`babbbbbb`b[bUUbbaabba`\_bbbaa^aa`  
@HWI-EAS443:3:37:145:788#0/1  
CTGGGTTTCGACTTTCTTACTTGATCCATCATTGCCCT  
+HWI-EAS443:3:37:145:788#0/1  
a`ZaY`aY]XUU``GY¥T`YPP\_TTMWaaTFNLXJW^aRF  
@HWI-EAS443:3:37:1631:978#0/1  
GCATCCCAGTGCTGGGAAGGACCCTAAGAAAACAGGAGGA  
+HWI-EAS443:3:37:1631:978#0/1  
abV^]\_`aa\_a\_\_a\_a\_a`\_\_\_\_\_]a`^`\_Ga\_aa\_^`VX  
@HWI-EAS443:3:37:1649:1036#0/1  
AATTTCTGGAGGGGTGAAAATGGACGAAGGACAAGGGTTG  
+HWI-EAS443:3:37:1649:1036#0/1  
aa¥aaabaa`\_aa^b]`\_\_aba`\_a```G\_Z\_\_a\_\_]^¥  
@HWI-EAS443:3:37:1673:390#0/1  
GAAATAAGGAGAGTTTGGCGCCAAGCAAACAATGGCGAAG

+HWI-EAS443:3:37:1673:390#0/1  
`RX]YWZW\_a]H[`\_\_a`aa[`]U]Q\_Ga^`\_]Q^YY¥  
@HWI-EAS443:3:37:1689:1622#0/1  
CATAATCACTGAGTTTGAGTTCAGTGCACATTTGGATGTA  
+HWI-EAS443:3:37:1689:1622#0/1  
R`^\_]`b`^`^`^XP¥b¥\_Vb`bbbX`^b^`^`^Z\_  
@HWI-EAS443:3:37:1708:1774#0/1  
GAGGGGTGAAAATGGACGAAGGACAAGGGTTGCTTATGAA  
+HWI-EAS443:3:37:1708:1774#0/1  
Ta\_\_b\_Q\_\_¥aa¥`]`]S`a`bbI`Ubbbbbaaba^  
@HWI-EAS443:3:37:1735:81#0/1  
GAGGGGATCAGTTGCACATAAATCCTGCCTGCCTGCTTGT  
+HWI-EAS443:3:37:1735:81#0/1  
aa`\_abaaaaa\_aaWa\_aa`aaa\_[`UWHX\_`aS\_\_\_W  
@HWI-EAS443:3:37:1743:291#0/1  
TCTCTTACTTGATCCATCATTGCCCTCTGGGAGCTGTTT  
+HWI-EAS443:3:37:1743:291#0/1  
aaa^aba^bb`aaa¥aaaaaaaa`aa^a^DW\_aa`aa\_a`  
@HWI-EAS443:3:37:1749:1397#0/1  
GGGAGATTCTACATCCAAATGTGCACTGAACTCAAACCTCA  
+HWI-EAS443:3:37:1749:1397#0/1  
`bb`ba\_ab\_b^a`]b`aa\_a]b`aaa`Z^baaaa`\_a\_a  
@HWI-EAS443:3:37:212:1271#0/1  
CATTCCGGTGCGAACAAGCGCTCTTGTCTCTGATATGTG  
+HWI-EAS443:3:37:212:1271#0/1  
^S^\_a`^[U\_]\_a[[^¥[ZT]NZ¥SZUPYG]^¥TY`\_¥V¥  
@HWI-EAS443:3:37:239:839#0/1  
GGAAGAATGATTGGTGAATCGGGAGATTCTACATCCAAA  
+HWI-EAS443:3:37:239:839#0/1  
a`Z`a]\_ab\_`a`^`^aa\_V]`aa\_[`\_`\_SPW^`¥[^H[Y  
@HWI-EAS443:3:37:248:880#0/1  
GGGAGCGCCAGGATGCCACAGAAATCAGAGCATCTGTCCG  
+HWI-EAS443:3:37:248:880#0/1  
aab]bbab^I[]\_Ybabba`^¥a`[a¥¥QU^]XSZ`U^]R  
@HWI-EAS443:3:37:284:527#0/1  
GCTGCGGTGAAAGGAGTTGGAACAATAGCAATGGAGTTAA  
+HWI-EAS443:3:37:284:527#0/1  
aaX`a`XFXVXZVZT[RX¥[PT¥LXJOY]VPQNLKXQTYS  
@HWI-EAS443:3:37:28:1184#0/1  
AGCTGGGTTTTCATTTGGTCTCATCAGGCTGACCACTTGG  
+HWI-EAS443:3:37:28:1184#0/1  
a`bbabb`abbbbaab`abab`aabbab`aaba]aa\_a^  
@HWI-EAS443:3:37:296:39#0/1  
GCAGAAAGCACCATCCTCTCTATTGTTATGCTATTCTGGA  
+HWI-EAS443:3:37:296:39#0/1  
a^L]\_VM`UY¥P]RG^¥SRVQLQ¥YURQPFQYQYUTWWTP  
@HWI-EAS443:3:37:305:1449#0/1  
CTGAGTTTGAGTTCAGTGCACATTTGGATGTAGAATCTCC  
+HWI-EAS443:3:37:305:1449#0/1  
aba¥`bb\_]Z`a`^`\_aabaaaaa\_a`[L^`\_`aa`[]`



@HWI-EAS443:3:37:453:223#0/1  
CTGCTGTTGCATCTTCGCCATTGTTTGCTGGCGCCAAAC  
+HWI-EAS443:3:37:453:223#0/1  
a`baa]]aaaa\_`a^\_\_a`TW[^^^[QVY\_\_YX[WWNN  
@HWI-EAS443:3:37:50:1031#0/1  
GTAATTTGAATGGGTCTATCCCGACCAGTGAGTACCCTTC  
+HWI-EAS443:3:37:50:1031#0/1  
aabaaaaabb^b`¥SX```aaa`a`XaaUZ]\_X]]\_`^a^  
@HWI-EAS443:3:37:50:227#0/1  
GGATGGTGCTTTCTGCTTTTGATGAGAGAAGAAATAAATA  
+HWI-EAS443:3:37:50:227#0/1  
ab]a`bWaaaaa`^aaa\_aaa`a\_a^`GYUYIY\_`]R[[  
@HWI-EAS443:3:37:556:185#0/1  
CGACTAATCCAGAATAGCATAACAATAGAGAGGATGGTGC  
+HWI-EAS443:3:37:556:185#0/1  
ab`aba`aaaa`^^`¥```[\_`^]\_^^RNG\_V]U\_^RYQ  
@HWI-EAS443:3:37:558:984#0/1  
CTCCCCACCAGTCTCCATTTGTTTCATATGATCGTTTGGTG  
+HWI-EAS443:3:37:558:984#0/1  
abbaabaaba\_Y`^`aaa\_\_`¥`a\_]a\_U¥\_ZV[^]¥U¥  
@HWI-EAS443:3:37:569:1771#0/1  
CACTTCCCAGAAGGTCTGGTGCCGCAGGTGCTGCGGTGAA  
+HWI-EAS443:3:37:569:1771#0/1  
]^b\_`bbba`[a`aSb]aaHab```¥a\_U[^Z^^`ZEVG¥  
@HWI-EAS443:3:37:572:1871#0/1  
GGCATGACTTTGAAAGGGAAGGGTACTCACTGGTCCGGAT  
+HWI-EAS443:3:37:572:1871#0/1  
aabbbabbbba\_bb`````aaaXbaaaaQ\_a^Yaa`\_a\_  
@HWI-EAS443:3:37:584:180#0/1  
ATGGGCTTGCAAGTCAAGTGGGCATGACTTTGAAAGGGA  
+HWI-EAS443:3:37:584:180#0/1  
aab¥Z¥LFY]]YSYZZaZ¥KV¥]WYZPT]SPTSKDKUV[P  
@HWI-EAS443:3:37:609:1525#0/1  
TACTGCAAGCCCATACACACAAGCAGGCAGGCAGGATTTA  
+HWI-EAS443:3:37:609:1525#0/1  
V¥`ZbbZ¥Z\_aZ]]bbbbbaabaabW\_^YLR]Q][[O\_`P  
@HWI-EAS443:3:37:753:1218#0/1  
CGTCCATCATAATCACTGAGTTTGAGTTCAGTGCACATTT  
+HWI-EAS443:3:37:753:1218#0/1  
`T\_a`a]b\_``^¥\_UZ^\_W\_Z^^`X\_VW\_GWV]\_¥V[ZZ]  
@HWI-EAS443:3:37:856:1992#0/1  
GAACAAGCGCTCTTGTCTCTGATATGTGGCATCATTAG  
+HWI-EAS443:3:37:856:1992#0/1  
Z\_Z^`U¥bZ¥Z]b¥[MUaaba^bV`WNRPGbaT`aa`b]]  
@HWI-EAS443:3:37:876:1080#0/1  
GAAGATGCAACAGCAGGTCTTACTCATATCATGATTTGGC  
+HWI-EAS443:3:37:876:1080#0/1  
\_¥``baa^U`^bbbbbaJabaS`a`I^]aP^aa[aa\_ba]  
@HWI-EAS443:3:37:886:986#0/1  
CTGGGATCCATTCCGGTGCGAACAAGCGCTCTTGTCTCT

+HWI-EAS443:3:37:886:986#0/1  
aaaaaaba`G`b\_a\_aa`aaaa^[\_`Za`]¥[\_\_\_\_a\_  
@HWI-EAS443:3:37:89:1360#0/1  
TTGCCCTCTGGGCAGCTGTTTGAATTTTCTTTGAGGAT  
+HWI-EAS443:3:37:89:1360#0/1  
^^`b`V¥P][S\_¥`b`VV][ ]OVV¥XNR¥aY]U\_\_]T]  
@HWI-EAS443:3:38:1014:1385#0/1  
GAAATAAGGAGAGTTTGGCGCCAAGCAAACAATGGCGAAG  
+HWI-EAS443:3:38:1014:1385#0/1  
\_T¥^`^Za`^^^]XZ`ab\_YP[YV]\_\_aUV]YVNL YUTR  
@HWI-EAS443:3:38:1033:426#0/1  
TGGGCTTGCAGTAGCAAGTGGGCATGACTTTGAAAGGGAA  
+HWI-EAS443:3:38:1033:426#0/1  
`abb]¥a`a]`X`aa]aMWZa]a]`¥V^]^^WZUXSPWM  
@HWI-EAS443:3:38:1050:642#0/1  
CTTCTATATATGGGTCCTCCTGTTTTCTTAGGGTCCTTCC  
+HWI-EAS443:3:38:1050:642#0/1  
abbba` `[`b^VXV\_bb\_bV`b`aaabbbaM^`bbba[Z  
@HWI-EAS443:3:38:1060:1389#0/1  
GCTTTCTGCTTTTGATGAGAGAAGAAATAAATACCTAGAA  
+HWI-EAS443:3:38:1060:1389#0/1  
aaaa` [``a`a\_\_\_\_a\_a¥\_N\_\_]a\_`¥^`MMK^]Z]^^XL  
@HWI-EAS443:3:38:1065:1934#0/1  
CATTTGGTCTCATCAGGCTGACCACTTGGCTGTTTTGGAG  
+HWI-EAS443:3:38:1065:1934#0/1  
aab` `a`aba]aaZb`W^aW\_Yaa\_`\_aaXO]H^^VFQQO  
@HWI-EAS443:3:38:1077:1817#0/1  
GAAGACCTCATTTCCTGGCACGGTCAGCACTCATTCTGA  
+HWI-EAS443:3:38:1077:1817#0/1  
` `ba[bbbbabaaa\_U]a]\_ba[\_Taaaa¥SMIU¥UV¥NW  
@HWI-EAS443:3:38:1142:794#0/1  
GTATGGGCTTGCAGTAGCAAGTGGGCATGACTTTGAAAGG  
+HWI-EAS443:3:38:1142:794#0/1  
a\_RX^b]aZ`WYPYZTVUUVN¥^XTV\_VTT[RXNLPYSK  
@HWI-EAS443:3:38:119:424#0/1  
AGTGGTCAGCCTGATGAGACCAAATGAAAACCCAGCTCAC  
+HWI-EAS443:3:38:119:424#0/1  
` [Y\_Qa¥a`^\_`W^`^^[^^`¥Y]¥V]S[Y[U^]SU^[V  
@HWI-EAS443:3:38:1216:932#0/1  
GGGAGATTCTACATCCAAATGTGCACTGAACTCAAACCTCA  
+HWI-EAS443:3:38:1216:932#0/1  
abbbbaabbbaa`aaaaaa^baaaab`X`¥` `^\_\_\_\_]  
@HWI-EAS443:3:38:1220:760#0/1  
TGCTTTCTGCTTTTGATGAGAGAAGAAATAAATACCTAGA  
+HWI-EAS443:3:38:1220:760#0/1  
abbaZZ\_\_\_\_]¥a\_`aa`^Y` `` `aa]` `aY[\_^XSRZ^[W  
@HWI-EAS443:3:38:131:1248#0/1  
GATCCATTCCGGTGCGAACAAGCGCTCTTGTCTCTGATA  
+HWI-EAS443:3:38:131:1248#0/1  
` ` `b\_W\_Xabb^`]R¥`bb]NTR]OV]`OXTYSZ]\_OQUU

@HWI-EAS443:3:38:1371:616#0/1  
GTGCTTTCTGCTTTTGGATGAGAGAAGAAATAAATACCTAG  
+HWI-EAS443:3:38:1371:616#0/1  
a¥bb`bb^`]UaabaM\_aaaaa\_`a`ab\_Za`\_a\_a\_a]  
@HWI-EAS443:3:38:1377:286#0/1  
TGCGGTGAAAGGAGTTGGAACAATAGCAATGGAGTTAATC  
+HWI-EAS443:3:38:1377:286#0/1  
abV^T\_¥UZZbaPa`aaa^^VX`a¥a^\_\_\_WURaYQ^V^X  
@HWI-EAS443:3:38:1382:482#0/1  
CCTCTCTATTGTTATGCTATTCTGGATTAGTCGTCATCA  
+HWI-EAS443:3:38:1382:482#0/1  
abaabbbbbbaaabaab`aab^V]]^\_Uaa[\_  
@HWI-EAS443:3:38:1391:937#0/1  
CATAATCACTGAGTTTGGAGTTCAGTGCACATTTGGATGTA  
+HWI-EAS443:3:38:1391:937#0/1  
aababbaaaa][`]abaab\_aaaa¥aa`a^]\_^`\_`XZ  
@HWI-EAS443:3:38:1524:469#0/1  
CTAATCCAGAATAGCATAACAATAGAGAGGATGGTGCTTT  
+HWI-EAS443:3:38:1524:469#0/1  
abbbbbbabbbbaabba^`bbbbbab`b][`aa]^SZaY  
@HWI-EAS443:3:38:1536:448#0/1  
GCTGACCGTGCCAGGAAATGAGGTCTTCAATCTCAGCGT  
+HWI-EAS443:3:38:1536:448#0/1  
```baaaaaaX^`^aaa`aaaY[a\_a^Z¥V][[`Z`U  
@HWI-EAS443:3:38:1571:657#0/1  
GATGGTGCTTTCTGCTTTTGGATGAGAGAAGAAATAAATAC  
+HWI-EAS443:3:38:1571:657#0/1  
a`OYZO^VLTT[U`][WP]ZQLXTZWTT]YXXY]^`XWO  
@HWI-EAS443:3:38:161:427#0/1  
TCCAACCTGAATGATGCCACATATCAGAGAACAAGAGCGC  
+HWI-EAS443:3:38:161:427#0/1  
abb`¥`aaa[aa`aaa`[`aaa`aa\_a¥^YZ``\_\_`¥\_S  
@HWI-EAS443:3:38:1666:1022#0/1  
GGTTTCGACTTTCTTACTTGATCCATCATTGCCCTCTG  
+HWI-EAS443:3:38:1666:1022#0/1  
abYa\_aYXD[a\_¥`a`¥[¥\_a\_\_`\_\_\_YUWWWQVRRQ  
@HWI-EAS443:3:38:1765:504#0/1  
TAACAATAGAGAGGATGGTGCTTTCTGCTTTTGGATGAGAG  
+HWI-EAS443:3:38:1765:504#0/1  
a`a`aaaa\_a¥`\_`a^YY¥Z\_\_[\_]V^^^WRXTXZYS  
@HWI-EAS443:3:38:348:115#0/1  
GTTGCATCTTCGCATTGTTTGCTTGGCGCCAACTCTCC  
+HWI-EAS443:3:38:348:115#0/1  
a`aaaaa]\_`\_a`a`a`a^\_]U¥^^Z¥\_]VXZZ]OZVZZW  
@HWI-EAS443:3:38:36:1476#0/1  
CGGAAGAATGATTGGTGAATCGGGAGATTCTACATCCAA  
+HWI-EAS443:3:38:36:1476#0/1  
a^\_[^]Z`]]Z¥\_a¥KZ\_¥]\_aa`^Z\_TW¥Y[[\_\_V[YWV  
@HWI-EAS443:3:38:407:91#0/1  
GGCTTGCAGTAGCAAGTGGGCATGACTTTGAAAGGGAAGG

+HWI-EAS443:3:38:407:91#0/1  
^ab[[\_b^b¥ba]SX^]XZ^`]a]^T^]aV\_X`aZRZW^  
@HWI-EAS443:3:38:469:150#0/1  
GGTCCTCCTGTTTTCTTAGGGTCCTCCCAGCACTGGGAT  
+HWI-EAS443:3:38:469:150#0/1  
aaabbbbbbbaababbbbaa`\_baaababa[a`\_aa`\_]\_  
@HWI-EAS443:3:38:508:1456#0/1  
GAGAGGATGGTGCTTTCTGCTTTTGATGAGAGAAGAAATA  
+HWI-EAS443:3:38:508:1456#0/1  
a`baaa\_\_a`W\_aaaaa`a\_a`a`\_`aa^^S¥Y`\_a^`X  
@HWI-EAS443:3:38:567:210#0/1  
GACTTTGAAAGGAAGGGTACTCACTGGTCGGGATAGACC  
+HWI-EAS443:3:38:567:210#0/1  
aaaaaa`aaaaaa]aa`aT`\_aaa`\_a\_Y\_]\_`\_^`\_]N  
@HWI-EAS443:3:38:671:394#0/1  
TGCTGGGAAGGACCCTAAGAAAACAGGAGGCCCATATAT  
+HWI-EAS443:3:38:671:394#0/1  
`ba`b^`Z^^]YWUZXP^`\_`aaaa^WZZ[JW]`aTU\_^  
@HWI-EAS443:3:38:73:868#0/1  
GGGCAATGATGGATCAAGTAAGAGAAAGTCGAAACCCAGG  
+HWI-EAS443:3:38:73:868#0/1  
abbaaba\_aabaa`aaaa\_abaRQJZ`]YaZ^a^Waaa`^  
@HWI-EAS443:3:38:804:638#0/1  
ATAGACCCATTCAAATTACTIONCAGCCAAAGTGGTCA  
+HWI-EAS443:3:38:804:638#0/1  
[N[OZbb¥U]baSV]a¥a[\_`]WYXU\_a\_]N][YOT]P¥S  
@HWI-EAS443:3:38:810:247#0/1  
CAAAAGCAGAAAGCACCATCCTCTATTGTTATGCTATT  
+HWI-EAS443:3:38:810:247#0/1  
ab¥¥aaa]^\_aa`[a`\_`\_`\_\_\_\_\_^\_^\_[YV^]^[W[]]Y  
@HWI-EAS443:3:38:814:329#0/1  
ATCCATTCCGGTGCGAACAAGCGCTCTTGTCTCTGATAT  
+HWI-EAS443:3:38:814:329#0/1  
```aa`aaaa`\_]\_^\_a\_\_`]\_\_\_\_]]^^YXXY]^¥¥¥U  
@HWI-EAS443:3:38:838:1191#0/1  
CCCTTGTCCTTCGTCATTTTCCCCCTCCAGAAATTTTCG  
+HWI-EAS443:3:38:838:1191#0/1  
abbaaaaaaaaa`a\_aaab`\_`aaa\_^^¥a¥W\_^`\_`^¥\_] [  
@HWI-EAS443:3:38:863:507#0/1  
GGGAGCGCCAGGATGCCACAGAAATCAGAGCATCTGTCGG  
+HWI-EAS443:3:38:863:507#0/1  
V\_¥V\_^^\_¥]WQRGXRTV\_^QQ¥\_a`Z^XRDU^][YGF¥^  
@HWI-EAS443:3:38:879:303#0/1  
GCTGTTTTGGAGTAATTTGAATGGGTCTATCCCGACCAGT  
+HWI-EAS443:3:38:879:303#0/1  
a`bbabbbabaaaaabbaaaa\_aaa]aaa\_ZVZaa^`\_`\_`W  
@HWI-EAS443:3:38:936:309#0/1  
CTGCTGTTGCATCTTCGCCATTGTTTGCTTGGCGCCAAAC  
+HWI-EAS443:3:38:936:309#0/1  
abbabbabbbbaa`aaaaab`\_`aaaa\_`\_`\_`^ZZ\_\_W\_^G

@HWI-EAS443:3:38:948:946#0/1  
ATGGGCTTGCAGTAGCAAGTGGGCATGACTTTGAAAGGGA  
+HWI-EAS443:3:38:948:946#0/1  
aaaaa`aaa`^^`aa`Waa`aaa`a\_]`^X`¥¥`¥[Q  
@HWI-EAS443:3:38:970:1021#0/1  
GCTGGGTTTTTCATTTGGTCTCATCAGGCTGACCACTTGGC  
+HWI-EAS443:3:38:970:1021#0/1  
a\_aaab]aaaa`aaa`^a`````a`\_\_`^VYU]]][YUU  
@HWI-EAS443:3:39:114:1641#0/1  
GCACCATCCTCTCTATTGTTATGCTATTCTGGATTAGTCG  
+HWI-EAS443:3:39:114:1641#0/1  
``R¥ba^^aS]]`U¥`^b^¥W`\_bab\_Xb]]\_T`]aaR`S  
@HWI-EAS443:3:39:1158:567#0/1  
GCGGTGAAAGGAGTTGGAACAATAGCAATGGAGTTAATCA  
+HWI-EAS443:3:39:1158:567#0/1  
^bbba`U\_]\_\_Y^Y`\_\_R[OZ]^Y\_]U^\_]NVWW`]\_^XW  
@HWI-EAS443:3:39:1201:1597#0/1  
ATGGTGCTTTCTGCTTTTGATGAGAGAAGAAATAAATACC  
+HWI-EAS443:3:39:1201:1597#0/1  
YN\_\_NYU]aaba`aZP¥ba`\_a\_WabWaa`RXa`a`\_a\_G  
@HWI-EAS443:3:39:1304:848#0/1  
GGTCCTCCTGTTTTCTTAGGGTCCTTCCCAGCACTGGGAT  
+HWI-EAS443:3:39:1304:848#0/1  
a\_abbbbab`abbbbaa`a`^a`aa`\_b`a¥`\_aaa]`]  
@HWI-EAS443:3:39:1306:593#0/1  
CTGCGGTGAAAGGAGTTGGAACAATAGCAATGGAGTTAAT  
+HWI-EAS443:3:39:1306:593#0/1  
aaba`aabaabb]aaba`\_a`\_a`aa`a`^`a`^`\_]  
@HWI-EAS443:3:39:1317:1025#0/1  
CTCCTGTTTTCTTAGGGTCCTTCCCAGCACTGGGATGCTC  
+HWI-EAS443:3:39:1317:1025#0/1  
a`aabb]bababba`^`\_Z\_aZ^aVaa¥Y]a`[¥\_]aYaO  
@HWI-EAS443:3:39:1353:463#0/1  
CACTTGGCTGTTTTGGAGTAATTTGAATGGGTCTATCCCG  
+HWI-EAS443:3:39:1353:463#0/1  
a``abb`]a¥HYab[aUWWPZ`¥\_LOTR¥`aTW\_]V[P`T  
@HWI-EAS443:3:39:1359:862#0/1  
AGAGAGGATGGTGCTTTCTGCTTTTGATGAGAGAAGAAAT  
+HWI-EAS443:3:39:1359:862#0/1  
`b``[ab`a`^`\_\_aaIY]M\_aa`X]XX¥V[O`[[[aG  
@HWI-EAS443:3:39:1379:1876#0/1  
GGACGACTAATCCAGAATAGCATAACAATAGAGAGGATGG  
+HWI-EAS443:3:39:1379:1876#0/1  
\_U`aaa`bbaR[[`a`\_a`¥XY[]`a`\_aa[ZXWaa¥^X^V  
@HWI-EAS443:3:39:1436:1417#0/1  
ATTTCTTCTCTCATCAAAAGCAGAAAGCACCATCCTCTCT  
+HWI-EAS443:3:39:1436:1417#0/1  
abbbabbabab`baababaa`aa`aa`aaa]^\_Wa`\_`^]  
@HWI-EAS443:3:39:1442:655#0/1  
GTGCTTTCTGCTTTTGATGAGAGAAGAAATAAATACCTAG

+HWI-EAS443:3:39:1442:655#0/1  
a[a[S\_aa`SZaaaaYDT`JOM^F]`QOR¥RU¥V[URQYY  
@HWI-EAS443:3:39:1448:1846#0/1  
GAGCATCCCAGTGCTGGGAAGACCCTAAGAAAACAGGAG  
+HWI-EAS443:3:39:1448:1846#0/1  
ababa\_bbabbaababa`[^^abaSb`bba[RZabaa[`^  
@HWI-EAS443:3:39:1603:927#0/1  
GTGCTTTCTGCTTTTGTGAGAGAAGAAATAAATACCTAG  
+HWI-EAS443:3:39:1603:927#0/1  
`abbbbbbbbbbbbbbbbaabbabb`bbbb\_abaabaa  
@HWI-EAS443:3:39:1678:1131#0/1  
AGGAGAGTTTGGCGCCAAGCAAACAATGGCGAAGATGCAA  
+HWI-EAS443:3:39:1678:1131#0/1  
ab]^\_^bababa¥`aa`RWU\_`]J[\_U\_Z`aTU^X^[[VX  
@HWI-EAS443:3:39:1724:990#0/1  
GTGAAAATGGACGAAGGACAAGGGTTGCTTATGAAAGAAT  
+HWI-EAS443:3:39:1724:990#0/1  
a^a\_\_\_aba\_^a\_\_a`]Y]]a`ZYZ\_Z\_\_ZX]W\_Z`W^X  
@HWI-EAS443:3:39:316:1176#0/1  
CATCATTCAGGTTGGAATGCCAAATCATGATATGAGTAAG  
+HWI-EAS443:3:39:316:1176#0/1  
ababbbab^a^Z`^a]aaabab\_`\_baaa\_a]a`aa¥a\_\_  
@HWI-EAS443:3:39:333:219#0/1  
CGCCAAGCAAACAATGGCGAAGATGCAACAGCAGGTCTTA  
+HWI-EAS443:3:39:333:219#0/1  
^abb\_bbbb```bbbaaabba\_QWZ\_aaaa`¥]a\_]\_\_]`  
@HWI-EAS443:3:39:393:317#0/1  
TGAATGATGCCACATATCAGAGAACAAGAGCGCTTGTTCG  
+HWI-EAS443:3:39:393:317#0/1  
abaaaaaaaaa\_a\_T¥`a^`\_`\_`\_`[^YZ^¥\_¥a[[[¥  
@HWI-EAS443:3:39:591:1465#0/1  
GAGAGTTTGGCGCCAAGCAAACAATGGCGAAGATGCAACA  
+HWI-EAS443:3:39:591:1465#0/1  
aaUba\_aaIa`XaaaUVaaaa[a^\_aT`^`\_W¥LFQZ\_T\_  
@HWI-EAS443:3:39:626:1236#0/1  
GGTCCTCCTGTTTTCTTAGGGTCCTTCCCAGCACTGGGAT  
+HWI-EAS443:3:39:626:1236#0/1  
`^G]^`a\_¥V\_`]a¥^a`Z^)``\_\_\_\_`¥P^[\_\_\_\_\_OU  
@HWI-EAS443:3:39:660:1076#0/1  
TAACAATAGAGAGGATGGTGCTTTCTGCTTTTGTGAGAG  
+HWI-EAS443:3:39:660:1076#0/1  
abbaa]babaaaaa`a\_G`\_\_`a`aY[[aa`S`\_a\_]\_V  
@HWI-EAS443:3:39:751:479#0/1  
GCTTGCAGTAGCAAGTGGGCATGACTTTGAAAGGGAAGGG  
+HWI-EAS443:3:39:751:479#0/1  
a\_\_\_aaa^U[YSVUUR[¥YXP¥¥]\_^RR[VWV¥¥\_RT¥]U  
@HWI-EAS443:3:39:89:59#0/1  
CAGTGATTATGATGGACGACTAATCCAGAATAGCATAACA  
+HWI-EAS443:3:39:89:59#0/1  
^¥a^b[bb`aa]\_b\_U\_aa``aX]a\_\_¥TT^a\_^Y¥UZ¥

@HWI-EAS443:3:39:917:1417#0/1  
GAATGATGCCACATATCAGAGAACAAGAGCGCTTGTTCGC  
+HWI-EAS443:3:39:917:1417#0/1  
[X`\_]`^¥¥^^^`Q[b`bbTS^^a]W^QVTX[Ua\_dUK`dU  
@HWI-EAS443:3:3:1056:1579#0/1  
CATCCTCTCTATTGTTATGCTATTCTGGATTAGTCGTC  
+HWI-EAS443:3:3:1056:1579#0/1  
Z`a\_aZaa`Za`baSW`ba`¥b`YS]bbbaa`b^abPYO\_  
@HWI-EAS443:3:3:1131:1552#0/1  
GGCATGACTTTGAAAGGGAAGGGTACTCACTGGTCGGGAT  
+HWI-EAS443:3:3:1131:1552#0/1  
aaaUZ\_X[aaa]XZJ\_]a`\_a]`UXNZR[YUVZZRY\_\_VQ  
@HWI-EAS443:3:3:1163:469#0/1  
TAACAATAGAGAGGATGGTGCTTTCTGCTTTTGATGAGAG  
+HWI-EAS443:3:3:1163:469#0/1  
aaaa`\_a\_a`a]`\_\_\_\_a¥V\_¥\_\_`S^PXZ[\_\_\_\_QW]Y\_^^  
@HWI-EAS443:3:3:117:636#0/1  
GCACCATCCTCTCTATTGTTATGCTATTCTGGATTAGTCG  
+HWI-EAS443:3:3:117:636#0/1  
a`X[]Z¥MZ`VW[TYUI]¥[^`a`\_V\_\_`Z]aZPZ\_XBBB  
@HWI-EAS443:3:3:120:1748#0/1  
CGACTAATCCAGAATAGCATAACAATAGAGAGGATGGTGC  
+HWI-EAS443:3:3:120:1748#0/1  
aaa`abba\_aaaaa`\_aa`aa`\_aaaa`XM[0`]\_XL[Y  
@HWI-EAS443:3:3:1241:1932#0/1  
AGGGTACTCACTGGTCGGGATAGACCCATTCAAATTACTC  
+HWI-EAS443:3:3:1241:1932#0/1  
```\_`\_]\_aa\_YXabTH^\_baaa\_YW`[\_\_`Raa`\_^]LNX  
@HWI-EAS443:3:3:1358:206#0/1  
ATCCCAGCAGTGAGTACCCTTCCCTTTCAAAGTCATGCC  
+HWI-EAS443:3:3:1358:206#0/1  
aa¥a`X`aWaa```][V^\_US\_\_[WP`¥\_YV\_\_^TW¥]UUB  
@HWI-EAS443:3:3:1429:1757#0/1  
CAGCTGTTTGAATTTTCCTTTGAGGATATTGCACATTCT  
+HWI-EAS443:3:3:1429:1757#0/1  
aab`ab`^aaabb¥bbab\_bbbaa`\_`bbab`aaaaabHb  
@HWI-EAS443:3:3:146:222#0/1  
CATTCCGGTGCGAACAAGCGCTCTTGTCTCTGATATGTG  
+HWI-EAS443:3:3:146:222#0/1  
a]a`Y`Ub\_^ZXZXaaa`W`]]aaW¥Y^\_\_aa^[^aTQ  
@HWI-EAS443:3:3:1555:412#0/1  
CTCAGAATGAGTGCTGACCGTGCCAGGAAAATGAGGTCTT  
+HWI-EAS443:3:3:1555:412#0/1  
\_b^Maa]]b\_b[b¥]b\_]Y¥\_aa]VUaaa][`]¥[XNLBB  
@HWI-EAS443:3:3:1678:692#0/1  
TAATCACTGAGTTTGAGTTCAGTGCACATTTGGATGTAGA  
+HWI-EAS443:3:3:1678:692#0/1  
\_^\_a^^``abaa]H]]`a]`aa][\_OZ¥\_`]U¥]\_¥\_ZB  
@HWI-EAS443:3:3:1781:1527#0/1  
ATGACTTTGAAAGGGAAGGGTACTCACTGGTCGGGATAGA

+HWI-EAS443:3:3:1781:1527#0/1  
aa[a]aa``\_a[US]¥\_``\_R^aU`U`\_]YU\_]^^^\_^[  
@HWI-EAS443:3:3:178:350#0/1  
TAGACCCATTCAAATTACTCCAAAACAGCCAAGTGGTCAG  
+HWI-EAS443:3:3:178:350#0/1  
abba\_W]bbaaa`\_\_aaaa\_a`Yaaaa\_`^`aa^`\_]V`\_  
@HWI-EAS443:3:3:305:1894#0/1  
ATCGGGAGATTCTACATCCAAATGTGCACTGAACTCAAAC  
+HWI-EAS443:3:3:305:1894#0/1  
^Ybaa`a`aa\_a^S\_a^]`a[aaZVaW`V^^`\_W\_J``YS  
@HWI-EAS443:3:3:420:319#0/1  
CTCAGAATGAGTGCTGACCGTGCCAGGAAAATGAGGTCTT  
+HWI-EAS443:3:3:420:319#0/1  
`TX[^XTUb[\_Y¥Y[a[YRYHa^[UaSM^^YV^V\_QGRZ^  
@HWI-EAS443:3:3:59:262#0/1  
GCTGGGTTTTCTTTGGTCTCATCAGGCTGACCACTTGGC  
+HWI-EAS443:3:3:59:262#0/1  
aa\_b``VRR`baa]SVMU\_JWX^G[[`^\_a\_NSQVVNZBB  
@HWI-EAS443:3:3:618:933#0/1  
TAACAATAGAGAGGATGGTGCTTTCTGCTTTTGATGAGAG  
+HWI-EAS443:3:3:618:933#0/1  
aaa\_\_X\_\_aaa\_aa`a`\_Q]LP¥aP¥TDM^`\_]SWRR]X  
@HWI-EAS443:3:3:661:1611#0/1  
GAATGATTGGTGAATCGGGAGATTCTACATCCAAATGTG  
+HWI-EAS443:3:3:661:1611#0/1  
aaa`a`a`\_]a¥\_``^a\_\_\_\_\_^]^^^\_]\_[X\_\_^^\_Z\_  
@HWI-EAS443:3:3:767:1231#0/1  
GAAACGCTGAGATTGAAGACCTCATTTCCTGGCACGGTC  
+HWI-EAS443:3:3:767:1231#0/1  
aaba\_`aaaab`aa\_\_a\_a`\_a\_aaa`a\_Y^^`\_\_^`\_Y]  
@HWI-EAS443:3:3:796:419#0/1  
ATCCTCTCTATTGTTATGCTATTCTGGATTAGTCGTCAT  
+HWI-EAS443:3:3:796:419#0/1  
aaaaa`a\_aaaab`aaaaaaaaaaaaa````a\_\_S\_a¥\_`  
@HWI-EAS443:3:3:867:1120#0/1  
GCCATTGTTTGCTTGGCGCCAACTCTCCTTATTTCTTCT  
+HWI-EAS443:3:3:867:1120#0/1  
a^Y\_]\_\_[[``[aZ¥UZ¥OJOOY[VOYTHIYTZ]VJORKM  
@HWI-EAS443:3:3:964:1708#0/1  
GGATGGTGCTTTCTGCTTTTGATGAGAGAAGAAATAAATA  
+HWI-EAS443:3:3:964:1708#0/1  
aaa^b```aaba`a^X`baaa\_bbX^Xa\_\_aa\_\_`a`^^a  
@HWI-EAS443:3:40:1028:1411#0/1  
TAACAATAGAGAGGATGGTGCTTTCTGCTTTTGATGAGAG  
+HWI-EAS443:3:40:1028:1411#0/1  
aaaaaaaaa`a`a\_\_\_\_\_`X`^^`\_XYW[U^\_aTWXTKPUZ  
@HWI-EAS443:3:40:1064:1750#0/1  
ACTGAACTCAAACCTCAGTGATTATGATGGACGACTAATCC  
+HWI-EAS443:3:40:1064:1750#0/1  
a`ZN¥a`XX^`ZX^RWT¥^[`[XWRSM[TPT`[^\_Y^G



@HWI-EAS443:3:40:1101:424#0/1  
GCACATTTGGATGTAGAATCTCCCGATTCCACCAATCATT  
+HWI-EAS443:3:40:1101:424#0/1  
a\_aa`a`a\_\_`\_^VYLW^Z^WWV]YYYYVWZ]MDKTVRRT  
@HWI-EAS443:3:40:1150:1054#0/1  
TGCTTTCTGCTTTTGATGAGAGAAGAAATAAATACCTAGA  
+HWI-EAS443:3:40:1150:1054#0/1  
abaaaaaaaa\_a\_`aa\_a\_a\_a\_`\_YLX]a^\_a```\_a\_\_  
@HWI-EAS443:3:40:116:361#0/1  
TGGGTTTTTCATTTGGTCTCATCAGGCTGACCACTTGGCTG  
+HWI-EAS443:3:40:116:361#0/1  
\_aaa\_bbbabbbaba\_aa^[`bbaaaZ`P]^aa\_\_aaa`a  
@HWI-EAS443:3:40:1224:1934#0/1  
ACAATAGAGAGGATGGTGCTTTCTGCTTTTGATGAGAGAA  
+HWI-EAS443:3:40:1224:1934#0/1  
aaa`ab`^`^aa]Za]X]VPX`\_]XVZ]\_\_W`ZXX[P\_^  
@HWI-EAS443:3:40:1231:176#0/1  
GCAATGATGGATCAAGTAAGAGAAAGTCGAAACCCAGGAA  
+HWI-EAS443:3:40:1231:176#0/1  
a^X\_]`^LZa^QPSPR[Z¥YQROSVYRM^UUTTR^WWYZSV  
@HWI-EAS443:3:40:1306:427#0/1  
GACCCATTCAAATTACTCCAAAACAGCCAAGTGGTCAGCC  
+HWI-EAS443:3:40:1306:427#0/1  
ab]a]ZPU¥ZV[^[\_`^`\_]`^`¥Z[U[^UUWR\_GUS^YP  
@HWI-EAS443:3:40:1327:1559#0/1  
TTTTTCATTTGGTCTCATCAGGCTGACCACTTGGCTGTTTT  
+HWI-EAS443:3:40:1327:1559#0/1  
]a`a`\_`a`\_\_¥a`¥`\_`aa^]aa`¥]baa^\_`¥`a]FX¥Z  
@HWI-EAS443:3:40:1417:789#0/1  
ATTCTGGGATCCATTCCGGTGCGAACAAGCGCTCTTGTTTC  
+HWI-EAS443:3:40:1417:789#0/1  
`b`^`^bbb`ba`aaaa`b¥Y`abaaYL`aaaa`aaaa`Z  
@HWI-EAS443:3:40:1432:833#0/1  
GAGAGAAGAAATAAATACCTAGAAGAGCATCCCAGTGCTG  
+HWI-EAS443:3:40:1432:833#0/1  
`]]\_`[Ta[^¥`a`^`^\_VN\_\_]\_\_]\_V\_U[¥S\_XYLZWU\_  
@HWI-EAS443:3:40:1479:1476#0/1  
CTCCTGTTTTCTTAGGGTCCTTCCCAGCACTGGGATGCTC  
+HWI-EAS443:3:40:1479:1476#0/1  
aababbbbbbbabbbabababbbbb`aab\_`abba`ab]ba  
@HWI-EAS443:3:40:1494:972#0/1  
GCCACATATCAGAGAACAAGAGCGCTTGTTTCGCACCGGAA  
+HWI-EAS443:3:40:1494:972#0/1  
a^V]PNXRVMORTRXKNUYRWWNYVPP¥[WSR]RZU[Q]JQ  
@HWI-EAS443:3:40:1570:809#0/1  
GGGTCCTCCTGTTTTCTTAGGGTCCTTCCCAGCACTGGGA  
+HWI-EAS443:3:40:1570:809#0/1  
a\_`Y`¥XR]^V^]\_Q`^Y]\_`[¥WSU]\_`\_WYSHYZZ¥]U  
@HWI-EAS443:3:40:1663:964#0/1  
TGGGCTTGCAGTAGCAAGTGGGCATGACTTTGAAAGGGAA

+HWI-EAS443:3:40:1663:964#0/1  
`\_]`¥abX^aZTWSY`^YX]T¥aWSHP\_\_a\_V`\_`[\_ZU  
@HWI-EAS443:3:40:1673:825#0/1  
ATCGGGAGATTCTACATCCAAATGTGCACTGAACTCAAAC  
+HWI-EAS443:3:40:1673:825#0/1  
abbbbbbb\_bbabaa]ba`bab`a¥abaa]^aababa^JW  
@HWI-EAS443:3:40:1696:493#0/1  
TAACAATAGAGAGGATGGTGCTTTCTGCTTTTGATGAGAG  
+HWI-EAS443:3:40:1696:493#0/1  
`\_a\_`T`a\_aY]a^Ya^0\_¥Z^¥X¥[]^¥[LPW\_][¥[¥  
@HWI-EAS443:3:40:1769:1289#0/1  
TGGTGCTTTCTGCTTTTGATGAGAGAAGAAATAAATACCT  
+HWI-EAS443:3:40:1769:1289#0/1  
aa`¥aaaa`aa\_`aaaaaa`a`VN]^`\_a\_V\_\_]W][  
@HWI-EAS443:3:40:182:320#0/1  
AATTACTCCAAAACAGCCAAGTGGTCAGCCTGATGAGACC  
+HWI-EAS443:3:40:182:320#0/1  
abbaabaaaaabaaaaaa`aa^a`¥]G¥\_\_`\_\_^a^\_Y[a  
@HWI-EAS443:3:40:210:197#0/1  
AACTGATCCCCTCAGAATGAGTGCTGACCGTGCCAGGAAA  
+HWI-EAS443:3:40:210:197#0/1  
aa[^aba^^aaa\_\_aS^]a\_`Y`\_]\_IZ¥`¥^`¥W¥UGV  
@HWI-EAS443:3:40:23:417#0/1  
GTCCTCTGTTTTCTTAGGGTCCTTCCCAGCACTGGGATG  
+HWI-EAS443:3:40:23:417#0/1  
`^`\_\_\_\_`aaNaa\_\_a\_\_aYWV¥V`\_^ZNFYVX¥^`]]YZ`  
@HWI-EAS443:3:40:260:1955#0/1  
ATGGTGCTTTCTGCTTTTGATGAGAGAAGAAATAAATACC  
+HWI-EAS443:3:40:260:1955#0/1  
a`\_[]aa`\_a`[\_\_\_\_`\_\_`^`\_`^ZH`]]`\_\_`XZaa]  
@HWI-EAS443:3:40:370:1807#0/1  
TCAGCACTCATTCTGAGGGATCAGTTGCACATAAATCCT  
+HWI-EAS443:3:40:370:1807#0/1  
aab]aaaaaaa¥aa\_a`^^^`^^TW¥NYaa[a\_a¥¥VaaU  
@HWI-EAS443:3:40:432:658#0/1  
GTTCCAACCTTTTACCAGCACCTGCGGCACCAGACC  
+HWI-EAS443:3:40:432:658#0/1  
a^a\_`\_aY\_\_`X^[^V\_`^Y¥]¥TS[P¥¥Y[SOQWJVUVM  
@HWI-EAS443:3:40:438:1695#0/1  
GCAGGCAGGATTTATGTGCAACTGATCCCCTCAGAATGAG  
+HWI-EAS443:3:40:438:1695#0/1  
`aa[ab^\_a[\_aa\_[T\_\_a`a`XO]Xaaba¥\_¥U[[TXZY  
@HWI-EAS443:3:40:46:1865#0/1  
GCTGTTGCATCTTCGCCATTGTTTGCTTGGCGCCAAACTC  
+HWI-EAS443:3:40:46:1865#0/1  
`a`XY^`b`^`S`\_]`a^¥aU]a¥T]Y\_PXVDZ^MOU¥¥\_  
@HWI-EAS443:3:40:491:350#0/1  
ATGCAAGTTCAACACTTCCCAGAAGGTCTGGTGCCGAG  
+HWI-EAS443:3:40:491:350#0/1  
V^`\_aX\_\_¥^aa`aaaa`\_a\_aa]]`TRaaa^R`a¥`^Qa

@HWI-EAS443:3:40:52:1139#0/1  
TGATTATGATGGACGACTAATCCAGAATAGCATAACAATA  
+HWI-EAS443:3:40:52:1139#0/1  
abaabbabaaa¥^aaaa^aaa\_a]P]Y`aaa\_a`^^\_`  
@HWI-EAS443:3:40:539:1876#0/1  
GCTTTCTGCTTTTGATGAGAGAAGAAATAAATACCTAGAA  
+HWI-EAS443:3:40:539:1876#0/1  
a`[V[WP]ZRVT^[ZUTVZFRYZXWUGROHTVUVYY]SV[  
@HWI-EAS443:3:40:646:1765#0/1  
CCCTTGCTCCTTCGTCATTTTCACCCCTCCAGAAATTCG  
+HWI-EAS443:3:40:646:1765#0/1  
a`a^Ya[aaX`^`U`]a\_^^\_[aaY]^Waaa\_a]SVWYaS  
@HWI-EAS443:3:40:662:1402#0/1  
AAATGGACGAAGGACAAGGGTTGCTTATGAAAGAATGTGC  
+HWI-EAS443:3:40:662:1402#0/1  
a`\_bbbbaaaa¥aaaa¥aa¥]`a`¥H[\_¥[a^¥` `a^`\_  
@HWI-EAS443:3:40:701:1389#0/1  
CTGTTTTCTTAGGGTCCTTCCCAGCACTGGGATGCTCTTC  
+HWI-EAS443:3:40:701:1389#0/1  
[`aa`a``baY¥\_a```\_W\_`^^^aaaa`^¥]aa\_a`]]  
@HWI-EAS443:3:40:706:1213#0/1  
CTGCTGTTGCATCTTCGCCATTGTTTGCTTGGCGCCAAAC  
+HWI-EAS443:3:40:706:1213#0/1  
Nbbbaa`[[`aba[`baaa]]`aZaU^[a¥`^XZ^HT¥X  
@HWI-EAS443:3:40:736:44#0/1  
AGAAGAAATAAATACCTAGAAGAGCATCCCAGTGCTGGGA  
+HWI-EAS443:3:40:736:44#0/1  
`\_XZ^a[¥Z\_aa\_T` `a[aZY^Y[V^S[ZLLLULU`HZ\_XX  
@HWI-EAS443:3:40:756:70#0/1  
TCCTGGGTTTCGACTTTCTTACTTGATCCATCATTGCC  
+HWI-EAS443:3:40:756:70#0/1  
ab\_aaaaUaa`aY^a\_\_\_\_^\_\_a\_`^WIU\_UP^`]YX[¥S  
@HWI-EAS443:3:40:956:1358#0/1  
AATGATTGGTGAATCGGGAGATTCTACATCCAAATGTGC  
+HWI-EAS443:3:40:956:1358#0/1  
\_abaa]aa\_¥`a`\_a`aaa`\_¥]\_\_VFU]¥^`\_a\_X^UXW  
@HWI-EAS443:3:40:997:578#0/1  
CACATTCTTTCATAAGCAACCCTTGCCTTCGTCCATTTT  
+HWI-EAS443:3:40:997:578#0/1  
aabbbaabb`bbaba`aaaaba`a\_a` ```\_a\_a\_U¥a`  
@HWI-EAS443:3:42:1007:101#0/1  
AGAGCATCCCAGTGCTGGGAAGGACCCTAAGAAAACAGGA  
+HWI-EAS443:3:42:1007:101#0/1  
abbbabbbabab\_baabbb\_aba¥a`\_aa`aa\_\_a^aaa`  
@HWI-EAS443:3:42:1031:366#0/1  
GTTGCTTATGAAAGAATGTGCAATATCCTCAAAGGAAAAT  
+HWI-EAS443:3:42:1031:366#0/1  
a`bb\_abaabaabaab\_a`aaaaaaab`aabaaa`aa  
@HWI-EAS443:3:42:1050:207#0/1  
CATAAATCCTGCCTGCCTGCTTGTGTGTATGGGCTTGCAG

+HWI-EAS443:3:42:1050:207#0/1  
a`[^`a^¥bb`^Z]X^[\_`\_a`¥aaUaba^RWY[LQY  
@HWI-EAS443:3:42:1085:1514#0/1  
CGCCAAGCAAACAATGGCGAAGATGCAACAGCAGGTCTTA  
+HWI-EAS443:3:42:1085:1514#0/1  
abbba`ab]b`\_a`¥Zbabbaa^a`Q^aaa[`a`^V\_\_\_\_]  
@HWI-EAS443:3:42:1096:846#0/1  
CTGCGGTGAAAGGAGTTGGAACAATAGCAATGGAGTTAAT  
+HWI-EAS443:3:42:1096:846#0/1  
\_bbbababbbbaababbbabbbbbb]bbaab`bbba  
@HWI-EAS443:3:42:1109:47#0/1  
CTCTAATGCAAGTTCAACACTTCCCAGAAGGTCTGGTGC  
+HWI-EAS443:3:42:1109:47#0/1  
a`bb`baba]0]bab`\_`^aabaaaa^¥b¥W` `T[`aa^b`  
@HWI-EAS443:3:42:1145:223#0/1  
AGTGAGTACCCTTCCCTTTCAAAGTCATGCCCACTTGCTA  
+HWI-EAS443:3:42:1145:223#0/1  
aa¥aa`\_X^`a\_]\_\_aaa`aa`¥¥a`X¥[\_^Z`\_`[^  
@HWI-EAS443:3:42:1188:1787#0/1  
GAACTCAAACACTCAGTGATTATGATGGACGACTAATCCAGA  
+HWI-EAS443:3:42:1188:1787#0/1  
abbabbbabababb`aaabbbaaaa`a`a`aaa\_a`aa`  
@HWI-EAS443:3:42:1219:1071#0/1  
AGCAGGTCTTACTCATATCATGATTTGGCATTCCAACCTG  
+HWI-EAS443:3:42:1219:1071#0/1  
¥]ZZ`^]aa]aaa]\_\_¥\_\_`a\_\_\_aa```a] [U¥LWa\_^  
@HWI-EAS443:3:42:1234:467#0/1  
AATCTCCCGATTCCACCAATCATTCTTCCGACAGATGCTC  
+HWI-EAS443:3:42:1234:467#0/1  
abba`]aa``aa\_a``\_a```\_`aa`a`Z`aa^Z\_Z\_a`X  
@HWI-EAS443:3:42:1312:858#0/1  
TGGGGAGCGCCAGGATGCCACAGAAATCAGAGCATCTGTC  
+HWI-EAS443:3:42:1312:858#0/1  
aaUa\_\_aa`^`\_YQQ]X`¥a`¥^Z]M` `^^¥¥¥¥^YUN  
@HWI-EAS443:3:42:1318:1259#0/1  
GCATAACAATAGAGAGGATGGTGCTTTCTGCTTTTGATGA  
+HWI-EAS443:3:42:1318:1259#0/1  
a`\_a\_a`\_a`\_\_`\_X`^¥`\_N\_[U`^U]XV^^^YRXWL  
@HWI-EAS443:3:42:1323:1547#0/1  
GAAGAAATAAATACCTAGAAGAGCATCCCAGTGCTGGGAA  
+HWI-EAS443:3:42:1323:1547#0/1  
`a` `aa^baaaaaabb`aaaab`aab`aaaXa` `X`\_`  
@HWI-EAS443:3:42:1324:943#0/1  
GTTGCATCTTCCGATTGTTTGTGTTGGCGCCAAACTCTCC  
+HWI-EAS443:3:42:1324:943#0/1  
`aa`\_\_`baaaZ`[\_a`\_ab`aY`¥¥^`\_X][XN]XV]\_  
@HWI-EAS443:3:42:1329:154#0/1  
CGTCCATCATAATCACTGAGTTTGAGTTTCAGTGACATTT  
+HWI-EAS443:3:42:1329:154#0/1  
¥V¥a\_]\_N\_[[]XV^] `bab^aaa`a\_a\_]`\_a]`\_Z]^`^`

@HWI-EAS443:3:42:1342:778#0/1  
GGTATTTATTTCTTCTCATCAAAAGCAGAAAGCACCAT  
+HWI-EAS443:3:42:1342:778#0/1  
ab^abbbaabb`abababaaa`aaaaa^^a`\_a]\_aaaa`  
@HWI-EAS443:3:42:1395:1114#0/1  
GTCCTCTGTTTTCTTAGGGTCTTCCCAGCACTGGGATG  
+HWI-EAS443:3:42:1395:1114#0/1  
aaa`baaababaa`aaaaa\_\_\_aa`a\_aab¥`\_aaaa^aa  
@HWI-EAS443:3:42:1430:107#0/1  
TGGGTTTTCGACTTTCTTACTTGATCCATCATTGCCCTC  
+HWI-EAS443:3:42:1430:107#0/1  
ab`\_Ubbba]aabab` `[a\_XW\_ba^`]\_`b\_a\_\_a]`a\_\_  
@HWI-EAS443:3:42:1446:1303#0/1  
GACCGTGCCAGGAAAATGAGGTCTTCAATCTCAGCGTTTC  
+HWI-EAS443:3:42:1446:1303#0/1  
a`Q¥aU\_aXR\_Z]`\_a`X]aZFXaY^\_Z]`]]YY^^U^QG  
@HWI-EAS443:3:42:147:492#0/1  
CCTGGGTTTTCGACTTTCTTACTTGATCCATCATTGCCC  
+HWI-EAS443:3:42:147:492#0/1  
abbbbbbbb\_U¥a`a\_\_a\_aa^aa[\_\_\_a[^`aaaa]a^^`  
@HWI-EAS443:3:42:1548:1424#0/1  
AAATTTCTGGAGGGGTGAAAATGGACGAAGGACAAGGGTT  
+HWI-EAS443:3:42:1548:1424#0/1  
¥a`^aab`^Y0]^¥]E]\_Z`b`WP\_¥`a``\_Y[]¥G¥aZ  
@HWI-EAS443:3:42:1554:409#0/1  
GATGGATCAAGTAAGAGAAAGTCGAAACCCAGGAAACGCT  
+HWI-EAS443:3:42:1554:409#0/1  
\_bbaba`abab\_abb\_b`\_aa\_a\_aa`U\_[]]`\_aaZ`\_Y  
@HWI-EAS443:3:42:165:26#0/1  
GGAAGGGTACTCACTGGTCGGGATAGACCCATTCAAATTA  
+HWI-EAS443:3:42:165:26#0/1  
aaa`a``Z^``a¥a¥¥aV\_``a^^\_\_[[`\_^Z^Z[YV]S¥  
@HWI-EAS443:3:42:1661:262#0/1  
TAGAGAGGATGGTGCTTTCTGCTTTTGATGAGAGAAGAAA  
+HWI-EAS443:3:42:1661:262#0/1  
aab`ba`b`\_baV^WYa\_^`¥V`\_a`WY``Ya]` [ ` \_X^¥  
@HWI-EAS443:3:42:1711:1507#0/1  
GCTTTCTGCTTTTGATGAGAGAAGAAATAAATACCTAGAA  
+HWI-EAS443:3:42:1711:1507#0/1  
aba`aaaa]abaab`aa\_b\_a^aa\_aaaa`aa^]a```]  
@HWI-EAS443:3:42:1718:1794#0/1  
GAAGAATGATTGGTGAATCGGGAGATTCTACATCCAAAT  
+HWI-EAS443:3:42:1718:1794#0/1  
^aabaaa^UaaYa^S\_a^`\_aaaRXXa[QY]GY\_RRW\_]Y  
@HWI-EAS443:3:42:174:424#0/1  
TCTGAGGGGATCAGTTGCACATAAATCCTGCCTGCCTGCT  
+HWI-EAS443:3:42:174:424#0/1  
aaababa`aaaaa`aaaa\_a`]a\_aa\_\_``\_`  
@HWI-EAS443:3:42:210:860#0/1  
GGTTTTCATTTGGTCTCATCAGGCTGACCACTTGGCTGTT

+HWI-EAS443:3:42:210:860#0/1  
ab^aa\_aRaaa]aa``\_aa\_\_a`\_`\_]\_a`[\_`\_`aW[  
@HWI-EAS443:3:42:232:843#0/1  
CCTCTCTATTGTTATGCTATTCTGGATTAGTCGTCATCA  
+HWI-EAS443:3:42:232:843#0/1  
aababbaabba`bababbabaaa\_baaaa\_aa\_`````a  
@HWI-EAS443:3:42:331:169#0/1  
CAAACAATGGCGAAGATGCAACAGCAGGTCTTACTCATAT  
+HWI-EAS443:3:42:331:169#0/1  
abaaaba`ba`aaaa`aa`a\_\_a`W\_\_`\_]`^\_Z`^`\_  
@HWI-EAS443:3:42:442:2020#0/1  
ATTTCAAACAGCTGCCAGAGGGCAATGATGGATCAAGTA  
+HWI-EAS443:3:42:442:2020#0/1  
aaZ]`a`^aaaZa\_\_aaa`RPY\_Z[Z]\_]X¥]R^`Y\_  
@HWI-EAS443:3:42:458:1794#0/1  
GAAAGAATGTGCAATATCCTCAAAGGAAAATTTCAAACAG  
+HWI-EAS443:3:42:458:1794#0/1  
\_\_baZ`a`abaaa\_aa\_aa`bbba`^aaaa[aaaab`  
@HWI-EAS443:3:42:557:89#0/1  
AGAGGGCAATGATGGATCAAGTAAGAGAAAGTCGAAACCC  
+HWI-EAS443:3:42:557:89#0/1  
[bbabb`aabbbaaba^aa\_b^baa`\_Wa`\_G\_aa`\_WY[  
@HWI-EAS443:3:42:638:207#0/1  
GAAGGGTACTCACTGGTCGGGATAGACCCATTCAAATTAC  
+HWI-EAS443:3:42:638:207#0/1  
ab\_bbb^abba\_baba\_aaaa\_\_aaaa`aaa`\_aaa¥a`  
@HWI-EAS443:3:42:746:1607#0/1  
TGTGAGCTGGGTTTTCTTTGGTCTCATCAGGCTGACCAC  
+HWI-EAS443:3:42:746:1607#0/1  
^a]\_\_`\_````````aabb\_`¥ZUa¥^a``\_\_]a\_`¥`\_a[  
@HWI-EAS443:3:42:784:1315#0/1  
GGGTCCTCCTGTTTTCTTAGGGTCCTTCCCAGCACTGGGA  
+HWI-EAS443:3:42:784:1315#0/1  
abaYabbbbabbbbabbb\_a`^aaabbabaaaa`a\_^¥  
@HWI-EAS443:3:42:831:298#0/1  
GACTTTGAAAGGGAAGGGTACTCACTGGTCGGGATAGACC  
+HWI-EAS443:3:42:831:298#0/1  
ZSaabba^\_X]T¥aa¥^aTaa¥]`a`baU[aX]`\_]X[YV  
@HWI-EAS443:3:42:907:1170#0/1  
TGGGGAGCGCCAGGATGCCACAGAAATCAGAGCATCTGTC  
+HWI-EAS443:3:42:907:1170#0/1  
\_b¥Z]aaa]YZ`^TW^Z^]a¥`\_]`^`a\_ZZ[\_^aYFQ  
@HWI-EAS443:3:42:939:509#0/1  
GGTCCTCCTGTTTTCTTAGGGTCCTTCCCAGCACTGGGAT  
+HWI-EAS443:3:42:939:509#0/1  
ab¥abaabbb\_abaabaaaa^aaaa^H^aaa`aaa`\_`  
@HWI-EAS443:3:42:954:233#0/1  
GATTAACCTCATTGCTATTGTTCCAACCTTTCACCGCA  
+HWI-EAS443:3:42:954:233#0/1  
aaaaaaaa\_a`aa`\_`\_\_a^\_]U^¥^`\_¥`\_`\_¥^a¥`¥¥

@HWI-EAS443:3:42:985:113#0/1  
CGCAGGTGCTGCGGTGAAAGGAGTTGGAACAATAGCAATG  
+HWI-EAS443:3:42:985:113#0/1  
abbbbb`bb\_baaaLa[^bbb`baa\_Pabaaa\_[]`S`^a  
@HWI-EAS443:3:42:99:1062#0/1  
AGAATCTCCCGATTCCACCAATCATTCTCCGACAGATGC  
+HWI-EAS443:3:42:99:1062#0/1  
aaa`aaaa\_aa\_aa]`a`¥^`\_\_`\_\_`a[¥\_\_Z\_\_YURX  
@HWI-EAS443:3:43:1003:1866#0/1  
GGCTTGCAGTAGCAAGTGGGCATGACTTTGAAAGGGAAGG  
+HWI-EAS443:3:43:1003:1866#0/1  
aaa[¥[a`]Y`\_a`\_RX[X[^\_\_Z\_`^XUY^ZUUY[[R  
@HWI-EAS443:3:43:1020:1384#0/1  
GAAGAAATAAATACCTAGAAGAGCATCCCAGTGCTGGGAA  
+HWI-EAS443:3:43:1020:1384#0/1  
a`X`\_\_T\_`]``\_VN\_\_`\_\_\_\_`\_\_]\_VU]`RY¥\_\_TTZZ  
@HWI-EAS443:3:43:105:764#0/1  
CCTCTCTATTGTTATGCTATTCTGGATTAGTCGTCATCA  
+HWI-EAS443:3:43:105:764#0/1  
aaabbbb`abbaab\_aababaa`\_`a`a][`a^^]`^`  
@HWI-EAS443:3:43:1131:792#0/1  
GAAATAAATACCTAGAAGAGCATCCCAGTGCTGGGAAGGA  
+HWI-EAS443:3:43:1131:792#0/1  
aa`aaaaaaX\_\_`aa`^]`]\_a\_]U¥Ya\_\_aaZ\_^a^\_  
@HWI-EAS443:3:43:1148:637#0/1  
TAACAATAGAGAGGATGGTGCTTTCTGCTTTTGATGAGAG  
+HWI-EAS443:3:43:1148:637#0/1  
aa\_\_`ab\_aaa`a\_V`aU^XX^N`\_X\_a\_\_SMY`W`]\_  
@HWI-EAS443:3:43:1157:878#0/1  
CCATCCTCTCTATTGTTATGCTATTCTGGATTAGTCGTC  
+HWI-EAS443:3:43:1157:878#0/1  
abbbab`bbbbbbbababababbaa\_a]abba`X`a\_  
@HWI-EAS443:3:43:1190:275#0/1  
TGGACGACTAATCCAGAATAGCATAACAATAGAGAGGATG  
+HWI-EAS443:3:43:1190:275#0/1  
abb\_aa``bba\_^a^baa`\_a\_\_a`a`a\_a]a\_a^a¥\_\_`  
@HWI-EAS443:3:43:1219:1292#0/1  
GGCATGACTTTGAAAGGGAAGGGTACTCACTGGTCGGGAT  
+HWI-EAS443:3:43:1219:1292#0/1  
abab`b]bbabbaaaaaaaaaa\_Ra`a\_a^\_]aU`abaY\_  
@HWI-EAS443:3:43:1222:2002#0/1  
CAGTGATTATGATGGACGACTAATCCAGAATAGCATAACA  
+HWI-EAS443:3:43:1222:2002#0/1  
`Mab`bbabaaa\_`^`¥`]b`\_`Z\_b^aaa^XX¥aaaXX  
@HWI-EAS443:3:43:1290:1402#0/1  
TGGGTTTCGACTTTCTTACTTGATCCATCATTGCCCTC  
+HWI-EAS443:3:43:1290:1402#0/1  
X`b^KZbaaaa¥Y`aa^a`\_`]`^¥`\_Za]Z`]W\_YaX`X  
@HWI-EAS443:3:43:1305:688#0/1  
GAAGAAATAAATACCTAGAAGAGCATCCCAGTGCTGGGAA

+HWI-EAS443:3:43:1305:688#0/1  
aaZ`[`aaa`^`^a\_aab``a\_\_\_\_\_`\_]`aYa`¥`^[^^  
@HWI-EAS443:3:43:1316:498#0/1  
AACAAATAGAGAGGATGGTGCTTTCTGCTTTTGATGAGAGA  
+HWI-EAS443:3:43:1316:498#0/1  
\_¥baaab`Uaab`S^¥^HW\_U``aZbXZa\_a^Pa^MXW]a  
@HWI-EAS443:3:43:1457:164#0/1  
GTTGCATCTTCGCCATTGTTTGCTTGGCGCCAAACTCTCC  
+HWI-EAS443:3:43:1457:164#0/1  
aX]`Yaaaaaaaa\_\_`\_]\_\_¥\_]`\_[] []XZ¥RGURUXU  
@HWI-EAS443:3:43:1474:1214#0/1  
AAATTTTCCTTTGAGGATATTGCACATTCTTTCATAAGCA  
+HWI-EAS443:3:43:1474:1214#0/1  
aaabbbabaaababbaSbaab`XW\_b`P`aa]]a`\_`\_`  
@HWI-EAS443:3:43:1554:1162#0/1  
GTGCACATTTGGATGTAGAATCTCCCGATTCCACCAATCA  
+HWI-EAS443:3:43:1554:1162#0/1  
aZ]Za\_aa]aaY¥LYTLNW\_\_N]NSS^YX`VXWGSWPVWS  
@HWI-EAS443:3:43:1634:393#0/1  
GAATAGCATAACAATAGAGAGGATGGTGCTTTCTGCTTTT  
+HWI-EAS443:3:43:1634:393#0/1  
a`aa`baaba`\_\_\_\_a\_a`a\_a`\_`a]T`XZ^^YYPV`\_`  
@HWI-EAS443:3:43:1649:635#0/1  
GGCTTGCAGTAGCAAGTGGGCATGACTTTGAAAGGGAAGG  
+HWI-EAS443:3:43:1649:635#0/1  
`aaa`]aa^W\_aXaXa^\_aX`\_\_a````aa¥^^a\_\_[\_`^  
@HWI-EAS443:3:43:1673:83#0/1  
TCCAAAACAGCCAAGTGGTCAGCCTGATGAGACCAAATGA  
+HWI-EAS443:3:43:1673:83#0/1  
aaaa\_a]\_\_a[\_Z^a[\_Y]^\_\_Z[``]\_`\_] [QYY]`^¥  
@HWI-EAS443:3:43:192:230#0/1  
GCTGTTTTGGAGTAATTTGAATGGGTCTATCCCGACCAGT  
+HWI-EAS443:3:43:192:230#0/1  
abab\_aabbbaa]a`ababbb`b\_b^aaa`\_`\_aa`X\_a]  
@HWI-EAS443:3:43:201:58#0/1  
GTGGGCATGACTTTGAAAGGGAAGGGTACTCACTGGTCGG  
+HWI-EAS443:3:43:201:58#0/1  
a``aaa`aa^`aaab\_a` [aa\_\_aa\_X`]`\_^\_\_`\_WU¥^  
@HWI-EAS443:3:43:228:1702#0/1  
ATAAATCCTGCCTGCCTGCTTGTGTGTATGGGCTTGCACT  
+HWI-EAS443:3:43:228:1702#0/1  
a`WZYVa`Uaaa¥¥]^Z``T\_]ZVSGL]U^^¥^ZX^¥[XV  
@HWI-EAS443:3:43:240:1049#0/1  
TAGAGAGGATGGTGCTTTCTGCTTTTGATGAGAGAAGAAA  
+HWI-EAS443:3:43:240:1049#0/1  
[^]Vbb^a]Z^aJTI¥b[NQ\_[Uaa¥NKX\_HRHS¥^¥XTN  
@HWI-EAS443:3:43:258:990#0/1  
CATTCAGTTGGAATGCCAAATCATGATATGAGTAAGACC  
+HWI-EAS443:3:43:258:990#0/1  
abbb`V``]aa`^abaaba```a`bbaaaa¥^] ^Y]\_ZL



@HWI-EAS443:3:43:28:407#0/1  
GCTTTCTGCTTTTGTGAGAGAAGAAATAAATACCTAGAA  
+HWI-EAS443:3:43:28:407#0/1  
aaa`\_]\_a`]`aaaa\_aa\_a^a^aaY``\_¥\_^``]W]^`^¥^  
@HWI-EAS443:3:43:357:1027#0/1  
CTCCTGTTTTCTTAGGGTCCTTCCCAGCACTGGGATGCTC  
+HWI-EAS443:3:43:357:1027#0/1  
a¥a^aaaa`^]b¥SS¥\_a^[¥aYXYb```a[a^`^a\_]YSX  
@HWI-EAS443:3:43:379:641#0/1  
CACATTCTTTCATAAGCAACCCTTGCCTTCGTCCATTTT  
+HWI-EAS443:3:43:379:641#0/1  
`a^^aa`^`U\_W]ZZa`^`a]a\_a\_VY`\_ZYa¥\_Za^aaa  
@HWI-EAS443:3:43:413:84#0/1  
TGATGGACGACTAATCCAGAATAGCATAACAATAGAGAGG  
+HWI-EAS443:3:43:413:84#0/1  
a\_aabaabaaaa`abaa`aa\_aaa`a\_```^a\_a\_a\_`a  
@HWI-EAS443:3:43:476:1567#0/1  
GCTGTTTTGGAGTAATTTGAATGGGTCTATCCCGACCAGT  
+HWI-EAS443:3:43:476:1567#0/1  
aaXYSa^Yba\_a[``][`^NZaaVJ\_]`^Z]\_¥¥RWaY`\_ZT  
@HWI-EAS443:3:43:506:898#0/1  
GTAAGAGAAAAGTCGAAACCCAGGAAACGCTGAGATTGAAG  
+HWI-EAS443:3:43:506:898#0/1  
\_I`\_]`[\_aUa`¥a^¥`\_\_¥ZZ^KRTY^YNV]Y\_VVUSYTV  
@HWI-EAS443:3:43:533:493#0/1  
GCTGTTTTGAAATTTTCTTTGAGGATATTGCACATTCTTT  
+HWI-EAS443:3:43:533:493#0/1  
aaab¥aa[POUY]SZ\_aa`¥^^^Z\_YW\_¥]^\_VU^\_\_`^\_  
@HWI-EAS443:3:43:539:114#0/1  
CCCAGTGCTGGGAAGGACCCTAAGAAAACAGGAGGACCCA  
+HWI-EAS443:3:43:539:114#0/1  
ababbaaabababbab`aabababab\_aa`Ya\_`a¥\_a  
@HWI-EAS443:3:43:553:661#0/1  
CAATGATGGATCAAGTAAGAGAAAAGTCGAAACCCAGGAAA  
+HWI-EAS443:3:43:553:661#0/1  
aabbbbabbbbaaaababbbb`a`baa^aaaaaaaa  
@HWI-EAS443:3:43:564:1426#0/1  
CATTGCCCTCTGGCAGCTGTTTCAAATTTTCTTTGAGG  
+HWI-EAS443:3:43:564:1426#0/1  
abaabbbbbbabaaab¥`baabbX^aabbab\_\_baaa`\_`  
@HWI-EAS443:3:43:589:1604#0/1  
GCATCCCAGTGCTGGGAAGGACCCTAAGAAAACAGGAGGA  
+HWI-EAS443:3:43:589:1604#0/1  
aabba`abbaaab`bababba\_`a`abaaaa\_aa`abaa  
@HWI-EAS443:3:43:630:1599#0/1  
CGACTAATCCAGAATAGCATAACAATAGAGAGGATGGTGC  
+HWI-EAS443:3:43:630:1599#0/1  
aa\_aaabaaaab^`Y]a\_aaaa`^\_aaaa`a\_`^a\_0\_X  
@HWI-EAS443:3:43:631:1125#0/1  
TAACAATAGAGAGGATGGTGCTTTCTGCTTTTGTGAGAG

+HWI-EAS443:3:43:631:1125#0/1  
\_aaaabba]^b¥aa\_aaa]aa\_`aR`aTaa\_^KG^RV\_Y\_  
@HWI-EAS443:3:43:728:658#0/1  
TGGACGACTAATCCAGAATAGCATAACAATAGAGAGGATG  
+HWI-EAS443:3:43:728:658#0/1  
abaa`ba`aa\_aa`b`a`aaaaa`aaaa[a\_a`^`\_  
@HWI-EAS443:3:43:818:1371#0/1  
ATTGTTCCAACCTCTTTCACCGCAGCACCTGCGGCACCAG  
+HWI-EAS443:3:43:818:1371#0/1  
]b)`W¥]bTa^^R^XY¥`\_a^^Xa`]¥`¥Xa¥[aOQY[[[  
@HWI-EAS443:3:43:881:837#0/1  
TAGAGAGGATGGTGCTTTCTGCTTTTGATGAGAGAAGAAA  
+HWI-EAS443:3:43:881:837#0/1  
``abaaabaab`GaZX` `[ZaYa`a\_]Ya\_Y]^`R^`¥`\_  
@HWI-EAS443:3:43:958:35#0/1  
GTGCTTTCTGCTTTTGATGAGAGAAGAAATAAATACCTAG  
+HWI-EAS443:3:43:958:35#0/1  
a\_a`\_aa^ab]a`aaa]aa]a]b¥\_a¥^^\_^^]^[]V\_X]  
@HWI-EAS443:3:44:1013:664#0/1  
GCTTTCTGCTTTTGATGAGAGAAGAAATAAATACCTAGAA  
+HWI-EAS443:3:44:1013:664#0/1  
`[[Z][\_`[\_`a\_XWYWTWQ^\_¥`ZZTW¥WU[\_VMY^WVV  
@HWI-EAS443:3:44:1115:355#0/1  
AGCCCATACACACAAGCAGGCAGGCAGGATTTATGTGCAA  
+HWI-EAS443:3:44:1115:355#0/1  
[a`Z`WU`]aW]ZZ^^ST\_\_`a`\_XUUDMLWRGXT[SYR  
@HWI-EAS443:3:44:128:999#0/1  
TGGTGCTTTCTGCTTTTGATGAGAGAAGAAATAAATACCT  
+HWI-EAS443:3:44:128:999#0/1  
a`a\_baaaaaaaa`aaaa`aaa\_\_a`a`\_aaaa`aa\_\_\_`  
@HWI-EAS443:3:44:1387:1091#0/1  
CATTGCTATTGTTCCAACCTCTTTCACCGCAGCACCTGCG  
+HWI-EAS443:3:44:1387:1091#0/1  
RZ\_ZZ\_\_X\_b`^\_bb^\_Z\_`a`U\_[Wa^X`X]¥¥]`X\_  
@HWI-EAS443:3:44:1389:1595#0/1  
TAATCACTGAGTTTGAGTTCAGTGCACATTTGGATGTAGA  
+HWI-EAS443:3:44:1389:1595#0/1  
a¥a]\_`[aa^a\_a`a]a)`a^`Y\_W`[a`\_[UY]]\_Y]]T  
@HWI-EAS443:3:44:1415:311#0/1  
TGACTTTGAAAGGGAAGGGTACTCACTGGTCGGGATAGAC  
+HWI-EAS443:3:44:1415:311#0/1  
aa\_\_aaaa\_a\_ba\_¥`^aX\_\_a\_\_\_]^Z]^]^]^\_Z  
@HWI-EAS443:3:44:1490:1456#0/1  
CTCCTGTTTTCTTAGGGTCCTTCCCAGCACTGGGATGCTC  
+HWI-EAS443:3:44:1490:1456#0/1  
a`aba\_Z¥bab\_Z\_Z]SUBaaa\_a¥aaaa^aaab[\_`[\_`R  
@HWI-EAS443:3:44:1512:585#0/1  
GAGGATGGTGCTTTCTGCTTTTGATGAGAGAAGAAATAAA  
+HWI-EAS443:3:44:1512:585#0/1  
a[``[aaa\_`W[``\_]`\_`[^]`a\_]`^\_Y`U]X^^¥\_\_`\_U

@HWI-EAS443:3:44:1537:1354#0/1  
GAGAGAAGAAATAAATACCTAGAAGAGCATCCCAGTGCTG  
+HWI-EAS443:3:44:1537:1354#0/1  
aY`\_bab^\_a\_\_a^\_\_a¥\_a\_a^`Q`\_^a\_W[S]`H`N\_^  
@HWI-EAS443:3:44:1584:233#0/1  
GGCATGACTTTGAAAGGGAAGGGTACTCACTGGTCGGGAT  
+HWI-EAS443:3:44:1584:233#0/1  
abbbbbbb`bbbaaabaa`abbaXa\_aaa\_a`^[Yaaa]]  
@HWI-EAS443:3:44:1692:154#0/1  
CACATTCTTTCATAAGCAACCCTTGCCTTCGTCCATTTT  
+HWI-EAS443:3:44:1692:154#0/1  
aaaabbaabbaaaa\_a`aa]a`aaa\_^\_\_`\_a^\_[[\_\_\_\_^  
@HWI-EAS443:3:44:1768:1192#0/1  
CAGAGCATCTGTCCGAAGAATGATTGGTGAATCGGGAGA  
+HWI-EAS443:3:44:1768:1192#0/1  
`aa`b[aa`b`\_`^YP[a`aa]\_\_a[YM`^P`\_]`\_^R\_Y  
@HWI-EAS443:3:44:1773:764#0/1  
AAACGCTGAGATTGAAGACCTCATTTTCCTGGCACGGTCA  
+HWI-EAS443:3:44:1773:764#0/1  
abbaaaa`^babbb\_aaa\_baaaaa`aX`[aVaU``W¥]  
@HWI-EAS443:3:44:1786:617#0/1  
GGGTGAAAATGGACGAAGGACAAGGGTTGCTTATGAAAGA  
+HWI-EAS443:3:44:1786:617#0/1  
aaaXa^`a`aaa\_\_a^]a`¥¥¥[]`\_Y\_a\_]`^\_]XY\_Y  
@HWI-EAS443:3:44:185:470#0/1  
CGCCAAGCAAACAATGGCGAAGATGCAACAGCAGGTCTTA  
+HWI-EAS443:3:44:185:470#0/1  
ab`b\_abab`aaaba`baba¥a\_abaWa\_[aa\_a¥W`\_a^  
@HWI-EAS443:3:44:192:143#0/1  
GTGCTTTCTGCTTTTGTGAGAGAAGAAATAAATACCTAG  
+HWI-EAS443:3:44:192:143#0/1  
aabaabaabb\_baaabaababab\_aaa^aaa`aaaa`\_ba  
@HWI-EAS443:3:44:213:870#0/1  
GTCCTTCCCAGCACTGGGATGCTCTTCTAGGTATTTATTT  
+HWI-EAS443:3:44:213:870#0/1  
aabbaabb`aba`bbabaabaaaa\_aaaa[[`aaabaa  
@HWI-EAS443:3:44:223:376#0/1  
CTTCCGACAGATGCTCTGATTTCTGTGGCATCCTGGCGCT  
+HWI-EAS443:3:44:223:376#0/1  
abbaabaaaaaaaaa\_aaaa`a`^`aaa\_a`Z[`^`Y[  
@HWI-EAS443:3:44:403:1159#0/1  
TGGGCATGACTTTGAAAGGGAAGGGTACTCACTGGTCGGG  
+HWI-EAS443:3:44:403:1159#0/1  
aa]\_\_\_\_¥]\_[abbbaYGWS^a`]aaQaa^^]U]aa[]`aa  
@HWI-EAS443:3:44:420:651#0/1  
GCTGTTTGAATTTTCTTTGAGGATATTGCACATTCTTT  
+HWI-EAS443:3:44:420:651#0/1  
aa^a\_a\_U¥^`\_^]\_\_\_\_\_a`\_\_`\_¥¥^¥[[[[P[^[[\_¥  
@HWI-EAS443:3:44:440:764#0/1  
AATTTCTGGAGGGGTGAAAATGGACGAAGGACAAGGGTTG

+HWI-EAS443:3:44:440:764#0/1  
aaaaaaaa\_¥`b`V^aa`¥abba^\_a[Z`]PLZ`aa`[\_a  
@HWI-EAS443:3:44:573:48#0/1  
GCTGGGTTTTTCATTTGGTCTCATCAGGCTGACCACTTGGC  
+HWI-EAS443:3:44:573:48#0/1  
aaabbbSa\_^`aa`aa\_a`a\_`^^^aa\_`[^\_][a^  
@HWI-EAS443:3:44:63:1582#0/1  
GGAGGGGTGAAAATGGACGAAGGACAAGGGTTGCTTATGA  
+HWI-EAS443:3:44:63:1582#0/1  
`¥YY¥ULPY^MRY[^MY]¥TYVSNMJSMLNRSVUMS[TXR  
@HWI-EAS443:3:44:654:198#0/1  
CGACTTTCTCTTACTTGATCCATCATTGCCCTCTGGGCAG  
+HWI-EAS443:3:44:654:198#0/1  
a`aaaa`\_\_¥\_^\_aa\_\_`\_\_a\_\_\_^Z^\_^]X]]\_]]]  
@HWI-EAS443:3:44:655:1151#0/1  
CATAATCACTGAGTTTGAGTTCAGTGCACATTTGGATGTA  
+HWI-EAS443:3:44:655:1151#0/1  
abbabaa`ab\_a`\_`a`aa]a`^`^`[\_\_\_\_`aSaW^V\_  
@HWI-EAS443:3:44:706:856#0/1  
AACAAATAGAGAGGATGGTGCTTTCTGCTTTTGATGAGAGA  
+HWI-EAS443:3:44:706:856#0/1  
abaaab`b^baba`\_ba]\_Y`aa]^^ZZ¥baa[W¥]`\_\_\_\_  
@HWI-EAS443:3:44:714:503#0/1  
CACATTCTTTCATAAGCAACCCTTGTCCTTCGCCATTTT  
+HWI-EAS443:3:44:714:503#0/1  
aaba`\_`baaYaaaaa]^aaZ`\_a`^]Z¥a]`\_`[`ab`a  
@HWI-EAS443:3:44:775:440#0/1  
GGTCGGGATAGACCCATTCAAATTACTCCAAAACAGCCAA  
+HWI-EAS443:3:44:775:440#0/1  
`]V]VQ`MHT¥UNQVZ¥\_XU]\_\_W]U^\_UVZQ]UY`WG¥T  
@HWI-EAS443:3:44:796:1643#0/1  
TGCTTTCTGCTTTTGATGAGAGAAGAAATAAATACCTAGA  
+HWI-EAS443:3:44:796:1643#0/1  
ZR]]aZ`ab`````\_`aaa`a`aaaY¥aaa\_\_a``aaa\_  
@HWI-EAS443:3:44:831:1803#0/1  
GGCATGACTTTGAAAGGGAAGGGTACTCACTGGTCGGGAT  
+HWI-EAS443:3:44:831:1803#0/1  
^`ababbabbbabbaaabbaa\_XaXaaa]\_`RLXaaa\_\_  
@HWI-EAS443:3:44:863:1952#0/1  
AGTGGTCAGCCTGATGAGACCAAATGAAAACCCAGCTCAC  
+HWI-EAS443:3:44:863:1952#0/1  
a`]]`]^\_^^ZV\_\_`[V\_`^]\_`^`\_¥^\_]\_TVT\_X^]¥YY  
@HWI-EAS443:3:44:916:185#0/1  
TGGGGAGCGCCAGGATGCCACAGAAATCAGAGCATCTGTC  
+HWI-EAS443:3:44:916:185#0/1  
a`^]a\_\_]ORLY`QP[UV]Z\_^¥XXR[TZYRMO\_[WYMK  
@HWI-EAS443:3:44:935:1513#0/1  
ATCCCAGTGCTGGGAAGGACCCTAAGAAAACAGGAGGACC  
+HWI-EAS443:3:44:935:1513#0/1  
aaaaaab]]ba\_aaaaabb`aa¥a```aaa]aaa`a``Z¥

@HWI-EAS443:3:44:946:355#0/1  
ATCATAATCACTGAGTTTGAGTTCAGTGCACATTTGGATG  
+HWI-EAS443:3:44:946:355#0/1  
aaaaaaaaaa^aa^bZ`aa\_a^\_\_`\_Z`¥\_^\_\_`\_a^\_^\_  
@HWI-EAS443:3:45:1108:709#0/1  
AATGGACGAAGGACAAGGGTTGCTTATGAAAGAATGTGCA  
+HWI-EAS443:3:45:1108:709#0/1  
abbbbab`\_aaa\_]UZaaa]¥VWaa\_aaZ]^a¥]`W¥P^  
@HWI-EAS443:3:45:1141:308#0/1  
TCTGGGATCCATTCCGGTGCGAACAAGCGCTCTTGTTC  
+HWI-EAS443:3:45:1141:308#0/1  
`babb`bababaaaabZN\_ab`b`aaa\_a]\_a``a`a\_a]  
@HWI-EAS443:3:45:1163:647#0/1  
CAGGCAGGATTTATGTGCAACTGATCCCCTCAGAATGAGT  
+HWI-EAS443:3:45:1163:647#0/1  
ab``aaab]a]U]\_IS^b^0¥`aabaaaaaab`\_ab`\_X  
@HWI-EAS443:3:45:123:581#0/1  
CACATTTGGATGTAGAATCTCCCGATTCCACCAATCATTC  
+HWI-EAS443:3:45:123:581#0/1  
aaabbb`X¥aaaaa`abbaaaa`^`]a¥aaWaaa^Z`Y\_\_  
@HWI-EAS443:3:45:1294:830#0/1  
GCACATTCTTTATAAGCAACCCTTGCTTCCTCGTCCATTT  
+HWI-EAS443:3:45:1294:830#0/1  
a\_W]\_``a`a¥^a¥[U]Y]UY]`XYPJW`¥¥`]^ZV¥[[  
@HWI-EAS443:3:45:130:777#0/1  
TAACAATAGAGAGGATGGTGCTTTCTGCTTTTGATGAGAG  
+HWI-EAS443:3:45:130:777#0/1  
\_\_a`[a`a¥\_[a`]^b`Z¥RT]^Z`¥U¥\_a`¥¥]\_XZG^  
@HWI-EAS443:3:45:1329:463#0/1  
GGTGAATCGGGAGATTCTACATCCAAATGTGCACTGAAC  
+HWI-EAS443:3:45:1329:463#0/1  
a\_\_a`^aaaa`\_^aX`]\_^`W]\_^]\_\_^^]ZaOWY^\_^]Z  
@HWI-EAS443:3:45:136:725#0/1  
ACTTCCCAGAAGGTCTGGTGCCGAGGTGCTGCGGTGAAA  
+HWI-EAS443:3:45:136:725#0/1  
`aa``\_a\_a`aa\_G`a\_aZb`\_aa\_a\_X`\_^\_\_`\_SZF[X  
@HWI-EAS443:3:45:1417:1533#0/1  
GTGGTCAGCCTGATGAGACCAAATGAAAACCCAGCTCACA  
+HWI-EAS443:3:45:1417:1533#0/1  
a[]ZY\_ZYXX[^¥Z[VVXQW^\_V\_\_^^]VQJNR[UUSVSY  
@HWI-EAS443:3:45:1423:986#0/1  
CGCCAAGCAAACAATGGCGAAGATGCAACAGCAGGTCTTA  
+HWI-EAS443:3:45:1423:986#0/1  
```¥aaaa]`aYa`[a]^a¥\_a`\_`\_^U\_\_\_\_\_a\_U]Z]]  
@HWI-EAS443:3:45:1505:562#0/1  
GCTGACCGTGCCAGGAAAATGAGGTCTTCAATCTCAGCGT  
+HWI-EAS443:3:45:1505:562#0/1  
aaaaaaVYMOZY\_¥``\_aJ¥aY[¥MVYZNHVX^a\_[\_Z\_¥  
@HWI-EAS443:3:45:1589:1004#0/1  
GCAGGCAGGATTTATGTGCAACTGATCCCCTCAGAATGAG

+HWI-EAS443:3:45:1589:1004#0/1  
aaab``\_a]¥\_`aUX^[X¥Y¥W\_W]\_VYR^^Y¥`WZ\_\_¥[  
@HWI-EAS443:3:45:1590:985#0/1  
GCACCATCCTCTCTATTGTTATGCTATTCTGGATTAGTCG  
+HWI-EAS443:3:45:1590:985#0/1  
aaa^`X`\_]a^OZ^\_VT][¥[GWDMTY\_VMVYRT[[TLQRP  
@HWI-EAS443:3:45:1714:383#0/1  
GATTAGTCGTCATCATAATCACTGAGTTTGAGTTCAGTG  
+HWI-EAS443:3:45:1714:383#0/1  
aaabab`aaaa`aa`aaa\_aa\_aa\_`\_`a^`b¥`\_][ZZ`  
@HWI-EAS443:3:45:184:1324#0/1  
GCAGGTCTTACTCATATCATGATTTGGCATTCCAACCTGA  
+HWI-EAS443:3:45:184:1324#0/1  
`b\_\_][K\_`a```ab`a`W^XX`]a^`a`a`\_`^`^`^`OQ]  
@HWI-EAS443:3:45:192:114#0/1  
GATTGGTGAATCGGGAGATTCTACATCCAAATGTGCACT  
+HWI-EAS443:3:45:192:114#0/1  
a^aaaa¥b``\_]\_aaa`\_`\_^]\_\_^\_]\_Y\_\_\_\_\_YZQ^Z¥  
@HWI-EAS443:3:45:211:524#0/1  
GAGGTCTTCAATCTCAGCGTTTCCTGGGTTTCGACTTTCT  
+HWI-EAS443:3:45:211:524#0/1  
a\_a\_\_ba`aaaa`^aa`\_a[aa¥abab\_aa\_b^^aa`¥a  
@HWI-EAS443:3:45:233:916#0/1  
AGAGAGGATGGTGCTTTCTGCTTTTGATGAGAGAAGAAAT  
+HWI-EAS443:3:45:233:916#0/1  
aaaaaabaab\_a`^a`^a¥Z\_abbTY]`X¥Zaa]¥¥a`]  
@HWI-EAS443:3:45:319:148#0/1  
CCCAGTGCTGGGAAGGACCCTAAGAAAACAGGAGGACCCA  
+HWI-EAS443:3:45:319:148#0/1  
`aaabaaaabbbbaabb`a`^a\_ab\_aa``aaa\_aa`]U¥\_  
@HWI-EAS443:3:45:376:1162#0/1  
GAGAGGATGGTGCTTTCTGCTTTTGATGAGAGAAGAAATA  
+HWI-EAS443:3:45:376:1162#0/1  
^a`b]baa]^P`^a¥aJ^a[``a`^^`\_S¥^\_Y`a^^^]¥  
@HWI-EAS443:3:45:414:592#0/1  
ATAGAGAGGATGGTGCTTTCTGCTTTTGATGAGAGAAGAA  
+HWI-EAS443:3:45:414:592#0/1  
`]X]X\_]baaX¥aVX¥P`]FW]QZ[a\_RS^]¥aU`ZR[\_]  
@HWI-EAS443:3:45:443:1245#0/1  
CAAACAGCTGCCAGAGGGCAATGATGGATCAAGTAAGAG  
+HWI-EAS443:3:45:443:1245#0/1  
abb`]abbabaa`\_aaba[Ybab^aba``¥H`]\_Wa\_b`b  
@HWI-EAS443:3:45:469:1993#0/1  
GTGCTTTCTGCTTTTGATGAGAGAAGAAATAAATACCTAG  
+HWI-EAS443:3:45:469:1993#0/1  
a\_W`\_RFJ]`¥YU^U[U\_``\_`^`¥F[ZaWXa\_a]`¥GY`X  
@HWI-EAS443:3:45:589:484#0/1  
GAGGGGTGAAAATGGACGAAGGACAAGGGTTGCTTATGAA  
+HWI-EAS443:3:45:589:484#0/1  
¥[\_`^``aaaa`^a``]ab\_Y\_b`]`a`^`^``Zaaaaa\_

@HWI-EAS443:3:45:629:1283#0/1  
GCACATTCTTTTCATAAGCAACCCTTGCCTTCGCCATTT  
+HWI-EAS443:3:45:629:1283#0/1  
a`]GYaa]`a`Y^aa^¥Y[¥^\_a^`^\_V\_\_V\_RUX]\_`]  
@HWI-EAS443:3:45:668:299#0/1  
GTGCTTTCTGCTTTTGATGAGAGAAGAAATAAATACCTAG  
+HWI-EAS443:3:45:668:299#0/1  
\_[ZX]``^^`\_`^¥][\_aR\_S¥YZ\_^`^¥ZZYV¥WYVa\_  
@HWI-EAS443:3:45:736:723#0/1  
TGTCGGAAGAATGATTGGTGAATCGGGAGATTCTACATC  
+HWI-EAS443:3:45:736:723#0/1  
abaabbaaaaaaaaa`aa¥[\_a`a`\_aa`\_a]aa`a`^`\_`Y  
@HWI-EAS443:3:45:845:38#0/1  
ATTGGTGAATCGGGAGATTCTACATCCAAATGTGCACTG  
+HWI-EAS443:3:45:845:38#0/1  
abbba\_abaa```a\_[a\_\_`a`^`\_`^^`^^`\_X`U^Z^\_  
@HWI-EAS443:3:45:886:737#0/1  
ATGCCACATATCAGAGAACAAGAGCGCTTGTTCGCACCGG  
+HWI-EAS443:3:45:886:737#0/1  
`^[\_¥I\_bba`U`^W¥`a`b`\_a\_]\_[a^^V`aba]XVaa  
@HWI-EAS443:3:45:892:287#0/1  
CCCTTGTCTTCGCCATTTTCACCCCTCCAGAAATTTTCG  
+HWI-EAS443:3:45:892:287#0/1  
aaabab\_a]¥a\_a\_]a[\_aaaaa\_``[\_a[`\_\_\_\_¥^\_\_  
@HWI-EAS443:3:45:948:123#0/1  
GGTCAGCACTCATTCTGAGGGGATCAGTTGCACATAAATC  
+HWI-EAS443:3:45:948:123#0/1  
a`NYZaWN[\_[0]^RQURZ^U^ZVNR^PGYKNT[YNPTWB  
@HWI-EAS443:3:45:948:1480#0/1  
CTCCTGTTTTCTTAGGGTCTTCCCAGCACTGGGATGCTC  
+HWI-EAS443:3:45:948:1480#0/1  
abba]]]bbbbbb^bbbaa]\_`b`Y]`aba`babb`ab\_aa  
@HWI-EAS443:3:45:954:500#0/1  
ACTTCCCAGAAGGTCTGGTGCCGCAGGTGCTGCGGTGAAA  
+HWI-EAS443:3:45:954:500#0/1  
\_`\_R``\_`baab\_GT^abYaXO]]]¥a¥VX\_``\_T\_ZBBBBB  
@HWI-EAS443:3:46:1066:240#0/1  
GAGAGGATGGTCTTTCTGCTTTTGATGAGAGAAGAAATA  
+HWI-EAS443:3:46:1066:240#0/1  
a^a]¥\_`Y\_aR]QZ^^T^¥X^`]^`^W¥ZO]XXXVZW]X]Y  
@HWI-EAS443:3:46:1085:1058#0/1  
GTGGTCAGCCTGATGAGACCAAATGAAAACCCAGCTCACA  
+HWI-EAS443:3:46:1085:1058#0/1  
]L¥X\_`U\_[UXZOSVYXFRVY`aVTZNVUR]^`[\_[ML¥NR  
@HWI-EAS443:3:46:1104:1651#0/1  
GTGCTGGGAAGGACCCTAAGAAAACAGGAGGCCCATATA  
+HWI-EAS443:3:46:1104:1651#0/1  
`\_a\_``\_``a``\_YX\_aa`^]a`aYaaaVa^^XX\_`^`\_`\_  
@HWI-EAS443:3:46:117:700#0/1  
GAATGATTGGTGAATCGGGAGATTCTACATCCAAATGTG

+HWI-EAS443:3:46:117:700#0/1  
ab^X`Xa`^W[`a\_a`aa`¥W]]Z`a^V¥`¥YOY\_^^ZW\_  
@HWI-EAS443:3:46:1266:1282#0/1  
CTGGATTAGTCGTCCATCATAATCACTGAGTTTGAGTTCA  
+HWI-EAS443:3:46:1266:1282#0/1  
abbaabbbba\_aa\_\_bbab`bba]aZab^b\_aab\_a\_a^`  
@HWI-EAS443:3:46:1296:1273#0/1  
GGGTCCTCCTGTTTTCTTAGGGTCCTTCCCAGCACTGGGA  
+HWI-EAS443:3:46:1296:1273#0/1  
aba\_aaaa`aS`baaaaaa\_\_a`aW`\_`\_`RX`\_`aaaY  
@HWI-EAS443:3:46:1365:16#0/1  
CTGAACTCAAACCTCAGTGATTATGATGGACGACTAATCCA  
+HWI-EAS443:3:46:1365:16#0/1  
a]b`abb`a```aaaa\_b]a`aaa`\_`^^\_a\_]\_`^`V\_\_  
@HWI-EAS443:3:46:1383:83#0/1  
ATTGTTCCAACCTTTTACCAGCACCTGCGGCACCAG  
+HWI-EAS443:3:46:1383:83#0/1  
Tba`\_]`^a^Zaaabb\_`bZ¥```a]```a```]VY^UX¥  
@HWI-EAS443:3:46:1469:436#0/1  
AAAAGCAGAAAGCACCATCCTCTCTATTGTTATGCTATTC  
+HWI-EAS443:3:46:1469:436#0/1  
abaa^`aa` `[`¥]¥Z\_a` `a` ``^¥^¥Y¥^\_]`^`¥UYW  
@HWI-EAS443:3:46:1546:37#0/1  
ATCAGGCTGACCACTTGGCTGTTTTGGAGTAATTTGAATG  
+HWI-EAS443:3:46:1546:37#0/1  
`aaaabaa`\_` ``^aaab^a^ET\_`MYITFQ[¥^BBBBBB  
@HWI-EAS443:3:46:1640:636#0/1  
AGAGGATGGTGCTTTCTGCTTTTGATGAGAGAAGAAATAA  
+HWI-EAS443:3:46:1640:636#0/1  
`aaba\_ab\_H` `[bb^`\_aaaa`X]`UV[``\_aa`\_`\_`\_a  
@HWI-EAS443:3:46:1676:1023#0/1  
CCCAGTGCTGGGAAGGACCCTAAGAAAACAGGAGGCCCA  
+HWI-EAS443:3:46:1676:1023#0/1  
aWZ\_b`b`bY]¥¥`\_`^ZZYW`\_TP^VZ]`\_¥`\_T¥WVT  
@HWI-EAS443:3:46:1701:972#0/1  
CTAATCCAGAATAGCATAACAATAGAGAGGATGGTGCTTT  
+HWI-EAS443:3:46:1701:972#0/1  
abbab`a]aaaaa`aaaa¥\_\_aaa^`\_aa]\_a`]aY\_\_`  
@HWI-EAS443:3:46:188:1062#0/1  
ATCAGAGCATCTGTCGGAAGAATGATTGGTGAATCGGGA  
+HWI-EAS443:3:46:188:1062#0/1  
ab¥[W`aaaaaaaT]¥` `\_Z]¥ZRU]]][TN\_W\_]S]]]¥  
@HWI-EAS443:3:46:196:102#0/1  
GGGTCCTCCTGTTTTCTTAGGGTCCTTCCCAGCACTGGGA  
+HWI-EAS443:3:46:196:102#0/1  
a\_\_G[\_\_\_\_]^ZUZ\_Z^\_T^`RYU`X]Z^X]]VTQV]]TTU  
@HWI-EAS443:3:46:358:1297#0/1  
GCTGTTGCATCTTCGCCATTGTTTGCTTGGCGCCAAACTC  
+HWI-EAS443:3:46:358:1297#0/1  
abb^`X\_aT\_aa\_]`^`a\_ab]Pa`R` `ZV`\_` [[\_` [R¥Y



@HWI-EAS443:3:46:403:1185#0/1  
GTGGAATCGGGAGATTCTACATCCAAATGTGCACTGAACT  
+HWI-EAS443:3:46:403:1185#0/1  
a\_^Xa^`W¥¥\_WSIW`¥`]]¥¥Y]¥]Y\_]S] []VTEX`HR  
@HWI-EAS443:3:46:438:135#0/1  
GTGCAACTGATCCCCTCAGAATGAGTGCTGACCGTGCCAG  
+HWI-EAS443:3:46:438:135#0/1  
aabababaabbb\_`aaa\_baaaaab``]aaaa¥\_¥aa¥\_^  
@HWI-EAS443:3:46:51:1482#0/1  
GAGATTGAAGACCTCATTTTCCTGGCACGGTCAGCACTCA  
+HWI-EAS443:3:46:51:1482#0/1  
\_X\_RO`^`ZT¥ZZ\_WOT`aaaaSaX]BBBBBBBBBBBBBB  
@HWI-EAS443:3:46:599:228#0/1  
ATATCCTCAAAGGAAAATTTCAAACAGCTGCCAGAGGGC  
+HWI-EAS443:3:46:599:228#0/1  
aaaa^`aa`^abaaaaaa\_a`]][]`a\_[a\_¥]¥aZa[`¥  
@HWI-EAS443:3:46:634:273#0/1  
GAAATAAATACCTAGAAGAGCATCCCAGTGCTGGGAAGGA  
+HWI-EAS443:3:46:634:273#0/1  
a\_aaaaa```a\_aaa\_a\_a\_`a\_\_`a\_a^\_a]a]]\_]]  
@HWI-EAS443:3:46:690:600#0/1  
GGGGATCAGTTGCACATAAATCCTGCCTGCCTGCTTGTGT  
+HWI-EAS443:3:46:690:600#0/1  
a\_a`RWW]`Z`Y^XZ^`X`[^ZU^Z^¥\_[S¥`^Z^\_U\_S  
@HWI-EAS443:3:46:784:1973#0/1  
ATTTGGATGTAGAATCTCCCGATTCCACCAATCATTCTTC  
+HWI-EAS443:3:46:784:1973#0/1  
aaaa[]b\_^Y][\_a\_\_`^^\_]\_`¥WZWQ\_\_]Z^]R\_]0  
@HWI-EAS443:3:46:797:1943#0/1  
GATGGACGACTAATCCAGAATAGCATAACAATAGAGAGGA  
+HWI-EAS443:3:46:797:1943#0/1  
a\_`IZ^]]aaa`]UVab`aaa\_a][aY``a`a`aa`\_]`^`  
@HWI-EAS443:3:46:926:616#0/1  
AGAGGATGGTGCTTTCTGCTTTTGATGAGAGAAGAAATAA  
+HWI-EAS443:3:46:926:616#0/1  
aa\_¥\_^aba\_a`\_\_a]a\_^`a`a¥X\_`[^a^`a\_\_\_\_\_¥  
@HWI-EAS443:3:46:942:24#0/1  
ATTGCCCTCTGGGCAGCTGTTTGAAATTTTCCTTTGAGGA  
+HWI-EAS443:3:46:942:24#0/1  
`aaa```aa``^`\_`a^`a^aaaZZY`\_aa¥\_a\_aa]a`^  
@HWI-EAS443:3:46:954:1939#0/1  
CTCTCATCAAAAAGCAGAAAGCACCATCCTCTCTATTGTTA  
+HWI-EAS443:3:46:954:1939#0/1  
aab\_bbbaaaa\_aaaa^`bbab]Z\_]UZa`a\_`aaaaW\_a  
@HWI-EAS443:3:47:1002:1412#0/1  
ATGGGTCCTCCTGTTTTCTTAGGGTCCTTCCCAGCACTGG  
+HWI-EAS443:3:47:1002:1412#0/1  
a`aa`\_abbaab^abaa\_`a`^aXU``¥`\_```[V^]```\_  
@HWI-EAS443:3:47:1081:779#0/1  
CTCAAACCTCAGTGATTATGATGGACGACTAATCCAGAATA

+HWI-EAS443:3:47:1081:779#0/1  
abbabZbbbaababbbbabbaa`ba`aaaa`Vaaa`a\_  
@HWI-EAS443:3:47:1092:1486#0/1  
GGGTTTTTCATTTGGTCTCATCAGGCTGACCACTTGGCTGT  
+HWI-EAS443:3:47:1092:1486#0/1  
ab`[aa``aaa`^a¥\_a\_a`\_]`a\_Yaa\_^[\_X\_\_^UU\_dM  
@HWI-EAS443:3:47:1131:840#0/1  
AATGGACGAAGGACAAGGGTTGCTTATGAAAGAATGTGCA  
+HWI-EAS443:3:47:1131:840#0/1  
[^aa`\_¥a`\_ba[^a`^`a]ZaS`])a[^`^`a]aab[W  
@HWI-EAS443:3:47:1140:1601#0/1  
TGGACGACTAATCCAGAATAGCATAACAATAGAGAGGATG  
+HWI-EAS443:3:47:1140:1601#0/1  
Y\_V^Y`X\_\_`V^\_b`a^Y`baaZa\_P\_`]TX\_]Z`Z]¥`  
@HWI-EAS443:3:47:1366:1571#0/1  
GTGCTTTCTGCTTTTGATGAGAGAAGAAATAAATACCTAG  
+HWI-EAS443:3:47:1366:1571#0/1  
]`bab^aab`\_Vab^abS¥¥[\_b`W^¥`JZ^``]UWS^^a  
@HWI-EAS443:3:47:1418:170#0/1  
GAAGGACAAGGGTTGCTTATGAAAGAATGTGCAATATCCT  
+HWI-EAS443:3:47:1418:170#0/1  
a[W^ba`ba`Z]ZVa]a^]¥XQa\_]SNW]L]UZV\_`^SY[  
@HWI-EAS443:3:47:1436:1786#0/1  
CTGCTGTTGCATCTTCGCCATTGTTTGCTTGGCGCCAAAC  
+HWI-EAS443:3:47:1436:1786#0/1  
¥bb\_bbabb`\_baba`a`\_aaa`aab¥W``HYZPZZ^ZR  
@HWI-EAS443:3:47:1554:1630#0/1  
GGATGGTCTTTCTGCTTTTGATGAGAGAAGAAATAAATA  
+HWI-EAS443:3:47:1554:1630#0/1  
aY[\_WXZ]`[\_a\_]Z`SW^`^P\_RR¥RSSPUX][\_]`^]`^Q  
@HWI-EAS443:3:47:1643:414#0/1  
GATCAGTTGCACATAAATCCTGCCTGCCTGCTTGTGTGTA  
+HWI-EAS443:3:47:1643:414#0/1  
`[aaabT]b\_a^`aaa`aU\_`^¥Z\_a\_¥¥a¥\_¥\_UZW\_W¥  
@HWI-EAS443:3:47:1663:1597#0/1  
GAGGGGTGAAAATGGACGAAGGACAAGGGTTGCTTATGAA  
+HWI-EAS443:3:47:1663:1597#0/1  
a`baaa^a``aab`a`\_a`\_a`\_¥`^`\_]Z\_\_[^`^`\_`^`  
@HWI-EAS443:3:47:1666:1201#0/1  
ATAACAATAGAGAGGATGGTCTTTCTGCTTTTGATGAGA  
+HWI-EAS443:3:47:1666:1201#0/1  
a`aa\_bbbbb`a^``aaaZFV¥S`]T¥X``aa\_XO]OQ¥F  
@HWI-EAS443:3:47:1668:803#0/1  
GAAATAAATACCTAGAAGAGCATCCCAGTGCTGGGAAGGA  
+HWI-EAS443:3:47:1668:803#0/1  
a`a`aaaaa^¥`aa^``\_`\_]VYY^V\_]`\_`^]`^W[  
@HWI-EAS443:3:47:1672:440#0/1  
GGAGGGGTGAAAATGGACGAAGGACAAGGGTTGCTTATGA  
+HWI-EAS443:3:47:1672:440#0/1  
`a`bbbb\_baaaaabaaaa\_]aa¥T\_\_]aa]aa¥`a``[X

@HWI-EAS443:3:47:1718:1288#0/1  
GACTAATCCAGAATAGCATAACAATAGAGAGGATGGTGCT  
+HWI-EAS443:3:47:1718:1288#0/1  
aa`aaaaaaaa`\_a`\_`\_`a`\_\_^`\_a^`\_a\_\_]^WTV  
@HWI-EAS443:3:47:1722:591#0/1  
GTGAAAATGGACGAAGGACAAGGGTTGCTTATGAAAGAAT  
+HWI-EAS443:3:47:1722:591#0/1  
^L[\_`\_]`¥\_R\_\_^`X^OT¥Z\_YQO`YU¥UT¥^XZW\_ZW¥  
@HWI-EAS443:3:47:1737:219#0/1  
TGCACATTTGGATGTAGAATCTCCCGATTCCACCAATCAT  
+HWI-EAS443:3:47:1737:219#0/1  
aaa`aaaaaaaa`\_a]\_\_\_\_[X]XWZUVVY]]UXX^YVYY  
@HWI-EAS443:3:47:251:548#0/1  
GCAAGGTTCAACACTTCCCAGAAGGTCTGGTGCCGCAGGT  
+HWI-EAS443:3:47:251:548#0/1  
\_aaa\_a¥`aaa`¥a^`^¥Q`N¥`¥ZY`\_a¥`^X¥]¥a`T  
@HWI-EAS443:3:47:270:670#0/1  
GGCTTGCAGTAGCAAGTGGGCATGACTTTGAAAGGGAAGG  
+HWI-EAS443:3:47:270:670#0/1  
`b^aab]`aZ`baa]aUa``TMMYLta\_aaRSW\_aa[^]\_  
@HWI-EAS443:3:47:353:1610#0/1  
GTGCTTTCTGCTTTTGTAGAGAGAAGAAATAAATACCTAG  
+HWI-EAS443:3:47:353:1610#0/1  
aI[XXT\_]Y\_QXLY]]K^^ZWR]WTXW\_[^\_W^UXHMS^]  
@HWI-EAS443:3:47:485:1547#0/1  
GGGTCCTCCTGTTTTCTTAGGGTCCTTCCCAGCACTGGGA  
+HWI-EAS443:3:47:485:1547#0/1  
aa^Uaaa`aab`\_\_[\_a`\_\_`\_Y\_Y\_[¥U¥`\_U¥W¥\_[SN  
@HWI-EAS443:3:47:498:17#0/1  
GTGAAAATGGACGAAGGACAAGGGTTGCTTATGAAAGAAT  
+HWI-EAS443:3:47:498:17#0/1  
aYa^^^Y\_a`\_T`¥]\_]WWVX\_^WVZ[T[]Y^`WUX\_ZZZ  
@HWI-EAS443:3:47:625:708#0/1  
GTCCTCCTGTTTTCTTAGGGTCCTTCCCAGCACTGGGATG  
+HWI-EAS443:3:47:625:708#0/1  
a\_b^^^abbababababaaa\_\_`a`¥`ZaY\_\_a\_X\_\_`  
@HWI-EAS443:3:47:712:1245#0/1  
GTCCTCCTGTTTTCTTAGGGTCCTTCCCAGCACTGGGATG  
+HWI-EAS443:3:47:712:1245#0/1  
a`abaaab`baa`aa`\_\_Y`a\_]V[\_a\_]\_``[\_Y`\_  
@HWI-EAS443:3:47:786:626#0/1  
TGCATCTTCGCCATTGTTTGTGCTTGGCGCCAAACTCTCCTT  
+HWI-EAS443:3:47:786:626#0/1  
aa`abbaaabbaabb]`aba`\_aaaa\_]\_OYZV]Y\_^¥`\_  
@HWI-EAS443:3:47:797:226#0/1  
ATTCCGGTGC GAACAAGCGCTCTTGTCTCTGATATGTGG  
+HWI-EAS443:3:47:797:226#0/1  
M\_]bb`b\_WY^abab`a\_aT^aZ[¥ZaP^]^`\_`^\_¥  
@HWI-EAS443:3:47:915:800#0/1  
GCAAGGTTCAACACTTCCCAGAAGGTCTGGTGCCGCAGGT

+HWI-EAS443:3:47:915:800#0/1  
`a`HZb^bbbbZ\_0¥aa^^`a]U^]YQba]Za¥Q`GGa¥G  
@HWI-EAS443:3:47:925:842#0/1  
CAGGAAACGCTGAGATTGAAGACCTCATTTTCCTGGCACG  
+HWI-EAS443:3:47:925:842#0/1  
\_XWWPW\_aVY^UVVZ¥aa`ZXH\_OS]ZW¥OMYHQ]]VHPY  
@HWI-EAS443:3:47:947:186#0/1  
TGCCCGAGGTGCTGCGGTGAAAGGAGTTGGAACAATAGCA  
+HWI-EAS443:3:47:947:186#0/1  
aa`ab¥Zaa]a`\_`S]`R\_SSZTYNYLX[`V¥PSPUUWTU  
@HWI-EAS443:3:47:960:711#0/1  
GAATGATGCCACATATCAGAGAACAAGAGCGCTTGTTTCGC  
+HWI-EAS443:3:47:960:711#0/1  
^VZX^00\_]T^OY]ZU^\_]^\_¥`][\_]IXZXI]ZWIR¥  
@HWI-EAS443:3:48:1031:1394#0/1  
CTAATCCAGAATAGCATAACAATAGAGAGGATGGTGCTTT  
+HWI-EAS443:3:48:1031:1394#0/1  
^`\_a`a`^aU[`^ZOW[OU\_[U`]aQa]\_a\_^`\_I]MU]¥  
@HWI-EAS443:3:48:1040:808#0/1  
CGTCCATCATAATCACTGAGTTTGAGTTGAGTGCACATTT  
+HWI-EAS443:3:48:1040:808#0/1  
`a`a\_ab\_abaaa`aaab^b`aaa\_a^`^^^a\_a^`a`  
@HWI-EAS443:3:48:106:1745#0/1  
TTCCTGGGTTTCGACTTTCTTACTTGATCCATCATTGC  
+HWI-EAS443:3:48:106:1745#0/1  
a`a\_a^a\_0`^`^`\_a¥]`^Y^^¥`W\_]^^\_]^^  
@HWI-EAS443:3:48:1079:759#0/1  
CTGGGATCCATTCCGGTGCGAACAAGCGCTCTTGTTCTCT  
+HWI-EAS443:3:48:1079:759#0/1  
aba`]\_\_b`\_b`^`a\_^\_bab`a`^`aaaaa\_bab`a[a\_a  
@HWI-EAS443:3:48:1085:88#0/1  
GGTACTCACTGGTCGGGATAGACCCATTCAAATTACTCCA  
+HWI-EAS443:3:48:1085:88#0/1  
a[P[aba`\_ab^UXbbbU`¥YRUHQ[R\_XVVR\_aVKYXRV  
@HWI-EAS443:3:48:1162:286#0/1  
GTCTTACTCATATCATGATTTGGCATTCCAACCTGAATGA  
+HWI-EAS443:3:48:1162:286#0/1  
\_¥`^\_VLZ[\_]ZXY[`a¥Xa^NZX¥YYTNY¥QS[ZRMT[N  
@HWI-EAS443:3:48:1246:827#0/1  
CCCTTGTCCTTCGTCATTTTCACCCCTCCAGAAATTCG  
+HWI-EAS443:3:48:1246:827#0/1  
abbbabaa`abab`b\_aabba`a\_aaa^aa\_]`aa`a`  
@HWI-EAS443:3:48:1307:504#0/1  
GTTCAACACTTCCCAGAAGGTCTGGTGCCGCAGGTGCTGC  
+HWI-EAS443:3:48:1307:504#0/1  
`W]V`^¥]XNVW¥PPXNO¥URXaVVT¥NB BBBB BBBB  
@HWI-EAS443:3:48:1360:71#0/1  
CCTGGGTTTCGACTTTCTTACTTGATCCATCATTGCCC  
+HWI-EAS443:3:48:1360:71#0/1  
\_bbbaa^bbabb`abb\_babba\_bbbaba^aa`aaa\_\_\_\_

@HWI-EAS443:3:48:1449:705#0/1  
TGAGGGGATCAGTTGCACATAAATCCTGCCTGCCTGCTTG  
+HWI-EAS443:3:48:1449:705#0/1  
a]Z]a¥a`\_a`b\_aa```aaa`aa\_``\_^^a^Za`VaaW  
@HWI-EAS443:3:48:1513:203#0/1  
ACCTGCTGTTGCATCTTCGCCATTGTTTGCTTGCGCCAA  
+HWI-EAS443:3:48:1513:203#0/1  
a]\_a``aaR`YZQ¥P\_`LMQ¥YYaY^\_FQX^WYQQJPWZ  
@HWI-EAS443:3:48:1631:795#0/1  
GCTTTCTGCTTTTGATGAGAGAAGAAATAAATACCTAGAA  
+HWI-EAS443:3:48:1631:795#0/1  
\_XTWVX¥]HW\_V`a]^a¥`[[VPZ]^XXWZXXSTY]YNR  
@HWI-EAS443:3:48:1644:1174#0/1  
CAATAGAGAGGATGGTGCTTTCTGCTTTTGATGAGAGAAG  
+HWI-EAS443:3:48:1644:1174#0/1  
ababbbab`abbabaZbaabb\_a``abbbYYaa\_aaaaa  
@HWI-EAS443:3:48:165:1537#0/1  
GGTGCTTTCTGCTTTTGATGAGAGAAGAAATAAATACCTA  
+HWI-EAS443:3:48:165:1537#0/1  
aaH\_]a\_a\_ba\_baa]aa`a`a`\_`\_aaTa\_X[\_a^^¥\_a  
@HWI-EAS443:3:48:1746:1472#0/1  
GTGCTGGGAAGGACCCTAAGAAAACAGGAGGCCATATA  
+HWI-EAS443:3:48:1746:1472#0/1  
a`Y`U`\_^]a\_`\_a]]SW\_¥`^`W`\_`Y`ZY[^WU\_`\_]\_  
@HWI-EAS443:3:48:1777:988#0/1  
GATCAAGTAAGAGAAAGTCGAAACCCAGGAAACGCTGAGA  
+HWI-EAS443:3:48:1777:988#0/1  
a`a\_``b`a]a\_a\_``a`\_``\_Z\_^`^`^¥^V^V^\_Y[Y  
@HWI-EAS443:3:48:1791:170#0/1  
GTGCAACTGATCCCCTCAGAATGAGTGCTGACCGTGCCAG  
+HWI-EAS443:3:48:1791:170#0/1  
`abaaaaaaaaa\_`¥`\_`a`\_`a^]aZ\_`[WZ\_W^URU¥  
@HWI-EAS443:3:48:181:601#0/1  
GCTTTCTGCTTTTGATGAGAGAAGAAATAAATACCTAGAA  
+HWI-EAS443:3:48:181:601#0/1  
¥\_a`bbbbbaabbabbabaaY`bba`bbbab`]Kabbb`  
@HWI-EAS443:3:48:258:1480#0/1  
GAAATAAATACCTAGAAGAGCATCCCAGTGCTGGGAAGGA  
+HWI-EAS443:3:48:258:1480#0/1  
aa\_a]a`aaaa`aaaa\_````^¥aa^`Xa^\_a\_\_X^\_^]  
@HWI-EAS443:3:48:430:643#0/1  
ACTTCCCAGAAGGTCTGGTGCCGAGGTGCTGCGGTGAAA  
+HWI-EAS443:3:48:430:643#0/1  
a]ba`a`aa`abbW`ab\_U`]aa\_^aaM]^¥^S]`G^WU^  
@HWI-EAS443:3:48:468:1438#0/1  
AGGATGGTGCTTTCTGCTTTTGATGAGAGAAGAAATAAAT  
+HWI-EAS443:3:48:468:1438#0/1  
¥P\_`[^aTa`b`ba`Z`bab`YaX`Z`\_^UX]`aa`a\_`\_  
@HWI-EAS443:3:48:481:169#0/1  
GCTTTCTGCTTTTGATGAGAGAAGAAATAAATACCTAGAA

+HWI-EAS443:3:48:481:169#0/1  
a`aaaaZaaaa^`b\_aYa\_\_a\_a\_`^a\_`\_¥¥\_aa]^  
@HWI-EAS443:3:48:569:80#0/1  
GACTAATCCAGAATAGCATAACAATAGAGAGGATGGTGCT  
+HWI-EAS443:3:48:569:80#0/1  
aa[aaaa`\_`b\_^a\_a^``^W\_^a)`\_]^[XX]VU¥XX  
@HWI-EAS443:3:48:588:330#0/1  
GGGTGAAAATGGACGAAGGACAAGGGTTGCTTATGAAAGA  
+HWI-EAS443:3:48:588:330#0/1  
aa`[aWa\_`aba\_`b\_`aa\_^]^\_\_a)\_`^`\_]^\_^^Z¥¥^  
@HWI-EAS443:3:48:603:1048#0/1  
CTCACTGGTCGGGATAGACCCATTCAAATTACTCCAAAAC  
+HWI-EAS443:3:48:603:1048#0/1  
a`[^NZX[XX^aa¥` `a`VSX\_WR]aV[aZRP¥TRY¥¥Z\_  
@HWI-EAS443:3:48:604:478#0/1  
CTCCTGTTTTCTTAGGGTCCTTCCCAGCACTGGGATGCTC  
+HWI-EAS443:3:48:604:478#0/1  
abbbbbbbbbb¥` `b\_TaZb\_b\_KZX` `)` `a`aXRaWa¥  
@HWI-EAS443:3:48:608:58#0/1  
TTCCGGTGCGAACAAGCGCTCTTGTTCTCTGATATGTGGC  
+HWI-EAS443:3:48:608:58#0/1  
a`][`\_Z`¥a`\_^`\_aW^^\_]`\_^`\_`\_¥V¥`]^`\_X`TW  
@HWI-EAS443:3:48:649:833#0/1  
CTCCTGTTTTCTTAGGGTCCTTCCCAGCACTGGGATGCTC  
+HWI-EAS443:3:48:649:833#0/1  
aa`aababaaaaa]bab``\_aba`a`aba`abaS\_b\_aV  
@HWI-EAS443:3:48:662:284#0/1  
ATGGGCTTGCAGTAGCAAGTGGGCATGACTTTGAAAGGGA  
+HWI-EAS443:3:48:662:284#0/1  
ababaaa`\_^`\_aaaaa\_Za]aX^abaXaa`Z\_\_\_aa\_^  
@HWI-EAS443:3:48:687:443#0/1  
TGCTTTCTGCTTTTGATGAGAGAAGAAATAAATACCTAGA  
+HWI-EAS443:3:48:687:443#0/1  
ababbbababbbbabababaaaaaaaaba\_\_bbb`  
@HWI-EAS443:3:48:742:256#0/1  
CAGTGATTATGATGGACGACTAATCCAGAATAGCATAACA  
+HWI-EAS443:3:48:742:256#0/1  
abbababba\_N¥baa`ba\_aaa` `a`^`\_` `aZ` \_\_\_\_]\_  
@HWI-EAS443:3:48:773:1007#0/1  
CAGCGTTTCCTGGGTTTCGACTTTCTCTTACTTGATCCAT  
+HWI-EAS443:3:48:773:1007#0/1  
aa`^a`abaaaaa\_abaa`\_aaa^a\_aaa^aaaa`[[`a  
@HWI-EAS443:3:48:786:1731#0/1  
AACAAATAGAGAGGATGGTGCTTTCTGCTTTTGATGAGAGA  
+HWI-EAS443:3:48:786:1731#0/1  
ab]aab]baa`baa`a]F]S`^a]W]QW]aa`Y^`¥[W\_S  
@HWI-EAS443:3:48:904:1477#0/1  
ATTTGAATGGGTCTATCCCACCAGTGAGTACCCTTCCCT  
+HWI-EAS443:3:48:904:1477#0/1  
aaaa`aa]baa\_` `aaa\_aa^¥` `aZa\_¥\_` ¥¥¥\_[V[\_\_\_

@HWI-EAS443:3:48:909:334#0/1  
GAATGATTGGTGAATCGGGAGATTCTACATCCAAATGTG  
+HWI-EAS443:3:48:909:334#0/1  
aaa`a\_b]a\_N\_RNR`a\_Z]\_XX[]^RHSYQO[UZ[WGY  
@HWI-EAS443:3:48:911:711#0/1  
AGAGCATCTGTCTGGAAGAATGATTGGTGAATCGGGAGAT  
+HWI-EAS443:3:48:911:711#0/1  
a[aaaba`bb\_aaa\_\_b]¥a`a\_aaQ\_aZ`Y\_a\_]`X]  
@HWI-EAS443:3:48:973:598#0/1  
GACAGATGCTCTGATTTCTGTGGCATCCTGGCGCTCCCCA  
+HWI-EAS443:3:48:973:598#0/1  
a`[a]Yab\_a]aa\_aaa`\_a^]][^\_VU^`[\_YUQVWTT  
@HWI-EAS443:3:49:102:1881#0/1  
CTTTCTTACTTGATCCATCATTGCCCTCTGGGCAGCTG  
+HWI-EAS443:3:49:102:1881#0/1  
\_]`aa\_Z`aa\_b\_a\_b^ab^¥aa`YRX`\_a\_ZT[`a\_^Z  
@HWI-EAS443:3:49:1103:1848#0/1  
ATCATAATCACTGAGTTTGAGTTCAGTGCACATTTGGATG  
+HWI-EAS443:3:49:1103:1848#0/1  
ab\_bbbbbababb¥aaabaaa`abbb\_bab`aba`a\_b`[  
@HWI-EAS443:3:49:1107:605#0/1  
ATAGAGAGGATGGTGCTTTCTGCTTTTGATGAGAGAAGAA  
+HWI-EAS443:3:49:1107:605#0/1  
aa`a\_babbaab¥[]]\_bb[``N^abbY[aa[\_X]^a\_`  
@HWI-EAS443:3:49:1179:234#0/1  
ATGATTGGTGAATCGGGAGATTCTACATCCAAATGTGCA  
+HWI-EAS443:3:49:1179:234#0/1  
\_^`^a^)]\_[aZ\_aVab\_\_`\_\_W\_\_`¥Y¥XV\_\_\_\_[OYWZ  
@HWI-EAS443:3:49:1197:837#0/1  
CTCCTGTTTTCTTAGGGTCCTTCCCAGCACTGGGATGCTC  
+HWI-EAS443:3:49:1197:837#0/1  
ababbaabbbabbbba`a`babaabaa`bbba\_aa\_bY  
@HWI-EAS443:3:49:1249:141#0/1  
CTTTGAAAGGAAGGGTACTCACTGGTCTGGGATAGACCCA  
+HWI-EAS443:3:49:1249:141#0/1  
abb`b[aa``¥\_]ba^a`Ya¥`aaa]R]a``\_aab]QZ[]  
@HWI-EAS443:3:49:1256:1809#0/1  
GGTCTTTCTGCTTTTGATGAGAGAAGAAATAAATACCTA  
+HWI-EAS443:3:49:1256:1809#0/1  
ab^a]a`a\_aa]\_aaaaaa^aY]\_^a^\_^[\_^a^Y]\_\_  
@HWI-EAS443:3:49:1260:1947#0/1  
TAATCACTGAGTTTGAGTTCAGTGCACATTTGGATGTAGA  
+HWI-EAS443:3:49:1260:1947#0/1  
aa^aababbbbSabbabSaaa`a\_aabbaabaa`a[a]`  
@HWI-EAS443:3:49:1353:995#0/1  
GTATGGGCTTGCAGTAGCAAGTGGGCATGACTTTGAAAGG  
+HWI-EAS443:3:49:1353:995#0/1  
\_N¥`S`\_¥^`VRYP¥`¥¥¥`W`^^¥¥V^WW¥¥W\_VVWWW  
@HWI-EAS443:3:49:1400:1037#0/1  
GCTTTCTGCTTTTGATGAGAGAAGAAATAAATACCTAGAA

+HWI-EAS443:3:49:1400:1037#0/1  
aUR¥Y\_^Z]`Y^Z¥\_U`^`ZZVVVYV]Z¥Y[V[X]WT  
@HWI-EAS443:3:49:1400:2027#0/1  
ATGGTGCTTTCTGCTTTTGATGAGAGAAGAAATAAATACC  
+HWI-EAS443:3:49:1400:2027#0/1  
a]bb¥aa\_aa`a\_\_a`a`\_\_a\_aZa\_W`\_^]\_^]WYY  
@HWI-EAS443:3:49:142:305#0/1  
TAACAATAGAGAGGATGGTGCTTTCTGCTTTTGATGAGAG  
+HWI-EAS443:3:49:142:305#0/1  
`baaaaabbaaabbaaabYa^^aa^aZ^aaaaZV`aZ`Xa  
@HWI-EAS443:3:49:1444:309#0/1  
TGGAGGGGTGAAAATGGACGAAGGACAAGGGTTGCTTATG  
+HWI-EAS443:3:49:1444:309#0/1  
\_`\_X\_bbaab`V^\_b\_WWUW[¥`YFW\_\_`a`^`^U[ZUX]  
@HWI-EAS443:3:49:1480:1851#0/1  
CATTGCCCTCTGGGCAGCTGTTTAAAATTTTCCTTTGAGG  
+HWI-EAS443:3:49:1480:1851#0/1  
abaa``abaaaa`babbabb\_bb`]babbbbaabbbbab`  
@HWI-EAS443:3:49:1487:345#0/1  
TCCTGTTTTCTTAGGGTCCTTCCCAGCACTGGGATGCTCT  
+HWI-EAS443:3:49:1487:345#0/1  
aaaa``aababaa`aX^aabaa`]`a`\_`aaaa^`a\_aY\_  
@HWI-EAS443:3:49:1494:835#0/1  
TCCTGGGTTTCGACTTTCTTACTTGATCCATCATTGCC  
+HWI-EAS443:3:49:1494:835#0/1  
a``\_bbbabb\_^aababaaabbaabbbab`aaa\_aaab\_\_  
@HWI-EAS443:3:49:1520:1067#0/1  
GTGCAATATCCTCAAAGGAAAATTTCAAACAGCTGCCAG  
+HWI-EAS443:3:49:1520:1067#0/1  
a`\_`abaaaa\_b\_\_`aaaaaa`aaa^`\_\_]`a]^`Z^X^\_  
@HWI-EAS443:3:49:1622:199#0/1  
CCCTTGCTTCGTCCTTTTCAACCCTCCAGAAATTCG  
+HWI-EAS443:3:49:1622:199#0/1  
`aaaaZ¥``bb\_¥\_¥``abb\_X\_^Z\_]`¥[R`]a^`^][Y  
@HWI-EAS443:3:49:1699:1052#0/1  
CGCCAAGCAAACAATGGCGAAGATGCAACAGCAGGTCTTA  
+HWI-EAS443:3:49:1699:1052#0/1  
ab`babbababaaaaaaaaa`a^a\_aa`aa\_\_a`UZ`a\_  
@HWI-EAS443:3:49:1708:1394#0/1  
AGTGAGTACCCTTCCCTTTCAAAGTCATGCCCACTTGCTA  
+HWI-EAS443:3:49:1708:1394#0/1  
aa]aba`[\_aaa`S`a\_X`\_`WZR^\_T]W^][\_\_^V^Y  
@HWI-EAS443:3:49:1743:1510#0/1  
AGTAATTTGAATGGGTCTATCCCGACCAGTGAGTACCCTT  
+HWI-EAS443:3:49:1743:1510#0/1  
ab\_aab[`b`\_a\_Q[\_\_aaaWY\_aa¥¥\_\_U\_]\_T\_TUW]\_  
@HWI-EAS443:3:49:179:740#0/1  
ATCAGGCTGACCACTTGGCTGTTTTGGAGTAATTTGAATG  
+HWI-EAS443:3:49:179:740#0/1  
abaaababbbbaa\_ab``\_aaS`aaW\_Q\_SZaa`QZ`[R



@HWI-EAS443:3:49:210:894#0/1  
TGGGGAGCGCCAGGATGCCACAGAAATCAGAGCATCTGTC  
+HWI-EAS443:3:49:210:894#0/1  
aa\_UV]XZaZVR]RLZYYUTT]a]W[]TZ\_K[F\_ULZVBB  
@HWI-EAS443:3:49:283:1519#0/1  
GACTTTGAAAGGAAGGGTACTCACTGGTCCGGGATAGACC  
+HWI-EAS443:3:49:283:1519#0/1  
ab`babba``bbaa`aba\_aaaa`aaaXab\_``aaaaZ[  
@HWI-EAS443:3:49:326:786#0/1  
CATAAGCAACCCTTGCCTTCGTCCATTTTCACCCCTCCA  
+HWI-EAS443:3:49:326:786#0/1  
abbbbbabaaabbbbaaaabbaaabababa`ba\_aaaaaa  
@HWI-EAS443:3:49:387:242#0/1  
AATAGAGAGGATGGTGTCTTTCTGCTTTTGATGAGAGAAGA  
+HWI-EAS443:3:49:387:242#0/1  
abb`V[bbaba¥a^HYVa`aYa`U^baaUS^\_a^a\_``  
@HWI-EAS443:3:49:431:561#0/1  
CAGGTGCTGCGGTGAAAGGAGTTGGAACAATAGCAATGGA  
+HWI-EAS443:3:49:431:561#0/1  
abbbbbbbabb`bab`¥a\_`^b\_b\_a[aaaaXV`aab\_]`  
@HWI-EAS443:3:49:476:141#0/1  
CTCAAACCTCAGTGATTATGATGGACGACTAATCCAGAATA  
+HWI-EAS443:3:49:476:141#0/1  
`babbbbbbab\_babbbbbbaaab`a\_\_aaa`a\_``\_aa`  
@HWI-EAS443:3:49:499:949#0/1  
GCTGCCAGAGGGCAATGATGGATCAAGTAAGAGAAAAGTC  
+HWI-EAS443:3:49:499:949#0/1  
aa`aaaaab\_baaa¥ba``aaa\_\_aa`\_^aaa``\_\_\_\_SZ  
@HWI-EAS443:3:49:536:732#0/1  
GGCTTGCAAGTGGCATGACTTTGAAAGGGAAGG  
+HWI-EAS443:3:49:536:732#0/1  
a`aa^]\_aaaaZ`aaUbaaY\_a\_\_^aa``]\_\_a\_a^^`  
@HWI-EAS443:3:49:553:1108#0/1  
GTGGTCAGCCTGATGAGACCAAATGAAAACCCAGCTCACA  
+HWI-EAS443:3:49:553:1108#0/1  
a\_aaYaZ¥]^T`]Za\_\_a[V`\_\_aa\_aaaU[U\_XU[^\_Za  
@HWI-EAS443:3:49:598:567#0/1  
AACAATAGAGAGGATGGTGTCTTTCTGCTTTTGATGAGAGA  
+HWI-EAS443:3:49:598:567#0/1  
abaVbbabababa`aba]`\_aYVY`]T^\_b[¥]`UaYa\_  
@HWI-EAS443:3:49:615:407#0/1  
GAGCTGGGTTTTCTTTGGTCTCATCAGGCTGACCACTTG  
+HWI-EAS443:3:49:615:407#0/1  
\_aa`]bababbaaabaW0¥aabUaZaTbbaS¥aUabb  
@HWI-EAS443:3:49:677:606#0/1  
GAGGATGGTGTCTTTCTGCTTTTGATGAGAGAAGAAATAAA  
+HWI-EAS443:3:49:677:606#0/1  
aa]a`aa`PX^^`Qa\_]`a^\_a^[[[]]X\_]`\_]\_^Y¥\_\_  
@HWI-EAS443:3:49:732:1776#0/1  
TGCAACAGCAGGTCTTACTCATATCATGATTTGGCATTCC

+HWI-EAS443:3:49:732:1776#0/1  
T¥\_a\_ba`¥^]Zbbb`^`¥¥`b\_W\_b^b`]aaZ]\_aaa`  
@HWI-EAS443:3:49:755:1024#0/1  
CTGGGTTTTCATTTGGTCTCATCAGGCTGACCACTTGGCT  
+HWI-EAS443:3:49:755:1024#0/1  
a\_a`a¥Z]a\_ba]]\_XU^\_\_^\_Y¥bZ]^a^VR\_[S\_]HZM  
@HWI-EAS443:3:49:820:472#0/1  
GCTTATGAAAGAATGTGCAATATCCTCAAAGGAAAATTC  
+HWI-EAS443:3:49:820:472#0/1  
a¥^]`aR^aaaa`b`b^aa`¥]YY`\_aa[Z¥]¥```a`Y  
@HWI-EAS443:3:49:824:48#0/1  
TAACAATAGAGAGGATGGTGCTTTCTGCTTTTGATGAGAG  
+HWI-EAS443:3:49:824:48#0/1  
aaaaaaaa`b`b`a\_V\_aaPaW\_^`[]XRYa`a\_X¥^V]Y\_  
@HWI-EAS443:3:49:856:97#0/1  
GCCGCAGGTGCTGCGGTGAAAGGAGTTGGAACAATAGCAA  
+HWI-EAS443:3:49:856:97#0/1  
a[SX[WNYT][Z\_Y`aP¥RUW`\_SYRYX¥ZVQQSQWMKMY  
@HWI-EAS443:3:49:874:853#0/1  
CTGGGTTTCGACTTTCTTACTTGATCCATCATTGCCCT  
+HWI-EAS443:3:49:874:853#0/1  
abbbbabbabbbbaaaabababababaaaa`]aaabaaa`  
@HWI-EAS443:3:49:894:325#0/1  
GAGAGTTTGGCGCCAAGCAAACAATGGCGAAGATGCAACA  
+HWI-EAS443:3:49:894:325#0/1  
abaab\_]b`Uab[Y`a`X`aVaa`Y`\_a\_a`U¥RZ¥WGY  
@HWI-EAS443:3:49:901:1431#0/1  
GAAGAAATAAATACCTAGAAGAGCATCCCAGTGCTGGGAA  
+HWI-EAS443:3:49:901:1431#0/1  
^b`aababbbabb\_Yabaaaaa\_aaa\_\_aa]a`````\_a^  
@HWI-EAS443:3:4:1062:1021#0/1  
CGCAGGTGCTGCGGTGAAAGGAGTTGGAACAATAGCAATG  
+HWI-EAS443:3:4:1062:1021#0/1  
\_b`aaa¥a`baabb\_aVabXGRb`aTa`a[H\_[a`T[]]Y  
@HWI-EAS443:3:4:1161:1519#0/1  
GGACGAAGGACAAGGGTTGCTTATGAAAGAATGTGCAATA  
+HWI-EAS443:3:4:1161:1519#0/1  
aba^^ZZ`aZWZ\_^`S^bRX¥\_aa\_\_\_\_\_]\_]\_^OLY^^`  
@HWI-EAS443:3:4:1238:454#0/1  
AAGCACCATCCTCTCTATTGTTATGCTATTCTGGATTAGT  
+HWI-EAS443:3:4:1238:454#0/1  
aaa`ba¥ab`La[aXaaab`\_a`a¥\_a¥`^a``\_¥¥BBBB  
@HWI-EAS443:3:4:1250:159#0/1  
AAGCGCTCTTGTTCTCTGATATGTGGCATCATTAGGTTG  
+HWI-EAS443:3:4:1250:159#0/1  
aabaa\_¥]aa^^\_X^^^a`^^^\_X]¥VX\_^YV]Y\_]`  
@HWI-EAS443:3:4:1331:193#0/1  
ATGACTTTGAAAGGAAGGGTACTCACTGGTCGGGATAGA  
+HWI-EAS443:3:4:1331:193#0/1  
^abbbb`a`a`baabaa^a^b¥a`a\_]`[aa]``a`

@HWI-EAS443:3:4:1332:66#0/1  
GCGTTTCCTGGGTTTCGACTTTCTCTTACTTGATCCATCA  
+HWI-EAS443:3:4:1332:66#0/1  
a[ [MKVNPQ[VNVWYSSWRVBBBBBBBBBBBBBBBBBB  
@HWI-EAS443:3:4:1378:1419#0/1  
AAGGGTACTCACTGGTCGGGATAGACCCATTCAAATTACT  
+HWI-EAS443:3:4:1378:1419#0/1  
a`a^Xa`a\_a\_ab`ZX`aa`aaa`Z\_Z[aa\_aaa`\_X\_  
@HWI-EAS443:3:4:1443:903#0/1  
GGAGGGGTGAAAATGGACGAAGGACAAGGGTTGCTTATGA  
+HWI-EAS443:3:4:1443:903#0/1  
a` [¥a`NaU^`aUX]^a^\_\_]ZU\_^\_^\_U\_]WW^Y\_XY  
@HWI-EAS443:3:4:1650:1077#0/1  
TCCATTCCGGTGCGAACAAGCGCTCTTGTCTCTGATATG  
+HWI-EAS443:3:4:1650:1077#0/1  
aaU¥a`X`aa^¥a`aXa`a`\_]`[``]`^`U`a^`^`  
@HWI-EAS443:3:4:173:988#0/1  
GGATGGTGCTTTCTGCTTTTGATGAGAGAAGAAATAAATA  
+HWI-EAS443:3:4:173:988#0/1  
0]¥Xbbab0baaX`bX¥bbabb`b\_Vaab\_b`bbb`aa  
@HWI-EAS443:3:4:182:1201#0/1  
GGTCCTCCTGTTTTCTTAGGGTCCTTCCCAGCACTGGGAT  
+HWI-EAS443:3:4:182:1201#0/1  
aa0QWZ^Va[\_]\_a`Za\_\_YP]Z`R]^R^`\_¥\_¥aZ\_UV  
@HWI-EAS443:3:4:194:133#0/1  
GTGCTTTCTGCTTTTGATGAGAGAAGAAATAAATACCTAG  
+HWI-EAS443:3:4:194:133#0/1  
a\_b^aaa\_aa¥`]a\_\_a`\_a]a`\_a`PY^\_Z^^^\_[^\_  
@HWI-EAS443:3:4:320:583#0/1  
CAAAGCAGAAAGCACCATCCTCTCTATTGTTATGCTATT  
+HWI-EAS443:3:4:320:583#0/1  
]T\_W\_bb\_a\_aW`aZ]]`^V¥¥Z\_Y^aa`[N¥W]][^]`\_  
@HWI-EAS443:3:4:516:790#0/1  
GAGAGGATGGTGCTTTCTGCTTTTGATGAGAGAAGAAATA  
+HWI-EAS443:3:4:516:790#0/1  
a`a^aa^a¥`L[a`]]`U`\_a`\_\_`a]\_\_`^`\_`^`\_]  
@HWI-EAS443:3:4:630:875#0/1  
TGGGCATGACTTTGAAAGGGAAGGGTACTCACTGGTCGGG  
+HWI-EAS443:3:4:630:875#0/1  
aabb`aa]`babb`\_baaXYaa[W^`\_a`\_`\_U\_\_\_a  
@HWI-EAS443:3:4:707:1403#0/1  
CACTTGGCTGTTTTGGAGTAATTTGAATGGGTCTATCCCG  
+HWI-EAS443:3:4:707:1403#0/1  
ab\_abababbJaabTXQX¥WYXa\_SYaZX[`QF[]\_`^VBB  
@HWI-EAS443:3:4:758:576#0/1  
ACCCTTCCCTTTCAAAGTCATGCCCACTTGCTACTGCAAG  
+HWI-EAS443:3:4:758:576#0/1  
``a]^a¥abaa`a`aa^Va`[G\_Z\_[`^`\_`\_`^`\_ZYYZ  
@HWI-EAS443:3:4:763:286#0/1  
TTCTGGGATCCATTCCGGTGCGAACAAGCGCTCTTGTCT

+HWI-EAS443:3:4:763:286#0/1  
\_bb[¥¥¥`ZRXa]`\_T\_bHbba]YQ`aaH`TXF]Z^SXP  
@HWI-EAS443:3:4:798:641#0/1  
CATAACAATAGAGAGGATGGTCTTTCTGCTTTTGATGAG  
+HWI-EAS443:3:4:798:641#0/1  
aKa\_aaaab`bab`bba]b^S`S[]^[\_a\_]aaa]V`a\_`  
@HWI-EAS443:3:4:815:160#0/1  
GCTTGCAGTAGCAAGTGGGCATGACTTTGAAAGGGAAGGG  
+HWI-EAS443:3:4:815:160#0/1  
a`aa¥X`aTaa¥\_\_V\_a\_[`\_`UU`\_``¥W¥^^`¥UV[^  
@HWI-EAS443:3:4:831:609#0/1  
GTGCTTTCTGCTTTTGATGAGAGAAGAAATAAATACCTAG  
+HWI-EAS443:3:4:831:609#0/1  
aTaaba]]aba`b\_]UaaQa\_a]W`\_a[^`^`\_a¥]]`a\_  
@HWI-EAS443:3:4:842:1724#0/1  
ATCCCAGCAGTGAGTACCCTTCCCTTTCAAAGTCATGCC  
+HWI-EAS443:3:4:842:1724#0/1  
]a\_^a`\_\_a\_P[]]]Ga¥SV]Waa]``]W[Vb\_¥NaX^PQ  
@HWI-EAS443:3:4:90:1314#0/1  
GCGCCAAGCAAACAATGGCGAAGATGCAACAGCAGGTCTT  
+HWI-EAS443:3:4:90:1314#0/1  
a`aaaa^`a\_M[\_`\_¥[^aY\_\_`¥V¥aX`Wa\_aVXX\_  
@HWI-EAS443:3:4:938:1033#0/1  
AGTAAGAGAAAGTCGAAACCCAGGAAACGCTGAGATTGAA  
+HWI-EAS443:3:4:938:1033#0/1  
ab]aab\_b¥aa\_U`[\_aa^a`^a[^`^`aN]aX``\_`^a]\_  
@HWI-EAS443:3:4:965:874#0/1  
TCTGGAGGGGTGAAAATGGACGAAGGACAAGGGTTGCTTA  
+HWI-EAS443:3:4:965:874#0/1  
a^W^S[aba]G^PKPY¥ZXXaa[Z`\_THZNP][L[^QX]^  
@HWI-EAS443:3:50:1008:670#0/1  
CTCCTGTTTTCTTAGGGTCCTTCCCAGCACTGGGATGCTC  
+HWI-EAS443:3:50:1008:670#0/1  
ababbbbabbbb`abb`\_`aba`\_bb\_aabbbbaabbaba  
@HWI-EAS443:3:50:1049:615#0/1  
GATGCAACAGCAGGTCTTACTCATATCATGATTTGGCATT  
+HWI-EAS443:3:50:1049:615#0/1  
\_ab]]bbTab\_¥bb^abbaaa`baa\_abbaaaa\_¥`a\_  
@HWI-EAS443:3:50:1175:1101#0/1  
GAGAGGATGGTCTTTCTGCTTTTGATGAGAGAAGAAATA  
+HWI-EAS443:3:50:1175:1101#0/1  
a`b`aaaabaMa\_aab]`a^aaaa\_\_aa\_a]`^\_\_`\_a\_  
@HWI-EAS443:3:50:1196:885#0/1  
TGGTGCTTTCTGCTTTTGATGAGAGAAGAAATAAATACCT  
+HWI-EAS443:3:50:1196:885#0/1  
]baabbbba]abbb`bb`b\_ba[aab`a\_ababaaabaa`a  
@HWI-EAS443:3:50:1269:794#0/1  
GTCCTCCTGTTTTCTTAGGGTCCTTCCCAGCACTGGGATG  
+HWI-EAS443:3:50:1269:794#0/1  
ab`ab`abb\_abaabbbbaa^babaaaabb[\_aaaa`^ab

@HWI-EAS443:3:50:1327:1987#0/1  
AGTAATTTGAATGGGTCTATCCCGACCAGTGAGTACCCTT  
+HWI-EAS443:3:50:1327:1987#0/1  
a^]`bb^\_\_aaaa`Pa^`a\_aa^b^]`aYa]bY````\_ZX  
@HWI-EAS443:3:50:1353:1716#0/1  
CTCCTGTTTTCTTAGGGTCTTCCCAGCACTGGGATGCTC  
+HWI-EAS443:3:50:1353:1716#0/1  
^V¥KS`bb¥bb`^X\_a\_X]`\_]\_¥OTX¥]XYZ[G^RX\_]a\_  
@HWI-EAS443:3:50:1389:1160#0/1  
CAATAGAGAGGATGGTGCTTTCTGCTTTTGATGAGAGAAG  
+HWI-EAS443:3:50:1389:1160#0/1  
¥¥\_bbb\_b¥bbbb¥`¥\_\_\_Y`^[\_aba^]^YU^[aU`a  
@HWI-EAS443:3:50:152:1215#0/1  
TGGGCTTGCAGTAGCAAGTGGGCATGACTTTGAAAGGGAA  
+HWI-EAS443:3:50:152:1215#0/1  
aa^aa\_baaaa\_abSbaaQ\_^a\_a`^`]aaaa¥\_\_a`\_\_\_\_  
@HWI-EAS443:3:50:1539:1748#0/1  
GTGATTATGATGGACGACTAATCCAGAATAGCATAACAAT  
+HWI-EAS443:3:50:1539:1748#0/1  
]LXP``]S¥P¥¥X]Naa[``^¥ZG[UVX¥U^OWQ]Z[VOV  
@HWI-EAS443:3:50:1622:1745#0/1  
CAGCGTTTCCTGGGTTTCGACTTTCTTACTTGATCCAT  
+HWI-EAS443:3:50:1622:1745#0/1  
abbababbbb]`]`bbabaabb^ab[aab\_bbbbaaab  
@HWI-EAS443:3:50:1673:1204#0/1  
CAGGCAGGCAGGATTTATGTGCAACTGATCCCCTCAGAAT  
+HWI-EAS443:3:50:1673:1204#0/1  
aaaa``````b\_Z\_aa\_a¥]a[`aV`\_`\_¥]¥`^`````a  
@HWI-EAS443:3:50:168:449#0/1  
ATGACTTTGAAAGGAAGGGTACTCACTGGTCGGGATAGA  
+HWI-EAS443:3:50:168:449#0/1  
abbaabbbbabbabbbaaXa`b^a`abb\_`b^aa`aa`  
@HWI-EAS443:3:50:1708:1189#0/1  
GCTTTCTGCTTTTGATGAGAGAAGAAATAAATACCTAGAA  
+HWI-EAS443:3:50:1708:1189#0/1  
a``aa\_aa`aba`^aaZa]aX\_a\_`\_`a`\_`\_¥Z\_\_\_\_^^  
@HWI-EAS443:3:50:1708:705#0/1  
ATTGTTCCAACCTTTTACCAGCAGCACCTGCGGCACCAG  
+HWI-EAS443:3:50:1708:705#0/1  
abb\_abaa`babaa\_bb`bb]ba^`\_a``aa¥a]]][^` [  
@HWI-EAS443:3:50:194:41#0/1  
TGCTTTCTGCTTTTGATGAGAGAAGAAATAAATACCTAGA  
+HWI-EAS443:3:50:194:41#0/1  
aZabb`a¥]I[ab[b\_bU\_bTaaSa\_`\_bSY]aaaYabaa  
@HWI-EAS443:3:50:229:665#0/1  
GGACAAGGGTTGCTTATGAAAGAATGTGCAATATCCTCAA  
+HWI-EAS443:3:50:229:665#0/1  
\_baa^\_¥¥bSa`]a`abYaaaY^`a[aa`Xa[]a[`\_\_\_\_  
@HWI-EAS443:3:50:249:806#0/1  
GCTTTCTGCTTTTGATGAGAGAAGAAATAAATACCTAGAA

+HWI-EAS443:3:50:249:806#0/1  
X` `aSaba¥¥`aabbbbU^]ab^a^` `a¥]\_baa`a` [Y]  
@HWI-EAS443:3:50:24:1542#0/1  
AATTTGAATGGGTCTATCCCGACCAGTGAGTACCCTTCCC  
+HWI-EAS443:3:50:24:1542#0/1  
a^aba[Tabba[RWabaa^b\_\_a[aa¥]^P¥\_\_^a[[`\_`  
@HWI-EAS443:3:50:287:1054#0/1  
CTTCCGACAGATGCTCTGATTTCTGTGGCATCCTGGCGCT  
+HWI-EAS443:3:50:287:1054#0/1  
aab\_[bb^baabaaaaba`bbbabbaU^aab`^\_a^\_` `]  
@HWI-EAS443:3:50:310:197#0/1  
GGAGGGGTGAAAATGGACGAAGGACAAGGGTTGCTTATGA  
+HWI-EAS443:3:50:310:197#0/1  
ab`aa`\_Z\_a`\_\_aa`a\_aaa`a\_\_a\_aabXabYaa` ` \_`  
@HWI-EAS443:3:50:348:1204#0/1  
TAATCACTGAGTTTGAGTTCAGTGCACATTTGGATGTAGA  
+HWI-EAS443:3:50:348:1204#0/1  
^^¥¥\_ba`ZQ`\_b` `` `aaaa¥]ZT]PY\_baa^[^aQ`^a  
@HWI-EAS443:3:50:35:408#0/1  
TGGACGACTAATCCAGAATAGCATAACAATAGAGAGGATG  
+HWI-EAS443:3:50:35:408#0/1  
abbababababbaabbaaaba`aaaa\_aaa` ` \_a\_baa^V  
@HWI-EAS443:3:50:38:705#0/1  
TAGACCCATTCAAATTACTCCAAAACAGCCAAGTGGTCAG  
+HWI-EAS443:3:50:38:705#0/1  
TW\_ZGY]^\_¥Z`a` `U\_\_[\_a`\_\_^`\_Z]¥\_¥]^ORT[W  
@HWI-EAS443:3:50:400:1450#0/1  
GCAGGCAGGCAGGATTTATGTGCAACTGATCCCCTCAGAA  
+HWI-EAS443:3:50:400:1450#0/1  
`aabab]`b^`bb]RbbbWGVZ¥Zb]\_V^^XU` `]`aaa]^  
@HWI-EAS443:3:50:423:1518#0/1  
GGCTTGCAGTAGCAAGTGGGCATGACTTTGAAAGGGAAGG  
+HWI-EAS443:3:50:423:1518#0/1  
`aaaa\_V`a`\_P`a`\_aaa]\_\_`\_\_aaaa\_[\_¥`a`\_\_a  
@HWI-EAS443:3:50:470:1374#0/1  
ATGACTTTGAAAGGGAAGGGTACTCACTGGTCGGGATAGA  
+HWI-EAS443:3:50:470:1374#0/1  
X\_JT` `aaU`\_\_SabK`aa¥J^RR`a\_aa`JTHN\_]Waa`  
@HWI-EAS443:3:50:568:693#0/1  
GGGCAATGATGGATCAAGTAAGAGAAAGTCGAAACCCAGG  
+HWI-EAS443:3:50:568:693#0/1  
ab\_]`X\_a\_¥aaa`ZY\_b\_aaa¥aa`]aWV¥a`\_^\_T[a\_  
@HWI-EAS443:3:50:56:228#0/1  
CCAGGAAACGCTGAGATTGAAGACCTCATTTTCTGGCAC  
+HWI-EAS443:3:50:56:228#0/1  
`bbaaabb`\_]bU[SabVHUabba`aaabbb`\_`Xbbabb  
@HWI-EAS443:3:50:593:1193#0/1  
AGAGAACAAGAGCGCTTGTTCGCACCGAATGGATCCCAG  
+HWI-EAS443:3:50:593:1193#0/1  
\_`aaYa`\_b\_]\_]\_a^`aa]\_^[¥UV^\_\_^`\_\_`^OW]\_Y

@HWI-EAS443:3:50:604:440#0/1  
GGGTCCTCTGTTTTCTTAGGGTCCTTCCCAGCACTGGGA  
+HWI-EAS443:3:50:604:440#0/1  
^`\_a^`b`bbbabbbbabbaaa^bb`\_abbbaaa\_Xaa  
@HWI-EAS443:3:50:614:1921#0/1  
CACGGTCAGCACTCATTCTGAGGGGATCAGTTGCACATAA  
+HWI-EAS443:3:50:614:1921#0/1  
abba^X`bbba`\_abbbbbbabb`U`a¥\_bababaa]  
@HWI-EAS443:3:50:621:181#0/1  
GTTGCTTATGAAAGAATGTGCAATATCCTCAAAGGAAAAT  
+HWI-EAS443:3:50:621:181#0/1  
aZS\_Taa^a^a^Y]\_^`ZZ\_aa\_`QZ[]aaa\_^\_aa\_a  
@HWI-EAS443:3:50:667:54#0/1  
CTGGGTTTTCATTTGGTCTCATCAGGCTGACCACTTGGCT  
+HWI-EAS443:3:50:667:54#0/1  
abbabaabbbbbbbbabbbbbbabbab`bbbbbbab  
@HWI-EAS443:3:51:1184:529#0/1  
GTCCTCTGTTTTCTTAGGGTCCTTCCCAGCACTGGGATG  
+HWI-EAS443:3:51:1184:529#0/1  
`R[¥^UXY\_N¥a`X^a^`SQJ\_\_WL`P[XT^][NZ^QW]X  
@HWI-EAS443:3:51:1230:1551#0/1  
TGCTGACCGTGCCAGGAAAATGAGGTCTTCAATCTCAGCG  
+HWI-EAS443:3:51:1230:1551#0/1  
aababa\_\_b\_b\_[Xaa\_\_`a\_\_Z]aU[aa¥\_\_^¥\_¥``Ua  
@HWI-EAS443:3:51:1258:1666#0/1  
AGGAAACGCTGAGATTGAAGACCTCATTTCCTGGCACGG  
+HWI-EAS443:3:51:1258:1666#0/1  
aaaaaa`\_^bbab`aab`aa\_¥a\_aaaaa¥\_a`aVa¥^V  
@HWI-EAS443:3:51:1289:683#0/1  
CATTCCGGTGCGAACAAGCGCTCTTGTCTCTGATATGTG  
+HWI-EAS443:3:51:1289:683#0/1  
`^a]`[\_VW^\_a\_] ^¥SYa]\_[]^YX^[\_][Z¥]]]U¥  
@HWI-EAS443:3:51:1380:1082#0/1  
GCAACAGCAGGTCTTACTCATATCATGATTTGGCATTCCA  
+HWI-EAS443:3:51:1380:1082#0/1  
aaaa^`a\_Za\_aaaaba]aa\_a\_\_aaaa`\_\_aaa[Z`  
@HWI-EAS443:3:51:1468:78#0/1  
GCTTTCTGCTTTTGATGAGAGAAGAAATAAATACCTAGAA  
+HWI-EAS443:3:51:1468:78#0/1  
I^aaab[b`bbaY`aababa¥Ybabba`abaaab`ba]b  
@HWI-EAS443:3:51:1470:1233#0/1  
TGGGTTTCGACTTTCTTACTTGATCCATCATTGCCCTC  
+HWI-EAS443:3:51:1470:1233#0/1  
abb`bbbaa[`baa`a`baa^a`\_\_`\_\_a`\_`a\_`]\_^[^  
@HWI-EAS443:3:51:1480:1853#0/1  
ATGGACGAAGGACAAGGGTTGCTTATGAAAGAATGTGCAA  
+HWI-EAS443:3:51:1480:1853#0/1  
`a¥P[¥aaab¥a`OY[a¥PYbYaa\_ab[WVRY`]KUMX[  
@HWI-EAS443:3:51:1496:834#0/1  
GTAATTTGAATGGGTCTATCCCGACCAGTGAGTACCCTC

+HWI-EAS443:3:51:1496:834#0/1  
aUUU¥S\_U¥\_b[¥U`b\_ZU^^`ab[N¥¥J\_I`a`]UUZ\_`  
@HWI-EAS443:3:51:1599:964#0/1  
AAGGAGAGTTTGGCGCCAAGCAAACAATGGCGAAGATGCA  
+HWI-EAS443:3:51:1599:964#0/1  
aabb\_ab`baaab`]bba\_[¥b`[\_a`[^]`a`aaa`[\_  
@HWI-EAS443:3:51:1622:1552#0/1  
TCCGGTGCGAACAAGCGCTCTTGTCTCTGATATGTGGCA  
+HWI-EAS443:3:51:1622:1552#0/1  
a\_`a`[] [Z`\_a^`Xb\_[P¥^¥[`¥\_^]TX\_\_`\_]aTZZ  
@HWI-EAS443:3:51:1656:344#0/1  
ATCCAGAATAGCATAACAATAGAGAGGATGGTGCTTTCTG  
+HWI-EAS443:3:51:1656:344#0/1  
aabbab¥aaaaaaaaaa^^aa^^`a`aa¥\_H¥JYa^RTD  
@HWI-EAS443:3:51:201:36#0/1  
GTGCTTTCTGCTTTTGATGAGAGAAGAAATAAATACCTAG  
+HWI-EAS443:3:51:201:36#0/1  
a\_baabaaaaababbb^aa]b^a`a\_a`aa`aaa`\_`aa  
@HWI-EAS443:3:51:214:1614#0/1  
GTCTGGTGCCGAGGTGCTGCGGTGAAAGGAGTTGGAACA  
+HWI-EAS443:3:51:214:1614#0/1  
a`a`\_]a]Ta`^a\_¥`U¥^X`UNSU[LNTTTVZ¥R[V¥  
@HWI-EAS443:3:51:259:650#0/1  
TGGTGCTTTCTGCTTTTGATGAGAGAAGAAATAAATACCT  
+HWI-EAS443:3:51:259:650#0/1  
abbabbbbab\_babbbbabababaabaabbbbaaba^a  
@HWI-EAS443:3:51:314:934#0/1  
TGTCGGAAGAATGATTGGTGAATCGGGAGATTCTACATC  
+HWI-EAS443:3:51:314:934#0/1  
Va\_a]a]ab]YZ]\_\_T¥a[b`Z¥\_a`a`a^\_\_WQ]]]\_¥  
@HWI-EAS443:3:51:342:1126#0/1  
CCAGTGCTGGGAAGGACCCTAAGAAAACAGGAGGCCCAT  
+HWI-EAS443:3:51:342:1126#0/1  
aa]a`aaabaabaXaa`^b\_a]aaaaaba`aa`V]^^`  
@HWI-EAS443:3:51:472:253#0/1  
GAATAGCATAACAATAGAGAGGATGGTGCTTTCTGCTTTT  
+HWI-EAS443:3:51:472:253#0/1  
a¥`a\_b\_aa\_\_`a\_a\_\_aV`a\_\_`^W]R[\_^Z^`NX]]¥  
@HWI-EAS443:3:51:476:1139#0/1  
CTCTTCTAGGTATTTATTTCTTCTCTCATCAAAAAGCAGAA  
+HWI-EAS443:3:51:476:1139#0/1  
`baababbbbX^bbbbbbbabababaababbbabaaaaa  
@HWI-EAS443:3:51:504:543#0/1  
ATCATAATCACTGAGTTTGAGTTCAGTGCACATTTGGATG  
+HWI-EAS443:3:51:504:543#0/1  
abababaaaaabb\_a`bba`b`a`aa`aaa`aaaa\_a`]  
@HWI-EAS443:3:51:516:848#0/1  
TGCTTTCTGCTTTTGATGAGAGAAGAAATAAATACCTAGA  
+HWI-EAS443:3:51:516:848#0/1  
a`H`Y][T`US\_YQ`Y]aN`PaSLY`\_P`\_^\_]U)`ZPS





+HWI-EAS443:3:52:1129:1495#0/1  
a\_\_`XX`aaY`aa^[a]^\_\_`]]\_X[UV]\_[]^`Z\_^\_  
@HWI-EAS443:3:52:1199:795#0/1  
CCCTTCCCTTTCAAAGTCATGCCACTTGCTACTGCAAGC  
+HWI-EAS443:3:52:1199:795#0/1  
a`bbbabbbbabbbbab`bb\_Y`b`bb`abaa`^aaa\_  
@HWI-EAS443:3:52:1337:902#0/1  
TTCAAACAGCTGCCAGAGGGCAATGATGGATCAAGTAAG  
+HWI-EAS443:3:52:1337:902#0/1  
abaaa\_`aa\_\_`\_`\_]a`\_^\_]U]aa\_a]]Y\_\_\_aY]^]  
@HWI-EAS443:3:52:1339:2028#0/1  
AATTTCTGGAGGGTGAAAATGGACGAAGGACAAGGGTTG  
+HWI-EAS443:3:52:1339:2028#0/1  
`¥`a`]\_baRabbaWb`a`\_aba^W`^Va\_^`\_a`TM^  
@HWI-EAS443:3:52:1362:1206#0/1  
CACTTGGCTGTTTTGGAGTAATTTGAATGGGTCTATCCCG  
+HWI-EAS443:3:52:1362:1206#0/1  
`bbb`baab`U^]b^¥Q`]`\_`b^RZXXG^[NP¥Y`MPYZ  
@HWI-EAS443:3:52:1522:802#0/1  
GCCACATATCAGAGAACAAGAGCGCTTGTTCGCACCGGAA  
+HWI-EAS443:3:52:1522:802#0/1  
a\_bbaaab^b]aaaa\_b\_Yaa`a¥`aa\_a\_aa\_\_\_a\_^\_  
@HWI-EAS443:3:52:1679:1836#0/1  
CATGACTTTGAAAGGGAAGGGTACTCACTGGTCGGGATAG  
+HWI-EAS443:3:52:1679:1836#0/1  
aabb\_\_bbb`[^aa]``\_a\_aR\_^\_\_a^\_]Z0Ta\_\_`\_]\_  
@HWI-EAS443:3:52:1768:359#0/1  
GAGAGGATGGTGTCTTCTGCTTTTGATGAGAGAAGAAATA  
+HWI-EAS443:3:52:1768:359#0/1  
^`\_¥ZQabb]``a`baZa[aabba`aaX]a`\_a^[^baab  
@HWI-EAS443:3:52:195:1372#0/1  
GTTTCCTGGTTTTCGACTTTCTTACTTGATCCATCATT  
+HWI-EAS443:3:52:195:1372#0/1  
V^Y\_b``]aWPa`aaW`a`^`aa`bb]^aaR`\_a]WT  
@HWI-EAS443:3:52:199:631#0/1  
GGAGGGGTGAAAATGGACGAAGGACAAGGGTTGCTTATGA  
+HWI-EAS443:3:52:199:631#0/1  
`b\_baab^b`^`aa`\_\_b^^b\_\_^^a`YU^a`\_`]]]  
@HWI-EAS443:3:52:237:913#0/1  
CACTTGGCTGTTTTGGAGTAATTTGAATGGGTCTATCCCG  
+HWI-EAS443:3:52:237:913#0/1  
abaaa\_baaaZ¥`a[ZU¥0XX]¥^QTXOS^^TXUXYYYXB  
@HWI-EAS443:3:52:248:1441#0/1  
GGTTTTCGACTTTCTTACTTGATCCATCATTGCCCTCTG  
+HWI-EAS443:3:52:248:1441#0/1  
aa`aaab`aba\_a\_\_aa^aaa\_\_\_\_\_``\_\_\_\_\_]^\_Z\_^\_  
@HWI-EAS443:3:52:321:169#0/1  
CACTTGGCTGTTTTGGAGTAATTTGAATGGGTCTATCCCG  
+HWI-EAS443:3:52:321:169#0/1  
aa`abbbba\_P¥bb\_aW]DZ]U\_aU[\_ZZaaVQWX]R¥]]

@HWI-EAS443:3:52:366:644#0/1  
ATCCAGAATAGCATAACAATAGAGAGGATGGTGCTTTCTG  
+HWI-EAS443:3:52:366:644#0/1  
a``baaa\_aaaaaaaaa\_`^a`b\_a`a`\_\_``[\_YY\_aY\_\_  
@HWI-EAS443:3:52:401:160#0/1  
TAACAATAGAGAGGATGGTGCTTTCTGCTTTTGATGAGAG  
+HWI-EAS443:3:52:401:160#0/1  
aaaa`\_``bab]aa\_`a]Z]W¥a\_WY¥X]a``¥T^`Y^X[  
@HWI-EAS443:3:52:413:970#0/1  
GGAGGGGTGAAAATGGACGAAGGACAAGGGTTGCTTATGA  
+HWI-EAS443:3:52:413:970#0/1  
aa^a]aa^b¥X\_\_``\_\_^`^]\_^]\_^Z`\_\_ZZ`^]\_]\_\_Z  
@HWI-EAS443:3:52:488:1226#0/1  
GAATGATGCCACATATCAGAGAACAAGAGCGCTTGTTCCGC  
+HWI-EAS443:3:52:488:1226#0/1  
aaaaX^bba[aabbaaaa\_`\_\_`¥a```a\_a\_`aaa[Y`\_  
@HWI-EAS443:3:52:691:698#0/1  
GACAGATGCTCTGATTTCTGTGGCATCCTGGCGCTCCCCA  
+HWI-EAS443:3:52:691:698#0/1  
ab`abbbba`bbaaba`b\_ab\_ba`\_aabab`\_a^a]\_  
@HWI-EAS443:3:52:69:340#0/1  
GGTGCTTTCTGCTTTTGATGAGAGAAGAAATAAATACCTA  
+HWI-EAS443:3:52:69:340#0/1  
abZaa`^^aa`\_`aaaaYaa\_a\_a`\_a`a]]a`\_`\_`Waa  
@HWI-EAS443:3:52:729:765#0/1  
GAAATAAATACCTAGAAGAGCATCCCAGTGCTGGGAAGGA  
+HWI-EAS443:3:52:729:765#0/1  
]^]\_aTa^a\_ZH[aa[^```UaZa`SabSb`¥``¥¥]aZR  
@HWI-EAS443:3:52:769:616#0/1  
GGGTCCTCTGTTTTCTTAGGGTCCTTCCCAGCACTGGGA  
+HWI-EAS443:3:52:769:616#0/1  
ab`[]aaaaaa`bbb\_aaaa`a\_^¥a``Z\_`aa\_`aa`]^  
@HWI-EAS443:3:52:783:145#0/1  
AACAAATAGAGAGGATGGTGCTTTCTGCTTTTGATGAGAGA  
+HWI-EAS443:3:52:783:145#0/1  
``bb\_`b`abbb^`ab]NYNS`aYb\_TUaaa\_¥a\_TaWa[  
@HWI-EAS443:3:52:808:1430#0/1  
AGGGGTGAAAATGGACGAAGGACAAGGGTTGCTTATGAAA  
+HWI-EAS443:3:52:808:1430#0/1  
a¥^^b``JXY\_¥bbaJ`Q]a]aa\_SL¥baST¥`b\_a]WSS  
@HWI-EAS443:3:52:808:1445#0/1  
CAGAAGGTCTGGTGCCGCAGGTGCTGCGGTGAAAGGAGTT  
+HWI-EAS443:3:52:808:1445#0/1  
ab\_`^`ba\_abb^^baaaaaaaaa^aa``^a\_NXV[¥Z`UZVY  
@HWI-EAS443:3:52:827:803#0/1  
GTGCTTTCTGCTTTTGATGAGAGAAGAAATAAATACCTAG  
+HWI-EAS443:3:52:827:803#0/1  
[LX`aaa`a\_V\_a\_]^[W\_W`X]^aa¥`^a]Y]aa¥¥]a`  
@HWI-EAS443:3:52:829:2017#0/1  
TGGACGACTAATCCAGAATAGCATAACAATAGAGAGGATG

+HWI-EAS443:3:52:829:2017#0/1  
`a[ZW`^`[aa\_ZOW^`aa\_QPV\_a[NZX^\_aZ^XYVa  
@HWI-EAS443:3:53:1054:322#0/1  
GGGATCCATTCCGGTGCGAACAAGCGCTCTTGTCTCTGA  
+HWI-EAS443:3:53:1054:322#0/1  
\_abb`\_[`abZaba]`aab`aa`\_b`^abb^`a]`\_``J  
@HWI-EAS443:3:53:1057:251#0/1  
CTGGGTTTCGACTTCTCTTACTTGATCCATCATTGCCCT  
+HWI-EAS443:3:53:1057:251#0/1  
abbbbbbbabbabbbbbabbbabbbbb^abb[bbbb^\_\_a  
@HWI-EAS443:3:53:1108:1680#0/1  
CTAATCCAGAATAGCATAACAATAGAGAGGATGGTGCTTT  
+HWI-EAS443:3:53:1108:1680#0/1  
Q\_[R[a`^`[¥aa¥bVzbbb`bb`\_aababaa^bbY`]Uaa  
@HWI-EAS443:3:53:1219:910#0/1  
GGGATCAGTTGCACATAAATCCTGCCTGCCTGCTTGTGT  
+HWI-EAS443:3:53:1219:910#0/1  
ababababbabb`babbaa`b\_aaba\_ab`\_ab\_aaa`aZ  
@HWI-EAS443:3:53:1251:681#0/1  
CGACTAATCCAGAATAGCATAACAATAGAGAGGATGGTG  
+HWI-EAS443:3:53:1251:681#0/1  
]``T`bb\_PP¥a`Y`ZY[\_aabb[[a`Y]b`b`[aa\_L¥D  
@HWI-EAS443:3:53:135:1730#0/1  
GAAATAAATACCTAGAAGAGCATCCCAGTGCTGGGAAGGA  
+HWI-EAS443:3:53:135:1730#0/1  
ab`bbbaaabaabaaaaaa`aa`]\_a^a`a`^^\_\_\_\_  
@HWI-EAS443:3:53:1363:1307#0/1  
CTCCTGTTTTCTTAGGGTCCTTCCCAGCACTGGGATGCTC  
+HWI-EAS443:3:53:1363:1307#0/1  
a\_a`^`XZX[G]Z)`XXb\_\_aa\_a`a\_b^]aU¥^¥aaZ]]  
@HWI-EAS443:3:53:1484:256#0/1  
ATAGAGAGGATGGTGCTTTCTGCTTTTGATGAGAGAAGAA  
+HWI-EAS443:3:53:1484:256#0/1  
`¥Ta\_bb\_ab`\_\_J]W]abY\_\_^WabaYWb`Ga^¥^`a^^  
@HWI-EAS443:3:53:1502:1469#0/1  
CAAACCTCAGTGATTATGATGGACGACTAATCCAGAATAGC  
+HWI-EAS443:3:53:1502:1469#0/1  
ab`baa]ab`a^aaaba`a`aa`aa\_baaa\_W`b\_aaa^Y  
@HWI-EAS443:3:53:158:1032#0/1  
GGCAGGATTTATGTGCAACTGATCCCCTCAGAATGAGTGC  
+HWI-EAS443:3:53:158:1032#0/1  
aa`\_R^MY^ZTX[P¥\_\_NT^VZ[`\_^[] [Y¥Z¥\_\_\_\_VN[R  
@HWI-EAS443:3:53:166:922#0/1  
ATCACTGAGTTTGAGTTCAGTGCACATTTGGATGTAGAAT  
+HWI-EAS443:3:53:166:922#0/1  
aaaabab]a\_baa\_a`aa[]^`\_``a`a``\_\_\_\_`Za\_^`¥  
@HWI-EAS443:3:53:1698:1477#0/1  
TGACTTTGAAAGGGAAGGGTACTCACTGGTCGGGATAGAC  
+HWI-EAS443:3:53:1698:1477#0/1  
S¥¥Y\_aab]^a`¥¥Qa``¥L^D[^XY]a^¥]Wa^X`T]LD

@HWI-EAS443:3:53:1724:1517#0/1  
ATCCCCTCAGAATGAGTGCTGACCGTGCCAGGAAAATGAG  
+HWI-EAS443:3:53:1724:1517#0/1  
]b\_UM0`\_ab]aaaa`[\_GT¥`ZY^]] [X`bZT]JUFY[\_  
@HWI-EAS443:3:53:186:898#0/1  
TTGGCGCCAAGCAAACAATGGCGAAGATGCAACAGCAGGT  
+HWI-EAS443:3:53:186:898#0/1  
aa`aa\_\_`Za\_[UPS]aaYXVNaQLa`^^ZQ]V\_]L^[YL  
@HWI-EAS443:3:53:191:874#0/1  
GCGCTCTTGTCTCTGATATGTGGCATCATTGAGTTGGA  
+HWI-EAS443:3:53:191:874#0/1  
^abbabbbbbbabb`ababbabaabb]bbb¥b¥b`bbaa  
@HWI-EAS443:3:53:227:210#0/1  
GTTGCTTATGAAAGAATGTGCAATATCCTCAAAGGAAAAT  
+HWI-EAS443:3:53:227:210#0/1  
`^`aaaa[aa````]aaa^\_\_```]a^Z\_\_¥]\_aa\_\_¥¥`  
@HWI-EAS443:3:53:284:1063#0/1  
GTTTCGACTTTCTTACTTGATCCATCATTGCCCTCTGG  
+HWI-EAS443:3:53:284:1063#0/1  
ZY`\_^a[a]`ab`^ [X]Y` `Z` `b^]¥¥Zaabaab\_\_ba  
@HWI-EAS443:3:53:285:454#0/1  
ATGGGCTTGCAAGTAGCAAGTGGGCATGACTTTGAAAGGGA  
+HWI-EAS443:3:53:285:454#0/1  
a` ``aaY`\_aaa]]`a` [ `Zaaaa`\_a` [ `a` ] ]\_`aaa¥  
@HWI-EAS443:3:53:445:116#0/1  
GCGCCAAGCAAACAATGGCGAAGATGCAACAGCAGGTCTT  
+HWI-EAS443:3:53:445:116#0/1  
aabaaaa\_a\_a\_\_`aa\_\_`a\_] ^\_V`X`¥R`^XX^^  
@HWI-EAS443:3:53:527:1824#0/1  
GACCGTGCCAGGAAAATGAGGTCTTCAATCTCAGCGTTTC  
+HWI-EAS443:3:53:527:1824#0/1  
aaaa`\_ab`^` [aaa` [^¥]Vaaa\_a\_aa`U\_] ^` ] ` `V  
@HWI-EAS443:3:53:528:1580#0/1  
GGGGAGCGCCAGGATGCCACAGAAATCAGAGCATCTGTCCG  
+HWI-EAS443:3:53:528:1580#0/1  
ab\_babbabaaa`aba`a¥baabaaa`aa`SaaYaYQX]  
@HWI-EAS443:3:53:571:148#0/1  
GCCGCAGGTGCTGCGGTGAAAGGAGTTGGAACAATAGCAA  
+HWI-EAS443:3:53:571:148#0/1  
a\_]aaa]aUa]`aY` `F]PU\_`^`R\_QV¥\_HWG]VY]SWVY  
@HWI-EAS443:3:53:60:1733#0/1  
CTCCTGTTTTCTTAGGGTCCTTCCCAGCACTGGGATGCTC  
+HWI-EAS443:3:53:60:1733#0/1  
V¥a\_¥VW¥\_aX^^\_W]`a\_¥\_] ` `^`^¥W^aZ[Z]\_U^P  
@HWI-EAS443:3:53:651:340#0/1  
GTCCTCCTGTTTTCTTAGGGTCCTTCCCAGCACTGGGATG  
+HWI-EAS443:3:53:651:340#0/1  
a` `aa` `abaabaaaaa\_^Z` ` `a\_Y]`a\_] ^aaa` ]\_a  
@HWI-EAS443:3:53:668:471#0/1  
ACCTGCTGTTGCATCTTCGCCATTGTTTGCTTGGCGCCAA

+HWI-EAS443:3:53:668:471#0/1  
aba`b]bbZ¥[^¥a[a`XRYa[\_aY`b`Q]\_\_IYLZ¥¥]\_  
@HWI-EAS443:3:53:688:1403#0/1  
AAATTTCTGGAGGGGTGAAAATGGACGAAGGACAAGGGTT  
+HWI-EAS443:3:53:688:1403#0/1  
a`abababb`[^aaaXba\_\_`aaaaa`a\_PZ\_\_\_a`\_X`  
@HWI-EAS443:3:53:710:1885#0/1  
TGAAAATGGACGAAGGACAAGGGTTGCTTATGAAAGAATG  
+HWI-EAS443:3:53:710:1885#0/1  
abLa`a\_YWaUZWSPPTZ^0^WSMZ`SU\_[\_YH]\_SWZ]Z  
@HWI-EAS443:3:53:753:403#0/1  
GTTTTGGAGTAATTTGAATGGGTCTATCCCGACCAGTGAG  
+HWI-EAS443:3:53:753:403#0/1  
a`aa\_bbaaY``aaa\_\_^`RDXYa`\_RY\_]¥G0¥QS]U  
@HWI-EAS443:3:53:758:1305#0/1  
AGGTGCTGCGGTGAAAGGAGTTGGAACAATAGCAATGGAG  
+HWI-EAS443:3:53:758:1305#0/1  
abbaaa\_baaaJbaaab`T¥\_\_[]U`\_Y`a`][\_`^a\_]\_a  
@HWI-EAS443:3:53:892:1866#0/1  
AATCTCCCGATTCCACCAATCATTCTCCGACAGATGCTC  
+HWI-EAS443:3:53:892:1866#0/1  
ab`\_I`a`aaa^U^`a[\_`]^WNQ¥Wa]aUFXa^)]¥HG  
@HWI-EAS443:3:53:942:452#0/1  
GGGGAGCGCCAGGATGCCACAGAAATCAGAGCATCTGTCCG  
+HWI-EAS443:3:53:942:452#0/1  
aba`]b`b`aaaaaabY]a^^aabaZab`aSaa\_aa`[]  
@HWI-EAS443:3:53:971:601#0/1  
GGGTCCTCCTGTTTTCTTAGGGTCCTTCCCAGCACTGGGA  
+HWI-EAS443:3:53:971:601#0/1  
`abaabbbbababbbb\_bbbbbba`aabbbabb``a`bb\_b`  
@HWI-EAS443:3:53:9:522#0/1  
GTTTTCATTTGGTCTCATCAGGCTGACCACTTGGCTGTTT  
+HWI-EAS443:3:53:9:522#0/1  
a]]\_`\_]````aZ¥\_`^\_W]^X^^^V^ZXZ]Z^^]XZNU]  
@HWI-EAS443:3:54:1005:1303#0/1  
AAATTTCTGGAGGGGTGAAAATGGACGAAGGACAAGGGTT  
+HWI-EAS443:3:54:1005:1303#0/1  
aabababba^aaa`¥aa`aabba`a\_b`\_a``\_\_`a``¥\_  
@HWI-EAS443:3:54:109:571#0/1  
ATGACTTTGAAAGGGAAGGGTACTCACTGGTCGGGATAGA  
+HWI-EAS443:3:54:109:571#0/1  
aaba]ab`a\_a\_aa\_a\_aaaZ```\_\_\_\_aa]\_a`a]YU^]  
@HWI-EAS443:3:54:1137:750#0/1  
GGCTTGCAGTAGCAAGTGGGCATGACTTTGAAAGGGAAGG  
+HWI-EAS443:3:54:1137:750#0/1  
W\_bbbb`bbabbbbb`bbbbbbababbbbbabbabaaba  
@HWI-EAS443:3:54:1180:1326#0/1  
TCGAAACCCAGGAAACGCTGAGATTGAAGACCTCATTTTC  
+HWI-EAS443:3:54:1180:1326#0/1  
aba\_bbaaaabaaaa[b\_ab`baaabaaa\_\_`aaababa`

@HWI-EAS443:3:54:1218:1922#0/1  
GACTAATCCAGAATAGCATAACAATAGAGAGGATGGTGCT  
+HWI-EAS443:3:54:1218:1922#0/1  
ab\_aaaa`aa`a`aaa\_aV`\_a]a`a`aa`\_a[F[S¥  
@HWI-EAS443:3:54:127:1397#0/1  
GTGCTTTCTGCTTTTGATGAGAGAAGAAATAAATACCTAG  
+HWI-EAS443:3:54:127:1397#0/1  
a`ab\_]Taa\_RW[]¥ZZ`UZH\_[¥[¥\_UZ`^Z[Z¥¥^a`  
@HWI-EAS443:3:54:1320:35#0/1  
GATATGTGGCATCATTGAGTTGGAATGCCAAATCATGAT  
+HWI-EAS443:3:54:1320:35#0/1  
]Qa]`^`¥RY\_YRa\_ba¥V¥b\_[]Y`¥Y\_b`a]\_aabab  
@HWI-EAS443:3:54:1459:1857#0/1  
GGAAGAATGATTGGTGAATCGGGAGATTCTACATCCAAA  
+HWI-EAS443:3:54:1459:1857#0/1  
aa`aba\_b`aaa\_]a^^`a`\_¥a\_aa]`^R\_¥^^^  
@HWI-EAS443:3:54:148:2018#0/1  
TGGGTCCTCCTGTTTTCTTAGGGTCCTTCCCAGCACTGGG  
+HWI-EAS443:3:54:148:2018#0/1  
\_`Z\_X`a¥^`)]`\_aaaa`Z[Y\_\_a`\_Z\_a^`\_`^`\_\_\_\_  
@HWI-EAS443:3:54:1506:100#0/1  
ATGGGCTTGCAGTAGCAAGTGGGCATGACTTTGAAAGGGA  
+HWI-EAS443:3:54:1506:100#0/1  
`bbbbabba^a`aab`]`aZaaa¥``a\_\_aaaa¥^`[\_`¥  
@HWI-EAS443:3:54:151:86#0/1  
GCTGGGTTTTCATTTGGTCTCATCAGGCTGACCACTTGGC  
+HWI-EAS443:3:54:151:86#0/1  
a[]aba[Z`¥\_\_\_\_\_`¥]`^^\_`X`\_Y[^ZZW[WW^\_¥Y  
@HWI-EAS443:3:54:1618:1579#0/1  
GCGCTCTTGTCTCTGATATGTGGCATCATTGAGTTGGA  
+HWI-EAS443:3:54:1618:1579#0/1  
aabaaab`babaa`bbabb```aaaab^aba[abbaa\_a\_  
@HWI-EAS443:3:54:1621:2037#0/1  
GGGTACTCACTGGTCGGGATAGACCCATTCAAATTACTCC  
+HWI-EAS443:3:54:1621:2037#0/1  
ab[UaaUIb\_`bZY^\_aaa`\_aYZ`Q]a\_¥]`¥\_NFFXU\_  
@HWI-EAS443:3:54:1682:1697#0/1  
GTATGGGCTTGCAGTAGCAAGTGGGCATGACTTTGAAAGG  
+HWI-EAS443:3:54:1682:1697#0/1  
a\_Z`Z`a`¥UOYV[KQ\_a\_V¥V]```\_`¥\_`aZa`YIT¥\_\_  
@HWI-EAS443:3:54:1737:1645#0/1  
GAAATAAATACCTAGAAGAGCATCCCAGTGCTGGGAAGGA  
+HWI-EAS443:3:54:1737:1645#0/1  
aI[XP\_aW0[^Y[]`VX`[VRYQLMLJ]\_HYDP\_ZN[TUFP  
@HWI-EAS443:3:54:207:1724#0/1  
CAGTGCACATTTGGATGTAGAATCTCCCGATTCCACCAAT  
+HWI-EAS443:3:54:207:1724#0/1  
VS^T[Y`SaWab]TV\_¥TU]aSSHZOXYWH]YDV\_`aa][  
@HWI-EAS443:3:54:222:1578#0/1  
CAGCAGGTCTTACTCATATCATGATTTGGCATTCCAACCT

+HWI-EAS443:3:54:222:1578#0/1  
`b`aabb`abb^[aaaababbbbaaba^\_aaa\_aa`\_\_\_\_  
@HWI-EAS443:3:54:228:146#0/1  
CACATTCTTTCATAAGCAACCCTTGCCTTCGTCCATTTT  
+HWI-EAS443:3:54:228:146#0/1  
aab\_bbbbbbaaba\_aaaa\_\_aa\_\_`^aa\_[\_\_^^aa`a  
@HWI-EAS443:3:54:406:914#0/1  
GTTTCAGTGCACATTTGGATGTAGAATCTCCCGATTCCACC  
+HWI-EAS443:3:54:406:914#0/1  
`Z^R¥TX[L^`^`\_VUZ`XWW[WN[SZZVU[^ZQXN^Y  
@HWI-EAS443:3:54:427:1916#0/1  
CTCAAACCTCAGTGATTATGATGGACGACTAATCCAGAATA  
+HWI-EAS443:3:54:427:1916#0/1  
]b\_^^]\_baa]F[Rbbbaaaabaa\_\_XS^`aaW]^a¥`a\_  
@HWI-EAS443:3:54:528:1268#0/1  
GGTGCCGCGAGGTGCTGCGGTGAAAGGAGTTGGAACAATAG  
+HWI-EAS443:3:54:528:1268#0/1  
aa`aaaba`abTa[aa\_b`UaY\_]U`[¥R¥`\_YUH]^\_[V  
@HWI-EAS443:3:54:549:1712#0/1  
GAGGATGGTGCTTTCTGCTTTTGATGAGAGAAGAAATAAA  
+HWI-EAS443:3:54:549:1712#0/1  
]ab`\_\_b`Y`a^a`a\_\_]aaaaaaaa`a\_aa`aa`^^aaa  
@HWI-EAS443:3:54:610:1993#0/1  
CTCCTGTTTTCTTAGGGTCCTTCCCAGCACTGGGATGCTC  
+HWI-EAS443:3:54:610:1993#0/1  
¥Y`\_b\_\_ababbbba`aW[abb]]^[ab`baaZW`bbbaba  
@HWI-EAS443:3:54:636:1026#0/1  
GCACATTCTTTCATAAGCAACCCTTGCCTTCGTCCATTT  
+HWI-EAS443:3:54:636:1026#0/1  
a\_aU[¥aaaa¥\_a\_TYX\_\_`[\_`^^^¥a\_\_\_Y\_]¥X^  
@HWI-EAS443:3:54:723:1511#0/1  
GACGAAGGACAAGGGTTGCTTATGAAAGAATGTGCAATAT  
+HWI-EAS443:3:54:723:1511#0/1  
`a^`Z¥bX]b¥UDWXab`bbaaZSZaaZ]aa`¥YbYa\_`  
@HWI-EAS443:3:54:731:540#0/1  
GACCTGCTGTTGCATCTTCGCCATTGTTTGCTTGCGCCA  
+HWI-EAS443:3:54:731:540#0/1  
aa`abbab^\_]¥^a`^\_VS^TOV¥W\_aYHT\_`V[VWJZ\_  
@HWI-EAS443:3:54:804:133#0/1  
GACGACTAATCCAGAATAGCATAACAATAGAGAGGATGGT  
+HWI-EAS443:3:54:804:133#0/1  
a^]a`¥a¥`R[^]OU`a`a\_]a\_\_X\_[`^`[a\_^^`^P  
@HWI-EAS443:3:54:844:118#0/1  
GAAGAAATAAATACCTAGAAGAGCATCCCAGTGCTGGGAA  
+HWI-EAS443:3:54:844:118#0/1  
aaabaaaa`aaaa\_]aaa\_\_a`a`aW^¥\_aXa^\_a^`\_^  
@HWI-EAS443:3:54:869:524#0/1  
CATCATAATCACTGAGTTTGAGTTTCAGTGCACATTTGGAT  
+HWI-EAS443:3:54:869:524#0/1  
abbbbbaba`\_^baaa`bb\_a`aabababaa\_[H^b`\_aa





+HWI-EAS443:3:55:1547:202#0/1  
ab^aabbbZ`\_ba]^aabaa^aaaaa^^`aaaa`aa\_`a  
@HWI-EAS443:3:55:1575:281#0/1  
ACTGAACTCAAACCTCAGTGATTATGATGGACGACTAATCC  
+HWI-EAS443:3:55:1575:281#0/1  
¥Y¥`aaZ^Uab\_¥¥[`]P^^ab^ab¥Wa^][¥^^a\_]\_TR  
@HWI-EAS443:3:55:172:1492#0/1  
AAGGTTCAACACTTCCCAGAAGGTCTGGTGCCGAGGTGC  
+HWI-EAS443:3:55:172:1492#0/1  
`X^YPZa\_`a`a`^a\_^^UUW]QYa`¥Ra\_[`V¥\_[KST  
@HWI-EAS443:3:55:1738:833#0/1  
GTGCTTTCTGCTTTTGATGAGAGAAGAAATAAATACCTAG  
+HWI-EAS443:3:55:1738:833#0/1  
^a]`abbaab`bbbab\_ba`aaaa]^aaaaa`a]JWZba  
@HWI-EAS443:3:55:1756:1664#0/1  
GTGAAAATGGACGAAGGACAAGGGTTGCTTATGAAAGAAT  
+HWI-EAS443:3:55:1756:1664#0/1  
a]^a^\_aa¥VU\_]a[POZW¥^[`]`X^¥X^¥XR^UZ^\_  
@HWI-EAS443:3:55:230:1830#0/1  
GTCGTCCATCATAATCACTGAGTTTGAGTTCAGTGCACAT  
+HWI-EAS443:3:55:230:1830#0/1  
a]]YRa¥HO[^]SX^a\_]W[W`Z¥]UDWSXXLZSXDTONW  
@HWI-EAS443:3:55:239:1624#0/1  
GGCTTGCAGTAGCAAGTGGGCATGACTTTGAAAGGGAAGG  
+HWI-EAS443:3:55:239:1624#0/1  
`bbbababa`a^bb`^a^bbbabaaaabbaU[\_a^b\_`aa^  
@HWI-EAS443:3:55:240:758#0/1  
GTGCTTTCTGCTTTTGATGAGAGAAGAAATAAATACCTAG  
+HWI-EAS443:3:55:240:758#0/1  
`abbabbabbbbbbbaaa]aab]^baaaaa\_`aaa  
@HWI-EAS443:3:55:261:1317#0/1  
CTCCCCGATTCCACCAATCATTCTTCCGACAGATGCTCTGA  
+HWI-EAS443:3:55:261:1317#0/1  
abaaaaaaaa`a`a\_aa```a`\_¥^\_\_\_\_¥\_\_X`\_`\_¥  
@HWI-EAS443:3:55:28:545#0/1  
GACTTTGAAAGGGAAGGGTACTCACTGGTCGGGATAGACC  
+HWI-EAS443:3:55:28:545#0/1  
aaa\_aaaa^^a\_\_\_\_`a`\_]\_aa¥^aa^^[\_\_\_\_`\_`\_V  
@HWI-EAS443:3:55:361:443#0/1  
GCTTTCTGCTTTTGATGAGAGAAGAAATAAATACCTAGAA  
+HWI-EAS443:3:55:361:443#0/1  
Y`\_]^[^]S^^`b^[\_aaa\_b]YTY¥¥a`¥ZaaSR\_VPZY  
@HWI-EAS443:3:55:402:336#0/1  
GTCCTCTGTTTTCTTAGGGTCTTCCCAGCACTGGGATG  
+HWI-EAS443:3:55:402:336#0/1  
aaaaaa`ab``a\_aa\_aa\_V`a\_\_`^\_\_^`^`\_¥[\_\_\_\_  
@HWI-EAS443:3:55:437:801#0/1  
CAATATCCTCAAAGGAAAATTTCAAACAGCTGCCAGAGG  
+HWI-EAS443:3:55:437:801#0/1  
```b`a^``a\_aa`a^SZaaaa\_`aZ`]`b`Z\_\_a\_a`

@HWI-EAS443:3:55:497:1124#0/1  
GTGCACATTTGGATGTAGAATCTCCCGATTCCACCAATCA  
+HWI-EAS443:3:55:497:1124#0/1  
]PSab`b``W¥WV]]`a^`Z¥WW¥[R\_Z\_`ZYT`]Y¥L  
@HWI-EAS443:3:55:546:137#0/1  
GGCGCCAAGCAAACAATGGCGAAGATGCAACAGCAGGTCT  
+HWI-EAS443:3:55:546:137#0/1  
abab\_a[\_a]`aaa`aaa\_a```\_\_a\_[a[\_]UU`]GV^  
@HWI-EAS443:3:55:576:707#0/1  
CTGGGATCCATTCCGGTGCGAACAAGCGCTCTTGTCTCT  
+HWI-EAS443:3:55:576:707#0/1  
ab`baabaaZbbaa`^bb`aaa`a^`a`aa`a\_\_aa`a  
@HWI-EAS443:3:55:588:1962#0/1  
GGTGCTTTCTGCTTTTGATGAGAGAAGAAATAAATACCTA  
+HWI-EAS443:3:55:588:1962#0/1  
\_\_V\_`Tba``aabbaba¥`baa```aaa`a`aaaa`Waa  
@HWI-EAS443:3:55:620:1121#0/1  
CACTTGGCTGTTTTGGAGTAATTTGAATGGGTCTATCCCG  
+HWI-EAS443:3:55:620:1121#0/1  
a\_Z]\_\_bb\_M[aaaUL[FW]]\_YTY`UTZaNZ]QVXX¥B  
@HWI-EAS443:3:55:655:891#0/1  
TCCAACCTCTTTCACCGCAGCACCTGCGGCACCAGACCTT  
+HWI-EAS443:3:55:655:891#0/1  
aaaaaaaa`a\_`aa\_a`a`\_`^`¥\_a^^`\_^^¥^¥¥¥  
@HWI-EAS443:3:55:681:948#0/1  
GAACAAGCGCTCTTGTCTCTGATATGTGGCATCATTAG  
+HWI-EAS443:3:55:681:948#0/1  
\_a`abaa`Z\_a¥`]]Y`\_]\_a]`[``^^`X]a[^a\_^Z`a  
@HWI-EAS443:3:55:692:1556#0/1  
GAAGAAATAAATACCTAGAAGAGCATCCCAGTGCTGGGAA  
+HWI-EAS443:3:55:692:1556#0/1  
abbbbaabbabbbbaabbaaaaaaaba^^aaa¥a\_aaa\_aa  
@HWI-EAS443:3:55:75:377#0/1  
CTAATGCAAGGTTCAACACTTCCCAGAAGGTCTGGTGCCG  
+HWI-EAS443:3:55:75:377#0/1  
abaaabaa`aa¥aaaa`aa`a`\_`a¥^^`W`a\_`XaZ[\_  
@HWI-EAS443:3:55:778:1895#0/1  
CCCTTGTCTTCGTCCATTTTCCCCCTCCAGAAATTTTCG  
+HWI-EAS443:3:55:778:1895#0/1  
aa\_abaaa¥baaa\_]\_abaa`\_ba`^a`[]a]a`aa\_^\_`  
@HWI-EAS443:3:55:831:399#0/1  
CATTCCGGTGCGAACAAGCGCTCTTGTCTCTGATATGTG  
+HWI-EAS443:3:55:831:399#0/1  
ab\_bbb\_Z\_b[bbb\_b`b`¥`a\_`U`aab```[a`aa\_a  
@HWI-EAS443:3:55:862:1085#0/1  
GTAATTTGAATGGGTCTATCCCGACCAGTGAGTACCCTTC  
+HWI-EAS443:3:55:862:1085#0/1  
a`W``ab\_aaa[]P\_¥¥]a¥^`V[^`Xa\_Z\_]YLY\_a¥  
@HWI-EAS443:3:55:880:172#0/1  
GCTGTTTTGGAGTAATTTGAATGGGTCTATCCCGACCAGT

+HWI-EAS443:3:55:880:172#0/1  
aaaa[aaaaa\_a^^^`\_a`\_`Z``\_Y^)``]]^\_^UUV^W  
@HWI-EAS443:3:55:918:242#0/1  
GAAATAAGGAGAGTTTGGCGCCAAGCAAACAATGGCGAAG  
+HWI-EAS443:3:55:918:242#0/1  
aaa\_baabaaaa`^a\_aa`^W[a\_aV\_`^`\_\_\_\_a`^`\_\_a  
@HWI-EAS443:3:56:1121:1491#0/1  
TCCAGAATAGCATAACAATAGAGAGGATGGTGCTTTCTGC  
+HWI-EAS443:3:56:1121:1491#0/1  
a¥aab\_ab¥^a\_^X\_^)]`a`^`ZPKW[UUTBBBBBBBBB  
@HWI-EAS443:3:56:1299:1945#0/1  
ACTCCAAAACAGCCAAGTGGTCAGCCTGATGAGACCAAAT  
+HWI-EAS443:3:56:1299:1945#0/1  
a¥a`\_`bbaa`\_`]YP)`\_V^Z[^\_`UV\_a`\_]J\_ZV`[^\_`  
@HWI-EAS443:3:56:136:1023#0/1  
AAGAATGATTGGTGAATCGGGAGATTCTACATCCAAATG  
+HWI-EAS443:3:56:136:1023#0/1  
a`\_`aaa`\_`SRU\_S^`\_`\_S]W^XW^]X\_^YX^^[XK  
@HWI-EAS443:3:56:1377:205#0/1  
TGTCGGAAGAATGATTGGTGAATCGGGAGATTCTACATC  
+HWI-EAS443:3:56:1377:205#0/1  
ab`\_`aa`^`babbaaaaZZ]\_`\_`\_a`^`[P^¥]`¥`\_[0]^Z  
@HWI-EAS443:3:56:137:852#0/1  
GAAAGAATGTGCAATATCCTCAAAGGAAAATTTCAAACAG  
+HWI-EAS443:3:56:137:852#0/1  
`YVY\_Y[Y`]aa^M^`X[MYWUJV][VYST\_VWWYP[¥¥¥  
@HWI-EAS443:3:56:1570:1104#0/1  
GTGCAATATCCTCAAAGGAAAATTTCAAACAGCTGCCAG  
+HWI-EAS443:3:56:1570:1104#0/1  
a¥]`\_`\_`^a`\_a`^W`\_`^a`\_`a`\_`]^`\_`\_a`\_aX]^U]  
@HWI-EAS443:3:56:172:1120#0/1  
GTCGGGATAGACCCATTCAAATTACTCCAAAACAGCCAAG  
+HWI-EAS443:3:56:172:1120#0/1  
`\_`aa`\_`[b`ababa`babaabaa`aaV[a\_`aaa`\_`aaa  
@HWI-EAS443:3:56:262:373#0/1  
GAAGGACCCTAAGAAAACAGGAGGCCATATATAGAAGA  
+HWI-EAS443:3:56:262:373#0/1  
`bbZX^aaa`\_`aaaa`\_`aaa`\_`^`[a`\_`\_`aaaaa`\_`a¥\_`a[  
@HWI-EAS443:3:56:353:1223#0/1  
TGGGCTTGCAGTAGCAAGTGGGCATGACTTTGAAAGGGAA  
+HWI-EAS443:3:56:353:1223#0/1  
aYJZ`W]^]XXV¥`ZXV[[`\_Va^Y]aWZ]]`\_`TLZ^YYXY  
@HWI-EAS443:3:56:364:228#0/1  
TGGGCTTGCAGTAGCAAGTGGGCATGACTTTGAAAGGGAA  
+HWI-EAS443:3:56:364:228#0/1  
aba`]a`ba\_a¥¥`¥`¥aZ\_a\_Z`\_`\_`[^`\_`\_`WX¥`\_`\_`¥¥  
@HWI-EAS443:3:56:420:1182#0/1  
TCTGGATTAGTCGTCATCATAATCACTGAGTTTGAGTTC  
+HWI-EAS443:3:56:420:1182#0/1  
aa`a`\_`aaa]L[a\_aaYTV[\_]]¥\_W`\_`\_`Y`¥W`\_`W]Z`\_`\_`

@HWI-EAS443:3:56:428:875#0/1  
GTGCTTTCTGCTTTTGATGAGAGAAGAAATAAATACCTAG  
+HWI-EAS443:3:56:428:875#0/1  
`U^`aaaa`]\_aaaa`W[`Z`X¥YT\_[W\_\_\_\_]W¥^^Z^`^  
@HWI-EAS443:3:56:515:1580#0/1  
GATTGGTGAATCGGGAGATTCTACATCCAAATGTGCACT  
+HWI-EAS443:3:56:515:1580#0/1  
aaa`aaZaaaa`a```[a`a\_Y\_```TQ]`a`\_\_]\_]^]Y  
@HWI-EAS443:3:56:581:185#0/1  
ATCCATTCCGGTGCGAACAAGCGCTCTTGTCTCTGATAT  
+HWI-EAS443:3:56:581:185#0/1  
aaaaabb`abb¥a^a^Y¥aa`Y][\_Z\_\_\_\_\_`Y^V^\_U\_^`  
@HWI-EAS443:3:56:700:1271#0/1  
GGGTCCTCCTGTTTTCTTAGGGTCCTTCCCAGCACTGGGA  
+HWI-EAS443:3:56:700:1271#0/1  
`aa[bbb`\_bb¥baababaa]SVTaaa`\_¥]a]a``aY¥\_  
@HWI-EAS443:3:56:736:701#0/1  
GGTGCGAACAAGCGCTCTTGTCTCTGATATGTGGCATCA  
+HWI-EAS443:3:56:736:701#0/1  
aaa`abab`bbb]aaaaaaaaaaaa`aa`aaa\_\_aa\_aa``  
@HWI-EAS443:3:56:74:991#0/1  
CTCATTCTGAGGGATCAGTTGCACATAAATCCTGCCTGC  
+HWI-EAS443:3:56:74:991#0/1  
^a\_aaaa`G`aR\_\_\_\_`\_NX`¥[¥`\_Y`¥\_a\_W]\_¥^]¥  
@HWI-EAS443:3:56:794:440#0/1  
CCTGGGTTTCGACTTTCTTACTTGATCCATCATTGCCC  
+HWI-EAS443:3:56:794:440#0/1  
a[bbba\_ababbabb`aabbaabbbab`abbaaaaa`\_\_  
@HWI-EAS443:3:56:807:24#0/1  
GTGCGAACAAGCGCTCTTGTCTCTGATATGTGGCATCAT  
+HWI-EAS443:3:56:807:24#0/1  
a^[RX`]\_¥\_\_Z[ZUSS\_aV[LWVTYLJUYZQTQSPUSUV  
@HWI-EAS443:3:56:827:631#0/1  
GGTCCTCCTGTTTTCTTAGGGTCCTTCCCAGCACTGGGAT  
+HWI-EAS443:3:56:827:631#0/1  
aa\_a\_baabbabba`aba``\_aaaa``aaa`a\_aaa\_^`  
@HWI-EAS443:3:56:829:1370#0/1  
GGGGTAAAATGGACGAAGGACAAGGGTTGCTTATGAAAG  
+HWI-EAS443:3:56:829:1370#0/1  
a```Uaaaa`aa``\_^^aa`\_^\_\_`\_a\_]`]\_\_\_\_``\_^^\_  
@HWI-EAS443:3:56:838:836#0/1  
AATAGAGAGGATGGTGCTTTCTGCTTTTGATGAGAGAAGA  
+HWI-EAS443:3:56:838:836#0/1  
aa`aa```ba^^^`^`abbaa^YV]baaYZa^]baaaa\_\_  
@HWI-EAS443:3:56:852:567#0/1  
CATCATAATCACTGAGTTTGAGTTCAGTGCACATTTGGAT  
+HWI-EAS443:3:56:852:567#0/1  
abbbabb`bbabb`b¥bbbbbaabab\_bababaaabaaa  
@HWI-EAS443:3:56:90:975#0/1  
TTCTGCTTTTGATGAGAGAAGAAATAAATACCTAGAAGAG

+HWI-EAS443:3:56:90:975#0/1  
¥^\_ ]\_a\_a\_a\_H]`^a^a][^^¥X\_]a`^]]aZ^^Y¥^`  
@HWI-EAS443:3:56:930:1387#0/1  
GGAAGAATGATTGGTGGAAATCGGGAGATTCTACATCCAAA  
+HWI-EAS443:3:56:930:1387#0/1  
`\_SO\_¥V`¥Z`a^YEZ¥\_TQ[\_VRPV¥X[\_[``UYZ^\_TQ  
@HWI-EAS443:3:56:934:894#0/1  
TGGAGGGGTGAAAATGGACGAAGGACAAGGGTTGCTTATG  
+HWI-EAS443:3:56:934:894#0/1  
aba`abba^b`aa`aaaaa` `a^^` `a`^W\_a`\_a\_aa  
@HWI-EAS443:3:56:996:581#0/1  
GGAGGGGTGAAAATGGACGAAGGACAAGGGTTGCTTATGA  
+HWI-EAS443:3:56:996:581#0/1  
`babaaa\_baaaaaa` `b`\_\_[\_`\_\_^a` `X`b^aa`\_`\_^  
@HWI-EAS443:3:57:1008:527#0/1  
ATGACTTTGAAAGGAAGGGTACTCACTGGTCGGGATAGA  
+HWI-EAS443:3:57:1008:527#0/1  
UQZ\_Z¥QR`baU\_U\_a¥¥QF\_W[W\_GRaZOP`¥^]U\_¥^  
@HWI-EAS443:3:57:1059:1626#0/1  
GTCCTCCTGTTTTCTTAGGGTCCTTCCCAGCACTGGGATG  
+HWI-EAS443:3:57:1059:1626#0/1  
aZ[V`a^aa`\_`\_a`a`\_TTPPYX¥`PS]`^\_Z`^^[W\_`^  
@HWI-EAS443:3:57:1192:1067#0/1  
CACTTGGCTGTTTTGGAGTAATTTGAATGGGTCTATCCCG  
+HWI-EAS443:3:57:1192:1067#0/1  
ababbbbaba]bb` [WI\_T`abbbY¥b]abbSaaa]N[ `a  
@HWI-EAS443:3:57:1208:122#0/1  
TAACAATAGAGAGGATGGTCTTTCTGCTTTTGATGAGAG  
+HWI-EAS443:3:57:1208:122#0/1  
`^¥Y`Sa0aIWS` `H[NXTIS^`^VWSWY¥^^`S^^YUP^  
@HWI-EAS443:3:57:1289:1681#0/1  
TGGGCTTGCAGTAGCAAGTGGGCATGACTTTGAAAGGGAA  
+HWI-EAS443:3:57:1289:1681#0/1  
abaaabab`abVaa`\_aa¥a^a¥`aaaUaaba]¥` [\_`\_\_\_\_  
@HWI-EAS443:3:57:1348:1090#0/1  
GGTCTTTCTGCTTTTGATGAGAGAAGAAATAAATACCTA  
+HWI-EAS443:3:57:1348:1090#0/1  
a\_I`^`\_aaY^aS[ `ba[ ]`Paa^UZ`\_` `a\_a]` `X¥a`  
@HWI-EAS443:3:57:1386:1050#0/1  
CTGAACTCAAACCTCAGTGATTATGATGGACGACTAATCCA  
+HWI-EAS443:3:57:1386:1050#0/1  
`abababaaaaab\_a`Zb`aa]a^a\_aa`\_`\_a`\_a^`¥U`  
@HWI-EAS443:3:57:1389:1313#0/1  
AAATGGACGAAGGACAAGGGTTGCTTATGAAAGAATGTGC  
+HWI-EAS443:3:57:1389:1313#0/1  
a¥Q\_bbaaba`]a`aaYa[ ` `a][ `b\_b[ `aaa`WaaV` ]  
@HWI-EAS443:3:57:1425:1038#0/1  
GGGGAGCGCCAGGATGCCACAGAAATCAGAGCATCTGTCCG  
+HWI-EAS443:3:57:1425:1038#0/1  
ab] ` [^T¥aaZX]OM]TXPT]\_¥aVID[W¥[[XSN¥BBBB

@HWI-EAS443:3:57:1449:1226#0/1  
GGGTCCTCCTGTTTTCTTAGGGTCCTTCCCAGCACTGGGA  
+HWI-EAS443:3:57:1449:1226#0/1  
aba^\_ab\_bbb`bbbababaa]Z`abaa`abaa`\_aX]bZ  
@HWI-EAS443:3:57:150:211#0/1  
CGCCAAGCAAACAATGGCGAAGATGCAACAGCAGGTCTTA  
+HWI-EAS443:3:57:150:211#0/1  
ab`abbbabbba`b]bbbb\_aba]aaa`aaaaa`¥IR` `a  
@HWI-EAS443:3:57:153:1771#0/1  
ATCCATTCCGGTGCGAACAAGCGCTCTTGTCTCTGATAT  
+HWI-EAS443:3:57:153:1771#0/1  
`a\_\_Z`KbaRTMza\_\_`^\_a`¥NUYV^WZ]]\_]VP¥¥]B  
@HWI-EAS443:3:57:155:290#0/1  
GTAATTTGAATGGGTCTATCCCGACCAGTGAGTACCCTTC  
+HWI-EAS443:3:57:155:290#0/1  
a^aaaaaaaa\_\_aaaV`aa` `` `` `` ` \_ `a]` `]\_Y^[[U^\_[  
@HWI-EAS443:3:57:159:1889#0/1  
ATCTCCCGATTCCACCAATCATTCTTCCGACAGATGCTCT  
+HWI-EAS443:3:57:159:1889#0/1  
a\_^a^abb` `]^` `a`^¥R¥`][^]\_\_^[U]^`^`X\_Z^  
@HWI-EAS443:3:57:1632:285#0/1  
ATGGACGACTAATCCAGAATAGCATAACAATAGAGAGGAT  
+HWI-EAS443:3:57:1632:285#0/1  
P]b^`\_¥\_X[ZbZUMa^aab`b\_Za`bJb]` `]`Z^]\_V\_`  
@HWI-EAS443:3:57:164:46#0/1  
CGTGCCAGGAAAATGAGGTCTTCAATCTCAGCGTTTCCTG  
+HWI-EAS443:3:57:164:46#0/1  
ab`b]`\_abaaaa^¥baZYaa` `^a`\_`\_\_a\_a` `^`^aa  
@HWI-EAS443:3:57:1723:1953#0/1  
CAGCTGCCAGAGGGCAATGATGGATCAAGTAAGAGAAAG  
+HWI-EAS443:3:57:1723:1953#0/1  
a\_]\_ab]^aab\_Sa¥W\_aaa¥a`a[^]` `` `[[[ZN]\_BB  
@HWI-EAS443:3:57:1751:1667#0/1  
ATTGTTCCAACCTTTTACCAGCAGCACCTGCGGCACCAG  
+HWI-EAS443:3:57:1751:1667#0/1  
]¥`a\_b\_aa` `a`]baaaaJPaa^^OS^`\_WZ¥^X]UBBB  
@HWI-EAS443:3:57:182:1215#0/1  
AATTTGAATGGGTCTATCCCGACCAGTGAGTACCCTTCCC  
+HWI-EAS443:3:57:182:1215#0/1  
¥¥\_b¥¥ZUOQUWH¥¥a^`Z`aWZWNQOQT]WUEOP^NSB  
@HWI-EAS443:3:57:225:475#0/1  
CAAGCGCTCTTGTCTCTGATATGTGGCATCATTGAGTT  
+HWI-EAS443:3:57:225:475#0/1  
ab\_`aaba[^a]a\_aaab` `\_\_]V\_a¥`\_V`\_a` `` ` \_Va  
@HWI-EAS443:3:57:226:1622#0/1  
TCCTGTTTTCTTAGGGTCCTTCCCAGCACTGGGATGCTCT  
+HWI-EAS443:3:57:226:1622#0/1  
W\_Ya`Ubb`\_\_¥`¥^OWbaa`aaP`^TQ`]aa[S[XX[aB  
@HWI-EAS443:3:57:270:911#0/1  
AAAGCACCATCCTCTCTATTGTTATGCTATTCTGGATTAG

+HWI-EAS443:3:57:270:911#0/1  
aa^bab`a^¥aaR`\_aaa`^Va`aa\_a\_a`\_YY]S¥^^Y  
@HWI-EAS443:3:57:337:1444#0/1  
CGACTAATCCAGAATAGCATAACAATAGAGAGGATGGTGC  
+HWI-EAS443:3:57:337:1444#0/1  
aba\_abbbaabaaaa`aaaa\_a`a``aaa`\_`a\_W¥T  
@HWI-EAS443:3:57:368:685#0/1  
CTGAACTCAAACCTCAGTGATTATGATGGACGACTAATCCA  
+HWI-EAS443:3:57:368:685#0/1  
aabbabb^aaaaaaaa`b\_aaaaaaaa\_aaa`\_a`\_\_a  
@HWI-EAS443:3:57:382:497#0/1  
GATTGGTGAATCGGGAGATTCTACATCCAAATGTGCACT  
+HWI-EAS443:3:57:382:497#0/1  
aa]`a`\_a\_T\_]`X\_\_Z[a]Z^WY¥^POW\_¥UO\_UWQ[  
@HWI-EAS443:3:57:416:1893#0/1  
CAGGAAACGCTGAGATTGAAGACCTCATTTTCCTGGCAGC  
+HWI-EAS443:3:57:416:1893#0/1  
aa`a\_ba\_b\_¥a[a`Saa\_]V¥G`Saaa`a`R¥[X¥KZ\_`  
@HWI-EAS443:3:57:46:861#0/1  
ATGGTGCTTTCTGCTTTTGATGAGAGAAGAAATAAATACC  
+HWI-EAS443:3:57:46:861#0/1  
a`a`Wa\_R`aaaa``aaaa^a`\_`a`^\_¥X`\_]U]^\_\_[  
@HWI-EAS443:3:57:491:21#0/1  
GAATGATTGGTGAATCGGGAGATTCTACATCCAAATGTG  
+HWI-EAS443:3:57:491:21#0/1  
`aaa`IHVaXOSa^RZ^]`UT]Q]NNPGJ^PTNOOBBBBB  
@HWI-EAS443:3:57:540:420#0/1  
GGTGCTTTCTGCTTTTGATGAGAGAAGAAATAAATACCTA  
+HWI-EAS443:3:57:540:420#0/1  
aaSR`a¥a]][]aaaa\_\_XXa]aXY]\_`\_`\_a[\_`^M^a  
@HWI-EAS443:3:57:600:1441#0/1  
GCAATATCCTCAAAGAAAATTTCAAACAGCTGCCAGAG  
+HWI-EAS443:3:57:600:1441#0/1  
\_abbab`abaa`aabab^baaaaa`aaa]aa`\_`a`a  
@HWI-EAS443:3:57:709:940#0/1  
TGGGTCCTCCTGTTTTCTTAGGGTCCTCCCAGCACTGGG  
+HWI-EAS443:3:57:709:940#0/1  
aaba[aaa]aaa]a`a¥aa^`]V\_`\_`\_R`\_\_[``a[  
@HWI-EAS443:3:57:716:1285#0/1  
TCTGGGATCCATTCCGGTGCGAACAAGCGCTCTTGTTC  
+HWI-EAS443:3:57:716:1285#0/1  
aaaaabbaabaaa`a`Wa\_a]\_`a`^\_aaa]a\_\_a\_a`  
@HWI-EAS443:3:57:730:1758#0/1  
GACCCATTCAAATTACTCCAAAACAGCCAAGTGGTCAGCC  
+HWI-EAS443:3:57:730:1758#0/1  
a^[]^bbbababaaaaa[a`\_`\_aa\_a`aa^`[``a[\_`  
@HWI-EAS443:3:57:760:1804#0/1  
GACGACTAATCCAGAATAGCATAACAATAGAGAGGATGGT  
+HWI-EAS443:3:57:760:1804#0/1  
`baaaaabab\_abbabbb^[]aaa[a\_aaaaaa`a`\_`Y



@HWI-EAS443:3:57:769:172#0/1  
GGGATCAGTTGCACATAAATCCTGCCTGCCTGCTTGTGTG  
+HWI-EAS443:3:57:769:172#0/1  
aba`aab\_aaaa`aaaa`^^`\_\_a]\_`aV\_¥a¥`U`  
@HWI-EAS443:3:57:885:1318#0/1  
ACCCATTCAAATTACTCCAAAACAGCCAAGTGGTCAGCCT  
+HWI-EAS443:3:57:885:1318#0/1  
a`a[aaaa`]aab\_a\_a`aaa`a\_a]\_``P`ZU\_\_\_`U]  
@HWI-EAS443:3:57:906:1816#0/1  
GATGGTGCTTTCTGCTTTTGATGAGAGAAGAAATAAATAC  
+HWI-EAS443:3:57:906:1816#0/1  
^aWI[\_`\_¥\_¥`X[]Q\_b`bbaa¥TWVZY\_Waab¥`Y]¥^W  
@HWI-EAS443:3:57:93:884#0/1  
GAAACGCTGAGATTGAAGACCTCATTTTCCTGGCACGGTC  
+HWI-EAS443:3:57:93:884#0/1  
]aV`a^a\_b[Y[`aa`K\_a¥Z¥aa^\_aa\_aab¥Sa\_\_a\_^  
@HWI-EAS443:3:58:1177:1198#0/1  
CTGTTTTCTTAGGGTCCTTCCCAGCACTGGGATGCTCTTC  
+HWI-EAS443:3:58:1177:1198#0/1  
aba`bbb`bbaa`a^abaaa`abaa\_aaaa`a\_a^aa\_  
@HWI-EAS443:3:58:1218:893#0/1  
ACCAGTGAGTACCCTTCCCTTCAAAGTCATGCCCACTTG  
+HWI-EAS443:3:58:1218:893#0/1  
`X`a`^\_a\_Ra\_[\_\_a]^¥`a\_\_\_a`^U\_[\_\_UN¥^\_`^¥  
@HWI-EAS443:3:58:1273:1287#0/1  
CCTCTCTATTGTTATGCTATTCTGGATTAGTCGCCATCA  
+HWI-EAS443:3:58:1273:1287#0/1  
aa¥[bbZ`\_]\_^]a\_]Z[\_aZ\_\_\_`^Z`a`YXZ`S]]U\_  
@HWI-EAS443:3:58:1290:19#0/1  
GGGGAGCGCCAGGATGCCACAGAAATCAGAGCATCTGTCCG  
+HWI-EAS443:3:58:1290:19#0/1  
Z\_ba^bba^^abbaaaaa`\_`ba`aaP`[[a`^^]a\_PM`  
@HWI-EAS443:3:58:1434:492#0/1  
GTAATTTGAATGGGTCTATCCCGACCAGTGAGTACCCTTC  
+HWI-EAS443:3:58:1434:492#0/1  
aaa\_babbbbaa`baZZaaa[\_\_aa^[\_a\_b\_¥U¥^RR`\_]`  
@HWI-EAS443:3:58:1536:1489#0/1  
GGCTGTTTTGGAGTAATTTGAATGGGTCTATCCCGACCAG  
+HWI-EAS443:3:58:1536:1489#0/1  
aaaa`¥]baQ¥U`U^`aaa¥Ta]\_a`VY`\_VZZTLX]YR]  
@HWI-EAS443:3:58:1599:1002#0/1  
ATTTCAAACAGCTGCCAGAGGGCAATGATGGATCAAGTA  
+HWI-EAS443:3:58:1599:1002#0/1  
aaba^baa^`a\_¥`^`WXUa\_XVY\_aa\_aa]U[\_]`[\_W¥  
@HWI-EAS443:3:58:1676:1622#0/1  
AAGGTCTGGTGCCGAGGTGCTGCGGTGAAAGGAGTTGGA  
+HWI-EAS443:3:58:1676:1622#0/1  
^[[WN\_babaa]abaZU¥^^[\_\_V\_\_OU^Y]a\_QP^]HN]  
@HWI-EAS443:3:58:262:926#0/1  
GGGGAGCGCCAGGATGCCACAGAAATCAGAGCATCTGTCCG

+HWI-EAS443:3:58:262:926#0/1  
ab]]`aaXYJ[SOXSS[\_a[]\_[VRGS]¥RXXT[¥X\_NPR  
@HWI-EAS443:3:58:290:636#0/1  
TGGTGCTTTCTGCTTTTGATGAGAGAAGAAATAAATACCT  
+HWI-EAS443:3:58:290:636#0/1  
abbaaababbbbabbbbaab`bab`^aaaaa`]aa\_``  
@HWI-EAS443:3:58:307:78#0/1  
AATTACTCCAAAACAGCCAAGTGGTCAGCCTGATGAGACC  
+HWI-EAS443:3:58:307:78#0/1  
a`ba`ababaaa\_aaa`aaaa^aa^`a\_`\_^[]`^a^^\_  
@HWI-EAS443:3:58:327:671#0/1  
GGATGGTGCTTTCTGCTTTTGATGAGAGAAGAAATAAATA  
+HWI-EAS443:3:58:327:671#0/1  
aa`¥`a[]aaaa`^`aaaa`aZZa\_`]`[`a``a¥`\_`\_  
@HWI-EAS443:3:58:364:449#0/1  
GTCGGAAGAATGATTGGTGAATCGGGAGATTCTACATCC  
+HWI-EAS443:3:58:364:449#0/1  
aaabbaaaaaaaaaaaaa]aa\_\_`\_aa\_\_`\_`\_Y¥\_\_\_\_\_SZ  
@HWI-EAS443:3:58:39:1667#0/1  
GCACATTCTTTCATAAGCAACCCTTGTCCCTTCGCCATTT  
+HWI-EAS443:3:58:39:1667#0/1  
Y``U\_bb[bbbabab¥¥^T[a^`)]`bIb]Y[Uaaaa\_[  
@HWI-EAS443:3:58:430:832#0/1  
TGGTGCTTTCTGCTTTTGATGAGAGAAGAAATAAATACCT  
+HWI-EAS443:3:58:430:832#0/1  
aaa[a\_aaaaaa\_abba``aaaa\_``¥`\_`a`aa\_\_aa\_T`  
@HWI-EAS443:3:58:437:13#0/1  
CATTGCCCTCTGGGCAGCTGTTTCAAATTTTCCTTTGAGG  
+HWI-EAS443:3:58:437:13#0/1  
`¥S¥`a`^b``Z`¥]YYYZ`VW\_aV[UZ]^¥S[^`Xa`a¥  
@HWI-EAS443:3:58:494:1074#0/1  
ATGCAACAGCAGGTCTTACTCATATCATGATTTGGCATT  
+HWI-EAS443:3:58:494:1074#0/1  
`abaab\_ab`aa`X\_]`a`^^a`\_`]aa\_\_`a^Y^`¥\_\_  
@HWI-EAS443:3:58:49:1374#0/1  
TGGGTCCTCCTGTTTTCTTAGGGTCCTTCCCAGCACTGGG  
+HWI-EAS443:3:58:49:1374#0/1  
a\_aa\_baaaaabaaaaaaaaaY¥^\_aa`aa\_a\_`\_^`\_`\_  
@HWI-EAS443:3:58:49:836#0/1  
ATGCAACAGCAGGTCTTACTCATATCATGATTTGGCATT  
+HWI-EAS443:3:58:49:836#0/1  
a\_WU^b\_\_[^`]a¥YZ\_\_aaaSYaa^Ya^)[\_\_UZ\_Z\_\_Z  
@HWI-EAS443:3:58:508:802#0/1  
CTAATCCAGAATAGCATAACAATAGAGAGGATGGTGCTTT  
+HWI-EAS443:3:58:508:802#0/1  
ab\_]`^`bbaaaaa`\_aa`\_a`^aaa`a`aaa^aSG]T¥^\_  
@HWI-EAS443:3:58:52:1292#0/1  
CTCATTCTGAGGGATCAGTTGCACATAAATCCTGCCTGC  
+HWI-EAS443:3:58:52:1292#0/1  
abaa``aabab\_^^^[\_aa[a¥a`a`aaaa`Z^aa¥\_¥]

@HWI-EAS443:3:58:52:451#0/1  
GGTCCTCCTGTTTTCTTAGGGTCCTTCCCAGCACTGGGAT  
+HWI-EAS443:3:58:52:451#0/1  
aa\_aaa\_a`b^aa`a`\_aa]Va\_\_`aZZ^\_Y^\_\_^\_YY  
@HWI-EAS443:3:58:560:1286#0/1  
ACTTGGCTGTTTTGGAGTAATTTGAATGGGTCTATCCCGA  
+HWI-EAS443:3:58:560:1286#0/1  
aaa`b`\_a`T^a`\_¥R]LY\_``\_TW\_ST[^P^`¥ZZ^]Y¥  
@HWI-EAS443:3:58:590:106#0/1  
TGGGCATGACTTTGAAAGGGAAGGGTACTCACTGGTCGGG  
+HWI-EAS443:3:58:590:106#0/1  
a`[]NV¥^PGT¥TXW\_`a`UQ^\_T\_VUV\_\_RUVXX]\_^U\_  
@HWI-EAS443:3:58:607:1375#0/1  
GTGCTTTCTGCTTTTGATGAGAGAAGAAATAAATACCTAG  
+HWI-EAS443:3:58:607:1375#0/1  
a\_]aaaaaaaaabbaaa^aaaa\_\_^aa`aaaaaaaaaaaa  
@HWI-EAS443:3:58:608:152#0/1  
GGTCCTCCTGTTTTCTTAGGGTCCTTCCCAGCACTGGGAT  
+HWI-EAS443:3:58:608:152#0/1  
aa`aab¥¥aYb]``aa¥b`a¥``\_a\_\_\_\_\_`\_^]`dW^][  
@HWI-EAS443:3:58:647:746#0/1  
CAGGTGCTGCGGTGAAAGGAGTTGGAACAATAGCAATGGA  
+HWI-EAS443:3:58:647:746#0/1  
aabbZaaaa`a\_W]^]\_a[`W`[X\_]`U¥^a]\_^^^\_  
@HWI-EAS443:3:58:707:34#0/1  
GCTGTTTTGGAGTAATTTGAATGGGTCTATCCCGACCAGT  
+HWI-EAS443:3:58:707:34#0/1  
a\_ab\_bbab\_]^[^]\_abaa\_```aV]^]\_\_^^`X^]\_W  
@HWI-EAS443:3:58:805:696#0/1  
ATGACTTTGAAAGGGAAGGGTACTCACTGGTCGGGATAGA  
+HWI-EAS443:3:58:805:696#0/1  
aaba`aabaa``a``\_`aaaZ`\_\_```\_^`\_Y\_a^`\_]\_\_\_\_  
@HWI-EAS443:3:58:875:307#0/1  
CCTGGGTTTCGACTTTCTTACTTGATCCATCATTGCCC  
+HWI-EAS443:3:58:875:307#0/1  
aaaaZ`Vaaaa\_aa\_a\_a\_aa`^a`aZ[^^^a\_\_```\_] ]  
@HWI-EAS443:3:58:880:298#0/1  
GGTCTTCAATCTCAGCGTTTCCTGGGTTTCGACTTTCTCT  
+HWI-EAS443:3:58:880:298#0/1  
aaVaaW`WT\_WP]U\_]a[THZ¥^`\_[LX^\_\_U[^[¥VV\_¥  
@HWI-EAS443:3:58:894:2036#0/1  
ATTGCCCTCTGGGCAGCTGTTTGAATTTTCCTTTGAGGA  
+HWI-EAS443:3:58:894:2036#0/1  
aa`]aabaaRZP[\_a¥¥``^a\_¥R``aa^a[Ya`\_a\_S`^  
@HWI-EAS443:3:58:8:1237#0/1  
GCATCATTGAGTTGGAATGCCAAATCATGATATGAGTAA  
+HWI-EAS443:3:58:8:1237#0/1  
a`b``V`aa\_V¥X`WN¥\_^ZYY\_]P]Y¥U][`\_Z\_\_a^VS  
@HWI-EAS443:3:58:920:344#0/1  
CTCCATTGCTATTGTTCCAACCTTTCCACCGCAGCACCT

+HWI-EAS443:3:58:920:344#0/1  
aba`aaabababbbabaaa`aa`aa`aaa`baaaaa\_`^`  
@HWI-EAS443:3:58:936:424#0/1  
CAAAAGCAGAAAGCACCATCCTCTCTATTGTTATGCTATT  
+HWI-EAS443:3:58:936:424#0/1  
aa``babb`babbbbaaaaaYaa`aRbaaaaaa]aaaa  
@HWI-EAS443:3:58:955:313#0/1  
GACTAATCCAGAATAGCATAACAATAGAGAGGATGGTGCT  
+HWI-EAS443:3:58:955:313#0/1  
aabbbba`aa`]`aba`aaaa^aaa^baaa`^a¥QY00  
@HWI-EAS443:3:58:974:1728#0/1  
ATCCCAGTGCTGGGAAGGACCCTAAGAAAACAGGAGGACC  
+HWI-EAS443:3:58:974:1728#0/1  
YTY`aaa`aa¥]ZR¥UXY^UZVa\_[\_U\_¥`VK¥`Y\_\_[RR  
@HWI-EAS443:3:59:1000:30#0/1  
GAAAGAATGTGCAATATCCTCAAAGGAAAATTTCAAACAG  
+HWI-EAS443:3:59:1000:30#0/1  
]bbabaabaZaababbaabaaaabbb\_a`aaaaWU``\_  
@HWI-EAS443:3:59:1003:69#0/1  
GGCATGACTTTGAAAGGGAAGGGTACTCACTGGTCGGGAT  
+HWI-EAS443:3:59:1003:69#0/1  
ab^Y`ba\_``ab``baa^]aaaVa`\_\_\_\_\_]^VYSaXX  
@HWI-EAS443:3:59:1015:1623#0/1  
AGAGGATGGTGCTTTCTGCTTTTGATGAGAGAAGAAATAA  
+HWI-EAS443:3:59:1015:1623#0/1  
V\_G\_bb`bbP¥VJ]a\_ZWW\_ba`bR^^^¥V^PW`ZXW\_\_  
@HWI-EAS443:3:59:1133:218#0/1  
GACAAGGGTTGCTTATGAAAGAATGTGCAATATCCTCAA  
+HWI-EAS443:3:59:1133:218#0/1  
a[``^b`¥UX\_U\_]Y]\_^X]Y[W]R\_\_\_\_\_T¥VVTQZ]S  
@HWI-EAS443:3:59:1211:1425#0/1  
AATAGAGAGGATGGTGCTTTCTGCTTTTGATGAGAGAAGA  
+HWI-EAS443:3:59:1211:1425#0/1  
abbbbabbbababa¥baabb`a`abbbb]aa\_ZaNY]\_\_]  
@HWI-EAS443:3:59:1214:787#0/1  
GGTCCTCCTGTTTTCTTAGGGTCCTCCCAGCACTGGGAT  
+HWI-EAS443:3:59:1214:787#0/1  
a¥Z¥XaV]]b`aaaa\_a`a\_Jaa``aaaY`V]\_\_UWaYV  
@HWI-EAS443:3:59:1216:856#0/1  
GTGAGCTGGGTTTTCATTTGGTCTCATCAGGCTGACCACT  
+HWI-EAS443:3:59:1216:856#0/1  
HV[a\_VXba^W^Y`ab\_`YYaa[[abab\_`¥^abaTNPP\_  
@HWI-EAS443:3:59:1248:1856#0/1  
ATCCAGAATAGCATAACAATAGAGAGGATGGTGCTTTCTG  
+HWI-EAS443:3:59:1248:1856#0/1  
`]K\_aa\_a\_a^\_a\_¥[`^aa\_a\_a\_a\_b`GXVXYNNRG  
@HWI-EAS443:3:59:1276:1661#0/1  
ATCAGTTGCACATAAATCCTGCCTGCCTGCTTGTGTGTAT  
+HWI-EAS443:3:59:1276:1661#0/1  
aaaa`a`a`aaaababba`^\_aaa`a\_aaaaZZZ^R^WZU

@HWI-EAS443:3:59:1383:886#0/1  
TTGCCCTCTGGGCAGCTGTTTCAAATTTTCCTTTGAGGAT  
+HWI-EAS443:3:59:1383:886#0/1  
aaba`\_aaa\_ab\_a\_Y\_``aaa`aaaaba]\_`aaaYWaZ\_  
@HWI-EAS443:3:59:1535:1322#0/1  
CTCTTACTTGATCCATCATTGCCCTCTGGGCAGCTGTTTG  
+HWI-EAS443:3:59:1535:1322#0/1  
aab`bbbbbb`abb`[^abaaU`bba`bbXa`a]T]\_P  
@HWI-EAS443:3:59:153:2037#0/1  
CGACTTTCTTACTTGATCCATCATTGCCCTCTGGGCAG  
+HWI-EAS443:3:59:153:2037#0/1  
abaaaaaaaaaaaaaaaaaaaaaaaaaaa`aa`X\_^]UV]^W  
@HWI-EAS443:3:59:1595:1807#0/1  
TGGACGACTAATCCAGAATAGCATAACAATAGAGAGGATG  
+HWI-EAS443:3:59:1595:1807#0/1  
V\_[Ubbaba\_V[b`bb0\_bababab\_bbb`a\_aa\_aaa^b  
@HWI-EAS443:3:59:1598:745#0/1  
CAATAGAGAGGATGGTGCTTTCTGCTTTTGATGAGAGAAG  
+HWI-EAS443:3:59:1598:745#0/1  
abab\_a\_babb^ab^P`S¥a\_ZZa]^baa[[]¥^aPW`\_\_  
@HWI-EAS443:3:59:1623:1130#0/1  
CTTCCGACAGATGCTCTGATTTCTGTGGCATCCTGGCGCT  
+HWI-EAS443:3:59:1623:1130#0/1  
abbbbaaabbaababaa`abbbbababaabbW`abYUa[R  
@HWI-EAS443:3:59:1663:647#0/1  
GAAATAAGGAGAGTTTGGCGCCAAGCAAACAATGGCGAAG  
+HWI-EAS443:3:59:1663:647#0/1  
``aabaabbabaa`aabb`[\_]\_ab\_^aaaa[``PR^YS  
@HWI-EAS443:3:59:1690:1001#0/1  
GTCCGAAGAATGATTGGTGAATCGGGAGATTCTACATCC  
+HWI-EAS443:3:59:1690:1001#0/1  
a`[abaab`aa`aa\_ZT\_a^`a`^]a`^]TXZYU[UQ  
@HWI-EAS443:3:59:1705:180#0/1  
ATGGTGCTTTCTGCTTTTGATGAGAGAAGAAATAAATACC  
+HWI-EAS443:3:59:1705:180#0/1  
abb`]aaabaZab`aabbbaab\_aaba]aaa]a`TW\_SG  
@HWI-EAS443:3:59:175:207#0/1  
TGCCCTCTGGGCAGCTGTTTCAAATTTTCCTTTGAGGATA  
+HWI-EAS443:3:59:175:207#0/1  
abbbbb`^abbbb`Z]aabba\_S^bbaa`^¥aab¥\_a]SX  
@HWI-EAS443:3:59:202:502#0/1  
ATTGCCCTCTGGGCAGCTGTTTCAAATTTTCCTTTGAGGA  
+HWI-EAS443:3:59:202:502#0/1  
ab`a¥]aaaa\_^^^a¥aa¥^¥S¥`aaaTa`[ZZ`RS  
@HWI-EAS443:3:59:220:128#0/1  
GTTGCTTATGAAAGAATGTGCAATATCCTCAAAGGAAAAT  
+HWI-EAS443:3:59:220:128#0/1  
aZ]a`[a¥[\_Y\_`TR^W\_\_`\_]Y\_^]XU]^]¥YVRV]  
@HWI-EAS443:3:59:384:961#0/1  
TCCCAGTGCTGGGAAGGACCCTAAGAAAACAGGAGGACCC

+HWI-EAS443:3:59:384:961#0/1  
`a`aa\_\_`aaa`a\_\_`aa`aa\_V`Y`a`TZ`]S  
@HWI-EAS443:3:59:393:1493#0/1  
GGTTGCTTATGAAAGAATGTGCAATATCCTCAAAGGAAAA  
+HWI-EAS443:3:59:393:1493#0/1  
ababbabbbb`a``abaY\_aabba`aaba`^aaa¥`aa\_  
@HWI-EAS443:3:59:399:163#0/1  
GTCCATCATAATCACTGAGTTTGAGTTCAGTGCACATTTG  
+HWI-EAS443:3:59:399:163#0/1  
aX¥`aa`\_S^[a\_\_^aa]a]Y\_a[`Y]`X\_YZ]]YXY]XW  
@HWI-EAS443:3:59:426:1056#0/1  
TAACAATAGAGAGGATGGTGCTTTCTGCTTTTGATGAGAG  
+HWI-EAS443:3:59:426:1056#0/1  
aabb^ab]^RZ¥bb^a^^0`^\_a^`¥^a`a^[]R\_VG`NN  
@HWI-EAS443:3:59:452:1000#0/1  
TGCGGTGAAAGGAGTTGGAACAATAGCAATGGAGTTAATC  
+HWI-EAS443:3:59:452:1000#0/1  
aaa`b\_^Xa\_`a]Y]abaaaa\_a\_]¥`aa]]\_Y]]\_\_X  
@HWI-EAS443:3:59:460:14#0/1  
CATAATCACTGAGTTTGAGTTCAGTGCACATTTGGATGTA  
+HWI-EAS443:3:59:460:14#0/1  
aabb`a`ab\_babbbaba`]ab`b`a`[aaab`XZb¥^  
@HWI-EAS443:3:59:499:409#0/1  
ATCACTGAGTTTGAGTTCAGTGCACATTTGGATGTAGAAT  
+HWI-EAS443:3:59:499:409#0/1  
aaaa\_bb\_b\_aaa`a`a`a`a`V]aaa\_\_X\_a^RR\_\_[  
@HWI-EAS443:3:59:671:1500#0/1  
CGCAGGTGCTGCGGTGAAAGGAGTTGGAACAATAGCAATG  
+HWI-EAS443:3:59:671:1500#0/1  
aabbbbaabba`bYa\_[`^]ababaa\_bba`\_a\_UU\_^Y  
@HWI-EAS443:3:59:726:501#0/1  
GGGATCAGTTGCACATAAATCCTGCCTGCCTGCTTGTGTG  
+HWI-EAS443:3:59:726:501#0/1  
[`¥K\_[X¥Zabb\_aWb\_ZY¥`a]\_abaabaYVWb`TK\_]W  
@HWI-EAS443:3:59:873:203#0/1  
TGGGTTTCGACTTTCTTACTTGATCCATCATTGCCCTC  
+HWI-EAS443:3:59:873:203#0/1  
a`b\_G\_¥``\_aba`^aV^aVU\_aba\_XX^¥`^]`aVTa\_X  
@HWI-EAS443:3:5:1016:2006#0/1  
AGCACTCATTCTGAGGGGATCAGTTGCACATAAATCCTGC  
+HWI-EAS443:3:5:1016:2006#0/1  
a`a`a\_aaY\_[aa]`\_`Y]^a\_]JLa[Wa\_W^^¥TBBB  
@HWI-EAS443:3:5:1052:1975#0/1  
CAGGAAACGCTGAGATTGAAGACCTCATTTTCCTGGCACG  
+HWI-EAS443:3:5:1052:1975#0/1  
a``aabba`Ua`Ya[a\_aab^a[LSa^a`\_a\_Q^a[aaYa  
@HWI-EAS443:3:5:1116:2039#0/1  
AATTTGAATGGGTCTATCCCGACCAGTGAGTACCCTTCCC  
+HWI-EAS443:3:5:1116:2039#0/1  
ababbbba\_ba\_aabaabba]bb[abb`bRY[aa\_¥\_

@HWI-EAS443:3:5:1195:1204#0/1  
TTTCAAACAGCTGCCAGAGGGCAATGATGGATCAAGTAA  
+HWI-EAS443:3:5:1195:1204#0/1  
a`aaaa`aaa\_R\_\_\_\_`aZ`\_SV\_\_\_\_aa\_]UX^¥^]aX\_]`  
@HWI-EAS443:3:5:1195:526#0/1  
GCTGTTTTGGAGTAATTTGAATGGGTCTATCCCGACCAGT  
+HWI-EAS443:3:5:1195:526#0/1  
`abbabbbbbaaa\_a\_aba^`\_]¥[\_^]aaa¥^Ya`]^a¥B  
@HWI-EAS443:3:5:1298:862#0/1  
GCTTTCTGCTTTTGTATGAGAGAAGAAATAAATACCTAGAA  
+HWI-EAS443:3:5:1298:862#0/1  
\_`b`\_a\_a`babb`b¥[RVSa^b`aaa\_`aab`LI¥b`[B  
@HWI-EAS443:3:5:1362:700#0/1  
GGTCCTCCTGTTTTCTTAGGGTCCTTCCCAGCACTGGGAT  
+HWI-EAS443:3:5:1362:700#0/1  
a\_]`bbaa\_babb^Z\_a`[a^R^`a`a`¥`a[`aaa``Y]  
@HWI-EAS443:3:5:1473:900#0/1  
GAGGTCTTCAATCTCAGCGTTTCTGGGTTTCGACTTTCT  
+HWI-EAS443:3:5:1473:900#0/1  
aaba\_\_bbabbb`b`aba[aba`\_aabb`aa^a`^aaa^a  
@HWI-EAS443:3:5:1621:1172#0/1  
AGTAATTTGAATGGGTCTATCCCGACCAGTGAGTACCCTT  
+HWI-EAS443:3:5:1621:1172#0/1  
abaa`aab^`b`^F\_Uaaa\_]OWa^¥`a^a`\_Wa0]WBB  
@HWI-EAS443:3:5:191:1473#0/1  
TGACTTTGAAAGGGAAGGGTACTCACTGGTCGGGATAGAC  
+HWI-EAS443:3:5:191:1473#0/1  
aababbbababbabababb^aaaaa`aaa^aaaa`aaaaa  
@HWI-EAS443:3:5:216:1952#0/1  
ATCCCGACCAGTGAGTACCCTTCCCTTTCAAAGTCATGCC  
+HWI-EAS443:3:5:216:1952#0/1  
aaaa^ab^`\_aXa`\_¥a\_¥a`aa\_\_^a\_V``a¥W¥a\_¥BB  
@HWI-EAS443:3:5:217:397#0/1  
GGGTCTCCTGTTTTCTTAGGGTCCTTCCCAGCACTGGGA  
+HWI-EAS443:3:5:217:397#0/1  
aaa`bbba`ab^aab^a]]^^¥^`^\_^]]`\_P¥`]]B  
@HWI-EAS443:3:5:293:1497#0/1  
ATGGGCTTGCAAGTGGGCATGACTTTGAAAGGGA  
+HWI-EAS443:3:5:293:1497#0/1  
`Q[^UY^PY\_`¥aYa[aaGa`Z\_\_R\_aN\_`^`\_U¥¥\_BBB  
@HWI-EAS443:3:5:391:110#0/1  
GCACATTCTTTCATAAGCAACCCTTGTCTTCGTCCATTT  
+HWI-EAS443:3:5:391:110#0/1  
``a``bbbbabUbb`aaa\_a\_XabSaVaUaaYa\_`U^a\_B  
@HWI-EAS443:3:5:392:1411#0/1  
GTGAAAATGGACGAAGGACAAGGGTTGCTTATGAAAGAAT  
+HWI-EAS443:3:5:392:1411#0/1  
a]b`a`\_aaaaa``aaaa\_¥Z```S^`\_a^\_aa`\_a`\_^B  
@HWI-EAS443:3:5:474:372#0/1  
AGCGCTCTTGTCTCTGATATGTGGCATCATTGAGTTGG

+HWI-EAS443:3:5:474:372#0/1  
aa`aa`aa`\_a[`Y\_a\_\_\_\_\_aX\_`]\_\_]^\_\_]^`\_X\_0B  
@HWI-EAS443:3:5:507:579#0/1  
TGCACATTCTTTCATAAGCAACCCTTGCCTTCGTCCATT  
+HWI-EAS443:3:5:507:579#0/1  
`babbbbabbbbabbb`]baaba`aaa¥^bb\_b[`¥aaB  
@HWI-EAS443:3:5:518:64#0/1  
GGGTCCTCCTGTTTTCTTAGGGTCCTTCCCAGCACTGGGA  
+HWI-EAS443:3:5:518:64#0/1  
abbV]QUTN`\_K\_Ua\_a\_aZ¥RHPU^¥GVFY\_Y¥KXX\_BB  
@HWI-EAS443:3:5:648:588#0/1  
CTGGAGGGGTGAAAATGGACGAAGGACAAGGGTTGCTTAT  
+HWI-EAS443:3:5:648:588#0/1  
abb````bb^baaa]bbabbaaaaaaa`aa]R]b`a``a  
@HWI-EAS443:3:5:651:1206#0/1  
TAACAATAGAGAGGATGGTGCTTTCTGCTTTTGATGAGAG  
+HWI-EAS443:3:5:651:1206#0/1  
aababWb^baa`\_T¥`baPa\_\_\_aTa[Z[```\_\_\_^\_b`a  
@HWI-EAS443:3:5:651:567#0/1  
CTCCTGTTTTCTTAGGGTCCTTCCCAGCACTGGGATGCTC  
+HWI-EAS443:3:5:651:567#0/1  
abbbabbbbbbbaabbbbaabbbbaab`b]  
@HWI-EAS443:3:5:721:1811#0/1  
GGTCCTCCTGTTTTCTTAGGGTCCTTCCCAGCACTGGGAT  
+HWI-EAS443:3:5:721:1811#0/1  
]`^WQ¥bba\_b]]b]abba]]aab\_abX^[`baaaaaZaa  
@HWI-EAS443:3:5:843:1685#0/1  
ATCAGTTGCACATAAATCCTGCCTGCCTGCTTGTGTGTAT  
+HWI-EAS443:3:5:843:1685#0/1  
a\_b]aX]]]^Z[¥`\_`Ha]U\_M^[aU`[]\_\_\_\_\_]aUaR¥B  
@HWI-EAS443:3:5:854:976#0/1  
GCAGGTGCTGCGGTGAAAGGAGTTGGAACAATAGCAATGG  
+HWI-EAS443:3:5:854:976#0/1  
`aa`a]aaaaab`W\_\_\_\_\_]a`Xaa\_]\_0^\_^^\_XY^^Z[  
@HWI-EAS443:3:5:856:1375#0/1  
TGACTTTGAAAGGGAAGGGTACTCACTGGTCGGGATAGAC  
+HWI-EAS443:3:5:856:1375#0/1  
[bbXY[b]aaaa`b`[`aaY`Ya]\_^`\_Z0Sa^^]U\_¥]V  
@HWI-EAS443:3:5:904:707#0/1  
TAACAATAGAGAGGATGGTGCTTTCTGCTTTTGATGAGAG  
+HWI-EAS443:3:5:904:707#0/1  
aaa`a`bbbaa`aa`abaR`¥`a\_S\_]J[aaaX¥aa¥a[`  
@HWI-EAS443:3:5:918:779#0/1  
ATCATAATCACTGAGTTTGAGTTCAGTGCACATTTGGATG  
+HWI-EAS443:3:5:918:779#0/1  
abaabaabaa`ab\_aababaaaaaaa`a\_a\_aa`a``a\_a  
@HWI-EAS443:3:5:926:909#0/1  
CAGTGCACATTTGGATGTAGAATCTCCCGATTCCACCAAT  
+HWI-EAS443:3:5:926:909#0/1  
abaa[aabbbabb`bab`babaa\_aa]aa\_`a^`\_`]`aa\_



@HWI-EAS443:3:5:964:135#0/1  
GAGGGGTGAAAATGGACGAAGGACAAGGGTTGCTTATGAA  
+HWI-EAS443:3:5:964:135#0/1  
WS`\_`a\_¥^L0`^`]^¥ba`]^XSY``aa]Y¥P\_\_^Y`BB  
@HWI-EAS443:3:5:98:63#0/1  
CAGGTGCTGCGGTGAAAGGAGTTGGAACAATAGCAATGGA  
+HWI-EAS443:3:5:98:63#0/1  
a`b\_^a^`babaNaVY`\_\_¥\_¥``[¥\_Z\_\_\_\_]\_VZ\_^ZBB  
@HWI-EAS443:3:60:1029:872#0/1  
GCTTTCTGCTTTTGATGAGAGAAGAAATAAATACCTAGAA  
+HWI-EAS443:3:60:1029:872#0/1  
a\_RMV\_]Y]W[[ZaaY¥]^\_¥¥Y[`QMSX`UY]YFUaYUQ¥  
@HWI-EAS443:3:60:108:609#0/1  
CAAGAGCGCTTGTTCGCACCGAATGGATCCCAGAATGTG  
+HWI-EAS443:3:60:108:609#0/1  
a`U\_`[aaa\_``\_a^``^^a\_YY¥\_\_WT\_¥¥WZWWWST  
@HWI-EAS443:3:60:1134:1850#0/1  
GTGGGCATGACTTTGAAAGGGAAGGGTACTCACTGGTCGG  
+HWI-EAS443:3:60:1134:1850#0/1  
¥RU\_¥XZZ]aGZ`Z^U\_XW\_]¥Q^¥WW¥QWIRNW\_MBBBB  
@HWI-EAS443:3:60:1143:284#0/1  
GGAGGGGTGAAAATGGACGAAGGACAAGGGTTGCTTATGA  
+HWI-EAS443:3:60:1143:284#0/1  
ab^]aba\_baaa]abaaaba`\_a`\_]`aa\_`^S]\_Wa]]  
@HWI-EAS443:3:60:11:438#0/1  
TATATATGGGTCCTCCTGTTTTCTTAGGGTCCTCCCAGC  
+HWI-EAS443:3:60:11:438#0/1  
aa`[``¥\_¥^Ra^]a]Z\_VZaZ]]\_U`]VN^]¥V¥\_XN[Y  
@HWI-EAS443:3:60:124:587#0/1  
AAGCAACCCTTGCTCCTCGTCCATTTTCACCCCTCCAGAA  
+HWI-EAS443:3:60:124:587#0/1  
aaaa`a\_```\_`\_]```\_\_]`\_\_^\_^]^^]]X]^WRWU  
@HWI-EAS443:3:60:1270:477#0/1  
ACTTCCCAGAAGGTCTGGTGCCGCAGGTGCTGCGGTGAAA  
+HWI-EAS443:3:60:1270:477#0/1  
a`aaaa\_`a`^^\_Z`a`]^`XS`X^`\_\_XOVZKTPSBBBB  
@HWI-EAS443:3:60:1275:1048#0/1  
CTTCTATATATGGGTCCTCCTGTTTTCTTAGGGTCCTTCC  
+HWI-EAS443:3:60:1275:1048#0/1  
abbbbbbbbabbbbbbabbbb`abbbbbbaababbbbbbb  
@HWI-EAS443:3:60:1355:1747#0/1  
AGCATAACAATAGAGAGGATGGTCTTTCTGCTTTTGATG  
+HWI-EAS443:3:60:1355:1747#0/1  
aa\_`a\_a\_`\_aa`a`a\_]Y]SSZ^a\_U^¥[¥U\_aT]^¥  
@HWI-EAS443:3:60:1594:118#0/1  
TTCAAACAGCTGCCAGAGGGCAATGATGGATCAAGTAAG  
+HWI-EAS443:3:60:1594:118#0/1  
aa^aab\_aa\_`b\_`^`\_a`a^]`\_a`^``\_^^XX]`Y\_]`  
@HWI-EAS443:3:60:1628:933#0/1  
ATTCCGGTGCGAACAAGCGCTCTTGTCTCTGATATGTGG

+HWI-EAS443:3:60:1628:933#0/1  
abba`\_]Zab^`a#b`^\_aa[\_^Z\_\_P\_\_\_\_\_Wa]]XV^a  
@HWI-EAS443:3:60:1764:839#0/1  
TGACTTTGAAAGGGAAGGGTACTCACTGGTCGGGATAGAC  
+HWI-EAS443:3:60:1764:839#0/1  
Y\_#\_ab\_WZ`aaZ^`a`[]a`#[a`#`a\_Z[^[VZ]  
@HWI-EAS443:3:60:197:1896#0/1  
GAATGATTGGTGAATCGGGAGATTCTACATCCAAATGTG  
+HWI-EAS443:3:60:197:1896#0/1  
a`^`[^^^#YX^`#Y#[QRT`\_`ZY^^\_S^YW]W]X]XX]  
@HWI-EAS443:3:60:581:1824#0/1  
CTCCTGTTTTCTTAGGGTCCTTCCCAGCACTGGGATGCTC  
+HWI-EAS443:3:60:581:1824#0/1  
aa]abaabbaabb`ba`#aaaaa`a\_aa`aaaa`\_^\_a^  
@HWI-EAS443:3:60:620:125#0/1  
GAAAGCACCATCCTCTCTATTGTTATGCTATTCTGGATTA  
+HWI-EAS443:3:60:620:125#0/1  
aa`\_a]XN]^`^Y`^a`aV\_\_a]`\_[a\_\_Y#Z#]\_`]]QY  
@HWI-EAS443:3:60:623:374#0/1  
GTCCTCCTGTTTTCTTAGGGTCCTTCCCAGCACTGGGATG  
+HWI-EAS443:3:60:623:374#0/1  
``abaaabba`a`a`aaY^a`aa`^a`aa`a`a[Zaa  
@HWI-EAS443:3:60:697:455#0/1  
GGAAGAATGATTGGTGAATCGGGAGATTCTACATCCAAA  
+HWI-EAS443:3:60:697:455#0/1  
aaY^#V#aaaa#a`M`aaa`\_aa`]`#^`\_\_^Y\_\_ZS]^]  
@HWI-EAS443:3:60:698:247#0/1  
ACTTGGCTGTTTTGGAGTAATTTGAATGGGTCTATCCCGA  
+HWI-EAS443:3:60:698:247#0/1  
#R^`aa`aZNU`a[a#VVXVSY]W^#V\_] [LFYTZSGOUS  
@HWI-EAS443:3:60:721:1818#0/1  
TGCTATTCTGGATTAGTCGTCCATCATAATCACTGAGTTT  
+HWI-EAS443:3:60:721:1818#0/1  
a^]^abb`^aa]\_aa`aTT\_\_aa\_a`aaZT`MV#R[[``  
@HWI-EAS443:3:60:759:894#0/1  
GGGTCTCCTGTTTTCTTAGGGTCCTTCCCAGCACTGGGA  
+HWI-EAS443:3:60:759:894#0/1  
aba]aaaaaaaaabaaabaaaaa^aaaaa`a`\_`\_a\_a^\_  
@HWI-EAS443:3:60:846:430#0/1  
ATGCAACAGCAGGTCTTACTCATATCATGATTTGGCATT  
+HWI-EAS443:3:60:846:430#0/1  
\_`aX\_^]aa^Z\_[R^]\_]`ab#^]\_^\_Z]`]Y]`\_`\_^  
@HWI-EAS443:3:60:876:105#0/1  
CCTGCTGTTGCATCTTCGCCATTGTTTGCTTGGCGCCAAA  
+HWI-EAS443:3:60:876:105#0/1  
`bbbaab`abaaaaabaa`aabaa`ab`]`aa`U\_\_YY]\_  
@HWI-EAS443:3:60:877:208#0/1  
GGCTTGCAGTAGCAAGTGGGCATGACTTTGAAAGGGAAGG  
+HWI-EAS443:3:60:877:208#0/1  
abaaaba]b\_aa`aa#a`a\_^`]#`\_`aW\_\_`[`W^`#

@HWI-EAS443:3:60:946:951#0/1  
CCTGGGTTTTCGACTTTCTTACTTGATCCATCATTGCC  
+HWI-EAS443:3:60:946:951#0/1  
a\_]ba¥Yabaa\_ababaaaa`\_\_`a`]SX`]^\_^[W^Y  
@HWI-EAS443:3:61:1003:1669#0/1  
AGAGTTTGGCGCAAGCAAACAATGGCGAAGATGCAACAG  
+HWI-EAS443:3:61:1003:1669#0/1  
aabaZab`]a\_aI\_`¥aaaa¥ZL]\_\_a`ZVSPSNZV\_VXL  
@HWI-EAS443:3:61:1270:661#0/1  
ATGGGTCCTCCTGTTTTCTTAGGGTCCTTCCCAGCACTGG  
+HWI-EAS443:3:61:1270:661#0/1  
a^Zab^bb`[babaaabbY`\_a^]baU\_a`aY¥`\_W^\_^  
@HWI-EAS443:3:61:1278:419#0/1  
GCCACATATCAGAGAACAAGAGCGCTTGTCGCACCGGAA  
+HWI-EAS443:3:61:1278:419#0/1  
\_bbaZHW^]aU]a[[a`¥]\_a¥]aaYL]a]S`T^UMWVN¥  
@HWI-EAS443:3:61:1335:209#0/1  
GACCCATTCAAATTACTCCAAAACAGCCAAGTGGTCAGCC  
+HWI-EAS443:3:61:1335:209#0/1  
aaXaaabaa]¥`\_\_`a^`a`SWaa`XT][\_V^MXRX]XX  
@HWI-EAS443:3:61:1356:2019#0/1  
TGAAAATGGACGAAGGACAAGGGTTGCTTATGAAAGAATG  
+HWI-EAS443:3:61:1356:2019#0/1  
Yb^Sab¥\_Z`^aaL`¥]^¥aa¥][a\_]QGPYZ[H\_¥FOW  
@HWI-EAS443:3:61:138:1487#0/1  
CACTTGGCTGTTTTGGAGTAATTTGAATGGGTCTATCCCG  
+HWI-EAS443:3:61:138:1487#0/1  
aaaabbbb`V¥abY[[[HT]X\_[OW[VUXSSRYVUUQB  
@HWI-EAS443:3:61:1511:1185#0/1  
CGACTTTCTTACTTGATCCATCATTGCCCTCTGGGCAG  
+HWI-EAS443:3:61:1511:1185#0/1  
abaababbbaaba`aba]bb`Zabaaaa`\_a^]`^\_^]  
@HWI-EAS443:3:61:1569:1685#0/1  
CAAATGTGCACTGAACTCAAACACTCAGTGATTATGATGGAC  
+HWI-EAS443:3:61:1569:1685#0/1  
abbab`^abb`b`abba`aYabba`aba\_a¥aba`VZ[O  
@HWI-EAS443:3:61:1644:1502#0/1  
GTGAGCTGGGTTTTCATTTGGTCTCATCAGGCTGACCACT  
+HWI-EAS443:3:61:1644:1502#0/1  
a`^Y^Ua\_\_`X`a`\_aaa^`\_`aaaa`\_P^[V]]^V^GR  
@HWI-EAS443:3:61:166:925#0/1  
CACTTCCCAGAAGGTCTGGTGCCGCAGGTGCTGCGGTGAA  
+HWI-EAS443:3:61:166:925#0/1  
abbbbbbbTb\_W[b\_b[``^b`a^`a]T`\_`YX^^UOPP  
@HWI-EAS443:3:61:1705:1611#0/1  
GGGTTTTCATTTGGTCTCATCAGGCTGACCACTTGGCTGT  
+HWI-EAS443:3:61:1705:1611#0/1  
aba]baba`aaa^¥^abbaaaaaaaaaa^Z\_`^`[ZN`\_W  
@HWI-EAS443:3:61:172:1105#0/1  
GTGCTTTCTGCTTTTGATGAGAGAAGAAATAAATACCTAG

+HWI-EAS443:3:61:172:1105#0/1  
aZ]````¥]\_`\_\_`V^¥YXWX[U]^ [VOXUXY[VWXZY  
@HWI-EAS443:3:61:1738:213#0/1  
GTGCTTTCTGCTTTTGATGAGAGAAGAAATAAATACCTAG  
+HWI-EAS443:3:61:1738:213#0/1  
a[ `W]aa\_`a\_a`aa¥^ba\_a^a¥\_b\_\_\_a^\_X]^UZ^^Z  
@HWI-EAS443:3:61:1760:1720#0/1  
TCCTGTTTTCTTAGGGTCCTTCCCAGCACTGGGATGCTCT  
+HWI-EAS443:3:61:1760:1720#0/1  
aa\_a` `baa^ba\_`\_]a\_aaba`^`a`^`^VV\_¥YXX  
@HWI-EAS443:3:61:1767:1184#0/1  
AGCAAGTGGGCATGACTTTGAAAGGGAAGGGTACTCACTG  
+HWI-EAS443:3:61:1767:1184#0/1  
abbbab^]V` `aZa]` `abb]S^bb\_R\_bb\_ZV^` `][Y  
@HWI-EAS443:3:61:245:1720#0/1  
TCTGGGATCCATTCCGGTGCGAACAAGCGCTCTTGTCTC  
+HWI-EAS443:3:61:245:1720#0/1  
aba^[]`aaaba`a`\_]\_Zab`][a`aaa\_a\_\_Z^\_W\_^\_\_  
@HWI-EAS443:3:61:25:274#0/1  
AGGTGCTGCGGTGAAAGGAGTTGGAACAATAGCAATGGAG  
+HWI-EAS443:3:61:25:274#0/1  
aba]a` `abbaYaa`]` ` `aU¥U¥PW]]R]^\_RZU¥` [Z]  
@HWI-EAS443:3:61:284:178#0/1  
AAGGAGAGTTTGGCGCCAAGCAAACAATGGCGAAGATGCA  
+HWI-EAS443:3:61:284:178#0/1  
`X`VabM\_b^abbaaHTYU]¥ML[ ` \_¥Sa[¥bZU^MDVV^  
@HWI-EAS443:3:61:315:1401#0/1  
CCTGGGTTTTCGACTTTCTTACTTGATCCATCATTGCCC  
+HWI-EAS443:3:61:315:1401#0/1  
` `a`bb[b`\_` `b^`aabbaxZ^a\_ab`aaaa[^ [VGNNG  
@HWI-EAS443:3:61:398:267#0/1  
TGCGGTGAAAGGAGTTGGAACAATAGCAATGGAGTTAATC  
+HWI-EAS443:3:61:398:267#0/1  
abaaa^baa`aa`a`\_aa\_a`W\_^YZ\_\_\_\_\_ ` \_Z\_Z\_^]]X  
@HWI-EAS443:3:61:547:798#0/1  
GATTGGTGAATCGGGAGATTCTACATCCAAATGTGCACT  
+HWI-EAS443:3:61:547:798#0/1  
]V^]`a]\_`Z^[¥U[¥¥Z]^Z^MQ^[¥XWZ\_YPUYUXHHO  
@HWI-EAS443:3:61:572:908#0/1  
TGCATCTTCGCCATTGTTTGCTTGGCGCCAAACTCTCCTT  
+HWI-EAS443:3:61:572:908#0/1  
ab`a\_`bbb`\_][b`\_]aaW`U`^`b`^P\_Z\_W[\_WPO¥Z  
@HWI-EAS443:3:61:576:897#0/1  
ATAACAATAGAGAGGATGGTGCTTTCTGCTTTTGATGAGA  
+HWI-EAS443:3:61:576:897#0/1  
abbaaababab\_aabaa\_aa[[a^`\_`a\_\_¥` ` `¥U[Z]Z]  
@HWI-EAS443:3:61:607:473#0/1  
GTGCTTTCTGCTTTTGATGAGAGAAGAAATAAATACCTAG  
+HWI-EAS443:3:61:607:473#0/1  
¥MRS[\_\_\_V¥ZTZT¥\_WMSLJYFWQXWOYOOYRYTXKOVPR



+HWI-EAS443:3:62:1394:1141#0/1  
T\_aaabb]bbba`abY`aaabbbbYa\_aaba\_bb]I\_bba  
@HWI-EAS443:3:62:1435:863#0/1  
AAACAGCCAAGTGGTCAGCCTGATGAGACCAAATGAAAAC  
+HWI-EAS443:3:62:1435:863#0/1  
aaaaa`aaaa^a`Uaaa`^aaaa`\_aa`aa``^\_``\_`  
@HWI-EAS443:3:62:1453:373#0/1  
GGTGCTTTCTGCTTTTGGATGAGAGAAGAAATAAATACCTA  
+HWI-EAS443:3:62:1453:373#0/1  
`aUba`b\_b¥\_¥ababbabb`\_baaaa`\_bbaa`]]abb  
@HWI-EAS443:3:62:1494:672#0/1  
AAGGGTACTCACTGGTCGGGATAGACCCATTCAAATTACT  
+HWI-EAS443:3:62:1494:672#0/1  
¥]\_[[YXY\_VaU`aaUa[[`XLV)`XFPVRZY\_\_U\_Ta`\_  
@HWI-EAS443:3:62:1511:1024#0/1  
ACAATAGAGAGGATGGTGCTTTCTGCTTTTGGATGAGAGAA  
+HWI-EAS443:3:62:1511:1024#0/1  
a\_aab`b`a\_bba\_ba]`R[aa^`TW`aa`[\_UY^X`\_a  
@HWI-EAS443:3:62:1526:702#0/1  
AACAAGCGCTCTTGTCTCTGATATGTGGCATCATTCAGG  
+HWI-EAS443:3:62:1526:702#0/1  
a``a``a``a``^]`^aaaba`a``^]\_¥`\_`a`¥^`^`  
@HWI-EAS443:3:62:1569:96#0/1  
ATGGTGCTTTCTGCTTTTGGATGAGAGAAGAAATAAATACC  
+HWI-EAS443:3:62:1569:96#0/1  
abbb^babababb`abbbbab`b`a^`baa`aa\_``aa\_  
@HWI-EAS443:3:62:1618:354#0/1  
AAGCAACCCTTGCTCCTTCGTCATTTTCACCCCTCCAGAA  
+HWI-EAS443:3:62:1618:354#0/1  
aaaaaaaa\_bab`^aaaaaaaaSaaaaa\_b`a[[aR^``aa  
@HWI-EAS443:3:62:164:1713#0/1  
CCGACCAGTGAGTACCCTTCCCTTTCAAAGTCATGCCAC  
+HWI-EAS443:3:62:164:1713#0/1  
a`\_aa\_X^0\_aa^aab`abaa`a`\_\_Wa`[V`ZT[¥Y]a  
@HWI-EAS443:3:62:358:933#0/1  
GACCTGCTGTTGCATCTTCGCCATTGTTTGCTTGGCGCCA  
+HWI-EAS443:3:62:358:933#0/1  
a[VaYWYU][YLN[[\_Q]RZVPR]ZZ[\_\_¥NRPNM¥aN  
@HWI-EAS443:3:62:360:1531#0/1  
TTTCAAACAGCTGCCAGAGGGCAATGATGGATCAAGTAA  
+HWI-EAS443:3:62:360:1531#0/1  
a]]aa`aa`\_a[`a\_aY[Z¥Sa`\_\_`¥^]]V`¥^V`\_  
@HWI-EAS443:3:62:447:44#0/1  
AGTAATTTGAATGGGTCTATCCCGACCAGTGAGTACCCTT  
+HWI-EAS443:3:62:447:44#0/1  
aaaaabbbbaa`aa`Uaa`\_a\_^`aX^^`U[[TWUVU[YV  
@HWI-EAS443:3:62:45:1254#0/1  
GGGTCCTCCTGTTTTCTTAGGGTCCTTCCCAGCACTGGGA  
+HWI-EAS443:3:62:45:1254#0/1  
W`^G¥aaa^\_¥\_¥\_\_a¥ZWW^]O[aU\_\_^]¥V\_]a[[MP[

@HWI-EAS443:3:62:510:1125#0/1  
CAAACAGCTGCCAGAGGGCAATGATGGATCAAGTAAGAG  
+HWI-EAS443:3:62:510:1125#0/1  
aWQZaaaX¥[aa`\_`U]`Y`X`````\_`¥a[¥¥V\_¥\_¥^  
@HWI-EAS443:3:62:569:634#0/1  
GAAGAAATAAATACCTAGAAGAGCATCCCAGTGCTGGGAA  
+HWI-EAS443:3:62:569:634#0/1  
`\_UYUX]^Z¥aaaaa`a\_KX`W`[X[\_]N\_Y\_`VXX^XX  
@HWI-EAS443:3:62:597:717#0/1  
ATGGACGACTAATCCAGAATAGCATAACAATAGAGAGGAT  
+HWI-EAS443:3:62:597:717#0/1  
abb`^abb^aaaaaba`S\_aa`]Ya\_aa\_\_a\_a\_a]a\_[[  
@HWI-EAS443:3:62:750:774#0/1  
GCATCCCAGTGCTGGGAAGGACCCTAAGAAAACAGGAGGA  
+HWI-EAS443:3:62:750:774#0/1  
a¥W^aaa^a]TT]b\_XWY]^`^[^^^XZUNX¥^XSR]UU  
@HWI-EAS443:3:62:754:705#0/1  
CAGAAGGTCTGGTGCCGAGGTGCTGCGGTGAAAGGAGTT  
+HWI-EAS443:3:62:754:705#0/1  
ab``aba\_abba[bbbbaa\_U`a`\_]\_VXR\_] [¥¥¥S\_  
@HWI-EAS443:3:62:760:774#0/1  
GACCCATTCAAATTACTCCAAAACAGCCAAGTGGTCAGCC  
+HWI-EAS443:3:62:760:774#0/1  
`a`^]¥]Zaa`a`S\_baab\_]`aY]^`\_`\_`]VW]a][  
@HWI-EAS443:3:62:90:116#0/1  
GGTCAGCACTCATTCTGAGGGGATCAGTTGCACATAAATC  
+HWI-EAS443:3:62:90:116#0/1  
\_baa^^`ab`]bbabaX^a`b^YT^a^^a^^\_a\_¥^^T  
@HWI-EAS443:3:62:926:654#0/1  
AAGTGGTCAGCCTGATGAGACCAAATGAAAACCCAGCTCA  
+HWI-EAS443:3:62:926:654#0/1  
aaWXaa¥a`\_aaa`aaaa`````\_aa`\_aa\_\_Y]\_^\_a\_  
@HWI-EAS443:3:62:991:598#0/1  
GGCGCCAAGCAAACAATGGCGAAGATGCAACAGCAGGTCT  
+HWI-EAS443:3:62:991:598#0/1  
`U`]aTR^OX¥^`]`¥]a[^\_a`XZY^W^URJW\_YYG[^  
@HWI-EAS443:3:63:1017:641#0/1  
CTGGGATCCATTCCGGTGCGAACAAGCGCTCTTGTCTCT  
+HWI-EAS443:3:63:1017:641#0/1  
`V¥a[]b`^N^a`\_a\_T¥\_TRSWUNN][¥X¥¥Ya¥[¥\_[]  
@HWI-EAS443:3:63:1215:830#0/1  
ATCATAATCACTGAGTTTGAGTTCAGTGCACATTTGGATG  
+HWI-EAS443:3:63:1215:830#0/1  
aa`a`aaba``a`^a`aaaaaaaaa`a^aZaaaaa¥`\_\_  
@HWI-EAS443:3:63:1321:1362#0/1  
ATTGTTCCAACCTTTTACCAGCAGCACCTGCGGCACCAG  
+HWI-EAS443:3:63:1321:1362#0/1  
abaUE¥WW`\_a]`\_aa`\_aaaa`\_a[\_VT¥LSW\_BBBB  
@HWI-EAS443:3:63:1389:1032#0/1  
ATGCAACAGCAGGTCTTACTCATATCATGATTTGGCATTTC

+HWI-EAS443:3:63:1389:1032#0/1  
Y¥`¥\_¥`UWQ^`Lb^SX\_[^V\_XT\_`¥`]`Yab\_NX\_¥¥  
@HWI-EAS443:3:63:1412:1151#0/1  
GATGCAACAGCAGGTCTTACTCATATCATGATTTGGCATT  
+HWI-EAS443:3:63:1412:1151#0/1  
^``aaaaa``aa¥[aaaa`aba`a`a\_]\_a`Y]X`a^  
@HWI-EAS443:3:63:1420:433#0/1  
GCTTATGAAAGAATGTGCAATATCCTCAAAGGAAAATTC  
+HWI-EAS443:3:63:1420:433#0/1  
a^]\_`a[]`^^¥W`\_Va```\_aZSX]X¥`^[[]a\_X[Y¥Z  
@HWI-EAS443:3:63:1463:864#0/1  
CCCAGTGTGGGAAGGACCCTAAGAAAACAGGAGGACCCA  
+HWI-EAS443:3:63:1463:864#0/1  
a\_`[¥`babbbabbabab`ababbbbaa\_bbbaba`a\_aa  
@HWI-EAS443:3:63:1475:646#0/1  
GGACGAAGGACAAGGGTTGCTTATGAAAGAATGTGCAATA  
+HWI-EAS443:3:63:1475:646#0/1  
Z\_QQX]SSVV\_Va``ZQaRSRVTT`ZPHMUM[aSVL\_VZ`  
@HWI-EAS443:3:63:1507:1631#0/1  
CACCATCCTCTCTATTGTTATGCTATTCTGGATTAGTCGT  
+HWI-EAS443:3:63:1507:1631#0/1  
ab`\_\_aa^b`b^b\_bbbbbba\_\_aab`XY`^aaaaa\_Y^T  
@HWI-EAS443:3:63:1514:211#0/1  
CTTCTATATATGGGTCTCCTGTTTTCTTAGGGTCCTTCC  
+HWI-EAS443:3:63:1514:211#0/1  
`bbbbabbbbbbbbbbbbbbbbbbbbbbbbb\_babbbbbbb  
@HWI-EAS443:3:63:1717:474#0/1  
CAGCAGGTCTTACTCATATCATGATTTGGCATTCCAACCT  
+HWI-EAS443:3:63:1717:474#0/1  
R\_]WW^\_X\_¥¥`^aZ\_]\_¥`aa]]¥`\_^[¥¥\_\_¥¥^a`  
@HWI-EAS443:3:63:172:1823#0/1  
GCTTTCTGCTTTTGATGAGAGAAGAAATAAATACCTAGAA  
+HWI-EAS443:3:63:172:1823#0/1  
abababba]`bbb]aabZaa\_ababb¥`\_\_a]bba\_b`ba  
@HWI-EAS443:3:63:1754:1040#0/1  
GCATGACTTTGAAAGGAAGGGTACTCACTGGTCGGGATA  
+HWI-EAS443:3:63:1754:1040#0/1  
abbbbbbbbaa\_aaab`\_\_a`Waaaaa^X`a\_aaa`[`a  
@HWI-EAS443:3:63:1781:281#0/1  
GGACGACTAATCCAGAATAGCATAACAATAGAGAGGATGG  
+HWI-EAS443:3:63:1781:281#0/1  
aaaaaa\_aaa\_\_`aa\_\_a`^`\_]\_\_^^^`\_a^a\_]`X  
@HWI-EAS443:3:63:200:837#0/1  
GTGCTTTCTGCTTTTGATGAGAGAAGAAATAAATACCTAG  
+HWI-EAS443:3:63:200:837#0/1  
aabbbbbbbbbbbbaS`a`b`aaaabaaaaaaaa`a``  
@HWI-EAS443:3:63:255:617#0/1  
GCTTTCTGCTTTTGATGAGAGAAGAAATAAATACCTAGAA  
+HWI-EAS443:3:63:255:617#0/1  
aaaa`aaaaaaaaa^[]U]\_`\_`\_`\_`[`a¥\_\_a\_\_a\_]U



@HWI-EAS443:3:63:320:959#0/1  
GAAATAAATACCTAGAAGAGCATCCCAGTGCTGGGAAGGA  
+HWI-EAS443:3:63:320:959#0/1  
aa\_\_a\_`[[[`a]aaZ\_`[¥`¥[a\_`X^R`]]^ZXZ^^W\_  
@HWI-EAS443:3:63:440:1077#0/1  
CTCCTGTTTTCTTAGGGTCCTTCCCAGCACTGGGATGCTC  
+HWI-EAS443:3:63:440:1077#0/1  
aabaaTLZb``a\_`a^YZb]Y\_aZW]a``W`¥WVP^^^^]  
@HWI-EAS443:3:63:452:1165#0/1  
TGGGCATGACTTTGAAAGGGAAGGGTACTCACTGGTCGGG  
+HWI-EAS443:3:63:452:1165#0/1  
a\_a\_aa`bbbbaabbb\_baaab\_a`X]a`aaa\_a¥Qa]\_a  
@HWI-EAS443:3:63:463:739#0/1  
GCAATATCCTCAAAGGAAAATTTCAAACAGCTGCCAGAG  
+HWI-EAS443:3:63:463:739#0/1  
aabbaaaabaabb\_ba\_a^`aaa`^aaaa\_`aaaa\_\_\_\_  
@HWI-EAS443:3:63:486:541#0/1  
CCCTTCCCTTTCAAAGTCATGCCCACTTGCTACTGCAAGC  
+HWI-EAS443:3:63:486:541#0/1  
a`\_WZ\_UYX^ZR]YTRR\_W[[V¥¥TYQWSYZ^YXZZV[XV  
@HWI-EAS443:3:63:633:581#0/1  
GTGCTTTCTGCTTTTGTATGAGAGAAGAAATAAATACCTAG  
+HWI-EAS443:3:63:633:581#0/1  
aabaaaaaaa`aaaabbab`a`baaaaaaaa`aa\_aaaa  
@HWI-EAS443:3:63:675:301#0/1  
AATTACTCCAAAACAGCCAAGTGGTCAGCCTGATGAGACC  
+HWI-EAS443:3:63:675:301#0/1  
abbaaaaaaaaaaa^aa`aaa^^aUW`\_`[\_`\_`\_^`^¥[^^^  
@HWI-EAS443:3:63:694:119#0/1  
GTCCTCTGTTTTCTTAGGGTCCTTCCCAGCACTGGGATG  
+HWI-EAS443:3:63:694:119#0/1  
aaabaaaababbaabbbbaaaa`baaaa`^aaa\_aaa\_X\_`  
@HWI-EAS443:3:63:697:168#0/1  
GGTGCTTTCTGCTTTTGTATGAGAGAAGAAATAAATACCTA  
+HWI-EAS443:3:63:697:168#0/1  
ababbaabaabaaaaab`aa\_a`aaaa`ba\_a`\_```Z`^  
@HWI-EAS443:3:63:886:27#0/1  
AAGAATGATTGGTGAATCGGGAGATTCTACATCCAAATG  
+HWI-EAS443:3:63:886:27#0/1  
``b`^aba`abb]aa``\_`aaa\_\_^\_\_^\_\_\_\_``\_\_^`^Z^  
@HWI-EAS443:3:63:997:1486#0/1  
CATAAATCCTGCCTGCCTGCTTGTGTGTATGGGCTTGCGAG  
+HWI-EAS443:3:63:997:1486#0/1  
ab`a^aa`a`aaaaaaaaabaabb¥b\_`^`aaaaa\_]`^Za`  
@HWI-EAS443:3:64:1004:1212#0/1  
CAAACCTCAGTGATTATGATGGACGACTAATCCAGAATAGC  
+HWI-EAS443:3:64:1004:1212#0/1  
ababaab`bababbaaaaaaaaaaaaaaaaaa``a[`aa``\_  
@HWI-EAS443:3:64:1010:767#0/1  
GAGCATCCCAGTGCTGGGAAGGACCCTAAGAAAACAGGAG

+HWI-EAS443:3:64:1010:767#0/1  
a[\_`Xa\_baaaH`\_]\_a¥`X^a`U]^\_a\_Za[¥\_[]`a^\_\_  
@HWI-EAS443:3:64:1038:54#0/1  
GTGCTTTCTGCTTTTGATGAGAGAAGAAATAAATACCTAG  
+HWI-EAS443:3:64:1038:54#0/1  
aabbbbabbbabbb`ab\_babaaa`a`aaaaa^\_aaa  
@HWI-EAS443:3:64:1064:1987#0/1  
TGATTGGTGAATCGGGAGATTCTACATCCAAATGTGCAC  
+HWI-EAS443:3:64:1064:1987#0/1  
ZJ]Y^`\_TY\_J`XZ`^`^`aXOP^]\_] [XUYaaMKU¥¥UV]  
@HWI-EAS443:3:64:110:1037#0/1  
GGTTCAACACTTCCCAGAAGGTCTGGTGCCGCAGGTGCTG  
+HWI-EAS443:3:64:110:1037#0/1  
aa\_abb\_Y[]a`a``PK\_[UY^a]Ua`^`\_¥\_¥G¥SUQ  
@HWI-EAS443:3:64:1125:1562#0/1  
CTCTCATCAAAGCAGAAAGCACCATCCTCTCTATTGTTA  
+HWI-EAS443:3:64:1125:1562#0/1  
a\_Y¥abaaZX[P\_TWT¥T\_R¥a`a]WRX^\_aa`\_`\_a\_\_W  
@HWI-EAS443:3:64:1176:1985#0/1  
TGGTGCTTTCTGCTTTTGATGAGAGAAGAAATAAATACCT  
+HWI-EAS443:3:64:1176:1985#0/1  
]W¥Z¥baaaaaa\_aaaaaaa¥aa\_a`a\_aa\_aaa`a]Y`  
@HWI-EAS443:3:64:1177:1074#0/1  
CTGGATTAGTCGTCCATCATAATCACTGAGTTTGAGTTCA  
+HWI-EAS443:3:64:1177:1074#0/1  
\_`^`abba`Y\_\_Q\_XZ\_bb``\_¥\_]X`\_S\_``a]\_\_^a]]  
@HWI-EAS443:3:64:1178:383#0/1  
CCTCTCTATTGTTATGCTATTCTGGATTAGTCGTCCATCA  
+HWI-EAS443:3:64:1178:383#0/1  
a`\_^VbbabbaZZ]baa^aa[]]aY^`a[FR\_RY\_W\_[X  
@HWI-EAS443:3:64:118:278#0/1  
GTTGCACATAAATCCTGCCTGCCTGCTTGTGTATGGGC  
+HWI-EAS443:3:64:118:278#0/1  
a`aaaa\_a`aaaa\_\_a^a\_]\_^\_\_\_\_^\_¥¥V\_¥¥V¥¥¥V  
@HWI-EAS443:3:64:1280:1628#0/1  
AGTAATTTGAATGGGTCTATCCCGACCAGTGAGTACCCTT  
+HWI-EAS443:3:64:1280:1628#0/1  
[\_`\_baZ\_XaaaaTPH\_a]ZRTYV`QX¥[PZZSZaYTQ\_\_  
@HWI-EAS443:3:64:1307:1419#0/1  
GGACGACTAATCCAGAATAGCATAACAATAGAGAGGATGG  
+HWI-EAS443:3:64:1307:1419#0/1  
a\_W][^[\_`a[]YZ]^\_a^]^\_a^XMXa`\_`]^`^W\_TTY  
@HWI-EAS443:3:64:1314:1289#0/1  
GAAAGCACCATCCTCTCTATTGTTATGCTATTCTGGATTA  
+HWI-EAS443:3:64:1314:1289#0/1  
```W^Y^aUb`QURY¥Laa\_YYa`Wa^]Uaa`\_aaWOa`^  
@HWI-EAS443:3:64:1364:23#0/1  
AGCTGGGTTTTCATTTGGTCTCATCAGGCTGACCACTTGG  
+HWI-EAS443:3:64:1364:23#0/1  
[\_`aabb\_abb``baa]`\_aa\_aa]aa\_Z\_a\_`LTYaaa^

@HWI-EAS443:3:64:1441:1092#0/1  
CTTCCCAGAAGGTCTGGTGCCGCAGGTGCTGCGGTGAAAG  
+HWI-EAS443:3:64:1441:1092#0/1  
abab\_Z\_b`b^\_GT^WXQa¥¥`XTQV¥Y¥V[[PSUEVN]  
@HWI-EAS443:3:64:1446:929#0/1  
CAGGTGCTGCGGTGAAAGGAGTTGGAACAATAGCAATGGA  
+HWI-EAS443:3:64:1446:929#0/1  
abbaabbbabbbbababbbb\_b\_ba]\_a[aaa`aYa`a]\_a  
@HWI-EAS443:3:64:1503:871#0/1  
TCCTGGGTTTTCGACTTTCTTACTTGATCCATCATTGCC  
+HWI-EAS443:3:64:1503:871#0/1  
aaaaaab¥a`\_\_`aaa`V`a`[aaa\_a\_```[^a^^WV  
@HWI-EAS443:3:64:1570:1495#0/1  
GGATGGTGCTTTCTGCTTTTGATGAGAGAAGAAATAAATA  
+HWI-EAS443:3:64:1570:1495#0/1  
\_T]X`aX]XRZaaaa]aaaa^\_aaS\_SXS^\_[`]aadW^\_  
@HWI-EAS443:3:64:1573:1207#0/1  
CGTCCATCATAATCACTGAGTTTGAGTTCAGTGCACATTT  
+HWI-EAS443:3:64:1573:1207#0/1  
`bbbabbbbbbba^aaa`[baabb]aaaa]Zb\_b\_aaaa  
@HWI-EAS443:3:64:1604:921#0/1  
CTTACTCATATCATGATTTGGCATTCCAACCTGAATGATG  
+HWI-EAS443:3:64:1604:921#0/1  
abbbababbbbbbabb`babbbbaabaa`bbbbbbabb  
@HWI-EAS443:3:64:1627:167#0/1  
GGATGGTGCTTTCTGCTTTTGATGAGAGAAGAAATAAATA  
+HWI-EAS443:3:64:1627:167#0/1  
aaaabbababba\_aa^aab\_^\_aa\_a^a^`a\_\_\_a\_\_\_`a  
@HWI-EAS443:3:64:1708:39#0/1  
GGGTCCTCCTGTTTTCTTAGGGTCCTTCCCAGCACTGGGA  
+HWI-EAS443:3:64:1708:39#0/1  
ab\_`abaabbabba\_abaaa`[\_`aa^¥[^a\_[^aa¥^[  
@HWI-EAS443:3:64:171:1016#0/1  
ATTCTGGGATCCATTCCGGTGCGAACAAGCGCTCTTGTTTC  
+HWI-EAS443:3:64:171:1016#0/1  
abaaa`a`a`aaaaaaa¥aaaa`a`aaa````\_````^\_\_  
@HWI-EAS443:3:64:190:565#0/1  
TAGTCGTCCATCATAATCACTGAGTTTGAGTTCAGTGCAC  
+HWI-EAS443:3:64:190:565#0/1  
a\_b````^aba``\_abbabaa\_`Xa[````W`]¥]U\_Za]VX  
@HWI-EAS443:3:64:198:1816#0/1  
CAGTTGCACATAAATCCTGCCTGCCTGCTTGTGTGTATGG  
+HWI-EAS443:3:64:198:1816#0/1  
]ba¥a^abbbbaabaaaa¥\_a\_\_a\_]\_]``\_U\_\_\_Wa\_]S  
@HWI-EAS443:3:64:205:1078#0/1  
CATCTGTCGGAAGAATGATTGGTGGGAATCGGGAGATTCTA  
+HWI-EAS443:3:64:205:1078#0/1  
ababaa\_`a`a^]``a`Y[aa¥Ya\_¥\_\_``\_``^\_]a\_\_a  
@HWI-EAS443:3:64:267:1178#0/1  
CCAGAGGGCAATGATGGATCAAGTAAGAGAAAGTCGAAAC

+HWI-EAS443:3:64:267:1178#0/1  
a\_JZ`aaabbababb`aaa]aaaa`aaaa[``]`¥`aaa  
@HWI-EAS443:3:64:358:592#0/1  
CTTCCGACAGATGCTCTGATTTCTGTGGCATCCTGGCGCT  
+HWI-EAS443:3:64:358:592#0/1  
ab`a^baaaa^aaa`a`a`aaaa``Z\_^`Z¥a^^^\_^^¥V  
@HWI-EAS443:3:64:369:991#0/1  
GCCGCAGGTGCTGCGGTGAAAGGAGTTGGAACAATAGCAA  
+HWI-EAS443:3:64:369:991#0/1  
`abaaaa`X`\_`^a¥P[S¥¥LYRZQ[ZYMZZ[\_]ZZYV¥  
@HWI-EAS443:3:64:463:924#0/1  
CAAGCAAACAATGGCGAAGATGCAACAGCAGGTCTTACTC  
+HWI-EAS443:3:64:463:924#0/1  
ab`abaXZ]aaZOXa`[a`\_\_aa``\_\_\_\_``ORT]]^ZVYU  
@HWI-EAS443:3:64:672:632#0/1  
AGAGGATGGTGCTTTCTGCTTTTGATGAGAGAAGAAATAA  
+HWI-EAS443:3:64:672:632#0/1  
aba\_aaabaY^`]`aaa¥a^aaa[^^`]^\_a`aaU`\_aaa  
@HWI-EAS443:3:64:67:965#0/1  
GACGACTAATCCAGAATAGCATAACAATAGAGAGGATGGT  
+HWI-EAS443:3:64:67:965#0/1  
a^a^aaabaaaaaaaa`a`\_`a^``\_aaa]a¥[^`^WYZS  
@HWI-EAS443:3:64:711:848#0/1  
ATGGGCTTGCGTAGCAAGTGGGCATGACTTTGAAAGGGA  
+HWI-EAS443:3:64:711:848#0/1  
`a`]`ba`U`\_`^a]`aaa^a\_aa`aa^aa\_a^X``\_\_`  
@HWI-EAS443:3:64:724:1270#0/1  
ATCTCCCATTCCACCAATCATTCTTCCGACAGATGCTCT  
+HWI-EAS443:3:64:724:1270#0/1  
S\_abb]\_¥bbbb\_b¥S`\_aa\_ZZbaabba¥LY\_V[]¥V  
@HWI-EAS443:3:64:727:86#0/1  
CGACTTTCTTACTTGATCCATCATTGCCCTCTGGGCAG  
+HWI-EAS443:3:64:727:86#0/1  
aba`babbbabba]a`a]ZG^[aM^``a`¥Raa\_\_X\_R^[  
@HWI-EAS443:3:64:842:1142#0/1  
GGTACTCACTGGTCGGGATAGACCCATTCAAATTACTCCA  
+HWI-EAS443:3:64:842:1142#0/1  
aa`aa^aa\_a\_]Z]a``]a]\_a`^a``a^]``aZZ^XZ^  
@HWI-EAS443:3:64:869:894#0/1  
GTGAAAATGGACGAAGGACAAGGGTTGCTTATGAAAGAAT  
+HWI-EAS443:3:64:869:894#0/1  
\_`Z`a\_\_\_^aa[V[^\_ZXZTZ\_aSOT]a¥XX]]UMT]]Y]  
@HWI-EAS443:3:64:870:1875#0/1  
GCACATTCTTTCATAAGCAACCCTTGCCTTCGTCATTT  
+HWI-EAS443:3:64:870:1875#0/1  
UYXXOYY¥X`^\_XY`\_X]ZWa^`WT¥ZYXZX[V¥Y]Z¥W  
@HWI-EAS443:3:64:923:1952#0/1  
GTTGCTTATGAAAGAATGTGCAATATCCTCAAAGGAAAAT  
+HWI-EAS443:3:64:923:1952#0/1  
a^]\_\_U`a^aaa^a[[]YX\_aaa\_a]QW^\_\_\_a¥Y`aa`\_

@HWI-EAS443:3:64:952:59#0/1  
CATAATCACTGAGTTTGAGTTCAGTGCACATTTGGATGTA  
+HWI-EAS443:3:64:952:59#0/1  
abbaabbbbbbbabbbbabb]baaabbbabbbbbbb\_b  
@HWI-EAS443:3:64:975:189#0/1  
AGCATCCCAGTGCTGGGAAGGACCCTAAGAAAACAGGAGG  
+HWI-EAS443:3:64:975:189#0/1  
``b`a`\_R0\_]¥\_Z\_^`X\_a¥^a[]`\_`Z]R]Z`[\_X  
@HWI-EAS443:3:65:1123:383#0/1  
CATGACTTTGAAAGGGAAGGGTACTCACTGGTCGGGATAG  
+HWI-EAS443:3:65:1123:383#0/1  
ababa`abb\_[\_aba^^abaaZ¥`aaa^aaaY\_\_ba`\_aa  
@HWI-EAS443:3:65:1214:1600#0/1  
TAACAATAGAGAGGATGGTGCTTTCTGCTTTTGATGAGAG  
+HWI-EAS443:3:65:1214:1600#0/1  
aaaaaabaaa`aaaa`aSa^\_a^a^\_aaa[\_\_\_Y\_W\_  
@HWI-EAS443:3:65:1231:323#0/1  
ATGCAACAGCAGGTCTTACTCATATCATGATTTGGCATT  
+HWI-EAS443:3:65:1231:323#0/1  
`¥[¥bb`a`aba]^aab^`aa\_a`aaa\_aa\_a`\_`\_\_  
@HWI-EAS443:3:65:1232:393#0/1  
GGATGGTGCTTTCTGCTTTTGATGAGAGAAGAAATAAATA  
+HWI-EAS443:3:65:1232:393#0/1  
abbabb]baaab`ababbbbaaaa`bab`\_aaaa`b`\_a  
@HWI-EAS443:3:65:1258:902#0/1  
GAAAGAATGTGCAATATCCTCAAAGGAAATTTCAAACAG  
+HWI-EAS443:3:65:1258:902#0/1  
WX]\_¥S^aaXaa^`b]\_ZY\_^aaa`\_¥`[\_ba]¥`¥`\_`a  
@HWI-EAS443:3:65:1307:540#0/1  
ATTTCAAACAGCTGCCAGAGGGCAATGATGGATCAAGTA  
+HWI-EAS443:3:65:1307:540#0/1  
WYZ\_bb^[\_b\_0^`a^\_a\_G]^^]^\_ba^`]^YVZ`N^  
@HWI-EAS443:3:65:132:1857#0/1  
AAGCACCATCCTCTATTGTTATGCTATTCTGGATTAGT  
+HWI-EAS443:3:65:132:1857#0/1  
\_\_T\_aaa`a`b^b`^]VY][U]ZW^[^^^aPWU¥]]WRQ  
@HWI-EAS443:3:65:1429:1709#0/1  
GTGCTTTCTGCTTTTGATGAGAGAAGAAATAAATACCTAG  
+HWI-EAS443:3:65:1429:1709#0/1  
a^a]Y]\_a`Y¥```]aaa`a[^`[```\_\_`\_`^T¥^Z\_  
@HWI-EAS443:3:65:1432:407#0/1  
ATTCAGGTTGGAATGCCAATCATGATATGAGTAAGACCT  
+HWI-EAS443:3:65:1432:407#0/1  
abaaabbabbbababaa`b`aababaaaa\_a\_aa\_\_`  
@HWI-EAS443:3:65:1586:569#0/1  
GGGGATCAGTTGCACATAAATCCTGCCTGCCTGCTTGTGT  
+HWI-EAS443:3:65:1586:569#0/1  
a\_aaR\_a[YR`R`]UXRaZYRY¥X]^PVLX¥[ZMQPU¥H  
@HWI-EAS443:3:65:1613:904#0/1  
GTAATTTGAATGGTCTATCCCGACCAGTGAGTACCCTTC

+HWI-EAS443:3:65:1613:904#0/1  
a[``aaaaa`¥\_U[^X`\_\_XR¥`\_Z^Z]\_^\_] ^YR0]XV  
@HWI-EAS443:3:65:1644:406#0/1  
CTAATCCAGAATAGCATAACAATAGAGAGGATGGTGCTTT  
+HWI-EAS443:3:65:1644:406#0/1  
a`Xa`aa[0]Q\_[POLZ`a[W[Q`P^aY^`¥]]VURUU¥  
@HWI-EAS443:3:65:1775:661#0/1  
TGGGTTTTTCATTTGGTCTCATCAGGCTGACCACTTGGCTG  
+HWI-EAS443:3:65:1775:661#0/1  
a`¥UDVYXZ\_¥[]`¥L][VUYVTLN¥XJNSOWZ[UBBBBB  
@HWI-EAS443:3:65:177:1840#0/1  
GTATGGGCTTGCAAGTGGGCATGACTTTGAAAGG  
+HWI-EAS443:3:65:177:1840#0/1  
[R\_abaa\_]Z^^a\_H`aabaWPWYW\_a\_]\_aa``[^`^`ZY  
@HWI-EAS443:3:65:205:539#0/1  
TGAAAATGGACGAAGGACAAGGGTTGCTTATGAAAGAATG  
+HWI-EAS443:3:65:205:539#0/1  
aaXaaabXP]\_a`a`\_^[\_^a`S^a[][[a\_\_`\_^\_\_^  
@HWI-EAS443:3:65:207:1487#0/1  
TTGCATCTTCGCCATTGTTTGCTTGGCGCCAACTCTCCT  
+HWI-EAS443:3:65:207:1487#0/1  
a\_¥aa^abaaa`^^^]aa\_a``]\_a`a^]Y\_\_^Z`]Y[  
@HWI-EAS443:3:65:209:449#0/1  
CGACTTTCTTACTTGATCCATCATTGCCCTCTGGGCAG  
+HWI-EAS443:3:65:209:449#0/1  
Va\_a^abaaSXX\_V¥^b`[ZX]`[aba\_aaW^a`X]Z```  
@HWI-EAS443:3:65:316:1714#0/1  
CAGTGATTATGATGGACGACTAATCCAGAATAGCATAACA  
+HWI-EAS443:3:65:316:1714#0/1  
`[VIaaa\_a]UP]^¥`aXaYaa¥^a\_T`aZ^TTZ^a\_a`  
@HWI-EAS443:3:65:325:40#0/1  
TAACAATAGAGAGGATGGTGCTTTCTGCTTTTGATGAGAG  
+HWI-EAS443:3:65:325:40#0/1  
\_\_aaX\_a¥b\_bYbaWPa¥MX¥`Y]`W`\_¥^a\_ROWYZ¥0`  
@HWI-EAS443:3:65:41:1106#0/1  
TGACTTTGAAAGGGAAGGGTACTCACTGGTCGGGATAGAC  
+HWI-EAS443:3:65:41:1106#0/1  
a`Ya`\_a`]aaaZ`a]T^Xa`\_```\_\_Ta^¥]^a^¥[a[  
@HWI-EAS443:3:65:445:145#0/1  
CTGAACTCAAACCTCAGTGATTATGATGGACGACTAATCCA  
+HWI-EAS443:3:65:445:145#0/1  
a]\_`ab\_a`[W^aa]`Za^```\_`^`\_]Z¥\_\_\_\_\_ZPT¥  
@HWI-EAS443:3:65:452:82#0/1  
GTGAGTACCCTTCCCTTTCAAAGTCATGCCCACTTGCTAC  
+HWI-EAS443:3:65:452:82#0/1  
aSaa\_¥\_\_\_\_¥¥\_[Z[\_^^W^`\_\_VS¥[VWW[WW¥[UVYSW  
@HWI-EAS443:3:65:454:1438#0/1  
GGTACTCACTGGTCGGGATAGACCACTTCAAATTACTCCA  
+HWI-EAS443:3:65:454:1438#0/1  
aaYa`\_`a^`a^0aS\_\_^]\_]\_aX`\_¥^`\_`\_\_W\_Y^U]\_



+HWI-EAS443:3:66:1062:380#0/1  
aaaaaaaa`^a\_aaa\_aa`aa`a`\_`a`\_`aaa^a^\_\_  
@HWI-EAS443:3:66:1086:633#0/1  
GAGGATGGTCTTTCTGCTTTTGATGAGAGAAGAAATAAA  
+HWI-EAS443:3:66:1086:633#0/1  
a\_a]\_`ba]aaa`a^a¥aaaa\_a\_aS`[\_`\_a```\_\_  
@HWI-EAS443:3:66:1192:1677#0/1  
CGGAAGAATGATTGGTGAATCGGGAGATTCTACATCCAA  
+HWI-EAS443:3:66:1192:1677#0/1  
abbbbabbbbabaa\_aabaaaaaaaaaaaaaaaa\_a`\_a^  
@HWI-EAS443:3:66:119:1224#0/1  
GGAAAATGAGGTCTTCAATCTCAGCGTTTCCTGGGTTTCG  
+HWI-EAS443:3:66:119:1224#0/1  
a`abbbab`aa\_aaabbaabaaaaa^a`a`aa```]\_\_a`  
@HWI-EAS443:3:66:1303:1529#0/1  
TGGTGCTTTCTGCTTTTGATGAGAGAAGAAATAAATACCT  
+HWI-EAS443:3:66:1303:1529#0/1  
XW\_[\_``¥\_¥Z`[[\_`¥Z^Y^aZ[a]\_Z¥\_]`^aaa`a\_LR^  
@HWI-EAS443:3:66:1308:647#0/1  
GCTTTCTGCTTTTGATGAGAGAAGAAATAAATACCTAGAA  
+HWI-EAS443:3:66:1308:647#0/1  
aba`aa\_aaaaaa\_aa]a]a\_\_`¥^Za\_a\_\_a^`\_a\_\_\_\_  
@HWI-EAS443:3:66:1331:433#0/1  
TGAAAATGGACGAAGGACAAGGGTTGCTTATGAAAGAATG  
+HWI-EAS443:3:66:1331:433#0/1  
ab]Z`abab`a`[UWa^aa\_aaa^`baaa`a```\_aa`\_\_\_\_  
@HWI-EAS443:3:66:1360:851#0/1  
GTCCATCATAATCACTGAGTTTGAGTTCAGTGACATTTG  
+HWI-EAS443:3:66:1360:851#0/1  
aaaabaaabaaababba^`aaaaa^aaaa\_a```^aaaa`  
@HWI-EAS443:3:66:1380:1526#0/1  
CTGCTGTTGCATCTTCGCCATTGTTTGCTTGCGCCAAAC  
+HWI-EAS443:3:66:1380:1526#0/1  
abbabaaa`aabaaa\_]`aaaaaab``a\_Z\_\_\_\_`\_``aN  
@HWI-EAS443:3:66:1451:49#0/1  
CCTCAGAATGAGTGCTGACCGTGCCAGGAAAATGAGGTCT  
+HWI-EAS443:3:66:1451:49#0/1  
aabbbb`abab\_b`abaa\_aab\_```b`\_aa\_aaaaNU\_  
@HWI-EAS443:3:66:1483:53#0/1  
GTCCTCCTGTTTTCTTAGGGTCCTTCCCAGCACTGGGATG  
+HWI-EAS443:3:66:1483:53#0/1  
`PTHZFIZ]a\_XSV`^Pa]ZNPZR[ZXU¥[YULN[]\_QJO  
@HWI-EAS443:3:66:1516:173#0/1  
ACTCCTTTCACCGCAGCACCTGCGGCACCAGACCTTCTGG  
+HWI-EAS443:3:66:1516:173#0/1  
\_W\_aab```\_bb^^^Z`baa`X¥ba```\_]b][OKMP]a[  
@HWI-EAS443:3:66:1583:1981#0/1  
AAATTTCTGGAGGGTGGAAAATGGACGAAGGACAAGGGTT  
+HWI-EAS443:3:66:1583:1981#0/1  
`baaa`aaa`aa^`]a]aaaa\_a`a`\_a]`\_]`^XZZ^





+HWI-EAS443:3:66:719:899#0/1  
aa]Z\_babaababbabba]aZ\_¥aaaaaaaaab`aa`]^]  
@HWI-EAS443:3:66:771:176#0/1  
GTTCCAACCTCTTTCACCGCAGCACCTGCGGCACCAGACC  
+HWI-EAS443:3:66:771:176#0/1  
aU]^ZNN[]]MUTR^\_aU\_UW¥¥^S¥W¥¥SWS¥WSSLHHP  
@HWI-EAS443:3:66:781:1082#0/1  
GCAATATCCTCAAAGGAAAATTTCAAACAGCTGCCCAGAG  
+HWI-EAS443:3:66:781:1082#0/1  
¥a]]aYabaabbbW^^`ba`bbbaa]b`]a``baaa``a  
@HWI-EAS443:3:66:837:1752#0/1  
GTACTCACTGGTCGGATAGACCCATTCAAATTACTIONCAA  
+HWI-EAS443:3:66:837:1752#0/1  
aU[baaaaZU`Vb`\_a]UaR\_``^Q\_`]XaZ`ZaMZ]L\_]  
@HWI-EAS443:3:67:1054:865#0/1  
CTTATGAAAGAATGTGCAATATCCTCAAAGGAAAATTTCA  
+HWI-EAS443:3:67:1054:865#0/1  
¥¥]bba\_`aa]`aaN^`^Z\_`b```aa]ab````b\_bZ^``  
@HWI-EAS443:3:67:1094:1278#0/1  
GGGGAGCGCCAGGATGCCACAGAAATCAGAGCATCTGTCCG  
+HWI-EAS443:3:67:1094:1278#0/1  
aabb\_`\_T`]abba`ZJ`baa¥Wbbababab\_``aaaQ]]  
@HWI-EAS443:3:67:1127:1082#0/1  
GAATCTCCCGATTCCACCAATCATTCTTCCGACAGATGCT  
+HWI-EAS443:3:67:1127:1082#0/1  
\_baababaaaaaa`aaaaaaaaa``````a\_a`^aa\_aaa`  
@HWI-EAS443:3:67:1158:454#0/1  
GAGGATGGTGCTTTCTGCTTTTGATGAGAGAAGAAATAAA  
+HWI-EAS443:3:67:1158:454#0/1  
aa`````aa^aaaa`^`\_`^aaa\_a``a]a\_a\_\_a^`aa`\_\_  
@HWI-EAS443:3:67:1184:765#0/1  
GTGAAAATGGACGAAGGACAAGGGTTGCTTATGAAAGAAT  
+HWI-EAS443:3:67:1184:765#0/1  
a`aaa`baaa`\_b\_\_a`^ZYU````]`a`\_`^`\_`[\_]^^\_  
@HWI-EAS443:3:67:1324:420#0/1  
ATAGAGAGGATGGTGCTTTCTGCTTTTGATGAGAGAAGAA  
+HWI-EAS443:3:67:1324:420#0/1  
abb¥aaaaaba^^]H^X¥T\_¥aaW¥aba[YYMEW¥aRQTR\_  
@HWI-EAS443:3:67:1355:772#0/1  
GAATGATTGGTGAATCGGGAGATTCTACATCCAAATGTG  
+HWI-EAS443:3:67:1355:772#0/1  
aaWLTaS`]`UOM^VVWQ`[\_^UWPRX[KXOTKXYXPXWYF  
@HWI-EAS443:3:67:1400:1702#0/1  
TCCTGGGTTTCGACTTTCTCTTACTTGATCCATCATTGCC  
+HWI-EAS443:3:67:1400:1702#0/1  
aaaaaab`bb\_a`\_aaa`aa``a]\_\_`a```^`a[a\_\_\_¥X  
@HWI-EAS443:3:67:1406:247#0/1  
ATCATAATCACTGAGTTTGAGTTCAGTGCACATTTGGATG  
+HWI-EAS443:3:67:1406:247#0/1  
a^]`^a^¥T\_W\_`^¥ZY^`aZ`Za`¥¥¥\_\_[¥\_^]Y\_PUW¥



+HWI-EAS443:3:67:457:461#0/1  
abaa`abbbbabbbWaaaaaaaNa\_]a[aU`Ta`^L]S[¥X  
@HWI-EAS443:3:67:462:986#0/1  
CATCATAATCACTGAGTTTGAGTTCAGTGCACATTTGGAT  
+HWI-EAS443:3:67:462:986#0/1  
aaaaaaaaZ\_aa`a`a]a^\_aY]\_a\_\_Z`\_a\_\_`\_`\_aW`Y  
@HWI-EAS443:3:67:46:1114#0/1  
CTTCCGACAGATGCTCTGATTTCTGTGGCCTCCTGGCGCT  
+HWI-EAS443:3:67:46:1114#0/1  
aaaaaaaa`a^Z]X^^`\_¥¥[``a\_`aW^Za\_[^^TSS^P¥W  
@HWI-EAS443:3:67:479:1983#0/1  
CAATAGAGAGGATGGTCTTTCTGCTTTTGATGAGAGAAG  
+HWI-EAS443:3:67:479:1983#0/1  
aaaaa^`\_`\_a\_\_\_\_`[S\_`]^\_\_\_\_TV[``aJ[^]\_Y^][^¥  
@HWI-EAS443:3:67:50:1992#0/1  
ATGACTTTGAAAGGGAAGGGTACTCACTGGTCGGGATAGA  
+HWI-EAS443:3:67:50:1992#0/1  
S]Z`ba```a`^`[Y^^Z[ZQab^aa`[U]U`]^`UY¥`  
@HWI-EAS443:3:67:513:1151#0/1  
TGGGCATGACTTTGAAAGGGAAGGGTACTCACTGGTCGGG  
+HWI-EAS443:3:67:513:1151#0/1  
a[\_bb`aIab^b\_`bbbaaaZ]aY^ZU`abaaab^Z\_`aa  
@HWI-EAS443:3:67:561:1573#0/1  
ATGACTTTGAAAGGGAAGGGTACTCACTGGTCGGGATAGA  
+HWI-EAS443:3:67:561:1573#0/1  
¥\_`\_]aaaa`]aaa\_aa^]TWa`\_``a]\_YG`R^^aWa\_a  
@HWI-EAS443:3:67:616:1824#0/1  
TGAGTACCCTTCCCTTTCAAAGTCATGCCCACTTGCTACT  
+HWI-EAS443:3:67:616:1824#0/1  
VW[LL\_\_WW\_WX[^¥QG\_ba¥¥0¥a]^R^WI\_^GV]U`XT  
@HWI-EAS443:3:67:617:990#0/1  
ATCCAGAATAGCATAACAATAGAGAGGATGGTCTTTCTG  
+HWI-EAS443:3:67:617:990#0/1  
aaaaab`aaaaaaaaaaa`aaa]aaa`\_\_`\_X]^`\_aYVP  
@HWI-EAS443:3:67:634:1699#0/1  
CTGGGTTTCGACTTTCTCTTACTTGATCCATCATTGCCCT  
+HWI-EAS443:3:67:634:1699#0/1  
aaaab¥`abaaaababaaaaabaaaa`baaab``[a``^  
@HWI-EAS443:3:67:666:316#0/1  
GGAGGGGTGAAAATGGACGAAGGACAAGGGTTGCTTATGA  
+HWI-EAS443:3:67:666:316#0/1  
`a\_ababVa`\_a^b\_a`^a``\_\_\_\_a^a¥`Z^aV\_a`aa\_  
@HWI-EAS443:3:67:701:517#0/1  
GTTCCAACCTCTTTCACCGCAGCACCTGCGGCACCAGACC  
+HWI-EAS443:3:67:701:517#0/1  
aabab]baaa`bbaabaab^aaaaaaaaa^aaa]a\_a\_^^  
@HWI-EAS443:3:67:758:1331#0/1  
GATGGACGACTAATCCAGAATAGCATAACAATAGAGAGGA  
+HWI-EAS443:3:67:758:1331#0/1  
^bVb`abb\_[``a^`^`\_`¥]\_a`RRYa`^aa\_\_`baaaa



+HWI-EAS443:3:68:1586:1452#0/1  
aa¥Y¥XJ[L[NVS^bYZKMX\_Q`Ra[^UVWwSNL[V```Q  
@HWI-EAS443:3:68:1612:239#0/1  
TGGGCTTGACAGTAGCAAGTGGGCATGACTTTGAAAGGGAA  
+HWI-EAS443:3:68:1612:239#0/1  
`b`\_Z`¥a`^b^SaaS^ZU^S^`\_\_¥W`aaW¥^¥W`¥Z  
@HWI-EAS443:3:68:1614:774#0/1  
GTCTGGTGCCGAGGTGCTGCGGTGAAAGGAGTTGGAACA  
+HWI-EAS443:3:68:1614:774#0/1  
a\_abab¥```a\_^aaZ`\_]Z`aU]VY^X^T[RX]`Q[Q[  
@HWI-EAS443:3:68:1635:1309#0/1  
CATGACTTTGAAAGGGAAGGGTACTCACTGGTCGGGATAG  
+HWI-EAS443:3:68:1635:1309#0/1  
`W[abaaaUba^`^ZaSaa`a0a]¥`a\_a\_^GHYW][ ]\_  
@HWI-EAS443:3:68:1662:550#0/1  
GGGAGCGCCAGGATGCCACAGAAATCAGAGCATCTGTCCG  
+HWI-EAS443:3:68:1662:550#0/1  
abaaaaa[ab`^a[^¥^aaaaaa`aa\_\_\_\_\_¥aaZS]]  
@HWI-EAS443:3:68:1711:550#0/1  
ATTCTGGGATCCATTCCGGTGC GAACAAGCGCTCTTGTTTC  
+HWI-EAS443:3:68:1711:550#0/1  
ab\_`aaabbbbaaaaaaba\_a`baaba\_a\_baaaa`^`a\_  
@HWI-EAS443:3:68:1763:845#0/1  
CGCTCTTGTTCTCTGATATGTGGCATCATTAGGTTGGAA  
+HWI-EAS443:3:68:1763:845#0/1  
ababbbb`\_b`bbbbbbabbbababbbbbbaaba\_bbaab  
@HWI-EAS443:3:68:190:764#0/1  
CGGGAGATTCTACATCCAAATGTGCACTGAACTCAAATC  
+HWI-EAS443:3:68:190:764#0/1  
aa¥a`^Y`aa]¥]`\_aaa`\_\_^Ua`a^^`\_Z^\_\_\_\_¥Z¥\_`^  
@HWI-EAS443:3:68:191:243#0/1  
GGGTCCTCCTGTTTTCTTAGGGTCCTTCCCAGCACTGGGA  
+HWI-EAS443:3:68:191:243#0/1  
aba^bbaabbb`aaaaaaaaa\_\_aaaaaaaa\_aaa``a`\_  
@HWI-EAS443:3:68:217:203#0/1  
GCCCTCTGGGCAGCTGTTTGAATTTTCCTTTGAGGATAT  
+HWI-EAS443:3:68:217:203#0/1  
`\_abababaaa`aaaaaaaaaaaaa`\_aaaa`\_aa]\_Z`  
@HWI-EAS443:3:68:228:1408#0/1  
CAATAGAGAGGATGGTGCTTTCTGCTTTTGATGAGAGAAG  
+HWI-EAS443:3:68:228:1408#0/1  
aaaaa\_Y]```^aa¥P\_¥]`\_a^Z\_Z^`UXYS^^^^Y\_`^  
@HWI-EAS443:3:68:243:600#0/1  
GACTAATCCAGAATAGCATAACAATAGAGAGGATGGTGCT  
+HWI-EAS443:3:68:243:600#0/1  
aaaaab\_aaaa\_]`\_\_a`\_\_^`\_]a``\_`\_`\_]`^\_¥UT[X  
@HWI-EAS443:3:68:375:1578#0/1  
ATGGGCTTGACAGTAGCAAGTGGGCATGACTTTGAAAGGGA  
+HWI-EAS443:3:68:375:1578#0/1  
`a^^aba]T^aaV]`aa`^S[a^a``^a\_``a]a``¥^M\_

@HWI-EAS443:3:68:392:1181#0/1  
TCTAATGCAAGGTTCAACACTTCCCAGAAGGTCTGGTGCC  
+HWI-EAS443:3:68:392:1181#0/1  
a]R]^YV¥\_KW`MZUSZaQ`a]aVY¥]UVYXFX¥UQQ[UW  
@HWI-EAS443:3:68:409:1228#0/1  
GGTCCTCCTGTTTTCTTAGGGTCCTTCCCAGCACTGGGAT  
+HWI-EAS443:3:68:409:1228#0/1  
aa\_bbbaaa^bbabbabab`\_abbabbbbabbbababa\_a  
@HWI-EAS443:3:68:454:671#0/1  
ATCAGTTGCACATAAATCCTGCCTGCCTGCTTGTGTGTAT  
+HWI-EAS443:3:68:454:671#0/1  
aa`a]\_`a`\_`X`\_aa`a```]\_\_`^]U¥``\_¥`¥^W^^  
@HWI-EAS443:3:68:465:1886#0/1  
GCATGACTTTGAAAGGAAGGGTACTCACTGGTCGGGATA  
+HWI-EAS443:3:68:465:1886#0/1  
RY\_``bbba\_abb]WY[bUbb\_Y`b`bb\_`^`\_¥V][L  
@HWI-EAS443:3:68:573:1116#0/1  
GGGGAGCGCCAGGATGCCACAGAAATCAGAGCATCTGTCTG  
+HWI-EAS443:3:68:573:1116#0/1  
a\_a\_Z\_bab`aa\_\_abaaaaX`aaaa`]`aa\_a`aU\_\_  
@HWI-EAS443:3:68:711:410#0/1  
AAGCGCTCTTGTCTCTGATATGTGGCATCATTAGGTTG  
+HWI-EAS443:3:68:711:410#0/1  
a\_bb\_b\_bba^ab```abaaa\_W]W^^a`\_aba]``\_Vba  
@HWI-EAS443:3:68:733:857#0/1  
CGACTTCTCTTACTTGATCCATCATTGCCCTCTGGGCAG  
+HWI-EAS443:3:68:733:857#0/1  
a`Y`\_[b]¥aa¥Y\_aba^]Ya`\_\_a\_\_aa]`a`X]¥ZY^U  
@HWI-EAS443:3:68:797:822#0/1  
GCAATATCCTCAAAGGAAAATTTCAAACAGCTGCCAGAG  
+HWI-EAS443:3:68:797:822#0/1  
¥abba]bbbbbabba`aabaaba`aaaa\_ba`a\_aa¥  
@HWI-EAS443:3:68:931:112#0/1  
TCCTGTTTTCTTAGGGTCCTTCCCAGCACTGGGATGCTCT  
+HWI-EAS443:3:68:931:112#0/1  
ZR]]```abaa¥aa`][\_\_\_a^W\_Z\_[XY]Xa^^GJ]aY^N¥  
@HWI-EAS443:3:68:949:1006#0/1  
GTTCCAACCTTTTACCAGCACCTGCGGCACCAGACC  
+HWI-EAS443:3:68:949:1006#0/1  
aaaaabaaababaaabb`aaaaaa`aaaa`a``^\_``a`¥  
@HWI-EAS443:3:68:964:156#0/1  
CGGAAGAATGATTGGTGAATCGGGAGATTCTACATCCAA  
+HWI-EAS443:3:68:964:156#0/1  
abbabba`bb`bbba^baaaaabbaab]aaa`\_V`a[Z^\_  
@HWI-EAS443:3:69:1117:591#0/1  
CTGCGGTGAAAGGAGTTGGAACAATAGCAATGGAGTTAAT  
+HWI-EAS443:3:69:1117:591#0/1  
]bbbbbb]^^¥`WXY\_ab`^]aaaabbb`¥]bbb``\_aaaa  
@HWI-EAS443:3:69:1213:1261#0/1  
CTTCGCCATTGTTTGCTTGGCGCCAACTCTCCTTATTTTC

+HWI-EAS443:3:69:1213:1261#0/1  
]bab^ba`abaa\_\_Q^aaa`\_^aaa\_[\_` `aR[aZN[``P  
@HWI-EAS443:3:69:1229:1426#0/1  
CTAATGCAAGGTTCAACACTTCCCAGAAGGTCTGGTGCCG  
+HWI-EAS443:3:69:1229:1426#0/1  
\_XV]]` `¥0\_`U^^aWTPSX`¥]U^VJXX^PY^UUQSQUU  
@HWI-EAS443:3:69:1276:2008#0/1  
GACCTGCTGTTGCATCTTCGCCATTGTTTGCTTGCGGCCA  
+HWI-EAS443:3:69:1276:2008#0/1  
aaa`[\_` `b\_UZaa`\_^US]`\_]T¥[00[^TWLWP\_^U^\_^  
@HWI-EAS443:3:69:1415:306#0/1  
TGAGTGCTGACCGTGCCAGGAAAATGAGGTCTTCAATCTC  
+HWI-EAS443:3:69:1415:306#0/1  
ab`bI`a`MXRYb`b¥]\_[^`aa\_`a\_`WYMa`¥`[\_[\_Z  
@HWI-EAS443:3:69:1430:1401#0/1  
CTGCTGTTGCATCTTCGCCATTGTTTGCTTGCGGCCAAAC  
+HWI-EAS443:3:69:1430:1401#0/1  
abbabbab`baaab`a]a` `baaabaaVa`P^\_Va\_a` `S  
@HWI-EAS443:3:69:150:222#0/1  
GCTTTCTGCTTTTGATGAGAGAAGAAATAAATACCTAGAA  
+HWI-EAS443:3:69:150:222#0/1  
aaaaaaR`aa]aaa]a\_^a`\_\_\_\_\_a\_[¥Y^`\_]`\_^Y\_  
@HWI-EAS443:3:69:1528:986#0/1  
GGAGGGGTGAAAATGGACGAAGGACAAGGGTTGCTTATGA  
+HWI-EAS443:3:69:1528:986#0/1  
aa^aaaaYa` `` ` \_aa\_\_a^\_\_\_Z^`^a\_\_Y]a¥\_`^`\_^  
@HWI-EAS443:3:69:1537:958#0/1  
GCTTTCTGCTTTTGATGAGAGAAGAAATAAATACCTAGAA  
+HWI-EAS443:3:69:1537:958#0/1  
abab\_` `baabbbaaa`\_Y¥baabaaab`a\_]aW[]aaa`  
@HWI-EAS443:3:69:15:1431#0/1  
ATTGCCCTCTGGGCAGCTGTTTGAATTTTCCTTTGAGGA  
+HWI-EAS443:3:69:15:1431#0/1  
¥IVbaa\_^^` `a^¥TUYN¥LaYV^O\_WXH[^^^`ZST\_\_¥P  
@HWI-EAS443:3:69:1652:2018#0/1  
GATGGTGCTTTCTGCTTTTGATGAGAGAAGAAATAAATAC  
+HWI-EAS443:3:69:1652:2018#0/1  
]\_^bb`baabaa`\_OS^`aaaZ\_Ha` `` `]\_X¥` ` [[]a]Y  
@HWI-EAS443:3:69:1716:661#0/1  
GCGCTCTTGTCTCTGATATGTGGCATCATTGAGGTTGGA  
+HWI-EAS443:3:69:1716:661#0/1  
aaa\_aaaaaa]a]`a\_a`\_Y^aa]`\_\_` `\_^\_aU¥\_\_`¥  
@HWI-EAS443:3:69:1753:253#0/1  
ATTGCCCTCTGGGCAGCTGTTTGAATTTTCCTTTGAGGA  
+HWI-EAS443:3:69:1753:253#0/1  
aaY`aba]baTGUUTQ]`QU¥^WLWWP^^\_XVL¥[RWXRY  
@HWI-EAS443:3:69:261:1863#0/1  
AATTTCTGGAGGGGTGAAAATGGACGAAGGACAAGGGTTG  
+HWI-EAS443:3:69:261:1863#0/1  
¥^\_aabaa[aa^^a][`` `^aa\_aa\_a`^^\_]`^]ZY]



@HWI-EAS443:3:69:270:1380#0/1  
GACTTTGAAAGGAAGGGTACTCACTGGTCGGGATAGACC  
+HWI-EAS443:3:69:270:1380#0/1  
ababaaababaa\_bab`VP[aabaa^[\_Ta\_\_`\_\_\_aa]]  
@HWI-EAS443:3:69:301:939#0/1  
AGCGCCAGGATGCCACAGAAATCAGAGCATCTGTCCGGAAG  
+HWI-EAS443:3:69:301:939#0/1  
TWaab\_¥a\_W\_babbb^a^HY¥`aT]Z\_Z`^XNUJUKZR  
@HWI-EAS443:3:69:324:1203#0/1  
CTGGAGGGGTGAAAATGGACGAAGGACAAGGGTTGCTTAT  
+HWI-EAS443:3:69:324:1203#0/1  
ab]bVaa\_aGa]^YUaaaa^U`^]aaab`a^`R^a]]^Z`  
@HWI-EAS443:3:69:397:468#0/1  
CACATAAATCCTGCCTGCCTGCTTGTGTGTATGGGCTTGC  
+HWI-EAS443:3:69:397:468#0/1  
ababaaaaa`aa\_a`a`\_\_a`a\_a¥\_¥a¥``\_^]W¥^\_  
@HWI-EAS443:3:69:489:1197#0/1  
TGGGCATGACTTTGAAAGGAAGGGTACTCACTGGTCGGG  
+HWI-EAS443:3:69:489:1197#0/1  
a^aaabba`baaa\_a]^\_LYaa``a\_aabaa\_abX^aa\_a  
@HWI-EAS443:3:69:493:961#0/1  
CTGGGTTTCGACTTTCTTACTTGATCCATCATTGCCCT  
+HWI-EAS443:3:69:493:961#0/1  
ab¥X[]`Za\_L\_baaa`a^a]Y^`]VYa]a`\_\_a\_Va^  
@HWI-EAS443:3:69:72:880#0/1  
CTCATTCTGAGGGATCAGTTGCACATAAATCCTGCCTGC  
+HWI-EAS443:3:69:72:880#0/1  
aaaaaabaaaaaaaa`^aa^`a`¥`aaa`a^\_a^`^^^\_\_  
@HWI-EAS443:3:69:783:607#0/1  
CAGTTGCACATAAATCCTGCCTGCCTGCTTGTGTGTATGG  
+HWI-EAS443:3:69:783:607#0/1  
a\_b\_aaabaabbaa`aaaaaaaa`a`a`aZaVa^````\_  
@HWI-EAS443:3:69:842:316#0/1  
GAATGATTGGTGAATCGGGAGATTCTACATCCAAATGTG  
+HWI-EAS443:3:69:842:316#0/1  
a^QT]X\_a¥VTYW]X¥^¥Y]\_WUWUTXYFYNNZ^¥U[¥X^  
@HWI-EAS443:3:69:84:1599#0/1  
AGGTCTTACTCATATCATGATTTGGCATTCCAACCTGAAT  
+HWI-EAS443:3:69:84:1599#0/1  
\_]`]aa`aaaaaa^a\_aaa^^^^Xaa`^aa`a`\_]Z\_]`  
@HWI-EAS443:3:69:879:1840#0/1  
TGGGCTTGCAGTAGCAAGTGGGCATGACTTTGAAAGGGAA  
+HWI-EAS443:3:69:879:1840#0/1  
aaa^baaaaaa¥aaaaaaWa```aaaa\_aaaa]a`\_`\_\_\_\_  
@HWI-EAS443:3:69:920:1118#0/1  
GTGCTTTCTGCTTTTGTATGAGAGAAGAAATAAATACCTAG  
+HWI-EAS443:3:69:920:1118#0/1  
aaaaabaaabaaaaab\_aa`aa`^`aaaaa\_NXR`PBBB  
@HWI-EAS443:3:69:932:836#0/1  
CAAGGTTCAACACTTCCCAGAAGGTCTGGTGCCGCAGGTG

+HWI-EAS443:3:69:932:836#0/1  
T]Q^\_W\_b\_^a^bbbb`b]¥XW]\_`Z`XQGWba¥``]^N^  
@HWI-EAS443:3:69:933:1479#0/1  
TAACAATAGAGAGGATGGTGCTTTCTGCTTTTGATGAGAG  
+HWI-EAS443:3:69:933:1479#0/1  
]b¥bbbbba`a`aa`a^X^^¥¥aa\_X[UY\_WT¥^Z]\_`X  
@HWI-EAS443:3:69:958:380#0/1  
GGACGAAGGACAAGGGTTGCTTATGAAAGAATGTGCAATA  
+HWI-EAS443:3:69:958:380#0/1  
aaa`aaaa`\_`aaaa^`a\_aaaaa\_\_aa\_``a]a```aa  
@HWI-EAS443:3:69:961:702#0/1  
AAAGTCGAAACCCAGGAAACGCTGAGATTGAAGACCTCAT  
+HWI-EAS443:3:69:961:702#0/1  
¥¥¥`SaaXVRNRN\_Z¥Ya\_^YL^^ZWP¥]`\_`SRFO¥XZY  
@HWI-EAS443:3:69:975:1647#0/1  
GCTTTCTGCTTTTGATGAGAGAAGAAATAAATACCTAGAA  
+HWI-EAS443:3:69:975:1647#0/1  
abaaaaababaaaa`a`^aaaabab`baaab]^`a^aa  
@HWI-EAS443:3:69:97:472#0/1  
GTCAGCACTCATTCTGAGGGGATCAGTTGCACATAAATCC  
+HWI-EAS443:3:69:97:472#0/1  
a¥baaaZ`\_aaa\_```\_\_\_\_^Y¥`\_`\_\_^¥^\_\_\_\_]W^^[¥  
@HWI-EAS443:3:69:980:171#0/1  
ATTGCCCTCTGGGCAGCTGTTTGAAATTTTCCTTTGAGGA  
+HWI-EAS443:3:69:980:171#0/1  
abbaaaaaabaa]```ab^ab```aa\_a\_\_aaaa^aa`  
@HWI-EAS443:3:6:1049:991#0/1  
GAATAGCATAACAATAGAGAGGATGGTGCTTTCTGCTTTT  
+HWI-EAS443:3:6:1049:991#0/1  
aaaba¥Z^`ZY\_a`aab\_]`aa\_\_a\_U`M¥`¥S^YPY```\_  
@HWI-EAS443:3:6:1092:1736#0/1  
CAGTTGCACATAAATCCTGCCTGCCTGCTTGTGTATGG  
+HWI-EAS443:3:6:1092:1736#0/1  
]baabba^bbab`bba^babaa`b\_b`^bbaaaaaabaa  
@HWI-EAS443:3:6:1094:141#0/1  
GAAATTTCTGGAGGGGTGAAAATGGACGAAGGACAAGGGT  
+HWI-EAS443:3:6:1094:141#0/1  
abaabab`bba\_\_aaaXa\_^`\_aa\_\_Wa\_^`\_^Z\_\_\_\_¥Z  
@HWI-EAS443:3:6:1285:238#0/1  
GGGTCCTCCTGTTTTCTTAGGGTCCTTCCCAGCACTGGGA  
+HWI-EAS443:3:6:1285:238#0/1  
ZbbZ00`baa\_aabba`baa\_`\_\_ba]WZab\_a¥\_aa\_¥  
@HWI-EAS443:3:6:1344:1479#0/1  
TACTTGATCCATCATTGCCCTCTGGGCAGCTGTTTGAAAT  
+HWI-EAS443:3:6:1344:1479#0/1  
]ba\_`aXaa¥abbaZ\_\_\_\_¥W\_Ra^\_]a`aWaa[`aba\_\_a  
@HWI-EAS443:3:6:1369:229#0/1  
TGGCGCCAAGCAAACAATGGCGAAGATGCAACAGCAGGTC  
+HWI-EAS443:3:6:1369:229#0/1  
abaaa\_aa^a\_a\_aWY¥a\_aQ\_XYa\_\_^LLY[WYNQUZRU

@HWI-EAS443:3:6:1429:1591#0/1  
CAATAGAGAGGATGGTGCTTTCTGCTTTTGATGAGAGAAG  
+HWI-EAS443:3:6:1429:1591#0/1  
`bbbbabbbbaaab\_babb`bb`]abbb`aba\_bab\_ab  
@HWI-EAS443:3:6:1463:651#0/1  
GTCCTCCTGTTTTCTTAGGGTCCTCCAGCACTGGGATG  
+HWI-EAS443:3:6:1463:651#0/1  
aRZSZNY[\_K]\_¥IZ`Z\_X\_VN¥[¥TGRUZ¥[VSZ\_NWBB  
@HWI-EAS443:3:6:1516:1712#0/1  
CAGGATTTATGTGCAACTGATCCCCTCAGAATGAGTGCTG  
+HWI-EAS443:3:6:1516:1712#0/1  
a\_bb` `a^\_a\_aSa`b]bb`XPVPW^Z]b`]aaaaUaV[X  
@HWI-EAS443:3:6:1581:1082#0/1  
ATATCCTCAAAGGAAAATTTCAAACAGCTGCCAGAGGGC  
+HWI-EAS443:3:6:1581:1082#0/1  
ababa\_b`a[abb\_bbabbbY`\_\_\_aaaa[^]``\_a\_\_Q  
@HWI-EAS443:3:6:1700:1435#0/1  
CATAAATCCTGCCTGCCTGCTTGTGTGTATGGGCTTGCAG  
+HWI-EAS443:3:6:1700:1435#0/1  
abbbb\_bbbbab^baa^bb\_bbb]^`aZ`\_aaa`\_[`U[\_  
@HWI-EAS443:3:6:187:1284#0/1  
TGCTTTCTGCTTTTGATGAGAGAAGAAATAAATACCTAGA  
+HWI-EAS443:3:6:187:1284#0/1  
abbaaabaaababaaaaa`baa`a^¥aaa\_aaaaY¥^aaa  
@HWI-EAS443:3:6:283:1306#0/1  
GCGCTCTTGTCTCTGATATGTGGCATCATTGAGTTGGA  
+HWI-EAS443:3:6:283:1306#0/1  
\_b`bbbb` `bbbabaaaaa^`\_aaaa]aa¥abaaaaa  
@HWI-EAS443:3:6:313:1744#0/1  
GTCGGAAGAATGATTGGTGAATCGGGAGATTCTACATCC  
+HWI-EAS443:3:6:313:1744#0/1  
^T[\_aaaZZ\_UW^S[HQMFY]YV^`\_] [VX[UVSFVBBB  
@HWI-EAS443:3:6:334:1836#0/1  
GGTGCTTTCTGCTTTTGATGAGAGAAGAAATAAATACCTA  
+HWI-EAS443:3:6:334:1836#0/1  
aZS\_\_GTISS\_WSWV]\_ZIZVYSOOZXU[V] []BBBBBBB  
@HWI-EAS443:3:6:468:478#0/1  
ATCCAGAATAGCATAACAATAGAGAGGATGGTGCTTTCTG  
+HWI-EAS443:3:6:468:478#0/1  
aaa^aaaaa`b\_ab` `a` `aa`a\_a\_\_^]\_Wa^^\_HZ]  
@HWI-EAS443:3:6:491:900#0/1  
TGCCGCAGGTGCTGCGGTGAAAGGAGTTGGAACAATAGCA  
+HWI-EAS443:3:6:491:900#0/1  
ab`\_a\_\_\_\_\_Y`\_]\_¥`aG\_¥W`]ZT^H^\_¥V¥UWWW¥¥BB  
@HWI-EAS443:3:6:636:1325#0/1  
CTGGGTTTTCATTTGGTCTCATCAGGCTGACCACTTGGCT  
+HWI-EAS443:3:6:636:1325#0/1  
abaababba[bbb`ab]^`bbbaaaa^`a`a` [a\_\_aa\_U\_  
@HWI-EAS443:3:6:710:496#0/1  
AGAAGAGCATCCCAGTGCTGGGAAGGACCCTAAGAAAACA

+HWI-EAS443:3:6:710:496#0/1  
\_¥RZT^`T\_a\_a]Z`G`a]\_VYUa\_\_NFV\_¥¥^aV\_YTS  
@HWI-EAS443:3:6:742:561#0/1  
ATGGGCTTGCAGTAGCAAGTGGGCATGACTTTGAAAGGGA  
+HWI-EAS443:3:6:742:561#0/1  
aa]^¥Z\_^`aZS``]``ZVaaZGYba]]aab]¥\_\_UY\_Y\_  
@HWI-EAS443:3:6:756:1063#0/1  
CTAATCCAGAATAGCATAACAATAGAGAGGATGGTGCTTT  
+HWI-EAS443:3:6:756:1063#0/1  
abbbaaaaaaaaaaaaaaaa`\_aaa`a`a`\_`\_`aS`ZW^\_  
@HWI-EAS443:3:6:772:775#0/1  
CGGAAGAATGATTGGTGAATCGGGAGATTCTACATCCAA  
+HWI-EAS443:3:6:772:775#0/1  
\_a^`\_`abUbbabba`^a`\_Z^Vaaa]\_]abXbaaaaOR\_\_  
@HWI-EAS443:3:6:941:227#0/1  
ACATAAATCCTGCCTGCCTGCTTGTGTGTATGGGCTTGCA  
+HWI-EAS443:3:6:941:227#0/1  
`aababbbbaabaa````aa\_aaa\_a\_b`aa\_aZ\_\_aY]  
@HWI-EAS443:3:6:969:1790#0/1  
GAAGGGTACTCACTGGTCCGGATAGACCCATTCAAATTAC  
+HWI-EAS443:3:6:969:1790#0/1  
ab`ba[D[aa]a\_a]aXYa\_a¥`^\_aT^aaaa^a`aaaa]  
@HWI-EAS443:3:6:977:29#0/1  
GGAAACGCTGAGATTGAAGACCTCATTTTCCTGGCACGGT  
+HWI-EAS443:3:6:977:29#0/1  
ab`aaZb¥aa\_b\_\_W`[Z`[WQ\_[Z`\_\_`SU\_\_^U^W\_BB  
@HWI-EAS443:3:70:1050:1788#0/1  
GGAAGAATGATTGGTGAATCGGGAGATTCTACATCCAAA  
+HWI-EAS443:3:70:1050:1788#0/1  
`abbabbaaZ`aaa]aabbaaa``a\_aa`aaa`\_`\_\_aaa`  
@HWI-EAS443:3:70:1061:1504#0/1  
CACTTCCCAGAAGGTCTGGTGCCGCAGGTGCTGCGGTGAA  
+HWI-EAS443:3:70:1061:1504#0/1  
abba`\_bb]b[\_ba¥babb`bababa]aTaaaaX\_aH`ZZ  
@HWI-EAS443:3:70:1103:1916#0/1  
TGAACTCAAATCAGTGATTATGATGGACGACTAATCCAG  
+HWI-EAS443:3:70:1103:1916#0/1  
ab`¥\_M`¥]`\_`¥bUVbb[R[]]^¥\_HYHQ]WT^YZaYb]  
@HWI-EAS443:3:70:1244:165#0/1  
GGTCCTCCTGTTTTCTTAGGGTCCTTCCCAGCACTGGGAT  
+HWI-EAS443:3:70:1244:165#0/1  
ab\_^VHYQZaS\_^W]RXZaTS¥OG]Z[LSTY]^^^aa\_]X  
@HWI-EAS443:3:70:133:1449#0/1  
CCCTTCCCTTTCAAAGTCATGCCCACTTGCTACTGCAAGC  
+HWI-EAS443:3:70:133:1449#0/1  
abba^babYW¥bW¥\_a\_bb¥Q\_aaaa]¥Va]`a^`XY^]  
@HWI-EAS443:3:70:1347:781#0/1  
GGCTGTTTTGGAGTAATTTGAATGGGTCTATCCCGACCAG  
+HWI-EAS443:3:70:1347:781#0/1  
`abb¥P¥bbY[J[XU[aba`^bWaa\_ZXab`TUZa`VV\_¥

@HWI-EAS443:3:70:1467:746#0/1  
GGGATGCTCTTCTAGGTATTTATTTCTTCTCTCATCAAAA  
+HWI-EAS443:3:70:1467:746#0/1  
]`b`bbbb`bbabab`Iabbaabba[bb^baaaaa\_aaaa  
@HWI-EAS443:3:70:1502:2011#0/1  
GGGATCCATTCCGGTGCGAACAAGCGCTTTGTTCTCTGA  
+HWI-EAS443:3:70:1502:2011#0/1  
a\_0]]bb^XJ\_`¥aGRa]aa[^]Ua¥X`\_\_a\_\_S¥\_a\_\_Y  
@HWI-EAS443:3:70:1650:1343#0/1  
CTGGGTTTCGACTTTCTTTACTTGATCCATCATTGCCCT  
+HWI-EAS443:3:70:1650:1343#0/1  
[bbbb]bbbb[ababb]baabbbbaa\_aabaa¥b\_ba  
@HWI-EAS443:3:70:1661:146#0/1  
GAGGATGGTGCTTTCTGCTTTTGATGAGAGAAGAAATAAA  
+HWI-EAS443:3:70:1661:146#0/1  
````\_aa`¥`\_a\_a`^a^aaaa]``\_]W`[\_Z[^`\_^\_  
@HWI-EAS443:3:70:1687:2032#0/1  
GAAGAAATAAATACCTAGAAGAGCATCCCAGTGCTGGGAA  
+HWI-EAS443:3:70:1687:2032#0/1  
[a¥Y`bbbb[Ob`R¥bWbbaaa`a^Pa\_`IbaWU\_\_aa  
@HWI-EAS443:3:70:169:1112#0/1  
GGGTCCTCTGTTTTCTTAGGGTCCTCCCAGCACTGGGA  
+HWI-EAS443:3:70:169:1112#0/1  
a\_^\_aa\_`^^ZT[aab``\_XJ\_T`b\_a]a^YU`a\_¥^00`  
@HWI-EAS443:3:70:1710:511#0/1  
GAATGATTGGTGAATCGGGAGATTCTACATCCAAATGTG  
+HWI-EAS443:3:70:1710:511#0/1  
aa`[^]^a¥XVaZX`\_W^^`Y\_NSX¥WVPU^¥]ZLP`XX[  
@HWI-EAS443:3:70:1716:1401#0/1  
CAGGAAAATGAGGTCTTCAATCTCAGCGTTTCCTGGGTTT  
+HWI-EAS443:3:70:1716:1401#0/1  
aZbb\_abbaba`S¥aa^baa`aaaa]aUaa¥aR]Z`^]¥  
@HWI-EAS443:3:70:1724:476#0/1  
GAGCGCCAGGATGCCACAGAAATCAGAGCATCTGTCCGGAA  
+HWI-EAS443:3:70:1724:476#0/1  
aaabaaaaab\_a\_\_aa\_bbaabaaaaX[aa^aa]V¥\_NU  
@HWI-EAS443:3:70:1729:1103#0/1  
TAACAATAGAGAGGATGGTGCTTTCTGCTTTTGATGAGAG  
+HWI-EAS443:3:70:1729:1103#0/1  
\_^^^a\_a¥a\_b\_aa`aaXa]\_aaP\_\_]\_aa`]SZTS\_N\_  
@HWI-EAS443:3:70:258:684#0/1  
CCTGTTTTCTTAGGGTCCTCCCAGCACTGGGATGCTCTT  
+HWI-EAS443:3:70:258:684#0/1  
abbb\_aabaaa`a`^aa\_aa`b\_aa```\_`¥`\_a\_\_\_\_`]  
@HWI-EAS443:3:70:260:1176#0/1  
AAAATGAGGTCTTCAATCTCAGCGTTTCCTGGGTTTCGAC  
+HWI-EAS443:3:70:260:1176#0/1  
a`^aa``[Iaaaabaaa`S`baSa\_aa`Z¥[\_\_\_\_`\_]  
@HWI-EAS443:3:70:297:2010#0/1  
CTTCGCCATTGTTTGCTTGGCGCCAAACTCTCCTTATTC

+HWI-EAS443:3:70:297:2010#0/1  
ab^bab\_Z]MXW\_X]`[WUR¥Zb`^]Q]\_`X^^¥YLUYMQ  
@HWI-EAS443:3:70:362:307#0/1  
CATGACTTTGAAAGGGAAGGGTACTCACTGGTCGGGATAG  
+HWI-EAS443:3:70:362:307#0/1  
aYaaX`baaa]ZSWV]^Za`a]a`\_`a^\_¥XS]`]\_\_\_^^  
@HWI-EAS443:3:70:409:1378#0/1  
TAACAATAGAGAGGATGGTGCTTTCTGCTTTTGATGAGAG  
+HWI-EAS443:3:70:409:1378#0/1  
`\_bbaX`Va[]\_`aa`a`R^`\_`\_`WV]U`^^¥¥a`]U\_  
@HWI-EAS443:3:70:416:1406#0/1  
AAACAGCCAAGTGGTCAGCCTGATGAGACCAAATGAAAAC  
+HWI-EAS443:3:70:416:1406#0/1  
aa\_``]aaaa^YZVY`V]\_^]]^]]Y^¥a\_]^^]^\_^^X  
@HWI-EAS443:3:70:456:926#0/1  
AATTACTCCAAAACAGCCAAGTGGTCAGCCTGATGAGACC  
+HWI-EAS443:3:70:456:926#0/1  
¥Yb`Uaa\_a`a¥]aa\_[a\_^aZ`\_¥`\_\_Z¥^a¥`\_\_\_\_Z^  
@HWI-EAS443:3:70:463:1417#0/1  
GGGATCCATTCCGGTGCGAACAAGCGCTCTTGTCTCTGA  
+HWI-EAS443:3:70:463:1417#0/1  
ab^\_\_bbbbbabbba\_bbabaab\_abaaaaaaa\_aaaa``a  
@HWI-EAS443:3:70:659:553#0/1  
TGTCGGAAGAATGATTGGTGAATCGGGAGATTCTACATC  
+HWI-EAS443:3:70:659:553#0/1  
a^\_`¥^\_Za^S]aaaa\_\_]`a^Z]a`^^]\_^Y`[\_`¥\_^[  
@HWI-EAS443:3:70:690:1854#0/1  
GCTGACCGTGCCAGGAAAATGAGGTCTTCAATCTCAGCGT  
+HWI-EAS443:3:70:690:1854#0/1  
aba`\_`bUN¥`\_a^]aaa`[\_^^UWa[]¥a\_Z`¥\_\_^[^V  
@HWI-EAS443:3:70:732:1788#0/1  
CTGCTGTTGCATCTTCGCCATTGTTTGTGGCGCCAAAC  
+HWI-EAS443:3:70:732:1788#0/1  
a^L¥\_\_WXa]ZQVU\_Z\_\_Z¥WLQ[]X[WS[X^TZ\_¥L  
@HWI-EAS443:3:70:742:1567#0/1  
CTGGGTTTCGACTTTCTTACTTGATCCATCATTGCCCT  
+HWI-EAS443:3:70:742:1567#0/1  
aa\_W\_a\_bab`bbabababba]aa`aa`\_``baa`ab`a^  
@HWI-EAS443:3:70:747:1690#0/1  
GGCTTGCAGTAGCAAGTGGGCATGACTTTGAAAGGGAAGG  
+HWI-EAS443:3:70:747:1690#0/1  
aTb]¥V\_WYR]PVaQK¥[][\_][`¥\_Y]`\_`R][\_XO¥][  
@HWI-EAS443:3:70:827:1405#0/1  
CTGAACTCAAACACTCAGTGATTATGATGGACGACTAATCCA  
+HWI-EAS443:3:70:827:1405#0/1  
ababbbbbbb^bbaaaa`a\_abaaaaaa`aa`aaaa^aaa  
@HWI-EAS443:3:70:829:1009#0/1  
CTTCAATCTCAGCGTTTCCTGGGTTTCGACTTTCTCTTAC  
+HWI-EAS443:3:70:829:1009#0/1  
``a^^]bb]bbb\_¥aa]]]Q]U]Y`aXaZXaa``\_\_\_\_\_

@HWI-EAS443:3:70:845:1583#0/1  
TGAAAATGGACGAAGGACAAGGGTTGCTTATGAAAGAATG  
+HWI-EAS443:3:70:845:1583#0/1  
`a`^a]aaRLaX`R^^``¥PVSS]\_`\_RT`\_`a^YY\_\_^  
@HWI-EAS443:3:70:913:408#0/1  
AATGATTGGTGAATCGGGAGATTCTACATCCAAATGTGC  
+HWI-EAS443:3:70:913:408#0/1  
aaaa]aaa]X\_a\_````\_^^^\_^^^\_W\_\_^\_^^^]]X¥Z  
@HWI-EAS443:3:70:987:670#0/1  
CTTCTATATATGGGTCCTCCTGTTTTCTTAGGGTCCTTCC  
+HWI-EAS443:3:70:987:670#0/1  
a``bbb`aaaba\_\_T`\_`baba`a^T\_a¥a`aaaZ``aa  
@HWI-EAS443:3:71:100:471#0/1  
CCATCCTCTCTATTGTTATGCTATTCTGGATTAGTCGTCC  
+HWI-EAS443:3:71:100:471#0/1  
ab`aaaaaaa\_aa`¥aaa`a`Y`^a]a]¥`^a\_^^]¥YQ  
@HWI-EAS443:3:71:1137:1039#0/1  
GGAGGGGTGAAAATGGACGAAGGACAAGGGTTGCTTATGA  
+HWI-EAS443:3:71:1137:1039#0/1  
aaR¥]XUWa^MR\_a^]\_\_a\_]`Y[\_`¥YZ]Na]a\_[¥`[\_`  
@HWI-EAS443:3:71:1191:1471#0/1  
CCATCCTCTCTATTGTTATGCTATTCTGGATTAGTCGTCC  
+HWI-EAS443:3:71:1191:1471#0/1  
X``Z¥`^`K¥b`a^VV^bbb¥b^YS]a\_W^^^\_a\_\_^FU  
@HWI-EAS443:3:71:1191:744#0/1  
GTGGGCATGACTTTGAAAGGAAGGGTACTCACTGGTCGG  
+HWI-EAS443:3:71:1191:744#0/1  
a\_abaaa`\_]aabbbbaaa[aa^[aXaaa`aa\_a[T\_a\_  
@HWI-EAS443:3:71:1195:1736#0/1  
AGGATTTATGTGCAACTGATCCCCTCAGAATGAGTGCTGA  
+HWI-EAS443:3:71:1195:1736#0/1  
aaa`a`ab\_a]`\_aa`aaa\_aa`\_\_a`aa^\_\_\_\_\_^\_]`^  
@HWI-EAS443:3:71:1205:1782#0/1  
CTGCTGTTGCATCTTCGCCATTGTTTGCTTGGCGCCAAAC  
+HWI-EAS443:3:71:1205:1782#0/1  
a\_```¥\_\_bb``aaaaa`aa\_a¥V`b¥\_W`a`\_P^]PWDD  
@HWI-EAS443:3:71:1263:373#0/1  
GCTGTTTGAATTTTCCTTTGAGGATATTGCACATTCTTT  
+HWI-EAS443:3:71:1263:373#0/1  
a^ab^¥\_a[```aa\_a\_\_a]a¥`\_U`0\_\_`]YU^\_\_[]]\_  
@HWI-EAS443:3:71:127:62#0/1  
CCCTTGTCCTTCGTCCATTTTCACCCCTCCAGAAATTTTCG  
+HWI-EAS443:3:71:127:62#0/1  
aaaaaaW^[\_`]a]]Y\_\_`\_\_\_\_\_V]XW\_^[^PVWXXUWV  
@HWI-EAS443:3:71:1289:567#0/1  
ATGGTGCTTTCTGCTTTTGATGAGAGAAGAAATAAATACC  
+HWI-EAS443:3:71:1289:567#0/1  
aab`[bbabaaaaXaaaba^ab\_``b`ab`aaaa`aa^N  
@HWI-EAS443:3:71:131:483#0/1  
CTGGTCGGGATAGACCCATTCAAATTACTCCAAAACAGCC

+HWI-EAS443:3:71:131:483#0/1  
^Z[GP\_¥\_ba\_]ZbZ\_¥[^aR`¥`bb`aa^ba[]UXabb  
@HWI-EAS443:3:71:1481:247#0/1  
CAACTGATCCCCTCAGAATGAGTGCTGACCGTGCCAGGAA  
+HWI-EAS443:3:71:1481:247#0/1  
abb\_XZa^`\_\_SPZab¥aa]XaVa¥aa][N]Xa\_[U\_\_\_a  
@HWI-EAS443:3:71:1489:403#0/1  
GCATGACTTTGAAAGGAAGGGTACTCACTGGTCGGGATA  
+HWI-EAS443:3:71:1489:403#0/1  
]Tabb`bbbb\_bb``abab\_``ZDZa`abaaT\_Vba\_aa  
@HWI-EAS443:3:71:1552:373#0/1  
CACCATCCTCTATTGTTATGCTATTCTGGATTAGTCGT  
+HWI-EAS443:3:71:1552:373#0/1  
^aaW^a\_¥\_¥]F^a[aa¥]a^Z\_¥ab\_aa`¥\_¥`M\_Z[PX  
@HWI-EAS443:3:71:1641:888#0/1  
CCTGGGTTTCGACTTTCTTTACTTGATCCATCATTGCC  
+HWI-EAS443:3:71:1641:888#0/1  
aabbbaabbaaaabbbbabbb`babbaa]ababa`a\_[]  
@HWI-EAS443:3:71:1656:394#0/1  
ATGACTTTGAAAGGAAGGGTACTCACTGGTCGGGATAGA  
+HWI-EAS443:3:71:1656:394#0/1  
abbaabbb^]b``a`aaa]````\_[aa``XQ]aa]V^^^Y  
@HWI-EAS443:3:71:225:1478#0/1  
GGATGGTGCTTTCTGCTTTTGATGAGAGAAGAAATAAATA  
+HWI-EAS443:3:71:225:1478#0/1  
]bbaba¥abababaababbaa]a`a`a\_aaaaX^ab\_a\_a  
@HWI-EAS443:3:71:245:736#0/1  
GTTTGAATTTTCTTTGAGGATATTGCACATTCTTTCAT  
+HWI-EAS443:3:71:245:736#0/1  
a``\_^UY`aaaaaXaaa\_a]^Y\_¥]a]Ya`^`\_  
@HWI-EAS443:3:71:273:1545#0/1  
AGGAAACGCTGAGATTGAAGACCTCATTTCCTGGCACGG  
+HWI-EAS443:3:71:273:1545#0/1  
\_¥\_a]a`a`]`\_\_`\_\_aaZ¥`a\_\_T]\_a^```]\_U`\_^[[  
@HWI-EAS443:3:71:341:1365#0/1  
GGCTTGCAAGTGGGATGACTTTGAAAGGAAGG  
+HWI-EAS443:3:71:341:1365#0/1  
abbb^^a`a``ba\_\_Z¥aab\_aa^\_aab^^aaaa]aa`a  
@HWI-EAS443:3:71:371:1289#0/1  
CGTCCATCATAATCACTGAGTTTGAGTTCAGTGCACATTT  
+HWI-EAS443:3:71:371:1289#0/1  
aa\_aaaaba`^]a`¥aa`\_a^a`\_`aW\_a\_\_Z^a`\_\_^\_  
@HWI-EAS443:3:71:405:1964#0/1  
GAAAATGGACGAAGGACAAGGGTTGCTTATGAAAGAATGT  
+HWI-EAS443:3:71:405:1964#0/1  
Y^S`¥baabbbabaabba¥aa¥[Ibaaaba`aaba`a\_X^  
@HWI-EAS443:3:71:414:68#0/1  
CATGACTTTGAAAGGAAGGGTACTCACTGGTCGGGATAG  
+HWI-EAS443:3:71:414:68#0/1  
abb`\_``bbba\_`baaa^`aa]a\_a]a^\_a[W\_aaa]\_\_`



@HWI-EAS443:3:71:514:153#0/1  
AGAGAGGATGGTGCTTTCTGCTTTTGATGAGAGAAGAAAT  
+HWI-EAS443:3:71:514:153#0/1  
abbbabbX`bbXb[a`ba`a\_abb`T\_`\_]b[``aaa\_  
@HWI-EAS443:3:71:514:552#0/1  
GTGAAAATGGACGAAGGACAAGGGTTGCTTATGAAAGAAT  
+HWI-EAS443:3:71:514:552#0/1  
a`b`ba\_abaabaa`aaaaaa^abaaaaa`]aaa\_a  
@HWI-EAS443:3:71:569:74#0/1  
CCTCCTGTTTTCTTAGGGTCCTCCAGCACTGGGATGCT  
+HWI-EAS443:3:71:569:74#0/1  
a]]``\_Y[`^b`a\_a\_[DRa``\_Y\_YVU``V\_[V¥[U\_V[  
@HWI-EAS443:3:71:586:221#0/1  
CTTCCGACAGATGCTCTGATTTCTGTGGCATCCTGGCGCT  
+HWI-EAS443:3:71:586:221#0/1  
aaaaa`baa`]aaaaa\_a`\_X``^\_[^`Za¥^T^[VV  
@HWI-EAS443:3:71:604:43#0/1  
GAGGATGGTGCTTTCTGCTTTTGATGAGAGAAGAAATAAA  
+HWI-EAS443:3:71:604:43#0/1  
a¥aa`RX\_RZU[Y`\_\_a¥`a\_]`[[Z\_a]``^a`[[`^\_T  
@HWI-EAS443:3:71:611:494#0/1  
CATGACTTTGAAAGGGAAGGGTACTCACTGGTCGGGATAG  
+HWI-EAS443:3:71:611:494#0/1  
abbb\_`bbbaa¥aaba\_``Za`aaaaaa\_baaaa\_aa  
@HWI-EAS443:3:71:685:1374#0/1  
GCATCCCAGTGCTGGGAAGGACCCTAAGAAAACAGGAGGA  
+HWI-EAS443:3:71:685:1374#0/1  
`baabba`W^^a`a^^abaaa\_a\_`[`a`Za]`a``a\_¥a  
@HWI-EAS443:3:71:686:1711#0/1  
GTCCTCCTGTTTTCTTAGGGTCCTCCAGCACTGGGATG  
+HWI-EAS443:3:71:686:1711#0/1  
a`b\_aaa\_VRa]]`[aaXZ\_Xaa\_`¥\_\_\_[^N¥^^aU]U\_  
@HWI-EAS443:3:71:719:439#0/1  
CGGGAGATTCTACATCCAAATGTGCACTGAACTCAAATC  
+HWI-EAS443:3:71:719:439#0/1  
ab\_Ya[`¥W^^^a]^^W[X]TQV`ZY`a¥PU¥^ZUYY\_`  
@HWI-EAS443:3:71:742:491#0/1  
CCCTTGTCCTTCGTCCATTTTCACCCCTCCAGAAATTTTCG  
+HWI-EAS443:3:71:742:491#0/1  
Q\_[`¥¥VYW\_¥UWRZ\_`^`Z¥a¥\_a`X`¥\_U¥^[QY[[¥\_  
@HWI-EAS443:3:71:745:531#0/1  
CGGAAGAATGATTGGTGAATCGGGAGATTCTACATCCAA  
+HWI-EAS443:3:71:745:531#0/1  
abb`a^^^\_baaab\_ababaabaaaaa`aa]^`aa``a  
@HWI-EAS443:3:71:756:678#0/1  
CCTCTCTATTGTTATGCTATTCTGGATTAGTCGTCCATCA  
+HWI-EAS443:3:71:756:678#0/1  
aabbbbbbbababbbbbbbbbbaaab`bb\_a`\_`^a  
@HWI-EAS443:3:71:80:839#0/1  
CTAATCCAGAATAGCATAACAATAGAGAGGATGGTGCTTT

+HWI-EAS443:3:71:80:839#0/1  
a`bbabbabaa`^aa\_XX¥aa\_aY^\_a`a`Sa\_T`^^[\_  
@HWI-EAS443:3:71:825:1186#0/1  
GTTCAACACTTCCCAGAAGGTCTGGTGCCGAGGTGCTGC  
+HWI-EAS443:3:71:825:1186#0/1  
a]aaabb¥ZX^a]`b`YUV`aa`Maaa^^Y`^LDX¥YY  
@HWI-EAS443:3:71:84:1462#0/1  
GGCAGCTGTTTGAAATTTTCCTTTGAGGATATTGCACATT  
+HWI-EAS443:3:71:84:1462#0/1  
`bb^`\_Q¥`ba\_Y`^a^^ab`aa^\_U]`[X¥[RT¥STZ[  
@HWI-EAS443:3:71:869:468#0/1  
CCTGCTGTTGCATCTTCGCCATTGTTTGCTTGGCGCCAAA  
+HWI-EAS443:3:71:869:468#0/1  
aa`bb\_]\_a]`R`\_ba`]I\_T¥^^`]\_aaTGX`[\_R]Q  
@HWI-EAS443:3:71:924:1128#0/1  
GACCCATTCAAATTACTIONCAGCCAAAGTGGTCAGCC  
+HWI-EAS443:3:71:924:1128#0/1  
UR\_b\_S^¥`WQ^\_Z`baa]\_¥`b`V][`bbaW\_V\_aaYD[  
@HWI-EAS443:3:72:1026:445#0/1  
AAACAGCCAAGTGGTCAGCCTGATGAGACCAAATGAAAAC  
+HWI-EAS443:3:72:1026:445#0/1  
aa^aaaaaaaaUa`HZ\_a\_\_aa\_WEVa\_]`a`\_a\_\_\_\_V  
@HWI-EAS443:3:72:1126:771#0/1  
ATTTGAATGGGTCTATCCCGACCAGTGAGTACCCTTCCCT  
+HWI-EAS443:3:72:1126:771#0/1  
abbaaab`aa`a`aaa^`a`aa]`^aYa]a\_\_\_\_Z^`\_  
@HWI-EAS443:3:72:1239:1089#0/1  
AGAGCATCTGTCCGAAGAATGATTGGTGAATCGGGAGAT  
+HWI-EAS443:3:72:1239:1089#0/1  
aba`abbaaaaaab`aa`a`a`aa`W¥^`\_¥[]`¥\_a`]  
@HWI-EAS443:3:72:1323:1034#0/1  
GTCCTTCCCAGCACTGGGATGCTCTTCTAGGTATTTATTT  
+HWI-EAS443:3:72:1323:1034#0/1  
a\_ab\_TZaXYb¥Z`VPPXN`a\_a\_YL\_]Y¥\_OYW^XNUWJ  
@HWI-EAS443:3:72:1347:1702#0/1  
CAGCCAAGTGGTCAGCCTGATGAGACCAAATGAAAACCA  
+HWI-EAS443:3:72:1347:1702#0/1  
`````U`¥R¥\_H^`\_\_bbb]\_S¥aa^^XN`aaaaaZT¥¥  
@HWI-EAS443:3:72:1349:825#0/1  
GAGGATGGTCTTTCTGCTTTTGATGAGAGAAGAAATAAA  
+HWI-EAS443:3:72:1349:825#0/1  
`^aaa`^YUaaaaa`aaa`aaba`\_a\_\_\_\_Zaa\_a`\_`\_\_`  
@HWI-EAS443:3:72:1357:721#0/1  
GAATGATTGGTGAATCGGGAGATTCTACATCCAAATGTG  
+HWI-EAS443:3:72:1357:721#0/1  
aabbababaaa\_aaaaaab\_a`aaaa\_aa`\_a`\_`\_`\_`a]a  
@HWI-EAS443:3:72:1376:1677#0/1  
ACACTTCCCAGAAGGTCTGGTGCCGAGGTGCTGCGGTGA  
+HWI-EAS443:3:72:1376:1677#0/1  
a`aa`aaaaZa\_V^[[\_a^\_U]^¥]PUZYUVLXVVBBBBB

@HWI-EAS443:3:72:1441:1601#0/1  
AATAGAGAGGATGGTGCTTTCTGCTTTTGATGAGAGAAGA  
+HWI-EAS443:3:72:1441:1601#0/1  
a^¥`\_`R^]TOZ\_\_OGWXY\_R`][Y^][OF[ZRW\_[KFTQ  
@HWI-EAS443:3:72:1445:427#0/1  
GGGTCCTCCTGTTTTCTTAGGGTCCTCCAGCACTGGGA  
+HWI-EAS443:3:72:1445:427#0/1  
aaa[U^a`bb\_aba\_ab\_]a\_¥`\_`\_`]\_`\_\_^\_`^`^`  
@HWI-EAS443:3:72:1452:1651#0/1  
AAATGGACGAAGGACAAGGGTTGCTTATGAAAGAATGTGC  
+HWI-EAS443:3:72:1452:1651#0/1  
a`abba`]ab`baa^\_`a][Sa`^aaOUM^a`a^aa`\_`\_`  
@HWI-EAS443:3:72:1522:1497#0/1  
AATTTCTGGAGGGGTGAAAATGGACGAAGGACAAGGGTTG  
+HWI-EAS443:3:72:1522:1497#0/1  
`abbbabbaab`^a[aaaaaaaa\_aaaaa`]a\_`^Z\_a  
@HWI-EAS443:3:72:1529:219#0/1  
ATGGATCAAGTAAGAGAAAGTCGAAACCCAGGAAACGCTG  
+HWI-EAS443:3:72:1529:219#0/1  
\_`\_`S\_T\_`^ab`][^abU`[LH¥a`YU¥S[YH[\_RTDG^  
@HWI-EAS443:3:72:1547:1406#0/1  
GGGAAGGGTACTCACTGGTCGGGATAGACCCATTCAAATT  
+HWI-EAS443:3:72:1547:1406#0/1  
\_AY][aa`L`\_`\_abSbba\_\_baa`aba^XS]aa`^`^`aa`  
@HWI-EAS443:3:72:1550:1631#0/1  
GAAGAAATAAATACCTAGAAGAGCATCCCAGTGCTGGGAA  
+HWI-EAS443:3:72:1550:1631#0/1  
ZT^baa¥]F]bb`^R\_¥¥^aZ`ba^X`NYZ`W\_Xa]`aUT  
@HWI-EAS443:3:72:1589:338#0/1  
ATCCCAGCAGTGAGTACCCTTCCCTTTCAAAGTCATGCC  
+HWI-EAS443:3:72:1589:338#0/1  
a^]\_Yaa^]`a^a^V`STY`]ZVV¥`\_Y`\_aaU][\_\_VR  
@HWI-EAS443:3:72:1630:1979#0/1  
GTAATTTGAATGGGTCTATCCCGACCAGTGAGTACCCTTC  
+HWI-EAS443:3:72:1630:1979#0/1  
VbaM`b\_b\_baa^¥[`aa[aT]a`aaUP[FYba\_UQa\_\_a  
@HWI-EAS443:3:72:1694:1807#0/1  
CCTGGGTTTCGACTTTCTTACTTGATCCATCATTGCCC  
+HWI-EAS443:3:72:1694:1807#0/1  
^aba^a]\_`bb\_a`a`a^`b\_ab\_\_a`bbababab\_Za  
@HWI-EAS443:3:72:16:843#0/1  
CTTCTCTCATCAAAGCAGAAAGCACCATCCTCTCTATTG  
+HWI-EAS443:3:72:16:843#0/1  
abbb`¥aaZab`\_`\_`\_\_aaaYS\_aa\_\_a\_aa`aaaa\_\_\_\_`  
@HWI-EAS443:3:72:229:429#0/1  
AAAGCACCATCCTCTCTATTGTTATGCTATTCTGGATTAG  
+HWI-EAS443:3:72:229:429#0/1  
Q¥YU^XUa^a^ZTW`[[aW¥\_UMT^VV[]XITTW[QI[¥`  
@HWI-EAS443:3:72:320:1568#0/1  
GAAAGCACCATCCTCTCTATTGTTATGCTATTCTGGATTA

+HWI-EAS443:3:72:320:1568#0/1  
abbb¥bababbaa`abbbaaaa`aba\_aaaaaaaaaY`a`a  
@HWI-EAS443:3:72:332:993#0/1  
GGTCCTCCTGTTTTCTTAGGGTCCTCCCAGCACTGGGAT  
+HWI-EAS443:3:72:332:993#0/1  
aaZ``aaa]a[aaaa`]a\_`¥aaa\_aaaZ¥\_U\_\_a\_^Z[  
@HWI-EAS443:3:72:380:1249#0/1  
TGCGGCACCAGACCTTCTGGGAAGTGTGAACCTTGCATT  
+HWI-EAS443:3:72:380:1249#0/1  
abaabbab`S^baaaaaaaaaab`a`¥a`aaaa\_aaaa\_aa`  
@HWI-EAS443:3:72:457:1761#0/1  
ACTTCCCAGAAGGTCTGGTGCCGCAGGTGCTGCGGTGAAA  
+HWI-EAS443:3:72:457:1761#0/1  
aa\_¥a^`a\_\_`\_¥Sa`YVSV\_^S^UUMPT¥UX\_BBBBBBB  
@HWI-EAS443:3:72:53:465#0/1  
GGTGAAAGGAGTTGGAACAATAGCAATGGAGTTAATCAGA  
+HWI-EAS443:3:72:53:465#0/1  
aaQaaaX\_a\_a]```\_a``¥\_T[`]X^^[X^VUWR[\_\_\_\_  
@HWI-EAS443:3:72:56:1800#0/1  
GCGCCAAGCAAACAATGGCGAAGATGCAACAGCAGGTCTT  
+HWI-EAS443:3:72:56:1800#0/1  
abbbbaa``¥^bb¥YXaaaa¥]\_[\_`Y``\_\_b\_¥aV`^ [  
@HWI-EAS443:3:72:57:729#0/1  
CTCTCTATTGTTATGCTATTCTGGATTAGTCGTCCATCAT  
+HWI-EAS443:3:72:57:729#0/1  
abbaaa]aaa`aaaaaa^aaa\_aaaa\_`^`X¥\_aa``a\_  
@HWI-EAS443:3:72:711:465#0/1  
AACAAGCGCTCTTGTCTCTGATATGTGGCATCATTACAGG  
+HWI-EAS443:3:72:711:465#0/1  
abab`aaaaa\_``]^a\_[^\_a^\_\_\_\_Ya\_Za^^`\_]\_¥\_X  
@HWI-EAS443:3:72:890:534#0/1  
GGTGCTTTCTGCTTTTGATGAGAGAAGAAATAAATACCTA  
+HWI-EAS443:3:72:890:534#0/1  
aa^a]^`aaa¥[a\_aa`Zaa[¥G^V]a^^¥`][\_\_\_\_]``\_  
@HWI-EAS443:3:72:891:964#0/1  
GTTGCACATAAATCCTGCCTGCCTGCTTGTGTGTATGGGC  
+HWI-EAS443:3:72:891:964#0/1  
`\_aab`abbba\_aaaabba\_`\_`aa[aaa`bWbSaaaZ\_\_  
@HWI-EAS443:3:72:916:1593#0/1  
GATCAGTTGCACATAAATCCTGCCTGCCTGCTTGTGTGTA  
+HWI-EAS443:3:72:916:1593#0/1  
`^`b¥[QY\_^a]aaaa`\_\_[\_a`Z^`X^a`\_\_dW\_^`Y^  
@HWI-EAS443:3:72:946:359#0/1  
CCCTTGTCCTTCGTCCATTTTCACCCCTCCAGAAATTCG  
+HWI-EAS443:3:72:946:359#0/1  
`bb``a]YQY\_[\_YWSZ\_ba``\_\_TUXaaUU¥^Z]aa]¥\_  
@HWI-EAS443:3:72:949:1099#0/1  
AAAATGGACGAAGGACAAGGGTTGCTTATGAAAGAATGTG  
+HWI-EAS443:3:72:949:1099#0/1  
Y]\_`aa\_^aaX\_\_`^abaaa^[`a``aaaaab\_¥`]\_^Y`

@HWI-EAS443:3:73:1027:1581#0/1  
GGAAAATGAGGTCTTCAATCTCAGCGTTTCCTGGGTTTCG  
+HWI-EAS443:3:73:1027:1581#0/1  
aa]]`]Z\_aa\_]aaaaa]]a^a``Z`\_`^^a\_^^\_``  
@HWI-EAS443:3:73:1085:785#0/1  
GCTGGGTTTTCATTTGGTCTCATCAGGCTGACCACTTGGC  
+HWI-EAS443:3:73:1085:785#0/1  
a^\_0\_^)`¥XZ`baa]^N\_\_aUTZaWOY^`Z^a\_[PY^N]  
@HWI-EAS443:3:73:1100:1104#0/1  
ATTGCCCTCTGGGCAGCTGTTTGAATTTTCCTTTGAGGA  
+HWI-EAS443:3:73:1100:1104#0/1  
a`b`WX]S[]a\_Y0^\_Y)`¥\_Y^HPZX`¥XNOYa`T]a[¥  
@HWI-EAS443:3:73:1148:1498#0/1  
CATCATAATCACTGAGTTTGAGTTCAGTGCACATTTGGAT  
+HWI-EAS443:3:73:1148:1498#0/1  
aabaaUW\_WWYaa^]a]a]]]\_b]¥ZMX]a^aa`\_aPaa  
@HWI-EAS443:3:73:1212:751#0/1  
CAATAGAGAGGATGGTGCTTTCTGCTTTTGATGAGAGAAG  
+HWI-EAS443:3:73:1212:751#0/1  
aaaaaaabaaaa`a\_¥`\_^aa[`a^]aaaa^]W]a\_a[Z]  
@HWI-EAS443:3:73:1217:1386#0/1  
TGGGTTTTTCATTTGGTCTCATCAGGCTGACCACTTGGCTG  
+HWI-EAS443:3:73:1217:1386#0/1  
[``X`aaba\_Z¥`]SQ\_`a``aa\_^a\_aZZWa\_`a\_Q]`  
@HWI-EAS443:3:73:1321:184#0/1  
GTCGTCCATCATAATCACTGAGTTTGAGTTCAGTGCACAT  
+HWI-EAS443:3:73:1321:184#0/1  
a\_`a\_`\_a`]`\_`a`Z]W]`VaZ`a][\_\_`Y^\_] [X[Y]\_  
@HWI-EAS443:3:73:1360:1579#0/1  
AGAGCATCCCAGTGCTGGGAAGGACCCTAAGAAAACAGGA  
+HWI-EAS443:3:73:1360:1579#0/1  
aaaaaaaaa\_`a^`\_`aa`\_\_a]^`]¥a^\_\_^^]]\_\_]^  
@HWI-EAS443:3:73:152:687#0/1  
GTCCATCATAATCACTGAGTTTGAGTTCAGTGCACATTTG  
+HWI-EAS443:3:73:152:687#0/1  
aaabaa`Z\_aaab`aa`[a\_a\_a``\_\_\_^^]\_aa^`\_`^`\_  
@HWI-EAS443:3:73:1615:408#0/1  
TAACAATAGAGAGGATGGTGCTTTCTGCTTTTGATGAGAG  
+HWI-EAS443:3:73:1615:408#0/1  
]`\_\_]a¥]¥¥YLaaa`a\_N]LPa`\_]¥FUa`a`GS]H`G]  
@HWI-EAS443:3:73:1749:657#0/1  
AGCATCCCAGTGCTGGGAAGGACCCTAAGAAAACAGGAGG  
+HWI-EAS443:3:73:1749:657#0/1  
`]\_\_\_\_\_]\_¥KJTW`aSKM`HUMMUVRTa^Z¥^BBBBBBB  
@HWI-EAS443:3:73:1790:1099#0/1  
CCATTCCGGTGCGAACAAGCGCTCTTGTCTCTGATATGT  
+HWI-EAS443:3:73:1790:1099#0/1  
`TUZ\_\_V`UJSNWUTWITWQSRWJ[X]ZXR¥R¥ZRZZ]SZ  
@HWI-EAS443:3:73:228:758#0/1  
GAAAATGGACGAAGGACAAGGGTTGCTTATGAAAGAATGT

+HWI-EAS443:3:73:228:758#0/1  
aZ]Z^`aaaaa]Z`\_`\_`\_`a^X\_a`\_\_[\_a]X\_\_\_\_[¥\_W  
@HWI-EAS443:3:73:22:1009#0/1  
GGGTGAAAATGGACGAAGGACAAGGGTTGCTTATGAAAGA  
+HWI-EAS443:3:73:22:1009#0/1  
abaXa^W]aaaaXaaaaa\_``a`\_^`a\_`\_\_`a\_`\_`^  
@HWI-EAS443:3:73:272:394#0/1  
CCTCTCTATTGTTATGCTATTCTGGATTAGTCGCCATCA  
+HWI-EAS443:3:73:272:394#0/1  
abbbbbbbabaabaa`baaaaaaaaa¥aba\_a]\_b\_a`aa  
@HWI-EAS443:3:73:324:1264#0/1  
TGGAATCGGGAGATTCTACATCCAAATGTGCACTGAACTC  
+HWI-EAS443:3:73:324:1264#0/1  
a^^a¥abababbbaaaabb]aaaa`a`a\_aa`a`\_\_a\_\_a  
@HWI-EAS443:3:73:336:1058#0/1  
CACTGGTCGGGATAGACCCATTCAAATTACTCCAAAACAG  
+HWI-EAS443:3:73:336:1058#0/1  
`¥\_U^a\_\_\_Y\_V[a^`Z`\_Z¥a\_a¥][`\_^`¥QV]^]S  
@HWI-EAS443:3:73:346:581#0/1  
CATGACTTTGAAAGGGAAGGGTACTCACTGGTCGGGATAG  
+HWI-EAS443:3:73:346:581#0/1  
]X]baa`[a\_]\_a`\_`aaaaRV]aa¥`^[RO`]S\_\_Y\_^  
@HWI-EAS443:3:73:444:1416#0/1  
AGTTGCACATAAATCCTGCCTGCCTGCTTGTGTGTATGGG  
+HWI-EAS443:3:73:444:1416#0/1  
M¥¥aaba]ba`[\_aa`\_aa¥^a`\_Z\_`\_a¥ZWUV\_]ZSU  
@HWI-EAS443:3:73:546:671#0/1  
GGCTTGCAGTAGCAAGTGGGCATGACTTTGAAAGGGAAGG  
+HWI-EAS443:3:73:546:671#0/1  
abbUU`¥X\_K]¥`ZU¥YaY¥\_UV``¥`Y][X^X[`\_S]V^  
@HWI-EAS443:3:73:644:924#0/1  
GAGAGGATGGTGCTTTCTGCTTTTGATGAGAGAAGAAATA  
+HWI-EAS443:3:73:644:924#0/1  
a\_[S^\_[UZ[¥`Z`ZWIP[aa]RN]Z¥`]^Y^\_XT¥M\_  
@HWI-EAS443:3:73:660:417#0/1  
CCTCTGGGCAGCTGTTTGAATTTTCCTTTGAGGATATTG  
+HWI-EAS443:3:73:660:417#0/1  
aabbbbbbbbaaaaabbaaaabbb``abbaabaaaaa`  
@HWI-EAS443:3:73:688:1275#0/1  
CTCCTGTTTTCTTAGGGTCCTTCCCAGCACTGGGATGCTC  
+HWI-EAS443:3:73:688:1275#0/1  
`\_a¥a\_`b`b]`a\_¥VWba^Saabaa`aaaaZa`b\_aa  
@HWI-EAS443:3:73:73:708#0/1  
GGTCCTCCTGTTTTCTTAGGGTCCTTCCCAGCACTGGGAT  
+HWI-EAS443:3:73:73:708#0/1  
ab`bbaabbaabbaabaaaa`¥aaaaaaaaab\_a`a`aRa  
@HWI-EAS443:3:73:743:2041#0/1  
CAAAAGCAGAAAGCACCATCCTCTCTATTGTTATGCTATT  
+HWI-EAS443:3:73:743:2041#0/1  
\_]\_Z\_a`YY]``Z^`^a\_`a^ZY]^`\_^\_XUZZZZX^¥R

@HWI-EAS443:3:73:790:580#0/1  
CTGCTGTTGCATCTTCGCCATTGTTTGCTTGGCGCCAAAC  
+HWI-EAS443:3:73:790:580#0/1  
abaabbabbaab`aaaa\_aab`\_a\_H^`a[aaa`[HYRV  
@HWI-EAS443:3:73:791:1027#0/1  
TGGTGCTTTCTGCTTTTGATGAGAGAAGAAATAAATACCT  
+HWI-EAS443:3:73:791:1027#0/1  
\_aZRa`baba`aa^`bba^`b¥`bb\_\_a`^abbbbbbbbab  
@HWI-EAS443:3:74:1043:859#0/1  
GGGTTGCTTATGAAAGAATGTGCAATATCCTCAAAGGAAA  
+HWI-EAS443:3:74:1043:859#0/1  
^T]I^abaVaba\_I`PPY`^¥¥¥`aa¥^Qaa\_baabYaaa  
@HWI-EAS443:3:74:1075:174#0/1  
CTCCTGTTTTCTTAGGGTCCTTCCCAGCACTGGGATGCTC  
+HWI-EAS443:3:74:1075:174#0/1  
abbbbbbbbbbbbbbbbabbbbaabbabbbbbbb`bb`a\_  
@HWI-EAS443:3:74:1133:696#0/1  
GTTTGAATTTTCTTTGAGGATATTGCACATTCTTTCAT  
+HWI-EAS443:3:74:1133:696#0/1  
aaaaaaaaaaaa`aa`aa```\_\_^]¥`\_`\_¥\_a^X¥^  
@HWI-EAS443:3:74:1190:638#0/1  
GCTGTTTTGGAGTAATTTGAATGGGTCTATCCCGACCAGT  
+HWI-EAS443:3:74:1190:638#0/1  
U``¥U\_ba`Xababba```¥^baa[b[b\_PUT\_ba]]aY  
@HWI-EAS443:3:74:1230:1000#0/1  
GGTCCTCCTGTTTTCTTAGGGTCCTTCCCAGCACTGGGAT  
+HWI-EAS443:3:74:1230:1000#0/1  
`bbbbbbbababab`bb`bbba`abbb[`ba\_bbaba`aa  
@HWI-EAS443:3:74:1335:2005#0/1  
TGCATCTTCGCCATTGTTTGCTTGGCGCCAAACTCTCCTT  
+HWI-EAS443:3:74:1335:2005#0/1  
^b\_aUa^W¥T^]bYZbb]`\_`XXONWEYaVLWXJNYHYS`  
@HWI-EAS443:3:74:1343:548#0/1  
ATCCTCAAAGGAAAATTTCAAACAGCTGCCAGAGGGCAA  
+HWI-EAS443:3:74:1343:548#0/1  
aabYbaaaaZZ`b`abaa]a`aaa````^`\_`a\_aa\_X]\_  
@HWI-EAS443:3:74:1351:699#0/1  
TCATTTGGTCTCATCAGGCTGACCACTTGGCTGTTTTGGA  
+HWI-EAS443:3:74:1351:699#0/1  
aa\_aaaa\_a\_]Z^a\_a`^`aa`^a]a\_a````aPXY\_R\_G  
@HWI-EAS443:3:74:1391:344#0/1  
CTGTGGAAGAATGATTGGTGAATCGGGAGATTCTACAT  
+HWI-EAS443:3:74:1391:344#0/1  
`XV^`\_`^¥a¥\_\_[W]\_^MZ]U\_NM]U¥YWU^]S\_^OVR  
@HWI-EAS443:3:74:1401:828#0/1  
GGTGCTTTCTGCTTTTGATGAGAGAAGAAATAAATACCTA  
+HWI-EAS443:3:74:1401:828#0/1  
^aJb`bbb^bb¥abbaUaa¥aK```]aa[[``[aa`RK[a  
@HWI-EAS443:3:74:1467:1967#0/1  
GGGGAGCGCCAGGATGCCACAGAAATCAGAGCATCTGTGCG

+HWI-EAS443:3:74:1467:1967#0/1  
aa^`¥a\_a]KW\_\_`[\`TZ\_`a`\_Z\_YV]]^\_V``UY¥KKT  
@HWI-EAS443:3:74:1563:313#0/1  
GTGCTTTCTGCTTTTGATGAGAGAAGAAATAAATACCTAG  
+HWI-EAS443:3:74:1563:313#0/1  
T\_b\_bbbabb\_bbbbbbbbab`bbba`abaabbba[\_bb  
@HWI-EAS443:3:74:1590:531#0/1  
GTGGTCAGCCTGATGAGACCAAATGAAAACCCAGCTCACA  
+HWI-EAS443:3:74:1590:531#0/1  
]¥\_¥Za\_Z]\_\_aUaa\_a`\_a`aaa\_a\_\_]\_W]^T\_U\_Y^  
@HWI-EAS443:3:74:21:845#0/1  
GCTGTTTTGGAGTAATTTGAATGGGTCTATCCCGACCAGT  
+HWI-EAS443:3:74:21:845#0/1  
````¥abbaaa\_^\_ZabaaZaaa]a^aaa``aa^aaa`XY  
@HWI-EAS443:3:74:349:1783#0/1  
ACCTCATTTTCTGGCACGGTCAGCACTCATTCTGAGGGG  
+HWI-EAS443:3:74:349:1783#0/1  
ab\_UZ\_b\_``Y`^V¥aa`^[W^]P]aa^\_]XNZPRXNTPP  
@HWI-EAS443:3:74:46:888#0/1  
AGGGTTGCTTATGAAAGAATGTGCAATATCCTCAAAGGAA  
+HWI-EAS443:3:74:46:888#0/1  
\_``^]`baaaaa`]ba^]`a]a][\_\_a`aaaa`aYa`aa  
@HWI-EAS443:3:74:481:789#0/1  
ACCATCCTCTCTATTGTTATGCTATTCTGGATTAGTCGTC  
+HWI-EAS443:3:74:481:789#0/1  
aaaaaaaa`aa`\_\_\_a[`aa``aa`]`¥[[Z^^Z^]\_XX\_  
@HWI-EAS443:3:74:549:426#0/1  
ATTTGAATGGGTCTATCCCGACCAGTGAGTACCCTTCCCT  
+HWI-EAS443:3:74:549:426#0/1  
abbaaab\_b`b¥ba`aaaaaba``a¥`\_a\_a\_`¥`\_S¥W`  
@HWI-EAS443:3:74:575:1776#0/1  
ATTGCCCTCTGGGCGAGCTGTTTGAATTTTCTTTGAGGA  
+HWI-EAS443:3:74:575:1776#0/1  
^^S\_¥abab]ZV¥a`¥`^S^\_\_ZZ^]\_``Y`¥¥^U¥XZZ  
@HWI-EAS443:3:74:647:1143#0/1  
AGCCAAGTGGTCAGCCTGATGAGACCAAATGAAAACCCAG  
+HWI-EAS443:3:74:647:1143#0/1  
a`aaa`[a`X``\_[[\_\_\_^`\_^Y^a\_\_\_^`````\_^\_^  
@HWI-EAS443:3:74:690:708#0/1  
CTGCGGACCCAGACCTTCTGGGAAGTGTGAACCTTGCAT  
+HWI-EAS443:3:74:690:708#0/1  
aba`V]^ba\_U]^a\_aa`aaa`^`a¥]\_a`¥``\_\_\_\_¥¥^  
@HWI-EAS443:3:74:764:1640#0/1  
GAATGATTGGTGAATCGGGAGATTCTACATCCAAATGTG  
+HWI-EAS443:3:74:764:1640#0/1  
`\_S\_`^a\_bbW`\_a`^`a`Waa]MY\_[\_WUZabaa`¥WZ]  
@HWI-EAS443:3:74:924:131#0/1  
GAAAGCACCATCCTCTCTATTGTTATGCTATTCTGGATTA  
+HWI-EAS443:3:74:924:131#0/1  
aaaaaaaa`aa^^`^a\_a``a\_\_`\_^\_\_a\_a^]\_\_\_\_]\_^



@HWI-EAS443:3:74:976:632#0/1  
TGCCAAATCATGATATGAGTAAGACCTGCTGTTGCATCTT  
+HWI-EAS443:3:74:976:632#0/1  
\_`aaabbbay``\_aab`a[b`aaaYaa¥`]R`[]Y[BBB  
@HWI-EAS443:3:75:1037:515#0/1  
AGCTGTTTAAAATTTTCTTTGAGGATATTGCACATTCTT  
+HWI-EAS443:3:75:1037:515#0/1  
^¥a\_\_S¥]aa\_\_[bb`W\_¥baWU\_`^`VR[HY[\_PGZ^T¥Z  
@HWI-EAS443:3:75:1067:846#0/1  
CGACTTTCTTACTTGATCCATCATTGCCCTCTGGGCAG  
+HWI-EAS443:3:75:1067:846#0/1  
a`abbbbbbbaabbbb`bbabbbabab`aaab  
@HWI-EAS443:3:75:1068:1492#0/1  
ACAATAGAGAGGATGGTGCTTTCTGCTTTTGATGAGAGAA  
+HWI-EAS443:3:75:1068:1492#0/1  
aa]abaa`XaTaa¥L\_]LYa`]]`ZZaa\_UFY]]\_R[M]  
@HWI-EAS443:3:75:1123:246#0/1  
GGAGGGGTGAAAATGGACGAAGGACAAGGGTTGCTTATGA  
+HWI-EAS443:3:75:1123:246#0/1  
ab`aabaVb`a`a\_a`a`]a`\_]`aV`aX\_a]\_\_V  
@HWI-EAS443:3:75:1175:669#0/1  
GAAATAAATACCTAGAAGAGCATCCCAGTGCTGGGAAGGA  
+HWI-EAS443:3:75:1175:669#0/1  
abbbbbbbaaa\_aab`baaaaa`aa\_\_a]a^aa\_a`aa\_a  
@HWI-EAS443:3:75:1182:1285#0/1  
GGCAGCTGTTTAAAATTTTCTTTGAGGATATTGCACATT  
+HWI-EAS443:3:75:1182:1285#0/1  
`aa¥\_`¥b]b¥bab[\_ab`¥¥abaY\_ab`Y]^Raa`ZL]\_  
@HWI-EAS443:3:75:1190:1130#0/1  
GGAGGGGTGAAAATGGACGAAGGACAAGGGTTGCTTATGA  
+HWI-EAS443:3:75:1190:1130#0/1  
ababb]`]a\_aabaa^bbbabaa\_aaaaa[ba``aaab`  
@HWI-EAS443:3:75:1273:805#0/1  
AGAAGGTCTGGTGCCGAGGTGCTGCGGTGAAAGGAGTTG  
+HWI-EAS443:3:75:1273:805#0/1  
^¥\_\_\_\_]L^ba]\_\_\_\_]Za]aaTW¥a]\_]XS\_UR^]]¥F`\_  
@HWI-EAS443:3:75:1335:506#0/1  
ATCCCCACCAGTGAGTACCCTTCCCTTTCAAAGTCATGCC  
+HWI-EAS443:3:75:1335:506#0/1  
a`¥\_Wa\_aa``]baaR^^T]aa\_IS¥```a`aa[[a^\_Y\_  
@HWI-EAS443:3:75:1496:724#0/1  
GGCATGACTTTGAAAGGGAAGGGTACTCACTGGTCGGGAT  
+HWI-EAS443:3:75:1496:724#0/1  
ab]a]U\_`¥Ubaa`SaPNUN[]TSJ[]Y``VaaVY\_a[]a  
@HWI-EAS443:3:75:1510:1309#0/1  
GAAATAAATACCTAGAAGAGCATCCCAGTGCTGGGAAGGA  
+HWI-EAS443:3:75:1510:1309#0/1  
W[`YUYa`^\_SH[QV\_bUSVa¥\_b`Lab]¥HW\_Z\_aaba`  
@HWI-EAS443:3:75:156:565#0/1  
GACCTGCTGTTGCATCTTCGCCATTGTTTCTTGCTTGCGCCA

+HWI-EAS443:3:75:156:565#0/1  
aabaabb\_a][Y^`\_]Y^YV¥\_aWOV\_`¥]ZXOQ]Z`WG  
@HWI-EAS443:3:75:1606:1360#0/1  
GGCTTGCAGTAGCAAGTGGGCATGACTTTGAAAGGGAAGG  
+HWI-EAS443:3:75:1606:1360#0/1  
`aabbaba`b\_^aab[a]Y\_\_aaaXa`a`\_aaaa\_aa^  
@HWI-EAS443:3:75:1624:1074#0/1  
GACCCATTCAAATTACTCCAAAACAGCCAAGTGGTCAGCC  
+HWI-EAS443:3:75:1624:1074#0/1  
aba`]```aaa\_a`aaaa`a[aa]VZaaa`[]PXa^a0`  
@HWI-EAS443:3:75:1662:1536#0/1  
ATTGTTCCAACCTTTCCACCGCAGCACCTGCGGCACCAG  
+HWI-EAS443:3:75:1662:1536#0/1  
¥ZW\_bbU¥a\_Z¥Y\_a\_Sb^\_N`\_a^TP^XPTT`Xb]P`b  
@HWI-EAS443:3:75:1713:1403#0/1  
CCTCTCTATTGTTATGCTATTCTGGATTAGTCGTCATCA  
+HWI-EAS443:3:75:1713:1403#0/1  
Y^`bbbbbbabb\_\_bbbbbaabbaaa\_ab``^\_a`\_a`\_`  
@HWI-EAS443:3:75:215:1020#0/1  
CGACTTCTCTTACTTGATCCATCATTGCCCTCTGGGCAG  
+HWI-EAS443:3:75:215:1020#0/1  
ab`a`aaaaba][\_aa]`\_```\_a`V¥[^`\_\_a\_WUW[^¥  
@HWI-EAS443:3:75:215:1982#0/1  
GGTCTCTCTTTTTCTTAGGGTCTTCCCAGCACTGGGAT  
+HWI-EAS443:3:75:215:1982#0/1  
a`Tbb^bb`b\_aaaa[X\_TSZa`U¥aaaXQ``¥Z¥PR[V  
@HWI-EAS443:3:75:22:716#0/1  
TCTGGGATCCATTCCGGTGCGAACAAGCGCTCTTGTTC  
+HWI-EAS443:3:75:22:716#0/1  
^aSSWbYW¥PKZaaa\_]\_a\_X\_QZ]P]Xa\_Y\_``]`^\_¥\_\_  
@HWI-EAS443:3:75:234:1910#0/1  
CACTTCCCAGAAGGTCTGGTGCCGCAGGTGCTGCGGTGAA  
+HWI-EAS443:3:75:234:1910#0/1  
abaa`aaaZ]`\_\_\_Sa^\_PUY[¥SRSTUGGZWUUBBBBB  
@HWI-EAS443:3:75:261:76#0/1  
GGTCTTTCTGCTTTTGGAGTAATTTGAATGGTCTATCCCG  
+HWI-EAS443:3:75:261:76#0/1  
a¥``QZbb]baa`a\_bba\_]T\_Ya][`[¥[`^V`aZGL^a  
@HWI-EAS443:3:75:291:319#0/1  
CACTTGGCTGTTTTGGAGTAATTTGAATGGTCTATCCCG  
+HWI-EAS443:3:75:291:319#0/1  
Sabb```bb[V\_b¥0\_\_aZX^`a\_aa`[\_LZ\_\_\_YZa[  
@HWI-EAS443:3:75:302:1758#0/1  
GATGCAACAGCAGGTCTTACTCATATCATGATTTGGCATT  
+HWI-EAS443:3:75:302:1758#0/1  
a`abbbabaabba¥^aaaaaY\_a`a`aa¥]X\_``^Za^a¥  
@HWI-EAS443:3:75:316:1670#0/1  
CTCCATTGCTATTGTTCCAACCTTTCCACCGCAGCACCT  
+HWI-EAS443:3:75:316:1670#0/1  
a``X\_``a]Taa````^bb^babb]]abbab]aaXba^X`



+HWI-EAS443:3:76:1152:1272#0/1  
a]^a^aaaa\_\_a\_\_a`aa]aa`\_a`\_a\_a\_aaaa`aZ\_\_  
@HWI-EAS443:3:76:115:385#0/1  
CGTCCATCATAATCACTGAGTTTGAGTTCAGTGCACATTT  
+HWI-EAS443:3:76:115:385#0/1  
`a^babaaa`aaaaaaW\_^\_aa`\_]`\_`\_]\_\_`^\_^]\_  
@HWI-EAS443:3:76:1349:261#0/1  
AAATTTCTGGAGGGGTGAAAATGGACGAAGGACAAGGGTT  
+HWI-EAS443:3:76:1349:261#0/1  
aabbbbabaaabaaa\_ba`aabbaaXba\_aa]S^`ba\_]a  
@HWI-EAS443:3:76:1356:95#0/1  
GTGGAATCGGGAGATTCTACATCCAAATGTGCACTGAACT  
+HWI-EAS443:3:76:1356:95#0/1  
a\_bb`^aabab\_a^\_a\_\_\_¥```[^`\_YZaZ¥X^`^XV\_  
@HWI-EAS443:3:76:140:58#0/1  
ACTCATTCTGAGGGGATCAGTTGCACATAAATCCTGCCTG  
+HWI-EAS443:3:76:140:58#0/1  
a`aa[ba`aa`baaa\_\_\_\_\_¥`\_a`\_¥a¥`\_`\_¥\_YYW¥  
@HWI-EAS443:3:76:1416:423#0/1  
TCTTCCGACAGATGCTCTGATTTCTGTGGCATCCTGGCGC  
+HWI-EAS443:3:76:1416:423#0/1  
a^baY¥aa\_aa`^\_]Z^SV]``S`\_[\_HU¥¥SYWWZUUU  
@HWI-EAS443:3:76:1466:1773#0/1  
ATCCTCTCTATTGTTATGCTATTCTGGATTAGTCGTCCAT  
+HWI-EAS443:3:76:1466:1773#0/1  
ab``a^abaaaa\_aaaa\_aaa`\_`^\_`\_]a\_]^[[^]`\_  
@HWI-EAS443:3:76:1524:2040#0/1  
TGGTGCTTTCTGCTTTTGATGAGAGAAGAAATAAATACCT  
+HWI-EAS443:3:76:1524:2040#0/1  
a\_QXabab`b`b^[YUaaa][RT`¥[^\_HO\_aa`^^\_[S[  
@HWI-EAS443:3:76:1540:687#0/1  
AATGGACGAAGGACAAGGGTTGCTTATGAAAGAATGTGCA  
+HWI-EAS443:3:76:1540:687#0/1  
Y\_``¥^abbaa`^VYZ¥Z`VY\_0]^XY^^^^[VTV`GY¥a  
@HWI-EAS443:3:76:1580:901#0/1  
GCACCATCCTCTCTATTGTTATGCTATTCTGGATTAGTCG  
+HWI-EAS443:3:76:1580:901#0/1  
a¥][X]]YU\_Z[Z]X]¥[T`\_\_ZS¥]^¥[X^WW]Y]]WY]  
@HWI-EAS443:3:76:1585:1931#0/1  
GGCATGACTTTGAAAGGGAAGGGTACTCACTGGTCGGGAT  
+HWI-EAS443:3:76:1585:1931#0/1  
aa\_\_\_\_\_a]^`aZX\_a\_\_`^`\_XOTR\_¥RVR^RMW\_\_\_U]  
@HWI-EAS443:3:76:1662:285#0/1  
GCACATTCTTTTCATAAGCAACCCTTGTCCTTCGTCCATTT  
+HWI-EAS443:3:76:1662:285#0/1  
a[``]^Za¥`S¥\_\_X\_]X\_XZUaYQSWT\_ZVVWSVV]]]  
@HWI-EAS443:3:76:176:498#0/1  
GTCCTCCTGTTTTCTTAGGGTCTTCCCAGCACTGGGATG  
+HWI-EAS443:3:76:176:498#0/1  
aR\_`¥aX\_^G^]XS]\_U\_VXY]\_YVWY]Y^OYXY[GUVV^



+HWI-EAS443:3:76:698:919#0/1  
a`a\_a\_a`T^`^\_\_\_\_^`Y^`^^\_W\_\_XZ\_]\_[Z]PU  
@HWI-EAS443:3:76:808:528#0/1  
GTCGGAAGAATGATTGGTGAATCGGGAGATTCTACATCC  
+HWI-EAS443:3:76:808:528#0/1  
a]Y¥ZT[^^\_\_\_\_]]YZT]Z[¥XX¥]YX]Y]YX]^ZZZV]  
@HWI-EAS443:3:76:839:1459#0/1  
GCTTGCAGTAGCAAGTGGGCATGACTTTGAAAGGGAAGGG  
+HWI-EAS443:3:76:839:1459#0/1  
ab[[[aYSS\_\_VWUWLV[SW`¥VYPP¥[Z]YXVRYUVP^M  
@HWI-EAS443:3:76:946:1888#0/1  
TTCGACTTTCTTACTTGATCCATCATTGCCCTCTGGGC  
+HWI-EAS443:3:76:946:1888#0/1  
aaa`aaaaaaa`\_`a`a\_\_`a]\_\_]`\_^]Z\_^Z^ZXZ  
@HWI-EAS443:3:76:972:448#0/1  
CCCTTGTCTTCGTCATTTTCACCCCTCCAGAAATTCG  
+HWI-EAS443:3:76:972:448#0/1  
a`abbab]b`¥Z^R]Yab`aa`VI^\_a\_]aaVZaa\_T^  
@HWI-EAS443:3:77:1030:414#0/1  
GTGCTTTCTGCTTTTGATGAGAGAAGAAATAAATACCTAG  
+HWI-EAS443:3:77:1030:414#0/1  
a`a`bbabb\_bababbaa\_babaaaaabbaaaa\_^aba  
@HWI-EAS443:3:77:1141:1619#0/1  
CATTCCGGTGCGAACAAGCGCTCTTGTCTCTGATATGTG  
+HWI-EAS443:3:77:1141:1619#0/1  
a[\_\_\_`b\_\_I\_b\_ababbbb]`bbbb^\_b]bbbaa`bb`\_a  
@HWI-EAS443:3:77:1158:1420#0/1  
CGACCAGTGAGTACCCTTCCCTTCAAAGTCATGCCCACT  
+HWI-EAS443:3:77:1158:1420#0/1  
abbabbba`aa\_baa[aa\_\_baaba`ab``\_b^\_aZ\_aa\_  
@HWI-EAS443:3:77:1168:1632#0/1  
GCATGACTTTGAAAGGGAAGGGTACTCACTGGTCGGGATA  
+HWI-EAS443:3:77:1168:1632#0/1  
aaa`aaa^¥]]^¥a`¥aa`\_^¥^^aVW^YQT]WPZ^]  
@HWI-EAS443:3:77:1169:693#0/1  
GAAGGACAAGGGTTGCTTATGAAAGAATGTGCAATACCT  
+HWI-EAS443:3:77:1169:693#0/1  
\_\_\_\_[a^bba^`¥V^b¥baabb`ab]bbaY`Y`abba[]a  
@HWI-EAS443:3:77:1189:262#0/1  
CATGACTTTGAAAGGGAAGGGTACTCACTGGTCGGGATAG  
+HWI-EAS443:3:77:1189:262#0/1  
abbbbabbbbaababbbabab`a`aZb\_aba\_abaa`\_`a  
@HWI-EAS443:3:77:1255:679#0/1  
AGAAGGTCTGGTGCCGCAGGTGCTGCGGTGAAAGGAGTTG  
+HWI-EAS443:3:77:1255:679#0/1  
ORQ]^\_H`\_^\_Zba`\_`aXVIW`\_^[\_^Za[[aa]^EX`  
@HWI-EAS443:3:77:1340:1061#0/1  
AATCCAGAATAGCATAACAATAGAGAGGATGGTGCTTTCT  
+HWI-EAS443:3:77:1340:1061#0/1  
abaaa^b\_aa\_a`aaa`aab`a\_a\_aa`a\_YXL[\_`\_TZ

@HWI-EAS443:3:77:148:1797#0/1  
CTGAACTCAAACCTCAGTGATTATGATGGACGACTAATCCA  
+HWI-EAS443:3:77:148:1797#0/1  
a\_[]]a[^Z[H^`\_]W`Y^\_^\_\_YXWTV[^\_`¥X^VYY^  
@HWI-EAS443:3:77:1499:733#0/1  
AGCAAACAATGGCGAAGATGCAACAGCAGGTCTTACTCAT  
+HWI-EAS443:3:77:1499:733#0/1  
``\_]aaab]bZ\_\_aabb`aaabb\_baa`b\_XRaa\_[^Wab  
@HWI-EAS443:3:77:1652:95#0/1  
TGGGCTTGCAGTAGCAAGTGGGCATGACTTTGAAAGGGAA  
+HWI-EAS443:3:77:1652:95#0/1  
ab`aa`¥`]aaVaa[\_\_\_aZaa`UZaa\_U\_\_\_`\_¥¥Z`^¥¥¥  
@HWI-EAS443:3:77:1655:702#0/1  
CGAAGATGCAACAGCAGGTCTTACTCATATCATGATTTGG  
+HWI-EAS443:3:77:1655:702#0/1  
aaU`bb^bb^L\_`T\_ba`\_a`^]aGb`[aRVa`a\_a\_VT  
@HWI-EAS443:3:77:1670:1800#0/1  
ATTGCTATTGTTCCAACCTTTCCACCGCAGCACCTGCGG  
+HWI-EAS443:3:77:1670:1800#0/1  
aabb\_aaabb\_a^`aU`aXa``]b`b`^\_a\_Z^aU¥]  
@HWI-EAS443:3:77:197:1851#0/1  
CTCCTGTTTTCTTAGGGTCCTTCCCAGCACTGGGATGCTC  
+HWI-EAS443:3:77:197:1851#0/1  
a]aaaa\_`]b`]a`Z^Za`\_a\_aaZa`\_]QTU[\_^YZ  
@HWI-EAS443:3:77:24:144#0/1  
ATTTGGATGTAGAATCTCCCGATTCCACCAATCATTCTTC  
+HWI-EAS443:3:77:24:144#0/1  
\_]aba¥¥¥\_`Z\_¥W^`^`]¥NXXY[W]T[[RXRTRTWS  
@HWI-EAS443:3:77:257:1808#0/1  
TGGGTTTTCGACTTTCTTACTTGATCCATCATTGCCCTC  
+HWI-EAS443:3:77:257:1808#0/1  
abVa\_aaaabaababaaa^ZWa`]aaaaaaaa`\_\_a\_\_¥a  
@HWI-EAS443:3:77:397:1923#0/1  
GTGCTGACCGTGCCAGGAAAATGAGGTCTTCAATCTCAGC  
+HWI-EAS443:3:77:397:1923#0/1  
`P]ba`¥¥]PD^`ZXX\_a``^¥0^TZEXWOZ¥OPU[a\_XT  
@HWI-EAS443:3:77:405:1099#0/1  
AGGCAGGCAGGATTTATGTGCAACTGATCCCCTCAGAATG  
+HWI-EAS443:3:77:405:1099#0/1  
T\_aaW\_\_abbXR]`\_\_WYaR\_^RWYY`^baa`Q`Y`¥]`¥  
@HWI-EAS443:3:77:411:490#0/1  
GCATGACTTTGAAAGGAAGGGTACTCACTGGTCGGGATA  
+HWI-EAS443:3:77:411:490#0/1  
aaa\_]¥a`[]aX`a``aQ[a`\_X\_]Z\_`]]]Q^Z^^^]  
@HWI-EAS443:3:77:46:177#0/1  
ATCAGTTGCACATAAATCCTGCCTGCCTGCTTGTGTGTAT  
+HWI-EAS443:3:77:46:177#0/1  
K`WMYU`¥S¥b]Z¥]\_abb\_^TXaaaaVb`S^X^\_QaZVZ  
@HWI-EAS443:3:77:484:883#0/1  
GCATCCCAGTGCTGGGAAGGACCCTAAGAAAACAGGAGGA

+HWI-EAS443:3:77:484:883#0/1  
aa]^\`aa`b\_aa^aaaSZ]]^\`]aa[^\_X\_YP]`a\_]`\_\_  
@HWI-EAS443:3:77:598:700#0/1  
CTGTTTTCTTAGGGTCCTTCCCAGCACTGGGATGCTCTTC  
+HWI-EAS443:3:77:598:700#0/1  
XaaTa`aZaS\_[`T`b`b`b`b`a`bZb`^`Y`b\_babbbb  
@HWI-EAS443:3:77:631:749#0/1  
CTGCTGTTGCATCTTCGCCATTGTTTGCTTGGCGCCAAAC  
+HWI-EAS443:3:77:631:749#0/1  
abbbaa`a]aaaaaaaa`aaa`a`aaa\_a\_\_\_Za`\_^ZR  
@HWI-EAS443:3:77:632:1941#0/1  
ATCCTCTCTATTGTTATGCTATTCTGGATTAGTCGCCAT  
+HWI-EAS443:3:77:632:1941#0/1  
aaaaaaaa`aa\_`^`a`\_`aaaa`a^^`a`\_`a[^`]X`^a\_  
@HWI-EAS443:3:77:635:953#0/1  
ATCTGTGCGAAGAATGATTGGTGAATCGGGAGATTCTAC  
+HWI-EAS443:3:77:635:953#0/1  
``¥a^]^^`a^^`^a`S`\_a`W][a\_[]\_]UX`a\_¥¥Wa`  
@HWI-EAS443:3:77:686:796#0/1  
CACTTGGCTGTTTTGGAGTAATTTGAATGGGTCTATCCCG  
+HWI-EAS443:3:77:686:796#0/1  
ababb`aaaIab]QU\_^ZZ¥\_`\_]aSO¥]Q]^a[Q[\_S  
@HWI-EAS443:3:77:692:533#0/1  
GGCATGACTTTGAAAGGGAAGGGTACTCACTGGTCGGGAT  
+HWI-EAS443:3:77:692:533#0/1  
\_b`aa`baa]`¥aaaZP^aa]`\_a\_aa^`^]\_\_`a\_¥  
@HWI-EAS443:3:77:753:1963#0/1  
TGGGTCCTCCTGTTTTCTTAGGGTCCTTCCCAGCACTGGG  
+HWI-EAS443:3:77:753:1963#0/1  
XO\_\_S`^ab][]bbbbbbbaab`\_a`aa`[\_a]bbSa\_^a  
@HWI-EAS443:3:77:766:173#0/1  
GTCCTCCTGTTTTCTTAGGGTCCTTCCCAGCACTGGGATG  
+HWI-EAS443:3:77:766:173#0/1  
aZa`\_`aa`^a`^YTDV\_]X`]\_]VZ]ZYXX^^]XU]  
@HWI-EAS443:3:77:774:963#0/1  
TGGGTTTTCGACTTTCTTACTTGATCCATCATTGCCCTC  
+HWI-EAS443:3:77:774:963#0/1  
a`\_]Y`\_\_b^aaaaa`\_]a\_a`a\_Z`aa`\_\_\_\_]\_a^[^¥  
@HWI-EAS443:3:77:819:1386#0/1  
CAATGGCGAAGATGCAACAGCAGGTCTTACTCATATCATG  
+HWI-EAS443:3:77:819:1386#0/1  
abbaabbaabaaaaabbaa`baaaX`aaa`\_]\_aa`aa`aa  
@HWI-EAS443:3:77:853:54#0/1  
CGCTGAGATTGAAGACCTCATTTTCCTGGCACGGTCAGCA  
+HWI-EAS443:3:77:853:54#0/1  
[bbba]b[b[bb\_\_`b[aJab\_aaaa`\_a¥]]`ZZTZbVZ  
@HWI-EAS443:3:77:95:354#0/1  
TGTCGGAAGAATGATTGGTGAATCGGGAGATTCTACATC  
+HWI-EAS443:3:77:95:354#0/1  
abaa¥WL\_`^TZ\_`^`aaa]]`aa`\_]\_\_`^]\_^^^]`\_]\_



@HWI-EAS443:3:78:1023:347#0/1  
GTGCTTTCTGCTTTTGATGAGAGAAGAAATAAATACCTAG  
+HWI-EAS443:3:78:1023:347#0/1  
a]\_\_aa\_\_aa[a`aaaa`[[\_]`]\_\_^^^`a\_`a\_]Z\_\_\_\_  
@HWI-EAS443:3:78:1069:170#0/1  
GTGGTCAGCCTGATGAGACCAAATGAAAACCCAGCTCACA  
+HWI-EAS443:3:78:1069:170#0/1  
[¥aaW`[a`aab]ab\_a\_^[\_a\_U^`]aGaUW]ZX[XR^  
@HWI-EAS443:3:78:1069:743#0/1  
ATCTTCGCCATTGTTTGCTTGGCGCCAAACTCTCCTTATT  
+HWI-EAS443:3:78:1069:743#0/1  
a^a\_]^\_]`a^aa`aa`Y]a`T^^\_\_\_\_`]a\_\_\_\_S\_aZ`a  
@HWI-EAS443:3:78:1084:1508#0/1  
GCCCTCTGGGCAGCTGTTTGAAATTTTCCTTTGAGGATAT  
+HWI-EAS443:3:78:1084:1508#0/1  
aaaaaa\_a\_`\_`]\_a`a\_a^[\_`a\_aS`\_\_a\_a\_\_\_\_Z]V  
@HWI-EAS443:3:78:1114:1418#0/1  
TTTCAAACAGCTGCCAGAGGGCAATGATGGATCAAGTAA  
+HWI-EAS443:3:78:1114:1418#0/1  
`abaaaa`aa\_baa^^a]^`a\_\_\_\_aa`aa`]\_]`\_]^^^  
@HWI-EAS443:3:78:1126:922#0/1  
GATTAGTCGTCCATCATAATCACTGAGTTTGAGTTCAGTG  
+HWI-EAS443:3:78:1126:922#0/1  
aaa`a`]aS¥a\_]\_^`\_a^a\_^^\_¥X^¥`P^\_]V^\_aZ^  
@HWI-EAS443:3:78:1153:565#0/1  
GCACATTCTTTCATAAGCAACCCTTGCCTTCGTCCTTT  
+HWI-EAS443:3:78:1153:565#0/1  
a`]a]ab`a`aa\_aa`a[Xa`ZS]`a`YV`a`a^ZP^a\_\_  
@HWI-EAS443:3:78:116:1899#0/1  
CACTTCCCAGAAGGTCTGGTGCCGCAGGTGCTGCGGTGAA  
+HWI-EAS443:3:78:116:1899#0/1  
abbaaaaa`]aa`¥a\_`[V\_a^]``\_ZW]¥¥`^]G¥U]  
@HWI-EAS443:3:78:1173:382#0/1  
CACATTCTGGGATCCATTCCGGTGCGAACAAGCGCTCTTG  
+HWI-EAS443:3:78:1173:382#0/1  
X\_bbY[UVb`baa^¥[ab[ba`ab\_ab^^aabbabb[abY  
@HWI-EAS443:3:78:1235:1861#0/1  
CAACACTTCCCAGAAGGTCTGGTGCCGCAGGTGCTGCGGT  
+HWI-EAS443:3:78:1235:1861#0/1  
aab`\_\_`U`¥ZWX^X\_U\_aU^GaZSZG]]¥S^TU^¥BBB  
@HWI-EAS443:3:78:131:168#0/1  
GGGGAGCGCCAGGATGCCACAGAAATCAGAGCATCTGTGCG  
+HWI-EAS443:3:78:131:168#0/1  
abaaaba`¥¥¥`WU^]¥\_¥]^¥^^¥¥WWW¥¥¥Z¥SUXSWU  
@HWI-EAS443:3:78:1435:826#0/1  
GTCGGAAGAATGATTGGTGAATCGGGAGATTCTACATCC  
+HWI-EAS443:3:78:1435:826#0/1  
a[ab\_aaaaa]]`aaaa^a`\_`YYa[][\_¥`^V]]U\_\_GQ  
@HWI-EAS443:3:78:1455:696#0/1  
AGGATTTATGTGCAACTGATCCCCCTCAGAATGAGTGCTGA

+HWI-EAS443:3:78:1455:696#0/1  
a^aa\_aa`[^aWa\_\_`a`XXUR\_T[[^\_aa\_aUaS^\_¥  
@HWI-EAS443:3:78:1644:1249#0/1  
CAGGCTGACCACTTGGCTGTTTTGGAGTAATTTGAATGGG  
+HWI-EAS443:3:78:1644:1249#0/1  
aaa\_abaa^aa`^aa¥aaI^[aJ0J[MZ[a\_WDT\_V\_YV  
@HWI-EAS443:3:78:165:1556#0/1  
AATTTGAATGGGTCTATCCCGACCAGTGAGTACCCTTCCC  
+HWI-EAS443:3:78:165:1556#0/1  
aaaaa`V\_a`\_`a\_a`aaa\_¥`\_`VS`VZ```]Y`\_\_  
@HWI-EAS443:3:78:1696:1088#0/1  
GAGCATCCCAGTGCTGGGAAGGACCCTAAGAAAACAGGAG  
+HWI-EAS443:3:78:1696:1088#0/1  
a¥Z¥abab\_\_aaaaabbb`a]``[\_a]aaaa`a\_aa\_aa  
@HWI-EAS443:3:78:1784:560#0/1  
GCTTTCTGCTTTTGATGAGAGAAGAAATAAATACCTAGAA  
+HWI-EAS443:3:78:1784:560#0/1  
a`^R]QX]Q¥U[SSPW`^SN[¥^¥¥[N[]¥Y[]XDV^^^  
@HWI-EAS443:3:78:219:1703#0/1  
TCTTCCGACAGATGCTCTGATTTCTGTGGCATCCTGGCGC  
+HWI-EAS443:3:78:219:1703#0/1  
abbbbbabb`aaa¥bbbbaaaaaaaX^^^abaaaa`Y`Y]  
@HWI-EAS443:3:78:219:2002#0/1  
AGGTCTTACTCATATCATGATTTGGCATTCCAACCTGAAT  
+HWI-EAS443:3:78:219:2002#0/1  
¥\_^R¥\_Zb`X^\_`¥aaa¥YY]]][Qa\_`^`¥^\_`S[\_X  
@HWI-EAS443:3:78:232:1004#0/1  
GTCCTCCTGTTTTCTTAGGGTCCTCCCAGCACTGGGATG  
+HWI-EAS443:3:78:232:1004#0/1  
¥NWZab`]VPaaaa¥^^aaSa\_`ZX`^ZXaU]^]TQUZU  
@HWI-EAS443:3:78:281:531#0/1  
GGGTGAAAATGGACGAAGGACAAGGGTTGCTTATGAAAGA  
+HWI-EAS443:3:78:281:531#0/1  
ab\_M^`a]]`aaaa`WTZa^^a```\_X^a^\_`^`^^[^`]  
@HWI-EAS443:3:78:422:657#0/1  
GTGCCGACGGTCTGCGGTGAAAGGAGTTGGAACAATAGC  
+HWI-EAS443:3:78:422:657#0/1  
Za[b\_a¥\_ab¥\_^¥a^b\_Q[KW¥\_YD¥V^`^WZ[X][[¥¥  
@HWI-EAS443:3:78:435:560#0/1  
CCCTTGTCCTTCGTCATTTTCACCCCTCCAGAAATTCG  
+HWI-EAS443:3:78:435:560#0/1  
abbbbbaaabbbbaa`aaabaaaa\_aa`aaa`aaaa`\_a\_  
@HWI-EAS443:3:78:436:654#0/1  
GCATGACTTTGAAAGGGAAGGGTACTCACTGGTCGGGATA  
+HWI-EAS443:3:78:436:654#0/1  
aaaa\_Y[`]Y]^\_Y\_a\_]J\_`\_V^`^`[X\_\_V``\_]Y^  
@HWI-EAS443:3:78:588:1962#0/1  
TGCTTTCTGCTTTTGATGAGAGAAGAAATAAATACCTAGA  
+HWI-EAS443:3:78:588:1962#0/1  
a`abaaaaabbbaaaa\_a^Z]ab``abaabba[[\_`\_aaa\_

@HWI-EAS443:3:78:656:807#0/1  
ATCCAGAATAGCATAACAATAGAGAGGATGGTGCTTTCTG  
+HWI-EAS443:3:78:656:807#0/1  
a\_`^a`\_]aa\_a````]\_\_`\_`^\_\_\_^^]^[SXW]]]VZN  
@HWI-EAS443:3:78:698:465#0/1  
GCACATTCTTTCATAAGCAACCCTTGTCCCTTCGTCATTT  
+HWI-EAS443:3:78:698:465#0/1  
aabbbaaaaaa`aaa`baaaa\_`a^a^aYaa````````\_a`  
@HWI-EAS443:3:78:718:1750#0/1  
AATTACTCCAAAACAGCCAAGTGGTCAGCCTGATGAGACC  
+HWI-EAS443:3:78:718:1750#0/1  
a`Y¥aaaaabZb```^aa]SVR[NY\_aYS¥`[\_¥HRY\_]U  
@HWI-EAS443:3:78:750:1224#0/1  
CGAAGATGCAACAGCAGGTCTTACTCATATCATGATTTGG  
+HWI-EAS443:3:78:750:1224#0/1  
aa`\_Z]X]Z[\_aZ^a]\_V[ZXZ`a^Y`\_[]`a`\_\_\_\_\_^^\_`^  
@HWI-EAS443:3:78:774:1512#0/1  
GGGTCCTCCTGTTTTCTTAGGGTCCTTCCCAGCACTGGGA  
+HWI-EAS443:3:78:774:1512#0/1  
`abW`Z\_`^bWa``aabVQ\_SN\_^\_Z^\_[TV]¥¥\_`^VSW  
@HWI-EAS443:3:78:784:1478#0/1  
AGAATCTCCCGATTCCACCAATCATTCTTCCGACAGATGC  
+HWI-EAS443:3:78:784:1478#0/1  
]a\_`aaaaaYY\_aaaaUaVa\_]\_a`\_`\_`V[\_`\_`\_`a\_`^`\_`\_`  
@HWI-EAS443:3:78:818:830#0/1  
CTAATCCAGAATAGCATAACAATAGAGAGGATGGTGCTTT  
+HWI-EAS443:3:78:818:830#0/1  
abbb¥`¥aab¥`aab`bb``Y]b`b`b`baaaa¥FV]L]`  
@HWI-EAS443:3:78:836:156#0/1  
GGATAGACCCATTCAAATTACTCCAAAACAGCCAAGTGGT  
+HWI-EAS443:3:78:836:156#0/1  
aa`\_`\_a\_^[S[\_[V]\_\_\_^^X\_WWZ]]]X]^YU¥^^YWUU  
@HWI-EAS443:3:78:84:1105#0/1  
CTAATGCAAGGTTCAACACTTCCCAGAAGGTCTGGTGCCG  
+HWI-EAS443:3:78:84:1105#0/1  
aZIR[[`¥T[[JS`aaa`a¥^^`^Y[X[TPK^YYTZ[YY  
@HWI-EAS443:3:78:917:427#0/1  
CTAATGCAAGGTTCAACACTTCCCAGAAGGTCTGGTGCCG  
+HWI-EAS443:3:78:917:427#0/1  
Ubabbbabbbba]b\_babbabba```abba````abb`¥ba¥a  
@HWI-EAS443:3:78:971:1900#0/1  
TCCTGGGTTTCGACTTCTTACTTGATCCATCATTGCC  
+HWI-EAS443:3:78:971:1900#0/1  
\_]Ua\_T]X¥`b]ZSZ`YZ]RRXZJZ^[^XP[T^¥a[W¥[R  
@HWI-EAS443:3:79:1040:1415#0/1  
ACCTGCTGTTGCATCTTCGCCATTGTTTGCTTGCGCCAA  
+HWI-EAS443:3:79:1040:1415#0/1  
aaaaa`aaZ[QHU[T[ZUFY\_PVYQTa[FVVYNYUVJVS]  
@HWI-EAS443:3:79:1042:857#0/1  
GGACGACTAATCCAGAATAGCATAACAATAGAGAGGATGG

+HWI-EAS443:3:79:1042:857#0/1  
abaabbaa`aaa^`[a]aab]a]¥]aaa\_a^`^a\_a`  
@HWI-EAS443:3:79:1065:371#0/1  
TCCAAAACAGCCAAGTGGTCAGCCTGATGAGACCAAATGA  
+HWI-EAS443:3:79:1065:371#0/1  
`aaa\_aa`a\_baaaa]^\_aa\_a`aaaa\_a^aX`\_`\_^\_  
@HWI-EAS443:3:79:1135:475#0/1  
GTGCACATTTGGATGTAGAATCTCCCGATTCCACCAATCA  
+HWI-EAS443:3:79:1135:475#0/1  
a\_a`baabbb\_aaa\_`^a^`\_`^`W`¥\_\_U[`XY\_\_\_[  
@HWI-EAS443:3:79:1147:177#0/1  
GCTGTTTTGGAGTAATTTGAATGGGTCTATCCCGACCAGT  
+HWI-EAS443:3:79:1147:177#0/1  
aa]\_V¥^aRX]ZF[RYQ¥Za]WPWVXY[YVVRWR[BBBBB  
@HWI-EAS443:3:79:1156:1896#0/1  
TGAACTCAAACAGTGATTATGATGGACGACTAATCCAG  
+HWI-EAS443:3:79:1156:1896#0/1  
ababbbbbbbabaaba`baaababaaa```a^`aa`^¥aa  
@HWI-EAS443:3:79:1240:874#0/1  
GATGGACGACTAATCCAGAATAGCATAACAATAGAGAGGA  
+HWI-EAS443:3:79:1240:874#0/1  
aaaa^`aa^aa\_]a`a\_aa`a^`a\_]`^`¥\_Z\_\_\_\_\_^  
@HWI-EAS443:3:79:1263:1099#0/1  
GCCCTCTGGGCAGCTGTTTCAAATTTTCCTTTGAGGATAT  
+HWI-EAS443:3:79:1263:1099#0/1  
abaab`b\_abaaa\_abaaa\_aaaabbba[baaaaa`a`a[  
@HWI-EAS443:3:79:1272:1207#0/1  
ACTTCCCAGAAGGTCTGGTGCCGAGGTGCTGCGGTGAAA  
+HWI-EAS443:3:79:1272:1207#0/1  
abaa^bbabaa^a¥`bba\_a^\_aa``aVa\_^^`¥aSUNRX  
@HWI-EAS443:3:79:1362:60#0/1  
AGAGAAAGTCGAAACCCAGGAAACGCTGAGATTGAAGACC  
+HWI-EAS443:3:79:1362:60#0/1  
`babbbaaaa[`aaGaY`\_aUaaXaG^`Q`ZW`^ZWaUGR  
@HWI-EAS443:3:79:140:1293#0/1  
GGGGAGCGCCAGGATGCCACAGAAATCAGAGCATCTGTCCG  
+HWI-EAS443:3:79:140:1293#0/1  
aaaYQZa]]\_W]TZ[\_a`Y)`\_]T^^YQQ]ZYNQ^[^U[B  
@HWI-EAS443:3:79:1425:1434#0/1  
GTGAAAATGGACGAAGGACAAGGGTTGCTTATGAAAGAAT  
+HWI-EAS443:3:79:1425:1434#0/1  
\_`b^]a`bbbbabaabaaab`¥\_Sbbaaaba\_a`\_]b  
@HWI-EAS443:3:79:1524:1545#0/1  
CATGATTTGGCATTCCAACCTGAATGATGCCACATATCAG  
+HWI-EAS443:3:79:1524:1545#0/1  
V]`ba`\_`TFV^`S```]Uaa]U¥b]UaTQ^WH]baGab  
@HWI-EAS443:3:79:1592:1363#0/1  
GGACGACTAATCCAGAATAGCATAACAATAGAGAGGATGG  
+HWI-EAS443:3:79:1592:1363#0/1  
aa]U]W¥\_YYYZZaa^\_\_a\_¥¥\_`\_\_a\_aab`b¥bZ^\_ab

@HWI-EAS443:3:79:1713:688#0/1  
GGGAAGGACCCTAAGAAAACAGGAGGACCCATATATAGAA  
+HWI-EAS443:3:79:1713:688#0/1  
abaaaba\_^\_\_a`aa`\_`aZ`a]^a\_\_ZZVX\_`\_\_^]Y^Z  
@HWI-EAS443:3:79:1718:1278#0/1  
GTTTTGGAGTAATTTGAATGGGTCTATCCCGACCAGTGAG  
+HWI-EAS443:3:79:1718:1278#0/1  
W\_bbbbbbbba`abaaababbb\_bbbbaa^^aaQbaaaa`  
@HWI-EAS443:3:79:181:1139#0/1  
AGCCCATACACACAAGCAGGCAGGCAGGATTTATGTGCAA  
+HWI-EAS443:3:79:181:1139#0/1  
¥V\_\_¥WZa````]^[\_`\_¥Y\_Z`ZYWXQQNY¥¥PQOXV  
@HWI-EAS443:3:79:242:1094#0/1  
TGCTGTTGCATCTTCGCCATTGTTTGCTTGCGCCAAACT  
+HWI-EAS443:3:79:242:1094#0/1  
¥a\_XQY¥`S`^`\_\_VZ``YJYQZVYT^XOR^XP]¥0]WUV  
@HWI-EAS443:3:79:275:1058#0/1  
CGTCCATCATAATCACTGAGTTTGAGTTCAGTGACATTT  
+HWI-EAS443:3:79:275:1058#0/1  
a`Paba]aY`Yaaaa\_aa\_aZ\_\_`\_a`a`\_`[\_\_\_\_\_\_^^  
@HWI-EAS443:3:79:346:807#0/1  
AAACTCAGTGATTATGATGGACGACTAATCCAGAATAGCA  
+HWI-EAS443:3:79:346:807#0/1  
VWZa``¥bR\_Ybabb\_\_^a]^Y][]^`^aa¥a\_\_`]a`¥  
@HWI-EAS443:3:79:486:791#0/1  
CTCTAATGCAAGTTCAACACTTCCCAGAAGGTCTGGTGC  
+HWI-EAS443:3:79:486:791#0/1  
abZ^^aab`b`aaQbb\_X`aaaabaaaa`a^Y]a`\_Y`  
@HWI-EAS443:3:79:490:1699#0/1  
GTCCTCCTGTTTTCTTAGGGTCCTTCCCAGCACTGGGATG  
+HWI-EAS443:3:79:490:1699#0/1  
`\_bb`bbbaZbaaaa`][a\_Ybaa`babaa\_aaa\_\_`^`\_`  
@HWI-EAS443:3:79:591:21#0/1  
TAACAATAGAGAGGATGGTCTTTCTGCTTTTGATGAGAG  
+HWI-EAS443:3:79:591:21#0/1  
aa`\_a\_aaaaaaaaa\_\_a\_VZ[T\_¥^XPY^\_\_`YU[¥X\_]\_  
@HWI-EAS443:3:79:642:681#0/1  
TAATCACTGAGTTTGAGTTCAGTGACATTTGGATGTAGA  
+HWI-EAS443:3:79:642:681#0/1  
\_\_aaaa`ababaaa`]a`aaa^aaa\_aa^`\_`X`\_]R  
@HWI-EAS443:3:79:667:617#0/1  
GTGAGCTGGGTTTTCTTTGTTCTCATCAGGCTGACCACT  
+HWI-EAS443:3:79:667:617#0/1  
a]bb]abbbbSbb[`ba`aaaUbbbb`a[b`aa`a`]aaa  
@HWI-EAS443:3:79:673:1045#0/1  
TGGGTTTCGACTTCTTACTTGATCCATCATTGCCCTC  
+HWI-EAS443:3:79:673:1045#0/1  
[^bb^bbabbbb`bbbbabbb\_]aa^X\_\_b]a`````]`  
@HWI-EAS443:3:79:726:1737#0/1  
ATTTGGATGTAGAATCTCCCGATTCCACCAATCATTCTTC

+HWI-EAS443:3:79:726:1737#0/1  
aaaa^b\_S`a^aaaaZa\_X^a\_\_`^`\_`\_`\_U\_^`\_[X\_\_  
@HWI-EAS443:3:79:799:822#0/1  
GGGAGATTCTACATCCAAATGTGCACTGAACTCAAACCTCA  
+HWI-EAS443:3:79:799:822#0/1  
\_aSYWZYZO[`]ZY^XN[a^NZab]bX]]V]]XZ[W^R  
@HWI-EAS443:3:79:847:1882#0/1  
TCAGTTGCACATAAATCCTGCCTGCCTGCTTGTGTGTATG  
+HWI-EAS443:3:79:847:1882#0/1  
aabaaabab]babbbaba[aaaaaaaaaa\_aa`a\_`aa  
@HWI-EAS443:3:7:1006:1418#0/1  
AGGGTACTCACTGGTCGGGATAGACCCATTCAAATTACTC  
+HWI-EAS443:3:7:1006:1418#0/1  
a\_aa[ababbbaaa¥T`baa`aaaaV¥aaa]a``a\_a]\_[  
@HWI-EAS443:3:7:1097:1147#0/1  
GCTTTCTGCTTTTGATGAGAGAAGAAATAAATACCTAGAA  
+HWI-EAS443:3:7:1097:1147#0/1  
aaaaa\_`a`abbbb`aa`a`a`aa```aaa`a`\_Vaaa`\_  
@HWI-EAS443:3:7:1220:592#0/1  
CCTGGGTTTCGACTTTCTTACTTGATCCATCATTGCCC  
+HWI-EAS443:3:7:1220:592#0/1  
`bbbbbbabababba`bQbba`a`aabSa`aPH\_Zb[WQ  
@HWI-EAS443:3:7:1238:553#0/1  
CAGGTGCTGCGGTGAAAGGAGTTGGAACAATAGCAATGGA  
+HWI-EAS443:3:7:1238:553#0/1  
abab[b\_ba\_bbaaT]\_b`\_aUa^b^`a`\_]a]^Y\_\_`]]  
@HWI-EAS443:3:7:1330:1569#0/1  
CACTTGGCTGTTTTGGAGTAATTTGAATGGGTCTATCCCG  
+HWI-EAS443:3:7:1330:1569#0/1  
aabbbab`aba`bb`¥F\_\_a`^abW\_b^bbaH¥`a`\_^`\_  
@HWI-EAS443:3:7:1365:509#0/1  
TGGACGACTAATCCAGAATAGCATAACAATAGAGAGGATG  
+HWI-EAS443:3:7:1365:509#0/1  
aba\_]aaaaa\_ab``a\_aaabX\_a\_]\_`a\_a`\_`\_`\_`\_a  
@HWI-EAS443:3:7:1399:247#0/1  
GAGGTCTTCAATCTCAGCGTTTCCTGGGTTTCGACTTTCT  
+HWI-EAS443:3:7:1399:247#0/1  
a`aaXY\_a\_```\_`R`a]a^`\_]R^\_^X^]X\_YX]^]X\_  
@HWI-EAS443:3:7:1428:206#0/1  
AATTACTCCAAAACAGCCAAGTGGTCAGCCTGATGAGACC  
+HWI-EAS443:3:7:1428:206#0/1  
`aaa\_Z`a\_aaaaXa\_S^\_aaX[GUZ]\_ZU^\_^]]X\_ZVX  
@HWI-EAS443:3:7:1539:1135#0/1  
AAGGTCTGGTGCCGAGGTGCTGCGGTGAAAGGAGTTGGA  
+HWI-EAS443:3:7:1539:1135#0/1  
aaab[Y`bb\_b`ab`\_aa\_aW`Ub\_N^NV\_^aZ\_Q\_^B  
@HWI-EAS443:3:7:1603:1300#0/1  
GTGCTTTCTGCTTTTGATGAGAGAAGAAATAAATACCTAG  
+HWI-EAS443:3:7:1603:1300#0/1  
a``\_`\_`\_`^¥¥T]a``a\_\_aZ\_¥\_¥^^Y¥¥]\_^]\_[ZV]]\_

@HWI-EAS443:3:7:1611:544#0/1  
CAAGCGCTCTTGTCTCTGATATGTGGCATCATTGAGTT  
+HWI-EAS443:3:7:1611:544#0/1  
`bbbb`]a\_bbbbbQb`bb`aa`\_aab\_aa\_aaa^\_aa¥a  
@HWI-EAS443:3:7:166:16#0/1  
TATGGGCTTGCAGTAGCAAGTGGGCATGACTTTGAAAGGG  
+HWI-EAS443:3:7:166:16#0/1  
`aababaa¥[Z\_Q^aaX\_`PXKS]QR`¥`^`UWW^M¥L\_  
@HWI-EAS443:3:7:1675:1187#0/1  
TAATCCAGAATAGCATAACAATAGAGAGGATGGTGCTTTC  
+HWI-EAS443:3:7:1675:1187#0/1  
a¥Za^X]¥X\_b]a]a`^Z\_[OY[VWa``]T` `[VRGT[BB  
@HWI-EAS443:3:7:167:1191#0/1  
CTCCTGTTTTCTTAGGGTCCTTCCCAGCACTGGGATGCTC  
+HWI-EAS443:3:7:167:1191#0/1  
aa`aba`baa]aa`aa`aaaaaa`aaa¥aa^a``a]`Z  
@HWI-EAS443:3:7:1745:1507#0/1  
CCAGTGCTGGGAAGGACCCTAAGAAAACAGGAGGACCCAT  
+HWI-EAS443:3:7:1745:1507#0/1  
V[V\_[[XSS[V^abba^¥\_]TWaa^S`Q\_b\_Q`]¥VH¥ZL  
@HWI-EAS443:3:7:1754:728#0/1  
ATCCAGAATAGCATAACAATAGAGAGGATGGTGCTTCTG  
+HWI-EAS443:3:7:1754:728#0/1  
a^PP][^aaa`^aa`\_P]\_\_\_aY[a`\_a[`ZOUVV¥OYB  
@HWI-EAS443:3:7:303:803#0/1  
AGAGGGCAATGATGGATCAAGTAAGAGAAAAGTCGAAACCC  
+HWI-EAS443:3:7:303:803#0/1  
`¥\_]` ``a`Q`^¥a`]a¥b\_a`b`a\_[\_aXQa`T`SXY  
@HWI-EAS443:3:7:484:534#0/1  
GATGCAACAGCAGGTCTTACTCATATCATGATTTGGCATT  
+HWI-EAS443:3:7:484:534#0/1  
V\_\_bbbbba\_\_bbb]b`ba`bbbaba`baa^`\_Y]¥Y\_ba  
@HWI-EAS443:3:7:642:626#0/1  
GGGAGCGCCAGGATGCCACAGAAATCAGAGCATCTGTCCG  
+HWI-EAS443:3:7:642:626#0/1  
aaa^]WZ^[a`]^`^L[^N`\_aUVXFZ``¥QTZNVXQQ^B  
@HWI-EAS443:3:7:694:1246#0/1  
GGTCCTCCTGTTTTCTTAGGGTCCTTCCCAGCACTGGGAT  
+HWI-EAS443:3:7:694:1246#0/1  
abSa][aa¥\_\_aWYF0`^J^Y[¥^a]P]\_`L`\_¥[`a]N¥  
@HWI-EAS443:3:7:725:1390#0/1  
TCCAACCTCTTACCAGCACCTGCGGCACCAGACCTT  
+HWI-EAS443:3:7:725:1390#0/1  
aa`^a`a`a]`^aa`¥`a`]^`¥W^`U`¥¥S]QUQ[SYV¥  
@HWI-EAS443:3:7:813:504#0/1  
GCTGTTTGAATTTTCTTTGAGGATATTGCACATTCTTT  
+HWI-EAS443:3:7:813:504#0/1  
`aaa`a^b\_aaaaaa^`aaaa`a^\_\_a\_\_]`[]\_`[^`  
@HWI-EAS443:3:7:81:1184#0/1  
AGAGAGGATGGTGCTTTCTGCTTTTGATGAGAGAAGAAAT

+HWI-EAS443:3:7:81:1184#0/1  
ab`]S\_ba`a^T```aaa`WX]aaaY]]a^\_XY]aa\_``T  
@HWI-EAS443:3:7:93:510#0/1  
CAAGTGGTCAGCCTGATGAGACCAAATGAAAACCCAGCTC  
+HWI-EAS443:3:7:93:510#0/1  
aaaa]a`Y]Uaa`a\_``]a\_W\_a^\_\_`¥`\_\_]^\_]aX]U  
@HWI-EAS443:3:80:1005:409#0/1  
ACTTCCCAGAAGGTCTGGTGCCGAGGTGCTGCGGTGAAA  
+HWI-EAS443:3:80:1005:409#0/1  
aaaaa`aaaa\_a`¥`aa`¥``Y\_\_`\_^Z]Za\_Y¥`MWOY  
@HWI-EAS443:3:80:1010:912#0/1  
GAGGGGATCAGTTGCACATAAATCCTGCCTGCCTGCTTGT  
+HWI-EAS443:3:80:1010:912#0/1  
`Q`¥aa]PZ^R\_\_a][^`a\_a^`¥SXNTY¥U¥SPWSU[^U  
@HWI-EAS443:3:80:1020:129#0/1  
GGGTCCTCCTGTTTTCTTAGGGTCCTTCCCAGCACTGGGA  
+HWI-EAS443:3:80:1020:129#0/1  
\_b`Ua[a\_aaa``aaaa\_a`aa^ZT\_a]¥¥¥`^]\_aaZ]Y  
@HWI-EAS443:3:80:1041:698#0/1  
CATTGCCCTCTGGGCAGCTGTTTGAAATTTTCCTTTGAGG  
+HWI-EAS443:3:80:1041:698#0/1  
abaabaa\_bbaaa\_aababbabb`aaaaaab\_aaaaa`\_a  
@HWI-EAS443:3:80:1073:299#0/1  
CACTTCCCAGAAGGTCTGGTGCCGAGGTGCTGCGGTGAA  
+HWI-EAS443:3:80:1073:299#0/1  
abbbbbbaaa`abb¥aabb]aaab\_SabUa^]bMaYDZT^  
@HWI-EAS443:3:80:122:1667#0/1  
GTTGCATCTTCGCCATTGTTTGCTTGGCGCCAAACTCTCC  
+HWI-EAS443:3:80:122:1667#0/1  
a\_\_Ya^aaaabZaabaaaa\_ab^¥0¥```aY`¥]\_`\_YT  
@HWI-EAS443:3:80:1328:1262#0/1  
GTGAAAATGGACGAAGGACAAGGGTTGCTTATGAAAGAAT  
+HWI-EAS443:3:80:1328:1262#0/1  
`Zb[a\_aaa``\_a`^aa]]\_\_a\_\_Z^`Y^`^\_aV^`^\_`^`  
@HWI-EAS443:3:80:1329:412#0/1  
GTCCGAAGAATGATTGGTGAATCGGGAGATTCTACATCC  
+HWI-EAS443:3:80:1329:412#0/1  
^X`)]`a`\_`b]W]X]aa[QXRaa[YN\_\_aW\_a¥^\_TZXTS  
@HWI-EAS443:3:80:1388:238#0/1  
ATCTGTCCGAAGAATGATTGGTGAATCGGGAGATTCTAC  
+HWI-EAS443:3:80:1388:238#0/1  
abX]Ya]baaaba]aa\_a^¥[a\_a\_\_^[\_T^\_aXXZG]\_U  
@HWI-EAS443:3:80:1436:237#0/1  
GTGGAATCGGGAGATTCTACATCCAAATGTGCACTGAACT  
+HWI-EAS443:3:80:1436:237#0/1  
`aa\_\_aa`\_ZZ`b`aa`\_\_Y]`^`\_`\_]`^aU`][U`\_`^U^  
@HWI-EAS443:3:80:1571:253#0/1  
TTCTGGGATCCATTCCGGTGCGAACAAGCGCTCTTGTCT  
+HWI-EAS443:3:80:1571:253#0/1  
a`a\_UZRa\_¥\_[aaN¥aaW^UaV¥WZ¥¥Y\_N^W\_\_^Y]SY



@HWI-EAS443:3:80:161:1830#0/1  
GGCATGACTTTGAAAGGGAAGGGTACTCACTGGTCGGGAT  
+HWI-EAS443:3:80:161:1830#0/1  
S]aT\_[]¥\_[baaaX0Q^a]baaXabaaaa^^`Ua`¥`a¥  
@HWI-EAS443:3:80:183:816#0/1  
AGAGAGGATGGTGCTTTCTGCTTTTGATGAGAGAAGAAAT  
+HWI-EAS443:3:80:183:816#0/1  
aa`a^bbaabZHY¥^a`[Za```a\_JX]SS\_FV[]TWT[\_  
@HWI-EAS443:3:80:249:1345#0/1  
GTGCTGACCGTGCCAGGAAAATGAGGTCTTCAATCTCAGC  
+HWI-EAS443:3:80:249:1345#0/1  
]^`aaZW\_b\_\_aaaa`]aaa¥X¥`\_Vaaa`X¥\_\_aa\_`  
@HWI-EAS443:3:80:270:1204#0/1  
TGCTTTCTGCTTTTGATGAGAGAAGAAATAAATACCTAGA  
+HWI-EAS443:3:80:270:1204#0/1  
`bb`aaaabbaa\_`b^R`aa\_a`aa¥]a\_`Za`aa`]a\_`  
@HWI-EAS443:3:80:278:252#0/1  
GAATGATTGGTGAATCGGGAGATTCTACATCCAAATGTG  
+HWI-EAS443:3:80:278:252#0/1  
a^^`^`a\_T¥\_`Ya]aa[¥V]XR]\_^][^\_]Y`TZUTW\_  
@HWI-EAS443:3:80:295:274#0/1  
GCTGTTGCATCTTCGCCATTGTTTGCTTGGCGCCAAACTC  
+HWI-EAS443:3:80:295:274#0/1  
aaZ\_Q¥V^\_Y\_\_^`]¥`\_[]SU`\_UYU¥Z¥WWYTV¥SP[W  
@HWI-EAS443:3:80:313:1164#0/1  
CACATAAATCCTGCCTGCCTGCTTGTGTGTATGGGCTTGC  
+HWI-EAS443:3:80:313:1164#0/1  
abbb`\_\_`abaaaab`aa[aaaaaa^\_\_a^^`a``a^`\_`  
@HWI-EAS443:3:80:331:587#0/1  
CAAACAATGGCGAAGATGCAACAGCAGGTCTTACTCATAT  
+HWI-EAS443:3:80:331:587#0/1  
a`bbaaba\_aaaaaa\_\_a`a```a\_\_\_X\_\_`\_^`^`  
@HWI-EAS443:3:80:498:2035#0/1  
CAAGCAAACAATGGCGAAGATGCAACAGCAGGTCTTACTC  
+HWI-EAS443:3:80:498:2035#0/1  
¥``^baa\_bb]baaaabY^¥\_a``a\_`Q\_a\_ZRR[^`\_¥T  
@HWI-EAS443:3:80:555:381#0/1  
TAGCAAGTGGGCATGACTTTGAAAGGGAAGGGTACTCACT  
+HWI-EAS443:3:80:555:381#0/1  
Z[^V¥`¥W`a``abLbbaaa`^b]Z]ZZ[\_`ST]a`\_Z¥  
@HWI-EAS443:3:80:605:1109#0/1  
GTGCTTTCTGCTTTTGATGAGAGAAGAAATAAATACCTAG  
+HWI-EAS443:3:80:605:1109#0/1  
aV`\_\_\_\_\_`[^\_¥Q¥aZ\_X^Y`\_^^^a^`^`\_W]`Y  
@HWI-EAS443:3:80:60:1437#0/1  
GATTGGTGAATCGGGAGATTCTACATCCAAATGTGCACT  
+HWI-EAS443:3:80:60:1437#0/1  
aaaXZYXXJLUN]aW]\_^V^^`]S[XZa\_[T¥POLR¥\_]R  
@HWI-EAS443:3:80:659:986#0/1  
TATTGTTCCAACCTCTTTCACCGCAGCACCTGCGGCACCA

+HWI-EAS443:3:80:659:986#0/1  
`Uaa^a`aba`ba^^aaaaab`aaaaaa]aa]¥\_aa^¥a  
@HWI-EAS443:3:80:728:1037#0/1  
CTGAATGATGCCACATATCAGAGAACAAGAGCGCTTGTTC  
+HWI-EAS443:3:80:728:1037#0/1  
a\_a`a\_`X^\_aa`^`a\_aa¥`^[^Z^[[`\_\_\_¥YW`U^W  
@HWI-EAS443:3:80:743:120#0/1  
CTATTCTGGATTAGTCGTCCATCATAATCACTGAGTTTGA  
+HWI-EAS443:3:80:743:120#0/1  
^b`ba`b`¥`aaba^X`S]^bb[`a\_a\_Y¥` `a¥a[^^\_W  
@HWI-EAS443:3:80:869:1770#0/1  
ATGGGCTTGCAAGTGGGCATGACTTTGAAAGGGA  
+HWI-EAS443:3:80:869:1770#0/1  
a\_Z¥]aYaa`^aZ^]\_MV`V¥^\_`a^` `¥VS]\_]MLJ  
@HWI-EAS443:3:80:885:1255#0/1  
GTCGAAGAATGATTGGTGAATCGGGAGATTCTACATCC  
+HWI-EAS443:3:80:885:1255#0/1  
aabbaaaaabaaa`a`\_Waaaaaaaa`a`\_\_`a`\_X]  
@HWI-EAS443:3:80:97:1987#0/1  
TCGAAGAATGATTGGTGAATCGGGAGATTCTACATCCA  
+HWI-EAS443:3:80:97:1987#0/1  
`aaa\_\_W]QY[T^YZaXYSZYZ` `][ ]¥]W^VQ¥[[` [ `  
@HWI-EAS443:3:80:980:89#0/1  
GGCTTGCAAGTGGGCATGACTTTGAAAGGGAAGG  
+HWI-EAS443:3:80:980:89#0/1  
Zba\_KZ` `b]T\_bZZaa`abZXsba[babba[U^`UU]a`  
@HWI-EAS443:3:80:987:1442#0/1  
CACATAAATCCTGCCTGCCTGCTTGTGTGTATGGGCTTGC  
+HWI-EAS443:3:80:987:1442#0/1  
abbbbbbaabba^aabaaba`abb¥b\_a\_aaa\_`a¥¥\_X  
@HWI-EAS443:3:81:1022:1912#0/1  
GTGGGCATGACTTTGAAAGGGAAGGGTACTCACTGGTCGG  
+HWI-EAS443:3:81:1022:1912#0/1  
a^^WZ\_^\_b[aaba\_\_]^`]aaa`^YGaaa¥`aSa`U[¥^  
@HWI-EAS443:3:81:1142:1030#0/1  
CTCTCATCAAAGCAGAAAGCACCATCCTCTCTATTGTTA  
+HWI-EAS443:3:81:1142:1030#0/1  
^`b\_aa` `a¥`b`\_]¥¥aa`\_b`^T\_\_G\_^`a` ` `b`  
@HWI-EAS443:3:81:1229:863#0/1  
ATCATAATCACTGAGTTTGAGTTCAGTGCACATTTGGATG  
+HWI-EAS443:3:81:1229:863#0/1  
ab`abbabaa`ba`\_abbaaa\_a`a`^a\_a`aaaa`a` `  
@HWI-EAS443:3:81:1262:1660#0/1  
AAAGCAGAAAGCACCATCCTCTCTATTGTTATGCTATTCT  
+HWI-EAS443:3:81:1262:1660#0/1  
aaa` `b\_\_ZR]LSWYa`¥Z`\_\_a`^] `]N]Y\_`^a^`^S]  
@HWI-EAS443:3:81:1284:214#0/1  
GTGGGCATGACTTTGAAAGGGAAGGGTACTCACTGGTCGG  
+HWI-EAS443:3:81:1284:214#0/1  
aTaSQWa¥\_\_Y\_aaa\_a\_aZ\_`^`Z\_TZOX¥\_S`\_NNW[H

@HWI-EAS443:3:81:1320:1377#0/1  
GAATGAGTGCTGACCGTGCCAGGAAAATGAGGTCCTTCAAT  
+HWI-EAS443:3:81:1320:1377#0/1  
aa`a]`\_Ua\_\_a\_T\_\_[\`V¥V¥¥¥¥W[UUU\_[W¥\_WW¥W¥  
@HWI-EAS443:3:81:132:1370#0/1  
CCAGAATAGCATAACAATAGAGAGGATGGTGCTTTCTGCT  
+HWI-EAS443:3:81:132:1370#0/1  
ab^aTVY^PTb¥V`bYW\_]YV\_0[H^\_PZG]ZHYY]VMLW  
@HWI-EAS443:3:81:1383:1078#0/1  
TTGGTCTCATCAGGCTGACCACTTGGCTGTTTTGGAGTAA  
+HWI-EAS443:3:81:1383:1078#0/1  
`aba\_a`W`[]aVPU[\_a`Z\_``]V¥a\_NY`\_HTQTNMV  
@HWI-EAS443:3:81:1392:850#0/1  
GTAATTTGAATGGGTCTATCCCGACCAAGTACCCCTTC  
+HWI-EAS443:3:81:1392:850#0/1  
\_FXT[^RLX`U`T¥NZXX^RRNSNRVUHGSWQTVUMGS  
@HWI-EAS443:3:81:1448:1086#0/1  
CTGATATGTGGCATCATTGAGTTGGAATGCCAAATCATG  
+HWI-EAS443:3:81:1448:1086#0/1  
\_Y]Xaba`[TS`[TRaa`TYY`\_]\_[N\_L¥TTZ¥ZLR[\_a¥  
@HWI-EAS443:3:81:1491:1193#0/1  
AGTGAGTACCCTTCCCTTTCAAAGTCATGCCCACTTGCTA  
+HWI-EAS443:3:81:1491:1193#0/1  
`aQaaa[\_\_\_Ua]a\_Y\_aa^[a`\_aYW\_¥FZWY\_VaWaH^N  
@HWI-EAS443:3:81:1640:1854#0/1  
AGAGCATCTGTCGGAAGAATGATTGGTGGGAATCGGGAGAT  
+HWI-EAS443:3:81:1640:1854#0/1  
¥RY`\_aa^a`Qa`]^`aaa¥`\_\_^X\_S^]\_]\_]`^`^`[^  
@HWI-EAS443:3:81:1714:1962#0/1  
GGGGAGCGCCAGGATGCCACAGAAATCAGAGCATCTGTCCG  
+HWI-EAS443:3:81:1714:1962#0/1  
¥RV\_`ZY\_¥Q^^Z^N\_\_UW`]\_]\_]`Q^X¥RQ]\_XZ]JJL  
@HWI-EAS443:3:81:205:1360#0/1  
GTTTTCATTTGGTCTCATCAGGCTGACCACTTGGCTGTTT  
+HWI-EAS443:3:81:205:1360#0/1  
aWaa^\_\_aa`\_][a`a`aa``[a`\_a\_]`\_a^ZUa^TMY\_  
@HWI-EAS443:3:81:212:261#0/1  
GGAGAGTTTGGCGCAAGCAAACAATGGCGAAGATGCAAC  
+HWI-EAS443:3:81:212:261#0/1  
aabaa^\_a]aaaa\_baaabVa\_a\_\_``]`U¥`\_¥``^`\_  
@HWI-EAS443:3:81:226:1162#0/1  
GGGAAGGACCCTAAGAAAACAGGAGGACCCATATATAGAA  
+HWI-EAS443:3:81:226:1162#0/1  
¥]aZ`a\_Va¥a¥LZb\_aY^a]a\_a^aaa``^`[aX]``Z`  
@HWI-EAS443:3:81:310:133#0/1  
GTCCATCATAATCACTGAGTTTGAGTTCAGTGACATTTG  
+HWI-EAS443:3:81:310:133#0/1  
a\_aaaaa^`aaaa\_`^`M`^`\_`\_]`X¥^X\_Z]^^]]]^Z]  
@HWI-EAS443:3:81:325:744#0/1  
CTTCCCAGAAGGTCTGGTGCCGAGGTGCTGCGGTGAAAG

+HWI-EAS443:3:81:325:744#0/1  
aaaa`baa¥aba\_aa`a\_b^^aaaa^Xa^]a`adW]HRU^  
@HWI-EAS443:3:81:504:1398#0/1  
CAAGGTTCAACACTTCCCAGAAGGTCTGGTGCCGCAGGTG  
+HWI-EAS443:3:81:504:1398#0/1  
a`[aZVU^\_`¥W]`ZZ^[H¥Q]Q^T`¥RJKY[U]^N]PF¥  
@HWI-EAS443:3:81:506:1621#0/1  
GAATGATTGGTGAATCGGGAGATTCTACATCCAAATGTG  
+HWI-EAS443:3:81:506:1621#0/1  
aaaZa`\_`[[G]``abaM`W[`a`b`a`¥U\_aaaa]YV`  
@HWI-EAS443:3:81:532:1500#0/1  
TCAGTGCACATTTGGATGTAGAATCTCCCGATTCCACCAA  
+HWI-EAS443:3:81:532:1500#0/1  
aa^a]^\_`^aaaa[aaa`U\_\_\_`\_]\_``¥S[`]`aY[`]Z  
@HWI-EAS443:3:81:571:1983#0/1  
GGACGAAGGACAAGGGTTGCTTATGAAAGAATGTGCAATA  
+HWI-EAS443:3:81:571:1983#0/1  
a¥`ab`PWT LJ¥LW¥GT]]Wa¥V^^`[`]JTLX[XZa\_]Z]  
@HWI-EAS443:3:81:593:1648#0/1  
TGGGTCCTCCTGTTTTCTTAGGGTCCTTCCCAGCACTGGG  
+HWI-EAS443:3:81:593:1648#0/1  
`TY`¥aa\_aaa`^`\_`a\_a\_¥W^a`\_`aa^aY`[[Z[SZ  
@HWI-EAS443:3:81:663:1560#0/1  
GTTGCATCTTCGCCATTGTTTGCTTGGCGCCAAACTCTCC  
+HWI-EAS443:3:81:663:1560#0/1  
¥^]]aaaZa¥`a[S¥¥[¥¥a¥^¥¥aY`]ZV^Ubb]\_aba]  
@HWI-EAS443:3:81:67:390#0/1  
AGTGCACATTTGGATGTAGAATCTCCCGATTCCACCAATC  
+HWI-EAS443:3:81:67:390#0/1  
aVab`bb]bbbabbab]aab`aaaa\_aa\_``aaaa]^`^\_  
@HWI-EAS443:3:81:708:1658#0/1  
GAATAGCATAACAATAGAGAGGATGGTGCTTTCTGCTTTT  
+HWI-EAS443:3:81:708:1658#0/1  
Q¥Y^`^Yabb\_\_]]¥[XXXX\_]`a[OX``a\_VQSP\_XX]X  
@HWI-EAS443:3:81:819:737#0/1  
CACGGTCAGCACTCATTCTGAGGGGATCAGTTGCACATAA  
+HWI-EAS443:3:81:819:737#0/1  
aaaaaaaa\_]\_aa¥aaaa`a¥YXaS``^aS^a`a^]]^S  
@HWI-EAS443:3:81:832:239#0/1  
GACAGATGCTCTGATTTCTGTGGCATCCTGGCGCTCCCCA  
+HWI-EAS443:3:81:832:239#0/1  
aa\_a`^abaa\_a¥^a\_`]`^]\_\_UW^YW¥]¥W¥T¥WYUY  
@HWI-EAS443:3:81:892:1987#0/1  
GGGGAGCGCCAGGATGCCACAGAAATCAGAGCATCTGTCCG  
+HWI-EAS443:3:81:892:1987#0/1  
`a`aaa```Ta`]a\_a\_`a`b`aaa`aa\_`]`a^^`ZVS¥  
@HWI-EAS443:3:81:915:1114#0/1  
CTGGTGGGGAGCGCCAGGATGCCACAGAAATCAGAGCATC  
+HWI-EAS443:3:81:915:1114#0/1  
abba^abbbabbbaabba``aa`aabaaaaaaaaaaaaa\_

@HWI-EAS443:3:81:932:346#0/1  
ATAATCACTGAGTTTGGAGTTTCAGTGCACATTTGGATGTAG  
+HWI-EAS443:3:81:932:346#0/1  
ab]`a`aaa`ab\_aba\_b¥aa\_a\_`^`[a`aaa`\_\_Y\_\_  
@HWI-EAS443:3:82:1241:1934#0/1  
AACAAGCGCTCTTGTCTCTGATATGTGGCATCATTACAGG  
+HWI-EAS443:3:82:1241:1934#0/1  
ab\_baT[aabaa^\_W\_\_a\_a`baaa^^¥UWa\_aa]aS\_]U  
@HWI-EAS443:3:82:1312:805#0/1  
CTCCTGTTTTCTTAGGGTCCTTCCCAGCACTGGGATGCTC  
+HWI-EAS443:3:82:1312:805#0/1  
abaa\_`bbbbabbbabb`abaaaa[aa\_bbbb\_b`ab`b\_  
@HWI-EAS443:3:82:1416:885#0/1  
CGCCAAGCAAACAATGGCGAAGATGCAACAGCAGGTCTTA  
+HWI-EAS443:3:82:1416:885#0/1  
aYHY]`¥`¥\_ULaI`]V¥XU``I^aUa\_Q`\_QWHFR\_\_¥  
@HWI-EAS443:3:82:143:1657#0/1  
ATCCCAGCAGTGAGTACCCTTCCCTTTCAAAGTCATGCC  
+HWI-EAS443:3:82:143:1657#0/1  
a`\_aaabb`]^SW¥PSZ¥]\_a]aa\_P]XZ¥JWLL][]T`\_  
@HWI-EAS443:3:82:1510:576#0/1  
TGGACGACTAATCCAGAATAGCATAACAATAGAGAGGATG  
+HWI-EAS443:3:82:1510:576#0/1  
abbb\_ababbb`a`ababbaabbaa`ab^bab`b`^a`  
@HWI-EAS443:3:82:1510:790#0/1  
GCTTATGAAAGAATGTGCAATATCCTCAAAGGAAAATTC  
+HWI-EAS443:3:82:1510:790#0/1  
aaba\_`^`Y\_aa¥aabTa^Xaa\_a[U`R\_\_aab][[\_aX  
@HWI-EAS443:3:82:1617:43#0/1  
CATTCCGGTGCGAACAAGCGCTCTTGTCTCTGATATGTG  
+HWI-EAS443:3:82:1617:43#0/1  
a[LSaZ^`^`][aa`aab[b\_aaaX]Z\_\_a`^`Ua]¥`\_`  
@HWI-EAS443:3:82:1696:1065#0/1  
CTCCTGTTTTCTTAGGGTCCTTCCCAGCACTGGGATGCTC  
+HWI-EAS443:3:82:1696:1065#0/1  
RPa\_¥]M\_¥` `[aR[\_JZ^\_ZWX[\_^bbbVbXK[a\_b\_\_H  
@HWI-EAS443:3:82:1707:454#0/1  
TCCTGTTTTCTTAGGGTCCTTCCCAGCACTGGGATGCTCT  
+HWI-EAS443:3:82:1707:454#0/1  
Z`\_`\_VSSX¥¥]bbbbXWU\_aU\_R¥^¥aa¥`bbaa\_VS]J  
@HWI-EAS443:3:82:203:1235#0/1  
GTACTCACTGGTGGGATAGACCCATTCAAATTACTIONCAA  
+HWI-EAS443:3:82:203:1235#0/1  
a^aaaaaa]^^]aa`a\_`^¥R`\_`^`^]PZ`]^a\_\_a^`\_  
@HWI-EAS443:3:82:244:305#0/1  
TGGGTTTCGACTTTCTTACTTGATCCATCATTGCCCTC  
+HWI-EAS443:3:82:244:305#0/1  
abbb\_bbab\_aaaaaaaaaa\_`aa^`a^a`aa`\_a`\_\_\_\_  
@HWI-EAS443:3:82:290:381#0/1  
ATCATAATCACTGAGTTTGGAGTTTCAGTGCACATTTGGATG

+HWI-EAS443:3:82:290:381#0/1  
aabbbaaa`aaaa]Ra¥a`a`\_`aaa]a\_^aa]`a`]a\_`  
@HWI-EAS443:3:82:356:694#0/1  
GGTGCTTTCTGCTTTTGATGAGAGAAGAAATAAATACCTA  
+HWI-EAS443:3:82:356:694#0/1  
]HYaaaaaaaa\_aaaaaaaaa\_aVa\_aa`aZabaa`\_\_\_\_a  
@HWI-EAS443:3:82:37:612#0/1  
TGCTTTCTGCTTTTGATGAGAGAAGAAATAAATACCTAGA  
+HWI-EAS443:3:82:37:612#0/1  
aaabaabaaa]bbaaaaa`a\_a`aaa¥``a¥a`a`Z\_a\_a  
@HWI-EAS443:3:82:38:245#0/1  
GTGCTGGGAAGGACCCTAAGAAAACAGGAGGCCCATATA  
+HWI-EAS443:3:82:38:245#0/1  
a]ba`aaa\_a\_a`\_a`\_`\_\_\_\_`¥[U\_]\_^]]V\_YWZW^  
@HWI-EAS443:3:82:392:888#0/1  
GGCTTGCAGTAGCAAGTGGGCATGACTTTGAAAGGGAAGG  
+HWI-EAS443:3:82:392:888#0/1  
\_`bbb`b`baa]bb[`Wbababab]]bbb\_ababa`aab`  
@HWI-EAS443:3:82:439:1121#0/1  
CTGGTGCCGCAGGTGCTGCGGTGAAAGGAGTTGGAACAAT  
+HWI-EAS443:3:82:439:1121#0/1  
abaa[`aaa\_\_^`¥]a\_\_\_aWGSZ^]VZVRR^Z^S¥\_VUW  
@HWI-EAS443:3:82:465:1085#0/1  
ATCAGTTGCACATAAATCCTGCCTGCCTGCTTGTGTGTAT  
+HWI-EAS443:3:82:465:1085#0/1  
` `baa[aba`aa¥aa`aa\_aaa^aa\_\_aa\_\_a\_Y¥`¥\_\_  
@HWI-EAS443:3:82:465:937#0/1  
GAGGGGATCAGTTGCACATAAATCCTGCCTGCCTGCTTGT  
+HWI-EAS443:3:82:465:937#0/1  
]U\_]OU\_]\_aa[```a[Z¥aZZ\_U][XZ\_`a\_``\_Ya\_`U  
@HWI-EAS443:3:82:479:545#0/1  
ATCCATTCCGGTGCGAACAAGCGCTCTTGTCTCTGATAT  
+HWI-EAS443:3:82:479:545#0/1  
`b]bZ\_abbaWG\_aa\_`\_a]X`aa^a^[aU\_`\_``a[Z]\_`  
@HWI-EAS443:3:82:489:1388#0/1  
TGGTGCTTTCTGCTTTTGATGAGAGAAGAAATAAATACCT  
+HWI-EAS443:3:82:489:1388#0/1  
abaYbbb`bbbbbbbbbaaaab`[`bbb`[a]`a`ba^a  
@HWI-EAS443:3:82:541:50#0/1  
GCTGTTTGAATTTTCTTTGAGGATATTGCACATTCTTT  
+HWI-EAS443:3:82:541:50#0/1  
a`ab^aaa\_`¥aaaa\_\_aa`a`a`^`\_`¥^¥[^[V^ZR]\_\_  
@HWI-EAS443:3:82:636:1067#0/1  
GATGCCACATATCAGAGAACAAGAGCGCTTGTTCGCACCG  
+HWI-EAS443:3:82:636:1067#0/1  
aa\_Zaabaaaa`\_aYa]aaabbaa`ba\_a[a\_a`[`bZa^  
@HWI-EAS443:3:82:751:1661#0/1  
CAGTGCTGGGAAGGACCCTAAGAAAACAGGAGGCCCATATA  
+HWI-EAS443:3:82:751:1661#0/1  
U[b]bbbbbbbaa`Vbbabbbabbabbbbaab\_bbabbbbbb

@HWI-EAS443:3:82:76:57#0/1  
CTCAGAATGAGTGCTGACCGTGCCAGGAAAATGAGGTCTT  
+HWI-EAS443:3:82:76:57#0/1  
aa``baabbababb\_baaaaa\_]aS\_]PZ\_``TVZUT]X  
@HWI-EAS443:3:82:800:850#0/1  
GGACGAAGGACAAGGGTTGCTTATGAAAGAATGTGCAATA  
+HWI-EAS443:3:82:800:850#0/1  
`a\_¥¥\_¥^aba\_]\_`a¥abZ^aY`a[Z`aa¥aaY¥]^^^  
@HWI-EAS443:3:82:82:32#0/1  
TGACTTTGAAAGGGAAGGGTACTCACTGGTCGGGATAGAC  
+HWI-EAS443:3:82:82:32#0/1  
`b\_`aab```aaaa\_]`aaV`a`aa`a`X\_aa\_WSXY^Y  
@HWI-EAS443:3:82:898:757#0/1  
GTGCACATTTGGATGTAGAATCTCCCGATTCCACCAATCA  
+HWI-EAS443:3:82:898:757#0/1  
a\_b\_aaabbaa`aaa`aaaaa\_]`aa\_`aa\_]aa\_a\_  
@HWI-EAS443:3:83:1010:923#0/1  
CGCTGAGATTGAAGACCTCATTTTCCTGGCACGGTCAGCA  
+HWI-EAS443:3:83:1010:923#0/1  
aabbbababbb\_XZZabbaababb`bbba`abab]^b`a^  
@HWI-EAS443:3:83:103:1434#0/1  
CACTTGGCTGTTTTGGAGTAATTTGAATGGGTCTATCCCG  
+HWI-EAS443:3:83:103:1434#0/1  
aaaZ\_`[\_aaW[a]HSPQNYWY]XPXYQUU[HVLWFV[^V  
@HWI-EAS443:3:83:1062:2043#0/1  
ATGACTTTGAAAGGGAAGGGTACTCACTGGTCGGGATAGA  
+HWI-EAS443:3:83:1062:2043#0/1  
a\_a`a`aa\_aaaY\_`\_`^\_Za^\_a`]Z\_XZ¥^\_^]^`^\_  
@HWI-EAS443:3:83:1180:77#0/1  
TCCTCCTGTTTTCTTAGGGTCCTTCCCAGCACTGGGATGC  
+HWI-EAS443:3:83:1180:77#0/1  
a\_`\_\_`abVaba\_]a\_\_\_ZOV\_\_[]V^]aXOVY^]YY^]V  
@HWI-EAS443:3:83:1348:1135#0/1  
AGCACTGGGATGCTCTTCTAGGTATTTATTTCTTCTCTCA  
+HWI-EAS443:3:83:1348:1135#0/1  
aab\_ab`baaba`a\_ba`aba`Uabaaaaba\_baaaab\_a  
@HWI-EAS443:3:83:135:1569#0/1  
GAATGATTGGTGAATCGGGAGATTCTACATCCAAATGTG  
+HWI-EAS443:3:83:135:1569#0/1  
``\_\_aaa`b`W`aaa\_\_``\_\_¥aTYa\_^[\_][^H`^\_]\_  
@HWI-EAS443:3:83:1478:404#0/1  
TTTCTGCTTTTGATGAGAGAAGAAATAAATACCTAGAAGA  
+HWI-EAS443:3:83:1478:404#0/1  
\_¥^Xbaaaa`b``\_bYa`a\_\_a\_]`\_Z`\_`a]XSa^^]\_^  
@HWI-EAS443:3:83:1533:331#0/1  
GGGAGATTCTACATCCAAATGTGCACTGAACTCAAACCTCA  
+HWI-EAS443:3:83:1533:331#0/1  
\_Z]VaX^\_QWVMTY[ZZ¥[¥ZZ]W¥Y^^][X]SYUWYYQY  
@HWI-EAS443:3:83:1592:306#0/1  
ATGGGCTTGCACTAGCAAGTGGGCATGACTTTGAAAGGGA

+HWI-EAS443:3:83:1592:306#0/1  
aa`U\_\_¥ZXZ````aaX]¥YaaaU\_[X]S```a¥`¥a\_¥[  
@HWI-EAS443:3:83:1650:614#0/1  
GCTATTCTGGATTAGTCGTCCATCATAATCACTGAGTTTG  
+HWI-EAS443:3:83:1650:614#0/1  
\_\_b\_aaabbbba`b¥a]`YGY`aSaaaa¥¥Waaa^^a\_\_  
@HWI-EAS443:3:83:240:467#0/1  
CATTGCCCTCTGGGCAGCTGTTTCAAATTTTCCTTTGAGG  
+HWI-EAS443:3:83:240:467#0/1  
aba]\_W`baa`aa]``¥`\_`WY]a[[]\_\_aXY[¥`[aZZX  
@HWI-EAS443:3:83:302:1783#0/1  
GTGCTTTCTGCTTTTGATGAGAGAAGAAATAAATACCTAG  
+HWI-EAS443:3:83:302:1783#0/1  
`aaabbbbbbbbbbababaabbbb`babbbabaaaba  
@HWI-EAS443:3:83:427:1725#0/1  
GTGCTTTCTGCTTTTGATGAGAGAAGAAATAAATACCTAG  
+HWI-EAS443:3:83:427:1725#0/1  
`a`abbabba`bbb\_bbaabababbb`ab`ab\_aaba  
@HWI-EAS443:3:83:622:1197#0/1  
GATGGTGCTTTCTGCTTTTGATGAGAGAAGAAATAAATAC  
+HWI-EAS443:3:83:622:1197#0/1  
^^Ta]DY`ba^`babba\_aZY]b[aaa`a]Za`\_``[Y¥^  
@HWI-EAS443:3:83:626:1365#0/1  
ATCATAATCACTGAGTTTGAGTTCAGTGCACATTTGGATG  
+HWI-EAS443:3:83:626:1365#0/1  
aaaaabbabbaa`^\_\_aaaa^a`a`\_aaa`aaaa\_Za\_\_  
@HWI-EAS443:3:83:701:489#0/1  
GTGCTGGGAAGGACCCTAAGAAAACAGGAGGCCCATATA  
+HWI-EAS443:3:83:701:489#0/1  
a`a\_\_a`^^`aXW]\_^a¥^ZZ[^\_`aa\_]\_^¥T]Z\_\_^\_  
@HWI-EAS443:3:83:795:95#0/1  
CGCTGAGATTGAAGACCTCATTTTCCTGGCACGGTCAGCA  
+HWI-EAS443:3:83:795:95#0/1  
ab`bbbaabababaaab\_aaaaaaabbaabb\_¥abS\_  
@HWI-EAS443:3:83:805:858#0/1  
CAACACTTCCCAGAAGGTCTGGTGCCGAGGTGCTGCGGT  
+HWI-EAS443:3:83:805:858#0/1  
abbabbbbbbbba]bb¥abaa¥bbaba¥aa¥a\_`a`aaM  
@HWI-EAS443:3:83:88:1995#0/1  
CAGGAAACGCTGAGATTGAAGACCTCATTTTCCTGGCACG  
+HWI-EAS443:3:83:88:1995#0/1  
a``V`a`UZ¥^QFYUQPY[¥\_aVY`¥¥¥ZUR¥V¥N¥]WS  
@HWI-EAS443:3:83:942:1128#0/1  
ATCATTGAGTTGGAATGCCAAATCATGATATGAGTAAGA  
+HWI-EAS443:3:83:942:1128#0/1  
Ya[]^a\_`b\_aYa`[ab\_`¥a`aa¥Qa`aaaa`aXZ[T`  
@HWI-EAS443:3:83:962:1550#0/1  
CTCTTACTTGATCCATCATTGCCCTCTGGGCAGCTGTTTG  
+HWI-EAS443:3:83:962:1550#0/1  
aTFW^`\_bb\_^\_V¥\_¥VYZ^WM[aaJJOVXR`^T`[`aa



@HWI-EAS443:3:83:99:1122#0/1  
CCTGGGTTTCGACTTTCTTACTTGATCCATCATTGCC  
+HWI-EAS443:3:83:99:1122#0/1  
aaaaaaXa`baa`aaa`aaaaaaaa[``\_aaa``^\_\_]  
@HWI-EAS443:3:84:1006:2008#0/1  
TAGCATAACAATAGAGAGGATGGTGCTTTCTGCTTTTGG  
+HWI-EAS443:3:84:1006:2008#0/1  
ab]\_bbbbUX`aa]babaaX`XI¥``S\_¥Rb]aaabaa¥  
@HWI-EAS443:3:84:1016:829#0/1  
CTGAGTTTGAGTTCAGTGCACATTTGGATGTAGAATCTCC  
+HWI-EAS443:3:84:1016:829#0/1  
`I`\_b^[¥\_¥N\_\_V^Yaaa[aaa`aaa`aZ`aaaa[Z]  
@HWI-EAS443:3:84:1021:1033#0/1  
GGCATGACTTTGAAAGGGAAGGGTACTCACTGGTCGGGAT  
+HWI-EAS443:3:84:1021:1033#0/1  
aba]`bab`^\_b\_a\_aaa`abaWaaa`aaa]^\_`aa\_]\_  
@HWI-EAS443:3:84:1058:297#0/1  
GTGGGCATGACTTTGAAAGGGAAGGGTACTCACTGGTCGG  
+HWI-EAS443:3:84:1058:297#0/1  
a\_`[`a^aa`[aa`^¥Z[^\_¥¥^W¥V¥Y¥T¥WVY^TW^Z  
@HWI-EAS443:3:84:1199:1131#0/1  
GAGGATGGTCTTCTGCTTTTGGATGAGAGAAGAAATAAA  
+HWI-EAS443:3:84:1199:1131#0/1  
^[bb`^Z¥VaI\_`a¥`¥\_XY\_a`ab¥Ya\_\_Q^]T`\_]`]  
@HWI-EAS443:3:84:1237:1464#0/1  
CAGGAAACGCTGAGATTGAAGACCTCATTTTCTGGCACG  
+HWI-EAS443:3:84:1237:1464#0/1  
a\_`[W^aSa¥\_`[[Waaa\_[]``K\_aabaa`R^aQaa¥a  
@HWI-EAS443:3:84:1302:1048#0/1  
AATTTCTGGAGGGTAAAATGGACGAAGGACAAGGGTTG  
+HWI-EAS443:3:84:1302:1048#0/1  
a`aaa`ab`W`a`aNaa`aaaaaa`a`a`\_\_`V`\_`\_`\_`\_`\_`  
@HWI-EAS443:3:84:1513:627#0/1  
ACAATAGAGAGGATGGTGCTTTCTGCTTTTGGATGAGAGAA  
+HWI-EAS443:3:84:1513:627#0/1  
aaaababab`abaaa\_Z`^aaa^`a[aaaa`\_`a\_a`^`\_  
@HWI-EAS443:3:84:1692:1973#0/1  
CATTGCCCTCTGGCAGCTGTTTAAAATTTTCTTTGAGG  
+HWI-EAS443:3:84:1692:1973#0/1  
abb``a]ab^Z`ba\_a\_\_abab`]`b¥bbbbZ¥aaaa]R`  
@HWI-EAS443:3:84:1774:1810#0/1  
GGTGCTTCTGCTTTTGGATGAGAGAAGAAATAAATACCTA  
+HWI-EAS443:3:84:1774:1810#0/1  
a`¥Ya`\_]``a\_a`\_\_`^a^`^a^`]Y\_^`^]VY`\_`\_  
@HWI-EAS443:3:84:1778:638#0/1  
GAAGAGCATCCCAGTGCTGGGAAGGACCCTAAGAAAACAG  
+HWI-EAS443:3:84:1778:638#0/1  
a`\_^a`V]XXPY^VU]YMVSOY[VXUUSK]VU^[]MZSVQ  
@HWI-EAS443:3:84:224:1519#0/1  
CTGCGGTGAAAGGAGTTGGAACAATAGCAATGGAGTTAAT

+HWI-EAS443:3:84:224:1519#0/1  
aaaaa]Y\_\_`\_`\_aZ`¥]\_\_\_^^^`\_QY]^X]ZZ\_¥Y  
@HWI-EAS443:3:84:267:963#0/1  
GGGAGATTCTACATCCAAATGTGCACTGAACTCAAACCTCA  
+HWI-EAS443:3:84:267:963#0/1  
ab\_`^¥Z¥]\_Y\_Z\_aa¥`Z\_WQ]]X`¥[[L[¥`]VNZ]`\_`  
@HWI-EAS443:3:84:362:1825#0/1  
CTGGGATCCATTCCGGTGCGAACAAGCGCTCTTGTTCTCT  
+HWI-EAS443:3:84:362:1825#0/1  
a`^`¥a`aaaa`a\_[N\_a\_aaaa]^`\_\_\_`\_¥W^`¥`]  
@HWI-EAS443:3:84:447:677#0/1  
CTCCTGTTTTCTTAGGGTCCTTCCCAGCACTGGGATGCTC  
+HWI-EAS443:3:84:447:677#0/1  
a`^`a`^`^`^`^`^`a]a\_¥Y`\_\_`\_Z\_a`a`^`^`[`a¥\_[  
@HWI-EAS443:3:84:483:1133#0/1  
GGGGAGCGCCAGGATGCCACAGAAATCAGAGCATCTGTCCG  
+HWI-EAS443:3:84:483:1133#0/1  
abbbaaaa\_`^aaaa`¥aaaabaaaa¥aa]]aaaa`VY[  
@HWI-EAS443:3:84:495:882#0/1  
ATTCTGGATTAGTCGTCCATCATAATCACTGAGTTTGAGT  
+HWI-EAS443:3:84:495:882#0/1  
aaabaaaaaaaa`aa`a^aa`aa^a`^X\_aaYa^a^``a\_  
@HWI-EAS443:3:84:534:1038#0/1  
GTGCTTTCTGCTTTTGATGAGAGAAGAAATAAATACCTAG  
+HWI-EAS443:3:84:534:1038#0/1  
a]`aaaaaaaa`]]`[YaY\_W\_YOY^\_\_\_[¥YY\_Y[[`X  
@HWI-EAS443:3:84:552:110#0/1  
GGATGGTGCTTTCTGCTTTTGATGAGAGAAGAAATAAATA  
+HWI-EAS443:3:84:552:110#0/1  
a\_\_^aa[a^`a\_`\_Z\_\_a`\_Z`\_X`^`Z]`Z]^`]]^^]  
@HWI-EAS443:3:84:599:492#0/1  
CACTTGGCTGTTTTGGAGTAATTTGAATGGGTCTATCCCG  
+HWI-EAS443:3:84:599:492#0/1  
aa`abbbaaT^a`K`^X`\_aa^W[`TV¥aU\_\_]`[`\_X  
@HWI-EAS443:3:84:657:896#0/1  
CTTCCGACAGATGCTCTGATTTCTGTGGCATCCTGGCGCT  
+HWI-EAS443:3:84:657:896#0/1  
abb`¥\_`a``Sa]^a`V[``^`\_Z\_¥[\_\_¥^¥\_X¥Y[VXP  
@HWI-EAS443:3:84:737:929#0/1  
AGCTGTTTGAAATTTTCCTTTGAGGATATTGCACATTCTT  
+HWI-EAS443:3:84:737:929#0/1  
]Z¥H\_`^`[U\_XZXZWR¥XPNY\_[\_¥][`a`QPDLZ\_YZ[  
@HWI-EAS443:3:84:757:1193#0/1  
AGCAGGTCTTACTCATATCATGATTTGGCATTCCAACCTG  
+HWI-EAS443:3:84:757:1193#0/1  
`a^`b\_`\_a\_a\_a]]aa\_aabaWY¥\_`^aa¥[[¥\_R\_]\_\_  
@HWI-EAS443:3:84:760:1441#0/1  
ATCCAGAATAGCATAACAATAGAGAGGATGGTGCTTTCTG  
+HWI-EAS443:3:84:760:1441#0/1  
`\_baa]bM`b¥`aW\_`^^¥aaaa\_¥aG[`Y\_UWUW[a¥^¥

@HWI-EAS443:3:84:765:1099#0/1  
GAATAGCATAACAATAGAGAGGATGGTGCTTTCTGCTTTT  
+HWI-EAS443:3:84:765:1099#0/1  
YaVbabb\_\_T`a^bbq]aR`aaba`[\_`^^a¥^¥¥^aaa  
@HWI-EAS443:3:84:773:1290#0/1  
CAGGAAACGCTGAGATTGAAGACCTCATTTTCCTGGCACG  
+HWI-EAS443:3:84:773:1290#0/1  
abbaababbbbabb`aaa`baaaabbbbaabaa`aa]aa\_a  
@HWI-EAS443:3:84:778:431#0/1  
GGGAGCGCCAGGATGCCACAGAAATCAGAGCATCTGTCCG  
+HWI-EAS443:3:84:778:431#0/1  
aWYQ]YR]\_WT^^[]XYZT\_ZTXV¥]Y]Y\_^]XLQYJRNN  
@HWI-EAS443:3:84:812:1375#0/1  
TGAGGGGATCAGTTGCACATAAATCCTGCCTGCCTGCTTG  
+HWI-EAS443:3:84:812:1375#0/1  
`a¥a`a`a`a`¥a\_a`[aaY[``aYaTL\_]a\_VaY[``\_`  
@HWI-EAS443:3:84:818:238#0/1  
CAGCACTCATTCTGAGGGGATCAGTTGCACATAAATCCTG  
+HWI-EAS443:3:84:818:238#0/1  
^baUY¥a`]aaaNb\_aaba[a\_b`ab[abab\_``Y\_^`  
@HWI-EAS443:3:84:842:133#0/1  
AGAAGGTCTGGTGCCGCAGGTGCTGCGGTGAAAGGAGTTG  
+HWI-EAS443:3:84:842:133#0/1  
abaaab\_aaaa\_b`Z\_a\_a\_WaX\_``\_S\_U^[\_`K¥HX¥  
@HWI-EAS443:3:84:895:621#0/1  
ATCATAATCACTGAGTTTGAGTTGAGTGCACATTTGGATG  
+HWI-EAS443:3:84:895:621#0/1  
aaaaaaaa`ab\_a\_aaa\_a\_aa]`a¥`^aaa`[\_`aY\_  
@HWI-EAS443:3:84:987:794#0/1  
CAGAGGGCAATGATGGATCAAGTAAGAGAAAGTCGAAACC  
+HWI-EAS443:3:84:987:794#0/1  
Vb]Kb\_Z`aNaaaaabb\_\_\_bbbbabaabbaaUab`]a^b  
@HWI-EAS443:3:85:1024:771#0/1  
GGAGAGTTTGGCGCCAAGCAAACAATGGCGAAGATGCAAC  
+HWI-EAS443:3:85:1024:771#0/1  
aV[\_\_\_[KVY¥TV`TU[P]Z^V]TVSU\_^Z]PW]JNUTTXV  
@HWI-EAS443:3:85:111:1000#0/1  
GAAATAAGGAGAGTTTGGCGCCAAGCAAACAATGGCGAAG  
+HWI-EAS443:3:85:111:1000#0/1  
aaa[aaaaa\_\_^a\_\_`aa`\_`^]`\_\_\_^a\_\_X^]\_^`]^Y  
@HWI-EAS443:3:85:1138:106#0/1  
CACTTGGCTGTTTTGGAGTAATTTGAATGGGTCTATCCCG  
+HWI-EAS443:3:85:1138:106#0/1  
[b`b[bbabaR]bb[ZS¥`¥ab][X^]H^aXR^R¥ZTR[Q  
@HWI-EAS443:3:85:1145:183#0/1  
CATCCTCTATTGTTATGCTATTCTGGATTAGTCGTCCA  
+HWI-EAS443:3:85:1145:183#0/1  
\_a¥\_[a]\_]Ya\_\_`aa¥^Za^\_Z¥V\_¥¥[\_`\_`V\_^T¥Y^  
@HWI-EAS443:3:85:1234:313#0/1  
CAGCTGTTTGAATTTTCCTTTGAGGATATTGCACATTCT

+HWI-EAS443:3:85:1234:313#0/1  
¥^ba¥bb`X`abaababXWa\_ba[`^[abab`T¥aYbb\_b  
@HWI-EAS443:3:85:1319:994#0/1  
GTGCTTTCTGCTTTTGATGAGAGAAGAAATAAATACCTAG  
+HWI-EAS443:3:85:1319:994#0/1  
a\_\_\_aa\_[a\_Y\_`a```\_\_¥^`a^\_\_\_\_a`a¥^`\_ZW\_\_`  
@HWI-EAS443:3:85:1346:1434#0/1  
ATCAGAGAACAAGAGCGCTTGTTCGCACCGGAATGGATCC  
+HWI-EAS443:3:85:1346:1434#0/1  
Ua\_abZT^¥S\_a`R`\_[abbb]\_RX]ZL0¥]KU]a]RJ[S  
@HWI-EAS443:3:85:1403:1519#0/1  
ATGCTATTCTGGATTAGTCGTCCATCATAATCACTGAGTT  
+HWI-EAS443:3:85:1403:1519#0/1  
abbabbbaa`aa\_\_aba\_a\_`a`aa0\_\_a]a^aaaa^`\_\_  
@HWI-EAS443:3:85:1406:1440#0/1  
ATTTCAAACAGCTGCCAGAGGGCAATGATGGATCAAGTA  
+HWI-EAS443:3:85:1406:1440#0/1  
aab\_\_bab^`a^\_a]X\_\_\_^`^a]^0¥\_a`a\_`¥H\_¥\_[^  
@HWI-EAS443:3:85:1481:1201#0/1  
CATTCCGGTGCGAACAAGCGCTCTTGTCTCTGATATGTG  
+HWI-EAS443:3:85:1481:1201#0/1  
`bb\_baa\_[babaWSbbaaa\_a^baa\_\_U`\_ab`aa\_ZTV  
@HWI-EAS443:3:85:1525:964#0/1  
AAAGCAGAAAGCACCATCCTCTCTATTGTTATGCTATTCT  
+HWI-EAS443:3:85:1525:964#0/1  
aa`aa`aaa\_aS`[]a`][\_\_`^a^``\_\_\_\_a\_]\_\_\_\_^V^  
@HWI-EAS443:3:85:1546:1151#0/1  
CGTCCATCATAATCACTGAGTTTGAGTTCAGTGCACATTT  
+HWI-EAS443:3:85:1546:1151#0/1  
aaaba`a¥X\_baa\_a¥aaP``a]a¥W¥[\_\_TS`¥a]`\_YW  
@HWI-EAS443:3:85:1593:1065#0/1  
GACCCATTCAAATTACTCCAAAACAGCCAAGTGGTCAGCC  
+HWI-EAS443:3:85:1593:1065#0/1  
abaa`aZ\_`\_\_\_a\_aaa^\_a¥X`\_aa^\_YaW]\_\_[a`YR  
@HWI-EAS443:3:85:1681:774#0/1  
TGGGTTTTCGACTTTCTTACTTGATCCATCATTGCCCTC  
+HWI-EAS443:3:85:1681:774#0/1  
``[aba]¥ZX¥bb`aaaa\_baaa`a\_aa]aa`b[PS`X  
@HWI-EAS443:3:85:1744:962#0/1  
TTTCAAACAGCTGCCAGAGGGCAATGATGGATCAAGTAA  
+HWI-EAS443:3:85:1744:962#0/1  
`¥[¥a\_`T\_R]]aa`\_SYS]^`SSaZS^YY\_U]]`Q`T  
@HWI-EAS443:3:85:249:834#0/1  
CTGTTTTCTTAGGGTCCTTCCCAGCACTGGGATGCTCTTC  
+HWI-EAS443:3:85:249:834#0/1  
aaaaaabbbbaZaaa\_baaaaaa^baaaaa]`\_`a`a```^  
@HWI-EAS443:3:85:251:954#0/1  
AATTTGAATGGGTCTATCCCGACCAGTGAGTACCCTTCCC  
+HWI-EAS443:3:85:251:954#0/1  
a`baaa`b`aaa]aaaa`aaabaZ¥`^a`\_X``\_\_\_`]`U

@HWI-EAS443:3:85:256:107#0/1  
GCTGTTTGAATTTTCTTTGAGGATATTGCACATTCTTT  
+HWI-EAS443:3:85:256:107#0/1  
aaa^[¥[^PW^aaabaa\_aaaa`\_a\_\_\_Y¥¥V]Y]^^\_]`  
@HWI-EAS443:3:85:26:561#0/1  
GTAATTTGAATGGGTCTATCCCGACCAGTGAGTACCCTTC  
+HWI-EAS443:3:85:26:561#0/1  
`R[HS\_¥¥X¥\_UYN[^[\_\_\_^Z`U]UN]R^^]XBBBBBBB  
@HWI-EAS443:3:85:293:460#0/1  
AGAGGATGGTGCTTTCTGCTTTTGTATGAGAGAAGAAATAA  
+HWI-EAS443:3:85:293:460#0/1  
aba]U¥¥¥VPa`]¥GRWaU[[Y\_ZO[VZXRX^\_a\_`TQWa  
@HWI-EAS443:3:85:296:1878#0/1  
GCTGCGGTGAAAGGAGTTGGAACAATAGCAATGGAGTTAA  
+HWI-EAS443:3:85:296:1878#0/1  
aa^aa]\_F[Z¥^^a[^X\_[]]``aW¥Z^`[[[]\_[^XT\_\_  
@HWI-EAS443:3:85:302:787#0/1  
ATTGCCCTCTGGGCAGCTGTTTGAATTTTCTTTGAGGA  
+HWI-EAS443:3:85:302:787#0/1  
^M\_aba\_ab[R]`a]^aW\_]^^`UXRaYZ^`a^Ya^¥aP^  
@HWI-EAS443:3:85:308:793#0/1  
GCACCATCTCTATTGTTATGCTATTCTGGATTAGTCG  
+HWI-EAS443:3:85:308:793#0/1  
aa^\_aba\_aaa`a\_aa`\_a`a`a\_aa`a¥`\_\_`^^^a\_  
@HWI-EAS443:3:85:415:1867#0/1  
GTGCTGACCGTGCCAGGAAAATGAGGTCTTCAATCTCAGC  
+HWI-EAS443:3:85:415:1867#0/1  
aPa^bX]bZVOW`aa^]Y^]``][^W`\_\_`U]a\_^\_X\_  
@HWI-EAS443:3:85:432:1036#0/1  
CAGGCAGGATTTATGTGCAACTGATCCCCTCAGAATGAGT  
+HWI-EAS443:3:85:432:1036#0/1  
aba]aabb]bbabab\_bba^aa`bbaaab`b¥a`aaaaaY  
@HWI-EAS443:3:85:435:296#0/1  
CTAATCCAGAATAGCATAACAATAGAGAGGATGGTGCTTT  
+HWI-EAS443:3:85:435:296#0/1  
abbbbbbabbabbababaaaaaaa`a]b`ba``baP]V]a[  
@HWI-EAS443:3:85:493:575#0/1  
GCTTTCTGCTTTTGTATGAGAGAAGAAATAAATACCTAGAA  
+HWI-EAS443:3:85:493:575#0/1  
``^`a^^a]`aabaabaaa\_\_[\_Y^^`\_Z\_aa``a\_]R¥  
@HWI-EAS443:3:85:572:1562#0/1  
TGGTGCTTTCTGCTTTTGTATGAGAGAAGAAATAAATACCT  
+HWI-EAS443:3:85:572:1562#0/1  
aaa\_abababbbaa`bab\_aababbbaaabaabaaaaa`a  
@HWI-EAS443:3:85:594:652#0/1  
CTCCTGTTTTCTTAGGGTCTTCCCAGCACTGGGATGCTC  
+HWI-EAS443:3:85:594:652#0/1  
`\_b`a]^^`\_]\_]\_^]Ua`]aaa`¥a]X[``¥ZXZ]Z`]  
@HWI-EAS443:3:85:658:335#0/1  
CTTCCGACAGATGCTCTGATTTCTGTGGCATCCTGGCGCT

+HWI-EAS443:3:85:658:335#0/1  
aaabba`a\_aaa`aa`a^a\_`¥`U`^¥aa^]¥^^\_^V¥  
@HWI-EAS443:3:85:75:1751#0/1  
TTTTCTGGCACGGTCAGCACTCATTCTGAGGGGATCAGT  
+HWI-EAS443:3:85:75:1751#0/1  
Y[aa^a]V]^`aaY[\_^[UY\_X]YXXYZT[SU[J]W][\_]  
@HWI-EAS443:3:85:779:814#0/1  
GTGCTTTCTGCTTTTGATGAGAGAAGAAATAAATACCTAG  
+HWI-EAS443:3:85:779:814#0/1  
a¥YY]Xaba^\_]aaaaUaaT`^^X]\_^XY]aa`a^^a\_  
@HWI-EAS443:3:85:820:1810#0/1  
AATCACTGAGTTTGAGTTCAGTGCACATTTGGATGTAGAA  
+HWI-EAS443:3:85:820:1810#0/1  
a`aabba`a`Wa`\_a`a`aa¥]^a\_a\_`^^Z`\_aV^]`  
@HWI-EAS443:3:85:865:282#0/1  
GAGGTCTTCAATCTCAGCGTTTCCTGGGTTTCGACTTTCT  
+HWI-EAS443:3:85:865:282#0/1  
aaaa^`aaaa`ba`\_a\_a\_aa`\_aa\_^¥\_a^\_\_^a\_\_^a  
@HWI-EAS443:3:85:935:384#0/1  
AAGCGCTCTTGTCTCTGATATGTGGCATCATTCAAGTTG  
+HWI-EAS443:3:85:935:384#0/1  
a^a^WR]^`a\_aYa\_aa`\_N]Q^YPKSLXX`aa¥]Q^\_TZ]  
@HWI-EAS443:3:86:1081:351#0/1  
CTCAAACCTCAGTGATTATGATGGACGACTAATCCAGAATA  
+HWI-EAS443:3:86:1081:351#0/1  
aa`\_Y¥a`aa^]`aabbbaabaaabb\_abaa]`[a`a`\_  
@HWI-EAS443:3:86:112:513#0/1  
TCTGGATTAGTCGTCATCATAATCACTGAGTTTGAGTTC  
+HWI-EAS443:3:86:112:513#0/1  
ababaaa^b`¥\_aUa[``Z`¥Y]\_¥^^^Z`W^`^^^Y]X  
@HWI-EAS443:3:86:1234:1334#0/1  
CTGATTAACCTCATTGCTATTGTTCCAACCTTTTCACCG  
+HWI-EAS443:3:86:1234:1334#0/1  
abbb\_]\_¥a\_[\_ab`a`b\_bb`ab^\_¥\_]\_^]aba^a]U\_  
@HWI-EAS443:3:86:1259:561#0/1  
CGCCAAGCAAACAATGGCGAAGATGCAACAGCAGGTCTTA  
+HWI-EAS443:3:86:1259:561#0/1  
abbabb`bbbbbbbbb``abbbba`ab\_bbaabb]¥baa  
@HWI-EAS443:3:86:1262:690#0/1  
GCTGCCAGAGGGCAATGATGGATCAAGTAAGAGAAAGTC  
+HWI-EAS443:3:86:1262:690#0/1  
aaX`aXWG¥X]Z\_]YU`¥aaaZYZ¥WRaQTP¥S\_[M^\_RU  
@HWI-EAS443:3:86:1557:1010#0/1  
CAAAGCAGAAAGCACCATCCTCTCTATTGTTATGCTATT  
+HWI-EAS443:3:86:1557:1010#0/1  
abbbabbabbbbbbYbbaYXb`b[a`bab\_a`b\_\_aaa`  
@HWI-EAS443:3:86:1580:418#0/1  
AGCAAGTGGGCATGACTTTGAAAGGGAAGGGTACTCACTG  
+HWI-EAS443:3:86:1580:418#0/1  
[\_MZ`\_X`¥\_a¥a\_^^`b^\_a\_]¥WO`aba[VD[V[NZ^

@HWI-EAS443:3:86:1628:1294#0/1  
ATTCCGGTGC GAACAAGCGCTCTTGTCTCTGATATGTGG  
+HWI-EAS443:3:86:1628:1294#0/1  
`bb`ababaababbb`baa`aaabaa^¥b\_aa`^aab`a`  
@HWI-EAS443:3:86:215:1162#0/1  
TGGGTCTATCCCGACCGAGTACCCTTCCCTTTCAAAG  
+HWI-EAS443:3:86:215:1162#0/1  
abaY`bababbb`baaa``aaa\_a\_aaa`aaa`\_aaa```  
@HWI-EAS443:3:86:241:1054#0/1  
CCAGTGAGTACCCTTCCCTTTCAAAGTCATGCCCACTTGC  
+HWI-EAS443:3:86:241:1054#0/1  
abbbaab`V[`a`aaaaaabaa`aa^aa`Z]a`a`¥\_^  
@HWI-EAS443:3:86:247:184#0/1  
CAAGCCCATACACACAAGCAGGCAGGCAGGATTTATGTGC  
+HWI-EAS443:3:86:247:184#0/1  
abaa\_aaaaaaaaa`Zaaaaaaaa```[P^\_PR]^ZY[P[R  
@HWI-EAS443:3:86:261:1799#0/1  
CTCAGTGATTATGATGGACGACTAATCCAGAATAGCATAA  
+HWI-EAS443:3:86:261:1799#0/1  
¥^ba]Zaa`bbabba¥¥^ba```ba\_baaaa^\_a`\_`\_]a  
@HWI-EAS443:3:86:267:476#0/1  
AATGAGTGCTGACCGTGCCAGGAAAATGAGGTCTTCAATC  
+HWI-EAS443:3:86:267:476#0/1  
]a¥\_T[^ba¥¥Z]aaL^`\_V^aTa^VTUZ`FRZ\_\_a]N[  
@HWI-EAS443:3:86:282:1397#0/1  
CAGTTGCACATAAATCCTGCCTGCCTGCTTGTGTGTATGG  
+HWI-EAS443:3:86:282:1397#0/1  
`Z^aaa`abaab\_b`bb`^``aa¥`aa`aa^a¥a\_``^  
@HWI-EAS443:3:86:310:329#0/1  
GCATGACTTTGAAAGGAAGGGTACTCACTGGTCGGGATA  
+HWI-EAS443:3:86:310:329#0/1  
aaaa`a\_aaaa`¥]a`aa`a``Ra\_\_`¥^^^W\_a\_`^W^  
@HWI-EAS443:3:86:356:1535#0/1  
GACAAGGGTTGCTTATGAAAGAATGTGCAATATCCTCAAA  
+HWI-EAS443:3:86:356:1535#0/1  
aabb^aa\_]\_aaa`a`aaaaaaaaaYaaaaaa`a]\_\_`\_`  
@HWI-EAS443:3:86:367:1306#0/1  
CTTTCACCGCAGCACCTGCGGCACCAGACCTTCTGGGAAG  
+HWI-EAS443:3:86:367:1306#0/1  
QYW\_]¥ZV]¥`^ab]ZZOR^ON]ZY¥`Z¥ZZFQWS]SP]  
@HWI-EAS443:3:86:370:1008#0/1  
AGGTCTTCAATCTCAGCGTTTCCTGGGTTTCGACTTTCTC  
+HWI-EAS443:3:86:370:1008#0/1  
aaa¥baabbabababaaaba\_aaaaaa`\_a`aa\_\_b`a\_a^  
@HWI-EAS443:3:86:447:1792#0/1  
GGGGTGAATAATGGACGAAGGACAAGGGTTGCTTATGAAAG  
+HWI-EAS443:3:86:447:1792#0/1  
Za`[\_aabab\_ababaab`bbbb\_W\_`^``aabaab\_a`  
@HWI-EAS443:3:86:486:155#0/1  
TTCTCTTACTTGATCCATCATTGCCCTCTGGGCAGCTGTT

+HWI-EAS443:3:86:486:155#0/1  
aaa`aaaa^aaaaa\_`aaaaaa\_¥[^^]a^\_¥^]^\_^Z^  
@HWI-EAS443:3:86:556:65#0/1  
GCCACATATCAGAGAACAAGAGCGCTTGTTCGCACCCGAA  
+HWI-EAS443:3:86:556:65#0/1  
ab`babbaaaa\_a`\_`\_a`aaa`\_b^^[\_^¥\_]\_^  
@HWI-EAS443:3:86:611:1489#0/1  
CGCCAAGCAAACAATGGCGAAGATGCAACAGCAGGTCTTA  
+HWI-EAS443:3:86:611:1489#0/1  
a]abb`aba^[abb``baaab\_Uaaa`\_a]Ya``RY^[`  
@HWI-EAS443:3:86:682:1021#0/1  
GCTTTCTGCTTTTGATGAGAGAAGAAATAAATACCTAGAA  
+HWI-EAS443:3:86:682:1021#0/1  
aaaaa`\_`]`aaaba]`baa`a`¥a``aaaa`aa\_aaaaa  
@HWI-EAS443:3:86:734:1555#0/1  
CGCTGAGATTGAAGACCTCATTTTCCTGGCACGGTCAGCA  
+HWI-EAS443:3:86:734:1555#0/1  
a\_bbaab^a\_\_aaaaabbbaaaaa`aaaab¥`aU^``U[  
@HWI-EAS443:3:86:769:395#0/1  
AGAAGGTCTGGTGCCGCAGGTGCTGCGGTGAAAGGAGTTG  
+HWI-EAS443:3:86:769:395#0/1  
a^\_aa\_]\_ba`T`^^^b\_\_\_Z\_\_\_X\_¥OSMUZ¥\_X¥IWK  
@HWI-EAS443:3:86:777:1985#0/1  
GTGAAAATGGACGAAGGACAAGGGTTGCTTATGAAAGAAT  
+HWI-EAS443:3:86:777:1985#0/1  
a^^`aa]aTaaY¥]SY\_UZ]aaSSQW`GOXS^U[\_^][V]  
@HWI-EAS443:3:86:785:1504#0/1  
GACGACTAATCCAGAATAGCATAACAATAGAGAGGATGGT  
+HWI-EAS443:3:86:785:1504#0/1  
abbbbabbbbbba`bba`bbbabababbba`abaaaa0  
@HWI-EAS443:3:86:788:683#0/1  
GCGCCAAGCAAACAATGGCGAAGATGCAACAGCAGGTCTT  
+HWI-EAS443:3:86:788:683#0/1  
aaaaaaaaaba\_^a\_aaa`\_^¥]a\_]^a\_^`^a^\_^GY\_^  
@HWI-EAS443:3:86:81:1940#0/1  
TGCTTTCTGCTTTTGATGAGAGAAGAAATAAATACCTAGA  
+HWI-EAS443:3:86:81:1940#0/1  
^`bba[aa\_^`ba\_ba`bbaX`Y\_``b¥b```bb]aaa]  
@HWI-EAS443:3:86:838:907#0/1  
CAGAGCATCTGTCGGAAGAATGATTGGTGAATCGGGAGA  
+HWI-EAS443:3:86:838:907#0/1  
Z¥a]`¥bbbb`¥`^U¥bb¥bbV¥W]T```a\_ZQ`ba]a^  
@HWI-EAS443:3:86:855:130#0/1  
TGATGGACGACTAATCCAGAATAGCATAACAATAGAGAGG  
+HWI-EAS443:3:86:855:130#0/1  
\_bbabbab`ZQSV`\_RPa``aaaaS``^\_`aaa```]`\_aa  
@HWI-EAS443:3:86:894:118#0/1  
GTGCTGGGAAGGACCCTAAGAAAACAGGAGGACCCATATA  
+HWI-EAS443:3:86:894:118#0/1  
aSa\_\_aa`Z\_a¥LZV\_`\_V\_]¥VV[`a]a\_VYOY]VV^V



@HWI-EAS443:3:86:953:2016#0/1  
GGGTCCTCCTGTTTTCTTAGGGTCCTTCCCAGCACTGGGA  
+HWI-EAS443:3:86:953:2016#0/1  
a^aXZaa^ba¥¥\_aa\_b`a`XUT^¥`XQ[\_`¥\_T]`¥\_X  
@HWI-EAS443:3:86:973:766#0/1  
AATTACTCCAAAACAGCCAAGTGGTCAGCCTGATGAGACC  
+HWI-EAS443:3:86:973:766#0/1  
`abbZ`ba`b`]a`abbaaa[aaaaa`aZaba`\_b\_`^YG  
@HWI-EAS443:3:87:1028:1724#0/1  
GATGGATCAAGTAAGAGAAAGTCGAAACCCAGGAAACGCT  
+HWI-EAS443:3:87:1028:1724#0/1  
abba¥aab`aa`Z`]aaaa¥`[a`\_``\_\_`a\_a\_WaS\_  
@HWI-EAS443:3:87:1047:854#0/1  
CGGTCAGCACTCATTCTGAGGGGATCAGTTGCACATAAAT  
+HWI-EAS443:3:87:1047:854#0/1  
aa^0¥b^\_XH`[T`aIab^¥W¥^¥¥Xa`]a`¥ZUTa^YLT  
@HWI-EAS443:3:87:1503:194#0/1  
ATTTGGTCTCATCAGGCTGACCACTTGGCTGTTTTGGAGT  
+HWI-EAS443:3:87:1503:194#0/1  
`b`ba`aa\_a`a`\_\_U]aba^a`Xaaaa]`bT`^\_IXJRP  
@HWI-EAS443:3:87:1523:245#0/1  
GGAATCGGGAGATTCTACATCCAAATGTGCACTGAACTCA  
+HWI-EAS443:3:87:1523:245#0/1  
ab\_ba`bbb`aaabXaaaaa^aaaa`aab\_\_Zaa\_`\_\_^a  
@HWI-EAS443:3:87:1542:1267#0/1  
AAGAGAAAGTCGAAACCCAGGAAACGCTGAGATTGAAGAC  
+HWI-EAS443:3:87:1542:1267#0/1  
\_¥¥\_\_b\_b`¥P[bVbWQ¥WRYTZZ`Y¥XSa¥UV\_aa\_`P  
@HWI-EAS443:3:87:1682:629#0/1  
GCGCCAGGATGCCACAGAAATCAGAGCATCTGTCCGGAAGA  
+HWI-EAS443:3:87:1682:629#0/1  
`a]`\_aa`VLU¥^a\_bbb\_`Zbaa^a]Za^¥UQ¥a¥V]\_Z  
@HWI-EAS443:3:87:1708:953#0/1  
AAGTAAGAGAAAGTCGAAACCCAGGAAACGCTGAGATTGA  
+HWI-EAS443:3:87:1708:953#0/1  
`\_`UZ`bbbaa`a]``aaaI\_a\_bba`b\_b``b\_b`aa\_`  
@HWI-EAS443:3:87:1714:1202#0/1  
GCTTTCTGCTTTTGTGAGAGAAGAAATAAATACCTAGAA  
+HWI-EAS443:3:87:1714:1202#0/1  
YYa^ababV`¥U^b¥YbW`[ba^bTq[XZ^`a`WY\_\_`^\_  
@HWI-EAS443:3:87:1788:1740#0/1  
AGAGAGGATGGTCTTTCTGCTTTTGTGAGAGAAGAAAT  
+HWI-EAS443:3:87:1788:1740#0/1  
``\_\_`aa[URaW\_S\_\_`\_]\_¥\_`aaS^[W\_^V¥Z`^KZTY  
@HWI-EAS443:3:87:227:1796#0/1  
ATTGTTCCAACCTTTTACCAGCAGCACCTGCGGCACCAG  
+HWI-EAS443:3:87:227:1796#0/1  
`\_^]`aaaabaaaa`aabba¥Xa`^`b`^`[^`¥¥a\_Ua`]  
@HWI-EAS443:3:87:228:1955#0/1  
GGTCAGCACTCATTCTGAGGGGATCAGTTGCACATAAATC

+HWI-EAS443:3:87:228:1955#0/1  
\_``ab]X````QYa\_TWT\_````ab]Xa`Raa`ababa]  
@HWI-EAS443:3:87:240:1592#0/1  
AGAGCATCCCAGTGCTGGGAAGGACCCTAAGAAAACAGGA  
+HWI-EAS443:3:87:240:1592#0/1  
VRZ\_a^XZU¥\_WXXM]ab]aa¥S¥]Z^aaaa]S``Z^]P  
@HWI-EAS443:3:87:397:449#0/1  
CTTTCTGCTTTTGGATGAGAGAAGAAATAAATACCTAGAAG  
+HWI-EAS443:3:87:397:449#0/1  
abbbbbbaababbabbababaaaabbaababaaa`aaabaaa  
@HWI-EAS443:3:87:409:1066#0/1  
AGAAGAAATAAATACCTAGAAGAGCATCCCAGTGCTGGGA  
+HWI-EAS443:3:87:409:1066#0/1  
\_baaaabaaab\_aaaaaa`\_`a`a`a```]`\_¥a`\_a\_\_\_\_  
@HWI-EAS443:3:87:423:400#0/1  
TTTGAGTTCAGTGCACATTTGGATGTAGAATCTCCCGATT  
+HWI-EAS443:3:87:423:400#0/1  
``aa`bV\_a]\_\_aaa\_aba`a]a\_aS[^WQ[¥\_\_\_\_`a^^[  
@HWI-EAS443:3:87:466:890#0/1  
CTCACTGGTCGGGATAGACCCATTCAAATTACTCCAAAAC  
+HWI-EAS443:3:87:466:890#0/1  
aa\_]`¥ZQ`¥¥\_[R\_\_\_\_\_XOZ^a^^X[^`L\_[\_\_\_\_`\_\_\_\_  
@HWI-EAS443:3:87:522:1761#0/1  
TGTGAGCTGGGTTTTTCATTTGGTCTCATCAGGCTGACCAC  
+HWI-EAS443:3:87:522:1761#0/1  
aa^ba¥¥`aUaXUaZab`Y]`ZL^bb[H^¥`]aX[T\_XaT  
@HWI-EAS443:3:87:525:1311#0/1  
TGGCGCCAAGCAAACAATGGCGAAGATGCAACAGCAGGTC  
+HWI-EAS443:3:87:525:1311#0/1  
aaab\_b`[\_`aa^a`a`aa¥aa`Z[`¥a\_aaXa\_]a``Y\_  
@HWI-EAS443:3:87:528:1929#0/1  
GCTGACCGTGCCAGGAAAATGAGGTCTTCAATCTCAGCGT  
+HWI-EAS443:3:87:528:1929#0/1  
`aaababaabb`a`aababaaa¥0Laaa]R\_aaaaa`\_a\_  
@HWI-EAS443:3:87:593:406#0/1  
GATCCATTCCGGTGCGAACAAGCGCTCTTGTCTCTGATA  
+HWI-EAS443:3:87:593:406#0/1  
[Z[a`b¥`\_ZXZTUUXaba[aa¥]b[^Yaa`PW`^a\_aa  
@HWI-EAS443:3:87:623:733#0/1  
GTCCTCTGTTTTCTTAGGGTCCTTCCCAGCACTGGGATG  
+HWI-EAS443:3:87:623:733#0/1  
a\_[^`^a`a`a`a`a`\_a^\_]aa\_\_\_\_\_]a]^^\_a`X``  
@HWI-EAS443:3:87:633:808#0/1  
CTGATTAACCTCATTGCTATTGTTCCAACCTTTTACCG  
+HWI-EAS443:3:87:633:808#0/1  
abbbba]``abaaabaab]baa`aaa````a\_aaaaaaaaa  
@HWI-EAS443:3:87:719:538#0/1  
CATTCAAGTTGGAATGCCAAATCATGATATGAGTAAGACC  
+HWI-EAS443:3:87:719:538#0/1  
a^aaaa¥a^b^ZV^Wa`^a`\_W¥[ ]\_``a^a\_aP`P\_UYU

@HWI-EAS443:3:87:774:1823#0/1  
GAAATAAATACCTAGAAGAGCATCCCAGTGCTGGGAAGGA  
+HWI-EAS443:3:87:774:1823#0/1  
]``\_V¥\_a`\_Z`^`ZSV¥ababbbZQ^^T\_\_aa```a¥^a  
@HWI-EAS443:3:87:807:522#0/1  
TACTCATATCATGATTTGGCATTCCAACCTGAATGATGCC  
+HWI-EAS443:3:87:807:522#0/1  
ababbabaabaa`aababbaabaaaa`aaa\_aaabaaaa  
@HWI-EAS443:3:87:925:1378#0/1  
TGGGCATGACTTTGAAAGGGAAGGGTACTCACTGGTCGGG  
+HWI-EAS443:3:87:925:1378#0/1  
a`a\_abbbaabaabaaaa^a\_a`\_]S\_¥\_[`¥a`¥V`]\_\_  
@HWI-EAS443:3:87:941:753#0/1  
ATGGTGCTTTCTGCTTTTGATGAGAGAAGAAATAAATACC  
+HWI-EAS443:3:87:941:753#0/1  
abbb`babbbabbabbbbabaaa\_baabbaab`aabb``  
@HWI-EAS443:3:87:957:217#0/1  
ATTGCCCTCTGGGCAGCTGTTTGAAATTTTCCTTTGAGGA  
+HWI-EAS443:3:87:957:217#0/1  
]aab¥aa`[aYXTY`]XZ]¥a¥¥¥a``a`dWG¥^`\_`^ZS  
@HWI-EAS443:3:88:1126:243#0/1  
TGAAAGGGAAGGGTACTCACTGGTCGGGATAGACCCATTC  
+HWI-EAS443:3:88:1126:243#0/1  
aba``aaa`\_aa`V`\_a``\_\_a`V`\_a`^a`\_`YV¥`^]]  
@HWI-EAS443:3:88:1137:309#0/1  
AGTGGTCAGCCTGATGAGACCAAATGAAAACCCAGCTCAC  
+HWI-EAS443:3:88:1137:309#0/1  
ab^``^a`\_\_]^`^`\_aaaa`^`\_aaaa^`\_dWW`\_aX`]^`\_  
@HWI-EAS443:3:88:115:196#0/1  
ATAATCACTGAGTTTGAGTTCAGTGCACATTTGGATGTAG  
+HWI-EAS443:3:88:115:196#0/1  
aabbbbaaab\_b`baaab`aa\_aYaaaa\_a`a^`\_`Q`\_  
@HWI-EAS443:3:88:1203:278#0/1  
TTTATGTGCAACTGATCCCCTCAGAATGAGTGCTGACCGT  
+HWI-EAS443:3:88:1203:278#0/1  
abaabaV^[`a^``a`^UN[[X¥a`\_Z\_aV]P\_Z¥a[WUXW  
@HWI-EAS443:3:88:1240:53#0/1  
ATTGCCCTCTGGGCAGCTGTTTGAAATTTTCCTTTGAGGA  
+HWI-EAS443:3:88:1240:53#0/1  
aabb^``aab```\_]aaa^`aaa`\_\_a`aa`\_b``Y^a^[  
@HWI-EAS443:3:88:1254:141#0/1  
ATATTGCACATTCTTTCATAAGCAACCCTTGTCCTTCGTC  
+HWI-EAS443:3:88:1254:141#0/1  
abab`W`^aa`]`baa]ba\_b`ZWXDP^aa]\_OaaaaXY  
@HWI-EAS443:3:88:1322:811#0/1  
CACCTGCGGCACCAGACCTTCTGGGAAGTGTGAACCTTG  
+HWI-EAS443:3:88:1322:811#0/1  
\_\_bbabbba[aUR\_\_aa`babb\_baa\_J\_HXa]]]Zabb  
@HWI-EAS443:3:88:1335:281#0/1  
AATTTCTGGAGGGGTGAAAATGGACGAAGGACAAGGGTTG

+HWI-EAS443:3:88:1335:281#0/1  
a`bbbabbb`bbbb\_b\_aaabbaa\_ba\_a`\_\_a\_ba\_X\_a  
@HWI-EAS443:3:88:1413:1202#0/1  
GGTGA AAAATGGACGAAGGACAAGGGTTGCTTATGAAAGAA  
+HWI-EAS443:3:88:1413:1202#0/1  
a`0\_WMZ`X]aa\_a^]`a^X¥a]T]WR\_`a\_\_`a\_S`a^\_  
@HWI-EAS443:3:88:1420:1031#0/1  
GGTTGCTTATGAAAGAATGTGCAATATCCTCAAAGGAAAA  
+HWI-EAS443:3:88:1420:1031#0/1  
Z\_`aZJabbbbbbb`\_babababaabb`bb\_bbabbb¥b`  
@HWI-EAS443:3:88:1440:197#0/1  
CTCCTGTTTTCTTAGGGTCTTCCCAGCACTGGGATGCTC  
+HWI-EAS443:3:88:1440:197#0/1  
abV¥Z^\_ab]R\_\_a^X^]`^aa\_aWaY`\_^^\_a[^Z^bN[[  
@HWI-EAS443:3:88:1487:366#0/1  
TGGGCATGACTTTGAAAGGGAAGGGTACTCACTGGTCGGG  
+HWI-EAS443:3:88:1487:366#0/1  
HXaab\_¥\_``[¥\_aZ\_RTXZTbbbbWPV]b^R`ZQGO\_a`  
@HWI-EAS443:3:88:1577:817#0/1  
GGAGCGCCAGGATGCCACAGAAATCAGAGCATCTGTCCGA  
+HWI-EAS443:3:88:1577:817#0/1  
aaab`aa\_`b`\_¥ZU]^Paa`aa^Xa`a`\_`\_a\_baYTXSQ  
@HWI-EAS443:3:88:1707:1308#0/1  
ACCTGCGGCACCAGACCTTCTGGGAAGTGTGAACCTTGC  
+HWI-EAS443:3:88:1707:1308#0/1  
ab]a^abb`a]]Z]^`[[ab\_b^Z]Y\_X\_a`aa`ZNV[```[  
@HWI-EAS443:3:88:226:781#0/1  
CTGGGTTTTCTTTGGTCTCATCAGGCTGACCACTTGGCT  
+HWI-EAS443:3:88:226:781#0/1  
aabbb\_aabb\_aaaba`aaaWaaaa`\_`a`aaaaSTa\_aa\_  
@HWI-EAS443:3:88:272:300#0/1  
AAAGCAGAAAGCACCATCCTCTCTATTGTTATGCTATTCT  
+HWI-EAS443:3:88:272:300#0/1  
]a`babb`aaaa`a\_`\_`\_aaa`\_`\_aZ\_`\_`\_`^`^`^`^`\_  
@HWI-EAS443:3:88:287:1889#0/1  
CGAAGATGCAACAGCAGGTCTTACTCATATCATGATTTGG  
+HWI-EAS443:3:88:287:1889#0/1  
Xab`\_a\_babb\_bbaa`¥H¥b`ab\_baababaabbb`SKb  
@HWI-EAS443:3:88:37:2002#0/1  
GAAAGAATGTGCAATATCCTCAAAGGAAAATTTCAAACAG  
+HWI-EAS443:3:88:37:2002#0/1  
a[a]aaaa`Y\_`[^¥aaab\_\_SZa\_¥aMWQZ`\_aaa`a`^  
@HWI-EAS443:3:88:416:521#0/1  
CCCACCAGTGAGTACCCTTCCCTTTCAAAGTCATGCCCA  
+HWI-EAS443:3:88:416:521#0/1  
ab\_aaZ]aaMa\_a¥^^^a\_]aaa^\_a\_a^a^¥aa^TM`YY  
@HWI-EAS443:3:88:637:280#0/1  
CTGCTGTTGCATCTTCGCCATTGTTTGCTTGGCGCCAAAC  
+HWI-EAS443:3:88:637:280#0/1  
abbbbb`bb`¥abbabbbbaba]]bbabababbb`aY`aa

@HWI-EAS443:3:88:702:561#0/1  
GGTCCTCCTGTTTTCTTAGGGTCCTTCCCAGCACTGGGAT  
+HWI-EAS443:3:88:702:561#0/1  
^¥UY`^^aaSa[Uab\_[¥RWQa`aaaaX`aW\_Ta[\_XYTZ  
@HWI-EAS443:3:88:726:1973#0/1  
ATCAGGCTGACCACTTGGCTGTTTTGGAGTAATTTGAATG  
+HWI-EAS443:3:88:726:1973#0/1  
a]N^`\_\_aa¥R[a\_aVZ]^\_[LT\_]NUNRNJ¥S¥YO[[FO  
@HWI-EAS443:3:88:754:1827#0/1  
AATCACTGAGTTTGAGTTCAGTGCACATTTGGATGTAGAA  
+HWI-EAS443:3:88:754:1827#0/1  
abaaY`aa\_a]aa`\_`\_`a\_\_`\_`^`a\_`^]a\_\_^`\_\_a  
@HWI-EAS443:3:88:772:684#0/1  
TTCCCTTTCAAAGTCATGCCCACTTGCTACTGCAAGCCCA  
+HWI-EAS443:3:88:772:684#0/1  
[\_`\_`aa]^0^bbTUT[bSabaaba[]Iba[a]LUa\_`X]]  
@HWI-EAS443:3:88:780:1289#0/1  
GCTGGGTTTTCATTTGGTCTCATCAGGCTGACCACTTGGC  
+HWI-EAS443:3:88:780:1289#0/1  
`Z`\_S\_N\_U`¥¥]^[]¥P¥`a\_a[¥V¥][`[Z\_\_\_\_^SWU]  
@HWI-EAS443:3:88:905:477#0/1  
CAGAGGGCAATGATGGATCAAGTAAGAGAAAGTCGAAACC  
+HWI-EAS443:3:88:905:477#0/1  
abb\_bbbbbabbbba\_baaa\_a\_b`bbbbbbba\_`babb^b  
@HWI-EAS443:3:88:929:1051#0/1  
CTTCCGACAGATGCTCTGATTTCTGTGGCATCCTGGCGCT  
+HWI-EAS443:3:88:929:1051#0/1  
\_`^TTYX\_T¥\_ZT]Z^]]QZ]`\_`\_`RV\_VXYSRZX\_YWVW  
@HWI-EAS443:3:88:969:116#0/1  
GGAGGGGTGAAAATGGACGAAGGACAAGGGTTGCTTATGA  
+HWI-EAS443:3:88:969:116#0/1  
abVb\_bb[bb^b^baababV\_ba`\_`a]`ab\_`ba`aabb`  
@HWI-EAS443:3:88:975:1428#0/1  
CACTCATTCTGAGGGGATCAGTTGCACATAAATCCTGCCT  
+HWI-EAS443:3:88:975:1428#0/1  
`[J`baabVa`abbb`\_`b\_bb\_bbabb[abaZba[aabSb  
@HWI-EAS443:3:88:978:1053#0/1  
CAAGCGCTCTTGTCTCTGATATGTGGCATCATTAGGTT  
+HWI-EAS443:3:88:978:1053#0/1  
a[babaa]][\_b`babbbbabab^[\_`\_`\_`aWbaaaaaWa  
@HWI-EAS443:3:89:1007:970#0/1  
ATCCCACCAGTGAGTACCCTTCCCTTTCAAAGTCATGCC  
+HWI-EAS443:3:89:1007:970#0/1  
aaa]aba¥abaZ^\_a¥aUNaa\_\_XR\_`¥V\_`^\_UQ[UVGS  
@HWI-EAS443:3:89:1052:473#0/1  
TGCACATAAATCCTGCCTGCCTGCTTGTGTGTATGGGCTT  
+HWI-EAS443:3:89:1052:473#0/1  
abababbbabba`ababbaabbababbaab`aba`aa`\_`  
@HWI-EAS443:3:89:1121:924#0/1  
TTAGTCGTCATCATAATCACTGAGTTTGGAGTTCAGTGCA

+HWI-EAS443:3:89:1121:924#0/1  
]VWV[`aYS\_\_Z`bbb¥ST\_\_baT` `b¥QQb`ab\_S\_PSa  
@HWI-EAS443:3:89:1170:855#0/1  
AAAGCACCATCCTCTCTATTGTTATGCTATTCTGGATTAG  
+HWI-EAS443:3:89:1170:855#0/1  
abaaaba\_ab` `aab^`a`aa\_\_aaa`aaa`Waa\_\_^\_\_\_\_  
@HWI-EAS443:3:89:1181:306#0/1  
CAACTGATCCCCTCAGAATGAGTGCTGACCGTGCCAGGAA  
+HWI-EAS443:3:89:1181:306#0/1  
`babbaabbbbaaabaabbbbababaabbNaaaaaZabaaa  
@HWI-EAS443:3:89:1268:1052#0/1  
GAGGATGGTGCTTTCTGCTTTTGATGAGAGAAGAAATAAA  
+HWI-EAS443:3:89:1268:1052#0/1  
\_^]TWZ\_`Z^^V\_YW¥Y`¥aaa[UP¥Xa\_^^^aU\_U`\_aU  
@HWI-EAS443:3:89:1396:692#0/1  
CAAGAGCGCTTGTTTCGCACCGGAATGGATCCCAGAATGTG  
+HWI-EAS443:3:89:1396:692#0/1  
`` `bbb\_b` `Zbb\_bb\_bUa[ `bb^abaaa\_ab` aaba\_  
@HWI-EAS443:3:89:1513:426#0/1  
CTCCTGTTTTCTTAGGGTCCTTCCCAGCACTGGGATGCTC  
+HWI-EAS443:3:89:1513:426#0/1  
`bbbbbbba`abbbabababbaY\_bbaabbbbabbb`\_\_  
@HWI-EAS443:3:89:1514:589#0/1  
CGTCCATCATAATCACTGAGTTTGAGTTCAGTGCACATTT  
+HWI-EAS443:3:89:1514:589#0/1  
a\_` `bbb`abaabb\_`bb` `bbb`]\_\_abababab`bbbb  
@HWI-EAS443:3:89:1591:128#0/1  
AATCCAGAATAGCATAACAATAGAGAGGATGGTGCTTTCT  
+HWI-EAS443:3:89:1591:128#0/1  
abaa`aba¥aab^aa`a\_]Wa\_a^a\_aa¥^a\_P\_S^^^YY  
@HWI-EAS443:3:89:1654:1219#0/1  
GGATGGTGCTTTCTGCTTTTGATGAGAGAAGAAATAAATA  
+HWI-EAS443:3:89:1654:1219#0/1  
]b0bbbTbVa\_aX¥b\_bbaa[aba^a`\_`aaaabaaa`ba  
@HWI-EAS443:3:89:252:179#0/1  
ATGGGTCCTCCTGTTTTCTTAGGGTCCTTCCCAGCACTGG  
+HWI-EAS443:3:89:252:179#0/1  
a`aab[aa` `a`\_aaaaaaaa`aWa\_^^¥^^X\_¥W¥\_\_\_\_  
@HWI-EAS443:3:89:292:1020#0/1  
GGGGAGCGCCAGGATGCCACAGAAATCAGAGCATCTGTCTG  
+HWI-EAS443:3:89:292:1020#0/1  
abaaaaaYaZ^`^^a`]a\_a`a`^¥]\_]\_^\_^^¥WU¥  
@HWI-EAS443:3:89:298:1017#0/1  
TGGGATCCATTCCGGTGC GAACAAGCGCTCTTGTCTCTG  
+HWI-EAS443:3:89:298:1017#0/1  
`baabababb`abbb\_b`bbaaabaaaa\_baa` `aa\_aa  
@HWI-EAS443:3:89:325:75#0/1  
GATTAGTCGTCCATCATAATCACTGAGTTTGAGTTCAGTG  
+HWI-EAS443:3:89:325:75#0/1  
`IYTW` [VXNUTZ\_]ZVO^[[¥U` [HZL[X\_SUOWXPPS`

@HWI-EAS443:3:89:352:1836#0/1  
CTATTCTGGATTAGTCGTCCATCATAATCACTGAGTTTGA  
+HWI-EAS443:3:89:352:1836#0/1  
aaab^babab^ab[]a\_Xaaaaaaaaab\_aa\_a`TVQ`a\_\_  
@HWI-EAS443:3:89:452:1256#0/1  
AGAGGATGGTGCTTTCTGCTTTTGATGAGAGAAGAAATAA  
+HWI-EAS443:3:89:452:1256#0/1  
^a^a]Z¥`aT[ZX¥YDP^aa[\_aa\_\_^W\_\_`^^\_U\_T]``  
@HWI-EAS443:3:89:559:1836#0/1  
AAATGGACGAAGGACAAGGGTTGCTTATGAAAGAATGTGC  
+HWI-EAS443:3:89:559:1836#0/1  
abaa`baaaa^Z\_aaaa`\_W`aaa`aaa`aaa\_a\_`^]`  
@HWI-EAS443:3:89:60:1786#0/1  
AATCACTGAGTTTGAGTTCAGTGCACATTTGGATGTAGAA  
+HWI-EAS443:3:89:60:1786#0/1  
\_aZ\_YaYVUWL\_V[NOTS]¥YL\_¥XYTZ^^^M[LSRWU[¥  
@HWI-EAS443:3:89:655:1062#0/1  
GAATGATTGGTGAATCGGGAGATTCTACATCCAAATGTG  
+HWI-EAS443:3:89:655:1062#0/1  
\_\_]aa`aaaa^`\_VY``]`¥`\_^`^`^`Za`]`\_^W`  
@HWI-EAS443:3:89:663:726#0/1  
TGCTTTCTGCTTTTGATGAGAGAAGAAATAAATACCTAGA  
+HWI-EAS443:3:89:663:726#0/1  
]`T^\_¥`¥`^`^`bbbb¥^^¥]¥aN¥`Y\_VVababababbbb  
@HWI-EAS443:3:89:723:123#0/1  
GTCCATCATAATCACTGAGTTTGAGTTCAGTGCACATTTG  
+HWI-EAS443:3:89:723:123#0/1  
XTbb`\_\_\_\_`[`Y^abb`]bL`bbababa]b\_babab^Y`a  
@HWI-EAS443:3:89:814:1916#0/1  
CGCCAAGCAAACAATGGCGAAGATGCAACAGCAGGTCTTA  
+HWI-EAS443:3:89:814:1916#0/1  
a`aabb`bab\_a`\_a`baa^Y`^`\_]a\_a\_U`\_^X[`¥\_  
@HWI-EAS443:3:89:907:1033#0/1  
TTCCCTTTCAAAGTCATGCCCACTTGCTACTGCAAGCCCA  
+HWI-EAS443:3:89:907:1033#0/1  
aba]PX^Z`Y^aa]Q^]\_aS]`ZP`P¥\_[`ZN^Y\_`\_¥U^  
@HWI-EAS443:3:89:913:931#0/1  
GACTAATCCAGAATAGCATAACAATAGAGAGGATGGTGCT  
+HWI-EAS443:3:89:913:931#0/1  
ab`aabaaaa`aaa^\_aabaa`a\_a`a`a`a`\_a`V\_]\_  
@HWI-EAS443:3:89:977:721#0/1  
GAGAGGATGGTGCTTTCTGCTTTTGATGAGAGAAGAAATA  
+HWI-EAS443:3:89:977:721#0/1  
Q\_ZZV]RY^STZ[`]^[]XY\_P\_`\_X[^[¥\_]¥WRW`a]  
@HWI-EAS443:3:8:1082:149#0/1  
CCCAGAAGGTCTGGTGCCGAGGTGCTGCGGTGAAAGGAG  
+HWI-EAS443:3:8:1082:149#0/1  
`\_\_ab¥[[]]ZS^`XMa]X\_YT]VMXIPYT\_BBBBBBBBBB  
@HWI-EAS443:3:8:1082:523#0/1  
CCAGTGCTGGGAAGGACCCTAAGAAAACAGGAGGCCCAT

+HWI-EAS443:3:8:1082:523#0/1  
\_]^[a]` `]]\_aaaa\_X`V`a\_RR¥`¥\_]\_\_\_\_]aa¥PPPZ]  
@HWI-EAS443:3:8:122:997#0/1  
CCCTTGTCCTTCGTCATTTTCACCCCTCCAGAAATTCG  
+HWI-EAS443:3:8:122:997#0/1  
abbbabbbbaabbbabababbbabba`aa`aaabaaaaa`Y  
@HWI-EAS443:3:8:1285:69#0/1  
CATGACTTTGAAAGGGAAGGGTACTCACTGGTCGGGATAG  
+HWI-EAS443:3:8:1285:69#0/1  
abbab`bbbabbbabb`abbb[a]`Xaabba]`bba^]\_a  
@HWI-EAS443:3:8:1373:1623#0/1  
GGTCCTCCTGTTTTCTTAGGGTCCTTCCCAGCACTGGGAT  
+HWI-EAS443:3:8:1373:1623#0/1  
ab]`¥baabbaaaa^aaaaaW`\_aa[¥\_`a¥\_¥a`]a¥^  
@HWI-EAS443:3:8:1399:1029#0/1  
AGCGTTTCCTGGGTTTCGACTTTCTTACTTGATCCATC  
+HWI-EAS443:3:8:1399:1029#0/1  
Yabbbba\_\_\_\_`]\_ab¥` `Xaa`V]Yaaa\_a[aaaNZ`\_T  
@HWI-EAS443:3:8:1416:539#0/1  
GACTTTGAAAGGGAAGGGTACTCACTGGTCGGGATAGACC  
+HWI-EAS443:3:8:1416:539#0/1  
a`ZbaVaTHX`ab]\_]abVY\_]Y\_¥[b^MR^\_a^ZQ`\_XR  
@HWI-EAS443:3:8:1457:606#0/1  
TGGGTTTCGACTTTCTTACTTGATCCATCATTGCCCTC  
+HWI-EAS443:3:8:1457:606#0/1  
\_bba[`^]ab[a]a`bX[aaQ]a^`aa\_`baa^`aU\_G\_\_  
@HWI-EAS443:3:8:1473:2028#0/1  
AGAGAGGATGGTGCTTTCTGCTTTTGATGAGAGAAGAAAT  
+HWI-EAS443:3:8:1473:2028#0/1  
abaaaba^`baYZ¥\_\_aU\_^P`\_aa\_W^XZ^]\_] [ZU^]\_  
@HWI-EAS443:3:8:149:827#0/1  
GGAGGGGTGAAAATGGACGAAGGACAAGGGTTGCTTATGA  
+HWI-EAS443:3:8:149:827#0/1  
ab` `aabXa` `^aa` `a`Xa\_] ^` ` `\_] ^aY` ` `^`\_  
@HWI-EAS443:3:8:1649:931#0/1  
GCACATTCTTTCATAAGCAACCCTTGTCCTTCGTCATTT  
+HWI-EAS443:3:8:1649:931#0/1  
^XZWR[Z]T\_[Xa`X¥a^¥`V¥YZZXUNL[UZaWNW^UZ]  
@HWI-EAS443:3:8:1651:527#0/1  
TCCTGTTTTCTTAGGGTCCTTCCCAGCACTGGGATGCTCT  
+HWI-EAS443:3:8:1651:527#0/1  
aaaababbbababaaa\_\_\_\_baa¥Ua\_]\_^a` `[^^`X\_Ra  
@HWI-EAS443:3:8:1790:1273#0/1  
CACATTCTTTCATAAGCAACCCTTGTCCTTCGTCATTTT  
+HWI-EAS443:3:8:1790:1273#0/1  
`babbabbbababab`bb`ababb`S]ab`ba\_Z`bb`a  
@HWI-EAS443:3:8:193:314#0/1  
GCTTTCTGCTTTTGATGAGAGAAGAAATAAATACCTAGAA  
+HWI-EAS443:3:8:193:314#0/1  
O^`^¥`IU`Za^`\_X\_bbbaab` `bbbb\_]\_bbaYbabb`



@HWI-EAS443:3:8:203:1546#0/1  
GGAGGGGTGAAAATGGACGAAGGACAAGGGTTGCTTATGA  
+HWI-EAS443:3:8:203:1546#0/1  
U[baab] []b\_ababbbbababaabbbba^abaa^[aba  
@HWI-EAS443:3:8:203:312#0/1  
ACACAAGCAGGCAGGCAGGATTTATGTGCAACTGATCCCC  
+HWI-EAS443:3:8:203:312#0/1  
aaa[^UUaa`Z^¥a`WL¥`RFW¥STXQUVPXOQ[Z^\_TS[  
@HWI-EAS443:3:8:209:118#0/1  
GGAGGGGTGAAAATGGACGAAGGACAAGGGTTGCTTATGA  
+HWI-EAS443:3:8:209:118#0/1  
aa\_^b\_VT^H^ZY¥\_^¥]\_aXSVX]`RWa[UX^OVVY^Y  
@HWI-EAS443:3:8:229:1372#0/1  
GTCCATCATAATCACTGAGTTTGAGTTCAGTGACATTTG  
+HWI-EAS443:3:8:229:1372#0/1  
`K]aaaaaabba`bab`ba\_a^aa`S^a`ZWYY]]^\_^aa  
@HWI-EAS443:3:8:238:1893#0/1  
ATTCCGGTGC GAACAAGCGCTCTTGTCTCTGATATGTGG  
+HWI-EAS443:3:8:238:1893#0/1  
`aaaaUGaaaa\_aaa¥a¥aQ¥\_`Y¥U\_a\_`\_¥¥]ZWS[  
@HWI-EAS443:3:8:267:362#0/1  
CAGGCAGGCAGGATTTATGTGCAACTGATCCCCTCAGAAT  
+HWI-EAS443:3:8:267:362#0/1  
a\_`ba`aa```X]`\_a[V]X]]N]`aVXLVP[\_¥a]]\_`  
@HWI-EAS443:3:8:36:1450#0/1  
AGCACTCATTCTGAGGGGATCAGTTGCACATAAATCCTGC  
+HWI-EAS443:3:8:36:1450#0/1  
^Z\_bVa[a¥a`aaa`aX\_a^UZ`¥[[\_`\_aV^X[YYa¥\_¥  
@HWI-EAS443:3:8:393:740#0/1  
CAATAGAGAGGATGGTGCTTTCTGCTTTTGATGAGAGAAG  
+HWI-EAS443:3:8:393:740#0/1  
aaaaabaaaaaa[aa\_¥T0¥a`X^]\_`a\_]Za^[a]`G`a  
@HWI-EAS443:3:8:42:1235#0/1  
CAACACTTCCCAGAAGGTCTGGTGCCGCAGGTGCTGCGGT  
+HWI-EAS443:3:8:42:1235#0/1  
\_aa\_\_`\_^`X\_`^Y`aU^^¥`Sa[X`^Y`R^¥¥¥]^B  
@HWI-EAS443:3:8:452:1960#0/1  
GTTGGAATGCCAATCATGATATGAGTAAGACCTGCTGTT  
+HWI-EAS443:3:8:452:1960#0/1  
`M``\_]L]a` []TW^]¥S¥W]¥¥¥W^0[[`]XU[]BBBBB  
@HWI-EAS443:3:8:480:765#0/1  
GGTCCTCCTGTTTTCTTAGGGTCCTTCCCAGCACTGGGAT  
+HWI-EAS443:3:8:480:765#0/1  
¥PN¥a¥^^\_]]`aa¥a\_]\_Q[^aY[U`VO¥¥a¥^]WNW¥Y  
@HWI-EAS443:3:8:512:431#0/1  
CAATAGAGAGGATGGTGCTTTCTGCTTTTGATGAGAGAAG  
+HWI-EAS443:3:8:512:431#0/1  
abbbbb`bbbabbbb`b`aba\_`YUZbbb`a```\_\_\_\_]aa  
@HWI-EAS443:3:8:595:206#0/1  
CACAAGCAGGCAGGCAGGATTTATGTGCAACTGATCCCCT

+HWI-EAS443:3:8:595:206#0/1  
^^\_U¥b`¥S[`aZ]aaaUV\_]¥Q¥ZNP`S]\_\_\_PLHR\_  
@HWI-EAS443:3:8:599:1898#0/1  
CAGGTGCTGCGGTGAAAGGAGTTGGAACAATAGCAATGGA  
+HWI-EAS443:3:8:599:1898#0/1  
Va[WUb]ab`\_b\_]¥`a\_HUT\_b\_ab`\_]`[YD¥^aS`a  
@HWI-EAS443:3:8:609:655#0/1  
TGAAAATGGACGAAGGACAAGGGTTGCTTATGAAAGAATG  
+HWI-EAS443:3:8:609:655#0/1  
aa^]WO`b[N^P`\_bX`aa^aG^W¥]^`\_^a0^\_\_`¥\_a  
@HWI-EAS443:3:8:616:1671#0/1  
AAAGCACCATCCTCTCTATTGTTATGCTATTCTGGATTAG  
+HWI-EAS443:3:8:616:1671#0/1  
ab\_`^aaa`]UZ`\_a^`\_`\_`^`]\_\_JSa^^0\_¥¥][[`[  
@HWI-EAS443:3:8:647:976#0/1  
GGGTCCTCCTGTTTTCTTAGGGTCCTTCCCAGCACTGGGA  
+HWI-EAS443:3:8:647:976#0/1  
`baJaXaaXa`b`Zaa\_aa]\_Za[`a¥aa¥\_\_V\_Z^`\_X  
@HWI-EAS443:3:8:732:757#0/1  
GACTAATCCAGAATAGCATAACAATAGAGAGGATGGTGCT  
+HWI-EAS443:3:8:732:757#0/1  
ababbbb`abbaabbaabaaaa`a\_bababaa\_b`Wa]`  
@HWI-EAS443:3:8:800:1255#0/1  
CATTGCTATTGTTCCAACCTCTTTCACCGCAGCACCTGCG  
+HWI-EAS443:3:8:800:1255#0/1  
a`bbbbabba]T^[]\_`\_]`[]a[`aaaaaaa`]aaQV\_Z\_  
@HWI-EAS443:3:8:900:658#0/1  
ATCATAATCACTGAGTTTGAGTTCAGTGCACATTTGGATG  
+HWI-EAS443:3:8:900:658#0/1  
a^a]ZSWYX[Y`aZa\_aaa\_aa\_`\_]YWO]HNYPT[\_  
@HWI-EAS443:3:90:134:1371#0/1  
TAATCACTGAGTTTGAGTTCAGTGCACATTTGGATGTAGA  
+HWI-EAS443:3:90:134:1371#0/1  
a¥UXa`aaa`\_a\_a]\_Y^][`Z^`][`\_`^X\_V\_U`W\_  
@HWI-EAS443:3:90:1377:1648#0/1  
GACTTTGAAAGGGAAGGGTACTCACTGGTCGGGATAGACC  
+HWI-EAS443:3:90:1377:1648#0/1  
`\_U\_aaba[`\_JXbaaab¥`aaba[¥a`Gaba]X\_^aa[Y  
@HWI-EAS443:3:90:1404:1028#0/1  
GCTTTCTGCTTTTGATGAGAGAAGAAATAAATACCTAGAA  
+HWI-EAS443:3:90:1404:1028#0/1  
`aa\_a^aa`b\_a\_S`aZ^`^¥\_]\_^`¥\_^WX`¥\_^\_  
@HWI-EAS443:3:90:1435:75#0/1  
AAGCAACCCTTGCTTCCTTCGTCATTTTCACCCCTCCAGAA  
+HWI-EAS443:3:90:1435:75#0/1  
aababbaaabbaa\_bb`aa\_\_aaaa\_a\_]W\_\_R\_]\_]\_  
@HWI-EAS443:3:90:1552:726#0/1  
GGTGCTTTCTGCTTTTGATGAGAGAAGAAATAAATACCTA  
+HWI-EAS443:3:90:1552:726#0/1  
ab\_`U`ba`aaU`aaaa`a``¥]\_\_a\_``aaa\_\_`¥`a

@HWI-EAS443:3:90:1575:1859#0/1  
ATGATGGATCAAGTAAGAGAAAGTCGAAACCCAGGAAACG  
+HWI-EAS443:3:90:1575:1859#0/1  
`bbbbbbba`\_aa`¥`^ba`a^aaXW\_aaa¥¥^`^^`\_U`  
@HWI-EAS443:3:90:1607:654#0/1  
AGCATAACAATAGAGAGGATGGTCTTTCTGCTTTTGATG  
+HWI-EAS443:3:90:1607:654#0/1  
K¥\_babbaabaXZaa\_ba]^bbK]^`[a`¥a[b`bWZH]b  
@HWI-EAS443:3:90:1637:1926#0/1  
GTGGAATCGGGAGATTCTACATCCAAATGTGCACTGAACT  
+HWI-EAS443:3:90:1637:1926#0/1  
a\_a\_Ma\_aaa]^¥TY\_]I\_aa[VURIUUaV`]V`^¥RW  
@HWI-EAS443:3:90:1753:1952#0/1  
TGACTTTGAAAGGGAAGGTTACTCACTGGTCGGGATAGAC  
+HWI-EAS443:3:90:1753:1952#0/1  
aab\_abbb^aa\_a`\_aaaa]a`a\_a`\_a\_W¥aa\_^\_a`aZ  
@HWI-EAS443:3:90:219:894#0/1  
CACATAAATCCTGCCTGCCTGCTTGTGTGTATGGGCTTGC  
+HWI-EAS443:3:90:219:894#0/1  
aababbaababbbbaaaabaabaa\_a`a`\_aaa``\_]\_S  
@HWI-EAS443:3:90:260:207#0/1  
GAAAATGGACGAAGGACAAGGTTGCTTATGAAAGAATGT  
+HWI-EAS443:3:90:260:207#0/1  
aaaVaabaaabaaaa\_a`\_aa\_]\_a^```\_\_\_\_]`\_X`^¥  
@HWI-EAS443:3:90:273:1321#0/1  
GGGGATCAGTTGCACATAAATCCTGCCTGCCTGCTTGTGT  
+HWI-EAS443:3:90:273:1321#0/1  
a]]][abaa`baaaaa]aaa`aaa`\_`a`aaaa`\_`a`dW  
@HWI-EAS443:3:90:286:1556#0/1  
GAGGATGGTCTTTCTGCTTTTGATGAGAGAAGAAATAAA  
+HWI-EAS443:3:90:286:1556#0/1  
\_\_`aaaaa`ba`aaaa\_aa\_aa\_a`\_`\_a\_aaa`aaaaa`  
@HWI-EAS443:3:90:347:363#0/1  
AAAGAATGTGCAATATCCTCAAAGGAAAATTTCAAACAGC  
+HWI-EAS443:3:90:347:363#0/1  
ababa`ab]abaaaaaaaa\_aaaaa`aa`\_`aaa`W`aa\_\_  
@HWI-EAS443:3:90:374:565#0/1  
GGTGAATGGACGAAGGACAAGGTTGCTTATGAAAGAA  
+HWI-EAS443:3:90:374:565#0/1  
aa[a\_a^]aaa`\_a\_a`^`a`\_`\_Z^a`\_`^`\_^^`\_]`  
@HWI-EAS443:3:90:479:1978#0/1  
TGGACGACTAATCCAGAATAGCATAACAATAGAGAGGATG  
+HWI-EAS443:3:90:479:1978#0/1  
WY¥`bX`Z`WG^ab[ZS\_S\_^abb¥^aa¥V`^`^]¥b\_`  
@HWI-EAS443:3:90:595:655#0/1  
GGTGAATGGACGAAGGACAAGGTTGCTTATGAAAGAA  
+HWI-EAS443:3:90:595:655#0/1  
aa\_a\_\_[\_`a]\_\_a^a\_\_aaYa`]X^aa`\_`\_aa]^`a^  
@HWI-EAS443:3:90:619:1080#0/1  
GGGAGCGCCAGGATGCCACAGAAATCAGAGCATCTGTCGG

+HWI-EAS443:3:90:619:1080#0/1  
abaa`baabbaa[a`baaabaaaa\_]aa`aaa^]aa]^\_`  
@HWI-EAS443:3:90:633:1873#0/1  
TAACAATAGAGAGGATGGTGCTTTCTGCTTTTGATGAGAG  
+HWI-EAS443:3:90:633:1873#0/1  
WR\_`aa[\_a¥X`a\_`OZ¥KJ^U\_Y^^¥^`ZbaV^VZH¥\_¥  
@HWI-EAS443:3:90:805:323#0/1  
CACTGGTCGGGATAGACCCATTCAAATTACTCCAAAACAG  
+HWI-EAS443:3:90:805:323#0/1  
a\_0]bbUa[a`\_\_\_ZVZ\_a`a[Uaaa[`^S\_^]ba^ab\_V  
@HWI-EAS443:3:90:816:1856#0/1  
CTGTTTTCTTAGGGTCCTTCCCAGCACTGGGATGCTCTTC  
+HWI-EAS443:3:90:816:1856#0/1  
`a\_bbbbbbb`^`[Ybabbbba^¥abbaab\_¥ab\_]¥]baa  
@HWI-EAS443:3:90:829:328#0/1  
AACAATAGAGAGGATGGTGCTTTCTGCTTTTGATGAGAGA  
+HWI-EAS443:3:90:829:328#0/1  
Yb¥U\_b\_ZY\_\_aX]¥Y^NaYHY``¥`aabWa^[D]^`^]aI  
@HWI-EAS443:3:90:851:1564#0/1  
ATCAGGCTGACCACTTGGCTGTTTTGGAGTAATTTGAATG  
+HWI-EAS443:3:90:851:1564#0/1  
a\_aba\_aaaaa`aaa`abaaaY` `[ZUZV[\_[[`L^\_ON  
@HWI-EAS443:3:90:88:1598#0/1  
CAGGCAGGCAGGATTTATGTGCAACTGATCCCCTCAGAAT  
+HWI-EAS443:3:90:88:1598#0/1  
aa]^\_OHQ`ZYMWXZVX¥]RYaYVLY\_\_W[]^aZ^[^XRT  
@HWI-EAS443:3:90:981:940#0/1  
GGAGAGTTTGGCGCAAGCAAACAATGGCGAAGATGCAAC  
+HWI-EAS443:3:90:981:940#0/1  
ab`ZZHU\_`¥¥RW`GJMXXSQ]H[X`\_\_aM]^N^M^PG  
@HWI-EAS443:3:90:984:1126#0/1  
GGTCTGGTGCCGCAGGTGCTGCGGTGAAAGGAGTTGGAAC  
+HWI-EAS443:3:90:984:1126#0/1  
aba`bba]b^`a``VSPa^¥`^ba]`Y¥`a`UXLXXZLML  
@HWI-EAS443:3:91:1076:23#0/1  
ATCCATTCCGGTGCGAACAAGCGCTCTTGTCTCTGATAT  
+HWI-EAS443:3:91:1076:23#0/1  
`]^\_¥aa`\_`^^a\_aa`U^`a\_`^X^`\_Z\_^`V\_aT`¥\_  
@HWI-EAS443:3:91:1091:621#0/1  
ATCATAATCACTGAGTTTGAGTTCAGTGACATTTGGATG  
+HWI-EAS443:3:91:1091:621#0/1  
Y¥WV^¥Xa]aaTNY]X¥bba^Z^\_¥R]b¥a`¥bWQ\_ab\_]`  
@HWI-EAS443:3:91:1100:122#0/1  
ATTTGGATGTAGAATCTCCCGATTCCACCAATCATTCTTC  
+HWI-EAS443:3:91:1100:122#0/1  
aba^WQ]a`X]V¥` `^`VZYHP]TQ¥TP^\_[UV[UP^^X  
@HWI-EAS443:3:91:1113:1850#0/1  
GCTTTCTGCTTTTGATGAGAGAAGAAATAAATACCTAGAA  
+HWI-EAS443:3:91:1113:1850#0/1  
aa[¥^S\_\_Xa\_\_BBBBBBBBBBBBBBBBBBBBBBBBBBBB

@HWI-EAS443:3:91:1135:1164#0/1  
AGTGAGTACCCTTCCCTTTCAAAGTCATGCCCACTTGCTA  
+HWI-EAS443:3:91:1135:1164#0/1  
]WP^b\_Pa\_]abb`\_baba\_babbOUaa]`^\_a]b\_\_Y`a  
@HWI-EAS443:3:91:1136:374#0/1  
TTATGCTATTCTGGATTAGTCGTCCATCATAATCACTGAG  
+HWI-EAS443:3:91:1136:374#0/1  
abaa\_aaaaa\_`\_a`a\_a\_\_`^`^`Y\_\_\_\_\_aZ`[\_][`  
@HWI-EAS443:3:91:1180:1052#0/1  
TGAAATTTTCCCTTTGAGGATATTGCACATTCTTTCATAAG  
+HWI-EAS443:3:91:1180:1052#0/1  
\_`¥¥^bbZ^^Z¥a`a\_b\_`aaabbT\_T\_a``ab^Y¥aaa`  
@HWI-EAS443:3:91:138:1285#0/1  
ATTCCGGTGC GAACAAGCGCTCTTGTCTCTGATATGTGG  
+HWI-EAS443:3:91:138:1285#0/1  
aaaabab`abaaaab]\_aaaaaaaa`a``aa`aaaa`¥][  
@HWI-EAS443:3:91:1391:1177#0/1  
CATGATTTGGCATTCCAACCTGAATGATGCCACATATCAG  
+HWI-EAS443:3:91:1391:1177#0/1  
aba`^bbbb`babaaaa``bbaabaab`^\_`abba[a`  
@HWI-EAS443:3:91:1517:571#0/1  
TCAAATTACTCCAAAACAGCCAAGTGGTCAGCCTGATGAG  
+HWI-EAS443:3:91:1517:571#0/1  
abaaaaaa`ba`^`aa\_`XW¥aaaRZ\_[S]`QZ\_a\_`\_]`  
@HWI-EAS443:3:91:154:1946#0/1  
TAGAGAGGATGGTGCTTTCTGCTTTTGATGAGAGAAGAAA  
+HWI-EAS443:3:91:154:1946#0/1  
aaaaaaaa`a`\_]P]^^`^\_X[\_]`aX]^VOKW]¥[XW`\_  
@HWI-EAS443:3:91:1564:739#0/1  
CATAATCACTGAGTTTGAGTTCAGTGCACATTTGGATGTA  
+HWI-EAS443:3:91:1564:739#0/1  
aabb`bbZ¥aa`b`abbbb\_bbba`b\_aa]aaa`]aaaX\_  
@HWI-EAS443:3:91:1662:864#0/1  
ACCCTTGCTTTCGTCCATTTTACCCTCCAGAAATTTTC  
+HWI-EAS443:3:91:1662:864#0/1  
```^aba]]`aaYOW\_^\_\_`aa\_aNRTU\_S[[[\_]^[\_]Y  
@HWI-EAS443:3:91:1668:1682#0/1  
TCCAAATGTGCACTGAACTCAAACCTCAGTGATTATGATGG  
+HWI-EAS443:3:91:1668:1682#0/1  
a^\_aaabb\_baaZaaaa``¥aaaaa¥aa]a]aaa\_]`\_`  
@HWI-EAS443:3:91:1763:1667#0/1  
ACTTTCTCTTACTTGATCCATCATTGCCCTCTGGGCAGCT  
+HWI-EAS443:3:91:1763:1667#0/1  
`bbbbbbba`bbaaba`aa`ab\_aaa\_^^^a^aaa\_Y`aU`  
@HWI-EAS443:3:91:249:1802#0/1  
AGGCCAGGATGCCACAGAAATCAGAGCATCTGTGGAAG  
+HWI-EAS443:3:91:249:1802#0/1  
aab]`aa^aa\_aT`[a]a`\_]`]¥R[\_]`PYU¥P¥S  
@HWI-EAS443:3:91:288:1959#0/1  
AAAGCAGAAAGCACCATCCTCTCTATTGTTATGCTATTCT

+HWI-EAS443:3:91:288:1959#0/1  
abbUab^aY\_^^¥¥^`\_\_`\_aa\_`\_^]^^YJMT[\_¥BB  
@HWI-EAS443:3:91:396:484#0/1  
CTCAAACCTCAGTGATTATGATGGACGACTAATCCAGAATA  
+HWI-EAS443:3:91:396:484#0/1  
abbaa`abaXa`a]^a`aba`b\_a`aa]^a``XZ\_a\_`\_\_  
@HWI-EAS443:3:91:527:835#0/1  
CTAATCCAGAATAGCATAACAATAGAGAGGATGGTGCTTT  
+HWI-EAS443:3:91:527:835#0/1  
abbbbbbbbbbbbbbbbabba^aaaaba`baMa\_\_aa  
@HWI-EAS443:3:91:631:875#0/1  
AACAAGCGCTCTTGTCTCTGATATGTGGCATCATTCAAG  
+HWI-EAS443:3:91:631:875#0/1  
`UY`\_`a]^aI\_`RX^¥ZX\_]ZR^XSMSX^X^¥XWSV[¥  
@HWI-EAS443:3:91:634:194#0/1  
CTGGGATCCATTCCGGTGCGAACAAGCGCTCTTGTCTCT  
+HWI-EAS443:3:91:634:194#0/1  
`abbabbaa\_bbbabaYbbbbbaababbaa`bbabbaabb  
@HWI-EAS443:3:91:703:1218#0/1  
CTGGAGGGGTGAAAATGGACGAAGGACAAGGGTTGCTTAT  
+HWI-EAS443:3:91:703:1218#0/1  
a`ab`\_`a`Va\_¥¥\_a^\_W\_a`^^`^aa```Y^`¥X][`  
@HWI-EAS443:3:91:830:93#0/1  
TTGACTTTCTCTTACTTGATCCATCATTGCCCTCTGGGC  
+HWI-EAS443:3:91:830:93#0/1  
^babVWRYY`aa`a]N`Z¥aXR¥¥W[\_RTTMZ]QWOTU  
@HWI-EAS443:3:91:965:157#0/1  
ATGACTTTGAAAGGAAGGGTACTCACTGGTCGGGATAGA  
+HWI-EAS443:3:91:965:157#0/1  
a\_a`bbaaaa`[\_`T]a^XPZVaa`aa\_aFT]\_\_\_\_]`Y\_  
@HWI-EAS443:3:91:985:1472#0/1  
GTCGGGATAGACCCATTCAAATTACTCCAAAACAGCCAAG  
+HWI-EAS443:3:91:985:1472#0/1  
`RX\_a^]^aa\_\_`a`¥¥a`a[¥\_SS`]\_a\_\_\_\_Y[\_^]  
@HWI-EAS443:3:92:1007:460#0/1  
GAAAGCACCATCCTCTCTATTGTTATGCTATTCTGGATTA  
+HWI-EAS443:3:92:1007:460#0/1  
aaaa^^ZLSbYYaaSa^a[XYWX`a\_a^aa^HI`aXG¥^¥  
@HWI-EAS443:3:92:106:1789#0/1  
AATTTCTGGAGGGGTGAAAATGGACGAAGGACAAGGGTTG  
+HWI-EAS443:3:92:106:1789#0/1  
aaa`aaa`\_\_a\_\_X\_\_^`a^¥\_`^\_]Y\_`]U]¥ZZ\_  
@HWI-EAS443:3:92:1077:906#0/1  
GGTGAAAATGGACGAAGGACAAGGGTTGCTTATGAAAGAA  
+HWI-EAS443:3:92:1077:906#0/1  
aa^^U\_\_W\_aa\_aa¥\_`^[a]Z`]^`^a``a\_¥`]^^[a\_\_  
@HWI-EAS443:3:92:109:741#0/1  
GGGTCCTCCTGTTTTCTTAGGGTCCTTCCCAGCACTGGGA  
+HWI-EAS443:3:92:109:741#0/1  
`PRN`]N]^`¥K]Y^`]Z^^XSU[V[U^]^¥^¥P¥\_`^¥¥

@HWI-EAS443:3:92:1150:1754#0/1  
CCCAGTGCTGGGAAGGACCCTAAGAAAACAGGAGGACCCA  
+HWI-EAS443:3:92:1150:1754#0/1  
aaaba`baabbbabbbba\_baababb`bbbbaaaabYNWb  
@HWI-EAS443:3:92:1228:822#0/1  
GCCAAGTGGTCAGCCTGATGAGACCAAATGAAAACCCAGC  
+HWI-EAS443:3:92:1228:822#0/1  
a`aaa`aaYa`a\_\_ab\_aaP`\_X\_a`a``\_]`¥X\_a\_  
@HWI-EAS443:3:92:127:1488#0/1  
CAACCCTTGTCTTCGTCCATTTTCACCCCTCCAGAAATT  
+HWI-EAS443:3:92:127:1488#0/1  
^Zbaba]aa^`\_a\_\_^aaaa¥\_a\_aa[``]`\_^\_Ua\_^]  
@HWI-EAS443:3:92:1352:848#0/1  
CTGGGATCCATTCCGGTGCGAACAAGCGCTCTTGTCTCT  
+HWI-EAS443:3:92:1352:848#0/1  
\_PWXRXXMZ[Z[Q`\_[a\_a`a\_aYR]b[a[aa^^`URU\_  
@HWI-EAS443:3:92:1358:966#0/1  
ACAATAGAGAGGATGGTGCTTTCTGCTTTTGATGAGAGAA  
+HWI-EAS443:3:92:1358:966#0/1  
aba\_abb\_aaa`\_a`S`[\_`a]a\_^`aa[¥`Y\_S[]^  
@HWI-EAS443:3:92:1504:501#0/1  
CTGGGATCCATTCCGGTGCGAACAAGCGCTCTTGTCTCT  
+HWI-EAS443:3:92:1504:501#0/1  
aa`aaTaa`abaZV\_a`Xaa`\_`ba]`aa[a`a]\_WaU\_  
@HWI-EAS443:3:92:1521:1381#0/1  
TGGACGACTAATCCAGAATAGCATAACAATAGAGAGGATG  
+HWI-EAS443:3:92:1521:1381#0/1  
aba\_\_\_\_`a`aaa`aaa`a`b\_a`a`Za`\_a`\_\_`a`\_a  
@HWI-EAS443:3:92:1526:351#0/1  
GCTTGCAGTAGCAAGTGGGCATGACTTTGAAAGGGAAGGG  
+HWI-EAS443:3:92:1526:351#0/1  
aba¥bb\_R\_\_aR`YXHaaaZG¥aa`XZ\_a`[Z`a\_^X\_a¥  
@HWI-EAS443:3:92:367:1928#0/1  
CATGACTTTGAAAGGGAAGGGTACTCACTGGTCGGGATAG  
+HWI-EAS443:3:92:367:1928#0/1  
aaaaaa\_aa^aaa`\_\_aaa^UVa`\_aaa^\_\_V`]^`\_\_\_\_`\_  
@HWI-EAS443:3:92:372:1623#0/1  
GAATGATTGGTGAATCGGGAGATTCTACATCCAAATGTG  
+HWI-EAS443:3:92:372:1623#0/1  
``aab]bba¥^baa`aab[D^]aa`a\_\_``[``aaa^]Y  
@HWI-EAS443:3:92:451:882#0/1  
GTGAGTACCCTTCCCTTCAAAGTCATGCCCACTTGCTAC  
+HWI-EAS443:3:92:451:882#0/1  
a]a\_a[Z``\_\_\_\_`X^[[SVVYT`¥`^R^^R]W\_S[¥UUUU  
@HWI-EAS443:3:92:481:1041#0/1  
CAATAGAGAGGATGGTGCTTTCTGCTTTTGATGAGAGAAG  
+HWI-EAS443:3:92:481:1041#0/1  
aaa`aa^aa`a`\_aa\_a\_\_aa`\_^`\_a\_a]U`a^a^Y\_\_\_\_  
@HWI-EAS443:3:92:554:1546#0/1  
GAATGATTGGTGAATCGGGAGATTCTACATCCAAATGTG

+HWI-EAS443:3:92:554:1546#0/1  
a\_bb\_ababbab\_bbbbbbaabaaabababbaaabaabaa¥a  
@HWI-EAS443:3:92:558:1051#0/1  
CCTGGGTTTCGACTTTCTCTTACTTGATCCATCATTGCC  
+HWI-EAS443:3:92:558:1051#0/1  
abb^\_b`b`ZaZ^[Z`bbaa`]^a\_bZa`aa\_`a\_`aa\_\_  
@HWI-EAS443:3:92:654:116#0/1  
CGTCCATCATAATCACTGAGTTTGAGTTCAGTGCACATTT  
+HWI-EAS443:3:92:654:116#0/1  
abab\_baabbbbaa`bbabbbbab`babb\_bab\_aaaa  
@HWI-EAS443:3:92:699:355#0/1  
AACTCCTTTCACCGCAGCACCTGCGGCACCAGACCTTCTG  
+HWI-EAS443:3:92:699:355#0/1  
a\_aaba`baabaaaa¥]a`a]aa\_a^[^a`\_\_Y[[`]a^  
@HWI-EAS443:3:92:742:1790#0/1  
ATCCTCAAAGGAAAATTTCAAACAGCTGCCAGAGGGCAA  
+HWI-EAS443:3:92:742:1790#0/1  
U``\_ab`\_`a`]aZa`a[a\_`T\_aaa`\_\_`a^¥S`[]L`^  
@HWI-EAS443:3:92:908:706#0/1  
ATGCAAGTTCAACACTTCCCAGAAGGTCTGGTGCCGCAG  
+HWI-EAS443:3:92:908:706#0/1  
[`b\_]0]aaa`bb]a`b^ab]^a]\_b`U\_b^a¥a[N\_]a`  
@HWI-EAS443:3:92:948:589#0/1  
CTCCTGTTTTCTTAGGGTCCTTCCCAGCACTGGGATGCTC  
+HWI-EAS443:3:92:948:589#0/1  
Z[XV\_[\_[]\_¥[[V\_\_XXb^W]X\_H\_WJXX\_`ab^aa`¥]  
@HWI-EAS443:3:92:979:819#0/1  
GATGGTGCTTTCTGCTTTTGATGAGAGAAGAAATAAATAC  
+HWI-EAS443:3:92:979:819#0/1  
aaaaa\_a`aaa````abaaa\_aa`a\_a`aaa`aaa`a\_`\_  
@HWI-EAS443:3:92:999:396#0/1  
CAATATCCTCAAAGGAAAATTTCAAACAGCTGCCAGAGG  
+HWI-EAS443:3:92:999:396#0/1  
R\_`\_VZUXV¥¥RY^\_\_Y\_ba\_aaa\_I`¥abbbVb]]Y\_b  
@HWI-EAS443:3:93:1035:1664#0/1  
CAATAGAGAGGATGGTGCTTTCTGCTTTTGATGAGAGAAG  
+HWI-EAS443:3:93:1035:1664#0/1  
aaab^a[`aa]¥X`a^\_Y^\_aUY```aa]S\_\_YQ\_]`\_]\_a  
@HWI-EAS443:3:93:108:27#0/1  
CATAATCACTGAGTTTGAGTTCAGTGCACATTTGGATGTA  
+HWI-EAS443:3:93:108:27#0/1  
abb\_```\_`bbabab\_baba`bab¥baa\_aa\_`baa^aN¥  
@HWI-EAS443:3:93:1212:892#0/1  
GCAGGATTTATGTGCACTGATCCCCTCAGAATGAGTGCT  
+HWI-EAS443:3:93:1212:892#0/1  
^S\_`]¥a`a]^WV¥¥`]Wa]\_]¥ZUW\_Q]\_ZY]\_^¥RYLS  
@HWI-EAS443:3:93:1597:477#0/1  
CTTCCGACAGATGCTCTGATTTCTGTGGCATCCTGGCGCT  
+HWI-EAS443:3:93:1597:477#0/1  
aaaa¥ba]ba`aa¥`abb^aba^a]¥^U[^`]^¥Z]P\_S`



@HWI-EAS443:3:93:1602:648#0/1  
GCACATTCTTTCATAAGCAACCCTTGTCCCTTCGCCATTT  
+HWI-EAS443:3:93:1602:648#0/1  
a\_b\_`ba\_bbbaaaaba¥aa``\_aaa\_UY`aab\_^U\_`\_a  
@HWI-EAS443:3:93:161:431#0/1  
GGTGCTTTCTGCTTTTGTGAGAGAAGAAATAAATACCTA  
+HWI-EAS443:3:93:161:431#0/1  
^\_Yb¥VW[]a\_Y]¥^a^QRa\_baa\_¥`a\_\_]^U\_]PV\_]`  
@HWI-EAS443:3:93:1632:1541#0/1  
GTGCTTTCTGCTTTTGTGAGAGAAGAAATAAATACCTAG  
+HWI-EAS443:3:93:1632:1541#0/1  
`V^baab`baabbbababb`a`aaaa`aa``aaaTX``a  
@HWI-EAS443:3:93:168:1423#0/1  
GACTAATCCAGAATAGCATAACAATAGAGAGGATGGTGCT  
+HWI-EAS443:3:93:168:1423#0/1  
aa`aaa]aa^aaa`Za``^\_aa\_[a]a^`〕\_\_U\_]TNOW  
@HWI-EAS443:3:93:230:1554#0/1  
ATAACAATAGAGAGGATGGTGCTTTCTGCTTTTGTGAGAGA  
+HWI-EAS443:3:93:230:1554#0/1  
a\_aaaaT`^`ZVXY^X\_^TY¥QVQGY¥U]]]RTPZT[B  
@HWI-EAS443:3:93:230:1770#0/1  
GAAGGGTACTCACTGGTCGGGATAGACCCATTCAAATTAC  
+HWI-EAS443:3:93:230:1770#0/1  
a`[b\_OY]a\_\_PZ`aP¥aKaP`\_a`YaJQ`\_`¥aa[UD[a  
@HWI-EAS443:3:93:238:1509#0/1  
GTCGTCCATCATAATCACTGAGTTTGAGTTCAGTGACACAT  
+HWI-EAS443:3:93:238:1509#0/1  
`LYXSIXVW`^[]SWW\_\_U[UNR`PZ¥[Z¥QLSYWMPVMO  
@HWI-EAS443:3:93:289:1001#0/1  
ATCATAATCACTGAGTTTGAGTTCAGTGACACATTTGGATG  
+HWI-EAS443:3:93:289:1001#0/1  
aab^``baaaa`b^`^aab\_a^\_a\_a]a`a\_aaa`aR\_\_a  
@HWI-EAS443:3:93:48:1092#0/1  
TGGGTCCTCCTGTTTTCTTAGGGTCCTTCCCAGCACTGGG  
+HWI-EAS443:3:93:48:1092#0/1  
]]`aZbb`bZTa[ZaabbaaZ`a^aXaU\_TZ¥\_b`a¥XXX  
@HWI-EAS443:3:93:540:459#0/1  
GAAGGGTACTCACTGGTCGGGATAGACCCATTCAAATTAC  
+HWI-EAS443:3:93:540:459#0/1  
aaaaa`^`a\_a\_\_`aa]aaaa`aaa`\_]\_\_a\_\_``^\_`^`  
@HWI-EAS443:3:93:543:1869#0/1  
TCATGATATGAGTAAGACCTGCTGTTGCATCTTCGCCATT  
+HWI-EAS443:3:93:543:1869#0/1  
``¥`aZ]\_bb[aXYa\_I\_Q^aa]aRPMSIVDUBBBBBBBB  
@HWI-EAS443:3:93:563:422#0/1  
CACATATCAGAGAACAAGAGCGCTTGTTCGCACCGGAATG  
+HWI-EAS443:3:93:563:422#0/1  
``a\_baaa`bJ`aababZY`aVbb\_\_Ybb[``a¥a[`Z\_a  
@HWI-EAS443:3:93:588:809#0/1  
GGAAACGCTGAGATTGAAGACCTCATTTTCTGCGCACGGT

+HWI-EAS443:3:93:588:809#0/1  
^\_^^^`aab[``\_\_a\_\_[\_``\_\_^[¥ZRS]```¥YV¥W  
@HWI-EAS443:3:93:616:273#0/1  
GTTCCAACCTCTTTCACCGCAGCACCTGCGGCACCAGACC  
+HWI-EAS443:3:93:616:273#0/1  
aPGTTZYZZ^¥YSX¥UU¥TZS¥USSBBBBBBBBBBBBBB  
@HWI-EAS443:3:93:784:813#0/1  
AATAGCATAACAATAGAGAGGATGGTGCTTTCTGCTTTTG  
+HWI-EAS443:3:93:784:813#0/1  
`\_]\_aa`a`Uaab`a^`]b`aQ[a`aY\_SS^a\_aZ]^\_[]  
@HWI-EAS443:3:93:845:882#0/1  
AATTTCTGGAGGGGTGAAAATGGACGAAGGACAAGGGTTG  
+HWI-EAS443:3:93:845:882#0/1  
`]^[^]`a`Za`ZaVa[R]\_aa[^]`\_^¥^\_^]\_^`Y]a  
@HWI-EAS443:3:93:887:680#0/1  
ATCCAGAATAGCATAACAATAGAGAGGATGGTGCTTTCTG  
+HWI-EAS443:3:93:887:680#0/1  
^^`P¥XJZQW\_b`Y]¥a]T\_¥^¥[P¥a[¥PPIXXYZTR]  
@HWI-EAS443:3:94:103:27#0/1  
TGACTTTGAAAGGGAAGGGTACTCACTGGTCGGGATAGAC  
+HWI-EAS443:3:94:103:27#0/1  
aaaa`a`a`\_][a`a\_]^^^S`\_\_]^^\_]^Y]\_\_\_Z]]^]X  
@HWI-EAS443:3:94:1100:509#0/1  
GGGCAATGATGGATCAAGTAAGAGAAAGTCGAAACCCAGG  
+HWI-EAS443:3:94:1100:509#0/1  
\_a0¥b¥Sb\_aMGVT`[X]X]P`I\_[UJGHTLZa^WVZUR\_  
@HWI-EAS443:3:94:1125:135#0/1  
ATGGTGCTTTCTGCTTTTGATGAGAGAAGAAATAAATACC  
+HWI-EAS443:3:94:1125:135#0/1  
\_I^[0\_aa`[^`a\_]aaa\_S[```Y`SU``U``\_a]a\_QF  
@HWI-EAS443:3:94:1333:939#0/1  
GCATGACTTTGAAAGGGAAGGGTACTCACTGGTCGGGATA  
+HWI-EAS443:3:94:1333:939#0/1  
a\_bb`babbbbaaaaa`aaaa\_a\_aaaa`aa^¥aaa]\_a  
@HWI-EAS443:3:94:1425:1735#0/1  
GATGCAACAGCAGGTCTTACTCATATCATGATTTGGCATT  
+HWI-EAS443:3:94:1425:1735#0/1  
¥Y````ba`a[SVWW`\_U\_^]T¥aa¥MZ\_b¥^```¥VYW]  
@HWI-EAS443:3:94:150:815#0/1  
CCCTTGTCCTTCGTCCATTTTCACCCCTCCAGAAATTCG  
+HWI-EAS443:3:94:150:815#0/1  
aaaaba\_`aaaa[aaYaa`a```\_\_a^`\_\_a¥]]\_Z]]]  
@HWI-EAS443:3:94:1531:609#0/1  
TCCTCCTGTTTTCTTAGGGTCCTTCCCAGCACTGGGATGC  
+HWI-EAS443:3:94:1531:609#0/1  
\_P¥^ZUaaX````]\_\_`PUUYU`\_UX]]\_UXR]]S^XX[Y  
@HWI-EAS443:3:94:1769:827#0/1  
CGCCAAGCAAACAATGGCGAAGATGCAACAGCAGGTCTTA  
+HWI-EAS443:3:94:1769:827#0/1  
aabbbabaa`baaaaa\_\_baaaa``YYaaa`TX]\_R][\_\_

@HWI-EAS443:3:94:1782:1232#0/1  
CGTCCATCATAATCACTGAGTTTGTGAGTTCAGTGCACATTT  
+HWI-EAS443:3:94:1782:1232#0/1  
aababbaabbbbaababb]`aabb\_\_`aaaa]a\_`\_a\_aa  
@HWI-EAS443:3:94:1783:241#0/1  
ACCTGAATGATGCCACATATCAGAGAACAAGAGCGCTTGT  
+HWI-EAS443:3:94:1783:241#0/1  
aZ`\_U`baaU¥ZYsSaSZ¥a[a\_R\_Qa\_[a¥XZHT\_\_\_\_\_]X  
@HWI-EAS443:3:94:181:1270#0/1  
TAACAATAGAGAGGATGGTCTTTCTGCTTTTGTGAGAG  
+HWI-EAS443:3:94:181:1270#0/1  
aXbb¥WZbbaa`b]YbaN^`aa\_XTY[¥\_aaa\_`a\_`[`  
@HWI-EAS443:3:94:263:351#0/1  
CAGTAGCAAGTGGGCATGACTTTGAAAGGGAAGGGTACTC  
+HWI-EAS443:3:94:263:351#0/1  
^aaababbbbaababbbbbbabbbaab]bbba\_aaaWa`aa  
@HWI-EAS443:3:94:315:114#0/1  
CAGTTGCACATAAATCCTGCCTGCCTGCTTGTGTGTATGG  
+HWI-EAS443:3:94:315:114#0/1  
aab[[`a`\_`aa\_`a^^`aZ\_a\_¥Z^\_`\_`Z\_P^[Z[^W  
@HWI-EAS443:3:94:338:88#0/1  
ATTTCAAACAGCTGCCCAGAGGGCAATGATGGATCAAGTA  
+HWI-EAS443:3:94:338:88#0/1  
aba\_[aa`\_`ba\_a`\_`\_aWaa^\_`Z`a\_aa`Z\_Z\_Z\_X^  
@HWI-EAS443:3:94:399:1507#0/1  
CAGGAAACGCTGAGATTGAAGACCTCATTTTCTGGCACG  
+HWI-EAS443:3:94:399:1507#0/1  
`a]^^a\_`\_`aZ``\_`¥aaaWQZ^[a^`\_`¥\_¥¥¥\_]\_\_¥]  
@HWI-EAS443:3:94:429:643#0/1  
GGGAGCGCCAGGATGCCACAGAAATCAGAGCATCTGTCCG  
+HWI-EAS443:3:94:429:643#0/1  
a`a\_a¥^¥¥^`\_¥^`^Z]¥`^`\_\_[Z\_[R`¥^^W^\_UR[Z  
@HWI-EAS443:3:94:468:171#0/1  
CTGGGATCCATTCCGGTGCGAACAAGCGCTCTTGTCTCT  
+HWI-EAS443:3:94:468:171#0/1  
abbabaaaaabbaaaaZbaaa`\_`aa`a\_`^`\_`aY\_\_`\_`  
@HWI-EAS443:3:94:508:413#0/1  
TACCCTTCCCTTTCAAAGTCATGCCCACTTGCTACTGCAA  
+HWI-EAS443:3:94:508:413#0/1  
^a`bUab`a]]`aababa[`ba`aaa\_a`\_a\_a`¥¥aV[\_  
@HWI-EAS443:3:94:604:907#0/1  
CGACTAATCCAGAATAGCATAACAATAGAGAGGATGGTGC  
+HWI-EAS443:3:94:604:907#0/1  
`bbb\_abaabaabbbbbb`bbb\_`bbbbaa^abaXa]  
@HWI-EAS443:3:94:659:145#0/1  
GGCTTGCAGTAGCAAGTGGGCATGACTTTGAAAGGGAAGG  
+HWI-EAS443:3:94:659:145#0/1  
a`aa`\_`aa¥]]S)``¥`^^[``^¥\_```X¥[\_\_\_\_WZ\_¥  
@HWI-EAS443:3:94:663:1746#0/1  
ATGGGCTTGCAGTAGCAAGTGGGCATGACTTTGAAAGGGA

+HWI-EAS443:3:94:663:1746#0/1  
aWaaaaS]^S]a¥aa`XR`S` `M\_]a\_\_aVLRXOTa¥aJ  
@HWI-EAS443:3:94:680:2001#0/1  
GGATGGTGCTTTCTGCTTTTGATGAGAGAAGAAATAAATA  
+HWI-EAS443:3:94:680:2001#0/1  
abaaaa^bbb\_^ba^a\_a\_^`aaa\_`\_`a\_a\_]`aa`\_\_`  
@HWI-EAS443:3:94:72:572#0/1  
TAATCACTGAGTTTGAGTTCAGTGCACATTTGGATGTAGA  
+HWI-EAS443:3:94:72:572#0/1  
`TS\_¥baWQ[ `ZY\_\_Z^]Za^VV^¥[¥^]YabP`RbUZYa  
@HWI-EAS443:3:94:850:1383#0/1  
GCATAACAATAGAGAGGATGGTGCTTTCTGCTTTTGATGA  
+HWI-EAS443:3:94:850:1383#0/1  
`¥^`\_a`X]aa`\_aW`\_`\_`[R^\_U]\_[¥^Y\_\_\_\_¥YQWU  
@HWI-EAS443:3:94:857:1283#0/1  
CTGGGATCCATTCCGGTGCGAACAAGCGCTCTTGTCTCT  
+HWI-EAS443:3:94:857:1283#0/1  
a`[YY^]b`Ub`L`a] []ba[b]`aaU` `[abba^a\_]a  
@HWI-EAS443:3:94:886:427#0/1  
CGGAAGAATGATTGGTGAATCGGGAGATTCTACATCCAA  
+HWI-EAS443:3:94:886:427#0/1  
aab^aa`\_¥aaa`\_a[aaU]^`a`^]\_Q^\_\_\_U]W\_\_V]X  
@HWI-EAS443:3:94:900:1446#0/1  
CAAGTGGTCAGCCTGATGAGACCAAATGAAAACCCAGCTC  
+HWI-EAS443:3:94:900:1446#0/1  
abba^S¥]V\_a`[aaa`aa\_`H` `a\_a\_]aaZ\_`Ya\_LTY  
@HWI-EAS443:3:95:1048:1424#0/1  
GTCCTCCTGTTTTCTTAGGGTCCTTCCCAGCACTGGGATG  
+HWI-EAS443:3:95:1048:1424#0/1  
aUa]` `b` `a`aaaa\_X¥PZZ`[ `^a\_a` ` `¥a`a[\_aa  
@HWI-EAS443:3:95:1154:188#0/1  
AACAAATAGAGAGGATGGTGCTTTCTGCTTTTGATGAGAGA  
+HWI-EAS443:3:95:1154:188#0/1  
`b]bbaaaababbaa`a^Z`abaZa\_Ybab]¥YbbT¥\_]`  
@HWI-EAS443:3:95:1219:427#0/1  
AGAGGGCAATGATGGATCAAGTAAGAGAAAGTCGAAACCC  
+HWI-EAS443:3:95:1219:427#0/1  
abaaab`b`abaabaaa`a`a\_aabaaa\_aaZ`b\_¥\_ZZ]  
@HWI-EAS443:3:95:1259:721#0/1  
CATAAATCCTGCCTGCCTGCTTGTGTGTATGGGCTTGCAG  
+HWI-EAS443:3:95:1259:721#0/1  
ab]b]a`bbbbbbZabbbbbbaaaa`\_aabbbbab\_`b  
@HWI-EAS443:3:95:1328:41#0/1  
GGTCCTCCTGTTTTCTTAGGGTCCTTCCCAGCACTGGGAT  
+HWI-EAS443:3:95:1328:41#0/1  
abbXL\_TPXb`abbRba`aXPVWQbaZ`\_^DUaaa` `R`  
@HWI-EAS443:3:95:1339:383#0/1  
GCATGACTTTGAAAGGAAGGGTACTCACTGGTCGGGATA  
+HWI-EAS443:3:95:1339:383#0/1  
a`bbb^Xbbba\_`a`a`aab]aaa`a^aaaZ`b`a]\_]

@HWI-EAS443:3:95:1399:292#0/1  
GAAATAAATACCTAGAAGAGCATCCCAGTGCTGGGAAGGA  
+HWI-EAS443:3:95:1399:292#0/1  
^\_bbbaaaaaabbbbbbabb`\_bbba\_bbbb\_bbbb`bbaa  
@HWI-EAS443:3:95:1461:92#0/1  
GGGAGCGCCAGGATGCCACAGAAATCAGAGCATCTGTCCG  
+HWI-EAS443:3:95:1461:92#0/1  
ab\_\_VHVHDX[a`S\_¥VRDR^U^UUMTXBBBBBBBBBBBB  
@HWI-EAS443:3:95:1492:50#0/1  
GAATGATTGGTGAATCGGGAGATTCTACATCCAAATGTG  
+HWI-EAS443:3:95:1492:50#0/1  
a`VaaXQ]b\_QS\_ZI^0WaZ`a`[`GT\_XYZQI\_]I¥VX^  
@HWI-EAS443:3:95:1497:1434#0/1  
CGGTCAGCACTCATTCTGAGGGGATCAGTTGCACATAAAT  
+HWI-EAS443:3:95:1497:1434#0/1  
\_babaabbbbaXababaab\_bbbbb\_abbbaabaabbbab  
@HWI-EAS443:3:95:158:1953#0/1  
GCTATTCTGGATTAGTCGTCCATCATAATCACTGAGTTTG  
+HWI-EAS443:3:95:158:1953#0/1  
``^`^a`W\_aV`[]`aQa\_^\_SYab\_]`aaaa^^Xa¥X  
@HWI-EAS443:3:95:1599:755#0/1  
TCTGGGATCCATTCCGGTGCGAACAAGCGCTCTTGTTC  
+HWI-EAS443:3:95:1599:755#0/1  
W\_`\_b\_^a^TR\_bX]`a\_[U]YGWb¥aaaaS0¥b^G^U^H  
@HWI-EAS443:3:95:1605:617#0/1  
GGAGGGGTGAAAATGGACGAAGGACAAGGGTTGCTTATGA  
+HWI-EAS443:3:95:1605:617#0/1  
Za[bba\_FYXbabbbbb`a`ba^a^aba¥V¥^\_a`aaa\_  
@HWI-EAS443:3:95:1606:841#0/1  
ATGGACGACTAATCCAGAATAGCATAACAATAGAGAGGAT  
+HWI-EAS443:3:95:1606:841#0/1  
aabbb`bb^baba\_Wa`aa`a\_\_a`a`a`a`ab\_a`\_`  
@HWI-EAS443:3:95:1654:562#0/1  
CAGAGGGCAATGATGGATCAAGTAAGAGAAAGTCGAAACC  
+HWI-EAS443:3:95:1654:562#0/1  
V\_b\_¥a\_[bb\_a\_a¥\_bb\_a¥aa`baababY`Ybbaaaaa  
@HWI-EAS443:3:95:1748:1573#0/1  
CATGACTTTGAAAGGGAAGGGTACTCACTGGTCGGGATAG  
+HWI-EAS443:3:95:1748:1573#0/1  
`a¥`bWQQ\_a\_\_Z[¥`W[¥XT¥¥¥JaZU¥bI]ba`a]``  
@HWI-EAS443:3:95:204:401#0/1  
GGGTCCTCCTGTTTTCTTAGGGTCCTTCCCAGCACTGGGA  
+HWI-EAS443:3:95:204:401#0/1  
`]WD¥b¥\_`T^a]¥a]^^ZaaaQ`ZVRQUUDFWUPX[YB  
@HWI-EAS443:3:95:221:1344#0/1  
TTCCCTTTCAAAGTCATGCCCACTTGCTACTGCAAGCCCA  
+HWI-EAS443:3:95:221:1344#0/1  
aabaaaaabbb`\_aa[^a\_`a\_`\_`\_`\_][^\_]QWQa  
@HWI-EAS443:3:95:326:378#0/1  
CGAAATTTCTGGAGGGGTGAAAATGGACGAAGGACAAGGG

+HWI-EAS443:3:95:326:378#0/1  
aaaWTW[`abaWba^`\_MaaaV`aa^babbaa`a\_aa`\_a  
@HWI-EAS443:3:95:357:508#0/1  
GTTTCGACTTCTCTTACTTGATCCATCATTGCCCTCTGG  
+HWI-EAS443:3:95:357:508#0/1  
aVaaaa\_abaaaa`a`a\_aaaaa^`a\_aa\_^`^^`Y]^`^  
@HWI-EAS443:3:95:432:619#0/1  
GTGCACTGAACCTCAAACCTCAGTGATTATGATGGACGACTA  
+HWI-EAS443:3:95:432:619#0/1  
aX`W`^aa`¥aaa`a^`\_\_\_\_^`Z\_\_^`a^`\_]`^`^X]`\_  
@HWI-EAS443:3:95:442:1070#0/1  
CCGGTGCGAACAAGCGCTCTTGTCTCTGATATGTGGCAT  
+HWI-EAS443:3:95:442:1070#0/1  
ab`Z`]Y\_U]aa^a`\_\_a`a^^`a\_\_a`]`^`a[\_`[[^  
@HWI-EAS443:3:95:572:311#0/1  
CTGTTTTGGAGTAATTTGAATGGGTCTATCCCGACCAGTG  
+HWI-EAS443:3:95:572:311#0/1  
^a[a^T¥`¥Za]\_bbbbaaa]b\_UY`Y[\_YXaZaaG]Z^a  
@HWI-EAS443:3:95:596:1099#0/1  
ATTTCTGGAGGGTGAAAATGGACGAAGGACAAGGGTTGC  
+HWI-EAS443:3:95:596:1099#0/1  
abbaabba\_ab`a[aaa`aba`¥`aaX]\_a]aaa\_a]\_a\_  
@HWI-EAS443:3:95:600:213#0/1  
GAAGAAATAAATACCTAGAAGAGCATCCCAGTGCTGGGAA  
+HWI-EAS443:3:95:600:213#0/1  
SV¥bY`I[aa]^baaa`a^LT^¥Ta\_\_T]^`[]`^WXX\_  
@HWI-EAS443:3:95:632:702#0/1  
AGGGGATCAGTTGCACATAAATCCTGCCTGCCTGCTTGTG  
+HWI-EAS443:3:95:632:702#0/1  
]`aa[Zb\_baba\_aa`aa^]a\_SW^`¥\_a\_^ab\_`aaR[  
@HWI-EAS443:3:95:749:264#0/1  
GTCTGGTGCCGAGGTGCTGCGGTGAAAGGAGTTGGAACA  
+HWI-EAS443:3:95:749:264#0/1  
a¥`aaa^a`a^^`aS\_¥`\_[aaSXPU¥Z`M¥MYX^P¥P¥  
@HWI-EAS443:3:95:767:1071#0/1  
GACCCATTCAAATTACTCCAAAACAGCCAAGTGGTCAGCC  
+HWI-EAS443:3:95:767:1071#0/1  
abbbb]\_baba\_bbaab^abaaaaba^a\_bb`baa¥aaY^  
@HWI-EAS443:3:95:783:703#0/1  
ATCCCGACCAGTGAGTACCCTTCCCTTTCAAAGTCATGCC  
+HWI-EAS443:3:95:783:703#0/1  
a]Z\_aZaaZaaN`[\_`WaS¥S]^`]SP`[\_`a`\_`\_V[\_WVNX  
@HWI-EAS443:3:95:796:1630#0/1  
GGTGCTTTCTGCTTTTGTGATGAGAGAAGAAATAAATACCTA  
+HWI-EAS443:3:95:796:1630#0/1  
`a`\_`bbbbab\_aaa`abbb`a`baaabbX`bbabbaa`bb  
@HWI-EAS443:3:95:806:694#0/1  
TGCTTTCTGCTTTTGTGATGAGAGAAGAAATAAATACCTAGA  
+HWI-EAS443:3:95:806:694#0/1  
abbbbbbabbbbbbbbbbb]aabaaaa`bbaaaba¥ba`a

@HWI-EAS443:3:95:828:173#0/1  
AATTTTCCTTTGAGGATATTGCACATTCTTTCATAAGCAA  
+HWI-EAS443:3:95:828:173#0/1  
aabaa\_a`bbbbaYWaa`aa`a[```[aaa]`a`]^`^\_\_  
@HWI-EAS443:3:95:833:1204#0/1  
TGCACATTTGGATGTAGAATCTCCCGATTCCACCAATCAT  
+HWI-EAS443:3:95:833:1204#0/1  
ababbabbbbabaa]aaaa`aaa\_aa\_\_a¥\_`]aaa\_^`]  
@HWI-EAS443:3:95:945:829#0/1  
TCCTGGGTTTCGACTTTCTTACTTGATCCATCATTGCC  
+HWI-EAS443:3:95:945:829#0/1  
aaaabab`ababa`aba`a\_aaa\_aabaa]aa\_aa¥aS]  
@HWI-EAS443:3:95:988:1358#0/1  
AATTTCTGGAGGGGTGAAAATGGACGAAGGACAAGGGTTG  
+HWI-EAS443:3:95:988:1358#0/1  
a]a^][aWY¥bbbaZbaaaaaTaa\_a\_a`Y]`\_`aaX`a  
@HWI-EAS443:3:95:995:476#0/1  
GTACTCACTGGTCGGGATAGACCCATTCAAATTACTCCAA  
+HWI-EAS443:3:95:995:476#0/1  
a`aHW[]^¥``YQ[V\_YY`\_UPRTS^`a`P¥`W[VUNV[Y  
@HWI-EAS443:3:95:997:689#0/1  
CTTTGAAAGGGAAGGGTACTCACTGGTCGGGATAGACCCA  
+HWI-EAS443:3:95:997:689#0/1  
aabbaa`bbaabbaab]babaaaaba`aaaa\_aaaa`WU^  
@HWI-EAS443:3:96:1034:1472#0/1  
CATTGCCCTCTGGGCAGCTGTTTGAAATTTTCCTTTGAGG  
+HWI-EAS443:3:96:1034:1472#0/1  
aab]]`a¥^]aaaa\_aaaabaaa\_`[]aaaaUa]\_`¥\_`]  
@HWI-EAS443:3:96:1227:937#0/1  
GAGAGGATGGTGCTTTCTGCTTTTGATGAGAGAAGAAATA  
+HWI-EAS443:3:96:1227:937#0/1  
\_Xa`baabbbabb`baa]^YV`bba^b\_WbUb^ab`aaa¥  
@HWI-EAS443:3:96:1231:382#0/1  
GCACATTCTTTCATAAGCAACCCTTGTCCTTCGTCCATTT  
+HWI-EAS443:3:96:1231:382#0/1  
a`a\_abb`bbaZ`ba\_aaa\_XY^```^]V```]a`X¥\_\_\_a  
@HWI-EAS443:3:96:1340:774#0/1  
CCCTTGTCCTTCGTCCATTTTCACCCCTCCAGAAATTTTCG  
+HWI-EAS443:3:96:1340:774#0/1  
\_U`bbbSP^\_R[]a\_HZX\_baabXXX^X¥^\_a\_a\_aa¥GY  
@HWI-EAS443:3:96:1409:771#0/1  
GCTGTTTGAAATTTTCCTTTGAGGATATTGCACATTCTTT  
+HWI-EAS443:3:96:1409:771#0/1  
a^Za\_a]a\_aXaaabRDZa\_a`Y\_¥ZYa\_SW^\_\_\_\_Y^^\_  
@HWI-EAS443:3:96:1414:1610#0/1  
AGAAAGTCGAAACCCAGGAAACGCTGAGATTGAAGACCTC  
+HWI-EAS443:3:96:1414:1610#0/1  
a`abY\_Y\_a`\_UHYUSW[ZUUHY^`XU]XVX\_a\_TLHER^  
@HWI-EAS443:3:96:1497:331#0/1  
GAGATTGAAGACCTCATTTTCCTGGCACGGTCAGCACTCA

+HWI-EAS443:3:96:1497:331#0/1  
a[^`aba`aaa¥YaYaaaa`Y]a\_\_T^WZ\_UUaaS¥W^X^  
@HWI-EAS443:3:96:1558:1390#0/1  
CAATAGAGAGGATGGTGCTTTCTGCTTTTGATGAGAGAAG  
+HWI-EAS443:3:96:1558:1390#0/1  
aabb`baaabb\_aba0`Y^`aS`QG`aaaJNaH][\_PMV\_  
@HWI-EAS443:3:96:158:850#0/1  
AACCCAGGAAACGCTGAGATTGAAGACCTCATTTTCCTGG  
+HWI-EAS443:3:96:158:850#0/1  
aaaa`\_aa\_\_¥\_a`YV¥aQZ]a^Z[\_\_\_T^¥¥\_¥^¥WWW\_Y  
@HWI-EAS443:3:96:1704:465#0/1  
TAACAATAGAGAGGATGGTGCTTTCTGCTTTTGATGAGAG  
+HWI-EAS443:3:96:1704:465#0/1  
`a\_SXZaa]Z^W[a\_^bP`YYa\_X[HKVaa\_PBBBBBBB  
@HWI-EAS443:3:96:278:830#0/1  
GCTTTCTGCTTTTGATGAGAGAAGAAATAAATACCTAGAA  
+HWI-EAS443:3:96:278:830#0/1  
a`a`ba]`abaaabaaa`a\_baaba``b`a`\_`\_¥aaa¥`  
@HWI-EAS443:3:96:32:1525#0/1  
ATTGCCCTCTGGGCAGCTGTTTGAATTTTCCTTTGAGGA  
+HWI-EAS443:3:96:32:1525#0/1  
aaa`a]baaaaa\_a```a`U``a¥\_`]]^a``a^`\_`a^¥\_  
@HWI-EAS443:3:96:349:395#0/1  
GGACAAGGGTTGCTTATGAAAGAATGTGCAATATCCTCAA  
+HWI-EAS443:3:96:349:395#0/1  
a`aaaabaaWaa\_aa\_ab^``a\_\_aa\_\_^a\_aa\_WW`V^`  
@HWI-EAS443:3:96:386:883#0/1  
CATAAATCCTGCCTGCCTGCTTGTGTGTATGGGCTTGCAG  
+HWI-EAS443:3:96:386:883#0/1  
aaaXY^Saa\_¥`[aa\_```¥a]\_\_`¥aW]¥\_``[S¥¥WV\_  
@HWI-EAS443:3:96:38:1389#0/1  
CCTCTCTATTGTTATGCTATTCTGGATTAGTCGTCATCA  
+HWI-EAS443:3:96:38:1389#0/1  
`a`Z[R]]`YX^^`\_Y\_``[]¥`a\_^Za^N^V[X¥`^W¥  
@HWI-EAS443:3:96:458:659#0/1  
GTGGAATCGGGAGATTCTACATCCAAATGTGCACTGAACT  
+HWI-EAS443:3:96:458:659#0/1  
a¥[^`\_]`\_`^`aXR^^^aV^[V\_\_¥\_\_Q\_]\_Y^`^`\_]]  
@HWI-EAS443:3:96:462:1528#0/1  
CATGATTTGGCATTCCAACCTGAATGATGCCACATATCAG  
+HWI-EAS443:3:96:462:1528#0/1  
a\_bbaaaa`Z\_b\_YZ]`)]`Z``aa¥NW\_[[]a\_`a\_^]\_0  
@HWI-EAS443:3:96:479:1702#0/1  
TGCTTTCTGCTTTTGATGAGAGAAGAAATAAATACCTAGA  
+HWI-EAS443:3:96:479:1702#0/1  
ab^babbb]bbabb\_abba\_abbab`baaa\_aab^^bb\_a  
@HWI-EAS443:3:96:510:975#0/1  
GGTCCTCCTGTTTTCTTAGGGTCCTTCCCAGCACTGGGAT  
+HWI-EAS443:3:96:510:975#0/1  
^^Z^]bbabb`bbaaba^a`a]\_aaa^[^aaaaaaaaXM



@HWI-EAS443:3:96:580:1429#0/1  
CGAAGATGCAACAGCAGGTCTTACTCATATCATGATTTGG  
+HWI-EAS443:3:96:580:1429#0/1  
a\_`abaabaabaaaaa`\_^\_\_[a`abaaa^aa``a`b\_\_  
@HWI-EAS443:3:96:657:1539#0/1  
AGAGGGCAATGATGGATCAAGTAAGAGAAAAGTCGAAACCC  
+HWI-EAS443:3:96:657:1539#0/1  
aa[U[baa^aVaaabbbbaaaaY\_^[]aaSa`^\_^baN[a  
@HWI-EAS443:3:96:65:885#0/1  
CTCTAATGCAAGGTTCAACACTTCCCAGAAGGTCTGGTGC  
+HWI-EAS443:3:96:65:885#0/1  
aaaa]W\_aaa`\_a^¥]`aa`\_Z^\_^\_¥a^] ^XS]^¥^WBB  
@HWI-EAS443:3:96:678:1102#0/1  
GATCCATTCCGGTGCGAACAAGCGCTCTTGTCTCTGATA  
+HWI-EAS443:3:96:678:1102#0/1  
]\_`b`aabab`b]baaaa\_aaa`ba`aaaaIa`\_a^Ra`  
@HWI-EAS443:3:96:800:254#0/1  
GGCTTGCAGTAGCAAGTGGGCATGACTTTGAAAGGGAAGG  
+HWI-EAS443:3:96:800:254#0/1  
aa`¥\_]\_\_a[\_\_\_U``\_Q`\_TLVFN[RQT¥¥VRNZT[\_Y¥B  
@HWI-EAS443:3:96:899:1381#0/1  
TGGACGACTAATCCAGAATAGCATAACAATAGAGAGGATG  
+HWI-EAS443:3:96:899:1381#0/1  
abaaabb`aba`\_aabaaa\_a`aa^`a``a`a`a\_aa¥\_a  
@HWI-EAS443:3:96:949:483#0/1  
CAACTCCTTTCACCGCAGCACCTGCGGCACCAGACCTTCT  
+HWI-EAS443:3:96:949:483#0/1  
TY^Ybaab\_¥Y\_aWZ\_abZXLObba`JM¥HFURWFTM¥^Z  
@HWI-EAS443:3:96:957:333#0/1  
CCCAGGAAACGCTGAGATTGAAGACCTCATTTTCCTGGCA  
+HWI-EAS443:3:96:957:333#0/1  
``Y`a]]b`JSU[b]Y^N\_¥[¥MZ\_N]U\_a[[`QQUb¥BB  
@HWI-EAS443:3:97:1007:515#0/1  
ATAATCACTGAGTTTGAGTTCAGTGCACATTTGGATGTAG  
+HWI-EAS443:3:97:1007:515#0/1  
aaaa`aaYba¥``a\_^¥aaXZa\_Ra^V\_\_ZYW`\_X``VY\_  
@HWI-EAS443:3:97:1023:1989#0/1  
GCTTATGAAAGAATGTGCAATATCCTCAAAGGAAAATTTTC  
+HWI-EAS443:3:97:1023:1989#0/1  
ab`a\_aa``aa\_aaaY^\_aa^`\_W[aPa\_\_\_^a\_a\_`^^[  
@HWI-EAS443:3:97:1062:228#0/1  
CTTTCTTACTTGATCCATCATTGCCCTCTGGGCAGCTG  
+HWI-EAS443:3:97:1062:228#0/1  
[`bbabb`ab`bbbb`[^bbbbbabba^Laabbbb`ab¥bb  
@HWI-EAS443:3:97:1076:124#0/1  
ATTATGATGGACGACTAATCCAGAATAGCATAACAATAGA  
+HWI-EAS443:3:97:1076:124#0/1  
¥`Xa\_\_^bb^`¥baUaab`]`a^\_\_a\_a]baSaa`^a`a`  
@HWI-EAS443:3:97:1089:1596#0/1  
TGGGGAGCGCCAGGATGCCACAGAAATCAGAGCATCTGTC

+HWI-EAS443:3:97:1089:1596#0/1  
¥`abaab\_\_YRaba\_UaPHZ]`ba`¥¥Y\_\_[\_¥a[\_``PH  
@HWI-EAS443:3:97:1116:1125#0/1  
CACATAAATCCTGCCTGCCTGCTTGTGTGTATGGGCTTGC  
+HWI-EAS443:3:97:1116:1125#0/1  
ab`babbbb¥T\_a`Zaba`aba`ab`baba\_aaaa]`\_a¥  
@HWI-EAS443:3:97:1193:1301#0/1  
AGCAAACAATGGCGAAGATGCAACAGCAGGTCTTACTCAT  
+HWI-EAS443:3:97:1193:1301#0/1  
\_a]`aY```YLWab\_`U[S\_^¥UM¥`V[UZTOZ\_VX[OWY  
@HWI-EAS443:3:97:1277:897#0/1  
CCTCCTGTTTTCTTAGGGTCCTTCCCAGCACTGGGATGCT  
+HWI-EAS443:3:97:1277:897#0/1  
aab`J]babaaaa`aaa^¥][bTa¥`\_`\_aa]aaa`X^Ya  
@HWI-EAS443:3:97:1466:1156#0/1  
GAACAAGCGCTCTTGTCTCTGATATGTGGCATCATTCAG  
+HWI-EAS443:3:97:1466:1156#0/1  
`XZN]a^aa¥]Y`a\_\_]\_\_\_`¥\_VZZVU]S]¥V[`]VV\_  
@HWI-EAS443:3:97:1480:1139#0/1  
GACTAATCCAGAATAGCATAACAATAGAGAGGATGGTGCT  
+HWI-EAS443:3:97:1480:1139#0/1  
ab\_ba`b\_aab`aaaa\_ab^a\_aab``aaaabaaaaS]S`  
@HWI-EAS443:3:97:1488:225#0/1  
GATATGTGGCATCATTCAGGTTGGAATGCCAAATCATGAT  
+HWI-EAS443:3:97:1488:225#0/1  
a]\_^RL[Za\_\_\_[aaaPY][RVba`Z``SU[`]J¥U[¥Q[T  
@HWI-EAS443:3:97:1577:1232#0/1  
AGTTGCACATAAATCCTGCCTGCCTGCTTGTGTGTATGGG  
+HWI-EAS443:3:97:1577:1232#0/1  
a^I[a`b\_abaaaa`Uba[¥aaZ^bbWa`a\_[\_]`^a`T^B  
@HWI-EAS443:3:97:1613:967#0/1  
ATTCTGGATTAGTCGTCATCATAATCACTGAGTTTGAGT  
+HWI-EAS443:3:97:1613:967#0/1  
aba\_a^^a\_\_ab`Ra^a¥Y^\_[`¥SOY\_Qaa[a\_`a]PR\_  
@HWI-EAS443:3:97:164:1029#0/1  
CTGCTGTTGCATCTTCGCCATTGTTTGCTTGGCGCCAAAC  
+HWI-EAS443:3:97:164:1029#0/1  
`bababaabbaa¥aa`a`a`\_a`\_aaaa\_`^\_¥\_^\_WVWS  
@HWI-EAS443:3:97:1775:414#0/1  
AAGAGAAAGTCGAAACCCAGGAAACGCTGAGATTGAAGAC  
+HWI-EAS443:3:97:1775:414#0/1  
a`ZY[`]bab\_GUbbb`\_`\_aV¥`adW¥V`\_`X]``Y\_a^\_W  
@HWI-EAS443:3:97:223:1219#0/1  
CTCTTACTTGATCCATCATTGCCCTCTGGGCGAGCTGTTTG  
+HWI-EAS443:3:97:223:1219#0/1  
a`b`\_aabababbbbabbbab`aba]a``a`X^abaa`aa  
@HWI-EAS443:3:97:401:132#0/1  
CTGCTGTTGCATCTTCGCCATTGTTTGCTTGGCGCCAAAC  
+HWI-EAS443:3:97:401:132#0/1  
abbb]babaL\_X]`bbba[Zbaa`\_a`\_a`b\_¥YY[V\_\_G

@HWI-EAS443:3:97:431:1057#0/1  
CAGGCTGACCACTTGGCTGTTTTGGAGTAATTTGAATGGG  
+HWI-EAS443:3:97:431:1057#0/1  
ababbabb\_bbaabbbbbb`ab^FZO¥V\_a\_a\_X`\_STa]  
@HWI-EAS443:3:97:457:57#0/1  
GCTGTTTTGGAGTAATTTGAATGGGTCTATCCCGACCAGT  
+HWI-EAS443:3:97:457:57#0/1  
aa\_bZaaa`a¥a¥a`a`\_]`\_`¥¥X^`¥WPUVUWW\_W  
@HWI-EAS443:3:97:466:1606#0/1  
GTCCGAAGAATGATTGGTGAATCGGGAGATTCTACATCC  
+HWI-EAS443:3:97:466:1606#0/1  
\_V[\_`b`aa]^aa\_a\_\_\_\_\_][`[\_^^[^]W^]SS  
@HWI-EAS443:3:97:481:469#0/1  
GCAGGATTTATGTGCAACTGATCCCCTCAGAATGAGTGCT  
+HWI-EAS443:3:97:481:469#0/1  
aaabbaaaaaa\_baaa\_aaaa\_`a`a^aa\_`¥`[`  
@HWI-EAS443:3:97:484:423#0/1  
CTAATCCAGAATAGCATAACAATAGAGAGGATGGTGCTTT  
+HWI-EAS443:3:97:484:423#0/1  
abbbbaabbaababaabaaaaaab`baaa`aa\_S^\_`\_`  
@HWI-EAS443:3:97:542:1495#0/1  
ACATATCAGAGAACAAGAGCGCTTGTTCGCACCGGAATGG  
+HWI-EAS443:3:97:542:1495#0/1  
abaaaaba^a\_aaaaaa`a`aa¥`Zaa`Z[`\_\_\_Z\_\_  
@HWI-EAS443:3:97:587:2028#0/1  
GGGTCCTCCTGTTTTCTTAGGGTCCTTCCCAGCACTGGGA  
+HWI-EAS443:3:97:587:2028#0/1  
abaaabbaabbbbaabaa`aabaaaa]`a`aaaa`  
@HWI-EAS443:3:97:597:1668#0/1  
GGGAGATTCTACATCCAAATGTGCACTGAACTCAAATCA  
+HWI-EAS443:3:97:597:1668#0/1  
aa\_a\_a\_aa^a\_a`a`\_]aY\_\_a`aaaaX\_\_`\_]\_`¥Y  
@HWI-EAS443:3:97:621:602#0/1  
GATCAGTTGCACATAAATCCTGCCTGCCTGCTTGTGTGTA  
+HWI-EAS443:3:97:621:602#0/1  
`a¥R`aX^¥¥[ZL`VQW^Z[^TQX\_ZUZaYV\_\_¥`Q[IY  
@HWI-EAS443:3:97:622:671#0/1  
ATGGACGAAGGACAAGGGTTGCTTATGAAAGAATGTGCAA  
+HWI-EAS443:3:97:622:671#0/1  
\_bbbaabb\_bb`]`a``]aaaaabaaa¥Xaab^b]Ya  
@HWI-EAS443:3:97:673:841#0/1  
GGGAAGGGTACTCACTGGTCGGGATAGACCCATTCAAATT  
+HWI-EAS443:3:97:673:841#0/1  
`aa\_\_a]¥G\_Zb]b`¥¥`U0[a[a\_N¥^^`]^V`^^`  
@HWI-EAS443:3:97:690:776#0/1  
GGGGTAAAAATGGACGAAGGACAAGGGTTGCTTATGAAAG  
+HWI-EAS443:3:97:690:776#0/1  
]abaG\_aaaaaaabaZb\_\_`a`a`[W\_a\_\_`aa\_^\_`  
@HWI-EAS443:3:97:946:1262#0/1  
CGCCAAGCAAACAATGGCGAAGATGCAACAGCAGGTCTTA

+HWI-EAS443:3:97:946:1262#0/1  
abb¥[bb^^abaabK\_¥\_`[`bbabVb`VbaS]a`P¥Za\_  
@HWI-EAS443:3:98:1083:369#0/1  
CTCTAATGCAAGGTTCAACACTTCCCAGAAGGTCTGGTGC  
+HWI-EAS443:3:98:1083:369#0/1  
`a`aTV`]`a^aa`a\_`a`Z¥aQU¥\_a¥¥``VU`a\_WaB  
@HWI-EAS443:3:98:1084:1491#0/1  
CGGAAGAATGATTGGTGAATCGGGAGATTCTACATCCAA  
+HWI-EAS443:3:98:1084:1491#0/1  
abbabbabbbabbbb[abaab\_ba`aaaabaaaVaa^`a\_  
@HWI-EAS443:3:98:1119:2014#0/1  
AGAGCATCCCAGTGCTGGGAAGGACCCTAAGAAAACAGGA  
+HWI-EAS443:3:98:1119:2014#0/1  
aa]a\_a`XaZaa^``\_a\_`^a^\_]\_H\_¥\_YSWXNTZ[Q  
@HWI-EAS443:3:98:1123:1280#0/1  
GCTTTCTGCTTTTGGATGAGAGAAGAAATAAATACCTAGAA  
+HWI-EAS443:3:98:1123:1280#0/1  
aa`]a`aa``aaaa\_`a`a\_`^a`Ya\_``\_\_\_`^^\_a\_``  
@HWI-EAS443:3:98:1128:1279#0/1  
CACTTCCCAGAAGGTCTGGTGCCGCAGGTGCTGCGGTGAA  
+HWI-EAS443:3:98:1128:1279#0/1  
[bZbbbbbb`bbb^W\_ba^aa\_`\_bb`^E\_]ababbI[^J  
@HWI-EAS443:3:98:1163:795#0/1  
GACTTTGAAAGGAAGGGTACTCACTGGTCGGGATAGACC  
+HWI-EAS443:3:98:1163:795#0/1  
`^D[baaWababa\_a\_]][aa`^a\_aaaY\_[aa^aaaa[W  
@HWI-EAS443:3:98:1176:1744#0/1  
ATCATAATCACTGAGTTTGAGTTCAGTGCACATTTGGATG  
+HWI-EAS443:3:98:1176:1744#0/1  
ab`bababaa^ab\_a`aaaa`a`aa]aWa[aaa`Xa\_\_  
@HWI-EAS443:3:98:122:1451#0/1  
ATCCCGACCAGTGAGTACCCTTCCCTTTCAAAGTCATGCC  
+HWI-EAS443:3:98:122:1451#0/1  
aaa`]aaaa\_]\_^[\`V`^aX]``\_\_^`\_[a\_\_VV¥\_VS\_W  
@HWI-EAS443:3:98:1333:412#0/1  
CGCTGAGATTGAAGACCTCATTTTCTGGCACGGTCAGCA  
+HWI-EAS443:3:98:1333:412#0/1  
````\_`a`abbaab`\_abZ`\_ab^a\_\_\_X`a\_a`NGZ`G¥  
@HWI-EAS443:3:98:1450:352#0/1  
TGCTTATGAAAGAATGTGCAATATCCTCAAAGGAAAATTT  
+HWI-EAS443:3:98:1450:352#0/1  
ab`bbbbbbbabbbbababbbbaabaabababbbabba  
@HWI-EAS443:3:98:1646:1477#0/1  
TAATCACTGAGTTTGAGTTCAGTGCACATTTGGATGTAGA  
+HWI-EAS443:3:98:1646:1477#0/1  
``]ba^Tbb[[]abb]a\_aaR]V```a]aa\_]a\_`a\_Z]Y\_  
@HWI-EAS443:3:98:170:1884#0/1  
CAGTTGCACATAAATCCTGCCTGCCTGCTTGTGTGTATGG  
+HWI-EAS443:3:98:170:1884#0/1  
a]bX`a`\_abaa\_]\_Z¥Z¥Xa\_\_U[a`aabaVb¥aY\_`^]

@HWI-EAS443:3:98:174:698#0/1  
GTCCTCCTGTTTTCTTAGGGTCCTTCCCAGCACTGGGATG  
+HWI-EAS443:3:98:174:698#0/1  
]a`b\_]\_aaa\_baaaaa\_a]aaa\_``\_^]aa[aaa]^\_a  
@HWI-EAS443:3:98:212:133#0/1  
GCTTTCTGCTTTTGATGAGAGAAGAAATAAATACCTAGAA  
+HWI-EAS443:3:98:212:133#0/1  
a\_aaaaaa^a`\_a\_a`X`¥a^^^\_¥\_`\_\_\_\_\_]]^]X^  
@HWI-EAS443:3:98:243:275#0/1  
GGGTCCTCCTGTTTTCTTAGGGTCCTTCCCAGCACTGGGA  
+HWI-EAS443:3:98:243:275#0/1  
G^bW¥`\_W\_a¥``abb`bbb\_T^Xab^Z^bTXT`bbb`b`  
@HWI-EAS443:3:98:270:770#0/1  
GACCCATTCAAATTACTCCAAAACAGCCAAGTGGTCAGCC  
+HWI-EAS443:3:98:270:770#0/1  
`^]``b`\_abaaaa`aa\_a^aa`a]\_a``]a]`a\_\_\_a[^  
@HWI-EAS443:3:98:284:107#0/1  
AGGGTACTCACTGGTCGGGATAGACCCATTCAAATTACTC  
+HWI-EAS443:3:98:284:107#0/1  
aab\_Uaaba\_a\_a\_[bb]b`\_a`\_U[WU[a\_a\_\_\_``^^\_  
@HWI-EAS443:3:98:326:941#0/1  
GGAGAGTTTGGCGCCAAGCAAACAATGGCGAAGATGCAAC  
+HWI-EAS443:3:98:326:941#0/1  
a`^\_^`V\_\_^`^a`\_^`\_[\_\_^¥`\_ZR^S¥V¥¥W^S¥¥W  
@HWI-EAS443:3:98:328:1326#0/1  
AGCATCCCAGTGCTGGGAAGGACCCTAAGAAAACAGGAGG  
+HWI-EAS443:3:98:328:1326#0/1  
Z[[aaaa[XaTXaUW]\_\_a`\_^XVT\_a`\_aZS\_Ya\_\_T\_]`  
@HWI-EAS443:3:98:398:76#0/1  
ATTGCCCTCTGGGCAGCTGTTTGAATTTTCCTTTGAGGA  
+HWI-EAS443:3:98:398:76#0/1  
aa¥a[```aaa`^]a\_aaY`aa\_``]a`^W``\_\_^\_\_]  
@HWI-EAS443:3:98:460:367#0/1  
GGCATGACTTTGAAAGGGAAGGGTACTCACTGGTCGGGAT  
+HWI-EAS443:3:98:460:367#0/1  
ab`bbaa\_abbaaaaaab`aaaaSa`aaa^aaaZaa``\_\_`  
@HWI-EAS443:3:98:492:1274#0/1  
TCAACACTTCCCAGAAGGTCTGGTGCCGCAGGTGCTGCGG  
+HWI-EAS443:3:98:492:1274#0/1  
¥`aa\_``aaa``^``aa`\_]STa¥^\_````U\_¥\_\_Z`]`  
@HWI-EAS443:3:98:507:1035#0/1  
ATCAGTTGCACATAAATCCTGCCTGCCTGCTTGTGTGTAT  
+HWI-EAS443:3:98:507:1035#0/1  
aaaab\_aaaa\_aaXX]aaa¥`\_\_\_\_``^a`\_``\_[`V\_W¥`  
@HWI-EAS443:3:98:546:1191#0/1  
TGCTTTCTGCTTTTGATGAGAGAAGAAATAAATACCTAGA  
+HWI-EAS443:3:98:546:1191#0/1  
\_b^Ua\_abbb¥aaabbabaabbbbb`bNbbaaabTPaa```  
@HWI-EAS443:3:98:730:1352#0/1  
CTGAACCTCAAACCTCAGTGATTATGATGGACGACTAATCCA

+HWI-EAS443:3:98:730:1352#0/1  
a`]YZL¥aZZVUa]a`\_^Y\_[Y¥aRN\_\_XPX`X¥`¥KZ\_]`  
@HWI-EAS443:3:98:757:270#0/1  
ATAACAATAGAGAGGATGGTGCTTTCTGCTTTTGATGAGA  
+HWI-EAS443:3:98:757:270#0/1  
a`^]a¥aaabababaaab^N¥R¥`aSa^Z^aaaa\_`[Xa]  
@HWI-EAS443:3:98:785:1664#0/1  
CACATTTGGATGTAGAATCTCCCGATTCCACCAATCATTC  
+HWI-EAS443:3:98:785:1664#0/1  
Va]bbbbUab^\_GYVZbbb]b]V\_V\_abLb]Ma`a`^H`a  
@HWI-EAS443:3:98:870:445#0/1  
ATTTGAATGGGTCTATCCCGACCAGTGAGTACCCTTCCCT  
+HWI-EAS443:3:98:870:445#0/1  
ab]ab^X\_`^^Xa^b\_`Z^XaVNU[Zba^Z`PQ\_`TFU\_a  
@HWI-EAS443:3:98:878:725#0/1  
AAATGGACGAAGGACAAGGGTTGCTTATGAAAGAATGTGC  
+HWI-EAS443:3:98:878:725#0/1  
aaabbbb]ba\_b`aaaabba¥ab`aaaab`^aaaaaa]a`  
@HWI-EAS443:3:99:1013:287#0/1  
ATTGCCCTCTGGGCAGCTGTTTAAAATTTTCTTTGAGGA  
+HWI-EAS443:3:99:1013:287#0/1  
abaa]\_abbbaa```b`baaabba\_\_aaaa¥¥aaaa`a\_\_  
@HWI-EAS443:3:99:1022:775#0/1  
GGCTTGCAGTAGCAAGTGGGCATGACTTTGAAAGGGAAGG  
+HWI-EAS443:3:99:1022:775#0/1  
^babbaabb`abbabaabbb``ab``bbba`a`b`b`abb  
@HWI-EAS443:3:99:108:1144#0/1  
AAGCGCTCTTGTCTCTGATATGTGGCATCATTCAGGTTG  
+HWI-EAS443:3:99:108:1144#0/1  
``^[\_a`X\_ab^a\_a\_aaa`^a`^\_]`YX^a\_¥\_^\_Y\_^  
@HWI-EAS443:3:99:1097:1500#0/1  
GGGAGCGCCAGGATGCCACAGAAATCAGAGCATCTGTCCG  
+HWI-EAS443:3:99:1097:1500#0/1  
a\_OV¥ba[`\_b[^aaaXaXbb`a\_a[a]\_a^a`\_^aWQVY  
@HWI-EAS443:3:99:1158:790#0/1  
CTCAGAATGAGTGCTGACCGTGCCAGGAAAATGAGGTCTT  
+HWI-EAS443:3:99:1158:790#0/1  
abbbbabbbbabaabbb`b`baaabbaaaaabaaa^Yab  
@HWI-EAS443:3:99:1373:1017#0/1  
TAACAATAGAGAGGATGGTGCTTTCTGCTTTTGATGAGAG  
+HWI-EAS443:3:99:1373:1017#0/1  
aY\_``ab¥bUbabb`a\_`0`¥aabHa^[]`a\_\_^^^\_¥Wa  
@HWI-EAS443:3:99:1390:736#0/1  
ACCTGCTGTTGCATCTTCGCCATTGTTTGCTTGGCGCCAA  
+HWI-EAS443:3:99:1390:736#0/1  
a`\_a``aaJ[\_[a\_]R\_TRUU\_^^M\_¥\_QVTUFVFPNTSZ  
@HWI-EAS443:3:99:1415:1866#0/1  
CACTCATTCTGAGGGATCAGTTGCACATAAATCCTGCCT  
+HWI-EAS443:3:99:1415:1866#0/1  
Ua^bbabaV^a[babaaaa`a[ab[bKb[bb`b`U`b]Ub

@HWI-EAS443:3:99:1472:148#0/1  
GCTGTTTGAATTTTCCTTTGAGGATATTGCACATTCTTT  
+HWI-EAS443:3:99:1472:148#0/1  
\_abb¥M` `` `a`a`[\`ab\_b\_ab]^aa^aYZR\_`]MZ`^  
@HWI-EAS443:3:99:1482:344#0/1  
TCCTGGGTTTCGACTTTCTTACTTGATCCATCATTGCC  
+HWI-EAS443:3:99:1482:344#0/1  
ab]bba¥ab]P[\_V\_bbabab`b\_ba`]ba]^aa``\_aN  
@HWI-EAS443:3:99:1610:694#0/1  
AGGTCTTACTCATATCATGATTTGGCATTCCAACCTGAAT  
+HWI-EAS443:3:99:1610:694#0/1  
aba\_abbab\_abb``babaaabb\_a`aa]abaaZaaaab  
@HWI-EAS443:3:99:1632:1047#0/1  
GCCACATATCAGAGAACAAGAGCGCTTGTTCCGACCCGAA  
+HWI-EAS443:3:99:1632:1047#0/1  
`\_\_\_b\_RPa`Uaba¥^bbaZaaY]]Y`\_]`[]XaTR\_a\_a  
@HWI-EAS443:3:99:170:504#0/1  
AGCAGGTCTTACTCATATCATGATTTGGCATTCCAACCTG  
+HWI-EAS443:3:99:170:504#0/1  
^`a^]\_S`XSYb``baaaY^ba\_`V\_] [V\_] [Y^a`]\_\_`  
@HWI-EAS443:3:99:224:1279#0/1  
TTTCAAACAGCTGCCAGAGGGCAATGATGGATCAAGTAA  
+HWI-EAS443:3:99:224:1279#0/1  
abababaaaa^baaaaa`aaa`\_`aa`a`\_`a`\_a]\_^  
@HWI-EAS443:3:99:253:764#0/1  
CTAATCCAGAATAGCATAACAATAGAGAGGATGGTGCTTT  
+HWI-EAS443:3:99:253:764#0/1  
abbaabbaa\_ba`ba]b\_a\_\_aa\_b^b`a^`\_`aY¥[\_\_a  
@HWI-EAS443:3:99:272:658#0/1  
TAACAATAGAGAGGATGGTGCTTTCTGCTTTTGATGAGAG  
+HWI-EAS443:3:99:272:658#0/1  
aa`Z`]``b\_`[a]``bY[`WU``a\_aSXaa¥^T]Z¥`Y`  
@HWI-EAS443:3:99:278:850#0/1  
CATAATCACTGAGTTTGAGTTCAGTGCACATTTGGATGTA  
+HWI-EAS443:3:99:278:850#0/1  
aa]SZ``\_a`^a^a``\_a^¥a¥\_X`] ]\_\_`\_`\_\_^\_\_W¥  
@HWI-EAS443:3:99:489:1836#0/1  
GAGTTTGGCGCCAAGCAAACAATGGCGAAGATGCAACAGC  
+HWI-EAS443:3:99:489:1836#0/1  
`aUQWabaa`a\_\_^aaab^¥aa\_]¥]``\_`V\_Q\_\_¥`BBBB  
@HWI-EAS443:3:99:500:1548#0/1  
GATCCCCTCAGAATGAGTGCTGACCGTGCCAGGAAAATGA  
+HWI-EAS443:3:99:500:1548#0/1  
V\_bb\_b`TZb\_IW\_¥^\_]\_\_\_\_a\_abb]\_Z¥[baab``a`\_  
@HWI-EAS443:3:99:546:1721#0/1  
CAAAAGCAGAAAGCACCATCCTCTCTATTGTTATGCTATT  
+HWI-EAS443:3:99:546:1721#0/1  
abbbbabbb\_bbbbbababYab`a`babababaaa\_aaaa  
@HWI-EAS443:3:99:569:396#0/1  
GAGGATGGTGCTTTCTGCTTTTGATGAGAGAAGAAATAAA

+HWI-EAS443:3:99:569:396#0/1  
aY`b^Ub^WaZa^¥\_a¥H`¥\_adW`a\_\_\_\_a]¥^ZU\_a]]^  
@HWI-EAS443:3:99:675:156#0/1  
GCCACATATCAGAGAACAAGAGCGCTTGTTCGCACCCGGAA  
+HWI-EAS443:3:99:675:156#0/1  
```aWa^a[¥a\_aa]^`aa\_\_`^a\_\_[[[]U^UR\_`WZ  
@HWI-EAS443:3:99:676:1844#0/1  
GTAATTTGAATGGGTCTATCCCGACCAGTGAGTACCCTTC  
+HWI-EAS443:3:99:676:1844#0/1  
Q\_abbY\_[X\_`a\_RI]Nbbba]RXbab\_Zaab`a`aaa\_b  
@HWI-EAS443:3:99:713:1451#0/1  
CAATAGAGAGGATGGTGCTTTCTGCTTTTGATGAGAGAAG  
+HWI-EAS443:3:99:713:1451#0/1  
abbbb`a`baba`bb¥\_¥W`]¥T]a¥baa`\_bb\_`ababa  
@HWI-EAS443:3:99:720:1066#0/1  
AGGGGATCAGTTGCACATAAATCCTGCCTGCCTGCTTGTG  
+HWI-EAS443:3:99:720:1066#0/1  
X\_X]\_\_\_\_`¥]HX\_\_^^`\_^aaa\_Xaa]aab]YabZ\_a]\_a  
@HWI-EAS443:3:99:798:742#0/1  
TTAGTCGTCCATCATAATCACTGAGTTTGAGTTCAGTGCA  
+HWI-EAS443:3:99:798:742#0/1  
aaaaaa`Ya`aaaaabaaaa\_aa^b\_aaab^`\_a^a\_`  
@HWI-EAS443:3:99:810:1827#0/1  
CTCCTGTTTTCTTAGGGTCCTTCCCAGCACTGGGATGCTC  
+HWI-EAS443:3:99:810:1827#0/1  
[ab[]^bbbbabbba\_`]]Tbba]`a^aab\_baabbR`Y  
@HWI-EAS443:3:99:928:275#0/1  
GGATGGTGCTTTCTGCTTTTGATGAGAGAAGAAATAAATA  
+HWI-EAS443:3:99:928:275#0/1  
aa^aba\_baa`aaabaaaaabaaa`a`b\_aba`aaa\_a\_a  
@HWI-EAS443:3:99:930:294#0/1  
CTCCTGTTTTCTTAGGGTCCTTCCCAGCACTGGGATGCTC  
+HWI-EAS443:3:99:930:294#0/1  
abbabbbbbbbbabaaaabbbaabbbbbbbbaabb\_a`  
@HWI-EAS443:3:99:953:1811#0/1  
GGGAGATTCTACATCCAAATGTGCACTGAACTCAAACCTCA  
+HWI-EAS443:3:99:953:1811#0/1  
¥baaXbbab¥b¥aa`aabbbaababR^babb^S¥\_bWbaa  
@HWI-EAS443:3:99:97:1414#0/1  
CTGAACTCAAACCTCAGTGATTATGATGGACGACTAATCCA  
+HWI-EAS443:3:99:97:1414#0/1  
abbbb`abbaaaa\_aaab`bbbb`aa`a\_Y`aaabb``¥\_  
@HWI-EAS443:3:9:1008:267#0/1  
CGGAAGAATGATTGGTGAATCGGGAGATTCTACATCCAA  
+HWI-EAS443:3:9:1008:267#0/1  
`bba``bbbbabbababa`bb^bba^bab`aaa\_aaZ]a`  
@HWI-EAS443:3:9:1169:160#0/1  
TGGACGACTAATCCAGAATAGCATAACAATAGAGAGGATG  
+HWI-EAS443:3:9:1169:160#0/1  
`SV\_N\_ZRZ¥\_¥HV^¥SZ^]¥VV^YWRRTTS\_V]R^BBBB



@HWI-EAS443:3:9:1380:1017#0/1  
GGGAGCGCCAGGATGCCACAGAAATCAGAGCATCTGTCCG  
+HWI-EAS443:3:9:1380:1017#0/1  
`V` [ ` []X\_[V`SRVRW[V^\_¥VVQW^\_¥WVWSRRVRNRV  
@HWI-EAS443:3:9:155:656#0/1  
ATATCCTCAAAGGAAAATTTCAAACAGCTGCCAGAGGGC  
+HWI-EAS443:3:9:155:656#0/1  
aaaaa\_a`baaaa\_aaa`aa`\_]\_`aZa^`\_^`]\_\_\_^  
@HWI-EAS443:3:9:162:986#0/1  
GGCAATGATGGATCAAGTAAGAGAAAGTCGAAACCCAGGA  
+HWI-EAS443:3:9:162:986#0/1  
a\_G[bbbabba`aabab\_abaaba`baYaaaa]`aa`a`\_  
@HWI-EAS443:3:9:23:1380#0/1  
CTCACTGGTCGGGATAGACCCATTCAAATTACTCCAAAAC  
+HWI-EAS443:3:9:23:1380#0/1  
abababb]]^^b`Saa^aaa`aaa\_aaZaab`aaaaaV  
@HWI-EAS443:3:9:273:125#0/1  
AAATGGACGAAGGACAAGGGTTGCTTATGAAAGAATGTGC  
+HWI-EAS443:3:9:273:125#0/1  
\_b]abbabaXK¥aa`ZaaWW]^aX`^a\_X`\_a`\_^\_0[Y  
@HWI-EAS443:3:9:482:448#0/1  
AGGGGTGAAAATGGACGAAGGACAAGGGTTGCTTATGAAA  
+HWI-EAS443:3:9:482:448#0/1  
abbba`ba`ababaabbb`ba^\_^b`a^`a`\_aa`aaa`  
@HWI-EAS443:3:9:614:1289#0/1  
GCTTTCTGCTTTTGATGAGAGAAGAAATAAATACCTAGAA  
+HWI-EAS443:3:9:614:1289#0/1  
a`[`a¥S`aa]^ba\_`Q`\_^\_Ya[ ]`a\_\_^¥`^]aa]aa  
@HWI-EAS443:3:9:634:493#0/1  
GAAGGTCTGGTGCCGAGGTGCTGCGGTGAAAGGAGTTGG  
+HWI-EAS443:3:9:634:493#0/1  
\_a`baXabbb\_baaa^aab¥b]aa^`\_G¥ZQaZaX`GXSa  
@HWI-EAS443:3:9:644:1501#0/1  
AGGATTTATGTGCAACTGATCCCCTCAGAATGAGTGCTGA  
+HWI-EAS443:3:9:644:1501#0/1  
`a`Q`aa`VYU¥[\_`\_\_`X^]\_¥`¥ZZ`UZQVZRL[TZW]  
@HWI-EAS443:3:9:647:804#0/1  
CAGCTGCCAGAGGGCAATGATGGATCAAGTAAGAGAAAG  
+HWI-EAS443:3:9:647:804#0/1  
a\_a\_\_a\_a`\_a`a^`\_`aaa`a\_]U\_a]aUa¥a^`^¥¥¥  
@HWI-EAS443:3:9:697:1008#0/1  
CTGCTGTTGCATCTTCGCCATTGTTTGCTTGCGCCAAAC  
+HWI-EAS443:3:9:697:1008#0/1  
Xabbb¥S¥b\_]aaab`¥\_````bRabb^a`ab¥a\_¥a\_a[  
@HWI-EAS443:3:9:727:838#0/1  
GAATGATGCCACATATCAGAGAACAAGAGCGCTTGTTTCGC  
+HWI-EAS443:3:9:727:838#0/1  
a^aUZ¥¥GXZbSba]`Xa`a^¥\_[¥]a^SVYVWaT^\_ZV  
@HWI-EAS443:3:9:813:1996#0/1  
TTCCGACAGATGCTCTGATTTCTGTGGCATCCTGGCGCTC

+HWI-EAS443:3:9:813:1996#0/1  
abX`aaa\_]Za`XZM¥]¥Z`^^TIR^¥aYT]W¥¥XWPPS  
@HWI-EAS443:3:9:977:1145#0/1  
CTGGGCAGCTGTTTAAAATTTTCTTTGAGGATATTGCAC  
+HWI-EAS443:3:9:977:1145#0/1  
a]bbaabbaababbaaaaaabbaa\_aabbaa\_`aa\_[^a^  
@HWI-EAS443:3:37:1321:1279#0/1  
AGTGATTCCAAGAGGAAAGCTTTCCACAAGAGGTGGACCT  
+HWI-EAS443:3:37:1321:1279#0/1  
abS`]abaaM^`aZ^]X\_b[`\_^\_]\_\_aaZS\_]a^Zb`V  
@HWI-EAS443:3:47:100:1300#0/1  
TGATTCCAAGAGGAAAGCTTTCCACAAGAGGGGAGGTGGC  
+HWI-EAS443:3:47:100:1300#0/1  
a\_^aaaaa]¥a¥^Va\_a\_aa]UY]^WM^\_a`\_\_Q\_[R[VN  
@HWI-EAS443:3:74:1747:1484#0/1  
GCCTTTTGTGATTGGTATTTCCCTCCACTCCTGCCTTAT  
+HWI-EAS443:3:74:1747:1484#0/1  
^abbbba\_b`aaaYa`aabb`aaa^\_Y\_a\_a¥^Zaa\_]`  
@HWI-EAS443:3:36:776:594#0/1  
CCACCGTCTTCATTGTTCCCGCTGAATCCTGCCATAACG  
+HWI-EAS443:3:36:776:594#0/1  
a^L]`Z`abaa\_¥\_`\_S^]T`a`Z``¥KHOPSVQQVPUPX  
@HWI-EAS443:3:96:1048:867#0/1  
CTCCCTTTTAAAAGAGCAACCGTTATGGCAGAATTCAACG  
+HWI-EAS443:3:96:1048:867#0/1  
\_Q¥`Y^YYWY[PSG[V¥^XQRaQBBBBBBBBBBBBBBBB  
@HWI-EAS443:3:50:748:866#0/1  
CTTGAATCACTTTCTTTCTCTATGAACTTGATACTCT  
+HWI-EAS443:3:50:748:866#0/1  
abbbbbbbaabbbbbbbaabbaaR]MK``^bXGXHJ¥X]  
@HWI-EAS443:3:72:1071:1575#0/1  
ATTTCTCCACTCCTGCCTTATGGCCAGTATCTGCTTC  
+HWI-EAS443:3:72:1071:1575#0/1  
^\_\_\_¥\_\_`\_]¥\_Z^\_Z^Z[X]T]W^Z]]¥[ZX][\_[XTJ  
@HWI-EAS443:3:75:682:280#0/1  
ATAACGGTTGCTCTTTCAAAGGGAGATTGCTGCACTGA  
+HWI-EAS443:3:75:682:280#0/1  
a\_baab`Va\_a\_Ta`a^^XY`abWFZ¥VUZ\_X]a¥\_GYa]  
@HWI-EAS443:3:80:458:1398#0/1  
CACTGATCTGCCTGCGGATGCCTTTTGTGATTGGTATTT  
+HWI-EAS443:3:80:458:1398#0/1  
S\_\_^a\_aW^TXaa\_[^\_]ZZUZ\_\_aa]aaXQ[aa[S``[a  
@HWI-EAS443:3:89:1280:865#0/1  
CTTCAAATGAGAATGTGGAAACCATGACTCCAATACCCTG  
+HWI-EAS443:3:89:1280:865#0/1  
Saaa^^^a^b¥U`aaa¥a]X\_\_Vbba`ab]aXaa`T`a^a  
@HWI-EAS443:3:2:750:1459#0/1  
GTTTCATAAGAGGAAAGAAAGTGATTCCAAGAGGGGAGCT  
+HWI-EAS443:3:2:750:1459#0/1  
a\_a`\_\_a]a\_aY]\_Z``a`aU¥]\_\_SSa``\_[[]Z\_Y`

@HWI-EAS443:3:6:405:636#0/1  
AGCCGGCCTTCATTGTTCCCGCTGAATGCTGCCATAACGG  
+HWI-EAS443:3:6:405:636#0/1  
a]baaT````abbbb\_aaba]\_a]Waaa\_TS¥X`aba]`N  
@HWI-EAS443:3:90:1292:1373#0/1  
ATTTCTTCGGAGACAATGCAGAGGAGTATGACAGAGTGAG  
+HWI-EAS443:3:90:1292:1373#0/1  
`baaSab`aaa\_a^aaa^[aa\_aa\_`V`\_a`^a\_^\_Z\_ZV  
@HWI-EAS443:3:24:596:1138#0/1  
AGCCCCGCTGAATGCTGCCATAACGGTTGATCTTTCAAAG  
+HWI-EAS443:3:24:596:1138#0/1  
abaPXT¥RY¥ORT`\_T`[FXZ`BBBBBBBBBBBBBBBBBB  
@HWI-EAS443:3:4:909:135#0/1  
CTGGCCTGCGGATGCCTTTTGTGATTGGAATTCCTCGA  
+HWI-EAS443:3:4:909:135#0/1  
a]^\_ZT]MTZK]PZVTJQV¥QRNSGYXVMMXWBBBBBBB  
@HWI-EAS443:3:69:1220:510#0/1  
TGGTCCGCTTTTCATTGTTCCCGCTGAATGCTGCCATAAC  
+HWI-EAS443:3:69:1220:510#0/1  
ab```bbaabb``abbaaa``a`aaa`]^\_YaZ``aa^P  
@HWI-EAS443:3:72:1487:1971#0/1  
GAAACTGATTCCAAGAGGAAAGCTTTCCACAAGAGGGGAC  
+HWI-EAS443:3:72:1487:1971#0/1  
aUHQQW¥XN^`¥OSRZNIvXa[[[ZJLYHZ]WY]XX\_VR¥  
@HWI-EAS443:3:18:603:1325#0/1  
AGTGATTCCAAGAGGAAAGCTTTCCACAAGAGGGGCTGAG  
+HWI-EAS443:3:18:603:1325#0/1  
abXbb`abbab`ba`¥aabb^^abUbaaZ[XW^]XaX]]\_  
@HWI-EAS443:3:5:1415:469#0/1  
CACTGAGAATGTAGGCTGCACACTGATCTGGCCTGGGNAT  
+HWI-EAS443:3:5:1415:469#0/1  
]\_ababbba`b¥baa[ba\_[S`\_bb\_a`\_bb`ZH[D]DL`  
@HWI-EAS443:3:31:1144:573#0/1  
GCTGCACTGAGAATGTAGGCTGCACACTGATTTGGCCTGT  
+HWI-EAS443:3:31:1144:573#0/1  
¥VS]¥a`b]^^]Ra[`WW^¥a¥a`YSR\_`¥XJ¥^a[\_[U  
@HWI-EAS443:3:33:1366:491#0/1  
GCCCCGCTGAATGCTGCCATAACGGTTGCTCTTTTAAAAGG  
+HWI-EAS443:3:33:1366:491#0/1  
HQQa]a^\_U¥a\_Za\_SZ\_^\_\_US]X^]\_XUSZZFRZKOMQ  
@HWI-EAS443:3:33:290:28#0/1  
GCCCCCTTGTGGAAAGCTTTCTCTTGAATAACTTTCT  
+HWI-EAS443:3:33:290:28#0/1  
aba`b[WU]]RYaUT[[\_a^\_U^[TMWYYXVTL LJUUMU¥  
@HWI-EAS443:3:40:260:1253#0/1  
ACCGTCTTCATTGTTCCCGCTGAATGCTGCCATACCGGT  
+HWI-EAS443:3:40:260:1253#0/1  
a`aaXb`¥aaaa^a^aaaa^`¥a`[[¥`V^X\_\_^[I]`\_W  
@HWI-EAS443:3:4:1793:431#0/1  
NAGAATGTAGGCTGCACACTGATCTGGCCTGCTGATGCCT

+HWI-EAS443:3:4:1793:431#0/1  
DPSUTYWWTPWUJWLPWVBBBBBBBBBBBBBBBBBBBB  
@HWI-EAS443:3:52:740:1633#0/1  
AGTCCGTCTTTCATTGTTCCCGCTGAATGCTGCCATAACG  
+HWI-EAS443:3:52:740:1633#0/1  
UbUb[abb^abababbab\_a\_`^aa[abRaa\_a¥aa]`UU  
@HWI-EAS443:3:59:1334:1575#0/1  
CAGATACTGGGCCATAAGGACCAGGAGTGGAGGAGATACA  
+HWI-EAS443:3:59:1334:1575#0/1  
H\_T\_Z[\_¥¥aY\_b]a\_X\_aZb`¥ab]a\_aa\_V\_a[^P`¥P  
@HWI-EAS443:3:67:64:1244#0/1  
AGAGCAACCGTTATGGCAGGATTCAGCGGGAACAATGAAA  
+HWI-EAS443:3:67:64:1244#0/1  
aXa^`\_baaTKVa\_`Z`\_KRMXLSP^Z\_]TVH[\_GSBBB  
@HWI-EAS443:3:75:712:422#0/1  
ACCCGCTGAATGCTGCCATAACGGTTGGTCTTTCAAAAGG  
+HWI-EAS443:3:75:712:422#0/1  
RO[^YW[O[¥V\_Y[TQW¥\_QYH\_ZP¥ZFUKVX]RP¥TTXX  
@HWI-EAS443:3:95:616:177#0/1  
CGTCCGTCTTTCATTGTTCCCGCTGAATGCTGCCATAACG  
+HWI-EAS443:3:95:616:177#0/1  
aaZ\_Sa¥`b`\_OZaa\_VUXZZ^S¥b`^`a]]LXa\_`TYU  
@HWI-EAS443:3:11:1581:150#0/1  
ATGGAGGCTGCACACTGATCTGGCCTGCGGATGCCTTTTG  
+HWI-EAS443:3:11:1581:150#0/1  
aa\_GO]aa\_`T\_V]YV]UXPVYYBBBBBBBBBBBBBBBB  
@HWI-EAS443:3:13:1711:1115#0/1  
GTCCTTCTCTTATGAACTTGATACTCTTAAATCTTCAA  
+HWI-EAS443:3:13:1711:1115#0/1  
T`aL\_\_VV¥^`bYb]PTYO`¥\_Rb`)]`\_bV``aabaVHVZ  
@HWI-EAS443:3:39:909:1113#0/1  
CAATGAAGGACGGACATCCGACATGCGAACAGAAGTAATA  
+HWI-EAS443:3:39:909:1113#0/1  
a^`bbYR\_\_[Y[aYa[^ZV\_W\_]^RW\_^XX\_\_BBBBBBB  
@HWI-EAS443:3:44:328:378#0/1  
TGGCAGCATTTCAGCGGGAACAATGAAGGACGGACATACGA  
+HWI-EAS443:3:44:328:378#0/1  
]b\_X`b\_Y^^^\_a\_¥``aY`Ka`a\_0^`F\_aba\_aZH^aa  
@HWI-EAS443:3:48:1626:1538#0/1  
GCCTCTTCCATCATTCTTATAACTTCTGTTCGCATGTTCG  
+HWI-EAS443:3:48:1626:1538#0/1  
OZ`[^¥S``XW[\_Z\_\_0\_¥T¥`^Y\_aa`aY[¥\_a`R\_X]`  
@HWI-EAS443:3:4:399:827#0/1  
ACTCATTTGAAGCAATCTGGACCCCTCTTGTGGAAAGATT  
+HWI-EAS443:3:4:399:827#0/1  
aT`b``aYba`bVb\_`IWbba\_aXR[^`a\_\_aaVQbaaHaZ  
@HWI-EAS443:3:61:827:670#0/1  
GCCCCAGGAGTGGAGGAAATACCAATCAACAAAAGGCAT  
+HWI-EAS443:3:61:827:670#0/1  
^M^¥U`Pa`T^GKSP]`GOU[RXKTGSYNIEYSWUSMUUW

@HWI-EAS443:3:62:1433:1809#0/1  
CGCTGCACTGAGAATGTAGGCTGCACACTGATCTGGGCTG  
+HWI-EAS443:3:62:1433:1809#0/1  
\_]W^LT]U\_W¥a\_R\_^V\_a^\_R`WZZ]QUY^W`OU¥MTZT  
@HWI-EAS443:3:71:930:343#0/1  
GATGCCTTTTGTGATTGGTATTTCCCTCCACTCCTGNGCC  
+HWI-EAS443:3:71:930:343#0/1  
aaab\_^bbbabab`\_ba^a\_aaaaaaaaaa`a^a\_]DDYU  
@HWI-EAS443:3:82:565:590#0/1  
CTTCAATCTTCAAATGCAGCAGAGTGGCATGCCATCCACA  
+HWI-EAS443:3:82:565:590#0/1  
]W\_L\_abbaa\_[00XWWWZ[`UZbZZ\_a\_Z¥\_\_YGNIT`V  
@HWI-EAS443:3:85:347:1019#0/1  
GTTCCACATTCTCATTTGAAGCAATCTGGACCCCTCTTG  
+HWI-EAS443:3:85:347:1019#0/1  
aaZOxbU`aaaaababaa`¥a\_]\_``\_`¥`\_a\_``\_][`]  
@HWI-EAS443:3:90:427:1400#0/1  
GTGCCTTTGCACTTTCCATCATTCTTATAACTTCTGTTTCG  
+HWI-EAS443:3:90:427:1400#0/1  
aaWG[a\_\_XZVabaU`aWbbb\_bbaaab`bbaaaaaaWa  
@HWI-EAS443:3:94:530:1812#0/1  
AAGTGATTCCAAGAGGAAAGCTTTCCACAAGAGGGGCTTT  
+HWI-EAS443:3:94:530:1812#0/1  
ab^PR\_^aa\_ba^a\_aa`aa`aa`aa`aa]a\_Z\_Z¥`W\_  
@HWI-EAS443:3:96:1303:1305#0/1  
AAGTGATTCCAAGAGGAAAGCTTTCCACAAGAGGGGAATA  
+HWI-EAS443:3:96:1303:1305#0/1  
ab\_WXW¥\_aa\_]a\_\_aa^X0`a\_\_¥[^\_Z\_\_`^]¥[^\_  
@HWI-EAS443:3:96:385:249#0/1  
AAGTGATTCCAAGAGGAAAGCTTTCCACAAGAGGGGCCAG  
+HWI-EAS443:3:96:385:249#0/1  
\_a`^baa`ba^aa`^^^a^a\_a\_[M`Y^]a)`[SZUVZ^  
@HWI-EAS443:3:100:1030:1796#0/1  
GAACAATGAAGGAGGACATCCGACATGCCAACAGAAGTT  
+HWI-EAS443:3:100:1030:1796#0/1  
YUbbb\_0aaa`R^Lba\_aabVa\_^X`b`aJb`\_]WPIZa  
@HWI-EAS443:3:100:851:135#0/1  
ATGGCATGCCACTCTGTTGCATTTGAAGATTTAAGAGTAT  
+HWI-EAS443:3:100:851:135#0/1  
aRab[ ]aaa¥aS^T`MFYTO[\_`a]Y[`YY`¥¥\_a\_\_U^B  
@HWI-EAS443:3:100:865:1973#0/1  
GAGCAACCGTTATGGCAGCATTTCAGCGGAAAAATGAAGG  
+HWI-EAS443:3:100:865:1973#0/1  
abVRabaabaa]b^Y\_ba¥]HXa\_bJ¥aaQ^\_abU¥KZBB  
@HWI-EAS443:3:10:569:1055#0/1  
ATCCAACATGCCAACAGAAGTTATAAGAATGATGGAAAGT  
+HWI-EAS443:3:10:569:1055#0/1  
aaa¥0\_baabaa]a`Ya\_Yb`aaaa`b^\_ab\_^a```\_`\_Z  
@HWI-EAS443:3:10:625:741#0/1  
CCCTCTTGTTGGAAAGCTTTTCTCTTGAATCACTTTCTTT

+HWI-EAS443:3:10:625:741#0/1  
\_bbba`\_b`bb\_bb`ab`b]aaabb`bbbaaaabbbba`bb  
@HWI-EAS443:3:14:1129:674#0/1  
CTTAAATCTTCAAATGCAGCAGAGTGGCATGTCATCCACA  
+HWI-EAS443:3:14:1129:674#0/1  
\_^VV]Qa`a[S^`TWaabYKYaY¥W`a\_X`WJSZT^S[RP  
@HWI-EAS443:3:14:1156:363#0/1  
CAAATGAGAATGTGGAAACCATGGACTCCAATGCCCTGGA  
+HWI-EAS443:3:14:1156:363#0/1  
aaaaaababaa\_aa\_a`aaaaa^\_a\_]`\_`]^^^`b\_]`  
@HWI-EAS443:3:14:987:1728#0/1  
TGAATGCTGCCATAACGGTTGGTCTTTCAAAGGGAGATT  
+HWI-EAS443:3:14:987:1728#0/1  
^Z``abbaa¥S\_b`a¥b¥[^YFYZQ`\_`NTYa\_aa\_a][WU  
@HWI-EAS443:3:15:434:565#0/1  
CAACAGTCATACTCCTCTGCATTGTCTCCGAAGAAATAAG  
+HWI-EAS443:3:15:434:565#0/1  
`Z``aaa¥V]]X^]XZT`a][[X¥QG¥ZL¥U\_YW^^^¥¥  
@HWI-EAS443:3:18:1121:674#0/1  
GCACTTTCCTTCATTCTTATAACTTCTGTTCCGCATGTCGG  
+HWI-EAS443:3:18:1121:674#0/1  
a]T¥aaba]Xaa`ba\_aa`a\_a]a`\_aaaa^`\_\_[DUaa  
@HWI-EAS443:3:19:1360:567#0/1  
GAAAGTGATTCCAAGAGGAAAGCTTTCCGACAAGAGGGGTC  
+HWI-EAS443:3:19:1360:567#0/1  
aaaa¥JS`a`\_\_\_a\_]Z^`\_\_\_\_\_^MDSY]a\_^^^Z^ZP  
@HWI-EAS443:3:1:126:1150#0/1  
CCAGGGTATTGGAGTCCATGGTTTCCACATTCTAATTTGA  
+HWI-EAS443:3:1:126:1150#0/1  
aaUb[UFT[a`\_`[\_TXVRKDP^VM[]G¥aYWLFRR\_BBBB  
@HWI-EAS443:3:1:396:597#0/1  
GTCCGCTTTTCATTGTTCCCGCTGAATGCTGCCATAACGG  
+HWI-EAS443:3:1:396:597#0/1  
`\_]UaQ[Xaaa`baa][\_`a\_][^Y¥aT\_U¥X``\_BBBB  
@HWI-EAS443:3:1:424:1051#0/1  
CAGATTGCTTCAAATGAGAATGTGGAAACCATAGACTCCA  
+HWI-EAS443:3:1:424:1051#0/1  
`a`a``\_Y\_baaaabZ`b\_\_bb`aba\_^UZaaa`]YZYYB  
@HWI-EAS443:3:1:614:347#0/1  
CAGATTGCTTCAAATGAGAATGTGGAAACCATGGAGTCCA  
+HWI-EAS443:3:1:614:347#0/1  
aba¥[^YXa]DUa`SPZ]baaVYa^¥\_]¥W¥BBBBBBBBBB  
@HWI-EAS443:3:23:1601:1569#0/1  
ATTTCCCTCCACTCCTGGTCCTTATGGCCCAGGATCTGCTT  
+HWI-EAS443:3:23:1601:1569#0/1  
X`bZPJWX\_H[VTN[XOYZZP^[\_Z^\_V^BBBBBBBBBB  
@HWI-EAS443:3:24:1093:773#0/1  
GAAAGTGATTCCAAGATGAAAGCTTTCCACAAGAGGGGTC  
+HWI-EAS443:3:24:1093:773#0/1  
\_VSV`H]R^]`\_XRYWG\_XXPZ[\_a`PW[OZUPYXa\_a¥S

@HWI-EAS443:3:27:1169:376#0/1  
GTAGGCTGCACACTGATCTGGCCTGCGGGTGCCTTTTGTT  
+HWI-EAS443:3:27:1169:376#0/1  
aWZ\_^¥\_bYHOOPYUXV``]ZPYT[[\_]HXLUGL][U[QH  
@HWI-EAS443:3:27:858:1275#0/1  
AAGAAAGAGATTCCAAGAGGAAAGCTTTCCACAAGAGGGG  
+HWI-EAS443:3:27:858:1275#0/1  
^X]^¥^TDTMQPX`aa``Z¥[a]^a\_¥TWa\_]¥P`\_a]^¥  
@HWI-EAS443:3:29:781:1437#0/1  
GACCCGTCTTGTGGAAAGCTTTCCTCTTGAATCACTTTC  
+HWI-EAS443:3:29:781:1437#0/1  
]bbb]F[bbab^`]`aa``aa\_baaaaaaaaa^`ba``\_\_a  
@HWI-EAS443:3:30:369:1250#0/1  
GACCAGGAGTGGAGGAAATACCAATCAACAACAGGCATCC  
+HWI-EAS443:3:30:369:1250#0/1  
¥\_b¥X[YQ^S¥Za^``a`abbb`^`\_ba`^H\_```\_UZ`  
@HWI-EAS443:3:30:816:22#0/1  
GCCTTTTGTGGTTGGTATTTCCCTCCACTCCTGGTCCTTA  
+HWI-EAS443:3:30:816:22#0/1  
Z[ZRY`^\_0[^KK[^]QU\_¥U¥T]]^]YVVZTXNRIMNS  
@HWI-EAS443:3:30:900:1625#0/1  
AGAATGATGGAAAGTGCAAACCCAGAAGATTTGTCCTTCC  
+HWI-EAS443:3:30:900:1625#0/1  
V``\_b`Wa^^\_Z¥UTY`W^H`bbab]a]\_QXW\_`a`]WV  
@HWI-EAS443:3:32:532:1710#0/1  
TGCCTTTTGTGATTGGTATTTCCCTCCACTCCTGGCCCTT  
+HWI-EAS443:3:32:532:1710#0/1  
a\_bbaabaaabaaa`^Zbaaaba\_aabb`ba\_^[\_aa^¥  
@HWI-EAS443:3:33:1211:1670#0/1  
AAAGAAAGTGATTCCAAGAGGAAAGCTTTCCAGAAGAGGG  
+HWI-EAS443:3:33:1211:1670#0/1  
a\_aaV¥¥^[TZN]^`ZTX`]^\_]\_`[]^\_¥G^UYW][Z  
@HWI-EAS443:3:33:1632:1263#0/1  
GAAAGCTTTCCTCTTGAATCACTTTCTTTCCTGTTATGA  
+HWI-EAS443:3:33:1632:1263#0/1  
aaaababaa[Z`W\_`ab`Z`\_a\_a`aN¥aTDNFY\_[-^^  
@HWI-EAS443:3:33:189:607#0/1  
CCAGGGTATTGGAGTACATGGTTTCCACATTCTCATTGA  
+HWI-EAS443:3:33:189:607#0/1  
aaaaaaV`\_\_`a\_\_Wa^`¥\_YT\_\_\_\_\_`^\_`¥¥¥\_¥¥\_`¥¥  
@HWI-EAS443:3:33:234:895#0/1  
GTCCGTCTTTCATTGTTCCCGCTGAATGCTGCCATAACGG  
+HWI-EAS443:3:33:234:895#0/1  
[G\_\_aab^``aaa]Y]]aaa]`¥¥\_\_[Z\_[]ZQ[]\_`^NZZ  
@HWI-EAS443:3:33:366:128#0/1  
ATTGGTGTGGATGGCATGCCACTCTGCTGGATTTGAAGAT  
+HWI-EAS443:3:33:366:128#0/1  
¥aabaY`^\_bb^bb`¥0]]^V]V[[\_WM[EZ]¥]S0Tα]P  
@HWI-EAS443:3:33:663:1177#0/1  
GGAGGAAATACCAATCAACAAAAGGCATCCGCAGGTCAGA

+HWI-EAS443:3:33:663:1177#0/1  
\_¥\_`\_S\_ba^ab\_U]abaaaa]T\_^a` `]aW^WY`U¥\_\_^  
@HWI-EAS443:3:34:134:786#0/1  
CCCCGCTGAATGCTGCCATAACGGTTGGTCTTTCAAAGGG  
+HWI-EAS443:3:34:134:786#0/1  
Q\_bbb` [ `bOU\_X[ `aT[^a\_R¥ZWFZaa^XU^aa^VZP  
@HWI-EAS443:3:34:779:952#0/1  
GCCTTTTGTGAATGGTATTTCCCTCCACTCCTGGTCCTTA  
+HWI-EAS443:3:34:779:952#0/1  
aaabaaaa\_aaa`aa`\_aaaaaaaa\_a`aaa^\_\_VZT^W\_  
@HWI-EAS443:3:36:17:1845#0/1  
GTCGGATGTCTGTCCTTCATTGTTCCCGCTGAATGCTGCC  
+HWI-EAS443:3:36:17:1845#0/1  
a\_aaa^^]X`^X^^^N]aZ¥\_X^¥\_\_\_Q]NUU¥SPWKNUY  
@HWI-EAS443:3:37:564:954#0/1  
GCAGGCCAGATCAGTGTGCAGCCTACATTATCAGTGCAGC  
+HWI-EAS443:3:37:564:954#0/1  
ab[\_T\_`X¥PXR^^M`YV[P]\_`^`\_`^`\_LUY\_WYVW]STT  
@HWI-EAS443:3:38:1085:411#0/1  
CATCATTCTTATAACTTCTGTTCCGCATCTCGGATGTCCGT  
+HWI-EAS443:3:38:1085:411#0/1  
` [¥NU[aYaWN\_` [ `W[ZZU\_^a^\_BBBBBBBBBBBBBBB  
@HWI-EAS443:3:38:1552:997#0/1  
GAAATACCAATCAACAAAAGGCATCCGCAGCCCAGATCAG  
+HWI-EAS443:3:38:1552:997#0/1  
a]\_U^b`¥\_aa\_a`UaaY]NXaa^X^aQBBBBBBBBBBBBB  
@HWI-EAS443:3:3:1159:105#0/1  
CCCCGCTGAATGCTGCCATAACGGTTGCTCTTTTAAAAGGG  
+HWI-EAS443:3:3:1159:105#0/1  
H\_X\_Vbbb\_a]¥bbVa`b`V\_bb\_a` [ `HTWXGRSYaSaa  
@HWI-EAS443:3:3:576:1942#0/1  
GATTGCTTCAAATGAGAATGTGGAAAGCATGGACTCCAAT  
+HWI-EAS443:3:3:576:1942#0/1  
ObZb^¥b`\_a¥abXbaa`b]L^bab^G` `YbW¥Z^a¥aa]  
@HWI-EAS443:3:40:108:736#0/1  
CCGTCTTTCATTGTTCCCGCTGAATGCTGCCATAACGGTT  
+HWI-EAS443:3:40:108:736#0/1  
abbabbbbbbb`abbbab`a\_aaa` `¥a[\_a` ]`aaZ`  
@HWI-EAS443:3:40:242:1247#0/1  
TGCCACTCTGCTGCATTTGAAGATTTAAGAGTCTCAAGTT  
+HWI-EAS443:3:40:242:1247#0/1  
X` `¥`aaZ¥\_\_\_^GZ`Z\_]` \_\_^]LWa]YMKY\_OT¥]^  
@HWI-EAS443:3:43:1197:779#0/1  
CTCCCTTTTGAAGAGCAACCGTTATGGCAGGATTCAGCG  
+HWI-EAS443:3:43:1197:779#0/1  
a`WT[\_bb`\_]\_Q\_VHT^YI`\_YNNBBBBBBBBBBBBBBB  
@HWI-EAS443:3:49:395:1017#0/1  
TTCAAATGCAGCAGAGTGGCATGCTATCCACACCAATTGA  
+HWI-EAS443:3:49:395:1017#0/1  
aXbbaZNaay^`aa\_Ra\_a\_\_^Ta\_[U[ `^aJYa`X\_SU



@HWI-EAS443:3:4:138:1860#0/1  
CATTCTCATCTGAAGCAATCTGGACCCCTCTTGTGGAAAG  
+HWI-EAS443:3:4:138:1860#0/1  
ab\_]babbZ\_``bba[ba`Sa`U^b`b``TaXPaa\_a[^  
@HWI-EAS443:3:50:1302:1812#0/1  
GAAAGCTTTCCACAAGAGGGGTCCAGATTGGTTCAAATGA  
+HWI-EAS443:3:50:1302:1812#0/1  
XV`¥aSXW`QW^b\_\_b`^^\_PEP¥abZIU\_Ga^T^`][`a  
@HWI-EAS443:3:50:167:1569#0/1  
GAAAGAGATTCCAAGAGGAAAGCTTTCCACAAGAGGGGTC  
+HWI-EAS443:3:50:167:1569#0/1  
a``aXF\_Zba[aZVa`Z^Y\_\_[\_``^b\_`^TVPP¥aWD  
@HWI-EAS443:3:50:775:1921#0/1  
GTCCGCTTTTCATTGTTCCCGCTGAATGCTGCCATAACGG  
+HWI-EAS443:3:50:775:1921#0/1  
aY^ZUTL\_a`\_a`aaS\_]R``VVTUUI[ZNGNRY^¥VRY\_  
@HWI-EAS443:3:51:124:416#0/1  
TGAGAATGTAGGCTGCACATTGATCTGGCCTGCGGATGCC  
+HWI-EAS443:3:51:124:416#0/1  
`b\_bV\_bbWaaa\_a]X[\_``aa\_XS[[^M]]]\_aN^SPQ  
@HWI-EAS443:3:52:1046:111#0/1  
GCCTTTTGTGATTGGTACTTCCTCCACTCCTGGTCCTTA  
+HWI-EAS443:3:52:1046:111#0/1  
aa`bbabb`ababbaa¥b^ba`^a`Z`\_a`¥aaa¥`¥a``  
@HWI-EAS443:3:53:520:1597#0/1  
GAGCAACCGTTATGGTAGCATTGAGCGGAACAATGAAGG  
+HWI-EAS443:3:53:520:1597#0/1  
ababb\_^aa\_\_`ab\_Y\_a^a`[a`¥Y`\_a]^XW`]X]a``  
@HWI-EAS443:3:55:1343:1649#0/1  
CTTAAATCTTCAAATGCAGCAGAGTGGCATGCCATACACA  
+HWI-EAS443:3:55:1343:1649#0/1  
aabba\_`bb^U¥`aabYab\_a¥YNYa^`b^ORQU]GJ[X`  
@HWI-EAS443:3:57:717:1615#0/1  
ATGGTTTCCACATTCTATTTGAGGCAATCTGGACCCCTC  
+HWI-EAS443:3:57:717:1615#0/1  
aaa\_\_bbaab[abaa`\_a`aaaYG^`\_`aa`\_^^\_¥\_\_\_\_  
@HWI-EAS443:3:58:1094:523#0/1  
GTGTGGACGGCATGCCACTCTGCTGCATTTGAAGATTTAA  
+HWI-EAS443:3:58:1094:523#0/1  
aY`UVMRWYa\_Z[YTQW¥VUW]U]^ZT^ZY\_XUUV¥¥Z[T  
@HWI-EAS443:3:58:1245:97#0/1  
GTTTCGCATGTCCGATGTCCGTCCTTCATTGTTCCCTCTGA  
+HWI-EAS443:3:58:1245:97#0/1  
a\_`\_a\_\_`aT[^aS^^RVWYJRUIW[¥¥][^WXTSTWW¥UT  
@HWI-EAS443:3:58:1610:592#0/1  
GAGGAAAGAAAGTGATTCCAAGAGGAAAGCCTTCCACAAG  
+HWI-EAS443:3:58:1610:592#0/1  
a\_aa`\_\_a^X\_aRa[^]W^\_\_`^`\_`\_0[\_^Z^^]^\_\_  
@HWI-EAS443:3:58:1706:1389#0/1  
GACCGCTCTTGTGGAAAGCTTTCCCTCTTGAATCACTTTC

+HWI-EAS443:3:58:1706:1389#0/1  
abaabababa]`a`aa`^baa`\_a\_aaaa\_\_b\_a\_a`a`  
@HWI-EAS443:3:59:1246:885#0/1  
GATTGCTTCAAATGAGAATGTGGAAACCATGTACTCCAAT  
+HWI-EAS443:3:59:1246:885#0/1  
ZXba`V¥b\_\_Vbabaa`¥a¥abb\_baaaa\_F]a`T0]\_\_  
@HWI-EAS443:3:64:943:1706#0/1  
AGTGATACCAAGAGGAAAGCTTTCCACAAGAGGGGTCCAG  
+HWI-EAS443:3:64:943:1706#0/1  
^¥Q¥aVF^[b\_QZZa¥aVWaRSa]R\_Xa`^YLYFLSEX]  
@HWI-EAS443:3:65:1384:1216#0/1  
GAAGGACGGACATCCGACATGCGAACAGAAGCTATAAGAA  
+HWI-EAS443:3:65:1384:1216#0/1  
ZZabONU[a^^¥^\_]`U\_b^¥XZ\_a]b]]¥VWa`\_aa`a  
@HWI-EAS443:3:66:376:1268#0/1  
GTCCGTCTTTCATTGTTCCCGCTGAATGCTGCCATAACGG  
+HWI-EAS443:3:66:376:1268#0/1  
a`b^]Uaaaaaba`a]`aa^\_````]]`a\_\_````^`[a`  
@HWI-EAS443:3:68:1575:1856#0/1  
ATACCAATCAACAAAAGGCATCCACAGGCCAGATCAGTGT  
+HWI-EAS443:3:68:1575:1856#0/1  
aa`\_aba`a`a`\_]`\_a\_\_a\_\_[^S^`^UR]]\_[TZVU]X  
@HWI-EAS443:3:68:276:1439#0/1  
AGGAAATACCACTCAACAAAAGGCATCCGCAGGCCAGATC  
+HWI-EAS443:3:68:276:1439#0/1  
a^`^Y¥]\_a`¥J¥bYR^a`]VXR`a\_\_]^\_T¥[P[ZUZUP  
@HWI-EAS443:3:68:920:1687#0/1  
TTTTGAAAGAGCAACCGTTATGGCAGCATTGAGGGGGAAC  
+HWI-EAS443:3:68:920:1687#0/1  
aa`\_ababS[aab\_aaaQ`^`Y^`\_\_\_\_Q[BBBBBBBBBB  
@HWI-EAS443:3:70:1151:41#0/1  
CAACTGTCATACTCCTCTGCATTGTGTCCGAAGAAATAAG  
+HWI-EAS443:3:70:1151:41#0/1  
WQQ¥S``\_Ya\_^T[]OV\_IQ^X¥WH][[]`P]WWGRS[a  
@HWI-EAS443:3:70:1249:1474#0/1  
GAGGGGTCCAGATTGCTTCAAATGAGAATTTGGAAACCAT  
+HWI-EAS443:3:70:1249:1474#0/1  
abZN¥a\_a\_¥\_Ya\_aab`a\_a[aaaa\_ba`\_aaaa``]aa  
@HWI-EAS443:3:71:1162:1237#0/1  
GTCGGATGGCCGTCCCTTCATTGTTCCCGCTGAATGCTGCC  
+HWI-EAS443:3:71:1162:1237#0/1  
]R\_bbaa`KMY]^`QO[[^]^ [HYK¥]L[X^UPXXSPZVS  
@HWI-EAS443:3:71:988:410#0/1  
CCAGGGCATTGGAGTCCATGGTTTCCACATTCTCATTTGA  
+HWI-EAS443:3:71:988:410#0/1  
aa¥\_Z\_LOZ^¥RVRUXRZ\_NNN^WSYaX`WZ`V^aa^\_¥  
@HWI-EAS443:3:73:312:1331#0/1  
TGGCATGCCACTCCGCTGCATTTGAAGATTTAAGAGTATC  
+HWI-EAS443:3:73:312:1331#0/1  
V`ZZ`aZab[Z`]H\_aYb\_UXbbbWSX\_Zab`aY`a[aM^

@HWI-EAS443:3:73:379:605#0/1  
GTCCGCTTTTCATTGTTCCCGCTGAATGCTGCCATAACGG  
+HWI-EAS443:3:73:379:605#0/1  
`\_]`[D[aa\_PZ`U¥^Z`]a`\_a`\_XXZNZ¥^[^¥ZZ[Q  
@HWI-EAS443:3:75:935:336#0/1  
TGTCCGCTCCTTCATTGTTCCCGCTGAATGCAGCCATAACG  
+HWI-EAS443:3:75:935:336#0/1  
aa`a`a`^]\_aa`aaaa\_a^[Z``\_a\_\_^`\_\_\_\_[Z``^]Xa  
@HWI-EAS443:3:77:297:201#0/1  
GTCCGCTTTTCATTGTTCCCGCTGAATGCTGCCATAACGG  
+HWI-EAS443:3:77:297:201#0/1  
aW[Sa^^\_a`^^\_^X]\_`RU`^W\_Z[W^QTVWUUS¥URZL  
@HWI-EAS443:3:79:1404:1523#0/1  
CGGACATCTGACATGCGAACAGAAGTTATAAGAATGATGG  
+HWI-EAS443:3:79:1404:1523#0/1  
aa]a`bbbbabaabbabbbabbaabababbbaaabaabb  
@HWI-EAS443:3:81:1638:959#0/1  
GCTGCACTGAGAATGTAGGCTGCACACTGCTCTGGCCTGC  
+HWI-EAS443:3:81:1638:959#0/1  
aabb`b^ba\_abb`baaa\_P`a`V^0`RHX^`¥`KYPYP  
@HWI-EAS443:3:81:798:1762#0/1  
AGAATGTAGGCTGCACACTGATCTAGCCTGCGGATGCCTT  
+HWI-EAS443:3:81:798:1762#0/1  
aba`Z[Tb\_\_aaa`aZ`aRa`^ZaX[\_ZNa\_`]Z[Y¥\_`  
@HWI-EAS443:3:82:70:199#0/1  
GGTCCAGACTGCTTCAAATGAGAATGTGGAACCATGGAC  
+HWI-EAS443:3:82:70:199#0/1  
`¥S^a]]¥¥¥]]^^a^ZY\_\_¥`[H[`W`^^Z^^[Y]`¥Z[  
@HWI-EAS443:3:82:952:1451#0/1  
AAGGCATCCGCAGGCCAGATCAGTGGGCAGCCTACATTCT  
+HWI-EAS443:3:82:952:1451#0/1  
abbaaIZR`Q\_TT¥`^J^^^PZ\_¥]b`XUV\_UVW\_GUUR  
@HWI-EAS443:3:85:252:489#0/1  
TGGCCTGCGGCTGCCTTTTGTGATTGGTATTTCCCTCCAC  
+HWI-EAS443:3:85:252:489#0/1  
aa\_Xbaa[\_TLT^^b`a]]W[``PXVVWD[[ZZXRX^¥U[  
@HWI-EAS443:3:87:1173:227#0/1  
GATTGCTTCAAATGAGAATGTTGAAACCATGGACTCCAAT  
+HWI-EAS443:3:87:1173:227#0/1  
^abb¥W\_^[aaW^a`b`bab`bbaa`L`\_\_YOPVVY]aa  
@HWI-EAS443:3:87:1212:1067#0/1  
CCCTTTTGAAGAGCAACCGTTATGGCAGGATTCAGCGGG  
+HWI-EAS443:3:87:1212:1067#0/1  
`bbbbabbbbab`abba]a^baabaaa¥HTN\_¥YTO[ab  
@HWI-EAS443:3:87:540:439#0/1  
ATAACTTCTGTTTCGCATGTCGTATGTCCTCCTTCATTGT  
+HWI-EAS443:3:87:540:439#0/1  
`PQ\_NWaa\_`^¥QR]]\_ZV`ZGL[aYBBBBBBBBBBBBBB  
@HWI-EAS443:3:88:240:953#0/1  
TGGCATGCCACTCTGCTGCATTTGAAGACTTAAGAGTATC

+HWI-EAS443:3:88:240:953#0/1  
abab\_bbbbbbb` `aba¥bbaaaab\_¥Z]a[aaaX]aa  
@HWI-EAS443:3:90:1154:1690#0/1  
AGAGCAACCGTCATGGCAGCATTAGCGGGAACAATGAAG  
+HWI-EAS443:3:90:1154:1690#0/1  
ab`T]aa` `b^ab^^X`a\_U]]aRaZ^Y^a`U\_\_0^^]^  
@HWI-EAS443:3:90:1341:775#0/1  
ACCAATCAGCAAAAGGCATCCGCAGGCCAGATCAGTGTGC  
+HWI-EAS443:3:90:1341:775#0/1  
aa][`aabaaaa]]aaaa`aba¥b\_aa`b\_a``a\_^` `[  
@HWI-EAS443:3:91:397:543#0/1  
ACACTGATCTGGCCTGCGGATGCCTTTTGTGAGTGGTAT  
+HWI-EAS443:3:91:397:543#0/1  
a\_SWa\_[aZ¥aZ^a`aWHYUVVSZ]a^RWY`X]HTG\_[VG  
@HWI-EAS443:3:91:399:1818#0/1  
ACCGTTATGGCAGCATTAGCGGGAACAACGAAGGACGGA  
+HWI-EAS443:3:91:399:1818#0/1  
abaaabbaabba`Raa][X]¥a`S`]aaS^¥X¥^MFMVS  
@HWI-EAS443:3:92:1620:361#0/1  
TTCCACATTCTCATTTGAAGCAATCTGGACCACTCTTGTG  
+HWI-EAS443:3:92:1620:361#0/1  
a`R¥aaa\_aUaa\_a`ab^]`Za^a` [0` [LGN\_\_`YWSZ  
@HWI-EAS443:3:92:875:1770#0/1  
CAGCATTAGCGGGAACAATGAAGGACGGACATCTGACAT  
+HWI-EAS443:3:92:875:1770#0/1  
aaSZOGZ`Y\_aaU\_Sa]aH`a^NZ`JG¥aSL`]NN^GG^X  
@HWI-EAS443:3:96:1433:274#0/1  
GGAACAATGAAGGAAGGACATCCGACATGCGAACAGAAGT  
+HWI-EAS443:3:96:1433:274#0/1  
a` `bQ[]]XaS]]ZH`aQ`YN[RH¥^^X`¥`Z¥\_IIXZ  
@HWI-EAS443:3:96:212:787#0/1  
CGCTGCACTGAGAATGTAGGCTGCACACTGGTCTGGCCTG  
+HWI-EAS443:3:96:212:787#0/1  
ab[W`b[JX^a\_Q0`]NZ[`Waa`S]XY[WG¥YVP¥RBBB  
@HWI-EAS443:3:97:1039:1454#0/1  
AGCAGATACTGGGCCATAAGGACCAGGAGTGGATGAAATA  
+HWI-EAS443:3:97:1039:1454#0/1  
I^¥`a`a[a[ab`ZS¥`Vb[¥^R\_aaab[`babba`aaY  
@HWI-EAS443:3:98:1154:1959#0/1  
GGCCTGCGGATGCCTTTTGTGATTGGTATCTCCTCCACT  
+HWI-EAS443:3:98:1154:1959#0/1  
ZaQ]ab`Xaa]XRa\_aaabSaaX`a`Q` `^aWZ\_WV\_¥\_  
@HWI-EAS443:3:99:116:32#0/1  
GTTTCATAGGAGGAAAGAAAGTGATTCCAAGAGGAAAGCT  
+HWI-EAS443:3:99:116:32#0/1  
a¥^YQY]SOW[Z]RQZ\_RLP^PYUUSJPLTYYYYXBBBB  
@HWI-EAS443:3:99:438:408#0/1  
AGGAAATACCAATCAACAAAAGGCATCCACAGGCCAGATC  
+HWI-EAS443:3:99:438:408#0/1  
a\_YGYa`N[Z[TZTS]Y`XTU[[J[SPUSYXYZEKVBBBB

@HWI-EAS443:3:9:513:895#0/1  
CGCATGTCGGATGTCCTTCATTGTTCCCGCTAAATG  
+HWI-EAS443:3:9:513:895#0/1  
ababTaXa\_a`a[^aX`aJSaUb`XUU`\_GX\_[HVJXaS¥  
@HWI-EAS443:3:10:1664:1456#0/1  
ACGCCCTCTTGTTGAAAGCTTTCCTCTTGAATCACTTTC  
+HWI-EAS443:3:10:1664:1456#0/1  
a`b\_\_\_bY\_a`a`aa^a`adW^a\_a`a^^`\_]^^`\_`X  
@HWI-EAS443:3:23:1697:899#0/1  
AGGCCCTCTTGTTGAAAGCTTTCCTCTTGAATCACTTT  
+HWI-EAS443:3:23:1697:899#0/1  
a\_RZ``bb\_bb`^a]X\_a`U^baY`a^aaba\_``[a^[\_Z  
@HWI-EAS443:3:31:1520:449#0/1  
GAGGAAAGAAAGTGATTCCAAGAGGAAAGCTTCCACGAG  
+HWI-EAS443:3:31:1520:449#0/1  
a\_]¥Z]X\_`[aZa^Z\_][]YVRKRS]Z]RV\_TNSRP`Z]  
@HWI-EAS443:3:33:1453:1598#0/1  
AGCGGGAACAATGAAGGACGGACATCCGACATGCGAAGAG  
+HWI-EAS443:3:33:1453:1598#0/1  
]a]QT¥[]Y]a^`[ZXY]]a`Y¥^`U`X[Z¥FQ]^PG[^  
@HWI-EAS443:3:45:239:1958#0/1  
GAAATACCAATCAACAAAAGGCATCCGCAGGCCAGATGAG  
+HWI-EAS443:3:45:239:1958#0/1  
R\_aa[ab\_Wa\_YOQ\_b`W^QU^b\_QR]JWTZZRLabWQQZ  
@HWI-EAS443:3:45:750:241#0/1  
CCTCTCTTGTTGAAAGCTTTCCTCTTGAATCACTTTCTT  
+HWI-EAS443:3:45:750:241#0/1  
abbabaabaabbabaaabbba`a`abaaaa`aaaa\_aa  
@HWI-EAS443:3:47:1781:233#0/1  
CACCCATCATTCTTATAACTTCTGTTCCGCATGTCGGATGT  
+HWI-EAS443:3:47:1781:233#0/1  
Sabb`Y^[¥\_babbbb[babbYaabb^`\_ab[XaaX`bY  
@HWI-EAS443:3:63:1783:1070#0/1  
AGGACCAGGAGTGGAGGAAATACCAATCAACAAAAGGAAT  
+HWI-EAS443:3:63:1783:1070#0/1  
YRU`YR`Za`\_Zaa^b]T¥`\_YT\_aa\_JaaR`]BBBBBBB  
@HWI-EAS443:3:65:1177:1894#0/1  
TCAAGTTTCATAAGAGGAAAGAAAGTGATTCCAAGAGTAA  
+HWI-EAS443:3:65:1177:1894#0/1  
aabba\_aa`baba`aaaa`abaYO¥a\_^`¥a\_`a[LWa  
@HWI-EAS443:3:65:1522:1591#0/1  
GTCCTTATTGTTCCCGCTGAATGCTGCCATAACGGTCGC  
+HWI-EAS443:3:65:1522:1591#0/1  
`^`ab```abb\_aX\_aa^[^\_¥`YY]\_\_\_a`\_`^\_\_LPX^  
@HWI-EAS443:3:70:1483:629#0/1  
GGGCCCTCTTGTTGAAAGCTTTCCTCTTGAATCACTTT  
+HWI-EAS443:3:70:1483:629#0/1  
aabbbbabbbabbaa`bbbbbbab`aabbbab`aabaa  
@HWI-EAS443:3:72:335:103#0/1  
GCTGCACACTGATCTGGCCTGCGGATGCCTTTTGTGGTT

+HWI-EAS443:3:72:335:103#0/1  
aa\_a\_a\_Z¥\_ba`aXaa^¥¥\_\_\_aNZ\_MU]\_`¥^QZVGK[  
@HWI-EAS443:3:72:952:1873#0/1  
GACCCCTCTTGTGGAAAGCTTTCCTCTTGAATCACTNTC  
+HWI-EAS443:3:72:952:1873#0/1  
]abbbbaYUR]R\_`^]`^aa\_[Ya`a`^`\_\_L]L]DYR  
@HWI-EAS443:3:77:1080:2017#0/1  
AGTGATTCCAAGAGGAAAGCTTCCACAAGAGGGTTCGAG  
+HWI-EAS443:3:77:1080:2017#0/1  
a]`bababbb`a`[V]`bbaaa``abaaa`a`\_`XGZF¥\_  
@HWI-EAS443:3:83:684:429#0/1  
ATGAAGTTTCATAAGAGGAAAGAAAGTGATTCCAAGAGGA  
+HWI-EAS443:3:83:684:429#0/1  
a^H]\_`¥babbbaa\_aaa¥\_]aa\_`\_aX\_`a`\_``a^a\_`^  
@HWI-EAS443:3:91:1191:983#0/1  
AGTGATTCCAAGAGGAAAGCTTCCACAAGAGGGTTCGAG  
+HWI-EAS443:3:91:1191:983#0/1  
a`U`b\_J\_\_^b]a`^Z^^]Z\_aaa^^]¥Y]U\_\_]GTHRa  
@HWI-EAS443:3:93:1396:52#0/1  
GGGCCCTCTTGTGGAAAGCTTTCCTCTTGAATCACTTT  
+HWI-EAS443:3:93:1396:52#0/1  
Vbaaaaaabbbabbbbabbb`bbbb^babbaabaa^abab  
@HWI-EAS443:3:98:1531:987#0/1  
GATTGCTTCAAATGAGAATGTGGAAACCATGGACTCCNAT  
+HWI-EAS443:3:98:1531:987#0/1  
O\_\_T^\_T\_aaaa\_PRbba^]YaZ`\_]\_FH`bab¥GVXFDRB  
@HWI-EAS443:3:100:159:165#0/1  
AGCAGATACTGGNCCATAAGGACCAGGAGTGGAGGAAATA  
+HWI-EAS443:3:100:159:165#0/1  
aaa`a\_a`a`a¥DV`^a`aa\_^]``a`\_]`X`aXa^X^Z]B  
@HWI-EAS443:3:11:1581:332#0/1  
CAGCCAGATCAGTGTGCAGCCTACATTCTCANTGCAGCG  
+HWI-EAS443:3:11:1581:332#0/1  
aaaabbbbabbbbaaab`bb`abbaabbaaZYDWb¥aa`a  
@HWI-EAS443:3:15:1137:61#0/1  
ATTTCTCCACTCCTGGTCCTTATNGCCAGTATCTGCTT  
+HWI-EAS443:3:15:1137:61#0/1  
^ab^\_`babbY`a]\_`YV\_¥aaRSDU]HRNVW^\_UJ[R`\_  
@HWI-EAS443:3:16:418:17#0/1  
AGAGTATCAAGTTTCATAAGAGGAAAGANAGTGATTCCAA  
+HWI-EAS443:3:16:418:17#0/1  
U¥Z\_Y]\_b\_^\_Z`¥`WZW``^aaVYX`YD[^L¥]^`\_`\_`\_  
@HWI-EAS443:3:17:456:1651#0/1  
TGTTCCCCTGAATGCTNCCATAACGGTTGCTCTTTCAA  
+HWI-EAS443:3:17:456:1651#0/1  
`^TT¥a\_Za¥XT^`¥YWDV\_\_``a\_a¥Q^\_]VYNYXZMXV  
@HWI-EAS443:3:24:1024:1700#0/1  
CAGCGGAANAATGAAGGACGGACATCCGACATGCGAACA  
+HWI-EAS443:3:24:1024:1700#0/1  
\_`aa^]XaUDP`aaa\_]\_`YR]`aaX\_[[aaa¥LS[Z]a

@HWI-EAS443:3:2:956:1175#0/1  
CAGNGTGGAGGAAATACCAATCAACAAAAGGCATCCGCA  
+HWI-EAS443:3:2:956:1175#0/1  
aab¥D[\_bb`bba`a`\_a\_aaa\_aa\_aa\_\_`\_a\_¥]`Y¥  
@HWI-EAS443:3:31:338:1915#0/1  
CAAGTTTCATAAGAGGAAANAAAGTGATTCCAAGAGGAAA  
+HWI-EAS443:3:31:338:1915#0/1  
aa\_[T]`aa`\_`Y^\_T`XWDX`^TGRUTQ`^^`X`¥R^`^  
@HWI-EAS443:3:34:1425:1097#0/1  
GTCCGATNTCCGTCCTTCATTGTTCCCGCTGAATGCTGCC  
+HWI-EAS443:3:34:1425:1097#0/1  
a^^a`^WDWZ¥¥V\_¥\_\_UV]\_TZ[Y[[U[VUV[USVB BBB  
@HWI-EAS443:3:3:985:986#0/1  
GAGGAAAGAAAGTGATTCCAAGAGGAAAGNTTCCACAAG  
+HWI-EAS443:3:3:985:986#0/1  
abbbababa`bbJa`b`aaa`a``UU``[DTba`I\_\_a\_  
@HWI-EAS443:3:42:1091:630#0/1  
TGGCATGCCACTCTGCTGCATTTGAAGATTTANGAGTATC  
+HWI-EAS443:3:42:1091:630#0/1  
`b`abbbbbbabbabbbaabbbbaabaaba[D]ab\_baa  
@HWI-EAS443:3:43:1374:364#0/1  
AGTGATTCCAAGAGGAAAGCTTCCACAAGANGGGTCCAG  
+HWI-EAS443:3:43:1374:364#0/1  
ab\_b^`\_`\_aa\_a^`aaa`aa\_a\_]\_aVDV\_\_]ZR\_\_  
@HWI-EAS443:3:47:1111:1752#0/1  
CATAAGAGGAAAGAAAGTGATTCCAAGANGAAAGCTTCC  
+HWI-EAS443:3:47:1111:1752#0/1  
abbb^a`bb`KaSZ`aaZb`\_\_aba`¥D[`aa`^\_aaUF  
@HWI-EAS443:3:48:1284:1570#0/1  
GATTCCAAGANGAAAGCTTCCACAAGAGGGGTCCAGATT  
+HWI-EAS443:3:48:1284:1570#0/1  
a^aaaab]\_^D[abab`aaa\_Ya`^`a\_\_`Z\_X`^`^]`^  
@HWI-EAS443:3:58:1111:201#0/1  
GAAAGCTTNCACAAGAGGGGTCCAGATTGCTTCAAATGA  
+HWI-EAS443:3:58:1111:201#0/1  
\_S`\_]X]STDPYU¥WUXVJQUS^^X`^ULYUU\_SSWUR¥¥  
@HWI-EAS443:3:5:1559:717#0/1  
TTCTGGCTTTGCACTTNCATCATTCTTATAACTTCTGTT  
+HWI-EAS443:3:5:1559:717#0/1  
`aYaa]aaaa¥¥\_Ua^D[S[a\_]\_aRa`^`\_`a^\_aU`aX\_  
@HWI-EAS443:3:63:1277:1132#0/1  
TTTCCACATTCTCATTNAAGCAATCTGGACCCCTCTTGT  
+HWI-EAS443:3:63:1277:1132#0/1  
aaaaa`babaaaU\_aa^DW^\_\_\_\_a`^^`^^\_[^\_\_\_\_[WY  
@HWI-EAS443:3:63:1577:1061#0/1  
GGAAANACCAATCAACAAAAGGCATCCGCAGGCCAGATCA  
+HWI-EAS443:3:63:1577:1061#0/1  
a`^ZXDR`¥[¥\_^]\_`RXQ[\_U[PZU`V`^U\_ZZVZWSZ  
@HWI-EAS443:3:63:806:1201#0/1  
GCTGCATTTGAAGANTTAAGAGTATCAAGTTTCATAAGAG

+HWI-EAS443:3:63:806:1201#0/1  
aa`a`a`a\_a\_\_WaTDU`\_`\_`\_T[W]^)[Y]¥]\_[¥\_¥\_\_  
@HWI-EAS443:3:71:169:1504#0/1  
CCGCTGAATGCTGCCATAACGGTTGCTCTTTCNAAAGGGA  
+HWI-EAS443:3:71:169:1504#0/1  
aaab`a^`\_\_`^¥`aaa\_¥\_Y\_¥Z^SKX¥^ZPDV^\_¥[V¥  
@HWI-EAS443:3:78:109:1233#0/1  
GATTGCTTCAAATGAGAATGTGGAAACNATGGACTCCAAT  
+HWI-EAS443:3:78:109:1233#0/1  
aaaZabaabbbaa`[\`T`aa`]aaaZD[\_`X`^a`[^  
@HWI-EAS443:3:78:1144:1339#0/1  
GACCCCTCTTGTGGAAAGCTTTCCTCTTGGANTCACTTTC  
+HWI-EAS443:3:78:1144:1339#0/1  
aa`\_`)[^UUT`VXRab`\_VW\_WZX[Ya[[]WDV[`]`WVX  
@HWI-EAS443:3:79:1674:523#0/1  
TGTCCGCTCTTNATTGTTCCCGCTGAATGCTGCCATAACG  
+HWI-EAS443:3:79:1674:523#0/1  
abaaabb`ab^D[bbaaaU`a^a\_aaab]aaaUa`\_]a  
@HWI-EAS443:3:80:1756:1271#0/1  
AAAGANAGTGATTCCAAGAGGAAAGCTTTCACAAGAGGG  
+HWI-EAS443:3:80:1756:1271#0/1  
aa^a¥D¥a\_`^aaa\_`aa`aX]`a\_¥[a`a\_`\_]\_`\_Z^V[  
@HWI-EAS443:3:80:683:736#0/1  
CATCATTCTTACTTCTGTTTCGCATGTCGGATGTCCGT  
+HWI-EAS443:3:80:683:736#0/1  
^ab`Taa¥`bYD[0\_bbbaa\_`a]J` `[T\_aWT\_NQLow  
@HWI-EAS443:3:81:1207:372#0/1  
GAATGATGGAAAGTGCAAAGCCAGAAGATTTGTCNTCCA  
+HWI-EAS443:3:81:1207:372#0/1  
`Q[aa`¥a`[\_`Xb\_\_\_\_a^`^a`^¥a¥`\_\_a\_`VDXWW\_  
@HWI-EAS443:3:84:1487:1145#0/1  
AAGTTATAAGAANGATGGAAAGTGCAAAGCCAGAAGATTT  
+HWI-EAS443:3:84:1487:1145#0/1  
aaa\_aab`abaVDY¥baW]aa^`aaaaQaZ`a]`bZaYa  
@HWI-EAS443:3:86:815:1491#0/1  
CCAGGGTATTGGAGTCCATGGTTNCCACATTCTCATTGA  
+HWI-EAS443:3:86:815:1491#0/1  
abbb` `[ba`]ba]aabbaab\_`DXa`\_aaaa`^aaa]`  
@HWI-EAS443:3:90:1212:683#0/1  
CAACTGTCATACTCCTCTGNATTGTCTCCGAAGAAATAAG  
+HWI-EAS443:3:90:1212:683#0/1  
abba]¥\_bbbbbaba]aab[D^ba`a\_aa]aaab\_`\_ab`  
@HWI-EAS443:3:94:1745:517#0/1  
CAACNGTCATACTCCTCTGCATTGTCTCCGAAGAAATAAG  
+HWI-EAS443:3:94:1745:517#0/1  
abbVD]aababaa^aa`bb\_babaa\_a\_aaa\_b\_`aaaaV  
@HWI-EAS443:3:98:1461:762#0/1  
GCAGCATTGACGGGAACAATGAAGGACGGANATCCGACA  
+HWI-EAS443:3:98:1461:762#0/1  
` `baaabbb`bUaaaaa\_abaaa` ` ` \_ZT^[DQaQXX[\_Z



@HWI-EAS443:3:100:796:899#0/1  
TGCCTTTTGTGATTGGTATTTCCCTCCACTCCTGGTCCNT  
+HWI-EAS443:3:100:796:899#0/1  
aa[`aabab\_aa\_aaaaWaaa`\_]a\_\_^¥`\_Ya\_\_Y^ID^  
@HWI-EAS443:3:14:196:1623#0/1  
AGCCCCTCTTGTGAAAGCTTTCCCTCTTGAATCACTTTC  
+HWI-EAS443:3:14:196:1623#0/1  
a\_bbbba^JaVR`a`¥aaa`a`\_]Za\_a^aX\_a\_```\_\_b  
@HWI-EAS443:3:15:856:788#0/1  
GGAACAATGAAGGACGGACATCCGACATGCGAACAGAANT  
+HWI-EAS443:3:15:856:788#0/1  
a`aa^aa\_a\_aY\_]\_a[\_^\_^\_Z``]^\_\_X\_Z^Z^\_ZVDL  
@HWI-EAS443:3:20:1258:1160#0/1  
GGGTGGAGGAAATACCAATCAACAAAAGGCATCCGCAGGC  
+HWI-EAS443:3:20:1258:1160#0/1  
abaSa`\_a[``aa`¥aa\_\_\_a`\_a```\_^a^[¥`\_\_\_WZ  
@HWI-EAS443:3:26:258:1694#0/1  
AGGCCAGATCAGTGTGCAGCCTACATTCTCAGTGCAGCAA  
+HWI-EAS443:3:26:258:1694#0/1  
^SYaaba[aa\_FXS]aYH¥b`\_a`^^a^aa\_U`a`\_[a\_  
@HWI-EAS443:3:27:225:842#0/1  
CGCTGCACTGAGAATGTAGGCTGCACACTGATCTGGCCCG  
+HWI-EAS443:3:27:225:842#0/1  
VRZH\_WWR^TRaU^W`VTVZX[ ]`\_¥GYa`0]¥aBBBBBB  
@HWI-EAS443:3:30:714:156#0/1  
CTTCATTGTTCCCGCTGAATGCTGCCATAACGGTTGCTTT  
+HWI-EAS443:3:30:714:156#0/1  
a^`]`¥b`\_a\_\_][Pa\_``\_a^\_TLV^Z\_N]YTXQHILR  
@HWI-EAS443:3:30:805:893#0/1  
ATTGTTCCCGCTGAATGCTGCCATAACGGTTGCTCTTTGA  
+HWI-EAS443:3:30:805:893#0/1  
RZ[\_L]^\_\_U\_V¥Y\_\_`\_^VQXPRV¥U[BBBBBBBBBBBB  
@HWI-EAS443:3:34:1297:852#0/1  
GGCCCCTCTTGTGAAAGCTTTCCCTCTTGAATCACTTTC  
+HWI-EAS443:3:34:1297:852#0/1  
abaaabbbb`Ya^Y\_aZa`aaa`aa^aa[a\_]a^\_]\_\_]R  
@HWI-EAS443:3:34:442:112#0/1  
CTTTTGAAAGAGCAACCGTTATGGCAGCATTAGCGGGGA  
+HWI-EAS443:3:34:442:112#0/1  
aaabba\_bbaa`aaaa\_a¥`\_\_a\_\_a[SSV¥QVRMMY\_BB  
@HWI-EAS443:3:34:594:1325#0/1  
AAAAGGCATCCGCAGGCCAGATCAGTGTGCAGCCTACT  
+HWI-EAS443:3:34:594:1325#0/1  
a`aa`^aa^aaYa`¥¥aa`¥^^^\_YW¥U^¥^S\_]U^W¥T¥  
@HWI-EAS443:3:38:55:519#0/1  
GGGAGGGGTCCAGATTGCTTCAAATGAGAATGTGGAAACC  
+HWI-EAS443:3:38:55:519#0/1  
a``\_aaaa¥aaa`[\_`\_aaa`a`\_\_`\_aU^`aW`\_^`\_¥¥  
@HWI-EAS443:3:3:35:1428#0/1  
ACACTGATCTGGCCTGCGGATGCCTTTTGTGATTGGTCT

+HWI-EAS443:3:3:35:1428#0/1  
aab¥\_ZSUa`PVT LJQU^V[S`¥LR\_`bS¥]Y]`[O¥FBB  
@HWI-EAS443:3:44:155:165#0/1  
CGCTGAATGCTGCCATAACGGTTGCTCTTTCAAAGGGTG  
+HWI-EAS443:3:44:155:165#0/1  
ab`^`^`aa\_a\_\_^`\_`¥^a`aU\_`]X\_\_^^\_\_^^XXOW  
@HWI-EAS443:3:45:718:149#0/1  
AGCCCCTCTTGTTGAAAGCTTTCCTCTTGAATCACTTTC  
+HWI-EAS443:3:45:718:149#0/1  
^¥`aaaaaa`X¥aa\_``YYa\_]\_\_\_\_\_]`VT^^P¥Y\_¥ZT  
@HWI-EAS443:3:4:93:1133#0/1  
CGCCCCTGAATGCTGCCATAACGGTTGCTCTTTCAAAG  
+HWI-EAS443:3:4:93:1133#0/1  
``aaab`a`[]aaa\_\_aaaa\_`b`U\_a]\_^`\_`U\_[]¥Z]  
@HWI-EAS443:3:51:1724:283#0/1  
ANATCTTCAAATGCAGCAGAGTGGCATGCCATCCACACCA  
+HWI-EAS443:3:51:1724:283#0/1  
RD[[\_`aa`aaa\_aaab\_\_\_N[\_\_\_`\_`^]Y¥[X^PW[X  
@HWI-EAS443:3:55:188:1028#0/1  
GCCTTTTGTGATTGGTATTTCTCCACTCCTGGTCCTAT  
+HWI-EAS443:3:55:188:1028#0/1  
`a`a`aaa]]V[`\_\_[]QU]X^\_]`]]\_`^U\_`XZWP]YU^U  
@HWI-EAS443:3:57:158:1731#0/1  
AAGTGATTCCAAGAGGAAAGCTTTCACAAGAGGGGTCAA  
+HWI-EAS443:3:57:158:1731#0/1  
aaSH^`aa¥\_a`YSRKW]^`XXWQ[Ta\_a`T`^POLHXG[  
@HWI-EAS443:3:5:571:1682#0/1  
TACCGCTGAATGCTGCCATAACGGTTGCTCTTTCAAAGG  
+HWI-EAS443:3:5:571:1682#0/1  
`a\_Kb`\_abbb\_\_[]P¥a\_\_ba[Wbba\_\_\_\_]\_[][[aaabBB  
@HWI-EAS443:3:60:83:388#0/1  
GGCCCCTCTTGTTGAAAGCTTTCCTCTTGAATCACTTTC  
+HWI-EAS443:3:60:83:388#0/1  
abbbbbbbaabb\_aaabbbbbba\_aaab\_a\_a\_\_\_\_a\_a`  
@HWI-EAS443:3:72:1307:2040#0/1  
GCCCAGATTGCTTCAAATGAGAATGTGGAAACCATGGACT  
+HWI-EAS443:3:72:1307:2040#0/1  
¥H`]bVTVR^]Y\_a]S`Z[`U[`\_^X\_¥Ta]THWX¥WXPS  
@HWI-EAS443:3:74:1112:834#0/1  
ACGGGGTCCAGATTGCTTCAAATGAGAATGTGGAAACCAT  
+HWI-EAS443:3:74:1112:834#0/1  
aaaabbZ``abaabb`bbaaaaa`aaaabb`aaaaa\_\_\_\_`  
@HWI-EAS443:3:74:1574:1045#0/1  
GCCCCCTGAATGCTGCCATAACGGTTGCTCTTTCAAAG  
+HWI-EAS443:3:74:1574:1045#0/1  
`]^aa\_\_aaaaaba\_[O^a`aVa\_¥a[RV¥S\_aV\_¥W^^  
@HWI-EAS443:3:82:1722:707#0/1  
CGCCCCTCTTGTTGAAAGCTTTCCTCTTGAATCACTTTC  
+HWI-EAS443:3:82:1722:707#0/1  
\_`bbabbbbbbbabb`bbbabbbb`bbbb`bbbbaabbbba

@HWI-EAS443:3:87:718:1339#0/1  
AGCCCCTCTTGTGGAAAGCTTTCCTCTTGAATCACTTTC  
+HWI-EAS443:3:87:718:1339#0/1  
[G\_bb`bba¥YQH^`YU\_aaYa\_a\_a]^¥V`aa\_U\_\_\_^  
@HWI-EAS443:3:89:791:405#0/1  
GAAAGTGATTCCAAGAGGAAAGCTTTCACAAGAGGGGAT  
+HWI-EAS443:3:89:791:405#0/1  
aa]]a`a]aa\_\_\_\_\_aZ`\_¥Za`\_aaaVY`\_Z\_Ya¥`XZ\_  
@HWI-EAS443:3:90:1003:183#0/1  
GGCCCCTCTTGTGGAAAGCTTTCCTCTTGAATCACTTTC  
+HWI-EAS443:3:90:1003:183#0/1  
aba\_\_`aaa\_] [\_``aaa\_aaa\_Ya^``a`\_^aW\_Va\_\_]  
@HWI-EAS443:3:93:1059:1649#0/1  
CGTCCAGGGTATTGGAGTCCATGGTTTCCACATTCTCATT  
+HWI-EAS443:3:93:1059:1649#0/1  
aZT`Y[U`]L\_RZa]]RW[[ZTHRU[¥I]\_^[¥Z[ZKXP]  
@HWI-EAS443:3:95:941:1731#0/1  
CGCCCCTCTTGTGGAAAGCTTTCCTCTTGAATCACTTTC  
+HWI-EAS443:3:95:941:1731#0/1  
\_baaa`bbba]\_b``bb`aab`aa\_bbbbaabab^aab`  
@HWI-EAS443:3:98:607:725#0/1  
CACTCTGCTGCATTTGAAGATTTAAGAGTATCAAGTTTAA  
+HWI-EAS443:3:98:607:725#0/1  
^ZZ^^\_¥\_b¥WX^b`b^a¥OWa``b\_^`]b\_Ta^bI¥`K\_  
@HWI-EAS443:3:98:959:844#0/1  
AGCCCCTCTTGTGGAAAGCTTTCCTCTTGAATCACTTTC  
+HWI-EAS443:3:98:959:844#0/1  
aaaaa\_babaaaa]aaa`aba^^a^aaaa\_a]a\_aa`\_  
@HWI-EAS443:3:10:450:449#0/1  
ACTGGACCCCTCTTGTGGAAAGCTTTCCTCTTGAATCAC  
+HWI-EAS443:3:10:450:449#0/1  
^a\_bbb^a^I\_a`Za\_aaa`a`¥aaaaYa`\_\_[a``a[a^  
@HWI-EAS443:3:12:577:1156#0/1  
GCCCCGCTGAATGCTGCCATAACGGTTGCTCTTTCAAAGG  
+HWI-EAS443:3:12:577:1156#0/1  
``baZ\_]RF]\_a`a^¥V^^`V¥\_VKXVHOY^¥\_NV¥¥\_^¥  
@HWI-EAS443:3:14:1427:941#0/1  
AGCAGATACTGGCCATAAGGACCAGGAGTGGAGGAAATT  
+HWI-EAS443:3:14:1427:941#0/1  
¥b```^aababa^a]\_a]````a\_\_]]Wb]^X^a]GTW``  
@HWI-EAS443:3:16:1372:117#0/1  
ACCAGGGTATTGGAGTCCATGGTTTCCACATTCTCATTG  
+HWI-EAS443:3:16:1372:117#0/1  
aaY`baaUaa[`a\_a^\_\_\_]a\_]\_\_XW^]]`^R`Z]^`^\_  
@HWI-EAS443:3:18:792:656#0/1  
CGTTTCGCATGTCGGATGTCCGTCCTTCATTGTTCCCGCTG  
+HWI-EAS443:3:18:792:656#0/1  
ab^abbbbababaaaabZ`a\_¥```aa`\_aa`\_a`\_^`¥\_\_  
@HWI-EAS443:3:19:313:746#0/1  
CCTGTTTCGCATGTCGGATGTCCGTCCTTCATTGTTCCCGC

+HWI-EAS443:3:19:313:746#0/1  
abbbbabababaaaa\_X]^a^R`ab`[aa^\_aaa]T  
@HWI-EAS443:3:1:296:1779#0/1  
AGCCACTCTGCTGCATTTGAAGATTTAAGAGTATCAAGTT  
+HWI-EAS443:3:1:296:1779#0/1  
a\_^¥aa`Ya¥W\_a¥`a`\_a\_\_`]`a`aa[D[]W\_^\_BB  
@HWI-EAS443:3:1:896:643#0/1  
ACCGTCCCTTCATTGTTCCCGCTGAATGCTGCCATAACGGT  
+HWI-EAS443:3:1:896:643#0/1  
a]ab`^¥\_^]^aaa\_a\_aaaZab`a`R`UT^`\_`BBBB  
@HWI-EAS443:3:28:1323:1903#0/1  
GGATGGCATGCCACTCTGCTGCATTTGAAGATTTAAGAGA  
+HWI-EAS443:3:28:1323:1903#0/1  
P\_aaba¥¥¥U`^`¥ZSI¥`bab`[`\_aY`X`b[aaX`b¥I  
@HWI-EAS443:3:28:56:33#0/1  
GTTCCACATTCTCATTTGAAGCAATCTGGACCCCTCTTGT  
+HWI-EAS443:3:28:56:33#0/1  
`Q[``Z¥QQ[`Y]U¥Y^`X[X[XRZ¥YWXRW¥`\_`W^VVRN  
@HWI-EAS443:3:2:1664:750#0/1  
TTCTTGTGGAAAGCTTTCTCTTGGAAATCACTTTCTTTCC  
+HWI-EAS443:3:2:1664:750#0/1  
aaa`aa^a`aaXK\_aa`\_`\_a`a`\_`\_aW]`\_`\_`[\_\_aYW  
@HWI-EAS443:3:30:791:1455#0/1  
CCCCCTTGTGGAAAGCTTTCTCTTGGAAATCACTTTCT  
+HWI-EAS443:3:30:791:1455#0/1  
abbbbabaa`\_a\_a\_aabaaaa`a^\_aa`\_`\_aaa`\_`\_]\_a  
@HWI-EAS443:3:31:1218:1253#0/1  
CCCCCTTGTGGAAAGCTTTCTCTTGGAAATCACTTTCT  
+HWI-EAS443:3:31:1218:1253#0/1  
aabaaa^`\_ZR]YWT^W]\_¥Z\_aX[T\_a^\_Z[\_]\_]]]]  
@HWI-EAS443:3:33:488:1202#0/1  
GGGGTCCAGATTGCTTCAAATGAGAATGTGGAAACCATG  
+HWI-EAS443:3:33:488:1202#0/1  
a¥P¥ZHa]]`]]`YU¥]¥U\_NWXVOV\_[QJYV\_^aZNS[  
@HWI-EAS443:3:36:1311:1949#0/1  
CGCCTGCGGATGCCTTTTGTGATTGGTATTTCCCTCCACT  
+HWI-EAS443:3:36:1311:1949#0/1  
a\_bbbabaaa`b`\_aaaa^aa`\_a\_aWaa`\_^]`\_aa¥`  
@HWI-EAS443:3:38:157:1451#0/1  
CGGCTTGGCACTTTCCATCATTCTTATAACTTCTGTTTCGC  
+HWI-EAS443:3:38:157:1451#0/1  
aa\_aU\_aZa\_^^aaba\_a\_L^^a\_]a[HJ]VX[QY¥`YN  
@HWI-EAS443:3:40:1368:182#0/1  
CGTTCCTGCTGAATGCTGCCATAACGGTTGCTTTTCAAA  
+HWI-EAS443:3:40:1368:182#0/1  
aba`baabbababbbbaabbbb\_]Wa`\_`^Z^¥Ya`\_]\_Xa  
@HWI-EAS443:3:42:1319:1294#0/1  
TGGGGTCCAGATTGCTTCAAATGAGAATGTGGAAACCATG  
+HWI-EAS443:3:42:1319:1294#0/1  
`ba`b`abbaa`aaabbaababababa\_\_ba\_a`a]aba

@HWI-EAS443:3:42:918:822#0/1  
ATGATACTCTTAAATCTTCAAATGCAGCAGAGTGGCATGC  
+HWI-EAS443:3:42:918:822#0/1  
abbbbaababbbbababaaaaaaa^aaaaa\_¥a`aaaa\_  
@HWI-EAS443:3:46:558:412#0/1  
ACCCGCTGAATGCTGCCATAACGGTTGCTCTTTCAAAGG  
+HWI-EAS443:3:46:558:412#0/1  
`ab\_\_Zabaa\_]b^\_a`aa¥bb[a\_]`¥`a\_NZ^\_\_a`  
@HWI-EAS443:3:48:1206:1623#0/1  
CGGAGGAAATACCAATCAACAAAAGGCATCCGCAGGCCAG  
+HWI-EAS443:3:48:1206:1623#0/1  
Vb¥^¥bb`^[baabbb`\_Waa\_]\_a`ba^¥`Z]`UX^a  
@HWI-EAS443:3:49:1008:1609#0/1  
CGCTGCATTTGAAGATTTAAGAGTATCAAGTTTCATAAGA  
+HWI-EAS443:3:49:1008:1609#0/1  
`aabababbbbaa`b¥bbbbbbbaabb`a`\_abaaabaaaa  
@HWI-EAS443:3:4:1056:1599#0/1  
CGGGTCCAGATTGCTTCAAATGAGAATGTGGAAACCATGG  
+HWI-EAS443:3:4:1056:1599#0/1  
abbb\_bbbba`abbbabaaa`baaab]aaaa^\_aaa`  
@HWI-EAS443:3:50:227:994#0/1  
CTCTGGACCCCTCTTGTGGAAAGCTTTCCTCTTGAATCA  
+HWI-EAS443:3:50:227:994#0/1  
`abb`a`baabbbaaa\_aa`aa`bb`Yaaaa]aab`b  
@HWI-EAS443:3:52:11:301#0/1  
CTCCAGGGTATTGGAGTCCATGGTTTCCACATTCTCATTT  
+HWI-EAS443:3:52:11:301#0/1  
aaabb`[P]MZaa^aZ`[]]aa[¥\_V]¥Z^`Y\_Y[\_`\_`  
@HWI-EAS443:3:52:130:75#0/1  
GCCCTCTTGTGGAAAGCTTTCCTCTTGAATCACTTTCTT  
+HWI-EAS443:3:52:130:75#0/1  
aaaaa\_aaa^^aVa`aUa`\_`a^`aa[^`¥TU`\_]a^  
@HWI-EAS443:3:52:673:791#0/1  
TGGGGTCCAGATTGCTTCAAATGAGAATGTGGAAACCATG  
+HWI-EAS443:3:52:673:791#0/1  
aa[`a\_baa^aaabaaaa`a`bbba`\_aa`a`\_a`\_\_`aa  
@HWI-EAS443:3:56:1332:826#0/1  
AGGACCCCTCTTGTGGAAAGCTTTCCTCTTGAATCACTT  
+HWI-EAS443:3:56:1332:826#0/1  
aba]Zaaaa]`\_UY]ZUaa]W^`\_[¥a¥a^¥Z\_W\_Y\_\_\_a  
@HWI-EAS443:3:58:909:741#0/1  
GGGACCAGGAGTGGAGGAAATACCAATCAACAAAAGGCAT  
+HWI-EAS443:3:58:909:741#0/1  
aaa`aaaba\_a^ba`aa``\_`^Z``¥a``a`\_`\_`\_]Z  
@HWI-EAS443:3:59:292:859#0/1  
CGGGTATTGGAGTCCATGGTTTCCACATTCTCATTTGAAG  
+HWI-EAS443:3:59:292:859#0/1  
``b`a`bb^[baa\_Z`^ba^`[]¥a^a`L[aaVU[¥S  
@HWI-EAS443:3:59:389:215#0/1  
GGGACCCCTCTTGTGGAAAGCTTTCCTCTTGAATCACTT

+HWI-EAS443:3:59:389:215#0/1  
abb`aaaaa\_aaa^a`aa]^Y^a`aaa`aaaUZ[]YW¥[^  
@HWI-EAS443:3:5:1134:1190#0/1  
ACCCGCTGAATGCTGCCATAACGGTTGCTCTTTCAAAAGG  
+HWI-EAS443:3:5:1134:1190#0/1  
aaa`\_`aa[a`b[¥]^\_aa\_[UaZSa\_S\_R¥aaV\_\_¥\_\_B  
@HWI-EAS443:3:62:948:569#0/1  
GCCCCGCTGAATGCTGCCATAACGGTTGCTCTTTCAAAAGG  
+HWI-EAS443:3:62:948:569#0/1  
a\_`aaaXP¥RXa\_a[¥^`¥X`WZXU^]YVZZ][ZTQXNXZ  
@HWI-EAS443:3:65:1200:241#0/1  
ACTGGCTTTGCACTTTCCATCATTCTTATAAATTCTGTTC  
+HWI-EAS443:3:65:1200:241#0/1  
abaa¥aaaaV]\_S`aa`a`V\_`a^aa`a\_\_X\_a^a`^\_\_  
@HWI-EAS443:3:66:123:849#0/1  
GCAGCGGAACAATGAAGGACGGACATCCGACATGCGAAC  
+HWI-EAS443:3:66:123:849#0/1  
aaa`aaaaaaa`a^`a\_`^`a\_]`^`\_\_\_\_\_`^`\_]YV  
@HWI-EAS443:3:67:875:1216#0/1  
CGAGGGTCCAGATTGCTTCAAATGAGAATGTGGAAACCA  
+HWI-EAS443:3:67:875:1216#0/1  
^^VVV]]YaZ\_XQOZ]`]ZR\_aaYT¥]Z]`N]]¥\_XW¥Z  
@HWI-EAS443:3:69:1294:412#0/1  
GTCTTATGAAACTTGATACTTTAAATCTTCAAATGCAGC  
+HWI-EAS443:3:69:1294:412#0/1  
R^`¥b]a`Z`ababa\_bbbbbabbbb``bbbab`aab\_ba  
@HWI-EAS443:3:70:1230:599#0/1  
ACCGTCTTCATTGTTCCCGCTGAATGCTGCCATAACGGT  
+HWI-EAS443:3:70:1230:599#0/1  
aaaaaaabbb`bbb`a\_abaaaa`aaaaba`\_aaaaba¥  
@HWI-EAS443:3:72:505:1738#0/1  
CGGGTCCAGATTGCTTCAAATGAGAATGTGGAAACCATG  
+HWI-EAS443:3:72:505:1738#0/1  
aa^a`Za`b`aa`aaa`aaa`^aa`a`\_Y\_\_aaa`a`W]  
@HWI-EAS443:3:75:1025:428#0/1  
ACTGGCTTTGCACTTTCCATCATTCTTATAAATTCTGTTC  
+HWI-EAS443:3:75:1025:428#0/1  
ab[aaaba`Y`a`Y\_LWV]VW`¥R]aY^LLZ]¥^\_YH^\_  
@HWI-EAS443:3:76:650:1349#0/1  
CGGCTTTGCACTTTCCATCATTCTTATAAATTCTGTTCGC  
+HWI-EAS443:3:76:650:1349#0/1  
aaaaaaa\_a]aabaa`[aa\_a`^`^aa`^a\_\_\_\_\_]^`TH`  
@HWI-EAS443:3:76:941:1226#0/1  
CACCCCTCTTGTTGAAAGCTTTCTCTTGAATCACTTTC  
+HWI-EAS443:3:76:941:1226#0/1  
aV`a\_a\_a¥`a¥a\_aa]`a`aZ`a`]]\_`\_`]^`Z`0]\_  
@HWI-EAS443:3:7:734:822#0/1  
GTGGAGGAAATACCAATCAACAAAAGGCATCCGCAGGCCT  
+HWI-EAS443:3:7:734:822#0/1  
a¥`]X[a\_`aa^YHWXWZ¥RK`\_WYSBBBBBBBBBBBBBB

@HWI-EAS443:3:86:783:1961#0/1  
AAGTGATTCCAAGAGGAAAGCTTTCCACAAGAGGGGTCCG  
+HWI-EAS443:3:86:783:1961#0/1  
\_ba\_abbbaabaa`abbbYa`aaaaabbbaaa^[K[\_^  
@HWI-EAS443:3:87:611:1845#0/1  
AAGGGGTCCAGATTGCTTCAAATGAGAATGTGGAAACCAT  
+HWI-EAS443:3:87:611:1845#0/1  
ab[b][TU\_``]`TS\_aa`]aTZQ`[^Ha¥aQV¥J]a[``  
@HWI-EAS443:3:87:949:805#0/1  
GGAGGGGTCCAGATTGCTTCAAATGAGAATGTGGAAACCA  
+HWI-EAS443:3:87:949:805#0/1  
G]V\_bbbaaa\_Tab\_\_¥bba\_bbbq]bb`ab]baaab]bb  
@HWI-EAS443:3:89:1439:559#0/1  
GAAAGTGATTCCAAGAGGAAAGCTTTCCACAAGAGGGGTG  
+HWI-EAS443:3:89:1439:559#0/1  
`aY[ISS\_^\_Z``\_b¥¥aaaab¥¥\_\_G¥bbabbbb^a[UH  
@HWI-EAS443:3:8:1017:94#0/1  
CCTCTGCTGCAATTTGAAGATTTAAGAGTATCAAGTTTCAT  
+HWI-EAS443:3:8:1017:94#0/1  
aTbabbbaba]bbbbZab`\_\_b`a[`a¥`\_a``aU`b  
@HWI-EAS443:3:8:1024:2047#0/1  
NACCAATCAACAAAAGGCATCCGCAGGCCAGATCAGTGTG  
+HWI-EAS443:3:8:1024:2047#0/1  
DMNUUUUYUUNSWHYWWWQUUHTYQUNUQSBBBBBBBBBBB  
@HWI-EAS443:3:8:335:417#0/1  
GGAGGGGTCCAGATTGCTTCAAATGAGAATGTGGAAACCA  
+HWI-EAS443:3:8:335:417#0/1  
a``a^a¥aa`a]``a]aa`\_a`\_a\_a\_\_\_\_X``^^\_YU\_  
@HWI-EAS443:3:91:1712:1034#0/1  
AGAGCAACCGTTATGGCAGCATTCCAGCGGAACAATGAAA  
+HWI-EAS443:3:91:1712:1034#0/1  
]¥¥\_`a¥aV``a¥¥¥RQ][DJ^RSNZPWBBBBBBBBBBB  
@HWI-EAS443:3:91:497:2035#0/1  
CGGGGTCCAGATTGCTTCAAATGAGAATGTGGAAACCATG  
+HWI-EAS443:3:91:497:2035#0/1  
SWbbKK`¥`¥baa¥abbbaa[¥bbbbbb`aWIabb\_SX\_^  
@HWI-EAS443:3:92:611:665#0/1  
ACTGGCTTTGCACTTTCCATCATTCTTATAACTTCTGTTC  
+HWI-EAS443:3:92:611:665#0/1  
aa^aaabaaUTX^`aa]`aa[aa]\_a]``aYa``TX^V  
@HWI-EAS443:3:93:718:565#0/1  
GCCCCCTTGTGGAAAGCTTTCCCTTGGAAATCACTTTCT  
+HWI-EAS443:3:93:718:565#0/1  
[ba`bbab\_]abbbabb]baaabbabbbbaa^bbb\_aab`a  
@HWI-EAS443:3:94:702:1086#0/1  
GATGCCTTTTGTGATTGGTATTTCCCTCCACTCCTGGTCG  
+HWI-EAS443:3:94:702:1086#0/1  
a\_\_XSaaaT]b``a]RUZaY````aa^\_\_\_\_^aZVZ`RMD  
@HWI-EAS443:3:95:376:1424#0/1  
CGGCATCCGCAGGCCAGATCAGTGTGCAGCCTACATTCTC

+HWI-EAS443:3:95:376:1424#0/1  
TQT]Y`W]T]¥QZTVK`¥U]T¥]TQ`bb\_[\_abb\_\_WZZ^  
@HWI-EAS443:3:95:938:802#0/1  
CGGGGTCCAGATTGCTTCAAATGAGAATGTGGAAACCATG  
+HWI-EAS443:3:95:938:802#0/1  
^bbbbbabb`\_a\_^ba^YOM¥ba]`[aZVa^aaU¥a[V  
@HWI-EAS443:3:9:1105:198#0/1  
CGGGGTCCAGATTGCTTCAAATGAGAATGTGGAAACCATG  
+HWI-EAS443:3:9:1105:198#0/1  
aabbaW\_^b`b[ba^a`a`a\_abaab]bbYa`]]a`\_aaa  
@HWI-EAS443:3:100:1004:639#0/1  
CATTTGAAGCAATCTGGACCCCTCTTGTGGAAAGCTTCC  
+HWI-EAS443:3:100:1004:639#0/1  
aabbbbaa````baaaaa`a`\_aa``a\_¥``aaa^`\_a^^  
@HWI-EAS443:3:100:1157:1388#0/1  
AGAAAGTGATTCCAAGAGGAAAGCTTCCACAAGAGGGGT  
+HWI-EAS443:3:100:1157:1388#0/1  
abaabb\_baab]^aY``a`aaaWaa\_UWaUaUW`[PU]B  
@HWI-EAS443:3:100:1302:240#0/1  
AAGTGATTCCAAGAGGAAAGCTTCCACAAGAGGGGTCCA  
+HWI-EAS443:3:100:1302:240#0/1  
aba\_aaa``[\_aa\_aa\_\_Zaa`^``]\_\_\_\_\_`]SIMBB  
@HWI-EAS443:3:100:1690:1128#0/1  
GCGGATGCCTTTTGTGATTGGTATTTCCCTCCACTCCTGG  
+HWI-EAS443:3:100:1690:1128#0/1  
a\_``ab\_aabbbba`b^`baaaaaba`a\_a\_Xa]\_Y]\_``  
@HWI-EAS443:3:100:269:344#0/1  
ATCCGACATGCGAACAGAAGTTATAAGAATGATGGAAAGT  
+HWI-EAS443:3:100:269:344#0/1  
]¥`\_aa`aa¥]b`¥\_abXab`^\_]`b^aaa^a`TW\_\_\_X  
@HWI-EAS443:3:100:544:779#0/1  
CACTGATCTGGCCTGCGGATGCCTTTTGTGATTGGTATT  
+HWI-EAS443:3:100:544:779#0/1  
\_Z^^a^a¥]`aX^aaZ\_WUWZRT]^aUHxa^U`¥WXK[[B  
@HWI-EAS443:3:100:633:1571#0/1  
GTGTGGATGGCATGCCACTCTGCTGCATTTGAAGATTTAA  
+HWI-EAS443:3:100:633:1571#0/1  
aTa^aa\_]Y]`]^¥]`¥a\_a`^`]\_\_aaaa^\_a\_\_\_aa`  
@HWI-EAS443:3:100:838:1074#0/1  
GCATGTCCGATGTCCGTCCTTCATTGTTCCCGCTGAATGC  
+HWI-EAS443:3:100:838:1074#0/1  
aa\_aa\_a]P^`a`R\_a`\_`\_aZbbbZ``¥[a[aaX`a\_X  
@HWI-EAS443:3:100:93:91#0/1  
AGAGTATCAAGTTTCATAAGAGGAAAGAAAGTGATTCCAA  
+HWI-EAS443:3:100:93:91#0/1  
aaaaYaa\_`¥a[`a````^a\_`\_X^¥aXX]\_U\_S[^ZY]B  
@HWI-EAS443:3:100:955:1265#0/1  
CGTCCTTCATTGTTCCCGCTGAATGCTGCCATAACGGTTG  
+HWI-EAS443:3:100:955:1265#0/1  
abbbabbbbbbbbababbbbbbbba`aaaabb`\_`a\_ab



@HWI-EAS443:3:100:992:830#0/1  
ATTGCTTCAAATGAGAATGTGGAAACCATGGACTCCAATA  
+HWI-EAS443:3:100:992:830#0/1  
aaaa^aa^aaaababaaabZ``\_aa]V`a``\_[\_\_0\_^B  
@HWI-EAS443:3:10:1628:1118#0/1  
CTGCATTTGAAGATTTAAGAGTATCAAGTTTCATAAGAGG  
+HWI-EAS443:3:10:1628:1118#0/1  
`a^b]Zab`W]`a^`Z\_aba`\_a`[^babbMa¥V]babb  
@HWI-EAS443:3:10:1700:983#0/1  
CTTTCCTCTTGAATCACTTTCTTTCCTCTTATGAACTT  
+HWI-EAS443:3:10:1700:983#0/1  
abbbbabbbbababbabbbb¥bbbb`babbabbaa`bb  
@HWI-EAS443:3:10:1727:1445#0/1  
TTCAGCGGGAACAATGAAGGACGGACATCCGACATGCGAA  
+HWI-EAS443:3:10:1727:1445#0/1  
aK^`a`a\_\_N^R¥\_ZZ^`^¥Q¥[RS¥TSR]MDTT¥WWNN  
@HWI-EAS443:3:10:374:1449#0/1  
CTTAAATCTTCAAATGCAGCAGAGTGGCATGCCATCCACA  
+HWI-EAS443:3:10:374:1449#0/1  
ababbbbbbbaabb\_bbabbaba\_a[aaaa\_\_`aXa\_`[a  
@HWI-EAS443:3:10:480:1898#0/1  
TGTCCGTCCTTCATTGTTCCCGCTGAATGCTGCCATAACG  
+HWI-EAS443:3:10:480:1898#0/1  
[bTaa[bb\_baaa`Z`aabbbaab^`b`a`a][Tabaa\_`  
@HWI-EAS443:3:10:900:249#0/1  
CTCTTGTTGGAAAGCTTTCCTCTTGAATCACTTTCTTCC  
+HWI-EAS443:3:10:900:249#0/1  
abbbbbbbbbbb`bbbb`bbbbbbbaabaa`baa`aaa^^  
@HWI-EAS443:3:10:951:1129#0/1  
ATCTCCCTTTTGAAGAGCAACCGTTATGGCAGCATTCCAG  
+HWI-EAS443:3:10:951:1129#0/1  
a]aa\_¥^aaaa`a``\_\_`\_`^\_aY^`\_`^\_V`^UW]VVVY  
@HWI-EAS443:3:11:1007:1853#0/1  
AAAGTGATTCCAAGAGGAAAGCTTTCACAAGAGGGGTCC  
+HWI-EAS443:3:11:1007:1853#0/1  
a]^USXZ[]b`a`\_aT`\_aa`]\_`¥]]\_V\_\_R\_¥^XaU[U  
@HWI-EAS443:3:11:1022:642#0/1  
CGCTGCACTGAGAATGTAGGCTGCACACTGATCTGGCCTG  
+HWI-EAS443:3:11:1022:642#0/1  
``ZOQYV]bZ]b`bb\_H¥a`ZXTTUP`^Xb`PR^`\_VN\_\_  
@HWI-EAS443:3:11:1118:1295#0/1  
GTCCAGATTGCTTCAAATGAGAATGTGGAAACCATGGACT  
+HWI-EAS443:3:11:1118:1295#0/1  
``^P]aXNHTSNZ^\_a[YS``S¥aaR`]\_^WGTO\_^]OR\_  
@HWI-EAS443:3:11:1124:1155#0/1  
AGAGTATCAAGTTTCATAAGAGGAAAGAAAGTGATTCCAA  
+HWI-EAS443:3:11:1124:1155#0/1  
aabb\_^abb`b\_abaaba`baaaa`\_aa]`aYa\_`¥\_`^`\_  
@HWI-EAS443:3:11:1422:1972#0/1  
CACTGATCTGGCCTGCGGATGCCTTTTGTGATTGGTATT

+HWI-EAS443:3:11:1422:1972#0/1  
[aa``aababbabb^aab]W\_\_bbba`Z]\_X`¥`K[Ua  
@HWI-EAS443:3:11:143:124#0/1  
GTTTCATAAGAGGAAAGAAAGTGATTCCAAGAGGAAAGCT  
+HWI-EAS443:3:11:143:124#0/1  
aaaaaaaaa\_ba^aaaaaaZa]`\_aa\_\_\_\_`\_]-`\_]^  
@HWI-EAS443:3:11:1468:225#0/1  
CCGCTGAATGCTGCCATAACGGTTGCTCTTCAAAGGGA  
+HWI-EAS443:3:11:1468:225#0/1  
ab\_\_ba\_bb\_^\_bZ]``\_b\_ba\_aa¥^a^a^N^a`a^Xb\_  
@HWI-EAS443:3:11:33:280#0/1  
GTCCAGATTGCTTCAAATGAGAATGTGGAAACCATGGACT  
+HWI-EAS443:3:11:33:280#0/1  
aaabbabaaabaaba\_aaa``\_]`a^aaa``\_a\_aa``\_]\_  
@HWI-EAS443:3:11:458:546#0/1  
CATCATTCTTATAACTTCTGTTTCGCATGTCGGATGTCCGT  
+HWI-EAS443:3:11:458:546#0/1  
aaa[^`aaaaa^\_`aaa`a]a`a``\_]\_]a[^`YPT`X  
@HWI-EAS443:3:11:499:1903#0/1  
GAGGAAATACCAATCAACAAAAGGCATCCGCAGGCCAGAT  
+HWI-EAS443:3:11:499:1903#0/1  
\_bab]bbaabbbabbbb\_`baba^`aWP]^`¥Yya\_a\_  
@HWI-EAS443:3:11:648:1698#0/1  
TGAAGGACGACATCCGACATGCGAACAGAAGTTATAAGA  
+HWI-EAS443:3:11:648:1698#0/1  
^b]b]aaaa\_`bb]`aaaa^]a^LTaa`]R\_GX]\_]aa[  
@HWI-EAS443:3:11:715:288#0/1  
GTTGATTGGTATTTCTCCACTCCTGGTCCTTATGGCCCA  
+HWI-EAS443:3:11:715:288#0/1  
a\_a`\_``aaVaa`\_\_]^a]`^`¥^]]\_X^^^ZUWY^TNVU  
@HWI-EAS443:3:11:771:1356#0/1  
GAACAATGAAGGACGACATCCGACATGCGAACAGAAGTT  
+HWI-EAS443:3:11:771:1356#0/1  
aab\_a`]ba`\_\_\_\_`\_a`^`\_ZS\_`[`Y\_]`¥\_]`¥^R\_0^  
@HWI-EAS443:3:11:857:522#0/1  
GAGTGGAGGAAATACCAATCAACAAAAGGCATCCGCAGGC  
+HWI-EAS443:3:11:857:522#0/1  
a]¥F¥a^WXTQ[XY[Xa[\_YVS]^U[TYZ\_ZPN\_W¥¥BB  
@HWI-EAS443:3:12:1058:620#0/1  
ATGCCTTTTGTGATTGGTATTTCTCCACTCCTGGTCCT  
+HWI-EAS443:3:12:1058:620#0/1  
abaabaabbbabbabbbaWab`aa\_aa\_a\_a\_Vaa\_\_^Xa  
@HWI-EAS443:3:12:1085:294#0/1  
ATTCTCATTTGAAGCAATCTGGACCCCTCTTGTGGAAAGC  
+HWI-EAS443:3:12:1085:294#0/1  
aabaaa\_\_\_\_ab^`a]`]`aa^SY[Z[`aT\_¥[Q\_^^WYXB  
@HWI-EAS443:3:12:1136:777#0/1  
GACCCCTCTTGTGGAAAGCTTTCCTCTTGGAAATCACTTTC  
+HWI-EAS443:3:12:1136:777#0/1  
a[SZWY]]aa`J`\_VXU``]]\_]\_\_^`\_aWWaSR^[`[^

@HWI-EAS443:3:12:1288:1590#0/1  
GAGGAAAGAAAGTGATTCCAAGAGGAAAGCTTTCCACAAG  
+HWI-EAS443:3:12:1288:1590#0/1  
aaaa^aba`a\_a^aa]aa]ab\_a\_X]a\_\_`^\_```a`\_\_`  
@HWI-EAS443:3:12:1346:404#0/1  
CAAAAGGCATCCGCAGGCCAGATCAGTGTGCAGCCTACAT  
+HWI-EAS443:3:12:1346:404#0/1  
a^^aab\_bb\_\_T¥aaaaaaaa[^\_¥aYWG`V`]¥^]\_^\_`  
@HWI-EAS443:3:12:1509:1013#0/1  
AAAGAAAGTGATTCCAAGAGGAAAGCTTTCCACAAGAGGG  
+HWI-EAS443:3:12:1509:1013#0/1  
``]a]]abYa\_`\_`S`\_\_`\_`\_]\_^\_Z^TPT0[]ZXSXX  
@HWI-EAS443:3:12:1699:219#0/1  
CTGCATTTGAAGATTTAAGAGTATCAAGTTTCATAAGAGG  
+HWI-EAS443:3:12:1699:219#0/1  
abbaabbbb`\_`aaabaabbb\_aaaaab\_aa]aaaa`\_a  
@HWI-EAS443:3:12:260:154#0/1  
GAAAGTGATTCCAAGAGGAAAGCTTTCCACAAGAGGGGTC  
+HWI-EAS443:3:12:260:154#0/1  
aaTabYa\_a`aa`\_]\_^\_a\_\_\_¥`\_\_^R]Y\_^]\_^]UXR  
@HWI-EAS443:3:12:297:1935#0/1  
GAAAGTGATTCCAAGAGGAAAGCTTTCCACAAGAGGGGTC  
+HWI-EAS443:3:12:297:1935#0/1  
abb`b\_bbaaabYX`aabbaaaaaaaaaaabab`WaTHY  
@HWI-EAS443:3:12:345:816#0/1  
ACTTGATACTCTTAAATCTTCAAATGCAGCAGAGTGGCAT  
+HWI-EAS443:3:12:345:816#0/1  
a`\_aaba^a\_TZaaba\_aaaaa\_a^`b^aI\_[VPY^aR  
@HWI-EAS443:3:12:421:1318#0/1  
CATCCGCAGGCCAGATCAGTGTGCAGCCTACATTCTCAGT  
+HWI-EAS443:3:12:421:1318#0/1  
^WXW``¥U]T¥]aR¥STLRS\_S^TGLQ\_RP\_[ZaOFMYB  
@HWI-EAS443:3:12:43:282#0/1  
ATCTGGACCCCTCTTGTGGAAAGCTTTCCTCTTGAATCA  
+HWI-EAS443:3:12:43:282#0/1  
K¥`^`XU\_b\_[bb[`aW¥W^\_Z^a\_YY\_X\_a`]\_^`SR[WU  
@HWI-EAS443:3:12:46:1033#0/1  
GTTCGCATGTCCGATGTCCGTCCTTCATTGTTCCCGCTGA  
+HWI-EAS443:3:12:46:1033#0/1  
[DHY\_\_TZZP`QVIIYPY[XS[^ZV[ZRXSP^Z^`ZBBBB  
@HWI-EAS443:3:12:494:2025#0/1  
CAAGAGGGGTCCAGATTGCTTCAAATGAGAATGTGGAAC  
+HWI-EAS443:3:12:494:2025#0/1  
aa^¥Q`^`YGGZX^X]TNZaTR][W^\_\_ZRV\_\_]U\_VN[\_Y  
@HWI-EAS443:3:12:556:1090#0/1  
GAAATACCAATCAACAAAAGGCATCCGCAGGCCAGATCAG  
+HWI-EAS443:3:12:556:1090#0/1  
¥QZ\_^YQ\_¥\_`X\_VV]]\_]RRRX[W\_TZ¥^[^aaa[J\_Z¥  
@HWI-EAS443:3:12:787:856#0/1  
GGAGTCCATGGTTTCCACATTCTCATTGGAAGCAATCTGG

+HWI-EAS443:3:12:787:856#0/1  
abaaababaab\_aaa`aaaaaaaaaaaaaaaa`¥`\_\_`]  
@HWI-EAS443:3:12:829:998#0/1  
ATGCCTTTTGTGATTGGTATTTCCCTCCACTCCTGGTCCT  
+HWI-EAS443:3:12:829:998#0/1  
ZY`\_[^\_U¥\_¥]\_Z]\_\_VY`\_`a\_¥\_]^[a\_V^`[Y]X  
@HWI-EAS443:3:13:102:374#0/1  
GTTTCATAAGAGGAAAGAAAGTGATTCCAAGAGGAAAGCT  
+HWI-EAS443:3:13:102:374#0/1  
^aaab\_bb`a]ba`abaaaa]aa``baa^`\_P\_aaa^a]  
@HWI-EAS443:3:13:1172:653#0/1  
AGTGATTCCAAGAGGAAAGCTTTCCACAAGAGGGGTCCAG  
+HWI-EAS443:3:13:1172:653#0/1  
abaa`aaa`[\_a`^Y[]^`aa`YU`W`a[[ZVK[[PW`aa  
@HWI-EAS443:3:13:1470:1582#0/1  
AGGCTGCACACTGATCTGGCCTGCGGATGCCTTTTGTGA  
+HWI-EAS443:3:13:1470:1582#0/1  
a\_aaaba\_aaa`\_\_Xaaa\_]\_\_\_a`[UVUVZ\_aaVS\_QT  
@HWI-EAS443:3:13:1482:1486#0/1  
GTTGATTGGTATTTCCCTCCACTCCTGGTCCTTATGGCCCA  
+HWI-EAS443:3:13:1482:1486#0/1  
a¥GN\_UTXN[`]VZBBBBBBBBBBBBBBBBBBBBBBBBB  
@HWI-EAS443:3:13:1504:1745#0/1  
GAAGGACGGACATCCGACATGCGAACAGAAGTTATAAGAA  
+HWI-EAS443:3:13:1504:1745#0/1  
`^a]a`]]`^G^a^S]`\_aaaXa\_a^a`S\_]ZY`a\_^a¥\_  
@HWI-EAS443:3:13:1524:1778#0/1  
AGGAAATACCAATCAACAAAAGGCATCCGCAGGCCAGATC  
+HWI-EAS443:3:13:1524:1778#0/1  
a\_]¥abbaaab`a\_\_`a\_^a]Y`\_Z[\_\_\_]U`\_Y^]\_X\_  
@HWI-EAS443:3:13:1762:809#0/1  
CCCCTCTTGTGGAAAGCTTTCTCTTGAATCACTTTCTT  
+HWI-EAS443:3:13:1762:809#0/1  
\_ab\_ZXSS\_¥bb[]aaaa`R\_]`bb\_V]ZLSQZa\_[[`  
@HWI-EAS443:3:13:215:390#0/1  
GGAAATACCAATCAACAAAAGGCATCCGCAGGCCAGATCA  
+HWI-EAS443:3:13:215:390#0/1  
a``aaaa`aa\_\_`a\_a[V]\_[[\_¥^ZY^\_ZW^SZ\_¥ZTZ  
@HWI-EAS443:3:13:39:864#0/1  
ATCTGGACCCCTCTTGTGGAAAGCTTTCTCTTGAATCA  
+HWI-EAS443:3:13:39:864#0/1  
UWaT]\_RI[\_a\_^]M\_^ZZ¥\_a^\_]Z^X\_^aaVX`ZZ  
@HWI-EAS443:3:13:428:373#0/1  
GTGATTCCAAGAGGAAAGCTTTCCACAAGAGGGGTCCAGA  
+HWI-EAS443:3:13:428:373#0/1  
a\_a\_a]a`a\_aa`aaa^a`\_\_`\_`\_aY^`\_\_`\_VV^`\_`\_  
@HWI-EAS443:3:13:443:173#0/1  
GAGGAAAGAAAGTGATTCCAAGAGGAAAGCTTTCCACAAG  
+HWI-EAS443:3:13:443:173#0/1  
\_[^`¥\_¥XZX^\_G\_a]`aaaaab]Zzaa`XYVVNW]\_\_\_X

@HWI-EAS443:3:13:771:60#0/1  
CTCTTGGAACTACTTTCTTTCTTATGAACTTGATAC  
+HWI-EAS443:3:13:771:60#0/1  
abbbbbbba`bababbabbbb`babbabb`^a`aab`aa\_  
@HWI-EAS443:3:14:1423:1854#0/1  
ACACTGATCTGGCCTGCGGATGCCTTTTGTGATTGGTAT  
+HWI-EAS443:3:14:1423:1854#0/1  
aa\_]a`U]\_^\_¥WS^^\_W¥^SR¥\_^¥W\_^VW¥¥SU¥U  
@HWI-EAS443:3:14:1448:1071#0/1  
GATTGCTTCAAATGAGAATGTGGAAACCATGGACTCCAAT  
+HWI-EAS443:3:14:1448:1071#0/1  
aabababb\_a``aaaa^aaa¥a[\_^`Y[a\_]ZU^R¥[\_\_\_  
@HWI-EAS443:3:14:1579:1888#0/1  
TGCCTTTTGTGATTGGTATTTCTCCACTCCTGGTCCTT  
+HWI-EAS443:3:14:1579:1888#0/1  
WY[aa\_]`b`a]\_ba]\_Rbba`YXZaa^NTQT¥a[WU^` [  
@HWI-EAS443:3:14:236:1522#0/1  
GGCCTGCGGATGCCTTTTGTGATTGGTATTTCTCCACT  
+HWI-EAS443:3:14:236:1522#0/1  
\_P\_a`\_aa¥a[¥a`aaa¥Z\_\_[[^J[XY^\_\_\_ZV¥\_Z\_\_  
@HWI-EAS443:3:14:297:240#0/1  
CAACTGTCATACTCCTCTGCATTGTCTCCGAAGAAATAAG  
+HWI-EAS443:3:14:297:240#0/1  
aa`aab^a]\_`\_aaaaaaaa^a]T`\_]\_a\_\_a]\_`\_]¥\_]\_a^  
@HWI-EAS443:3:14:434:130#0/1  
GGAAATACCAATCAACAAAAGGCATCCGCAGGCCAGATCA  
+HWI-EAS443:3:14:434:130#0/1  
^^^a]¥WXW]Wa\_\_a[¥Za`a^[]]`\_^HUa[O¥PZS[[W  
@HWI-EAS443:3:14:539:723#0/1  
CAACTGTCATACTCCTCTGCATTGTCTCCGAAGAAATAAG  
+HWI-EAS443:3:14:539:723#0/1  
ab¥aaaaababa`aaaa`aa\_a\_aa^`a`\_a\_\_a\_aa`  
@HWI-EAS443:3:14:870:88#0/1  
ATGGCAGCATTGCGGGAACAATGAAGGACGGACATCCG  
+HWI-EAS443:3:14:870:88#0/1  
a`bb`ab\_Xaa\_Xa¥ba^Ra¥¥a\_YGXQa\_Q`\_GFYRQW¥  
@HWI-EAS443:3:14:90:1314#0/1  
GTCCTTATTGTTCCCGCTGAATGCTGCCATAACGGTTGC  
+HWI-EAS443:3:14:90:1314#0/1  
^aWaabbbba\_^^bb`^^aM^Xa^¥]aaba\_a[]aZXZ`  
@HWI-EAS443:3:14:930:1337#0/1  
CCCCTTGTGGAAAGCTTTCTTCTTGGAACTACTTTCTT  
+HWI-EAS443:3:14:930:1337#0/1  
aaaaaaaaa]`a`aa`aa``\_aa```a````\_a`\_`\_`\_\_\_\_  
@HWI-EAS443:3:14:980:1799#0/1  
CTCTTGTGGAAAGCTTTCTTCTTGGAACTACTTTCTTCC  
+HWI-EAS443:3:14:980:1799#0/1  
aabaZUUP¥OXXWXZaTbVT\_a`aa¥Y]ZTXTZ]S^¥[NX  
@HWI-EAS443:3:15:1043:1952#0/1  
GCACCTTCCATCATTCTTATAACTTCTGTTTCGCATGTCGG

+HWI-EAS443:3:15:1043:1952#0/1  
a`\_Y^`bbaYaaYS[`¥ba^aa^\_P]a`\_]K^¥aaaYNZ\_  
@HWI-EAS443:3:15:1090:1366#0/1  
TCCAGATTGCTTCAAATGAGAATGTGGAAACCATGGACTC  
+HWI-EAS443:3:15:1090:1366#0/1  
abbbbaaaabaab\_^baaa`ab`a`aa^^\_aaaa`^^^`  
@HWI-EAS443:3:15:1456:1661#0/1  
TTCCTCTTATGAAACTTGATACTTTAAATCTTCAAATGC  
+HWI-EAS443:3:15:1456:1661#0/1  
^a\_]aTabbbba]P\_baa\_a`a¥a`baaa\_aa[`aa`aT  
@HWI-EAS443:3:15:219:1921#0/1  
CAACAAAAGGCATCCGCAGGCCAGATCAGTGTGCAGCCTA  
+HWI-EAS443:3:15:219:1921#0/1  
a`b`^`abaa`baa]`abaXVabb^a\_^`a`Z^¥Z\_a`¥a¥`  
@HWI-EAS443:3:15:231:508#0/1  
CTGGGCCATAAGGACCAGGAGTGGAGGAAATACCAATCAA  
+HWI-EAS443:3:15:231:508#0/1  
a\_R]`aSG]V[R[]\_[]\_[]O]¥aaYa`\_a`XKZ[¥Z[RZ^  
@HWI-EAS443:3:15:315:1407#0/1  
AGTGATTCCAAGAGGAAAGCTTTCCACAAGAGGGTCCAG  
+HWI-EAS443:3:15:315:1407#0/1  
R^Zbbbbbb\_0\_]bZ\_aa\_\_a\_abbbba[aaa[VTYaS`  
@HWI-EAS443:3:15:344:206#0/1  
GCTTCTCTTGAATCACTTTCTTCTTCTTATGAACT  
+HWI-EAS443:3:15:344:206#0/1  
aabaaa`a`a`aaaa`aaaaaa`a``a]`\_a``a``\_`\_\_`  
@HWI-EAS443:3:15:366:1010#0/1  
TGGTTTCCACATTCTCATTGAAGCAATCTGGACCCCTCT  
+HWI-EAS443:3:15:366:1010#0/1  
abb`bbbb`abbbbbbabbbaaaaaabaaaaa`b`aaa  
@HWI-EAS443:3:15:471:1764#0/1  
GGTTTCCACATTCTCATTGAAGCAATCTGGACCCCTCTT  
+HWI-EAS443:3:15:471:1764#0/1  
¥\_WaU[W\_]\_W¥WW¥\_U\_]ba`XW[[OGRabaY`]¥aTHI  
@HWI-EAS443:3:15:49:1764#0/1  
CTTCTGGCTTTGCACTTCCATCATTCTTATAACTTCTGT  
+HWI-EAS443:3:15:49:1764#0/1  
abbbbababbaaaaaabbaabaaaaabbbbaababba`  
@HWI-EAS443:3:15:649:1531#0/1  
AGTGATTCCAAGAGGAAAGCTTTCCACAAGAGGGTCCAG  
+HWI-EAS443:3:15:649:1531#0/1  
abWaa\_aaaba\_a\_aaaa\_^`\_```aaa`\_a`[[UM¥^`\_\_`  
@HWI-EAS443:3:15:890:447#0/1  
ATCACTTCTTCTCTTATGAACTTGATACTTTAAAT  
+HWI-EAS443:3:15:890:447#0/1  
abbbabbbbabba`aaabaaa`\_\_`aaa\_b\_^b`baaaaa  
@HWI-EAS443:3:16:1030:1932#0/1  
GACCCCTCTTGTGGAAAGCTTTCCTCTTGGAAATCACTTTC  
+HWI-EAS443:3:16:1030:1932#0/1  
`ba^Y]aaa`L\_`\_`a`a]a\_¥LUBH`\_a`a¥a`\_`\_^]\_`

@HWI-EAS443:3:16:1079:1213#0/1  
AGTTATAAGAATGATGGAAAGTGCAAAGCCAGAAGATTTG  
+HWI-EAS443:3:16:1079:1213#0/1  
`^`M\_a^^`\_`^U`^Z\_baa`]Wba^W^¥YVYaYU]`aa[]  
@HWI-EAS443:3:16:1185:863#0/1  
CGCAGGCCAGATCAGTGTGCAGCCTACATTCTCAGTGCAG  
+HWI-EAS443:3:16:1185:863#0/1  
aabb`abbaaaa`baaa``¥]]`\_abaaa`aaYaa^`X[a  
@HWI-EAS443:3:16:1189:817#0/1  
GGTCCAGATTGCTTCAAATGAGAATGTGGAAACCATGGAC  
+HWI-EAS443:3:16:1189:817#0/1  
aa]bbaba]¥baa`aaba`babaa`a^aa```^``aa^a^  
@HWI-EAS443:3:16:1231:1376#0/1  
TTCCAGGGTATTGGAGTCCATGGTTTCCACATTCTCATTT  
+HWI-EAS443:3:16:1231:1376#0/1  
Z¥`\_¥[``\_S\_\_a[QJ]Y`b^bbba]XO¥]OY^U]SX¥K]S  
@HWI-EAS443:3:16:1340:1668#0/1  
ATCCGCAGGCCAGATCAGTGTGCAGCCTACATTCTCAGTG  
+HWI-EAS443:3:16:1340:1668#0/1  
abaa\_¥KPba¥R]ZZQ¥WZVV]LRaMN[\_X`^]NZWYSV[  
@HWI-EAS443:3:16:1518:1389#0/1  
ATAAGAGGAAAGAAAGTGATTCCAAGAGGAAAGCTTTCCA  
+HWI-EAS443:3:16:1518:1389#0/1  
abbbbabbabbaabaa`aaaaaaaa\_b\_\_`aaaaaa]`^a  
@HWI-EAS443:3:16:1605:91#0/1  
TGGCATGCCACTCTGCTGCATTTGAAGATTTAAGAGTATC  
+HWI-EAS443:3:16:1605:91#0/1  
`bb[abb`\_bZa¥aa]aaYX\_aaa][aZ`\_a^\_a]a]\_`Z  
@HWI-EAS443:3:16:1734:312#0/1  
AGTGATTCCAAGAGGAAAGCTTTCCACAAGAGGGTCCAG  
+HWI-EAS443:3:16:1734:312#0/1  
ab\_```aaaaa[`[XZb`\_[\_\_a[]\_\_`\_]``^U^URW]`  
@HWI-EAS443:3:16:256:844#0/1  
ATTGGTGTGGATGGCATGCCACTCTGCTGCATTTGAAGAT  
+HWI-EAS443:3:16:256:844#0/1  
]bbaa\_aaba[aba^U\_\_aaaa`^^a¥a``ab\_T[^a`\_  
@HWI-EAS443:3:16:333:746#0/1  
GTTTCATAAGAGGAAAGAAAGTGATTCCAAGAGGAAAGCT  
+HWI-EAS443:3:16:333:746#0/1  
a`abaaa`aaaaaaaaaaaaU``a`aaaa`\_\_\_\_a\_a\_\_  
@HWI-EAS443:3:16:455:190#0/1  
TAAGGACCAGGAGTGGAGGAAATACCAATCAACAAAAGGC  
+HWI-EAS443:3:16:455:190#0/1  
aa`aaUaa\_\_aYaU`M[a[``\_]\_WZG[XW]^YZ\_Y^U]XB  
@HWI-EAS443:3:16:566:185#0/1  
CCCCTCTGTGGAAAGCTTTCCTCTTGAATCACTTTCTT  
+HWI-EAS443:3:16:566:185#0/1  
a][\_YS`\_TP[IP`\_`^``[P¥`]]W^\_¥U[X^YWZ[MS[  
@HWI-EAS443:3:16:63:92#0/1  
GTCCTTATTGTTCCCGCTGAATGCTGCCATAACGGTTGC

+HWI-EAS443:3:16:63:92#0/1  
a`abaa\_aaa\_\_a`aa`a`\_\_\_\_\_]\_\_\_]Z\_^\_Ya^VV]R  
@HWI-EAS443:3:17:1062:285#0/1  
GAAGGACGGACATCCGACATGCGAACAGAAAGTTATAAGAA  
+HWI-EAS443:3:17:1062:285#0/1  
aa\_a`\_aa`^`^`^`^`¥Y]¥Z¥ZV]WY]]`X`X\_]\_Y]^X]  
@HWI-EAS443:3:17:1142:1501#0/1  
CACATTCTCATTTGAAGCAATCTGGACCCCTCTTGTGGAA  
+HWI-EAS443:3:17:1142:1501#0/1  
ababaa]ababbaaab`aaaa`W[a\_a\_a\_a\_\_^a^`\_  
@HWI-EAS443:3:17:1165:1841#0/1  
CCAGGGTATTGGAGTCCATGGTTTCCACATTCTCATTTGA  
+HWI-EAS443:3:17:1165:1841#0/1  
ab\_aaXY\_RSWTN¥YUXaVZ¥S\_ZJG^S[[\_\_a\_\_W\_]^[  
@HWI-EAS443:3:17:125:702#0/1  
AATCTCCCTTTTGAAGAGCAACCGTTATGGCAGCATTCA  
+HWI-EAS443:3:17:125:702#0/1  
abb`aaaaaab`aaaa`a\_`a\_aa¥\_`a\_a[]LNUWWQ  
@HWI-EAS443:3:17:1539:1195#0/1  
AGGAAAGAAAGTGATTCCAAGAGGAAAGCTTCCACAAGA  
+HWI-EAS443:3:17:1539:1195#0/1  
]a`[`Z`¥aT`a`a`a`a\_aa[a\_Ya\_\_Saa]R[[]`\_W  
@HWI-EAS443:3:17:1572:1900#0/1  
GACCCCTCTTGTGGAAAGCTTTCCTCTTGAATCACTTTC  
+HWI-EAS443:3:17:1572:1900#0/1  
ab\_\_`\_YY]a\_`^`\_a\_a`\_`\_]¥WM]a\_[X\_[P[^]X^]  
@HWI-EAS443:3:17:1730:1880#0/1  
CATCATTCTTATAACTTCTGTTTCGCATGTCGGATGTCCGT  
+HWI-EAS443:3:17:1730:1880#0/1  
aa^`\_baaabba¥a\_aa\_a`a`a¥bW\_aa`[\_\_^`\_SYR\_  
@HWI-EAS443:3:17:179:1270#0/1  
GGCAGCATTGCGGGAACAATGAAGGACGGACATCCGAC  
+HWI-EAS443:3:17:179:1270#0/1  
abbba`T`bba`abbabbabaaa`a]\_`aaaa`a`aaa  
@HWI-EAS443:3:17:801:2023#0/1  
AGTGATTCCAAGAGGAAAGCTTCCACAAGAGGGGTCCAG  
+HWI-EAS443:3:17:801:2023#0/1  
\_]U]T`Y`a`X^UXUP¥¥Z`]]TX`\_a`\_\_\_¥^]HSGZY  
@HWI-EAS443:3:17:814:292#0/1  
GAGTGGAGGAAATACCAATCAACAAAAGGCATCCGCAGGC  
+HWI-EAS443:3:17:814:292#0/1  
aX^Zaa\_a`aa`a^Z\_aa¥\_`\_`\_`\_ZZ\_¥¥¥¥¥^¥WV  
@HWI-EAS443:3:17:861:1477#0/1  
CACTTCTTTTCTTATGAACTTGATACTTAAATCT  
+HWI-EAS443:3:17:861:1477#0/1  
^¥a`\_]a`a`\_T`bbb`a^\_\_b[`¥^a\_a[b[`aa`X^W`  
@HWI-EAS443:3:17:86:2036#0/1  
ATTTAAGAGTATCAAGTTTCATAAGAGGAAAGAAAGTGAT  
+HWI-EAS443:3:17:86:2036#0/1  
]\_`bb`]\_^\_Qa^\_GS^`^`^`\_a`¥\_ba^`aa\_a`^[T\_\_]



@HWI-EAS443:3:17:960:1905#0/1  
GGATGCCTTTTGTGATTGGTATTTCCCTCCACTCCTGGTC  
+HWI-EAS443:3:17:960:1905#0/1  
\_UZ\_Za^Q\_¥MW]YP¥P\_\_S¥\_]¥X`a\_H\_YRXV^]SVX  
@HWI-EAS443:3:18:1143:1546#0/1  
ATGAAACTTGATACTCTTAAATCTTCAAATGCAGCAGAGT  
+HWI-EAS443:3:18:1143:1546#0/1  
`abaab\_bab`aa`a\_aba^a\_aaaa\_^\_\_a\_]a`\_^Y  
@HWI-EAS443:3:18:1189:62#0/1  
ATCAAGTTTCATAAGAGGAAAGAAAGTGATTCCAAGAGGA  
+HWI-EAS443:3:18:1189:62#0/1  
aa\_aaa^aa\_aa`aa`aa^`\_a[¥\_`Z\_\_\_\_]\_`\_]^[\_]  
@HWI-EAS443:3:18:1247:1050#0/1  
TGGCATGCCACTCTGCTGCATTTGAAGATTTAAGAGTATC  
+HWI-EAS443:3:18:1247:1050#0/1  
`bbaT`^b^^¥\_]aa[`]aaaab\_YXaaa`¥`aaaaZ\_¥^  
@HWI-EAS443:3:18:1379:1878#0/1  
GTCCGTCCTTCATTGTTCCCGCTGAATGCTGCCATAACGG  
+HWI-EAS443:3:18:1379:1878#0/1  
^Y\_aa^aaZa\_^\_aa¥\_a^\_YUZ[U^¥]\_¥\_^R^¥¥\_QZ¥  
@HWI-EAS443:3:18:1716:830#0/1  
CTTAAATCTTCAAATGCAGCAGAGTGGCATGCCATCCACA  
+HWI-EAS443:3:18:1716:830#0/1  
abb\_aab\_a\_abaa`V]]\_]^b`^V`a^^]^PRZMZRUST  
@HWI-EAS443:3:18:190:366#0/1  
CGTTATGGCAGCATTTCAGCGGAACAATGAAGGACGGACA  
+HWI-EAS443:3:18:190:366#0/1  
a`\_b`bb^aa`YNXa`^]H^`\_X[JVVP]¥¥]XUG^`ZYU  
@HWI-EAS443:3:18:307:1313#0/1  
AAGTTATAAGAATGATGGAAAGTGCAAAGCCAGAAGATTT  
+HWI-EAS443:3:18:307:1313#0/1  
V\_`aa``\_abaaabaabaaaa¥^^aaa¥a^aaa`Xaa^\_  
@HWI-EAS443:3:18:30:1046#0/1  
GTTCCCGCTGAATGCTGCCATAACGGTTGCTCTTTCAAAA  
+HWI-EAS443:3:18:30:1046#0/1  
a[[\_`\_aaa\_```^`\_^^^a\_^Z^^\_`V^]VW[U[^Z[¥^]  
@HWI-EAS443:3:18:356:1945#0/1  
CAACAAAAGGCATCCGCAGGCCAGATCAGTGTGCAGCCTA  
+HWI-EAS443:3:18:356:1945#0/1  
aaaabba^^\_`b]ba`aaYW^aa[`Z\_\_\_\_Q¥N\_¥\_¥`Z\_`  
@HWI-EAS443:3:18:43:1943#0/1  
ATGTCCGATGTCCGTCCTTCATTGTTCCCGCTGAATGCTG  
+HWI-EAS443:3:18:43:1943#0/1  
a\_¥^\_Z\_`^ZY]S¥U^\_\_^^^\_Z¥¥^[WR¥¥¥¥^ZWVSN  
@HWI-EAS443:3:18:637:1281#0/1  
AGAGCAACCGTTATGGCAGCATTTCAGCGGAACAATGAAG  
+HWI-EAS443:3:18:637:1281#0/1  
aaa`[`a`\_aH\_\_RR`a`VPLUW[NIUP[GVVHY^RRU¥N  
@HWI-EAS443:3:18:679:40#0/1  
AAAGAAAGTGATTCCAAGAGGAAAGCTTTCCACAAGAGGG

+HWI-EAS443:3:18:679:40#0/1  
a`ab`aaa^aa^`aa\_`\_`W[`\_^¥]Z]W]]^\_\_`]XVX  
@HWI-EAS443:3:18:725:389#0/1  
AAAGGCATCCGCAGGCCAGATCAGTGTGCAGCCTACATTC  
+HWI-EAS443:3:18:725:389#0/1  
a`HGQaaa]ZQQY\_`Sa\_`Q\_Z\_`¥U¥Z¥^NKTPY^[Q]Y  
@HWI-EAS443:3:18:823:1924#0/1  
GTCCGATGTCCGTCCTTCATTGTTCCCGCTGAATGCTGCC  
+HWI-EAS443:3:18:823:1924#0/1  
[T\_a[\_P[N^^SMW`]XUVRV^IQ]PaY[Z]LRGNTQ¥BB  
@HWI-EAS443:3:18:876:1017#0/1  
CCAGGGTATTGGAGTCCATGGTTTCCACATTCTCATTTGA  
+HWI-EAS443:3:18:876:1017#0/1  
a``aabUba\_\_a`a\_`aa^\_a]\_\_\_\_\_`\_\_a^`\_`\_`\_`\_`  
@HWI-EAS443:3:19:1043:1247#0/1  
TGGCATGCCACTCTGCTGCATTTGAAGATTTAAGAGTATC  
+HWI-EAS443:3:19:1043:1247#0/1  
abbbbabbbbbbbbbbaaaaaabbb`ababbabbabbXbaa  
@HWI-EAS443:3:19:1045:1711#0/1  
GAGGAAAGAAAGTGATTCCAAGAGGAAAGCTTCCACAAG  
+HWI-EAS443:3:19:1045:1711#0/1  
U\_`a`\_`¥Sab\_YQ^[[`b^^aHZL]]^`YZPa[\_a`R^`\_`  
@HWI-EAS443:3:19:105:161#0/1  
CAGATACTGGGCCATAAGGACCAGGAGTGGAGGAAATACC  
+HWI-EAS443:3:19:105:161#0/1  
abbaaabaabaabaaba`babaaaa]b\_bb`ba\_bbaaa`  
@HWI-EAS443:3:19:1158:229#0/1  
GTCCGATGTCCGTCCTTCATTGTTCCCGCTGAATGCTGCC  
+HWI-EAS443:3:19:1158:229#0/1  
aXZ¥a`\_`aX^^`RSLY]U¥\_`^TRY[U[TSVZVXSSQUZWU  
@HWI-EAS443:3:19:1203:1728#0/1  
GACCCCTCTTGTTGAAAGCTTTCCTCTTGGAATCACTTTC  
+HWI-EAS443:3:19:1203:1728#0/1  
`baa\_`^baba\_X`aaa`\_abaa\_aaaa\_a^aaa`^a\_a\_  
@HWI-EAS443:3:19:127:702#0/1  
CAACTGTCATACTCCTCTGCATTGTCTCCGAAGAAATAAG  
+HWI-EAS443:3:19:127:702#0/1  
a`baaa\_abaaaaaaaaaaaa\_aa\_\_a`\_\_a\_`a^`a^`a\_  
@HWI-EAS443:3:19:1307:90#0/1  
GGAGGAAATACCAATCAACAAAAGGCATCCGCAGGCCAGA  
+HWI-EAS443:3:19:1307:90#0/1  
a\_R]VSU¥^\_TS]\_SSYRGTYXXWVSUUYY¥WWW¥QTTTB  
@HWI-EAS443:3:19:1649:907#0/1  
TTGTGAAAGCTTTCCTCTTGGAATCACTTTCCTTCTCT  
+HWI-EAS443:3:19:1649:907#0/1  
aba`baaabaabbba`babab`a`a`a`baaa`baa\_Xa¥a  
@HWI-EAS443:3:19:261:416#0/1  
CCCCTCTTGTTGAAAGCTTTCCTCTTGGAATCACTTTCCTT  
+HWI-EAS443:3:19:261:416#0/1  
¥`a`^`\_Z\_`W\_Z\_^ZaZS¥^a\_R[¥Za¥^YZV¥`WSZY\_\_

@HWI-EAS443:3:19:27:1984#0/1  
CCAGGGTATTGGAGTCCATGGTTTCCACATTCTCATTTGA  
+HWI-EAS443:3:19:27:1984#0/1  
aa`]`]Ua`\_^`^`Taaa^\_`W^`\_`aa``\_\_\_\_\_`\_\_¥`\_^  
@HWI-EAS443:3:19:307:1546#0/1  
AGCGGGAACAATGAAGGACGGACATCCGACATGCGAACAG  
+HWI-EAS443:3:19:307:1546#0/1  
a¥`YUUZb`R[Uaaaa^a]X]\_]VY`\_^\_YI^UZ`^X]BB  
@HWI-EAS443:3:19:589:1539#0/1  
GAAATACCAATCAACAAAAGGCATCCGCAGGCCAGATCAG  
+HWI-EAS443:3:19:589:1539#0/1  
`aaa`a[a\_ZaX`\_[aaVX\_]a\_\_\_\_^\_\_\_\_`]¥`a`^U\_\_B  
@HWI-EAS443:3:19:772:687#0/1  
AGGAAAGAAAGTGATTCCAAGAGGAAAGCTTTCCACAAGA  
+HWI-EAS443:3:19:772:687#0/1  
aaaabaa^aaa^a]`\_aa`a\_a`\_aa``\_\_^\_\_a\_\_\_\_^  
@HWI-EAS443:3:19:944:1169#0/1  
GAGGAAAGAAAGTGATTCCAAGAGGAAAGCTTTCCACAAG  
+HWI-EAS443:3:19:944:1169#0/1  
a`a`Z`aa`¥a]F^ZZVU[Z``aZ``\_`a^`\_```[]U\_X]  
@HWI-EAS443:3:1:1018:1199#0/1  
GCTGAATGCTGCCATAACGGTTGCTCTTTCAAAAGGGAGA  
+HWI-EAS443:3:1:1018:1199#0/1  
a\_aaaaa`]`\_`\_`aa`\_`aa\_a`T[X\_aaY¥W\_\_`¥`^BB  
@HWI-EAS443:3:1:1452:680#0/1  
CTTCATTGTTCCCGCTGAATGCTGCCATAACGGTTGCTCT  
+HWI-EAS443:3:1:1452:680#0/1  
ab`S¥ba`Vba¥Y`[a`ba`aY\_aY`\_a`Q\_bV`\_¥FVBB  
@HWI-EAS443:3:1:1541:1158#0/1  
GAGTGGAGGAAATACCAATCAACAAAAGGCATCCGCAGGC  
+HWI-EAS443:3:1:1541:1158#0/1  
aY¥P``¥`]WPZa^ULY\_a0]¥]\_\_V^¥]U\_YQN]BBBBB  
@HWI-EAS443:3:1:1624:229#0/1  
AGGAAAGAAAGTGATTCCAAGAGGAAAGCTTTCCACAAGA  
+HWI-EAS443:3:1:1624:229#0/1  
aab^`a\_\_`a`]a^a^Y]`\_\_a\_]`^`\_\_U`^^OX]RBBBB  
@HWI-EAS443:3:1:254:407#0/1  
GCATGTCGGATGTCCGTCCTTCATTGTTCCCGCTGAATGC  
+HWI-EAS443:3:1:254:407#0/1  
a\_a`b\_\_aa¥\_a\_Y[\_SZT^\_¥`\_`\_`W¥^VV^USBBBBBB  
@HWI-EAS443:3:1:381:1645#0/1  
GATTCCAAGAGGAAAGCTTTCCACAAGAGGGGTCCAGATT  
+HWI-EAS443:3:1:381:1645#0/1  
ababbbba^a`^bba^abbaaabb`\_W[¥¥W]RUXZZbBB  
@HWI-EAS443:3:1:48:333#0/1  
GAAAGTGATTCCAAGAGGAAAGCTTTCCACAAGAGGGGTC  
+HWI-EAS443:3:1:48:333#0/1  
a\_baaNH¥^^]Z^\_Y`UP¥aa^baaaaa\_Y¥H]Z]ZJ[BB  
@HWI-EAS443:3:1:535:834#0/1  
AAGAAAGTGATTCCAAGAGGAAAGCTTTCCACAAGAGGGG

+HWI-EAS443:3:1:535:834#0/1  
aaba\_b\_Pb` ` \_]W`a\_\_aaa`^aZ\_`^\_U]\_¥\_a` `]BB  
@HWI-EAS443:3:1:775:573#0/1  
CAGGAGTGGAGGAAATACCAATCAACAAAAGGCATCCGCA  
+HWI-EAS443:3:1:775:573#0/1  
aba`aaXba\_ab`aab`aaaabaaaab`a` `a[`¥GVaBB  
@HWI-EAS443:3:1:992:1097#0/1  
GTCCTTCATTGTTCCCGCTGAATGCTGCCATAACGGTTGC  
+HWI-EAS443:3:1:992:1097#0/1  
^a]^¥^Xaabaaa`^Na\_\_a\_\_a\_aa]^` ` \_]a\_BBBB  
@HWI-EAS443:3:20:106:308#0/1  
TGCACACTGATCTGGCCTGCGGATGCCTTTTGTGATTGG  
+HWI-EAS443:3:20:106:308#0/1  
]b` `b¥bab]bbbbaZaabba]Ra\_` ` ` `aaZG]a` \_a\_Z  
@HWI-EAS443:3:20:1168:92#0/1  
AGTGATTCCAAGAGGAAAGCTTTCCACAAGAGGGGTCCAG  
+HWI-EAS443:3:20:1168:92#0/1  
aaZba\_¥XaaaYa` \_]a\_\_]\_^^¥SVX` ¥Y^` ^XWVOX]\_  
@HWI-EAS443:3:20:1332:1709#0/1  
GATTCCAAGAGGAAAGCTTTCCACAAGAGGGGTCCAGATT  
+HWI-EAS443:3:20:1332:1709#0/1  
¥UWmbabaXaa\_aVaZ\_a`a[RUP\_a][TRJJW^J]PXXS  
@HWI-EAS443:3:20:1352:1372#0/1  
TGGATGGCATGCCACTCTGCTGCATTTGAAGATTTAAGAG  
+HWI-EAS443:3:20:1352:1372#0/1  
aaaaabb\_b`b` `bR\_aa`a` \_UXaa` ` `Y` `a]b\_\_a`a  
@HWI-EAS443:3:20:1364:1620#0/1  
GGAAATACCAATCAACAAAAGGCATCCGCAGGCCAGATCA  
+HWI-EAS443:3:20:1364:1620#0/1  
^abba` `ab\_X\_abaa`aabX^`baa[^\_aaa¥Xaaa\_H`  
@HWI-EAS443:3:20:1390:1322#0/1  
GCTTTCCACAAGAGGGGTCCAGATTGCTTCAAATGAGAAT  
+HWI-EAS443:3:20:1390:1322#0/1  
aaa` \_`aa` `^` \_aaa^Y` ]` \_\_\_aZW` ^^` \_\_\_]Y[\_\_\_¥  
@HWI-EAS443:3:20:1400:825#0/1  
CAATTGGTGTGGATGGCATGCCACTCTGCTGCATTTGAAG  
+HWI-EAS443:3:20:1400:825#0/1  
[Z¥` \_¥SX` ^^a` ¥¥\_[Y^[]MYaTS]\_aYU` `ba^XRU[  
@HWI-EAS443:3:20:1503:1030#0/1  
CTTTTGTGATTGGTATTTCTCCACTCCTGGTCCTTATG  
+HWI-EAS443:3:20:1503:1030#0/1  
abbbbbbbbabbbbaabbbbaaaabaaaabaa^` `aaaa^  
@HWI-EAS443:3:20:151:598#0/1  
AGAGTATCAAGTTTCATAAGAGGAAAGAAAGTGATTCCAA  
+HWI-EAS443:3:20:151:598#0/1  
a^a[^]¥][Y` ]\_\_^YaYNT^VWVa]^VWTQN\_` ¥XVR¥¥  
@HWI-EAS443:3:20:1663:1266#0/1  
GAGAATGTAGGCTGCACACTGATCTGGCCTGCGGATGCCT  
+HWI-EAS443:3:20:1663:1266#0/1  
a]b]a]aaaa]XY` ]aP¥¥aa¥TRR` [JXS\_Xa` NNWFOJ

@HWI-EAS443:3:20:1768:589#0/1  
GGAAATACCAATCAACAAAAGGCATCCGCAGGCCAGATCA  
+HWI-EAS443:3:20:1768:589#0/1  
aa[Ya`aRSX[\_S]^W]a\_\_\_¥Z\_^WW\_^¥^\_VUW¥YWMU  
@HWI-EAS443:3:20:361:157#0/1  
GAGGAAAGCTTTCCACAAGAGGGGTCCAGATTGCTTCAAA  
+HWI-EAS443:3:20:361:157#0/1  
`\_`aabb`]^aaaaa^X]aa\_TZ`]\_[a`aaX\_\_`^^a^\_  
@HWI-EAS443:3:20:580:38#0/1  
AAGAAAGTGATTCCAAGAGGAAAGCTTTCCACAAGAGGGG  
+HWI-EAS443:3:20:580:38#0/1  
aa`^```Z`Y`aa\_a\_a\_\_\_`\_a^\_\_\_^\_Z]\_]\_^`^^^  
@HWI-EAS443:3:20:714:1627#0/1  
CAGGGTATTGGAGTCCATGGTTTCCACATTCTCATTGAA  
+HWI-EAS443:3:20:714:1627#0/1  
a]Z^\_V`aaa`X^U^^a^`[\_`WU[[]\_\_^\_[\_`\_\_`¥  
@HWI-EAS443:3:20:758:253#0/1  
TGGGCCATAAGGACCAGGAGTGGAGGAAATACCAATCAAC  
+HWI-EAS443:3:20:758:253#0/1  
TJ^¥a`babb`[T``\_[La`¥ba\_[HSVbaXaX`^a]a^¥  
@HWI-EAS443:3:21:1083:463#0/1  
ATCCGACATGCGAACAGAAGTTATAAGAATGATGGAAAAGT  
+HWI-EAS443:3:21:1083:463#0/1  
a`a\_aa[]b`W`ZY[a¥]a\_\_^`\_`a¥^aa\_\_a]^\_[^X  
@HWI-EAS443:3:21:1245:617#0/1  
GATTGCTTCAAATGAGAATGTGGAAACCATGGACTCCAAT  
+HWI-EAS443:3:21:1245:617#0/1  
a\_`````\_a¥]a\_`Y^aW]^ [¥a\_Z^XSUT\_\_]^Z]ZXX  
@HWI-EAS443:3:21:1277:1298#0/1  
GAAAGTGATTCCAAGAGGAAAGCTTTCCACAAGAGGGGTC  
+HWI-EAS443:3:21:1277:1298#0/1  
\_¥Z^`[a¥aaaabaa[\_YY\_```]`a^`^`\_a\_¥^a]\_U^Y  
@HWI-EAS443:3:21:1317:990#0/1  
CTTGATACTCTTAAATCTTCAAATGCAGCAGAGTGGCATG  
+HWI-EAS443:3:21:1317:990#0/1  
abaa¥aaabababbba`ba¥`\_a`^`^`]`a]YXa`W`\_]`  
@HWI-EAS443:3:21:1377:140#0/1  
AACAAAAGGCATCCGCAGGCCAGATCAGTGTGCAGCCTAC  
+HWI-EAS443:3:21:1377:140#0/1  
`^Z¥`\_¥\_aaaa¥T]Z^a^UU]aVUZZTR[NVQRYPRUZZ  
@HWI-EAS443:3:21:1428:1111#0/1  
TAAGGACCAGGAGTGGAGGAAATACCAATCAACAAAAGGC  
+HWI-EAS443:3:21:1428:1111#0/1  
aaaa\_a]]]aa[bZa\_`aa^`]a]¥Xa\_`\_a`^\_a]^`^YZ  
@HWI-EAS443:3:21:1766:180#0/1  
GGAAATACCAATCAACAAAAGGCATCCGCAGGCCAGATCA  
+HWI-EAS443:3:21:1766:180#0/1  
abaa\_aaZaaaa\_a`^`^`^ZZ\_¥¥¥¥X¥¥U¥U[XVYYY¥  
@HWI-EAS443:3:21:180:291#0/1  
GTCGGATGTCCGTCCTTCATTGTTCCCCTGAATGCTGCC

+HWI-EAS443:3:21:180:291#0/1  
a¥` `P]YZOQa]FQ\_Q\_PR][aMM^\_\_^PQOG]¥YJWB  
@HWI-EAS443:3:21:310:716#0/1  
GATGCCTTTTGTGATTGGTATTTCTCCACTCCTGGTCC  
+HWI-EAS443:3:21:310:716#0/1  
aaabaaabbbb\_abaabba\_abaaa`aaaaaa\_aa\_X¥[  
@HWI-EAS443:3:21:434:1270#0/1  
TAAGAATGATGGAAAGTGCAAAGCCAGAAGATTTGTCCTT  
+HWI-EAS443:3:21:434:1270#0/1  
`YY\_^bab]^`\_F]b]^aa\_]a[aba`\_]\_`^`\_aV\_\_\_\_[  
@HWI-EAS443:3:21:756:239#0/1  
GTGATTCCAAGAGGAAAGCTTTCCACAAGAGGGGTCCAGA  
+HWI-EAS443:3:21:756:239#0/1  
¥N\_]aRba]SUY¥LYXYSXPVXTNZXUWTV^U^UTLS]]V  
@HWI-EAS443:3:21:947:950#0/1  
AGGGTATTGGAGTCCATGGTTTCCACATTCTCATTGGAAG  
+HWI-EAS443:3:21:947:950#0/1  
abab^aaba`aaaaaba\_aaa\_a`ba`aa^aaaa` `a  
@HWI-EAS443:3:21:967:1204#0/1  
TTCAGCGGAACAATGAAGGACGGACATCCGACATGCGAA  
+HWI-EAS443:3:21:967:1204#0/1  
`O¥RPT\_UO¥V]^]¥P][ ]\_`W[\_ZYXJLLU]^Z^R^YZ  
@HWI-EAS443:3:22:1124:1699#0/1  
GACATCCGACATGCGAACAGAAGTTATAAGAATGATGGAA  
+HWI-EAS443:3:22:1124:1699#0/1  
`^]^]¥O[[O[[¥RUUa\_R` `TUTW]]MQZ]ZU`\_\_¥R¥a  
@HWI-EAS443:3:22:1164:145#0/1  
GATCTGGCCTGCGGATGCCTTTTGTGATTGGTATTTCTCCT  
+HWI-EAS443:3:22:1164:145#0/1  
`a\_X\_aaa` `Z\_\_¥]`]¥]\_` `Za\_[\_`]XRR¥`\_¥TV  
@HWI-EAS443:3:22:1343:1126#0/1  
AGTGATTCCAAGAGGAAAGCTTTCCACAAGAGGGGTCCAG  
+HWI-EAS443:3:22:1343:1126#0/1  
\_`Zbaba`^ab\_aa]]^a\_[bbaa^`¥aa\_^]Z]RV`\_a  
@HWI-EAS443:3:22:1400:598#0/1  
TCCAGGGTATTGGAGTCCATGGTTTCCACATTCTCATTG  
+HWI-EAS443:3:22:1400:598#0/1  
a`a]^a`Raaa`^`a^Z^aa^`Sa`\_\_aY]a`]aY`a` `W  
@HWI-EAS443:3:22:1459:1856#0/1  
CGGATGTCCGTCCTTCATTGTTCCCGCTGAATGCTGCCAT  
+HWI-EAS443:3:22:1459:1856#0/1  
abbaba`aabaabbbabbbb`aaa\_a]aaaa` `\_\_¥\_aa  
@HWI-EAS443:3:22:1487:724#0/1  
AGCAGATACTGGCCATAAGGACCAGGAGTGGAGGAAATA  
+HWI-EAS443:3:22:1487:724#0/1  
I]]^aaaa` `a`PX`aaaaa]\_`Za\_^Y`a^aa\_\_`]]  
@HWI-EAS443:3:22:1527:897#0/1  
ATTTCTCCACTCCTGGTCTTATGGCCCAGTATCTGCTT  
+HWI-EAS443:3:22:1527:897#0/1  
aab¥DL]T]]Q\_SL]a`ZU[^` [V¥SVSP¥aSY]LQVW^Z

@HWI-EAS443:3:22:1580:904#0/1  
AGGGTATTGGAGTCCATGGTTTCCACATTCTCATTGAAG  
+HWI-EAS443:3:22:1580:904#0/1  
ab^]0`J`bbaa`aa`aabS`Y\_\_\_baa^a)`aaaa\_`  
@HWI-EAS443:3:22:1670:1798#0/1  
AGTGATTCCAAGAGGAAAGCTTTCCACAAGAGGGGTCCAG  
+HWI-EAS443:3:22:1670:1798#0/1  
`V[Vaaa`)]`\_Zaabaab`Q]\_\_\_^\_0`R^Z\_V]a]]]^a  
@HWI-EAS443:3:22:429:390#0/1  
GGACCCCTCTTGTGGAAAGCTTTCTCTTGAATCACTTT  
+HWI-EAS443:3:22:429:390#0/1  
Za[S]aaS`aaa^a[aa\_`a`[a[\_`LTaa^]^``\_\_\_^^  
@HWI-EAS443:3:22:477:1374#0/1  
CAGAAGTTATAAGAATGATGGAAAGTGCAAAGCCAGAAGA  
+HWI-EAS443:3:22:477:1374#0/1  
aaa]Ta\_aaaaaa\_\_\_^^^a\_a`)]X\_``\_a]W]\_^¥\_X\_  
@HWI-EAS443:3:22:506:1329#0/1  
AAATGAGAATGTGGAAACCATGGACTCCAATACCCTGGAA  
+HWI-EAS443:3:22:506:1329#0/1  
a`a]]aaZ]\_b\_aTa^^ba`)]W`a¥`\_a``\_\_aa[W^\_\_  
@HWI-EAS443:3:22:609:1089#0/1  
GTTTCCACATTCTCATTGAAGCAATCTGGACCCCTCTTG  
+HWI-EAS443:3:22:609:1089#0/1  
[`aaba`b)`abaa^abaaaaaaaaaaaa\_Ya`\_a\_\_a^\_[  
@HWI-EAS443:3:22:62:1051#0/1  
GTTTCCACATTCTCATTGAAGCAATCTGGACCCCTCTTG  
+HWI-EAS443:3:22:62:1051#0/1  
aaaaaaaaaaaa\_a``aaaaa^`\_\_^`^^`^^`\_\_\_\_^  
@HWI-EAS443:3:22:640:586#0/1  
CAGATTGCTTCAAATGAGAATGTGGAAACCATGGACTCCA  
+HWI-EAS443:3:22:640:586#0/1  
a``¥XOZ`S`\_¥Q[WZ`)]`]VX`\_aa`]P\_[]RY[\_a[[  
@HWI-EAS443:3:22:644:119#0/1  
TCCAGGGTATTGGAGTCCATGGTTTCCACATTCTCATTG  
+HWI-EAS443:3:22:644:119#0/1  
\_]`^bZbU]R`a\_P¥RZa]^aaN[\_U`\_[Z¥WNYU^`¥\_`  
@HWI-EAS443:3:22:823:1303#0/1  
AAACTTGATACTTTAAATCTTCAAATGCAGCAGAGTGGC  
+HWI-EAS443:3:22:823:1303#0/1  
T^`aVVQ^aXaaaa]b[[¥b`Z`baaaT]\_¥]YSTUU\_]Y  
@HWI-EAS443:3:22:875:552#0/1  
GGAAAGAAAGTGATTCCAAGAGGAAAGCTTTCCACAAGAG  
+HWI-EAS443:3:22:875:552#0/1  
a`ZQ\_bVa\_a]a`Z]`]]`[\_a\_``[^Y`¥]]][^]UYU\_`^  
@HWI-EAS443:3:22:914:1445#0/1  
GAAGTTATAAGAATGATGGAAAGTGCAAAGCCAGAAGATT  
+HWI-EAS443:3:22:914:1445#0/1  
```b`babb`b`abbaabbabba\_baaaa[aaaa]a``a  
@HWI-EAS443:3:22:98:1465#0/1  
TGTGGATGGCATGCCACTCTGCTGCATTTGAAGATTTAAG

+HWI-EAS443:3:22:98:1465#0/1  
`YYa[a`aYQWYZ`aXZUYWQ[]VYW\_a[U]aZ[Ta¥T`P  
@HWI-EAS443:3:23:1011:1280#0/1  
GATTGCTTCAAATGAGAATGTGGAAACCATGGACTCCAAT  
+HWI-EAS443:3:23:1011:1280#0/1  
]\_aX\_¥bV`UZabW\_¥bbab\_aZ`abaaba[^`aaaZWW  
@HWI-EAS443:3:23:108:258#0/1  
GAGGAAAGAAAGTGATTCCAAGAGGAAAGCTTCCACAAG  
+HWI-EAS443:3:23:108:258#0/1  
aaaa^¥\_a`aaWa^`aa^\_0\_\_\_\_\_]]\_Y^\_^\_  
@HWI-EAS443:3:23:1145:496#0/1  
TGCCTTTTGTGATTGGTATTTCTCCACTCCTGGTCCTT  
+HWI-EAS443:3:23:1145:496#0/1  
aa^^a`aaa\_`^`a^W\_^^WW^]Y]Z^WY]^XX]Z^Z  
@HWI-EAS443:3:23:139:1148#0/1  
CCAGGGTATTGGAGTCCATGGTTTCCACATTCTCATTGA  
+HWI-EAS443:3:23:139:1148#0/1  
a`[`Y\_NVaaa[NO\_a`YaSP^a`YS]a`\_`\_`a`\_X]  
@HWI-EAS443:3:23:1629:1273#0/1  
AGTGATTCCAAGAGGAAAGCTTCCACAAGAGGGTCCAG  
+HWI-EAS443:3:23:1629:1273#0/1  
]b`\_S\_b``[baabaa]abaaa]Vaa¥a^a\_`¥T[P[]  
@HWI-EAS443:3:23:267:1182#0/1  
CACTGAGAATGTAGGCTGCACACTGATCTGGCCTGCGGAT  
+HWI-EAS443:3:23:267:1182#0/1  
V\_XZ\_\_Y[W¥TZ`WL[T¥^Z[T`abZHVWb¥IFX`]LHL  
@HWI-EAS443:3:23:407:1445#0/1  
AGAGGAAAGAAAGTGATTCCAAGAGGAAAGCTTCCACAA  
+HWI-EAS443:3:23:407:1445#0/1  
aaaa`)`aaaa`Vaaa\_aaa\_`[a\_a\_a`^]\_\_¥^^a^  
@HWI-EAS443:3:23:466:1858#0/1  
GCGGATGCCTTTTGTGATTGGTATTTCTCCACTCCTGG  
+HWI-EAS443:3:23:466:1858#0/1  
^b`baabaabaaa\_aab`b^aZ\_ab`bU`\_aZa`aa\_\_a  
@HWI-EAS443:3:23:623:334#0/1  
ATCTTCAAATGCAGCAGAGTGGCATGCCATCCACACCAAT  
+HWI-EAS443:3:23:623:334#0/1  
aaaaXaa`^`a`[ZX^aa]Taa^a\_WNWTN]WV^RGUZYN  
@HWI-EAS443:3:23:710:376#0/1  
GGAGTCCATGGTTTCCACATTCTCATTGAAGCAATCTGG  
+HWI-EAS443:3:23:710:376#0/1  
ab^baabbaaa]aba\_baaaa`a`aaaa^\_a^`\_Z\_^  
@HWI-EAS443:3:24:1022:1458#0/1  
CAGCGGAACAATGAAGGACGGACATCCGACATGCGAACA  
+HWI-EAS443:3:24:1022:1458#0/1  
abbbbaba`Y`abbabaaaabaaaaaaaaaaaaa\_a`a`a  
@HWI-EAS443:3:24:1161:354#0/1  
TGGCATGCCACTCTGCTGCATTTGAAGATTTAAGAGTATC  
+HWI-EAS443:3:24:1161:354#0/1  
abbbabbb`baabbaabb`abbbbaabba`bbbbbb[aaa



@HWI-EAS443:3:24:1280:1655#0/1  
GATTGCTTCAAATGAGAATGTGGAAACCATGGACTCCAAT  
+HWI-EAS443:3:24:1280:1655#0/1  
abb\_]\_abbabaaabaaba[``ab\_Uaaaa]a^`]U````  
@HWI-EAS443:3:24:1432:948#0/1  
GGAAAGCTTTCCACAAGAGGGGTCCAGATTGCTTCAAATG  
+HWI-EAS443:3:24:1432:948#0/1  
ab`bbbaabbabbaabababaaaa`baaabbaab`a`abb  
@HWI-EAS443:3:24:145:1689#0/1  
AGGACGGACATCCGACATGCGAACAGAAGTTATAAGAATG  
+HWI-EAS443:3:24:145:1689#0/1  
aUL]b\_Ya`^^aa]¥][U]]JY[]RZX^\_Q\_]^\_ZZX¥`\_  
@HWI-EAS443:3:24:1691:1401#0/1  
CGCTGCACTGAGAATGTAGGCTGCACACTGATCTGGCCTG  
+HWI-EAS443:3:24:1691:1401#0/1  
abaaab`abb\_`aaab]a`a^`a[aG[U¥`X\_U`^aVUWZ  
@HWI-EAS443:3:24:412:706#0/1  
CCCCTCTTGTGGAAAGCTTTCCTCTTGGAATCACTTCTT  
+HWI-EAS443:3:24:412:706#0/1  
abbaaa`\_a\_]a`aa¥aaaa`aab¥a`aaaaaa`\_Za\_  
@HWI-EAS443:3:24:437:286#0/1  
ATCTCCCTTTTGAAGAGCAACCGTTATGGCAGCATTTCAG  
+HWI-EAS443:3:24:437:286#0/1  
a^\_YaWZX¥QZRZQT¥U]`\_a¥ZaU[`X[¥^\_BBBBBBBB  
@HWI-EAS443:3:24:497:33#0/1  
AAAGAAAGTGATTCCAAGAGGAAAGCTTTCACAAGAGGG  
+HWI-EAS443:3:24:497:33#0/1  
abbbababababbaabaabaabaaaaa`a¥a`aaaa`\_  
@HWI-EAS443:3:24:523:336#0/1  
GGATGGCATGCCACTCTGCTGCATTTGAAGATTTAAGAGT  
+HWI-EAS443:3:24:523:336#0/1  
aba]abbaaaaab`\_]a`X`bZPa\_\_a[X^^`\_\_a`aaS  
@HWI-EAS443:3:24:559:15#0/1  
AACTGTCATACTCCTCTGCATTGTCTCCGAAGAAATAAGA  
+HWI-EAS443:3:24:559:15#0/1  
aabaah\_a\_a`aa^aY\_aaa\_aaYa`^a\_a\_a\_a`\_a`\_^  
@HWI-EAS443:3:24:743:1889#0/1  
CTTCATTGTTCCCGCTGAATGCTGCCATAACGGTTGCTCT  
+HWI-EAS443:3:24:743:1889#0/1  
\_a^abaa`^aYbaaaa`a\_\_aP\_H\_]\_\_a[U\_^UXWPVX]  
@HWI-EAS443:3:24:797:414#0/1  
AGTGATTCCAAGAGGAAAGCTTTCACAAGAGGGGTCCAG  
+HWI-EAS443:3:24:797:414#0/1  
aa¥aaa`baaaaaa`a^`\_\_\_\_a```\_aaa\_a`\_\_\_[]Y`a  
@HWI-EAS443:3:24:862:290#0/1  
GAAATACCAATCAACAAAAGGCATCCGCAGGCCAGATCAG  
+HWI-EAS443:3:24:862:290#0/1  
a`]a`a]\_]\_a^a\_Ta]\_\_`^R^^UY\_]\_YRV]]^TTTT]  
@HWI-EAS443:3:25:1096:644#0/1  
GAAAGTGATTCCAAGAGGAAAGCTTTCACAAGAGGGGTC

+HWI-EAS443:3:25:1096:644#0/1  
aaaZ¥T`^a]`\_VPU0XR`Z\_U¥^Y]\_]`]]]]\_VU  
@HWI-EAS443:3:25:1116:1431#0/1  
CTGGCTTTGCACTTTCCATCATTCTTATAAATTCTGTTCG  
+HWI-EAS443:3:25:1116:1431#0/1  
ababbbbbbbbabbbbbbbbabbbbbbbbabababaaaa  
@HWI-EAS443:3:25:1237:243#0/1  
CGCAGGCCAGATCAGTGTGCAGCCTACATTCTCAGTGCAG  
+HWI-EAS443:3:25:1237:243#0/1  
Ja[¥bbbb¥\_abb\_bbY`bKabb\_bbbaab\_b`\_]`^bbb  
@HWI-EAS443:3:25:1450:1503#0/1  
AGAGGAAAGAAAGTGATTCCAAGAGGAAAGCTTTCCACAA  
+HWI-EAS443:3:25:1450:1503#0/1  
a\_bbbabbbbbbaabaab\_abbaba]aba`aaa`\_aa\_aa  
@HWI-EAS443:3:25:1482:316#0/1  
TAAGGACCAGGAGTGGAGGAAATACCAATCAACAAAAGGC  
+HWI-EAS443:3:25:1482:316#0/1  
`b`\_]`^YH[bbaaXaaX]\_]`\_Y`\_XUaZ][XZNZV^VUVL  
@HWI-EAS443:3:25:1749:771#0/1  
AAGTGATTCCAAGAGGAAAGCTTTCCACAAGAGGGGTCCA  
+HWI-EAS443:3:25:1749:771#0/1  
ababbbbaab`babbbbbbaabab`Zaaaaaaaa\_a\_RO¥  
@HWI-EAS443:3:25:269:131#0/1  
CGCATGTCGGATGTCCGTCCTTCATTGTTCCCGCTGAATG  
+HWI-EAS443:3:25:269:131#0/1  
`ab`ab¥aa`X`a\_\_a\_^`a`\_`^]aa]\_aa^`[V`^^^\_  
@HWI-EAS443:3:25:299:287#0/1  
GAGGAAAGAAAGTGATTCCAAGAGGAAAGCTTTCCACAAG  
+HWI-EAS443:3:25:299:287#0/1  
a\_a`aaaaaaa`]a`\_\_a`\_`¥\_Y\_X\_¥^\_]W^^Y]Y\_]X  
@HWI-EAS443:3:25:503:44#0/1  
CTTTTGTGATTGGTATTTCTCCACTCCTGGTCCTTATG  
+HWI-EAS443:3:25:503:44#0/1  
`bbbbbababbbbbbabbbb]bbbbbaaabba\_a`aaaa  
@HWI-EAS443:3:25:560:595#0/1  
CAAATGAGAATGTGGAAACCATGGACTCCAATACCCTGGA  
+HWI-EAS443:3:25:560:595#0/1  
abbbbbbbbababbbbbbbbabbbbabbbbbb`bbba  
@HWI-EAS443:3:25:631:106#0/1  
CGTCCTTCATTGTTCCCGCTGAATGCTGCCATAACGGTTG  
+HWI-EAS443:3:25:631:106#0/1  
abbaabbbbbbbbababaaabbabb\_aaZ`aaa]ba\_ab  
@HWI-EAS443:3:25:65:1733#0/1  
AGGAAATACCAATCAACAAAAGGCATCCGCAGGCCAGATC  
+HWI-EAS443:3:25:65:1733#0/1  
a`abbaabaa`aaa`aaa^\_aa\_aa]aa\_]a^a]^]\_  
@HWI-EAS443:3:25:742:747#0/1  
CAGATTGCTTCAAATGAGAATGTGGAAACCATGGACTCCA  
+HWI-EAS443:3:25:742:747#0/1  
a]bbbbbbbbbbbbbbbbbbbababaaabbaabaa`a

@HWI-EAS443:3:25:780:1933#0/1  
ATTGCTTCAAATGAGAATGTGGAAACCATGGACTCCAATA  
+HWI-EAS443:3:25:780:1933#0/1  
[HU`^^^[^S\_]ZY]TR¥W\_\_`\_\_\_ZW\_TP]\_UTX\_^Z\_  
@HWI-EAS443:3:25:804:751#0/1  
CCGCAGGCCAGATCAGTGTGCAGCCTACATTCTCAGTGCA  
+HWI-EAS443:3:25:804:751#0/1  
]a^¥\_]`a^bba`\_]X]`]\_\_aaaa^a^Z`a`\_XaZa  
@HWI-EAS443:3:25:929:619#0/1  
CTCCCTTTTGAAGAGCAACCGTTATGGCAGCATTTCAGCG  
+HWI-EAS443:3:25:929:619#0/1  
abbbbbbbbbbbbaabbbbaa\_bbbab`bbH¥¥\_[^¥0]  
@HWI-EAS443:3:26:1004:776#0/1  
ATCCGACATGCGAACAGAAGTTATAAGAATGATGGAAAGT  
+HWI-EAS443:3:26:1004:776#0/1  
^\_¥Q`a^\_aZI]]ZTZb^a^a`Z[````[`aTHW\_aY  
@HWI-EAS443:3:26:1098:731#0/1  
GTTCGCATGTCCGATGTCCGTCCTTCATTGTTCCCGCTGA  
+HWI-EAS443:3:26:1098:731#0/1  
`b``[\_\_bb\_¥b]V\_b\_Z]ab`aaba\_Yab`b`^a]P^`¥  
@HWI-EAS443:3:26:1222:1127#0/1  
CTCTTGTTGGAAAGCTTCTCTTGAATCACTTTCTTTCC  
+HWI-EAS443:3:26:1222:1127#0/1  
ababbabbbbbbababbabbbabbbbaabbb\_bbaaa  
@HWI-EAS443:3:26:1246:620#0/1  
AGGAAAGAAAGTGATTCCAAGAGGAAAGCTTCCACAAGA  
+HWI-EAS443:3:26:1246:620#0/1  
^baa^]aU^b¥N\_`Y[aaX[`ab]`Y`Z\_Za`]`]a^  
@HWI-EAS443:3:26:1394:288#0/1  
AGGAGTGGAGGAAATACCAATCAACAAAAGGCATCCGCAG  
+HWI-EAS443:3:26:1394:288#0/1  
\_a\_\_b]a^^bbb[^`]abb`b[a]N\_aaaaa`aV\_a^Ua  
@HWI-EAS443:3:26:1491:1815#0/1  
AGAGGAAAGAAAGTGATTCCAAGAGGAAAGCTTCCACAA  
+HWI-EAS443:3:26:1491:1815#0/1  
aaabbaaaa]a`[a]]`a[b\_`ba]\_a^[H]\_aTL]Wa\_  
@HWI-EAS443:3:26:225:187#0/1  
AGTGATTCCAAGAGGAAAGCTTCCACAAGAGGGTCCAG  
+HWI-EAS443:3:26:225:187#0/1  
a\_]a]^a]a¥0\_a^U¥][P[WU\_Y\_a[[[VWWZSSP\_¥]V  
@HWI-EAS443:3:26:430:375#0/1  
CCGACATGCGAACAGAAGTTATAAGAATGATGGAAAGTGC  
+HWI-EAS443:3:26:430:375#0/1  
aabb`]]aaa`aa]]`a^aaaaa\_aaaaaa`a`^a\_  
@HWI-EAS443:3:26:454:711#0/1  
TTCGCATGTCCGATGTCCGTCCTTCATTGTTCCCGCTGAA  
+HWI-EAS443:3:26:454:711#0/1  
`a`b]a]`WabaaXVHY\_WN\_a`aX¥`a`\_`SW]^`^`T  
@HWI-EAS443:3:26:519:2035#0/1  
ATCTCCCTTTTGAAGAGCAACCGTTATGGCAGCATTTCAG

+HWI-EAS443:3:26:519:2035#0/1  
[W¥Z¥`^0¥UX\_a`ZT]Xaaa[\_WU\_`^\_BBBBBBBBBBBB  
@HWI-EAS443:3:26:666:1000#0/1  
AGTGATTCCAAGAGGAAAGCTTTCCACAAGAGGGGTCCAG  
+HWI-EAS443:3:26:666:1000#0/1  
a`]a]]`baaY]aa\_^a]^`\_^aaa`aa\_\_^^\_\_W^^\_\_  
@HWI-EAS443:3:26:72:94#0/1  
GTCCAGATTGCTTCAAATGAGAATGTGGAAACCATGGACT  
+HWI-EAS443:3:26:72:94#0/1  
a\_`\_`a\_UX¥`aa`X[aZ`X]SS¥`VVXPXH^TUU^ZV[[  
@HWI-EAS443:3:26:881:1061#0/1  
ATCTGGACCCCTCTTGTGGAAAGCTTTCCTCTTGAATCA  
+HWI-EAS443:3:26:881:1061#0/1  
aaa^`^Zab]aaaa]\_``aa`aaaa\_aaaa`aa\_a\_[]`  
@HWI-EAS443:3:26:908:200#0/1  
AAGAAAGTGATTCCAAGAGGAAAGCTTTCCACAAGAGGGG  
+HWI-EAS443:3:26:908:200#0/1  
`\_bbW[bXb`ba`aa¥Yaa\_a`a\_`YR]Sa]X``^\_`^a  
@HWI-EAS443:3:27:1014:331#0/1  
GCTTTCCACAAGAGGGGTCCAGATTGCTTCAAATGAGAAT  
+HWI-EAS443:3:27:1014:331#0/1  
abbbb`baababaa\_aa`\_`aa`aaa\_aa\_aaaaaa\_``  
@HWI-EAS443:3:27:1045:1195#0/1  
GATTGCTTCAAATGAGAATGTGGAAACCATGGACTCCAAT  
+HWI-EAS443:3:27:1045:1195#0/1  
aabaabaabaaa`a\_baa\_^^`a`aaaaa^X^a\_\_\_^Z  
@HWI-EAS443:3:27:1076:1685#0/1  
TCTTGAATCACTTTCTTTCCTTTATGAACTTGATACT  
+HWI-EAS443:3:27:1076:1685#0/1  
^\_X`¥\_a`Va¥^a]N\_\_^RQ[[[V^]a`^aa\_`a\_a^¥`W]  
@HWI-EAS443:3:27:1340:170#0/1  
GGTTTCCACATTCTCATTGAAGCAATCTGGACCCCTCTT  
+HWI-EAS443:3:27:1340:170#0/1  
aWO\_aaaa`aa^¥P\_`aZ``]W^``]Y^^VUZ[UYP[[  
@HWI-EAS443:3:27:1656:296#0/1  
AGAGTATCAAGTTTCATAAGAGGAAAGAAAGTGATTCCAA  
+HWI-EAS443:3:27:1656:296#0/1  
a¥abIb`^`aaaa`X^^^[a`aa\_a\_a\_\_\_a]``\_^VU[\_  
@HWI-EAS443:3:27:1681:762#0/1  
TTCAAATGCAGCAGAGTGGCATGCCATCCACCAATTGA  
+HWI-EAS443:3:27:1681:762#0/1  
aa`a\_a]b\_]a`Z`XX[`X``[VLJQXLSLRKIPTRV]YY  
@HWI-EAS443:3:27:318:673#0/1  
GGTTTCCACATTCTCATTGAAGCAATCTGGACCCCTCTT  
+HWI-EAS443:3:27:318:673#0/1  
]b`^babbbabaaaba]`abaa`bb`aaa``aaaa\_a`\_  
@HWI-EAS443:3:27:353:536#0/1  
AGTGATTCCAAGAGGAAAGCTTTCCACAAGAGGGGTCCAG  
+HWI-EAS443:3:27:353:536#0/1  
^JX[Y`\_]\_\_\_\_Q¥^]^^Z\_`^\_a]`S¥WU`\_TYVUMY¥]\_

@HWI-EAS443:3:27:356:619#0/1  
GAAATACCAATCAACAAAAGGCATCCGCAGGCCAGATCAG  
+HWI-EAS443:3:27:356:619#0/1  
aabaabbb\_R\_aa\_`^a\_`a^`Y`a`a\_`\_]a^S^a^\_  
@HWI-EAS443:3:27:550:1344#0/1  
AAGAAAGTGATTCCAAGAGGAAAGCTTTCCACAAGAGGGG  
+HWI-EAS443:3:27:550:1344#0/1  
a[¥]P\_]\_^aa`b\_ZUaZ^^\_]W\_]^Z]^W¥^]ZXBBB  
@HWI-EAS443:3:27:60:1483#0/1  
ATCAAGTTTCATAAGAGGAAAGAAAGTGATTCCAAGAGGA  
+HWI-EAS443:3:27:60:1483#0/1  
a`b`^]aaba`Z`aaaa`aaa^]`^YaZ\_]`^\_Z\_X`SUZ  
@HWI-EAS443:3:27:671:807#0/1  
AGTGATTCCAAGAGGAAAGCTTTCCACAAGAGGGGTCCAG  
+HWI-EAS443:3:27:671:807#0/1  
]aQ\_a]abbaaX`S^`b`aaabaaa\_\_Zaa`\_aaUaa\_`  
@HWI-EAS443:3:27:674:596#0/1  
GAGGAAATACCAATCAACAAAAGGCATCCGCAGGCCAGAT  
+HWI-EAS443:3:27:674:596#0/1  
aZ¥^^aaX`¥aW¥a`\_`\_\_\_\_\_X``[Z`]`^\_`^UQR[^TT  
@HWI-EAS443:3:27:675:148#0/1  
ATTCAGCGGGAACAATGAAGGACGGACATCCGACATGCGA  
+HWI-EAS443:3:27:675:148#0/1  
]`a\_abab``\_b`a`a[`aaZa]`^\_[`^^```[^X\_Z  
@HWI-EAS443:3:27:714:1254#0/1  
GGCTTTGCACTTTCCATCATTCTTATAACTTCTGTTCGCA  
+HWI-EAS443:3:27:714:1254#0/1  
¥R^Yb[¥bbKY¥¥^¥`b\_S¥ab^Z`¥\_\_b^]abaa\_aa`  
@HWI-EAS443:3:27:75:1686#0/1  
GGTCCAGATTGCTTCAAATGAGAATGTGGAAACCATGGAC  
+HWI-EAS443:3:27:75:1686#0/1  
a`]bb`a```aa[\_\_\_T^b]¥`\_a[aa]a`\_Xa\_\_a^^`aa  
@HWI-EAS443:3:27:875:1407#0/1  
CATCCGCAGGCCAGATCAGTGTGCAGCCTACATTCTCAGT  
+HWI-EAS443:3:27:875:1407#0/1  
a^`W^^]ZQ[\_^`VQ\_a¥P`WaX¥\_]Q^[[^^\_¥`MYS  
@HWI-EAS443:3:27:909:816#0/1  
GGAAATACCAATCAACAAAAGGCATCCGCAGGCCAGATCA  
+HWI-EAS443:3:27:909:816#0/1  
a`X¥\_^]Z`Y`¥]\_YXX]¥¥[NU¥SPaVVMQP[\_[XPU[Z  
@HWI-EAS443:3:28:1024:1139#0/1  
GCCTTTTGTGATTGGTATTTCCCTCCACTCCTGGTCCTTA  
+HWI-EAS443:3:28:1024:1139#0/1  
Q\_`¥aa]¥\_T¥^```aZabbabbWV\_aa¥¥0][XW]\_^a^  
@HWI-EAS443:3:28:1037:482#0/1  
CCACTCTGCTGCATTTGAAGATTTAAGAGTATCAAGTTTC  
+HWI-EAS443:3:28:1037:482#0/1  
aabbababbab`ababa`abaabbab`bb\_aaaaaa[ab\_  
@HWI-EAS443:3:28:1038:1980#0/1  
GCTGCACACTGATCTGGCCTGCGGATGCCTTTTGTGATT

+HWI-EAS443:3:28:1038:1980#0/1  
[b\_babbab[\_ab\_bbZ^\_Zaaabaaa`QZ\_bb`aa`]aa  
@HWI-EAS443:3:28:1046:1757#0/1  
AAGAAAGTGATTCCAAGAGGAAAGCTTTCCACAAGAGGGG  
+HWI-EAS443:3:28:1046:1757#0/1  
aaab¥`bW\_```a\_adWa``\_aa`W\_```^a¥`a\_`^X¥\_  
@HWI-EAS443:3:28:1138:1463#0/1  
GGAGTGGAGGAAATACCAATCAACAAAAGGCATCCGCAGG  
+HWI-EAS443:3:28:1138:1463#0/1  
a\_P\_X`a`a^Z^a¥QNYP^\_\_\_YSYY¥¥XSP\_MKKSUY¥B  
@HWI-EAS443:3:28:1231:113#0/1  
GGAGGAAATACCAATCAACAAAAGGCATCCGCAGGCCAGA  
+HWI-EAS443:3:28:1231:113#0/1  
aZ\_bb^b\_]`\_a``aH^a^`\_`\_aYR]`^¥`T`\_]SZ¥¥[  
@HWI-EAS443:3:28:1243:1920#0/1  
CAAATGAGAATGTGGAAACCATGGACTCCAATACCCTGGA  
+HWI-EAS443:3:28:1243:1920#0/1  
abbbbbbbbabbbb\_babbaabbababababaaaab`b\_aa\_`  
@HWI-EAS443:3:28:1294:1249#0/1  
CTCTTGTGGAAAGCTTTCTCTTGAATCACTTTCTTTCC  
+HWI-EAS443:3:28:1294:1249#0/1  
a``a``^¥b`ZUU``bV^^```abaaaa¥a`aa\_`b`a\_\_  
@HWI-EAS443:3:28:1353:1721#0/1  
AGTGATTCCAAGAGGAAAGCTTTCCACAAGAGGGGTCCAG  
+HWI-EAS443:3:28:1353:1721#0/1  
a\_[`aaba`a`^a`\_\_ba]a^\_a\_\_a¥a`V^S^Z\_W¥U`^  
@HWI-EAS443:3:28:1382:700#0/1  
GCCTTTTGTGATTGGTATTTCTCCACTCCTGGTCCTTA  
+HWI-EAS443:3:28:1382:700#0/1  
a\_a]]`a`[aa\_a\_a\_] [a]`a`\_VZ\_\_\_NL[Z[GM^aY^  
@HWI-EAS443:3:28:1431:1841#0/1  
GAGTGGAGGAAATACCAATCAACAAAAGGCATCCGCAGGC  
+HWI-EAS443:3:28:1431:1841#0/1  
\_`^Vb[TX]N]aU`\_\_`aWZ¥\_]`]¥^TRSGNSUUUW]PS  
@HWI-EAS443:3:28:1442:1448#0/1  
GGAGTGGAGGAAATACCAATCAACAAAAGGCATCCGCAGG  
+HWI-EAS443:3:28:1442:1448#0/1  
aa\_aXa\_\_a\_[\_\_\_\_`¥Q`Y^X\_^Z\_\_^^^ZV^¥YU^X[¥Z  
@HWI-EAS443:3:28:1457:647#0/1  
CTTAAATCTTCAAATGCAGCAGAGTGGCATGCCATCCACA  
+HWI-EAS443:3:28:1457:647#0/1  
aabbb`bbbbbaabbabbbbab^aababbb`\_ba\_bbWb  
@HWI-EAS443:3:28:157:1201#0/1  
CTTTTGAAGAGCAACCGTTATGGCAGCATTAGCGGGAA  
+HWI-EAS443:3:28:157:1201#0/1  
abaababab[aa`bbbaa\_aaa`aaa]WVX][`V[\_\_\_]0`  
@HWI-EAS443:3:28:1642:1764#0/1  
GGAAAGAAAGTGATTCCAAGAGGAAAGCTTTCCACAAGAG  
+HWI-EAS443:3:28:1642:1764#0/1  
`]a^ba¥^Sa[aaaa`aa\_aZa^\_\_`^`\_`\_] ^X^]^^\_

@HWI-EAS443:3:28:169:1490#0/1  
GTCCGATGTCCGCTTCATTGTTCCCGCTGAATGCTGCC  
+HWI-EAS443:3:28:169:1490#0/1  
`a`\_Z`aaXab^]aaaa\_`aa][`bb¥^JZ[`Z¥]YW\_`  
@HWI-EAS443:3:28:294:652#0/1  
TGGAATCACTTTCTTCTTCTTATGAACTTGATACTCTT  
+HWI-EAS443:3:28:294:652#0/1  
a^\_S\_a\_``````^^`ab`^a`^`\_]`\_]\_a`aa\_a\_`aa`  
@HWI-EAS443:3:28:458:1562#0/1  
TCTGGCTTTGCACTTTCCATCATTCTTATAACTTCTGTTC  
+HWI-EAS443:3:28:458:1562#0/1  
`ba`Tb`a^W¥^aa`¥ab\_V`\_`a\_\_`a\_]QZ\_\_a`\_Y[W  
@HWI-EAS443:3:28:503:1983#0/1  
GATTCCAAGAGGAAAGCTTTCCACAAGAGGGGTCCAGATT  
+HWI-EAS443:3:28:503:1983#0/1  
^[\_`bbb`ab¥\_aba\_a\_a``aa\_`a[a¥WV\_`^a`aVa]R  
@HWI-EAS443:3:28:815:599#0/1  
CATTGTTCCCGCTGAATGCTGCCATAACGGTTGCTCTTTC  
+HWI-EAS443:3:28:815:599#0/1  
^`ba\_`\_`bb^Y`baaabaabb^abbb`aa[aZS¥[a`aX  
@HWI-EAS443:3:28:98:1412#0/1  
ATTGCTTCAAATGAGAATGTGGAAACCATGGACTCCAATA  
+HWI-EAS443:3:28:98:1412#0/1  
aaaaa^¥aa\_]`^`aaa]`\_Ya```V]\_¥`\_X[^[a]V`\_\_  
@HWI-EAS443:3:29:1150:795#0/1  
CAAATGAGAATGTGGAAACCATGGACTCCAATACCCTGGA  
+HWI-EAS443:3:29:1150:795#0/1  
a^^\_S`WYP¥XXLW]LM\_WZV^a]V]Y[¥YJ][\_WZ¥¥[W  
@HWI-EAS443:3:29:1245:1648#0/1  
TCCTCTTATGAACTTGATACTTTAAATCTTCAAATGCA  
+HWI-EAS443:3:29:1245:1648#0/1  
abaa]b`a[baZaZaa^VYaaa`X\_`aaXY`a`aba`\_`[a  
@HWI-EAS443:3:29:1258:1464#0/1  
AGGAAAGAAAGTGATTCCAAGAGGAAAGCTTTCCACAAGA  
+HWI-EAS443:3:29:1258:1464#0/1  
[\_]aa\_aaX¥[F^L[\_^^[^`\_\_\_\_``ZNX[[^``\_\_\_\_XB  
@HWI-EAS443:3:29:1372:684#0/1  
GGACCCCTCTTGTGGAAAGCTTTCCTCTTGAATCACTTT  
+HWI-EAS443:3:29:1372:684#0/1  
ab`L\_aa`aaa^\_a\_\_\_\_\_]0\_`a^`a\_\_\_\_a]a\_Z[\_\_\_\_^  
@HWI-EAS443:3:29:1432:1725#0/1  
AGGCTGCACACTGATCTGGCCTGCGGATGCCTTTTGTGGA  
+HWI-EAS443:3:29:1432:1725#0/1  
`a[```a`a\_]¥a`]T[aQ[Z^U[\_¥^P[WZ\_`a¥¥¥MR  
@HWI-EAS443:3:29:1622:338#0/1  
ATAAGAGGAAAGAAAGTGATTCCAAGAGGAAAGCTTTCCA  
+HWI-EAS443:3:29:1622:338#0/1  
^Zabbab\_bbb`aa]^]b`ab`aa\_\_aaa`baaPbIaRTW  
@HWI-EAS443:3:29:1658:747#0/1  
CTCTTGTGGAAAGCTTTCCTCTTGAATCACTTTCTTCC

+HWI-EAS443:3:29:1658:747#0/1  
abbb¥aXb¥b\_baPabaaabbabb`a`a^aZbaa`abba`  
@HWI-EAS443:3:29:1791:945#0/1  
CCAGATTGCTTCAAATGAGAATGTGGAAACCATGGACTCC  
+HWI-EAS443:3:29:1791:945#0/1  
a\_\_`aa`^\_ba]``b\_\_]\_a`S]^X¥]UYabba`\_\_¥B  
@HWI-EAS443:3:29:523:1200#0/1  
GCAGGCCAGATCAGTGTGCAGCCTACATTCTCAGTGCAGC  
+HWI-EAS443:3:29:523:1200#0/1  
aa`a\_]``[Z^aa]\_Z^aa`\_aa`\_¥\_aa¥a``U\_\_\_`[  
@HWI-EAS443:3:29:605:1344#0/1  
ATCAAGTTTCATAAGAGGAAAGAAAGTGATTCCAAGAGGA  
+HWI-EAS443:3:29:605:1344#0/1  
¥Z`^`\_W¥]^a`baaa`Raaa¥^aaaWY`¥X^`a]O`OB  
@HWI-EAS443:3:29:757:596#0/1  
CTTCTGGCTTTGCACTTTCCATCATTCTTATAACTTCTGT  
+HWI-EAS443:3:29:757:596#0/1  
`¥X^`^X^baaQUZV\_Z^`¥SGVHT]\_a`YX¥`[I¥X[S[  
@HWI-EAS443:3:29:899:1095#0/1  
CAAGTTTCATAAGAGGAAAGAAAGTGATTCCAAGAGGAAA  
+HWI-EAS443:3:29:899:1095#0/1  
abab`aaaaba]`aba`aaa`a`^a`aa\_aba\_^a`aba  
@HWI-EAS443:3:29:905:502#0/1  
CCCCTCTGTGGAAAGCTTTCCTCTTGAATCACTTTCTT  
+HWI-EAS443:3:29:905:502#0/1  
abbbbaaaabaa`abab`aa`\_\_aaaaa\_a\_a\_aaaaaa`  
@HWI-EAS443:3:2:1102:969#0/1  
GATTGGTATTTCTCCACTCCTGGTCCTTATGGCCCAGTA  
+HWI-EAS443:3:2:1102:969#0/1  
^RaaabaXb^a`RZVOR\_`]YZ``V[^a¥Z¥UYZSRZ[NB  
@HWI-EAS443:3:2:1287:1291#0/1  
GCTGCACTGAGAATGTAGGCTGCACACTGATCTGGCCTGC  
+HWI-EAS443:3:2:1287:1291#0/1  
aaa]]a¥`NY]aaaSUYa^^`SWX]S]aW¥U¥XYG¥BBB  
@HWI-EAS443:3:2:1558:548#0/1  
GGATGGCATGCCACTCTGCTGCATTTGAAGATTTAAGAGT  
+HWI-EAS443:3:2:1558:548#0/1  
a`Ybaaabaa`a¥`^`baa][Yaaa`\_X`V\_aa]\_^a¥K  
@HWI-EAS443:3:2:225:502#0/1  
CAGCATTCCAGCGGAACAATGAAGGACGGACATCCGACAT  
+HWI-EAS443:3:2:225:502#0/1  
abbbb`a¥ab]b\_b`a\_a`aa\_[[Y`R\_aaaaa\_^aROZ\_  
@HWI-EAS443:3:2:437:808#0/1  
CTTTCATCATTCTTATAACTTCTGTTCGCATGTCGGATG  
+HWI-EAS443:3:2:437:808#0/1  
^b\_abb`]bbb`\_a`b]`ababaaab\_bbbabaaaaabb  
@HWI-EAS443:3:2:55:853#0/1  
AAAGGCATCCGAGGCCAGATCAGTGTGCAGCCTACATTC  
+HWI-EAS443:3:2:55:853#0/1  
\_aaaaabXX`X\_\_aa\_VHWQH\_^`\_\_V`QV^¥]^\_Q\_a`S



@HWI-EAS443:3:2:717:1767#0/1  
CACATTCTCATTTGAAGCAATCTGGACCCCTCTTGTGGAA  
+HWI-EAS443:3:2:717:1767#0/1  
ab\_V^aaa\_[V`\_aaa`Taa\_R^^0\_RLTY¥\_ZNVO]^Z¥  
@HWI-EAS443:3:2:792:107#0/1  
CATTGTTCCCGCTGAATGCTGCCATAACGGTTGCTCTTTC  
+HWI-EAS443:3:2:792:107#0/1  
aabbbbb`a`bX^ba`ab^``\_`aa\_`\_aaNa]N[]]a¥Q  
@HWI-EAS443:3:2:99:476#0/1  
GAAATACCAATCAACAAAAGGCATCCGCAGGCCAGATCAG  
+HWI-EAS443:3:2:99:476#0/1  
X¥\_bbb^FZbZ\_\_a`]SX[`¥^]]QZ¥YW\_Q]Wa`]a\_¥]  
@HWI-EAS443:3:30:1004:1306#0/1  
GGTGTGGATGGCATGCCACTCTGCTGCATTTGAAGATTTA  
+HWI-EAS443:3:30:1004:1306#0/1  
aaWaa`aa^b\_`¥[``a]^U[Ya\_`]\_`aaXLU`\_^^a`  
@HWI-EAS443:3:30:1046:1144#0/1  
GTGATTCCAAGAGGAAAGCTTTCCACAAGAGGGTCCAGA  
+HWI-EAS443:3:30:1046:1144#0/1  
a`a`baab\_a`ba\_ab\_`aaaa\_`a`a\_\_a\_`]¥NU^`\_a  
@HWI-EAS443:3:30:1053:69#0/1  
AGGACGGACATCCGACATGCGAACAGAAGTTATAAGAATG  
+HWI-EAS443:3:30:1053:69#0/1  
aaa``aaaaa`aba`aaa\_aX\_\_^a]\_a]a\_aa^`Z\_`\_  
@HWI-EAS443:3:30:1119:968#0/1  
GGAGGAAATACCAATCAACAAAAGGCATCCGCAGGCCAGA  
+HWI-EAS443:3:30:1119:968#0/1  
]VQ]TZ^]\_`\_a`a[XLa`¥V^ZNO¥[¥U¥^THU^SXVBB  
@HWI-EAS443:3:30:1177:699#0/1  
TTGTGGAAAGCTTTCCTCTTGAATCACTTTCTTTCCTCT  
+HWI-EAS443:3:30:1177:699#0/1  
aba`aaabaabbbbaaabaabaaaa`aaaaaaaa\_Ua]a  
@HWI-EAS443:3:30:1203:351#0/1  
AGAGTATCAAGTTTCATAAGAGGAAAGAAAGTGATTCCAA  
+HWI-EAS443:3:30:1203:351#0/1  
¥`bba\_aa[Ya`]aa`aaba`]`aa```\_aPa[[^Y\_``  
@HWI-EAS443:3:30:1210:1577#0/1  
AGGAAAGCTTTCACAAGAGGGTCCAGATTGCTTCAAAT  
+HWI-EAS443:3:30:1210:1577#0/1  
`Y`\_a\_`Z\_]`a`\_^^[^¥WYQY`\_]`\_W^\_¥ZZ^ZX^  
@HWI-EAS443:3:30:1230:334#0/1  
TGGACCCCTCTTGTGGAAAGCTTTCCTCTTGAATCACTT  
+HWI-EAS443:3:30:1230:334#0/1  
aabaaaabbaaa]`\_\_abaaaaa\_\_a`\_aaaa`a^`^^a  
@HWI-EAS443:3:30:1321:1732#0/1  
AGTGATTCCAAGAGGAAAGCTTTCACAAGAGGGTCCAG  
+HWI-EAS443:3:30:1321:1732#0/1  
aa`bbaabbaaab``aaa^a``aaabaa`\_`a\_\_`Y¥]`a  
@HWI-EAS443:3:30:1339:1809#0/1  
TTCCAGGGTATTGGAGTCCATGGTTTCCACATTCTCATTT

+HWI-EAS443:3:30:1339:1809#0/1  
`YY[a`bb)`a\_Z\_aa[\_\_\_a``UU^[¥Z\_¥^a\_R\_^^^`\_  
@HWI-EAS443:3:30:1344:1543#0/1  
ACAAAAGGCATCCGCAGGCCAGATCAGTGTGCAGCCTACA  
+HWI-EAS443:3:30:1344:1543#0/1  
aaaaa¥aabaa`aaaaXaaaa`X\_\_\_\_Z\_U¥]a\_\_^]`W]  
@HWI-EAS443:3:30:1413:2024#0/1  
CCTGCGGATGCCTTTTGTGATTGGTATTTCTCCACTCC  
+HWI-EAS443:3:30:1413:2024#0/1  
a\_SX^bZV\_ab`OYZY¥LT`¥[VTZNV[ZQRYX¥YYP  
@HWI-EAS443:3:30:1479:1455#0/1  
CTCTTAAATCTTCAAATGCAGCAGAGTGGCATGCCATCCA  
+HWI-EAS443:3:30:1479:1455#0/1  
`bbbbababbbbaab`bbbaababb`baa`a]`aa[¥P¥  
@HWI-EAS443:3:30:1613:519#0/1  
CTTTTGTGATTGGTATTTCTCCACTCCTGGTCCTTATG  
+HWI-EAS443:3:30:1613:519#0/1  
abbbbabbabbbbbb`bbbbaab\_ababaaaab\_aZaaaa  
@HWI-EAS443:3:30:178:1574#0/1  
GTCCGATGTCCGTCCTTCATTGTTCCCGCTGAATGCTGCC  
+HWI-EAS443:3:30:178:1574#0/1  
`aba^ba`Z`b`Xba`aba`a\_\_aba`a^\_aZZ]`¥S`\_  
@HWI-EAS443:3:30:258:1255#0/1  
GGACCAGGAGTGGAGGAAATACCAATCAACAAAAGGCATC  
+HWI-EAS443:3:30:258:1255#0/1  
]TYa\_^a\_]WL[ZT\_WX^]\_\_a]\_¥]^^R[]GNHVYa[Y`  
@HWI-EAS443:3:30:367:1330#0/1  
AAAGTGATTCCAAGAGGAAAGCTTTCCACAAGAGGGGTCC  
+HWI-EAS443:3:30:367:1330#0/1  
\_X]aZ¥Y\_`aaZWQ\_`\_]`\_\_a``^aa[a`YUK[^VXWZ]  
@HWI-EAS443:3:30:386:609#0/1  
GAAAGTGATTCCAAGAGGAAAGCTTTCCACAAGAGGGGTCC  
+HWI-EAS443:3:30:386:609#0/1  
aVaWbXa`aaaba]ZbTXZaaaa`\_aaa`a\_\_\_\_^^\_W]  
@HWI-EAS443:3:30:396:959#0/1  
AGTGATTCCAAGAGGAAAGCTTTCCACAAGAGGGGTCCAG  
+HWI-EAS443:3:30:396:959#0/1  
`Y]^[a\_abba`a]W^¥\_Y]a\_a`aa\_a]Za^SV\_W[\_`\_  
@HWI-EAS443:3:30:474:999#0/1  
GTCCGATGTCCGTCCTTCATTGTTCCCGCTGAATGCTGCC  
+HWI-EAS443:3:30:474:999#0/1  
a^aZ]W]b^Zb`\_`^Q^baa^UR\_^aa\_\_XTY`[¥¥WNU\_  
@HWI-EAS443:3:30:494:1087#0/1  
TTCATAAGAGGAAAGAAAGTGATTCCAAGAGGAAAGCTTT  
+HWI-EAS443:3:30:494:1087#0/1  
aa`\_aa`a`aaa`a\_\_aa\_W\_`^`aa`^a\_¥`a\_]\_[]X  
@HWI-EAS443:3:30:527:1203#0/1  
GTCCAGATTGCTTCAAATGAGAATGTGGAAACCATGGACT  
+HWI-EAS443:3:30:527:1203#0/1  
aababaa`baaaaa`baa`\_aaaa\_a````aaa\_\_`\_] ]

@HWI-EAS443:3:30:651:1478#0/1  
GATTTAAGAGTATCAAGTTTCATAAGAGGAAAGAAAGTGA  
+HWI-EAS443:3:30:651:1478#0/1  
aZ\_aa\_`a`\_]`aab\_aUa`b`a\_aa``\_\_\_\_`a¥^XOT\_  
@HWI-EAS443:3:30:738:330#0/1  
GTTCGCATGTCCGATGTCCGTCCTTCATTGTTCCCGCTGA  
+HWI-EAS443:3:30:738:330#0/1  
aTS]X``\_\_R\_[^HRPWNLQQ\_UZ^WW¥^QVZRZVZWMR\_  
@HWI-EAS443:3:30:910:692#0/1  
AAGCTTTCCACAAGAGGGGTCCAGATTGCTTCAAATGAGA  
+HWI-EAS443:3:30:910:692#0/1  
aa`aa\_`b\_`aaaaR``¥`[aa`a]aW¥\_``]aL^[]\_]`  
@HWI-EAS443:3:30:939:672#0/1  
GCTTTGCACTTTCCATCATTCTTATAACTTCTGTTCGCAT  
+HWI-EAS443:3:30:939:672#0/1  
abbbbb\_aabbbbbbbba`bbbbababbbb\_b\_a`ab  
@HWI-EAS443:3:31:1237:316#0/1  
AGTGATTCCAAGAGGAAAGCTTTCCACAAGAGGGGTCCAG  
+HWI-EAS443:3:31:1237:316#0/1  
abbb`b]baab`bbabbbabbaa\_a\_aaaaaaa]a^``  
@HWI-EAS443:3:31:1268:691#0/1  
ATCCGACATGCGAACAGAAGTTATAAGAATGATGGAAAGT  
+HWI-EAS443:3:31:1268:691#0/1  
¥¥^\_[Z\_]Z\_^SWHO\_aLNYX^^^aabWX¥bZSa^ZZ¥a[  
@HWI-EAS443:3:31:1276:1523#0/1  
GATTGCTTCAAATGAGAATGTGGAAACCATGGACTCCAAT  
+HWI-EAS443:3:31:1276:1523#0/1  
\_aUa]`[`Y^W0\_`¥Z][`aRW]aaa\_a\_Za[¥[^YYa[]  
@HWI-EAS443:3:31:1765:1733#0/1  
GATTGCTTCAAATGAGAATGTGGAAACCATGGACTCCAAT  
+HWI-EAS443:3:31:1765:1733#0/1  
^aabba`¥`\_bbbaabbabb`bab`aT]`ab`a]\_``aaa  
@HWI-EAS443:3:31:226:118#0/1  
CTTTCCATCATTCTTATAACTTCTGTTCGCATGTCCGGATG  
+HWI-EAS443:3:31:226:118#0/1  
`bbbbababbabbab`aab`bbbbabbbb\_aaa\_ab`a^a  
@HWI-EAS443:3:31:304:574#0/1  
GTTCCAGGGTATTGGAGTCCATGGTTTCCACATTCTCATT  
+HWI-EAS443:3:31:304:574#0/1  
a``aaWaaa]aaa`X`a\_aaa[\_]Ya\_a`aZU\_a\_`ZN]`  
@HWI-EAS443:3:31:469:478#0/1  
GTGATTCCAAGAGGAAAGCTTTCCACAAGAGGGGTCCAGA  
+HWI-EAS443:3:31:469:478#0/1  
a`aa`a`aaa\_a``aa`aa\_a```]`^`^`\_`^^XZZS[^X  
@HWI-EAS443:3:31:928:613#0/1  
GGAGGAAATACCAATCAACAAAAGGCATCCGCAGGCCAGA  
+HWI-EAS443:3:31:928:613#0/1  
ab`aa`a`a`b\_a````^\_a`^[\_][\_\_\_\_][\_\_\_\_][\_\_\_\_]  
@HWI-EAS443:3:31:969:1874#0/1  
CCAGGAGTGGAGGAAATACCAATCAACAAAAGGCATCCGC

+HWI-EAS443:3:31:969:1874#0/1  
Q\_¥\_¥[a]aa`\_\_\_\_^¥`bbbaaa`^bb\_]^[U`\_\_a]0  
@HWI-EAS443:3:32:1005:905#0/1  
CGCTGCACTGAGAATGTAGGCTGCACACTGATCTGGCCTG  
+HWI-EAS443:3:32:1005:905#0/1  
a\_Y`\_W\_[aaa`aa`^¥`\_]¥`¥^T^NXX^U[Ta]BB  
@HWI-EAS443:3:32:1239:406#0/1  
GTCCAGATTGCTTCAAATGAGAATGTGGAAACCATGGACT  
+HWI-EAS443:3:32:1239:406#0/1  
`\_^aaa`a]aa^\_\_`a`\_`\_`aV\_a\_]\_]V]\_]\_]`  
@HWI-EAS443:3:32:1247:255#0/1  
CTTTCCACAAGAGGGTCCAGATTGCTTCAAATGAGAATG  
+HWI-EAS443:3:32:1247:255#0/1  
`Y]b]baaaaaabb\_baa]]`ab`aaaa`aa^[`Y]aba  
@HWI-EAS443:3:32:1315:1220#0/1  
GAAAGTGATTCCAAGAGGAAAGCTTTCCACAAGAGGGGTC  
+HWI-EAS443:3:32:1315:1220#0/1  
abbaa]aaaa`aab\_b\_\_baaa\_aaa^a`^a`a`\_`\_`\_^\_  
@HWI-EAS443:3:32:1350:812#0/1  
GTTCCGATGTCCGATGTCCGTCCTTCATTGTTCCCGCTGA  
+HWI-EAS443:3:32:1350:812#0/1  
a`aaaaab`RaZ\_¥\_JRZX\_[N\_a^V]aaXZ`\_^[]\_S\_]`  
@HWI-EAS443:3:32:1361:1244#0/1  
AGCAGATACTGGCCATAAGGACCAGGAGTGGAGGAAATA  
+HWI-EAS443:3:32:1361:1244#0/1  
VZ`[ab\_R[a\_\_`Z`````aa^Q\_a¥[]Q¥]¥][SU^a`  
@HWI-EAS443:3:32:1434:85#0/1  
AGCGGGAACAATGAAGGACGGACATCCGACATGCGAACAG  
+HWI-EAS443:3:32:1434:85#0/1  
`bbbb\_]baaaaa\_\_aWTU`aYX¥\_0¥`PIT```O[KWY]\_  
@HWI-EAS443:3:32:1448:951#0/1  
GCAGGCCAGATCAGTGTGCAGCCTACATTCTCAGTGCAGC  
+HWI-EAS443:3:32:1448:951#0/1  
aV]^Y[P¥XZZ`URPWW[QTBBBBBBBBBBBBBBBBBBB  
@HWI-EAS443:3:32:1467:613#0/1  
TGAAGATTTAAGAGTATCAAGTTTCATAAGAGGAAAGAAA  
+HWI-EAS443:3:32:1467:613#0/1  
\_Z`^b`^\_abaaa¥a`\_aab`aa\_¥\_a`^aa`¥`\_a\_]`^  
@HWI-EAS443:3:32:1478:1027#0/1  
ATTTCCCTCCACTCCTGGTCCTTATGGCCAGTATCTGCTT  
+HWI-EAS443:3:32:1478:1027#0/1  
^`a¥\_]`aaaZUZaYZWL^]]W]\_\_UQX^¥]U\_U]RZ¥BB  
@HWI-EAS443:3:32:1750:1581#0/1  
GTTTCATAAGAGGAAAGAAAGTATTCCAAGAGGAAAGCT  
+HWI-EAS443:3:32:1750:1581#0/1  
YL[S`aa¥`^aba^a\_a]Z\_\_TQV`\_`RW¥^a^XX`ZaX`\_`  
@HWI-EAS443:3:32:418:204#0/1  
GAAATACCAATCAACAAAAGGCATCCGCAGGCCAGATCAG  
+HWI-EAS443:3:32:418:204#0/1  
a`a`][aaa]aaV]^^[U^[¥][[]]\_\_]W\_VLU[]UWBBB

@HWI-EAS443:3:32:491:1816#0/1  
CTTATAACTTCTGTTCGCATGTCCGATGTCCGTCCTTCAT  
+HWI-EAS443:3:32:491:1816#0/1  
aabbUQ\_`aaa¥`aabaa\_\_a\_`XZRDK\_YGS[ZWaYW  
@HWI-EAS443:3:32:579:858#0/1  
CCGACATGCGAACAGAAGTTATAAGAATGATGGAAAGTGC  
+HWI-EAS443:3:32:579:858#0/1  
abb`[L^\_a]ZSPSW[YaS`\_^R¥\_I`\_[]^`\_\_aT0\_\_  
@HWI-EAS443:3:32:667:375#0/1  
GTCCGTCCTTCATTGTTCCCGCTGAATGCTGCCATAACGG  
+HWI-EAS443:3:32:667:375#0/1  
a\_]`\_RZT`aU¥]¥[VX\_``aZVU`Y\_[ZRWW^`QTXQU  
@HWI-EAS443:3:32:75:486#0/1  
GATTCCAAGAGGAAAGCTTTCCACAAGAGGGGTCCAGATT  
+HWI-EAS443:3:32:75:486#0/1  
]\_a¥abba¥\_¥¥ZPZ[^X\_^`\_¥\_\_\_\_]`\_V]SX`a]IV`  
@HWI-EAS443:3:32:82:1348#0/1  
GTCCGATGTCCGTCCTTCATTGTTCCCGCTGAATGCTGCC  
+HWI-EAS443:3:32:82:1348#0/1  
\_]babaa]`aa[`baaa]R^a]\_aa`a]^\_`a\_V^¥¥ab  
@HWI-EAS443:3:32:904:1416#0/1  
TTCATAAGAGGAAAGAAAGTGATTCCAAGAGGAAAGCTTT  
+HWI-EAS443:3:32:904:1416#0/1  
a`a`a`a`\_aaa\_\_`a`Y]`\_Z]]`\_X`¥^^a]]\_Y^W  
@HWI-EAS443:3:32:950:709#0/1  
AGCGGGAACAATGAAGGACGGACATCCGACATGCGAACAG  
+HWI-EAS443:3:32:950:709#0/1  
abbbbabbbbaaba`a^abba\_aa\_\_a\_a\_a\_a^a```  
@HWI-EAS443:3:33:1005:1851#0/1  
AGTGATTCCAAGAGGAAAGCTTTCCACAAGAGGGGTCCAG  
+HWI-EAS443:3:33:1005:1851#0/1  
aZRUa`ababb\_a\_\_\_^`ZY`^Z^^bV`¥`]LMIRVXFY]  
@HWI-EAS443:3:33:1048:1027#0/1  
AACTGTCATACTCCTCTGCATTGTCTCCGAAGAAATAAGA  
+HWI-EAS443:3:33:1048:1027#0/1  
TT¥¥Uwba``aYZ`Y]\_]`^`^a¥RYXW]a]NG^¥`\_[X¥  
@HWI-EAS443:3:33:1052:1438#0/1  
CATCCGACAGCCAGATCAGTGTGCAGCCTACATTCTCAGT  
+HWI-EAS443:3:33:1052:1438#0/1  
ab\_^¥FUXX[N\_XRXU\_PVJOVO]aXUY[XOQVQDU^ZZV  
@HWI-EAS443:3:33:1128:599#0/1  
GCAGATACTGGCCATAAGGACCAGGAGTGGAGGAAATAC  
+HWI-EAS443:3:33:1128:599#0/1  
``abaaaaaaa^aa`^`a¥^\_`a`[aWaa¥¥`Y`\_\_\_\_U  
@HWI-EAS443:3:33:1157:924#0/1  
ATTGCTTCAAATGAGAATGTGGAAACCATGGACTCCAATA  
+HWI-EAS443:3:33:1157:924#0/1  
aa^`bba¥aa]0]aa`aa¥a`a\_a[Xa`\_\_]X[S]¥^`]  
@HWI-EAS443:3:33:1322:84#0/1  
GAGAATGTAGGCTGCACACTGATCTGGCCTGCGGATGCCT

+HWI-EAS443:3:33:1322:84#0/1  
aabS][b[WUX`VXZMPWK[ULSTBBBBBBBBBBBBBBBB  
@HWI-EAS443:3:33:1376:1312#0/1  
GACCCCTCTTGTTGAAAGCTTTCCTCTTGGAATCACTTTC  
+HWI-EAS443:3:33:1376:1312#0/1  
Y#aabbbabaaa]ba`\_bbba\_a`bb¥baaba``aaaab^  
@HWI-EAS443:3:33:14:1555#0/1  
GACCCCTCTTGTTGAAAGCTTTCCTCTTGGAATCACTTTC  
+HWI-EAS443:3:33:14:1555#0/1  
`]abbbabaa^^aa]\_]`\_`aaa`a\_\_`]a]¥\_\_`\_\_a  
@HWI-EAS443:3:33:1570:872#0/1  
ATACCAATCAACAAAAGGCATCCGCAGGCCAGATCAGTGT  
+HWI-EAS443:3:33:1570:872#0/1  
`\_^]V`^W]a]\_\_`\_a\_TS[`TPU¥Z\_[R^NKTWVYUMUQ  
@HWI-EAS443:3:33:1659:809#0/1  
GCCTTTTGTGATTGGTATTTCCCTCCACTCCTGGTCCTTA  
+HWI-EAS443:3:33:1659:809#0/1  
^a``aaa^\_]\_`ab\_W\_a``]^\_R[[[R¥URXVPV¥]\_  
@HWI-EAS443:3:33:1676:203#0/1  
GATTGCTTCAAATGAGAATGTGGAACCATGGACTCCAAT  
+HWI-EAS443:3:33:1676:203#0/1  
\_bbba\_bbaaaaaaabaa`^a`\_^a]`\_\_UXKMZZZ^]Z  
@HWI-EAS443:3:33:169:1013#0/1  
GTCCTTCAATTGTTCCCGCTGAATGCTGCCATAACGGTTGC  
+HWI-EAS443:3:33:169:1013#0/1  
a^bbbababb\_b``baaaa``aa`aa`\_aaaa`[^V]W`^\_  
@HWI-EAS443:3:33:258:389#0/1  
CAGATTGCTTCAAATGAGAATGTGGAACCATGGACTCCA  
+HWI-EAS443:3:33:258:389#0/1  
aaabaa`baabbaaa]^a\_aaa]a`a``\_\_`\_^]^\_\_^\_\_  
@HWI-EAS443:3:33:686:393#0/1  
CCCCTGAATGCTGCCATAACGGTTGCTCTTCAAAGGG  
+HWI-EAS443:3:33:686:393#0/1  
abbbbaabbbabaaaa\_aaaaa`¥aaT`¥`a`H\_]\_0¥\_  
@HWI-EAS443:3:33:689:1412#0/1  
GCAGGCCAGATCAGTGTGCAGCCTACATTCTCAGTGCAGC  
+HWI-EAS443:3:33:689:1412#0/1  
^\_[\_ZY^a`aZ\_WTXWFXYPW¥TSXa[aa\_XRGNW]HYV  
@HWI-EAS443:3:33:911:386#0/1  
CACTTTCTTTCCTCTTATGAACTTGATACTCTTAAATCT  
+HWI-EAS443:3:33:911:386#0/1  
YaL¥[^`aa\_Vba`aabbaZZ¥]bbabb¥a\_HPbabH[YZ  
@HWI-EAS443:3:33:99:1721#0/1  
CTTGTGAAAGCTTTCCTCTTGGAATCACTTCTTTCCTC  
+HWI-EAS443:3:33:99:1721#0/1  
aa`[Yaaab`\_b`aabbaba\_]\_aa``aa``a\_a`\_a\_\_a  
@HWI-EAS443:3:34:1110:1946#0/1  
GTCCGTCCTTCAATTGTTCCCGCTGAATGCTGCCATAACGG  
+HWI-EAS443:3:34:1110:1946#0/1  
aa\_ab`a\_bbbbbbb\_aaa\_aaaab\_aaa``\_¥\_\_a¥W¥Z

@HWI-EAS443:3:34:1164:1300#0/1  
GGAGGAAATACCAATCAACAAAAGGCATCCGCAGGCCAGA  
+HWI-EAS443:3:34:1164:1300#0/1  
T`]R]W¥\_H\_\_`\_\_R¥a`^ZZ`^\_[aaY`[W[]]ZBBBB  
@HWI-EAS443:3:34:1172:1177#0/1  
TGAAGGACGACATCCGACATGCGAACAGAAGTTATAAGA  
+HWI-EAS443:3:34:1172:1177#0/1  
abababaabbbbaaba`ab`\_b\_\_aa`¥^a\_a\_a\_\_\_\_]  
@HWI-EAS443:3:34:1217:944#0/1  
CGCTGCACTGAGAATGTAGGCTGCACACTGATCTGGCCTG  
+HWI-EAS443:3:34:1217:944#0/1  
aababba`bbab\_Z`a^aa`^aa]¥YaSVV^¥U^Z^U[RP  
@HWI-EAS443:3:34:1237:536#0/1  
TGCATTTGAAGATTTAAGAGTATCAAGTTTCATAAGAGGA  
+HWI-EAS443:3:34:1237:536#0/1  
` `aabbaaabaabaaaaaab\_aa`a`a^aa`aa\_\_a^a[]  
@HWI-EAS443:3:34:1310:1500#0/1  
AGCAGATACTGGGCCATAAGGACCAGGAGTGGAGGAAATA  
+HWI-EAS443:3:34:1310:1500#0/1  
^`ZW\_]^\_ab]\_a`a]baZaaa]U0¥`b\_TKUSP¥\_\_`Y  
@HWI-EAS443:3:34:1412:895#0/1  
GAAAGTGATTCCAAGAGGAAAGCTTTCCACAAGAGGGGTC  
+HWI-EAS443:3:34:1412:895#0/1  
^`bb`]aababbaaa\_aabaa¥aaa\_ab¥aa[`¥\_Y]VX  
@HWI-EAS443:3:34:1421:1299#0/1  
GATTCCAAGAGGAAAGCTTTCCACAAGAGGGGTCCAGATT  
+HWI-EAS443:3:34:1421:1299#0/1  
a`aabbaaaaaaaa`\_aaa\_aa\_`]\_\_\_\_Y[NW^^[B  
@HWI-EAS443:3:34:1612:1253#0/1  
AGCAGATACTGGGCCATAAGGACCAGGAGTGGAGGAAATA  
+HWI-EAS443:3:34:1612:1253#0/1  
[``bbVbaa``aab`[``\_``]a^Z[\_S^aXZYBBBBB  
@HWI-EAS443:3:34:1711:1130#0/1  
GTCGGATGTCCGTCCTTCATTGTTCCCGCTGAATGCTGCC  
+HWI-EAS443:3:34:1711:1130#0/1  
aaaabaab\_a``]aaaaX`a`\_¥[^ZZT¥S][^ZRKNSBB  
@HWI-EAS443:3:34:264:503#0/1  
GAGGAAAGAAAGTGATTCCAAGAGGAAAGCTTTCCACAAG  
+HWI-EAS443:3:34:264:503#0/1  
a[a`ab[aZZ^a¥a\_aabaX[\_aa^`a`\_a\_\_^`^aV\_\_]  
@HWI-EAS443:3:34:497:1129#0/1  
GTCGGATGTCCGTCCTTCATTGTTCCCGCTGAATGCTGCC  
+HWI-EAS443:3:34:497:1129#0/1  
\_aa[¥W^[J^a[\_`W\_\_^^^¥UXaXBBBBBBBBBBBBBBB  
@HWI-EAS443:3:34:616:343#0/1  
GAAAGTGATTCCAAGAGGAAAGCTTTCCACAAGAGGGGTC  
+HWI-EAS443:3:34:616:343#0/1  
abY\_aYb]aaabba\_a`a¥``\_\_aa\_aaa\_\_`\_^]VXYR  
@HWI-EAS443:3:34:641:708#0/1  
TTCCAGGGTATTGGAGTCCATGGTTTCCACATTCTCATTT

+HWI-EAS443:3:34:641:708#0/1  
abbb\_b]a^baaaaa^`baa`aa^aa\_]Z]Z\_a`\_\_^\_\_`  
@HWI-EAS443:3:34:744:128#0/1  
CTTTGCACTTCCATCATTCTTATAACTTCTGTTTCGCATG  
+HWI-EAS443:3:34:744:128#0/1  
aabb`baa`bbb`aa`abaaaaaaa`\_aaaa`\_^\_X^\_\_  
@HWI-EAS443:3:34:758:994#0/1  
AAGGACCAGGAGTGGAGGAAATACCAATCAACAAAAGGCA  
+HWI-EAS443:3:34:758:994#0/1  
`bb`abaa\_Z^Y^^[aaaa```aa`\_aa][`aU^ZTW¥  
@HWI-EAS443:3:34:843:1579#0/1  
GATTGCTTCAAATGAGAATGTGGAAACCATGGACTCCAAT  
+HWI-EAS443:3:34:843:1579#0/1  
¥\_\_\_\_aZ\_ba``\_\_\_\_bba`[]a`\_`¥a^[])`YX[M¥\_\_  
@HWI-EAS443:3:34:851:1041#0/1  
ATCCGACATGCGAACAGAAGTTATAAGAATGATGGAAAGT  
+HWI-EAS443:3:34:851:1041#0/1  
^[^WPT]Y]\_^VQZUJ¥a]aUaaQ^\_aaa[[GGV\_IYP`B  
@HWI-EAS443:3:34:986:1089#0/1  
TCCAGATTGCTTCAAATGAGAATGTGGAAACCATGGACTC  
+HWI-EAS443:3:34:986:1089#0/1  
\_b^W\_bbaVZaZ\_aaa\_bbaba]aS^Q`ab\_ab`¥a¥Z[a  
@HWI-EAS443:3:34:998:402#0/1  
GTTTCATAAGAGGAAAGAAAGTGATTCCAAGAGGAAAGCT  
+HWI-EAS443:3:34:998:402#0/1  
a¥ORRYRT^]0[W^¥T¥]\_TNOUOOFVLV[VNYYSO^BBBB  
@HWI-EAS443:3:35:1410:1686#0/1  
GCTTCCACAAGAGGGTCCAGATTGCTTCAAATGAGAAT  
+HWI-EAS443:3:35:1410:1686#0/1  
[baabbbbaabaa`\_a\_babaaa`abaaaaaaa`aab\_a  
@HWI-EAS443:3:35:1451:315#0/1  
CTTCATTGTTCCCGCTGAATGCTGCCATAACGGTTGCTCT  
+HWI-EAS443:3:35:1451:315#0/1  
abbbbbbbaabab`baabbaaa\_a`^¥aa`\_abaaa]N¥S`  
@HWI-EAS443:3:35:1651:1215#0/1  
AGCGGGAACAATGAAGGACGGACATCCGACATGCGAACAG  
+HWI-EAS443:3:35:1651:1215#0/1  
^¥UWb`\_a`ab\_aYYZ`¥N]a\_\_`\_^aP\_aa`^][¥^[Qa  
@HWI-EAS443:3:35:214:1525#0/1  
TTCCCGCTGAATGCTGCCATAACGGTTGCTCTTCAAAG  
+HWI-EAS443:3:35:214:1525#0/1  
aabb`ba`bbaab\_\_abba`aa`^`^`\_aS]\_``a\_\_R]R  
@HWI-EAS443:3:35:404:114#0/1  
CAGATTGCTTCAAATGAGAATGTGGAAACCATGGACTCCA  
+HWI-EAS443:3:35:404:114#0/1  
]a``¥X`¥^bbbbb]bbbaaa^W\_bXXT\_]\_]\_W[T\_``Y^  
@HWI-EAS443:3:35:40:1024#0/1  
ATCACTTTCTTCTCTTATGAACTTGATACTCTTAAAT  
+HWI-EAS443:3:35:40:1024#0/1  
aab`baa`bab`baaaa`aaa\_W^\_a^]H]aaaabaaa`\_`



@HWI-EAS443:3:35:410:57#0/1  
CACTTTCTTTCTTATGAACTTGATACTCTTAAATCT  
+HWI-EAS443:3:35:410:57#0/1  
a#b`bbbbbbbaabaabbaa\_\_aab`a\_``abaaaaa^`  
@HWI-EAS443:3:35:676:131#0/1  
CAGGGTATTGGAGTCCATGGTTTCCACATTCTCATTGAA  
+HWI-EAS443:3:35:676:131#0/1  
aUab`Wa\_``aaa^`aaa`Yq]\_T^W]a^`\_]a`^[\_  
@HWI-EAS443:3:35:729:757#0/1  
CTCTTGTGGAAAGCTTTCCTCTTGAATCACTTTCTTTCC  
+HWI-EAS443:3:35:729:757#0/1  
`¥aa][HX`Y`aa^XYY\_\_[[`\_]`\_`\_\_ZU¥\_\_^WYP  
@HWI-EAS443:3:35:72:1479#0/1  
TGTCCGCTCTTCATTGTTCCCGCTGAATGCTGCCATAACG  
+HWI-EAS443:3:35:72:1479#0/1  
`]^ba]\_bbaaaZaaa`abbbaba`a`¥`]¥\_\_ZZ^aaV  
@HWI-EAS443:3:35:914:1746#0/1  
CACTGATCTGGCCTGCGGATGCCTTTTGTGATTGGTATT  
+HWI-EAS443:3:35:914:1746#0/1  
^TQZaZ\_\_ZU^`¥Q\_ZH]¥TX[[ZUZ¥FFTZMLRKZRZT¥  
@HWI-EAS443:3:36:102:381#0/1  
GGAGGAAATACCAATCAACAAAAGGCATCCGCAGGCCAGA  
+HWI-EAS443:3:36:102:381#0/1  
`a\_^[\_[\_bbba[]\_ZL^aa``aaaa^ba^]\_]\_a\_Z^S  
@HWI-EAS443:3:36:1220:1843#0/1  
GATTGCTTCAAATGAGAATGTGGAAACCATGGACTCCAAT  
+HWI-EAS443:3:36:1220:1843#0/1  
aa`abaaabba\_ababaa^Zaaaaa\_a`a^``a\_ba``  
@HWI-EAS443:3:36:1243:1711#0/1  
GAAAGCTTCCACAAGAGGGTCCAGATTGCTTCAAATGA  
+HWI-EAS443:3:36:1243:1711#0/1  
ab\_bbbabb`aaaaabaa\_a^]`]aaaa`aa`^aa\_a`\_  
@HWI-EAS443:3:36:1279:680#0/1  
TTCATAAGAGGAAAGAAAGTGATTCCAAGAGGAAAGCTTT  
+HWI-EAS443:3:36:1279:680#0/1  
abbaa`ba^aa\_\_aaa[a`]\_R][`a¥`aa\_\_a[\_aa\_\_  
@HWI-EAS443:3:36:1329:103#0/1  
GTTTCATAAGAGGAAAGAAAGTGATTCCAAGAGGAAAGCT  
+HWI-EAS443:3:36:1329:103#0/1  
aaaaaaba`aaa\_`a\_a\_a]a]``aX`\_¥^^]^\_\_\_Z\_  
@HWI-EAS443:3:36:1338:1101#0/1  
GGAGGAAATACCAATCAACAAAAGGCATCCGCAGGCCAGA  
+HWI-EAS443:3:36:1338:1101#0/1  
aa`aaaaaa`\_`a`\_`\_\_\_\_\_]`\_a`\_¥\_\_V^U^¥``¥¥  
@HWI-EAS443:3:36:1348:1866#0/1  
GGAACAATGAAGGACGGACATCCGACATGCGAACAGAAGT  
+HWI-EAS443:3:36:1348:1866#0/1  
a\_^bba^\_aaa^`]^`[]aa`\_`\_]`aY\_\_a^^^a\_Y\_XZ  
@HWI-EAS443:3:36:1405:245#0/1  
GAAAGAAAGTGATTCCAAGAGGAAAGCTTTCACAAGAGG

+HWI-EAS443:3:36:1405:245#0/1  
aa[[`]V\_a[b[aaaaab`a[ZW`aba^a`aM^W`]a[\_T  
@HWI-EAS443:3:36:1493:580#0/1  
CAACCGTTATGGCAGCATTTCAGCGGAACAATGAAGGACG  
+HWI-EAS443:3:36:1493:580#0/1  
abbabbaaaa\_aabaH[ab¥^aXa`aXXSaaX]¥a`aQ[`  
@HWI-EAS443:3:36:1741:292#0/1  
CTCTTGTTGAAAGCTTTCCTCTTGAATCACTTCTTTCC  
+HWI-EAS443:3:36:1741:292#0/1  
a\_^^¥\_H^`^UZZW]¥]^Z¥`aZ[W\_```XZVWW[PZQ]  
@HWI-EAS443:3:36:1792:364#0/1  
GACCCCTCTTGTTGAAAGCTTTCCTCTTGAATCACTTTC  
+HWI-EAS443:3:36:1792:364#0/1  
abbbbbb`^]aa`\_]a]aaa^]aaa`aa^`\_`\_`a\_\_a  
@HWI-EAS443:3:36:310:252#0/1  
GGATGGCATGCCACTCTGCTGCATTTGAAGATTTAAGAGT  
+HWI-EAS443:3:36:310:252#0/1  
ab``babbaabaaaababaaa`aaaba\_aa¥\_aaaaaaaU  
@HWI-EAS443:3:36:39:1325#0/1  
TAGGCTGCACACTGATCTGGCCTGCGGATGCCTTTTGTG  
+HWI-EAS443:3:36:39:1325#0/1  
aba`baab^`baa`a\_ba]\_`a^W[QY^¥Y```\_\_a`TR]S  
@HWI-EAS443:3:36:39:304#0/1  
GTCCGATGTCCGTCCTTCATTGTTCCCGCTGAATGCTGCC  
+HWI-EAS443:3:36:39:304#0/1  
a^`^`VZ\_X¥\_XL[^[^]Z\_^\_YW¥\_`X\_XZU¥WWWUUBBB  
@HWI-EAS443:3:36:877:257#0/1  
GGTATTTCTCCACTCCTGGTCCTTATGGCCCAGTATCTG  
+HWI-EAS443:3:36:877:257#0/1  
aa`aaaaaaaa\_a``aa\_\_\_Y`\_`\_\_\_T\_Z\_W[ZW¥¥¥XW  
@HWI-EAS443:3:36:926:1709#0/1  
TAAGAGTATCAAGTTTCATAAGAGGAAAGAAAGTGATTCC  
+HWI-EAS443:3:36:926:1709#0/1  
¥^a\_^^`\_\_aa]¥¥b`^aa`^`a^[^b`\_\_U]`W]\_`ZVa  
@HWI-EAS443:3:36:937:1813#0/1  
GATGGCATGCCACTCTGCTGCATTTGAAGATTTAAGAGTA  
+HWI-EAS443:3:36:937:1813#0/1  
^``aa`bb\_``aaaaa]a\_a`a`^¥¥a^bab`aa^`abZ\_  
@HWI-EAS443:3:37:1006:650#0/1  
GAAATACCAATCAACAAAAGGCATCCGCAGGCCAGATCAG  
+HWI-EAS443:3:37:1006:650#0/1  
[KP`^¥\_¥YVRY\_\_YYNXLXPYV[^[[UHKU[ZYPYXZ  
@HWI-EAS443:3:37:1294:393#0/1  
GACCAGGAGTGGAGGAAATACCAATCAACAAAAGGCATCC  
+HWI-EAS443:3:37:1294:393#0/1  
\_Xa`]Z¥Ub^aaTa`¥V^QYPZ\_a\_a`\_\_JHYTMNXMP^Z  
@HWI-EAS443:3:37:1624:1589#0/1  
GACCCCTCTTGTTGAAAGCTTTCCTCTTGAATCACTTTC  
+HWI-EAS443:3:37:1624:1589#0/1  
^[Z\_X[b\_]`XX¥ZNYaa]TYUGX]\_\_a¥IWZ`a\_\_^`ZP

@HWI-EAS443:3:37:164:920#0/1  
CTCTTATGAAACTTGATACTCTTAAATCTTCAAATGCAGC  
+HWI-EAS443:3:37:164:920#0/1  
abbbabaaP]aaaaaaaaaababa`b\_]ba[0[aaa^a  
@HWI-EAS443:3:37:168:1859#0/1  
AGAGCAACCGTTATGGCAGCATTTCAGCGGGAACAATGAAG  
+HWI-EAS443:3:37:168:1859#0/1  
a\_a]`aba`¥^`\_¥[\_aTLTQ[]TOTNVPZ^YHSNNT]U  
@HWI-EAS443:3:37:211:175#0/1  
CATTTCAGCGGGAACAATGAAGGACGGACATCCGACATGCG  
+HWI-EAS443:3:37:211:175#0/1  
ab^Ya]V\_^a`\_K¥^[[`aa^[\_`\_^]KV``]¥][WXaX  
@HWI-EAS443:3:37:535:620#0/1  
GGATGGCATGCCACTCTGCTGCATTTGAAGATTTAAGAGT  
+HWI-EAS443:3:37:535:620#0/1  
]LU]Z\_]Z`\_[ZWaaaa¥N\_^`Xa\_a][PSY`^\_]\_[``P  
@HWI-EAS443:3:37:645:1554#0/1  
ACTCTGCTGCATTTGAAGATTTAAGAGTATCAAGTTTCAT  
+HWI-EAS443:3:37:645:1554#0/1  
aa\_^\_\_X````\_^\_\_\_WZ¥]\_]\_`¥VXGa[GSY¥]\_] ]  
@HWI-EAS443:3:37:712:1785#0/1  
CAGCATTTCAGCGGGAACAATGAAGGACGGACATCCGACAT  
+HWI-EAS443:3:37:712:1785#0/1  
Vba`bb^b`a^aa\_babbaa`abba\_]J`ba]baaab]\_  
@HWI-EAS443:3:37:765:1171#0/1  
TCTCATTGAAGCAATCTGGACCCCTCTTGTGGAAAGCTT  
+HWI-EAS443:3:37:765:1171#0/1  
]bbUUb\_\_Yb¥QWaTWa\_WaU\_bb[]a`]YYaR^W[\_aW¥  
@HWI-EAS443:3:37:841:1871#0/1  
GAAAGTGATTCCAAGAGGAAAGCTTCCACAAGAGGGGTC  
+HWI-EAS443:3:37:841:1871#0/1  
a\_bba]bbabb¥bb`Z\_bbbabaaa\_] [HU]aaa^^`Z\_  
@HWI-EAS443:3:37:972:491#0/1  
TAAGGACCAGGAGTGGAGGAAATACCAATCAACAAAAGGC  
+HWI-EAS443:3:37:972:491#0/1  
abbaabbbabb\_b^b`abaa]`aaaa`\_aTb`aaX`^\_\_  
@HWI-EAS443:3:37:979:882#0/1  
TTCCAGGGTATTGGAGTCCATGGTTTCCACATTCTCATTT  
+HWI-EAS443:3:37:979:882#0/1  
aab`abb`V``aaa`a`aaa`a`Za^\_]ZFS¥\_a`^[^a`  
@HWI-EAS443:3:38:1012:149#0/1  
CCCTCTTGTGGAAAGCTTTCCTCTTGAATCACTTTCTTT  
+HWI-EAS443:3:38:1012:149#0/1  
abaaaba`\_a¥aaaa`aa`^a^aaa`\_`\_U¥Z\_] ^¥^`Z  
@HWI-EAS443:3:38:1184:831#0/1  
ATTTAAGAGTATCAAGTTTCATAAGAGGAAAGAAAGTGAT  
+HWI-EAS443:3:38:1184:831#0/1  
^]abbbbaa^aa\_Z`b`a]baabba]Y\_^]`\_``M\_aZ  
@HWI-EAS443:3:38:1312:1051#0/1  
CTTCATTGTTCCCCTGAATGCTGCCATAACGGTTGCTCT

+HWI-EAS443:3:38:1312:1051#0/1  
abaabaab^`aa`\_aa`^`a`a`\_a`aYU]]U][LTWS  
@HWI-EAS443:3:38:1349:357#0/1  
AAGGACGGACATCCGACATGCGAACAGAAGTTATAAGAAT  
+HWI-EAS443:3:38:1349:357#0/1  
aa\_]Zb]^b`]a]W`\_^a`XaaaXaa^[\_Z\_YaXXaX^V  
@HWI-EAS443:3:38:1408:170#0/1  
GAAGGACGGACATCCGACATGCGAACAGAAGTTATAAGAA  
+HWI-EAS443:3:38:1408:170#0/1  
Z\_b^]\_]`aaXQYWZ\_]`]¥WXaX¥]WWFOUW¥W^]ZZWT  
@HWI-EAS443:3:38:1424:70#0/1  
CAAGTTTCATAAGAGGAAAGAAAGTGATTCCAAGAGGAAA  
+HWI-EAS443:3:38:1424:70#0/1  
aabbbabbbbbbaaaaaabbaabbbbbbb[K¥[aabbb[W  
@HWI-EAS443:3:38:1489:801#0/1  
ATCCGACATGCGAACAGAAGTTATAAGAATGATGGAAAGT  
+HWI-EAS443:3:38:1489:801#0/1  
abba`[aXabXYUUFY^^]`Z¥Y`a^a^\_a^`OZ]LLZ\_]L  
@HWI-EAS443:3:38:1656:1011#0/1  
GAAATACCAATCAACAAAAGGCATCCGCAGGCCAGATCAG  
+HWI-EAS443:3:38:1656:1011#0/1  
a[]^aa]\_ba`\_]`aaa\_aaZTF^a\_]¥^aUULLSWYRS[G  
@HWI-EAS443:3:38:213:588#0/1  
CGCTGCACTGAGAATGTAGGCTGCACACTGATCTGGCCTG  
+HWI-EAS443:3:38:213:588#0/1  
abbbab`bbbaaaaa¥`Ua]^a\_]ZXX`^^ZYRYa[^\_  
@HWI-EAS443:3:38:314:881#0/1  
TTTGCACCTTCCATCATTCTTATAACTTCTGTTCGCATGT  
+HWI-EAS443:3:38:314:881#0/1  
aa`b]a`\_]`a]a`aa`aa`aYYba```\_a\_]¥`]`Y  
@HWI-EAS443:3:38:349:37#0/1  
GAGGAAATACCAATCAACAAAAGGCATCCGCAGGCCAGAT  
+HWI-EAS443:3:38:349:37#0/1  
`N\_a]YZ`ZSZUV[UT¥Z]]TX\_a¥^¥RLUFU^\_XTBBBB  
@HWI-EAS443:3:38:396:2039#0/1  
CGGGAACAATGAAGGACGGACATCCGACATGCGAACAGAA  
+HWI-EAS443:3:38:396:2039#0/1  
`ZRXXab¥aZ¥Y\_GZUa`V^\_a^\_[P[]`\_]QPWR\_\_ZSTV  
@HWI-EAS443:3:38:543:1026#0/1  
GGAGGAAATACCAATCAACAAAAGGCATCCGCAGGCCAGA  
+HWI-EAS443:3:38:543:1026#0/1  
a`a`aa[[]`aa`baaaa`a`aaaa`\_a`b]Y^`X¥`a`\_^  
@HWI-EAS443:3:38:608:1810#0/1  
CGGACATCCGACATGCGAACAGAAGTTATAAGAATGATGG  
+HWI-EAS443:3:38:608:1810#0/1  
aa\_^a\_X]\_V]\_^WU¥UZ\_^^[[]]S^`¥XM]]OUMUX]T  
@HWI-EAS443:3:38:631:25#0/1  
AGTGATTCCAAGAGGAAAGCTTCCACAAGAGGGTCCAG  
+HWI-EAS443:3:38:631:25#0/1  
X[[\_O^\_YZ\_\_\_\_\_^]¥\_W`¥X\_WZU`Z¥QXUVVY\_RWRXT

@HWI-EAS443:3:38:701:1238#0/1  
GTTCCCGCTGAATGCTGCCATAACGGTTGCTCTTTCAAAA  
+HWI-EAS443:3:38:701:1238#0/1  
¥`abbbba]`aaab^``\_]^0^`SV^UNVFY\_ZVS\_[U  
@HWI-EAS443:3:38:79:1257#0/1  
GAGGAAAGAAAGTGATTCCAAGAGGAAAGCTTTCCACAAG  
+HWI-EAS443:3:38:79:1257#0/1  
a``^aabaa[``]a\_``aba[]`\_\_^^^a]\_`\_a\_\_a``Y  
@HWI-EAS443:3:39:1253:642#0/1  
GTCCAGATTGCTTCAAATGAGAATGTGGAAACCATGGACT  
+HWI-EAS443:3:39:1253:642#0/1  
^DP[S]W]P`^[[`VS[¥a^¥\_Y]][^\_WRLVM¥NTNOMM  
@HWI-EAS443:3:39:1350:530#0/1  
CCGTCCTTCATTGTTCCCGCTGAATGCTGCCATAACGGTT  
+HWI-EAS443:3:39:1350:530#0/1  
aabbaabbbbb`bbbabbbbbbb`baaa\_bab\_ba``  
@HWI-EAS443:3:39:1435:694#0/1  
GAAAGAAAGTGATTCCAAGAGGAAAGCTTTCCACAAGAGG  
+HWI-EAS443:3:39:1435:694#0/1  
YYWV[Y\_ZX[]^`WTTa^0\_\_¥\_\_\_]UYRORORT[MU¥YJ  
@HWI-EAS443:3:39:162:220#0/1  
ATCAAGTTTCATAAGAGGAAAGAAAGTGATTCCAAGAGGA  
+HWI-EAS443:3:39:162:220#0/1  
^abb]b\_b`abaa`VZYR``T\_aaXVX]`R\_]`aa\_aaZ^  
@HWI-EAS443:3:39:427:1056#0/1  
GGAGGAAATACCAATCAACAAAAGGCATCCGCAGGCCAGA  
+HWI-EAS443:3:39:427:1056#0/1  
``Vbbbbbb\_bbb]bbbbbaabaabbbba\_aaaa``a`  
@HWI-EAS443:3:39:434:89#0/1  
CAATCAACAAAAGGCATCCGCAGGCCAGATCAGTGTGCAG  
+HWI-EAS443:3:39:434:89#0/1  
abbbaba`abb`bbbaaaZaaaaa\_`a\_¥^VaWaU^QY\_  
@HWI-EAS443:3:39:48:807#0/1  
CAGGGTATTGGAGTCCATGGTTTCCACATTCTCATTTGAA  
+HWI-EAS443:3:39:48:807#0/1  
a^aaa[a````][]\_aa]^``^\_a`aa````^``\_a^¥^\_  
@HWI-EAS443:3:39:556:582#0/1  
TAAGAGGAAAGAAAGTGATTCCAAGAGGAAAGCTTTCCAC  
+HWI-EAS443:3:39:556:582#0/1  
abbabaaa]`aaaaa]aa`aaaa`^^\_a]`a]\_a\_^a^a\_  
@HWI-EAS443:3:39:568:1279#0/1  
TGGCATGCCACTCTGCTGCATTTGAAGATTTAAGAGTATC  
+HWI-EAS443:3:39:568:1279#0/1  
Y¥a\_SSZabb¥T\_US\_a`\_¥Z^ab\_¥`^aa`^\_\_\_\_¥`aR  
@HWI-EAS443:3:39:654:1161#0/1  
GAAAGAAAGTGATTCCAAGAGGAAAGCTTTCCACAAGAGG  
+HWI-EAS443:3:39:654:1161#0/1  
a```\_UNX`\_]`\_\_`a`^¥\_¥WUX\_`]\_]^^Z¥X]]\_Z^Z  
@HWI-EAS443:3:39:659:1680#0/1  
GGTTTCCACATTCTCATTTGAAGCAATCTGGACCCCTCTT

+HWI-EAS443:3:39:659:1680#0/1  
ababbbbbb`bbbabb]abbbbaa^\_\_aaaa`  
@HWI-EAS443:3:39:805:1071#0/1  
AAGAAAGTGATTCCAAGAGGAAAGCTTCCACAAGAGGGG  
+HWI-EAS443:3:39:805:1071#0/1  
aaa`b]¥WaaYP\_`U^Naa\_¥Y¥a\_a`aaaa]a\_[P]^U^  
@HWI-EAS443:3:39:828:1955#0/1  
CAACTGTCATACTCCTCTGCATTGTCTCCGAAGAAATAAG  
+HWI-EAS443:3:39:828:1955#0/1  
ab`baaUab]a¥V¥aabaa\_\_\_\_\_aW`\_baaaZ^ZT^Y`R  
@HWI-EAS443:3:39:899:1578#0/1  
AAGAAAGTGATTCCAAGAGGAAAGCTTCCACAAGAGGGG  
+HWI-EAS443:3:39:899:1578#0/1  
abb\_ba¥0\_aab`^\_W`]aa]a]aa\_ZZ`aT\_`T[[][X  
@HWI-EAS443:3:3:1024:168#0/1  
GAATGATGGAAAGTGCAAAGCCAGAAGATTTGTCCTTCCA  
+HWI-EAS443:3:3:1024:168#0/1  
aXX`a\_\_aa[UZ\_Sa^W\_ZVTZW\_U¥VWWUWXWSVVXWVB  
@HWI-EAS443:3:3:1024:782#0/1  
GAAAGTGATTCCAAGAGGAAAGCTTCCACAAGAGGGGTC  
+HWI-EAS443:3:3:1024:782#0/1  
M`a\_bZX\_b¥K^[^U^Vb\_[OHSSa`PUa¥a\_a\_a\_[aMF  
@HWI-EAS443:3:3:1150:1201#0/1  
ATTCAGCGGGAACAATGAAGGACGGACATCCGACATGCGA  
+HWI-EAS443:3:3:1150:1201#0/1  
a\_X¥baaaaa`aXUF¥]W\_aUa]bWfY]MRTN^J[OYBB  
@HWI-EAS443:3:3:1238:262#0/1  
TTCATAAGAGGAAAGAAAGTGATTCCAAGAGGAAAGCTTT  
+HWI-EAS443:3:3:1238:262#0/1  
aa`aaaa\_aa\_a\_a]\_`a^a^`\_V^\_\_X\_\_¥]^^\_X]^^  
@HWI-EAS443:3:3:1529:434#0/1  
AGTGATTCCAAGAGGAAAGCTTCCACAAGAGGGGTCCAG  
+HWI-EAS443:3:3:1529:434#0/1  
ab^aaaaabaa`aZa`a¥¥aaa]]`\_`\_]XZUVVX[Z  
@HWI-EAS443:3:3:1611:907#0/1  
AGGCTGCACACTGATCTGGCCTGCGGATGCCTTTTGTGA  
+HWI-EAS443:3:3:1611:907#0/1  
^U\_W`R[`aa]abaaaaabY`aaZaa\_\_YY]baa^^\_NP  
@HWI-EAS443:3:3:1652:99#0/1  
CAGGAGTGGAGGAAATACCAATCAACAAAAGGCATCCGCA  
+HWI-EAS443:3:3:1652:99#0/1  
\_`bbaaaa\_aabbaba`bbb]b\_`aba[aUa\_YJ[XB  
@HWI-EAS443:3:3:1748:2021#0/1  
GGAGTGGAGGAAATACCAATCAACAAAAGGCATCCGCAAG  
+HWI-EAS443:3:3:1748:2021#0/1  
abXbSabaaa^Ua`VZ][]^\_G[\_^X[SSNRPN¥BBBB  
@HWI-EAS443:3:3:1785:1461#0/1  
ATCACTTTCTTCTTCTTATGAACTTGATACTCTTAAAT  
+HWI-EAS443:3:3:1785:1461#0/1  
ab\_aabbaabaa`^a¥`baa`aa\_aaa\_a`]a`a`

@HWI-EAS443:3:3:239:146#0/1  
TTCTGGCTTTGCACTTTCCATCATTCTTATAACTTCTGTT  
+HWI-EAS443:3:3:239:146#0/1  
`ba¥Q]\_`a\_W]YK\_^^aaa\_W]aP`¥Y^^a\_[a¥X^^U`  
@HWI-EAS443:3:3:340:483#0/1  
CTTGTGGAAAGCTTTCCTCTTGAATCACTTTCTTTCCTC  
+HWI-EAS443:3:3:340:483#0/1  
aaaaaaaaaX]aa`^\_a\_\_\_a\_\_^]^^`¥\_S\_Y[U\_]W  
@HWI-EAS443:3:3:366:1632#0/1  
CTCTTGTGGAAAGCTTTCCTCTTGAATCACTTTCTTTC  
+HWI-EAS443:3:3:366:1632#0/1  
Xa\_bb`] `aabZb¥b¥`a`baaab\_bbaababaaW`b`\_\_  
@HWI-EAS443:3:3:512:656#0/1  
GAACAGAAGTTATAAGAATGATGGAAAGTGCAAAGCCAGA  
+HWI-EAS443:3:3:512:656#0/1  
a``\_\_a\_\_b\_aaa\_`a^`aa\_`a`\_a\_`[a\_a^`[¥[\_[  
@HWI-EAS443:3:3:522:1350#0/1  
TCCAGGGTATTGGAGTCCATGGTTTCCACATTCTCATTG  
+HWI-EAS443:3:3:522:1350#0/1  
`bb```a\_abba^]\_`\_aa\_ba]aaZ¥b0\_\_\_\_\_X\_^a\_\_  
@HWI-EAS443:3:3:632:1061#0/1  
GTTCGCATGTCCGATGTCCGTCCTTCATTGTTCCCGCTGA  
+HWI-EAS443:3:3:632:1061#0/1  
aaa`a\_aaaaaa\_`aZ¥\_`¥]\_`a]^`a\_¥^W]S\_V¥`¥  
@HWI-EAS443:3:3:648:1216#0/1  
GAAGATTTAAGAGTATCAAGTTTCATAAGAGGAAAGAAAG  
+HWI-EAS443:3:3:648:1216#0/1  
``¥¥`^^`ba`a`^a\_aaaa`aa\_`a`^a\_\_a`a¥aa\_`a  
@HWI-EAS443:3:3:833:227#0/1  
CAACTGTCATACTCCTCTGCATTGTCTCCGAAGAAATAAG  
+HWI-EAS443:3:3:833:227#0/1  
¥ba¥ab`S`a\_`¥b\_bRbb\_abb\_a\_aaba^`bb\_`abaB  
@HWI-EAS443:3:40:1040:1273#0/1  
AAGAGGAAAGAAAGTGATTCCAAGAGGAAAGCTTCCACA  
+HWI-EAS443:3:40:1040:1273#0/1  
`aaaabaa`\_`¥J\_¥\_a\_`aaaa`a^^`V¥````^\_``^a\_  
@HWI-EAS443:3:40:106:477#0/1  
GATGCCTTTTGTGATTGGTATTTCCCTCCACTCCTGGTCC  
+HWI-EAS443:3:40:106:477#0/1  
aaa\_abaaaba\_aa`a`a`Yaaaa\_Xa\_]`\_a\_]ZUU\_`  
@HWI-EAS443:3:40:1082:1366#0/1  
TGCACACTGATCTGGCCTGCGGATGCCTTTTGTGATTGG  
+HWI-EAS443:3:40:1082:1366#0/1  
T\_\_\_]ZY^^b¥ZZa^`^X\_]\_`XZ^Q^ROZZa]¥ZVU\_`]  
@HWI-EAS443:3:40:1168:369#0/1  
AGAGCAACCGTTATGGCAGCATTAGCGGGAACAATGAAG  
+HWI-EAS443:3:40:1168:369#0/1  
aa`\_`a`Z\_bU`X^``Qb]QMOYIRL]`[¥UVLGUDUY¥V  
@HWI-EAS443:3:40:1270:325#0/1  
CTCTTGTGGAAAGCTTTCCTCTTGAATCACTTTCTTTC

+HWI-EAS443:3:40:1270:325#0/1  
U`a`a``bbbb`bbbb`abbbbbbb^[bbaX\_baaaa]a  
@HWI-EAS443:3:40:1272:1660#0/1  
AGTGATTCCAAGAGGAAAGCTTTCCACAAGAGGGTCCAG  
+HWI-EAS443:3:40:1272:1660#0/1  
ab\_ababaaba`a\_a\_aa`aaaa\_\_a\_S¥`\_\_\_a]a]a\_  
@HWI-EAS443:3:40:1395:129#0/1  
CGCTGCACTGAGAATGTAGGCTGCACACTGATCTGGCCTG  
+HWI-EAS443:3:40:1395:129#0/1  
abbbbbbbbababaabb`bba`abX\_YQ`^aY`[]a^¥\_Ua  
@HWI-EAS443:3:40:1437:103#0/1  
GACCAGGAGTGGAGGAAATACCAATCAACAAAAGGCATCC  
+HWI-EAS443:3:40:1437:103#0/1  
a¥\_\_aa\_PZN^a[a\_S[\_^RZT`YPKYZQ[^RZTSR[TKV  
@HWI-EAS443:3:40:1533:417#0/1  
ATTTCTCCACTCCTGGTCCTTATGGCCCAGTATCTGCTT  
+HWI-EAS443:3:40:1533:417#0/1  
aaba\_a^a`a\_a\_\_a`\_[¥`a\_\_\_[Za\_a^V\_[\_¥]SY^  
@HWI-EAS443:3:40:1561:1743#0/1  
ATCTGGACCCCTCTTGTGGAAAGCTTTCCTCTTGAATCA  
+HWI-EAS443:3:40:1561:1743#0/1  
`Z\_bb\_XZ¥¥^aX\_\_]¥Z`abaaaa`b`Uaa`]\_aaa`  
@HWI-EAS443:3:40:1662:574#0/1  
GAGGAAAGAAAGTATTCCAAGAGGAAAGCTTTCCACAAG  
+HWI-EAS443:3:40:1662:574#0/1  
a\_a\_\_aaa^a``Ua\_¥¥\_UY^a\_]G[]\_Y]^^\_\_^^^]  
@HWI-EAS443:3:40:267:130#0/1  
GGACCCCTCTTGTGGAAAGCTTTCCTCTTGAATCACTTT  
+HWI-EAS443:3:40:267:130#0/1  
a\_Za``a[SS\_ZT\_X¥SV¥\_S^]ZX^ZOZXXUXSZNTTYU  
@HWI-EAS443:3:40:270:1853#0/1  
CTGGCCTGCGGATGCCTTTTGTGATTGGTATTTCTCCA  
+HWI-EAS443:3:40:270:1853#0/1  
aaaabbaab```\_aaaa`a^¥```\_N\_¥¥\_\_a¥adWaa]  
@HWI-EAS443:3:40:646:644#0/1  
GAAAGTATTCCAAGAGGAAAGCTTTCCACAAGAGGGGTC  
+HWI-EAS443:3:40:646:644#0/1  
``aaaWa^\_a\_aa\_T\_\_\_`a`\_`\_`\_]`P¥]\_^SYZ]RKT  
@HWI-EAS443:3:40:697:762#0/1  
CTGCGGATGCCTTTTGTGATTGGTATTTCTCCACTCCT  
+HWI-EAS443:3:40:697:762#0/1  
a[`b`^[a\_b^\_Za`Z`]abaaZaV\_\_aZxa[0^Z¥\_Y  
@HWI-EAS443:3:40:857:531#0/1  
AAGAAAGTATTCCAAGAGGAAAGCTTTCCACAAGAGGGG  
+HWI-EAS443:3:40:857:531#0/1  
aabaa[b]baa`aaaa^aa`aa`\_\_GZaa`\_`[\_^\_]`^  
@HWI-EAS443:3:40:871:897#0/1  
TTGCTTCAAATGAGAATGTGGAAACCATGGACTCCAATAC  
+HWI-EAS443:3:40:871:897#0/1  
XV^^]\_aYU`USH^aaa^Va]¥a^XFLVZXOKQY^]TNXW



@HWI-EAS443:3:40:887:553#0/1  
ATTGCTTCAAATGAGAATGTGGAAACCATGGACTCCAATA  
+HWI-EAS443:3:40:887:553#0/1  
aa`aaa``aaa`aaa`aa]a`\_\_^^`aZ\_]\_a^\_^S^^\_  
@HWI-EAS443:3:42:101:1347#0/1  
CATCCGACATGCGAACAGAAGTTATAAGAATGATGGAAAG  
+HWI-EAS443:3:42:101:1347#0/1  
ababb^Va¥aVaaW[aQ\_[\_a]VR]LO^TN¥aX`aZ^]]\_  
@HWI-EAS443:3:42:1090:608#0/1  
GGCATGCCACTCTGCTGCATTTGAAGATTTAAGAGTATCA  
+HWI-EAS443:3:42:1090:608#0/1  
a¥aaabaaa]`aaaa`a[^aaaa\_`a¥`aa\_`aaaZa\_] ^  
@HWI-EAS443:3:42:113:1890#0/1  
CAACTGTCATACTCCTCTGCATTGTCTCCGAAGAAATAAG  
+HWI-EAS443:3:42:113:1890#0/1  
a¥`aS[^bb\_abab``abababb]XSaa\_]\_]\_^`\_`b`]  
@HWI-EAS443:3:42:1198:2030#0/1  
AGTGATTCCAAGAGGAAAGCTTTCCACAAGAGGGGTCCAG  
+HWI-EAS443:3:42:1198:2030#0/1  
a`\_`Y``T¥]^W[`aXa^^\_a¥]^V[`a\_\_\_^[Z¥XZ^\_\_  
@HWI-EAS443:3:42:1303:658#0/1  
GGAGGAAATACCAATCAACAAAAGGCATCCGCAGGCCAGA  
+HWI-EAS443:3:42:1303:658#0/1  
`a\_bbabbabaabbbabaaaaaaa`abaaaaaaa^aaa  
@HWI-EAS443:3:42:1314:592#0/1  
CATTCTTATAACTTCTGTTTCGCATGTCCGATGTCCGTCCT  
+HWI-EAS443:3:42:1314:592#0/1  
abbbabbabbbabbabb`bab`abbaaab`aa\_\_`b[a`\_  
@HWI-EAS443:3:42:1394:506#0/1  
CGCATGTCGGATGTCCGTCCTTCATTGTTCCCGCTGAATG  
+HWI-EAS443:3:42:1394:506#0/1  
`bbbbbbabbbaba[aabaa`bba`aaba`a^¥a\_aa^¥`a  
@HWI-EAS443:3:42:1458:1218#0/1  
TACCAATCAACAAAAGGCATCCGCAGGCCAGATCAGTGTG  
+HWI-EAS443:3:42:1458:1218#0/1  
`a`[YS¥`\_`[]XS]YOS¥\_¥YYZ^]^^`VYY[UTXRXRX  
@HWI-EAS443:3:42:1508:1840#0/1  
GATTGCTTCAAATGAGAATGTGGAAACCATGGACTCCAAT  
+HWI-EAS443:3:42:1508:1840#0/1  
^`bbaZaaabbbbaaaabaabaab`aaa``]aYa\_YYUaa\_  
@HWI-EAS443:3:42:154:718#0/1  
TGGCATGCCACTCTGCTGCATTTGAAGATTTAAGAGTATC  
+HWI-EAS443:3:42:154:718#0/1  
\_bbbbbbbaabbaaaa`aaaabbaabbaaaabba]ba`  
@HWI-EAS443:3:42:1660:1586#0/1  
GCCTGCGGATGCCTTTTGTGATTGGTATTTCCCTCCACTC  
+HWI-EAS443:3:42:1660:1586#0/1  
]b`\_ba]X\_]RX\_`bbbbaa`^^a\_XV]aaa¥¥\_¥¥]aaZ  
@HWI-EAS443:3:42:1715:631#0/1  
GATGTCCTCCTTCATTGTTCCCGCTGAATGCTGCCATAA

+HWI-EAS443:3:42:1715:631#0/1  
`[¥`¥abbZaabbabbbbaa`a`a\_aaaaaaZ[P]\_\_```  
@HWI-EAS443:3:42:206:359#0/1  
CTCTTAAATCTTCAAATGCAGCAGAGTGGCATGCCATCCA  
+HWI-EAS443:3:42:206:359#0/1  
a`bbbb`babbab^ab^a\_abaa`\_aaaaa^]aaaaZ  
@HWI-EAS443:3:42:339:404#0/1  
CAGGGTATTGGAGTCCATGGTTTCCACATTCTCATTTGAA  
+HWI-EAS443:3:42:339:404#0/1  
a`\_ZXYba\_U\_ZVY^`baa`^a\_[L\_]`[^]¥a[V\_T[  
@HWI-EAS443:3:42:374:386#0/1  
ATGGTTTCCACATTCTCATTTGAAGCAATCTGGACCCCTC  
+HWI-EAS443:3:42:374:386#0/1  
a[aa\_aaaabXQ`aaaaaaaa`\_`\_T\_\_\_\_^`^`\_`\_¥  
@HWI-EAS443:3:42:392:91#0/1  
GGACGGACATCCGACATGCGAACAGAAGTTATAAGAATGA  
+HWI-EAS443:3:42:392:91#0/1  
aa\_\_aa``aaaaa\_\_\_`a\_\_]^`^a]YaY`^`\_¥\_UZ^\_]`  
@HWI-EAS443:3:42:499:373#0/1  
CGCTGAATGCTGCCATAACGGTTGCTCTTTCAAAGGGAG  
+HWI-EAS443:3:42:499:373#0/1  
aaaab\_S]a[aXV^^`baUab\_aaKT\_QYMVZ\_ZX^X[¥W  
@HWI-EAS443:3:42:588:1125#0/1  
AGGAAAGAAAGTGATTCCAAGAGGAAAGCTTTCCACAAGA  
+HWI-EAS443:3:42:588:1125#0/1  
aa`a]^a`aaaXa\_a\_\_aa`\_`\_`\_^Z`a`^`^`^`PZX  
@HWI-EAS443:3:42:75:895#0/1  
GCAGGCCAGATCAGTGTGCAGCCTACATTCTCAGTGCAGC  
+HWI-EAS443:3:42:75:895#0/1  
abbbbbbbYb`bbab^a`baaaaaa\_Uaaaba[``a^Z`b  
@HWI-EAS443:3:42:933:987#0/1  
GAACAATGAAGGACGGACATCCGACATGCGAACAGAAGTT  
+HWI-EAS443:3:42:933:987#0/1  
^`U`^`^aa]VaX^a]^U`¥U[a]P^]a`\_S\_X]\_aZ[^\_  
@HWI-EAS443:3:43:1011:639#0/1  
GATTGCTTCAAATGAGAATGTGGAAACCATGGACTCCAAT  
+HWI-EAS443:3:43:1011:639#0/1  
a]aS][Q^aab`\_`aa\_\_`aSY\_]\_`^^Waa\_]^[^`Y^TZ  
@HWI-EAS443:3:43:102:1816#0/1  
GAGGAAAGAAAGTGATTCCAAGAGGAAAGCTTTCCACAAG  
+HWI-EAS443:3:43:102:1816#0/1  
]a```b\_V\_a`````abb`baba^`¥^\_]bbaababaa^]  
@HWI-EAS443:3:43:1108:894#0/1  
GAGGAAAGAAAGTGATTCCAAGAGGAAAGCTTTCCACAAG  
+HWI-EAS443:3:43:1108:894#0/1  
a]Z\_\_\_\_a^a]aRa^`][\_]\_\_W`\_]\_[^]`R^UVZ[YX]W^  
@HWI-EAS443:3:43:1225:1435#0/1  
GTCCGTCCTTCAATTGTTCCCGCTGAATGCTGCCATAACGG  
+HWI-EAS443:3:43:1225:1435#0/1  
`a`a`Z``aabaaba```aa\_\_aaaa[``[aZ^aa\_]Ya`

@HWI-EAS443:3:43:1267:1098#0/1  
CGCTGCACTGAGAATGTAGGCTGCACACTGATCTGGCCTG  
+HWI-EAS443:3:43:1267:1098#0/1  
a`a^\_^`^bbbbaaabab````bZ]a`Xab``¥a``]Vaa  
@HWI-EAS443:3:43:1425:1691#0/1  
GGTATTTCTCCACTCCTGGTCCTTATGGCCCAGTATCTG  
+HWI-EAS443:3:43:1425:1691#0/1  
aaVaaabbaaa\_aaa\_a][[W¥`\_`[\_V^V^Z\_W\_\_Y¥¥  
@HWI-EAS443:3:43:262:867#0/1  
GGAAATACCAATCAACAAAAGGCATCCGCAGGCCAGATCA  
+HWI-EAS443:3:43:262:867#0/1  
aaababaaabaa\_aaaaaX`aa`aaa]\_`a]^`a`\_\_  
@HWI-EAS443:3:43:450:1030#0/1  
AGGAAATACCAATCAACAAAAGGCATCCGCAGGCCAGATC  
+HWI-EAS443:3:43:450:1030#0/1  
Z¥b\_Q\_¥¥TH^`^Z`R^abaa]SZ[]^YUJV\_`\_Z\_]S^H  
@HWI-EAS443:3:43:501:900#0/1  
GAAAGTGATTCCAAGAGGAAAGCTTTCCACAAGAGGGGTC  
+HWI-EAS443:3:43:501:900#0/1  
a¥aaaaabYaaaaa\_a\_a`a\_\_aaa`\_`a^^a`\_^]WOW  
@HWI-EAS443:3:43:516:1831#0/1  
GGAGTGGAGGAAATACCAATCAACAAAAGGCATCCGCAGG  
+HWI-EAS443:3:43:516:1831#0/1  
`bZaN\_^\_aa^baaa`\_aa\_\_a]T`\_]¥]UZ¥¥Z¥¥\_¥¥¥  
@HWI-EAS443:3:43:529:228#0/1  
CCGCAGGCCAGATCAGTGTGCAGCCTACATTCTCAGTGCA  
+HWI-EAS443:3:43:529:228#0/1  
aaa^^`ba`^b^]`a`U]^`¥`a``a¥\_Y\_\_\_\_`\_¥\_Q\_Z^  
@HWI-EAS443:3:43:557:982#0/1  
TGATTCCAAGAGGAAAGCTTTCCACAAGAGGGGTCCAGAT  
+HWI-EAS443:3:43:557:982#0/1  
aa\_a\_aaa`bb^`b`aaaa`a\_aaaa^a`a`Z¥]\_¥`a`]  
@HWI-EAS443:3:43:668:698#0/1  
ATTCCAAGAGGAAAGCTTTCCACAAGAGGGGTCCAGATTG  
+HWI-EAS443:3:43:668:698#0/1  
¥]aa¥Q¥`\_ZX\_bb`baaa[baaaa^baaa¥]`^b^Z\_\_  
@HWI-EAS443:3:43:997:935#0/1  
GAGGAAAGCTTTCCACAAGAGGGGTCCAGATTGCTTCAAA  
+HWI-EAS443:3:43:997:935#0/1  
UQa\_\_b`\_`a\_a`bbbaabaXaab\_a[\_¥Z`HHYbXaa^Y  
@HWI-EAS443:3:44:1070:617#0/1  
GAAAGAAAGTGATTCCAAGAGGAAAGCTTTCCACAAGAGG  
+HWI-EAS443:3:44:1070:617#0/1  
a^\_`b`aaa`a\_aaaa`\_aa`\_`a\_a\_aaa\_a`\_a`````\_  
@HWI-EAS443:3:44:1129:1494#0/1  
ATGGCATGCCACTCTGCTGCATTTGAAGATTTAAGAGTAT  
+HWI-EAS443:3:44:1129:1494#0/1  
aaaaabaabaaa`aa]aa\_`aaa`\_`aaaaba`aaa]aa  
@HWI-EAS443:3:44:1166:992#0/1  
CGGGAACAATGAAGGACGGACATCCGACATGCGAACAGAA



@HWI-EAS443:3:45:1356:1646#0/1  
AGGAAAGAAAGTGATTCCAAGAGGAAAGCTTCCACAAGA  
+HWI-EAS443:3:45:1356:1646#0/1  
a^Waa^`aaa¥\_OX]`a`a`aaa\_`]]`aa\_aa`^`a^  
@HWI-EAS443:3:45:1386:334#0/1  
CTGATCTGGCCTGCGGATGCCTTTTGTGATTGGTATTTC  
+HWI-EAS443:3:45:1386:334#0/1  
abbbbbbbbaaab`bb`ab]abbbbaabb\_bbab`^aba^  
@HWI-EAS443:3:45:1698:730#0/1  
CCGCTGAATGCTGCCATAACGGTTGCTCTTTCAAAAGGGA  
+HWI-EAS443:3:45:1698:730#0/1  
aaa`YbR^SaV[`¥¥¥X[\_\_\_aaZWYQVU\_\_\_]OOS^Y¥^]V  
@HWI-EAS443:3:45:1735:735#0/1  
CAGATTGCTTCAAATGAGAATGTGGAAACCATGGACTCCA  
+HWI-EAS443:3:45:1735:735#0/1  
abaababaaaaabaaba^aaab\_aa`a`a`aa`\_\_\_\_`\_  
@HWI-EAS443:3:45:270:425#0/1  
ATCAACAAAAGGCATCCGCAGCCAGATCAGTGTGCAGCC  
+HWI-EAS443:3:45:270:425#0/1  
W^a]bT`aVWVa[SWV\_a`ZWT[\_¥Z`¥TM]FZYLRV^  
@HWI-EAS443:3:45:409:391#0/1  
CTTTGCACTTCCATCATTCTTATAACTTCTGTTCGCATG  
+HWI-EAS443:3:45:409:391#0/1  
abbbbbbbabbaabbaabbabbbbaa\_ababbabab`aab  
@HWI-EAS443:3:45:563:999#0/1  
GAGGAAAGAAAGTGATTCCAAGAGGAAAGCTTCCACAAG  
+HWI-EAS443:3:45:563:999#0/1  
`abaabbb¥]\_b\_aabaabba`b`aabb`aa`^^¥`\_aa  
@HWI-EAS443:3:45:838:1206#0/1  
GATTGCTTCAAATGAGAATGTGGAAACCATGGACTCCAAT  
+HWI-EAS443:3:45:838:1206#0/1  
]aa]aV¥^`]]]a¥]Q\_\_^aVZW]^¥Y]¥aYWXUXSZa\_W  
@HWI-EAS443:3:45:86:710#0/1  
GACCCCTCTTGTGGAAAGCTTTCCTCTTGAATCACTTTC  
+HWI-EAS443:3:45:86:710#0/1  
abaaaabaaba`aaaaa`aaa\_a`aaa`T`\_aaaa  
@HWI-EAS443:3:46:1005:895#0/1  
CGCATGTCGGATGTCCGTCCTTATTGTTCCCGCTGAATG  
+HWI-EAS443:3:46:1005:895#0/1  
Zaa\_aaaaa`a\_W\_\_\_¥\_aba\_\_`a`^aa`\_]\_a`[\_^  
@HWI-EAS443:3:46:1013:1130#0/1  
CTTGTGGAAAGCTTTCCTCTTGAATCACTTTCCTCCTC  
+HWI-EAS443:3:46:1013:1130#0/1  
aaabbbbbbabbbbabbbbabbb`a`bababbaabaaaaa  
@HWI-EAS443:3:46:1081:595#0/1  
ACCAGGAGTGGAGGAAATACCAATCAACAAAAGGCATCCG  
+HWI-EAS443:3:46:1081:595#0/1  
]`a\_aa`b\_bbaa\_]\_aa^]\_^\_a```a]¥\_``]`¥]`  
@HWI-EAS443:3:46:1108:423#0/1  
CCCCTGAATGCTGCCATAACGGTTGCTCTTTCAAAAGG

+HWI-EAS443:3:46:1108:423#0/1  
aabba][\_\_^Zb\_aa\_]\_`\_aa`Y`aV¥¥]\_aTKXSUU\_a  
@HWI-EAS443:3:46:127:1752#0/1  
GTTCGCATGTCCGATGTCCGTCCTTCATTGTTCCCGCTGA  
+HWI-EAS443:3:46:127:1752#0/1  
a``\_^]`a]]`\_a¥YXWYWQ¥\_[`SVV]¥RVZXV\_ZSVXX  
@HWI-EAS443:3:46:1306:719#0/1  
AAGTTATAAGAATGATGGAAAGTGCAAAGCCAGAAGATTT  
+HWI-EAS443:3:46:1306:719#0/1  
Z¥¥\_a]¥U]`Yaabab¥`\_aaa\_`^]`U\_]``]U\_``a[  
@HWI-EAS443:3:46:1333:1006#0/1  
CATCATTCTTATAACTTCTGTTCCGATGTCCGATGTCCGT  
+HWI-EAS443:3:46:1333:1006#0/1  
a`ab`baabbabaa\_bbaab\_aaa\_Ua`\_aaa^]a][XFP  
@HWI-EAS443:3:46:1429:1053#0/1  
CGTTATGGCAGCATTCCAGCGGAACAATGAAGGACGGACA  
+HWI-EAS443:3:46:1429:1053#0/1  
ababbbabaabJ`a\_¥ZXyaba^ZH]aGT]\_T\_¥¥`aN\_\_  
@HWI-EAS443:3:46:1497:680#0/1  
GAAAGTGATTCCAAGAGGAAAGCTTTCCACAAGAGGGGTC  
+HWI-EAS443:3:46:1497:680#0/1  
aWX``R`[^]`Y¥]``\_¥\_]\_V\_]WWW^ZZWZ^]]XYR  
@HWI-EAS443:3:46:1503:26#0/1  
CGCTGCACTGAGAATGTAGGCTGCACACTGATCTGGCCTG  
+HWI-EAS443:3:46:1503:26#0/1  
ababbabbabbaabbbabaabb\_a\_^a`a[a\_bba¥¥\_\_  
@HWI-EAS443:3:46:1725:81#0/1  
CTTTCCACAAGAGGGTCCAGATTGCTTCAAATGAGAATG  
+HWI-EAS443:3:46:1725:81#0/1  
[bb]b¥WZ¥PYJ`b`aZ[`a`Ya\_a`aa`ZL^UaVaa[^a  
@HWI-EAS443:3:46:330:1478#0/1  
CCAGGGTATTGGAGTCCATGGTTTCCACATTCTCATTGA  
+HWI-EAS443:3:46:330:1478#0/1  
abab\_\_V\_a]]\_^]R\_aaaaa\_aa¥^Z\_\_aaaa`a``a\_`  
@HWI-EAS443:3:46:345:960#0/1  
GGTCCAGATTGCTTCAAATGAGAATGTGGAAACCATGGAC  
+HWI-EAS443:3:46:345:960#0/1  
`\_\_\_a^]a\_aabaa`\_aaZa`\_a\_aa^a\_]^^^¥a``^^  
@HWI-EAS443:3:46:654:352#0/1  
TTATAACTTCTGTTCCGATGTCCGATGTCCGTCCTTCATT  
+HWI-EAS443:3:46:654:352#0/1  
ZXJ¥Ubb`\_ZV\_¥b^`^baa\_a`aS\_a\_XX`\_¥Y]\_`[]  
@HWI-EAS443:3:46:756:939#0/1  
GCTTTCCACAAGAGGGTCCAGATTGCTTCAAATGAGAAT  
+HWI-EAS443:3:46:756:939#0/1  
aab[``\_Y^R¥`a\_Wa0`a\_a\_]`\_]a\_\_`U]a\_a`\_¥  
@HWI-EAS443:3:46:791:919#0/1  
TGATTCCAAGAGGAAAGCTTTCCACAAGAGGGTCCAGAT  
+HWI-EAS443:3:46:791:919#0/1  
aaaa`aa`aaa```\_aa\_aaaa``]\_^`\_]\_^X^^^`^]

@HWI-EAS443:3:46:929:1678#0/1  
AAGAAAGTGATTCCAAGAGGAAAGCTTCCACAAGAGGGG  
+HWI-EAS443:3:46:929:1678#0/1  
abba\_abRa^`a`aaa`b^aaba\_`\_\_^\_a\_a\_\_\_^W^V  
@HWI-EAS443:3:46:941:1603#0/1  
AGGAAATACCAATCAACAAAAGGCATCCGCAGGCCAGATC  
+HWI-EAS443:3:46:941:1603#0/1  
S¥)`\_\_W\_abb]Y]WYa`\_`WTO[[SZ]¥`SV[\_¥Z[N  
@HWI-EAS443:3:46:973:474#0/1  
GCTTTGCACTTTCATCATTCTTATAACTTCTGTTCCGCAT  
+HWI-EAS443:3:46:973:474#0/1  
a`a``aaa]aaa`\_\_a¥\_aa\_`aa``^aa^aa^a^a]`a  
@HWI-EAS443:3:47:1034:1982#0/1  
GAAGGACGGACATCCGACATGCGAACAGAAGTTATAAGAA  
+HWI-EAS443:3:47:1034:1982#0/1  
aa`^WU^`¥^`a`¥^a`aa][Z]0[V[a^^\_RS^^[\_^U]  
@HWI-EAS443:3:47:1056:1638#0/1  
ATGGCATGCCACTCTGCTGCATTTGAAGATTTAAGAGTAT  
+HWI-EAS443:3:47:1056:1638#0/1  
aabaaa`ba\_\_¥\_]\_\_aaSXaa\_aZ^`^]\_`\_\_`Z^^  
@HWI-EAS443:3:47:1134:1442#0/1  
AGCAGATACTGGGCCATAAGGACCAGGAGTGGAGGAAATA  
+HWI-EAS443:3:47:1134:1442#0/1  
a\_\_Waaba`b`Uabaaaa\_aa]aa`bb]a\_a[aVaUa]\_a  
@HWI-EAS443:3:47:1206:1029#0/1  
AGCAACCGTTATGGCAGCATTCCAGCGGAACAATGAAGGA  
+HWI-EAS443:3:47:1206:1029#0/1  
aaaaaa`b`aaaa\_a]JTU^YY[R]^`[JUGY^PXQ¥S]B  
@HWI-EAS443:3:47:1235:816#0/1  
GAAGGACGGACATCCGACATGCGAACAGAAGTTATAAGAA  
+HWI-EAS443:3:47:1235:816#0/1  
\_WZ``\_\_b``¥VW``\_X¥X^X`Z]]^Y]^Y[VVWX^]Y  
@HWI-EAS443:3:47:1269:1096#0/1  
GTCCAGATTGCTTCAAATGAGAATGTGGAAACCATGGACT  
+HWI-EAS443:3:47:1269:1096#0/1  
aaa`ab``]^`\_aa]aaa\_a``a\_\_aX``^^]UZ^]`[PX¥  
@HWI-EAS443:3:47:1459:1439#0/1  
AAGGACCAGGAGTGGAGGAAATACCAATCAACAAAAGGCA  
+HWI-EAS443:3:47:1459:1439#0/1  
aaaaaba`ba`b\_bb\_aa`aaaa[Va^`[\_ZYa\_\_[ZZNY  
@HWI-EAS443:3:47:1601:587#0/1  
CTTTCTTCTCTTATGAAACTTGATACTCTTAAATCTTC  
+HWI-EAS443:3:47:1601:587#0/1  
abbbabbbb^babbabbaaaabbbaaa`babbbababa\_  
@HWI-EAS443:3:47:1766:350#0/1  
GTTCCAGGGTATTGGAGTCCATGGTTTCCACATTCTCATT  
+HWI-EAS443:3:47:1766:350#0/1  
a\_^a^[aaaV\_\_Z\_^][ZV[¥\_]Y^¥YRV[Y\_^U¥WX\_¥  
@HWI-EAS443:3:47:247:1282#0/1  
GTCGGATGTCCTTCATTGTTCCCCTGAATGCTGCC

+HWI-EAS443:3:47:247:1282#0/1  
^abba[ ` \_RHPX¥` ]\_ ^ ` \_U]\_ ¥ [REVZV` ¥ ` V\_ ¥ZL  
@HWI-EAS443:3:47:251:872#0/1  
CAATGAAGGACGGACATCCGACATGCGAACAGAAGTTATA  
+HWI-EAS443:3:47:251:872#0/1  
aaa`b`a`a` ] ``]aaa` `a^`\_aa\_a^^` ` \_ []aZ` \_a\_  
@HWI-EAS443:3:47:346:194#0/1  
ATTGCTTCAAATGAGAATGTGGAAACCATGGACTCCAATA  
+HWI-EAS443:3:47:346:194#0/1  
`babaaa`aa`aaaaaa\_ ^aa\_\_ ` ^ ` \_ ^ \_ ^ \_Z^^ \_ ^  
@HWI-EAS443:3:47:436:1633#0/1  
TGGATGGCATGCCACTCTGCTGCATTTGAAGATTTAAGAG  
+HWI-EAS443:3:47:436:1633#0/1  
¥aa`ab`bbbVa`a\_baa\_T`baaabaa[a` `ba` `b\_aa  
@HWI-EAS443:3:47:466:260#0/1  
GAAAGTGATTCCAAGAGGAAAGCTTTCCACAAGAGGGGTC  
+HWI-EAS443:3:47:466:260#0/1  
a\_a\_a^a\_a`a` `\_\_a\_` \_ `^` ]\_ ` ` ]\_V\_U^ ] ^ ] ^ ^ZY  
@HWI-EAS443:3:47:526:1289#0/1  
AGGCTGCACACTGATCTGGCCTGCGGATGCCTTTTGTGA  
+HWI-EAS443:3:47:526:1289#0/1  
aa\_[aba\_\_ ` \_\_\_U` ^aaa¥\_[S¥a[N\_`W¥V\_a`QXaUS  
@HWI-EAS443:3:47:603:1355#0/1  
CAGGAGTGGAGGAAATACCAATCAACAAAAGGCATCCGCA  
+HWI-EAS443:3:47:603:1355#0/1  
aa\_^^^XZ¥` ^]X[Z` ] [ `baa\_\_a` ` ` \_\_XZX` ¥TXVU^  
@HWI-EAS443:3:47:674:1324#0/1  
AGTGATTCCAAGAGGAAAGCTTTCCACAAGAGGGGTCCAG  
+HWI-EAS443:3:47:674:1324#0/1  
aa[babaabbaYa`aab`babba]Ka^aab\_ `aa\_]Z]aa  
@HWI-EAS443:3:47:839:1064#0/1  
ACCAATCAACAAAAGGCATCCGCAGGCCAGATCAGTGTGC  
+HWI-EAS443:3:47:839:1064#0/1  
`XU[KRTYZZ¥`\_VPQT] `Za] [WX[^a^Q[\_ZQX`SRY]U  
@HWI-EAS443:3:47:919:1902#0/1  
GGAAATACCAATCAACAAAAGGCATCCGCAGGCCAGATCA  
+HWI-EAS443:3:47:919:1902#0/1  
abaaabbaabaa[aa¥aaa\_[ ` \_ `a¥] [Za¥^]Y^\_\_WW¥  
@HWI-EAS443:3:48:1086:65#0/1  
GGAGGAAATACCAATCAACAAAAGGCATCCGCAGGCCAGA  
+HWI-EAS443:3:48:1086:65#0/1  
aa\_aa\_a`a` [ ^ ` \_a\_\_¥[a`^^`¥¥` \_ZV\_WY` ^SR[\_W  
@HWI-EAS443:3:48:1231:1821#0/1  
GTGATTCCAAGAGGAAAGCTTTCCACAAGAGGGGTCCAGA  
+HWI-EAS443:3:48:1231:1821#0/1  
a` ` ` \_` \_aaaa` \_aaa\_\_ [ ` ] [ [ \_ ` \_` \_` \_` YVQVV¥` \_]  
@HWI-EAS443:3:48:1401:190#0/1  
CGCTGAATGCTGCCATAACGGTTGCTCTTTCAAAGGGGAG  
+HWI-EAS443:3:48:1401:190#0/1  
ababaabaabaaa\_aaaa`b` ^a`T]^aaaT^\_ ^ ` ¥^a^`



@HWI-EAS443:3:48:1467:1403#0/1  
CACTTTCTTTCTTATGAACTTGATACTCTTAAATCT  
+HWI-EAS443:3:48:1467:1403#0/1  
`Y\_\_ab\_bbbb¥abbb\_`b^`a\_baa`baaa`aa`aaaa  
@HWI-EAS443:3:48:1486:1043#0/1  
CCAGGGTATTGGAGTCCATGGTTTCCACATTCTCATTGA  
+HWI-EAS443:3:48:1486:1043#0/1  
`aaa`¥Qa`aab`a\_`a^aa`^aa^\_[¥^a`]``\_```\_\_  
@HWI-EAS443:3:48:1567:103#0/1  
GTGTGGATGGCATGCCACTCTGCTGCATTTGAAGATTTAA  
+HWI-EAS443:3:48:1567:103#0/1  
a\_a\_¥Y`\_ba[aa^\_\_`]`]``Z\_aOX\_a`]OS[V^]\_0¥  
@HWI-EAS443:3:48:1703:473#0/1  
CTGCGGATGCCTTTTGTGATTGGTATTTCCCTCCACTCCT  
+HWI-EAS443:3:48:1703:473#0/1  
aababb¥ab`]ab`bbabb\_aab]\_aaabaPaaaa`W[^  
@HWI-EAS443:3:48:271:1974#0/1  
AGAGTATCAAGTTTCATAAGAGGAAAGAAAGTGATTCCAA  
+HWI-EAS443:3:48:271:1974#0/1  
`ba¥Qaaa]aaaa^\_abbaa\_`b^^aa[aa`GTaa\_Xa\_\_  
@HWI-EAS443:3:48:349:349#0/1  
AAGAGGAAAGAAAGTGATTCCAAGAGGAAAGCTTTCCACA  
+HWI-EAS443:3:48:349:349#0/1  
``aabbaa`baaab[baab\_``a\_`a\_¥`TYa\_\_\_\_a]]S  
@HWI-EAS443:3:48:466:889#0/1  
GTTTCATAAGAGGAAAGAAAGTGATTCCAAGAGGAAAGCT  
+HWI-EAS443:3:48:466:889#0/1  
aX[Z0^a[V^`^`U¥\_`UTV`SWYVQSVYLSWU¥^Z^SVU  
@HWI-EAS443:3:48:472:1291#0/1  
ATCCGACATGCGAACAGAAGTTATAAGAATGATGGAAAGT  
+HWI-EAS443:3:48:472:1291#0/1  
^X¥ZRUY[\_VO\_VZ^Y^VWZZ]\_a]]Y[\_]\_aa\_Z[]^Z  
@HWI-EAS443:3:48:593:320#0/1  
GGGTATTGGAGTCCATGGTTTCCACATTCTCATTGAAGC  
+HWI-EAS443:3:48:593:320#0/1  
a¥YP\_`a`Q\_b\_`Va`\_QRZ]S`\_\_`\_`]`\_`\_`\_`¥^\_Z  
@HWI-EAS443:3:48:78:520#0/1  
CGCTGCACTGAGAATGTAGGCTGCACACTGATCTGGCCTG  
+HWI-EAS443:3:48:78:520#0/1  
aaa```babb¥baaba\_aaaa^[[\_[[`\_a^¥XaaaY\_aa  
@HWI-EAS443:3:48:99:700#0/1  
GTCCTTATTGTTCCCGCTGAATGCTGCCATAACGGTTGC  
+HWI-EAS443:3:48:99:700#0/1  
a¥`aaaaaab``aa`aaaa^^]`¥\_a\_\_``Y^¥]^[] [R  
@HWI-EAS443:3:49:1030:564#0/1  
GGATGGCATGCCACTCTGCTGCATTTGAAGATTTAAGAGT  
+HWI-EAS443:3:49:1030:564#0/1  
`ba`baaaa^b^`Zaba`]^`\_¥aaa\_I``Y`\_UY`\_```  
@HWI-EAS443:3:49:103:1464#0/1  
GAGGAAATACCAATCAACAAAAGGCATCCGCAGGCCAGAT

+HWI-EAS443:3:49:103:1464#0/1  
aaabbaabbbabaa^`\_]aa\_] [[aaa\_\_a`aa]\_\_a¥Z\_  
@HWI-EAS443:3:49:1227:1025#0/1  
CAGATACTGGGCCATAAGGACCAGGAGTGGAGGAAATACC  
+HWI-EAS443:3:49:1227:1025#0/1  
abbbabb\_bbb\_abb\_`aaab`abaab[abbabbbaa^XV  
@HWI-EAS443:3:49:1450:883#0/1  
GAAGGACGGACATCCGACATGCGAACAGAAGTTATAAGAA  
+HWI-EAS443:3:49:1450:883#0/1  
a][aba]`^]`^a`X[\_UU]`\_Z`PUYLYRYaQVY\_[U^VY  
@HWI-EAS443:3:49:154:904#0/1  
CAGGGTATTGGAGTCCATGGTTTCCACATTCTCATTTGAA  
+HWI-EAS443:3:49:154:904#0/1  
a[bbUH`a\_]aa¥¥b]^`^`¥\_aa`aaaa]aa\_aaa`b\_\_  
@HWI-EAS443:3:49:1590:550#0/1  
GTTCGCATGTCCGATGTCCGTCCTTCATTGTTCCCGCTGA  
+HWI-EAS443:3:49:1590:550#0/1  
aabbZbb[``abb`b]VbU][[XZ\_Z^`UYZ\_YXMRGR  
@HWI-EAS443:3:49:1620:991#0/1  
GAGCAACCGTTATGGCAGCATTGCGGGAACAATGAAGG  
+HWI-EAS443:3:49:1620:991#0/1  
aX`\_aba`b`aaa`a\_ZaYtZ^Uz¥VRL]QYN^BBBBBBB  
@HWI-EAS443:3:49:281:1099#0/1  
AGTGATTCCAAGAGGAAAGCTTTCCACAAGAGGGGTCCAG  
+HWI-EAS443:3:49:281:1099#0/1  
^^Rbaba`aa]aa[T¥aaa`aa^]\_a\_a``aa`]^\_^[  
@HWI-EAS443:3:49:324:1504#0/1  
ATGGCATGCCACTCTGCTGCATTTGAAGATTTAAGAGTAT  
+HWI-EAS443:3:49:324:1504#0/1  
¥YX`bU\_Ua^^^HR\_¥`abVD]`UTHaVT\_a`]WQ`]UVN  
@HWI-EAS443:3:49:349:441#0/1  
GAAGGACGGACATCCGACATGCGAACAGAAGTTATAAGAA  
+HWI-EAS443:3:49:349:441#0/1  
a]\_\_`[\_[`HJZ]]Y`VR[[LVUZZ¥¥SR`QPXTN]`Y^  
@HWI-EAS443:3:49:545:1563#0/1  
GCCTTTTGTGATTGGTATTTCTCCACTCCTGGTCCTTA  
+HWI-EAS443:3:49:545:1563#0/1  
a\_b]bab\_]aaa\_a[`Yba\_a]^aaaaT]`[aZ¥^[\_`a\_  
@HWI-EAS443:3:49:546:1653#0/1  
CTTGGAATCACTTTCTTTCTTATGAACTTGATACTC  
+HWI-EAS443:3:49:546:1653#0/1  
abbbaaaaab`bbbaaba`aaaabbaaaaaabaabaa\_aa  
@HWI-EAS443:3:49:563:1799#0/1  
GAAATACCAATCAACAAAAGGCATCCGCAGGCCAGATCAG  
+HWI-EAS443:3:49:563:1799#0/1  
aabbabbbbbbabb`baaaa\_`baaaaYaaa`[aaaZ[\_a  
@HWI-EAS443:3:49:642:124#0/1  
ATGAGAATGTGGAAACCATGGACTCCAATACCCTGGAAC  
+HWI-EAS443:3:49:642:124#0/1  
`SW^VZSab¥]P^Uaa\_]a]^SSRZ]]XPRLJ¥aZZZM^

@HWI-EAS443:3:49:791:653#0/1  
GTGATTCCAAGAGGAAAGCTTTCCACAAGAGGGGTCCAGA  
+HWI-EAS443:3:49:791:653#0/1  
aabaab\_aba`ba`aab`aaa`^a\_`^a`aa]¥^^¥aa`  
@HWI-EAS443:3:49:891:236#0/1  
GTGGAGGAAATACCAATCAACAAAAGGCATCCGCAGGCCA  
+HWI-EAS443:3:49:891:236#0/1  
a]bbTbaaaaaa`\_`aaaa`\_]`a`\_\_`]^^^`]^\_ZRV`  
@HWI-EAS443:3:49:918:1345#0/1  
GGGGTCCAGATTGCTTCAAATGAGAATGTGGAAACCATGG  
+HWI-EAS443:3:49:918:1345#0/1  
a`bb^`[`ababab\_ba\_a`aaaab`a`a\_a\_aa\_]`^`\_]\_a  
@HWI-EAS443:3:49:959:299#0/1  
ACTTGATACTCTTAAATCTTCAAATGCAGCAGAGTGGCAT  
+HWI-EAS443:3:49:959:299#0/1  
`bbb`a^Xaabbbbaabb`aa`bbY`[Ybaa¥Ib^[`[  
@HWI-EAS443:3:49:983:829#0/1  
TGGCATGCCACTCTGCTGCATTTGAAGATTTAAGAGTATC  
+HWI-EAS443:3:49:983:829#0/1  
a^\_`bbb`bbababbbbaabbbbaababbbabbaa\_aa`  
@HWI-EAS443:3:4:1036:270#0/1  
GCGGGAACAATGAAGGACGGACATCCGACATGCGAACAGA  
+HWI-EAS443:3:4:1036:270#0/1  
a```a^\_[\_]`aYPKNYT]]VNZ]]VWXP¥UUY]]U  
@HWI-EAS443:3:4:1039:611#0/1  
GATTGGTATTTCTCCACTCCTGGTCCTTATGGCCCAGTA  
+HWI-EAS443:3:4:1039:611#0/1  
abbbbabbbba\_baabaaa\_aa\_\_`\_aaa`a`\_T¥`a`\_`  
@HWI-EAS443:3:4:1086:651#0/1  
CAGGAGTGGAGGAAATACCAATCAACAAAAGGCATCCGCA  
+HWI-EAS443:3:4:1086:651#0/1  
aabbabVbbaaba^abb``abaWX\_^b\_aaba^^`VYbS\_  
@HWI-EAS443:3:4:1143:1345#0/1  
CACTGATCTGGCCTGCGGATGCCTTTTGTGATTGGTATT  
+HWI-EAS443:3:4:1143:1345#0/1  
a\_baa\_aaababaaaU]a`Ya``abaaaTaq]XZZ[aZ\_^]  
@HWI-EAS443:3:4:1160:1769#0/1  
GGAAAGAAAGTGATTCCAAGAGGAAAGCTTTCCACAAGAG  
+HWI-EAS443:3:4:1160:1769#0/1  
ab^T]``TV\_Ua`^`[[Q^YSZ]^X]^]]YVTT0JNY^BB  
@HWI-EAS443:3:4:1222:996#0/1  
AGTGATTCCAAGAGGAAAGCTTTCCACAAGAGGGGTCCAG  
+HWI-EAS443:3:4:1222:996#0/1  
ababaaaa\_ba`a`a\_aaaaa\_aa\_a\_a\_a\_a`]]]\_]a`  
@HWI-EAS443:3:4:1263:1125#0/1  
CAGATTGCTTCAAATGAGAATGTGGAAACCATGGACTCCA  
+HWI-EAS443:3:4:1263:1125#0/1  
abbabbbbaa`bbaabbabaaba`aaa\_`baaaaa\_`a  
@HWI-EAS443:3:4:1507:1354#0/1  
TGATACTCTTAAATCTTCAAATGCAGCAGAGTGGCATGCC

+HWI-EAS443:3:4:1507:1354#0/1  
]aaaa`b]aa`aaa^\_\_]a\_[^)``\_\_^aZaZ\_^ZZH\_QB  
@HWI-EAS443:3:4:1545:1838#0/1  
ATTGCTTCAAATGAGAATGTGGAAACCATGGACTCCAATA  
+HWI-EAS443:3:4:1545:1838#0/1  
UXY)\_T)`aaa\_[`[aaaaUXU^\_\_R¥\_Y^\_^ZROX0]O\_  
@HWI-EAS443:3:4:1672:889#0/1  
TACTGGGCCATAAGGACCAGGAGTGGAGGAAATACCAATC  
+HWI-EAS443:3:4:1672:889#0/1  
^`babbb`YU[¥VabaaZ]aaUbJ)`abaa\_a\_]GG\_\_aH  
@HWI-EAS443:3:4:201:1060#0/1  
ATTGCTTCAAATGAGAATGTGGAAACCATGGACTCCAATA  
+HWI-EAS443:3:4:201:1060#0/1  
a\_aa¥\_`^`^R^^^]a^WQPQZ^¥]^^`\_]WUYQZ^  
@HWI-EAS443:3:4:514:1136#0/1  
CCAGGGTATTGGAGTCCATGGTTTCCACATTCTCATTGGA  
+HWI-EAS443:3:4:514:1136#0/1  
\_\_X`ZX)`[^T\_ZYX[^a\_`W`NS^]U\_TNT\_\_]\_\_¥\_  
@HWI-EAS443:3:4:585:1375#0/1  
GCACTTCCATCATTCTTATAACTTCTGTTCGCATGTCCGG  
+HWI-EAS443:3:4:585:1375#0/1  
aa][W]¥V^`PT\_aT¥\_\_aYYV\_VQNa]UGWY[YRVMSV  
@HWI-EAS443:3:4:624:190#0/1  
GATTGCTTCAAATGAGAATGTGGAAACCATGGACTCCAAT  
+HWI-EAS443:3:4:624:190#0/1  
aaaab`aa`baaaa`aa`a^`aa0[aVaa\_\_\_\_]]^^\_  
@HWI-EAS443:3:4:736:931#0/1  
TCCAGATTGCTTCAAATGAGAATGTGGAAACCATGGACTC  
+HWI-EAS443:3:4:736:931#0/1  
aa\_a`a`\_aaaa`a`[^\_\_a^^V`\_\_^T¥``\_\_ZYZ  
@HWI-EAS443:3:4:854:1606#0/1  
GAAATACCAATCAACAAAAGGCATCCGCAGGCCAGATCAG  
+HWI-EAS443:3:4:854:1606#0/1  
a\_baaaaab\_aa`aZaaa`^U`]]]]]\_^\_VP¥]]^BBB  
@HWI-EAS443:3:4:884:391#0/1  
CAGATTGCTTCAAATGAGAATGTGGAAACCATGGACTCCA  
+HWI-EAS443:3:4:884:391#0/1  
abbbb`bbb``bbbbabbaba\_bb^¥`a)``aa`\_\_^\_\_  
@HWI-EAS443:3:4:964:1881#0/1  
GTGATTCCAAGAGGAAAGCTTCCACAAGAGGGGTCCAGA  
+HWI-EAS443:3:4:964:1881#0/1  
`V^^`]^`^`a\_a^`\_N¥\_U]X\_^\_R\_ZUNNTNNU^BB  
@HWI-EAS443:3:50:1034:1465#0/1  
CCCCTCTGTGGAAAGCTTTCCTCTTGAATCACTTTCTT  
+HWI-EAS443:3:50:1034:1465#0/1  
a`WYOTZ^Q¥\_\_R`XY]\_US[W¥YZ]]Z\_]¥¥`a\_U\_a  
@HWI-EAS443:3:50:1037:205#0/1  
CCCCTCTGTGGAAAGCTTTCCTCTTGAATCACTTTCTT  
+HWI-EAS443:3:50:1037:205#0/1  
I\_Ta^^`¥a¥`^bbab`bbb¥a`]^a`^[Sa¥ZYbbaXaa

@HWI-EAS443:3:50:1046:1925#0/1  
AGTGATTCCAAGAGGAAAGCTTTCCACAAGAGGGGTCCAG  
+HWI-EAS443:3:50:1046:1925#0/1  
abUb`ba`a`a\_a``aaaa\_\_aa\_^aXaa\_`^^\_X]U`\_  
@HWI-EAS443:3:50:1072:1695#0/1  
CAAAAGGCATCCGCAGGCCAGATCAGTGTGCAGCCTACAT  
+HWI-EAS443:3:50:1072:1695#0/1  
[\_^\_\_\_^Wb`ZX\_¥b\_T[¥\_JZXZTR`M\_X^`a^][M^a  
@HWI-EAS443:3:50:13:1179#0/1  
ATGGCATGCCACTCTGCTGCATTTGAAGATTTAAGAGTAT  
+HWI-EAS443:3:50:13:1179#0/1  
\_^W\_aba^WG]Q\_XSR\_]¥Z^\_ba^X\_a`b`b[ZLZ^Waa  
@HWI-EAS443:3:50:1413:48#0/1  
GGGTATTGGAGTCCATGGTTTCCACATTCTCATTGAAGC  
+HWI-EAS443:3:50:1413:48#0/1  
aba^babab`ba\_aa`bb¥ba`V`Z[b`U¥[\_baa[[`a[  
@HWI-EAS443:3:50:1422:114#0/1  
GCGGGAACAATGAAGGACGGACATCCGACATGCGAACAGA  
+HWI-EAS443:3:50:1422:114#0/1  
a^aba\_`Y^`aaa`ab^^\_aa`aa¥¥\_\_^aaa¥]V]Y[XX  
@HWI-EAS443:3:50:383:526#0/1  
GGAAATACCAATCAACAAAAGGCATCCGCAGGCCAGATCA  
+HWI-EAS443:3:50:383:526#0/1  
Q\_bba]W\_aaaaabb\_ZZZ\_ba^\_b]^\_^¥]a\_^a`KZPW  
@HWI-EAS443:3:50:406:577#0/1  
GTATTGGAGTCCATGGTTTCCACATTCTCATTGAAGCAA  
+HWI-EAS443:3:50:406:577#0/1  
a]^`baba`^aaaa\_]a\_a]^`^`\_b\_^\_Z\_aaa^\_]`R^\_  
@HWI-EAS443:3:50:827:509#0/1  
GGCCTGCGGATGCCTTTTGTGATTGGTATTTCTCCACT  
+HWI-EAS443:3:50:827:509#0/1  
`aab`b\_bb\_bbaabaaaaaa\_aaXaVaabaX^aaaaW`  
@HWI-EAS443:3:50:885:1986#0/1  
TGAAGATTTAAGAGTATCAAGTTTCATAAGAGGAAAGAAA  
+HWI-EAS443:3:50:885:1986#0/1  
`aaa`Yabb``baa¥b`Z^`bT`^^\_aaa\_]YZ`[a\_\_^  
@HWI-EAS443:3:50:955:218#0/1  
GAAGGACGGACATCCGACATGCGAACAGAAGTTATAAGAA  
+HWI-EAS443:3:50:955:218#0/1  
^babababbbbbbb\_[abaaaaabaaabb\_Wa`a\_baaaaab  
@HWI-EAS443:3:51:1272:828#0/1  
GGAAATACCAATCAACAAAAGGCATCCGCAGGCCAGATCA  
+HWI-EAS443:3:51:1272:828#0/1  
]bbbbaba`aba`a\_aa`a\_\_\_aa]¥`aaa¥\_`aa\_W[\_  
@HWI-EAS443:3:51:1422:1723#0/1  
TGGCATGCCACTCTGCTGCATTTGAAGATTTAAGAGTATC  
+HWI-EAS443:3:51:1422:1723#0/1  
aa\_baaaaaabab`ZHZX^`bb^YaWXTabaaa`Wb`ab`  
@HWI-EAS443:3:51:1705:1052#0/1  
GAAAGCTTTCTCTTGAATCACTTTCTTTCTCTTATGA

+HWI-EAS443:3:51:1705:1052#0/1  
abbabbbb\_abababbaab\_a`aba`bba\_`b\_baaaaa  
@HWI-EAS443:3:51:187:150#0/1  
GTCGGATGTCCGTCCTTCATTGTTCCCGCTGAATGCTGCC  
+HWI-EAS443:3:51:187:150#0/1  
aY]aaZ`XRLS]XUR\_] [U^`\_Z\_^UZ^^ZZZWRRNTU  
@HWI-EAS443:3:51:524:709#0/1  
ATGGCATGCCACTCTGCTGCATTTGAAGATTTAAGAGTAT  
+HWI-EAS443:3:51:524:709#0/1  
Sabb^^Z\_a\_¥¥`baa]a`\_]\_]T[a`aaba\_`^]T]a  
@HWI-EAS443:3:51:588:37#0/1  
GGACCCCTCTTGTGGAAAGCTTTCCTCTTGAATCACTTT  
+HWI-EAS443:3:51:588:37#0/1  
abaa`aaa`aba\_aa`aaa\_aa\_¥^`]aaaa`\_a[\_¥a`a  
@HWI-EAS443:3:51:894:1646#0/1  
GGACCCCTCTTGTGGAAAGCTTTCCTCTTGAATCACTTT  
+HWI-EAS443:3:51:894:1646#0/1  
\_``aaaaaa^^`]aaaa[``[SYX^`a^`]`]`ZZ[Z  
@HWI-EAS443:3:51:959:155#0/1  
ATCCGACATGCGAACAGAAGTTATAAGAATGATGGAAAGT  
+HWI-EAS443:3:51:959:155#0/1  
`a^Q`\_a\_\_a]aWWZ``]`b]a¥a\_\_^`\_aa^`\_aa]Ra^  
@HWI-EAS443:3:52:1000:775#0/1  
GGAAGGACAAATCTTCTGGCTTTGCACTTTCCATCATTCT  
+HWI-EAS443:3:52:1000:775#0/1  
a]Xa`a`[aaabaa`\_`aa\_aaa`a`^a`a`\_`aY^aa^`  
@HWI-EAS443:3:52:1039:1805#0/1  
AGTGATTCCAAGAGGAAAGCTTCCACAAGAGGGGTCCAG  
+HWI-EAS443:3:52:1039:1805#0/1  
UWY\_V`^U^`^RV^YR]a\_PTYVT\_PX]^a¥`][aZWRW¥  
@HWI-EAS443:3:52:1091:793#0/1  
GGCTTTGCACTTTCCATCATTCTTATAACTTCTGTTGCA  
+HWI-EAS443:3:52:1091:793#0/1  
^a\_b`[T¥bYbaab\_aa\_\_aa]^aab^V[ba`ba`ba`¥Y  
@HWI-EAS443:3:52:1116:971#0/1  
TAAGGACCAGGAGTGGAGGAAATACCAATCAACAAAAGGC  
+HWI-EAS443:3:52:1116:971#0/1  
aaaa`a\_a`a\_V`U`¥`¥¥`\_`¥`\_\_^W^\_Z\_¥`¥VW¥  
@HWI-EAS443:3:52:1173:268#0/1  
GAAAGTGATTCCAAGAGGAAAGCTTCCACAAGAGGGGTCC  
+HWI-EAS443:3:52:1173:268#0/1  
`aaa`[a`aaa\_a`aa\_a\_a`a^``X]\_\_¥a^a^\_ZW¥  
@HWI-EAS443:3:52:1186:1083#0/1  
GTGATTCCAAGAGGAAAGCTTCCACAAGAGGGGTCCAGA  
+HWI-EAS443:3:52:1186:1083#0/1  
aYa\_`a`aa^`[``]``\_Y\_\_`X¥^^`\_V^`XYYY\_V]^]  
@HWI-EAS443:3:52:1275:466#0/1  
GACCAGGAGTGGAGGAAATACCAATCAACAAAAGGCATCC  
+HWI-EAS443:3:52:1275:466#0/1  
`aaa[T`R[F\_aaa^`aa¥aY`a¥\_aa`M`\_\_Z`[SXVZ



+HWI-EAS443:3:52:668:59#0/1  
abaaaa`baabaa`a``a\_aaa`]\_\_\_a\_\_`a[^a^\_\_]  
@HWI-EAS443:3:52:678:1271#0/1  
ATTGCTTCAAATGAGAATGTGGAAACCATGGACTCCAATA  
+HWI-EAS443:3:52:678:1271#0/1  
a^]aa¥`a\_]\_X¥Y\_aba]a````[\_`\_Z¥[aa][¥\_`a  
@HWI-EAS443:3:52:737:28#0/1  
CTTTCCATCATTCTTATACTTCTGTTCGCATGTCCGGATG  
+HWI-EAS443:3:52:737:28#0/1  
TYV```a`aWaaaba\_b]\_ZaZb`b`a]aa^¥abb\_ba^a  
@HWI-EAS443:3:52:875:2018#0/1  
AGTGATTCCAAGAGGAAAGCTTTCCACAAGAGGGGTCCAG  
+HWI-EAS443:3:52:875:2018#0/1  
\_a\_aZLUaa[aYa`\_`a^^`\_\_R`\_\_^\_\_\_^^[\_NOU^^\_  
@HWI-EAS443:3:52:90:818#0/1  
CTTGATACTCTTAAATCTTCAAATGCAGCAGAGTGGCATG  
+HWI-EAS443:3:52:90:818#0/1  
aaabba`aaaa`^^[b`aa\_aaab`aa\_a\_`]aa``\_`  
@HWI-EAS443:3:53:100:1141#0/1  
AGGACCAGGAGTGGAGGAAATACCAATCAACAAAAGGCAT  
+HWI-EAS443:3:53:100:1141#0/1  
aa[`a`a`]R\_Z``\_`a^\_\_`\_\_[a\_\_¥a`¥¥`Z\_[¥¥[V  
@HWI-EAS443:3:53:1040:540#0/1  
ATTTCTCCTCCTCTGTCCTTATGGCCCAGTATCTGCTT  
+HWI-EAS443:3:53:1040:540#0/1  
\_b\_Z```aa`baa\_abb\_U`[aaaa^]^[Y`aZ`aQaaY`^  
@HWI-EAS443:3:53:1197:383#0/1  
TTCATAAGAGGAAAGAAAGTGATTCCAAGAGGAAAGCTTT  
+HWI-EAS443:3:53:1197:383#0/1  
aa]aababaaa`aaa`aabXa]a``^`a\_`aa^`\_\_aYa\_\_  
@HWI-EAS443:3:53:1230:1020#0/1  
GTGATTCCAAGAGGAAAGCTTTCCACAAGAGGGGTCCAGA  
+HWI-EAS443:3:53:1230:1020#0/1  
a\_V¥bb^ba`^^^UXb\_a]\_a``[¥a`]`\_a\_a^¥G\_a\_  
@HWI-EAS443:3:53:1427:1495#0/1  
ATTGGTGTGGATGGCATGCCACTCTGCTGCATTTGAAGAT  
+HWI-EAS443:3:53:1427:1495#0/1  
abbba`babaaaa]G¥``^X`Ua\_`XWa\_Y]\_b`R[]]^\_  
@HWI-EAS443:3:53:1577:1972#0/1  
CTCTGCTGCATTTGAAGATTTAAGAGTATCAAGTTTCATA  
+HWI-EAS443:3:53:1577:1972#0/1  
a¥]a`VbbS^abb^aab\_abba]bab]bb`baa`abaa`a  
@HWI-EAS443:3:53:158:223#0/1  
GCTTTCCACAAGAGGGGTCCAGATTGCTTCAAATGAGAAT  
+HWI-EAS443:3:53:158:223#0/1  
a\_aaaa\_aa`aa`a``Y]X\_\_^^`\_^`^]]^`\_]]\_\_]]]  
@HWI-EAS443:3:53:315:826#0/1  
GGAGGAAATACCAATCAACAAAAGGCATCCGCAGGCCAGA  
+HWI-EAS443:3:53:315:826#0/1  
ab`bababa[aaaaabaaa\_a^aa`^aa`\_a\_a\_a\_\_a\_^



@HWI-EAS443:3:53:405:27#0/1  
GGAAATACCAATCAACAAAAGGCATCCGCAGGCCAGATCA  
+HWI-EAS443:3:53:405:27#0/1  
ab\_aaa]a[\_a\_a\_]\_\_\_^`a\_\_`¥¥`V]aZUUV[QXSW  
@HWI-EAS443:3:53:669:1124#0/1  
AGATACTGGCCATAAGGACCAGGAGTGGAGGAAATACCA  
+HWI-EAS443:3:53:669:1124#0/1  
\_`\_`babbabaa`\_]\_bb\_¥aXbaab^bbabaaaaaa`aa  
@HWI-EAS443:3:53:702:26#0/1  
AGCAGATACTGGCCATAAGGACCAGGAGTGGAGGAAATA  
+HWI-EAS443:3:53:702:26#0/1  
aba`baa`aabbb\_aabaaab`\_`abb`b`ba\_ba]\_``\_  
@HWI-EAS443:3:54:1026:390#0/1  
CCCCTGAATGCTGCCATAACGGTTGCTCTTTCAAAGGG  
+HWI-EAS443:3:54:1026:390#0/1  
`abbVaba`ab`[[a`bbaa\_¥¥[a\_S\_Pa[a\_Q\_a^aaa  
@HWI-EAS443:3:54:1035:842#0/1  
GTGTGGATGGCATGCCACTCTGCTGCATTTGAAGATTTAA  
+HWI-EAS443:3:54:1035:842#0/1  
a\_^]baa`ab\_[aa\_\_`\_]`ZX\_WP¥aaaP``]a\_a`]  
@HWI-EAS443:3:54:1103:1811#0/1  
CCCCTCTTGTTGAAAGCTTTCTCTTGAATCACTTTCTT  
+HWI-EAS443:3:54:1103:1811#0/1  
`YWZ^0\_SXZbaW]^`^]\_\_\_¥\_`\_¥aNTZ^\_^[]\_T]^  
@HWI-EAS443:3:54:1132:1430#0/1  
CTGGAAGGACAAATCTTCTGGCTTTGCACTTTCCATCATT  
+HWI-EAS443:3:54:1132:1430#0/1  
¥XZa^a]\_\_\_b`aa¥bb`\_^a\_aaa\_\_a[aaa`a`a^\_``  
@HWI-EAS443:3:54:115:1639#0/1  
CTGCATTTGAAGATTTAAGAGTATCAAGTTTCATAAGAGG  
+HWI-EAS443:3:54:115:1639#0/1  
a^`VS^[`\_Z¥\_]XZa^^b^`QS\_``[^^^a`aa[]^a`¥  
@HWI-EAS443:3:54:1354:817#0/1  
AGGAGTGGAGGAAATACCAATCAACAAAAGGCATCCGCAG  
+HWI-EAS443:3:54:1354:817#0/1  
`ba\_b\_bb[ab`aba`\_aabaaaa\_aaaaa`aa``\_]`]  
@HWI-EAS443:3:54:1364:638#0/1  
GAAAGTGAATCCAAGAGGAAAGCTTTCCACAAGAGGGGTC  
+HWI-EAS443:3:54:1364:638#0/1  
TabaZabaaababaab^]babaababaabaaaaa\_Xa`\_  
@HWI-EAS443:3:54:1398:1238#0/1  
CTTGTGGAAAGCTTTCTCTTGAATCACTTTCTTTCTC  
+HWI-EAS443:3:54:1398:1238#0/1  
^bba^¥¥aaW`a`¥[G]b^b`aabbaQQT^abYT`aXIbY  
@HWI-EAS443:3:54:15:972#0/1  
CAGATACTGGCCATAAGGACCAGGAGTGGAGGAAATACC  
+HWI-EAS443:3:54:15:972#0/1  
a\_babbbabba`baabbb`aaaab\_a¥baaab\_aaaaa`  
@HWI-EAS443:3:54:1623:1654#0/1  
CTTAAATCTTCAAATGCAGCAGAGTGGCATGCCATCCACA

+HWI-EAS443:3:54:1623:1654#0/1  
[aa`\_`bbbb`b`bb^W`aab``[bb^``\_U¥``ZV¥U¥  
@HWI-EAS443:3:54:289:1412#0/1  
AGTGATTCCAAGAGGAAAGCTTCCACAAGAGGGGTCCAG  
+HWI-EAS443:3:54:289:1412#0/1  
aa]a\_V`aaaa^a```b¥Z`\_\_\_a\_\_`a\_]\_\_]Y^W\_Z`\_  
@HWI-EAS443:3:54:290:536#0/1  
GTTCGCATGTCCGATGTCCGTCCTTCATTGTTCCCGCTGA  
+HWI-EAS443:3:54:290:536#0/1  
aa¥WVZR\_bYa`ZKZQNSPVY][^TWW\_ZaX¥[R[ZUOZU  
@HWI-EAS443:3:54:382:1131#0/1  
CCCCTCTGTGGAAAGCTTTCCTCTTGAATCACTTTCTT  
+HWI-EAS443:3:54:382:1131#0/1  
¥aa``¥`a^`¥^abbbaZ\_`^)`aa]Y[[Qaaa\_Zaa``^  
@HWI-EAS443:3:54:414:638#0/1  
AGAGTATCAAGTTTCATAAGAGGAAAGAAAGTGATTCCAA  
+HWI-EAS443:3:54:414:638#0/1  
\_aab[``\_b`\_b[aa]^aa`^)`^¥a\_a\_aab]a\_\_\_\_\_a`  
@HWI-EAS443:3:54:527:1287#0/1  
AGTGATTCCAAGAGGAAAGCTTCCACAAGAGGGGTCCAG  
+HWI-EAS443:3:54:527:1287#0/1  
a`Z``^a```^aaaaa¥¥]^`^]Y\_Y\_`ZT`a`NUZXV`  
@HWI-EAS443:3:54:757:345#0/1  
ATTGCTTCAAATGAGAATGTGGAAACCATGGACTCCAATA  
+HWI-EAS443:3:54:757:345#0/1  
aaabaaa``^a)`^Z\_S]]\_aa^[[L¥¥YRU¥^^`^`T  
@HWI-EAS443:3:54:835:661#0/1  
TCCGCAGGCCAGATCAGTGTGCAGCCTACATTCTCAGTGC  
+HWI-EAS443:3:54:835:661#0/1  
a`ZQV\_bZaX¥a\_a[[a[\_SbZ\_bZ\_b\_^aaa\_a\_\_aR¥R  
@HWI-EAS443:3:54:868:2023#0/1  
GGATGGCATGCCACTCTGCTGCATTTGAAGATTTAAGAGT  
+HWI-EAS443:3:54:868:2023#0/1  
aaa\_aa\_b`a`^a`aa`a^¥a\_[a`a\_\_``a\_a`\_``aaU  
@HWI-EAS443:3:54:892:230#0/1  
TTCAGCGGGAACAATGAAGGACGGACATCCGACATGCGAA  
+HWI-EAS443:3:54:892:230#0/1  
[^`^aX``aQaTba]b`¥bbT¥aaYQ]\_\_`\_^`¥\_YO[Z]  
@HWI-EAS443:3:55:1085:1383#0/1  
CTGTCATACTCCTCTGCATTGTCTCCGAAGAAATAAGACC  
+HWI-EAS443:3:55:1085:1383#0/1  
a`\_a¥ba]R\_b]\_]\_]P\_[^aaaa^)^UX\_¥aa`^`a]WT  
@HWI-EAS443:3:55:1089:1948#0/1  
TATAACTTCTGTTCGCATGTCCGATGTCCGTCCTTCATTG  
+HWI-EAS443:3:55:1089:1948#0/1  
a\_`]a`aY^^YY\_^[ZVa\_RV[YXY\_WVY]OX]¥^S^V^S  
@HWI-EAS443:3:55:1136:279#0/1  
ATCCGACATGCGAACAGAAGTTATAAGAATGATGGAAAGT  
+HWI-EAS443:3:55:1136:279#0/1  
ab`ab`[]a^`a\_a^[\U]b`b``a\_b\_a`a\_aaa^]\_aZ

@HWI-EAS443:3:55:1156:1180#0/1  
ATGTCGGATGTCCGTCCTTCATTGTTCCCGCTGAATGCTG  
+HWI-EAS443:3:55:1156:1180#0/1  
aaaW]a`]ZY][\_\_YZV\_]RTa\_\_X`]^^S^SVQ\_Y¥PPX  
@HWI-EAS443:3:55:1178:1086#0/1  
GAAAGTGAATCCAAGAGGAAAGCTTTCCACAAGAGGGGTC  
+HWI-EAS443:3:55:1178:1086#0/1  
\_b`aaababb`\_`abaaabbaaaaa`baaaa`a`a^Xa  
@HWI-EAS443:3:55:1282:355#0/1  
ATCCGACATGCGAACAGAAGTTATAAGAATGATGGAAAGT  
+HWI-EAS443:3:55:1282:355#0/1  
abV`aaa`aaTa`\_\_`a`[aW`Wa`\_\_K¥aa`aaa]a\_a0  
@HWI-EAS443:3:55:1335:1081#0/1  
AGGCTGCACACTGATCTGGCCTGCGGATGCCTTTTGTGA  
+HWI-EAS443:3:55:1335:1081#0/1  
``\_TRb`ba\_[a`a^Xaa^``¥I\_a`\_aa¥aaabX`aaWM  
@HWI-EAS443:3:55:18:1289#0/1  
CTTCCATCATTCTTATAACTTCTGTTCCGATGTCCGATG  
+HWI-EAS443:3:55:18:1289#0/1  
aabaaaaa¥aaaa^\_J\_abba`\_aaa^aaa`a^`aa  
@HWI-EAS443:3:55:298:485#0/1  
CAATTGGTGTGGATGGCATGCCACTCTGCTGCATTTGAAG  
+HWI-EAS443:3:55:298:485#0/1  
aaababa^`ba\_aaaYJW^`[¥`\_a```^^a``YPZ`  
@HWI-EAS443:3:55:352:191#0/1  
GCCTTTTGTGATTGGTATTTCCCTCCACTCCTGGTCCTTA  
+HWI-EAS443:3:55:352:191#0/1  
aa`aaaa`aa^aaaa^aa`\_\_\_\_[^\_^\_^]`]UW[\_][  
@HWI-EAS443:3:55:378:1612#0/1  
GAAAGAAAGTGAATCCAAGAGGAAAGCTTTCCACAAGAGG  
+HWI-EAS443:3:55:378:1612#0/1  
`a`b]baaZ\_b\_\_\_aaaaa^a^b`a\_aaaaa\_aZaZ\_¥  
@HWI-EAS443:3:55:532:639#0/1  
ATTGCTTCAAATGAGAATGTGGAAACCATGGACTCCAATA  
+HWI-EAS443:3:55:532:639#0/1  
`baaabba\_`bba`baabbY```a¥aaaaba\_`a``]\_`a  
@HWI-EAS443:3:55:677:1939#0/1  
GATCCAAGAGGAAAGCTTTCCACAAGAGGGTCCAGATT  
+HWI-EAS443:3:55:677:1939#0/1  
X`SJ[aaWRa`aaa]babb]a\_aa\_a]ZXYT`T\_PZ[a`]  
@HWI-EAS443:3:55:692:433#0/1  
AGGCTGCACACTGATCTGGCCTGCGGATGCCTTTTGTGA  
+HWI-EAS443:3:55:692:433#0/1  
]bbaaaaa]a`¥\_\_`aab`a\_a[X```]a\_Xaaa\_VT^\_¥  
@HWI-EAS443:3:55:782:184#0/1  
ATCCGACATGCGAACAGAAGTTATAAGAATGATGGAAAGT  
+HWI-EAS443:3:55:782:184#0/1  
`[\_aV]aTba¥\_V\_[^`Naa```aa\_a\_aaa`^aa[\_aX  
@HWI-EAS443:3:55:797:30#0/1  
GAAATACCAATCAACAAAAGGCATCCGAGGCCAGATCAG

+HWI-EAS443:3:55:797:30#0/1  
]X¥]^aZTWT]QX`\_Z\_[S^a][^^UaY\_`]^^^`[[[XY  
@HWI-EAS443:3:56:1030:1287#0/1  
CTGTTCGCATGTCCGATGTCCGTCCTTCATTGTTCCCGCT  
+HWI-EAS443:3:56:1030:1287#0/1  
abaaabaabbbaaba`aaa^]\_R]]b\_Zaaa]`a^^aa¥^  
@HWI-EAS443:3:56:1050:710#0/1  
GAAAGTGATTCCAAGAGGAAAGCTTTCCACAAGAGGGGTC  
+HWI-EAS443:3:56:1050:710#0/1  
aa`a```V\_aaaaaa```\_a`a`Z\_\_\_aZa]\_]\_]¥  
@HWI-EAS443:3:56:1155:257#0/1  
AGAGTATCAAGTTTCATAAGAGGAAAGAAAGTGATTCCAA  
+HWI-EAS443:3:56:1155:257#0/1  
aaba\_abaa`baba`aaaa\_aa`\_\_a\_\_\_a\_a\_`\_`^`a  
@HWI-EAS443:3:56:1437:1057#0/1  
GAGGAAAGAAAGTGATTCCAAGAGGAAAGCTTTCCACAAG  
+HWI-EAS443:3:56:1437:1057#0/1  
aa`\_abaa`aaa^`a\_aa`a\_]`^]`a¥\_`^]`^]¥^]\_  
@HWI-EAS443:3:56:147:1301#0/1  
GCTGCACTGAGAATGTAGGCTGCACACTGATCTGGCCTGC  
+HWI-EAS443:3:56:147:1301#0/1  
`aa`^\_aa]SZ`\_aa]]\_Za^ZLY¥\_Y¥a¥V¥¥¥[YYUTT  
@HWI-EAS443:3:56:1482:1218#0/1  
CAGGCCAGATCAGTGTGCAGCCTACATTCTCAGTGCAGCG  
+HWI-EAS443:3:56:1482:1218#0/1  
`¥S]UNV`¥Y`Y[JWYabaaQPq]S\_aNaa^ab^b`\_b]¥  
@HWI-EAS443:3:56:1519:1235#0/1  
AGTGATTCCAAGAGGAAAGCTTTCCACAAGAGGGGTCCAG  
+HWI-EAS443:3:56:1519:1235#0/1  
Ua]¥Q\_¥RZ^`^^`]^aa^X\_aa\_aY[`\_aXS^aaV`^`a  
@HWI-EAS443:3:56:1552:233#0/1  
ATTGCTTCAAATGAGAATGTGGAAACCATGGACTCCAATA  
+HWI-EAS443:3:56:1552:233#0/1  
\_\_^\_Ybaa\_aa`¥\_baYb`U^¥\_a\_\_\_`a\_T]]`UZ`\_a^  
@HWI-EAS443:3:56:1610:97#0/1  
GAGGAAATACCAATCAACAAAAGGCATCCGCAGGCCAGAT  
+HWI-EAS443:3:56:1610:97#0/1  
Nab[aaab`\_`a`aa`a]\_aaaaP[Wa\_XGa]Sa`RL¥^BB  
@HWI-EAS443:3:56:1688:627#0/1  
TGGCATGCCACTCTGCTGCATTTGAAGATTTAAGAGTATC  
+HWI-EAS443:3:56:1688:627#0/1  
aaa`abaa¥b`b`aY\_aa\_]abaa]]`aaa`aa`a^`^`^  
@HWI-EAS443:3:56:196:937#0/1  
AGCAGATACTGGCCATAAGGACCAGGAGTGGAGGAAATA  
+HWI-EAS443:3:56:196:937#0/1  
\_babb`aab``bb]baaab`aa`\_[ba]a¥baaa`\_`[``a  
@HWI-EAS443:3:56:459:79#0/1  
GCAGGCCAGATCAGTGTGCAGCCTACATTCTCAGTGCAGC  
+HWI-EAS443:3:56:459:79#0/1  
aaaab`a`[a`\_b\_a^aa`a[``^¥¥a`[`^[\_Y`[^\_¥

@HWI-EAS443:3:56:463:34#0/1  
GATTGCTTCAAATGAGAATGTGGAAACCATGGACTCCAAT  
+HWI-EAS443:3:56:463:34#0/1  
aaaaa\_ba\_aa^a`aaUaaY\_`]]\_]^`a]]]]\_]]\_]  
@HWI-EAS443:3:56:471:558#0/1  
ATGAAGGACGGACATCCGACATGCGAACAGAAGTTATAAG  
+HWI-EAS443:3:56:471:558#0/1  
a\_] [aa`aY`a`¥`a\_]\_^aa`b[]aYa`RaM`\_\_]S\_  
@HWI-EAS443:3:56:559:460#0/1  
GACCCCTCTTGTGGAAAGCTTTCCTCTTGAATCACTTTC  
+HWI-EAS443:3:56:559:460#0/1  
a`X\_\_aaaaaY^X¥\_\_a````\_^a^\_aa]^`^^`^^`\_`a]  
@HWI-EAS443:3:56:65:1983#0/1  
GTGATTCCAAGAGGAAAGCTTCCACAAGAGGGGTCCAGA  
+HWI-EAS443:3:56:65:1983#0/1  
`OROY^`a^V[XQYa]X\_S[¥WWW¥\_VYY[¥TY¥MVVWXZ  
@HWI-EAS443:3:56:831:1190#0/1  
ATGGCATGCCACTCTGCTGCATTTGAAGATTTAAGAGTAT  
+HWI-EAS443:3:56:831:1190#0/1  
[ZZ¥\_LZa`T¥\_a\_Z``]]`[Y]`YZQUZ¥U\_Z]¥`UY¥  
@HWI-EAS443:3:57:1123:746#0/1  
CTCTTGTGGAAAGCTTTCCTCTTGAATCACTTTCCTTCC  
+HWI-EAS443:3:57:1123:746#0/1  
ab`aabab`a\_abaaaaa\_baaaaaaa`ba\_\_b`\_^  
@HWI-EAS443:3:57:1240:405#0/1  
GATTGCTTCAAATGAGAATGTGGAAACCATGGACTCCAAT  
+HWI-EAS443:3:57:1240:405#0/1  
RZZ^\_R\_\_PZ`aaa`Xa`\_\_¥¥¥W\_JX`^^WZ`bTZ^W]  
@HWI-EAS443:3:57:1259:1633#0/1  
AGTGATTCCAAGAGGAAAGCTTCCACAAGAGGGGTCCAG  
+HWI-EAS443:3:57:1259:1633#0/1  
`ba]Yb\_aa`\_Ya\_aa^\_a`a\_\_\_a^¥^a\_a^^UU^^¥\_  
@HWI-EAS443:3:57:1326:410#0/1  
GATACTGGGCCATAAGGACCAGGAGTGGAGGAAATACCAA  
+HWI-EAS443:3:57:1326:410#0/1  
abbbbaabbbb\_]a`aa`]aaaa^\_b^b]ab]^aaa^V]a`  
@HWI-EAS443:3:57:154:718#0/1  
AGAGGGGTCCAGATTGCTTCAAATGAGAATGTGGAAACCA  
+HWI-EAS443:3:57:154:718#0/1  
^^^¥XYZ^U^¥[`YXSXQ\_a`\_`aaU``[\_a]\_P]][^]  
@HWI-EAS443:3:57:163:1877#0/1  
GGAGGAAATACCAATCAACAAAAGGCATCCGCAGGCCAGA  
+HWI-EAS443:3:57:163:1877#0/1  
a^RMRY]W^]]a`Xaa]VWX[[PYY¥]\_^X^Z^S[UXVB  
@HWI-EAS443:3:57:188:1516#0/1  
GTGGAAAGCTTTCCTCTTGAATCACTTTCCTTTCCTCTTA  
+HWI-EAS443:3:57:188:1516#0/1  
aa[Q¥¥W`Y`Y]aa¥^`aaXLVYRWX^\_\_`\_^X[YV\_Z^  
@HWI-EAS443:3:57:27:873#0/1  
CAATGAAGGACGGACATCCGACATGCGAACAGAAGTTATA

+HWI-EAS443:3:57:27:873#0/1  
ababb^`b`aaa\_a\_aa]a\_[^ZY¥`^a`a]P\_]a¥a\_  
@HWI-EAS443:3:57:446:88#0/1  
GTTTCATAAGAGGAAAGAAAGTGATTCCAAGAGGAAAGCT  
+HWI-EAS443:3:57:446:88#0/1  
a`aba\_aaab^aaa^a]\_\_aZa]\_]\_^\_^^`^Z`X`V^  
@HWI-EAS443:3:57:691:1113#0/1  
GCTTTGCACTTTCCATCATTCTTATAACTTCTGTTCGCAT  
+HWI-EAS443:3:57:691:1113#0/1  
aabbaa\_\_abbaa`aaabbabbaaaaaabaa`a\_aaa`  
@HWI-EAS443:3:57:793:1605#0/1  
CCCGCTGAATGCTGCCATAACGGTTGCTCTTTCAAAAGGG  
+HWI-EAS443:3:57:793:1605#0/1  
`bbb`baabaa^[^`abaaa]^a`R`aaa]Waa\_^a]  
@HWI-EAS443:3:57:880:1016#0/1  
CGGACATCCGACATGCGAACAGAAGTTATAAGAATGATGG  
+HWI-EAS443:3:57:880:1016#0/1  
a¥bV\_Y\_bbab¥¥a`\_H]^bb]Za`ba`Y`bZ]a[[aba  
@HWI-EAS443:3:57:933:1326#0/1  
ACTTCCATCATTCTTATAACTTCTGTTCGCATGTCGGAT  
+HWI-EAS443:3:57:933:1326#0/1  
aabbbbbbababbabbab`aba\_aa`a`baaaaa\_\_`a  
@HWI-EAS443:3:57:939:1398#0/1  
GAGGGTCCAGATTGCTTCAAATGAGAATGTGGAAACCAT  
+HWI-EAS443:3:57:939:1398#0/1  
`b``a\_babaaabbaaaaaabaaaba`ab\_aa\_aa\_\_aa  
@HWI-EAS443:3:57:990:550#0/1  
ATTGGAGTCCATGGTTTCCACATTCTCATTGAAGCAATC  
+HWI-EAS443:3:57:990:550#0/1  
aaa`aaa\_\_`a`aa¥aa``^`\_a\_a^``aa\_\_`]^]^]  
@HWI-EAS443:3:58:1020:1176#0/1  
AATGAGAATGTGGAAACCATGGACTCCAATACCCTGGAAC  
+HWI-EAS443:3:58:1020:1176#0/1  
aaaabbbbaabaa`aa`aaaa`aa\_aaaa`\_aa`^a^  
@HWI-EAS443:3:58:1026:370#0/1  
CCGCAGGCCAGATCAGTGTGCAGCCTACATTCTCAGTGCA  
+HWI-EAS443:3:58:1026:370#0/1  
aabaab`^`^aa`aab[\_Z\_a\_a]`a`]\_baaa`aaVa^`  
@HWI-EAS443:3:58:1077:1668#0/1  
TCAAGTTTCATAAGAGGAAAGAAAGTGATTCCAAGAGGAA  
+HWI-EAS443:3:58:1077:1668#0/1  
]`aZXOHUZ¥`V]ba^a`T\_aYN]aG^YV\_TYa\_¥aa]]a  
@HWI-EAS443:3:58:1094:1865#0/1  
AAGAAAGTGATTCCAAGAGGAAAGCTTCCACAAGAGGGG  
+HWI-EAS443:3:58:1094:1865#0/1  
a`Y¥]H¥YZY[a`\_`TZ`SOS^\_\_QR^[XUTL]\_`\_^]^¥  
@HWI-EAS443:3:58:1220:464#0/1  
GATTGGTATTTCTCCACTCCTGGTCCTTATGGCCCAGTA  
+HWI-EAS443:3:58:1220:464#0/1  
a\_aaba]abaaaa`Xa``\_^\_a\_]^[^`\_\_^\_]^[^\_VZ

@HWI-EAS443:3:58:1416:293#0/1  
ACACTGATCTGGCCTGCGGATGCCTTTTGTGATTGGTAT  
+HWI-EAS443:3:58:1416:293#0/1  
a]b\_aaaaaab\_`a``a\_a\_NV`aaaX[a^Z\_\_][^`  
@HWI-EAS443:3:58:1623:1157#0/1  
GTCGGATGTCCGTCCTTCATTGTTCCCCTGAATGCTGCC  
+HWI-EAS443:3:58:1623:1157#0/1  
a]RY`]STJYNPGVUUTSN¥Xa¥ZPSQWKT\_VSSXWWRMT  
@HWI-EAS443:3:58:1629:55#0/1  
GAAAGTGATTCCAAGAGGAAAGCTTTCCACAAGAGGGGTC  
+HWI-EAS443:3:58:1629:55#0/1  
a``b^aaaa^aaa`a^`^¥T¥\_`]\_\_]\_^\_Y^Z^^YV  
@HWI-EAS443:3:58:1751:549#0/1  
GCCTTTTGTGATTGGTATTTCCCTCCACTCCTGGTCCTTA  
+HWI-EAS443:3:58:1751:549#0/1  
aaaaaba`aaaaaa\_aaaa`\_\_\_`a\_`a]`\_\_[-]`\_^  
@HWI-EAS443:3:58:186:698#0/1  
CCAGATTGCTTCAAATGAGAATGTGGAAACCATGGACTCC  
+HWI-EAS443:3:58:186:698#0/1  
aa¥a[aaaa`b\_^a\_aaa[`adWa[¥a[]a^][`Y¥¥\_]  
@HWI-EAS443:3:58:358:529#0/1  
GATTCCAAGAGGAAAGCTTTCCACAAGAGGGGTCCAGATT  
+HWI-EAS443:3:58:358:529#0/1  
`aababaaabab]a]aabaaa`a``]a\_a^a\_Z]Z\_``¥  
@HWI-EAS443:3:58:495:427#0/1  
CGCTGCACTGAGAATGTAGGCTGCACACTGATCTGGCCTG  
+HWI-EAS443:3:58:495:427#0/1  
abaaa[I\_aa`b\_aa^ZY]^a\_`W\_[-\_a\_aV¥\_U[aW^¥N  
@HWI-EAS443:3:58:525:1128#0/1  
CCAGATTGCTTCAAATGAGAATGTGGAAACCATGGACTCC  
+HWI-EAS443:3:58:525:1128#0/1  
aa]a\_]\_]][^S¥]Wa]^SW\_Y\_SVWXVVO]]T]^`\_]U[  
@HWI-EAS443:3:58:580:447#0/1  
AGTGATTCCAAGAGGAAAGCTTTCCACAAGAGGGGTCCAG  
+HWI-EAS443:3:58:580:447#0/1  
`W`Z^b¥¥\_[-`a`W¥b¥[FW`¥X]^`aaa]^Y¥\_[-T[-`  
@HWI-EAS443:3:58:646:244#0/1  
GAAAGTGATTCCAAGAGGAAAGCTTTCCACAAGAGGGGTC  
+HWI-EAS443:3:58:646:244#0/1  
a\_\_\_aZ``\_\_^`\_]`a\_^\_]^^^^Y^]^]\_^\_\_^]YY  
@HWI-EAS443:3:58:787:1250#0/1  
GATTGCTTCAAATGAGAATGTGGAAACCATGGACTCCAAT  
+HWI-EAS443:3:58:787:1250#0/1  
aaa\_aaaaa`aa`a\_aaaaaZa\_]`\_^\_a\_a`^\_\_\_\_^^`  
@HWI-EAS443:3:58:831:1560#0/1  
AGCAGATACTGGGCCATAAGGACCAGGAGTGGAGGAAATA  
+HWI-EAS443:3:58:831:1560#0/1  
a[aaaa^ab\_\_¥`a]\_`aa``\_\_\_`a\_^\_Ya\_^\_`\_`a`\_`  
@HWI-EAS443:3:58:854:1519#0/1  
TTCAGCGGGAACAATGAAGGACGGACATCCGACATGCGAA

+HWI-EAS443:3:58:854:1519#0/1  
`Y\_aa\_0¥[\_aZaXYZ\_[^ZW]Z\_a]S¥^\_^^`]]]\_  
@HWI-EAS443:3:58:894:804#0/1  
GCGGGAACAATGAAGGACGGACATCCGACATGCGAACAGA  
+HWI-EAS443:3:58:894:804#0/1  
aaa`aaaaaa\_a`a`¥\_aa]\_`\_`\_^\_^^`\_\_^a]]^\_\_U  
@HWI-EAS443:3:58:983:1245#0/1  
ATCAAGTTTCATAAGAGGAAAGAAAGTGATTCCAAGAGGA  
+HWI-EAS443:3:58:983:1245#0/1  
a`]]\_aZaa^a`^`a`¥ZZa\_\_`a¥]\_`\_`aY^Z`Z\_^  
@HWI-EAS443:3:59:1113:352#0/1  
GATTGCTTCAAATGAGAATGTGGAAACCATGGACTCCAAT  
+HWI-EAS443:3:59:1113:352#0/1  
```a`aa\_\_\_\_`\_a^`a^aa^a\_\_`¥\_```W]Z`URXXZ  
@HWI-EAS443:3:59:1320:829#0/1  
CAGATTGCTTCAAATGAGAATGTGGAAACCATGGACTCCA  
+HWI-EAS443:3:59:1320:829#0/1  
a`^abba`b^a\_`^`\_abba¥bb`\_`bbb\_baaZW^^\_  
@HWI-EAS443:3:59:1422:20#0/1  
GAGTGGAGGAAATACCAATCAACAAAAGGCATCCGCAGGC  
+HWI-EAS443:3:59:1422:20#0/1  
`^b[b\_Z\_aaaaaa¥aaa\_a`Z\_aa[aaa[R]\_[NRa`P  
@HWI-EAS443:3:59:1433:569#0/1  
AGCAGATACTGGGCCATAAGGACCAGGAGTGGAGGAAATA  
+HWI-EAS443:3:59:1433:569#0/1  
\_baabbaabaab\_X]`b`abaaaa`ab]a`b`a`SWa\_`  
@HWI-EAS443:3:59:1546:235#0/1  
CCCCTCTTGTGGAAAGCTTTCCTTGTGAATCACTTCTT  
+HWI-EAS443:3:59:1546:235#0/1  
aaa`\_aa`aabbabbababb`ab`ba`a\_abUa`a[X¥a`  
@HWI-EAS443:3:59:1691:1251#0/1  
TATAAGAATGATGGAAAGTGCAAAGCCAGAAGATTTGTCC  
+HWI-EAS443:3:59:1691:1251#0/1  
aaa]]XZ``\_X`a]`a`U``Uaaa[`aaa\_^V``\_\_U`VP  
@HWI-EAS443:3:59:419:828#0/1  
AGTGATTCCAAGAGGAAAGCTTTCACAAGAGGGGTCCAG  
+HWI-EAS443:3:59:419:828#0/1  
`bXaaa`baaab]¥abaaa[a`]TVa^V]]`]]\_RSYU[  
@HWI-EAS443:3:59:659:970#0/1  
CACTGATCTGGCCTGCGGATGCCTTTTGTGATTGGTATT  
+HWI-EAS443:3:59:659:970#0/1  
abaabababa`aaa`ab`^`a\_a`abaabU`aaVP^`  
@HWI-EAS443:3:59:722:1768#0/1  
AAGAAAGTGATTCCAAGAGGAAAGCTTTCACAAGAGGGG  
+HWI-EAS443:3:59:722:1768#0/1  
`b`a`aa]baaab`]\_\_b\_aabaabaaaaba^`\_¥Z]YSG  
@HWI-EAS443:3:59:787:590#0/1  
GTCGGATGTCCGTCTTCATTGTTCCCGCTGAATGCTGCC  
+HWI-EAS443:3:59:787:590#0/1  
aa`a\_aa`]]a`R\_\_`aZ`aaa]\_`\_aY^\_aW¥SUPQ[RW



@HWI-EAS443:3:5:1169:460#0/1  
GAAAGTGATTCCAAGAGGAAAGCTTTCCACAAGAGGGGTC  
+HWI-EAS443:3:5:1169:460#0/1  
a`aaaXaa``\_`\_`¥`\_\_a`\_^a]ZZ^^a]\_\_]^]^ZX  
@HWI-EAS443:3:5:1258:716#0/1  
CTTCTGGCTTTGCACTTTCCATCATTCTTATAACTTCTGT  
+HWI-EAS443:3:5:1258:716#0/1  
ab^¥`^W]TP[YIWRaa^]¥0¥Y^aa\_`¥¥[`YR^`\_\_¥B  
@HWI-EAS443:3:5:1437:424#0/1  
GAAAGTGATTCCAAGAGGAAAGCTTTCCACAAGAGGGGTC  
+HWI-EAS443:3:5:1437:424#0/1  
aab^`Yb\_T\_aP\_[Rbaaaaaa\_``^]\_^`Y`]^`\_X`UB  
@HWI-EAS443:3:5:1495:767#0/1  
AGTGATTCCAAGAGGAAAGCTTTCCACAAGAGGGGTCCAG  
+HWI-EAS443:3:5:1495:767#0/1  
`¥[\_baa`a¥T¥bb\_`[^`bbba\_V¥X`V]\_`¥\_PYWIZb  
@HWI-EAS443:3:5:219:188#0/1  
GAACAATGAAGGACGGACATCCGACATGCGAACAGAAGTT  
+HWI-EAS443:3:5:219:188#0/1  
aaa]aaaa\_`aX^]`a\_^`VY`\_X]\_aU^YZ\_^\_YY\_V^  
@HWI-EAS443:3:5:264:611#0/1  
TCTGGACCCCTCTTGTGGAAAGCTTTCTTCTTGAATCAC  
+HWI-EAS443:3:5:264:611#0/1  
a]aba]`\_\_`a`\_a\_[``]R\_TZ^^^\_\_`^`\_a``\_\_\_\_V  
@HWI-EAS443:3:5:300:1213#0/1  
AATCTCCCTTTTGAAGAGCAACCGTTATGGCAGCATTCA  
+HWI-EAS443:3:5:300:1213#0/1  
]bbbb\_bbbabbaabbaaba`a[b\_aa`b\_\_a[IFZZBB  
@HWI-EAS443:3:5:310:617#0/1  
GTTCGCATGTCCGATGTCCGTCCTTCATTGTTCCCGCTGA  
+HWI-EAS443:3:5:310:617#0/1  
aT^[a\_^aaYY`a\_¥\_TUU`MIWY\_X[[`ZNYW^Z^¥U¥B  
@HWI-EAS443:3:5:337:1336#0/1  
CCCTCTTGTGGAAAGCTTTCTTCTTGAATCACTTTCTTT  
+HWI-EAS443:3:5:337:1336#0/1  
aab`abba^aababaaaba\_abaaabaaa`a^aa\_`a`a  
@HWI-EAS443:3:5:444:1534#0/1  
CACTGATCTGGCCTGCGGATGCCTTTTGTGATTGGTATT  
+HWI-EAS443:3:5:444:1534#0/1  
abbbbbbbbaabb`abbaab\_abbbbaabaaabZaQaba  
@HWI-EAS443:3:5:461:1712#0/1  
CAATGAAGGACGGACATCCGACATGCGAACAGAAGTTATA  
+HWI-EAS443:3:5:461:1712#0/1  
]aXX\_WIX¥\_ZUaUaa`\_`ba[W^baUS\_aa^]K\_Y]Ta`  
@HWI-EAS443:3:5:52:1860#0/1  
GAGCAACCGTTATGGCAGCATTGAGCGGAACAATGAAGG  
+HWI-EAS443:3:5:52:1860#0/1  
`baabbaUaabba\_``a\_S]¥aaaSV]a¥YUF¥`XXY^BB  
@HWI-EAS443:3:5:538:391#0/1  
GGACCAGGAGTGGAGGAAATACCAATCAACAAAAGGCATC

+HWI-EAS443:3:5:538:391#0/1  
aabbabbbab^bbbbabbbb\_bbbbbababaaababba`  
@HWI-EAS443:3:5:65:36#0/1  
AGGAAATACCAATCAACAAAAGGCATCCGCAGGCCAGATC  
+HWI-EAS443:3:5:65:36#0/1  
^¥\_aW[aa][ab`a]Y[]^W^`^]a`¥`\_\_]Z¥\_`X`BB  
@HWI-EAS443:3:5:719:1038#0/1  
GGTTTCCACATTCTCATTTGAAGCAATCTGGACCCCTCTT  
+HWI-EAS443:3:5:719:1038#0/1  
aba]bbabR^aa¥a`abbaaZ`a[\_]ab]YYaW\_a\_]\_aB  
@HWI-EAS443:3:5:910:457#0/1  
GGAGGAAATACCAATCAACAAAAGGCATCCGCAGGCCAGA  
+HWI-EAS443:3:5:910:457#0/1  
a\_abba]ba`[\_`¥`\_aa]aaa`\_````V^a¥\_]ZR]``B  
@HWI-EAS443:3:60:1032:831#0/1  
CTCATTTGAAGCAATCTGGACCCCTCTTGTGGAAAGCTTT  
+HWI-EAS443:3:60:1032:831#0/1  
a\_aaaa\_a`]¥¥`¥a`]a`\_¥[^Z\_\_\_^TTT][U¥VY^^  
@HWI-EAS443:3:60:1081:1851#0/1  
TTCCAGGGTATTGGAGTCCATGGTTTCCACATTCTCATTT  
+HWI-EAS443:3:60:1081:1851#0/1  
a`a`\_aa\_X`aa`[\_^\_\_`aa¥`Y`^\_\_W`a\_0\_]\_\_\_\_`  
@HWI-EAS443:3:60:1201:146#0/1  
GAAATACCAATCAACAAAAGGCATCCGCAGGCCAGATCAG  
+HWI-EAS443:3:60:1201:146#0/1  
aaaaa`\_]aaa`\_U`^`^`^`^`^]\_]W\_[WVW^WWWV[  
@HWI-EAS443:3:60:1217:617#0/1  
CTTTCCACAAGAGGGTCCAGATTGCTTCAAATGAGAATG  
+HWI-EAS443:3:60:1217:617#0/1  
abbbabaabbbabaaaaabbbababab`baaaaa`aaa  
@HWI-EAS443:3:60:1276:1674#0/1  
GAAAGTGATTCCAAGAGGAAAGCTTTCCACAAGAGGGGTC  
+HWI-EAS443:3:60:1276:1674#0/1  
¥abbb`\_abbbabb`bba`b`b]aba`a^`bbabba[\_a[  
@HWI-EAS443:3:60:1296:1659#0/1  
CCAGATTGCTTCAAATGAGAATGTGGAAACCATGGACTCC  
+HWI-EAS443:3:60:1296:1659#0/1  
abbbabb`abbaab\_aabbbbbb`baaabbabbb\_a¥ab^  
@HWI-EAS443:3:60:143:836#0/1  
GGCATGCCACTCTGCTGCATTTGAAGATTTAAGAGTATCA  
+HWI-EAS443:3:60:143:836#0/1  
^aaa]Xaa[`aZ\_`a][M]b^¥N^U]\_`aaZM¥aX]¥V¥  
@HWI-EAS443:3:60:1493:408#0/1  
GAAGGACGGACATCCGACATGCGAACAGAAGTTATAAGAA  
+HWI-EAS443:3:60:1493:408#0/1  
a\_````\_```\_^`aX^`^^`\_Z\_V]]^aX]\_^\_Y\_]Y^]`  
@HWI-EAS443:3:60:1502:716#0/1  
TTGGAGTCCATGGTTTCCACATTCTCATTTGAAGCAATCT  
+HWI-EAS443:3:60:1502:716#0/1  
aaaaaa^aaaaaaV`aa`aaaaa\_\_^a`^`aa\_^\_a^]\_]\_

@HWI-EAS443:3:60:1570:1467#0/1  
GCAGCATTGACGGGAACAATGAAGGACGGACATCCGACA  
+HWI-EAS443:3:60:1570:1467#0/1  
aabbXaa\_aaaaaab`a`a\_]a\_\_`Y\_`aV]\_\_\_]U\_\_X\_  
@HWI-EAS443:3:60:1583:1100#0/1  
CTGGCTTTGCACTTTCCATCATTCTTATAACTTCTGTTCG  
+HWI-EAS443:3:60:1583:1100#0/1  
a][aa`baaa`\_a\_a`\_aaa\_aa\_a`aaZ`^aa]a`\_`^  
@HWI-EAS443:3:60:1653:152#0/1  
TGGCATGCCACTCTGCTGCATTTGAAGATTTAAGAGTATC  
+HWI-EAS443:3:60:1653:152#0/1  
abbabbb`\_baaaab\_bbaabbbb```aabaa`baa^aa\_  
@HWI-EAS443:3:60:1768:753#0/1  
CTGCGGATGCCTTTTGTGATTGGTATTTCCCTCCACTCCT  
+HWI-EAS443:3:60:1768:753#0/1  
aababbaabaaaaabb`a^`abba\_aaaaa]`a\_a``^¥^  
@HWI-EAS443:3:60:189:825#0/1  
CCGAGGCCAGATCAGTGTGCAGCCTACATTCTCAGTGCA  
+HWI-EAS443:3:60:189:825#0/1  
a^RZW`]]\_YXV[[LRNOQ]YXPRUYYZSTZYZNOVRR]N  
@HWI-EAS443:3:60:202:100#0/1  
GGAGGAAATACCAATCAACAAAAGGCATCCGAGGCCAGA  
+HWI-EAS443:3:60:202:100#0/1  
ab¥baaaaaa\_\_a`\_`a`¥\_\_¥[Z[V\_`^¥¥¥^¥¥¥WVYWT  
@HWI-EAS443:3:60:288:865#0/1  
CAGGCCAGATCAGTGTGCAGCCTACATTCTCAGTGCAGCG  
+HWI-EAS443:3:60:288:865#0/1  
]Mab`aaa\_RXZ`MY[a\_a¥QT\_XZ\_\_^¥^[Z\_S\_¥T¥XZ  
@HWI-EAS443:3:60:295:1458#0/1  
AAATACCAATCAACAAAAGGCATCCGAGGCCAGATCAGT  
+HWI-EAS443:3:60:295:1458#0/1  
aa\_Z\_a]aaaa`aY`a]SV]]`[¥[X^]W^S¥[YUXNZTU  
@HWI-EAS443:3:60:348:902#0/1  
GTCCGATGTCCGTCCTTCATTGTTCCCGCTGAATGCTGCC  
+HWI-EAS443:3:60:348:902#0/1  
^SY¥^YRTOU^RRVZVTWPKSYT¥P¥XHWVVOYBBBBBBB  
@HWI-EAS443:3:60:465:338#0/1  
CGCATGTCGGATGTCCGTCCTTCATTGTTCCCGCTGAATG  
+HWI-EAS443:3:60:465:338#0/1  
aa`bbab^`a]ba¥`\_aab\_abaa`bbaa\_aaa¥^a``\_\_  
@HWI-EAS443:3:60:485:1155#0/1  
GACCCCTCTTGTGGAAAGCTTTCCCTCTTGAATCACTTTC  
+HWI-EAS443:3:60:485:1155#0/1  
][abbbbbbbba`\_a`\_`\_babaaabaaaa^aaaaaaaaa  
@HWI-EAS443:3:60:508:711#0/1  
CACTGAGAATGTAGGCTGCACACTGATCTGGCCTGCGGAT  
+HWI-EAS443:3:60:508:711#0/1  
\_U\_a]VXYI^^]\_¥\_Y\_]TY]UQY`^]]]\_\_V[[Z[Z[NP  
@HWI-EAS443:3:60:558:1028#0/1  
GTCCGTCCTTCATTGTTCCCGCTGAATGCTGCCATAACGG

+HWI-EAS443:3:60:558:1028#0/1  
a\_`\_`Va\_a\_\_W]aaZ[a^¥Z\_\_\_\_\_^^Z^^¥[[^]]\_--  
@HWI-EAS443:3:60:730:226#0/1  
TCCACATTCTCATTTGAAGCAATCTGGACCCCTCTTGTGG  
+HWI-EAS443:3:60:730:226#0/1  
aaaaaaaaaaaa`aa````\_`^\_\_\_\_\_^^]^\_Z^]]Y]U  
@HWI-EAS443:3:60:910:1428#0/1  
ATCTCCCTTTTGAAGAGCAACCGTTATGGCAGCATTTCAG  
+HWI-EAS443:3:60:910:1428#0/1  
abba^^^b\_^aaaaa`aaaa\_a`^aaa]Z[aYEPZUPXT  
@HWI-EAS443:3:61:1047:858#0/1  
CCGCTGAATGCTGCCATAACGGTTGCTCTTTCAAAGGGA  
+HWI-EAS443:3:61:1047:858#0/1  
aabbbb[abbabaabbbbbaabbb\_\_aabbb\_\_aab`a^`  
@HWI-EAS443:3:61:1128:285#0/1  
GACCCCTCTGTGGAAAGCTTTCCTCTTGAATCACTTTC  
+HWI-EAS443:3:61:1128:285#0/1  
aa^¥a\_\_\_aaZZ]U[\_`^^a\_a`a\_\_]\_Z[VURTW]YW  
@HWI-EAS443:3:61:1168:773#0/1  
GAAAGTGATTCCAAGAGGAAAGCTTCCACAAGAGGGGTC  
+HWI-EAS443:3:61:1168:773#0/1  
a`V`^a^a\_aa\_`\_`\_a`]`\_`\_\_\_\_\_¥W`]XZ^WYXXU  
@HWI-EAS443:3:61:117:387#0/1  
AAGAGGAAAGAAAGTGATTCCAAGAGGAAAGCTTCCACA  
+HWI-EAS443:3:61:117:387#0/1  
`baaababbbbaaaa^aa`a\_0J[aa^aYY`\_\_\_\_\_^^`]-  
@HWI-EAS443:3:61:1333:138#0/1  
CCCCTCTGTGGAAAGCTTTCCTCTTGAATCACTTTCCT  
+HWI-EAS443:3:61:1333:138#0/1  
ab`ababbbbbbbaabaaababbbabbbba\_a]¥\_aaaY`a  
@HWI-EAS443:3:61:1405:771#0/1  
CCAGGAGTGAGGAAATACCAATCAACAAAAGGCATCCGC  
+HWI-EAS443:3:61:1405:771#0/1  
abbbb]babbbbbbba`abbb`^X^`a`VXXaaPPQM  
@HWI-EAS443:3:61:1414:90#0/1  
GAGGAAAGAAAGTGATTCCAAGAGGAAAGCTTCCACAAG  
+HWI-EAS443:3:61:1414:90#0/1  
a\_^\_RYY`OVWYLXXUX]^O^W]^¥YBBBBBBBBBBBBB  
@HWI-EAS443:3:61:1417:591#0/1  
GTCCGTCCTTCATTGTTCCCGCTGAATGCTGCCATAACGG  
+HWI-EAS443:3:61:1417:591#0/1  
\_UY¥`[][^Y]]`]U]^`a^a]¥¥]^\_[^U^[[RURT  
@HWI-EAS443:3:61:1509:409#0/1  
CTTGTGGAAAGCTTTCCTCTTGAATCACTTTCCTTCTCCTC  
+HWI-EAS443:3:61:1509:409#0/1  
abaa\_bbabbbabbb^bbbbbba\_aabbabaa`aab^aaS  
@HWI-EAS443:3:61:1593:536#0/1  
CCAGGGTATTGGAGTCCATGGTTTCCACATTCTCATTTGA  
+HWI-EAS443:3:61:1593:536#0/1  
aaaa`babab[`a]Xaababa^bbbbbbaa``[¥\_a`a^W

@HWI-EAS443:3:61:1716:1973#0/1  
CAAGTTTCATAAGAGGAAAGAAAGTGATTCCAAGAGGAAA  
+HWI-EAS443:3:61:1716:1973#0/1  
P\_`^bbaabbbbbbabbbbabab`abbbbaababbaabaa  
@HWI-EAS443:3:61:1750:399#0/1  
AAAGAAAGTGATTCCAAGAGGAAAGCTTTCCACAAGAGGG  
+HWI-EAS443:3:61:1750:399#0/1  
abbbbaabbababaaab`abbaababaaaaaa^`\_a\_`^]  
@HWI-EAS443:3:61:181:896#0/1  
GACATGCGAACAGAAGTTATAAGAATGATGGAAAGTGCAA  
+HWI-EAS443:3:61:181:896#0/1  
a`^`a¥`P`YZ`\_Y\_WY[`]HZZW^`\_a\_XX¥¥ZZZZ]  
@HWI-EAS443:3:61:190:1387#0/1  
GTCCGATGTCCGCTCCTTCATTGTTCCCGCTGAATGCTGCC  
+HWI-EAS443:3:61:190:1387#0/1  
aVb`[L[TO[VMN]ZX¥\_VU\_TRKVabBBBBBBBBBBBBBBB  
@HWI-EAS443:3:61:271:454#0/1  
AAGGACCAGGAGTGGAGGAAATACCAATCAACAAAAGGCA  
+HWI-EAS443:3:61:271:454#0/1  
abbbbaabba]bZ`aaba^]V^]a`^Z]````a`\_] [¥\_a  
@HWI-EAS443:3:61:404:367#0/1  
GCTTTGCACTTTCCATCATTCTTATAACTTCTGTTCGCAT  
+HWI-EAS443:3:61:404:367#0/1  
aa\_`a`a]^`\_`¥^¥a`[^\_]ZPXX[^\_^^\_AY]^ZXZY  
@HWI-EAS443:3:61:678:1849#0/1  
GATACTCTTAAATCTTCAAATGCAGCAGAGTGGCATGCCA  
+HWI-EAS443:3:61:678:1849#0/1  
aa`a¥W\_aY`aa]R[`]YWZ[\_a] [] [ [¥[LTQRUUXWOX  
@HWI-EAS443:3:61:800:756#0/1  
GTTTCATAAGAGGAAAGAAAGTGATTCCAAGAGGAAAGCT  
+HWI-EAS443:3:61:800:756#0/1  
aW`aZ^[`]a¥aaXY\_\_R\_\_\_Y]KRX\_W[^\_XZ]¥V]ZT  
@HWI-EAS443:3:61:853:372#0/1  
CATTGTTCCCGCTGAATGCTGCCATAACGGTTGCTCTTTC  
+HWI-EAS443:3:61:853:372#0/1  
abb`bZH]a[]^aYRR^aaabba`a^[ZV[ZZ`X^[SYXD  
@HWI-EAS443:3:62:1040:1610#0/1  
AGCAGATACTGGGCCATAAGGACCAGGAGTGGAGGAAATA  
+HWI-EAS443:3:62:1040:1610#0/1  
\_`^`ba\_]¥XZ]W`Z[aa^]W¥a[]U`¥aV¥¥`]TR`aaa  
@HWI-EAS443:3:62:1067:409#0/1  
GAAAGTGATTCCAAGAGGAAAGCTTTCCACAAGAGGGGTC  
+HWI-EAS443:3:62:1067:409#0/1  
a`][aS\_Q`\_`^`¥^`^`\_`^`\_`Z^`^`\_`^`^`\_`ZZ  
@HWI-EAS443:3:62:1199:745#0/1  
ATCAAGTTTCATAAGAGGAAAGAAAGTGATTCCAAGAGGA  
+HWI-EAS443:3:62:1199:745#0/1  
abbbabaaaaaaa\_ab`aaaaa`aZaaaaaaaYRa\_`\_  
@HWI-EAS443:3:62:180:729#0/1  
TGATTCCAAGAGGAAAGCTTTCCACAAGAGGGTCCAGAT

+HWI-EAS443:3:62:180:729#0/1  
¥baa\_ab`Y\_ab`]]`aaaa\_aabab^a]\_abaWXHPZYS  
@HWI-EAS443:3:62:254:949#0/1  
GTTCGCATGTCCGATGTCCGCCTTCATTGTCCCGCTGA  
+HWI-EAS443:3:62:254:949#0/1  
a\_aaa`a`W`\_\_V\_\_U^^\_QZVZ\_^\_\_^[SW¥\_¥W^WRN  
@HWI-EAS443:3:62:385:521#0/1  
GTCCAGATTGCTTCAAATGAGAATGTGGAAACCATGGACT  
+HWI-EAS443:3:62:385:521#0/1  
aaaaaa\_Taaaaaba`\_]a`aa^\_R\_]a`^`^\_U\_^R  
@HWI-EAS443:3:62:411:1746#0/1  
ATTGGTATTTCTCCACTCCTGGTCCTTATGGCCAGTAT  
+HWI-EAS443:3:62:411:1746#0/1  
a\_]\_V[VW¥Z[aa`X^]aa]a\$¥SFZZ^[UZUHZT\_PRLVP  
@HWI-EAS443:3:62:420:1539#0/1  
GAAAGTGATTCCAAGAGGAAAGCTTTCCACAAGAGGGGTC  
+HWI-EAS443:3:62:420:1539#0/1  
a`aba^aa\_aaaabaaa]]aaUa``\_\_aaaa\_X\_]V^Q`  
@HWI-EAS443:3:62:623:1869#0/1  
GAAATACCAATCAACAAAAGGCATCCGCAGGCCAGATCAG  
+HWI-EAS443:3:62:623:1869#0/1  
aabbbbaabbaab`\_bbaabaUaFM[UNI^GRY[MMMZWY  
@HWI-EAS443:3:62:639:269#0/1  
AGGACCAGGAGTGGAGGAAATACCAATCAACAAAAGGCAT  
+HWI-EAS443:3:62:639:269#0/1  
a^a¥^[`\_a¥W0aa`aa^aaa¥\_\_\_\_¥`]\_a¥¥\_\_VVVV^¥  
@HWI-EAS443:3:62:658:1721#0/1  
AGTGATTCCAAGAGGAAAGCTTTCCACAAGAGGGGTCCAG  
+HWI-EAS443:3:62:658:1721#0/1  
a^`V[^`a]`aa`]YabaU`a``UZ\_a``V[¥[QF¥a\_\_  
@HWI-EAS443:3:62:764:34#0/1  
ACAGAAGTTATAAGAATGATGGAAAGTGCAAAGCCAGAAG  
+HWI-EAS443:3:62:764:34#0/1  
aaab]`baaaa\_ab\_¥aa[aba`a^a^a\_a\_\_Y\_Z\_a\_[`  
@HWI-EAS443:3:62:814:1526#0/1  
AGTGATTCCAAGAGGAAAGCTTTCCACAAGAGGGGTCCAG  
+HWI-EAS443:3:62:814:1526#0/1  
Z¥^^\_a`abbaaa\_Q`aa\_]```]Y^[\_X\_^YY[XUaaa^  
@HWI-EAS443:3:62:929:1827#0/1  
ATAAGAATGATGGAAAGTGCAAAGCCAGAAGATTTGTCCT  
+HWI-EAS443:3:62:929:1827#0/1  
aaa`aT`a\_Z¥\_^Va^[SYHa`^N\_N`a`\_]ZNNW^[U¥  
@HWI-EAS443:3:62:978:257#0/1  
CTTTTGAAAGAGCAACCGTTATGGCAGCATTTCAGCGGGAA  
+HWI-EAS443:3:62:978:257#0/1  
abbbbaababbbbaaaaaaaaaaaaa`\_a`SXY`YP¥N\_\_`N[  
@HWI-EAS443:3:63:1148:1464#0/1  
GAGGAAAGAAAGTGATTCCAAGAGGAAAGCTTTCCACAAG  
+HWI-EAS443:3:63:1148:1464#0/1  
¥\_aa]Y`ba\_bV]aW\_aabba`a`a[a\_`b\_babbbba^b

@HWI-EAS443:3:63:1417:756#0/1  
GAAAGAAAGTGATTCCAAGAGGAAAGCTTTCCACAAGAGG  
+HWI-EAS443:3:63:1417:756#0/1  
a\_\_aa\_\_a`Z``a^^`a^\_\_\_`a^Z¥Z^^]R\_V\_ZZZ`]  
@HWI-EAS443:3:63:1586:156#0/1  
GTTATAAGAATGATGGAAAGTGCAAAGCCAGAAGATTTGT  
+HWI-EAS443:3:63:1586:156#0/1  
aab`¥``]]`aa¥\_\_\_^aa\_X``^`VOS]\_YZ^\_^]]\_X  
@HWI-EAS443:3:63:272:519#0/1  
CGCTGCACTGAGAATGTAGGCTGCACACTGATCTGGCCTG  
+HWI-EAS443:3:63:272:519#0/1  
abbaabaaaaa`]`b]W``aaaaa`a^`\_`a^\_a¥¥^^  
@HWI-EAS443:3:63:665:929#0/1  
CCGTCCTTCATTGTTCCCGCTGAATGCTGCCATAACGGTT  
+HWI-EAS443:3:63:665:929#0/1  
aa^aabba````a`bbba]aaV]\_aaaaaa^`^``[¥  
@HWI-EAS443:3:63:673:849#0/1  
CACTGAGAATGTAGGCTGCACACTGATCTGGCCTGCGGAT  
+HWI-EAS443:3:63:673:849#0/1  
a]aaaU^a)`XQX¥`[aa`Z\_J\_\_a`VMJR^T^¥[SZX]B  
@HWI-EAS443:3:63:708:427#0/1  
GAAGGACGGACATCCGACATGCGAACAGAAGTTATAAGAA  
+HWI-EAS443:3:63:708:427#0/1  
VV^¥¥^abb`ZGR\_b`a`aa¥aX\_aX¥VZ`X``^K[bZY  
@HWI-EAS443:3:63:837:410#0/1  
GTTTCATAAGAGGAAAGAAAGTGATTCCAAGAGGAAAGCT  
+HWI-EAS443:3:63:837:410#0/1  
a[aa^aabaaa^`^aa^aa`a]a]```\_\_`[\_Y\_\_]`\_\_  
@HWI-EAS443:3:63:875:75#0/1  
CTTTTGAAAGAGCAACCGTTATGGCAGCATTCCAGCGGGAA  
+HWI-EAS443:3:63:875:75#0/1  
abbbbb`[abab`a`ab\_aabaaaab¥S]]ZS\_T¥BBBB  
@HWI-EAS443:3:63:921:1131#0/1  
AGTGATTCCAAGAGGAAAGCTTTCCACAAGAGGGTCCAG  
+HWI-EAS443:3:63:921:1131#0/1  
YXN`\_aY¥bb`Xaaaa`\_aaaWOY\_a¥]`^\_a[aN`Ta`  
@HWI-EAS443:3:63:923:406#0/1  
GATTGCTTCAAATGAGAATGTGGAAACCATGGACTCCAAT  
+HWI-EAS443:3:63:923:406#0/1  
aa`aaaaaaaaa`a`aaaaXaa\_\_aaaa`a`a`]a`a`a]  
@HWI-EAS443:3:63:96:1124#0/1  
CCGCTGAATGCTGCCATAACGGTTGCTCTTTCAAAGGGA  
+HWI-EAS443:3:63:96:1124#0/1  
[aabb\_W^a[```a`]a]^¥a\_Za`V]^`VQRV`Z^^V  
@HWI-EAS443:3:64:1131:147#0/1  
GTTTCCACATTCTCATTTGAAGCAATCTGGACCCCTCTTG  
+HWI-EAS443:3:64:1131:147#0/1  
a`aa`aaaaa\_a`aaa\_^`\_`¥`X\_^^\_] [XZWYX]  
@HWI-EAS443:3:64:1166:1522#0/1  
CATGCCACTCTGCTGCATTTGAAGATTTAAGAGTATCAAG

+HWI-EAS443:3:64:1166:1522#0/1  
aaWZV`b`\_`aX\_aaaaa]YSGT^`^a¥W¥\_[DT\_a\_[`  
@HWI-EAS443:3:64:1337:327#0/1  
AATCAACAAAAGGCATCCGCAGGCCAGATCAGTGTGCAGC  
+HWI-EAS443:3:64:1337:327#0/1  
aabaaaZaa```Wb`¥Z`\_Q¥Z`¥NWZSZX¥SWVS¥VW¥V  
@HWI-EAS443:3:64:1364:315#0/1  
TACCAATCAACAAAAGGCATCCGCAGGCCAGATCAGTGTG  
+HWI-EAS443:3:64:1364:315#0/1  
\_`P`bbaba¥T``a^^)`¥L¥[a`\_`VY¥`\_¥¥X`\_`Z^[\_  
@HWI-EAS443:3:64:1499:2027#0/1  
CTTTCCTCTTGAATCACTTTCCTTCTTCTTATGAACTT  
+HWI-EAS443:3:64:1499:2027#0/1  
^a``WLYaZY^WSZaa\_YR`b\_^¥bXN\_aa^b^Q``^G[`  
@HWI-EAS443:3:64:174:1320#0/1  
TTTTGAAAGAGCAACCGTTATGGCAGCATTTCAGCGGGAAC  
+HWI-EAS443:3:64:174:1320#0/1  
]bba``bb`\_`baQ\_aa\_aaa`]a`]WMT[UMNP[X^BBB  
@HWI-EAS443:3:64:1750:1166#0/1  
AAGGACCAGGAGTGGAGGAAATACCAATCAACAAAAGGCA  
+HWI-EAS443:3:64:1750:1166#0/1  
aa`[aaaa`b`b]b`\_`\_`a\_aaa^Tb`a\_a`^a`^`\_UZa  
@HWI-EAS443:3:64:208:930#0/1  
AGTGATTCCAAGAGGAAAGCTTCCACAAGAGGGGTCCAG  
+HWI-EAS443:3:64:208:930#0/1  
JPNRPR¥```S`\_`\_bba]Z[SX`UNX]PRRH¥aXNGNS\_  
@HWI-EAS443:3:64:280:937#0/1  
GTTTCATAAGAGGAAAGAAAGTGATTCCAAGAGGAAAGCT  
+HWI-EAS443:3:64:280:937#0/1  
`Y`a`^`^`^`^`^`\_¥[Z]V[¥^`\_`^]WY\_`^¥¥¥¥]]¥  
@HWI-EAS443:3:64:314:719#0/1  
CGCTGAATGCTGCCATAACGGTTGCTCTTTCAAAAGGGAG  
+HWI-EAS443:3:64:314:719#0/1  
aa^Z\_a`\_aaa`aa]^`^QVa`P¥[PRNZYXTX]RTZ[PLS  
@HWI-EAS443:3:64:554:921#0/1  
AAGAAAGTGATTCCAAGAGGAAAGCTTCCACAAGAGGGG  
+HWI-EAS443:3:64:554:921#0/1  
\_J`\_ZaZPW[Y\_aaa`X]S][`\_`R¥RW\_W]\_``\_aXNZU  
@HWI-EAS443:3:64:647:190#0/1  
TGTCCGTCCTTCATTGTTCCCGCTGAATGCTGCCATAACG  
+HWI-EAS443:3:64:647:190#0/1  
`\_Vbbb`ba`aaa`bba[[`aU\_¥XZV^]\_aM[^U\_Saa`  
@HWI-EAS443:3:64:795:216#0/1  
CTTTTGTGATTGGTATTTCCCTCCACTCCTGGTCCTTATG  
+HWI-EAS443:3:64:795:216#0/1  
abbabbbbabbbbaa]abaaaaabaaa`aa\_Z^aa``]^  
@HWI-EAS443:3:64:919:875#0/1  
TCTTTCCTCTTATGAACTTGATACTCTTAAATCTTCAAA  
+HWI-EAS443:3:64:919:875#0/1  
abbba\_bbaba`aa^aaaaa`aabaabbbaa\_aaaa¥^



@HWI-EAS443:3:64:93:802#0/1  
CTGCGGATGCCTTTTGTGATTGGTATTTCCCTCCACTCCT  
+HWI-EAS443:3:64:93:802#0/1  
aa]aa`Y`aa``aaaZ`a\_``aZ\_a\_`][^ZNV`[[\_V  
@HWI-EAS443:3:65:13:1700#0/1  
GCTGCACTGAGAATGTAGGCTGCACACTGATCTGGCCTGC  
+HWI-EAS443:3:65:13:1700#0/1  
abaaaba`aa`aaaW`Ya\_Zaa¥`]^\_ZU^[\_T`UW\_  
@HWI-EAS443:3:65:146:719#0/1  
CAGATTGCTTCAAATGAGAATGTGGAAACCATGGACTCCA  
+HWI-EAS443:3:65:146:719#0/1  
`Y`U`^]]a`b````aab`aa\_S``[T[[a\_`a¥¥\_[YY[  
@HWI-EAS443:3:65:1708:1641#0/1  
CGTCCTTCATTGTTCCCGCTGAATGCTGCCATAACGGTTG  
+HWI-EAS443:3:65:1708:1641#0/1  
ab\_`ab`babab]\_\_``aaaa`a^`a\_`\_`\_aa^R¥^[[¥  
@HWI-EAS443:3:65:1749:480#0/1  
ACCAATCAACAAAAGGCATCCGCAGGCCAGATCAGTGTGC  
+HWI-EAS443:3:65:1749:480#0/1  
aaaaaa``V`a`X]]]^`[^UKXUVYP¥OTBBBBBBBB  
@HWI-EAS443:3:65:528:2003#0/1  
AGTGATTCCAAGAGGAAAGCTTTCCACAAGAGGGTCCAG  
+HWI-EAS443:3:65:528:2003#0/1  
a\_¥[`]¥aaaaSaX]^a``R]]]\_`W\_\_\_\_YNQMG\_\_U]  
@HWI-EAS443:3:65:544:94#0/1  
GAGCAACCGTTATGGCAGCATTGAGCGGAACAATGAAGG  
+HWI-EAS443:3:65:544:94#0/1  
aababaabbaababaaab]W]^JYUY`^aVaQaYM^¥Z^U  
@HWI-EAS443:3:65:626:437#0/1  
GAAAGTGATTCCAAGAGGAAAGCTTTCCACAAGAGGGGTC  
+HWI-EAS443:3:65:626:437#0/1  
^Y\_Z]Z]¥\_\_UV\_VLXPZZY\_`\_^GY\_\_``[Q]SZVNTT^  
@HWI-EAS443:3:65:644:48#0/1  
GCAACCGTTATGGCAGCATTGAGCGGAACAATGAAGGAC  
+HWI-EAS443:3:65:644:48#0/1  
aa````\_a\_`\_`aa^`^RHR]YZZUZ`ZDLQZUQXST¥YSS  
@HWI-EAS443:3:65:700:957#0/1  
CCCCTCTGTGGAAAGCTTTCCCTCTTGAATCACTTTCTT  
+HWI-EAS443:3:65:700:957#0/1  
]abb`babaaba^ababbaaabaaaa¥]aaabb`aaaaba  
@HWI-EAS443:3:65:720:572#0/1  
TGGCATGCCACTCTGCTGCATTTGAAGATTTAAGAGTATC  
+HWI-EAS443:3:65:720:572#0/1  
VT\_bbb`bbbbaa`baab¥ZYa`ba¥b\_\_aabZZ\_aZ^\_V  
@HWI-EAS443:3:65:771:57#0/1  
CGCATGTCGGATGTCCGTCCTTATTGTTCCCGCTGAATG  
+HWI-EAS443:3:65:771:57#0/1  
Z^b\_^]`X\_]OQ\_W\_]¥UU]^`^``T`W^]aZ[[[]]W0^  
@HWI-EAS443:3:65:82:270#0/1  
ATCCGACATGCGAACAGAAGTTATAAGAATGATGGAAAGT

+HWI-EAS443:3:65:82:270#0/1  
aa\_a`^`a\_\_`aXTZ`\_]`W]SZ¥M]ZX^\_Y¥^]Z]][X  
@HWI-EAS443:3:65:872:1778#0/1  
ATTGCGGGGAACAATGAAGGACGGACATCCGACATGCGA  
+HWI-EAS443:3:65:872:1778#0/1  
`[\_aaaab\_ab`aa`^^`a``aaa`a\_a`[``]`\_```^[[  
@HWI-EAS443:3:65:970:1541#0/1  
GAGGAAAGAAAGTGATTCCAAGAGGAAAGCTTCCACAAG  
+HWI-EAS443:3:65:970:1541#0/1  
]XU\_\_¥^¥U\_Z[OZY¥]aaZYV`\_]¥Y\_a]W\_`^[]^`\_  
@HWI-EAS443:3:66:1003:848#0/1  
GATGGCATGCCACTCTGCTGCATTTGAAGATTTAAGAGTA  
+HWI-EAS443:3:66:1003:848#0/1  
a¥a`[]^]a]ZS]]WZa^`a\_\_aa``]]]^]a^]S^^][W  
@HWI-EAS443:3:66:1021:711#0/1  
GAAACTTGATACTCTTAAATCTTCAAATGCAGCAGAGTGG  
+HWI-EAS443:3:66:1021:711#0/1  
¥YY``bba]\_]aXab¥`Z\_^aa`YZO^^¥[^a\_`Y`X``  
@HWI-EAS443:3:66:1079:1861#0/1  
TAAGGACCAGGAGTGGAGGAAATACCAATCAACAAAAGGC  
+HWI-EAS443:3:66:1079:1861#0/1  
\_b`aaUR\_a[a``G^``\_[[\_`W\_\_a`¥``\_a\_]S^V  
@HWI-EAS443:3:66:108:974#0/1  
GCTGCACACTGATCTGGCCTGCGGATGCCTTTTGTGATT  
+HWI-EAS443:3:66:108:974#0/1  
`a¥[a`baa`a¥aa¥`¥[a^X¥\_`UV¥ZWW¥U¥¥N¥ZWS¥  
@HWI-EAS443:3:66:1117:128#0/1  
AGTGATTCCAAGAGGAAAGCTTCCACAAGAGGGGTCCAG  
+HWI-EAS443:3:66:1117:128#0/1  
[aaa\_aaaa¥``a]aYYa\_`aaa\_SZM^Ua¥^^W¥YPUZ\_  
@HWI-EAS443:3:66:1135:1159#0/1  
GTTTCATAAGAGGAAAGAAAGTGATTCCAAGAGGAAAGCT  
+HWI-EAS443:3:66:1135:1159#0/1  
\_aa`bbbbabb^[\`a\_a[\`^`\_aaaaa]]\_aaaaaaV^  
@HWI-EAS443:3:66:1158:738#0/1  
GAGGAAAGAAAGTGATTCCAAGAGGAAAGCTTCCACAAG  
+HWI-EAS443:3:66:1158:738#0/1  
a`aa`\_aa`PYa^a```\_\_\_\_`a\_\_[a`\_`¥¥`\_`^`\_\_\_\_\_  
@HWI-EAS443:3:66:1243:226#0/1  
AGTGATTCCAAGAGGAAAGCTTCCACAAGAGGGGTCCAG  
+HWI-EAS443:3:66:1243:226#0/1  
\_`^`baabbbb^W\_`a^`^aaba```aaaaaba`aV]Oaa  
@HWI-EAS443:3:66:12:1608#0/1  
ATGAGAATGTGGAAACCATGGACTCCAATACCCTGGAACT  
+HWI-EAS443:3:66:12:1608#0/1  
VPZ]aa^`[XaVaa\_aaa\_``\_a^a]Q\_\_YY\_`^`^YZ\_]`^  
@HWI-EAS443:3:66:14:795#0/1  
GAAAGTGATTCCAAGAGGAAAGCTTCCACAAGAGGGGTC  
+HWI-EAS443:3:66:14:795#0/1  
a``aa¥`]]`aaa¥M`]¥]]```a`\_`\_`¥^`\_`^`\_`¥U[]Y\_

@HWI-EAS443:3:66:1769:1825#0/1  
GTGGATGGCATGCCACTCTGCTGCATTTGAAGATTTAAGA  
+HWI-EAS443:3:66:1769:1825#0/1  
aSW\_RV]FYSY`\_S^]T[SXQ[TXRY[OTGY[O]W]Z]Q  
@HWI-EAS443:3:66:196:248#0/1  
GCCTTTTGTGATTGGTATTTCCCTCCACTCCTGGTCCTTA  
+HWI-EAS443:3:66:196:248#0/1  
aaaa`aba^aa`a\_¥\_]aa`a`a`\_aa\_\_]\_Z^^Y^^]]  
@HWI-EAS443:3:66:197:1581#0/1  
CCACATTCTCATTTGAAGCAATCTGGACCCCTCTTGTGGA  
+HWI-EAS443:3:66:197:1581#0/1  
abbaba\_b`\_a\_aZ[^PW`\_a\_a]]]¥¥\_Y^\_VRSVV¥  
@HWI-EAS443:3:66:211:1969#0/1  
CCCTTTTGAAAGAGCAACCGTTATGGCAGCATTAGCGGG  
+HWI-EAS443:3:66:211:1969#0/1  
aY]Q¥RSN]V[UZFXVY]BBBBBBBBBBBBBBBBBBBB  
@HWI-EAS443:3:66:244:1634#0/1  
GGTCCAGATTGCTTCAAATGAGAATGTGGAAACCATGGAC  
+HWI-EAS443:3:66:244:1634#0/1  
\_b¥ba¥`T^aab`a\_\_W`^aaaYZ^`S¥`\_]`aaa\_\_^^\_  
@HWI-EAS443:3:66:276:144#0/1  
TGTTGATTGGTATTTCCCTCCACTCCTGGTCCTTATGGCCC  
+HWI-EAS443:3:66:276:144#0/1  
^[aabaaaba]aaaaaa`\_aa\_a¥]\_\_\_[^`\_`\_]VRV^W  
@HWI-EAS443:3:66:572:251#0/1  
AACCGTTATGGCAGCATTAGCGGAACAATGAAGGACGG  
+HWI-EAS443:3:66:572:251#0/1  
aaaab`aaaaaaaaTXW\_¥[^¥^a\_Y\_X¥`VV[^\_QG[\_  
@HWI-EAS443:3:66:756:2045#0/1  
GCCTTTTGTGATTGGTATTTCCCTCCACTCCTGGTCCTTA  
+HWI-EAS443:3:66:756:2045#0/1  
abbb]ab¥Z`aTZ^¥¥Qaabaaaaa^`aa^`a\_S`^^^]  
@HWI-EAS443:3:66:862:205#0/1  
GAAACTTGATACTCTTAAATCTTCAAATGCAGCAGAGTGG  
+HWI-EAS443:3:66:862:205#0/1  
aaaa\_bbbaa`\_aaaaaaaa`aa`\_`\_`a[\_a\_`\_]^Y\_\_  
@HWI-EAS443:3:66:910:1395#0/1  
CTGTCATACTCCTCTGCATTGTCTCCGAAGAAATAAGACC  
+HWI-EAS443:3:66:910:1395#0/1  
aaa[`]aa`Y`^`^`]^`^\_]Ya\_a]]]````^]X¥]PY  
@HWI-EAS443:3:66:932:327#0/1  
TGGCTTTGCACTTTCCATCATTCTTATAACTTCTGTTCGC  
+HWI-EAS443:3:66:932:327#0/1  
]^`Y^\_aa`\_a]aaaaaaaa^aa`a\_¥a`^^`a`\_`aZ`^[W  
@HWI-EAS443:3:66:98:1407#0/1  
GCTGCACTGAGAATGTAGGCTGCACACTGATCTGGCCTGC  
+HWI-EAS443:3:66:98:1407#0/1  
ab\_^`aa`\_Z^`\_¥[UZZ`]a[^`^`^¥^Y]WQYY¥WU^  
@HWI-EAS443:3:67:1238:1342#0/1  
CAATGAAGGACGGACATCCGACATGCGAACAGAAGTTATA

+HWI-EAS443:3:67:1238:1342#0/1  
\_b¥\_a^`aaS]]a\_\_`b\_``baabaaa^Y]^a¥[```a\_a^  
@HWI-EAS443:3:67:1395:476#0/1  
CCCCTCTTGTGGAAAGCTTTCCTCTTGAATCACTTCTT  
+HWI-EAS443:3:67:1395:476#0/1  
a`^abbb`¥Y]\_aa^X^aa`P\_\_Z`aa¥LWaa¥[F¥aaa\_a  
@HWI-EAS443:3:67:1509:1206#0/1  
GTCCGATGTCCGTCCTTCATTGTTCCCGCTGAATGCTGCC  
+HWI-EAS443:3:67:1509:1206#0/1  
`^\_¥`]^aRRYaZQUabZ[a`¥[aY^\_\_\_^\_^\_ZTTZUWR  
@HWI-EAS443:3:67:164:948#0/1  
AAAGTGATTCCAAGAGGAAAGCTTCCACAAGAGGGTCC  
+HWI-EAS443:3:67:164:948#0/1  
^V\_\_S`P^`aaaa]a]]\_a`\_`\_\_`^\_^\_Y`\_`¥¥]]UX¥  
@HWI-EAS443:3:67:1782:345#0/1  
GTTGATTGGTATTTCCCTCCACTCCTGGTCCTTATGGCCCA  
+HWI-EAS443:3:67:1782:345#0/1  
a`aaaaa``\_aaaa`\_a`\_a]\_\_`\_`\_Y^Y\_\_^\_^VVT]V  
@HWI-EAS443:3:67:239:1686#0/1  
AAACTTGATACTCTTAAATCTTCAAATGCAGCAGAGTGGC  
+HWI-EAS443:3:67:239:1686#0/1  
\_abaZ¥a^a``baaaa^¥a`\_aaaa\_\_a`Uaa[\_NY\_S\_  
@HWI-EAS443:3:67:298:727#0/1  
GTTTCATAAGAGGAAAGAAAGTGATTCCAAGAGGAAAGCT  
+HWI-EAS443:3:67:298:727#0/1  
a[^UNXUOPWVF^TVS¥¥^SXZ`WYJ`YNTXa^[UWN] [\_  
@HWI-EAS443:3:67:307:963#0/1  
CTTCATTGTTCCCGCTGAATGCTGCCATAACGGTTGCTCT  
+HWI-EAS443:3:67:307:963#0/1  
¥¥Y\_[UZVUR`b]S]]SU`^`LH¥\_¥¥T^XXJKWZJOR[  
@HWI-EAS443:3:67:341:1437#0/1  
GGAAAGCTTTCACAAGAGGGTCCAGATTGCTTCAAATG  
+HWI-EAS443:3:67:341:1437#0/1  
[PU]XZbPJZU\_Y\_aa[TZ¥WRRQXP[a\_\_`aQ¥U]TNYW  
@HWI-EAS443:3:67:384:558#0/1  
GCACTTTCATCATTCTTATAACTTCTGTTCCGATGTCGG  
+HWI-EAS443:3:67:384:558#0/1  
aab]¥¥``aba\_a^aa]a]a\_Z]a\_\_\_a^``a`Y`Y[^Z  
@HWI-EAS443:3:67:394:472#0/1  
GATTGCTTCAAATGAGAATGTGGAAACCATGGACTCCAAT  
+HWI-EAS443:3:67:394:472#0/1  
abaa`aabaa`aZaaa`aa]a``\_`a`a`\_\_^\_]\_\_`\_  
@HWI-EAS443:3:67:429:1263#0/1  
GAAAGTGATTCCAAGAGGAAAGCTTTCACAAGAGGGGTC  
+HWI-EAS443:3:67:429:1263#0/1  
\_W\_aY¥T^abaTWQ¥]¥[]a\_a¥YXa^T[¥KV\_YNU¥LQ  
@HWI-EAS443:3:67:446:149#0/1  
CGTCCTTCATTGTTCCCGCTGAATGCTGCCATAACGGTTG  
+HWI-EAS443:3:67:446:149#0/1  
a^]^bbbVI\_\_¥\_b`aaU`T`[¥`¥^]a]MW``U\_aYLV^

@HWI-EAS443:3:67:455:554#0/1  
AAGAGGAAAGAAAGTGATTCCAAGAGGAAAGCTTTCCACA  
+HWI-EAS443:3:67:455:554#0/1  
X¥]\_a¥`aa^V^Z`WaKaZT^a\_]ab]`````\_ ]Z\_^\_  
@HWI-EAS443:3:67:557:682#0/1  
GCAGGCCAGATCAGTGTGCAGCCTACATTCTCAGTGCAGC  
+HWI-EAS443:3:67:557:682#0/1  
abaaab`\_`¥\_aX\_V^Waa`]Y]`aaa`a`\_^]`V`  
@HWI-EAS443:3:67:582:950#0/1  
GAAATACCAATCAACAAAAGGCATCCGCAGGCCAGATCAG  
+HWI-EAS443:3:67:582:950#0/1  
aa^Q\_`aaba`bb\_Y\_`^^a\_T]\_aa`aaa\_a`ZW][^aX  
@HWI-EAS443:3:67:656:24#0/1  
GAAACTTGATACTCTTAAATCTTCAAATGCAGCAGAGTGG  
+HWI-EAS443:3:67:656:24#0/1  
`S[¥]`]a\_`\_`\_`\_WVY]^`\_a\_^]\_`\_`\_Y\_]\_Z]]  
@HWI-EAS443:3:67:792:1020#0/1  
CCGCTGAATGCTGCCATAACGGTTGCTCTTTCAAAGGGA  
+HWI-EAS443:3:67:792:1020#0/1  
`¥¥]ONOH^W\_P]]X\_X]SLYZRQ[BBBBBBBBBBBBBBB  
@HWI-EAS443:3:67:803:2008#0/1  
AGGCTGCACACTGATCTGGCCTGCGGATGCCTTTTGTGA  
+HWI-EAS443:3:67:803:2008#0/1  
`^ZaZ^aa`aXa`aZ[ZU][\_\_¥ZOT[Z[S[\_\_\_^U\_QV  
@HWI-EAS443:3:67:834:975#0/1  
GGCAGCATTGCGGGAACAATGAAGGACGGACATCCGAC  
+HWI-EAS443:3:67:834:975#0/1  
aaabab`bbbaa`\_`a¥aaaaaa`[aaYY`a\_ZYP]Y¥¥Z  
@HWI-EAS443:3:67:880:1501#0/1  
ATTTCTCCACTCCTGGTCCTTATGGCCCAGTATCTGCTT  
+HWI-EAS443:3:67:880:1501#0/1  
`\_`\_`bbabbaaa`ZULV`a`^]`]`aWXT`^]\_^[[[  
@HWI-EAS443:3:67:99:1730#0/1  
GGCCTGCGGATGCCTTTTGTGATTGGTATTTCTCCACT  
+HWI-EAS443:3:67:99:1730#0/1  
aaabaab^\_MKZ]^XaaaWS^Q[^TUMVaV]]R JW[¥ZNV  
@HWI-EAS443:3:68:1436:36#0/1  
CCCTCTTGTTGAAAGCTTTCTCTTGAATCACTTTCTTT  
+HWI-EAS443:3:68:1436:36#0/1  
ababa`Z`¥b`Laa`abba^`aa]bb\_]aaa``aaa]aaa  
@HWI-EAS443:3:68:1453:875#0/1  
GGAGTGGAGGAAATACCAATCAACAAAAGGCATCCGCAGG  
+HWI-EAS443:3:68:1453:875#0/1  
`Xb[a`aaa\_a`\_`[^`¥^`¥`\_`^ZU[Z¥T¥¥T¥¥U  
@HWI-EAS443:3:68:1471:1560#0/1  
GATTGCTTCAAATGAGAATGTGGAAACCATGGACTCCAAT  
+HWI-EAS443:3:68:1471:1560#0/1  
[aTVPNX[U\_a^`WUWYab^X`YZQWT[T¥\_]UN`NV[`^  
@HWI-EAS443:3:68:1598:108#0/1  
AGTGATTCCAAGAGGAAAGCTTTCCACAAGAGGGTCCAG

+HWI-EAS443:3:68:1598:108#0/1  
ab[bab¥`aa\_baaaa`\_\_\_\_`[\_Q`\_a\_^\_]WVVP[\_  
@HWI-EAS443:3:68:191:1397#0/1  
GCCTGCGGATGCCTTTTGTGATTGGTATTTCCCTCCACTC  
+HWI-EAS443:3:68:191:1397#0/1  
]a]X`X0¥Y`ZPZa¥¥¥ZRYZ]\_aaYH¥\_¥\_`\_`\_`aWT^  
@HWI-EAS443:3:68:338:221#0/1  
GACCCCTCTTGTTGAAAGCTTTCTCTTGAATCACTTTC  
+HWI-EAS443:3:68:338:221#0/1  
ZVa`^`\_`a`QZTY\_\_L¥aaa^QWYa`X¥XR`¥ZNTG^\_Z\_  
@HWI-EAS443:3:68:534:2022#0/1  
TCTCATTTGAAGCAATCTGGACCCCTCTTGTTGAAAGCTT  
+HWI-EAS443:3:68:534:2022#0/1  
]`[¥¥¥]ab][^aa`ab[aW\_abbaW\_X\_ZY\_\_`\_]TQRU  
@HWI-EAS443:3:68:56:2015#0/1  
ACCAATCAACAAAAGGCATCCGCAGGCCAGATCAGTGTGC  
+HWI-EAS443:3:68:56:2015#0/1  
`abbaab`^`]\_VV¥a`\_`a¥aSXTa`\_¥¥¥\_¥QYUY¥\_  
@HWI-EAS443:3:68:610:1028#0/1  
AAGTGATTCCAAGAGGAAAGCTTTCCACAAGAGGGGTCCA  
+HWI-EAS443:3:68:610:1028#0/1  
\_^`¥¥QZX\_a)`ZaY\_Y]a`aaa\_aaa\_aa\_\_TITUG\_[a  
@HWI-EAS443:3:68:724:318#0/1  
CCCTTTTGAAGAGCAACCGTTATGGCAGCATTCCAGCGGG  
+HWI-EAS443:3:68:724:318#0/1  
aaabaaabaababa`b\_aa^aaaa\_b`YTRX[[^Z^`Z  
@HWI-EAS443:3:68:761:767#0/1  
ATTGGTGTGGATGGCATGCCACTCTGCTGCATTTGAAGAT  
+HWI-EAS443:3:68:761:767#0/1  
]abaaa`\_a\_a]¥b]]^X]a[]YX\_]^^]¥Zaaa¥^^][Y  
@HWI-EAS443:3:68:80:1373#0/1  
GGAAAGAAAGTGATTCCAAGAGGAAAGCTTTCCACAAGAG  
+HWI-EAS443:3:68:80:1373#0/1  
abb`Uaabbb\_]aaabbbba^bZ`aa]aa\_\_aaaa\_`a¥a\_  
@HWI-EAS443:3:68:957:427#0/1  
GATGCCTTTTGTGATTGGTATTTCCCTCCACTCCTGGTCC  
+HWI-EAS443:3:68:957:427#0/1  
][Z]\_\_baabb^bbabb`^U\_abaabb`ab\_a`\_aa`¥]^  
@HWI-EAS443:3:68:95:384#0/1  
CATGCCACTCTGCTGCATTTGAAGATTTAAGAGTATCAAG  
+HWI-EAS443:3:68:95:384#0/1  
a¥aabbaaaaaa`a`[\_aaa\_\_a\_aaaaaaaW``¥`\_`  
@HWI-EAS443:3:68:973:700#0/1  
CAGATTGCTTCAAATGAGAATGTGGAAACCATGGACTCCA  
+HWI-EAS443:3:68:973:700#0/1  
abbabbbbbbbabbbbbbbabb`bbb`abaaaaaaaaaaaa  
@HWI-EAS443:3:68:984:916#0/1  
ATGAACTTGATACTCTTAAATCTTCAAATGCAGCAGAGT  
+HWI-EAS443:3:68:984:916#0/1  
a`\_S\_aab\_¥\_baababbba[`aaa```X\_aaa[a^[¥^T

@HWI-EAS443:3:69:1086:1048#0/1  
CCAGGGTATTGGAGTCCATGGTTTCCACATTCTCATTGA  
+HWI-EAS443:3:69:1086:1048#0/1  
aaZaYZPQ[^`\_b`YX`a¥Y¥R]a\_aa\_\_a`Waa[aa][[  
@HWI-EAS443:3:69:1238:1152#0/1  
CTTTCCTCTTGAATCACTTTCTTTCCTCTTATGAACTT  
+HWI-EAS443:3:69:1238:1152#0/1  
]HS¥Q¥a\_ZU`ba]]\_¥S¥T`X``Y]LTSaa\_a^X\_WLY`  
@HWI-EAS443:3:69:1306:1391#0/1  
AGATTGCTTCAAATGAGAATGTGGAAACCATGGACTCCAA  
+HWI-EAS443:3:69:1306:1391#0/1  
Z[aR]`ba\_[\_Z^]^abU¥U\_Z\_^[VYZX[]a]VQPDHUT  
@HWI-EAS443:3:69:1357:345#0/1  
CTTAAATCTTCAAATGCAGCAGAGTGGCATGCCATCCACA  
+HWI-EAS443:3:69:1357:345#0/1  
[\_`a¥¥¥[aba]b[`aa`b``\_`b¥`bab``^`aYQU^F^  
@HWI-EAS443:3:69:1673:1945#0/1  
CCTTTTCAAAGAGCAACCGTTATGGCAGCATTAGCGGGA  
+HWI-EAS443:3:69:1673:1945#0/1  
a]HVX\_aa\_ZLT]0[^HXJQKX^[NLZ[QMJRDOZBBBBB  
@HWI-EAS443:3:69:233:382#0/1  
GAAAGTGATTCCAAGAGGAAAGCTTCCACAAGAGGGGTC  
+HWI-EAS443:3:69:233:382#0/1  
a\_aZ¥Z`[a\_a``¥L]W\_^V`\_a`]^]\_\_X]ZR]]YXT\_  
@HWI-EAS443:3:69:424:812#0/1  
GAGCAACCGTTATGGCAGCATTAGCGGGAACAATGAAGG  
+HWI-EAS443:3:69:424:812#0/1  
`abbbbbbb]aaa]bbbb]X¥\_\_¥Z\_a`aXa^^]S0¥aSa  
@HWI-EAS443:3:69:450:450#0/1  
CTCTTAAATCTTCAAATGCAGCAGAGTGGCATGCCATCCA  
+HWI-EAS443:3:69:450:450#0/1  
aaaaaaaa`baaaaaa`a`a`[^`\_^`a`a`\_`\_^]^^\_  
@HWI-EAS443:3:69:45:1855#0/1  
CGCTGAATGCTGCCATAACGGTTGCTCTTTCAAAAGGGAG  
+HWI-EAS443:3:69:45:1855#0/1  
aaaWOWTaaba``a^`a^¥]S`¥]Z[]^aUYU^`Z`¥V]  
@HWI-EAS443:3:69:595:284#0/1  
ATTCCAAGAGGAAAGCTTTCACAAGAGGGGTCCAGATTG  
+HWI-EAS443:3:69:595:284#0/1  
ababb`\_]aa`aaaaaa`aa``\_``\_YZ\_X\_\_``^`^\_  
@HWI-EAS443:3:69:678:871#0/1  
CGCTGAATGCTGCCATAACGGTTGCTCTTTCAAAAGGGAG  
+HWI-EAS443:3:69:678:871#0/1  
Y\_`¥`SKa`\_W\_`¥Wa¥¥¥aaPabba\_Vb`U\_Q\_[a`¥Za  
@HWI-EAS443:3:69:700:2029#0/1  
AGTGATTCCAAGAGGAAAGCTTTCACAAGAGGGGTCCAG  
+HWI-EAS443:3:69:700:2029#0/1  
a^[aS\_\_bab`WbH¥]]a[aYaa`a\_\_ab\_a\_UGUIH\_aY  
@HWI-EAS443:3:6:1164:608#0/1  
AAAGGCATCCGCAGGCCAGATCAGTGTGCAGCCTACATTC

+HWI-EAS443:3:6:1164:608#0/1  
ab`baaba\_W\_a`a¥a`aaa]]^aUaUa^Y][Sa^Y\_a\_G  
@HWI-EAS443:3:6:1199:1618#0/1  
AAAGGCATCCGCAGGCCAGATCAGTGTGCAGCCTACATTC  
+HWI-EAS443:3:6:1199:1618#0/1  
^[\`b]MbbSaZR\_baaa`b]¥Y^a^aV¥PU]U^[aV\_S\_B  
@HWI-EAS443:3:6:121:744#0/1  
GAAATACCAATCAACAAAAGGCATCCGCAGGCCAGATCAG  
+HWI-EAS443:3:6:121:744#0/1  
abaabbaaaaaa\_`aa`¥a[aa\_\_a\_\_a\_\_a\_`\_\_\_\_  
@HWI-EAS443:3:6:1428:974#0/1  
AGGGTATTGGAGTCCATGGTTTCCACATTCTCATTTGAAG  
+HWI-EAS443:3:6:1428:974#0/1  
¥bbb[a]T]LJZ`a`aabbRabbZ^OJ`¥]aS^`bPb]¥B  
@HWI-EAS443:3:6:146:1053#0/1  
GTCCAGATTGCTTCAAATGAGAATGTGGAAACCATGGACT  
+HWI-EAS443:3:6:146:1053#0/1  
aaabbbbbbbaabbabbabbababab\_aaaa\_aaaaa\_`^`  
@HWI-EAS443:3:6:1481:567#0/1  
CATCCGACATGCGAACAGAAGTTATAAGAATGATGGAAAG  
+HWI-EAS443:3:6:1481:567#0/1  
aa¥]]][[ZS`[Ub[\_ZWVW\_¥G¥\_`P[^a\_^^`]]WYa  
@HWI-EAS443:3:6:170:825#0/1  
AGTGATTCCAAGAGGAAAGCTTCCACAAGAGGGTCCAG  
+HWI-EAS443:3:6:170:825#0/1  
aa`aaaaaaaa`baa`aaaaa`\_`a`a`\_`\_`^`]]`^^`  
@HWI-EAS443:3:6:255:899#0/1  
CATTGTTCCCGCTGAATGCTGCCATAACGGTTGCTCTTTC  
+HWI-EAS443:3:6:255:899#0/1  
U\_`YYUa`bSa\_G]\_¥[\_[bV\_\_a]\_\_aaUaa`aQ]a\_Y  
@HWI-EAS443:3:6:341:1501#0/1  
CAACTGTCATACTCCTCTGCATTGTCTCCGAAGAAATAAG  
+HWI-EAS443:3:6:341:1501#0/1  
a`V¥[GXU^ba]ab\_YaaY]a\_`G`a[\_XL\_``Ta^BBB  
@HWI-EAS443:3:6:460:586#0/1  
CGCTGCACTGAGAATGTAGGCTGCACACTGATCTGGCCTG  
+HWI-EAS443:3:6:460:586#0/1  
``Z`bbba`babaaaU^aaa\_aa\_aXaUYa\_`Oaaa\_`YW  
@HWI-EAS443:3:6:50:1990#0/1  
GAAAGTGATTCCAAGAGGAAAGCTTCCACAAGAGGGGTC  
+HWI-EAS443:3:6:50:1990#0/1  
^^a``XV[RW¥\_QXWTWVS]`VRSYOY¥RYBBBBBBBBBB  
@HWI-EAS443:3:6:588:1680#0/1  
GAGTGGAGGAAATACCAATCAACAAAAGGCATCCGCAGGC  
+HWI-EAS443:3:6:588:1680#0/1  
aVMFZ``]UWRQIRZPBbbbbbbbbbbbbbbbbbbbbbb  
@HWI-EAS443:3:6:744:1768#0/1  
CCCCTCTTGTTGAAAGCTTTCCTCTTGAATCACTTTCTT  
+HWI-EAS443:3:6:744:1768#0/1  
ab`abbaba[a\_ababaa\_aW\_baaa^ab\_a^aaa\_b\_`a



@HWI-EAS443:3:70:1356:1810#0/1  
ATTCAGCGGGAACAATGAAGGACGGACATCCGACATGCGA  
+HWI-EAS443:3:70:1356:1810#0/1  
abba\_X\_baaaa[a`aaaaZ`a\_\_a\_a`aa`\_\_W`Y`]  
@HWI-EAS443:3:70:1369:1387#0/1  
CAATGAAGGACGGACATCCGACATGCGAACAGAAAGTTATA  
+HWI-EAS443:3:70:1369:1387#0/1  
aa`a^`JTNa^H`ab¥^aaa`aYJaaaa]\_GZ\_\_a\_a^  
@HWI-EAS443:3:70:1415:377#0/1  
AGTGATTCCAAGAGGAAAGCTTTCCACAAGAGGGGTCCAG  
+HWI-EAS443:3:70:1415:377#0/1  
`bab\_aba`bbabaaabbaabab\_Ya^a`aab`\_\_\_\_V\_a  
@HWI-EAS443:3:70:1419:1267#0/1  
GCTTTCCACAAGAGGGGTCCAGATTGCTTCAAATGAGAAT  
+HWI-EAS443:3:70:1419:1267#0/1  
a`a``aZ]\_`aa`a`^`\_`baaa][a```\_[\_\_`a``]  
@HWI-EAS443:3:70:1431:64#0/1  
CGCTGCACTGAGAATGTAGGCTGCACACTGATCTGGCCTG  
+HWI-EAS443:3:70:1431:64#0/1  
aabbbababbbbbbab`¥`[aSaba[Q^``]¥aZ  
@HWI-EAS443:3:70:1612:278#0/1  
TGGAGGAAATACCAATCAACAAAAGGCATCCGCAGGCCAG  
+HWI-EAS443:3:70:1612:278#0/1  
[ba`aaaaaaaa¥baaZba]`a`a^Raa¥U`¥`a\_¥V`\_  
@HWI-EAS443:3:70:1782:1231#0/1  
GATTCCAAGAGGAAAGCTTTCCACAAGAGGGGTCCAGATT  
+HWI-EAS443:3:70:1782:1231#0/1  
a\_^bab[[aa`^ab]aaaba\_baaabaaaaaYa\_\_aa`a  
@HWI-EAS443:3:70:188:30#0/1  
AGTGATTCCAAGAGGAAAGCTTTCCACAAGAGGGGTCCAG  
+HWI-EAS443:3:70:188:30#0/1  
aaW\_]TGW\_XVT`[Z[[Z¥\_]W]TQZVVY]Z]ZZZONLTZ  
@HWI-EAS443:3:70:192:1154#0/1  
CGTCCTTCATTGTTCCCGCTGAATGCTGCCATAACGGTTG  
+HWI-EAS443:3:70:192:1154#0/1  
a`baaaaaaYa]aba`VaV¥XZZ\_a`V`aa]YRU[ZQRR  
@HWI-EAS443:3:70:273:777#0/1  
GTGATTCCAAGAGGAAAGCTTTCCACAAGAGGGGTCCAGA  
+HWI-EAS443:3:70:273:777#0/1  
a\_aa\_aba`]aaa`TZ`\_aaaaaa`a``][W\_R\_a\_\_\_\_  
@HWI-EAS443:3:70:321:2024#0/1  
GATTGCTTCAAATGAGAATGTGGAAACCATGGACTCCAAT  
+HWI-EAS443:3:70:321:2024#0/1  
^¥IX^ba^[\_`¥^abY]Q\_a[\_\_\_`aX^]a]`U^a^`a\_\_^  
@HWI-EAS443:3:70:370:1208#0/1  
CATCATTCTTATAACTTCTGTTTCGCATGTCGGATGTCCGT  
+HWI-EAS443:3:70:370:1208#0/1  
`]U```ab][¥^Z[``Y``a^\_a`a``\_YaVPNRL0]]VL  
@HWI-EAS443:3:70:408:166#0/1  
GGATGGCATGCCACTCTGCTGCATTTGAAGATTTAAGAGT

+HWI-EAS443:3:70:408:166#0/1  
\_[TYZ`¥Z[X¥`]Z]]Z\_aZW[UY¥]`¥Y]XY]^¥YZ¥aW  
@HWI-EAS443:3:70:423:1184#0/1  
CGTCCTTCATTGTTCCCGCTGAATGCTGCCATAACGGTTG  
+HWI-EAS443:3:70:423:1184#0/1  
a``abbbbbaaaaaaba¥aa\_U\_a`\_\_aaa\_aU]a]¥T]a  
@HWI-EAS443:3:70:470:874#0/1  
GGAAATACCAATCAACAAAAGGCATCCGCAGGCCAGATCA  
+HWI-EAS443:3:70:470:874#0/1  
`TaTb[T`^Y^a[WQ¥U`a]b]Tb`\_a]¥JQYJ]\_N¥`a]  
@HWI-EAS443:3:70:607:912#0/1  
CCCCTCTTGGAAGCTTTCCTCTTGAATCACTTTCTT  
+HWI-EAS443:3:70:607:912#0/1  
abababaaaaaV\_\_`aaaaab`aa`Uaa`aa`\_a]`\_]  
@HWI-EAS443:3:70:64:1581#0/1  
CGCTGAATGCTGCCATAACGGTTGCTCTTCAAAGGGAG  
+HWI-EAS443:3:70:64:1581#0/1  
]R\_`]ZV\_Z`¥Xaaa[T¥a[¥S\_¥¥N¥^[U[PVTUT^ZR[  
@HWI-EAS443:3:70:68:1527#0/1  
GAAATACCAATCAACAAAAGGCATCCGCAGGCCAGATCAG  
+HWI-EAS443:3:70:68:1527#0/1  
¥aZ^[abb^WZ``[\_]\_QOR^bWG^aYaa^aaa]OZ^a^Y  
@HWI-EAS443:3:70:68:1992#0/1  
GTCCGATGTCCGTCCTTCATTGTTCCCGCTGAATGCTGCC  
+HWI-EAS443:3:70:68:1992#0/1  
a\_baa\_PYO[`QM\_`[]a¥]¥Z[\_\_^¥Z^U[Z[WZSPW\_  
@HWI-EAS443:3:70:848:1600#0/1  
AAAGAAAGTGATTCCAAGAGGAAAGCTTCCACAAGAGGG  
+HWI-EAS443:3:70:848:1600#0/1  
aaa`\_\_a]Za`\_\_abba]a¥``Y`^`^\_]`aa\_\_a^a^X]  
@HWI-EAS443:3:70:852:550#0/1  
CAACTGTCATACTCCTCTGCATTGTCTCCGAAGAAATAAG  
+HWI-EAS443:3:70:852:550#0/1  
\_XR]\_Y^`]M\_]W\_UH[[`S`Vaa`a^a[^WVFX¥V``^  
@HWI-EAS443:3:70:978:708#0/1  
AGAAAGTGATTCCAAGAGGAAAGCTTCCACAAGAGGGGT  
+HWI-EAS443:3:70:978:708#0/1  
abaaab`a^aaaaa\_a\_a\_aaaaaa``a`a`a`^`Z  
@HWI-EAS443:3:70:988:2021#0/1  
GGTGTGGATGGCATGCCACTCTGCTGCATTTGAAGATTTA  
+HWI-EAS443:3:70:988:2021#0/1  
a\_¥a\_a]aabb]Z[[aaa^[`¥^YVLOW[aaRZ`Y^``\_  
@HWI-EAS443:3:71:1014:524#0/1  
ACTTTCTTCTCTTATGAACTTGATACTCTTAAATCTT  
+HWI-EAS443:3:71:1014:524#0/1  
`abaabbbbaababaaba\_``abaa`b`ababbbbaaa`aa  
@HWI-EAS443:3:71:1015:1161#0/1  
GCAGGCCAGATCAGTGTGCAGCCTACATTCTCAGTGCAGC  
+HWI-EAS443:3:71:1015:1161#0/1  
aaaabaa[`a`````\_Qaaaa\_^\_a\_[aaa`a`a¥aa``\_`

@HWI-EAS443:3:71:1066:943#0/1  
AGTGATTCCAAGAGGAAAGCTTTCCACAAGAGGGGTCCAG  
+HWI-EAS443:3:71:1066:943#0/1  
]OU\_ZV^`¥S`Z^]\_\_`b¥`[¥a`W\_a`\_QQYa\_`]¥N¥`  
@HWI-EAS443:3:71:1164:1059#0/1  
TGTTGATTGGTATTTCTCCACTCCTGGTCCTTATGGCCC  
+HWI-EAS443:3:71:1164:1059#0/1  
ab\_aaabbbbaabaaaabaaba`\_``]a^\_\_`aaa]\_]\_[  
@HWI-EAS443:3:71:142:850#0/1  
CTCATTTGAAGCAATCTGGACCCCTCTTGTGGAAAGCTTT  
+HWI-EAS443:3:71:142:850#0/1  
a]aa\_`aa[]U^RVT^U]UU`YYW]^Y^RU^S00VTT]VV  
@HWI-EAS443:3:71:1566:29#0/1  
GGAGTCCATGGTTTCCACATTCTCATTTGAAGCAATCTGG  
+HWI-EAS443:3:71:1566:29#0/1  
abab^``aaaa^aa\_`a\_a`a]a¥`aaaa\_\_a^`Y`X`Y  
@HWI-EAS443:3:71:218:461#0/1  
TGCATTTGAAGATTTAAGAGTATCAAGTTTCATAAGAGGA  
+HWI-EAS443:3:71:218:461#0/1  
]bbaabbbba`bb`abaa[aaaaa\_aaaabZaa^b`a  
@HWI-EAS443:3:71:253:662#0/1  
GTTTCATAAGAGGAAAGAAAGTGATTCCAAGAGGAAAGCT  
+HWI-EAS443:3:71:253:662#0/1  
a\_a\_`b\_YZaWVS\_a¥``a\_U^`¥\_U`aa\_`a\_WWa\_]W\_  
@HWI-EAS443:3:71:257:1608#0/1  
ATTTCTCCACTCCTGGTCCTTATGGCCCAGTATCTGCTT  
+HWI-EAS443:3:71:257:1608#0/1  
^aa``a^a`\_`\_]`a\_\_^T`\_^¥\_]VS^^\_T[UXZ^[ZUZW  
@HWI-EAS443:3:71:315:319#0/1  
GTGATTCCAAGAGGAAAGCTTTCCACAAGAGGGGTCCAGA  
+HWI-EAS443:3:71:315:319#0/1  
a]a¥[aaaa`a\_\_\_aaaa`[¥a\_]`^`\_]`^`]]^YWU\_`^\_  
@HWI-EAS443:3:71:513:224#0/1  
GGAGGAAATACCAATCAACAAAAGGCATCCGCAGGCCAGA  
+HWI-EAS443:3:71:513:224#0/1  
Z`]aba[`^b`X`^`b^Y^`bab`^V`aa¥¥¥]aa\_V¥]\_X  
@HWI-EAS443:3:71:537:461#0/1  
ATGAAACTTGATACTCTTAAATCTTCAAATGCAGCAGAGT  
+HWI-EAS443:3:71:537:461#0/1  
aYZYU[\_^^^SaL]V^`\_`^^`aa\_]UZUSa^`][[aW  
@HWI-EAS443:3:71:656:339#0/1  
GAAATACCAATCAACAAAAGGCATCCGCAGGCCAGATCAG  
+HWI-EAS443:3:71:656:339#0/1  
aXaaabaaaaa\_a\_]aaa`\_\_aa\_\_`\_\_]R]\_a\_`^\_]U\_\_  
@HWI-EAS443:3:71:659:277#0/1  
AGGGTATTGGAGTCCATGGTTTCCACATTCTCATTTGAAG  
+HWI-EAS443:3:71:659:277#0/1  
V\_`^¥Zbbbbbba`^`bab`babbbbbb\_babb`bbb```bb  
@HWI-EAS443:3:71:685:1820#0/1  
TGTGGATGGCATGCCACTCTGCTGCATTTGAAGATTTAAG

+HWI-EAS443:3:71:685:1820#0/1  
aa\_a\_aSa^ZWQL]^ab[^X`[]]U\_\_`\_\_\_\_^\_¥a^`^M  
@HWI-EAS443:3:71:765:39#0/1  
CTTAAATCTTCAAATGCAGCAGAGTGGCATGCCATCCACA  
+HWI-EAS443:3:71:765:39#0/1  
abbbbbbbbabbbbbbb`bbbaabbabaa[^`a`aaaa  
@HWI-EAS443:3:71:828:691#0/1  
ATGGTTTCCACATTCTCATTTGAAGCAATCTGGACCCCTC  
+HWI-EAS443:3:71:828:691#0/1  
aabb\_abbbyaaaaabb\_`abaaaaaaaaa\_`aa\_\_\_a`  
@HWI-EAS443:3:71:834:694#0/1  
CTTTTGAAAGAGCAACCGTTATGGCAGCATTGAGCGGAA  
+HWI-EAS443:3:71:834:694#0/1  
aaabbba`^\_a`\_ba`a`bb`\_`a`\_`a\_XZXZ\_]\_F¥  
@HWI-EAS443:3:71:928:1314#0/1  
CTGCACACTGATCTGGCCTGCGGATGCCTTTTGTGATTG  
+HWI-EAS443:3:71:928:1314#0/1  
[a^baabbbba[^`b`aba[aab`UE[b\_bb^\_Z^Ya\_  
@HWI-EAS443:3:72:1167:1200#0/1  
GAGGAAAGCTTTCCACAAGAGGGTCCAGATTGCTTCAA  
+HWI-EAS443:3:72:1167:1200#0/1  
abZ\_abbabaaabbaaba`bbaa`\_aab`ba\_a``aaaa  
@HWI-EAS443:3:72:116:1194#0/1  
AGTGATTCCAAGAGGAAAGCTTTCCACAAGAGGGTCCAG  
+HWI-EAS443:3:72:116:1194#0/1  
`b^b^aabbax`a[a^`a`a`\_\_\_\_aa\_a`^^a]^Z\_`^`  
@HWI-EAS443:3:72:1247:850#0/1  
GTGATTCCAAGAGGAAAGCTTTCCACAAGAGGGTCCAGA  
+HWI-EAS443:3:72:1247:850#0/1  
a)`[aa`\_`^¥a\_\_\_a]a[a\_]YX¥^\_a^a\_`\_UUP^\_\_  
@HWI-EAS443:3:72:178:1109#0/1  
GCAGCATTGAGCGGAACAATGAAGGACGGACATCCGACA  
+HWI-EAS443:3:72:178:1109#0/1  
abbaa]OMZRHX[NLW^RY\_RSL[^[LNFNQRQTNX[Q  
@HWI-EAS443:3:72:451:1513#0/1  
AATCTCCCTTTTGAAGAGCAACCGTTATGGCAGCATTCA  
+HWI-EAS443:3:72:451:1513#0/1  
Z[b\_\_[^`a\_U\_a`^VbJaU\_[¥bbZ\_aa`a\_[aI\_RYW]R  
@HWI-EAS443:3:72:716:1175#0/1  
TGCCACTCTGCTGCATTTGAAGATTTAAGAGTATCAAGTT  
+HWI-EAS443:3:72:716:1175#0/1  
aaababbbbaaba`a`abbbbaaa`a`aaa`aTW^aa\_aYa  
@HWI-EAS443:3:72:780:666#0/1  
AGTGATTCCAAGAGGAAAGCTTTCCACAAGAGGGTCCAG  
+HWI-EAS443:3:72:780:666#0/1  
`aY`XZ`\_XM\_W¥¥aa^ZV]W]Z[^`¥XZEWYTOVVLSS[Y  
@HWI-EAS443:3:72:813:146#0/1  
GTGATTCCAAGAGGAAAGCTTTCCACAAGAGGGTCCAGA  
+HWI-EAS443:3:72:813:146#0/1  
a\_b\_`[^a`]Xa^¥)`¥TZ\_[\_`¥a^Y^\_]\_^QVY^`Y

@HWI-EAS443:3:72:824:1262#0/1  
CTTGTGGAAAGCTTCTCTTGAATCACTTTCTTCTCTC  
+HWI-EAS443:3:72:824:1262#0/1  
`baba\_Vabb` `a` aabbbb^a\_Z`^aaaa`aaaaaa  
@HWI-EAS443:3:73:1062:1954#0/1  
GAAAGTGATTCCAAGAGGAAAGCTTCCACAAGAGGGGTC  
+HWI-EAS443:3:73:1062:1954#0/1  
aV]a`STV]]^` [aaa^`X`\_S¥`\_\_` `` `NY\_\_]]RX  
@HWI-EAS443:3:73:1370:1460#0/1  
GTTCGCATGTTCGATGTCCGTCCTTCATTGTTCCCGCTGA  
+HWI-EAS443:3:73:1370:1460#0/1  
`Ya^R\_PZ^KZZ`VPYNM¥XY`VXYWNZ[KZ¥U^]KSQZ  
@HWI-EAS443:3:73:140:579#0/1  
AGAGGGGTCCAGATTGCTTCAAATGAGAATGTGGAAACCA  
+HWI-EAS443:3:73:140:579#0/1  
aaaaa`a\_aaaa\_a`¥` `a` \_\_\_\_` ]\_aX` ` ]\_]Q[^\_`  
@HWI-EAS443:3:73:143:2028#0/1  
GCAGGCCAGATCAGTGTGCAGCCTACATTCTCAGTGCAGC  
+HWI-EAS443:3:73:143:2028#0/1  
abaa^bba¥` `[Z¥[RZ¥\_]\_a`¥U`^YWa\_a` [U^a¥S]  
@HWI-EAS443:3:73:1516:56#0/1  
AACTGTCATACTCCTCTGCATTGTCTCCGAAGAAATAAGA  
+HWI-EAS443:3:73:1516:56#0/1  
` [ ]a[atbbbwassa`aa[abaWZ\_^WSb]¥\_¥]\_\_\_aZ¥  
@HWI-EAS443:3:73:178:1157#0/1  
GTTTCATAAGAGGAAAGAAAGTGATTCCAAGAGGAAAGCT  
+HWI-EAS443:3:73:178:1157#0/1  
aaa[bab¥XYa[ ]^aa¥P[¥^\_a` \_` a` `W[a]\_\_\_\_]UW`  
@HWI-EAS443:3:73:271:536#0/1  
ACTTGATACTCTTAAATCTTCAAATGCAGCAGAGTGGCAT  
+HWI-EAS443:3:73:271:536#0/1  
UW\_TYSX\_¥YY^a\_[[Y¥a`WT]HO¥a\_[\_` `V¥]a` `^N  
@HWI-EAS443:3:73:275:124#0/1  
TGCACACTGATCTGGCCTGCGGATGCCTTTTGTGATTGG  
+HWI-EAS443:3:73:275:124#0/1  
abaaabaab` `` `baa[ `\_\_` `` `¥\_\_^[\_a\_a¥` `W¥\_\_`  
@HWI-EAS443:3:73:336:240#0/1  
GGATGGCATGCCACTCTGCTGCATTTGAAGATTTAAGAGT  
+HWI-EAS443:3:73:336:240#0/1  
abb`bbbbaaaaabaaaaab`\_abbaabaaba^¥abaV  
@HWI-EAS443:3:73:475:565#0/1  
ATTGCTTCAAATGAGAATGTGGAAACCATGGACTCCAATA  
+HWI-EAS443:3:73:475:565#0/1  
a`^¥` `\_\_X` ]\_` `a`U` `Y`a[ ]Y^\_Z]]` `a`\_ [ZZ¥¥`  
@HWI-EAS443:3:73:491:700#0/1  
ATTTCTCCACTCCTGGTCCTTATGGCCCAGTATCTGCTT  
+HWI-EAS443:3:73:491:700#0/1  
 ]\_Z\_^aaZaZW^aaaaZ^[¥X^`R]]¥XX[VU[PTYSGY  
@HWI-EAS443:3:73:499:1614#0/1  
AATGAAGGACGGACATCCGACATGCCAACAGAAGTTATAA

+HWI-EAS443:3:73:499:1614#0/1  
ab^[b]^ab\_\_a`WXaa`X`^\_]TV]]P]T`[Q\_\_^`  
@HWI-EAS443:3:73:535:88#0/1  
CCCCGCTGAATGCTGCCATAACGGTTGCTCTTTCAAAGGG  
+HWI-EAS443:3:73:535:88#0/1  
Y\_^`aT`TZ\_baaaT]\_XHPXJ\_S`^TIa]UZ`VSFO`Z`  
@HWI-EAS443:3:73:806:1865#0/1  
GGACCCCTCTTGTTGGAAAGCTTTCCTCTTGAATCACTTT  
+HWI-EAS443:3:73:806:1865#0/1  
]bbbabbbbab¥]a`aV`abaaaaba\_a`aaaa`aaaa`  
@HWI-EAS443:3:73:900:848#0/1  
AGTGATTCCAAGAGGAAAGCTTCCACAAGAGGGGTCCAG  
+HWI-EAS443:3:73:900:848#0/1  
Q¥`^XQ¥S\_aa`]bb\_U\_aMSabaab¥¥¥a\_aUXTW`^`Y  
@HWI-EAS443:3:74:1004:1062#0/1  
TCCGCTCTTCATTGTTCCCGCTGAATGCTGCCATAACGGT  
+HWI-EAS443:3:74:1004:1062#0/1  
aa```\_abaa`abbaaaaaa`aa`a`[\_\_^\_aaa`U``[  
@HWI-EAS443:3:74:1029:1380#0/1  
GAAAGTGATTCCAAGAGGAAAGCTTCCACAAGAGGGGTC  
+HWI-EAS443:3:74:1029:1380#0/1  
aaaaa\_a]aa```a^a\_aaaa\_\_\_`aa^aaa\_\_\_^YXSZ  
@HWI-EAS443:3:74:1079:308#0/1  
AGTGATTCCAAGAGGAAAGCTTCCACAAGAGGGGTCCAG  
+HWI-EAS443:3:74:1079:308#0/1  
aa\_babbba`^[\_b`XabbaabaYY]a\_`aa\_X\_a\_`¥`  
@HWI-EAS443:3:74:1387:465#0/1  
ATGGCATGCCACTCTGCTGCATTTGAAGATTTAAGAGTAT  
+HWI-EAS443:3:74:1387:465#0/1  
abb\_¥bbabab\_babbabbaababa`abaaaaa`bb]aa  
@HWI-EAS443:3:74:1424:827#0/1  
ATTTCTCCACTCCTGGTCCTTATGGCCCAGTATCTGCTT  
+HWI-EAS443:3:74:1424:827#0/1  
a`bb\_]`abb\_b`a`]`¥aaaa`aaaa\_\_\_`Y\_a¥`aWa^  
@HWI-EAS443:3:74:1471:870#0/1  
CAGATTGCTTCAAATGAGAATGTGGAAACCATGGACTCCA  
+HWI-EAS443:3:74:1471:870#0/1  
abba\_KaQ^a^X`a]abaaaa[`Y]]YTYa``aX]aYQY  
@HWI-EAS443:3:74:1507:145#0/1  
AAGAAAGTGATTCCAAGAGGAAAGCTTCCACAAGAGGGG  
+HWI-EAS443:3:74:1507:145#0/1  
aababb`[Y^a[¥aa\_N¥YX^]YZN[\_]TXWZ]\_\_^\_WOX  
@HWI-EAS443:3:74:190:361#0/1  
GAAAGTGATTCCAAGAGGAAAGCTTCCACAAGAGGGGTC  
+HWI-EAS443:3:74:190:361#0/1  
ab`ab\_b[abaaaaa\_\_aaaa\_aa`\_aa```\_\_`Z`X]  
@HWI-EAS443:3:74:259:806#0/1  
CATGGTTTCCACATTCTCATTTGAAGCAATCTGGACCCCT  
+HWI-EAS443:3:74:259:806#0/1  
aa]\_ZTabb]bbaZ`\_a`X`aa`¥`\_aa`\_`a\_^`aY¥Y\_

@HWI-EAS443:3:74:283:787#0/1  
GTGATTCCAAGAGGAAAGCTTTCCACAAGAGGGGTCCAGA  
+HWI-EAS443:3:74:283:787#0/1  
`YZYXUaaa^aba#a\_a[^\_¥¥\_`aYR\_]\_]\_\_WNY\_]Z\_  
@HWI-EAS443:3:74:303:1770#0/1  
AAAGAAAGTGATTCCAAGAGGAAAGCTTTCCACAAGAGGG  
+HWI-EAS443:3:74:303:1770#0/1  
\_VZOZXSSR]XTW^¥¥RT¥UGN]\_^`R]U\_ZZY\_\_XYTOQ  
@HWI-EAS443:3:74:335:1760#0/1  
AGTGATTCCAAGAGGAAAGCTTTCCACAAGAGGGGTCCAG  
+HWI-EAS443:3:74:335:1760#0/1  
]\_OU\_UN]aa^Ya]]]a\_Q\_^¥`aaaa]]WaXVZZUW[W]  
@HWI-EAS443:3:74:341:378#0/1  
AGTGATTCCAAGAGGAAAGCTTTCCACAAGAGGGGTCCAG  
+HWI-EAS443:3:74:341:378#0/1  
aa[baaabaaa]aaaaaaaa`aa`a`aaaa`a`^]]]\_\_^\_  
@HWI-EAS443:3:74:399:1258#0/1  
ATCCGACATGCGAACAGAAGTTATAAGAATGATGGAAAGT  
+HWI-EAS443:3:74:399:1258#0/1  
aaa\_a\_]ZVa`[Y]^[]YS¥]`\_\_¥¥a^a\_\_`\_^K`^¥¥Z  
@HWI-EAS443:3:74:486:769#0/1  
CTTCTGGCTTTGCACTTTCCATCATTCTTATAACTTCTGT  
+HWI-EAS443:3:74:486:769#0/1  
`\_a```^baaZ\_\_Yaba\_aaaa`aaaabbbbaaaaaZ¥RV  
@HWI-EAS443:3:74:522:259#0/1  
CATTCTTATAACTTCTGTTTCGCATGTCGGATGTCCTCCT  
+HWI-EAS443:3:74:522:259#0/1  
\_bb\_0\_bbbbbabbabbbbaaabbaabaaaaa]``b]\_]a  
@HWI-EAS443:3:74:589:1637#0/1  
AGTGATTCCAAGAGGAAAGCTTTCCACAAGAGGGGTCCAG  
+HWI-EAS443:3:74:589:1637#0/1  
aa\_b\_aabbb`\_b]aab^a\_a`\_a]aaa```\_\_^\_Z\_\_`\_  
@HWI-EAS443:3:74:813:1357#0/1  
GTTTCATAAGAGGAAAGAAAGTGATTCCAAGAGGAAAGCT  
+HWI-EAS443:3:74:813:1357#0/1  
``a¥bbaab``aaaab\_]\_aa^a^a\_a\_aaWb\_^`a`]]^  
@HWI-EAS443:3:74:823:739#0/1  
TATTTCTCCACTCCTGGTCCTTATGGCCCAGTATCTGCT  
+HWI-EAS443:3:74:823:739#0/1  
`bbabbabababbaa`]V`aaa\_\_a`aYaV¥M¥``\_Y^S  
@HWI-EAS443:3:74:911:682#0/1  
AAGGACCAGGAGTGGAGGAAATACCAATCAACAAAAGGCA  
+HWI-EAS443:3:74:911:682#0/1  
\_\_Z```\_^\_\_baab\_]\_^W\_bbaaa^`Z^\_``^]``Z\_^  
@HWI-EAS443:3:74:98:1241#0/1  
AAGAAAGTGATTCCAAGAGGAAAGCTTTCCACAAGAGGGG  
+HWI-EAS443:3:74:98:1241#0/1  
Za^aabbabaa¥bbb\_Q``\_^b]]ba`abbbaaa\_`[^[^  
@HWI-EAS443:3:75:1153:906#0/1  
GAAAGAAAGTGATTCCAAGAGGAAAGCTTTCCACAAGAGG

+HWI-EAS443:3:75:1153:906#0/1  
`¥R`\_V``aaaba`a\_V]abbba^ZZaaQa^Yaa[\_a\_  
@HWI-EAS443:3:75:1159:68#0/1  
CGTCCTTCATTGTTCCCGCTGAATGCTGCCATAACGGTTG  
+HWI-EAS443:3:75:1159:68#0/1  
^bbbabbb\_]bbbbbbabb`abb`bb\_bbbbbbbabbbbbbba  
@HWI-EAS443:3:75:1192:561#0/1  
GATTGCTTCAAATGAGAATGTGGAAACCATGGACTCCAAT  
+HWI-EAS443:3:75:1192:561#0/1  
abbX`aababaabaabbaaa^baaaW`aabaaaa\_aaaa  
@HWI-EAS443:3:75:136:1403#0/1  
CCGTCCTTCATTGTTCCCGCTGAATGCTGCCATAACGGTT  
+HWI-EAS443:3:75:136:1403#0/1  
aaaabaaabaaaaW`bbaaa`\_aaaa\_\_[aa`\_UY\_]W^  
@HWI-EAS443:3:75:1475:566#0/1  
CGCATGTCGGATGTCCGTCCTTCATTGTTCCCGCTGAATG  
+HWI-EAS443:3:75:1475:566#0/1  
`bbbbbbbbbba\_[G\_a[^Z`bb`bb`a`\_a`baba`^`]  
@HWI-EAS443:3:75:1505:1480#0/1  
TTTTGAAAGAGCAACCGTTATGGCAGCATTGAGCGGGAAC  
+HWI-EAS443:3:75:1505:1480#0/1  
abbbbbbbbaaabX`baaa`b^a`SZaYKZUD^`[[P  
@HWI-EAS443:3:75:1622:890#0/1  
AAGAAAGTGATTCCAAGAGGAAAGCTTCCACAAGAGGGG  
+HWI-EAS443:3:75:1622:890#0/1  
aba]aa`]\_baWX[`aabbabb`¥`^`[^aaa\_]¥a\_U\_  
@HWI-EAS443:3:75:192:278#0/1  
GATTGCTTCAAATGAGAATGTGGAAACCATGGACTCCAAT  
+HWI-EAS443:3:75:192:278#0/1  
aaa]\_aaaaa[S\_b^`^^¥\_Q`T`^X^]¥`[]^`[]^W]  
@HWI-EAS443:3:75:354:966#0/1  
TTTTGAAAGAGCAACCGTTATGGCAGCATTGAGCGGGAAC  
+HWI-EAS443:3:75:354:966#0/1  
a`abaaaaRWa¥\_`aa^aaZ^`a`[¥VV^YSSWX]P¥G  
@HWI-EAS443:3:75:450:443#0/1  
GGACCAGGAGTGGAGGAAATACCAATCAACAAAAGGCATC  
+HWI-EAS443:3:75:450:443#0/1  
a¥TZYOS[\_GYXSX¥LSWQ]Y][TNZR[U¥][ZR[TYSU  
@HWI-EAS443:3:75:629:1158#0/1  
CCCTCTTGTGGAAAGCTTCCCTCTTGAATCACTTTCTTT  
+HWI-EAS443:3:75:629:1158#0/1  
`aaa`aJa]V\_\_aab\_]`a[Ya]\_]`K^Xa]^`]YT`\_``  
@HWI-EAS443:3:75:794:1465#0/1  
CTTCATTGTTCCCGCTGAATGCTGCCATAACGGTTGCTCT  
+HWI-EAS443:3:75:794:1465#0/1  
GUY[[\_¥\_Q\_ba¥SX[\_Q\_[aW¥b^^\_AT`abbba\_T[Za  
@HWI-EAS443:3:75:949:40#0/1  
CGCTGAATGCTGCCATAACGGTTGCTCTTTCAAAGGGAG  
+HWI-EAS443:3:75:949:40#0/1  
\_ba`aa[b`Q`Y`Ya[aUY[bbNa`\_¥^^a\_\_G[S`Y`a¥a



@HWI-EAS443:3:76:1129:1650#0/1  
TTTCCTCTTATGAAACTTGATACTCTTAAATCTTCAAATG  
+HWI-EAS443:3:76:1129:1650#0/1  
^^Z^`^Z``aa`a¥`\_aa``Z`Yaaa`\_]V\_WXa\_\_\_\_  
@HWI-EAS443:3:76:1264:299#0/1  
CAGATTGCTTCAAATGAGAATGTGGAAACCATGGACTCCA  
+HWI-EAS443:3:76:1264:299#0/1  
]a[a^``\_a^ZTZ[¥a`^^`Za]aa[XS¥Ma``Ya\_a^RZ  
@HWI-EAS443:3:76:1306:821#0/1  
ACCAATCAACAAAAGGCATCCGCAGGCCAGATCAGTGTGC  
+HWI-EAS443:3:76:1306:821#0/1  
a\_\_baaaaaXa\_``[¥]a^`\_a\_\_\_¥¥¥\_\_VWW\_WW¥W¥U  
@HWI-EAS443:3:76:1319:1957#0/1  
GCAGGCCAGATCAGTGTGCAGCCTACATTCTCAGTGCAGC  
+HWI-EAS443:3:76:1319:1957#0/1  
`YaaaQ[aaW`X^\_VaS]P¥YV\_]^\_\_[\_R]QY\_]YNXXQ  
@HWI-EAS443:3:76:1419:1822#0/1  
GCTGCACACTGATCTGGCCTGCGGATGCCTTTTGTGATT  
+HWI-EAS443:3:76:1419:1822#0/1  
^PV^V`YZKV^^[¥UY^WU\_\_¥^SHS XVSP TUV¥RXRSUB  
@HWI-EAS443:3:76:146:402#0/1  
GGAGGAAATACCAATCAACAAAAGGCATCCGCAGGCCAGA  
+HWI-EAS443:3:76:146:402#0/1  
aWU^RQR`\_]`YOXXX]]MLNYZORSZXRNYSWSTYQNLRO  
@HWI-EAS443:3:76:1626:1880#0/1  
AAAGCTTCCACAAGAGGGTCCAGATTGCTTCAAATGAG  
+HWI-EAS443:3:76:1626:1880#0/1  
ab]¥Ww`a[Ub`baaXZMJ]S\_T]b\_\_¥X^^a[aaa\_]a\_  
@HWI-EAS443:3:76:1739:1013#0/1  
CCGCTGAATGCTGCCATAACGGTTGCTCTTTCAAAGGGA  
+HWI-EAS443:3:76:1739:1013#0/1  
abbbabbbbaaab`abbaaab\_a\_I]`aaaY^^`\_\_^\_Y  
@HWI-EAS443:3:76:197:332#0/1  
ATGGTTTCCACATTCTCATTGAAGCAATCTGGACCCCTC  
+HWI-EAS443:3:76:197:332#0/1  
aa^`Uaba`¥`]aaa```a\_a````W`]\_\_\_\_]^¥¥]]X]Z  
@HWI-EAS443:3:76:336:535#0/1  
AGCAACCGTTATGGCAGCATTAGCGGGAACAATGAAGGA  
+HWI-EAS443:3:76:336:535#0/1  
aabbabab¥UZ^¥]W^[ZYY[a]V\_`YU[JUSDTRYVZB  
@HWI-EAS443:3:76:394:1188#0/1  
GAGCAACCGTTATGGCAGCATTAGCGGGAACAATGAAGG  
+HWI-EAS443:3:76:394:1188#0/1  
^\_¥`T[Xba\_]\_Za^aa\_RHTY`UNV]\_^U]PVWTZVPVT  
@HWI-EAS443:3:76:592:1925#0/1  
TTTCCTCTTATGAAACTTGATACTCTTAAATCTTCAAATG  
+HWI-EAS443:3:76:592:1925#0/1  
\_V`^YQY\_[a^^¥XU¥WOPWW]\_``RPPR`V[Z]Z[US\_`  
@HWI-EAS443:3:76:616:1299#0/1  
GGACCAGGAGTGGAGGAAATACCAATCAACAAAAGGCATC

+HWI-EAS443:3:76:616:1299#0/1  
aX`aZ]¥¥X`U]`[X]Y¥`W^^`\_\_\_¥`^^[^`^ULNR\_YR  
@HWI-EAS443:3:76:644:1786#0/1  
TAAGAGGAAAGAAAGTGATTCCAAGAGGAAAGCTTTCCAC  
+HWI-EAS443:3:76:644:1786#0/1  
abbaba`abb\_aab\_]ab``abaa^aa`aa[a\_^^a`aa  
@HWI-EAS443:3:76:807:676#0/1  
GAAATACCAATCAACAAAAGGCATCCGCAGGCCAGATCAG  
+HWI-EAS443:3:76:807:676#0/1  
a`^^^`¥a``¥V\_¥^^\_U\_YVQ\_W[U]]¥¥YWY¥¥WTNWW  
@HWI-EAS443:3:76:873:1101#0/1  
GAGGAAAGAAAGTGATTCCAAGAGGAAAGCTTTCCACAAG  
+HWI-EAS443:3:76:873:1101#0/1  
abbaabbaaa`[TY`]aa\_aaaa\_aaaaa`aa¥a^aY[[`  
@HWI-EAS443:3:76:902:153#0/1  
ATTGCTTCAAATGAGAATGTGGAAACCATGGACTCCAATA  
+HWI-EAS443:3:76:902:153#0/1  
`\_0`P]ba^]PSa\_V¥Y`^Yba\_]¥DWYU[I^YSYZZYPZ  
@HWI-EAS443:3:76:939:985#0/1  
GGACCCCTCTTGTGGAAAGCTTTCCTCTTGAATCACTTT  
+HWI-EAS443:3:76:939:985#0/1  
a`aaa`\_`a\_\_\_W^`^aa\_\_`a^^`\_`\_\_`\_`\_]`^^]]X  
@HWI-EAS443:3:76:997:707#0/1  
GGCCTGCGGATGCCTTTTGTGATTGGTATTTCCCTCCACT  
+HWI-EAS443:3:76:997:707#0/1  
aa^a`a¥a\_V¥`V^`\_`^\_X\_a¥^¥¥\_WZ^¥`¥W¥WWWWW  
@HWI-EAS443:3:77:1024:784#0/1  
GATGTCCGCTTCATTGTTCCCGCTGAATGCTGCCATAA  
+HWI-EAS443:3:77:1024:784#0/1  
ZX¥a\_Z`ba`ab`\_¥^^`\_a`^]]X\_a\_Z]¥Z^a^[]`S]  
@HWI-EAS443:3:77:1120:381#0/1  
GAAAGTGATTCCAAGAGGAAAGCTTTCCACAAGAGGGGTC  
+HWI-EAS443:3:77:1120:381#0/1  
aaaba\_baaaa\_aa\_aaaa`aa\_aa`aa`a\_a\_a\_^\_Z[  
@HWI-EAS443:3:77:1595:474#0/1  
CCCCTCTTGTGGAAAGCTTTCCTCTTGAATCACTTTCTT  
+HWI-EAS443:3:77:1595:474#0/1  
abb\_\_baa\_Kb\_babb¥b\_bXbaa`\_bbbaa^ababbabb  
@HWI-EAS443:3:77:1707:914#0/1  
GTATTGGAGTCCATGGTTTCCACATTCTCATTGAAGCAA  
+HWI-EAS443:3:77:1707:914#0/1  
aabaaabaaa`]^a`aab`\_baX\_a`¥a]baaaaaaNa`  
@HWI-EAS443:3:77:1773:968#0/1  
GATGCCTTTTGTGATTGGTATTTCCCTCCACTCCTGGTCC  
+HWI-EAS443:3:77:1773:968#0/1  
`Y^Wa][^b¥SS[\_a`bYa¥\_aa]aUZabba¥a^b¥Q]^a  
@HWI-EAS443:3:77:477:1003#0/1  
GCAGGCCAGATCAGTGTGCAGCCTACATTCTCAGTGCAGC  
+HWI-EAS443:3:77:477:1003#0/1  
aab^aaba`\_]aaU`]]][`XY`Q``a^aaaaY¥\_\_`a

@HWI-EAS443:3:77:558:866#0/1  
ATTGCTTCAAATGAGAATGTGGAAACCATGGACTCCAATA  
+HWI-EAS443:3:77:558:866#0/1  
abbabbbbaabab`abbababaa`^aaa`aaaa]aa  
@HWI-EAS443:3:77:598:1394#0/1  
GAAACTTGATACTCTTAAATCTTCAAATGCAGCAGAGTGG  
+HWI-EAS443:3:77:598:1394#0/1  
\_aaab`aaaa`\_¥VZ`ba`aa`b`]a]`[`Xa`^^ZO`]  
@HWI-EAS443:3:77:621:665#0/1  
GAAATACCAATCAACAAAAGGCATCCGCAGGCCAGATCAG  
+HWI-EAS443:3:77:621:665#0/1  
Z[ba]bb`[bbbaabba`a¥babbaabaab`bbb`a`ba  
@HWI-EAS443:3:77:646:1686#0/1  
GTCCGCTCTTATTGTTCCCGCTGAATGCTGCCATAACGG  
+HWI-EAS443:3:77:646:1686#0/1  
XabbVZ]`\_a^WQ\_P]\_b^R^X`VZ`\_a]aaa]S\_]¥[  
@HWI-EAS443:3:77:706:1307#0/1  
GAAATACCAATCAACAAAAGGCATCCGCAGGCCAGATCAG  
+HWI-EAS443:3:77:706:1307#0/1  
^`\_aYa\_WWXZVZM`b]aaaa`^\_]`K`\_Yb¥b]XRMX  
@HWI-EAS443:3:77:741:1903#0/1  
GACCCCTCTTGTGGAAAGCTTTCCTTGGAAATCACTTTC  
+HWI-EAS443:3:77:741:1903#0/1  
`aT`a^\_a`Q¥SLJT]^Wbaa`\_baZa`¥¥¥[]`a\_a\_\_Y  
@HWI-EAS443:3:77:793:810#0/1  
ATTGCTTCAAATGAGAATGTGGAAACCATGGACTCCAATA  
+HWI-EAS443:3:77:793:810#0/1  
`aaaaaa`aaaaaa^¥aa^a\_aaa\_aaa`^a`aa`a\_a`  
@HWI-EAS443:3:78:1096:546#0/1  
GTGATTCCAAGAGGAAAGCTTTCACAAGAGGGGTCCAGA  
+HWI-EAS443:3:78:1096:546#0/1  
\_XZTZZY][\_XYQVTQY`RW[[LGZ¥UV¥]\_IQ^WSV¥`\_  
@HWI-EAS443:3:78:109:1846#0/1  
AGGAAAGAAAGTGATTCCAAGAGGAAAGCTTTCACAAGA  
+HWI-EAS443:3:78:109:1846#0/1  
a`\_`aa^]U^00W[]]aa`\_WaPUY``W\_]Z]\_\_\_\_]^¥YX  
@HWI-EAS443:3:78:1261:1190#0/1  
GAGGAAAGAAAGTGATTCCAAGAGGAAAGCTTTCACAAG  
+HWI-EAS443:3:78:1261:1190#0/1  
\_]QT`aabaa^aaaaa^¥]a\_\_a]````^aaSZ\_X¥Z`\_  
@HWI-EAS443:3:78:1312:532#0/1  
GGACCCCTCTTGTGGAAAGCTTTCCTTGGAAATCACTTT  
+HWI-EAS443:3:78:1312:532#0/1  
aab````a`a`aYZ`\_a```aaa\_]`^`aa`b\_a¥\_X``^  
@HWI-EAS443:3:78:1407:708#0/1  
TCTGGCTTGCACCTTCCATCATTCTTATAACTTCTGTTC  
+HWI-EAS443:3:78:1407:708#0/1  
U`]`^S^baVV]¥abZ¥]`b\_a]\_X^`XaaaYa`TaaWYG  
@HWI-EAS443:3:78:203:1731#0/1  
AGTGATTCCAAGAGGAAAGCTTTCACAAGAGGGGTCCAG

+HWI-EAS443:3:78:203:1731#0/1  
aXMHY`W]`\_a`Y^Y\_\_`aW\_\_W`V]\_`SVZUWZY^]^[  
@HWI-EAS443:3:78:207:451#0/1  
CTCTTGTGGAAAGCTTTCCTCTTGAATCACTTCTTTCC  
+HWI-EAS443:3:78:207:451#0/1  
abbabb`a`bbb`abaabaaaaaa\_aaaaa`aaabaa`\_  
@HWI-EAS443:3:78:230:700#0/1  
GTCCGATGTCCGTCCTTCATTGTTCCCGCTGAATGCTGCC  
+HWI-EAS443:3:78:230:700#0/1  
aaaba\_aa`aa[^`^]`^X`a\_\_\_\_\_a]^[\_`a^]ZU\_Z\_  
@HWI-EAS443:3:78:278:551#0/1  
CAATCAACAAAAGGCATCCGCAGGCCAGATCAGTGTGCAG  
+HWI-EAS443:3:78:278:551#0/1  
aaaaaaaa`baaaa`a`aa\_a`\_a[\_\_\_`a\_Z¥[^Y¥W^WU[  
@HWI-EAS443:3:78:367:1784#0/1  
GGGTATTGGAGTCCATGGTTTCCACATTCTCATTGAAGC  
+HWI-EAS443:3:78:367:1784#0/1  
a[`[b`\_`\_aY`aaa`^¥V`aaaaaaaaaaa`a`a\_\_`Y`  
@HWI-EAS443:3:78:419:914#0/1  
GATGCCTTTTGTGATTGGTATTTCTCCACTCCTGGTCC  
+HWI-EAS443:3:78:419:914#0/1  
\_U]`]aab[baJ]`^S]bbX]abbb`[ba]]Oab`a]Ya[  
@HWI-EAS443:3:78:452:102#0/1  
GAGGAAAGAAAGTGATTCCAAGAGGAAAGCTTCCACAAG  
+HWI-EAS443:3:78:452:102#0/1  
aabaaaab]a`a^a`\_aaaa\_a\_\_\_`\_`\_U\_\_^]^^\_\_  
@HWI-EAS443:3:78:616:143#0/1  
CTTAAATCTTCAAATGCAGCAGAGTGGCATGCCATCCACA  
+HWI-EAS443:3:78:616:143#0/1  
ab`abaaaa¥]^\_aaaa\_aaa`aTZa`\_`\_^\_]UPLT[XQ\_  
@HWI-EAS443:3:78:634:721#0/1  
CCCCTGAATGCTGCCATAACGGTTGCTCTTCAAAGGG  
+HWI-EAS443:3:78:634:721#0/1  
abbaaba^baaaaa`bab]`a`a¥a]]^¥a`a\_^\_\_\_¥\_\_  
@HWI-EAS443:3:78:646:675#0/1  
GACCCCTCTTGTGGAAAGCTTTCCTCTTGAATCACTTTC  
+HWI-EAS443:3:78:646:675#0/1  
^a\_]a`a`aa]¥a\_ZS``a```[]`[^\_X]]]¥`Y]`  
@HWI-EAS443:3:78:704:1015#0/1  
TGCATTTCCATCATTCTTATAACTTCTGTTTCGCATGTCG  
+HWI-EAS443:3:78:704:1015#0/1  
a`bYV¥^Y\_`V]a`KV¥JWab`XUaa¥JZ\_TQ`\_TQ¥HIa  
@HWI-EAS443:3:78:741:171#0/1  
GAAATACCAATCAACAAAAGGCATCCGCAGGCCAGATCAG  
+HWI-EAS443:3:78:741:171#0/1  
`U][VRVS]]¥][[U]¥[UTXZZZYNSU][Z[ZJU\_UPUBB  
@HWI-EAS443:3:78:834:574#0/1  
GTGATTCCAAGAGGAAAGCTTCCACAAGAGGGGTCCAGA  
+HWI-EAS443:3:78:834:574#0/1  
^Raa`a``¥``¥`\_`W\_¥`a\_T[a\_a`a\_`\_`\_U\_\_`a`

@HWI-EAS443:3:78:871:2005#0/1  
GAAAGAAAGTGATTCCAAGAGGAAAGCTTCCACAAGAGG  
+HWI-EAS443:3:78:871:2005#0/1  
]X`^b[aa\_Q]^W\_ba\_X[FZ\_a`[]¥Z^\_W\_a\_`a``T  
@HWI-EAS443:3:78:897:1171#0/1  
CGTCCTTCATTGTTCCCGCTGAATGCTGCCATAACGGTTG  
+HWI-EAS443:3:78:897:1171#0/1  
aaVbabb`bbba``baZaaa^a¥\_a`]a`aaa\_\_b\_X`\_  
@HWI-EAS443:3:78:924:271#0/1  
AGCGGGAACAATGAAGGACGGACATCCGACATGCGAACAG  
+HWI-EAS443:3:78:924:271#0/1  
ababaaaa`aaa`Za`\_`aa\_^\_]U[a\_^a\_a\_a^\_]`^a  
@HWI-EAS443:3:78:975:569#0/1  
GGTCCAGATTGCTTCAAATGAGAATGTGGAAACCATGGAC  
+HWI-EAS443:3:78:975:569#0/1  
aYJ\_`X`\_\_a[a\_]`[PW`a\_a`^`a]TJW[\_[]Z]]]SW  
@HWI-EAS443:3:78:990:930#0/1  
CAGATTGCTTCAAATGAGAATGTGGAAACCATGGACTCCA  
+HWI-EAS443:3:78:990:930#0/1  
\_ZZ`^Ya\_TX`b^Ta`bbXXa`YKV`[\_V\_]WIZY\_ZWG  
@HWI-EAS443:3:79:1076:832#0/1  
GGAAAGCTTCCACAAGAGGGTCCAGATTGCTTCAAATG  
+HWI-EAS443:3:79:1076:832#0/1  
abbbbbbbabbbbab`aa\_bbaabbbb`babbaaaaa  
@HWI-EAS443:3:79:1111:272#0/1  
ATCATTCTATAACTTCTGTTCCGCATGTCCGATGTCCGTC  
+HWI-EAS443:3:79:1111:272#0/1  
\_b`bba`aabbaababb`a`aaabb`b`^aaXFWSSU  
@HWI-EAS443:3:79:1204:1549#0/1  
GAGCAACCGTTATGGCAGCATTGCGGGAACAATGAAGG  
+HWI-EAS443:3:79:1204:1549#0/1  
`a`\_\_\_a¥^¥bb\_\_¥¥\_`^^a\_W[YU]a\_IZL]\_M\_ZZXY  
@HWI-EAS443:3:79:136:837#0/1  
TGCGGATGCCTTTTGTGATTGGTATTTCCCTCCACTCCTG  
+HWI-EAS443:3:79:136:837#0/1  
aa]a¥]Z^¥\_X^`^W\_aa`]`X][¥]a^a[¥¥]X\_\_\_Y]¥  
@HWI-EAS443:3:79:1594:1823#0/1  
ATCTCCCTTTTGAAGAGCAACCGTTATGGCAGCATTGAG  
+HWI-EAS443:3:79:1594:1823#0/1  
aXNXa^\_\_\_a`W`YXK\_aWRRKM^BBBBBBBBBBBBBBBB  
@HWI-EAS443:3:79:1764:579#0/1  
CGCATGTCCGATGTCCGTCCTTCATTGTTCCCGCTGAATG  
+HWI-EAS443:3:79:1764:579#0/1  
Z\_a\_`¥KZaa`abT[`\_R¥a``ZR¥`[aZ\_HRb[aaaaXV  
@HWI-EAS443:3:79:197:26#0/1  
CAATGAAGGACGGACATCCGACATGCGAACAGAAGTTATA  
+HWI-EAS443:3:79:197:26#0/1  
a`babaaa`\_\_a`Y`a\_```\_^`\_a\_a^^]\_^WV^V¥^^]  
@HWI-EAS443:3:79:200:1355#0/1  
AAAGGCATCCGAGGCCAGATCAGTGTGCAGCCTACATTC

+HWI-EAS443:3:79:200:1355#0/1  
`aa\_\_ba[``aa\_\_¥a` `\_[W[¥¥XVQ[ZSR\_¥¥\_VTSWW  
@HWI-EAS443:3:79:251:1230#0/1  
TTCCAGGGTATTGGAGTCCATGGTTTCCACATTCTCATTT  
+HWI-EAS443:3:79:251:1230#0/1  
aab\_]``aYa\_\_`^`a\_aa]]\_\_^a`a`S`[^`^Z\_`\_``\_`  
@HWI-EAS443:3:79:312:923#0/1  
AGGAAATACCAATCAACAAAAGGCATCCGCAGGCCAGATC  
+HWI-EAS443:3:79:312:923#0/1  
^`^Z]Z^aa\_a^\_W\_^XYPYU`a]a^Z^¥^ZZZ\_[[T]  
@HWI-EAS443:3:79:317:432#0/1  
CCCTTTTGAAAGAGCAACCGTTATGGCAGCATTTCAGCGGG  
+HWI-EAS443:3:79:317:432#0/1  
aaaabaababba\_Za`bbab`aaaaaaa\_S[¥¥ZR[\_\_\_a  
@HWI-EAS443:3:79:520:1391#0/1  
CATCCGACATGCGAACAGAAGTTATAAGAATGATGGAAAG  
+HWI-EAS443:3:79:520:1391#0/1  
abaaabbaaa`ab]a`Ua\_]a]\_aa`aaaaaa``a\_a`a^  
@HWI-EAS443:3:79:556:225#0/1  
AGTGATTCCAAGAGGAAAGCTTTCCACAAGAGGGGTCCAG  
+HWI-EAS443:3:79:556:225#0/1  
aa]bbb`Wa`babab`a^Z[]``aba`a`a]\_]\_\_aYUF¥`  
@HWI-EAS443:3:79:563:409#0/1  
GAAATACCAATCAACAAAAGGCATCCGCAGGCCAGATCAG  
+HWI-EAS443:3:79:563:409#0/1  
T¥W¥\_H[\_¥b\_0Q\_`^Wa\_WYS¥aa]`UH\_\_Z\_ZWT`SZb  
@HWI-EAS443:3:79:726:1530#0/1  
GGATGGCATGCCACTCTGCTGCATTTGAAGATTTAAGAGT  
+HWI-EAS443:3:79:726:1530#0/1  
^^\_b^bbbbb`bb¥bbabbabbbbbb\_aba\_babba¥aa\_  
@HWI-EAS443:3:79:877:1668#0/1  
GTCGGATGTCCGTCCTTCATTGTTCCCGCTGAATGCTGCC  
+HWI-EAS443:3:79:877:1668#0/1  
`\_a\_LL^¥G`\_ZGR\_\_a^`aXQX¥\_aaY¥UVWX¥\_VZ¥[U  
@HWI-EAS443:3:79:890:504#0/1  
TTTGCATTTCCATCATTCTTATAACTTCTGTTCGCATGT  
+HWI-EAS443:3:79:890:504#0/1  
aa`]``ZaaaaaaY`aaaa`a¥¥\_a` `a\_`a^a^aaa^  
@HWI-EAS443:3:79:946:984#0/1  
CGCTGAATGCTGCCATAACGGTTGCTCTTTCAAAGGGAG  
+HWI-EAS443:3:79:946:984#0/1  
abababaabababbaabb\_bb]a^abaaaa\_\_a`aa¥aaa  
@HWI-EAS443:3:7:1103:1497#0/1  
TGAAGATTTAAGAGTATCAAGTTTCATAAGAGGAAAGAAA  
+HWI-EAS443:3:7:1103:1497#0/1  
a` `aaaaaaaab`Saaa\_\_a^a` `]`a`aa`\_a\_\_a\_\_a\_\_  
@HWI-EAS443:3:7:1130:338#0/1  
TTCAGCGGAACAATGAAGGACGGACATCCGACATGCGAA  
+HWI-EAS443:3:7:1130:338#0/1  
ab\_]X\_`baa\_aaXaa\_XX^a\_`^`\_`TT^X]]YXa¥\_`

@HWI-EAS443:3:7:1242:660#0/1  
CCGTCCTTCATTGTTCCCGCTGAATGCTGCCATAACGGTT  
+HWI-EAS443:3:7:1242:660#0/1  
`bba\_\_`a`abbbbbbba^baaabaab]bb^a`baa\_\_a\_a  
@HWI-EAS443:3:7:1536:1593#0/1  
GAAAGTGATTCCAAGAGGAAAGCTTTCCACAAGAGGGGTC  
+HWI-EAS443:3:7:1536:1593#0/1  
abaabWbbaa\_aaa`aaa^a`a\_`a[`a\_\_\_\_\_`STN^RP  
@HWI-EAS443:3:7:1549:1765#0/1  
GAGGAAATACCAATCAACAAAAGGCATCCGCAGGCCAGAT  
+HWI-EAS443:3:7:1549:1765#0/1  
a`bbba^\_`Z)`baaaaaaaaa¥`¥a\_^\_)]`[QZ[`¥\_  
@HWI-EAS443:3:7:1740:1192#0/1  
GTTTCATAAGAGGAAAGAAAGTGATTCCAAGAGGAAAGCT  
+HWI-EAS443:3:7:1740:1192#0/1  
\_a^X)^baa`aaUZ)`S`VWV[U`V`Wa\_¥a[^\_¥S^XB  
@HWI-EAS443:3:7:350:935#0/1  
AATGAAGGACGGACATCCGACATGCGAACAGAAGTTATAA  
+HWI-EAS443:3:7:350:935#0/1  
Yb` `[X`a\_¥aaaTaaaYa[^aa`aaa\_[\_a^\_a\_¥`a^a  
@HWI-EAS443:3:7:351:1539#0/1  
GAAATACCAATCAACAAAAGGCATCCGCAGGCCAGATCAG  
+HWI-EAS443:3:7:351:1539#0/1  
\_b` `^[ba`abaaa\_a^aV^aaTZa¥aZZ\_aVN\_a¥UQBB  
@HWI-EAS443:3:7:389:1624#0/1  
CAGGGTATTGGAGTCCATGGTTTCCACATTCTCATTTGAA  
+HWI-EAS443:3:7:389:1624#0/1  
]b`a`[b`¥a]^^[aba\_a`[a`)]`aab`a`aa`a``abb  
@HWI-EAS443:3:7:422:171#0/1  
ATTGGAGTCCATGGTTTCCACATTCTCATTTGAAGCAATC  
+HWI-EAS443:3:7:422:171#0/1  
\_`\_X\_[bYa]a^aTZaa`][aaaW^a]aaaa\_\_[TaY^]  
@HWI-EAS443:3:7:558:1380#0/1  
AGCAGATACTGGGCCATAAGGACCAGGAGTGGAGGAAATA  
+HWI-EAS443:3:7:558:1380#0/1  
aaa[a\_X` `\_aa`[ZN\_a`a^\_\_Y` `\_Y[DXa`a¥V\_a]\_  
@HWI-EAS443:3:7:694:1061#0/1  
TCCGTCCTTCATTGTTCCCGCTGAATGCTGCCATAACGGT  
+HWI-EAS443:3:7:694:1061#0/1  
```aRX` `^a`aa¥¥\_\_`\_¥^\_\_`^\_Z^WW\_\_WW^W^S  
@HWI-EAS443:3:7:748:1810#0/1  
CATTCTCATTTGAAGCAATCTGGACCCCTTGTGGAAAG  
+HWI-EAS443:3:7:748:1810#0/1  
`aabbbbaababaJa`aba\_^` `G\_\_a\_¥[a0aVaaa^  
@HWI-EAS443:3:7:813:1533#0/1  
AGTGATTCCAAGAGGAAAGCTTTCCACAAGAGGGTCCAG  
+HWI-EAS443:3:7:813:1533#0/1  
`bUbb¥^Z` `a`aaaaab^\_¥\_a`¥aZa`a]a[]aXWH`\_  
@HWI-EAS443:3:7:858:907#0/1  
AGGAAATACCAATCAACAAAAGGCATCCGCAGGCCAGATC

+HWI-EAS443:3:7:858:907#0/1  
\_ab]bbbabbaaa`a`abaa`\_\_aaa`a\_\_`\_[Waa¥TT  
@HWI-EAS443:3:7:897:1045#0/1  
CTTTCCTCTTATGAACTTGATACTCTTAAATCTTCAAAT  
+HWI-EAS443:3:7:897:1045#0/1  
\_bbb`a`ababbb\_bb`bb¥ab\_Xb]babbab¥aba\_aba  
@HWI-EAS443:3:7:903:558#0/1  
CAGCATTGCGGGAACAATGAAGGACGGACATCCGACAT  
+HWI-EAS443:3:7:903:558#0/1  
U[SVaY[]b\_OV\_SZM]TMP]`ba\_FKXV[TYPFKXJM`a  
@HWI-EAS443:3:7:98:1484#0/1  
AAGAAAGTGATTCCAAGAGGAAAGCTTCCACAAGAGGGG  
+HWI-EAS443:3:7:98:1484#0/1  
aa]¥Z\_^DYa`aaa^PWZ]R]]UQZUQ[\_\_\_`\_a]XW[\_\_\_B  
@HWI-EAS443:3:80:1044:1572#0/1  
GGAGGAAATACCAATCAACAAAAGGCATCCGCAGGCCAGA  
+HWI-EAS443:3:80:1044:1572#0/1  
aYO`^UaVULX¥ZMVTZ[^SFVQVTMHM`[WMPRRNTSWY  
@HWI-EAS443:3:80:1220:979#0/1  
GAAAGTGATTCCAAGAGGAAAGCTTCCACAAGAGGGGTC  
+HWI-EAS443:3:80:1220:979#0/1  
a`\_ZUPaa\_¥\_a\_\_`aa\_]a[0¥\_`^¥X\_`^\_\_`\_WVZ]GO  
@HWI-EAS443:3:80:1285:519#0/1  
TGTTGATTGGTATTTCTCCACTCCTGGTCCTTATGGCCC  
+HWI-EAS443:3:80:1285:519#0/1  
U^¥¥[[]bbZaYa`a`]a¥PSa``YU[\_N\_\_a¥ZY`a`aQQ  
@HWI-EAS443:3:80:1291:315#0/1  
GAGGAAAGAAAGTGATTCCAAGAGGAAAGCTTCCACAAG  
+HWI-EAS443:3:80:1291:315#0/1  
a[\_\_\_aa¥W¥aa\_LR]aa[`a]]^]]Za\_`T¥\_`VY\_Z\_YN  
@HWI-EAS443:3:80:1367:866#0/1  
GAGGAAAGAAAGTGATTCCAAGAGGAAAGCTTCCACAAG  
+HWI-EAS443:3:80:1367:866#0/1  
^`baaaaaaabaabbaa`bab]¥aaaa\_aaa\_\_a\_\_\_^  
@HWI-EAS443:3:80:17:538#0/1  
GAAATACCAATCAACAAAAGGCATCCGCAGGCCAGATCAG  
+HWI-EAS443:3:80:17:538#0/1  
a\_^a\_]\_aa`^`^R^]\_`^^[`^\_^^`\_`^^^^ZW[T[  
@HWI-EAS443:3:80:192:704#0/1  
CCGCAGGCCAGATCAGTGTGCAGCCTACATTCTCAGTGCA  
+HWI-EAS443:3:80:192:704#0/1  
aabbbbaabb]`aaa\_aa`a]^aa`baTaaaa``aXa¥\_  
@HWI-EAS443:3:80:262:1575#0/1  
TAAATCTTCAAATGCAGCAGAGTGGCATGCCATCCACACC  
+HWI-EAS443:3:80:262:1575#0/1  
abaW^`aaaa¥`aaaaaa[a¥\_Y¥``a\_Ya\_aZ^`\_`^YW  
@HWI-EAS443:3:80:308:1720#0/1  
CCGCAGGCCAGATCAGTGTGCAGCCTACATTCTCAGTGCA  
+HWI-EAS443:3:80:308:1720#0/1  
aaZaaX[a`a`a^`^VY\_`aY¥^a^a```¥^`\_`\_V\_\_`



@HWI-EAS443:3:80:329:1440#0/1  
GAGGAAATACCAATCAACAAAAGGCATCCGCAGGCCAGAT  
+HWI-EAS443:3:80:329:1440#0/1  
abb`\_`abb[bbabb[UWbaab\_\_`\_¥]]a`[[`¥`aaX  
@HWI-EAS443:3:80:363:1241#0/1  
GGACCCCTCTTGTGGAAAGCTTTCCTCTTGAATCACTTT  
+HWI-EAS443:3:80:363:1241#0/1  
aa\_bbbbbbb]aa[b`¥^baa`aaaaaaa\_aa]`aa``aa\_  
@HWI-EAS443:3:80:409:178#0/1  
CTTAAATCTTCAAATGCAGCAGAGTGGCATGCCATCCACA  
+HWI-EAS443:3:80:409:178#0/1  
^ababa\_babbbababa]ababbaaSaa`¥]`Z`ZZ¥NTJL  
@HWI-EAS443:3:80:414:433#0/1  
GTCCATGGTTTCCACATTCTCATTTGAAGCAATCTGGACC  
+HWI-EAS443:3:80:414:433#0/1  
aYaaa\_b¥]aaaa`Z`a``^T\_\_\_\_\_a```````\_]U^]Z  
@HWI-EAS443:3:80:593:1770#0/1  
GAAAGTGATTCCAAGAGGAAAGCTTTCACAAGAGGGGTC  
+HWI-EAS443:3:80:593:1770#0/1  
aaa`TW`\_]abaa\_XTQ^a`\_`^^]\_[a^\_\_^\_Y]YYZ]  
@HWI-EAS443:3:80:611:688#0/1  
AGGAAAGAAAGTGATTCCAAGAGGAAAGCTTTCACAAGA  
+HWI-EAS443:3:80:611:688#0/1  
]XNYY]`b]a\_V`VUaaba`]a^^`WX\_[aaZb\_aaa[a\_  
@HWI-EAS443:3:80:720:1007#0/1  
GGAGGAAATACCAATCAACAAAAGGCATCCGCAGGCCAGA  
+HWI-EAS443:3:80:720:1007#0/1  
aa`aaZ]¥aa``aY[]V`¥``¥TV]^`¥a¥[\_Z[WU][[¥¥  
@HWI-EAS443:3:80:782:96#0/1  
TCCACAAGAGGGGTCCAGATTGCTTCAAATGAGAATGTGG  
+HWI-EAS443:3:80:782:96#0/1  
aaa\_^aaaaaaa`^\_\_aa``aa^a`^`\_`aa\_a^\_aa^`\_  
@HWI-EAS443:3:81:1013:35#0/1  
GGATGGCATGCCACTCTGCTGCATTTGAAGATTTAAGAGT  
+HWI-EAS443:3:81:1013:35#0/1  
^aabba\_ab\_bbbababaJababbbba^b\_abbaaab`  
@HWI-EAS443:3:81:107:884#0/1  
TTTCCACAAGAGGGGTCCAGATTGCTTCAAATGAGAATGT  
+HWI-EAS443:3:81:107:884#0/1  
a`[baab`a[`baa`[aaa]a``aa``a][`\_\_Ta`]aa]  
@HWI-EAS443:3:81:1391:995#0/1  
CAATCAACAAAAGGCATCCGCAGGCCAGATCAGTGTGCAG  
+HWI-EAS443:3:81:1391:995#0/1  
a^^`¥abbaaZ^babb`\_abXb]a`\_`b\_]Y`a[aWa\_`a  
@HWI-EAS443:3:81:1453:262#0/1  
ATTTCTCCACTCCTGGTCCTTATGGCCAGTATCTGCTT  
+HWI-EAS443:3:81:1453:262#0/1  
abbaabaababbaaab`[^bbaaUZZTZa]\_a`^\_\_Sa`  
@HWI-EAS443:3:81:153:1815#0/1  
TCTTGAATCACTTTCTTCTCTTATGAACTTGATACT

+HWI-EAS443:3:81:153:1815#0/1  
¥bb\_UQUTRaYZW[abZaba]Y`Ua`aSHSX^a¥\_babY\_  
@HWI-EAS443:3:81:1715:1559#0/1  
AAACTTGATACTCTTAAATCTTCAAATGCAGCAGAGTGGC  
+HWI-EAS443:3:81:1715:1559#0/1  
`a\_[aaba`aaaU`abaaa`a`\_a\_`ba^a\_aa\_aXa^\_  
@HWI-EAS443:3:81:1777:478#0/1  
AGGAAATACCAATCAACAAAAGGCATCCGCAGGCCAGATC  
+HWI-EAS443:3:81:1777:478#0/1  
`aaaaa[\_Yaa\_a\_aaaaaaXX\_a`\_\_\_\_`SX\_]\_^UZ  
@HWI-EAS443:3:81:239:175#0/1  
AGGGTATTGGAGTCCATGGTTTCCACATTCTCATTTGAAG  
+HWI-EAS443:3:81:239:175#0/1  
abab\_baaba`aa`baaZ`aaa\_aa¥aaaa\_aaab`a  
@HWI-EAS443:3:81:266:1790#0/1  
TTCAGCGGAACAATGAAGGACGGACATCCGACATGCGAA  
+HWI-EAS443:3:81:266:1790#0/1  
[aa[Za[Z`\_]\_]WaWa¥^\_]\_I\_`b````]`baaZYHZ\_]\_  
@HWI-EAS443:3:81:412:462#0/1  
CAGGCCAGATCAGTGTGCAGCCTACATTCTCAGTGCAGCG  
+HWI-EAS443:3:81:412:462#0/1  
abbb\_bbb`abab\_a^ababaaaaa`aa`aaa]a`aa`a  
@HWI-EAS443:3:81:436:928#0/1  
GAAACTTGATACTCTTAAATCTTCAAATGCAGCAGAGTGG  
+HWI-EAS443:3:81:436:928#0/1  
aaa\_\_bab^a¥aaaab`aaa`a`aaa`abaaaa`^a^Z^\_  
@HWI-EAS443:3:81:44:1572#0/1  
GGGTATTGGAGTCCATGGTTTCCACATTCTCATTTGAAGC  
+HWI-EAS443:3:81:44:1572#0/1  
^OZYbaaaa^XWab[`a`Zaaaa`aa```a`W`aaa`[[a  
@HWI-EAS443:3:81:476:1162#0/1  
ATGCCACTCTGCTGCATTTGAAGATTTAAGAGTATCAAGT  
+HWI-EAS443:3:81:476:1162#0/1  
aa`Y`a\_b\_aaaaaaaaaa\_a`aa^]a\_aaS]^``\_]\_  
@HWI-EAS443:3:81:553:1925#0/1  
GCAGGCCAGATCAGTGTGCAGCCTACATTCTCAGTGCAGC  
+HWI-EAS443:3:81:553:1925#0/1  
abbaabba``aaaa`Zaaa\_aa`ba\_aa`aa^¥`PR`a  
@HWI-EAS443:3:81:563:1727#0/1  
ATCAACAAAAGGCATCCGCAGGCCAGATCAGTGTGCAGCC  
+HWI-EAS443:3:81:563:1727#0/1  
aa`a[aa\_\_[T¥a`¥aa\_a`TaZ¥^a]`]^0¥Q¥TYRRV  
@HWI-EAS443:3:81:639:1317#0/1  
CTGCATTTGAAGATTTAAGAGTATCAAGTTTCATAAGAGG  
+HWI-EAS443:3:81:639:1317#0/1  
a^]\_Ya`^T[X[P]a`]a¥ZaX[```^¥^]^a\_`a¥]`aS  
@HWI-EAS443:3:81:864:1571#0/1  
ATCTGGACCCCTTTGTGGAAAGCTTTCCTCTTGAATCA  
+HWI-EAS443:3:81:864:1571#0/1  
¥U][OR[^`^`aa¥^`Xaa^Za[]][`aQL`\_a\_a`\_Y^\_]\_

@HWI-EAS443:3:81:998:1787#0/1  
GAGGAAATACCAATCAACAAAAGGCATCCGCAGGCCAGAT  
+HWI-EAS443:3:81:998:1787#0/1  
aaaXabaaaa`bba]aaaaa¥a]a\_a\_]TZ]aa^\_a\_VY]  
@HWI-EAS443:3:82:1160:645#0/1  
ATTTAAGAGTATCAAGTTTCATAAGAGGAAAGAAAGTGAT  
+HWI-EAS443:3:82:1160:645#0/1  
aba]\_abb\_J\_aa\_]bXa`X¥babbaaa\_aab``\_]ba`  
@HWI-EAS443:3:82:1265:1520#0/1  
AGCAGATACTGGGCATAAGGACCAGGAGTGGAGGAAATA  
+HWI-EAS443:3:82:1265:1520#0/1  
aaYY\_a\_0\_a[Xa^¥Wa`TVYa`Xaaa^Ra`\_a`]\_¥``  
@HWI-EAS443:3:82:1310:901#0/1  
TTCCTCTTATGAAACTTGATACTCTTAAATCTTCAAATGC  
+HWI-EAS443:3:82:1310:901#0/1  
Za^P\_a\_]\_bb]TX^\_U\_YS¥a^a^`ab``\_ZZ^\_P  
@HWI-EAS443:3:82:1316:1973#0/1  
TGCACACTGATCTGGCCTGCGGATGCCTTTTGTGATTGG  
+HWI-EAS443:3:82:1316:1973#0/1  
a\_M[0\_aQ\_]U`\_¥a\_H¥^\_Ya\_ZWWH\_aa^``]ZX]\_`  
@HWI-EAS443:3:82:138:106#0/1  
AAATACCAATCAACAAAAGGCATCCGCAGGCCAGATCAGT  
+HWI-EAS443:3:82:138:106#0/1  
a\_a`]\_aaXa`aaVZ\_\_\_\_^M^V\_TZZ]\_UVWHZMPQNQR  
@HWI-EAS443:3:82:153:447#0/1  
ACCCCTCTTGTGGAAAGCTTTCCTCTTGAATCACTTTCT  
+HWI-EAS443:3:82:153:447#0/1  
\_aaba`a`\_a¥^][^L`a`aabaaa`a[^0[^[^\_\_`\_`  
@HWI-EAS443:3:82:1653:1172#0/1  
AGTGATTCCAAGAGGAAAGCTTCCACAAGAGGGGTCCAG  
+HWI-EAS443:3:82:1653:1172#0/1  
`a[b\_[ba\_ab`baaabaUab`a`a¥\_a`abba\_¥^0a\_  
@HWI-EAS443:3:82:173:193#0/1  
GGAAAGAAAGTGATTCCAAGAGGAAAGCTTCCACAAGAG  
+HWI-EAS443:3:82:173:193#0/1  
a\_¥TX`US¥aP\_TY`XYF0[`ZS^]X]a[TR]YVZY\_Z\_V  
@HWI-EAS443:3:82:279:652#0/1  
CCAGATTGCTTCAAATGAGAATGTGGAAACCATGGACTCC  
+HWI-EAS443:3:82:279:652#0/1  
aaVaa`Taaa^a\_]`a¥a`a\_a\_a`a\_```\_¥¥^WQ\_\_  
@HWI-EAS443:3:82:329:948#0/1  
GATGCCTTTTGTGATTGGTATTTCCCTCCACTCCTGGTCC  
+HWI-EAS443:3:82:329:948#0/1  
aa`aabaaaabaaaa`aaaXa\_a`aa\_¥`a`a\_a\_ZWa\_  
@HWI-EAS443:3:82:520:22#0/1  
GGAAATACCAATCAACAAAAGGCATCCGCAGGCCAGATCA  
+HWI-EAS443:3:82:520:22#0/1  
ab``aba``^`a^a`aaa¥aa¥\_a[^a\_]Y]````WZZ[  
@HWI-EAS443:3:82:652:1368#0/1  
CGCATGTCGGATGTCCGTCCTTCATTGTTCCCGCTGAATG

+HWI-EAS443:3:82:652:1368#0/1  
abbbbb^bbbaaa\_ab`aaababbaabaaaaaaaa`a`]  
@HWI-EAS443:3:82:694:219#0/1  
AGGCTGCACACTGATCTGGCCTGCGGATGCCTTTTGTGA  
+HWI-EAS443:3:82:694:219#0/1  
a``a`a^\_WUb\_X`b]abaaaa¥X]baWZFDZaa]JN¥[O  
@HWI-EAS443:3:82:740:910#0/1  
GATTGCTTCAAATGAGAATGTGGAAACCATGGACTCCAAT  
+HWI-EAS443:3:82:740:910#0/1  
a^`V\_a\_aa]ZWaZa¥a^`^LaaZ]`\_\_`\_¥]`\_R]TVX  
@HWI-EAS443:3:82:825:292#0/1  
GAGGAAAGAAAGTGATTCCAAGAGGAAAGCTTTCCACAAG  
+HWI-EAS443:3:82:825:292#0/1  
aaaaaa`a`aaa`a^aaa`^aaa`\_\_a]QDX]U¥QUH`Q[  
@HWI-EAS443:3:82:864:1120#0/1  
GAAAGTGATTCCAAGAGGAAAGCTTTCCACAAGAGGGGTC  
+HWI-EAS443:3:82:864:1120#0/1  
aaa^a¥abb`a`abababab`aaa\_aa`\_aaabaa^V^Va  
@HWI-EAS443:3:83:1000:445#0/1  
TTTTGAAAGAGCAACCGTTATGGCAGCATTGCGGGAAC  
+HWI-EAS443:3:83:1000:445#0/1  
aaaaa`\_aa\_a`¥\_] [aXa\_`^`Sa`N^¥]PUUYUR^N[T  
@HWI-EAS443:3:83:105:468#0/1  
TGGTATTTCCCTCCACTCCTGGTCCTTATGGCCCAGTATCT  
+HWI-EAS443:3:83:105:468#0/1  
\_bb`babbba^aaab`ab`a¥\_a^`aaaa\_a`^`^a^¥\_  
@HWI-EAS443:3:83:1078:923#0/1  
CCGTCCTTATTGTTCCCGCTGAATGCTGCCATAACGGTT  
+HWI-EAS443:3:83:1078:923#0/1  
a\_b\_abbababaaa`aab`aaabaabb\_aa`aaaa¥aa\_\_  
@HWI-EAS443:3:83:1213:769#0/1  
ATACTGGGCCATAAGGACCAGGAGTGGAGGAAATACCAAT  
+HWI-EAS443:3:83:1213:769#0/1  
aabaaa`bbaabaaabaa\_aaa\_a]b[`baaaa`T\_aa^  
@HWI-EAS443:3:83:124:1521#0/1  
GAAATACCAATCAACAAAAGGCATCCGCAGGCCAGATCAG  
+HWI-EAS443:3:83:124:1521#0/1  
abaaaWaa\_`¥ba]ab]IV]\_aa\_a`a^\_]\_``\_]NPYS  
@HWI-EAS443:3:83:1400:1031#0/1  
GGAAATACCAATCAACAAAAGGCATCCGCAGGCCAGATCA  
+HWI-EAS443:3:83:1400:1031#0/1  
aa`aba`aaa`^]]`¥\_^ [R`^V`\_]\_[YW^ZWXVW  
@HWI-EAS443:3:83:1462:1257#0/1  
ATCCGACATGCGAACAGAAGTTATAAGAATGATGGAAAGT  
+HWI-EAS443:3:83:1462:1257#0/1  
]\_¥^b`bbbb`\_W]`ab¥¥^abaaaa` [bba\_Z\_`^`\_S  
@HWI-EAS443:3:83:1462:1289#0/1  
AAGAAAGTGATTCCAAGAGGAAAGCTTTCCACAAGAGGGG  
+HWI-EAS443:3:83:1462:1289#0/1  
a\_`\_Y^aYa]baaabb]baaYb]`aaaa\_Q\_¥]aa``\_ZQ

@HWI-EAS443:3:83:1521:679#0/1  
GTTTCCACATTCTCATTTGAAGCAATCTGGACCCCTCTTG  
+HWI-EAS443:3:83:1521:679#0/1  
`^aXYV`P¥`aT`^\_a[[`Z¥\_OV^\_U\_YZZZLORRW^\_Y  
@HWI-EAS443:3:83:1710:1671#0/1  
AGCAACCGTTATGGCAGCATTTCAGCGGGAACAATGAAGGA  
+HWI-EAS443:3:83:1710:1671#0/1  
aabab]X¥`abb]a]b]SLFY]U¥FX^]PXHVaBBBBBBB  
@HWI-EAS443:3:83:1715:1266#0/1  
GAATGATGGAAAGTGCAAAGCCAGAAGATTTGTCCTTCCA  
+HWI-EAS443:3:83:1715:1266#0/1  
V`WZbabbaXba[^babab\_]`^]aaabbaaaZ]aa]Ga  
@HWI-EAS443:3:83:196:1798#0/1  
GATTGCTTCAAATGAGAATGTGGAAACCATGGACTCCAAT  
+HWI-EAS443:3:83:196:1798#0/1  
a\_JYbbYNbb¥SZaa]b\_aaQaaW[b`bX`^\_\_\_a\_aaba  
@HWI-EAS443:3:83:235:764#0/1  
ATGTAGGCTGCACACTGATCTGGCCTGCGGATGCCTTTTG  
+HWI-EAS443:3:83:235:764#0/1  
aaa\_abaaa`aaa^`^`\_`\_`a]^¥]^``[[N[^[\_[H  
@HWI-EAS443:3:83:321:971#0/1  
CACTGATCTGGCCTGCGGATGCCTTTTGTGATTGGTATT  
+HWI-EAS443:3:83:321:971#0/1  
aaaaa\_aaaa\_`^S^^`\_WV][VZ\_\_\_W\_^R[¥[\_Y¥¥¥  
@HWI-EAS443:3:83:363:1604#0/1  
CAGCGGGAACAATGAAGGACGGACATCCGACATGCGAACA  
+HWI-EAS443:3:83:363:1604#0/1  
aa[ba`VGUaaZSRT¥\_Q^¥\_V]USFPUMR¥X[Z[YVZHU  
@HWI-EAS443:3:83:486:593#0/1  
AAAGTGATTCCAAGAGGAAAGCTTTCCACAAGAGGGGTCC  
+HWI-EAS443:3:83:486:593#0/1  
`aaaW`TaabaX`Z`aa\_\_`ba\_a`aaaaaa\_a\_\_`OUO  
@HWI-EAS443:3:83:547:1413#0/1  
AAAGTGATTCCAAGAGGAAAGCTTTCCACAAGAGGGGTCC  
+HWI-EAS443:3:83:547:1413#0/1  
`a^`Xa][abb]]abb^aab`b`\_`\_aaabaa\_\_a^¥\_Z\_\_  
@HWI-EAS443:3:83:655:1293#0/1  
ATGGTTTCCACATTCTCATTTGAAGCAATCTGGACCCCTC  
+HWI-EAS443:3:83:655:1293#0/1  
a[\_¥Z[aaaL\_ba`\_`^a\_`¥Ya\_a`S\_`^`\_ZZ^]`^`  
@HWI-EAS443:3:83:72:920#0/1  
TGCACACTGATCTGGCCTGCGGATGCCTTTTGTGATTGG  
+HWI-EAS443:3:83:72:920#0/1  
abba\_Vababababa]aa^aaaaa``¥¥a`[R^aXY[`]a  
@HWI-EAS443:3:83:749:1175#0/1  
GTGGATGGCATGCCACTCTGCTGCATTTGAAGATTTAAGA  
+HWI-EAS443:3:83:749:1175#0/1  
a`^aaXa\_N\_aZV]a^\_a`a`\_]UU]\_a¥V```aa``aYa  
@HWI-EAS443:3:83:904:706#0/1  
GCAGGCCAGATCAGTGTGCAGCCTACATTCTCAGTGCAGC

+HWI-EAS443:3:83:904:706#0/1  
aaa`baaaa]\_aa`¥aVa\_\_\_`W\_a\_Za\_¥a\_\_\_`S`\_\_^Z  
@HWI-EAS443:3:84:1033:541#0/1  
CTTGTGGAAAGCTTTCCTCTTGAATCACTTCTTTCCTC  
+HWI-EAS443:3:84:1033:541#0/1  
abb`abbbb`bbbbbbbbbaabbba\_b\_bbbabbaaba  
@HWI-EAS443:3:84:1138:559#0/1  
GTTTCATAAGAGGAAAGAAAGTGATTCCAAGAGGAAAGCT  
+HWI-EAS443:3:84:1138:559#0/1  
a\_aaaaaaaaaa]\_`b\_\_^¥Xa``\_[\_\_`[\_]\_\_`^P]  
@HWI-EAS443:3:84:1164:335#0/1  
CTTCAAATGAGAATGTGGAAACCATGGACTCCAATACCCT  
+HWI-EAS443:3:84:1164:335#0/1  
abaabaaabaababa^aaaaaaaa\_a`\_\_a\_]baaa\_a^a  
@HWI-EAS443:3:84:1448:1626#0/1  
AACAAAAGGCATCCGCAGGCCAGATCAGTGTGCAGCCTAC  
+HWI-EAS443:3:84:1448:1626#0/1  
aY\_[bS¥aba^SQ¥TWUaZLX``SQ`a^aZ\_aa^WL\_^Z  
@HWI-EAS443:3:84:1689:108#0/1  
ATTGCTTCAAATGAGAATGTGGAAACCATGGACTCCAATA  
+HWI-EAS443:3:84:1689:108#0/1  
\_\_bb\_bbaaa``Xaaa\_a]a`¥^Z]a\_]a^X\_^0\_Z\_^  
@HWI-EAS443:3:84:208:782#0/1  
GAAAGTGATTCCAAGAGGAAAGCTTCCACAAGAGGGGTC  
+HWI-EAS443:3:84:208:782#0/1  
a[^W[HVROR[^`Y¥YaXZZZ^`^ZX\_a^RFT`YV¥XLN  
@HWI-EAS443:3:84:218:1603#0/1  
GGTCCAGATTGCTTCAAATGAGAATGTGGAAACCATGGAC  
+HWI-EAS443:3:84:218:1603#0/1  
UbTb`T`b\_`bbVabbX]Xbbaaab\_a```babVa^Q^a  
@HWI-EAS443:3:84:231:787#0/1  
CTTAAATCTTCAAATGCAGCAGAGTGGCATGCCATCCACA  
+HWI-EAS443:3:84:231:787#0/1  
ab[^[^`a\_X`]¥XV^]\_aa`\_\_\_X\_^`[[a]XSQXSZ^^  
@HWI-EAS443:3:84:343:843#0/1  
CATGTCGGATGTCCTTTCATTGTTCCCGCTGAATGCT  
+HWI-EAS443:3:84:343:843#0/1  
\_¥^^]a^¥WV\_P¥]WDXZ]\_XUZ]XM[\_¥^V^LSG[¥VQV  
@HWI-EAS443:3:84:410:524#0/1  
TTGGTATTTCTCCACTCCTGGTCCTTATGGCCAGTATC  
+HWI-EAS443:3:84:410:524#0/1  
[aWU`a`[aaY\_a\_XS]\_U¥IP[\_TY``SPaT^`[ZIXa  
@HWI-EAS443:3:84:583:1730#0/1  
GAGCAACCGTTATGGCAGCATTGAGCGGGAACAATGAAGG  
+HWI-EAS443:3:84:583:1730#0/1  
`abba`ba]Saba¥ZXaa[¥\_a`[O[QZ`GX\_\_[ZH]RSQ  
@HWI-EAS443:3:84:659:1829#0/1  
GAAATACCAATCAACAAAAGGCATCCGCAGGCCAGATCAG  
+HWI-EAS443:3:84:659:1829#0/1  
aaU\_]\_`bbb]bZbRTX^]SV\_]aZaTY`¥^\_a[\_aP]\_G

@HWI-EAS443:3:84:704:796#0/1  
AGTGATTCCAAGAGGAAAGCTTTCCACAAGAGGGGTCCAG  
+HWI-EAS443:3:84:704:796#0/1  
a`[`baabbb]a\_\_\_aZX^aa``baa¥0\_Z\_]`PX^\_\_  
@HWI-EAS443:3:84:851:178#0/1  
CCCCTCTGTGGAAAGCTTTCCTCTTGAATCACTTTCTT  
+HWI-EAS443:3:84:851:178#0/1  
abaabaab¥M[a\_Z]a`\_aaa`a`aaa`a]`a\_^\_]`^a`  
@HWI-EAS443:3:84:877:670#0/1  
GAGTGGAGGAAATACCAATCAACAAAAGGCATCCGCAGGC  
+HWI-EAS443:3:84:877:670#0/1  
aab`ba\_ba`aaaa\_aaa```\_`a]]`a\_aa`a[`Y\_\_\_\_`  
@HWI-EAS443:3:85:1173:1168#0/1  
CATTTGAAGATTTAAGAGTATCAAGTTTCATAAGAGGAAA  
+HWI-EAS443:3:85:1173:1168#0/1  
aa\_]bb[]]Pba``baab^bb`a¥b\_a`\_aa^X\_aba¥\_\_  
@HWI-EAS443:3:85:126:240#0/1  
CGGATGTCCGTCCTTCATTGTTCCCGCTGAATGCTGCCAT  
+HWI-EAS443:3:85:126:240#0/1  
aaVKX\_¥^\_\_V\_\_\_\_[^V\_¥\_SS¥^\_V¥V^¥XV¥UUUVWUW  
@HWI-EAS443:3:85:1349:2040#0/1  
GAAATACCAATCAACAAAAGGCATCCGCAGGCCAGATCAG  
+HWI-EAS443:3:85:1349:2040#0/1  
aabb]b\_\_\_\_]¥aba^baaaaa\_^`Za^a`\_Q`aa`Na``  
@HWI-EAS443:3:85:1422:320#0/1  
GAGTGGAGGAAATACCAATCAACAAAAGGCATCCGCAGGC  
+HWI-EAS443:3:85:1422:320#0/1  
`a\_PXb[b\_¥N]b\_ZS¥aaa`\_[a`¥\_`WH```WaY[\_aN  
@HWI-EAS443:3:85:1591:1136#0/1  
CAGCATTCAGCGGAACAATGAAGGACGGACATCCGACAT  
+HWI-EAS443:3:85:1591:1136#0/1  
^babaa[`aabaa[\_babUa[abZMRPabba[YPY¥RRba  
@HWI-EAS443:3:85:1683:1520#0/1  
ATGCCTTTTGTGATTGGTATTTCCCTCCACTCCTGGTCCT  
+HWI-EAS443:3:85:1683:1520#0/1  
aaaaaaaa`U`a\_[aa`Ya\_aa]]a\_\_a\_a¥Z``^]XZ^  
@HWI-EAS443:3:85:1745:1816#0/1  
AGGCTGCACACTGATCTGGCCTGCGGATGCCTTTTGTGTA  
+HWI-EAS443:3:85:1745:1816#0/1  
a\_aZQX¥ZH¥\_a`]Tba`\_¥QZ[^a]N][[]]`aZSUR  
@HWI-EAS443:3:85:292:1613#0/1  
TGGTTTCCACATTCTCATTTGAAGCAATCTGGACCCCTCT  
+HWI-EAS443:3:85:292:1613#0/1  
abb\_aZ`\_\_bbbbabb`Z[`[Z\_bYXaaa]Za\_\_\_\_]aa``  
@HWI-EAS443:3:85:368:1170#0/1  
AGGACCAGGAGTGGAGGAAATACCAATCAACAAAAGGCAT  
+HWI-EAS443:3:85:368:1170#0/1  
a`]¥ba]a`\_a\_aa`aaaaaaaa`aaaaa\_``\_V\_\_\_\_`\_  
@HWI-EAS443:3:85:598:1876#0/1  
AAGAAAGTGATTCCAAGAGGAAAGCTTTCCACAAGAGGGG

+HWI-EAS443:3:85:598:1876#0/1  
ab]a`^AG\_QY`\_`aYbU¥^a[\_a]^a\_\_^¥[[[]WXZ  
@HWI-EAS443:3:85:780:1869#0/1  
CCGTCCTTCATTGTTCCCGCTGAATGCTGCCATAACGGTT  
+HWI-EAS443:3:85:780:1869#0/1  
X]\_K`b\_baaaa```babb\_`b`]aaa]`bbba^\_aa  
@HWI-EAS443:3:85:792:500#0/1  
ATAAGAATGATGGAAAGTGAAAGCCAGAAGATTTGTCCT  
+HWI-EAS443:3:85:792:500#0/1  
M`bbaaabbbb`\_a`b\_abbbbb`a\_bbabbbbbbaaab  
@HWI-EAS443:3:85:802:87#0/1  
CAGGGTATTGGAGTCCATGGTTTCCACATTCTCATTTGAA  
+HWI-EAS443:3:85:802:87#0/1  
abb`^abbaaa`aa^baab`bb`ba\_b]\_a`aaaaba`  
@HWI-EAS443:3:85:85:1198#0/1  
GATTGCTTCAAATGAGAATGTGGAAACCATGGACTCCAAT  
+HWI-EAS443:3:85:85:1198#0/1  
ababababb`b]bbabbbb\_aaaaZabbaaaaaaa`Va  
@HWI-EAS443:3:86:1065:565#0/1  
CATTCTATTTGAAGCAATCTGGACCCCTCTTGTGGAAAG  
+HWI-EAS443:3:86:1065:565#0/1  
a\_a`¥bbbaabb`b\_0`a]\_ba]X`WZ]¥]\_`]ba^aa`  
@HWI-EAS443:3:86:1099:534#0/1  
ATGGCATGCCACTCTGCTGCATTTGAAGATTTAAGAGTAT  
+HWI-EAS443:3:86:1099:534#0/1  
``baaabb\_Z`aaabbaa¥\_aa\_]W¥`^aaaa`b``Xaa  
@HWI-EAS443:3:86:1142:1187#0/1  
CACACTGATCTGGCCTGCGGATGCCTTTTGTGATTGGTA  
+HWI-EAS443:3:86:1142:1187#0/1  
WWb`\_`a\_bbbZ\_W\_b`bb]abZPZbb\_Z\_aa]Ub[\_]T  
@HWI-EAS443:3:86:1253:400#0/1  
AGTGATTCCAAGAGGAAAGCTTCCACAAGAGGGTCCAG  
+HWI-EAS443:3:86:1253:400#0/1  
a\_H\_abbbbb\_a¥\_\_\_bbb`bba\_^\_]aaaaaab`[Yaa  
@HWI-EAS443:3:86:1257:954#0/1  
GGCCTGCGGATGCCTTTTGTGATTGGTATTTCTCCACT  
+HWI-EAS443:3:86:1257:954#0/1  
ab[aaa\_ab[`TXaaabb[^`]\_^\_b]a]^aaaU`a\_\_\_W\_  
@HWI-EAS443:3:86:1461:877#0/1  
CTTGATACTCTTAAATCTTCAAATGCAGCAGAGTGGCATG  
+HWI-EAS443:3:86:1461:877#0/1  
aabbaba`b`\_aabaaaa`a`b^aaaaa¥`ba]Tba^`aa  
@HWI-EAS443:3:86:1559:903#0/1  
GGACCCCTCTTGTGGAAAGCTTTCCTCTTGAATCACTTT  
+HWI-EAS443:3:86:1559:903#0/1  
ab`YYQTab^S[T`¥¥`^`\_`aa^OaZa`\_`\_`^`F¥X```  
@HWI-EAS443:3:86:380:264#0/1  
CTGCACTGAGAATGTAGGCTGCACACTGATCTGGCCTGCG  
+HWI-EAS443:3:86:380:264#0/1  
ababb`bb`aabaaaa`aa\_\_`\_W\_a¥\_^a`a\_Z^]W[



@HWI-EAS443:3:86:442:863#0/1  
ATTGCTTCAAATGAGAATGTGGAAACCATGGACTCCAATA  
+HWI-EAS443:3:86:442:863#0/1  
a^]aaaa`[`Z\_a`]^`aaZa`a¥\_\_^U[\_]\_^¥Z`[WW]  
@HWI-EAS443:3:86:596:89#0/1  
CAGCGGAACAATGAAGGACGGACATCCGACATGCGAACA  
+HWI-EAS443:3:86:596:89#0/1  
aba]bba][`b[aTbUbY`0`RXFX\_^Va^IU\_a\_aZaYY  
@HWI-EAS443:3:86:740:189#0/1  
CTGCGGATGCCTTTTGTGATTGGTATTTCCCTCCACTCCT  
+HWI-EAS443:3:86:740:189#0/1  
`bbaaaaab`aababaaa\_`a`a¥\_aaa``aa\_a\_^`]^  
@HWI-EAS443:3:86:929:1082#0/1  
GTTGATTGGTATTTCCCTCCACTCCTGGTCCTTATGGCCCA  
+HWI-EAS443:3:86:929:1082#0/1  
`bbaabb]bbbbbbbababab^bbbb¥[abbbbbba]aa  
@HWI-EAS443:3:87:1228:1326#0/1  
GGTCCAGATTGCTTCAAATGAGAATGTGGAAACCATGGAC  
+HWI-EAS443:3:87:1228:1326#0/1  
aa[aaaa\_aa\_\_`aa`````aa¥\_aa\_aa`\_\_`[\_aa\_]¥  
@HWI-EAS443:3:87:1450:1763#0/1  
CATCATTCTTATAACTTCTGTTCGCATGTCGGATGTCCGT  
+HWI-EAS443:3:87:1450:1763#0/1  
ab\_\_^^`b\_\_ZX¥aGZaU\_a\_a¥]]UaaX`S\_]\_TGPLUO  
@HWI-EAS443:3:87:1486:1411#0/1  
GCGGATGCCTTTTGTGATTGGTATTTCCCTCCACTCCTGG  
+HWI-EAS443:3:87:1486:1411#0/1  
aaab`bb`aabbb\_abbabaa`\_abab]^aZWb^aZUa]\_  
@HWI-EAS443:3:87:1604:793#0/1  
CGGATGTCCGCTTCATTGTTCCCGCTGAATGCTGCCAT  
+HWI-EAS443:3:87:1604:793#0/1  
aa`abbb^baaS[abU^bbaabbb\_bbbaba\_bUbaaaba  
@HWI-EAS443:3:87:211:763#0/1  
TGATTCCAAGAGGAAAGCTTTCCACAAGAGGGTCCAGAT  
+HWI-EAS443:3:87:211:763#0/1  
ab]aaabb¥`a\_^`a`aaa``aaa\_a`````\_^]``\_\_^  
@HWI-EAS443:3:87:352:542#0/1  
ACTGAGAATGTAGGCTGCACACTGATCTGGCCTGCGGATG  
+HWI-EAS443:3:87:352:542#0/1  
abbbbaUZHT^`\_\_`a\_b^¥a^`b[UGW¥aQa\_\_\_\_]bZ[]  
@HWI-EAS443:3:87:495:119#0/1  
GATTGCTTCAAATGAGAATGTGGAAACCATGGACTCCAAT  
+HWI-EAS443:3:87:495:119#0/1  
aaaaa`aaaaa`\_aaa``aa^aa`\_\_^`[`a\_``^a\_\_`^^  
@HWI-EAS443:3:87:572:1142#0/1  
ATCCGCAGGCCAGATCAGTGTGCAGCCTACATTCTCAGTG  
+HWI-EAS443:3:87:572:1142#0/1  
aa^a`a`\_\_^\_[QYYQ¥TW^T¥W^^W^\_¥¥¥¥U¥^UW^  
@HWI-EAS443:3:87:787:405#0/1  
ATTGGTATTTCCCTCCACTCCTGGTCCTTATGGCCAGTAT

+HWI-EAS443:3:87:787:405#0/1  
]\_]\_^][\_^ba`aa`\_\_aa\_Z\_\_Za\_\_aaaaaba`\_^ZZa  
@HWI-EAS443:3:87:854:1018#0/1  
ACTGATCTGGCCTGCGGATGCCTTTTGTGATTGGTATTT  
+HWI-EAS443:3:87:854:1018#0/1  
`a\_aaabaaaaaa`aaaa\_`aaa[]`a^`\_XaY`a\_`  
@HWI-EAS443:3:87:868:292#0/1  
AAGAAAGTGATTCCAAGAGGAAAGCTTCCACAAGAGGGG  
+HWI-EAS443:3:87:868:292#0/1  
ab`\_a`b`baaaaaa`baa```aaa]Y```\_aaa\_a¥\_`  
@HWI-EAS443:3:87:924:1172#0/1  
GCTTCCACAAGAGGGTCCAGATTGCTTCAAATGAGAAT  
+HWI-EAS443:3:87:924:1172#0/1  
aa]^Z]ba`^a^]a`¥VZ^`¥^a[^`^`[^^^^a\_a^Z`  
@HWI-EAS443:3:87:952:1937#0/1  
AAATGAGAATGTGGAAACCATGGACTCCAATACCCTGGAA  
+HWI-EAS443:3:87:952:1937#0/1  
aab`Za[\_aab0a[aa[a^a`Y\_\_\_XU`^``¥`Z\_\_`¥Ga  
@HWI-EAS443:3:88:1069:1452#0/1  
TGATACTTTAAATCTTCAAATGCAGCAGAGTGGCATGCC  
+HWI-EAS443:3:88:1069:1452#0/1  
\_bZaa[\_^]baaab¥aa`\_baa]Ybaa`]b^W\_^XaXQZa  
@HWI-EAS443:3:88:1277:1391#0/1  
GGTCCAGATTGCTTCAAATGAGAATGTGGAAACCATGGAC  
+HWI-EAS443:3:88:1277:1391#0/1  
a`a^¥¥aaa]babaabNb`aabbaaaMaZZ\_b```aba\_]`  
@HWI-EAS443:3:88:1422:1095#0/1  
TGGTTTCCACATTCTCATTTGAAGCAATCTGGACCCCTCT  
+HWI-EAS443:3:88:1422:1095#0/1  
\_¥\_```aa^a^abaaa¥```abbaa`[aZ\_^aa\_`^YVY][`  
@HWI-EAS443:3:88:316:498#0/1  
GTCGGATGTCCGTCCTTCATTGTTCCCGCTGAATGCTGCC  
+HWI-EAS443:3:88:316:498#0/1  
a\_a]a]aa^Y`aWR\_X`V`^^`Q\_`a]\_YPUV[W```¥¥¥`  
@HWI-EAS443:3:88:678:1508#0/1  
GCCTTTTGTGATTGGTATTTCTCCACTCCTGGTCCTTA  
+HWI-EAS443:3:88:678:1508#0/1  
aaabbbbaaaaaaaaa`aaaa\_`aaa`a```\_X\_\_\_]a  
@HWI-EAS443:3:89:1002:1239#0/1  
CAATCAACAAAAGGCATCCGCAGGCCAGATCAGTGTGCAG  
+HWI-EAS443:3:89:1002:1239#0/1  
aabbbbbbb`a`a^babab`aa`a\_baaaaa`a`a`aa  
@HWI-EAS443:3:89:1221:970#0/1  
CAACTGTCATACTCCTCTGCATTGTCTCCGAAGAAATAAG  
+HWI-EAS443:3:89:1221:970#0/1  
ab```bbb``^aZaaababa``bb\_\_aababaaaaaaaaa  
@HWI-EAS443:3:89:1284:1392#0/1  
AGTGATTCCAAGAGGAAAGCTTCCACAAGAGGGTCCAG  
+HWI-EAS443:3:89:1284:1392#0/1  
\_`Zaaba]aa¥b^^V¥`ZQW```Xa`P^a][]^`aN¥^Ya

@HWI-EAS443:3:89:1404:379#0/1  
AGTGATTCCAAGAGGAAAGCTTTCCACAAGAGGGGTCCAG  
+HWI-EAS443:3:89:1404:379#0/1  
aaabbbbbb`aaaabaaa^bZFUa^aaaaa\_\_\_^]aa  
@HWI-EAS443:3:89:1565:1914#0/1  
CGCATGTCCGATGTCCGTCCTTTCATTGTTCCCGCTGAATG  
+HWI-EAS443:3:89:1565:1914#0/1  
Ubbb`babaaZTZ`T]HT\_bb¥]aaaa]`bTb\_[baT]^  
@HWI-EAS443:3:89:302:841#0/1  
GTTCCAGGTATTGGAGTCCATGTTTTCCACATTCTCATT  
+HWI-EAS443:3:89:302:841#0/1  
aaaY`W`b]LXa\_TS`aU`aZV`^Z`\_a¥VYY`\_`\_¥H¥^  
@HWI-EAS443:3:89:37:1971#0/1  
GATTGCTTCAAATGAGAATGTGGAAACCATGGACTCCAAT  
+HWI-EAS443:3:89:37:1971#0/1  
]PNVY¥TW\_V]\_YZ[`[]`^S[VU^S^Y¥^^XW]ZY`ZX[  
@HWI-EAS443:3:89:578:61#0/1  
AGTGATTCCAAGAGGAAAGCTTTCCACAAGAGGGGTCCAG  
+HWI-EAS443:3:89:578:61#0/1  
ab^a`bbbabaabbaaaaa]aaa`^\_aa`\_aa\_`W\_`a`  
@HWI-EAS443:3:89:599:1937#0/1  
AGCAGATACTGGGCCATAAGGACCAGGAGTGGAGGAAATA  
+HWI-EAS443:3:89:599:1937#0/1  
]PK]ORLMLZLR0[\_aPZV\_]XVWS^PUU^^ZRNYZ^\_  
@HWI-EAS443:3:89:665:2015#0/1  
GAAAGTGATTCCAAGAGGAAAGCTTTCCACAAGAGGGGTC  
+HWI-EAS443:3:89:665:2015#0/1  
`aS\_¥¥\_bb\_`]\_Y[R^T]W^`Z`^`X]aPZ][ZTTH  
@HWI-EAS443:3:89:794:518#0/1  
CTTGTGGAAAGCTTCTCCTTGAATCACTTTCTTCTCCTC  
+HWI-EAS443:3:89:794:518#0/1  
aaaa[a^a`[``ab`[aab`aY\_ab^`aaa\_aaa]R`\_  
@HWI-EAS443:3:89:955:454#0/1  
GTGATTCCAAGAGGAAAGCTTTCCACAAGAGGGGTCCAGA  
+HWI-EAS443:3:89:955:454#0/1  
aaaab`b`aY\_bbaba`]\_]``]``aab`aaXaX\_\_\_```  
@HWI-EAS443:3:89:993:1768#0/1  
AAGAAAGTGATTCCAAGAGGAAAGCTTTCCACAAGAGGGG  
+HWI-EAS443:3:89:993:1768#0/1  
aaaaba`[`a`a`baaa]abaaaaaaaa^aaa`a\_^a  
@HWI-EAS443:3:8:1109:23#0/1  
GAAAGAAAGTGATTCCAAGAGGAAAGCTTTCCACAAGAGG  
+HWI-EAS443:3:8:1109:23#0/1  
a[X\_]TV^`NaUXYX]\_U^`Z\_^aGYVTPU\_U00¥X¥B  
@HWI-EAS443:3:8:110:1017#0/1  
GGTATTTCTCCTCCTGGTCTTATGGCCAGTATCTG  
+HWI-EAS443:3:8:110:1017#0/1  
^ZYW\_]^\_\_\_`^]\_¥]]`][Y][¥^¥¥`YY^¥XUYZSXZZ  
@HWI-EAS443:3:8:1110:1231#0/1  
GTGATTCCAAGAGGAAAGCTTTCCACAAGAGGGGTCCAGA

+HWI-EAS443:3:8:1110:1231#0/1  
a\_b\_`aa^¥`\_a^a\_a)`]a\_]¥U\_U\_VKX`XWVUUUZ^^  
@HWI-EAS443:3:8:1136:866#0/1  
AAAGTGATTCCAAGAGGAAAGCTTTCCACAAGAGGGGTCC  
+HWI-EAS443:3:8:1136:866#0/1  
\_\_XbU[`aa]aa]abbaa`\_TRaaa¥¥a¥\_XNX[\_^][HO]  
@HWI-EAS443:3:8:1204:448#0/1  
GGTCCAGATTGCTTCAAATGAGAATGTGGAAACCATGGAC  
+HWI-EAS443:3:8:1204:448#0/1  
ab[PU\_`^TQW\_a\_`¥]P\_\_\_`X`\_T\_\_\_][UQN]]\_PRL  
@HWI-EAS443:3:8:1227:1444#0/1  
CTGCACTGAGAATGTAGGCTGCACACTGATCTGGCCTGCG  
+HWI-EAS443:3:8:1227:1444#0/1  
`abaa]^aa][aV\_V]^\_^]ZXU^a¥^]QYPUU[¥T¥RBB  
@HWI-EAS443:3:8:134:1260#0/1  
GTTTCATAAGAGGAAAGAAAGTGATTCCAAGAGGAAAGCT  
+HWI-EAS443:3:8:134:1260#0/1  
a^]^`a\_`]¥\_ba`TZa[¥\_KP\_a`¥`I`\_a\_\_^\_^\_Y^^  
@HWI-EAS443:3:8:1518:409#0/1  
GAAATACCAATCAACAAAAGGCATCCGCAGGCCAGATCAG  
+HWI-EAS443:3:8:1518:409#0/1  
aaa^aa[aaa\_]\_]`¥\_\_^\_N`YW¥V]\_¥ST¥UWWWB  
@HWI-EAS443:3:8:1526:1825#0/1  
CAATGAAGGACGGACATCCGACATGCGAACAGAAGTTATA  
+HWI-EAS443:3:8:1526:1825#0/1  
Ybabaa``^`T¥]aVab[YYa\_bb¥X^]b]V^`¥`S^aaa  
@HWI-EAS443:3:8:1538:417#0/1  
GTTCCCGCTGAATGCTGCCATAACGTTGCTCTTTCAAAA  
+HWI-EAS443:3:8:1538:417#0/1  
\_X[[[Xa^`a\_\_aa\_`\_Z[¥`\_\_UaVW\_XRNR[¥¥QTY¥Y  
@HWI-EAS443:3:8:167:1885#0/1  
AGCGGGAACAATGAAGGACGGACATCCGACATGCGAACAG  
+HWI-EAS443:3:8:167:1885#0/1  
aaWa[\_aa\_ba``a\_¥Z`\_a\_[a`\_`[Yaa``^]`]`W`a  
@HWI-EAS443:3:8:475:1845#0/1  
ATCTGGACCCCTCTTGTGGAAAGCTTTCCTCTTGAATCA  
+HWI-EAS443:3:8:475:1845#0/1  
aaa`^\_\_a\_\_\_\_`^]V¥`aa`^¥X]`V^\_]`^YORRWW]  
@HWI-EAS443:3:8:851:1247#0/1  
AGGCTGCACACTGATCTGGCCTGCGGATGCCTTTTGTGA  
+HWI-EAS443:3:8:851:1247#0/1  
abaa^aaaa]Y`a`a`^`a^`\_]\_a[]\_aW¥]aaaZ\_``[  
@HWI-EAS443:3:8:863:1580#0/1  
CCCTCTTGTGGAAAGCTTTCCTCTTGAATCACTTCTTT  
+HWI-EAS443:3:8:863:1580#0/1  
aaababbbbbbbbbbbbbb`b`abbabab^b`abaaba  
@HWI-EAS443:3:8:888:824#0/1  
GAGGAAAGAAAGTGATTCCAAGAGGAAAGCTTTCACAAG  
+HWI-EAS443:3:8:888:824#0/1  
aa^VSaa^¥]aaZ`X[\_^^]X^\_U^Y^^[L¥]\_^VZW^\_\_

@HWI-EAS443:3:90:1258:1203#0/1  
GGAGGAAATACCAATCAACAAAAGGCATCCGCAGGCCAGA  
+HWI-EAS443:3:90:1258:1203#0/1  
R\_aa`bbbb`\_abb\_aabba`a`aabb` `aabaaa`a]  
@HWI-EAS443:3:90:1345:349#0/1  
ATCCGACATGCGAACAGAAGTTATAAGAATGATGGAAAGT  
+HWI-EAS443:3:90:1345:349#0/1  
`^`Yb`ba\_bbaaJabaaa^babaaaZab]]baV\_`baW  
@HWI-EAS443:3:90:149:1011#0/1  
GGAGGAAATACCAATCAACAAAAGGCATCCGCAGGCCAGA  
+HWI-EAS443:3:90:149:1011#0/1  
a`SMZ]ZTa^`a`\_`[`VUV[ZXYWMUW[^`¥VV¥[GSRM  
@HWI-EAS443:3:90:1554:1224#0/1  
CAGGGTATTGGAGTCCATGGTTTCCACATTCTCATTGAA  
+HWI-EAS443:3:90:1554:1224#0/1  
`a`aaabbbabbbbaabbbb\_b¥T`babbbabaabbbab`  
@HWI-EAS443:3:90:1611:1610#0/1  
TCCAGGGTATTGGAGTCCATGGTTTCCACATTCTCATTG  
+HWI-EAS443:3:90:1611:1610#0/1  
a^U`]b\_FT]YZZaa]X][[]\_R\_`UF`¥a\_`\_¥P¥aa`a  
@HWI-EAS443:3:90:214:246#0/1  
GTGGATGGCATGCCACTCTGCTGCATTTGAAGATTTAAGA  
+HWI-EAS443:3:90:214:246#0/1  
a^a` `aa^^\_S`a`\_]Y\_\_`\_W^\_^\_]^\_]¥\_\_\_\_\_^  
@HWI-EAS443:3:90:327:1776#0/1  
GAAATACCAATCAACAAAAGGCATCCGCAGGCCAGATCAG  
+HWI-EAS443:3:90:327:1776#0/1  
`bb\_^`abbbabba`bb\_ba\_bba\_a\_`aaaa\_a¥^aZ  
@HWI-EAS443:3:90:478:407#0/1  
GGAAAGCTTTCCACAAGAGGGGTCCAGATTGCTTCAAATG  
+HWI-EAS443:3:90:478:407#0/1  
abS`aaaY¥X][^[^aa¥\_]NWPOU^a\_[X`Ha¥\_\_Y\_\_^  
@HWI-EAS443:3:90:60:292#0/1  
GAGAATGTAGGCTGCACACTGATCTGGCCTGCGGATGCCT  
+HWI-EAS443:3:90:60:292#0/1  
aa`\_aY\_Ra¥KX^][` `PP]LRUY\_^\_AT\_¥TRRQVMDI  
@HWI-EAS443:3:90:716:562#0/1  
AGTGATTCCAAGAGGAAAGCTTTCCACAAGAGGGGTCCAG  
+HWI-EAS443:3:90:716:562#0/1  
[```[`bbba```ba`Z¥]¥`ba`^a]`]aYaa`^V`]]a  
@HWI-EAS443:3:91:1083:312#0/1  
GTCCAGATTGCTTCAAATGAGAATGTGGAAACCATGGACT  
+HWI-EAS443:3:91:1083:312#0/1  
a¥^X\_`\_Z]]^ZX]^\_¥^^\_^]Y]W]]^]]ZU^ZZ^ZUW  
@HWI-EAS443:3:91:1166:1148#0/1  
CCGTCCTTCAATGTTCCCGCTGAATGCTGCCATAACGGTT  
+HWI-EAS443:3:91:1166:1148#0/1  
¥abab` `ababbb` `babbbbbbbaabbbbbbabbab  
@HWI-EAS443:3:91:1184:810#0/1  
TCCCGCTGAATGCTGCCATAACGGTTGCTCTTCAAAGG

+HWI-EAS443:3:91:1184:810#0/1  
`abab`baS^b`[a]a\_b`aa¥ba\_]`Z¥Zaa\_YU^\_a¥^  
@HWI-EAS443:3:91:1210:2028#0/1  
CGCTGCACTGAGAATGTAGGCTGCACACTGATCTGGCCTG  
+HWI-EAS443:3:91:1210:2028#0/1  
^abHba`aJ^aa\_aS`Za\_^`Gb^`\_aJ\_¥MMI¥\_¥XNW¥  
@HWI-EAS443:3:91:1425:543#0/1  
AAGGACCAGGAGTGGAGGAAATACCAATCAACAAAAGGCA  
+HWI-EAS443:3:91:1425:543#0/1  
abb`aaaabaab]baaab¥aaaaVaaa^a`Sa``\_`[U`  
@HWI-EAS443:3:91:1489:800#0/1  
TGCACACTGATCTGGCCTGCGGATGCCTTTTGTGATTGG  
+HWI-EAS443:3:91:1489:800#0/1  
a`\_bbaab¥bbabbab`b`aa`T`aU]abbbba``I``b  
@HWI-EAS443:3:91:155:821#0/1  
ATGGCATGCCACTCTGCTGCATTTGAAGATTTAAGAGTAT  
+HWI-EAS443:3:91:155:821#0/1  
aaaaaaabaaa\_```aa\_a`^aa`a¥¥a^\_\_a\_]`aX^\_  
@HWI-EAS443:3:91:1584:287#0/1  
AAATGAGAATGTGGAAACCATGGACTCCAATACCCTGGAA  
+HWI-EAS443:3:91:1584:287#0/1  
`ababbaabbb\_aaaaa`Zabba\_a\_X`aa`\_OXaaa`\_  
@HWI-EAS443:3:91:1625:1392#0/1  
TGCACACTGATCTGGCCTGCGGATGCCTTTTGTGATTGG  
+HWI-EAS443:3:91:1625:1392#0/1  
aaba`bbbbbaabaa]aa\_abaaa\_aabba`a\_]aaX\_  
@HWI-EAS443:3:91:1714:760#0/1  
AGTGATTCCAAGAGGAAAGCTTTCCACAAGAGGGTCCAG  
+HWI-EAS443:3:91:1714:760#0/1  
VaVNSbba`aaR^RY`bbXSbb¥¥YaW[aS`\_Y\_`^`a\_  
@HWI-EAS443:3:91:1782:599#0/1  
GATTGCTTCAAATGAGAATGTGGAAACCATGGACTCCAAT  
+HWI-EAS443:3:91:1782:599#0/1  
a``ST^aa`aaa\_a`]\_^\_]aa\_^XX\_]`S[]¥¥^`^^  
@HWI-EAS443:3:91:249:1133#0/1  
CTGCATTTGAAGATTTAAGAGTATCAAGTTTCATAAGAGG  
+HWI-EAS443:3:91:249:1133#0/1  
abbb`bbbb`bbbbabbba`babbbabbbbbbbb`a  
@HWI-EAS443:3:91:340:1195#0/1  
ATTCCTCCACTCCTGGTCCTTATGGCCAGTATCTGCTT  
+HWI-EAS443:3:91:340:1195#0/1  
ab^\_bbabbaaaaaaaaaXaa`X\_\_[aaaa\_UU[¥^`[^  
@HWI-EAS443:3:91:648:607#0/1  
AAGAGTATCAAGTTTCATAAGAGGAAAGAAAGTGATTCCA  
+HWI-EAS443:3:91:648:607#0/1  
S\_\_\_Z\_X\_L\_b\_0¥Xabb`Z\_Za``b¥R^b¥¥0^aa````  
@HWI-EAS443:3:91:86:1485#0/1  
ATCTCCCTTTTGAAGAGCAACCGTTATGGCAGCATTTCAG  
+HWI-EAS443:3:91:86:1485#0/1  
abaa\_a`\_^`baaaa`Z\_U\_]`b\_a\_]`a\_\_XDZQZBBB

@HWI-EAS443:3:91:90:336#0/1  
ATCCGCAGGCCAGATCAGTGTGCAGCCTACATTCTCAGTG  
+HWI-EAS443:3:91:90:336#0/1  
ababbb`aaaa`YZaaa[aR]`¥a[^`a[]]¥`\_\_\_\_Va  
@HWI-EAS443:3:92:1078:446#0/1  
ATGGCATGCCACTCTGCTGCATTTGAAGATTTAAGAGTAT  
+HWI-EAS443:3:92:1078:446#0/1  
aba^aa\_VT¥a[\_[\_WS¥aa\_]^]^\_ab`aaa\_aa\_aYa¥  
@HWI-EAS443:3:92:1189:1962#0/1  
AGTGATTCCAAGAGGAAAGCTTTCCACAAGAGGGTCCAG  
+HWI-EAS443:3:92:1189:1962#0/1  
\_`Ya`a``aa`\_\_^\_\_aa¥\_^^a\_`\_`a``\_Y¥Z^RVR`^  
@HWI-EAS443:3:92:1197:1148#0/1  
GTGGAGGAAATACCAATCAACAAAAGGCATCCGCAGGCCA  
+HWI-EAS443:3:92:1197:1148#0/1  
^U]TY\_XUY]T¥QOY]Z[VXXZ[UOW¥RWY¥V¥Z^Z^ZYY  
@HWI-EAS443:3:92:127:1460#0/1  
ATCAAGTTTCATAAGAGGAAAGAAAGTGATTCCAAGAGGA  
+HWI-EAS443:3:92:127:1460#0/1  
aaa¥IX^baaaaa[]]aYQZ]^`T]\_`¥^^\_aa]W]`][\_  
@HWI-EAS443:3:92:1344:867#0/1  
CTCATTTGAAGCAATCTGGACCCCTTTGTGGAAAGCTTT  
+HWI-EAS443:3:92:1344:867#0/1  
`baaaabba`aa`aaaa`a]V]`aa`aa\_a``aa`Xa\_`  
@HWI-EAS443:3:92:1791:1028#0/1  
GAAATACCAATCAACAAAAGGCATCCGCAGGCCAGATCAG  
+HWI-EAS443:3:92:1791:1028#0/1  
Wa\_`a`^]abbbab`^^`a\_X¥ba`aaaab`^^`^XTN\_\_  
@HWI-EAS443:3:92:255:939#0/1  
GAAAGAAAGTGATTCCAAGAGGAAAGCTTTCCACAAGAGG  
+HWI-EAS443:3:92:255:939#0/1  
aaabb^^abX^V]aaaa\_a``¥aaaa\_`\_\_a`a`\_\_\_\_  
@HWI-EAS443:3:92:281:555#0/1  
GGTCCAGATTGCTTCAAATGAGAATGTGGAAACCATGGAC  
+HWI-EAS443:3:92:281:555#0/1  
abaabababab`aaabbaab`baabb\_`a`aaa\_a`a``U  
@HWI-EAS443:3:92:296:449#0/1  
CTGATCTGGCCTGCGGATGCCTTTTGTGATTGGTATTTTC  
+HWI-EAS443:3:92:296:449#0/1  
abb`bb`\_```a`\_a\_aa`]]`abaa[\_`\_`a\_`[aaa`^  
@HWI-EAS443:3:92:45:171#0/1  
AGTGATTCCAAGAGGAAAGCTTTCCACAAGAGGGTCCAG  
+HWI-EAS443:3:92:45:171#0/1  
ababbbabaa\_bbb`bba^abbaabaaaa^\_\_``]X¥\_a  
@HWI-EAS443:3:92:579:1933#0/1  
AGTGATTCCAAGAGGAAAGCTTTCCACAAGAGGGTCCAG  
+HWI-EAS443:3:92:579:1933#0/1  
\_OXaaaaaba\_Waa\_`U``aa`\_\_`^Va\_Za^]^\_Z\_0\_\_  
@HWI-EAS443:3:92:652:677#0/1  
GAAATACCAATCAACAAAAGGCATCCGCAGGCCAGATCAG

+HWI-EAS443:3:92:652:677#0/1  
^abbbaaabaaaaabb`aaaaaa\_]a`b`\_`aa`\_`a`  
@HWI-EAS443:3:92:706:109#0/1  
CGTTATGGCAGCATTTCAGCGGGAACAATGAAGGACGGACA  
+HWI-EAS443:3:92:706:109#0/1  
ababbbb`aa\_0SaaX\_a\_abaW¥N^¥N\_NX^`QS\_]NOV  
@HWI-EAS443:3:92:717:1460#0/1  
GATTGCTTCAAATGAGAATGTGGAAACCATGGACTCCAAT  
+HWI-EAS443:3:92:717:1460#0/1  
`bbbabbbbbbaabbabbbababaa`aaaaabaaaaaa  
@HWI-EAS443:3:92:737:1836#0/1  
ATAAGGACCAGGAGTGGAGGAAATACCAATCAACAAAAGG  
+HWI-EAS443:3:92:737:1836#0/1  
`\_K[^`U^[b¥[ab\_a]U]^]T\_a[aab]]aa\_^a\_UaZF  
@HWI-EAS443:3:92:776:21#0/1  
ACTTGATACTCTTAAATCTTCAAATGCAGCAGAGTGGCAT  
+HWI-EAS443:3:92:776:21#0/1  
aaabbaa`\_aaaaaabaaa`aaaa[aa`\_a`a^a¥]\_`  
@HWI-EAS443:3:92:786:1044#0/1  
AGAAAGTGATTCCAAGAGGAAAGCTTCCACAAGAGGGGT  
+HWI-EAS443:3:92:786:1044#0/1  
]bab`\_VYZ]¥`aWZZa\_`¥a]aaaa]aa\_a]a^`\_¥`Y  
@HWI-EAS443:3:92:863:1184#0/1  
GGTTTCCACATTCTCATTGAAGCAATCTGGACCCCTCTT  
+HWI-EAS443:3:92:863:1184#0/1  
aa\_aaaabaaaa``abaaba`aa``aaaa`\_`\_`^`]`\_`  
@HWI-EAS443:3:92:86:237#0/1  
CATCCGCAGGCCAGATCAGTGTGCAGCCTACATTCTCAGT  
+HWI-EAS443:3:92:86:237#0/1  
¥\_abbb\_a\_abb`TTb`]`aaXaa\_a`a^a^`aaaaQ`]V  
@HWI-EAS443:3:92:897:1488#0/1  
AGGGTATTGGAGTCCATGGTTTCCACATTCTCATTGAAG  
+HWI-EAS443:3:92:897:1488#0/1  
]baa[a^aaaa\_a`a`aa`a```baaaaa`Z`aaaa`\_`a  
@HWI-EAS443:3:93:1076:1878#0/1  
GAGGAAAGCTTCCACAAGAGGGGTCCAGATTGCTTCAAAA  
+HWI-EAS443:3:93:1076:1878#0/1  
ab\_a\_baabbbb^]`baababa^RY\_^a]aaaaUba^^`a  
@HWI-EAS443:3:93:1120:25#0/1  
TGTCGGATGTCCGTCCTTTCATTGTTCCCGCTGAATGCTGC  
+HWI-EAS443:3:93:1120:25#0/1  
aba`aa`\_`GY`\_`RY`a^^¥aaa[^U]O]UT`¥¥UVRUUZ  
@HWI-EAS443:3:93:1163:810#0/1  
GGAAAGCTTCCACAAGAGGGGTCCAGATTGCTTCAAATG  
+HWI-EAS443:3:93:1163:810#0/1  
aabaab`bba`aa`babaaa`a^aVaaaa^aaaaY]^`\_`a  
@HWI-EAS443:3:93:1303:146#0/1  
GAGGAAAGAAAGTGATTCCAAGAGGAAAGCTTCCACAAG  
+HWI-EAS443:3:93:1303:146#0/1  
\_NYVTVRIWT`ZG¥ZNXPK[X\_[T\_^]Z^LL[NVNPXY[



@HWI-EAS443:3:93:1318:1527#0/1  
GTTTCATAAGAGGAAAGAAAGTGATTCCAAGAGGAAAGCT  
+HWI-EAS443:3:93:1318:1527#0/1  
aX^`^a\_aa`aa\_aa`S\_aaV\_aW]^\_\_aa`X\_\_\_XO\_  
@HWI-EAS443:3:93:1404:268#0/1  
GAGGAAATACCAATCAACAAAAGGCATCCGCAGGCCAGAT  
+HWI-EAS443:3:93:1404:268#0/1  
a\_a`\_`a`aT^a]\_Y`\_S\_¥¥W\_[TQYWY¥WBBBBBBBBB  
@HWI-EAS443:3:93:1414:822#0/1  
TGTCCGCTCCTTCATTGTTCCCGCTGAATGCTGCCATAACG  
+HWI-EAS443:3:93:1414:822#0/1  
`a`Zb\_\_`ab\_`ab`a]Yab``\_¥`aaU\_`\_¥`WTWY`  
@HWI-EAS443:3:93:1416:509#0/1  
GAAATACCAATCAACAAAAGGCATCCGCAGGCCAGATCAG  
+HWI-EAS443:3:93:1416:509#0/1  
SP¥\_\_\_\_P\_aZ[^\_UZ^aaXQYN¥[FL^\_¥`[Q`][YS[PX  
@HWI-EAS443:3:93:242:524#0/1  
GAAAGTGATTCCAAGAGGAAAGCTTCCACAAGAGGGGTC  
+HWI-EAS443:3:93:242:524#0/1  
]QXYa^a]aa]``^aZa`X\_a``\_\_\_\_X¥U^\_[[Q^S\_  
@HWI-EAS443:3:93:273:277#0/1  
CTCTTGTTGGAAAGCTTTCCTCTTGAATCACTTCTTTCC  
+HWI-EAS443:3:93:273:277#0/1  
aaaa[X]a`aaaa`a`\_\_a\_a\_a`\_\_a`^`\_\_[\_`][T  
@HWI-EAS443:3:93:453:294#0/1  
CCCGCTGAATGCTGCCATAACGGTTGCTCTTCAAAAAGGG  
+HWI-EAS443:3:93:453:294#0/1  
``a``b^^]``^^aba``aba^`\_V][^a][\_Z¥Z^`  
@HWI-EAS443:3:93:473:526#0/1  
ACTTCCATCATTCTTATAACTTCTGTTCCGATGTCGGAT  
+HWI-EAS443:3:93:473:526#0/1  
aababbaba`a`^baaa`abbbaaaZ`\_a`aaa\_a]`\_`  
@HWI-EAS443:3:93:539:960#0/1  
AGTGGAGGAAATACCAATCAACAAAAGGCATCCGCAGGCC  
+HWI-EAS443:3:93:539:960#0/1  
]QXbaab`V¥VX]W^][^`aa`\_Za`X\_a\_a[\_a^^]U\_  
@HWI-EAS443:3:93:607:1819#0/1  
TGCCTTTTGTGATTGGTATTTCCCTCCACTCCTGGTCCTT  
+HWI-EAS443:3:93:607:1819#0/1  
aTX]aa]^¥\_a`a]ZYF[UV\_[a\_¥Q`\_Q\_\_\_\_TLQ\_VBB  
@HWI-EAS443:3:93:616:320#0/1  
AGGGGTCCAGATTGCTTCAAATGAGAATGTGGAAACCATG  
+HWI-EAS443:3:93:616:320#0/1  
^ZUTUW\_bba]^`aa`a]a`U[aaTX`\_aZa]`]`WfY`B  
@HWI-EAS443:3:93:63:682#0/1  
AGTGATTCCAAGAGGAAAGCTTCCACAAGAGGGGTCCAG  
+HWI-EAS443:3:93:63:682#0/1  
aa^a\_a`aaaa¥aa`[^`\_`\_\_^`^`^\_\_\_\_]^`^`\_ZSX]^  
@HWI-EAS443:3:93:690:1083#0/1  
CCCTCTTGTTGGAAAGCTTTCCTCTTGAATCACTTCTTT

+HWI-EAS443:3:93:690:1083#0/1  
`a]bb\_ab`aWa`b¥`bb\_b`aaU[Y\_\_\_\_\_a^^¥a\_  
@HWI-EAS443:3:93:737:2004#0/1  
AGTGATTCCAAGAGGAAAGCTTTCCACAAGAGGGGTCCAG  
+HWI-EAS443:3:93:737:2004#0/1  
`]Yba[Ya`\_bbbWbbbbbbbabaa[aba`a`S`Ra\_ba  
@HWI-EAS443:3:93:98:1538#0/1  
GACATCCGACATGCGAACAGAAGTTATAAGAATGATGGAA  
+HWI-EAS443:3:93:98:1538#0/1  
`\_U¥Wa]a^R`]\_X\_UZYL`a\_T]`\_\_a^\_\_`^a[^  
@HWI-EAS443:3:94:1009:1496#0/1  
AAAGGCATCCGCAGGCCAGATCAGTGTGCAGCCTACATTC  
+HWI-EAS443:3:94:1009:1496#0/1  
]\_Za]aa]a\_abV\_a^¥\_]XWa\_\_a¥\_]Y]\_`^^^^¥`\_  
@HWI-EAS443:3:94:1026:1000#0/1  
TCTTGGGAATCACTTTCTTTCTTATGAACTTGATACT  
+HWI-EAS443:3:94:1026:1000#0/1  
aaa`aaaa\_a`aaaabaa^aa`aaaa^]`\_a`a`\_\_a  
@HWI-EAS443:3:94:1050:614#0/1  
AGTGATTCCAAGAGGAAAGCTTTCCACAAGAGGGGTCCAG  
+HWI-EAS443:3:94:1050:614#0/1  
aa\_b`aaaaaaaa`aab`a`aaa¥`\_`aaaa`a¥[¥aa  
@HWI-EAS443:3:94:1142:1446#0/1  
GGATGGCATGCCACTCTGCTGCATTTGAAGATTAAGAGT  
+HWI-EAS443:3:94:1142:1446#0/1  
[`aa^`a`a`a`abaaaaab`abaaaaaaba`abaa]  
@HWI-EAS443:3:94:309:488#0/1  
GAGGAAAGAAAGTGATTCCAAGAGGAAAGCTTTCCACAAG  
+HWI-EAS443:3:94:309:488#0/1  
\_[ab`^`^]b`aaWV]]ba]¥ba¥¥a`a`^^[\_N[\_`][  
@HWI-EAS443:3:94:352:887#0/1  
GCACTTTCCATCATTCTTATAACTTCTGTTCGCATGTCCG  
+HWI-EAS443:3:94:352:887#0/1  
aba\_a`abbbaaa^¥\_aa[a\_\_aaaa`aaaa[R¥a]¥a\_  
@HWI-EAS443:3:94:638:1078#0/1  
CCCCTCTTGTTGAAAGCTTTCTTCTTGGGAATCACTTTCTT  
+HWI-EAS443:3:94:638:1078#0/1  
aababaaaa\_a]\_b`aaaa\_aaaaa`a^`aaa`a````  
@HWI-EAS443:3:94:751:864#0/1  
GCAGATACTGGCCATAAGGACCAGGAGTGGAGGAAATAC  
+HWI-EAS443:3:94:751:864#0/1  
a]Q\_b\_\_aaa`^[a]aaabaa`aab`Y\_Y\_VG\_]¥]XYTY  
@HWI-EAS443:3:94:971:394#0/1  
AGAGGGGTCCAGATTGCTTCAAATGAGAATGTGGAAACCA  
+HWI-EAS443:3:94:971:394#0/1  
\_`[a`a^Z^Z¥\_S¥\_KXabaZ\_¥RP]`[aab`bbYYTHJ\_  
@HWI-EAS443:3:95:1045:844#0/1  
ATCAAGTTTCATAAGAGGAAAGAAAGTGATTCCAAGAGGA  
+HWI-EAS443:3:95:1045:844#0/1  
aaaa^b\_aababaaba`aaaaaaaa\_]baa\_^aaa`b\_aa

@HWI-EAS443:3:95:105:562#0/1  
AAGTGATTCCAAGAGGAAAGCTTTCCACAAGAGGGGTCCA  
+HWI-EAS443:3:95:105:562#0/1  
aa\_Pababab]aaa``aa^][¥``]`a\_aYaa¥a^\_\_`  
@HWI-EAS443:3:95:1197:622#0/1  
GACCAGGAGTGGAGGAAATACCAATCAACAAAAGGCATCC  
+HWI-EAS443:3:95:1197:622#0/1  
``\_a^b`Sa\_bb`baa\_aa`Z\_a`a^aaVa`^\_``N\_]GS  
@HWI-EAS443:3:95:1211:543#0/1  
GGAGGAAATACCAATCAACAAAAGGCATCCGCAGGCCAGA  
+HWI-EAS443:3:95:1211:543#0/1  
^\_^\_b\_T`\_^aTTZZ\_\_^a[]a\_[I^]a¥`[`Q\_WF^R``  
@HWI-EAS443:3:95:125:869#0/1  
GAGGAAATACCAATCAACAAAAGGCATCCGCAGGCCAGAT  
+HWI-EAS443:3:95:125:869#0/1  
aab^`abaaa`a`a\_\_`¥\_WV\_S\_a\_Q\_\_aN]¥]\_VW¥Q  
@HWI-EAS443:3:95:1367:1045#0/1  
GAAATACCAATCAACAAAAGGCATCCGCAGGCCAGATCAG  
+HWI-EAS443:3:95:1367:1045#0/1  
^bb[b]Saab[aa`Ibbba^M`^a]a``aaQGba`\_^[\_  
@HWI-EAS443:3:95:1470:1103#0/1  
TGTAGGCTGCACACTGATCTGGCCTGCGGATGCCTTTTGT  
+HWI-EAS443:3:95:1470:1103#0/1  
`b^b^aba\_X`[^Zaa^aZb\_`HSLMMaa\_\_\_PZS¥a`YU  
@HWI-EAS443:3:95:232:890#0/1  
GCCTTTTGTGATTGGTATTTCTCCACTCCTGGTCCTTA  
+HWI-EAS443:3:95:232:890#0/1  
abaabbbb`aa\_bbbb\_aabaaaaaaaa`\_a`a^`\_aa\_  
@HWI-EAS443:3:95:443:1943#0/1  
TACTCTTAAATCTTCAAATGCAGCAGAGTGGCATGCCATC  
+HWI-EAS443:3:95:443:1943#0/1  
ababbbabbbabaa`baaaaabaaaaaUT[`aa^`\_Za^^  
@HWI-EAS443:3:95:600:826#0/1  
TTCAGCGGAACAATGAAGGACGGACATCCGACATGCGAA  
+HWI-EAS443:3:95:600:826#0/1  
a`a^a`aba^]`^`\_`\_]Z^]a`\_¥`\_UQBBBBBBBBBB  
@HWI-EAS443:3:95:756:430#0/1  
GTTTCCACATTCTCATTTGAAGCAATCTGGACCCCTCTTG  
+HWI-EAS443:3:95:756:430#0/1  
a`\_Ya\_\_aa¥\_\_ZZWaa`a^[RGX`\_]\_]\_^ZLN]]ZXZYV  
@HWI-EAS443:3:96:1029:1401#0/1  
ACCAGGAGTGGAGGAAATACCAATCAACAAAAGGCATCCG  
+HWI-EAS443:3:96:1029:1401#0/1  
a\_aaaa\_`]a`^aa``aa^UUa`\_\_a`Y]^^^`\_WaXUU\_  
@HWI-EAS443:3:96:1032:213#0/1  
AGGAAATACCAATCAACAAAAGGCATCCGCAGGCCAGATC  
+HWI-EAS443:3:96:1032:213#0/1  
a\_a]a\_W^bZba[`a\_]b^a^a\_R]aHZbW^a`\_Z`a^\_\_  
@HWI-EAS443:3:96:1087:1883#0/1  
GACCCCTCTTGTTGAAAGCTTTCTCTTGAATCACTTTC

+HWI-EAS443:3:96:1087:1883#0/1  
ab\_ZT\_aaab`a[aba\_a`abbbabaa`b\_\_bba\_a\_`aa  
@HWI-EAS443:3:96:1091:560#0/1  
GTGGAGGAAATACCAATCAACAAAAGGCATCCGCAGGCCA  
+HWI-EAS443:3:96:1091:560#0/1  
a\_a\_[`XVQVZLLQ¥^[\_\_]¥\_\_`XXPLUZGU^WW¥UBBB  
@HWI-EAS443:3:96:1327:1188#0/1  
GAAAGTGATTCCAAGAGGAAAGCTTTCCACAAGAGGGGTC  
+HWI-EAS443:3:96:1327:1188#0/1  
a\_aaa^a\_`a\_aa\_`Za`\_\_`\_`\_\_YRXZ`^\_]\_^]WLY  
@HWI-EAS443:3:96:1540:1616#0/1  
GAGGAAATACCAATCAACAAAAGGCATCCGCAGGCCAGAT  
+HWI-EAS443:3:96:1540:1616#0/1  
a\_ababb`b`\_aaaaaaaa^a`aa\_aYWa^\_b\_¥[`a¥\_  
@HWI-EAS443:3:96:1644:606#0/1  
AAGTTTCATAAGAGGAAAGAAAGTGATTCCAAGAGGAAAG  
+HWI-EAS443:3:96:1644:606#0/1  
aV`U[`[aa¥]V`^`^]`b^UZ^WaYaSEIW[¥`W\_]^[^a  
@HWI-EAS443:3:96:367:322#0/1  
GATGCCTTTTGTGATTGGTATTTCTCCACTCCTGGTCC  
+HWI-EAS443:3:96:367:322#0/1  
aaab[aabbaaaaa`a`¥a¥aa\_`\_]\_[]\_Y^\_X^^[NYV  
@HWI-EAS443:3:96:383:666#0/1  
CACTGAGAATGTAGGCTGCACACTGATCTGGCCTGCGGAT  
+HWI-EAS443:3:96:383:666#0/1  
¥]`]bbb^T\_\_Zba`aa\_NL¥`aa¥^^¥]\_aaaXaZBBBB  
@HWI-EAS443:3:96:448:1183#0/1  
GAGGAAAGCTTTCCACAAGAGGGTCCAGATTGCTTCAAA  
+HWI-EAS443:3:96:448:1183#0/1  
aaaT\_babaab\_\_baaa`aa`aa^]\_`aaaa`a^a^^a\_\_  
@HWI-EAS443:3:96:532:268#0/1  
GAAAGAAAGTGATTCCAAGAGGAAAGCTTTCCACAAGAGG  
+HWI-EAS443:3:96:532:268#0/1  
aaa`baa`a\_`a`aaaa\_a\_a\_aaaU`\_`Z^`a[`\_`\_\_  
@HWI-EAS443:3:96:550:258#0/1  
GTTTCATAAGAGGAAAGAAAGTGATTCCAAGAGGAAAGCT  
+HWI-EAS443:3:96:550:258#0/1  
a\_]`K\_P\_[`\_`UUY^`YY¥aUaQRTZY]]X\_\_W^\_]WX  
@HWI-EAS443:3:96:659:1507#0/1  
CGCAGGCCAGATCAGTGTGCAGCCTACATTCTCAGTGCAG  
+HWI-EAS443:3:96:659:1507#0/1  
\_W`\_a`\_abb¥¥]a\_FTPaa¥\_[a]`a\_a`¥^`a]P]NV\_  
@HWI-EAS443:3:96:742:1050#0/1  
GAGGAAAGAAAGTGATTCCAAGAGGAAAGCTTTCCACAAG  
+HWI-EAS443:3:96:742:1050#0/1  
]aVaa\_b]bb`[]`\_bbbbbbUbaaa`aaU`ab\_aabaa  
@HWI-EAS443:3:96:868:561#0/1  
GGTGTGGATGGCATGCCACTCTGCTGCATTTGAAGATTTA  
+HWI-EAS443:3:96:868:561#0/1  
aaX`\_ab[[`][`¥¥¥\_\_a^a[S[aaYX`^a\_Y[`^\_^`a

@HWI-EAS443:3:96:890:502#0/1  
ATTGGTATTTCTCCACTCCTGGTCCTTATGGCCCAGTAT  
+HWI-EAS443:3:96:890:502#0/1  
abaab\_aaaa\_aaa\_a`\_]\_a]V\_]\_\_\_\_`\_]\_UX\_\_X\_\_  
@HWI-EAS443:3:97:1192:141#0/1  
GAAGGACGGACATCCGACATGCGAACAGAAGTTATAAGAA  
+HWI-EAS443:3:97:1192:141#0/1  
a`^a^a\_a`[¥\_aVU\_^R¥\_^U`\_\_G^\_¥^]]a\_`]]][S]  
@HWI-EAS443:3:97:1323:874#0/1  
GAAAGTGATTCCAAGAGGAAAGCTTTCCACAAGAGGGGTC  
+HWI-EAS443:3:97:1323:874#0/1  
ab[aaS`\_ab]aabaabaaa\_Waa\_X^`\_a`aaa`TVH  
@HWI-EAS443:3:97:1517:422#0/1  
CCCCTCTTGTTGAAAGCTTTCTCTTGAATCACTTTCTT  
+HWI-EAS443:3:97:1517:422#0/1  
a`a[Z¥TTYaUb`a\_S^bba]ababa``\_\_\_\_G[bab]Jaa  
@HWI-EAS443:3:97:154:534#0/1  
AGTGATTCCAAGAGGAAAGCTTTCCACAAGAGGGTCCAG  
+HWI-EAS443:3:97:154:534#0/1  
VaXZ0b]T¥a`]PP]a[Z^[\_aa`^aa[H\_VGLJU\_  
@HWI-EAS443:3:97:158:876#0/1  
GTCCGTCCTTCATTGTTCCCGCTGAATGCTGCCATAACGG  
+HWI-EAS443:3:97:158:876#0/1  
aPON¥`[VUZxw\_Vaaa\_a\_\_\_\_NNN\_[aTY^LNRUXYTWB  
@HWI-EAS443:3:97:1702:625#0/1  
AAGGACCAGGAGTGGAGGAAATACCAATCAACAAAAGGCA  
+HWI-EAS443:3:97:1702:625#0/1  
abaa`¥\_abb\_b\_baaaa\_aaaaYUa`aTa`¥`\_]`^VG\_  
@HWI-EAS443:3:97:1779:396#0/1  
CCCTCTTGTTGAAAGCTTTCTCTTGAATCACTTTCTTT  
+HWI-EAS443:3:97:1779:396#0/1  
aaX\_\_b¥X`Z^a`Z\_¥¥Y`W`\_PV]a`][X[¥JRWVX  
@HWI-EAS443:3:97:217:37#0/1  
CAACAAAAGGCATCCGCAGGCCAGATCAGTGTGCAGCCTA  
+HWI-EAS443:3:97:217:37#0/1  
a`¥`bbb`aba\_^^aaaabbaaa`^^^\_a¥a^a`\_`[\_aa  
@HWI-EAS443:3:97:297:75#0/1  
AATGAAGGACGGACATCCGACATGCGAACAGAAGTTATAA  
+HWI-EAS443:3:97:297:75#0/1  
aa^b\_a`a^\_ba^^\_^^`a¥^\_aa\_\_[VW[\_¥XaXZ[] []  
@HWI-EAS443:3:97:311:85#0/1  
CACACTGATCTGGCCTGCGGATGCCTTTTGTGATTGGTA  
+HWI-EAS443:3:97:311:85#0/1  
`bab\_abaaabba`a`ba]\_a[^aaaba\_aaVa\_U`NZ  
@HWI-EAS443:3:97:431:301#0/1  
GATTGCTTCAAATGAGAATGTGGAAACCATGGACTCCAAT  
+HWI-EAS443:3:97:431:301#0/1  
``aa`aa````aaa`^^aaZ`a\_\_\_\_]`]Z¥Y\_¥¥]^]YU  
@HWI-EAS443:3:97:451:1210#0/1  
CCCCTCTTGTTGAAAGCTTTCTCTTGAATCACTTTCTT

+HWI-EAS443:3:97:451:1210#0/1  
a[¥^`S`aXH¥ZaaUWUaV[]W]P\_a]bZa^LT\_¥[X¥b]  
@HWI-EAS443:3:97:526:1340#0/1  
GTGGAGGAAATACCAATCAACAAAAGGCATCCGCAGGCCA  
+HWI-EAS443:3:97:526:1340#0/1  
\_^baab`aaaa`\_\_aXa`¥aZ\_aa\_^V\_\_¥aZa]\_a\_¥¥Z  
@HWI-EAS443:3:97:562:1702#0/1  
CTCTTGTGGAAAGCTTCTCTTGAATCACTTCTTTCC  
+HWI-EAS443:3:97:562:1702#0/1  
abV^N`^`a[aa][\_\_a^Y]a^[]`¥`^a^`^^\_\_ZW^ZM  
@HWI-EAS443:3:97:811:447#0/1  
TCTGCTGCATTTGAAGATTTAAGAGTATCAAGTTTCATAA  
+HWI-EAS443:3:97:811:447#0/1  
a[ab\_a\_aababa^]b`^`a\_aaaaV`]NX\_a\_a]0]a`  
@HWI-EAS443:3:97:881:96#0/1  
CTGCATTTGAAGATTTAAGAGTATCAAGTTTCATAAGAGG  
+HWI-EAS443:3:97:881:96#0/1  
abb\_bbbabbbbbbbbabbbabb`bababb\_abaababb  
@HWI-EAS443:3:97:953:270#0/1  
ATCAAGTTTCATAAGAGGAAAGAAAGTGATTTCAAGAGGA  
+HWI-EAS443:3:97:953:270#0/1  
[W]GU^]^X\_Y`a\_b`\_RZ^b¥V]Y\_[b¥YYUaa¥QTWJY  
@HWI-EAS443:3:97:968:183#0/1  
GTCCGTCCTTCATTGTTCCCGCTGAATGCTGCCATAACGG  
+HWI-EAS443:3:97:968:183#0/1  
]UV`a[G¥a\_Uaaa`a¥TX\_Wa][¥\_\_SW^QTU¥¥]G¥B  
@HWI-EAS443:3:97:984:1155#0/1  
AGTGATTTCAAGAGGAAAGCTTTCCACAAGAGGGGTCCAG  
+HWI-EAS443:3:97:984:1155#0/1  
Sa¥bbb¥Ybbaaaa`S`aaa`ba\_]\_aabba`^`ab\_\_`aa  
@HWI-EAS443:3:98:1180:1714#0/1  
AGTGATTTCAAGAGGAAAGCTTTCCACAAGAGGGGTCCAG  
+HWI-EAS443:3:98:1180:1714#0/1  
ab`baab`[M`bbaaRbabI\_`^`¥\_a`^R¥baaaaU\_\_`a  
@HWI-EAS443:3:98:1185:431#0/1  
CCAGGGTATTGGAGTCCATGGTTTCCACATTCTCATTTGA  
+HWI-EAS443:3:98:1185:431#0/1  
]\_`\_a[`ZW\_a]a]HY[b`a¥Sbbbabaaaba\_\_\_\_`^`ab]  
@HWI-EAS443:3:98:127:1873#0/1  
CAGGGTATTGGAGTCCATGGTTTCCACATTCTCATTTGAA  
+HWI-EAS443:3:98:127:1873#0/1  
aaa[SG^\_T`^`]]¥W`b^¥YNT\_\_aaa`\_a`\_Ya`]]\_[]¥  
@HWI-EAS443:3:98:1415:304#0/1  
GGTGTGGATGGCATGCCACTCTGCTGCATTTGAAGATTTA  
+HWI-EAS443:3:98:1415:304#0/1  
ab\_b^bbaabaGaa\_¥]a^\_\_^aZ\_ZW^aabY¥aa¥^ab\_  
@HWI-EAS443:3:98:1495:1780#0/1  
TGTCCGTCCTTCATTGTTCCCGCTGAATGCTGCCATAACG  
+HWI-EAS443:3:98:1495:1780#0/1  
aba\_[ZL]]babaabVaUaP^a\_`^`aa\_`\_a¥\_Va`^`^`a

@HWI-EAS443:3:98:158:220#0/1  
CTCTGCTGCATTTGAAGATTTAAGAGTATCAAGTTTCATA  
+HWI-EAS443:3:98:158:220#0/1  
¥baX`aWa^a\_aZTN\_\_b^aaba^aI\_`\_a^`T^]Z\_a[  
@HWI-EAS443:3:98:1607:768#0/1  
CCGCAGGCCAGATCAGTGTGCAGCCTACATTCTCAGTGCA  
+HWI-EAS443:3:98:1607:768#0/1  
^ab`b]^]aba]^a]¥¥HZa]X^ab`^`ab\_aQaaV\_Xa  
@HWI-EAS443:3:98:641:559#0/1  
AAGGACCAGGAGTGGAGGAAATACCAATCAACAAAAGGCA  
+HWI-EAS443:3:98:641:559#0/1  
a]abZb`\_L0aQ`]YZ[\_a^`[\_`\_^]\_\_\_\_\_a\_`a¥\_`  
@HWI-EAS443:3:98:643:378#0/1  
CCCCTCTTGTGGAAAGCTTTCCTCTTGAATCACTTTCTT  
+HWI-EAS443:3:98:643:378#0/1  
a\_Y\_b]bbba`\_^`aa]^`aaaQa]^abaaaa]^`\_aaaUaa  
@HWI-EAS443:3:98:753:1378#0/1  
ACACTGATCTGGCCTGCGGATGCCTTTTGTGATTGGTAT  
+HWI-EAS443:3:98:753:1378#0/1  
]a¥Z\_bba¥ab`ZUZ\_PT^Z]H]Y^aa¥YY`I^S][`\_\_Q  
@HWI-EAS443:3:98:761:1197#0/1  
CTCTTATGAAACTTGATACTCTTAAATCTTCAAATGCAGC  
+HWI-EAS443:3:98:761:1197#0/1  
RYba^`a\_baa\_`bb`b\_¥^``a\_`a`a`a¥\_aa`aaa  
@HWI-EAS443:3:98:773:759#0/1  
GTGGATGGCATGCCACTCTGCTGCATTTGAAGATTTAAGA  
+HWI-EAS443:3:98:773:759#0/1  
a`aa`^baaaa\_\_`\_aaaa`[ab\_¥aaa]]\_a]^`ba\_aa`  
@HWI-EAS443:3:99:1322:1508#0/1  
CATGGTTTCCACATTCTCATTTGAAGCAATCTGGACCCCT  
+HWI-EAS443:3:99:1322:1508#0/1  
[bbbb\_bb\_Wbbbbbb\_abb`aababbbbbbbbaYU[NWb  
@HWI-EAS443:3:99:136:95#0/1  
GAGTGGAGGAAATACCAATCAACAAAAGGCATCCGCAGGC  
+HWI-EAS443:3:99:136:95#0/1  
a¥aW\_aYaa¥Z\_\_¥T^\_U\_WWVN¥SVTWWWYWNWWBBBB  
@HWI-EAS443:3:99:1643:1991#0/1  
GATTGCTTCAAATGAGAATGTGGAAACCATGGACTCCAAT  
+HWI-EAS443:3:99:1643:1991#0/1  
\_`aa\_b^G^^^a\_\_a\_a]^Z¥[\_\_\_U]Y\_Z]^ZXRZ]\_  
@HWI-EAS443:3:99:165:1388#0/1  
AGCAACCGTTATGGCAGCATTCTCAGCGGAACAATGAAGGA  
+HWI-EAS443:3:99:165:1388#0/1  
aa[[]a`b\_aa`aaa`]XNS`^X^U`X^G[\_\_\_¥BBBBBBB  
@HWI-EAS443:3:99:212:292#0/1  
CAACTGTCATACTCCTCTGCATTGTCTCCGAAGAAATAAG  
+HWI-EAS443:3:99:212:292#0/1  
ab¥bbbbabb\_`bXbbbbbaabbbba^bbaaaabaaaaaba  
@HWI-EAS443:3:99:225:625#0/1  
GACCCCTCTTGTGGAAAGCTTTCCTCTTGAATCACTTTC

+HWI-EAS443:3:99:225:625#0/1  
a]`a```a`Z\_\_^Z^\_\_\_\_`\_]\_]\_\_\_\_^]]]]^UY[W  
@HWI-EAS443:3:99:347:1617#0/1  
GAAAGTGATTCCAAGAGGAAAGCTTTCCACAAGAGGGGTC  
+HWI-EAS443:3:99:347:1617#0/1  
GT\_Zb]b`abb`babbbbbbabbbaaba`abaa[aabbb  
@HWI-EAS443:3:99:533:1147#0/1  
GAGGAAAGAAAGTGATTCCAAGAGGAAAGCTTTCCACAAG  
+HWI-EAS443:3:99:533:1147#0/1  
a^R^T`a\_]S`a\_a`aab^[aaa\_[a`]UaaW^^a^`^\_  
@HWI-EAS443:3:99:542:377#0/1  
GTGATTCCAAGAGGAAAGCTTTCCACAAGAGGGGTCCAGA  
+HWI-EAS443:3:99:542:377#0/1  
`RYHXZ`Z]\_aa\_b\_`^a[ `[aTa\_H` [ `\_[aa\_YZV\_a\_  
@HWI-EAS443:3:99:630:934#0/1  
TCCCGCTGAATGCTGCCATAACGGTTGCTCTTCAAAGG  
+HWI-EAS443:3:99:630:934#0/1  
aaa`b\_bbaa\_\_aaa\_`b`aba^a`Y\_aaba^X%` `]^  
@HWI-EAS443:3:99:678:1617#0/1  
GTTTCATAAGAGGAAAGAAAGTGATTCCAAGAGGAAAGCT  
+HWI-EAS443:3:99:678:1617#0/1  
aV[ `Sa\_ZS]a`[\_aaYa^%]F`\_^[XR` `aa`\_\_%^^R`  
@HWI-EAS443:3:99:860:530#0/1  
CTCTTGTTGAAAGCTTTCTCTTGAATCACTTTCTTTCC  
+HWI-EAS443:3:99:860:530#0/1  
a\_`bba\_babba^Ybba^[aa`aba^]] [a\_aa\_`aaaaX  
@HWI-EAS443:3:99:865:1752#0/1  
AGAGTATCAAGTTTCATAAGAGGAAAGAAAGTGATTCCAA  
+HWI-EAS443:3:99:865:1752#0/1  
aaaaT\_`^VSbIaa`a\_a`aa]baaa`\_[\_aYaaa\_`U\_`  
@HWI-EAS443:3:99:880:1136#0/1  
ATGCCACTCTGCTGCATTTGAAGATTTAAGAGTATCAAGT  
+HWI-EAS443:3:99:880:1136#0/1  
a^a`ba` `bbba`abbbbabbabbbaabb^abbabb`b  
@HWI-EAS443:3:99:934:1440#0/1  
CGTCCTTCATTGTTCCCGCTGAATGCTGCCATAACGGTTG  
+HWI-EAS443:3:99:934:1440#0/1  
\_babaababbbabaabababbbabba^bbabbbbabb`bb  
@HWI-EAS443:3:99:969:523#0/1  
GGACCAGGAGTGGAGGAAATACCAATCAACAAAAGGCATC  
+HWI-EAS443:3:99:969:523#0/1  
aaaaa%`a\_a%ba`aaa`aa`[aa`a\_a`^\_`^a%`\_^Q  
@HWI-EAS443:3:9:1094:35#0/1  
AAAGAAAGTGATTCCAAGAGGAAAGCTTTCCACAAGAGGG  
+HWI-EAS443:3:9:1094:35#0/1  
GY\_\_\_a]a%a`a\_¥abbba\_V%]b^` ` \_XI]Y[^b[bba  
@HWI-EAS443:3:9:1135:1820#0/1  
GTCCAGATTGCTTCAAATGAGAATGTGGAAACCATGGACT  
+HWI-EAS443:3:9:1135:1820#0/1  
`^a^aaa` `a^a`Y\_`aa[T` ` `a`Za\_\_a^\_Va\_`]YW\_



@HWI-EAS443:3:9:1188:1430#0/1  
ATTGGAGTCCATGGTTTCCACATTCTCATTTGAAGCAATC  
+HWI-EAS443:3:9:1188:1430#0/1  
aaa]\_aa\_b¥aaa\_¥`aaaa`aa¥Z` ]`a` `` \_`a]\_\_a]  
@HWI-EAS443:3:9:1474:688#0/1  
GAGGAAAGAAAGTGATTCCAAGAGGAAAGCTTTCCACAAG  
+HWI-EAS443:3:9:1474:688#0/1  
aQ]RR\_\_ ]\_WXXR\_^WVNW^TX\_^Y]UPWXYXWRRNUUB  
@HWI-EAS443:3:9:1546:1411#0/1  
GACCCCTCTTGTTGAAAGCTTTCTCTTGAATCACTTTC  
+HWI-EAS443:3:9:1546:1411#0/1  
aa]aa^^Yba\_]a`^a]¥¥]a¥[\_\_\_\_Z` \_[\_\_R]H¥`a^  
@HWI-EAS443:3:9:1560:674#0/1  
GAAAGCTTTCCACAAGAGGGTCCAGATTGCTTCAAATGA  
+HWI-EAS443:3:9:1560:674#0/1  
a`Y]XN^[^S¥Y^\_\_`^a`¥[TZNP` \_`^`Z^ZV\_^WV]]  
@HWI-EAS443:3:9:196:1349#0/1  
CTCTTGTTGAAAGCTTTCTCTTGAATCACTTTCTTCC  
+HWI-EAS443:3:9:196:1349#0/1  
\_^`Y`^HWVYSV¥aaZ`a`¥^a`¥XIPZ`a`Sa^]WTHSV  
@HWI-EAS443:3:9:198:480#0/1  
GAGGAAATACCAATCAACAAAAGGCATCCGCAGGCCAGAT  
+HWI-EAS443:3:9:198:480#0/1  
^P`a[\_[aaXSZ¥a` \_`^a\_]`\_^[Z`^`\_^ZV\_ZZ[¥U¥  
@HWI-EAS443:3:9:223:1608#0/1  
GACCCCTCTTGTTGAAAGCTTTCTCTTGAATCACTTTC  
+HWI-EAS443:3:9:223:1608#0/1  
ababaaa`ab\_X`a` \_`¥^`aaY[a`a`ba]V]^\_Yaa\_a  
@HWI-EAS443:3:9:272:625#0/1  
AATCTGGACCCCTCTTGTTGAAAGCTTTCTCTTGAATC  
+HWI-EAS443:3:9:272:625#0/1  
¥V` `abb` `baaa` \_\_SRU[^U^]` \_` `` \_`^` \_a` ^` ^`  
@HWI-EAS443:3:9:300:171#0/1  
CCCTCTTGTTGAAAGCTTTCTCTTGAATCACTTTCTTT  
+HWI-EAS443:3:9:300:171#0/1  
X` ^` bbb` bbb` Xa^[ab\_[¥aa^bbaa¥`YaZ`a`U`\_a  
@HWI-EAS443:3:9:392:461#0/1  
CTCTTGTTGAAAGCTTTCTCTTGAATCACTTTCTTCC  
+HWI-EAS443:3:9:392:461#0/1  
a`aa^ZO` \_`ab`bbabaabb\_aabab`\_^a\_aaaaaYV` \_`  
@HWI-EAS443:3:9:581:962#0/1  
GGAAATACCAATCAACAAAAGGCATCCGCAGGCCAGATCA  
+HWI-EAS443:3:9:581:962#0/1  
a`\_XV]\_` `` `` \_VY[YXPXZ\_\_Y^S¥QSWS¥W¥Q¥WUBBB  
@HWI-EAS443:3:9:594:1060#0/1  
AGTGATTCCAAGAGGAAAGCTTTCCACAAGAGGGTCCAG  
+HWI-EAS443:3:9:594:1060#0/1  
aaaa`a`baa\_ba`a\_aa\_a\_\_`^`aaa[` \_\_\_\_`^`U0` `a  
@HWI-EAS443:3:9:740:729#0/1  
GAAATACCAATCAACAAAAGGCATCCGCAGGCCAGATCAG

+HWI-EAS443:3:9:740:729#0/1  
abaaab`\_ba`b`aaaa\_aa`a`¥^a]a\_`¥¥`\_]¥W``  
@HWI-EAS443:3:9:882:478#0/1  
GAAGGACGGACATCCGACATGCGAACAGAAGTTATAAGAA  
+HWI-EAS443:3:9:882:478#0/1  
ZV¥`^^b¥]^aaa`ba¥WT]Ya^]¥[\_a]\_0]`\_]^a[\_  
@HWI-EAS443:3:9:969:326#0/1  
GATTGCTTCAAATGAGAATGTGGAAACCATGGACTCCAAT  
+HWI-EAS443:3:9:969:326#0/1  
aaa`aaaa¥a\_a`a`aZ`^^]WYV^¥\_\_\_\_\_Z¥^]^  
@HWI-EAS443:3:99:396:77#0/1  
CAAATCATCTCAAACCGTTTCTTGACTTAATGCTTTTAG  
+HWI-EAS443:3:99:396:77#0/1  
\_aaaababab\_baaa`ab\_aa^bba¥]K[\_aaZ`\_aaYa  
@HWI-EAS443:3:34:1785:1108#0/1  
ATGATGACACTGAGCTCAATTGCTCTCTTAGTTCCTCATA  
+HWI-EAS443:3:34:1785:1108#0/1  
¥b[¥\_\_`Va00^V\_S`]HSYZ`\_]aaURZWBBBBBBBBBB  
@HWI-EAS443:3:85:1623:861#0/1  
GCTGTCGTTACACCTTTGTTGAGTCATGATTGGGCCATG  
+HWI-EAS443:3:85:1623:861#0/1  
`^a`a`\_ab`T¥Y]`a^`a]a^`]¥Z`\_`a`\_`a]]`¥  
@HWI-EAS443:3:1:1127:854#0/1  
ACAGAATGGTGGCTAGCACTACGGCAAAGGACATGAA  
+HWI-EAS443:3:1:1127:854#0/1  
a`bbb]]]bRb\_a`a^aa]\_\_^YXRaaN]\_`¥]V^\_V`BB  
@HWI-EAS443:3:28:535:947#0/1  
GCCTGATTAGTGGATTGGTGGTAGTAGCCATTTTTTTGTG  
+HWI-EAS443:3:28:535:947#0/1  
abbb]aaab^aaaa^¥^BBBBBBBBBBBBBBBBBBBBBB  
@HWI-EAS443:3:45:1221:849#0/1  
GCCTGATTAGTGGATTGGTGGTAGTAGCCATTTTCGTGTG  
+HWI-EAS443:3:45:1221:849#0/1  
aaabb\_bbab]baa`aaa`aaYVQMWLVWFBBBBBBBBBB  
@HWI-EAS443:3:56:1667:770#0/1  
GCCTGATTAGTGGATTGGTGGTAGTAGCCATTTTCTTTG  
+HWI-EAS443:3:56:1667:770#0/1  
a^abaabbaa\_`X`aaa`aa`RYOHXGG[SY[BBBBBBBB  
@HWI-EAS443:3:61:1094:1424#0/1  
CGCCTGATTAGTGGATTGGTGGTAGTAGCCATTTTTTTGT  
+HWI-EAS443:3:61:1094:1424#0/1  
``abbbbbbba]bbbbbabab\_M[¥JVXR[TW\_BBBBBBB  
@HWI-EAS443:3:20:520:97#0/1  
GCCTGATTAGTGGATTGGTGGTAGAAGCCATTTGTCTTTG  
+HWI-EAS443:3:20:520:97#0/1  
a`aba¥^]`bYaaWVa\_R`BBBBBBBBBBBBBBBBBBBB  
@HWI-EAS443:3:32:1418:734#0/1  
GCCTGATTAGTGGATTGGTGGTAGTACCCATTTGTCTTTT  
+HWI-EAS443:3:32:1418:734#0/1  
abaaaGO]I^N`a`S\_UZ`BBBBBBBBBBBBBBBBBBBB

@HWI-EAS443:3:43:1548:1209#0/1  
GCCTGATTAGTGGATTGGTGGGAGTAGCCATTTGTCTTTG  
+HWI-EAS443:3:43:1548:1209#0/1  
a\_ab]abb`b\_ba``aaaU`BBBBBBBBBBBBBBBBBBBB  
@HWI-EAS443:3:69:1070:263#0/1  
TGCCTGATTAGTGGATTGGTGGTAGAAGCCATTTGTCCTT  
+HWI-EAS443:3:69:1070:263#0/1  
a\_bbaaa\_Q\_a\_b^baab`S^aBBBBBBBBBBBBBBBBBBBB  
@HWI-EAS443:3:6:1156:1032#0/1  
GATTGGTGGTAGTAGCCATTTTTCTGTGAGACCGATGGTG  
+HWI-EAS443:3:6:1156:1032#0/1  
a`aa\_a]a`V\_TR[P]][^`ZFZTUMBBBBBBBBBBBBBBB  
@HWI-EAS443:3:78:1712:967#0/1  
CACAGACAAATGGCCACTACCACCAATCCACTAATCAAAC  
+HWI-EAS443:3:78:1712:967#0/1  
\_bababa`aaba`^aaba^adW^a^a^\_abbbaa^ZY¥G  
@HWI-EAS443:3:90:1261:1430#0/1  
GCCTGATTAGTGGATTGGTGGTAGGAGCCATTTGTCTTTG  
+HWI-EAS443:3:90:1261:1430#0/1  
aaab^Z[\_]a¥\_aaa¥aa\_abVBBBBBBBBBBBBBBBBBBB  
@HWI-EAS443:3:96:930:1431#0/1  
GCCTAGTCTGATTAGCAACTTCCATGGCCTCTGCTGCATG  
+HWI-EAS443:3:96:930:1431#0/1  
a]¥¥VZNWZ[U]N]aQUZKDT\_aa[RQFY^WRXR[JBBBB  
@HWI-EAS443:3:96:208:1670#0/1  
GCCTGATTAGTGGANTGGTGGTAGTAGCCATTTTTCTGTG  
+HWI-EAS443:3:96:208:1670#0/1  
aaaaaaaaaa[a]UD[aa^`\_RVQN[KLRUT[XBBBBBBB  
@HWI-EAS443:3:23:418:1134#0/1  
TGCCTGATTAGTGGATTGGTGGTAGTAGCCATTTTTCTTG  
+HWI-EAS443:3:23:418:1134#0/1  
aaaaabaaaa\_a`^aa]a¥\_]RYBBBBBBBBBBBBBBBBB  
@HWI-EAS443:3:84:1544:1502#0/1  
TTGCCTGATTAGTGGATTGGTGGTAGTAGCCATTTTTGTG  
+HWI-EAS443:3:84:1544:1502#0/1  
]ab`\_abaa`ab`baabaab\_a^S^]G¥NRT[U\_BBBBBB  
@HWI-EAS443:3:90:1641:638#0/1  
TGCCTGATTAGTGGATTGGTGGTAGTAGCCATTTTTCTTT  
+HWI-EAS443:3:90:1641:638#0/1  
aba`baabbab^aaaaaa`]aXQ[XW^LFQ^BBBBBBBBB  
@HWI-EAS443:3:43:407:38#0/1  
TGAACAGGCAGCAGAGGCCATGGAGGGTGCTAATCAGAAT  
+HWI-EAS443:3:43:407:38#0/1  
aaa`Z[ba[\_a]^\_]``\_¥¥^SaG^`NVQUMWWNNV¥NQ  
@HWI-EAS443:3:4:1684:707#0/1  
GCATGCCTGATTAGTGGATTGGTGGTAGTAGCGATTTGTT  
+HWI-EAS443:3:4:1684:707#0/1  
a`]`aV[^a]a^\_aYa`\_\_`\_BBBBBBBBBBBBBBBBBBB  
@HWI-EAS443:3:57:915:2009#0/1  
CGAGTGAACAGGCAGCAGAGGCCATGGAGGGTGCTAATAA

+HWI-EAS443:3:57:915:2009#0/1  
]`bbabbbZbababaa]a`ab^]aZ^\_RQYHZ^QJMYEDS  
@HWI-EAS443:3:7:1059:1781#0/1  
CTGATTAGTGGATTGGTGGTAGTAGCCATTTGTCTGTGGG  
+HWI-EAS443:3:7:1059:1781#0/1  
`babbaab\_bababaa[baN\_YHXFLTV\_BBBBBBBBBBB  
@HWI-EAS443:3:30:984:864#0/1  
ACAGAATGGTGCTGGCTAGCACTACGGCAAAGGCTTTAGA  
+HWI-EAS443:3:30:984:864#0/1  
aaaaX]`aa¥baaaaa`a```\_`\_]a`[Y^aadW``¥PSV  
@HWI-EAS443:3:38:172:478#0/1  
CGCCTGATTAGTGGATTGGTGGTAGTAGCCATTTGTTTGT  
+HWI-EAS443:3:38:172:478#0/1  
aaaaaa\_`a^a\_a````\_`\_N^\_LQQBBBBBBBBBBBBBB  
@HWI-EAS443:3:46:413:21#0/1  
ATGGAACAGAATGGTGCTGGCTAGCACTACGGCAAAGGG  
+HWI-EAS443:3:46:413:21#0/1  
a\_XH^aba^Y`Y¥W¥^ba^W`HXUZSOL^QR\_a[XZQ`WJ  
@HWI-EAS443:3:53:1680:1968#0/1  
CAAATGGCTACTACCACCAATCCACTAATCAGGCAGAGAA  
+HWI-EAS443:3:53:1680:1968#0/1  
abWaa\_a]a`Z]TT¥XY[b\_[Sb\_YHT\_[^^Y\_PYa[`X\_  
@HWI-EAS443:3:84:920:1210#0/1  
AGACAAATGGCTACTACCACCAATCCACTAATCAGCCATA  
+HWI-EAS443:3:84:920:1210#0/1  
`bbab\_aabaaab`aa\_\_a^b`[``a^a\_a\_\_\_^\_\_a^\_  
@HWI-EAS443:3:13:1539:208#0/1  
GTGCCTGATTAGTGGATTGGTGGTAGTAGCCATTTTCTG  
+HWI-EAS443:3:13:1539:208#0/1  
aab\_\_aa\_aa`aZ``^````V^BBBBBBBBBBBBBBBBBB  
@HWI-EAS443:3:37:593:327#0/1  
ACCTGATTAGTGGATTGGTGGTAGTAACCATTTGTCTGTG  
+HWI-EAS443:3:37:593:327#0/1  
\_`babb\_babJbVb`ba[`Y\_NSbaYGHY[X[^HRX\_^BB  
@HWI-EAS443:3:50:424:304#0/1  
AGACAAATGGCTACTACCACCAATCCACTAATCTGGCATA  
+HWI-EAS443:3:50:424:304#0/1  
abbbbbbb^aaba`¥]XMXaaa^^^\_`a`aU[^^^`U^^`  
@HWI-EAS443:3:68:624:937#0/1  
GCCTGATTAGTGGATTGGTGGTAGTAGCCATTTTCTGTT  
+HWI-EAS443:3:68:624:937#0/1  
¥bbabaabab``aaabaa`aaRYFDRLS[PDX\_HTBBBBB  
@HWI-EAS443:3:69:763:618#0/1  
AGCCTGATTAGTGGATTGGTGGTAGTAGCCATTTTCTGT  
+HWI-EAS443:3:69:763:618#0/1  
^^bbbabbb`aab`baaab]abBBBBBBBBBBBBBBBBBB  
@HWI-EAS443:3:73:462:728#0/1  
AGCCTGATTAGTGGATTGGTGGTAGTAACCATTTGTCTGT  
+HWI-EAS443:3:73:462:728#0/1  
\_`bbaa[abbbXb^baa\_UTaXFTOFXBBBBBBBBBBBBBB

@HWI-EAS443:3:7:340:1982#0/1  
AGCCTGATTAGTGGATTGGTGGTAGTAGCCATTTTCTGT  
+HWI-EAS443:3:7:340:1982#0/1  
`a`baa\_aSRT[\_\_\_`\_BBBBBBBBBBBBBBBBBBBB  
@HWI-EAS443:3:100:651:1952#0/1  
CAGAATGGTGGCTAGCACTACGGCAAAGGCTATTGAA  
+HWI-EAS443:3:100:651:1952#0/1  
a^a\_] [UV¥aa[^X]\_`ZG\_`YXQGUS[FQ¥`BBBBBB  
@HWI-EAS443:3:27:963:1412#0/1  
AACAGAATGGTGGCTAGCACTACGGCAAAGGCTTAGG  
+HWI-EAS443:3:27:963:1412#0/1  
¥\_\_VZ[[¥MRU¥aaZJP^ZO¥^a¥XVSXZ[\_]]U¥XPFW^  
@HWI-EAS443:3:4:730:869#0/1  
CATGTGCCTAGTCTGATTAGCAACCTCCATGGCCTCTGCT  
+HWI-EAS443:3:4:730:869#0/1  
ab]OZbbaaa`a^baaaaabaaa^VaZ^aa`a]aa¥`aU]  
@HWI-EAS443:3:55:735:300#0/1  
GGTGGTAGTAGCCATTTGTCTGTGAGACCGATGCTGGGAA  
+HWI-EAS443:3:55:735:300#0/1  
abU]]^ba[^` [M]^`aUNQaXJ]Q]^V\_W]]`X]XG¥]\_  
@HWI-EAS443:3:66:578:1049#0/1  
CAGAGGCCATGGAGGTTGCTAATCAGACTAGGCAGAAGAA  
+HWI-EAS443:3:66:578:1049#0/1  
a[a`\_0\_bbaabab`¥`¥¥]aa¥UU\_^]]X`¥YZ[\_]`a  
@HWI-EAS443:3:7:887:48#0/1  
GGTGGTAGTAGCCATTTGTCTGTGAGACCGATGCTGGGAA  
+HWI-EAS443:3:7:887:48#0/1  
W\_P\_\_I\_aWZa`Z`bbbYa`¥UbHGQ\_[aHNZaHUH\_IB  
@HWI-EAS443:3:100:315:1411#0/1  
AGTGGATTGGTGGTAGTAGCCATTTGTCTGTGAGAACGAT  
+HWI-EAS443:3:100:315:1411#0/1  
aa]^¥ababa\_]aJ[RVXOT[S]^`aHZ]]ZUBBBBBBBBBB  
@HWI-EAS443:3:100:531:509#0/1  
GCCTGATTAGTGGATTGGTGGTAGTAGCCATTTGTTTGTG  
+HWI-EAS443:3:100:531:509#0/1  
\_`abaaabab\_bbaa`a`\_abUXYFTSUTYRZ`BBBBBBB  
@HWI-EAS443:3:10:872:1570#0/1  
AAACAGAATGGTGGCTAGCACTAAGGCAAAGGCTATG  
+HWI-EAS443:3:10:872:1570#0/1  
Y^W\_T[^`a[a[FG^UZ[\_\_\_H^L\_U`¥L¥YGX\_R`PIMXN[  
@HWI-EAS443:3:11:128:452#0/1  
GAATGGTGGCTAGCACTACGGCAAAGGCTACGGAACA  
+HWI-EAS443:3:11:128:452#0/1  
aW¥W^XY¥¥[[^U^YPPYQLUU[PPP[U[UUUUYQNRPB  
@HWI-EAS443:3:11:448:470#0/1  
GCCTGATTAGTGGATTGGTGGTAGTAGCCATTTTCTGTG  
+HWI-EAS443:3:11:448:470#0/1  
aaaab`aaaa^aaaa\_aaZa`VZUPYLV^RUS]BBBBBBB  
@HWI-EAS443:3:13:971:1774#0/1  
ATGCCTGATTAGTGGATTGGTGGGAGTAGCCATTTGTCTG

+HWI-EAS443:3:13:971:1774#0/1  
a^V[¥aaUj`aaSa`XZaa`V^`BBBBBBBBBBBBBBBBBB  
@HWI-EAS443:3:14:1364:1832#0/1  
GTAGTAGCCATTTGTTTGTGAGACCGATGCTGTGAATCAG  
+HWI-EAS443:3:14:1364:1832#0/1  
`Uaa[^]`a\_[a\_RVHZ^]\_VSXP`\_\_`S\_^\_VX^`]\_G  
@HWI-EAS443:3:14:597:1408#0/1  
CACAGACAAATGGCTACCACCACCAATCCACTAATCAGGC  
+HWI-EAS443:3:14:597:1408#0/1  
aYZVUaWTZ¥]WPR\_NOGOKZVX¥[OGG^\_UXSXPFWRB  
@HWI-EAS443:3:14:772:1443#0/1  
TAGCCATTTGTTTGTGAGACCGATGCTGTGAATCAGCAAT  
+HWI-EAS443:3:14:772:1443#0/1  
a\_b`\_]abbaaYabT\_V`aaaaa\_aabWa`\_`a`]`\_¥  
@HWI-EAS443:3:17:389:85#0/1  
GCCTTTGCCGTAGCGCTAGCCAGCACCATTCTGTTTTTCAT  
+HWI-EAS443:3:17:389:85#0/1  
aaaVa`W][[M¥`G\_Y`^[YJRV^SGYZN^YWYP¥¥[RPN  
@HWI-EAS443:3:1:671:83#0/1  
GAACAGGCAGCAGAGGCCATGGAGGTTGGTAATCAGACTA  
+HWI-EAS443:3:1:671:83#0/1  
aaaM]^^Ya`MO]Ja^QY¥ZVaMXaPUBBBBBBBBBBBBBBB  
@HWI-EAS443:3:24:617:401#0/1  
TTCATGCCTGATTAGTGGATTGGTGGTAGTAGCCCTTTGT  
+HWI-EAS443:3:24:617:401#0/1  
ab``abaaba`aaaa^aaaa`aU`]NXPQMVBVVBBBBBB  
@HWI-EAS443:3:27:214:327#0/1  
AGCCTTTGCCGTAGGGCTAGCCAGCACCATTCTGTTTTCA  
+HWI-EAS443:3:27:214:327#0/1  
UYbb^^\_U\_ZPa`F\_\_`^Taa`]G[WUOZ]U\_V¥]SSS  
@HWI-EAS443:3:29:87:1395#0/1  
CATGCCTGATTAGTGGATTGGTGGTAGTAGCCCTTTGTCT  
+HWI-EAS443:3:29:87:1395#0/1  
\_]X\_\_a`X[a`Y`Z[[XZ`^BBBBBBBBBBBBBBBBBBBBBB  
@HWI-EAS443:3:30:646:193#0/1  
CTTTGCCGTAGTGCTAGCCAGCACCATTCTGTCTTCATGC  
+HWI-EAS443:3:30:646:193#0/1  
aabaa^ab\_a^[aaaa`aa`^a\_`^`^^\_aU[UZW[WWW  
@HWI-EAS443:3:32:1256:68#0/1  
TGCCTGATTAGTGGATTGGTGGTAGTAGCCATTTTCTGT  
+HWI-EAS443:3:32:1256:68#0/1  
aba]bba`a]b\_bbaabba]bbK¥]UVTBBBBBBBBBBBBBB  
@HWI-EAS443:3:33:1654:813#0/1  
GATCGAGTGAACAGGCAGCAGAGGGCATGGAGGTTGCTAA  
+HWI-EAS443:3:33:1654:813#0/1  
aa]Z^]]Ua``V\_a`S`\_KNSS^BBBBBBBBBBBBBBBBBB  
@HWI-EAS443:3:34:1305:1666#0/1  
ATCGAGTGAACAGGCAGCAGAGGCCATGGAGGTTGCTAAT  
+HWI-EAS443:3:34:1305:1666#0/1  
]S^bb`Rb`\_a\_]bb\_XW^^a\_Z]`H¥^J\_]GNRBBBBBB

@HWI-EAS443:3:34:532:324#0/1  
GAACAGGTAGCAGAGGCCATGGAGGTTGCTAATCAGACTA  
+HWI-EAS443:3:34:532:324#0/1  
abaabba¥babb\_`aaa`a`a`\_a`N¥ZS¥¥Y^[UTPB  
@HWI-EAS443:3:35:1544:1346#0/1  
TGCCTGATTAGTGGATTGGTGGTAGGAGCCATTTGTCTGT  
+HWI-EAS443:3:35:1544:1346#0/1  
\_\_¥\_\_`Z`¥\_¥]bbba``¥Z¥^KQTEXY\_¥GX^BBBBBBB  
@HWI-EAS443:3:35:788:496#0/1  
GCCTGATTAGTGGATTGGTGGTAGTAGCCCTTTGTCTGTG  
+HWI-EAS443:3:35:788:496#0/1  
abaaa`aa\_a`aa`\_`aV`BBBBBBBBBBBBBBBBBBB  
@HWI-EAS443:3:36:932:1304#0/1  
AGACAAATGGCTACTACCACCAATCCCCTAATCAGGCATG  
+HWI-EAS443:3:36:932:1304#0/1  
`b]aaaU`VR`aa[H]`aXRa[`\_\_XGMX¥]TQ[TW][¥V  
@HWI-EAS443:3:37:734:1261#0/1  
AACAGAATGGTGCTGGCTAGCACTACGGCACAGGCTATGG  
+HWI-EAS443:3:37:734:1261#0/1  
]QM]b\_ba]M0]`\_aaa[a¥¥``]T^[^aQGZY¥`Z[W[V  
@HWI-EAS443:3:37:938:1231#0/1  
GCCTACTCTGATTAGCAACCTCCATGGCCTCTGCTGCCTG  
+HWI-EAS443:3:37:938:1231#0/1  
abba]IXZ¥a^a`^Zaaa`]a`^YU[U`Sa¥W\_SM^¥WW  
@HWI-EAS443:3:39:647:1990#0/1  
GAATGGTGCTGGCTAGCACTACGGCAAAGCGATGGAACA  
+HWI-EAS443:3:39:647:1990#0/1  
`\_\_aU`XbbaONYTba¥[Ha¥XJWQTaaHXRIQXMF0ZS]  
@HWI-EAS443:3:3:306:629#0/1  
GATCGAGTGAACAGGCAGCAGAGGCCATGGAGGGTGCTAA  
+HWI-EAS443:3:3:306:629#0/1  
\_aaba```bbb^\_]Z\_```a]^XW¥^SW^TWBBBBBBBBB  
@HWI-EAS443:3:42:770:574#0/1  
ATGCCTGATTAGTGGATTGGTGGTAGTAGCCAATTGTCTG  
+HWI-EAS443:3:42:770:574#0/1  
aba`abbababa\_\_``[aaaSa`BBBBBBBBBBBBBBBBB  
@HWI-EAS443:3:44:1080:584#0/1  
GACAAATGGCTACTACCGCCAATCCACTAATCAGGCATGA  
+HWI-EAS443:3:44:1080:584#0/1  
^`bbbaaaaa^Z^\_0[FY\_\_``¥aa[^Z\_][¥^a`Q][¥[  
@HWI-EAS443:3:46:1325:828#0/1  
GCCTGATTAGTGGATTGGTGGTAGTAGCCATTTGTCTGTG  
+HWI-EAS443:3:46:1325:828#0/1  
\_`^`aa]`a\_a^a\_]\_^aa]`^]¥YHMODPN]]ZPNBBBBB  
@HWI-EAS443:3:46:795:1222#0/1  
GCCTGATTAGTGGATTGGTGGTAGTAGCCATTTTCTGTG  
+HWI-EAS443:3:46:795:1222#0/1  
a^]¥\_TZZ]aWZ\_UX[X][BBBBBBBBBBBBBBBBBBBBB  
@HWI-EAS443:3:47:430:845#0/1  
GATTGGTGGTAGTAGCCTTTTGTCTGTGAGACCGATGCTG

+HWI-EAS443:3:47:430:845#0/1  
ababab\_`aIZJW¥UV^`aaaUYBBBBBBBBBBBBBBBBBBB  
@HWI-EAS443:3:49:1494:1744#0/1  
AGCCTTTGCCATAGTGCTAGCCAGCACCATTCTGTTTTCA  
+HWI-EAS443:3:49:1494:1744#0/1  
aa`Zba\_baY\_aT¥S`\_a`¥]W\_]\_`ZY¥¥`Y``Y\_\_\_WY  
@HWI-EAS443:3:53:1382:1010#0/1  
CGAGTGAACAGGCAGCAGAGGCCATGGAGGGTGCTAATCA  
+HWI-EAS443:3:53:1382:1010#0/1  
Uaaa`bababbaZba^aa\_bb^baabb\_bbRRRSa^a\_U¥  
@HWI-EAS443:3:59:1242:574#0/1  
TGATTAGTGGATTGGTGGTAGTAGCCATTTGTGTGTGAGA  
+HWI-EAS443:3:59:1242:574#0/1  
ab`a\_ab^baa``\_b[\_aBBBBBBBBBBBBBBBBBBBBBBB  
@HWI-EAS443:3:5:526:1609#0/1  
AGCCTTTGCCGTAGTGCTAGCCAGCAACATTCTGTTTTCA  
+HWI-EAS443:3:5:526:1609#0/1  
`\_]aaa¥\_P^UbYM`\_a[b]XY\_aRTPa\_ZNba\_Z]\_^`  
@HWI-EAS443:3:62:247:456#0/1  
GGTGGTTGTAGCCATTTGTCTGTGAGACCGATGCTGTGAA  
+HWI-EAS443:3:62:247:456#0/1  
aaXaaZ]a]^aYX`a^T][RQXMWXX^ZVXVJWRVPU  
@HWI-EAS443:3:63:1074:1152#0/1  
ATCGAGTGAACAGGCAGCAGAGGCCATGGAGGGTGCTAAT  
+HWI-EAS443:3:63:1074:1152#0/1  
^W^\_WOK^Za`RTWaa`^]a`¥]YVU]]]G]aH\_RSVUBB  
@HWI-EAS443:3:64:114:394#0/1  
GCCTGATTAGTGGATTGGTGGTAGTAGCCATTTTCTGTG  
+HWI-EAS443:3:64:114:394#0/1  
aab``abbaa]`a`b\_Wa^\_\_N^VBBBBBBBBBBBBBBBBBBB  
@HWI-EAS443:3:67:1644:916#0/1  
ATGCCTGATTAGTGGATTGGTGGTAGTAGCCATTTTCTG  
+HWI-EAS443:3:67:1644:916#0/1  
aaaa`a^`aba]^a````aa]a[BBBBBBBBBBBBBBBBBBB  
@HWI-EAS443:3:67:292:312#0/1  
GCCTGATTAGTGGATTGGTGGTAGTAGCCATTTATCTGTG  
+HWI-EAS443:3:67:292:312#0/1  
aaaaaaaaa]aa`aaaaXa\_KYNLXMKVUS[[BBBBBBB  
@HWI-EAS443:3:68:1095:628#0/1  
GCCTGATTAGTGGATTGGTGGTAGTAGCCATTTGTTTGTG  
+HWI-EAS443:3:68:1095:628#0/1  
Xa^abaa]ab]U`aaa]aa[BBBBBBBBBBBBBBBBBBB  
@HWI-EAS443:3:68:338:452#0/1  
CAGAATGGTGGCTAGCACTACGACAAAGGCTATGGAA  
+HWI-EAS443:3:68:338:452#0/1  
abab`aaa\_aba`aaaU`]VYaaZ\_a^Qa]^^^`]RPUQU  
@HWI-EAS443:3:69:416:1405#0/1  
CTGATTAGTGGATTGGTGGTAGTAGCCATTTTCTGTGAG  
+HWI-EAS443:3:69:416:1405#0/1  
aa^\_aaba\_aa`aa\_]¥LXJFZBBBBBBBBBBBBBBBBBBB



@HWI-EAS443:3:6:184:852#0/1  
GAACAGGCAGCAGAGGCCATGGAGGTTGGTAATCAGACTA  
+HWI-EAS443:3:6:184:852#0/1  
`\_TPX^\_\_`TZYW[a^V000¥YUXBBBBBBBBBBBBBBB  
@HWI-EAS443:3:6:563:1310#0/1  
ATCGAGTGAACAGGCAGCAGAGGCCATGGAGGTTGGTAAT  
+HWI-EAS443:3:6:563:1310#0/1  
`Waaab¥aaa^]¥aaa^VQa^]\_¥¥¥X^VBBBBBBBBBBB  
@HWI-EAS443:3:6:609:1091#0/1  
TGATTAGCAACCTCCATGGCCTCTGCTGCCTGTCCACTCG  
+HWI-EAS443:3:6:609:1091#0/1  
^aWZZ]X]X^]aWZXb\_Y\_\_JW`^VWXaPRV`PDW]`VV¥  
@HWI-EAS443:3:70:818:993#0/1  
GCCTGATTAGTGGATTGGTGGTAGTAGCCATTTTCTGTG  
+HWI-EAS443:3:70:818:993#0/1  
^ab^VZbbbb\_bb\_b`aab]N`SHVOW[HR[^BBBBBBB  
@HWI-EAS443:3:72:1090:465#0/1  
GCCTGATTAGTGGATTGGTGGTAGTAGCCATTTGTTTGTG  
+HWI-EAS443:3:72:1090:465#0/1  
aaabbaabab\_aaaaaa[\_aHRMKNBBBBBBBBBBBBB  
@HWI-EAS443:3:77:887:1490#0/1  
GAAAACAGAATGGTTCTGGCTAGCACTACGGCAAAGGCTA  
+HWI-EAS443:3:77:887:1490#0/1  
[^V\_bbb]\_ZVbb`ba\_U\_a]ba^b¥Q^^\_[\_]\_aa^¥[P¥  
@HWI-EAS443:3:79:830:54#0/1  
CATGCCTGATTAGTGGATTGGTGGTAGTAGTCATTTGTCT  
+HWI-EAS443:3:79:830:54#0/1  
`aaa`babbbbb¥`bbba`\_]`b\_BBBBBBBBBBBBBBB  
@HWI-EAS443:3:80:1132:1617#0/1  
AAACAGAATGGTGCTGGCTAGCACTATGGCAAAGGCTATG  
+HWI-EAS443:3:80:1132:1617#0/1  
``[^ZX\_]USHX`a\_a]ZZ^]QSTEPaUP]\_\_\_QL[¥\_  
@HWI-EAS443:3:84:1173:1323#0/1  
GATTGGTGGTAGTAGCCATTTGTCTGGGAGACCGATGCTG  
+HWI-EAS443:3:84:1173:1323#0/1  
abaaa`XaaRaXX\_NZa]X\_`J\_W^HZR¥XH\_]RVVVUS  
@HWI-EAS443:3:87:1291:478#0/1  
TGAAAACAGAATGGTGCTGGCTAGCACTAAGGCAAAGGCT  
+HWI-EAS443:3:87:1291:478#0/1  
aa\_\_WU^\_^^a\_`I`a`^`a^`\_[L``\_`G^UV]¥RV\_U`  
@HWI-EAS443:3:87:1520:205#0/1  
GCCTGATTAGTGGATTGGTGGTAGTAGACATTTGTCTGTG  
+HWI-EAS443:3:87:1520:205#0/1  
a]^aa`aa`bT\_a`Z`^UQ`^LZBBBBBBBBBBBBBBB  
@HWI-EAS443:3:87:861:159#0/1  
TAGCCATTTGTCTGTGAGACCGATGCTGTGAATTAGCAAT  
+HWI-EAS443:3:87:861:159#0/1  
abaa\_aabbaaab]baba\_aaa`aaaa^a`\_]F¥\_^\_\_a  
@HWI-EAS443:3:88:1140:249#0/1  
GCCTGATTAGTGGATTGGTGGTAGGAGCCATTTGTCTGTG

+HWI-EAS443:3:88:1140:249#0/1  
` ` bbbbababbabb`bb^[PDOXRVTQ^aBBBBBBB  
@HWI-EAS443:3:89:1169:136#0/1  
GCCTGATTAGTGGATTGGTGGTAGTAGCCATTTTCTGTG  
+HWI-EAS443:3:89:1169:136#0/1  
aaabb^bb`b\_aaaa`aa]aBBBBBBBBBBBBBBBBBB  
@HWI-EAS443:3:89:1225:1216#0/1  
CACAGACAAATGGCCACTACCACCAATCCACTAATCAGGC  
+HWI-EAS443:3:89:1225:1216#0/1  
J`babaabaabbaUbbab`bbab`aaa\_ba[baaWbab[  
@HWI-EAS443:3:8:1361:1823#0/1  
AGTAGCCATTTGTCTGTGAGACGGATGCTGTGAATCAGCA  
+HWI-EAS443:3:8:1361:1823#0/1  
aZUPaaa\_T\_JZZ]`WV]\_\_\_JGSXZRLNZRHW^BBBBBB  
@HWI-EAS443:3:90:972:1333#0/1  
CCTGATTAGTGGATTGGTGGTAGTAGGCATTTGTCTGTGA  
+HWI-EAS443:3:90:972:1333#0/1  
a\_aZ][¥Z\_UaTq]PBBBBBBBBBBBBBBBBBBBBBB  
@HWI-EAS443:3:91:140:1711#0/1  
CAGGCATGAAAACAGAATGGTGGCTAGCACTAAGGCA  
+HWI-EAS443:3:91:140:1711#0/1  
abba[a`b\_[]^aba\_T]baWa¥^a\_] [a\_\_VT^SFVVYP  
@HWI-EAS443:3:93:1483:652#0/1  
TGCCTAGTCTGATTAGCAACCTCCATGGCTTCTGCTGCCT  
+HWI-EAS443:3:93:1483:652#0/1  
` ` ` ` a`^\_aba` ` \_aa\_aU] `a\_\_ ` [[\_ZZ]US[[NR\_  
@HWI-EAS443:3:93:675:919#0/1  
CATGCCTGATTAGTGGATTGGTGGGAGTAGCCATTTGTCT  
+HWI-EAS443:3:93:675:919#0/1  
\_\_^a^aabbba^^^aa¥]¥a`\_[HZTDXTR¥YJTBBBBB  
@HWI-EAS443:3:94:69:570#0/1  
TGCCTGATTAGTGGATTGGTGGGAGTAGCCATTTGTCTGT  
+HWI-EAS443:3:94:69:570#0/1  
abababbbbab`bb`baab]aaGaUWa\_a]PN]aHQNTTL  
@HWI-EAS443:3:95:1260:1165#0/1  
TGCCTGATTAGTGGATTGGTGGTAGTAGCGATTTGTCTGT  
+HWI-EAS443:3:95:1260:1165#0/1  
W¥UI\_b[Y`ab[bb` `baa\_bb\_aYBBBBBBBBBBBBBB  
@HWI-EAS443:3:96:374:1306#0/1  
GAAAACAGAATGGTGGCTAGCACTATGGCAAAGGCTA  
+HWI-EAS443:3:96:374:1306#0/1  
` ` ]a`^Y\_] [[Y]U] `YP] `VXXZT[TFL`UWZQ\_\_HT]  
@HWI-EAS443:3:98:1250:1123#0/1  
ACAGAATGGTGGCTTGCTAGCACTACGGCAAAGGCTATGGA  
+HWI-EAS443:3:98:1250:1123#0/1  
`a¥aaVb^RUMR\_H\_¥aaZJZ]\_aV`\_ZW[Z[RLZ\_]Z\_J  
@HWI-EAS443:3:99:1004:285#0/1  
CAGAATGGTGGCTAGCACTACGGCAAAGCTATGGAA  
+HWI-EAS443:3:99:1004:285#0/1  
aZaaa`P\_¥]V\_STX¥T`\_YPY¥DXWN^aPEUJVYSBBBB

@HWI-EAS443:3:99:502:261#0/1  
AGCCATTTGTCTGTGAGACGGATGCTGTGAATCAGCAATC  
+HWI-EAS443:3:99:502:261#0/1  
a\_[]aZRV[]TTbRa[XVGF¥`^YZZ\_QU]¥VFSaP]UMB  
@HWI-EAS443:3:28:913:478#0/1  
ATCGAGTGAACAGGCAGCAGAGGCCATGGAGGTTGCTTAA  
+HWI-EAS443:3:28:913:478#0/1  
\_T]`aaZ\_aa[a][0¥`¥^\_QU\_¥[[BBBBBBBBBBBBBBB  
@HWI-EAS443:3:33:650:455#0/1  
GATTGGTGGTAGTAGCCATTTGTCTGTGAGACCGATGATG  
+HWI-EAS443:3:33:650:455#0/1  
aaa`baZa`L¥TOYZ\_¥QWYavUYBBBBBBBBBBBBBBB  
@HWI-EAS443:3:57:176:1880#0/1  
CAGGCAGCAGAGGCCATGGAGGTTGCTAATCAGACTAAGC  
+HWI-EAS443:3:57:176:1880#0/1  
\_a[Haa`a`a¥^[¥`\_^¥XLM\_SYRZ¥Q]VUWNZNTWHNB  
@HWI-EAS443:3:78:305:1063#0/1  
GCCTAGTCTGATTAGCAACCTCCATGGCCTCTGCTGCATG  
+HWI-EAS443:3:78:305:1063#0/1  
abbabbabbbb`a``YTZaaaa^^```^`[\_^\_^[]Y  
@HWI-EAS443:3:79:967:301#0/1  
CTACCTAGTCTGATTAGCAACCTCCATGGCCTCTGCTGCC  
+HWI-EAS443:3:79:967:301#0/1  
X\_`a^a^^XXb[`a[¥`bbZWZ[`\_\_L¥^aT`baa^\_^[S  
@HWI-EAS443:3:91:1198:1691#0/1  
AATGGTGCTGGCTAGCACTACGGCAAAGGCTATGGAAAAG  
+HWI-EAS443:3:91:1198:1691#0/1  
ZbbVVG\_ba`^Z]X]\_\_Sa]aabaaba`a`ZX\_]¥ELY  
@HWI-EAS443:3:16:1501:1871#0/1  
CACAGACAAATGGCTNCTACCACCAATCCACTAATCAGGC  
+HWI-EAS443:3:16:1501:1871#0/1  
aa`aa^bbabbbbaTDY`bba¥W^b`\_MV^^abb^Ta]PW  
@HWI-EAS443:3:17:1304:1424#0/1  
GAATGNTGCTGGCTAGCACTACGGCAAAGGCTATGGAACA  
+HWI-EAS443:3:17:1304:1424#0/1  
`bba^DZbbbbbabbbb\_aaaaaaab```]aa`Xa\_^R`  
@HWI-EAS443:3:56:948:1074#0/1  
CAGACAAATGGCTACTACCACCAATCCACNAATCAGGCAT  
+HWI-EAS443:3:56:948:1074#0/1  
abbb`abbabb\_bbL`^]aaa`]aa[`]RD[a^[a\_aX`\_  
@HWI-EAS443:3:60:448:717#0/1  
AGCCATTTGTCTGTGANACCGATGCTGTGAATCAGCAATC  
+HWI-EAS443:3:60:448:717#0/1  
aaaa`aaaa^aaa]aZD[a`a`\_\_`\_a\_aa\_```]¥¥¥¥  
@HWI-EAS443:3:62:652:671#0/1  
TAGCCATTTGTCTGTGAGACCGATGCTNTGAATCAGCAAT  
+HWI-EAS443:3:62:652:671#0/1  
`a`bbbbbbbbbbb\_aaa`bbbba`a^D[a``aaaa^Z]a  
@HWI-EAS443:3:66:1324:1423#0/1  
CACCATTCTGTTTTTCATGCCTGATTAGTGNATTGGTGGTA

+HWI-EAS443:3:66:1324:1423#0/1  
ab`]bbbbababbaaaba]bbabaaa^D[a` ``Y^aHX  
@HWI-EAS443:3:70:1466:1493#0/1  
AGACAAATGGCTACTACCACCAATCCACTAATCNGGCATG  
+HWI-EAS443:3:70:1466:1493#0/1  
aaaa`¥[a\_[`a\_Z\_Y]ZN\_UYLOW¥¥¥UWVPDX¥Y^\_[  
@HWI-EAS443:3:83:1697:883#0/1  
ATCGAGTGAACAGGCAGCAGAGGCCATGGNGGTTGCTAAT  
+HWI-EAS443:3:83:1697:883#0/1  
\_` `ab][X\_a¥a` ``ZOZ]¥UXU[^MM\_VBBBBBBBBBBB  
@HWI-EAS443:3:97:487:1485#0/1  
CATTTGTCTGTGAGACCGATGCTGNGAATCAGCAATCTGT  
+HWI-EAS443:3:97:487:1485#0/1  
\_^aba¥Z`baXaa\_b\_]`^`aa\_YD[aaa`¥\_` `aaYa]X  
@HWI-EAS443:3:20:1436:814#0/1  
TGCCTGATTAGTGGATTGGTGGTAGTAGCCATTTGTCTTG  
+HWI-EAS443:3:20:1436:814#0/1  
aa`\_aaWab`a]b`\_\_aaaYa`UM^GUBBBBBBBBBBBBBB  
@HWI-EAS443:3:24:70:831#0/1  
CACAGACAAATGGCTACTACCACCAATCCACTAATCAGAG  
+HWI-EAS443:3:24:70:831#0/1  
`L`Z\_`\_`[ZSR`aa]TTTZXON\_W]X¥Z¥WOYV¥Y[SV^  
@HWI-EAS443:3:27:766:175#0/1  
GCTGCCTGATTAGTGGATTGGTGGTAGTAGCCATTTGTCT  
+HWI-EAS443:3:27:766:175#0/1  
a`aYOS\_ZZ^¥^\_Ta`\_^[[BBBBBBBBBBBBBBBBBBBB  
@HWI-EAS443:3:36:1119:626#0/1  
AGAGGCCATGGAGTTGCTAATCAGACTAGGCAGATGGGA  
+HWI-EAS443:3:36:1119:626#0/1  
abY`b[bU^[]Q]`UX¥P¥P\_XXZ[[[U]\_`NUWUUP\_GR  
@HWI-EAS443:3:50:1036:78#0/1  
ACAGAATGGTGCTGGCTAGCACTACGGCAAAGGCTATGAT  
+HWI-EAS443:3:50:1036:78#0/1  
a][baVaba`aYaabaa`T`\_NY\_V\_^PV¥¥^UZQ[LVZX  
@HWI-EAS443:3:61:569:1523#0/1  
TGGTAGTAGCCATTTGTCTGTGAGACCGATGCTGTGAANC  
+HWI-EAS443:3:61:569:1523#0/1  
VI`Ra[aa^W\_`]XVax¥VT]WU`a¥\_\_ZTVXT¥¥XDD  
@HWI-EAS443:3:93:1085:1968#0/1  
GCGCCTTTGCCGTAGTGCTAGCCAGCACCATTCTGTTTTTC  
+HWI-EAS443:3:93:1085:1968#0/1  
a¥T`a`b`Za\_Ub\_I¥J\_\_ZZJaUSaa\_\_`]bUab]aNWZ  
@HWI-EAS443:3:93:1331:664#0/1  
CGAGTGAACAGGCAGCAGAGGCCATGGAGGTTGCTAATGA  
+HWI-EAS443:3:93:1331:664#0/1  
aaaa`] \_aaa^]Z`\_PQ¥Ua`VW[X^aP]BBBBBBBBBBBB  
@HWI-EAS443:3:96:1081:699#0/1  
CAGAATGGTGCTGGCTAGCACTACGGCAAAGGCTATGGGA  
+HWI-EAS443:3:96:1081:699#0/1  
aaba[]a[Haa¥ab]a]\_[^U]aQaaU^X`[aMPZX` `J`

@HWI-EAS443:3:16:827:1426#0/1  
GACAGACAAATGGCTACTACCACCAATCCACTAATCAGGC  
+HWI-EAS443:3:16:827:1426#0/1  
Kab`bb¥^^\_]ZH`Y[\_Rb^`]^[ab¥`ab`S¥]`\_TQ[^  
@HWI-EAS443:3:22:800:1425#0/1  
CGCCTGATTAGTGGATTGGTGGTAGTAGCCATTTGTCTGT  
+HWI-EAS443:3:22:800:1425#0/1  
aabaaa`aa\_a^aaa`aa[Z`\_BBBBBBBBBBBBBBBBBB  
@HWI-EAS443:3:23:1131:385#0/1  
AGCCATTTGTCTGTGAGACCGATGCTGTGAATCAGCAATA  
+HWI-EAS443:3:23:1131:385#0/1  
`Z^`b]]ab]JZa``ba\_¥`ZXRV[¥a`^X`][X\_[TZMD  
@HWI-EAS443:3:27:1254:1367#0/1  
GCTGCCTAGTCTGATTAGCAACCTCCATGGCCTCTGCTGC  
+HWI-EAS443:3:27:1254:1367#0/1  
aaaa]abK`abaabb``baba`abaaaa`aU^a`]aaaa  
@HWI-EAS443:3:29:1400:803#0/1  
CTTTGCCGTAGTGTAGCCAGCACCATTTCTGTTTTTCATGA  
+HWI-EAS443:3:29:1400:803#0/1  
U`VQR[abYbbY``¥Z\_^]b[``WGOBYaba\_a`K`a]F  
@HWI-EAS443:3:32:1078:258#0/1  
ACTGCCTAGTCTGATTAGCAACCTCCATGGCCTCTGCTGC  
+HWI-EAS443:3:32:1078:258#0/1  
^^`XWWV\_\_OV\_Y\_\_\_`]`a`[aZ`R`aXMX^^N`VaX\_^  
@HWI-EAS443:3:34:121:1844#0/1  
ATCTGCCTAGTCTGATTAGCAACCTCCATGGCCTCTGCTN  
+HWI-EAS443:3:34:121:1844#0/1  
]aa^]a`^`QVa^[a^¥aM^aaa`¥\_Z^OTR\_\_^\_¥UWBB  
@HWI-EAS443:3:37:1650:1331#0/1  
ACAGAATGGTGGCTGGCTAGCACTACGGCAAAGGCTATGGG  
+HWI-EAS443:3:37:1650:1331#0/1  
W\_aba^^T\_Vb]`]abab^a\_UPUR¥`F\_PX^b¥`UVYZF  
@HWI-EAS443:3:40:456:149#0/1  
ACTGCCTAGTCTGATTAGCAACCTCCATGGCCTCTGCTGC  
+HWI-EAS443:3:40:456:149#0/1  
`aZbaa]`aUbabaVaZX`aaaa`]RO^]RT\_^`Y``]V¥  
@HWI-EAS443:3:4:358:1350#0/1  
ACTGCCTAGTCTGATTAGCAACCTCCATGGCCTCTGCTGC  
+HWI-EAS443:3:4:358:1350#0/1  
`baaa`a¥aYa`a`\_]Za\_a\_[R`^Z\_aaS[W]\_VZ¥Z¥V  
@HWI-EAS443:3:50:1135:1518#0/1  
CGTAGCCATTTGTCTGTGAGACCGATGCTGTGAATCAGCA  
+HWI-EAS443:3:50:1135:1518#0/1  
^aUaba^a``bb^]aa^^a``¥ORWq]`a`¥b``]J¥YUW  
@HWI-EAS443:3:51:1102:899#0/1  
CGCCTGATTAGTGGATTGGTGGTAGTAGCCATTTGTCTGT  
+HWI-EAS443:3:51:1102:899#0/1  
ab^G^a^abbba`aaabbb\_\_ZOSRTTYFRBBBBBBBBBB  
@HWI-EAS443:3:58:411:1086#0/1  
GCTGCCTAGTCTGATTAGCAACCTCCATGGCCTCTGCTGC

+HWI-EAS443:3:58:411:1086#0/1  
`a`aaaaaa^)`aaa]a`^\_]`^`^^`^^a¥`^^^V^^`¥  
@HWI-EAS443:3:62:747:897#0/1  
GCCTGATTAGTGGATTGGTGGTAGTAGCCATTTGTCTGTT  
+HWI-EAS443:3:62:747:897#0/1  
aaab^[aaaaaa[aaaa]aaUURLBBBBBBBBBBBBBB  
@HWI-EAS443:3:68:239:1495#0/1  
GCCATCTGCCTAGTCTGATTAGCAACCTCCATGGCCTCTG  
+HWI-EAS443:3:68:239:1495#0/1  
ab`V]`[R`a¥a¥`b\_S^```]a\_Z`a[aa^^[ZaV^`[^  
@HWI-EAS443:3:69:926:663#0/1  
ACCTAGTCTGATTAGCAACCTCCATGGCCTCTGCTGCCTG  
+HWI-EAS443:3:69:926:663#0/1  
abaaaaaba`aa`Z`aa[a`¥aaa`¥`a\_\_\_\_\_a`RN^`  
@HWI-EAS443:3:76:461:1643#0/1  
TTTCATGCCTGATTAGTGGATTGGTGGTAGTAGCCATTTT  
+HWI-EAS443:3:76:461:1643#0/1  
abbb\_`abba`]aaaa^a`a`\_`a¥[YFYPFRBBBBBBBB  
@HWI-EAS443:3:79:970:453#0/1  
GCTGCCTAGTCTGATTAGCAACCTCCATGGCCTCTGCTGC  
+HWI-EAS443:3:79:970:453#0/1  
ababaaaab`abbabaabaa``abaaaaa]]aZaWKX]^  
@HWI-EAS443:3:81:508:2039#0/1  
CGCCTAGTCTGATTAGCAACCTCCATGGCCTCTGCTGCCT  
+HWI-EAS443:3:81:508:2039#0/1  
`Z`^TLL^V\_P]]Y\_Z`^ZYJX¥PLLXY^US¥SY[BB  
@HWI-EAS443:3:83:61:959#0/1  
CGGTGCTGGCTAGCACTACGGCAAAGGCTATGGAACAGAT  
+HWI-EAS443:3:83:61:959#0/1  
aa^Uaa\_aZaQaY]]¥[VU[Y`¥¥YV[\_WXQUYUU¥UUUW  
@HWI-EAS443:3:84:935:211#0/1  
AGCCTGATTAGTGGATTGGTGGTAGTAGCCATTTGTCTGT  
+HWI-EAS443:3:84:935:211#0/1  
abba]babb\_\_aaa\_`bX`¥aaPVFY\_\_BBBBBBBBBBBB  
@HWI-EAS443:3:100:1300:107#0/1  
CTGTTCCATAGCCTTTGCCGTAGTGCTAGCCAGCACCATT  
+HWI-EAS443:3:100:1300:107#0/1  
aaa^`\_\_`bb`YVa`ba^W\_P\_b]ba``bHS\_a¥\_\_`\_aa  
@HWI-EAS443:3:100:684:185#0/1  
ATTTGTCTGTGAGACCGATGCTGTGAATCAGCAATCTGTT  
+HWI-EAS443:3:100:684:185#0/1  
abbaaaa\_a`aaa\_`a`aSaa`a^\_\_\_\_Z\_\_^\_]`Z`^^B  
@HWI-EAS443:3:100:760:1113#0/1  
TGCTGATTCACAGCATCGGTCTCACAGACAAATGGCTACT  
+HWI-EAS443:3:100:760:1113#0/1  
\_a\_a]\_\_N]`R\_\_I\_a\_YaZ^^R¥¥`\_QH\_^]GVBBBBB  
@HWI-EAS443:3:10:113:46#0/1  
GCCTAGTCTGATTAGCAACCTCCATGGCCTCTGCTGCCTG  
+HWI-EAS443:3:10:113:46#0/1  
a\_`WO^¥`aa^Z[¥Y¥V¥[[[¥¥¥XPS[V[¥[V¥SWWW¥

@HWI-EAS443:3:10:117:1041#0/1  
CAGGCAGCAGAGGCCATGGAGGTTGCTAATCAGACTAGGC  
+HWI-EAS443:3:10:117:1041#0/1  
abbabbb`aa]aaabbaa`[b`[b\_]`^aaaSaaaR`^Ya^  
@HWI-EAS443:3:10:1295:1244#0/1  
AGCCATTTGTCTGTGAGACCGATGCTGTGAATCAGCAATC  
+HWI-EAS443:3:10:1295:1244#0/1  
a`b`^abaaa`aaY\_\_aa]Z^`aa\_ab^a^` ` ` a^\_^\_]  
@HWI-EAS443:3:10:327:523#0/1  
AGCCATTTGTCTGTGAGACCGATGCTGTGAATCAGCAATC  
+HWI-EAS443:3:10:327:523#0/1  
a`aaabaaa\_`aa\_aaaa^\_`\_`\_]`\_Va` ` ^\_^]\_\_]]  
@HWI-EAS443:3:10:339:2040#0/1  
ATTTGTCTGTGAGACCGATGCTGTGAATCAGCAATCTGTT  
+HWI-EAS443:3:10:339:2040#0/1  
aba`YVaaa^aa`aa]\_`\_^\_]aTU`a\_a`\_¥\_`\_\_\_¥X]  
@HWI-EAS443:3:10:422:753#0/1  
AGCAACCTCCATGGCCTCTGCTGCCTGTTCACTCGATCCA  
+HWI-EAS443:3:10:422:753#0/1  
\_Q]a`^a\_` ` ^]`^^¥^^`V^^^WW^¥^¥\_WW¥¥^WWW¥  
@HWI-EAS443:3:10:746:1257#0/1  
AGACAAATGGCTACTACCACCAATCCACTAATCAGGCATG  
+HWI-EAS443:3:10:746:1257#0/1  
abbaaa`a^aaa\_\_`\_`a\_a` `^Y^\_[\_`\_¥[\_Z[Z^^X  
@HWI-EAS443:3:11:1442:1682#0/1  
AGCCTTTGCCGTAGTGTAGCCAGCACCATTCTGTTTTCA  
+HWI-EAS443:3:11:1442:1682#0/1  
aa`aabab\_Na^a\_PQV]a\_`\_`aZ\_WW\_\_\_¥]`¥\_^\_^\_  
@HWI-EAS443:3:11:1451:1829#0/1  
CAGAATGGTGTGCTAGCACTACGGCAAAGGCTATGGAA  
+HWI-EAS443:3:11:1451:1829#0/1  
^¥ZTXT]¥Y¥ZTXVHTZ`XZVZZO\_¥XSTZ\_XDKZ^]]BB  
@HWI-EAS443:3:11:1655:218#0/1  
GAAAACAGAATGGTGTGCTAGCACTACGGCAAAGGCTA  
+HWI-EAS443:3:11:1655:218#0/1  
aaaaa`ab`aaa`Y`]aaa]^`\_T]U\_^U^]TQZ^UYBBB  
@HWI-EAS443:3:11:186:603#0/1  
AGTCTGATTAGCAACCTCCATGGCCTCTGCTGCCTGTTCA  
+HWI-EAS443:3:11:186:603#0/1  
aa`bb`[a`babbb`aabba`a]aaaa\_Za\_]a\_^aW¥aa  
@HWI-EAS443:3:12:1099:722#0/1  
CAGCATCGGTCTCACAGACAAATGGCTACTACCACCAATC  
+HWI-EAS443:3:12:1099:722#0/1  
aaaaaa\_ba\_a]VY[\_\_\_]N]`\_\_^Z¥\_XDVSLOWJW^BBB  
@HWI-EAS443:3:12:332:758#0/1  
AACAGAATGGTGTGCTAGCACTACGGCAAAGGCTATGG  
+HWI-EAS443:3:12:332:758#0/1  
aaXS` `RTSSLXWa\_`[\_ZRV[VZN\_\_NMMURJRUBBBB  
@HWI-EAS443:3:12:620:41#0/1  
AACAGAATGGTGTGCTAGCACTACGGCAAAGGCTATGG

+HWI-EAS443:3:12:620:41#0/1  
abaababaaaZa\_aaaaaa^`¥[\_`\_aaS¥\_]`\_`\_¥U^^  
@HWI-EAS443:3:13:1522:1473#0/1  
TGGTAGTAGCCATTTGTCTGTGAGACCGATGCTGTGAATC  
+HWI-EAS443:3:13:1522:1473#0/1  
^`\_`aaa`]aaaa]\_aaa]]`¥¥`¥FZa`SX][a]a\_[\_0  
@HWI-EAS443:3:13:1702:496#0/1  
CAGGCATGAAAACAGAATGGTGCTGGCTAGCACTACGGCA  
+HWI-EAS443:3:13:1702:496#0/1  
[\_`a^^`]]RZbbaa`]VHVaabV]¥FRM¥]TXRPU  
@HWI-EAS443:3:13:810:1387#0/1  
GACAAATGGCTACTACCACCAATCCACTAATCAGGCATGA  
+HWI-EAS443:3:13:810:1387#0/1  
abb`aabbaaab]`\_]\_SUA\_X\_\_`X]aa\_^\_]`\_`\_\_\_\_  
@HWI-EAS443:3:14:1343:1463#0/1  
AGTCTGATTAGCAACCTCCATGGCCTCTGCTGCCTGTTCA  
+HWI-EAS443:3:14:1343:1463#0/1  
J¥`\_`X[`a^Z[T^W`[ZZRb\_Y\_W\_a`aaQ¥]^\_TS`H`  
@HWI-EAS443:3:15:1742:482#0/1  
CACCATTCTGTTTTCATGCCTGATTAGTGGATTGGTGGTA  
+HWI-EAS443:3:15:1742:482#0/1  
ab\_a[bbaab¥ba`]bbbaXbbaaba[Zbb`aaa`ZbBBB  
@HWI-EAS443:3:16:1577:1351#0/1  
ATTTGTCTGTGAGACCGATGCTGTGAATCAGCAATCTGTT  
+HWI-EAS443:3:16:1577:1351#0/1  
a`\_`ba\_a`b`b^\_aUZaa]a`^Z¥aaa\_a^]`^Z\_a`\_a¥V  
@HWI-EAS443:3:16:159:549#0/1  
CAGAATGGTGCTGGCTAGCACTACGGCAAAGGCTATGGAA  
+HWI-EAS443:3:16:159:549#0/1  
aaaaaaaa]G\_`\_`aa\_^¥``[^¥\_^]`\_]U¥^aZ^¥U¥YYB  
@HWI-EAS443:3:16:80:1685#0/1  
GCCTAGTCTGATTAGCAACCTCCATGGCCTCTGCTGCCTG  
+HWI-EAS443:3:16:80:1685#0/1  
abba`\_`[aaab`\_`a^abaaa`^a`\_`\_¥a]`a^`\_`¥[\_`¥`^  
@HWI-EAS443:3:16:925:117#0/1  
CAAATGGCTACTACCACCAATCCACTAATCAGGCATGAAA  
+HWI-EAS443:3:16:925:117#0/1  
`aabbab`\_`Y¥]\_aaa\_`X¥][aPW]]][aXUaa[S^`P`]  
@HWI-EAS443:3:17:1253:1481#0/1  
AGCCTTTGCCGTAGTGTAGCCAGCACCATTCTGTTTTCA  
+HWI-EAS443:3:17:1253:1481#0/1  
`\_]`aaaaa`\_`TaaXaU]a^\_\_`a¥X`^^]a\_`\_`]\_aYY\_  
@HWI-EAS443:3:17:1402:1287#0/1  
GTGGATTGGTGGTAGTAGCCATTTGTCTGTGAGACCGATG  
+HWI-EAS443:3:17:1402:1287#0/1  
a^aa]aaa\_Za]M^QNTU¥VUY\_BBBBBBBBBBBBBBBBB  
@HWI-EAS443:3:17:1412:1239#0/1  
ACAGAATGGTGCTGGCTAGCACTACGGCAAAGGCTATGGA  
+HWI-EAS443:3:17:1412:1239#0/1  
]`ab`bbbaXa`\_`ba`aaaaXaa¥aaa]]\_aa^`\_]R]Y



@HWI-EAS443:3:17:1522:118#0/1  
GGTGGTAGCCATTTGTCTGTGAGACCGATGCTGTGAA  
+HWI-EAS443:3:17:1522:118#0/1  
ab^ba\_`aZ[MWQ[Z\_YUUURZP^T\_N[YWUVZRRXQQVU  
@HWI-EAS443:3:17:228:2000#0/1  
GGTGGTAGCCATTTGTCTGTGAGACCGATGCTGTGAA  
+HWI-EAS443:3:17:228:2000#0/1  
ab^aa¥b`Ua\_b`K\_aaHY\_\_^X^^[\_a`]\_]WX\_]SZ\_  
@HWI-EAS443:3:17:647:163#0/1  
GGTGGTAGCCATTTGTCTGTGAGACCGATGCTGTGAA  
+HWI-EAS443:3:17:647:163#0/1  
aa\_a`G¥aV`\_`\_U\_aa^U^U`]\_Z]Y]\_UXY[UW[RRZ\_  
@HWI-EAS443:3:17:772:125#0/1  
GCCTAGTCTGATTAGCAACCTCCATGGCCTCTGCTGCCTG  
+HWI-EAS443:3:17:772:125#0/1  
aa]]Y^`a`VJWW]]\_[[^ZUXRTZ\_Z[^PSSZSV^WWWS  
@HWI-EAS443:3:18:1679:1517#0/1  
GCCTAGTCTGATTAGCAACCTCCATGGCCTCTGCTGCCTG  
+HWI-EAS443:3:18:1679:1517#0/1  
Z¥RRRO]X``¥W\_[\_\_OTU[a]X^[Q^[^UQ[RQ^VLJYW  
@HWI-EAS443:3:18:466:239#0/1  
ACAGAATGGTGCTGGCTAGCACTACGGCAAAGGCTATGGA  
+HWI-EAS443:3:18:466:239#0/1  
`b``aX¥ZXS[`Wa^a]Z]SZTYWH^WYaQ`YZPZQS`BB  
@HWI-EAS443:3:18:472:640#0/1  
ACAGAATGGTGCTGGCTAGCACTACGGCAAAGGCTATGGA  
+HWI-EAS443:3:18:472:640#0/1  
aaaaaaaa\_L^]\_Z\_\_`^Y^``WTVZ`X[\_]¥¥Z\_]BBBB  
@HWI-EAS443:3:18:589:1288#0/1  
AACAGAATGGTGCTGGCTAGCACTACGGCAAAGGCTATGG  
+HWI-EAS443:3:18:589:1288#0/1  
`T\_]`X\_Y^]]\_^aaa\_Z\_YbX\_UMYT``a`\_¥\_^XZRK  
@HWI-EAS443:3:19:1733:1276#0/1  
AGTAGCCATTTGTCTGTGAGACCGATGCTGTGAATCAGCA  
+HWI-EAS443:3:19:1733:1276#0/1  
]\_V`\_¥U^a`aQ]T\_aX]X]^W[`Y¥^VUVT\_PYZON`GB  
@HWI-EAS443:3:19:194:1073#0/1  
AGTAGCCATTTGTCTGTGAGACCGATGCTGTGAATCAGCA  
+HWI-EAS443:3:19:194:1073#0/1  
a`]]][aaa``\_a^`\_\_V\_\_^\_]\_]\_^``[[\_]`^X\_^^  
@HWI-EAS443:3:19:455:1323#0/1  
AAACAGAATGGTGCTGGCTAGCACTACGGCAAAGGCTATG  
+HWI-EAS443:3:19:455:1323#0/1  
aaa`aa\_a¥`\_W^Z^\_\_\_¥`^¥¥¥¥^YW¥U¥¥QWZUUVB  
@HWI-EAS443:3:19:704:884#0/1  
CTGATTAGCAACCTCCATGGCCTCTGCTGCCTGTTCACTC  
+HWI-EAS443:3:19:704:884#0/1  
ab`[\_]bba¥`\_abbaa\_]`¥a`\_^¥¥aa]\_\_XaaaaUX  
@HWI-EAS443:3:1:1065:1039#0/1  
TGCCTGATTAGTGGATTGGTGGTAGTAGCCATTTGTCTGT

+HWI-EAS443:3:1:1065:1039#0/1  
`a\_[ab`aa`]^a`\_\_a\_aSaWFLZN[NLLBBBBBBBBBBB  
@HWI-EAS443:3:1:569:521#0/1  
AAAACAGAATGGTGCTGGCTAGCACTACGGCAAAGGCTAT  
+HWI-EAS443:3:1:569:521#0/1  
aaa`^aa\_a\_`\_]aX`a`a\_]\_W`V`]X\_]\_\_X^BB  
@HWI-EAS443:3:1:843:894#0/1  
AACAGATTGCTGATTCACAGCATCGGTCTCACAGACAAAT  
+HWI-EAS443:3:1:843:894#0/1  
ab\_a`^`aaa`abaa\_^a^aa0`a\_a`]Ya^`^`^0\_\_BB  
@HWI-EAS443:3:20:1370:20#0/1  
TGCCTAGTCTGATTAGCAACCTCCATGGCCTCTGCTGCCT  
+HWI-EAS443:3:20:1370:20#0/1  
a`^^`¥`\_`ba\_a\_`^a`[[a¥V`\_^X^OXQT\_¥¥¥STZ  
@HWI-EAS443:3:20:1430:169#0/1  
AGCCATTTGTCTGTGAGACCGATGCTGTGAATCAGCAATC  
+HWI-EAS443:3:20:1430:169#0/1  
a`^TRN[a[a`]b`a\_¥^VT]Y¥]P]¥Y`Z]OJVVG[]^Q  
@HWI-EAS443:3:20:758:1312#0/1  
ACAGAATGGTGCTGGCTAGCACTACGGCAAAGGCTATGGA  
+HWI-EAS443:3:20:758:1312#0/1  
]b`]a]aaaYaaW`a`XW\_HZ`Za^a`a]a\_^TZ\_^RYU  
@HWI-EAS443:3:21:1004:1333#0/1  
CTCACAGACAAATGGCTACTACCACCAATCCACTAATCAG  
+HWI-EAS443:3:21:1004:1333#0/1  
aa`ba`aababa`^aaabQ`\_Xa\_X`\_`\_\_^`\_`^`^¥\_]`  
@HWI-EAS443:3:21:1396:356#0/1  
AAAACAGAATGGTGCTGGCTAGCACTACGGCAAAGGCTAT  
+HWI-EAS443:3:21:1396:356#0/1  
aaaaaabaa`^`Ua\_aa^S`\_`X[PX\_¥L`P¥][^][UZZ^  
@HWI-EAS443:3:21:527:253#0/1  
AGTAGCCATTTGTCTGTGAGACCGATGCTGTGAATCAGCA  
+HWI-EAS443:3:21:527:253#0/1  
a^Ua[Z]\_\_a^aI[^\_P\_[\_^^`\_Z]^^^W\_YV^W¥^WV  
@HWI-EAS443:3:21:606:257#0/1  
AACAGAATGGTGCTGGCTAGCACTACGGCAAAGGCTATGG  
+HWI-EAS443:3:21:606:257#0/1  
aaaaa`aaaaW\_\_`aa^`\_`^]\_\_^Z`^Z¥¥¥\_WZ[WUW^  
@HWI-EAS443:3:22:1699:959#0/1  
ACAGATTGCTGATTCACAGCATCGGTCTCACAGACAAATG  
+HWI-EAS443:3:22:1699:959#0/1  
aa`TDRYa¥b\_N\_[\_]a¥OR¥R]aYW]R[L¥PVB BBBB  
@HWI-EAS443:3:22:195:275#0/1  
CATCTGTTCCATAGCCTTTGCCGTAGTGCTAGCCAGCACC  
+HWI-EAS443:3:22:195:275#0/1  
a\_\_aa`bbb]¥aX`bb^bba]\_Q^aa`[\_]\_^]\_\_\_\_\_X\_  
@HWI-EAS443:3:22:19:504#0/1  
GATTAGCAACCTCCATGGCCTCTGCTGCCTGTTCACTCGA  
+HWI-EAS443:3:22:19:504#0/1  
aa\_]`abaaaa`a\_a\_aa\_a`a`\_¥\_\_\_a¥\_\_\_a`\_`^`

@HWI-EAS443:3:22:780:429#0/1  
AACAGAATGGTGGCTAGCACTACGGCAAAGGCTATGG  
+HWI-EAS443:3:22:780:429#0/1  
aaa¥`a\_U`Xaaa`b`\_`\_0\_Xa\_MQ[DU\_\_V\_`XX\_Q]  
@HWI-EAS443:3:23:1264:263#0/1  
GTAGCCATTTGTCTGTGAGACCGATGCTGTGAATCAGCAA  
+HWI-EAS443:3:23:1264:263#0/1  
a]aaaaaa`aa]]aaXa`\_]\_a`Z`]ZS]Q\_UZZU¥\_VV^  
@HWI-EAS443:3:23:1788:1060#0/1  
GATTGGTGGTAGTAGCCATTTGTCTGTGAGACCGATGCTG  
+HWI-EAS443:3:23:1788:1060#0/1  
abaabb\_aa[a`L^UL¥\_aaaa¥LXPW[Q\_Q][MHWZSHX  
@HWI-EAS443:3:23:217:853#0/1  
TGCTGGCTAGCACTACGGCAAAGGCTATGGAACAGATGGC  
+HWI-EAS443:3:23:217:853#0/1  
aaaa`a^``\_aa^^^\_a\_aX\_\_aaZX\_V\_¥MV¥SNSNQXV  
@HWI-EAS443:3:23:913:944#0/1  
AGCCATTTGTCTGTGAGACCGATGCTGTGAATCAGCAATC  
+HWI-EAS443:3:23:913:944#0/1  
aS\_\_aYY\_aY\_]`Y]``\_]^^]YY^][MP\_\_¥]¥^]\_\_V^  
@HWI-EAS443:3:24:1106:1524#0/1  
ACAGACAAATGGCTACTACCACCAATCCACTAATCAGGCA  
+HWI-EAS443:3:24:1106:1524#0/1  
abbab\_¥bbaaab]^R`\_U[^U]^`\_a¥a^^`a[X^`XXa  
@HWI-EAS443:3:24:1428:1785#0/1  
CTGCCTAGTCTGATTAGCAACCTCCATGGCCTCTGCTGCC  
+HWI-EAS443:3:24:1428:1785#0/1  
T^\_W¥\_¥`bXab[[\_bba\_^¥W]`b`a^V\_]aaZ]a`¥  
@HWI-EAS443:3:24:1496:27#0/1  
CAGGCATGAAAACAGAATGGTGGCTAGCACTACGGCA  
+HWI-EAS443:3:24:1496:27#0/1  
ab`bb\_bbUbbbabbbba\_bSbbb\_bbbZ\_TaaY`HQa  
@HWI-EAS443:3:24:43:459#0/1  
AGCCTTTGCCGTAGTGTAGCCAGCACCATTCTGTTTTCA  
+HWI-EAS443:3:24:43:459#0/1  
aaaabb`])`a`Xb\_T¥aaaa`a````a\_```\_a\_a[\_a¥OD  
@HWI-EAS443:3:25:1022:946#0/1  
TTTGTCTGTGAGACCGATGCTGTGAATCAGCAATCTGTTC  
+HWI-EAS443:3:25:1022:946#0/1  
aaaa`^aaW````\_a\_\_^^^]^^\_^V\_^\_^^]¥ZS¥W  
@HWI-EAS443:3:25:756:667#0/1  
TAGCCATTTGTCTGTGAGACCGATGCTGTGAATCAGCAAT  
+HWI-EAS443:3:25:756:667#0/1  
abbbabbabaababa]\_`bbabaaba\_b\_bbaa`\_]`^a[`  
@HWI-EAS443:3:25:770:1338#0/1  
CAGAATGGTGGCTAGCACTACGGCAAAGGCTATGGAA  
+HWI-EAS443:3:25:770:1338#0/1  
YOTZ¥Ub]^`[KaV]^\_Z0baabYY^aVa¥RQ\_bb^I\_^b  
@HWI-EAS443:3:26:1443:930#0/1  
GAACAGATTGCTGATTACAGCATCGGTCTCACAGACAAA

+HWI-EAS443:3:26:1443:930#0/1  
aaaYbaa¥ba`aa`a`abT\_aYaa^a`\_]\_a\_`[aaaW[`]  
@HWI-EAS443:3:26:200:281#0/1  
GAAAACAGAATGGTGCTGGCTAGCACTACGGCAAAGGCTA  
+HWI-EAS443:3:26:200:281#0/1  
aaaaa`\_]U`aaaTa```\_a`````ZZ\_^VSW[\_¥[¥UZ¥  
@HWI-EAS443:3:26:261:347#0/1  
GAACAGATTGCTGATTACAGCATCGGTCTCACAGACAAA  
+HWI-EAS443:3:26:261:347#0/1  
^`\_]`S`bba`¥Z\_]\_a\_¥VW^W\_Z]L`]QUa][```Y[  
@HWI-EAS443:3:27:1122:530#0/1  
GATTGGTGGTAGCCATTTGTCTGTGAGACCGATGCTG  
+HWI-EAS443:3:27:1122:530#0/1  
`[[`\_aY`\_N[QLQSDMS¥aYMQVBBBBBBBBBBBBBBB  
@HWI-EAS443:3:27:139:2042#0/1  
CAGGCATGAAAACAGAATGGTGCTGGCTAGCACTACGGCA  
+HWI-EAS443:3:27:139:2042#0/1  
abbbbbb]bbbabbbbbbbbaVabbbbb^b^bb[\_bbY`bb  
@HWI-EAS443:3:27:1432:601#0/1  
GATTAGCAACCTCCATGGCCTCTGCTGCCTGTTCACCTCGA  
+HWI-EAS443:3:27:1432:601#0/1  
`aaabaabbaa\_``aa\_aT\_aa^````\_`````V\_\_aU\_Va\_  
@HWI-EAS443:3:27:1434:678#0/1  
TGCTGATTACAGCATCGGTCTCACAGACAAATGGCTACT  
+HWI-EAS443:3:27:1434:678#0/1  
a``abbbbaaaaaaaaa`a`¥^`¥]`a`````\_`\_¥S\_]NY  
@HWI-EAS443:3:27:1551:1614#0/1  
TGCCTGATTAGTGGATTGGTGGTAGTAGCCATTTGTCTGT  
+HWI-EAS443:3:27:1551:1614#0/1  
a\_a`ababbab^a``a`aaZa`NQTGXOFYWX^BBBBBBB  
@HWI-EAS443:3:27:567:1578#0/1  
ATGAAAACAGAATGGTGCTGGCTAGCACTACGGCAAAGGC  
+HWI-EAS443:3:27:567:1578#0/1  
aaa\_\_[\_`]¥``\_XWU[\_¥¥]`¥\_VQ¥¥T[[T¥¥USWWU  
@HWI-EAS443:3:27:692:1663#0/1  
AACAGATTGCTGATTACAGCATCGGTCTCACAGACAAAT  
+HWI-EAS443:3:27:692:1663#0/1  
a`aa`aa`\_aa`\_a`a\_\_\_\_\_^\_]Ua¥^]XXN]G^\_\_R  
@HWI-EAS443:3:28:1033:296#0/1  
CTGCCTAGTCTGATTAGCAACCTCCATGGCCTCTGCTGCC  
+HWI-EAS443:3:28:1033:296#0/1  
`^bab¥^\_abbbabaa]`ba`\_aa]^a`aS`aYbaZ`a`V  
@HWI-EAS443:3:28:1101:130#0/1  
ACAGAATGGTGCTGGCTAGCACTACGGCAAAGGCTATGGA  
+HWI-EAS443:3:28:1101:130#0/1  
a\_b`a`b^`Za]a`aaaa[`Qa`Z\_¥[`\_¥a]N\_¥¥I\_N  
@HWI-EAS443:3:28:1185:1449#0/1  
GAATGGTGGCTAGCACTACGGCAAAGGCTATGGAACA  
+HWI-EAS443:3:28:1185:1449#0/1  
abbaabT]\_aba``aa`aaaa^aa]aa`aa`^`\_a`^^G\_

@HWI-EAS443:3:28:1237:1593#0/1  
AGCCATTTGTCTGTGAGACCGATGCTGTGAATCAGCAATC  
+HWI-EAS443:3:28:1237:1593#0/1  
aa`^^aaa`\_ba]¥aaXaa`a`¥[Y[a[a\_`\_`\_]`S\_a][  
@HWI-EAS443:3:28:1318:1869#0/1  
CAGAGGCCATGGAGGTTGCTAATCAGACTAGGCAGATGGT  
+HWI-EAS443:3:28:1318:1869#0/1  
abaaaaaa\_ab]TZaQ\_\_\_\_\_`ZYZ\_YWVZWZ¥\_\_SU\_XG  
@HWI-EAS443:3:28:1337:938#0/1  
GTCTGATTAGCAACCTCCATGGCCTCTGCTGCCTGTTTAC  
+HWI-EAS443:3:28:1337:938#0/1  
aaaaaZbXaaba\_aaaa^a]^a^`V\_]\_`Z]\_`a\_\_U\_^  
@HWI-EAS443:3:28:1406:1784#0/1  
TCTGCCTAGTCTGATTAGCAACCTCCATGGCCTCTGCTGC  
+HWI-EAS443:3:28:1406:1784#0/1  
^\_¥\_```^`\_`\_]¥RZaa\_`^Z\_a`````^Z`\_¥]XYUZP  
@HWI-EAS443:3:28:147:208#0/1  
GCCTAGTCTGATTAGCAACCTCCATGGCCTCTGCTGCCTG  
+HWI-EAS443:3:28:147:208#0/1  
aabaaa\_babaaab`^aaa^aaa`\_`\_`^`\_]`````^\_\_  
@HWI-EAS443:3:28:835:333#0/1  
CTGCCTAGTCTGATTAGCAACCTCCATGGCCTCTGCTGCC  
+HWI-EAS443:3:28:835:333#0/1  
aa`]aab`]`ababaaaab`]`^aaa`a`\_¥\_`^\_aZ[^^^  
@HWI-EAS443:3:29:1013:1657#0/1  
GGCATGAAAACAGAATGGTGCTGGCTAGCACTACGGCAAA  
+HWI-EAS443:3:29:1013:1657#0/1  
a[bbaaaaa`ab\_bbaa^K¥aa^aa\_a`GaV\_a\_a^\_a\_`  
@HWI-EAS443:3:29:1580:1085#0/1  
AACAGATTGCTGATTCACAGCATCGGTCTCACAGACAAAT  
+HWI-EAS443:3:29:1580:1085#0/1  
a`abRYb[`\_aa^^a^a\_aY^\_b¥a`]X`^PU\_`WOa[BB  
@HWI-EAS443:3:29:458:34#0/1  
GGTGGTAGCCATTTGTCTGTGAGACCGATGCTGTGAA  
+HWI-EAS443:3:29:458:34#0/1  
ab`aaR]ZD[`aaa\_`aVXUX\_UYUV^YZYPL\_ZW^R^BB  
@HWI-EAS443:3:29:902:495#0/1  
GTGCTGGCTAGCACTACGGCAAAGGCTATGGAACAGATGG  
+HWI-EAS443:3:29:902:495#0/1  
a¥a[a¥a`\_a`T]^`^]XT]IDX^Z`^¥¥PS¥W`S`USP^B  
@HWI-EAS443:3:29:920:44#0/1  
CAGCATCGGTCTCACAGACAAATGGCTACTACCAATC  
+HWI-EAS443:3:29:920:44#0/1  
abbbababb]aa`\_a¥MXN¥`^¥a\_Y^\_UXXOV¥RG\_\_BB  
@HWI-EAS443:3:2:1342:2009#0/1  
AGTCTGATTAGCAACCTCCATGGCCTCTGCTGCCTGTTCA  
+HWI-EAS443:3:2:1342:2009#0/1  
a`a^a\_a`abaX`^VIV\_\_a`a\_¥H`¥`XQ\_XLPBBBBBB  
@HWI-EAS443:3:2:1396:1068#0/1  
GAACAGATTGCTGATTCACAGCATCGGTCTCACAGACAAA

+HWI-EAS443:3:2:1396:1068#0/1  
a`YO\_\_GTTUWZ\_\_YXHGM^ZH^\_QaBBBBBBBBBBBBBBB  
@HWI-EAS443:3:2:360:312#0/1  
AGCCTTTGCCGTAGTGCTAGCCAGCACCATTCTGTTTTCA  
+HWI-EAS443:3:2:360:312#0/1  
aabaabba\_]\_PY`[\_`\_\_aY`\_[R\_\_¥^\_a`]aX]a]\_]\_  
@HWI-EAS443:3:30:1096:506#0/1  
GCCTTTGCCGTAGTGCTAGCCAGCACCATTCTGTTTTCAT  
+HWI-EAS443:3:30:1096:506#0/1  
aa\_aaaa\_`\_Za]U\_\_aa`\_\_`\_]\_W[^`\_¥\_\_[^¥^WW^  
@HWI-EAS443:3:30:1295:1240#0/1  
CTACCACCAATCCACTAATCAGGCATGAAAACAGAATGGT  
+HWI-EAS443:3:30:1295:1240#0/1  
a`bb^bbb`aa`aab\_^bbYaYb\_bbaaa`ba\_`\_\_NFQ  
@HWI-EAS443:3:30:1435:1382#0/1  
GGTGGTAGCCATTTGTCTGTGAGACCGATGCTGTGAA  
+HWI-EAS443:3:30:1435:1382#0/1  
]\_[a`GW^U`\_^¥a][[PNSSVF[YQZ[Y¥V]]YNJURZV  
@HWI-EAS443:3:30:479:1461#0/1  
AGCCATTTGTCTGTGAGACCGATGCTGTGAATCAGCAATC  
+HWI-EAS443:3:30:479:1461#0/1  
[V]`aaa\_aZa¥`U[^Yaaa\_Z^`WZW^\_\_[\_]\_^\_¥^  
@HWI-EAS443:3:30:529:56#0/1  
CTGCCTAGTCTGATTAGCAACCTCCATGGCCTCTGCTGCC  
+HWI-EAS443:3:30:529:56#0/1  
abbbababaabbaaab`\_\_^aaa\_a`a\_]\_\_`\_`[[¥W^  
@HWI-EAS443:3:30:775:1332#0/1  
TGAAAACAGAATGGTGGCTAGCACTACGGCAAAGGCT  
+HWI-EAS443:3:30:775:1332#0/1  
`aa`baa\_aab\_`\_Uaa\_a`\_\_[^Xa]\_\_\_\_\_``]X]^UX  
@HWI-EAS443:3:31:1102:430#0/1  
GTAGCCATTTGTCTGTGAGACCGATGCTGTGAATCAGCAA  
+HWI-EAS443:3:31:1102:430#0/1  
aab]baab[``V`ab]a]a^Pab[YQ^aaVa\_```a]]a]  
@HWI-EAS443:3:32:1666:1726#0/1  
GATCGAGTGAACAGGCAGCAGAGGCCATGGAGGTTGCTAA  
+HWI-EAS443:3:32:1666:1726#0/1  
X¥aa]ba^\_bbaaa\_¥bba`a\_\_^STa¥`\_Y¥YNXBBBBB  
@HWI-EAS443:3:32:710:1331#0/1  
ATTGCTGATTCACAGCATCGGTCTCACAGACAAATGGCTA  
+HWI-EAS443:3:32:710:1331#0/1  
a``\_a`a]^]aa\_a\_\_`\_\_\_\_\_X^¥^^¥¥V[^\_]\_]XWUX¥  
@HWI-EAS443:3:32:813:1096#0/1  
ACAGAATGGTGGCTAGCACTACGGCAAAGGCTATGGA  
+HWI-EAS443:3:32:813:1096#0/1  
[bb]¥^]b]Mabaaaaaaaaa`\_`a`\_UXa^¥]R]O]]O  
@HWI-EAS443:3:33:188:1141#0/1  
GGTAGTAGCCATTTGTCTGTGAGACCGATGCTGTGAATCA  
+HWI-EAS443:3:33:188:1141#0/1  
`a^b[Zb`aa`aa`U¥a\_\_Z\_\_[\_``Z\_¥\_\_W^W^Z^¥\_\_

@HWI-EAS443:3:33:225:1774#0/1  
GAACAGATTGCTGATTCACAGCATCGGTCTCACAGACAAA  
+HWI-EAS443:3:33:225:1774#0/1  
abbbaaba`\_baaaaabbbb\_aaaa`^^a\_aaX`\_a\_`Z`  
@HWI-EAS443:3:33:823:286#0/1  
GCCTAGTCTGATTAGCAACCTCCATGGCCTCTGCTGCCTG  
+HWI-EAS443:3:33:823:286#0/1  
\_]`^a`P\_aa`]Yaaaaa]\_^^`a`UaYVUVQWYTSUY  
@HWI-EAS443:3:34:1782:237#0/1  
TAGCCATTTGTCTGTGAGACCGATGCTGTGAATCAGCAAT  
+HWI-EAS443:3:34:1782:237#0/1  
\_a`Xa`^ab\_W¥¥a[aaYaXS\_\_\_\_bM]bZ[`YZ]ZYBBBB  
@HWI-EAS443:3:34:210:629#0/1  
AACAGAATGGTGTGGCTAGCACTACGGCAAAGGCTATGG  
+HWI-EAS443:3:34:210:629#0/1  
^W`Z]a¥`aa[aaa`aab`X\_a\_aaa`\_\_`^¥¥^\_^  
@HWI-EAS443:3:34:255:1780#0/1  
AGTCTGATTAGCAACCTCCATGGCCTCTGCTGCCTGTTCA  
+HWI-EAS443:3:34:255:1780#0/1  
a^Xba`aa`a\_bbbbbabaaaN[aa\_\_\_Za\_Q\_b\_UVWV\_  
@HWI-EAS443:3:34:411:340#0/1  
ACAGATTGCTGATTCACAGCATCGGTCTCACAGACAAATG  
+HWI-EAS443:3:34:411:340#0/1  
aaaaaaabaaaa]\_`a\_aaaa`\_aV`\_^X^\_Z\_VW^ZBB  
@HWI-EAS443:3:34:830:1155#0/1  
CTGCCTAGTCTGATTAGCAACCTCCATGGCCTCTGCTGCC  
+HWI-EAS443:3:34:830:1155#0/1  
aaaaaaa`\_a`a`\_a]aaa`a`^a\_¥\_\_aa\_]¥^\_WVWW  
@HWI-EAS443:3:35:1499:1048#0/1  
CCATCTGTTCCATAGCCTTTGCCGTAGTGCTAGCCAGCAC  
+HWI-EAS443:3:35:1499:1048#0/1  
abbbbaab``abbababbbbaab\_a\_Rbbabbaaa]b^a  
@HWI-EAS443:3:35:1555:363#0/1  
GATTGGTGGTAGTAGCCATTTGTCTGTGAGACCGATGCTG  
+HWI-EAS443:3:35:1555:363#0/1  
aaaa`\_Za\_T^¥LVYWYP[ ]¥LSSVFOOLTTR^ZBBBBBB  
@HWI-EAS443:3:35:1594:358#0/1  
GGTAGTAGCCATTTGTCTGTGAGACCGATGCTGTGAATCA  
+HWI-EAS443:3:35:1594:358#0/1  
a`aaZX`SRa`aaZ`Y]^a\_\_a\_RFR\_N\_a\_\_aU\_¥\_^Y\_  
@HWI-EAS443:3:35:387:1883#0/1  
AACAGATTGCTGATTCACAGCATCGGTCTCACAGACAAAT  
+HWI-EAS443:3:35:387:1883#0/1  
a^`TJ¥^`a¥^¥XT[W^[]VXM][¥U[H^T[YYZ]¥JPY  
@HWI-EAS443:3:35:562:828#0/1  
ATCTGCCTAGTCTGATTAGCAACCTCCATGGCCTCTGCTG  
+HWI-EAS443:3:35:562:828#0/1  
[WT]]^¥\_TXW```]\_URMW`XUa]Z¥PXVRadW¥^^^RS  
@HWI-EAS443:3:35:607:622#0/1  
GTGGTAGTAGCCATTTGTCTGTGAGACCGATGCTGTGAAT

+HWI-EAS443:3:35:607:622#0/1  
a\_]\_[a\_XXP]`Q¥XNR¥WLVXVM^SMSWTZW\_UBBBB  
@HWI-EAS443:3:35:679:143#0/1  
GTGGTAGTAGCCATTTGTCTGTGAGACCGATGCTGTGAAT  
+HWI-EAS443:3:35:679:143#0/1  
a\_`U`P]XV\_QY[^SWXX\_URPNWMRNNTYWVTBBBBB  
@HWI-EAS443:3:35:793:652#0/1  
GCCTAGTCTGATTAGCAACCTCCATGGCCTCTGCTGCCTG  
+HWI-EAS443:3:35:793:652#0/1  
ababba\_abaaa`^Zbab\_aaaaaaaaa\_a\_a\_aa\_Y\_^^`  
@HWI-EAS443:3:36:1198:1297#0/1  
GAAAACAGAATGGTGCTGGCTAGCACTACGGCAAAGGCTA  
+HWI-EAS443:3:36:1198:1297#0/1  
a`Ua]a\_aaaa`¥`a`a`\_a`\_`^`\_`\_`W¥^[Y¥Z¥V  
@HWI-EAS443:3:36:1236:1217#0/1  
CTTTGCCGTAGTGCTAGCCAGCACCATTCTGTTTTTCATGC  
+HWI-EAS443:3:36:1236:1217#0/1  
[aa^aZbWK[ `[ ` \_`aa\_SW^` `¥X`T`¥XXX` []^`R¥  
@HWI-EAS443:3:36:1507:732#0/1  
CAGAATGGTGCTGGCTAGCACTACGGCAAAGGCTATGGAA  
+HWI-EAS443:3:36:1507:732#0/1  
abb`bbbbabbba^abbbbaabaaaba` ``a\_\_\_aaaaRZ  
@HWI-EAS443:3:36:72:1704#0/1  
GATTAGCAACCTCCATGGCCTCTGCTGCCTGTTCACTCGA  
+HWI-EAS443:3:36:72:1704#0/1  
\_¥`a\_aa^`abaaba^]X\_aa`]^a[Xaaa`^^a[ `[bXI  
@HWI-EAS443:3:36:915:913#0/1  
CAGCATCGGTCTCACAGACAAATGGCTACTACCACCAATC  
+HWI-EAS443:3:36:915:913#0/1  
abbbbabb`\_a\_aaa` `` `` `^`\_`\_`a` [TXUG`¥^SH\_HV  
@HWI-EAS443:3:37:1155:656#0/1  
GTGCTGGCTAGCACTACGGCAAAGGCTATGGAACAGATGG  
+HWI-EAS443:3:37:1155:656#0/1  
a\_a^abaa^ba^a`\_¥^^`¥` [[^aa^YPF`S]¥^¥YSVT  
@HWI-EAS443:3:37:270:906#0/1  
GTAGTAGCCATTTGTCTGTGAGACCGATGCTGTGAATCAG  
+HWI-EAS443:3:37:270:906#0/1  
a]SRabaa[RQ]^WE^[S]`]aaBBBBBBBBBBBBBBBBB  
@HWI-EAS443:3:37:585:560#0/1  
TAGCCATTTGTCTGTGAGACCGATGCTGTGAATCAGCAAT  
+HWI-EAS443:3:37:585:560#0/1  
abaaaa`aaa\_a`a`\_aaa^aaa`aa\_\_X^Ha^a`a`a`\_`  
@HWI-EAS443:3:38:1142:504#0/1  
TAGCCAGCACCATTCTGTTTTTCATGCCTGATTAGTGGATT  
+HWI-EAS443:3:38:1142:504#0/1  
abaaaabaa`Z` `a\_b`aaa`\_`a`a`aXX`^aZ`aZ]Z  
@HWI-EAS443:3:38:166:476#0/1  
GAATGGTGCTGGCTAGCACTACGGCAAAGGCTATGGAACA  
+HWI-EAS443:3:38:166:476#0/1  
a\_]Y]Q`a^X^a`W`]^^U[V^^^BBBBBBBBBBBBBBBBB



@HWI-EAS443:3:38:291:113#0/1  
GTGGATTGGTGGTAGTAGCCATTTGTCTGTGAGACCGATG  
+HWI-EAS443:3:38:291:113#0/1  
a`aaaa`aaXa`M[TM¥LU^UP^BBBBBBBBBBBBBBBB  
@HWI-EAS443:3:38:476:471#0/1  
GATTCACAGCATCGGTCTCACAGACAAATGGCTACTACCA  
+HWI-EAS443:3:38:476:471#0/1  
aba`^`\_\_`aaa`\_aa¥`\_\_^Y`\_^TYZZ]^TYVVS[P  
@HWI-EAS443:3:38:818:1416#0/1  
GATTGGTGGTAGTAGCCATTTGTCTGTGAGACCGATGCTG  
+HWI-EAS443:3:38:818:1416#0/1  
¥`a`a^`XVZWS[RW\_[^]WFWZWBBBBBBBBBBBBBBB  
@HWI-EAS443:3:39:1169:1770#0/1  
GATTAGCAACCTCCATGGCCTCTGCTGCCTGTCTACTCGA  
+HWI-EAS443:3:39:1169:1770#0/1  
aababa`bbb^`\_\_aa¥X¥aaaaaa]`a\_TT\_Y`¥\_[`Z  
@HWI-EAS443:3:39:1405:1373#0/1  
TGGTGGTAGTAGCCATTTGTCTGTGAGACCGATGCTGTGA  
+HWI-EAS443:3:39:1405:1373#0/1  
`\_`^b\_[\_\_[\_^ZU`^YTY`¥PZ¥VWR`¥UZ[\_¥YNUZ  
@HWI-EAS443:3:39:1696:527#0/1  
ATCTGCCTAGTCTGATTAGCAACCTCCATGGCCTCTGCTG  
+HWI-EAS443:3:39:1696:527#0/1  
abbabaaba`¥¥a]ab`aa\_^a]UaaY]¥aUGS\_a^^\_VV  
@HWI-EAS443:3:39:190:2026#0/1  
GAAAACAGAATGGTGGCTGGCTAGCACTACGGCAAAGGCTA  
+HWI-EAS443:3:39:190:2026#0/1  
a]``aa]\_]¥^]\_¥a`¥U¥\_VaZ\_\_aXPUQRFY[^Z¥\_VB  
@HWI-EAS443:3:39:233:455#0/1  
CAGGCATGAAAACAGAATGGTGGCTGGCTAGCACTACGGCA  
+HWI-EAS443:3:39:233:455#0/1  
a[``\_]`^a\_a¥\_[`a\_a\_[aQ]a\_`a\_\_\_\_\_`^¥[XQ\_¥¥W  
@HWI-EAS443:3:39:759:299#0/1  
CACAGACAAATGGCTACTACCACCAATCCACTAATCAGGC  
+HWI-EAS443:3:39:759:299#0/1  
^]aa``ba¥KT^^a[\_ZZZ\_Y^0¥^ZFRTLZSUVVLXZBB  
@HWI-EAS443:3:3:1233:1347#0/1  
AGCATCGGTCTCACAGACAAATGGCTACTACCACCAATCC  
+HWI-EAS443:3:3:1233:1347#0/1  
a^]`\_`\_ab`Ua`aYa\_aaaaa`\_^W\_WMY]S]^ZU¥][YB  
@HWI-EAS443:3:3:161:896#0/1  
ATGCCTGATTAGTGGATTGGTGGTAGTAGCCATTTGTCTG  
+HWI-EAS443:3:3:161:896#0/1  
a¥a]`\_]V\_aaa¥aaU`\_aaPaBBBBBBBBBBBBBBBBBBB  
@HWI-EAS443:3:3:236:186#0/1  
AGTAGCCATTTGTCTGTGAGACCGATGCTGTGAATCAGCA  
+HWI-EAS443:3:3:236:186#0/1  
aa\_b\_X^WaaaaZ^\_a¥a^^^Z^\_^]XZ^`V\_^\_[P[^UZ  
@HWI-EAS443:3:3:524:124#0/1  
AGCCATTTGTCTGTGAGACCGATGCTGTGAATCAGCAATC

+HWI-EAS443:3:3:524:124#0/1  
aa`aaa`aa`aa^a^a`\_\_^\_\_^\_\_^\_\_^XV^^U^^]V  
@HWI-EAS443:3:3:555:235#0/1  
ATGGTGTGCTAGCACTACGGCAAAGGCTATGGAACAGA  
+HWI-EAS443:3:3:555:235#0/1  
aaaa¥aa\_bba^`aS\_Va]V\_`U\_]aS\_^\_]\_Z¥VZSU  
@HWI-EAS443:3:3:858:282#0/1  
CAATCCACTAATCAGGCATGAAAACAGAATGGTGTGCTGGCT  
+HWI-EAS443:3:3:858:282#0/1  
\_¥Y\_¥Z¥UT`Yb\_\_U\_^`ba]`\_]a\_bb`baU\_`Y¥b\_XV  
@HWI-EAS443:3:40:1161:566#0/1  
GTAGCCATTTGTCTGTGAGACCGATGCTGTGAATCAGCAA  
+HWI-EAS443:3:40:1161:566#0/1  
]J¥¥U\_PY`YZY]L]QSQ[^¥Z¥UR[[RWVZUQOONULMN  
@HWI-EAS443:3:40:1176:743#0/1  
TGCCTGATTAGTGGATTGGTGGTAGTAGCCATTTGTCTGT  
+HWI-EAS443:3:40:1176:743#0/1  
a^b^a`]a\_X^Ybaaab`ZBBBBBBBBBBBBBBBBBBBB  
@HWI-EAS443:3:40:1204:1548#0/1  
CATTTGTCTGTGAGACCGATGCTGTGAATCAGCAATCTGT  
+HWI-EAS443:3:40:1204:1548#0/1  
`bbbWaa\_]\_`S^Y]ab`YX\_`^b`[W\_]^[^\_\_aa`a`[]  
@HWI-EAS443:3:40:438:1109#0/1  
CATGAAAACAGAATGGTGTGCTAGCACTACGGCAAAGG  
+HWI-EAS443:3:40:438:1109#0/1  
a\_b]`¥babababa`a\_`a`aaaa]aaa`a\_a\_aaaa¥^  
@HWI-EAS443:3:40:702:1144#0/1  
TGCCTGATTAGTGGATTGGTGGTAGTAGCCATTTGTCTGT  
+HWI-EAS443:3:40:702:1144#0/1  
aa^bab\_abaaZ``a`aaaWaYLWBBBBBBBBBBBBBBBB  
@HWI-EAS443:3:42:1331:516#0/1  
GCTGATTCACAGCATCGGTCTCACAGACAAATGGCTACTA  
+HWI-EAS443:3:42:1331:516#0/1  
ababaabab`baaaaab`\_\_a^aS]aa[a\_`\_`aZ`a¥V¥  
@HWI-EAS443:3:42:136:721#0/1  
GAACAGATTGCTGATTCACAGCATCGGTCTCACAGACAAA  
+HWI-EAS443:3:42:136:721#0/1  
Z\_V\_a\_\_abbb\_`XZZabbababaaaa^\_]\_a]\_\_\_¥R\_U  
@HWI-EAS443:3:42:1554:703#0/1  
GCCTGATTAGTGGATTGGTGGTAGTAGCCATTTGTCTGTG  
+HWI-EAS443:3:42:1554:703#0/1  
abaabaabab\_baaaa`^a`HYLJ]RBBBBBBBBBBBBBB  
@HWI-EAS443:3:42:1639:1566#0/1  
TGAAAACAGAATGGTGTGCTAGCACTACGGCAAAGGCT  
+HWI-EAS443:3:42:1639:1566#0/1  
Uaa\_XZ]S[^\_] ^VMZZU]S]Y\_WKWS¥XOV]¥U¥S\_^VU  
@HWI-EAS443:3:42:1672:335#0/1  
ATTTGTCTGTGAGACCGATGCTGTGAATCAGCAATCTGTT  
+HWI-EAS443:3:42:1672:335#0/1  
abb`a`bba¥aa`\_`\_a`aa``a]a\_`a^a`Z^^\_¥\_\_]^

@HWI-EAS443:3:42:499:114#0/1  
GACAAATGGCTACTACCACCAATCCACTAATCAGGCATGA  
+HWI-EAS443:3:42:499:114#0/1  
abaaaa`b`aa`X]aaS\_]\_\_VY\_YUU¥\_RWZ`XRQVRZ  
@HWI-EAS443:3:42:982:190#0/1  
AGCCATTTGTCTGTGAGACCGATGCTGTGAATCAGCAATC  
+HWI-EAS443:3:42:982:190#0/1  
a\_[P¥b\_a\_MUab`a]aX]]abaa]S\_^b\_aaN^a^aa[R  
@HWI-EAS443:3:43:1306:1082#0/1  
ATCCACTAATCAGGCATGAAAACAGAATGGTGCTGGCTAG  
+HWI-EAS443:3:43:1306:1082#0/1  
^bab\_bW]\_Q\_aabaZ¥aa¥a`Z`b`^] ^V[]ZZT[^Y  
@HWI-EAS443:3:43:1666:1541#0/1  
GACAAATGGCTACTACCACCAATCCACTAATCAGGCATGA  
+HWI-EAS443:3:43:1666:1541#0/1  
``b`babaaaXY]^\_\_UX[[\_`U`a\_ZP[\_[H^^[^  
@HWI-EAS443:3:43:253:223#0/1  
GAACAGATTGCTGATTACAGCATCGGTCTCACAGACAAA  
+HWI-EAS443:3:43:253:223#0/1  
aaaabb`bbbbbaaab`\_`b`\_aab`^^a`Za]`Y`a^  
@HWI-EAS443:3:43:648:466#0/1  
GCCTAGTCTGATTAGCAACCTCCATGGCCTCTGCTGCCTG  
+HWI-EAS443:3:43:648:466#0/1  
a\_aa]`T`ba\_]`a`X]`\_aba\_a`aa^aa¥`]U]a  
@HWI-EAS443:3:43:680:218#0/1  
AGTAGCCATTTGTCTGTGAGACCGATGCTGTGAATCAGCA  
+HWI-EAS443:3:43:680:218#0/1  
aa\_\_aaaaaaa`^\_aaYa\_¥^aaa^Z\_V¥]V]^\_[^^WW  
@HWI-EAS443:3:43:733:1082#0/1  
AGCCATTTGTCTGTGAGACCGATGCTGTGAATCAGCAATC  
+HWI-EAS443:3:43:733:1082#0/1  
aaaa^aaa`aaaZaaaaaa`\_`aa¥a`a`^`¥`¥\_¥  
@HWI-EAS443:3:44:1103:1428#0/1  
AGAATGGTGCTGGCTAGCACTACGGCAAAGGCTATGGAAC  
+HWI-EAS443:3:44:1103:1428#0/1  
aa`aba\_a]\_aa\_\_a^X`\_aS\_^U[[¥TZU^YWO`VZU  
@HWI-EAS443:3:44:1692:1095#0/1  
TGCCTGATTAGTGGATTGGTGGTAGTAGCCATTTGTCTGT  
+HWI-EAS443:3:44:1692:1095#0/1  
aaa`a`¥aaaa¥aaY\_\_`a¥`XUBBBBBBBBBBBBBBBB  
@HWI-EAS443:3:44:409:1433#0/1  
AGCCTTTGCCGTAGTCTAGCCAGCACCATTCTGTTTTCA  
+HWI-EAS443:3:44:409:1433#0/1  
`Za`abaaaaaaa¥aaab^`a¥N¥aaaa\_\_^aa[S^\_`¥  
@HWI-EAS443:3:44:477:1416#0/1  
ACCATCTGCCTAGTCTGATTAGCAACCTCCATGGCCTCTG  
+HWI-EAS443:3:44:477:1416#0/1  
a`a^ZT\_[¥[`^W]`YY``^^\_¥¥¥]¥¥]ZTST¥W¥¥W  
@HWI-EAS443:3:44:83:755#0/1  
AGAATGGTGCTGGCTAGCACTACGGCAAAGGCTATGGAAC

+HWI-EAS443:3:44:83:755#0/1  
aa^`V[N`\_`aaaPX\_aaa\_[VSV^\_[^ZZa]^ZTYS  
@HWI-EAS443:3:44:872:373#0/1  
TTAGCAACCTCCATGGCCTCTGCTGCCTGTTCACTCGATC  
+HWI-EAS443:3:44:872:373#0/1  
[`¥`¥XQ¥¥b[\_\_\_\_]ZXUW]^aa`^UX][a][`[abXU\_VY  
@HWI-EAS443:3:45:1223:1736#0/1  
GGTGGTAGTAGCCATTTGTCTGTGAGACCGATGCTGTGAA  
+HWI-EAS443:3:45:1223:1736#0/1  
ababa`b\_G`\_\_\_\_aaaabZ^`aYZZ`a]^ZXPZa\_\_`\_\_\_\_  
@HWI-EAS443:3:45:288:925#0/1  
GAACAGATTGCTGATTCACAGCATCGGTCTCACAGACAAA  
+HWI-EAS443:3:45:288:925#0/1  
aaaabaaaa`a[```¥`a^a`[``VU[\_\_\_\_]`\_\_\_\_  
@HWI-EAS443:3:45:429:1617#0/1  
GCAGAGGCCATGGAGTTGCTAATCAGACTAGGCAGATGG  
+HWI-EAS443:3:45:429:1617#0/1  
`aa`a]\_\_\_\_\_aT`R\_QY][`]N\_X\_G^WU]]¥UU]T  
@HWI-EAS443:3:45:730:1361#0/1  
ATGAAAACAGAATGGTGCTGGCTAGCACTACGGCAAAGGC  
+HWI-EAS443:3:45:730:1361#0/1  
aa`\_]b]a\_Y¥]]JDUa]`aaV\_\_¥V\_[``VPU\_`a[[G^  
@HWI-EAS443:3:45:985:1075#0/1  
CTGCCTAGTCTGATTAGCAACCTCCATGGCCTCTGCTGCC  
+HWI-EAS443:3:45:985:1075#0/1  
abaaaa]a`baaaa`aa`aaU`aaZa`aa^^a\_^PV\_\_\_¥  
@HWI-EAS443:3:46:1249:552#0/1  
TAGCCATTTGTCTGTGAGACCGATGCTGTGAATCAGCAAT  
+HWI-EAS443:3:46:1249:552#0/1  
ZabXU\_U\_^aWZS``\_T\_^Y¥Z]\_a[[aQ`\_UWUPa`]`X  
@HWI-EAS443:3:46:1291:687#0/1  
GTAGTAGCCATTTGTCTGTGAGACCGATGCTGTGAATCAG  
+HWI-EAS443:3:46:1291:687#0/1  
a\_ba^aaa`aaa^]aaa¥a`a`a`a\_^]]a\_`¥`^Z¥¥  
@HWI-EAS443:3:46:173:711#0/1  
ACAGAATGGTGCTGGCTAGCACTACGGCAAAGGCTATGGA  
+HWI-EAS443:3:46:173:711#0/1  
\_¥Z\_KW\_UZZZ¥\_\_babbba`Z`abb^¥]^a]`WS\_`W  
@HWI-EAS443:3:46:253:495#0/1  
TGGTAGTAGCCATTTGTCTGTGAGACCGATGCTGTGAATC  
+HWI-EAS443:3:46:253:495#0/1  
aaa\_ba`baaaaaaa\_`aa\_\_\_a\_\_\_`\_\_^\_¥U]U`\_\_Z^  
@HWI-EAS443:3:47:1347:1604#0/1  
CTAGCCAGCACCATTTCTGTTTTTCATGCCTGATTAGTGGAT  
+HWI-EAS443:3:47:1347:1604#0/1  
ab]\_bb]aZS^abb`]`ba`a\_aa\_aa`WX\_]`aXa\_\_\_\_  
@HWI-EAS443:3:47:1552:119#0/1  
CAGACAAATGGCTACTACCAATCCACTAATCAGGCAT  
+HWI-EAS443:3:47:1552:119#0/1  
a`b`bab]abbbaa^M¥U`]ZZ[[[]VYVG¥^¥YQV[^SY¥

@HWI-EAS443:3:47:1589:209#0/1  
GATTGCTGATTCACAGCATCGGTCTCACAGACAAATGGCT  
+HWI-EAS443:3:47:1589:209#0/1  
ab`\_baabaaa`a\_aaaa`aa^`\_]\_\_Y`]U\_Z\_]^^ZX  
@HWI-EAS443:3:47:1642:1171#0/1  
AACAGAATGGTGGCTAGCACTACGGCAAAGGCTATGG  
+HWI-EAS443:3:47:1642:1171#0/1  
¥`P¥aTa]bbJ`b`bbb\_b¥V^^W^^ba[I`a``W¥OXG]  
@HWI-EAS443:3:47:1690:1268#0/1  
CTACCACCAATCCACTAATCAGGCATGAAAACAGAATGGT  
+HWI-EAS443:3:47:1690:1268#0/1  
aaab¥[`aT```\_aZbbaa]]aba``a\_aS^Xaa\_aaa¥S  
@HWI-EAS443:3:47:546:1299#0/1  
GACAAATGGCTACTACCACCAATCCACTAATCAGGCATGA  
+HWI-EAS443:3:47:546:1299#0/1  
abbaabaaba[bJZb`a`Y`]aYV\_a[```a`\_aY`X`\_ZH  
@HWI-EAS443:3:47:661:748#0/1  
TAGTCTGATTAGCAACCTCCATGGCCTCTGCTGCCTGTTC  
+HWI-EAS443:3:47:661:748#0/1  
a`aY\_aa[`````\_a`¥\_a`^`\_`¥\_¥\_¥¥\_¥U^TU¥¥W¥¥  
@HWI-EAS443:3:47:921:2024#0/1  
CAGAATGGTGGCTAGCACTACGGCAAAGGCTATGGAA  
+HWI-EAS443:3:47:921:2024#0/1  
aab`a`a``bbaaaa`ba]a)`aZaaVW¥\_`^]Z]^a^¥^  
@HWI-EAS443:3:48:1194:941#0/1  
AAAACAGAATGGTGGCTAGCACTACGGCAAAGGCTAT  
+HWI-EAS443:3:48:1194:941#0/1  
\_]XU\_\_¥¥Z\_\_`Z`T\_a\_X]\_\_WZ[[[USR\_]ZTZGOUOW  
@HWI-EAS443:3:48:1436:1476#0/1  
TAGCCATTTGTCTGTGAGACCGATGCTGTGAATCAGCAAT  
+HWI-EAS443:3:48:1436:1476#0/1  
a¥\_^\_aababaaab`bba`aaaaa^`]¥a```X\_`S`Y`  
@HWI-EAS443:3:48:1723:1269#0/1  
TAGCCATTTGTCTGTGAGACCGATGCTGTGAATCAGCAAT  
+HWI-EAS443:3:48:1723:1269#0/1  
aab`^0\_bbba\_bbabaaaaaaaa`aa`b`][\_\_a\_``\_  
@HWI-EAS443:3:48:932:1254#0/1  
TGAACAGATTGCTGATTCACAGCATCGGTCTCACAGACAA  
+HWI-EAS443:3:48:932:1254#0/1  
aaaaa```U^VNYLL]][\_a[ZaaWZ^[FUZP`¥[WXF^^  
@HWI-EAS443:3:49:1605:1094#0/1  
GTGGTAGTAGCCATTTGTCTGTGAGACCGATGCTGTGAAT  
+HWI-EAS443:3:49:1605:1094#0/1  
aabb`b^PaaT]Y]b\_0^S¥¥PZLY]¥]\_PX¥U]XNMMV]  
@HWI-EAS443:3:49:161:85#0/1  
CAGACAAATGGCTACTACCACCAATCCACTAATCAGGCAT  
+HWI-EAS443:3:49:161:85#0/1  
`bbbbbbab]`bbb^b``bbabbb\_¥^`[bb`aXab`\_\_b  
@HWI-EAS443:3:49:1755:1664#0/1  
TGAAAACAGAATGGTGGCTAGCACTACGGCAAAGGCT

+HWI-EAS443:3:49:1755:1664#0/1  
X¥^[OSa`aa\_aabX\_X^¥T^`\_a`¥[[`U`\_^¥YLY]XU  
@HWI-EAS443:3:49:1776:893#0/1  
AAAACAGAATGGTGGCTAGCACTACGGCAAAGGCTAT  
+HWI-EAS443:3:49:1776:893#0/1  
Y^[^a`¥^ab\_bZ`aa]`^a¥SXXaa¥]`\_a`[^`U`]¥  
@HWI-EAS443:3:49:9:377#0/1  
TGGTGGTAGTAGCCATTTGTCTGTGAGACCGATGCTGTGA  
+HWI-EAS443:3:49:9:377#0/1  
a````a^^]F[Y][YO`a\_WT\_\_[UU\_ZLZVYTNO[TVYZ  
@HWI-EAS443:3:4:1642:72#0/1  
ATTTGTCTGTGAGACCGATGCTGTGAATCAGCAATCTGTT  
+HWI-EAS443:3:4:1642:72#0/1  
a]aab]I^bZaa[\_U[]VPZJZ[Xa¥S`Y^^XBBBBBBBB  
@HWI-EAS443:3:4:1723:851#0/1  
ACAGAATGGTGGCTAGCACTACGGCAAAGGCTATGGA  
+HWI-EAS443:3:4:1723:851#0/1  
a`^baabab\_b\_a`a¥a`ZK\_Qa\_WaZG\_\_Za\_X\_]X[BB  
@HWI-EAS443:3:4:415:1949#0/1  
GCTAGCCAGCACCATTCTGTTTTTCATGCCTGATTAGTGGGA  
+HWI-EAS443:3:4:415:1949#0/1  
aa^a\_``a`\_aX]\_^\_\_aaU\_\_^^^\_Y\_`\_^\_^WY`X\_  
@HWI-EAS443:3:4:477:830#0/1  
CTGATTAGCAACCTCCATGGCCTCTGCTGCCTGTTCACTC  
+HWI-EAS443:3:4:477:830#0/1  
a\_baTW`bababaaaaaaaa\_a`a\_baZ`\_\_^`\_\_¥aQU`  
@HWI-EAS443:3:4:553:524#0/1  
ATTTGTCTGTGAGACCGATGCTGTGAATCAGCAATCTGTT  
+HWI-EAS443:3:4:553:524#0/1  
a]aW^R\_]ZP^YQ\_¥[``]`V[aaa\_[]\_Xa¥a\_US\_BBB  
@HWI-EAS443:3:50:1261:1124#0/1  
GACAAATGGCTACTACCACCAATCCACTAATCAGGCATGA  
+HWI-EAS443:3:50:1261:1124#0/1  
\_\_a^`\_a\_P\_SX\_ZQ\_YPa[S[PZSXX]]PYV`TNTRFY  
@HWI-EAS443:3:50:1321:498#0/1  
CACAGACAAATGGCTACTACCACCAATCCACTAATCAGGC  
+HWI-EAS443:3:50:1321:498#0/1  
`babbb`bbbabbbabb`b¥`\_aaa¥SYa\_Haaa]aaa`T  
@HWI-EAS443:3:50:1607:621#0/1  
TGAAAACAGAATGGTGGCTAGCACTACGGCAAAGGCT  
+HWI-EAS443:3:50:1607:621#0/1  
abaa\_aaaa\_]aaa¥b\_a[a]\_^\_Q\_S\_\_S^`V[^V^ZR[  
@HWI-EAS443:3:51:1075:831#0/1  
CTAGCCAGCACCATTCTGTTTTTCATGCCTGATTAGTGGAT  
+HWI-EAS443:3:51:1075:831#0/1  
aba`\_bb`b^ababbaababbbbaabb[bbbabb\_a`b^`a  
@HWI-EAS443:3:51:1248:1375#0/1  
GACAAATGGCTACTACCACCAATCCACTAATCAGGCATGA  
+HWI-EAS443:3:51:1248:1375#0/1  
`aa`ab\_\_a\_ba¥`\_`a`¥a`b`\_aa\_aZ]T^\_a^N`Z¥`

@HWI-EAS443:3:51:1384:355#0/1  
TACCACCAATCCACTAATCAGGCATGAAAACAGAATGGTG  
+HWI-EAS443:3:51:1384:355#0/1  
abaaaaabaa`aa\_aaaaZ`a`\_`aa`a`\_\_\_`a\_aa\_¥W`  
@HWI-EAS443:3:51:545:1371#0/1  
TGGTAGTAGCCATTTGTCTGTGAGACCGATGCTGTGAATC  
+HWI-EAS443:3:51:545:1371#0/1  
]a`a`\_`]¥\_ORW`\_ZWNGZ`][\_OXZ\_\_QTO^ZXU]]\_UX  
@HWI-EAS443:3:51:614:1618#0/1  
GATCGAGTGAACAGGCAGCAGAGGCCATGGAGGTTGCTAA  
+HWI-EAS443:3:51:614:1618#0/1  
aba]\_b[Taaa`aab`bb\_\_aU\_a\_`\_\_J]\_ab\_`SNVV`  
@HWI-EAS443:3:52:1344:560#0/1  
GAGTGAACAGGCAGCAGAGGCCATGGAGGTTGCTAATCAG  
+HWI-EAS443:3:52:1344:560#0/1  
abbaaababaa\_ab^`\_`ab\_\_\_[P`T]`PYPDTNY[BBB  
@HWI-EAS443:3:52:1537:294#0/1  
ATAGCCTTTGCCGTAGTGCTAGCCAGCACCATTCTGTTTT  
+HWI-EAS443:3:52:1537:294#0/1  
aaba\_abbba\_`a]]YW¥Za^`W]¥\_]X]X``W]aX^]`  
@HWI-EAS443:3:52:239:1174#0/1  
GATTAGCAACCTCCATGGCCTCTGCTGCCTGTTCACCTCGA  
+HWI-EAS443:3:52:239:1174#0/1  
aabbab`bbaaaaa`Uaa]ba\_a`a^\_aaa\_a]a``¥aa  
@HWI-EAS443:3:52:395:1690#0/1  
ACCATCTGCCTAGTCTGATTAGCAACCTCCATGGCCTCTG  
+HWI-EAS443:3:52:395:1690#0/1  
`aa\_`^aT^\_a`^`^`aa\_\_a[^]¥¥\_\_Z\_^]\_VX¥^W¥¥  
@HWI-EAS443:3:52:645:571#0/1  
GACAAATGGCTACTACCACCAATCCACTAATCAGGCATGA  
+HWI-EAS443:3:52:645:571#0/1  
¥¥a¥ab`W¥aU]XN¥Z^Q\_`¥`\_QUX^¥a^aRR[^UT¥NV  
@HWI-EAS443:3:53:880:635#0/1  
TGCCGTAGTGCTAGCCAGCACCATTCTGTTTTCATGCCTG  
+HWI-EAS443:3:53:880:635#0/1  
aa\_ab^ba¥aaaaaaaab\_aa\_^aa[\_a\_ab`\_]\_`a^¥a]  
@HWI-EAS443:3:54:1052:498#0/1  
CCTAGTCTGATTAGCAACCTCCATGGCCTCTGCTGCCTGT  
+HWI-EAS443:3:54:1052:498#0/1  
abbbbbbbbbbbbbbabbbaba`bbbb^ababaabaa`aZa  
@HWI-EAS443:3:54:1089:224#0/1  
ATTAGCAACCTCCATGGCCTCTGCTGCCTGTTCACTCGAT  
+HWI-EAS443:3:54:1089:224#0/1  
``aab\_aaS^a\_Va`^TY¥\_Y^^¥¥VNZ\_¥TLVWYW^¥W  
@HWI-EAS443:3:54:1573:136#0/1  
CTAGTCTGATTAGCAACCTCCATGGCCTCTGCTGCCTGTT  
+HWI-EAS443:3:54:1573:136#0/1  
`b\_^abbbba]^R^aaba`ab¥\_Qab``a``aY\_[¥\_\_  
@HWI-EAS443:3:54:1655:873#0/1  
AGCCATTTGTCTGTGAGACCGATGCTGTGAATCAGCAATC

+HWI-EAS443:3:54:1655:873#0/1  
a``^`baWV^VSZWZ^\_Z[\_]ZZ\_R¥^^a¥Q¥V]^\_¥X  
@HWI-EAS443:3:54:609:87#0/1  
CACAGACAAATGGCTACTACCACCAATCCACTAATCAGGC  
+HWI-EAS443:3:54:609:87#0/1  
ababbbabaaabbab`T`XU`aV`\_a]^W`¥`]\_\_]]`\_T  
@HWI-EAS443:3:54:816:371#0/1  
GCCTAGTCTGATTAGCAACCTCCATGGCCTCTGCTGCCTG  
+HWI-EAS443:3:54:816:371#0/1  
aab`baa^aa[`]^U]^aQX`\_0`^[\_¥Z¥aaX^^\_P¥\_]`  
@HWI-EAS443:3:54:897:179#0/1  
TGAAAACAGAATGGTGCTGGCTAGCACTACGGCAAAGGCT  
+HWI-EAS443:3:54:897:179#0/1  
aa`\_a\_]ab`a`aa[baaaa¥`aaS`^\_\_¥¥aVY]\_¥`W¥  
@HWI-EAS443:3:55:1557:1148#0/1  
AAAACAGAATGGTGCTGGCTAGCACTACGGCAAAGGCTAT  
+HWI-EAS443:3:55:1557:1148#0/1  
`\_aaa`a`bbaSYa]ba]`\_Z\_[^ZaRXa^X[`]aZOZVW  
@HWI-EAS443:3:55:1630:1198#0/1  
AACAGAATGGTGCTGGCTAGCACTACGGCAAAGGCTATGG  
+HWI-EAS443:3:55:1630:1198#0/1  
`Uabbbba\_P¥\_b^0\_aUZ`a`aH^¥WTU]`WabaR`aXa^  
@HWI-EAS443:3:56:1143:1187#0/1  
ATCGAGTGAACAGGCAGCAGAGGCCATGGAGGTTGCTAAT  
+HWI-EAS443:3:56:1143:1187#0/1  
abbbbbb\_bbbabab]`aaa`¥aa]]`aaYU^aSZYDUVYQ  
@HWI-EAS443:3:56:1405:482#0/1  
TGGTGGTAGTAGCCATTTGTCTGTGAGACCGATGCTGTGA  
+HWI-EAS443:3:56:1405:482#0/1  
aba¥a\_M]ULWYW¥X`aVRUZTJWWRH]Y[G[[T^[BBB  
@HWI-EAS443:3:56:1552:1417#0/1  
TAGCAACCTCCATGGCCTCTGCTGCCTGTTCACTCGATCC  
+HWI-EAS443:3:56:1552:1417#0/1  
]``^ab\_baa[`]b\_XWZ`babaaa¥aab`aWaaaaa`aZ  
@HWI-EAS443:3:56:185:1270#0/1  
GATTGGTGGTAGTAGCCATTTGTCTGTGAGACCGATGCTG  
+HWI-EAS443:3:56:185:1270#0/1  
ab`a`^`^\_[U`TQZQN\_[P`^]`T`\_OB BBBBBBBBBBBBBB  
@HWI-EAS443:3:56:523:1108#0/1  
GATCGAGTGAACAGGCAGCAGAGGCCATGGAGGTTGCTAA  
+HWI-EAS443:3:56:523:1108#0/1  
a`U`bb`^bbaaaa`\_a\_YW]`aZE¥XSX\_XT^BBBBBBBB  
@HWI-EAS443:3:56:679:809#0/1  
GGCAGCAGAGGCCATGGAGGTTGCTAATCAGACTAGGCAG  
+HWI-EAS443:3:56:679:809#0/1  
aababaaaaabaaaaaa\_aa[aZV]]]\_`X]]V[W[`]TU[  
@HWI-EAS443:3:56:708:1603#0/1  
GTAGTAGCCATTTGTCTGTGAGACCGATGCTGTGAATCAG  
+HWI-EAS443:3:56:708:1603#0/1  
`aba\_bbb`bbaaa`\_a`[]aa`a`aaa`aa``aaa`\_a\_



@HWI-EAS443:3:56:774:1471#0/1  
CATAGCCTTTGCCGTAGTGCTAGCCAGCACCATTCTGTTT  
+HWI-EAS443:3:56:774:1471#0/1  
ababb\_`bbbaaab`a\_\_baba\_`a\_a\_`\_a\_ba\_a`\_]\_a  
@HWI-EAS443:3:56:984:602#0/1  
CATTTGTCTGTGAGACCGATGCTGTGAATCAGCAATCTGT  
+HWI-EAS443:3:56:984:602#0/1  
abb]bb]abba]`^aXVaba[Yba]¥`ba]abVWVa]a^U  
@HWI-EAS443:3:57:1618:445#0/1  
GCCTTTGCCGTAGTGCTAGCCAGCACCATTCTGTTTTTCAT  
+HWI-EAS443:3:57:1618:445#0/1  
aaabaaa`Z^TU^RWR`a`[U¥\_Z`¥YY`\_NZaUZ\_¥U[^  
@HWI-EAS443:3:57:420:423#0/1  
TAGCCATTTGTCTGTGAGACCGATGCTGTGAATCAGCAAT  
+HWI-EAS443:3:57:420:423#0/1  
aaa\_aaaaaa\_aab^`aaaaaa`a`aa\_aa\_\_\_\_\_a]`Y`  
@HWI-EAS443:3:57:820:1833#0/1  
CAAATGGCTACTACCACCAATCCACTAATCAGGCATGAAA  
+HWI-EAS443:3:57:820:1833#0/1  
abbb¥`bbbMab^ab\_^]aT¥^`Y\_`aa¥aaaTbbbaab  
@HWI-EAS443:3:57:988:920#0/1  
GAAAACAGAATGGTGCTGGCTAGCACTACGGCAAAGGCTA  
+HWI-EAS443:3:57:988:920#0/1  
aa\_a\_a\_```\_`¥W\_¥a`a¥\_`^T\_U\_¥¥^\_¥¥W¥¥^U¥Y  
@HWI-EAS443:3:58:1021:1255#0/1  
TGGTAGTAGCCATTTGTCTGTGAGACCGATGCTGTGAATC  
+HWI-EAS443:3:58:1021:1255#0/1  
ZbaSb^][aa\_[aba]U\_\_Z\_\_YHU`a`a¥a`a`GZJY`[  
@HWI-EAS443:3:58:1082:754#0/1  
GTCTGATTAGCAACCTCCATGGCCTCTGCTGCCTGTTTAC  
+HWI-EAS443:3:58:1082:754#0/1  
a`aaaaaaaaaaaa`a````\_\_[a`\_a^\_\_\_\_`a^\_¥\_[  
@HWI-EAS443:3:58:108:1846#0/1  
ATCGAGTGAACAGGCAGCAGAGGCCATGGAGGTTGCTAAT  
+HWI-EAS443:3:58:108:1846#0/1  
a^^`\_aT^```\_Xa`b\_[N`BBBBBBBBBBBBBBBBBBBB  
@HWI-EAS443:3:58:18:93#0/1  
GGTGGTAGTAGCCATTTGTCTGTGAGACCGATGCTGTGAA  
+HWI-EAS443:3:58:18:93#0/1  
ab\_baY^YN¥a¥]P]`¥YWZ[aV]RPKL^ZLJVQNZBBBB  
@HWI-EAS443:3:59:1240:1965#0/1  
CTTTGCCGTAGTGCTAGCCAGCACCATTCTGTTTTTCATGC  
+HWI-EAS443:3:59:1240:1965#0/1  
Sababa^ab\_`bZab[ZaabYba\_bb]b]]bUbaa^\_]a[  
@HWI-EAS443:3:59:1240:413#0/1  
GAAAACAGAATGGTGCTGGCTAGCACTACGGCAAAGGCTA  
+HWI-EAS443:3:59:1240:413#0/1  
a`\_\_Y\_`a`^¥aGa]`aa\_^\_a¥\_¥\_\_\_\_a^GQ¥\_QWQ\_W  
@HWI-EAS443:3:59:1323:648#0/1  
TTGCCGTAGTGCTAGCCAGCACCATTCTGTTTTTCATGCCT

+HWI-EAS443:3:59:1323:648#0/1  
YXU¥^a]¥ZT]ZYX^a¥¥aa^]XY\_baabaaa`\_[XGY^\_  
@HWI-EAS443:3:59:1353:241#0/1  
CAAATGGCTACTACCACCAATCCACTAATCAGGCATGAAA  
+HWI-EAS443:3:59:1353:241#0/1  
`abaabbbba[abaa\_aa]a[Z\_X]\_`baaa]a]¥PRa\_\_  
@HWI-EAS443:3:59:1751:1012#0/1  
CAGGCATGAAAACAGAATGGTGCTGGCTAGCACTACGGCA  
+HWI-EAS443:3:59:1751:1012#0/1  
aZbb^aba¥^[``abaaaZ\_aa`babbb`bPTPa[HM\_GW  
@HWI-EAS443:3:59:275:1077#0/1  
CAGAATGGTGCTGGCTAGCACTACGGCAAAGGCTATGGAA  
+HWI-EAS443:3:59:275:1077#0/1  
aba^\_U\_a`\_`\_aWVZ]a¥`a]¥a]^`\_]`X`[[RZKTPW  
@HWI-EAS443:3:5:1175:774#0/1  
AACAGAATGGTGCTGGCTAGCACTACGGCAAAGGCTATGG  
+HWI-EAS443:3:5:1175:774#0/1  
\_R`b^¥`[^a\_N`a^\_abZS\_]`¥Pa\_\_aa[UW\_aXaBB  
@HWI-EAS443:3:5:1440:428#0/1  
AGTAGCCATTTGTCTGTGAGACCGATGCTGTGAATCAGCA  
+HWI-EAS443:3:5:1440:428#0/1  
\_¥Z[aYa]\_aa¥`\_]\_\_`SaaON\_YTNPGG]T^ZIVUYBB  
@HWI-EAS443:3:5:585:610#0/1  
ATCGAGTGAACAGGCAGCAGAGGCCATGGAGGTTGCTAAT  
+HWI-EAS443:3:5:585:610#0/1  
``bbbb¥baaaaa]^^`a\_a^V]V[Z\_``G]^BBBBBBBB  
@HWI-EAS443:3:5:594:1039#0/1  
GGTAGTAGCCATTTGTCTGTGAGACCGATGCTGTGAATCA  
+HWI-EAS443:3:5:594:1039#0/1  
ab¥b`^a]a^a`aaaa]aXYRNZ\_YN`aG¥P^U]`a]OBB  
@HWI-EAS443:3:60:1012:764#0/1  
TGAAAACAGAATGGTGCTGGCTAGCACTACGGCAAAGGCT  
+HWI-EAS443:3:60:1012:764#0/1  
[\_ORZU\_Z\_`a^]MNbb[RVaa\_¥V¥^^VS]ZVT]VZZ¥U  
@HWI-EAS443:3:60:1370:1419#0/1  
GTAGTAGCCATTTGTCTGTGAGACCGATGCTGTGAATCAG  
+HWI-EAS443:3:60:1370:1419#0/1  
a\_b\_\_a`\_``aaa`^]a]]`\_ZMHW\_`]V^\_Y]]\_XN^^  
@HWI-EAS443:3:60:156:1146#0/1  
TGCCTGATTAGTGGATTGGTGGTAGTAGCCATTTGTCTGT  
+HWI-EAS443:3:60:156:1146#0/1  
aa`a[aaaa`^`aa^]\_\_\_\_\_BBBBBBBBBBBBBBBB  
@HWI-EAS443:3:60:1632:1476#0/1  
GGTGGTAGTAGCCATTTGTCTGTGAGACCGATGCTGTGAA  
+HWI-EAS443:3:60:1632:1476#0/1  
`baaa\_b`\_a\_`[^bbMa^a][\_Y\_a^\_a\_\_WU\_Z]\_\_`  
@HWI-EAS443:3:60:803:903#0/1  
GAAAACAGAATGGTGCTGGCTAGCACTACGGCAAAGGCTA  
+HWI-EAS443:3:60:803:903#0/1  
`^aaa`\_`\_¥`\_U`[]`X]¥a^¥]¥^]V]]Z^[^WV¥[

@HWI-EAS443:3:60:902:724#0/1  
GCCTAGTCTGATTAGCAACCTCCATGGCCTCTGCTGCCTG  
+HWI-EAS443:3:60:902:724#0/1  
`bbaZ^a`baab\_aba\_b`^`ZaZba^^S\_a\_\_\_^]Xa^a  
@HWI-EAS443:3:60:958:1326#0/1  
AGACAAATGGCTACTACCACCAATCCACTAATCAGGCATG  
+HWI-EAS443:3:60:958:1326#0/1  
a\_a\_abT\_¥¥``aU\_aU\_aYaaWNZ^[Y\_^\_X[]\_V^^]  
@HWI-EAS443:3:61:1472:1203#0/1  
AATCCACTAATCAGGCATGAAAACAGAATGGTGCTGGCTA  
+HWI-EAS443:3:61:1472:1203#0/1  
\_^\_a]abbaaaaa`\_bab`X¥¥aaba`\_\_[]^`VYVY  
@HWI-EAS443:3:61:230:692#0/1  
ATCGAGTGAACAGGCAGCAGAGGCCATGGAGGTTGCTAAT  
+HWI-EAS443:3:61:230:692#0/1  
aaabab¥`Xa`V\_`]aa]0¥YY\_^\_TVBBBBBBBBBBBB  
@HWI-EAS443:3:61:771:928#0/1  
AAAACAGAATGGTGCTGGCTAGCACTACGGCAAAGGCTAT  
+HWI-EAS443:3:61:771:928#0/1  
ab\_\_`a[ababa]aab¥¥a^Xaaa\_^V]`\_\_^¥\_\_¥^WW  
@HWI-EAS443:3:61:783:1568#0/1  
AGCCATTTGTCTGTGAGACCGATGCTGTGAATCAGCAATC  
+HWI-EAS443:3:61:783:1568#0/1  
]Y]a`^Z]\_``T\_XV\_Z]``¥JZ\_\_^\_¥`a`¥OWQY[[VJ  
@HWI-EAS443:3:61:78:1029#0/1  
CTGCCTAGTCTGATTAGCAACCTCCATGGCCTCTGCTGCC  
+HWI-EAS443:3:61:78:1029#0/1  
``b`b]bbabbbabbbb\_Zabbab\_Q\_\_bbaa`a`^R¥\_\_  
@HWI-EAS443:3:61:888:1761#0/1  
AGCCATTTGTCTGTGAGACCGATGCTGTGAATCAGCAATC  
+HWI-EAS443:3:61:888:1761#0/1  
¥\_\_Z]b``S¥¥Q\_R]OYSa\_WR`U¥a`TU\_RWS\_X]P[GR  
@HWI-EAS443:3:61:94:1142#0/1  
ATCTGCCTAGTCTGATTAGCAACCTCCATGGCCTCTGCTG  
+HWI-EAS443:3:61:94:1142#0/1  
]Q\_VWZVTT\_U]]¥`^\_a`\_\_a`^`^`[``XVZXYTZ¥V  
@HWI-EAS443:3:62:108:371#0/1  
GCTAGCCAGCACCATTCTGTTTTTCATGCCTGATTAGTGGA  
+HWI-EAS443:3:62:108:371#0/1  
a`¥\_]\_`Z]^W^]]WZ\_^¥]Q\_\_a`]Y^[[`T[YYW¥VQ  
@HWI-EAS443:3:62:1096:1430#0/1  
GTGCTGGCTAGCACTACGGCAAAGGCTATGGAACAGATGG  
+HWI-EAS443:3:62:1096:1430#0/1  
aaaab`aba`[`a]abaaaaabaa\_^\_a`aV\_^``\_YY]  
@HWI-EAS443:3:62:1104:93#0/1  
GACAAATGGCTACTACCACCAATCCACTAATCAGGCATGA  
+HWI-EAS443:3:62:1104:93#0/1  
ababb¥a\_^aaaLaaI\_^\_\_^X¥¥\_¥[]\_YSZ^TDT``\_  
@HWI-EAS443:3:62:1349:218#0/1  
ACCATCTGCCTAGTCTGATTAGCAACCTCCATGGCCTCTG

+HWI-EAS443:3:62:1349:218#0/1  
a^a[\_Y¥TROZQPX\_T`[^a]]`aRPXYX¥]YTZU¥¥[a  
@HWI-EAS443:3:62:1433:604#0/1  
CTCACAGACAAATGGCTACTACCACCAATCCACTAATCAG  
+HWI-EAS443:3:62:1433:604#0/1  
RX`JWW¥\_\_`b\_\_bb`b``^W\_a^^`^b\_¥`MW^^]]XZ  
@HWI-EAS443:3:62:574:1800#0/1  
AGACAAATGGCTACTACCACCAATCCACTAATCAGGCATG  
+HWI-EAS443:3:62:574:1800#0/1  
\_`X¥aaWTVa\_\_LDVZ`¥`^\_YS¥]ODMZUYVNNLSLL  
@HWI-EAS443:3:63:1626:203#0/1  
GTGCTGGCTAGCACTACGGCAAAGGCTATGGAACAGATGG  
+HWI-EAS443:3:63:1626:203#0/1  
aaa\_abbaab\_]\_`\_a`KXaXaa¥`Z\_`¥MaS`ZXY]^  
@HWI-EAS443:3:63:484:181#0/1  
GTGGTAGTAGCCATTTGTCTGTGAGACCGATGCTGTGAAT  
+HWI-EAS443:3:63:484:181#0/1  
aabb^ab]^]Xa`\_aa¥XURVRTTTZ\_^XBBBBBBBBBBB  
@HWI-EAS443:3:63:523:231#0/1  
GTCTGATTAGCAACCTCCATGGCCTCTGCTGCCTGTTTAC  
+HWI-EAS443:3:63:523:231#0/1  
a`aabaa`aaaaa^]aa]aa\_^a\_\_`\_a\_Z[[[Y¥[RTXW  
@HWI-EAS443:3:64:1287:33#0/1  
CTGCCTAGTCTGATTAGCAACCTCCATGGCCTCTGCTGCC  
+HWI-EAS443:3:64:1287:33#0/1  
ab¥babaZX`bbabbaaba`\_Y\_]`a^a`]Y^Y]aS\_Z¥P  
@HWI-EAS443:3:64:1424:319#0/1  
GGTAGTAGCCATTTGTCTGTGAGACCGATGCTGTGAATCA  
+HWI-EAS443:3:64:1424:319#0/1  
a\_[a\_`a`a`aaa]^`a`^Z[`]`\_Y\_]`^aX`Y^YZ  
@HWI-EAS443:3:64:1597:1287#0/1  
TTTGTCTGTGAGACCGATGCTGTGAATCAGCAATCTGTTC  
+HWI-EAS443:3:64:1597:1287#0/1  
aa`a\_a``I```VSMTPYQTXRTU[WOBBSBBBBBBBBBBB  
@HWI-EAS443:3:64:182:361#0/1  
GATCGAGTGAACAGGCAGCAGAGGCCATGGAGGTTGCTAA  
+HWI-EAS443:3:64:182:361#0/1  
aa`aaaa\_aaa``][`^`S¥¥V0^UYQ^BBBBBBBBBBBBB  
@HWI-EAS443:3:64:710:286#0/1  
TAGCCATTTGTCTGTGAGACCGATGCTGTGAATCAGCAAT  
+HWI-EAS443:3:64:710:286#0/1  
aa]^`babbaa`abb`babbaaba`aaaa`aaaaa`\_aa`  
@HWI-EAS443:3:64:910:1194#0/1  
CCTGATTAGTGGATTGGTGGTAGTAGCCATTTGTCTGTGA  
+HWI-EAS443:3:64:910:1194#0/1  
abb`bbbababbaab`aaa`S¥SHWMF]PW\_aBBBBBBBBB  
@HWI-EAS443:3:65:1186:522#0/1  
GATTGCTGATTCACAGCATCGGTCTCACAGACAAATGGCT  
+HWI-EAS443:3:65:1186:522#0/1  
`a]]\_YO^EPZP\_P¥aa[V^]`YQJV^UTJW^BBBBBBBBB

@HWI-EAS443:3:65:1404:190#0/1  
TGAAAACAGAATGGTGCTGGCTAGCACTACGGCAAAGGCT  
+HWI-EAS443:3:65:1404:190#0/1  
`a`aa]`aa`aaXKZ`a`W¥\_`^]\_\_\_\_W^]¥WWW`WW¥  
@HWI-EAS443:3:65:311:1749#0/1  
TAGCCATTTGTCTGTGAGACCGATGCTGTGAATCAGCAAT  
+HWI-EAS443:3:65:311:1749#0/1  
abaa`Wabbabbaaaababba\_aaaba]Tabbaaaaaaaaa  
@HWI-EAS443:3:65:509:1552#0/1  
ATCCACTAATCAGGCATGAAAACAGAATGGTGCTGGCTAG  
+HWI-EAS443:3:65:509:1552#0/1  
aaa`]^^aa`a``]a`\_aaZ¥Z^a\_aX^\_\_Y^]¥^\_UZQ  
@HWI-EAS443:3:65:802:579#0/1  
CAGAATGGTGCTGGCTAGCACTACGGCAAAGGCTATGGAA  
+HWI-EAS443:3:65:802:579#0/1  
aababa^b[``\_baba^b`^`]``a`a][`[a^][X[`T]  
@HWI-EAS443:3:66:119:1676#0/1  
CAGACAAATGGCTACTACCACCAATCCACTAATCAGGCAT  
+HWI-EAS443:3:66:119:1676#0/1  
aa\_a`aaa\_Y\_a`[S¥a[\_L]XNZY`^\_YRXRYTVRZ]  
@HWI-EAS443:3:66:1346:1512#0/1  
GTAGTAGCCATTTGTCTGTGAGACCGATGCTGTGAATCAG  
+HWI-EAS443:3:66:1346:1512#0/1  
`Ya]V\_aaaaaa`W]aaZ][]¥¥¥QQ¥Z¥X[`YY]V[`  
@HWI-EAS443:3:66:1398:206#0/1  
CAGACAAATGGCTACTACCACCAATCCACTAATCAGGCAT  
+HWI-EAS443:3:66:1398:206#0/1  
abaS`X¥^a¥aaaZO¥HL¥W¥^a^¥X¥a^¥]\_X\_Z¥KX[  
@HWI-EAS443:3:66:1453:1157#0/1  
CTGTTCCATAGCCTTTGCCGTAGTGCTAGCCAGCACCATT  
+HWI-EAS443:3:66:1453:1157#0/1  
abbababbababababb`aa\_ba\_baaab`\_`a¥a¥\_\_a`  
@HWI-EAS443:3:66:426:836#0/1  
GATTGGTGGTAGTAGCCATTTGTCTGTGAGACCGATGCTG  
+HWI-EAS443:3:66:426:836#0/1  
`abb`[aa]LUTSbbLa`^Ua\_aa[]^\_a^aH\_V^QGURa  
@HWI-EAS443:3:66:880:764#0/1  
ACAGAATGGTGCTGGCTAGCACTACGGCAAAGGCTATGGA  
+HWI-EAS443:3:66:880:764#0/1  
a\_]¥abaaaZ]a`a`a]W][Z¥a\_\_\_\_\_^[`¥^]\_^Z^[`U  
@HWI-EAS443:3:67:1075:999#0/1  
GTGGTAGTAGCCATTTGTCTGTGAGACCGATGCTGTGAAT  
+HWI-EAS443:3:67:1075:999#0/1  
a\_a`Vb`WaaaaU`aaQVXXQL]XZ\_Z\_VNSXYVXLYS[B  
@HWI-EAS443:3:67:1317:588#0/1  
AGCAACCTCCATGGCCTCTGCTGCCTGTTCACTCGATCCA  
+HWI-EAS443:3:67:1317:588#0/1  
^]`^aba`baaa\_\_]\_]b``WZ\_[`a]aaa\_aaaY\_`aZa[  
@HWI-EAS443:3:67:1496:1261#0/1  
CAATCCACTAATCAGGCATGAAAACAGAATGGTGCTGGCT

+HWI-EAS443:3:67:1496:1261#0/1  
a`aaZ^aaa]]`a\_UY^aa`\_`aaaaa`aaaXZ`¥a`]]^  
@HWI-EAS443:3:68:1234:1290#0/1  
ACAGAATGGTGCTGGCTAGCACTACGGCAAAGGCTATGGA  
+HWI-EAS443:3:68:1234:1290#0/1  
]\_]\_UI\_WX[^¥\_\_^\_T]\_XZ\_aTZ`\_`[^`¥V¥]WX`J  
@HWI-EAS443:3:68:1294:821#0/1  
GATTGGTGGTAGTAGCCATTTGTCTGTGAGACCGATGCTG  
+HWI-EAS443:3:68:1294:821#0/1  
aaa`a`^a`Pa[Z\_X\_\_^[`a]]X¥TNUJN^T[]SSXVY^  
@HWI-EAS443:3:68:1549:306#0/1  
GAACAGATTGCTGATTCACAGCATCGGTCTCACAGACAAA  
+HWI-EAS443:3:68:1549:306#0/1  
`a`\_`[¥`\_X[a^Ya\_S^]`¥M`\_¥`^WZ^Y]Z\_]0\_]\_  
@HWI-EAS443:3:68:1605:2000#0/1  
CTCACAGACAAATGGCTACTACCACCAATCCACTAATCAG  
+HWI-EAS443:3:68:1605:2000#0/1  
aa][\_a`abaab[T`aa`UZZ`^^aY\_[R]\_YWP]PU`¥  
@HWI-EAS443:3:68:1724:304#0/1  
AGCCATTTGTCTGTGAGACCGATGCTGTGAATCAGCAATC  
+HWI-EAS443:3:68:1724:304#0/1  
aV`\_`a`a]^\_aa`a¥\_]^Za\_a\_[`^^Za\_^\_aR]YaN  
@HWI-EAS443:3:68:173:71#0/1  
CAGCATCGGTCTCACAGACAAATGGCTACTACCACCAATC  
+HWI-EAS443:3:68:173:71#0/1  
a\_aaaaaabZaaaaY\_a`^\_`\_\_\_\_\_¥NZ\_T^RQ]¥[GS  
@HWI-EAS443:3:68:319:1367#0/1  
ACAGAATGGTGCTGGCTAGCACTACGGCAAAGGCTATGGA  
+HWI-EAS443:3:68:319:1367#0/1  
abbaaa]¥\_Z\_a¥ZZa]` `[a¥[U\_¥XU]^¥XZ]Q¥SOTR  
@HWI-EAS443:3:68:596:901#0/1  
AGTAGCCATTTGTCTGTGAGACCGATGCTGTGAATCAGCA  
+HWI-EAS443:3:68:596:901#0/1  
a`Sa\_a`a\_a\_\_X\_] [U]X^^`^YU]]]]UU]^]]¥[X\_  
@HWI-EAS443:3:68:703:1434#0/1  
AGCCATTTGTCTGTGAGACCGATGCTGTGAATCAGCAATC  
+HWI-EAS443:3:68:703:1434#0/1  
aaaa`aaa\_a`\_]`\_`a^^`\_\_a\_[`a`\_`\_\_^^^\_  
@HWI-EAS443:3:68:704:1911#0/1  
AGCCTTTGCCGTAGTGCTAGCCAGCACCATTTCTGTTTTCA  
+HWI-EAS443:3:68:704:1911#0/1  
aXab`\_`aaba¥Mba¥ab\_a^Xa]Sa\_\_a`\_]a^\_H¥^^`\_  
@HWI-EAS443:3:68:896:401#0/1  
GTGGATTGGTGGTAGTAGCCATTTGTCTGTGAGACCGATG  
+HWI-EAS443:3:68:896:401#0/1  
a`aa`aaaaWa\_RYBBBBBBBBBBBBBBBBBBBBBBBBBBB  
@HWI-EAS443:3:68:918:1656#0/1  
TGAACAGATTGCTGATTCACAGCATCGGTCTCACAGACAA  
+HWI-EAS443:3:68:918:1656#0/1  
[```\_¥¥b\_]¥ab`\_`W`\_`\_R¥`aa`^I`^`^\_RZM¥]^U



+HWI-EAS443:3:6:517:347#0/1  
\_a\_b\_[^b\_Wbb\_^PVba`]Y[XaaH[aa`Wa\_YHa`\_SB  
@HWI-EAS443:3:70:149:420#0/1  
GAACAGATTGCTGATTCACAGCATCGGTCTCACAGACAAA  
+HWI-EAS443:3:70:149:420#0/1  
a\_\_`aa`aabbaaaaa\_a\_aaaa`\_a`¥`\_aW¥\_\_\_\_`]Q\_  
@HWI-EAS443:3:70:608:1593#0/1  
TAGCCATTTGTCTGTGAGACCGATGCTGTGAATCAGCAAT  
+HWI-EAS443:3:70:608:1593#0/1  
aaabbabaa`aa]a[aa`aaaa^aaa`a^`aa`a`aaaa\_  
@HWI-EAS443:3:71:1493:624#0/1  
CAGACAAATGGCTACTACCACCAATCCACTAATCAGGCAT  
+HWI-EAS443:3:71:1493:624#0/1  
`bbb`babaabba\_b`^`a\_\_aaab\_a`^\_a¥aYa`\_G[W  
@HWI-EAS443:3:71:485:836#0/1  
GGTGGTAGTAGCCATTTGTCTGTGAGACCGATGCTGTGAA  
+HWI-EAS443:3:71:485:836#0/1  
]¥Sbbaa`TYWZ`a^a`Z]a\_UZWV¥`[^[SV]]]¥L`^^`  
@HWI-EAS443:3:72:175:910#0/1  
AGTAGCCATTTGTCTGTGAGACCGATGCTGTGAATCAGCA  
+HWI-EAS443:3:72:175:910#0/1  
a`Va\_a]`\_^`\_Y\_^\_V^Z^^\_\_YNSWZ]\_U^UUUV]VYV]  
@HWI-EAS443:3:72:993:1607#0/1  
GAGTGAACAGGCAGCAGAGGCCATGGAGGTTGCTAATCAG  
+HWI-EAS443:3:72:993:1607#0/1  
aba`abbbaaaaba^a\_Z`\_X^`\_`]U]`H[PRV¥`VZ[B  
@HWI-EAS443:3:73:1248:736#0/1  
ATTGCTGATTCACAGCATCGGTCTCACAGACAAATGGCTA  
+HWI-EAS443:3:73:1248:736#0/1  
`aa`abba`\_\_a^`\_\_`a^aa][aa^P]\_`X`a`]X^P^Z  
@HWI-EAS443:3:73:1542:1332#0/1  
CATCTGCCTAGTCTGATTAGCAACCTCCATGGCCTCTGCT  
+HWI-EAS443:3:73:1542:1332#0/1  
]aba]]aab`bVab\_aaZ^^a`\_a^a\_STaH¥\_XaJ]aN[  
@HWI-EAS443:3:73:1597:1727#0/1  
AAAACAGAATGGTGCTGGCTAGCACTACGGCAAAGGCTAT  
+HWI-EAS443:3:73:1597:1727#0/1  
a]aaaaaaaa`a\_aa^`[^`TV][P`UZ^`Y]VV[ZZ[[  
@HWI-EAS443:3:73:1607:829#0/1  
TTTGTCTGTGAGACCGATGCTGTGAATCAGCAATCTGTTC  
+HWI-EAS443:3:73:1607:829#0/1  
aaa\_\_b\_\_Q¥a\_^][a^\_\_Y`\_`\_`S]^`\_]X`¥X¥V  
@HWI-EAS443:3:73:34:429#0/1  
GCCTAGTCTGATTAGCAACCTCCATGGCCTCTGCTGCCTG  
+HWI-EAS443:3:73:34:429#0/1  
^a]`]RT¥bZGWN[`\_\_¥`\_]`^`VWXVZMOW¥NUOR]TZV  
@HWI-EAS443:3:74:1062:1824#0/1  
GGTGGTAGTAGCCATTTGTCTGTGAGACCGATGCTGTGAA  
+HWI-EAS443:3:74:1062:1824#0/1  
\_YS]]S`TKY`[\_][`a^S[Y\_PTZX¥X\_PSWNPN]RMY`



@HWI-EAS443:3:74:1692:1785#0/1  
TCTGCCTAGTCTGATTAGCAACCTCCATGGCCTCTGCTGC  
+HWI-EAS443:3:74:1692:1785#0/1  
Q¥ba^b]]][aba¥T^¥Zb\_R]\_RZba^`^`ZXZ\_ZY  
@HWI-EAS443:3:74:224:1401#0/1  
CTTTGCCGTAGTGCTAGCCAGCACCATTCTGTTTTTCATGC  
+HWI-EAS443:3:74:224:1401#0/1  
aaaaaa^U`]]\_a\_a\_^`Z^\_W¥]¥Z\_a\_\_[]^a`]]^  
@HWI-EAS443:3:74:300:252#0/1  
CATCTGCCTAGTCTGATTAGCAACCTCCATGGCCTCTGCT  
+HWI-EAS443:3:74:300:252#0/1  
abbbbbbbbaaaabbbbabaabaabaabaa`a`aa¥`  
@HWI-EAS443:3:74:337:1710#0/1  
GTAGCCATTTGTCTGTGAGACCGATGCTGTGAATCAGCAA  
+HWI-EAS443:3:74:337:1710#0/1  
\_\_`b`¥`b\_X[`aaR]^aaa^]a`aaZ^^aaa]abaaa]  
@HWI-EAS443:3:75:1536:1565#0/1  
GCCTAGTCTGATTAGCAACCTCCATGGCCTCTGCTGCCTG  
+HWI-EAS443:3:75:1536:1565#0/1  
aaab`a^aba`^aaaaa`^^aa`aaZa]`aY]aUT¥`  
@HWI-EAS443:3:75:1652:157#0/1  
AAACAGAATGGTGCTGGCTAGCACTACGGCAAAGGCTATG  
+HWI-EAS443:3:75:1652:157#0/1  
J\_bbZb`ab`\_0\_baaba\_^¥T`IbaP^ba\_aa[¥DY]ZZ  
@HWI-EAS443:3:75:405:1351#0/1  
GTGGTAGTAGCCATTTGTCTGTGAGACCGATGCTGTGAAT  
+HWI-EAS443:3:75:405:1351#0/1  
a\_ba¥^`Z`Z\_aSa[a^\_\_`S]¥¥V\_Z\_\_[RPR]WVZ[^]  
@HWI-EAS443:3:75:597:1038#0/1  
TGAACAGATTGCTGATTCACAGCATCGGTCTCACAGACAA  
+HWI-EAS443:3:75:597:1038#0/1  
Ub¥¥`¥b¥Ub`\_¥baba¥Ua\_U]^b`bV]a`^aNZT`\_aY  
@HWI-EAS443:3:75:622:1169#0/1  
GCCTAGTCTGATTAGCAACCTCCATGGCCTCTGCTGCCTG  
+HWI-EAS443:3:75:622:1169#0/1  
abbb\_baabaa`abababbaabbbba`aaaaa`aa^aaa  
@HWI-EAS443:3:76:1099:228#0/1  
AAAACAGAATGGTGCTGGCTAGCACTACGGCAAAGGCTAT  
+HWI-EAS443:3:76:1099:228#0/1  
abab^ba\_bab]Vb\_aab``aa]a[\_\_W\_`VZ\_\_`[J[]Z  
@HWI-EAS443:3:76:1301:588#0/1  
TGAAAACAGAATGGTGCTGGCTAGCACTACGGCAAAGGCT  
+HWI-EAS443:3:76:1301:588#0/1  
aa`U]\_]¥V[`HSPX[]V¥`\_`^\_YZ`XTZZXNT\_`]NQ  
@HWI-EAS443:3:76:244:1984#0/1  
CAGAATGGTGCTGGCTAGCACTACGGCAAAGGCTATGGAA  
+HWI-EAS443:3:76:244:1984#0/1  
]]\_baaaaZa^`aab\_^^^`a`a`\_\_QZ\_^Y^¥SYZ\_WX  
@HWI-EAS443:3:76:81:1540#0/1  
AGTAGCCATTTGTCTGTGAGACCGATGCTGTGAATCAGCA

+HWI-EAS443:3:76:81:1540#0/1  
\_Y¥a`aaa`^^a^`]^a^aa\_^¥¥]^`^]W[X[YWYV[W  
@HWI-EAS443:3:76:990:541#0/1  
TGGTAGTAGCCATTTGTCTGTGAGACCGATGCTGTGAATC  
+HWI-EAS443:3:76:990:541#0/1  
aba`\_a\_aa\_\_`aa\_a^`\_a^a^`\_[\_`^`\_^`^a\_\_]V  
@HWI-EAS443:3:77:1235:439#0/1  
GCCTAGTCTGATTAGCAACCTCCATGGCCTCTGCTGCCTG  
+HWI-EAS443:3:77:1235:439#0/1  
aaaa^aY`a\_S`VZ]a`\_Z\_a`\_[^[\N¥Y¥aZ\_\_VNV\_  
@HWI-EAS443:3:77:319:1967#0/1  
GACAAATGGCTACTACCACCAATCCACTAATCAGGCATGA  
+HWI-EAS443:3:77:319:1967#0/1  
[^aabba`aab^¥b\_baaa`a`^`\_a]b¥bb¥\_aaU`  
@HWI-EAS443:3:77:356:1125#0/1  
GCCTAGTCTGATTAGCAACCTCCATGGCCTCTGCTGCCTG  
+HWI-EAS443:3:77:356:1125#0/1  
`bbb\_aWbbbaaaabbaaaabaaa```]\_]aa\_\_a`\_  
@HWI-EAS443:3:77:46:1957#0/1  
AGCCATTTGTCTGTGAGACCGATGCTGTGAATCAGCAATC  
+HWI-EAS443:3:77:46:1957#0/1  
a^aa\_\_\_\_^`]\_\_\_\_YV\_^`a\_¥[]\_]Y^\_]\_^]\_\_^X]  
@HWI-EAS443:3:78:391:981#0/1  
TGGTAGTAGCCATTTGTCTGTGAGACCGATGCTGTGAATC  
+HWI-EAS443:3:78:391:981#0/1  
a¥a^baTbaaa`\_aa¥Z\_a]`\_``a\_a`\_[^^aZ`\_`U\_  
@HWI-EAS443:3:78:53:936#0/1  
CAGAATGGTGTGGCTAGCACTACGGCAAAGGCTATGGAA  
+HWI-EAS443:3:78:53:936#0/1  
`[RTZW]U`Q]XVXZWOQVN]YV\_]`^¥Y\_VZQB BBBB  
@HWI-EAS443:3:78:879:820#0/1  
CTAGTCTGATTAGCAACCTCCATGGCCTCTGCTGCCTGTT  
+HWI-EAS443:3:78:879:820#0/1  
aaa]Y¥`baaab]\_aaa\_aa¥`ZPSYa`]¥\_^`VW^W\_S¥  
@HWI-EAS443:3:79:1336:1677#0/1  
AGTAGCCATTTGTCTGTGAGACCGATGCTGTGAATCAGCA  
+HWI-EAS443:3:79:1336:1677#0/1  
Va\_\_GV\_a^ba`W^S^Y]\_\_^ZT¥Z`\_UXZTZ]PZN[PWZ  
@HWI-EAS443:3:79:1550:813#0/1  
TGCCTAGTCTGATTAGCAACCTCCATGGCCTCTGCTGCCT  
+HWI-EAS443:3:79:1550:813#0/1  
VRX[VQZW^\_b`\_`[¥a\_\_^`\_^]`b`[YN^)`SZa[¥a  
@HWI-EAS443:3:79:695:556#0/1  
CAGGCATGAAAACAGAATGGTGTGGCTAGCACTACGGCA  
+HWI-EAS443:3:79:695:556#0/1  
aabZbabbUbaaabaaaa`XVa\_aaaa\_a\_aa\_¥Z\_¥T`a  
@HWI-EAS443:3:80:616:909#0/1  
AACAGAATGGTGTGGCTAGCACTACGGCAAAGGCTATGG  
+HWI-EAS443:3:80:616:909#0/1  
aaaba\_[a]\_R\_\_aaa`a]``[``¥P^aa`W`\_\_[\_YQ

@HWI-EAS443:3:80:671:1784#0/1  
GTCTGATTAGCAACCTCCATGGCCTCTGCTGCCTGTTTAC  
+HWI-EAS443:3:80:671:1784#0/1  
`aba]^aX[`ab``]b^a]VSYa^Z\_Y¥``]^\_Y^``]  
@HWI-EAS443:3:80:759:521#0/1  
GACAAATGGCTACTACCACCAATCCACTAATCAGGCATGA  
+HWI-EAS443:3:80:759:521#0/1  
aaa^^`a`aa\_X`\_]`^][[^`Z`^\_YVW]a¥^`^Z  
@HWI-EAS443:3:80:998:2039#0/1  
GTGAACAGGCAGCAGAGGCCATGGAGGTTGCTAATCAGAC  
+HWI-EAS443:3:80:998:2039#0/1  
aSaX]]SRL\_`XZBBBBBBBBBBBBBBBBBBBBBBBBBB  
@HWI-EAS443:3:81:608:1001#0/1  
GAACAGATTGCTGATTACAGCATCGGTCTCACAGACAAA  
+HWI-EAS443:3:81:608:1001#0/1  
aVb\_b`Vaabaabaaaaba[ab`ba`Xa\_aa^`aa`ba  
@HWI-EAS443:3:81:873:278#0/1  
GTGCTGGCTAGCACTACGGCAAAGGCTATGGAACAGATGG  
+HWI-EAS443:3:81:873:278#0/1  
a`V```a`¥`a^TR`XPV]Z^X^\_YKTW¥^^S[UO¥UNYW  
@HWI-EAS443:3:81:966:1873#0/1  
GCTAGCCAGCACCATTCTGTTTTTCATGCCTGATTAGTGGA  
+HWI-EAS443:3:81:966:1873#0/1  
abaa]aaaaaaaa`aa]aTa`aa`aaa`a]a]\_`Xa][  
@HWI-EAS443:3:82:159:825#0/1  
TGGTAGTAGCCATTTGTCTGTGAGACCGATGCTGTGAATC  
+HWI-EAS443:3:82:159:825#0/1  
\_XRYb\_Y``]aU``aWL]¥^I^\_aaV```V`\_W]Z][]T¥  
@HWI-EAS443:3:82:1678:1499#0/1  
AGCCAGCACCATTCTGTTTTTCATGCCTGATTAGTGGATTG  
+HWI-EAS443:3:82:1678:1499#0/1  
`babaaababbbabb^bbb``ab`\_ba`bbbb\_bbaaab  
@HWI-EAS443:3:82:621:277#0/1  
GCCTGATTAGTGGATTGGTGGTAGTAGCCATTTGTCTGTG  
+HWI-EAS443:3:82:621:277#0/1  
aba```abaa^baaaaa¥a¥BBBBBBBBBBBBBBBBBB  
@HWI-EAS443:3:82:842:1596#0/1  
GATTCACAGCATCGGTCTCACAGACAAATGGCTACTACCA  
+HWI-EAS443:3:82:842:1596#0/1  
ab`\_`]ab[\_bb\_aa[bbab`bab`aaa`a`b`aQWa[aa  
@HWI-EAS443:3:82:95:1797#0/1  
GCCTAGTCTGATTAGCAACCTCCATGGCCTCTGCTGCCTG  
+HWI-EAS443:3:82:95:1797#0/1  
abbbbbabb`^abbaba`abbbbaaa^aaabaaaa\_aaaa  
@HWI-EAS443:3:82:985:347#0/1  
GCATCGGTCTCACAGACAAATGGCTACTACCACCAATCCA  
+HWI-EAS443:3:82:985:347#0/1  
aaaaaab]aaa\_\_b`Zaa`^``]\_V^^G\_XU^R\_UQ\_]`  
@HWI-EAS443:3:83:1355:167#0/1  
CATTTGTCTGTGAGACCGATGCTGTGAATCAGCAATCTGT

+HWI-EAS443:3:83:1355:167#0/1  
\_abb\_[\_XS`¥^`aWWa`SSSa`L`]]\_]\_¥MRRPP]]P  
@HWI-EAS443:3:84:100:1044#0/1  
CTAGCCAGCACCATTCTGTTTTTCATGCCTGATTAGTGGAT  
+HWI-EAS443:3:84:100:1044#0/1  
aa¥ab^RT^a`aWY^`[¥`[^X]\_[V]^[[^YU[V^\_  
@HWI-EAS443:3:84:731:1651#0/1  
AATGGTGCTGGCTAGCACTACGGCAAAGGCTATGGAACAG  
+HWI-EAS443:3:84:731:1651#0/1  
a\_WX\_[aRGQ]]][aY^WP^\_TTXKZ[Q]UX^^Z\_RT[]^¥  
@HWI-EAS443:3:84:846:1102#0/1  
CAGACAAATGGCTACTACCACCAATCCACTAATCAGGCAT  
+HWI-EAS443:3:84:846:1102#0/1  
aaaab\_babaaaab`^\_S`a`^^`[a`a\_a``^SY`^^^^  
@HWI-EAS443:3:85:1111:1299#0/1  
TAGCCATTTGTCTGTGAGACCGATGCTGTGAATCAGCAAT  
+HWI-EAS443:3:85:1111:1299#0/1  
abbbaabbaaaa`b`aaabbabaa`aaaabaaaaab\_a``  
@HWI-EAS443:3:85:182:1914#0/1  
GGATTGGTGGTAGTAGCCATTTGTCTGTGAGACCGATGCT  
+HWI-EAS443:3:85:182:1914#0/1  
`bba`^\_\_aa^UV]Q\_^UT¥\_H[Z\_ZNSMNTP]BBBBBB  
@HWI-EAS443:3:85:297:102#0/1  
GTGCTGGCTAGCACTACGGCAAAGGCTATGGAACAGATGG  
+HWI-EAS443:3:85:297:102#0/1  
aababbbbaaaa\_aZZ`Qa``\_\_Qa`V^W\_[\_¥¥S^XST`\_  
@HWI-EAS443:3:85:911:73#0/1  
CTGTTCCATAGCCTTTGCCGTAGTGCTAGCCAGCACCATT  
+HWI-EAS443:3:85:911:73#0/1  
`bbabbbbbbbaabaabaabXa[¥ba`\_aa`\_aa^¥\_a`  
@HWI-EAS443:3:86:1380:808#0/1  
GTGGTAGTAGCCATTTGTCTGTGAGACCGATGCTGTGAAT  
+HWI-EAS443:3:86:1380:808#0/1  
abababb]`¥a¥abbbb^`]aZWV^Vaaaa¥U\_a]\_ZaZ  
@HWI-EAS443:3:86:159:1522#0/1  
AACAGAATGGTGCTGGCTAGCACTACGGCAAAGGCTATGG  
+HWI-EAS443:3:86:159:1522#0/1  
¥`aaaaa\_[^Z^]¥¥a¥\_[YVYa\_][]¥``\_[V[ZVTR  
@HWI-EAS443:3:86:1653:570#0/1  
ATTTGTCTGTGAGACCGATGCTGTGAATCAGCAATCTGTT  
+HWI-EAS443:3:86:1653:570#0/1  
\_b]baab`babXW`a\_\_a[SX``Yaab`^YNbaa\_\_\_`Z  
@HWI-EAS443:3:86:447:225#0/1  
CAAATGGCTACTACCACCAATCCACTAATCAGGCATGAAA  
+HWI-EAS443:3:86:447:225#0/1  
a[]aaabbabTQ^¥]]`a`\_`\_a]^Z`\_XU[\_S^\_W[^  
@HWI-EAS443:3:87:1433:727#0/1  
AGCCATTTGTCTGTGAGACCGATGCTGTGAATCAGCAATC  
+HWI-EAS443:3:87:1433:727#0/1  
a¥baaUb¥`]]`R\_`]ba^S`^`\_aa^ba`\_]ab[aaaY

@HWI-EAS443:3:87:532:1221#0/1  
CAGGCATGAAAACAGAATGGTGCTGGCTAGCACTACGGCA  
+HWI-EAS443:3:87:532:1221#0/1  
a\_`]¥aa`[ababaaab\_a[Z\_aa\_`a`aR`Za[[\_S]L]  
@HWI-EAS443:3:88:1141:1398#0/1  
AGCAACCTCCATGGCCTCTGCTGCCTGTTCACTCGATCCA  
+HWI-EAS443:3:88:1141:1398#0/1  
X[T]b`a`a`^a`Z]]`]]^`[\_]\_Z\_\_X]aa\_]VV[  
@HWI-EAS443:3:88:1678:1446#0/1  
AGCCTTTGCCGTAGTGCTAGCCAGCACCATTCTGTTTTCA  
+HWI-EAS443:3:88:1678:1446#0/1  
aa`ababbaab`abSaa`b`a`aa`aPZ^ba]ab\_aba]`  
@HWI-EAS443:3:88:59:1683#0/1  
TGGTAGTAGCCATTTGTCTGTGAGACCGATGCTGTGAATC  
+HWI-EAS443:3:88:59:1683#0/1  
YY¥R\_[Q\_U\_ZZX]]¥`a\_\_V\_W¥Y`VP`\_\_`¥R]]][JU  
@HWI-EAS443:3:88:648:124#0/1  
AGCCATTTGTCTGTGAGACCGATGCTGTGAATCAGCAATC  
+HWI-EAS443:3:88:648:124#0/1  
abaabbbabaaba\_a`a`aaaaa\_aa\_a`\_a]`V\_a\_\_  
@HWI-EAS443:3:88:728:209#0/1  
GCCTAGTCTGATTAGCAACCTCCATGGCCTCTGCTGCCTG  
+HWI-EAS443:3:88:728:209#0/1  
X^`^bbb\_bbbb\_```ba\_]`aaa^`]^aab````^`ab  
@HWI-EAS443:3:89:1167:1348#0/1  
GCCTGATTAGTGGATTGGTGGTAGTAGCCATTTGTCTGTG  
+HWI-EAS443:3:89:1167:1348#0/1  
aaaabababa]aaaa`Ya[JYULLOVTGSXBBBBBBBB  
@HWI-EAS443:3:89:1307:803#0/1  
TGAAAACAGAATGGTGCTGGCTAGCACTACGGCAAAGGCT  
+HWI-EAS443:3:89:1307:803#0/1  
ab^]YW¥Xa`X^aXNa]`aa\_]^`V\_]VPR]X[Z`XNZ  
@HWI-EAS443:3:89:1647:896#0/1  
ATTGCTGATTCACAGCATCGGTCTCACAGACAAATGGCTA  
+HWI-EAS443:3:89:1647:896#0/1  
a]bb`RTH\_`aU¥Z]T^YT\_W0aU]]XU`[^`^b`WZU[`W  
@HWI-EAS443:3:89:330:1309#0/1  
GCCTAGTCTGATTAGCAACCTCCATGGCCTCTGCTGCCTG  
+HWI-EAS443:3:89:330:1309#0/1  
`W`a^aWb]^¥a[W````^X`[VP¥bZZ¥]OHXYU\_XOVY  
@HWI-EAS443:3:89:541:187#0/1  
GATTAGTGGATTGGTGGTAGTAGCCATTTGTCTGTGAGAC  
+HWI-EAS443:3:89:541:187#0/1  
aaaaabZaa[a`a\_]aZKUUBBBBBBBBBBBBBBBBBBBB  
@HWI-EAS443:3:89:742:1330#0/1  
ATTTGTCTGTGAGACCGATGCTGTGAATCAGCAATCTGTT  
+HWI-EAS443:3:89:742:1330#0/1  
`^Y`bbbaTWVW^bb\_]`]]`ab````^`a]¥`aa]T`]^  
@HWI-EAS443:3:89:854:512#0/1  
CAGGCAGCAGAGGCCATGGAGTTGCTAATCAGACTAGGC

+HWI-EAS443:3:89:854:512#0/1  
abaab`abbaa`aababaa`aa]`aYaa`aZa`a[¥\_V]R  
@HWI-EAS443:3:8:257:758#0/1  
AGTCTGATTAGCAACCTCCATGGCCTCTGCTGCCTGTTCA  
+HWI-EAS443:3:8:257:758#0/1  
aaaabbbb]b`aaaa`^aa\_a`\_`a]^[]V`a\_¥¥`  
@HWI-EAS443:3:8:377:1319#0/1  
CATAGCCTTTGCCGTAGTGCTAGCCAGCACCATTCTGTTT  
+HWI-EAS443:3:8:377:1319#0/1  
ababbb\_`abaabb\_baU\_UU\_a^aaa\_a[a^a\_``a¥`\_`  
@HWI-EAS443:3:8:859:492#0/1  
CTCACAGACAAATGGCTACTACCACCAATCCACTAATCAG  
+HWI-EAS443:3:8:859:492#0/1  
`U\_Z]`\_]\_UGY[\_U^¥UY\_ZSaYa^Ua¥X¥^[PW¥TF\_a  
@HWI-EAS443:3:90:1673:715#0/1  
TGGTAGTAGCCATTTGTCTGTGAGACCGATGCTGTGAATC  
+HWI-EAS443:3:90:1673:715#0/1  
abaRab`ba]R]aaba`¥]`Gaaa[GV\_\_\_^W`aYaaa\_R  
@HWI-EAS443:3:90:959:1425#0/1  
ATCTGCCTAGTCTGATTAGCAACCTCCATGGCCTCTGCTG  
+HWI-EAS443:3:90:959:1425#0/1  
a^F[[\_bbabUNaba`bUaabaa\_\_Y`^a\_\_`^^a¥`\_¥b  
@HWI-EAS443:3:91:1479:1550#0/1  
TAGCCTTTGCCGTAGTGCTAGCCAGCACCATTCTGTTTTTC  
+HWI-EAS443:3:91:1479:1550#0/1  
aVV`¥`ab`a[T`a`a`T`bb\_\_a`YaX0`bZXa]]Za]M  
@HWI-EAS443:3:91:1748:159#0/1  
AACAGAATGGTGTGGCTAGCACTACGGCAAAGGCTATGG  
+HWI-EAS443:3:91:1748:159#0/1  
aaaabaaaaaaa`aaaa`\_a\_Za`¥`aU\_\_\_a^P^\_QNZ  
@HWI-EAS443:3:91:1779:795#0/1  
AACAGAATGGTGTGGCTAGCACTACGGCAAAGGCTATGG  
+HWI-EAS443:3:91:1779:795#0/1  
aa[ZY\_baXa¥T`a^baa`XV``a^U]0[^`^`UR[\_YGK  
@HWI-EAS443:3:91:190:1088#0/1  
CATCTGCCTAGTCTGATTAGCAACCTCCATGGCCTCTGCT  
+HWI-EAS443:3:91:190:1088#0/1  
a]WQ]TWZZTX0a[b]WW`baa`\_W]00EVH]a^]I\_TY  
@HWI-EAS443:3:91:313:464#0/1  
AGCCATTTGTCTGTGAGACCGATGCTGTGAATCAGCAATC  
+HWI-EAS443:3:91:313:464#0/1  
`¥¥`¥aaba¥¥a\_¥a^b]aaa`aaa`Y`^a`^`[``Y  
@HWI-EAS443:3:91:692:346#0/1  
CATGAAAACAGAATGGTGTGGCTAGCACTACGGCAAAGG  
+HWI-EAS443:3:91:692:346#0/1  
¥b¥\_XL\_`^[\_¥baaZX[\_Wa¥U\_b\_^]\_¥WXaaYHW^aa^  
@HWI-EAS443:3:91:795:1832#0/1  
ACAGAATGGTGTGGCTAGCACTACGGCAAAGGCTATGGA  
+HWI-EAS443:3:91:795:1832#0/1  
abaa\_a`^^U]]`]Uaaa[0]^`¥IY]X`a^]ZO¥YWMVQ

@HWI-EAS443:3:92:1092:1104#0/1  
ACCATCTGCCTAGTCTGATTAGCAACCTCCATGGCCTCTG  
+HWI-EAS443:3:92:1092:1104#0/1  
`aa\_¥\_S`Xa`a]M¥aa\_\_\_^Z\_``QS`a[```\_¥[N\_^  
@HWI-EAS443:3:92:1337:592#0/1  
ATCGGTCTCACAGACAAATGGCTACTACCACCAATCCACT  
+HWI-EAS443:3:92:1337:592#0/1  
aa`aa]X`^``aa\_^`a`aY\_\_U\_VYVPP[]^UO\_OV  
@HWI-EAS443:3:92:438:1168#0/1  
CACAGCATCGGTCTCACAGACAAATGGCTACTACCACCAA  
+HWI-EAS443:3:92:438:1168#0/1  
a`[`a`a\_aa`W[aaa\_\_``\_a\_\_UZ\_Y\_\_IXZH]UVX]]  
@HWI-EAS443:3:92:73:533#0/1  
ACCATCTGCCTAGTCTGATTAGCAACCTCCATGGCCTCTG  
+HWI-EAS443:3:92:73:533#0/1  
TaT¥\_aa`aaaaaR]bZZ¥RVWVaaa]Qa00]V`OVY^^X  
@HWI-EAS443:3:93:1153:711#0/1  
GCCTAGTCTGATTAGCAACCTCCATGGCCTCTGCTGCCTG  
+HWI-EAS443:3:93:1153:711#0/1  
a^abab\_aaabaaaaab`^aaa```]^^`^\_a]^`UW\_a  
@HWI-EAS443:3:93:1267:801#0/1  
GTGGTAGTAGCCATTTGTCTGTGAGACCGATGCTGTGAAT  
+HWI-EAS443:3:93:1267:801#0/1  
a\_aa^aa^`]YY\_\_ab]WQVZY`TXUUR]LTUT[Y^QZ[V  
@HWI-EAS443:3:93:1474:577#0/1  
TAGCCATTTGTCTGTGAGACCGATGCTGTGAATCAGCAAT  
+HWI-EAS443:3:93:1474:577#0/1  
aaa`\_`a¥\_a^Ya\_^a\_XaPU`\_]¥X`¥[\_\_\_]\_R[^G00\_  
@HWI-EAS443:3:93:1650:627#0/1  
GCCTAGTCTGATTAGCAACCTCCATGGCCTCTGCTGCCTG  
+HWI-EAS443:3:93:1650:627#0/1  
a\_`baa`\_aaabab`Zbaaa`aaaXa`^\_V]a`UaW¥ZZ\_  
@HWI-EAS443:3:93:352:253#0/1  
AGACAAATGGCTACTACCACCAATCCACTAATCAGGCATG  
+HWI-EAS443:3:93:352:253#0/1  
aaa`aaaaaaa`a\_\_\_\_]\_`^`^a\_^`^[\_`VTU^^MX]\_  
@HWI-EAS443:3:93:740:648#0/1  
CACAGACAAATGGCTACTACCACCAATCCACTAATCAGGC  
+HWI-EAS443:3:93:740:648#0/1  
`aabaaaaa`aaaaaaa\_`¥`\_a`Ya\_Z¥a\_`\_^Z]W^\_  
@HWI-EAS443:3:93:939:1286#0/1  
CATCTGCCTAGTCTGATTAGCAACCTCCATGGCCTCTGCT  
+HWI-EAS443:3:93:939:1286#0/1  
aaaaaabaa`]\_\_bbaaa``aaa\_^a]T\_`\_¥\_X\_`^`U`  
@HWI-EAS443:3:94:1163:214#0/1  
CAGGCATGAAAACAGAATGGTGGCTAGCACTACGGCA  
+HWI-EAS443:3:94:1163:214#0/1  
abbbbbbbbabbaabaabaa\_b`aaaaaaa\_`\_a`]`^^  
@HWI-EAS443:3:94:601:967#0/1  
TGGTAGTAGCCATTTGTCTGTGAGACCGATGCTGTGAATC

+HWI-EAS443:3:94:601:967#0/1  
aba\_ba`a`\_`a`aaa\_a¥]\_a)`a\_\_Z\_\_Y`\_`V]\_`\_V  
@HWI-EAS443:3:94:963:2021#0/1  
GCAGAGGCCATGGAGTTGCTAATCAGACTAGGCAGATGG  
+HWI-EAS443:3:94:963:2021#0/1  
aaa`aaa`aa`a`\_`aa][Y[[`\_`][Z¥¥UZ^W[VY]]0^\_  
@HWI-EAS443:3:95:1139:138#0/1  
CTTTGCCGTAGTGCTAGCCAGCACCATTCTGTTTTTCATGC  
+HWI-EAS443:3:95:1139:138#0/1  
\_]baa^a\_`^¥\_`[a`^^b\_bbS]\_bb``\_Z\_bba\_bb\_  
@HWI-EAS443:3:95:1585:949#0/1  
TGGTAGTAGCCATTTGTCTGTGAGACCGATGCTGTGAATC  
+HWI-EAS443:3:95:1585:949#0/1  
abbaa``b`XX`bbaTaY\_^T0^a^[Pa^`b]ab`aaa`X  
@HWI-EAS443:3:96:1362:1414#0/1  
AAAACAGAATGGTGCTGGCTAGCACTACGGCAAAGGCTAT  
+HWI-EAS443:3:96:1362:1414#0/1  
\_`^`0`b`ab\_`\_`[^QJ[]a[`]aX`YDX¥MTaIQMM[BB  
@HWI-EAS443:3:96:316:1229#0/1  
TAGCCATTTGTCTGTGAGACCGATGCTGTGAATCAGCAAT  
+HWI-EAS443:3:96:316:1229#0/1  
\_`a\_``bbbb]aba¥]baaa\_a]\_S]`a¥`b`\_aa`a]]  
@HWI-EAS443:3:97:1256:617#0/1  
GATTGGTGGTAGTAGCCATTTGTCTGTGAGACCGATGCTG  
+HWI-EAS443:3:97:1256:617#0/1  
aaaa``[¥`U]]V[UTUWLV`SBBBBBBBBBBBBBBBBBB  
@HWI-EAS443:3:97:1319:400#0/1  
TCACAGACAAATGGCTACTACCACCAATCCACTAATCAGG  
+HWI-EAS443:3:97:1319:400#0/1  
[aY`ab`[`aVa``Ya^JUa^¥\_W]¥]`TR`0``^TY\_SZ  
@HWI-EAS443:3:97:417:1599#0/1  
TGGTAGTAGCCATTTGTCTGTGAGACCGATGCTGTGAATC  
+HWI-EAS443:3:97:417:1599#0/1  
`bbb`aababa]W^``S[ULSa`]ab¥Q\_a`a]`]WWa\_\_  
@HWI-EAS443:3:97:443:1089#0/1  
CATTTGTCTGTGAGACCGATGCTGTGAATCAGCAATCTGT  
+HWI-EAS443:3:97:443:1089#0/1  
aab\_aa`\_b[aabaaaba[aa]^a`a`aaa[¥F]\_\_\_\_\_`Z  
@HWI-EAS443:3:97:478:207#0/1  
TGAACAGGCAGCAGAGGCCATGGAGTTGCTAATCAGACT  
+HWI-EAS443:3:97:478:207#0/1  
`b`WR]Z`]ZVTZ`\_a`ZZUVV[R[BBBBBBBBBBBBBBBB  
@HWI-EAS443:3:97:956:741#0/1  
AACAGAATGGTGCTGGCTAGCACTACGGCAAAGGCTATGG  
+HWI-EAS443:3:97:956:741#0/1  
aa`a`abaaa^abaaaaaaa`Va`Za`W`a]aaNa`¥Ta  
@HWI-EAS443:3:98:1190:472#0/1  
CAGACAAATGGCTACTACCACCAATCCACTAATCAGGCAT  
+HWI-EAS443:3:98:1190:472#0/1  
abbbabb\_`bbbbVbb\_`b\_Vaaa``aJ``¥GZ`aa¥a`



@HWI-EAS443:3:98:154:1246#0/1  
AACAGAATGGTGGCTAGCACTACGGCAAAGGCTATGG  
+HWI-EAS443:3:98:154:1246#0/1  
]bbUb\_]¥abRb¥\_ab]Xbaaaa`^`ba[\_[VZ¥Xa^`XV  
@HWI-EAS443:3:98:388:832#0/1  
AGCCTTTGCCGTAGTGGCTAGCCAGCACCATTCTGTTTTCA  
+HWI-EAS443:3:98:388:832#0/1  
`S`¥Y[\_`aa¥TW^ba¥Y`a`aaaaYF¥YL^a[\_VZ\_^  
@HWI-EAS443:3:98:908:1761#0/1  
CAGAATGGTGGCTAGCACTACGGCAAAGGCTATGGAA  
+HWI-EAS443:3:98:908:1761#0/1  
a\_aaaa¥bYaVaaa^`aaaaZ^`^]Z`^]Z^`^^^\_¥^  
@HWI-EAS443:3:99:123:129#0/1  
GATTGCTGATTCACAGCATCGGTCTCACAGACAAATGGCT  
+HWI-EAS443:3:99:123:129#0/1  
`aaaa\_ba\_a`a`a\_a\_]aa¥[\_[¥X^^\_UY^U\_YW]  
@HWI-EAS443:3:99:1669:1151#0/1  
TGGTAGTAGCCATTTGTCTGTGAGACCGATGCTGTGAATC  
+HWI-EAS443:3:99:1669:1151#0/1  
ab`b\_\_a`\_\_abbb¥^aaaaaa`^Na^\_aRZa^\_\_`][  
@HWI-EAS443:3:99:844:501#0/1  
CAGACAAATGGCTACTACCACCAATCCACTAATCAGGCAT  
+HWI-EAS443:3:99:844:501#0/1  
`abaaabaabbbbaabb[N\_\_abab\_\_abbbbbbbbaab  
@HWI-EAS443:3:9:1369:398#0/1  
GACAAATGGCTACTACCACCAATCCACTAATCAGGCATGA  
+HWI-EAS443:3:9:1369:398#0/1  
aaa\_W\_X`ZZZaY¥]LRZV[U[VVQSP`ZMM\_ZHY]X]  
@HWI-EAS443:3:9:1373:1283#0/1  
CAGGCATGAAAACAGAATGGTGGCTAGCACTACGGCA  
+HWI-EAS443:3:9:1373:1283#0/1  
ab`a``bbb^`^\_]a`][`¥\_]aa]Y¥^¥^^`ZTR  
@HWI-EAS443:3:32:391:1629#0/1  
CCCCCTAAGCCGAGATCGCGCAGAGACTGGAAAGTTGC  
+HWI-EAS443:3:32:391:1629#0/1  
`Z\_MLOXLVXY]\_M¥ROKRZNP]`VJGN^^YBBBBBBBBB  
@HWI-EAS443:3:63:812:1674#0/1  
TGCCCCCTCAAAGCCGAGCTCGCGCAGAGACTGGAAAGTG  
+HWI-EAS443:3:63:812:1674#0/1  
\_Xa`\_]Z`bba`W¥Z``VVQXIR[BBBBBBBBBBBBBB  
@HWI-EAS443:3:11:566:390#0/1  
GGCCCCCTCAAAGCCGAGATCGCGCAGAGACTGGAAAGTG  
+HWI-EAS443:3:11:566:390#0/1  
a`^\_P¥^GJO¥KXQXPRX]K¥YYYVPSUBBBBBBBBBBB  
@HWI-EAS443:3:69:1452:196#0/1  
AAGACACTTTCCAGTCTCTGCGGATCTCGGCTTTTAGGG  
+HWI-EAS443:3:69:1452:196#0/1  
\_\_\_\_WY\_R]\_XRWY¥Yaa[]XYPHSV`S[NHVQYBBBBBBB  
@HWI-EAS443:3:70:986:1166#0/1  
CAGGCCCTCAAAGCCAAGATCGCGCAGAGACTGGAAAG

+HWI-EAS443:3:70:986:1166#0/1  
abbababaaaa`aab]H]aa`aaaaa^]aY\_a``\_aa\_  
@HWI-EAS443:3:99:706:676#0/1  
GCCGCCCTCAAAGCCGAGATCGCGCAGAGACTGGAAAG  
+HWI-EAS443:3:99:706:676#0/1  
a`aba]aaabaaaa]abbbaa`aaaRa`¥a]Y^a^`a``  
@HWI-EAS443:3:37:1064:628#0/1  
CGCCCCCTCAAAGCCGAGATCGCGCAGAGACTGGAAAGTG  
+HWI-EAS443:3:37:1064:628#0/1  
`^]X`ba\_a`Z]¥]\_aaa`]aa`a¥\_N]U``WZYZY^U¥  
@HWI-EAS443:3:100:1129:1348#0/1  
AGACACTTCCAGTCTCTGCGGATCTCGGCTTTGAGGGG  
+HWI-EAS443:3:100:1129:1348#0/1  
`aa`\_`a`^`Z`^Xa¥``F\_V`^]¥^K\_\_K``]^NBBBB  
@HWI-EAS443:3:17:1251:739#0/1  
CAGGCCCTCAAAGCCGAGATCGCGCAGAGACTGGAAAG  
+HWI-EAS443:3:17:1251:739#0/1  
`¥aaaaaaaaaaa\_aaa\_aa\_Y``\_a^aa`¥``[aaY`\_`¥  
@HWI-EAS443:3:17:46:937#0/1  
CCTCAAAGCCGAGATCGCGCAGAGACTGGAAAGTGTCTTT  
+HWI-EAS443:3:17:46:937#0/1  
ab`````Z]````]¥Y```]a^^^^[^^YXX¥ZQYV[^ZW  
@HWI-EAS443:3:17:687:1581#0/1  
GGCCCCCTCAAAGCCGAGATCGCGCAGAGACTGGAAAGTG  
+HWI-EAS443:3:17:687:1581#0/1  
aabaabaaZaba¥`aa`a\_a```^Y¥¥^¥W\_]¥`ZaXGY  
@HWI-EAS443:3:19:356:905#0/1  
AAGACACTTCCAGTCTCTGCGGATCTCGGCTTTGAGGG  
+HWI-EAS443:3:19:356:905#0/1  
aa\_\_X`^`ba^`TS[a``\_]Z`R\_[YUY¥XU[VUYJDHT]  
@HWI-EAS443:3:21:1511:879#0/1  
GCCCTCAAAGCCGAGATCGCGCAGAGACTGGAAAGTGT  
+HWI-EAS443:3:21:1511:879#0/1  
aZ]]XRa^a`a`UJ[]YY[P^L^¥^`Y[UMY¥TV^^UUYB  
@HWI-EAS443:3:23:237:581#0/1  
CAAAGCCGAGATCGCGCAGAGACTGGAAAGTGTCTTTGCA  
+HWI-EAS443:3:23:237:581#0/1  
]¥¥Y`b`Ja¥Y`aa`^]aab[[`\_]¥ba^Z]\_\_a[UJRQ  
@HWI-EAS443:3:24:828:102#0/1  
CAGGCCCTCAAAGCCGAGATCGCGCAGAGACTGGAAAG  
+HWI-EAS443:3:24:828:102#0/1  
Zb`baZZ\_b^]bbaZ]`ba`R]aa¥a`JaVbZX]aaX\_a^  
@HWI-EAS443:3:25:1209:189#0/1  
CTCAAAGCCGAGATCGCGCAGAGACTGGAAAGTGTCTTTG  
+HWI-EAS443:3:25:1209:189#0/1  
]¥b\_JPa¥[^\_b\_Z\_^`a``bbb``aa`\_Q^\_Tbaba]\_\_  
@HWI-EAS443:3:25:954:1746#0/1  
TCAAAGCCGAGATCGCGCAGAGACTGGAAAGTGTCTTTGC  
+HWI-EAS443:3:25:954:1746#0/1  
]a`b\_[`\_Z]]\_abba```aaa^aaaX^``¥S`¥¥`^\_a[

@HWI-EAS443:3:33:686:516#0/1  
GCCCCCTCAAAGCCGAGATCGCGCAGAGACTGGAAAGTGT  
+HWI-EAS443:3:33:686:516#0/1  
^\_bbabbbbbbabbabbbbbbabbabbbNbabaXb\_  
@HWI-EAS443:3:35:562:1233#0/1  
ACACTTCCAGTCTCTGCGGATCTCGGCTTTGAGGGGGC  
+HWI-EAS443:3:35:562:1233#0/1  
aa`aaaaaa``aaa^`a\_\_\_¥[\_[Xa^\_¥ROYZ¥S[W  
@HWI-EAS443:3:38:347:529#0/1  
CCCCCTCAAAGCCGAGATCGCGCAGAGACTGGAAAGTGT  
+HWI-EAS443:3:38:347:529#0/1  
W]bbbb¥Y`R`\_T`a^W^¥¥``aWT\_]aaa\_¥`Q¥]V^TU  
@HWI-EAS443:3:43:955:226#0/1  
AAAGACACTTCCAGTCTCTGCGGATCTCGGCTTTGAGG  
+HWI-EAS443:3:43:955:226#0/1  
a\_Zb]ZR`\_`¥¥^WUYZ]```G[ZbM^U¥¥XULV^`QFTY  
@HWI-EAS443:3:51:448:476#0/1  
CAGCCCCCTCAAAGCCGAGATCGCGCAGAGACTGGAAAG  
+HWI-EAS443:3:51:448:476#0/1  
abb\_babababba]aabab``abb^X^]aU`]Z`b`Zaaa  
@HWI-EAS443:3:51:609:1401#0/1  
GCCCCCTCAAAGCCGAGATCGCGCAGAGACTGGAAAGTGT  
+HWI-EAS443:3:51:609:1401#0/1  
a\_`U]]^`V`^\_XZ]Z^¥[^YUU[JYT0]YQLKX[QYS  
@HWI-EAS443:3:58:1643:1680#0/1  
CAAAGCCGAGATCGCGCAGAGACTGGAAAGTGTCTTTGCA  
+HWI-EAS443:3:58:1643:1680#0/1  
]P\_a^`ababa\_aa`aaa`^`\_^[^\_a\_aW\_W^`\_a[RR  
@HWI-EAS443:3:58:954:586#0/1  
CAAAGCCGAGATCGCGCAGAGACTGGAAAGTGTCTTTGCA  
+HWI-EAS443:3:58:954:586#0/1  
`bbbbabb`bababaaaabab``bbaabbbba`\_b`abaa  
@HWI-EAS443:3:66:658:1196#0/1  
AGGCCCCCTCAAAGCCGAGATCGCGCAGAGACTGGAAAGT  
+HWI-EAS443:3:66:658:1196#0/1  
\_^WX\_]X]Z]XWW]M¥VY]]XTZJN]¥BBBBBBBBBBBB  
@HWI-EAS443:3:67:1233:40#0/1  
CAGCCCCCTCAAAGCCGAGATCGCGCAGAGACTGGAAAG  
+HWI-EAS443:3:67:1233:40#0/1  
`bbb]b`a`bSaaaWTaa`a\_`a`K`^XXZaXS^`\_]`Y  
@HWI-EAS443:3:67:917:1076#0/1  
CAGGCCCCCTCAAAGCCGAGATCGCGCAGAGACTGGAAAG  
+HWI-EAS443:3:67:917:1076#0/1  
a\_aa```aaaa`]`]aaa```\_aaaa\_\_`aa`\_a\_Y^`a\_  
@HWI-EAS443:3:71:1024:455#0/1  
CAGGCCCCCTCAAAGCCGAGATCGCGCAGAGACTGGAAAG  
+HWI-EAS443:3:71:1024:455#0/1  
ab^b`\_bb]`]a`baTaa^a`a¥T\_aaba`¥\_ba^a`a^  
@HWI-EAS443:3:71:227:1135#0/1  
CCCCCTCAAAGCCGAGATCGCGCAGAGACTGGAAAGTGT

+HWI-EAS443:3:71:227:1135#0/1  
aabbaabaaaaabaabaaaaaaaa\_\_aa^]\_aaa`Z`W\_  
@HWI-EAS443:3:75:1387:593#0/1  
CAGGCCCCCTCAAAGCCGAGATCGCGCAGAGACTGGAAAG  
+HWI-EAS443:3:75:1387:593#0/1  
abbba^aabbbbbbbbbbbbbbbbababbbbbabbbbbbab  
@HWI-EAS443:3:75:163:99#0/1  
TGCAAAGACACTTTCCAGTCTCTGCGCGATCTCGGCTTTG  
+HWI-EAS443:3:75:163:99#0/1  
`a\_aa[`a`aaaa`¥^]a¥`¥\_`\_\_^XZ]``\_]T`\_^¥  
@HWI-EAS443:3:77:1705:453#0/1  
CAAAGACACTTTCCAGTCTCTGCGCGATCTCGGCTTTGAG  
+HWI-EAS443:3:77:1705:453#0/1  
ITOZ\_]TXabaZba\_abba`a`WW\_^I`a^TIXaaZ`T  
@HWI-EAS443:3:79:505:532#0/1  
GCAAAGACACTTTCCAGTCTCTGCGCGATCTCGGCTTTGA  
+HWI-EAS443:3:79:505:532#0/1  
`\_V\_^baaba\_Z\_baa]Z\_`a`a]a`a][^aV`Z]^`[J  
@HWI-EAS443:3:81:220:1832#0/1  
AGGCCCCCTCAAAGCCGAGATCGCGCAGAGACTGGAAAGT  
+HWI-EAS443:3:81:220:1832#0/1  
^[DZ]a]a^a\_WTHXa`VM` `a\_aZRPV\_U`^]VYNOUGU  
@HWI-EAS443:3:81:98:453#0/1  
CTCAAAGCCGAGATCGCGCAGAGACTGGAAAGTGTCTTTG  
+HWI-EAS443:3:81:98:453#0/1  
aba^aaabaaaa`^`aaaa` `[aV^`]Y\_]J¥W`W\_^UX  
@HWI-EAS443:3:82:303:199#0/1  
CAAAGCCGAGATCGCGCAGAGACTGGAAAGTGTCTTTGCA  
+HWI-EAS443:3:82:303:199#0/1  
aa[\_abbbbaaaababab]`aaaa^`]aa^¥b^aa`a`\_\_  
@HWI-EAS443:3:84:208:440#0/1  
CAAAGCCGAGATCGCGCAGAGACTGGAAAGTGTCTTTGCA  
+HWI-EAS443:3:84:208:440#0/1  
aUaa\_aaXW^V^¥\_Q\_]¥TG^¥TZ[WZNV¥QUT¥WWWUUH  
@HWI-EAS443:3:92:1176:189#0/1  
CAGGCCCCCTCAAAGCCGAGATCGCGCAGAGACTGGAAAG  
+HWI-EAS443:3:92:1176:189#0/1  
`aaaaa\_a`\_aa`aa`aa`a`a`aZaa^a^W^`^X` `a  
@HWI-EAS443:3:93:226:868#0/1  
CTCAAAGCCGAGATCGCGCAGAGACTGGAAAGTGTCTTTG  
+HWI-EAS443:3:93:226:868#0/1  
aaa\_abbaab[b`a`aaaa`a\_a` `` `\_\_`¥Va¥]\_¥\_\_  
@HWI-EAS443:3:94:626:719#0/1  
GCCCCCTCAAAGCCGAGATCGCGCAGAGACTGGAAAGTGT  
+HWI-EAS443:3:94:626:719#0/1  
``bbaabaaa\_a]`aabaaWba]`\_a]a\_a`aZ`\_^W^¥  
@HWI-EAS443:3:97:388:529#0/1  
CAGGCCCCCTCAAAGCCGAGATCGCGCAGAGACTGGAAAG  
+HWI-EAS443:3:97:388:529#0/1  
aa^`\_]Y[^`a`\_R\_X`aaaa`¥¥S]Taaa[^T¥a^X\_[^

@HWI-EAS443:3:79:220:1669#0/1  
ATCGTCTTTTTTTCAAATGTATTTATCGTCGCTTTAAAT  
+HWI-EAS443:3:79:220:1669#0/1  
¥V`b¥ba`a`^ba]0[UYW[QYZ^^\_X\_]Z¥¥\_`]a\_U[\_  
@HWI-EAS443:3:89:329:1976#0/1  
GACCCGAACAACATGGATAGAGCAGTTAAACTAAAAAGA  
+HWI-EAS443:3:89:329:1976#0/1  
aabb`]TX`X]¥^ZYS[RW^Y]^TVFMYZ¥VT^F]LZJL^  
@HWI-EAS443:3:86:1694:1243#0/1  
CGAGCAGTAATCCACAATATCAGGTGCNAGATCCCAATGA  
+HWI-EAS443:3:86:1694:1243#0/1  
X\_\_Z[Sa^Z^bPN]]Xaaa`ab\_aaaOD^bbb¥Z¥abbab  
@HWI-EAS443:3:14:709:2041#0/1  
GCCTGGGCTCATATACAACAGGATGGGAGCAGTGACCAC  
+HWI-EAS443:3:14:709:2041#0/1  
aa\_aa`aaa`\_\_\_\_`aa`\_\_`\_\_`\_\_aVUKW¥`\_S¥`UVWW  
@HWI-EAS443:3:23:1662:1541#0/1  
GCCTCATATACAACAGGATGGGAACAGGGACCACAGANGC  
+HWI-EAS443:3:23:1662:1541#0/1  
W^WYG^\_]aa\_¥\_¥ZZT[V\_aa`YPWUF¥`[GUQZ`ZDRF  
@HWI-EAS443:3:27:1650:937#0/1  
CCGAGATCGCGCAGAGACTGGAAAGGGTCTTGCAGGCAA  
+HWI-EAS443:3:27:1650:937#0/1  
`a^VM¥aX[YXY`UKHSQZ\_FLYSGXU^]TU¥TSY¥VJI  
@HWI-EAS443:3:51:990:1365#0/1  
AGAAGCTGCTTTTGGTCTAGTGTGTGCCAGTTGTGAAAAG  
+HWI-EAS443:3:51:990:1365#0/1  
¥`T^a^\_H]^Y]XOYaZXW\_XXWZTV\_NIW^YVHRWDR^  
@HWI-EAS443:3:53:1128:1921#0/1  
TGACAAGATTGGTCTTGTCTTTGGCCATTCCATGAGATCC  
+HWI-EAS443:3:53:1128:1921#0/1  
`b`ZVX¥Xbbbb]aX`^Xbb\_H\_HHIbRSY]HZ]TFIY\_  
@HWI-EAS443:3:91:1319:1857#0/1  
AAAGTGTCTTTGCAGGAAAGAACACAGATCTTCAGGCAAC  
+HWI-EAS443:3:91:1319:1857#0/1  
aaa^G^aW`aWQJX`a\_a`[^a^aRa\_\_\_\_^\_W`\_]\_^XZZ  
@HWI-EAS443:3:97:552:462#0/1  
GGTCCTCATATACAACAGGATGGGAACAGTGACGACAGAA  
+HWI-EAS443:3:97:552:462#0/1  
a\_U]^`¥`[^a\_[]]^`[^\_`W^[\_`U]¥TETU^\_\_^  
@HWI-EAS443:3:1:1032:343#0/1  
GACCACAGAAGCTGCCTTTGGTNTAGTGTGTGCCACTTGT  
+HWI-EAS443:3:1:1032:343#0/1  
aa`¥`^a]aa\_¥aa[V`\_`V^XDY\_`\_\_\_\_¥\_XQT]T\_¥BB  
@HWI-EAS443:3:1:1158:1969#0/1  
GATCGTCTTTTTTTNAAATGTATTTATAGTCGCTTTAAAT  
+HWI-EAS443:3:1:1158:1969#0/1  
ab¥ba¥SY]]]¥aWDHa\_`VW^\_Y[TXGWY]UMXW^BBBB  
@HWI-EAS443:3:36:1148:1484#0/1  
CTGTTTTCATGCCNGATTAGTGGATTGGTGGGAGTAGCCA

+HWI-EAS443:3:36:1148:1484#0/1  
¥¥bbbabbaa`YD]a`a^`abbabbab\_b\_NSDPTF[BB  
@HWI-EAS443:3:49:1430:1881#0/1  
GGCCTCATNTACAACAGGATGGGAAGAGTGACCACAGAAG  
+HWI-EAS443:3:49:1430:1881#0/1  
\_PVOP[OPDW\_BBBBBBBBBBBBBBBBBBBBBBBBBBBB  
@HWI-EAS443:3:64:1737:712#0/1  
GCTGCANTGACGGGAGGATCACTTGAATCGCTGCATCTGC  
+HWI-EAS443:3:64:1737:712#0/1  
aPV`WVDV]^`\_XS[VXNPG[U^^YBBBBBBBBBBBBBBB  
@HWI-EAS443:3:64:309:1772#0/1  
CACTCCCATTCTGCTTCTGGTNGGCTTGCAAATTTTCAAGA  
+HWI-EAS443:3:64:309:1772#0/1  
a`a\_baa`a¥a^\_[P^\_]NDP]UT^¥]^^[YY]W\_[ZX]  
@HWI-EAS443:3:6:1021:1866#0/1  
ACTAGACCAAAAGCAGCTTCTGTGGTCACTGGTCCCNTCC  
+HWI-EAS443:3:6:1021:1866#0/1  
VaZaa\_[\_[a\_\_bb[R]``¥\_aVI^Y`[N\_XH\_\_GIDDN\_  
@HWI-EAS443:3:7:283:2003#0/1  
AGCAGCTTCTGTGGTCACTGGTCCCATCCTNTTGTATATG  
+HWI-EAS443:3:7:283:2003#0/1  
aa]aTaVPRVT``LT\_\_\_YET\_¥[\_QNGRDIZ¥G^¥BBB  
@HWI-EAS443:3:88:781:1653#0/1  
CACTGGAGCTAGGATGAGTCNCAATAGTTCTCCTTGCATG  
+HWI-EAS443:3:88:781:1653#0/1  
a\_ZWbba`aab]XY`baa\_¥D[b^aa`[aa\_GS^aZ`aa`  
@HWI-EAS443:3:99:983:1424#0/1  
GAACAGTGNCCATAGAAGCTGCTTTTGGTCTAGTGTGTGC  
+HWI-EAS443:3:99:983:1424#0/1  
[Vaaba]GDPYb]aaaa^[\_a¥aa`aHVY`aa\_]\_`b^a]  
@HWI-EAS443:3:57:833:535#0/1  
TGTGAATCAGCAATCTGTTCAAGTGCACACACTAGACC  
+HWI-EAS443:3:57:833:535#0/1  
¥ZHU\_Y\_````^^Z^Vbbab`[aa\_^`^abb\_Q\_[\_aa  
@HWI-EAS443:3:65:800:496#0/1  
TACATTTGAAAAAAGACGATCAGTAATCCACAATATCAGG  
+HWI-EAS443:3:65:800:496#0/1  
abbbbbbabbba`^abaaa]\_`\_¥\_`X¥ZUY^WS[]ZX¥W  
@HWI-EAS443:3:2:1104:1686#0/1  
CAAAAGAGAAATAACGTTCCATGGGGCCAAGGAGCATGTC  
+HWI-EAS443:3:2:1104:1686#0/1  
a\_a¥ba`a\_a\_bb`^\_^aa^ab\_\_[\_`Sa¥`SS\_`\_`T\_Ga  
@HWI-EAS443:3:30:596:205#0/1  
TACATTTGAAAAAAGACGATCAGTAATCCACAAATATCC  
+HWI-EAS443:3:30:596:205#0/1  
a\_ababbbbbbabbabbbba`aaa^`a]a\_a`aaaQa[]^  
@HWI-EAS443:3:31:980:1713#0/1  
AGTTGAATAGCTTAGTGACACCTCCTTGGCCCCAGATGCT  
+HWI-EAS443:3:31:980:1713#0/1  
]R^[abaaaaabaa\_a¥aaaaaa`\_`\_a`b]VX\_\_[\_aaZ

@HWI-EAS443:3:52:682:385#0/1  
GACTGGAAAGTGTCTTTGCAGGAAAGAACACAGAGCTTTG  
+HWI-EAS443:3:52:682:385#0/1  
R]ba]abZZa`aaaaabbL¥`aMaaaUa`^Z\_a\_`[a`\_Z  
@HWI-EAS443:3:90:1448:358#0/1  
CATCTGCCTAGTCTGATTAGCAACCTCCATGGCCCTTTGC  
+HWI-EAS443:3:90:1448:358#0/1  
a`b`bbbabaab\_bbbbbaaaba^`a\_Z\_b\_aaGZbaaa^  
@HWI-EAS443:3:42:318:1559#0/1  
TTGAAAAAAGACGATCAGTAATCCACNATATCAGGTACA  
+HWI-EAS443:3:42:318:1559#0/1  
^]a^^aX^ZX\_`\_b`SY[¥QN`RFNWWDZ¥¥YROX]KRZZ  
@HWI-EAS443:3:25:388:1002#0/1  
CATTCTGTTTTCATGCCTGATTAGTGGATTGGGGTAGGA  
+HWI-EAS443:3:25:388:1002#0/1  
`Z\_^\_bbaa\_`a`\_`\_`\_W\_`U¥^`\_WaaaZGYBBBBBB  
@HWI-EAS443:3:49:472:1027#0/1  
GCTGGCTAGCACTACGGCAAAGGCTATGGAAGAGATGGGT  
+HWI-EAS443:3:49:472:1027#0/1  
Z]\_a¥ZQ¥^PSYa`S\_\_a\_aZWYU^]ZX]SWFV]UYa`BB  
@HWI-EAS443:3:65:1329:1541#0/1  
ATACATTTGAAAAAAGACGATCAGTAATCCCAATATAA  
+HWI-EAS443:3:65:1329:1541#0/1  
a`¥a`abaS^a`a[`a^^\_a\_^TNTSWTBBBBBBBBBBBB  
@HWI-EAS443:3:74:1209:1685#0/1  
GATGGGAACAGGGACCACAGAAGCTGCTTTTGGTCTAGGG  
+HWI-EAS443:3:74:1209:1685#0/1  
XW`¥ZZU\_b\_ND[b]`WZXb^]a¥\_bZ^`ZT\_GTGY¥DP  
@HWI-EAS443:3:42:1545:167#0/1  
GCTGTAATCAGCAATCTGTTCAAGTGGCACACACTAGA  
+HWI-EAS443:3:42:1545:167#0/1  
``ababb`aa]\_aaa^`aT]\_\_\_\_\_Y\_`Za]\_X\_\_U\_Y¥  
@HWI-EAS443:3:47:1764:253#0/1  
GAGGCCTCATATACAACAGGATGGGAACAGTGACCAAAG  
+HWI-EAS443:3:47:1764:253#0/1  
aS`]a`TKYQ\_`U^NU\_Y^]XXNX[ZTUQ^WN¥RDKRGUW  
@HWI-EAS443:3:59:1751:1076#0/1  
CGGGCCTCATATACAACAGGATGGGAACAGTGACCATAGA  
+HWI-EAS443:3:59:1751:1076#0/1  
abbbabbabbabb`baaaaa`abbbaa`bb\_[a\_YQFX\_W  
@HWI-EAS443:3:73:1292:303#0/1  
CACTAGACAAAAGCAGCTTCTGTGGTCACTGTTGAATC  
+HWI-EAS443:3:73:1292:303#0/1  
a`U]YRHW]\_NUYRSU^¥V¥[YPR`\_`Y\_N``[UDDDV]G  
@HWI-EAS443:3:21:1668:1152#0/1  
GATTTTGGTCTAGTGTGTGCCACTNGTGAACAGATTGCTG  
+HWI-EAS443:3:21:1668:1152#0/1  
¥¥\_ZbbbbY¥Y[b^bab`b`]ba[DT^aa]R`a\_aWROaa  
@HWI-EAS443:3:34:563:508#0/1  
GCTGNCTAGCACTACGGCAAAGGCTATGGAACAGATGGGT

+HWI-EAS443:3:34:563:508#0/1  
aa`[DY`^`^aa`^a]a]\_P]aa`[^Y[XEVOYZBBBBBBB  
@HWI-EAS443:3:71:1566:335#0/1  
CAAAAGCAGCTTCTGTGGNCACTGTTCCCATCCTGTTGGA  
+HWI-EAS443:3:71:1566:335#0/1  
W\_bbbbbYb\_aa[bX\_WDU¥Sa\_Qaa\_b\_NWba]`XWGU  
@HWI-EAS443:3:13:1205:309#0/1  
GCTCCCGTTCGCTTCTGGTAGGCCTGCAAATTTTCAAGAA  
+HWI-EAS443:3:13:1205:309#0/1  
aab]^`b`a`^`]aa\_a`¥^`a\_[]^a`\_a`\_`^`\_]a^\_  
@HWI-EAS443:3:18:1150:60#0/1  
GTGGGGACAGTGACCACAGAAGCTGCTTTTGGTCTAGTGT  
+HWI-EAS443:3:18:1150:60#0/1  
aVaaXa\_\_`a¥a[^^\_U^`SV\_V¥\_W¥Z¥¥\_¥GQ¥VUU^N  
@HWI-EAS443:3:26:1059:1234#0/1  
GACCGATGCTGTGAATCAGCAATCTGTTCAAGAGGCAA  
+HWI-EAS443:3:26:1059:1234#0/1  
ab^b`bKSRRaQRa]\_UaY\_aYaa`aa`S\_\_U\_aHa]GaO  
@HWI-EAS443:3:33:1328:878#0/1  
GGGGGCCAAGGAGGTGTCACTAAGCTATTCAAATGGTGCA  
+HWI-EAS443:3:33:1328:878#0/1  
a¥`^`^`[```\_\_aa[a[aa^aaaa^`\_`^Z\_UDV`XU]UT  
@HWI-EAS443:3:42:722:917#0/1  
GGGGCCTCATATACAACAGGATGGGAACAGTGACCCAGAG  
+HWI-EAS443:3:42:722:917#0/1  
ab^]]`aa\_XW`Z`]SXV][FS]`Z^YMMZSTVZWF PDT¥  
@HWI-EAS443:3:5:1609:1278#0/1  
GACGTTATTTATCTTTTGAGCTTCTTGTATAGTTTAACTG  
+HWI-EAS443:3:5:1609:1278#0/1  
aXab¥b`abbIb\_abaa^aaSab``bbaab`a^ba`aYaa  
@HWI-EAS443:3:60:382:1560#0/1  
GGGGCCTCATATACAACAGGATGGGAACAGCGACCACAGA  
+HWI-EAS443:3:60:382:1560#0/1  
a`ZU`^Xa^[[[Z]`W[V¥W\_a¥Y[ZU^^YZ[SYYZ[WU  
@HWI-EAS443:3:69:1191:1791#0/1  
GGGGCCTCATATACAACAGGATGGGAACAGCGACCACAGA  
+HWI-EAS443:3:69:1191:1791#0/1  
KW¥`¥Z]`a[`b`aR¥]`b]¥WWW^a`a\_]0`¥XXRT``B  
@HWI-EAS443:3:70:992:1339#0/1  
CTGTTTTCATGCCTGATTAGTGGATTGGTGGGAGTAGCCC  
+HWI-EAS443:3:70:992:1339#0/1  
aa\_UXOR]¥WW^MY^`^ZYXJ^^BBBBBBBBBBBBBBBBB  
@HWI-EAS443:3:78:265:1003#0/1  
AGCATGTACCACCTGCCTAGTCTGATTAGCAACCTCCATG  
+HWI-EAS443:3:78:265:1003#0/1  
¥`Z]Z^LXXR¥JRX\_]ZRWTYaV[X^SbaaZOZ][XQZT[  
@HWI-EAS443:3:81:1593:278#0/1  
CACTTGTGAACAGATTGCTGATTCAAAGCATCGGTCTCAA  
+HWI-EAS443:3:81:1593:278#0/1  
][WYOb`S[[`\_]\_^WWYQXaaaRHYb^Y[SYWMRTL TG



@HWI-EAS443:3:81:1691:105#0/1  
AGGGCCTCATATAACAACAGGATGGGAACAGCGACCACAGA  
+HWI-EAS443:3:81:1691:105#0/1  
a#b`\_\_`\_ab\_`a#`a\_aaaaaa`a^`¥Y^L¥a¥Y\_¥¥\_Y  
@HWI-EAS443:3:92:1235:454#0/1  
GGCCGAGATCGCGTAGAGACTGGAAAGTGTCTTTGCAGGA  
+HWI-EAS443:3:92:1235:454#0/1  
]WTR[¥[QWWTMDP¥WZOVR¥VZ\_RQMXKXOBBBBBBBB  
@HWI-EAS443:3:93:1770:879#0/1  
CGGGGACCCGAACAACATGGATAGAGCAGATAAACTATAC  
+HWI-EAS443:3:93:1770:879#0/1  
a`a`\_`¥¥\_b\_V[aaY]a`Xa[]\_YR[LUHUYa\_VTTZXB  
@HWI-EAS443:3:96:700:2046#0/1  
NACTTGAATCGCTGCATCTGCACTCGCATTGCTTCTGGT  
+HWI-EAS443:3:96:700:2046#0/1  
DL SVUSUXVWURUWVWWWNVURUQSKQUUJTNVUSVBBBB  
@HWI-EAS443:3:9:181:1333#0/1  
ACGGGTCCCATTCCTTTAGGGCATATTGGACAAAGCG  
+HWI-EAS443:3:9:181:1333#0/1  
aaQZ\_Xaab\_```a\_S\_\_\_¥]NRR\_\_VX\_\_^^aSa\_\_XX\_  
@HWI-EAS443:3:100:65:1528#0/1  
GCCTCATATAACAACAGGATGGGAACAGTGACCACAGCAGC  
+HWI-EAS443:3:100:65:1528#0/1  
]\_¥^^^b^\_```aaabaR\_]aa\_``LU]¥VQZ¥YH[\_B  
@HWI-EAS443:3:12:792:1759#0/1  
AGATCCCAATGATATTTGCTGCAATGACGAGAGGATAATT  
+HWI-EAS443:3:12:792:1759#0/1  
¥]a\_a]S`U[a\_URZ\_WY]N[W\_URS^\_\_YBBBBBBBBBB  
@HWI-EAS443:3:16:337:1662#0/1  
GAGCCCAATAGTTCTCATTGCATGTACCATCTGCCTAGT  
+HWI-EAS443:3:16:337:1662#0/1  
ZVQUXWa[`\_[RRa`U\_¥\_ba[abaMb]^`^b]aa`aa][  
@HWI-EAS443:3:20:49:1120#0/1  
AAACGCCTACCAGAAGCGAATGGGAGTGCAGATGCAGCGA  
+HWI-EAS443:3:20:49:1120#0/1  
\_^`\_SYa]UQa[RWY[]QRT]aa`YXR`¥U]RTR\_Y`^ZJ  
@HWI-EAS443:3:24:1732:66#0/1  
GATGGTCTTTTTTTCAAATGTATTTATCGTCGCTTTAAAT  
+HWI-EAS443:3:24:1732:66#0/1  
aaVP`WL\_aaaaaa0]]a^[N¥a``YONWZVYU\_YaXQ¥Z  
@HWI-EAS443:3:27:548:1603#0/1  
GTGTCTTTGCAGGAAAGAACACAGATCTTGAGGCTCCCAT  
+HWI-EAS443:3:27:548:1603#0/1  
]M[]¥\_QZWaZZ0[^a]\_^[]`a\_V^VY¥TaYWZ`\_MGLLO  
@HWI-EAS443:3:30:1375:818#0/1  
ACAGACTGGAAAGTGTCTTTGCAGGAAAGAACACAGATTT  
+HWI-EAS443:3:30:1375:818#0/1  
`a^0\_\_aa^a^JZa`]ab^^`a¥Y`a`a\_\_\_]\_^`PTTIT  
@HWI-EAS443:3:34:1545:1529#0/1  
TGGGCCTCATATAACAACAGGATGGGAACAGTGACCAGAGA

+HWI-EAS443:3:34:1545:1529#0/1  
U^^S`abbbabb`Y¥]aabaa]SZ`^^UTL[VNGVG`BB  
@HWI-EAS443:3:35:1189:1901#0/1  
CGCTGCACTACGGCAAAGGCTATGGAACAGATGGCTGGAT  
+HWI-EAS443:3:35:1189:1901#0/1  
TTEVababb\_¥Wa`U`abab]aa]`aP`b\_TWT¥X¥WQ  
@HWI-EAS443:3:3:351:1928#0/1  
TAGGCAGATGGTACATGCAATGAGAACTATTGGGACGAAT  
+HWI-EAS443:3:3:351:1928#0/1  
]\_WHR^`Z¥\_WL^aaR`\_^aZ]P[`bU`^^aWQFVBBBBB  
@HWI-EAS443:3:43:792:83#0/1  
CGCGCAGAGACTGGAAAGTGTCTTTGCAGGAAAGAAAACA  
+HWI-EAS443:3:43:792:83#0/1  
aaabaabbbb`bbbababab\_aaba\_V\_ab`aab`aWa  
@HWI-EAS443:3:52:93:823#0/1  
GACCCGAACAACATGGATAGAGCAGTTAACTATACGAGA  
+HWI-EAS443:3:52:93:823#0/1  
\_`Yabaa`]aa\_]`][0[`¥aRa¥¥[Q[Y]^Z]X]Z  
@HWI-EAS443:3:59:1535:90#0/1  
CGCGCAGAGACTGGAAAGTGTCTTTGCAGGAAAGAAAACA  
+HWI-EAS443:3:59:1535:90#0/1  
abababbaa]bbbbbbb`ba`bbb`bba`ab\_UM^FX  
@HWI-EAS443:3:61:1407:1616#0/1  
GTCCCCATTCCCATTAGGGCATTGGACAAAGCGGCTA  
+HWI-EAS443:3:61:1407:1616#0/1  
aPWS¥V¥\_`^]UUU^W\_S^`KP]¥aZaBBBBBBBBBBBB  
@HWI-EAS443:3:62:1118:638#0/1  
TTGAAAATTTGCAGGCCTACCAGAAGCGAATGGGAGGGCA  
+HWI-EAS443:3:62:1118:638#0/1  
^[RH`\_`[WaaaYbU]PW¥a\_Q[\_¥`[]ZZZ]\_VSVFW\_S  
@HWI-EAS443:3:65:995:691#0/1  
AAGGGCACTCCCATTCGCTTCTGGTAGGCCTGCAAATTTT  
+HWI-EAS443:3:65:995:691#0/1  
aaa\_[a\_a`\_Y\_]\_aa\_¥^YWW^^]X[W`^^TK`^^\_  
@HWI-EAS443:3:69:478:357#0/1  
AATAGTTCTCATTGCATGTACCATCTGCCTAGTCTGCTTA  
+HWI-EAS443:3:69:478:357#0/1  
X\_\_Q\_P[a`a`a\_Z[\_[]`^Z^a\_W^\_[T¥DVZ\_\_PX]  
@HWI-EAS443:3:70:435:1112#0/1  
GGCTCTCATGGAATGGCTAAAGACAAGACCAATCTTTTCA  
+HWI-EAS443:3:70:435:1112#0/1  
abbab]bVaZa`]`\_aZbb^U[a^TI¥P]K][¥SYG[XN  
@HWI-EAS443:3:72:276:748#0/1  
ATCCCAATGATATTTGCTGCAATGACGAGAGGATCAATTG  
+HWI-EAS443:3:72:276:748#0/1  
aaaVTZZXY[aaaa\_aa\_Za^aVY`\_\_Z¥W]\_QX[NFVPU  
@HWI-EAS443:3:73:82:2006#0/1  
TGCACCTGATATTGTGGATTACTGATCGTCTTTTTTCAAA  
+HWI-EAS443:3:73:82:2006#0/1  
VabKbbaaYX]^bbIa`WU]bY^^^ab^a]]aaaaba[

@HWI-EAS443:3:82:396:1120#0/1  
CACTAGCTATTCAACTGGTGCACCTGCCAGTTGCATGGGC  
+HWI-EAS443:3:82:396:1120#0/1  
ababbbbbaaaaaba`\_a\_a\_\_aa`a\_^HYX\_\_\_\_\_`J\_T  
@HWI-EAS443:3:8:1791:1657#0/1  
AATGTTGTCACCTCTGACTAAGGGAATTTTAGGATTTGTG  
+HWI-EAS443:3:8:1791:1657#0/1  
^baS\_¥`Y`]YYWRRX`\_[a\_UX¥TSGSJ`\_NNOV[SW  
@HWI-EAS443:3:91:126:139#0/1  
GTGGGCCACTTGTGAACAGATTGCTGATTCACAGCATCGG  
+HWI-EAS443:3:91:126:139#0/1  
aH[GV]YQVLZRU`]XVXVVYRPPWUSQYVXVVVRYVOXY  
@HWI-EAS443:3:96:1171:336#0/1  
GGGATCTTGCACCTGATATTGTGGATTACTGATCGTATTT  
+HWI-EAS443:3:96:1171:336#0/1  
H\_a`\_a\_V[baVX\_ba`¥aa`I``\_bba]SabaVbZH`aa  
@HWI-EAS443:3:97:294:397#0/1  
CAGGGACTGGAAAGTGTCTTTGCAGGAAAGAACACAGATC  
+HWI-EAS443:3:97:294:397#0/1  
S¥\_YYab]ZJaXU\_a`Q`b]]`a]bbUSZRZaS\_ZP\_`^VQ  
@HWI-EAS443:3:12:163:1126#0/1  
GGGGAGTGCAGATGCAGCGATTCAAGTGATCCTCTCNTCA  
+HWI-EAS443:3:12:163:1126#0/1  
``aba\_[baa`\_a\_ab]`\_]][¥^)`\_a]`aaa\_[DT`\_  
@HWI-EAS443:3:69:1337:1394#0/1  
CGGGCCTCATATACAACAGGATNGGAACAGTGACCACAGA  
+HWI-EAS443:3:69:1337:1394#0/1  
aa[aa^^a`\_aa`\_\_`a[`¥UTDT`\_UOKXLXZTSXT[WB  
@HWI-EAS443:3:100:471:889#0/1  
GGGCCTCATATACAACAGGATGGGAAGAGTGACCACAGAA  
+HWI-EAS443:3:100:471:889#0/1  
\_`QQSWaUabb`¥T^`[\_QTabbbXZGZ]¥QYPS\_aBBBB  
@HWI-EAS443:3:100:764:1193#0/1  
GGCCTCGTATACAACAGGATGGGAACAGTGACCACAGAAG  
+HWI-EAS443:3:100:764:1193#0/1  
`\_\_\_\_`Z^Z]SYLXa\_X^¥Z[¥V[V^W¥ZV`\_NZXVX^NBB  
@HWI-EAS443:3:10:1036:1699#0/1  
GAGACCGATGCTGTGAATCAGCAATCTGTTCAAAAGTGGC  
+HWI-EAS443:3:10:1036:1699#0/1  
abaa\_Yaaaa`\_aR`a`¥G][V[\_\_\_\_`\_aW¥MZG¥\_`R^VU  
@HWI-EAS443:3:11:1094:779#0/1  
CTTGCCACCTCTGACTAAGGGAATTTTAGGATTTGTGTTC  
+HWI-EAS443:3:11:1094:779#0/1  
`b`\_JRWa¥babb`\_F\_b[a`aa^aaaa`b]`a`b]a`ab  
@HWI-EAS443:3:11:241:1471#0/1  
ACTAGACCAAAAGCAGCTTCTGTGGGCACTGTTCCCATCC  
+HWI-EAS443:3:11:241:1471#0/1  
a]¥L\_`^`\_QU¥WX¥a¥^W\_`]]VUZFVY[Y\_][Z^[SSY[  
@HWI-EAS443:3:11:829:976#0/1  
CACTCCCATTGCTTCTGGTAGGCCTGCAAATTTTAAAGA

+HWI-EAS443:3:11:829:976#0/1  
aabaa)`abbabaaaa^]¥aa\_`[^`\_`\_]`aaa`\_\_a\_  
@HWI-EAS443:3:12:973:1960#0/1  
GAAAGATGACCTTCTTGAAAATTTGCATGCCTACCAGAAG  
+HWI-EAS443:3:12:973:1960#0/1  
\_S`aa¥baabbX`S]baaaaa^][\_HTZW[][\_[\_U\_¥  
@HWI-EAS443:3:13:166:974#0/1  
GACCGATGCTGTGAATCAGCAATCTGTTACAAAATGGCAC  
+HWI-EAS443:3:13:166:974#0/1  
¥\_`abab[b`]bSVRUQO\_RXU`aa`YaU)`GDDY``aa  
@HWI-EAS443:3:13:199:1796#0/1  
GTTGAATAGCTTAGTGACACCTCCTTGGCCCGATGGAACG  
+HWI-EAS443:3:13:199:1796#0/1  
aUIPUY\_UL]W¥]LS`]RX^\_SUJQQTUUPFPPTQBBBBB  
@HWI-EAS443:3:13:540:137#0/1  
GCCTCATATACAACAGGATGGGAACCGTGACCACAGAAGC  
+HWI-EAS443:3:13:540:137#0/1  
a`SX]a`a`a`\_\_\_¥Y]RY\_X^¥`T[LSQ¥SLUQWNWRBB  
@HWI-EAS443:3:13:958:1575#0/1  
CAGTGACCACAGAAGCTGCTTTTAGTCTAGTGTGTGCCAC  
+HWI-EAS443:3:13:958:1575#0/1  
abb^bbbbbababb\_aabaaabaa\_^bab\_\_X¥S\_^`a`\_  
@HWI-EAS443:3:14:1116:271#0/1  
GGTCACTGTTCCCATCCTGTTGTATATGAGGCGCATGCAA  
+HWI-EAS443:3:14:1116:271#0/1  
\_TVUUSMXMLWWWVZXZ^TTZLQLYBBBBBBBBBBBBBBBB  
@HWI-EAS443:3:16:1281:660#0/1  
GATGGGAACAGTGACCACAGAAGCTGCTTTTGGACTAGTG  
+HWI-EAS443:3:16:1281:660#0/1  
aXSV^Y`\_ZZ\_IZ¥KKNURU[Q]BBBBBBBBBBBBBBBBBB  
@HWI-EAS443:3:16:167:1432#0/1  
GAATCGCTGCATCTGCACTCCCATTCGCTTCTGGAAGGCC  
+HWI-EAS443:3:16:167:1432#0/1  
\_```\_`[JTYbU`[`bbYbbb^XWHHOY[[`\_R¥G]Y]L]  
@HWI-EAS443:3:16:897:1965#0/1  
AGAAGCTCAAAAGAGAAATAACGTTCCATGAGGCCAAGGA  
+HWI-EAS443:3:16:897:1965#0/1  
a`aaa¥MU\_\_`\_`\_]R]^a[FXU^Z]^YX]XXXXZ]]OV  
@HWI-EAS443:3:17:1468:106#0/1  
GGGCCTCATATACAACAGGATGGGAAGAGTGACCACAGAA  
+HWI-EAS443:3:17:1468:106#0/1  
`a]VOLPaaWTTUSU][abZVX`V\_QGFOS\_\_VBBBBBBB  
@HWI-EAS443:3:17:774:1723#0/1  
ACAAGATTGGTCCTGTCTTTAGCCATTCCATGAGAGCCTC  
+HWI-EAS443:3:17:774:1723#0/1  
abbYb\_a\_OIZ[FR]\_]\_^`U]Ya\_¥R`aW\_YGTHW^ZHZ  
@HWI-EAS443:3:18:744:995#0/1  
GCGACGATAAATACATTTGAAAAAAGACGATCAGAAATC  
+HWI-EAS443:3:18:744:995#0/1  
aaaaabaa`bb`baaaaababaa`baaaaa`YIPTGa\_S^

@HWI-EAS443:3:19:122:251#0/1  
ATTCTGTTTTTCATGCCTGATTAGTGGATTGGTGGGAGTAG  
+HWI-EAS443:3:19:122:251#0/1  
aabbab\_babaaaV`a`aaaa`Taa`]^^]W`BBBBBBB  
@HWI-EAS443:3:19:1280:1548#0/1  
AATCAGACTAGGCAGATGGGACATGCAATGAGAACTATTG  
+HWI-EAS443:3:19:1280:1548#0/1  
aZXQ^abWS]Y^XX`X`X¥F\_Z]\_ZU]\_a\_U[[\_\_aa[QY  
@HWI-EAS443:3:19:347:691#0/1  
GATATTGTGGATTACTGATCGTCTTTTTTTAAAATGTATT  
+HWI-EAS443:3:19:347:691#0/1  
]XSY`ZNGPNH`XZa`W[¥^YSUW`a¥¥KTD^P¥GWN[[B  
@HWI-EAS443:3:1:1517:416#0/1  
AGATCCCAATGATATTTGGTGAATGACGAGAGGATCACT  
+HWI-EAS443:3:1:1517:416#0/1  
aaaa\_a^`aaaa`b\_b]F]aa]aaa\_\_a\_aa\_a\_^¥`BB  
@HWI-EAS443:3:1:1546:946#0/1  
GGAACAGTGACCACAGAAGCTGCTTTTTGTCTAGTGTGTG  
+HWI-EAS443:3:1:1546:946#0/1  
```Ua\_XJZba`¥NQ]\_Za\_[PF][b^G^¥VaXR[`aBBB  
@HWI-EAS443:3:1:1734:539#0/1  
GTAATCCACAATATCAGGTGCAAGATCGCAATGATATTTG  
+HWI-EAS443:3:1:1734:539#0/1  
a]a\_`a]a¥\_`]Y^U\_`]SVU\_\_VSJFJ^U]^`\_XZBBB  
@HWI-EAS443:3:1:656:734#0/1  
AGCAGTTAAAGTATACAAGAAGCTCAAAAGAGAAATAACG  
+HWI-EAS443:3:1:656:734#0/1  
]babbbba^]D]ba`\_a`baa^XaSa`aba``^`aaaa`B  
@HWI-EAS443:3:1:982:567#0/1  
GCAGGTGGTACATGCAATGAGAACTATTGGGACTCATCCT  
+HWI-EAS443:3:1:982:567#0/1  
\_YVZFYVQTN¥\_]RY\_`]^WLSX^]aT`]`^WBBBBBBB  
@HWI-EAS443:3:20:1318:319#0/1  
ATCCCAATGAAATTTGCTGCAATGACGAGAGGATCACTTG  
+HWI-EAS443:3:20:1318:319#0/1  
U¥OW`b]YaYF\_ba\_UZ]]]Ta\_a\_RF`Q]¥^`\_\_NN¥aQa  
@HWI-EAS443:3:21:1778:663#0/1  
ATACAACAGGATGGGAACAGTGAACACAGAAGCTGCTTTT  
+HWI-EAS443:3:21:1778:663#0/1  
a\_aa`^X[a`XTX\_\_WYXY\_WXUBBBBBBBBBBBBBBBBBB  
@HWI-EAS443:3:21:541:1138#0/1  
TACATTTGAAAAAAGACGATCAGTAAACCACAATATCAG  
+HWI-EAS443:3:21:541:1138#0/1  
\_b\_`^\_\_¥``\_b^aVZa`[a¥WYaZ¥ZHNUaQ`Y¥\_`^NUZ  
@HWI-EAS443:3:22:507:1845#0/1  
CTGTTTTCATGCCTGATTAGTGGATTGGTGTAGTAGCCA  
+HWI-EAS443:3:22:507:1845#0/1  
a`aX^a`ba``aaa`\_a\_a`¥\_Wa^^^\_U^\_R`WO\_Y\_]\_  
@HWI-EAS443:3:23:1542:671#0/1  
TGTGAATCAGCAATCTGTTCAAGGGGCACACACTAGAC

+HWI-EAS443:3:23:1542:671#0/1  
Y^`¥0]bba\_X¥ab\_aaab]TJX\_^M¥^FWY\_[YNW]^a^  
@HWI-EAS443:3:23:1731:2012#0/1  
AGAGAAATAACGTTCCATGGGGCCAAGGAGGGGTCCTAA  
+HWI-EAS443:3:23:1731:2012#0/1  
`ab]a\_\_bb\_S`H[aV`ab^\_¥^Ha¥\_UMSKDZMTY\_\_`V  
@HWI-EAS443:3:24:1010:584#0/1  
CGCGCAGAGACTGGAAAGTGTCTTTGGAGGAAAGAACACA  
+HWI-EAS443:3:24:1010:584#0/1  
`b`[\_`aW\_Y[b\_WUT\_¥T\_\_\_aa]¥FPX\_`aa`\_Z]aQ`  
@HWI-EAS443:3:24:1479:1375#0/1  
AAAGCAGCTTCTGGGGTCACTGTTCCCATCCTGTTGTATA  
+HWI-EAS443:3:24:1479:1375#0/1  
¥[QWVaaZb[LR^F]^T`XGY¥^`¥RO\_\_^FRXYa\_^aa¥  
@HWI-EAS443:3:24:1610:1064#0/1  
GAAAGATGACCTTCTTGAATAATTTGCAGGCCTACAAGAAG  
+HWI-EAS443:3:24:1610:1064#0/1  
^^^``[M[YUYa^T\_^X¥^a`]a[Z¥\_aTG[`]WD¥aVa^  
@HWI-EAS443:3:24:1682:668#0/1  
CAGTGACCACAGAAGCTGGTTTTGGTCTAGTGTGTGCCAC  
+HWI-EAS443:3:24:1682:668#0/1  
abb[b`ZI\_T]baKaRa[F[`a¥0\_¥L[]aOHQ¥OYFFXG  
@HWI-EAS443:3:24:442:1223#0/1  
CATGGAGGTTGCTAATCAGACTAGGCAGATGGGACATGCA  
+HWI-EAS443:3:24:442:1223#0/1  
ab]b]]`aH]Y][Y]YTX`[XU\_^^[LWNRT[FRNX][WX  
@HWI-EAS443:3:24:442:1952#0/1  
CCAATAGTTCTCATTGCACGTACCATCTGCCTAGTCTGAT  
+HWI-EAS443:3:24:442:1952#0/1  
a`[]OZ]UXVXaa]¥UGUH[Va]a`\_\_TO[RP]¥G`PZ^S  
@HWI-EAS443:3:25:714:1128#0/1  
CATGGAGGTTGCTAATCAGACTAGGCAGATGGGACATGCA  
+HWI-EAS443:3:25:714:1128#0/1  
\_a`aa\_\_aRa[ZUU\_a\_KU^ZT¥¥\_PM¥FPV[FXV][JQSV  
@HWI-EAS443:3:27:1171:1986#0/1  
GGCCTCATATACAACAGGATGGGAACAGTGACAACAGAAG  
+HWI-EAS443:3:27:1171:1986#0/1  
`[aaa]a`\_`a^`\_[^FLTX[U¥]\_^Q]RYZRG]R^¥R]]  
@HWI-EAS443:3:27:401:1356#0/1  
CTAGGATGAGTCCCGATAGTTCTCATTGCATGTACCATCT  
+HWI-EAS443:3:27:401:1356#0/1  
`\_WRW[``\_WY\_`\_¥UZXX0[`aa^QWabaaPRa``\_[ZP  
@HWI-EAS443:3:29:1137:443#0/1  
AGGCCATGGAGGGTGCTAATCAGACTAGGCAGATGGTACA  
+HWI-EAS443:3:29:1137:443#0/1  
aa\_]\_]`aa\_aZF]a`QZ`\_¥\_\_a¥XRS\_¥[\_Z¥`aWWWB  
@HWI-EAS443:3:29:22:860#0/1  
GCCCCGTGGAACGTTATTTCTCTTTTGAGCTTCTTGTATA  
+HWI-EAS443:3:29:22:860#0/1  
\_\_ab`XP\_V\_`^`^¥X¥^^¥^¥^``]YMZX^^a[UZQYV¥

@HWI-EAS443:3:2:1624:347#0/1  
ATGCCCTAAATGGGAATGGGGACCCGAAGAACATGGATAG  
+HWI-EAS443:3:2:1624:347#0/1  
abb\_\_aaaa\_aa[Y`UX\_`^^WWX`VWFY]H]^Y][R^B  
@HWI-EAS443:3:2:943:1714#0/1  
CATATACAACAGGATGGGAACAGTGACCACAGAAGATGCT  
+HWI-EAS443:3:2:943:1714#0/1  
abbU``[[bSWHXaZYZ\_^]W]`\_¥¥X[UY¥QX]aMZVIX  
@HWI-EAS443:3:30:1699:1075#0/1  
ATTCTGTTTTTCATGCCTGATTAGTGGATTGGTGGGAGTAG  
+HWI-EAS443:3:30:1699:1075#0/1  
`bb\_bbaba`[abb`\_```aa`a^¥a`a`a\_BBBBBBBB  
@HWI-EAS443:3:31:1247:907#0/1  
CTTGGATCGCTGCATCTGCACTCCCATTGCTTCTGGTAG  
+HWI-EAS443:3:31:1247:907#0/1  
[`abbb¥[a¥[WWWaa`^aU```¥Y¥\_Z^a```^YFYPZP  
@HWI-EAS443:3:31:1663:819#0/1  
CAACTGGCAAGTGCACCAGTTGAACAGCTTAGTGACACCT  
+HWI-EAS443:3:31:1663:819#0/1  
abaabb]bab]ba`aaZbbbbbbaababaa\_]`aUa^]`  
@HWI-EAS443:3:32:707:1669#0/1  
AAAAAGACGATCAGTAATCCACAATATCAGGCGCAAGATC  
+HWI-EAS443:3:32:707:1669#0/1  
MXTS]VS`SLL`[ZG¥aXXVTTa]TZNPGDDEUG[Y[\_Qa  
@HWI-EAS443:3:33:1074:470#0/1  
CTGTTTTTCATGCCTGATTAGTGGATTGGTAGTAGTAGCCA  
+HWI-EAS443:3:33:1074:470#0/1  
aa`Z`b\_\_`aba``babbbaZbbabaX\_Q¥`PR\_H]LDXX  
@HWI-EAS443:3:33:1650:644#0/1  
GATGCTGTGAATCAGCAATCTGTTCCACAAGCGGCACACAC  
+HWI-EAS443:3:33:1650:644#0/1  
aaa^¥¥\_¥\_Ua\_X[`R\_X¥Z`[Y[R¥RZZ]VQPHUWWUY  
@HWI-EAS443:3:33:447:1059#0/1  
ATGGGGCCAAGGAGGTGTCCTAAGCTATTCAACCGGTGC  
+HWI-EAS443:3:33:447:1059#0/1  
Y¥b\_RVa\_¥X\_^^`¥V]\_abb]`Z\_``\_`\_]`]]\_RLWVO[  
@HWI-EAS443:3:33:857:856#0/1  
CGCAGAGACTGGAAAGCGTCTTTGCAGGAAAGAACACAGA  
+HWI-EAS443:3:33:857:856#0/1  
ab\_¥XQ\_^aT\_aa^[Z[ZHT¥LaX¥aa\_VGRNS[T¥YY^U  
@HWI-EAS443:3:34:114:214#0/1  
AGAAGCTGCTTTTGGTCTCGTGTGTGCCACTTGTGAACAG  
+HWI-EAS443:3:34:114:214#0/1  
¥0]W]`^R[Q^^YX¥QTWGXVOLWN[0[¥[BBBBBBBBBB  
@HWI-EAS443:3:34:1702:320#0/1  
GCCTCATATACAACAGGATGGGAACAGTGAGCACAGAAGC  
+HWI-EAS443:3:34:1702:320#0/1  
`^b`bbb[abbbV[aaTJ¥]baYaa\_aRaTGSW]\_aUZUU  
@HWI-EAS443:3:34:299:498#0/1  
CGCAGAGACTGGAAAGTGTATTTGCAGGAAAGAACACAGA

+HWI-EAS443:3:34:299:498#0/1  
abbba`bbbZaaaba`bYH^abbaaaaa]\_a\_R¥L\_`¥  
@HWI-EAS443:3:35:1422:376#0/1  
TGACCACAGAAGCTGCATTTGGTCTAGTGTGCCACTTG  
+HWI-EAS443:3:35:1422:376#0/1  
aabababba`ba^aa`aba`aa\_``aaYa\_a\_aaX`Y\_^`  
@HWI-EAS443:3:35:1781:62#0/1  
ACTAGACCAAAACCAGCTTCTGTGGTCACTGTCCCATCC  
+HWI-EAS443:3:35:1781:62#0/1  
^^aba¥I^]abWHU]a`\_]N^[`ZZ\_Y¥[[RNYWXNOLT  
@HWI-EAS443:3:36:1118:1425#0/1  
CTGTTCACAAGTGGCACACACTAAACCAAAAGCAGCTTCT  
+HWI-EAS443:3:36:1118:1425#0/1  
M\_Q^`¥X\_b`b]]X\_^` [¥ba[^bab\_¥¥¥]`^Z\_Z\_aa  
@HWI-EAS443:3:36:120:870#0/1  
CATTGCTTCTGGTAGGCCTTCAAATTTTCAAGAAGGTCA  
+HWI-EAS443:3:36:120:870#0/1  
abbbbb\_bbbb[[Xbbbbbb``abbbb\_bbba`aa\_]a  
@HWI-EAS443:3:36:600:1966#0/1  
CACTAGACCAAAAGCAGCTTCTGTGGTACTGTCCCATC  
+HWI-EAS443:3:36:600:1966#0/1  
a^aZZ\_Ua`SZ^TS^^^ [¥^^\_QQNXOFR`PUZRR[aVV^  
@HWI-EAS443:3:37:1726:488#0/1  
AGCCATATGTCTGTGAGACCGATGCTGTGAATCAGCAATC  
+HWI-EAS443:3:37:1726:488#0/1  
abb\_]Vbaba^baY[S`^\_Ua¥a\_]a\_WLH^^Ya¥P``UG  
@HWI-EAS443:3:37:291:1939#0/1  
CCGAGATCGCGCAGAGACTGGAAAGTGTCTCTGCAGGAAA  
+HWI-EAS443:3:37:291:1939#0/1  
aab`aa]aZbba`aa[ab^^^¥a`QS\_¥VKDV^a¥^\_Zaa  
@HWI-EAS443:3:37:50:525#0/1  
CTCTCATGGAATGGCTAAAGACAAGACCCATCTTGTACC  
+HWI-EAS443:3:37:50:525#0/1  
aab\_a`aa`aa`a^a¥`aXOVYPXTSY¥GYSPXOMXLT`  
@HWI-EAS443:3:37:913:727#0/1  
GCCGAGATCGCGCAGAGACTGGAAAGTGTGTTGCAGGAA  
+HWI-EAS443:3:37:913:727#0/1  
`aU¥`aaW^aaa[TYL]X[`OQGL[¥¥\_FDOUM[RUUUQP  
@HWI-EAS443:3:37:920:1195#0/1  
GGGCCTCATATACAACAGGATGGGAACAGGGACCACAGAA  
+HWI-EAS443:3:37:920:1195#0/1  
X`^]^[`bab]^¥\_Y`\_^XU`aa^`QO]HX^`b¥^^`\_a  
@HWI-EAS443:3:38:1219:1482#0/1  
CAGCCATCTGTTCCATAGCCTTTGCCGTAGTGGTAGCCAG  
+HWI-EAS443:3:38:1219:1482#0/1  
ab[Zabb^aY^]PV^WZ^[UYV[FSYBBBBBBBBBBBBBB  
@HWI-EAS443:3:38:1226:72#0/1  
ACCGATGCTGTGAATCAGCAATCTGTTCCATAAGTGGCACA  
+HWI-EAS443:3:38:1226:72#0/1  
`[baU]^U^ZT]S`a`[a]aa`a]X[STDW[PET\_[\_]\_R



@HWI-EAS443:3:38:1508:1480#0/1  
GATGGTACATGCAATGAGA ACTATTGGGACTCATACTAGC  
+HWI-EAS443:3:38:1508:1480#0/1  
[abaVUbbabbaaaa^`\_Y^]a]bbb`b`aZbbGba\_`Y  
@HWI-EAS443:3:38:1666:37#0/1  
GGCCAAGGAGGGTCACTAAGCTATTCAACTGGTGCACTT  
+HWI-EAS443:3:38:1666:37#0/1  
aaWU¥^ab\_ZQFYPP`T^[^\_X`^^^ZVPJPPQNFSSS  
@HWI-EAS443:3:38:855:1289#0/1  
ATACATTTGAAAAAAGACGATCAGTAATCAACAATATCA  
+HWI-EAS443:3:38:855:1289#0/1  
aaaababaaaa\_a]Ua\_aa``\_UPTH¥`^WU^W\_YSTVYX  
@HWI-EAS443:3:38:894:725#0/1  
GCCTCGTATACAACAGGATGGGAACAGTGACCACAGAAGC  
+HWI-EAS443:3:38:894:725#0/1  
aaaaaaa\_aa\_`a^`aa¥\_\_`^]a^\_\_W\_¥UGWW¥¥WW^H  
@HWI-EAS443:3:3:1160:1584#0/1  
CTACGGCAAAGGCTATGGAAGAGATGGCTGGATCGAGTGA  
+HWI-EAS443:3:3:1160:1584#0/1  
\_[JRb^aa^]UaZbUbbUbZHbb`Sba^``¥Z\_QYZaQa\_  
@HWI-EAS443:3:40:294:1340#0/1  
TGGGCCTCATATACAACAGGATGGGACCAGTGACCACAGA  
+HWI-EAS443:3:40:294:1340#0/1  
``aaaaabaaaaXaaaaaa`^`[[¥G¥W^T\_aa\_S\_^Z¥  
@HWI-EAS443:3:43:1052:446#0/1  
GATATTTGCTGCAACGACGAGAGGATCACTTGAATCGCTG  
+HWI-EAS443:3:43:1052:446#0/1  
^^`^`a`^aRZPaaX^`X\_aaaaXV]`U[`]PTUZ[¥N]  
@HWI-EAS443:3:44:1105:416#0/1  
TTCCCATCTGTTGTATATGAGGCCAATGCAACTGGCAAG  
+HWI-EAS443:3:44:1105:416#0/1  
aZ]a00TSaaaVa^`]aZZXZa]`aG^aaY\_UOV\_a¥]]`  
@HWI-EAS443:3:44:1655:622#0/1  
TGCAACTGGCACGTGCACCAGTTGAATAGCTTAGTGACAC  
+HWI-EAS443:3:44:1655:622#0/1  
UQVU\_a`[WWUHW\_a\_X\_`T`XY`¥ZPYVW¥¥Y^UV¥SYU  
@HWI-EAS443:3:44:569:672#0/1  
CAGTAATCCACAATATCAGGTGCAAGATCCAAATGATATT  
+HWI-EAS443:3:44:569:672#0/1  
XSZT^SSZ`J\_Y`bY`bbV^a\_RU]\_ZOIR\_bZ`ba`^  
@HWI-EAS443:3:44:611:939#0/1  
GAAAGATTACCTTCTTAAAAATTTGCAGGCCTACCAGAAG  
+HWI-EAS443:3:44:611:939#0/1  
VW¥Ta\_ZI^S[`aaa[`b`bb^Xaaaaa^]\_aa`S`[a[a  
@HWI-EAS443:3:44:726:1564#0/1  
CATGGCCTCATATACAACAGGATGGGAACAGAGACCACA  
+HWI-EAS443:3:44:726:1564#0/1  
\_a`bb`aba\_bba`a`aba\_^¥^Ua`bababbGaV]LaIa  
@HWI-EAS443:3:45:500:860#0/1  
ACACACTAGACCAAAAGCAGCTTCTGTGGTCACTGGTCCC

+HWI-EAS443:3:45:500:860#0/1  
aZ`a`X`YZ[a` `[LY\_T]]ZZVVLU\_KDXU#BBBBBB  
@HWI-EAS443:3:46:1017:1109#0/1  
GCTGGTTAGCACTACGGCAAAGGCTATGGAACAGATGGCT  
+HWI-EAS443:3:46:1017:1109#0/1  
aa``^]\_T¥)`¥Y^`\_ZVSV\_^^^XQX¥¥¥U^^[UY[SS  
@HWI-EAS443:3:46:1180:1757#0/1  
CAGCAATCTGTTCCACAAGCGGCACACACTAGACCAAAAGC  
+HWI-EAS443:3:46:1180:1757#0/1  
`ZX`a)`^a`a\_U`a\_aaG[^^b\_aa\_a\_\_ZS\_Qa`a[¥V  
@HWI-EAS443:3:46:777:556#0/1  
GCACTACGGCAAAGGCTATGGGACAGATGGCTGGATCGAG  
+HWI-EAS443:3:46:777:556#0/1  
`^^X`\_P\_^Z[Z[PSN¥UETFPTZ`KSPTNS`WBBBBBB  
@HWI-EAS443:3:46:803:1634#0/1  
ATCCCAATGATATTTGCTGCAATGACGAGAGGAGCACTTG  
+HWI-EAS443:3:46:803:1634#0/1  
]V\_a[`aSSUW`RUROH[^¥SaTSW]a`¥PXaTGJ¥FT^P  
@HWI-EAS443:3:47:1287:1220#0/1  
CACTAAACTATTCAACTGGTGCAC TTGCCAGTTGCATGGG  
+HWI-EAS443:3:47:1287:1220#0/1  
^abab```bbbaabbabbaabbbabbbab`aabb`aaa`a  
@HWI-EAS443:3:47:327:763#0/1  
GAAATAACGTTCCATGGGGCCAAGGAGGGGTCAC TAAGCT  
+HWI-EAS443:3:47:327:763#0/1  
aa`Xaaaa]bU\_I[a\_U^HWM[`[aGb¥F\_\_Za\_\_^a\_N\_  
@HWI-EAS443:3:48:306:747#0/1  
GGATGAGTCCCAATAGTTCTCATTGCATGTACTATCTGCC  
+HWI-EAS443:3:48:306:747#0/1  
ab`a``¥ZRXb`¥Y`aaaa[\_`a\_\_\_\_\_aa^`]aa\_\_Y\_] ]  
@HWI-EAS443:3:48:877:2043#0/1  
CAGAGACTGGAAAGTGTCTTTGCAGGAAAGAAGACAGATC  
+HWI-EAS443:3:48:877:2043#0/1  
^`a`bab```[`ba]0^^^]OZZ]¥]H)``a[D[HUNW`W  
@HWI-EAS443:3:49:1208:1757#0/1  
CAAACCGTATTTAAAGCGACGATAAATACATTTTAAAAAA  
+HWI-EAS443:3:49:1208:1757#0/1  
`aaaX`\_Zaaaaa\_a`a]S\_]a\_\_¥`[\_\_\_\_]\_`\_a¥[`[  
@HWI-EAS443:3:49:1546:2022#0/1  
CAGTGACCACAGAAGCTGCTTTTGGTCTAGTGTGGGCCAC  
+HWI-EAS443:3:49:1546:2022#0/1  
WSaS\_aW\_a]a`b`[^`^]\_\_¥P^[`b]VRX[D[QZ¥Q  
@HWI-EAS443:3:4:1573:1121#0/1  
GAGGCTCTCATGGAATGGCTAAAGACAAGAACAATCTTGT  
+HWI-EAS443:3:4:1573:1121#0/1  
a`aaaaa`\_`aa^a\_\_a\_^aa\_]Z[ ]\_\_HWY\_VRX\_\_B  
@HWI-EAS443:3:50:1254:933#0/1  
GTTCTGTCCCCATTCCCATTTAGGGCATT TTTGGACAAAG  
+HWI-EAS443:3:50:1254:933#0/1  
\_a\_¥¥]b\_^\_Z^\_]aa]Z^aaa`^¥YW¥aaa]]ZY[[[¥

@HWI-EAS443:3:50:295:857#0/1  
CAGCAATCTCTTCACAAGTGGCACACACTAGACCAAAAAGC  
+HWI-EAS443:3:50:295:857#0/1  
[\_¥Zaa[[ZK\_[[`]`\_WSZ\_baW\_ab`a``]VZ`V]\_[¥  
@HWI-EAS443:3:52:1112:273#0/1  
ACCTGCTATTGTGGATTACTGATCGTCTTTTTTTCAAATG  
+HWI-EAS443:3:52:1112:273#0/1  
a`ab\_Y\_`a`]]aa\_a\_`^\_`¥[\_Y]a\_aa\_a\_V^[\_`  
@HWI-EAS443:3:52:165:111#0/1  
GCCTCATATACAACAGGATGGGTACAGTGACCACAGAAGC  
+HWI-EAS443:3:52:165:111#0/1  
a\_a``aa\_`\_`^`]]`\_\_Y^U]\_X\_^WWTVPWXXU  
@HWI-EAS443:3:54:550:1900#0/1  
GGCCTCATATACAACAGGATGGGACCAGTGACCACAGAAG  
+HWI-EAS443:3:54:550:1900#0/1  
¥U¥`]]\_ZU\_ZT\_¥YZVYQ¥Wa[YJD[]G]X[VVVUZZYQ  
@HWI-EAS443:3:55:107:471#0/1  
CATGGGGCCAAGGAGGTGGCACTAAGCTATTCAACTGGTG  
+HWI-EAS443:3:55:107:471#0/1  
^\_abb\_U^Y\_aaaTXaNPM\_aYTQTWXVR[X[UHNTYNYJ  
@HWI-EAS443:3:56:466:420#0/1  
AAAGCAGCTTCTGTGGTCACTGTTCTCCTCCTGTTGTATA  
+HWI-EAS443:3:56:466:420#0/1  
ZaWa¥\_\_]a]\_[¥VV`XH^a]`YGXH][Ta]U¥Z]R^S\_I  
@HWI-EAS443:3:56:510:827#0/1  
GCTAGCACTACGGCAAAGGCTATGGAACAGGTGGCTGGAT  
+HWI-EAS443:3:56:510:827#0/1  
Q\_XH\_RT\_¥]]`^W^^Q]]U]]ROTNMZHYFMOO^BBBBB  
@HWI-EAS443:3:56:873:669#0/1  
AACACAAATCCTAAAATCCCTTAGTCAGAGGCGACAAGA  
+HWI-EAS443:3:56:873:669#0/1  
`Ya``YYXa^`\_`T]`\_\_b]S\_Z¥^YaaaXb[F\_QV\_\_a^  
@HWI-EAS443:3:57:676:2004#0/1  
CGCAGAGACTGGAAAGTGTTCAGGAAAGAACACAGA  
+HWI-EAS443:3:57:676:2004#0/1  
aWI\_\_a[bbbbab`]bVb`XZZO]b``]a`b^MR`b`]`a  
@HWI-EAS443:3:57:72:1257#0/1  
TTCTGTTTTTCATGCCTGATTAGTGGATTGGTGGGAGTAGC  
+HWI-EAS443:3:57:72:1257#0/1  
`baab\_aaaaaa\_]aaabaq]^a¥a`^]`S]XFYBBBBB  
@HWI-EAS443:3:58:1484:758#0/1  
GCACCTGATATTGTGGATTACTGATCGTATTTTTTTCAA  
+HWI-EAS443:3:58:1484:758#0/1  
a`[JYT\_OY\_WZYP`SG^aRQRTTT[TJFSZ¥¥^Z¥¥Y[N  
@HWI-EAS443:3:58:397:1505#0/1  
ATGGAGGGTGCTAATCAGACTAGGCAGATGGTACATGCAA  
+HWI-EAS443:3:58:397:1505#0/1  
aX``\_a]HUY^aabaUZ¥\_XTVTW]U][NUSQ¥QSTHM\_^  
@HWI-EAS443:3:58:568:204#0/1  
CTCCCATTGCTTCTGGTAGGCCTGCAAATCTTCAAGAAG

+HWI-EAS443:3:58:568:204#0/1  
a\_aab]bbaa`baa^PDY`[YLXRY¥a[XFZZSRXaY[\_  
@HWI-EAS443:3:58:951:601#0/1  
TACATTTGAAAAAAGACGATCAGTAATCTACAATATCAG  
+HWI-EAS443:3:58:951:601#0/1  
aa\_aabbb`aaaa`a`a`YU¥XNU\_UUO]X^^T]^NTZ  
@HWI-EAS443:3:59:1040:357#0/1  
GCCTCATATACAACAGGATGGGAACAGCGACCACAGAAGC  
+HWI-EAS443:3:59:1040:357#0/1  
`¥`aOR0^aaaU[a]YUP¥]YVP^\_W[BBBBBBBBBBBB  
@HWI-EAS443:3:59:1509:1009#0/1  
ATGGGCCTCATATACAACAGGATGGGAACAGTGATCACAG  
+HWI-EAS443:3:59:1509:1009#0/1  
ZaZF[\_WUZX`]`]aW`]`[aU``\_Sa`RWQXUIIPU^\_  
@HWI-EAS443:3:59:164:1508#0/1  
CATTGGGATCTTGCACCTGATATTGTGGATTACTGGTCGT  
+HWI-EAS443:3:59:164:1508#0/1  
`R`^^OTZaaaaZ¥¥ab`a`aa`b`[aYaaa[R`WGQYMS  
@HWI-EAS443:3:59:865:1682#0/1  
GGATTACTGATCGTCTTTTTTCAAATGTATCTATCGTCG  
+HWI-EAS443:3:59:865:1682#0/1  
abaaaa\_aa`a\_a`aaaaaa\_aaaaa\_aaY`^^VRYTT  
@HWI-EAS443:3:5:1790:1413#0/1  
CAATGACCAGAGGATCACTTGAATCGCTGCATCTGCACTC  
+HWI-EAS443:3:5:1790:1413#0/1  
Va`ab][G¥[aaaababaabbbabUb[ba[bb\_ab]a`b^  
@HWI-EAS443:3:5:182:855#0/1  
GAACAGCGACCACAGAAGCTGCTTTTGGTCTAGTGTGTGC  
+HWI-EAS443:3:5:182:855#0/1  
a\_a\_Y¥L]\_\_\_\_`a]\_^ZH]¥RZ`\_^T`VT[^]Y\_X]]BB  
@HWI-EAS443:3:5:922:691#0/1  
CACACTAGACCAAAAAGCAGCTTCTGTGGTCAGTGTCCCA  
+HWI-EAS443:3:5:922:691#0/1  
[aZU[b`]abab[TWX[a`a]`¥`b`¥[¥aG]bT`TJ\_B  
@HWI-EAS443:3:60:134:1872#0/1  
GAGACCGATGCTGTGAATCAGCGATCTGTTCACAAGTGGC  
+HWI-EAS443:3:60:134:1872#0/1  
aaaba`[\_\_\_`ba\_¥aa^`a`LY\_]`X^\_¥`^[\_SQWV¥  
@HWI-EAS443:3:60:1783:1585#0/1  
CAACTGGTAAGTGCACCAGTTGAATAGCTTAGTGACACCT  
+HWI-EAS443:3:60:1783:1585#0/1  
\_ba¥Q\_WH^\_aN`a]^^`]ZQT¥^]^^`\_`YNVUUSZ^Q  
@HWI-EAS443:3:61:462:1338#0/1  
CTGTTTTCATGCCTGATTAGTGGATTGGTGGGAGTAGCCA  
+HWI-EAS443:3:61:462:1338#0/1  
abbbbbbbbbbbbbbbbbbb`¥b`[`aba`^BBBBBBBB  
@HWI-EAS443:3:62:484:1544#0/1  
CACTCCATTCTGCTTCTGGTAGGCCTGCAAATCTTCAAGA  
+HWI-EAS443:3:62:484:1544#0/1  
ababbabbaaa^`bbaa[a\_\_aaa`\_abbb]``aa`aaaa

@HWI-EAS443:3:63:676:573#0/1  
ATATCATTGGGATCTTGCACCTGCTATTGTGGATTACTGA  
+HWI-EAS443:3:63:676:573#0/1  
Y`aaaaaaaa`aab]X` `aab]WQQR[MPSRSLVYT  
@HWI-EAS443:3:64:438:380#0/1  
TGGGCCTCATATACAACAGGATTGGAACAGTGACCACAGA  
+HWI-EAS443:3:64:438:380#0/1  
]bbZa`]a\_` `^aYa^b`a` [b¥J`aaa^aaaZZaa]\_  
@HWI-EAS443:3:65:1111:1779#0/1  
CACAGAAGCTGCTTTTGGTCTAGCGTGTGCCACTTGTGAA  
+HWI-EAS443:3:65:1111:1779#0/1  
aab¥a`¥\_aRa^\_ZTT¥RMZQ]HZQ`G\_\_Y`\_NNJQU]¥  
@HWI-EAS443:3:65:734:401#0/1  
GCCTCATATACAACAGGATGGGAACAGTGACCACGGAAGC  
+HWI-EAS443:3:65:734:401#0/1  
ababbabbbbaabbaababaa`aaaa\_aa`aaaa\_  
@HWI-EAS443:3:68:1557:58#0/1  
GAACAGTGACCACAGAAGCTGCTTTTGGGCTAGTGTGTGC  
+HWI-EAS443:3:68:1557:58#0/1  
\_^`ab`[^a\_]WX^aa]P]\_SX` `^ZWDHRU]SaT^YZK  
@HWI-EAS443:3:68:657:1772#0/1  
GACGAGAGGATCTCTTGAATCGCTGCATCTGCACTCCCAT  
+HWI-EAS443:3:68:657:1772#0/1  
`b`aa\_WMP[JYLMyV^]\_X]S\_GYa¥[TVaUJVGv[MYV  
@HWI-EAS443:3:68:802:871#0/1  
GTTCCATGGGACCAAGGAGGTGCTACTAAGCTATTCAACT  
+HWI-EAS443:3:68:802:871#0/1  
aaaa`aaaaa`aaa`a`Y^¥`a`aa` `` `a\_\_` `\_^  
@HWI-EAS443:3:69:1238:722#0/1  
ATCTGTTCAAGCGGCACACTAGACCAAAAGCAGCTT  
+HWI-EAS443:3:69:1238:722#0/1  
N[¥\_\_]Y\_X]^]RGT`¥[\_a^]\_\_XRZU`¥¥U\_WT`¥]¥  
@HWI-EAS443:3:69:1516:587#0/1  
GCATGGGCCTCATATCCAACAGGATGGGAACAGTGACCAC  
+HWI-EAS443:3:69:1516:587#0/1  
aa`b^a`aaa^a`a]HZ\_\_¥^a¥^`\_Y`\_¥\_\_S`\_UQ¥W  
@HWI-EAS443:3:6:1005:1328#0/1  
ATCCACTAATCAGGCATGAAAACAGAATGGAGCTGGCTAG  
+HWI-EAS443:3:6:1005:1328#0/1  
aUIYaa`^\_^W¥W\_\_a^S¥\_IO\_^UYZ`^GYZUM[R\_BB  
@HWI-EAS443:3:6:1323:608#0/1  
GGGAGTGCAGATGCAGCGATTCAAGGATCCTCTCGTCAT  
+HWI-EAS443:3:6:1323:608#0/1  
aabX`K`PXUU[¥MT\_]`Q]^YNZVHPKFUV¥W[UBBBBB  
@HWI-EAS443:3:70:1685:857#0/1  
GTGCCACATGTGAACAGATTGCTGATTCACAGCATCGGTC  
+HWI-EAS443:3:70:1685:857#0/1  
Wa`¥[XUW^¥ZabaXaaaabbab`R^]¥a^aa^¥[T]¥TK  
@HWI-EAS443:3:70:759:500#0/1  
TGGGAACGGTGACCACAGAAGCTGCTTTTGGTCTAGTGTG

+HWI-EAS443:3:70:759:500#0/1  
aa` `[aPORQ`aaaababbbbaaaaaaaaaa^b]\_\_[\_Z\_]\_  
@HWI-EAS443:3:71:1241:59#0/1  
CACAAAGTGGTACACACTAGACCAAAAGCAGCTTCTGTGGT  
+HWI-EAS443:3:71:1241:59#0/1  
Wb\_bbaa`aGaab\_ba[aaa[a\_b[baVbaaaabbb\_\_`^  
@HWI-EAS443:3:72:1630:126#0/1  
GGAGGTGTCACCTAAGCTATTCAACCGGTGCACTTGCCAGT  
+HWI-EAS443:3:72:1630:126#0/1  
a`La]I\_b\_bJ`a`aS`b`aa`b\_\_VDT\_Q\_NaZaNS]\_¥  
@HWI-EAS443:3:73:1247:1744#0/1  
GGGCCAAGGAGGGTCACTAAGCTATTCAACTGGTGCACT  
+HWI-EAS443:3:73:1247:1744#0/1  
aWZ][^`RaQRSZP`Y¥]a^V` `]YY]JS¥\_NN¥[OPU  
@HWI-EAS443:3:73:1640:690#0/1  
GGCCTCATATACAACAGGATGGGAACAGCGACCACAGAAG  
+HWI-EAS443:3:73:1640:690#0/1  
aYWPR]`T]XRRNNZ¥a^GUSJYZ\_WYODUVQTXU[BBB  
@HWI-EAS443:3:73:1755:60#0/1  
CACTCGATCCAGCCATCTGTTCCATAGCCTTTGTCGTAGT  
+HWI-EAS443:3:73:1755:60#0/1  
^b\_\_¥W\_XUX¥WPP]¥XYLYZVY\_[RZ¥]`a\_ZBBBBBBB  
@HWI-EAS443:3:75:1077:408#0/1  
CAGGCCTACCAGAAGCGAATGGGAGTGCAGATGGAGCGAT  
+HWI-EAS443:3:75:1077:408#0/1  
abbbbbbbbababa` `b`babbbbabababbab\_Z\_aabba  
@HWI-EAS443:3:75:178:1475#0/1  
ACAGAAGCTGCTTTTCGTCTAGTGTGTGCCACTTGTGAAC  
+HWI-EAS443:3:75:178:1475#0/1  
\_¥`^` [¥a]^GH¥^IZ^\_FLXNQRSGXSX[GQZYQ`OXQ  
@HWI-EAS443:3:76:1360:383#0/1  
ATGAGTCCAAATAGTTCTCATTGCATGTACCATCTGCCTA  
+HWI-EAS443:3:76:1360:383#0/1  
\_W\_a` ``^Hab`ba`\_` `R¥^\_¥GTa\_aaUG¥a\_[RPXaS  
@HWI-EAS443:3:76:16:279#0/1  
AGATCCCTATGATATTTGCTGCAATGACGAGAGGATCACT  
+HWI-EAS443:3:76:16:279#0/1  
Y^]\_ab`X`abba`aaYa^`a[¥`\_]`[^Y^\_ZVVTZW`  
@HWI-EAS443:3:77:1235:1240#0/1  
AAGATCCCAATGATATTTGTTGCAATGACGAGAGGATCAC  
+HWI-EAS443:3:77:1235:1240#0/1  
aUSYY[[NWW]^0`\_`\_aUXGNOY]Y`OUR\_]a^]WMPHXY  
@HWI-EAS443:3:77:1521:1291#0/1  
ACCTGATATTGTGGATTACTGATCATCTTTTTTTCAAATG  
+HWI-EAS443:3:77:1521:1291#0/1  
aaabaababbb\_a^[abaaaa\_a¥`a\_aaaaaa`\_a`\_a\_  
@HWI-EAS443:3:78:1060:993#0/1  
ACTCCGATTCGCTTCTGGTAGGCCTGCAAATTTTCAAGAA  
+HWI-EAS443:3:78:1060:993#0/1  
`^bb]^UZZZ]a`aa^]]Ra`\_aY` [¥`a]a` `a\_aa\_\_`

@HWI-EAS443:3:79:1254:1649#0/1  
ATGGGAGTGCAGATGCAGCGATTCAAGTGATCCGCTCGTC  
+HWI-EAS443:3:79:1254:1649#0/1  
ab`\_bK^I^b¥U`U^Va`U]b¥`a`WbGa`PIaHWTN[[a  
@HWI-EAS443:3:79:417:1590#0/1  
TGGGCCTCATATACAACAGGATGGGAACAATGACCACAGA  
+HWI-EAS443:3:79:417:1590#0/1  
``JabbTaW0\_Y]`\_¥`aaSXR\_aWabaVMGPYaXa^]YQ  
@HWI-EAS443:3:79:552:1062#0/1  
CACTAGACCAAAAAGCAGCTTCTGTGGTCTCTGTTCCCATC  
+HWI-EAS443:3:79:552:1062#0/1  
`a`[X\_`]]``XZ[a\_WZa\_`U[SU`RX]XXTLUURRSU¥  
@HWI-EAS443:3:79:882:1524#0/1  
CTGCTCTATCCATGTTGTTCCGGTCCCCATTCCTATTTAG  
+HWI-EAS443:3:79:882:1524#0/1  
ababaabbbbaaabaabb[a]ababbbb`abbbabb  
@HWI-EAS443:3:79:908:1171#0/1  
AACGTTCCATGGGGCCAAGGAGGTGCCACTAAGCTATTCA  
+HWI-EAS443:3:79:908:1171#0/1  
\_\_U^aa\_`[`a]WW^\_XZZ`U\_ZXYL^`\_\_WZ\_^a`[^a¥  
@HWI-EAS443:3:79:953:793#0/1  
GCCTCATATACAACAGGATGGGAACAGGGACCACAGAAGC  
+HWI-EAS443:3:79:953:793#0/1  
aaIaaaPV]a`VWPL¥ZTNPVR[\_¥VMGL¥RRVU]`NU]S  
@HWI-EAS443:3:7:1151:349#0/1  
CAATGACGAGAGGATCACTTGAATCGCTGGATCTGCACTC  
+HWI-EAS443:3:7:1151:349#0/1  
\_bbabbVb`bbabVb]\_Y````a\_SbYbXG\_SNR\_F¥`WB  
@HWI-EAS443:3:7:1662:924#0/1  
GTGGTTTACTGATCGTCTTTTTTTCAAATGTATTTATCGT  
+HWI-EAS443:3:7:1662:924#0/1  
a\_aa[a`a[aa\_a\_a¥]aaa\_`a`]]\_\_aZ\_\_`]¥\_U\_  
@HWI-EAS443:3:7:1719:229#0/1  
AAATGCCCTAAATGGGAATGGGGACGCGAACCAACATGGAT  
+HWI-EAS443:3:7:1719:229#0/1  
^]\_^WM^`\_]\_[`ba\_^VFP¥aU]SNQJNXN]]U[^BBBB  
@HWI-EAS443:3:7:197:1978#0/1  
CATTCTGTTTTCATGCCTGATTAGTGGATTGGTGGGAAGTA  
+HWI-EAS443:3:7:197:1978#0/1  
aab\_UYRQZYUZVXL`FXPM[TWPPTNXWBBBBBBBBBB  
@HWI-EAS443:3:7:28:1381#0/1  
GGGCCTCATACACAACAGGATGGGAACAGTGACCACAGAA  
+HWI-EAS443:3:7:28:1381#0/1  
\_````aaba[Jabbbbabaaabaaaaaa^aa^N]NZ]^S  
@HWI-EAS443:3:7:542:507#0/1  
GACCGATGCTGTGAATCAGCAATCTGTTACGAGTGGCAC  
+HWI-EAS443:3:7:542:507#0/1  
abb`a`S]aaaaaaabaa`aa\_Waa^\_`aRDLaW\_a¥aW  
@HWI-EAS443:3:7:797:500#0/1  
CAGCAATCTGTTCAAGTGGCAGACACTAGACCAAAAAGC

+HWI-EAS443:3:7:797:500#0/1  
Y^[W¥[R¥Y\_Y[ba\_^Ub\_]YWb\_^N^[aabaNV]Ia\_a¥  
@HWI-EAS443:3:80:809:821#0/1  
CTGTTTTTCATGCCTGATTAGTGGATTGGTGGGAGTAGCCA  
+HWI-EAS443:3:80:809:821#0/1  
^aa[ba`babbabb]bbb`baaa\_babb^aaQ]RH[BBBB  
@HWI-EAS443:3:81:1129:119#0/1  
CAAGATTGGTCTTGTCTTTAGCCATTCCATGAGAGTCTCA  
+HWI-EAS443:3:81:1129:119#0/1  
NWVR¥\_b`¥^b¥bbbb`Vb\_b\_P¥\_bb`b\_b\_`¥\_H¥bVb  
@HWI-EAS443:3:83:1076:149#0/1  
GCACCTGATATTGTGGATTACTGATCGACTTTTTTTTCAAA  
+HWI-EAS443:3:83:1076:149#0/1  
`¥¥Z¥`b¥]\_a`]T¥\_X¥]^X¥\_^WXXJV\_]`^Z\_VSYXX  
@HWI-EAS443:3:83:195:589#0/1  
GGCCTCATATACATCAGGATGGGAACAGTGACCACAGAAG  
+HWI-EAS443:3:83:195:589#0/1  
aaaaaa[aaa\_aaaa]a`\_`a`^`a``¥aV¥aa`aa\_a^\_\_  
@HWI-EAS443:3:83:876:1641#0/1  
GGGCCTCATATACAACAGGATGGGAACAGCGACCACAGAA  
+HWI-EAS443:3:83:876:1641#0/1  
ab\_U[bb`aa[babbb]\_`b^bSbU`IUVN^bbabMa`bb  
@HWI-EAS443:3:84:1622:1654#0/1  
TCCCGTTCGCTTCTGGTAGGCCTGCAAATTTTCAAGAAGG  
+HWI-EAS443:3:84:1622:1654#0/1  
V]S^baaVa`b\_a\_[`Sa\_a\_aa^`a^a`aaba[[baaaa  
@HWI-EAS443:3:84:1742:1923#0/1  
CAAGGAGGTGTCACTAAGCTATTCAACTGATGCACTTGCC  
+HWI-EAS443:3:84:1742:1923#0/1  
abU[VYRL[]Nba¥Z`RT¥][RM`aa`a]FFaYa\_]PaYa  
@HWI-EAS443:3:84:850:1656#0/1  
GGAACAGTGACCACAGAACCTGCTTTTGGTCTAGTGTGTG  
+HWI-EAS443:3:84:850:1656#0/1  
aaabbbb]aba`aaa\_b`HYW^ST¥^]W¥W¥¥BBBBBBBB  
@HWI-EAS443:3:84:990:1143#0/1  
CAGTGACCACAGAAGCTGCCTTTGGTCTAGTGTGTGCCAC  
+HWI-EAS443:3:84:990:1143#0/1  
abbSbbbaabbabb^abaaaa`\_ba`aaaa\_a¥a\_\_a^aa  
@HWI-EAS443:3:85:872:125#0/1  
TGAAAAAAGACTATCAGTAATCCACAATATCAGGTGCAA  
+HWI-EAS443:3:85:872:125#0/1  
aaa`aaa`aaa\_`aaaa^`a`\_\_`[a`aa\_W\_``[``]^`^  
@HWI-EAS443:3:86:1643:763#0/1  
ATTCTGTTTTTCATGCCTGATTAGTGGATTGGTGGGAGTAG  
+HWI-EAS443:3:86:1643:763#0/1  
ab\_WXaaa]Z^¥\_a]^`^a^a]^aaaaX`BBBBBBBBBB  
@HWI-EAS443:3:87:1113:627#0/1  
ATACATTTGAAAAAAGACGATCAGTAGTCCACAATATCA  
+HWI-EAS443:3:87:1113:627#0/1  
\_`RO\_ab`b`XQ¥`\_TPVKYHZJ[VPPGQ\_`OHV]N]ZT\_



@HWI-EAS443:3:87:1129:516#0/1  
AAGCGAATGGGAGTGCAGATGCAGCGATCCAAGTGATCCT  
+HWI-EAS443:3:87:1129:516#0/1  
^¥bba^abb`\_Ua`baa`¥¥`U`X`¥`¥]YWUX\_SZ  
@HWI-EAS443:3:87:1302:826#0/1  
CGATGCTGTGAATCAGCAATCTGTTCAAGGGGCACACA  
+HWI-EAS443:3:87:1302:826#0/1  
U[b`\_VV[bbb^¥]Y¥VK¥bTaw`a]I\_^`Na^¥\_XTWU  
@HWI-EAS443:3:87:1735:1593#0/1  
GACCCGAACAACATGGATAGAGCAGTTAAAATATACAAGA  
+HWI-EAS443:3:87:1735:1593#0/1  
a\_\_aaaa`b`Uab[baaa`^a[\_a`a\_\_`I^\_]^VXVNR  
@HWI-EAS443:3:88:84:1423#0/1  
AAAGCCGAGATCGCGCAGAGACTGGAAAGTGTCTGTGCAG  
+HWI-EAS443:3:88:84:1423#0/1  
IQ`b`b¥S^^Z\_^a`YY¥WQ[b¥ab^^^X\_XXOGX[NO^  
@HWI-EAS443:3:89:740:845#0/1  
AAGAGAAATAATGTTCCATGGGGCCAAGGAGGTGTCACTA  
+HWI-EAS443:3:89:740:845#0/1  
aa`aaaa`baKR`\_a\_aaaa\_aa`aa`b^`a`^a\_ab`\_`a  
@HWI-EAS443:3:8:1669:1304#0/1  
ACTAGACCAAAAAGCAGCTTCTGTGGTCACTGTTCCATCC  
+HWI-EAS443:3:8:1669:1304#0/1  
aaV[b`ZiA]a][ZUYQaZGV^UR`IGZFS]\_`FFY^XFK  
@HWI-EAS443:3:8:176:195#0/1  
TGATCGTCTTTTTTCAAATGTTTTTATCGTCGCTTTAAA  
+HWI-EAS443:3:8:176:195#0/1  
¥a^Y`aZ¥^X¥[`bb`U¥]DU\_^`\_Z^Ta\_¥^a`UNY  
@HWI-EAS443:3:8:256:1343#0/1  
GACCGATGCTGTGAATCAGCAATCTGTTCAAGTTGCAC  
+HWI-EAS443:3:8:256:1343#0/1  
aaa`aba`baaSaab\_aaaaa`\_\_`a`[`a`\_`\_U[\_¥a\_  
@HWI-EAS443:3:8:278:728#0/1  
GCAGGCCTACCAGAAGCGAATGGGAGGGCAGATGCAGCGA  
+HWI-EAS443:3:8:278:728#0/1  
aa]```SMWTZ¥\_FM[^`TKVIWBBBBBBBBBBBBBBBB  
@HWI-EAS443:3:90:566:274#0/1  
GCACCTGATATTGTGGATTACTGATAGTCTTTTTTTTCAA  
+HWI-EAS443:3:90:566:274#0/1  
a]P[`Ya`RJJO\_L[LWQHvy`PLMFWP\_WPYSU^QX\_UP  
@HWI-EAS443:3:90:949:1671#0/1  
GGTCTAGTGTGCCACTTGTGGACAGATTGCTGATTCAC  
+HWI-EAS443:3:90:949:1671#0/1  
aba[]`^`S`¥aaLa`^^^aa\_Q\_¥aa`¥^`\_]a\_]Y  
@HWI-EAS443:3:91:1046:772#0/1  
GGCCTATCAGAAGCGAATGGGAGTGCAGATGCAGCGATTC  
+HWI-EAS443:3:91:1046:772#0/1  
aaZ¥`¥V^^a]¥[[]]^`^V^^\_R¥XY`X\_ZKX`Z`R¥VN  
@HWI-EAS443:3:91:1541:814#0/1  
AAATGCTCTAAATGGGAATGGGGACCCGAACAACATGGAT

+HWI-EAS443:3:91:1541:814#0/1  
abb`ba\_ababaa^ab\_a\_b`V^aUKY`^a`a]]\_bb[X`  
@HWI-EAS443:3:91:291:239#0/1  
TTCGGGCCCCATTCCCATTTAGGGCATTGACAAAGC  
+HWI-EAS443:3:91:291:239#0/1  
aaba\_a\_a\_`Xaaa^`¥`\_aaa`a`Za`\_```]^W]``\_Y  
@HWI-EAS443:3:91:496:567#0/1  
CAAAGGCTATGGAACAGATGGCTGGATCGCGTGAACAGGC  
+HWI-EAS443:3:91:496:567#0/1  
abbbbbbbbababaaa\_ba\_\_aaa\_a`[[\_P`Q`SZ`]\_  
@HWI-EAS443:3:92:833:465#0/1  
GCTAGCACTACGGCAAAGGCTATGGAACAGATGGTTGGAT  
+HWI-EAS443:3:92:833:465#0/1  
ab^¥0VWXbVTb`SFVM[[OQ[WQUG\_NaBBBBBBBBBBB  
@HWI-EAS443:3:94:426:1537#0/1  
TGGGCCTCATATACAACAGGATGGGCACAGTGACCACAGA  
+HWI-EAS443:3:94:426:1537#0/1  
ab`aaaaYJXQ``aUU``TRQYVSKKMXGFOTK]RUU¥K  
@HWI-EAS443:3:95:1126:440#0/1  
TGGGCCTCATATACAACAGGATGGGAACAGGGACCACAGA  
+HWI-EAS443:3:95:1126:440#0/1  
aT]WU^QQM¥`^a\_T]^XTR¥J\_UXHZWGY\_YXTKYV[  
@HWI-EAS443:3:96:106:146#0/1  
GGAGGTTGCTAATCAGCCTAGGCAGATGGTACATGCAATG  
+HWI-EAS443:3:96:106:146#0/1  
\_`\_Z\_`a¥]^`[`XW^KU]¥ZXJXVQPRXWUU^BBBBBBB  
@HWI-EAS443:3:96:1425:1372#0/1  
GGAAAGCGTCTTTGCAGGAAAGAACACAGATCTTGAGGCT  
+HWI-EAS443:3:96:1425:1372#0/1  
]baa\_ZF¥]]U`abS`]\_Ta\_[^\_`\_`\_¥aRGa^¥QYOJ\_  
@HWI-EAS443:3:96:1454:966#0/1  
CAGGCCTACCAGAAGCGAATGGGAGGGCAGATGCAGCGAT  
+HWI-EAS443:3:96:1454:966#0/1  
aa`aZUZbaa¥`^`bXaWaSaaaP^M`U\_Z^Vb^W`VHR`  
@HWI-EAS443:3:96:465:684#0/1  
CACTAAGCTATTCAACTGGTGCACCTGCCAGTTGAATGGG  
+HWI-EAS443:3:96:465:684#0/1  
`\_]\_¥\_]`]^][VW[X\_aaUaZ¥[BBBBBBBBBBBBBBBBB  
@HWI-EAS443:3:97:1755:1609#0/1  
ACCTGATATTGGGATTACTGATCGTCTTTTTTTCAAATG  
+HWI-EAS443:3:97:1755:1609#0/1  
aaabbaaa`ZH^baa`\_0^^a\_[WaSa^baa\_¥H^aadW  
@HWI-EAS443:3:97:179:2038#0/1  
ACCAAAGCAGCTTTTGTGGTCACTGTTCCCATCCTGTTG  
+HWI-EAS443:3:97:179:2038#0/1  
a[^[RY`^aUa]`YN\_XXY]G`][LWWBBBBBBBBBBBBB  
@HWI-EAS443:3:97:911:989#0/1  
GGAGTGCAGATGCAGCGATTAAGTGATCCTCTCGTCATT  
+HWI-EAS443:3:97:911:989#0/1  
aXabTa]VaaU[]a\_a`UUUGX]aUa\_YGSZH]N`XXBBB

@HWI-EAS443:3:98:233:661#0/1  
GTCTTTTTTCAAATGTATTTATCGTCGCTTTATATACGG  
+HWI-EAS443:3:98:233:661#0/1  
^Y]^0]]X]bUaXTXRDV¥X]XX¥a`VL^NDX¥FM[BBBB  
@HWI-EAS443:3:98:353:1702#0/1  
GATCCCAACGATATTTGCTGCAATGACGAGAGGATCACTT  
+HWI-EAS443:3:98:353:1702#0/1  
`\_Y``\_¥\_S`Z[`\_aa¥^TV\_a¥\_YUZ]Y]SX]^U\_W[W  
@HWI-EAS443:3:99:455:1464#0/1  
ACCTGATATTGTGGATTACTGATCGTGTTTTTTTCAAATG  
+HWI-EAS443:3:99:455:1464#0/1  
```bb`b`Vaa\_a^aa^\_ba\_aa`^Ha\_aabaa\_^^`\_a  
@HWI-EAS443:3:99:938:1297#0/1  
CAAGTGGCACACACTAGACCAAAGCAGCTTCTGTTGTCA  
+HWI-EAS443:3:99:938:1297#0/1  
a)`UQXQ\_]]WX¥Taa^[]a[Y`b\_\_^aU`Z]bUGH[WZB  
@HWI-EAS443:3:9:1502:1865#0/1  
CAAGTGGCACACACTAGACCAAAGCAGCTTGTGTGGTCA  
+HWI-EAS443:3:9:1502:1865#0/1  
Q¥a\_Taa[]R¥b\_]\_V`\_Za]ba¥U\_b`]VJ\_`XbbPSB  
@HWI-EAS443:3:100:727:459#0/1  
ACAGTGACCACAGAAGCTGCTTTTGGTCTAGTGTGTGACA  
+HWI-EAS443:3:100:727:459#0/1  
[Uaba[`bb`SXb\_PW¥YaNU\_YRVWFFP]SG]M]\_BBBB  
@HWI-EAS443:3:13:461:1336#0/1  
CCGAGTGATCCTCTCGTCATTGCAGCAAATATCATTGGGA  
+HWI-EAS443:3:13:461:1336#0/1  
aXUN¥Q\_\_R]]\_\_^]XYaY]\_Q\_^\_PM^]V^V]X]XVY¥Y  
@HWI-EAS443:3:14:1690:843#0/1  
CGGGCTTCTTGTATAGTTTAACTGCTCTATCCATGTTGTT  
+HWI-EAS443:3:14:1690:843#0/1  
abaZ^[aQ]ZXaaa]YW`¥\_\_a[`XUI]\_`YV]\_aV^`^V  
@HWI-EAS443:3:19:1083:1248#0/1  
GCGGGCCTACCAGAAGCGAATGGGAGTGCAGATGCAGCGA  
+HWI-EAS443:3:19:1083:1248#0/1  
`b]b`aa^ba\_]Xa\_aaZaaba``a]aaZ^a]a`aa¥aY  
@HWI-EAS443:3:26:1320:1638#0/1  
CGCGTCACTAAGCTATTCAACTGGTGCCTTGCCAGTTGC  
+HWI-EAS443:3:26:1320:1638#0/1  
\_`\_VZZ[R\_RTZ¥\_¥\_YOV\_Z\_\_^0]H[HP\_aNOFKVNRF  
@HWI-EAS443:3:27:544:600#0/1  
CCGTGGAACGTTATTTCTCTTTTGAGCTTCTTGTATAGTT  
+HWI-EAS443:3:27:544:600#0/1  
abaabbabbb\_\_bbabaa\_aaaa\_a\_aaa`a``]a`\_¥\_\_  
@HWI-EAS443:3:34:1552:264#0/1  
GGCCATGGAGGTTGCTAATCAGACTAGGCAGATGGTAAAT  
+HWI-EAS443:3:34:1552:264#0/1  
ab¥]aaba`aaX`aY^\_]WRZ\_ZN]^`\_]\_\_TO]SGRVBB  
@HWI-EAS443:3:37:160:1491#0/1  
CCCCCCCCATGGAACGTTATTTCTCTTTTGAGCTTCTTGT

+HWI-EAS443:3:37:160:1491#0/1  
abaZabbaa`¥`a`a`\_aa`aaa`\_[aS]^^`a\_ZU  
@HWI-EAS443:3:37:85:229#0/1  
CAAGATTGGTCTTGTCTTTAGCCATTCCATGAGAGCCGAC  
+HWI-EAS443:3:37:85:229#0/1  
abbabaa\_aVaaaa^a`\_`a^a`]Z^aaQ¥WaQJ¥`\_^]¥  
@HWI-EAS443:3:38:333:396#0/1  
ATTCTGTTTTTCATGCCTGATTAGTGGATTGGTGGTAGGAG  
+HWI-EAS443:3:38:333:396#0/1  
]aba`b`\_[V`a`aa]^baa`^a]aYW^R[BBBBBBBBBB  
@HWI-EAS443:3:3:121:648#0/1  
ATTCTGTTTTTCATGCCTGATTAGTGGATTGGTGGTAGGAG  
+HWI-EAS443:3:3:121:648#0/1  
aa\_aab^aaaa`a\_\_aa\_aa`aSa`\_\_\_a]MV[BBBBBB  
@HWI-EAS443:3:40:176:181#0/1  
GGATTACTGATCGTCTTTTTTTCAAATGTATTTATCGCCG  
+HWI-EAS443:3:40:176:181#0/1  
`YIP`VSNKVY]S[¥OUZ¥\_VTBBBBBBBBBBBBBBBB  
@HWI-EAS443:3:45:120:214#0/1  
CCCCGCCTCATATACAACAGGATGGGAACAGTGACCACAG  
+HWI-EAS443:3:45:120:214#0/1  
aabaaaaa`\_V¥`\_`\_a]QV^a\_\_RZR`aS`\_¥[^¥[\_  
@HWI-EAS443:3:45:455:837#0/1  
GGGGTTGCTAATCAGACTAGGCAGATGGTACATGCAATG  
+HWI-EAS443:3:45:455:837#0/1  
^\_bab[bbbbbbbaabbabbaaa\_a`aaa`U^`aaa^aa  
@HWI-EAS443:3:46:224:143#0/1  
ATTCTGTTTTTCATGCCTGATTAGTGGATTGGTGGTAGGAG  
+HWI-EAS443:3:46:224:143#0/1  
\_¥¥][T\_\_\_\_\_R`]S¥\_]`\_\_aW\_]WBBBBBBBBBBBB  
@HWI-EAS443:3:46:840:210#0/1  
ATACAACAGGATGGGAACAGTGACCACAGAAGCTGCTCTT  
+HWI-EAS443:3:46:840:210#0/1  
abbbabbabb\_baaa`a^`a\_aa`Y`\_aaVa\_\_`TNYLW  
@HWI-EAS443:3:46:907:847#0/1  
ATTCTGTTTTTCATGCCTGATTAGTGGATTGGTGGTAGGAG  
+HWI-EAS443:3:46:907:847#0/1  
]aab\_aa]aba]bbYabba^W`bYaa^U\_T]HaBBBBBBB  
@HWI-EAS443:3:50:1003:383#0/1  
GTCGGATTACTGATCGTCTTTTTTTCAAATGTATTTATCG  
+HWI-EAS443:3:50:1003:383#0/1  
ab`a^abbab`]`]`a`abbaaaaTa\_^a\_Yaaaa^]W`  
@HWI-EAS443:3:54:333:854#0/1  
GCCTCATATACAACAGGATGGGAACAGTGACCACAGACGC  
+HWI-EAS443:3:54:333:854#0/1  
aaab``^`^`a`aaa[¥aaaaX`]U^a`a`\_a\_XJV^  
@HWI-EAS443:3:54:373:1349#0/1  
TACTGATCGTCTTTTTTTCAAATGTATTTATCGTCGCATT  
+HWI-EAS443:3:54:373:1349#0/1  
abaa`aaaWaaaaabb`a\_\_a`a]aaaa`^a[^\_^\_

@HWI-EAS443:3:56:648:966#0/1  
CATGATCTGTGTTCTTTCCTGCAAAGACACTTCCAGTCT  
+HWI-EAS443:3:56:648:966#0/1  
`\_¥^Z`^a\_]b`\_Y\_]a\_V[Xaa\_]\_YZXb`\_RX[RY`  
@HWI-EAS443:3:56:746:102#0/1  
CGGGCTTCTTGTATAGTTTAACTGCTCTATCCATGTTGTT  
+HWI-EAS443:3:56:746:102#0/1  
abbaabbabbbaabaa`baaaaaaa`a`a`\_ab`aa`  
@HWI-EAS443:3:59:1714:1602#0/1  
GTGGCACCTGATATTGTGGATTACTGATCGTCTTTTTTTC  
+HWI-EAS443:3:59:1714:1602#0/1  
a\_aa^a\_\_`a\_a`aaa]a\_¥`a`^a`Z]]^^S\_\_\_[^\_ZT  
@HWI-EAS443:3:60:1648:501#0/1  
GGGCACTGTTCCCATCCTGTTGTATATGAGGCCCATGCAA  
+HWI-EAS443:3:60:1648:501#0/1  
[`H`RaQSZ\_\_WT]ZPT[] []aUU``\_QPUDM]SRSTSX^  
@HWI-EAS443:3:62:967:1946#0/1  
ATTCTGTTTTTCATGCCTGATTAGTGGATTGGTGGTAGGAA  
+HWI-EAS443:3:62:967:1946#0/1  
`aT``babbUaaLaaaa[b]a\_aSba`U\_BBBBBBBBBBB  
@HWI-EAS443:3:64:1234:1756#0/1  
AGGGCCTCATATACAACAGGATGGGAACAGTGACCACAAA  
+HWI-EAS443:3:64:1234:1756#0/1  
aa``aab`aaaaa`aaaa[U`X``¥Y`\_\_W`a[^^a`\_`\_`  
@HWI-EAS443:3:65:449:1515#0/1  
CAGGATGGGAACAGTGACCACAGAAGCTGCTTTTGGTTTA  
+HWI-EAS443:3:65:449:1515#0/1  
a]aZ\_a`^`aa\_a`¥\_aa``\_`\_`\_¥a\_[SU[¥¥Z¥W¥^¥  
@HWI-EAS443:3:6:1398:37#0/1  
GACCGATGCTGTGAATCAGCAATCTGTTCCACAAGTGGTAC  
+HWI-EAS443:3:6:1398:37#0/1  
\_`aa``¥U]``ST`baJX[Haa`GSJUaaa`^`P[BBBBBB  
@HWI-EAS443:3:72:35:219#0/1  
ATTCTGTTTTTCATGCCTGATTAGTGGATTGGTGGTAGAAG  
+HWI-EAS443:3:72:35:219#0/1  
T^\_XX¥bX\_\_`]bba`[a]aaYaH`aa`BBBBBBBBBBBB  
@HWI-EAS443:3:81:455:330#0/1  
GGGGGTGTCACCTAAGCTATTCAACTGGTGCACCTTGCCAGT  
+HWI-EAS443:3:81:455:330#0/1  
abbbba¥aaa`^aaaabaabaaa`\_\_a]Z``a\_a``[\_a`¥  
@HWI-EAS443:3:81:599:513#0/1  
CCGGGATCTTGCACCTGATATTGTGGATTACTGATCGTC  
+HWI-EAS443:3:81:599:513#0/1  
abaaaaaabaaaaaaabaaaaaa\_a`\_`a``aa\_a\_a\_]`  
@HWI-EAS443:3:83:1119:1996#0/1  
ATTCTGTTTTTCATGCCTGATTAGTGGATTGGTGGTAGGAG  
+HWI-EAS443:3:83:1119:1996#0/1  
aRRMV`\_¥I\_a^\_\_aZ[U^ZM`^ULZ^BBBBBBBBBBBB  
@HWI-EAS443:3:87:1442:484#0/1  
GTGACCACAGAAGCTGCTTTTGGTCTAGTGTGTGCCANTT

+HWI-EAS443:3:87:1442:484#0/1  
a^`Z\_¥`^aY` `]HW` ¥`TY¥QZMVQR¥URUMVVSVDNW  
@HWI-EAS443:3:8:745:755#0/1  
ACTGTATTTAAAGCGACGATAAATACATTTGAAAAAAGA  
+HWI-EAS443:3:8:745:755#0/1  
a`YbPbbbbbaaa]baaaaa[a`a^`aa`a`\_\_`^^`\_\_\_\_  
@HWI-EAS443:3:92:1453:171#0/1  
AAGACGATCAGTAATCCACAATATCAGGTGCAAGATCACA  
+HWI-EAS443:3:92:1453:171#0/1  
]`aaab[a`\_][aXWNTS]Y`\_a^V¥[^ZZFTYX¥\_[GSN  
@HWI-EAS443:3:93:1238:1503#0/1  
GTGACCACAGAAGCTGCTTTTGGTCTAGTGTGTGCCAATT  
+HWI-EAS443:3:93:1238:1503#0/1  
a)`aLVYUV¥a\_TP`a^`\_\_\_\_aa\_SRR[PV^0^X[SYVGOY  
@HWI-EAS443:3:10:236:634#0/1  
ATTCTGTTTTCATGCCTGATTAGTNGATTGGTGGTAGTAG  
+HWI-EAS443:3:10:236:634#0/1  
a`P`aa\_baaaaaaaaa\_V\_\_^aTD[\_` `` `X`YFUBBBB  
@HWI-EAS443:3:11:756:196#0/1  
CAAGATTGGTCTTGNCTTTAGCCATTCCATGAGAGCCTCA  
+HWI-EAS443:3:11:756:196#0/1  
a`YaaXaab[a[`YD0a\_[`¥\_\_]NJR`` ` `R\_\_QGNSS\_  
@HWI-EAS443:3:12:645:776#0/1  
GGAGGTTGCTAATCAGACTNGGCAGATGGTACATGCAATG  
+HWI-EAS443:3:12:645:776#0/1  
ab`bbUaaaaaaaaaaaa\_YDX]\_\_a`a\_^Y` `]`Z\_¥`^^\_  
@HWI-EAS443:3:13:1360:1677#0/1  
CAAGTGGNACACACTAGACCAAAGCAGCTTCTGTGGTCA  
+HWI-EAS443:3:13:1360:1677#0/1  
aabWJZYD¥abaa\_\_aaa\_aaaaa¥¥b\_\_ `aN][U` [VZ\_  
@HWI-EAS443:3:13:1747:518#0/1  
AGAAGCTGCTTTTGGTNTAGTGTGTGCCACTTGTGAACAG  
+HWI-EAS443:3:13:1747:518#0/1  
abaaaa`Uaaaaaa]RDY\_aN`]a[a`X\_[\_¥`\_]Z\_Z  
@HWI-EAS443:3:14:932:258#0/1  
ACCGATGCTGTGAATCAGCAATCTGTTCAAGTGGNACA  
+HWI-EAS443:3:14:932:258#0/1  
a`aaa¥a\_` `[\_`^^^]^^^\_¥W¥\_[^Z[[^ZZU¥NDPQT  
@HWI-EAS443:3:15:645:1018#0/1  
GTCCCCATTCCNATTTAGGGCATTGACAAAAGCGTCTA  
+HWI-EAS443:3:15:645:1018#0/1  
\_abaaabbaa[DVaa`aa`aaaa`a`aaaabbaaaa]aaa  
@HWI-EAS443:3:20:1017:1910#0/1  
GGTGTCACTAAGCTATTCAACTGGTGCNCTTGCCAGTTGC  
+HWI-EAS443:3:20:1017:1910#0/1  
`bXa^`bbabba`abaaaab\_\_T]^`OD[a`\_aXa\_Y\_a^  
@HWI-EAS443:3:21:1453:1659#0/1  
GGGCCTCATATACAANAGGATGGGAACAGTGACCACAGAA  
+HWI-EAS443:3:21:1453:1659#0/1  
aabb¥]b`a\_^^]YD¥` [¥[ZR]U¥¥`^H^`OX¥Y¥`¥R

@HWI-EAS443:3:23:1189:1574#0/1  
GCCTCATATACAACAGNATGGGAACAGTGACCACAGAAGC  
+HWI-EAS443:3:23:1189:1574#0/1  
abbbbbbbbaabbaa]D^bbaabaab^bba\_a]abaaa\_  
@HWI-EAS443:3:26:417:1467#0/1  
AAACTATACAAGAAGCTCAAAGAGAAAANAACGTTCCATG  
+HWI-EAS443:3:26:417:1467#0/1  
aaaaaa`a\_a`a`\_`a\_aaaa\_``\_^\_¥D]a\_¥]^\_^\_¥¥  
@HWI-EAS443:3:29:165:1796#0/1  
ACCTGATATTGTGGATTACTGATCGTCTTTTTTTCNAATG  
+HWI-EAS443:3:29:165:1796#0/1  
aab```a^`a^]a¥a``aaa\_`\_W[a\_````\_`^D[`^Z  
@HWI-EAS443:3:2:246:1021#0/1  
CTTGAATCGCTGCATCTGCACTNCCATTCGCTTCTGGTAG  
+HWI-EAS443:3:2:246:1021#0/1  
aa`b]]Y¥aaa^X`[]¥a^¥^MDMZ\_SWSGWUWU^[HSV¥  
@HWI-EAS443:3:2:953:1623#0/1  
CAGCGATTCAAGTGATCCTCTCGTCATTGCAGCANATATC  
+HWI-EAS443:3:2:953:1623#0/1  
aaa\_b``b`aba0a[S\_aa]a¥a]Ga``a]aa\_[D^`aaH  
@HWI-EAS443:3:30:1238:663#0/1  
ACCTTCTTGA AAAATTTGCAGGCCTACCAGAAGCGAANGGG  
+HWI-EAS443:3:30:1238:663#0/1  
a[`aa``b^b`Y¥b`aaaa`a`[abZ^a`^a`W`¥VDS`U  
@HWI-EAS443:3:30:1577:1365#0/1  
GCCTCANATACAACAGGATGGGAACAGTGACCACAGAAGC  
+HWI-EAS443:3:30:1577:1365#0/1  
\_W[\_¥YD[UUbb`\_a\_Y]N¥^]ZW^[aZa\_QLURP[UY^V  
@HWI-EAS443:3:31:1156:1955#0/1  
GTGAGACCGATGCTGTGAATCAGCAATCTGTTACANGTG  
+HWI-EAS443:3:31:1156:1955#0/1  
a]b`]babab]abaa`^`aaab\_aaaaaaa\_a^a][DV[\_  
@HWI-EAS443:3:31:1758:264#0/1  
CGCGCAGANACTGGAAAGTGTCTTTGCAGGAAAGAACACA  
+HWI-EAS443:3:31:1758:264#0/1  
abbaXabYDS]bbaaaa]a¥Y\_aa`a\_`aX\_XUZUH\_YZ  
@HWI-EAS443:3:33:331:682#0/1  
CCAAAAGCAGNTTCTGTGGTCACTGTTCCCATCCTGTTGT  
+HWI-EAS443:3:33:331:682#0/1  
^`a`abbbbZD[a``a`]¥aa`a^]]aaaaZaUa^a`\_¥\_  
@HWI-EAS443:3:36:1328:376#0/1  
GCGAATGGGAGTGCAGATGCAGCGATTCCANGTGATCCTCT  
+HWI-EAS443:3:36:1328:376#0/1  
a\_b\_`aaaa)`Ya\_^^X``[\_Z^^[^ZTVDDWW^W^Z^ZW[  
@HWI-EAS443:3:37:472:1197#0/1  
GGGACCCGAACAACATGGATAGAGCAGTTAAACNATACAA  
+HWI-EAS443:3:37:472:1197#0/1  
ab`aaabaaXbabababa`aa\_`\_YV^]XS]a[DXZ[`a^  
@HWI-EAS443:3:39:555:1312#0/1  
GGGGACCCGAACAACATGGATANAGCAGTTAAACTATACA

+HWI-EAS443:3:39:555:1312#0/1  
]a\_bbbbabba`ababaaa¥D[ab```\_`^YPV\_`a\_`  
@HWI-EAS443:3:44:929:1092#0/1  
GCCTACCAGAAGCGAATGGGAGNGCAGATGCAGCGATTCA  
+HWI-EAS443:3:44:929:1092#0/1  
aabbaababaababaababa`[D[`aaaaa\_``^Z^S]  
@HWI-EAS443:3:46:1031:1273#0/1  
GACNAATCTTGTCACCTCTGACTAAGGGAATTTTAGGATT  
+HWI-EAS443:3:46:1031:1273#0/1  
aaXD]aabaaa`a``baaba\_aa\_aa`aa``\_a\_\_\_`  
@HWI-EAS443:3:49:749:1148#0/1  
GGGAGTGCAGNTGCAGCGATTCAAGTGATCCTCTCGTCAT  
+HWI-EAS443:3:49:749:1148#0/1  
aa`aaZb[\_[D[aZ]a^b^\_V\_Y\_Za``^Y\_]\_¥\_¥^]  
@HWI-EAS443:3:52:1282:1271#0/1  
GCAAGATCCCAATGATATTTGCTGCAATGACGAGNGGATC  
+HWI-EAS443:3:52:1282:1271#0/1  
abbb`\_baa`^aa]ab\_b]`baaa``^`Z^`a[YD[\_V[[  
@HWI-EAS443:3:55:1482:1744#0/1  
CAGTAATCCACAATATNAGGTGCAAGATCCCAATGATATT  
+HWI-EAS443:3:55:1482:1744#0/1  
^bb`\_a\_bbb\_bbaa^D^a]ababbabb`\_\_babbbbab  
@HWI-EAS443:3:58:1298:601#0/1  
GGCCTCATATACAACAGGATGGGAACAGTGACCACNGAAG  
+HWI-EAS443:3:58:1298:601#0/1  
\_]\_aa¥ba¥a`][``a\_]X\_a[a¥]aYa\_a[YLDV¥Za  
@HWI-EAS443:3:58:1726:1792#0/1  
CACNCACTAGACCAAAAGCAGCTTCTGTGGTCACTGTTCC  
+HWI-EAS443:3:58:1726:1792#0/1  
abWD[aaabaaaaaa`]aaXaa[a^\_a\_\_\_aSa`\_`S`  
@HWI-EAS443:3:64:1128:610#0/1  
ATTGTGGATTANTGATCGTCTTTTTTTCAAATGTATTTAT  
+HWI-EAS443:3:64:1128:610#0/1  
YbbaXa`]bYD]b`ba``\_abaabba`aaaa\_\_aba\_a  
@HWI-EAS443:3:64:1767:264#0/1  
GTGAGACCGATGCTGTGAATCAGCAATCTGTTCNCAAGTG  
+HWI-EAS443:3:64:1767:264#0/1  
a]bbaa`baaa\_aaaaaaa`\_`a^Y\_a]aUDO\_^[W^  
@HWI-EAS443:3:67:934:1934#0/1  
CAGGCNTACCAGAAGCGAATGGGAGTGCAGATGCAGCGAT  
+HWI-EAS443:3:67:934:1934#0/1  
a[`¥[DXWb\_abbZaaa`U\_`^]aVaQ`\_X[]JXaQ\_a\_  
@HWI-EAS443:3:69:507:1155#0/1  
GATGGGAACAGTGACCACAGNAGCTGCTTTTGGTCTAGTG  
+HWI-EAS443:3:69:507:1155#0/1  
aaaaaabbbbaaSaabaab^XD^aa^`aaaa\_a\_¥a`]]Y¥  
@HWI-EAS443:3:6:113:581#0/1  
CGCNGAGACTGGAAAGTGTCTTTGCAGGAAAGAACACAGA  
+HWI-EAS443:3:6:113:581#0/1  
abSDY\_b[\_V]\_\_a`]G`X``\_``\_V`a¥`XV\_aSa\_BBB



@HWI-EAS443:3:73:764:294#0/1  
ATCGCTGCATCTGCACTCCCNTTCGCTTCTGGTAGGCCTG  
+HWI-EAS443:3:73:764:294#0/1  
a`aa[``aa`\_^a]]`\_^MDU\_^\_^\_` ]TU^][VW^^  
@HWI-EAS443:3:77:265:1482#0/1  
CACTAGACCAAAAGCAGCTTCTGTGGTCACNGTCCCATC  
+HWI-EAS443:3:77:265:1482#0/1  
abb¥`\_`bb`aab`aa`a`aU\_ZPZW`ZXDORZ\_\_\_\_\_VV  
@HWI-EAS443:3:7:1218:1747#0/1  
CACAAGTGGCACACACTAGACCAAAAGCANCTTCTGTGGT  
+HWI-EAS443:3:7:1218:1747#0/1  
aa^bbbabbbbbbaba`bbaa]aabaaUYD[a` ]``^aaX  
@HWI-EAS443:3:80:47:582#0/1  
ATCCCAATGATATTTGCTGNAATGACGAGAGGATCACTTG  
+HWI-EAS443:3:80:47:582#0/1  
^aabaaabab```^`ba`YDYa[a\_``¥¥```\_[W^^]]U¥  
@HWI-EAS443:3:81:1210:1128#0/1  
GCACCTGATATTGTGGATTACTGATCGTCTTTNTTTCAAA  
+HWI-EAS443:3:81:1210:1128#0/1  
a[VOLXYLWP\_XWKX`WUaLP[^SY]\_[FOWYD^\_[S¥S]  
@HWI-EAS443:3:84:510:829#0/1  
ACTGATCGTCTTTNTTTCAAATGATTTATCGTCGCTTTA  
+HWI-EAS443:3:84:510:829#0/1  
\_a`^a`aa\_\_\_aYD¥aa]]`aa]`aaaaaa\_`a`\_`\_`  
@HWI-EAS443:3:85:186:1723#0/1  
GGCTAGCACTANGGCAAAGGCTATGGAACAGATGGCTGGA  
+HWI-EAS443:3:85:186:1723#0/1  
a\_a¥¥`^T]`ZDY^\_\_`]¥`\_¥`^`\_]¥¥\_\_X[V[^RX¥U  
@HWI-EAS443:3:87:1429:1330#0/1  
AGATGGTACATNCAATGAGA ACTATTGGGACTCATCCTAG  
+HWI-EAS443:3:87:1429:1330#0/1  
aaa]ab]Z[^YDY]`b`]]TN¥a\_a\_\_aa^\_\_Pa\_NR¥XY  
@HWI-EAS443:3:89:1532:814#0/1  
GGGATCTNGCACCTGATATTGTGGATTACTGATCGTCTTT  
+HWI-EAS443:3:89:1532:814#0/1  
aa`]ab^D]baaabb`babbb\_bb^aaa`ab^a\_aa\_abb  
@HWI-EAS443:3:93:1140:1910#0/1  
GCAGATGCAGCGATTCAAGTGATCCTCTCGTCATTGNAGC  
+HWI-EAS443:3:93:1140:1910#0/1  
a\_\_Y^]aab¥[¥\_¥\_aa\_XU`W\_]JQWRKTW[\_^TRDW^T  
@HWI-EAS443:3:93:1232:540#0/1  
CAAGATTGGTCTTGTCTTTAGCCATTNCATGAGAGCCTCA  
+HWI-EAS443:3:93:1232:540#0/1  
abb`\_^babYabbb`abbbbaa`baYD¥a\_aaa\_b`H\_¥[  
@HWI-EAS443:3:93:1257:77#0/1  
CAAGATCTGTGTTCTTTCCTGCAAAGACACNTTCCAGTCT  
+HWI-EAS443:3:93:1257:77#0/1  
^a`bab]bb\_b`aY`ba[``b[aaab``aOD¥\_`J`^^]^  
@HWI-EAS443:3:93:1416:676#0/1  
CTCATATACAACAGGATGGGANCAAGTACCACAGAAGCTG

+HWI-EAS443:3:93:1416:676#0/1  
a`\_abZb`^b^aaaaa\_[TDLa\_Qa\_[Z`a^a]^\_N\_a  
@HWI-EAS443:3:93:1681:1297#0/1  
ATATACAACAGGATGGGAACAGTGACCACANAAGCTGCTT  
+HWI-EAS443:3:93:1681:1297#0/1  
aba`aT[aa\_ba`^b[aaa\_]a`a`\_aaaUDY\_a\_]\_V` [  
@HWI-EAS443:3:10:169:953#0/1  
CAAGATTGGTCTTGTCTTTAGCCATTCCATGAGAGCCTAT  
+HWI-EAS443:3:10:169:953#0/1  
aaa\_K¥babV]b`aI\_b^aabbabaaaaZQ\_a\_a\_aQ`X]  
@HWI-EAS443:3:12:64:2038#0/1  
GNCCACAGAAGCTGCTTTTGGTCTAGTGTGTGCCACTTGT  
+HWI-EAS443:3:12:64:2038#0/1  
[D^babbabbababaaaa`a^baaaV\_]a\_\_aaaa`^``  
@HWI-EAS443:3:14:153:1826#0/1  
GAGGCCTCATATACAACAGGATGGGAACAGTGACCACAGA  
+HWI-EAS443:3:14:153:1826#0/1  
X[a^`]a`bbb\_R\_bb``aaYM^``aZ\_Y¥]^aaaa¥a`a  
@HWI-EAS443:3:16:852:1616#0/1  
GCTTAGTGACACCTCCTTGGCCCCATGGAACGTTATTTAT  
+HWI-EAS443:3:16:852:1616#0/1  
`bXU\_T¥VZZ`b^[Y`I¥\_`[RX¥U]Y\_aW\_aOW\_`^`OQ  
@HWI-EAS443:3:17:1320:1090#0/1  
CATCTTTTTTTCAAATGTATTTATCGTCGCTTTAAATACG  
+HWI-EAS443:3:17:1320:1090#0/1  
abbbabbbbbbabbab^ababab`a\_bb\_bbb\_`aaa\_a  
@HWI-EAS443:3:18:1019:1144#0/1  
GCTCGGGTCCCCATTCCCATTTAGGGCATTTTGGACAAAG  
+HWI-EAS443:3:18:1019:1144#0/1  
ababaaa``aaaa`a\_aa^a\_`aaa`aa`aaaa^a`a`a\_  
@HWI-EAS443:3:19:632:318#0/1  
GGGGGCCTCATATACAACAGGATGGGAACAGTGACCACAG  
+HWI-EAS443:3:19:632:318#0/1  
aX^`\_\_¥YY[¥`URU^TQ¥^ZZW¥ZTTVUXUVXYUPUPUU  
@HWI-EAS443:3:1:1206:1135#0/1  
CGTCTTTTTTTCAAATGTATTTATCGTCGCTTTAAATAGG  
+HWI-EAS443:3:1:1206:1135#0/1  
`b¥a``ZP\_^a^ab\_bb``babb`Tba^aY^a``^a]BBB  
@HWI-EAS443:3:1:1697:1699#0/1  
AGCAATCTGTTCACAAGTGGCACACACTAGACCAAAGAA  
+HWI-EAS443:3:1:1697:1699#0/1  
`aLR`Z^`a\_aY\_G]^Y[`aY^¥aZ\_¥]^`^X`a\_\_BBBB  
@HWI-EAS443:3:21:524:796#0/1  
ACGGGCCTCATATACAACAGGATGGGAACAGTGACCACAG  
+HWI-EAS443:3:21:524:796#0/1  
aa````a\_aaaa\_a`^^a^^[^¥\_¥\_¥a^`]W^\_\_\_Y¥¥¥  
@HWI-EAS443:3:26:890:627#0/1  
CTACCAGAAGCGAATGGGAGTGCAGATGCAGCGATTACCG  
+HWI-EAS443:3:26:890:627#0/1  
]\_\_[VV¥``\_\_¥\_[[[\_]TX`\_\_\_¥Q`TZW^ZWWT\_BBBB

@HWI-EAS443:3:28:480:546#0/1  
CTGATATTGTGGATTACTGATCGTCTTTTTTTCAAATGGA  
+HWI-EAS443:3:28:480:546#0/1  
[a¥U^b¥bbYaaNXKbaa`¥]bb`baV¥`bb\_Y\_^\_T^FS  
@HWI-EAS443:3:34:1757:1320#0/1  
AGGGGAACAGTGACCACAGAAGCTGCTTTTTGGTCTAGTGT  
+HWI-EAS443:3:34:1757:1320#0/1  
[GZba^a`[^¥aa`¥^\_a]aa`\_\_^TTU[UTYRQNZBBBB  
@HWI-EAS443:3:34:759:1722#0/1  
CAGGGCCTCATATACAACAGGATGGGAACAGTGACCACAG  
+HWI-EAS443:3:34:759:1722#0/1  
\_\_ZW¥\_aa]^\_aY[]aa¥YUY\_XV`X¥a``¥V[WZ^RBBB  
@HWI-EAS443:3:36:180:1280#0/1  
TTCTGTTTTCATGCCTGATTAGTGGATTGGTGGTAGTACC  
+HWI-EAS443:3:36:180:1280#0/1  
]^`aa¥Saaabb\_\_ab^WUZ`UZVW\_P````BBBBBBBBBB  
@HWI-EAS443:3:36:326:1690#0/1  
ACGGCCTCATATACAACAGGATGGGAACAGTGACCACAGA  
+HWI-EAS443:3:36:326:1690#0/1  
aaZG\_a\_bZJTVUQ\_\_\_[`VS^YSN¥VR`TH^]S^]a\_ZZ  
@HWI-EAS443:3:40:204:640#0/1  
CACAGAAGCTGCTTTTTGGTCTAGTGTGTGCCACTTGTGCA  
+HWI-EAS443:3:40:204:640#0/1  
\_X^\_ZJXaa`\_`V`a[\_\_\_¥\_[]SNWNWUWSYWX¥VRPFO  
@HWI-EAS443:3:49:1768:1817#0/1  
CAAGTGGCACACACTAGACCAAAAGCAGCTTCTGTGGTGA  
+HWI-EAS443:3:49:1768:1817#0/1  
\_]a`]U¥aabaabZYb`aa][G]a\_aa\_Q¥T\_[[V`XRD\_  
@HWI-EAS443:3:4:1398:177#0/1  
GGCACACACTAGACCAAAAGCAGCTTCTGTGGTCACTGGT  
+HWI-EAS443:3:4:1398:177#0/1  
a[DQ\_PMUNXRJOYSV[XY^¥¥[UUMB BBBB BBBB BBBB  
@HWI-EAS443:3:50:740:146#0/1  
CAGCAATCTGTTCAAGTGGCACACACTAGACCAAAAAT  
+HWI-EAS443:3:50:740:146#0/1  
`\_ba\_abb\_¥\_bY\_bbba^bb`\_`b`aabbbba^bbbbbba  
@HWI-EAS443:3:53:1772:741#0/1  
ATCGTCTTTTTTTCAAATGTATTTATCGTCGCTTTAAAAA  
+HWI-EAS443:3:53:1772:741#0/1  
aa\_^RG]¥`ZZULJUT^`XPa`X^W[DMVT]T]BBBBBBB  
@HWI-EAS443:3:56:131:1289#0/1  
ATCCCAATGATATTTGCTGCAATGACGAGAGGATCACTAG  
+HWI-EAS443:3:56:131:1289#0/1  
abaaaaaabbaab\_a^`bb\_aaa`aaaa`\_aaa\_Zaa\_\_[  
@HWI-EAS443:3:57:124:1035#0/1  
GGGGCTCTCATGGAATGGCTAAAGACAAGACCAATCTTGT  
+HWI-EAS443:3:57:124:1035#0/1  
ab\_a^aaa`]]U)``\_\_[[V``VHXYZ[¥[GVYVRY[]BB  
@HWI-EAS443:3:57:1308:927#0/1  
CCGTGGTCACTGTTCCCATCCTGTTGTATATGAGGCCCAT

+HWI-EAS443:3:57:1308:927#0/1  
a`¥^`\_]\_Z]\_\_^a\_```ZP¥\_`R\_`[^\_V]``ZZRPZ]T  
@HWI-EAS443:3:58:687:610#0/1  
GTTTCCCTTAGTCAGAGGTGACAAGATTGGTCTTGTCTTT  
+HWI-EAS443:3:58:687:610#0/1  
aabaa``a`aa^`a\_`Z``\_[a]\_\_\_`Z^\_^\_^^\_^]  
@HWI-EAS443:3:61:162:1599#0/1  
TGGGCCTCATATACAACAGGATGGGAACAGTGACCACAAA  
+HWI-EAS443:3:61:162:1599#0/1  
a``]Z\_^Z`\_LUa¥a¥`]W]WRSXOT]`BBBBBBBBBBBB  
@HWI-EAS443:3:61:499:1554#0/1  
GTGTCACTAAGCTATTCAACTGGTGCACCTGCCAGTTGAA  
+HWI-EAS443:3:61:499:1554#0/1  
aYaT``a\_U¥X^V]`¥UOX[LZNTS]\_BBBBBBBBBBBB  
@HWI-EAS443:3:63:157:1746#0/1  
GCATTACTGATCGTCTTTTTTTCAAATGTATTTATCGTCG  
+HWI-EAS443:3:63:157:1746#0/1  
YFVZ``Y````[X\_Za^ZZX]]Y]W^VSS¥0¥UWSPPRH  
@HWI-EAS443:3:64:33:517#0/1  
AAGGGAGTGCAGATGCAGCGATTCAAGTGATCCTCTCGTC  
+HWI-EAS443:3:64:33:517#0/1  
^W¥`aa`T`¥]]a`[a`]aaY`aa]V]]a[[aa^`U]UT^  
@HWI-EAS443:3:65:1411:1338#0/1  
GCCGCGCAGAGACTGGAAAGTGTCTTTGCAGGAAAGAACA  
+HWI-EAS443:3:65:1411:1338#0/1  
^F\_\_`]]ZR`b^YS\_[-\_aaaN`ZQ]^\_]R[aIVZ¥YaU\_  
@HWI-EAS443:3:67:853:73#0/1  
GCGGGCCTCATATACAACAGGATGGGAACAGTGACCACAG  
+HWI-EAS443:3:67:853:73#0/1  
aaaaaaaa`aa`a`[a\_¥\_aa\_``a`^\_^^`V`¥^UXW¥¥  
@HWI-EAS443:3:67:863:1250#0/1  
GTGCCTCATATACAACAGGATGGGAACAGTGACCACAGAA  
+HWI-EAS443:3:67:863:1250#0/1  
a\_bb\_babaaaabaaaaa^\_aaa[a^a^Waa^\_\_^]\_^`  
@HWI-EAS443:3:69:1723:1023#0/1  
CGCTTGTGAACAGATTGCTGATTCACAGCATCGGTCTCAC  
+HWI-EAS443:3:69:1723:1023#0/1  
abbbba`bbb\_ababbaabaaa`aaaa`aaaaa]^\_`aV  
@HWI-EAS443:3:73:1277:1655#0/1  
ANCAGCAATCTGTTCAAGTGGCACACACTAGACCAAAA  
+HWI-EAS443:3:73:1277:1655#0/1  
[DQ``Y`a\_a`aY\_ZRxa\_\_Z^Yaa¥a]\_`[a`\_^V]ZY¥  
@HWI-EAS443:3:74:409:1524#0/1  
CGGGGATCTTGACCTGATATTGTGGATTACTGATCGTCT  
+HWI-EAS443:3:74:409:1524#0/1  
aa^^W¥Z`Z\_aaaa\_\_a\_\_`\_\_Z^][]\_\_^^]`]`\_V^^  
@HWI-EAS443:3:77:215:1927#0/1  
CAGGGCCTCATATACAACAGGATGGGAACAGTGACCACAG  
+HWI-EAS443:3:77:215:1927#0/1  
`SZW]bbaaVZ^Vbaaaaa`W¥]\_\_\_\_\_aVa\_U\_`a¥a\_`\_`

@HWI-EAS443:3:79:1653:264#0/1  
CATGCACCTGATATTGTGGATTACTGATCGTCTTTTTTTC  
+HWI-EAS443:3:79:1653:264#0/1  
Y^a¥[a\_I\_b`ba`^`aa[Jbb¥V[Wa`\_V^Q]bbaba`X  
@HWI-EAS443:3:79:183:1189#0/1  
GTCCTCATATACAACAGGATGGGAACAGTGACCACAGAAG  
+HWI-EAS443:3:79:183:1189#0/1  
aaba^¥KWQWYYaa\_`]XUY[^TUUS¥T\_\_a\_¥\_U\_^W\_  
@HWI-EAS443:3:7:1481:1429#0/1  
ACGGCCTCATATACAACAGGATGGGAACAGTGACCACAG  
+HWI-EAS443:3:7:1481:1429#0/1  
a^b^a]]IXZ[`aSWSZ\_¥a`WS[¥`¥\_SN[G\_]UN¥BBB  
@HWI-EAS443:3:7:781:1426#0/1  
GCCTACCAGAAGCGAATGGGAGTGCAGATGCAGCGATTAA  
+HWI-EAS443:3:7:781:1426#0/1  
a\_]W[\_a\_\_aa`]b\_]aba¥aa\_a\_`\_`\_]V^\_ZaN^OFY  
@HWI-EAS443:3:80:224:156#0/1  
AGATGACCTTCTTGAAAATTTGCAGGCCTACCAGAAGCAG  
+HWI-EAS443:3:80:224:156#0/1  
aaa`aa`^a]aaaa^U[`\_`^Xa\_a)`\_a\_\_aQ^\_^^¥  
@HWI-EAS443:3:81:503:552#0/1  
GGCCCGAACACATGGATAGAGCAGTTAACTATACAAGA  
+HWI-EAS443:3:81:503:552#0/1  
a\_aa``ZW)`[a^`a]Y\_Y]X¥YZ¥[^Z\_\_^\_^]WQU\_ZV  
@HWI-EAS443:3:82:288:149#0/1  
GTGCTTCTTGTATAGTTTAACTGCTCTATCCATGTTGTTC  
+HWI-EAS443:3:82:288:149#0/1  
a[aaaaaaaa`aT`\_aaa`Z\_a`\_`\_`\_^X\_\_^]\_^[[  
@HWI-EAS443:3:84:203:1533#0/1  
GGGGCCTCATATACAACAGGATGGGAACAGTGACCACAG  
+HWI-EAS443:3:84:203:1533#0/1  
a`aabbabba`baaabaab``aa\_aba`b\_¥\_ba¥aaa\_  
@HWI-EAS443:3:92:732:1300#0/1  
GTCCTCATATACAACAGGATGGGAACAGTGACCACAGAAG  
+HWI-EAS443:3:92:732:1300#0/1  
a¥T]ZPWQ^RTZbb`QP]PTQWYL]T\_XRY`H]XU\_`aZ\_  
@HWI-EAS443:3:93:465:1090#0/1  
AGCAGTTAACTATACAAGAAGCTCAAAAGAGAAATAATG  
+HWI-EAS443:3:93:465:1090#0/1  
a\_aaa^a`aaaa`aaaa`\_\_a^\_\_\_S^^\_\_a\_\_a\_`\_H\_  
@HWI-EAS443:3:93:724:1359#0/1  
ATCGCGCAGAGACTGGAAAGTGTCTTTGCAGGAAAGAAAA  
+HWI-EAS443:3:93:724:1359#0/1  
¥]a`\_]\_^[W`a``a]XW\_¥VZJ^\_V[`XY`¥KV]¥YWF[  
@HWI-EAS443:3:94:260:245#0/1  
TCTGTTTTTCATGCCTGATTAGTGGATTGGTGGTAGTAGGC  
+HWI-EAS443:3:94:260:245#0/1  
a^abYaaaab\_a`aaaaaa\_[aa```BBBBBBBBBBBBB  
@HWI-EAS443:3:95:1681:873#0/1  
GGGATCGTCTTTTTTTCAAATGTATTTATCGTCGCTTTAA

+HWI-EAS443:3:95:1681:873#0/1  
`bb`b`\_YTaabbbbbb`aaaa^abaabaaa`\_aaW¥\_[]  
@HWI-EAS443:3:98:477:236#0/1  
ACGCCCATGGAACGTTATTTCTCTTTTGAGCTTCTTGTA  
+HWI-EAS443:3:98:477:236#0/1  
a]]¥aa[0¥]`JXWb]a^aaa^TY]¥`a¥V¥Y\_`I¥\_^]W  
@HWI-EAS443:3:99:1526:1045#0/1  
CAAGTGGCACACACTAGACCAAAGCAGCTTCTGTGGTAA  
+HWI-EAS443:3:99:1526:1045#0/1  
¥^XU]`\_W\_Q¥\_\_Xaaaa`abbb`a\_aV¥b\_a\_]S]\_BBB  
@HWI-EAS443:3:92:1599:958#0/1  
CACCAATCCACTAATCAGGCATGAAAACAGAATGGGGCTG  
+HWI-EAS443:3:92:1599:958#0/1  
aba^b\_abMb¥¥`^]Qbb`Xaa`aaaaS¥\_baaaaY]VUB  
@HWI-EAS443:3:100:290:365#0/1  
AGGCCTCATATACAACAGGATGGGAACAGTGACCACAGAA  
+HWI-EAS443:3:100:290:365#0/1  
aXaYY][\_a`¥\_\_\_¥W¥\_ZWW[¥¥¥UYWWT^¥TUSW¥WBB  
@HWI-EAS443:3:10:711:2047#0/1  
NCCGATGCTGTGAATCAGCAATCTGTTCAAGTGGCACA  
+HWI-EAS443:3:10:711:2047#0/1  
DPVWTYYSMURVYUWSWYWYUWWWWWUWYWWPWYVWVY  
@HWI-EAS443:3:11:351:329#0/1  
CGGCCTCATATACAACAGGATGGGAACAGTGACCACAGAA  
+HWI-EAS443:3:11:351:329#0/1  
abbabbbabababba`abba`aaaZaaa`Vaaa`\_`a`\_\_  
@HWI-EAS443:3:12:1098:1203#0/1  
CGAGAGGATCACTTGAATCGCTGCATCTGCACTCCCATTA  
+HWI-EAS443:3:12:1098:1203#0/1  
a\_] [F[^TX^X¥a¥\_a`^]¥`ZQ¥¥¥¥^ZNPVSPBBBBBB  
@HWI-EAS443:3:12:370:663#0/1  
GGAGGATCACTTGAATCGCTGCATCTGCACTCCCATTCGC  
+HWI-EAS443:3:12:370:663#0/1  
aba^\_a\_aaaaa\_aa\_a\_a\_a^a`\_a`^\_¥\_¥\_a\_\_\_\_`V  
@HWI-EAS443:3:14:235:385#0/1  
CGGGCCTCATATACAACAGGATGGGAACAGTGACCACAGA  
+HWI-EAS443:3:14:235:385#0/1  
a`a`]`\_`b`b`aab^YZb\_aWbaZaa`\_`X\_\_0]]^Va[  
@HWI-EAS443:3:16:1767:994#0/1  
CGGGCCTCATATACAACAGGATGGGAACAGTGACCACAGA  
+HWI-EAS443:3:16:1767:994#0/1  
abaaaY`[ab\_aaa`a`\_bURXa`\_T`W\_aWa``Q¥W\_\_¥  
@HWI-EAS443:3:17:1696:239#0/1  
CGGGCCTCATATACAACAGGATGGGAACAGTGACCACAGA  
+HWI-EAS443:3:17:1696:239#0/1  
\_aab¥^abbbbbbbbaabbabb`b\_a\_a`]b\_RT]Q``\_  
@HWI-EAS443:3:17:546:161#0/1  
CGGGCCTCATATACAACAGGATGGGAACAGTGACCACAGA  
+HWI-EAS443:3:17:546:161#0/1  
\_a```\_ab`[\_b\_\_`a\_\_bb]abaa^a`\_`Q`a\_\_N\_a]

@HWI-EAS443:3:17:70:483#0/1  
AGGGCCTCATATAACAGGATGGGAACAGTGACCACAGA  
+HWI-EAS443:3:17:70:483#0/1  
a`^\_\_aaa\_a`aaaa`aa]\_¥a```]\_\_U\_`X`YU\_dW  
@HWI-EAS443:3:18:1301:278#0/1  
CCCTTCTTGAAAATTTGCAGGCCTACCAGAAGCGAATGGG  
+HWI-EAS443:3:18:1301:278#0/1  
I¥a[]¥\_aba`b¥aYZ\_]\_^Wa\_^OZ^^]aa[Ybbabb  
@HWI-EAS443:3:18:132:509#0/1  
CGAGGTTGCTAATCAGACTAGGCAGATGGTACATGCAATG  
+HWI-EAS443:3:18:132:509#0/1  
abab`X`ba¥`a\_aaaab`a\_a\_aa`aa`Y\_a[\_\_\_[Ya`a  
@HWI-EAS443:3:18:1718:819#0/1  
CGGGCCTCATATAACAGGATGGGAACAGTGACCACAGA  
+HWI-EAS443:3:18:1718:819#0/1  
abbaRababbbba\_a\_a`b\_\_^[`ZbQ\_`^aa¥Q\_^\_a`  
@HWI-EAS443:3:19:1004:774#0/1  
AGGGCCTCATATAACAGGATGGGAACAGTGACCACAGA  
+HWI-EAS443:3:19:1004:774#0/1  
aaa`\_abaaa`a`aaa\_`baaa\_`a\_a]YaX\_a^a]\_\_\_\_  
@HWI-EAS443:3:19:821:832#0/1  
NGACCACAGAAGCTGCTTTTGGTCTAGTGTGTGCCACTTG  
+HWI-EAS443:3:19:821:832#0/1  
DHYYYYYVTYRVVXXXVYVXXVUYUXYYYYVYVSVQXY  
@HWI-EAS443:3:19:870:18#0/1  
CGTGGATTACTGATCGTCTTTTTTCAAATGTATTTATCG  
+HWI-EAS443:3:19:870:18#0/1  
ZaZ\_`^`^YXX[\_a`Y]abbab`b`^`a^`¥\_Y]Z]]¥a¥\_  
@HWI-EAS443:3:19:963:1031#0/1  
TACAGGATGGGAACAGTGACCACAGAAGCTGCTTTTGGTC  
+HWI-EAS443:3:19:963:1031#0/1  
\_[\_Q¥WMW]^ZU¥`[\_`[bSa][\_TMRFP^X`S`\_\_^BBBB  
@HWI-EAS443:3:1:1040:1449#0/1  
CAGCAATCTGTTCAAGTGGCACACACTAGACCAAAAGA  
+HWI-EAS443:3:1:1040:1449#0/1  
^]¥[b]babaYa`¥P^aa\_\_T[a\_ba\_`a`^`aWaa\_`aBB  
@HWI-EAS443:3:1:391:815#0/1  
CGGGCCTCATATAACAGGATGGGAACAGTGACCACAGA  
+HWI-EAS443:3:1:391:815#0/1  
`bb`ba`\_bbaabab`ab\_^a`bb`a[bb`abaRaaa`B  
@HWI-EAS443:3:1:736:1362#0/1  
GATTCCCTTAGTCAGAGGTGACAAGATTGGTCTTGTCTTT  
+HWI-EAS443:3:1:736:1362#0/1  
a`\_^\_\_^Y`a[\_`\_a^`^Ua\_X`\_`\_]W\_`ZUZ^`ZW\_BB  
@HWI-EAS443:3:20:1366:1508#0/1  
CGGGCCTCATATAACAGGATGGGAACAGTGACCACAGA  
+HWI-EAS443:3:20:1366:1508#0/1  
abba\_^b`bba^]\_aX\_\_ba\_^[X`^[`aa`a\_a¥Z\_\_`  
@HWI-EAS443:3:20:600:612#0/1  
CGGGCCTCATATAACAGGATGGGAACAGTGACCACAGA

+HWI-EAS443:3:20:600:612#0/1  
aaW`a\_a]]aaaaab\_\_]\_aS\_a]a`[^a\_\_^^aa`\_\_`]  
@HWI-EAS443:3:21:1144:1344#0/1  
GCCTGATATTGTGGATTACTGATCGTCTTTTTTTCAAATG  
+HWI-EAS443:3:21:1144:1344#0/1  
a\_]V`Y[Z`aaQ¥\_\_^\_\_^XR]Y¥aW^\_\_^`\_]`^]  
@HWI-EAS443:3:21:1550:730#0/1  
GTGGGCCTCATATACAACAGGATGGGAACAGTGACCACAG  
+HWI-EAS443:3:21:1550:730#0/1  
\_[a`¥U]^`aba^^`a\_[\_R\_SU^]¥P`H]YUL[¥Za  
@HWI-EAS443:3:24:1530:591#0/1  
GGGGCCTCATATACAACAGGATGGGAACAGTGACCACAGA  
+HWI-EAS443:3:24:1530:591#0/1  
aba`\_abaababa\_ab¥aaa\_abaa[\_`a^ba\_¥aQ^\_¥  
@HWI-EAS443:3:25:1344:1050#0/1  
AGGGGCCAAGGAGGTGTCACTAAGCTATTCAACTGGTGCA  
+HWI-EAS443:3:25:1344:1050#0/1  
TZY\_\_WW\_VV\_]`XT¥V]¥`^ZZ\_[W\_ab^`^UZS]X^¥`  
@HWI-EAS443:3:25:1494:1843#0/1  
TGCCTCATATACAACAGGATGGGAACAGTGACCACAGAAG  
+HWI-EAS443:3:25:1494:1843#0/1  
aaa\_a`aaaa`aaba\_aa`\_a^¥\_[M[¥R^`ZP[S]^\_AY  
@HWI-EAS443:3:27:1515:1280#0/1  
AGGCCTCATATACAACAGGATGGGAACAGTGACCACAGAA  
+HWI-EAS443:3:27:1515:1280#0/1  
ZO\_¥Xab```a\_[`a`aa]^a^aTa\_ab\_aa^aa`]aaa  
@HWI-EAS443:3:28:72:791#0/1  
CGCCTCATATACAACAGGATGGGAACAGTGACCACAGAAG  
+HWI-EAS443:3:28:72:791#0/1  
aabb^bZb\_^[aa^aabb\_]b`a`^a[a^aa`\_a``\_¥Z  
@HWI-EAS443:3:28:94:31#0/1  
AGGGCCTCATATACAACAGGATGGGAACAGTGACCACAGA  
+HWI-EAS443:3:28:94:31#0/1  
\_WT^]\_P\_URZ]XGZXT¥`\_V\_\_UTJOPNTLW[[XPVVRB  
@HWI-EAS443:3:29:1321:1363#0/1  
AGGGCCTCATATACAACAGGATGGGAACAGTGACCACAGA  
+HWI-EAS443:3:29:1321:1363#0/1  
aa[`a^baVbaa`b^Ua]aa¥`aaY\_a\_a`Saaaa\_`^`B  
@HWI-EAS443:3:29:825:1234#0/1  
GGACTGGAAAGTGTCTTTGCAGGAAAGAACACAGATCTTG  
+HWI-EAS443:3:29:825:1234#0/1  
T\_aa``ab¥\_bZ^^b\_bbbaba`b`\_Ybb``¥W`abbbaa  
@HWI-EAS443:3:30:134:1061#0/1  
AGGGCCTCATATACAACAGGATGGGAACAGTGACCACAGA  
+HWI-EAS443:3:30:134:1061#0/1  
]aWXZaaaa\_b]``aa\_a^^V¥a\_`a[\_\_[F[\_a^S]^I  
@HWI-EAS443:3:31:272:160#0/1  
GGAGGATCACTTGAATCGCTGCATCTGCACTCCCATTCGC  
+HWI-EAS443:3:31:272:160#0/1  
a`¥aaa\_aa\_aa\_\_aa\_aa`[\_`a`^a\_\_`¥^UZUUR¥¥



@HWI-EAS443:3:31:843:1682#0/1  
GTGGGAACAGTGACCACAGAAGCTGCTTTTGGTCTAGTGT  
+HWI-EAS443:3:31:843:1682#0/1  
aYa\_U]bab\_Z]bbba`Xaa\_\_aaV\_\_aaa^UT\_¥a^WXU  
@HWI-EAS443:3:33:1261:1436#0/1  
ATGCCACTTGTGAACAGATTGCTGATTCACAGCATCGGTC  
+HWI-EAS443:3:33:1261:1436#0/1  
`a\_a\_aa`a`\_aaa`\_`aa^[\_aa\_\_^\_`¥`]H]YX^^Z]  
@HWI-EAS443:3:33:1409:422#0/1  
GTGGGCCTCATATACAACAGGATGGGAACAGTGACCACAG  
+HWI-EAS443:3:33:1409:422#0/1  
aV\_a`\_`\_`¥\_\_a`^\_a¥`\_WZ\_\_`W^Q`ZRVWRUTNY¥  
@HWI-EAS443:3:34:408:1045#0/1  
CGGGCCTCATATACAACAGGATGGGAACAGTGACCACAGA  
+HWI-EAS443:3:34:408:1045#0/1  
aaQ`\_`aa^RWa`\_aa]`\_aa]SVMY[\_[\_`VS]^VPPGV¥¥  
@HWI-EAS443:3:34:614:215#0/1  
CAGCAATCTGTTCAAGTGGCACACACTAGACCAAAAAGA  
+HWI-EAS443:3:34:614:215#0/1  
a`^a`Y`¥a`U[\_UV^\_LZZ[a\_^Z\_^XU¥¥BBBBBBBB  
@HWI-EAS443:3:34:953:1339#0/1  
CGGGCCTCATATACAACAGGATGGGAACAGTGACCACAGA  
+HWI-EAS443:3:34:953:1339#0/1  
`]Xaabbabbbabbab\_aaa`\_X]Z`a\_a`V\_a`X`VXN¥  
@HWI-EAS443:3:35:716:386#0/1  
GGGGCCTCATATACAACAGGATGGGAACAGTGACCACAGA  
+HWI-EAS443:3:35:716:386#0/1  
aa]aa`b\_ababa\_aaaaa`aaaaa^UX^`baa`\_`a`b  
@HWI-EAS443:3:36:1533:1264#0/1  
AGGCCTCATATACAACAGGATGGGAACAGTGACCACAGAA  
+HWI-EAS443:3:36:1533:1264#0/1  
]\_\_VT^\_Sa\_]aba[Z`\_`^`^¥Z¥\_]Z]V\_]U]T]`RX  
@HWI-EAS443:3:38:499:579#0/1  
CGCTGCAATGACGAGAGGATCACTTGAATCGCTGCATCTG  
+HWI-EAS443:3:38:499:579#0/1  
aabbbbbb`aaaababbabaU[T]]aSaaXOZ^Z[`a]RTY  
@HWI-EAS443:3:39:678:205#0/1  
TATGGGGACCCGAACAACATGGATAGAGCAGTTAAACTAT  
+HWI-EAS443:3:39:678:205#0/1  
abaVaaa`aa[\_\_\_a][aa\_^`\_Y¥¥T^YY^0^\_\_\_UI^W  
@HWI-EAS443:3:3:359:1626#0/1  
CATGTACCATCTGCCTAGTCTGATTAGCAACCTCCATGGA  
+HWI-EAS443:3:3:359:1626#0/1  
`bbab`abb`aQZ`\_`Y\_¥¥`a`\_`\_`^a\_a^W\_\_Vaa\_[B  
@HWI-EAS443:3:40:1348:159#0/1  
CGCTGCTTTTGGTCTAGTGTGTGCCACTTGTGAACAGATT  
+HWI-EAS443:3:40:1348:159#0/1  
abbbbbbabba]`[bbaab[aa]¥`aa¥aZa`Z\_]\_¥T`  
@HWI-EAS443:3:44:1153:41#0/1  
TTCTGCACTCCCATTCGCTTCTGGTAGGCCTGCAAATTTT



@HWI-EAS443:3:56:180:1424#0/1  
CGCACCTGATATTGTGGATTACTGATCGTCTTTTTTTTCAA  
+HWI-EAS443:3:56:180:1424#0/1  
Q¥]PWVV[[]`a¥` [WRT¥R\_bb`\_T[Z\_USP`a`b`\_a^a  
@HWI-EAS443:3:56:266:428#0/1  
CGGCCTCATATACAACAGGATGGGAACAGTGACCACAGAA  
+HWI-EAS443:3:56:266:428#0/1  
aa`babaaa^aaaaa`aa`a`a\_a\_`dW`aa\_]Z¥^[  
@HWI-EAS443:3:56:821:1079#0/1  
CGGGCCTCATATACAACAGGATGGGAACAGTGACCACAGA  
+HWI-EAS443:3:56:821:1079#0/1  
aaaaa`abbbbbaaaaa\_\_baa`aa`aaaa¥\_a\_\_`aa\_  
@HWI-EAS443:3:57:585:722#0/1  
AGGGCCTCATATACAACAGGATGGGAACAGTGACCACAGA  
+HWI-EAS443:3:57:585:722#0/1  
abaa`bababbaaaaaabaaaaa\_a`aa[`a^aa\_]aZ  
@HWI-EAS443:3:59:1163:364#0/1  
CGTCACTAAGCTATTCAACTGGTGCCTTGCCAGTTGCAT  
+HWI-EAS443:3:59:1163:364#0/1  
abbbbabb`bb`bbbbbabbbabbabb[K]aaMMY`  
@HWI-EAS443:3:59:848:1280#0/1  
AGGGCCTCATATACAACAGGATGGGAACAGTGACCACAGA  
+HWI-EAS443:3:59:848:1280#0/1  
aaab`aaa`aaa^a^¥`\_`aTa`aa]GQ`ZKDZYY  
@HWI-EAS443:3:5:813:415#0/1  
GCCTCTCGTCATTGCAGCAAATATCATTGGGATCTTGAC  
+HWI-EAS443:3:5:813:415#0/1  
S\_S¥`b\_\_\_\_`TQY¥¥`aZabaaabaab]babTRG¥Z¥[  
@HWI-EAS443:3:62:1166:1769#0/1  
AGGGGCCAAGGAGGTGTCACTAAGCTATTCAACTGGTGCA  
+HWI-EAS443:3:62:1166:1769#0/1  
aaa\_^abaaa`Sa^a`aaX]\_a`aa\_]N\_\_`  
@HWI-EAS443:3:62:166:866#0/1  
CGGGCCTCATATACAACAGGATGGGAACAGTGACCACAGA  
+HWI-EAS443:3:62:166:866#0/1  
a\_\_[a`ababa^aa\_aaa`¥`a`\_`aa¥a^^\_Y^U[Z  
@HWI-EAS443:3:62:330:1386#0/1  
CGGGCCTCATATACAACAGGATGGGAACAGTGACCACAGA  
+HWI-EAS443:3:62:330:1386#0/1  
ab[aabbbbbbbbabbaabaab[a\_baaa\_abaaaa`U  
@HWI-EAS443:3:62:715:622#0/1  
CTGGGCCTCATATACAACAGGATGGGAACAGTGACCACAG  
+HWI-EAS443:3:62:715:622#0/1  
aababaaaaabaaaaa`b^aa`aa`]^a¥`aWa`Z\_\_a`  
@HWI-EAS443:3:63:526:49#0/1  
CGGGCCTCATATACAACAGGATGGGAACAGTGACCACAGA  
+HWI-EAS443:3:63:526:49#0/1  
aabaa[bb`a`ba\_aa`\_aa^`aaaYa¥[`T`a\_\_^^`¥  
@HWI-EAS443:3:64:647:1955#0/1  
GGGGATCTTGACCTGATATTGTGGATTACTGATCGTCTT

+HWI-EAS443:3:64:647:1955#0/1  
a\_^¥a\_aaaa^Z`aa\_a¥a`\_`[a^`¥\_OSX`Z\_RWa]\_  
@HWI-EAS443:3:65:1269:1278#0/1  
CGGGATCTTGCACCTGATATTGTGGATTACTGATCGTCTT  
+HWI-EAS443:3:65:1269:1278#0/1  
a\_\_^Y`aY^¥`M]]¥a^Z`aa¥X^¥WX\_^`ZaYa`\_XH\_a  
@HWI-EAS443:3:65:1664:277#0/1  
NAAGATTGGTCTTGTCTTTAGCCATTCCATGAGAGCCTCA  
+HWI-EAS443:3:65:1664:277#0/1  
DKTXXZYTTWWZZZZZZZZVVTXXXYYYUUVVWUQWWWV  
@HWI-EAS443:3:65:473:483#0/1  
CGGGCCAAGGAGGTGTCACTAAGCTATTCAACTGGTGCAC  
+HWI-EAS443:3:65:473:483#0/1  
abba`\_^]`WWab]a]aba¥a^\_W¥]a^a\_JTY``¥`a[Y  
@HWI-EAS443:3:66:1651:358#0/1  
AGCGCAGAGACTGGAAAGTGTCTTTGCAGGAAAGAACACA  
+HWI-EAS443:3:66:1651:358#0/1  
abba]bbbaa¥a¥[¥aaZZb[ab`ab``\_a\_aaaa`a``a  
@HWI-EAS443:3:67:327:109#0/1  
CGGGCCTCATATACAACAGGATGGGAACAGTGACCACAGA  
+HWI-EAS443:3:67:327:109#0/1  
aabb\_aaIb`aU]^Y\_Z\_a`¥¥aa^N\_QZ\_U\_W\_NW¥]`U  
@HWI-EAS443:3:68:1164:1492#0/1  
CGCCGAGATCGCGCAGAGACTGGAAAGTGTCTTTGCAGGA  
+HWI-EAS443:3:68:1164:1492#0/1  
][U``bbbaa`bb`^b`bbaaba\_^Z^U\_\_`a`aa¥Z¥`¥  
@HWI-EAS443:3:68:134:895#0/1  
GCGGGTCCCCATTCCCATTAGGGCATTGGACAAAGCG  
+HWI-EAS443:3:68:134:895#0/1  
aba]YZaab`a`aaaa[aaaaaaaa\_Z^a``[XX`a]R]a\_  
@HWI-EAS443:3:68:918:1990#0/1  
AGGGCCTCATATACAACAGGATGGGAACAGTGACCACAGA  
+HWI-EAS443:3:68:918:1990#0/1  
RHM\_[\_¥\_a^`]a`bba^Z^Y¥\_`Z`aaa`L¥a]]\_]baa  
@HWI-EAS443:3:69:593:194#0/1  
GGGCCTACCAGAAGCGAATGGGAGTGCAGATGCAGCGATT  
+HWI-EAS443:3:69:593:194#0/1  
aaaaaaaa`a`Z^b^\_aa`^¥`S[[`¥R]ZX`Y`[UU  
@HWI-EAS443:3:71:127:664#0/1  
AGTCATTGCAGCAAATATCATTGGGATCTTGCACCTGATA  
+HWI-EAS443:3:71:127:664#0/1  
ab``bbaaaaa\_]^Ya`aba`\_Z`a``a`\_a```aaa]`\_  
@HWI-EAS443:3:71:1482:1310#0/1  
CGGCCTCATATACAACAGGATGGGAACAGTGACCACAGAA  
+HWI-EAS443:3:71:1482:1310#0/1  
\_bba`bbabbb`abaabba\_ab`XXaabb\_aaaaa\_a^\_\_  
@HWI-EAS443:3:71:589:875#0/1  
NCTGCATCTGCACTCCCATTCTGCTTCTGGTAGGCCTGCAA  
+HWI-EAS443:3:71:589:875#0/1  
DOXVVVVVTSVWTTUSVWWRVWXXYXUVURQSTWVWVVS

@HWI-EAS443:3:71:623:427#0/1  
GGCCGAGATCGCGCAGAGACTGGAAAGTGTCTTTGCAGGA  
+HWI-EAS443:3:71:623:427#0/1  
aababbbbaaaba`a^\_`]a\_aaa`aa\_[`ZR]\_a\_^\_`Q  
@HWI-EAS443:3:73:394:530#0/1  
GTGGGCCTCATATACAACAGGATGGGAACAGTGACCACAG  
+HWI-EAS443:3:73:394:530#0/1  
a\_aa¥baaabaa`aaa\_\_`a\_``\_\_\_\_\_a\_a\_N\_a]P¥\_^\_  
@HWI-EAS443:3:73:53:272#0/1  
CGGGCCTCATATACAACAGGATGGGAACAGTGACCACAGA  
+HWI-EAS443:3:73:53:272#0/1  
a\_`^bbbbb`bbaba\_\_a\_``aaaaa\_a`a`[aaa`^X`Z  
@HWI-EAS443:3:73:780:148#0/1  
TGAGCCTCAAGATCTGTGTTCTTTCCTGCAAAGACACTTT  
+HWI-EAS443:3:73:780:148#0/1  
I\_NXbaab\_P[[bbab\_ba`b]baVba^]a\_abbb\_a]a  
@HWI-EAS443:3:74:296:134#0/1  
GGGGATCTTGCACCTGATATTGTGGATTACTGATCGTCTT  
+HWI-EAS443:3:74:296:134#0/1  
¥bba]¥aVabaaXZaa]aaaa]aa^^`aa\_a¥a]a[[^a  
@HWI-EAS443:3:74:359:500#0/1  
GGGGCCTCATATACAACAGGATGGGAACAGTGACCACAGA  
+HWI-EAS443:3:74:359:500#0/1  
`aa`abababaabba`aaa`a`aaaabaaaUaaaa\_`\_^  
@HWI-EAS443:3:74:528:601#0/1  
TTGGGAGTGCAGATGCAGCGATTCAAGTGATCCTCTCGTC  
+HWI-EAS443:3:74:528:601#0/1  
[a]Z¥GRVX`[\_PT¥abbSZTQ¥S\_^SRTZIS]Y`\_[\_TP  
@HWI-EAS443:3:75:596:453#0/1  
CGGGAGTGCAGATGCAGCGATTCAAGTGATCCTCTCGTCA  
+HWI-EAS443:3:75:596:453#0/1  
ababbaabbbbbbbbbbbbabbbbaaabbaabbbba`a[b  
@HWI-EAS443:3:77:343:1142#0/1  
CGGCCTCATATACAACAGGATGGGAACAGTGACCACAGAA  
+HWI-EAS443:3:77:343:1142#0/1  
abbbbbbabbb\_bba]b`a]a\_aaaaaa\_baba[a`a`a  
@HWI-EAS443:3:77:729:1221#0/1  
CTGGGAGTGCAGATGCAGCGATTCAAGTGATCCTCTCGTC  
+HWI-EAS443:3:77:729:1221#0/1  
abbabababbbbbbbbabbb`abbbbb\_bbbabbbbb`  
@HWI-EAS443:3:78:543:741#0/1  
CTGTGTGCCACTTGTGAACAGATTGCTGATTCACAGCATC  
+HWI-EAS443:3:78:543:741#0/1  
HP]¥Z``[a][[a\_]¥\_¥aaVbab¥¥]aaabb`ba`^  
@HWI-EAS443:3:79:1135:1298#0/1  
AAGATGACCTTCTTGAATAATTTGCAGGCCTACCAGAAGCA  
+HWI-EAS443:3:79:1135:1298#0/1  
a[[¥Y`]¥ZZZ\_``\_TX\_^`¥^`aa`\_Y]^Z`^a^`\_  
@HWI-EAS443:3:79:133:798#0/1  
AACCAATCTTGTACCTCTGACTAAGGGAATTTTAGGATT

+HWI-EAS443:3:79:133:798#0/1  
I\_bbbbbbbbabbbbbbb\_bbb\_bbb]abbbababaab  
@HWI-EAS443:3:7:116:880#0/1  
CGGGCCTCATATAACAGGATGGGAACAGTGACCACAGA  
+HWI-EAS443:3:7:116:880#0/1  
`bbbb]babbabba^Zab]^`aa`\_]`aa^baaaaaa\_  
@HWI-EAS443:3:80:112:1127#0/1  
ATTCTGTTTTTCATGCCTGATTAGTGGATTGGTGGTAGTAA  
+HWI-EAS443:3:80:112:1127#0/1  
aaaaaa[\_aaaa\_aaaa\_aaa\_a`\_\_\_\_`\_S\_BBBBBBB  
@HWI-EAS443:3:82:317:245#0/1  
CGGGCCTCATATAACAGGATGGGAACAGTGACCACAGA  
+HWI-EAS443:3:82:317:245#0/1  
]bb\_]aa[`U`Uaa^H[`^^YaaaZG¥UY]Ta^`aVWaa]  
@HWI-EAS443:3:83:1281:390#0/1  
CACTACGGCAAAGGCTATGGAACAGATGGCTGGATCGAGA  
+HWI-EAS443:3:83:1281:390#0/1  
abab]Zaa]a`aa\_]bbb^WT``\_babb\_N]\_bQ]N[UbS  
@HWI-EAS443:3:83:1299:347#0/1  
AGGGCCTCATATAACAGGATGGGAACAGTGACCACAGA  
+HWI-EAS443:3:83:1299:347#0/1  
abbbaabaabbbaabaaa^a`aaaaaa`aa^aaV\_`\_aa`  
@HWI-EAS443:3:83:390:1478#0/1  
AGGGCCTCATATAACAGGATGGGAACAGTGACCACAGA  
+HWI-EAS443:3:83:390:1478#0/1  
`aa]abaababaaaabaaaa\_a`a\_\_a\_`\_¥`a\_`[^a\_`  
@HWI-EAS443:3:84:1060:422#0/1  
CGGGCCTCATATAACAGGATGGGAACAGTGACCACAGA  
+HWI-EAS443:3:84:1060:422#0/1  
^¥T^R\_YD[aY[`W¥ORTV\_YR\_a¥KPY]^PWLuaY[`YY  
@HWI-EAS443:3:85:1529:565#0/1  
AAGTGGCACACACTAGACAAAAGCAGCTTCTGTGGTCAA  
+HWI-EAS443:3:85:1529:565#0/1  
``[H[a\_aT^HYV\_`XZ]]`YZQYaT^Sa`^BBBBBBBBB  
@HWI-EAS443:3:88:103:1208#0/1  
TCCTGATATTGTGGATTACTGATCGTCTTTTTTTCAAATG  
+HWI-EAS443:3:88:103:1208#0/1  
aaab\_Z`Z\_\_aVU¥^aa\_aa[Ya[aX0^]¥Xa^aa[YPZa  
@HWI-EAS443:3:89:1438:374#0/1  
GGGGTCCCCATTCCCATTTAGGGCATTGACAAAAGCGT  
+HWI-EAS443:3:89:1438:374#0/1  
abb`bbaUabbbbaaaa`abb]a`\_abbbaabbabaaaXb`  
@HWI-EAS443:3:89:293:687#0/1  
AGACCTTCTTGAAAATTTGCAGGCCTACCAGAAGCGAATG  
+HWI-EAS443:3:89:293:687#0/1  
`WZb\_^ba^]SPR`Y\_\_aaa^aW`PXZXTV[VEVXTRZ^\_  
@HWI-EAS443:3:8:408:859#0/1  
ATCAGACTAGGCAGATGGTACATGCAATGAGAACTATTGA  
+HWI-EAS443:3:8:408:859#0/1  
aaabab`\_a`a^Ya\_aaa0a`a\_aaa\_ab`^`\_`\_a`a^aU

@HWI-EAS443:3:91:1186:903#0/1  
TAGGAGGTGTCACCTAAGCTATTCAACTGGTGCACCTTGCCA  
+HWI-EAS443:3:91:1186:903#0/1  
a\_UEUTb\_]N``[aU]ZHa`YT`[]`R`Q\_P\_SNV\_VY[  
@HWI-EAS443:3:92:1459:117#0/1  
AAGGCCTACCAGAAGCGAATGGGAGTGCAGATGCAGCGAT  
+HWI-EAS443:3:92:1459:117#0/1  
¥\_a[X`\_b]]b\_abbZbabbbbZbb\_bZabaZb`aaSa]F  
@HWI-EAS443:3:92:1553:1245#0/1  
AGCGCAGAGACTGGAAAGTGTCTTTGCAGGAAAGAACACA  
+HWI-EAS443:3:92:1553:1245#0/1  
a¥Y[ZaaXa\_\_aa\_^a\_\_Va[0\_`aYR[\_`¥``\_\_\_V\_G[  
@HWI-EAS443:3:93:279:1122#0/1  
CGTCACTGTTCCCATCCTGTTGTATATGAGGCCCATGCAA  
+HWI-EAS443:3:93:279:1122#0/1  
a`\_`a][^P^aa`a\_aa`a`\_^aa\_\_Y`\_\_[[V\_\_\_W¥B  
@HWI-EAS443:3:94:1522:930#0/1  
AGGGCCTCATATACAACAGGATGGGAACAGTGACCACAGA  
+HWI-EAS443:3:94:1522:930#0/1  
`abbaY`^babba]aaY^ba^aaaa\_[\_a\_`aN\_^Ua\_]`  
@HWI-EAS443:3:94:302:559#0/1  
CCGGTCCCCATTCCCATTTAGGGCATTGTTGGACAAAGCG  
+HWI-EAS443:3:94:302:559#0/1  
a^`¥¥V¥[a^aXU^^a^VZ`^\_]X[`PM`YN[SY¥`YP^  
@HWI-EAS443:3:96:1139:757#0/1  
GGAGGTTGCTAATCAGACTAGGCAGATGGTACATGCAATA  
+HWI-EAS443:3:96:1139:757#0/1  
^a`\_b\_abaaVabaaaa`ba\_Y^abYa^`¥aOa`S¥WZBB  
@HWI-EAS443:3:96:371:595#0/1  
AAAGTGTCTTTGCAGGAAAGAACACAGATCTTGAGGCTCA  
+HWI-EAS443:3:96:371:595#0/1  
aaTbYa`]^`^\_Y`a`]^`^\_`^\_`^\_YY]^`X[XX]VXX  
@HWI-EAS443:3:99:153:1375#0/1  
CGCCGAGATCGCGCAGAGACTGGAAAGTGTCTTTGCAGGA  
+HWI-EAS443:3:99:153:1375#0/1  
]a¥\_Qbb`aZ`bbab\_ZZaSababbaTKWZa]]]JV`^`\_  
@HWI-EAS443:3:99:345:448#0/1  
CGGGAGTGCAGATGCAGCGATTCAAGTATCCTCTCGTCA  
+HWI-EAS443:3:99:345:448#0/1  
Ta[bbb[b^abaaababbbbaabbbb\_baabaabVab`\_a  
@HWI-EAS443:3:100:102:1282#0/1  
GATATTTGCTGCAATGACGAGAGGATCACTTGAATCGCTG  
+HWI-EAS443:3:100:102:1282#0/1  
aab\_\_a\_V\_aaUa`]a\_]a`\_\_`[ZY^VJTZXZ^\_V\_SYB  
@HWI-EAS443:3:100:107:974#0/1  
CATGGCCTCATATACAACAGGATGGGAACAGTGACCACA  
+HWI-EAS443:3:100:107:974#0/1  
Q^\_\_\_a```Yaa`a`\_`\_bbbbb`ab\_^a[aa[`b`U  
@HWI-EAS443:3:100:1096:660#0/1  
CATGGCCTCATATACAACAGGATGGGAACAGTGACCACA

+HWI-EAS443:3:100:1096:660#0/1  
aaabaaa`b`\_babbabaaab]\_`bbaaa^ab`ba^`[^a  
@HWI-EAS443:3:100:1164:87#0/1  
TAGCTTAGTGACACCTCCTTGGCCCCATGGAACGTTATTT  
+HWI-EAS443:3:100:1164:87#0/1  
[\_aWb`]V^Z`]aV`]X¥a`^RXSYW[aX\_XZW`^ZZaBB  
@HWI-EAS443:3:100:1273:1598#0/1  
ATGGGCCTCATATACAACAGGATGGGAACAGTGACCACAG  
+HWI-EAS443:3:100:1273:1598#0/1  
abaaa\_a`[abaaaaab[ab[aaab`]aUaa¥`aWI`W`B  
@HWI-EAS443:3:100:1349:1254#0/1  
ATCAGACTAGGCAGATGGTACATGCAATGAGAACTATTGG  
+HWI-EAS443:3:100:1349:1254#0/1  
a]S[^\_Q]]^`ZSPZY\_`T¥PWY^IMW^a]a¥ZMSZ\_BBB  
@HWI-EAS443:3:100:1403:617#0/1  
CATTTGAAAAAAGACGATCAGTAATCCACAATATCAGGT  
+HWI-EAS443:3:100:1403:617#0/1  
^bbbbabaa`^aaa\_aaaHa^\_aa]U\_`Ya\_aaaY\_XBB  
@HWI-EAS443:3:100:1549:748#0/1  
CGTATTTAAAGCGACGATAAATACATTTGAAAAAAGACG  
+HWI-EAS443:3:100:1549:748#0/1  
\_`Yabbbbbbb\_G`b^bbbaab\_\_bbababaa``aaa`Ua  
@HWI-EAS443:3:100:253:774#0/1  
GACCGATGCTGTGAATCAGCAATCTGTTCCACAAGTGGCAC  
+HWI-EAS443:3:100:253:774#0/1  
X\_`\_\_`\_b]bbababbaa]]bab`abaa¥`Vaa`W\_a^bN  
@HWI-EAS443:3:100:312:1235#0/1  
CAATAGTTCTCATTGCATGTACCATCTGCCTAGTCTGATT  
+HWI-EAS443:3:100:312:1235#0/1  
ab`aaa\_a¥NVYbb\_`a\_\_ab^\_^[\_a\_a\_a¥EX`0`BBBB  
@HWI-EAS443:3:100:313:99#0/1  
AGTTCTCATTGCATGTACCATCTGCCTAGTCTGATTAGCA  
+HWI-EAS443:3:100:313:99#0/1  
ZZ\_]aa^aaaa\_\_`¥Za`P¥`]`]OT][¥TX¥`]Z¥BBBB  
@HWI-EAS443:3:100:343:551#0/1  
AAGATGACCTTCTTGGAAATTTGCAGGCCTACCAGAAGCG  
+HWI-EAS443:3:100:343:551#0/1  
aaaaaaaaaab[baa\_aaaa\_\_a`]U¥aZ^`Y`aPXWVGB  
@HWI-EAS443:3:100:359:449#0/1  
ATCTGTTCCACAAGTGGCACACACTAGACCAAAGCAGCTT  
+HWI-EAS443:3:100:359:449#0/1  
\_U`b`V^YU`a^\_\_aabS`^]`^`^\_X¥Ra`\_]VK¥\_U\_B  
@HWI-EAS443:3:100:395:751#0/1  
AGATGACCTTCTTGGAAATTTGCAGGCCTACCAGAAGCGA  
+HWI-EAS443:3:100:395:751#0/1  
`TZO\_^XW¥^Z`]`TYPOPX`¥`X]\_[R¥[\_Q\_aQ\_YBBB  
@HWI-EAS443:3:100:629:1464#0/1  
CACTAAGCTATTCAACTGGTGCACCTGCCAGTTGCATGGG  
+HWI-EAS443:3:100:629:1464#0/1  
L\_a\_\_aa]¥\_aJ^\_aP\_\_ZS\_0][\_``¥ZW¥F\_]ZZV^]\_



@HWI-EAS443:3:100:653:749#0/1  
CACTCCCATTTCGTTCTGGTAGGCCTGCAAATTTTCAAGA  
+HWI-EAS443:3:100:653:749#0/1  
a\_aa\_QRF^a`\_]`T^P^\_a]^RYYQ^bX\_X\_RUB  
@HWI-EAS443:3:100:742:152#0/1  
CACAAAGTGGCACACTAGACCAAAAGCAGCTTCTGTGGT  
+HWI-EAS443:3:100:742:152#0/1  
aa`bbbU]bab`aaa`Vaa\_\_aba`a\_aXa\_Z``¥BBB  
@HWI-EAS443:3:100:828:1800#0/1  
CTTTTTTCAAATGTATTTATCGTCGCTTTAAATACGGTT  
+HWI-EAS443:3:100:828:1800#0/1  
abbbbab`b\_bb\_[bbbbbb[`] [ `abbbbaaab`¥bVa  
@HWI-EAS443:3:100:901:21#0/1  
GGCCTCATATACAACAGGATGGGAACAGTGACCACAGAAG  
+HWI-EAS443:3:100:901:21#0/1  
aa`aaabbaa\_a`^aaa`\_aa¥a\_Y`Za^UPXRX`Y^B  
@HWI-EAS443:3:10:1162:969#0/1  
CGGGTCCCCATTCCCATTAGGGCATTGGACAAAGCGT  
+HWI-EAS443:3:10:1162:969#0/1  
T`]ZW¥`R`aa[aabababaWX```aZa\_bT^X`aaa]bY  
@HWI-EAS443:3:10:1308:399#0/1  
ACTTGAATCGCTGCATCTGCACTCCCATTTCGTTCTGGTA  
+HWI-EAS443:3:10:1308:399#0/1  
]\_¥^a`aY]\_`^a\_bb¥aa¥aba[X[^WZaZ`^J^``¥]  
@HWI-EAS443:3:10:1311:1142#0/1  
ATCAGACTAGGCAGATGGTACATGCAATGAGAACTATTGG  
+HWI-EAS443:3:10:1311:1142#0/1  
`b`bbaabaabaaa`aa\_a\_a`a^`aa`a^\_Ta```\_Y  
@HWI-EAS443:3:10:156:1075#0/1  
TGGGCCTCATATACAACAGGATGGGAACAGTGACCACAGA  
+HWI-EAS443:3:10:156:1075#0/1  
aabaa`\_aaaaaaaa`^\_aa\_]a`a¥`\_^`Y`^Y\_\_\_\_\_  
@HWI-EAS443:3:10:1751:1300#0/1  
AACAGTGACCACAGAAGCTGCTTTTGGTCTAGTGTGTGCC  
+HWI-EAS443:3:10:1751:1300#0/1  
a\_W`P^ZU^]aa^`\_`WV]¥]`\_WHDTWQRYSYMIHT  
@HWI-EAS443:3:10:305:1667#0/1  
TTTTGGTCTAGTGTGTGCCACTTGTGAACAGATTGCTGAT  
+HWI-EAS443:3:10:305:1667#0/1  
ab\_]ba¥bV]V¥U\_Y\_`a`Wb[\_`Q`aWbbaab]`L^aba  
@HWI-EAS443:3:10:405:109#0/1  
GCCTCATATACAACAGGATGGGAACAGTGACCACAGAAGC  
+HWI-EAS443:3:10:405:109#0/1  
a[¥`\_^a\_\_^¥\_\_¥Y`\_¥¥¥^Y^Y^W^¥YTUWY¥YYWN  
@HWI-EAS443:3:10:434:1083#0/1  
GTGACCACAGAAGCTGCTTTTGGTCTAGTGTGTGCCACTT  
+HWI-EAS443:3:10:434:1083#0/1  
a\_\_\_\_`\_¥TYa`^Z¥Y[¥BBBBBBBBBBBBBBBBBBBB  
@HWI-EAS443:3:10:462:918#0/1  
AGCGAATGGGAGTGCAGATGCAGCGATTCAAGTGATCCTC

+HWI-EAS443:3:10:462:918#0/1  
\_¥UWVRWTZ[MWZ\_UZQVZX]TZXHDILRWBBBBBBBBBBB  
@HWI-EAS443:3:10:591:1645#0/1  
CAGTGACCACAGAAGCTGCTTTTGGTCTAGTGTGTGCCAC  
+HWI-EAS443:3:10:591:1645#0/1  
aba]bbbaabbbbb`aa]a[aaaY`Wa`a\_\_`]a\_\_\_^a`  
@HWI-EAS443:3:10:606:1081#0/1  
ATACATTTGAAAAAAGACGATCAGTAATCCACAATATCA  
+HWI-EAS443:3:10:606:1081#0/1  
aaaaaaaa`aaa`aaa\_aaaa¥[`\_]aa\_\_¥[Sa\_^`]W`  
@HWI-EAS443:3:10:619:1798#0/1  
AACAGGATGGGAACAGTGACCACAGAAGCTGCTTTTGGTC  
+HWI-EAS443:3:10:619:1798#0/1  
aaaaaa`^^`a¥a\_W`a¥\_\_\_a`a\_¥\_Y¥WWW¥YYWQW  
@HWI-EAS443:3:10:626:1689#0/1  
AGAGCCTCAAGATCTGTGTTCTTTCCTGCAAAGACACTTT  
+HWI-EAS443:3:10:626:1689#0/1  
aaa\_aa\_aa`a\_\_`\_aYa¥\_\_a]\_\_¥\_\_\_`¥\_`YaWT]^  
@HWI-EAS443:3:10:634:1368#0/1  
TAAATACATTTGAAAAAAGACGATCAGTAATCCACAATA  
+HWI-EAS443:3:10:634:1368#0/1  
aaaa\_PST\_RV`a\_H¥]YP¥\_¥[YZ^\_T^¥TPPU^¥]T[  
@HWI-EAS443:3:10:645:158#0/1  
TAGCACTACGGCAAAGGCTATGGAACAGATGGCTGGATCG  
+HWI-EAS443:3:10:645:158#0/1  
abbaaabbbba]aabaaaaY`a^aMXaZK\_`\_]a]S¥S^  
@HWI-EAS443:3:10:699:1759#0/1  
CAAGATCTGTGTTCTTTCCTGCAAAGACACTTCCAGTCT  
+HWI-EAS443:3:10:699:1759#0/1  
¥aPGV`XW]U`Za\_XW]a^Z¥Yaa^aa`aZa^\_\_[\_`\_Q¥^  
@HWI-EAS443:3:10:727:1479#0/1  
ATTTGCTGCAATGACGAGAGGATCACTTGAATCGCTGCAT  
+HWI-EAS443:3:10:727:1479#0/1  
aaaaaa`aaaa`aa`\_`a\_\_^a\_`¥`\_\_\_`¥\_¥\_^`\_¥  
@HWI-EAS443:3:10:735:769#0/1  
GGAGGTTGCTAATCAGACTAGGCAGATGGTACATGCAATG  
+HWI-EAS443:3:10:735:769#0/1  
a`NN\_QY¥LTHZ]^XZRTVXR[RX]SUU^OVRYRUHVYUV  
@HWI-EAS443:3:10:825:1890#0/1  
ACTCGATCCAGCCATCTGTTCCATAGCCTTTGCCGTAGTG  
+HWI-EAS443:3:10:825:1890#0/1  
aaa`b`\_aaX]\_a\_\_\_a¥\_^Z`^`W\_¥^¥¥WWW¥UW¥STU  
@HWI-EAS443:3:10:889:680#0/1  
ACTGGAGCTAGGATGAGTCCCAATAGTTCTCATTGCATGT  
+HWI-EAS443:3:10:889:680#0/1  
a`aaa¥a`aaaa]^a\_a]^V`\_^\_\_Y\_^\_]^[^]\_[\_]\_  
@HWI-EAS443:3:10:915:471#0/1  
CGCGCAGAGACTGGAAAGTGTCTTTGCAGGAAAGAACACA  
+HWI-EAS443:3:10:915:471#0/1  
abbabaaV\_babb[bab\_\_aYaaabb]aaaaYaaaZ\_a[a

@HWI-EAS443:3:10:972:1314#0/1  
GCTGTGAATCAGCAATCTGTTCAACAAGTGGCACACACTAG  
+HWI-EAS443:3:10:972:1314#0/1  
aYQWDN\_SYSX]]RPLTPYTXRLJVX\_I[VX[UVR\_^RUS  
@HWI-EAS443:3:10:988:1609#0/1  
CAGTAATCCACAATATCAGGTGCAAGATCCCAATGATATT  
+HWI-EAS443:3:10:988:1609#0/1  
abbab`babbabbaVabab`Sbabaaaa\_Wa\_aabaab\_  
@HWI-EAS443:3:11:101:1143#0/1  
AGCAGCTTCTGTGGTCACTGTTCCCATCCTGTTGTATATG  
+HWI-EAS443:3:11:101:1143#0/1  
aaa\_baaab\_`Z]aPTZa^W\_]` `\_\_\_\_XQXS[¥\_]TV^  
@HWI-EAS443:3:11:1020:1154#0/1  
CGCGCAGAGACTGGAAAGTGTCTTTGCAGGAAAGAACACA  
+HWI-EAS443:3:11:1020:1154#0/1  
abbbabbabaabaaaaaa\_b`aa`aa\_`aa\_a`a\_a\_a\_`  
@HWI-EAS443:3:11:107:1748#0/1  
GCTGCATCTGCACTCCCATTTCGCTTCTGGTAGGCCTGCAA  
+HWI-EAS443:3:11:107:1748#0/1  
abaabaab`a\_Z`ba`\_^`a\_a``aa[V^\_\_`Ya\_\_\_`a  
@HWI-EAS443:3:11:1119:243#0/1  
CGATCAGTAATCCACAATATCAGGTGCAAGATCCCAATGA  
+HWI-EAS443:3:11:1119:243#0/1  
abbaabbababa`b^abbbbaa``Xaa`aa`a\_^W`\_`b`  
@HWI-EAS443:3:11:112:1769#0/1  
ACCTGATATTGTGGATTACTGATCGTCTTTTTTTCAAATG  
+HWI-EAS443:3:11:112:1769#0/1  
abaaWQ\_aa]a]¥]Z`]aaZa`\_\_\_Za\_aa\_``\_``^`\_\_  
@HWI-EAS443:3:11:1184:127#0/1  
ACTTGAATCGCTGCATCTGCACTCCCATTTCGCTTCTGGTA  
+HWI-EAS443:3:11:1184:127#0/1  
`Lbbba\_a```\_`Z\_¥Z^a\_ZY[\_WW¥¥TW^G^VW\_GZWW  
@HWI-EAS443:3:11:1375:844#0/1  
AAAAAAGACGATCAGTAATCCACAATATCAGGTGCAAGAT  
+HWI-EAS443:3:11:1375:844#0/1  
abaaaaaaaaaVWa]aaa\_\_a`````a][^^R\_T[\_\_\_^¥  
@HWI-EAS443:3:11:1433:984#0/1  
GTCCCAATAGTTCTCATTGCATGTACCATCTGCCTAGTCT  
+HWI-EAS443:3:11:1433:984#0/1  
a^\_\_\_`a^VZ\_]Y^Y\_¥^]\_]\_[Y^]X]\_XY^VWWY^  
@HWI-EAS443:3:11:1513:1525#0/1  
CAAGATTGGTCTTGTCTTTAGCCATTCCATGAGAGCCTCA  
+HWI-EAS443:3:11:1513:1525#0/1  
``\_Z¥^V]^X]^R`W¥[\_` `OZ\_^V[X\_] ^¥Y¥X^¥GXWR  
@HWI-EAS443:3:11:1755:632#0/1  
GTCTTTTTTTCAAATGTATTTATCGTCGCTTTAAATACGG  
+HWI-EAS443:3:11:1755:632#0/1  
a`\_aa`\_\_ba[¥`¥U`^`a\_a^\_\_S^YaY^` [XWX][XM[  
@HWI-EAS443:3:11:225:1200#0/1  
ACTAGACCAAAAAGCAGCTTCTGTGGTCACTGTTCCCATCC

+HWI-EAS443:3:11:225:1200#0/1  
aaaaab\_b\_`^a\_ba\_`aaaaaXXZXa\_`^\_\_W]``\_\_^\_]  
@HWI-EAS443:3:11:225:42#0/1  
AGATCCCAATGATATTTGCTGCAATGACGAGAGGATCACT  
+HWI-EAS443:3:11:225:42#0/1  
aa`a]a\_`aaa\_\_`W^a`aa^\_`a\_\_a^a^a^]¥\_`^\_\_  
@HWI-EAS443:3:11:245:1259#0/1  
GACCGATGCTGTGAATCAGCAATCTGTTCAACAAGTGGCAC  
+HWI-EAS443:3:11:245:1259#0/1  
a¥ba\_V\_ababZ]WZabba\_a`babb`^`]]`a0`Z`a`  
@HWI-EAS443:3:11:263:1720#0/1  
AAGCGAATGGGAGTGCAGATGCAGCGATTCAAGTGATCCT  
+HWI-EAS443:3:11:263:1720#0/1  
a]aba\_`a\_`^\_¥]\_aa[¥\_`^¥\_\_`^¥\_¥ZZ]`^S¥`\_¥¥B  
@HWI-EAS443:3:11:432:641#0/1  
GAAAGATGACCTTCTTGAAAATTTGCAGGCCTACCAGAAG  
+HWI-EAS443:3:11:432:641#0/1  
Y^`^Y^]T0^`\_`]¥aaa\_W\_a`aaWa`Y¥][ ]\_`V`\_\_`  
@HWI-EAS443:3:11:458:413#0/1  
GATGGGAACAGTGACCACAGAAGCTGCTTTTGGTCTAGTG  
+HWI-EAS443:3:11:458:413#0/1  
a\_aaaa\_a`\_b¥aa`X\_`^aaa^a]`aW¥]¥^Z^WW¥¥¥W¥  
@HWI-EAS443:3:11:508:181#0/1  
CAATGACGAGAGGATCACTTGAATCGCTGCATCTGCACTC  
+HWI-EAS443:3:11:508:181#0/1  
aaaa¥PN\_`bbaa^[\_`Y`¥`a]T`¥[\_\_aXXU`¥^Q¥V  
@HWI-EAS443:3:11:602:97#0/1  
ACAGTGACCACAGAAGCTGCTTTTGGTCTAGTGTGTGCCA  
+HWI-EAS443:3:11:602:97#0/1  
abbb]abb\_aaabbaa\_\_a\_aa`YbV\_a`XR[N¥LXR\_`  
@HWI-EAS443:3:11:647:478#0/1  
ATGGGCCTCATATACAACAGGATGGGAACAGTGACCACAG  
+HWI-EAS443:3:11:647:478#0/1  
aa]aa]aaa]aaaaaaa^\_a`\_`\_aa`\_`\_`]a\_Uaa^H[^  
@HWI-EAS443:3:11:659:179#0/1  
GGAGGTTGCTAATCAGACTAGGCAGATGGTACATGCAATG  
+HWI-EAS443:3:11:659:179#0/1  
aaTabM]`aYY\_`\_a^S^^`\_`^]NY¥\_V^RZZ^]]WWW  
@HWI-EAS443:3:11:681:1406#0/1  
ATATACAACAGGATGGGAACAGTGACCACAGAAGCTGCTT  
+HWI-EAS443:3:11:681:1406#0/1  
`abababbbY`baaaaa`b^aa]aaa\_`^a`ba^^[\_`¥]\_  
@HWI-EAS443:3:11:706:1187#0/1  
CCTGTTCACTCGATCCAGCCATCTGTTCCATAGCCTTTGC  
+HWI-EAS443:3:11:706:1187#0/1  
\_bb`aaa`bbbaab¥Q\_`^W`\_`\_`\_`\_a][Y]aY]¥`¥a`a`]  
@HWI-EAS443:3:11:792:1492#0/1  
GGAGGTTGCTAATCAGACTAGGCAGATGGTACATGCAATG  
+HWI-EAS443:3:11:792:1492#0/1  
]¥]a`XT¥`^`Y`bVV\_aaa[¥`\_`¥¥aI`[^MaY]\_`\_`OR

@HWI-EAS443:3:11:816:1206#0/1  
GGTACATGCAATGAGA ACTATTGGGACTCATCCTAGCTCC  
+HWI-EAS443:3:11:816:1206#0/1  
aaUaaaa^aa\_aa\_`\_`\_aaaa\_\_\_\_\_^]\_^YX]^\_^XT  
@HWI-EAS443:3:11:99:1417#0/1  
GATATTTGCTGCAATGACGAGAGGATCACTTGAATCGCTG  
+HWI-EAS443:3:11:99:1417#0/1  
aa`aba\_a\_\_aaa\_]`aaa[\_`a\_\_NN\_Y^\_\_\_\_`]]XU\_U  
@HWI-EAS443:3:12:1119:720#0/1  
CCAAGGAGGTGTCAC TAAGCTATTCAACTGGTGCACCTTGC  
+HWI-EAS443:3:12:1119:720#0/1  
aaaaaaaa^a[`\_\_aaaaaa`\_\_`aaR\_^\_Z\_^W`\_\_`^\_\_\_\_Z  
@HWI-EAS443:3:12:1171:806#0/1  
ACGGCAAAGGCTATGGAACAGATGGCTGGATCGAGTGAAC  
+HWI-EAS443:3:12:1171:806#0/1  
aabba)`a`^`)]`TW\_N][P\_^]V]Q]R`[^P^Y^U¥YBB  
@HWI-EAS443:3:12:1240:365#0/1  
GGTACATGCAATGAGA ACTATTGGGACTCATCCTAGCTCC  
+HWI-EAS443:3:12:1240:365#0/1  
aZQ^^`\_aaXX^a\_`¥`^aaYR`VaZ^NZ¥TP¥Z\_¥Y¥WT  
@HWI-EAS443:3:12:124:197#0/1  
GAACAGTGACCACAGAAGCTGCTTTTGGTCTAGTGTGTGC  
+HWI-EAS443:3:12:124:197#0/1  
^`\_b`\_TZ[bb^\_^bbaa\_a\_\_a\_[`YPZ^\_\_PVU\_V[U  
@HWI-EAS443:3:12:1297:406#0/1  
CAGTGACCACAGAAGCTGCTTTTGGTCTAGTGTGTGCCAC  
+HWI-EAS443:3:12:1297:406#0/1  
aab`bbaabababaa\_aa\_a`^`a`^`a`^`^`\_Y\_]\_]\_U  
@HWI-EAS443:3:12:1303:603#0/1  
TGTCTGTGAGACCGATGCTGTGAATCAGCAATCTGTTTAC  
+HWI-EAS443:3:12:1303:603#0/1  
aba`aa\_\_a`\_PXa]a]aab^a`aa^a`[^aa\_a`\_]T[Z  
@HWI-EAS443:3:12:1361:316#0/1  
CTTTCCTGCAAAGACACTTTCCAGTCTCTGCGGATCTCG  
+HWI-EAS443:3:12:1361:316#0/1  
aabab\_\_`bb¥b\_] [Taab^Z\_aXabaaaabab^MW¥^a  
@HWI-EAS443:3:12:1367:1609#0/1  
CATGGCCTCATATACAACAGGATGGGAACAGTGACCACA  
+HWI-EAS443:3:12:1367:1609#0/1  
WV`bZ\_JT`b[bb]b^`\_Z\_\_¥`\_bbb`[^a¥0[¥\_I[ab  
@HWI-EAS443:3:12:1387:454#0/1  
ATGGGCCTCATATACAACAGGATGGGAACAGTGACCACAG  
+HWI-EAS443:3:12:1387:454#0/1  
aaaaa]\_aa`aaa^]\_a`aaa¥\_aR¥\_\_¥``Va\_\_¥¥Y\_`  
@HWI-EAS443:3:12:1399:525#0/1  
GGAGTGCAGATGCAGCGATTCAAGTGATCCTCTCGTCATT  
+HWI-EAS443:3:12:1399:525#0/1  
ab`b[\_a\_`¥`\_aaa[a\_`\_\_^X¥`a`LU\_Wa¥PNW^`B  
@HWI-EAS443:3:12:1439:707#0/1  
CGATGCTGTGAATCAGCAATCTGTTTCAAGTGGCACACA

+HWI-EAS443:3:12:1439:707#0/1  
^[FYWZ\_bW]X^`^T`\_T`^X[TR`a]QNRU[\_FYGL  
@HWI-EAS443:3:12:1461:1338#0/1  
GCTGGCTAGCACTACGGCAAAGCTATGGAACAGATGGCT  
+HWI-EAS443:3:12:1461:1338#0/1  
a[aX\_NRa\$SOQVZBBBBBBBBBBBBBBBBBBBBBBBBB  
@HWI-EAS443:3:12:1617:1851#0/1  
GATGGTACATGCAATGAGAACTATTGGGACTCATCCTAGC  
+HWI-EAS443:3:12:1617:1851#0/1  
aaSaaQaQ`\_`\_SPQZ^VJSZFT^\$NWY`ZGN`WUTBBBB  
@HWI-EAS443:3:12:1676:1493#0/1  
GGAGTGCAGATGCAGCGATTCAAGTGATCCTCTCGTCATT  
+HWI-EAS443:3:12:1676:1493#0/1  
`XU\_PaZVWXO[^UH0\$PT^`\$KZ`\_UH\$NWJFRBBBB  
@HWI-EAS443:3:12:1712:1999#0/1  
CAACAGGATGGGAACAGTGACCACAGAAGCTGCTTTTGGT  
+HWI-EAS443:3:12:1712:1999#0/1  
aab`\_`\_baabaQ`SY`U`aT`^U`\_a`aV`\_N`\_aZ`W  
@HWI-EAS443:3:12:182:973#0/1  
GGGCCTCATATAACAAGGATGGGAACAGTGACCACAGAA  
+HWI-EAS443:3:12:182:973#0/1  
a`a```aaaa`\$`][^^`\$\$`\_a\_X\_a^Z^`\_ZSW  
@HWI-EAS443:3:12:269:342#0/1  
CACACTAGACCAAAAAGCAGCTTCTGTGGTCACTGTTCCCA  
+HWI-EAS443:3:12:269:342#0/1  
aaa\_a`aaaa`a\_aa\_a`^`a`\_]X`^UZ`\_X\_X[\$^Y\_  
@HWI-EAS443:3:12:275:1212#0/1  
GACCAAAAGCAGCTTCTGTGGTCACTGTTCCCATCCTGTT  
+HWI-EAS443:3:12:275:1212#0/1  
abba^V`\_bbaaa^X\$`\_Z```^Lyz^`\_[YV]`\_T`]  
@HWI-EAS443:3:12:379:94#0/1  
GGGCCTCATATAACAAGGATGGGAACAGTGACCACAGAA  
+HWI-EAS443:3:12:379:94#0/1  
`baaabb`a`\_a`b`\$`\_ba`\_aaa`\_`\_a`Uaa\$`\_[W`\_dM`]  
@HWI-EAS443:3:12:386:1360#0/1  
GCCTCAAGATCTGTGTTCTTTCTGCAAAGACTTTCCA  
+HWI-EAS443:3:12:386:1360#0/1  
aaa]THVZJXa`a[^TaaS]`\_]S]X`\_Wa`\_`\_Y]Y]YWGP  
@HWI-EAS443:3:12:396:308#0/1  
GCCTCATATAACAAGGATGGGAACAGTGACCACAGAAGC  
+HWI-EAS443:3:12:396:308#0/1  
a`^```aaaaa`a\$V]aZ`^`\_]U[WZ^T\_]X`\$`]`\_VWUW  
@HWI-EAS443:3:12:46:1966#0/1  
GGGCCTCATATAACAAGGATGGGAACAGTGACCACAGAA  
+HWI-EAS443:3:12:46:1966#0/1  
aa`bbabbabbabb`a\$`]`aa^a`\_a`\_aaWaaaaaaaa`\_  
@HWI-EAS443:3:12:47:539#0/1  
ATACAAGAAGCTCAAAAGAGAAATAACGTTCCATGGGGCC  
+HWI-EAS443:3:12:47:539#0/1  
[aaaaaa`\_a]bab\$`]\_YX`\_Xa`\_[a]ZVWLZ`\_]Z]`\_``\_`]

@HWI-EAS443:3:12:484:1165#0/1  
GAAAGATGACCTTCTTGAAAATTTGCAGGCCTACCAGAAG  
+HWI-EAS443:3:12:484:1165#0/1  
V[aaaaaZba`aaaba\_\_bbaaaY\_a`a\_a^^^\_Y`\_\_a  
@HWI-EAS443:3:12:497:1112#0/1  
GACCGATGCTGTGAATCAGCAATCTGTTACACAAGTGGCAC  
+HWI-EAS443:3:12:497:1112#0/1  
a``T^Y\_\_aaaG¥`\_U\_WVRTY]^]^YZTNLROUMMZR^W  
@HWI-EAS443:3:12:503:1115#0/1  
GATAAATACATTTGAAAAAAGACGATCAGTAATCCACAA  
+HWI-EAS443:3:12:503:1115#0/1  
¥NG\_VU[U\_XR][YUZQ]QYO¥M]\_^Y[UZTZZT¥RSSYP  
@HWI-EAS443:3:12:637:165#0/1  
GAATCGCTGCATCTGCACTCCCATTGCTTCTGGTAGGCC  
+HWI-EAS443:3:12:637:165#0/1  
`aaa¥aa\_a`a\_a\_^J[\_`\_Y^[Z^^\_UTWS¥XVW¥¥^QB  
@HWI-EAS443:3:12:702:1056#0/1  
CAAGATTGGTCTTGTCTTTAGCCATTCCATGAGAGCCTCA  
+HWI-EAS443:3:12:702:1056#0/1  
W``baaa¥`Ybbb`]aaa`b`]Uaa`a^\_abaaaaS`Z`  
@HWI-EAS443:3:12:756:983#0/1  
GCTAGGATGAGTCCCAATAGTTCTCATTGCATGTACCATC  
+HWI-EAS443:3:12:756:983#0/1  
Z^¥bab`[SWa\_aa`aa`\_]\_^\_\_`\_\_a\_a`Y^a^\_]¥]  
@HWI-EAS443:3:12:823:273#0/1  
CAATAGTTCTCATTGCATGTACCATCTGCCTAGTCTGATT  
+HWI-EAS443:3:12:823:273#0/1  
a^b]N\_aY^^[ba`S`^a`\_¥X]aaa[aYRYZ^^````\_  
@HWI-EAS443:3:12:847:728#0/1  
CGAGAGGATCACTTGAATCGCTGCATCTGCACTCCCATTC  
+HWI-EAS443:3:12:847:728#0/1  
abbaaaaaaaaa`aaaaaab`\_`a\_a`\_`a`\_`a\_\_\_\_`\_S  
@HWI-EAS443:3:12:865:779#0/1  
TACTGATCGTCTTTTTTTCAAATGTATTTATCGTCGCTTT  
+HWI-EAS443:3:12:865:779#0/1  
X¥```aba^aaY\_ba`Y`bb^bbb]``\_\_XX]^LYbaa^¥  
@HWI-EAS443:3:12:908:647#0/1  
GTCCCCATTCCCATTTAGGGCATTGGACAAAGCGTCTA  
+HWI-EAS443:3:12:908:647#0/1  
`¥[\_Z¥`K`aZ\_bbaaQ¥¥^\_\_^^]`a`XY^^aXb`]^Z  
@HWI-EAS443:3:12:93:207#0/1  
TTGGTCTAGTGTGTGCCACTTGTGAACAGATTGCTGATTC  
+HWI-EAS443:3:12:93:207#0/1  
`^]SR\_^bbY]aZ`^^a\_a`^a]X]]]```YJ¥^¥ZZ\_]\_  
@HWI-EAS443:3:12:982:631#0/1  
ATCAGACTAGGCAGATGGTACATGCAATGAGA ACTATTGG  
+HWI-EAS443:3:12:982:631#0/1  
`¥]aba^[a\_Y`aa`^XZ`[Y\_\_P\_a\_]\_]VaSa`\_\_[\_  
@HWI-EAS443:3:12:989:524#0/1  
CAATGACGAGAGGATCACTTGAATCGCTGCATCTGCACTC

+HWI-EAS443:3:12:989:524#0/1  
aa`aa`a\_a^`\_]\_¥^[¥aa\_¥\_¥\_^^\_¥\_^Q\_`W\_Y¥V  
@HWI-EAS443:3:13:1031:1350#0/1  
ATTTGAAAAAAGACGATCAGTAATCCACAATATCAGGTG  
+HWI-EAS443:3:13:1031:1350#0/1  
abbaaa\_\_aaa\_\_`aa]]\_Y^\_WV^^¥`^)^[[^YU¥  
@HWI-EAS443:3:13:1140:1736#0/1  
TGATCCTCTCGTCATTGCAGCAAATATCATTGGGATCTTG  
+HWI-EAS443:3:13:1140:1736#0/1  
`b\_aaab^a\_a\_`Y`aa^]a\_]`a`]]^]¥¥\_`]Y¥Z¥  
@HWI-EAS443:3:13:1152:1330#0/1  
CAGCAATCTGTTCAAGTGGCACACACTAGACCAAAGC  
+HWI-EAS443:3:13:1152:1330#0/1  
aabaa`a^ab\_aaa^aa`]aab`a\_`]``\_Y\_a\_\_`\_`  
@HWI-EAS443:3:13:1391:1333#0/1  
CTGTGAATCAGCAATCTGTTCAAGTGGCACACACTAGA  
+HWI-EAS443:3:13:1391:1333#0/1  
a]F[bbbbbbb`bbaaab]aaaaa\_UU^aa\_a\_a`\_a`  
@HWI-EAS443:3:13:1419:1446#0/1  
TGCACCTGATATTGTGGATTACTGATCGTCTTTTTTTCAA  
+HWI-EAS443:3:13:1419:1446#0/1  
W¥¥baabaa^^`Y^Vaabb`]¥ba^aa\_VV^][abaa\_aS  
@HWI-EAS443:3:13:1510:313#0/1  
ATCCCAATGATATTTGCTGCAATGACGAGAGGATCACTTG  
+HWI-EAS443:3:13:1510:313#0/1  
```]abaabaaa\_aa`^a\_a\_```a[`a\_\_a]¥\_\_WYa¥¥  
@HWI-EAS443:3:13:1516:1957#0/1  
CAAGATTGGTCTTGTCTTTAGCCATTCCATGAGAGCCTCA  
+HWI-EAS443:3:13:1516:1957#0/1  
a`aY`a]UVa\_^]PHUaY][0a`^[[^][U[\_N][M[GT  
@HWI-EAS443:3:13:1580:877#0/1  
TGGGCCTCATATACAACAGGATGGGAACAGTGACCACAGA  
+HWI-EAS443:3:13:1580:877#0/1  
abbaa`a[ababaaaa`aba`aab\_`a^ab\_a`]Y]]a`^  
@HWI-EAS443:3:13:1605:408#0/1  
CGTCATTGCAGCAAATATCATTGGGATCTTGACCTGATA  
+HWI-EAS443:3:13:1605:408#0/1  
`ba`aa`K\_a^aa`a`a]a`\_a\_\_\_`X`aa¥^ZZa\_]\_]`  
@HWI-EAS443:3:13:1632:648#0/1  
GCCGAGATCGCGCAGAGACTGGAAAGTGTCTTTGCAGGAA  
+HWI-EAS443:3:13:1632:648#0/1  
ab\_bTbZRYaaa]\_\_`a`]a\_VZ¥]a¥aSG]Q`X^^`\_S¥  
@HWI-EAS443:3:13:165:778#0/1  
CAATAGTTCTCATTGCATGTACCATCTGCCTAGTCTGATT  
+HWI-EAS443:3:13:165:778#0/1  
aaaabaZaaabaaaaaa`\_aa`a\_a`a`aaab^aaa`^\_  
@HWI-EAS443:3:13:184:974#0/1  
ACCTGATATTGTGGATTACTGATCGTCTTTTTTTCAAATG  
+HWI-EAS443:3:13:184:974#0/1  
aabbbbaaaaab\_ba`a`]a`aaaa\_aaaaaa\_aa`aa



@HWI-EAS443:3:13:320:476#0/1  
CAAAAGAGAAATAACGTTCCATGGGGCCAAGGAGGTGTCA  
+HWI-EAS443:3:13:320:476#0/1  
]bb]\_babaab````\_aa`aaaab\_\_aZ[^\_a\_`\_^Va\_\_a  
@HWI-EAS443:3:13:356:440#0/1  
GATCACTTGAATCGCTGCATCTGCACTCCCATTCGCTTCT  
+HWI-EAS443:3:13:356:440#0/1  
Z^¥[K^b^]¥Z\_UV\_X^`a\_\_¥`ZH`\_^¥¥KPPYLY`¥¥\_  
@HWI-EAS443:3:13:415:303#0/1  
CAAACCGTATTTAAAGCGACGATAAATACATTTGAAAAAA  
+HWI-EAS443:3:13:415:303#0/1  
aabbaab^aaa`````aa`aa\_^[\\_][^\_\_\_\_^\_[\_\_  
@HWI-EAS443:3:13:526:1471#0/1  
GACGAGAGGATCACTTGAATCGCTGCATCTGCACTCCCAT  
+HWI-EAS443:3:13:526:1471#0/1  
aabaa`]aaaaaZ``ZaW\_¥aa\_V[a^`\_`aQ`¥^YSW\_X  
@HWI-EAS443:3:13:549:1120#0/1  
GAAAGATGACCTTCTTGAAAATTTGCAGGCCTACCAGAAG  
+HWI-EAS443:3:13:549:1120#0/1  
`¥Y`bb`abaaaaabbbbbbbababaaaaaabbaa`ab  
@HWI-EAS443:3:13:608:1536#0/1  
GAAAGATGACCTTCTTGAAAATTTGCAGGCCTACCAGAAG  
+HWI-EAS443:3:13:608:1536#0/1  
a^U^R^a^WR]``]a``^^`PXU¥aa]^a`^a]a\_`\_]\_  
@HWI-EAS443:3:13:61:1725#0/1  
GATCAGTAATCCACAATATCAGGTGCAAGATCCCAATGAT  
+HWI-EAS443:3:13:61:1725#0/1  
Z\_^aX\_IZ]`a^]aaabaa`abZTa`Y`¥a\_W]\_¥a\_a`V  
@HWI-EAS443:3:13:622:1040#0/1  
TGGGCCTCATATACAACAGGATGGGAACAGTGACCACAGA  
+HWI-EAS443:3:13:622:1040#0/1  
aa^]Z`a]U`^[aba`aa[aZab\_Za]aa\_aa\_\_\_\_a[¥  
@HWI-EAS443:3:13:665:1219#0/1  
GACCACAGAAGCTGCTTTTGGTCTAGTGTGTGCCACTTGT  
+HWI-EAS443:3:13:665:1219#0/1  
`abaabb]\_`a]b\_SI\_X\_aaP[¥b^[Z[\_¥^\_T`]U]aY  
@HWI-EAS443:3:13:692:1806#0/1  
GATCCCAATGATATTTGCTGCAATGACGAGAGGATCACTT  
+HWI-EAS443:3:13:692:1806#0/1  
aaU^]W`^Z^a``TX`bb`b`T\_X```[^`][NNTYBBBB  
@HWI-EAS443:3:13:785:1601#0/1  
CCTTCTTGAAAATTTGCAGGCCTACCAGAAGCGAATGGGA  
+HWI-EAS443:3:13:785:1601#0/1  
abaa`ab^^aaa\_aaaab[a\_\_aY]\_aaaa`\_a¥\_a]S`¥  
@HWI-EAS443:3:13:957:244#0/1  
GGTACATGCAATGAGAACTATTGGGACTCATCCTAGCTCC  
+HWI-EAS443:3:13:957:244#0/1  
ab\_a\_a^^a\_a`]\_`¥\_`^aZa\_\_¥^a\_]\_`\_¥V\_\_\_W\_WN  
@HWI-EAS443:3:13:994:350#0/1  
CTTGTGAACAGATTGCTGATTCACAGCATCGGTCTCACAG

+HWI-EAS443:3:13:994:350#0/1  
a`aaJb`\_Zb\_\_a\_a]aa`X¥`[Z\_P^]`[X]\_YXX[B  
@HWI-EAS443:3:14:1192:309#0/1  
GCGACGATAAATACATTTGAAAAAAGACGATCAGTAATC  
+HWI-EAS443:3:14:1192:309#0/1  
a]V¥0]L\_Y\_`T[V\_aaQWZQS]TNXLLTWOQP`GTYBB  
@HWI-EAS443:3:14:1249:1302#0/1  
GACCGATGCTGTGAATCAGCAATCTGTTCAACAAGTGGCAC  
+HWI-EAS443:3:14:1249:1302#0/1  
]baZa]`YU¥GKVWXP[a¥^ZXTVa\_S[NQKYGUF\_]OUU  
@HWI-EAS443:3:14:1272:358#0/1  
ATCGCTGCATCTGCACTCCCATTCGTTCTGGTAGGCCTG  
+HWI-EAS443:3:14:1272:358#0/1  
aaaba\_a`aa`[bY\_[^a\_^¥`\_Xa¥\_\_¥`XYUV^ZWWW\_  
@HWI-EAS443:3:14:1321:1048#0/1  
ACTAGACCAAAGCAGCTTCTGTGGTCACTGTTCCCATCC  
+HWI-EAS443:3:14:1321:1048#0/1  
aabaaaaab`aaa`\_a`\_Ya][\_R\_^]^VZ^UZ\_^W^  
@HWI-EAS443:3:14:1332:1743#0/1  
ATGGGCCTCATATACAACAGGATGGGAACAGTGACCACAG  
+HWI-EAS443:3:14:1332:1743#0/1  
a\_aaaaXa\_\_aaaa`aa^aaQ¥`¥^\_¥¥`¥\_]^U\_\_\_Y  
@HWI-EAS443:3:14:1481:1387#0/1  
CACACTAGACCAAAGCAGCTTCTGTGGTCACTGTTCCCA  
+HWI-EAS443:3:14:1481:1387#0/1  
ab`aaa`aa\_\_aaaa`aaa\_\_a^a\_]a[X\_^X^\_X]RZ\_`  
@HWI-EAS443:3:14:1489:442#0/1  
ATCGTCTTTTTTCAAATGTATTTATCGTCGCTTTAAATA  
+HWI-EAS443:3:14:1489:442#0/1  
a`bb`aaaabaab\_^`a^`V]`\_]\_\_[][¥W¥^`a¥\_] ] ] ]  
@HWI-EAS443:3:14:1632:904#0/1  
CTGTGAGACCGATGCTGTGAATCAGCAATCTGTTCAACAAG  
+HWI-EAS443:3:14:1632:904#0/1  
¥Sa^\_`bbbbbb`b`ab]baabXaaZ^a`^bb[XXa`\_`\_a  
@HWI-EAS443:3:14:1637:210#0/1  
CAGGTGCAAGATCCCAATGATATTTGCTGCAATGACGAGA  
+HWI-EAS443:3:14:1637:210#0/1  
aaaZa\_]aaa[[VH^[S\_a\_S^\_a`\_^\_X^^W^]X[SV]  
@HWI-EAS443:3:14:1668:711#0/1  
CACAAGTGGCACACACTAGACCAAAGCAGCTTCTGTGGT  
+HWI-EAS443:3:14:1668:711#0/1  
abbbbbaaaaab`aaa¥aaaa\_aaaa`b`\_a\_a`\_\_\_ZZ]U  
@HWI-EAS443:3:14:1729:437#0/1  
GTGTGCCACTTGTGAACAGATTGCTGATTCACAGCATCGG  
+HWI-EAS443:3:14:1729:437#0/1  
\_X\_XQEXa]aa\_Y]a[S¥`\_`\_^\_aa^WU[V[\_Z\_] ] ] ]  
@HWI-EAS443:3:14:201:789#0/1  
AGAGAAATAACGTTCCATGGGGCCAAGGAGGTGTCACTAA  
+HWI-EAS443:3:14:201:789#0/1  
aa`\_`\_`\_`aaaa\_]a`a`\_XY^\_aa¥`QX^U^`\_] ] ] ]

@HWI-EAS443:3:14:259:1793#0/1  
CAAGTGGCACACACTAGACCAAAGCAGCTTCTGTGGTCA  
+HWI-EAS443:3:14:259:1793#0/1  
aaaZP¥[baaa`a`[¥^`a``\_\_\_\_[`a¥[¥¥`W^WTTVT\_  
@HWI-EAS443:3:14:347:97#0/1  
GTCTAGTGTGTGCCACTTGTGAACAGATTGCTGATTCACA  
+HWI-EAS443:3:14:347:97#0/1  
a^a`aa\_`^aX`]]`\_\_\_\_^`\_`]]`\_\_]]X^`^\_AU^U\_  
@HWI-EAS443:3:14:363:542#0/1  
TGACCACAGAAGCTGCTTTTGGTCTAGTGTGTGCCACTTG  
+HWI-EAS443:3:14:363:542#0/1  
]babZX\_abb^bbaaab\_OU\_¥`aaab]a]^aa]]R[\_\_\_  
@HWI-EAS443:3:14:459:1861#0/1  
GCCTCATATACAACAGGATGGGAACAGTGACCACAGAAGC  
+HWI-EAS443:3:14:459:1861#0/1  
abaaaa\_`aa`aZa\_`````a¥`\_S^a\_W\_]a]\_^Z]  
@HWI-EAS443:3:14:475:106#0/1  
TGTGAATCAGCAATCTGTTCAAGTGGCACACACTAGAC  
+HWI-EAS443:3:14:475:106#0/1  
\_aa`abaa]aa^`^aaaa]aa\_aa]\_a`\_b^a]a\_^\_\_\_\_^  
@HWI-EAS443:3:14:48:1800#0/1  
GGCCAAGGAGGTGTCACCTAAGCTATTCAACTGGTGCACCT  
+HWI-EAS443:3:14:48:1800#0/1  
]VWX\_OP]\_YPYRHT`QW[]]WV[][\_`W`MEW[SQ¥[BB  
@HWI-EAS443:3:14:546:1202#0/1  
ATACAAGAAGCTCAAAGAGAAATAACGTTCCATGGGGCC  
+HWI-EAS443:3:14:546:1202#0/1  
aaaa`\_]\_]aa`\_a]\_\_`a[aa`aaR\_Z^]]`^^Z\_\_UY  
@HWI-EAS443:3:14:565:844#0/1  
CAGCAATCTGTTCAAGTGGCACACACTAGACCAAAGC  
+HWI-EAS443:3:14:565:844#0/1  
abaa^^]\_a¥\_Z\_^[\`a[Y¥Taa`aY\_\_^^`\_TV]^`\_\_ZU  
@HWI-EAS443:3:14:598:527#0/1  
ATCAGGTGCAAGATCCCAATGATATTTGCTGCAATGACGA  
+HWI-EAS443:3:14:598:527#0/1  
a\_aZa¥W`¥MU`\_\_`\_\_^^`Z^[aa^^Y`\_X\_^\_`[]\_^  
@HWI-EAS443:3:14:622:830#0/1  
GTGAGACCGATGCTGTGAATCAGCAATCTGTTCAAGTG  
+HWI-EAS443:3:14:622:830#0/1  
aa¥¥]a`b`WZ`ZU]]\_Y^a[\`a`^¥^a]\_^[V\_\_aXW  
@HWI-EAS443:3:14:776:990#0/1  
GATGAGTCCCAATAGTTCTCATTGCATGTACCATCTGCCT  
+HWI-EAS443:3:14:776:990#0/1  
aaa`^a0`aaVVTY[G^a\_[\_JU^`Y¥^Y\_]\_``V]U]^  
@HWI-EAS443:3:14:785:554#0/1  
GGCCTCATATACAACAGGATGGGAACAGTGACCACAGAAG  
+HWI-EAS443:3:14:785:554#0/1  
aa[a^b\_^^bb`Q]^`^^aa`^Z\_]U]ZUZ``\_aY`a  
@HWI-EAS443:3:14:832:1278#0/1  
ATCTGTTCAAGTGGCACACACTAGACCAAAGCAGCTT

+HWI-EAS443:3:14:832:1278#0/1  
aaaaa`^¥Ya]a]`a`a\_\_`\_a]`a\_X\_\_Z\_]\_[-^^[Y  
@HWI-EAS443:3:14:849:196#0/1  
GGCCAAGGAGGTGTCACCTAAGCTATTCAACTGGTGCACCT  
+HWI-EAS443:3:14:849:196#0/1  
abbaaab]W\_aXa\_ab\_aa^a\_\_\_\_\_]\_`\_\_V\_^Q\_^¥USS  
@HWI-EAS443:3:14:86:333#0/1  
GCCTCATATACAACAGGATGGGAACAGTGACCACAGAAGC  
+HWI-EAS443:3:14:86:333#0/1  
abb[`aaaa^baa\_aa`¥[[a`¥`^`\_X]a``\_a]YYQ`X  
@HWI-EAS443:3:14:873:186#0/1  
GTGAGACCGATGCTGTGAATCAGCAATCTGTTCAAGTG  
+HWI-EAS443:3:14:873:186#0/1  
a][VU¥]`aWSZ[Y]W^\_¥]Y]]YYVVXX]VTVRUWVZVV  
@HWI-EAS443:3:14:940:1787#0/1  
ATTTGCTGCAATGACGAGAGGATCACTTGAATCGCTGCAT  
+HWI-EAS443:3:14:940:1787#0/1  
\_WV\_\_¥Z¥\_\_a¥Z`a^a^`^¥aXbS\_]b]bbaa¥RHYa¥X  
@HWI-EAS443:3:14:943:1917#0/1  
GCCTCATATACAACAGGATGGGAACAGTGACCACAGAAGC  
+HWI-EAS443:3:14:943:1917#0/1  
]\_^`\_`\_baa`Y]b\_bbUaaaXXQ¥SaaR`^^]a¥XaZY  
@HWI-EAS443:3:14:968:873#0/1  
CTGTGGTCACTGTTCCCATCCTGTTGTATATGAGGCCCAT  
+HWI-EAS443:3:14:968:873#0/1  
a`a]aaa`\_\_abaa^aa`aa\_aa^aba`aa`\_\_\_\_^Z¥]\_\_  
@HWI-EAS443:3:14:972:1648#0/1  
ATGCCCTAAATGGGAATGGGGACCCGAACAACATGGATAG  
+HWI-EAS443:3:14:972:1648#0/1  
a]a`\_\_^\_a\_^`\_^\_¥^^¥RR]ZWZ]¥ZWZ^Z^]\_WBBBB  
@HWI-EAS443:3:15:1015:518#0/1  
TGGGCCTCATATACAACAGGATGGGAACAGTGACCACAGA  
+HWI-EAS443:3:15:1015:518#0/1  
]b]aa[baa\_\_\_b[`aa\_[aa`^^Qa\_]bYadW``a`\_]`  
@HWI-EAS443:3:15:1197:1721#0/1  
ACTTGAATCGCTGCATCTGCACTCCCATTCGCTTCTGGTA  
+HWI-EAS443:3:15:1197:1721#0/1  
ab\_ababba``a\_X`aaaaaa`aa\_^¥\_[Z]a`a`X`]`  
@HWI-EAS443:3:15:1262:2007#0/1  
CGTCTTTTTTCAAATGTATTTATCGTCGCTTTAAATACG  
+HWI-EAS443:3:15:1262:2007#0/1  
ab¥bbba\_bba^abbb^Tabbbab`b``baaabbbabaI`  
@HWI-EAS443:3:15:1369:101#0/1  
GTGAGACCGATGCTGTGAATCAGCAATCTGTTCAAGTG  
+HWI-EAS443:3:15:1369:101#0/1  
^R¥[¥Xa¥]\_`a^\_TL\_OHVRX^^¥WXSUULRQLQUW]QB  
@HWI-EAS443:3:15:1507:2012#0/1  
GCTTTTGGTCTAGTGTGTGCCACTTGTGAACAGATTGCTG  
+HWI-EAS443:3:15:1507:2012#0/1  
¥abba\_¥[aab`bba`]`\_^a]]`aZaa``¥¥`[^a````

@HWI-EAS443:3:15:1510:583#0/1  
ATTTGAAAAAAGACGATCAGTAATCCACAATATCAGGTG  
+HWI-EAS443:3:15:1510:583#0/1  
[`bbba[baaa^bUabaaZ`a`]a`WXaXaa\_\_XW][VSY  
@HWI-EAS443:3:15:1721:1142#0/1  
GAGACCGATGCTGTGAATCAGCAATCTGTTCAAGTGGC  
+HWI-EAS443:3:15:1721:1142#0/1  
RZ^\_V\_\_\_\_[¥U[\_a\_ba]\_]\_K]¥YUY]RZOX^TY¥H¥¥a  
@HWI-EAS443:3:15:222:1461#0/1  
GAACAGTGACCACAGAAGCTGCTTTTGGTCTAGTGTGTGC  
+HWI-EAS443:3:15:222:1461#0/1  
aV\_]¥a\_]`a¥\_]abaaba[\_`Y`\_\_a[S]a[]][Y]R`\_  
@HWI-EAS443:3:15:342:1491#0/1  
GAACAGTGACCACAGAAGCTGCTTTTGGTCTAGTGTGTGC  
+HWI-EAS443:3:15:342:1491#0/1  
`\_Q\_`a]aabbba`¥ba^aa]`a\_\_]¥]]b\_]Ga\_\_S[a  
@HWI-EAS443:3:15:44:1337#0/1  
GCCGAGATCGCGCAGAGACTGGAAAGTGTCTTTGCAGGAA  
+HWI-EAS443:3:15:44:1337#0/1  
abb`\_X^ab\_U[¥``XY^[]ZZ¥Z]TN\_^^^[^QSW]^¥[  
@HWI-EAS443:3:15:516:574#0/1  
CAGAAGCTGCTTTTGGTCTAGTGTGTGCCACTTGTGAACA  
+HWI-EAS443:3:15:516:574#0/1  
]`^^ab\_aa[aaa^^`ZUa`Y`¥`]R``a]`aaZa`dUa  
@HWI-EAS443:3:15:569:1611#0/1  
GTGAACAGATTGCTGATTCACAGCATCGGTCTCACAGACA  
+HWI-EAS443:3:15:569:1611#0/1  
a``aba`aaaaaaaa`abbaa\_aaa\_aa]a\_\_`\_`aaVa  
@HWI-EAS443:3:15:584:176#0/1  
CTTGTCACCTCTGACTAAGGGAATTTTAGGATTTGTGTTC  
+HWI-EAS443:3:15:584:176#0/1  
abbaULWaa`XT^]^^\_OUZWaX[^H^`YVZOOV`]V¥FP  
@HWI-EAS443:3:15:643:1859#0/1  
TACATTTGAAAAAAGACGATCAGTAATCCACAATATCAG  
+HWI-EAS443:3:15:643:1859#0/1  
aa``babbbbbb¥b^^abaa^\_``Iaa[^baUY\_Ya`Z``  
@HWI-EAS443:3:15:656:336#0/1  
GCAGATGGTACATGCAATGAGAACTATTGGGACTCATCCT  
+HWI-EAS443:3:15:656:336#0/1  
aabaa`ba¥``a\_a`a\_`aa`^\_\_`\_``\_`X\_¥^``¥\_¥T  
@HWI-EAS443:3:15:701:1267#0/1  
AAGAGAAATAACGTTCCATGGGGCCAAGGAGGTGCTACTA  
+HWI-EAS443:3:15:701:1267#0/1  
^b^JZY``^a\_b^]N)`\_[^\_\_\_\_`Y[O\_\_^\_\_W\_Y`\_`Va  
@HWI-EAS443:3:15:772:715#0/1  
CGAGAGGATCACTTGAATCGCTGCATCTGCACTCCCATTC  
+HWI-EAS443:3:15:772:715#0/1  
abbabba^``[aba\_bb`baaZabaa\_aa`aa^a]`aa^  
@HWI-EAS443:3:15:996:812#0/1  
GATCACTTGAATCGCTGCATCTGCACTCCCATTCGCTTCT

+HWI-EAS443:3:15:996:812#0/1  
aXZ00[XaX]a^^XUa`\_a`UJ`[¥R\_Q^`a[P`a\_a\_U[  
@HWI-EAS443:3:16:1065:774#0/1  
GTGGATTACTGATCGTCTTTTTTCAAATGTATTTATCGT  
+HWI-EAS443:3:16:1065:774#0/1  
`Q\_]aYY\_Y`\_a]WW[\_ZVZ^\_]TS[^\_ZV\_OYPOBB  
@HWI-EAS443:3:16:1068:1190#0/1  
GACCGATGCTGTGAATCAGCAATCTGTTCAAGTGGCAC  
+HWI-EAS443:3:16:1068:1190#0/1  
`aJaWU^^`ZTG]a¥]aa``¥V^^`a^¥a[\_^Y^V`WS¥Z  
@HWI-EAS443:3:16:107:1525#0/1  
CATGGGCCTCATATACAACAGGATGGGAACAGTGACCACA  
+HWI-EAS443:3:16:107:1525#0/1  
aa^^I^aaaa`a\_b`[\_XXXRW¥\_\_aaa`Xaaa^```  
@HWI-EAS443:3:16:1124:768#0/1  
CAAGTGGCACACACTAGACCAAAGCAGCTTCTGTGGTCA  
+HWI-EAS443:3:16:1124:768#0/1  
aa`aY^`[\_a`aaaa```\_\_`^`[\_Y^\_aZ`[VQ\_UUZ  
@HWI-EAS443:3:16:1166:236#0/1  
AGCAATCTGTTCAAGTGGCACACACTAGACCAAAGCA  
+HWI-EAS443:3:16:1166:236#0/1  
`babbbbaabaabaa```\_ba\_b\_``aa`aaa\_aa[^a``a  
@HWI-EAS443:3:16:1208:1317#0/1  
ACCTTCTTGAAAATTTGCAGGCCTACCAGAAGCGAATGGG  
+HWI-EAS443:3:16:1208:1317#0/1  
abaaa\_a`baa`aaZ\_aa``][a\_^^UX`^^`Y\_[V``\_^  
@HWI-EAS443:3:16:1290:801#0/1  
GGCCTCATATACAACAGGATGGGAACAGTGACCACAGAAG  
+HWI-EAS443:3:16:1290:801#0/1  
ababaa[a\_]`aaaaaba^aaa]a[\_a`b\_`\_a¥aa[\_a  
@HWI-EAS443:3:16:1404:1792#0/1  
CATGGGCCTCATATACAACAGGATGGGAACAGTGACCACA  
+HWI-EAS443:3:16:1404:1792#0/1  
MabaV\_bbbba`bbb^ba\_^Z[bbbbbbb\_a^Ybbb]a^a  
@HWI-EAS443:3:16:1408:1492#0/1  
GAGAGCCTCAAGATCTGTGTTCTTTCCTGCAAAGACACTT  
+HWI-EAS443:3:16:1408:1492#0/1  
aa`ab\_a`a`ab`a`aa]b`\_^a`a]```¥a`\_a`\_\_]  
@HWI-EAS443:3:16:141:871#0/1  
GTCCCCATTCCCATTTAGGGCATTGACAAAAGCGTCTA  
+HWI-EAS443:3:16:141:871#0/1  
a`aaa\_b\_Zaaaaa\_^¥`]]`aaa\_Y][\_a][]WN][a  
@HWI-EAS443:3:16:1424:472#0/1  
GGGCCTCATATACAACAGGATGGGAACAGTGACCACAGAA  
+HWI-EAS443:3:16:1424:472#0/1  
\_]VNV\_a]Y]`[PQVFO\_WU[`WSNRWUVF¥[ZNQSTQWB  
@HWI-EAS443:3:16:1543:1295#0/1  
ATCAGACTAGGCAGATGGTACATGCAATGAGAACTATTGG  
+HWI-EAS443:3:16:1543:1295#0/1  
abaabaaaaba\_abaaaa^\_a`a[\_`aa\_a^`]¥\_`\_\_[

@HWI-EAS443:3:16:1553:1844#0/1  
GTGAGACCGATGCTGTGAATCAGCAATCTGTTCAACAAGTG  
+HWI-EAS443:3:16:1553:1844#0/1  
`^`aaaaaa\_U¥¥^[¥aa]UPY¥G¥X[R¥YLVJUNT\_ZMY  
@HWI-EAS443:3:16:1563:843#0/1  
CTTTTGGTCTAGTGTGTGCCACTTGTGAACAGATTGCTGA  
+HWI-EAS443:3:16:1563:843#0/1  
abbbbbbaab`^`aaa^a^aa`aab^`aaZ¥aaa`a\_¥a\_  
@HWI-EAS443:3:16:1605:1122#0/1  
ACCTGATATTGTGGATTACTGATCGTCTTTTTTTCAAATG  
+HWI-EAS443:3:16:1605:1122#0/1  
a`]aa\_ZQ]^^[aa`\_a^¥aZW\_0\_VS]```a`]OZ¥\_]a  
@HWI-EAS443:3:16:1690:434#0/1  
GGGCCAAGGAGGTGTCACTAAGCTATTCAACTGGTGCCT  
+HWI-EAS443:3:16:1690:434#0/1  
^`b¥FSYR[Q\_ [¥ZQ0^X^a^S¥TZZ^[T^XDZ`QaUYBB  
@HWI-EAS443:3:16:227:1314#0/1  
ACCTTCTTGAAAATTTGCAGGCCTACCAGAAGCGAATGGG  
+HWI-EAS443:3:16:227:1314#0/1  
aba``aaa`aaaa`\_^^`^^]``\_a]\_\_\_^\_\_\_`^^`\_`\_]  
@HWI-EAS443:3:16:342:577#0/1  
AATCAGACTAGGCAGATGGTACATGCAATGAGAACTATTG  
+HWI-EAS443:3:16:342:577#0/1  
`^``ZZZ`]aba``a\_\_ZWLW`a^` [ `¥ZY]a]aQ`YY\_`  
@HWI-EAS443:3:16:424:1656#0/1  
TGGGCCTCATATACAACAGGATGGGAACAGTGACCACAGA  
+HWI-EAS443:3:16:424:1656#0/1  
aba¥``````aaabababa^X^\_bb`aa]aZa\_b\_a`a`^  
@HWI-EAS443:3:16:465:1259#0/1  
ACCTTCTTGAAAATTTGCAGGCCTACCAGAAGCGAATGGG  
+HWI-EAS443:3:16:465:1259#0/1  
a``^aaa`a^^aa^aa`\_]\_`\_`a`\_]\_\_`^a``^a`]Y  
@HWI-EAS443:3:16:496:397#0/1  
GTGCCACTTGTGAACAGATTGCTGATTCACAGCATCGGTC  
+HWI-EAS443:3:16:496:397#0/1  
a^bbabaaaa`a\_\_a\_\_a\_aa\_a`\_a` [ `W`\_^a\_V^  
@HWI-EAS443:3:16:538:795#0/1  
GAGAAATAACGTTCCATGGGGCCAAGGAGGTGTCACTAAG  
+HWI-EAS443:3:16:538:795#0/1  
aababaabaa`a\_aaaaa`\_^]aa\_\_`Za\_Z`]`aa\_ZX`  
@HWI-EAS443:3:16:608:1614#0/1  
GAACAGTGACCACAGAAGCTGCTTTTGGTCTAGTGTGTGC  
+HWI-EAS443:3:16:608:1614#0/1  
aU\_aa¥^^[¥baUaa]UXa[aY]S]U\_\_Ua\_^UUJYQN\_V  
@HWI-EAS443:3:16:696:628#0/1  
GGCCAAGGAGGTGTCACTAAGCTATTCAACTGGTGCCTT  
+HWI-EAS443:3:16:696:628#0/1  
aba`bbbaaba¥ba\_a^]Z\_aX\_`\_^]V[[YUaU\_a^US[  
@HWI-EAS443:3:16:861:1620#0/1  
GTTCAACAAGTGGCACACACTAGACCAAAGCAGCTTCTGT

+HWI-EAS443:3:16:861:1620#0/1  
a\_[^ [aa\_aIa^aaa^` `¥]\_^ [^ ^ [ \_¥¥Y` \_U^QUBB  
@HWI-EAS443:3:16:895:101#0/1  
GGCCTCATATACAACAGGATGGGAACAGTGACCACAGAAG  
+HWI-EAS443:3:16:895:101#0/1  
aa¥Z\_Y\_^aaY¥¥`T¥`\_¥Y`\_aW¥Y^\_W`¥WWWUTW¥YW¥  
@HWI-EAS443:3:16:994:496#0/1  
CGTCATTGCAGCAAATATCATTGGGATCTTGACCTGATA  
+HWI-EAS443:3:16:994:496#0/1  
abaabaabaabaaaaaa¥aa`\_`\_a\_aaaaa` `Yaa^`\_  
@HWI-EAS443:3:17:1030:658#0/1  
CTGATCGTCTTTTTTCAAATGTATTTATCGTCGCTTTAA  
+HWI-EAS443:3:17:1030:658#0/1  
aY¥[abZ]bb`babb\_a¥Z]\_baabb`\_a\_aR[aSbaa^]  
@HWI-EAS443:3:17:105:247#0/1  
GTGTGCCACTTGTGAACAGATTGCTGATTCACAGCATCGG  
+HWI-EAS443:3:17:105:247#0/1  
`U`RZV\_`¥`¥`^aWa^M^`^ [ ` \_\_\_\_]VPSTVVV][UWX  
@HWI-EAS443:3:17:1414:663#0/1  
GTTCTTTCTGCAAAGACACTTTCCAGTCTCTGCGCGATC  
+HWI-EAS443:3:17:1414:663#0/1  
aTNZ`]P\_V]W[^aZ[UR[SU\_\_WQ^`WVVS\_UVPSSWW  
@HWI-EAS443:3:17:1465:1982#0/1  
TGTGAATCAGCAATCTGTTCAAGTGGCACACACTAGAC  
+HWI-EAS443:3:17:1465:1982#0/1  
\_aZZW¥Z\_a¥]¥Y]TV`^T^^`¥YXRM^` [ ]^ [ ` aZH  
@HWI-EAS443:3:17:1481:562#0/1  
GGCCTCATATACAACAGGATGGGAACAGTGACCACAGAA  
+HWI-EAS443:3:17:1481:562#0/1  
a^X]Z\_^a\_aa`\_]YS\_X^\_\_`T[S[ `WZP`\_^NZU^^RV  
@HWI-EAS443:3:17:1504:1491#0/1  
ATACATTTGAAAAAAGACGATCAGTAATCCACAATATCA  
+HWI-EAS443:3:17:1504:1491#0/1  
¥V¥\_W¥`baaU¥L]ZSS¥¥a^¥YV\_Yba¥PN]¥` `^` [WZ  
@HWI-EAS443:3:17:1513:308#0/1  
GACCACAGAAGCTGCTTTTGGTCTAGTGTGTGCCACTTGT  
+HWI-EAS443:3:17:1513:308#0/1  
abaa\_a`bb¥b]\_X[ ` ` ¥G¥ [ \_ [ \_Z`\_U[V]VU^W¥ZQZ  
@HWI-EAS443:3:17:1625:1346#0/1  
GAGGATCACTTGAATCGCTGCATCTGCACTCCCATTCGCT  
+HWI-EAS443:3:17:1625:1346#0/1  
aa^a¥^aaaa`bab` [b\_X`Qaa¥¥a`\_V\_Q\_Ua¥^Z\_V¥  
@HWI-EAS443:3:17:1647:182#0/1  
GGTCACTGTTCCCATCCTGTTGTATATGAGGCCCATGCAA  
+HWI-EAS443:3:17:1647:182#0/1  
ab^\_a^aa`a^Z[ \_\_W[ `a¥`\_V^`\_`\_¥[WUZVWZ^VXW  
@HWI-EAS443:3:17:166:1667#0/1  
ATGCAACTGGCAAGTGCACCAGTTGAATAGCTTAGTGACA  
+HWI-EAS443:3:17:166:1667#0/1  
[Z`a`Taa¥^aaa\_U`a`\_a[X[ ` ^ [ ^U^a` ` ] \_^U\_a¥`



@HWI-EAS443:3:17:1733:58#0/1  
CAGCAATCTGTTCAACAAGTGGCACACACTAGACCAAAAAGC  
+HWI-EAS443:3:17:1733:58#0/1  
ab`¥¥ab\_aa\_a¥\_`aaV`Z[\_\_\_Z\_\_\_¥^\_ZUZ]]YTU  
@HWI-EAS443:3:17:1748:212#0/1  
ACCTGATATTGTGGATTACTGATCGTCTTTTTTTTCAAATG  
+HWI-EAS443:3:17:1748:212#0/1  
a\_a^b`baabbZba\_aaaaa```Va¥¥`a`aaaaV^^Y¥[  
@HWI-EAS443:3:17:314:1328#0/1  
AGATGACCTTCTTGAAAATTTGCAGGCCTACCAGAAGCGA  
+HWI-EAS443:3:17:314:1328#0/1  
`^]`^XZ`a`a¥X0^^^\_\_^¥^`\_[M^\_] [W^\_^ [H]]\_S  
@HWI-EAS443:3:17:316:475#0/1  
AAATGCCCTAAATGGGAATGGGGACCCGAACAACATGGAT  
+HWI-EAS443:3:17:316:475#0/1  
aaa```aa\_aaa`a\_`^`]aa^\_\_`aaaZ`^`\_`^```[\_\_\_  
@HWI-EAS443:3:17:341:215#0/1  
AGTGCACCAGTTGAATAGCTTAGTGACACCTCCTTGCCCC  
+HWI-EAS443:3:17:341:215#0/1  
¥XW]H[abaaa^¥¥^^¥^aaZa\_Qa\_\_`ZZ[^S[^\_GVNR  
@HWI-EAS443:3:17:386:1567#0/1  
GCCTCATATACAACAGGATGGGAACAGTGACCACAGAAGC  
+HWI-EAS443:3:17:386:1567#0/1  
S\_b`Z\_T¥[`b`b]Z\_ab\_\_¥¥aa\_\_aRa\_abaW`a^\_]Z  
@HWI-EAS443:3:17:552:973#0/1  
ATCAGCAATCTGTTCAACAAGTGGCACACACTAGACCAAAA  
+HWI-EAS443:3:17:552:973#0/1  
aaaaaa\_X]\_aa^\_U[`a[[UTY\_aZ\_\_\_^S\_\_\_¥XZZ[`\_  
@HWI-EAS443:3:17:554:238#0/1  
GGCCTACCAGAAGCGAATGGGAGTGCAGATGCAGCGATTC  
+HWI-EAS443:3:17:554:238#0/1  
]abbabbabb]a\_bbaba]aa]a\_bX`aS\_\_V`^`^^U[Z  
@HWI-EAS443:3:17:690:52#0/1  
ATCCCAATGATATTTGCTGCAATGACGAGAGGATCACTTG  
+HWI-EAS443:3:17:690:52#0/1  
aa`a`\_`bbabbaa``aaaaa^Ya^Wa\_\_\_a`]XY\_[\_]¥a  
@HWI-EAS443:3:17:812:50#0/1  
GGCCTCATATACAACAGGATGGGAACAGTGACCACAGAAG  
+HWI-EAS443:3:17:812:50#0/1  
`]```aaa`Ya\_\_`Z\_aa]^Z]Z[`Z¥^U\_\_¥^¥VX^TW¥  
@HWI-EAS443:3:17:875:854#0/1  
CAGGCCTACCAGAAGCGAATGGGAGTGCAGATGCAGCGAT  
+HWI-EAS443:3:17:875:854#0/1  
abbaabbbbaabaaa\_baaaaa`^aWa```a`\_a]aa\_\_\_^  
@HWI-EAS443:3:17:885:398#0/1  
CAGCAATCTGTTCAACAAGTGGCACACACTAGACCAAAAAGC  
+HWI-EAS443:3:17:885:398#0/1  
aababbaba^^a`aaa¥`V`aa`aa`aa`F¥\_[\_a\_a`\_  
@HWI-EAS443:3:17:905:1768#0/1  
AAATTTGCAGGCCTACCAGAAGCGAATGGGAGTGCAGATG

+HWI-EAS443:3:17:905:1768#0/1  
aaaa`a`a\_\_\_a`a^`\_\_^`[\_¥`\_\_\_^\_\_T^V\_`¥W¥  
@HWI-EAS443:3:18:1121:1242#0/1  
GACCGATGCTGTGAATCAGCAATCTGTTCAAGTGGCAC  
+HWI-EAS443:3:18:1121:1242#0/1  
abab`a``abbaaaaaaaaa`aa`aa`a`a[a\_`[\_Z`^  
@HWI-EAS443:3:18:1130:1054#0/1  
GATTACTGATCGTCTTTTTTCAAATGTATTTATCGTCGC  
+HWI-EAS443:3:18:1130:1054#0/1  
aaaaaaaaa`\_`aaaa`^`\_\_`a[aa\_``^`^`[\_`  
@HWI-EAS443:3:18:1135:1196#0/1  
TGCACCTGATATTGTGGATTACTGATCGTCTTTTTTCAA  
+HWI-EAS443:3:18:1135:1196#0/1  
aaa¥U\_bb`\_S\_a¥RZaaaa¥a`a\_a^^``[aaa`Y]^¥  
@HWI-EAS443:3:18:1138:1666#0/1  
ACCTGATATTGTGGATTACTGATCGTCTTTTTTCAAATG  
+HWI-EAS443:3:18:1138:1666#0/1  
aTW[YW`]P[\_T`V^\_]`a[b`Ia\_^Ua\_¥T^\_WNW\_`¥Y  
@HWI-EAS443:3:18:1139:1441#0/1  
ATCAGGTGCAAGATCCCAATGATATTTGCTGCAATGACGA  
+HWI-EAS443:3:18:1139:1441#0/1  
a`VZ^[X`¥]aa]\_a`a^aaaYS\_Z`a\_\_\_]V¥^a\_\_Z`\_  
@HWI-EAS443:3:18:1218:1749#0/1  
CATGGCCTCATATACAACAGGATGGGAACAGTGACCACA  
+HWI-EAS443:3:18:1218:1749#0/1  
aa\_aYaa]aaaaa\_`baa\_aZ``\_a`^`Wa`W`aY][^a  
@HWI-EAS443:3:18:1387:727#0/1  
ATACATTTGAAAAAAGACGATCAGTAATCCACAATATCA  
+HWI-EAS443:3:18:1387:727#0/1  
aaa`abaaaa\_a`aa\_\_a]`^^^\_a^a\_\_^`[\_`\_]^^]\_^  
@HWI-EAS443:3:18:1450:1260#0/1  
GTGACCACAGAAGCTGCTTTTGGTCTAGTGTGTGCCACTT  
+HWI-EAS443:3:18:1450:1260#0/1  
a]`a`Z¥U\_a\_\_\_^VZ]]\_ZRUVU]WWU¥UXUXXXYYXV  
@HWI-EAS443:3:18:1548:761#0/1  
GCACTCCCATTCGCTTCTGGTAGGCCTGCAAATTTTCAAG  
+HWI-EAS443:3:18:1548:761#0/1  
aaa`aa^`¥R\_\_`\_`\_`V[V\_\_]Q\_\_Y`YV^\_^VW¥]\_  
@HWI-EAS443:3:18:1581:1096#0/1  
GATCGTCTTTTTTCAAATGTATTTATCGTCGCTTAAAT  
+HWI-EAS443:3:18:1581:1096#0/1  
aa`VaV^bbbabbaV]aaab\_abaa\_a^a][a]aaa^X^a  
@HWI-EAS443:3:18:197:718#0/1  
ATCTTGTCACCTCTGACTAAGGGAATTTTAGGATTTGTGT  
+HWI-EAS443:3:18:197:718#0/1  
aa```a\_a[a\_aaaa^aa\_a\_`\_]`\_\_\_\_\_aa^`^`\_`X\_Y  
@HWI-EAS443:3:18:246:1275#0/1  
CAAGATTGGTCTTGTCTTTAGCCATTCCATGAGAGCCTCA  
+HWI-EAS443:3:18:246:1275#0/1  
\_aV\_b`a[b^^Z^Y\_baba`a^``\_a^`aaa\_a]]`[\_`\_`

@HWI-EAS443:3:18:357:1030#0/1  
ATATACAACAGGATGGGAACAGTGACCACAGAAGCTGCTT  
+HWI-EAS443:3:18:357:1030#0/1  
aaa`abaa`aaa^aaa\_``a]`a\_\_¥^\_\_aa\_^^^Y¥^  
@HWI-EAS443:3:18:363:177#0/1  
ACCAAAAGCAGCTTCTGTGGTCACTGTTCCCATCCTGTTG  
+HWI-EAS443:3:18:363:177#0/1  
aaaa\_aa``\_]a`\_\_\_aUV^X^\_VZ]XY\_]ZY]]U]Y]]  
@HWI-EAS443:3:18:499:323#0/1  
GCTGTGAATCAGCAATCTGTTCACAAGTGGCACACACTAG  
+HWI-EAS443:3:18:499:323#0/1  
^`¥\_HX^aaaZ``aaa\_`W]`\_^T[]]V\_] [\_V]U`T¥\_]`  
@HWI-EAS443:3:18:544:433#0/1  
ATCTGTTCACAAGTGGCACACACTAGACAAAAGCAGCTT  
+HWI-EAS443:3:18:544:433#0/1  
ab`a`aaa^aaaa¥ababbaaa`¥aaaaXaaa`]`^`Ya\_  
@HWI-EAS443:3:18:612:1308#0/1  
ATACATTTGAAAAAAGACGATCAGTAATCCACAATATCA  
+HWI-EAS443:3:18:612:1308#0/1  
aa\_aaa\_`a`a\_a```\_\_`\_]VX^]X^\_W]X^UZ]X]ZY[  
@HWI-EAS443:3:18:687:621#0/1  
AAATACATTTGAAAAAAGACGATCAGTAATCCACAATAT  
+HWI-EAS443:3:18:687:621#0/1  
``aaaaa`aa^]a\_aa`^]\_[T]`[^`\_]\_\_]`\_]  
@HWI-EAS443:3:18:690:1625#0/1  
AAAGCAGCTTCTGTGGTCACTGTTCCCATCCTGTTGTATA  
+HWI-EAS443:3:18:690:1625#0/1  
aaa`^¥]¥\_`X`]\_U\_U``¥YYZZ^^\_[TUZ\_]TVSSWW^  
@HWI-EAS443:3:18:709:171#0/1  
TGCAGATGCAGCGATTCAAGTGATCCTCTCGTCATTGCAG  
+HWI-EAS443:3:18:709:171#0/1  
[Ub¥¥`\_`aaaU]\_VPTa\_aQa[RU^[]^VZURZYV]U]\_  
@HWI-EAS443:3:18:721:1909#0/1  
ATCCCAATGATATTTGCTGCAATGACGAGAGGATCACTTG  
+HWI-EAS443:3:18:721:1909#0/1  
a^Y^Jbaaaa\_]T\_¥\_\_aQJWa\_0ZYZWV`\_R`NS¥IDNW  
@HWI-EAS443:3:18:847:1207#0/1  
AGATCCCAATGATATTTGCTGCAATGACGAGAGGATCACT  
+HWI-EAS443:3:18:847:1207#0/1  
a]`Zabb]b`ba^`a^X``Xaa\_\_aa]`a[``a`\_]XY[^  
@HWI-EAS443:3:18:91:1260#0/1  
GGCCTCATATACAACAGGATGGGAACAGTGACCACAGAAG  
+HWI-EAS443:3:18:91:1260#0/1  
W¥X\_La]\_[\_a`a]^XW\_^ZZXZU\_b^PFW`]\_]X\_Q]^  
@HWI-EAS443:3:19:1000:1321#0/1  
TGGGCCTCATATACAACAGGATGGGAACAGTGACCACAGA  
+HWI-EAS443:3:19:1000:1321#0/1  
aaa`baaaaaabaabaaa[X`aaa\_`a\_]Y`aa\_]\_\_]a  
@HWI-EAS443:3:19:1002:1109#0/1  
ATCTGTTCACAAGTGGCACACACTAGACAAAAGCAGCTT

+HWI-EAS443:3:19:1002:1109#0/1  
aX`^SVZGUVWYUL\_WZ\_`[\`¥\_^[^VYZ[XU]\_\_^SUBB  
@HWI-EAS443:3:19:1266:1243#0/1  
TGGGAGTGCAGATGCAGCGATTCAAGTGATCCTCTCGTCA  
+HWI-EAS443:3:19:1266:1243#0/1  
\_bb^a\_\_aaabaa`ZX]WY\_\_[S^VPS]`Z[W]\_¥^ZXGY  
@HWI-EAS443:3:19:1274:1087#0/1  
ATCTGTTCACAAGTGGCACACACTAGACAAAAGCAGCTT  
+HWI-EAS443:3:19:1274:1087#0/1  
ab]`b`a\_]aaa]Zaaaaa`\_\_`a`¥`a`aaa\_a¥]\_`  
@HWI-EAS443:3:19:1281:1802#0/1  
CTTGCACCTGATATTGTGGATTACTGATCGTCTTTTTTTC  
+HWI-EAS443:3:19:1281:1802#0/1  
abbbaaa`abab`baa\_`aaa\_`Zbba`^a\_]a`baa\_a\_  
@HWI-EAS443:3:19:1339:1278#0/1  
CATGCAATGAGAACTATTGGGACTCATCCTAGCTCCAGTG  
+HWI-EAS443:3:19:1339:1278#0/1  
a[`\_]`a\_^^`]aaaXa]^a`a]Yaaa]aaaaSaa\_¥\_[]  
@HWI-EAS443:3:19:1384:1873#0/1  
GATCGTCTTTTTTCAAATGTATTTATCGTCGCTTTAAAT  
+HWI-EAS443:3:19:1384:1873#0/1  
aa`\_]a¥aaaaa`^\_a`aa^aa`a`^^]\_]```\_`\_\_  
@HWI-EAS443:3:19:1467:153#0/1  
CCAGAAGCGAATGGGAGTGCAGATGCAGCGATTCAAGTGA  
+HWI-EAS443:3:19:1467:153#0/1  
ab\_`aa¥\_bXJ¥bbbabaaaab¥`^`\_b^`¥a\_¥\_¥¥W\_\_  
@HWI-EAS443:3:19:1521:1145#0/1  
AAAAAAGACGATCAGTAATCCACAATATCAGGTGCAAGAT  
+HWI-EAS443:3:19:1521:1145#0/1  
abbbabaa`ba`Ya]^aaa\_[XPaaa\_aX\_\_`]V``\_\_Z  
@HWI-EAS443:3:19:1551:319#0/1  
AAGAGAAATAACGTTCCATGGGGCCAAGGAGGTGTCACTA  
+HWI-EAS443:3:19:1551:319#0/1  
aba`a]a\_ab\_`a\_WP[\_`a^`]\_]\_^VVV]XX\_XY^  
@HWI-EAS443:3:19:1573:1622#0/1  
CGAGATCGCGCAGAGACTGGAAAGTGTCTTTGCAGGAAAG  
+HWI-EAS443:3:19:1573:1622#0/1  
]b¥UbSS\_`V]]`aZbUa`bUba`bbYaK`a\_H]b]N]aa  
@HWI-EAS443:3:19:1588:1383#0/1  
GCCTCATATACAACAGGATGGGAACAGTGACCACAGAAGC  
+HWI-EAS443:3:19:1588:1383#0/1  
aabbabbbbaaaa`\_ab``bba^^Y\_b^`¥`Y]\_aa`\_a^  
@HWI-EAS443:3:19:1639:1757#0/1  
AATACATTTGAAAAAAGACGATCAGTAATCCACAATATC  
+HWI-EAS443:3:19:1639:1757#0/1  
`babbab[\_`^baa\_]V¥aY^\_^UaW0aaaOFYSZ\_YaX]  
@HWI-EAS443:3:19:1656:1069#0/1  
AGTGATCCTCTCGTCATTGCAGCAAATATCATTGGGATCT  
+HWI-EAS443:3:19:1656:1069#0/1  
ab`bba`a`a`\_b\_a\_aaa`aa^¥`\_\_aaU^a\_\_\_\_]¥[O`

@HWI-EAS443:3:19:1657:1144#0/1  
CAAGATTGGTCTTGTCTTTAGCCATTCCATGAGAGCCTCA  
+HWI-EAS443:3:19:1657:1144#0/1  
ab`babbbbaZbbbbbbaaaaaab^ba`ababbba`^\_\_Ya  
@HWI-EAS443:3:19:1761:308#0/1  
TTCGGGTCCCCATTCCCATTAGGGCATTGGACAAAGC  
+HWI-EAS443:3:19:1761:308#0/1  
X`[\_\_aW`[\_`a`YQUZN\_X```\_aSx[^aa^RM¥[^\_`¥  
@HWI-EAS443:3:19:1767:743#0/1  
CAGTGACCACAGAAGCTGCTTTTGGTCTAGTGTGTGCCAC  
+HWI-EAS443:3:19:1767:743#0/1  
`bbabb`bbaabbbba`aaaaaX]^`aa`\_a\_a`\_U^¥G  
@HWI-EAS443:3:19:313:243#0/1  
GTGTCCTAAGCTATTCAACTGGTGCCTTGCCAGTTGCA  
+HWI-EAS443:3:19:313:243#0/1  
aXa^aa`aaaa`ba`aaa`\_`W`^a^\_[\_\_^`\_W^\_`^¥  
@HWI-EAS443:3:19:353:1673#0/1  
GGCCTCATATACAACAGGATGGGAACAGTGACCACAGAAG  
+HWI-EAS443:3:19:353:1673#0/1  
Q`\_`\_W\_W]\_\_W\_[VWZ\_VTR\_]\_XX`\_Vaa`^`\_`\_a^V  
@HWI-EAS443:3:19:355:1307#0/1  
TGTCCTAAGCTATTCAACTGGTGCCTTGCCAGTTGCAT  
+HWI-EAS443:3:19:355:1307#0/1  
aaabbbbabbaaababbaa^a^\_[`aaaaa\_a\_\_`^a`  
@HWI-EAS443:3:19:364:1959#0/1  
GTGGATTACTGATCGTCTTTTTTCAAATGTATTTATCGT  
+HWI-EAS443:3:19:364:1959#0/1  
\_Z\_]```aaaa`aaXa`a`aa`]^`a`a^`^\_a\_\_a`\_`^  
@HWI-EAS443:3:19:45:1139#0/1  
ACCTGATATTGTGGATTACTGATCGTCTTTTTTCAAATG  
+HWI-EAS443:3:19:45:1139#0/1  
``a^aV¥X`aa]^`\_`a^aa]]\_Z\_]`[\_aaaa`]]¥\_`¥  
@HWI-EAS443:3:19:469:1098#0/1  
GGAGGTGTCCTAAGCTATTCAACTGGTGCCTTGCCAGT  
+HWI-EAS443:3:19:469:1098#0/1  
``¥¥¥^YY]aa`````]]`\_`a`P¥\_]¥Pa`a[¥¥]¥RQ¥Z  
@HWI-EAS443:3:19:574:396#0/1  
GCCTCATATACAACAGGATGGGAACAGTGACCACAGAAGC  
+HWI-EAS443:3:19:574:396#0/1  
aaa\_\_ab\_ba]aaaVOWX\_Z`a^`\_¥FVaaZV\_]`\_`\_`[V  
@HWI-EAS443:3:19:596:1487#0/1  
GTGGATTACTGATCGTCTTTTTTCAAATGTATTTATCGT  
+HWI-EAS443:3:19:596:1487#0/1  
]HX\_[]^a^`a]aa^\_¥T`^a[ZV¥YWV¥Uaa`¥a``[Y  
@HWI-EAS443:3:19:879:1560#0/1  
GGGAGTGCAGATGCAGCGATTCAAGTGATCCTCTCGTCAT  
+HWI-EAS443:3:19:879:1560#0/1  
aaaZ`Ua`[aaaaa\_aa\_]ZZR`\_N`\_Z]¥]]YU\_HYUB  
@HWI-EAS443:3:19:945:533#0/1  
ATTGGGATCTTGCACCTGATATTGTGGATTACTGATCGTC

+HWI-EAS443:3:19:945:533#0/1  
ab`¥ab`a`aabaaa`ab`babaa\_aaVaa`^ab`\_`a\_\_\_  
@HWI-EAS443:3:19:987:1949#0/1  
CATGGGGCCAAGGAGGTGTCCTAAGCTATTCAACTGGTG  
+HWI-EAS443:3:19:987:1949#0/1  
^^¥¥`¥\_`\_Z\_[^\_W¥[HSZW\_`\_\_0\_aW]a[STV]SP\_  
@HWI-EAS443:3:19:989:406#0/1  
CATGTTGTTCCGGTCCCCATTCCCATTAGGGCATTGGG  
+HWI-EAS443:3:19:989:406#0/1  
aabbabbabaaaaa]a`bbaa]\_aaaa`aaa\_aaaa\_a\_  
@HWI-EAS443:3:1:1225:1487#0/1  
ACCAAAGCAGCTTCTGTGGTCACTGTTCCCATCCTGTTG  
+HWI-EAS443:3:1:1225:1487#0/1  
UaJ[a[`\_`\_abRVaY^^PaaYYSLQWW[ENGQQUGS\_BBB  
@HWI-EAS443:3:1:1339:672#0/1  
GTGTCCTAAGCTATTCAACTGGTGCCTTGGCAGTTGCA  
+HWI-EAS443:3:1:1339:672#0/1  
a\_a^\_bSaa\_Z¥a`\_`\_a^]\_¥XZ`¥\_U`\_`\_TQ\_UWVBBB  
@HWI-EAS443:3:1:1383:1832#0/1  
TACATTTGAAAAAAGACGATCAGTAATCCACAATATCAG  
+HWI-EAS443:3:1:1383:1832#0/1  
ab\_aaaabaaaaaaa^a¥`\_`\_Waa¥aa`]a`\_`\_a`\_BBB  
@HWI-EAS443:3:1:1483:929#0/1  
GACTAGGCAGATGGTACATGCAATGAGAACTATTGGGACT  
+HWI-EAS443:3:1:1483:929#0/1  
`]WZ\_`\_aW¥^^Z¥\_^Z0[RUP\_`\_¥]LYT¥S^VUUBBBB  
@HWI-EAS443:3:1:1517:719#0/1  
ATGGGGCCAAGGAGGTGTCCTAAGCTATTCAACTGGTGC  
+HWI-EAS443:3:1:1517:719#0/1  
ab\_PX^X^a\_\_\_\_\_`\_aV\_Z¥bWaaa`Vaa\_¥U\_\_U`]WBBB  
@HWI-EAS443:3:1:1519:1092#0/1  
GGCCAAGGAGGTGTCCTAAGCTATTCAACTGGTGCCTT  
+HWI-EAS443:3:1:1519:1092#0/1  
a`VR`a\_]RTWT¥[V[X`¥UQNT^U`V[PQSSUUBBBBBB  
@HWI-EAS443:3:1:1682:458#0/1  
ATACATTTGAAAAAAGACGATCAGTAATCCACAATATCA  
+HWI-EAS443:3:1:1682:458#0/1  
a\_a]aa\_[`\_`\_QU[^`\_`\_^[^`\_XXa]^`\_`\_ZG¥U^^]BBBB  
@HWI-EAS443:3:1:180:1279#0/1  
GCACCTGATATTGTGGATTACTGATCGTCTTTTTTTCAAA  
+HWI-EAS443:3:1:180:1279#0/1  
]a\_\_^b\_V]b`]Va`Y`\_`\_ZTza^a¥a^a`aa`\_ab^BBB  
@HWI-EAS443:3:1:242:1105#0/1  
CAGGCCTACCAGAAGCGAATGGGAGTGCAGATGCAGCGAT  
+HWI-EAS443:3:1:242:1105#0/1  
ab`aabbbaabb`]b`baaaaba`a]a`aa]\_aa`\_a\_aBB  
@HWI-EAS443:3:1:306:430#0/1  
AAAAAAGACGATCAGTAATCCACAATATCAGGTGCAAGAT  
+HWI-EAS443:3:1:306:430#0/1  
`b`\_a\_\_`\_aa`\_aaX`\_`\_S]a\_`\_`\_`\_`\_¥\_\_]Z\_Z]]BBB

@HWI-EAS443:3:1:365:177#0/1  
CGAGAGGATCACTTGAATCGCTGCATCTGCACTCCCATTC  
+HWI-EAS443:3:1:365:177#0/1  
W\_^a`¥\_b`\_a¥abb^b[H\_aaaa`ZW`\_````\_VPNBBBB  
@HWI-EAS443:3:1:412:783#0/1  
GATGCTGTGAATCAGCAATCTGTTCAAGTGGCACACAC  
+HWI-EAS443:3:1:412:783#0/1  
aa`]]`U\_ba`]W\_aW`Xa]`\_``Ua`\_a`Y\_]X`YURBB  
@HWI-EAS443:3:1:530:100#0/1  
TGCACCTGATATTGTGGATTACTGATCGTCTTTTTTTTCAA  
+HWI-EAS443:3:1:530:100#0/1  
¥^ZJ^]U^`a\_aa`\_`a[^aT^[\`UVR¥UVY\_[\`^\_BBBB  
@HWI-EAS443:3:1:537:2030#0/1  
AAAGACAAGACCAATCTTGTACCTCTGACTAAGGGAATT  
+HWI-EAS443:3:1:537:2030#0/1  
abVUa^a`b^MXa`aTY`]FYa\_Za]^a^\_a^`aaXSaBB  
@HWI-EAS443:3:1:557:1360#0/1  
GCGACGATAAATACATTTGAAAAAAGACGATCAGTAATC  
+HWI-EAS443:3:1:557:1360#0/1  
aaaaabYHaba`UP^aZ0a`SQ[aa\_```b`IP`\_XBBBB  
@HWI-EAS443:3:1:786:459#0/1  
CTTGTGAACAGATTGCTGATTACAGCATCGGTCTCACAG  
+HWI-EAS443:3:1:786:459#0/1  
`bababb`aaabaababbaba`a`ab``b¥aaPS\_ZaYaB  
@HWI-EAS443:3:1:939:264#0/1  
TGCAGATGCAGCGATTCAAGTGATCCTCTCGTCATTGCAG  
+HWI-EAS443:3:1:939:264#0/1  
YbYXN[Qa^bWabQRQTVF¥¥Y]``R`G[RVGS^Q]BBBB  
@HWI-EAS443:3:20:1023:1840#0/1  
ATCGCTGCATCTGCACTCCCATTTCGTTCTGGTAGGCCTG  
+HWI-EAS443:3:20:1023:1840#0/1  
aa^\_]¥\_\_a\_\_^\_^\_\_]\_^]]^YUWZ^Y]]WUU]XXU]UW  
@HWI-EAS443:3:20:105:501#0/1  
TGGGCCTCATATACAACAGGATGGGAACAGTGACCACAGA  
+HWI-EAS443:3:20:105:501#0/1  
aaabaabbabaabaaa`^aa``aaa^a``a\_aa`a[^`a¥  
@HWI-EAS443:3:20:1091:1870#0/1  
ATTTGCAGGCCTACCAGAAGCGAATGGGAGTGCAGATGCA  
+HWI-EAS443:3:20:1091:1870#0/1  
¥U`aX^`]^WaU`[Y`¥X\_TZX^\_aS\_Za[PVSTX00VZ`  
@HWI-EAS443:3:20:119:400#0/1  
GTCCCCATTCCCATTTAGGGCATTGTTGGACAAAGCGTCTA  
+HWI-EAS443:3:20:119:400#0/1  
aabbbbabbabbbbbb`bbbbbaababb`W`abbaaaa  
@HWI-EAS443:3:20:1242:889#0/1  
GGAGGTTGCTAATCAGACTAGGCAGATGGTACATGCAATG  
+HWI-EAS443:3:20:1242:889#0/1  
ababa\_abaaaaa`aa`a`a`aa\_\_`\_]\_]\_\_`Z[\_\_\_`  
@HWI-EAS443:3:20:1414:1977#0/1  
TGTGGATTACTGATCGTCTTTTTTTTCAAATGTATTTATCG

+HWI-EAS443:3:20:1414:1977#0/1  
^]^\aa¥bab^abaaWV`^a^aaaba\_a\_aaa\_aa\_`\_\_S]  
@HWI-EAS443:3:20:1436:1441#0/1  
ATTTGAAAAAAGACGATCAGTAATCCACAATATCAGGTG  
+HWI-EAS443:3:20:1436:1441#0/1  
\_`b\_G0aVbab`YYaWa^\_WaW`^`\_]\_XW[\_`YU¥X[G]  
@HWI-EAS443:3:20:1520:243#0/1  
ATTGTGGATTACTGATCGTCTTTTTTTCAAATGTATTTAT  
+HWI-EAS443:3:20:1520:243#0/1  
aabb\_b`aabb`bbaaaa^abaaaba^a`a`Y`aaa\_a  
@HWI-EAS443:3:20:171:170#0/1  
GAACAGTGACCACAGAAGCTGCTTTTGGTCTAGTGTGTGC  
+HWI-EAS443:3:20:171:170#0/1  
a\_`aaaWaaba`aaaaaa`^\_\_`¥YY\_[VVU^W^WW  
@HWI-EAS443:3:20:1778:1610#0/1  
GGAGGTGTCACTAAGCTATTCAACTGGTGCACCTGCCAGT  
+HWI-EAS443:3:20:1778:1610#0/1  
aa`baVa\_\_a]`a`a`\_a¥¥^`^Y^`\_S]R]V¥¥¥ZV^WW  
@HWI-EAS443:3:20:198:1929#0/1  
CAATCTTGTCACCTCTGACTAAGGGAATTTTAGGATTTGT  
+HWI-EAS443:3:20:198:1929#0/1  
a\_\_aYX]YN\_\_`]YLSa^`YaaGZ\_[VYZ[U]\_YX[ZBBB  
@HWI-EAS443:3:20:267:945#0/1  
GGGCCTCATATACAACAGGATGGGAACAGTGACCACAGAA  
+HWI-EAS443:3:20:267:945#0/1  
]bbbb`bN]bba\_X\_a`baaab`a]a\_a`]\_b`[Raa¥\_a  
@HWI-EAS443:3:20:322:1616#0/1  
ATGGGCCTCATATACAACAGGATGGGAACAGTGACCACAG  
+HWI-EAS443:3:20:322:1616#0/1  
aZ[OX\_b[aY^U0`\_aba\_a]VNa]T[`\_a^G^\_\_NZWSR  
@HWI-EAS443:3:20:332:815#0/1  
ACCTGATATTGTGGATTACTGATCGTCTTTTTTTCAAATG  
+HWI-EAS443:3:20:332:815#0/1  
`R^^bb¥SVbaP¥UWG`]L¥¥¥aaa]`a^b^`ba\_\_a`[W  
@HWI-EAS443:3:20:390:1014#0/1  
GAGGCCATGGAGGTTGCTAATCAGACTAGGCAGATGGTAC  
+HWI-EAS443:3:20:390:1014#0/1  
\_¥abbbba^I¥b\_baabba]ababaa`\_aa\_aaa\_aV^H  
@HWI-EAS443:3:20:425:397#0/1  
ATAAATACATTTGAAAAAAGACGATCAGTAATCCACAAT  
+HWI-EAS443:3:20:425:397#0/1  
a^aa^abba\_aaaaaa[`b\_a`a`\_]¥V¥a[WT]^a]^  
@HWI-EAS443:3:20:438:167#0/1  
GAAAGATGACCTTCTTGAAAATTTGCAGGCCTACCAGAAG  
+HWI-EAS443:3:20:438:167#0/1  
]]ba]]a\_a\_b`a\_abaa\_aUa\_aa]`\_\_a]aa\_`^a\_¥a  
@HWI-EAS443:3:20:460:1738#0/1  
GGCCTCATATACAACAGGATGGGAACAGTGACCACAGAAG  
+HWI-EAS443:3:20:460:1738#0/1  
``babbbbbbba\_aabaa`b\_bbaaWOXa`b`a`\_\_a\_



@HWI-EAS443:3:20:465:2012#0/1  
ATCAGACTAGGCAGATGGTACATGCAATGAGAACTATTGG  
+HWI-EAS443:3:20:465:2012#0/1  
]P^b`¥`a`WW]\_X]¥RSDZ^\_aa¥Q`[aX\_\_b\_a¥^\_OD  
@HWI-EAS443:3:20:489:371#0/1  
CAAGATTGGTCTTGTCTTTAGCCATTCCATGAGAGCCTCA  
+HWI-EAS443:3:20:489:371#0/1  
ababaaabb`bba``aaab`aa\_aaa`^`aaaa`a^`^¥a  
@HWI-EAS443:3:20:516:1988#0/1  
GAGAGGATCACTTGAATCGCTGCATCTGCACTCCCATTCTG  
+HWI-EAS443:3:20:516:1988#0/1  
``^ba^b``aZ\_[bbaa\_]Q\_\_abY\_`\_ab\_]¥^Va\_S^N  
@HWI-EAS443:3:20:547:166#0/1  
CCTGATATTGTGGATTACTGATCGTCTTTTTTTCAAATGT  
+HWI-EAS443:3:20:547:166#0/1  
aabbbbabbbbabbbbabbaaabbbbabbaaa`\_  
@HWI-EAS443:3:20:556:56#0/1  
CACACACTAGACCAAAAGCAGCTTCTGTGGTCACTGTTCC  
+HWI-EAS443:3:20:556:56#0/1  
ab][a¥aa¥aaVS^`\_aaa^a`^a^\_aV^`Z\_\_U^\_U]YN  
@HWI-EAS443:3:20:591:731#0/1  
GATCGCGCAGAGACTGGAAAGTGTCTTTGCAGGAAAGAAC  
+HWI-EAS443:3:20:591:731#0/1  
a\_^Ta\_a¥\_\_T\_Y`\_¥P`\_[¥YaU^¥[\_LNSYNT^¥QY\_¥  
@HWI-EAS443:3:20:632:363#0/1  
AAGCGAATGGGAGTGCAGATGCAGCGATTCAAGTGATCCT  
+HWI-EAS443:3:20:632:363#0/1  
`¥`\_`\_^][^^`]a\_b\_aaWUa\_\_][aa]^¥`[aZa\_^SZY  
@HWI-EAS443:3:20:653:1787#0/1  
ATGGGCCTCATATACAACAGGATGGGAACAGTGACCACAG  
+HWI-EAS443:3:20:653:1787#0/1  
`TYR\_\_`aaX\_a[a`aa\_QZZ^\_¥ZUaSa`WZYXR¥[N^  
@HWI-EAS443:3:20:654:1474#0/1  
CAGTAATCCACAATATCAGGTGCAAGATCCCAATGATATT  
+HWI-EAS443:3:20:654:1474#0/1  
aQT^\_a\_YY``\_Z]`[YZZV0a^`a`aR]PD[a[^¥W^`Z  
@HWI-EAS443:3:21:1006:1399#0/1  
GATGCAGCGATTCAAGTGATCCTCTCGTCATTGCAGCAA  
+HWI-EAS443:3:21:1006:1399#0/1  
aab\_baaaa]a\_``[aZa`\_`^`^`^a]\_^`^^\_\_Y\_^X  
@HWI-EAS443:3:21:1059:119#0/1  
TGGAGCTAGGATGAGTCCCAATAGTTCTCATTGCATGTAC  
+HWI-EAS443:3:21:1059:119#0/1  
ab\_]ba^bba[[a\_]Wta]\_^aY^U`Zaa\_aaYQ[aa]`V  
@HWI-EAS443:3:21:1082:1194#0/1  
GACCGATGCTGTGAATCAGCAATCTGTTCAAGTGGCAC  
+HWI-EAS443:3:21:1082:1194#0/1  
a¥X`ba¥ab]\_T`a\_V]`\_]RGX\_[`Y¥\_`\_`¥]V[X]`S  
@HWI-EAS443:3:21:1110:1556#0/1  
GCCGAGATCGCGCAGAGACTGGAAAGTGTCTTTGCAGGAA

+HWI-EAS443:3:21:1110:1556#0/1  
aab[]baaaaa`a^[`\_]ZWZ¥]0\_V\_\_¥ZQJQ¥\_RN  
@HWI-EAS443:3:21:1154:86#0/1  
GGGCTCATATACAACAGGATGGGAACAGTGACCACAGAA  
+HWI-EAS443:3:21:1154:86#0/1  
aaa\_\_aaaa`aa\_aa]`ba\_aaa\_`^Y\_a¥a`¥W^¥\_a]¥  
@HWI-EAS443:3:21:1205:1757#0/1  
CTTGCACCTGATATTGTGGATTACTGATCGTCTTTTTTTC  
+HWI-EAS443:3:21:1205:1757#0/1  
a\_`^S^\_TQP[aYa`\_TZRP`N¥^N]\_YTLQNW\_YMU¥TP  
@HWI-EAS443:3:21:1241:1318#0/1  
AGTCCCAATAGTTCTCATTGCATGTACCATCTGCCTAGTC  
+HWI-EAS443:3:21:1241:1318#0/1  
aa`a\_a``aa\_]a`a\_aaaa]a``\_a\_^a`\_aa]W`\_\_UV  
@HWI-EAS443:3:21:1393:331#0/1  
GCCTACCAGAAGCGAATGGGAGTGCAGATGCAGCGATTCA  
+HWI-EAS443:3:21:1393:331#0/1  
aa\_a`¥[`a`aa\_\_¥W``a¥U\_V¥TY\_¥W¥VV\_S\_WW[RZ  
@HWI-EAS443:3:21:1401:1610#0/1  
ATCAGCAATCTGTTACACAAGTGGCACACACTAGACCAAAA  
+HWI-EAS443:3:21:1401:1610#0/1  
aa`\_]\_`¥]]\_`^\_WMUNPZ\_S[LK\_\_`PPY]YYPQSY¥YY  
@HWI-EAS443:3:21:1435:1215#0/1  
ATCTTGTCACCTCTGACTAAGGGAATTTTAGGATTTGTGT  
+HWI-EAS443:3:21:1435:1215#0/1  
a¥^a\_b\_\_\_\_Y]`a\_aa¥aa[^¥[^`^Z]\_]¥a\_Y\_`]VYZ  
@HWI-EAS443:3:21:1478:172#0/1  
GCAAATATCATTGGGATCTTGCACCTGATATTGTGGATTA  
+HWI-EAS443:3:21:1478:172#0/1  
a^`\_`\_`VZ\_^\_Z\_Z[Y\_Z^]YXX^`Z]X^^\_Z]UV]ZZ  
@HWI-EAS443:3:21:1485:1050#0/1  
GGAGGTTGCTAATCAGACTAGGCAGATGGTACATGCAATG  
+HWI-EAS443:3:21:1485:1050#0/1  
`a\_``Jaa`Z]a]^aaa`Y^a^UZ[X[XUN]W^U^O[N^¥  
@HWI-EAS443:3:21:1497:1518#0/1  
GATGCTGTGAATCAGCAATCTGTTACACAAGTGGCACACAC  
+HWI-EAS443:3:21:1497:1518#0/1  
aa\_\_\_\_[a[a\_a\_\_\_\_`¥`\_]\_]YS¥0^] ^O[^Y\_T[XVY  
@HWI-EAS443:3:21:1546:1859#0/1  
GCTAAAGACAAGACCAATCTTGTACCTCTGACTAAGGGA  
+HWI-EAS443:3:21:1546:1859#0/1  
`^`a\_\_^]``\_aa]TZ^\_VTZ]XMZOP^U¥¥VWWW^Y[[Y  
@HWI-EAS443:3:21:1759:700#0/1  
GACCGATGCTGTGAATCAGCAATCTGTTACACAAGTGGCAC  
+HWI-EAS443:3:21:1759:700#0/1  
aaaaab^`^b`ba\_`R\_aXV^a^¥`][T]S\_^UVY^]WR  
@HWI-EAS443:3:21:310:1194#0/1  
GAGACCGATGCTGTGAATCAGCAATCTGTTACACAAGTGGC  
+HWI-EAS443:3:21:310:1194#0/1  
¥¥`Z\_Y\_¥S\_^Za``Y[¥a\_¥^^¥X`a`MUW¥W]WTM`^`

@HWI-EAS443:3:21:374:122#0/1  
CAAGTGGCACACACTAGACCAAAAGCAGCTTCTGTGGTCA  
+HWI-EAS443:3:21:374:122#0/1  
aaaa^aba^ab\_a[`aaa\_Xa\_\_aaa`\_\_^\_\_`VaaNU\_  
@HWI-EAS443:3:21:375:292#0/1  
CATGGCCTCATATACAACAGGATGGGAACAGTGACCACA  
+HWI-EAS443:3:21:375:292#0/1  
aaabaaaXaaaaaaaaa\_\_`^^`\_aa`\_`\_aV\_`\_\_\_\_^`  
@HWI-EAS443:3:21:453:506#0/1  
CCAAAAGCAGCTTCTGTGGTCACTGTTCCCATCCTGTTGT  
+HWI-EAS443:3:21:453:506#0/1  
abV][\_\_\_\_[`a^`¥[Q[U¥¥¥^¥¥ZWY¥UYW^W¥VVU^^T  
@HWI-EAS443:3:21:507:203#0/1  
ATCAGCAATCTGTTCAAGTGGCACACACTAGACCAAAA  
+HWI-EAS443:3:21:507:203#0/1  
abaaaaab`ba\_a\_a\_a`aYa`\_`\_]`^\_]`^\_\_^Y^`\_`\_`^  
@HWI-EAS443:3:21:519:270#0/1  
GGAACAGTGACCACAGAAGCTGCTTTTGGTCTAGTGTGTG  
+HWI-EAS443:3:21:519:270#0/1  
aaa`¥\_aN\_\_\_\_^X¥¥YY[\_\_\_U^[Q[V¥¥^SWQQTN¥U¥T¥  
@HWI-EAS443:3:21:547:903#0/1  
ATCGCGCAGAGACTGGAAAGTGTCTTTGCAGGAAAGAACA  
+HWI-EAS443:3:21:547:903#0/1  
aababaa`a`\_a^`a^`aa\_U`Y`^Y^`^¥`\_]\_\_^^\_Z]  
@HWI-EAS443:3:21:562:223#0/1  
CCCAATAGTTCTCATTGCATGTACCATCTGCCTAGTCTGA  
+HWI-EAS443:3:21:562:223#0/1  
Y`aZb]]M[Z`aaZaab\_a]`T^M^`a`[aUaaZP`\_a  
@HWI-EAS443:3:21:614:562#0/1  
TCCAATGATATTTGCTGCAATGACGAGAGGATCACTTGA  
+HWI-EAS443:3:21:614:562#0/1  
abababbaaaaaaaaab`aaaaa`a`a\_aaa[N]\_`\_`[]  
@HWI-EAS443:3:21:759:591#0/1  
AGCCGAGATCGCGCAGAGACTGGAAAGTGTCTTTGCAGGA  
+HWI-EAS443:3:21:759:591#0/1  
^\_bbaa`\_]`a\_W`a][E¥a`a¥XZ`\_\_G\_\_¥^aa]PZ`[X  
@HWI-EAS443:3:21:771:1415#0/1  
AGCGACGATAAATACATTTGAAAAAAGACGATCAGTAAT  
+HWI-EAS443:3:21:771:1415#0/1  
a\_a\_]aa\_\_\_a¥^]\_`\_`Y`\_`\_`\_`\_`U[¥W`VU[^S]YS  
@HWI-EAS443:3:21:794:1015#0/1  
GGCCTACCAGAAGCGAATGGGAGTGCAGATGCAGCGATTC  
+HWI-EAS443:3:21:794:1015#0/1  
aabaaabaaaa`a`][NY`T]\_`Xa\_aa\_\_\_`[\_]`\_`[TR¥  
@HWI-EAS443:3:21:861:67#0/1  
AGAGCCTCAAGATCTGTGTTCTTTCCTGCAAAGACACTTT  
+HWI-EAS443:3:21:861:67#0/1  
`a`Y`a`\_¥`Ya¥Xb]aU¥]a`\_MW^\_Y^^ZYV]U\_SM  
@HWI-EAS443:3:21:879:1012#0/1  
CAAGTGGCACACACTAGACCAAAAGCAGCTTCTGTGGTCA

+HWI-EAS443:3:21:879:1012#0/1  
aaX]Z`abaa`a^\_a`a[aa`^`^`\_\_\_^`XWX\_SU]  
@HWI-EAS443:3:21:989:872#0/1  
CGATCAGTAATCCACAATATCAGGTGCAAGATCCCAATGA  
+HWI-EAS443:3:21:989:872#0/1  
aba`abbabbbabababaaaaa\_¥a\_aaa`\_X\_aaaaa  
@HWI-EAS443:3:22:1019:1467#0/1  
ACTGATCGTCTTTTTTCAAATGTATTTATCGTCGCTTTA  
+HWI-EAS443:3:22:1019:1467#0/1  
a¥`\_a^^`\_baa`aa\_aaa^aaUa`a`\_aa^`\_^\_\_\_\_  
@HWI-EAS443:3:22:1040:388#0/1  
AAAGCAGCTTCTGTGGTCACTGTTCCCATCCTGTTGTATA  
+HWI-EAS443:3:22:1040:388#0/1  
a[[aXaaa^U\_ab`X^\_] [Z`aXa`a\_[X[\_`^`\_V\_\_X  
@HWI-EAS443:3:22:1268:1910#0/1  
GCAACTGGCAAGTGCACCAGTTGAATAGCTTAGTGACACC  
+HWI-EAS443:3:22:1268:1910#0/1  
\_aaX]SVTZ\_]YSZN\_¥¥[RFSOQ[[¥BBBBBBBBBBBBBB  
@HWI-EAS443:3:22:142:703#0/1  
GAGGTTGCTAATCAGACTAGGCAGATGGTACATGCAATGA  
+HWI-EAS443:3:22:142:703#0/1  
aaaYRYaa^\_]ZQ^`W[`\_\_`\_]\_\_ZU^`^Z\_\_]^WZW  
@HWI-EAS443:3:22:1527:445#0/1  
TACTACCACCAATCCACTAATCAGGCATGAAAACAGAATG  
+HWI-EAS443:3:22:1527:445#0/1  
]]aa^\_aaZ]^`a^XZ^`\_]`\_`\_X]^`\_]Z]ZT\_`]Y¥X  
@HWI-EAS443:3:22:1559:390#0/1  
GGGAACAGTGACCACAGAAGCTGCTTTTGGTCTAGTGTGT  
+HWI-EAS443:3:22:1559:390#0/1  
aa]YS¥]a\_aa\_X\_^`[[[]W]^Z[\_``¥^SSY¥SW^¥^W  
@HWI-EAS443:3:22:1682:70#0/1  
GACCGATGCTGTGAATCAGCAATCTGTTCAACAAGTGGCAC  
+HWI-EAS443:3:22:1682:70#0/1  
aXFRaXXX]Wa¥[]^[]Y]]UXXYU\_\_T[NOJXUWSWUSUQ  
@HWI-EAS443:3:22:1705:1251#0/1  
AGCGATTCAAGTGATCCTCTCGTCATTGCAGCAAATATCA  
+HWI-EAS443:3:22:1705:1251#0/1  
a]¥a\_baa`\_aZUDX]0aSa]^`^^aY\_W^\_OZ\_^^UaX¥  
@HWI-EAS443:3:22:1712:713#0/1  
TGTTCCCATCCTGTTGTATATGAGGCCCATGCAACTGGCA  
+HWI-EAS443:3:22:1712:713#0/1  
a\_^]^V]]a]P]aZV¥N`\_VXX\_XNP[[U[PN¥Z¥ZUQP  
@HWI-EAS443:3:22:182:1052#0/1  
GCTGCAATGACGAGAGGATCACTTGAATCGCTGCATCTGC  
+HWI-EAS443:3:22:182:1052#0/1  
`\_Y\_P\_X`\_Y`¥T]H[¥ZS`[\_WT[Z[Q^T¥HZ\_]WSVSR  
@HWI-EAS443:3:22:192:225#0/1  
CGACGATAAATACATTTGAAAAAAGACGATCAGTAATCC  
+HWI-EAS443:3:22:192:225#0/1  
UU¥]^ba`\_`\_a^YZ^^aaV\_ba`\_`\_a`aaN\_]RI¥^`Z\_

@HWI-EAS443:3:22:208:1156#0/1  
GCAAATATCATTGGGATCTTGACCTGATATTGTGGATTA  
+HWI-EAS443:3:22:208:1156#0/1  
abaaaaaaaa`\_a\_a]aaa`aaa`a`a`\_a``X`^\_\_\_\_  
@HWI-EAS443:3:22:257:1808#0/1  
GACCGATGCTGTGAATCAGCAATCTGTTCCACAAGTGGCAC  
+HWI-EAS443:3:22:257:1808#0/1  
]bba\_a^Z`a`Uab`\_bb[aabbaa^Taab\_baLX`Ybba  
@HWI-EAS443:3:22:32:269#0/1  
AACAGGATGGGAACAGTGACCACAGAAGCTGCTTTTGGTC  
+HWI-EAS443:3:22:32:269#0/1  
]b\_QZa^baa[¥`\_aX`baa¥\_U`^a`¥Za`Xa`XYLU[a  
@HWI-EAS443:3:22:389:332#0/1  
GGTGTCACTAAGCTATTCAACTGGTGCCTTGCCAGTTGC  
+HWI-EAS443:3:22:389:332#0/1  
aa\_¥`a`a`aaa^`Xa`\_aa\_¥]\_S\_\_\_\_W\_Q[[VW¥U\_^Z  
@HWI-EAS443:3:22:417:1766#0/1  
AAAAGAGAAATAACGTTCCATGGGGCCAAGGAGGTGTCAC  
+HWI-EAS443:3:22:417:1766#0/1  
aZ]aaaTaabaa[]`\_ba`a^X`\_`^^\_¥`V\_XORLEa`  
@HWI-EAS443:3:22:419:724#0/1  
ACTCGATCCAGCCATCTGTTCCATAGCCTTGCCGTAGTG  
+HWI-EAS443:3:22:419:724#0/1  
]`V^V^WOY`VV¥0¥\_Y`Q[P[[[YRRXZYNKTT¥BBBBB  
@HWI-EAS443:3:22:491:1400#0/1  
GCTGCTTTTGGTCTAGTGTGTGCCACTTGTGAACAGATTG  
+HWI-EAS443:3:22:491:1400#0/1  
^[^ab`ba]`\_\_aaa]ZX[\_\_a]aaaa`Y¥aaaaa]\_R  
@HWI-EAS443:3:22:636:1696#0/1  
GACAAGATTGGTCTTGTCTTTAGCCATTCCATGAGAGCCT  
+HWI-EAS443:3:22:636:1696#0/1  
UT\_babb¥¥b[baYZ`VbXVIS¥^`^`W\_aa]^Vabaa`]T  
@HWI-EAS443:3:22:850:1513#0/1  
GCCTCATATACAACAGGATGGGAACAGTGACCACAGAAGC  
+HWI-EAS443:3:22:850:1513#0/1  
aaaZ[OW^Z^aa`¥TZV¥\_\_[]Xa\_¥[RXa¥Y¥[^[[`Q[  
@HWI-EAS443:3:22:864:327#0/1  
GCTGCATCTGCACTCCCATTGCTTCTGGTAGGCCTGCAA  
+HWI-EAS443:3:22:864:327#0/1  
aa`a\_a`\_^aa`\_\_`\_^`\_Z^Z\_¥^¥YPW¥[URW[ZWZZ  
@HWI-EAS443:3:22:891:1296#0/1  
CAGCAATCTGTTCCACAAGTGGCACACACTAGACCAAAGC  
+HWI-EAS443:3:22:891:1296#0/1  
abaaaaaaaaabaaaa`abaYa\_aa`a`a`\_a\_a\_\_a\_a\_\_[  
@HWI-EAS443:3:22:90:735#0/1  
AGTGACCACAGAAGCTGCTTTTGGTCTAGTGTGTGCCACT  
+HWI-EAS443:3:22:90:735#0/1  
aaVbbab`bbabZ^`\_`a``aaaY]``\_\_ZZWTV]\_`\_Y]  
@HWI-EAS443:3:22:981:1130#0/1  
TGCAGATGCAGCGATTCAAGTGATCCTCTCGTCATTGCAG

+HWI-EAS443:3:22:981:1130#0/1  
aaba]aabababaaaaaaaa[\_a`a`a^^`YX\_`\_]``  
@HWI-EAS443:3:23:1126:486#0/1  
GACCACAGAAGCTGCTTTTGGTCTAGTGTGCCACTTGT  
+HWI-EAS443:3:23:1126:486#0/1  
aaaaSaaba¥\_a`a``aaaY`aa`a`a`a^\_a`\_`a^  
@HWI-EAS443:3:23:1185:547#0/1  
GTCCTAAGCTATTCAACTGGTGCCTTGCAGTTGCATG  
+HWI-EAS443:3:23:1185:547#0/1  
`^^b`aa`a`aaa`aa`aa[^`\_a]`\_a[^[W\_^^^\_  
@HWI-EAS443:3:23:1202:701#0/1  
AAAATTTGCAGGCCTACCAGAAGCGAATGGGAGTGCAGAT  
+HWI-EAS443:3:23:1202:701#0/1  
\_\_ba\_aa`a`a`aaa\_]a`\_a`aX`\_`^`\_`X\_¥`\_`\_`  
@HWI-EAS443:3:23:1207:175#0/1  
AACGTTATTTCTCTTTTGAGCTTCTTGTATAGTTTAACTG  
+HWI-EAS443:3:23:1207:175#0/1  
aaYaabaab\_[babbbbaZ^Y\_b¥aaaa[\_YYa`aaa]`]  
@HWI-EAS443:3:23:123:879#0/1  
CTCGTCATTGCAGCAAATATCATTGGGATCTTGCACCTGA  
+HWI-EAS443:3:23:123:879#0/1  
ab`ZN\_\_b]aaaabaa`^`a`^¥^`\_`a^^`\_`a^a\_a\_a\_  
@HWI-EAS443:3:23:1293:1004#0/1  
GTCCCCATTCCCATTTAGGGCATTGGACAAAGCGTCTA  
+HWI-EAS443:3:23:1293:1004#0/1  
``^ba[\_Yaa`aa`W`a``]aaa``]\_````\_Xa\_\_\_a  
@HWI-EAS443:3:23:1384:207#0/1  
GTGGATTACTGATCGTCTTTTTTCAAATGTATTTATCGT  
+HWI-EAS443:3:23:1384:207#0/1  
```a^^aXQZ^)^Y`^G\_]`^`a^]]`Y]\_UT[¥RY\_WBB  
@HWI-EAS443:3:23:1597:361#0/1  
GATCCCAATGATATTTGCTGCAATGACGAGAGGATCACTT  
+HWI-EAS443:3:23:1597:361#0/1  
\_XUN[\_`a`\_`a`\_YYVV¥a]X[ZXZMW]\_WX]]ZS]ZSU  
@HWI-EAS443:3:23:1632:1112#0/1  
GCCTCATATACAACAGGATGGGAACAGTGACCACAGAAGC  
+HWI-EAS443:3:23:1632:1112#0/1  
abababbbb`ab`aaa\_aa[Q[\_`^`^^`\_`¥M^U^`\_]`^U  
@HWI-EAS443:3:23:1640:1373#0/1  
CATATACAACAGGATGGGAACAGTGACCACAGAAGCTGCT  
+HWI-EAS443:3:23:1640:1373#0/1  
`aT`b][aaabbbbabbab^bb`\_`\_`\_`aaa`VXa`]VN  
@HWI-EAS443:3:23:181:1626#0/1  
GTTGCTAATCAGACTAGGCAGATGGTACATGCAATGAGAA  
+HWI-EAS443:3:23:181:1626#0/1  
a\_\_¥VXaVaa¥VUYTXT¥`TTP`Y¥NT`^S[POUV^H^\_\_  
@HWI-EAS443:3:23:201:1477#0/1  
AATTCCTTAGTCAGAGGTGACAAGATTGGTCTTGTCTTT  
+HWI-EAS443:3:23:201:1477#0/1  
\_VXabbbb`R\_T^```\_NX`aa^]V]^]RVS]¥`\_`W`\_`^`

@HWI-EAS443:3:23:23:1089#0/1  
CGCGCAGAGACTGGAAAGTGTCTTTGCAGGAAAGAACACA  
+HWI-EAS443:3:23:23:1089#0/1  
abbaaaaa^aaa`aZ]`Va\_a`\_`Y`\_]\_Z^`[\_^\_  
@HWI-EAS443:3:23:327:1246#0/1  
ATTACTGATCGTCTTTTTTCAAATGTATTTATCGTCGCT  
+HWI-EAS443:3:23:327:1246#0/1  
aaabbabaaaa`baaabaa`aaa\_a^a`a^`Xa]\_\_\_\_\_`  
@HWI-EAS443:3:23:353:1910#0/1  
GATGCAGCGATTCAAGTGATCCTCTCGTCATTGCAGCAAA  
+HWI-EAS443:3:23:353:1910#0/1  
[\_aabbbbbbaabb[b\_ab\_Ybaaa`]bba[\_ab\_]R#a  
@HWI-EAS443:3:23:451:614#0/1  
GAGACCGATGCTGTGAATCAGCAATCTGTTCAAGTGGC  
+HWI-EAS443:3:23:451:614#0/1  
a]aaa^JR]a`\_`\_Z[JZX`]aMPZXRGNT\_V^[QQ#[W  
@HWI-EAS443:3:23:489:922#0/1  
GCCTCATATACAACAGGATGGGAACAGTGACCACAGAAGC  
+HWI-EAS443:3:23:489:922#0/1  
aaabb`\_[abbbba`aa`aaa`%a\_a`\_aa`aa`\_`a\_\_\_\_`  
@HWI-EAS443:3:23:516:1374#0/1  
AGGAGGTGTCACTAAGCTATTCAACTGGTGCCTTGCCAG  
+HWI-EAS443:3:23:516:1374#0/1  
a\_\_aa^U`\_#[`a`a\_\_^a`\_a`\_a^%XTK%a\_]#[QW^M  
@HWI-EAS443:3:23:618:1009#0/1  
GGCAGATGGTACATGCAATGAGAACTATTGGGACTCATCC  
+HWI-EAS443:3:23:618:1009#0/1  
aabbbbabb^abb`a`abaa`aaaaaaaaaaaa`aaa\_a  
@HWI-EAS443:3:23:695:1708#0/1  
GACCGATGCTGTGAATCAGCAATCTGTTCAAGTGGCAC  
+HWI-EAS443:3:23:695:1708#0/1  
`baaabaUabbZ`aa^\_Yab`aIaXQXaa`\_`aWP^Ya`Y  
@HWI-EAS443:3:23:908:1126#0/1  
GACCGATGCTGTGAATCAGCAATCTGTTCAAGTGGCAC  
+HWI-EAS443:3:23:908:1126#0/1  
a^Xa[aa]U%]^aa%`aa`^^`\_aZa%a`\_\_aR^`T`W  
@HWI-EAS443:3:24:1029:1140#0/1  
AGATGGTACATGCAATGAGAACTATTGGGACTCATCCTAG  
+HWI-EAS443:3:24:1029:1140#0/1  
aabb\_b%abb`abbbbbaaa\_a`baaaa`]aaaaaabaa\_  
@HWI-EAS443:3:24:1241:1965#0/1  
ATCCCAATGATATTTGCTGCAATGACGAGAGGATCACTTG  
+HWI-EAS443:3:24:1241:1965#0/1  
W]ab^%a`\_`^`aa\_a\_aaa`a`a`[^]#a`\_`YS^N][T  
@HWI-EAS443:3:24:1358:1407#0/1  
CGATCAGTAATCCACAATATCAGGTGCAAGATCCCAATGA  
+HWI-EAS443:3:24:1358:1407#0/1  
]bbbY\_\_^ab]^%0\_\_a[ba^b]I]bb]babaU]b`a`\_  
@HWI-EAS443:3:24:1377:497#0/1  
TAGACCAAAAGCAGCTTCTGTGGTCACTGTTCCCATCCTG

+HWI-EAS443:3:24:1377:497#0/1  
]bb\_bb]\_[b`ba]\_bab¥[¥`\_aaXaa]aS[\_`bS`ab  
@HWI-EAS443:3:24:1434:910#0/1  
GCCTCATATACAACAGGATGGGAACAGTGACCACAGAAGC  
+HWI-EAS443:3:24:1434:910#0/1  
\_`^ZS\_[^aaW\_b¥\_`^`ab\_]\_XR\_aT]^aUY\_\_bWX`V  
@HWI-EAS443:3:24:1456:1924#0/1  
CACTTGTGAACAGATTGCTGATTCACAGCATCGGTCTCAC  
+HWI-EAS443:3:24:1456:1924#0/1  
`aa\_^`R`ababbaa[aa`b`a`aa`abT\_a[^b]\_[TF[  
@HWI-EAS443:3:24:1475:46#0/1  
ATACATTTGAAAAAAGACGATCAGTAATCCACAATATCA  
+HWI-EAS443:3:24:1475:46#0/1  
``[IX\_bZTTU¥`VYZPY`a]]\_aX\_\_[S¥YY^Z\_¥]W^  
@HWI-EAS443:3:24:1510:87#0/1  
TGGGCCTCATATACAACAGGATGGGAACAGTGACCACAGA  
+HWI-EAS443:3:24:1510:87#0/1  
abbb^`bbbbaba\_aa\_aaa^`aaaZ`R^aSaa\_X\_T\_\_^  
@HWI-EAS443:3:24:1646:597#0/1  
GGGCCTCATATACAACAGGATGGGAACAGTGACCACAGAA  
+HWI-EAS443:3:24:1646:597#0/1  
\_¥aPO\_¥¥aa\_aW\_``\_\_\_\_J^[aWIIR\_`¥`\_OW[H]a]O  
@HWI-EAS443:3:24:174:183#0/1  
GGGCCTCATATACAACAGGATGGGAACAGTGACCACAGAA  
+HWI-EAS443:3:24:174:183#0/1  
X\_^`b\_\_Yb\_Z\_ab^]\_aaa`X`b`\_YR^Y]aaa\_aZX  
@HWI-EAS443:3:24:185:1216#0/1  
GAGAAATAACGTTCCATGGGGCCAAGGAGGTGCTACTAAG  
+HWI-EAS443:3:24:185:1216#0/1  
aaaaaaaa`baa^`aaa`\_\_`aa\_a`Z`Z\_V\_Uaa`^W\_^  
@HWI-EAS443:3:24:189:1296#0/1  
ATCAGGTGCAAGATCCCAATGATATTTGCTGCAATGACGA  
+HWI-EAS443:3:24:189:1296#0/1  
aaaa`W\_aaa\_a\_[`aa`a]``\_\_`\_\_^`^^`\_^`\_\_  
@HWI-EAS443:3:24:213:36#0/1  
TGCCACTTGTGAACAGATTGCTGATTCACAGCATCGGTCT  
+HWI-EAS443:3:24:213:36#0/1  
abbbbbabb`a`\_\_abaaaa`a`a`a¥Z`\_\_``]\_^  
@HWI-EAS443:3:24:290:1607#0/1  
GAATCAGCAATCTGTTCAAGTGGCACACACTAGACCAA  
+HWI-EAS443:3:24:290:1607#0/1  
Wa`bb\_Y\_babba[J`aa]^aV`aab^bbaa\_\_[aaa^¥  
@HWI-EAS443:3:24:443:318#0/1  
CAGCAATCTGTTCAAGTGGCACACACTAGACCAAAGC  
+HWI-EAS443:3:24:443:318#0/1  
`bbabbabbaa`aaa\_a`aab`a`ba\_b\_a``aa]aa\_  
@HWI-EAS443:3:24:598:502#0/1  
ATGACCTTCTTGAATTTGCAGGCCTACCAGAAGCGAAT  
+HWI-EAS443:3:24:598:502#0/1  
abaU]\_aaa^abZ`\_aa`a\_¥a]\_[`ab]b`^V^`a^X\_



@HWI-EAS443:3:24:680:1028#0/1  
GACCGATGCTGTGAATCAGCAATCTGTTCCACAAGTGGCAC  
+HWI-EAS443:3:24:680:1028#0/1  
`bbababbbbabbbbbaaaa`bab`bba`aaa^a\_Za\_\_b`  
@HWI-EAS443:3:24:750:1766#0/1  
GATCAGTAATCCACAATATCAGGTGCAAGATCCCAATGAT  
+HWI-EAS443:3:24:750:1766#0/1  
`bbbbbbaba^abbabbbabbbaXVabaabbabaabbaaba  
@HWI-EAS443:3:24:806:1104#0/1  
ATGGGCCTCATATACAACAGGATGGGAACAGTGACCACAG  
+HWI-EAS443:3:24:806:1104#0/1  
`Z\_`a`bba[`aa]]aaa¥[\_]`[\_a^¥^X\_Uaa¥[¥L\_a  
@HWI-EAS443:3:24:993:961#0/1  
ACCTGATATTGTGGATTACTGATCGTCTTTTTTTCAAATG  
+HWI-EAS443:3:24:993:961#0/1  
T\_aXaWQXZaPFY¥Q¥`U`Z]YZZ]MV\_b\_[a^¥UYZ^OQ  
@HWI-EAS443:3:25:1050:853#0/1  
CAAGATTGGTCTTGTCTTTAGCCATTCCATGAGAGCCTCA  
+HWI-EAS443:3:25:1050:853#0/1  
ab`b`VVV\_a````aZba\_`W[¥baZabWUa`aaaW[Z]b  
@HWI-EAS443:3:25:1099:1718#0/1  
CAACTGGCAAGTGACCAGTTGAATAGCTTAGTGACACCT  
+HWI-EAS443:3:25:1099:1718#0/1  
`b`abbabb`^]\_bbbbbb`bbbbbaababbaabbaa\_b  
@HWI-EAS443:3:25:1106:483#0/1  
AAACCGTATTTAAAGCGACGATAAATACATTTGAAAAAAA  
+HWI-EAS443:3:25:1106:483#0/1  
abbabbaabbbbbaaaaaa^baaaaaa\_`aaaaa``a``a  
@HWI-EAS443:3:25:1241:1619#0/1  
TGGGCCTCATATACAACAGGATGGGAACAGTGACCACAGA  
+HWI-EAS443:3:25:1241:1619#0/1  
aab^aabababbaaba`aa^a\_aaaaa¥a`Waa\_¥aa\_a\_  
@HWI-EAS443:3:25:1270:1162#0/1  
ATGGATAGAGCAGTTAAACTATACAAGAAGCTCAAAGAG  
+HWI-EAS443:3:25:1270:1162#0/1  
abbbb`[`bbb`b`ab^^abbbbabbba\_U¥ab`Waa  
@HWI-EAS443:3:25:1400:126#0/1  
AAAGACGATCAGTAATCCACAATATCAGGTGCAAGATCCC  
+HWI-EAS443:3:25:1400:126#0/1  
abbbbabaaZaaU``]`^Ya^a\_`\_\_Y^^\_W¥Y]`[^WSRT  
@HWI-EAS443:3:25:1406:1323#0/1  
CAATGACGAGAGGATCACTTGAATCGCTGCATCTGCACTC  
+HWI-EAS443:3:25:1406:1323#0/1  
Z]a\_M`\_a]b\_`¥b[aa]ba[[^Z\_aaUa]\_a[a`^^`Z  
@HWI-EAS443:3:25:1448:1292#0/1  
CGTCATTGCAGCAAATATCATTGGGATCTTGACCTGATA  
+HWI-EAS443:3:25:1448:1292#0/1  
\_`babbbbbbbababbaa`b`T`aabbaba`^XYZb`aa  
@HWI-EAS443:3:25:1455:500#0/1  
ATGGTACATGCAATGAGAACTATTGGGACTCATCCTAGCT

+HWI-EAS443:3:25:1455:500#0/1  
Y` ` \_¥Y^¥[Kaa`a\_ab\_S[^¥V`b` `b^\_aa]H^Z¥]Y  
@HWI-EAS443:3:25:1550:1255#0/1  
TCTGTTCAACAAGTGGCACACACTAGACCAAAGCAGCTTC  
+HWI-EAS443:3:25:1550:1255#0/1  
a`a\_\_aa`aaaaU`\_]`^^^\_\_^^^\_\_[V]^]¥VXX  
@HWI-EAS443:3:25:1660:1165#0/1  
TGCAGATGCAGCGATTCAAGTGATCCTCTCGTCATTGCAG  
+HWI-EAS443:3:25:1660:1165#0/1  
KW^aabbUZaZ^^^^[OR¥UX\_aUQqa[X¥FFUZx^[\_a  
@HWI-EAS443:3:25:1780:936#0/1  
ATGGGCCTCATATACAACAGGATGGGAACAGTGACCACAG  
+HWI-EAS443:3:25:1780:936#0/1  
ababb`bbbbbbbaaba¥aa]\_a^`X¥XIXaT`\_V[[U\_\_  
@HWI-EAS443:3:25:229:1001#0/1  
TGTGGATTACTGATCGTCTTTTTTCAAATGTATTTATCG  
+HWI-EAS443:3:25:229:1001#0/1  
a`P\_\_`^b` ``]`^`¥` ``]¥aZa]W¥a`L\_\_`[`¥^\_  
@HWI-EAS443:3:25:234:80#0/1  
ATTTGCTGCAATGACGAGAGGATCACTTGAATCGCTGCAT  
+HWI-EAS443:3:25:234:80#0/1  
¥^`bbaabbb`]ba¥`^b¥ba[X]a`a^aaa`^a` ``]]`X  
@HWI-EAS443:3:25:250:33#0/1  
AAGATTGGTCTTGTCTTTAGCCATTCCATGAGAGCCTCAA  
+HWI-EAS443:3:25:250:33#0/1  
^Tbb\_bababbbbaabbaaba\_bbaaa`a\_[a^\_]a[`\_^  
@HWI-EAS443:3:25:306:2000#0/1  
AGATGGTACATGCAATGAGA ACTATTGGGACTCATCCTAG  
+HWI-EAS443:3:25:306:2000#0/1  
abbaaa]baa`abaa`a`a\_a`a`a\_\_]^` ` `a^a\_^a[  
@HWI-EAS443:3:25:349:1796#0/1  
AGCACTACGGCAAAGGCTATGGAACAGATGGCTGGATCGA  
+HWI-EAS443:3:25:349:1796#0/1  
[F[`[¥\_a¥]ZS` `[ZXL]N\_NRR]V^THMQ^UZLLNXX  
@HWI-EAS443:3:25:35:1041#0/1  
AGAGGATCACTTGAATCGCTGCATCTGCACTCCCATTTCGC  
+HWI-EAS443:3:25:35:1041#0/1  
ab]aa`a`aaaa`aaaa`a` `aa^`aaa\_a`a`^`\_`^Y]  
@HWI-EAS443:3:25:445:1036#0/1  
GCCTCATATACAACAGGATGGGAACAGTGACCACAGAAGC  
+HWI-EAS443:3:25:445:1036#0/1  
`\_`\_\_a\_\_a`^`V[^¥¥¥\_\_¥\_¥^^WY^[T[W^¥USQQ  
@HWI-EAS443:3:25:460:1698#0/1  
GACCGATGCTGTGAATCAGCAATCTGTTCAAGTGGCAC  
+HWI-EAS443:3:25:460:1698#0/1  
aaa^Ha\_\_a`Z^`a\_Z^^X` `¥SZ`¥\_T`¥\_¥VPS¥V\_T  
@HWI-EAS443:3:25:622:1229#0/1  
CGAATGGGAGTGCAGATGCAGCGATTCAAGTGATCCTCTC  
+HWI-EAS443:3:25:622:1229#0/1  
a`[\_bbba\_a]abb`\_ba`a^abb` `aaa`¥]` ``aaa\_a

@HWI-EAS443:3:25:830:255#0/1  
ATGGGCCTCATATACAACAGGATGGGAACAGTGACCACAG  
+HWI-EAS443:3:25:830:255#0/1  
a`\_\_a`\_\_\_\_`a¥]\_\_\_\_X^¥]]]]^X^YY]]V]^YYYYVY  
@HWI-EAS443:3:25:895:1257#0/1  
ATCTGCACTCCCATTCGCTTCTGGTAGGCCTGCAAATTTT  
+HWI-EAS443:3:25:895:1257#0/1  
aaa`baaaaa`\_a`\_a\_\_^^V^¥^[SV^\_\_USY^^\_^^  
@HWI-EAS443:3:25:908:193#0/1  
CAAGATTGGTCTTGTCTTTAGCCATTCCATGAGAGCCTCA  
+HWI-EAS443:3:25:908:193#0/1  
abaaaabb\_Wbbaa`aabaa`a^aa`^`^`]a`\_^\_X]^\_^^\_  
@HWI-EAS443:3:25:983:103#0/1  
TGAGACCGATGCTGTGAATCAGCAATCTGTTCAAGTGG  
+HWI-EAS443:3:25:983:103#0/1  
`bbX¥\_W\_J0`a`[ba^aaab`)]`\_ab[`\_][^aa]\_^  
@HWI-EAS443:3:25:985:277#0/1  
CAGGTGCAAGATCCCAATGATATTTGCTGCAATGACGAGA  
+HWI-EAS443:3:25:985:277#0/1  
¥\_¥¥H¥b`a`S\_ZQ\_\_X`a\_b\_]\_¥`b`baa`^H`a`  
@HWI-EAS443:3:26:1024:62#0/1  
GTGCCACTTGTGAACAGATTGCTGATTCACAGCATCGGTC  
+HWI-EAS443:3:26:1024:62#0/1  
]FZV^aZ]Za`a`^aa]\_]`R¥[[\_]Y[U^`Y\_^Wa\_PN  
@HWI-EAS443:3:26:1463:465#0/1  
CAGCAATCTGTTCAAGTGGCACACACTAGACCAAAAAGC  
+HWI-EAS443:3:26:1463:465#0/1  
ababbbbaab`bbabbb`bWbb\_b`babbbbbbba`ababa`  
@HWI-EAS443:3:26:1517:1568#0/1  
CTGATATTGTGGATTACTGATCGTCTTTTTTTTCAAATGTA  
+HWI-EAS443:3:26:1517:1568#0/1  
¥a^ZYZU^^[\_a`[Va^^a[`a[aa\_aa^aTWZ\_[UYRY  
@HWI-EAS443:3:26:1691:1086#0/1  
ACCTGATATTGTGGATTACTGATCGTCTTTTTTTTCAAATG  
+HWI-EAS443:3:26:1691:1086#0/1  
`S\_bbabaabaYS¥U\_ba]abaa^]`^abaaaa`W\_^^a^  
@HWI-EAS443:3:26:184:1525#0/1  
CGCAGAGACTGGAAAGTGTCTTTGCAGGAAAGAACACAGA  
+HWI-EAS443:3:26:184:1525#0/1  
aaaZLT\_]aaa\_XGVNX[[W\_¥^WLHQU]Z¥\_\_¥RHFTQY  
@HWI-EAS443:3:26:303:1750#0/1  
ATCCCAATGATATTTGCTGCAATGACGAGAGGATCACTTG  
+HWI-EAS443:3:26:303:1750#0/1  
aQ`a]^]^aa`\_\_\_\_a\_\_]\_\_`¥^`]\_VTR]\_X]T¥Z  
@HWI-EAS443:3:26:447:557#0/1  
GGAGGTTGCTAATCAGACTAGGCAGATGGTACATGCAATG  
+HWI-EAS443:3:26:447:557#0/1  
a`aaa^aaaa`a\_\_aa`\_`\_\_\_\_a^^`[R`^\_¥\_\_\_\_^Z  
@HWI-EAS443:3:26:525:2023#0/1  
CGCAATGGGAGTGCAGATGCAGCGATTCAAGTGCCTCT

+HWI-EAS443:3:26:525:2023#0/1  
aXIT]ST]]aPYV^RISMPU^T¥^¥STPTKG¥MWT¥WWB  
@HWI-EAS443:3:26:656:1884#0/1  
CAAGTGGCACACTAGACCAAAGCAGCTTCTGTGGTCA  
+HWI-EAS443:3:26:656:1884#0/1  
aaa`Pa`bb]abba\_b[`] `aaba]Zb^^`\_ba\_NP]VZ¥  
@HWI-EAS443:3:26:699:901#0/1  
GCCTCATATACAACAGGATGGGAACAGTGACCACAGAAGC  
+HWI-EAS443:3:26:699:901#0/1  
a\_PS`WWYYVU[¥Y]UUVT]^YNUKXVSPZWNOUNTRPB  
@HWI-EAS443:3:26:74:923#0/1  
ATGGGAGTGCAGATGCAGCGATTCAAGTGATCCTCTCGTC  
+HWI-EAS443:3:26:74:923#0/1  
aabba^\_]aa`a\_a` ``\_\_a\_`]\_\_`W]`\_a]^]]a]X\_  
@HWI-EAS443:3:26:840:2020#0/1  
ATTGGGATCTTGCACCTGATATTGTGGATTACTGATCGTC  
+HWI-EAS443:3:26:840:2020#0/1  
aa]a`^`a`a`^^aZ`a`a\_\_\_\_\_]`\_`]Wa\_]]]XZTUR  
@HWI-EAS443:3:26:872:637#0/1  
GCTAATCAGACTAGGCAGATGGTACATGCAATGAGAACTA  
+HWI-EAS443:3:26:872:637#0/1  
aaaaaaaaab]`aaa\_aaa\_\_\_aW\_\_^^`\_^\_\_\_^`]`Z\_Z  
@HWI-EAS443:3:26:886:1051#0/1  
GTTCTTTCTGCAAAGACACTTTCCAGTCTCTGCGCGATC  
+HWI-EAS443:3:26:886:1051#0/1  
a[OFW`\_WJL^]XPSXW]VVa[`]Q]\_S\_\_¥¥S¥BBBBBB  
@HWI-EAS443:3:26:989:1590#0/1  
GTCCCCATTCCCATTTAGGGCATTGTTGGACAAAGCGTCTA  
+HWI-EAS443:3:26:989:1590#0/1  
]R]]\_ZUU[\_¥XWWXV^\_\_X¥YYS^QZZSOYY\_VM[BBBB  
@HWI-EAS443:3:27:1077:1651#0/1  
GGTTGCTAATCAGACTAGGCAGATGGTACATGCAATGAGA  
+HWI-EAS443:3:27:1077:1651#0/1  
aaaabbbb^bbabaa`aaaaaa^a[0¥^b\_a\_`a\_`a¥\_  
@HWI-EAS443:3:27:1151:377#0/1  
CAAGAAGCTCAAAAGAGAAATAACGTTCCATGGGGCCAAG  
+HWI-EAS443:3:27:1151:377#0/1  
abbb`bbab\_baaaabaabbba^a`a\_^aaaa`a]\_a\_a  
@HWI-EAS443:3:27:1176:1118#0/1  
ATCAGGTGCAAGATCCCAATGATATTTGCTGCAATGACGA  
+HWI-EAS443:3:27:1176:1118#0/1  
aa`a]]Ya`aaa\_aW^\_aaaa\_\_a]\_a\_` `\_\_\_\_\_]\_Za\_  
@HWI-EAS443:3:27:1184:643#0/1  
ATCGCTGCATCTGCACTCCCATTCGCTTCTGGTAGGCCTG  
+HWI-EAS443:3:27:1184:643#0/1  
aa^aXaaZb][^`Va]aa^]V`\_]aYYaX`[^X\_`YLPW`  
@HWI-EAS443:3:27:1236:1124#0/1  
CAAGTGGCACACTAGACCAAAGCAGCTTCTGTGGTCA  
+HWI-EAS443:3:27:1236:1124#0/1  
]aab^¥Xabbbb\_^abb\_ababbab[bb`baa`b]aaR\_b

@HWI-EAS443:3:27:1316:1004#0/1  
GAATGGGGACCCGAACAACATGGATAGAGCAGTTAAACTA  
+HWI-EAS443:3:27:1316:1004#0/1  
XSSXU¥`¥\_]ZZa¥Z[WPDQZaaZ`\_HOROZN]SBBBBB  
@HWI-EAS443:3:27:134:935#0/1  
GCTGGCTAGCACTACGGCAAAGGCTATGGAACAGATGGCT  
+HWI-EAS443:3:27:134:935#0/1  
aba]ab\_a\_Y\_]Xa`^aa^]a`Xa]]^ZYX`^^UX\_^YP  
@HWI-EAS443:3:27:1360:1334#0/1  
AAATACATTTGAAAAAAGACGATCAGTAATCCACAATAT  
+HWI-EAS443:3:27:1360:1334#0/1  
\_`babbaaaa\_aaaa`\_aaa`]\_\_YZYaXW]\_`^Y\_Y  
@HWI-EAS443:3:27:1364:665#0/1  
GCAGGCCTACCAGAAGCGAATGGGAGTGCAGATGCAGCGA  
+HWI-EAS443:3:27:1364:665#0/1  
aa`baaabaa`aa\_aa\_a^\_aa^^¥\_¥`]`\_^¥]¥^`¥`¥`¥`  
@HWI-EAS443:3:27:1474:1336#0/1  
TTCCCATCCTGTTGTATATGAGGCCCATGCAACTGGCAAG  
+HWI-EAS443:3:27:1474:1336#0/1  
aaaa`baX¥[Xb¥Ra\_[\_Z]XKP\_R\_aS¥^XUY\_RRU¥^  
@HWI-EAS443:3:27:1537:444#0/1  
GATGGGAACAGTGACCACAGAAGCTGCTTTTGGTCTAGTG  
+HWI-EAS443:3:27:1537:444#0/1  
\_¥a¥\_\_Sa`\_\_XUYa[[\_`^aXSTT[^QT¥WLWU]]^BBB  
@HWI-EAS443:3:27:1538:1382#0/1  
TCTTGCACCTGATATTGTGGATTACTGATCGTCTTTTTTTT  
+HWI-EAS443:3:27:1538:1382#0/1  
¥b`a`\_¥\_`b]aabab`ab^aa]X^a^`X`\_`aaaaaaa  
@HWI-EAS443:3:27:1723:406#0/1  
ATCAGGTGCAAGATCCCAATGATATTTGCTGCAATGACGA  
+HWI-EAS443:3:27:1723:406#0/1  
\_bbX`^`a^`bbaZ]]\_ZW^baaaaa\_¥Y`]Y\_aa`aV`a  
@HWI-EAS443:3:27:297:935#0/1  
CAGCGATTCAAGTGATCCTCTCGTCATTGCAGCAAATATC  
+HWI-EAS443:3:27:297:935#0/1  
abaabaabaa`a\_aaaaaabaaa\_aa`\_`a`\_a`aa\_a\_a  
@HWI-EAS443:3:27:38:884#0/1  
GTGGATTACTGATCGTCTTTTTTTCAAATGTATTTATCGT  
+HWI-EAS443:3:27:38:884#0/1  
a]`aaa`a`aaaaaa^aaaaaaa¥S¥a\_Z^aa``a]WV  
@HWI-EAS443:3:27:405:297#0/1  
GACAAGACCAATCTTGTACCTCTGACTAAGGGAATTTTA  
+HWI-EAS443:3:27:405:297#0/1  
a`¥WYV¥\_\_]RVYR\_[U`\_`Z^[T`]\_\_[X`\_\_^¥^]]Y^  
@HWI-EAS443:3:27:461:144#0/1  
GAACAGTGACCACAGAAGCTGCTTTTGGTCTAGTGTGTGC  
+HWI-EAS443:3:27:461:144#0/1  
aaaaaa]bbaaaaa`aa^\_`^\_\_^^\_VW^^UV[U]UZU  
@HWI-EAS443:3:27:476:1711#0/1  
GTGACCACAGAAGCTGCTTTTGGTCTAGTGTGTGCCACTT

+HWI-EAS443:3:27:476:1711#0/1  
a^`bbbaaba]baa\_`aa\_`a\_Z]a\_a]\_[¥\_XX\_\_aY^\_  
@HWI-EAS443:3:27:539:437#0/1  
GTCCCCATTCCCATTTAGGGCATTGACAAAGCGTCTA  
+HWI-EAS443:3:27:539:437#0/1  
]R`T\_aTbbbITZ]]RXQW¥U]a]aaT`T¥^\_`a^U[\_`  
@HWI-EAS443:3:27:550:446#0/1  
CTAGTGTGTGCCACTTGTGAACAGATTGCTGATTCACAGC  
+HWI-EAS443:3:27:550:446#0/1  
^\_\_bX^Y^bVaa^bab¥QR]aba[bbbbVaabbbbb\_bba  
@HWI-EAS443:3:27:613:1784#0/1  
GTGCCACTTGTGAACAGATTGCTGATTCACAGCATCGGTC  
+HWI-EAS443:3:27:613:1784#0/1  
aYU^\_\_a``RQ]a^aXa]^\_a¥V`[]]a`\_Y\_`]\_\_\_VR  
@HWI-EAS443:3:27:905:1432#0/1  
GGCCTACCAGAAGCGAATGGGAGTGCAGATGCAGCGATTC  
+HWI-EAS443:3:27:905:1432#0/1  
aaababaabab`aaaaa`aaa`Taa`aa^a\_aa^a]¥¥^  
@HWI-EAS443:3:28:1118:617#0/1  
GTGAATCAGCAATCTGTTCCACAAGTGGCACACACTAGACC  
+HWI-EAS443:3:28:1118:617#0/1  
a^aaaaaaa¥a\_a\_aa``\_`\_`\_aXa]\_a\_]\_W\_\_\_\_\_VT  
@HWI-EAS443:3:28:1172:1487#0/1  
GGGTCCCCATTCCCATTTAGGGCATTGACAAAGCGTC  
+HWI-EAS443:3:28:1172:1487#0/1  
a\_TUTYZbb[RQ\_a`bbaabZ¥La``]a`]¥0aVaS`BBB  
@HWI-EAS443:3:28:1230:1514#0/1  
TGGGCCTCATATACAACAGGATGGGAACAGTGACCACAGA  
+HWI-EAS443:3:28:1230:1514#0/1  
`aY^b[bbba`aabbaaaaa`aaa¥`\_]\_ZTaa\_¥\_¥aa`  
@HWI-EAS443:3:28:1266:686#0/1  
CCTGATATTGTGGATTACTGATCGTCTTTTTTTCAAATGT  
+HWI-EAS443:3:28:1266:686#0/1  
\_ZSUY^[`bb¥b^Z¥ba]\_bVaJa[]baabaab\_^]U[b\_  
@HWI-EAS443:3:28:1285:1938#0/1  
CAGCAATCTGTTCCACAAGTGGCACACACTAGACCAAAAAGC  
+HWI-EAS443:3:28:1285:1938#0/1  
U\_[[bbabaaY]`bKbbaJ\_[0[`\_[baUb[a`[[a`[aX  
@HWI-EAS443:3:28:1340:791#0/1  
GACCACAGAAGCTGCTTTTGGTCTAGTGTGTGCCACTTGT  
+HWI-EAS443:3:28:1340:791#0/1  
^`a]a`bbaaaaa^aabaab\_`a`a\_a[`^a[\_`U`\_X^  
@HWI-EAS443:3:28:135:132#0/1  
GTGCCACTTGTGAACAGATTGCTGATTCACAGCATCGGTC  
+HWI-EAS443:3:28:135:132#0/1  
aa`X\_\_`¥`UV`[[`\_`VX\_]^[UWYV¥W¥UY¥UT[MDK  
@HWI-EAS443:3:28:1374:1702#0/1  
CAGCAATCTGTTCCACAAGTGGCACACACTAGACCAAAAAGC  
+HWI-EAS443:3:28:1374:1702#0/1  
^ba^^\_a`aa\_a`aaaaQ`^\_b`aaa]`a\_¥¥Wa\_a\_¥B

@HWI-EAS443:3:28:1512:1149#0/1  
TTTTGGTCTAGTGTGCCACTTGTGAACAGATTGCTGAT  
+HWI-EAS443:3:28:1512:1149#0/1  
]`X]U^\_aaaa\_a`\_\_a\_¥a\_aaa\_a`\_]^[X`^\_  
@HWI-EAS443:3:28:162:312#0/1  
GGCTAGCACTACGGCAAAGGCTATGGAACAGATGGCTGGA  
+HWI-EAS443:3:28:162:312#0/1  
abaa]aaaa`aa`a]aa¥aa\_^`¥]a^aY^`TYW^`\_`ZP  
@HWI-EAS443:3:28:1713:1563#0/1  
GGCCAAGGAGGTGTCACCTAAGCTATTCAACTGGTGCACCT  
+HWI-EAS443:3:28:1713:1563#0/1  
]¥ZbbabaaaWG`bXaaaabbUba`]\_a```aaNaQ`[\_a  
@HWI-EAS443:3:28:1742:793#0/1  
CTACCAGAAGCGAATGGGAGTGCAGATGCAGCGATTCAAG  
+HWI-EAS443:3:28:1742:793#0/1  
abbbbbbbbbbbbabbaaab]babaa\_aa\_ba]aa`a^  
@HWI-EAS443:3:28:184:1383#0/1  
CAGCAATCTGTTCAAGTGGCACACACTAGACCAAAAAGC  
+HWI-EAS443:3:28:184:1383#0/1  
a`]`abb\_aa\_Za^¥aaa`\_a`\_]aabab\_^]a``aZ`Z^a  
@HWI-EAS443:3:28:261:699#0/1  
CAACTGGCAAGTGCACCAGTTGAATAGCTTAGTGACACCT  
+HWI-EAS443:3:28:261:699#0/1  
XW`¥ZZ^\_W^`TWX\_]`[a¥a`W\_]aa]]P]RX[^`a`Z  
@HWI-EAS443:3:28:271:773#0/1  
GTGGATTACTGATCGTCTTTTTTCAAATGTATTTATCGT  
+HWI-EAS443:3:28:271:773#0/1  
a\_bZY`a`aYaa`aa]``aaaaa`\_R\_¥`S`\_a\_``a\_¥  
@HWI-EAS443:3:28:276:345#0/1  
TACATTTGAAAAAAGACGATCAGTAATCCACAATATCAG  
+HWI-EAS443:3:28:276:345#0/1  
a`bbabbba`a\_`aaaaaa^¥¥^WY`\_]a`]YU\_\_XYN  
@HWI-EAS443:3:28:281:810#0/1  
CTAGTGTGTGCCACTTGTGAACAGATTGCTGATTACAGC  
+HWI-EAS443:3:28:281:810#0/1  
a`]`^a`R`aaa`\_\_\_\_]`a^^a\_^`¥\_a`^^^`\_]\_\_\_\_  
@HWI-EAS443:3:28:341:1060#0/1  
GCTGCTTTTGGTCTAGTGTGTGCCACTTGTGAACAGATTG  
+HWI-EAS443:3:28:341:1060#0/1  
aa`aaaa`aa\_\_`a^\_Ua`\_U\_\_`\_]\_[\_][Z[¥\_\_\_\_¥\_\_  
@HWI-EAS443:3:28:346:470#0/1  
GCCTCATATACAACAGGATGGGAACAGTGACCACAGAAGC  
+HWI-EAS443:3:28:346:470#0/1  
aaaaaaa`aaaaa^aa\_\_```\_a\_a\_Y`a\_¥`^a\_^Y^]  
@HWI-EAS443:3:28:388:437#0/1  
GGGCCTCATATACAACAGGATGGGAACAGTGACCACAGAA  
+HWI-EAS443:3:28:388:437#0/1  
abaaaaabaaaaaaa`aaaaaaa`¥`Ya`\_``a`\_`\_`  
@HWI-EAS443:3:28:588:721#0/1  
CGCTGCATCTGCACTCCCATTCGCTTCTGGTAGCCTGCA

+HWI-EAS443:3:28:588:721#0/1  
abaabbbbaaba\_aaaaaaaaaaaaaaaaaaXW\_aa[\_`a`a  
@HWI-EAS443:3:28:589:2008#0/1  
GGCTAGCACTACGGCAAAGGCTATGGAACAGATGGCTGGA  
+HWI-EAS443:3:28:589:2008#0/1  
^^XNOVTRYba[Z\_][aV[RU^YLUJ¥VX[^PN¥BBBBB  
@HWI-EAS443:3:28:635:1526#0/1  
CAGTGACCACAGAAGCTGCTTTTGGTCTAGTGTGTGCCAC  
+HWI-EAS443:3:28:635:1526#0/1  
abb\_abbbbbbab]`b`]\_aa`^`V`¥a`^a¥a]\_`aaT  
@HWI-EAS443:3:28:644:492#0/1  
AAAAAGACGATCAGTAATCCACAATATCAGGTGCAAGATC  
+HWI-EAS443:3:28:644:492#0/1  
a```aaaaa¥WWYO^`QS¥ZG¥`0`WTTOQOUWX\_W[TS  
@HWI-EAS443:3:28:668:1055#0/1  
GTCCTGTTCCCATCCTGTTGTATATGAGGCCCATGCAAC  
+HWI-EAS443:3:28:668:1055#0/1  
`S\_aa]a``]^\_a\_Z]^`aaaX^]\_]Z[[X]POZ`a]T[  
@HWI-EAS443:3:28:751:622#0/1  
TGCCTGTTCACTCGATCCAGCCATCTGTTCCATAGCCTTT  
+HWI-EAS443:3:28:751:622#0/1  
`ba`¥`Sa]abSb\_^aX]aa`^`U^`U]\_¥\_ZZ\_¥X\_R^  
@HWI-EAS443:3:28:784:550#0/1  
CATTTGAAAAAAGACGATCAGTAATCCACAATATCAGGT  
+HWI-EAS443:3:28:784:550#0/1  
[^b`¥aU`a^¥bb`bb``]Y]Z\_XXXa`a^WZ\_K[¥[L  
@HWI-EAS443:3:28:870:1717#0/1  
TGGGCCTCATATACAACAGGATGGGAACAGTGACCACAGA  
+HWI-EAS443:3:28:870:1717#0/1  
[TO`b\_Q[^a\_a`\_b\_aba`X]]TXT]^[[[]¥X^S\_]\_\_  
@HWI-EAS443:3:28:91:971#0/1  
CAGCAATCTGTTCAAGTGGCACACACTAGACCAAAAGC  
+HWI-EAS443:3:28:91:971#0/1  
ababbbabab\_bbbbb]a^aa`a\_aaa``aaaaaaXa]a  
@HWI-EAS443:3:28:926:1660#0/1  
CGAGAGGATCACTTGAATCGCTGCATCTGCACTCCCATTC  
+HWI-EAS443:3:28:926:1660#0/1  
a^aab``aVaaa[[¥aa^`aZMQ[`WYZ\_XW\_Y\_^YYYQP  
@HWI-EAS443:3:28:957:293#0/1  
ATCCCAATGATATTTGCTGCAATGACGAGAGGATCACTTG  
+HWI-EAS443:3:28:957:293#0/1  
aY`aaaa]b\_aa\_¥]aYaaa\_]\_aa\_aa\_\_\_\_\_TW][V`¥[  
@HWI-EAS443:3:29:1053:1664#0/1  
ATCCCAATGATATTTGCTGCAATGACGAGAGGATCACTTG  
+HWI-EAS443:3:29:1053:1664#0/1  
aa[aa^\_ab`a`^X`[¥a[a^TY`Z`a`a^¥I]¥[bR\_B  
@HWI-EAS443:3:29:1138:1941#0/1  
ATGGGCCTCATATACAACAGGATGGGAACAGTGACCACAG  
+HWI-EAS443:3:29:1138:1941#0/1  
[`]b\_K\_aba`ab`a]bVLV`\_\_aabUa]X\_a``]Z]B



@HWI-EAS443:3:29:1190:1390#0/1  
ACATTTGAAAAAAGACGATCAGTAATCCACAATATCAGG  
+HWI-EAS443:3:29:1190:1390#0/1  
aabbbaabb¥¥^\_\_aaa\_\_SUF[\_T\_W[\_a]W\_^P¥V\_  
@HWI-EAS443:3:29:1320:1174#0/1  
ACCTGATATTGTGGATTACTGATCGTCTTTTTTTCAAATG  
+HWI-EAS443:3:29:1320:1174#0/1  
ababb`baaab]ba`aaa\_`aaa\_a]^aaaaaa`aaa``  
@HWI-EAS443:3:29:1323:148#0/1  
CCATTCTGTTTTCATGCCTGATTAGTGGATTGGTGGTAGT  
+HWI-EAS443:3:29:1323:148#0/1  
`bbbbabbbbb`a^b`abbabbaa`bbaabaa^aBBBBB  
@HWI-EAS443:3:29:1442:895#0/1  
AGGATCACTTGAATCGCTGCATCTGCACTCCCATTCGCTT  
+HWI-EAS443:3:29:1442:895#0/1  
[ba¥^V`ab]b`ab\_a\_`[[Y`¥[b^RZ[¥[\_[aa\_]U\_U  
@HWI-EAS443:3:29:1619:1226#0/1  
GGGCCTCATATACAACAGGATGGGAACAGTGACCACAGAA  
+HWI-EAS443:3:29:1619:1226#0/1  
abb^ababb^b\_babab]\_abbbbaa\_bbGaaa`U\_aa\_a  
@HWI-EAS443:3:29:1754:1115#0/1  
CGCTGCATCTGCACTCCCATTCGCTTCTGGTAGGCCTGCA  
+HWI-EAS443:3:29:1754:1115#0/1  
a`[\_b\_a`bbbaa`aaY\_\_aa\_b`Va]a]¥`ab\_TZa][  
@HWI-EAS443:3:29:1761:867#0/1  
GTGCCACTTGTGAACAGATTGCTGATTCACAGCATCGGTC  
+HWI-EAS443:3:29:1761:867#0/1  
`[^`a]¥`bbTW[^`]]\_`^`a\_]YWa¥¥\_S^\_Y^a\_`XBB  
@HWI-EAS443:3:29:488:421#0/1  
CTTTCCTGCAAAGACACTTTCCAGTCTCTGCGGATCTCG  
+HWI-EAS443:3:29:488:421#0/1  
ababaaaab¥T\_aa`aXaa`^a\_`¥a`a\_a`a\_XV^¥¥`  
@HWI-EAS443:3:29:491:329#0/1  
GCCTACCAGAAGCGAATGGGAGTGCAGATGCAGCGATTCA  
+HWI-EAS443:3:29:491:329#0/1  
`VbYQ][¥a¥YZYZPN\_[PKXN^RR^WRUURUW[BBBBB  
@HWI-EAS443:3:29:54:1398#0/1  
GGTGTCACTAAGCTATTCAACTGGTGCCTTGCCAGTTGC  
+HWI-EAS443:3:29:54:1398#0/1  
`¥WWZabb\_¥\_aa\_\_a`aa\_`aZRY]aaa`Y`b[UZZ]^`  
@HWI-EAS443:3:29:570:1766#0/1  
CTAGTGTGTGCCACTTGTGAACAGATTGCTGATTACAGC  
+HWI-EAS443:3:29:570:1766#0/1  
a\_a\_\_\_\_\_`^a`aa`\_`\_`W\_`\_`\_`a\_`¥¥¥^`\_]\_Wa`^`^^  
@HWI-EAS443:3:29:639:1227#0/1  
GAAGCTCAAAAGAGAAATAACGTTCCATGGGGCCAAGGAG  
+HWI-EAS443:3:29:639:1227#0/1  
aa`^aS¥V\_¥¥`¥TR¥abY]^`Q]aaa]WUZLaBBBBBBB  
@HWI-EAS443:3:29:639:683#0/1  
ATCCCAATGATATTTGCTGCAATGACGAGAGGATCACTTG

+HWI-EAS443:3:29:639:683#0/1  
LZbXa^XaaS^aab\_bQOW\_`ba[aZV]bbTOV^ZSYUS  
@HWI-EAS443:3:29:766:806#0/1  
CTATACAAGAAGCTCAAAGAGAAATAACGTTCCATGGGG  
+HWI-EAS443:3:29:766:806#0/1  
aa`aa``aaaa\_`\_`a`X\_\_\_\_\_`a`¥`^^V\_^^^Y]]  
@HWI-EAS443:3:29:822:496#0/1  
CTCAAAGAGAAATAACGTTCCATGGGGCCAAGGAGGTGT  
+HWI-EAS443:3:29:822:496#0/1  
`bbbaabb`ba`abaa\_a`a`aab]Va`aa\_a\_`aaYa^  
@HWI-EAS443:3:29:824:478#0/1  
CGCGCAGAGACTGGAAAGTGTCTTTGCAGGAAAGAACACA  
+HWI-EAS443:3:29:824:478#0/1  
a\_abbbb\_aabbaWabaaU`aa\_]^^`\_aaaa^\_¥^  
@HWI-EAS443:3:29:836:412#0/1  
AGATCCCAATGATATTTGCTGCAATGACGAGAGGATCACT  
+HWI-EAS443:3:29:836:412#0/1  
aba`¥Ya^\_abba^baab`aa]]`aa\_\_aaaa^`^\_a[^a  
@HWI-EAS443:3:29:842:941#0/1  
GGAACAGTGACCACAGAAGCTGCTTTTGGTCTAGTGTGTG  
+HWI-EAS443:3:29:842:941#0/1  
\_ababbbUb\_bbaaaabaaa`^aa]`]\_\_\_\_^\_X[^¥ZU  
@HWI-EAS443:3:29:847:35#0/1  
CACTAGACCAAAAGCAGCTTCTGTGGTCACTGTTCCCATC  
+HWI-EAS443:3:29:847:35#0/1  
aabbaba\_[`bbab^ab`\_`a\_a^GX]`aRT^^aa\_a\_\_U  
@HWI-EAS443:3:29:86:129#0/1  
GGGCTCATATACAACAGGATGGGAACAGTGACCACAGAA  
+HWI-EAS443:3:29:86:129#0/1  
]abbabbbbbbbaabaaaabb`aaaa\_aaaaaaaaa\_a  
@HWI-EAS443:3:29:885:1153#0/1  
AGCAATCTGTTCACAAGTGGCACACACTAGACCAAAAGCA  
+HWI-EAS443:3:29:885:1153#0/1  
Z]a^\_\_`Z¥¥`a`W`XQYV\_`a\_¥\_\_aaa\_\_¥¥\_`a^a  
@HWI-EAS443:3:29:957:22#0/1  
CAAGATCCCAATGATATTTGCTGCAATGACGAGAGGATCA  
+HWI-EAS443:3:29:957:22#0/1  
a\_aaaa^a^a`a^`\_\_aab\_a\_T]¥[`\_Ta\_a`^]SU[  
@HWI-EAS443:3:2:105:522#0/1  
GTGGATTACTGATCGTCTTTTTTCAAATGTATTTATCGT  
+HWI-EAS443:3:2:105:522#0/1  
a^aaaaaaaa\_a`\_`a¥^aaaaaaaaW\_a`\_a]`aa^\_\_W\_Z  
@HWI-EAS443:3:2:1104:1769#0/1  
AAGCGAATGGGAGTGCAGATGCAGCGATTCAAGTGATCCT  
+HWI-EAS443:3:2:1104:1769#0/1  
aVa]baa¥bb¥a\_¥a]ab\_\_bYaa\_a`a^\_a^^V]`\_LV]  
@HWI-EAS443:3:2:1116:432#0/1  
AAAAAGACGATCAGTAATCCACAATATCAGGTGCAAGAT  
+HWI-EAS443:3:2:1116:432#0/1  
aaaaa\_a`aa\_``Yaa`]a¥\_`\_\_`\_^\_^Y`S\_]`\_^

@HWI-EAS443:3:2:1248:1064#0/1  
ACAGATTGCTGATTCACAGCATCGGTCTCACAGACAGATG  
+HWI-EAS443:3:2:1248:1064#0/1  
a\_aa\_\_`a^^W^^]Y^WS\_^U]^XWTXXX[WWXSJSXB  
@HWI-EAS443:3:2:1262:104#0/1  
GATGCAGCGATTCAAGTGATCCTCTCGTCATTGCAGCAAA  
+HWI-EAS443:3:2:1262:104#0/1  
aaba`ab¥a`aa`aaa[bb`[]¥`a\_aZS\_`a\_\_]^L]^\_  
@HWI-EAS443:3:2:1324:437#0/1  
CAGTGACCACAGAAGCTGCTTTTGGTCTAGTGTGTGCCAC  
+HWI-EAS443:3:2:1324:437#0/1  
^aaN\_Z¥YWT`Z`a\_S¥`]W^^a]^N[Z\_`¥a¥a¥\_U^VR  
@HWI-EAS443:3:2:1426:106#0/1  
GTGAGACCGATGCTGTGAATCAGCAATCTGTTCAAGTG  
+HWI-EAS443:3:2:1426:106#0/1  
aXa`a\_\_Y\_\_\_\_X]^X]]`UX^]]X^U^^YYXXWYXUXX  
@HWI-EAS443:3:2:1457:1316#0/1  
ATCAGACTAGGCAGATGGTACATGCAATGAGAACTATTGG  
+HWI-EAS443:3:2:1457:1316#0/1  
ab\_aabWaaa`Z^a\_Yaa^Y\_\_`Qa[ZOU`^¥]^\_¥a¥L  
@HWI-EAS443:3:2:1757:980#0/1  
TGGGCCTCATATACAACAGGATGGGAACAGTGACCACAGA  
+HWI-EAS443:3:2:1757:980#0/1  
a\_^a^aa[^`a\_]Uba\_```b`\_aUYaP¥a\_[a\_\_S¥Ya^  
@HWI-EAS443:3:2:259:161#0/1  
TGGAAAGTGTCTTTGCAGGAAAGAACACAGATCTTGAGGC  
+HWI-EAS443:3:2:259:161#0/1  
^]ZJUXb[aNU\_[¥VLVUTSSUFWUXVOVB BBBB BBBB  
@HWI-EAS443:3:2:312:1915#0/1  
ACCAAAAGCAGCTTCTGTGGTCACTGTTCCCATCCTGTTG  
+HWI-EAS443:3:2:312:1915#0/1  
a\_\_\_\_]\_¥WY^`UYX\_RSY¥\_PSSVUVW]YYVVQJNY]]B  
@HWI-EAS443:3:2:326:1551#0/1  
ATACAAGAAGCTCAAAGAGAAATAACGTTCCATGGGGCC  
+HWI-EAS443:3:2:326:1551#0/1  
aab\_`aa`a`a`]Taaaa`a\_a^aaU^Y^[]\_\_\_\_\_^`Z  
@HWI-EAS443:3:2:375:1125#0/1  
CAAGTGGCACACACTAGACCAAAGCAGCTTCTGTGGTCA  
+HWI-EAS443:3:2:375:1125#0/1  
abab`bb¥baaaa\_\_`aa]\_aaSaaaaZ^\_^``¥\_aSV\_  
@HWI-EAS443:3:2:382:297#0/1  
GGGAGTGCAGATGCAGCGATTCAAGTGATCCTCTCGTCAT  
+HWI-EAS443:3:2:382:297#0/1  
a^`WaW`¥Z^^¥WQ¥WTaWYYYWYUWW¥WYWYWWYWTYW  
@HWI-EAS443:3:2:409:1714#0/1  
CATGGGGCCAAGGAGGTGTCACTAAGCTATTCAACTGGTG  
+HWI-EAS443:3:2:409:1714#0/1  
ababbaa\_abb\_aaa`b`b`aba]Uaaaa]aa\_^Z¥a  
@HWI-EAS443:3:2:535:780#0/1  
GGCCTCATATACAACAGGATGGGAACAGTGACCACAGAAG

+HWI-EAS443:3:2:535:780#0/1  
aa^[a\_aaaaaa\_`\_a`\_`a`a\_]\_`¥\_`¥Z^T`^¥¥¥  
@HWI-EAS443:3:2:540:115#0/1  
ACCTTCTTGAAAATTTGCAGGCCTACCAGAAGCGAATGGG  
+HWI-EAS443:3:2:540:115#0/1  
\_\_`\_`a\_^`a\_\_\_¥R`^`\_]aa\_R]a\_]`¥U[`Y^Y^UaBB  
@HWI-EAS443:3:2:688:737#0/1  
GGATCTTGCACCTGATATTGTGGATTACTGATCGTCTTTT  
+HWI-EAS443:3:2:688:737#0/1  
ababaaba\_a^aaa\_a^a\_`[ab\_aaaaaa`0a^¥a`a`  
@HWI-EAS443:3:2:699:723#0/1  
AGCGAATGGGAGTGCAGATGCAGCGATTCAAGTGATCCTC  
+HWI-EAS443:3:2:699:723#0/1  
[a^)`baZQ`PYSa\_] [VV] [\_T¥JVXNY¥STZBBBBBB  
@HWI-EAS443:3:2:74:1705#0/1  
TCTGCACTCCCATTGCTTCTGGTAGGCCTGCAAATTTTC  
+HWI-EAS443:3:2:74:1705#0/1  
`\_]\_^)`aa[\_`aX[aa\_]YPT\_]Z[\_^^`\_`¥^[^N  
@HWI-EAS443:3:2:758:97#0/1  
GACCTTCTTGAAAATTTGCAGGCCTACCAGAAGCGAATGG  
+HWI-EAS443:3:2:758:97#0/1  
abababbbbababbababb\_baa^aa[aaa`\_`a^b\_\_bba  
@HWI-EAS443:3:2:954:1092#0/1  
GGGAACAGTGACCACAGAAGCTGCTTTTGGTCTAGTGTGT  
+HWI-EAS443:3:2:954:1092#0/1  
ab\_U`¥R¥P\_a[ZY]\_[aaYTZa¥UXZ¥Q\_PPT¥SQBBBB  
@HWI-EAS443:3:30:109:1385#0/1  
AATCGCTGCATCTGCACTCCCATTGCTTCTGGTAGGCCT  
+HWI-EAS443:3:30:109:1385#0/1  
abaaV`\_`abaab\_aaaa\_b\_a\_\_\_`\_`^Z`¥UMU\_^T[WS  
@HWI-EAS443:3:30:1115:311#0/1  
AAAAAAGACGATCAGTAATCCACAATATCAGGTGCAAGAT  
+HWI-EAS443:3:30:1115:311#0/1  
abbbbbbbabba^a`¥aaRSW\_N]a^^ZVX^YH^T[\_VVQ  
@HWI-EAS443:3:30:1251:2042#0/1  
GGGAGTGCAGATGCAGCGATTCAAGTGATCCTCTCGTCAT  
+HWI-EAS443:3:30:1251:2042#0/1  
¥\_ba`\_]UZ^bZ\_[a\_S^a[V[`\_`S[a\_]S]^\_X^XYU^  
@HWI-EAS443:3:30:1318:708#0/1  
GCACCTGATATTGTGGATTACTGATCGTCTTTTTTTTCAAA  
+HWI-EAS443:3:30:1318:708#0/1  
aa\_`\_aaba\_`ba`a¥\_ab`\_a`¥^\_\_¥`aa`aaba^\_^`  
@HWI-EAS443:3:30:1322:125#0/1  
CACAAATCCTAAAATTCCTTAGTCAGAGGTGACAAGATT  
+HWI-EAS443:3:30:1322:125#0/1  
abab\_X`aaba\_aaaa`\_`\_\_\_\_\_¥¥^Z^`¥U\_¥XUW]WWX  
@HWI-EAS443:3:30:1353:517#0/1  
CGTCTTTTTTTCAAATGTATTTATCGTCGCTTTAAATACG  
+HWI-EAS443:3:30:1353:517#0/1  
Xb`bba^b`a\_\_W`bb`]aabaa¥HY`ab`bbb¥\_^abWa



+HWI-EAS443:3:30:617:1478#0/1  
aa\_\_\_aaa^]W`Y]a`b`\_`a``aaa]]Z¥Z[ZL]`[X¥¥  
@HWI-EAS443:3:30:621:1151#0/1  
ACAGAAGCTGCTTTTGGTCTAGTGTGTGCCACTTGTGAAC  
+HWI-EAS443:3:30:621:1151#0/1  
ab^\_QW`b`^a\_]¥Z]¥aaa\_¥`^a]a`a`a`\_`\_]`\_`  
@HWI-EAS443:3:30:621:806#0/1  
CAGCCATCTGTTCCATAGCCTTTGCCGTAGTGCTAGCCAG  
+HWI-EAS443:3:30:621:806#0/1  
ab`baaaaaa\_aaaa¥`\_aa]X^^`\_\_¥]¥V`\_`¥`\_¥¥W¥  
@HWI-EAS443:3:30:665:381#0/1  
ACCTGATATTGTGGATTACTGATCGTCTTTTTTTCAAATG  
+HWI-EAS443:3:30:665:381#0/1  
abbaa]]^¥aa¥aaa[a`¥a`RY\_aQ`\_]aaaa^[\_`\_`S`  
@HWI-EAS443:3:30:674:270#0/1  
CAATCTTGTCACCTCTGACTAAGGGAATTTTAGGATTTGT  
+HWI-EAS443:3:30:674:270#0/1  
a`^^`[T^b\_\_[\_`I[^a\_aaa\_`ZYa^[\_`a`V`\_`^a^\_Z  
@HWI-EAS443:3:30:80:475#0/1  
GTGACCACAGAAGCTGCTTTTGGTCTAGTGTGTGCCACTT  
+HWI-EAS443:3:30:80:475#0/1  
a¥`W\_\_X\_\_RR]]¥a¥]X[¥UYO0XXTHLZXS]\_VXULV  
@HWI-EAS443:3:30:83:1215#0/1  
AGACTGGAAAGTGTCTTTGCAGGAAAGAACACAGATCTTG  
+HWI-EAS443:3:30:83:1215#0/1  
aaaaaa`a^Z`]a^a`\_\_`\_\_`\_\_`\_`\_\_a\_\_\_\_\_^Y`]^]  
@HWI-EAS443:3:30:860:1457#0/1  
CGTCTTTTTTTCAAATGTATTTATCGTCGCTTTAAATACG  
+HWI-EAS443:3:30:860:1457#0/1  
a`\_aaaabaa``aa`^a[\_`aaaa`a\_^]\_^\_\_``a^\_^W]  
@HWI-EAS443:3:30:940:1607#0/1  
GACCGATGCTGTGAATCAGCAATCTGTTCAAGTGGCAC  
+HWI-EAS443:3:30:940:1607#0/1  
abbaab`aba```baaba`baaaba\_a\_aaab\_R`^\_aa  
@HWI-EAS443:3:31:1028:1005#0/1  
TTCGGGTCCCCATTCCCATTTAGGGCATTTTGGACAAAGC  
+HWI-EAS443:3:31:1028:1005#0/1  
]YN]^`^Y¥\_ZZ\_ZZ^^[^¥`ZXV\_[ZaT]ZXW`\_`Xa]¥[P  
@HWI-EAS443:3:31:1183:1831#0/1  
GTGACCACAGAAGCTGCTTTTGGTCTAGTGTGTGCCACTT  
+HWI-EAS443:3:31:1183:1831#0/1  
a\_¥I¥a`¥[a¥PNYU¥TPX[XPVU^]^RPRMWPVVXWVY  
@HWI-EAS443:3:31:1363:1596#0/1  
TGGAGTTGCTAATCAGACTAGGCAGATGGTACATGCAAT  
+HWI-EAS443:3:31:1363:1596#0/1  
]UXa\_\_G`\_]\_]Q\_QZ¥¥^VZ[[¥UZXNT\_\_JNL]SUH]XV  
@HWI-EAS443:3:31:1393:1213#0/1  
CAGTGACCACAGAAGCTGCTTTTGGTCTAGTGTGTGCCAC  
+HWI-EAS443:3:31:1393:1213#0/1  
aba^abba`baaaaaaa`^\_\_a^^X\_\_\_\_`U\_]X`^^\_R

@HWI-EAS443:3:31:145:1340#0/1  
GTTCCGGTCCCCATTCCCATTTAGGGCATTGACAAAAG  
+HWI-EAS443:3:31:145:1340#0/1  
[GN\_WX\_M\_`\_`TW\_\_^a\_U[RYSWY]RPVVSZZ[IRRY  
@HWI-EAS443:3:31:14:126#0/1  
AGATCCCAATGATATTTGCTGCAATGACGAGAGGATCACT  
+HWI-EAS443:3:31:14:126#0/1  
aa\_aaaa\_aaa`\_aa\_\_`^^`\_^\_\_`^^`¥\_] ^SVSWT]  
@HWI-EAS443:3:31:1576:658#0/1  
TGGAGTTGCTAATCAGACTAGGCAGATGGTACATGCAAT  
+HWI-EAS443:3:31:1576:658#0/1  
`aaaab¥a`^a\_aa\_\_`Z\_VaXXUa]^`¥^X¥\_\_W\_^Z  
@HWI-EAS443:3:31:1596:1383#0/1  
TGGGCCTCATATACAACAGGATGGGAACAGTGACCACAGA  
+HWI-EAS443:3:31:1596:1383#0/1  
]¥\_[`bbbaa\_a`ba`bb`bbbbaaaabaa`X]aaa`  
@HWI-EAS443:3:31:1662:1735#0/1  
TACTGATCGTCTTTTTTCAAATGTATTTATCGTCGCTTT  
+HWI-EAS443:3:31:1662:1735#0/1  
ababbaaab`abaaaaa`a`aaa\_aaaaaa¥\_\_`\_^aa\_  
@HWI-EAS443:3:31:1778:1251#0/1  
TGATCGTCTTTTTTCAAATGTATTTATCGTCGCTTTAAA  
+HWI-EAS443:3:31:1778:1251#0/1  
aba`ab`abbbabba\_aaaa]¥ab`\_aa`\_`a`\_`a\_]X  
@HWI-EAS443:3:31:196:372#0/1  
TGTGAATCAGCAATCTGTTCAAGTGGCACACACTAGAC  
+HWI-EAS443:3:31:196:372#0/1  
ab¥ba\_aba\_bba`a`\_`\_a\_a\_a\_¥]^]\_\_`\_]\_\_\_\_X  
@HWI-EAS443:3:31:261:614#0/1  
GGAACAGTGACCACAGAAGCTGCTTTTGGTCTAGTGTGTG  
+HWI-EAS443:3:31:261:614#0/1  
SaXWUaW¥aa[^`^^`b`^\_bZWW]Z]^`^b]¥JU¥NR[V  
@HWI-EAS443:3:31:278:109#0/1  
CATGGGCCTCATATACAACAGGATGGGAACAGTGACCACA  
+HWI-EAS443:3:31:278:109#0/1  
\_\_¥Z`]aab`X\_`[]U\_aR^]0[\_aa[FWYSXG\_]\_^`¥[  
@HWI-EAS443:3:31:376:305#0/1  
ACTCGATCCAGCCATCTGTTCCATAGCCTTTGCCGTAGTG  
+HWI-EAS443:3:31:376:305#0/1  
aa`aaa`^a`Y¥`X¥^`\_Z\_\_\_\_Z^[^`\_¥¥Y¥\_¥SWTSW  
@HWI-EAS443:3:31:468:311#0/1  
AAGATCCCAATGATATTTGCTGCAATGACGAGAGGATCAC  
+HWI-EAS443:3:31:468:311#0/1  
aabaab`ba`a`aa`a`^^`a^aa`a`a\_\_\_\_\_a^\_\_W[[]Z  
@HWI-EAS443:3:31:572:346#0/1  
GTGGCACACACTAGACCAAAGCAGCTTCTGTGGTCACTG  
+HWI-EAS443:3:31:572:346#0/1  
a`]R]baaa]^`\_]Z\_a`^]\_`¥[`[XU¥^X^BBBB  
@HWI-EAS443:3:31:59:922#0/1  
GAATCAGCAATCTGTTCAAGTGGCACACACTAGACCAA

+HWI-EAS443:3:31:59:922#0/1  
abbbbbbb`aaaa`a`a`a`^`\_`aaaa`a\_a\_aa`a`  
@HWI-EAS443:3:31:607:705#0/1  
GGGCCTCATATACAACAGGATGGGAACAGTGACCACAGAA  
+HWI-EAS443:3:31:607:705#0/1  
aaaabaaaaaaaa\_aa`aa`\_`aa\_S\_a\_[¥`\_a¥`\_[S^  
@HWI-EAS443:3:31:633:979#0/1  
AGTGCAGATGCAGCGATTCAAGTGATCCTCTCGTCATTGC  
+HWI-EAS443:3:31:633:979#0/1  
a^¥ab\_¥`\_aaaa`a`\_\_`\_]VW\_W^`¥[\_`\_\_X`^`\_]^U  
@HWI-EAS443:3:31:685:549#0/1  
CAGTAATCCACAATATCAGGTGCAAGATCCCAATGATATT  
+HWI-EAS443:3:31:685:549#0/1  
ababbabb`babaabaaaaZaabaaaaaba`\_aaaa^\_  
@HWI-EAS443:3:31:717:547#0/1  
ACCTGATATTGTGGATTACTGATCGTCTTTTTTTCAAATG  
+HWI-EAS443:3:31:717:547#0/1  
aab^[[[]]Z^aXY)`¥\_]L]XWYQY\_\_[a\_\_`a^Z\_WXYZ  
@HWI-EAS443:3:31:721:1560#0/1  
CACTCCCATTGCTTCTGGTAGGCCTGCAAATTTTCAAGA  
+HWI-EAS443:3:31:721:1560#0/1  
aababa`\_a`a]aaa^`^V¥\_]X`^a¥a`^¥\_\_^\_a\_R`  
@HWI-EAS443:3:31:809:1075#0/1  
GGTTGCTAATCAGACTAGGCAGATGGTACATGCAATGAGA  
+HWI-EAS443:3:31:809:1075#0/1  
a\_S¥ab`aa]W\_aa^Sa\_a\_\_\_^`\_S\_ZYZ\_\_`\_SYY^]  
@HWI-EAS443:3:31:854:1834#0/1  
GGTGTCACTAAGCTATTCAACTGGTGCCTTGCCAGTTGC  
+HWI-EAS443:3:31:854:1834#0/1  
abP^`bbaabbbabb`bbb`Z[Z\_aaaba`\_`abZVU\_\_`  
@HWI-EAS443:3:31:87:916#0/1  
GGCCTACCAGAAGCGAATGGGAGTGCAGATGCAGCGATTC  
+HWI-EAS443:3:31:87:916#0/1  
aababNbb\_aababb`abbaaaaXaa`\_a`]aaa`\_JV^Z  
@HWI-EAS443:3:31:917:1885#0/1  
CGTCATTGCAGCAAATATCATTGGGATCTTGACCTGATA  
+HWI-EAS443:3:31:917:1885#0/1  
abZ^ba[bbaaab```^]`YZXQTMT[XUX¥^XUNZ`^^]  
@HWI-EAS443:3:31:955:477#0/1  
CAAGTGGCACACACTAGACCAAAGCAGCTTCTGTGGTCA  
+HWI-EAS443:3:31:955:477#0/1  
¥\_\_ZY\_a^a`babbaZ\_Uaaaababb`aa\_SXbZR^XXM  
@HWI-EAS443:3:31:981:118#0/1  
ATCTGTTCACAAGTGGCACACACTAGACCAAAGCAGCTT  
+HWI-EAS443:3:31:981:118#0/1  
S¥a¥b`\_ba[babYbb``\_ba]aaa`[ZZ^a\_aaaaVa^  
@HWI-EAS443:3:32:1046:1631#0/1  
GATCAGTAATCCACAATATCAGGTGCAAGATCCCAATGAT  
+HWI-EAS443:3:32:1046:1631#0/1  
¥`\_`abaabababbabb`bbabb^U`bbb^bababbbbbb



@HWI-EAS443:3:32:1113:549#0/1  
AGTTCTCATTGCATGTACCATCTGCCTAGTCTGATTAGCA  
+HWI-EAS443:3:32:1113:549#0/1  
ab¥Z^^]`\_RUZUZZ`W[a\_YXQWFQ¥WRIS[]XTWJWZ`  
@HWI-EAS443:3:32:1139:1700#0/1  
GATCTTGCACCTGATATTGTGGATTACTGATCGTCTTTTT  
+HWI-EAS443:3:32:1139:1700#0/1  
¥`bbbb\_babb\_abab`baWaaa`abXa\_aa^b^aaaa\_a  
@HWI-EAS443:3:32:116:691#0/1  
CAAAAGCAGCTTCTGTGGTCACTGTTCCCATCCTGTTGTA  
+HWI-EAS443:3:32:116:691#0/1  
^WM¥X[¥U\_a]Y\_Y]TUVQZ¥]VYNR^\_¥¥XXVQOONWMB  
@HWI-EAS443:3:32:1182:1784#0/1  
GAACAGTGACCACAGAAGCTGCTTTTGGTCTAGTGTGTGC  
+HWI-EAS443:3:32:1182:1784#0/1  
abb`^]\_aba\_a`b\_a`\_]`[¥X¥[\_[]U[\_\_\_ZWZWXN[Y  
@HWI-EAS443:3:32:1204:88#0/1  
TGCAGGCCTACCAGAAGCGAATGGGAGTGCAGATGCAGCG  
+HWI-EAS443:3:32:1204:88#0/1  
`baabbaaa]]^b\_]b]a^]aa\_a¥a¥aP^^¥^\_U`^a  
@HWI-EAS443:3:32:1237:86#0/1  
GGCCTCATATACAACAGGATGGGAACAGTGACCACAGAAG  
+HWI-EAS443:3:32:1237:86#0/1  
aa`VVS\_SaVVJS\_Q\_Wa`¥\_Z[`SZPSP\_`QTV\_WZQRZ  
@HWI-EAS443:3:32:1339:1482#0/1  
CTTGAATCGCTGCATCTGCACTCCCATTGCTTCTGGTAG  
+HWI-EAS443:3:32:1339:1482#0/1  
a¥\_\_U`^`\_aS[Ua]QH]]¥`¥aa`YOXV`aXTV\_[^R¥Z  
@HWI-EAS443:3:32:1361:1307#0/1  
GCCTCATATACAACAGGATGGGAACAGTGACCACAGAAGC  
+HWI-EAS443:3:32:1361:1307#0/1  
a`a`baa`ba`ba`a`aXaaa`\_]`a]`\_[Z\_Ua\_a`^`^  
@HWI-EAS443:3:32:1392:692#0/1  
CAAGATCTGTGTTCTTTCCTGCAAAGACACTTTCAGTCT  
+HWI-EAS443:3:32:1392:692#0/1  
a\_\_\_U¥`]b`\_Zaabaa`aab`\_\_aZV]¥a[aV`Ya^\_a  
@HWI-EAS443:3:32:1550:1812#0/1  
AAATATCATTGGGATCTTGCACCTGATATTGTGGATTACT  
+HWI-EAS443:3:32:1550:1812#0/1  
aba^aaaaa`\_`a\_\_\_a\_a[\_a[\_a]\_\_`^`Y`X¥^aa\_\_  
@HWI-EAS443:3:32:1583:870#0/1  
CAGTAATCCACAATATCAGGTGCAAGATCCCAATGATATT  
+HWI-EAS443:3:32:1583:870#0/1  
aab`bbbbbabababaaabba^baaaaaa^[\_abab\_aabb  
@HWI-EAS443:3:32:1670:681#0/1  
CAGCAATCTGTTCAAGTGGCACACACTAGACCAAAAGC  
+HWI-EAS443:3:32:1670:681#0/1  
aaa¥baaaaaZaXa`^aUNZ][aXWV]X`Oa¥aV[¥aaaU  
@HWI-EAS443:3:32:1688:1023#0/1  
GTGGATTACTGATCGTCTTTTTTTTCAAATGTATTTATCGT

+HWI-EAS443:3:32:1688:1023#0/1  
a`a^`aaa¥]U[`]\_V¥]¥]^aa`¥]a`\_`^`a^aXa[X]  
@HWI-EAS443:3:32:177:1097#0/1  
CACTAGACCAAAAGCAGCTTCTGTGGTCACTGTTCCCATC  
+HWI-EAS443:3:32:177:1097#0/1  
aba\_`aabbb]KS^b`baa`a]¥[`]a`^`^IS]^`aaZB  
@HWI-EAS443:3:32:199:2000#0/1  
GTGCAGATGCAGCGATTCAAGTGATCCTCTCGTCATTGCA  
+HWI-EAS443:3:32:199:2000#0/1  
a\_aa^\_a[\_aaaa\_^]\_`a[¥Z[Y]\_\_\_\_^^]Y^\_\_VV]P  
@HWI-EAS443:3:32:210:703#0/1  
GACCGATGCTGTGAATCAGCAATCTGTTCAAGTGGCAC  
+HWI-EAS443:3:32:210:703#0/1  
abaaa]\_aa`¥^aaa\_a]\_a\_`\_[\_\_Y]a\_^\_]U[W\_\_`  
@HWI-EAS443:3:32:265:1951#0/1  
GCCTCATATACAACAGGATGGGAACAGTGACCACAGAAGC  
+HWI-EAS443:3:32:265:1951#0/1  
`bbbbbbbabbbbbbba`a\_aaaab\_a`V\_baaa\_a\_]\_Yb  
@HWI-EAS443:3:32:362:294#0/1  
ACCAATCTTGTCACCTCTGACTAAGGGAATTTTAGGATTT  
+HWI-EAS443:3:32:362:294#0/1  
aaaaaa\_`a`a\_^`^aa]`\_\_^]]\_^^]]^ZXT\_]Z  
@HWI-EAS443:3:32:471:1781#0/1  
CGTCTTTTTTCAAATGTATTTATCGTCGCTTTAAATACG  
+HWI-EAS443:3:32:471:1781#0/1  
^GXa\_`Y`¥`b`a^Z]L\_`^`\_¥]\_Z¥\_`\_¥]]\_`^X`X  
@HWI-EAS443:3:32:477:458#0/1  
GGGGCCAAGGAGGTGTCCTAAGCTATTCAACTGGTGCAC  
+HWI-EAS443:3:32:477:458#0/1  
ab`aaa`W`aba\_baabaaaaaaaa`^^`¥^\_\_U\_\_a¥  
@HWI-EAS443:3:32:47:796#0/1  
GTCCTAAGCTATTCAACTGGTGCCTTGCCAGTTGCATG  
+HWI-EAS443:3:32:47:796#0/1  
a\_abaa]\_aa`[a`aaaa\_\_`U\_`\_`\_\_a\_Y0[]\_\_a\_^]  
@HWI-EAS443:3:32:545:739#0/1  
AAACTATACAAGAAGCTCAAAGAGAAATAACGTTCCATG  
+HWI-EAS443:3:32:545:739#0/1  
aaa`aa\_a\_`aaaYa^`^`\_`^\_]a]]^`]Z\_^XZ\_]Z  
@HWI-EAS443:3:32:587:1965#0/1  
AATAGTTCTCATTGCATGTACCATCTGCCTAGTCTGATTA  
+HWI-EAS443:3:32:587:1965#0/1  
aa^ZRQ[``a]ZUN`b\_a0aaaaZTY\_a\_X^UUX\_GWQQY  
@HWI-EAS443:3:32:60:1840#0/1  
CGCGCAGAGACTGGAAAGTGTCTTTGCAGGAAAGAACACA  
+HWI-EAS443:3:32:60:1840#0/1  
aa`V^^[ `[Z\_`\_\_\_\_`¥VU¥Z`VUSSZSRVR[KP¥^]R¥N  
@HWI-EAS443:3:32:611:267#0/1  
AGCGATTCAAGTGATCCTCTCGTCATTGCAGCAAATATCA  
+HWI-EAS443:3:32:611:267#0/1  
ZT\_YZ[0]WZ]¥¥\_]\_]UWZ]W¥TMP[ [¥MYOWFLLQ\_B

@HWI-EAS443:3:32:667:1472#0/1  
GGAGTGCAGATGCAGCGATTCAAGTGATCCTCTCGTCATT  
+HWI-EAS443:3:32:667:1472#0/1  
aaSUG\_XUNN^`\_\_aX[QRNXX]RNR]UYYX^U¥WBBBBB  
@HWI-EAS443:3:32:800:429#0/1  
TGGAGCTAGGATGAGTCCCAATAGTTCTCATTGCATGTAC  
+HWI-EAS443:3:32:800:429#0/1  
aabaaa`a`aaaa`a^aa`aaaaaaa`baaaa`[baa\_ba  
@HWI-EAS443:3:32:838:397#0/1  
GTCCCCATTCCCATTTAGGGCATTGGACAAAGCGTCTA  
+HWI-EAS443:3:32:838:397#0/1  
a^a`aaaaaa`a\_aaaaa`\_\_\_aaaaaaV````\_a[F[`a  
@HWI-EAS443:3:32:839:1095#0/1  
CTCATATACAACAGGATGGGAACAGTGACCACAGAAGCTG  
+HWI-EAS443:3:32:839:1095#0/1  
abbabaaabbbaaab]aaaa\_aaa`^aaa`a`aaba``\_`^  
@HWI-EAS443:3:32:936:1264#0/1  
CAGCAATCTGTTCAAGTGGCACACACTAGACCAAAAGC  
+HWI-EAS443:3:32:936:1264#0/1  
¥YVX`IW]`\_¥Xaa¥R[\_ZJVS]XX`MLJZLSQRTNTTLX  
@HWI-EAS443:3:33:1022:875#0/1  
GCTGCATCTGCACTCCCATTGCTTCTGGTAGGCCTGCAA  
+HWI-EAS443:3:33:1022:875#0/1  
abababababaaaaab`a`a`a`a`a`[\_[ZFH]\_\_^^\_[  
@HWI-EAS443:3:33:1057:1740#0/1  
ATCCCAATGATATTTGCTGCAATGACGAGAGGATCACTTG  
+HWI-EAS443:3:33:1057:1740#0/1  
ZSb\_aX\_IN]]^aaa`b[PMT]^ZYN¥`V[LGPZ\_WT\_  
@HWI-EAS443:3:33:1065:327#0/1  
GTGTTCTTTCTGCAAAGACACTTTCCAGTCTCTGCGCGA  
+HWI-EAS443:3:33:1065:327#0/1  
`T\_``aaaa^¥^ZV¥``[aXaX]YXXU]¥YZ[P[YUUTTT  
@HWI-EAS443:3:33:1076:1722#0/1  
TGTGAATCAGCAATCTGTTCAAGTGGCACACACTAGAC  
+HWI-EAS443:3:33:1076:1722#0/1  
aaaabbbb`\_abb`bb``\_baba``\_aVa¥XDYV`a^a\_  
@HWI-EAS443:3:33:1080:1534#0/1  
GATCACTTGAATCGCTGCATCTGCACTCCCATTGCTTCT  
+HWI-EAS443:3:33:1080:1534#0/1  
aaabbbabbaaaa``\_abaaa`[aaa`a]Y]`W¥Z¥`Y\_¥  
@HWI-EAS443:3:33:1091:958#0/1  
GCTGCAATGACGAGAGGATCACTTGAATCGCTGCATCTGC  
+HWI-EAS443:3:33:1091:958#0/1  
ababbabbbbbaaaaaa`\_a`\_aaaa`^a`¥V[\_\_\_^¥`[  
@HWI-EAS443:3:33:1197:1086#0/1  
TTGTGGATTACTGATCGTCTTTTTTTCAAATGTATTTATC  
+HWI-EAS443:3:33:1197:1086#0/1  
abbab`a]\_\_aa`\_a]aa`aaaaYLZ]\_^aXZ````^¥  
@HWI-EAS443:3:33:1236:36#0/1  
GGCCTCATATACAACAGGATGGGAACAGTGACCACAGAAG

+HWI-EAS443:3:33:1236:36#0/1  
\_`\_`bbbbbbba`babbbabbbb]a\_SaYaa[G[¥aa\_\_]  
@HWI-EAS443:3:33:1264:1667#0/1  
GAGGTTGCTAATCAGACTAGGCAGATGGTACATGCAATGA  
+HWI-EAS443:3:33:1264:1667#0/1  
\_`^aaVZ¥b```¥]¥W\_RVU]]Z^YXZW¥FX]YL[S[\_Y[[  
@HWI-EAS443:3:33:1297:1754#0/1  
CAGGATGGGAACAGTGACCACAGAAGCTGCTTTTGGTCTA  
+HWI-EAS443:3:33:1297:1754#0/1  
a` `babb`baabaa^aba`a\_aaaa`Ua`¥^`G^X`^W¥\_  
@HWI-EAS443:3:33:1330:1228#0/1  
GCCTCATATACAACAGGATGGGAACAGTGACCACAGAAGC  
+HWI-EAS443:3:33:1330:1228#0/1  
^X^YT\_]a]aZOS]UUTU[VX\_R¥ZPRZU¥XGNPYNQUSD  
@HWI-EAS443:3:33:1356:963#0/1  
GGGCCTCATATACAACAGGATGGGAACAGTGACCACAGAA  
+HWI-EAS443:3:33:1356:963#0/1  
a[\_`\_ZU`\_`\_\_\_N\_Y^SaaRZ\_`]P`TS[Q¥WT¥WZZ¥WN  
@HWI-EAS443:3:33:1437:801#0/1  
GTGCACCAGTTGAATAGCTTAGTGACACCTCCTTGGCCCC  
+HWI-EAS443:3:33:1437:801#0/1  
a\_a\_a`\_`\_a`bbaaaaa`aaa\_\_\_`\_\_\_]a\_YX^X]]XRX  
@HWI-EAS443:3:33:1587:973#0/1  
AGATCCCAATGATATTTGCTGCAATGACGAGAGGATCACT  
+HWI-EAS443:3:33:1587:973#0/1  
aaaaaaaaaaaaa`aaaa\_aa]a\_`a]^a`a\_Y]Y]X^X\_  
@HWI-EAS443:3:33:1624:190#0/1  
GAAAGATGACCTTCTTAAAAATTTGCAGGCCTACCAGAAG  
+HWI-EAS443:3:33:1624:190#0/1  
`\_bbabaaa` `bbaabaaaaaaaaa\_a\_\_[aQWV^`¥\_a  
@HWI-EAS443:3:33:189:1661#0/1  
GACGATAAATACATTTGAAAAAAGACGATCAGTAATCCA  
+HWI-EAS443:3:33:189:1661#0/1  
Z\_¥aZ`a\_b`b`Z^^¥W\_¥aa`\_¥X`¥bb¥b[¥[`^[\_`\_b  
@HWI-EAS443:3:33:31:1756#0/1  
GCTGCTTTTGGTCTAGTGTGTGCCACTTGTGAACAGATTG  
+HWI-EAS443:3:33:31:1756#0/1  
^`babbab\_baabbbbaaaa`ba^abaabaa]aabaaaa]  
@HWI-EAS443:3:33:325:1467#0/1  
TGGGCCTCATATACAACAGGATGGGAACAGTGACCACAGA  
+HWI-EAS443:3:33:325:1467#0/1  
a\_Z^bbbbbbbabba\_baa`a`a`¥^aba`Va\_a\_\_\_a\_b  
@HWI-EAS443:3:33:391:570#0/1  
AGGATGAGTCCCAATAGTTCTCATTGCATGTACCATCTGC  
+HWI-EAS443:3:33:391:570#0/1  
aa\_\_aaaa\_```[]\_`^a^`a\_`a`\_\_^^``W`YY]^`\_\_^  
@HWI-EAS443:3:33:403:403#0/1  
GAAAGATGACCTTCTTAAAAATTTGCAGGCCTACCAGAAG  
+HWI-EAS443:3:33:403:403#0/1  
\_S\_a^P]U\_aa` `a`aa\_P^^\_`^`aa^¥a\_^[[PY\_Y[^

@HWI-EAS443:3:33:423:316#0/1  
GGGCCTCATATACAACAGGATGGGAACAGTGACCACAGAA  
+HWI-EAS443:3:33:423:316#0/1  
aa\_a`aba\_aa\_aaa`]\_\_^\_\_a\_^a¥`\_U¥^S^¥WY^W¥  
@HWI-EAS443:3:33:467:893#0/1  
ACACACTAGACCAAAAGCAGCTTCTGTGGTCACTGTTCCC  
+HWI-EAS443:3:33:467:893#0/1  
¥]a]aa`\_JUZ`ZaZY]]V¥`¥\_[^XYUUGXZUBBBBBBB  
@HWI-EAS443:3:33:695:885#0/1  
CTCATATACAACAGGATGGGAACAGTGACCACAGAAGCTG  
+HWI-EAS443:3:33:695:885#0/1  
aa`W\_a\_]¥`\_^QTYXX[X\_]X¥LXaUQYRUTQV^^UR  
@HWI-EAS443:3:33:704:1397#0/1  
ATGATATTTGCTGCAATGACGAGAGGATCACTTGAATCGC  
+HWI-EAS443:3:33:704:1397#0/1  
a`bbaa`a`a\_aaaa]`\_aa`\_\_\_\_\_]]^\_[\_¥\_]`\_  
@HWI-EAS443:3:33:770:625#0/1  
CAGACTAGGCAGATGGTACATGCAATGAGAACTATTGGGA  
+HWI-EAS443:3:33:770:625#0/1  
aa]\_b\_YUa`M`\_\_bbQaW\_Y^P]UWU`UaaQT\_]VZa¥¥  
@HWI-EAS443:3:33:778:1493#0/1  
CAAATATCATTGGGATCTTGCACCTGATATTGTGGATTAC  
+HWI-EAS443:3:33:778:1493#0/1  
[Ua^YOPb`a\_aRW\_\_aWZ¥\_Z`Z^a[``a`ZL]\_¥W]\_^  
@HWI-EAS443:3:33:794:1005#0/1  
TGCAGATGCAGCGATTCAAGTGATCCTCTCGTCATTGCAG  
+HWI-EAS443:3:33:794:1005#0/1  
`^aaa¥`^`\_a``]]NVXT`\_`b`\_a¥aaVKXa\_¥W]Y  
@HWI-EAS443:3:33:835:1148#0/1  
GATCGTCTTTTTTCAAATGTATTTATCGTCGCTTTAAAT  
+HWI-EAS443:3:33:835:1148#0/1  
abbb\_abbbbbbbbaZabbaaababaaaaa\_Iaaaa\_a`  
@HWI-EAS443:3:33:867:480#0/1  
CATTGGGATCTTGCACCTGATATTGTGGATTACTGATCGT  
+HWI-EAS443:3:33:867:480#0/1  
abbaaaa`aaa`bbaaba`^`^`aaa^aaaa`¥QY`\_^U`X  
@HWI-EAS443:3:33:878:1692#0/1  
AGCTAGGATGAGTCCCAATAGTTCTCATTGCATGTACCAT  
+HWI-EAS443:3:33:878:1692#0/1  
a\_a`b`T[\_Y\_SYaa`\_\_\_\_]R\_\_¥]\_^\_¥X`YVX^YY\_\_  
@HWI-EAS443:3:33:950:2011#0/1  
CAGGCCTACCAGAAGCGAATGGGAGTGAGATGCAGCGAT  
+HWI-EAS443:3:33:950:2011#0/1  
abZabbabaaaaaaaa`a]a]\_^aW\_\_\_\_^XUMS\_\_X]¥]  
@HWI-EAS443:3:34:1096:1043#0/1  
ATTTGCTGCAATGACGAGAGGATCACTTGAATCGCTGCAT  
+HWI-EAS443:3:34:1096:1043#0/1  
aaY^aaa¥^DX]`\_^a¥X\_YU^\_PV`^`¥^Y][UXTNWB  
@HWI-EAS443:3:34:1101:1998#0/1  
GGATCACTTGAATCGCTGCATCTGCACTCCCATTCGCTTC

+HWI-EAS443:3:34:1101:1998#0/1  
W\_\_YOY\_\_\_¥`¥\_]`b]^b]\_ab`^\_[``UO[\_\_aU`SK  
@HWI-EAS443:3:34:1151:24#0/1  
AGACTGGAAAGTGTCTTTGCAGGAAAGAACACAGATCTTG  
+HWI-EAS443:3:34:1151:24#0/1  
a`bbbb`\_bb^a`aaaaaa```aaa[V^\_^^^ZVPV]]  
@HWI-EAS443:3:34:1202:1515#0/1  
ATTCGCTTCTGGTAGGCCTGCAAATTTTCAAGAAGGTCAT  
+HWI-EAS443:3:34:1202:1515#0/1  
a`a¥a`bba\_\_aabbaba\_aab`bbbbba\_¥aY]¥aaX  
@HWI-EAS443:3:34:1311:36#0/1  
TGGGAGTGCAGATGCAGCGATTCAAGTGATCCTCTCGTCA  
+HWI-EAS443:3:34:1311:36#0/1  
`a\_baa[a`a^\_a`aa\_a`^\_^^¥`Y\_\_\_YW^T¥WWYSW  
@HWI-EAS443:3:34:1375:499#0/1  
AAAGACAAGACCAATCTTGTCACCTCTGACTAAGGGAATT  
+HWI-EAS443:3:34:1375:499#0/1  
aaaa`aaa```\_a\_a¥\_aa\_¥¥^¥`^`]^\_Z^\_X]W]Z]  
@HWI-EAS443:3:34:1397:1872#0/1  
GACCGATGCTGTGAATCAGCAATCTGTTCAAGTGGCAC  
+HWI-EAS443:3:34:1397:1872#0/1  
`baaa\_¥X`\_\_T\_Y[SS[R][\_[W\_Y]]^YNSUMPUQFQN  
@HWI-EAS443:3:34:1402:664#0/1  
GACCACAGAAGCTGCTTTTGGTCTAGTGTGTGCCACTTGT  
+HWI-EAS443:3:34:1402:664#0/1  
ab\_a][\_`\_S`\_\_\_^V^`\_]OY^XVXUV]X]XXXXWYBB  
@HWI-EAS443:3:34:1662:920#0/1  
CTTGAATCGCTGCATCTGCACTCCCATTGCTTCTGGTAG  
+HWI-EAS443:3:34:1662:920#0/1  
ab`abbbb`\_b`a`a`b]\_aaa\_WTTaaaa`XWVSBBBB  
@HWI-EAS443:3:34:16:577#0/1  
GGAGGTTGCTAATCAGACTAGGCAGATGGTACATGCAATG  
+HWI-EAS443:3:34:16:577#0/1  
a`Z`a\_a`a[HZ`a\_aa`¥X`]^¥][¥¥XDU\_VS]]^V¥]  
@HWI-EAS443:3:34:1785:778#0/1  
GCAGGCCTACCAGAAGCGAATGGGAGTGCAGATGCAGCGA  
+HWI-EAS443:3:34:1785:778#0/1  
a]aaaaaaaaaaaaa\_a\_\_aaaV]^]\_[a^\_VNZWUWB  
@HWI-EAS443:3:34:310:1398#0/1  
TAAATACATTTGAAAAAAGACGATCAGTAATCCACAATA  
+HWI-EAS443:3:34:310:1398#0/1  
`^`\_a^bbbaa`\_`a\_^]aaa\_\_^¥¥¥Q[[]OW]V[]LDW  
@HWI-EAS443:3:34:326:169#0/1  
GCTGCAATGACGAGAGGATCACTTGAATCGCTGCATCTGC  
+HWI-EAS443:3:34:326:169#0/1  
aabbba`aabba`b`baaHa```a\_\_a\_a\_aU[\_\_V¥V\_B  
@HWI-EAS443:3:34:363:493#0/1  
CTCTCATGGAATGGCTAAAGACAAGACCAATCTTGTACC  
+HWI-EAS443:3:34:363:493#0/1  
abaabaabaaaaaab`aaa\_\_`\_```]YR\_]Y¥^UW^ME

@HWI-EAS443:3:34:388:683#0/1  
CGTATTTAAAGCGACGATAAATACATTTGAAAAAAGACG  
+HWI-EAS443:3:34:388:683#0/1  
a\_`aaaa`aZ\_b\_]aaa\_]a\_[^\_aa`\_\_aa^`\_W\_^^  
@HWI-EAS443:3:34:398:1735#0/1  
GACCGATGCTGTGAATCAGCAATCTGTTCAACAAGTGGCAC  
+HWI-EAS443:3:34:398:1735#0/1  
Waba\_a`\_`aba]b\_` `[`b\_[¥ba[baaba[a]N[R\_\_X  
@HWI-EAS443:3:34:420:1257#0/1  
CAATAGTTCTCATTGCATGTACCATCTGCCTAGTCTGATT  
+HWI-EAS443:3:34:420:1257#0/1  
`ZZHV` `a`Zba`ZO]aWHNb\_]XY\_] [ZTSZSW[Y[SNB  
@HWI-EAS443:3:34:49:1840#0/1  
GCAAAGGCTATGGAACAGATGGCTGGATCGAGTGAACAGG  
+HWI-EAS443:3:34:49:1840#0/1  
abbbbbabb`bababba\_a]`ba`]aaa\_b][X`a¥`YX  
@HWI-EAS443:3:34:500:145#0/1  
TGCTTTTGGTCTAGTGTGTGCCACTTGTGAACAGATTGCT  
+HWI-EAS443:3:34:500:145#0/1  
`ba`ababaYb]`^¥a\_aa`aaa`^\_\_\_`\_`\_\_`^XVWW^  
@HWI-EAS443:3:34:524:555#0/1  
GCACCTGATATTGTGGATTACTGATCGTCTTTTTTTCAAA  
+HWI-EAS443:3:34:524:555#0/1  
abaaa`]VZ`a`U`¥^^`\_`\_`ZPZ`X` `^\_a`\_X]]^  
@HWI-EAS443:3:34:567:172#0/1  
ATCTGTTCAACAAGTGGCACACACTAGACAAAAGCAGCTT  
+HWI-EAS443:3:34:567:172#0/1  
ababa`aaaaaaa]a`ab`aaa\_\_a`a\_`V`]\_^]R^^  
@HWI-EAS443:3:34:64:567#0/1  
TGGAGTTGCTAATCAGACTAGGCAGATGGTACATGCAAT  
+HWI-EAS443:3:34:64:567#0/1  
aaa`Y\_[`aa`XZ\_^SS]VI\_\_\_`YVZ^X¥PX[Y^YSKUV  
@HWI-EAS443:3:34:729:1062#0/1  
CTTCTTGGAAATTTGCAGGCCTACCAGAAGCGAATGGGAG  
+HWI-EAS443:3:34:729:1062#0/1  
ab`¥Taaa`Z`aaaaa\_^[``]\_`a¥`aa`a¥KDY\_WRBB  
@HWI-EAS443:3:34:972:917#0/1  
GTGGATTACTGATCGTCTTTTTTTCAAATGTATTTATCGT  
+HWI-EAS443:3:34:972:917#0/1  
]O^\_]TTZ[[``]\_¥PR]Z]¥`\_YZUSSW`TXXZ¥^XWSU  
@HWI-EAS443:3:35:1056:1053#0/1  
GCCTCATATACAACAGGATGGGAACAGTGACCACAGAAGC  
+HWI-EAS443:3:35:1056:1053#0/1  
ababa^aaaaaaaa^a^[]^` `a`^aW\_V`\_Q`a`]Za  
@HWI-EAS443:3:35:1135:513#0/1  
GGCCTACCAGAAGCGAATGGGAGTGCAGATGCAGCGATTC  
+HWI-EAS443:3:35:1135:513#0/1  
ababbaa`\_babaab][`aaaa`¥aYa[]aaaa`a\_\_^^  
@HWI-EAS443:3:35:1197:831#0/1  
CAGCAATCTGTTCAACAAGTGGCACACACTAGACAAAAGC

+HWI-EAS443:3:35:1197:831#0/1  
a`a`aab`aaaaaaaa^`a`a``^Y`¥]aaa`]]\_Ua  
@HWI-EAS443:3:35:1233:70#0/1  
ACTGGAGCTAGGATGAGTCCCAATAGTTCTCATTGCATGT  
+HWI-EAS443:3:35:1233:70#0/1  
]YWTWL¥XVYYUNT]XPNJOH¥Q^QUS¥V¥[ZTRBBBBBB  
@HWI-EAS443:3:35:1331:892#0/1  
TGAATCAGCAATCTGTTCAAGTGGCACACACTAGACCA  
+HWI-EAS443:3:35:1331:892#0/1  
aa\_aa`a`a`^`^[\_a\_\_\_\_Y\_]\_]aaa\_]\_]\_]\_R¥  
@HWI-EAS443:3:35:1495:804#0/1  
CATTGCAGCAAATATCATTGGGATCTTGCACCTGATATTG  
+HWI-EAS443:3:35:1495:804#0/1  
abbbbabbbabababaaaaabb\_a\_aaabababb`b`bab  
@HWI-EAS443:3:35:1508:837#0/1  
GGCCTCATATACAACAGGATGGGAACAGTGACCACAGAAG  
+HWI-EAS443:3:35:1508:837#0/1  
a\_]\_bbaaaaaaaa`^`^`^`aZ^Z``\_]\_]a``Z[¥` []  
@HWI-EAS443:3:35:1511:571#0/1  
CAGCAATCTGTTCAAGTGGCACACACTAGACCAAAGC  
+HWI-EAS443:3:35:1511:571#0/1  
[Z]OXX[U[`Z`]XW[T\_UXW[¥V^SYZ\_]\_]`^\_ZV[]Ra  
@HWI-EAS443:3:35:1652:1064#0/1  
CAGGATGGGAACAGTGACCACAGAAGCTGCTTTTGGTCTA  
+HWI-EAS443:3:35:1652:1064#0/1  
aab\_SS¥`VU[][\_L¥`a]WOU]P[`]¥`]PU^`VJORa  
@HWI-EAS443:3:35:1781:1607#0/1  
CTGTGAATCAGCAATCTGTTCAAGTGGCACACACTAGA  
+HWI-EAS443:3:35:1781:1607#0/1  
aab\_b^a`a`¥\_aa`[\_aa[R¥`a^YW]aaa``^`X^`M`  
@HWI-EAS443:3:35:217:1202#0/1  
ATCTTGCACCTGATATTGTGGATTACTGATCGTCTTTTTT  
+HWI-EAS443:3:35:217:1202#0/1  
aab\_]\_]\_W^aa]Za¥a`\_XaaY`[]``\_]\_]aYQ\_]\_]`^`  
@HWI-EAS443:3:35:268:1052#0/1  
CACTTGTGAACAGATTGCTGATTACAGCATCGGTCTCAC  
+HWI-EAS443:3:35:268:1052#0/1  
abbb`a\_bb\_a¥`aa\_aba`aa`\_a]`^```a`a]`\_a\_a  
@HWI-EAS443:3:35:271:277#0/1  
CGGGTCCCCATTCCCATTAGGGCATTGGACAAAGCGT  
+HWI-EAS443:3:35:271:277#0/1  
aaaa`abaaaa]aa`a]¥`]¥¥`^`\_`T]S]^]U`¥^^W  
@HWI-EAS443:3:35:321:1454#0/1  
ATCCCAATGATATTTGCTGCAATGACGAGAGGATCACTTG  
+HWI-EAS443:3:35:321:1454#0/1  
aaaaaaaaaaaaTaaa¥`aaaZ\_a\_Y^`\_¥\_]Y\_]\_]\_]`^`^`  
@HWI-EAS443:3:35:448:274#0/1  
ACAAGACCAATCTTGTACCTCTGACTAAGGGAATTTTAG  
+HWI-EAS443:3:35:448:274#0/1  
]aaaaabbaabaaa[a`aaaa``\_a`W^^[Y]¥``^`\_]



@HWI-EAS443:3:35:766:641#0/1  
GCTGTGAATCAGCAATCTGTTTACAAGTGGCACACACTAG  
+HWI-EAS443:3:35:766:641#0/1  
\_ ^X\_a`\_S]\_^¥¥0R\_¥U¥TSZR¥WOXM^\_TQZ^R^[VWS  
@HWI-EAS443:3:35:790:1643#0/1  
CAGTGACCACAGAAGCTGCTTTTGGTCTAGTGTGTGCCAC  
+HWI-EAS443:3:35:790:1643#0/1  
\_[Z`]¥\_T^[]Saa[a`[UY]`]OMPax^T[V^XTUJ^\_a  
@HWI-EAS443:3:35:881:1310#0/1  
TGTGAATCAGCAATCTGTTTACAAGTGGCACACACTAGAC  
+HWI-EAS443:3:35:881:1310#0/1  
a`[baaaba\_aa`R`\_aS]`\_\_`]YO\_Vaaa``a^^[U[\_  
@HWI-EAS443:3:35:885:1426#0/1  
CAGCAATCTGTTTACAAGTGGCACACACTAGACAAAAGC  
+HWI-EAS443:3:35:885:1426#0/1  
a\_`baab[a`aaa^aab[W¥[ababaZZIY`b`bbab]X\_  
@HWI-EAS443:3:35:915:275#0/1  
GGGCCTCATATACAACAGGATGGGAACAGTGACCACAGAA  
+HWI-EAS443:3:35:915:275#0/1  
aSL]XX`\_`aY`\_`\_AY`\_WG¥M¥¥^VZNGS[WZVVTURU  
@HWI-EAS443:3:36:101:1280#0/1  
CAGCGATTCAAGTGATCCTCTCGTCATTGCAGCAAATATC  
+HWI-EAS443:3:36:101:1280#0/1  
a`U`a\_TYa`^RY¥``aa\_a``WUa`^]¥^TS[\_ZROWY`  
@HWI-EAS443:3:36:1041:143#0/1  
ATGGGCCTCATATACAACAGGATGGGAACAGTGACCACAG  
+HWI-EAS443:3:36:1041:143#0/1  
aab^ab`V\_]\_aYaabbaZ¥]^`aa]Y\_U`¥U\_¥`[Z[WZ  
@HWI-EAS443:3:36:1072:812#0/1  
CGTATTTAAAGCGACGATAAATACATTTGAAAAAAGACG  
+HWI-EAS443:3:36:1072:812#0/1  
aba^bbabbbaaab\_aaaa`a`a``aa`aa`a¥`a\_]^^  
@HWI-EAS443:3:36:1249:795#0/1  
ATGGGAGTGAGATGCAGCGATTCAAGTGATCCTCTCGTC  
+HWI-EAS443:3:36:1249:795#0/1  
^`^SS\_^J]bbb`aWYb`\_¥]SWa`\_RX`[]NQ¥aX[]N¥  
@HWI-EAS443:3:36:1329:1171#0/1  
GTCCTAAGCTATTCAACTGGTGCACCTGCCAGTTGCATG  
+HWI-EAS443:3:36:1329:1171#0/1  
]U```¥\_\_\_^]]^\_ZW]\_¥ZY]\_]\_^Zaa\_Z¥N]¥a¥V^  
@HWI-EAS443:3:36:1422:753#0/1  
GTGAATCAGCAATCTGTTTACAAGTGGCACACACTAGACC  
+HWI-EAS443:3:36:1422:753#0/1  
ZOY¥\_Z`^`^`\_a^a`^\_[ZX\_]\_Y\_[N[[RSZW\_^a^R]  
@HWI-EAS443:3:36:1531:1112#0/1  
CAGGCCTACCAGAAGCGAATGGGAGTGAGATGCAGCGAT  
+HWI-EAS443:3:36:1531:1112#0/1  
MJ`]bbbbbbbababb\_Xa``baaa¥bQ`[]`aX\_babX^  
@HWI-EAS443:3:36:1546:126#0/1  
ACAGTGACCACAGAAGCTGCTTTTGGTCTAGTGTGTGCCA

+HWI-EAS443:3:36:1546:126#0/1  
a\_bb^bbaa\_`\_^aa`aaY\_``\_]X]^\_YYY\_X¥^BB  
@HWI-EAS443:3:36:1592:1367#0/1  
TGTGAGACCGATGCTGTGAATCAGCAATCTGTTCAAGT  
+HWI-EAS443:3:36:1592:1367#0/1  
\_U]b\_]babVba`aaaaabaaa[aaa`ZX\_]¥`\_\_aW]YH  
@HWI-EAS443:3:36:1648:1910#0/1  
TGCCAGTTGCATGGGCCTCATATACAACAGGATGGGAACA  
+HWI-EAS443:3:36:1648:1910#0/1  
aaabab\_bbaaa`a[a`^U^b\_aaab[TMYZPZ\_WV¥[H^  
@HWI-EAS443:3:36:1665:92#0/1  
CAAATCCTAAAATTCCTTAGTCAGAGGTGACAAGATTGG  
+HWI-EAS443:3:36:1665:92#0/1  
a`b]bbabb`aaaa[`aaa¥aX[^a^a\_X`]TX^^VX^RZ  
@HWI-EAS443:3:36:1737:110#0/1  
GACCGATGCTGTGAATCAGCAATCTGTTCAAGTGGCAC  
+HWI-EAS443:3:36:1737:110#0/1  
a^a`¥US\_[¥^[V^¥\_[Q\_QOSYOV[WXXV[NQLSXXVQ[  
@HWI-EAS443:3:36:220:398#0/1  
TCTGTGAGACCGATGCTGTGAATCAGCAATCTGTTCAAA  
+HWI-EAS443:3:36:220:398#0/1  
ababa\_U\_bbbaa^`^aa\_aa]`aaaa`¥Wa``^\_\_V`\_H  
@HWI-EAS443:3:36:254:1249#0/1  
CAAAAGAGAAATAACGTTCCATGGGGCCAAGGAGGTGTCA  
+HWI-EAS443:3:36:254:1249#0/1  
a\_¥¥U¥^`Z`^`\_`^^`]Z\_`Z¥¥\_TWUT[RYYJ¥Z``  
@HWI-EAS443:3:36:308:1370#0/1  
GCGCAGAGACTGGAAAGTGTCTTGCAGGAAAGAACACAG  
+HWI-EAS443:3:36:308:1370#0/1  
¥a]a\_aba`^a¥GVaba¥`Za`X^a]]^`^]a^[J]^Y  
@HWI-EAS443:3:36:399:1831#0/1  
GAAAGATGACCTTCTTAAAAATTTGCAGGCCTACCAGAAG  
+HWI-EAS443:3:36:399:1831#0/1  
U[\_aab]``bb]bbbab¥[\_bbbb`bb[]aba[abb`aa`  
@HWI-EAS443:3:36:409:1913#0/1  
AGGATGAGTCCCAATAGTTCTCATTGCATGTACCATCTGC  
+HWI-EAS443:3:36:409:1913#0/1  
aaab¥aa`]a`aa`aZ^GWaa`\_¥`\_a`\_Ya]TW`a[¥a  
@HWI-EAS443:3:36:415:1499#0/1  
CTCATATACAACAGGATGGGAACAGTGACCACAGAAGCTG  
+HWI-EAS443:3:36:415:1499#0/1  
a\_`KX`¥Q`¥]^ [ORZW^US\_\_ZSRGP¥^`UUWWR\_Y^WX  
@HWI-EAS443:3:36:472:1227#0/1  
GTTCCGGTCCCCATTCCCATTTAGGGCATTGTTGGACAAAG  
+HWI-EAS443:3:36:472:1227#0/1  
a\_ab]a¥^bbb`a`aaaa\_`¥`Xa`b`^`¥a`¥^\_I^aZ  
@HWI-EAS443:3:36:512:967#0/1  
ATGGGCCTCATATACAACAGGATGGGAACAGTGACCACAG  
+HWI-EAS443:3:36:512:967#0/1  
aaR¥\_baaa`\_a\_\_a`^`a\_\_a^^`\_\_¥`a\_\_W¥\_¥\_]a]

@HWI-EAS443:3:36:587:189#0/1  
CAGGATGGGAACAGTGACCACAGAAGCTGCTTTTGGTCTA  
+HWI-EAS443:3:36:587:189#0/1  
a]aa`aba\_a`ab\_`baaaaaa`\_a```\_^`^`W^^¥  
@HWI-EAS443:3:36:751:846#0/1  
TAAAGACAAGACCAATCTTGTCACCTCTGACTAAGGGAAT  
+HWI-EAS443:3:36:751:846#0/1  
aba^a¥b\_Z¥baaaaaaaaaXaaaU\_```a\_\_\_`\_a`^a`U  
@HWI-EAS443:3:36:822:1269#0/1  
CTGGAGCTAGGATGAGTCCCAATAGTTCTCATTGCATGTA  
+HWI-EAS443:3:36:822:1269#0/1  
a^a¥¥¥a[`WaQUW[a\_ba¥]\_`¥aX]`V^WU]X^\_\_\_XU  
@HWI-EAS443:3:36:831:624#0/1  
CAGCAATCTGTTCCACAAGTGGCACACACTAGACCAAAGC  
+HWI-EAS443:3:36:831:624#0/1  
a`\_`\_\_\_`^Y`¥aa`\_a¥R[``]W\_a¥ST\_aa\_Q][\_Za[\_  
@HWI-EAS443:3:36:893:1086#0/1  
ACGTTCCATGGGGCCAAGGAGGTGTCACCTAAGCTATTCAA  
+HWI-EAS443:3:36:893:1086#0/1  
]\_W^¥R\_b\_\_\_SO^aYa`X]R¥ZN\_^`GYXHP\_]a`W`PI  
@HWI-EAS443:3:36:922:1321#0/1  
ACTGATCGTCTTTTTTTCAAATGTATTTATCGTCGCTTTA  
+HWI-EAS443:3:36:922:1321#0/1  
aa```^b¥X\_\_aaa`^Y^\_\_```^a¥a[a^¥00ZXQ[^]X  
@HWI-EAS443:3:36:943:1112#0/1  
ATCGTCTTTTTTTCAAATGTATTTATCGTCGCTTTAAATA  
+HWI-EAS443:3:36:943:1112#0/1  
^^aa¥ba\_aY0\_\_YY^`ZaY[`a\_a\_aY00WZX¥NN[TW  
@HWI-EAS443:3:37:1045:1160#0/1  
GACCGATGCTGTGAATCAGCAATCTGTTCCACAAGTGGCAC  
+HWI-EAS443:3:37:1045:1160#0/1  
a\_PIZ^¥aa\_aY\_\_^aSU¥R]a\_`U]SR^WaUPQP^^`\_\_\_  
@HWI-EAS443:3:37:1082:1520#0/1  
GCTGGCTAGCACTACGGCAAAGGCTATGGAACAGATGGCT  
+HWI-EAS443:3:37:1082:1520#0/1  
a^`\_\_\_baaa\_aR¥`P`VKX]\_^SY^\_VFWIVMY¥MQ^UU  
@HWI-EAS443:3:37:1165:1763#0/1  
CTTGAATCGCTGCATCTGCACTCCCATTGCTTCTGGTAG  
+HWI-EAS443:3:37:1165:1763#0/1  
[`aabbbbbaaaa`babab^bbbbbbb]bbYbabbbbaYab[  
@HWI-EAS443:3:37:1168:552#0/1  
ATTTGCTGCAATGACGAGAGGATCACTTGAATCGCTGCAT  
+HWI-EAS443:3:37:1168:552#0/1  
¥\_\_abYYaab\_Wa^U\_R]a`]]HRV```^`Ha`\_Y]X¥\_`R  
@HWI-EAS443:3:37:1253:42#0/1  
ATCCCAATGATATTTGCTGCAATGACGAGAGGATCACTTG  
+HWI-EAS443:3:37:1253:42#0/1  
ab`\_]\_^Y`bb\_b^aaa]]`^`aaaabbWXGaa`Ya]\_[\_\_\_  
@HWI-EAS443:3:37:1259:825#0/1  
AAGTGGCACACACTAGACCAAAGCAGCTTCTGTGGTCCAC

+HWI-EAS443:3:37:1259:825#0/1  
Ua\_IW\_bab`S``aab^aab[\_]bb^^aGbZ^Z]]Raa¥  
@HWI-EAS443:3:37:1574:1432#0/1  
GACCACAGAAGCTGCTTTTGGTCTAGTGTGTGCCACTTGT  
+HWI-EAS443:3:37:1574:1432#0/1  
[ab`bbb`a`a[^aUba]`Y[\_aa\_]RX^V¥\_baa^`a` [  
@HWI-EAS443:3:37:161:252#0/1  
ATCTTGTCACCTCTGACTAAGGGAATTTTAGGATTTGTGT  
+HWI-EAS443:3:37:161:252#0/1  
`[ba¥¥\_]ba]b]b\_X^a\_ZUZJZUVZUXN^bVP]Q¥R\_N  
@HWI-EAS443:3:37:1700:225#0/1  
GCGACGATAAATACATTTGAAAAAAGACGATCAGTAATC  
+HWI-EAS443:3:37:1700:225#0/1  
aaa^b`\_^`^¥`aaa¥X`\_\_\_\_\_]a]ZHSYXX]Y`^^R  
@HWI-EAS443:3:37:1706:308#0/1  
TGTGGATTACTGATCGTCTTTTTTTCAAATGTATTTATCG  
+HWI-EAS443:3:37:1706:308#0/1  
ab``^bbb`aa]a¥bY]aaabbaba`\_]K]Vbab`^\_W^  
@HWI-EAS443:3:37:295:1723#0/1  
CAAATATCATTGGGATCTTGCACCTGATATTGTGGATTAC  
+HWI-EAS443:3:37:295:1723#0/1  
a`^\_V[^`^¥¥YW[]\_aaa\_\_a\_\_]]VXXFU[XaW\_\_¥\_Y  
@HWI-EAS443:3:37:349:304#0/1  
GACCGATGCTGTGAATCAGCAATCTGTTCAACAAGTGGCAC  
+HWI-EAS443:3:37:349:304#0/1  
a`b\_\_^\_]aa\_R\_aaaaaaSX]¥`a\_\_\_¥aaQ¥R\_\_aa\_  
@HWI-EAS443:3:37:374:1130#0/1  
GACTAGGCAGATGGTACATGCAATGAGAACTATTGGGACT  
+HWI-EAS443:3:37:374:1130#0/1  
abbb]ababb]a`]W¥`b``baaba`a^aHaa`^`\_YZ\_a  
@HWI-EAS443:3:37:457:1989#0/1  
GACCGATGCTGTGAATCAGCAATCTGTTCAACAAGTGGCAC  
+HWI-EAS443:3:37:457:1989#0/1  
`baba]`^b``aabbbbY¥Paa\_TTRJ\_b[bb]\_Qa^aaQ  
@HWI-EAS443:3:37:53:669#0/1  
TTGTGAACAGATTGCTGATTCACAGCATCGGTCTCACAGA  
+HWI-EAS443:3:37:53:669#0/1  
abb`\_`¥``a^abaa`b^^a`W`\_`^^a`XT]RXO\_WT[  
@HWI-EAS443:3:37:581:1216#0/1  
GACCCGAACAACATGGATAGAGCAGTTAAACTATACAAGA  
+HWI-EAS443:3:37:581:1216#0/1  
a\_aabbV`baY``b`aa\_a`aba^Za`RRbZY^a]ZYW^  
@HWI-EAS443:3:37:585:1875#0/1  
GTGATCCTCTCGTCATTGCAGCAAATATCATTGGGATCTT  
+HWI-EAS443:3:37:585:1875#0/1  
¥`^ababbbb¥Y`bbbabbabb`bbabX`baaa^`aaa  
@HWI-EAS443:3:37:654:1131#0/1  
CATGCAATGAGAACTATTGGGACTCATCCTAGCTCCAGTG  
+HWI-EAS443:3:37:654:1131#0/1  
`[U\_\_`\_YV]\_`]^\_\_^\_ZY`^^Y[\_\_SHVaX]R\_]Y]

@HWI-EAS443:3:37:865:478#0/1  
CGTCATTGCAGCAAATATCATTGGGATCTTGACCTGATA  
+HWI-EAS443:3:37:865:478#0/1  
abaabbbaabbababbaaaaaa`aaaaa\_`aaaaaaa\_a\_  
@HWI-EAS443:3:37:86:1194#0/1  
CAGTAATCCACAATATCAGGTGCAAGATCCCAATGATATT  
+HWI-EAS443:3:37:86:1194#0/1  
a`\_N[a`a\_Z¥¥a[a`abZMW^a¥Z]`[\_[\_]I[aaaY`]  
@HWI-EAS443:3:37:910:880#0/1  
GAAAGATGACCTTCTTGAAAATTTGCAGGCCTACCAGAAG  
+HWI-EAS443:3:37:910:880#0/1  
a\_\_``aaaaaaaabaa[]\_aaaaaaaaa\_Vaaaaa``V]`  
@HWI-EAS443:3:37:923:822#0/1  
CAAGATTGGTCTTGTCTTTAGCCATTCCATGAGAGCCTCA  
+HWI-EAS443:3:37:923:822#0/1  
W¥`^`aaa[Z\_OY]ab`\_U`\_bb]U¥a\_JURaUQ\_aY`¥S  
@HWI-EAS443:3:38:1076:1271#0/1  
TGCAGATGCAGCGATTCAAGTGATCCTCTCGTCATTGCAG  
+HWI-EAS443:3:38:1076:1271#0/1  
abaa]`abab`aa^aaa\_]b^aa`\_``UaSQ]Za^\_a[\_Z  
@HWI-EAS443:3:38:1099:425#0/1  
CCGATGCTGTGAATCAGCAATCTGTTCAAGTGGCACAC  
+HWI-EAS443:3:38:1099:425#0/1  
aa]Z\_\_¥^b`U][[\_[Y\_]a\_T¥^]\_\_VZYUUP[MJ^¥\_G  
@HWI-EAS443:3:38:1140:1150#0/1  
GCTAATCAGACTAGGCAGATGGTACATGCAATGAGAACTA  
+HWI-EAS443:3:38:1140:1150#0/1  
aaa`\_`\_`^`^\_YV]\_Z]¥¥[¥TZ[V[\_`SRWWW[V¥TVW  
@HWI-EAS443:3:38:1158:625#0/1  
TGCAATGAGAACTATTGGGACTCATCCTAGCTCCAGTGCT  
+HWI-EAS443:3:38:1158:625#0/1  
`\_\_¥Ua^PaR\_`Z`aUbaPWRa¥^a]aaXNRXV][`Z`Z[  
@HWI-EAS443:3:38:1170:989#0/1  
GGGCCTCATATACAACAGGATGGGAACAGTGACCACAGAA  
+HWI-EAS443:3:38:1170:989#0/1  
abbbbaabbabb`aabbabb`aabb\_aaab¥[a\_\_a`a`a^  
@HWI-EAS443:3:38:1359:1781#0/1  
GGGCCTCATATACAACAGGATGGGAACAGTGACCACAGAA  
+HWI-EAS443:3:38:1359:1781#0/1  
aa]R¥``]a]V¥a\_\_a]^aaZWaaa][UQ\_TZVT[MUW  
@HWI-EAS443:3:38:1434:71#0/1  
TGGAACGTTATTTCTCTTTGAGCTTCTTGTATAGTTTAA  
+HWI-EAS443:3:38:1434:71#0/1  
``a^babaaaaaa[aaaaaaa^a`a`aaa\_Z[\_]YZaa]Y  
@HWI-EAS443:3:38:1511:1414#0/1  
GCCTCATATACAACAGGATGGGAACAGTGACCACAGAAGC  
+HWI-EAS443:3:38:1511:1414#0/1  
aaa]a`aa^LT¥\_\_\_\_]¥[Y\_\_\_\_]\_V\_aG\_SWXX¥PV]WSG  
@HWI-EAS443:3:38:1596:230#0/1  
CAAGATTGGTCTTGTCTTTAGCCATTCCATGAGAGCCTCA

+HWI-EAS443:3:38:1596:230#0/1  
abbbab`baaaaabaaabaaaa`a\_a\_aZ^]\_^`^Z]]Z  
@HWI-EAS443:3:38:161:1428#0/1  
CATTGCTTCTGGTAGGCCTGCAAATTTTCAAGAAGGTCA  
+HWI-EAS443:3:38:161:1428#0/1  
aabaaZ\_b\_ba]Z\_\_`¥aaaaYYa`aa^\_\_\_X```^V`V  
@HWI-EAS443:3:38:1726:918#0/1  
GTGACCACAGAAGCTGCTTTTGGTCTAGTGTGCCACTT  
+HWI-EAS443:3:38:1726:918#0/1  
a\_aa\_^a\_aaa\_X]^\_W\_\_^`U`XX][ ]LMIUUNU^GLM  
@HWI-EAS443:3:38:1738:344#0/1  
GACCGATGCTGTGAATCAGCAATCTGTTCAAGTGGCAC  
+HWI-EAS443:3:38:1738:344#0/1  
^babaabaaab¥a`aaaba\_aaa`aaa`a¥W¥\_¥V\_\_Z`Q  
@HWI-EAS443:3:38:203:625#0/1  
GAGTGCAGATGCAGCGATTCAAGTGATCCTCTCGTCATTG  
+HWI-EAS443:3:38:203:625#0/1  
a^WZa`S\_^`\_\_`][Y``]U\_]V[^^^^\_`YZ`^XT  
@HWI-EAS443:3:38:225:1597#0/1  
GACAAGACCAATCTTGTACCTCTGACTAAGGGAATTTTA  
+HWI-EAS443:3:38:225:1597#0/1  
`^bb`\_^`b`¥a^aa`aaabaaaaab\_aa^aa\_aaa\_\_a  
@HWI-EAS443:3:38:322:600#0/1  
CACTGTTCCCATCCTGTTGTATATGAGGCCCATGCAACTG  
+HWI-EAS443:3:38:322:600#0/1  
aKTZ]UWaxUSQSPVWXS\_TU\_^VRU]LLRV^RZLRXNTQ  
@HWI-EAS443:3:38:403:1883#0/1  
GGAGTGCAGATGCAGCGATTCAAGTGATCCTCTCGTCATT  
+HWI-EAS443:3:38:403:1883#0/1  
`baa`abb`aa\_aaabbbaaaa\_XZR`\_aZ\_\_`a^¥a^bY  
@HWI-EAS443:3:38:52:280#0/1  
TGCAGATGCAGCGATTCAAGTGATCCTCTCGTCATTGCAG  
+HWI-EAS443:3:38:52:280#0/1  
ab`\_\_Z]baa^\_ZW^]UW]aZW\_\_a]\_\_Z[OUZ[^[YWTX  
@HWI-EAS443:3:38:696:235#0/1  
GATCGTCTTTTTTTCAAATGTATTTATCGTCGCTTTAAAT  
+HWI-EAS443:3:38:696:235#0/1  
`][`a\_Z`baab\_a`^\_T\_aaV]^a`a\_W][XV[^\_`^`^`  
@HWI-EAS443:3:38:72:1198#0/1  
CTCATATACAACAGGATGGGAACAGTGACCACAGAAGCTG  
+HWI-EAS443:3:38:72:1198#0/1  
aabb`a`bb`\_W^]aaa\_\_aa\_aXaaa\_\_^````\_\_\_\_]  
@HWI-EAS443:3:38:778:1987#0/1  
GAGAAATAACGTTCCATGGGGCCAAGGAGGTGCTACTAAG  
+HWI-EAS443:3:38:778:1987#0/1  
a\_aaW[aaa\_Z¥\_Na\_\_[YRR]```\_\_\_\_YUTQWW¥T¥Y`W  
@HWI-EAS443:3:38:83:1143#0/1  
GAGAAATAACGTTCCATGGGGCCAAGGAGGTGCTACTAAG  
+HWI-EAS443:3:38:83:1143#0/1  
a)`YY]a`\_a\_\_YY`¥^]XU[\_a\_¥^^[XWP[¥¥aX^U[U

@HWI-EAS443:3:38:961:811#0/1  
GTCTGTGAGACCGATGCTGTGAATCAGCAATCTGTTCCACA  
+HWI-EAS443:3:38:961:811#0/1  
aaa`\_\_b\_bbaaaaaa`b\_aaaa^aaZZ^WV^`\_]\_Y\_¥^  
@HWI-EAS443:3:38:970:228#0/1  
TCAAGATCTGTGTTCTTTCTGCAAAGACACTTTCCAGTC  
+HWI-EAS443:3:38:970:228#0/1  
Z`a`]`Q]^bbUbSX\_^b[aaabab[aa\_aZT\_¥^[V\_^YU  
@HWI-EAS443:3:39:1004:1051#0/1  
GAGAAATAACGTTCCATGGGGCCAAGGAGGTGTCACCTAAG  
+HWI-EAS443:3:39:1004:1051#0/1  
ZXZYU]XX¥`WNPn`XN^UZYN[RT[RNXQLQSUZNNNTZS  
@HWI-EAS443:3:39:1028:1622#0/1  
GAGGATCACTTGAATCGCTGCATCTGCACTCCCATTGCT  
+HWI-EAS443:3:39:1028:1622#0/1  
aaaba]aabbb\_bbaa]¥[`Xa]Y`^`^aa\_\_VX`]^^`U^  
@HWI-EAS443:3:39:1222:263#0/1  
TGTGAATCAGCAATCTGTTCCACAAGTGGCACACACTAGAC  
+HWI-EAS443:3:39:1222:263#0/1  
ab\_aaaaaa\_aaa`aa`]`\_`\_`\_`Y^`\_`YV^^\_`\_`^V  
@HWI-EAS443:3:39:1321:513#0/1  
TTTTTTTTCAAATGTATTTATCGTCGCTTTAAATACGGTTT  
+HWI-EAS443:3:39:1321:513#0/1  
abbbbaab^\_ba]bbabab^\_[`baaaa^\_Wa]a^^^a\_  
@HWI-EAS443:3:39:1331:566#0/1  
TGACCACAGAAGCTGCTTTTGGTCTAGTGTGTGCCACTTG  
+HWI-EAS443:3:39:1331:566#0/1  
aaba`aaaaaa\_`aa`a`a[\_V]aa]X\_]X[]a^\_]\_R  
@HWI-EAS443:3:39:1452:1359#0/1  
TACTGATCGTCTTTTTTTCAAATGTATTTATCGTCGCTTT  
+HWI-EAS443:3:39:1452:1359#0/1  
Z¥\_Z¥¥b\_WU``]a¥^bba]^a¥`RYaa`a^Q]^aV¥]^]  
@HWI-EAS443:3:39:1564:869#0/1  
GAAAGATGACCTTCTTGAATAATTTGCAGGCCTACCAGAAG  
+HWI-EAS443:3:39:1564:869#0/1  
XV]ROZ\_]ba^Z^¥X`KwY^X¥ZXaaPZY]]Y¥``V]V]^  
@HWI-EAS443:3:39:1676:1129#0/1  
CGATGCTGTGAATCAGCAATCTGTTCCACAAGTGGCACACA  
+HWI-EAS443:3:39:1676:1129#0/1  
ab`baab`ab`ba¥aaaa`^aa^`a\_\_a\_ZQXZa`ZZXT  
@HWI-EAS443:3:39:1685:2000#0/1  
CAAGATCTGTGTTCTTTCTGCAAAGACACTTTCCAGTCT  
+HWI-EAS443:3:39:1685:2000#0/1  
a]¥G¥`Vb``bU`U\_b\_Za`]\_^b^`[\_aNFFGaUZVNV  
@HWI-EAS443:3:39:1746:529#0/1  
GGCCTCATATACAACAGGATGGGAACAGTGACCACAGAAG  
+HWI-EAS443:3:39:1746:529#0/1  
abaabbaabbaaa\_aba`]`\_ba]]a\_a^a`UVV\_\_a\_VU  
@HWI-EAS443:3:39:363:1123#0/1  
CGCGCAGAGACTGGAAAGTGTCTTTGCAGGAAAGAACA

+HWI-EAS443:3:39:363:1123#0/1  
aabbab`\_`baaaa^a`Ua¥a`a`^^^X`¥]a`\_^`a]\_  
@HWI-EAS443:3:39:407:190#0/1  
AAAGCGACGATAAATACATTTGAAAAAAGACGATCAGTA  
+HWI-EAS443:3:39:407:190#0/1  
abbab^baaa`\_]`a\_R]a`\_]`[Y[`]¥¥U]^Y^[XX^  
@HWI-EAS443:3:39:437:1885#0/1  
CTGATCGTCTTTTTTCAAATGTATTTATCGTCGCTTTAA  
+HWI-EAS443:3:39:437:1885#0/1  
aYGS]a^\_a]`[¥aa`a]\_\_Y\_W`\_^]\_\_\_\_]W]Q`^]Y]U  
@HWI-EAS443:3:39:444:367#0/1  
GACCGATGCTGTGAATCAGCAATCTGTTACAAGTGGCAC  
+HWI-EAS443:3:39:444:367#0/1  
`bba\_^`a`\_¥\_aa¥\_\_^aaUS]a```\_a]`````Wa\_^W  
@HWI-EAS443:3:39:553:135#0/1  
CACAAGTGGCACACACTAGACCAAAGCAGCTTCTGTGGT  
+HWI-EAS443:3:39:553:135#0/1  
abbZbbab¥bbbaaababaa\_a]T\_X^baaZZ¥\_`[[^VG  
@HWI-EAS443:3:39:568:1557#0/1  
GTGCCACTTGTGAACAGATTGCTGATTCACAGCATCGGTC  
+HWI-EAS443:3:39:568:1557#0/1  
aYabbabaaa`aababaaaa`aaaa`aaa\_^aaa][SU  
@HWI-EAS443:3:39:588:1106#0/1  
AAAATGCCCTAAATGGGAATGGGACCCGAACAACATGGA  
+HWI-EAS443:3:39:588:1106#0/1  
a`^[]]aaaa`¥¥\_`[H[\_\_\_]X][a]`¥^\_R^^^\_WNU  
@HWI-EAS443:3:39:707:1816#0/1  
ACCTGATATTGTGGATTACTGATCGTCTTTTTTTCAAATG  
+HWI-EAS443:3:39:707:1816#0/1  
aaa\_]HSY`aa\_aZ`]a\_X`T`\_]`\_\_`]^^Z][\_]YBBB  
@HWI-EAS443:3:39:881:1757#0/1  
GCCTCATATACAACAGGATGGGAACAGTGACCACAGAAGC  
+HWI-EAS443:3:39:881:1757#0/1  
a``]W`\_\_¥aaa``\_a`V]\_\_[\_`\_ZSu^WXGVVLWZM  
@HWI-EAS443:3:39:910:784#0/1  
ATCAGCAATCTGTTACAAGTGGCACACACTAGACCAAAA  
+HWI-EAS443:3:39:910:784#0/1  
aaa]Z`U[``\_]a`a^`¥\_Y]RVa`^`^^^Y^\_W^`\_^  
@HWI-EAS443:3:39:982:1534#0/1  
TGACCACAGAAGCTGCTTTTGGTCTAGTGTGTGCCACTTG  
+HWI-EAS443:3:39:982:1534#0/1  
[bb`b`b`bbbab[baa]\_a\_a`VP¥aW[R`Z]ab`a\_]U  
@HWI-EAS443:3:3:1060:1062#0/1  
GCTTCTGGTAGGCCTGCAAATTTTCAAGAAGGTCATCTTT  
+HWI-EAS443:3:3:1060:1062#0/1  
a\_a\_a¥aaX`\_a^¥aa\_a^\_aaa`\_`^\_^]`^U[`^X]^\_  
@HWI-EAS443:3:3:1079:114#0/1  
GGCCATGGAGGTTGCTAATCAGACTAGGCAGATGGTACAT  
+HWI-EAS443:3:3:1079:114#0/1  
aaa`aaaa`aa¥``^a¥aa¥¥a\_W\_¥\_`XV\_¥[]\_NWS¥W



@HWI-EAS443:3:3:1146:1753#0/1  
CATGGCCTCATATACAACAGGATGGGAACAGTGACCACA  
+HWI-EAS443:3:3:1146:1753#0/1  
ab`bbb¥^babbabbaababa`aaaaaabQaa]ba¥Y^U`  
@HWI-EAS443:3:3:1158:644#0/1  
ATGGGCCTCATATACAACAGGATGGGAACAGTGACCACAG  
+HWI-EAS443:3:3:1158:644#0/1  
aabab\_`baabaaa`aaaaaaa`aaa\_`]`aX\_a`X\_]a^  
@HWI-EAS443:3:3:122:457#0/1  
CAAGATCTGTGTTCTTTCCTGCAAAGACACTTCCAGTCT  
+HWI-EAS443:3:3:122:457#0/1  
\_]\_b\_¥]abab`b¥`ba``]b]\_a]\_b\_a`a`aT\_aa\_Xb  
@HWI-EAS443:3:3:1291:472#0/1  
CTCATATACAACAGGATGGGAACAGTGACCACAGAAGCTG  
+HWI-EAS443:3:3:1291:472#0/1  
¥\_\_V¥bbbbabba\_`bb`\_b¥ba``baaa\_aba\_¥\_ba  
@HWI-EAS443:3:3:1337:1314#0/1  
AAGAGAAATAACGTTCCATGGGGCCAAGGAGGTGCTACTA  
+HWI-EAS443:3:3:1337:1314#0/1  
YOYO\_`T]Z¥a^VOURRU^^`ba[`\_W`^OXOFXNUaS[`  
@HWI-EAS443:3:3:1444:512#0/1  
ACTTGAATCGCTGCATCTGCACTCCCATTTCGTTCTGGTA  
+HWI-EAS443:3:3:1444:512#0/1  
`a`bb\_bXaba\_KY]]`Ta\_aZa]S\_aabZaW¥a\_a\_\_BB  
@HWI-EAS443:3:3:1446:1377#0/1  
ATCCCAATGATATTTGCTGCAATGACGAGAGGATCACTTG  
+HWI-EAS443:3:3:1446:1377#0/1  
aa]]V\_bab]aYaa``Wa¥SU`\_a^GX\_`]^`¥^W¥IY[\_  
@HWI-EAS443:3:3:1461:101#0/1  
GGGCCTCATATACAACAGGATGGGAACAGTGACCACAGAA  
+HWI-EAS443:3:3:1461:101#0/1  
[aa¥Ya^Za\_a\_]\_^T¥a`Y]a[aW^¥VYW\_^UQYS¥¥SW  
@HWI-EAS443:3:3:1467:180#0/1  
GCACCTGATATTGTGGATTACTGATCGTCTTTTTTTTCAA  
+HWI-EAS443:3:3:1467:180#0/1  
a``VaXa]aa\_^]]aa\_a\_`U`Y[\_¥``V]a\_aa]aSIZ^  
@HWI-EAS443:3:3:1483:1648#0/1  
CAATGACGAGAGGATCACTTGAATCGCTGCATCTGCACTC  
+HWI-EAS443:3:3:1483:1648#0/1  
abb`bb`ba`b\_bYaVa^b\_a`ba^b\_\_[HS\_]aZRQ`X  
@HWI-EAS443:3:3:1592:566#0/1  
GGATTACTGATCGTCTTTTTTTTCAAATGTATTTATCGTCG  
+HWI-EAS443:3:3:1592:566#0/1  
`aaYa\_bY\_^TIZ^``Rbb`^]S\_¥aa]UUT^[`\_LZQL[  
@HWI-EAS443:3:3:223:1591#0/1  
AGAGCCTCAAGATCTGTGTTCTTTCCTGCAAAGACACTTT  
+HWI-EAS443:3:3:223:1591#0/1  
aaaaa`\_a\_aa\_¥`NUXa^aaaU^P^^Ua\_`^YK[\_aBB  
@HWI-EAS443:3:3:226:130#0/1  
CAGCAATCTGTTTACAAGTGGCACACACTAGACCAAAAAGC

+HWI-EAS443:3:3:226:130#0/1  
abaab`b`abaa`aaaaU\_aab\_\_a`\_\_a\_a]\_aa\_a]B  
@HWI-EAS443:3:3:270:755#0/1  
GACGATCAGTAATCCACAATATCAGGTGCAAGATCCCAAT  
+HWI-EAS443:3:3:270:755#0/1  
abbba\_bba¥abbb`b^\_bbbaabba¥babbbbaa\_[a\_aa  
@HWI-EAS443:3:3:304:391#0/1  
TTTCAAACCGTATTTAAAGCGACGATAAATACATTTGAAA  
+HWI-EAS443:3:3:304:391#0/1  
abbbaaa^ab\_aaaaa\_a`aa`a\_\_a\_Y^aa\_\_\_`a`\_\_  
@HWI-EAS443:3:3:464:982#0/1  
GTGATCCTCTCGTCATTGCAGCAAATATCATTGGGATCTT  
+HWI-EAS443:3:3:464:982#0/1  
a\_aaY``abaaa^^\_a`a`\_`\_`a^`\_`\_]`\_Z]Z\_]\_Z`]  
@HWI-EAS443:3:3:520:1587#0/1  
CACTAGACCAAAGCAGCTTCTGTGGTCACTGTTCCCATC  
+HWI-EAS443:3:3:520:1587#0/1  
`bbbbbbbababaabaabaa\_aa\_`^\_]`a^aa\_UH[P]¥P  
@HWI-EAS443:3:3:659:790#0/1  
AGAAGCTGCTTTTGGTCTAGTGTGTGCCACTTGTGAACAG  
+HWI-EAS443:3:3:659:790#0/1  
Zb^^^ababba¥ZaP]]`a^a^aZa]L^\_``aX\_\_`P``  
@HWI-EAS443:3:3:682:339#0/1  
ATCTGTTCACAAGTGGCACACACTAGACCAAAGCAGCTT  
+HWI-EAS443:3:3:682:339#0/1  
aaaab[b\_aaba`\_aa`b]a\_a]]\_aaY\_a`a\_aYa`V`]  
@HWI-EAS443:3:3:769:214#0/1  
CACAGAAGCTGCTTTTGGTCTAGTGTGTGCCACTTGTGAA  
+HWI-EAS443:3:3:769:214#0/1  
^^^`ba\_Vaaa¥aaa`[SJZZ\_ZQYLRV^JYXNVX¥R]]Z  
@HWI-EAS443:3:3:821:1827#0/1  
CAGGCCTACCAGAAGCGAATGGGAGTGCAGATGCAGCGAT  
+HWI-EAS443:3:3:821:1827#0/1  
ab]`]aaZaSbaRQ¥aba^abaaU`^^Xaaa`aPV^E[aB  
@HWI-EAS443:3:3:848:552#0/1  
TGGGAGTGCAGATGCAGCGATTCAAGTGATCCTCTCGTCA  
+HWI-EAS443:3:3:848:552#0/1  
^^\_aaa¥aaab`a\_\_aa`^\_^`\_QX`VONSX^]\_ZVB  
@HWI-EAS443:3:40:1034:104#0/1  
AAAGGCTATGGAACAGATGGCTGGATCGAGTGAACAGGCA  
+HWI-EAS443:3:40:1034:104#0/1  
a\_abbbbaabaa`\_]b^`\_X`a`\_Z\_YHZU`UMRPV`\_Y  
@HWI-EAS443:3:40:1082:391#0/1  
CAGTGACCACAGAAGCTGCTTTTGGTCTAGTGTGTGCCAC  
+HWI-EAS443:3:40:1082:391#0/1  
abbabbbbabbbbbbbaabaabaa`b`a\_K[^a\_a^`XYY  
@HWI-EAS443:3:40:1102:548#0/1  
CAAGTGGCACACACTAGACCAAAGCAGCTTCTGTGGTCA  
+HWI-EAS443:3:40:1102:548#0/1  
abababbbbba`bbbbbaabbaa]aa`aa`\_¥Y`U]\_

@HWI-EAS443:3:40:114:655#0/1  
CTTTTTTCAAATGATTTATCGTCGCTTTAAATACGGTT  
+HWI-EAS443:3:40:114:655#0/1  
abbbbbbbbbbb^bbab^abbaaa\_a¥aa\_`^^a`a¥a  
@HWI-EAS443:3:40:1183:55#0/1  
ACAAGATTGGTCTTGTCTTTAGCCATTCCATGAGAGCCTC  
+HWI-EAS443:3:40:1183:55#0/1  
aabaaaaaaa^\_aab`aa`aa``\_Za^\_\_`\_\_\_\_\_]^U  
@HWI-EAS443:3:40:1205:726#0/1  
GAATCAGCAATCTGTTCAAGTGGCACACACTAGACCAA  
+HWI-EAS443:3:40:1205:726#0/1  
a^Y¥^YP¥VL^]Z^YR[GWQS]Y]BBBBBBBBBBBBBBB  
@HWI-EAS443:3:40:1210:1763#0/1  
TGGGCCTCATATACAACAGGATGGGAACAGTGACCACAGA  
+HWI-EAS443:3:40:1210:1763#0/1  
aa¥\_bb`^aaaaa`aaa`X^aa`XU]^]Taaaaa`aa  
@HWI-EAS443:3:40:1246:1051#0/1  
AGTGACCACAGAAGCTGCTTTTGGTCTAGTGTGCCACT  
+HWI-EAS443:3:40:1246:1051#0/1  
ab`bbbaaa`aaa]\_`a[0¥a`a`]WS`¥WYW]V^^aaa^  
@HWI-EAS443:3:40:133:1470#0/1  
GGCCAAGGAGGTGTCACCTAAGCTATTCAACTGGTGCCTT  
+HWI-EAS443:3:40:133:1470#0/1  
¥T¥ZTMYU`\_¥TJ^¥]\_T[TO[H^X^ZTR[[PNNY]VMFU  
@HWI-EAS443:3:40:1373:194#0/1  
GGAACAGTGACCACAGAAGCTGCTTTTGGTCTAGTGTGTG  
+HWI-EAS443:3:40:1373:194#0/1  
aa^`W^¥U`¥QQXV[GTH\_UUVGTYVWVRYGXVYUX  
@HWI-EAS443:3:40:1509:1267#0/1  
CAATATCAGGTGCAAGATCCCAATGATATTTGCTGCAATG  
+HWI-EAS443:3:40:1509:1267#0/1  
abbaaabbbb`abababb\_aabbb`abaaaaabba`aa  
@HWI-EAS443:3:40:1571:464#0/1  
TCGGGTCCCCATTCCCATTAGGGCATTGGACAAAGCG  
+HWI-EAS443:3:40:1571:464#0/1  
abb`^`^`aa`abaaa`aaa`\_`aX\_Ya`a¥`¥a\_]a\_a  
@HWI-EAS443:3:40:1619:1019#0/1  
ATCGTCTTTTTTCAAATGATTTATCGTCGCTTTAAATA  
+HWI-EAS443:3:40:1619:1019#0/1  
X[]\_MW^\_ba`a^SQ]^a¥]Z^`YF[ZTY`a]^FWZGZ  
@HWI-EAS443:3:40:1619:1486#0/1  
AACAACATGGATAGAGCAGTTAAACTATACAAGAAGCTCA  
+HWI-EAS443:3:40:1619:1486#0/1  
^aa`bbabbbaabaaaa`\_`aba\_¥R]b\_ab`b`a`a\_  
@HWI-EAS443:3:40:177:1323#0/1  
AAAGCAGCTTCTGTGGTCACTGTTCCCATCCTGTTGTATA  
+HWI-EAS443:3:40:177:1323#0/1  
a^a\_aa^aa`a¥\_T[Z`^a`^¥\_a`^¥Sa[[XU^\_W`[\_  
@HWI-EAS443:3:40:218:261#0/1  
GAGACCGATGCTGTGAATCAGCAATCTGTTCAAGTGGC

+HWI-EAS443:3:40:218:261#0/1  
a]aaab^SGY]a\_R¥[U[\_]¥]YNW`Q\_UVYG^PPNU¥U¥  
@HWI-EAS443:3:40:248:1367#0/1  
ACCTGATATTGTGGATTACTGATCGTCTTTTTTTCAAATG  
+HWI-EAS443:3:40:248:1367#0/1  
aaa`aba\_aaaXaaa\_a`]VZ¥a\_L]^\_a\_``\_`YG¥^`  
@HWI-EAS443:3:40:413:317#0/1  
CTCATATACAACAGGATGGGAACAGTGACCACAGAAGCTG  
+HWI-EAS443:3:40:413:317#0/1  
a\_]`¥baUa`a\_XJTNY`aa]¥YRHHUPNZPSNRPSYPSR  
@HWI-EAS443:3:40:437:1052#0/1  
TAAGCTATTCAACTGGTGCCTTGCCAGTTGCATGGGCCT  
+HWI-EAS443:3:40:437:1052#0/1  
aab`babbaababa\_a[`aaaa`aa[X`V`\_aa\_`¥Xaa\_  
@HWI-EAS443:3:40:44:964#0/1  
GACCGATGCTGTGAATCAGCAATCTGTTCAAGTGGCAC  
+HWI-EAS443:3:40:44:964#0/1  
a]aa]S][^a]]\_aaa\_RU¥]]\_Z¥ZU``]WS]¥W\_\_\_`^  
@HWI-EAS443:3:40:499:375#0/1  
ATCTTGCACCTGATATTGTGGATTACTGATCGTCTTTTTT  
+HWI-EAS443:3:40:499:375#0/1  
`a`abb`T]`ab`^\_aaa\_b^WZVZ¥X\_G^ZP¥\_^`\_]a  
@HWI-EAS443:3:40:500:1927#0/1  
GATGGTACATGCAATGAGAACTATTGGGACTCATCCTAGC  
+HWI-EAS443:3:40:500:1927#0/1  
\_`a^X]\_b\_``a`\_ba\_aab\_ab`\_]ZXZ`^bbabbab`a  
@HWI-EAS443:3:40:546:119#0/1  
GGCAAAGGCTATGGAACAGATGGCTGGATCGAGTGAACAG  
+HWI-EAS443:3:40:546:119#0/1  
a`]a\_]\_]¥\_W¥^^¥¥M^¥U^^UQ^SVVWUUUUWUUSWT  
@HWI-EAS443:3:40:597:1204#0/1  
TGCATGGGCCTCATATACAACAGGATGGGAACAGTGACCA  
+HWI-EAS443:3:40:597:1204#0/1  
aabaa`^a[a```a`a`¥^^a`\_[W\_YV^\_\_XR[\_\_\_\_[  
@HWI-EAS443:3:40:613:165#0/1  
GACCACAGAAGCTGCTTTTGGTCTAGTGTGTGCCACTTGT  
+HWI-EAS443:3:40:613:165#0/1  
aaa`Z^Y`^)`aZYZ¥UZUY¥Q\_NRWQ^RZW^\_\_U^UPSU  
@HWI-EAS443:3:40:731:827#0/1  
GTTCCCATCCTGTTGTATATGAGGCCCATGCAACTGGCAA  
+HWI-EAS443:3:40:731:827#0/1  
aQ¥\_a[^[aXPbZ\_`[]]Z¥RaVR\_]LV^ZZPP[¥]X]  
@HWI-EAS443:3:40:864:43#0/1  
TGGGCCTCATATACAACAGGATGGGAACAGTGACCACAGA  
+HWI-EAS443:3:40:864:43#0/1  
\_abbabbbab¥aa`ba`aaa``aaaXH\_[aWa`a]¥`aa\_  
@HWI-EAS443:3:40:970:584#0/1  
CCCAATGATATTTGCTGCAATGACGAGAGGATCACTTGAA  
+HWI-EAS443:3:40:970:584#0/1  
abab`bbbbbbbbbbabbbbbb^bba[a`a\_^`^`^`^U`



+HWI-EAS443:3:42:1759:586#0/1  
abbabbbbbbbaabbabbbbbbabaabaabba`aaaa  
@HWI-EAS443:3:42:234:755#0/1  
GGTACATGCAATGAGA ACTATTGGGACTCATCCTAGCTCC  
+HWI-EAS443:3:42:234:755#0/1  
ab[bbbaabaaYa`a`a`aaa`]V`a`a```\_``\_a^a`  
@HWI-EAS443:3:42:237:61#0/1  
CTTCTGTGGTCACTGTTCCCATCCTGTTGTATATGAGGCC  
+HWI-EAS443:3:42:237:61#0/1  
a\_\_¥\_V\_¥\_ZaX\_`\_WXRZZba¥¥^JG^JVTZZ¥[]¥``  
@HWI-EAS443:3:42:26:234#0/1  
CATGGGCCTCATATACAACAGGATGGGAACAGTGACCACA  
+HWI-EAS443:3:42:26:234#0/1  
`b[bababa`\_a`\_\_aaa\_\_a]^aa`Za\_\_`Y^\_[[[a]  
@HWI-EAS443:3:42:313:855#0/1  
GTCCCCATTCCCATTTAGGGCATTTTGGACAAAGCGTCTA  
+HWI-EAS443:3:42:313:855#0/1  
aZa`^ZYaaa\_]`^a]\_]`[aaaaa`\_¥UX`]a^^`a  
@HWI-EAS443:3:42:315:2025#0/1  
GAGAGGATCACTTGAATCGCTGCATCTGCACTCCCATTCTG  
+HWI-EAS443:3:42:315:2025#0/1  
¥`\_[\_\_\_\_`bbbb`[\_ba`a¥]`bba^a]abaaa`Za]aa  
@HWI-EAS443:3:42:393:1354#0/1  
ATTTGCTGCAATGACGAGAGGATCACTTGAATCGCTGCAT  
+HWI-EAS443:3:42:393:1354#0/1  
Y`b\_U`aa]]¥U¥\_a]SZ`YXX¥`Y]^aYOUV¥Xa[JOQ]  
@HWI-EAS443:3:42:435:1203#0/1  
TGGGAGTGCAGATGCAGCGATTCAAGTGATCCTCTCGTCA  
+HWI-EAS443:3:42:435:1203#0/1  
ab]aa\_^a`ba`\_aaaa¥a¥\_a\_a^`T]^`[[\_\_aa\_]W  
@HWI-EAS443:3:42:440:593#0/1  
ACCTGATATTGTGGATTACTGATCGTCTTTTTTTCAAATG  
+HWI-EAS443:3:42:440:593#0/1  
abbbaabaabb\_bbbaa\_aaaaaa^aa`aaaaa[\_a¥\_`  
@HWI-EAS443:3:42:528:471#0/1  
TGACCACAGAAGCTGCTTTTGGTCTAGTGTGTGCCACTTG  
+HWI-EAS443:3:42:528:471#0/1  
`bbb\_]aab\_ZZaba`aa`aa`aab^aVa\_a`^aa^`a  
@HWI-EAS443:3:42:632:1409#0/1  
ATACATTTGAAAAAAGACGATCAGTAATCCACAATATCA  
+HWI-EAS443:3:42:632:1409#0/1  
a\_a\_a`aaaa\_`\_a`S\_\_a\_UROQI]`SU[YS]VSWXMT  
@HWI-EAS443:3:42:679:164#0/1  
CGAGAGGATCACTTGAATCGCTGCATCTGCACTCCCATTCT  
+HWI-EAS443:3:42:679:164#0/1  
abbbabb^`aZ^a¥\_b\_a^`¥\_aaV^¥a`\_]`¥`^¥Z¥S]  
@HWI-EAS443:3:42:809:1588#0/1  
AGTGATCCTCTCGTCACTTGCAGCAAATATCATTGGGATCT  
+HWI-EAS443:3:42:809:1588#0/1  
ab\_\_b`b`a`^a¥a¥bXaH\_aaa```[`aa`\_[[\_^T^\_

@HWI-EAS443:3:42:943:693#0/1  
GGGCCTCATATACAACAGGATGGGAACAGTGACCACAGAA  
+HWI-EAS443:3:42:943:693#0/1  
abababbbabbbbaaaaab`aaba\_aaabZa`a\_`a[aa\_  
@HWI-EAS443:3:42:980:952#0/1  
CTGCTTTTGGTCTAGTGTGTGCCACTTGTGAACAGATTGC  
+HWI-EAS443:3:42:980:952#0/1  
^`]aabb]\_b]b]]a]a\_babaaZbbaabbVZ^`¥\_aaa  
@HWI-EAS443:3:43:1003:1091#0/1  
GCCTCATATACAACAGGATGGGAACAGTGACCACAGAAGC  
+HWI-EAS443:3:43:1003:1091#0/1  
aa`aaab`bbaaaaab^^`\_a\_a]]\_]aa`\_`^a\_\_\_\_\_¥  
@HWI-EAS443:3:43:1007:1810#0/1  
GCCTCATATACAACAGGATGGGAACAGTGACCACAGAAGC  
+HWI-EAS443:3:43:1007:1810#0/1  
a\_QT]a]aaa[X`a`^^^`a`¥XVZZK[\_[^Z]¥[Z[U  
@HWI-EAS443:3:43:1062:1560#0/1  
GGGCCTCATATACAACAGGATGGGAACAGTGACCACAGAA  
+HWI-EAS443:3:43:1062:1560#0/1  
^a^`VZZZbb`b\_a^Z¥]RZabaMU[N[\_[`aZ``0a^`S  
@HWI-EAS443:3:43:1084:429#0/1  
CTAGACCAAAAAGCAGCTTCTGTGGTCACTGTTCCCATCCT  
+HWI-EAS443:3:43:1084:429#0/1  
a\_`babbb``\_aaa]`abaaaaa^aa\_a]^`a\_`¥``\_]`  
@HWI-EAS443:3:43:1198:1920#0/1  
AGACCGATGCTGTGAATCAGCAATCTGTTCAAGTGGCA  
+HWI-EAS443:3:43:1198:1920#0/1  
^[\_`babb`bbbbaaaa^\_U\_V``\_T\_\_Y`]`^a`WP^X]^`  
@HWI-EAS443:3:43:1213:1233#0/1  
GAACAGTGACCACAGAAGCTGCTTTTGGTCTAGTGTGTGC  
+HWI-EAS443:3:43:1213:1233#0/1  
`bbbab`bbbabaaa```abaaaaa^a\_aaaa\_`^\_\_a]  
@HWI-EAS443:3:43:1344:378#0/1  
GATGACCTTCTTGAATAATTTGCAGGCCTACCAGAAGCGAA  
+HWI-EAS443:3:43:1344:378#0/1  
abb¥baabb`ba\_``baaaaa\_aa``\_aa`¥]a``aQa\_^`  
@HWI-EAS443:3:43:1360:680#0/1  
CTCATATACAACAGGATGGGAACAGTGACCACAGAAGCTG  
+HWI-EAS443:3:43:1360:680#0/1  
U\_`[^[¥a`aaa`b^X\_aWQ\_[]`b¥bbba]bbbaaab  
@HWI-EAS443:3:43:140:688#0/1  
CACTTGTGAACAGATTGCTGATTCACAGCATCGGTCTCAC  
+HWI-EAS443:3:43:140:688#0/1  
a`bbbabbbbbbabbba[bbbbbbabbabb]ababa  
@HWI-EAS443:3:43:1413:899#0/1  
GGATTACTGATCGTCTTTTTTTCAAATGTATTATCGTCG  
+HWI-EAS443:3:43:1413:899#0/1  
ababbbabb`aab`\_bbbbbaaaaabaa\_abaa\_aV\_\_\_a  
@HWI-EAS443:3:43:1417:889#0/1  
AATCAGCAATCTGTTCAAGTGGCACACACTAGACCAAA

+HWI-EAS443:3:43:1417:889#0/1  
a`bbaaaabaab``\_aaa`a]a`a````````a\_]`[\_]]  
@HWI-EAS443:3:43:1445:995#0/1  
ATCTGCACTCCCATTCGCTTCTGGTAGGCCTGCAAATTTT  
+HWI-EAS443:3:43:1445:995#0/1  
`[TY\_b``Z¥PUOYG][WY¥X¥XXQQ`TFF`ZFQQ¥¥X]O  
@HWI-EAS443:3:43:1448:346#0/1  
GGAGTGCAGATGCAGCGATTCAAGTGATCCTCTCGTCATT  
+HWI-EAS443:3:43:1448:346#0/1  
ab`aYaaaa\_aa\_aa]b`a`^\_a]a`\_ZZa`^`a]]^`\_  
@HWI-EAS443:3:43:1548:1883#0/1  
GAACAGTGACCACAGAAGCTGCTTTTGGTCTAGTGTGTGC  
+HWI-EAS443:3:43:1548:1883#0/1  
a]\_\_X\_F]aUJZN[aX`\_[RYNY\_Z[IVWWZZRYU]UWL  
@HWI-EAS443:3:43:1556:21#0/1  
AATCAGACTAGGCAGATGGTACATGCAATGAGAACTATTG  
+HWI-EAS443:3:43:1556:21#0/1  
\_^aaabba\_]aba`b^aaa^\_aaaa¥[a`R[]^U]^a\_a  
@HWI-EAS443:3:43:1573:488#0/1  
GATCGTCTTTTTTCAAATGTATTTATCGTCGCTTTAAAT  
+HWI-EAS443:3:43:1573:488#0/1  
a]X\_^^^\_a````b\_XXYR]LV^Y`\_¥X¥WTXZ¥^X[YYY  
@HWI-EAS443:3:43:1631:1409#0/1  
TGCACCTGATATTGTGGATTACTGATCGTCTTTTTTTCAA  
+HWI-EAS443:3:43:1631:1409#0/1  
`bab`b`b`babaa¥`¥^aaa^\_Y\_a^^\_ZaaabaaaP]\_  
@HWI-EAS443:3:43:1653:1943#0/1  
GAGCAGTTAAACTATACAAGAAGCTCAAAAGAGAAATAAC  
+HWI-EAS443:3:43:1653:1943#0/1  
\_^]\_\_\_\_^`\_G[b\_a\_aaa`\_aYW\_\_`^¥V[YUY\_a`\_T  
@HWI-EAS443:3:43:1726:1171#0/1  
AGGTGCAAGATCCCAATGATATTTGCTGCAATGACGAGAG  
+HWI-EAS443:3:43:1726:1171#0/1  
¥¥`[[]¥`^bb¥0Za`aa\_ba`]Za`]a]aaZ\_]K]\_aT\_  
@HWI-EAS443:3:43:1775:40#0/1  
TGTCTGTGAGACCGATGCTGTGAATCAGCAATCTGTTCAC  
+HWI-EAS443:3:43:1775:40#0/1  
W¥`\_O\_^\_]`\_¥X¥\_a]R]^`a]]`a]\_UVZ^U[MWS  
@HWI-EAS443:3:43:1779:111#0/1  
AGGCCATGGAGTTGCTAATCAGACTAGGCAGATGGTACA  
+HWI-EAS443:3:43:1779:111#0/1  
aab\_\_`b`b`ab\_aZUaa[\_aWb¥F^Y]^UNZNP]]UVGY  
@HWI-EAS443:3:43:194:481#0/1  
GTGACCACAGAAGCTGCTTTTGGTCTAGTGTGTGCCACTT  
+HWI-EAS443:3:43:194:481#0/1  
¥ORZW]XY¥Z`¥MM]XYZTYVOYW\_W]\_N¥XPMWG¥OWUS  
@HWI-EAS443:3:43:295:1785#0/1  
CAGCAATCTGTTCAAGTGGCACACACTAGACCAAAAGC  
+HWI-EAS443:3:43:295:1785#0/1  
abbb`aaaa\_^^`bbaZVM`ababaa\_abab[^a`aaa^



@HWI-EAS443:3:43:303:25#0/1  
TGACAAGATTGGTCTTGTCTTTAGCCATTCATGAGAGCC  
+HWI-EAS443:3:43:303:25#0/1  
ab^^\_U]X`aab^\_\_^bZ\_aYaaaa^\_ZX`Z`\_`\_]`XU  
@HWI-EAS443:3:43:305:253#0/1  
TGGGCCTCATATACAACAGGATGGGAACAGTGACCACAGA  
+HWI-EAS443:3:43:305:253#0/1  
ab``ababbbbababba`ab`abab`a`aa\_baaaa`baa  
@HWI-EAS443:3:43:341:263#0/1  
CGATAAATACATTTGAAAAAAGACGATCAGTAATCCACA  
+HWI-EAS443:3:43:341:263#0/1  
a\_X¥aaaa¥^a\_bba]aaa^¥^`\_a`\_XZ[]T\_a\_ZUZX`  
@HWI-EAS443:3:43:374:1156#0/1  
TGGGCCTCATATACAACAGGATGGGAACAGTGACCACAGA  
+HWI-EAS443:3:43:374:1156#0/1  
`baUab[]abaa`P\_]\_aaaaaaY\_¥aaZaa]\_a^PW`  
@HWI-EAS443:3:43:528:1213#0/1  
GATCCCAATGATATTTGCTGCAATGACGAGAGGATCACTT  
+HWI-EAS443:3:43:528:1213#0/1  
aba\_Y]abb\_WW\_`abaa^Za```a\_\_^`^`]]`XY`Z]X  
@HWI-EAS443:3:43:581:90#0/1  
GTCCTGTTCCCATCCTGTTGTATATGAGGCCCATGCAAC  
+HWI-EAS443:3:43:581:90#0/1  
a^\_a\_\_a^\_\_\_\_¥\_X[X\_]^^X]]^)^XXXUXVVV^UXXR  
@HWI-EAS443:3:43:618:798#0/1  
GACCACAGAAGCTGCTTTTGGTCTAGTGTGTGCCACTTGT  
+HWI-EAS443:3:43:618:798#0/1  
abababbabbabaaaa`a`a^\_\_a\_\_\_\_``\_aa¥\_\_a`]-  
@HWI-EAS443:3:43:736:1732#0/1  
GCACCTGATATTGTGGATTACTGATCGTCTTTTTTTTCAAA  
+HWI-EAS443:3:43:736:1732#0/1  
aaaa^bb[`aba¥]Z\_a[aaa`a]]][a[aa\_abbbYM[]\_-  
@HWI-EAS443:3:43:745:1098#0/1  
GGCCAAGGAGGTGTCCTAAGCTATTCAACTGGTGCACTT  
+HWI-EAS443:3:43:745:1098#0/1  
ababaaaabaUa`]aab]a```aaaa^a`]a\_¥¥`aX\_a  
@HWI-EAS443:3:43:784:1231#0/1  
AAGAAGCTCAAAAGAGAAATAACGTTCCATGGGGCCAAGG  
+HWI-EAS443:3:43:784:1231#0/1  
¥\_W]UXXaa^ab^bXS^0¥aaaa\_a^V`]Ya\_Wa\_R`a]X  
@HWI-EAS443:3:43:793:1196#0/1  
TGATCGTCTTTTTTTTCAAATGTATTTATCGTCGCTTTAAA  
+HWI-EAS443:3:43:793:1196#0/1  
`ab```aabbbbaabaaaa`¥Y`aa`¥^¥¥\_a``aa[Y\_  
@HWI-EAS443:3:43:858:1344#0/1  
TGGGAGTGCAGATGCAGCGATTCAAGTGATCCTCTCGTCA  
+HWI-EAS443:3:43:858:1344#0/1  
a\_U^aX]aaa\_\_`a\_\_a\_]\_]\_[[]Y^\_\_^[]^U\_[-\_-]  
@HWI-EAS443:3:43:986:496#0/1  
GATCTGTGTTCTTTCTGCAAAGACACTTTCCAGTCTCTG

+HWI-EAS443:3:43:986:496#0/1  
aa]`Z\_aaa\_Rbbaaaa`\_aaa`a¥¥^\_aa`\_`a^`¥X\_  
@HWI-EAS443:3:43:98:1194#0/1  
CAGTAATCCACAATATCAGGTGCAAGATCCCAATGATATT  
+HWI-EAS443:3:43:98:1194#0/1  
aababbbbbbbaabbaabaa¥aa`[`aaaaaaaaaaaa`  
@HWI-EAS443:3:44:1117:609#0/1  
ATCAGCAATCTGTTCCACAAGTGGCACACACTAGACCAAAA  
+HWI-EAS443:3:44:1117:609#0/1  
XZ\_U`ba\_aabaaa¥ZUU¥aQa]U\_¥PX^R]Z[aXW^\_a\_  
@HWI-EAS443:3:44:1186:682#0/1  
CTCTCATGGAATGGCTAAAGACAAGACCAATCTTGTCCACC  
+HWI-EAS443:3:44:1186:682#0/1  
U\_a\_\_¥a^`b\_\_a`¥\_[^¥\_Y\_\_a^`\_UZ]¥[a]Z[T]V[  
@HWI-EAS443:3:44:1297:1630#0/1  
CAAAAGAGAAATAACGTTCCATGGGGCCAAGGAGGTGTCA  
+HWI-EAS443:3:44:1297:1630#0/1  
aaa`a`a`a\_\_baa\_^]aa\_a]^Z`[WU\_\_a\_X`\_]\_]`  
@HWI-EAS443:3:44:1326:1467#0/1  
CAAGTGGCACACACTAGACCAAAAGCAGCTTCTGTGGTCA  
+HWI-EAS443:3:44:1326:1467#0/1  
aa^\_GYa]]U]U¥]][\_V]`¥^XU`\_a`¥¥Y^P[ZPTLX  
@HWI-EAS443:3:44:1353:1329#0/1  
GCCTCATATACAACAGGATGGGAACAGTGACCACAGAAGC  
+HWI-EAS443:3:44:1353:1329#0/1  
Z\_b^[[[Z[U\_aaQaSSVZbb¥a\_TaZUaaXMYU\_a\_UVD  
@HWI-EAS443:3:44:1358:1683#0/1  
CGCTGCATCTGCACTCCCATTCGCTTCTGGTAGGCCTGCA  
+HWI-EAS443:3:44:1358:1683#0/1  
aba[abbaaa\_aaaaaVMaa`aa]\_aUa]T[^a\_U[^Z¥  
@HWI-EAS443:3:44:1359:1794#0/1  
GTGAATCAGCAATCTGTTCCACAAGTGGCACACACTAGACC  
+HWI-EAS443:3:44:1359:1794#0/1  
`YF¥abaWb][]aYaYT^U\_^U\_T^VU[[\_\_\_\_]^\_^\_WU  
@HWI-EAS443:3:44:136:430#0/1  
GTGCCACTTGTGAACAGATTGCTGATTACAGCATCGGTC  
+HWI-EAS443:3:44:136:430#0/1  
aZO\_a`b`a`WZ]bZ^bUaaXb\_aaa\_U`X^aaa]SN`  
@HWI-EAS443:3:44:1457:735#0/1  
GGGCCAAGGAGGTGTCACCTAAGCTATTCAACTGGTGCACCT  
+HWI-EAS443:3:44:1457:735#0/1  
a`baaaaaa\_bZa\_[^a\_aaW^X`\_^`¥\_\_¥Ua¥[W[  
@HWI-EAS443:3:44:1476:1269#0/1  
CTTGTGAACAGATTGCTGATTACAGCATCGGTCTCACAG  
+HWI-EAS443:3:44:1476:1269#0/1  
ab[aYba`¥TZ`[^aa\_bZN¥`]R]YaaaaZNVXRGX^  
@HWI-EAS443:3:44:14:417#0/1  
CAAGTGGCACACACTAGACCAAAAGCAGCTTCTGTGGTCA  
+HWI-EAS443:3:44:14:417#0/1  
aab\_U\_\_`a\_aa¥[\_]¥]¥aVI\_a\_Xa`[\_¥[NU\_\_ZV[



+HWI-EAS443:3:44:898:1011#0/1  
aaaa\_aYa`VZaaaX\_\_aaaa`\_Z[Y][[[\_`\_\_`\_`\_Z\_  
@HWI-EAS443:3:44:976:828#0/1  
GTGAGACCGATGCTGTGAATCAGCAATCTGTTCAAGTG  
+HWI-EAS443:3:44:976:828#0/1  
a[a```aaaa^aaaa^a`aa¥aa^^^`\_a\_`\_Y\_[¥U¥  
@HWI-EAS443:3:45:1040:822#0/1  
GTCTGTGAGACCGATGCTGTGAATCAGCAATCTGTTCA  
+HWI-EAS443:3:45:1040:822#0/1  
aabZ`\_^U¥a¥PUZb\_V¥\_b\_aW]Q[SV\_[JFTZDNa^Q^  
@HWI-EAS443:3:45:1047:484#0/1  
TTTTTTCAAATGTATTTATCGTCGCTTTAAATACGGTTTG  
+HWI-EAS443:3:45:1047:484#0/1  
aaaaaa]aa`\_a^`aa`\_a`\_[[`\_`a`^V]\_] [aWP\_^  
@HWI-EAS443:3:45:1141:1560#0/1  
TACTGATCGTCTTTTTTTCAAATGTATTTATCGTCGCTTT  
+HWI-EAS443:3:45:1141:1560#0/1  
\_`b`a]b^`aYbba`bb`\_aU`^aX]aaaaZSXOXYQ^aa  
@HWI-EAS443:3:45:1152:1597#0/1  
TTCGGGTCCCATTCCTTTAGGGCATTGACAAAGC  
+HWI-EAS443:3:45:1152:1597#0/1  
a¥X]RGR[aa\_aZ`aa^a^ba`\_\_NTGZa\_\_VFT[¥\_Z\_¥  
@HWI-EAS443:3:45:1161:1033#0/1  
GGGCTCATATACAACAGGATGGGAACAGTGACCACAGAA  
+HWI-EAS443:3:45:1161:1033#0/1  
a`\_a\_]aaa`a`aV\_XG\_a\_XVX`¥`^¥U[\_\_\_[VTX^XK  
@HWI-EAS443:3:45:133:800#0/1  
GCTGGCTAGCACTACGGCAAAGGCTATGGAACAGATGGCT  
+HWI-EAS443:3:45:133:800#0/1  
a^\_bVaaa[M]Ya\_^¥ZK^[YVIRTPVRJOW^[Y^XUTPO  
@HWI-EAS443:3:45:1438:578#0/1  
ATCCCAATGATATTTGCTGCAATGACGAGAGGATCACTTG  
+HWI-EAS443:3:45:1438:578#0/1  
RMRQWW^^^\_]a[aX¥WZ]^\_Y\_UU]O]Y^¥SIGYQHRX  
@HWI-EAS443:3:45:144:916#0/1  
ATTCTGTTTTCATGCCTGATTAGTGGATTGGTGGTAGTAG  
+HWI-EAS443:3:45:144:916#0/1  
aababb^aabaaaa`abaaa`\_a[a\_a\_Z\_\_BBBBBB  
@HWI-EAS443:3:45:1476:321#0/1  
TAAAGACAAGACCAATCTTGTCACCTCTGACTAAGGGAAT  
+HWI-EAS443:3:45:1476:321#0/1  
abbabaaabaa\_aa\_a`aaa`\_a\_\_`\_`a`^`\_\_`aa\_`^`  
@HWI-EAS443:3:45:152:1180#0/1  
ATCCCAATGATATTTGCTGCAATGACGAGAGGATCACTTG  
+HWI-EAS443:3:45:152:1180#0/1  
XW]a\_]\_[F]U¥aa[Za]YaaU`\_]\_OOX`YWTU[QDR`N  
@HWI-EAS443:3:45:1534:467#0/1  
CAGCAATCTGTTCAAGTGGCACACACTAGACCAAAAGC  
+HWI-EAS443:3:45:1534:467#0/1  
aX^[ZZbabbS]WSUa\_``[R\_```\_`^[^Z^`YLQX\_\_Y

@HWI-EAS443:3:45:165:702#0/1  
CAGTAATCCACAATATCAGGTGCAAGATCCCAATGATATT  
+HWI-EAS443:3:45:165:702#0/1  
¥\_a`La`¥`aabbab\_Z\_a¥Qaaba\_a]Y``\_abbbaa`\_  
@HWI-EAS443:3:45:1726:664#0/1  
TACATTTGAAAAAAGACGATCAGTAATCCACAATATCAG  
+HWI-EAS443:3:45:1726:664#0/1  
ab\_abbbbaab`a``aab\_^WUXDYW\_TPT]¥]\_[I^U  
@HWI-EAS443:3:45:212:85#0/1  
GCCTCATATACAACAGGATGGGAACAGTGACCACAGAAGC  
+HWI-EAS443:3:45:212:85#0/1  
X¥aa\_Kbb[b`b`aabb[bbbaa\_Yb]\_bba[\_R\_aab]^  
@HWI-EAS443:3:45:220:1068#0/1  
ATTTGCTGCAATGACGAGAGGATCACTTGAATCGCTGCAT  
+HWI-EAS443:3:45:220:1068#0/1  
`a\_a^][baa\_aa\_¥\_N\_^\_[YFRP¥[Q[`¥¥¥¥UGUUU  
@HWI-EAS443:3:45:463:711#0/1  
AGCCGAGATCGCGCAGAGACTGGAAAGTGTCTTTCAGGA  
+HWI-EAS443:3:45:463:711#0/1  
`aa\_a\_Z]Z^`^¥a\_\_\_^\_¥MZ¥W]OZV[XW¥]OV]]  
@HWI-EAS443:3:45:496:1431#0/1  
AGCAGCTTCTGTGGTCACTGTTCCCATCCTGTTGTATATG  
+HWI-EAS443:3:45:496:1431#0/1  
aaa`a\_aa]`XVX\_]][SYSX\_¥\_V\_WWW\_\_¥\_\_WV\_V¥X  
@HWI-EAS443:3:45:500:383#0/1  
GGGCCTCATATACAACAGGATGGGAACAGTGACCACAGAA  
+HWI-EAS443:3:45:500:383#0/1  
aaaa`aaaaa`a`aaa^`a`a^`^`Za\_^¥^[^\_\_^  
@HWI-EAS443:3:45:555:123#0/1  
GAGACCGATGCTGTGAATCAGCAATCTGTTCAAGTGGC  
+HWI-EAS443:3:45:555:123#0/1  
abbb`aaaabaab^aaaa\_a^Ya\_a`\_aYa^`\_a^Y`\_\_  
@HWI-EAS443:3:45:573:1897#0/1  
CAAAGCAGCTTCTGTGGTCACTGTTCCCATCCTGTTGTA  
+HWI-EAS443:3:45:573:1897#0/1  
[ba`baaab[abaaa]```aa\_]aa`aU`a`^ab[^aNaa  
@HWI-EAS443:3:45:618:1395#0/1  
ACCACAGAAGCTGCTTTTGGTCTAGTGTGTGCCACTTGTG  
+HWI-EAS443:3:45:618:1395#0/1  
`[^`a\_baaa\_\_Y^^YY`^`aZRZ\_\_]^]¥[YS]a`^^]V^  
@HWI-EAS443:3:45:679:1033#0/1  
TGGAAAGTGTCTTTCAGGAAAGAACACAGATCTTGAGGC  
+HWI-EAS443:3:45:679:1033#0/1  
SS\_¥`[U^X¥S\_XY\_^Y\_¥\_ZH]TYFT\_a^QST\_aU]WOY  
@HWI-EAS443:3:45:72:459#0/1  
TGTGGATTACTGATCGTCTTTTTTTCAAATGTATTTATCG  
+HWI-EAS443:3:45:72:459#0/1  
\_b[bbbabaaabba\_b`babbba\_\_a`b^`aba\_a\_\_  
@HWI-EAS443:3:45:77:1446#0/1  
ATGGGCCTCATATACAACAGGATGGGAACAGTGACCACAG

+HWI-EAS443:3:45:77:1446#0/1  
`^¥`ab``\_aba\_`\_^0V\_a``aaZ`^[U^]XZ^¥NXZ\_`  
@HWI-EAS443:3:45:896:402#0/1  
GCAGATGCAGCGATTCAAGTGATCCTCTCGTCATTGCAGC  
+HWI-EAS443:3:45:896:402#0/1  
aa``\_`\_a\_``\_\_^^]]\_\_U`\_] ^Y]U\_Y\_YX]]\_]U^]X  
@HWI-EAS443:3:45:916:209#0/1  
GCTTTTGGTCTAGTGTGTGCCACTTGTGAACAGATTGCTG  
+HWI-EAS443:3:45:916:209#0/1  
aaSaYaa\_U]\_`]]^[Z\_\_\_\_\_`^`\_]]`]YU\_]\_]X\_RX^  
@HWI-EAS443:3:45:943:1324#0/1  
GACCGATGCTGTGAATCAGCAATCTGTTCAACAAGTGGCAC  
+HWI-EAS443:3:45:943:1324#0/1  
`\_a¥^SUa\_UWX\_``^]\_`aWYU¥][¥UZ^`W]X[ZFU  
@HWI-EAS443:3:45:98:387#0/1  
GGCCAAGGAGGTGTCACTAAGCTATTCAACTGGTGCACCT  
+HWI-EAS443:3:45:98:387#0/1  
aaaaaaaaa`¥a[[a\_a```a`\_`a[aaZ[^ZU`]^U^\_  
@HWI-EAS443:3:46:1220:1318#0/1  
CAAAAGAGAAATAACGTTCCATGGGGCCAAGGAGGTGTCA  
+HWI-EAS443:3:46:1220:1318#0/1  
\_S]\_W\_`\_TSZ`a``aZUVUY`a\_] ^Z\_¥]ZSV[G]VVZ  
@HWI-EAS443:3:46:1375:337#0/1  
AAAGCGACGATAAATACATTTGAAAAAAGACGATCAGTA  
+HWI-EAS443:3:46:1375:337#0/1  
aa`bab\_ab`aaaa`a\_aaaa\_``a`a^a``a¥^\_\_`Y]  
@HWI-EAS443:3:46:1447:1297#0/1  
GCAGATGCAGCGATTCAAGTGATCCTCTCGTCATTGCAGC  
+HWI-EAS443:3:46:1447:1297#0/1  
aaaaS¥```a`aZ^\_^\_^T[Y][Z\_V\_[\_YUT]^]TSWN  
@HWI-EAS443:3:46:1514:204#0/1  
GTGACCACAGAAGCTGCTTTTGGTCTAGTGTGTGCCACTT  
+HWI-EAS443:3:46:1514:204#0/1  
a``a\_]\_\_aa\_\_YS[RS^\_ZZTZ^VWUZPYS[WUVYYW  
@HWI-EAS443:3:46:1758:260#0/1  
GGCAGATGGTACATGCAATGAGAACTATTGGGACTCATCC  
+HWI-EAS443:3:46:1758:260#0/1  
abaabaaba[a`a^a`\_Xaa\_a¥a^`\_\_\_\_`[^\_^ZZ\_[WX  
@HWI-EAS443:3:46:1785:1178#0/1  
CTAGTGTGTGCCACTTGTGAACAGATTGCTGATTACAGC  
+HWI-EAS443:3:46:1785:1178#0/1  
abbb`bbaabbabbbbababababaaaab]bbabaaa`aa\_  
@HWI-EAS443:3:46:275:1650#0/1  
GCTGCAATGACGAGAGGATCACTTGAATCGCTGCATCTGC  
+HWI-EAS443:3:46:275:1650#0/1  
]abbabbbb\_XZ^a`aaa`X`P`]`]a`^]UZYZ\_^^XVS  
@HWI-EAS443:3:46:376:293#0/1  
ATGGGCCTCATATACAACAGGATGGGAACAGTGACCACAG  
+HWI-EAS443:3:46:376:293#0/1  
aabaaa\_a[`aaaa\_aa\_\_aa``a``^`¥``W``^¥\_W\_\_

@HWI-EAS443:3:46:53:550#0/1  
GCAGAGACTGGAAAGTGTCTTTGCAGGAAAGAACACAGAT  
+HWI-EAS443:3:46:53:550#0/1  
\_abbaba`bbabba]\_baaaabY^aab\_aaa\_\_`^G]a`]  
@HWI-EAS443:3:46:557:729#0/1  
CACTGTTCCCATCCTGTTGTATATGAGGCCCATGCAACTG  
+HWI-EAS443:3:46:557:729#0/1  
aabbabbbb`b`^bbabaabbabbbbaa``baa`baaaa  
@HWI-EAS443:3:46:601:816#0/1  
ATCAGGTGCAAGATCCCAATGATATTTGCTGCAATGACGA  
+HWI-EAS443:3:46:601:816#0/1  
a``\_ab]aaaa`aaaba`aaaaaba`a\_aa`````aa\_b¥  
@HWI-EAS443:3:46:760:102#0/1  
GATCGTCTTTTTTTCAAATGTATTTATCGTCGCTTTAAAT  
+HWI-EAS443:3:46:760:102#0/1  
\_H\_]VV`ab^¥]`Y^^UabX[\_aS]VS[^^[0\_\_`PWQY  
@HWI-EAS443:3:46:927:1425#0/1  
GCACCTGATATTGTGGATTACTGATCGTCTTTTTTTCAAA  
+HWI-EAS443:3:46:927:1425#0/1  
^^aaabbbbabb\_¥`b`bbaabaaba\_\_babbbba`aaa  
@HWI-EAS443:3:46:950:239#0/1  
CAAGATTGGTCTTGTCTTTAGCCATTCCATGAGAGCCTCA  
+HWI-EAS443:3:46:950:239#0/1  
\_]YbZbbb\_`^aaaa^babbb`ba`aba^^Za``X`¥W`\_`  
@HWI-EAS443:3:46:964:1171#0/1  
GCCACTTGTGAACAGATTGCTGATTCACAGCATCGGTCTC  
+HWI-EAS443:3:46:964:1171#0/1  
aaaaaaaa`^aaa\_aaaa`a\_aa\_a```\_`a\_`a\_aa[[`^  
@HWI-EAS443:3:47:1068:143#0/1  
GGTTGCTAATCAGACTAGGCAGATGGTACATGCAATGAGA  
+HWI-EAS443:3:47:1068:143#0/1  
ab`abaaa`aYaaaaaaaa\_\_a^\_a]V^]\_^\_]\_]\_a]\_Y  
@HWI-EAS443:3:47:1080:315#0/1  
ATTACTGATCGTCTTTTTTTCAAATGTATTTATCGTCGCT  
+HWI-EAS443:3:47:1080:315#0/1  
¥Z\_\_ab¥Sba`JSaaa¥aaaP]\_`aa[PaY]^\_\_¥P\_^]X  
@HWI-EAS443:3:47:1161:244#0/1  
ATCGTCTTTTTTTCAAATGTATTTATCGTCGCTTTAAATA  
+HWI-EAS443:3:47:1161:244#0/1  
aaabaabbbbbbbbaaaZ^Y]aab]a¥a\_aa\_aab]\_\_\_\_\_  
@HWI-EAS443:3:47:1168:398#0/1  
CACAAGTGGCACACACTAGACCAAAGCAGCTTCTGTGGT  
+HWI-EAS443:3:47:1168:398#0/1  
abb`bbabbbbbbbabbbbb`^abbabaaa`\_a^aa`aa¥  
@HWI-EAS443:3:47:1196:1093#0/1  
GAGAGGATCACTTGAATCGCTGCATCTGCACTCCCATTG  
+HWI-EAS443:3:47:1196:1093#0/1  
a^S¥Z^`\_]\_^0¥]TW¥a`aVVOV[VTLW[V\_U\_¥SNMMN]  
@HWI-EAS443:3:47:1223:1185#0/1  
GGGGACCCGAACAACATGGATAGAGCAGTTAAACTATACA





@HWI-EAS443:3:47:328:1934#0/1  
GCCTCATATACAACAGGATGGGAACAGTGACCACAGAAGC  
+HWI-EAS443:3:47:328:1934#0/1  
a\_Y¥]`aVa\_\_a][X]`\_¥aY`a\_^^YG[XVPYW\_ZV\_SS  
@HWI-EAS443:3:47:747:504#0/1  
ACCTGATATTGTGGATTACTGATCGTCTTTTTTTCAAATG  
+HWI-EAS443:3:47:747:504#0/1  
aaabaab`bb\_`baaab\_\_aa`\_^a\_]aabbabaY`\_`\_`  
@HWI-EAS443:3:47:763:186#0/1  
CCCCAACACATGGATAGAGCAGTTAAACTATACAAGAAG  
+HWI-EAS443:3:47:763:186#0/1  
abbb`bbbbbbbaaab]a]`a\_aaaa\_\_a^W\_aaa`^  
@HWI-EAS443:3:47:828:488#0/1  
GGCCTCATATACAACAGGATGGGAACAGTGACCACAGAAG  
+HWI-EAS443:3:47:828:488#0/1  
aaZ`baab``aaa\_\_\_\_aa\_\_\_\_]a^`S¥^P`\_YLWSV¥[¥Y  
@HWI-EAS443:3:47:829:1291#0/1  
GGAGTGCAGATGCAGCGATTCAAGTGATCCTCTCGTCATT  
+HWI-EAS443:3:47:829:1291#0/1  
aaaa¥aaaa\_``aa`\_\_^`¥P^\_Y``]UV`]\_^]XU^^Y  
@HWI-EAS443:3:47:842:1114#0/1  
CAGCAATCTGTTCAAGTGGCACACACTAGACCAAAAAGC  
+HWI-EAS443:3:47:842:1114#0/1  
\_¥`b]aababbaabba\_aaaa\_]a^`a`aaSaaaa`\_  
@HWI-EAS443:3:47:858:936#0/1  
GCCTCATATACAACAGGATGGGAACAGTGACCACAGAAGC  
+HWI-EAS443:3:47:858:936#0/1  
ab\_a`aaabaa\_[]`ba^\_a\_ZZ`\_\_T``\_^\_\_`^aZZY  
@HWI-EAS443:3:48:1004:681#0/1  
GACCTTCTTGAAAATTTGCAGGCCTACCAGAAGCGAATGG  
+HWI-EAS443:3:48:1004:681#0/1  
aa```a`babb`abababa¥a]]aaaa[ab\_aa^b\_\_aaa  
@HWI-EAS443:3:48:1055:575#0/1  
AGATGACCTTCTTGAAAATTTGCAGGCCTACCAGAAGCGA  
+HWI-EAS443:3:48:1055:575#0/1  
ab\_b¥^`b]^abaZ\_\_`aaa^a\_\_aa¥\_a^`\_\_N]\_YaQ  
@HWI-EAS443:3:48:1134:640#0/1  
CTCTCATGGAATGGCTAAAGACAAGACCAATCTTGTACC  
+HWI-EAS443:3:48:1134:640#0/1  
a\_```¥^`Ya^`b\_a^baZ\_SS]a``XS]\_\_V¥[]UY¥XS  
@HWI-EAS443:3:48:1230:1846#0/1  
GCCTCATATACAACAGGATGGGAACAGTGACCACAGAAGC  
+HWI-EAS443:3:48:1230:1846#0/1  
`¥\_aV[]`W\_]aa\_[a\_[]^`¥`¥NZ\_SL^R^\_¥¥¥T  
@HWI-EAS443:3:48:1236:1175#0/1  
TGGGCCTCATATACAACAGGATGGGAACAGTGACCACAGA  
+HWI-EAS443:3:48:1236:1175#0/1  
```^aaaaaaaa`a\_\_a`\_^a\_\_\_\_a[\_aVa^\_¥\_W`\_\_  
@HWI-EAS443:3:48:1302:303#0/1  
GCTTTGTCCAAAATGCCCTAAATGGGAATGGGGACCCGAA

+HWI-EAS443:3:48:1302:303#0/1  
`[¥¥`YHVZ]ZZ^[a^[W]`\_\_aaa`\_]\_a^\_¥^Y[W]WV  
@HWI-EAS443:3:48:1312:1981#0/1  
GGATCACTTGAATCGCTGCATCTGCACTCCCATTCGCTTC  
+HWI-EAS443:3:48:1312:1981#0/1  
aa`a`a`a`a`a`X¥aa`\_a`\_\_a^`\_`\_\_ZV\_^Z]\_]\_]U  
@HWI-EAS443:3:48:1372:871#0/1  
GACCACAGAAGCTGCTTTTGGTCTAGTGTGTGCCACTTGT  
+HWI-EAS443:3:48:1372:871#0/1  
aa\_\_^¥`ab`a`\_]\_]\_^`[[U[^[\_V]]^X^WZ]XX]^X  
@HWI-EAS443:3:48:1425:1572#0/1  
TACCAGAAGCGAATGGGAGTGCAGATGCAGCGATTCAAGT  
+HWI-EAS443:3:48:1425:1572#0/1  
a`\_]\_a`aa[a\_\_`aa`a`R`¥a`X\_\_¥\_\_V\_UWYT¥¥^U  
@HWI-EAS443:3:48:1529:540#0/1  
GCTGCATCTGCACTCCCATTCGCTTCTGGTAGGCCTGCAA  
+HWI-EAS443:3:48:1529:540#0/1  
a`YSXaa[TYS[TWJTN\_^X¥¥`R[RU^[GU^WTSRZVQW  
@HWI-EAS443:3:48:1539:1084#0/1  
CTCGTCATTGCAGCAAATATCATTGGGATCTTGCACCTGA  
+HWI-EAS443:3:48:1539:1084#0/1  
`bbb\_^`ba\_¥¥XZ`^abb]aaaa]aaaVaa^`]Y¥aa¥  
@HWI-EAS443:3:48:1554:1575#0/1  
GCACTCCCATTCGCTTCTGGTAGGCCTGCAAATTTTCAAG  
+HWI-EAS443:3:48:1554:1575#0/1  
a[JSU`aUHXNV\_^`W`^VP¥`]SP\_[YXT]^]]U^¥[  
@HWI-EAS443:3:48:1557:955#0/1  
CAAGATCTGTGTTCTTTCTGCAAAGACACTTTCCAGTCT  
+HWI-EAS443:3:48:1557:955#0/1  
ab``]aabb`b\_bababaaabaaa\_aaaaabaa`ZX^^\_\_  
@HWI-EAS443:3:48:1578:1737#0/1  
GGGACCCGAACAACATGGATAGAGCAGTTAAACTATACAA  
+HWI-EAS443:3:48:1578:1737#0/1  
aaaa\_`ab`aaa`\_aaaa`aXFNUQQXRXSV[SXTYZPLV  
@HWI-EAS443:3:48:1588:494#0/1  
ACCAAAAGCAGCTTCTGTGGTCACTGTTCCCATCCTGTTG  
+HWI-EAS443:3:48:1588:494#0/1  
¥\_\_\_\_a`b^bbaba^aaa\_a^[Z]``¥a`XNT]¥YYa\_\_0  
@HWI-EAS443:3:48:1655:638#0/1  
ATCAGGTGCAAGATCCCAATGATATTTGCTGCAATGACGA  
+HWI-EAS443:3:48:1655:638#0/1  
`] ^0]V\_bKWabab[L`Zabba\_\_baX^^a`¥]¥`X\_V[P  
@HWI-EAS443:3:48:1667:687#0/1  
CCGAGATCGCGCAGAGACTGGAAAGTGTCTTTGCAGGAAA  
+HWI-EAS443:3:48:1667:687#0/1  
`bbabbb`abbaa`baaabaa`\_a\_Z]a`aPMX[`T]`  
@HWI-EAS443:3:48:168:1215#0/1  
GGCCTCATATACAACAGGATGGGAACAGTGACCACAGAAG  
+HWI-EAS443:3:48:168:1215#0/1  
X`aab`b`]U\_\_U¥X\_aV[0ab¥^¥X\_]Xba^Z\_]^\_¥a¥

@HWI-EAS443:3:48:1721:339#0/1  
TTTCAAATGTATTTATCGTCGCTTTAAATACGGTTTGAAA  
+HWI-EAS443:3:48:1721:339#0/1  
aaa\_^aaaa\_\_baa`aab\_]`^a``]\_W\_^Xa\_^\_\_^]^^  
@HWI-EAS443:3:48:1736:968#0/1  
AGAGAAATAACGTTCCATGGGGCCAAGGAGGTGCTACTAA  
+HWI-EAS443:3:48:1736:968#0/1  
a\_R`U`b`aa¥aaaa[aba]^^ZN\_a[\_Zb\_Y\_\_Za]\_\_]  
@HWI-EAS443:3:48:1776:1275#0/1  
GCCTCATATACAACAGGATGGGAACAGTGACCACAGAAGC  
+HWI-EAS443:3:48:1776:1275#0/1  
a`Y`Za¥aaa^\_a[^]Y\_^¥]W^GZ^V\_^SWUJ¥^UV[W  
@HWI-EAS443:3:48:193:1600#0/1  
CAGCGATTCAAGTGATCCTCTCGTCATTGCAGCAAATATC  
+HWI-EAS443:3:48:193:1600#0/1  
ab\_\_¥\_XRZb\_QN^V¥¥TYXKOWUYS^VRYWUXYY[[YGT  
@HWI-EAS443:3:48:195:938#0/1  
CGTCTTTTTTTCAAATGTATTTATCGTCGCTTTAAATACG  
+HWI-EAS443:3:48:195:938#0/1  
`b`abbbbabbab^abb^abbaba`a`\_`a`abaa`^aa`a  
@HWI-EAS443:3:48:42:304#0/1  
GTGCCACTTGGAACAGATTGCTGATTCACAGCATCGGTC  
+HWI-EAS443:3:48:42:304#0/1  
`ZaaZ\_bba^abaaa\_aaaa^`\_]`a`\_]`]a`\_`\_a\_aaY¥  
@HWI-EAS443:3:48:468:1756#0/1  
TGACCACAGAAGCTGCTTTTGGTCTAGTGTGTGCCACTTG  
+HWI-EAS443:3:48:468:1756#0/1  
aabaabbbabbaabaaababa`\_`\_`\_¥a`a`a][aWa`a  
@HWI-EAS443:3:48:497:1784#0/1  
GGCCTCATATACAACAGGATGGGAACAGTGACCACAGAAG  
+HWI-EAS443:3:48:497:1784#0/1  
ab]YPW\_[Z]MOTT\_¥b^U[¥T]Y\_HPMX\_NDKYZPYVL  
@HWI-EAS443:3:48:506:134#0/1  
GAGACCGATGCTGTGAATCAGCAATCTGTTCAAGTGGC  
+HWI-EAS443:3:48:506:134#0/1  
a`aa`ba^a\_a`Xaaa`a\_\_¥\_\_\_¥\_\_\_¥\_YU\_¥¥U^¥¥  
@HWI-EAS443:3:48:594:692#0/1  
AGATCCCAATGATATTTGCTGCAATGACGAGAGGATCACT  
+HWI-EAS443:3:48:594:692#0/1  
`[]`N]a\_Y¥a¥]aa]abTaaaZ\_Za`]ZYX]\_^FSOXVa  
@HWI-EAS443:3:48:712:640#0/1  
CTTGTGAACAGATTGCTGATTCACAGCATCGGTCTCACAG  
+HWI-EAS443:3:48:712:640#0/1  
abb`bbbbbbaababbaababb[^aa`V`^  
@HWI-EAS443:3:48:747:469#0/1  
ATCAGCAATCTGTTCAAGTGGCACACACTAGACCAAAA  
+HWI-EAS443:3:48:747:469#0/1  
abba`abaaabb`aaa`ba`\_a`Ya\_\_`a]aaaa¥\_a`^a  
@HWI-EAS443:3:48:767:520#0/1  
GCCCCATGGAACGTTATTTCTCTTTTGAGCTTCTTGATA

+HWI-EAS443:3:48:767:520#0/1  
aaab\_`aab`b`b`\_¥aa\_Q\_[aaaa\_X¥Xa`[aa\_^]¥V  
@HWI-EAS443:3:48:875:1264#0/1  
GGCCTCATATACAACAGGATGGGAACAGTGACCACAGAAG  
+HWI-EAS443:3:48:875:1264#0/1  
]TV)`X`a¥a]T¥a¥¥aa[¥`¥a\_\_L[\_[a¥X[UZU^[U^  
@HWI-EAS443:3:49:1070:1637#0/1  
CTGATATTGTGGATTACTGATCGTCTTTTTTTCAAATGTA  
+HWI-EAS443:3:49:1070:1637#0/1  
a`bbbbbbbaabba` `[`bbabb]X`b\_bba`L\_bbbb\_`  
@HWI-EAS443:3:49:1072:418#0/1  
ATCCCAATGATATTTGCTGCAATGACGAGAGGATCACTTG  
+HWI-EAS443:3:49:1072:418#0/1  
aba`^`abbaaaa`\_\_`a`^¥`Wb```a^]]Y`^^`¥  
@HWI-EAS443:3:49:1087:1572#0/1  
ATCAGCAATCTGTTCAAGTGGCACACACTAGACCAAAA  
+HWI-EAS443:3:49:1087:1572#0/1  
a`[\_aaaaaaaa\_`aaa\_a^`a^a`a\_a^^`a\_¥0\_\_a\_  
@HWI-EAS443:3:49:1240:164#0/1  
CAGAAGCTGCTTTTGGTCTAGTGTGTGCCACTTGTGAACA  
+HWI-EAS443:3:49:1240:164#0/1  
a\_\_]\_\_Z¥¥Za^]¥\_\_^`Z\_U]\_]^Z]]`a]W[YZ\_VZFT  
@HWI-EAS443:3:49:1329:1470#0/1  
CTCTCATGGAATGGCTAAAGACAAGACCAATCTTGTCCACC  
+HWI-EAS443:3:49:1329:1470#0/1  
aa^`abbbbbbbba\_ab`aaZM¥a`^XX\_\_]Za¥S[X¥SW  
@HWI-EAS443:3:49:1383:999#0/1  
GATGGGAACAGTGACCACAGAAGCTGCTTTTGGTCTAGTG  
+HWI-EAS443:3:49:1383:999#0/1  
ZN]aTZOZ]aaQaaXa^\_\_`Z[[^aa[XX¥]]ZLY[¥[NY  
@HWI-EAS443:3:49:1435:503#0/1  
CAGCAATCTGTTCAAGTGGCACACACTAGACCAAAAAGC  
+HWI-EAS443:3:49:1435:503#0/1  
`baaba\_^ba`b`babbb`ba`baaaa`aaaa¥^aa^\_a\_  
@HWI-EAS443:3:49:1440:819#0/1  
CGCGCAGAGACTGGAAAGTGTCTTTGCAGGAAAGAACACA  
+HWI-EAS443:3:49:1440:819#0/1  
ababaabbaabbaabbb`baabaaW\_b`¥aa\_a`\_aU\_  
@HWI-EAS443:3:49:1464:310#0/1  
AGATGACCTTCTTGAAAATTTGCAGGCCTACCAGAAGCGA  
+HWI-EAS443:3:49:1464:310#0/1  
aaba]a`ba\_bba`aYaaaa\_aa\_\_\_^aa^^a`\_]\_\_\_¥  
@HWI-EAS443:3:49:1602:363#0/1  
GTGATCCTCTCGTCATTGCAGCAAATATCATTGGGATCTT  
+HWI-EAS443:3:49:1602:363#0/1  
\_]\_` `[`aa\_Za]X^a`a]`a\_Y\_\_`^`Z^^^a`¥V[T\_Y  
@HWI-EAS443:3:49:1712:354#0/1  
GACCACAGAAGCTGCTTTTGGTCTAGTGTGTGCCACTTGT  
+HWI-EAS443:3:49:1712:354#0/1  
abbbbaababbb`b`abbbba`\_aaa`\_`aaa\_Ya\_\_a]\_

@HWI-EAS443:3:49:1737:1836#0/1  
AGCAATCTGTTCACAAGTGGCACACACTAGACCAAAAGCA  
+HWI-EAS443:3:49:1737:1836#0/1  
`babaaaab\_a^aZa`aZaa\_a\_`^a\_\_`\_UU\_`a\_¥Q\_  
@HWI-EAS443:3:49:192:363#0/1  
ACCTGATATTGTGGATTACTGATCGTCTTTTTTTCAAATG  
+HWI-EAS443:3:49:192:363#0/1  
a^VaaU`\_abaVYY`aa```]Z^a¥JYa\_aaaaVa^\_\_a  
@HWI-EAS443:3:49:269:1263#0/1  
GAACAGTGACCACAGAAGCTGCTTTTGGTCTAGTGTGTGC  
+HWI-EAS443:3:49:269:1263#0/1  
abb^bb]baaaaab\_baa\_aa``aaa`a^`aa]X¥`\_\_a¥  
@HWI-EAS443:3:49:361:103#0/1  
GGAAAGTGTCTTTGCAGGAAAGAACACAGATCTTGAGGCT  
+HWI-EAS443:3:49:361:103#0/1  
abaa`bWb`\_aa\_a`aaa^`aa\_\_Z`\_`a^\_N```¥\_\_UZ  
@HWI-EAS443:3:49:422:1642#0/1  
GATCTGTGTTCTTTCTGCAAAGACACTTTCCAGTCTCTG  
+HWI-EAS443:3:49:422:1642#0/1  
abbabaaaa`aab`bbba\_b`aa^bbaba]G\_bX\_a^a`  
@HWI-EAS443:3:49:432:609#0/1  
TGCAGATGCAGCGATTCAAGTGATCCTCTCGTCATTGCAG  
+HWI-EAS443:3:49:432:609#0/1  
aa]`S¥babab]ba`ZPVZU0[^]\_``[Z`[W[\_`aYS^a  
@HWI-EAS443:3:49:465:696#0/1  
GATGGTACATGCAATGAGAAGTATTGGGACTCATCCTAGC  
+HWI-EAS443:3:49:465:696#0/1  
aabab\_a`a\_W]a`aa\_a\_a^a\_\_`\_[[`\_a\_aa^`\_a[\_  
@HWI-EAS443:3:49:477:1355#0/1  
GATGGGAACAGTGACCACAGAAGCTGCTTTTGGTCTAGTG  
+HWI-EAS443:3:49:477:1355#0/1  
\_\_I\_¥¥HZX\_W[\_[XSVZ¥]X[]MZNJ]\_\_\_XWIUSZ] [\_  
@HWI-EAS443:3:49:561:756#0/1  
CAAGATTGGTCTTGTCTTTAGCCATTCCATGAGAGCCTCA  
+HWI-EAS443:3:49:561:756#0/1  
`b[bab``b`bbbababbbba[bbaabaab\_abaaaaa\_b  
@HWI-EAS443:3:49:78:197#0/1  
ATCTGTTCACAAGTGGCACACACTAGACCAAAAGCAGCTT  
+HWI-EAS443:3:49:78:197#0/1  
Y`bb]\_`\_]\_V\_b]L¥\_ab¥baaa\_aa`^aZ]\_`]]¥U]]^  
@HWI-EAS443:3:49:966:1870#0/1  
GGATCACTTGAATCGCTGCATCTGCACTCCCATTGCTTC  
+HWI-EAS443:3:49:966:1870#0/1  
aaa`^\_HZ\_¥``\_]QU``Va`\_P]Z¥]UVFLQVRDYX¥\_\_  
@HWI-EAS443:3:49:977:244#0/1  
CAGCAATCTGTTCACAAGTGGCACACACTAGACCAAAAGC  
+HWI-EAS443:3:49:977:244#0/1  
`bbbb[aab¥S^\_\_a`a[I[`]\_[`\_\_Q\_aaa][```aa]0  
@HWI-EAS443:3:4:1111:766#0/1  
CAAGATTGGTCTTGTCTTTAGCCATTCCATGAGAGCCTCA

+HWI-EAS443:3:4:1111:766#0/1  
\_\_aaKa`ba`VabaXWab\_aaXZVbaW^¥a\_SaaUG]aSa  
@HWI-EAS443:3:4:1147:954#0/1  
ATCACTTGAATCGCTGCATCTGCACTCCCATTCGCTTCTG  
+HWI-EAS443:3:4:1147:954#0/1  
VbVa`aba]baabJIba`]^a[b\_\_\_\_`\_^Ra\_aa`^^\_B  
@HWI-EAS443:3:4:1205:273#0/1  
AAAAGAGAAATAACGTTCCATGGGGCCAAGGAGGTGTCAC  
+HWI-EAS443:3:4:1205:273#0/1  
aba`a`a`aaa`\_\_\_\_`\_\_aa`\_^]Q¥\_]Z\_\_Z\_ZR\_Z  
@HWI-EAS443:3:4:1319:1226#0/1  
GCTATTCAACTGGTGCAC TTGCCAGTTGCATGGGCCTCAT  
+HWI-EAS443:3:4:1319:1226#0/1  
a` [ [¥^`^a`ZV^W^\_¥ [ ^`a^¥\_`^UZ\_U¥QZ^^VUYS¥¥  
@HWI-EAS443:3:4:1474:1389#0/1  
ATGGGCCTCATATACAACAGGATGGGAACAGTGACCACAG  
+HWI-EAS443:3:4:1474:1389#0/1  
aaabaaabaabaa`\_`\_a\_\_a\_^aa\_a]]¥`¥\_aWW\_Y\_\_  
@HWI-EAS443:3:4:1492:1233#0/1  
GACCGATGCTGTGAATCAGCAATCTGTTCAAGTGGCAC  
+HWI-EAS443:3:4:1492:1233#0/1  
`\_`\_a^]\_`\_`b\_`Z`¥D[\_R\_[¥S¥\_QRJNIXRTJSUDVT  
@HWI-EAS443:3:4:1566:1913#0/1  
GTAATCCACAATATCAGGTGCAAGATCCCAATGATATTTG  
+HWI-EAS443:3:4:1566:1913#0/1  
`Y^\_]0¥^V`¥0VQL[Z[V¥YZ^^SOMSRX^XZ¥VXXBBB  
@HWI-EAS443:3:4:1579:100#0/1  
CGCTGCATCTGCACTCCCATTCGCTTCTGGTAGGCCTGCA  
+HWI-EAS443:3:4:1579:100#0/1  
`ba[ba`a`a][`\_^U^Y[Q\_aYRZ`\_^RDMMWUPTGTV^B  
@HWI-EAS443:3:4:1661:1324#0/1  
CAGCGATTCAAGTGATCCTCTCGTCATTGCAGCAAATATC  
+HWI-EAS443:3:4:1661:1324#0/1  
aaaaaW\_aY\_`Q]a][SUW\_P]^QX\_]^^ZZWUW¥]^]B  
@HWI-EAS443:3:4:1663:1041#0/1  
GCCTCATATACAACAGGATGGGAACAGTGACCACAGAAGC  
+HWI-EAS443:3:4:1663:1041#0/1  
a\_aaaaaaaaa`aa\_Z^`\_\_ZXWY]QX]]`WJOUR\_BBBB  
@HWI-EAS443:3:4:1719:1680#0/1  
GGGCCAAGGAGGTGTCAC TAAGCTATTCAACTGGTGCAC T  
+HWI-EAS443:3:4:1719:1680#0/1  
^\_bbabbbb\_Z\_abSbb`TbZ\_b`a`\_]IP^¥XVRaZ`B  
@HWI-EAS443:3:4:252:804#0/1  
CAGGTGCAAGATCCCAATGATATTTGCTGCAATGACGAGA  
+HWI-EAS443:3:4:252:804#0/1  
aa\_a]ababb`aVab\_bbbaa`a]ab¥\_b`a^a]aba`^  
@HWI-EAS443:3:4:26:1403#0/1  
AAATGCCCTAAATGGGAATGGGGACCCGAACAACATGGAT  
+HWI-EAS443:3:4:26:1403#0/1  
aaaa`\_]`^`a`a\_``[ `a`\_] ] ] `^\_]^^^X[\_^\_^\_^\_`^

@HWI-EAS443:3:4:381:987#0/1  
AGATCCCAATGATATTTGCTGCAATGACGAGAGGATCACT  
+HWI-EAS443:3:4:381:987#0/1  
`Z]YLYUV\_]aa`aTXUa\_]aWaaYaaUT]Ya\_VUG[]0`  
@HWI-EAS443:3:4:387:719#0/1  
TGGGCCTCATATACAACAGGATGGGAACAGTGACCACAGA  
+HWI-EAS443:3:4:387:719#0/1  
abb^]TY`aaba\_X`aVbbaZ[b`aI`P¥aTaa\_Z¥`\_a\_  
@HWI-EAS443:3:4:454:266#0/1  
ATACAACAGGATGGGAACAGTGACCACAGAAGCTGCTTTT  
+HWI-EAS443:3:4:454:266#0/1  
aaaaaa`aaa^\_aa\_^`¥\_\_V\_]V]]^]`^^X]]VX¥]U  
@HWI-EAS443:3:4:59:1630#0/1  
GGAGGTTGCTAATCAGACTAGGCAGATGGTACATGCAATG  
+HWI-EAS443:3:4:59:1630#0/1  
¥\_abbYb\_\_baaabbaaabbaa`ab\_bbUb`aaaV¥a`a  
@HWI-EAS443:3:4:640:384#0/1  
AGAGAAATAACGTTCCATGGGGCCAAGGAGGTGCTACTAA  
+HWI-EAS443:3:4:640:384#0/1  
\_TTba\_bbaZW`^\_^P\_T`\_\_\_TU]^[]\_`]Y^VR`]ZBB  
@HWI-EAS443:3:4:686:1227#0/1  
GGCCTCATATACAACAGGATGGGAACAGTGACCACAGAAG  
+HWI-EAS443:3:4:686:1227#0/1  
aa\_`^`^`\_\_aaaaZ`a\_\_`aa[\_V\_a¥`\_\_SWZ`\_`\_]  
@HWI-EAS443:3:4:711:161#0/1  
GCTAATCAGACTAGGCAGATGGTACATGCAATGAGAACTA  
+HWI-EAS443:3:4:711:161#0/1  
a\_a`\_aYZ`\_V\_\_¥^YU\_UV\_]V]X^Y]V]YVVYXVVBBB  
@HWI-EAS443:3:4:72:1388#0/1  
GAATCGCTGCATCTGCACTCCCATTCGCTTCTGGTAGGCC  
+HWI-EAS443:3:4:72:1388#0/1  
^J`W`]^\_a\_SQ`bV¥^]¥^a`\_YRU^\_X]XP[SIY[^  
@HWI-EAS443:3:4:824:1209#0/1  
AGATGACCTTCTTGAAAATTTGCAGGCCTACCAGAAGCGA  
+HWI-EAS443:3:4:824:1209#0/1  
aU\_aYV^Y`aaaa`a`\_`\_V\_]a`RUaaSU^a\_]aQ`Y  
@HWI-EAS443:3:4:85:850#0/1  
TGGAGCTAGGATGAGTCCCAATAGTTCTCATTGCATGTAC  
+HWI-EAS443:3:4:85:850#0/1  
ab^T¥aY`^^¥QOP^[QHYYTVQH^[`S]^NVVZZ¥[`ZV  
@HWI-EAS443:3:4:911:231#0/1  
CAGTAATCCACAATATCAGGTGCAAGATCCCAATGATATT  
+HWI-EAS443:3:4:911:231#0/1  
aab^bbb\_aa\_aaaaa\_aaa^`Xa^a`]YX]\_`a`\_`^\_`^  
@HWI-EAS443:3:4:942:685#0/1  
CACTTGGAACAGATTGCTGATTACAGCATCGGTCTCAC  
+HWI-EAS443:3:4:942:685#0/1  
[bbabbbbab\_babba\_`bbabb]babbabbabaY`a\_b^  
@HWI-EAS443:3:4:951:1884#0/1  
GATCACTTGAATCGCTGCATCTGCACTCCCATTCGCTTCT

+HWI-EAS443:3:4:951:1884#0/1  
aaaaaZaaa`a^\_aZ¥a`\_XQ[a\_X\_\_^][\_]ZW]XS¥¥]  
@HWI-EAS443:3:4:952:940#0/1  
GGATTACTGATCGTCTTTTTTTCAAATGTATTTATCGTTCG  
+HWI-EAS443:3:4:952:940#0/1  
ab`aaaaaaa`\_a^\_a`aaa`^a\_\_`a¥]aa\_\_`\_\_\_\_[^  
@HWI-EAS443:3:4:95:225#0/1  
GATCACTTGAATCGCTGCATCTGCACTCCCATTTCGCTTCT  
+HWI-EAS443:3:4:95:225#0/1  
\_P\_aa\_bbabb`aa`aaaXVa\_\_¥]\_\_Z¥S`\_\_¥WZ¥¥]  
@HWI-EAS443:3:50:1062:1760#0/1  
ATACAACAGGATGGGAACAGTGACCACAGAAGCTGCTTTT  
+HWI-EAS443:3:50:1062:1760#0/1  
aaa\_ba[^\_``aaa`ab\_aaUaa]]a`aa\_a`¥`\_]\_`]^  
@HWI-EAS443:3:50:1196:1579#0/1  
GTTCCGGTCCCCATTCCCATTTAGGGCATTTTGGACAAAG  
+HWI-EAS443:3:50:1196:1579#0/1  
``\_a`aa\_aa^^[]a``]\_aa`a\_]V]aaaT\_T¥W`]¥Z  
@HWI-EAS443:3:50:1220:444#0/1  
CGCGCAGAGACTGGAAAGTGTCTTTGCAGGAAAGAACACA  
+HWI-EAS443:3:50:1220:444#0/1  
aa[\_W][W\_T0^Z[X^\_V\_bZZUWW[SVZ^WWZH]]U[RZ  
@HWI-EAS443:3:50:1225:392#0/1  
CCACTTGTGAACAGATTGCTGATTCACAGCATCGGTCTCA  
+HWI-EAS443:3:50:1225:392#0/1  
\_`bbbbbaa^a^a\_bbbbbaaabbb^aaba]b\_S\_b`ba\_  
@HWI-EAS443:3:50:1233:259#0/1  
GGAGGTTGCTAATCAGACTAGGCAGATGGTACATGCAATG  
+HWI-EAS443:3:50:1233:259#0/1  
\_b`bbab`abbaaab]Yaaa`\_a`a^`\_`]aa`^`\_a  
@HWI-EAS443:3:50:1258:592#0/1  
CATTTGAAAAAAGACGATCAGTAATCCACAATATCAGGT  
+HWI-EAS443:3:50:1258:592#0/1  
abbbbbbbbbbbabbabbbZYY[T^[RGWWW\_^0[^MU]UG  
@HWI-EAS443:3:50:1415:469#0/1  
CACTCCCATTTCGCTTCTGGTAGGCCTGCAAATTTTCAAGA  
+HWI-EAS443:3:50:1415:469#0/1  
aabbaabbbbaabbbba`abbaabb`bbbbbbbabaaa  
@HWI-EAS443:3:50:1492:345#0/1  
GGTGTCACTAAGCTATTCAACTGGTGCACCTGCCAGTTGC  
+HWI-EAS443:3:50:1492:345#0/1  
^aR`a\_bbabab\_bbbbbbaa\_\_¥``aab`aa`abaaa\_  
@HWI-EAS443:3:50:1517:1246#0/1  
CTTGTGAACAGATTGCTGATTCACAGCATCGGTCTCACAG  
+HWI-EAS443:3:50:1517:1246#0/1  
abaa]S[`abb\_baaaab]\_a]aZaa\_\_aaaaSH^\_aR\_]`  
@HWI-EAS443:3:50:1667:2040#0/1  
GGGCCAAGGAGGTGTCACTAAGCTATTCAACTGGTGCACCT  
+HWI-EAS443:3:50:1667:2040#0/1  
``\_]`\_a\_]`b^`^aa`aa`Xaaba````\_`aa^a][¥W



@HWI-EAS443:3:50:1667:541#0/1  
CATTCTGTTTTTCATGCCTGATTAGTGGATTGGTGGTAGTA  
+HWI-EAS443:3:50:1667:541#0/1  
aab`b^\_[baaZ^aaaaba`b]b[\_]^`\_¥]]V\_HFQQB  
@HWI-EAS443:3:50:286:398#0/1  
CAAGTGGCACACTAGACCAAAGCAGCTTCTGTGGTCA  
+HWI-EAS443:3:50:286:398#0/1  
aZIZZ^^]a`]aa[]^[[¥^YY]\_`¥¥]]a]]ZISXQ[X  
@HWI-EAS443:3:50:346:598#0/1  
CTCTCGTCATTGCAGCAAATATCATTGGGATCTTGCACCT  
+HWI-EAS443:3:50:346:598#0/1  
`bbb`a]abbbbbbbbaabab`abaaaba\_babaa`\_a  
@HWI-EAS443:3:50:391:231#0/1  
CGTATTTAAAGCGACGATAAATACATTTGAAAAAAGACG  
+HWI-EAS443:3:50:391:231#0/1  
ab`a`bbaa^aba^ba\_aaa\_a``ab\_aaaaaaaaaa[¥`  
@HWI-EAS443:3:50:402:1135#0/1  
GGCCTCATATACAACAGGATGGGAACAGTGACCACAGAAG  
+HWI-EAS443:3:50:402:1135#0/1  
aa^ababbbbaaba\_bbb\_abaa\_a`ab`bb\_Z¥\_aaa`a  
@HWI-EAS443:3:50:402:961#0/1  
GGAGGTTGCTAATCAGACTAGGCAGATGGTACATGCAATG  
+HWI-EAS443:3:50:402:961#0/1  
aaRaaTa\_\_a[W^Pa`U^^]Z[aTY``HUQ\_Y\_]]]U[  
@HWI-EAS443:3:50:461:1197#0/1  
GGAGTGCAGATGCAGCGATTCAAGTGATCCTCTCGTCATT  
+HWI-EAS443:3:50:461:1197#0/1  
aaabaaabbabbab`ba\_\_a`aa\_\_a`b^aa`a]a¥\_``a  
@HWI-EAS443:3:50:487:684#0/1  
CTCCCATTCGCTTCTGGTAGGCCTGCAAATTTTCAAGAAG  
+HWI-EAS443:3:50:487:684#0/1  
abbba[bbaabbbbaaaabab`bbbaabbbbbbbaabbbba  
@HWI-EAS443:3:50:625:386#0/1  
TGCAGATGCAGCGATTCAAGTGATCCTCTCGTCATTGCAG  
+HWI-EAS443:3:50:625:386#0/1  
\_`\_S¥b`b[babaYUK`]b]`[`¥VaVb``^`\_`bb\_M]\_  
@HWI-EAS443:3:50:658:616#0/1  
TGGGCCTCATATACAACAGGATGGGAACAGTGACCACAGA  
+HWI-EAS443:3:50:658:616#0/1  
aa`[`abaaaba`aa`aaa\_`¥`\_`¥``[\_`[R\_T\_X^  
@HWI-EAS443:3:50:66:1381#0/1  
AACAGTGACCACAGAAGCTGCTTTTGGTCTAGTGTGTGCC  
+HWI-EAS443:3:50:66:1381#0/1  
\_bYaa\_bb\_Yab`V]aa\_\_aZ^a\_¥QXX\_a^`U`\_\_^^]]  
@HWI-EAS443:3:50:768:616#0/1  
CATCTGCACTCCCATTTCGCTTCTGGTAGGCCTGCAAATTT  
+HWI-EAS443:3:50:768:616#0/1  
]IYaaaS¥^Ua^XX`]L]Y]\_`abZZ¥LLP¥aX]ZXb`a  
@HWI-EAS443:3:50:770:201#0/1  
GTGACCACAGAAGCTGCTTTTGGTCTAGTGTGTGCCACTT

+HWI-EAS443:3:50:770:201#0/1  
\_a\_ba\_aY[[aaa^^`Z\_]ba[WI]]]KNa^a\_aX¥[]`  
@HWI-EAS443:3:50:801:1975#0/1  
GAGAGCCTCAAGATCTGTGTTCTTTCCTGCAAAGACACTT  
+HWI-EAS443:3:50:801:1975#0/1  
abb\_\_[bababbbb`ba`bab\_bbaXXabb]bababZ`a  
@HWI-EAS443:3:50:865:306#0/1  
AGCTGCTTTTGGTCTAGTGTGTGCCACTTGTGAACAGATT  
+HWI-EAS443:3:50:865:306#0/1  
^\_\_abaabbbbb`aabb`ab\_ba`babbb\_aaaabb`aa  
@HWI-EAS443:3:50:897:848#0/1  
CAGCAATCTGTTCAAGTGGCACACACTAGACCAAAAGC  
+HWI-EAS443:3:50:897:848#0/1  
a^¥`bb]\_a\_Wa^^`\_`¥`aab`^b\_^¥P\_b]aaJ  
@HWI-EAS443:3:50:903:848#0/1  
CAAGATTGGTCTTGTCTTTAGCCATTCCATGAGAGCCTCA  
+HWI-EAS443:3:50:903:848#0/1  
\_bbaabaab[aaabY\_b\_ba\_aaaaaTabaabaWaTa¥a  
@HWI-EAS443:3:50:936:930#0/1  
ATCCCAATGATATTTGCTGCAATGACGAGAGGATCACTTG  
+HWI-EAS443:3:50:936:930#0/1  
aa`a`\_bbb`\_`aa\_b`a`]a`a`\_Va`\_\_`\_YH^U\_]`  
@HWI-EAS443:3:51:1032:805#0/1  
GCCCCATGGAACGTTATTTCTCTTTTGAGCTTCTTGATA  
+HWI-EAS443:3:51:1032:805#0/1  
`bbba\_\_\_`b`abbabbbababaabbab`aaaba\_a\_ba  
@HWI-EAS443:3:51:1116:905#0/1  
TGTTCAACAAGTGGCACACACTAGACCAAAAGCAGCTTCTG  
+HWI-EAS443:3:51:1116:905#0/1  
aaaa`a`\_\_`\_a¥Ya^aZ]R`¥]W`a`^`\_[a^Ya\_V[Q  
@HWI-EAS443:3:51:1155:14#0/1  
GGATTACTGATCGTCTTTTTTTCAAATGTATTTATCGTCG  
+HWI-EAS443:3:51:1155:14#0/1  
^^`\_a\_Zaaa`a^Wbbbab`a\_\_aa`b[\_aba[^X`[Y]  
@HWI-EAS443:3:51:1168:695#0/1  
CACTAAGCTATTCAACTGGTGCACCTGCCAGTTGCATGGG  
+HWI-EAS443:3:51:1168:695#0/1  
ab`b`bbababbbba`baV[aab\_aa\_b\_ab\_b`a]aa]`  
@HWI-EAS443:3:51:116:987#0/1  
GTGGATTACTGATCGTCTTTTTTTCAAATGTATTTATCGT  
+HWI-EAS443:3:51:116:987#0/1  
`S\_\_\_`]¥^]¥U\_ZaXY^Y\_^\_^\_]`[\_¥`X]\_\_\_¥ZT^Y  
@HWI-EAS443:3:51:1342:1369#0/1  
CATGGCCTCATATACAACAGGATGGGAACAGTGACCACA  
+HWI-EAS443:3:51:1342:1369#0/1  
`SQ¥\_¥ZOX]YT^SLTXPDOX^XQ\_VOZ[LZ^S\_BBBBBB  
@HWI-EAS443:3:51:1358:160#0/1  
CACTAGACCAAAAGCAGCTTCTGTGGTCACTGTTCCCATC  
+HWI-EAS443:3:51:1358:160#0/1  
`baaab`aa`baaZaa\_a``]S][`Ra\_^\_]G\_U]\_UVP

@HWI-EAS443:3:51:1419:1862#0/1  
CTCCCATTGCTTCTGGTAGGCCTGCAAATTTTCAAGAAG  
+HWI-EAS443:3:51:1419:1862#0/1  
`a[^bXP]\_bb^Z\_[[baa\_\_aXa`\_aabb`\_aa\_^a  
@HWI-EAS443:3:51:1500:1816#0/1  
GTGGATTACTGATCGTCTTTTTTCAAATGTATTTATCGT  
+HWI-EAS443:3:51:1500:1816#0/1  
`^baa`baXbab\_]¥b`aba\_baaK`ba]^abba\_bb^`^  
@HWI-EAS443:3:51:1751:197#0/1  
CCTTCTTGA AAAATTTGCAGGCCTACCAGAAGCGAATGGGA  
+HWI-EAS443:3:51:1751:197#0/1  
abbbabbbbabbbbabbbU\_aabbabbab\_baba`ba^]a  
@HWI-EAS443:3:51:332:159#0/1  
ACCTGATATTGTGGATTACTGATCGTCTTTTTTCAAATG  
+HWI-EAS443:3:51:332:159#0/1  
]abab][]ba`I^\_Saaa]^aXaRb^)`^aaaa¥\_ZQ¥  
@HWI-EAS443:3:51:335:1050#0/1  
GGGCCTCATATACAACAGGATGGGAACAGTGACCACAGAA  
+HWI-EAS443:3:51:335:1050#0/1  
aaa]a`ba`\_aaa]aa`¥aaaa\_a\_aa^^`[U^aab^  
@HWI-EAS443:3:51:347:1322#0/1  
GCCTACCAGAAGCGAATGGGAGTGCAGATGCAGCGATTCA  
+HWI-EAS443:3:51:347:1322#0/1  
abaaa\_a[b`\_babTaaaa]bZVaaa`^`^`ab\_b`\_a\_\_  
@HWI-EAS443:3:51:347:727#0/1  
AAGCAGCTTCTGTGGTCACTGTTCCCATCCTGTTGTATAT  
+HWI-EAS443:3:51:347:727#0/1  
aaZa`\_aaa`\_bUP^[¥b^\_a¥[Q\_\_[]\_¥aa`\_a^¥\_¥V  
@HWI-EAS443:3:51:348:1551#0/1  
GCAATCTGTTCAAGTGGCACACACTAGACCAAAGCAG  
+HWI-EAS443:3:51:348:1551#0/1  
a\_]`aaaZ\_aS]\_`X`XES^`Z¥Y[^a^Xa\_¥a\_a¥YU¥\_  
@HWI-EAS443:3:51:375:53#0/1  
GGCACACACTAGACCAAAGCAGCTTCTGTGGTCACTGTT  
+HWI-EAS443:3:51:375:53#0/1  
abbb\_bab`aabaa``baaa\_aa\_aa`ba\_\_a`R\_TaaZ`  
@HWI-EAS443:3:51:505:98#0/1  
CAGGCCTACCAGAAGCGAATGGGAGTGCAGATGCAGCGAT  
+HWI-EAS443:3:51:505:98#0/1  
a`Z]bbabbZababbaa`Ybbba\_bWbTabPL[aaa`aXa  
@HWI-EAS443:3:51:544:1081#0/1  
GTCCCCATTCCCATTTAGGGCATTGTTGGACAAAGCGTCTA  
+HWI-EAS443:3:51:544:1081#0/1  
aabaaababababaaaaa\_ba`abaaaabaaa`a`a\_^`a  
@HWI-EAS443:3:51:558:1159#0/1  
TGGGCCTCATATACAACAGGATGGGAACAGTGACCACAGA  
+HWI-EAS443:3:51:558:1159#0/1  
abab`ababbbbaaaaaabbbaaaaa¥aaaa¥`a`^`^`\_a`  
@HWI-EAS443:3:51:637:1491#0/1  
CATTTGAAAAAAGACGATCAGTAATCCACAATATCAGGT

+HWI-EAS443:3:51:637:1491#0/1  
abbbbb`bbbaa¥aaaab\_]¥XJX^]W)`^aaZa¥LWYTS  
@HWI-EAS443:3:51:665:241#0/1  
CGATGCTGTGAATCAGCAATCTGTTCAACAAGTGGCACACA  
+HWI-EAS443:3:51:665:241#0/1  
abbabbbbabbaaabbbbabaaa\_aaab`baabaa\_a  
@HWI-EAS443:3:51:887:2032#0/1  
GACCGATGCTGTGAATCAGCAATCTGTTCAACAAGTGGCAC  
+HWI-EAS443:3:51:887:2032#0/1  
\_bbabbbabbaabbbbaaabab`\_a^\_aaba\_a]S`¥  
@HWI-EAS443:3:52:1010:1155#0/1  
CTGATCGCTTTTTTTCAAATGTATTTATCGTCGCTTTAA  
+HWI-EAS443:3:52:1010:1155#0/1  
abaab^b\_bbbbbba`babab`aababa]]\_aa`bbaa`  
@HWI-EAS443:3:52:1052:431#0/1  
CTAGCACTACGGCAAAGGCTATGGAACAGATGGCTGGATC  
+HWI-EAS443:3:52:1052:431#0/1  
abba\_babb`ba`a`\_ab\_aaa``¥`\_aa[\_¥^S]aa¥[W  
@HWI-EAS443:3:52:1054:1619#0/1  
CATATACAACAGGATGGGAACAGTGACCACAGAAGCTGCT  
+HWI-EAS443:3:52:1054:1619#0/1  
\_Z¥aZ0]W\_¥`\_[WY\_Z[WS]¥YL\_] ^XSQT¥ZV¥[UVYZ  
@HWI-EAS443:3:52:108:1718#0/1  
CTCATATACAACAGGATGGGAACAGTGACCACAGAAGCTG  
+HWI-EAS443:3:52:108:1718#0/1  
aa`^ [X`]]R¥Q¥QNWUaZZU^U^PN]]UOZWQZTVXJMI  
@HWI-EAS443:3:52:1199:1217#0/1  
GACCGATGCTGTGAATCAGCAATCTGTTCAACAAGTGGCAC  
+HWI-EAS443:3:52:1199:1217#0/1  
a`^`^`a````[a`````¥\_\_\_Wa```W\_W``¥W\_¥¥`Z  
@HWI-EAS443:3:52:1230:1563#0/1  
CAAGATTGGTCTTGTCTTTAGCCATTCCATGAGAGCCTCA  
+HWI-EAS443:3:52:1230:1563#0/1  
aabb]ab^V``bbb`\_abaZYOWY^aT^P\_]\_^] ^X]`a  
@HWI-EAS443:3:52:1269:1246#0/1  
CATTTGAAAAAAGACGATCAGTAATCCACAATATCAGGT  
+HWI-EAS443:3:52:1269:1246#0/1  
`bbbbbbbbbbbaabbVQ^[RTXLYZUYa^TZ]S[Z[G  
@HWI-EAS443:3:52:1600:908#0/1  
TGCAGATGCAGCGATTCAAGTGATCCTCTCGTCATTGCAG  
+HWI-EAS443:3:52:1600:908#0/1  
`][Z`Z`\_ ^X[aVR¥^```]`^]\_^] ^PXU\_\_``\_SUU  
@HWI-EAS443:3:52:170:867#0/1  
GGGCCTCATATACAACAGGATGGGAACAGTGACCACAGAA  
+HWI-EAS443:3:52:170:867#0/1  
a]X`G\_aaaU\_\_aaX]P`\_VXaaa^[UaaTa]\_X\_\_[\_`Z^  
@HWI-EAS443:3:52:207:1720#0/1  
AATCAGACTAGGCAGATGGTACATGCAATGAGAACTATTG  
+HWI-EAS443:3:52:207:1720#0/1  
aabbaaaaaba`aa`aaaa[\_^a]a\_^a`a\_a\_\_```a\_¥

@HWI-EAS443:3:52:221:439#0/1  
TGCACCTGATATTGTGGATTACTGATCGTCTTTTTTTTCAA  
+HWI-EAS443:3:52:221:439#0/1  
abbaaab`aaaab^\_aaaa`a`\_a¥\_`aaaaa[\_\_\_  
@HWI-EAS443:3:52:306:955#0/1  
CAAGATTGGTCTTGTCTTTAGCCATTCCATGAGAGCCTCA  
+HWI-EAS443:3:52:306:955#0/1  
``\_a\_abaaYab`^W¥¥\_\_0\_aYZ[a[[^a`Za^¥a]\_\_^  
@HWI-EAS443:3:52:360:937#0/1  
GCCTCATATACAACAGGATGGGAACAGTGACCACAGAAGC  
+HWI-EAS443:3:52:360:937#0/1  
a\_``\_b\_a`a\_a¥^a\_\_\_`a¥¥U\_\_¥`¥VT^\_\_a¥W^Y  
@HWI-EAS443:3:52:368:1208#0/1  
AGAGGATCACTTGAATCGCTGCATCTGCACTCCCATTTCGC  
+HWI-EAS443:3:52:368:1208#0/1  
`^`b\_aSaQUIU)`W`¥SR¥U^T[T\_[a`^HR\_Q]\_XP\_P  
@HWI-EAS443:3:52:384:252#0/1  
GCCTACCAGAAGCGAATGGGAGTGCAGATGCAGCGATTCA  
+HWI-EAS443:3:52:384:252#0/1  
a[aa`[`[¥VU`\_`SR\_a`\_¥\_N\_ZZ`ZUZUV`Z]USSNS  
@HWI-EAS443:3:52:407:1555#0/1  
CTCTCGTCATTGCAGCAAATATCATTGGGATCTTGCACCT  
+HWI-EAS443:3:52:407:1555#0/1  
`¥b`aYS[a^W])`Y^¥R`YH]YOPT)^TZ[Z^Z[U[  
@HWI-EAS443:3:52:491:126#0/1  
CCGATGCTGTGAATCAGCAATCTGTTCAACAAGTGGCACAC  
+HWI-EAS443:3:52:491:126#0/1  
abbbababbababbaaaaaa`aa``a]``Ua\_`\_Z\_]`  
@HWI-EAS443:3:52:504:824#0/1  
ATCTGTTCAACAAGTGGCACACACTAGACCAAAGCAGCTT  
+HWI-EAS443:3:52:504:824#0/1  
¥abb`\_`Y\_aZ¥Z]Za[Zaab\_TXaa\_a`Y\_]\_\_]aZZa  
@HWI-EAS443:3:52:506:786#0/1  
GTGAATCAGCAATCTGTTCAACAAGTGGCACACACTAGACC  
+HWI-EAS443:3:52:506:786#0/1  
aa\_V\_Va¥NU¥XYPTSSW¥NY``HYU^^Y\_T\_PVX`VTQ  
@HWI-EAS443:3:52:519:1522#0/1  
CTTGTGAACAGATTGCTGATTCACAGCATCGGTCTCACAG  
+HWI-EAS443:3:52:519:1522#0/1  
\_`Xa\_`baa[\_]\_aab]XZU^]\_`aa\_a\_\_a]U^]SQJMW  
@HWI-EAS443:3:52:548:647#0/1  
TGGGGCCAAGGAGGTGCTACTAAGCTATTCAACTGGTGCA  
+HWI-EAS443:3:52:548:647#0/1  
aa^aaaa`^ba`aa^a^a`\_aaaa[\_`\_a\_]¥¥`\_¥\_¥\_  
@HWI-EAS443:3:52:646:698#0/1  
AGACTGGAAAGTGTCTTTGCAGGAAAGAACACAGATCTTG  
+HWI-EAS443:3:52:646:698#0/1  
\_bbabaaa\_\_[`b`abbaaZWaba`abW]¥P\_`a\_bbaaa  
@HWI-EAS443:3:52:730:1107#0/1  
GACCACAGAAGCTGCTTTTGGTCTAGTGTGTGCCACTTGT

+HWI-EAS443:3:52:730:1107#0/1  
^a\_]\_`\_UZ\_a][a`]^`^aXXJ^^]a`\_UZa]ZXVHZW^J  
@HWI-EAS443:3:52:861:629#0/1  
CGTCTTTTTTCAAATGTATTTATCGTCGCTTTAAATACG  
+HWI-EAS443:3:52:861:629#0/1  
abaabbbbbbb`baaab\_aabaaaa`^a\_bab\_\_`aa\_a  
@HWI-EAS443:3:53:103:1721#0/1  
CGCTTCTGGTAGGCCTGCAAATTTTCAAGAAGGTCATCTT  
+HWI-EAS443:3:53:103:1721#0/1  
]abbbbabbb]ba\_bbbbbbaababbbbabbb]abbbabb  
@HWI-EAS443:3:53:1061:1590#0/1  
CAGTGACCACAGAAGCTGCTTTTGGTCTAGTGTGCCAC  
+HWI-EAS443:3:53:1061:1590#0/1  
a]SK¥aS¥`U`aaVbK`U¥¥b^aYba^W`b]¥Ua`\_Q`bH  
@HWI-EAS443:3:53:1164:549#0/1  
GGGCCTCATATACAACAGGATGGGAACAGTGACCACAGAA  
+HWI-EAS443:3:53:1164:549#0/1  
abbbbbb`babb`bbbbbabbbbabbbbabbbbabbbba  
@HWI-EAS443:3:53:1252:1575#0/1  
GAGTTGCTAATCAGACTAGGCAGATGGTACATGCAATGA  
+HWI-EAS443:3:53:1252:1575#0/1  
^\_b`]¥\_\_bbabYa`aaab``[a`a[`a`\_TZXZ[b¥XXa  
@HWI-EAS443:3:53:1282:1340#0/1  
GCCTACCAGAAGCGAATGGGAGTGCAGATGCAGCGATTCA  
+HWI-EAS443:3:53:1282:1340#0/1  
a\_\_baaa`a]Xa\_`R`a`¥R`\_¥aSYa\_``\_¥a^a\_WNTU  
@HWI-EAS443:3:53:1367:419#0/1  
GCAAGATCCCAATGATATTTGCTGCAATGACGAGAGGATC  
+HWI-EAS443:3:53:1367:419#0/1  
`bbbb\_S¥baa[`b\_bbabababb\_babba]^\_aa\_]`H  
@HWI-EAS443:3:53:13:862#0/1  
ACAGAAGCTGCTTTTGGTCTAGTGTGTGCCACTTGTGAAC  
+HWI-EAS443:3:53:13:862#0/1  
a`b\_\_`T¥\_b``baaba\_a`]ZP\_R]Z][`ZL]a¥¥¥¥[N  
@HWI-EAS443:3:53:1417:1993#0/1  
CACTAAGCTATTCAACTGGTGCACCTGCCAGTTGCATGGG  
+HWI-EAS443:3:53:1417:1993#0/1  
abSbbaabbbb\_]babb\_a`]Sb\_bbb\_a[a`]`\_baaaa  
@HWI-EAS443:3:53:172:553#0/1  
GCTCTATCCATGTTGTTCCGGTCCCCATTTCCATTTAGGG  
+HWI-EAS443:3:53:172:553#0/1  
^bbbaabb`]bbbaaababbaaaa`ab`aaZaaaa\_a\_T  
@HWI-EAS443:3:53:1758:1561#0/1  
GCTAGCACTACGGCAAAGGCTATGGAACAGATGGCTGGAT  
+HWI-EAS443:3:53:1758:1561#0/1  
a[^aVV\_]a]b]PQP[aaU^L[URYJPKQDIS^U`\_QLN  
@HWI-EAS443:3:53:392:588#0/1  
CTGCTTTTGGTCTAGTGTGTGCCACTTGTGAACAGATTGC  
+HWI-EAS443:3:53:392:588#0/1  
abbbbabbbbaabbbbbbababaaaaaaaabaa[``aaaaX

@HWI-EAS443:3:53:405:911#0/1  
CAAGATCTGTGTTCTTTCCTGCAAAGACACTTCCAGTCT  
+HWI-EAS443:3:53:405:911#0/1  
\_baaaaabbabababbbb]aa`a`aababbbaab^aaa``  
@HWI-EAS443:3:53:419:981#0/1  
ACTCGATCCAGCCATCTGTTCCATAGCCTTTGCCGTAGTG  
+HWI-EAS443:3:53:419:981#0/1  
aaaab`^a\_]\_`aaaaa\_`[```a`[]^^^XXZ^NY]W[  
@HWI-EAS443:3:53:434:1850#0/1  
CTTGCACCTGATATTGTGGATTACTGATCGTCTTTTTTTC  
+HWI-EAS443:3:53:434:1850#0/1  
abbabb^\_\_\_ababbaY]\_`bbbbba`aa`[]babaab\_  
@HWI-EAS443:3:53:506:1192#0/1  
CTTGAATCGCTGCATCTGCACTCCCATTGCTTCTGGTAG  
+HWI-EAS443:3:53:506:1192#0/1  
abbbbbbbabab\_]ababbbbbabababaaaaabbbb\_aa  
@HWI-EAS443:3:53:654:271#0/1  
ATCCCAATGATATTTGCTGCAATGACGAGGATCACTTG  
+HWI-EAS443:3:53:654:271#0/1  
`ba```a`baa\_a`aaaa\_a``aa`b\_a\_a\_\_`]-Y\_`\_  
@HWI-EAS443:3:53:675:1171#0/1  
GGTGTCACTAAGCTATTCAACTGGTGCCTTGCCAGTTGC  
+HWI-EAS443:3:53:675:1171#0/1  
a^TLZ^`\_aabaY[Zaa\_ZV[\_aWWa]aR``]ZVN]R]^U  
@HWI-EAS443:3:53:703:169#0/1  
GGTTGCTAATCAGACTAGGCAGATGGTACATGCAATGAGA  
+HWI-EAS443:3:53:703:169#0/1  
]`Ybbab[b[¥H`aa`ab\_\_`X\_baMMZ`]^ZZ\_[a^`P  
@HWI-EAS443:3:53:891:572#0/1  
GTCCTGTTCCCATCCTGTTGTATATGAGGCCCATGCAAC  
+HWI-EAS443:3:53:891:572#0/1  
\_[\_^^\_QOXaa\_\_¥¥^^\_Y^^`\_^]VXQ\_UXYZMNU]``T  
@HWI-EAS443:3:53:89:1429#0/1  
CTTGCACCTGATATTGTGGATTACTGATCGTCTTTTTTTC  
+HWI-EAS443:3:53:89:1429#0/1  
abbbbbbabbbabbbb\_ba`abaaaaa`b`\_aaabaaZ  
@HWI-EAS443:3:53:920:909#0/1  
TTGGGATCTTGCACCTGATATTGTGGATTACTGATCGTCT  
+HWI-EAS443:3:53:920:909#0/1  
aa^a`aabbaba`\_\_bb`aabab\_baaaaa``baaaa\_]a  
@HWI-EAS443:3:54:1097:1791#0/1  
GCCTCATATACAACAGGATGGGAACAGTGACCACAGAAGC  
+HWI-EAS443:3:54:1097:1791#0/1  
a`^aaaaaaaaaaa]`aa`\_`aa\_\_``\_V`¥aU`¥\_\_\_\_^¥¥  
@HWI-EAS443:3:54:1192:708#0/1  
GGGGCCAAGGAGGTGTCCTAAGCTATTCAACTGGTGCAC  
+HWI-EAS443:3:54:1192:708#0/1  
a`Ya^^bbb[aaa\_ba\_aaaabaaaaaaaaa\_a^OY]\_aW  
@HWI-EAS443:3:54:1237:1421#0/1  
GGGCCTCATATACAACAGGATGGGAACAGTGACCACAGAA

+HWI-EAS443:3:54:1237:1421#0/1  
aaXPPZZUUUVWZVX[0¥a¥[X\_]\_]PYFV^]ZNZNT¥[[  
@HWI-EAS443:3:54:1278:1430#0/1  
CAAGTGGCACACACTAGACCAAAAGCAGCTTCTGTGGTCA  
+HWI-EAS443:3:54:1278:1430#0/1  
`b\_abbbaabb\_b`abb`^ab[ba`]`\_baZb\_a]a`][  
@HWI-EAS443:3:54:127:1519#0/1  
AGGCCATGGAGTTGCTAATCAGACTAGGCAGATGGTACA  
+HWI-EAS443:3:54:127:1519#0/1  
a\_U`aabba[b`Yaaa^`aa`\_\_¥]`[[Y`ZY]X^T^L¥\_\_  
@HWI-EAS443:3:54:1295:1714#0/1  
AGATGGTACATGCAATGAGAACTATTGGGACTCATCCTAG  
+HWI-EAS443:3:54:1295:1714#0/1  
`bbabaaaabbbabbbb`^^a\_baaaaabaab`aaa]aa\_  
@HWI-EAS443:3:54:1365:1020#0/1  
GTTCCGGTCCCCATTCCCATTTAGGGCATTGTTGGACAAAG  
+HWI-EAS443:3:54:1365:1020#0/1  
`]]`V]]¥\_X`T]]`^^¥`a`\_`^]X¥¥`^^¥`^¥V¥¥¥  
@HWI-EAS443:3:54:1428:818#0/1  
GAGGATCACTTGAATCGCTGCATCTGCACTCCCATTGCT  
+HWI-EAS443:3:54:1428:818#0/1  
aaabab`babbb`ab[a`aa`abZaaa\_`a\_¥¥\_`b^[T`  
@HWI-EAS443:3:54:15:138#0/1  
GCAATGACGAGAGGATCACTTGAATCGCTGCATCTGCACT  
+HWI-EAS443:3:54:15:138#0/1  
a[[G[a\_]\_[a\_[KY\_\_[S`\_`U]RRVNOSWSV¥VXZVVV  
@HWI-EAS443:3:54:1603:1016#0/1  
TGGGCCTCATATACAACAGGATGGGAACAGTGACCACAGA  
+HWI-EAS443:3:54:1603:1016#0/1  
aZ[\_a\_b¥`b`aa\_a\_`\_`\_\_aaa`Q\_\_\_\_`Wa``[``]a  
@HWI-EAS443:3:54:1674:1315#0/1  
CACACTAGACCAAAAGCAGCTTCTGTGGTCACTGTTCCCA  
+HWI-EAS443:3:54:1674:1315#0/1  
¥a\_S]\_babab\_Z]\_a\_baabb`\_T^bY\_bb`abaa[b``  
@HWI-EAS443:3:54:234:1996#0/1  
TCCCAATGATATTTGCTGCAATGACGAGAGGATCACTTGA  
+HWI-EAS443:3:54:234:1996#0/1  
aabbb``]aababaaaabaaaaaaa`^aa\_`\_`a`\_\_a  
@HWI-EAS443:3:54:343:509#0/1  
TGCCACTTGTGAACAGATTGCTGATTACAGCATCGGTCT  
+HWI-EAS443:3:54:343:509#0/1  
abbbbbbbbabaaaababaaaabaaaabaab`ba\_ba¥^a  
@HWI-EAS443:3:54:368:56#0/1  
GCCTCATATACAACAGGATGGGAACAGTGACCACAGAAGC  
+HWI-EAS443:3:54:368:56#0/1  
a\_¥`\_aa`aa\_\_¥^aa¥^``¥¥¥¥`Y\_`¥¥¥W¥`YY^U  
@HWI-EAS443:3:54:42:358#0/1  
GATCCCAATGATATTTGCTGCAATGACGAGAGGATCACTT  
+HWI-EAS443:3:54:42:358#0/1  
aaabab`^bab]W^]WaZT]a`\_\_a[``]L^P\_`UVS]^T



@HWI-EAS443:3:54:642:1418#0/1  
GACCGATGCTGTGAATCAGCAATCTGTTCCACAAGTGGCAC  
+HWI-EAS443:3:54:642:1418#0/1  
aaaa\_ZYbaaaZ]URaa\_]aa^a\_Z¥`¥XZ``V`^Za\_  
@HWI-EAS443:3:54:769:504#0/1  
GCCTCATATACAACAGGATGGGAACAGTGACCACAGAAGC  
+HWI-EAS443:3:54:769:504#0/1  
a\_abaabaaaaa`\_aa\_a¥aa\_] [``Waa\_[`\_\_a¥^a[  
@HWI-EAS443:3:54:803:684#0/1  
CCGAACAACATGGATAGAGCAGTTAAACTATACAAGAAGC  
+HWI-EAS443:3:54:803:684#0/1  
abbbbabbbaab`ababab`ababab`Rbaa``aaa`abb  
@HWI-EAS443:3:54:812:1614#0/1  
ATGGGCTCATATACAACAGGATGGGAACAGTGACCACAG  
+HWI-EAS443:3:54:812:1614#0/1  
`a``\_Xaaabb\_\_a`a`\_]a¥`X``^`^\_[`Sa`\_\_\_\_^`^`\_  
@HWI-EAS443:3:54:980:831#0/1  
CAGTGACCACAGAAGCTGCTTTTGGTCTAGTGTGTGCCAC  
+HWI-EAS443:3:54:980:831#0/1  
a`\_Sbba^`\_YaaZaa`¥^\_a¥]URV[aa[a[\_`\_Y`ZR  
@HWI-EAS443:3:54:995:1209#0/1  
CACTAGACCAAAAAGCAGCTTCTGTGGTCACTGTTCCCATC  
+HWI-EAS443:3:54:995:1209#0/1  
U\_¥¥WaZY\_^YM`bb]bZ\_[W¥\_HZ]\_\_\_¥b\_W\_ab[U`S  
@HWI-EAS443:3:55:1020:1185#0/1  
CCAAAAGCAGCTTCTGTGGTCACTGTTCCCATCCTGTTGT  
+HWI-EAS443:3:55:1020:1185#0/1  
aa]`\_``^`^aaa\_[^`aaa¥aa`\_`[a¥ZZV[[Z\_Z[aZV  
@HWI-EAS443:3:55:1022:1871#0/1  
CATGGCCTCATATACAACAGGATGGGAACAGTGACCACA  
+HWI-EAS443:3:55:1022:1871#0/1  
]`XWYb`Xbab^bZaZ]b\_[D[\_Sa`Zab```[a]aZ`\_\_  
@HWI-EAS443:3:55:1078:336#0/1  
CAAATCCTAAAATTCCCTTAGTCAGAGGTGACAAGATTGG  
+HWI-EAS443:3:55:1078:336#0/1  
aaaYaaabaababbbaa^baaba`ababa^aaaaab\_a`ba  
@HWI-EAS443:3:55:113:832#0/1  
GAATCAGCAATCTGTTCCACAAGTGGCACACACTAGACCAA  
+HWI-EAS443:3:55:113:832#0/1  
a`abaaaaaaabbaYaa`aa`b\_a[^`a`aaaa\_\_\_^Y  
@HWI-EAS443:3:55:1171:288#0/1  
ATACAACAGGATGGGAACAGTGACCACAGAAGCTGCTTTT  
+HWI-EAS443:3:55:1171:288#0/1  
ab`aaa]aab\_\_a`^a`\_a[a`\_] [\_\_a\_\_Z^`X^]\_`  
@HWI-EAS443:3:55:1191:718#0/1  
GGAGGTTGCTAATCAGACTAGGCAGATGGTACATGCAATG  
+HWI-EAS443:3:55:1191:718#0/1  
^aZ`\_Q`b]``a¥V]a`a\_¥a]¥¥]X[Y`Z^X[[¥R¥V¥X  
@HWI-EAS443:3:55:1216:920#0/1  
CAATAGTTCTCATTGCATGTACCATCTGCCTAGTCTGATT

+HWI-EAS443:3:55:1216:920#0/1  
RPR[[WW\_U[\_V\_WV][Z¥aaV\_¥U]aba^\_\_[Y`b`\_aa  
@HWI-EAS443:3:55:1232:1012#0/1  
CCGTATTTAAAGCGACGATAAATACATTTGAAAAAAGAC  
+HWI-EAS443:3:55:1232:1012#0/1  
`Y`ZRQ¥bW¥a\_ab`[aabaXS¥`[]bb^SUaaa`Y][R  
@HWI-EAS443:3:55:1248:1538#0/1  
CTTCTTGAAAATTTGCAGGCCTACCAGAAGCGAATGGGAG  
+HWI-EAS443:3:55:1248:1538#0/1  
^X]\_]UU`baa`¥^¥Y`[XaaPSPY]¥Xa^aa\_`^Z`\_`  
@HWI-EAS443:3:55:1311:662#0/1  
ATCAGGTGCAAGATCCCAATGATATTTGCTGCAATGACGA  
+HWI-EAS443:3:55:1311:662#0/1  
abaa`babababaaaa`aababaaaaa`a\_a\_aaa]a`  
@HWI-EAS443:3:55:161:1842#0/1  
ATCAGACTAGGCAGATGGTACATGCAATGAGAACTATTGG  
+HWI-EAS443:3:55:161:1842#0/1  
aa`a\_baa`aa`a\_\_a`\_Ua\_`\_`Z\_\_`\_\_\_\_]`Y^\_^`^U  
@HWI-EAS443:3:55:20:370#0/1  
TGGGCCTCATATACAACAGGATGGGAACAGTGACCACAGA  
+HWI-EAS443:3:55:20:370#0/1  
ZbbZZZTaK\_[`R^`ba]`T¥]baZM¥ZV\_Naa¥]a`a`^  
@HWI-EAS443:3:55:260:1129#0/1  
GAGACCGATGCTGTGAATCAGCAATCTGTTCAAGTGGC  
+HWI-EAS443:3:55:260:1129#0/1  
aaaa`a^^`a\_a^a]¥^^Z]\_\_]\_¥\_QZVW^X[UYT^\_U  
@HWI-EAS443:3:55:293:457#0/1  
CTGGCTAGCACTACGGCAAAGGCTATGGAACAGATGGCTG  
+HWI-EAS443:3:55:293:457#0/1  
a`baaaaaab`a^`a]X¥a`]^`^\_`]^`a^\_YYZPX^[QP^  
@HWI-EAS443:3:55:317:535#0/1  
CACACACTAGACCAAAAGCAGCTTCTGTGGTCACTGTTCC  
+HWI-EAS443:3:55:317:535#0/1  
abaaa^`aabaa\_aY^a\_^\_a`aaaaV^`]\_\_\_\_aY]]^  
@HWI-EAS443:3:55:36:1728#0/1  
GGGAGTGCAGATGCAGCGATTCAAGTGATCCTCTCGTCAT  
+HWI-EAS443:3:55:36:1728#0/1  
aaa\_aYaa\_\_\_\_\_^^^\_a^^`\_`\_[Y^\_]Y]\_\_[VZ]]^  
@HWI-EAS443:3:55:373:1287#0/1  
CTAGTGTGTGCCACTTGTGAACAGATTGCTGATTCACAGC  
+HWI-EAS443:3:55:373:1287#0/1  
a\_I¥\_U]`]WZQTTZWYaWaa\_VZTYWWWVIUTTSYa^P`  
@HWI-EAS443:3:55:411:298#0/1  
CAATAGTTCTCATTGCATGTACCATCTGCCTAGTCTGATT  
+HWI-EAS443:3:55:411:298#0/1  
`aa[`bVYab^X[a[a\_aaa`a`\_\_aaa\_`aRaUZa`\_a\_  
@HWI-EAS443:3:55:432:1582#0/1  
CGTATTTAAAGCGACGATAAATACATTTGAAAAAAGACG  
+HWI-EAS443:3:55:432:1582#0/1  
`U¥`bb\_WW``Y`\_Z[¥Y^TVYY¥b¥¥\_\_Y`bb\_W[`a

@HWI-EAS443:3:55:443:1862#0/1  
CTTCTTGAAAATTTGCAGGCCTACCAGAAGCGAATGGGAG  
+HWI-EAS443:3:55:443:1862#0/1  
abbbbaabbababaaaba`a\_`aaaaa\_¥a\_aa\_\_\_a  
@HWI-EAS443:3:55:490:414#0/1  
ATACATTTGAAAAAAGACGATCAGTAATCCACAATATCA  
+HWI-EAS443:3:55:490:414#0/1  
abaaababbaaaaaa]a^`\_`]]\_¥NZ]WVXW\_[T`ZLS  
@HWI-EAS443:3:55:491:1253#0/1  
GCTACTACCACCAATCCACTAATCAGGCATGAAAACAGAA  
+HWI-EAS443:3:55:491:1253#0/1  
\_VQTLHa`WXXY¥`XQ]\_a^aU¥¥X`[a\_a¥XXU^\_\_\_\_  
@HWI-EAS443:3:55:52:332#0/1  
CTTGTCACCTCTGACTAAGGGAATTTTAGGATTTGTGTTC  
+HWI-EAS443:3:55:52:332#0/1  
]aY`ab^J^b^abZWa]T`^XRZZTX`]Va\_a`SX¥¥\_  
@HWI-EAS443:3:55:531:788#0/1  
GCCGAGATCGCGCAGAGACTGGAAAGTGTCTTTGCAGGAA  
+HWI-EAS443:3:55:531:788#0/1  
aaabaaa`aaa`[a^`^`\_^^¥\_W¥]\_^`¥ZTZ`\_WZ  
@HWI-EAS443:3:55:538:1410#0/1  
AAATGGGAATGGGGACCCGAACAACATGGATAGAGCAGTT  
+HWI-EAS443:3:55:538:1410#0/1  
aba[`]RR^aa````[^UXSTN¥]\_a`]]`a`X\_SYNOQ  
@HWI-EAS443:3:55:728:471#0/1  
CAAGTGGCACACACTAGACCAAAAGCAGCTTCTGTGGTCA  
+HWI-EAS443:3:55:728:471#0/1  
aaa]0]bab\_aa\_Yaab\_a`a]a]]`[^aaa^][ZaaXY\_  
@HWI-EAS443:3:55:87:146#0/1  
TGGGCCTCATATACAACAGGATGGGAACAGTGACCACAGA  
+HWI-EAS443:3:55:87:146#0/1  
\_bb\_^`aZ^`ba]`^UW\_`^^OUV^[Z[L\_YPQVKZY¥  
@HWI-EAS443:3:55:899:590#0/1  
GGGAGTGCAGATGCAGCGATTCAAGTGATCCTCTCGTCAT  
+HWI-EAS443:3:55:899:590#0/1  
aa\_N`T\_Z\_ZUZ\_VT`Ta\_RU[[^J^XYOFWPWVULMVQ  
@HWI-EAS443:3:55:925:549#0/1  
GGGCCTCATATACAACAGGATGGGAACAGTGACCACAGAA  
+HWI-EAS443:3:55:925:549#0/1  
aab`abababbb`aa`\_ba\_\_baa\_a\_`a¥ba`\_`U]a``  
@HWI-EAS443:3:55:951:331#0/1  
CAAGATTGGTCTTGTCTTTAGCCATTCCATGAGAGCCTCA  
+HWI-EAS443:3:55:951:331#0/1  
a\_b\_\_bbab]a`bb[^aaaXaa`a\_Y^a]aa]]`a\_[a^\_  
@HWI-EAS443:3:55:998:414#0/1  
ACAAGATTGGTCTTGTCTTTAGCCATTCCATGAGAGCCTC  
+HWI-EAS443:3:55:998:414#0/1  
S\_¥`aV`^aaV^\_bba]ab^a]]aaa^RY`^a^Y[aa]a\_  
@HWI-EAS443:3:56:1005:1634#0/1  
AGAAGCTGCTTTTGGTCTAGTGTGTGCCACTTGTGAACAG

+HWI-EAS443:3:56:1005:1634#0/1  
abb]bab`a`aab¥\_NW`a]W` `a[VZZ]Waa`aa`aYaa  
@HWI-EAS443:3:56:1034:284#0/1  
ATCTTGTCACCTCTGACTAAGGGAATTTTAGGATTTGTGT  
+HWI-EAS443:3:56:1034:284#0/1  
`bababa`a\_aba\_`¥`b\_abaa\_\_abaaba\_`baa\_a\_  
@HWI-EAS443:3:56:1054:149#0/1  
GGCCTACCAGAAGCGAATGGGAGTGCAGATGCAGCGATTC  
+HWI-EAS443:3:56:1054:149#0/1  
abaaababab`ab`a`\_abaa^a\_a\_\_a`a`\_aa¥`\_¥]W  
@HWI-EAS443:3:56:1076:1767#0/1  
TCTTGACCTGATATTGTGGATTACTGATCGTCTTTTTTT  
+HWI-EAS443:3:56:1076:1767#0/1  
¥WV^¥QZ[a^`\_^[MX`N`aaa]]Ya]`XTRNOU\_]Z^  
@HWI-EAS443:3:56:1149:1284#0/1  
CACTGGAGCTAGGATGAGTCCCAATAGTTCTCATTGCATG  
+HWI-EAS443:3:56:1149:1284#0/1  
``¥¥ab``b`Zaab¥¥S^bZ]abbbbabb]aabaab\_  
@HWI-EAS443:3:56:1152:810#0/1  
GCTGCAATGACGAGAGGATCACTTGAATCGCTGCATCTGC  
+HWI-EAS443:3:56:1152:810#0/1  
a\_aa`aaaaa\_a` `\_\_\_\_`^\_¥` `\_\_\_\_[[[¥`^^^¥^\_U  
@HWI-EAS443:3:56:117:1562#0/1  
TACTGATCGTCTTTTTTTCAAATGTATTTATCGTCGCTTT  
+HWI-EAS443:3:56:117:1562#0/1  
aba`XQ^`\_a`a¥aaaab``^P`X[\_`a```TXY\_a]`Y`  
@HWI-EAS443:3:56:123:698#0/1  
GATCACTTGAATCGCTGCATCTGCACTCCCATTGCTTCT  
+HWI-EAS443:3:56:123:698#0/1  
a\_aa^abbbbbbbbaaaaaab\_aa`a\_aa\_^^^a`\_^``^  
@HWI-EAS443:3:56:1398:1205#0/1  
GACGATAAATACATTTGAAAAAAGACGATCAGTAATCCA  
+HWI-EAS443:3:56:1398:1205#0/1  
aaaaaaba[a^`aaa^^a\_aaa^Z^\_a\_YQTRTUYWSW[  
@HWI-EAS443:3:56:1538:242#0/1  
ATCGCGCAGAGACTGGAAAGTGTCTTTGCAGGAAAGAACA  
+HWI-EAS443:3:56:1538:242#0/1  
a\_0[VST^`Z`Z`\_VPWZ¥0Y¥^T\_` `S[RWJRTWRW]TB  
@HWI-EAS443:3:56:173:65#0/1  
CAGTGACCACAGAAGCTGCTTTTGGTCTAGTGTGTGCCAC  
+HWI-EAS443:3:56:173:65#0/1  
aababbabaaab`aaaaa\_a`\_aaa[V`\_a^\_]a\_a^[^Z  
@HWI-EAS443:3:56:199:1498#0/1  
TGGGCCTCATATACAACAGGATGGGAACAGTGACCACAGA  
+HWI-EAS443:3:56:199:1498#0/1  
Yaa^\_¥\_bb\_[a[\_\_aba\_a\_¥]¥¥¥Zaa[S\_`^`Z`\_^¥  
@HWI-EAS443:3:56:238:507#0/1  
CAGCAATCTGTTCAACAAGTGGCACACACTAGACCAAAAGC  
+HWI-EAS443:3:56:238:507#0/1  
a\_bb[YbbbbZbbaa]ab¥baaaa`aaaa\_]aaaa]a`^

@HWI-EAS443:3:56:347:247#0/1  
AGCGAATGGGAGTGCAGATGCAGCGATTCAAGTGATCCTC  
+HWI-EAS443:3:56:347:247#0/1  
ab`bZ\_bb\_bab\_\_aa`\_a`\_¥aXR[SZ\_UUPY\_]W^W  
@HWI-EAS443:3:56:378:1576#0/1  
ATCAGACTAGGCAGATGGTACATGCAATGAGAACTATTGG  
+HWI-EAS443:3:56:378:1576#0/1  
aaaaabba`]a`aaaaa\_]`a\_a^`^]\_aa\_]P`\_\_\_\_^Z  
@HWI-EAS443:3:56:395:990#0/1  
GGGCCTCATATACAACAGGATGGGAACAGTGACCACAGAA  
+HWI-EAS443:3:56:395:990#0/1  
V\_I^bYbbb¥`bab^ab\_\_baZaaaaabZba`T\_`Waaa  
@HWI-EAS443:3:56:440:261#0/1  
GCCTCATATACAACAGGATGGGAACAGTGACCACAGAAGC  
+HWI-EAS443:3:56:440:261#0/1  
a`a\_YMXP^`\_]VR^aTUZ\_WRXZZ\_UV[TTSVXXZQRN  
@HWI-EAS443:3:56:494:444#0/1  
AAGATGACCTTCTTGAAAATTTGCAGGCCTACCAGAAGCG  
+HWI-EAS443:3:56:494:444#0/1  
a\_[Y^`[abbaa`\_a[[\_b\_aaa]`V[XZ`U]^Z\_a\_a  
@HWI-EAS443:3:56:668:1027#0/1  
GGCCTCATATACAACAGGATGGGAACAGTGACCACAGAAG  
+HWI-EAS443:3:56:668:1027#0/1  
]W\_^a\_¥^QR¥\_WY]]]]]ZP[\_X^]YZV][Z`[\_Q¥[Z  
@HWI-EAS443:3:56:756:1658#0/1  
GCCTCATATACAACAGGATGGGAACAGTGACCACAGAAGC  
+HWI-EAS443:3:56:756:1658#0/1  
^UUyx`bRa]QZ`\_a`PR^ZZP\_X¥[G[\_^¥UUQQY¥¥T  
@HWI-EAS443:3:56:997:901#0/1  
TGGGGACCCGAACAACATGGATAGAGCAGTTAAACTATAC  
+HWI-EAS443:3:56:997:901#0/1  
abba`aab`bbaa^]\_^bb`aaa][[VW¥Va¥\_a\_aa[[[  
@HWI-EAS443:3:56:99:1663#0/1  
GACCGATGCTGTGAATCAGCAATCTGTTCAAGTGGCAC  
+HWI-EAS443:3:56:99:1663#0/1  
`\_babbbbbbbbababaaaaa`a`aaaa`aaaa`Z``]`\_  
@HWI-EAS443:3:57:1024:991#0/1  
GGCAGATGGTACATGCAATGAGAACTATTGGGACTCATCC  
+HWI-EAS443:3:57:1024:991#0/1  
aa\_XV[\_aRSW]a\_\_`V\_Z¥T\_G^N\_W\_]\_\_\_\_¥Z\_N^\_VV  
@HWI-EAS443:3:57:102:254#0/1  
CTAGTGTGTGCCACTTGTGAACAGATTGCTGATTCACAGC  
+HWI-EAS443:3:57:102:254#0/1  
[\_[b`aXSUba`baaZbV^X\_^Z`U[HbX[a\_\_YFTR^W]  
@HWI-EAS443:3:57:1030:1469#0/1  
GAACAGTGACCACAGAAGCTGCTTTTGGTCTAGTGTGTGC  
+HWI-EAS443:3:57:1030:1469#0/1  
a\_a\_Y\_P^]ZZ^^`]`\_TY]Y¥¥Z^VX[SZ][VSUUQZVZ  
@HWI-EAS443:3:57:1116:1132#0/1  
GACCACAGAAGCTGCTTTTGGTCTAGTGTGTGCCACTTGT

+HWI-EAS443:3:57:1116:1132#0/1  
aa[X`a`a`\_\_\_\_`Y`\_`\_^^Z[U^\_V^S\_Q\_[W[T[QLR  
@HWI-EAS443:3:57:1287:894#0/1  
CTGATATTGTGGATTACTGATCGTCTTTTTTTCAAATGTA  
+HWI-EAS443:3:57:1287:894#0/1  
abbabbbbabbabbbabbaa^b`]abbbabaaaaab^a  
@HWI-EAS443:3:57:131:544#0/1  
CACCTCCTTGGCCCCATGGAACGTTATTTCTCTTTTGAGC  
+HWI-EAS443:3:57:131:544#0/1  
aV`baa`bY¥b]Ta^aXP]\_`b¥RNUbaa`P`aa]GN`^  
@HWI-EAS443:3:57:1401:2017#0/1  
AGATGACCTTCTTGAAAATTTGCAGGCCTACCAGAAGCGA  
+HWI-EAS443:3:57:1401:2017#0/1  
`aaa\_\_\_\_a\_Naa`¥`a\_a`aP¥¥\_U¥^a[W\_\_\_\_]]^GYB  
@HWI-EAS443:3:57:1481:1347#0/1  
CCAAAAGCAGCTTCTGTGGTCACTGTTCCCATCCTGTTGT  
+HWI-EAS443:3:57:1481:1347#0/1  
]\_Y[[a¥ZaaTa`b`[\_aS^^\_S`]``\_YaWU`¥V`b^  
@HWI-EAS443:3:57:1604:1676#0/1  
ACAGAAGCTGCTTTTGGTCTAGTGTGTGCCACTTGTGAAC  
+HWI-EAS443:3:57:1604:1676#0/1  
U\_bba`[¥`b`V`b\_XaaaaaX]W\_Z\_U`X`Y``]Z]O  
@HWI-EAS443:3:57:1651:969#0/1  
CAAGATTGGTCTTGTCTTTAGCCATTCCATGAGAGCCTCA  
+HWI-EAS443:3:57:1651:969#0/1  
`b`bY[R¥]V`aba[\_bb`aaXa\_a`Sa`ab`\_XaSX][U  
@HWI-EAS443:3:57:178:477#0/1  
GCCGAGATCGCGCAGAGACTGGAAAGTGTCTTTGCAGGAA  
+HWI-EAS443:3:57:178:477#0/1  
aa`aab`baaa`Uaaa\_\_`a\_\_\_\_aWa^W`^\_\_W\_a`Y^  
@HWI-EAS443:3:57:219:1056#0/1  
ATACATTTGAAAAAAGACGATCAGTAATCCACAATATCA  
+HWI-EAS443:3:57:219:1056#0/1  
aa^`¥¥aa^\_ZZV]]a¥[^YaWSHUUSWS]¥Z\_[GJUBBB  
@HWI-EAS443:3:57:251:1449#0/1  
ATCTTGCACCTGATATTGTGGATTACTGATCGTCTTTTTT  
+HWI-EAS443:3:57:251:1449#0/1  
Z^a`aababbaa]L^Wba^aaaaaaaa^`\_ZZ\_a^^aba  
@HWI-EAS443:3:57:337:665#0/1  
CACTCCCATTGCTTCTGGTAGGCCTGCAAATTTTCAAGA  
+HWI-EAS443:3:57:337:665#0/1  
aaaaabZJXYa[\_a¥S\_\_P]\_¥PVP\_a^^J`\_`\_\_\_\_^J]^  
@HWI-EAS443:3:57:35:865#0/1  
TGTTCCGGTCCCCATTCCCATTTAGGGCATTGTTGGACAAA  
+HWI-EAS443:3:57:35:865#0/1  
ab`aaaa¥aaa`aaa``````a\_aa\_\_a``\_a`^[\_`^V  
@HWI-EAS443:3:57:439:869#0/1  
GCTGCATCTGCACTCCCATTGCTTCTGGTAGGCCTGCAA  
+HWI-EAS443:3:57:439:869#0/1  
`\_O[¥¥W`^^`¥W[] [P¥]]]ZMY^XY[S[YVQ\_[SXVY

@HWI-EAS443:3:57:454:1819#0/1  
CCGTATTTAAAGCGACGATAAATACATTTGAAAAAAGAC  
+HWI-EAS443:3:57:454:1819#0/1  
¥S`WS^`a\_\_U\_X\_\_LSTaZXZT^OT^VX]\_Z]IW\_BBBB  
@HWI-EAS443:3:57:588:1406#0/1  
GATATTTGCTGCAATGACGAGAGGATCACTTGAATCGCTG  
+HWI-EAS443:3:57:588:1406#0/1  
aaaaaaaaa]^a``a`a`^^a^^]ZZ`^`a¥a`\_Y¥^`\_`  
@HWI-EAS443:3:57:708:196#0/1  
CAAATATCATTGGGATCTTGCACCTGATATTGTGGATTAC  
+HWI-EAS443:3:57:708:196#0/1  
abaXbbabab`aaaaabaaba`a^ab\_a\_aaa\_`^`a``^`  
@HWI-EAS443:3:57:739:1933#0/1  
AGACGCTTGTCCAAAATGCCCTAAATGGGAATGGGGACC  
+HWI-EAS443:3:57:739:1933#0/1  
`^a`aaaa^^^[¥^`aa^a`¥^`\_`a¥`\_\_`\_\_\_¥¥^`\_ZW  
@HWI-EAS443:3:57:81:874#0/1  
ATGGGAGTGCAGATGCAGCGATTCAAGTGATCCTCTCGTC  
+HWI-EAS443:3:57:81:874#0/1  
abbababHb`Yaaa]a`bb\_`XNZ[QQ^]¥X^¥YUU]Y¥  
@HWI-EAS443:3:57:861:1482#0/1  
GCTGGCTAGCACTACGGCAAAGGCTATGGAACAGATGGCT  
+HWI-EAS443:3:57:861:1482#0/1  
`abbbabbbab\_aaXbaaaaa\_`¥aa\_Xa\_a^X^[^PXT\_  
@HWI-EAS443:3:57:876:1543#0/1  
CATGGGGCCAAGGAGGTGTCACCTAAGCTATTCAACTGGTG  
+HWI-EAS443:3:57:876:1543#0/1  
`bbaba`a\_ba`U^^^b\_aa`aaaaZ\_bbaabXa\_`^`\_a  
@HWI-EAS443:3:57:894:1062#0/1  
CAGCAATCTGTTCCACAAGTGGCACACACTAGACCAAAGC  
+HWI-EAS443:3:57:894:1062#0/1  
a`bb`\_\_aba\_a`^ba^`\_\_WaYaVa[\_aaa`^a`\_\_aV  
@HWI-EAS443:3:57:957:1653#0/1  
CTTGAATCGCTGCATCTGCACTCCCATTGCTTCTGGTAG  
+HWI-EAS443:3:57:957:1653#0/1  
`\_¥aa]\_¥baabZbaa`]WZa`XD0\_\_T^a`^XX[a¥T[Z  
@HWI-EAS443:3:57:95:1642#0/1  
CAAGATCTGTGTTCTTTCCTGCAAAGACACTTTCCAGTCT  
+HWI-EAS443:3:57:95:1642#0/1  
`a`\_]bbb\_`\_a`ab`b`a¥`\_`^Y```baa]a[`aY]V`  
@HWI-EAS443:3:58:1105:881#0/1  
GTGACCACAGAAGCTGCTTTTGGTCTAGTGTGTGCCACTT  
+HWI-EAS443:3:58:1105:881#0/1  
Va¥[Z\_\_Y[b\_ZRVXYJ0aaZSUOWWZZS^VXOYNVYV][  
@HWI-EAS443:3:58:1109:75#0/1  
ACCTGATATTGTGGATTACTGATCGTCTTTTTTTCAAATG  
+HWI-EAS443:3:58:1109:75#0/1  
a¥aaa`baabb`ba¥aaa`ab`a\_`a^aababb`^^`[\_a  
@HWI-EAS443:3:58:1229:294#0/1  
GCAGGCCTACCAGAAGCGAATGGGAGTGCAGATGCAGCGA

+HWI-EAS443:3:58:1229:294#0/1  
`^aaa\_`¥]\_a^^a^a^[aa``[aUaT¥`^[[QZ]S\_Z  
@HWI-EAS443:3:58:1256:1316#0/1  
ATCTTGTCACCTCTGACTAAGGGAATTTTAGGATTTGTGT  
+HWI-EAS443:3:58:1256:1316#0/1  
aa\_aaS`a\_]a\_a`\_`\_]a\_a^\_a`a`\_`\_`\_`^`a¥a^  
@HWI-EAS443:3:58:1263:1905#0/1  
AAATACATTTGAAAAAAGACGATCAGTAATCCACAATAT  
+HWI-EAS443:3:58:1263:1905#0/1  
aaaaaabaaaaaaaaaaaa`[aa`S\_]S\_\_OFV^[[[Z\_X  
@HWI-EAS443:3:58:1379:731#0/1  
GACGAGAGGATCACTTGAATCGCTGCATCTGCACTCCCAT  
+HWI-EAS443:3:58:1379:731#0/1  
aa\_]`^aa\_a^\_XXVaa[]a\_^^^\_`\_a`ZYY¥\_Y^¥¥UW`  
@HWI-EAS443:3:58:1478:1409#0/1  
ATCCCAATGATATTTGCTGCAATGACGAGAGGATCACTTG  
+HWI-EAS443:3:58:1478:1409#0/1  
¥[Y]abbaba`aab\_R`Z`\_aaa\_aa[`aa`[\_¥[¥a`  
@HWI-EAS443:3:58:1567:1337#0/1  
CTAGTGTGTGCCACTTGTGAACAGATTGCTGATTCACAGC  
+HWI-EAS443:3:58:1567:1337#0/1  
aa`a[`^`^aa`a^abb^`bab`abbb^bbababbaaa\_  
@HWI-EAS443:3:58:161:547#0/1  
CGATGCTGTGAATCAGCAATCTGTTCACAAGTGGCACACA  
+HWI-EAS443:3:58:161:547#0/1  
aaa`aab^aa`a`a`\_]\_aX\_\_\_\_]\_^U\_V\_\_\_\_]^X[  
@HWI-EAS443:3:58:221:1484#0/1  
GACCGATGCTGTGAATCAGCAATCTGTTCACAAGTGGCAC  
+HWI-EAS443:3:58:221:1484#0/1  
ab`b]aaaaaa^a`a^aa`\_\_aa`^`^[\_XZa\_VU\_^\_a^  
@HWI-EAS443:3:58:23:362#0/1  
CAGCGATTCAAGTGATCCTCTCGTCATTGCAGCAAATATC  
+HWI-EAS443:3:58:23:362#0/1  
abaab`a\_a\_\_aVOZ¥XVY`aQaZ`\_¥^a¥LZ`VGTUU[P  
@HWI-EAS443:3:58:341:1759#0/1  
CTTTTTTTCAAATGTATTTATCGTCGCTTTAAATACGGTT  
+HWI-EAS443:3:58:341:1759#0/1  
aa```abaaaa\_a\_\_^a`^]`^`[ZX¥\_\_`^]`^`^XT[[[\_  
@HWI-EAS443:3:58:371:1942#0/1  
CAAGATTGGTCTTGTCTTTAGCCATTCCATGAGAGCCTCA  
+HWI-EAS443:3:58:371:1942#0/1  
```]`^b`¥HaT^a\_\_P]\_]\_]\_aa\_\_abRGJ^^`\_¥FW`  
@HWI-EAS443:3:58:391:1207#0/1  
CACTTGTGAACAGATTGCTGATTCACAGCATCGGTCTCAC  
+HWI-EAS443:3:58:391:1207#0/1  
a[¥b`aaaa`ab`]T^`Xaa]\_¥`a`]`\_]a]\_\_a]YY^Y  
@HWI-EAS443:3:58:45:1542#0/1  
CGCAGAGACTGGAAAGTGTCTTTGCAGGAAAGAACACAGA  
+HWI-EAS443:3:58:45:1542#0/1  
]GW[\_[QVZXNSY¥Z¥TZQWVTGWNOQVZRTT]VYMW



@HWI-EAS443:3:58:460:308#0/1  
GCTGCAATGACGAGAGGATCACTTGAATCGCTGCATCTGC  
+HWI-EAS443:3:58:460:308#0/1  
aaa`]a]aa\_^a^W\_aX[Y[P^YZ[ZU¥TTTTXQUV[V  
@HWI-EAS443:3:58:471:792#0/1  
ATTTGCAGGCCTACCAGAAGCGAATGGGAGTGCAGATGCA  
+HWI-EAS443:3:58:471:792#0/1  
aaaaabaaaaaaaa`aaa\_a\_a\_\_`a`a`aWa\_``\_`a[`  
@HWI-EAS443:3:58:486:544#0/1  
TGGGAGTGCAGATGCAGCGATTCAAGTATCCTCTCGTCA  
+HWI-EAS443:3:58:486:544#0/1  
abbbb]Zbaaaaabaababaa``\_`bZab]``\_`aaa¥\_\_  
@HWI-EAS443:3:58:48:1189#0/1  
CTGTTCACAAGTGGCACACACTAGACAAAAGCAGCTTCT  
+HWI-EAS443:3:58:48:1189#0/1  
aab^`bba[a\_^`aaaa\_```[^\_\_\_\_P[``ZU[\_\_\_\_]]\_  
@HWI-EAS443:3:58:506:1313#0/1  
AACAGTGACCACAGAAGCTGCTTTTGGTCTAGTGTGTGCC  
+HWI-EAS443:3:58:506:1313#0/1  
^`UYa[ba`\_aa¥W\_abab¥]¥a`aUYSaabbab`]J`S¥  
@HWI-EAS443:3:58:601:147#0/1  
CCTGATATTGTGGATTACTGATCGTCTTTTTTTCAAATGT  
+HWI-EAS443:3:58:601:147#0/1  
abbbabbbbabbaabaabbabab`abaabbbbaaaaaab\_  
@HWI-EAS443:3:58:622:662#0/1  
CCAAAAGCAGCTTCTGTGGTCACTGTTCCCATCCTGTTGT  
+HWI-EAS443:3:58:622:662#0/1  
aaa]Z\_bba]^aaa\_`^a]aa\_`a\_`^a]^a^`^a` [  
@HWI-EAS443:3:58:624:1094#0/1  
AGCTTCTGTGGTCACTGTTCCCATCCTGTTGTATATGAGG  
+HWI-EAS443:3:58:624:1094#0/1  
`^b`aa^aa]a\_Z\_\_^baaabbaa`^a^ZOZ\_\_a]Y\_]W  
@HWI-EAS443:3:58:63:1254#0/1  
CTTAGTCAGAGGTGACAAGATTGGTCTTGTCTTTAGCCAT  
+HWI-EAS443:3:58:63:1254#0/1  
abbaa^b^b``aYaaa[\_a]aa`a^ab`]`aaaa`¥[\_``  
@HWI-EAS443:3:58:720:107#0/1  
TGTGAGACCGATGCTGTGAATCAGCAATCTGTTCACAAGT  
+HWI-EAS443:3:58:720:107#0/1  
abababaaaa\_a`aa\_aaa`\_`aZ^\_\_[aa\_^[^Z^\_aW  
@HWI-EAS443:3:58:922:85#0/1  
GGATCTTGCACCTGATATTGTGGATTACTGATCGTCTTTT  
+HWI-EAS443:3:58:922:85#0/1  
^b\_VZb`^`\_`]`a\_\_YV`¥R`a^`[ZP`aX\_\_`LN``\_\_  
@HWI-EAS443:3:58:923:1474#0/1  
GTGACCACAGAAGCTGCTTTTGGTCTAGTGTGTGCCACTT  
+HWI-EAS443:3:58:923:1474#0/1  
aHSIZ]X^TR\_a\_aa\_`\_X\_[RVZSZ]\_RPVS^\_[N]]^Z  
@HWI-EAS443:3:59:1011:816#0/1  
CTGCTTTTGGTCTAGTGTGTGCCACTTGTGAACAGATTGC

+HWI-EAS443:3:59:1011:816#0/1  
`a\_W`[^a\_]Y]XZZQ[¥\_W[TVa\_T^^^]\_PZa`JF[XS  
@HWI-EAS443:3:59:106:323#0/1  
TGGGCCTCATATAACAACAGGATGGGAACAGTGACCACAGA  
+HWI-EAS443:3:59:106:323#0/1  
ab`Ya`b`aaa\_aa\_R^aV\_aa\_a\_[aN`Y\_VL[\_W  
@HWI-EAS443:3:59:1150:81#0/1  
GACCGATGCTGTGAATCAGCAATCTGTTCAAGTGGCAC  
+HWI-EAS443:3:59:1150:81#0/1  
aa^aaaaa`b`a`aa`\_]\_¥\_¥a\_aa[aZ^\_ZX]U[Q¥TQ  
@HWI-EAS443:3:59:1298:595#0/1  
GCTCTATCCATGTTGTTCCGGTCCCCATTCCCATTAGGG  
+HWI-EAS443:3:59:1298:595#0/1  
aabaaaa`\_`abaaa`aaaa^Ya`a`\_]\_aaaaQ`a`WT`^Z  
@HWI-EAS443:3:59:1409:749#0/1  
GCGCAGAGACTGGAAAGTGTCTTTGCAGGAAAGAACACAG  
+HWI-EAS443:3:59:1409:749#0/1  
`aa`^^^a¥¥a[¥a`aS[Y¥\_\_\_a`]a`\_]\_Z\_¥\_QTWYW  
@HWI-EAS443:3:59:140:1295#0/1  
AGTGACCACAGAAGCTGCTTTTGGTCTAGTGTGTGCCACT  
+HWI-EAS443:3:59:140:1295#0/1  
^\_^ab¥bb`\_]`bZaa`b`a\_a^Y¥a¥¥][`[WV]UN]OR  
@HWI-EAS443:3:59:1484:1240#0/1  
GGAGGTTGCTAATCAGACTAGGCAGATGGTACATGCAATG  
+HWI-EAS443:3:59:1484:1240#0/1  
aa`a\_\_a]aaaa\_ab`aaaa^)``abaWYG]]][LR\_]V  
@HWI-EAS443:3:59:148:895#0/1  
GAGAGGATCACTTGAATCGCTGCATCTGCACTCCCATTCTG  
+HWI-EAS443:3:59:148:895#0/1  
a\_^abbaabaaa`abaaaa`aaaa`aaX`\_\_^`Y]^ZZ  
@HWI-EAS443:3:59:1545:1164#0/1  
CAGCAATCTGTTCAAGTGGCACACACTAGACCAAAAGC  
+HWI-EAS443:3:59:1545:1164#0/1  
Q[a\_bbbbaabba¥`b`[R¥Z\_Z`b`^Wb]\_U\_U[]WX  
@HWI-EAS443:3:59:1565:1490#0/1  
GCACCTGATATTGTGGATTACTGATCGTCTTTTTTTTCAAA  
+HWI-EAS443:3:59:1565:1490#0/1  
a¥OX`V[a\_`¥[`WNVa]`a`[`a^a`a^`a`\_TOXY[  
@HWI-EAS443:3:59:1631:147#0/1  
GAACAGTGACCACAGAAGCTGCTTTTGGTCTAGTGTGTGC  
+HWI-EAS443:3:59:1631:147#0/1  
aaa\_aa^aa`^`\_aaaa\_\_\_`^`\_a\_\_X]Z`V^]]YTVSS  
@HWI-EAS443:3:59:1737:111#0/1  
TTGGGATCTTGACCTGATATTGTGGATTACTGATCGTCT  
+HWI-EAS443:3:59:1737:111#0/1  
abaab`a\_aabaa\_\_bb\_a`bbb]b``aaa`\_a`\_XP¥Y\_  
@HWI-EAS443:3:59:1762:464#0/1  
TGTATAGTTTAACTGCTCTATCCATGTTGTTCCGGTCCCC  
+HWI-EAS443:3:59:1762:464#0/1  
ab`abababbbbaaaab`aaa\_]a``abbaaY]`WT^VU

@HWI-EAS443:3:59:1766:473#0/1  
GTGAATCAGCAATCTGTTCAACAAGTGGCACACACTAGACC  
+HWI-EAS443:3:59:1766:473#0/1  
aRZ\_[R^¥aaa`^`[]]^YVTX¥Wxa\_`]]N]WVSJQQO  
@HWI-EAS443:3:59:279:189#0/1  
CCGATGCTGTGAATCAGCAATCTGTTCAACAAGTGGCACAC  
+HWI-EAS443:3:59:279:189#0/1  
abb\_\_baaba\_a^a\_`\_^¥aa`aa\_a¥J]`XXV[[NV^\_\_  
@HWI-EAS443:3:59:38:127#0/1  
GGGCTCATATACAACAGGATGGGAACAGTGACCACAGAA  
+HWI-EAS443:3:59:38:127#0/1  
aaaa\_aa`aaa^a\_^[`a`W\_aa¥HNSUWKVWW[PWP[VT  
@HWI-EAS443:3:59:40:150#0/1  
ACAAGATTGGTCTTGTCTTTAGCCATTCCATGAGAGCCTC  
+HWI-EAS443:3:59:40:150#0/1  
a`a]aa`[]aX\_`\_\_Uaa\_]U`\_\_^\_^\_]ZVTS]XWWWY  
@HWI-EAS443:3:59:458:684#0/1  
CTGGCAAGTGCACCAGTTGAATAGCTTAGTGACACCTCCT  
+HWI-EAS443:3:59:458:684#0/1  
aXaa\_bZ`[RYTVa]`Z^R]V^W]\_a\_TZ\_a[[¥PHPKYQ  
@HWI-EAS443:3:59:461:16#0/1  
GGGCCAAGGAGGTGCTACTAAGCTATTCAACTGGTGCCT  
+HWI-EAS443:3:59:461:16#0/1  
abbaaXV`baab\_b¥aaaaaaa\_^Xaa`^TVZa\_QZSZW¥  
@HWI-EAS443:3:59:50:1538#0/1  
GGTACATGCAATGAGAACTATTGGGACTCATCCTAGCTCC  
+HWI-EAS443:3:59:50:1538#0/1  
¥VO\_PXH\_¥a^^`¥`^X\_R[^P[`a^[[`\_TRO\_aRQ]VL  
@HWI-EAS443:3:59:677:1649#0/1  
ATTCCCTTAGTCAGAGGTGACAAGATTGGTCTTGTCTTTA  
+HWI-EAS443:3:59:677:1649#0/1  
Z[VaQa]b]a¥a\_X^`^0¥^Y^\_a\_a[a][a\_X[ZUQX[R  
@HWI-EAS443:3:59:704:1780#0/1  
ACCTTCTTGAATAATTTGCAGGCCTACCAGAAGCGAATGGG  
+HWI-EAS443:3:59:704:1780#0/1  
[bb\_MXZbaaabZVZ^`\_aTKX¥``aa\_a`ZRZQYXY^UZ  
@HWI-EAS443:3:59:823:549#0/1  
ATCCCAATGATATTTGCTGCAATGACGAGAGGATCACTTG  
+HWI-EAS443:3:59:823:549#0/1  
\_\_¥^]^^^aaaaZa^^``baa`abaabaaaa]^\_]MJ¥]\_  
@HWI-EAS443:3:59:85:1764#0/1  
CGAGAGGATCACTTGAATCGCTGCATCTGCACTCCCATTC  
+HWI-EAS443:3:59:85:1764#0/1  
`]]`bbba\_]a`\_\_Z\_a^^`bab`bbb`b^^Gabaa^`\_V  
@HWI-EAS443:3:59:878:107#0/1  
CAGCAATCTGTTCAACAAGTGGCACACACTAGACCAAAAGC  
+HWI-EAS443:3:59:878:107#0/1  
`Y^baabbbb\_b\_a¥aaa`b`ab`a`ba`ab¥^[[WW^^T  
@HWI-EAS443:3:59:915:600#0/1  
GGCCTCATATACAACAGGATGGGAACAGTGACCACAGAAG

+HWI-EAS443:3:59:915:600#0/1  
^aXXY\_W[ba\_W`YX`b^[^¥¥W¥` `[L\_]NYZ]QP[]Y  
@HWI-EAS443:3:59:927:1351#0/1  
AAAAAAGACGATCAGTAATCCACAATATCAGGTGCAAGAT  
+HWI-EAS443:3:59:927:1351#0/1  
abbbb`bbaa`\_aa^aa[¥]`ab````^\_\_LO[UUT[X]  
@HWI-EAS443:3:59:954:456#0/1  
CATGGGGCCAAGGAGGTGCTACTAAGCTATTCAACTGGTG  
+HWI-EAS443:3:59:954:456#0/1  
abbabbbabZ\_bb\_ba¥a`\_abbaabbb]aaZa` [WW^W[  
@HWI-EAS443:3:59:971:1128#0/1  
GCCTCATATACAACAGGATGGGAACAGTGACCACAGAAGC  
+HWI-EAS443:3:59:971:1128#0/1  
abababbbbabbaabbaaaaa`baaa^a` `U\_aaYUa\_W  
@HWI-EAS443:3:5:1073:248#0/1  
ACCTGATATTGTGGATTACTGATCGTCTTTTTTTCAAATG  
+HWI-EAS443:3:5:1073:248#0/1  
``T^`\_b]baW[a^\_¥[`GJ\_a^TaTR^a`a`aBBBBBBB  
@HWI-EAS443:3:5:1489:30#0/1  
GAAGCGAATGGGAGTGCAGATGCAGCGATTCAAGTGATCC  
+HWI-EAS443:3:5:1489:30#0/1  
\_]a]¥ZW`ba]aXZJaQa\_a` [GPaZa¥Q\_GXW\_W\_BBBB  
@HWI-EAS443:3:5:1506:1189#0/1  
GGAGGTTGCTAATCAGACTAGGCAGATGGTACATGCAATG  
+HWI-EAS443:3:5:1506:1189#0/1  
abaab`ab`baa\_Y]aaaaaa^\_`a`\_a]Z\_Z^^ZR[\_`a  
@HWI-EAS443:3:5:1583:1068#0/1  
CAATCTTGTCACCTCTGACTAAGGGAATTTTAGGATTTGT  
+HWI-EAS443:3:5:1583:1068#0/1  
]XY`^N^aZX^^)`a`a[IaYzb^\_V`a`\_a\_W¥\_aaBB  
@HWI-EAS443:3:5:1751:345#0/1  
GCACCTGATATTGTGGATTACTGATCGTCTTTTTTTCAA  
+HWI-EAS443:3:5:1751:345#0/1  
abb`abaaab`a]aa\_aaa]`a\_a` `^a`aaaa^aa\_  
@HWI-EAS443:3:5:232:640#0/1  
GGGAGTGCAGATGCAGCGATTCAAGTGATCCTCTCGTCAT  
+HWI-EAS443:3:5:232:640#0/1  
`^a`\_R`\_a`X`^Z]]¥\_`^YXR[aV`\_`\_TU]R][^XGBB  
@HWI-EAS443:3:5:243:317#0/1  
ACAGAAGCTGCTTTTGGTCTAGTGTGCCACTTGTGAAC  
+HWI-EAS443:3:5:243:317#0/1  
`bbba\_aa` ` \_aaaa\_\_aa]a`\_Ua`\_aa^`\_¥a\_a¥  
@HWI-EAS443:3:5:284:1923#0/1  
GCCTACCAGAAGCGAATGGGAGTGCAGATGCAGCGATTCA  
+HWI-EAS443:3:5:284:1923#0/1  
]ab]TZbba`ba\_bYV]XbZY]S]]aYPMR]]G^\_P^BBB  
@HWI-EAS443:3:5:545:284#0/1  
CTAGACAAAAGCAGCTTCTGTGGTCACTGTCCCATCCT  
+HWI-EAS443:3:5:545:284#0/1  
`\_ab`\_]`^aa`a]\_`¥\_`¥\_\_X`\_U^¥V`\_W[WM¥¥WWBB

@HWI-EAS443:3:5:546:508#0/1  
GAGACCGATGCTGTGAATCAGCAATCTGTTCAACAAGTGGC  
+HWI-EAS443:3:5:546:508#0/1  
`b`aa^b`aa`\_a\_a``aabaaaa`aa```\_¥aaa\_a\_B  
@HWI-EAS443:3:5:588:659#0/1  
GAGAGGATCACTTGAATCGCTGCATCTGCACTCCCATTTCG  
+HWI-EAS443:3:5:588:659#0/1  
MZZV\_X\_¥¥\_Z\_b`[\_`\_\_\_b\_`Z`\_\_\_\_Q¥K\_WPPWWZ\_B  
@HWI-EAS443:3:5:639:21#0/1  
CACAAAGTGGCACACACTAGACCAAAGCAGCTTCTGTGGT  
+HWI-EAS443:3:5:639:21#0/1  
ab`bbb`bb`baa\_a`aaaa\_\_`a`aa\_aa```¥\_\_^`BB  
@HWI-EAS443:3:5:734:1061#0/1  
AGATCCCAATGATATTTGCTGCAATGACGAGAGGATCACT  
+HWI-EAS443:3:5:734:1061#0/1  
\_b]¥\_`^V¥aba`\_`b][[\_bba`Xaaaa`¥\_\_a[¥]`]B  
@HWI-EAS443:3:5:845:1307#0/1  
ACCGATGCTGTGAATCAGCAATCTGTTCAACAAGTGGCACA  
+HWI-EAS443:3:5:845:1307#0/1  
a^Z[\_`aa\_aa¥a\_a`\_a]\_`\_\_`]V¥X`0\_\_\_W\_\_X\_V^  
@HWI-EAS443:3:5:885:355#0/1  
CAAGATTGGTCTTGTCTTTAGCCATTCCATGAGAGCCTCA  
+HWI-EAS443:3:5:885:355#0/1  
¥`ab\_ab`\_^`b``bab]¥¥WJ]a¥[Taa]Zba\_]aYa  
@HWI-EAS443:3:60:1069:1816#0/1  
GTCTTTTTTTCAAATGTATTTATCGTCGCTTTAAATACGG  
+HWI-EAS443:3:60:1069:1816#0/1  
X^`¥bbbbbaab\_¥]`ba^aaX^RXbI^\_b¥\_\_^`NY`  
@HWI-EAS443:3:60:1121:1977#0/1  
GATCGTCTTTTTTTCAAATGTATTTATCGTCGCTTTAAAT  
+HWI-EAS443:3:60:1121:1977#0/1  
^aSM[P\_]¥`¥¥a¥V^b^\_aYa]`¥QZ^KVSPR]a^`\_`\_I  
@HWI-EAS443:3:60:1183:868#0/1  
CTTTTTTTCAAATGTATTTATCGTCGCTTTAAATACGGTT  
+HWI-EAS443:3:60:1183:868#0/1  
`bbbbbbba`ababbbbbbaab\_a]baa]\_\_a`]^baa  
@HWI-EAS443:3:60:1201:1672#0/1  
GACCGATGCTGTGAATCAGCAATCTGTTCAACAAGTGGCAC  
+HWI-EAS443:3:60:1201:1672#0/1  
aa\_Y^¥\_¥¥W`\_]¥^]Y^]¥]Z^S[[PZV]PZ[TTVVJ]L  
@HWI-EAS443:3:60:122:1029#0/1  
ACAGAAGCTGCTTTTGGTCTAGTGTGTGCCACTTGTGAAC  
+HWI-EAS443:3:60:122:1029#0/1  
aa\_]bbabaaa`a\_aaa\_a`^V\_\_]\_^\_]\_\_\_\_\_^\_\_WT  
@HWI-EAS443:3:60:1294:544#0/1  
ACCTGATATTGTGGATTACTGATCGTCTTTTTTTCAAATG  
+HWI-EAS443:3:60:1294:544#0/1  
aba`bab`abbaaa`aba`aa`a`b^`a`baaaa\_`\_`a]  
@HWI-EAS443:3:60:1312:1069#0/1  
ATTCTGTTTTTCATGCCTGATTAGTGGATTGGTGGTAGTAG

+HWI-EAS443:3:60:1312:1069#0/1  
abb`aa`aba`aaaaaa^aa`Xaa`a``\_^\_YBBBBBB  
@HWI-EAS443:3:60:1437:1067#0/1  
AGAGGATCACTTGAATCGCTGCATCTGCACTCCCATTTCGC  
+HWI-EAS443:3:60:1437:1067#0/1  
abaa`aaa`aaaa\_aa\_aa\_a`a`\_¥a\_¥`\_`¥YY^\_¥[W  
@HWI-EAS443:3:60:1589:858#0/1  
GAGACCGATGCTGTGAATCAGCAATCTGTTCAACAAGTGGC  
+HWI-EAS443:3:60:1589:858#0/1  
\_P^\_`^aaSa\_`a`[TPa\_`^¥X\_Q\_`^]M[S¥¥XT[UU  
@HWI-EAS443:3:60:1614:622#0/1  
CATGGGGCCAAGGAGGTGTCACCTAAGCTATTCAACTGGTG  
+HWI-EAS443:3:60:1614:622#0/1  
abbbab`a\_ba```aaaba`b\_baaaab`baa`]]a]]][b  
@HWI-EAS443:3:60:1625:1210#0/1  
CAGTGACCACAGAAGCTGCTTTTGGTCTAGTGTGTGCCAC  
+HWI-EAS443:3:60:1625:1210#0/1  
abaaababa`bbbaaabb`babbX]\_`b\_aaa^\_\_a]\_a^  
@HWI-EAS443:3:60:1740:763#0/1  
CAGTGACCACAGAAGCTGCTTTTGGTCTAGTGTGTGCCAC  
+HWI-EAS443:3:60:1740:763#0/1  
abb\_bbb`babbbaaaaa\_aaaa^`V]`aa^a\_\_^a]aa]  
@HWI-EAS443:3:60:1751:467#0/1  
GGAGGTTGCTAATCAGACTAGGCAGATGGTACATGCAATG  
+HWI-EAS443:3:60:1751:467#0/1  
abTVHKaT\_[V]]TSW\_Z`Y]\_[QWRPYXOYBBBBBBBBBB  
@HWI-EAS443:3:60:1761:85#0/1  
AGAAGCTCAAAAGAGAAATAACGTTCCATGGGGCCAAGGA  
+HWI-EAS443:3:60:1761:85#0/1  
abaaba`a]aaab¥a\_aa\_\_\_R`\_aWZY\_`\_`NQQU`¥F  
@HWI-EAS443:3:60:187:1850#0/1  
ATCAGACTAGGCAGATGGTACATGCAATGAGAACTATTGG  
+HWI-EAS443:3:60:187:1850#0/1  
`^V`aaaX¥YOYaY^Y]W]UG^\_\_I`aaHa\_]\_YY`M[]]  
@HWI-EAS443:3:60:223:842#0/1  
CACTGTTCCCATCCTGTTGTATATGAGGCCCATGCAACTG  
+HWI-EAS443:3:60:223:842#0/1  
aaabb\_aaaaaaaab\_\_b¥`a^`\_^\_]Z```¥]`¥\_`^  
@HWI-EAS443:3:60:300:888#0/1  
ATCGCTGCATCTGCACTCCCATTTCGTTCTGGTAGGCCTG  
+HWI-EAS443:3:60:300:888#0/1  
``a¥]\_a``a]a[[¥aaZZEV][[XXVXXXURJOUJMTV  
@HWI-EAS443:3:60:323:738#0/1  
GGCCTCATATACAACAGGATGGGAACAGTGACCACAGAAG  
+HWI-EAS443:3:60:323:738#0/1  
`bb`ba[aR`Y\_]X\_`a[aa[a^aaT`a\_\_YY\_\_[W\_  
@HWI-EAS443:3:60:367:208#0/1  
GAGACCGATGCTGTGAATCAGCAATCTGTTCAACAAGTGGC  
+HWI-EAS443:3:60:367:208#0/1  
abaaaab`aaX`aabaaa`a`aa`]\_\_\_\_\_^`]a¥^U\_\_V

@HWI-EAS443:3:60:510:713#0/1  
ATGGGAATGGGGACCCGAACAACATGGATAGAGCAGTTAA  
+HWI-EAS443:3:60:510:713#0/1  
a\_ba`aa^b]Z\_Z`aaaaa`Xaaaab`^`¥a[¥][]^\_  
@HWI-EAS443:3:60:603:549#0/1  
AATACATTTGAAAAAAGACGATCAGTAATCCACAATATC  
+HWI-EAS443:3:60:603:549#0/1  
UT\_]\_Za`\_`Z\_aVZWa`Z^`^`^\_U`]b`\_]\_]\_V`aaa^0  
@HWI-EAS443:3:60:700:676#0/1  
ATGGGCCTCATATACAACAGGATGGGAACAGTGACCACAG  
+HWI-EAS443:3:60:700:676#0/1  
aabaaaababbaaaaa`aaa`ba`a¥aa¥aa`a\_\_a`  
@HWI-EAS443:3:60:701:54#0/1  
GTCTAGTGTGTGCCACTTGTGAACAGATTGCTGATTCACA  
+HWI-EAS443:3:60:701:54#0/1  
aaaa\_aY`^`]`\_\_`^a\_a`\_\_Y\_a\_\_^`^`]`X\_YX^X]  
@HWI-EAS443:3:60:712:1733#0/1  
CAAGATTGGTCTTGTCTTTAGCCATTCCATGAGAGCCTCA  
+HWI-EAS443:3:60:712:1733#0/1  
abababbab`b`b`bb`bb[^`aaaa`aba`\_^GYTa`\_  
@HWI-EAS443:3:60:784:1426#0/1  
GCCTACCAGAAGCGAATGGGAGTGCAGATGCAGCGATTCA  
+HWI-EAS443:3:60:784:1426#0/1  
aaaba`a^a`aa\_aa]aaa`[^`Z^\_\_a[Za\_\_\_^ZZ[SZ^  
@HWI-EAS443:3:60:845:704#0/1  
GGATTACTGATCGTCTTTTTTCAAATGTATTTATCGTCG  
+HWI-EAS443:3:60:845:704#0/1  
abaabbaabaaaba`bbababb`a\_aba^aaaa`a`a^``  
@HWI-EAS443:3:60:854:115#0/1  
CACTTGTGAACAGATTGCTGATTCACAGCATCGGTCTCAC  
+HWI-EAS443:3:60:854:115#0/1  
ababbb]bab`baaaab\_ab`a`\_`a^aa\_a`Y^`^`^`  
@HWI-EAS443:3:60:904:1173#0/1  
CGCGCAGAGACTGGAAAGTGTCTTTGCAGGAAAGAACACA  
+HWI-EAS443:3:60:904:1173#0/1  
abaaY`abababbbaba`\_`bab¥aab]]]JZ][`Z`Xa  
@HWI-EAS443:3:60:936:288#0/1  
ACCGATGCTGTGAATCAGCAATCTGTTCAAGTGGCACA  
+HWI-EAS443:3:60:936:288#0/1  
a```W¥¥VV\_\_a^YZPY]¥WZWS¥¥ZZTQUVTTTX[PW¥Y  
@HWI-EAS443:3:60:945:468#0/1  
CAATAGTTCTCATTGCATGTACCATCTGCCTAGTCTGATT  
+HWI-EAS443:3:60:945:468#0/1  
abab]Va`a\_]\_]ba`[bbb^ba^a^aab`a`b]X`a\_\_\_\_  
@HWI-EAS443:3:60:967:2043#0/1  
GGGCCTCATATACAACAGGATGGGAACAGTGACCACAGAA  
+HWI-EAS443:3:60:967:2043#0/1  
aba`aba`bbb`aa\_aaaYaaa¥]a\_aa¥\_a^N\_\_`\_\_`  
@HWI-EAS443:3:61:1002:149#0/1  
CACTTGAATCGCTGCATCTGCACTCCCATTCTGCTTCTGGT

+HWI-EAS443:3:61:1002:149#0/1  
`bbbaabbabb`b]^bbbbbb\_bab`aaaa[\_\_\_\_a`Z\_Y  
@HWI-EAS443:3:61:1117:864#0/1  
TGAGAGCCTCAAGATCTGTGTTCTTTCCTGCAAAGACACT  
+HWI-EAS443:3:61:1117:864#0/1  
¥\_ITU\_Va^Ua`\_[U^ba\_b[^[^RUU¥b\_0^[]aZ`R[  
@HWI-EAS443:3:61:1202:770#0/1  
ATCACTTGAATCGCTGCATCTGCACTCCCATTGCTTCTG  
+HWI-EAS443:3:61:1202:770#0/1  
^\_a]Zabbbbbbaaab\_\_aaaaa^aba`aa^^¥`\_[\_¥  
@HWI-EAS443:3:61:1240:78#0/1  
GACAAGATTGGTCTTGTCTTTAGCCATTCCATGAGAGCCT  
+HWI-EAS443:3:61:1240:78#0/1  
aa\_\_Zaa\_aaa[^`\_`X`\_\_^\_]\_X\_\_¥]]][XX\_UXWWY  
@HWI-EAS443:3:61:126:357#0/1  
TGGGCCTCATATACAACAGGATGGGAACAGTGACCACAGA  
+HWI-EAS443:3:61:126:357#0/1  
abaaaaaaaaabaaaaa`\_^U[W^\_U[R\_\_W^\_[T^¥^[[  
@HWI-EAS443:3:61:1335:1206#0/1  
CTTAGTCAGAGGTGACAAGATTGGTCTTGTCTTTAGCCAT  
+HWI-EAS443:3:61:1335:1206#0/1  
abbabaaab\_bbXbaababbabbaabbaabbbbb`aa`  
@HWI-EAS443:3:61:1371:670#0/1  
GAACAGTGACCACAGAAGCTGCTTTTGGTCTAGTGTGTGC  
+HWI-EAS443:3:61:1371:670#0/1  
a\_^WT]R`\_^[]Y^]Y]YS^YX^YVVXYXYVWUUT  
@HWI-EAS443:3:61:1396:270#0/1  
ACAAGACCAATCTTGTACCTCTGACTAAGGGAATTTAG  
+HWI-EAS443:3:61:1396:270#0/1  
a`a[U^\_] [a\_[]`\_]T^¥`[]a]\_\_\_\_a[aU[Z]X]WX  
@HWI-EAS443:3:61:143:1958#0/1  
TGGGCCTCATATACAACAGGATGGGAACAGTGACCACAGA  
+HWI-EAS443:3:61:143:1958#0/1  
a]^`ab]]^`aaU\_ZU`V]S\_Z[^Y`a``ZRR¥V^^[VZU  
@HWI-EAS443:3:61:1455:1335#0/1  
CACTAGACCAAAAGCAGCTTCTGTGGTCACTGTTCCATC  
+HWI-EAS443:3:61:1455:1335#0/1  
`b`bbababbabaabbbabbbbaabbaaa^ab\_a^W`¥W  
@HWI-EAS443:3:61:1475:1695#0/1  
ATGGGAACAGTGACCACAGAAGCTGCTTTTGGTCTAGTGT  
+HWI-EAS443:3:61:1475:1695#0/1  
ab`baaaaba^aa`\_babbaabbaUaaaaa`V¥`\_`YW¥Y  
@HWI-EAS443:3:61:1641:1458#0/1  
CAAGATCCCAATGATATTTGCTGCAATGACGAGAGGATCA  
+HWI-EAS443:3:61:1641:1458#0/1  
¥^ab]ba\_^b\_bbbaabbaababba]aa`aaaa\_R^WX  
@HWI-EAS443:3:61:1644:620#0/1  
AAAAAGACGATCAGTAATCCACAATATCAGGTGCAAGATC  
+HWI-EAS443:3:61:1644:620#0/1  
ab\_¥`aaaaa`\_^\_[aa^[aa^Waa`^\_\_\_\_`]`¥]]UX[U



@HWI-EAS443:3:61:1742:766#0/1  
GGATTACTGATCGTCTTTTTTTCAAATGTATTTATCGTCG  
+HWI-EAS443:3:61:1742:766#0/1  
aa^\_^`aa\_a\_`]^```aa`a^WY]a[¥]`^]\_¥ZWW[  
@HWI-EAS443:3:61:1776:281#0/1  
ACCTGATATTGTGGATTACTGATCGTCTTTTTTTCAAATG  
+HWI-EAS443:3:61:1776:281#0/1  
aaabbababa`bb\_abaaa`^^`b`aaaaaaa^¥`\_`\_`  
@HWI-EAS443:3:61:1788:243#0/1  
ACCTTCTTGAAAATTTGCAGGCCTACCAGAAGCGAATGGG  
+HWI-EAS443:3:61:1788:243#0/1  
aaaaaaaaaaaaaaaaaaaa`aa]^^a`^¥^^U][WY\_VZ  
@HWI-EAS443:3:61:212:293#0/1  
ATCCATGTTGTTCCGGTCCCCATTCCCATTAGGGCATT  
+HWI-EAS443:3:61:212:293#0/1  
\_bababb`abaaaaa\_aabbY\_aa\_a\_aa`a`a^`\_`]  
@HWI-EAS443:3:61:275:1164#0/1  
CAGGCCTACCAGAAGCGAATGGGAGTGCAGATGCAGCGAT  
+HWI-EAS443:3:61:275:1164#0/1  
ab\_ab`baaa`\_]`^aabJaaa`Y`N`Y\_¥Q[Z^^`¥¥VR  
@HWI-EAS443:3:61:322:495#0/1  
CTGCACTCCCATTCGCTTCTGGTAGGCCTGCAAATTTTCA  
+HWI-EAS443:3:61:322:495#0/1  
^\_¥`[[[\_][Q[a¥Za\_¥\_¥Ua]0[\_TG]\_RZ]]N]PYYY[  
@HWI-EAS443:3:61:368:594#0/1  
GCTGGCTAGCACTACGGCAAAGGCTATGGAACAGATGGCT  
+HWI-EAS443:3:61:368:594#0/1  
a¥`\_`¥X¥ZZ`P¥XX\_V¥WXSUWYNNSSYW¥WWWPUWSU  
@HWI-EAS443:3:61:37:1697#0/1  
CGTCTTTTTTTCAAATGTATTTATCGTCGCTTTAAATACG  
+HWI-EAS443:3:61:37:1697#0/1  
abbaabbbabbbb`a```\_bba^ab\_\_aabba\_¥`\_`\_¥IW  
@HWI-EAS443:3:61:402:712#0/1  
ATCAGCAATCTGTTCAACAAGTGGCACACACTAGACCAAAA  
+HWI-EAS443:3:61:402:712#0/1  
aa`^Z`\_aX`\_a`\_a\_aaZK\_U\_^`W]aaaa`^`^`^`^`^`^`  
@HWI-EAS443:3:61:421:1047#0/1  
CTTCTGTGGTCACTGTTCCCATCCTGTTGTATATGAGGCC  
+HWI-EAS443:3:61:421:1047#0/1  
abbabaab`\_bbabaabbbab`aa`¥[ba`^^`a``¥¥VV  
@HWI-EAS443:3:61:472:640#0/1  
CGTCATTGCAGCAAATATCATTGGGATCTTGCACCTGATA  
+HWI-EAS443:3:61:472:640#0/1  
X¥bbX`bbaaaa]`[HH`VaQPY^TQVa\_H]a^XZLYO]V  
@HWI-EAS443:3:61:477:444#0/1  
TGTGAATCAGCAATCTGTTCAACAAGTGGCACACACTAGAC  
+HWI-EAS443:3:61:477:444#0/1  
abab`aabbbabaaaab¥\_Z\_aW[aY``aaa\_V`^^^^^]  
@HWI-EAS443:3:61:489:379#0/1  
CACAGAAGCTGCTTTTGGTCTAGTGTGTGCCACTTGTGAA

+HWI-EAS443:3:61:489:379#0/1  
a`abbbbbbaababb`b[aa`a^a\_a\_b\_`b^a\_`^\_\_\_\_  
@HWI-EAS443:3:61:496:1091#0/1  
ATCGTCTTTTTTCAAATGTATTTATCGTCGCTTTAAATA  
+HWI-EAS443:3:61:496:1091#0/1  
a]ba`a\_\_ab`a\_]\_bb\_VPSX\_]RYa^¥[`Y¥]]R]\_Y]  
@HWI-EAS443:3:61:548:361#0/1  
TGTGAATCAGCAATCTGTTCAAGTGGCACACACTAGAC  
+HWI-EAS443:3:61:548:361#0/1  
W¥`Y¥a\_bZ`VaZ\_aY¥Z¥\_X\_R¥\_U¥`¥\_dW¥Z\_a````]  
@HWI-EAS443:3:61:638:587#0/1  
TTCGGGTCCCCATTCCCATTAGGGCATTGGACAAAGC  
+HWI-EAS443:3:61:638:587#0/1  
a`a``^\_aa`a`^`\_aaaa\_^W¥X^`Xa``a`[\_^^^\_¥S  
@HWI-EAS443:3:61:662:206#0/1  
CGATCAGTAATCCACAATATCAGGTGCAAGATCCCAATGA  
+HWI-EAS443:3:61:662:206#0/1  
^Zb`aaaa\_bb`SS¥VT\_Q[a\_NHR]\_`Y^)`^^`aT\_Y\_  
@HWI-EAS443:3:61:838:595#0/1  
GATCGTCTTTTTTCAAATGTATTTATCGTCGCTTTAAAT  
+HWI-EAS443:3:61:838:595#0/1  
\_``W^aaa\_]`aV`\_`Y`[aNY]]XN]NYVDRT\_`YKRWX  
@HWI-EAS443:3:61:856:1481#0/1  
ATTTGCTGCAATGACGAGAGGATCACTTGAATCGCTGCAT  
+HWI-EAS443:3:61:856:1481#0/1  
`\_V^\_¥aa`XURa][^\_U\_`^WQaaa\_`\_aa[Z\_VU][[UK  
@HWI-EAS443:3:61:938:1071#0/1  
TGTGAATCAGCAATCTGTTCAAGTGGCACACACTAGAC  
+HWI-EAS443:3:61:938:1071#0/1  
aa[`b`b`a`aaaaabbabaaaXa`[a\_`a^a]`^^^\_^]X  
@HWI-EAS443:3:61:940:315#0/1  
ATCGTCTTTTTTCAAATGTATTTATCGTCGCTTTAAATA  
+HWI-EAS443:3:61:940:315#0/1  
aa^a\_abaaabaa^aaa`b^``aa]`\_\_]]`]\_\_`^Y[[[  
@HWI-EAS443:3:61:943:1877#0/1  
AAGGAGGTGTCACCTAAGCTATTCAACTGGTGCACCTGCCA  
+HWI-EAS443:3:61:943:1877#0/1  
]Y^SaU```[abb`b`baab`ababaaZN[`[\_\_\_\_V[RM]  
@HWI-EAS443:3:61:971:749#0/1  
CTAGTGTGTGCCACTTGTGAACAGATTGCTGATTCACAGC  
+HWI-EAS443:3:61:971:749#0/1  
abbbbbbabbbbbbbbbbb`¥a¥`bbbbabbbabaaaaa]  
@HWI-EAS443:3:61:985:888#0/1  
AGCGATTCAAGTGATCCTCTCGTCATTGCAGCAAATATCA  
+HWI-EAS443:3:61:985:888#0/1  
X\_bba^V¥a\_\_0¥`a\_aab`baZba`aa^`\_`[[[Z¥^TS  
@HWI-EAS443:3:62:1172:1685#0/1  
CACAGAAGCTGCTTTTGGTCTAGTGTGTGCCACTTGTGAA  
+HWI-EAS443:3:62:1172:1685#0/1  
a\_0\_]a^]Xa\_R]aaZV]Zab]``a^XaZSR\_`^]PGRb]

@HWI-EAS443:3:62:1193:1138#0/1  
CTTGCACCTGATATTGTGGATTACTGATCGTCTTTTTTTTC  
+HWI-EAS443:3:62:1193:1138#0/1  
`bbbaababbabaabb\_aaaaa``ab`a`\_aaaaaaa  
@HWI-EAS443:3:62:1226:618#0/1  
CGCTGCATCTGCACTCCCATTCGCTTCTGGTAGGCCTGCA  
+HWI-EAS443:3:62:1226:618#0/1  
abbaaababbabaab`a¥aba[aaaab`\_¥`b\_\_Vabaa  
@HWI-EAS443:3:62:1271:1023#0/1  
GCACCTGATATTGTGGATTACTGATCGTCTTTTTTTTCAA  
+HWI-EAS443:3:62:1271:1023#0/1  
a]XQ\_¥\_RXPW]Z]T^]UW[\_UVVVV\_Z¥¥]^YRRTZ  
@HWI-EAS443:3:62:1285:1329#0/1  
GTGACCACAGAAGCTGCTTTTGGTCTAGTGTGCCACTT  
+HWI-EAS443:3:62:1285:1329#0/1  
`[baaaaaaaaaW`[]\_\_a\_\_aVa]a`\_`Z^UTZ^a\_]Z  
@HWI-EAS443:3:62:1301:2030#0/1  
CACAAGTGGCACACACTAGACAAAAGCAGCTTCTGTGGT  
+HWI-EAS443:3:62:1301:2030#0/1  
a^Xa]TNOL^a\_bSbbZ[DW^Y^a\_U\_`][\_\_U]^]^SO  
@HWI-EAS443:3:62:1310:60#0/1  
AGATCCCAATGATATTTGCTGCAATGACGAGAGGATCACT  
+HWI-EAS443:3:62:1310:60#0/1  
abab`aaaabbababbbbaab\_aaaa\_\_b`a\_aa\_\_Z¥^\_  
@HWI-EAS443:3:62:1463:653#0/1  
GGCCTCATATACAACAGGATGGGAACAGTGACCACAGAAG  
+HWI-EAS443:3:62:1463:653#0/1  
ab``a`baabaaaa]aba`b`a\_`WZaQ`a[\_\_\_\_`\_``\_  
@HWI-EAS443:3:62:1475:1903#0/1  
AAGATTGGTCTTGTCTTTAGCCATTCCATGAGAGCCTCAA  
+HWI-EAS443:3:62:1475:1903#0/1  
aababbbb`¥bab`babaaa]a\_`S]\_a\_a\_`¥[Z¥aa`  
@HWI-EAS443:3:62:1511:56#0/1  
GGGGCCAAGGAGGTGTCACTAAGCTATTCAACTGGTGCAC  
+HWI-EAS443:3:62:1511:56#0/1  
a^]b\_`a\_b^[\_X[a^`Zaa`a[\_\_\_aaa`^U[^^W\_^^^  
@HWI-EAS443:3:62:1555:1597#0/1  
GCCACTTGTGAACAGATTGCTGATTCACAGCATCGGTCTC  
+HWI-EAS443:3:62:1555:1597#0/1  
a`aaX````\_¥a\_aa`\_\_¥`¥\_\_\_Y\_Ya`\_\_`Xa[RV\_Y  
@HWI-EAS443:3:62:1567:1596#0/1  
CACTACGGCAAAGGCTATGGAACAGATGGCTGGATCGAGT  
+HWI-EAS443:3:62:1567:1596#0/1  
\_b\_abaa[SWaa`^[aa\_ab\_`^`^VXSUbaXZ`QZH^UYH  
@HWI-EAS443:3:62:1574:1621#0/1  
GATCCTCTCGTCATTGCAGCAAATATCATTGGGATCTTGC  
+HWI-EAS443:3:62:1574:1621#0/1  
ab\_¥^b]`Vb`\_a\_\_baaaaa`a\_\_\_`aa`Xa]Z]^`aa  
@HWI-EAS443:3:62:1621:78#0/1  
GTCCCAATAGTTCTCATTGCATGTACCATCTGCCTAGTCT

+HWI-EAS443:3:62:1621:78#0/1  
a[LG]Y\_YN¥Y[U\_WZZZ^ZU¥[VXNOY¥PY]QJYTSTBB  
@HWI-EAS443:3:62:181:993#0/1  
GGAGGTTGCTAATCAGACTAGGCAGATGGTACATGCAATG  
+HWI-EAS443:3:62:181:993#0/1  
ab\_aa¥aa`aa`\_`W`\_`\_^ZYJ[Z^^aRLYHVU^]R[Z  
@HWI-EAS443:3:62:229:1139#0/1  
CCCATGGAACGTTATTTCTCTTTTGAGCTTCTGTATAGT  
+HWI-EAS443:3:62:229:1139#0/1  
`aaaZ\_a`\_a\_]a\_\_aaa`a`\_Y\_\_a`^\_\_\_^[\_^\_]`  
@HWI-EAS443:3:62:247:1061#0/1  
GACCACAGAAGCTGCTTTTGGTCTAGTGTGTGCCACTTGT  
+HWI-EAS443:3:62:247:1061#0/1  
`¥aaTa[a^`\_SY\_\_YY\_\_\_`G\_YYKLXSWWP^\_`RZTFP  
@HWI-EAS443:3:62:296:1291#0/1  
GACCGATGCTGTGAATCAGCAATCTGTTCCACAAGTGGCAC  
+HWI-EAS443:3:62:296:1291#0/1  
`\_aa]a^]aab\_aaaab]Taa¥`aa^`¥\_Ta\_a`¥\_UW\_a  
@HWI-EAS443:3:62:348:1593#0/1  
GGCCTACCAGAAGCGAATGGGAGTGCAGATGCAGCGATTC  
+HWI-EAS443:3:62:348:1593#0/1  
a`\_SaSa]Y^Q^JVU^YUW¥QQXKXK]OUPYVHPS^UQNZ  
@HWI-EAS443:3:62:484:423#0/1  
GCACCTGATATTGTGGATTACTGATCGTCTTTTTTTTCAA  
+HWI-EAS443:3:62:484:423#0/1  
^`]¥\_`aYO[[VZYX^R[^OWXa[YV]QY¥^a^\_Y[[XLV  
@HWI-EAS443:3:62:511:723#0/1  
GCCTACCAGAAGCGAATGGGAGTGCAGATGCAGCGATTCA  
+HWI-EAS443:3:62:511:723#0/1  
Z`^X\_[XWT]¥W`WR\_X`^`]ZJZXYUTVW`SQOXK¥]ZR  
@HWI-EAS443:3:62:529:1369#0/1  
AGATCCCAATGATATTTGCTGCAATGACGAGAGGATCACT  
+HWI-EAS443:3:62:529:1369#0/1  
a¥aaaabaababaa`\_]`a\_aaba]`aa\_a^a`\_`\_]`^`  
@HWI-EAS443:3:62:608:1849#0/1  
ATCACTTGAATCGCTGCATCTGCACTCCCATTGCTTCTG  
+HWI-EAS443:3:62:608:1849#0/1  
^a\_bab\_Zabbaaa`]abaa`aaaa^\_[a\_a\_\_\_a`\_aa¥  
@HWI-EAS443:3:62:63:242#0/1  
CACTGTTCCCATCCTGTTGTATATGAGGCCCATGCAACTG  
+HWI-EAS443:3:62:63:242#0/1  
`bbbbaaaabbaaaabaaa\_abaaa`\_Y`^`^`¥\_\_]^YZ  
@HWI-EAS443:3:62:684:615#0/1  
CGCTTCTGGTAGGCCTGCAAATTTTCAAGAAGGTCATCTT  
+HWI-EAS443:3:62:684:615#0/1  
a`^a\_a]S\_ZP]a¥`abaa¥NWRZ\_\_a`\_`a\_\_Q\_[X^U\_  
@HWI-EAS443:3:62:716:1061#0/1  
GGGCCTCATATACAACAGGATGGGAACAGTGACCACAGAA  
+HWI-EAS443:3:62:716:1061#0/1  
abbbbabbbbbb`aaa\_baaa\_aa`a`aa¥aaaaa`aa^V

@HWI-EAS443:3:62:73:1067#0/1  
CTCATATACAACAGGATGGGAACAGTGACCACAGAAGCTG  
+HWI-EAS443:3:62:73:1067#0/1  
aa¥S^bba\_VVSZ^aZX`^`PXR[[^YZUXH\_[J`Q[DM  
@HWI-EAS443:3:62:878:831#0/1  
GTGTACTAAGCTATTCAACTGGTGCACCTGCCAGTTGCA  
+HWI-EAS443:3:62:878:831#0/1  
^Za^\_ababaaaa`a`^\_`a`Y]]aa`^¥¥`^U]]\_`^  
@HWI-EAS443:3:62:881:66#0/1  
GAGACCGATGCTGTGAATCAGCAATCTGTTACAAGTGGC  
+HWI-EAS443:3:62:881:66#0/1  
aVY]]S¥Z¥¥VW¥W^UTY[Z^YYWTTYZTSSRQVVWSWVW  
@HWI-EAS443:3:62:901:220#0/1  
CCAATCTTGTCACCTCTGACTAAGGGAATTTTAGGATTTG  
+HWI-EAS443:3:62:901:220#0/1  
ab`bbbbbb\_bbaabbbbbbbbabbbbaaaaaaaaaaaaa\_a  
@HWI-EAS443:3:62:907:151#0/1  
CCGATGCTGTGAATCAGCAATCTGTTACAAGTGGCACAC  
+HWI-EAS443:3:62:907:151#0/1  
aa`a^a\_b`aaaa`¥X\_`Z`V¥^ZPWYV[T]U^TU^WVU  
@HWI-EAS443:3:62:985:1499#0/1  
GGTGTACTAAGCTATTCAACTGGTGCACCTGCCAGTTGC  
+HWI-EAS443:3:62:985:1499#0/1  
ab\_aaababbaaabbaaabbaa\_a\_\_`aaaaaa\_a[¥a``  
@HWI-EAS443:3:63:1141:1086#0/1  
TACTGATCGTCTTTTTTTCAAATGTATTTATCGTCGCTTT  
+HWI-EAS443:3:63:1141:1086#0/1  
a`aaa`aaa\_aaaaaaaaaa\_\_\_a]aaa`a\_¥aZa\_`a\_`  
@HWI-EAS443:3:63:1142:1155#0/1  
ACAGTGACCACAGAAGCTGCTTTTGGTCTAGTGTGTGCCA  
+HWI-EAS443:3:63:1142:1155#0/1  
aa``]aaaa`aba\_aa^`a`\_\_X\_]\_]YS^]`W^a  
@HWI-EAS443:3:63:1232:468#0/1  
GACGAGAGGATCACTTGAATCGCTGCATCTGCACTCCCAT  
+HWI-EAS443:3:63:1232:468#0/1  
ababbabbaaaaa\_bb`abb`aa`a`a`\_`^]`^a\_aa¥[Y  
@HWI-EAS443:3:63:1330:1521#0/1  
ATTACTGATCGTCTTTTTTTCAAATGTATTTATCGTCGCT  
+HWI-EAS443:3:63:1330:1521#0/1  
W\_¥\_QOI[¥ZR[`][¥aba`]aa`Wb\_VYa\_]¥a\_HSa`Y  
@HWI-EAS443:3:63:1333:789#0/1  
ATCAGGTGCAAGATCCCAATGATATTTGCTGCAATGACGA  
+HWI-EAS443:3:63:1333:789#0/1  
Y``¥V\_abab\_¥Z\_Z]aba`\_`\_ab^b`Y`SUaa\_`^Yba  
@HWI-EAS443:3:63:1371:1118#0/1  
CAAAAGAGAAATAACGTTCCATGGGGCCAAGGAGGTGTCA  
+HWI-EAS443:3:63:1371:1118#0/1  
\_bbbbbbbbbbbbb^bbabbbba]]a]]`^Y]aba]b``b  
@HWI-EAS443:3:63:1391:908#0/1  
TGCACCTGATATTGTGGATTACTGATCGTCTTTTTTTCAA

+HWI-EAS443:3:63:1391:908#0/1  
abb[VU¥b]a^a`\_F\_a`R^Yaaa¥Ymb^a]aaabab^Z`  
@HWI-EAS443:3:63:1424:1163#0/1  
GCAAAGGCTATGGAACAGATGGCTGGATCGAGTGAACAGG  
+HWI-EAS443:3:63:1424:1163#0/1  
a\_X`[a^^^YWRZM^SY`^^Y`\_^][RKXUVBBBBBBBBBB  
@HWI-EAS443:3:63:1473:565#0/1  
TTTCAAACCGTATTTAAAGCGACGATAAATACATTTGAAA  
+HWI-EAS443:3:63:1473:565#0/1  
aaa\_a`aaabXaaba`a`a\_a^aa`\_a]\_a^]``^\_a`a`  
@HWI-EAS443:3:63:1482:355#0/1  
GCCTACCAGAAGCGAATGGGAGTGCAGATGCAGCGATTCA  
+HWI-EAS443:3:63:1482:355#0/1  
\_abbaaab`abab\_Xbbab]aTa\_aaaa^aa`a^`\_aa  
@HWI-EAS443:3:63:1501:184#0/1  
GCCTCATATACAACAGGATGGGAACAGTGACCACAGAAGC  
+HWI-EAS443:3:63:1501:184#0/1  
`¥¥b`\_Y]]¥Y]\_KZaa^^Z``I\_\_a\_Ya[PP^]]UBBBB  
@HWI-EAS443:3:63:152:1932#0/1  
CGCTTCTGGTAGGCCTGCAAATTTTCAAGAAGTCATCTT  
+HWI-EAS443:3:63:152:1932#0/1  
^\_]OY`PXXY`YHR]LNUX]R\_]UU\_X]VYRSJR¥W^][W  
@HWI-EAS443:3:63:1576:790#0/1  
GGCCATGGAGGTTGCTAATCAGACTAGGCAGATGGTACAT  
+HWI-EAS443:3:63:1576:790#0/1  
a\_a`abba\_ba^aa\_aaaaV\_aaX``a`WZ\_X¥[`M^M¥P  
@HWI-EAS443:3:63:196:1638#0/1  
GAAAGATGACCTTCTTAAAAATTTGCAGGCCTACCAGAAG  
+HWI-EAS443:3:63:196:1638#0/1  
aV^ZRSOU`aaX\_aWVa\_W`[^][U`\_¥Wa`\_`\_] ^VUZ  
@HWI-EAS443:3:63:19:93#0/1  
ATGGGCCTCATATACAACAGGATGGGAACAGTGACCACAG  
+HWI-EAS443:3:63:19:93#0/1  
aabaaaaa`aaaa\_aa\_\_aaZ^]U\_[\_YU¥[\_XVWV  
@HWI-EAS443:3:63:295:207#0/1  
GGAACAGTGACCACAGAAGCTGCTTTTGGTCTAGTGTGTG  
+HWI-EAS443:3:63:295:207#0/1  
abaabab`abbbabbaaWaaa`a`a\_]VV]\_a[Z^]\_WV  
@HWI-EAS443:3:63:393:102#0/1  
AGAAGCTGCTTTTGGTCTAGTGTGTGCCACTTGTGAACAG  
+HWI-EAS443:3:63:393:102#0/1  
aabbaa`\_a\_aa`\_aZ\_\_\_\_\_^\_V\_¥^^^\_Y^] ^W^]  
@HWI-EAS443:3:63:572:1064#0/1  
ATTTGCTGCAATGACGAGAGGATCACTTGAATCGCTGCAT  
+HWI-EAS443:3:63:572:1064#0/1  
a`a\_Z\_P^T¥`\_aYV\_a]XOTQTa¥XVUNY a^\_YBBBBBB  
@HWI-EAS443:3:63:615:391#0/1  
CATGGAGGTTGCTAATCAGACTAGGCAGATGGTACATGCA  
+HWI-EAS443:3:63:615:391#0/1  
aaaaba`bYa[LLHYaa`\_aX][a\_]\_`W^]\_G[]SZR^]

@HWI-EAS443:3:63:691:225#0/1  
GTGTACTAAGCTATTCAACTGGTGCACCTGCCAGTTGCA  
+HWI-EAS443:3:63:691:225#0/1  
a\_]^\`aaaaa\_\_\_^\`aa\_\_X\_\_Ya\_\`a\_\`^\`\_W]^\`^\`  
@HWI-EAS443:3:63:802:1296#0/1  
CAGTGACCACAGAAGCTGCTTTTGGTCTAGTGTGTGCCAC  
+HWI-EAS443:3:63:802:1296#0/1  
aaa]aabaaaaabaaa`aa``\`a\_a\_\```[]`\`^\`]^\`[^\`\_\_  
@HWI-EAS443:3:63:843:2041#0/1  
GATGGGAACAGTGACCACAGAAGCTGCTTTTGGTCTAGTG  
+HWI-EAS443:3:63:843:2041#0/1  
^\`\_Ub]a]\`aba[abababbbaa`\_aaaa^[b\_UaG`a`]\`\_\_  
@HWI-EAS443:3:63:873:509#0/1  
GGGCCTCATATACAACAGGATGGGAACAGTGACCACAGAA  
+HWI-EAS443:3:63:873:509#0/1  
abbababbabaaaaaaaaaaaaabaa`a`aa¥aaa\_\`a`aa  
@HWI-EAS443:3:63:942:989#0/1  
AGCAATCTGTTCAACAAGTGGCACACACTAGACCAAAAAGCA  
+HWI-EAS443:3:63:942:989#0/1  
`\`\_]\`b`aba^aaa]\_aUaZY\_aaa¥]Waa¥`\`^U\_\`^b`\`  
@HWI-EAS443:3:63:966:1110#0/1  
TATCCATGTTGTTCCGGTCCCCATTCCCATTTAGGGCATT  
+HWI-EAS443:3:63:966:1110#0/1  
aaaa`abaab`a`\`Y¥`T`aaa`\`\_a\_\`^\`¥¥^W\_]^\`^\`  
@HWI-EAS443:3:64:1076:1186#0/1  
GGTGTACTAAGCTATTCAACTGGTGCACCTGCCAGTTGC  
+HWI-EAS443:3:64:1076:1186#0/1  
`b\_baabbbb`\_aaaaaaa`a`aa\_a\_\`aaaaZ`\`^a]\_\`  
@HWI-EAS443:3:64:1078:1943#0/1  
GGTACATGCAATGAGAACTATTGGGACTCATCCTAGCTCC  
+HWI-EAS443:3:64:1078:1943#0/1  
`\`[ab¥ba[abba^baYaa`aa\_XYZ\_]^^aa\_a\_a\_\`\_^^  
@HWI-EAS443:3:64:1088:1976#0/1  
AGCAGCTTCTGTGGTCACTGTTCCCATCCTGTTGTATATG  
+HWI-EAS443:3:64:1088:1976#0/1  
a[\_baaabbb\_ZZa¥^\`[^QQa\_W^a^NZ]]TaXZ^^\_WQ  
@HWI-EAS443:3:64:1210:924#0/1  
TGGGCCTCATATACAACAGGATGGGAACAGTGACCACAGA  
+HWI-EAS443:3:64:1210:924#0/1  
aaaa`aaaabaaa`\_aaaa\_aa`\`\_aX`aX`a^^`\`\_^\`\_]  
@HWI-EAS443:3:64:1304:1797#0/1  
AGGAGGTGTACTAAGCTATTCAACTGGTGCACCTGCCAG  
+HWI-EAS443:3:64:1304:1797#0/1  
[¥\_aa]S¥^bb\_b^YaRbba^aa`QM`^R¥JX[\_[\`FNaa  
@HWI-EAS443:3:64:1306:1265#0/1  
CTGATCGTCTTTTTTTCAAATGTATTTATCGTCGCTTTAA  
+HWI-EAS443:3:64:1306:1265#0/1  
YaX¥\_\`^\`abab^b`\`b¥\_\`\_bW\_\_baaaaa`^¥Z`\`\_a¥a]  
@HWI-EAS443:3:64:1374:1866#0/1  
GATCACTTGAATCGCTGCATCTGCACTCCCATTGCTTCT

+HWI-EAS443:3:64:1374:1866#0/1  
ab`baab^bbb¥`a^\_b\_aa^aa]\_Z]\_a`VKU^`a^a  
@HWI-EAS443:3:64:1423:336#0/1  
GGATTACTGATCGTCTTTTTTTCAAATGTATTATCGTCG  
+HWI-EAS443:3:64:1423:336#0/1  
abaabbabbab`baabbbbbbaaa`ab`abbaaa\_a]\_a  
@HWI-EAS443:3:64:1541:774#0/1  
GCACACACTAGACCAAAAGCAGCTTCTGTGGTCACTGTTC  
+HWI-EAS443:3:64:1541:774#0/1  
a`aYa`a]\_a]X\_] []\_a[N[`X¥\_\_^]H^^R]WTQXXUU  
@HWI-EAS443:3:64:1559:964#0/1  
GTGCCACTTGTGAACAGATTGCTGATTACAGCATCGGTC  
+HWI-EAS443:3:64:1559:964#0/1  
¥U\_]STXZ^Z`a`SQ\_`S`ZL^a`YX^`¥`[X`\_S`YJ]  
@HWI-EAS443:3:64:1566:937#0/1  
GCATGTACCATCTGCCTAGTCTGATTAGCAACCTCCATGG  
+HWI-EAS443:3:64:1566:937#0/1  
aba]aabbbaaaaa[`a\_a`aaaa\_\_\_\_\_`a`\_S`\_\_X  
@HWI-EAS443:3:64:1585:1882#0/1  
ACGTTCCATGGGGCCAAGGAGGTGCTACTAAGCTATTCAA  
+HWI-EAS443:3:64:1585:1882#0/1  
aV`S[^Xa`\_\_ZS¥\_¥[UZW¥¥W¥U¥^HVZ¥QUUU¥SSQW  
@HWI-EAS443:3:64:1776:1585#0/1  
CTTTTTTTCAAATGTATTTATCGTCGCTTTAAATACGGTT  
+HWI-EAS443:3:64:1776:1585#0/1  
ab`\_b\_aaYabbab]abaa\_baa`J^Y\_aaU¥^RX\_[`S\_  
@HWI-EAS443:3:64:231:1828#0/1  
GATCCCAATGATATTTGCTGCAATGACGAGAGGATCACTT  
+HWI-EAS443:3:64:231:1828#0/1  
aaabbb\_b]aa`ba[[¥a`aaa`]a\_\_`M`[\_]XZa\_\_]  
@HWI-EAS443:3:64:304:1697#0/1  
GAAAGATGACCTTCTTGAAAATTTGCAGGCCTACCAGAAG  
+HWI-EAS443:3:64:304:1697#0/1  
`baa\_aa^aa`U`aa\_`[aa\_`\_\_^a`\_`\_\_W[Ya\_^^^  
@HWI-EAS443:3:64:322:220#0/1  
AGCTTCTTGTATAGTTTAACTGCTCTATCCATGTTGTTTCG  
+HWI-EAS443:3:64:322:220#0/1  
a`a\_aabb¥]V\_\_\_P`aab]Y[]a^^a```V`a\_\_`\_\_^]  
@HWI-EAS443:3:64:351:552#0/1  
GTCCCCATTTCCATTTAGGGCATTGACAAAAGCGTCTA  
+HWI-EAS443:3:64:351:552#0/1  
a^aa\_b]bbbaababba`]abaaaaabZaabaabZaab  
@HWI-EAS443:3:64:418:308#0/1  
TGTGAATCAGCAATCTGTTCAAGTGGCACACACTAGAC  
+HWI-EAS443:3:64:418:308#0/1  
[`[`J`aaXab^Taab`Xa]Z\_^`[\_`aabaaa`^a[`Z  
@HWI-EAS443:3:64:446:544#0/1  
GAACAGTGACCACAGAAGCTGCTTTTGGTCTAGTGTGTGC  
+HWI-EAS443:3:64:446:544#0/1  
aabb^b\_\_aaabaaba\_aaa`aa\_`[Y^`aXZ\_^\_^W^



@HWI-EAS443:3:64:482:422#0/1  
CTTTTTTCAAATGATTTATCGTCGCTTTAAATACGGTT  
+HWI-EAS443:3:64:482:422#0/1  
aa`[^a[]^aaab[]`\_a`aa`Ya\_V]Y` `` `ZQV`\_Y\_  
@HWI-EAS443:3:64:485:1798#0/1  
GTGTCACTAAGCTATTCAACTGGTGCACCTGCCAGTTGCA  
+HWI-EAS443:3:64:485:1798#0/1  
aTXJY`[Y[TX¥RZV0[`¥R\_[`V`ZY\_\_^S[OPVFWDO  
@HWI-EAS443:3:64:492:1202#0/1  
AAAGCAGCTTCTGTGGTCACTGTTCCCATCCTGTTGTATA  
+HWI-EAS443:3:64:492:1202#0/1  
\_^^^\_\_`aabaa¥]Z^Za`¥]X]`aa\_a\_`^]]^`XU¥\_\_  
@HWI-EAS443:3:64:594:572#0/1  
CTGATCGTCTTTTTTCAAATGATTTATCGTCGCTTTAA  
+HWI-EAS443:3:64:594:572#0/1  
abaaabb`bbbabbaaa`aaaa^bbaaaa\_b``aaa``\_\_  
@HWI-EAS443:3:64:693:956#0/1  
GGCACACACTAGACCAAAAAGCAGCTTCTGTGGTCACTGTT  
+HWI-EAS443:3:64:693:956#0/1  
aba[aaababbaa`\_abb`aba]a^b``a]\_XSVT\_Y\_  
@HWI-EAS443:3:64:75:1513#0/1  
CTTTTGGTCTAGTGTGTGCCACTTGTGAACAGATTGCTGA  
+HWI-EAS443:3:64:75:1513#0/1  
a`a`^\_^Za`a]V`Y]]^\_\_a^\_\_^]]^``\_`\_\_^]]ZZU^  
@HWI-EAS443:3:64:774:618#0/1  
GATGCTGTGAATCAGCAATCTGTTACAAGTGGCACACAC  
+HWI-EAS443:3:64:774:618#0/1  
aa]]aa\_Yaaaabaa\_aaa````a`aVa``P^¥V\_V\_a^T  
@HWI-EAS443:3:64:863:995#0/1  
GACAAGATTGGTCTTGTCTTTAGCCATTCCATGAGAGCCT  
+HWI-EAS443:3:64:863:995#0/1  
¥¥Z\_abbba¥`Yabbb`b``¥^^[Z^`aaZ¥W\_^a]V¥b`  
@HWI-EAS443:3:64:908:1224#0/1  
CAAGTGGCACACACTAGACCAAAAAGCAGCTTCTGTGGTCA  
+HWI-EAS443:3:64:908:1224#0/1  
abba\_aaaaaa`a`\_\_\_aa`aa`[Vaa`\_`a\_^VWZ^UW^  
@HWI-EAS443:3:64:941:1054#0/1  
CATTCTGTTTTCATGCCTGATTAGTGGATTGGTGGTAGTA  
+HWI-EAS443:3:64:941:1054#0/1  
aabaabbabbabaaa`ab`aba^aa`aaa\_\_a\_BBBBB  
@HWI-EAS443:3:64:990:1272#0/1  
CCACAGAAGCTGCTTTTGGTCTAGTGTGTGCCACTTGTGA  
+HWI-EAS443:3:64:990:1272#0/1  
aa`aa`aa\_a`\_Z`^^\_^XX^Y`^U]X^X^^^Y]U]XY]  
@HWI-EAS443:3:65:1015:2004#0/1  
ATGAGGCCCATGCAACTGGCAAGTGCACCAGTTGAATAGC  
+HWI-EAS443:3:65:1015:2004#0/1  
`VZ`b`W]]TP\_HO`^W`ZXX`^QXVa`ZZUHT¥\_aZROM  
@HWI-EAS443:3:65:1036:1096#0/1  
GGCCTCATATACAACAGGATGGGAACAGTGACCACAGAAG

+HWI-EAS443:3:65:1036:1096#0/1  
`aaa[a]aa`a`aaYT\_a\_\_Z¥\_\_aZaa\_\_`¥Y`\_¥¥\_^\_  
@HWI-EAS443:3:65:1089:1457#0/1  
CTTTTTTCAAATGTATTTATCGTCGCTTTAAATACGGTT  
+HWI-EAS443:3:65:1089:1457#0/1  
abb`bbbbbbabb`bbaaaab`abaaaaa`\_a\_\_a^a  
@HWI-EAS443:3:65:1096:214#0/1  
CAAGATTGGTCTTGTCTTTAGCCATTCCATGAGAGCCTCA  
+HWI-EAS443:3:65:1096:214#0/1  
aaH\_aabba`aaba`aab^aaa\_aa`\_a\_aa\_a\_\_[\_`\_\_¥  
@HWI-EAS443:3:65:1117:922#0/1  
CTTCTTGAAAATTTGCAGGCCTACCAGAAGCGAATGGGAG  
+HWI-EAS443:3:65:1117:922#0/1  
abbabb]aabababb`aaaaa\_aaa`\_`\_a\_\_aa\_a\_a  
@HWI-EAS443:3:65:1230:822#0/1  
CAGCAATCTGTTCCACAAGTGGCACACACTAGACCAAAAGC  
+HWI-EAS443:3:65:1230:822#0/1  
aWQ\_`a`a]aa\_RJa\_a\_[[Sa``Za^]¥KYGS[V\_`RQ  
@HWI-EAS443:3:65:1257:825#0/1  
GAATCAGCAATCTGTTCCACAAGTGGCACACACTAGACCAA  
+HWI-EAS443:3:65:1257:825#0/1  
```aa^aaaaa\_a¥`\_a`a^a¥]\_a`]^`^`[[[\_`a^]  
@HWI-EAS443:3:65:1360:1153#0/1  
GCTCTATCCATGTTGTTCCGGTCCCCATTTCCATTTAGGG  
+HWI-EAS443:3:65:1360:1153#0/1  
Yaaabbbb¥¥ab]baaaaaa[`X[aaaaaa\_aabaaaa  
@HWI-EAS443:3:65:1362:581#0/1  
AGATGACCTTCTTGAATTTGCAGGCCTACCAGAAGCGA  
+HWI-EAS443:3:65:1362:581#0/1  
^RYXL[aYPP¥^00^TYYXU`\_NVPQ[ZRVLV^VQOFRM  
@HWI-EAS443:3:65:1386:440#0/1  
AGACTAGGCAGATGGTACATGCAATGAGAACTATTGGGAC  
+HWI-EAS443:3:65:1386:440#0/1  
aaa\_\_a\_a]`a\_`aRX[\_^aY\_^`¥¥¥]M^^^`\_`^^Y  
@HWI-EAS443:3:65:1450:793#0/1  
CAAGATCTGTGTTCTTTCTGCAAAGACACTTTCCAGTCT  
+HWI-EAS443:3:65:1450:793#0/1  
\_aab]b\_abX^b]a]baabaababaaa`aa\_aX`U\_Qa  
@HWI-EAS443:3:65:1478:1022#0/1  
CGATGCTGTGAATCAGCAATCTGTTCCACAAGTGGCACACA  
+HWI-EAS443:3:65:1478:1022#0/1  
`bababaaabaaba`\_b`\_abaaaa\_aaaY]^`^a`\_a\_a  
@HWI-EAS443:3:65:1587:2035#0/1  
CACTCCCATTGCTTCTGGTAGGCCTGCAAATTTTCAAGA  
+HWI-EAS443:3:65:1587:2035#0/1  
^`aZ`\_aa\_Q`\_aa]`Q`^U^[W^RZ^`\_`[\_a^`U`[\_X  
@HWI-EAS443:3:65:1679:966#0/1  
CTTGAATCGCTGCATCTGCACTCCCATTGCTTCTGGTAG  
+HWI-EAS443:3:65:1679:966#0/1  
`bb`bbbab`b`bba`ab`bab\_\_\_abaaa`aa`aa]\_^R

@HWI-EAS443:3:65:167:2018#0/1  
TGCACCTGATATTGTGGATTACTGATCGTCTTTTTTTTCAA  
+HWI-EAS443:3:65:167:2018#0/1  
`aa[abaZ^a`a`^[¥¥Z``aa\_\_\_`\_¥X\_a`aaaa`\_¥  
@HWI-EAS443:3:65:1757:1621#0/1  
CGAGAGGATCACTTGAATCGCTGCATCTGCACTCCCATTC  
+HWI-EAS443:3:65:1757:1621#0/1  
`bT\_^ab\_a`W^Z¥Z`XVV^H^XP\_V\_ZYT]W`^¥PV]Z  
@HWI-EAS443:3:65:242:572#0/1  
AGCGACGATAAATACATTTGAAAAAAGACGATCAGTAAT  
+HWI-EAS443:3:65:242:572#0/1  
aabbabaa`¥]^Za`b^a`aa\_a\_a[\_¥^]P]Y¥V[X[  
@HWI-EAS443:3:65:257:1085#0/1  
GATCAGTAATCCACAATATCAGGTGCAAGATCCCAATGAT  
+HWI-EAS443:3:65:257:1085#0/1  
S¥U\_¥YY\_V)`\_][aa]T[\_¥Y]OZ[PH^¥`\_`\_Y\_a^`^\_  
@HWI-EAS443:3:65:278:562#0/1  
TCGGGTCCCCATTCCCATTTAGGGCATTTTGGACAAAGCG  
+HWI-EAS443:3:65:278:562#0/1  
ab`\_`¥bbb]T\_aaaaT```aaa`a`a`aaaa`]Q[^a  
@HWI-EAS443:3:65:319:671#0/1  
AGAAGCTGCTTTTGGTCTAGTGTGTGCCACTTGTGAACAG  
+HWI-EAS443:3:65:319:671#0/1  
¥^\_ZZ]ZZ\_\_^[P[MWUZOEWS]OYXTSM[YR[¥Y[S¥Z  
@HWI-EAS443:3:65:31:1714#0/1  
GTGGATTACTGATCGTCTTTTTTTCAAATGTATTTATCGT  
+HWI-EAS443:3:65:31:1714#0/1  
]QPT]aaa^^^Z\_]aX^R¥ZS]\_\_YRY`WXEUZ`\_]XYUG  
@HWI-EAS443:3:65:494:110#0/1  
GACCCGAACAACATGGATAGAGCAGTTAAACTATACAAGA  
+HWI-EAS443:3:65:494:110#0/1  
aaaaaaabaa`a\_aaaaa`\_`\_¥W[\_`\_`Z[[]^V`\_^\_  
@HWI-EAS443:3:65:551:986#0/1  
GCACCTGATATTGTGGATTACTGATCGTCTTTTTTTTCAA  
+HWI-EAS443:3:65:551:986#0/1  
a^RWYa^S]a^a`Y¥ZWDZ^`YY^`a]N\_```a]^a^TS  
@HWI-EAS443:3:65:60:756#0/1  
GGGCCTCATATACAACAGGATGGGAACAGTGACCACAGAA  
+HWI-EAS443:3:65:60:756#0/1  
aaaaabbbaaZXaYLWZ\_U[UY`US]ZZYP^¥`^VNHRRU  
@HWI-EAS443:3:65:649:1578#0/1  
CTACTACCACCAATCCACTAATCAGGCATGAAAACAGAAT  
+HWI-EAS443:3:65:649:1578#0/1  
aaa¥\_``ba]\_`\_a\_`a\_]R\_a\_\_Z````\_[[\_^^Z^SY  
@HWI-EAS443:3:65:705:290#0/1  
GATGGGAACAGTGACCACAGAAGCTGCTTTTGGTCTAGTG  
+HWI-EAS443:3:65:705:290#0/1  
abba`\_][babb\_bbaaaaabaaba`a`aaaaaZ\_aa`Za  
@HWI-EAS443:3:65:758:57#0/1  
CGCAGAGACTGGAAAGTGTCTTTGCAGGAAAGAACACAGA

+HWI-EAS443:3:65:758:57#0/1  
abb^b`bV^\_]Z`^ZPZS¥\_[VUGL]`S¥X`X\_U^^^TV  
@HWI-EAS443:3:65:905:821#0/1  
GCCTCATATACAACAGGATGGGAACAGTGACCACAGAAGC  
+HWI-EAS443:3:65:905:821#0/1  
aa`Xaaaa¥a`[\_^[S]^`[Y[Z`aW\_]N^`¥¥\_¥\_PS  
@HWI-EAS443:3:66:1008:201#0/1  
GAAGCTCAAAGAGAAATAACGTTCCATGGGGCCAAGGAG  
+HWI-EAS443:3:66:1008:201#0/1  
aa^aaa\_`\_[Ya\_`[T\_`a\_]\_]YY^\_YY]]XV^Y\_YY[  
@HWI-EAS443:3:66:1111:637#0/1  
GACCGATGCTGTGAATCAGCAATCTGTTCAAGTGGCAC  
+HWI-EAS443:3:66:1111:637#0/1  
abbaa]aaaaabaaa`a`a`a`aba`aaaa\_]\_\_Za\_  
@HWI-EAS443:3:66:123:311#0/1  
CAAGATTGGTCTTGTCTTTAGCCATTCCATGAGAGCCTCA  
+HWI-EAS443:3:66:123:311#0/1  
`b\_XRQ[TW^a`aa]\_\_]¥Z\_``\_]`\_]¥Z[WY]W[¥Y  
@HWI-EAS443:3:66:1241:877#0/1  
CAGGTGCAAGATCCCAATGATATTTGCTGCAATGACGAGA  
+HWI-EAS443:3:66:1241:877#0/1  
aa]^ababbaaaaa`ababaa\_baab\_abaaaaaaXa\_aa  
@HWI-EAS443:3:66:1254:303#0/1  
TGGGCCTCATATACAACAGGATGGGAACAGTGACCACAGA  
+HWI-EAS443:3:66:1254:303#0/1  
abba\_abaaaaaa`aa\_]aa\_`^`a\_a\_]Y\_aY\_`¥¥\_`^  
@HWI-EAS443:3:66:1265:469#0/1  
GGGAGTGCAGATGCAGCGATTCAAGTGATCCTCTCGTCAT  
+HWI-EAS443:3:66:1265:469#0/1  
abaaa]aWab\_^a]a¥W`WG^\_\_Z[Pa\_]WR`]R¥aX¥^]  
@HWI-EAS443:3:66:1280:1471#0/1  
ATCCCAATGATATTTGCTGCAATGACGAGAGGATCACTTG  
+HWI-EAS443:3:66:1280:1471#0/1  
a\_`a\_¥a\_a`a]aa\_aaaa`\_\_`\_\_\_a]W\_`^`^YPR\_ZRY  
@HWI-EAS443:3:66:1317:267#0/1  
GTGGATTACTGATCGTCTTTTTTTCAAATGTATTTATCGT  
+HWI-EAS443:3:66:1317:267#0/1  
aSaaaa`Z\_aa^a]\_^]`a\_\_``\_Xa\_`\_`^^a`\_`^`[\_^  
@HWI-EAS443:3:66:1364:1858#0/1  
CAACAGGATGGGAACAGTGACCACAGAAGCTGCTTTTGGT  
+HWI-EAS443:3:66:1364:1858#0/1  
aaba\_`[a`aa`aa^a`\_aaa\_\_`a\_a`^]`^`\_¥^¥^¥¥¥  
@HWI-EAS443:3:66:1412:1572#0/1  
ACTAGACCAAAGCAGCTTCTGTGGTCACTGTCCCATCC  
+HWI-EAS443:3:66:1412:1572#0/1  
a`abab\_aaa`aa\_a^a^[[a]UTZ^`^^TOWaX\_\_`]Z[  
@HWI-EAS443:3:66:1434:885#0/1  
AAATAACGTTCCATGGGGCCAAGGAGGTGTCACTAAGCTA  
+HWI-EAS443:3:66:1434:885#0/1  
¥`a¥`b\_^]a]^XZ\_X\_]a]Sxa\_\_[ab[\_aSaa\_a¥\_X

@HWI-EAS443:3:66:1450:1199#0/1  
TTCTGTGGTCACTGTTCCCATCCTGTTGTATATGAGGCC  
+HWI-EAS443:3:66:1450:1199#0/1  
ab`aS[W`\_\_\_\_`a\_¥`a\_[U\_\_^[\_aS\_\_\_\_\_WU¥^¥  
@HWI-EAS443:3:66:1556:697#0/1  
TGGAGTTGCTAATCAGACTAGGCAGATGGTACATGCAAT  
+HWI-EAS443:3:66:1556:697#0/1  
aba\_aa^aa^aa`a^`\_Y]\_\_a]]`[]\_`W[]\_W]YY\_[  
@HWI-EAS443:3:66:1571:733#0/1  
GGAACAGTGACCACAGAAGCTGCTTTTGGTCTAGTGTGTG  
+HWI-EAS443:3:66:1571:733#0/1  
aaaa`aa\_aaaaa]\_`aa\_a\_\_\_\_]`\_`[^X^`\_`Y]]^X\_  
@HWI-EAS443:3:66:1575:1340#0/1  
GGCCAAGGAGGTGTCACCTAAGCTATTCAACTGGTGCACCT  
+HWI-EAS443:3:66:1575:1340#0/1  
aaaba`\_`abbaaa\_ba`a]aaaaababaa\_\_`Ya\_\_\_a`  
@HWI-EAS443:3:66:1688:1007#0/1  
ACCGTATTTAAAGCGACGATAAATACATTTGAAAAAAGA  
+HWI-EAS443:3:66:1688:1007#0/1  
aaaaZ`baaaaaXZ]^aa`^^^aaaa`aa\_\_[a\_`^\_  
@HWI-EAS443:3:66:1753:1545#0/1  
GAAAGATGACCTTCTTGAAAATTTGCAGGCCTACCAGAAG  
+HWI-EAS443:3:66:1753:1545#0/1  
a`aaabaaaaaa\_ab^]aaa`aaaa`\_T\_[a`Z[^¥\_  
@HWI-EAS443:3:66:267:1557#0/1  
GGGCCTCATATACAACAGGATGGGAACAGTGACCACAGAA  
+HWI-EAS443:3:66:267:1557#0/1  
aa`bb`bb\_b`aabaaa]``Y[^]¥`\_`¥\_aaaa`\_a\_  
@HWI-EAS443:3:66:316:1043#0/1  
GGCCTCATATACAACAGGATGGGAACAGTGACCACAGAAG  
+HWI-EAS443:3:66:316:1043#0/1  
\_bbbbbbba`b^G[bb^baaaabbb`[abbaaaaaaa  
@HWI-EAS443:3:66:340:1652#0/1  
CGACGATAAATACATTTGAAAAAAGACGATCAGTAATCC  
+HWI-EAS443:3:66:340:1652#0/1  
`^`a¥`^`a^¥a\_a`a`[^T\_]a`^U[^¥¥XZ¥XPZ^X¥[  
@HWI-EAS443:3:66:341:1677#0/1  
GGTCCCCATTCCCATTTAGGGCATTGACAAAGCGTCT  
+HWI-EAS443:3:66:341:1677#0/1  
\_`a¥``¥X^TY]¥]\_bab]YZ]WZ\_Y`baa^baaYOXYa]  
@HWI-EAS443:3:66:360:988#0/1  
CCGATGCTGTGAATCAGCAATCTGTTCAAGTGGCACAC  
+HWI-EAS443:3:66:360:988#0/1  
VbY¥ba[aaR]Zb\_aaaYS`a\_\_aS]]\_aa\_aYPG\_aZ\_[  
@HWI-EAS443:3:66:409:487#0/1  
GGCTAGCACTACGGCAAAGGCTATGGAACAGATGGCTGGA  
+HWI-EAS443:3:66:409:487#0/1  
aab]\_bbbaaa^aa`aaaaaa`aa\_`a^ZZX^[Y¥aYX  
@HWI-EAS443:3:66:435:1740#0/1  
CGAGAGGATCACTTGAATCGCTGCATCTGCACTCCCATTC

+HWI-EAS443:3:66:435:1740#0/1  
aaaQ^\_aa^`XV\_[¥\_\_\_\_\_XYW]^a¥]¥^¥\_VY¥\_\_¥W¥W  
@HWI-EAS443:3:66:574:1762#0/1  
ATCAGGTGCAAGATCCCAATGATATTTGCTGCAATGACGA  
+HWI-EAS443:3:66:574:1762#0/1  
a\_^SRPR`a]]`¥]TYXZYT\_]¥^R^\_^]\_\_^ZZNPUZ\_  
@HWI-EAS443:3:66:710:563#0/1  
CTGATCGTCTTTTTTTCAAATGTATTTATCGTCGCTTTAA  
+HWI-EAS443:3:66:710:563#0/1  
ab``abbabbbbbbbba`aab\_abaaaaaa^aaaaba``  
@HWI-EAS443:3:66:730:1220#0/1  
GAGAGCCTCAAGATCTGTGTTCTTTCCTGCAAAGACACTT  
+HWI-EAS443:3:66:730:1220#0/1  
T\_IXXV`[\_¥¥U`ZQQPNbTRZ\_]P\_`VRWXNW)`U¥a]R  
@HWI-EAS443:3:66:735:56#0/1  
ATTGTGGATTACTGATCGTCTTTTTTTCAAATGTATTTAT  
+HWI-EAS443:3:66:735:56#0/1  
a\_`Z[¥bV`¥\_QR\_UGS^NT^a`ZZZ]]¥Z]W\_OYY]^¥Z  
@HWI-EAS443:3:66:755:629#0/1  
GAACAGTGACCACAGAAGCTGCTTTTGGTCTAGTGTGTGC  
+HWI-EAS443:3:66:755:629#0/1  
^ZWU¥ZF¥]Z¥W^S\_a\_YZ]S^¥TX¥[UT[XXVR¥RY¥]Z  
@HWI-EAS443:3:66:803:133#0/1  
CAAGTGGCACACACTAGACCAAAAGCAGCTTCTGTGGTCA  
+HWI-EAS443:3:66:803:133#0/1  
aba\_J`Xabaaaa\_aaaa[[`\_aa\_aV]VR`YYSTPVQGP  
@HWI-EAS443:3:66:848:142#0/1  
GTCCCCATTCCCATTTAGGGCATTTTGGACAAAGCGTCTA  
+HWI-EAS443:3:66:848:142#0/1  
^W^`^aa\_]\_X)``[\_aaa^]]`^\_\_a`^^¥]^]]QX[`  
@HWI-EAS443:3:66:892:475#0/1  
CACAAATCCTAAAATTCCCTTAGTCAGAGGTGACAAGATT  
+HWI-EAS443:3:66:892:475#0/1  
abaa`aab^bbbabaaab`baaaaa^aa\_Yb\_aaaa\_a\_  
@HWI-EAS443:3:66:913:1149#0/1  
AAGAGAAATAACGTTCCATGGGGCCAAGGAGGTGTCACTA  
+HWI-EAS443:3:66:913:1149#0/1  
]¥^`\_[[`^aa`\_¥Z`\_X\_¥¥^^^\_YY¥^[[V\_XR^][R  
@HWI-EAS443:3:67:1001:1189#0/1  
CCAAAAGCAGCTTCTGTGGTCACTGTTCCCATCCTGTTGT  
+HWI-EAS443:3:67:1001:1189#0/1  
abab[`\_baZ\_aa`]V`¥aa\_\_\_a\_WYZ`\_^\_Z\_\_W  
@HWI-EAS443:3:67:1021:1907#0/1  
CAGCAATCTGTTCAAGTGGCACACACTAGACCAAAAGC  
+HWI-EAS443:3:67:1021:1907#0/1  
abbaa]bbaaabbbbaaa`bbbabbaaab`baaaba``  
@HWI-EAS443:3:67:1042:504#0/1  
GCCTCATATACAACAGGATGGGAACAGTGACCACAGAAGC  
+HWI-EAS443:3:67:1042:504#0/1  
aba```b\_aaa`aa\_^U]aaa`[]aab[aa\_``[`a^X¥\_

@HWI-EAS443:3:67:1241:1491#0/1  
GCAGGCCTACCAGAAGCGAATGGGAGTGCAGATGCAGCGA  
+HWI-EAS443:3:67:1241:1491#0/1  
aaaX]¥`aa^]a`]aaaXX\_aaa`[Ya`\_a\_[\_\_`\_Za^  
@HWI-EAS443:3:67:1247:1218#0/1  
GGGCCTCATATACAACAGGATGGGAACAGTGACCACAGAA  
+HWI-EAS443:3:67:1247:1218#0/1  
aaZb`^SVbbba[a[XSbb\_a[aaHaab^Wa\_`^a]aaYa  
@HWI-EAS443:3:67:1328:337#0/1  
ATCGCGCAGAGACTGGAAAGTGTCTTTGCAGGAAAGAACA  
+HWI-EAS443:3:67:1328:337#0/1  
abb¥[W]^\_¥Za\_¥TXY\_Z[L\_\_]]`XZPZ]\_¥^\_Y[\_V]  
@HWI-EAS443:3:67:1573:332#0/1  
AGGTGCAAGATCCCAATGATATTTGCTGCAATGACGAGAG  
+HWI-EAS443:3:67:1573:332#0/1  
aaa\_aaa`bab`\_\_`abaa`a`aa`\_\_a]a\_aa\_]a`^`\_  
@HWI-EAS443:3:67:1606:1974#0/1  
ATCACTTGAATCGCTGCATCTGCACTCCCATTGCTTCTG  
+HWI-EAS443:3:67:1606:1974#0/1  
U]HYXZPU\_ba`baa^`b`RZ][^SXa\_\_\_\_`\_YNT\_X[\_W  
@HWI-EAS443:3:67:1611:525#0/1  
TGGGCCTCATATACAACAGGATGGGAACAGTGACCACAGA  
+HWI-EAS443:3:67:1611:525#0/1  
aa][\_`aabbaaaaa`a\_\_aaaaa\_a]]\_`^^`\_`a\_  
@HWI-EAS443:3:67:1629:1593#0/1  
CTTGACCTGATATTGTGGATTACTGATCGTCTTTTTTTC  
+HWI-EAS443:3:67:1629:1593#0/1  
]b\_¥bbYbb\_aabba¥aa\_bb\_a`¥``abXabaababb\_  
@HWI-EAS443:3:67:1726:1811#0/1  
GTCCCCATTCCCATTTAGGGCATTGACAAAAGCGTCTA  
+HWI-EAS443:3:67:1726:1811#0/1  
`V`X[RQ¥KvX[[QYG][¥NM^Z^¥V¥XUUUZxOPsw[B  
@HWI-EAS443:3:67:235:655#0/1  
GAACAGTGACCACAGAAGCTGCTTTTGGTCTAGTGTGTGC  
+HWI-EAS443:3:67:235:655#0/1  
aaaaaa[```a\_aa]a]\_a\_\_\_\_\_`^\_\_\_V^¥P¥W^U^]¥Y  
@HWI-EAS443:3:67:265:1836#0/1  
CTGTTCACAAGTGGCACACACTAGACAAAAGCAGCTTCT  
+HWI-EAS443:3:67:265:1836#0/1  
a`a\_aaaaba\_¥\_\_abaaaa`\_`[aa`aaaa¥\_a¥\_^¥\_S  
@HWI-EAS443:3:67:294:2044#0/1  
GGATTACTGATCGTCTTTTTTTCAAATGTATTTATCGTCG  
+HWI-EAS443:3:67:294:2044#0/1  
\_`^`Y¥`a`aab[W`PUaVvb`\_]`^\_V\_V`a`\_`\_`\_¥\_¥  
@HWI-EAS443:3:67:411:930#0/1  
GGAGGTTGCTAATCAGACTAGGCAGATGGTACATGCAATG  
+HWI-EAS443:3:67:411:930#0/1  
aa[`¥S`aaaa`a`aa^¥\_[\_]\_]V¥L¥^`[[U]\_^^  
@HWI-EAS443:3:67:563:1165#0/1  
TCTTGACCTGATATTGTGGATTACTGATCGTCTTTTTTT

+HWI-EAS443:3:67:563:1165#0/1  
abbaaabbbb`a`a`\_]\_\_\_`aa^`a`\_]^^aa`a`  
@HWI-EAS443:3:67:608:1683#0/1  
GCCTCATATACAACAGGATGGGAACAGTGACCACAGAAGC  
+HWI-EAS443:3:67:608:1683#0/1  
^^\_[\_\_YQ¥aa¥W\_\_`NVPXZG]a]¥VTX\_\_W\_\_a[FX[B  
@HWI-EAS443:3:67:688:282#0/1  
CCTTCTTGAAAATTTGCAGGCCTACCAGAAGCGAATGGGA  
+HWI-EAS443:3:67:688:282#0/1  
abaTTabbYbaL¥bZOW^[\`aaa\_¥^aaa^HWa^`aa\_a^  
@HWI-EAS443:3:67:719:938#0/1  
GGCAGATGGTACATGCAATGAGAACTATTGGGACTCATCC  
+HWI-EAS443:3:67:719:938#0/1  
`abb\_W]¥¥Q\_]`aaaaa^¥]aa\_aa``]]`\_\_\_aa\_a^  
@HWI-EAS443:3:67:730:788#0/1  
AACGTTCCATGGGGCCAAGGAGGTGTCACTAAGCTATTCA  
+HWI-EAS443:3:67:730:788#0/1  
`baa`aaaa`]X`]aa]\_`aaTa^^a\_a`a[\`\_\_\_`  
@HWI-EAS443:3:67:740:1470#0/1  
GCAGCTTCTGTGGTCACTGTTCCCATCCTGTTGTATATGA  
+HWI-EAS443:3:67:740:1470#0/1  
\_`^^baaba`X`a^bab\_]`]b`aabaa]bX^aa`Z\_`  
@HWI-EAS443:3:67:810:1007#0/1  
AGCGAATGGGAGTGCAGATGCAGCGATTCAAGTGATCCTC  
+HWI-EAS443:3:67:810:1007#0/1  
]ba\_X]abba¥`^aaaaaa\_aa`a`a\_a`a]YQ^^]\_[\`\_  
@HWI-EAS443:3:67:849:135#0/1  
CAGCAATCTGTTCAAGTGGCACACACTAGACCAAAGC  
+HWI-EAS443:3:67:849:135#0/1  
a`b`]\_\_aaaa\_\_aa`¥a\_[a`aaa¥¥`a`XU[Z¥\_¥\_  
@HWI-EAS443:3:67:874:1078#0/1  
ACCTGATATTGTGGATTACTGATCGTCTTTTTTTCAAATG  
+HWI-EAS443:3:67:874:1078#0/1  
aaaaaaa\_\_aa\_`¥`aaa\_`a`\_\_\_`aaaaa\_]\_a\_`\_  
@HWI-EAS443:3:67:889:964#0/1  
CAGAAGCTGCTTTTGGTCTAGTGTGTGCCACTTGTAACA  
+HWI-EAS443:3:67:889:964#0/1  
a\_`¥`^^`aa\_aaaa\_\_Ta^^YV^W`U[\_\_\_`\_\_[U\_]\_^`  
@HWI-EAS443:3:67:88:407#0/1  
AGATCCCAATGATATTTGCTGCAATGACGAGAGGATCACT  
+HWI-EAS443:3:67:88:407#0/1  
aaaabaaaZ``a`Yaaa¥\_`^aaaa`a]````]\_`¥]X`\_`  
@HWI-EAS443:3:67:918:389#0/1  
CATGGGCCTCATATACAACAGGATGGGAACAGTGACCACA  
+HWI-EAS443:3:67:918:389#0/1  
aa`^^`\_`````aaabaaba`aaabaaaa`aU`a]V^^`  
@HWI-EAS443:3:67:940:1543#0/1  
GATCCCAATGATATTTGCTGCAATGACGAGAGGATCACTT  
+HWI-EAS443:3:67:940:1543#0/1  
abaaaabb`Ubaaba`a\_aaab`aaa`a`aa`\_]\_`^\_[



@HWI-EAS443:3:67:978:1401#0/1  
CACAAAGTGGCACACACTAGACCAAAGCAGCTTCTGTGGT  
+HWI-EAS443:3:67:978:1401#0/1  
`[\_ZX\_S\_aa`a^[\`aaa¥ZQOV`¥][N\_ZVVVBBBBBBB  
@HWI-EAS443:3:67:995:183#0/1  
GGCCTCATATACAACAGGATGGGAACAGTGACCACAGAAG  
+HWI-EAS443:3:67:995:183#0/1  
abaabaab^a\_aa\_Z`^`aa\_\_\_a\_]N^\_\_\_¥[``ZW[  
@HWI-EAS443:3:68:1085:467#0/1  
AATACATTTGAAAAAAGACGATCAGTAATCCACAATATC  
+HWI-EAS443:3:68:1085:467#0/1  
`¥a[\`a\_bY^U`^U[^^`\_\_a`SWTYJUZ``WTOW]]U¥U  
@HWI-EAS443:3:68:1113:518#0/1  
CTTGCACCTGATATTGTGGATTACTGATCGTCTTTTTTTC  
+HWI-EAS443:3:68:1113:518#0/1  
a\_a`a```ab^`^ab``^\_abaa]`aa`[\_Y[\`aaaa`[  
@HWI-EAS443:3:68:1188:1685#0/1  
CGGCAAAGGCTATGGAACAGATGGCTGGATCGAGTGAACA  
+HWI-EAS443:3:68:1188:1685#0/1  
a`\_b\_X^a`ZaYa¥]`a]aZ¥aa]]a¥V[[[¥S¥VWG`  
@HWI-EAS443:3:68:1374:990#0/1  
CAAGTGGCACACACTAGACCAAAGCAGCTTCTGTGGTCA  
+HWI-EAS443:3:68:1374:990#0/1  
abbbab\_ababababbaaaa`^aabaaa^aa[aa¥aa^¥`  
@HWI-EAS443:3:68:151:904#0/1  
GCCTCATATACAACAGGATGGGAACAGTGACCACAGAAGC  
+HWI-EAS443:3:68:151:904#0/1  
M[^aaWaU\_ba[a\_T^`UXXabaUabb^bba\_a[T`aaba  
@HWI-EAS443:3:68:1536:1244#0/1  
CTAGTGTGTGCCACTTGTGAACAGATTGCTGATTCACAGC  
+HWI-EAS443:3:68:1536:1244#0/1  
Z¥b`Z]aa]¥\_b]baa````]b]bbababa\_baab``X`a`  
@HWI-EAS443:3:68:1608:644#0/1  
GGCCTCATATACAACAGGATGGGAACAGTGACCACAGAAG  
+HWI-EAS443:3:68:1608:644#0/1  
a]^OV^ZaV`\_GRWXbba¥VVU\_QT^T]]`]PZ\_¥MJ\_a\_  
@HWI-EAS443:3:68:1689:1979#0/1  
CAGTGACCACAGAAGCTGCTTTTGGTCTAGTGTGTGCCAC  
+HWI-EAS443:3:68:1689:1979#0/1  
abb`bbbab`aababbb`aab`a\_b`\_baa\_\_a`[MM`\_  
@HWI-EAS443:3:68:1695:1730#0/1  
GAACAGTGACCACAGAAGCTGCTTTTGGTCTAGTGTGTGC  
+HWI-EAS443:3:68:1695:1730#0/1  
aaabaa\_aaa`\_V^aa\_a\_aa\_aa`PX]ZXL[\_ZSVY  
@HWI-EAS443:3:68:1783:1887#0/1  
GATCGTCTTTTTTCAAATGTATTTATCGTCGCTTTAAAT  
+HWI-EAS443:3:68:1783:1887#0/1  
a]]a\_\_\_aaaa`a`WVY]]][X]^\_\_^[[]URKUPP\_]WSYV  
@HWI-EAS443:3:68:200:922#0/1  
AATCAGACTAGGCAGATGGTACATGCAATGAGAACTATTG

+HWI-EAS443:3:68:200:922#0/1  
^S[a\_aa`a`\_T\_\_[WS`\_]`YKZ`XUY[Z#R\_N[ZX]U  
@HWI-EAS443:3:68:351:185#0/1  
AGTGATCCTCTCGTCATTGCAGCAAATATCATTGGGATCT  
+HWI-EAS443:3:68:351:185#0/1  
\_aZ[^aabaa\_aZU\_aaaa`^`a\_W]W\_#N^\_[^Z`^]\_^  
@HWI-EAS443:3:68:373:1470#0/1  
TCCCATTCGCTTCTGGTAGGCCTGCAAATTTTCAAGAAGG  
+HWI-EAS443:3:68:373:1470#0/1  
`b\_a\_a\_aaa\_\_aU\_\_^\_[]aa\_\_a[WZ[`]`\_X\_[UZP  
@HWI-EAS443:3:68:397:715#0/1  
TGTGAATCAGCAATCTGTTCAAGTGGCACACACTAGAC  
+HWI-EAS443:3:68:397:715#0/1  
aa`^^^aaaabaa`aaa]a\_a^0^aT\_\_`a\_a`[\_^a`^  
@HWI-EAS443:3:68:447:86#0/1  
CTGATATTGTGGATTACTGATCGTCTTTTTTTCAAATGTA  
+HWI-EAS443:3:68:447:86#0/1  
abbababbbabbbbbbbbbbb`abbbbbbbbaabb`a  
@HWI-EAS443:3:68:449:504#0/1  
ATCGTCTTTTTTCAAATGTATTTATCGTCGCTTTAAATA  
+HWI-EAS443:3:68:449:504#0/1  
aabb`aabbabaa^`W`bZaabaa`a^a`\_`a`[\_`\_\_  
@HWI-EAS443:3:68:534:1347#0/1  
CTCATATACAACAGGATGGGAACAGTGACCACAGAAGCTG  
+HWI-EAS443:3:68:534:1347#0/1  
a`aaaa#\_baa^aaaaa``aaa\_^aa\_\_\_\_\_^\_a`^\_\_\_\_  
@HWI-EAS443:3:68:547:990#0/1  
CATGGGGCCAAGGAGGTGCTACTAAGCTATTCAACTGGTG  
+HWI-EAS443:3:68:547:990#0/1  
abba\_bbbabaaaaaaMa#abaaabaaaXaaa]aa#^\_Ya  
@HWI-EAS443:3:68:560:924#0/1  
CAGCAATCTGTTCAAGTGGCACACACTAGACCAAAAGC  
+HWI-EAS443:3:68:560:924#0/1  
Z][bZ[\_b\_#Z\_]#aYa\_YV\_bYU]]a^^]]`Z]\_Zb  
@HWI-EAS443:3:68:625:1318#0/1  
CTCATATACAACAGGATGGGAACAGTGACCACAGAAGCTG  
+HWI-EAS443:3:68:625:1318#0/1  
`^`a`[\_`\_bb\_Q`\_a`\_`abbbba`abaa`a`ab\_Y]^  
@HWI-EAS443:3:68:744:1100#0/1  
CTGGCTAGCACTACGGCAAAGGCTATGGAACAGATGGCTG  
+HWI-EAS443:3:68:744:1100#0/1  
a`bbba]b\_ababb\_b`a[\_^b[aZaaaab`````\_aQaa  
@HWI-EAS443:3:68:749:2003#0/1  
GCCTACCAGAAGCGAATGGGAGTGCAGATGCAGCGATTCA  
+HWI-EAS443:3:68:749:2003#0/1  
`bbZ\_\_`[X`TX`WX`a]#QR]YWaaY\_a^\_ZXVS\_V^  
@HWI-EAS443:3:68:779:372#0/1  
TCGTCTTTTTTCAAATGTATTTATCGTCGCTTTAAATAC  
+HWI-EAS443:3:68:779:372#0/1  
#bb#ab`bbbbaa`^^`L`aabaaaa`a^`aaaWQ[a\_X

@HWI-EAS443:3:68:854:775#0/1  
TGGGCCTCATATACAACAGGATGGGAACAGTGACCACAGA  
+HWI-EAS443:3:68:854:775#0/1  
`baabb\_¥`bbbbba\_^`bb]¥`aaaba^a[`a`a^a`]]  
@HWI-EAS443:3:68:884:30#0/1  
CATGGGCCTCATATACAACAGGATGGGAACAGTGACCACA  
+HWI-EAS443:3:68:884:30#0/1  
aaa`b¥\_abab`aaaaa^`aaZ`^\_VX^adWa][VZX]  
@HWI-EAS443:3:69:103:514#0/1  
AAATGCCCTAAATGGGAATGGGGACCCGAACAACATGGAT  
+HWI-EAS443:3:69:103:514#0/1  
aaa`aaaa`aaa\_aaa]`aZ[\_\_\_\_^]\_\_\_\_^XY]^`]]^  
@HWI-EAS443:3:69:1064:1018#0/1  
TGGGCCTCATATACAACAGGATGGGAACAGTGACCACAGA  
+HWI-EAS443:3:69:1064:1018#0/1  
abaaabbbabbabaaaa\_ba`a```\_a`aZ\_`a`\_`  
@HWI-EAS443:3:69:1118:445#0/1  
GCCGAGATCGCGCAGAGACTGGAAAGTGTCTTTGCAGGAA  
+HWI-EAS443:3:69:1118:445#0/1  
T¥W\_\_\_\_[\_\_W¥`\_\_V\_bb^`aX^b\_MXQV\_\_KQ\_YT¥Q\_  
@HWI-EAS443:3:69:1144:1863#0/1  
GCCTCATATACAACAGGATGGGAACAGTGACCACAGAAGC  
+HWI-EAS443:3:69:1144:1863#0/1  
a^a`ba^baabaa`a`\_]\_`\_]\_a^a`W`a```[a\_\_`X  
@HWI-EAS443:3:69:1199:997#0/1  
ATCAGTAATCCACAATATCAGGTGCAAGATCCCAATGATA  
+HWI-EAS443:3:69:1199:997#0/1  
`b`]^\_^`baabaababaaaa\_]aaaa`a\_\_````aaaa  
@HWI-EAS443:3:69:1220:138#0/1  
ACTGTTCCCATCCTGTTGTATATGAGGCCCATGCAACTGG  
+HWI-EAS443:3:69:1220:138#0/1  
aaabaaaaaab^X\_a\_aa`\_a\_a^^\_aY^^^\_aTX\_XZZU  
@HWI-EAS443:3:69:1230:408#0/1  
ATCTGTTCACAAGTGGCACACACTAGACCAAAAGCAGCTT  
+HWI-EAS443:3:69:1230:408#0/1  
a`babababaabb[bbaaT`aaabYba^aa]aaa\_\_`aa  
@HWI-EAS443:3:69:1275:920#0/1  
CTGTGAGACCGATGCTGTGAATCAGCAATCTGTTCAAG  
+HWI-EAS443:3:69:1275:920#0/1  
abbba`abbabbbabba`baaa`bb`bbbaaba`^\_\_aa`  
@HWI-EAS443:3:69:1312:1097#0/1  
CCTCCTTGGCCCCATGGAACGTTATTTCTCTTTTGAGCTT  
+HWI-EAS443:3:69:1312:1097#0/1  
aaaaaaaa``aaaaaaaa`b\_a`aaaaaaaa`a`aaa]]\_aa  
@HWI-EAS443:3:69:1398:892#0/1  
GATCCCAATGATATTTGCTGCAATGACGAGAGGATCACTT  
+HWI-EAS443:3:69:1398:892#0/1  
`\_aa`^]Zaa\_]\_^aaa`a^Q[`^a]]`¥a\_aaYZWXY^`  
@HWI-EAS443:3:69:1646:646#0/1  
GCCACTTGTGAACAGATTGCTGATTACAGCATCGGTCTC

+HWI-EAS443:3:69:1646:646#0/1  
aaababbbbbb`bbabb`bbbaa\_b\_aa\_`a\_ba^^a]  
@HWI-EAS443:3:69:1689:1252#0/1  
AAGAGAAATAACGTTCCATGGGGCCAAGGAGGTGTCACCTA  
+HWI-EAS443:3:69:1689:1252#0/1  
\_Z\_\_\_\_[\_[``UT[XW[XZ]R^aUZ]aaa[``\_Q^Y^]V\_]`  
@HWI-EAS443:3:69:182:154#0/1  
AAGCTATTCAACTGGTGCACCTGCCAGTTGCATGGGCCCTC  
+HWI-EAS443:3:69:182:154#0/1  
`\_Z\_`U[YG[ZVQMJYYVV[SUVXYTTWUXLVSVWVWWT  
@HWI-EAS443:3:69:187:241#0/1  
GTGAATCAGCAATCTGTTCAAGTGGCACACACTAGACC  
+HWI-EAS443:3:69:187:241#0/1  
\_[\_`Y```aY`^`^X]Y]¥¥\_`\_]TUV¥^Ua¥XSS[ ]NUU  
@HWI-EAS443:3:69:216:135#0/1  
GTCTAGTGTGTGCCACTTGTGAACAGATTGCTGATTCACA  
+HWI-EAS443:3:69:216:135#0/1  
`[aa`WFZZ\_Za]¥\_\_UU[T\_XHM^[VWZUYWW¥^WYYTY  
@HWI-EAS443:3:69:222:732#0/1  
GATGGTACATGCAATGAGAATTTGGGACTCATCCTAGC  
+HWI-EAS443:3:69:222:732#0/1  
a¥^aaWa\_IU``\_[\_ZR[P`¥`¥`\_\_^W\_^UJ^`¥^`¥¥  
@HWI-EAS443:3:69:246:882#0/1  
TGTGTGCCACTTGTGAACAGATTGCTGATTCACAGCATCG  
+HWI-EAS443:3:69:246:882#0/1  
aaP]QG\_bba]]aaaaX\_¥`YUVVa[aPY^ZPH][YZNS]  
@HWI-EAS443:3:69:247:1791#0/1  
TGTGAATCAGCAATCTGTTCAAGTGGCACACACTAGAC  
+HWI-EAS443:3:69:247:1791#0/1  
`WUX\_W¥a]\_b`^`b^^]aa\_ZbaXLZY\_`aaaa`]a\_`^  
@HWI-EAS443:3:69:317:353#0/1  
CAAGTGGCACACACTAGACAAAAGCAGCTTCTGTGGTCA  
+HWI-EAS443:3:69:317:353#0/1  
Q\_a\_RZV¥aa\_\_\_\_^¥abbbbbb`abba^^`a`\_Z\_\_V]Y  
@HWI-EAS443:3:69:386:1840#0/1  
TGATCGTCTTTTTTTCAAATGTATTTATCGTCGCTTTAAA  
+HWI-EAS443:3:69:386:1840#0/1  
`aaa`^^abbbabbabbaaa]T\_`aabba\_b¥\_a\_\_ba`  
@HWI-EAS443:3:69:401:599#0/1  
GGGCCTCATATACAACAGGATGGGAACAGTGACCACAGAA  
+HWI-EAS443:3:69:401:599#0/1  
abbbba`Zbb\_bba\_Z^baaaa`\_a]]\_abaWS[\_^a\_  
@HWI-EAS443:3:69:401:812#0/1  
GACAAGATTGGTCTTGTCTTTAGCCATTCCATGAGAGCCT  
+HWI-EAS443:3:69:401:812#0/1  
`ba`a^aab]a`aaabaaa`aaaaaaa`aaaaa`a\_`a^  
@HWI-EAS443:3:69:403:958#0/1  
TCTGTGGTCACTGTTCCCATCCTGTTGTATATGAGGCCCA  
+HWI-EAS443:3:69:403:958#0/1  
a\_a`\_a\_\_bbaa¥[a\_a`]^a¥`T[VZZ¥^]Y¥¥\_^\_\_

@HWI-EAS443:3:69:414:637#0/1  
TGTGGATTACTGATCGTCTTTTTTCAAATGTATTTATCG  
+HWI-EAS443:3:69:414:637#0/1  
aa`baaaa`~~~~~`]`a`aaaa`^`Z`\_`V]`a`~~~~^  
@HWI-EAS443:3:69:59:1275#0/1  
CTCCTTGCCCCATGGAACGTTATTTCTCTTTTGAGCTTC  
+HWI-EAS443:3:69:59:1275#0/1  
a`aa^\_\_\_aaaa]X¥^\_`Z¥[\_]^\_]\_^N¥^W]]\_]Y^  
@HWI-EAS443:3:69:663:1109#0/1  
CAACAGGATGGGAACAGTGACCACAGAAGCTGCTTTTGGT  
+HWI-EAS443:3:69:663:1109#0/1  
`ZX¥¥\_]WGZ]^N¥aYQM[]a]V¥aUYV]BBBBBBBBBB  
@HWI-EAS443:3:69:689:1482#0/1  
CAAGATTGGTCTTGTCTTTAGCCATTCCATGAGAGCCTCA  
+HWI-EAS443:3:69:689:1482#0/1  
aaa\_\_\_`\_aZaaa\_^`\_a\_a^aa\_\_\_a\_a^U`¥]^a\_\_\_^  
@HWI-EAS443:3:69:705:1934#0/1  
CATGGGCCTCATATACAACAGGATGGGAACAGTGACCACA  
+HWI-EAS443:3:69:705:1934#0/1  
aaaa¥aababb\_baaabaaa\_^`\_`aaa`U^a\_\_\_aa  
@HWI-EAS443:3:69:783:675#0/1  
GCACCTGATATTGTGGATTACTGATCGTCTTTTTTTCAAA  
+HWI-EAS443:3:69:783:675#0/1  
aaaaaaaa\_aaa`a]`a\_a\_a\_^a\_\_\_a^`\_`\_`\_`]^a\_\_\_  
@HWI-EAS443:3:69:891:100#0/1  
ATACATTTGAAAAAAGACGATCAGTAATCCACAATATCA  
+HWI-EAS443:3:69:891:100#0/1  
aaaaabbabaa```a\_a^a\_a^¥Ta]\_\_^X^\_[`^]]YX¥  
@HWI-EAS443:3:69:998:1301#0/1  
TGTGAATCAGCAATCTGTTCAAGTGGCACACACTAGAC  
+HWI-EAS443:3:69:998:1301#0/1  
\_b`ba\_bbbb]ababbbaabaaaa\_aa¥babbabaaaa  
@HWI-EAS443:3:6:1081:292#0/1  
GAGACCGATGCTGTGAATCAGCAATCTGTTCAAGTGGC  
+HWI-EAS443:3:6:1081:292#0/1  
aa]¥aaa`a\_\_\_a`\_`Y[^Z^`\_]\_]S\_\_\_]\_W^Y^^^XX]B  
@HWI-EAS443:3:6:121:547#0/1  
GGGCCAAGGAGGTGCTACTAAGCTATTCAACTGGTGCCT  
+HWI-EAS443:3:6:121:547#0/1  
aaaababaaa`a\_baababa\_baaaaa``a`]a¥^a^`^a  
@HWI-EAS443:3:6:1236:1970#0/1  
GAAAGATGACCTTCTTAAAATTTGCAGGCCTACCAGAAG  
+HWI-EAS443:3:6:1236:1970#0/1  
U```ZM`ba\_\_WW¥``ZTR¥b]`]PSXUOZ]¥¥S\_aUVa  
@HWI-EAS443:3:6:1320:1624#0/1  
AAGTGTCTTTGCAGGAAAGAACACAGATCTTGAGGCTCTC  
+HWI-EAS443:3:6:1320:1624#0/1  
ab\_`bSa`aa¥]^a`^]\_`Z\_]`W`\_\_\_[`\_\_¥\_]`^Z]V  
@HWI-EAS443:3:6:1332:1594#0/1  
GACCACAGAAGCTGCTTTTGGTCTAGTGTGTGCCACTTGT

+HWI-EAS443:3:6:1332:1594#0/1  
aba[a\_aa\_IaJ`V)`\_SR`RGUX¥XY\_TUU`XXRUG\_ZB  
@HWI-EAS443:3:6:1418:1231#0/1  
GCGCAGAGACTGGAAAGTGTCTTTGCAGGAAAGAACACAG  
+HWI-EAS443:3:6:1418:1231#0/1  
`b]ba[]`\_abV¥a\_TR\_aVa\_^XXV¥WV\_^X`¥GZ¥`\_  
@HWI-EAS443:3:6:276:93#0/1  
CGCTGCATCTGCACTCCCATTTCGCTTCTGGTAGGCCTGCA  
+HWI-EAS443:3:6:276:93#0/1  
ab\_)`Raba\_ba`\_a`¥\_\_\_\_aW`\_]Z`¥W¥`\_SQ^[¥^  
@HWI-EAS443:3:6:465:1180#0/1  
ATCAGACTAGGCAGATGGTACATGCAATGAGAACTATTGG  
+HWI-EAS443:3:6:465:1180#0/1  
]^aW`^Z¥aUH^\_bTa`\_`\_a\_Q^ZPZ]aaaa^aY\_^aa\_  
@HWI-EAS443:3:6:484:55#0/1  
CAAGATTGGTCTTGTCTTTAGCCATTCCATGAGAGCCTCA  
+HWI-EAS443:3:6:484:55#0/1  
X\_abYUbbaabbUbUa`^Xb^J[]babaU\_a```\_U`a0^  
@HWI-EAS443:3:6:487:70#0/1  
GAACAGTGACCACAGAAGCTGCTTTTGGTCTAGTGTGTGC  
+HWI-EAS443:3:6:487:70#0/1  
a¥H\_\_`Y`^^^¥\_\_`[^V]`V^VY]X]]OQTRYXX^BBB  
@HWI-EAS443:3:6:587:1293#0/1  
TGGGAGTGACAGATGCAGCGATTCAAGTGATCCTCTCGTCA  
+HWI-EAS443:3:6:587:1293#0/1  
aa]¥`a¥aYaaaQa\_aa\_a[Z\_U^`\_U`^UW¥Q[M^UQ¥  
@HWI-EAS443:3:6:591:1704#0/1  
GGAACAGTGACCACAGAAGCTGCTTTTGGTCTAGTGTGTG  
+HWI-EAS443:3:6:591:1704#0/1  
`bbbLPZQY`GTbQQ]Y`YPPQ[aa\_Y^DXN^\_a[SBBBB  
@HWI-EAS443:3:6:63:1099#0/1  
GGAACAGTGACCACAGAAGCTGCTTTTGGTCTAGTGTGTG  
+HWI-EAS443:3:6:63:1099#0/1  
aaaaa¥b¥a`aa¥^aa`\_¥aa¥```a`W^\_a\_\_\_\_¥`T^  
@HWI-EAS443:3:6:667:1374#0/1  
GCACACACTAGACAAAAGCAGCTTCTGTGGTCACTGTTC  
+HWI-EAS443:3:6:667:1374#0/1  
abab\_)`aab^\_aba]``aa`aa`b`\_a]Z]XVa[\_a[^X  
@HWI-EAS443:3:6:671:973#0/1  
GGGCCTCATATACAACAGGATGGGAACAGTGACCACAGAA  
+HWI-EAS443:3:6:671:973#0/1  
aabaa\_aaabaa`aa`\_b[[Z¥\_^T]T]Y^\_aZ^^[`^^^  
@HWI-EAS443:3:6:711:1634#0/1  
CAGGCCTACCAGAAGCGAATGGGAGTGACAGATGCAGCGAT  
+HWI-EAS443:3:6:711:1634#0/1  
^WVW\_¥F¥ZaWbRWWIX^^`TTIbX]VaaaRb``]ab\_B  
@HWI-EAS443:3:6:773:126#0/1  
ATCCCAATGATATTTGCTGCAATGACGAGAGGATCACTTG  
+HWI-EAS443:3:6:773:126#0/1  
a]`aX^bbb`\_`baaa\_aa```]a\_^]a^]`\_`^VZ^¥`UU

@HWI-EAS443:3:6:797:1830#0/1  
GACCGATGCTGTGAATCAGCAATCTGTTCCACAAGTGGCAC  
+HWI-EAS443:3:6:797:1830#0/1  
`\_a`\_`\_a`b`¥ba\_\_a\_U\_abaaa`\_]a[bba\_ab` `B  
@HWI-EAS443:3:6:873:1321#0/1  
CTACGGCAAAGGCTATGGAACAGATGGCTGGATCGAGTGA  
+HWI-EAS443:3:6:873:1321#0/1  
^bbb[[\_J]abb[\_bb\_]`^]`^aQWaaaabXQ`a]]P]B  
@HWI-EAS443:3:6:892:1584#0/1  
ATCATTGGGATCTTGCACCTGATATTGTGGATTACTGATC  
+HWI-EAS443:3:6:892:1584#0/1  
aaaa`Ya`aa\_a``aaa\_^aa]a\_a\_a]a`\_\_`a^\_a\_\_^  
@HWI-EAS443:3:6:918:184#0/1  
CGTCATTGCAGCAAATATCATTGGGATCTTGCACCTGATA  
+HWI-EAS443:3:6:918:184#0/1  
aaa`babb\_bbbaaaaaaaaaaaa\_a^aYa`a]a^Zaa\_\_^  
@HWI-EAS443:3:70:1104:978#0/1  
GGCCAAGGAGGTGTCACCTAAGCTATTCAACTGGTGCACCT  
+HWI-EAS443:3:70:1104:978#0/1  
V¥`abb]bbb]b`aabba\_\_aa``aa\_\_a`ba\_baaaaa  
@HWI-EAS443:3:70:1133:1029#0/1  
GATGCTGTGAATCAGCAATCTGTTCCACAAGTGGCACACAC  
+HWI-EAS443:3:70:1133:1029#0/1  
`\_a`abb\_aaba\_aaaaaa` `^aZ\_¥a¥`Y`X`bZa`\_W  
@HWI-EAS443:3:70:1188:830#0/1  
CTGCACTCCCATTCGCTTCTGGTAGGCCTGCAAATTTTCA  
+HWI-EAS443:3:70:1188:830#0/1  
abbbbbbbbaababbaaba^`^a`]aaa\_abaaaaa`a  
@HWI-EAS443:3:70:1243:590#0/1  
TGGGCCTCATATACAACAGGATGGGAACAGTGACCACAGA  
+HWI-EAS443:3:70:1243:590#0/1  
ab`bbaaabbbb`baba[baabbaa`baa\_\_ba\_aaaab`  
@HWI-EAS443:3:70:1374:701#0/1  
TATTTGCTGCAATGACGAGAGGATCACTTGAATCGCTGCA  
+HWI-EAS443:3:70:1374:701#0/1  
abaabaaaa`aa`aa¥a\_a^`^^V^U` `^\_ZY]Y^WT^  
@HWI-EAS443:3:70:1421:582#0/1  
TGGAGTTGCTAATCAGACTAGGCAGATGGTACATGCAAT  
+HWI-EAS443:3:70:1421:582#0/1  
abaaaa]a\_]aa`^a^a^\_\_\_`\_\_^]\_aaR`U^U¥^^\_]`  
@HWI-EAS443:3:70:1534:1869#0/1  
GGGCCTCATATACAACAGGATGGGAACAGTGACCACAGAA  
+HWI-EAS443:3:70:1534:1869#0/1  
ababaaababaaabba`bb` `abaa`^abZaaaZ`\_aa`\_`  
@HWI-EAS443:3:70:1639:1408#0/1  
AGCAGTTAAACTATACAAGAAGCTCAAAAGAGAAATAACG  
+HWI-EAS443:3:70:1639:1408#0/1  
aZZI\_YaNR]^ZZ[\_X^` `ZX`\_TZ]TQP^U`]UUXPV]\_`  
@HWI-EAS443:3:70:1644:1097#0/1  
GAATCAGCAATCTGTTCCACAAGTGGCACACACTAGACCAA

+HWI-EAS443:3:70:1644:1097#0/1  
^Z\_baba^Z\_a[X`aa`Y]F\_]KX\_Y[YaV]R\_XPW`  
@HWI-EAS443:3:70:1647:1213#0/1  
CCGATGCTGTGAATCAGCAATCTGTTACAAGTGGCACAC  
+HWI-EAS443:3:70:1647:1213#0/1  
aaabb`bbbbabbb[b`abbb`b^`b]aabab\_a\_Zb\_a`  
@HWI-EAS443:3:70:1674:1817#0/1  
CGAGAGGATCACTTGAATCGCTGCATCTGCACTCCCATTC  
+HWI-EAS443:3:70:1674:1817#0/1  
a\_¥\_W\_ZTR\_Z\_`\_]HT\_Y[P^X\_[T[Y`YGXRUZLNNVY  
@HWI-EAS443:3:70:1744:976#0/1  
GGCACACACTAGACCAAAGCAGCTTCTGTGGTCACTGTT  
+HWI-EAS443:3:70:1744:976#0/1  
abbabbbbaababbbbbbbaabaabba\_b`[aabSa[  
@HWI-EAS443:3:70:261:944#0/1  
ACAGTGACCACAGAAGCTGCTTTTGGTCTAGTGTGTGCCA  
+HWI-EAS443:3:70:261:944#0/1  
aaaaXaabaabaaa]\_a^\_a`\_\_\_¥Z`[aZU\_¥VR]^V  
@HWI-EAS443:3:70:438:744#0/1  
GCCTCATATACAACAGGATGGGAACAGTGACCACAGAAGC  
+HWI-EAS443:3:70:438:744#0/1  
\_bb`bbbabbbbbbabaabba`abaa¥`aaaa[a\_aa`  
@HWI-EAS443:3:70:471:234#0/1  
ACTCGATCCAGCCATCTGTTCCATAGCCTTTGCCGTAGTG  
+HWI-EAS443:3:70:471:234#0/1  
aaVbZPTY¥`YV\_^^[a`Q[\_a]\_^YRX]N¥V^UTN[RUV  
@HWI-EAS443:3:70:480:1777#0/1  
GAGCAGTTAAACTATACAAGAAGCTCAAAAGAGAAATAAC  
+HWI-EAS443:3:70:480:1777#0/1  
^babbb[abbbbbbabbabbababbaaaa¥aababb\_  
@HWI-EAS443:3:70:529:1747#0/1  
GGGGCCAAGGAGGTGCTACTAAGCTATTCAACTGGTGCAC  
+HWI-EAS443:3:70:529:1747#0/1  
`\_V^\_`a`aaa`[a`abaaab^baa]]baa`^^U`]a\_  
@HWI-EAS443:3:70:573:1103#0/1  
CTCTCGTCATTGCAGCAAATATCATTGGGATCTTGCACCT  
+HWI-EAS443:3:70:573:1103#0/1  
aabaaa\_aaaaaaaaa^Y\_¥\_ba]]\_]^\_`\_Y`a^`^  
@HWI-EAS443:3:70:634:345#0/1  
AGCTGCTTTTGGTCTAGTGTGTGCCACTTGTGAACAGATT  
+HWI-EAS443:3:70:634:345#0/1  
aaaabaaaabaa\_aaaa¥a^[\_`a\_\_`a^a]`\_`a`¥^  
@HWI-EAS443:3:70:682:1250#0/1  
AATCAGACTAGGCAGATGGTACATGCAATGAGAACTATTG  
+HWI-EAS443:3:70:682:1250#0/1  
aba```a\_\_a\_]a]`a\_a\_W^a`^^a\_`\_`\_¥^a^]\_]¥  
@HWI-EAS443:3:70:826:970#0/1  
CAAGTGGCACACACTAGACCAAAGCAGCTTCTGTGGTCA  
+HWI-EAS443:3:70:826:970#0/1  
aaaa^aaaaaaaa`\_aaaa`a``aaaa[[[\_¥V]YS¥\_



@HWI-EAS443:3:70:843:1406#0/1  
CAGCAATCTGTTACACAAGTGGCACACACTAGACCAAAGC  
+HWI-EAS443:3:70:843:1406#0/1  
aY[a`\_aa`^^\_a\_\_aaa¥[Yabaa`aXU^\_a\_\_`\_X\_¥\_  
@HWI-EAS443:3:70:883:30#0/1  
GGAACAGTGACCACAGAAGCTGCTTTTGGTCTAGTGTGTG  
+HWI-EAS443:3:70:883:30#0/1  
ab`a`\_a^aa`a¥`\_`a\_\_`\_`\_\_\_^^\_\_V^Z[Z¥^W¥WU  
@HWI-EAS443:3:70:887:974#0/1  
TTTCAAATGTATTTATCGTCGCTTTAAATACGGTTTGAAA  
+HWI-EAS443:3:70:887:974#0/1  
X`\_¥R\_¥a¥`bb^¥^`aa`¥b`W`RV`\_SYa\_Za\_¥[`a  
@HWI-EAS443:3:70:924:32#0/1  
CAAGTGGCACACACTAGACCAAAGCAGCTTCTGTGGTCA  
+HWI-EAS443:3:70:924:32#0/1  
aaabSa¥`abaaaaabaa^]\_aa]a`\_a¥`\_[[[¥W`UUS  
@HWI-EAS443:3:70:947:553#0/1  
GCTGCATCTGCACTCCCATTGCTTCTGGTAGGCCTGCAA  
+HWI-EAS443:3:70:947:553#0/1  
a^HUR`a]V^¥UTWZ\_SX\_a`X`Z]`ZHYHQZPUYWDRR  
@HWI-EAS443:3:71:1010:2012#0/1  
CAAGATTGGTCTTGTCTTTAGCCATTCCATGAGAGCCTCA  
+HWI-EAS443:3:71:1010:2012#0/1  
`a`¥\_bba`\_baab^baaab\_aaaa`aaba^aabY\_``¥a  
@HWI-EAS443:3:71:1021:1751#0/1  
TACATTTGAAAAAAGACGATCAGTAATCCACAATATCAG  
+HWI-EAS443:3:71:1021:1751#0/1  
XY`a\_\_[]V\_RT^¥\_¥\_[^\_\_\_\_[`R\_\_¥[\_¥^\_X¥\_TDY\_  
@HWI-EAS443:3:71:1035:427#0/1  
CTGATATTGTGGATTACTGATCGTCTTTTTTTCAAATGTA  
+HWI-EAS443:3:71:1035:427#0/1  
abbaa^bababbabbbbababbbW`babbbaaaa`aa^U`  
@HWI-EAS443:3:71:1162:1557#0/1  
TGCATGTACCATCTGCCTAGTCTGATTAGCAACCTCCATG  
+HWI-EAS443:3:71:1162:1557#0/1  
¥[bab\_Zabb`abaabZZaZZabaabaabab^¥`Zaa`a  
@HWI-EAS443:3:71:1213:447#0/1  
CAAGATTGGTCTTGTCTTTAGCCATTCCATGAGAGCCTCA  
+HWI-EAS443:3:71:1213:447#0/1  
abbababbbbbbaabbbbb]baabbbbbbaaabaab\_a  
@HWI-EAS443:3:71:1244:287#0/1  
ACCTTCTTGAATAATTTGCAGGCCTACCAGAAGCGAATGGG  
+HWI-EAS443:3:71:1244:287#0/1  
abbbbbbbbbbbabbbbbbaa`\_`bbaaab`ababaabaa\_  
@HWI-EAS443:3:71:1358:392#0/1  
GAATCAGCAATCTGTTACACAAGTGGCACACACTAGACCAA  
+HWI-EAS443:3:71:1358:392#0/1  
]¥YQVaab\_ZS`Za`a^W`\_ba^SKYaaZH¥]bbb^M`\_  
@HWI-EAS443:3:71:1409:1510#0/1  
CACACTAGACCAAAGCAGCTTCTGTGGTCACTGTTCCCA

+HWI-EAS443:3:71:1409:1510#0/1  
W[bbb`a`\_ab`U[bb^¥`Zab\_Z^Z^\_\_^a^Wam`ZNZ]  
@HWI-EAS443:3:71:1496:1261#0/1  
CGCAGAGACTGGAAAGTGTCTTTGCAGGAAAGAACACAGA  
+HWI-EAS443:3:71:1496:1261#0/1  
^WaY`\_Z¥`a\_\_¥`\_]W`aZV^VX`\_^a^^ZZ`^^^^  
@HWI-EAS443:3:71:1758:1650#0/1  
GTCCCCATTCCCATTTAGGGCATTGACAAAGCGTCTA  
+HWI-EAS443:3:71:1758:1650#0/1  
a\_^X][W`a`\_`\_`aaa`^¥Z]\_\_\_`\_[\_Y\_]YZ[PSSZ  
@HWI-EAS443:3:71:1787:1365#0/1  
CAGCGATTCAAGTGATCCTCTCGTCATTGCAGCAAATATC  
+HWI-EAS443:3:71:1787:1365#0/1  
\_]RW`Z`\_¥J^HYaZZVZ]YZ\_QVV[WYVWZVGSYa][R  
@HWI-EAS443:3:71:343:196#0/1  
ACTGATCGTCTTTTTTCAAATGTATTTATCGTCGCTTTA  
+HWI-EAS443:3:71:343:196#0/1  
aa\_Z\_aaaa`\_`a\_aaa]a\_¥\_aU¥`aBBBBBBBBBBBB  
@HWI-EAS443:3:71:351:184#0/1  
TTGAATAGCTTAGTGACACCTCCTTGGCCCCATGGAACGT  
+HWI-EAS443:3:71:351:184#0/1  
aabbaaa`aaaa^aaaa`\_`\_]^[^]\_^\_¥\_Y\_^¥\_¥YY\_W  
@HWI-EAS443:3:71:397:1480#0/1  
ATACATTTGAAAAAAGACGATCAGTAATCCACAATATCA  
+HWI-EAS443:3:71:397:1480#0/1  
`aabaaaa^a`aa`\_`\_`\_`\_XZZVPX`¥¥¥XWa\_Y[Y\_\_  
@HWI-EAS443:3:71:418:542#0/1  
AAACCGTATTTAAAGCGACGATAAATACATTTGAAAAAA  
+HWI-EAS443:3:71:418:542#0/1  
VaM¥]\_S^a]a]^`\_b[^¥\_^ZY¥a`[a^[abaa^R]R[  
@HWI-EAS443:3:71:457:769#0/1  
CATATACAACAGGATGGGAACAGTGACCACAGAAGCTGCT  
+HWI-EAS443:3:71:457:769#0/1  
aa`aa¥abaaaa\_\_aa`[]aa`aUaa\_\_aaa`\_`^`\_`]^  
@HWI-EAS443:3:71:496:2032#0/1  
CGCGCAGAGACTGGAAAGTGTCTTTGCAGGAAAGAACACA  
+HWI-EAS443:3:71:496:2032#0/1  
a`aba]XS]]¥RLYaZXMP0[YM[[\_W[XTXUWZ]SYFY  
@HWI-EAS443:3:71:536:473#0/1  
GTCCCCATTCCCATTTAGGGCATTGACAAAGCGTCTA  
+HWI-EAS443:3:71:536:473#0/1  
a`]^`¥aaaaYT]a¥¥a`\_`\_`XVSY]XPY¥[\_\_^S¥ZM  
@HWI-EAS443:3:71:591:506#0/1  
GCTTTGTCCAAAATGCCCTAAATGGGAATGGGGACCCGAA  
+HWI-EAS443:3:71:591:506#0/1  
aaX]Y^aa]Y¥`\_`a^X`\_]PV[YWOQYV`\_`TYPY^L^SQZ  
@HWI-EAS443:3:71:604:36#0/1  
TTGCTAATCAGACTAGGCAGATGGTACATGCAATGAGAAC  
+HWI-EAS443:3:71:604:36#0/1  
a¥]G]aa[]Z\_[X¥\_a`¥X^PYa]PYS[¥aWVZZ^X`Y[L

@HWI-EAS443:3:71:752:209#0/1  
AGCCTCAAGATCTGTGTTCTTTCCTGCAAAGACACTTTCC  
+HWI-EAS443:3:71:752:209#0/1  
\_`^\_abaaab`aabbab\_aaabaaaa]aaa`abb`aa\_]`^  
@HWI-EAS443:3:71:850:461#0/1  
ACCTGATATTGTGGATTACTGATCGTCTTTTTTTCAAATG  
+HWI-EAS443:3:71:850:461#0/1  
aXQXb\_aVaX\_U]QYq]¥XZ^U¥U]``aY^\_a]UTWZZ^  
@HWI-EAS443:3:71:947:259#0/1  
AGGCCATGGAGTTGCTAATCAGACTAGGCAGATGGTACA  
+HWI-EAS443:3:71:947:259#0/1  
aa``a`a^Y\_aY`a`¥\_`a\_]^^U[``^\_a^^Y\_X[Y\_  
@HWI-EAS443:3:72:1124:1271#0/1  
GAGAGGATCACTTGAATCGCTGCATCTGCACTCCCATTCCG  
+HWI-EAS443:3:72:1124:1271#0/1  
\_Z¥U\_baabX^b^XY`][`]¥a]aX^aUMJS\_T`\_]`^Z  
@HWI-EAS443:3:72:1144:621#0/1  
CAAGATTGGTCTTGTCTTTAGCCATTCCATGAGAGCCTCA  
+HWI-EAS443:3:72:1144:621#0/1  
aaab`bbbbaabbbbaababaaaaabaa`abaaa`b\_[\_`a  
@HWI-EAS443:3:72:1163:150#0/1  
AGGCCATGGAGTTGCTAATCAGACTAGGCAGATGGTACA  
+HWI-EAS443:3:72:1163:150#0/1  
`IU]\_¥\_PWZaaVPZR]\_¥¥YR¥TQZQTQNVY[Y\_^SKPT  
@HWI-EAS443:3:72:1178:45#0/1  
CCTTCTTGAAAATTTGCAGGCCTACCAGAAGCGAATGGGA  
+HWI-EAS443:3:72:1178:45#0/1  
abbbba``baba^`a`^`\_Z¥X`b``Taa^aaVa`[¥`]Z^  
@HWI-EAS443:3:72:1180:220#0/1  
GGCCTCATATACAACAGGATGGGAACAGTGACCACAGAAG  
+HWI-EAS443:3:72:1180:220#0/1  
ab\_ba\_Zba`aaaa]`baYaaa\_a`Xa\_UaaV\_^]]`^\_^  
@HWI-EAS443:3:72:1234:1893#0/1  
GCTCTATCCATGTTGTTCCGGTCCCCATTCCCATTAGGG  
+HWI-EAS443:3:72:1234:1893#0/1  
Vbba\_ba^`bbZabb[a``]XQ\_aa\_a``a`\_aa`aaaa  
@HWI-EAS443:3:72:1260:1220#0/1  
AGATCCCAATGATATTTGCTGCAATGACGAGAGGATCACT  
+HWI-EAS443:3:72:1260:1220#0/1  
aabaa^]`Z]\_a`Yaa\_a[\_a`a]`YY``a\_\_`Z^VO\_\_^  
@HWI-EAS443:3:72:1289:442#0/1  
CAAGATTGGTCTTGTCTTTAGCCATTCCATGAGAGCCTCA  
+HWI-EAS443:3:72:1289:442#0/1  
abaababb`aa`ab]bb\_¥b]a\_a`\_aTZ]a`aa`YU^a`  
@HWI-EAS443:3:72:1292:1026#0/1  
TGGGCCTCATATACAACAGGATGGGAACAGTGACCACAGA  
+HWI-EAS443:3:72:1292:1026#0/1  
ab^Z^aaaaaa`aa`aaa\_a`aa`\_a\_aa]`aZ``Za`]  
@HWI-EAS443:3:72:1301:1491#0/1  
ACTTGAATCGCTGCATCTGCACTCCCATTCCGTTCTGGTA

+HWI-EAS443:3:72:1301:1491#0/1  
`abb\_bbbbabaa`bba^¥aaabaaaaaaa[aa\_aaaXOZ  
@HWI-EAS443:3:72:1324:1188#0/1  
GGCTACTACCACCAATCCACTAATCAGGCATGAAAACAGA  
+HWI-EAS443:3:72:1324:1188#0/1  
I\_b[`\_\_Waa\_a`¥\_[a`ba\_a]ZUa\_¥Z¥\_\_^]\_TW]H\_  
@HWI-EAS443:3:72:1428:180#0/1  
GGGCCTCATATACAACAGGATGGGAACAGTGACCACAGAA  
+HWI-EAS443:3:72:1428:180#0/1  
aba\_Zbaa`aa`¥^\_¥a`¥W]\_`\_¥\_W^^V¥a¥S¥W\_¥¥¥  
@HWI-EAS443:3:72:1462:1663#0/1  
GGGCCTCATATACAACAGGATGGGAACAGTGACCACAGAA  
+HWI-EAS443:3:72:1462:1663#0/1  
]NVVQ]`a`a\_a\_\_J^^YZHPZU]`YFZJQ[¥[GVT`¥¥Z  
@HWI-EAS443:3:72:1480:2027#0/1  
AGTGACCACAGAAGCTGCTTTTGGTCTAGTGTGTGCCACT  
+HWI-EAS443:3:72:1480:2027#0/1  
ZSXW]\_¥VR[]Y\_QP]`\_ZWVNPWZWQ]YFRYRHNTV[S[  
@HWI-EAS443:3:72:1484:1046#0/1  
GAACAGTGACCACAGAAGCTGCTTTTGGTCTAGTGTGTGC  
+HWI-EAS443:3:72:1484:1046#0/1  
aaa`aaZbbabaaaa\_aa\_`a¥a\_``]\_]\_`aXa^\_U\_]`  
@HWI-EAS443:3:72:1547:549#0/1  
CGCGCAGAGACTGGAAAGTGTCTTTGCAGGAAAGAACACA  
+HWI-EAS443:3:72:1547:549#0/1  
aa\_¥\_bb\_aa]Z\_aaaaa^^^aa`aa\_``^X``\_aR¥`¥\_  
@HWI-EAS443:3:72:1586:1251#0/1  
GACCGATGCTGTGAATCAGCAATCTGTTTACAAGTGGCAC  
+HWI-EAS443:3:72:1586:1251#0/1  
^aV]\_\_a¥\_baZ\_¥Z\_b`baba`\_`b]a``¥a\_] [ZV]`^  
@HWI-EAS443:3:72:1615:1348#0/1  
GACCGATGCTGTGAATCAGCAATCTGTTTACAAGTGGCAC  
+HWI-EAS443:3:72:1615:1348#0/1  
aa\_abbba`baabbabba`bababa\_a^a^aa`^`aaa`  
@HWI-EAS443:3:72:246:242#0/1  
CAGGCCTACCAGAAGCGAATGGGAGTGCAGATGCAGCGAT  
+HWI-EAS443:3:72:246:242#0/1  
aaa]\_\_`^a]a¥\_]\_aW¥^]^^WZM]¥UWW¥¥W¥^U^WW  
@HWI-EAS443:3:72:298:1540#0/1  
CAGCAATCTGTTTACAAGTGGCACACACTAGACCAAAAGC  
+HWI-EAS443:3:72:298:1540#0/1  
a[]\_S¥\_¥aXW]\_`]a`SNV[aaaW``ZYZTQXX`X`]P¥  
@HWI-EAS443:3:72:333:636#0/1  
ATTTGCTGCAATGACGAGAGGATCACTTGAATCGCTGCAT  
+HWI-EAS443:3:72:333:636#0/1  
Uaa\_``VW\_\_Z\_[¥]Y¥^]V\_H^]]]]\_`^Z\_R]T¥ZPW[Q  
@HWI-EAS443:3:72:351:1098#0/1  
GAACAGTGACCACAGAAGCTGCTTTTGGTCTAGTGTGTGC  
+HWI-EAS443:3:72:351:1098#0/1  
`aabaa]bbabaababaaaaaa\_aYa`aaX\_]\_]\_\_

@HWI-EAS443:3:72:363:1147#0/1  
TGTGAATCAGCAATCTGTTCAAGTGGCACACACTAGAC  
+HWI-EAS443:3:72:363:1147#0/1  
[aZa¥RHY`abb¥`a\_a]a`[`¥``Uaaaba]\_\_`Z^Y¥`  
@HWI-EAS443:3:72:38:260#0/1  
GACCGATGCTGTGAATCAGCAATCTGTTCAAGTGGCAC  
+HWI-EAS443:3:72:38:260#0/1  
abaa`\_abaa`aaaaaa`\_a`a`a\_\_\_\_`\_`^[[Z^^¥`  
@HWI-EAS443:3:72:403:160#0/1  
GTAATCCACAATATCAGGTGCAAGATCCCAATGATATTTG  
+HWI-EAS443:3:72:403:160#0/1  
a`Waa\_Y\_`Waa`Xaaaa^a\_¥¥`\_¥\_\_ZZ``aa^X``^a  
@HWI-EAS443:3:72:463:1417#0/1  
ATGGAGGTTGCTAATCAGACTAGGCAGATGGTACATGCAA  
+HWI-EAS443:3:72:463:1417#0/1  
`aba`abS]aaZY`¥ZN]aa^`\_ZYIWGU`^GRS[RP\_VZ  
@HWI-EAS443:3:72:472:913#0/1  
GGAGGTTGCTAATCAGACTAGGCAGATGGTACATGCAATG  
+HWI-EAS443:3:72:472:913#0/1  
aa\_aa]\_a`¥¥^`\_`^`a^`^X\_U\_^]\_¥Y^`^V]V[]^\_  
@HWI-EAS443:3:72:514:26#0/1  
CAAGATTGGTCTTGTCTTTAGCCATTCCATGAGAGCCTCA  
+HWI-EAS443:3:72:514:26#0/1  
````¥`\_`aaZa`R`UYb`\_`¥\_\_\_\_`¥]W^^]]`Z^UW\_ZW  
@HWI-EAS443:3:72:572:1972#0/1  
ACCTGATATTGTGGATTACTGATCGTCTTTTTTTCAAATG  
+HWI-EAS443:3:72:572:1972#0/1  
ab`aa`a¥a[a[[VZ^`X\_a\_aX\_WWa^¥¥`aaZZ^VWNZ  
@HWI-EAS443:3:72:603:1915#0/1  
ATCTTGTCACCTCTGACTAAGGGAATTTTAGGATTTGTGT  
+HWI-EAS443:3:72:603:1915#0/1  
a`a`¥]¥aaaa`\_\_aa\_a\_]\_\_`Z[^¥\_\_\_\_]^]^`^YXY  
@HWI-EAS443:3:72:651:828#0/1  
GGGCTCATATACAACAGGATGGGAACAGTGACCACAGAA  
+HWI-EAS443:3:72:651:828#0/1  
ab`\_\_Y¥`bb`\_`\_a^¥baa\_S^`Z^`^aXR`¥]UXP]a`W  
@HWI-EAS443:3:72:744:98#0/1  
CACTTGTAACAGATTGCTGATTCACAGCATCGGTCTCAC  
+HWI-EAS443:3:72:744:98#0/1  
aaabab]bbbabab]bbabbaba\_a`aa\_aa^aa\_]\_```  
@HWI-EAS443:3:72:868:419#0/1  
GGCCTCATATACAACAGGATGGGAACAGTGACCACAGAAG  
+HWI-EAS443:3:72:868:419#0/1  
`a[^a^^baaa\_aa^`\_`a\_\_aaa\_a`\_`Xaa\_\_\_\_`a\_V\_a  
@HWI-EAS443:3:72:933:607#0/1  
CTGCACTCCCATTCGCTTCTGGTAGGCCTGCAAATTTTCA  
+HWI-EAS443:3:72:933:607#0/1  
aababaabaaaaa\_aaaaaaa]`aaa\_aaaaa\_aaaa`\_`  
@HWI-EAS443:3:72:957:854#0/1  
AGGATGGGAACAGTGACCACAGAAGCTGCTTTTGGTCTAG

+HWI-EAS443:3:72:957:854#0/1  
abb\_abbbaaab^abbaaabab`]aa`\_aa`aY^Z]`a`  
@HWI-EAS443:3:72:991:1022#0/1  
AGACGATCAGTAATCCACAATATCAGGTGCAAGATCCCAA  
+HWI-EAS443:3:72:991:1022#0/1  
\_]\_^a^\_aY`NT\_\_\_\_]SZ[¥\_]WPWW`ZUSX^[¥]YTW¥\_  
@HWI-EAS443:3:73:1141:763#0/1  
TTCCGGTCCCCATTCCCATTTAGGGCATTGACAAAAGC  
+HWI-EAS443:3:73:1141:763#0/1  
aaa]``ba`\_¥\_aaa`baa\_a\_^a^\_a`a`]`¥```\_\_  
@HWI-EAS443:3:73:1182:1774#0/1  
AAAGCAGCTTCTGTGGTCACTGTTCCCATCCTGTTGTATA  
+HWI-EAS443:3:73:1182:1774#0/1  
a\_a`baa\_a]`G\_\_RU^N]\_] [V\_] [¥RZUW^VM\_X]  
@HWI-EAS443:3:73:1240:1981#0/1  
CACCAGTTGAATAGCTTAGTGACACCTCCTGGCCCCATG  
+HWI-EAS443:3:73:1240:1981#0/1  
a\_ba\_a\_b`baaaa`\_a`\_0\_a`ZN]\_^][S\_^`0Z\_^`  
@HWI-EAS443:3:73:1380:748#0/1  
CAGTGACCACAGAAGCTGCTTTTGGTCTAGTGTGTGCCAC  
+HWI-EAS443:3:73:1380:748#0/1  
abb^bbbbbabab]\_X\_ab]\_\_bb][\_aaa\_a`a[aX^a`  
@HWI-EAS443:3:73:1523:2027#0/1  
GTCCCCATTCCCATTTAGGGCATTGACAAAAGCGTCTA  
+HWI-EAS443:3:73:1523:2027#0/1  
`bbbbbbbabbbbabaaaaabbaaaaaaba``a\_\_aa  
@HWI-EAS443:3:73:1573:413#0/1  
GAAAATTTGCAGGCCTACCAGAAGCGAATGGGAGTGCAGA  
+HWI-EAS443:3:73:1573:413#0/1  
XVOUH^UXW¥VSSYYUVPHU¥Z[]Xa^Q¥\_YRPUWa^[[U  
@HWI-EAS443:3:73:1613:878#0/1  
GTGGATTACTGATCGTCTTTTTTTCAAATGTATTTATCGT  
+HWI-EAS443:3:73:1613:878#0/1  
]F^Y[YaaY^\_^]Y`X^aa`\_aa]VY[``][`^U^X^P  
@HWI-EAS443:3:73:1627:731#0/1  
CTGTGAATCAGCAATCTGTTCAAGTGGCACACACTAGA  
+HWI-EAS443:3:73:1627:731#0/1  
abb`\_^\_a]`^W\_aa]baS`]a\_baa`\_b`\_P````a``\_  
@HWI-EAS443:3:73:1661:934#0/1  
ACTGATCGTCTTTTTTTCAAATGTATTTATCGTCGCTTTA  
+HWI-EAS443:3:73:1661:934#0/1  
a^ab`aab\_aaaaaaa^`X`abW`aa\_aa]a¥Pa¥`a\_U  
@HWI-EAS443:3:73:1779:321#0/1  
GTGCAGATGCAGCGATTCAAGTGATCCTCTCGTCATTGCA  
+HWI-EAS443:3:73:1779:321#0/1  
`[\_`\_] [Y[]^`^^XVOYNS\_WaXWWZ]P[U]QLZWZ[QS  
@HWI-EAS443:3:73:215:1234#0/1  
CAGTGACCACAGAAGCTGCTTTTGGTCTAGTGTGTGCCAC  
+HWI-EAS443:3:73:215:1234#0/1  
aa]YaZaa\_a\_\_a`\_`\_]\_Y^]^[^]V[Y\_RV\_W]V]YY]]

@HWI-EAS443:3:73:25:1828#0/1  
CATGGGGCCAAGGAGGTGTCACCTAAGCTATTCAACTGGTG  
+HWI-EAS443:3:73:25:1828#0/1  
`R\_aa`X\_a]W`aVUFH\_V\_b\_]T[P\_\_`\_P^``]PTQSQ  
@HWI-EAS443:3:73:418:1660#0/1  
CAGTGACCACAGAAGCTGCTTTTGGTCTAGTGTGTGCCAC  
+HWI-EAS443:3:73:418:1660#0/1  
``a^a`baaaaYa\_[\_\_^WY]a`VRRR¥ZSGR^XNSPW¥  
@HWI-EAS443:3:73:44:1762#0/1  
AACAGGATGGGAACAGTGACCACAGAAGCTGCTTTTGGTC  
+HWI-EAS443:3:73:44:1762#0/1  
\_`\_T[[]`VYT]`¥U¥JX`\_`TYY[`Y[YTPMQRXRNUWZ  
@HWI-EAS443:3:73:472:1149#0/1  
GGGAACAGTGACCACAGAAGCTGCTTTTGGTCTAGTGTGT  
+HWI-EAS443:3:73:472:1149#0/1  
\_\_\_aWaa]Vabbaabb`\_Va`aabaaaa`\_aZZ]Q`¥\_Y  
@HWI-EAS443:3:73:51:483#0/1  
CAATGACGAGAGGATCACTTGAATCGCTGCATCTGCACTC  
+HWI-EAS443:3:73:51:483#0/1  
a`Ta`\_ababaaaa[`¥aaa]aa[`¥`]Y\_aZ^^a`\_^Z¥  
@HWI-EAS443:3:73:578:1029#0/1  
GTGACCACAGAAGCTGCTTTTGGTCTAGTGTGTGCCACTT  
+HWI-EAS443:3:73:578:1029#0/1  
a]aabb`bb^bb`b`aaaa`aa^a`a`^a^aYZ`\_]^^¥  
@HWI-EAS443:3:73:589:462#0/1  
ATTGCATGTACCATCTGCCTAGTCTGATTAGCAACCTCCA  
+HWI-EAS443:3:73:589:462#0/1  
aaaa]aaaaaWVZPX]b¥`\_]`\_JUXI\_XV`[OaRWY[PSa  
@HWI-EAS443:3:73:637:1364#0/1  
TTCGCTTCTGGTAGGCCTGCAAATTTTCAAGAAGGTCATC  
+HWI-EAS443:3:73:637:1364#0/1  
ZVZab[[]ba`P^ZUaa`aaa`OM]``aa\_]`XWV¥Wa`a`  
@HWI-EAS443:3:73:672:353#0/1  
TATCAGGTGCAAGATCCCAATGATATTTGCTGCAATGACG  
+HWI-EAS443:3:73:672:353#0/1  
aaaaa]\_Ya`aa`a`aaaa^\_a`a`a[Xa¥\_a`a]^`  
@HWI-EAS443:3:74:1021:220#0/1  
GACCGATGCTGTGAATCAGCAATCTGTTCAAGTGGCAC  
+HWI-EAS443:3:74:1021:220#0/1  
aa\_aaaaaaaaa\_baYW¥Zb^aa`Qa^^`[\_T[[[Y\_RN\_U  
@HWI-EAS443:3:74:1069:230#0/1  
GGAACAGTGACCACAGAAGCTGCTTTTGGTCTAGTGTGTG  
+HWI-EAS443:3:74:1069:230#0/1  
abYaM`a]bbRX\_a^``\_\_Y][\_\_\_\_]Y\_HHPL\_`VXTXGY  
@HWI-EAS443:3:74:1378:884#0/1  
CTACCAGAAGCGAATGGGAGTGAGATGCAGCGATTCAAG  
+HWI-EAS443:3:74:1378:884#0/1  
ab\_abab]ab\_\_\_aaaababXaaab\_aa^ba^`]`a`a`Z  
@HWI-EAS443:3:74:1582:513#0/1  
ACCTGATATTGTGGATTACTGATCGTCTTTTTTTTCAAATG

+HWI-EAS443:3:74:1582:513#0/1  
ab`abababbbabbababbabbaab]aaababbb^aa`aa  
@HWI-EAS443:3:74:1723:1567#0/1  
AACAGGATGGGAACAGTGACCACAGAAGCTGCTTTTGGTC  
+HWI-EAS443:3:74:1723:1567#0/1  
aa`ab`a[`abZaaaaVabaaa\_a\_]aa`\_W[a`\_^VZ^N  
@HWI-EAS443:3:74:182:217#0/1  
ATCTGTTCACAAGTGGCACACACTAGACCAAAGCAGCTT  
+HWI-EAS443:3:74:182:217#0/1  
ab`aa\_a`aab`\_]\_aaa\_`aa]\_`^`^^[¥`\_`\_\_\_`\_]`\_^  
@HWI-EAS443:3:74:185:1376#0/1  
TGGGCCTCATATACAACAGGATGGGAACAGTGACCACAGA  
+HWI-EAS443:3:74:185:1376#0/1  
]SRU\_aU¥b]U`Zbbabaaa\_[aaa^aaa\_Zaaa`a`\_^¥  
@HWI-EAS443:3:74:208:1444#0/1  
CTGTGAATCAGCAATCTGTTCCACAAGTGGCACACACTAGA  
+HWI-EAS443:3:74:208:1444#0/1  
Yaab``Yabbbab`bbbbaaa]`Xaa][ZbbbYbba^`bb  
@HWI-EAS443:3:74:252:1075#0/1  
CTGTGAATCAGCAATCTGTTCCACAAGTGGCACACACTAGA  
+HWI-EAS443:3:74:252:1075#0/1  
\_S\_R^[]\_a`^^`XX^W`X]a\_\_Z[HS]R[SQ[^\_]UP¥  
@HWI-EAS443:3:74:272:345#0/1  
GTGCCACTTGTGAACAGATTGCTGATTCACAGCATCGGTC  
+HWI-EAS443:3:74:272:345#0/1  
a\_Z`\_baa\_b`a]¥^aa`[Xa\_```\_]`\_aa\_\_\_\_\_]QW  
@HWI-EAS443:3:74:489:721#0/1  
GTGAATCAGCAATCTGTTCCACAAGTGGCACACACTAGACC  
+HWI-EAS443:3:74:489:721#0/1  
a\_aa````\_\_aa``\_aa^a`aaaa`[]¥^````]`a^`\_\_¥W  
@HWI-EAS443:3:74:587:750#0/1  
CAGCGATTCAAGTGATCCTCTCGTCATTGCAGCAAATATC  
+HWI-EAS443:3:74:587:750#0/1  
aababbbbbb`aabaa]aaaaaaaaabab\_aYba`b]YV  
@HWI-EAS443:3:74:635:215#0/1  
GGCCTCATATACAACAGGATGGGAACAGTGACCACAGAAG  
+HWI-EAS443:3:74:635:215#0/1  
aaaaabbbbaabaaa\_abb`aaa\_¥a¥aa^`\_^``^`\_  
@HWI-EAS443:3:74:68:1413#0/1  
CTTGCACCTGATATTGTGGATTACTGATCGTCTTTTTTTC  
+HWI-EAS443:3:74:68:1413#0/1  
aaY[\_`a\_]`¥X\_```Wa`¥`^a\_]JX\_¥a]V]\_\_`YO  
@HWI-EAS443:3:74:751:1679#0/1  
GGAATGGGGACCCGAACAACATGGATAGAGCAGTTAAACT  
+HWI-EAS443:3:74:751:1679#0/1  
`^bbaabbbbbbba`bbbb`bba`ab`abaa]YV]¥]b`U^  
@HWI-EAS443:3:74:916:753#0/1  
ATCGTCTTTTTTCAAATGTATTTATCGTCGCTTTAAATA  
+HWI-EAS443:3:74:916:753#0/1  
`abbabbbbbbba^`bba`^\_bbaaaa`a`¥aa\_]Y]a^



@HWI-EAS443:3:74:917:1361#0/1  
CAGTGACCACAGAAGCTGCTTTTGGTCTAGTGTGTGCCAC  
+HWI-EAS443:3:74:917:1361#0/1  
a`]Sabaa\_bbabbaaYa`aaaaZ]¥b\_``]a[`Sa¥^aV  
@HWI-EAS443:3:75:1088:1077#0/1  
GTGCAGATGCAGCGATTCAAGTGATCCTCTCGTCATTGCA  
+HWI-EAS443:3:75:1088:1077#0/1  
a`baaaaaa`baaaaaaaa`\_aaa^\_a`\_`\_a¥SZ\_\_[``  
@HWI-EAS443:3:75:1350:401#0/1  
CACTGGAGCTAGGATGAGTCCCAATAGTTCTCATTGCATG  
+HWI-EAS443:3:75:1350:401#0/1  
a`\_aXV`\_[W`Saa`bab^ON^^`aS¥S^]b`abbaXaab  
@HWI-EAS443:3:75:1443:604#0/1  
GGAACAGTGACCACAGAAGCTGCTTTTGGTCTAGTGTGTG  
+HWI-EAS443:3:75:1443:604#0/1  
aaab\_aa¥ba\_Y\_Y`a^\_W\_Z[``\_`^W¥\_\_\_¥`W\_T\_  
@HWI-EAS443:3:75:1451:758#0/1  
TGACAAGATTGGTCTTGTCTTTAGCCATTCCATGAGAGCC  
+HWI-EAS443:3:75:1451:758#0/1  
abb``bbaZ^bb^LbbaVa`]baa[]baa`N^`Y\_aaa¥a  
@HWI-EAS443:3:75:1492:1088#0/1  
CACTAAGCTATTCAACTGGTGCACTTGCCAGTTGCATGGG  
+HWI-EAS443:3:75:1492:1088#0/1  
`b]bbba`b`baaba]bbbaabaabbbbaV`abaaabbbb  
@HWI-EAS443:3:75:149:515#0/1  
TTGGGATCTTGCACCTGATATTGTGGATTACTGATCGTCT  
+HWI-EAS443:3:75:149:515#0/1  
¥\_aVWXQ`a``aaa`b\_H^aaba``Yaaa\_]`Y[a`^Z`a  
@HWI-EAS443:3:75:152:537#0/1  
GACCACAGAAGCTGCTTTTGGTCTAGTGTGTGCCACTTGT  
+HWI-EAS443:3:75:152:537#0/1  
abbbba`W`aa`baaaaaaaaaZa`ba\_a\_a\_\_aaaa`\_`^  
@HWI-EAS443:3:75:1616:1206#0/1  
CACACACTAGACCAAAGCAGCTTCTGTGGTCACTGTTCC  
+HWI-EAS443:3:75:1616:1206#0/1  
V`\_abb`b`aaWaabbbba`aa`bbZa`\_`b^bbXa`a`QU  
@HWI-EAS443:3:75:1667:332#0/1  
GGGATCTTGCACCTGATATTGTGGATTACTGATCGTCTTT  
+HWI-EAS443:3:75:1667:332#0/1  
``aa[JYbb¥YN¥`aaaa\_\_N`b\_aaa]abaa]aYYaaa  
@HWI-EAS443:3:75:221:1738#0/1  
CTTGCACCTGATATTGTGGATTACTGATCGTCTTTTTTTC  
+HWI-EAS443:3:75:221:1738#0/1  
a\_^¥aa`Y^U\_aaa^WX]¥¥^^Z¥[[^][XT\_[Y]\_\_\_\_]^  
@HWI-EAS443:3:75:241:686#0/1  
CGAGAGGATCACTTGAATCGCTGCATCTGCACTCCCATTC  
+HWI-EAS443:3:75:241:686#0/1  
abRb[]`WYaaWOV`^¥YLE[[MNTKTR^¥UTT^T¥SPMX  
@HWI-EAS443:3:75:271:343#0/1  
CAGTGACCACAGAAGCTGCTTTTGGTCTAGTGTGTGCCAC

+HWI-EAS443:3:75:271:343#0/1  
WWZT\_]`¥X\_]X`a^`^aa\_]RF[ZZZLWM[XZJR¥V  
@HWI-EAS443:3:75:28:1773#0/1  
CTCTCATGGAATGGCTAAAGACAAGACCAATCTTGTCACC  
+HWI-EAS443:3:75:28:1773#0/1  
aababb]]]a\_aY`b\_a`¥SSYY]PZ\_]NT^[\_S[^`\_^  
@HWI-EAS443:3:75:39:14#0/1  
GCAAGATCCCAATGATATTTGCTGCAATGACGAGAGGATC  
+HWI-EAS443:3:75:39:14#0/1  
aZWZ\_¥ST^UW¥\_[LVX[YSUPGYJTNUVTTZLYVWUVVV  
@HWI-EAS443:3:75:444:1880#0/1  
ACCAATCTTGTCACCTCTGACTAAGGGAATTTTAGGATTT  
+HWI-EAS443:3:75:444:1880#0/1  
a`a`][a`XUT¥aa\_`^XT^^]`[WQ¥^PT\_^`YRQY¥W  
@HWI-EAS443:3:75:468:855#0/1  
CTTGTGAACAGATTGCTGATTCACAGCATCGGTCTCACAG  
+HWI-EAS443:3:75:468:855#0/1  
abbbabbbbabababbbbaaaaaaaaaaaaaaaZ\_\_`]]`  
@HWI-EAS443:3:75:61:85#0/1  
ATCCCAATGATATTTGCTGCAATGACGAGAGGATCACTTG  
+HWI-EAS443:3:75:61:85#0/1  
a`a\_aaa`a\_aa\_¥Z`a`a]]`aY\_a\_a\_a\_VQRYU]\_Z  
@HWI-EAS443:3:75:684:1875#0/1  
CAAGATTGGTCTTGTCTTTAGCCATTCCATGAGAGCCTCA  
+HWI-EAS443:3:75:684:1875#0/1  
ab`]babba\_baabab`a`babaaa`bba`\_b\_a\_aaa\_a  
@HWI-EAS443:3:75:695:167#0/1  
GGATTACTGATCGTCTTTTTTTCAAATGTATTTATCGTCG  
+HWI-EAS443:3:75:695:167#0/1  
\_`a`ZaaZV¥`Xb]HQUaZabaa`]aa`IR`ZKaVJ\_WX`  
@HWI-EAS443:3:75:727:1331#0/1  
CTTAGTCAGAGGTGACAAGATTGGTCTTGTCTTTAGCCAT  
+HWI-EAS443:3:75:727:1331#0/1  
ab^¥Y[``^V^Ta`¥aaa\_`VV`\_¥Ta`a`U`a`Y  
@HWI-EAS443:3:75:733:790#0/1  
GGGGACCCGAACAACATGGATAGAGCAGTTAAACTATACA  
+HWI-EAS443:3:75:733:790#0/1  
ab]`\_aY^^]J[`ZGPUaa`^]WO`WFQLQTWWFZ^LNDR  
@HWI-EAS443:3:75:821:1659#0/1  
TTTTCAAATGTATTTATCGTCGCTTTAAATACGGTTTGAAA  
+HWI-EAS443:3:75:821:1659#0/1  
¥`R\_a\_R`b\_\_a\_¥V\_a\_UZ`]a]]\_Z^^WWaV`^Y¥\_¥  
@HWI-EAS443:3:75:824:488#0/1  
CACAAGTGGCACACACTAGACCAAAAGCAGCTTCTGTGGT  
+HWI-EAS443:3:75:824:488#0/1  
^bab[\_a^X\_aab\_a\_aa`QT]^U[\_\_\_a`X`b`aV]J[Q  
@HWI-EAS443:3:75:930:1405#0/1  
CTGATATTGTGGATTACTGATCGTCTTTTTTTCAAATGTA  
+HWI-EAS443:3:75:930:1405#0/1  
aaa^a[aa^]baaaa\_`aab`]`\_aa]aaaaa^`Z]`aY\_

@HWI-EAS443:3:76:1022:1456#0/1  
GACCGATGCTGTGAATCAGCAATCTGTTCAAGTGGCAC  
+HWI-EAS443:3:76:1022:1456#0/1  
]]a`babbba\_`abbabaa^a\_abaaUa]`b\_aU[bWa^  
@HWI-EAS443:3:76:1028:665#0/1  
CAGCAATCTGTTCAAGTGGCACACACTAGACCAAAAGC  
+HWI-EAS443:3:76:1028:665#0/1  
O\_aaaba¥babaaabbbba\_\_`bbbab\_aa¥a`\_`a^a\_Z  
@HWI-EAS443:3:76:1313:248#0/1  
ATCTGTTCAAGTGGCACACACTAGACCAAAAGCAGCTT  
+HWI-EAS443:3:76:1313:248#0/1  
aa\_aa\_ba`aa`¥¥[^a]`\_a^`]`\_QY\_^\_^\_\_N^  
@HWI-EAS443:3:76:1355:1473#0/1  
ATCTTGTCACCTCTGACTAAGGGAATTTTAGGATTTGTGT  
+HWI-EAS443:3:76:1355:1473#0/1  
aaaaababbbaaaaaaaaaaaaaaaaaaaaaa\_aaaaa^\_\_  
@HWI-EAS443:3:76:1404:1427#0/1  
TGGGCCTCATATACAACAGGATGGGAACAGTGACCACAGA  
+HWI-EAS443:3:76:1404:1427#0/1  
aa`a^aaaaaa\_\_`\_`a`^X^`]¥^]¥R\_`\_\_]^[^¥  
@HWI-EAS443:3:76:1441:629#0/1  
GAAAGATGACCTTCTTAAAATTTGCAGGCCTACCAGAAG  
+HWI-EAS443:3:76:1441:629#0/1  
a[`]LX[\_\_¥\_aV`^aYUXZ`^\_aR^\_[VU]\_YXX\_ZZ]  
@HWI-EAS443:3:76:1644:1037#0/1  
CTAAAATTCCTTAGTCAGAGGTGACAAGATTGGTCTTGT  
+HWI-EAS443:3:76:1644:1037#0/1  
aaYab`bZ`^bbaVa]]a`]^`]b\_F]`b`Yab\_\_aabQ  
@HWI-EAS443:3:76:186:973#0/1  
CAGCAATCTGTTCAAGTGGCACACACTAGACCAAAAGC  
+HWI-EAS443:3:76:186:973#0/1  
abbb`[`bbaabbbbbbaabbababbabaaaa[aaaaa  
@HWI-EAS443:3:76:483:1988#0/1  
ACAGAAGCTGCTTTTGGTCTAGTGTGTGCCACTTGTGAAC  
+HWI-EAS443:3:76:483:1988#0/1  
a``aZ¥a]]`]]¥YWQO^RZONXWWIT\_]¥YTTPOQV]P  
@HWI-EAS443:3:76:48:612#0/1  
TTCGGGTCCCCATTCCCATTTAGGGCATTGTTGGACAAAGC  
+HWI-EAS443:3:76:48:612#0/1  
abbaaa]baaaaaaaaaaba`\_aa[aa`\_\_`\_\_`a[XZ\_  
@HWI-EAS443:3:76:529:1075#0/1  
TGTGAACAGATTGCTGATTCACAGCATCGGTCTCACAGAC  
+HWI-EAS443:3:76:529:1075#0/1  
aa`abba`baaaaab`aaba`a`aaa\_]`^`aYWY[]X  
@HWI-EAS443:3:76:52:1159#0/1  
CAAGATTGGTCTTGTCTTTAGCCATTCCATGAGAGCCTCA  
+HWI-EAS443:3:76:52:1159#0/1  
`aV]¥aaXaXbaabaa`a^baa¥[^\_\_aa[\_]`]^`Z\_]`  
@HWI-EAS443:3:76:552:1464#0/1  
GATCCCAATGATATTTGCTGCAATGACGAGAGGATCACTT

+HWI-EAS443:3:76:552:1464#0/1  
aa¥a[`YXa\_a\_Y`¥\_\_`\_Z¥KX¥W]\_\_]^¥]^¥[\_^V\_]`  
@HWI-EAS443:3:76:578:634#0/1  
AAGACGATCAGTAATCCACAATATCAGGTGCAAGATCCCA  
+HWI-EAS443:3:76:578:634#0/1  
aa]^a^YYaaa^aa\_a`X`]aa`\_\_`\_Q\_\_\_\_\_^Z¥][  
@HWI-EAS443:3:76:637:585#0/1  
ATTTGCTGCAATGACGAGAGGATCACTTGAATCGCTGCAT  
+HWI-EAS443:3:76:637:585#0/1  
Z¥¥[bbaa¥\_W`¥¥\_ZQa\_]ZZW^aa\_``]aaZZ\_``V\_Y  
@HWI-EAS443:3:76:757:886#0/1  
GCCAGTTGCATGGGCCTCATATACAACAGGATGGGAACAG  
+HWI-EAS443:3:76:757:886#0/1  
aa`^`¥\_a^`\_][[a]\_]\_]^[^¥¥\_`^ZZ[[W¥¥¥¥VYVYZ  
@HWI-EAS443:3:76:824:1150#0/1  
GCAGCTTCTGTGGTCACTGTTCCCATCCTGTTGTATATGA  
+HWI-EAS443:3:76:824:1150#0/1  
aaaaa¥``YOMT^U¥ZYZPV[\_USNV\_`ZXN^XPX[^YYS  
@HWI-EAS443:3:76:827:117#0/1  
AAAAGCAGCTTCTGTGGTCACTGTTCCCATCCTGTTGTAT  
+HWI-EAS443:3:76:827:117#0/1  
abbbaba\_aa[aaZa`\_`aQ`a¥a^`\_`\_`¥\_\_[¥a\_W¥\_  
@HWI-EAS443:3:76:928:2004#0/1  
CGATGCTGTGAATCAGCAATCTGTTCAAGTGGCACACA  
+HWI-EAS443:3:76:928:2004#0/1  
\_UW`aba\_]bbaa`^`aaaa]SX[aaaa[G[W]a^a\_a  
@HWI-EAS443:3:76:936:1408#0/1  
ATCCCAATGATATTTGCTGCAATGACGAGAGGATCACTTG  
+HWI-EAS443:3:76:936:1408#0/1  
abb`^a`bbba`ba]``^`aaaaaaaaa\_`a\_a```a]  
@HWI-EAS443:3:76:963:585#0/1  
TGCTGTGAATCAGCAATCTGTTCAAGTGGCACACACTA  
+HWI-EAS443:3:76:963:585#0/1  
aaaaaaabaaaaa\_aaa\_`a`a\_`\_\_`W``¥`\_`^a^^\_  
@HWI-EAS443:3:76:99:195#0/1  
ATCAGGTGCAAGATCCCAATGATATTTGCTGCAATGACGA  
+HWI-EAS443:3:76:99:195#0/1  
aaabba\_ba\_\_a^`aaaaab`a^aa`a\_``[`Z`a`]a`  
@HWI-EAS443:3:77:1075:452#0/1  
GACCACAGAAGCTGCTTTTGGTCTAGTGTGTGCCACTTGT  
+HWI-EAS443:3:77:1075:452#0/1  
\_bbUb`a`a`aX\_Tbbbaa`a[[Zabb[^TRLYVRaa^  
@HWI-EAS443:3:77:1096:202#0/1  
GACCGATGCTGTGAATCAGCAATCTGTTCAAGTGGCAC  
+HWI-EAS443:3:77:1096:202#0/1  
a`]a`aa^\_ab^aaa`^`aZaaa\_a`\_aZ^[^\_]`\_WVY  
@HWI-EAS443:3:77:1154:759#0/1  
TTCCCATCCTGTTGTATATGAGGCCCATGCAACTGGCAAG  
+HWI-EAS443:3:77:1154:759#0/1  
`ba\_aaaaaaa^baaabbaaba`^`^aabaa^¥]a\_`\_]Y

@HWI-EAS443:3:77:1161:1252#0/1  
GAGGCCATGGAGGTTGCTAATCAGACTAGGCAGATGGTAC  
+HWI-EAS443:3:77:1161:1252#0/1  
`abbbbabbb`bbb]aaaa\_babaab\_bbaa`aab\_abU\_\_  
@HWI-EAS443:3:77:1161:131#0/1  
GGATTACTGATCGTCTTTTTTTCAAATGTATTTATCGTCCG  
+HWI-EAS443:3:77:1161:131#0/1  
a`^`a`^`a`aZa]Za`a`aaa^¥]]\_a^`\_`a\_`W\_[U^  
@HWI-EAS443:3:77:1189:29#0/1  
GCCTCATATACAACAGGATGGGAACAGTGACCACAGAAGC  
+HWI-EAS443:3:77:1189:29#0/1  
a\_`aY\_`\_`^Z\_`^`\_aaZ\_`¥^V] [] `W\_\_RTZW\_\_XW^W  
@HWI-EAS443:3:77:1306:1901#0/1  
CGTCATTGCAGCAAATATCATTGGGATCTTGACCTGATA  
+HWI-EAS443:3:77:1306:1901#0/1  
]b`T`b`abK[QVaaba`aa`ababaaWaaa`aZ` `a\_a^  
@HWI-EAS443:3:77:1715:93#0/1  
CTCATATACAACAGGATGGGAACAGTGACCACAGAAGCTG  
+HWI-EAS443:3:77:1715:93#0/1  
ababbbbb`bbabbbabbbbabbbabbb`abaaX^b  
@HWI-EAS443:3:77:220:1281#0/1  
GCCACTTGTGAACAGATTGCTGATTCACAGCATCGGTCTC  
+HWI-EAS443:3:77:220:1281#0/1  
aa\_]ZWSWP\_aa[\_^XOLV[^a\_RFXZ`¥YVKG`\_ZQ[LU  
@HWI-EAS443:3:77:244:292#0/1  
CACTTGTGAACAGATTGCTGATTCACAGCATCGGTCTCAC  
+HWI-EAS443:3:77:244:292#0/1  
]aa`bZaaa`aa^`aa]a`]^`^`a¥a`WY`U\_]HM`\_\_U  
@HWI-EAS443:3:77:255:217#0/1  
GAACAGTGACCACAGAAGCTGCTTTTGGTCTAGTGTGTGC  
+HWI-EAS443:3:77:255:217#0/1  
^\_aVP\_\_baaXP]R]a\_\_\_\_\_]aUGZZ\_]U¥Q¥UTXY¥NVG  
@HWI-EAS443:3:77:279:93#0/1  
ATCGTCTTTTTTTCAAATGTATTTATCGTCCGCTTTAAATA  
+HWI-EAS443:3:77:279:93#0/1  
abba`aabbbbab\_R\_`abX]aaa]^`aa\_\_`\_\_aa\_¥\_^^  
@HWI-EAS443:3:77:317:1982#0/1  
GTGAGACCGATGCTGTGAATCAGCAATCTGTTCAAGTG  
+HWI-EAS443:3:77:317:1982#0/1  
`T¥aW¥b`\_aOH\_baQaaaaZ^^ab`Q`aZ\_`]P\_¥R\_TY  
@HWI-EAS443:3:77:373:151#0/1  
TGACAAGATTGGTCTTGTCTTTAGCCATTCCATGAGAGCC  
+HWI-EAS443:3:77:373:151#0/1  
a\_ZW^^`WW\_]`^\_aab¥PZ^aZ\_`\_TZ\_]\_Z¥¥[]\_a]¥^\_  
@HWI-EAS443:3:77:458:234#0/1  
ATCCCAATGATATTTGCTGCAATGACGAGAGGATCACTTG  
+HWI-EAS443:3:77:458:234#0/1  
aababaaaaabaa`aaa`a`aaa` `a`a`aa`\_`^` `\_]`  
@HWI-EAS443:3:77:552:1222#0/1  
CAAGATCTGTGTTCTTTCTGCAAAGACACTTCCAGTCT

+HWI-EAS443:3:77:552:1222#0/1  
`WXZPQTUaR^GZa^[X¥]J^U]ZUW]^aaaPa¥Q^Z¥XR  
@HWI-EAS443:3:77:585:1229#0/1  
GTGACCACAGAAGCTGCTTTTGGTCTAGTGTGCCACTT  
+HWI-EAS443:3:77:585:1229#0/1  
a`abbabababaaaa`a`aaaa`\_aaa^^`\_\_\_\_]``a¥``  
@HWI-EAS443:3:77:691:1689#0/1  
GCTGTGAATCAGCAATCTGTTTACAAGTGGCACACACTAG  
+HWI-EAS443:3:77:691:1689#0/1  
aba`\_]¥a\_a]``\_aa\_PT[¥\_[`a¥\_NZV^`^]`a\_U`¥  
@HWI-EAS443:3:77:723:1706#0/1  
TACATTTGAAAAAAGACGATCAGTAATCCACAATATCAG  
+HWI-EAS443:3:77:723:1706#0/1  
J^^bba¥ba`^^```bab\_[`^V[\_QY¥a`a`^S¥¥a\_  
@HWI-EAS443:3:77:745:1016#0/1  
ATCTTGTACCTCTGACTAAGGGAATTTTAGGATTTGTGT  
+HWI-EAS443:3:77:745:1016#0/1  
^a`^aa\_aaVa]a^YTaZZ`^aa`][aYa`a]a`a\_V¥\_S  
@HWI-EAS443:3:77:840:700#0/1  
ACCAATCTTGTACCTCTGACTAAGGGAATTTTAGGATTT  
+HWI-EAS443:3:77:840:700#0/1  
a\_a\_]\_a`aI`^YT```\_XS`WW`^\_0[YFMX^`^0^\_Q  
@HWI-EAS443:3:77:841:1084#0/1  
CACTAGACCAAAAAGCAGCTTCTGTGGTCACTGTTCCCATC  
+HWI-EAS443:3:77:841:1084#0/1  
abaZbabbbbaa\_bba`a`ba`\_aa[\_]a][a`\_\_YOS  
@HWI-EAS443:3:77:851:250#0/1  
CACACTAGACCAAAAAGCAGCTTCTGTGGTCACTGTTCC  
+HWI-EAS443:3:77:851:250#0/1  
¥XU`¥¥b`\_WS¥¥`¥`b`\_Wq]`UHXbYY^`^QG`\_MGRM  
@HWI-EAS443:3:77:896:103#0/1  
TGTGAATCAGCAATCTGTTTACAAGTGGCACACACTAGAC  
+HWI-EAS443:3:77:896:103#0/1  
abaa\_aa`a`\_`a`ab`\_]`\_\_^\_]`^`]]V]V^^^X  
@HWI-EAS443:3:77:935:889#0/1  
AACAGTGACCACAGAAGCTGCTTTTGGTCTAGTGTGCC  
+HWI-EAS443:3:77:935:889#0/1  
a`\_baabbabababaa\_aaababa^a]aaaaZa\_a]`\_a  
@HWI-EAS443:3:78:1036:1234#0/1  
GCACCTGATATTGTGGATTACTGATCGTCTTTTTTTCAAA  
+HWI-EAS443:3:78:1036:1234#0/1  
aaba`baaa¥aa\_Sab`aaa]a][`[a]^aa`aaa]U^`a  
@HWI-EAS443:3:78:1092:796#0/1  
GACCGATGCTGTGAATCAGCAATCTGTTTACAAGTGGCAC  
+HWI-EAS443:3:78:1092:796#0/1  
a`b`a`abbab`aaaabaaaaa\_aa^\_]`\_`aaa]`\_\_a`  
@HWI-EAS443:3:78:1113:899#0/1  
GTTAAACTATACAAGAAGCTCAAAAGAGAAATAACGTTCC  
+HWI-EAS443:3:78:1113:899#0/1  
^UV\_OUMLTUaZaZa^QWT]`XJOT`[\_WFZ¥YQJ¥R[ZT

@HWI-EAS443:3:78:1117:642#0/1  
CTTGCACCTGATATTGTGGATTACTGATCGTCTTTTTTTC  
+HWI-EAS443:3:78:1117:642#0/1  
aaababaabb`aaaab\_baaa`a¥a` `a\_a\_`aaaaaa`  
@HWI-EAS443:3:78:1219:908#0/1  
ACGGCAAAGGCTATGGAACAGATGGCTGGATCGAGTGAAC  
+HWI-EAS443:3:78:1219:908#0/1  
[Qa]^W\_U`\_W]baa`YYS^`^`\_`0`T¥Ia^a[`^]KZU  
@HWI-EAS443:3:78:1234:1663#0/1  
AAACTATACAAGAAGCTCAAAAGAGAAATAACGTTCCATG  
+HWI-EAS443:3:78:1234:1663#0/1  
aaa\_aa`a]aa^\_`\_\_\_[\_aZ\_]`^)``\_aa]^`^XX^W  
@HWI-EAS443:3:78:1585:120#0/1  
ATGGGCCTCATATACAACAGGATGGGAACAGTGACCACAG  
+HWI-EAS443:3:78:1585:120#0/1  
aabab¥X^`aaaa^VRa)`a^¥]^\_TNS]U¥X]BBBBBB  
@HWI-EAS443:3:78:1603:1073#0/1  
CAAGATCTGTGTTCTTTCCTGCAAAGACACTTTCAGTCT  
+HWI-EAS443:3:78:1603:1073#0/1  
^a\_QZb`b`Sab^aab`\_H`a]]aaVYLaNaa^XY`\_Y¥B  
@HWI-EAS443:3:78:297:1685#0/1  
GCACACACTAGACCAAAGCAGCTTCTGTGGTCACTGTTC  
+HWI-EAS443:3:78:297:1685#0/1  
\_`^`\_UXZ\_VJ\_aWQ[X]aabZ`[M`\_]\_HQQ^a\_VTUX\_  
@HWI-EAS443:3:78:389:118#0/1  
GGATGGGAACAGTGACCACAGAAGCTGCTTTTGGTCTAGT  
+HWI-EAS443:3:78:389:118#0/1  
ab¥abbb`aaaa¥abaaa]\_baaa`\_a^`\_`\_`\_`\_`W`¥[S  
@HWI-EAS443:3:78:454:631#0/1  
CGAACAACATGGATAGAGCAGTTAAACTATACAAGAAGCT  
+HWI-EAS443:3:78:454:631#0/1  
a^X\_aaa\_]aa]`aa][W`U`T^YX]\_\_`^`[¥^`\_`\_`¥T  
@HWI-EAS443:3:78:600:1759#0/1  
ATCAGCAATCTGTTACAAAGTGGCACACACTAGACCAAAA  
+HWI-EAS443:3:78:600:1759#0/1  
`XVPY^W[VbaZMXWT\_S[UP]MVaUZUTUK[[`^`a]Y[  
@HWI-EAS443:3:78:698:60#0/1  
GAGAGGATCACTTGAATCGCTGCATCTGCACTCCCATTTCG  
+HWI-EAS443:3:78:698:60#0/1  
a`aaba` `¥a`a\_aaaa` `Ra`YPYa¥^¥¥¥¥WU[¥X\_  
@HWI-EAS443:3:78:700:844#0/1  
GATGCTGTGAATCAGCAATCTGTTACAAAGTGGCACACAC  
+HWI-EAS443:3:78:700:844#0/1  
` `a\_\_\_\_` ]` `^aaaaaaaaa^X`\_YYaadWaaaa`a`a^  
@HWI-EAS443:3:78:71:322#0/1  
GACCACAGAAGCTGCTTTTGGTCTAGTGTGTGCCACTTGT  
+HWI-EAS443:3:78:71:322#0/1  
\_`¥¥WV^^\_]X\_¥UU]R¥ZRTXWOR^¥FRP¥SQL¥JMWVBB  
@HWI-EAS443:3:78:746:1647#0/1  
CTCTCGTCATTGCAGCAAATATCATTGGGATCTTGCACCT

+HWI-EAS443:3:78:746:1647#0/1  
a`aaa\_]a`\_]`a`\_a\_\_Y\_\_^]ZZY\_^¥¥\_\_\_\_\_]^  
@HWI-EAS443:3:78:751:421#0/1  
GACAAGACCAATCTTGTCACCTCTGACTAAGGGAATTTTA  
+HWI-EAS443:3:78:751:421#0/1  
aa`ababaaaabaab\_aa\_\_aaaa`Zba\_baaa`aaa`a  
@HWI-EAS443:3:78:884:1660#0/1  
GGGCCTCATATACAACAGGATGGGAACAGTGACCACAGAA  
+HWI-EAS443:3:78:884:1660#0/1  
`X\_Yabbbbbaba`baabaa\_aa\_bb\_\_aabaaaa`\_`  
@HWI-EAS443:3:78:958:966#0/1  
CCCAATGATATTTGCTGCAATGACGAGAGGATCACTTGAA  
+HWI-EAS443:3:78:958:966#0/1  
`W\_\_ab\_\_b^aa]QZ`¥]`a]\_`aa\_aa\_XX\_`\_`aa  
@HWI-EAS443:3:79:1034:1019#0/1  
ATGGGCCTCATATACAACAGGATGGGAACAGTGACCACAG  
+HWI-EAS443:3:79:1034:1019#0/1  
`Yb\_\_`\_]\_`aabbab`^\_W0¥aaa`a¥^]¥aaa¥]\_aa  
@HWI-EAS443:3:79:1050:708#0/1  
AGCTGCTTTTGGTCTAGTGTGTGCCACTTGTGAACAGATT  
+HWI-EAS443:3:79:1050:708#0/1  
abXa`b\_\_R\_Y[VZ^]]HXY`aT]b\_a`[^a¥R`\_\_SVR  
@HWI-EAS443:3:79:1132:557#0/1  
CAAGTGATCCTCTCGTCATTGCAGCAAATATCATTGGGAT  
+HWI-EAS443:3:79:1132:557#0/1  
aabbabbb^`abab\_`abbb¥b\_bb^abbbab]aaa[a`  
@HWI-EAS443:3:79:1248:1216#0/1  
CAGCAATCTGTTCAACAAGTGGCACACACTAGACCAAAAGC  
+HWI-EAS443:3:79:1248:1216#0/1  
abVNab`bbaaa^`a`\_a`\_aVb]\_WaWJ`X^aZaaaa  
@HWI-EAS443:3:79:1327:1320#0/1  
CTTTTTTCAAATGTATTTATCGTCGCTTTAAATACGGTT  
+HWI-EAS443:3:79:1327:1320#0/1  
abbbbbbbbaabbbbaabbbbbbbabb`bbbaabbb`b\_ab  
@HWI-EAS443:3:79:1338:725#0/1  
ACTGATCGTCTTTTTTCAAATGTATTTATCGTCGCTTTA  
+HWI-EAS443:3:79:1338:725#0/1  
aabbabaaaabaabbbabaaaa]abaaaa\_\_\_\_a^a`a`  
@HWI-EAS443:3:79:1524:172#0/1  
CTACTACCACCAATCCACTAATCAGGCATGAAAACAGAAT  
+HWI-EAS443:3:79:1524:172#0/1  
abaabbb`b^`abbab`abaab`babaab`\_]¥^`\_aa  
@HWI-EAS443:3:79:156:1915#0/1  
TGTTGTTCCGGTCCCCATTCCCATTTAGGGCATTGTTGGAC  
+HWI-EAS443:3:79:156:1915#0/1  
a`]a^aab]]\_`b`\_`a`a`ab\_\_a\_a\_\_[¥a\_a^a`]aa  
@HWI-EAS443:3:79:1655:44#0/1  
GACCGATGCTGTGAATCAGCAATCTGTTCAACAAGTGGCAC  
+HWI-EAS443:3:79:1655:44#0/1  
ab`\_bbbabbbabaa]`bXaaa^bbaa`\_Hab\_[aaYb\_



@HWI-EAS443:3:79:1658:1301#0/1  
CACCTCCTTGGCCCCATGGAACGTTATTTCTCTTTTGAGC  
+HWI-EAS443:3:79:1658:1301#0/1  
abbbbaab\_`bY`aab\_baabaaabababaa\_baaa\_\_a`  
@HWI-EAS443:3:79:175:1385#0/1  
AGCAATCTGTTCACAAGTGGCACACACTAGACCAAAGCA  
+HWI-EAS443:3:79:175:1385#0/1  
a\_a^0^b\_a^\_a`\_a`]`W\_V`^`^`a`\_`^`a`\_`^`^X\_  
@HWI-EAS443:3:79:220:525#0/1  
GCTGCTTTTGGTCTAGTGTGTGCCACTTGTGAACAGATTG  
+HWI-EAS443:3:79:220:525#0/1  
aaaaa`aaa^Za^`^`^`\_Y^`aX^`\_`VVT`\_`\_YQ]  
@HWI-EAS443:3:79:279:553#0/1  
AAAGCAGCTTCTGTGGTCACTGTTCCCATCCTGTTGTATA  
+HWI-EAS443:3:79:279:553#0/1  
a\_Z^\_VZ\_]^[^QRFQa`aQYRMNZXYaJRP^\_ZUTPYUZ`  
@HWI-EAS443:3:79:349:1162#0/1  
ATCCCAATGATATTTGCTGCAATGACGAGAGGATCACTTG  
+HWI-EAS443:3:79:349:1162#0/1  
a\_aaa`b\_aaXYX\_P^a\_a`[S[a`\_`\_`\_ZFX\_`S`^`]  
@HWI-EAS443:3:79:375:153#0/1  
TGACACCTCCTTGGCCCCATGGAACGTTATTTCTCTTTTG  
+HWI-EAS443:3:79:375:153#0/1  
abbb^aaaaaaba^aaa`aa`a`b`\_`aaa\_a\_a`\_`\_`  
@HWI-EAS443:3:79:41:1776#0/1  
CACAAGTGGCACACACTAGACCAAAGCAGCTTCTGTGGT  
+HWI-EAS443:3:79:41:1776#0/1  
aaba`ZV`\_bba^`a^`][`aa`\_`a^`[V`^`\_XMS[ZV  
@HWI-EAS443:3:79:451:1186#0/1  
GCCTCATATACAACAGGATGGGAACAGTGACCACAGAAGC  
+HWI-EAS443:3:79:451:1186#0/1  
abbbbababaaaaZb[W^`\_`[`a`aa`\_Yab`a]aV`\_`\_`^  
@HWI-EAS443:3:79:496:1505#0/1  
CAAGATCCCAATGATATTTGCTGCAATGACGAGAGGATCA  
+HWI-EAS443:3:79:496:1505#0/1  
abb\_]ab`abbbaab]ba`\_aaaabaaaa`aa\_aaaaa`a  
@HWI-EAS443:3:79:503:1176#0/1  
CAAAGGCTATGGAACAGATGGCTGGATCGAGTGAACAGGC  
+HWI-EAS443:3:79:503:1176#0/1  
a\_RYaab]aaRXZaYaa`Y`]]`a`^^^`^`P]^Y[TTT^  
@HWI-EAS443:3:79:658:446#0/1  
GTGACCACAGAAGCTGCTTTTGGTCTAGTGTGTGCCACTT  
+HWI-EAS443:3:79:658:446#0/1  
a^bbaaa\_aaba^aaa`a`a^\_a]\_`\_`^VaZ\_^]`[`ZZ\_  
@HWI-EAS443:3:79:711:1713#0/1  
GCCTCATATACAACAGGATGGGAACAGTGACCACAGAAGC  
+HWI-EAS443:3:79:711:1713#0/1  
TZ`\_`[b`\_ba[`\_XW`W`bb\_]\_]\_aJZ\_aa`\_`a`XR  
@HWI-EAS443:3:79:809:1369#0/1  
CCTCATATACAACAGGATGGGAACAGTGACCACAGAAGCT

+HWI-EAS443:3:79:809:1369#0/1  
`babbabaabb\_a\_bb\_aa`a\_aa\_a¥aaaa`aaa\_``[\_  
@HWI-EAS443:3:79:920:795#0/1  
GATGGTACATGCAATGAGAAGTATTGGGACTCATCCTAGC  
+HWI-EAS443:3:79:920:795#0/1  
\_ZZ]W\_]I\_[Z¥WS]]`QT¥¥NQ[aWLYa\_[^Vaa^^QX  
@HWI-EAS443:3:79:969:1370#0/1  
ATCAGGTGCAAGATCCCAATGATATTTGCTGCAATGACGA  
+HWI-EAS443:3:79:969:1370#0/1  
`a\_ab^YaaaU]X¥\_a``abaa`\_aa`aa^`````\_``^`\_  
@HWI-EAS443:3:7:1017:911#0/1  
AAATGCCCTAAATGGGAATGGGACCCGAACAACATGGAT  
+HWI-EAS443:3:7:1017:911#0/1  
abbab`\_aaaaaaaaa\_``a`\_^^^\_a\_\_W\_\_^\_aa\_`^  
@HWI-EAS443:3:7:1020:1253#0/1  
AGAGCCTCAAGATCTGTGTTCTTTCCTGCAAAGACACTTT  
+HWI-EAS443:3:7:1020:1253#0/1  
a^^a\_X\_a^\_a^\_\_aa\_\_\_a`a```X`^X]a\_``]]\_`X\_  
@HWI-EAS443:3:7:1054:483#0/1  
CATGGGGCCAAGGAGGTGTCACCTAAGCTATTCAACTGGTG  
+HWI-EAS443:3:7:1054:483#0/1  
aTZTUaabb^ba\_[\_]bUL^a^a\_K¥a\_b]RX`[[]aUa  
@HWI-EAS443:3:7:112:1604#0/1  
AGTGATCCTCTCGTCATTGCAGCAAATATCATTGGGATCT  
+HWI-EAS443:3:7:112:1604#0/1  
ab`]aab`baaaa`[a`a\_`^¥a`\_aaa^^aa`UUV^\_\_`  
@HWI-EAS443:3:7:1221:1341#0/1  
GCCGAGATCGCGCAGAGACTGGAAAGTGTCTTTGCAGGAA  
+HWI-EAS443:3:7:1221:1341#0/1  
\_GQO^[aZ^\_[aYZ\_NPUY^^¥PYNPRsbT¥[QKT[[]B  
@HWI-EAS443:3:7:1284:451#0/1  
TCCTGCAAAGACACTTCCAGTCTCTGCGGATCTCGGCT  
+HWI-EAS443:3:7:1284:451#0/1  
aa`aa\_a\_aaa[a\_aaaZ]a`¥\_\_Y`\_^a]a]¥T^Ua¥U^  
@HWI-EAS443:3:7:1286:441#0/1  
AAGATGACCTTCTTGAATAATTTGCAGGCCTACCAGAAGCG  
+HWI-EAS443:3:7:1286:441#0/1  
aba``aa\_a\_aaba`aYa`aa^^^aT`\_\_``]S\_¥\_\_\_Za  
@HWI-EAS443:3:7:1376:1297#0/1  
CAAGTGGCACACACTAGACCAAAAGCAGCTTCTGTGGTCA  
+HWI-EAS443:3:7:1376:1297#0/1  
^aaaaaab\_babbbba`b[]babab¥Y[b`¥[¥^W^UXRb  
@HWI-EAS443:3:7:1443:1111#0/1  
GCGACGATAAATACATTTGAAAAAAGACGATCAGTAATC  
+HWI-EAS443:3:7:1443:1111#0/1  
a¥a`[aa``a`aa\_`aaa```\_``\_`[\_Za\_\_[]^R^]^Y  
@HWI-EAS443:3:7:1458:1504#0/1  
ATCAGGTGCAAGATCCCAATGATATTTGCTGCAATGACGA  
+HWI-EAS443:3:7:1458:1504#0/1  
aa\_baa[b]abaa¥\_aaaaaa`\_aa^`\_\_aVa\_`^``Sa\_

@HWI-EAS443:3:7:1462:1899#0/1  
GGAGTGCAGATGCAGCGATTCAAGTGATCCTCTCGTCATT  
+HWI-EAS443:3:7:1462:1899#0/1  
W[S[RXZaa\_a^`a\_]\_OX`Xa¥X¥aaa``UTX`¥RW\_^  
@HWI-EAS443:3:7:155:1068#0/1  
GATATTTGCTGCAATGACGAGAGGATCACTTGAATCGCTG  
+HWI-EAS443:3:7:155:1068#0/1  
a`^```a`a\_]\_\_[V\_\_aa¥a\_`]]Y^¥Y[] [¥]RQ¥XQP  
@HWI-EAS443:3:7:1639:1511#0/1  
GCTGCAATGACGAGAGGATCACTTGAATCGCTGCATCTGC  
+HWI-EAS443:3:7:1639:1511#0/1  
I\_Uaa\_Za`bbaba`a``abbab`^^```^Ua\_Tbbabbb  
@HWI-EAS443:3:7:1711:1014#0/1  
CAGCAATCTGTTCAAGTGGCACACACTAGACCAAAAGC  
+HWI-EAS443:3:7:1711:1014#0/1  
abaabaaabaab`a\_aab]aa]bUaY`RaaY\_U\_`\_``ZZ  
@HWI-EAS443:3:7:1715:442#0/1  
CAACAGGATGGGAACAGTGACCACAGAAGCTGCTTTTGGT  
+HWI-EAS443:3:7:1715:442#0/1  
aaaXU^`a\_bUaaaGaaP`aXOP^^baaaUaUX\_a`aXY¥  
@HWI-EAS443:3:7:1782:1433#0/1  
CAGCAATCTGTTCAAGTGGCACACACTAGACCAAAAGC  
+HWI-EAS443:3:7:1782:1433#0/1  
aba`a`\_Zabb\_babbb`abZbab`aa\_bba\_\_\_`aba\_  
@HWI-EAS443:3:7:207:704#0/1  
ATTCTGTTTTCATGCCTGATTAGTGGATTGGTGGTAGTAG  
+HWI-EAS443:3:7:207:704#0/1  
a^`J]b[XaV`aa``aaa\_a`aXa\_[M^^\_RaBBBBBBB  
@HWI-EAS443:3:7:287:1550#0/1  
CACAGAAGCTGCTTTTGGTCTAGTGTGTGCCACTTGTGAA  
+HWI-EAS443:3:7:287:1550#0/1  
a`a[abbabaa\_Ua`^aaOWX``G^U[^^^`YaY\_\_`\_`\_`\_`  
@HWI-EAS443:3:7:427:792#0/1  
GAGGTTGCTAATCAGACTAGGCAGATGGTACATGCAATGA  
+HWI-EAS443:3:7:427:792#0/1  
^`\_]G[¥]WW\_R¥`^`¥]`W]¥]`\_\_PWD^ZZHZLV\_]a`  
@HWI-EAS443:3:7:458:799#0/1  
AAGCTATTCAACTGGTGCACCTGCCAGTTGCATGGGCCCTC  
+HWI-EAS443:3:7:458:799#0/1  
a`aY`\_a`¥a^^^UXUY\_\_UW¥\_¥T¥WY\_\_Y\_¥W]¥¥U^W  
@HWI-EAS443:3:7:722:728#0/1  
CATTTGAAAAAAGACGATCAGTAATCCACAATATCAGGT  
+HWI-EAS443:3:7:722:728#0/1  
^`¥T[a\_¥R`ba¥Sbbb\_SZ\_[0]^`^0^X^`a\_V]¥¥VV  
@HWI-EAS443:3:7:73:712#0/1  
TCCCATTCGCTTCTGGTAGGCCTGCAAATTTTCAAGAAGG  
+HWI-EAS443:3:7:73:712#0/1  
Kbaba`a`\_\_aaa``\_Yaba^a`a`U^aaa`aaa\_a\_`a\_  
@HWI-EAS443:3:7:752:46#0/1  
CACAGAAGCTGCTTTTGGTCTAGTGTGTGCCACTTGTGAA

+HWI-EAS443:3:7:752:46#0/1  
a`bbbbbb`bbbbabbaba\_baa\_babba]Ga\_aaaSaaa  
@HWI-EAS443:3:7:850:56#0/1  
GTGAACAGATTGCTGATTCACAGCATCGGTCTCACAGACA  
+HWI-EAS443:3:7:850:56#0/1  
a`^aZaa`\_\_a\_aa`aY]WZ`Z\_^U`^UQVFWY`BBB  
@HWI-EAS443:3:7:872:2042#0/1  
ATACATTTGAAAAAAGACGATCAGTAATCCACAATATCA  
+HWI-EAS443:3:7:872:2042#0/1  
\_ZW]a[Uy\_a`a`¥`\_]\_\_[[ZWP^WSYHXOY^Z\_VBB  
@HWI-EAS443:3:7:880:1734#0/1  
TGACCACAGAAGCTGCTTTTGGTCTAGTGTGTGCCACTTG  
+HWI-EAS443:3:7:880:1734#0/1  
ab]`bb\_ababbbbaa[SYaaa[JQQV[X`\_aW[R^aQaUX  
@HWI-EAS443:3:7:939:1783#0/1  
TGGAAAGTGTCTTTGCAGGAAAGAACACAGATCTTGAGGC  
+HWI-EAS443:3:7:939:1783#0/1  
¥a¥¥V`\_G\_]S\_X¥YWbb`¥a\_]^aaa^Z`a^TNXNGOYH  
@HWI-EAS443:3:7:943:1705#0/1  
CAAGATTGGTCTTGTCTTTAGCCATTCCATGAGAGCCTCA  
+HWI-EAS443:3:7:943:1705#0/1  
`¥\_b`bbba`b\_a\_bbbbaaabb`¥b¥\_G`a[UQTYUb  
@HWI-EAS443:3:80:1075:1253#0/1  
TGACCACAGAAGCTGCTTTTGGTCTAGTGTGTGCCACTTG  
+HWI-EAS443:3:80:1075:1253#0/1  
^aS¥b`]ab]Y`^a`\_\_a[a\_]Pa`T^MQVQ`````VU\_\_a  
@HWI-EAS443:3:80:1114:281#0/1  
CATTTGAAAAAAGACGATCAGTAATCCACAATATCAGGT  
+HWI-EAS443:3:80:1114:281#0/1  
abbbbbbbaab^a\_\_`abaaWab¥\_a\_V[a]a\_aa`M^^SL  
@HWI-EAS443:3:80:1314:101#0/1  
GACGAGAGGATCACTTGAATCGCTGCATCTGCACTCCCAT  
+HWI-EAS443:3:80:1314:101#0/1  
`ba]abbab`aaaWab]aaa\_aW¥V^]`^a¥^¥a¥X¥¥]  
@HWI-EAS443:3:80:145:196#0/1  
GCACCTGATATTGTGGATTACTGATCGTCTTTTTTTTCAAA  
+HWI-EAS443:3:80:145:196#0/1  
\_a```a^Y¥]a^YN[X]TP`a¥S[^Y¥M¥ZSP][][MZZU  
@HWI-EAS443:3:80:1729:1643#0/1  
CGATAAATACATTTGAAAAAAGACGATCAGTAATCCACA  
+HWI-EAS443:3:80:1729:1643#0/1  
aabaabbbabbaabbbbababaaabb]aaaW`aa]`a¥a  
@HWI-EAS443:3:80:206:239#0/1  
ACAAGATTGGTCTTGTCTTTAGCCATTCCATGAGAGCCTC  
+HWI-EAS443:3:80:206:239#0/1  
`^VF^I[¥\_a\_\_\_\_[a\_aaaT¥TZ[W[^¥a^\_]GZ]\_W^W[  
@HWI-EAS443:3:80:258:360#0/1  
GACCGATGCTGTGAATCAGCAATCTGTTCCACAAGTGGCAC  
+HWI-EAS443:3:80:258:360#0/1  
abbbbaaaaaa\_Za`aa^a`^a`\_YU¥\_\_¥\_] [U\_\_aaa

@HWI-EAS443:3:80:263:50#0/1  
GCCTCATATACAACAGGATGGGAACAGTGACCACAGAAGC  
+HWI-EAS443:3:80:263:50#0/1  
aY^RZR¥bXHvX^\_`^^TD¥`aNY[NaW\_Q¥ZSLWSURYN  
@HWI-EAS443:3:80:312:764#0/1  
ATCGTCTTTTTTCAAATGTATTTATCGTCGCTTTAAATA  
+HWI-EAS443:3:80:312:764#0/1  
```a^X^^bba¥]WW]]¥aXX`aYaa`aXU^a\_a\_VUSZT  
@HWI-EAS443:3:80:37:1360#0/1  
TGTGAATCAGCAATCTGTTCAAGTGGCACACACTAGAC  
+HWI-EAS443:3:80:37:1360#0/1  
ab]\_[babbbb```aa]]aba`U`^^a\_aaaa\_a``a[`]  
@HWI-EAS443:3:80:399:1028#0/1  
TGGGAGTGCAGATGCAGCGATTCAAGTGATCCTCTCGTCA  
+HWI-EAS443:3:80:399:1028#0/1  
[XX`a]]a]Yaaaa]b`^aS```¥W]VZ[Y`¥^\_]^^U`\_  
@HWI-EAS443:3:80:427:84#0/1  
AGCAGCTTCTGTGGTCACTGTTCCCATCCTGTTGTATATG  
+HWI-EAS443:3:80:427:84#0/1  
aaa\_¥T`XXYWRaaUQ\_Y\_[¥VP^^[YSMXTLM[H[¥¥^W  
@HWI-EAS443:3:80:499:1785#0/1  
GTTGCTAATCAGACTAGGCAGATGGTACATGCAATGAGAA  
+HWI-EAS443:3:80:499:1785#0/1  
aba^abbabababaab]`baaa`[a\_aaaa^`a\_aaa`aa  
@HWI-EAS443:3:80:49:927#0/1  
TTTTTCAAATGTATTTATCGTCGCTTTAAATACGGTTTGA  
+HWI-EAS443:3:80:49:927#0/1  
aaaaa`a\_Vab¥]aa`aaaa\_aa\_``\_ZP^`a\_\_^V\_^^¥  
@HWI-EAS443:3:80:532:56#0/1  
CGCAGAGACTGGAAAGTGTCTTTGCAGGAAAGAACACAGA  
+HWI-EAS443:3:80:532:56#0/1  
`YY`V¥¥T[\_a`PT`Xa[[] [V`^R^\_]]]XLRV\_TV[Q  
@HWI-EAS443:3:80:590:1778#0/1  
GGGCCTCATATACAACAGGATGGGAACAGTGACCACAGAA  
+HWI-EAS443:3:80:590:1778#0/1  
Y\_Z\_\_\_bbbbbbbbbb\_bbbba\_\_^\_baba[aaa`ab\_^\_\_  
@HWI-EAS443:3:80:662:363#0/1  
CTGTGAATCAGCAATCTGTTCAAGTGGCACACACTAGA  
+HWI-EAS443:3:80:662:363#0/1  
[`bYa`^\_\_a^a]\_bbb\_^]aa`aab¥Y]L\_`b^]V^X`  
@HWI-EAS443:3:80:720:1333#0/1  
ACTAGACAAAAGCAGCTTCTGTGGTCACTGTTCCCATCC  
+HWI-EAS443:3:80:720:1333#0/1  
\_aaa\_abba¥aba`baabbbbaa`a`Zb]`a\_`a\_a`]\_a`  
@HWI-EAS443:3:80:796:184#0/1  
TGGGCCTCATATACAACAGGATGGGAACAGTGACCACAGA  
+HWI-EAS443:3:80:796:184#0/1  
^^`^UUV^`Z^WPU]U^aa`aa`V`Ua][`G`[\_^ [¥¥]G  
@HWI-EAS443:3:80:824:648#0/1  
CAGAAGCGAATGGGAGTGCAGATGCAGCGATTCAAGTGAT

+HWI-EAS443:3:80:824:648#0/1  
abb\_\_bbbaababaabU\_¥`bbb`\_aa\_a¥`aaaaa¥a`¥  
@HWI-EAS443:3:80:899:980#0/1  
GCCGAGATCGCGCAGAGACTGGAAAGTGTCTTTGCAGGAA  
+HWI-EAS443:3:80:899:980#0/1  
aaa` ``baabbaaaaX]a`baaaaa\_a¥^aa`¥`aa`]]  
@HWI-EAS443:3:80:941:378#0/1  
GGAGTGCAGATGCAGCGATTCAAGTGATCCTCTCGTCATT  
+HWI-EAS443:3:80:941:378#0/1  
aba`]baabaaaa^aaa`aa`aaaW` `][U`\_`^][Z^\_  
@HWI-EAS443:3:81:1087:159#0/1  
TTTTCAAATGTATTTATCGTCGCTTTAAATACGGTTTGAA  
+HWI-EAS443:3:81:1087:159#0/1  
`aaa\_aaa`a\_aa`aa`a\_\_a`\_a\_^]`\_`\_`^`^¥]  
@HWI-EAS443:3:81:1089:1500#0/1  
CGATCAGTAATCCACAATATCAGGTGCAAGATCCCAATGA  
+HWI-EAS443:3:81:1089:1500#0/1  
a`XT]]\_Xbbaa`]`aaaa`b¥^YM]aaaX`aX\_aaa\_Za  
@HWI-EAS443:3:81:1129:179#0/1  
ATCAGCAATCTGTTCCACAAGTGGCACACACTAGACCAAAA  
+HWI-EAS443:3:81:1129:179#0/1  
abaaaa`ab\_ab` ``aaaaaZ\_\_\_a^a` `^aa`a]Ra\_\_\_\_  
@HWI-EAS443:3:81:1132:121#0/1  
GAGAAATAACGTTCCATGGGGCCAAGGAGGTGTCACTAAG  
+HWI-EAS443:3:81:1132:121#0/1  
a^baaaaa\_[a[^U^[^a[^Z[VV^]`^]aR\_VS]QX]X]  
@HWI-EAS443:3:81:1228:1128#0/1  
TGTGAATCAGCAATCTGTTCCACAAGTGGCACACACTAGAC  
+HWI-EAS443:3:81:1228:1128#0/1  
a^P]]` `X`aaaaa[ab^TU\_[a\_\_VaRR¥]aYZ]\_\_\_\_Y  
@HWI-EAS443:3:81:126:1038#0/1  
TGGGCCTCATATACAACAGGATGGGAACAGTGACCACAGA  
+HWI-EAS443:3:81:126:1038#0/1  
a\_[\_bb]^]^]b` `aa\_XMW[]Y[[`^QYaaa`aR]^  
@HWI-EAS443:3:81:1273:536#0/1  
TGACAAGATTGGTCTTGTCTTTAGCCATTCCATGAGAGCC  
+HWI-EAS443:3:81:1273:536#0/1  
]]]¥]XV^U]\_ZUQ]ab\_\_a` `]`\_FX\_]\_X]\_\_[aaQR]L  
@HWI-EAS443:3:81:1279:1274#0/1  
CAAGATTGGTCTTGTCTTTAGCCATTCCATGAGAGCCTCA  
+HWI-EAS443:3:81:1279:1274#0/1  
]`ab]abWb[]b^a` `a\_b]a[\_]`¥¥]`\_¥NXa\_a\_\_UO`  
@HWI-EAS443:3:81:1295:145#0/1  
CATGCAATGAGAACTATTGGGACTCATCCTAGCTCCAGTG  
+HWI-EAS443:3:81:1295:145#0/1  
a¥`ZX`Ra]¥^^]VPYW\_]SRLXa`\_aYH[WROT`\_][ZM^  
@HWI-EAS443:3:81:1366:2012#0/1  
AAATACATTTGAAAAAAGACGATCAGTAATCCACAATAT  
+HWI-EAS443:3:81:1366:2012#0/1  
aa\_\_\_\_` `a` `a\_\_`aa\_Z^` `I[]][\_`^W¥[]¥^^]^V

@HWI-EAS443:3:81:1457:1726#0/1  
ATCCCAATGATATTTGCTGCAATGACGAGAGGATCACTTG  
+HWI-EAS443:3:81:1457:1726#0/1  
a]Ra[aa`aaaa\_\_`a¥a\_\_WVa`a`^a\_XKTU]]  
@HWI-EAS443:3:81:1574:245#0/1  
CGCGCAGAGACTGGAAAGTGTCTTTGCAGGAAAGAACACA  
+HWI-EAS443:3:81:1574:245#0/1  
^¥^aP]b\_b`Habaaaab\_b]V`a`[LYaa[XX]PZSWHW  
@HWI-EAS443:3:81:1771:581#0/1  
GCCTCATATAACAACAGGATGGGAACAGTGACCACAGAAGC  
+HWI-EAS443:3:81:1771:581#0/1  
a\_Za\_aaaaa\_a`\_¥]\_\_^`a`¥\_Z\_^W^\_ZZ^Y`\_[ZUW  
@HWI-EAS443:3:81:184:426#0/1  
ATTCTGTTTTTCATGCCTGATTAGTGGATTGGTGGTAGTAG  
+HWI-EAS443:3:81:184:426#0/1  
aa`aaa¥aaaa`aa`^a\_a`J¥Yaa\_a`aBBBBBBBBBBB  
@HWI-EAS443:3:81:263:154#0/1  
CAGCAATCTGTTCACAAGTGGCACACACTAGACCAAAAAGC  
+HWI-EAS443:3:81:263:154#0/1  
a^a¥¥aa`aZa¥XX^`a^a\_UZ]]VYUWaa[TPT[`^TN  
@HWI-EAS443:3:81:292:1795#0/1  
CTTTCCTGCAAAGACACTTTCCAGTCTCTGCGCGATCTCG  
+HWI-EAS443:3:81:292:1795#0/1  
a\_Y]\_baa`[`¥]`a]X¥aa[TZ`^`YT`SaUKT¥U^S  
@HWI-EAS443:3:81:312:1757#0/1  
CAAGACCAATCTTGTCACCTCTGACTAAGGGAATTTTAGG  
+HWI-EAS443:3:81:312:1757#0/1  
aY`abb`a\_a`^`\_aaaa\_a`^`\_a`^\_]`\_\_\_\_^`\_Z  
@HWI-EAS443:3:81:356:1434#0/1  
CAGCAATCTGTTCACAAGTGGCACACACTAGACCAAAAAGC  
+HWI-EAS443:3:81:356:1434#0/1  
aa`a`[aa`\_^[¥\_aa`WU[````\_]`[[YV^^[W^\_]Y  
@HWI-EAS443:3:81:366:1995#0/1  
ATCATTGGGATCTTGACCTGATATTGTGGATTACTIONGATC  
+HWI-EAS443:3:81:366:1995#0/1  
`a`a`aZ\_\_¥\_]a^^¥a`^`\_`a^]\_XZ`^\_]\_\_\_\_]^^^WW  
@HWI-EAS443:3:81:372:468#0/1  
ATCTTGTGACCTCTGACTAAGGGAATTTTAGGATTTGTGT  
+HWI-EAS443:3:81:372:468#0/1  
a`]``X`ZV¥aaaaaaaaaaa`X`^¥aa`\_]a`\_`  
@HWI-EAS443:3:81:417:1254#0/1  
CACTTGTGAACAGATTGCTGATTCACAGCATCGGTCTCAC  
+HWI-EAS443:3:81:417:1254#0/1  
aaa``Yaaaa]a^W^aa`a\_\_aa`a`\_\_\_\_\_aaX`[¥WS  
@HWI-EAS443:3:81:580:1459#0/1  
TGGGCCTCATATAACAACAGGATGGGAACAGTGACCACAGA  
+HWI-EAS443:3:81:580:1459#0/1  
\_VLTN\_\_ab^aa^abb`\_YV]\_Z`Y^]`Raaa^^`a`  
@HWI-EAS443:3:81:649:456#0/1  
CGCAGAGACTGGAAAGTGTCTTTGCAGGAAAGAACACAGA

+HWI-EAS443:3:81:649:456#0/1  
^]UR]`b]aaaba`a]\_b]aaa`]X]aa\_aaaa`aa\_XM  
@HWI-EAS443:3:81:775:665#0/1  
CAGTAATCCACAATATCAGGTGCAAGATCCCAATGATATT  
+HWI-EAS443:3:81:775:665#0/1  
aba[aaaba^`^aabaaba`]aabYa`a`\_\_`a\_b[\_aa\_  
@HWI-EAS443:3:81:831:2014#0/1  
ACACTAGACCAAAAAGCAGCTTCTGTGGTCACTGTCCCAT  
+HWI-EAS443:3:81:831:2014#0/1  
a\_aa\_a\_a`a`a`a\_a`a\_\_\_^[TTQNT[\_Z]]Y]\_[[^[^Y  
@HWI-EAS443:3:81:855:462#0/1  
GGAGGTTGCTAATCAGACTAGGCAGATGGTACATGCAATG  
+HWI-EAS443:3:81:855:462#0/1  
aa¥]]^[\`¥\_]`\_ZYa^¥]^`\_\_^ZZ]^UZZ^[YU[]W[  
@HWI-EAS443:3:81:857:200#0/1  
GTGCCACTTGTGAACAGATTGCTGATTCACAGCATCGGTC  
+HWI-EAS443:3:81:857:200#0/1  
a^]^\_a`\_Y\_\_¥UYUa`\_]\_\_R^`\_\_[Z[]\_\_Y¥^Z^]SY  
@HWI-EAS443:3:81:897:1882#0/1  
CAGCAATCTGTTCAAGTGGCACACACTAGACCAAAAAGC  
+HWI-EAS443:3:81:897:1882#0/1  
abaabbbaaa]aaabbb`\_``Xaabaaa`ab``aaaa`  
@HWI-EAS443:3:81:944:259#0/1  
CAAGATTGGTCTTGTCTTTAGCCATTCCATGAGAGCCTCA  
+HWI-EAS443:3:81:944:259#0/1  
T`bbbaabbba[aa\_bbbba]baaa`aba]Q\_aa`\_S  
@HWI-EAS443:3:82:1109:1925#0/1  
GAGACCGATGCTGTGAATCAGCAATCTGTTCAAGTGGC  
+HWI-EAS443:3:82:1109:1925#0/1  
^bbbabaaa\_]aa`abaaabbb\_I\_`\_\_¥a[abaa[^a¥\_  
@HWI-EAS443:3:82:1179:1147#0/1  
TGGGCCTCATATACAACAGGATGGGAACAGTGACCACAGA  
+HWI-EAS443:3:82:1179:1147#0/1  
Z\_ZV\_babb`[\`¥\_W¥^Wab``a`Ya]aW¥a`a^^^J]a\_  
@HWI-EAS443:3:82:1251:581#0/1  
AATTTGCAGGCCTACCAGAAGCGAATGGGAGTGCAGATGC  
+HWI-EAS443:3:82:1251:581#0/1  
a\_b\_bVaa^aVa[aaaaabab\_\_[bbbbbaaa`babb[  
@HWI-EAS443:3:82:1325:1063#0/1  
ATCGCTGCATCTGCACTCCCATTCGTTCTGGTAGGCCTG  
+HWI-EAS443:3:82:1325:1063#0/1  
`¥]\_]^a`a¥]Y¥¥^`^SZ\_`a`YZF]\_]ZY\_[\_X¥VYZU  
@HWI-EAS443:3:82:1467:371#0/1  
AATAGTTCTCATTGCATGTACCATCTGCCTAGTCTGATTA  
+HWI-EAS443:3:82:1467:371#0/1  
abbbbabbbabaabaa`bab`abbabaX]a`ba\_aa\_a\_a  
@HWI-EAS443:3:82:1555:1891#0/1  
GATATTTGCTGCAATGACGAGAGGATCACTTGAATCGCTG  
+HWI-EAS443:3:82:1555:1891#0/1  
`babaa`baab[ab`a``bbaa\_[[TQWTa\_`a`Y]]\_`



@HWI-EAS443:3:82:291:466#0/1  
GTGACCACAGAAGCTGCTTTTGGTCTAGTGTGTGCCACTT  
+HWI-EAS443:3:82:291:466#0/1  
aI]¥¥Z\_a\_]T]aYY]¥\_\_]\_¥KZ^¥\_aY\_Z^U[V^[Z^V  
@HWI-EAS443:3:82:397:89#0/1  
GTGAGACCGATGCTGTGAATCAGCAATCTGTTCAACAAGTG  
+HWI-EAS443:3:82:397:89#0/1  
a`baba\_\_baaaaa]aa`\_\_`aY\_\_`]a\_^\_\_]]`M^X`  
@HWI-EAS443:3:82:424:433#0/1  
AATCAGACTAGGCAGATGGTACATGCAATGAGAACTATTG  
+HWI-EAS443:3:82:424:433#0/1  
]``aaabbabaaaa`aaa]aa``a\_a````\_a\_a^a\_```\_  
@HWI-EAS443:3:82:427:557#0/1  
CAGCAATCTGTTCAACAAGTGGCACACACTAGACCAAAGC  
+HWI-EAS443:3:82:427:557#0/1  
aabbbabbbbaabaa`ba\_aabaa`aa`aaaa`aaaa`\_  
@HWI-EAS443:3:82:471:109#0/1  
GTGCAGATGCAGCGATTCAAGTGATCCTCTCGTCATTGCA  
+HWI-EAS443:3:82:471:109#0/1  
a`b``\_]aaaa[a]\_`\_WZU`Z^\_T[X\_]YX\_]Y^^VX  
@HWI-EAS443:3:82:532:597#0/1  
TACATTTGAAAAAAGACGATCAGTAATCCACAATATCAG  
+HWI-EAS443:3:82:532:597#0/1  
abaababbabaaab`aaaa`^^¥]Yaa\_]a`P`a\_`^`[^`^  
@HWI-EAS443:3:82:550:204#0/1  
ACCTTCTTGAAAATTTGCAGGCCTACCAGAAGCGAATGGG  
+HWI-EAS443:3:82:550:204#0/1  
¥Z\_ababa\_\_^^`T¥a[ ]`ZV\_Y]``\_aYU]`aZW`\_a`  
@HWI-EAS443:3:82:561:1772#0/1  
CTGTGAATCAGCAATCTGTTCAACAAGTGGCACACACTAGA  
+HWI-EAS443:3:82:561:1772#0/1  
aaa`bbaabbaaabab`a]aaaaba`Za`aaaaa`\_]\_a`  
@HWI-EAS443:3:82:576:1005#0/1  
GCTTCTGTGGTCACTGTTCCCATCCTGTTGTATATGAGGC  
+HWI-EAS443:3:82:576:1005#0/1  
ab]`¥`]YQZZ`aa][[^¥a]`^a\_YVY\_¥Z\_\_`[V[ZS^  
@HWI-EAS443:3:82:70:99#0/1  
TGGAAAGTGTCTTTGCAGGAAAGAACACAGATCTTGAGGC  
+HWI-EAS443:3:82:70:99#0/1  
aa`a``aZb\_\_a`a\_\_\_`a]^^^]^^^W\_\_^^Z\_^\_VX^X  
@HWI-EAS443:3:82:760:1473#0/1  
ACCGATGCTGTGAATCAGCAATCTGTTCAACAAGTGGCACA  
+HWI-EAS443:3:82:760:1473#0/1  
`a\_aa`\_aa\_\_aaaa`Z`aa`aaa¥\_a[aa`a`V`[]a`a  
@HWI-EAS443:3:82:854:138#0/1  
GTGACCACAGAAGCTGCTTTTGGTCTAGTGTGTGCCACTT  
+HWI-EAS443:3:82:854:138#0/1  
a\_`\_\_Z`\_aaRZ[^]\_Y[¥\_\_^YU[]YVUU]U]UXXXYY  
@HWI-EAS443:3:82:937:525#0/1  
CAAGATTGGTCTTGTCTTTAGCCATTCCATGAGAGCCTCA



@HWI-EAS443:3:83:1382:1549#0/1  
CTCATATACAACAGGATGGGAACAGTGACCACAGAAGCTG  
+HWI-EAS443:3:83:1382:1549#0/1  
abbbbbbb`bbaaabbaaaa\_b\_a`\_ab\_HZIX]a[\_RXW  
@HWI-EAS443:3:83:1455:1118#0/1  
GGGCTCATATACAACAGGATGGGAACAGTGACCACAGAA  
+HWI-EAS443:3:83:1455:1118#0/1  
abbaab\_`a[bba\_]a\_Y[GZ^\_]QYXVXN\_Z\_UST`aaY  
@HWI-EAS443:3:83:1541:184#0/1  
CTAGTGTGTGCCACTTGTGAACAGATTGCTGATTCACAGC  
+HWI-EAS443:3:83:1541:184#0/1  
\_Q^TW\_¥J\_^¥^`b\_XZa^L¥]\_W\_¥P\_b¥STVQM¥\_V  
@HWI-EAS443:3:83:1667:1840#0/1  
AAAAGCAGCTTCTGTGGTCACTGTTCCCATCCTGTTGTAT  
+HWI-EAS443:3:83:1667:1840#0/1  
aabRaaa\_aabIX\_\_ba\_W\_\_`[Xa\_UR^\_\_X\_\_]\_ZUZ\_  
@HWI-EAS443:3:83:1746:425#0/1  
CAGGCCTACCAGAAGCGAATGGGAGTGCAGATGCAGCGAT  
+HWI-EAS443:3:83:1746:425#0/1  
R]¥U¥`ba^ab`aab\_b^[b`ba`V`^a`]]`[``Za¥V  
@HWI-EAS443:3:83:278:313#0/1  
ATGATATTTGCTGCAATGACGAGAGGATCACTTGAATCGC  
+HWI-EAS443:3:83:278:313#0/1  
a^^]aaaaa`\_U^^``a[``a`\_``\_\_^\_^\_`[]\_\_  
@HWI-EAS443:3:83:421:1748#0/1  
TCCCAATGATATTTGCTGCAATGACGAGAGGATCACTTGA  
+HWI-EAS443:3:83:421:1748#0/1  
abba\_]\_]\_]baaaabZ]^``aa\_]\_]\_]V¥^`aaaa]`  
@HWI-EAS443:3:83:529:1727#0/1  
GAATCAGCAATCTGTTCAAGTGGCACACACTAGACCAA  
+HWI-EAS443:3:83:529:1727#0/1  
abb`]bZbbaaa`\_aa^\_a`QRY]aaaabaV`U\_aaaaa  
@HWI-EAS443:3:83:544:464#0/1  
GTGTGCCACTTGTGAACAGATTGCTGATTCACAGCATCGG  
+HWI-EAS443:3:83:544:464#0/1  
\_J\_V\_b`\_Y`]aWUU]U][TZaaa\_PTX00`\_\_\_\_`V`Z^[  
@HWI-EAS443:3:83:577:422#0/1  
GATCAGTAATCCACAATATCAGGTGCAAGATCCCAATGAT  
+HWI-EAS443:3:83:577:422#0/1  
a`a]a\_bbaba\_aa^aaa\_aa]Z`[`aaa\_\_aY```aa`  
@HWI-EAS443:3:83:603:334#0/1  
CACTAAGCTATTCAACTGGTGCACCTGCCAGTTGCATGGG  
+HWI-EAS443:3:83:603:334#0/1  
Q\_baabbbbbbb\_\_¥[b`Y\_\_babbbab`aab`bU[bbb[a  
@HWI-EAS443:3:83:664:671#0/1  
GCTGCATCTGCACTCCCATTGCTTCTGGTAGGCCTGCAA  
+HWI-EAS443:3:83:664:671#0/1  
aaa^X^`ba[^a^^aQQVWW`V`a^a`Z¥0JXW]\_a`R  
@HWI-EAS443:3:83:752:80#0/1  
TGGGCCTCATATACAACAGGATGGGAACAGTGACCACAGA



@HWI-EAS443:3:84:1180:891#0/1  
CAGGCCTACCAGAAGCGAATGGGAGTGCAGATGCAGCGAT  
+HWI-EAS443:3:84:1180:891#0/1  
`abaaaabaa^\_aabab`ab`ab`a¥aaa`a]a^aaa`Za  
@HWI-EAS443:3:84:1182:1267#0/1  
ATACATTTGAAAAAAGACGATCAGTAATCCACAATATCA  
+HWI-EAS443:3:84:1182:1267#0/1  
^ab^a]\_\_^^¥aaaa`]R]`WTXX`Q\_a^YVZV[]VY^XR  
@HWI-EAS443:3:84:1213:816#0/1  
GCACCTGATATTGTGGATTACTGATCGTCTTTTTTTTCAA  
+HWI-EAS443:3:84:1213:816#0/1  
`]ZX¥ZV`^`W]G]VZSLLSVT]W[ZOUZX]¥VYMHR]Y  
@HWI-EAS443:3:84:1276:880#0/1  
ATGCTGTGAATCAGCAATCTGTTCAAGTGGCACACACT  
+HWI-EAS443:3:84:1276:880#0/1  
UX\_VGW^aab\_VXa¥[W\_^^\_Va^b`\_[YM^``a``a\_a  
@HWI-EAS443:3:84:1326:1958#0/1  
ATCAGGTGCAAGATCCCAATGATATTTGCTGCAATGACGA  
+HWI-EAS443:3:84:1326:1958#0/1  
a\_aaa`W\_a^a`aYU¥\_``aa\_a\_a`Z`Za\_`aa^``  
@HWI-EAS443:3:84:1448:1067#0/1  
GTTAAACTATACAAGAAGCTCAAAGAGAAATAACGTTCC  
+HWI-EAS443:3:84:1448:1067#0/1  
aaa`aa¥a\_YWT]T^a[`[ZT]YZ^aYRJW\_Y`¥XPLTSU  
@HWI-EAS443:3:84:161:565#0/1  
ACAAGATTGGTCTTGTCTTTAGCCATTCCATGAGAGCCTC  
+HWI-EAS443:3:84:161:565#0/1  
aaaa\_¥\_aa¥]a^aa]\_`a`a\_a\_\_\_^`^a]\_\_^^\_\_\_\_  
@HWI-EAS443:3:84:1625:781#0/1  
GAACAGTGACCACAGAAGCTGCTTTTGGTCTAGTGTGTGC  
+HWI-EAS443:3:84:1625:781#0/1  
aaaabb\_ba`[bbbaba\_^ba]babaU`\_abbYYWab`[M  
@HWI-EAS443:3:84:1631:358#0/1  
ATGCTGTGAATCAGCAATCTGTTCAAGTGGCACACACT  
+HWI-EAS443:3:84:1631:358#0/1  
aba\_bbabbbaabaWb\_a`a]`a\_a^aba\_a`]a^\_Xa¥^  
@HWI-EAS443:3:84:1649:842#0/1  
GACCGATGCTGTGAATCAGCAATCTGTTCAAGTGGCAC  
+HWI-EAS443:3:84:1649:842#0/1  
`\_`Zaaabaaa]baaaaaa]\_^`Yaa[a^a^¥`Y\_\_\_\_]^X  
@HWI-EAS443:3:84:236:1102#0/1  
TGTGAATCAGCAATCTGTTCAAGTGGCACACACTAGAC  
+HWI-EAS443:3:84:236:1102#0/1  
a\_^`[``^aaaaaaa\_`aaa`Y`]\_\_aa`aaaa^Y[`\_  
@HWI-EAS443:3:84:309:609#0/1  
ACTTGTGAACAGATTGCTGATTCACAGCATCGGTCTCACA  
+HWI-EAS443:3:84:309:609#0/1  
]`baaXaI[aa\_`\_`aaa`\_\_[[`\_\_`[a`aX^]]\_Z\_  
@HWI-EAS443:3:84:318:491#0/1  
TCACAAGTGGCACACACTAGACCAAAGCAGCTTCTGTGG



@HWI-EAS443:3:84:754:486#0/1  
GACCGATGCTGTGAATCAGCAATCTGTTCCACAAGTGGCAC  
+HWI-EAS443:3:84:754:486#0/1  
ab``^a[``aa]baaaaa^]aaaaba\_`R¥S````aa\_]\_]\_  
@HWI-EAS443:3:84:770:386#0/1  
GCAGATGCAGCGATTCAAGTGATCCTCTCGTCATTGCAGC  
+HWI-EAS443:3:84:770:386#0/1  
^\_Z\_[\_Y\_SZaaa``bZaaHaaaZ¥Uaa\_bUbaaaaaZ]Q  
@HWI-EAS443:3:84:808:439#0/1  
GGGCCTCATATACAACAGGATGGGAACAGTGACCACAGAA  
+HWI-EAS443:3:84:808:439#0/1  
a`a`aa\_]a]\_\_^\_¥Va`W\_a]`Z\_\_\_^W\_]a^W^[\_QU  
@HWI-EAS443:3:84:808:691#0/1  
ATGAGTCCCAATAGTTCTCATTGCATGTACCATCTGCCTA  
+HWI-EAS443:3:84:808:691#0/1  
`a\_Y^`a\_a\_babaabaa\_\_a\_a`aaa`ab^a]a\_a\_aa]  
@HWI-EAS443:3:84:815:713#0/1  
CTGTGGTCACTGTTCCCATCCTGTTGTATATGAGGCCCAT  
+HWI-EAS443:3:84:815:713#0/1  
a^TZZXKW`baba`]aabQ`bb]\_b¥]¥b¥baa\_\_\_a¥\_  
@HWI-EAS443:3:84:867:471#0/1  
GATGCTGTGAATCAGCAATCTGTTCCACAAGTGGCACACAC  
+HWI-EAS443:3:84:867:471#0/1  
aaabaababaaa\_aa```a`aa\_a]a``\_a[^a\_a`a`a[  
@HWI-EAS443:3:84:906:427#0/1  
TGATATTTGCTGCAATGACGAGAGGATCACTTGAATCGCT  
+HWI-EAS443:3:84:906:427#0/1  
`b]`][`aaa\_a[Z`aa`\_a\_a`\_XWZWW`Z¥^^^][  
@HWI-EAS443:3:84:924:405#0/1  
GGCTAGCACTACGGCAAAGGCTATGGAACAGATGGCTGGA  
+HWI-EAS443:3:84:924:405#0/1  
aaaa`ab^aaa]^]aa\_a¥`a```\_Ya¥aa`\_aaY```\_  
@HWI-EAS443:3:84:951:1076#0/1  
CAAGTGGCACACACTAGACCAAAGCAGCTTCTGTGGTCA  
+HWI-EAS443:3:84:951:1076#0/1  
^^[\_Y¥Zab]\_baaaa\_^]abaaa]aa`a`[abU^^XS]  
@HWI-EAS443:3:85:1095:835#0/1  
GAGAGCCTCAAGATCTGTGTTCTTTCTGCAAAGCACTT  
+HWI-EAS443:3:85:1095:835#0/1  
aZZW`[aaa^`aSaabb`bZ\_\_ZW[^`\_\_a¥`^aaZR\_\_a  
@HWI-EAS443:3:85:1190:186#0/1  
CGTATTTAAAGCGACGATAAATACATTTGAAAAAAGACG  
+HWI-EAS443:3:85:1190:186#0/1  
aaaaabbb`bba`aa\_a`\_Y\_bYVaaaabaaaaaab`YY`  
@HWI-EAS443:3:85:1386:1151#0/1  
GAAGCTCAAAGAGAAATAACGTTCCATGGGGCCAAGGAG  
+HWI-EAS443:3:85:1386:1151#0/1  
Zabbbb[`baba]bZbbbbbab`ab\_aababb``aab``b  
@HWI-EAS443:3:85:1406:1329#0/1  
GTTCTTTCTGCAAAGCACTTTCCAGTCTCTGCGCGATC

+HWI-EAS443:3:85:1406:1329#0/1  
 a^`aa%a]^X]^a]Ua%Z^Z^YTU[W%YU%S[%US  
 @HWI-EAS443:3:85:1502:404#0/1  
 TCTTGACCTGATATTGTGGATTACTGATCGTCTTTTTTT  
 +HWI-EAS443:3:85:1502:404#0/1  
 aaabaaa``abaa`aaa\_b``aaa^`a\_a\_a`^aaaaaa^  
 @HWI-EAS443:3:85:1571:1453#0/1  
 GAGGTTGCTAATCAGACTAGGCAGATGGTACATGCAATGA  
 +HWI-EAS443:3:85:1571:1453#0/1  
 ``ab]bb\_aaab\_a\_a\_`aa`\_`\_`^a\_\_^`\_a^\_\_a`^  
 @HWI-EAS443:3:85:1732:542#0/1  
 AGATCCCAATGATATTTGCTGCAATGACGAGAGGATCACT  
 +HWI-EAS443:3:85:1732:542#0/1  
 ]Q0]TZOV`\_W\_a%aaaaPOOLW[a[ZUXOLY[%WXL0S%  
 @HWI-EAS443:3:85:1774:1278#0/1  
 CATGGGGCCAAGGAGGTGTCACTAAGCTATTCAACTGGTG  
 +HWI-EAS443:3:85:1774:1278#0/1  
 [X`bb%X[%bbbbbb`]`aababbbaa^abbabaaaaaR^  
 @HWI-EAS443:3:85:1776:1206#0/1  
 GTCCTAAGCTATTCAACTGGTGCACTTGCCAGTTGCATG  
 +HWI-EAS443:3:85:1776:1206#0/1  
 a\_`b`aaaa]`aaa]aa]`\_Z]a]`Z`^`%`\_`^`[]`\_`^[  
 @HWI-EAS443:3:85:204:1352#0/1  
 CACTAGACCAAAGCAGCTTCTGTGGTCACTGTTCCCA  
 +HWI-EAS443:3:85:204:1352#0/1  
 [baa```QSWa\_0[%b\_]YbX]a`\_[WWWYPWUVVRUV%  
 @HWI-EAS443:3:85:226:498#0/1  
 AGCTTAGTGACACCTCCTTGCCCATGGAACGTTATTTC  
 +HWI-EAS443:3:85:226:498#0/1  
 ^\_abaaaa\_bbaba`abaaaaaaa`aaaba`]^b^]Ua`aW  
 @HWI-EAS443:3:85:326:898#0/1  
 GTGTGTGCCACTTGTGAACAGATTGCTGATTCACAGCATC  
 +HWI-EAS443:3:85:326:898#0/1  
 aabZaSa\_P\_aaaaPaaaaa``aa``a\_`Z\_a[]a\_\_\_\_  
 @HWI-EAS443:3:85:475:1453#0/1  
 CACTAAGCTATTCAACTGGTGCACTTGCCAGTTGCATGGG  
 +HWI-EAS443:3:85:475:1453#0/1  
 `b\_a\_baaa\_aWabba`[\_\_`aaa\_a````Z````\_\_]%  
 @HWI-EAS443:3:85:507:1731#0/1  
 ACTAGGCAGATGGTACATGCAATGAGAACTATTGGGACTC  
 +HWI-EAS443:3:85:507:1731#0/1  
 a`\_`^M0]P`\_aSNVSTWHa]\_aa][a]]`\_]\_Z]^\_[\_  
 @HWI-EAS443:3:85:509:1426#0/1  
 CAACTGGCAAGTGCACCAGTTGAATAGCTTAGTGACACCT  
 +HWI-EAS443:3:85:509:1426#0/1  
 abaa`RY`ZW`[a\_Y^W\_PY\_a]]`]V`^XZ`Raa\_\_a^%  
 @HWI-EAS443:3:85:611:1889#0/1  
 CAATAGTTCTCATTGCATGTACCATCTGCCTAGTCTGATT  
 +HWI-EAS443:3:85:611:1889#0/1  
 abbab^Pbb`\_`b]H%baaabaX`a`aaabaaaa\_]`aaX



@HWI-EAS443:3:85:615:825#0/1  
GGATCTTGCACCTGATATTGTGGATTACTGATCGTCTTTT  
+HWI-EAS443:3:85:615:825#0/1  
abaaababb]\_^a^ababa\_abaa`\_aa`a`\_aaaaa  
@HWI-EAS443:3:85:663:1871#0/1  
CAGCAATCTGTTCAACAAGTGGCACACACTAGACCAAAGC  
+HWI-EAS443:3:85:663:1871#0/1  
aaUaXaSa\_[WZV`]^SZGVUZX[\_`\_]¥a¥SPN^^VSY`  
@HWI-EAS443:3:85:786:1124#0/1  
ATACATTTGAAAAAAGACGATCAGTAATCCACAATATCA  
+HWI-EAS443:3:85:786:1124#0/1  
aaaa`aaabaaa\_Z]Y`a]aaQWSSM[]T¥YYO[YP\_YXZ  
@HWI-EAS443:3:85:914:1367#0/1  
GAAGCTGCTTTTGGTCTAGTGTGTGCCACTTGTGAACAGA  
+HWI-EAS443:3:85:914:1367#0/1  
abb\_aaaaa`\_`\_^aaa\_¥\_^\_]a^aa`\_a`¥\_aa^a`\_  
@HWI-EAS443:3:86:1091:396#0/1  
GTGGATTACTGATCGTCTTTTTTTCAAATGATTTATCGT  
+HWI-EAS443:3:86:1091:396#0/1  
`[][]\_]W]a\_\_\_^UXa]Z]^\_X]^XW]SZ\_¥^VQ[Y  
@HWI-EAS443:3:86:1145:960#0/1  
CGCAGAGACTGGAAAGTGTCTTTGCAGGAAAGAACACAGA  
+HWI-EAS443:3:86:1145:960#0/1  
[bb[[]Yba\_bb^b`]bXb]^`abbMV\_R^aaS¥QLG\_G\_`X  
@HWI-EAS443:3:86:1165:471#0/1  
GAAAGATGACCTTCTTGGAAATTTGCAGGCCTACCAGAAG  
+HWI-EAS443:3:86:1165:471#0/1  
Xa¥`baORTaaS]\_a^T^a\_ZV`¥KTaZZOX\_PZPZVG\_  
@HWI-EAS443:3:86:117:898#0/1  
ATGATATTTGCTGCAATGACGAGAGGATCACTTGAATCGC  
+HWI-EAS443:3:86:117:898#0/1  
ab`bab\_aa\_a`bbb\_`a[^\_aa\_`\_\_\_^a\_\_`a]V\_`\_`\_  
@HWI-EAS443:3:86:1258:121#0/1  
AATGCCCTAAATGGGAATGGGGACCCGAACAACATGGATA  
+HWI-EAS443:3:86:1258:121#0/1  
abab\_^]a``aaaa`^a\_a\_\_a^VVT¥^Z^^XR^^^UZXR  
@HWI-EAS443:3:86:1400:411#0/1  
GCGCAGAGACTGGAAAGTGTCTTTGCAGGAAAGAACACAG  
+HWI-EAS443:3:86:1400:411#0/1  
W`\_O^¥RU]Y^b\_\_[^ZW\_XD¥V]XLR]\_Q]]`^MFWF[`  
@HWI-EAS443:3:86:1534:907#0/1  
ATGCTGTGAATCAGCAATCTGTTCAACAAGTGGCACACACT  
+HWI-EAS443:3:86:1534:907#0/1  
^ab^\_abba`\_`\_`baabbYaba`\_a\_aaa\_a\_\_a0\_U`\_]\_  
@HWI-EAS443:3:86:1571:433#0/1  
CTTGCACCTGATATTGTGGATTACTGATCGTCTTTTTTTC  
+HWI-EAS443:3:86:1571:433#0/1  
a`¥`\_U\_\_[a¥aabaa`b¥IYb\_T[ba`[¥YDU]`aaa^0  
@HWI-EAS443:3:86:1585:1342#0/1  
AGCTAGGATGAGTCCCAATAGTTCTCATTGCATGTACCAT

+HWI-EAS443:3:86:1585:1342#0/1  
`baaaabaaba\_\_aa\_a`ba```¥a¥aaab\_`aa^aRX`a  
@HWI-EAS443:3:86:1723:980#0/1  
AAGATCCCAATGATATTTGCTGCAATGACGAGAGGATCAC  
+HWI-EAS443:3:86:1723:980#0/1  
aa]^`a[P]abaababbba\_ab\_\_\_a][b\_]a`\_]\_0\_Q  
@HWI-EAS443:3:86:224:654#0/1  
ATGGGCTCATATACAACAGGATGGGAACAGTGACCACAG  
+HWI-EAS443:3:86:224:654#0/1  
\_`b\_\_aabb\_\_^ab¥^Za¥W¥XZ`^UR]¥ZZ`\_]`aaaa  
@HWI-EAS443:3:86:347:90#0/1  
TCGGGTCCCCATTCCCATTAGGGCATTGGACAAAGCG  
+HWI-EAS443:3:86:347:90#0/1  
aaaaa]^`aa`\_`a`\_`\_`a¥`^`\_a`¥¥`\_\_\_\_`]¥W¥\_V¥VZ  
@HWI-EAS443:3:86:52:1060#0/1  
AGACAAGACCAATCTTGTCACCTCTGACTAAGGGAATTTT  
+HWI-EAS443:3:86:52:1060#0/1  
aababbaaaU^aaa`a`\_aa\_a\_````a`a`][a`\_\_\_\_^  
@HWI-EAS443:3:86:585:1818#0/1  
CGCGCAGAGACTGGAAAGTGTCTTGCAGGAAAGAACACA  
+HWI-EAS443:3:86:585:1818#0/1  
aNG[^Z0]^`^aa[`]¥\_Q¥]^`[] [PX\_WW¥`Z[[a]a\_  
@HWI-EAS443:3:86:604:357#0/1  
CTTGAATCGCTGCATCTGCACTCCCATTGCTTCTGGTAG  
+HWI-EAS443:3:86:604:357#0/1  
abbbbbbbbaaabbaabaabaaba\_aaaabaaaaa`\_aa  
@HWI-EAS443:3:86:700:322#0/1  
CACAGAAGCTGCTTTTGGTCTAGTGTGTGCCACTTGTGAA  
+HWI-EAS443:3:86:700:322#0/1  
aababbabba`abbbab]^`\_baa^\_aZ`^^aa`\_a\_aaa  
@HWI-EAS443:3:86:706:2043#0/1  
CACTGGAGCTAGGATGAGTCCCAATAGTTCTCATTGCATG  
+HWI-EAS443:3:86:706:2043#0/1  
abb\_bbbb\_^bbaabbab\_\_bbbbabbaa]bbbaaaa`bb  
@HWI-EAS443:3:86:709:473#0/1  
GGAAAGTGTCTTGCAGGAAAGAACACAGATCTTGAGGCT  
+HWI-EAS443:3:86:709:473#0/1  
`aaaaaa\_aaaaa`baabaaa`a]\_aa``\_aa`a````  
@HWI-EAS443:3:86:917:1753#0/1  
GACCACAGAAGCTGCTTTTGGTCTAGTGTGTGCCACTTGT  
+HWI-EAS443:3:86:917:1753#0/1  
`ba`^bbbb]\_aaV¥]bbaa`M`aa\_\_a``aaaZa^aaaU  
@HWI-EAS443:3:86:934:1515#0/1  
GCCTCATATACAACAGGATGGGAACAGTGACCACAGAAGC  
+HWI-EAS443:3:86:934:1515#0/1  
aaZ¥a¥Za`aa]a]0`^UW^\_TVYFZaPY]¥N]^Z\_TVa¥  
@HWI-EAS443:3:87:1007:1335#0/1  
CACACTAGACCAAAGCAGCTTCTGTGGTCACTGTTCC  
+HWI-EAS443:3:87:1007:1335#0/1  
¥\_b¥VX¥¥[aS¥^[L`aa\_a[\_¥\_YU^H^ZQVXYZ`\_IJK

@HWI-EAS443:3:87:1021:685#0/1  
ATCGTCTTTTTTCAAATGTATTTATCGTCGCTTTAAATA  
+HWI-EAS443:3:87:1021:685#0/1  
aba^]\_abY`¥a\_X\_a`¥JPP\_baV\_VU[ZI[a]OYVQ¥  
@HWI-EAS443:3:87:1072:1039#0/1  
TGGGCCTCATATACAACAGGATGGGAACAGTGACCACAGA  
+HWI-EAS443:3:87:1072:1039#0/1  
[bb\_0\_UUaaaa^`Ua`X`^`]b`a`Y¥abH¥aZXab¥Q¥  
@HWI-EAS443:3:87:1089:454#0/1  
GACCACAGAAGCTGCTTTTGGTCTAGTGTGTGCCACTTGT  
+HWI-EAS443:3:87:1089:454#0/1  
aaZa\_\_aaa`a`]`\_YXaa\_\_^\_\_\_\_^YU[`^WTNXWa[\_U  
@HWI-EAS443:3:87:1170:718#0/1  
TGCAGATGCAGCGATTCAAGTGATCCTCTCGTCATTGCAG  
+HWI-EAS443:3:87:1170:718#0/1  
X]XX]\_b^^¥a^` [a¥P¥^^]\_a\_PMTZaaQQ^]]YHFJ¥  
@HWI-EAS443:3:87:1198:639#0/1  
CTGGCTAGCACTACGGCAAAGCTATGGAACAGATGGCTG  
+HWI-EAS443:3:87:1198:639#0/1  
a\_`a¥a\_[^ZPU`\_aa^WW¥]a[\_\_[aaK\_P]a¥^¥aUZ\_  
@HWI-EAS443:3:87:1250:748#0/1  
TGCAGATGCAGCGATTCAAGTGATCCTCTCGTCATTGCAG  
+HWI-EAS443:3:87:1250:748#0/1  
a\_\_`a^`a\_aa`aa`a`aaa^aa`aY\_``\_Z]]`a\_\_¥^\_  
@HWI-EAS443:3:87:1318:1209#0/1  
CAAAAGAGAAATAACGTTCCATGGGGCCAAGGAGGTGTCA  
+HWI-EAS443:3:87:1318:1209#0/1  
`abbbbbbbbbbbbababbaabbbbaababbb]R^bab  
@HWI-EAS443:3:87:1348:2018#0/1  
ACAAGATTGGTCTTGTCTTTAGCCATTCCATGAGAGCCTC  
+HWI-EAS443:3:87:1348:2018#0/1  
aa\_ab^\_`^OT]aYb\_Na^a`bYZa`\_\_VU\_X`a`a]PRS  
@HWI-EAS443:3:87:1358:1964#0/1  
CACTAGACCAAAAGCAGCTTCTGTGGTCACTGTTCCCATC  
+HWI-EAS443:3:87:1358:1964#0/1  
[bSaabbbb`ba^babbbba^baa[baa`abbbba`^U\_ba  
@HWI-EAS443:3:87:1361:619#0/1  
GACGAGAGGATCACTTGAATCGCTGCATCTGCACTCCCAT  
+HWI-EAS443:3:87:1361:619#0/1  
`]\_bb\_bb`aaY`]a^T`aa^a\_aUM``Z]H]aVa\_\_¥^`  
@HWI-EAS443:3:87:146:1688#0/1  
ATCGTCTTTTTTCAAATGTATTTATCGTCGCTTTAAATA  
+HWI-EAS443:3:87:146:1688#0/1  
`a^][aaaaaaaa\_\_aa]YVa`aaa^]\_Z`\_]\_\_a\_^¥^  
@HWI-EAS443:3:87:1491:1226#0/1  
CAGGCCTACCAGAAGCGAATGGGAGTGCAGATGCAGCGAT  
+HWI-EAS443:3:87:1491:1226#0/1  
abbbbbbabababba\_bbabbbbaab`babbabb^ab\_baa  
@HWI-EAS443:3:87:1571:1484#0/1  
ATCGTCTTTTTTCAAATGTATTTATCGTCGCTTTAAATA

+HWI-EAS443:3:87:1571:1484#0/1  
aaa`ZZa^bbba\_¥aaY^`Yabbaab`a¥a^`ba`\_]XZ  
@HWI-EAS443:3:87:226:184#0/1  
AGAAGCTGCTTTTGGTCTAGTGTGTGCCACTTGTGAACAG  
+HWI-EAS443:3:87:226:184#0/1  
aaa`aa\_`Q)`\_\_\_\_[¥^X]\_Y^X\_]VV]WW]U]W]X]XX^  
@HWI-EAS443:3:87:471:777#0/1  
CACTGGAGCTAGGATGAGTCCCAATAGTTCTCATTGCATG  
+HWI-EAS443:3:87:471:777#0/1  
]b`bYa]b`¥`a\_a`¥[Xa]a\_aaa\_aa\_`]X^a`a`\_  
@HWI-EAS443:3:87:613:711#0/1  
CATGGGGCCAAGGAGGTGCTACTAAGCTATTCAACTGGTG  
+HWI-EAS443:3:87:613:711#0/1  
abbb`\_baa`aba\_aaZa\_aaaa\_a^aaa^``aX\_]Va  
@HWI-EAS443:3:87:724:1268#0/1  
AGTGACCACAGAAGCTGCTTTTGGTCTAGTGTGTGCCACT  
+HWI-EAS443:3:87:724:1268#0/1  
^b[bbbaa\_`abb\_a\_Taaa`^ZU\_a]¥]¥a``\_\_\_\_[a``  
@HWI-EAS443:3:87:796:1831#0/1  
CACTAAGCTATTCAACTGGTGCACCTGCCAGTTGCATGGG  
+HWI-EAS443:3:87:796:1831#0/1  
aabbba]abbababb`]baaaaa`a`aa`a`¥aaaa\_a\_a  
@HWI-EAS443:3:87:814:158#0/1  
ATGATATTTGCTGCAATGACGAGAGGATCACTTGAATCGC  
+HWI-EAS443:3:87:814:158#0/1  
a`^^^a[^ab¥\_]a`aaaY`aaaaa\_`X¥Z\_`\_[a^WVS  
@HWI-EAS443:3:87:877:1596#0/1  
GGAGTGCAGATGCAGCGATTCAAGTGATCCTCTCGTCATT  
+HWI-EAS443:3:87:877:1596#0/1  
aa\_a^aabaaa`aaaaba\_aaa`a¥a`aaaa^aa`\_\_aa]  
@HWI-EAS443:3:87:889:1164#0/1  
ATTTGAAAAAAGACGATCAGTAATCCACAATATCAGGTG  
+HWI-EAS443:3:87:889:1164#0/1  
ab`ZTH^`aaZ^`^\_baaaaaYa\_Za\_Q\_aa]\_¥Ya\_VVV  
@HWI-EAS443:3:87:895:457#0/1  
GGGCTCATATACAACAGGATGGGAACAGTGACCACAGAA  
+HWI-EAS443:3:87:895:457#0/1  
\_T\_^["a¥a^XaVU\_[^a\_\_\_a`aY\_\_\_\_Va\_]S[\_[Z^]  
@HWI-EAS443:3:87:91:857#0/1  
GAGACTGGAAAGTGTCTTTGCAGGAAAGAACACAGATCTT  
+HWI-EAS443:3:87:91:857#0/1  
`^\_aaa\_\_^[I^YaaaaaaZ]Y¥`Z`aa```a\_[\_\_^]\_^\_  
@HWI-EAS443:3:88:1029:1071#0/1  
CCCAATGATATTTGCTGCAATGACGAGAGGATCACTTGAA  
+HWI-EAS443:3:88:1029:1071#0/1  
abbbbbbbbbbbbbabbbbabbbababababaaa^a`babaa  
@HWI-EAS443:3:88:1033:162#0/1  
ACTACGGCAAAGGCTATGGAACAGATGGCTGGATCGAGTG  
+HWI-EAS443:3:88:1033:162#0/1  
aabbbaa^aa``aaaaaaaa]\_^`a`\_^\_P]a`\_\_Za\_`V`

@HWI-EAS443:3:88:1046:1000#0/1  
CTTCTGGTAGGCCTGCAAATTTTCAAGAAGGTCATCTTTC  
+HWI-EAS443:3:88:1046:1000#0/1  
HT`¥]a¥a[YPN^¥[\_a^\_\_`\_V\_`^V\_WX\_P^¥^`b¥aX  
@HWI-EAS443:3:88:104:672#0/1  
AATCGCTGCATCTGCACTCCCATTTCGCTTCTGGTAGGCCT  
+HWI-EAS443:3:88:104:672#0/1  
a¥¥aaa[]aa\_`¥aaU\_]`a\_RVRY\_¥\_W[YY¥WW¥TXSX  
@HWI-EAS443:3:88:111:1511#0/1  
ACTAGACCAAAAGCAGCTTCTGTGGTCACTGTTCCCATCC  
+HWI-EAS443:3:88:111:1511#0/1  
aa`baaaaaaaaa\_aa`a`\_\_a\_Y\_]` `[TR\_^\_Y\_Y]Y  
@HWI-EAS443:3:88:1122:933#0/1  
GCCTCATATACAACAGGATGGGAACAGTGACCACAGAAGC  
+HWI-EAS443:3:88:1122:933#0/1  
^[HO[S\_ba[`]]]XaZ)`aab[OUPW[PURDY`]]]BBB  
@HWI-EAS443:3:88:1153:394#0/1  
GAACAGTGACCACAGAAGCTGCTTTTGGTCTAGTGTGTGC  
+HWI-EAS443:3:88:1153:394#0/1  
^\_baWa¥^b^XZ`Y`bb`Z]\_\_a^aa\_]¥\_aaa]]R]^^[  
@HWI-EAS443:3:88:1180:384#0/1  
GTGCAGATGCAGCGATTCAAGTGATCCTCTCGTCATTGCA  
+HWI-EAS443:3:88:1180:384#0/1  
\_N\_` `` `aab\_aaab[aa\_a\_a^`\_`Ra\_]a\_]` `a`¥`  
@HWI-EAS443:3:88:1303:230#0/1  
AAAAGACGATCAGTAATCCACAATATCAGGTGCAAGATCC  
+HWI-EAS443:3:88:1303:230#0/1  
aa`\_Q¥aba`Z^aY^` `a\_]T^\_a\_`X]aaVa`¥\_a`\_][  
@HWI-EAS443:3:88:1372:53#0/1  
ACGATAAATACATTTGAAAAAAGACGATCAGTAATCCAC  
+HWI-EAS443:3:88:1372:53#0/1  
aabaa`abba`abbabaaaaabbaa^aa\_Ya`]aa\_YWa^  
@HWI-EAS443:3:88:156:1489#0/1  
GTCTTTTTTTCAAATGTATTTATCGTCGCTTTAAATACGG  
+HWI-EAS443:3:88:156:1489#0/1  
aaaaaaaaaaaa`aa`abWaaaa¥]\_a\_a\_\_`a\_`¥\_¥`^a`  
@HWI-EAS443:3:88:1593:602#0/1  
GTGCCACTTGTGAACAGATTGCTGATTCACAGCATCGGTC  
+HWI-EAS443:3:88:1593:602#0/1  
\_W]a]a^Zaa[^^`\_I`\_[¥]P\_b\_aa¥a`]\_\_`\_0]\_LJ  
@HWI-EAS443:3:88:159:183#0/1  
GGGCCTCATATACAACAGGATGGGAACAGTGACCACAGAA  
+HWI-EAS443:3:88:159:183#0/1  
abaaaaaaaaaaaaaaaaaaaa`aaa\_`¥\_`^V\_`¥X^\_`\_\_Z  
@HWI-EAS443:3:88:166:347#0/1  
GGAGTGCAGATGCAGCGATTCAAGTGATCCTCTCGTCATT  
+HWI-EAS443:3:88:166:347#0/1  
aaaa¥ba`aa`aa`a`a\_`^`^aY\_¥\_ZZ\_¥¥¥\_Y¥^W  
@HWI-EAS443:3:88:170:116#0/1  
GACCGATGCTGTGAATCAGCAATCTGTTCAAGTGGCAC

+HWI-EAS443:3:88:170:116#0/1  
]XW\_\_UUaaab\_ba`b\_UU\_`aa^a\_\_¥ZZ]RUU]TS¥S  
@HWI-EAS443:3:88:177:1509#0/1  
GCAGATGCAGCGATTCAAGTGATCCTCTCGTCATTGCAGC  
+HWI-EAS443:3:88:177:1509#0/1  
a`a`aa\_a]\_¥V]`WL]XWY]^¥Z`X`^RX[]XN¥Z¥Y  
@HWI-EAS443:3:88:1788:1178#0/1  
CAACTGGCAAGTGACCAGTTGAATAGCTTAGTGACACCT  
+HWI-EAS443:3:88:1788:1178#0/1  
T^W\_Za^Z[[][Q\_\_QUaa^^a\_M¥a`ab\_``b]^XD¥  
@HWI-EAS443:3:88:259:203#0/1  
TCGGGTCCCCATTCCCATTTAGGGCATTGGACAAAGCG  
+HWI-EAS443:3:88:259:203#0/1  
aba`bYb`baa\_a`Y¥aaa`][P¥\_]a]^```U¥R¥\_W`  
@HWI-EAS443:3:88:281:568#0/1  
GGTGTCACTAAGCTATTCAACTGGTGCACCTGCCAGTTGC  
+HWI-EAS443:3:88:281:568#0/1  
ab^`ababbbbaaaaaaaaaaXZ`aaaa`aa\_]`\_`\_`  
@HWI-EAS443:3:88:313:1503#0/1  
ATCAGGTGCAAGATCCCAATGATATTTGCTGCAATGACGA  
+HWI-EAS443:3:88:313:1503#0/1  
^aa\_]\_OJ¥\_U\_aa[a`bY^aaa`aaa`aUa^\_a\_\_T`^V]  
@HWI-EAS443:3:88:318:387#0/1  
GCACCTGATATTGTGGATTACTGATCGTCTTTTTTTTCAA  
+HWI-EAS443:3:88:318:387#0/1  
aaaaabbbaaaaa^aa\_\_a\_`a\_^\_\_^`a`a\_a\_\_a\_\_  
@HWI-EAS443:3:88:409:1768#0/1  
TGCACCTGATATTGTGGATTACTGATCGTCTTTTTTTTCAA  
+HWI-EAS443:3:88:409:1768#0/1  
ab\_W^`aZZ`^a`aT[X¥\_`^^¥ZRS```\_`a\_]\_a`\_Y¥H  
@HWI-EAS443:3:88:435:1518#0/1  
CAGCAATCTGTTCAACAAGTGGCACACACTAGACCAAAAGC  
+HWI-EAS443:3:88:435:1518#0/1  
\_X^b]]`aaaa]aa]a^X[¥\_aaXa\_aa^[aa\_\_\_\_\_^V[  
@HWI-EAS443:3:88:479:564#0/1  
ACCTGATATTGTGGATTACTGATCGTCTTTTTTTTCAAATG  
+HWI-EAS443:3:88:479:564#0/1  
^^a]bW\_R¥bbabaZa^`[\_Z``]]¥^aabbbbaadW\_a`  
@HWI-EAS443:3:88:712:17#0/1  
ATGGGCCTCATATACAACAGGATGGGAACAGTGACCACAG  
+HWI-EAS443:3:88:712:17#0/1  
abab¥VX[b\_bXYOXXUWO\_b^X]\_[XU[a\_Q`]TXYXR\_  
@HWI-EAS443:3:88:712:552#0/1  
GACAAGACCAATCTTGTCACCTCTGACTAAGGGAATTTTA  
+HWI-EAS443:3:88:712:552#0/1  
`aaabbbabbaabaab\_`baaa`ab^aaaabaaaaaa]aa  
@HWI-EAS443:3:88:718:622#0/1  
CGAGATCGCGCAGAGACTGGAAAGTGTCTTTGCAGGAAAG  
+HWI-EAS443:3:88:718:622#0/1  
abbbabbbbaaaaaaab\_bbaa\_baaaaaaa\_aaaa

@HWI-EAS443:3:88:723:876#0/1  
CAGTGACCACAGAAGCTGCTTTTGGTCTAGTGTGTGCCAC  
+HWI-EAS443:3:88:723:876#0/1  
ab\_a`bbabababbabbbaaabaaa\_aaba\_aaa`baaaa  
@HWI-EAS443:3:88:747:1442#0/1  
AGTTCTCATTGCATGTACCATCTGCCTAGTCTGATTAGCA  
+HWI-EAS443:3:88:747:1442#0/1  
¥[NO[\_a\_b` `ab`\_]`bbba\_aa]\_a[b]XZ¥`TZZ¥]  
@HWI-EAS443:3:88:751:28#0/1  
GAGAGGATCACTTGAATCGCTGCATCTGCACTCCCATTCTG  
+HWI-EAS443:3:88:751:28#0/1  
^T^¥a`Y^U\_`aZZ¥]bY`[¥[¥YYL[aXUV]\_TPXX^Va  
@HWI-EAS443:3:88:75:130#0/1  
CTGCTTTTGGTCTAGTGTGTGCCACTTGTGAACAGATTGC  
+HWI-EAS443:3:88:75:130#0/1  
abba¥` `aaaZ`aZa¥a]aXa\_\_`][^`U^\_]W[\_]^X\_X  
@HWI-EAS443:3:88:787:1648#0/1  
TACTGATCGTCTTTTTTTCAAATGTATTTATCGTCGCTTT  
+HWI-EAS443:3:88:787:1648#0/1  
`bYa` `b`baabbbbbb\_baaaabb[ab^b`a¥\_` `aba^  
@HWI-EAS443:3:89:1002:463#0/1  
CAGCGATTCAAGTGATCCTCTCGTCATTGCAGCAAATATC  
+HWI-EAS443:3:89:1002:463#0/1  
`ababbbbabbb`babaaabaaaa`a`aa`a\_a`aaaa\_  
@HWI-EAS443:3:89:1016:912#0/1  
CTTGCACCTGATATTGTGGATTACTGATCGTCTTTTTTTTC  
+HWI-EAS443:3:89:1016:912#0/1  
a^YT]a`a`aaa\_` `[La^\_a[aXaa\_[0^[\_a\_aa`\_`U  
@HWI-EAS443:3:89:1095:1099#0/1  
GTGTGTGCCACTTGTGAACAGATTGCTGATTCACAGCATC  
+HWI-EAS443:3:89:1095:1099#0/1  
abb`a`X^^`abba[\_aaZ`b^a`^]abaaaa` `aba[aQ  
@HWI-EAS443:3:89:1104:751#0/1  
CATGGGGCCAAGGAGGTGTCACTAAGCTATTCAACTGGTG  
+HWI-EAS443:3:89:1104:751#0/1  
][^¥a`\_^Zba]W^]aY`a\_V¥aa\_a` `a\_aa]XZ\_U\_  
@HWI-EAS443:3:89:1148:988#0/1  
GCCTGTTCACCTCGATCCAGCCATCTGTTCCATAGCCTTTG  
+HWI-EAS443:3:89:1148:988#0/1  
`[ `]a`a\_HZ`¥]¥ZV`WXJ`]^UM`PWKXT]ZMZPRM  
@HWI-EAS443:3:89:1195:1452#0/1  
TTTTTTCAAATGTATTTATCGTCGCTTTAAATACGGTTTG  
+HWI-EAS443:3:89:1195:1452#0/1  
aababb`aa`aa[abaaaa\_` `a]aaaa\_aaVa^[a\_\_  
@HWI-EAS443:3:89:1325:1086#0/1  
AATTTGCAGGCCTACCAGAAGCGAATGGGAGTGCAGATGC  
+HWI-EAS443:3:89:1325:1086#0/1  
abbbba`bbbbbbbabbbbbb`b¥abbbbaab`baabbaa`  
@HWI-EAS443:3:89:1327:1223#0/1  
GTGGATTACTGATCGTCTTTTTTTCAAATGTATTTATCGT

+HWI-EAS443:3:89:1327:1223#0/1  
`\_`ZX[a]Ya]U`Z\_X\_aaaaba\_H]aa]aVaa`a\_^S`Y  
@HWI-EAS443:3:89:1494:737#0/1  
ATCTTGTCACCTCTGACTAAGGGAATTTTAGGATTTGTGT  
+HWI-EAS443:3:89:1494:737#0/1  
``a`aa]`a]W`abaa\_aa`]baa`aa``aaQ[a\_aa¥\_Z  
@HWI-EAS443:3:89:1587:155#0/1  
CTGTTCCCATCCTGTTGTATATGAGGCCCATGCAACTGGC  
+HWI-EAS443:3:89:1587:155#0/1  
QK\_bbba`aaaY``^`ba`a`Y]]\_R¥\_^a\_\_[O`¥\_¥VU  
@HWI-EAS443:3:89:1673:1748#0/1  
CTAGACCAAAGCAGCTTCTGTGGTCACTGTTCCCATCCT  
+HWI-EAS443:3:89:1673:1748#0/1  
¥`\_ba¥]`\_bb]`\_babbaaa]aa`ab``aaa\_`a]]]aa  
@HWI-EAS443:3:89:1734:190#0/1  
TGCCTGTTCACTCGATCCAGCCATCTGTTCCATAGCCTTT  
+HWI-EAS443:3:89:1734:190#0/1  
aaaaa`babb[HYaaa^Za]UTS`R^a]YZ[Y]WQJJR][  
@HWI-EAS443:3:89:352:1869#0/1  
CGATCAGTAATCCACAATATCAGGTGCAAGATCCCAATGA  
+HWI-EAS443:3:89:352:1869#0/1  
a`\_`a\_XV¥a\_\_aaaaa`a`aaVVM\_¥aa``X¥¥^a\_\_^`  
@HWI-EAS443:3:89:385:1868#0/1  
CTGATATTGTGGATTACTGATCGTCTTTTTTTCAAATGTA  
+HWI-EAS443:3:89:385:1868#0/1  
J¥\_`[`a`\_]`\_\_[Xaab^]X¥aW][b^V\_\_X\_]b¥^`N]  
@HWI-EAS443:3:89:410:167#0/1  
GGGAGTGCAGATGCAGCGATTCAAGTGATCCTCTCGTCAT  
+HWI-EAS443:3:89:410:167#0/1  
a`a\_\_^a\_\_`\_]`\_a\_[aXX^^^`X^`^X^^X^X^X\_X  
@HWI-EAS443:3:89:418:380#0/1  
CTTGAATCGCTGCATCTGCACTCCCATTGCTTCTGGTAG  
+HWI-EAS443:3:89:418:380#0/1  
abaabbabbbbabbbb¥bbaaa\_`aaaaabaa\_a`aa]ab  
@HWI-EAS443:3:89:577:1801#0/1  
CAAGATCTGTGTTCTTTCCCTGCAAAGACACTTTCCAGTCT  
+HWI-EAS443:3:89:577:1801#0/1  
a]]ZONXW¥KRX\_U\_SV\_RTaW¥¥Y`¥^]`^`SUPG]VQZV  
@HWI-EAS443:3:89:647:1213#0/1  
GGAGGTGTCCTAAGCTATTCAACTGGTGCACCTGCCAGT  
+HWI-EAS443:3:89:647:1213#0/1  
a\_^aaNaYa`¥VaX[]^a\_\_a`\_]\_¥¥V^V^¥^^¥ZWZ^Y  
@HWI-EAS443:3:89:707:564#0/1  
AAAAAAGACGATCAGTAATCCACAATATCAGGTGCAAGAT  
+HWI-EAS443:3:89:707:564#0/1  
`aaabaVaab``^QRWZ^X¥\_a[^````\_X[^X`YZ][[P  
@HWI-EAS443:3:89:712:639#0/1  
CATGTACCATCTGCCTAGTCTGATTAGCAACCTCCATGGC  
+HWI-EAS443:3:89:712:639#0/1  
abaa`bbbbbaababa¥abbbbabbabb`bbaabbb\_



@HWI-EAS443:3:89:845:954#0/1  
ATTTAAAGCGACGATAAATACATTTGAAAAAAGACGATC  
+HWI-EAS443:3:89:845:954#0/1  
aabbba`bbba`babaaaaaaab\_a]^a\_`]aa`\_aa\_  
@HWI-EAS443:3:89:947:681#0/1  
TCTGTGGTCACTGTTCCCATCCTGTTGTATATGAGGCCCA  
+HWI-EAS443:3:89:947:681#0/1  
`ba^^]b^`baa`abaabaa`abaabb`aba]\_]\_a`aa  
@HWI-EAS443:3:89:950:273#0/1  
GCCTCATATACAACAGGATGGGAACAGTGACCACAGAAGC  
+HWI-EAS443:3:89:950:273#0/1  
aba\_aabaab\_abaaa`aaba\_`a^aaY\_a[\_a`aa[]N  
@HWI-EAS443:3:8:1079:996#0/1  
CCGATGCTGTGAATCAGCAATCTGTTCAAGTGGCACAC  
+HWI-EAS443:3:8:1079:996#0/1  
abb¥^X\_¥\_`ab¥UaaaaXa\_`aaab`aaXWaY\_W^\_  
@HWI-EAS443:3:8:1089:772#0/1  
GATCACTTGAATCGCTGCATCTGCACTCCCATTGCTTCT  
+HWI-EAS443:3:8:1089:772#0/1  
aaa`a`bab\_aa`aa`^`\_\_\_a\_\_W\_¥S¥a^¥^W\_^V\_  
@HWI-EAS443:3:8:113:1897#0/1  
CCTTCTTGAAAATTTGCAGGCCTACCAGAAGCGAATGGGA  
+HWI-EAS443:3:8:113:1897#0/1  
ab`Z^[Z`^\_T[aaaab]aaba\_aaaaa`aaa\_\_`aa`\_a  
@HWI-EAS443:3:8:1227:1461#0/1  
GACCAATCTTGTACCTCTGACTAAGGGAATTTTAGGATT  
+HWI-EAS443:3:8:1227:1461#0/1  
Y`\_]ab`^a`\_`^aa^¥`Zaba¥a]\_abab^a\_a[`^aZS]  
@HWI-EAS443:3:8:1316:1853#0/1  
GCCTCATATACAACAGGATGGGAACAGTGACCACAGAAGC  
+HWI-EAS443:3:8:1316:1853#0/1  
aa¥X`WZaXa[X\_WX[`W[YZ\_ZXPZ\_U`XRNRSZRU¥BB  
@HWI-EAS443:3:8:1352:22#0/1  
GGATCTTGCACCTGATATTGTGGATTACTGATCGTCTTTT  
+HWI-EAS443:3:8:1352:22#0/1  
abaa¥`^`¥aYaaaU`]aaaZaa]\_\_VS¥`Z¥V]YT`\_¥a  
@HWI-EAS443:3:8:1591:476#0/1  
GACTAGGCAGATGGTACATGCAATGAGA ACTATTGGGACT  
+HWI-EAS443:3:8:1591:476#0/1  
ab`bbab`abaabb`a^a```]`a`Ua\_`Ya`a\_\_[\_]X`  
@HWI-EAS443:3:8:222:1654#0/1  
GGGCTCATATACAACAGGATGGGAACAGTGACCACAGAA  
+HWI-EAS443:3:8:222:1654#0/1  
aba`]aab\_abb^`aab[b\_\_aaaa`b[TYb`^[UW[aa  
@HWI-EAS443:3:8:354:1486#0/1  
AAAATTCCCTTAGTCAGAGGTGACAAGATTGGTCTTGTCT  
+HWI-EAS443:3:8:354:1486#0/1  
\_Ua`a\_aaaaa`\_`aa`^T¥`\_`a\_\_^\_\_a\_ZY^Y`X^]  
@HWI-EAS443:3:8:401:195#0/1  
TGTGAATCAGCAATCTGTTCAAGTGGCACACACTAGAC

+HWI-EAS443:3:8:401:195#0/1  
U\_XbZTVTZaSY[Y\_bb^WMUbb\_Z\_baYZ`bWPX\_\_`Za  
@HWI-EAS443:3:8:492:396#0/1  
GCCCTAAATGGGAATGGGGACCCGAACAACATGGATAGAG  
+HWI-EAS443:3:8:492:396#0/1  
aa\_Z[¥PU[`Z`X¥X\_a`\_]\_^]]\_WTT]UXXY\_]XX¥BB  
@HWI-EAS443:3:8:549:70#0/1  
GAGGCCATGGAGGTTGCTAATCAGACTAGGCAGATGGTAC  
+HWI-EAS443:3:8:549:70#0/1  
a`aa\_a[aa`Ua`¥^a¥\_^^¥^¥\_\_TW¥¥[VX\_YW¥^UUS  
@HWI-EAS443:3:8:816:1670#0/1  
GATCGTCTTTTTTCAAATGTATTTATCGTCGCTTTAAAT  
+HWI-EAS443:3:8:816:1670#0/1  
a\_\_\_\_\_[\_XY]^a`^X¥[V^\_Z\_a^)`WWNS\_\_\_\_]^[]U¥S  
@HWI-EAS443:3:8:960:1518#0/1  
ACAGGATGGGAACAGTGACCACAGAAGCTGCTTTTGGTCT  
+HWI-EAS443:3:8:960:1518#0/1  
a``\_a`¥aa\_^`Q\_`W\_\_¥T¥Y¥^`¥Y¥^\_T¥^WYSYWBB  
@HWI-EAS443:3:8:987:1411#0/1  
ATTACTGATCGTCTTTTTTCAAATGTATTTATCGTCGCT  
+HWI-EAS443:3:8:987:1411#0/1  
`S^ba`[^a^aa¥T]abbaYZ^`\_\_aSaa``a\_\_][X`¥`  
@HWI-EAS443:3:90:1010:493#0/1  
ATACATTTGAAAAAAGACGATCAGTAATCCACAATATCA  
+HWI-EAS443:3:90:1010:493#0/1  
`]S\_a`^`^^]V`XWb]Q[\_\_\_`XGF¥[SVW`UZW]Pa[W  
@HWI-EAS443:3:90:1104:1945#0/1  
GACCGATGCTGTGAATCAGCAATCTGTTCAACAAGTGGCAC  
+HWI-EAS443:3:90:1104:1945#0/1  
a`XZ`aXaZa\_]aa\_\_aa`¥aaa^S`^^`\_]\_¥`G`YO]]  
@HWI-EAS443:3:90:1171:349#0/1  
GATCGTCTTTTTTCAAATGTATTTATCGTCGCTTTAAAT  
+HWI-EAS443:3:90:1171:349#0/1  
aa`aa\_aaaaaaa¥a`aa]`aa`\_^]a\_^\_]`\_^]`^  
@HWI-EAS443:3:90:1221:961#0/1  
GTCTAGTGTGTGCCACTTGTGAACAGATTGCTGATTCACA  
+HWI-EAS443:3:90:1221:961#0/1  
``bYHZaZO^N¥VXZ\_aW\_Yba]^`aT^`H`a]ZR^`T[  
@HWI-EAS443:3:90:137:628#0/1  
GTCCTAAGCTATTCAACTGGTGCACCTGCCAGTTGCATG  
+HWI-EAS443:3:90:137:628#0/1  
aabaaVFRbb¥\_a]aaXY)`a[¥aa\_T[aVY`^R\_\_R¥XP  
@HWI-EAS443:3:90:1473:1372#0/1  
TGATCGTCTTTTTTCAAATGTATTTATCGTCGCTTTAAA  
+HWI-EAS443:3:90:1473:1372#0/1  
\_babaaVbbbbbaa`¥¥VWYbU]`aaa^`\_¥]KY`]`V\_\_  
@HWI-EAS443:3:90:1622:589#0/1  
GGGCCTCATATACAACAGGATGGGAACAGTGACCACAGAA  
+HWI-EAS443:3:90:1622:589#0/1  
abaa`aaabbbbaaaaaabaaba`])`a`aa\_baa[a¥aaa\_

@HWI-EAS443:3:90:1628:1346#0/1  
GAATCAGCAATCTGTTACACAAGTGGCACACACTAGACCAA  
+HWI-EAS443:3:90:1628:1346#0/1  
aaaa`aaaaaa\_ab`a`a`aaa^^ZZa]a``]`\_`\_]\_\_  
@HWI-EAS443:3:90:1665:1433#0/1  
CTAGACCAAAAGCAGCTTCTGTGGTCACTGTTCCCATCCT  
+HWI-EAS443:3:90:1665:1433#0/1  
aaabaaabbababbbabba`U]baT[a\_aaaaW^\_]\_a  
@HWI-EAS443:3:90:1671:1774#0/1  
GAGAAATAACGTTCCATGGGGCCAAGGAGGTGTCACTAAG  
+HWI-EAS443:3:90:1671:1774#0/1  
`b\_aaaaaa`a\_aa\_abb^``\_a```\_\_aSK[QMUS¥aa]  
@HWI-EAS443:3:90:1752:761#0/1  
CAGGCCTACCAGAAGCGAATGGGAGTGCAGATGCAGCGAT  
+HWI-EAS443:3:90:1752:761#0/1  
^`N[N^ab\_^aZ`abZ`]ZabUYQHTQaQ[IYMYBBBBB  
@HWI-EAS443:3:90:324:492#0/1  
GGCCTACCAGAAGCGAATGGGAGTGCAGATGCAGCGATTC  
+HWI-EAS443:3:90:324:492#0/1  
aab\_W\_aaZ^V\_aa`X^^\_RY]^¥aZZW`QZT\_OYUVP^P  
@HWI-EAS443:3:90:470:400#0/1  
AATCTGTTACACAAGTGGCACACACTAGACCAAAAGCAGCT  
+HWI-EAS443:3:90:470:400#0/1  
aaaaaS\_a`b`a`a`aaa^aYa\_```\_`\_a```]Wa`\_`^a  
@HWI-EAS443:3:90:498:1418#0/1  
CGCGCAGAGACTGGAAAGTGTCTTTGCAGGAAAGAACACA  
+HWI-EAS443:3:90:498:1418#0/1  
aba\_a\_\_\_\_\_``\_\_aaaS\_^\_\_\_¥Z\_X^\_Q¥`T[¥Q\_¥^  
@HWI-EAS443:3:90:551:947#0/1  
CGCGCAGAGACTGGAAAGTGTCTTTGCAGGAAAGAACACA  
+HWI-EAS443:3:90:551:947#0/1  
\_abaa`\_]aaaVW`]¥X[\_UXR[[SX[]YUXW¥S^¥U^\_  
@HWI-EAS443:3:90:572:1269#0/1  
GGGCCTCATATACAACAGGATGGGAACAGTGACCACAGAA  
+HWI-EAS443:3:90:572:1269#0/1  
W\_`¥[^a\_a\_\_¥[^]\_\_aW\_aaa\_]a\_^]\_\_\_^abbb\_Q  
@HWI-EAS443:3:90:623:257#0/1  
GTGGCACACACTAGACCAAAAGCAGCTTCTGTGGTCACTG  
+HWI-EAS443:3:90:623:257#0/1  
a`a\_aaQ`\_\_¥V\_^U¥\_\_\_[R^¥^\_^¥^¥¥]W^¥V¥¥UVU  
@HWI-EAS443:3:90:782:1189#0/1  
CAGGCCTACCAGAAGCGAATGGGAGTGCAGATGCAGCGAT  
+HWI-EAS443:3:90:782:1189#0/1  
aab`aab^]W`ZO^a`aPOZa^TR]NVRYZRXQKUPT¥BB  
@HWI-EAS443:3:90:790:1213#0/1  
CTGATCGTCTTTTTTTCAAATGTATTTATCGTCGCTTTAA  
+HWI-EAS443:3:90:790:1213#0/1  
Y\_H\_`Za```V\_Q\_b\_XX]SHXX]\_aX\_YO\_a]OYa^b`V  
@HWI-EAS443:3:90:837:1971#0/1  
CAGCGATTCAAGTGATCCTCTCGTCATTGCAGCAAATATC

+HWI-EAS443:3:90:837:1971#0/1  
\_¥`]Vb[[\_H\_]Ibaa`b`b]bbUbSa]a`Y`\_]\_^\_aY\_  
@HWI-EAS443:3:91:1058:1090#0/1  
CGAGAGGATCACTTGAATCGCTGCATCTGCACTCCCATTCC  
+HWI-EAS443:3:91:1058:1090#0/1  
aa`aaZ\_\_¥T\_^\_Y[X\_Z`¥`]V\_`Z\_\_a`QX\_RI`\_¥^U  
@HWI-EAS443:3:91:1080:1078#0/1  
ACCTGATATTGTGGATTACTGATCGTCTTTTTTTCAAATG  
+HWI-EAS443:3:91:1080:1078#0/1  
ab]`^aXaba]^P\_abaa\_a`¥RWVaabaa[^a``b  
@HWI-EAS443:3:91:1091:1563#0/1  
CAGTGACCACAGAAGCTGCTTTTGGTCTAGTGTGTGCCAC  
+HWI-EAS443:3:91:1091:1563#0/1  
aab`bbbbbabbbabbaabbbbaXa\_^[]`Xb]aa`a\_  
@HWI-EAS443:3:91:117:653#0/1  
AGAAGCTGCTTTTGGTCTAGTGTGTGCCACTTGTGAACAG  
+HWI-EAS443:3:91:117:653#0/1  
aa]aaa`aaX`\_`aZS`aaaZ\_^`R`R[\_]^`0\_\_`T[]  
@HWI-EAS443:3:91:1188:149#0/1  
ATGATATTTGCTGCAATGACGAGAGGATCACTTGAATCGC  
+HWI-EAS443:3:91:1188:149#0/1  
Ta`a¥aa`a`bbb¥^```\_bbb`^W\_abW`Z\_¥¥¥NWW  
@HWI-EAS443:3:91:1227:1132#0/1  
AGTGACCACAGAAGCTGCTTTTGGTCTAGTGTGTGCCACT  
+HWI-EAS443:3:91:1227:1132#0/1  
ab\_abbbaabbbbaa\_ba`aabaaa]^a`a`a\_a\_\_^`¥`  
@HWI-EAS443:3:91:1259:2004#0/1  
CAAATATCATTGGGATCTTGCACCTGATATTGTGGATTAC  
+HWI-EAS443:3:91:1259:2004#0/1  
`abaabb\_bba`¥bbbabba^bb`aaabaaba`baaaba]  
@HWI-EAS443:3:91:1308:1164#0/1  
ACTGGAGCTAGGATGAGTCCCAATAGTTCTCATTGCATGT  
+HWI-EAS443:3:91:1308:1164#0/1  
abb`b\_a^]bba¥`a`aU\_]a\_^a]\_`[a]`\_a\_\_\_\_a\_  
@HWI-EAS443:3:91:1363:205#0/1  
AGATCCCAATGATATTTGCTGCAATGACGAGAGGATCACT  
+HWI-EAS443:3:91:1363:205#0/1  
abbaYab^\_abb`aU\_b^ba`aaWa]^aa`b^\_\_`\_Ua  
@HWI-EAS443:3:91:1396:1269#0/1  
GCAAGATCCCAATGATATTTGCTGCAATGACGAGAGGATC  
+HWI-EAS443:3:91:1396:1269#0/1  
\_a[]`]a`Y`T`aa`a`Zaa`\_aa`^`\_`X\_\_``aa\_[]  
@HWI-EAS443:3:91:1430:1128#0/1  
GGGATCTTGCACCTGATATTGTGGATTACTGATCGTCTTT  
+HWI-EAS443:3:91:1430:1128#0/1  
\_b`\_aaa\_aaa^`ab\_a\_aaa]a`\_a\_Y\_aa\_a[`]Z`\_a  
@HWI-EAS443:3:91:1579:1981#0/1  
ACAGAAGCTGCTTTTGGTCTAGTGTGTGCCACTTGTGAAC  
+HWI-EAS443:3:91:1579:1981#0/1  
`ab`^¥]aaYa`baaaSTaa\_Xb`\_^Qa`a]`^aaa¥

@HWI-EAS443:3:91:1584:1042#0/1  
ATCGTCTTTTTTCAAATGTATTTATCGTCGCTTTAAATA  
+HWI-EAS443:3:91:1584:1042#0/1  
aba`abbabbbb\_abbbbb`b`baa]^Z`^Qabb\_a`a\_  
@HWI-EAS443:3:91:1625:2018#0/1  
CAAGATCTGTGTTCTTTCCTGCAAAGACACTTCCAGTCT  
+HWI-EAS443:3:91:1625:2018#0/1  
`b\_a\_bba^UYababbaabbbbbbb^bab^b]Ub^N#b  
@HWI-EAS443:3:91:1733:531#0/1  
ATGGGCCTCATATACAACAGGATGGGAACAGTGACCACAG  
+HWI-EAS443:3:91:1733:531#0/1  
^a#]\_a\_a]a`\_bab^`#a`^`\_#\_a^a#]aVN][aa  
@HWI-EAS443:3:91:195:1122#0/1  
CGAGAGGATCACTTGAATCGCTGCATCTGCACTCCCATTC  
+HWI-EAS443:3:91:195:1122#0/1  
aa`a`aba^bbaaab\_bababa`ab^^#b`aaa^aaa]`a  
@HWI-EAS443:3:91:286:1985#0/1  
GGGGCCAAGGAGGTGTCACCTAAGCTATTCAACTGGTGAC  
+HWI-EAS443:3:91:286:1985#0/1  
XG\_a``#`VZaSVM^PLYW#U^`M\_#WZSRGPSHNQWUB  
@HWI-EAS443:3:91:351:325#0/1  
TGTCACCTAAGCTATTCAACTGGTGCACTTGCCAGTTGCAT  
+HWI-EAS443:3:91:351:325#0/1  
aaUY\_```ab^`aa``aZ^`\_R\_a[^a^a`[[aVZ`^]`^  
@HWI-EAS443:3:91:401:342#0/1  
CGCGCAGAGACTGGAAAGTGTCTTTGCAGGAAAGAACACA  
+HWI-EAS443:3:91:401:342#0/1  
ab\_Z[SWZ[`Y`Z\_a]^`^\_\_T\_ab^GLGUX\_HQX]]WSZ]  
@HWI-EAS443:3:91:436:565#0/1  
GGCCTCATATACAACAGGATGGGAACAGTGACCACAGAAG  
+HWI-EAS443:3:91:436:565#0/1  
`^a`a\_a`#````\_a`\_a`\_`\_`^`Y\_[Q\_^XS#W#Y#Y#\_  
@HWI-EAS443:3:91:438:692#0/1  
CAGTAATCCACAATATCAGGTGCAAGATCCCAATGATATT  
+HWI-EAS443:3:91:438:692#0/1  
T^WWS#[aaWZ\_\_^`U\_a\_HR#`bab#Y#Y#[b\_W\_aa[ZP  
@HWI-EAS443:3:91:446:710#0/1  
ATCGTCTTTTTTCAAATGTATTTATCGTCGCTTTAAATA  
+HWI-EAS443:3:91:446:710#0/1  
Y[Z[UXUT#]`#Ua``[aaZbZaMaaZ[\_#[\_aa\_`b#P  
@HWI-EAS443:3:91:483:1240#0/1  
CGAGAGGATCACTTGAATCGCTGCATCTGCACTCCCATTC  
+HWI-EAS443:3:91:483:1240#0/1  
abbbabbbbbXabbabbbabb`abaa`ba`]\_Za\_`a\_`  
@HWI-EAS443:3:91:484:561#0/1  
CGCAGAGACTGGAAAGTGTCTTTGCAGGAAAGAACACAGA  
+HWI-EAS443:3:91:484:561#0/1  
`bbbbbbbbbba`bbb\_baabaaa`aaaaaaaa`aaaaa  
@HWI-EAS443:3:91:49:1218#0/1  
CAGCAATCTGTTCAACAAGTGGCACACACTAGACCAAAAGC

+HWI-EAS443:3:91:49:1218#0/1  
a`bbbabababbbbab]b\_babbbbabba]bba\_ba]b\_b  
@HWI-EAS443:3:91:540:617#0/1  
CTTTTGGTCTAGTGTGTGCCACTTGTGAACAGATTGCTGA  
+HWI-EAS443:3:91:540:617#0/1  
[`aZa\_WWbbbbbb\_]bbaababab`babbbbaaa[aba  
@HWI-EAS443:3:91:554:81#0/1  
AGTTCTCATTGCATGTACCATCTGCCTAGTCTGATTAGCA  
+HWI-EAS443:3:91:554:81#0/1  
X[W\_aaP\_baaaabaYaX[b`^Ya0¥]b\_\_R`b`ba`a\_a  
@HWI-EAS443:3:91:57:1544#0/1  
CAGGTGCAAGATCCCAATGATATTTGCTGCAATGACGAGA  
+HWI-EAS443:3:91:57:1544#0/1  
a\_]`^X`bba\_]bb`]bbba`ab`[]]a\_]a`b\_aa^b  
@HWI-EAS443:3:91:646:911#0/1  
AAATAACGTTCCATGGGGCCAAGGAGGTGCTACTAAGCTA  
+HWI-EAS443:3:91:646:911#0/1  
a¥]\_bbabaab\_Z`a`]aa`a`aa`a\_Na\_aaa`a``\_a  
@HWI-EAS443:3:91:674:778#0/1  
CACTAGACCAAAGCAGCTTCTGTGGTCACTGTTCCCATC  
+HWI-EAS443:3:91:674:778#0/1  
abbbbbbbbbbbabbababbbbbbbabbaabab`ababaab\_  
@HWI-EAS443:3:91:679:1086#0/1  
TTACTGATCGTCTTTTTTTCAAATGTATTTATCGTCGCTT  
+HWI-EAS443:3:91:679:1086#0/1  
abaabb]aaa\_aa\_aaab`a¥aa`a]baa\_\_\_\_]OV]]``  
@HWI-EAS443:3:91:725:798#0/1  
AAATATCATTGGGATCTTGCACCTGATATTGTGGATTACT  
+HWI-EAS443:3:91:725:798#0/1  
aaY`bba]`a]`^\_X\_aa`a`\_a\_\_a\_a`\_`b\_^\_`\_`  
@HWI-EAS443:3:91:768:1170#0/1  
GGAGGTTGCTAATCAGACTAGGCAGATGGTACATGCAATG  
+HWI-EAS443:3:91:768:1170#0/1  
aa`a[`a\_aa^\_\_`\_`\_]`\_a`\_\_^`R\_]^[¥W`^¥^  
@HWI-EAS443:3:91:782:274#0/1  
TCTGTGGTCACTGTTCCCATCCTGTTGTATATGAGGCCCA  
+HWI-EAS443:3:91:782:274#0/1  
`\_`\_\_aa^\_a`\_`\_`\_Z^`¥X^`¥\_aW`\_`\_¥\_WSUU¥  
@HWI-EAS443:3:91:789:544#0/1  
ATTTGAAAAAAGACGATCAGTAATCCACAATATCAGGTG  
+HWI-EAS443:3:91:789:544#0/1  
\_`babaaX¥¥baY\_Xb\_aa`b¥ab`¥]^\_abaa\_aaa\_a  
@HWI-EAS443:3:91:898:732#0/1  
CAGCAATCTGTTCCACAAGTGGCACACACTAGACCAAAGC  
+HWI-EAS443:3:91:898:732#0/1  
abbb^b\_\_aba^`aabbbababaabaa]abaa`a`\_baaL  
@HWI-EAS443:3:91:936:171#0/1  
GACCACAGAAGCTGCTTTTGGTCTAGTGTGTGCCACTTGT  
+HWI-EAS443:3:91:936:171#0/1  
aa\_]\_Zaaa`\_¥]\_W^\_¥]^\_XV[]^X`X]V^]Y]VXX]Y

@HWI-EAS443:3:92:1020:1947#0/1  
GTGACCACAGAAGCTGCTTTTGGTCTAGTGTGTGCCACTT  
+HWI-EAS443:3:92:1020:1947#0/1  
a¥\_\_R`¥V]^aa\_] [a\_Y`\_]\_X\_\_[\_V]UaU]Z[`VTU  
@HWI-EAS443:3:92:1048:28#0/1  
TGGGCCTCATATACAACAGGATGGGAACAGTGACCACAGA  
+HWI-EAS443:3:92:1048:28#0/1  
aba^OUa^aa`a`¥``\_¥aaW^a`a\_]U^\_V`\_VT[T[`¥  
@HWI-EAS443:3:92:1072:368#0/1  
CAAGATTGGTCTTGTCTTTAGCCATTCCATGAGAGCCTCA  
+HWI-EAS443:3:92:1072:368#0/1  
ababbbbbb\_abb]abbabaaabb`\_aaaaabab`\_`\_`a  
@HWI-EAS443:3:92:113:823#0/1  
GCTAATCAGACTAGGCAGATGGTACATGCAATGAGAACTA  
+HWI-EAS443:3:92:113:823#0/1  
aaa^aa`Yaa`a`\_\_\_\_\_^[[\_Z\_\_`Z[^\_\_\_\_\_]`¥][[]  
@HWI-EAS443:3:92:1155:586#0/1  
CGTCTTTTTTTCAAATGTATTTATCGTCGCTTTAAATACG  
+HWI-EAS443:3:92:1155:586#0/1  
`a¥a`bbab\_baa\_aaa\_aaaabaaa^`aa\_aaa^\_Za\_b  
@HWI-EAS443:3:92:1163:925#0/1  
GACCGATGCTGTGAATCAGCAATCTGTTCAAGTGGCAC  
+HWI-EAS443:3:92:1163:925#0/1  
`a]UWaHJWLUX`W^PRYNY\_P^G[NX¥XQH[[^0^ZGNY  
@HWI-EAS443:3:92:1232:399#0/1  
GCACCTGATATTGTGGATTACTGATCGTCTTTTTTTCAAA  
+HWI-EAS443:3:92:1232:399#0/1  
aaaa[ab\_a\_\_aaU`\_\_¥\_P`\_]`\_aU]\_aaaa`X`^]  
@HWI-EAS443:3:92:1331:260#0/1  
GTCTTTTTTTCAAATGTATTTATCGTCGCTTTAAATACGG  
+HWI-EAS443:3:92:1331:260#0/1  
]^`^Taaaa[JYG^a`SG¥^`\_`Q]\_Y`U^\_]S]U`XNP]  
@HWI-EAS443:3:92:1356:345#0/1  
GATCAGTAATCCACAATATCAGGTGCAAGATCCCAATGAT  
+HWI-EAS443:3:92:1356:345#0/1  
a`]Pa\_QZaUQ¥\_SXZa\_a\_] [RS]T``aa[QJQ¥^`¥a¥  
@HWI-EAS443:3:92:1528:770#0/1  
GCACCTGATATTGTGGATTACTGATCGTCTTTTTTTCAAA  
+HWI-EAS443:3:92:1528:770#0/1  
aaaPYaa\_XY]`¥XZY^\_Y]\_`]a¥XN`\_a\_``^a^Z^Z  
@HWI-EAS443:3:92:1537:1223#0/1  
GGATGGGAACAGTGACCACAGAAGCTGCTTTTGGTCTAGT  
+HWI-EAS443:3:92:1537:1223#0/1  
W\_a^bbb]\_UaaabUNaaaababa]aa\_b\_bZaa`UaS^a  
@HWI-EAS443:3:92:1729:1436#0/1  
GGGCCAAGGAGGTGCTACTAAGCTATTCAACTGGTGCCT  
+HWI-EAS443:3:92:1729:1436#0/1  
`\_`baaaaa\_aa`]\_`a^\_aa\_Za`\_`\_a`[U[^VMXWXM[  
@HWI-EAS443:3:92:1784:1320#0/1  
TGACCACAGAAGCTGCTTTTGGTCTAGTGTGTGCCACTTG





@HWI-EAS443:3:92:596:890#0/1  
TGGGCCTCATATAACAGGATGGGAACAGTGACCACAGA  
+HWI-EAS443:3:92:596:890#0/1  
]^GVZ\_aSVU\_¥U\_TRXXPYa\_]ZZGX¥DLX`Z\_]W¥]  
@HWI-EAS443:3:92:632:1304#0/1  
GAAAGATGACCTTCTTGAAAATTTGCAGGCCTACCAGAAG  
+HWI-EAS443:3:92:632:1304#0/1  
``^`aa\_aaaba\_a`^a]V^`a``b¥\_\_a]Va]\_\_\_\_^\_[  
@HWI-EAS443:3:92:644:407#0/1  
GAACACAAATCCTAAAATTCCTTAGTCAGAGGTGACAAG  
+HWI-EAS443:3:92:644:407#0/1  
aa\_Y\_aa`U]aaaa`a`a\_]\_]aa`a\_\_`a\_]`Ua\_X\_\_a  
@HWI-EAS443:3:92:678:971#0/1  
CGCGCAGAGACTGGAAAGTGTCTTTGCAGGAAAGAACACA  
+HWI-EAS443:3:92:678:971#0/1  
abbaa`a]a`\_a`aY]PGa¥`[\_^U[a`\_`\_¥`¥[^W`  
@HWI-EAS443:3:92:696:1985#0/1  
GGTCACTGTTCCCATCCTGTTGTATATGAGGCCCATGCAA  
+HWI-EAS443:3:92:696:1985#0/1  
``aabba`aababbabaa`baaabbaZbX^`aabaaZba  
@HWI-EAS443:3:92:943:680#0/1  
CTGCTTTTGGTCTAGTGTGTGCCACTTGTGAACAGATTGC  
+HWI-EAS443:3:92:943:680#0/1  
abbabbbaba\_abba`a`a`aabaa`aaaaaaaa`a`a`  
@HWI-EAS443:3:92:974:1858#0/1  
ATCAGCAATCTGTTCAAGTGGCACACACTAGACCAAAA  
+HWI-EAS443:3:92:974:1858#0/1  
aaa¥`^a\_aU¥a^¥Za¥`a\_R\_\_^a``\_]^[a\_aaa\_¥`\_  
@HWI-EAS443:3:93:105:270#0/1  
CAATCTTGTCACCTCTGACTAAGGGAATTTTAGGATTTGT  
+HWI-EAS443:3:93:105:270#0/1  
abaaaaaa\_aa`aaaaaa\_aa`aa`\_\_a\_aaaa`\_`\_\_`X  
@HWI-EAS443:3:93:1060:1816#0/1  
GGGGCCAAGGAGGTGTCACTAAGCTATTCAACTGGTGCAC  
+HWI-EAS443:3:93:1060:1816#0/1  
a`aa\_Y``aa``^V^]aa]aa``a\_aaVP¥^`X^^GYS]Y  
@HWI-EAS443:3:93:1081:1465#0/1  
GAGAAATAACGTTCCATGGGGCCAAGGAGGTGTCACTAAG  
+HWI-EAS443:3:93:1081:1465#0/1  
a]a`¥\_YZZ`a]0`aa`[^\_¥\_aY]Y^]XL]GW`RMY\_B  
@HWI-EAS443:3:93:111:1569#0/1  
TTGGGATCTTGACCTGATATTGTGGATTACTGATCGTCT  
+HWI-EAS443:3:93:111:1569#0/1  
`baab`[^babbabbb`¥`bbb]bbaa]ba\_baa\_a\_[\_  
@HWI-EAS443:3:93:1201:591#0/1  
CAGCTTCTGTGGTCACTGTTCCCATCCTGTTGTATATGAG  
+HWI-EAS443:3:93:1201:591#0/1  
aabX]^]¥]^]^HWZ\_\_S¥YP[T``RQ`aY^a[¥\_ZSZU\_  
@HWI-EAS443:3:93:1242:1098#0/1  
TGGGCCTCATATAACAGGATGGGAACAGTGACCACAGA

+HWI-EAS443:3:93:1242:1098#0/1  
aaaa\_abaaaba`\_aaaaaa\_aa`a¥`^¥\_¥a`^G¥W\_\_¥  
@HWI-EAS443:3:93:133:2041#0/1  
GCCGAGATCGCGCAGAGACTGGAAAGTGTCTTTGCAGGAA  
+HWI-EAS443:3:93:133:2041#0/1  
aaabaaa\_a`a\_aaXNW`\_\_\_\_[^0¥YR^TTW¥UT[YYSWY  
@HWI-EAS443:3:93:1343:1239#0/1  
ATCAGGTGCAAGATCCCAATGATATTTGCTGCAATGACGA  
+HWI-EAS443:3:93:1343:1239#0/1  
aaaa`a^`baaa\_a^a`aaaaaa\_\_\_\_\_^`¥`^Z^`  
@HWI-EAS443:3:93:1461:842#0/1  
ATCGCGCAGAGACTGGAAAGTGTCTTTGCAGGAAAGAACA  
+HWI-EAS443:3:93:1461:842#0/1  
`Ma`X`Ub[Y`Zba\_Z\_\_TNaVH^Ia\_VI]ZG]`SZ`Ya  
@HWI-EAS443:3:93:1463:1345#0/1  
GGGCCTCATATACAACAGGATGGGAACAGTGACCACAGAA  
+HWI-EAS443:3:93:1463:1345#0/1  
a^`NY]aa\_aa\_aa`a`aQG[a\_a`a`\_¥]a\_]¥U^U^B  
@HWI-EAS443:3:93:1520:227#0/1  
GGGCCTCATATACAACAGGATGGGAACAGTGACCACAGAA  
+HWI-EAS443:3:93:1520:227#0/1  
\_`aYUaaba[aaa`ba`ba]abba[\_[aa¥aaSZ\_T\_\_¥a  
@HWI-EAS443:3:93:1689:565#0/1  
GCAGAGACTGGAAAGTGTCTTTGCAGGAAAGAACACAGAT  
+HWI-EAS443:3:93:1689:565#0/1  
a\_aa[`¥^a`a\_a`aP]¥X\_\_`\_]\_^U^T^Y\_\_^NZXZ^UZ  
@HWI-EAS443:3:93:220:2034#0/1  
AGGTTGCTAATCAGACTAGGCAGATGGTACATGCAATGAG  
+HWI-EAS443:3:93:220:2034#0/1  
¥¥bZ\_]¥¥Y^^`\_ba¥0F]`a]]UXaYa[\_\_\_X]a\_`  
@HWI-EAS443:3:93:303:1662#0/1  
AGCGAATGGGAGTGCAGATGCAGCGATTCAAGTGATCCTC  
+HWI-EAS443:3:93:303:1662#0/1  
a\_a[bba¥XXUM¥`[O[`¥^^^X]`aS^a]TKKY\_a^XUV  
@HWI-EAS443:3:93:33:1248#0/1  
ACCAAAAGCAGCTTCTGTGGTCACTGTTCCCATCCTGTTG  
+HWI-EAS443:3:93:33:1248#0/1  
abba`aY`^^`aaaaaa0SZJ]¥a¥^[`\_[[a¥\_^WQYX\_  
@HWI-EAS443:3:93:451:448#0/1  
AAAAGACGATCAGTAATCCACAATATCAGGTGCAAGATCC  
+HWI-EAS443:3:93:451:448#0/1  
aaa]a`aaa`]¥\_X\_a\_]`\_`\_]`WLV¥]W^[^\_^^YN]  
@HWI-EAS443:3:93:462:91#0/1  
TGTTCCGGTCCCCATTCCCATTTAGGGCATTGTTGGACAAA  
+HWI-EAS443:3:93:462:91#0/1  
``\_\_\_\_\_N]`P^¥\_Z\_S[\_U[H^U`YNV¥^WT^¥V¥UUBB  
@HWI-EAS443:3:93:671:1304#0/1  
ATATTTGCTGCAATGACGAGAGGATCACTTGAATCGCTGC  
+HWI-EAS443:3:93:671:1304#0/1  
V`bbaaabaabaaaa\_ab\_`¥a\_a`a`^a`aaaa`^]`a

@HWI-EAS443:3:93:677:311#0/1  
GCATCTGCACTCCCATTCGCTTCTGGTAGGCCTGCAAATT  
+HWI-EAS443:3:93:677:311#0/1  
aab]V[b]aXZV`V^T¥aa¥^^a\_]UPT¥[[[¥¥RT¥[[[  
@HWI-EAS443:3:93:777:425#0/1  
GATCCCAATGATATTTGCTGCAATGACGAGAGGATCACTT  
+HWI-EAS443:3:93:777:425#0/1  
aa`\_S\_a^`a`a`\_]YUZ`a\_\_`VY¥SX[]a\_X\_S^Y\_\_  
@HWI-EAS443:3:93:868:406#0/1  
GGATTACTGATCGTCTTTTTTTCAAATGTATTTATCGTCG  
+HWI-EAS443:3:93:868:406#0/1  
aaa`aa``aaaa\_aaaaaabaaa\_\_\_a^`a`a`\_`¥` [¥`  
@HWI-EAS443:3:93:877:1448#0/1  
CAAGATTGGTCTTGTCTTTAGCCATTCCATGAGAGCCTCA  
+HWI-EAS443:3:93:877:1448#0/1  
^ZT\_aa]VWQ`bababbaTaaa^¥]a¥^b[aa``^PZZL\_  
@HWI-EAS443:3:93:883:987#0/1  
CTCATATACAACAGGATGGGAACAGTGACCACAGAAGCTG  
+HWI-EAS443:3:93:883:987#0/1  
a`\_]`baaababaaaaaaaaaaaaa`^aa`^^X¥]^`X`\_  
@HWI-EAS443:3:93:902:249#0/1  
CTCTCATGGAATGGCTAAAGACAAGACCAATCTTGTCAACC  
+HWI-EAS443:3:93:902:249#0/1  
abb\_aabbb`bb` [ `bab` `a\_b`a`UZ\_aa\_aa^^]^TY  
@HWI-EAS443:3:93:904:164#0/1  
CAGGCCTACCAGAAGCGAATGGGAGTGCAGATGCAGCGAT  
+HWI-EAS443:3:93:904:164#0/1  
`^b^U¥a\_a¥^¥VXba\_MY\_aaa]¥P¥YULQV]U^]N]BB  
@HWI-EAS443:3:94:1001:428#0/1  
GTGACCACAGAAGCTGCTTTTGGTCTAGTGTGTGCCACTT  
+HWI-EAS443:3:94:1001:428#0/1  
OT\_`aPV[`XR^`^aVZTMOOR¥L]^`¥OX`¥G\_QX¥GZ]  
@HWI-EAS443:3:94:1034:258#0/1  
CAGCAATCTGTTCAAGTGGCACACACTAGACCAAAAGC  
+HWI-EAS443:3:94:1034:258#0/1  
abaaa`babb`a`aa`aa]a`ab^`^`^a`aaa\_\_aa\_a]  
@HWI-EAS443:3:94:1137:1816#0/1  
AAAAAAGACGATCAGTAATCCACAATATCAGGTGCAAGA  
+HWI-EAS443:3:94:1137:1816#0/1  
abbababaaaa^IX]R0[^U^a`S\_``^LSNN[T[QX]¥\_  
@HWI-EAS443:3:94:1180:273#0/1  
AAAGACAAGACCAATCTTGTACCTCTGACTAAGGGAATT  
+HWI-EAS443:3:94:1180:273#0/1  
a\_aa`aaaaa`a`a¥`aa\_]a\_X`U`Y` [\_\_\_\_a\_^]^\_\_  
@HWI-EAS443:3:94:1190:371#0/1  
CACTACGGCAAAGGCTATGGAACAGATGGCTGGATCGAGT  
+HWI-EAS443:3:94:1190:371#0/1  
ababbaaa\_U`ab\_bb\_aaa[``aa\_aa`G^aaa^¥aZ^X  
@HWI-EAS443:3:94:1374:1730#0/1  
AGTGCAGATGCAGCGATTCAAGTGATCCTCTCGTCATTGC

+HWI-EAS443:3:94:1374:1730#0/1  
a\_]b`a\_a\_¥aaaW\_]a^\_\_a]Y\_\_\_RS\_X\_]\_RV\_\_\_\_\_0  
@HWI-EAS443:3:94:1380:1151#0/1  
CAGCAATCTGTTTACAAGTGGCACACACTAGACCAAAAAGC  
+HWI-EAS443:3:94:1380:1151#0/1  
Y¥bb¥ab`¥abaaVabbaabbababaa^babaUWa\_aaa]  
@HWI-EAS443:3:94:139:361#0/1  
ATCTTGTCTGCTGACTAAGGGAATTTTAGGATTTGTGT  
+HWI-EAS443:3:94:139:361#0/1  
aa^`aaaaaa\_`aaaaaa\_\_a[a\_`\_`\_`a\_a`\_`\_`a\_aY\_Y  
@HWI-EAS443:3:94:1455:1809#0/1  
CAGTGACCACAGAAGCTGCTTTTGGTCTAGTGTGTGCCAC  
+HWI-EAS443:3:94:1455:1809#0/1  
abb`bbaab\_bbab\_]b\_Ha`abb[\_V[b`]Jaa^b)`aY  
@HWI-EAS443:3:94:1469:354#0/1  
ATCCCAATGATATTTGCTGCAATGACGAGAGGATCACTTG  
+HWI-EAS443:3:94:1469:354#0/1  
^^aaVLab\_bZa^SaaTa^\_b^baROX¥\_\_W\_THTY\_XHS  
@HWI-EAS443:3:94:1485:455#0/1  
ACCACAGAAGCTGCTTTTGGTCTAGTGTGTGCCACTTGTG  
+HWI-EAS443:3:94:1485:455#0/1  
\_V`SN]`]OTYXQJQQY¥^^LFL¥VXHK`]WNY[PPROGV  
@HWI-EAS443:3:94:1541:466#0/1  
CAAGTGGCACACACTAGACCAAAAAGCAGCTTCTGTGGTCA  
+HWI-EAS443:3:94:1541:466#0/1  
`a\_b¥`bababaa`a[``UZbaba`Xaaaaa\_a`WZa\_SU  
@HWI-EAS443:3:94:1557:1515#0/1  
CAAGATTGGTCTTGTCTTTAGCCATTCCATGAGAGCCTCA  
+HWI-EAS443:3:94:1557:1515#0/1  
Q\_bba\_b`\_RZa^\_¥^a``aba¥`ba^^`bbaba¥^[aP\_  
@HWI-EAS443:3:94:1560:1402#0/1  
TGCTAATCAGACTAGGCAGATGGTACATGCAATGAGAACT  
+HWI-EAS443:3:94:1560:1402#0/1  
aabaa]ab\_aaabaWXZY`Ga]`P[X\_\_\_\_\_Q\_aa0\_^]X\_  
@HWI-EAS443:3:94:1588:768#0/1  
ATCCCAATGATATTTGCTGCAATGACGAGAGGATCACTTG  
+HWI-EAS443:3:94:1588:768#0/1  
a\_ZS\_^]YXZ[\_^b`^V`aHX[W\_^[\_P]YQ^``YIP]S^  
@HWI-EAS443:3:94:1600:1245#0/1  
TGTGAATCAGCAATCTGTTTACAAGTGGCACACACTAGAC  
+HWI-EAS443:3:94:1600:1245#0/1  
^UVb^WY`abY[`]aa]ZX\_S\_a`ZZORYG[ZWMY^a\_Y  
@HWI-EAS443:3:94:229:52#0/1  
CAGTAATCCACAATATCAGGTGCAAGATCCCAATGATATT  
+HWI-EAS443:3:94:229:52#0/1  
abbabbbbbbbabbbbaabb`baaabaaaaaaabaa`b\_  
@HWI-EAS443:3:94:24:542#0/1  
CTCGTCATTGCAGCAAATATCATTGGGATCTTGCACCTGA  
+HWI-EAS443:3:94:24:542#0/1  
abab\_aa`WZaS``¥\_\_Y\_aba\_UXR¥``X\_a\_\_UYS[`]

@HWI-EAS443:3:94:35:618#0/1  
AACAGTGACCACAGAAGCTGCTTTTGGTCTAGTGTGTGCC  
+HWI-EAS443:3:94:35:618#0/1  
\_X\_ababa`]]`[a^WH¥X[YV0[ZOY]\_]\_]V`]YL^^`  
@HWI-EAS443:3:94:421:424#0/1  
CACTCCCATTTCGCTTCTGGTAGGCCTGCAAATTTTCAAGA  
+HWI-EAS443:3:94:421:424#0/1  
aaaa`aa`a`aaaa`aa`[]a^a`[\`a\_`a\_aaaa\_]\_\_Y  
@HWI-EAS443:3:94:472:1371#0/1  
CAAACCGTATTTAAAGCGACGATAAATACATTTGAAAAA  
+HWI-EAS443:3:94:472:1371#0/1  
a\_WR`^a``aaa\_Z\_ab`ba`a\_aZZ^b`¥\_aaaaaa\_¥\_  
@HWI-EAS443:3:94:587:97#0/1  
GACCGATGCTGTGAATCAGCAATCTGTTCAAGTGGCAC  
+HWI-EAS443:3:94:587:97#0/1  
a¥VNYJRYW¥^PYUV[Y[ZQTSQS]]TNTVVWR[YZULRU  
@HWI-EAS443:3:94:728:705#0/1  
ATGCTGTGAATCAGCAATCTGTTCAAGTGGCACACACT  
+HWI-EAS443:3:94:728:705#0/1  
`abaaa\_a`baaba`\_aaaa[]P`\_a\_\_W`T^`^a^]¥^  
@HWI-EAS443:3:94:84:1402#0/1  
CAACTGGCAAGTGCACCAGTTGAATAGCTTAGTGACACCT  
+HWI-EAS443:3:94:84:1402#0/1  
aaa`aa^bbba^aaaa\_a\_a\_]\_a\_\_¥a`\_`¥]`\_dW¥¥  
@HWI-EAS443:3:94:891:1204#0/1  
GGCCAAGGAGGTGTCATAAGCTATTCAACTGGTGCACCT  
+HWI-EAS443:3:94:891:1204#0/1  
`\_\_Z`¥]][\`¥HUL¥ba¥^aa¥SZ]][\_a\_\_¥`^P[U`^VY  
@HWI-EAS443:3:94:901:158#0/1  
TGCCACTTGTGAACAGATTGCTGATTCACAGCATCGGTCT  
+HWI-EAS443:3:94:901:158#0/1  
aaa\_a\_aaa\_aa`Z`a```\_`aa\_\_`^`^^\_]\_\_¥\_\_TV]  
@HWI-EAS443:3:94:947:715#0/1  
GGTCCCCATTCCCATTTAGGGCATTGACAAAGCGTCT  
+HWI-EAS443:3:94:947:715#0/1  
`b]b`bbZZ`]]]aba`[\`aa\_]`^ba`aaaS¥a\_a]a\_]`  
@HWI-EAS443:3:94:974:86#0/1  
CCGATGCTGTGAATCAGCAATCTGTTCAAGTGGCACAC  
+HWI-EAS443:3:94:974:86#0/1  
aabaaa\_ababa\_aa`a^\_Y\_^`a\_a^X^\_\_`^`\_X\_U\_X  
@HWI-EAS443:3:95:1046:458#0/1  
GAGACCGATGCTGTGAATCAGCAATCTGTTCAAGTGGC  
+HWI-EAS443:3:95:1046:458#0/1  
aaaba]a]^a\_a\_V]`¥XaaU\_a`N`Y`WXaXQ`a[\`\_Q  
@HWI-EAS443:3:95:1427:1615#0/1  
TCTAGTGTGTGCCACTTGTGAACAGATTGCTGATTCACAG  
+HWI-EAS443:3:95:1427:1615#0/1  
aab\_a\_\_aaaaX^a^baa`\_`a`baaab]baaaa\_a]`\_  
@HWI-EAS443:3:95:1499:1640#0/1  
CGCTGCATCTGCACTCCCATTTCGCTTCTGGTAGGCCTGCA

+HWI-EAS443:3:95:1499:1640#0/1  
a]bbbKaaUbb[baa`\_aa`a`[bbb\_baab``^aY`b^b  
@HWI-EAS443:3:95:1553:861#0/1  
GAGAGCCTCAAGATCTGTGTTCTTTCCTGCAAAGACACTT  
+HWI-EAS443:3:95:1553:861#0/1  
\_abbbbbba^bbbabaabbaabbba`bbabbbb^aaa^  
@HWI-EAS443:3:95:1585:1614#0/1  
ATCTTGCACCTGATATTGTGGATTACTGATCGTCTTTTTT  
+HWI-EAS443:3:95:1585:1614#0/1  
ab`b]^\_ab^bb``baabWaaaa\_a\_aa\_\_\_aP\_aa`a`a  
@HWI-EAS443:3:95:1616:467#0/1  
CCAGAAGCGAATGGGAGTGCAGATGCAGCGATTCAAGTGA  
+HWI-EAS443:3:95:1616:467#0/1  
`abbbabbbabbbbbbUb^bbabb^aTWa`\_a\_b\_XHOX  
@HWI-EAS443:3:95:1744:1399#0/1  
CGTCTTTTTTCAAATGTATTTATCGTCGCTTTAAATACG  
+HWI-EAS443:3:95:1744:1399#0/1  
abbb`bbbbbbbbb\_bbbabbbbbbba\_bbbbbbbabb^b  
@HWI-EAS443:3:95:211:521#0/1  
ACCTGATATTGTGGATTACTGATCGTCTTTTTTTCAAATG  
+HWI-EAS443:3:95:211:521#0/1  
Wa`^^Z\_]a\_bWVZabW]^XLQ\_Z`UXa]]a`\_ZaX`V¥\_  
@HWI-EAS443:3:95:217:1460#0/1  
GAGGTTGCTAATCAGACTAGGCAGATGGTACATGCAATGA  
+HWI-EAS443:3:95:217:1460#0/1  
aabbXababb`ba\_aaba`aSaaa`aaaN`Ya¥`[\_`aaa  
@HWI-EAS443:3:95:278:1873#0/1  
GGGCCAAGGAGGTGCTACTAAGCTATTCAACTGGTGCCT  
+HWI-EAS443:3:95:278:1873#0/1  
abaaab\_WYW`RbZW¥aa`aaaa[\_\_\_abbZ]Z\_V\_aa`\_  
@HWI-EAS443:3:95:27:1158#0/1  
TGCTACTAAGCTATTCAACTGGTGCCTTGCCAGTTGCAT  
+HWI-EAS443:3:95:27:1158#0/1  
ab`bbabbab`a`bbbbbaaa]\_\_Y`aa```a`^\_``a``  
@HWI-EAS443:3:95:289:1883#0/1  
GTGGATTACTGATCGTCTTTTTTTCAAATGTATTTATCGT  
+HWI-EAS443:3:95:289:1883#0/1  
a\_a^V]]a\_aaa^\_ZXTa\_\_aaa^\_a\_¥SDT`]^`^`^¥Y  
@HWI-EAS443:3:95:319:1621#0/1  
CAGACTAGGCAGATGGTACATGCAATGAGAACTATTGGGA  
+HWI-EAS443:3:95:319:1621#0/1  
ababb`b\_aabaaaa[a\_aaaaa``aaa\_a\_a\_a\_\_\_^`  
@HWI-EAS443:3:95:406:19#0/1  
TGCTAATCAGACTAGGCAGATGGTACATGCAATGAGAACT  
+HWI-EAS443:3:95:406:19#0/1  
Yaaba^aabb\_bbbbbbaaaabbbWa¥^a\_W^X`b\_b\_\_\_a  
@HWI-EAS443:3:95:500:1008#0/1  
CACAGAAGCTGCTTTTGGTCTAGTGTGTGCCACTTGTGAA  
+HWI-EAS443:3:95:500:1008#0/1  
abbbbbbbbabbbbabab`aaba^a`aaba`a`abaaaaa

@HWI-EAS443:3:95:538:180#0/1  
GGGCCTCATATACAACAGGATGGGAACAGTGACCACAGAA  
+HWI-EAS443:3:95:538:180#0/1  
abaaaa\_aaaaa`\_aba\_aaa`¥\_^\_aUaa^[\_¥^`\_]  
@HWI-EAS443:3:95:560:1170#0/1  
CTGCTTTTGGTCTAGTGTGTGCCACTTGTGAACAGATTGC  
+HWI-EAS443:3:95:560:1170#0/1  
abbbbbbbbabbbbabaaab`abbaaaaaabbbbaaaba  
@HWI-EAS443:3:95:703:466#0/1  
CGTATTTAAAGCGACGATAAATACATTTGAAAAAAGACG  
+HWI-EAS443:3:95:703:466#0/1  
aa`abbbaabbab`\_abbaaba\_bbbbaaba`aa`a\_b  
@HWI-EAS443:3:95:832:1515#0/1  
TGATCGTCTTTTTTCAAATGTATTTATCGTCGCTTTAAA  
+HWI-EAS443:3:95:832:1515#0/1  
`abb`\_`bbbabbbaabaabUaaaa^`¥a\_]^[^aaaa`\_`  
@HWI-EAS443:3:95:972:423#0/1  
GGGCCTCATATACAACAGGATGGGAACAGTGACCACAGAA  
+HWI-EAS443:3:95:972:423#0/1  
aaSXaaaaabaa^a`\_aa\_[\_`^a`^aa]a\_^a`\_¥^^¥  
@HWI-EAS443:3:95:978:426#0/1  
TGCACCTGATATTGTGGATTACTGATCGTCTTTTTTTCAA  
+HWI-EAS443:3:95:978:426#0/1  
^`a`Zabababba^bb`aaa\_\_aa\_\_aa`\_`aaabbaSa`  
@HWI-EAS443:3:96:1053:1980#0/1  
AGCGACGATAAATACATTTGAAAAAAGACGATCAGTAAT  
+HWI-EAS443:3:96:1053:1980#0/1  
aa[a^aaa\_\_\_\_\_aa`P`\_T[`\_a`\_\_[[`\_`\_]\_^\_Y^^\_  
@HWI-EAS443:3:96:1069:398#0/1  
CTCATATACAACAGGATGGGAACAGTGACCACAGAAGCTG  
+HWI-EAS443:3:96:1069:398#0/1  
a`abaabaabbX\_`b`aaaaZaI`\_`Taa]Z\_Uab\_\_`Raa  
@HWI-EAS443:3:96:113:1798#0/1  
ACTTGAATCGCTGCATCTGCACTCCCATTCGCTTCTGGTA  
+HWI-EAS443:3:96:113:1798#0/1  
a`b\_]`b`\_`a`abb`a^ba`a`X`\_`^`\_\_^`\_`a`[]GU\_  
@HWI-EAS443:3:96:1182:1022#0/1  
CAGAAGCTGCTTTTGGTCTAGTGTGTGCCACTTGTGAACA  
+HWI-EAS443:3:96:1182:1022#0/1  
¥abbabb\_ba`abbbZ]aaabbbVa\_bWJ]Yaa\_^aa[J\_  
@HWI-EAS443:3:96:1203:1646#0/1  
GAGGCCATGGAGGTTGCTAATCAGACTAGGCAGATGGTAC  
+HWI-EAS443:3:96:1203:1646#0/1  
\_abbab^b\_a`aa]\_`Naa\_a^]\_\_Ra`aa¥\_a[[`OTT]  
@HWI-EAS443:3:96:1264:383#0/1  
GAGAAATAACGTTCCATGGGGCCAAGGAGGTGTCCTAAG  
+HWI-EAS443:3:96:1264:383#0/1  
aXa\_\_a\_]\_Y\_\_Z\_Z\_W[YYZ\_\_]¥`ZS¥[N^[U^X¥TZa  
@HWI-EAS443:3:96:1280:642#0/1  
GTCCCCATTCCCATTTAGGGCATTGACAAAGCGTCTA

+HWI-EAS443:3:96:1280:642#0/1  
aVH¥]Wa\_^VRW\_[[N^ZZXYU\_\_¥]ZP^WNU\_^U^XUBB  
@HWI-EAS443:3:96:1312:543#0/1  
CTGGAAAGTGTCTTTGCAGGAAAGAACACAGATCTTGAGG  
+HWI-EAS443:3:96:1312:543#0/1  
a`\_`a^aa[U`]a`a[^]XX]a`\_\_ZaQ`[\_a]\_\_a]\_]  
@HWI-EAS443:3:96:1337:973#0/1  
AAAAAAGACGATCAGTAATCCACAATATCAGGTGCAAGAT  
+HWI-EAS443:3:96:1337:973#0/1  
aVvb\_¥¥VbbbU0]^P¥^XWXVT`a^YSZ\_a]0¥[[[\_`]  
@HWI-EAS443:3:96:1368:1256#0/1  
GACAAGACCAATCTTGTACCTCTGACTAAGGGAATTTTA  
+HWI-EAS443:3:96:1368:1256#0/1  
a\_b]\_ba\_a`a^\_aa`aa0[a`\_aW0a^`^^a\_`a\_]\_  
@HWI-EAS443:3:96:1413:878#0/1  
TGTTCAACAAGTGGCACACACTAGACCAAAAGCAGCTTCTG  
+HWI-EAS443:3:96:1413:878#0/1  
`X`Za\_aaa^a`aZa`^¥aa]VN¥`\_aGaaQ^`N`X  
@HWI-EAS443:3:96:186:1140#0/1  
GCTGGCTAGCACTACGGCAAAGGCTATGGAACAGATGGCT  
+HWI-EAS443:3:96:186:1140#0/1  
abaaa\_\_\_W`^]\_a`\_Z\_\_¥`\_`X\_TZa`GPGS]MTY[BB  
@HWI-EAS443:3:96:221:66#0/1  
GACCTTCTTGAAAATTTGCAGGCCTACCAGAAGCGAATGG  
+HWI-EAS443:3:96:221:66#0/1  
ababbbabbbbaaa`baaba`bba`a`\_\_aa^\_a¥a\_¥`a`  
@HWI-EAS443:3:96:289:1328#0/1  
CAGAAGCTGCTTTTGGTCTAGTGTGTGCCACTTGTGAACA  
+HWI-EAS443:3:96:289:1328#0/1  
abbabb`aa[`aaa`XVaa```]\_\_aR\_a`a\_\_\_\_\_``\_Y\_  
@HWI-EAS443:3:96:326:1902#0/1  
GACCTTCTTGAAAATTTGCAGGCCTACCAGAAGCGAATGG  
+HWI-EAS443:3:96:326:1902#0/1  
`abbab`babbbababbb`ab`abab\_bbaaaaaQabb`  
@HWI-EAS443:3:96:338:1327#0/1  
GTTCTTTCTGCAAAGACACTTTCCAGTCTCTGCGCGATC  
+HWI-EAS443:3:96:338:1327#0/1  
]OV^Wa`aa[]UUSW[\_aaYX]R`]NZO¥[[¥`¥BBBBBB  
@HWI-EAS443:3:96:381:1422#0/1  
ATCGTCTTTTTTCAAATGTATTTATCGTCGCTTTAAATA  
+HWI-EAS443:3:96:381:1422#0/1  
abaa\_babbaaaba]YZa\_NWVb`aY^a]a`¥^`a\_VO^`  
@HWI-EAS443:3:96:395:732#0/1  
GAACGTTATTTCTCTTTTGAGCTTCTTGTATAGTTTAACT  
+HWI-EAS443:3:96:395:732#0/1  
aY\_Xa¥¥]^aa``¥\_\_`\_aRX[^¥\_^[^P^^¥Y¥\_^]]S]  
@HWI-EAS443:3:96:488:765#0/1  
AAATACATTTGAAAAAAGACGATCAGTAATCCACAATAT  
+HWI-EAS443:3:96:488:765#0/1  
ZYSVbaaXa`bb\_aa\_¥WWaaaa\_ab¥aa[```^aa\_ba



@HWI-EAS443:3:96:604:1147#0/1  
TGTGTTCTTTCCTGCAAAGACACTTCCAGTCTCTGCGCG  
+HWI-EAS443:3:96:604:1147#0/1  
`ba\_[aabbbaa`a\_aaaaaa`aaaa`a\_\_``a\_\_`\_  
@HWI-EAS443:3:96:632:525#0/1  
GCGACGATAAATACATTTGAAAAAAGACGATCAGTAATC  
+HWI-EAS443:3:96:632:525#0/1  
aQS^ZTV]U`U\_\_HPa\_W`POVN\_\_`RP^]T^]WU[Y^\_B  
@HWI-EAS443:3:96:646:54#0/1  
TGTGGATTACTGATCGTCTTTTTTTCAAATGTATTTATCG  
+HWI-EAS443:3:96:646:54#0/1  
aa]a`\_aa`\_]\_a\_a^`^````aaa\_W\_\_]\_`Y¥```^^[P\_  
@HWI-EAS443:3:96:663:857#0/1  
GTCTTTTTTTCAAATGTATTTATCGTCGCTTTAAATACGG  
+HWI-EAS443:3:96:663:857#0/1  
SPV¥b]bb¥YZY`S[b¥baa`U`baUN\_]aV`TW]¥Yabb  
@HWI-EAS443:3:96:789:841#0/1  
AATCTTGTCACCTCTGACTAAGGGAATTTTAGGATTTGTG  
+HWI-EAS443:3:96:789:841#0/1  
a``bb`b\_\_a\_\_aaa]]aaa\_bb`X[aaa`a`a^^``aXa  
@HWI-EAS443:3:96:822:648#0/1  
GACCGATGCTGTGAATCAGCAATCTGTTCAAGTGGCAC  
+HWI-EAS443:3:96:822:648#0/1  
aa]]b^PZ`aa^[]\_`[aaH\_Z]N¥```^\_SH]\_QYRV`\_  
@HWI-EAS443:3:96:845:249#0/1  
ACCTTCTTGAAAATTTGCAGGCCTACCAGAAGCGAATGGG  
+HWI-EAS443:3:96:845:249#0/1  
a\_aa`aaabaa]\_aaZ`\_RXY`\_TQU\_\_¥\_¥\_N¥¥\_S\_  
@HWI-EAS443:3:96:888:1543#0/1  
ACTAAGCTATTCAACTGGTGCCTTCCAGTTGCATGGGC  
+HWI-EAS443:3:96:888:1543#0/1  
]Z¥\_b`Z`^^`Wa\_]X]aV`````aaVYS]N`a]\_\_\_YSJ  
@HWI-EAS443:3:96:894:1741#0/1  
GGCCTCATATACAACAGGATGGGAACAGTGACCACAGAAG  
+HWI-EAS443:3:96:894:1741#0/1  
ab`bbbbbbababab`ba`[abaa`bZba¥bb[`a[`a\_aa  
@HWI-EAS443:3:96:980:1775#0/1  
AACAGGATGGGAACAGTGACCACAGAAGCTGCTTTTGGTC  
+HWI-EAS443:3:96:980:1775#0/1  
aa`a`a`\_a`\_`\_¥`\_W`a^[]`\_`\_a`^¥\_]T`¥^YWWY^  
@HWI-EAS443:3:97:1086:944#0/1  
CAGCAATCTGTTCAAGTGGCACACACTAGACCAAAGC  
+HWI-EAS443:3:97:1086:944#0/1  
aaa]bb`[`b]``aX\_aa[``V¥[a^a\_aaa`VU^`\_`\_`P  
@HWI-EAS443:3:97:1171:888#0/1  
CGCGCAGAGACTGGAAAGTGTCTTTGCAGGAAAGAACACA  
+HWI-EAS443:3:97:1171:888#0/1  
aba]`ZUQaaaa\_baa^J\_NXV¥a`\_\_XXS[]Z`¥[Q^Z`  
@HWI-EAS443:3:97:1506:172#0/1  
AACAGTGACCACAGAAGCTGCTTTTGGTCTAGTGTGTGCC

+HWI-EAS443:3:97:1506:172#0/1  
abQa]LZbaaS[abb`XKWG[aa`[¥S\_¥`Z\_W]]`ZS¥T  
@HWI-EAS443:3:97:1599:257#0/1  
AGTTCTCATTGCATGTACCATCTGCCTAGTCTGATTAGCA  
+HWI-EAS443:3:97:1599:257#0/1  
ab]aUa`baa\_Zaa[T[a[`XP[`RKX[VVKWXVXYBBBB  
@HWI-EAS443:3:97:1612:254#0/1  
CGAGAGGATCACTTGAATCGCTGCATCTGCACTCCCATTC  
+HWI-EAS443:3:97:1612:254#0/1  
Zbbba`bbUZ]bb\_\_abX\_\_a`Za`H^QP\_Q^RSa^`BB  
@HWI-EAS443:3:97:1623:1805#0/1  
CACAGAAGCTGCTTTTGGTCTAGTGTGTGCCACTTGTGAA  
+HWI-EAS443:3:97:1623:1805#0/1  
XYR`X[]bb`[\_abaa\_a]NZWaYa\_a¥PTOaR[^][¥]Z  
@HWI-EAS443:3:97:302:1536#0/1  
AAATAACGTTCCATGGGGCCAAGGAGGTGCTACTAAGCTA  
+HWI-EAS443:3:97:302:1536#0/1  
aba`bba```a`]ab`\_\_aU`][a¥`Z]\_\_]a][\_`aN`\_  
@HWI-EAS443:3:97:370:1155#0/1  
CAAATCCTAAAATTCCCTTAGTCAGAGGTGACAAGATTGG  
+HWI-EAS443:3:97:370:1155#0/1  
ab`Y`Y`b`\_`^Zbaa\_ba`^Ybab`\_XPbQN]^a]X]\_X  
@HWI-EAS443:3:97:387:58#0/1  
GAGGATCACTTGAATCGCTGCATCTGCACTCCCATTGCT  
+HWI-EAS443:3:97:387:58#0/1  
aXaaS[Z\_\_aaaRTXY`\_\_\_V\_ZS\_\_WXWVSQWSW¥SWSB  
@HWI-EAS443:3:97:40:713#0/1  
GGGCTCATATACAACAGGATGGGAACAGTGACCACAGAA  
+HWI-EAS443:3:97:40:713#0/1  
ab\_RZ`SZQ]a¥¥aSa\_aaaa`[V[]aa\_ZZ^\_P[\_[^RZ  
@HWI-EAS443:3:97:470:446#0/1  
CAGTAATCCACAATATCAGGTGCAAGATCCCAATGATATT  
+HWI-EAS443:3:97:470:446#0/1  
aaa`aaaa`Y)`a``aa\_\_aZaaa`a\_Z``^W^a`^`S\_\_  
@HWI-EAS443:3:97:482:1847#0/1  
ATTCTGTTTTTCATGCCTGATTAGTGGATTGGTGGTAGTAG  
+HWI-EAS443:3:97:482:1847#0/1  
abb`^babababaaXaaaaaa`]a\_aaa\_] [\_`R]GXBB  
@HWI-EAS443:3:97:486:1010#0/1  
CAGTGACCACAGAAGCTGCTTTTGGTCTAGTGTGTGCCAC  
+HWI-EAS443:3:97:486:1010#0/1  
`IZFO^X\_X\_`\_]`a[``¥YTTVV`ZRZT[¥UNLXB  
@HWI-EAS443:3:97:550:425#0/1  
AAGAAGCTCAAAAGAGAAATAACGTTCCATGGGGCCAAGG  
+HWI-EAS443:3:97:550:425#0/1  
aaa`abaa```\_\_ba`[a\_aaa`aX^ZZ\_\_a\_^\_]^^^\_  
@HWI-EAS443:3:97:564:735#0/1  
GCGCAGAGACTGGAAAGTGTCTTTGCAGGAAAGAACACAG  
+HWI-EAS443:3:97:564:735#0/1  
a\_\_XUX¥aOR^\_[NZ`\_H¥UUXV¥UQVQN[\_W^VXQQV^B

@HWI-EAS443:3:97:641:1457#0/1  
ATGGGCCTCATATACAACAGGATGGGAACAGTGACCACAG  
+HWI-EAS443:3:97:641:1457#0/1  
aaabaa\_`babaaa````ab\_aaa`a¥a]ab[aaa\_\_Waa  
@HWI-EAS443:3:97:791:617#0/1  
GGGCCTCATATACAACAGGATGGGAACAGTGACCACAGAA  
+HWI-EAS443:3:97:791:617#0/1  
ababababbabbaababa`abaaaa\_aa\_ba\_``aaaa`  
@HWI-EAS443:3:97:874:565#0/1  
CGATAAATACATTTGAAAAAAGACGATCAGTAATCCACA  
+HWI-EAS443:3:97:874:565#0/1  
Xabbbab¥ab[b`\_\_bbb^[\_Y\_a[`[a```\_Yaa]\_U`¥a  
@HWI-EAS443:3:98:1073:1427#0/1  
GCAAGATCCCAATGATATTTGCTGCAATGACGAGAGGATC  
+HWI-EAS443:3:98:1073:1427#0/1  
`aa¥Z¥`\_]Qa`aaaa`\_\_^)`^a\_a]a\_a`a\_a\_`\_]RN  
@HWI-EAS443:3:98:1077:919#0/1  
GACCGATGCTGTGAATCAGCAATCTGTTCAAGTGGCAC  
+HWI-EAS443:3:98:1077:919#0/1  
aa¥b` [ ]aX\_aaaaaba^a]aYbUab\_aY]G\_]aX\_ZZ`a  
@HWI-EAS443:3:98:1285:741#0/1  
CAATCTTGTCACCTCTGACTAAGGGAATTTTAGGATTTGT  
+HWI-EAS443:3:98:1285:741#0/1  
abbbabbbaaa`\_a\_bba`bbaaaa`aaaaa`a]]aaa`  
@HWI-EAS443:3:98:1349:817#0/1  
AAAAGAGAAATAACGTTCCATGGGGCCAAGGAGGTGTCAC  
+HWI-EAS443:3:98:1349:817#0/1  
[`VS]]][\_\_`\_Y\_Q¥¥YWOQ]bQOWSU\_Xbaa`U^[ZU`Y  
@HWI-EAS443:3:98:1580:250#0/1  
GACCACAGAAGCTGCTTTTGGTCTAGTGTGTGCCACTTGT  
+HWI-EAS443:3:98:1580:250#0/1  
ab^``abaaa`]aa\_aba^X` [Ya`H¥[YU¥\_V]YQX\_\_]  
@HWI-EAS443:3:98:1688:1123#0/1  
GTCTAGTGTGTGCCACTTGTGAACAGATTGCTGATTCACA  
+HWI-EAS443:3:98:1688:1123#0/1  
a`Qa]^[^RYXaYX\_Y\_Y\_UaV]V``YX]\_X¥a[^VX¥¥^  
@HWI-EAS443:3:98:1743:122#0/1  
GCGACGATAAATACATTTGAAAAAAGACGATCAGTAATC  
+HWI-EAS443:3:98:1743:122#0/1  
`¥bQP^abU]^]]R0``bbVVa]Y[¥[\_]]]LH¥]OSa\_\_  
@HWI-EAS443:3:98:269:78#0/1  
TGGGAACAGTGACCACAGAAGCTGCTTTTGGTCTAGTGTG  
+HWI-EAS443:3:98:269:78#0/1  
abaaZaa`b\_a\_\_`RXT[a]`URZRRX^R^]UVWT]NVBB  
@HWI-EAS443:3:98:306:278#0/1  
CTGATCGTCTTTTTTTCAAATGTATTTATCGTCGCTTTAA  
+HWI-EAS443:3:98:306:278#0/1  
`^U`¥^a`Z^bbb`Y^aa^a^b`ab¥a`T```¥``¥a`a\_  
@HWI-EAS443:3:98:356:1429#0/1  
GTCTAGTGTGTGCCACTTGTGAACAGATTGCTGATTCACA

+HWI-EAS443:3:98:356:1429#0/1  
^\_Ywa¥Q]VQ[a]V¥aa)`TY¥[YY]^¥`Vaaa^¥NVZ^  
@HWI-EAS443:3:98:411:788#0/1  
ATGGGCCTCATATACAACAGGATGGGAACAGTGACCACAG  
+HWI-EAS443:3:98:411:788#0/1  
a`\_a]^`\_\_`a`aa`a^[Uba\_^aaZ`a[\_¥G``YLTX¥^  
@HWI-EAS443:3:98:456:776#0/1  
CTTGCCAGTTGCATGGGCCTCATATACAACAGGATGGGAA  
+HWI-EAS443:3:98:456:776#0/1  
aba^b^aZFT]\_aYXY`^Z\_a\_]\_a^^^`¥^aaZ[`aZ]]  
@HWI-EAS443:3:98:488:1179#0/1  
ATTGCATGTACCATCTGCCTAGTCTGATTAGCAACCTCCA  
+HWI-EAS443:3:98:488:1179#0/1  
\_aaaaabb^baabaabaaaaa\_aaaa`^a\_aaa`]a`\_a  
@HWI-EAS443:3:98:583:1594#0/1  
GCCTCATATACAACAGGATGGGAACAGTGACCACAGAAGC  
+HWI-EAS443:3:98:583:1594#0/1  
a`X``b¥baa\_abaa\_```baa`aaa\_\_\_a\_aa\_a`]a`\_  
@HWI-EAS443:3:98:589:1874#0/1  
CATGCAATGAGAACTATTGGGACTCATCCTAGCTCCAGTG  
+HWI-EAS443:3:98:589:1874#0/1  
]Zb\_aVbaaaaaaab]a^Q\_I]a`MaNba^ZVI]]aRXTa  
@HWI-EAS443:3:98:597:1680#0/1  
AGATCCCAATGATATTTGCTGCAATGACGAGAGGATCACT  
+HWI-EAS443:3:98:597:1680#0/1  
aaa\_\_aaaabaa`aa^\_a`^aZ``a`aaaaa\_\_`ZW¥]^`  
@HWI-EAS443:3:98:614:1016#0/1  
CAGTGACCACAGAAGCTGCTTTTGGTCTAGTGTGTGCCAC  
+HWI-EAS443:3:98:614:1016#0/1  
abbUabaZaabbbb]aabba\_b\_Xb`[a`aUa\_b\_baUbQ  
@HWI-EAS443:3:98:660:345#0/1  
GGCCTCATATACAACAGGATGGGAACAGTGACCACAGAAG  
+HWI-EAS443:3:98:660:345#0/1  
aaR]]a]¥`^`\_\_a[¥a\_\_S\_VVZ`X^Ua`ST`\_U\_¥\_\_  
@HWI-EAS443:3:98:723:881#0/1  
CACAAATCCTAAAATTCCCTTAGTCAGAGGTGACAAGATT  
+HWI-EAS443:3:98:723:881#0/1  
abbaY0]a`abb`[`baa\_bbbbaabb\_ba\_baX\_Ya`^a  
@HWI-EAS443:3:98:764:1678#0/1  
GACCGATGCTGTGAATCAGCAATCTGTTACAAGTGGCAC  
+HWI-EAS443:3:98:764:1678#0/1  
abbabbabbbb^abb`abaabaaaa`b]aa`aaZa`\_a\_  
@HWI-EAS443:3:98:784:984#0/1  
TGTGGATTACTGATCGTCTTTTTTTCAAATGTATTTATCG  
+HWI-EAS443:3:98:784:984#0/1  
ab`\_a\_baa`abaaa`aabbabba`aa\_ab`\_ab`aaaa  
@HWI-EAS443:3:98:879:389#0/1  
CAAGATCCCAATGATATTTGCTGCAATGACGAGAGGATCA  
+HWI-EAS443:3:98:879:389#0/1  
aaaa]aa`^``abb```a`a`ab\_aaa^¥`a\_aaa`^^W]

@HWI-EAS443:3:98:883:495#0/1  
GACAAGACCAATCTTGTCACCTCTGACTAAGGGAATTTTA  
+HWI-EAS443:3:98:883:495#0/1  
a`\_bbbbaaaaba`a\_aa`\_`\_aaa\_aaaa\_\_aaa\_\_\_`  
@HWI-EAS443:3:98:955:576#0/1  
GGGGCCAAGGAGGTGTCATAAGCTATTCAACTGGTGCAC  
+HWI-EAS443:3:98:955:576#0/1  
abaaaaabaaab`aaab\_baaa\_abba`aa^\_a`\_a¥a¥  
@HWI-EAS443:3:98:973:1454#0/1  
GATCACTTGAATCGCTGCATCTGCACTCCCATTCGCTTCT  
+HWI-EAS443:3:98:973:1454#0/1  
a^PT¥X^aa`\_aaa`\_aaa\_VW\_[^\_Z\_¥\_]¥\_S¥]¥WU¥  
@HWI-EAS443:3:99:1095:1385#0/1  
GCATGTACCATCTGCCTAGTCTGATTAGCAACCTCCATGG  
+HWI-EAS443:3:99:1095:1385#0/1  
aa[RU[T`a`aZZ][`ZZN]aa[]a\_^`aaUYZ]Z^^^¥  
@HWI-EAS443:3:99:1223:647#0/1  
GTGACCACAGAAGCTGCTTTTGGTCTAGTGTGTGCCACTT  
+HWI-EAS443:3:99:1223:647#0/1  
a[aaYNT]UX[\_a]¥[U]VXYX[QVW¥[U^U\_YZLG\_NWB  
@HWI-EAS443:3:99:1595:211#0/1  
AAGATCTGTGTTCTTTCTGCAAAGACACTTTCCAGTCTC  
+HWI-EAS443:3:99:1595:211#0/1  
aa]aa\_abaaaa^abb¥\_aa]aaa`aTaSaa`Q\_^\_SWXU  
@HWI-EAS443:3:99:202:53#0/1  
CACCTCCTTGGCCCCATGGAACGTTATTTCTCTTTTGAGC  
+HWI-EAS443:3:99:202:53#0/1  
a`Y[\_a\_\_a^]^^^]\_\_^\_W]ZaXZX\_\_]X]X\_^Z\_[G\_X  
@HWI-EAS443:3:99:261:617#0/1  
TGGGCCTCATATACAACAGGATGGGAACAGTGACCACAGA  
+HWI-EAS443:3:99:261:617#0/1  
ab`abababaaaaab`\_aa````aaa`aaa¥a`a\_\_a``¥  
@HWI-EAS443:3:99:285:552#0/1  
CAGTGACCACAGAAGCTGCTTTTGGTCTAGTGTGTGCCAC  
+HWI-EAS443:3:99:285:552#0/1  
`bbabbb^^^bbbbbababbbbaa`\_aaa\_b`a``baba  
@HWI-EAS443:3:99:335:418#0/1  
AGACGATCAGTAATCCACAATATCAGGTGCAAGATCCCAA  
+HWI-EAS443:3:99:335:418#0/1  
ab\_bbaa]]b`a¥]¥¥¥]]ba`\_Yaaa]aa]YP`\_ZPO[Y  
@HWI-EAS443:3:99:376:1607#0/1  
GGTGTACTAAGCTATTCAACTGGTGCCTTGCCAGTTGC  
+HWI-EAS443:3:99:376:1607#0/1  
ab\_babbbbbbabbabbabbbaabaababababaa\_b\_aaa  
@HWI-EAS443:3:99:393:160#0/1  
ACAACAGGATGGGAACAGTGACCACAGAAGCTGCTTTTGG  
+HWI-EAS443:3:99:393:160#0/1  
a`aaa\_b`[abaaZa\_\_aZaa\_]\_^`\_`^`¥Y\_W^¥¥WBB  
@HWI-EAS443:3:99:48:926#0/1  
GAATCAGCAATCTGTTCAAGTGGCACACACTAGACCAA

+HWI-EAS443:3:99:48:926#0/1  
aaba\_ab`\_\_a^abaa\_a`a¥U`[[a`a`\_`¥Z\_[\_\_\_\_¥  
@HWI-EAS443:3:99:505:1020#0/1  
CAAGATCTGTGTTCTTTCCTGCAAAGACACTTCCAGTCT  
+HWI-EAS443:3:99:505:1020#0/1  
\_\_0\_aUPZ[M[¥V\_U\_ZSZ\_\_[Ya`a`R`]^aaa^Yb^RT  
@HWI-EAS443:3:99:591:1383#0/1  
ATCCCAATGATATTTGCTGCAATGACGAGAGGATCACTTG  
+HWI-EAS443:3:99:591:1383#0/1  
`a\_ba\_abaaa`a^bb`aaaabaaaab`^abaa``\_``\_`  
@HWI-EAS443:3:99:59:1780#0/1  
AAGAAGCTCAAAGAGAAATAACGTTCCATGGGGCCAAGG  
+HWI-EAS443:3:99:59:1780#0/1  
aa^\_aX`\_a`\_\_UX\_\_H\_\_Y[`X]UW[UQHaX\_BBBBBBB  
@HWI-EAS443:3:99:660:1410#0/1  
CTCATATACAACAGGATGGGAACAGTGACCACAGAAGCTG  
+HWI-EAS443:3:99:660:1410#0/1  
abbbbbbbbbbbbbbbabb`babbZbbabbbbbbaaab  
@HWI-EAS443:3:99:746:543#0/1  
GTCTAGTGTGTGCCACTTGTGAACAGATTGCTGATTCACA  
+HWI-EAS443:3:99:746:543#0/1  
a¥VRaaT\_RI\_aa¥YV]aaW\_\_XV`b¥]`[\_a[aVT^T`  
@HWI-EAS443:3:99:821:311#0/1  
GTGAATCAGCAATCTGTTCAAGTGGCACACACTAGACC  
+HWI-EAS443:3:99:821:311#0/1  
a\_aaa`^aaaa[[a`Z^R\_^`XU`[¥aa`]]`^^]]PX  
@HWI-EAS443:3:99:944:451#0/1  
CAGCGATTCAAGTGATCCTCTCGTCATTGCAGCAAATATC  
+HWI-EAS443:3:99:944:451#0/1  
aV\_^\_abaa`a¥b`b`La`a[a`\_aaXZ]X]ZY\_\_\_Z\_U  
@HWI-EAS443:3:9:1055:824#0/1  
CAAGATTGGTCTTGTCTTTAGCCATTCCATGAGAGCCTCA  
+HWI-EAS443:3:9:1055:824#0/1  
abbbabbbbaabbbba^bbbbba`baa^^abaaa]a¥^`\_a  
@HWI-EAS443:3:9:1083:387#0/1  
CTCATATACAACAGGATGGGAACAGTGACCACAGAAGCTG  
+HWI-EAS443:3:9:1083:387#0/1  
a`]HR\_aPUWTYN\_URXaXWRUQ^ZU`¥\_WUUX¥[ZYBBB  
@HWI-EAS443:3:9:1135:1393#0/1  
CAAGTGGCACACACTAGACAAAAGCAGCTTCTGTGGTCA  
+HWI-EAS443:3:9:1135:1393#0/1  
]baZ^b`b`abb`bababbabbbI`bbbab`\_Za[Y¥a  
@HWI-EAS443:3:9:1136:249#0/1  
CAATCTTGTACCTCTGACTAAGGGAATTTTAGGATTTGT  
+HWI-EAS443:3:9:1136:249#0/1  
\_bba`baaaaaab\_\_abbbbaaab`ababbaaa\_aa`a`  
@HWI-EAS443:3:9:1223:574#0/1  
TGTGAATCAGCAATCTGTTCAAGTGGCACACACTAGAC  
+HWI-EAS443:3:9:1223:574#0/1  
aa¥b\_\_\_\_\_baYbaaaaab[]\_`\_a¥aWaaTa\_]Z^a¥\_\_\_Z

@HWI-EAS443:3:9:1404:1820#0/1  
ATCCTCTCGTCATTGCAGCAAATATCATTGGGATCTTGCA  
+HWI-EAS443:3:9:1404:1820#0/1  
a`\_aaZa\_aYI`aa`\_`¥^`^a^`Z\_^¥Y^\_XZO\_¥^X]  
@HWI-EAS443:3:9:1438:956#0/1  
CTCGTCATTGCAGCAAATATCATTGGGATCTTGACCTGA  
+HWI-EAS443:3:9:1438:956#0/1  
`bababbabaaababaabab]aaa^`aaa`aaa\_^SZaa\_  
@HWI-EAS443:3:9:1515:1250#0/1  
GGAGGTTGCTAATCAGACTAGGCAGATGGTACATGCAATG  
+HWI-EAS443:3:9:1515:1250#0/1  
aa`aa¥Y]`[\_`W]`\_U`Z`\_U[`Q[¥aVVM]]`]]]`\_`  
@HWI-EAS443:3:9:1621:801#0/1  
CACTAAGCTATTCAACTGGTGCACCTGCCAGTTGCATGGG  
+HWI-EAS443:3:9:1621:801#0/1  
ababbbbbbV\_RR^ba^bb^bSa]ab^`Waa^ZV]\_]\_a\_  
@HWI-EAS443:3:9:213:434#0/1  
GGGCCAAGGAGGTGCTCACTAAGCTATTCAACTGGTGCAC  
+HWI-EAS443:3:9:213:434#0/1  
`bbbabbbb¥`a]`a`bababbabbb\_bbaaaa\_b`aaa  
@HWI-EAS443:3:9:341:855#0/1  
GAGGATCACTTGAATCGCTGCATCTGCACTCCCATTCGCT  
+HWI-EAS443:3:9:341:855#0/1  
^aabaaaab`baaaaab\_aaaaa`\_`aa\_]VU\_\_Z^`\_  
@HWI-EAS443:3:9:461:259#0/1  
TGCAAGATCCCAATGATATTTGCTGCAATGACGAGAGGAT  
+HWI-EAS443:3:9:461:259#0/1  
[abOVbYU¥W`\_Va\_]V]V]PP]a]a`P`[`aX¥[^^\_]`  
@HWI-EAS443:3:9:50:2026#0/1  
AAGACAAGACCAATCTTGTCACCTCTGACTAAGGGAATTT  
+HWI-EAS443:3:9:50:2026#0/1  
a\_]`[[a`^a`a`\_`^]Za`^]`^`a]`^`^`^`[Y^TFTZ]  
@HWI-EAS443:3:9:531:344#0/1  
TGCATGTACCATCTGCCTAGTCTGATTAGCAACCTCCATG  
+HWI-EAS443:3:9:531:344#0/1  
abbbbaabbabbbbba\_bab\_abaaa`a`Xaaa`a`aaaa  
@HWI-EAS443:3:9:651:26#0/1  
ACCTGATATTGTGGATTACTGATCGTCTTTTTTTCAAATG  
+HWI-EAS443:3:9:651:26#0/1  
Y`b`^^b]bbPaV`\_aa\_Waa`]aX]a\_``a``W\_U^\_a  
@HWI-EAS443:3:9:65:557#0/1  
TCAGACTAGGCAGATGGTACATGCAATGAGAACTATTGGG  
+HWI-EAS443:3:9:65:557#0/1  
a`][aa\_aa`a\_a\_```F¥a```\_`a\_````R]]`^]\_\_\_\_  
@HWI-EAS443:3:9:671:757#0/1  
TTTTCAAATGTATTTATCGTCGCTTTAAATACGGTTTGAA  
+HWI-EAS443:3:9:671:757#0/1  
abb^[`baabYabaaaaab^\_a````\_`^`a\_\_`Wa`\_¥^  
@HWI-EAS443:3:9:719:1995#0/1  
GACGAGAGGATCACTTGAATCGCTGCATCTGCACTCCCAT

+HWI-EAS443:3:9:719:1995#0/1  
ab\_aaa`aaa`\_`^aWa\_a`Z\_SU`¥¥]\_¥a]Z¥U]¥UWY  
@HWI-EAS443:3:9:723:170#0/1  
ACTGGAGCTAGGATGAGTCCCAATAGTTCTCATTGCATGT  
+HWI-EAS443:3:9:723:170#0/1  
aaabaaa\_aaaa\_`a`][W\_\_`\_^^X\_`^`^\_`V\_`^]]X  
@HWI-EAS443:3:9:749:334#0/1  
CAGTTGAATAGCTTAGTGACACCTCCTTGGCCCCATGGAA  
+HWI-EAS443:3:9:749:334#0/1  
`bb`bababaa`bbab\_baab`\_`a\_\_aa\_`Z\_\_^a]]\_\_`  
@HWI-EAS443:3:9:997:1040#0/1  
ACCACAGAAGCTGCTTTTGGTCTAGTGTGTGCCACTTGTG  
+HWI-EAS443:3:9:997:1040#0/1  
aa`\_^aa][VV`S^`\_]`^`VV[USV\_T\_UZTT\_[V[\_YY  
@HWI-EAS443:3:62:234:1739#0/1  
AACACCATTGCCGATTTGAATGAAAATCCTTTACTCCAT  
+HWI-EAS443:3:62:234:1739#0/1  
``ab`a```^`\_`[¥S\_aaaa```aaaaaaa\_¥VBBBBBB  
@HWI-EAS443:3:43:399:1617#0/1  
GGGCTATATACAGTAAAGACAACAGAATAAGAATCGGGTC  
+HWI-EAS443:3:43:399:1617#0/1  
ZTVbRa[Y^UWSLW^ZaX`H]`]YZGT]W¥a^^SP[SIOG  
@HWI-EAS443:3:4:738:1490#0/1  
ATGGGCTATATACAGTAAAGACAACAGGATAAGAATCTGA  
+HWI-EAS443:3:4:738:1490#0/1  
^Y`[T]X\_]Va]WZb¥R`]aX\_]U[`G\_\_\_a¥XT[PBBB  
@HWI-EAS443:3:10:790:1965#0/1  
ATAAGAATCGGTTCCAAGGGGGATGCGTTTGT CATANGGG  
+HWI-EAS443:3:10:790:1965#0/1  
\_¥]a^ba\_a\_¥FXZW[^X`[S¥]]¥HWYO]RXSSMWDV[  
@HWI-EAS443:3:37:366:201#0/1  
GTTTTTTGAACAAATTACTTGTCAATGGNACATGGCAACT  
+HWI-EAS443:3:37:366:201#0/1  
aR]Z\_US\_`ZXUVOLSOPTR¥K\_BBBBBBBBBBBBBBBBBB  
@HWI-EAS443:3:67:1458:1981#0/1  
AGTTTTTTGAACAATTACTTGTCAATGGTAAATGGCAACT  
+HWI-EAS443:3:67:1458:1981#0/1  
OaOY\_`\_X`W^Vaa¥a`NO]¥U¥\_a\_dWNZ^XY]VLZPLZ  
@HWI-EAS443:3:20:1142:1223#0/1  
TAATGACCGATGGACCAAGTGATGGACAGGCCTCTACTCA  
+HWI-EAS443:3:20:1142:1223#0/1  
`ba]aaaaa\_`a`¥\_\_aaUa\_\_`\_`¥`^`\_Y\_¥\_\_V`]¥  
@HWI-EAS443:3:74:764:809#0/1  
CACTTGGTCCATCGGTCATTACAGTAAAGCAAGATTGTGA  
+HWI-EAS443:3:74:764:809#0/1  
`aa\_aba\_bbbaaba¥`^a\_a`VTX]a`U`a```\_\_Y\_^  
@HWI-EAS443:3:28:1123:971#0/1  
ACTTGCTTTACTGTAATGACCGATGGACCAAGGGATGGAA  
+HWI-EAS443:3:28:1123:971#0/1  
aaaaaaaaab`aa\_a`aaZJX[]`Y[[[¥HPGVMM[[RB



@HWI-EAS443:3:77:941:1597#0/1  
GCTTTTTGAATAAATTACTTGTCAATGGTAAATGGCAACT  
+HWI-EAS443:3:77:941:1597#0/1  
a¥TXaa\_\_W^GTa\_dW[\_`P^\_a`aYT[]Y`NW]¥^¥P\_  
@HWI-EAS443:3:89:1459:1585#0/1  
GATTCTTATACTGTTGTCTTTACTGTNTATAGCCNATCCA  
+HWI-EAS443:3:89:1459:1585#0/1  
`^bb^babababababbaaabbba`WD]ba\_¥PXD^`¥ab  
@HWI-EAS443:3:32:1150:695#0/1  
GGGTGCAGTATCGTCTAATGGAGCAAATGGAGTAAAAGGA  
+HWI-EAS443:3:32:1150:695#0/1  
^abY`^abXa`\_a`abaa`\_ZZb`\_aaa\_a`S`]abb^U  
@HWI-EAS443:3:43:17:1024#0/1  
GCTATATACAGTAAAGACAACAGTATAAGAATCGGGTGCC  
+HWI-EAS443:3:43:17:1024#0/1  
abaaaaa¥aa`\_`a\_a`\_a¥RYJV¥[BBBBBBBBBBBBB  
@HWI-EAS443:3:61:1555:522#0/1  
GTCCGTCTTGCTTTACTGTAATGACCGATGGACCAAGTGA  
+HWI-EAS443:3:61:1555:522#0/1  
aWZZXN]Z¥SVY^>[]X`XZ[PY]`Z]NUV^TBBBBBBBB  
@HWI-EAS443:3:34:1631:601#0/1  
CAAACACATCCCCCTTGAACCGATTATTATACTGTTGTT  
+HWI-EAS443:3:34:1631:601#0/1  
ab¥¥UUba`a`]GW^a[\_Za^a\_0¥WG\_[aUYFOX[BBBB  
@HWI-EAS443:3:47:1488:174#0/1  
AGCCTGTCCATCACTTGGTCCATCGGCCATTACAGTAAAG  
+HWI-EAS443:3:47:1488:174#0/1  
`a`aab^`aaa`SV]^a^`Va]¥\_[FNX^]NQYXRYXWG  
@HWI-EAS443:3:5:71:87#0/1  
GGCTATATAAAGTAAAGACAACAGTATAAGAATCGGTTTCG  
+HWI-EAS443:3:5:71:87#0/1  
abbXPPTTHNaVRR¥Sb]\_S^W[YG]U\_]YWTTVBBBBBBB  
@HWI-EAS443:3:12:430:824#0/1  
GGCCTGTCCATCACTTGGTCCATCGGTCATTACAGTGAAG  
+HWI-EAS443:3:12:430:824#0/1  
¥\_\_\_Za^``¥XZZU]Za¥P[Z¥a¥aBBBBBBBBBBBBBBB  
@HWI-EAS443:3:17:1179:567#0/1  
GAGTTTTTTGAACAAATTACTTGTCAATGGTAAATGTCAA  
+HWI-EAS443:3:17:1179:567#0/1  
XI\_T¥a^bbb\_¥\_^[`ba`[Z]ZY]S]aZV[ZX\_\_[FM[]  
@HWI-EAS443:3:23:1464:35#0/1  
ATTATCTTTTGGTTTGGATTCATTTTAAACTCCTGCCTTG  
+HWI-EAS443:3:23:1464:35#0/1  
abbb\_abbb`a`^ba`aabb^`aaaaa`a`a^\_\_a\_WW`\_  
@HWI-EAS443:3:2:607:1638#0/1  
TGGGTGGGCTATATACAGTAAAGACAACAGTATAAGAATC  
+HWI-EAS443:3:2:607:1638#0/1  
aa]aVaaY[¥a^\_a`a]V\_`\_\_[a`^`¥]\_\_`^\_\_`ZQ  
@HWI-EAS443:3:3:1772:1835#0/1  
CAAATTACTTGTCAATGGTAAATGGCAACTCAGCACGGTC

+HWI-EAS443:3:3:1772:1835#0/1  
aVY^X¥^`bZDT`\_GZWVLIaRT^GY^XVUGZRUBBBBB  
@HWI-EAS443:3:43:1524:252#0/1  
CACCGTATAAGAATCGGTTCCAAGGGGGATGTGTTTGTCA  
+HWI-EAS443:3:43:1524:252#0/1  
a\_ba`\_abbabaa\_\_aaPMQWZVG¥YW\_FL¥P¥VRBBBBB  
@HWI-EAS443:3:45:1295:1859#0/1  
TGGAGTAAAAGGATTTTCATTCAAATACGGCAATGGGGTT  
+HWI-EAS443:3:45:1295:1859#0/1  
`O\_NaZ\_\_]¥`XFQ[a^SV`ZFFX]YaS^YFJT\_]GGYLR  
@HWI-EAS443:3:46:1453:1750#0/1  
CCTCGGGCTATATACAGTAAAGACAACAGTATAAGAATCG  
+HWI-EAS443:3:46:1453:1750#0/1  
aaaaaaa`a`\_`^^a^`\_]\_\_\_\_`Y`]Z\_^]]`^^]W^  
@HWI-EAS443:3:5:1202:1876#0/1  
AAGCGATGGACAGGCCTCATACAAGATCTTCAGAATAGAA  
+HWI-EAS443:3:5:1202:1876#0/1  
[\_`MZaa`S`XbaUa^\_`aa\_`aaa\_¥\_aaYaa\_\_^R]XB  
@HWI-EAS443:3:60:1020:775#0/1  
GGCACTGTCCATCACTTGGTCCATCGGTCATTACAGTAAA  
+HWI-EAS443:3:60:1020:775#0/1  
a^\_aaab[[S]aZW0]`aaW`\_\_\_\_W\_`QS^]¥WNP[NX^]  
@HWI-EAS443:3:60:525:46#0/1  
GTAAAGACAACAGTATAAGAATCGGTTCCAAGGGGGGTGT  
+HWI-EAS443:3:60:525:46#0/1  
``\_`^aa\_`a\_`aVXa``a^`\_\_`aXU^ZMKT]a`[BBBB  
@HWI-EAS443:3:63:746:2003#0/1  
GACAAACACATCCCCCTTGAACCGATTCTTATACTCTTG  
+HWI-EAS443:3:63:746:2003#0/1  
`b`abbabb`aZW]\_`^aa`\_bb\_`aa\_`^`^aaaaV]]`X  
@HWI-EAS443:3:64:1220:1557#0/1  
TGGGTGGGCTATATACAGTAAAGACAACAGTATAAGAATC  
+HWI-EAS443:3:64:1220:1557#0/1  
aa`aabaabaaaaa]`\_Xaa\_`a^aa[a^Zaa\_`^^^ZP  
@HWI-EAS443:3:67:23:421#0/1  
AAACTCCTTTTACTCCATTTGCTCCATTAGACGATACTGG  
+HWI-EAS443:3:67:23:421#0/1  
a¥V^]]ZYQZ¥S[X[a^aa\_PY]W¥YW¥RTU^\_BBBBBBB  
@HWI-EAS443:3:81:185:1187#0/1  
ATGCGGCCTGTCCATCACTTGGTCCATCGGTCATTACAGT  
+HWI-EAS443:3:81:185:1187#0/1  
ZTZHV^¥\_RXU]P]R\_a`\_]\_a]LX]]U\_^QL]IH¥XXY\_R  
@HWI-EAS443:3:83:880:1039#0/1  
ATACAGTAAAGACAACAGTATAAGAATCGGTTCCAACGGG  
+HWI-EAS443:3:83:880:1039#0/1  
]V[abVVb]a`¥aabb\_¥¥b]S¥`[b\_V`SZX¥ZIWJT]\_  
@HWI-EAS443:3:88:973:1959#0/1  
CTTTTATGAGGCCTGTCCATCACTTGGTCCATCGGTCATT  
+HWI-EAS443:3:88:973:1959#0/1  
a[¥Ja[bb]ababUb[baZabbY]¥aa`WF]a^bT]^^^`

@HWI-EAS443:3:9:1315:552#0/1  
GGGAAAGATCTTGTATGAGGCCTGTCCATCACTTGGTCCA  
+HWI-EAS443:3:9:1315:552#0/1  
U[RXUYTX\_X\_¥Z\_aZ\_¥FXWL[XMQYZXHnkZVR[[V`\_  
@HWI-EAS443:3:100:1325:263#0/1  
CACCATTGCCGATTTGAATGAAAATCCTTTTAGTCCATT  
+HWI-EAS443:3:100:1325:263#0/1  
`QOLRSV¥Xa\_OS¥^U`ZURSRH][^QJP]^\_[HXTXBBB  
@HWI-EAS443:3:11:1043:985#0/1  
GGCCTGTCCATCACTTGGCCCATCGGTCATTACAGTAAAG  
+HWI-EAS443:3:11:1043:985#0/1  
`X`[OQJ^W]]BBBBBBBBBBBBBBBBBBBBBBBBBBBB  
@HWI-EAS443:3:11:825:947#0/1  
AGTTTTTTGAACAAATTACTTGTCAATGGTAAAGGGCAAC  
+HWI-EAS443:3:11:825:947#0/1  
\_\_]^¥aRab`bYa[a`\_\_VZ¥a`V^`aaV`\_UH¥]^ZQX  
@HWI-EAS443:3:13:508:1989#0/1  
GGAGCTTTTTGAACAAATTACTTGTCAATGGTAAATGGCA  
+HWI-EAS443:3:13:508:1989#0/1  
aa`PG¥`M¥^S`^S`^^¥X^U¥^ZHX`U^\_UHT^¥Y]OK[  
@HWI-EAS443:3:18:459:224#0/1  
GGCCTGTCCATCACTTGGCCCATCGGTCATTACAGTAAAG  
+HWI-EAS443:3:18:459:224#0/1  
Z\_V[b\_VX`\_`M``[`aHX``]`¥FWXY[^00[S]R[W  
@HWI-EAS443:3:1:1427:767#0/1  
AGTTTTTTGAACAAATTACTTGTCAATGGTAGATGGCAAC  
+HWI-EAS443:3:1:1427:767#0/1  
aaVP\_`abba`a]^Y]baTVYa\_Za`aaaXNFxaaaBBBB  
@HWI-EAS443:3:20:1427:518#0/1  
GTCCAGTATCGTCCAATGGAGCAAATGGAGTAAAAGGATT  
+HWI-EAS443:3:20:1427:518#0/1  
aZ]\_^\_[[^X`]]XOXU`^R¥RUOXX\_]S^VZ]Z^^USVZ  
@HWI-EAS443:3:29:1222:1341#0/1  
CAAATTACTTGTCAAAGTAAATGGCAACTCAGCACCGTC  
+HWI-EAS443:3:29:1222:1341#0/1  
\_`]a\_bbb`\_bb[\_aa\_]Ubabbbbaa`babb[ba`\_`  
@HWI-EAS443:3:31:1248:299#0/1  
GCTATATACAGTAAAGACAACAGTATAAGAATCGGGTCCA  
+HWI-EAS443:3:31:1248:299#0/1  
`aaaVU\_\_b`b\_aa[¥V`^¥R```aabb^ba[ZYXBBBBB  
@HWI-EAS443:3:32:1644:1334#0/1  
AGTTTTTTGAACAAATTACTTGTCAATGTAAATGGCAAC  
+HWI-EAS443:3:32:1644:1334#0/1  
O`H`abab``bbbaaaXab\_¥OM]XPa[I`aW[^TI]aB  
@HWI-EAS443:3:37:1384:1046#0/1  
AAATTACTTGTCAATGGTAAATGGCAACTGAGCACCGTCT  
+HWI-EAS443:3:37:1384:1046#0/1  
ZK¥Rb[Z¥Y[JYSSP`P`Z[OSMa`XUN`[X^aY`Y\_]`  
@HWI-EAS443:3:37:1690:285#0/1  
GACCGATGGACCAAGTGATGGACAGGCCTAATACAAGATC

+HWI-EAS443:3:37:1690:285#0/1  
aa^\_aaa`b]^¥\_`a``]`a`\_]\_a`PPWDGX[¥Z\_\_VWV  
@HWI-EAS443:3:37:327:1655#0/1  
GGCCTGTCCATCACTTGGTCCATCGGTCCTTACAGTAAAG  
+HWI-EAS443:3:37:327:1655#0/1  
][\_¥a[abbbb\_`aaa^[Wb`^b`]^^[HRZ]a\_RY`a^Z  
@HWI-EAS443:3:37:737:1786#0/1  
TCTTGTATGAGGCCTGTCCATCACTTGGTGCATCGGTCAT  
+HWI-EAS443:3:37:737:1786#0/1  
abbbb[aabb`\_ba\_`aaaaab\_`aaaTTaa^a]`Vaa[  
@HWI-EAS443:3:37:787:308#0/1  
ATGAAAATCCCTTTACTCCATTTGCTCCATTAGACGATAC  
+HWI-EAS443:3:37:787:308#0/1  
aaa`aaaaaaaa`aa\_`aaa````a`\_YUTU`\_\_\_a\_]^X  
@HWI-EAS443:3:37:799:1452#0/1  
TGAAAATCCCTTTACTCCACTTGCTCCATTAGACGATACT  
+HWI-EAS443:3:37:799:1452#0/1  
^b``¥aba`aaaaW`abaaaaT`aaaa[SOY`a\_^^aIR  
@HWI-EAS443:3:3:994:2001#0/1  
ATCCCCCTTGAAGCGATTCTTATACTGTTGTCTTTACTG  
+HWI-EAS443:3:3:994:2001#0/1  
`¥baaab`\_aba`I`a¥ba^\_aaa`\_`b`ab\_S^aaa^aa  
@HWI-EAS443:3:40:119:539#0/1  
CAAATTACTTGTCAATGGTAAATGGCCACTCAGCACCGTC  
+HWI-EAS443:3:40:119:539#0/1  
Z]^[]babbababa`\_bb^][a`^VDN^a`Y`a[`]USa  
@HWI-EAS443:3:42:1286:1678#0/1  
TTTTTGAACAAATTACTTGTCAATGGAAAATGGCAACTCA  
+HWI-EAS443:3:42:1286:1678#0/1  
a`^]a`^`T]aa^U^Raa^Y[aaaa^F0^Q`a0G[aLY^X  
@HWI-EAS443:3:46:1519:694#0/1  
AATGGAGTAAAGGGATTTTCATTCAAATACGGCAATGGTG  
+HWI-EAS443:3:46:1519:694#0/1  
¥\_bbbbbababb\_P\_bb`babaabaabbabaaaaaba[b  
@HWI-EAS443:3:46:326:1855#0/1  
GAGTTTTTTGAACAAATTACTCGTCAATGGTAAATGGCAA  
+HWI-EAS443:3:46:326:1855#0/1  
\_FZ]a\_VZ`Wa\_\_`][\_R]Y]FWP[Y\_`a`UX\_ZPLDM^\_  
@HWI-EAS443:3:49:1574:471#0/1  
GTCCAGTATCGTCTAATGGAGCAGATGGAGTAAAAGGATT  
+HWI-EAS443:3:49:1574:471#0/1  
a]Y\_^bY\_`\_^\_Z][]^`I]TWY[\_`]QXY^X]\_^\_SS^  
@HWI-EAS443:3:4:788:2042#0/1  
ATACAGTAAAGACAAGAGTATAAGAATCGGTTCCAAGGGG  
+HWI-EAS443:3:4:788:2042#0/1  
aaa\_[]Saa^a`W\_a0]\_S`\_\_\_a\_`WP^¥OGWZWWWVBB  
@HWI-EAS443:3:54:492:1584#0/1  
AAATTACTTGTCAATGGTAAATCGCAACTCAGCACCGTCT  
+HWI-EAS443:3:54:492:1584#0/1  
aZa`[bXZ[aTURS\_]¥X`aaRJJ]a]FXXYR]^XVMW\_Z

@HWI-EAS443:3:55:1739:1234#0/1  
GTCCATCACTTGGTCCATCGGTCATTACAGTAAAGAAAAGA  
+HWI-EAS443:3:55:1739:1234#0/1  
a`\_\_\_b\_aWa`a¥MUW\_a\_aa]XZ^^YGRRQU][QFW¥YX  
@HWI-EAS443:3:57:1663:1057#0/1  
GTATGAGGCCTGTCCATCACTTGGTCCATCGGGCATTACA  
+HWI-EAS443:3:57:1663:1057#0/1  
^]bbb`a\_\_Wa\_bS\_U]]b[aba¥JV¥QXbZNXaa\_\_Ta  
@HWI-EAS443:3:59:262:1945#0/1  
GGGCTATATACAGTAATGACAACAGTATAAGAATCGGTTC  
+HWI-EAS443:3:59:262:1945#0/1  
a\_aSaaa`\_Za\_JWaa`^^Xa\_^Za¥\_\_a\_\_R¥\_ORWOIN  
@HWI-EAS443:3:60:1322:1948#0/1  
GGAGTAAAAGGATTTTCATTCAAATACGGCAATGGGGTTT  
+HWI-EAS443:3:60:1322:1948#0/1  
`PTYRVO[]NNYLPZSVZZYGUR[P[MJSRTUSUOJSXXV  
@HWI-EAS443:3:60:1675:1235#0/1  
AAGGATTTTCATTCAAATACGGCAATGGGGTTTGGATAGG  
+HWI-EAS443:3:60:1675:1235#0/1  
X`baP`bb^a^b^^^XS`¥QY`]SSU[XHXWX[ZUOS[``  
@HWI-EAS443:3:60:489:805#0/1  
TGGGCTATATACAGTAAAGACAACAGTATAGGAATCGGTT  
+HWI-EAS443:3:60:489:805#0/1  
aa]¥aaa¥I]b]W]^aaY``aaa\_aa¥a`\_`a^\_```aX]  
@HWI-EAS443:3:65:1399:1284#0/1  
GGGCTATATACAGTAAAGACAAGAGTATAAGAATCGGTTC  
+HWI-EAS443:3:65:1399:1284#0/1  
Ya¥`b\_bbbbb`]bbbabaa]DW`bbba``abaa`aS^¥  
@HWI-EAS443:3:65:653:781#0/1  
AGGATTTTCATTCAAATACGGCAATAGTGTGGATAGGG  
+HWI-EAS443:3:65:653:781#0/1  
a`¥Z]`\_`\_````\_\_\_\_\_````]]YYQ[S]Z\_\_\_TVY[XYT  
@HWI-EAS443:3:6:1104:310#0/1  
GTTTTTTGAACAAATTACTTGACAATGGTAAATGGCAACT  
+HWI-EAS443:3:6:1104:310#0/1  
^[]^a`]SYaX\_\_aY[\_YZY]GNX]^XX¥XXT^^]BBBB  
@HWI-EAS443:3:73:1180:1229#0/1  
GGAGTTTTTTGAACAAATTACTTGCAATGGCAAATGGCA  
+HWI-EAS443:3:73:1180:1229#0/1  
`[NWLIdaXWUVLOY`S`QU]Y^SOJU\_\_SGF[OZHVUZS  
@HWI-EAS443:3:73:43:937#0/1  
TGCCGATTTTGAATGGAAATCCTTTTACTCCATTTGCTCC  
+HWI-EAS443:3:73:43:937#0/1  
abbbYV^\_aa\_Z``YJXZ``a``a¥TZ^`aa`Y\_\_`\_\_a\_  
@HWI-EAS443:3:75:1007:75#0/1  
GAGTTTTTTGAACAAATTACTTGCCAATGGTAAATGGCAA  
+HWI-EAS443:3:75:1007:75#0/1  
a\_a`a\_\_aaa\_`\_`X^a`a]a`\_YY`^`]XY^`\_]a]WY[  
@HWI-EAS443:3:75:1055:141#0/1  
ATTCTGAATATCTTGTATGAGGCCTGTCCATCACTTGGTC

+HWI-EAS443:3:75:1055:141#0/1  
¥\_¥`aXbbba`aYZa\_\_`baa¥aaa`aa^`]a¥\_VZ`  
@HWI-EAS443:3:75:370:16#0/1  
CAAACACATCCCCCTTGAACCGATTCTTATATTGTTGTC  
+HWI-EAS443:3:75:370:16#0/1  
ab`\_a\_aababaaaa]`aaaaa]`aaaa\_`\_F\_a\_\_a\_\_  
@HWI-EAS443:3:76:668:126#0/1  
GAACAAATTACTTGTCAATGGGAAATGGCAACTCAGCACC  
+HWI-EAS443:3:76:668:126#0/1  
aaaU]abaab`a]bX\_`YaaaHY```aa¥^`\_`¥^`0^UO  
@HWI-EAS443:3:77:358:1422#0/1  
GGTCCAGTATCGTCTAATGGAACAAATGGAGTAAAAGGAT  
+HWI-EAS443:3:77:358:1422#0/1  
Xb`bbbb[\_\_\_aaTba^]a]YU^]VRaa`aTaS\_aaaa`[^  
@HWI-EAS443:3:78:408:1902#0/1  
CTTGAATGAGGCCTGTCCATCACTTGGTCCATCGGTCATT  
+HWI-EAS443:3:78:408:1902#0/1  
aaa^0]¥]¥MY\_]\_^P`]X]aa^\_]¥WW`^¥]`^SQ]\_¥Z  
@HWI-EAS443:3:79:805:1901#0/1  
GGGCTATATACAGTAAAGACAACAGGATAAGAATCGGTTC  
+HWI-EAS443:3:79:805:1901#0/1  
aV\_\_¥aYWQ^`\_RNW^\_Z\_HX\_[YOFI¥\_\_XQ\_YTR[G YW  
@HWI-EAS443:3:80:1144:1356#0/1  
AGGATTTTCATTCAAATACGGCAATGGGGTTTGGATAGGG  
+HWI-EAS443:3:80:1144:1356#0/1  
a\_^QIwa`X`aaaPNWWXP`a[`TZXPGLPY]ZGRRPUU  
@HWI-EAS443:3:80:1555:483#0/1  
ATGGAGCAAATGGGGTAAAAGGATTTTCATTCAAATACGG  
+HWI-EAS443:3:80:1555:483#0/1  
^^ab`bb\_I`b`H`Zabbbb`aU\_]bb`Saaaa`Z\_  
@HWI-EAS443:3:80:996:1635#0/1  
GGCCTGTCCATCACTTGGCCCATCGGTCATTACAGTAAAG  
+HWI-EAS443:3:80:996:1635#0/1  
ab^`aaaaabaababaaaa¥aa`aa\_^]a[aa\_a[\_[a` [  
@HWI-EAS443:3:82:1068:809#0/1  
GTTTTTCGAACAAATTACTTGTCAATGGTAAATGGCAACT  
+HWI-EAS443:3:82:1068:809#0/1  
aaaaabaab`a`bbba\_aba`aa`bb`^`aa`a\_\_aa\_`  
@HWI-EAS443:3:82:1196:1603#0/1  
CAACAGTATAAGAATCGGTTCCAAGGGGATGTGTATGTC  
+HWI-EAS443:3:82:1196:1603#0/1  
abbaaa`bbbbbbbaa`a[^]^\_a¥[\_`a]\_\_SaYS^\_]V  
@HWI-EAS443:3:82:638:353#0/1  
GGAGTTTTTTGAACAAATTACTTGTCAATGGGAAATGGCA  
+HWI-EAS443:3:82:638:353#0/1  
aaaa\_¥\_aa[X\_`Q\_Y\_¥G¥\_]`¥]\_]J^\_G^UZT]YYT  
@HWI-EAS443:3:83:1206:1774#0/1  
GTCCAGTATCGTCTAATGGAGCAAATGGAGGAAAAGGATT  
+HWI-EAS443:3:83:1206:1774#0/1  
a\_\_PZ\_V[\_W\_VV]\_`[\_O\_\_^S^\_^\_UUFW^`a¥]]Z]

@HWI-EAS443:3:84:732:57#0/1  
GTTTTTTGAAAAATTACTTGTCAATGGTAAATGGCAACT  
+HWI-EAS443:3:84:732:57#0/1  
`U[Y`Xa¥¥QFV00YVJQZV`¥XNTR`]NTOQUYPJVVFO  
@HWI-EAS443:3:84:767:1301#0/1  
GTCCGGTATCGTCTAATGGAGCAAATGGAGTAAAAGGATT  
+HWI-EAS443:3:84:767:1301#0/1  
a[aaaa]a\_aa^`a`\_`^`\_\_\_\_`aaa]aZ`aaaa^Y\_`  
@HWI-EAS443:3:87:1352:1596#0/1  
AGGATTTTCATTCAAATACGGCAATGGTGTGGGTAGGG  
+HWI-EAS443:3:87:1352:1596#0/1  
XbMYWVaZG\_Y]\_`a\_a]Ra\_\_]\_]¥FMW¥W`YGY\_¥\_Q  
@HWI-EAS443:3:88:1641:151#0/1  
TGCTTTACTGTAATGACCGATGGACGAAGTGATGGACAGG  
+HWI-EAS443:3:88:1641:151#0/1  
^`ZXbbaSW`^V^JXR\_aa[Z^[ZTFL^a]aXbU]]V\_`a  
@HWI-EAS443:3:92:765:1139#0/1  
GGCCTGTCCATCACTTGGTCCATCGGTGATTACAGTAAAG  
+HWI-EAS443:3:92:765:1139#0/1  
abaaa`ab]ba^S¥ba[`U¥TaUa`aHT\_IVQV\_NU^`\_`  
@HWI-EAS443:3:99:1519:1671#0/1  
ATGGAGTAAAAGGATTTTCATTCAAATATGGCAATGGTGT  
+HWI-EAS443:3:99:1519:1671#0/1  
a\_bb¥¥abb\_b`aababaabb\_baba\_Ybb\_\_aa`ba`  
@HWI-EAS443:3:99:937:1862#0/1  
ATTTGAATGAAAATCCTTTTACTCCATTTGCTACATTAGA  
+HWI-EAS443:3:99:937:1862#0/1  
¥ba`^)`W\_`aYZ[IW^`aaaaRR¥VJX`\_^FJ]aS^Xa  
@HWI-EAS443:3:10:1541:630#0/1  
GGAGTTTTTTGAACAAATTACTTGTCAATGGTAAATGACA  
+HWI-EAS443:3:10:1541:630#0/1  
a`\_a]\_a\_a`a][YZ¥\_\_]¥Y¥Z\_ZS]W^]WZXXUZVWVW  
@HWI-EAS443:3:10:1720:770#0/1  
GAGTTTTTTGAACAAATTACTTGTCAATGGTAAATGGGAA  
+HWI-EAS443:3:10:1720:770#0/1  
`PaH¥¥^X¥¥H]UVWS¥PYPYU]YHP[S]BBBBBBBBBBB  
@HWI-EAS443:3:25:616:77#0/1  
CACTTGGTCCATCGGTCATTACAGTAAAGCAAGAACCCTT  
+HWI-EAS443:3:25:616:77#0/1  
^babba`a`aabbba\_^]b`aU\_bT¥\_]`YaaaaVJT]¥  
@HWI-EAS443:3:26:1115:978#0/1  
GGGCTATATACAGTAAAGACAACAGTATAAGAATCGGGGC  
+HWI-EAS443:3:26:1115:978#0/1  
abbb[T[baaa`U^VTb`b[\_[WJ[Hba`]TW]]Sa[WRB  
@HWI-EAS443:3:34:1357:237#0/1  
GAACCGATTCTTATACTGTTGTCTTTACTGTATATAGACC  
+HWI-EAS443:3:34:1357:237#0/1  
aa[\_\_bVa¥ZX^aY¥R][Q¥X[ZTZ^\_¥YaUBBBBBBBBBB  
@HWI-EAS443:3:37:447:150#0/1  
CGNATGGGCTATATACAGTAAAGACAACAGTATAAGAATC

+HWI-EAS443:3:37:447:150#0/1  
aYDRV[Y¥[]\_\_`]]X`RZ¥]]UZJ[XNMKKPXXUNW]Y  
@HWI-EAS443:3:38:760:1329#0/1  
GGCGTTTTTTGAACAAATTACTTGTCAATGGTAAATGGCA  
+HWI-EAS443:3:38:760:1329#0/1  
a\_WS[aY\_X¥]`¥^`[T¥YY]TTKY^W]ZVGWVZ]WWS  
@HWI-EAS443:3:39:1740:487#0/1  
CGGGCTATATACAGTAAAGACAACAGTATAAGAATCGGGG  
+HWI-EAS443:3:39:1740:487#0/1  
a``aUSaa]W^``\_RP\_T]GTa]`^Q[\_\_VV[^^P¥PDI  
@HWI-EAS443:3:39:893:1425#0/1  
GGACTATATACAGTAAAGACAACAGTATAAGAATCGGTTC  
+HWI-EAS443:3:39:893:1425#0/1  
`bbbbbab\_abb\_Uabbbaaaa^``Uab`b`a]aa\_GON  
@HWI-EAS443:3:53:962:1456#0/1  
ACGGATTCTTATACTGTTGTCTTTACTGTATATAGCCCAT  
+HWI-EAS443:3:53:962:1456#0/1  
aYGU`¥X`a`\_`¥abbY`X\_baaba\_a[a\_b`aaaZPPa^  
@HWI-EAS443:3:6:1078:466#0/1  
GGGCTATATACAGTAAAGACAACAGTATAAGAATCGGGTC  
+HWI-EAS443:3:6:1078:466#0/1  
\_`bXS\_\_¥a¥ZabZaaa`ZTUYYW][MJa`\_^\_\_X\_[BBB  
@HWI-EAS443:3:70:1446:1649#0/1  
CCTATCCAAACACCATTGCCGATTTGAATGAAAATCATT  
+HWI-EAS443:3:70:1446:1649#0/1  
abb¥^^¥Y\_WXZVWYXOS\_`bNWWaa^XQaa`RQNYOFVZ  
@HWI-EAS443:3:71:737:1642#0/1  
CGGGCTATATACAGTAAAGACAACAGTATAAGAATCGGGT  
+HWI-EAS443:3:71:737:1642#0/1  
aaaab]V\_¥^\_\_\_¥FZV¥¥Z`^a\_]S]``\_W^]XLY]FT  
@HWI-EAS443:3:87:991:109#0/1  
GGGTGGGCTATATACAGTAAAGACAACAGTATAAGAATCG  
+HWI-EAS443:3:87:991:109#0/1  
aa^V`a]\_XY]YUGOZaRLUL\_[NUUR][QVUV¥XP¥[W^  
@HWI-EAS443:3:92:1326:1087#0/1  
GATTCTTATACTGTTGTCTTTACTGTATATAGCCCATACA  
+HWI-EAS443:3:92:1326:1087#0/1  
a\_aaWY[\_Y^aa`ZSaUXa¥¥YS^^Yaa]XX]Y[\_ZLF[\_  
@HWI-EAS443:3:14:560:908#0/1  
GCCGTATTTGAANGAAAATCCTTTTACTCCATTTGCTCCA  
+HWI-EAS443:3:14:560:908#0/1  
aabb[aab]b]YD^Y[`¥aaa`aa\_aa\_\_aa\_\_\_^`a\_a  
@HWI-EAS443:3:20:1501:697#0/1  
GTCCAGTATCGTCTAATGGAGCAAATGGAGTAAAANGATT  
+HWI-EAS443:3:20:1501:697#0/1  
^]aY`aa``\_a`^a``a``[\_Q]\_a`a`¥`U``\_[D[¥[]  
@HWI-EAS443:3:21:313:158#0/1  
GCCTGTCCATCACTTGNTCCATCGGTTCATTACAGTAAAGC  
+HWI-EAS443:3:21:313:158#0/1  
ababb`aa`aaa\_aa[DXa```aa\_Z``\_^ZW\_^^``¥¥



@HWI-EAS443:3:21:506:1261#0/1  
GGAGTTTTTTGAACAAANTACTTGTCAATGGTAAATGGCA  
+HWI-EAS443:3:21:506:1261#0/1  
X`Y`]\_U¥aaQ\_X]a\_WDY¥`¥RXRJ`VX]a¥a`\_UZUVZ  
@HWI-EAS443:3:23:906:538#0/1  
GGCTATATACAGTAAAGACAACAGTATAAGAATCGGNTCC  
+HWI-EAS443:3:23:906:538#0/1  
aaaaaa^aaUa`\_a\_aa`\_\_`\_\_`X^`\_a^¥^\_U¥TDRQR  
@HWI-EAS443:3:29:1647:471#0/1  
GAGTTTTTTGAACAAATTACTNGTCAATGGTAAATGGCAA  
+HWI-EAS443:3:29:1647:471#0/1  
a^]U]aaaa`\_a[a`\_b\_a^]D]`VWO¥aXWaaa`\_XBBB  
@HWI-EAS443:3:34:1223:1275#0/1  
ATCGTCTAATGGAGCAAATGGAGTAAAANGATTTTCATTC  
+HWI-EAS443:3:34:1223:1275#0/1  
`aab`abbba¥\_Y`^aa\_aaa]b]`\_a]DY`¥`\_`¥¥`\_]  
@HWI-EAS443:3:37:336:1210#0/1  
GGTCCAGTATCGTCTAATGGAGCAAATGGAGTNAAGGAT  
+HWI-EAS443:3:37:336:1210#0/1  
ababb^bb`bbaaba`abaaaaabab¥aYaSDZab`\_a\_  
@HWI-EAS443:3:62:496:1845#0/1  
GAGTTTTTTGAANAAATTACTTGTCAATGGTAAATGGCAA  
+HWI-EAS443:3:62:496:1845#0/1  
abWX[babaa`^D]`bbaa`a\_XU[`\_a\_QLY[¥VNI`ba  
@HWI-EAS443:3:63:1224:1593#0/1  
GGAGTTTTTTGAACAAATTACTTGTCAANTGGTAAATGGCA  
+HWI-EAS443:3:63:1224:1593#0/1  
]baa^bbb\_b`\_a\_abbbaaaba`bYD¥bWOW`a\_^]a`  
@HWI-EAS443:3:64:293:583#0/1  
GGAGTTTTTTGAACAAATTACTTGTCAATGNTAAATGGCA  
+HWI-EAS443:3:64:293:583#0/1  
a]RYT`] ^aaVT\_^]]]aX`\_`¥¥`\_Z^ZDN[\_\_XZZX\_  
@HWI-EAS443:3:73:1253:1674#0/1  
ACCGATTCTTATACTGTTGTCTTTACTGTATATAGCCCAT  
+HWI-EAS443:3:73:1253:1674#0/1  
a`aaaaa[D¥a`a^aa`\_`^\_a`aa^\_\_^a`\_`¥W\_[\_\_  
@HWI-EAS443:3:82:1451:223#0/1  
AGTTTTTTGAACNAATTACTTGTCAATGGTAAATGGCAAC  
+HWI-EAS443:3:82:1451:223#0/1  
ab\_\_aaaaaN\_RD[bba^^aab\_\_^aaa`]aabaORXa`G  
@HWI-EAS443:3:93:1178:285#0/1  
ACCGATTCTTATACTGTTGTCTTTACTGTATANAGCCCAT  
+HWI-EAS443:3:93:1178:285#0/1  
a\_\_a\_aa`\_aaa`^ab^`a`\_aaa^W\_a]^\_XDT]ZSXZ^  
@HWI-EAS443:3:94:1613:1789#0/1  
AATCCTTTTACTCCATTTGCTCCANTAGACGATACTGGAC  
+HWI-EAS443:3:94:1613:1789#0/1  
aWab^¥\_VT\_a`aYba\_S]Rbab¥D[a\_a^aSY`W¥a^\_U  
@HWI-EAS443:3:95:1588:1038#0/1  
AATCCTTTTACTCCNTTTGCTCCATTAGACGATACTGGAC

+HWI-EAS443:3:95:1588:1038#0/1  
abbaaabbbbababPD[baa¥ba`abbaa\_\_b`a`Xaa\_^R  
@HWI-EAS443:3:99:926:1314#0/1  
GGAGTNTTTTGAACAAATTACTTGTCAATGGTAAATGGCA  
+HWI-EAS443:3:99:926:1314#0/1  
¥^ab[D]`bb^abaa`baaa`abbaaZabb¥^aX]SaRIB  
@HWI-EAS443:3:100:616:558#0/1  
ANTTGAATGAAAATCCTTTTACTCCATTTGCTCCATTAGA  
+HWI-EAS443:3:100:616:558#0/1  
^D]ab\_\_bbaaaa\_\_aaaa`aa\_a\_¥[a^`¥Y\_\_\_`a\_  
@HWI-EAS443:3:33:453:1793#0/1  
AAGATTTTCATTCAAATACGGCAATGGTGTGGATAGGG  
+HWI-EAS443:3:33:453:1793#0/1  
^[GZ`¥¥aa\_WZa`YaaZaVY^\_\_aZTS\_]\_aRMRYWRUR  
@HWI-EAS443:3:39:1041:686#0/1  
GNATAAGAATCGGTTCCAAGGGGGATGTGTTTGCATAAG  
+HWI-EAS443:3:39:1041:686#0/1  
UDYbbbbbbbaaa]`aaY[a¥\_^\_P¥^R¥[¥\_^¥UX¥`VO  
@HWI-EAS443:3:4:725:918#0/1  
TGAAAGGATTTTCATTCAAATACGGCAATGGTGTGGAT  
+HWI-EAS443:3:4:725:918#0/1  
aYXY¥`aZU\_\_^[\_^^S\_¥^]X^`XSVXY\_UWTI\_[Z][U  
@HWI-EAS443:3:72:761:941#0/1  
GTTCCAGTATCGTCTAATGGAGCAAATGGAGTAAAAGGAT  
+HWI-EAS443:3:72:761:941#0/1  
a`a`\_aa\_aa`a\_\_`Z^a`\_^^^\_]a`\_¥\_Y\_^[\_`\_\_]\_  
@HWI-EAS443:3:7:561:551#0/1  
TAAAAATCCTTTTACTCCATTTGCTCCATTAGACGATACT  
+HWI-EAS443:3:7:561:551#0/1  
Xbbaabaaab`a`a`aa\_a\_aaa\_a`^\_aa^a\_`a`\_`RZ  
@HWI-EAS443:3:92:1451:291#0/1  
TGGGCTATATACAGTAAAGACAACAGTATAAGAATCGGGT  
+HWI-EAS443:3:92:1451:291#0/1  
¥\_a¥S]b`]a¥aba\_a]]`I¥aN¥bI`]`\_aaV`^^VFI  
@HWI-EAS443:3:12:990:22#0/1  
CGGGCTATATACAGTAAAGACAACAGTATAAGAATCGGTT  
+HWI-EAS443:3:12:990:22#0/1  
abbaaabab`a`ab\_a\_ab```a`a]`aa\_`\_`aU\_aVU  
@HWI-EAS443:3:16:1746:1737#0/1  
GGGCTATATACAGTAAAGACAACAGTATAAGAATCGGTTT  
+HWI-EAS443:3:16:1746:1737#0/1  
ab]^Y^Ya\_aa\_K\_\_Ya\_NRQ`W\_WS^a```\_aZDV]BBB  
@HWI-EAS443:3:18:1665:638#0/1  
TGGCCTGTCCATCACTTGGTCCATCGGTCATTACAGTAAA  
+HWI-EAS443:3:18:1665:638#0/1  
a\_VVYabY\_Y\_a\_\_Z\_\_`a^¥X`^^\_\_UTXX^¥VYXTQ][  
@HWI-EAS443:3:1:1158:654#0/1  
CTGCCGATTTTGAATGAAAATCCTTTTACTCCATTTGCTC  
+HWI-EAS443:3:1:1158:654#0/1  
abbbab[^bbba^`ba]`\_\_aHQZb^¥\_]^^^`b]`a`aS

@HWI-EAS443:3:20:1034:242#0/1  
NAAGGATTTTCATTCAAATACGGCAATGGTGTGGATAG  
+HWI-EAS443:3:20:1034:242#0/1  
DO[Y[[Y[[Y[[Y[[[[Z[[Y[[[[[[[[Z[[Y[[[[YU[[[W  
@HWI-EAS443:3:21:1041:1451#0/1  
GTATAAGAATCGGTTCCAAGGGGGATGTGTTTGCATAAA  
+HWI-EAS443:3:21:1041:1451#0/1  
aQaaaaaba^a`]YX]]^]]\_`^Z¥MTY[Z\_]YGLMTQF  
@HWI-EAS443:3:23:75:320#0/1  
AGCCTGTCCATCACTTGGTCCATCGGTCATTACAGTAAAG  
+HWI-EAS443:3:23:75:320#0/1  
`aab¥aU]aV[a\_`SZ^\_0`^`W\_\_Z0^\_V^SYTTQWT\_0  
@HWI-EAS443:3:29:793:24#0/1  
AGGGCTATATACAGTAAAGACAACAGTATAAGAATCGGTT  
+HWI-EAS443:3:29:793:24#0/1  
aaba\_a`¥aa``\_aU`\_`aa^a\_V`aY^\_^^]^^]^^BB  
@HWI-EAS443:3:2:1488:1087#0/1  
GGAGGCCTGTCCATCACTTGGTCCATCGGTCATTACAGTA  
+HWI-EAS443:3:2:1488:1087#0/1  
aUVaa)`aa]N\_Q^G]Qa¥WL¥\_]\_]PZURBBBBBBBBBB  
@HWI-EAS443:3:31:1042:1069#0/1  
GGGGCTATATACAGTAAAGACAACAGTATAAGAATCGGTT  
+HWI-EAS443:3:31:1042:1069#0/1  
ababbbabaaaa`a\_aabaaaab\_aa^aa\_a`a`a`\_`V]  
@HWI-EAS443:3:31:29:1944#0/1  
ATGGGCTATATACAGTAAAGACAACAGTATAAGAATCGGG  
+HWI-EAS443:3:31:29:1944#0/1  
a\_a\_\_b`a\_a^)`a\_W\_[`\_\_```YVSO[QR^ZZ]PBBBB  
@HWI-EAS443:3:38:1040:1219#0/1  
GGGCTATATACAGTAAAGACAACAGTATAAGAATCGGTTA  
+HWI-EAS443:3:38:1040:1219#0/1  
a\_]baaaaba`Ya^`]aa^Uaaaaa^)]`[T¥]¥R[ZVKD  
@HWI-EAS443:3:38:1715:76#0/1  
GGGCTATATACAGTAAAGACAACAGTATAAGAATCGGTTG  
+HWI-EAS443:3:38:1715:76#0/1  
``a¥U]a¥b\_\_^\_T\_[T\_`)]`YT¥^W[^ZRQWWWVWQOD  
@HWI-EAS443:3:39:675:1025#0/1  
CGCCGATTTGAATGAAAATCCTTTTACTCCATTTGCTCC  
+HWI-EAS443:3:39:675:1025#0/1  
a^b`XU¥aa`a\_^\_ZZX\_^^^a^`\_^\_`^\_\_\_\_^\_^^Q  
@HWI-EAS443:3:40:847:1162#0/1  
AGACCGATGGACCAAGTGATGGACAGGCCTCATACAAGAT  
+HWI-EAS443:3:40:847:1162#0/1  
`¥`````]a\_\_[[`[Y\_^\_`^Z^`^V`a^]\_\_\_\_\_ZP]\_\_\_  
@HWI-EAS443:3:40:955:441#0/1  
CGCCGATTTGAATGAAAATCCTTTTACTCCATTTGCTCC  
+HWI-EAS443:3:40:955:441#0/1  
X`U^ba^ba\_\_^b\_aV]^abab]b^Vb\_b\_R`\_[\_bXa[  
@HWI-EAS443:3:49:625:901#0/1  
CGGGCTATATACAGTAAAGACAACAGTATAAGAATCGGTT

+HWI-EAS443:3:49:625:901#0/1  
aa\_abb^bbaabaaaabbbbbaaaa`b`ba\_baaaa`YTZ  
@HWI-EAS443:3:53:124:1097#0/1  
GGAGGCCTGTCCATCACTTGGTCCATCGGTCATTACAGTA  
+HWI-EAS443:3:53:124:1097#0/1  
`aaaaaa\_b\_a`^P¥]aa\_N\_aS]]`\_N^X\_X\_]\_R\_  
@HWI-EAS443:3:53:1382:371#0/1  
GGGGCTATATACAGTAAAGACAACAGTATAAGAATCGGTT  
+HWI-EAS443:3:53:1382:371#0/1  
`¥[\_`\_aabab\_GU¥^`\_]\_Za`a^¥^^\_a^a[]`\_]X[^W  
@HWI-EAS443:3:54:527:755#0/1  
CGGCTATATACAGTAAAGACAACAGTATAAGAATCGGTTC  
+HWI-EAS443:3:54:527:755#0/1  
a`]ba]bZ]0][^]aa^a¥R]^\_TWKY``^TT]¥P[WRVY  
@HWI-EAS443:3:58:354:920#0/1  
CGGGCTATATACAGTAAAGACAACAGTATAAGAATCGGTT  
+HWI-EAS443:3:58:354:920#0/1  
aaaabbbba¥a\_aa`^a\_aaa`aa``¥a`\_`\_`¥]]OU  
@HWI-EAS443:3:58:916:620#0/1  
CGTCCATCACTTGGTCCATCGGTCATTACAGTAAAGCAAG  
+HWI-EAS443:3:58:916:620#0/1  
Y\_a``b`YV\_WUYW\_UaZaTJ[¥aa`^¥^a]JQ]a\_T\_]`  
@HWI-EAS443:3:63:433:1456#0/1  
AGACCGATGGACCAAGTGATGGACAGGCCTCATACAAGAT  
+HWI-EAS443:3:63:433:1456#0/1  
][abbaa`]YaaZV¥¥FR`\_[\_\_\_\_]SW]S¥^\_\_^`]^ [UU  
@HWI-EAS443:3:68:1431:342#0/1  
NAAAATCCTTTTACTCCATTTGCTCCATTAGACGATACTG  
+HWI-EAS443:3:68:1431:342#0/1  
DMWZZXXZXYYXXPUVYXXXOXUGUZZZZNNMUWZXZX  
@HWI-EAS443:3:6:1457:1804#0/1  
GAAATTACTTGTCAATGGTAAATGGCAACTCAGCACCGTC  
+HWI-EAS443:3:6:1457:1804#0/1  
J\_a]bbaa`\_a[]]aaa¥Xbbb]a`b]E]abaa\_G\_bZ[  
@HWI-EAS443:3:71:235:1918#0/1  
GGATGGGCTATATACAGTAAAGACAACAGTATAAGAATCA  
+HWI-EAS443:3:71:235:1918#0/1  
a]b[Z^baWSVb]abba`]¥]Z`aba`\_[a`aaa`a¥\_a  
@HWI-EAS443:3:74:1329:375#0/1  
AAAATCCTTTTACTCCATTTGCTCCATTAGACGATACTGT  
+HWI-EAS443:3:74:1329:375#0/1  
X`aa^\_^\_b\_a`[^`^bbbbbbaa\_[`bbb\_`[^baaW^XF  
@HWI-EAS443:3:74:630:241#0/1  
AGCCTGTCCATCACTTGGTCCATCGGTCATTACAGTAAAG  
+HWI-EAS443:3:74:630:241#0/1  
aa\_a\_¥]`aaa`aaa\_\_¥UW^FY``\_[ZX\_ZSM\_ZX^^]T  
@HWI-EAS443:3:77:331:183#0/1  
AGTTTTTTGAACAAATTACTTGTCAATGGTAAATGGCAAA  
+HWI-EAS443:3:77:331:183#0/1  
R\_N\_baW`a^b^babbba]`bb\_]bbbb¥[bY`abb`aaG

@HWI-EAS443:3:92:748:34#0/1  
AGTTTTTTGAACAAATTACTTGTCAATGGTAAATGGCAAG  
+HWI-EAS443:3:92:748:34#0/1  
V\_HU`¥¥¥`a`R\_a]^^[Sa\_baUIQ`a^XaZG]`\_GPYB  
@HWI-EAS443:3:96:728:1522#0/1  
CGCCTGTCCATCACTTGGTCCATCGGTCATTACAGTAAAG  
+HWI-EAS443:3:96:728:1522#0/1  
¥¥aba[`^]\_HX\_Va]^Z\_0^X0\_\_WQYU\_^\_]a\_Y]]X¥  
@HWI-EAS443:3:100:1018:1235#0/1  
ATGGGCTATATACAGTAAAGACAACAGTATAAGAATCGGT  
+HWI-EAS443:3:100:1018:1235#0/1  
aab\_a\_aaa\_a\_\_\_a^\_aaa`\_\_aS\_\_\_`a\_\_`^\_^]`BB  
@HWI-EAS443:3:100:1063:1165#0/1  
GTCCAGTATCGTCTAATGGAGCAAATGGAGTAAAAGGATT  
+HWI-EAS443:3:100:1063:1165#0/1  
a]Z]aaS\_\_W\_VX\_^a\_X^XYXZP^\_^PUa0^]]a]^BBB  
@HWI-EAS443:3:100:648:277#0/1  
AGTTTTTTGAACAAATTACTTGTCAATGGTAAATGGCAAC  
+HWI-EAS443:3:100:648:277#0/1  
^^Zaaba```a[^aaba\_a\_ba]¥W``a¥¥P[\_\_\_\_`]\_\_B  
@HWI-EAS443:3:100:848:1414#0/1  
ATTCTGAAGATCTTGTATGAGGCCTGTCCATCACTTGGTC  
+HWI-EAS443:3:100:848:1414#0/1  
abbaaba`b\_aH^a]aaaa^b`baa\_\_a]aaY]\_`a\_]Y]  
@HWI-EAS443:3:100:859:464#0/1  
GAGTTTTTTGAACAAATTACTTGTCAATGGTAAATGGCAA  
+HWI-EAS443:3:100:859:464#0/1  
a\_a^a`aaba`a]``aaaa\_a`a\_^\_\_`a\_Z^\_\_\_\_^^^\_a  
@HWI-EAS443:3:100:982:1948#0/1  
GGAGTTTTTTGAACAAATTACTTGTCAATGGTAAATGGCA  
+HWI-EAS443:3:100:982:1948#0/1  
`babUa¥bbaaa]Sb`aa\_a^`aba\_a\_\_a`]a`\_``]Pb  
@HWI-EAS443:3:10:1068:1021#0/1  
GGGCTATATACAGTAAAGACAACAGTATAAGAATCGGTTC  
+HWI-EAS443:3:10:1068:1021#0/1  
``\_\_`^a`¥Y]]^X^^^\_\_^\_\_Z\_YU^^[V¥Z]UXUZUTF  
@HWI-EAS443:3:10:1093:777#0/1  
ATGACAAACACATCCCCCTTGAACCGATTCTTATACTGT  
+HWI-EAS443:3:10:1093:777#0/1  
^aa¥\_aYabaaaaa`Y]\_a]Y`a^\_a]a\_¥`\_\_\_\_X`\_`  
@HWI-EAS443:3:10:1167:1442#0/1  
TGAAAATCCTTTTACTCCATTTGCTCCATTAGACGATACT  
+HWI-EAS443:3:10:1167:1442#0/1  
`aaYaa`ZUZ¥\_\_aYaIRaY\_¥`]X[\_¥YSW`TRMY^ZOW  
@HWI-EAS443:3:10:210:1226#0/1  
TTTTGAACAAATTACTTGTCAATGGTAAATGGCAACTCAG  
+HWI-EAS443:3:10:210:1226#0/1  
Ya^^bb`baaaabaabbaVbab`bb^\_abaa`aa`aaaa`  
@HWI-EAS443:3:10:353:612#0/1  
AAAGGATTTTCATTCAAATACGGCAATGGTGTGGATAG

+HWI-EAS443:3:10:353:612#0/1  
]`bb^`bbba]b`aab]aa`aaa[``]`Q`SaaaaY[`\_  
@HWI-EAS443:3:10:489:1333#0/1  
ACACCATTGCCGATTTGAATGAAAATCCTTTACTCCAT  
+HWI-EAS443:3:10:489:1333#0/1  
\_QZ¥ZZYaTU\_W`YZU``Y¥\_`^TN[YV[]S[X¥[V[YOW  
@HWI-EAS443:3:10:593:1043#0/1  
TGAGGCCTGTCCATCACTTGGTCCATCGGTCATTACAGTA  
+HWI-EAS443:3:10:593:1043#0/1  
[aaTUa\_aU`baU`SaY\_a^aVX`Y`UaG[]][W¥RY[¥S  
@HWI-EAS443:3:10:869:840#0/1  
TGGTCTTGCTTTACTGTAATGACCGATGGACCAAGTGAT  
+HWI-EAS443:3:10:869:840#0/1  
aba^aaaa`aa`aa\_aa]a`a``^a`aa\_^Z]\_]`Z^\_^  
@HWI-EAS443:3:10:899:957#0/1  
AAATTACTTGTCAATGGTAAATGGCAACTCAGCACCGTCT  
+HWI-EAS443:3:10:899:957#0/1  
a^abaaaaab\_```aaa^a``^\_\_\_\_a^`\_\_`[\_Y^`Y¥^  
@HWI-EAS443:3:10:980:432#0/1  
GATTCTTATACTGTTGTCTTTACTGTATATAGCCCATCCA  
+HWI-EAS443:3:10:980:432#0/1  
a\_\_\_W\_]a\_X\_`¥^XY^^^]V^^Z]\_]^XZURZZXZ  
@HWI-EAS443:3:11:1109:327#0/1  
TTTTTGAACAAATTACTTGTCAATGGTAAATGGCAACTCA  
+HWI-EAS443:3:11:1109:327#0/1  
`¥VaZaVbbb\_aa¥`]ab¥ab`^abaWbaaY¥Y^\_ZF¥OX  
@HWI-EAS443:3:11:1739:1236#0/1  
CTTGGAACCGATTCTTATACTGTTGTCTTTACTGTATATA  
+HWI-EAS443:3:11:1739:1236#0/1  
¥\_WF^`a^\_b`¥X\_\_^]ZaaZbb]\_]a¥Y^aaX]a\_\_^  
@HWI-EAS443:3:11:253:261#0/1  
AAAGGATTTTCATTCAAATACGGCAATGGTGTGGATAG  
+HWI-EAS443:3:11:253:261#0/1  
]\_bba\_abb`bba`aa``abbbab``abb[b`babaaaab  
@HWI-EAS443:3:11:369:1575#0/1  
AAATTACTTGTCAATGGTAAATGGCAACTCAGCACCGTCT  
+HWI-EAS443:3:11:369:1575#0/1  
`a¥aabaaaa`aaaaa[Zb`a\_\_\_¥aa\_^R`]a`\_Y^]]  
@HWI-EAS443:3:11:583:726#0/1  
GGCCTGTCCATCACTTGGTCCATCGGTCATTACAGTAAAG  
+HWI-EAS443:3:11:583:726#0/1  
aba`aaa[aXYa]\_[^^QUZ\_]\_\_aVZ]ZPP^`I\_\_aB  
@HWI-EAS443:3:11:717:1807#0/1  
ATGGGCTATATACAGTAAAGACAACAGTATAAGAATCGGT  
+HWI-EAS443:3:11:717:1807#0/1  
aYa^a\_Xa]XTaGV\_X]¥`\_^I^^Z]]O]^^WS]XRBBBB  
@HWI-EAS443:3:11:74:536#0/1  
GTTCTTGCTTTACTGTAATGACCGATGGACCAAGTGATGG  
+HWI-EAS443:3:11:74:536#0/1  
a\_aa`aaaaaa```a^`^\_`\_`a^\_\_X^X]]`X`]\_\_^

@HWI-EAS443:3:11:821:832#0/1  
GGCCTGTCCATCACTTGGTCCATCGGTCATTACAGTAAAG  
+HWI-EAS443:3:11:821:832#0/1  
\_baabbbbbbbabb]abbaabaabb^ba\_aba`a\_aaaZ  
@HWI-EAS443:3:11:984:2003#0/1  
GGGCTATATACAGTAAAGACAACAGTATAAGAATCGGTTC  
+HWI-EAS443:3:11:984:2003#0/1  
aaa`[[Ya\_\_\_\_\_XHW`\_\_\_\_^^^V^\_X¥]^XX]^VVXYBBB  
@HWI-EAS443:3:12:1372:1108#0/1  
TCTTGTATGAGGCCTGTCCATCACTTGGTCCATCGGTCAT  
+HWI-EAS443:3:12:1372:1108#0/1  
a\_aa]\_aaa^\_\_V]^\_^\_^\_\_W^Z^\_\_VZXW]^V]^ZWXX  
@HWI-EAS443:3:12:1418:568#0/1  
CCGATTCTTATACTGTTGTCTTTACTGTATATAGCCCATC  
+HWI-EAS443:3:12:1418:568#0/1  
a^```a`baaaaabb]aa¥¥aa`^Zabaaa`\_`a[^\_\_X  
@HWI-EAS443:3:12:1588:1261#0/1  
ATTTGAATGAAAATCCTTTTACTCCATTTGCTCCATTAGA  
+HWI-EAS443:3:12:1588:1261#0/1  
abbbaa^]a\_YSSb\_[aa[HWL]PVaa`a\_^\_X\_\_X\_PB  
@HWI-EAS443:3:12:1607:1188#0/1  
GGGCTATATACAGTAAAGACAACAGTATAAGAATCGGTTC  
+HWI-EAS443:3:12:1607:1188#0/1  
a]Z`¥^^[¥T`\_aYTQ\_^Z^[\_U¥^W`^^UZy][Y¥VBBB  
@HWI-EAS443:3:12:1682:1003#0/1  
CTTTACTGTAATGACCGATGGACCAAGTGATGGACAGGCC  
+HWI-EAS443:3:12:1682:1003#0/1  
abbbb]]\_]XbbaaI`aa]baaa\_a^a[aa¥V`a^X\_[V¥  
@HWI-EAS443:3:12:262:1209#0/1  
AGTTTTTTGAACAAATTACTTGTCAATGGTAAATGGCAAC  
+HWI-EAS443:3:12:262:1209#0/1  
VaT`[babab¥aab``\_ab\_a^aa^ab`Xa`a[b``\_aS  
@HWI-EAS443:3:12:446:322#0/1  
GGGCTATATACAGTAAAGACAACAGTATAAGAATCGGTTC  
+HWI-EAS443:3:12:446:322#0/1  
^b``\_R\_^]S^Z]Xa]aa]¥]X`VT][YXa\_\_``\_YWY  
@HWI-EAS443:3:12:572:217#0/1  
AGTTTTTTGAACAAATTACTTGTCAATGGTAAATGGCAAC  
+HWI-EAS443:3:12:572:217#0/1  
XaSbbaabaaa`abaaaaabab^a`abb\_[`¥¥\_a]a^a`  
@HWI-EAS443:3:12:621:1900#0/1  
ATTTGAATGAAAATCCTTTTACTCCATTTGCTCCATTAGA  
+HWI-EAS443:3:12:621:1900#0/1  
aaa``\_a`aaaa\_^WSaa\_]`Y\_]Xa\_¥\_\_X\_]\_\_\_\_Y`]]  
@HWI-EAS443:3:12:802:1484#0/1  
CACTTGGTCCATCGGTCATTACAGTAAAGCAAGAACCATT  
+HWI-EAS443:3:12:802:1484#0/1  
aaaaaaaa^baa\_aaaY\_a``a`Y[]a`^¥[``\_aaa^\_`\_\_  
@HWI-EAS443:3:12:981:1161#0/1  
GTCCAGTATCGTCTAATGGAGCAAATGGAGTAAAAGGATT

+HWI-EAS443:3:12:981:1161#0/1  
a\_^\_a[ `X¥Y` [Y¥T¥LYUZZ¥WVaS\_^Z]^WQQY  
@HWI-EAS443:3:13:1070:1994#0/1  
ATGGAGTAAAAGGATTTTCATTCAAATACGGCAATGGTGT  
+HWI-EAS443:3:13:1070:1994#0/1  
aaaaaaVabbb`¥aaa\_YZ`aaa`aaa`Xa\_^\_a\_a^`^  
@HWI-EAS443:3:13:1251:1273#0/1  
GGACCAAGTGATGGACAGGCCTCATACAAGATCTTCAGAA  
+HWI-EAS443:3:13:1251:1273#0/1  
Z\_Z\_T\_Y¥WZ^`aaV]] [[WUY` `\_]a` ]` [SO^\_a\_]U  
@HWI-EAS443:3:13:1285:1589#0/1  
GTCCAGTATCGTCTAATGGAGCAAATGGAGTAAAAGGATT  
+HWI-EAS443:3:13:1285:1589#0/1  
aba\_aa\_ab\_aa`a\_`aa`^ba^` `aaWG` ]\_\_`\_W^]]Y  
@HWI-EAS443:3:13:1613:320#0/1  
ATGAAAATCCTTTTACTCCATTTGCTCCATTAGACGATAC  
+HWI-EAS443:3:13:1613:320#0/1  
aab`a^]aTQYaaaa]^Z^a\_¥Z[¥[U[\_[^W^¥^\_X  
@HWI-EAS443:3:13:245:524#0/1  
ACCGATTCTTATACTGTTGTCTTTACTGTATATAGCCCAT  
+HWI-EAS443:3:13:245:524#0/1  
ab]FR`a^aaa\_\_aaa]`\_^\_a\_^\_a\_a¥a` `^¥X¥Z^\_^  
@HWI-EAS443:3:13:497:771#0/1  
GTTTTTTGAACAAATTACTTGTCAATGGTAAATGGCAACT  
+HWI-EAS443:3:13:497:771#0/1  
^Y[\_`a]\_Z]`Y¥\_a[^¥\_a^\_XT[`]U]Y[Z\_^Y^]]Y  
@HWI-EAS443:3:13:781:1205#0/1  
AGTTTTTTGAACAAATTACTTGTCAATGGTAAATGGCAAC  
+HWI-EAS443:3:13:781:1205#0/1  
a` ` ` `^¥a\_a`aaa` `^` ]`^^Y]` `¥Z^\_[ ]W]Y\_\_Y  
@HWI-EAS443:3:13:903:716#0/1  
GTCTAATGGAGCAAATGGAGTAAAAGGATTTTCATTCAAA  
+HWI-EAS443:3:13:903:716#0/1  
a\_\_aaXaaa[a`¥`\_]aa]a\_`Z^`a` ]^`^\_]` `\_^`^U  
@HWI-EAS443:3:13:980:1766#0/1  
GGGCTATATACAGTAAAGACAACAGTATAAGAATCGGTTC  
+HWI-EAS443:3:13:980:1766#0/1  
T`b^aaaab`VaOVbaYUa\_¥aU`bRa¥`\_aab]aVBBBB  
@HWI-EAS443:3:14:1142:666#0/1  
CACCATGGCGTATTTGAATGAAAATCCTTTTACTCCATT  
+HWI-EAS443:3:14:1142:666#0/1  
]Y\_¥¥Z¥`^W\_VY\_\_W¥Z]\_U]M]¥[SSZb`a`^] [\_]Z]  
@HWI-EAS443:3:14:115:197#0/1  
GGCCTGTCCATCACTTGGTCCATCGGTCATTACAGTAAAG  
+HWI-EAS443:3:14:115:197#0/1  
aabbab`abbaaaaaaa\_aaaaaaY¥\_\_` `\_\_a]\_a^X  
@HWI-EAS443:3:14:1312:657#0/1  
ATCGTCTAATGGAGCAAATGGAGTAAAAGGATTTTCATTC  
+HWI-EAS443:3:14:1312:657#0/1  
aa]`^T`^` [\_VZ]YY]Y]¥[W¥[X^Z^]¥WMU]XQX]WY



@HWI-EAS443:3:14:1517:211#0/1  
AGTTTTTTGAACAAATTACTTGTCAATGGTAAATGGCAAC  
+HWI-EAS443:3:14:1517:211#0/1  
ab\_aba`ba`Z``\_a`a`\_a]]\_a`\_[\_\_]^`^^\_^[  
@HWI-EAS443:3:14:1544:953#0/1  
GTTCTTGCTTTACTGTAATGACCGATGGACCAAGTGATGG  
+HWI-EAS443:3:14:1544:953#0/1  
ZZb^ba[ab`a\_ab\_`^bab¥¥¥ba^^Xa¥L^aaYa¥\_\_]  
@HWI-EAS443:3:14:459:1459#0/1  
GTCCAGTATCGTCTAATGGAGCAAATGGAGTAAAAGGATT  
+HWI-EAS443:3:14:459:1459#0/1  
`¥V`¥X^ZH^]NU\_ZX^U¥UW^P\_[a¥¥X]P]X\_`JPURQ  
@HWI-EAS443:3:14:640:1177#0/1  
AGTTTTTTGAACAAATTACTTGTCAATGGTAAATGGCAAC  
+HWI-EAS443:3:14:640:1177#0/1  
`bZbbaaaa[a`aaaaabbaaa^`\_`aa\_Za`a^\_\_^aa]  
@HWI-EAS443:3:14:767:1893#0/1  
GACCGATGGACCAAGTGATGGACAGGCCTCATACAAGATC  
+HWI-EAS443:3:14:767:1893#0/1  
X¥b\_aaY`b`¥abb^abb\_\_a`\_`aba]abababb\_aaS  
@HWI-EAS443:3:14:909:2020#0/1  
ATTTGAATGAAAATCCTTTTACTCCATTTGCTCCATTAGA  
+HWI-EAS443:3:14:909:2020#0/1  
R\_^¥bba\_Yab^b\_YJ`SV¥bbbbTbb`ba\_\_bYb]Xa^`  
@HWI-EAS443:3:15:1110:1657#0/1  
GAGTTTTTTGAACAAATTACTTGTCAATGGTAAATGGCAA  
+HWI-EAS443:3:15:1110:1657#0/1  
\_Z\_[Za`aa\_[KYW\_a`¥0[`b]]\_\_aa]S`\_YY\_^\_[\_  
@HWI-EAS443:3:15:1113:792#0/1  
TGGATGGGCTATATACAGTAAAGACAACAGTATAAGAATC  
+HWI-EAS443:3:15:1113:792#0/1  
`a^¥\_b\_ZUU]¥VWV\_]¥N]¥aRO^aaa\_[G\_]`a]ZY¥  
@HWI-EAS443:3:15:1193:1624#0/1  
CGTATTTGAATGAAAATCCTTTTACTCCATTTGCTCCATT  
+HWI-EAS443:3:15:1193:1624#0/1  
aba`bbbabaabaaabb\_\_baa`bZba\_aaa`\_aa\_\_aa^  
@HWI-EAS443:3:15:394:1597#0/1  
CTTATGACAAACACATCCCCCTTGAACCGATTCTTATAC  
+HWI-EAS443:3:15:394:1597#0/1  
aabbaabbababbbbabbbaaaa`a`]a`ab\_\_a`aaaaaa  
@HWI-EAS443:3:15:479:308#0/1  
GGGCTATATACAGTAAAGACAACAGTATAAGAATCGGTTC  
+HWI-EAS443:3:15:479:308#0/1  
a``a]TY`^]QZa`¥ZG[]U[TZZ[M[]ZZ[]¥[`aBBBB  
@HWI-EAS443:3:15:530:869#0/1  
TTTTTGAACAAATTACTTGTCAATGGTAAATGGCAACTCA  
+HWI-EAS443:3:15:530:869#0/1  
abbaaaabaaaaba`aaa\_aaaaa\_Wa`\_``\_a```^\_  
@HWI-EAS443:3:15:963:890#0/1  
AATCCTTTTACTCCATTTGCTCCATTAGACGATACTGGAC

+HWI-EAS443:3:15:963:890#0/1  
X`\_Y`aa\_H]\_Y\_\_abbaS^adW^]¥aYTaaaZK^UQ`N  
@HWI-EAS443:3:15:965:484#0/1  
GAATGAAAATCCTTTTACTCCATTTGCTCCATTAGACGAT  
+HWI-EAS443:3:15:965:484#0/1  
[^bbbbabb]`Z`\_abbab\_V`abaaa\_a\_a`aa`aabaa  
@HWI-EAS443:3:16:1032:1077#0/1  
GAGTTTTTTGAACAAATTACTTGTCAATGGTAAATGGCAA  
+HWI-EAS443:3:16:1032:1077#0/1  
^TZ\_aaa]`b`a^aaa`a`aa]`a`a\_aaa[`\_`a\_`^`  
@HWI-EAS443:3:16:1067:1001#0/1  
CCCTATCCAAACACCATTGCCGTATTTGAATGAAAATCCT  
+HWI-EAS443:3:16:1067:1001#0/1  
abaabbbbb^a¥aba]aabaaa\_\_aaaa]aaaa`\_\_a]W`  
@HWI-EAS443:3:16:1184:947#0/1  
AATGACCGATGGACCAAGTGATGGACAGGCCTCATACAAG  
+HWI-EAS443:3:16:1184:947#0/1  
]RY`Xa`¥`aaV]RZXWa\_V][Y[^ZZ`ZZ[\_Z]  
@HWI-EAS443:3:16:1309:1171#0/1  
GGCCTGTCCATCACTTGGTCCATCGGTCATTACAGTAAAG  
+HWI-EAS443:3:16:1309:1171#0/1  
ab`aa^a]b`aaa\_aa[\_`aa^a\_[aa]\_^Y^URZ\_`  
@HWI-EAS443:3:16:1430:744#0/1  
AAACACCATTGCCGTATTTGAATGAAAATCCTTTTACTCC  
+HWI-EAS443:3:16:1430:744#0/1  
\_\_\_\_\_¥¥¥\_\_^\_a`]\_`]^R^]\_\_^\_^]X]a\_Z^a\_]XT  
@HWI-EAS443:3:16:1446:1048#0/1  
AAAGGATTTTCATTCAAATACGGCAATGGTGTGGATAG  
+HWI-EAS443:3:16:1446:1048#0/1  
\_`abY^b]`\_aa`V^\_a`]HYWS[``^G¥Raa\_]SU[N  
@HWI-EAS443:3:16:1477:265#0/1  
GGAGTTTTTTGAACAAATTACTTGTCAATGGTAAATGGCA  
+HWI-EAS443:3:16:1477:265#0/1  
abab\_`aaaaaa]aa`aaaa^a`bX\_a`a`^W\_\_W^ZV\_  
@HWI-EAS443:3:16:164:1079#0/1  
CAAATTACTTGTCAATGGTAAATGGCAACTCAGCACCGTC  
+HWI-EAS443:3:16:164:1079#0/1  
aaaZbYUaabbbaa`a\_QU`]Z\_aa\_aa^[\_a\_a`R^Y  
@HWI-EAS443:3:16:1720:1009#0/1  
ATCACTTGGTCCATCGGTCATTACAGTAAAGCAAGAACCA  
+HWI-EAS443:3:16:1720:1009#0/1  
`b`aaaZT^XZ`^]a]`a[YG^RSW¥\_¥0¥¥][PLDU  
@HWI-EAS443:3:16:624:864#0/1  
CAAACACATCCCCCTTGAACCGATTCTTATACTGTTGTC  
+HWI-EAS443:3:16:624:864#0/1  
VW[U\_¥\_`^Z`a¥aaaaYa¥Y`\_`\_X]\_`¥\_[]a[Z¥TT  
@HWI-EAS443:3:16:643:1410#0/1  
GGCCTGTCCATCACTTGGTCCATCGGTCATTACAGTAAAG  
+HWI-EAS443:3:16:643:1410#0/1  
^`baa\_a`bb]abbabbb`bbbbbbb^abbbbaa`][\_bba



+HWI-EAS443:3:18:1279:1658#0/1  
a`aaaba]\_a\_JP\_`T\_aV`N`\_0a\_a]^\_^X\_SR\_]\_]\_0  
@HWI-EAS443:3:18:1458:2002#0/1  
AAATTACTTGTC AATGGTAAATGGCAACTCAGCACCGTCT  
+HWI-EAS443:3:18:1458:2002#0/1  
abYaYb^`^`]^`^a\_aJIY^¥]^¥R¥`]YU\_]0\_BBBBBB  
@HWI-EAS443:3:18:1458:620#0/1  
CAGTATAAGAATCGGTTCCAAGGGGGATGTGTTTGCATA  
+HWI-EAS443:3:18:1458:620#0/1  
abbaabbbbabbbabb\_\_a``[]Y\_aa\_\_a¥Za\_a¥XPS^`  
@HWI-EAS443:3:18:1542:687#0/1  
AGCAAATGGAGTAAAAGGATTTTCATTCAAATACGGCAAT  
+HWI-EAS443:3:18:1542:687#0/1  
^\_]aaabbaa\_`^aaaaba\_a`a`\_aaaa\_aaa\_a`]\_\_^  
@HWI-EAS443:3:18:1594:648#0/1  
ATTCTGAAGATCTTGATGAGGCCTGCCATCACTTGGTC  
+HWI-EAS443:3:18:1594:648#0/1  
¥S`Ya^`b\_W\_aabaRa\_``aa\_\_``[M` [[]aZ\_\_[ST]  
@HWI-EAS443:3:18:164:562#0/1  
GGATGGGCTATATACAGTAAAGACAACAGTATAAGAATCG  
+HWI-EAS443:3:18:164:562#0/1  
^a\_a`]\_a¥`aba\_`Va\_aTa\_`\_aa]aX\_\_^^YWUWZB  
@HWI-EAS443:3:19:1131:760#0/1  
GAACAAATTACTTGTC AATGGTAAATGGCAACTCAGCACCC  
+HWI-EAS443:3:19:1131:760#0/1  
aa`ab\_XaK¥abV\_``¥RVba[`aM¥`I\_bV`aW\_L`¥\_¥  
@HWI-EAS443:3:19:1162:1811#0/1  
GTTCTTGCTTTACTGTAATGACCGATGGACCAAGTGATGG  
+HWI-EAS443:3:19:1162:1811#0/1  
]Sba]aa]a¥WYaab\_a``aa[`aa`aaa`\_aaaX``[a\_  
@HWI-EAS443:3:19:1223:626#0/1  
AAATTACTTGTC AATGGTAAATGGCAACTCAGCACCGTCT  
+HWI-EAS443:3:19:1223:626#0/1  
a`b`baa`a`aa\_]¥ba¥aaaZ^^[`\_W\_Xaa¥a]¥\_]U  
@HWI-EAS443:3:19:1243:780#0/1  
ATTTGAATGAAAATCCTTTTACTCCATTTGCTCCATTAGA  
+HWI-EAS443:3:19:1243:780#0/1  
aabbbbbbbbabbb\_abbbbbabaabbabbaabaabaaaa  
@HWI-EAS443:3:19:1289:490#0/1  
GGGCTATATACAGTAAAGACAACAGTATAAGAATCGGTTC  
+HWI-EAS443:3:19:1289:490#0/1  
a]V^bab\_\_`]\_b\_\_¥`^^\_¥OX\_X]Y^`]\_]`^]`THNV  
@HWI-EAS443:3:19:1683:1405#0/1  
GAACAAATTACTTGTC AATGGTAAATGGCAACTCAGCACCC  
+HWI-EAS443:3:19:1683:1405#0/1  
`bba`bbbbbbSa\_b\_``^bb]]a\_[Ua`]a]\_a^¥\_]ZNB  
@HWI-EAS443:3:19:233:1027#0/1  
AGTTTTTTGAACAAATTACTTGTC AATGGTAAATGGCAAC  
+HWI-EAS443:3:19:233:1027#0/1  
\_`Uababbb\_ba``aaaaabab`baWaaa]a`a`a\_aa`a

@HWI-EAS443:3:19:44:1866#0/1  
AAGGATTTTCATTCAAATACGGCAATGGTGTGGATAGG  
+HWI-EAS443:3:19:44:1866#0/1  
aba`\_a`aa`aa\_a`\_a^Z\_\_\_\_\_]\_WW[X\_]¥[]^¥^  
@HWI-EAS443:3:19:474:831#0/1  
ATTTGAATGAAAATCCTTTTACTCCATTTGCTCCATTAGA  
+HWI-EAS443:3:19:474:831#0/1  
abab`¥Y`ba^aaaba`aa\_\_`aaaaaaa`a\_a^aa\_a[a  
@HWI-EAS443:3:19:599:529#0/1  
GTTTTTTGAACAAATTACTTGTCAATGGTAAATGGCAACT  
+HWI-EAS443:3:19:599:529#0/1  
a^T\_S`a\_]ZNa[Z`TV\_\_^¥UPPZTa`XOLSSJVZU\_¥U  
@HWI-EAS443:3:19:687:66#0/1  
AGCAAATGGAGTAAAAGGATTTTCATTCAAATACGGCAAT  
+HWI-EAS443:3:19:687:66#0/1  
a`a`\_abbb]b\_aaabb]Y\_aaaXaa^\_aa[``¥a^Y\_^  
@HWI-EAS443:3:19:759:470#0/1  
GTATGAGGCCTGTCCATCACTTGGTCCATCGGTCATTACA  
+HWI-EAS443:3:19:759:470#0/1  
`H^a`]¥^`\_aY^\_\_\_\_\_]Y^]]\_]V]^X^]XX\_SVYY^  
@HWI-EAS443:3:19:929:1980#0/1  
ACCAAGTGATGGACAGGCCTCATACAAGATCTTCAGAATA  
+HWI-EAS443:3:19:929:1980#0/1  
]ab¥QS`a]^J¥^a`Z]V¥\_\_`aX^ZVWV[[a\_\_ZU  
@HWI-EAS443:3:1:1072:724#0/1  
GGCCTGTCCATCACTTGGTCCATCGGTCATTACAGTAAAG  
+HWI-EAS443:3:1:1072:724#0/1  
aaaabba[\_aa^b`aaab`\_`bba`a`^aab^N`\_W^\_aB  
@HWI-EAS443:3:1:1161:276#0/1  
GGGCTATATACAGTAAAGACAACAGTATAAGAATCGGTTC  
+HWI-EAS443:3:1:1161:276#0/1  
a`X`\_`\_`\_`^¥`]¥¥\_a\_\_\_\_\_Z^^[^`Z^\_XZ\_R^BBBB  
@HWI-EAS443:3:1:1185:799#0/1  
ATCGTCTAATGGAGCAAATGGAGTAAAAGGATTTTCATTC  
+HWI-EAS443:3:1:1185:799#0/1  
abab\_\_b\_Z^W\_S`U`\_`aaa¥a`\_`aaa\_T¥a\_aY``BB  
@HWI-EAS443:3:1:1208:1619#0/1  
GAGTTTTTTGAACAAATTACTTGTCAATGGTAAATGGCAA  
+HWI-EAS443:3:1:1208:1619#0/1  
`aa\_abbbbabbbabbbbaaab^\_\_a\_bbb\_abaaa`a`\_`  
@HWI-EAS443:3:1:1367:1208#0/1  
GGAGTTTTTTGAACAAATTACTTGTCAATGGTAAATGGCA  
+HWI-EAS443:3:1:1367:1208#0/1  
abaa`a`aaaa\_\_W`\_`a`a[\_`\_]X``aa][\_Z\_]BBBB  
@HWI-EAS443:3:1:1469:1203#0/1  
GGCCTGTCCATCACTTGGTCCATCGGTCATTACAGTAAAG  
+HWI-EAS443:3:1:1469:1203#0/1  
`b\_H]]`Z\_]Z`\_PVab¥XNT`]\_]SYRG^P]]ZSV\_BB  
@HWI-EAS443:3:1:154:1563#0/1  
AGCAAATGGAGTAAAAGGATTTTCATTCAAATACGGCAAT

+HWI-EAS443:3:1:154:1563#0/1  
abUab`^b\_babbbabaabaaaR\_baaaaaababa\_`¥a  
@HWI-EAS443:3:1:205:137#0/1  
GGGCTATATACAGTAAAGACAACAGTATAAGAATCGGTTC  
+HWI-EAS443:3:1:205:137#0/1  
abbaaaaabaabaZ`a```a`a\_aW`a`]a^a\_X`^BBB  
@HWI-EAS443:3:1:766:843#0/1  
ACTGTAATGACCGATGGACCAAGTGATGGACAGGCCTCAT  
+HWI-EAS443:3:1:766:843#0/1  
aaSUPb`aab]T`\_a[\_ZTY\_ab]b^]aa`U\_\_\_RRBBBB  
@HWI-EAS443:3:20:1082:702#0/1  
GTTTTTTGAACAAATTACTTGTCAATGGTAAATGGCAACT  
+HWI-EAS443:3:20:1082:702#0/1  
aW]babaaa`a\_aaa`aaa¥\_\_\_a`[HW\_^U\_\_¥`\_0^  
@HWI-EAS443:3:20:1113:72#0/1  
GAGCAAATGGAGTAAAAGGATTTTCATTCAAATACGGCAA  
+HWI-EAS443:3:20:1113:72#0/1  
a\_aY[R¥aa`Z`¥[ ]\_\_bb\_]\_0\_\_\_a^^]W]\_]\_]N[Y  
@HWI-EAS443:3:20:1136:475#0/1  
GAACAAATTACTTGTCAATGGTAAATGGCAACTCAGCACC  
+HWI-EAS443:3:20:1136:475#0/1  
aaa`^`aa`\_aaa¥^`\_aa`W`¥`^^¥^`\_¥\_U\_^¥\_WW  
@HWI-EAS443:3:20:580:1232#0/1  
AAATTACTTGTCAATGGTAAATGGCAACTCAGCACCCTCT  
+HWI-EAS443:3:20:580:1232#0/1  
aba\_\_bbb[Y\_aaaa^RVb`[ `a`aa`]a`a][Z^U`Z\_]`  
@HWI-EAS443:3:20:699:557#0/1  
AGTTTTTTGAACAAATTACTTGTCAATGGTAAATGGCAAC  
+HWI-EAS443:3:20:699:557#0/1  
\_b\_aaaaabaa^¥aaaaa`aa`^```aaaZa`\_^`\_\_`\_]`  
@HWI-EAS443:3:21:1047:2018#0/1  
GTCCAGTATCGTCTAATGGAGCAAATGGAGTAAAAGGATT  
+HWI-EAS443:3:21:1047:2018#0/1  
a]a]Z`V`Y^`TYX[ `^`\_[Y`^Y¥V[¥G\_T[^`\_^[[[  
@HWI-EAS443:3:21:1375:760#0/1  
CAAGTGATGGACAGGCCTCATACAAGATCTTCAGAAATAGA  
+HWI-EAS443:3:21:1375:760#0/1  
abab]b^`^`^`^`^`\_]`^a]a\_\_aa[ `W`\_^\_a\_Y^^^^  
@HWI-EAS443:3:21:1560:425#0/1  
GTTTTTTGAACAAATTACTTGTCAATGGTAAATGGCAACT  
+HWI-EAS443:3:21:1560:425#0/1  
a¥^\_\_\_^^^^^][Z\_]Z[^^^W[ZZ\_^OXZZZZ^ZZZXZ  
@HWI-EAS443:3:21:1680:885#0/1  
AAAATCCTTTTACTCCATTTGCTCCATTAGACGATACTGG  
+HWI-EAS443:3:21:1680:885#0/1  
a[ `^a^aa^aa`^aX`aaa`[\_]TP\_]a]QX¥a`\_^R¥PW  
@HWI-EAS443:3:21:1744:965#0/1  
GTTTAAAATGAATCCAAACCAAAGATAATAACCATTGGT  
+HWI-EAS443:3:21:1744:965#0/1  
a`aa¥][\_]Y^`\_]a\_^TT`\_`\_]\_\_\_\_\_^V]\_[ ] [ ]

@HWI-EAS443:3:21:438:1207#0/1  
GTATGAGGCCTGTCCATCACTTGGTCCATCGGTCATTACA  
+HWI-EAS443:3:21:438:1207#0/1  
`ab^Xaaabaaa`bbbaaaa\_]¥Tb``aaaaV\_`aa\_Ya  
@HWI-EAS443:3:21:45:1123#0/1  
GGGCTATATACAGTAAAGACAACAGTATAAGAATCGGTTC  
+HWI-EAS443:3:21:45:1123#0/1  
``^a]aaba```a^]W¥\_a\_]X\_]Y`[``ZS¥XT\_ZBBB  
@HWI-EAS443:3:21:747:1269#0/1  
AAATCCTTTTACTCCATTTGCTCCATTAGACGATACTGGA  
+HWI-EAS443:3:21:747:1269#0/1  
a\_aaabbbbaa\_a\_`Y\_aaaaa[X^`a`aaaa^\_]^X\_  
@HWI-EAS443:3:21:920:1948#0/1  
GTTTTTTGAACAAATTACTTGTCAATGGTAAATGGCAACT  
+HWI-EAS443:3:21:920:1948#0/1  
a\_````YZ]`UVa\_\_\_\_`\_\_U^X]`^WGXH\_]X]RTQ¥^SW  
@HWI-EAS443:3:22:1299:1586#0/1  
AGTTTTTTGAACAAATTACTTGTCAATGGTAAATGGCAAC  
+HWI-EAS443:3:22:1299:1586#0/1  
¥`Z^¥bbbaaa^aa`a```a`a`¥X]\_¥IY^`\_X][RaXZ  
@HWI-EAS443:3:22:186:691#0/1  
AGTTTTTTGAACAAATTACTTGTCAATGGTAAATGGCAAC  
+HWI-EAS443:3:22:186:691#0/1  
S^¥¥b]\_`\_T¥bba]`Z`b`WaT\_\_a\_^VHa`JV^aaba\_  
@HWI-EAS443:3:22:206:1517#0/1  
GGCTATATACAGTAAAGACAACAGTATAAGAATCGGTTCC  
+HWI-EAS443:3:22:206:1517#0/1  
`abaa^^\_a\_ba`\_]JXa`a\_a]R`\_^a¥R][YU^RX^¥  
@HWI-EAS443:3:22:454:1080#0/1  
GGCCTGTCCATCACTTGGTCCATCGGTCATTACAGTAAAG  
+HWI-EAS443:3:22:454:1080#0/1  
¥abbbbbbabbabbbb`b\_bbabbbb\_baba]aY`Z\_aa`  
@HWI-EAS443:3:22:478:1822#0/1  
GGAACCGATTCTTATACTGTTGTCTTTACTGTATATAGCC  
+HWI-EAS443:3:22:478:1822#0/1  
a``bba^``abaabaaaa\_`aa^aaa`ba\_a^aab\_aU^`  
@HWI-EAS443:3:22:596:110#0/1  
AGTTTTTTGAACAAATTACTTGTCAATGGTAAATGGCAAC  
+HWI-EAS443:3:22:596:110#0/1  
\_b¥`aaaaaaaSa`a`aa`a\_a\_``\_aa\_V``^]]a]`\_`  
@HWI-EAS443:3:22:864:423#0/1  
AAACACCATTGCCGATTTGAATGAAAATCCTTTTACTCC  
+HWI-EAS443:3:22:864:423#0/1  
a^¥a^¥]a`^^]`\_aaa^aaaaa\_a^aaYZ`a`a^U^OL  
@HWI-EAS443:3:23:102:1663#0/1  
TTTTGAACAAATTACTTGTCAATGGTAAATGGCAACTCAG  
+HWI-EAS443:3:23:102:1663#0/1  
\_¥]a`abaaaa\_\_a`a`a^a`^a`\_Wa\_YR[^\_^Z]`^\_Y  
@HWI-EAS443:3:23:1175:660#0/1  
GAGTTTTTTGAACAAATTACTTGTCAATGGTAAATGGCAA

+HWI-EAS443:3:23:1175:660#0/1  
[S]a]^a\_aaWX\_`^aa]\_ZU]W`\_OFYX¥\_¥UYNWH`\_  
@HWI-EAS443:3:23:765:1739#0/1  
TGAAAATCCTTTTACTCCATTTGCTCCATTAGACGATACT  
+HWI-EAS443:3:23:765:1739#0/1  
[`[IWS]^a^\_Q\_`a^ba^^Z]\_aX\_MX^]\_Y[SZ`¥YML  
@HWI-EAS443:3:23:858:838#0/1  
AAACACCATTGCCGTATTTGAATGAAAATCCTTTTACTCC  
+HWI-EAS443:3:23:858:838#0/1  
¥¥Z\_aa^U]`a^Y^YP^Z¥XZRS\_\_\_[``[W¥\_^Y`^]P¥  
@HWI-EAS443:3:23:894:1824#0/1  
GGAGTAAAAGGATTTTCATTCAAATACGGCAATGGTGT  
+HWI-EAS443:3:23:894:1824#0/1  
^`aTWbb`\_b`\_`\_ab`bbb\_aab¥bb`LaYba`VSR^^b`  
@HWI-EAS443:3:23:970:222#0/1  
GACCGATGGACCAAGTGATGGACAGGCCTCATACAAGATC  
+HWI-EAS443:3:23:970:222#0/1  
aaaab\_bbaaa`aabYba\_aaa\_\_a`aW^`\_`\_`\_]a\_^¥  
@HWI-EAS443:3:24:1054:694#0/1  
AAATCCTTTTACTCCATTTGCTCCATTAGACGATACTGGA  
+HWI-EAS443:3:24:1054:694#0/1  
abbbaabbbbaabbabaaa`aba\_aba`aaaa\_a\_]\_aa^  
@HWI-EAS443:3:24:1205:221#0/1  
GGAGTTTTTTGAACAAATTACTTGTCAATGGTAAATGGCA  
+HWI-EAS443:3:24:1205:221#0/1  
a`]\_^aaba\_a\_b^aaabba\_aab\_Ya^aa`Xa\_\_\_`[]`  
@HWI-EAS443:3:24:1367:904#0/1  
GGAGTTTTTTGAACAAATTACTTGTCAATGGTAAATGGCA  
+HWI-EAS443:3:24:1367:904#0/1  
ab^Y`a]bab`]a\_XS[baa[a`aa`^a\_a`^\_a\_\_\_RS]  
@HWI-EAS443:3:24:1504:1394#0/1  
CCTTGAACCGATTCTTATACTGTTGTCTTTACTGTATAT  
+HWI-EAS443:3:24:1504:1394#0/1  
`ab`bbbb¥b`\_`bZbbbb`\_baabbbba^^bb\_\_bb¥  
@HWI-EAS443:3:24:1576:1053#0/1  
GGAGTTTTTTGAACAAATTACTTGTCAATGGTAAATGGCA  
+HWI-EAS443:3:24:1576:1053#0/1  
¥^^\_Y`a`ba^`abaZ`^baabaaY[aabb`aYaa\_YVb  
@HWI-EAS443:3:24:1709:569#0/1  
GAACAAATTACTTGTCAATGGTAAATGGCAACTCAGCACC  
+HWI-EAS443:3:24:1709:569#0/1  
``[[\_aab\_aSba`]`^\_a`XK\_aXZa¥[[[D[Z^ZR]XR  
@HWI-EAS443:3:24:274:1398#0/1  
AGGATTTTCATTCAAATACGGCAATGGTGTGGATAGGG  
+HWI-EAS443:3:24:274:1398#0/1  
`VZ[Z`U\_\_a\_]a`][\_\_`\_^\_^]]YWPZR]^WWYTPZZW  
@HWI-EAS443:3:24:574:1957#0/1  
CTGAAGATCTTGTATGAGGCCTGTCCATCACTTGGTCCAT  
+HWI-EAS443:3:24:574:1957#0/1  
`[`Z`W]¥a`aaX^YQ\_aX\_]`]F]\_^`Za]Z[¥MO^Z]^



@HWI-EAS443:3:24:626:1300#0/1  
GGTCCAGTATCGTCTAATGGAGCAAATGGAGTAAAAGGAT  
+HWI-EAS443:3:24:626:1300#0/1  
abXb\_abU[]ba[^^]`]^S\_QTYTaa\_U`U`\_`\_`YW]  
@HWI-EAS443:3:24:723:791#0/1  
AGTTTTTTGAACAAATTACTTGTCAATGGTAAATGGCAAC  
+HWI-EAS443:3:24:723:791#0/1  
\_aZ`^^^bb`b`X\_baa^bbbZZ¥aaa`XY`^\_a^aaaa  
@HWI-EAS443:3:25:1029:570#0/1  
CTTACTGTAATGACCGATGGACCAAGTGATGGACAGGCC  
+HWI-EAS443:3:25:1029:570#0/1  
abbbbbbbbbbbbbbbbabbbbbbbbabbbb`babbb`a  
@HWI-EAS443:3:25:1199:30#0/1  
ATGGAGTAAAAGGATTTTCATTCAAATACGGCAATGGTGT  
+HWI-EAS443:3:25:1199:30#0/1  
abbbabaabbabbbbbbbbabbb`aaaba\_ba\_```aa\_b`  
@HWI-EAS443:3:25:1287:868#0/1  
ATGGAGTAAAAGGATTTTCATTCAAATACGGCAATGGTGT  
+HWI-EAS443:3:25:1287:868#0/1  
[^`^a`XTTTa`^XRab\_0¥\_P[aYVa\_aZIRN]aaXH\_F  
@HWI-EAS443:3:25:1735:469#0/1  
TGGAACCGATTCTTATACTGTTGTCTTTACTGTATATAGC  
+HWI-EAS443:3:25:1735:469#0/1  
`^S¥b^¥b`bb[\_baaaaba`b[TXaa\_Zbb\_a]aa``]  
@HWI-EAS443:3:25:918:1594#0/1  
GTTTTTTGAACAAATTACTTGTCAATGGTAAATGGCAACT  
+HWI-EAS443:3:25:918:1594#0/1  
¥MTVWHIPNTO\_BBBBBBBBBBBBBBBBBBBBBBBBBB  
@HWI-EAS443:3:26:125:962#0/1  
GCCTGTCCATCACTTGGTCCATCGGTCATTACAGTAAAGC  
+HWI-EAS443:3:26:125:962#0/1  
a¥Z`\_N`SUWWW\_VT[RLZ\_`^¥^^OGYJX]V¥QQLQWSF  
@HWI-EAS443:3:26:1616:177#0/1  
AGTTTTTTGAACAAATTACTTGTCAATGGTAAATGGCAAC  
+HWI-EAS443:3:26:1616:177#0/1  
¥a\_X\_ab`YUabb^Z`ab^baaa\_aaa`\_U\_a\_ZR]]a^X  
@HWI-EAS443:3:26:42:479#0/1  
GGAGTTTTTTGAACAAATTACTTGTCAATGGTAAATGGCA  
+HWI-EAS443:3:26:42:479#0/1  
a^Za[[Y`^T^X¥Y[a\_\_`]\_ZaS\_[W\_`TDT``[XXWZ  
@HWI-EAS443:3:26:502:1374#0/1  
GACCAAGTGATGGACAGGCCTCATACAAGATCTTCAGAAT  
+HWI-EAS443:3:26:502:1374#0/1  
aabbaZa¥a\_aa`aa`X``\_aa\_\_`a```^a\_\_a\_\_\_\_^`  
@HWI-EAS443:3:26:564:1063#0/1  
ATTGCCGATTTGAATGAAAATCCTTTTACTCCATTTGCT  
+HWI-EAS443:3:26:564:1063#0/1  
U\_IR\_X`^\_a¥R`WaaWZI\_QXb^VP¥abaaZR`\_[`IT¥  
@HWI-EAS443:3:26:724:1008#0/1  
AGTTTTTTGAACAAATTACTTGTCAATGGTAAATGGCAAC

+HWI-EAS443:3:26:724:1008#0/1  
abU`baaabaa`aa`ab`abaa\_aaaa\_\_]aaaa\_]aa`]  
@HWI-EAS443:3:26:997:779#0/1  
GGAGTTTTTTGAACAAATTACTTGTCAATGGTAAATGGCA  
+HWI-EAS443:3:26:997:779#0/1  
a[WYSZ\_[XY^LXT¥VZ]\_¥¥^\_\_XY¥¥^`UDUXWYW[QY  
@HWI-EAS443:3:27:1001:647#0/1  
GGCCTGTCCATCACTTGGTCCATCGGTCATTACAGTAAAG  
+HWI-EAS443:3:27:1001:647#0/1  
\_\_`\_`\_`ab\_`\_`a^`aaa¥]aaaa^UX]]][HP[0]^Y  
@HWI-EAS443:3:27:1194:1258#0/1  
GGATGGGCTATATACAGTAAAGACAACAGTATAAGAATCG  
+HWI-EAS443:3:27:1194:1258#0/1  
aaaaaabbb^aaaa\_aa]`aaaa`a\_\_a^a`aa`\_\_\_\_  
@HWI-EAS443:3:27:1347:288#0/1  
GTCCAGTATCGTCTAATGGAGCAAATGGAGTAAAAGGATT  
+HWI-EAS443:3:27:1347:288#0/1  
ab]a`\_`\_`aaab`\_ba\_abaYb]\_^aa`aXb^\_`abaa\_^a  
@HWI-EAS443:3:27:1669:566#0/1  
ATTTGAATGAAAATCCTTTTACTCCATTTGCTCCATTAGA  
+HWI-EAS443:3:27:1669:566#0/1  
abb`b`\_`bb\_a`aa\_^aa\_aa`a]\_`a\_`a`\_ZZ`^\_a¥`  
@HWI-EAS443:3:27:1712:1102#0/1  
GACAAACACATCCCCCTTGAACCGATTCTTATACTGTTG  
+HWI-EAS443:3:27:1712:1102#0/1  
aaab`baaab\_¥`\_`^\_aaa`\_]a^`\_¥a`^\_^^^\_]\_\_  
@HWI-EAS443:3:27:1747:755#0/1  
ATGTTCTTGTCTTACTGTAATGACCGATGGACCAAGTGA  
+HWI-EAS443:3:27:1747:755#0/1  
`bab\_ba\_aa`aa`a[aaQa\_\_^]]¥a^a]\_]X¥^YXW\_^  
@HWI-EAS443:3:27:464:246#0/1  
GGCCTGTCCATCACTTGGTCCATCGGTCATTACAGTAAAG  
+HWI-EAS443:3:27:464:246#0/1  
a\_aaaa¥]\_T]`^[\_`]¥U^[^Y[`NVUZ^^ZWZTY^]X  
@HWI-EAS443:3:27:975:1385#0/1  
GAGTTTTTTGAACAAATTACTTGTCAATGGTAAATGGCAA  
+HWI-EAS443:3:27:975:1385#0/1  
aa`\_]aaabaaa\_abbbaaaa`a[\_a`^a[]`\_`a]`[\_a\_  
@HWI-EAS443:3:27:993:966#0/1  
AATGGAGTAAAAGGATTTTCATTCAAATACGGCAATGGTG  
+HWI-EAS443:3:27:993:966#0/1  
aabbb`\_]babbbbaaabbbbaaab`bbab`aa`aaaVa  
@HWI-EAS443:3:28:1120:1589#0/1  
GAGTTTTTTGAACAAATTACTTGTCAATGGTAAATGGCAA  
+HWI-EAS443:3:28:1120:1589#0/1  
Y`ba`bbbababab`bb¥b`baaYZa\_ba^Mbaa\_a`aaa  
@HWI-EAS443:3:28:1396:1873#0/1  
CAAATTACTTGTCAATGGTAAATGGCAACTCAGCACCGTC  
+HWI-EAS443:3:28:1396:1873#0/1  
abbbbbbbbababbbbaa`bbbbbbabbaaaba[b`a`\_`^`

@HWI-EAS443:3:28:16:863#0/1  
GTTTTTTGAACAAATTACTTGTCAATGGTAAATGGCAACT  
+HWI-EAS443:3:28:16:863#0/1  
`a\_bbb`bbaaaaabb`ba`]aaaa\_aa^`a]Y`^  
@HWI-EAS443:3:28:300:984#0/1  
GTATTTGAATGAAAATCCTTTTACTCCATTTGCTCCATTA  
+HWI-EAS443:3:28:300:984#0/1  
]NTZW^`a\_¥XYaZ^`\_\_\_`\_Z^a`a\_\_WZ]]`[[ZPT  
@HWI-EAS443:3:28:344:728#0/1  
GGAGTAAAAGGATTTTCATTCAAATACGGCAATGGTGT  
+HWI-EAS443:3:28:344:728#0/1  
abab\_bbbaaaYaababbb``aabaab`aa`aaa[a^aa  
@HWI-EAS443:3:28:605:904#0/1  
TGTCCATCACTTGGTCCATCGGTCATTACAGTAAAGCAAG  
+HWI-EAS443:3:28:605:904#0/1  
`aab]X\_bab``aa\_bab```]¥aa\_aZP`a[^aa[Vaa[  
@HWI-EAS443:3:28:630:185#0/1  
GCCTGTCCATCACTTGGTCCATCGGTCATTACAGTAAAGC  
+HWI-EAS443:3:28:630:185#0/1  
aa[bbaaS`^a^a\_a¥]]\_a`¥a`H^`\_\_`S\_¥^`\_\_]0  
@HWI-EAS443:3:28:794:1213#0/1  
TGAAAATCCTTTTACTCCATTTGCTCCATTAGACGATACT  
+HWI-EAS443:3:28:794:1213#0/1  
abbbabbbbab^abbabbab`b`bbbaabaaaaaK\_  
@HWI-EAS443:3:29:1045:1311#0/1  
GCCTGTCCATCACTTGGTCCATCGGTCATTACAGTAAAGC  
+HWI-EAS443:3:29:1045:1311#0/1  
aaa`a^babaabaaaa]\_a`aaaa`Z`\_]a`\_a]``]`R  
@HWI-EAS443:3:29:1366:1354#0/1  
CCGATTCTTATACTGTTGTCTTTACTGTATATAGCCCATC  
+HWI-EAS443:3:29:1366:1354#0/1  
R``[Q\_^¥b`XZ¥`¥a`a`\_\_baa¥\_0\_¥\_aZO\_a]S]^  
@HWI-EAS443:3:29:1556:945#0/1  
CATCACTTGGTCCATCGGTCATTACAGTAAAGCAAGAACC  
+HWI-EAS443:3:29:1556:945#0/1  
[`TQ\_ZaY`[]YP]\_U\_ZXW¥Z¥]OSaYS`\_a`\_ZXY]OX  
@HWI-EAS443:3:29:218:1770#0/1  
ATTTGAATGAAAATCCTTTTACTCCATTTGCTCCATTAGA  
+HWI-EAS443:3:29:218:1770#0/1  
¥aaYa\_``[Z]QW`baaa`aa`a`^`^a]b`\_]a^]  
@HWI-EAS443:3:29:248:981#0/1  
GTCCAGTATCGTCTAATGGAGCAAATGGAGTAAAAGGATT  
+HWI-EAS443:3:29:248:981#0/1  
aZ`aaW]Z]`Y\_\_`\_] [VU]\_[[`]`X^`S¥¥]a`^Z[Y  
@HWI-EAS443:3:29:287:112#0/1  
TGGGCTATATACAGTAAAGACAACAGTATAAGAATCGGTT  
+HWI-EAS443:3:29:287:112#0/1  
`a`^W\_`a^a\_\_W^^^]X^]a^U\_Z^^^X\_]^[[]TBB  
@HWI-EAS443:3:29:460:532#0/1  
GGCCTGTCCATCACTTGGTCCATCGGTCATTACAGTAAAG

+HWI-EAS443:3:29:460:532#0/1  
^abbbabbabb]ab^T][aaaaaa^a`\_`[\_ZYNT¥T^  
@HWI-EAS443:3:29:719:281#0/1  
AGTTTTTTGAACAAATTACTTGTCAATGGTAAATGGCAAC  
+HWI-EAS443:3:29:719:281#0/1  
\_ZWabbbba¥baababbaaabXaaaaa^aa`\_a`aa\_  
@HWI-EAS443:3:29:850:807#0/1  
GAAAATCCTTTTACTCCATTTGCTCCATTAGACGATACTG  
+HWI-EAS443:3:29:850:807#0/1  
a`¥ba`a\_abaaaaa`]^a`aa`a`a`^`^`^`XZ^B  
@HWI-EAS443:3:29:960:339#0/1  
AGTTTTTTGAACAAATTACTTGTCAATGGTAAATGGCAAC  
+HWI-EAS443:3:29:960:339#0/1  
a¥[[\_aa\_ba`Y\_V`^^[\_]\_a^\_VS]\_aW\_[YZ\_a\_]\_X  
@HWI-EAS443:3:2:1081:34#0/1  
ATGAGGCCTGTCCATCACTTGGTCCATCGGTCATTACAGT  
+HWI-EAS443:3:2:1081:34#0/1  
a]^`aa\_Z¥b`]UTTU^\_]\_WZ^UUW`\_`RRNZXJQ`B  
@HWI-EAS443:3:2:1336:662#0/1  
GTTTTTTGAACAAATTACTTGTCAATGGTAAATGGCAACT  
+HWI-EAS443:3:2:1336:662#0/1  
a^^`^`aa`a^AS¥\_] ^YR\_VX^]a\_\_X^^Z¥¥YSXRBB  
@HWI-EAS443:3:2:1371:1180#0/1  
GGTCCAGTATCGTCTAATGGAGCAAATGGAGTAAAAGGAT  
+HWI-EAS443:3:2:1371:1180#0/1  
ab`ab`aaaa`ba`b`\_baa\_a``\_aaaa\_aU\_\_`aa`Y\_  
@HWI-EAS443:3:2:1629:828#0/1  
GTCCAGTATCGTCTAATGGAGCAAATGGAGTAAAAGGATT  
+HWI-EAS443:3:2:1629:828#0/1  
a^^[Y]Y^\_a[^\_\_^`]T¥UW^^^\_\_W¥T\_Y^^\_]Y[[  
@HWI-EAS443:3:2:1724:1022#0/1  
CAAACACATCCCCCTTGAACCGATTCTTATACTGTTGTC  
+HWI-EAS443:3:2:1724:1022#0/1  
Q¥Y\_\_ab\_YPRNQWX¥\_Yb^RT]^\_a^X\_ZUHZ^]]^X  
@HWI-EAS443:3:2:394:680#0/1  
AAAGGATTTTCATTCAAATACGGCAATGGTGTGGATAG  
+HWI-EAS443:3:2:394:680#0/1  
`Yaa^V`\_a¥a\_a\_RXPa\_a\_a\_\_\_[\_][Q`Y^\_a`N[Y`  
@HWI-EAS443:3:2:635:1485#0/1  
GGAGTTTTTTGAACAAATTACTTGTCAATGGTAAATGGCA  
+HWI-EAS443:3:2:635:1485#0/1  
aa\_a`\_XZaab`\_W[a`\_\_a¥`aaZ`Y\_\_`WX^Y\_I^S¥B  
@HWI-EAS443:3:2:838:901#0/1  
CTTTACTGTAATGACCGATGGACCAAGTGATGGACAGGCC  
+HWI-EAS443:3:2:838:901#0/1  
ZU¥[`LZZZ[U¥\_\_¥QZ]Y\_]Y]\_¥X]U]ZZSOY^¥\_PPV  
@HWI-EAS443:3:2:892:271#0/1  
CTTGAACCGATTCTTATACTGTTGTCTTTACTGTATATA  
+HWI-EAS443:3:2:892:271#0/1  
a`aaaaRaa`a`^`[\_`^]a]\_\_¥W\_^\_\_Z\_\_X^^\_^\_

@HWI-EAS443:3:2:918:903#0/1  
AGGATTTTCATTCAAATACGGCAATGGTGTGGATAGGG  
+HWI-EAS443:3:2:918:903#0/1  
ab`^\_aa\_aaaa\_aZ`^\_aaa^]`a`U`Za^aa]^\_]]¥  
@HWI-EAS443:3:30:100:856#0/1  
AGTTTTTTGAACAAATTACTTGTCAATGGTAAATGGCAAC  
+HWI-EAS443:3:30:100:856#0/1  
\_b[aaaa^^`Y`a[\_a```aa\_\_a`V^\_a[^`a[Y\_aa\_^  
@HWI-EAS443:3:30:1032:1888#0/1  
GAACAAATTACTTGTCAATGGTAAATGGCAACTCAGCACC  
+HWI-EAS443:3:30:1032:1888#0/1  
`[a``aaaWa¥a\_\_Y[¥¥^\_ZV\_]\_^XNS^a\_UY\_UO\_Z]  
@HWI-EAS443:3:30:1371:1793#0/1  
GTTTTTTGAACAAATTACTTGTCAATGGTAAATGGCAACT  
+HWI-EAS443:3:30:1371:1793#0/1  
a)`^UTWSR\_[WZLOO]YQSQJRPZBBBBBBBBBBBBBBB  
@HWI-EAS443:3:30:138:387#0/1  
GTCCAGTATCGTCTAATGGAGCAAATGGAGTAAAAGGATT  
+HWI-EAS443:3:30:138:387#0/1  
a[ba`b`^`a\_]a````a`^a\_`^]aa\_]aY^\_`a\_]`^`^  
@HWI-EAS443:3:30:1565:1065#0/1  
GGGCTATATACAGTAAAGACAACAGTATAAGAATCGGTTC  
+HWI-EAS443:3:30:1565:1065#0/1  
ab\_a```a]aa]`^`aa^a`¥Za^\_aWaaa`a`aa0`TPRR  
@HWI-EAS443:3:30:206:1376#0/1  
GATGGACCAAGTGATGGACAGGCCTCATACAAGATCTTCA  
+HWI-EAS443:3:30:206:1376#0/1  
aba\_`abbaaa¥`\_a\_`aab\_\_ab¥aa^Q\_`J]¥^a\_`a`  
@HWI-EAS443:3:30:258:1124#0/1  
GTCCAGTATCGTCTAATGGAGCAAATGGAGTAAAAGGATT  
+HWI-EAS443:3:30:258:1124#0/1  
\_`a[J]Wa``]PTNMWRYM\_`\_^TFXVRVX[]`]WYY[  
@HWI-EAS443:3:30:631:482#0/1  
GACCGATGGACCAAGTGATGGACAGGCCTCATACAAGATC  
+HWI-EAS443:3:30:631:482#0/1  
a]aa\_^^b`Y`aa^¥^aa\_``\_Y\_^Z¥[¥T]Y\_\_`U\_^YZ  
@HWI-EAS443:3:30:76:780#0/1  
GTCCATCACTTGGTCCATCGGTCATTACAGTAAAGCAAGA  
+HWI-EAS443:3:30:76:780#0/1  
`[bbabaXababa\_babaaaa¥aaaa]XUWXN[`[QY][¥  
@HWI-EAS443:3:30:797:1432#0/1  
ATGGAGTAAAAGGATTTTCATTCAAATACGGCAATGGTGT  
+HWI-EAS443:3:30:797:1432#0/1  
S¥\_VZ\_````a^Mba`\_[a\_0\_a¥`baba`\_¥¥`]]`LZY  
@HWI-EAS443:3:30:883:1147#0/1  
GTCCAGTATCGTCTAATGGAGCAAATGGAGTAAAAGGATT  
+HWI-EAS443:3:30:883:1147#0/1  
`L^ZaSX¥``a0`\_RMQWZ]]\_SXLQUXTYOUZ\_\_\_\_^[YY  
@HWI-EAS443:3:31:110:1583#0/1  
CTGAAGATCTTGTATGAGGCCTGTCCATCACTTGGTCCAT

+HWI-EAS443:3:31:110:1583#0/1  
`S\_Y`]^`a`^`\_baaa][ab¥Z¥b^X]\_X\_a\_WVY``a^  
@HWI-EAS443:3:31:119:536#0/1  
GAGTTTTTTGAACAAATTACTTGTCAATGGTAAATGGCAA  
+HWI-EAS443:3:31:119:536#0/1  
ab``abbbaaab`[baaaaaa\_aaa`a\_S\_\_aZ`^W\_  
@HWI-EAS443:3:31:1299:826#0/1  
CATTGCCGTATTTGAATGAAAATCCTTTTACTCCATTTGC  
+HWI-EAS443:3:31:1299:826#0/1  
abbaa`Z\_\_ababa`baa[Y\_`]Za¥aaaa^`aa`a^\_\_[  
@HWI-EAS443:3:31:310:685#0/1  
GATTCTTATACTGTTGTCTTTACTGTATATAGCCCATCCA  
+HWI-EAS443:3:31:310:685#0/1  
a``abbabbbabaaa`aaaaa\_a]aaa\_`\_aaX]]\_a`  
@HWI-EAS443:3:31:643:1101#0/1  
AATGGAGCAAATGGAGTAAAAGGATTTTCATTCAAATACG  
+HWI-EAS443:3:31:643:1101#0/1  
`bba`¥aba`aa`ab\_bab`baa`aaaaa`aaaaaa`  
@HWI-EAS443:3:31:963:1343#0/1  
AACAGTATAAGAATCGGTTCCAAGGGGGATGTGTTTGTCA  
+HWI-EAS443:3:31:963:1343#0/1  
a``a¥Saaaaaa`a`YXa^WLNSR¥^YU¥GZWVUPGWM  
@HWI-EAS443:3:32:1039:1540#0/1  
AAAATGAATCCAAACCAAAGATAATAACCATTGGTTCCG  
+HWI-EAS443:3:32:1039:1540#0/1  
aababaaaaaaaaabaaaaa`a`aaa`aa]a`a`\_\_^a`\_  
@HWI-EAS443:3:32:1080:1331#0/1  
GGGCTATATACAGTAAAGACAACAGTATAAGAATCGGTTC  
+HWI-EAS443:3:32:1080:1331#0/1  
a]aaa`abaaaaa^`\_aaaaa``[Z\_`a``\_]`V[^  
@HWI-EAS443:3:32:1427:444#0/1  
AGTTTTTTGAACAAATTACTTGTCAATGGTAAATGGCAAC  
+HWI-EAS443:3:32:1427:444#0/1  
[\_UXa[\_VSZ`I`a¥^T0]YaaaR^]aZF`^\_S\_PaZVB  
@HWI-EAS443:3:32:427:1796#0/1  
TGAAAATCCTTTTACTCCATTTGCTCCATTAGACGATACT  
+HWI-EAS443:3:32:427:1796#0/1  
^aaabbabbaaaaa`bbaaaa\_babaaa]aWRT¥aS\_`]  
@HWI-EAS443:3:32:67:802#0/1  
AAGGATTTTCATTCAAATACGGCAATGGTGTGGATAGG  
+HWI-EAS443:3:32:67:802#0/1  
a\_^`V[a`aZ\_^`[W^^X\_]`WW^[[^X]Y`^XVSSTRZ  
@HWI-EAS443:3:32:744:1855#0/1  
GGAGTTTTTTGAACAAATTACTTGTCAATGGTAAATGGCA  
+HWI-EAS443:3:32:744:1855#0/1  
\_[Z`La\_^ZVabbaaabbabaab`]^bba¥\_`ab^Pa]aa  
@HWI-EAS443:3:32:931:1864#0/1  
TGCCGTATTTGAATGAAAATCCTTTTACTCCATTTGCTCC  
+HWI-EAS443:3:32:931:1864#0/1  
]aa[``abababb`aaaa^¥ab`[aaba\_\_\_aa\_]a`ba

@HWI-EAS443:3:32:946:321#0/1  
GTTTTTTGAACAAATTACTTGTCAATGGTAAATGGCAACT  
+HWI-EAS443:3:32:946:321#0/1  
\_S\_\_`\_[a^\_]\_\_`\_¥^`\_aZ[TV\_\_ZX^^YYYYPXWXY  
@HWI-EAS443:3:33:1049:280#0/1  
GAGTAAAAGGATTTTCATTCAAATACGGCAATGGTGTTTG  
+HWI-EAS443:3:33:1049:280#0/1  
a`bRaaaaa^X`]a`¥`\_`a\_a]`\_`\_`ZSVZVVJ[Y^[X  
@HWI-EAS443:3:33:443:1956#0/1  
GTCCAGTATCGTCTAATGGAGCAAATGGAGTAAAAGGATT  
+HWI-EAS443:3:33:443:1956#0/1  
`P\_aaaQa`a`\_]\_^R`^`\_W^a]^\_XX\_]X\_0\_\_[PMWZ  
@HWI-EAS443:3:33:898:1846#0/1  
ACCAAGTGATGGACAGGCCTCATACAAGATCTTCAGAATA  
+HWI-EAS443:3:33:898:1846#0/1  
aaabaa\_aaa\_aaaa`\_[a`Za[`a``\_\_\_\_`^WU[\_¥^^^  
@HWI-EAS443:3:33:950:997#0/1  
GGAGTTTTTTGAACAAATTACTTGTCAATGGTAAATGGCA  
+HWI-EAS443:3:33:950:997#0/1  
¥\_V]WX^a^[TOV\_Y]P]]\_`[U[Q]TWZ\_[RXYPZZXKZ  
@HWI-EAS443:3:33:962:1865#0/1  
GTCCAGTATCGTCTAATGGAGCAAATGGAGTAAAAGGATT  
+HWI-EAS443:3:33:962:1865#0/1  
`UaabaSaaaa\_\_aa`^Y]]\_a\_aa^¥aS`W\_^^aW^]0\_  
@HWI-EAS443:3:34:1170:388#0/1  
GGAGTTTTTTGAACAAATTACTTGTCAATGGTAAATGGCA  
+HWI-EAS443:3:34:1170:388#0/1  
^ZUa^a`aaaa^aa\_\_a\_a`a^a¥^YU]^¥X[YY[W]S[  
@HWI-EAS443:3:34:1483:1727#0/1  
GTAAAGACAACAGTATAAGAATCGGTTCCAAGGGGGATGT  
+HWI-EAS443:3:34:1483:1727#0/1  
aabbbbabba\_b\_[ba\_ba]aa``XS\_[\_\_\_\_ZTW^\_XUXB  
@HWI-EAS443:3:34:445:814#0/1  
GGAGTTTTTTGAACAAATTACTTGTCAATGGTAAATGGCA  
+HWI-EAS443:3:34:445:814#0/1  
aTHYNGZ^YY[YR¥¥^]ZY]\_[SUX[LEN^WQUYPGR]TB  
@HWI-EAS443:3:34:572:60#0/1  
CAAATTACTTGTCAATGGTAAATGGCAACTCAGCACCGTC  
+HWI-EAS443:3:34:572:60#0/1  
[babWbbbbbaa\_a[bb\_Gbaa]a[aaa\_aa^a^a`V\_^]  
@HWI-EAS443:3:34:858:963#0/1  
GGAGTTTTTTGAACAAATTACTTGTCAATGGTAAATGGCA  
+HWI-EAS443:3:34:858:963#0/1  
aaaa]a`aaaaaa`^aaaaa\_aa`]]`\_`aa[`¥\_]Y^U\_  
@HWI-EAS443:3:35:1258:241#0/1  
CATCCCCCTTGAACCGATTCTTATACTGTTGTCTTTACT  
+HWI-EAS443:3:35:1258:241#0/1  
abbbbaaaaaa``aaaaaab`baaaaa`aabb^aaa`aZa  
@HWI-EAS443:3:35:780:594#0/1  
AGTTTTTTGAACAAATTACTTGTCAATGGTAAATGGCAAC

+HWI-EAS443:3:35:780:594#0/1  
ab¥`abbaa`bbbab^Taa`aa]aa]a\_aSaa``a`]]`\_`\_  
@HWI-EAS443:3:35:93:1661#0/1  
AAATTACTTGTCAATGGTAAATGGCAACTCAGCACCGTCT  
+HWI-EAS443:3:35:93:1661#0/1  
OXab`Z``Y`\_`^[\_]LZ]\_\_[\_Y^Z\_]\_J0`\_a¥XXZX  
@HWI-EAS443:3:35:941:878#0/1  
CAAATTACTTGTCAATGGTAAATGGCAACTCAGCACCGTC  
+HWI-EAS443:3:35:941:878#0/1  
a`^a\_a\_abab`baaba^^^]`aa]^ab`a``aa\_a`¥a  
@HWI-EAS443:3:35:959:695#0/1  
TATTTGAATGAAAATCCTTTTACTCCATTTGCTCCATTAG  
+HWI-EAS443:3:35:959:695#0/1  
aaaaa]aaaaa``aaaa`a`a\_\_^[a`\_a\_a`a]\_`]]]  
@HWI-EAS443:3:36:1019:438#0/1  
CAAATTACTTGTCAATGGTAAATGGCAACTCAGCACCGTC  
+HWI-EAS443:3:36:1019:438#0/1  
abba`\_\_bbbb`aa`bb`S^aaabaaaaaa\_^YZ]ab¥a  
@HWI-EAS443:3:36:1097:497#0/1  
GTCTAATGGAGCAAATGGAGTAAAAGGATTTTCATTCAA  
+HWI-EAS443:3:36:1097:497#0/1  
a\_a`\_Na^aVW]\_U\_abY]aW\_] [a``Z^a`]S]a\_`^Z[  
@HWI-EAS443:3:36:1200:527#0/1  
ATTCTGAAGATCTTGTATGAGGCCTGTCCATCACTTGGTC  
+HWI-EAS443:3:36:1200:527#0/1  
]bbb]\_aaba\_`Z]`\_a[a^a[``\_`a¥TT\_`^\_[a]]aYZ  
@HWI-EAS443:3:36:1522:1358#0/1  
GGAGTTTTTTGAACAAATTACTTGTCAATGGTAAATGGCA  
+HWI-EAS443:3:36:1522:1358#0/1  
a``a\_abbabb\_aaaaab`a`b\_b^aa^\_baZ`^a^a\_[Z  
@HWI-EAS443:3:36:1544:359#0/1  
GGAGTTTTTTGAACAAATTACTTGTCAATGGTAAATGGCA  
+HWI-EAS443:3:36:1544:359#0/1  
aa\_a^aaaa`\_\_`X^`aa`\_^\_\_`]\_ZZ\_\_\_Z^^\_^\_ZV¥  
@HWI-EAS443:3:36:1694:82#0/1  
AATTACTTGTCAATGGTAAATGGCAACTCAGCACCGTCTG  
+HWI-EAS443:3:36:1694:82#0/1  
`bbbbabbb[]`Zbbb[aaa^baaa\_\_aa\_`YaUN]]\_  
@HWI-EAS443:3:36:266:217#0/1  
AACACCATTGCCGATTTGAATGAAAATCCTTTTACTCCA  
+HWI-EAS443:3:36:266:217#0/1  
aaaabaaa¥a`ab]aaaa[]a\_ZN[\_\_\_a`^^\_``\_]a¥\_  
@HWI-EAS443:3:36:40:1223#0/1  
GGCCTGTCCATCACTTGGTCCATCGGTCATTACAGTAAAG  
+HWI-EAS443:3:36:40:1223#0/1  
abbbababb``aaba`b\_bbaaba]`^]aa¥Z\_]`^a]  
@HWI-EAS443:3:36:636:1423#0/1  
GGAGTTTTTTGAACAAATTACTTGTCAATGGTAAATGGCA  
+HWI-EAS443:3:36:636:1423#0/1  
^^QUOX\_a``¥YW]\_\_^0aaa¥WXY\_]Z^^VT¥Ya^[RX`



@HWI-EAS443:3:37:1068:610#0/1  
GTCCAGTATCGTCTAATGGAGCAAATGGAGTAAAAGGATT  
+HWI-EAS443:3:37:1068:610#0/1  
aaaaaa\_aa\_b]\_`\_]aa^W^aX^W``¥PUY^^Ya\_`Z]\_  
@HWI-EAS443:3:37:1211:758#0/1  
GGAGTTTTTTGAACAAATTACTTGTCAATGGTAAATGGCA  
+HWI-EAS443:3:37:1211:758#0/1  
abS^J\_S]^^^]a¥Q\_]V`Y^`[^a¥^P`[Z]`\_WL¥W  
@HWI-EAS443:3:37:1275:1216#0/1  
GACAAACACATCCCCCTTGAACCGATTCTTATACTGTTG  
+HWI-EAS443:3:37:1275:1216#0/1  
\_¥aaab^b]`\_]`YaaZaba^abaab]]\_a[`]\_\_`\_Y]`  
@HWI-EAS443:3:37:174:359#0/1  
AGTTTTTTGAACAAATTACTTGTCAATGGTAAATGGCAAC  
+HWI-EAS443:3:37:174:359#0/1  
ZZ¥a[aa`][aa\_¥aaaaa\_`\_aY`]aMPT]¥[`¥0^\_P  
@HWI-EAS443:3:37:193:874#0/1  
CACTTGGTCCATCGGTCATTACAGTAAAGCAAGAACCATT  
+HWI-EAS443:3:37:193:874#0/1  
a]baabaabbbaa`[]aa¥aaa`]XV]]][VW`[N¥YYDP]  
@HWI-EAS443:3:37:442:314#0/1  
GGTCCAGTATCGTCTAATGGAGCAAATGGAGTAAAAGGAT  
+HWI-EAS443:3:37:442:314#0/1  
a`G\_aXa`ab`b¥ba`a`a`X^\_^[T``]^\_\_^^``¥WQ  
@HWI-EAS443:3:37:552:1855#0/1  
ACACCATTGCCGTTTTGAATGAAAATCCTTTTACTCCAT  
+HWI-EAS443:3:37:552:1855#0/1  
aabaa`\_]\_]`[Q[[Z`¥a[¥]U]WJ]\_aNL]¥[\_\_\_`a\_Z  
@HWI-EAS443:3:37:769:396#0/1  
CTGTAATGACCGATGGACCAAGTGATGGACAGGCCTCATA  
+HWI-EAS443:3:37:769:396#0/1  
a`b`bbbbbbabaaaa`aa`b^aa`a`THY\_`aa\_^W^a  
@HWI-EAS443:3:38:1139:1686#0/1  
AAATGGAGTAAAAGGATTTTCATTCAAATACGGCAATGGT  
+HWI-EAS443:3:38:1139:1686#0/1  
^^aabb`aXabbb^\_a\_bb\_abba`bbab`^^^Ya\_a\_ZG  
@HWI-EAS443:3:38:1170:659#0/1  
ATTTGAATGAAAATCCTTTTACTCCATTTGCTCCATTAGA  
+HWI-EAS443:3:38:1170:659#0/1  
aabaaaaaaa\_a`a`aaaa`a`aa\_aaa`^Y^\_]\_\_\_\_\_^^  
@HWI-EAS443:3:38:1489:856#0/1  
GTTTTTTGAACAAATTACTTGTCAATGGTAAATGGCAACT  
+HWI-EAS443:3:38:1489:856#0/1  
`Z`aaba`\_a\_\_\_\_\_aaaa`a^`a^`a¥XXXZY^¥U\_]YY  
@HWI-EAS443:3:38:161:788#0/1  
GGCCTGTCCATCACTTGGTCCATCGGTCATTACAGTAAAG  
+HWI-EAS443:3:38:161:788#0/1  
abbbbbbabb`abaaaba]baaaaaX`^T]]YZ`V^aaR  
@HWI-EAS443:3:38:199:1618#0/1  
GTCCAGTATCGTCTAATGGAGCAAATGGAGTAAAAGGATT

+HWI-EAS443:3:38:199:1618#0/1  
^Y`Y]TJW^a\_P`Y[Z[\_Z[\_RQYZZ\_V^SY0^Z\_^WW¥  
@HWI-EAS443:3:38:282:161#0/1  
AATTACTTGTCAATGGTAAATGGCAACTCAGCACCGTCTG  
+HWI-EAS443:3:38:282:161#0/1  
aaaaaaaaab\_aaaaaaZ`\_\_`\_aa`Z[`¥¥¥\_WUVVVV[  
@HWI-EAS443:3:38:407:1709#0/1  
AGGATTTTCATTCAAATACGGCAATGGTGTGGATAGGG  
+HWI-EAS443:3:38:407:1709#0/1  
a[Z[^`]W^^`a`[]`a\_\_^\_\_^[XZY^[WZ[X]YXW[YZ  
@HWI-EAS443:3:38:579:1982#0/1  
CTGTCCATCACTTGGTCCATCGGTCATTACAGTAAAGCAA  
+HWI-EAS443:3:38:579:1982#0/1  
`WTJT]]S]ZNYNQQU[P^U^Z¥SYXTT¥RVSPW\_TQFWS  
@HWI-EAS443:3:38:65:1702#0/1  
AAGGATTTTCATTCAAATACGGCAATGGTGTGGATAGG  
+HWI-EAS443:3:38:65:1702#0/1  
aba`T`aaabaa`aaa]a]a[Wa\_`\_\_[Z][\_a\_[V\_]XY  
@HWI-EAS443:3:38:842:1900#0/1  
GCTATATACAGTAAAGACAACAGTATAAGAATCGGTTCCA  
+HWI-EAS443:3:38:842:1900#0/1  
aa^HYa^\_aaaW`]UZ^W[\_UV0\_\_^] ^T¥UXRQGVSB  
@HWI-EAS443:3:39:1136:53#0/1  
AACACATCCCCCTTGAACCGATTCTTATACTGTTGTCTT  
+HWI-EAS443:3:39:1136:53#0/1  
a`bbbbbbbbbbabb`aa`baaaabaaba\_aa\_aa\_\_a\_  
@HWI-EAS443:3:39:1171:1939#0/1  
GAACCGATTCTTATACTGTTGTCTTTACTGTATATAGCCC  
+HWI-EAS443:3:39:1171:1939#0/1  
a^aaab[aa`\_bb]aa\_`^\_\_\_\_`\_a`¥`]`R¥]`\_\_\_\_]NYW  
@HWI-EAS443:3:39:1398:474#0/1  
TTTTTGAACAAATTACTTGTCAATGGTAAATGGCAACTCA  
+HWI-EAS443:3:39:1398:474#0/1  
a^^Va\_YZ]a`^]]Ya^]bW^[\_`aaM¥Y^[X]Wa\_^[PV  
@HWI-EAS443:3:39:1726:292#0/1  
GGGCTATATACAGTAAAGACAACAGTATAAGAATCGGTTC  
+HWI-EAS443:3:39:1726:292#0/1  
[G[^TX[Za\_¥TT]UX[XLUWVMM\_MPVSZBBBBBBBBBB  
@HWI-EAS443:3:39:405:601#0/1  
GAAAATCCTTTTACTCCATTTGCTCCATTAGACGATACTG  
+HWI-EAS443:3:39:405:601#0/1  
abZZ^aababbaa\_aaaaaa`\_aa\_a^^``\_a^YKKT  
@HWI-EAS443:3:39:449:469#0/1  
ATGGGCTATATACAGTAAAGACAACAGTATAAGAATCGGT  
+HWI-EAS443:3:39:449:469#0/1  
¥a``aaa¥¥\_]]aa^`]`a\_aa`ZY]S\_YX[^[]UYBBB  
@HWI-EAS443:3:39:45:1733#0/1  
GGAGTTTTTTGAACAAATTACTTGTCAATGGTAAATGGCA  
+HWI-EAS443:3:39:45:1733#0/1  
aZaaa\_abbbaaaaabb`aa\_a``[aa`a`\_U``¥G`T``

@HWI-EAS443:3:39:699:968#0/1  
CAAACACATCCCCCTTGAACCGATTCTTATACTGTTGTC  
+HWI-EAS443:3:39:699:968#0/1  
`a¥YaaV¥\_a[a\_X\_Ya^¥S^aa^[X¥a`a^[\_]`Z]] [T  
@HWI-EAS443:3:3:1011:406#0/1  
GGAGTTTTTTGAACAAATTACTTGTCAATGGTAAATGGCA  
+HWI-EAS443:3:3:1011:406#0/1  
abG]JR\_`^\_Y\_S^]¥a^][`W]UU]^UNMZWS]XWZ  
@HWI-EAS443:3:3:1287:1218#0/1  
AGTTTTTTGAACAAATTACTTGTCAATGGTAAATGGCAAC  
+HWI-EAS443:3:3:1287:1218#0/1  
ab\_aabbaa\_aaa`abaa`aaa`\_aa`aaZ`^\_\_a\_W\_a]  
@HWI-EAS443:3:3:442:1458#0/1  
TTTTTTGAACAAATTACTTGTCAATGGTAAATGGCAACTCA  
+HWI-EAS443:3:3:442:1458#0/1  
a`¥`a`\_\_]RYaaQI]G^VU\_S\_a¥^^]Z¥WVL]`S^]B  
@HWI-EAS443:3:3:477:1016#0/1  
GGAGTTTTTTGAACAAATTACTTGTCAATGGTAAATGGCA  
+HWI-EAS443:3:3:477:1016#0/1  
aa`a]\_`a`a`\_]`\_\_`\_^]\_]\_XY[XZ\_¥V\_^XS]YN\_  
@HWI-EAS443:3:3:491:1260#0/1  
GCTTTACTGTAATGACCGATGGACCAAGTGATGGACAGGC  
+HWI-EAS443:3:3:491:1260#0/1  
`Xa\_R``aaJXU¥\_ZNR^a^[XXUR\_\_YR`]XYVWU[^SB  
@HWI-EAS443:3:40:1128:943#0/1  
AGTTTTTTGAACAAATTACTTGTCAATGGTAAATGGCAAC  
+HWI-EAS443:3:40:1128:943#0/1  
¥bababaaaaa\_aabaaaaaab\_aa\_]a`Z`aa`aaaa\_  
@HWI-EAS443:3:40:1141:1687#0/1  
AAGGATTTTTCATTCAAATACGGCAATGGTGTGGATAGG  
+HWI-EAS443:3:40:1141:1687#0/1  
ab^\_¥^aa^^a`aaaa`aaaaba^U¥[N¥[\_Y]\_Y`¥¥  
@HWI-EAS443:3:40:121:648#0/1  
GGCCTGTCCATCACTTGGTCCATCGGTCATTACAGTAAAG  
+HWI-EAS443:3:40:121:648#0/1  
a`a`^URXX¥V`ZU\_[WLO\_¥XR]UTBBBBBBBBBBBBBB  
@HWI-EAS443:3:40:1401:1891#0/1  
CCAGTATCGTCTAATGGAGCAAATGGAGTAAAAGGATTTT  
+HWI-EAS443:3:40:1401:1891#0/1  
abb\_URXSZVL]]TX]WR¥\_WNW[XOGWQYL¥]^SXMJ¥L  
@HWI-EAS443:3:40:1437:1157#0/1  
CAAATTACTTGTCAATGGTAAATGGCAACTCAGCACCGTC  
+HWI-EAS443:3:40:1437:1157#0/1  
]\_\_\_[aa\_bb\_a[\_b`\_\_QZ\_bbbb`MQ\_¥\_baa^a^\_QQ  
@HWI-EAS443:3:40:1570:1192#0/1  
ACCAAGTGATGGACAGGCCTCATACAAGATCTTCAGAATA  
+HWI-EAS443:3:40:1570:1192#0/1  
aa^a\_b0`a`\_aX^^]¥\_U\_¥`a^XXXYY^^V`\_\_\_\_^Z`^  
@HWI-EAS443:3:40:1670:302#0/1  
GGAGTTTTTTGAACAAATTACTTGTCAATGGTAAATGGCA

+HWI-EAS443:3:40:1670:302#0/1  
`^aU\_aXUaR^\_Z\_]\_aa`\_]\_a`]X]]]a]W^[[U¥X]]  
@HWI-EAS443:3:40:357:889#0/1  
CCCTTGAACCGATTCTTATACTGTTGTCTTTACTGTATA  
+HWI-EAS443:3:40:357:889#0/1  
aaabbbaaaa`bbbbbbabbbbaaa\_abbaabbaa^aab  
@HWI-EAS443:3:40:566:1883#0/1  
AGCAAATGGAGTAAAAGGATTTTCATTCAAATACGGCAAT  
+HWI-EAS443:3:40:566:1883#0/1  
aaaaaaabaaa]aaaba[a`aaaa`^a¥aaaaaa\_a`T]  
@HWI-EAS443:3:40:708:738#0/1  
GTCCAGTATCGTCTAATGGAGCAAATGGAGTAAAAGGATT  
+HWI-EAS443:3:40:708:738#0/1  
aN]LTU¥PWN¥PXYOLLVTSVVUOTVP]WBBBBBBBBBBB  
@HWI-EAS443:3:40:957:1262#0/1  
GTCCAGTATCGTCTAATGGAGCAAATGGAGTAAAAGGATT  
+HWI-EAS443:3:40:957:1262#0/1  
\_S]¥YQWX`\_\_U^ZXQTSZVVYOSWVOVBBBBBBBBBBB  
@HWI-EAS443:3:42:1022:1573#0/1  
ACCAAGTGATGGACAGGCCTCATACAAGATCTTCAGAATA  
+HWI-EAS443:3:42:1022:1573#0/1  
Zaa]\_]ab`bb`\_]¥[[[]\_]aa`]¥^`]TZ^]aa^  
@HWI-EAS443:3:42:1035:1026#0/1  
GGCCTGTCCATCACTTGGTCCATCGGTCATTACAGTAAAG  
+HWI-EAS443:3:42:1035:1026#0/1  
¥a`b``bbab`a`a\_[ba^[XW]\_aa]W¥]WUNYZYS¥¥  
@HWI-EAS443:3:42:111:873#0/1  
GGATGGGCTATATACAGTAAAGACAACAGTATAAGAATCG  
+HWI-EAS443:3:42:111:873#0/1  
`^a¥^ZXaQYX^Z]\_V\_V\_]W\_]U\_a¥T¥T¥X¥0`\_]BBB  
@HWI-EAS443:3:42:1374:943#0/1  
GTTTTTTGAACAAATTACTTGTCAATGGTAAATGGCAACT  
+HWI-EAS443:3:42:1374:943#0/1  
`[`aaa\_a`\_\_a^`aa`Y`aa¥\_Z¥`aaY\_^\_]a^\_¥YZ^  
@HWI-EAS443:3:42:1424:353#0/1  
GAACAAATTACTTGTCAATGGTAAATGGCAACTCAGCACC  
+HWI-EAS443:3:42:1424:353#0/1  
^a]\_a¥¥bb\_aba\_\_aabbb`Saa[a^^`aaX^X``]\_a¥  
@HWI-EAS443:3:42:1751:310#0/1  
GAAAATCCTTTTACTCCATTTGCTCCATTAGACGATACTG  
+HWI-EAS443:3:42:1751:310#0/1  
a\_ZZ^`Z^aab`\_aaa`aa]Z`^`]ZZZ]\_\_\_\_a¥TXHRY  
@HWI-EAS443:3:42:549:713#0/1  
GTAATGACCGATGGACCAAGTGATGGACAGGCCTCATACA  
+HWI-EAS443:3:42:549:713#0/1  
aX]`aaaa`a\_`^`^`YU\_Q]^¥`\_`[\_\_\_\_]]\_]¥XTNZ¥  
@HWI-EAS443:3:42:739:1660#0/1  
ATTCTGAAGATCTTGTATGAGGCCTGTCCATCACTTGGTC  
+HWI-EAS443:3:42:739:1660#0/1  
\_Z¥H\_aZPX0^aW^`¥`ZIQRW\_¥¥NW^RXQJVMX`¥YW

@HWI-EAS443:3:42:995:163#0/1  
GTCCAGTATCGTCTAATGGAGCAAATGGAGTAAAAGGATT  
+HWI-EAS443:3:42:995:163#0/1  
aaa\_`a`aa\_b````\_`aa]a\_`^`aaXa]\_\_`aa`^^^  
@HWI-EAS443:3:43:1075:979#0/1  
GGGCTATATACAGTAAAGACAACAGTATAAGAATCGGTTC  
+HWI-EAS443:3:43:1075:979#0/1  
`T`aYY)`¥[Pa`]¥N])`\_`^YR]O\_\_]P^^PZ]^]RQJ  
@HWI-EAS443:3:43:1140:1107#0/1  
AAAGGATTTTCATTCAAATACGGCAATGGTGTGGATAG  
+HWI-EAS443:3:43:1140:1107#0/1  
R`¥a`VW^aa¥aa\_Z¥¥W^UN¥Y¥T¥T^[G[W][P¥H[Z  
@HWI-EAS443:3:43:1153:1562#0/1  
TGAAAATCCTTTTACTCCATTTGCTCCATTAGACGATACT  
+HWI-EAS443:3:43:1153:1562#0/1  
^¥X^WZb`Y`]^aU[Y`aXTZ`Q`^T`W`ZQZUUSLWP¥  
@HWI-EAS443:3:43:1174:790#0/1  
GGAGTTTTTTGAACAAATTACTTGTCAATGGTAAATGGCA  
+HWI-EAS443:3:43:1174:790#0/1  
abaa^abba`a¥```[I]a^\_a`[M[^]\_aRX\_PVV\_Z¥\_  
@HWI-EAS443:3:43:1198:503#0/1  
AGTTTTTTGAACAAATTACTTGTCAATGGTAAATGGCAAC  
+HWI-EAS443:3:43:1198:503#0/1  
`b`bbbbbb`baaabbbbbbbbaaabba\_aaaaba\_aa\_  
@HWI-EAS443:3:43:1233:578#0/1  
AGTTTTTTGAACAAATTACTTGTCAATGGTAAATGGCAAC  
+HWI-EAS443:3:43:1233:578#0/1  
abaabbbbbbb`a^aba`\_baa``a`aa`^a`\_\_``\_aa]  
@HWI-EAS443:3:43:1413:144#0/1  
AAATTACTTGTCAATGGTAAATGGCAACTCAGCACCGTCT  
+HWI-EAS443:3:43:1413:144#0/1  
T\_UVSaZ`X¥aaaaa[Tb[¥[^[Y]]YZT¥aV`XTXX\_  
@HWI-EAS443:3:43:1623:892#0/1  
CACTTGGTCCATCGGTCATTACAGTAAAGCAAGAACCATT  
+HWI-EAS443:3:43:1623:892#0/1  
abbbbab^^bbbabbaa]``a¥`X]\_ZZZ]aa\_VGOTZ^  
@HWI-EAS443:3:43:180:1096#0/1  
AATTACTTGTCAATGGTAAATGGCAACTCAGCACCGTCTG  
+HWI-EAS443:3:43:180:1096#0/1  
abaaaabaaZa`a`a\_Yb\_a\_\_][aa\_`\_\_]\_a\_`¥X`]  
@HWI-EAS443:3:43:208:958#0/1  
GCCGTATTTGAATGAAAATCCTTTTACTCCATTTGCTCCA  
+HWI-EAS443:3:43:208:958#0/1  
a[WaZY\_`\_`Y`aaU\_¥[]R[W[\_[NZ^X]]\_¥`ZZ][UZ  
@HWI-EAS443:3:43:353:1222#0/1  
CTTGTATGAGGCCTGTCCATCACTTGGTCCATCGGTCATT  
+HWI-EAS443:3:43:353:1222#0/1  
`Z\_]P^¥WY¥Z`^ZJX^ZY\_¥[`¥^]¥V\_aa\_]ZQRY¥YW  
@HWI-EAS443:3:43:387:132#0/1  
ATTCTGAAGATCTTGTATGAGGCCTGTCCATCACTTGGTC

+HWI-EAS443:3:43:387:132#0/1  
aaaa\_baaaaaaaaa^`aa`a^aa\_\_a`\_]`\_^\_\_\_ZW  
@HWI-EAS443:3:43:59:1588#0/1  
GCTTTACTGTAATGACCGATGGACCAAGTGATGGACAGGC  
+HWI-EAS443:3:43:59:1588#0/1  
aaaaX`\_a\_W`¥a\_¥^MXX`\_[\_Y]\_WUJ^VWYQY¥OYMS  
@HWI-EAS443:3:43:725:1761#0/1  
GGAGTTTTAAATGAATCCAAACCAAAAGATAATAACCATT  
+HWI-EAS443:3:43:725:1761#0/1  
a`a\_a\_bbbb¥`\_`aa^ba`aaa`^aaa`\_\_a^Y``a`  
@HWI-EAS443:3:43:750:765#0/1  
AAATCCTTTTACTCCATTTGCTCCATTAGACGATACTGGA  
+HWI-EAS443:3:43:750:765#0/1  
a`Y`\_]`[\_ab`aa\_\_^Y`\_]XTa¥`^¥a`Y`¥\_T[XOF  
@HWI-EAS443:3:43:786:1037#0/1  
AATCCTTTTACTCCATTTGCTCCATTAGACGATACTGGAC  
+HWI-EAS443:3:43:786:1037#0/1  
a¥¥PS[ZX]\_RYPUW]a`VU00[\_¥ZWVTP¥BBBBBBBB  
@HWI-EAS443:3:43:962:569#0/1  
GGAGTTTTTTGAACAAATTACTTGTCAATGGTAAATGGCA  
+HWI-EAS443:3:43:962:569#0/1  
ZaZ`^]¥a`\_]SXa`\_WZ]\_[¥ab[a\_VZ`^ZXZZ]¥^W  
@HWI-EAS443:3:44:1092:517#0/1  
GTCCAGTATCGTCTAATGGAGCAAATGGAGTAAAAGGATT  
+HWI-EAS443:3:44:1092:517#0/1  
a[`aaaW^a`aV^¥`X`UaQ]^`^`aaS`Z[Z^a¥WSX  
@HWI-EAS443:3:44:1148:464#0/1  
GAGTTTTTTGAACAAATTACTTGTCAATGGTAAATGGCAA  
+HWI-EAS443:3:44:1148:464#0/1  
aXa)`a`^a`^`^`[¥aa`\_\_aYY^]\_a\_Y\_]V¥\_]`[^  
@HWI-EAS443:3:44:1289:25#0/1  
GAGTTTTTTGAACAAATTACTTGTCAATGGTAAATGGCAA  
+HWI-EAS443:3:44:1289:25#0/1  
^\_b^bbbab`¥a`babaabab`\_a\_aa`¥`\_\_aaa^aa  
@HWI-EAS443:3:44:12:1561#0/1  
GGAGTTTTTTGAACAAATTACTTGTCAATGGTAAATGGCA  
+HWI-EAS443:3:44:12:1561#0/1  
aaaa\_aaaab^aaaa\_aaa`]a^a]\_\_\_`\_\_W^\_^\_X¥`  
@HWI-EAS443:3:44:1420:811#0/1  
GTTTTTTGAACAAATTACTTGTCAATGGTAAATGGCAACT  
+HWI-EAS443:3:44:1420:811#0/1  
a\_[aaaa]`U`\_`a`\_Yaaa\_]`\_`Z\_YZ`\_^`\_Y]  
@HWI-EAS443:3:44:1483:1114#0/1  
GACCGATGGACCAAGTGATGGACAGGCCTCATACAAGATC  
+HWI-EAS443:3:44:1483:1114#0/1  
aaaabaaaba`a^b^a`aba`^`]^¥a`\_\_`\_^`¥Z^R  
@HWI-EAS443:3:44:1499:508#0/1  
AACACCATTGCCGATTTGAATGAAAATCCTTTTACTCCA  
+HWI-EAS443:3:44:1499:508#0/1  
`baa``aab\_abZ\_aa`a`\_`\_`a\_a`\_\_a```a^a`[\_

@HWI-EAS443:3:44:435:439#0/1  
CGATTCTTATACTGTTGTCTTTACTGTATATAGCCCATCC  
+HWI-EAS443:3:44:435:439#0/1  
aba\_\_Q`Xa^`b`b``aWY]a^VU`]S`\_\_Z`\_[^`a\_^O  
@HWI-EAS443:3:44:531:992#0/1  
GGAGTTTTTTGAACAAATTACTTGTCAATGGTAAATGGCA  
+HWI-EAS443:3:44:531:992#0/1  
aa[a^aaaaa`a\_aa`a\_a`a`a\_\_`aaa\_Za`\_\_\_\_^]`  
@HWI-EAS443:3:44:862:1216#0/1  
GTCCAGTATCGTCTAATGGAGCAAATGGAGTAAAAGGATT  
+HWI-EAS443:3:44:862:1216#0/1  
a]ZUW[[^a]a\_Wa]]W[NLY\_¥YU]^^[U[Z^W\_]ZUUT  
@HWI-EAS443:3:44:966:756#0/1  
TCTTGTATGAGGCCTGTCCATCACTTGGTCCATCGGTCAT  
+HWI-EAS443:3:44:966:756#0/1  
WH[a\_[\_Z\_[^aba]RLR`][V[[[`aaXOY]YF^a[]¥X  
@HWI-EAS443:3:44:99:1814#0/1  
TGGGCTATATACAGTAAAGACAACAGTATAAGAATCGGTT  
+HWI-EAS443:3:44:99:1814#0/1  
]`a`aV```\_aabbY\_]aaa`aaaaYXW^¥¥`^R[^UDM  
@HWI-EAS443:3:45:1101:953#0/1  
GGGCTATATACAGTAAAGACAACAGTATAAGAATCGGTTC  
+HWI-EAS443:3:45:1101:953#0/1  
^aab\_aaabbaaa[\_aaaa`a`]¥¥``\_a^^\_a\_`¥MX]  
@HWI-EAS443:3:45:117:864#0/1  
GTCCAGTATCGTCTAATGGAGCAAATGGAGTAAAAGGATT  
+HWI-EAS443:3:45:117:864#0/1  
aaa`aaaa\_a^\_a\_a```Va]]`^`a\_]aZ`aa``^^`  
@HWI-EAS443:3:45:1265:76#0/1  
GGCCTGTCCATCACTTGGTCCATCGGTCATTACAGTAAAG  
+HWI-EAS443:3:45:1265:76#0/1  
ababab`a\_aa`aaaaab\_`aaaabb]^`\_`VUU[U\_`a]  
@HWI-EAS443:3:45:1267:493#0/1  
CAAATTACTTGTCAATGGTAAATGGCAACTCAGCACCGTC  
+HWI-EAS443:3:45:1267:493#0/1  
abbbba\_abbba`a``aba^aa`aaa^ab]a^aa\_a^Za^`  
@HWI-EAS443:3:45:1288:228#0/1  
AGTTTTTTGAACAAATTACTTGTCAATGGTAAATGGCAAC  
+HWI-EAS443:3:45:1288:228#0/1  
abaaaa`bb\_\_\_aaa`aaaa^`^\_aa¥N\_]XYTZ]\_Y  
@HWI-EAS443:3:45:1420:733#0/1  
AGTGGATGGGCTATATACAGTAAAGACAACAGTATAAGAA  
+HWI-EAS443:3:45:1420:733#0/1  
a`^^bb`baba[¥]ZaTRZ¥P]\_\_`]GVWN^`MXU^ZZX[  
@HWI-EAS443:3:45:1544:1098#0/1  
GAACAAATTACTTGTCAATGGTAAATGGCAACTCAGCACC  
+HWI-EAS443:3:45:1544:1098#0/1  
aaa`^aab\_a`aU\_G[Y\_`a\_U][W^[QS][¥XO^S\_\_ZZ  
@HWI-EAS443:3:45:222:738#0/1  
ATTCTGAAGATCTTGTATGAGGCCTGTCCATCACTTGGTC

+HWI-EAS443:3:45:222:738#0/1  
ab`Raba\_¥a\_]\_a`U`aa`RM^[¥`TZ]RW^^MMXa¥PV  
@HWI-EAS443:3:45:368:1437#0/1  
CAAACACATCCCCCTTGAACCGATTCTTATACTGTTGTC  
+HWI-EAS443:3:45:368:1437#0/1  
¥`a]H]Q[S¥\_Z\_¥`a\_Y^Y[O[S[TOQZX\_`Y[X¥[O^V  
@HWI-EAS443:3:45:48:206#0/1  
TGAAAATCCTTTTACTCCATTTGCTCCATTAGACGATACT  
+HWI-EAS443:3:45:48:206#0/1  
^b\_abbbaa\_abbaaba^aa`aa`a]` `aaaaa\_^]WW  
@HWI-EAS443:3:45:569:468#0/1  
GACCGATGGACCAAGTGATGGACAGGCCTCATACAAGATC  
+HWI-EAS443:3:45:569:468#0/1  
a`b`aaa` ` `]^`^a^b`a`^`\_\_a]`a\_\_a\_^`^`\_]\_Y  
@HWI-EAS443:3:45:593:1004#0/1  
GACCAAGTGATGGACAGGCCTCATACAAGATCTTCAGAAT  
+HWI-EAS443:3:45:593:1004#0/1  
` `aaa^b`baabaaaa]^R]a\_aaa\_aaaaaYaa` `a\_` `  
@HWI-EAS443:3:45:878:1445#0/1  
CTTTACTGTAATGACCGATGGACCAAGTGATGGACAGGCC  
+HWI-EAS443:3:45:878:1445#0/1  
abbab`baaabbbbab`abbaaaaaa\_aaaaaa`aa\_Y\_  
@HWI-EAS443:3:46:1188:469#0/1  
GACCGATGGACCAAGTGATGGACAGGCCTCATACAAGATC  
+HWI-EAS443:3:46:1188:469#0/1  
aaaabaaa]^` `a[a`\_aa` `a\_^Z^` ` `]\_\_`^]V  
@HWI-EAS443:3:46:1398:977#0/1  
ACCAAGTGATGGACAGGCCTCATACAAGATCTTCAGAATA  
+HWI-EAS443:3:46:1398:977#0/1  
X¥[IWbS\_`^ba^[[OUa^\_a`\_\_WYR`X\_W\_]SazO^]  
@HWI-EAS443:3:46:1479:1253#0/1  
GTTTTTTGAACAAATTACTTGTCAATGGTAAATGGCAACT  
+HWI-EAS443:3:46:1479:1253#0/1  
a`aaaba\_\_a\_aaaaaa`aaa^\_a\_aa`]a\_^\_\_XX`a]\_  
@HWI-EAS443:3:46:1486:506#0/1  
ATGACAAACACATCCCCCTTGAACCGATTCTTATACTGT  
+HWI-EAS443:3:46:1486:506#0/1  
^UW\_P` `[UaYVUTP¥UV\_TUZX[RS¥^¥[LYYX¥[UU\_Z  
@HWI-EAS443:3:46:1583:1532#0/1  
TGAAAATCCTTTTACTCCATTTGCTCCATTAGACGATACT  
+HWI-EAS443:3:46:1583:1532#0/1  
aa`\_a¥a`\_aaaa\_¥` [^^a`a`^`\_[Xaa\_] []a¥^XZX  
@HWI-EAS443:3:47:1190:1615#0/1  
ATTACTTGTCAATGGTAAATGGCAACTCAGCACCGTCTGG  
+HWI-EAS443:3:47:1190:1615#0/1  
\_[\_a\_\_XN\_W[\_aN\_O]V^MR]\_V\_]V` ]\_¥NYQSUQU  
@HWI-EAS443:3:47:1278:1455#0/1  
ATTACTTGTCAATGGTAAATGGCAACTCAGCACCGTCTGG  
+HWI-EAS443:3:47:1278:1455#0/1  
¥¥\_`Q^aa^`\_\_`aa^D^] `W`aaaa` `[a] `a` ^KMWZZ



@HWI-EAS443:3:47:1606:357#0/1  
GAGTTTTTTGAACAAATTACTTGTCAATGGTAAATGGCAA  
+HWI-EAS443:3:47:1606:357#0/1  
aab\_ab`aab`a^aa`aaa^a`a]X\_^`a`Y\_]¥X\_\_^\_^  
@HWI-EAS443:3:47:445:1039#0/1  
GTCCAGTATCGTCTAATGGAGCAAATGGAGTAAAAGGATT  
+HWI-EAS443:3:47:445:1039#0/1  
aaaaabaabab\_^a`bba[aX`\_`aaa]a^\_a`a\_\_]]\_  
@HWI-EAS443:3:47:713:63#0/1  
GAAGATCTTGTATGAGGCCTGTCCATCACTTGGTCCATCG  
+HWI-EAS443:3:47:713:63#0/1  
a`a^XX`¥a[Zaa^a`¥^^\_PPX^YYYYQ]S]`VUXWXU\_  
@HWI-EAS443:3:47:726:1706#0/1  
ACAAATTACTTGTCAATGGTAAATGGCAACTCAGCACCGT  
+HWI-EAS443:3:47:726:1706#0/1  
aa`aabbb¥aabH0]aaa`]aa^^\_]`X`]V\_[SZ^V\_Y  
@HWI-EAS443:3:47:799:523#0/1  
AACAAATTACTTGTCAATGGTAAATGGCAACTCAGCACCG  
+HWI-EAS443:3:47:799:523#0/1  
a\_bZbb¥`Y`^abXa^¥abbYa\_]Y`]Va]a\_aaa\_a\_S`  
@HWI-EAS443:3:47:828:1901#0/1  
ATGGGCTATATACAGTAAAGACAACAGTATAAGAATCGGT  
+HWI-EAS443:3:47:828:1901#0/1  
^b¥bba`Y`ba^SLbSV\_\_\_aUaaY^^R`¥S]\_X\_VFT\_J  
@HWI-EAS443:3:48:1012:1500#0/1  
CAAGTGATGGACAGGCCTCATACAAGATCTTCAGAATAGA  
+HWI-EAS443:3:48:1012:1500#0/1  
a`b`]ba`^`WNZQ^MT^a\_`[\_ZH`\_U]\_`^¥`[\_`]\_W  
@HWI-EAS443:3:48:1054:334#0/1  
TCCTTTTACTCCATTTGCTCCATTAGACGATACTGGACCA  
+HWI-EAS443:3:48:1054:334#0/1  
aa\_]ba\_¥a\_]^`W¥VQ`\_^`\_a\_\_\_\_XXGYYYYXQWP  
@HWI-EAS443:3:48:1331:630#0/1  
GGAGTTTTTTGAACAAATTACTTGTCAATGGTAAATGGCA  
+HWI-EAS443:3:48:1331:630#0/1  
ab`b\_abaaaaaa\_aaaa`\_aaa\_a\_\_aa\_]a\_a^`^\_  
@HWI-EAS443:3:48:1538:691#0/1  
ATTACTTGTCAATGGTAAATGGCAACTCAGCACCGTCTGG  
+HWI-EAS443:3:48:1538:691#0/1  
abaa`bbb^\_aaaa`[\_aX]¥¥Xa`^`[a```[V[TWW]X  
@HWI-EAS443:3:48:1554:122#0/1  
GTCCAGTATCGTCTAATGGAGCAAATGGAGTAAAAGGATT  
+HWI-EAS443:3:48:1554:122#0/1  
a]^\_\_aZ\_\_]a^Z\_]\_]\_\_Z]YXXZ]]]X\_XZXZ^]YSW]  
@HWI-EAS443:3:48:1599:947#0/1  
ATGGAGTAAAAGGATTTTCATTCAAATACGGCAATGGTGT  
+HWI-EAS443:3:48:1599:947#0/1  
Z^R\_Q`Y\_N\_¥P\_b`b\_[ZY¥]RY^]a`¥aa¥]ZY\_\_Qb¥  
@HWI-EAS443:3:48:1650:739#0/1  
GTTTTTTGAACAAATTACTTGTCAATGGTAAATGGCAACT

+HWI-EAS443:3:48:1650:739#0/1  
a`aaaa`a^a`aaa`aaa\_\_`^`a`Z`\_YX\_]\_]\_YY  
@HWI-EAS443:3:48:1679:1481#0/1  
GGCTATATACAGTAAAGACAACAGTATAAGAATCGGTTCC  
+HWI-EAS443:3:48:1679:1481#0/1  
\_a]b^bbbZ]a`¥a\_abY`a^FQ\_]`^\_a]`\_]\_a[L0¥¥  
@HWI-EAS443:3:48:519:706#0/1  
GGGCTATATACAGTAAAGACAACAGTATAAGAATCGGTTCC  
+HWI-EAS443:3:48:519:706#0/1  
a`\_\_X¥``\_^`\_^`\_^`\_^]\_`Z]\_]¥^X^\_XX]YU]WYX  
@HWI-EAS443:3:48:564:1454#0/1  
AAATCCTTTTACTCCATTTGCTCCATTAGACGATACTGGA  
+HWI-EAS443:3:48:564:1454#0/1  
aaaa\_abaa`a\_a^`aaa`a^aa^a\_aY```\_`^0^Y]W  
@HWI-EAS443:3:48:785:988#0/1  
GCCTGTCCATCACTTGGTCCATCGGTCATTACAGTAAAGC  
+HWI-EAS443:3:48:785:988#0/1  
aaaaa`\_aaaaaaaaa]`a\_a`a`\_`^`\_`\_a`^`[`T¥`\_`¥T  
@HWI-EAS443:3:48:971:760#0/1  
AATGAAAATCCTTTTACTCCATTTGCTCCATTAGACGATA  
+HWI-EAS443:3:48:971:760#0/1  
Y`bbVb^^`U`abbb`aba`bbbaaab`aaa`aba`baab  
@HWI-EAS443:3:49:1234:382#0/1  
GTTTTTTGAACAAATTACTTGTCAATGGTAAATGGCAACT  
+HWI-EAS443:3:49:1234:382#0/1  
aabbababaaT`abaa\_b]b\_\_`¥aaa^a`^`\_\_`\_Ya  
@HWI-EAS443:3:49:1383:579#0/1  
CAAATTACTTGTCAATGGTAAATGGCAACTCAGCACCGTC  
+HWI-EAS443:3:49:1383:579#0/1  
abbbbbbbbbbb`\_`\_aababbaa`bbbb[OXbbbaaab\_Z  
@HWI-EAS443:3:49:14:455#0/1  
GGAGTTTTTTGAACAAATTACTTGTCAATGGTAAATGGCA  
+HWI-EAS443:3:49:14:455#0/1  
a\_aa`babba`abaaaaaa`a`a\_aa`aa]X`a`]\_\_\_a  
@HWI-EAS443:3:49:1552:927#0/1  
ATTCTGAAGATCTTGTATGAGGCCTGTCCATCACTTGGTC  
+HWI-EAS443:3:49:1552:927#0/1  
^\_aaaa^aaaaabbb\_aa`aa`][ba^Y\_aa[\_Wa`\_a]X  
@HWI-EAS443:3:49:1576:1567#0/1  
TTTGAATGAAAATCCTTTTACTCCATTTGCTCCATTAGAC  
+HWI-EAS443:3:49:1576:1567#0/1  
`Zab¥¥a]¥PXW`\_W^a\_a¥MYVU\_]¥YL\_¥¥]^¥\_\_U  
@HWI-EAS443:3:49:1582:493#0/1  
CCCTTGAACCGATTCTTATACTGTTGTCTTTACTGTATA  
+HWI-EAS443:3:49:1582:493#0/1  
`¥^b`\_`^^`\_`\_a`\_a`aba`]`ba]aa`aa`aaTa`[^a^  
@HWI-EAS443:3:49:1653:1197#0/1  
AGTTTTTTGAACAAATTACTTGTCAATGGTAAATGGCAAC  
+HWI-EAS443:3:49:1653:1197#0/1  
¥b^```^`a¥`]Z`a`\_YP\_]YZb¥^b`VEV^X\_ZSZa¥W

@HWI-EAS443:3:49:1658:159#0/1  
ATTTGAATGAAAATCCTTTTACTCCATTTGCTCCATTAGA  
+HWI-EAS443:3:49:1658:159#0/1  
abbbbaaababaaaa`baa`^a\_\_aaaa`\_``Y\_``a]  
@HWI-EAS443:3:49:423:1951#0/1  
GGAGTTTTTTGAACAAATTACTTGTCAATGGTAAATGGCA  
+HWI-EAS443:3:49:423:1951#0/1  
aa]URa¥USUa]^TT`\_Z\_\_Y]¥RGH`\_^WPP\_^]R`XR[  
@HWI-EAS443:3:49:479:1814#0/1  
AGTTTTTTGAACAAATTACTTGTCAATGGTAAATGGCAAC  
+HWI-EAS443:3:49:479:1814#0/1  
aaa\_abababb`b`bbababb`\_a`bbVT[\_a^a`a`Z  
@HWI-EAS443:3:49:547:197#0/1  
GGTCCAGTATCGTCTAATGGAGCAAATGGAGTAAAAGGAT  
+HWI-EAS443:3:49:547:197#0/1  
ab``\_¥¥MYa`a[^`¥\_\_\_\_S\_¥SXXa`]T\_T[[\_\_\_\_XXZ  
@HWI-EAS443:3:49:733:1980#0/1  
GGTCCAGTATCGTCTAATGGAGCAAATGGAGTAAAAGGAT  
+HWI-EAS443:3:49:733:1980#0/1  
\_b`\_bbbM`aaX\_¥Vaa\_aabN`aaaab¥`[abb`ab\_  
@HWI-EAS443:3:4:1274:240#0/1  
ATTTGAATGAAAATCCTTTTACTCCATTTGCTCCATTAGA  
+HWI-EAS443:3:4:1274:240#0/1  
abbbb\_abaabaaa`^abaaa`a^\_aba^\_[aU\_^a`a`\_  
@HWI-EAS443:3:4:1435:1430#0/1  
GTCCAGTATCGTCTAATGGAGCAAATGGAGTAAAAGGATT  
+HWI-EAS443:3:4:1435:1430#0/1  
a`\_`\_a^aa\_a¥X`\_\_`aaY`UQ¥`^a`W\_Y^P\_``^]Y\_  
@HWI-EAS443:3:4:169:200#0/1  
GGTCCAGTATCGTCTAATGGAGCAAATGGAGTAAAAGGAT  
+HWI-EAS443:3:4:169:200#0/1  
aaYa`\_b\_a`^a¥\_a`^`\_\_Z\_^Z^^\_a`[\_Z]]\_``^]  
@HWI-EAS443:3:4:1775:2023#0/1  
ATGGGCTATATACAGTAAAGACAACAGTATAAGAATCGGT  
+HWI-EAS443:3:4:1775:2023#0/1  
aa`^a`a`a^a\_G`\_\_\_\_\_OLRWIVRIN\_BBBBBBBBBB  
@HWI-EAS443:3:4:1788:1647#0/1  
GGAGTTTTTTGAACAAATTACTTGTCAATGGTAAATGGCA  
+HWI-EAS443:3:4:1788:1647#0/1  
]Z¥aVa¥¥Z`¥aZ^V]Y[[¥`\_a^\_YQ`\_]VZVY]BBBB  
@HWI-EAS443:3:4:272:1715#0/1  
GGAGTTTTTTGAACAAATTACTTGTCAATGGTAAATGGCA  
+HWI-EAS443:3:4:272:1715#0/1  
a``T^VV`a]a¥^`a`^`\_SW]\_XRSU\_\_VPR[\_YS[I¥  
@HWI-EAS443:3:4:896:684#0/1  
GGAGTTTTTTGAACAAATTACTTGTCAATGGTAAATGGCA  
+HWI-EAS443:3:4:896:684#0/1  
a`\_a^aabba\_UY^]^`a`````T^`^\_a^]\_]Y\_^[B  
@HWI-EAS443:3:50:1067:336#0/1  
GAACAAATTACTTGTCAATGGTAAATGGCAACTCAGCACC

+HWI-EAS443:3:50:1067:336#0/1  
aa`aV`a]abbbab[`aa]bbHa\_aXJaY]^Va\_a\_]`P\_  
@HWI-EAS443:3:50:1155:28#0/1  
CTTGCTTTACTGTAATGACCGATGGACCAAGTGATGGACA  
+HWI-EAS443:3:50:1155:28#0/1  
RT^`a`a¥\_[^¥^^ba`\_QQ^\_\_^aW[a¥\_`¥\_S\_a`¥`T  
@HWI-EAS443:3:50:1771:819#0/1  
CGTCTAATGGAGCAAATGGAGTAAAAGGATTTTCATTCAA  
+HWI-EAS443:3:50:1771:819#0/1  
aba`abbbbaa`bbbb```\_bbabbbbbbbbaab`ab  
@HWI-EAS443:3:50:308:159#0/1  
GTCCAGTATCGTCTAATGGAGCAAATGGAGTAAAAGGATT  
+HWI-EAS443:3:50:308:159#0/1  
\_YZ`^^^`L]\_VTS]¥\_\_XSFS[T`a¥N\_T[X^`Z]^WZ  
@HWI-EAS443:3:50:421:1633#0/1  
GGAGTTTTTTGAACAAATTACTTGTCAATGGTAAATGGCA  
+HWI-EAS443:3:50:421:1633#0/1  
abab\_aabbaa\_aa\_baa`a`aaa`a``aaa[aa`````^`  
@HWI-EAS443:3:50:651:957#0/1  
GTTTTTTGAACAAATTACTTGTCAATGGTAAATGGCAACT  
+HWI-EAS443:3:50:651:957#0/1  
aJa`[aa`TRS\_\_XYaUW]S]G^\_¥\_`aNvZ\_]\_\_\_\_^¥W^  
@HWI-EAS443:3:50:657:54#0/1  
GGAGTTTTTTGAACAAATTACTTGTCAATGGTAAATGGCA  
+HWI-EAS443:3:50:657:54#0/1  
\_`]]``\_bb`a\_ab]]bbaaba¥a`QVaaab^Ta\_[abaP^  
@HWI-EAS443:3:50:819:158#0/1  
ATCCAAACACCATTGCCGATTTGAATGAAAATCCTTTTA  
+HWI-EAS443:3:50:819:158#0/1  
`X\_ba^`W\_S0]\_\_\_\_`^¥^XZ^a\_[S\_\_R^¥aXRT\_`]]VY  
@HWI-EAS443:3:51:1237:376#0/1  
GAGTTTTTTGAACAAATTACTTGTCAATGGTAAATGGCAA  
+HWI-EAS443:3:51:1237:376#0/1  
aabaabaabbaa\_a`aba`\_aaa\_\_`^bb`W`````a\_]`\_  
@HWI-EAS443:3:51:1319:1033#0/1  
ATGAGGCCTGTCCATCACTTGGTCCATCGGTCATTACAGT  
+HWI-EAS443:3:51:1319:1033#0/1  
abb`]]`baba`aaaaab^aa``\_a[a````^V¥]```X]]N  
@HWI-EAS443:3:51:1427:968#0/1  
CTTGGAACCGATTCTTATACTGTTGTCTTTACTGTATATA  
+HWI-EAS443:3:51:1427:968#0/1  
`b\_[bbbab`ab^^abbba[a]^aa^\_abY`aa`\_```a`a  
@HWI-EAS443:3:51:1575:1115#0/1  
CCGATTCTTATACTGTTGTCTTTACTGTATATAGCCCATC  
+HWI-EAS443:3:51:1575:1115#0/1  
\_bbabbbbbb^b`abaaabbbabbbbbbbabaaaaaa\_  
@HWI-EAS443:3:51:1667:1789#0/1  
CAAATTACTTGTCAATGGTAAATGGCAACTCAGCACCGTC  
+HWI-EAS443:3:51:1667:1789#0/1  
aba^aaaM¥bbWa\_bbbbabaaaaaUab^`\_\_`aab`a\_a

@HWI-EAS443:3:51:1685:477#0/1  
CATTGCCGATTTGAATGAAAATCCTTTTACTCCATTTGC  
+HWI-EAS443:3:51:1685:477#0/1  
abbaaab`abbb\_bbbbbbaab`abbbb¥b`aabbaY\_  
@HWI-EAS443:3:51:1717:1669#0/1  
CACCATTGCCGATTTGAATGAAAATCCTTTTACTCCATT  
+HWI-EAS443:3:51:1717:1669#0/1  
`\_baba]``]`aab\_bbaabbb``ab`abbbbbaaaaabb  
@HWI-EAS443:3:51:201:1718#0/1  
CCAGTATCGTCTAATGGAGCAAATGGAGTAAAAGGATTTT  
+HWI-EAS443:3:51:201:1718#0/1  
ab^`Zaa\_¥Xaaa\_]ZW]`\_¥\_a`\_XaU\_\_\_\_a`\_W\_\_\_\_]  
@HWI-EAS443:3:51:364:534#0/1  
AATCCTTTTACTCCATTTGCTCCATTAGACGATACTGGAC  
+HWI-EAS443:3:51:364:534#0/1  
¥Z`^aab`b]^`abab`ZV\_aabb\_\_`\_[a`a`[Za`RL  
@HWI-EAS443:3:51:46:1893#0/1  
TGGGCTATATACAGTAAAGACAACAGTATAAGAATCGGTT  
+HWI-EAS443:3:51:46:1893#0/1  
]`]]W]]````]^`[¥XSDZwa\_SZQG]¥R[U¥N\_Y^MUY  
@HWI-EAS443:3:51:585:528#0/1  
GTTTTTTGAACAAATTACTTGTCAATGGTAAATGGCAACT  
+HWI-EAS443:3:51:585:528#0/1  
a[``]aab```a\_aa`Z`aa^[¥¥aadW\_\_\_\_ZZ\_Y]\_]\_  
@HWI-EAS443:3:51:596:826#0/1  
AGCAAATGGAGTAAAAGGATTTTCATTCAAATACGGCAAT  
+HWI-EAS443:3:51:596:826#0/1  
YJ¥`ZU`^aba`a`abbbababbaab^b`a\_ba`aaZXab  
@HWI-EAS443:3:51:665:855#0/1  
GTTTTTTGAACAAATTACTTGTCAATGGTAAATGGCAACT  
+HWI-EAS443:3:51:665:855#0/1  
a^aaabaa\_a\_aaaaa`aaa`\_a^aa^Xa`Xa\_aZ`^^^  
@HWI-EAS443:3:51:879:982#0/1  
CTTGCTTTACTGTAATGACCGATGGACCAAGTGATGGACA  
+HWI-EAS443:3:51:879:982#0/1  
abbbabbbbabbbabbbbabbaaaababaab`baabb`Wa  
@HWI-EAS443:3:52:1093:861#0/1  
AATGGAGCAAATGGAGTAAAAGGATTTTCATTCAAATACG  
+HWI-EAS443:3:52:1093:861#0/1  
aa`b``baba\_bbbaa]aaaabaXaaaT`aaa``a`a``a  
@HWI-EAS443:3:52:1168:299#0/1  
GAGTTTTTTGAACAAATTACTTGTCAATGGTAAATGGCAA  
+HWI-EAS443:3:52:1168:299#0/1  
\_]baaabab[\_a\_aa\_aaZ^a`TWY[U\_a¥XY`]a`^W\_\_  
@HWI-EAS443:3:52:1403:1544#0/1  
TTCTGAAGATCTTGTATGAGGCCTGTCCATCACTTGGTCC  
+HWI-EAS443:3:52:1403:1544#0/1  
aa`aY[aa^`\_a]Y^\_`[^]^`X^a]^Y^\_]^]\_^\_\_^V0  
@HWI-EAS443:3:52:1435:69#0/1  
AGTTTTTTGAACAAATTACTTGTCAATGGTAAATGGCAAC

+HWI-EAS443:3:52:1435:69#0/1  
aaaabbbbaa`Xb^\_baa[a`U\_aZaa^Za^\_`\_]`^`  
@HWI-EAS443:3:52:1738:1077#0/1  
AGTTTTTTGAACAAATTACTTGTCAATGGTAAATGGCAAC  
+HWI-EAS443:3:52:1738:1077#0/1  
a``aaba`a^a`aa`a^aaa^]a``YS^`ZYUQ^\_]  
@HWI-EAS443:3:52:236:816#0/1  
GTTTTTTGAACAAATTACTTGTCAATGGTAAATGGCAACT  
+HWI-EAS443:3:52:236:816#0/1  
a¥Ya^WWaZWGW]a`[\_¥a`MVXR^WWMZSULY[ZTRX[  
@HWI-EAS443:3:52:375:1229#0/1  
GGAGTTTTTTGAACAAATTACTTGTCAATGGTAAATGGCA  
+HWI-EAS443:3:52:375:1229#0/1  
]GMVNTa]a`aXJU[W0[\_VZ¥Z`[XZX^\_[W[PPXUTQS  
@HWI-EAS443:3:52:682:1508#0/1  
TGGTCTTGCTTTACTGTAATGACCGATGGACCAAGTGAT  
+HWI-EAS443:3:52:682:1508#0/1  
aaX^]Ya]ba`^aa````aaaa`^`^]a`[ZW]Za`T^]¥  
@HWI-EAS443:3:52:708:475#0/1  
AATTACTTGTCAATGGTAAATGGCAACTCAGCACCGTCTG  
+HWI-EAS443:3:52:708:475#0/1  
]abba`bbbaaaab`^b`a`a`a`^a```[OW[\_`^`  
@HWI-EAS443:3:52:849:174#0/1  
ATCCAAACACCATTGCCGATTTGAATGAAAATCCTTTTA  
+HWI-EAS443:3:52:849:174#0/1  
aa````a\_a¥`\_`a\_[a]aa`\_```^]\_]W`^`^^  
@HWI-EAS443:3:53:1696:1868#0/1  
ATTCTGAAGATCTTGTATGAGGCCTGTCCATCACTTGGTC  
+HWI-EAS443:3:53:1696:1868#0/1  
abb¥ba¥`¥¥J]b`aTbbYVVbHTR¥]JXaXW]\_U^aV[S  
@HWI-EAS443:3:53:530:276#0/1  
AATCCTTTTACTCCATTTGCTCCATTAGACGATACTGGAC  
+HWI-EAS443:3:53:530:276#0/1  
a`b`b`bbbaa\_ba\_abaaa]a\_aaaaa\_a^a\_]XYW`[G  
@HWI-EAS443:3:53:534:152#0/1  
GGAGTTTTTTGAACAAATTACTTGTCAATGGTAAATGGCA  
+HWI-EAS443:3:53:534:152#0/1  
`bab`abbabaa`aaaa`aa\_aaaa\_aabWa```aa]\_  
@HWI-EAS443:3:53:609:357#0/1  
CCCCCTTGAACCGATTCTTATACTGTTGTCTTTACTGTA  
+HWI-EAS443:3:53:609:357#0/1  
aabbbbbbb¥]`abababbbbbabababbbbbbab`a  
@HWI-EAS443:3:53:729:319#0/1  
CCGATGGACCAAGTGATGGACAGGCCTCATACAAGATCTT  
+HWI-EAS443:3:53:729:319#0/1  
abbbbbbbabababbbbaabbaab`baa[baaaaaaa  
@HWI-EAS443:3:53:897:531#0/1  
TTTTTGAACAAATTACTTGTCAATGGTAAATGGCAACTCA  
+HWI-EAS443:3:53:897:531#0/1  
`bb]`U`^`U`abba]`]`P`XYa¥]¥¥ZZ]¥\_XY¥^¥FU

@HWI-EAS443:3:54:1049:1356#0/1  
CAAATTACTTGTCAATGGTAAATGGCAACTCAGCACCGTC  
+HWI-EAS443:3:54:1049:1356#0/1  
`\_\_\_\_bbbbbbb]bbbbbbbaabb\_bbb`baba``a``\_``¥  
@HWI-EAS443:3:54:1059:1697#0/1  
GGGCTATATACAGTAAAGACAACAGTATAAGAATCGGTTC  
+HWI-EAS443:3:54:1059:1697#0/1  
abaaba`aba`aa]a`\_b`\_aa\_Za^`a\_\_a]``X]]HLN  
@HWI-EAS443:3:54:1221:1603#0/1  
AGCAAATGGAGTAAAAGGATTTTCATTCAAATACGGCAAT  
+HWI-EAS443:3:54:1221:1603#0/1  
aa`babbbbab\_babaabaabab\_aba`a\_bbaa``\_``a  
@HWI-EAS443:3:54:122:396#0/1  
AAACACCATTGCCGTATTTGAATGAAAATCCTTTTACTCC  
+HWI-EAS443:3:54:122:396#0/1  
aaW¥aa`QX\_\_\_\_\_`Q¥`¥a\_\_`\_\_`TR]]XJS[^¥YZ]¥U  
@HWI-EAS443:3:54:1279:1721#0/1  
ATGACAAACACATCCCCCTTGAACCGATTCTTATACTGT  
+HWI-EAS443:3:54:1279:1721#0/1  
aaa`a^¥Y^aXa\_¥`^a^a`a]``^]\_Y^\_\_a`aZaZ]`^  
@HWI-EAS443:3:54:147:1900#0/1  
CCAGTATCGTCTAATGGAGCAAATGGAGTAAAAGGATTTT  
+HWI-EAS443:3:54:147:1900#0/1  
aaaa^aba`¥``a`Ua\_a\_a^a\_aYaX¥``a`a^Va`]  
@HWI-EAS443:3:54:543:1374#0/1  
CCAGTATCGTCTAATGGAGCAAATGGAGTAAAAGGATTTT  
+HWI-EAS443:3:54:543:1374#0/1  
abbbbbbbbaabaab]`abaaaabbbba\_babbbab`aaaa  
@HWI-EAS443:3:54:757:681#0/1  
GGAGTTTTTTGAACAAATTACTTGTCAATGGTAAATGGCA  
+HWI-EAS443:3:54:757:681#0/1  
YQMYNa]ba¥Y]`a]\_^a¥^a¥`\_]\_aaaY`]]a[]`a  
@HWI-EAS443:3:54:782:591#0/1  
GGCCTGTCCATCACTTGGTCCATCGGTCATTACAGTAAAG  
+HWI-EAS443:3:54:782:591#0/1  
`ababb`abbbbbbbbaaabbabab\_aaaba`a`aaaa  
@HWI-EAS443:3:55:1052:565#0/1  
GGAGTTTTTTGAACAAATTACTTGTCAATGGTAAATGGCA  
+HWI-EAS443:3:55:1052:565#0/1  
ab]b\_bba`bb``\_`\_`aaaaaaa`a`\_ba`]a`\_]a^Z`  
@HWI-EAS443:3:55:1161:270#0/1  
GTTTTTTGAACAAATTACTTGTCAATGGTAAATGGCAACT  
+HWI-EAS443:3:55:1161:270#0/1  
a`\_aa``Z^Z\_^a`^^a`a\_Z^]``\_W^^]]^]X^ZZ^  
@HWI-EAS443:3:55:1568:1759#0/1  
AGGATTTTTCATTCAAATACGGCAATGGTGTGGATAGGG  
+HWI-EAS443:3:55:1568:1759#0/1  
aaa`\_aaba^ba`\_\_^`a`PZZa]\_¥^^aa\_\_U^VLY^  
@HWI-EAS443:3:55:242:942#0/1  
CTTTTCTATTCTGAAGATCTTGTATGAGGCCTGTCCATCA

+HWI-EAS443:3:55:242:942#0/1  
[`aZ]b`\_YZ]Z\_Z¥aa`^a`¥V\_a\_]\_\_^R^WV^U\_`]]  
@HWI-EAS443:3:55:449:1031#0/1  
AAGGATTTTCATTCAAATACGGCAATGGTGTGGATAGG  
+HWI-EAS443:3:55:449:1031#0/1  
aaQR¥^aaYaYa`\_]\_Ya`\_`aS^]XaaQWZ^[W¥Z^Z^]  
@HWI-EAS443:3:55:604:1785#0/1  
AGTTTTTTGAACAAATTACTTGTCAATGGTAAATGGCAAC  
+HWI-EAS443:3:55:604:1785#0/1  
``\_abbbbabbaaabaab`bab`VY¥aaa[a`b```a\_a\_  
@HWI-EAS443:3:55:704:1164#0/1  
GAATGAAAATCCTTTTACTCCATTTGCTCCATTAGACGAT  
+HWI-EAS443:3:55:704:1164#0/1  
`bbbaab\_bbb`baabaabaaa`a`aba`aaaa\_aaa^  
@HWI-EAS443:3:55:722:1421#0/1  
ACCAAGTGATGGACAGGCCTCATACAAGATCTTCAGAATA  
+HWI-EAS443:3:55:722:1421#0/1  
\_\_Z\_aa¥`^\_a`^Yaa\_]WU[GT\_\_^\_\_`Z[ ]^V¥]]V]\_  
@HWI-EAS443:3:55:895:608#0/1  
AAAAGGATTTTCATTCAAATACGGCAATGGTGTGGATA  
+HWI-EAS443:3:55:895:608#0/1  
aaaaab\_aabbaaaa^\_aaaa`aa\_\_\_`a`[a\_aa``[a`  
@HWI-EAS443:3:55:923:1138#0/1  
GGAGTTTTTTGAACAAATTACTTGTCAATGGTAAATGGCA  
+HWI-EAS443:3:55:923:1138#0/1  
a\_F¥\_\_\_¥FK¥\_[VVXYPX¥P\_[\_XGZNaZ¥L]^Z^][VO  
@HWI-EAS443:3:55:968:1647#0/1  
ATACAGTAAAGACAACAGTATAAGAATCGTTCCAAGGGG  
+HWI-EAS443:3:55:968:1647#0/1  
aaa\_aa^a^^`¥S\_`]Z\_Y\_`\_`[^\_`LDWNYTS¥ZZ^¥^  
@HWI-EAS443:3:56:1349:380#0/1  
GAGTTTTTTGAACAAATTACTTGTCAATGGTAAATGGCAA  
+HWI-EAS443:3:56:1349:380#0/1  
a```aabbab¥aa`aaba`aab^`\_\_baa^a\_a\_¥a`aa  
@HWI-EAS443:3:56:1511:47#0/1  
GTGATGGACAGGCCTCATACAAGATCTTCAGAATAGAAAA  
+HWI-EAS443:3:56:1511:47#0/1  
a]a\_`a`\_^aa`^Z\_WX\_\_Z\_]\_Z^Z`ZXZXZ^X\_Z]]Y  
@HWI-EAS443:3:56:1683:619#0/1  
TGAAGATCTTGTATGAGGCCTGTCCATCACTTGGTCCATC  
+HWI-EAS443:3:56:1683:619#0/1  
SV^¥Z¥]``aW`\_\_¥MD[\_\_\_]WZ\_\_\_\_\_`Wa]aZZQ\_\_XX  
@HWI-EAS443:3:56:228:553#0/1  
ATCCTTTTACTCCATTTGCTCCATTAGACGATACTGGACC  
+HWI-EAS443:3:56:228:553#0/1  
aaa`aaabW]]a\_\_`a`aaa`\_¥]¥¥a^`\_^]ZY`[SXT  
@HWI-EAS443:3:56:263:194#0/1  
GGAGTTTTTTGAACAAATTACTTGTCAATGGTAAATGGCA  
+HWI-EAS443:3:56:263:194#0/1  
aa[a¥`aaaaa\_`\_]\_a`a\_a\_a¥`^`a`XZZYZ\_^]\_



@HWI-EAS443:3:56:263:395#0/1  
TCCCCCTTGAACCGATTCTTATACTGTTGTCTTTACTGT  
+HWI-EAS443:3:56:263:395#0/1  
^]]]S\_QZa`¥`PZa]^`X^`^a`a\_Z[^UX¥^^¥\_]ZR  
@HWI-EAS443:3:57:1326:1683#0/1  
AAGGATTTTCATTCAAATACGGCAATGGTGTGGATAGG  
+HWI-EAS443:3:57:1326:1683#0/1  
abR^U\_`[]a`Z¥XR[a\_\_Q¥`^ZT¥]^G`^¥aVXRSS^B  
@HWI-EAS443:3:57:1364:1397#0/1  
ATTTGAATGAAAATCCTTTTACTCCATTTGCTCCATTAGA  
+HWI-EAS443:3:57:1364:1397#0/1  
ab\_`^aabbbabaZUaabab\_a\_`bbb\_^¥a`Zaa`a]¥  
@HWI-EAS443:3:57:329:1977#0/1  
GAACAAATTACTTGTCAATGGTAAATGGCAACTCAGCACC  
+HWI-EAS443:3:57:329:1977#0/1  
`^baa`bb^]H\_aV^a\_V`bIaTZU¥ODUba`U[VUU[B  
@HWI-EAS443:3:57:914:1534#0/1  
ATTTGAATGAAAATCCTTTTACTCCATTTGCTCCATTAGA  
+HWI-EAS443:3:57:914:1534#0/1  
abbbbabbbb\_a\_b\_Y`ababab]Uababbbab\_bb`aaa  
@HWI-EAS443:3:58:1567:1266#0/1  
GATGGACAGGCCTCATACAAGATCTTCAGAATAGAAAAGG  
+HWI-EAS443:3:58:1567:1266#0/1  
aabba`bbaa\_\_\_\_`aaa`aa^`\_]aa\_aaaaa`a`\_\_^a^  
@HWI-EAS443:3:58:1602:551#0/1  
GTCCAGTATCGTCTAATGGAGCAAATGGAGTAAAAGGATT  
+HWI-EAS443:3:58:1602:551#0/1  
`aa^[[`\_a^Z`a\_`aa¥S\_\_]\_^`^`^aS\_\_`a`\_X]]  
@HWI-EAS443:3:58:169:312#0/1  
GGCCTGTCCATCACTTGGTCCATCGGTCATTACAGTAAAG  
+HWI-EAS443:3:58:169:312#0/1  
aaaaaa`abaa^¥aa\_aa¥¥`a`\_\_]0[]`]YZ\_Y¥``  
@HWI-EAS443:3:58:1764:1308#0/1  
GTCCAGTATCGTCTAATGGAGCAAATGGAGTAAAAGGATT  
+HWI-EAS443:3:58:1764:1308#0/1  
\_`^aZX]^`¥V\_aY^¥¥ZV]QLVV`^¥XZJV`\_a\_¥YRX  
@HWI-EAS443:3:58:225:82#0/1  
CCCCTTGAACCGATTCTTATACTGTTGTCTTTACTGTAT  
+HWI-EAS443:3:58:225:82#0/1  
`ba^ba[bWbW\_b^ba]aaaaaa^V\_\_\_\_`\_a\_a`\_`\_]`  
@HWI-EAS443:3:58:630:304#0/1  
AGTTTTTTGAACAAATTACTTGTCAATGGTAAATGGCAAC  
+HWI-EAS443:3:58:630:304#0/1  
ab^abbabb\_a`aaaaba\_aab^^a\_ab`^a`aaa`aaa\_  
@HWI-EAS443:3:58:856:572#0/1  
ATTTGAATGAAAATCCTTTTACTCCATTTGCTCCATTAGA  
+HWI-EAS443:3:58:856:572#0/1  
\_aba`abbbbabbbbbbba`\_¥`b`^^a]^`Y\_aba^aaba`  
@HWI-EAS443:3:58:947:886#0/1  
CTGTCCATCACTTGGTCCATCGGTCATTACAGTAAAGCAA

+HWI-EAS443:3:58:947:886#0/1  
aaa`aabbbaaaba^`U`]]ZGSR^YYGZXS^a^ZJ¥X  
@HWI-EAS443:3:59:1059:1559#0/1  
GGATTTTCATTCAAATACGGCAATGGTGTGGATAGGGA  
+HWI-EAS443:3:59:1059:1559#0/1  
abaaabbbba`aba`abaa`a\_\_`a`¥X]^aa]^W]YW^[  
@HWI-EAS443:3:59:12:99#0/1  
CCTGTCCATCATTGGTCCATCGGTCATTACAGTAAAGCA  
+HWI-EAS443:3:59:12:99#0/1  
aabbab`bba^abbaa¥aaaaaa\_`]^)][^`]¥¥Z¥¥Z  
@HWI-EAS443:3:59:1352:791#0/1  
AAGGATTTTCATTCAAATACGGCAATGGTGTGGATAGG  
+HWI-EAS443:3:59:1352:791#0/1  
abbaaabbaaaba\_aaaaaaba\_a\_aab]ba\_aa\_Y[\_]V  
@HWI-EAS443:3:59:1489:1401#0/1  
GTCCAGTATCGTCTAATGGAGCAAATGGAGTAAAAGGATT  
+HWI-EAS443:3:59:1489:1401#0/1  
¥H]a\_``aaaa\_Y\_] [\_aZV`]^T\_a]^`^XRZ\_a^VSV]  
@HWI-EAS443:3:59:1728:990#0/1  
AACACCATTGCCGATTTGAATGAAAATCCTTTTACTCCA  
+HWI-EAS443:3:59:1728:990#0/1  
ababaaab`baab\_aaba^aabaaa^baab]a\_`PWZ[Z  
@HWI-EAS443:3:59:299:1001#0/1  
CTTATGACAAACACATCCCCCTTGAACCGATTCTTATAC  
+HWI-EAS443:3:59:299:1001#0/1  
\_bbbbbbba`bbbbbaab`^aaaabaaZ\_baa`\_aa^Z\_`W  
@HWI-EAS443:3:59:434:1776#0/1  
GGCCTGTCCATCATTGGTCCATCGGTCATTACAGTAAAG  
+HWI-EAS443:3:59:434:1776#0/1  
`bbbbbbabbbbbbbbaababbb`^`aV\_a[¥aZV]a`W  
@HWI-EAS443:3:59:742:1394#0/1  
AAATTACTTGTCAATGGTAAATGGCAACTCAGCACCGTCT  
+HWI-EAS443:3:59:742:1394#0/1  
\_`\_a`bbbaa^aba`aaWaaa`aa``aa`aa^]aRLOSW]  
@HWI-EAS443:3:59:770:861#0/1  
AGTTTTTTGAACAAATTACTTGTCAATGGTAAATGGCAAC  
+HWI-EAS443:3:59:770:861#0/1  
\_`a`bbabb\_S\_`a`^bb`^bb\_\_aabbb^[^a\_aYN^aX  
@HWI-EAS443:3:5:1361:140#0/1  
GGATTTTCATTCAAATACGGCAATGGTGTGGATAGGGA  
+HWI-EAS443:3:5:1361:140#0/1  
\_b`aabba^\_aaa`b][^^`^aaaV^aaaa`]\_Y^aY]  
@HWI-EAS443:3:5:1419:833#0/1  
AAATTACTTGTCAATGGTAAATGGCAACTCAGCACCGTCT  
+HWI-EAS443:3:5:1419:833#0/1  
abbbba`abb`^b`ab`\_a^a\_a^aaaa\_a]Sa`Za`V`  
@HWI-EAS443:3:5:318:67#0/1  
GGCCTGTCCATCATTGGTCCATCGGTCATTACAGTAAAG  
+HWI-EAS443:3:5:318:67#0/1  
`X`aa¥\_¥^a`]^`]^G]H]a]ba\_¥\_\_\_XNT¥Z\_^`B

@HWI-EAS443:3:5:369:274#0/1  
ATTTGAATGAAAATCCTTTTACTCCATTTGCTCCATTAGA  
+HWI-EAS443:3:5:369:274#0/1  
aababaabaaaaa^aa\_a`\_a\_\_\_a`\_a^`\_^`\_^`\_`  
@HWI-EAS443:3:5:384:1433#0/1  
TGCTTTACTGTAATGACCGATGGACCAAGTGATGGACAGG  
+HWI-EAS443:3:5:384:1433#0/1  
a`baab`aaaYaa`]a`aa\_`^baa]a]a0aa\_aaaaa\_]`  
@HWI-EAS443:3:5:592:862#0/1  
GTAATGACCGATGGACCAAGTGATGGACAGGCCTCATACA  
+HWI-EAS443:3:5:592:862#0/1  
aaababa\_a]^aaa`a`a`a`aaab\_`^``\_\_Y^¥\_a`\_a  
@HWI-EAS443:3:5:772:1100#0/1  
GGAGTTTTTTGAACAAATTACTTGTCAATGGTAAATGGCA  
+HWI-EAS443:3:5:772:1100#0/1  
ab`b]abbaaaaaXa¥bb]Yb]]V`\_N\_]a`^a\_`[aBB  
@HWI-EAS443:3:5:909:2015#0/1  
GAACAAATTACTTGTCAATGGTAAATGGCAACTCAGCACC  
+HWI-EAS443:3:5:909:2015#0/1  
\_¥b\_^Yb`VbaYV[NV^M\_aaGa¥\_F]HLadW\_]T`^a`B  
@HWI-EAS443:3:5:926:357#0/1  
AAATCCTTTTACTCCATTTGCTCCATTAGACGATACTGGA  
+HWI-EAS443:3:5:926:357#0/1  
aabb]`babab\_a`aaaa\_a\_aaa\_a\_`]aaaa`PY`\_B  
@HWI-EAS443:3:60:1069:684#0/1  
AAATCCTTTTACTCCATTTGCTCCATTAGACGATACTGGA  
+HWI-EAS443:3:60:1069:684#0/1  
aa]`aaaaaaa`aaaaaaaaaaa]\_aa```\_a\_^`]¥V^]  
@HWI-EAS443:3:60:1191:551#0/1  
GTCCAGTATCGTCTAATGGAGCAAATGGAGTAAAAGGATT  
+HWI-EAS443:3:60:1191:551#0/1  
a\_a`\_a^`a`a\_^a`\_\_`^Z]^Z^`\_aX`W^`\_`\_P¥^^  
@HWI-EAS443:3:60:1278:1205#0/1  
GGGCTATATACAGTAAAGACAACAGTATAAGAATCGGTTC  
+HWI-EAS443:3:60:1278:1205#0/1  
\_¥¥Vba\_a^V`ab^a\_`¥]`a¥¥Wb`bbbb]a¥[Z\_a^VW  
@HWI-EAS443:3:60:1354:976#0/1  
AAATTACTTGTCAATGGTAAATGGCAACTCAGCACCGTCT  
+HWI-EAS443:3:60:1354:976#0/1  
abbbba`bbba``abb`\_a`\_aa\_``\_a\_a¥aa\_`WWa\_]a  
@HWI-EAS443:3:60:1368:200#0/1  
AGTTTTTTGAACAAATTACTTGTCAATGGTAAATGGCAAC  
+HWI-EAS443:3:60:1368:200#0/1  
`^aaababaaa\_aaaa`a``aa\_\_`\_aa`^`\_\_\_\_\_Y]^]  
@HWI-EAS443:3:60:1414:566#0/1  
CCCCCTTGAACCGATTCTTATACTGTTGTCTTTACTGTA  
+HWI-EAS443:3:60:1414:566#0/1  
aabb`bbabbbabbabbbbbb`bbabbaaaaa`abaa  
@HWI-EAS443:3:60:1424:950#0/1  
GTTTTTTGAACAAATTACTTGTCAATGGTAAATGGCAACT

+HWI-EAS443:3:60:1424:950#0/1  
`PGYT]^XV[PMO\_VGX\_UUQQVQWUBBBBBBBBBBBBBBB  
@HWI-EAS443:3:60:330:78#0/1  
GACAAACACATCCCCCTTGAACCGATTCTTATACTGTTG  
+HWI-EAS443:3:60:330:78#0/1  
aa``a^`^`\_`¥]\_^`^`\_`¥]YZaZ\_^]^^]^ZZ]^XZZ  
@HWI-EAS443:3:60:812:1246#0/1  
GGCCTGTCCATCACTTGGTCCATCGGTCATTACAGTAAAG  
+HWI-EAS443:3:60:812:1246#0/1  
aabbab]aa`a`aaaa`a`\_]aaa\_ZZa]``¥NX]W^\_\_¥  
@HWI-EAS443:3:60:963:585#0/1  
AGTTTTTTGAACAAATTACTTGTCAATGGTAAATGGCAAC  
+HWI-EAS443:3:60:963:585#0/1  
^^^`baaab`b`\_^b[Zzb^[`aaaaaQaa`\_a[]\_`S  
@HWI-EAS443:3:61:1645:702#0/1  
GGGCTATATACAGTAAAGACAACAGTATAAGAATCGGTTC  
+HWI-EAS443:3:61:1645:702#0/1  
a`a\_\_\_a\_a\_\_\_^`Z^^\_a`\_\_\_S^`\_^`\_^^`ZX]SUUWXU  
@HWI-EAS443:3:61:1728:1770#0/1  
CAAATTACTTGTCAATGGTAAATGGCAACTCAGCACCGTC  
+HWI-EAS443:3:61:1728:1770#0/1  
abbbbbbbbbbaabbbabbabbababYa\_\_a\_R\_V]  
@HWI-EAS443:3:61:358:544#0/1  
AGTTTTTTGAACAAATTACTTGTCAATGGTAAATGGCAAC  
+HWI-EAS443:3:61:358:544#0/1  
ab]abaaaa`aba]aaa`a`a]aYV\_a\_X`^^^\_]]]]]  
@HWI-EAS443:3:61:628:1537#0/1  
AGTTTTTTGAACAAATTACTTGTCAATGGTAAATGGCAAC  
+HWI-EAS443:3:61:628:1537#0/1  
`Z\_aaaaa`aa\_a`aaaba\_a^aa`a[Xa`]Z]XW^^Z  
@HWI-EAS443:3:61:774:605#0/1  
ATTCTGAAGATCTTGTATGAGGCCTGTCCATCACTTGGTC  
+HWI-EAS443:3:61:774:605#0/1  
a`a]a]a]a[]`\_a`aY]\_a\_[^ba^a[a]Z`]XV^\_\_YYX  
@HWI-EAS443:3:61:856:166#0/1  
CAAACACATCCCCCTTGAACCGATTCTTATACTGTTGTC  
+HWI-EAS443:3:61:856:166#0/1  
ab``a`b`\_¥aaa[\_`baaU]bb¥a`a\_b```Zab`aa]W  
@HWI-EAS443:3:62:1160:466#0/1  
GAGTTTTTTGAACAAATTACTTGTCAATGGTAAATGGCAA  
+HWI-EAS443:3:62:1160:466#0/1  
a`b`\_aaaa`a\_aa`a`a`a`a`a`a`\_a`\_a\_Y\_\_\_^^^\_a`  
@HWI-EAS443:3:62:1168:116#0/1  
GGGCTATATACAGTAAAGACAACAGTATAAGAATCGGTTC  
+HWI-EAS443:3:62:1168:116#0/1  
aabaaaaaaaa`a]`a`a`````]`\_Y`\_\_a]\_\_W^RVV  
@HWI-EAS443:3:62:121:747#0/1  
AGTTTTTTGAACAAATTACTTGTCAATGGTAAATGGCAAC  
+HWI-EAS443:3:62:121:747#0/1  
¥`UY`^`¥b[a`\_aaaa`YaaaZ^]HR`]¥\_ZY]WNQ\_]N

@HWI-EAS443:3:62:1507:929#0/1  
AGTTTTTTGAACAAATTACTTGTCAATGGTAAATGGCAAC  
+HWI-EAS443:3:62:1507:929#0/1  
QTZ\_`\_b`YU¥V][\_a`[]X\_W\_XZ^^^`^]Z[T^^`^a`\_]  
@HWI-EAS443:3:62:1606:911#0/1  
ATTTGAATGAAAATCCTTTTACTCCATTTGCTCCATTAGA  
+HWI-EAS443:3:62:1606:911#0/1  
a`aba^]b`^^`aabb^`bbbYaXN^aa^]¥a]T`aVWYW  
@HWI-EAS443:3:62:1709:692#0/1  
AGTTTTTTGAACAAATTACTTGTCAATGGTAAATGGCAAC  
+HWI-EAS443:3:62:1709:692#0/1  
aba`babab`a\_\_aabb]aaba\_^a\_abaYaY¥\_a]aaaa  
@HWI-EAS443:3:62:255:103#0/1  
TGGGCTATATACAGTAAAGACAACAGTATAAGAATCGGTT  
+HWI-EAS443:3:62:255:103#0/1  
aaa\_a\_Y]`\_`^^`¥\_]W^U^^¥XXZT¥YSUTVWRPVVTQ  
@HWI-EAS443:3:62:265:1646#0/1  
ATCACTTGGTCCATCGGTCATTACAGTAAAGCAAGAACCA  
+HWI-EAS443:3:62:265:1646#0/1  
aaabaaa`a]aa\_`a^a^][\_\_`\_^\_]a\_^]^^VW`\_`^  
@HWI-EAS443:3:62:409:688#0/1  
GGCCTGTCCATCACTTGGTCCATCGGTCATTACAGTAAAG  
+HWI-EAS443:3:62:409:688#0/1  
abbbab`ba`bbbbaaaa\_abbabb`W\_ca\_V^aa¥aaaX  
@HWI-EAS443:3:63:1019:830#0/1  
GAGTTTTTTGAACAAATTACTTGTCAATGGTAAATGGCAA  
+HWI-EAS443:3:63:1019:830#0/1  
aaa[aaaaaa`aa\_`aaaa`a`a^aaX^`[T^^`\_`^`  
@HWI-EAS443:3:63:1141:1032#0/1  
GGCCTGTCCATCACTTGGTCCATCGGTCATTACAGTAAAG  
+HWI-EAS443:3:63:1141:1032#0/1  
abbb\_\_`bbbbaaaa`¥`aaa``baaYY]]`TY\_\_^aa^]  
@HWI-EAS443:3:63:1321:232#0/1  
GGAGTTTTTTGAACAAATTACTTGTCAATGGTAAATGGCA  
+HWI-EAS443:3:63:1321:232#0/1  
aa¥a\_aaaaab\_`\_aaaaaa\_aaa^`\_`aa\_Z\_`\_`^^`\_`  
@HWI-EAS443:3:63:1352:1241#0/1  
ATTTGAATGAAAATCCTTTTACTCCATTTGCTCCATTAGA  
+HWI-EAS443:3:63:1352:1241#0/1  
``a^¥U\_`bbb`a\_a^bb`\_`ab\_Y`aaaba[aaaaba`a  
@HWI-EAS443:3:63:1703:452#0/1  
CACTTGGTCCATCGGTCATTACAGTAAAGCAAGAACCATT  
+HWI-EAS443:3:63:1703:452#0/1  
aaababb`babbabb`bba\_aabb`baaaa^baaaSV`bb  
@HWI-EAS443:3:63:1732:360#0/1  
GGATTTTCATTCAAATACGGCAATGGTGTGGATAGGGA  
+HWI-EAS443:3:63:1732:360#0/1  
Y`0^b\_b¥\_``baab^X``¥RY]¥``H¥SZ\_SWH[XZa`Q  
@HWI-EAS443:3:63:532:830#0/1  
TTCTTGCTTTACTGTAATGACCGATGGACCAAGTGATGGA

+HWI-EAS443:3:63:532:830#0/1  
aaba\_aba`)\`aaa\_aaaa\_]\_Z`a\_`\_\_a^^Wa\_[aYY  
@HWI-EAS443:3:63:819:535#0/1  
GGCCTGTCCATCACTTGGTCCATCGGTCATTACAGTAAAG  
+HWI-EAS443:3:63:819:535#0/1  
a`ab\_aabbbbbaabaaa`bababaa\_\_^a\_[YQ`¥\_aa\_  
@HWI-EAS443:3:64:1157:588#0/1  
GAGTTTTTTGAACAAATTACTTGTCAATGGTAAATGGCAA  
+HWI-EAS443:3:64:1157:588#0/1  
aab\_aaaba^G^a\_^¥bba\_`b`\_\_\_\_`aaaX`\_^\_a]]``  
@HWI-EAS443:3:64:1219:679#0/1  
GTCCAGTATCGTCTAATGGAGCAAATGGAGTAAAAGGATT  
+HWI-EAS443:3:64:1219:679#0/1  
aabaab`aaaa^a`[Y`^`\_]a\_¥]Z¥[`V`^]]^^XX\_  
@HWI-EAS443:3:64:1321:309#0/1  
ATTTGAATGAAAATCCTTTTACTCCATTTGCTCCATTAGA  
+HWI-EAS443:3:64:1321:309#0/1  
¥¥Z`bbaaY^PTb^ZTZ¥¥b\_V¥[S]\_b`XWaaa`baa`X  
@HWI-EAS443:3:64:1432:1597#0/1  
AACACATCCCCCTTGAACCGATTCTTATACTGTTGTCTT  
+HWI-EAS443:3:64:1432:1597#0/1  
aa]a]aa\_\_a\_aaaa\_\_aX]\_`aWa`a``Z^\_[a^^^a\_  
@HWI-EAS443:3:64:1527:1997#0/1  
GTCCAGTATCGTCTAATGGAGCAAATGGAGTAAAAGGATT  
+HWI-EAS443:3:64:1527:1997#0/1  
`^¥^¥^M[b^aUZ][RS\_TXaZ¥`W¥[VLXOXZ``\_^FX  
@HWI-EAS443:3:64:1535:1190#0/1  
GGCCTGTCCATCACTTGGTCCATCGGTCATTACAGTAAAG  
+HWI-EAS443:3:64:1535:1190#0/1  
`X]]`[aa¥aa¥X^aa\_¥OR¥`aW]a¥ZRX^]TXQPX[^V  
@HWI-EAS443:3:64:1578:847#0/1  
AGTTTTTTGAACAAATTACTTGTCAATGGTAAATGGCAAC  
+HWI-EAS443:3:64:1578:847#0/1  
ababbbbbbbbaabbbabaabaaa`aaba]aaa\_a`aaa^  
@HWI-EAS443:3:64:170:532#0/1  
TGCTTTACTGTAATGACCGATGGACCAAGTGATGGACAGG  
+HWI-EAS443:3:64:170:532#0/1  
aa]aa`Q\_`b\_ba`b``aa\_\_aaa\_a^^aWaY\_a¥^^a]]  
@HWI-EAS443:3:64:1778:962#0/1  
GGATTTTCATTCAAATACGGCAATGGTGTGGATAGGGA  
+HWI-EAS443:3:64:1778:962#0/1  
¥\_aaaa`Z`\_]baa``aa\_[ZRV^XWLZNX`WYIOVLJSX  
@HWI-EAS443:3:64:956:304#0/1  
GTTTTTTGAACAAATTACTTGTCAATGGTAAATGGCAACT  
+HWI-EAS443:3:64:956:304#0/1  
a\_``baaaabaaaaaaa`aaa\_```aaa\_Za\_`¥^\_\_¥Y\_  
@HWI-EAS443:3:65:1098:163#0/1  
CTTGTATGAGGCCTGTCCATCACTTGGTCCATCGGTCATT  
+HWI-EAS443:3:65:1098:163#0/1  
\_baa\_`b``bb]b`[aaa\_]a]`aaaYWW\_`\_^aR\_a\_`

@HWI-EAS443:3:65:1462:280#0/1  
AAATCCTTTTACTCCATTTGCTCCATTAGACGATACTGGA  
+HWI-EAS443:3:65:1462:280#0/1  
ababaabbbbaa`\_Zaaaba`\_Z`baaaaa`\_`M^^`W  
@HWI-EAS443:3:65:562:1172#0/1  
CCTTGAACCGATTCTTATACTGTTGTCTTTACTGTATAT  
+HWI-EAS443:3:65:562:1172#0/1  
ab`aabab`aaaaaaaaaaaaab`aa`aaaa`aa\_aaa\_  
@HWI-EAS443:3:65:58:1887#0/1  
CAAATTACTTGTCAATGGTAAATGGCAACTCAGCACCGTC  
+HWI-EAS443:3:65:58:1887#0/1  
a^^aX¥]\_RZ¥YYZZ[]XSY]UPOO¥VUVV[UOVV`TKL^  
@HWI-EAS443:3:65:696:386#0/1  
ATCTTGTATGAGGCCTGTCCATCACTTGGTCCATCGGTCA  
+HWI-EAS443:3:65:696:386#0/1  
`Q¥¥]ZL¥^]V^]\_WY[G^\_W[``^`a\_L]Y`VXYXK]^  
@HWI-EAS443:3:66:114:195#0/1  
GGAGTTTTTTGAACAAATTACTTGTCAATGGTAAATGGCA  
+HWI-EAS443:3:66:114:195#0/1  
aa[bY\_\_¥[aa\_]XV\_Z^^Y^`\_aW\_]YY\_^W[UTXYWR[  
@HWI-EAS443:3:66:1151:2003#0/1  
AACAAATTACTTGTCAATGGTAAATGGCAACTCAGCACCG  
+HWI-EAS443:3:66:1151:2003#0/1  
^R]QN\_]aa\_WT`[ZUaX^`P`[`Y\_^W^\_U[]^ZW`]U\_  
@HWI-EAS443:3:66:1566:1778#0/1  
AGGATTTTTCATTCAAATACGGCAATGGTGTGGATAGGG  
+HWI-EAS443:3:66:1566:1778#0/1  
aaa`\_\_aa\_a```\_\_a\_\_]VP\_[Z[[H^X\_]NTV[YX`^  
@HWI-EAS443:3:66:1720:1503#0/1  
AAATTACTTGTCAATGGTAAATGGCAACTCAGCACCGTCT  
+HWI-EAS443:3:66:1720:1503#0/1  
aababaabba\_aaaa`Waaa\_a[\_aa\_a]``\_\_]^X]^  
@HWI-EAS443:3:66:451:123#0/1  
ATCACTTGGTCCATCGGTCACTTACAGTAAAGCAAGAACCA  
+HWI-EAS443:3:66:451:123#0/1  
aaaaaa`aa^\_aa``aaX\_\_¥Z\_X\_]`^`XZ^\_]ZX]^  
@HWI-EAS443:3:66:547:976#0/1  
GAGTAAAAGGATTTTTCATTCAAATACGGCAATGGTGTGG  
+HWI-EAS443:3:66:547:976#0/1  
^] []abbaa``\_aaabbaabaaX^a^a^a\_a\_U]YX^a`a  
@HWI-EAS443:3:66:665:224#0/1  
ACCGATTCTTATACTGTTGTCTTTACTGTATATAGCCCAT  
+HWI-EAS443:3:66:665:224#0/1  
aaaaaaaaaaaa`a`a[]^[\_`a\_a`aa]a`\_a\_\_`^\_X  
@HWI-EAS443:3:66:738:675#0/1  
GTTTTTTGAACAAATTACTTGTCAATGGTAAATGGCAACT  
+HWI-EAS443:3:66:738:675#0/1  
\_X[^`b]a]a\_Z\_a``]a[``]]^^]USa]U¥XP][U[  
@HWI-EAS443:3:66:795:981#0/1  
CTGTCCATCACTTGGTCCATCGGTCACTTACAGTAAAGCAA

+HWI-EAS443:3:66:795:981#0/1  
]b\_Yaaa]\_^a`W^SUabaa¥ZR]a` [a¥]VFY`a^Y]P  
@HWI-EAS443:3:66:814:559#0/1  
GGGCTATATACAGTAAAGACAACAGTATAAGAATCGGTTC  
+HWI-EAS443:3:66:814:559#0/1  
aa\_a`baaaaaa\_`\_^aaaa\_`aa\_aa\_`\_`a\_\_^\_Y]^  
@HWI-EAS443:3:66:86:199#0/1  
AAATTACTTGTCAATGGTAAATGGCAACTCAGCACCGTCT  
+HWI-EAS443:3:66:86:199#0/1  
`a`bbbb[^Wa^\_]aa[aaZZbaa^aa`YMQS]\_UVUNT  
@HWI-EAS443:3:66:919:235#0/1  
GAGTTTTTTGAACAAATTACTTGTCAATGGTAAATGGCAA  
+HWI-EAS443:3:66:919:235#0/1  
`ab]aaaabaaa`aa`aaa`a\_a[`a\_`` [V`a^\_\_\_X\_\_  
@HWI-EAS443:3:67:1404:1457#0/1  
AAATTACTTGTCAATGGTAAATGGCAACTCAGCACCGTCT  
+HWI-EAS443:3:67:1404:1457#0/1  
\_¥\_`\_L\_a\_]X]X`¥ZYba\_Wa`P]aa]S\_¥X^\_VZ`\_¥  
@HWI-EAS443:3:67:248:1399#0/1  
ATGGAGTAAAAGGATTTTCATTCAAATACGGCAATGGTGT  
+HWI-EAS443:3:67:248:1399#0/1  
]bba\_a^aab¥a]\_\_aabaa`b`a`aaaa\_\_\_[a^Y]`U  
@HWI-EAS443:3:67:363:164#0/1  
AAAGGATTTTCATTCAAATACGGCAATGGTGTGGATAG  
+HWI-EAS443:3:67:363:164#0/1  
abbbba\_aaaaaaaaa^aaaab```a`aaY\_^``aaX`]¥  
@HWI-EAS443:3:67:420:282#0/1  
TGAAAATCCTTTTACTCCATTTGCTCCATTAGACGATACT  
+HWI-EAS443:3:67:420:282#0/1  
YTP¥a\_bb```Y¥X`]¥[```a`X[a¥H¥\_X`\_Z]Z¥YRP  
@HWI-EAS443:3:67:450:106#0/1  
GGAGTAAAAGGATTTTCATTCAAATACGGCAATGGTGT  
+HWI-EAS443:3:67:450:106#0/1  
ab`a^aaabbaa\_`a`\_aaaa`a`aa`a`\_\_^`\_\_Y`\_^`  
@HWI-EAS443:3:67:464:697#0/1  
AGACAACAGTATAAGAATCGGTCCAAGGGGATGTGTTT  
+HWI-EAS443:3:67:464:697#0/1  
^`^YZY\_¥Z`\_ZR\_¥S¥a`\_[QY]UGWXYTUDMWMW\_W  
@HWI-EAS443:3:67:719:1387#0/1  
CAAGGAGTTTTTTGAACAAATTACTTGTCAATGGTAAATG  
+HWI-EAS443:3:67:719:1387#0/1  
a\_b\_Zab¥a\_ba^`aaa\_\_^a`babaa]aaSaa`F¥``^  
@HWI-EAS443:3:67:883:1402#0/1  
GAGTTTTTTGAACAAATTACTTGTCAATGGTAAATGGCAA  
+HWI-EAS443:3:67:883:1402#0/1  
\_`]0]a\_bababbaabaabbaa\_abb`b]Saa`^\_Y]aa  
@HWI-EAS443:3:67:893:1585#0/1  
ATCCTTTTACTCCATTTGCTCCATTAGACGATACTGGACC  
+HWI-EAS443:3:67:893:1585#0/1  
^U^aa¥`\_bZaaa¥a\_\_``¥aZ\_\_¥V[P^`\_]ZSTSWXZ^



@HWI-EAS443:3:68:1098:1389#0/1  
GGAGTTTTTTGAACAAATTACTTGTCAATGGTAAATGGCA  
+HWI-EAS443:3:68:1098:1389#0/1  
a`]aYX\_\_T¥XF[ZZ^T][\_\_^^^WdWW¥]¥L¥V^STTOZ  
@HWI-EAS443:3:68:676:514#0/1  
AAGATCTTGTATGAGGCCTGTCCATCACTTGGTCCATCGG  
+HWI-EAS443:3:68:676:514#0/1  
aabbabbba`baaa\_aaaa\_aaaaa`aa`aaaa]Y\_  
@HWI-EAS443:3:68:728:997#0/1  
GGGCTATATACAGTAAAGACAACAGTATAAGAATCGGTTC  
+HWI-EAS443:3:68:728:997#0/1  
aa`a\_aZHZ`S]X[aY¥\_Ya\_]\_[\_SW^QR¥\_\_¥¥\_NQW]  
@HWI-EAS443:3:68:946:1012#0/1  
TCCCCCTTGAACCGATTCTTATACTGTTGTCTTTACTGT  
+HWI-EAS443:3:68:946:1012#0/1  
abbb^aZ][ZZ^``¥Vaa][`a`¥aZ¥aa`a¥\_a`]  
@HWI-EAS443:3:69:1279:976#0/1  
AATGGTTCTTGCTTTACTGTAATGACCGATGGACCAAGTG  
+HWI-EAS443:3:69:1279:976#0/1  
^XYa\_Y^aa)`Yaaa\_aa`I`aa\_aaa]\_a^PZ¥[T\_]a  
@HWI-EAS443:3:69:129:855#0/1  
CAAACACATCCCCCTTGAACCGATTCTTATACTGTTGTC  
+HWI-EAS443:3:69:129:855#0/1  
aa^[\`b\_VV]aaaa\_Xa`\_a`a[VZ\_\_a]\_V`Y^XR\_YZ  
@HWI-EAS443:3:69:1312:729#0/1  
GAGTTTTTTGAACAAATTACTTGTCAATGGTAAATGGCAA  
+HWI-EAS443:3:69:1312:729#0/1  
a]a¥aaba`a]^`aaa`a\_a\_bTRZ\_aa\_V^`^\_[\_\_\_\_  
@HWI-EAS443:3:69:1613:1142#0/1  
ATTTGAATGAAAATCCTTTTACTCCATTTGCTCCATTAGA  
+HWI-EAS443:3:69:1613:1142#0/1  
¥aZ`bZ`Z`^X]Va\_SXU^`aab\_[`abaaaaYL¥\_`[b[  
@HWI-EAS443:3:69:1655:1399#0/1  
AAATCCTTTTACTCCATTTGCTCCATTAGACGATACTGGA  
+HWI-EAS443:3:69:1655:1399#0/1  
\_\_ba\_\_aa\_babbba`aba\_`aa`abaaaababa¥\_aaX  
@HWI-EAS443:3:69:332:1536#0/1  
GTCCAGTATCGTCTAATGGAGCAAATGGAGTAAAAGGATT  
+HWI-EAS443:3:69:332:1536#0/1  
\_abbaa]baba\_ab[a`Y]\_]a\_a`a`¥¥][^`ab\_\_\_\_]\_  
@HWI-EAS443:3:69:610:1720#0/1  
GGAGTTTTTTGAACAAATTACTTGTCAATGGTAAATGGCA  
+HWI-EAS443:3:69:610:1720#0/1  
]baa\_ababbbbbbbbababbaaa[baaba\_]aa`\_^Taa  
@HWI-EAS443:3:69:651:1942#0/1  
ATAAGAATCGGTTCCAAGGGGATGTGTTTGTCCATAAGGG  
+HWI-EAS443:3:69:651:1942#0/1  
a\_Z^Sa\_U]]\_ZOX^UQMXF[XPTPPWY\_VFULNT[]XZY  
@HWI-EAS443:3:69:660:534#0/1  
TAATGGAGCAAATGGAGTAAAAGGATTTTCATTCAAATAC



@HWI-EAS443:3:70:1094:1070#0/1  
ATGGGCTATATACAGTAAAGACAACAGTATAAGAATCGGT  
+HWI-EAS443:3:70:1094:1070#0/1  
abaa^aa`Z]^aY\_[Z`\_Y`\_a`^X]V^`^^`\_`^¥ZZF  
@HWI-EAS443:3:70:1144:685#0/1  
AAATTACTTGTCAATGGTAAATGGCAACTCAGCACCGTCT  
+HWI-EAS443:3:70:1144:685#0/1  
a`abaaababaaaaab`V`aa\_a`\_aa\_aaa\_aa\_\_`X`  
@HWI-EAS443:3:70:1233:398#0/1  
GTTTTTTGAACAAATTACTTGTCAATGGTAAATGGCAACT  
+HWI-EAS443:3:70:1233:398#0/1  
a]^`aaaaa\_aa``aaa\_`aaa`a`^aa`Za\_`\_`\_]`^\_X^  
@HWI-EAS443:3:70:1578:990#0/1  
CAAACACATCCCCCTTGAACCGATTCTTATACTGTTGTC  
+HWI-EAS443:3:70:1578:990#0/1  
a\_b`aab`a`bbabab\_a`a`abbba^bbbbb`aa\_aa`]  
@HWI-EAS443:3:70:1592:1115#0/1  
GGAGTTTTTTGAACAAATTACTTGTCAATGGTAAATGGCA  
+HWI-EAS443:3:70:1592:1115#0/1  
aa`[[aaaaa\_\_\_\_\_^aaa\_a`b¥Y\_[\_\_][\_Z\_`^`ZP¥  
@HWI-EAS443:3:70:64:377#0/1  
GACAAACACATCCCCCTTGAACCGATTCTTATACTGTTG  
+HWI-EAS443:3:70:64:377#0/1  
^V\_]VS\_`XT¥a`^`a\_U\_\_[\_X^RWZTVVUSV]V¥XUV  
@HWI-EAS443:3:70:946:1376#0/1  
AGTTTTTTGAACAAATTACTTGTCAATGGTAAATGGCAAC  
+HWI-EAS443:3:70:946:1376#0/1  
aaZaaaaa\_baaaaaaaabaaa\_aa]aaa]aa^¥^`a`a\_  
@HWI-EAS443:3:71:1075:91#0/1  
GGAGTTTTTTGAACAAATTACTTGTCAATGGTAAATGGCA  
+HWI-EAS443:3:71:1075:91#0/1  
a]^`bVbaaaaaa`\_\_aabaabaa`W\_\_ab\_]a`a\_a][a  
@HWI-EAS443:3:71:1215:413#0/1  
CCTGTCCATCATTGGTCCATCGGTCATTACAGTAAAGCA  
+HWI-EAS443:3:71:1215:413#0/1  
[`bba\_a^Z` `[`bb\_a\_aaa`\_`abba`V`\_`X]bUNW  
@HWI-EAS443:3:71:1420:545#0/1  
GGTCCAGTATCGTCTAATGGAGCAAATGGAGTAAAAGGAT  
+HWI-EAS443:3:71:1420:545#0/1  
ababaab\_ab`b\_\_ba\_a`a\_aa\_\_aaaa\_a\_\_aaba\_^  
@HWI-EAS443:3:71:1600:1643#0/1  
ATCCTTTTACTCCATTTGCTCCATTAGACGATACTGGACC  
+HWI-EAS443:3:71:1600:1643#0/1  
aaa`a`bb`\_]aaaba`T¥aaaa\_`a`a`]^`PLW]¥UZ  
@HWI-EAS443:3:71:1674:1343#0/1  
AAGGATTTTCATTCAAATACGGCAATGGTGTGGATAGG  
+HWI-EAS443:3:71:1674:1343#0/1  
abbba\_aaa¥`aa\_aaTaa^aa`][`a`PaV^a\_[FV]\_\_  
@HWI-EAS443:3:71:212:1294#0/1  
ATTCTGAAGATCTTGTATGAGGCCTGTCCATCATTGGTC

+HWI-EAS443:3:71:212:1294#0/1  
aa[a]]PDM^\_\_\_¥\_W[\_[\_YT\_^T[Z`\_^TWS[XWUTT^  
@HWI-EAS443:3:71:644:50#0/1  
AAACACCATTGCCGATTTGAATGAAAATCCTTTTACTCC  
+HWI-EAS443:3:71:644:50#0/1  
`baaa`aaaaa\_a^a`aaa\_\_`a`\_\_aZ[````]`^V  
@HWI-EAS443:3:71:911:1827#0/1  
GAACAAATTACTTGTCAATGGTAAATGGCAACTCAGCACC  
+HWI-EAS443:3:71:911:1827#0/1  
`bbabbbbababaa\_ababaaXbaa`\_[baaa\_ab\_aaa`  
@HWI-EAS443:3:72:1353:2029#0/1  
ATGGAGTAAAAGGATTTTCATTCAAATACGGCAATGGTGT  
+HWI-EAS443:3:72:1353:2029#0/1  
abbb`aZbabbbba\_]`^ab\_baab`aaaba`aa`\_a\_aYa]  
@HWI-EAS443:3:72:204:492#0/1  
GAGTTTTTTGAACAAATTACTTGTCAATGGTAAATGGCAA  
+HWI-EAS443:3:72:204:492#0/1  
YS`]Xa``]a]]X¥ZZ^^\_W^ab¥^`ab^S\_aa```X[ZG  
@HWI-EAS443:3:72:221:918#0/1  
GTCCAGTATCGTCTAATGGAGCAAATGGAGTAAAAGGATT  
+HWI-EAS443:3:72:221:918#0/1  
a¥ab``[aaa`\_b\_Q\_a`¥Vaaa\_[\_aZ^\_]aX`a\_a`W]  
@HWI-EAS443:3:72:398:1181#0/1  
GGAGTTTTTTGAACAAATTACTTGTCAATGGTAAATGGCA  
+HWI-EAS443:3:72:398:1181#0/1  
aaa`\_aaaa`\_`aaa`a`aaa`^`a`^`XLY\_\_]¥¥\_\_  
@HWI-EAS443:3:72:547:725#0/1  
AACAAATTACTTGTCAATGGTAAATGGCAACTCAGCACCG  
+HWI-EAS443:3:72:547:725#0/1  
aaaaaaaaabaaa\_aa\_aa\_]aa¥\_\_`aaa`\_a`^`^`\_\_\_\_  
@HWI-EAS443:3:72:654:1498#0/1  
GTTTTTTGAACAAATTACTTGTCAATGGTAAATGGCAACT  
+HWI-EAS443:3:72:654:1498#0/1  
a\_aa`````^a`¥Xaaaaaaaa^`a`aa^]`aa^\_\_\_a`\_]`  
@HWI-EAS443:3:72:708:871#0/1  
ATTTGAATGAAAATCCTTTTACTCCATTTGCTCCATTAGA  
+HWI-EAS443:3:72:708:871#0/1  
aa`]`\_¥``aaa`\_`\_a`a``aa`a``\_\_aa\_]V]\_]\_\_\_\_  
@HWI-EAS443:3:72:773:612#0/1  
GGAGTTTTTTGAACAAATTACTTGTCAATGGTAAATGGCA  
+HWI-EAS443:3:72:773:612#0/1  
]ba`Y[Z`]`])`[^]Y]\_`aa]Y\_YM^aaQ`¥`]MMW`  
@HWI-EAS443:3:72:865:597#0/1  
CATTGCCGATTTGAATGAAAATCCTTTTACTCCATTTGC  
+HWI-EAS443:3:72:865:597#0/1  
aaaabbbb`abab`\_aab`a^aa``aaaa\_aa`aaa\_a`  
@HWI-EAS443:3:72:955:1698#0/1  
CACCATTGCCGATTTGAATGAAAATCCTTTTACTCCATT  
+HWI-EAS443:3:72:955:1698#0/1  
abbaa\_S\_abb\_`aaa`aa``aaaa`aaaaa`a^Yaa[

@HWI-EAS443:3:72:997:22#0/1  
TGAAAATCCTTTTACTCCATTTGCTCCATTAGACGATACT  
+HWI-EAS443:3:72:997:22#0/1  
aa\_aaaa\_\_bbbaaUb`a`aaaa\_aZU\_a\_a`a]a^^\_V\_  
@HWI-EAS443:3:73:1013:1380#0/1  
TGGGCTATATACAGTAAAGACAACAGTATAAGAATCGGTT  
+HWI-EAS443:3:73:1013:1380#0/1  
aa][`babbbb`a``abaaaaa`aa]aaaaaa\_]`a]]  
@HWI-EAS443:3:73:1160:787#0/1  
ATCTTGATGAGGCCTGTCCATCACTTGGTCCATCGGTCA  
+HWI-EAS443:3:73:1160:787#0/1  
ababba\_aaaaa`\_\_\_\_a\_a\_a`aa`aaaaZ^)`¥\_\_]]\_  
@HWI-EAS443:3:73:1220:1332#0/1  
TGAAAATCCTTTTACTCCATTTGCTCCATTAGACGATACT  
+HWI-EAS443:3:73:1220:1332#0/1  
aaYa```aaaaa\_\_a`a`^a`\_\_aa^^`a]`\_^`UU  
@HWI-EAS443:3:73:1624:1468#0/1  
CAAATTACTTGTCAATGGTAAATGGCAACTCAGCACCGTC  
+HWI-EAS443:3:73:1624:1468#0/1  
`bbabaa`aaa^`aa`^W`a`a^Zaa^\_R^UY`^YTVX  
@HWI-EAS443:3:73:1749:720#0/1  
GTTTTTTGAACAAATTACTTGTCAATGGTAAATGGCAACT  
+HWI-EAS443:3:73:1749:720#0/1  
aaaaabaaaa^aaaa`\_a`a\_]a`a`\_X\_\_\_\_`\_^Ua`X\_  
@HWI-EAS443:3:73:295:286#0/1  
ATGGGCTATATACAGTAAAGACAACAGTATAAGAATCGGT  
+HWI-EAS443:3:73:295:286#0/1  
abaa`baa`a\_a][^W\_a^^\_[`a`^`X\_\_^^^\_\_XYWOF  
@HWI-EAS443:3:73:335:1645#0/1  
GAAGATCTTGTATGAGGCCTGTCCATCACTTGGTCCATCG  
+HWI-EAS443:3:73:335:1645#0/1  
]bba`ab¥a`^b`aba`b\_aa^aaa`aa]``XQR^\_a[a\_  
@HWI-EAS443:3:73:369:1028#0/1  
AGTTTTTTGAACAAATTACTTGTCAATGGTAAATGGCAAC  
+HWI-EAS443:3:73:369:1028#0/1  
X\_`bbbbbabbbbabbbbaaab\_baZab[^baa``ab`aa  
@HWI-EAS443:3:73:714:1432#0/1  
GGAGTTTTTTGAACAAATTACTTGTCAATGGTAAATGGCA  
+HWI-EAS443:3:73:714:1432#0/1  
``^`Y`aV]]^aba^^Ya`^a]Ya\_`UT^a\_X¥[`UYT\_`  
@HWI-EAS443:3:73:806:1741#0/1  
ATTTGAATGAAAATCCTTTTACTCCATTTGCTCCATTAGA  
+HWI-EAS443:3:73:806:1741#0/1  
^Y]^^¥aa\_\_SV]aN¥aaaYIU]b¥aa`S^^^Y\_U¥`P^  
@HWI-EAS443:3:73:950:1587#0/1  
GGAGTTTTTTGAACAAATTACTTGTCAATGGTAAATGGCA  
+HWI-EAS443:3:73:950:1587#0/1  
aa^b]aaaaaaaaabaaaaaaaa\_]R\_aaaaaSaaa^a\_\_a  
@HWI-EAS443:3:74:1195:1920#0/1  
GGTTCTTGCTTTACTGTAATGACCGATGGACCAAGTGATG

+HWI-EAS443:3:74:1195:1920#0/1  
^a[abbbab`bbbb[abbbbaabbbb`ab]bbbQabab  
@HWI-EAS443:3:74:1445:536#0/1  
GGAGTTTTTTGAACAAATTACTTGTCAATGGTAAATGGCA  
+HWI-EAS443:3:74:1445:536#0/1  
]YWaX[aaaabaaaaaaa^a\_aa^Z\_S\_a`^`]][]W^  
@HWI-EAS443:3:74:154:601#0/1  
GTCCAGTATCGTCTAATGGAGCAAATGGAGTAAAAGGATT  
+HWI-EAS443:3:74:154:601#0/1  
a¥\_a^`[a\_\_`\_\_`^]\_\_[Y^`]Y`\_V^H\_]`\_]\_TZ]  
@HWI-EAS443:3:74:198:159#0/1  
CTTGGAACCGATTCTTATACTGTTGTCTTTACTGTATATA  
+HWI-EAS443:3:74:198:159#0/1  
a`Yaa`a```Y][\_a\_^`Z^`¥UZ`T¥¥^^UZZ^MZ[]X]  
@HWI-EAS443:3:74:28:238#0/1  
AAATTACTTGTCAATGGTAAATGGCAACTCAGCACCGTCT  
+HWI-EAS443:3:74:28:238#0/1  
[`¥¥^Ybb`a`baXbaa`\_JZ[\_¥aa`\_aaaa\_\_`Z\_\_  
@HWI-EAS443:3:74:615:1346#0/1  
GAGTTTTTTGAACAAATTACTTGTCAATGGTAAATGGCAA  
+HWI-EAS443:3:74:615:1346#0/1  
aYa¥Z`^b\_\_][\_a][Z\_]a^aY^Y[¥`¥Ua`]^\_Z`a`  
@HWI-EAS443:3:74:663:274#0/1  
GAGTTTTTTGAACAAATTACTTGTCAATGGTAAATGGCAA  
+HWI-EAS443:3:74:663:274#0/1  
aZ`aba[Yaa`aaa````b\_^Va``X`a]`YY`\_^UMT`\_  
@HWI-EAS443:3:74:861:1084#0/1  
CATTGCCGTATTTGAATGAAAATCCTTTTACTCCATTTGC  
+HWI-EAS443:3:74:861:1084#0/1  
abbaaab]`abbbba\_a\_aaba`^baaab`aaaabaaaa  
@HWI-EAS443:3:75:1378:110#0/1  
CTGAAGATCTTGTATGAGGCCTGTCCATCACTTGGTCCAT  
+HWI-EAS443:3:75:1378:110#0/1  
`bbbaabb`bbbbabbbbabbbaa[bb\_abbabbbYab  
@HWI-EAS443:3:75:1577:878#0/1  
GGACCAAGTGATGGACAGGCCTCATACAAGATCTTCAGAA  
+HWI-EAS443:3:75:1577:878#0/1  
ab`¥^[a`aaa`b`]aaaaYa¥aaa[`ab[L[\_[\_a`\_  
@HWI-EAS443:3:75:159:1039#0/1  
GTTTTTTGAACAAATTACTTGTCAATGGTAAATGGCAACT  
+HWI-EAS443:3:75:159:1039#0/1  
^^aba````^]`[`aa]aa`¥^`^]\_`Y^a\_\_^`[\_a`\_^  
@HWI-EAS443:3:75:581:1738#0/1  
GGAGTTTTTTGAACAAATTACTTGTCAATGGTAAATGGCA  
+HWI-EAS443:3:75:581:1738#0/1  
`\_bb`aabbabbbb^babbaaababbaba^[baa``\_aa  
@HWI-EAS443:3:75:609:1903#0/1  
AATCCTTTTACTCCATTTGCTCCATTAGACGATACTGGAC  
+HWI-EAS443:3:75:609:1903#0/1  
``^baaaa\_b\_`aaa`\_\_`\_`aaa^\_\_\_a`\_]`¥S]\_\_

@HWI-EAS443:3:75:698:42#0/1  
GGCCTGTCCATCACTTGGTCCATCGGTCATTACAGTAAAG  
+HWI-EAS443:3:75:698:42#0/1  
aabbabab`aaaabab`\_]`a]^^^`^`YNS¥NV^\_\_  
@HWI-EAS443:3:75:804:950#0/1  
CAAACACATCCCCCTTGAACCGATTCTTATACTGTTGTC  
+HWI-EAS443:3:75:804:950#0/1  
P\_Vab¥\_V\_¥b`LN\_^X[ZMZZaU]bXba`a¥abb¥ab[U  
@HWI-EAS443:3:75:891:27#0/1  
GAGTTTTTTGAACAAATTACTTGTCAATGGTAAATGGCAA  
+HWI-EAS443:3:75:891:27#0/1  
^Z`^¥¥^ba¥¥H[¥Z]ab[0]J^Q¥¥I[aaY`^XZ`¥BBB  
@HWI-EAS443:3:76:1465:322#0/1  
GGGCTATATACAGTAAAGACAACAGTATAAGAATCGGTTC  
+HWI-EAS443:3:76:1465:322#0/1  
aRaZYRS]]WNYWFO]^XVPV¥WI]WWWZSZSPHGTGVXW  
@HWI-EAS443:3:76:1489:517#0/1  
GGCCTGTCCATCACTTGGTCCATCGGTCATTACAGTAAAG  
+HWI-EAS443:3:76:1489:517#0/1  
a`[YY¥TU¥^¥RZWWV^^VSR[ZMZSUQXBBBBBBBBBBB  
@HWI-EAS443:3:76:1598:1567#0/1  
GGGCTATATACAGTAAAGACAACAGTATAAGAATCGGTTC  
+HWI-EAS443:3:76:1598:1567#0/1  
a`\_]Uaaa^^`¥S^\_\_\_\_^`a]]U\_] [YW[\_0]ZLUR  
@HWI-EAS443:3:76:1628:414#0/1  
TTTTTGAACAAATTACTTGTCAATGGTAAATGGCAACTCA  
+HWI-EAS443:3:76:1628:414#0/1  
a\_aaaa\_a^``\_\_`\_]a\_`^\_]X\_¥^X^]ZZZ]W\_`W^W^  
@HWI-EAS443:3:76:191:1721#0/1  
CTTGAACCGATTCTTATACTGTTGTCTTTACTGTATATA  
+HWI-EAS443:3:76:191:1721#0/1  
a^bbbaabb\_bbbabbbbababbabababbaa[bab\_b  
@HWI-EAS443:3:76:197:1134#0/1  
AATCCTTTTACTCCATTTGCTCCATTAGACGATACTGGAC  
+HWI-EAS443:3:76:197:1134#0/1  
ababbbbaaaaa`aa`aab`bbaa``\_aaaa\_\_¥U[]\_Z  
@HWI-EAS443:3:76:527:459#0/1  
GTTTTTTGAACAAATTACTTGTCAATGGTAAATGGCAACT  
+HWI-EAS443:3:76:527:459#0/1  
`S[^SWV[^^[TRPX^WZWX^WWGLPWXOXWXXZXXXXX  
@HWI-EAS443:3:76:527:876#0/1  
CCATCACTTGGTCCATCGGTCATTACAGTAAAGCAAGAAC  
+HWI-EAS443:3:76:527:876#0/1  
abaabbbbaaaa`baaaaaXaY\_aa]\_`\_]`a`X^[Z\_\_\_\_Z  
@HWI-EAS443:3:76:654:1918#0/1  
AAGATCTTGTATGAGGCCTGTCCATCACTTGGTCCATCGG  
+HWI-EAS443:3:76:654:1918#0/1  
a`\_VX¥\_U¥aa]Y\_VV\_aa]X^]]QOZ`[W[^Wa``V¥]V  
@HWI-EAS443:3:76:777:772#0/1  
AATCCTTTTACTCCATTTGCTCCATTAGACGATACTGGAC

+HWI-EAS443:3:76:777:772#0/1  
abbbbbbbababbbbababbaaaaaaaaa`\_`aaU]`\_`\_]  
@HWI-EAS443:3:76:988:1748#0/1  
GTTTTTTGAACAAATTACTTGTCAATGGTAAATGGCAACT  
+HWI-EAS443:3:76:988:1748#0/1  
aX]^\_WPX\_Y]]^V^W]^]]VRZZ^M^MKMZOFNZZ]XRZ  
@HWI-EAS443:3:77:1168:859#0/1  
AGTTTTTTGAACAAATTACTTGTCAATGGTAAATGGCAAC  
+HWI-EAS443:3:77:1168:859#0/1  
`bababbbaababaabaa`bbb^`aaaba\_aa\_`aaaa`^  
@HWI-EAS443:3:77:1529:373#0/1  
GTTTTTTGAACAAATTACTTGTCAATGGTAAATGGCAACT  
+HWI-EAS443:3:77:1529:373#0/1  
a`[aa¥^`^¥[````Z`\_a]a]¥^[\_]YO\_^S[XTT\_^[[  
@HWI-EAS443:3:77:236:1985#0/1  
CAAACACATCCCCCTTGAACCGATTCTTATACTGTTGTC  
+HWI-EAS443:3:77:236:1985#0/1  
ab\_S\_aaaa`a\_a[^ZX\_a\_]``\_[a]\_a^¥^]^[\_\_Z^  
@HWI-EAS443:3:77:267:700#0/1  
GGAGTTTTTTGAACAAATTACTTGTCAATGGTAAATGGCA  
+HWI-EAS443:3:77:267:700#0/1  
a`aa]`aaaaa\_```aa[\_a`a`Z`\_^`^]S^^Y]\_]\_  
@HWI-EAS443:3:77:329:1763#0/1  
CTTATGACAAACACATCCCCCTTGAACCGATTCTTATAC  
+HWI-EAS443:3:77:329:1763#0/1  
a`a``Wab```ababaaaaa\_\_a\_``T^X¥]\_\_\_\_\_a`a`  
@HWI-EAS443:3:77:826:1662#0/1  
TCTTGCTTTACTGTAATGACCGATGGACCAAGTATGGAC  
+HWI-EAS443:3:77:826:1662#0/1  
aba``aabaaaaa`aa`a]\_\_a`a\_aa`^a\_Za`\_`\_a\_  
@HWI-EAS443:3:77:900:355#0/1  
GTTTTTTGAACAAATTACTTGTCAATGGTAAATGGCAACT  
+HWI-EAS443:3:77:900:355#0/1  
a`aaaaaa[a\_`a`a`\_`a`]\_aa\_`^`X\_\_^\_\_`^Y\_  
@HWI-EAS443:3:77:989:1842#0/1  
CTCCCTATCCAAACACCATTGCCGATTTGAATGAAAATC  
+HWI-EAS443:3:77:989:1842#0/1  
¥^bVbbabb`bbbabbaababba`a`aababa`bbba]  
@HWI-EAS443:3:78:1220:1178#0/1  
GAGTTTTTTGAACAAATTACTTGTCAATGGTAAATGGCAA  
+HWI-EAS443:3:78:1220:1178#0/1  
aUWDTZa\_RTPZRK[Y`S^[^[[W[]]¥UL]¥^W]]V\_]\_  
@HWI-EAS443:3:78:1246:287#0/1  
GAAAATCCTTTTACTCCATTTGCTCCATTAGACGATACTG  
+HWI-EAS443:3:78:1246:287#0/1  
a\_`a\_a\_``[`a¥W`U]`\_ZZWUUX\_a^]Y`X]YZSBBB  
@HWI-EAS443:3:78:170:524#0/1  
GCTATATACAGTAAAGACAACAGTATAAGAATCGGTTCCA  
+HWI-EAS443:3:78:170:524#0/1  
`aa`^ZW^`a\_¥aY]````Z¥\_`UY`\_\_`\_`X][LUBBB



@HWI-EAS443:3:78:1786:859#0/1  
ATTTGAATGAAAATCCTTTTACTCCATTTGCTCCATTAGA  
+HWI-EAS443:3:78:1786:859#0/1  
abbbbababbbbaa^`bbbaaaaaaaaaa^aaaaaaaa`a  
@HWI-EAS443:3:79:100:1608#0/1  
AAACACCATTGCCGTATTTGAATGAAAATCCTTTTACTCC  
+HWI-EAS443:3:79:100:1608#0/1  
]\_]\_T\_a]U[\_`^UOY¥]XOXYYUUPXWZ\_]XY¥Z`\_Z\_^  
@HWI-EAS443:3:79:1084:1772#0/1  
GAGTTTTTTGAACAAATTACTTGTCAATGGTAAATGGCAA  
+HWI-EAS443:3:79:1084:1772#0/1  
a\_a[`b[a^`[babab\_ba^a[a\_ab\_`aaOba\_\_\_\_[aa  
@HWI-EAS443:3:79:124:380#0/1  
AGTTTTTTGAACAAATTACTTGTCAATGGTAAATGGCAAC  
+HWI-EAS443:3:79:124:380#0/1  
\_`\_bbbaabaababb]aaab\_a^abaXaaa```a]QX  
@HWI-EAS443:3:79:127:1511#0/1  
GTCCAGTATCGTCTAATGGAGCAAATGGAGTAAAAGGATT  
+HWI-EAS443:3:79:127:1511#0/1  
``baSX`ab]`aa¥`aaU¥\_a^^¥Z¥¥^aXaa`Z¥][^]  
@HWI-EAS443:3:79:1447:617#0/1  
AGTTTTTTGAACAAATTACTTGTCAATGGTAAATGGCAAC  
+HWI-EAS443:3:79:1447:617#0/1  
[`]¥`ba```a\_S^`ba`abbbabb``aaXaab¥`XMWa`  
@HWI-EAS443:3:79:1481:487#0/1  
TTTTTTGAACAAATTACTTGTCAATGGTAAATGGCAACTC  
+HWI-EAS443:3:79:1481:487#0/1  
`b\_]a`b\_b[]\_b`bXH¥aaa`aaab`^aXW[YT^`[N^`  
@HWI-EAS443:3:79:1663:631#0/1  
CGTATTTGAATGAAAATCCTTTTACTCCATTTGCTCCATT  
+HWI-EAS443:3:79:1663:631#0/1  
G^```b`b`R]```aba`aaabba`a\_Z¥a`b]J^YKVbb  
@HWI-EAS443:3:79:1701:1767#0/1  
AGTTTTTTGAACAAATTACTTGTCAATGGTAAATGGCAAC  
+HWI-EAS443:3:79:1701:1767#0/1  
abWbab`\_b\_aSabb`abababY`\_aba\_]`^`aVaT¥aaW  
@HWI-EAS443:3:79:304:963#0/1  
ATTCTGAAGATCTTGTATGAGGCCTGTCCATCACTTGGTC  
+HWI-EAS443:3:79:304:963#0/1  
¥L^^V]HX`^`T^Vb][ab]VZ`b`SYbaIS\_TYIJOHH\_  
@HWI-EAS443:3:79:922:149#0/1  
ACACCATTGCCGTATTTGAATGAAAATCCTTTTACTCCAT  
+HWI-EAS443:3:79:922:149#0/1  
aaaaab`\_aa\_a]`aaaa^``a`\_a\_a^`\_a```\_\_\_Z\_\_  
@HWI-EAS443:3:79:932:1571#0/1  
AGTTTTTTGAACAAATTACTTGTCAATGGTAAATGGCAAC  
+HWI-EAS443:3:79:932:1571#0/1  
ababbbbaabbbbababbabaaababba\_ba^¥a`[aba  
@HWI-EAS443:3:7:1159:1161#0/1  
GCCTGTCCATCACTTGGTCCATCGGTCATTACAGTAAAGC

+HWI-EAS443:3:7:1159:1161#0/1  
aaaaa^[\`ZNa\_\_`a\_[\`Y^a\_`Q]\_a[^U^YPTa`]U  
@HWI-EAS443:3:7:160:630#0/1  
AGTTTTTTGAACAAATTACTTGTCAATGGTAAATGGCAAC  
+HWI-EAS443:3:7:160:630#0/1  
^b\_bba`bbabaabbbbaaaa[aaabba\_aa`\_``\_`a`  
@HWI-EAS443:3:7:1731:834#0/1  
GTATGAGGCCTGTCCATCACTTGGTCCATCGGTCATTACA  
+HWI-EAS443:3:7:1731:834#0/1  
a`aaaZaa`\_a`a^aa^\_a\_`^^R``^^YX^Y]TFZ  
@HWI-EAS443:3:7:296:922#0/1  
ATCTTGTATGAGGCCTGTCCATCACTTGGTCCATCGGTCA  
+HWI-EAS443:3:7:296:922#0/1  
UVaa`\_`Y\_RYY`^`a\_XPV]`\_]aaVJ\_\_P`XPG]YYBBB  
@HWI-EAS443:3:7:461:1110#0/1  
ATGGAGTAAAAGGATTTTCATTCAAATACGGCAATGGTGT  
+HWI-EAS443:3:7:461:1110#0/1  
abVb[b^b`abab\_]`a`aaaa`^`a\_YU[^`Z\_VS]  
@HWI-EAS443:3:7:873:1637#0/1  
AAATCCTTTTACTCCATTTGCTCCATTAGACGATACTGGA  
+HWI-EAS443:3:7:873:1637#0/1  
\_aabWDYb`a`KY\_\_`a`XS]\_`bSaa^`G\_a\_`S^UBB  
@HWI-EAS443:3:7:889:261#0/1  
GGAGTTTTTTGAACAAATTACTTGTCAATGGTAAATGGCA  
+HWI-EAS443:3:7:889:261#0/1  
aaa`^a`^`a^a`a]\_`^`a^T`\_a]`[[`a\_Y`][W\_^TZ  
@HWI-EAS443:3:80:169:1651#0/1  
AGTTTTTTGAACAAATTACTTGTCAATGGTAAATGGCAAC  
+HWI-EAS443:3:80:169:1651#0/1  
VYYaa`^`aV\_\_b`Y`Y`Z\_Ya`]PZ\_a`Q0^]]T^FWaa\_  
@HWI-EAS443:3:80:573:741#0/1  
CAAATTACTTGTCAATGGTAAATGGCAACTCAGCACCGTC  
+HWI-EAS443:3:80:573:741#0/1  
aa\_ab`Y`abbaaaabbb\_aaa`a`\_aaaaa\_\_a`a`^`  
@HWI-EAS443:3:80:808:898#0/1  
GGAGTTTTTTGAACAAATTACTTGTCAATGGTAAATGGCA  
+HWI-EAS443:3:80:808:898#0/1  
``a`^a`aaa\_]aZ`a\_aab]aaa`\_Z^^`aa[[`  
@HWI-EAS443:3:81:1068:1752#0/1  
GCCTGTCCATCACTTGGTCCATCGGTCATTACAGTAAAGC  
+HWI-EAS443:3:81:1068:1752#0/1  
^X^]aUJYaa^TPa\_aaIYX`YY^]G[ZPOa`W`W^\_UXL  
@HWI-EAS443:3:81:1148:236#0/1  
TCCCCCTTGAACCGATTCTTATACTGTTGTCTTTACTGT  
+HWI-EAS443:3:81:1148:236#0/1  
aa\_\_`^`aaaa`a[Xa`^`a`aaaaZ`a`^`\_Z`^`a\_Y\_`]  
@HWI-EAS443:3:81:1253:14#0/1  
GGAGTTTTTTGAACAAATTACTTGTCAATGGTAAATGGCA  
+HWI-EAS443:3:81:1253:14#0/1  
a`\_`RPYQ[V^Z]ZPYN\_WXFY`SJSY[[]URXY^S^XRB

@HWI-EAS443:3:81:1555:754#0/1  
AGGATTTTCATTCAAATACGGCAATGGTGTGGATAGGG  
+HWI-EAS443:3:81:1555:754#0/1  
ab^a\_aaa\_\_aa¥`\_aa^a\_[[\_]¥]T\_^`aa^^\_\_[\_^  
@HWI-EAS443:3:81:17:1254#0/1  
ATCTTGATGAGGCCTGTCCATCACTTGGTCCATCGGTCA  
+HWI-EAS443:3:81:17:1254#0/1  
a]Y¥TOMMVXHOPW]QSS^[¥Y[R¥QR[WSXRWVZ^TSTW  
@HWI-EAS443:3:81:560:1184#0/1  
CATTGCCGTATTTGAATGAAAATCCTTTTACTCCATTTGC  
+HWI-EAS443:3:81:560:1184#0/1  
abbaba\_`a`bbbbbabbbabb`b`bbbbabaa\_baa`  
@HWI-EAS443:3:81:751:200#0/1  
CCAGTATCGTCTAATGGAGCAAATGGAGTAAAAGGATTTT  
+HWI-EAS443:3:81:751:200#0/1  
abbbabbbbaabbaabbaaaa`\_bba\_bXaaabaa\_`\_a^  
@HWI-EAS443:3:81:809:1246#0/1  
TGGGCTATATACAGTAAAGACAACAGTATAAGAATCGGTT  
+HWI-EAS443:3:81:809:1246#0/1  
abab\_aabaaaaa^bb`aaaaa^a`]a`\_`a`aa`XU^  
@HWI-EAS443:3:81:839:412#0/1  
GGAGTTTTTTGAACAAATTACTTGTCAATGGTAAATGGCA  
+HWI-EAS443:3:81:839:412#0/1  
ab]bWaaaa`Z`aXZ^`b¥^^`a[\_\_\_aa`]aa`ZYT]\_  
@HWI-EAS443:3:82:1129:1303#0/1  
AAATTACTTGTCAATGGTAAATGGCAACTCAGCACCGTCT  
+HWI-EAS443:3:82:1129:1303#0/1  
ab\_¥bbabbb\_baaba¥Ub\_^aaaYab^\_a`]``a`R`^  
@HWI-EAS443:3:82:1131:964#0/1  
GTCTAATGGAGCAAATGGAGTAAAAGGATTTTCATTCAA  
+HWI-EAS443:3:82:1131:964#0/1  
a\_`aaaaa^a^a^\_aaa^a^aaaaaa]\_`\_aa\_`¥\_^X  
@HWI-EAS443:3:82:1259:919#0/1  
CATTGCCGTATTTGAATGAAAATCCTTTTACTCCATTTGC  
+HWI-EAS443:3:82:1259:919#0/1  
abbbba]`abaabbababbaabba`bbbabbbababbaa¥  
@HWI-EAS443:3:82:134:1765#0/1  
ATCTTGATGAGGCCTGTCCATCACTTGGTCCATCGGTCA  
+HWI-EAS443:3:82:134:1765#0/1  
aaaaa`¥Z^\_a`^aa\_^^aa`\_a`\_^^\_aZa`\_]`^^WZ^  
@HWI-EAS443:3:82:1363:960#0/1  
CAAATTACTTGTCAATGGTAAATGGCAACTCAGCACCGTC  
+HWI-EAS443:3:82:1363:960#0/1  
^a\_b```bbbb`^```¥\_]`abbbb``aa`bbb[`aX`X  
@HWI-EAS443:3:82:241:692#0/1  
GTCCAGTATCGTCTAATGGAGCAAATGGAGTAAAAGGATT  
+HWI-EAS443:3:82:241:692#0/1  
aU`a\_aTW¥`\_S^XW]\_`\_V\_^URTXRZX[X¥\_^\_\_^XXY  
@HWI-EAS443:3:82:315:603#0/1  
GGGCTATATACAGTAAAGACAACAGTATAAGAATCGGTTC

+HWI-EAS443:3:82:315:603#0/1  
aa`ba``aaaaa[Ya`a`a]a`\_]\_Ya]ZU¥\_a¥W^\_LNQ  
@HWI-EAS443:3:82:373:589#0/1  
GGAGTTTTTTGAACAAATTACTTGTCAATGGTAAATGGCA  
+HWI-EAS443:3:82:373:589#0/1  
ab`]Ya`\_`¥^[a[aba`a\_[\_`a^\_a\_a`^P^W]UaX\_[  
@HWI-EAS443:3:82:51:781#0/1  
GAACAAATTACTTGTCAATGGTAAATGGCAACTCAGCACC  
+HWI-EAS443:3:82:51:781#0/1  
aab]a`^aa\_aaab\_]`aaaXXT¥`\_]`\_a\_a^]Y\_\_`Y  
@HWI-EAS443:3:82:569:1167#0/1  
GGAGTTTTTTGAACAAATTACTTGTCAATGGTAAATGGCA  
+HWI-EAS443:3:82:569:1167#0/1  
aa\_UFZZ^XUWa]]V]\_aa`T[¥¥R¥[[]``[V]`Z[R]Q  
@HWI-EAS443:3:82:673:1019#0/1  
GTCCAGTATCGTCTAATGGAGCAAATGGAGTAAAAGGATT  
+HWI-EAS443:3:82:673:1019#0/1  
a¥a`V]]Za`^Z]V`\_`\_]`\_]`\_]`^^[U\_[\_\_`^Z¥ZYW  
@HWI-EAS443:3:82:870:1435#0/1  
TTGAATGAAAATCCTTTTACTCCATTTGCTCCATTAGACG  
+HWI-EAS443:3:82:870:1435#0/1  
aaaa]aaa^`baaaa`aa`aaa`aa`\_a^aaaaa^\_`^`  
@HWI-EAS443:3:82:991:1051#0/1  
AATTACTTGTCAATGGTAAATGGCAACTCAGCACCGTCTG  
+HWI-EAS443:3:82:991:1051#0/1  
aUb\_a^^b`Y\_a¥`^\_a`b`VZ\_[XYa`a]]`UaY`]P\_^  
@HWI-EAS443:3:83:1148:504#0/1  
GTCCAGTATCGTCTAATGGAGCAAATGGAGTAAAAGGATT  
+HWI-EAS443:3:83:1148:504#0/1  
`aa]aa`aaaa`ba^`aJU`\_^]a`a`S`^`a`aaa^^^  
@HWI-EAS443:3:83:1387:434#0/1  
TGGGCTATATACAGTAAAGACAACAGTATAAGAATCGGTT  
+HWI-EAS443:3:83:1387:434#0/1  
aba^^`bbabaR\_b\_aaaaa\_aaGa\_\_aaa`^\_¥¥DW\_]G  
@HWI-EAS443:3:83:1660:448#0/1  
ATTTGAATGAAAATCCTTTTACTCCATTTGCTCCATTAGA  
+HWI-EAS443:3:83:1660:448#0/1  
]aba\_aabbaaaaa^bbab^`a[```bba````\_Z\_a`aaa  
@HWI-EAS443:3:83:1754:453#0/1  
CACCATTGCCGTTTTGAATGAAAATCCTTTTACTCCATT  
+HWI-EAS443:3:83:1754:453#0/1  
a`bb¥a\_WY\_b^¥bbb¥aaaabbaba^YbbaababYaaa`  
@HWI-EAS443:3:83:486:1832#0/1  
GTCCAGTATCGTCTAATGGAGCAAATGGAGTAAAAGGATT  
+HWI-EAS443:3:83:486:1832#0/1  
`Ya^U¥]a^a\_Z`]a\_]Z\_X¥\_]\_]`\_]XY^aa`T[¥¥¥  
@HWI-EAS443:3:83:781:871#0/1  
GGAGTTTTTTGAACAAATTACTTGTCAATGGTAAATGGCA  
+HWI-EAS443:3:83:781:871#0/1  
aa`a\_``abaaaaaabaaa\_a\_a\_a`[a``Z^^\_^^^\_

@HWI-EAS443:3:83:859:1494#0/1  
CAAACACATCCCCCTTGAACCGATTCTTATACTGTTGTC  
+HWI-EAS443:3:83:859:1494#0/1  
abbbbbbbbbbbabbba]bbaaa`bbabbbbababaaaa`  
@HWI-EAS443:3:84:1024:1663#0/1  
AGTTTTTTGAACAAATTACTTGTCAATGGTAAATGGCAAC  
+HWI-EAS443:3:84:1024:1663#0/1  
ab]aaaba^\_a`aaaaaa^a`^\_a`\_a\_Wa`\_\_\_\_`aaa^  
@HWI-EAS443:3:84:1271:818#0/1  
ATGGGCTATATACAGTAAAGACAACAGTATAAGAATCGGT  
+HWI-EAS443:3:84:1271:818#0/1  
aa`aaaa`a`a\_\_`\_Xa^`\_\_\_\_^¥\_aZ^`^\_\_X`^X^\_J  
@HWI-EAS443:3:84:385:1115#0/1  
ATTCTGAAGATCTTGTATGAGGCCTGTCCATCACTTGGTC  
+HWI-EAS443:3:84:385:1115#0/1  
`bbbbbbbaaaaaabaa\_baabab\_aa\_a^`aaaaaaa\_]`  
@HWI-EAS443:3:84:792:905#0/1  
ATTCTGAAGATCTTGTATGAGGCCTGTCCATCACTTGGTC  
+HWI-EAS443:3:84:792:905#0/1  
a`aaa```aa\_ab\_b\_aaa`\_]``a`^a\_aaaa`^`\_`Za  
@HWI-EAS443:3:85:1117:1768#0/1  
GAGTTTTTTGAACAAATTACTTGTCAATGGTAAATGGCAA  
+HWI-EAS443:3:85:1117:1768#0/1  
`][Iaa\_^^Ya`\_\_`aa`\_W`^WQW]X\_¥TLRUZ]^YQ^^  
@HWI-EAS443:3:85:1390:366#0/1  
AGTTTTTTGAACAAATTACTTGTCAATGGTAAATGGCAAC  
+HWI-EAS443:3:85:1390:366#0/1  
a`abbbbab\_a`a`abaaaaaaaaaaaaa]\_a`\_`a\_¥`a¥  
@HWI-EAS443:3:85:1537:1360#0/1  
TTCTGAAGATCTTGTATGAGGCCTGTCCATCACTTGGTCC  
+HWI-EAS443:3:85:1537:1360#0/1  
ab\_]baba`Ybb]¥\_aa\_¥I`a`TPXFT\_NaYaa]TW¥F  
@HWI-EAS443:3:85:200:2027#0/1  
GGTTCTTGCTTTACTGTAATGACCGATGGACCAAGTGATG  
+HWI-EAS443:3:85:200:2027#0/1  
^a\_Zaaaaaaaa]aa`ba`aaaba\_¥^^a`aa`P\_``]  
@HWI-EAS443:3:85:687:109#0/1  
GGAGTTTTTTGAACAAATTACTTGTCAATGGTAAATGGCA  
+HWI-EAS443:3:85:687:109#0/1  
`b\_b^abba`baa^a]aa\_^]aab\_\_`abaZ`\_\_\_\_`\_\_`  
@HWI-EAS443:3:85:789:828#0/1  
GACCAAGTGATGGACAGGCCTCATACAAGATCTTCAGAAT  
+HWI-EAS443:3:85:789:828#0/1  
aaaaa^`Zbaaa`aaaaaaa`a^`a]]\_aa^[\_`aaa\_^\_  
@HWI-EAS443:3:86:1051:509#0/1  
GGCCTGTCCATCACTTGGTCCATCGGTCATTACAGTAAAG  
+HWI-EAS443:3:86:1051:509#0/1  
ab^aab\_a\_a\_\_`\_bab]Zaaaa^aa][^`a\_U\_¥[T\_\_`  
@HWI-EAS443:3:86:1248:1454#0/1  
ATGAGGCCTGTCCATCACTTGGTCCATCGGTCATTACAGT

+HWI-EAS443:3:86:1248:1454#0/1  
a`WQZa^]¥YPS`a\_a^\_\_\_S`^aa]ZTR¥a\_Z`X\_`N  
@HWI-EAS443:3:86:1464:488#0/1  
GTTTTTTGAACAAATTACTTGTCAATGGTAAATGGCAACT  
+HWI-EAS443:3:86:1464:488#0/1  
a`aabaa`aa]aaaaa\_a``\_¥`^aaaZa`\_a`\_U^\_Z\_  
@HWI-EAS443:3:86:1776:836#0/1  
ATTCTGAAGATCTTGTATGAGGCCTGTCCATCACTTGGTC  
+HWI-EAS443:3:86:1776:836#0/1  
abaaa\_ba`aaa`aYaab\_a`Paaaa]a`a^Z`^\_\_TRZ^  
@HWI-EAS443:3:86:412:228#0/1  
AAAGGATTTTCATTCAAATACGGCAATGGTGTGGATAG  
+HWI-EAS443:3:86:412:228#0/1  
abbba]Y`b\_ba^\_]`a]]ba\_baaaa^Ra`aaab^Y`X  
@HWI-EAS443:3:86:515:629#0/1  
CAAATTACTTGTCAATGGTAAATGGCAACTCAGCACCGTC  
+HWI-EAS443:3:86:515:629#0/1  
aab^bb\_\_bab`ba^\_ba\_\_T]a¥`aba^aaa[aaa\_`TM  
@HWI-EAS443:3:86:563:68#0/1  
CATCACTTGGTCCATCGGTCATTACAGTAAAGCAAGAACC  
+HWI-EAS443:3:86:563:68#0/1  
abba^]bbbbaa]ab`a`a`ab]`\_`¥S\_aaY\_a\_a^aXa  
@HWI-EAS443:3:86:966:639#0/1  
CCTGTCCATCACTTGGTCCATCGGTCATTACAGTAAAGCA  
+HWI-EAS443:3:86:966:639#0/1  
aabaababaa`aaabaaaabaaaa\_`a`a`Vaa\_aaa\_\_a  
@HWI-EAS443:3:87:1072:362#0/1  
CAAATTACTTGTCAATGGTAAATGGCAACTCAGCACCGTC  
+HWI-EAS443:3:87:1072:362#0/1  
abbbabbbbbbba\_bbbba^Xbab`aaUbbab`a`aba``¥`  
@HWI-EAS443:3:87:1440:972#0/1  
AAGATCTTGTATGAGGCCTGTCCATCACTTGGTCCATCGG  
+HWI-EAS443:3:87:1440:972#0/1  
]\_\_aa]abba`aaba\_`b\_a`]aaPY\_\_`VT^]]¥`S``  
@HWI-EAS443:3:87:1453:1237#0/1  
TCCCCCTTGGAAACCGATTCTTATACTGTTGTCTTTACTGT  
+HWI-EAS443:3:87:1453:1237#0/1  
a]^a`X`\_TPa^aT^ZQ^`bab¥]Vaa\_a`SG¥``\_^a\_S  
@HWI-EAS443:3:87:184:259#0/1  
GAACAAATTACTTGTCAATGGTAAATGGCAACTCAGCACC  
+HWI-EAS443:3:87:184:259#0/1  
aaaab¥\_aa\_aa\_a\_aaa]X[V``\_\_`^[\_Y¥\_`^`\_X  
@HWI-EAS443:3:87:199:426#0/1  
ATGGGCTATATACAGTAAAGACAACAGTATAAGAATCGGT  
+HWI-EAS443:3:87:199:426#0/1  
[W¥\_\_bX¥YV[ZX\_T[Wa\_H[UUa\_¥YPXJY¥Z`a]]VSZ  
@HWI-EAS443:3:87:220:1065#0/1  
ATTTGAATGAAAATCCTTTTACTCCATTTGCTCCATTAGA  
+HWI-EAS443:3:87:220:1065#0/1  
^aa`^¥]¥\_^^\_a¥^\_aVa`a]`^`Y`X]aaa^aa`a^¥^

@HWI-EAS443:3:87:317:71#0/1  
CCCCCTTGAACCGATTCTTATACTGTTGTCTTTACTGT  
+HWI-EAS443:3:87:317:71#0/1  
abbaa`¥b`[aabb\_`aabbq]`Vaa]¥b[[^aa`R`a\_`  
@HWI-EAS443:3:87:433:1014#0/1  
ACGGTGCTGAGTTGCCATTTACCATTGACAAGTAATTTGT  
+HWI-EAS443:3:87:433:1014#0/1  
aaaa^aa`^[a^\_^^aaaaaaaaa``[aaa¥^a`a`a`  
@HWI-EAS443:3:87:500:454#0/1  
GGAGTTTTTTGAACAAATTACTTGTCAATGGTAAATGGCA  
+HWI-EAS443:3:87:500:454#0/1  
abab\_aabaa`a`abaaaaa`[^a`b`^a\_\_^a\_\_a  
@HWI-EAS443:3:87:566:1043#0/1  
GAGTTTTTTGAACAAATTACTTGTCAATGGTAAATGGCAA  
+HWI-EAS443:3:87:566:1043#0/1  
¥abaabbbbb\_baaaabb`bba`SaaabbaSaaa\_a\_aab  
@HWI-EAS443:3:87:59:262#0/1  
TAATGGAGCAAATGGAGTAAAAGGATTTTCATTCAAATAC  
+HWI-EAS443:3:87:59:262#0/1  
¥bab`¥^baaa¥`baab^a\_aaba^`a^\_aaa]\_\_T¥aa\_  
@HWI-EAS443:3:87:688:732#0/1  
AGCAAATGGAGTAAAAGGATTTTCATTCAAATACGGCAAT  
+HWI-EAS443:3:87:688:732#0/1  
aa`^¥a^`b`¥a\_\_a]`bbbabbababaabbbbb^Ya  
@HWI-EAS443:3:87:707:1469#0/1  
AGTTTTTTGAACAAATTACTTGTCAATGGTAAATGGCAAC  
+HWI-EAS443:3:87:707:1469#0/1  
ab^aabab^^aaa`aabaaa`\_a`aaa`X^¥aaa`a  
@HWI-EAS443:3:87:739:1817#0/1  
GTTTTTTGAACAAATTACTTGTCAATGGTAAATGGCAACT  
+HWI-EAS443:3:87:739:1817#0/1  
a\_YP[^a^`¥[\_a`aaa\_a[a]`]a\_Ua`\_^]]\_\_a]]  
@HWI-EAS443:3:88:1070:1990#0/1  
AGTTTTTTGAACAAATTACTTGTCAATGGTAAATGGCAAC  
+HWI-EAS443:3:88:1070:1990#0/1  
^`b¥`baba^S[\_`aa[ab\_aaaaaaSa`]\_Sab`¥  
@HWI-EAS443:3:88:263:1772#0/1  
AGGATTTTCATTCAAATACGGCAATGGTGTGGATAGGG  
+HWI-EAS443:3:88:263:1772#0/1  
^W^U¥VYXaa¥Za]UZ\_T\_[H[SQX`WQSQYW^\_VFWU[W  
@HWI-EAS443:3:88:580:1462#0/1  
GTCCAGTATCGTCTAATGGAGCAAATGGAGTAAAAGGATT  
+HWI-EAS443:3:88:580:1462#0/1  
`abaaaabbbbaabbaabaa`aab`ab`aaZaabba`aaa  
@HWI-EAS443:3:88:802:233#0/1  
GTTAGTGGATGGGCTATATACAGTAAAGACAACAGTATAA  
+HWI-EAS443:3:88:802:233#0/1  
aU^abWaa]^a`]PY¥Z]¥PS\_LY\_U]OJVYRZ[GWUW]  
@HWI-EAS443:3:88:856:1826#0/1  
CCTATCCAAACACCATTGCCGATTTGAATGAAAATCCTT

+HWI-EAS443:3:88:856:1826#0/1  
\_`^bb`a`¥a[aba\_¥[^^b^R^^`\_`aaaab`\_`baa^Y\_a  
@HWI-EAS443:3:89:1040:1855#0/1  
ATTACTTGTCAATGGTAAATGGCAACTCAGCACCGTCTGG  
+HWI-EAS443:3:89:1040:1855#0/1  
QZZa\_\_¥¥OM\_^\_TPWaZTZ¥FG\_\_GXR]]]aa]VVa[YG  
@HWI-EAS443:3:89:117:837#0/1  
AGTTTTTTGAACAAATTACTTGTCAATGGTAAATGGCAAC  
+HWI-EAS443:3:89:117:837#0/1  
abaaba\_ababaa`aa\_``aaa¥a\_\_aaaZ`\_`^a\_a^^^  
@HWI-EAS443:3:89:1255:923#0/1  
GGTCCAGTATCGTCTAATGGAGCAAATGGAGTAAAAGGAT  
+HWI-EAS443:3:89:1255:923#0/1  
aaabbbbaababaabaabbbbaaa`aabba`\_a\_aabbbbaa  
@HWI-EAS443:3:89:1277:911#0/1  
GGAGTTTTTTGAACAAATTACTTGTCAATGGTAAATGGCA  
+HWI-EAS443:3:89:1277:911#0/1  
`^T\_G\_bbb`¥^]`\_a``aaaabaa`ba`]baa`]Z]^  
@HWI-EAS443:3:89:426:190#0/1  
GGAGTTTTTTGAACAAATTACTTGTCAATGGTAAATGGCA  
+HWI-EAS443:3:89:426:190#0/1  
aZHa^`\_aa`a¥V]`\_`a``^a\_a^`^]\_\_\_W\_\_\_Z^ZV\_  
@HWI-EAS443:3:89:627:1442#0/1  
TGAGGCCTGTCCATCACTTGGTCCATCGGTCATTACAGTA  
+HWI-EAS443:3:89:627:1442#0/1  
aa]a¥ZV]^LT^¥W^`^]Z]`S`]^]S[XYYWYRZPZRN^  
@HWI-EAS443:3:89:657:1647#0/1  
GGCTATATACAGTAAAGACAACAGTATAAGAATCGGTTCC  
+HWI-EAS443:3:89:657:1647#0/1  
`\_N`bWSXW]`a\_aV`¥\_K`aVZYG¥[a¥\_]\_BBBBBBBB  
@HWI-EAS443:3:89:73:2031#0/1  
CGTCTAATGGAGCAAATGGAGTAAAAGGATTTTCATTCAA  
+HWI-EAS443:3:89:73:2031#0/1  
``]bb`bbbbababaZa`a\_b`abbabbaaba`baab`  
@HWI-EAS443:3:89:867:1697#0/1  
AAATCCTTTTACTCCATTTGCTCCATTAGACGATACTGGA  
+HWI-EAS443:3:89:867:1697#0/1  
aa```abbabb`baaaba\_a`baaaaa^ba`a`a\_]S\_  
@HWI-EAS443:3:89:883:397#0/1  
CATTGCCGTATTTGAATGAAAATCCTTTTACTCCATTTGC  
+HWI-EAS443:3:89:883:397#0/1  
\_aZ`^aababb^`b¥\_aaa¥a\_aXZaba\_``abaabaab  
@HWI-EAS443:3:89:971:851#0/1  
GTTTTTTGAACAAATTACTTGTCAATGGTAAATGGCAACT  
+HWI-EAS443:3:89:971:851#0/1  
a^\_Z^¥\_YV¥ZZNY¥V[^a[YP\_U¥[\_YMXQU^WT¥^UX  
@HWI-EAS443:3:8:1040:1910#0/1  
GAGTTTTTTGAACAAATTACTTGTCAATGGTAAATGGCAA  
+HWI-EAS443:3:8:1040:1910#0/1  
aab[`aa\_aa`a\_aaa`a`aaaaX\_\_`aa`]^^^Z`\_V\_\_



@HWI-EAS443:3:8:1085:1320#0/1  
CCAGTATCGTCTAATGGAGCAAATGGAGTAAAAGGATTTT  
+HWI-EAS443:3:8:1085:1320#0/1  
U\_a[¥bP^¥PPXbbb\_X^^a`YYb`¥H`[SWZb`aYTY  
@HWI-EAS443:3:8:1145:770#0/1  
AAAGGATTTTCATTCAAATACGGCAATGGTGTGGATAG  
+HWI-EAS443:3:8:1145:770#0/1  
abbbba`abbaabaZa`\_aa]ba]`\_\_aa[a]a`aaZ]\_^  
@HWI-EAS443:3:8:1310:877#0/1  
GAGTTTTTTGAACAAATTACTTGTCAATGGTAAATGGCAA  
+HWI-EAS443:3:8:1310:877#0/1  
Y¥a^^aZ^aS¥Y[a`a^[\`V`a\_XWU\_aa`LUaR[GV[Z  
@HWI-EAS443:3:8:1409:1296#0/1  
GAGTTTTTTGAACAAATTACTTGTCAATGGTAAATGGCAA  
+HWI-EAS443:3:8:1409:1296#0/1  
]^[\_aa]\_SVWSW`VW^Yb\_Xab`[a`ab`XRS]N[`JS^  
@HWI-EAS443:3:8:219:695#0/1  
GTTTTTTGAACAAATTACTTGTCAATGGTAAATGGCAACT  
+HWI-EAS443:3:8:219:695#0/1  
a\_Y\_aa^[Q\_a\_K¥`^\_a`[X[\_`Ya\_[S]\_YZ]^)^XXU  
@HWI-EAS443:3:8:426:1435#0/1  
ATGAAAATCCTTTTACTCCATTTGCTCCATTAGACGATAC  
+HWI-EAS443:3:8:426:1435#0/1  
¥X`aa^^W\_Yaa\_^aaaa`a^a]a`\_\_`\_\_\_\_ZTZ\_¥R][  
@HWI-EAS443:3:8:432:1822#0/1  
AGGATTTTCATTCAAATACGGCAATGGTGTGGATAGGG  
+HWI-EAS443:3:8:432:1822#0/1  
a]^Y]^`^^]^]\_\_\_\_^[[SWPSZ]MHMXZ]UBBBBBBB  
@HWI-EAS443:3:8:440:307#0/1  
CAAATTACTTGTCAATGGTAAATGGCAACTCAGCACCGTC  
+HWI-EAS443:3:8:440:307#0/1  
`b`ba^b¥bba\_^a^aa`W\_T\_\_ba^\_a`aV``\_`a¥TKP  
@HWI-EAS443:3:8:465:742#0/1  
GGATTTTCATTCAAATACGGCAATGGTGTGGATAGGGA  
+HWI-EAS443:3:8:465:742#0/1  
`[NY[^\_Y]¥`[]X[a\_Y¥`XUVYXRT^[^\_WLUX¥XXX  
@HWI-EAS443:3:8:502:1260#0/1  
ATTTGAATGAAAATCCTTTTACTCCATTTGCTCCATTAGA  
+HWI-EAS443:3:8:502:1260#0/1  
aaY`]^`a`UZVT^a`Z`^^\_a\_¥\_\_`^Y[JRTXWY\_^`  
@HWI-EAS443:3:8:874:172#0/1  
AGCAAATGGAGTAAAAGGATTTTCATTCAAATACGGCAAT  
+HWI-EAS443:3:8:874:172#0/1  
abbaa^bbb\_a`\_`abaa`\_`aaX`^a^\_\_^a\_¥a`[YYa  
@HWI-EAS443:3:90:1064:1631#0/1  
GAAAATCCTTTTACTCCATTTGCTCCATTAGACGATACTG  
+HWI-EAS443:3:90:1064:1631#0/1  
aabbabaabaaaa[a`aaaa`^a`\_`aaa`a\_a\_¥TT^  
@HWI-EAS443:3:90:1175:228#0/1  
AACACCATTGCCGATTTGAATGAAAATCCTTTTACTCCA

+HWI-EAS443:3:90:1175:228#0/1  
¥b]^a`bbabYO\_aLbbbaa`bba^`aL^aaba¥a^a^Pa  
@HWI-EAS443:3:90:512:1537#0/1  
GGATGGGCTATATACAGTAAAGACAACAGTATAAGAATCG  
+HWI-EAS443:3:90:512:1537#0/1  
a^X``\_\_a`a`aa]^`\_]``[X\_^a\_\_\_\_`]\_\_\_\_^^Z`^^Z  
@HWI-EAS443:3:90:616:634#0/1  
AGGATTTTCATTCAAATACGGCAATGGTGTGGATAGGG  
+HWI-EAS443:3:90:616:634#0/1  
ab\_QTX\_VaZ^a`[\_U^X[aa\_^¥`\_[H[]^^[aVRX\_\_[\_  
@HWI-EAS443:3:90:61:154#0/1  
AACAAATTACTTGTCAATGGTAAATGGCAACTCAGCACCG  
+HWI-EAS443:3:90:61:154#0/1  
`aaa^`aaaa`aa\_``\_\_aXW`\_\_]]^W]^]]YY^WWW  
@HWI-EAS443:3:90:657:1149#0/1  
GTTTTTTGAACAAATTACTTGTCAATGGTAAATGGCAACT  
+HWI-EAS443:3:90:657:1149#0/1  
a\_^\_ZN]aT\_a]VY[`]\_\_Xa\_]`¥^aPLWOU^]¥^aW]]  
@HWI-EAS443:3:90:724:1084#0/1  
CCCCTTGAACCGATTCTTATACTGTTGTCTTTACTGTAT  
+HWI-EAS443:3:90:724:1084#0/1  
ababbbbaaab`ab`aaaaaaaa`a`ba`a`aaaa`aaa\_aa  
@HWI-EAS443:3:90:775:1845#0/1  
GACCGATGGACCAAGTGATGGACAGGCCTCATACAAGATC  
+HWI-EAS443:3:90:775:1845#0/1  
aaaaaaaaa`aaa`aTaa\_a\_`aa\_¥`\_\_aa\_a[`a\_`]^  
@HWI-EAS443:3:90:840:263#0/1  
GTTTTTTGAACAAATTACTTGTCAATGGTAAATGGCAACT  
+HWI-EAS443:3:90:840:263#0/1  
aY¥Y`b¥^[]aUYW¥W\_N¥`^GQYY¥a^R\_[UUXRZ]¥UP  
@HWI-EAS443:3:90:939:370#0/1  
AATGGTTCTTGCTTTACTGTAATGACCGATGGACCAAGTG  
+HWI-EAS443:3:90:939:370#0/1  
a`\_a`R^`^`S^`bZb\_VZ\_¥\_a^¥baYb`aRDZX^P]  
@HWI-EAS443:3:91:1086:572#0/1  
AGTTTTTTGAACAAATTACTTGTCAATGGTAAATGGCAAC  
+HWI-EAS443:3:91:1086:572#0/1  
XXG^bbabbababbabaaaaabaa`Rbb\_Ya\_]a^Paaa\_  
@HWI-EAS443:3:91:1223:1305#0/1  
TCCCTATCCAAACACCATTGCCGTATTTGAATGAAAATCC  
+HWI-EAS443:3:91:1223:1305#0/1  
]baabbab`bab`b\_aaaaa[b`\_baa[]`ba`^`aaVS  
@HWI-EAS443:3:91:1641:1888#0/1  
ATAAGAATCGGTTCCAAGGGGGATGTGTTTGTGCATAAGGG  
+HWI-EAS443:3:91:1641:1888#0/1  
``\_aba]a\_IZ`^Y`¥]Z][`XT^SZHLW\_PHHQW]VYB  
@HWI-EAS443:3:91:284:1132#0/1  
AGGATTTTCATTCAAATACGGCAATGGTGTGGATAGGG  
+HWI-EAS443:3:91:284:1132#0/1  
a`a[\_````aa```````\_``````\_^^^\_]X\_[^`\_\_[^]]

@HWI-EAS443:3:91:319:149#0/1  
CAAATTACTTGTCAATGGTAAATGGCAACTCAGCACCGTC  
+HWI-EAS443:3:91:319:149#0/1  
aababbb`bb`babbaaa\_K\_aaa`b`\_\_aa^`YU`\_]  
@HWI-EAS443:3:91:898:1261#0/1  
CTTATGACAAACACATCCCCCTTGAACCGATTCTTATAC  
+HWI-EAS443:3:91:898:1261#0/1  
TT\_\_VaZa`Y`\_a`Z\_b\_^a`a`\_SS\_W`XbbX^V^Iaa  
@HWI-EAS443:3:92:1191:771#0/1  
AGTTTTTTGAACAAATTACTTGTCAATGGTAAATGGCAAC  
+HWI-EAS443:3:92:1191:771#0/1  
a`R]Z``a[aaa^aaa\_\_a`b]]a\_[^aH\$``Ua]]a\_W  
@HWI-EAS443:3:92:1274:408#0/1  
ATAAGAATCGGTTCCAAGGGGGATGTGTTTGTCCATAAGGG  
+HWI-EAS443:3:92:1274:408#0/1  
abaaabbaa`a`^`¥UU\_YVX`^`¥^^^\_`a[Y[PY]¥\_[-  
@HWI-EAS443:3:92:1444:51#0/1  
AAATTACTTGTCAATGGTAAATGGCAACTCAGCACCGTCT  
+HWI-EAS443:3:92:1444:51#0/1  
abaaba\_aba`\_\_aba]a`\_\_aa\_aa¥a^`^¥a]^\_ZZ]  
@HWI-EAS443:3:92:1503:750#0/1  
ATACTGTTGTCTTTACTGTATATAGCCCATCCACTAACAG  
+HWI-EAS443:3:92:1503:750#0/1  
``]abb[`]SYba[aaa¥a`a¥^aa\_GQX\_YU`W¥¥`R^W  
@HWI-EAS443:3:92:1527:464#0/1  
GTCCAGTATCGTCTAATGGAGCAAATGGAGTAAAAGGATT  
+HWI-EAS443:3:92:1527:464#0/1  
\_RI¥]\_ZMSHX`Q\_P\_\_\_aNaXPRP`YZGZ]ZX[]`UG^\_  
@HWI-EAS443:3:92:528:1546#0/1  
TGGAGTAAAAGGATTTTCATTCAAATACGGCAATGGTGTT  
+HWI-EAS443:3:92:528:1546#0/1  
aaa`a]aab`[\_`a\_a`a^`\_`\_\_^^`\_^\_`S\_W]  
@HWI-EAS443:3:92:592:1243#0/1  
AATTACTTGTCAATGGTAAATGGCAACTCAGCACCGTCTG  
+HWI-EAS443:3:92:592:1243#0/1  
abaaaaaaaa]a\_aa\_XOX\_YHW^Va`^W`\_XW\_] ]TOPTO  
@HWI-EAS443:3:92:901:1415#0/1  
AACAAATTACTTGTCAATGGTAAATGGCAACTCAGCACCG  
+HWI-EAS443:3:92:901:1415#0/1  
aabb`bb`a^ba[\_`aa`Y`Raaaaa]bb^`U`aaa[XY  
@HWI-EAS443:3:92:904:918#0/1  
ATGGACCAAGTGATGGACAGGCCTCATACAAGATCTTCAG  
+HWI-EAS443:3:92:904:918#0/1  
aaa¥baa\_¥a]aa`a][`a\_]\_\_S\_\_`aa`aM¥^``]\_`  
@HWI-EAS443:3:92:915:1472#0/1  
GGTCCAGTATCGTCTAATGGAGCAAATGGAGTAAAAGGAT  
+HWI-EAS443:3:92:915:1472#0/1  
aJG[^[\_`[¥^TIP]YTVYYY¥VW¥[MDUS]T``ZVZQQT  
@HWI-EAS443:3:92:968:738#0/1  
GAACAAATTACTTGTCAATGGTAAATGGCAACTCAGCACCC

+HWI-EAS443:3:92:968:738#0/1  
a^a\_a`ab`ba\_a\_\_^X\_a\_X\_\_X^\_V\_\_XYW\_ZR^Z^  
@HWI-EAS443:3:92:986:1229#0/1  
CTTTACTGTAATGACCGATGGACCAAGTGATGGACAGGCC  
+HWI-EAS443:3:92:986:1229#0/1  
¥`b`b¥bba¥abbbba`\_b]b^b`bb\_a\_]Z\_baba]^`  
@HWI-EAS443:3:93:1036:1090#0/1  
AATGGAGCAAATGGAGTAAAAGGATTTTCATTCAAATACG  
+HWI-EAS443:3:93:1036:1090#0/1  
aaa\_Z\_baa\_aa`a\_b^\_aaaa]aY`\_^^aaa``aa````  
@HWI-EAS443:3:93:1147:919#0/1  
GTTTTTTGAACAAATTACTTGTCAATGGTAAATGGCAACT  
+HWI-EAS443:3:93:1147:919#0/1  
aU`a`]a\_\_\_\_\_^`\_`^aaaY]\_¥`\_^[[^]YY^Y[¥  
@HWI-EAS443:3:93:1435:165#0/1  
GCTTTACTGTAATGACCGATGGACCAAGTGATGGACAGGC  
+HWI-EAS443:3:93:1435:165#0/1  
a]`a`Y`^]a\_`^^XR]\_`a^[U\_]YVWX]aBBBBBBB  
@HWI-EAS443:3:93:336:762#0/1  
ATTACTTGTCAATGGTAAATGGCAACTCAGCACCGTCTGG  
+HWI-EAS443:3:93:336:762#0/1  
aa`a`aaa^`a`aaUaaa^`]`a`^]a\_]a\_^^YU^¥X  
@HWI-EAS443:3:93:522:562#0/1  
CAAACACATCCCCCTTGAACCGATTCTTATACTGTTGTC  
+HWI-EAS443:3:93:522:562#0/1  
abbbabbbb`\_^bababaaaa\_a^Xaaaab`aabaaa\_`  
@HWI-EAS443:3:93:61:1602#0/1  
CAAATTACTTGTCAATGGTAAATGGCAACTCAGCACCGTC  
+HWI-EAS443:3:93:61:1602#0/1  
a``[¥X]b\_\_`Q\_^[]¥VR\_X]Z\_VYZX`\_a][¥Z\_UBBB  
@HWI-EAS443:3:93:626:1300#0/1  
GGATGGGCTATATACAGTAAAGACAACAGTATAAGAATCG  
+HWI-EAS443:3:93:626:1300#0/1  
aaaaa\_aa`a`\_a\_¥\_¥¥``\_`^^a`\_`X`\_\_\_\_^]XW][  
@HWI-EAS443:3:94:262:903#0/1  
AATGGAGTAAAAGGATTTTCATTCAAATACGGCAATGGTG  
+HWI-EAS443:3:94:262:903#0/1  
ab`b^ab\_¥b`b¥^Tbb`b^]bbaba]`¥`baba`aaaYa  
@HWI-EAS443:3:94:274:116#0/1  
GAGTTTTTTGAACAAATTACTTGTCAATGGTAAATGGCAA  
+HWI-EAS443:3:94:274:116#0/1  
aab\_aaaaaa^a]```a`\_]aab\_^^^`a`Z]]^^X^¥^\_  
@HWI-EAS443:3:94:328:1014#0/1  
AGCAAATGGAGTAAAAGGATTTTCATTCAAATACGGCAAT  
+HWI-EAS443:3:94:328:1014#0/1  
abbaaabbbab`bbbaa\_aabaaaaaaaaabb`baaaaa  
@HWI-EAS443:3:94:350:1882#0/1  
CGATTCTTATACTGTTGTCTTTACTGTATATAGCCCATCC  
+HWI-EAS443:3:94:350:1882#0/1  
abb`baaabaaaa\_a`Ya`aab`a¥]baa\_a\_¥\_\_a]\_a

@HWI-EAS443:3:94:524:686#0/1  
ATGGGCTATATACAGTAAAGACAACAGTATAAGAATCGGT  
+HWI-EAS443:3:94:524:686#0/1  
^abbbbaa\_`Y`a^ab`\_a^`¥]`\_aa[aa`a`^`\_W  
@HWI-EAS443:3:95:1073:1240#0/1  
GCCGTATTTGAATGAAAATCCTTTTACTCCATTTGCTCCA  
+HWI-EAS443:3:95:1073:1240#0/1  
a`^Xaabab`aaa^aaaa`\_a`aaa^a¥\_``aaa`\_¥W\_  
@HWI-EAS443:3:95:108:1825#0/1  
GGCCTGTCCATCACTTGGTCCATCGGTCATTACAGTAAAG  
+HWI-EAS443:3:95:108:1825#0/1  
aaaabbbbbbbaa`a^a\_aab^aa^\_ba\_`^Ua]0^ba\_  
@HWI-EAS443:3:95:137:895#0/1  
CAAGTGATGGACAGGCCTCATACAAGATCTTCAGAATAGA  
+HWI-EAS443:3:95:137:895#0/1  
`bababbb`b`b`b`aa\_aaa`\_aaaaaaaa^\_a`^`aa`  
@HWI-EAS443:3:95:1517:567#0/1  
ATAAGAATCGGTTCCAAGGGGATGTGTTTGCATAAGGG  
+HWI-EAS443:3:95:1517:567#0/1  
abab`¥b`Pa\_G¥¥P]]`[\_^Z^`ZaPOXZVJM\_[XPZ]  
@HWI-EAS443:3:95:28:548#0/1  
GCCTGTCCATCACTTGGTCCATCGGTCATTACAGTAAAGC  
+HWI-EAS443:3:95:28:548#0/1  
\_abbb`aabb\_aaaaaa^\_aaa[aa]\_a`\_\_a`aVa^¥^N  
@HWI-EAS443:3:95:528:160#0/1  
ATAAGAATCGGTTCCAAGGGGATGTGTTTGCATAAGGG  
+HWI-EAS443:3:95:528:160#0/1  
aababba`aaM]¥\_\_^`\_\_aHXa]]W]]YMS¥^]Y[]W  
@HWI-EAS443:3:95:597:282#0/1  
AAATTACTTGTCAATGGTAAATGGCAACTCAGCACCGTCT  
+HWI-EAS443:3:95:597:282#0/1  
abaaaa`abbVaaabbaPV\_a`a`^aaaa`a\_¥a¥VTVW^  
@HWI-EAS443:3:95:741:998#0/1  
ATGGAGTAAAAGGATTTTCATTCAAATACGGCAATGGTGT  
+HWI-EAS443:3:95:741:998#0/1  
ababa^aaaabba`aaba`aba`aaabaaa`^\_aa`^a\_  
@HWI-EAS443:3:95:948:643#0/1  
TGGAGTAAAAGGATTTTCATTCAAATACGGCAATGGTGT  
+HWI-EAS443:3:95:948:643#0/1  
ab`^b`bbbabbbaaaaa[baaaaababa`a`YaabYa`a  
@HWI-EAS443:3:95:975:151#0/1  
ATTTGAATGAAAATCCTTTTACTCCATTTGCTCCATTAGA  
+HWI-EAS443:3:95:975:151#0/1  
¥bbabaabbabbab^bbbaa`\_aa\_aaaa\_a]aaba```  
@HWI-EAS443:3:96:1240:357#0/1  
GGAGTTTTTTGAACAAATTACTTGTCAATGGTAAATGGCA  
+HWI-EAS443:3:96:1240:357#0/1  
a`[\_H`\_aa`Y\_¥\_]S\_^YM`\_^`Y][`^\_SUVPY\_[Z¥  
@HWI-EAS443:3:96:212:313#0/1  
GTTTTTTGAACAAATTACTTGTCAATGGTAAATGGCAACT

+HWI-EAS443:3:96:212:313#0/1  
aXa`a`¥\_]\_\_`a\_]\_^\_Y]¥]^`[X^^]XYY[Z[[]  
@HWI-EAS443:3:96:223:39#0/1  
GGAGTTTTTTGAACAAATTACTTGTCAATGGTAAATGGCA  
+HWI-EAS443:3:96:223:39#0/1  
a`UYNZ\_PW]^FJ^WPY\_\_XRP¥`ZSGGNWMMUUUBBBBB  
@HWI-EAS443:3:96:524:511#0/1  
CAAACACATCCCCCTTGAACCGATTCTTATACTGTTGTC  
+HWI-EAS443:3:96:524:511#0/1  
Y^bbZ¥`aaba^^^W¥\_aa¥]X`a]a^\_^]aaa`aab¥\_  
@HWI-EAS443:3:96:583:833#0/1  
AGTTTTTTGAACAAATTACTTGTCAATGGTAAATGGCAAC  
+HWI-EAS443:3:96:583:833#0/1  
W]U]Z^b¥S\_¥Z\_T^`\_\_¥a`\_\_XZQ^^Y[¥`¥a^aa\_V¥  
@HWI-EAS443:3:96:741:188#0/1  
ACCGATTCTTATACTGTTGTCTTTACTGTATATAGCCCAT  
+HWI-EAS443:3:96:741:188#0/1  
aaaa`bbabaaaaabaaa`\_aaa]a`¥Va¥Y`Z[^]^]  
@HWI-EAS443:3:97:1009:1018#0/1  
CAGTATCGTCTAATGGAGCAAATGGAGTAAAAGGATTTTC  
+HWI-EAS443:3:97:1009:1018#0/1  
ab\_a^bbb]a`^`b\_b`bY\_]`a``\_a¥ababab`\_aa¥`  
@HWI-EAS443:3:97:101:1361#0/1  
GTAAAGACAACAGTATAAGAATCGGTTCCAAGGGGGATGT  
+HWI-EAS443:3:97:101:1361#0/1  
SX\_PTY\_¥S¥ab`Z\_HW\_bVaabRRKYaLVD]HR¥[OF]T  
@HWI-EAS443:3:97:103:1470#0/1  
GGCCTGTCCATCACTTGGTCCATCGGTCATTACAGTAAAG  
+HWI-EAS443:3:97:103:1470#0/1  
abbbaa`aaaaaaaaaaa]`aa`aa`\_]`\_`a\_Y]\_Za`¥X  
@HWI-EAS443:3:97:1083:1196#0/1  
AGCAAATGGAGTAAAAGGATTTTCATTCAAATACGGCAAT  
+HWI-EAS443:3:97:1083:1196#0/1  
`aa`\_abbbaa¥bb¥babaaabb`ab`\_¥\_aabab]\_^\_a  
@HWI-EAS443:3:97:148:1787#0/1  
AGCAAATGGAGTAAAAGGATTTTCATTCAAATACGGCAAT  
+HWI-EAS443:3:97:148:1787#0/1  
`aaaaaba\_a\_aabbaaa`a\_\_abaab`R\_a`a`\_`\_]a`  
@HWI-EAS443:3:97:603:1130#0/1  
GTTTTTTGAACAAATTACTTGTCAATGGTAAATGGCAACT  
+HWI-EAS443:3:97:603:1130#0/1  
a\_aaaaaa`\_`a`\_a\_\_aaa^````\_^Ya`\_\_^XZ`^Z`  
@HWI-EAS443:3:97:758:436#0/1  
AGTTTTTTGAACAAATTACTTGTCAATGGTAAATGGCAAC  
+HWI-EAS443:3:97:758:436#0/1  
¥aRab\_bbb]a¥V`ab\_Y`ba^^^[abbaGZ`WYYX`\_\_Y  
@HWI-EAS443:3:97:817:1623#0/1  
CACCATTGCCGATTTGAATGAAAATCCTTTTACTCCATT  
+HWI-EAS443:3:97:817:1623#0/1  
a\_X¥Z[Y¥[QU\_aa¥aa]RZa`\_\_[¥Y]a^YXa[`\_]\_`]

@HWI-EAS443:3:97:996:813#0/1  
GGGCTATATACAGTAAAGACAACAGTATAAGAATCGGTTC  
+HWI-EAS443:3:97:996:813#0/1  
X\_`a`abbbaa`]^`^a`]^b[Zaabbaab]abZ[\_YXM  
@HWI-EAS443:3:98:1015:1612#0/1  
GGAGTAAAAGGATTTTCATTCAAATACGGCAATGGTGT  
+HWI-EAS443:3:98:1015:1612#0/1  
\_`WaZI]¥a`^]YS^bbab`ba]a`aaaa`\_]a`¥aSaa  
@HWI-EAS443:3:98:1101:938#0/1  
GAGTTTTTTGAACAAATTACTTGTCAATGGTAAATGGCAA  
+HWI-EAS443:3:98:1101:938#0/1  
aaa^aaaaaaaa¥aa]aa`\_a\_a\_^[[aa]T\_]`\_^^^a]  
@HWI-EAS443:3:98:1113:1739#0/1  
GAGTTTTTTGAACAAATTACTTGTCAATGGTAAATGGCAA  
+HWI-EAS443:3:98:1113:1739#0/1  
\_`b`babbaaababbbbab\_b`a`\_`aaaa`\_\_a`^^`b`  
@HWI-EAS443:3:98:37:73#0/1  
ATTCTGAAGATCTTGTATGAGGCCTGTCCATCACTTGGTC  
+HWI-EAS443:3:98:37:73#0/1  
abbabb^[a\_a`aab^aY]^`^^`\_`\_`Y`\_UH^^\_V^W]  
@HWI-EAS443:3:98:419:251#0/1  
ATTGCCGATTTGAATGAAAATCCTTTTACTCCATTTGCT  
+HWI-EAS443:3:98:419:251#0/1  
aaYRQ` `[`aaab`\_`aaaa`aa\_Y\_a\_a^Y\_]\_a^\_\_Y`  
@HWI-EAS443:3:98:506:290#0/1  
CAAGTGATGGACAGGCCTCATACAAGATCTTCAGAATAGA  
+HWI-EAS443:3:98:506:290#0/1  
`[U]¥`¥^[¥XG]UW]^a`a`^`\_`\_`[Z`XG[bZ^a^X]  
@HWI-EAS443:3:98:66:1882#0/1  
ACCGATTCTTATACTGTTGTCTTTACTGTATATAGCCCAT  
+HWI-EAS443:3:98:66:1882#0/1  
¥b^W`b`ab`a\_aa`bV\_]\_aaabTb`ZbaaYaU^H[\_U  
@HWI-EAS443:3:98:744:1827#0/1  
ACCGATTCTTATACTGTTGTCTTTACTGTATATAGCCCAT  
+HWI-EAS443:3:98:744:1827#0/1  
ababaaaababbbabaab`\_ba`aaaa[M^aaa`Y^Y\_a\_  
@HWI-EAS443:3:99:1125:848#0/1  
GGGCTATATACAGTAAAGACAACAGTATAAGAATCGGTTC  
+HWI-EAS443:3:99:1125:848#0/1  
^a\_aabbbb`Ya¥`aaaa`\_aW`\_^abaaa\_]aS`aPTS  
@HWI-EAS443:3:99:120:360#0/1  
GGAGTTTTTTGAACAAATTACTTGTCAATGGTAAATGGCA  
+HWI-EAS443:3:99:120:360#0/1  
aa¥a[aabaa`VSS\_]`[````]a^`YR[^[P^^¥VUVS\_  
@HWI-EAS443:3:99:1514:1606#0/1  
AAGGATTTTCATTCAAATACGGCAATGGTGTGGATAGG  
+HWI-EAS443:3:99:1514:1606#0/1  
abab`¥aa`NS``[Z`aa\_]a\_] [a\_UO¥[\_a]][^\_^^  
@HWI-EAS443:3:99:170:303#0/1  
TTCTGAAGATCTTGTATGAGGCCTGTCCATCACTTGGTCC

+HWI-EAS443:3:99:170:303#0/1  
`aa``aaaaaba\_aaa]\_a¥\_\_a^`]\_\_]\_`\_a]¥[X  
@HWI-EAS443:3:99:42:812#0/1  
GACCGATGGACCAAGTGATGGACAGGCCTCATACAAGATC  
+HWI-EAS443:3:99:42:812#0/1  
\_b`abaa`a¥^`]b\_ba\_aa\_aaa`a\_TT\_aaa^\_`]  
@HWI-EAS443:3:99:501:648#0/1  
CAAATTACTTGTCAATGGTAAATGGCAACTCAGCACCGTC  
+HWI-EAS443:3:99:501:648#0/1  
a`bba[^abab`aa]bb[¥b]Q^XaI`b[W]aY¥^ZNZ^\_  
@HWI-EAS443:3:99:541:76#0/1  
CTTTACTGTAATGACCGATGGACCAAGTGATGGACAGGCC  
+HWI-EAS443:3:99:541:76#0/1  
`b`\_`Y`b`bb\_bbbbbbabU[]W\_W`W¥[Z^b`[^Z\_NH  
@HWI-EAS443:3:99:643:828#0/1  
GGAGTTTTTTGAACAAATTACTTGTCAATGGTAAATGGCA  
+HWI-EAS443:3:99:643:828#0/1  
abab`aabbababbbbaa`\_aaa\_\_\_\_aaa]\_aa\_`¥Za  
@HWI-EAS443:3:99:752:810#0/1  
ATTTGAATGAAAATCCTTTTACTCCATTTGCTCCATTAGA  
+HWI-EAS443:3:99:752:810#0/1  
0`a`[VMYP\_SRX[^Y^^LRba]a`]^a^\_VV^^a\_`^  
@HWI-EAS443:3:9:1412:454#0/1  
GGCCTGTCCATCACTTGGTCCATCGGTCATTACAGTAAAG  
+HWI-EAS443:3:9:1412:454#0/1  
¥`aabbaaaaabbababaa`abbaa`a\_aaabWb^`\_abb  
@HWI-EAS443:3:9:1693:1132#0/1  
CTTTTCTATTCTGAAGATCTTGTATGAGGCCTGTCCATCA  
+HWI-EAS443:3:9:1693:1132#0/1  
a\_bbb`baababbaaabaabbb`a`]aba][aa``^`aT\_  
@HWI-EAS443:3:9:180:1224#0/1  
GAGGCCTGTCCATCACTTGGTCCATCGGTCATTACAGTAA  
+HWI-EAS443:3:9:180:1224#0/1  
^`TZa`bTS¥aa[\_`a\_ab]Xa`aa[]XPLY¥^aZTVGa\_  
@HWI-EAS443:3:9:277:959#0/1  
GAGTTTTTTGAACAAATTACTTGTCAATGGTAAATGGCAA  
+HWI-EAS443:3:9:277:959#0/1  
aU\_^S^`\_^^[XY\_]¥^^^\_^^X^Z^^]VX]^ZV]ZXX^  
@HWI-EAS443:3:9:409:1906#0/1  
ATCTTGTATGAGGCCTGTCCATCACTTGGTCCATCGGTCA  
+HWI-EAS443:3:9:409:1906#0/1  
a\_aY\_aWa\_]aa\_a\_\_a]^`a^\_`a^Z\_^0`^`^^\_]V\_\_  
@HWI-EAS443:3:9:632:1478#0/1  
GACCGATGGACCAAGTGATGGACAGGCCTCATACAAGATC  
+HWI-EAS443:3:9:632:1478#0/1  
a[^ab`Z\_X^^`]X][Q``aXXQ^\_N^VX[¥Z`[^X[\_GP  
@HWI-EAS443:3:9:655:1668#0/1  
CAGTATAAGAATCGGTTCCAAGGGGGATGTGTTTGTGATA  
+HWI-EAS443:3:9:655:1668#0/1  
aaa\_b\_b`Ybb`a`]VWX``\_`^`\_\_`XW\_Z^Z\_^]TWW]\_



@HWI-EAS443:3:9:704:398#0/1  
CCAGTATCGTCTAATGGAGCAAATGGAGTAAAAGGATTTT  
+HWI-EAS443:3:9:704:398#0/1  
aabb`ababaab\_ab^b[b``a`aab^b\_``abba^]aaa  
@HWI-EAS443:3:30:1308:452#0/1  
AGGCATTCATTTGACTGATTTGACTATGTTTCCCTTTTC  
+HWI-EAS443:3:30:1308:452#0/1  
abaW\_]UPQRT¥JY[^N`^BBBBBBBBBBBBBBBBBBBB  
@HWI-EAS443:3:92:607:922#0/1  
ATTCCGACTGATTTGACTATCTTTCCCTTTTCTATTCTGA  
+HWI-EAS443:3:92:607:922#0/1  
ab`^TYb¥[\_HaY]\_YYa[``Ya[`K]aW^NGXM¥ZW¥V^  
@HWI-EAS443:3:37:595:537#0/1  
TTCATTTGACTGATTTGACTATCTTTCCATTTTCTATTC  
+HWI-EAS443:3:37:595:537#0/1  
^X`^^`Y`TRX^`¥\_Za`[Y^[[``a][`FV\_V\_]`X]Z`  
@HWI-EAS443:3:48:166:501#0/1  
GGGGGATTCATTTGACTGATTTGACTATCTTTCCCTTTT  
+HWI-EAS443:3:48:166:501#0/1  
`^)`I[bbbbbaXaaaaab`\_bba^ZX\_``abb¥\_^b\_aa  
@HWI-EAS443:3:79:1716:1818#0/1  
GTCAAACCAGTCGAAATGAATGCCCTAATTATCACTATG  
+HWI-EAS443:3:79:1716:1818#0/1  
a]b`XRHQ^IPaY\_WYTb^]aa^P`[\_U¥PW]WGZS\_H`\_`  
@HWI-EAS443:3:24:895:1208#0/1  
AGTCAAATCAGTCGAAATGAATGCCCTAATTATCACCAT  
+HWI-EAS443:3:24:895:1208#0/1  
ab[aaa]`bab\_aaa^`a]aaa^^`aaa\_`aaaa`````  
@HWI-EAS443:3:76:1784:430#0/1  
TTCCTCANAGTGATAATTAGGGGCATTCATTTGACTGAT  
+HWI-EAS443:3:76:1784:430#0/1  
aaaaaa[DYaZa`a\_\_a`\_`a``\_``\_``\_``^]\_\_]^`^W`  
@HWI-EAS443:3:39:400:363#0/1  
TGGGGGCATTCATTTGACTGATTTGACTATCTTTCCCTT  
+HWI-EAS443:3:39:400:363#0/1  
^aa```aa`abaaaaba```a]aa`[T]aT[T\_a\_\_`X]^`  
@HWI-EAS443:3:48:126:1806#0/1  
GCGGCATTCATTTGACTGATTTGACTATCTTTCCCTTTT  
+HWI-EAS443:3:48:126:1806#0/1  
¥¥L\_W\_^YVI\_a`^ZYR^^`UZ]\_Za\_`^a\_\_]W[\_a`[  
@HWI-EAS443:3:14:275:859#0/1  
CGGGGCATTCATTTGACTGATTTGACTATCTTTCCCTT  
+HWI-EAS443:3:14:275:859#0/1  
a`aaab\_aaaaa`aaaWaa`aa`^aaaa```\_\_\_]\_\_`  
@HWI-EAS443:3:4:1342:1997#0/1  
TGGGGCATTCATTTGACTGATTTGACTATCTTTCCCTT  
+HWI-EAS443:3:4:1342:1997#0/1  
aaaabZaa`aaa`Z\_`\_`aW`^`a\_X\_`\_X]\_`W0]\_`\_`  
@HWI-EAS443:3:4:1525:1496#0/1  
GATTCATTTGACTGATTTGACTATCTTTCCCTTTTCTAT

+HWI-EAS443:3:4:1525:1496#0/1  
GQbbbb`a^¥^aa¥bbbaab\_aabbb\_bba`abbbb]b`b  
@HWI-EAS443:3:57:1525:1269#0/1  
TGGGGCATTTCATTTGACTGATTTGACTATCTTCCCTTT  
+HWI-EAS443:3:57:1525:1269#0/1  
ab\_aa`Y]aa`aaa]baaaaaa`\_\_a\_a¥a`aa^\_aaa  
@HWI-EAS443:3:71:1177:939#0/1  
TGGGCATTTCATTTGACTGATTTGACTATCTTCCCTTTT  
+HWI-EAS443:3:71:1177:939#0/1  
^\_[¥a¥bbaabbaaa[abb`aaaa\_`aaaaaa\_`^aa\_a  
@HWI-EAS443:3:72:783:1649#0/1  
TGGGGCATTTCATTTGACTGATTTGACTATCTTCCCTTT  
+HWI-EAS443:3:72:783:1649#0/1  
^\_^¥^a¥Y\_b¥aaV[\_¥bV\_aa]ab\_ba\_aa¥aaaa`aa  
@HWI-EAS443:3:85:334:1823#0/1  
TGGGGCATTTCATTTGACTGATTTGACTATCTTCCCTTT  
+HWI-EAS443:3:85:334:1823#0/1  
^\_`aaaaaa^aa`]\_¥`\_\_aaa\_¥`aaa``]a\_a^^`\_  
@HWI-EAS443:3:88:557:1599#0/1  
TGGGGCATTTCATTTGACTGATTTGACTATCTTCCCTTT  
+HWI-EAS443:3:88:557:1599#0/1  
aa^^`\_aba`abaJaaaaaa\_aa`^`\_a\_a`\_a\_a```  
@HWI-EAS443:3:10:1387:1014#0/1  
GGGGCATTTCATTTGACTGATTTGACTATCTTCCCTTTT  
+HWI-EAS443:3:10:1387:1014#0/1  
a\_\_^X^`^¥^\_^]\_XZ¥\_S^^^XS]]^XXXZTXWZXZZ  
@HWI-EAS443:3:10:489:279#0/1  
CATTTGACTGATTTGACTATCTTCCCTTTTCTATTCTG  
+HWI-EAS443:3:10:489:279#0/1  
Xaa`b^`[\_abb\_a\_b[X`]^I`X`^XHT¥^[F^a^]QU`  
@HWI-EAS443:3:12:1594:1178#0/1  
GACTGATTTGACTATCTTCCCTTTTCTATTCTGAAGATC  
+HWI-EAS443:3:12:1594:1178#0/1  
aaa¥\_]aaab\_W¥`^[¥aaVWZ\_``]\_\_^\_\_Y\_Y¥¥a]\_Y  
@HWI-EAS443:3:13:1014:641#0/1  
ATTTGACTGATTTGACTATCTTCCCTTTTCTATTCTGA  
+HWI-EAS443:3:13:1014:641#0/1  
aaa\_Sa]U]\_X]Y]aTOYJ¥U[Z^YYa\_¥[^V¥^\_¥Q][X  
@HWI-EAS443:3:13:1701:1278#0/1  
GGGAAAGATAGTCAAATCAGTCGAAATGAATGCCCTAAT  
+HWI-EAS443:3:13:1701:1278#0/1  
ab\_aa\_a\_a`X^\_a^`\_`a¥`\_`a¥`\_`^\_a`\_O]UW`^X`  
@HWI-EAS443:3:16:330:533#0/1  
GATCTTCAGAATAGAAAAGGGAAAGATAGTCAAATCAGTC  
+HWI-EAS443:3:16:330:533#0/1  
`V\_aabb`aba`aba`^`aaa`Z``aab^aa^a\_^aaMa  
@HWI-EAS443:3:17:620:1631#0/1  
ATTCATTTGACTGATTTGACTATCTTCCCTTTTCTATT  
+HWI-EAS443:3:17:620:1631#0/1  
¥b¥b`\_`a^ab¥aab`^bbb`\_ba[`aa^aa`abbb\_a[a`

@HWI-EAS443:3:17:795:1289#0/1  
TTCATTTGACTGATTTGACTATCTTTCCCTTTTCTATTC  
+HWI-EAS443:3:17:795:1289#0/1  
aaaaaaaaaaa`a\_`a\_`a\_`a\_`aa^`\_`^^`\_`^`  
@HWI-EAS443:3:19:382:688#0/1  
GTCAAATCAGTCGAAATGAATGCCCTAATTATCACTATG  
+HWI-EAS443:3:19:382:688#0/1  
a[bY`^aa]X0\_QR\_PVZ[Q¥^^]ZYX\_Za``^[aUZ`W^  
@HWI-EAS443:3:21:897:692#0/1  
TTCATTTGACTGATTTGACTATCTTTCCCTTTTCTATTC  
+HWI-EAS443:3:21:897:692#0/1  
^Yabb`aXWF]W\_¥`^`ZYW\_S``aa\_SUY`YW\_¥`XUD  
@HWI-EAS443:3:22:1236:1720#0/1  
GGGGCATTTCATTTGACTGATTTGACTATCTTTCCCTTTT  
+HWI-EAS443:3:22:1236:1720#0/1  
\_aaa\_abbabbabaaaaba¥aaaa]`aaa`aaa^¥`aaaa  
@HWI-EAS443:3:22:1632:1406#0/1  
AGGGGCATTTCATTTGACTGATTTGACTATCTTTCCCTTT  
+HWI-EAS443:3:22:1632:1406#0/1  
]\_aabaa`^baa\_aa`^\_ab\_ab`a\_YT[a^`a`ZVL`\_`a  
@HWI-EAS443:3:22:863:1108#0/1  
CATTTCATTTGACTGATTTGACTATCTTTCCCTTTTCTAT  
+HWI-EAS443:3:22:863:1108#0/1  
a\_baaabbaaaa`aa`aba¥aa`aaba`a\_aaaa\_aa`  
@HWI-EAS443:3:23:136:1153#0/1  
GGGGCATTTCATTTGACTGATTTGACTATCTTTCCCTTTT  
+HWI-EAS443:3:23:136:1153#0/1  
aaa]aaaababaaaa\_aaaZaaa[\_aaaaa`\_a`a\_`  
@HWI-EAS443:3:23:178:1421#0/1  
GGGCATTTCATTTGACTGATTTGACTATCTTTCCCTTTTC  
+HWI-EAS443:3:23:178:1421#0/1  
aXJ`[\_`\_^X\_RUaYW^b`abaYV^ba]]^abUTR^aY^`  
@HWI-EAS443:3:24:438:1847#0/1  
GGGGCATTTCATTTGACTGATTTGACTATCTTTCCCTTTT  
+HWI-EAS443:3:24:438:1847#0/1  
\_Z^aX`b^][U`\_WOXQ^^¥ZS^ZX¥W]S]^WQRLUR[¥[  
@HWI-EAS443:3:25:1292:1223#0/1  
CGACTGATTTGACTATCTTTCCCTTTTCTATTCTGAAGAT  
+HWI-EAS443:3:25:1292:1223#0/1  
`bbbbbabbbabab`babbbb``bbbaa`bbbbbbbaab  
@HWI-EAS443:3:25:1541:1497#0/1  
GGGGCATTTCATTTGACTGATTTGACTATCTTTCCCTTTT  
+HWI-EAS443:3:25:1541:1497#0/1  
aaaa`aaaa`a\_aa`aa\_a`a]^`\_`\_\_`^`]X\_ZW^\_  
@HWI-EAS443:3:25:576:1925#0/1  
TAGGGGCATTTCATTTGACTGATTTGACTATCTTTCCCTT  
+HWI-EAS443:3:25:576:1925#0/1  
aaa]^ababaaaaaaaa`a`aa`\_aa`\_\_`a\_a\_`  
@HWI-EAS443:3:32:751:1963#0/1  
ATTTGACTGATTTGACTATCTTTCCCTTTTCTATTCTGA

+HWI-EAS443:3:32:751:1963#0/1  
`^[Wba^a^`X\_]\_]PXVYX`WY`b\_]\_]\_^PaTPX  
@HWI-EAS443:3:33:192:854#0/1  
GTGATAATTAGGGGCATTCATTTGACTGATTTGACTATC  
+HWI-EAS443:3:33:192:854#0/1  
a^aaa[\_aaa`a`aa\_a`a`aa^\_\_`\_\_`V``\_^¥^^\_`^`  
@HWI-EAS443:3:34:898:148#0/1  
ATTCATTTGACTGATTTGACTATCTTTCCCTTTTCTATT  
+HWI-EAS443:3:34:898:148#0/1  
abbabbaaba`a\_aaaa^^`\_`\_`\_`^]^^^W^W^^  
@HWI-EAS443:3:35:525:2031#0/1  
GGCATTTCATTTGACTGATTTGACTATCTTTCCCTTTTCT  
+HWI-EAS443:3:35:525:2031#0/1  
[Ubb\_\_a\_babb\_^X]^`b¥\_baa`bab\_bb^bb\_baKb  
@HWI-EAS443:3:37:1410:1697#0/1  
GGGGCATTTCATTTGACTGATTTGACTATCTTTCCCTTTT  
+HWI-EAS443:3:37:1410:1697#0/1  
aa`[\_`bbbbbba`a\_aa\_abbabbabbWbbbb^\_aba`  
@HWI-EAS443:3:39:810:1916#0/1  
CATAGTGATAATTAGGGGCATTCATTTGACTGATTTGAC  
+HWI-EAS443:3:39:810:1916#0/1  
abaabaaaaabaaaa`aaaaa]aa\_^aaa`Z\_^aaa^\_Y  
@HWI-EAS443:3:3:61:345#0/1  
TTCATTTGACTGATTTGACTATCTTTCCCTTTTCTATTC  
+HWI-EAS443:3:3:61:345#0/1  
¥^T\_bbbab`]¥ZY\_YQaV¥aaaaaX]Z`^`a\_¥Wa`\_Y[  
@HWI-EAS443:3:42:908:1153#0/1  
GGGCATTTCATTTGACTGATTTGACTATCTTTCCCTTTTC  
+HWI-EAS443:3:42:908:1153#0/1  
`W`bbbbb`^^a\_ab]aaaa`babaaaaa``]`a`  
@HWI-EAS443:3:44:271:1297#0/1  
CATTTGACTGATTTGACTATCTTTCCCTTTTCTATTCTG  
+HWI-EAS443:3:44:271:1297#0/1  
a``abba^`bab`bbab`bbbbbbaaababb`aaaa\_a  
@HWI-EAS443:3:46:369:63#0/1  
GGGCATTTCATTTGACTGATTTGACTATCTTTCCCTTTT  
+HWI-EAS443:3:46:369:63#0/1  
¥b`a]Y]¥^VK\_bS]\_a]`X^bba\_aa[a]aaaXWG¥]a]  
@HWI-EAS443:3:46:521:91#0/1  
TTAGGGGCATTCATTTGACTGATTTGACTATCTTTCCCT  
+HWI-EAS443:3:46:521:91#0/1  
``abbbb^\_baa\_baaab\_\_`a^aaa^]a`a]aa`\_Z[`  
@HWI-EAS443:3:46:551:1037#0/1  
CATTTGACTGATTTGACTATCTTTCCCTTTTCTATTCTG  
+HWI-EAS443:3:46:551:1037#0/1  
abbbbbbaabb\_bbbb`abbabbbbaa`baba`a`aa\_ba  
@HWI-EAS443:3:49:1088:633#0/1  
GATAATTAGGGGCATTCATTTGACTGATTTGACTATCTT  
+HWI-EAS443:3:49:1088:633#0/1  
aabaabaab`a``]aa\_abaa\_a`\_aa\_aaa`\_\_a`a]aa

@HWI-EAS443:3:4:723:1235#0/1  
CATAGTGATAATTAGGGGCATTCATTTGACTGATTTGAC  
+HWI-EAS443:3:4:723:1235#0/1  
`bbbbabbbabbbab`aaaaaaYbbaaaaaaaaaaaaaa  
@HWI-EAS443:3:52:1672:2012#0/1  
GGGGCATTCATTTGACTGATTTGACTATCTTTCCCTTTT  
+HWI-EAS443:3:52:1672:2012#0/1  
V¥`^`I`ab\_\_bbbbSXa`\_abb`b\_a¥]¥bab[YZab`\_  
@HWI-EAS443:3:52:361:366#0/1  
TTCATTTGACTGATTTGACTATCTTTCCCTTTTCTATTC  
+HWI-EAS443:3:52:361:366#0/1  
abbababaa`aab]abaa\_`a`a\_a`a\_X`a\_aa\_a\_``]  
@HWI-EAS443:3:53:378:238#0/1  
ATTAGGGGCATTCATTTGACTGATTTGACTATCTTTCCC  
+HWI-EAS443:3:53:378:238#0/1  
abbbbbbbaabbaabbbab`abb\_bbba`^baa\_baa]]]  
@HWI-EAS443:3:53:696:84#0/1  
ATTCATTTGACTGATTTGACTATCTTTCCCTTTTCTATT  
+HWI-EAS443:3:53:696:84#0/1  
abbbbbb`baababbbb\_abab`bbba¥aaba¥baba  
@HWI-EAS443:3:53:920:1850#0/1  
TTCGACTGATTTGACTATCTTTCCCTTTTCTATTCTGAAG  
+HWI-EAS443:3:53:920:1850#0/1  
a\_W^aab``aba[]Yabb¥^b^`^`\_ab``a^aa¥\_`aaa  
@HWI-EAS443:3:54:1655:1501#0/1  
TTTCGACTGATTTGACTATCTTTCCCTTTTCTATTCTGAA  
+HWI-EAS443:3:54:1655:1501#0/1  
ab`abaaba]aa`a\_\_\_R^M\_aa`\_X`\_a¥KY^a`¥^^[V  
@HWI-EAS443:3:55:1747:1108#0/1  
GGGGCATTCATTTGACTGATTTGACTATCTTTCCCTTTT  
+HWI-EAS443:3:55:1747:1108#0/1  
aaa\_a`bb`b`aa]`a^b^Z^aaa\_\_`\_a[a`aXL¥aXaW  
@HWI-EAS443:3:55:28:418#0/1  
CCTCATAGTGATAATTAGGGGCATTCATTTGACTGATTT  
+HWI-EAS443:3:55:28:418#0/1  
aa¥aa\_HW^ba] [] [ `a\_a¥X\_Wb\_[]\_a]YaV¥\_aWa\_`  
@HWI-EAS443:3:55:299:945#0/1  
GGCATTCATTTGACTGATTTGACTATCTTTCCCTTTTCT  
+HWI-EAS443:3:55:299:945#0/1  
ababa`aaaaaba`aa`aa````\_aa`\_`\_a`\_]\_a`a\_\_  
@HWI-EAS443:3:55:620:1201#0/1  
ATTTGACTGATTTGACTATCTTTCCCTTTTCTATTCTGA  
+HWI-EAS443:3:55:620:1201#0/1  
¥^bba`Yba\_Vaa`\_`\_a]`Vaaa^\_a`]¥`\_`^aa[R¥`U  
@HWI-EAS443:3:56:325:291#0/1  
CATTTGACTGATTTGACTATCTTTCCCTTTTCTATTCTG  
+HWI-EAS443:3:56:325:291#0/1  
[[]YYabbZV`NRZ¥Y`YYVa`YYb\_PY]UJYS`T[¥VS[  
@HWI-EAS443:3:56:519:445#0/1  
ATTAGGGGCATTCATTTGACTGATTTGACTATCTTTCCC

+HWI-EAS443:3:56:519:445#0/1  
aba```aba^`aa``aab\_`ab`aaaa\_`a\_a`aaa^^\_  
@HWI-EAS443:3:56:74:859#0/1  
TTCATTTGACTGATTTGACTATCTTTCCCTTTTCTATTC  
+HWI-EAS443:3:56:74:859#0/1  
abaaaaabaaaa\_aaaa]^aaaa`a\_aa`aa^a\_`\_\_  
@HWI-EAS443:3:56:912:574#0/1  
TAATTAGGGGCATTCATTTGACTGATTTGACTATCTTTC  
+HWI-EAS443:3:56:912:574#0/1  
Y\_^XVXZabX0Z\_SXWZ\_SZNTZ^V\_a`]^SXZ`SZaXS  
@HWI-EAS443:3:57:88:136#0/1  
AATTAGGGGCATTCATTTGACTGATTTGACTATCTTTC  
+HWI-EAS443:3:57:88:136#0/1  
a]a]^baaba`aaa`aaaa\_`aa\_aa`a]^`\_\_\_`^Z^Z  
@HWI-EAS443:3:58:38:1769#0/1  
TTCATTTGACTGATTTGACTATCTTTCCCTTTTCTATTC  
+HWI-EAS443:3:58:38:1769#0/1  
aaaaa`a^Z]^S]^[\_a]R]aZ`^a`\_]`^`^`]^`\_]\_\_a\_T  
@HWI-EAS443:3:59:237:579#0/1  
ATTTGACTGATTTGACTATCTTTCCCTTTTCTATTCTGA  
+HWI-EAS443:3:59:237:579#0/1  
]a```aVVa`0Z^b\_Y`aba`a`aR\_`Y^W^X\_TEZ]M  
@HWI-EAS443:3:59:930:1583#0/1  
GGGGCATTCATTTGACTGATTTGACTATCTTTCCCTTTT  
+HWI-EAS443:3:59:930:1583#0/1  
^`a`\_`abbbbbbaaba\_aabbaabbab`a\_aP^`aa  
@HWI-EAS443:3:5:669:67#0/1  
GACTGATTTGACTATCTTTCCCTTTTCTATTCTGAAGATC  
+HWI-EAS443:3:5:669:67#0/1  
Y\_bbbaabba`aabb`bbbbbbbababbabZbb`ab^aS  
@HWI-EAS443:3:5:938:1659#0/1  
GGGGCATTCATTTGACTGATTTGACTATCTTTCCCTTTT  
+HWI-EAS443:3:5:938:1659#0/1  
aaaaZ\_abaaaaZaa]ab^a]aaa^aaa]\_a^`^]\_`a\_  
@HWI-EAS443:3:60:1586:980#0/1  
AGTGATAATTAGGGGCATTCATTTGACTGATTTGACTAT  
+HWI-EAS443:3:60:1586:980#0/1  
aaYbaaaaba\_\_`Y`abbaaaaba`b\_abaZbaab\_\_a\_a  
@HWI-EAS443:3:60:551:1041#0/1  
GGGGCATTCATTTGACTGATTTGACTATCTTTCCCTTTT  
+HWI-EAS443:3:60:551:1041#0/1  
``b``baaababaabaaa]abb\_\_`a\_``aaa]]a\_^a`  
@HWI-EAS443:3:61:1322:1610#0/1  
GGCATTCATTTGACTGATTTGACTATCTTTCCCTTTTCT  
+HWI-EAS443:3:61:1322:1610#0/1  
abRV]X\_^\_ZYPV^\_^X]\_Y\_^\_W^]^RYSY]YU[[  
@HWI-EAS443:3:62:455:588#0/1  
TTCATTTGACTGATTTGACTATCTTTCCCTTTTCTATTC  
+HWI-EAS443:3:62:455:588#0/1  
`WQZ]a`aa]Za`a\_a\_V\_a]^Ya`[Y[\_]a^^YUT[]`



+HWI-EAS443:3:71:303:1227#0/1  
^¥\_Z¥ZTW]W]]H[^UT^a\_YSZSW`[^X\_b`^^ZZaU  
@HWI-EAS443:3:71:313:1334#0/1  
AATTAGGGGCATTCATTTGACTGATTTGACTATCTTTCC  
+HWI-EAS443:3:71:313:1334#0/1  
aa]I\_b^]Va^a`^[Za\_^Q0^]ZR\_\_a`RVR\_]^\_XWZ  
@HWI-EAS443:3:72:1184:1825#0/1  
GAAAGATAGTCAAATCAGTCGAAATGAATGCCCTAATTA  
+HWI-EAS443:3:72:1184:1825#0/1  
a`a¥X\_bbb^abaaa]aaa]^`ba]V]¥\_`a[Xaaa\_\_a  
@HWI-EAS443:3:72:1222:1255#0/1  
GGGGCATTTCATTTGACTGATTTGACTATCTTTCCCTTTT  
+HWI-EAS443:3:72:1222:1255#0/1  
\_^\_aXTRXb^a`[]`Y[^\_\_\_\_^[\_]`Y¥[a[[aXU]\_Z  
@HWI-EAS443:3:73:1019:1108#0/1  
TCCTCATAGTGATAATTAGGGGCATTCATTTGACTGATT  
+HWI-EAS443:3:73:1019:1108#0/1  
ab`a`a`aY`\_a\_aaaaa`\_`a[\_aa`aa`a`a`a`a]\_`  
@HWI-EAS443:3:73:815:156#0/1  
GGCATTTCATTTGACTGATTTGACTATCTTTCCCTTTTCT  
+HWI-EAS443:3:73:815:156#0/1  
`SV`P][`P^¥Y\_\_\_T^R^RYa\_Q[T^^]\_UFQWZ]XVSX  
@HWI-EAS443:3:74:1193:735#0/1  
GGGGCATTTCATTTGACTGATTTGACTATCTTTCCCTTTT  
+HWI-EAS443:3:74:1193:735#0/1  
abbaaaaaabaaaa`ab\_aaba\_`a`aaaaa^aa\_\_^  
@HWI-EAS443:3:74:124:1876#0/1  
ATTTGACTGATTTGACTATCTTTCCCTTTTCTATTCTGA  
+HWI-EAS443:3:74:124:1876#0/1  
Y\_[`baaaaa`[^¥T\_^`a`ab`OZ\_^a`Y]]a]Y\_  
@HWI-EAS443:3:75:1689:1608#0/1  
GTCAAATCAGTCGAAATGAATGCCCTAATTATCACTATG  
+HWI-EAS443:3:75:1689:1608#0/1  
a`aa]\_¥]a^¥\_`aaaa^a`OVT^^]\_`Q[`a`^`^][  
@HWI-EAS443:3:77:789:328#0/1  
GGGGCATTTCATTTGACTGATTTGACTATCTTTCCCTTTT  
+HWI-EAS443:3:77:789:328#0/1  
aaa`X[aa`\_]\_a\_]^`U^`\_`[R\_]^^^\_UVXW]^^  
@HWI-EAS443:3:78:1319:1347#0/1  
TTCATTTGACTGATTTGACTATCTTTCCCTTTTCTATTC  
+HWI-EAS443:3:78:1319:1347#0/1  
a`^`Z`R]UWZXVS^TVYWXY`\_[][\_]XX¥WVUX  
@HWI-EAS443:3:7:134:510#0/1  
GGGGCATTTCATTTGACTGATTTGACTATCTTTCCCTTTT  
+HWI-EAS443:3:7:134:510#0/1  
aT`a\_FW`\_aaYaQZ]`[¥RF`[OU`^Y^Y¥^]P]¥¥WS  
@HWI-EAS443:3:7:844:1093#0/1  
GGGGCATTTCATTTGACTGATTTGACTATCTTTCCCTTTT  
+HWI-EAS443:3:7:844:1093#0/1  
a\_¥aYV]baabbaaa`¥`a`aaaa`[aaaXaa`WWS]aa`



@HWI-EAS443:3:80:1017:414#0/1  
GGCATTTCGACTGATTTGACTATCTTCCCTTTCT  
+HWI-EAS443:3:80:1017:414#0/1  
aab\_bbaaaba\_\_`aa\_abba\_`b\_a`aba¥`\_aaaa\_a  
@HWI-EAS443:3:80:873:139#0/1  
ATTCGACTGATTTGACTATCTTCCCTTTCTATTCTGA  
+HWI-EAS443:3:80:873:139#0/1  
^``]F^a^abaaa`\_ZN\_```ab\_PETaba]L\_Y]`NXRX  
@HWI-EAS443:3:80:946:1000#0/1  
GGGGCATTTCGACTGATTTGACTATCTTCCCTTTT  
+HWI-EAS443:3:80:946:1000#0/1  
aV^]Z\_\_a`\_]`[]¥X^\_[P]Ya^V]\_^a[``U¥[W]UW^  
@HWI-EAS443:3:81:1579:738#0/1  
CCTCATAGTGATAATTAGGGGCATTCATTTGACTGATTT  
+HWI-EAS443:3:81:1579:738#0/1  
a\_`^`a\_¥S\_^a`^bbbbb`^`a`^`aba\_L\_]`^UO¥^`  
@HWI-EAS443:3:81:710:240#0/1  
GGGGCATTTCGACTGATTTGACTATCTTCCCTTTT  
+HWI-EAS443:3:81:710:240#0/1  
\_OUaSN[X\_V^Ub\_P`aY[\_`[[\_FF¥R[\_[\_Y[G[``[]  
@HWI-EAS443:3:82:1028:562#0/1  
TTCATTTGACTGATTTGACTATCTTCCCTTTCTATTC  
+HWI-EAS443:3:82:1028:562#0/1  
a\_aababaab¥bbaaaaaUa\_a`aba^\_``aaa`[]\_\_^  
@HWI-EAS443:3:82:1354:528#0/1  
GGGGCATTTCGACTGATTTGACTATCTTCCCTTTT  
+HWI-EAS443:3:82:1354:528#0/1  
a`a]\_]\_\_a``aaa\_a\_]`a^\_a\_a^^`\_¥`aa[X^\_^]\_  
@HWI-EAS443:3:83:1079:675#0/1  
GGAGCATTTCATAGTGATAATTAGGGGCATTCATTTG  
+HWI-EAS443:3:83:1079:675#0/1  
aa[\_VW\_a`]]]Y^`a]a^a^^`\_[]`Y¥ZZa^R^`a\_]`  
@HWI-EAS443:3:87:690:1843#0/1  
AGGGGCATTCATTTGACTGATTTGACTATCTTCCCTTT  
+HWI-EAS443:3:87:690:1843#0/1  
a¥\_Z]`b]aa\_a``bba]^a^\_a\_b`\_aaaa^a\_a`ba^W  
@HWI-EAS443:3:8:246:838#0/1  
CATTCGACTGATTTGACTATCTTCCCTTTCTATTCTG  
+HWI-EAS443:3:8:246:838#0/1  
`bbab[bbaaa]bbba\_aabaa\_a\_a^aaaYa\_aa\_^a  
@HWI-EAS443:3:90:1515:207#0/1  
GGCATTTCGACTGATTTGACTATCTTCCCTTTCT  
+HWI-EAS443:3:90:1515:207#0/1  
ab``aaaaaa¥\_YV`a]a`a^Y^]\_]``aXTX`\_[]`[]  
@HWI-EAS443:3:91:1085:160#0/1  
ATTCGACTGATTTGACTATCTTCCCTTTCTATTCTGA  
+HWI-EAS443:3:91:1085:160#0/1  
`b`b^`¥Y[a`babaa\_aYa`aa¥[^[\_aa^aUaaW\_\_\_\_  
@HWI-EAS443:3:91:306:1511#0/1  
ATTAGGGGCATTCATTTGACTGATTTGACTATCTTCCC

+HWI-EAS443:3:91:306:1511#0/1  
Z^baa^`abaa`abaaabbabab`aaaaa`aa\_a``aa\_  
@HWI-EAS443:3:92:306:717#0/1  
GGGGCATTTCGACTGATTGACTATCTTCCCTTTT  
+HWI-EAS443:3:92:306:717#0/1  
\_`aba[abbaababbaabb`abbaaab`bbbab^a\_aaab  
@HWI-EAS443:3:92:51:1298#0/1  
TCGACTGATTGACTATCTTCCCTTTTCTATTCTGAAGA  
+HWI-EAS443:3:92:51:1298#0/1  
\_`\_Z[¥RP[]aUU^X0Z\_\_K`]V`aaa\_Z`W\_X^\_Ya]XB  
@HWI-EAS443:3:93:1210:1406#0/1  
GGGGCATTTCGACTGATTGACTATCTTCCCTTTT  
+HWI-EAS443:3:93:1210:1406#0/1  
aa`aZ`¥Q^JXG[Q[¥`ab`aaa^OF]\_aXa`aYWY\_]`^  
@HWI-EAS443:3:93:93:1767#0/1  
ATTTGACTGATTGACTATCTTCCCTTTTCTATTCTGA  
+HWI-EAS443:3:93:93:1767#0/1  
a`aa`[aaa¥aa`^aaa\_aa\_\_a`^^\_\_X`aaU`\_\_`W¥  
@HWI-EAS443:3:94:252:1575#0/1  
GGCATTTCGACTGATTGACTATCTTCCCTTTTCT  
+HWI-EAS443:3:94:252:1575#0/1  
¥¥a¥a^b`abb`Z\_baa¥^aa`]aabaaaa`a`aaa`Za  
@HWI-EAS443:3:94:660:1572#0/1  
GGGGCATTTCGACTGATTGACTATCTTCCCTTTT  
+HWI-EAS443:3:94:660:1572#0/1  
a`^a^^\_`^aaa[`aa`aa]a\_[\_]Za```aaaZX)`¥`\_  
@HWI-EAS443:3:95:1219:1581#0/1  
ATTTGACTGATTGACTATCTTCCCTTTTCTATTCTGA  
+HWI-EAS443:3:95:1219:1581#0/1  
`bab]ba\_aa\_bbaaa`aa`\_aaaa``baba]aa\_a][a\_  
@HWI-EAS443:3:96:1698:1457#0/1  
ATTTGACTGATTGACTATCTTCCCTTTTCTATTCTGA  
+HWI-EAS443:3:96:1698:1457#0/1  
aa`\_\_ba`aaX\_aaa\_]ba`Yaa\_[US¥\_\_^X\_\_^PW][  
@HWI-EAS443:3:96:927:249#0/1  
CATTTCGACTGATTGACTATCTTCCCTTTTCTAT  
+HWI-EAS443:3:96:927:249#0/1  
abbbbbbbabb`bbbbbb¥bbabbba\_bbbbaabab  
@HWI-EAS443:3:98:285:1251#0/1  
GGCATTTCGACTGATTGACTATCTTCCCTTTTCT  
+HWI-EAS443:3:98:285:1251#0/1  
aba¥bbbbbaab^a`babbb`aaaa\_a^aaaaaaaa\_a  
@HWI-EAS443:3:99:1321:1726#0/1  
GGGGCATTTCGACTGATTGACTATCTTCCCTTTT  
+HWI-EAS443:3:99:1321:1726#0/1  
a`\_]SX`R^^aaa0aaY`a]a\_ab\_``\_Y\_¥^a[UY\_X]`  
@HWI-EAS443:3:99:1550:485#0/1  
GGGGCATTTCGACTGATTGACTATCTTCCCTTTT  
+HWI-EAS443:3:99:1550:485#0/1  
`\_a\_Y\_^abaa^aab`abb`a\_bb]U``aY\_bYFYQ\_aaY

@HWI-EAS443:3:99:1593:143#0/1  
TTAGGGGCATTTCATTTGACTGATTTGACTATCTTTCCCT  
+HWI-EAS443:3:99:1593:143#0/1  
`]``\_VR]a[VW\_[Y^a[\_a]\_\_^\_WU`\_aY\_\_`PVP\_  
@HWI-EAS443:3:99:819:544#0/1  
GGGCATTTCATTTGACTGATTTGACTATCTTTCCCTTTTC  
+HWI-EAS443:3:99:819:544#0/1  
`XaT\_^`¥]`a\_W¥^[]a^\_aaa\_YaYWDZ]^U[S]^Z  
@HWI-EAS443:3:18:27:1084#0/1  
CATGACCAAGAAGATGGTCACGCAAAGAACAATGCGGAAA  
+HWI-EAS443:3:18:27:1084#0/1  
aa`a]b`V^a^`\_¥¥`aW`\_[``^\_Z[\_`^W^\_]a^T]\_  
@HWI-EAS443:3:1:605:1629#0/1  
GATTCTTCAAGGAAAGCCATAGCCTCTAGAACAGAGTGTG  
+HWI-EAS443:3:1:605:1629#0/1  
\_b]^U]\_S`babaa[`JIb]^aY\_a[[aaa`a`IbBBBBB  
@HWI-EAS443:3:28:255:433#0/1  
GAGATAACAACCCACTTTCAAAGAAAAAGGAGACACACAA  
+HWI-EAS443:3:28:255:433#0/1  
a```\_a\_abaa`aaa`ba\_YYaa`aa`Z^aa`¥¥`a\_  
@HWI-EAS443:3:40:1035:196#0/1  
GGGGCATTCACTATGAGAGCAAATCGTCGGATGATGGGA  
+HWI-EAS443:3:40:1035:196#0/1  
a\_LZQ]ZYHLR[^N\_YTLPYKNU`QJVLRM\_TYBBBBBBB  
@HWI-EAS443:3:40:427:1541#0/1  
ATTTGAGAATTCATGCCTTGAAACAATGGAAGTCGCTCAA  
+HWI-EAS443:3:40:427:1541#0/1  
a¥YX[\_aaa\_\_¥^V[ZU[ZZ`¥aabVM¥P^[]XX[ZFWODW  
@HWI-EAS443:3:47:1071:981#0/1  
GGTATGCACAAACAGACTGTGTTCTAGAGGCTAATGCTTT  
+HWI-EAS443:3:47:1071:981#0/1  
a^N^[]a`[aa]^`\_\_\_aaP¥[X[\_ZMXBBBBBBBBBBB  
@HWI-EAS443:3:53:357:2011#0/1  
AAAGTCTTCCCCTGAATCCCTTTGTCAGTCATAAAGAGAT  
+HWI-EAS443:3:53:357:2011#0/1  
abY][bbb\_ababaaa¥aaIaa\_baa`b¥\_[aaa`a]^\_a  
@HWI-EAS443:3:77:986:25#0/1  
AGCAGGAGTGGACAGATTCTACAGGACCTGCAATGCCCTG  
+HWI-EAS443:3:77:986:25#0/1  
]b`¥bbab[``\_\_ab¥]`]Za\_aab[Y[^][^]VaO[Z¥`  
@HWI-EAS443:3:7:904:1112#0/1  
CACCAATACTCAGAAAAGGGAAAGTGGACGACACTCCAGC  
+HWI-EAS443:3:7:904:1112#0/1  
^R]^\_\_bRYYa\_X^aa`\_bbbaa^Vb\_aUaQ[a¥G]XaaQ  
@HWI-EAS443:3:87:1564:871#0/1  
TGTTGATTCATTGAAGTACTTCAGGTCAATGCTATGTAAA  
+HWI-EAS443:3:87:1564:871#0/1  
ab\_\_`a]aaaa`^^`[^\_a`X\_ba¥`\_`\_aa]a``a]¥]^  
@HWI-EAS443:3:92:508:231#0/1  
CACCAATAAAGTGGACGACAAACACAGAGACTGGTGCACC

+HWI-EAS443:3:92:508:231#0/1  
`U^aabbba`b`bbbbbaaabb\_aabbba\_aa\_UKZ]``\_  
@HWI-EAS443:3:93:287:1954#0/1  
GGTGTGTTCTGTTTACTGTGTCCATGGTGTATCTGTTCCCT  
+HWI-EAS443:3:93:287:1954#0/1  
aaUaX`^aa`a^aa\_a`\_\_`\_a\_a`a\_]`¥`[\_aa]¥UYB  
@HWI-EAS443:3:94:1718:1181#0/1  
CAACAAAGAAGAAAATTGAGAAAATAAGGCCTCCTACT  
+HWI-EAS443:3:94:1718:1181#0/1  
aIY¥b^U\_¥T\_YDWN`Y`^][Z`UMR\_[PG]UGWYZGLS  
@HWI-EAS443:3:95:1317:807#0/1  
GATTGGAGAATCCCTTTGTCAGTCATAAAGAGATTGATTC  
+HWI-EAS443:3:95:1317:807#0/1  
abbaabab`[\_aU¥[a`baaab\_]aa`\_a\_WYaaaaadW  
@HWI-EAS443:3:95:927:1141#0/1  
ACAAACAGACTGTGTTCTAGAGGCTATGGCTTTTCTTTAA  
+HWI-EAS443:3:95:927:1141#0/1  
abbbb\_abbabba\_aaaaaaaaa^`]BBBBBBBBBBBBBB  
@HWI-EAS443:3:98:1645:72#0/1  
TTCATTTACTCCAGACTCCAAAGCTGGGTAGATACATG  
+HWI-EAS443:3:98:1645:72#0/1  
ab\_Y]aba`a```Y^U]\_RDxa\_¥SPZKVZ\_TDTFS[QF  
@HWI-EAS443:3:22:996:997#0/1  
GGAATGTTTAACATGCTAAGTACGGTCTTGGGAGTCTCGA  
+HWI-EAS443:3:22:996:997#0/1  
``a^`a`abaa\_\_`a`aa`a\_aWaaU\_`\_\_^`\_^]`^\_\_  
@HWI-EAS443:3:29:961:1834#0/1  
GTTTGAATTTGTGTGTCTCCCCTATGACACCTATATGTGT  
+HWI-EAS443:3:29:961:1834#0/1  
¥abbbba`bba``a\_bUaab`a^abaJJ^a`a\_\_\_\_aa`[YI  
@HWI-EAS443:3:33:695:600#0/1  
GCACAAACAGACTGTGTTCTAGAGGCTATGGCCTTCCCTG  
+HWI-EAS443:3:33:695:600#0/1  
\_]a\_V[\_ba`[VK[UaaOQ[[UBBBBBBBBBBBBBBB  
@HWI-EAS443:3:36:641:412#0/1  
AGTAAACAGAACACACCAATACACAGAAAAGGAAAGCGG  
+HWI-EAS443:3:36:641:412#0/1  
a\_L]aZNYQ]aW¥[aBBBBBBBBBBBBBBBBBBBBBB  
@HWI-EAS443:3:45:1183:1148#0/1  
AGGGAATGTGGTGCTTTTGGCATTGCGCTGGAATTACA  
+HWI-EAS443:3:45:1183:1148#0/1  
[]b^Xbbbab`VbXabb`b`^`ababa]aa`a¥Y]`^aaa  
@HWI-EAS443:3:46:827:585#0/1  
AGAAGATGGTCACGCAAAGAACAATAGAGAAGAAAAAGGC  
+HWI-EAS443:3:46:827:585#0/1  
¥aabb\_¥^\_GR[\_]XWT^\_\_\_\_`^\_ZZZ`WZ^\_V`¥VYZT  
@HWI-EAS443:3:53:125:1657#0/1  
ATTAATACGATGAGCAAAGATGCAGAGAGAGGCAAGCTA  
+HWI-EAS443:3:53:125:1657#0/1  
abb^ab\_aa\_Y]TUDWZaVU\_\_[]S^^¥[a`[\_a\_V]HXL

@HWI-EAS443:3:60:800:35#0/1  
AGTTTATCTACCCTTGTGGTTGAACGACTTCCATTGGAC  
+HWI-EAS443:3:60:800:35#0/1  
aaZ`abaaaa`[X]aaY[aaa\_a`¥Wa`W¥RY[RY]`Z[]  
@HWI-EAS443:3:62:538:208#0/1  
GGAGCATTGCGAAAAGCTTGAACAGTTTGGGCTCCCTGA  
+HWI-EAS443:3:62:538:208#0/1  
`\_X`\_aa`\_`X`\_]V\_¥[^XV`YT¥RLUXRXUUUVURBB  
@HWI-EAS443:3:69:1706:1571#0/1  
ACACATATAGGTGCCATAGGGGAGACACATAAATTCAAAC  
+HWI-EAS443:3:69:1706:1571#0/1  
^aaabbbba]`^]¥`aba`^aa```aaa\_G^`]aa\_aaa]  
@HWI-EAS443:3:75:1183:217#0/1  
GGGGTGTCTGTACTGTGTCCATGGAGTATCCTGTTCC  
+HWI-EAS443:3:75:1183:217#0/1  
aaU`a]PJ^Ubab[aU[T]aVW[a```DNP\_YFF\_aW[GQ  
@HWI-EAS443:3:75:1626:1868#0/1  
ATTTAATAAGAGCTCTGACATTAATACGATGACCAAAGA  
+HWI-EAS443:3:75:1626:1868#0/1  
a`F¥ba\_b`baVTKa`ab\_ba¥aa^a\_a`b\_¥\_]Y^`b  
@HWI-EAS443:3:80:1001:502#0/1  
AATTCATGCCTTGAAACAATGGAAGTGGTTCAACAAAAA  
+HWI-EAS443:3:80:1001:502#0/1  
VZZ\_QUa\$¥T[\_`[T¥R\_aaabZ]]JFW`\_ZTSO\_Y]G[Y  
@HWI-EAS443:3:81:1269:1691#0/1  
AGTGGGTATGAACAAACAGACTGTGTTCTAGAGGCTAAGG  
+HWI-EAS443:3:81:1269:1691#0/1  
ab¥Y¥\_\_bb\_G]a\_Ybb`V]V^\_Z^J`Q`^aU^`^aBBBB  
@HWI-EAS443:3:88:845:917#0/1  
CAATTGAAGAGCCATCTGTGCCGTTGCAGGTCCAAGGGCA  
+HWI-EAS443:3:88:845:917#0/1  
a`abZRU`\_\_b`¥a[a]\_H¥\_abZXaX`\_YJaaXG¥[DGa  
@HWI-EAS443:3:99:1761:1272#0/1  
GGGGTGTCTCTATTTCCTCTTTGTTTCATTGATTCAA  
+HWI-EAS443:3:99:1761:1272#0/1  
¥abb¥]bb[F[\_bb`b`bba^`abbbb`bbb\_\_bbbZb  
@HWI-EAS443:3:10:228:1648#0/1  
GAAACAATGGNAGTCGTTCAACAAACAAGGGTAGATAAAC  
+HWI-EAS443:3:10:228:1648#0/1  
a^\_a^a^¥^UDZ^Z^UZ]VX^W^^\_OZ][VRKS^^R^X]S  
@HWI-EAS443:3:16:1107:1279#0/1  
GTGCCATGCTCAGGATGTTTGTGAACCACTCGGGNTGATT  
+HWI-EAS443:3:16:1107:1279#0/1  
aY\_]LUGX]YT\_]^ZNPPW¥FSMOQS\_]¥Ua]]PDTYSZU  
@HWI-EAS443:3:21:1417:1950#0/1  
CAAGCATTGACCTGAAGGACTTCAATGAATCNACAAAGAA  
+HWI-EAS443:3:21:1417:1950#0/1  
a\_N\_[a\_V¥^T\_a\_a¥DW^a\_\_Sa\_\_`KYFDZZa]\_]\_[  
@HWI-EAS443:3:2:105:1769#0/1  
TAGGTGCCATAGGGGAGACACACAAATTCAAACNAGAAGA

+HWI-EAS443:3:2:105:1769#0/1  
aa\_aX`aaaa^a`\_\_a]`\_a^aa`a`\_`a\_IDX`]`\_`  
@HWI-EAS443:3:44:907:1822#0/1  
CAATTGAAGAGNCATCTGGGCCGTTGCAGGTCAAAGGTCA  
+HWI-EAS443:3:44:907:1822#0/1  
aWbaZ]``^aUDX[a`]`]U¥a¥^Y[W`YU[ODUYSTR]^  
@HWI-EAS443:3:51:1312:1546#0/1  
GGCTAATTTTATGCATGGAGCNACCCAGCTTTGGGGTGTCT  
+HWI-EAS443:3:51:1312:1546#0/1  
aa]I\_]`ZLHXa\_VSL^SVJDM\_PGUXFUX^]BBBBBBBB  
@HWI-EAS443:3:81:250:1355#0/1  
TGGANGTCGTTCAACAAACAAGGGTAGATAAACTAACTCA  
+HWI-EAS443:3:81:250:1355#0/1  
a`a¥DY¥aa`a`^a]a\_\_\_\_\_^¥]aY`TY[\_a`\_^`ZWT]`  
@HWI-EAS443:3:85:603:2008#0/1  
CCCAGCGTTGCGATAGCCCTTCTTTTTANCTTGCCTCTC  
+HWI-EAS443:3:85:603:2008#0/1  
abbab¥MW`ba^baY\_ab¥^`Y``baaa¥DP^XV`b\_aSa  
@HWI-EAS443:3:86:1414:106#0/1  
GGCTAATTTTATGCATGAGCTACCCAGCTTTGGAGTGTCTG  
+HWI-EAS443:3:86:1414:106#0/1  
ab\_bbabbab`PXabbab\_a¥Z\_YT`UZZabS^aUa]Xaa  
@HWI-EAS443:3:87:404:666#0/1  
AACAGATCTTATGATCTCAGAGAACTCTTCTTTCTTGATC  
+HWI-EAS443:3:87:404:666#0/1  
aa`\_\_^\_aaaaa`\_\_`aa\_\_Y`\_a``aa`\_a`\_\_`\_^  
@HWI-EAS443:3:100:183:261#0/1  
GCAAAATGGACGGATCAAGAAAGAAGAGTTCTCTGAGATC  
+HWI-EAS443:3:100:183:261#0/1  
a`^aaaaaaa\_aa`^``````\_\_\_\_\_a\_\_\_Z\_\_^X\_]`YXY  
@HWI-EAS443:3:13:198:532#0/1  
CAGTAACTAATGGATGATGATTATCGGGGAAGACTTTGTA  
+HWI-EAS443:3:13:198:532#0/1  
\_a`\_bba`]`abaaaa`baaa¥`a`]`\_`\_\_\_\_\_`aaU\_  
@HWI-EAS443:3:16:1178:998#0/1  
TGCTTATGGCATTTTTCGCTGGAATTTTGTAGGAAGAGAAG  
+HWI-EAS443:3:16:1178:998#0/1  
Zb\_a¥`VZVaJ[bb`b¥b\_ba`ZY`b0aUYbZV\_HT¥FYb  
@HWI-EAS443:3:16:228:19#0/1  
CAGGGGCAATGAAAAGAAGGCCAAACTGGCAAATTGTTG  
+HWI-EAS443:3:16:228:19#0/1  
aYab`a`a`[aa\_\_aaa`Y`¥a[YJT\_[[\_VRR\_S^R^]  
@HWI-EAS443:3:19:951:1775#0/1  
GAGATAACAACCCACTTTCAAAGAAAAAGGAGAGACGCTT  
+HWI-EAS443:3:19:951:1775#0/1  
a`^]0¥``bbaaab`aa\_b\_aR]aaaaaaaa\_a]\_\_W]^]  
@HWI-EAS443:3:1:1170:1935#0/1  
TGTGTACTCCATCTGATACTAATAGCCCTACCTTTGATTG  
+HWI-EAS443:3:1:1170:1935#0/1  
^b]a[HO]PM]¥Z``baYUZZ`^a[FYZ\_\_OMJ]Yb\_BBB

@HWI-EAS443:3:20:565:1283#0/1  
CTGTGGTAATGAACCAAGTGGGTATGCACAAACAGACTGT  
+HWI-EAS443:3:20:565:1283#0/1  
aaa`aZ[baaa`baaa]a\_aa`^aa\_`a`b`aaa`a^`\_0  
@HWI-EAS443:3:25:1557:1558#0/1  
CGGGTATGCACAAACAGACTGTGTTCTAGAGGCTAAGGGT  
+HWI-EAS443:3:25:1557:1558#0/1  
aaababbbbbbbbabbbbaab`aababbaaaa]`BBBBBB  
@HWI-EAS443:3:26:1716:1437#0/1  
CGGGTATGCACAAACAGACTGTGTTCTAGAGGCTAAAACA  
+HWI-EAS443:3:26:1716:1437#0/1  
Ya\_b¥aZ¥X¥\_Z[abba[aaaY`S]V]`XL]baaaBBBBB  
@HWI-EAS443:3:27:334:623#0/1  
AGCTAATGGATGATGATTATCGGGGAAGACTTTGGACATT  
+HWI-EAS443:3:27:334:623#0/1  
aaaaa`aa¥L]¥\_a`\_aa\_a\_\_ZTZ\_¥W`\_[\_W¥`Z^^\_  
@HWI-EAS443:3:3:709:1499#0/1  
CACATATAGGTGCCATAGGGGAGACACAAATTTAAAACG  
+HWI-EAS443:3:3:709:1499#0/1  
W\_abb^¥^\_a^\_bb`a\_^aabb`¥`b`\_b^babIabbbb  
@HWI-EAS443:3:44:275:591#0/1  
GAGATAACAACCCACTTTCAAAGAAAAAGGAGAGGACAGT  
+HWI-EAS443:3:44:275:591#0/1  
`¥a\_a`UZ\_a\_^\_X\_\_a^[TGT]Z¥^W]^XZ`X¥]YTK  
@HWI-EAS443:3:48:1741:430#0/1  
GTGGGTCTTCTTTTCATTGCCCCCTACTGGGAGCCCAGAC  
+HWI-EAS443:3:48:1741:430#0/1  
`X\_``G¥a`\_aba`Z^^[XX^Y¥U¥^ZZX`ZUZUVV^WW  
@HWI-EAS443:3:51:1330:439#0/1  
GGTGCATTCACTATGAGAGCAAAATCGTCGGATGTTTGTA  
+HWI-EAS443:3:51:1330:439#0/1  
S^LHQQT`Ta[Z^Z`SaSS¥SS`X`VXBBBBBBBBBBBBB  
@HWI-EAS443:3:54:671:2005#0/1  
ATTCCGACTTCCATTGTTTCAAGGCATGAATTCTCAAATA  
+HWI-EAS443:3:54:671:2005#0/1  
a^aa`aaa`a`a`\_aZVWQaXSZ`W`\_`^Sa``\_`a^`^]  
@HWI-EAS443:3:62:170:975#0/1  
AAAAATTCCAGCGCAAATGCCATAAGCACCACACCACAC  
+HWI-EAS443:3:62:170:975#0/1  
aaaaR\_`^`^]SYWS\_`\_Z^`\_]Z^`^^^ZZ]Z^^^  
@HWI-EAS443:3:64:470:1217#0/1  
GAGACAACATGACCAAGAAGATGGTCACGCAAAGGAAACA  
+HWI-EAS443:3:64:470:1217#0/1  
aaabb^`abbabbbbbbaaa`bbaYaaaaba^\_a[`aa``  
@HWI-EAS443:3:75:593:1837#0/1  
GGGTATGCACAAACAGACTGTGTTCTAGAGGCTAAGCGGC  
+HWI-EAS443:3:75:593:1837#0/1  
]`[`UYb[Yabb`][`\_abSNS\_`YY^[SBBBBBBBBBBBB  
@HWI-EAS443:3:91:755:727#0/1  
ATAGATTTCTTAAAGGATGTAATGGAATCAATGAGGCAAA

+HWI-EAS443:3:91:755:727#0/1  
ab\_baa`aabba`abaaab\_b\_aa`a`a`a`aa\_a```a\_  
@HWI-EAS443:3:93:1488:1946#0/1  
CATATAGGTGCCATAGGGGAGACACACAAATTCAAAAGAG  
+HWI-EAS443:3:93:1488:1946#0/1  
abbaaUbbab[HY`V`^a^¥`VQa\_a`bba`a]a\_\_GW`b  
@HWI-EAS443:3:97:1051:1629#0/1  
AAGAAGATGGTCACGCAAAGAACAATAGGGAAGATTTTGG  
+HWI-EAS443:3:97:1051:1629#0/1  
a\_b\_b]aaa`¥abaa^abaaaaaaa[a\_Ya^\_baaaaa[^  
@HWI-EAS443:3:39:1183:1804#0/1  
GATGCAAGTTAANAAGAAGGGCTATCGCAACACCTGGGAT  
+HWI-EAS443:3:39:1183:1804#0/1  
abaab`a]\_ab]D¥baab]\_[aaaa\_a^[X]TSaa\_Va]  
@HWI-EAS443:3:20:1209:283#0/1  
GAAAAACAAAGACTGAATAAGAGAGGCTATTTAATAAAA  
+HWI-EAS443:3:20:1209:283#0/1  
``abaa\_aaaaa`ab`aaa```a\_a`\_\_\_PJVBBBBBBB  
@HWI-EAS443:3:20:1235:1469#0/1  
TAACTTGCAGGACCTGTAGAATCTGTCCACTCCTGCTTTT  
+HWI-EAS443:3:20:1235:1469#0/1  
abXT[[]Z]aOFWQ¥^]SZaY^[UX¥PaW`U¥HUHVTTGL  
@HWI-EAS443:3:20:944:1263#0/1  
ATCGAGACTCCCAAGACCGTACTTAGCATGTTAAACATTC  
+HWI-EAS443:3:20:944:1263#0/1  
a^aaaaaaaa[aa¥`\_]^[a\_¥\_]^a`\_^\_a`^X`][[]  
@HWI-EAS443:3:28:71:1424#0/1  
GGGAATCCAAGCAGGAGTGGACAGATTCTACAGGACCTCC  
+HWI-EAS443:3:28:71:1424#0/1  
]TXKPTKZ¥Y[Z]^LLXUOUS\_RWPXLVL[QTBBBBBBBBB  
@HWI-EAS443:3:2:1117:823#0/1  
GGGGTGCCTTATGGCTTTTTGCGCTGGAATTTTTAGGAAAA  
+HWI-EAS443:3:2:1117:823#0/1  
YEXMRYOVBBBBBBBBBBBBBBBBBBBBBBBBBBBBBBB  
@HWI-EAS443:3:37:444:764#0/1  
CGGTGGTGCCTTATGGCATTGCGCTGGCATTGTTAGGAA  
+HWI-EAS443:3:37:444:764#0/1  
aaa0a`U\_a`\_`¥^a`\_\_¥\_[¥^U[¥F0¥`\_\_Z^^U¥  
@HWI-EAS443:3:46:1572:412#0/1  
CACAAACAGACTGTGTTCTAGAGGCTAAGGCTTTCCTTTA  
+HWI-EAS443:3:46:1572:412#0/1  
a`a`aa\_aa```abaaYa`]^b\_^a^BBBBBBBBBBBBB  
@HWI-EAS443:3:46:1789:1529#0/1  
ACAGCATCACTGAGTACTGGGATGATGATGGGCATGTTTA  
+HWI-EAS443:3:46:1789:1529#0/1  
\_¥]YaNb]Uaba\_`VFQbSVRV\_^aWLY\_RU¥¥¥ZX`^aW  
@HWI-EAS443:3:47:1787:377#0/1  
AAACAATGGAAGTCGTTCAACAAACAAGGGTAGATAAAAT  
+HWI-EAS443:3:47:1787:377#0/1  
aaa`¥Z\_abaaa]\_a[`W`a]\_`[G¥[\_\_\_HU`RNX\_ZGR



@HWI-EAS443:3:5:1149:208#0/1  
GGCTAATTTTAGCATGCAGCTACCCAGCTTTGGAGTGTAT  
+HWI-EAS443:3:5:1149:208#0/1  
ababb^b`aaab\_Yaa`H[X]BBBBBBBBBBBBBBBBBB  
@HWI-EAS443:3:61:567:1246#0/1  
TGTGTCTCCCCTATGGCACCTATATGTGCATCTGTAGTGT  
+HWI-EAS443:3:61:567:1246#0/1  
`]O]X¥T¥`]]][VQU`RLZXFSPFUPQZTPUWRKKWLHM  
@HWI-EAS443:3:67:684:602#0/1  
AAAAACAAAGACTGAATAAGAGAGGCTATCTGATAAGAAC  
+HWI-EAS443:3:67:684:602#0/1  
a\_]K^`\_W^`^YSaOV\_Q\_¥`]YYBBBBBBBBBBBBBB  
@HWI-EAS443:3:87:1033:2043#0/1  
AAAAACAAAGACTGAATAAGAGAGGCTAACTAATAAGGC  
+HWI-EAS443:3:87:1033:2043#0/1  
V\_\_a]Y`WQ]\_\_Y`YZW\_]^Y]\_BBBBBBBBBBBBBB  
@HWI-EAS443:3:92:33:1142#0/1  
TCGCCGTTGCAACTACACATTCCTGGATTTCCAAGAGGAA  
+HWI-EAS443:3:92:33:1142#0/1  
[¥]Va`R]\_V\_[]^`]a]a\_aa`TY¥\_¥[R]N]]\_U^[XQ  
@HWI-EAS443:3:94:999:334#0/1  
GGCTCTTTATTTCAGTCTTTGTTTTTTGTTCCCTATTGTT  
+HWI-EAS443:3:94:999:334#0/1  
[H[\_]\_a]]][aaYJ\_N]a\_a]YW]Z]ZF¥UVOX`¥\_\_]]P  
@HWI-EAS443:3:98:1550:803#0/1  
CGTTCAACAAACAAGGTAGATAAACCAACTCAAGGTCGT  
+HWI-EAS443:3:98:1550:803#0/1  
¥baWI`b`\_VaSXbbKbX\_b`\_aV`^Q¥S¥\_GSY¥b]QYH  
@HWI-EAS443:3:9:869:1759#0/1  
CGGGTGCCTATGGCATTTCGCGCTGGAATTTTAGGAAAA  
+HWI-EAS443:3:9:869:1759#0/1  
abbb¥a]aUb\_a`]SXa`\_X[YPXUT^\_[R``a\_\_\_^Y]\_  
@HWI-EAS443:3:15:981:1037#0/1  
CTCTTACTCTCCTTTTTCTTTGAAAGTGGGTTNNTATCTC  
+HWI-EAS443:3:15:981:1037#0/1  
abbbbabbbbbbbaa\_b`bba`WDD^`aaba  
@HWI-EAS443:3:60:1037:11#0/1  
AAAAATTCCAGCGCAAATGCCATAAGCNCCANATTCCCT  
+HWI-EAS443:3:60:1037:11#0/1  
\_a\_\_`abb]Q\_aa\_a`][a``\_`a\_[XODTYUDWZZ\_^X^  
@HWI-EAS443:3:100:437:885#0/1  
GAAATTTTCCCTAGCAGTTCATATAGGAGACCGGAATTT  
+HWI-EAS443:3:100:437:885#0/1  
abbabbaabaaabaa\_aa\_aa`aa`\_a`^^\_]`^a\_¥H]\_B  
@HWI-EAS443:3:11:556:681#0/1  
TGGGTATGCACAAACAGACTGTGTTCTAGAGGCTAAAGCT  
+HWI-EAS443:3:11:556:681#0/1  
`ba`Q)`\_\_\_\_aa\_]S\_a][\_OWYUW]`\_[\_\_BBBBBBBB  
@HWI-EAS443:3:17:56:1723#0/1  
CAGCTCAACCCGATTGATGGACCACTACCTGAGGAACAAA

+HWI-EAS443:3:17:56:1723#0/1  
ab`babUbab`b^aa`aaa`aa^`¥\_a`\_]\_a[^a^`baaa  
@HWI-EAS443:3:21:1694:636#0/1  
ATAGAGATAACAACCCACTTTCAAAGAAAAAGGAGCCGAG  
+HWI-EAS443:3:21:1694:636#0/1  
ab]aY`abba[abWZZ\_a^a`V`a^aa`\_\_a^aZaVLa¥`  
@HWI-EAS443:3:21:1712:1871#0/1  
ATGGATTTGTGGCTAATTTTAGCATGGAGCTACCCCGATT  
+HWI-EAS443:3:21:1712:1871#0/1  
`^a`]`ZUa^b]¥]\_XNYaW\_aXU^\_\_S^U^NUYLJSG¥Y  
@HWI-EAS443:3:21:68:917#0/1  
GCAGTGGTGGGATTCTTCAAGGAAAGCCATAGCCTCTAGA  
+HWI-EAS443:3:21:68:917#0/1  
abab`ab\_ba`S^aaaaaa``[a¥`\_^P]`[a`^W^\_^`  
@HWI-EAS443:3:25:1318:758#0/1  
GAGGCTGGCTTTCTTGAAGAATCCCACCCAGGAATATTT  
+HWI-EAS443:3:25:1318:758#0/1  
a`\_aaabaa[aYDZ`a^`aZU\_[^^^Y^`[P¥`RY^\_\_`\_  
@HWI-EAS443:3:25:1695:1247#0/1  
AAAAATTTCTCGAATAGATTGCAGCACTTCTGGTAAGAAT  
+HWI-EAS443:3:25:1695:1247#0/1  
ab`b`bbbbbab`ababaaabaaaa`a`\_aaa`aaa``a  
@HWI-EAS443:3:49:1158:866#0/1  
AGTCGATTCCCACTAACTTGCAGGTCCTGTAGAATCTGT  
+HWI-EAS443:3:49:1158:866#0/1  
abaabb\_ba`aababaa^aaaa`\_¥\_\_\_`\_`^Y\_a\_a`¥  
@HWI-EAS443:3:50:763:44#0/1  
GGGAATACAAGCAGGAGTGGACAGATTCTACAGGAAGTGC  
+HWI-EAS443:3:50:763:44#0/1  
a\_aW]`\_`Sb\_a[X^U\_[RXbSXSOFSYL[^PX¥BBBBBBB  
@HWI-EAS443:3:51:745:1742#0/1  
GTGGGTATGCACAAACAGACTGTGTTCTAGAGGCTGGGTT  
+HWI-EAS443:3:51:745:1742#0/1  
aaaaaUa`\_]`^aaa[^`Za`\_\_a\_^JZa`\_YVYUXZJM¥  
@HWI-EAS443:3:53:658:308#0/1  
GCACAAACAGACTGTGTTCTAGAGGCTATGGCTTTTATTT  
+HWI-EAS443:3:53:658:308#0/1  
`b`aaa[[]bb`]``W`a]¥`aaX\_]`\_]BBBBBBBBBBBB  
@HWI-EAS443:3:54:369:1545#0/1  
CAAGACTAGGGAAGGGTACATGTTTCGAGAGTAAAGAATG  
+HWI-EAS443:3:54:369:1545#0/1  
abaabbbbbabbbbbbaababbaabbaaaab\_abaaaaa  
@HWI-EAS443:3:56:1789:1566#0/1  
GGTGGGTATGCACAAACAGACTGTGTTCTAGAGGCTGGCT  
+HWI-EAS443:3:56:1789:1566#0/1  
``aabaZa``a]¥a^¥X\_\_[Z`^YZN¥Za`[]T]]SBBBB  
@HWI-EAS443:3:59:1219:1670#0/1  
CATGGTGTCTAGGGCCCGATTGATGCCAGGGTCGGGTTC  
+HWI-EAS443:3:59:1219:1670#0/1  
abaaZaba\_Z`aab`Ub`bUb¥QXb`babbXZ^^bJG^YD

@HWI-EAS443:3:67:1353:1590#0/1  
AAGATGCAGAGAGAGGCAAGTTAAAAAGAAGGGCTGGGTC  
+HWI-EAS443:3:67:1353:1590#0/1  
aabaabaaa\_a`a\_aaaa\_a¥aa`a`\_`\_`\_Z`aa^Z\_  
@HWI-EAS443:3:68:866:134#0/1  
ATTTTGTCTCATAGTGAATGCACCAAACCATGAGTGTGG  
+HWI-EAS443:3:68:866:134#0/1  
Z\_[`aba[[WaY````]ba`YV]\_b^^V^^[``[Zaa  
@HWI-EAS443:3:6:797:22#0/1  
AAAAATTCCAGCGCAAATGCCATAAGCACCACATCACCT  
+HWI-EAS443:3:6:797:22#0/1  
a``\_N\_a^\_]\_]RTa`^]\_VXa\_Y`]L]]Y^]\_Y]BBBB  
@HWI-EAS443:3:73:192:184#0/1  
GTCGTTCAACAAACAAGGGTAGATAAACTAACTCAAGGGC  
+HWI-EAS443:3:73:192:184#0/1  
a¥V^Y¥MRZTWa^XUPGZaY]^QLO^ZRV^MDKP][[VBB  
@HWI-EAS443:3:73:483:1891#0/1  
AGTCGACTTCGAGTCTGGACGGATCAAGAAAGAAGATTTC  
+HWI-EAS443:3:73:483:1891#0/1  
\_QM\_`R¥\_SLV\_NL\_^00a]]UGUUR]WOH`ZR^GW¥Z  
@HWI-EAS443:3:73:730:677#0/1  
CGGGGGGAGTGGACAGATTCTACAGGACCTGCAAGTTAGT  
+HWI-EAS443:3:73:730:677#0/1  
abbbb^\_a\_baaaa^a^^`b[Uaa[``\_aa[R[a¥\_]\_N  
@HWI-EAS443:3:74:474:509#0/1  
GAAAAACAAAGAGGAAATAGAGATAACAACCCACTTTCA  
+HWI-EAS443:3:74:474:509#0/1  
aabaaa¥aaaab`baaaabaab`aaa`aa`^aa```aa\_  
@HWI-EAS443:3:84:1170:969#0/1  
GACATATAGGTGCCATAGGGGAGACACACAAATTCAAACG  
+HWI-EAS443:3:84:1170:969#0/1  
GTab`¥`¥bb`]\_`¥`Xaaaaba^bb`[``T`S¥babab  
@HWI-EAS443:3:93:1024:333#0/1  
TGGCACCCATAATGTTCTCAAACAAAATGGCAAGATCTCG  
+HWI-EAS443:3:93:1024:333#0/1  
aba`a``abbbbb]b\_aa\_`a`aZ\_aa``\_a``^X\_] ]  
@HWI-EAS443:3:94:648:370#0/1  
CAAGGGTTTGTGCATACCCACTTGGTTCATTATCCTCAGG  
+HWI-EAS443:3:94:648:370#0/1  
aa`\_^]W¥``^aaaaa]`[`a`a]a^a\_\_`a\_``\_]\_\_\_¥  
@HWI-EAS443:3:97:804:587#0/1  
GTGGGTATGCACAAACAGACTGTGTTCTAGAGGCTGGGTT  
+HWI-EAS443:3:97:804:587#0/1  
aYa\_ZZaa]X\_\_``\_]Za[S^^]\_Z[W¥^]^]\_VY\_[OYB  
@HWI-EAS443:3:99:224:1260#0/1  
AGAGACAACATGACCAAGAAGATGGTCACGCAAAGCCTTC  
+HWI-EAS443:3:99:224:1260#0/1  
a^`baaa\_ab\_```\_[aa`Za`\_a\_¥``Na\_\_\_\_\_][SZ¥¥  
@HWI-EAS443:3:99:519:42#0/1  
CGGTCCTCTATATGAACTGCTAGGGAAAAATTTCTCGAA

+HWI-EAS443:3:99:519:42#0/1  
¥YS¥V\_¥HY\_00\_bVU^Z¥XLU\_a^a]^UZa^VYL^Wq¥R  
@HWI-EAS443:3:99:953:460#0/1  
CCTGAGCATGGCACCCATAATGTTCTCAAACAAAAACAAA  
+HWI-EAS443:3:99:953:460#0/1  
`a^a\_¥UP¥\_UQ¥[IYKWaa\_b\_Z¥a\_ZY\_\_`YW`Za\_]\_  
@HWI-EAS443:3:16:317:794#0/1  
CCCATTTTAAGCAGACTTCAGGAATGTGAAGNTTCCGTTG  
+HWI-EAS443:3:16:317:794#0/1  
aba`abaab]aaaa`a\_`ba^aYaaa^` `[DZ``\_`^\_\_  
@HWI-EAS443:3:42:1140:566#0/1  
TACACANATAGGTGCCATAGGGGAGACACAAAATTCAAA  
+HWI-EAS443:3:42:1140:566#0/1  
a^a`^YD]ba`a\_b\_\_UaaabbbSba`a\_aaaXO\_`\_a`a  
@HWI-EAS443:3:100:415:1793#0/1  
TTCTAATCTGCATCCCAGGTGTTGCGATAGCGCTTCTTTT  
+HWI-EAS443:3:100:415:1793#0/1  
`b`bab`YY```\_¥^Z^b¥`^b`^`UTaMFV`^S¥`YB  
@HWI-EAS443:3:11:539:1554#0/1  
GAACAGGATACACCATGGACCCAGTAAACAGAACACACCC  
+HWI-EAS443:3:11:539:1554#0/1  
]^`^Yaa\_a^T`S^ab[`a[`J^`aZ\_¥X`aa^a`RNa[IT  
@HWI-EAS443:3:14:209:1822#0/1  
GGTCCCCAGTGATTGTGAAAGGAATCTCTGTGTCTTGTGA  
+HWI-EAS443:3:14:209:1822#0/1  
^\_U\_baabb¥W\_^`Ya^^a^QG[baa\_]\_^\_SYZS\_\_SVO  
@HWI-EAS443:3:15:1621:138#0/1  
NTCATATTCCATGCTTTTGGCTGGACAATGGGCTGGCATT  
+HWI-EAS443:3:15:1621:138#0/1  
DNVUZWZWXVWOXUZWXZVWRVWZBBBBBBBBBBBBBBB  
@HWI-EAS443:3:18:1081:735#0/1  
TGCCTCTCTTATTTCAGTCTTTGTTTTTTTCTTCTCTATTGT  
+HWI-EAS443:3:18:1081:735#0/1  
^Q`P`SOSZ`T]¥TTPP\_]0¥\_V\_QU]`[ZPTDNYJ^^RG  
@HWI-EAS443:3:18:176:1784#0/1  
ATCCACTTAGTGTTGTCCCCAGTGATTGGGAAAGAAATCT  
+HWI-EAS443:3:18:176:1784#0/1  
a)`\_[^`X\_\_OLS\_]\_a`WZSZO`]OTUHW]OWVOX^UVZ  
@HWI-EAS443:3:1:1709:1024#0/1  
ATTCAGTATCGAGACTCCCAAGACCCTACTTAGCATGTTA  
+HWI-EAS443:3:1:1709:1024#0/1  
aa`¥\_^U][``]¥\_Y\_U`\_a`^^XNFRYY[\_\_[R¥^`BBB  
@HWI-EAS443:3:24:1348:572#0/1  
GCAGTCTCTGTGTTTGTCTGTCACCTTCCCTTTTTTGAGT  
+HWI-EAS443:3:24:1348:572#0/1  
abbbba]abbb^b`b^Z[X¥ZLQWUaa]JTZ]aa¥DZGFVL  
@HWI-EAS443:3:24:1428:2031#0/1  
CGCCTCTCTCTGCATCTTTGGTGATCGTATTTAATGTCAG  
+HWI-EAS443:3:24:1428:2031#0/1  
ababb\_a\_aWUa\_Y[ZaaabaVGTa^a[Y`aa```¥M[`a

@HWI-EAS443:3:31:1647:531#0/1  
CATGACCAAGAAGATGGTCACGCAAAGAACAACAGGGAAA  
+HWI-EAS443:3:31:1647:531#0/1  
``babbbabbbbaaa^]abab]baababa\_[]M[\_`¥`P  
@HWI-EAS443:3:39:1068:590#0/1  
CGGTCCATCAATCGGGTTGAGCTGGGGTGCAGCAGTCTCT  
+HWI-EAS443:3:39:1068:590#0/1  
`aaXaSaaaa¥¥¥\_R`¥¥X¥Q]G¥F\_YSa^]FRHYT]VKN  
@HWI-EAS443:3:39:99:1289#0/1  
ATTCAGTATCGAGACTCCCAAGACCGTGCTTAGCATGTTA  
+HWI-EAS443:3:39:99:1289#0/1  
aaaa^a¥^\_a`aYaa`aaYJP¥^\_`YR\_a[^[R\_`\_ZV`¥  
@HWI-EAS443:3:45:1713:706#0/1  
CTGACATTAATACGATGACCAAAGATGCAGAGTGAGGCC  
+HWI-EAS443:3:45:1713:706#0/1  
aaba`abaabaababaaaa\_\_aaaa\_a`ab\_a]^\_aY\_V  
@HWI-EAS443:3:48:1784:666#0/1  
CGCCCGGATTGACGCCAGGGTCGACTTCGAGTCTGGACGG  
+HWI-EAS443:3:48:1784:666#0/1  
aaaa^bbaaba^\_`¥a`aaU`^^^\_TRX]^Y`]]^U]^  
@HWI-EAS443:3:4:1246:1298#0/1  
ACGCTATGGATTTGGGGCTAATTTTAGCATGGAGCTACCC  
+HWI-EAS443:3:4:1246:1298#0/1  
aaa``]aW[\_a`XG\_YY]a`\_a`bUaZ[UT[^a\_U^UQQ  
@HWI-EAS443:3:4:659:1205#0/1  
TGATGATTATCGGGCAGACTTTGTAATCCCCTGAATCCA  
+HWI-EAS443:3:4:659:1205#0/1  
[a¥Xaba`¥b¥a`[PFT]\_V`Z¥YT\_WYXGS^UaX\_TTB  
@HWI-EAS443:3:50:1677:1590#0/1  
TTTTCTAAAAATTCCAGCGCAAATGCCATCAGCACCAA  
+HWI-EAS443:3:50:1677:1590#0/1  
aa\_`[\_`\_`baa¥\_`T`¥a\_a`PPVZ^`\_¥\_ZPZ]X\_VY^X  
@HWI-EAS443:3:51:280:111#0/1  
GGCTCTCATAGTGAATGGACCAAACCATGAGGGAATACAA  
+HWI-EAS443:3:51:280:111#0/1  
aba^[ZLSQ¥`S\_X]WUGY¥]W^¥R^Z¥UQaa^UX[PX[Y  
@HWI-EAS443:3:56:865:520#0/1  
ATCCTCCATATGATACTAATAGCCCTACCTTTGATTGGGT  
+HWI-EAS443:3:56:865:520#0/1  
RY]\_aaX¥XI¥`aYQ¥a¥R\_`^¥NWP^]H[SZY\_[UMUHF  
@HWI-EAS443:3:73:932:161#0/1  
TGAGAACATTATGGGTGCCATGCTCAGGATGTTTATGAAG  
+HWI-EAS443:3:73:932:161#0/1  
``^]bb`aZ¥a\_\_a^Y`WTX]^LMNYV`[]]LZUJQ\_Q¥G  
@HWI-EAS443:3:76:1418:949#0/1  
CGCTGGCATGAGTATTGGAGTAACAGTGATAAAGAACAAC  
+HWI-EAS443:3:76:1418:949#0/1  
\_`^[XX`[^R¥]\_\_b`¥`^^aa¥\_aY`]T^S^`[ZDT[]  
@HWI-EAS443:3:87:1038:735#0/1  
GTGCCGTTGCAACTACACATTCCTGGATTCCCAGGAGGAA

+HWI-EAS443:3:87:1038:735#0/1  
a\_ZWK\_W^]WJMQZYZ`]]\_UTTVZXU[SY][XG[Ra^NH  
@HWI-EAS443:3:8:352:280#0/1  
CGGGGCAATGAAAAAAGGCCAACTGGCAAATGTTGTGA  
+HWI-EAS443:3:8:352:280#0/1  
aba\_]a]\_¥\_a¥\_a\_a\_Y]aa^\_\_^\_\_^\_\_X\_¥RZ\_Za]  
@HWI-EAS443:3:92:347:1088#0/1  
CACAGCATCACTGAGTCCTGGGATGATGATGGGAATGTTT  
+HWI-EAS443:3:92:347:1088#0/1  
`[]a``ab^\_b\_\_b\_aaabab]ab\_aa^a`aa\_a\_a^T¥  
@HWI-EAS443:3:95:192:575#0/1  
TGGGCTATCAGTATCAGATGGAGGACCAAATTATACAAT  
+HWI-EAS443:3:95:192:575#0/1  
aa[[]P]YFO\_Q\_^\_[a][XSLVRLMJ[\_WTW]Z^]OYXO  
@HWI-EAS443:3:9:1543:179#0/1  
TGGGCCTGGATTGATGCCAGGGTCGACTTCGAGTCTGGAC  
+HWI-EAS443:3:9:1543:179#0/1  
[¥[\_UaX]^U^^^X^\_VFZX`QQSNHLTVT¥TREPUBBB  
@HWI-EAS443:3:9:653:855#0/1  
AAAAACAAAGACTGAATAAGAGAGGCTATATAATAAGAGA  
+HWI-EAS443:3:9:653:855#0/1  
Z[]``b``V¥^aXZ¥bb[\_aR¥`[\_U\_¥LEN]abVSKT\_B  
@HWI-EAS443:3:9:858:1759#0/1  
GCTGTTTACTGTGTCCATGGGGTATCCTGTTCCCTGTTCCA  
+HWI-EAS443:3:9:858:1759#0/1  
aaaYX]\_aa``W`UZZW^[]GZV¥^¥^W^U\_ZN¥]UMUZZB  
@HWI-EAS443:3:100:1361:343#0/1  
CACATATAGGTGCCATAGGGGAGACACACAAATTCAAACG  
+HWI-EAS443:3:100:1361:343#0/1  
a`]^`W`0[RLXb]a`RaR]Y][GT\_¥`Wa^MR¥YWB  
@HWI-EAS443:3:10:1082:1822#0/1  
AAAAACAAAGACTGAATAAGAGAGGCTATCTAATAAAAAAC  
+HWI-EAS443:3:10:1082:1822#0/1  
a\_`]^\_TXGYOY]`Y¥`]]]^WN¥BBBBBBBBBBBBBBB  
@HWI-EAS443:3:13:647:2047#0/1  
NGTGGGTATGCACAAACAGACTGTGTTCTAGAGGCTAATG  
+HWI-EAS443:3:13:647:2047#0/1  
DOGRQOMTTTXXWTWTTWWZZXUROQXUTTBBBBBBBBBB  
@HWI-EAS443:3:14:471:629#0/1  
AGGCCATGGTGTCTAGGGCCCGGATTGATGCCAGGGGCGA  
+HWI-EAS443:3:14:471:629#0/1  
\_T\_a`¥¥`\_X¥R]S¥`]]][RN]^OR¥^]¥OX¥ZVZ¥GQZB  
@HWI-EAS443:3:14:721:1214#0/1  
CACATATAGGTGCCATAGGGGAGACACACAAATTCAAACG  
+HWI-EAS443:3:14:721:1214#0/1  
aWab]]X`ZOM][a^ba¥UOV^\_a\_a\_bYa\_^aU[a\_`Ma  
@HWI-EAS443:3:16:1398:1744#0/1  
CAGCTCTTCATGATCTCAGAGAACTCTTCTTTCTTGATCC  
+HWI-EAS443:3:16:1398:1744#0/1  
Z`YGMa¥`]¥Z[^X`\_aaaX^\_a[]YV[Pa]YF]a\_YZ

@HWI-EAS443:3:19:1198:1735#0/1  
CACATATAGGTGCCATAGGGGAGACACACAAATTCAAACG  
+HWI-EAS443:3:19:1198:1735#0/1  
¥bbb`bababab\_bbbababbbabbb`bbbbaababbb`a  
@HWI-EAS443:3:19:700:402#0/1  
CACATATAGGTGCCATAGGGGAGACACACAAATTCAAACG  
+HWI-EAS443:3:19:700:402#0/1  
^aY]\_^Y^`a[Z¥[XZZaaZ]Wa^R^X\_a`]U]]W`[SV]  
@HWI-EAS443:3:1:247:1560#0/1  
CAGGAATGTGTAGTTGCAACGGCATCATATCCATGATTT  
+HWI-EAS443:3:1:247:1560#0/1  
^bb^Ybb\_abaaa`\_\_\_ab0aaGbb\_aaab`V0aa¥BBBB  
@HWI-EAS443:3:20:679:1277#0/1  
TGTGGGTATGCACAAACAGACTGTGTTCTAGAGGCTAAGG  
+HWI-EAS443:3:20:679:1277#0/1  
`]S`a`W^S[a\_a\_a\_a\_^[]^]\_[^¥]]BBBBBBB  
@HWI-EAS443:3:21:342:189#0/1  
AGAAGATGGTCACGCAAAGAACAATAGGGAAGAAAACCTCA  
+HWI-EAS443:3:21:342:189#0/1  
``aaaaab\_Zabaaa\_a`a\_`aa\_`a\_`^`a^\_`^^^`  
@HWI-EAS443:3:22:1037:169#0/1  
GACTCGAAGTCGACCCTGGCATCAATCCGGGCCCTAAACA  
+HWI-EAS443:3:22:1037:169#0/1  
a`XX``]WUMVO]KVNPZ\_BBBBBBBBBBBBBBBBBBBB  
@HWI-EAS443:3:22:1259:1581#0/1  
CACATATAGGTGCCATAGGGGAGACACACAAATTCAAACG  
+HWI-EAS443:3:22:1259:1581#0/1  
¥¥[\_^b`b`¥Q\_a`aX```\_\_\_\_\_`^T]]`Z¥`aaa\_\_La  
@HWI-EAS443:3:22:1719:198#0/1  
AACGACTTCCATTGTTTCAAGGCATGAATTCTCAAATATT  
+HWI-EAS443:3:22:1719:198#0/1  
¥aT^aab\_\_`]aa`\_aZ¥\_`]¥T]a]R¥aYU\_N``\_aadU  
@HWI-EAS443:3:25:524:1225#0/1  
GTGGCCCCAGTGATTGTGAAAGAAATCTCTGTGTCTTGTG  
+HWI-EAS443:3:25:524:1225#0/1  
a^WZaa^`T\_Z]\_\_^\_V^]]\_[U[^[XXY]ZWXU]]XWYO  
@HWI-EAS443:3:26:1342:1042#0/1  
CACATATAGGTGCCATAGGGGAGACACACAAATTCAAACG  
+HWI-EAS443:3:26:1342:1042#0/1  
abababbbbaa\_baaabab^aaaaa`a`baaaaaa\_aaa``  
@HWI-EAS443:3:27:332:688#0/1  
GGCCCCGATTGATGCCAGGGTCGACTTCGAGTCTGGGCGG  
+HWI-EAS443:3:27:332:688#0/1  
\_^XUXa^]Z¥KQXX¥\_`aX]SZTJJRV\_OX¥FPDWVKR]]  
@HWI-EAS443:3:28:1334:1478#0/1  
CACATATAGGTGCCATAGGGGAGACACACAAATTCAAACG  
+HWI-EAS443:3:28:1334:1478#0/1  
ab]aa`aa\_a¥a`Wa``````a`\_b[b``baaa`\_a`\_\_  
@HWI-EAS443:3:28:193:1903#0/1  
CACTACCTGAGGATAATGAACCAAGTGGGTATGCACGAAC

+HWI-EAS443:3:28:193:1903#0/1  
¥Z¥XS\_b¥aWXUZ]a`^X^\_^^ZPXG^aI¥]PQ]``^aaZ  
@HWI-EAS443:3:28:784:55#0/1  
CACATATAGGTGCCATAGGGGAGACACACAAATTCAAACG  
+HWI-EAS443:3:28:784:55#0/1  
abbbbbbb^bbbababbbabab`b\_b`baaa`aaaa\_a  
@HWI-EAS443:3:2:838:707#0/1  
GGTATGCACAAACAGACTGTGTTCTAGAGGCTATGGGTTT  
+HWI-EAS443:3:2:838:707#0/1  
ab`abb`ba``aaaaaab\_aaa\_a`a`a`BBBBBBBBBB  
@HWI-EAS443:3:30:1516:1219#0/1  
GTTAAACATGCCATCATCATCCCAGGACTCAGTGATGCT  
+HWI-EAS443:3:30:1516:1219#0/1  
^^`\_`¥¥[^]\_a^[^]`Z`Z¥¥¥YPW^`V[VVYNV  
@HWI-EAS443:3:31:1257:1656#0/1  
CACATATAGGTGCCATAGGGGAGACACACAAATTCAAACG  
+HWI-EAS443:3:31:1257:1656#0/1  
\_Z`\_\_`]R0\_`^aa``¥VGM[WVQ\_\_]\_b¥¥a^¥a``\_\_  
@HWI-EAS443:3:31:1287:151#0/1  
AACGACTTCCATTGTTTCAAGGCATGAATTCTCAAATATT  
+HWI-EAS443:3:31:1287:151#0/1  
¥abbbbbbbZbbbb`abbbbaabbbba\_ab\_ba`aabab`  
@HWI-EAS443:3:31:1435:898#0/1  
CACATATAGGTGCCATAGGGGAGACACACAAATTCAAACG  
+HWI-EAS443:3:31:1435:898#0/1  
ab^aa[a\_a\_Ra\_`a`Yaa`^Z[U0a^aa\_¥\_a^\_aa\_Z  
@HWI-EAS443:3:31:749:930#0/1  
CACATATAGGTGCCATAGGGGAGACACACAAATTCAAACG  
+HWI-EAS443:3:31:749:930#0/1  
abbbbbabaa^baaabab\_aaaa`\_a\_babaaa`\_aaaaa  
@HWI-EAS443:3:33:1240:36#0/1  
CACATATAGGTGCCATAGGGGAGACACACAAATTCAAACG  
+HWI-EAS443:3:33:1240:36#0/1  
aa^aU`^`ab\_aa¥^^]`baa^aYPYRT`ZZ\_S]]S\_YT\_  
@HWI-EAS443:3:34:1125:403#0/1  
AAGGGTTTGTGCATACCCACTTGGTTCATTATCCTCAGGT  
+HWI-EAS443:3:34:1125:403#0/1  
a¥¥bb]bba[`Xbaabb^]bb[b`a`\_]b`¥¥RS¥[¥`]S  
@HWI-EAS443:3:34:1195:1895#0/1  
CAACGGCCCAGATGGCTCTTCAATTGTTTCATCAAAGTCTA  
+HWI-EAS443:3:34:1195:1895#0/1  
aabZLLWRb[UIZa\_\_S\_^]NX[[\_XNX]\_¥NNM¥OGHVR  
@HWI-EAS443:3:34:926:129#0/1  
AAGATTAGTATCGAGACTCCCAAGACCGTACTTAGAATG  
+HWI-EAS443:3:34:926:129#0/1  
a\_V\_aaa`b\_aa\_a\_a[]\_aa\_VP^Y\_Z^R^UYXVBBBBB  
@HWI-EAS443:3:35:1260:604#0/1  
CACATATAGGTGCCATAGGGGAGACACACAAATTCAAACG  
+HWI-EAS443:3:35:1260:604#0/1  
`a\_¥`¥`b`aaabaa`S]\_`ba`\_S`babaZ^`\_`aa\_0`



@HWI-EAS443:3:35:319:677#0/1  
GTGGGTATGCACAAACAGACTGTGTTCTAGAGGCTAAGGC  
+HWI-EAS443:3:35:319:677#0/1  
a`YabYaaaZT]^R\_`¥N\_`aR[U^¥[[UBBBBBBBBBB  
@HWI-EAS443:3:36:1321:1069#0/1  
CACATATAGGTGCCATAGGGGAGACACACAAATTCAAACG  
+HWI-EAS443:3:36:1321:1069#0/1  
V¥\_a`YV^\_V[bba`^^`Z¥Z\_U^abaab\_N\_]a`¥\_Pa  
@HWI-EAS443:3:36:657:1417#0/1  
GCATGAATTCTCAAATATTCCTGGGTGGGATTCTTCGAGG  
+HWI-EAS443:3:36:657:1417#0/1  
a\_TROW]^`a¥SPOZZUTa\_`[\_]TQVRS¥TVKQ`SDLH^  
@HWI-EAS443:3:36:681:1466#0/1  
AGCATGGCACCCATAATGTTCTCAAACAAAATGGCACGAC  
+HWI-EAS443:3:36:681:1466#0/1  
aaa\_¥][`aY`]YZ`UTV[`Yba\_aaaL]aPKK`THUX`  
@HWI-EAS443:3:37:1323:1290#0/1  
CACATATAGGTGCCATAGGGGAGACACACAAATTCAAACG  
+HWI-EAS443:3:37:1323:1290#0/1  
\_a```bbb`X]Y`aaZ\_aa`\_\_\_a^`abRR¥``a`aX]Z  
@HWI-EAS443:3:37:326:1178#0/1  
CACATATAGGTGCCATAGGGGAGACACACAAATTCAAACG  
+HWI-EAS443:3:37:326:1178#0/1  
aabba¥`baa[aba`a]aaa\_aaa`a`ab[FX\_^aa`\_^`  
@HWI-EAS443:3:38:1522:492#0/1  
CGTCCCTCTTTGTTTCATTGATTCCATTACATCCTTTAAGA  
+HWI-EAS443:3:38:1522:492#0/1  
abaaa`bbbbba`babaaaabaa`bbbaa`\_[Wbaaa`a^  
@HWI-EAS443:3:3:696:582#0/1  
ATTGTTTCAAGGCATGAATTCTCAAATATTCCTGGGAGGG  
+HWI-EAS443:3:3:696:582#0/1  
Xa``abb``a``Y^bb`[[Z\_`\_S`^aa¥`]XbaaGa`¥  
@HWI-EAS443:3:44:889:1722#0/1  
GCAAAATCGTCGGATGATTGGAGCCCATCCCACCAGAATA  
+HWI-EAS443:3:44:889:1722#0/1  
a¥a`¥`¥Z]VNOV¥WYJSWTYLQMK\_X[TDRWQSYDEP]  
@HWI-EAS443:3:48:446:1220#0/1  
GTTCGAATCTTCATTCTTTTACTCTCGAACATGTA CTCTT  
+HWI-EAS443:3:48:446:1220#0/1  
aaaPR`¥a0¥\_\_W\_aYYaZ[^[]]TTY^^]¥\_NQ`SOJ\_[  
@HWI-EAS443:3:48:578:268#0/1  
CACATATAGGTGCCATAGGGGAGACACACAAATTCAAACG  
+HWI-EAS443:3:48:578:268#0/1  
ababbbbab\_baabbabbbab`aa`a\_Z\_aaa[aaaXa  
@HWI-EAS443:3:48:765:72#0/1  
CACATATAGGTGCCATAGGGGAGACACACAAATTCAAACG  
+HWI-EAS443:3:48:765:72#0/1  
¥IS```\_`ba]^`^Y^`Y`bbbZU]\_YWWP`[Za`JY\_[Ua  
@HWI-EAS443:3:49:1719:876#0/1  
ATTGAAGAGCCATCTGGGCCGTTGCAGGTCCAAGGTGATT

+HWI-EAS443:3:49:1719:876#0/1  
]\_^R]aZYa\_Xa\_WaXS`^^JYPM^\_VRJN]]ZKDX^X  
@HWI-EAS443:3:49:487:1422#0/1  
AATATTTGAGAATTCATGCCTTGAAACAATGGAAGTCGTT  
+HWI-EAS443:3:49:487:1422#0/1  
`^aba`abab`bb`Z`b[Waabbbb]b`^^a^`UV\_QZ  
@HWI-EAS443:3:4:453:1964#0/1  
ACCGTCCTGCTTGTATTCCCTCATGGTTTGGTGCATTAC  
+HWI-EAS443:3:4:453:1964#0/1  
a\_^PZb]\_aUW`XaaabY)`aaa^\_N[\_`XT]UYQ`X]G  
@HWI-EAS443:3:50:619:1540#0/1  
CACATATAGGTGCCATAGGGGAGACACACAAATTCAAACG  
+HWI-EAS443:3:50:619:1540#0/1  
`\_\_abbbbb]baaUbbba^a^`b`^bababb\_baaaba\_b  
@HWI-EAS443:3:51:1241:695#0/1  
CACATATAGGTGCCATAGGGGAGACACACAAATTCAAACG  
+HWI-EAS443:3:51:1241:695#0/1  
ababbbbaba\_ba`aabbabba\_aabab`a`abaaaa\_b  
@HWI-EAS443:3:51:1370:1346#0/1  
CACATATAGGTGCCATAGGGGAGACACACAAATTCAAACG  
+HWI-EAS443:3:51:1370:1346#0/1  
ab\_bbabba`\_bab`baTabXSZ`]Y`a`\_bb^[F[bb]Z  
@HWI-EAS443:3:51:356:453#0/1  
CACATATAGGTGCCATAGGGGAGACACACAAATTCAAACG  
+HWI-EAS443:3:51:356:453#0/1  
\_abbbabb^H`\_abbbba`b^`baa]^[^bbaaba`  
@HWI-EAS443:3:52:1555:294#0/1  
CACATATAGGTGCCATAGGGGAGACACACAAATTCAAACG  
+HWI-EAS443:3:52:1555:294#0/1  
abbb`b\_bab\_aaaab`babbaaa^a]a\_baab`\_b`a\_  
@HWI-EAS443:3:53:1212:1707#0/1  
TGGCTCTCAATTGTTTCATCAAAGACTACAGATACAAATA  
+HWI-EAS443:3:53:1212:1707#0/1  
\_Z\_P\_``bbb`T`\_`XY^ZN]ZP`[\_[Z^a^a`Z`G\_X`  
@HWI-EAS443:3:54:1428:1908#0/1  
AATATTTGAGAATTCATGCCTTGAAACAATGGAAGTCGTT  
+HWI-EAS443:3:54:1428:1908#0/1  
aabbbbbabbaba^aaaa]aaa`aa]a`aa`aaa`T\_^  
@HWI-EAS443:3:54:927:733#0/1  
GTGGGTATGCACAAACAGACTGTGTTCTAGAGGCTAAGGG  
+HWI-EAS443:3:54:927:733#0/1  
a``b^aa`[\_`\_`[\_Z`\_[Yaa`ZZR`Z^[^BBBBBBBB  
@HWI-EAS443:3:55:193:1778#0/1  
CACATATAGGTGCCATAGGGGAGACACACAAATTCAAACG  
+HWI-EAS443:3:55:193:1778#0/1  
abaabbaa`]`ba`ab`aaaaaaaaa`a`aa^aaaa\_a  
@HWI-EAS443:3:55:886:802#0/1  
CACATATAGGTGCCATAGGGGAGACACACAAATTCAAACG  
+HWI-EAS443:3:55:886:802#0/1  
ababbbbabbab\_a`a[bbaaaaaaaaaabaabb\_bba`b



+HWI-EAS443:3:65:676:1020#0/1  
aa]F]aaabbbbaa`aaabba`aaa\_a`aZaa```Ya\_a\_`  
@HWI-EAS443:3:65:948:1429#0/1  
GGTTGTTATCTCTATTTCCCTCTTTGTTTCATTGATTCTATT  
+HWI-EAS443:3:65:948:1429#0/1  
`YD]ZW¥]ab`\_SYW¥bbba`ba[]aa^`\_aW]aaVEYba  
@HWI-EAS443:3:65:986:1492#0/1  
CACATATAGGTGCCATAGGGGAGACACACAAATTCAAACG  
+HWI-EAS443:3:65:986:1492#0/1  
a`aa^a`a`Xa`[]`\_]X[]`\_`\_\_`a`Y^^[\_`^¥  
@HWI-EAS443:3:67:1375:455#0/1  
CCACGGGCTCCAATCATCCGACGATTTTGCTCTCATAGTG  
+HWI-EAS443:3:67:1375:455#0/1  
a`\_a`\_`a^aaaa`\_`]aa`baa]\_baaa]a\_a`aaZa  
@HWI-EAS443:3:67:829:474#0/1  
CGTGGGTATGCACAAACAGACTGTGTTCTAGAGGCTAAGG  
+HWI-EAS443:3:67:829:474#0/1  
`a]bbaXabbaaaba`a`aa`b]a\_a`a\_aaaa¥`^BBB  
@HWI-EAS443:3:67:832:1879#0/1  
GTGGGTATGCACAAACAGACTGTGTTCTAGAGGCTAAGGC  
+HWI-EAS443:3:67:832:1879#0/1  
a\_aa^a]aa]a`baa`\_b\_[aaX]Z[Y`a`\_¥ZBBBBBBB  
@HWI-EAS443:3:68:1508:1466#0/1  
ATTTTGTGTTGAGAACATTATGGGTGCCATGCTCAGGGTGT  
+HWI-EAS443:3:68:1508:1466#0/1  
LY\_Y]\_0¥^[^a^¥[a^aa^W\_L\_TW\_\_¥]Y]¥¥¥G[WV  
@HWI-EAS443:3:69:1317:1756#0/1  
CAGCTTTGGAGTGTCTGGAGTAAATGAATCAGCTGAAATG  
+HWI-EAS443:3:69:1317:1756#0/1  
a^^`^^ab`¥`XaS``\_\_\_\_\_X`a[[]`\_0^\_YIY]]GZZ]  
@HWI-EAS443:3:69:1454:982#0/1  
GAATCTGTCCACTCCTGCTTGTATTCCCTCATGGTTCGGT  
+HWI-EAS443:3:69:1454:982#0/1  
^][babb\_aa\_[aaaa`aab^aaa\_aaa\_a`]]`\_`aS  
@HWI-EAS443:3:69:484:1970#0/1  
AATATTTGAGAATTCATGCCTTGAAACAATGGAAGTCGTT  
+HWI-EAS443:3:69:484:1970#0/1  
aa`a`\_`^`a^\_a\_\_a^a\_\_\_\_`\_`aab```\_`\_¥P^][W  
@HWI-EAS443:3:6:1290:348#0/1  
CACATATAGGTGCCATAGGGGAGACACACAAATTCAAACG  
+HWI-EAS443:3:6:1290:348#0/1  
abaabbbbbbabaaababbb`aba\_a\_a\_abaaa¥aba^a  
@HWI-EAS443:3:70:488:1307#0/1  
GTGGGTATGCACAAACAGACTGTGTTCTAGAGGCTAATGC  
+HWI-EAS443:3:70:488:1307#0/1  
¥X`a`\_Ta`Ya]\_aa`\_[]`aaa[`T^]`a``BBBBBBBBB  
@HWI-EAS443:3:70:724:1827#0/1  
CACATATAGGTGCCATAGGGGAGACACACAAATTCAAACG  
+HWI-EAS443:3:70:724:1827#0/1  
`a`ababbaZ`\_\_baab¥\_\_^Y`abbababbbb^abbba^

@HWI-EAS443:3:72:1017:1535#0/1  
CATGGTTTGGTGCATTCACTATGAGAGCAAAATCGTGGGA  
+HWI-EAS443:3:72:1017:1535#0/1  
aa[WYLUX¥YGYX\_RRQ]S^OXV]¥N¥ZOTGYb\_YNFSbQ  
@HWI-EAS443:3:72:102:1936#0/1  
CACACCCACCCAGGAATATTTGAGAATTCATGCCTTGAAA  
+HWI-EAS443:3:72:102:1936#0/1  
a`a\_]aa`a`\_VWZ]\_V]^]]¥\_]^¥Z]^WY\_^XYYZV¥  
@HWI-EAS443:3:72:1352:1145#0/1  
CATGGACACAGTAAACAGAACACACCAATACTCAGAGACA  
+HWI-EAS443:3:72:1352:1145#0/1  
^b\_¥R\_b¥^bbVa¥abaa```ZVX¥adW`b\_baab`aa\_]`  
@HWI-EAS443:3:74:1711:111#0/1  
GAGGAAAATCGTCCGATGATTGGAGCCCATCCCACCAGTA  
+HWI-EAS443:3:74:1711:111#0/1  
a`\_HU]a`¥K`\_VOV^[`RZ[`^BBBBBBBBBBBBBBBBB  
@HWI-EAS443:3:75:1763:561#0/1  
AACAAAGACTGAATAAGAGAGGCTATCTAATAAGAGGACT  
+HWI-EAS443:3:75:1763:561#0/1  
a\_Zaa]\_IQZ[^[^[\_Z]^Q]aBBBBBBBBBBBBBBBBBBB  
@HWI-EAS443:3:76:1299:709#0/1  
GAAGAATTGAAGAGCCATCTGGGCCGTTGCAGGTCCAAGG  
+HWI-EAS443:3:76:1299:709#0/1  
aaW0[¥aa[\_aa\_YX\_a`U\_`]¥\_YQPTPV]]G]GLR^^  
@HWI-EAS443:3:76:722:1737#0/1  
ACGCTCTTGGGAGTCTCGATACTGAATCTTGGACAAAAGA  
+HWI-EAS443:3:76:722:1737#0/1  
^ZYFF^]U¥¥P¥`Q`a]WX]QTWT\_^RG¥\_W¥`YGZ\_ONV  
@HWI-EAS443:3:78:1691:887#0/1  
TGGGATTTGTGTTGGAATCTTCATTCTTTTACTCTCGAAC  
+HWI-EAS443:3:78:1691:887#0/1  
¥a[D[aa\_a^b^^`b]^b`aa[X]PI¥aa`aaaa\_aZYT  
@HWI-EAS443:3:78:22:1547#0/1  
AAAAATCCAGCGCAAATGCCATAAGCACCATGCGCG  
+HWI-EAS443:3:78:22:1547#0/1  
\_¥VTXYNzbU`^]QTHQYXJQWZ`BBBBBBBBBBBBBBBBB  
@HWI-EAS443:3:78:941:2030#0/1  
AGGCCATGGTGTCTAGGGCCCGATTGATGCCAGGGGCGA  
+HWI-EAS443:3:78:941:2030#0/1  
ZX[aaa`Z[P\_OR[\_^\_N\_a^`]¥ZXZ]UP\_^`^^[F[`T  
@HWI-EAS443:3:79:1015:197#0/1  
AAGATGCAGAGAGAGGCAAGTTAAAAAGAAGGGCTAAGGT  
+HWI-EAS443:3:79:1015:197#0/1  
abbbabbbbabab^aa`a`\_`ba\_aaaaa``^`Zaaa``V  
@HWI-EAS443:3:79:518:1968#0/1  
GCCGGGGTCCGACTTCGAGTCTGGACGGATCAAGAAAGAAG  
+HWI-EAS443:3:79:518:1968#0/1  
a[b^QXP\_aS\_]\_[a`S^YY]]P]^]][\_ba`aZaa[aZ¥  
@HWI-EAS443:3:7:316:1061#0/1  
CGGCGTGTCTGTTTACTGTGTCCATGGTGTATCCTGTTC

+HWI-EAS443:3:7:316:1061#0/1  
Yb¥¥[^`\_ba\_bab^baabUaab[^]]`aUa]¥^abZa`  
@HWI-EAS443:3:7:669:2019#0/1  
GAGATTTCTTTCACAATCACTGGGGACAACACTAAGAGGA  
+HWI-EAS443:3:7:669:2019#0/1  
S\_XbbbXaaaa\_¥baaaXV\_bb¥aaaX¥bb`b¥XaIbWa  
@HWI-EAS443:3:7:878:465#0/1  
TGTGGGTATGCACAAACAGACTGTGTTCTAGAGGCTAAGG  
+HWI-EAS443:3:7:878:465#0/1  
¥aZabb\_baaaaa^aabYa\_[]`L\_T`\_\_^^]aBBBBBBBB  
@HWI-EAS443:3:80:465:403#0/1  
GAGACAACATGACCAAGAAGATGGTCACGCAAAGAAAGAA  
+HWI-EAS443:3:80:465:403#0/1  
\_X`aaaa^a`aa¥\_[]aa`\_[]\_\_\_Z]\_^]]^VT`\_ZU`]W  
@HWI-EAS443:3:81:539:881#0/1  
GTGGGTATGCACAAACAGACTGTGTTCTAGAGGCTAAGGC  
+HWI-EAS443:3:81:539:881#0/1  
aZ^aaUaab`^aa[^aa`\_`a][T][Z\_]XZBBBBBBBB  
@HWI-EAS443:3:82:1110:522#0/1  
CACATATAGGTGCCATAGGGGAGACACACAAATTCAAACG  
+HWI-EAS443:3:82:1110:522#0/1  
aabbbbbbbbabbbbbbbabab`bbabaaabbabbaaabab  
@HWI-EAS443:3:83:1141:2005#0/1  
CCAGCCAGGAATATTTGAGAATTCATGCCTTGAAACAATG  
+HWI-EAS443:3:83:1141:2005#0/1  
¥`YJQ^]\_b\_ba\_aa¥\_aaab^a\_¥R^INZbY][`\_aWUO  
@HWI-EAS443:3:84:1122:1790#0/1  
AATTGAAGAGCCATCTGGGCCGTTGCAGGTCCAAGGGCAT  
+HWI-EAS443:3:84:1122:1790#0/1  
Zbbbabbb\_\_ba^ba]YYX[b[^H¥bY`ba[]]b\_S[aH`aH  
@HWI-EAS443:3:84:286:1526#0/1  
CACATATAGGTGCCATAGGGGAGACACACAAATTCAAACG  
+HWI-EAS443:3:84:286:1526#0/1  
a]baab¥WZ^^abaaaaa\_a`X¥¥`aaa`\_aba`\_\_  
@HWI-EAS443:3:85:1792:725#0/1  
NAAGTACACCAAGACAATATACTGGTGGGATGGGCTCAA  
+HWI-EAS443:3:85:1792:725#0/1  
DOSRSQVRVUUTPSUTURYVVVPPQYVSTUNTRBBBBBB  
@HWI-EAS443:3:85:856:1135#0/1  
CACATATAGGTGCCATAGGGGAGACACACAAATTCAAACG  
+HWI-EAS443:3:85:856:1135#0/1  
`]``\_b]a`Vb]aaba¥[]`W]^a^X]]^`\_ba\_]¥Y¥Y  
@HWI-EAS443:3:86:125:695#0/1  
TGTGGGTATGCACAAACAGACTGTGTTCTAGAGGCTAACG  
+HWI-EAS443:3:86:125:695#0/1  
abS¥¥YXbaa]T[^a`UVUX¥[DVIYYZVZ`BBBBBBBB  
@HWI-EAS443:3:86:1373:1978#0/1  
GGCCGGTCTCCATCTGATACTAATAGCCCTACCTTTGAT  
+HWI-EAS443:3:86:1373:1978#0/1  
abV]ba[[ab[\_\_\_aUaV`^b¥baaaa`QM^¥YKIa`aaa\_

@HWI-EAS443:3:86:164:1168#0/1  
AATTGAAGAGCCATCTGGGCCGTTGCAGGTCCAAGGGCAT  
+HWI-EAS443:3:86:164:1168#0/1  
\_]aaaZ\_]Z`¥]aYMZX^[YYL^^¥` `[Z]L¥HZ\_HNUZ  
@HWI-EAS443:3:87:1183:774#0/1  
CCCCGGTGTTCGATAGCCCTTCTTTTTAACTTGCCCTC  
+HWI-EAS443:3:87:1183:774#0/1  
aaabbb`b`bb`b¥\_\_a\_\_^abaaaaba`aaaaa^a\_`  
@HWI-EAS443:3:88:105:397#0/1  
CATGCTCAGGATGTTTCTGAACCACTCGGGTTGATTCCAT  
+HWI-EAS443:3:88:105:397#0/1  
a]X\_^aa]\_\_[0`\_\_`]¥Y^U¥T]]][[`SJSW`SXSZR^  
@HWI-EAS443:3:88:645:773#0/1  
AACGACTTCCATTGTTTCAAGGCATGAATTCTCAAATATT  
+HWI-EAS443:3:88:645:773#0/1  
a)`baaaaaabaa[Q)`a\_Q^aaa`a\_^a\_``^a\_\_`^\_¥  
@HWI-EAS443:3:89:1314:389#0/1  
ACCAATACTCAGAAAAGGAAAGTGGACGACAAACAAAGA  
+HWI-EAS443:3:89:1314:389#0/1  
\_[S\_bb[\_bbbb]]`a[MZ\_ab\_aabTbaPa[RM^Ga¥`  
@HWI-EAS443:3:90:1170:142#0/1  
ACNGGTCAGCTGATTCATTTACTCCAGACACTCCAAAGCT  
+HWI-EAS443:3:90:1170:142#0/1  
aYD¥\_\_aaa\_aaaa`\_abaaa`\_U]`\_`a^\_U`Z\_¥U¥  
@HWI-EAS443:3:91:1473:1643#0/1  
TGTGCCAGTGATTGTGAAAGAAATCTCTGTGTCTTGTGA  
+HWI-EAS443:3:91:1473:1643#0/1  
¥b^GWb^[^`\_a\_WW^T]aaa\_N^NZ][D0a\_\_aaa]LU  
@HWI-EAS443:3:91:166:1283#0/1  
ATCACACCCAGGAATATTTGAGAATTCATGCCTTGAACA  
+HWI-EAS443:3:91:166:1283#0/1  
aaba`¥`baa\_\_Zaaaaaaaaaaaaa\_[`\_`a[\_`aa``Ub  
@HWI-EAS443:3:91:315:369#0/1  
AACGACTTCCATTGTTTCAAGGCATGAATTCTCAAATATT  
+HWI-EAS443:3:91:315:369#0/1  
abba`abbaaaaab\_aa`aaaaa`a`\_\_\_\_`\_`\_a`a`  
@HWI-EAS443:3:92:457:176#0/1  
GGGTGCCATGCTCAGGATGTTTCTGAACCACTCGGGGTGA  
+HWI-EAS443:3:92:457:176#0/1  
aa^W^¥YJ^P^^TDOZTR^GSNVQ^XSUUQTPVVSQWUJ  
@HWI-EAS443:3:92:606:866#0/1  
AATTGAAGAGCCATCTGGGCCGTTGCAGGTCCAAGGGCAT  
+HWI-EAS443:3:92:606:866#0/1  
a]babbb[]`a\_ba\_\_\_[a\_a`S\_a]¥[[X\_\_]]a\_HY\_\_  
@HWI-EAS443:3:93:1110:1481#0/1  
ATTCGATCTAAAGACTTCTATGGTGTGGCCAATGCGGTT  
+HWI-EAS443:3:93:1110:1481#0/1  
a``[¥`b\_a[``VWZ\_a¥aXa]NFYU]T^JFZ\_ZSFFUQ\_  
@HWI-EAS443:3:93:1112:1555#0/1  
CACATATAGGTGCCATAGGGGAGACACACAAATTCAAACG

+HWI-EAS443:3:93:1112:1555#0/1  
aaabaa¥]¥bWb[`aa[ab` `S]\_Za¥a`a`a\_S^a¥\_U`  
@HWI-EAS443:3:93:1382:676#0/1  
GTCAATCCGACTCTACTTTTCCTAAAAATCCAGCGTAAA  
+HWI-EAS443:3:93:1382:676#0/1  
\_N^VYTP¥aXR[T\_\_\_a^^¥¥XYaR\_]a^X^[\_SPBBBB  
@HWI-EAS443:3:94:1586:620#0/1  
GTGGGTATGCACAAACAGACTGTGTTCTAGAGGCTAATGG  
+HWI-EAS443:3:94:1586:620#0/1  
a\_aaaUZ¥`T`W¥^XT`a\_]a`TZW^XYU]S]BBBBBBBB  
@HWI-EAS443:3:95:1473:370#0/1  
ACTCATTAGCTGTTAGGCCATTCGATCTAAAGACTTATAT  
+HWI-EAS443:3:95:1473:370#0/1  
`\_\_UaaY` `¥bb^]Z`]U^[ZSDT\_WUa0aS]SXa^BBBB  
@HWI-EAS443:3:95:626:1848#0/1  
GTGGGTATGCACAAACAGACTGTGTTCTAGAGGCTAAGGT  
+HWI-EAS443:3:95:626:1848#0/1  
`[aab[ `^]Z` `Y\_aaX¥\_Va\_\_aa\_\_BBBBBBBBBBBB  
@HWI-EAS443:3:95:862:136#0/1  
CACATATAGGTGCCATAGGGGAGACACACAAATTCAAACG  
+HWI-EAS443:3:95:862:136#0/1  
ab\_`bbbaab`babbabbbabbaba`bbbaaba` `a`\_a  
@HWI-EAS443:3:96:497:1720#0/1  
AGAACCATCTGGGCCGTTGCAGGTCCAAGGTCATTGTTTA  
+HWI-EAS443:3:96:497:1720#0/1  
aa`a\_ba^b\_ZU`a`¥VR¥S[XaU^W`\_]aRZ\_a¥¥T` `]  
@HWI-EAS443:3:98:1060:803#0/1  
GTGGGTATGCACAAACAGACTGTGTTCTAGAGGCTAAGGC  
+HWI-EAS443:3:98:1060:803#0/1  
a]`aaX^`a\_a\_\_\_\_\_]aQXa\_Y\_Ya^\_]^[U^] `^BBBB  
@HWI-EAS443:3:98:250:489#0/1  
CACATATAGGTGCCATAGGGGAGACACACAAATTCAAACG  
+HWI-EAS443:3:98:250:489#0/1  
a` `bbbaaaa\_aabbaaaaaab\_baaa`aa\_aaaaaa^b  
@HWI-EAS443:3:9:261:247#0/1  
GTCCCCAGTGATTGTGAAAGAAATCTCTGTGTCTTGGGAA  
+HWI-EAS443:3:9:261:247#0/1  
a^\_a`a]Z^` [ `]YPW^^\_AZ\_^X^]a¥WR^WW¥^]U]RX  
@HWI-EAS443:3:9:652:1143#0/1  
AAGGGTTTGTGCATACCCACTTGGTTCATTATCCTCAGGT  
+HWI-EAS443:3:9:652:1143#0/1  
a¥^\_\_a`a¥¥[ [ `]a`\_ba^aaYY\_Z\_^b`\_a^\_a\_\_]X  
@HWI-EAS443:3:39:1305:1219#0/1  
CAGGGGCAATGAAAAGAAGGCCAAACTGGCAAATGNTGT  
+HWI-EAS443:3:39:1305:1219#0/1  
`ab`aabbabaa` `aaa`a`a^a\_bZaaa`^`\_`aYD[aW  
@HWI-EAS443:3:63:89:1440#0/1  
CTGGCTTGTGTTGAGAATAGAACGATNCCTCTTGGGAATC  
+HWI-EAS443:3:63:89:1440#0/1  
ab\_NabZZ]aYaYQV\_\_^`\_`a`YXTDX` \_\_\_\_`¥\_]Y[Z¥



@HWI-EAS443:3:73:1304:1683#0/1  
GCACAAACAGACTGTGTTCTNGAGGCTATGGCTTTCCTTT  
+HWI-EAS443:3:73:1304:1683#0/1  
aaaaabaaa`aaa]a\_a^[D¥aaa`\_^BBBBBBBBBBBB  
@HWI-EAS443:3:84:31:1898#0/1  
CGCTGTGGNATCAAACCCAATCAAAGGTAGGGCTATTAGT  
+HWI-EAS443:3:84:31:1898#0/1  
`[\_a[¥XDR]aaa`\_aaa^\_`WX^YZ^^YY\_]a]V][T  
@HWI-EAS443:3:100:1102:2005#0/1  
GAATCCCACCAAGGAATATTTGAGAATTCATGCCTTGAAA  
+HWI-EAS443:3:100:1102:2005#0/1  
P\_a`T¥\_\_VKb¥\_bVVKaVXX`b\_aK]`bK\_GVab\_OU  
@HWI-EAS443:3:100:1617:660#0/1  
CATTAAGTACGATGACCAAAGATGCAGAGAGAGGCAAGTT  
+HWI-EAS443:3:100:1617:660#0/1  
]QQVaYH[`VYS^`T^b`TZY]¥VabaX¥^`Zba¥XYb  
@HWI-EAS443:3:100:763:1107#0/1  
CACCCAGGAATATTTGAGAATTTATGCCTTGAAACAATGG  
+HWI-EAS443:3:100:763:1107#0/1  
aaaba\_bbbbbbbbbbaa`b¥F^bba\_abbabZb\_aba  
@HWI-EAS443:3:100:777:1881#0/1  
TAATGCCAGCCCATGGTCCGCCAAAAGCATGGAATATGA  
+HWI-EAS443:3:100:777:1881#0/1  
abbaa`^^^a¥\_a`\_S`[aU\_aaaa`Ha¥[\_\_\_\_^\_aB  
@HWI-EAS443:3:100:810:2033#0/1  
ACTCCAATACTCATGTCAGCTGATTCATTTAGTCCAGACA  
+HWI-EAS443:3:100:810:2033#0/1  
a\_XY\_aa^aXaa\_\_W^`a^^¥]^\_0^¥¥¥SGX0]\_[^SB  
@HWI-EAS443:3:10:1122:508#0/1  
GAACGACTTCCATTGTTTCAAGGCATGAATTCTCAAATAT  
+HWI-EAS443:3:10:1122:508#0/1  
``Za`a]a]Y[\_bb`Y^aa]a`b[T`\_a¥FaY\_a`baY  
@HWI-EAS443:3:10:1225:503#0/1  
AGAAATTGCAACCGGTCTCCTATATGAACTGCTAGGGAAA  
+HWI-EAS443:3:10:1225:503#0/1  
a¥a`ba[^aa`\_TW`a^^a```a\_\_Za`]^^a\_`]`]  
@HWI-EAS443:3:10:144:349#0/1  
GGCCCCGACTGATGCCAGGGTCGACTTCGAGTCTGGACGG  
+HWI-EAS443:3:10:144:349#0/1  
a`a`ZXWJQ\_\_OZ¥^]a]S\_^¥PYU¥]V¥NNU\_ZUW¥^  
@HWI-EAS443:3:10:1471:995#0/1  
CTTTGATTGGGTTTGATCCACAGCTTCTTTAACCCAAAT  
+HWI-EAS443:3:10:1471:995#0/1  
abbbbbbbbbbbbbbbbabbbabbabbbbbbbba^bbbb  
@HWI-EAS443:3:10:1535:663#0/1  
AGATAACAACCCACTTCCAAGAAAAAGGAGAGTAAGAGA  
+HWI-EAS443:3:10:1535:663#0/1  
abbbbbaaa\_aaa\_aaa\_aa\_a`\_\_aa`\_a\_a^`a`\_a  
@HWI-EAS443:3:10:1663:1248#0/1  
GGTGCATTCACTATGAGAGCAAATCGTGGGATGATTGGA

+HWI-EAS443:3:10:1663:1248#0/1  
`]MHMH¥[^G^¥SWY¥WY^H[ZXVBBBBBBBBBBBBBBBBB  
@HWI-EAS443:3:10:437:1513#0/1  
ATGATGGGCATGTTTAAACATGCTAAGTACGGTCTTGGGAG  
+HWI-EAS443:3:10:437:1513#0/1  
¥bb`a\_X`¥ab`aabb\_baababaaWaaZ[N^aaa`P[]  
@HWI-EAS443:3:10:768:622#0/1  
GTGTGTTCTGTTTACTGTGTCCATGGAGTATCCTGTTCCCT  
+HWI-EAS443:3:10:768:622#0/1  
a¥\_S\_¥¥W¥¥¥¥¥VWVW[N^WT¥WU¥[V[NUYVVVUWUWVW  
@HWI-EAS443:3:10:903:1083#0/1  
CTTTTCTGAGTATTGGCGTGTCTGTTTACTGTGTCCATG  
+HWI-EAS443:3:10:903:1083#0/1  
aaa]a]ab\_]QXYZabTa`a`aX`a^aa]V`\_^`]]]G\_a  
@HWI-EAS443:3:11:1643:1385#0/1  
GCCATTTTGTGGAGGACATTATGGGTGCCATGCTCAGGA  
+HWI-EAS443:3:11:1643:1385#0/1  
a`]WRa^\_OT\_UUa[GYY`]YZUQQNQ`¥KUBBBBBBBBBB  
@HWI-EAS443:3:11:55:192#0/1  
ATGGAATCAATGCACAAAGAGGAAATAGAGATAACAACCC  
+HWI-EAS443:3:11:55:192#0/1  
[abVO[b`\_^¥^I`¥aa¥\_[aaa¥[a`WaR^`\_¥W\_\_RP  
@HWI-EAS443:3:11:627:223#0/1  
CATGGGCTGGCATTACCACAGCGTTGTTTACAGAATCAAT  
+HWI-EAS443:3:11:627:223#0/1  
\_^`¥]`a`aaa]][^a`a`[VY\_a\_\_\_\_\_`\_\_\_\_]U]`^  
@HWI-EAS443:3:11:889:1521#0/1  
GTTGATTCCCACTAATTGCAGGTCCTGTAGAATATGTCC  
+HWI-EAS443:3:11:889:1521#0/1  
a`aZaSU`V^a0Q¥aaT[WUPbJXFFYZ\_a\_BBBBBBBBBB  
@HWI-EAS443:3:12:1387:1996#0/1  
ACCGGCAGCAACTGCATTGGCCAAAACCATAGAAGTCTTT  
+HWI-EAS443:3:12:1387:1996#0/1  
aa0`Y^\_\_G\_aY]GOGV^Q\_VVBBBBBBBBBBBBBBBBBBB  
@HWI-EAS443:3:12:1563:546#0/1  
CAAAATCGTCGGATGATTGGAGCCCATCCCACCTGTATAT  
+HWI-EAS443:3:12:1563:546#0/1  
I¥\_ab`a¥VQ`bbb`YZV\_Y\_¥UZZOT¥\_R^[Uab\_aa``  
@HWI-EAS443:3:12:197:43#0/1  
TGGTGGGATGGGCTCCAATCATCCGACGATTCGCTCTCA  
+HWI-EAS443:3:12:197:43#0/1  
^`a\_bbbaabbbZa`]\_aaabaa`aaab`aaa\_b][\_a\_  
@HWI-EAS443:3:12:405:274#0/1  
GTTAGTTTATCTACCCTTGTGTTGTTGAACGACTTCCATTG  
+HWI-EAS443:3:12:405:274#0/1  
aaa¥bS`\_a\_a\_\_`]ZQS[Z^]X^`TX]\_X]]^^XT¥^`  
@HWI-EAS443:3:12:434:758#0/1  
AAGTCGTTCAACAAACAAGGTTAGATAAACTAACTCAAGG  
+HWI-EAS443:3:12:434:758#0/1  
a]a\_aa`PaZ][`\_^]^a^aTZ^]X\_\_\_Y\_\_^\_]\_]WZ]

@HWI-EAS443:3:12:541:135#0/1  
TGCCCTTGCAACTACACATTCCCTGGATTCCCAAGAGGAAT  
+HWI-EAS443:3:12:541:135#0/1  
`baaaaZa^[``\_a\_a[\_¥Y^`]]\_ ^XYVX]]^\_]Y^XRX  
@HWI-EAS443:3:13:1047:356#0/1  
GAATCAGCTGACATGAGTATTGGAGTAAGTGTGATAAAGA  
+HWI-EAS443:3:13:1047:356#0/1  
aa`\_``\_ ^aa\_\_\_\_]`^`\_] ^\_]¥Y^^]]\_W^[][\_]Y  
@HWI-EAS443:3:13:371:2029#0/1  
TTCCCCTTTGGCTTGTGTTGAGAATAGAAAGATTCCCTCTT  
+HWI-EAS443:3:13:371:2029#0/1  
`a[]a¥aaZTT^Y]WITN` [VR]ZV`V^aG\_PNR¥MPQFL  
@HWI-EAS443:3:13:791:517#0/1  
GTTAGTTTATCTACCCTTGTGTTGTTGAACGACTTCCATTG  
+HWI-EAS443:3:13:791:517#0/1  
a\_\_\_\_aVa\_`\_ [\_U\_X\_a\_YT\_ [\_X[W[WYTNNQ\_UUT\_^^  
@HWI-EAS443:3:14:1038:2038#0/1  
AGACAACATGACCAAGGAGATGGTCACGCAAAGAACAATA  
+HWI-EAS443:3:14:1038:2038#0/1  
[]\_ []S\_STQ[\_Y\_WIR\_Y\_]WY\_`\_¥`Y¥\_Z\_ZO]Z[  
@HWI-EAS443:3:14:1171:322#0/1  
AGACAATATACTGGTGGGATGGGCTCCAATGATCCGACGA  
+HWI-EAS443:3:14:1171:322#0/1  
aaZSRPT¥Y¥^R]\_J]X`WS[¥[DPRVZUXGLWQVZFTYB  
@HWI-EAS443:3:14:124:2023#0/1  
GAATCTGTCCACTCCCGCTTGTATTCCCTCATGGTTTGGT  
+HWI-EAS443:3:14:124:2023#0/1  
Vbaba\_`NaabbV`bUb` [b\_UUZ]Jbaab\_N`b[aaaTP  
@HWI-EAS443:3:14:1488:1216#0/1  
CTCCAATTATCCGACGATTTTGCTCTCATAGTGAATGCAC  
+HWI-EAS443:3:14:1488:1216#0/1  
aabaaa[F]a`\_```a`aaaaaa\_a\_a`a¥]a`\_a` []]  
@HWI-EAS443:3:14:1626:1155#0/1  
AATGAACCAAGTGGGAATGCACAAACAGACTGTGTTCTAG  
+HWI-EAS443:3:14:1626:1155#0/1  
^Va]ZWOVIVa\_ZORLX]Y\_\_aPN¥LNPLP]ZYBBBBBBBB  
@HWI-EAS443:3:14:271:1435#0/1  
AGTAAACAGAACACACCACTACTCAGAAAAGGGAAAGTGG  
+HWI-EAS443:3:14:271:1435#0/1  
Vb\_ ^aZ`baababaa\_aa¥aaa` `aa`a[aa^¥^` ``G\_\_  
@HWI-EAS443:3:15:1593:193#0/1  
ATTTGAGAATTCATGCCTTGAACAATGGAAGTCGTTCAA  
+HWI-EAS443:3:15:1593:193#0/1  
abbbabbabbba`ba`\_^baaaaa\_a`a` `a`a[Sa^` [UP  
@HWI-EAS443:3:15:1682:531#0/1  
GATTCCTACTAAGTGCAGGTCCTGTAGAACTGTTCCTACT  
+HWI-EAS443:3:15:1682:531#0/1  
\_P\_ ^a]R\_aa¥RW`\_^X\_b^YRZ[VXJaR`\_BBBBBBBBB  
@HWI-EAS443:3:16:1164:275#0/1  
CAATGGAAGTCGTTCAACAAACAAGGGTAGATAAACTAAC

+HWI-EAS443:3:16:1164:275#0/1  
abbbbbbbbaab^`a¥aaa\_`aZaaI\_^[[^^\_\_NZ`\_G  
@HWI-EAS443:3:16:1374:115#0/1  
GCACAAACAGACTGTGTTCTAGAGGCTATGGCTTTTCTTG  
+HWI-EAS443:3:16:1374:115#0/1  
a`]U]S]Y]]ZZ]\_WY\_^W^]\_XZBBBBBBBBBBBBBBB  
@HWI-EAS443:3:16:1538:1257#0/1  
TGGAGCAAATGAATCAGCTGACATGAGTATTGGAGTAACA  
+HWI-EAS443:3:16:1538:1257#0/1  
aba`a\_ab\_aaa\_a\_^`^aa\_\_\_aa^aY`^aa\_[¥X^\_X^  
@HWI-EAS443:3:16:1550:325#0/1  
GGCACCTATATGTGTATCTGTAGTCTTTGATGAAAAATTG  
+HWI-EAS443:3:16:1550:325#0/1  
abaaa`bababb`b\_\_a\_ba\_`a^\_aaaa]`^¥ZDY\_a\_\_\_  
@HWI-EAS443:3:16:1645:1201#0/1  
CAATCCGACTCTACTTTTCCTAAAAATTCCAGAGCAAAT  
+HWI-EAS443:3:16:1645:1201#0/1  
`¥Y[`ab[YV^\_RS]TP¥¥[aZaXa\_aaTY]SGbZ\_¥\_\_\_\_  
@HWI-EAS443:3:16:298:703#0/1  
CTCCAATCATCCAACGATTTTGCTCTCATAGTGAATGCAC  
+HWI-EAS443:3:16:298:703#0/1  
a`aaa^Y¥a[]WDX^Y^\_Y`\_¥^]^XZN[UWZ]^]^Y  
@HWI-EAS443:3:16:736:1325#0/1  
CAGACTCGAAGTCGACCCTGGCATCAATCCAGGCCCTAGA  
+HWI-EAS443:3:16:736:1325#0/1  
]]\_aa][Y]]\_ZT\_Z\_\_VOQ¥UXW\_[^^^OMDWLUN¥PB  
@HWI-EAS443:3:17:1190:1836#0/1  
AAACAAAGACTGAATAAGAGAGGCTATCTAATAAAAGCAC  
+HWI-EAS443:3:17:1190:1836#0/1  
ab`a\_a`b`aaaa`\_aaaa^`^`\_GTYNRY[YFQXPYH  
@HWI-EAS443:3:17:449:1376#0/1  
CACCTATATGTGTCTCTGTAGTCTTTGATGAACAATTGAA  
+HWI-EAS443:3:17:449:1376#0/1  
a^`a`aa^`^a[\_a\_a`^\_\_Va]`^\_\_\_\_`\_\_\_\_]\_^\_\_a  
@HWI-EAS443:3:17:68:527#0/1  
CTTTTCCTAAAAATTCCAGCGCAAAGTGCCATAAGCACCA  
+HWI-EAS443:3:17:68:527#0/1  
`[ZbS\_bPSYTPR[T]\_[a]ZMWHYLL`^a]`WYTY`]OK  
@HWI-EAS443:3:18:1095:788#0/1  
GAACGACTTCCATTGTTTCAAGGCATGAATTCTCAAATAT  
+HWI-EAS443:3:18:1095:788#0/1  
a`bab\_aaabaaaa^a`a`\_aa```aa\_a`\_a`\_\_^`\_a  
@HWI-EAS443:3:18:386:1778#0/1  
ATGGGCTCCAATCATCCGACGATCTTGCTCTCATAGTGAA  
+HWI-EAS443:3:18:386:1778#0/1  
aW\_¥Y\_]``aba¥¥V\_^\_aaS\_aYXaa\_X\_P¥]`RKIDVa  
@HWI-EAS443:3:18:993:1683#0/1  
CCAGGTGTTGCGATAGCCCTTCTTTTAAAGTTGCCTCTCT  
+HWI-EAS443:3:18:993:1683#0/1  
aa[a^PLa¥ZSYQ]a\_a\_YVXTa]aa¥ZFFZ[\_^]P^SU^

@HWI-EAS443:3:19:1043:872#0/1  
CAATAGAAGAGCCATCTGGGCCGTTGCAGGTCCAAGGTCA  
+HWI-EAS443:3:19:1043:872#0/1  
ab`\_ba`aaa`\_]Z`\_`\_`\_`a¥`]S^a\_W`W`[[\_UT[  
@HWI-EAS443:3:19:1179:1695#0/1  
GTTAGTTTATCTACCCTTGTGGTTGAACGACTTCCATTG  
+HWI-EAS443:3:19:1179:1695#0/1  
`U`a^`¥`\_`\_`a`\_`\_`\_]\_\_\_¥`[^\_¥[U]\_Z¥^^^\_  
@HWI-EAS443:3:19:1386:1168#0/1  
TGTTGATTCCCTCTAACTTGCAGGTCCTGTAGAATCTGTC  
+HWI-EAS443:3:19:1386:1168#0/1  
`aaa`Raa`^\_aY`\_a`\_aa`\_a\_U[^aa]\_`\_]\_\_W`^YY  
@HWI-EAS443:3:19:666:107#0/1  
GGCATGTTTAACATGCTAAGTACGGTCTTGGGAGTCTCGA  
+HWI-EAS443:3:19:666:107#0/1  
\_aa`a¥Z[`b^b`b[`ba[aabab^abb\_a[`aaa`\_`G  
@HWI-EAS443:3:19:671:181#0/1  
AAAAATTCCAGCGCAAATGCCACAAGCACCATCCCT  
+HWI-EAS443:3:19:671:181#0/1  
aaab\_\_\_]X]a`a^W^\_¥]^XX[0^^]^\_\_XXZZ^XXOV]  
@HWI-EAS443:3:19:766:1775#0/1  
ATTTGAGAATTCATGCCTTGAAACAATGGAAGTCGTTCAA  
+HWI-EAS443:3:19:766:1775#0/1  
a]aaYab`aaaaaaaa`\_`\_`aa\_b[aa`\_¥`U[Z]RVZM  
@HWI-EAS443:3:19:783:232#0/1  
GTGGGTTGTTATCTCTATTTCTCTTTCTTCATTGATTCC  
+HWI-EAS443:3:19:783:232#0/1  
`¥`\_`^S\_]Z`V^Ya`\_`\_`\_]SWY¥W[JZ]W[\_[¥^]^UV  
@HWI-EAS443:3:1:1101:1912#0/1  
AAAAAACAAAGACTGAATAAGAGAGGCTATATAATAAGAG  
+HWI-EAS443:3:1:1101:1912#0/1  
¥aa`^^U`a`\_`a^aaW`\_`aaaa\_aa\_H`aFFU¥\_BBBBBB  
@HWI-EAS443:3:1:1442:1919#0/1  
AGTAAAAAGAACACACCAATACTCAGAAAAGGGAAAGTGG  
+HWI-EAS443:3:1:1442:1919#0/1  
¥aVLYaJ`ba0aa¥aH^b`a`SYU\_a^\_\_aa`\_`\_`^BBBBB  
@HWI-EAS443:3:1:182:551#0/1  
CCCAGGGGTTGCGATAGCCCTTCTTTTTAACTTGCCTCTC  
+HWI-EAS443:3:1:182:551#0/1  
V^¥\_a]GXUZ^^a`\_`^aTTZYXNWV`a¥WXX]X¥NBBBBB  
@HWI-EAS443:3:1:182:834#0/1  
ATCATGCATTAGCTCCCATTTAAGCAGACTTCAGGAATG  
+HWI-EAS443:3:1:182:834#0/1  
¥bQP^GRa\_bVb\_aa`a`¥`\_`aabaH`baWb`Wa`IRaBB  
@HWI-EAS443:3:1:363:195#0/1  
AAAGAAATCTCTGTGTCTTGTGAATTAGTCATCATGTTTC  
+HWI-EAS443:3:1:363:195#0/1  
aabaa`aaZaT]`\_`b^[a`\_]aUZ`^X¥0GV]LQSFWaBB  
@HWI-EAS443:3:1:376:315#0/1  
TGTCCCCAGGGATTGTGAAAGAAATCTCTGTGTCTTGTGA

+HWI-EAS443:3:1:376:315#0/1  
¥[\_PWTVPYQ¥]SaZM`]a\_XHUVVWWTZ[WBBBBBBBBBBB  
@HWI-EAS443:3:1:539:1408#0/1  
GAACGACTTCCATTGTTTCAAGGCATGAATTCTCAAATAT  
+HWI-EAS443:3:1:539:1408#0/1  
aab`aaIaa`Xaaba^`aaaaa`aa\_\_a\_\_a\_XSRBBB  
@HWI-EAS443:3:1:696:1984#0/1  
CAAACACAGAGACTGGTGCACCCAGCTCAACACGATTGA  
+HWI-EAS443:3:1:696:1984#0/1  
[b[\_HX`baaaaa\_[H¥^^Z\_VZb\_\_a\_[`FDO[¥RaaB  
@HWI-EAS443:3:1:840:1381#0/1  
ACTCGAAGTCGACCCTGGCATCAATCAGGGCCCTAGACAC  
+HWI-EAS443:3:1:840:1381#0/1  
a]ZHab`\_TKZZ\_S^Zaaa¥YY]X]^G`Z¥ZGS\_aXBBBB  
@HWI-EAS443:3:1:906:643#0/1  
TTAGAGGTTTTCGTATACTTTGTTGAAAGTTTAGCTAGGAG  
+HWI-EAS443:3:1:906:643#0/1  
`¥aYL¥`WW]¥a\_X¥SHIYY][¥WJRDO[RLTBBBBBBB  
@HWI-EAS443:3:20:1013:396#0/1  
AATTTTTCCCTAGCAGTTCATATAGGAGACCGGTTAGAAT  
+HWI-EAS443:3:20:1013:396#0/1  
a[`abbW¥\_Zaaaa`^]\_`Z¥\_`^^QYb[`Z`a]]Ua`\_T  
@HWI-EAS443:3:20:1084:1483#0/1  
AGTTTATCTACCCTTGTGTTGTTGAACGACTTCCATTGTTT  
+HWI-EAS443:3:20:1084:1483#0/1  
aaaabbbaba`^`ab`ab`aa^]`aaaaa`\_\_a`^YaZ  
@HWI-EAS443:3:20:1269:98#0/1  
AACAATGGAAGTCGTTCAACAAACAAGGGTAGATAAACTA  
+HWI-EAS443:3:20:1269:98#0/1  
^a^ababbaaaZab\_XYa`Ia`X`\_\_a\_X^a^`¥`WZ^  
@HWI-EAS443:3:20:1415:1459#0/1  
ACCAGTCTCTGTGTTGTCGTCTACTTCCCTTTTCTGAG  
+HWI-EAS443:3:20:1415:1459#0/1  
aa^aa\_aa\_\_`^a^aa`0ZTZZ^XV`\_ZZ[\_`^^Q[]TY  
@HWI-EAS443:3:20:164:1208#0/1  
AACAATGGAAGTCGTTCAACAAACAAGGGTAGATAAACTA  
+HWI-EAS443:3:20:164:1208#0/1  
`abb````a`WX``\_WUI]PYa`W[]UTaGSJWY\_\_]FV]  
@HWI-EAS443:3:20:1716:575#0/1  
GATTCTTCAAGGAAAGCCATAGCCTCTAGAACAGAGTCTG  
+HWI-EAS443:3:20:1716:575#0/1  
a^aaV\_\_^\_Y`a`^V\_Z`\_Y¥PZ`X\_\_^]VUFXYR]Y  
@HWI-EAS443:3:20:812:1898#0/1  
GAACAACATGATAAACAATGACCTTCGACCTGCAACGGCC  
+HWI-EAS443:3:20:812:1898#0/1  
WV¥Z¥¥WZX]¥[bbb`abXP\_YDWZPJJS]VG¥bXX`^QUQ  
@HWI-EAS443:3:21:1601:1563#0/1  
CACTAACTTGCAGGTCCTGTAGAATCTGTGCACTCCTGCT  
+HWI-EAS443:3:21:1601:1563#0/1  
`\_^aa\_aaa\_aaa\_V`¥\_UN^\_^\_Y\_XZGMYRYORXTBB

@HWI-EAS443:3:21:386:1936#0/1  
AACATATCTTCATGATCTCAGAGAACTCTTCTTTCTTGAT  
+HWI-EAS443:3:21:386:1936#0/1  
¥bb\_aa`\_[\_bb\_\_a]b\_abWaa\_aaZ\_^YKVY¥a^Z¥XN  
@HWI-EAS443:3:21:641:1286#0/1  
GGCTATCTAATAAGAGCACTGACATTAATAGGATGACCA  
+HWI-EAS443:3:21:641:1286#0/1  
`V¥U[^a` `SM¥IXLKZ¥SU`\_PX[X]¥YTXDZP^]BB  
@HWI-EAS443:3:22:1040:964#0/1  
TTTCTTTTGGCCAAGATTCAGTATCGAGACTCCCAAGACC  
+HWI-EAS443:3:22:1040:964#0/1  
`Y`U¥PX`\_F^Z]`\_\_¥YU]aZS^YP[\_W[\_`]V\_]YQXN  
@HWI-EAS443:3:22:423:1144#0/1  
AGGGGGCAATGAAAAGAAGCCAACTGGCAACTGTTGTG  
+HWI-EAS443:3:22:423:1144#0/1  
`¥]PW\_bZb¥`aab\_aaaaa`¥aa`aa]`aaaa\_`a]a  
@HWI-EAS443:3:22:510:259#0/1  
GTTTATCTACCCTTGTGTTGTTGAACGACTTCCATTGTTTC  
+HWI-EAS443:3:22:510:259#0/1  
a`aa`a\_aa`\_`a\_\_^`a\_`^`]Z`^]^^\_\_a[[]]  
@HWI-EAS443:3:22:624:321#0/1  
ATCGAGACTCCCAAGACCGTACTTAGCATGTAAACATGC  
+HWI-EAS443:3:22:624:321#0/1  
`aaa`aa`\_`]aaaa\_`a]W^\_^¥\_¥\_`^a^`\_\_`¥`YUZ  
@HWI-EAS443:3:23:1328:673#0/1  
CACCCAGGAATATTTGAGAATGCATGCCTTGAACAATGG  
+HWI-EAS443:3:23:1328:673#0/1  
aba`aa`^a\_babaaa\_aaa`a`\_`a\_^`a`a`a]b\_\_a`  
@HWI-EAS443:3:23:1526:889#0/1  
GGCCATGGTGTCTAGGGCCCGGTTGATGCCAGGGTCGAC  
+HWI-EAS443:3:23:1526:889#0/1  
\_a\_aaaa`^`[\_a\_\_`^`^`[`a\_]`a\_`a\_^`V¥\_`[^^^K  
@HWI-EAS443:3:23:1674:1759#0/1  
GGACCATGGGCTGGAATTACCACAGCATTGTTTACAGAAT  
+HWI-EAS443:3:23:1674:1759#0/1  
`baa^aba`^aabbKa`ab`UaL`aUaa`aaa^a\_aab`S  
@HWI-EAS443:3:24:1068:585#0/1  
ATCGAGACTCCCAAGACCGTACTTAGCATGTAAACATGC  
+HWI-EAS443:3:24:1068:585#0/1  
aaaaaaaa`\_aa`\_`\_\_aa^`Va^`¥^`a\_\_`a`aV\_¥\_^  
@HWI-EAS443:3:24:131:1537#0/1  
TTAGCCTTCTGACTCATTAGCTGTTAGGCCCTTCGATCT  
+HWI-EAS443:3:24:131:1537#0/1  
ZU\_UbbabYbX`b^Y^\_]V\_`[[PSDG\_I][VGMJ\_NGVVU  
@HWI-EAS443:3:24:507:1448#0/1  
GGTGTGTTCTGTTTACTGTGTCCATAGTGTATCCTGTTCC  
+HWI-EAS443:3:24:507:1448#0/1  
`bXb[b\_ba`b\_bbaa`X`\_`\_aa`aaa[`Xaaba^`Za\_`  
@HWI-EAS443:3:24:541:931#0/1  
AGTTAGTTTATCTACCCTTGTGTTGTTGAACGACTTCCATT

+HWI-EAS443:3:24:541:931#0/1  
ab\_aba\_bbbabb`aaaa`aaaa\_aaaaaa`\_`a\_aaa\_  
@HWI-EAS443:3:24:651:732#0/1  
AAACAATGCTGCGGTAATGCCAGCCCATGGTCCAGCCAAA  
+HWI-EAS443:3:24:651:732#0/1  
`a\_Xa^[XZaaGZ`Uabbb\_¥]Va)`a\_aNN¥[[]]^X\_  
@HWI-EAS443:3:25:1049:654#0/1  
AGACAATATACTGGTGGGATGGGCTCCAATCACCCGACGA  
+HWI-EAS443:3:25:1049:654#0/1  
^bbbabbbababbbYbbb`aa`Zaaaa^\_]ZX`]]`Pa`  
@HWI-EAS443:3:25:1086:1281#0/1  
AATGACCTTGGACCTGCAACGCCAAGATGGCTCTTCAAT  
+HWI-EAS443:3:25:1086:1281#0/1  
[`¥\_b]bb]X)`a^`b\_baa`a`Gaba]Z\_`Y[`baaaa  
@HWI-EAS443:3:25:1131:772#0/1  
GAAGAATCCCACCCAGGCATATTTGAGAATTCATGCCTTG  
+HWI-EAS443:3:25:1131:772#0/1  
`¥aSO\_\_`VZ\_^bb¥aYDYU[baab[a]a`aX^aa\_^\_X  
@HWI-EAS443:3:25:1278:697#0/1  
ATCGAGACTCCCAAGACCGTACTTAGCATGTAAACATGC  
+HWI-EAS443:3:25:1278:697#0/1  
aaaaaaaa`aaaaaa\_a\_\_a¥aV`\_a[`aaa`aa`\_\_`\_\_[  
@HWI-EAS443:3:25:1407:1378#0/1  
CAAAGACTGAATAAGAGAGGCTATCTAATAAGAGTACTGA  
+HWI-EAS443:3:25:1407:1378#0/1  
\_``\_bbb`abababbb`\_V^bbYK¥^BBBBBBBBBBBBBB  
@HWI-EAS443:3:25:1490:1453#0/1  
TGTTACTCCAAAACATCATGTCAGCTGATTCATTTACTCCA  
+HWI-EAS443:3:25:1490:1453#0/1  
aaa]a`a\_\_ab``]a\_aa\_Z\_\_a\_\_\_```Ra`\_\_\_\_][Z]\_  
@HWI-EAS443:3:25:1504:246#0/1  
GGGCTCCAATCATCCGACGATTTTGCTGTCATAGTGAATG  
+HWI-EAS443:3:25:1504:246#0/1  
a\_a[[\_ZL]UVL[U]aTZZVPYU^^ZWFNTRS¥SVMT^^  
@HWI-EAS443:3:25:519:1418#0/1  
GAAGAATCCCACCCAGTAATATTTGAGAATTCATGCCTTG  
+HWI-EAS443:3:25:519:1418#0/1  
G^]TN\_aa\_Z`a`]]URXX¥[\_^)`^^b)`\_U``ab`¥H^  
@HWI-EAS443:3:26:1192:963#0/1  
GTTTATCTACCCTTGTGTTGAACGACTTCCATTGTTTC  
+HWI-EAS443:3:26:1192:963#0/1  
a\_aaaaaaaaaaaa`^^`^^`^^`^\_[[\_^\_\_a\_aZ^^Y  
@HWI-EAS443:3:26:1649:1441#0/1  
CGAGACTCCCAAGACCGTACTTAGCATGTAAACATGCCC  
+HWI-EAS443:3:26:1649:1441#0/1  
`bbbabbb`aabb[`aab\_a`aaaaaaa`a`baaZa\_W]] [  
@HWI-EAS443:3:26:686:1941#0/1  
AAAGCCTTCCCCGATAATCATCATCCATTAGCTCCCATTT  
+HWI-EAS443:3:26:686:1941#0/1  
X` [LDLP^¥X^]UW[\_Y[VZ\_ZVN^¥MGPQ^XYRJVKRG]



@HWI-EAS443:3:26:774:401#0/1  
CAGGAACAGGATACACCATGGACACAGCAAACAGAACACA  
+HWI-EAS443:3:26:774:401#0/1  
abbbbbbabbababa\_aaaabb`\_a\_a\_]aaaaaaaa\_a`a  
@HWI-EAS443:3:26:957:1143#0/1  
AAAAATTCCAGCGCAAATGCCATAAGGACCACATTC CCT  
+HWI-EAS443:3:26:957:1143#0/1  
`^a¥T¥aa]GT`¥\_a\_X0[aaTa\_ZWTH^T¥]UXSLVZG\_  
@HWI-EAS443:3:27:134:2016#0/1  
GAGGCTACGGCTTTCCTTGAAGAATCCCACCCAGGAATAT  
+HWI-EAS443:3:27:134:2016#0/1  
ab`ab`b][\_b\_`a[b]\_Ya`RaaZa\_b]`aaSRZR\_\_`¥  
@HWI-EAS443:3:27:1376:1720#0/1  
GAACGACTTCCATTGTTTCAAGGCATGAATTCTCAAATAT  
+HWI-EAS443:3:27:1376:1720#0/1  
a\_`¥TZ`aW`a^\_S\_X^]G)`¥Z0¥XU¥¥\_XS^Z^]WS^^  
@HWI-EAS443:3:27:609:388#0/1  
CTGGAGTAAATGAATCAGCTGAAATGAGTATTGGAGTAAC  
+HWI-EAS443:3:27:609:388#0/1  
`XY^Y¥S`aaaZP^0Qa^\_WYDWa[Y\_S\_U`ZM[^P¥\_W  
@HWI-EAS443:3:27:784:1195#0/1  
GATTGATGCCAGGGCCGACTTCGAGTCTGGACGGATCAAG  
+HWI-EAS443:3:27:784:1195#0/1  
`S]R`Z`a\_s\_]WFZ\_`P[UVZOLLYX[\_NNZUDIWZY[  
@HWI-EAS443:3:27:868:961#0/1  
CAGATCTTCAAGATCTCAGAGA ACTCTTCTTTCTTGATCC  
+HWI-EAS443:3:27:868:961#0/1  
aba]`b`P^aab]US`baaKa\_H]`IU[`\_`aZX^`aRUR  
@HWI-EAS443:3:28:1094:1680#0/1  
GAAACCTCTAATCTGCATCCCAGGTGATGCGATAGCCCTT  
+HWI-EAS443:3:28:1094:1680#0/1  
]¥[X0Z¥b¥`aTXU\_a^XZZaV\_HQ]HT¥Za`TG¥a\_TNY  
@HWI-EAS443:3:28:1099:283#0/1  
CTAGAGGCTATGGCTTTCCTTTAAGAATCCCACCCAGGAA  
+HWI-EAS443:3:28:1099:283#0/1  
abbabbbbbb¥Q]^\_bbK`¥`LW]R¥aVMXaXTa[\_`bS`  
@HWI-EAS443:3:28:1134:1160#0/1  
TTCGAATCTTCACTTTTACTCTCGAACATGGACCCTTT  
+HWI-EAS443:3:28:1134:1160#0/1  
JZY[Ya¥YR`^W\_ba^[bb\_`S`\_QY\_`^T[ZG]`ZOVa`  
@HWI-EAS443:3:28:1744:897#0/1  
CTTCGAGTCTGGAGGGATCAAGAAAGAAGATTCTCTGAG  
+HWI-EAS443:3:28:1744:897#0/1  
`OQ[a[¥^TZ^\_UF¥\_Z\_YXUQR\_SXUST\_W]QLLHV\_]V  
@HWI-EAS443:3:28:327:699#0/1  
GAACGACTTCCATTGTTTCAAGGCATGAATTCTCAAATAT  
+HWI-EAS443:3:28:327:699#0/1  
`bbbbabbbbbbbaabbbbabbbbaabaabababaaaa  
@HWI-EAS443:3:28:585:283#0/1  
GTCTTGGGAGTCTCGATACTGAATCTTGGCCAAAAGAAAT

+HWI-EAS443:3:28:585:283#0/1  
aaaabaaaaa\_aa\_a]aa\_aa\_`^\_a\_YFK]^^^]^\`\_]  
@HWI-EAS443:3:28:64:482#0/1  
CAGGAATGTGTAGTTGCAACGGCCTCATATCCATGCTTT  
+HWI-EAS443:3:28:64:482#0/1  
a\_a^SZaa`]V]¥[\_a`a]\_[0¥G0^Z^X^¥U^\_[¥LYY¥  
@HWI-EAS443:3:29:1413:1313#0/1  
AGCTGGTTCATTTACTCCAGACACTCCAAAGCTGGGTAGC  
+HWI-EAS443:3:29:1413:1313#0/1  
\_b\_X\_^\_`Y``]baYb\_`\_TX¥`Y\_aaWUaa`\_a\_[ZBBB  
@HWI-EAS443:3:29:1580:1965#0/1  
GCCATGCTCAGGATGTTTCTGAACCAATCGGGTTGATTTC  
+HWI-EAS443:3:29:1580:1965#0/1  
aa`\_R\_\_R¥]XX`\_\_RYOZYSWJODTFWXWZ`GS^YNVBB  
@HWI-EAS443:3:29:1679:1688#0/1  
ACAGAACTTCATGATCTCAGAGAACTCTTCTTTCTTGATC  
+HWI-EAS443:3:29:1679:1688#0/1  
a¥b`TIZ`X\_^PVS[VYVWVQ^W]`[\_¥]Y¥Y\_`XaMBB  
@HWI-EAS443:3:29:522:210#0/1  
GGCTTGTGCTGAGAATAGAACGATTCTTCTTGGGAATCCA  
+HWI-EAS443:3:29:522:210#0/1  
a^^UW[JaH`\_N^UG]V[¥WV]SU¥V¥NHWWQN¥TTSSBB  
@HWI-EAS443:3:29:645:1992#0/1  
AACTTGCAGTCTGTAGAATCTGTCCAATCCTGCTTGTA  
+HWI-EAS443:3:29:645:1992#0/1  
aaaS\_\_a\_ZLF¥a¥^UXV^a\_\_Y\_G\_\_[HW]TQR[\_USOB  
@HWI-EAS443:3:29:711:1732#0/1  
AAACAATCCTGTGTAATGCCAGCCCATGGTCCAGCCAAA  
+HWI-EAS443:3:29:711:1732#0/1  
`\_VUaaHD¥¥SU[PP`¥Y¥Y[\_`G\_VRU¥STN¥SGSUSWYB  
@HWI-EAS443:3:29:860:1370#0/1  
CTCCTTTTTCTTTGAAAGTGGGTTGTTATCTCCATTTCT  
+HWI-EAS443:3:29:860:1370#0/1  
¥\_babbbbabaaaa`b¥[bbaaab`baab`a`aaaaab\_  
@HWI-EAS443:3:2:1294:722#0/1  
AAAAATTCCAGCGCAAATGCCATAAGCACACATCCCCT  
+HWI-EAS443:3:2:1294:722#0/1  
`\_]`¥VY¥W`\_aQ^[Q\_]\_[PUY¥ZZ^\_]\_[UZWLVRUV  
@HWI-EAS443:3:2:1341:47#0/1  
TAGTCTTTGATGAACAATTGAAGAGCCATCTGGGTCGTTG  
+HWI-EAS443:3:2:1341:47#0/1  
aabT[aaaaaaaa`]a\_a\_a^a^a\_`]\_]`BBBBBBBBB  
@HWI-EAS443:3:2:1723:1212#0/1  
TGTGGCTAATTTTGAATGGAGCTACCCAGCTTTGGAGTG  
+HWI-EAS443:3:2:1723:1212#0/1  
^LJ^LUa]¥\_\_a\_RaJFS]LTXNU¥TVGVRSVV^RTTB  
@HWI-EAS443:3:2:1759:1025#0/1  
GGGAAAGGTACATGTTTCGAGAGAAAAGAATGAAGATTC  
+HWI-EAS443:3:2:1759:1025#0/1  
aba]a`PSN¥W[P[¥SaS]¥YOYGP^\_`¥P\_]`[WOYBBB

@HWI-EAS443:3:2:1766:1933#0/1  
TGAAGAGCGATCTGGGCCGTTGCAGGTCCAAGGTCATTGT  
+HWI-EAS443:3:2:1766:1933#0/1  
]aabb^^ZI[\_L\_b]``Ra\_]``a`¥]Y¥U``UVGb\_a]\_  
@HWI-EAS443:3:2:414:687#0/1  
GAGCTAATGGAAGATGATTATCGGGGAAGACTTTGTAATC  
+HWI-EAS443:3:2:414:687#0/1  
a\_\_`aa]a]X]L\_\_S[P\_\_\_\_\_Z\_[X]Y\_^ZZ\_^Z]YYB  
@HWI-EAS443:3:2:515:925#0/1  
ATCGAGACTCCCAAGACCGTACTTAGCATGTTAAACATGC  
+HWI-EAS443:3:2:515:925#0/1  
a\_\_a``\_]a``\_]`¥Wxa\_N\_]^Y\_V^^\_Y]`\_\_X]YXX  
@HWI-EAS443:3:2:724:649#0/1  
AACAGTCTGGGCTCCAAGTAGGGGCAATGAAAAGAAGGC  
+HWI-EAS443:3:2:724:649#0/1  
S\_¥`aVa]a\_[PSVZHPb`[M]Taa¥¥R^a¥RQ¥`¥\_\_FT  
@HWI-EAS443:3:2:990:947#0/1  
CCTCCATCTGATACTAATAGCCCTACCTTTGATTGCGTTT  
+HWI-EAS443:3:2:990:947#0/1  
`a`babaL\_aaa`\_\_[^Yaa\_\_a`\_`¥aaa`\_]\_XaLR¥^  
@HWI-EAS443:3:30:1362:229#0/1  
GAACGACTTCCATTGTTTCAAGGCATGAATTCTCAAATAT  
+HWI-EAS443:3:30:1362:229#0/1  
aaaaa^\_ab\_``bbb\_aa``\_aa]`a\_\_^``]a]¥]^a^a  
@HWI-EAS443:3:30:1398:1043#0/1  
GGATCAAGAAAGAAGAGTTCTCTGAGATCATGGAGATCTG  
+HWI-EAS443:3:30:1398:1043#0/1  
\_X[QQORY[ITVRSWY[Z]XP[^Z¥URJQZVOSTOTXBB  
@HWI-EAS443:3:30:1407:1495#0/1  
CATTTGCGAAAAGCTTGAACAGTCTGGGCTCCCCGTAGGG  
+HWI-EAS443:3:30:1407:1495#0/1  
abaab¥]\_babZa]bab`b¥`ZXaba]a`aaaK\_`U^X¥[  
@HWI-EAS443:3:30:1432:410#0/1  
AGAGAGGCGAGTTAAAAAGAAGGGCTATCGCAACACCTGG  
+HWI-EAS443:3:30:1432:410#0/1  
U`]baabbbXb`aWZ]b^b`a]RYH[a\_¥^L[^X^MNTG]  
@HWI-EAS443:3:30:345:851#0/1  
AAAACAAAGACTGAATAAGAGAGCCTATCTAATAAGAGCA  
+HWI-EAS443:3:30:345:851#0/1  
`aa`aaaa`X`baYZ`W`aaaa^ZBBBBBBBBBBBBBBBB  
@HWI-EAS443:3:30:718:1107#0/1  
GAAGAATCCCACCCAGGAATATCTGAGAATTCATGCCTTG  
+HWI-EAS443:3:30:718:1107#0/1  
aabbaaababba`\_`^aaaa^I^aa]aaa\_`aaa^[\_  
@HWI-EAS443:3:31:344:821#0/1  
GATTGATGCTAGGGTCGACTTCGAGTCTGGACGGATCAAG  
+HWI-EAS443:3:31:344:821#0/1  
^Tabaa`baa[aaaRaaa`aaaa¥a\_aaa[\_a\_\_\_\_`\_a`  
@HWI-EAS443:3:31:586:793#0/1  
ACAAACAAGGGTAGATAAACTAACTCAAGGCCCGCAGACT

+HWI-EAS443:3:31:586:793#0/1  
Y]]NU¥`a`\_`YY¥LS^Ua`Ya`\_`ab^JZTDR\_ZS^`]aa  
@HWI-EAS443:3:32:324:647#0/1  
CCTTGAGTTAGTTTATCTACCCTTGTGGTTGAACGACTT  
+HWI-EAS443:3:32:324:647#0/1  
aba`\_Ya^`a`^`a\_a```aa\_\_[¥]\_\_[^^^^W[]]^  
@HWI-EAS443:3:32:844:1252#0/1  
AAACAATGGAAGTCGTTCAACAAACAAGGGTAGATAAACT  
+HWI-EAS443:3:32:844:1252#0/1  
a\_aab]aa^¥¥a¥`]W\_]\_`U`aa\_\_Y^¥\_Y¥WVZYV¥TO  
@HWI-EAS443:3:32:910:1512#0/1  
GAACGACTTCCATTGTTTCAAGGCATGAATTCTCAAATAT  
+HWI-EAS443:3:32:910:1512#0/1  
ZVaaa]\_ba`aa]Z¥R]`]¥\_a^\_]`ab`]a¥aT`\_N¥]Y  
@HWI-EAS443:3:32:916:371#0/1  
AGTTAGTTTATCTACCCTTGTGGTTGAACGACTTCCATT  
+HWI-EAS443:3:32:916:371#0/1  
ab\_abbaabaabbaa``aaa\_aa``a`\_`Za\_Z^a]a[a`  
@HWI-EAS443:3:32:98:1059#0/1  
CTTGTGTTGAGAATAGAACAATTCCTCTTGGGAATCCAGG  
+HWI-EAS443:3:32:98:1059#0/1  
aaa]]a\_a`\_]\_```a]]aa`\_`^`\_`^`^]]]W[\_]`^]^^  
@HWI-EAS443:3:33:1300:1505#0/1  
CAGATCTTCATGATCTCAGAGAACTCTTCTTTGTTGATCC  
+HWI-EAS443:3:33:1300:1505#0/1  
[``¥\_\_`Y`ba]]]Z\_Y``aaba¥XZ``abaaRbaaaX]X  
@HWI-EAS443:3:33:1454:1364#0/1  
GAGACAACATGACCAAGAAGATGGTCACGCGAAGAACAAT  
+HWI-EAS443:3:33:1454:1364#0/1  
aaabbbbbbaa`a\_aa`aaa`aaa`]a\_]`\_\_]N\_VVZ]¥\_  
@HWI-EAS443:3:33:1700:887#0/1  
GTCCCCAGTGATTGTGAAAGAAATCTCTGTGTATTGTGAA  
+HWI-EAS443:3:33:1700:887#0/1  
^¥b`T^[SZ¥a\_]aW[Y]\_RR]^]U¥U\_NWSQH^V[\_YSP  
@HWI-EAS443:3:33:225:215#0/1  
CCCCAGTGATTGTGAAAGAGATCTCTGTGTCTTGTGAATT  
+HWI-EAS443:3:33:225:215#0/1  
aba]M^Pa¥aaa]a[aaa]PX¥a`aa\_Z\_]\_]aZPYOTZ^  
@HWI-EAS443:3:33:374:150#0/1  
GGCCATGGTGTCTAGGGCCCGGATTGATGCCAGGGGCGAC  
+HWI-EAS443:3:33:374:150#0/1  
a\_OVMXa\_RJWYMQO`¥T`Z]¥KU]XSQX^¥XBBBBBBBB  
@HWI-EAS443:3:33:470:928#0/1  
GAACGACTTCCATTGTTTCAAGGCATGAATTCTCAAATAT  
+HWI-EAS443:3:33:470:928#0/1  
^``baaaa`ba``ab¥X`\_Z[aaaa\_a^^a`\_¥]\_¥]\_`\_  
@HWI-EAS443:3:34:117:1381#0/1  
ATTTTGTGGAGAACATTATGGGTGCCACGCTCAGGATGT  
+HWI-EAS443:3:34:117:1381#0/1  
YX¥Z¥SRW`]W¥aa^\_[aY¥OXMS^ZVDX^OOWWNB BBB

@HWI-EAS443:3:34:298:620#0/1  
AGCTAATGGATGATGATTATTGGGGAAGACTTTGTAATCC  
+HWI-EAS443:3:34:298:620#0/1  
QV\_^\_\_`a]^aZ\_] [X`^RFWY]\_O\_WZ]`\_XGOXZ\_R  
@HWI-EAS443:3:34:364:262#0/1  
GATTGATGCCAGGGTCAACTTCGAGTCTGGACGGATCAAG  
+HWI-EAS443:3:34:364:262#0/1  
aaaaba`aa^aa^W`]aa`\_a`¥`¥^^aZZZ\_\_ [¥W¥W  
@HWI-EAS443:3:34:677:1334#0/1  
GCAACTGCATTGGCCAACACCATACAAGTCTTTAGATCGA  
+HWI-EAS443:3:34:677:1334#0/1  
abb¥Z`a`\_¥[ZU^a` [b\_^S`VXQTN\_Y`a`]\_]¥[]Y^  
@HWI-EAS443:3:34:86:950#0/1  
GAACGACTTCCATTGTTTCAAGGCATGAATTCTCAAATAT  
+HWI-EAS443:3:34:86:950#0/1  
a\_a`a`a`Sbaa`\_UG\_W]U]V\_]TYaZZ\_ZRY\_¥Z¥X^V  
@HWI-EAS443:3:35:1781:1882#0/1  
GATTCCCCTAAGTTCGAGTCCCTGTATAATCTGTCCACT  
+HWI-EAS443:3:35:1781:1882#0/1  
^a\_H¥MRUU\_bYR\_Z]]MXPTZ\_]OYJ]Y]\_Z¥VMDMJR  
@HWI-EAS443:3:35:276:1284#0/1  
AAAGACTTCTATAGTGTGGCCAATGCAGTTGCTGCCGGT  
+HWI-EAS443:3:35:276:1284#0/1  
¥^Y]L\_a]bZZYW^V[T` `[ `]TTZ` `X¥W¥YaYLMYOTR  
@HWI-EAS443:3:35:280:817#0/1  
CTGCATTGGCCAACACCATAGAAGTCTTTTCGATCGAATGG  
+HWI-EAS443:3:35:280:817#0/1  
QXbbba[¥`\_aa\_bbbbb`\_ba^[QaaaYJ`W\_\_RWWSYL  
@HWI-EAS443:3:35:783:612#0/1  
ATTTGAGAATTCATGCCTTGAAACAATGGAAGTCGTTCAA  
+HWI-EAS443:3:35:783:612#0/1  
`aabaabaabaaa`]aaa`b\_\_aaba`a`aaaX`\_U^\_^¥  
@HWI-EAS443:3:36:1298:861#0/1  
AATATTCCTGGGAGGGATTCTTCAAGGAAAGCCATAGCCT  
+HWI-EAS443:3:36:1298:861#0/1  
a¥`b]bbb`\_`¥G`b\_aaaaaabbaab]```P[ `aab` [\_  
@HWI-EAS443:3:36:1595:2037#0/1  
CCCGGATTGATGCCAGGGTAGACTTCGAGTCTGGACGGAT  
+HWI-EAS443:3:36:1595:2037#0/1  
`` `[bW]aba`b`X^P]^GL`]QXYGa¥aW`\_YJOU]\_V]  
@HWI-EAS443:3:36:1757:1897#0/1  
CACCCAGGAATATTTGAGAATTCATGCGTTGAAACAATGG  
+HWI-EAS443:3:36:1757:1897#0/1  
\_`\_¥abYVaab][Zaaaa¥`[[[ `Z\_ZF[ `aWST\_^`\_X]  
@HWI-EAS443:3:36:490:1697#0/1  
GAAGAATCCCACCCTGGAATATTTGAGAATTCATGCCTTG  
+HWI-EAS443:3:36:490:1697#0/1  
abb¥\_babbabaa\_aZ[ `b`aaa^b]a^aaaa`ab`\_`a  
@HWI-EAS443:3:36:703:170#0/1  
GTTCTGTTTACTGTGTCCATGGGGTATCCTGTTCTGTTCT

+HWI-EAS443:3:36:703:170#0/1  
UYZa\_b\_\_`\_Y[¥]a[bb`^]bGa]PUXV¥WN][`Z`MV]  
@HWI-EAS443:3:36:81:1882#0/1  
GCCAGGGTCGACTTCGCGTCTGGACGGATCAAGAAAGAAG  
+HWI-EAS443:3:36:81:1882#0/1  
`ba```])bbbbaabab`\_bababb^¥a`a^aaabb\_ab[  
@HWI-EAS443:3:37:1060:1485#0/1  
GAGAATTCATGCCTTGAAACAATGGAAGTAGTTCAACAAA  
+HWI-EAS443:3:37:1060:1485#0/1  
`[SZbab¥^^HYYa```aRa¥^aWa`YNETNT\_]Y[¥¥  
@HWI-EAS443:3:37:1261:1688#0/1  
CCTGGGGGGGATTCTTCAAGGAAAGCCATAGCCTCTAGAA  
+HWI-EAS443:3:37:1261:1688#0/1  
aaIZ\_RR[S[a]aI\_bb]UNR\_]Paa[[[I`aXP^RR`  
@HWI-EAS443:3:37:1278:923#0/1  
GATCCGTCCAGACTCGAAGTCGACCCTGGGATCAATCCGG  
+HWI-EAS443:3:37:1278:923#0/1  
X\_a`V````aaa`a^¥X\_^`\_I\_aaYSUJHT\_P\_V`]QV  
@HWI-EAS443:3:37:1496:275#0/1  
AGTGATTGTGAAAGAAATCTCTGTGTCTTTTGAATTAGTC  
+HWI-EAS443:3:37:1496:275#0/1  
ab¥]`bbbZa\_\_aa]a`a\_W\_``\_]`aWGVTRT`]PYUU  
@HWI-EAS443:3:37:1685:547#0/1  
AAAAATTCCAGCGCAAATGCCATAAGCAGCACATTCCCT  
+HWI-EAS443:3:37:1685:547#0/1  
aba`¥ba\_]b\_a```\_`^Z\_\_a\_`a`ZaG^`\_`^^Z\_Z^  
@HWI-EAS443:3:37:1698:786#0/1  
AATTGAAGAGCCATCTGGGCCGTTGCAGGGCCAAGGTCAT  
+HWI-EAS443:3:37:1698:786#0/1  
a`WOZ¥a]¥``^`^`^`Y`\_aa]\_\_a^`TL`ZN^`NFYZR  
@HWI-EAS443:3:37:185:775#0/1  
TCTCCTATATGAACTGCTAGGGAAACATTTCTCGAATAGA  
+HWI-EAS443:3:37:185:775#0/1  
a¥`aWISS]Z\_]``[a`ORX^T^¥SSYTN¥`Za^MUQG]¥  
@HWI-EAS443:3:37:198:310#0/1  
GAAACATCCTGAGCATGGCACCCATAATGGTCTCAAACAA  
+HWI-EAS443:3:37:198:310#0/1  
`SZb¥`]aa^`]`b¥WaNVW[`^[[P¥\_SGT¥S\_[PRX\_]`  
@HWI-EAS443:3:37:445:1928#0/1  
AAAAACAAAGACTGAATAAGAGAGGCTATGTAATAAGAGC  
+HWI-EAS443:3:37:445:1928#0/1  
`^\_UP]\_PQFGUZRY¥a\_]\_[\_BBBBBBBBBBBBBBBBB  
@HWI-EAS443:3:37:614:1366#0/1  
AGCTGATTCATTTACTCCAGACACTCCACAGCTGGGTAGC  
+HWI-EAS443:3:37:614:1366#0/1  
\_¥[`a\_b`baaaa]``[[a^`aa^baUGXO\_Q\_\_\_RSUX  
@HWI-EAS443:3:37:678:459#0/1  
ATTTGCGAAAAGCTTGAACAGTCTGGGCTTCCAGTAGGGG  
+HWI-EAS443:3:37:678:459#0/1  
aaaa]aZabaaaaaaaa¥^aa]``a\_Y\_YG^U]P^`Za[

@HWI-EAS443:3:37:708:1928#0/1  
AAAGCATGGAATATGATGCCGTTGCAAATACACATTCCTG  
+HWI-EAS443:3:37:708:1928#0/1  
`aaa[bPY\_ba\_a\_aa\_\_a\_a^\_a`¥FJWa\_a`YYYaWP  
@HWI-EAS443:3:38:1017:1964#0/1  
GTCAATCCGACTCTACTTTTCTAAAAATTCAAGCGCAA  
+HWI-EAS443:3:38:1017:1964#0/1  
a\_ZS¥¥¥]\_YF^aa``][0][Xbba¥ZQOILFXIQT^]]0  
@HWI-EAS443:3:38:1521:2023#0/1  
CACTAACTTGCAGTCTGTAGAATCTGTCCACTACTGCT  
+HWI-EAS443:3:38:1521:2023#0/1  
a\_`^]ab```OWa\_]¥^\_`a¥S¥b]0^`[QP¥NXHTVVQS  
@HWI-EAS443:3:38:1788:102#0/1  
ACTGGGAGCCCAGACTGTTCAAGCTTTTCGAAATGCTCC  
+HWI-EAS443:3:38:1788:102#0/1  
]`a`bbabb`V^W^baaaWaab`aaa`^]FOZ]R`SXVK  
@HWI-EAS443:3:38:29:1279#0/1  
GTGGTAACGCCAGCCCATGGTCCAGCCAAAAGCATGGAAT  
+HWI-EAS443:3:38:29:1279#0/1  
a`a`P``[W\_`ZY`\_^YYS[R¥¥PR^]S¥W[RL[QQVXYS  
@HWI-EAS443:3:39:1502:1881#0/1  
CCCCAGTGATTGTGAAAGAAATCTCTGTGTCTTTTGAATT  
+HWI-EAS443:3:39:1502:1881#0/1  
aUaa]SSYYaaa\_[```UU¥]\_^\_S\_NXTWXXZFTV]Z^S  
@HWI-EAS443:3:39:1670:579#0/1  
AGGCCATGGTGTCTAGGGCCCGGATTGATGCGAGGGTCGA  
+HWI-EAS443:3:39:1670:579#0/1  
QH]X`\_\_\_\_^H`TT¥UabaaVSaaV¥a¥`\_XMUWZBBBBBB  
@HWI-EAS443:3:39:196:313#0/1  
GAAATTTTTCCCTAGCCGTTTCATATAGGAGACCGGTTGGA  
+HWI-EAS443:3:39:196:313#0/1  
aaV^aa```]]¥[W[TF^R\_^UPO]\_`¥^\_NPU^\_XY\_\_[  
@HWI-EAS443:3:39:212:200#0/1  
ACAAAGTGGAATAGAGATAACAACCCACTTTCAAAGAAA  
+HWI-EAS443:3:39:212:200#0/1  
aba]a`^ba[aaaaaaa\_aaaaaa```Y^\_\_\_\_\_PZ`\_\_[  
@HWI-EAS443:3:39:240:1261#0/1  
TCGAGACTCCCAAGACCGTACTTAGCATGTAAACATGCC  
+HWI-EAS443:3:39:240:1261#0/1  
abbbaaaabbbaaa¥aa\_\_aZa`^^`Xab^a\_a`aa\_¥`¥  
@HWI-EAS443:3:39:256:184#0/1  
CAGAAATCAACCGCAGCAACTGCATTGCCAACAGCATA  
+HWI-EAS443:3:39:256:184#0/1  
abaRU\_Wb^a`[`Yb]aaaT`[QMRPYa¥Z`RSEIFTGXR  
@HWI-EAS443:3:39:583:117#0/1  
TAGAACGATTCTTGGGAATTCAGGAATGTGTAGTTGC  
+HWI-EAS443:3:39:583:117#0/1  
abbbb`Zaaa`aabaaaaaa``]aaWa`a]aX\_a]^`\_  
@HWI-EAS443:3:39:952:1638#0/1  
GGCATGTTTAAACATGCTAAGTACGGTCTTGGGAGTCTCGA

+HWI-EAS443:3:39:952:1638#0/1  
¥\_abbbabbbabbaabbb`YY]a\_YXXaa`¥R`Y\_`a`YM  
@HWI-EAS443:3:3:1105:1595#0/1  
GTCTGGAGTAAATGAATCAGCTGACATGAGAATTGGAGTA  
+HWI-EAS443:3:3:1105:1595#0/1  
`NUYWYRVRYaP]\_^^VZVWO]aYGS]`Z\_S]SSYVW^BB  
@HWI-EAS443:3:3:1556:1959#0/1  
GACGGATCAAGAAAGAAGAGTTCCTGAGATCATGAAGAT  
+HWI-EAS443:3:3:1556:1959#0/1  
aaabaa`abaaaa`a`aaa^aWZN\_^^\_^^[^\_^\_^]`R  
@HWI-EAS443:3:3:163:1555#0/1  
AAAGGGATTGAGGGATTACAAAGTCTTGCCCGATAATCA  
+HWI-EAS443:3:3:163:1555#0/1  
T\_YQWabX`]\_bRY\_YUQ[T```XS\_bYDRbWF^^J[Y[`  
@HWI-EAS443:3:3:1668:1539#0/1  
CATGGAGCTACCCAGCTTTGGAGTGTCTGGAGGAAATGAA  
+HWI-EAS443:3:3:1668:1539#0/1  
^U[baVM[\_]a\_[¥^P]aaaU^XUX^\_Z^a^\_FT`\_Q`BB  
@HWI-EAS443:3:3:1784:1124#0/1  
ATTTGAGAATTCATGCCTTGAAACAATGGAAGTCGTTCAA  
+HWI-EAS443:3:3:1784:1124#0/1  
a`bababbbbbb\_bbaU`bbaa\_babaaaa`aW]YLYY^\_  
@HWI-EAS443:3:3:216:523#0/1  
ATCGAGACTCCCAAGACCGTACTTAGCATGTTAAACATGC  
+HWI-EAS443:3:3:216:523#0/1  
`ab`aa`a`a`\_\_\_\_`a¥a\_U`\_\_`^a^]`a¥\_X``X`\_\_¥  
@HWI-EAS443:3:3:358:209#0/1  
ATTGAAGAGCCATCTGGGCCGTTGGAGGTCCAAGTCATT  
+HWI-EAS443:3:3:358:209#0/1  
Ya]b`a\_Y\_bbaY```^\_a]`^^YDY`ZVLQa[`aLNZ\_Y  
@HWI-EAS443:3:3:857:1069#0/1  
CAATACTCAGAAAAGGGAAAGTGGATGACAAACACAGAGA  
+HWI-EAS443:3:3:857:1069#0/1  
`]aaaR^XaaTa\_ab^U\_Xa0a\_WWaa¥Wa\_aZXR`\_]`^B  
@HWI-EAS443:3:40:1006:1243#0/1  
GCTGGCATTGTTGTTGCGAATCTTCATTCTTTTACTCTCGA  
+HWI-EAS443:3:40:1006:1243#0/1  
a\_]YHU`ab]W¥R```a[Q[\_Y\_QMSW¥TVXS¥a^`YR[[  
@HWI-EAS443:3:40:1483:1168#0/1  
ACAATGGAAGTCGTTCAACAAACAAGGGTAGATAAACTAA  
+HWI-EAS443:3:40:1483:1168#0/1  
aaaabaa`aaYZ`Z]QZ^N]`]NW¥X¥\_SRZUQY]\_UTYZ  
@HWI-EAS443:3:40:1563:1008#0/1  
GTCTGGACGGATCAAGAAAGAAGAGTCCTCTGAGATCATG  
+HWI-EAS443:3:40:1563:1008#0/1  
a^O¥¥UUY\_]NYVXNHWRNUZVQVLFXYXYXVSS[YUY  
@HWI-EAS443:3:40:1690:1510#0/1  
TGGCTCTTCAATTGTTTCATCAAGGACTACAGATACACATA  
+HWI-EAS443:3:40:1690:1510#0/1  
VZXYa`\_aVNSX^X[\_a^L\_\_^a\_]FU¥a`^\_\_a¥\_¥`\_\_



@HWI-EAS443:3:40:604:477#0/1  
AAGAAATCTCTGTGTCTTGTGCATTAGTCATCATCTTTCT  
+HWI-EAS443:3:40:604:477#0/1  
a\_b` `\_`\_aba^a^`a^ZYDO^[LQJSU\_¥\_^^¥^\_\_\_\_  
@HWI-EAS443:3:40:611:809#0/1  
ACGGAATCTTCACATTCCTGAAGTCTGCTTAAAAAGGGAG  
+HWI-EAS443:3:40:611:809#0/1  
^abba]`abbaaaaaaaaa^W^a\_^a]aYa¥T¥TK¥\_\_\_\_a  
@HWI-EAS443:3:40:754:307#0/1  
CAGTGCTCTTATTAGATAGCCTCTCTTATTACAGCCTTTGT  
+HWI-EAS443:3:40:754:307#0/1  
`XRF^aZa`YO[`YXQNQT`[Y¥V¥YQJMU[VYF[[[[[UT  
@HWI-EAS443:3:42:24:468#0/1  
ATCTAATATGAGCACTGACATTAATACGATGACCAAAGA  
+HWI-EAS443:3:42:24:468#0/1  
aaaaaaaaa`baaaaaaaaa`\_\_[`a`aaa\_]\_\_\_\_Ua`  
@HWI-EAS443:3:42:262:1686#0/1  
CAAGCAGGAGTGGACAGATTCTACAGGACCTCAAGTTAG  
+HWI-EAS443:3:42:262:1686#0/1  
ab[QaR^a\_UXaaaY¥TRSVSZWNUIPMY\_LFOLYUT[YB  
@HWI-EAS443:3:42:401:1492#0/1  
CAGGAACAGAATACACCATGGACACAGTAAACAGAACACA  
+HWI-EAS443:3:42:401:1492#0/1  
ab`[`^`b\_H\_]`^Y^Y`U`baaU]a[^WT\_VX¥J]BBBBB  
@HWI-EAS443:3:42:635:82#0/1  
CAACCCGAGTGGCTCAGAAACATCCTGAGCATGGCACCCA  
+HWI-EAS443:3:42:635:82#0/1  
aaa\_aaba[QY\_G\_]\_\_Y`ZUZ[^ZUU\_UUUZ\_V]S]VH  
@HWI-EAS443:3:42:802:950#0/1  
GGTGCTTATGGCATTTCGCGCTGGAATTTTTAGTAAAAGT  
+HWI-EAS443:3:42:802:950#0/1  
ab\_abaa\_abaaaaaaaa`ab¥¥aa\_aaaaa`a`Y^\_a¥  
@HWI-EAS443:3:43:1659:1824#0/1  
ATCCCACTAACTTGCAGGTCCTGTAGAACCCTGTCCACTC  
+HWI-EAS443:3:43:1659:1824#0/1  
`bb`]^b`^b`baaaaabYWyababbaa`^^^Y\_aa`a`  
@HWI-EAS443:3:43:475:776#0/1  
ATTTTGTGGAGAACATTATGGGTGCCATGCCAGGATGT  
+HWI-EAS443:3:43:475:776#0/1  
]bababab\_]a`\_b\_Y\_b^aa`aP¥¥]]aa]VF a\_`UYa\_  
@HWI-EAS443:3:43:480:1380#0/1  
GGTAATGGCAGCCCATGGTCCAGCCAAAAGCATGGAATAT  
+HWI-EAS443:3:43:480:1380#0/1  
aa\_aaaaabb\_X]a]US]Z\_^]PX]Q]a[QX`V^YZVU^¥  
@HWI-EAS443:3:43:561:325#0/1  
GAACGACTTCCATTGTTTCAAGGCATGAATTCTCAAATAT  
+HWI-EAS443:3:43:561:325#0/1  
Za\_aa^a¥ab`aa]b¥b¥R^]a`^^W[YS\_¥VXFS`^¥aa  
@HWI-EAS443:3:43:959:955#0/1  
GTCCTTCATCTGATACTAATAGCCCTACCTTTGATTGGGT

+HWI-EAS443:3:43:959:955#0/1  
aaaaabbbaabaaaaaa\_aaaa\_a`\_aaa`aaa]  
@HWI-EAS443:3:43:98:1713#0/1  
AGTTAGTTTATCTACCCTTGTGGTTGAACGACTTCCATT  
+HWI-EAS443:3:43:98:1713#0/1  
`a\_a`aaabba`aaaWaa`aa`¥\_\_\_`\_]^^\_a`  
@HWI-EAS443:3:44:1104:983#0/1  
ATGGAATCAATGAACAAGGAGAAATAGAGATAACAACCC  
+HWI-EAS443:3:44:1104:983#0/1  
aaba^`baabbbaaa`\_0a[aa\_a\_aaaaaa`\_]`a``^  
@HWI-EAS443:3:44:176:173#0/1  
GATGGGCATGTTTAAACATGCTAAGTACGGTCTTGGGAGTC  
+HWI-EAS443:3:44:176:173#0/1  
a^^X`a^]babbb]ababbaaba`aa`^P\_a\_`[¥]a¥U  
@HWI-EAS443:3:44:290:768#0/1  
CAAAGCTGGGTAGCTCCATGCTGAAATTAGCCACAAATCC  
+HWI-EAS443:3:44:290:768#0/1  
aabaaaaaa\_ba`a\_aaaa^G¥a`aaaa`¥`\_\_X^aYR  
@HWI-EAS443:3:44:432:392#0/1  
GAACGACTTCCATTGTTTCAAGGCATGAATTCTCAAATAT  
+HWI-EAS443:3:44:432:392#0/1  
a`aaa\_a`aa`ababW\_a`a]aa``\_W``\_`^\_]``\_\_  
@HWI-EAS443:3:44:686:447#0/1  
GCACAAACAGACTGTGTTCTAGAGGCTATGGGTTTCCTTG  
+HWI-EAS443:3:44:686:447#0/1  
aaa^R^aaaa\_a\_aWa`^\_\_Y`\_\_\_\_\_BBBBBBBBBBBBB  
@HWI-EAS443:3:45:1256:1372#0/1  
AGTTAGTTTATCTACCCTTGTGGTTGAACGACTTCCATT  
+HWI-EAS443:3:45:1256:1372#0/1  
\_`I¥a\_a`b^¥`\_\_Q\_aaa`T\_baZV`\_`QaTN\_`V^Y^\_  
@HWI-EAS443:3:45:1310:1376#0/1  
GAAAAAATAAAGACTGAATAAGAGAGGCTATCTAATAAGA  
+HWI-EAS443:3:45:1310:1376#0/1  
a`\_\_Za\_a`a]aY\_aa]\_``\_\_a\_^]\_^[LDPY]NTWNT  
@HWI-EAS443:3:45:1394:1822#0/1  
ATTCCATGCTTTTGGCTGGACCATGGGCTGGGATTACCAC  
+HWI-EAS443:3:45:1394:1822#0/1  
aab\_\_a\_a¥a`aa`a`\_`VY\_]^^[U]XDT[`WWHXS  
@HWI-EAS443:3:45:139:693#0/1  
CTGGGTGGGATTCTTCAAGAAAAGCCATAGCCTCTAGAAC  
+HWI-EAS443:3:45:139:693#0/1  
]VaY^bbbaba]abNF[^b\_Vb`]Ia[a]aM¥ba\_aY¥]  
@HWI-EAS443:3:45:1613:1979#0/1  
ATCCGAGTCTACTTTTCTAAAAATTCCAGCGCAAATGC  
+HWI-EAS443:3:45:1613:1979#0/1  
a^abaaJaW`a\_aUZ^¥Ya`a^^[abQHWV[]\_a\_\_aa`\_  
@HWI-EAS443:3:45:398:1963#0/1  
CACTAACTTGCAGTTCCTGTAGAATCTGTCCACTCCTGCT  
+HWI-EAS443:3:45:398:1963#0/1  
a`b]Wb\_baWSbWI¥aaaa`][^bbYbb`a^ZVb\_]UIN`

@HWI-EAS443:3:45:603:208#0/1  
AAGAGAGGCTATCTAATAGGAGCACTGACATTAATACGA  
+HWI-EAS443:3:45:603:208#0/1  
aaabaabaaa\_XTYLXYWRHLTYPV¥YUXZZMY^LOOYV  
@HWI-EAS443:3:46:1073:1457#0/1  
GATTGATGCCAGGGTTGACTTCGAGTCTGGACGGATCAAG  
+HWI-EAS443:3:46:1073:1457#0/1  
a^abbaaba\_Z\_aa]aa```\_^a`a]\_`aaa\_aa^\_^\_[^  
@HWI-EAS443:3:46:1084:572#0/1  
CATGTTTAACATGCTAAGTACGGTCTTGGGAGTCTCGATA  
+HWI-EAS443:3:46:1084:572#0/1  
`bbbabbbb`bababbabababa¥`bbaba\_b^aa\_b```  
@HWI-EAS443:3:46:1681:388#0/1  
AGAAGATGGTCACGCAAAGAACAATCGGGAAGAAAAACA  
+HWI-EAS443:3:46:1681:388#0/1  
abb`babbb\_aaab`aaabaa]\_`abY¥[XX\_VXX^ZZSW  
@HWI-EAS443:3:46:325:1672#0/1  
GATTGATGCCAGGATCGACTTCGAGTCTGGACGGATCAAG  
+HWI-EAS443:3:46:325:1672#0/1  
abbaaaaab\_^\_WWTa\_bba`bV]R[JZYV[[\_bWYYN  
@HWI-EAS443:3:46:464:1888#0/1  
ATGATGGGCATGTTTAACATGCTAAGTACGGTCTTGGGAG  
+HWI-EAS443:3:46:464:1888#0/1  
aab)`Z`a\_]\_b`Zaaaa`a]]a`a\_a]`aSUY[a^^^¥  
@HWI-EAS443:3:46:646:1548#0/1  
GTCCCCAGTGATTGTGAAAGAAATCTCTGTGTCTTATGAA  
+HWI-EAS443:3:46:646:1548#0/1  
XIU\_SSa`Y`a^abYXT\_YYUb`\_T\_0]`SP[YRYFL]aJ  
@HWI-EAS443:3:46:681:1956#0/1  
GAGATTTCTTTCACAATCACTGGGACAACAGTAAGTGGA  
+HWI-EAS443:3:46:681:1956#0/1  
aa`Yaabb`bbaaaaa`aaaaaaa`a`¥DX\_\_aZaa^  
@HWI-EAS443:3:46:721:1437#0/1  
GTCTGGGCGGATCAAGAAAGAAGAGTTCTCTGAGATCATG  
+HWI-EAS443:3:46:721:1437#0/1  
ab]```bbbba\_baaaaabb\_bb`baabbbbabaaaaaaa  
@HWI-EAS443:3:46:914:1328#0/1  
TTTCTCGAATAGATTGCAGCACTTCTGGTAAATCTGTTCA  
+HWI-EAS443:3:46:914:1328#0/1  
aa`a\_\_V`[`]Z^\_\_a^[\_^^]a¥^\_`BBBBBBBBBBBB  
@HWI-EAS443:3:47:1199:265#0/1  
TGTCCTCCTGCTTGTATTCCCTCATGGGTTGGTGCATT  
+HWI-EAS443:3:47:1199:265#0/1  
abbaaa`baabb\_bbaaaba\_\_`a\_aaaaaY`a`[a^Y```  
@HWI-EAS443:3:47:351:1688#0/1  
TGAAAGAAATCTCTGTGTCTTGTGAATTAGACATCATCTT  
+HWI-EAS443:3:47:351:1688#0/1  
ab\_\_aa\_ababa¥`a`\_^\_aa`W^`¥`^XYFO\_\_S[\_Z```  
@HWI-EAS443:3:47:52:1349#0/1  
CTCTATTTCTCTTTGTTTCATTGATTTCGATTACATCCTTT

+HWI-EAS443:3:47:52:1349#0/1  
]aba`ba\_b`W]`aV`a#b^\_b]FF]aV^b`baab\_X  
@HWI-EAS443:3:48:23:496#0/1  
GAACGACTTCCATTGTTTCAAGGCATGAATTCTCAAATAT  
+HWI-EAS443:3:48:23:496#0/1  
\_Z`¥[X`baa`ab^¥TZa\_\_Za`^\_\_¥`YV^^`¥S^a`  
@HWI-EAS443:3:48:572:1528#0/1  
CATGGGCTGGCGTTACCACAGCATTGTTTACAGAATCAAT  
+HWI-EAS443:3:48:572:1528#0/1  
ab`ba]b\_abb`ababbaba`b\_aabbbbaaaba`ba[  
@HWI-EAS443:3:49:39:140#0/1  
GCTGTGGTAATGCCAGCCCATGGTCCTGCCAAAAGCATGG  
+HWI-EAS443:3:49:39:140#0/1  
^S]ZHR¥TSW[Z[S¥^MS[VT]ZJYKDIVUQUXRRXWRQB  
@HWI-EAS443:3:49:634:1434#0/1  
CTCTTACTCTCCTTTTTCTTTGAAAGGGGGTTGTTATCTC  
+HWI-EAS443:3:49:634:1434#0/1  
^J]bbYbaa\_`aaa`a`b`¥b`K]D^aa^W\_\_aV¥¥`a  
@HWI-EAS443:3:49:696:1517#0/1  
GTGTTCTAGAGGCTATGGCTTTCTTGAAAAATCCCACCC  
+HWI-EAS443:3:49:696:1517#0/1  
a`aaaaabaaa`a\_KT[[W^XBBBBBBBBBBBBBBBBBBB  
@HWI-EAS443:3:49:720:1741#0/1  
GACTAGGGAAAGGGTACATGTTTCGAGAGCAAAGAATGAA  
+HWI-EAS443:3:49:720:1741#0/1  
SYRXYXTSXWP]Z¥`ba\_]WHSQHQSZSZGUIQ^a]WYOXW  
@HWI-EAS443:3:49:961:1102#0/1  
GAGCTAATGGATGATGACTATCGGGGAAGACTTTGTAATC  
+HWI-EAS443:3:49:961:1102#0/1  
aaaabbabba`ba`aaa`ba`¥\_aaa`[\_`^aaaa^``\_Z  
@HWI-EAS443:3:49:992:1676#0/1  
ATTGGAGCCCATCCCACCAGTATATTGTCTTTGTGTATTT  
+HWI-EAS443:3:49:992:1676#0/1  
aXaX`SZ]YZbba¥^a¥W]b]aa\_b`P`a\_I`Sxa`a\_  
@HWI-EAS443:3:4:1157:909#0/1  
TAAAAATTCCAGCTCAAATGCCATAAGCACCATTTCCC  
+HWI-EAS443:3:4:1157:909#0/1  
`bba`a`]W[ZMMYa]SZaaY¥Za\_\_^`\_\_\_\_]^Z^WOQ  
@HWI-EAS443:3:4:1352:588#0/1  
GCACTGACATTAATACGATGAGCAAAGATGCAGAGAGAG  
+HWI-EAS443:3:4:1352:588#0/1  
a[`W\_\_[L]a\_aW^^^I^^S\_MKRZnz`]W]UVaXXW^Z^  
@HWI-EAS443:3:4:292:894#0/1  
AATTGAAGAGCCATCTGGGCCGTTGCAGGACCAAGTCAT  
+HWI-EAS443:3:4:292:894#0/1  
aaaaaa]]Z^]\_\_`XKXKU\_BBBBBBBBBBBBBBBBBBBB  
@HWI-EAS443:3:4:627:2026#0/1  
GACTCATTAGCTGTTAGGCCATTTCGATCTAAAGAATTCTA  
+HWI-EAS443:3:4:627:2026#0/1  
ab]aaaa`aR`ba]^Sb`Z`[aT`]^`¥WETWN[Z

@HWI-EAS443:3:4:797:1434#0/1  
TGGAAGTCGTTCAACAAACAAGGGTAGATAAACTAACTCA  
+HWI-EAS443:3:4:797:1434#0/1  
a\_L]aXW\_a^^]\_\_R\_\_`0`^\_\_\_R`¥^U]\_^G]]^J¥ZB  
@HWI-EAS443:3:4:914:849#0/1  
ATTTGAGAATTCATGCCTTGAAACAATGGAAGTCGTTCAA  
+HWI-EAS443:3:4:914:849#0/1  
abbbabbaabaaaabaababa`a\_a\_`V``aa]`\_^`Y\_`  
@HWI-EAS443:3:50:1013:1441#0/1  
GTTCTGTTTACTGTGTCCATGGTGTATCCTATTCCTGTTC  
+HWI-EAS443:3:50:1013:1441#0/1  
a]^\_]XN\_]\_[\_aX`]^[^^`\_U[NUXS¥YR]]R[¥\_VZS  
@HWI-EAS443:3:50:517:174#0/1  
GTTCAAAAACATCCTGAGCATGGCACCCATAATGTTCTCA  
+HWI-EAS443:3:50:517:174#0/1  
a\_^0[a````\_a^]TQ\_Y\_Z^PZ[^^Z^\_VY[]\_\_TSS[0Z  
@HWI-EAS443:3:50:68:1029#0/1  
GTGGGATGAGCTCCAATCATCCGACGATTTTGCTCTCATA  
+HWI-EAS443:3:50:68:1029#0/1  
a``ba`aa````aaa`aa`a`\_]````a\_`aaaa\_^^\_¥\_`^`  
@HWI-EAS443:3:51:483:688#0/1  
GAACGACTTCCATTGTTTCAAGGCATGAATTCTCAAATAT  
+HWI-EAS443:3:51:483:688#0/1  
`aaabaaab`abbbabb````bb`babbaaa[baaaaaaa  
@HWI-EAS443:3:51:594:258#0/1  
CTCCAATACTCACGTCAGCTGATTCACTTACTCCAGACAC  
+HWI-EAS443:3:51:594:258#0/1  
abaabbaaaaabab`^bb\_bba`b``bbb```aaaaba```a  
@HWI-EAS443:3:51:612:1492#0/1  
CCTTTGTCAGTCATAAAGAGATTGATTCTGTAAAAAATGC  
+HWI-EAS443:3:51:612:1492#0/1  
X`baa`[SS````a`]R^babbaabab`aaYyb\_WF^aXXZ  
@HWI-EAS443:3:52:1321:658#0/1  
GTTAGTTTATCTACCCTTGTGGTTGAACGACTTCCATTG  
+HWI-EAS443:3:52:1321:658#0/1  
a\_aa]]aa]\_\_\_\_\_]]^a^X^`\_Y¥XUYVRVS^\_¥X¥¥^\_  
@HWI-EAS443:3:52:1532:13#0/1  
AGCCTCTTTTATTCAGTCTTTGTTTTTTCTTCCCTATTGT  
+HWI-EAS443:3:52:1532:13#0/1  
V\_b^VW^OY`R`a¥S[Z¥\_aT^X[bbb¥S[V^Z[ZSb\_J\_  
@HWI-EAS443:3:52:224:491#0/1  
GGCTCCAATCATCCGACGATTTTGCTCTCATGGTGAATGC  
+HWI-EAS443:3:52:224:491#0/1  
aaa^^[ORJUSWSN[\_[¥NSURX\_Y[NVSST¥VOXYT]RH  
@HWI-EAS443:3:52:237:1532#0/1  
GTTCTGTTTACTGTGTCCATGGTGCATCCTGTTCCTGTTC  
+HWI-EAS443:3:52:237:1532#0/1  
`¥`bab\_aaa``b\_a`a]``¥][a¥Xaa\_\_aa`Ua¥TNW^  
@HWI-EAS443:3:52:607:662#0/1  
CTAATGGATCATGATTATCGGGGAAGACTTTGTAATCCCC

+HWI-EAS443:3:52:607:662#0/1  
aa¥\_bbba\_`X^[\_`a`ZY]\_YVVYTSY¥\_SZZ\_YWT[X  
@HWI-EAS443:3:52:848:496#0/1  
GTCCTCCATCTGATACTAATAGCCTTACCTTTGATTGGGT  
+HWI-EAS443:3:52:848:496#0/1  
Y\_WVXO[Q`VYUW`ZYX[Y]PFI¥]WKS]X\_`[O¥Y¥G  
@HWI-EAS443:3:53:102:109#0/1  
TGTGTTCTGTTTACTGTGTCCATGGGGTATCCTGTTCTCTG  
+HWI-EAS443:3:53:102:109#0/1  
aa¥ba^S\_bJ\_WaW^aS\_NYRRO[^P¥SZS[KP[KKTSSR  
@HWI-EAS443:3:53:1091:268#0/1  
TAAGAGTCAACATGACCAAGAAGATGGTCACGCAAAGAAC  
+HWI-EAS443:3:53:1091:268#0/1  
^TQNTRF\_ZPVJHU^XNNSLQQPSUBBBBBBBBBBBBBBB  
@HWI-EAS443:3:53:1220:532#0/1  
GAAGTACTTCGGGTCAATGCTTGCTAGCATTCTGCTGGT  
+HWI-EAS443:3:53:1220:532#0/1  
a```\_R¥]aaa`0^Y`^^\_adWaa\_\_`aa\_[a]Xaaa]  
@HWI-EAS443:3:53:1305:2035#0/1  
GAATCCCCTTTGGCTTGTGTTGGGAATAGAACGATTCCT  
+HWI-EAS443:3:53:1305:2035#0/1  
a`N¥[\_abaaaa\_Y^bZT\_b\_a]H¥ZaV^aaQGx^SYRLV  
@HWI-EAS443:3:53:1544:1577#0/1  
CGACGATTTTGTCTCATAGTGAATGCAACAAACCATGAG  
+HWI-EAS443:3:53:1544:1577#0/1  
ZaY\_ba¥`¥ab`X`b\_K\_Z`\_bbb`aK¥b[¥aI[bbZ\_  
@HWI-EAS443:3:53:1771:1565#0/1  
GATGGCTCTTCAATTGTTCCACCAAAGACTACAGATACACA  
+HWI-EAS443:3:53:1771:1565#0/1  
aaabaaaaaX[¥aa`\_T]\_X^`¥X¥W[\_`Z^[¥^U¥X¥  
@HWI-EAS443:3:53:211:183#0/1  
TAGCTGTTAGGCCATTTCGACCTAAAGACTTCTATGGTGTT  
+HWI-EAS443:3:53:211:183#0/1  
abaaaa]aa`[VT^a`[\_`V\_\_\_^Z[FR\_\_VWVU[^WTUW  
@HWI-EAS443:3:53:360:2037#0/1  
AGTTTATCTACCCTTGTGTTGTTGAACGACTTCCATTGTTT  
+HWI-EAS443:3:53:360:2037#0/1  
aa`bab^ba`aX\_`a^aaa\_\_`aa`\_^\_\_`\_\_\_\_a`][^  
@HWI-EAS443:3:53:565:1796#0/1  
AAAGAAATACACCAAGAGAATATACTGGTGGGATGGGCTC  
+HWI-EAS443:3:53:565:1796#0/1  
abb^bbbbbababYD^aaaa`aaaa¥bbaY\_¥^`¥]`  
@HWI-EAS443:3:53:728:787#0/1  
GTGTGTTCTGTTTACTGCGTCCATGGTGTATCCTGTTCTCT  
+HWI-EAS443:3:53:728:787#0/1  
a`a`babab`aaaa^aaP\_\_a`\_ab^Ua[aaY\_aa¥\_aZ`  
@HWI-EAS443:3:53:811:1243#0/1  
ATCCCCTAACTTGCAGGTCCTGTGGAATCTGTCCACTC  
+HWI-EAS443:3:53:811:1243#0/1  
ab\_GMRW]]a]X`a`[W¥ZQZNP`TDU`[TTaZPNRWHSL

@HWI-EAS443:3:54:1558:408#0/1  
ATGCTCAGGATGTTTCTGAACCACTCGGGGTGATTTCTGG  
+HWI-EAS443:3:54:1558:408#0/1  
ab\_aa\_[a\_\_a\$]aa\_a\$^]^^]aa`G\_`^\_\_aZ`\_W  
@HWI-EAS443:3:54:361:1342#0/1  
GGCAAGACTAGGAAAGGCACATGTTTCGAGAGTAAAAGA  
+HWI-EAS443:3:54:361:1342#0/1  
aa\_Zaa00`Q\$[^`\_Z^a^Ma\_J^a[R\_a^U\_]``\_\_a\_  
@HWI-EAS443:3:55:1162:501#0/1  
CTCTTCGATTGTTTCATCAAAGACTACAGATACACATATAG  
+HWI-EAS443:3:55:1162:501#0/1  
ababbbb`bbaabaab`baabaaaa`aba`aab`aabaaa  
@HWI-EAS443:3:55:1337:414#0/1  
TGGGTGCGATTCTTCAAGGAAAGCCATAGCCTCTAGAACA  
+HWI-EAS443:3:55:1337:414#0/1  
\$\$\_XS[FY\$]U\$UXUPO^b`aaa\_0`^`^]KXZ]]\$`\_W\$  
@HWI-EAS443:3:55:1425:1172#0/1  
GATTGATGCCAGGGTCGACTTCGAGTCTGGAGGGATCAAG  
+HWI-EAS443:3:55:1425:1172#0/1  
a`b\$K^QHLI`\_SIQ\_URbYY\_WVRa[[H\$a\_YUMKSV  
@HWI-EAS443:3:55:857:165#0/1  
GTTGATCCCACTAACTTGCAGGTCCTGTAGAACCTGTCC  
+HWI-EAS443:3:55:857:165#0/1  
aaaa\$aa^[]a^a\_\_\_\_aaQ[a]]X]\_\_]^\_ZVSV^`XXZ  
@HWI-EAS443:3:56:1084:605#0/1  
CCCCAGTGATTGTGAAAGAAATCTCTGTGTCTTGTTAATT  
+HWI-EAS443:3:56:1084:605#0/1  
aa[\_abY`QWa]L]]Z\$M0[]VW\$`XX[PZ\_]VGQTR]  
@HWI-EAS443:3:56:1314:1298#0/1  
ATGGGCATGTTTAACATGCTAAGTACGGTCTTGGGAGTCT  
+HWI-EAS443:3:56:1314:1298#0/1  
aa\_a\_]\_ab^aaaa^\_\_a\_`a`X\_\_aaU]a\_a`Z]^]^^  
@HWI-EAS443:3:56:1638:737#0/1  
GATAGCCTCTTATTTCAGTCTCTGTTTTTTCTTCCCTAT  
+HWI-EAS443:3:56:1638:737#0/1  
aU\_S[ZS`\_aV\_aZaa\_\_`X\_`Xaa^\_a`ba[`a\$[]][`  
@HWI-EAS443:3:56:1653:1368#0/1  
GTTTATCTACCCTGTTTGTGAACGACTTCCATTGTTTC  
+HWI-EAS443:3:56:1653:1368#0/1  
a`aa`a`ba`\_\_aaa^`a\_`a\_]a]Y`aY^`a`a]\_`X  
@HWI-EAS443:3:56:530:377#0/1  
CATGGAGCTACCCAGCCTTGGAGTGTCTGGAGTAAATGAA  
+HWI-EAS443:3:56:530:377#0/1  
aa]\_a`baba`ba\_aa\_a^\_a]a]b]\_aaa]\$[Y`\_`a\_^  
@HWI-EAS443:3:56:927:672#0/1  
GCCAGGGTCGACTTCGAGTCTGGACAGATCAAGAAAGAAG  
+HWI-EAS443:3:56:927:672#0/1  
aaa]\_aa\_baa`Xa][FUH\_a``LZRWJJP\$YZV^^]X]\_  
@HWI-EAS443:3:57:1747:920#0/1  
TGGACCTGCAACGGCCAGATGGCTCTTTAATTGTTTCATC

+HWI-EAS443:3:57:1747:920#0/1  
X`abXZPPRP`WTZ^S^\_`^VW¥HUT` `YIXR[UMGXZBBB  
@HWI-EAS443:3:57:272:805#0/1  
CACTAACTTGCAGGTCCTGTAGAATCTGTCCACCCCTGCT  
+HWI-EAS443:3:57:272:805#0/1  
`aU¥N]a`\_b`^\_[Xa[U\_[` `]SU¥aa¥X¥\_WIR]^X¥B  
@HWI-EAS443:3:57:377:1469#0/1  
ATTGATGCCAGGGCCGACTTCGAGTCTGGACGGATCAAGA  
+HWI-EAS443:3:57:377:1469#0/1  
abYXbXSV^aaaRF¥[]\_a`\_^^`Y\_¥`\_`X^]¥¥][\_Z\_  
@HWI-EAS443:3:57:661:290#0/1  
AATGTGTAGTTACAACGGCATCATATCCATGCTTTTGGC  
+HWI-EAS443:3:57:661:290#0/1  
aab\_\_ba`baba`Ua`[\_VZa\_a`^`^P[Y`¥OWa` `a\_Y  
@HWI-EAS443:3:58:1089:1170#0/1  
ATCACTGAGTCCTGGGATGATGATGGGCATGTTAACATG  
+HWI-EAS443:3:58:1089:1170#0/1  
aa¥IUTZ0]\_\_^aa` `Z\_a\_Z]]Y] `U\_Z[\_SOYUX[a  
@HWI-EAS443:3:58:1169:270#0/1  
AGCAGGAGTGGACAGACTCTACAGGACCTGCAAGTTAGTG  
+HWI-EAS443:3:58:1169:270#0/1  
a¥][aWUaW` ¥`Z^¥UG[^XSNVY^]YX\_ZUMV`U]XZP¥  
@HWI-EAS443:3:58:573:1084#0/1  
GTCTTGGGAGTCTCGATACTGAATCTAGGACAAAAGAAAT  
+HWI-EAS443:3:58:573:1084#0/1  
\_UI]SO[[[VTQZXOHHZ^LUSN¥MSYW^TZVLVY[TUaQ  
@HWI-EAS443:3:58:642:574#0/1  
GAACGACTTCCATTGTTTCAAGGCATGAATTCTCAAATAT  
+HWI-EAS443:3:58:642:574#0/1  
aXbba[aaaaa\_baaY^a`aaaaa` `¥aWaa\_a[]a`\_`^  
@HWI-EAS443:3:58:916:975#0/1  
ATTTGAGAATTCATGCCTTGAACAATGGAAGTCGTTCAA  
+HWI-EAS443:3:58:916:975#0/1  
\_`a`abbaaaa\_aa`a\_aaa`\_a\_a`\_aa\_\_a[]^X]Z]]  
@HWI-EAS443:3:59:1062:1901#0/1  
AATTGAAGAGCCATCTGGGCCGTTGCAGGTCAAGGTCAT  
+HWI-EAS443:3:59:1062:1901#0/1  
`b`]]aa`]¥^`a\_a]ZP^`Z\_\_XYS`^`SLSY\_]HHTWT  
@HWI-EAS443:3:59:1491:438#0/1  
GATGCCAGGGTCGACTTCGAGTCTGGACGGATCAATAAAG  
+HWI-EAS443:3:59:1491:438#0/1  
` `a]LYSYX]Pa]^Y\_S^]ZV¥YY¥[ `¥]PQZ^^IR[VJ  
@HWI-EAS443:3:59:1654:1487#0/1  
AATTGAAGAGCCATCTGGGCCGTTGCAGGTCTAAGGTCAT  
+HWI-EAS443:3:59:1654:1487#0/1  
¥b^ab]`baa`\_aaaa`a\_TY^¥aaaaaa]\_FQTY]LV][  
@HWI-EAS443:3:59:269:840#0/1  
GGAAGTCGTTCAACAAACAAGGGTAGATAAACTAACTCAA  
+HWI-EAS443:3:59:269:840#0/1  
^Y¥Q¥¥`aT` `aaa`a]]Y]]¥¥`a^Z^¥^R^\_]MX¥^^



@HWI-EAS443:3:59:302:1134#0/1  
AACATTATGGGTGCCATGCTCGGGATGTTTCTGAACCACT  
+HWI-EAS443:3:59:302:1134#0/1  
`bbbb\_T¥bb` ] `ab\_aaaa\_]Y\_a` `a` `TZ\_SM\_SV  
@HWI-EAS443:3:59:711:522#0/1  
GTGGGATTCTCCAAGGAAAGCCATAGCCTCTAGAACACAG  
+HWI-EAS443:3:59:711:522#0/1  
`R]YYRX\_XYXJYYW[T[[00]\_\_Za[^[]USVTNR\_[T  
@HWI-EAS443:3:59:80:1166#0/1  
TGTAGAATCTGTCCACTCCTGCTTGTATTCCCTCACGGTT  
+HWI-EAS443:3:59:80:1166#0/1  
a`aaa\_]aaab\_a\_a\_\_\_`[Z\_\_`¥\_```aV^\_]X^]G]  
@HWI-EAS443:3:5:1183:1213#0/1  
ATCACTGAGTCCTGGGATGATGATGGGCATGTTTAAACATG  
+HWI-EAS443:3:5:1183:1213#0/1  
abaa\_bbab]`\_`baa\_aaaba\_\_\_V`^`\_bYa\_`Z¥\_[a  
@HWI-EAS443:3:5:1257:313#0/1  
ATTTGAGTTAAAGAAGATGTGGGATCAAACCAATCAAAG  
+HWI-EAS443:3:5:1257:313#0/1  
a]^W¥V\_\_b` [ `a`YSF\_UN]^aUZLXTVBTTTTTTTTTTT  
@HWI-EAS443:3:5:1270:1500#0/1  
AACAAAGACTGAATAAGAGAGGCTATGTAATAAGAGCACT  
+HWI-EAS443:3:5:1270:1500#0/1  
abbaabbbabbbbaabbbbabbaabXQDRF^aWXS\_RL]VP  
@HWI-EAS443:3:5:1292:15#0/1  
ACCTAAAGTACTTCAATGAATCAACAAAGAAGAAAATTGA  
+HWI-EAS443:3:5:1292:15#0/1  
a^aabaab[ `X` ` ` abbb`aaR]\_Y` ]\_a\_\_a^]]\_\_`\_^  
@HWI-EAS443:3:5:136:583#0/1  
CCCCAGTGATTGTGAAAGAAATCTCTGTGACTTGTGAATT  
+HWI-EAS443:3:5:136:583#0/1  
` `a`^¥abaaab`Y`\_` ]¥]a`aa\_\_ZY\_R[Z^¥LT[BBB  
@HWI-EAS443:3:5:189:1506#0/1  
GCGAAAAGCTTGAACAGTCTGGGCTCCCAGTAGGTGGCAA  
+HWI-EAS443:3:5:189:1506#0/1  
ab]¥YX¥XVabTaJVT\_P]X]Q^bZJab\_]W`LYG^UL`X  
@HWI-EAS443:3:5:264:884#0/1  
AGTTTATCTACCCTTGTGTTGTTGAACGACTTCCATTGTTT  
+HWI-EAS443:3:5:264:884#0/1  
ababaaaab` `aaaabaaaa\_aa¥a\_a\_[\_a\_a`aaa\_\_a  
@HWI-EAS443:3:61:1504:1936#0/1  
CTTTCCTTGAAGAATCACACCCAGGAATATTTGAGAATTC  
+HWI-EAS443:3:61:1504:1936#0/1  
aaba\_\_aX^X`¥\_V`aa`a`bbababbbbaa[ `a\_T` ` `a`W  
@HWI-EAS443:3:61:198:811#0/1  
CGAGACTCCCAAGACCGTACTTAGCATGTAAACATGCCC  
+HWI-EAS443:3:61:198:811#0/1  
abb\_^bb^^^aa\_aabYZ]aU^` `K^aaa\_XZR`^VTSF  
@HWI-EAS443:3:61:318:1355#0/1  
ATCGAGACTCCCAAGACCGTACTTAGCATGTAAACATGC

+HWI-EAS443:3:61:318:1355#0/1  
a`\_\_\_\_`a`]\_]Za]\_aaaXR^aTNXF]\_^RY`^]\_U^Z¥Z  
@HWI-EAS443:3:61:518:673#0/1  
CTCCAACCATCCGACGATTTTGCTCTCATAGTGAATGCAC  
+HWI-EAS443:3:61:518:673#0/1  
abbbbbbbabbabbbbabab`bbbbbbbaabbS]a`aaaa]  
@HWI-EAS443:3:61:920:1271#0/1  
ATCGAGACTCCCAAGACCGTACTTAGCATGTAAACATGC  
+HWI-EAS443:3:61:920:1271#0/1  
aa`a`a`a`a`a`\_aaaaTaa\_^R[\_\_\_a\_\_^`\_¥]YVU  
@HWI-EAS443:3:62:1123:1832#0/1  
GGAAAGTGGACGACAAACACAGACACTGGTGCACCCAGC  
+HWI-EAS443:3:62:1123:1832#0/1  
`bJ`\_Ta`ababbJb`]`b`QUHZ\_]bXaaaaXRDDU[]  
@HWI-EAS443:3:62:226:782#0/1  
CACTAGGTTATTATCCTCAGGTAGTGGTCCATCAATCGG  
+HWI-EAS443:3:62:226:782#0/1  
a]aaabaNaaaaaaaaa\_aaaa¥aa¥`^N\_\_[^\_^\_¥\_\_\_\_  
@HWI-EAS443:3:62:406:872#0/1  
GTTAGTTTATCTACCCTTGTGGTTGAACGACTTCCATTG  
+HWI-EAS443:3:62:406:872#0/1  
aaa[a\_aaaa\_`aa`a`a`Z`a]YW^Z[``\_[-^`\_`^\_\_  
@HWI-EAS443:3:62:656:1073#0/1  
CAAAGATGCAGAGAGAGGCAAGTTAAAAATAAGGGCTATC  
+HWI-EAS443:3:62:656:1073#0/1  
aba`^b`bbbb]baa]a^abaaaba\_aaaa^`\_`Ya^\_a  
@HWI-EAS443:3:63:1072:1270#0/1  
TATCGAGACTCCCAAGACCGTACTTAGCATGTAAACATG  
+HWI-EAS443:3:63:1072:1270#0/1  
^^abb¥¥0aW`]¥RR^RLYY[^^UXWYU0a\_] ^BBBBBB  
@HWI-EAS443:3:63:1122:1544#0/1  
AAGAGATTGATTCTGTAAACAATGCTGTGGGAATGCCAGC  
+HWI-EAS443:3:63:1122:1544#0/1  
[¥0VbbaZaabU`a^\_bb`\_Z\_T\_]aU\_SDY`]ZZaaa]  
@HWI-EAS443:3:63:1148:1159#0/1  
AAAATTCCTGCGCAAATGCCATAAGCACCATTCCTT  
+HWI-EAS443:3:63:1148:1159#0/1  
`]SZ]a\_^`a¥]W\_aaa`^[¥]`a[X\_^T^`^`\_`\_\_RTS\_\_  
@HWI-EAS443:3:63:312:1498#0/1  
TTGGGGTGTCTGTTTACTGTGTCCATGGTGTATCCTGTT  
+HWI-EAS443:3:63:312:1498#0/1  
a`V]GU[NZ`\_`S^TQVYPKMYT¥V]NXOJUM[BBBBBBB  
@HWI-EAS443:3:63:399:1989#0/1  
ATGCACAAACAGACTGTGTTCTAGAGGCTAAGGCTTTCCT  
+HWI-EAS443:3:63:399:1989#0/1  
`V[aa`aaa]a¥Y\_\_\_U^UZRWV¥UBBBBBBBBBBBBBB  
@HWI-EAS443:3:64:1384:1316#0/1  
TGAACGACTTCCATTGTTTCAAGGCATGAATTCTCAAATA  
+HWI-EAS443:3:64:1384:1316#0/1  
abaa`baaabaaaaab\_a`\_a\_aa\_\_aa\_Uaa\_\_\_\_\_

@HWI-EAS443:3:64:1685:1701#0/1  
CTAGGGCCCCGATTGATGCCAGGGTGGACTTCGAGTCTGG  
+HWI-EAS443:3:64:1685:1701#0/1  
R\_^\_^\V¥VX\_`a\_PVTUPH\_U][ZSR[TUTH\_\_[UO\_]B  
@HWI-EAS443:3:64:576:492#0/1  
GGAAGTCGTTCAACAAACAAGGGTAGATAAACTAACTCAA  
+HWI-EAS443:3:64:576:492#0/1  
aaXaa^abX^]R`XX[`G`¥^^aJ\_\_JH¥\_a]¥\_\_¥WZ]^  
@HWI-EAS443:3:65:1024:1191#0/1  
GTTTATCTACCCTTGTGGTTGAACGACTTCCATTGTTTC  
+HWI-EAS443:3:65:1024:1191#0/1  
a\_aaaa`a\_`\_\_\_\_a\_\_\_a]^`\_^\_Y]a\_\_\_\_`a\_`Z^]\_  
@HWI-EAS443:3:65:124:1004#0/1  
GTTTATCTACCCTTGTGGTTGAACGACTTCCATTGTTTC  
+HWI-EAS443:3:65:124:1004#0/1  
a)`]Z\_a^]a`a\_`^[^¥]¥\_\_^`\_¥¥\_^YZ[Q^\_¥X\_¥[  
@HWI-EAS443:3:65:1253:1962#0/1  
GATTGATGCCAGGGTCGACTTCGAGTGTGGACGGATCAAG  
+HWI-EAS443:3:65:1253:1962#0/1  
`Y`[bbabbaY¥a¥S\_]a]¥XNWH\_GNa`a`\_ba[Y^`\_a  
@HWI-EAS443:3:65:1461:133#0/1  
GAACACTTGAAGAGCCATCTGGGCCGTTGCAGGTCCAAGG  
+HWI-EAS443:3:65:1461:133#0/1  
a\_`^^H^UaSa\_TXUU[]R^TTaVBBBBBBBBBBBBBBBB  
@HWI-EAS443:3:65:543:1629#0/1  
GAGCCATCTGTGCCGTTGCAGGTCCAAGTCATTGTTTAT  
+HWI-EAS443:3:65:543:1629#0/1  
aU^a`bb`^[DY`\_]NVSZTYXJ[YVP`X^[[VYIZT¥U]  
@HWI-EAS443:3:65:896:906#0/1  
ACATTAACAGAACTCAACCGCAGCAACTGCATTGGCCA  
+HWI-EAS443:3:65:896:906#0/1  
Z\_b`USZa\_baZYG]b¥]\_WQ^\_^`a]¥]P\_]K\_YTZ`aY  
@HWI-EAS443:3:65:96:1885#0/1  
CTGGGCCGTTGCAGGTCCAAGTCATTCTTTATCATGTTG  
+HWI-EAS443:3:65:96:1885#0/1  
aXXZX]XLRXRNVN¥SSQUUUJQ[]XRFHSUQRORNUUNR  
@HWI-EAS443:3:66:180:941#0/1  
GGGCATGTTTAACATGCTAAGTACGGTCTTGGGAGTCTCG  
+HWI-EAS443:3:66:180:941#0/1  
a[Zaaaa`a^aaa`\_\_\_\_aa\_^Ta\_\_\_\_T¥^]Y]X[WX\_¥\_]`  
@HWI-EAS443:3:66:295:1053#0/1  
CAATACTCATGTCTGCTGATTCATTTACTCCAGACTCC  
+HWI-EAS443:3:66:295:1053#0/1  
a\_]\_Z^`a]Ya\_a```\_`X¥\_``\_^^`\_¥^\_\_^^\_`¥Y[W  
@HWI-EAS443:3:66:885:1701#0/1  
ATTACATACGATGACCAAAGATGCAGAGAGAGGCAAGTTA  
+HWI-EAS443:3:66:885:1701#0/1  
`WY000VW\_ZS¥OY\_\_^S^MHVPWYGWRS00UUMQRNGST  
@HWI-EAS443:3:67:1185:702#0/1  
AAACAATGGAAGTCGTTCAACAAACAAGGGTAGATAAACT

+HWI-EAS443:3:67:1185:702#0/1  
abbab`¥`aaaa^`]X¥¥T¥`\_]¥R]]\_aL]]X^Y`\_U¥  
@HWI-EAS443:3:67:1673:1725#0/1  
GGAAAGTGGACGACAAACACAGAACTGGTGCACCCCAGC  
+HWI-EAS443:3:67:1673:1725#0/1  
a`abX\_Uaa`\_Z`[¥b`ZZZaa]aa`\_]`Wa\_```]¥[\_`¥  
@HWI-EAS443:3:67:271:1731#0/1  
CTCCCAAGACCGTACTTAGCATGTTAAACATGCCATCAT  
+HWI-EAS443:3:67:271:1731#0/1  
a[abaaa`a``[GZ^^]`[\_``\_`^a\_\_`aZSZ]`\_``]`X  
@HWI-EAS443:3:67:912:1548#0/1  
GAACGACTTCCATTGTTTCAAGGCATGAATTCTCAAATAT  
+HWI-EAS443:3:67:912:1548#0/1  
XX`aa^`a¥Q\_a`¥¥J\_]`^\_aaa^]bba\_`^`\_a`a^\_]¥  
@HWI-EAS443:3:67:953:1586#0/1  
AATGGGTAGTTGCAACGGCATCATATCCATGCTTTTGGC  
+HWI-EAS443:3:67:953:1586#0/1  
a]`YDS]]R]`^`^\_ZN[ZV[^Za``X¥Paa\_YX\_\_V\_ZLX  
@HWI-EAS443:3:68:1033:841#0/1  
ATCGAGACTCCCAAGACCGTACTTAGCATGTTAAACATGC  
+HWI-EAS443:3:68:1033:841#0/1  
aaab`W`aaaa\_aa\_aa[\_]a]`\_a^\_aa^\_aa`\_]`^U`  
@HWI-EAS443:3:68:1280:2042#0/1  
GAAACAATGGAAGTCGTTCAACAAACAAGGGTAGATAAAC  
+HWI-EAS443:3:68:1280:2042#0/1  
[abaabbbbaabbW^a^`\_aa]baaJaWVYZHX[\_]^]aN  
@HWI-EAS443:3:68:1292:662#0/1  
CCCAGTGATTGTGAAAGAAATCTCTGAGTCTTGTGAATTA  
+HWI-EAS443:3:68:1292:662#0/1  
aaVSZZ¥PV`[\_`RW]]W\_^]`[Z\_][FGV]aa[OB BBBB  
@HWI-EAS443:3:68:22:44#0/1  
GCATGTTAAACATGCCATCATCATCCCAGGACTCAGTGA  
+HWI-EAS443:3:68:22:44#0/1  
^¥^U¥^^\_N]ZWY``¥a]ZW[Z][W\_\_¥WYVRZVUSVGV  
@HWI-EAS443:3:68:698:1561#0/1  
GATCATCTGAGTTAAAGAAGCTGTGGGATCAAACCAATC  
+HWI-EAS443:3:68:698:1561#0/1  
[SV`XY]¥ZTTMYNUYTUUYYMMHVNQW[¥BBBBBBBBBB  
@HWI-EAS443:3:68:769:407#0/1  
CTTTCCTTGAAGAATCCTACCCAGGAATATTTGAGAATTC  
+HWI-EAS443:3:68:769:407#0/1  
\_`\_\_L^bb`b`^a`^bRS\_Z¥¥aK\_¥N^`Z`^^`a\_PSG\_  
@HWI-EAS443:3:69:1283:1902#0/1  
GTTTCGTATACTTTGTTGAACTTTAGCTAGGAGCCTTTG  
+HWI-EAS443:3:69:1283:1902#0/1  
a¥\_``X]^TUH][\_`TQOWaYW^FO\_a\_X[¥RW\_^GGSV]  
@HWI-EAS443:3:69:1290:827#0/1  
CTGTGTTAATGCCAGCCCATGGTCCAGCCAAAAGCATGGA  
+HWI-EAS443:3:69:1290:827#0/1  
aaa[^H¥b¥b\_b`bbbbabaaa`aabaaaa¥aaa]aaa`a

@HWI-EAS443:3:69:1479:696#0/1  
GTTGTCCCCAGTGATTGGGAAAGAAATCTCTGTGTCTTGT  
+HWI-EAS443:3:69:1479:696#0/1  
]PMNW`UTTR]LQVPYIDK^^P]LW]ZQQR LUUXWSLTGU  
@HWI-EAS443:3:69:1734:229#0/1  
CAGAACACACCAATACTCAGAAAAGGGAAAGTGGATGACA  
+HWI-EAS443:3:69:1734:229#0/1  
a\$`UYbT[]VZaTZaa`T[[UPY\$[^][`a\$L]ZXN^`aa  
@HWI-EAS443:3:69:276:1516#0/1  
GAACGACTTCCATTGTTTCAAGGCATGAATTCTCAAATAT  
+HWI-EAS443:3:69:276:1516#0/1  
``ab\_abbababb`aaaa`a``bbabaaaaababaaa`a  
@HWI-EAS443:3:69:956:1334#0/1  
GAACGACTTCCATTGTTTCAAGGCATGAATTCTCAAATAT  
+HWI-EAS443:3:69:956:1334#0/1  
`bbbbbbbb`\_aaa`\_aa`\$Xaaaab\_\_a````aaaa  
@HWI-EAS443:3:69:956:1752#0/1  
AGACTTCGGGAATGTGAAGATTCCGTATATTGTATAAGTT  
+HWI-EAS443:3:69:956:1752#0/1  
`^abaa\_\$``aa]\$^aa`\_`aaaa^aaa`adWaa`\_a^\_  
@HWI-EAS443:3:6:1047:1399#0/1  
ATTTGAGAATTCATGCCTTGAAACAATGGAAGTCGTTCAA  
+HWI-EAS443:3:6:1047:1399#0/1  
aaaaaa`\_aaa\_a`\_a\_a`\_]a^b\_\_a\_\_\_a[\$\_Y]Z^^  
@HWI-EAS443:3:6:1534:222#0/1  
AACAATGGAAGTCGTTCAACAAACAAGGGTAGATAAACTA  
+HWI-EAS443:3:6:1534:222#0/1  
a``baaaaaa`\_Sb\_a\_a`G\_a`G\_]adW^`\$`^`^OBB  
@HWI-EAS443:3:6:1559:1724#0/1  
AGCTGATTGATTACTCCAGACTCCAAAGCTGGGTAGC  
+HWI-EAS443:3:6:1559:1724#0/1  
ab]aa`a`\_a`\_aa\_a\_NZa`]`Y\$LT`\_\_\_Z^`\_`^U\_BB  
@HWI-EAS443:3:6:1623:1335#0/1  
TGGTCCTCCATCTGATACTGATAGCCCTACCTTTGATTGG  
+HWI-EAS443:3:6:1623:1335#0/1  
aaUVVWaPL\$^U^\_SMUYWUW\_R]YORYYVV^^V\_PH\$BB  
@HWI-EAS443:3:6:195:1367#0/1  
GTAAAAAGAAGGGCTACCGCAACACCTGGGATGCAGATT  
+HWI-EAS443:3:6:195:1367#0/1  
aZUR^WR^]\_\_ZN\_UZGSHZ]WH[BBBBBBBBBBBBBB  
@HWI-EAS443:3:6:485:1575#0/1  
ATTTGAGAATTCATGCCTTGAAACAATGGAAGTCGTTCAA  
+HWI-EAS443:3:6:485:1575#0/1  
^^ab\$aab`\_a\_\_`R`T`][`\_b]\_aab]aa\$ZZT^[[^^  
@HWI-EAS443:3:6:869:1276#0/1  
GTTAGTTTATCTACCCTTGTGTTGTTGAACGACTTCCATTG  
+HWI-EAS443:3:6:869:1276#0/1  
a```X^V^a```XX^`\$aa^\_\_`[`[\$a\_[UX[]S\_\$\_]a  
@HWI-EAS443:3:6:900:1599#0/1  
ATCGAGACTCCCAAGACCGTACTTAGCATGTTAAACATGC

+HWI-EAS443:3:6:900:1599#0/1  
a\_]a^aSYW]^\_`XXXHX¥X¥]\_ZW\_^Z]U^B  
@HWI-EAS443:3:70:1448:1157#0/1  
TTCAAGGCATGAATTCTCAAATATTCCTGGGGGGATTCT  
+HWI-EAS443:3:70:1448:1157#0/1  
V`KZ`aUW¥]S¥J]a¥ab^[U^b`^^^aabaHZ]b^a^Za  
@HWI-EAS443:3:70:1478:613#0/1  
TTGTGGCTAATTTTAGGATGGAGCTACCCAGCTTTGGAGT  
+HWI-EAS443:3:70:1478:613#0/1  
abbMbb\_0]aWVb^^WTZ^P^[aXRTX`POVYY]aTYFZY  
@HWI-EAS443:3:70:1642:2009#0/1  
ATTATGGGTGCCATGCTCAGGATGTTTATGAACCACTCGG  
+HWI-EAS443:3:70:1642:2009#0/1  
``TaNb\_a\_bZ[¥\_QJ^^^Yaa¥VRaXFG]YY\_JaGYNY\_  
@HWI-EAS443:3:70:210:63#0/1  
TCGAGACTCCCAAGACCGTACTTAGCATGTAAACATGCC  
+HWI-EAS443:3:70:210:63#0/1  
a`a\_a]``^a\_¥\_\_Z\_\_`W¥¥¥¥UXT¥¥]W¥\_^ZU¥VWTU  
@HWI-EAS443:3:70:329:1323#0/1  
GCAACGGCCAGATGGCTCTCAATTGTTTCATCCAAGACT  
+HWI-EAS443:3:70:329:1323#0/1  
abbbbaaba`Q\_Z]``^`b`aaa^`a]`^aa\_ZY[[[¥Y¥  
@HWI-EAS443:3:70:430:198#0/1  
GGTTGAGCTGGGGTGTACCAGTCTCTGTGTTTGTCTCCA  
+HWI-EAS443:3:70:430:198#0/1  
abNaa`aa`aaba^`Xa`a\_a[a```\_Q\_T`\_PMZZN¥¥¥  
@HWI-EAS443:3:70:79:436#0/1  
GATACACATATAGGGCCATAGGGGAGACACACAAATTCA  
+HWI-EAS443:3:70:79:436#0/1  
aaa\_ab\_b`ba]\_aHb`aa\_a`\_^Z\_^]]^`a`V\_U]\_`  
@HWI-EAS443:3:70:922:1958#0/1  
ATGGAATCAATGAACAAAAAGGAAATAGAGATAACAACCC  
+HWI-EAS443:3:70:922:1958#0/1  
\_WR\_YaaU][aW[a^QGZV]SRVZ[¥NW^`^Z[a`][N  
@HWI-EAS443:3:70:992:89#0/1  
GCTTTAACAGTCTGGGCTCCCAGTAGGGGCAATGAAAAG  
+HWI-EAS443:3:70:992:89#0/1  
]]bZJ¥VXbaaVa[b`[a\_]YZa¥`a`Vb¥ZQ¥ZMY¥^^  
@HWI-EAS443:3:71:1013:1912#0/1  
CTCCAATCATACGACGATTTTGCTCTCATAGTGAATGCAC  
+HWI-EAS443:3:71:1013:1912#0/1  
aa\_b][ab`]GPX^]WUOHS`XVXZ`aZR\_SFROPHRZaI  
@HWI-EAS443:3:71:1231:484#0/1  
CTCATGTCAGCTGGTTCATTTACTCCAGACACTCCAAAGC  
+HWI-EAS443:3:71:1231:484#0/1  
ab]W\_ZZ]X]¥b^HU\_]ba¥^a`Y]\_Z`XYF`RNZaa[R  
@HWI-EAS443:3:71:196:429#0/1  
TGCCATGCTCAGGATGTTTCTGAACCACACGGGTTGATTT  
+HWI-EAS443:3:71:196:429#0/1  
a`bbbabb`aa``[aa\_aaaaaa\_a\_¥G^a`X``^^`]

@HWI-EAS443:3:71:567:796#0/1  
GATGATGGGCATGTTTAACATGCTAAGTACGGTCTTGGA  
+HWI-EAS443:3:71:567:796#0/1  
a\_abaaa\_\_a]`aYaZ]\_U`\_]a\_\_`\_Va\_^M^\_]^¥\_W  
@HWI-EAS443:3:71:605:561#0/1  
AACTGCTAGGCAAAAATTTCTCGAATAGATTGCAGCACTT  
+HWI-EAS443:3:71:605:561#0/1  
aa`aaaa¥a^\_Za`\_]`\_]^[^\_]Y^^Y]S[YY[  
@HWI-EAS443:3:71:757:1576#0/1  
ATTTGAGAATTCATGCCTTGAAACAATGGAAGTCGTTCAA  
+HWI-EAS443:3:71:757:1576#0/1  
aaababa\_aaa^aaaaa`\_a\_b\_aV``\_aa`Y^ZT\_Z^\_  
@HWI-EAS443:3:71:897:1853#0/1  
CACCAATACTCAGAAAAGGGAAAGCGGACGACAAACACAG  
+HWI-EAS443:3:71:897:1853#0/1  
abbbbTb`ab`bbaaaaa`aaaaabaaaaa]aaaaaaaa  
@HWI-EAS443:3:71:912:92#0/1  
TGTTTACTGTGTCCATGGGGTATCCTGTTCCCTGTTCCATG  
+HWI-EAS443:3:71:912:92#0/1  
aaaaa]W]^\_a\_W[^abWF]]\_^[^`V¥\_YZ]`\_\_RV]^X  
@HWI-EAS443:3:72:421:1543#0/1  
CATGGTGTCTAGGGCCCGGATCGATGCCAGGGTCGACTTC  
+HWI-EAS443:3:72:421:1543#0/1  
`\_\_T¥¥`a`\_¥Ua``^`Z]`RY¥`aaZ¥SS]¥¥`¥T[  
@HWI-EAS443:3:72:611:769#0/1  
CAACAAAGTAAACGAAACCTCTAATCTGCATCCCAGGTGT  
+HWI-EAS443:3:72:611:769#0/1  
\_\_\_\_]``¥Z`T¥`a\_]`^`a\_a```]^\_Z\_\_a\_\_a]`\_\_Y\_]`  
@HWI-EAS443:3:72:71:2004#0/1  
CAGAACACACCAATACTCAGAAAAGCGAAAGTGGACGACA  
+HWI-EAS443:3:72:71:2004#0/1  
a¥I\_aa`aa`baa\_b\_`bY]S^¥aMDU`¥]XU`G¥\_```a  
@HWI-EAS443:3:73:1059:2008#0/1  
AACAAAGACTGAATAAGAGAGGCTATTTAATAAGAGCACT  
+HWI-EAS443:3:73:1059:2008#0/1  
abbaa`aaaaaa`aaaaba\_a\_a\_\_WGNYa¥Y]QXPMQVL  
@HWI-EAS443:3:73:1062:1336#0/1  
GAACGACTTCCATTGTTTCAAGGCATGAATTCTCAAATAT  
+HWI-EAS443:3:73:1062:1336#0/1  
aa`aaaaaaaa`aaa^`aaaa`a\_aaaa[aa\_a]^^a`\_  
@HWI-EAS443:3:73:1310:188#0/1  
AATGAATCAGCTGACATGAGTATTGGAGTAACTGTGATAA  
+HWI-EAS443:3:73:1310:188#0/1  
`W]`]Z¥P¥TX\_[VT¥\_NTRH\_``][WVN]RNDTJXSTYY  
@HWI-EAS443:3:73:1426:676#0/1  
CTAACTTGCAGGTCCTGTAGAATCTGGCCACTCCTGCTTG  
+HWI-EAS443:3:73:1426:676#0/1  
a`bS\_[b`aaN^[``]aa\_`¥V\_`GZ^ZW¥aQ\_¥U¥^\_  
@HWI-EAS443:3:73:1489:1406#0/1  
GTCATAAAGAGATTGATTCTGTAAACAATGATGTGGTAAT

+HWI-EAS443:3:73:1489:1406#0/1  
 TZa^`RYXZ`ZTa^^RaYR` `WWIQW[a`\_HZ¥H\_VaBBB  
 @HWI-EAS443:3:73:154:607#0/1  
 TGGAAGTCGTTCAACAAACAAGGGTAGATAAACTAACTCA  
 +HWI-EAS443:3:73:154:607#0/1  
 ab\_R¥URbaR`^X\_]Y^`\_¥``\_0\_^ZZ`\_R]ZPUOLS  
 @HWI-EAS443:3:73:1664:1023#0/1  
 GTCTGGAGTATATGAATCAGCTGACATGAGTATTGGAGTA  
 +HWI-EAS443:3:73:1664:1023#0/1  
 a\_aa`a\_aQa`\_`a`Z^¥^`Z` `^`[\_\_\_^\_Y^`^¥]V\_[]  
 @HWI-EAS443:3:73:1677:1291#0/1  
 AATGAACCAAGTGGGTATGCACAAACAGACTGTGTGCTAG  
 +HWI-EAS443:3:73:1677:1291#0/1  
 YWYWMZTVZ^WF^[]LTYUHNLYTNRZYBBBBBBBBBBBB  
 @HWI-EAS443:3:73:260:656#0/1  
 ACCGGCAGCAACTGCATTGGCCAAAACCATAGAAGTCTTT  
 +HWI-EAS443:3:73:260:656#0/1  
 aaa\_]a\_]NX\_YZRVUNZU\_SZ]`HV¥]VTPRUZTGVY]Y  
 @HWI-EAS443:3:73:298:682#0/1  
 ATGGGCTCCAATCACCCGACGATTTTGCTCTCATAGTGAA  
 +HWI-EAS443:3:73:298:682#0/1  
 ZWb[W¥Yb\_QW¥¥VV[¥¥ZZOY^` `^`Z[aSXL\_GXJ\_a`  
 @HWI-EAS443:3:73:830:673#0/1  
 GAGACTCCCAAGACCGTACTTAGCATGTAAACATGCCCA  
 +HWI-EAS443:3:73:830:673#0/1  
 aa`aababbaaaaaaaaa`^aaa`aaa`aaaaaa`^\_\_\_a  
 @HWI-EAS443:3:73:877:142#0/1  
 GCTTTCCTTGAAGAATCACACCCAGGAATATTTGAGAATT  
 +HWI-EAS443:3:73:877:142#0/1  
 aaabaaabaabaaa``aaa^a^` ``````````aaa`¥`a`\_\_`^  
 @HWI-EAS443:3:73:92:255#0/1  
 AAACAATGGAAGTCGTTCAACAAACAAGGGTAGATAAACT  
 +HWI-EAS443:3:73:92:255#0/1  
 ]abbb]baba]`X\_\_Y¥`\_]NW`aS\_`¥^^0¥]\_V`]VKZ  
 @HWI-EAS443:3:73:998:1442#0/1  
 ATTTGAGAATTCATGCCTTGAACAATGGAAGTCGTTCAA  
 +HWI-EAS443:3:73:998:1442#0/1  
 ¥\_YWPPHUBaV\_`]]`Z\_R\_SZ`]a\_ab¥YtZH\_OLLJL`  
 @HWI-EAS443:3:74:1092:1897#0/1  
 GGAAGTCGTTCAACAAACAAGGGTAGATAAACTAACTCAA  
 +HWI-EAS443:3:74:1092:1897#0/1  
 `a` `SX` `^a\_Y]F)`ZM¥baaZR^UYUaU`X¥a[Y]aaa  
 @HWI-EAS443:3:74:1489:998#0/1  
 ATTCTTCAATGAAAGCCATAGCCTCTAGAACACAGTCTGT  
 +HWI-EAS443:3:74:1489:998#0/1  
 \_`^aYT^`VJQTWV\_aaaab`aa\_RW` `¥¥Z^¥`aZW¥\_L  
 @HWI-EAS443:3:74:304:889#0/1  
 ATCGCTATGGATTTGTGGCTAATTTTAGCATGTAGCTACC  
 +HWI-EAS443:3:74:304:889#0/1  
 [ `a` ` `]\_K¥V]aaa`a¥a]SWV^a`URUGVSV^`]¥XSF



@HWI-EAS443:3:74:374:303#0/1  
CATGGTGCCTAGGGCCCGGATTGATGCCAGGGTCGACTTC  
+HWI-EAS443:3:74:374:303#0/1  
`V[ZGGaJ`XX^XQ\_¥`\_¥G[X¥P¥`VGTTP`]XXV¥U  
@HWI-EAS443:3:74:518:1970#0/1  
AAGAAATACACCAAGACAATATACTGGTGGGATGGTCTCC  
+HWI-EAS443:3:74:518:1970#0/1  
M¥ZT`[UQWYaaVQHZ^`\_Z`a]X\_NZXZMY\_TVJDX^a]  
@HWI-EAS443:3:74:747:1097#0/1  
ATCCTCAGGTAGTGGTCCATCAATCGGGATGAGCTGGGGT  
+HWI-EAS443:3:74:747:1097#0/1  
aaa`aZZ`ZW]UF]aSaa`¥^Z`aaZ\_Y`X¥]a\_\_aX^`K  
@HWI-EAS443:3:75:116:633#0/1  
GGCCATGGTGTCTAGGGCCCGGATTGTTGCCAGGGTCGAC  
+HWI-EAS443:3:75:116:633#0/1  
`\_`a```¥XXX\_^Q¥`V``[¥]Z^^^N[X¥`Q]`ZRVPK[  
@HWI-EAS443:3:75:1737:1481#0/1  
CAAAGACTGAATAAGAGAGGCTATCTAATAATAGCACTGA  
+HWI-EAS443:3:75:1737:1481#0/1  
aabb¥\_Z``a\_b`a]`ba```aU[¥]F]\_`^IaMS]baa]  
@HWI-EAS443:3:75:216:19#0/1  
GCAACGGCCAGAAAGGCTCTTCAATTGTTTCATCAAAGACT  
+HWI-EAS443:3:75:216:19#0/1  
`^]W]TBBBBBBBBBBBBBBBBBBBBBBBBBBBBBBBBBBB  
@HWI-EAS443:3:75:910:995#0/1  
GAGTCCTGGGATGATGATGGGCATGTTTAACATGCTAAGT  
+HWI-EAS443:3:75:910:995#0/1  
```[`XN\_^]`^aaaba`X`\_\_\_\_aM`aa`\_a`a`a\_a]Z  
@HWI-EAS443:3:75:938:1218#0/1  
CAGATTCTACAGGACCTGCAAGTTTGTGGGAATCAACATG  
+HWI-EAS443:3:75:938:1218#0/1  
abaa]aabb¥b¥``\_a^¥`aab`aaZ`aa`\_^]ab`a\_\_  
@HWI-EAS443:3:76:1106:1633#0/1  
ATTTGAGAATTCATGCCTTGAAACAATGGAAGTCGTTCAA  
+HWI-EAS443:3:76:1106:1633#0/1  
aaabaa`aaaa]aa`aababaa^b`a^U¥`^W[X[T¥¥  
@HWI-EAS443:3:76:116:1851#0/1  
GATGATTGGAGCCCATCCCACCAGTATAATGTCTTGGTGT  
+HWI-EAS443:3:76:116:1851#0/1  
\_`[`XZY[JW]W]¥a]Wa^SW``YSDOXYJXRSZQNWXSUW  
@HWI-EAS443:3:76:1683:1045#0/1  
TGGCTAATTTTAGCATGGAGCTACCGAGCTTTGGAGTGTC  
+HWI-EAS443:3:76:1683:1045#0/1  
Ybba`[¥babbMaTI``a`¥aa[¥RPXbZaYaaWZ`XVSH  
@HWI-EAS443:3:76:448:1536#0/1  
GAACCAAGTGGGTATGCACAAACAGACTGTGGTCTAGAGG  
+HWI-EAS443:3:76:448:1536#0/1  
aaVaaT``UPV]VV^[¥XQ[aa^aS`¥YR]OY\_¥ZYOV\_  
@HWI-EAS443:3:76:967:208#0/1  
CCAGGGGCGACTTCGAGTCTGGACGGATCAAGAAAGAAGA

+HWI-EAS443:3:76:967:208#0/1  
^\_bb`\_H[b`b^Z`\_]W`Ya^\_bRP¥\_V\_]`^¥¥aaZ^`\_¥[  
@HWI-EAS443:3:77:684:2001#0/1  
GTATTGGTGTGTTCTGTTTACTGTGTCCCTGGTGTATCCT  
+HWI-EAS443:3:77:684:2001#0/1  
]abbbba`b\_aababaaaabbbbaaabababa\_aaaaa\_\_  
@HWI-EAS443:3:78:1750:1655#0/1  
GACTCGAAGTCGACCCTGGTATCAATCCGGGCCCTAGACA  
+HWI-EAS443:3:78:1750:1655#0/1  
\_^`[X[bb¥N]bUP]ZV[ODM[TT¥[¥M¥aSOT]BBBBBB  
@HWI-EAS443:3:78:1754:339#0/1  
GAACGACTTCCATTGTTTCAAGGCATGAATTCTCAAATAT  
+HWI-EAS443:3:78:1754:339#0/1  
`¥]^`ZP\_a^^aa`^`^`Ya\_\_]R[`a\_Y`\_X][¥^^`\_`  
@HWI-EAS443:3:78:721:199#0/1  
CTATCGCAACGCCTGGGATGCAGATTAGAGGTTTCGTATA  
+HWI-EAS443:3:78:721:199#0/1  
a`a\_\_\_\_\_Z`\_]¥aba\_]`\_]`¥`aa`\_T]aX`W^^  
@HWI-EAS443:3:79:1442:476#0/1  
ATCAAACCAATCAAAGGTAGGGCTATGAGTATCAGATGG  
+HWI-EAS443:3:79:1442:476#0/1  
`¥QWHSTTSOHYN¥F[`S`a`V^OPU[JTW]IZJG[PS¥a  
@HWI-EAS443:3:79:1443:1575#0/1  
CAAACACAGAGACTGGTGCACCCCAGCTGAACCCGATTGA  
+HWI-EAS443:3:79:1443:1575#0/1  
Tbba]b`\_b`]aTV\_a]babaaTI¥b\_]Q\_^]\_Ka`aMaZ  
@HWI-EAS443:3:79:1477:1654#0/1  
AATGGAAGTCGTTCAACAAACAAGGGTAGATAAACTAACT  
+HWI-EAS443:3:79:1477:1654#0/1  
a^]\_Y\_\_^WWWVYV]QUYZVVWXYXHW]UWWWWWVYZJZ  
@HWI-EAS443:3:79:340:1506#0/1  
AACCCGAGTGGTTCAGAAACATCCTGAGCATGCCACCCAT  
+HWI-EAS443:3:79:340:1506#0/1  
WW`b]VW\_X^]Z\_\_Z\_aZ]`VX]`XWYZ\_NOJNX¥`^WdW  
@HWI-EAS443:3:79:824:1658#0/1  
CAATGGAAGTCGTTCAACAAACAAGGGTAGATAAACTAACT  
+HWI-EAS443:3:79:824:1658#0/1  
aa^`\_Y^^0[^¥SXZU`\_T¥WY`\_ZOZGZQU\_[¥]FX`US  
@HWI-EAS443:3:79:832:300#0/1  
TGCCAGGGGCGACTTCGAGTCTGGACGGATCAAGAAAGAA  
+HWI-EAS443:3:79:832:300#0/1  
aX¥¥`Y[D¥a`¥\_Zab\_aYNY^^YYa\_MWX`¥ZXZa]a`  
@HWI-EAS443:3:7:1435:118#0/1  
GTGGGCGACAAACACAGAGACTGGTGCACCCCAGCTCAAC  
+HWI-EAS443:3:7:1435:118#0/1  
aG`\_KY`]SZSXUUNSaVVKKW\_WVWVQWUSVVUBBBBBB  
@HWI-EAS443:3:7:1552:472#0/1  
CTAATTTGCAGTCTGTAGAAATCTGTCCACTCCTGCTTG  
+HWI-EAS443:3:7:1552:472#0/1  
abb[DZ`bab``]a¥ba¥aaXaa\_a`LHFXRTPV[KV\_```

@HWI-EAS443:3:7:86:1776#0/1  
GTTCTGTTTACTGTGTCCATGGCGTATCCTGTTCCCTGTTC  
+HWI-EAS443:3:7:86:1776#0/1  
a`a`Y`YZ\_`^^a#a[aaa`aaG`S[ ]\_\_a^]]\_\_aS]S  
@HWI-EAS443:3:80:1101:608#0/1  
AAAGACTTCTATGGTGTGGCCAATGCAGTTGCTGGCGGT  
+HWI-EAS443:3:80:1101:608#0/1  
^T^Q^bbb\_\_]b#X`]a[N]W\_#R`[O\_^Yba\_[DLa\_U  
@HWI-EAS443:3:80:1219:296#0/1  
GCTAATTTTAGCATGGAGTTACCCAGCTTTGGAGTGTCTG  
+HWI-EAS443:3:80:1219:296#0/1  
]aaaWaaXTYa\_^aab]]FR\_`#]^aW^a^a]X\_Y\_^R\_^  
@HWI-EAS443:3:80:1415:1818#0/1  
AACCCGAGTGGTTCAGAAACATCCTGAGCAGGGCACCCAT  
+HWI-EAS443:3:80:1415:1818#0/1  
abaaabaa`bb\_\_\_\_`^]RQ]RWNT[W[USFZ#ZYY`] [K  
@HWI-EAS443:3:80:265:1509#0/1  
ACTCGAAGTCGACCCTGGCATCAATCCGGGCCCTCGACAC  
+HWI-EAS443:3:80:265:1509#0/1  
aa#\_`a`\_#` ``^ [`#^^#[Y`#YZ^^#TY#Z^UEU^ZZ\_  
@HWI-EAS443:3:80:55:965#0/1  
AATGGAAGTCGTTCAACAAACAAGGGTAGATAAACTAACT  
+HWI-EAS443:3:80:55:965#0/1  
aU#\_]^^YRVVTSMQVTQSYPRXPOROVNTWXYRUXSFM  
@HWI-EAS443:3:81:1438:1086#0/1  
GTTAGTTTATCTACCCTGTTTGTGAACGACTTCCATTG  
+HWI-EAS443:3:81:1438:1086#0/1  
aaaaa\_aa`a\_a`^\_\_aa`Zaa`\_a\_`^X\_[Z`\_]^\_\_\_\_`  
@HWI-EAS443:3:81:1631:476#0/1  
CCGTCCAGACTCGAAGTCGACCCTGGCATCAATCTGGGCC  
+HWI-EAS443:3:81:1631:476#0/1  
a`aaaaa`V\_T#aaa]XOPP[UYNRU^UN]a^JEZRMPG  
@HWI-EAS443:3:81:505:75#0/1  
GCTACCCAGCTTTGGGGTGTCTGGAGTAAATGAATCAGCT  
+HWI-EAS443:3:81:505:75#0/1  
aaa\_\_\_\_`\_#L##`\_]FVS`TU`Q\_T^TU\_[UTWZVWTPPS  
@HWI-EAS443:3:81:632:283#0/1  
GGAAGTCGTTCAACAAACAAGGGTAGATAAACTAACTCAA  
+HWI-EAS443:3:81:632:283#0/1  
\_TP][U\_] [P[^\_ZZa[TX]^\_[ONNO^UPZOKPXOOVYX  
@HWI-EAS443:3:82:1027:1872#0/1  
ATCTGTCCACCCCTGCTTGTATCCCTCATGGTTTGGTGC  
+HWI-EAS443:3:82:1027:1872#0/1  
a\_a\_ZSO\_\_ZZ\_b^#^a]ZH\_\_aaW\_a^X`[^` `[^XGUa  
@HWI-EAS443:3:82:1064:978#0/1  
TGGGATGCCGATTAGAGTTTTCGTATACTTTGTTGAACT  
+HWI-EAS443:3:82:1064:978#0/1  
X\_#`TQ\_\_HUU\_U#T`^#V^S]KaQHHI`Z]\_aa\_YV[Z`  
@HWI-EAS443:3:82:1106:761#0/1  
ATTTGAGAATTCATGCCTTGAAACAATGGAAGTCGTTCAA

+HWI-EAS443:3:82:1106:761#0/1  
ababaab^bbaabbba¥baaaabab]aaaaa]]`W\_Q\_^  
@HWI-EAS443:3:82:1129:676#0/1  
GAACGACTTCCATTGTTTCAAGGCATGAATTCTCAAATAT  
+HWI-EAS443:3:82:1129:676#0/1  
a`a``¥aba^`Uabbb``W^W`a\_^`b```[``^]Ra`\_  
@HWI-EAS443:3:82:1158:1414#0/1  
ATTTGAGAATTCATGCCTTGAAACAATGGAAGTCGTTCAA  
+HWI-EAS443:3:82:1158:1414#0/1  
]bb`^a^`baW]aa^aa`a^b`a\_Za\_\_^\_Z][RV\_\_aa  
@HWI-EAS443:3:82:1297:1286#0/1  
GGGCAATGATAAGAAGGCCAAACTGGCAAATGTTGTGAGA  
+HWI-EAS443:3:82:1297:1286#0/1  
¥a`Xab`WIFN\_UU\_^SV\_¥aXNU`RJ^\_¥Z\_GS]baaba  
@HWI-EAS443:3:82:1538:1155#0/1  
ACATCCGGAGCATGGCACCCATAATGTTCTCAAACAAAAT  
+HWI-EAS443:3:82:1538:1155#0/1  
ab`aa[Z]a¥^abZZ]`[a¥S[aa\_bOIXa`ba`\_a\_¥NZ  
@HWI-EAS443:3:82:1601:1497#0/1  
ATTGAAGAGCTATCTGGGCCGTTGCAGGTCCAAGGTCATT  
+HWI-EAS443:3:82:1601:1497#0/1  
abbbba`ba``aaaa``Z]^abaab¥`b`R``aab`W¥aba  
@HWI-EAS443:3:82:1631:1428#0/1  
AATTGAAGAGCCATCTGGGCCGTTGGAGGTCCAAGGTCAT  
+HWI-EAS443:3:82:1631:1428#0/1  
`b]aSV[aOT\_\_[bLbYGYMxa]^SG[UWH^[[U^RGU[`  
@HWI-EAS443:3:82:579:684#0/1  
CCCAGCGTTGCGATAGCCCTTCTTTTTAACTTGCCTCTC  
+HWI-EAS443:3:82:579:684#0/1  
Zaa[\_aK[bba]abb``aa^[`¥a^abaU¥bab\_Y[baab  
@HWI-EAS443:3:82:884:1072#0/1  
ATCGAGACTCCCAAGACCGTACTTAGCATGTAAACATGC  
+HWI-EAS443:3:82:884:1072#0/1  
ababba\_aa]aaab`b\_aaXaa`Q`\_`\_aaabbaa\_a```  
@HWI-EAS443:3:83:1516:838#0/1  
AATTGAAGAGCCATCTGGGCCGTTACAGGTCCAAGGTCAT  
+HWI-EAS443:3:83:1516:838#0/1  
a\_b`aabaa`a\_a`Q`a``Z\_b`\_\_]\_\_`^^Z\_]\_]Z[^\_  
@HWI-EAS443:3:83:345:1113#0/1  
GCCTCTTTATTCCGTCTTTGTTTTTTCTTCCCTATTGTT  
+HWI-EAS443:3:83:345:1113#0/1  
`[`WW`bb`SSZaJ\_PYZVYUTTUaaaa¥N¥T`aaT0^XZ  
@HWI-EAS443:3:83:352:825#0/1  
GGCTCCACTCATCCGACGATTTTGCTCTCATAGTGAATGC  
+HWI-EAS443:3:83:352:825#0/1  
`[bRX^`KXaR`WLPW\_]VT`a\_YWV\_[UZZ\_\_XYPRX[V  
@HWI-EAS443:3:83:481:1240#0/1  
CTGTCCACTCCTGCTTGTATTCCCTCATGGGTTGGTGCAT  
+HWI-EAS443:3:83:481:1240#0/1  
aRaZ^\_T`aa\_WS¥\_YLE[ZX[`[[[PR^TFTZV^W\_TWZ

@HWI-EAS443:3:83:931:1910#0/1  
ATCGAGACTCCAAGACCGTACTTAGCATGTTAAACATGC  
+HWI-EAS443:3:83:931:1910#0/1  
^^^b\_Ya]aba`a^]aa^^a\_]a`a`]\_T\_a\_]S`\_\_\_\_  
@HWI-EAS443:3:84:715:1118#0/1  
GAGTTAGTTTATCTACCCTTGTGGTTGAACGACTTCCAT  
+HWI-EAS443:3:84:715:1118#0/1  
`L\_SXY\_\_\_\_bbaa\_U\_\_^a`]¥US[Y`¥`VSOT[\_WYW\_]`  
@HWI-EAS443:3:85:102:1903#0/1  
GGCATGTTTAAACATGCTAAGTACGGTCTTGGGAGTCTCGA  
+HWI-EAS443:3:85:102:1903#0/1  
abbbbaabbb]bb`bba0b\_[bb\_RT]bba\_aa`aaaaa  
@HWI-EAS443:3:85:1091:1587#0/1  
GAACGACTTCCATTGTTTCAAGGCATGAATTCTCAAATAT  
+HWI-EAS443:3:85:1091:1587#0/1  
aabbaaab`abbaaaa`aaa\_\_a`aa\_ba\_b`aaaaa  
@HWI-EAS443:3:85:1493:519#0/1  
AAGAAGAAAATTGAGAAAATAAGGCGTCTTCTAATAGATG  
+HWI-EAS443:3:85:1493:519#0/1  
^¥`[a`[a[Ub`^]a^H^YZVba]NOY`bXT`a^[`\_^VI  
@HWI-EAS443:3:85:362:441#0/1  
CGAGACTCCAAGACCGTACTTAGCATGTTAAACATGCCC  
+HWI-EAS443:3:85:362:441#0/1  
abbababa`ba[b]\_ab`^`aa`aaa\_baaba`X^^b\_^N  
@HWI-EAS443:3:85:577:482#0/1  
AAATCGTCGGATGATTGGCGCCCATCCCACAGTATATTG  
+HWI-EAS443:3:85:577:482#0/1  
]¥¥`U\_bXWVZ\_¥ZZaaUHxa\_^\_Yxa`\_ZZ`\_NP¥QZYQ  
@HWI-EAS443:3:85:610:1758#0/1  
ATCGAGACTCCAAGACCGTACTTAGCATGTTAAACATGC  
+HWI-EAS443:3:85:610:1758#0/1  
a]PQ]aZbV[[^aX¥Y^a]G¥]UU]XULU\_¥^]W^¥ZZT\_  
@HWI-EAS443:3:85:964:109#0/1  
AATGGAAGTCGTTCAACAAACAAGGGTAGATAAACTAACT  
+HWI-EAS443:3:85:964:109#0/1  
a^`\_\_]^]TVRO]SWVGU]WOXTNTVGVXXWWWXYGYXZHV  
@HWI-EAS443:3:86:1364:1334#0/1  
GAACGACTTCCATTGTTTCAAGGCATGAATTCTCAAATAT  
+HWI-EAS443:3:86:1364:1334#0/1  
abbbbabbbbabbbabb\_babbababa`ba`baababbb  
@HWI-EAS443:3:86:1760:82#0/1  
ATCGAGACTCCAAGACCGTACTTAGCATGTTAAACATGC  
+HWI-EAS443:3:86:1760:82#0/1  
[aabab`\_ba[Iaaa`\_aW^`\_\_^¥[\_a]``¥]^¥¥¥U  
@HWI-EAS443:3:86:1779:54#0/1  
AGAATCTGTCCACTCCTGGTTGTATTCCCTCATGGTTTGG  
+HWI-EAS443:3:86:1779:54#0/1  
\_VR\_[[\_¥W]W[MYRR]YDYX]SS]¥FWOGZFYZ[JYUFR  
@HWI-EAS443:3:86:636:1171#0/1  
ACAAGGGTAGATAAACTAACTCAAGGCCGCCAGACTTATG

+HWI-EAS443:3:86:636:1171#0/1  
\_¥`aab\_b¥¥`aa^¥`Z`aabaa\_[F¥aa\_`a^`a`\_aa  
@HWI-EAS443:3:86:845:202#0/1  
GGCCAATGCAGTTGCTGCCGGGTGATTTCTGTTAATGTC  
+HWI-EAS443:3:86:845:202#0/1  
Ybaa\_\_XaaZaUZ`abX\_b`FV[Waa`]aa]]X\_XZ[SU  
@HWI-EAS443:3:87:386:1443#0/1  
GATTGATGCCAGGGGCGACTTCGAGTCTGGACGGATCAAG  
+HWI-EAS443:3:87:386:1443#0/1  
aab`\_a\_\_`ZINX¥G\_^UVZZXPUSa]\_[\_U¥]WG]^\_^  
@HWI-EAS443:3:87:535:1718#0/1  
GGCTCCAATCATCCGACGATTTTGCTCTCATAGAGAATGC  
+HWI-EAS443:3:87:535:1718#0/1  
a`XaXT\_aPN]YSR`a\_¥P]RZZQU]\_`\_\_URFTVXULS  
@HWI-EAS443:3:87:584:1323#0/1  
ATCGAGACTCCCAAGACCGTACTTAGCATGTTAAACATGC  
+HWI-EAS443:3:87:584:1323#0/1  
\_W\_b`b`Z`\_OFY`ba]Z[^a[aY\_¥aaR^a\_]\_a`[]  
@HWI-EAS443:3:87:651:1741#0/1  
AATTCATGCCTTGAAACAATGGAAGTGGTTCAACAAACAA  
+HWI-EAS443:3:87:651:1741#0/1  
¥aaa`\_]V`a`aaaab\_b\_\_a\_Za`OJVQ[YWXOV\_YDRY  
@HWI-EAS443:3:87:982:786#0/1  
ATTTGAGAATTCATGCCTTGAAACAATGGAAGTCGTTCAA  
+HWI-EAS443:3:87:982:786#0/1  
[^`\_b`[XYaaaaaa\_aaa¥V\_a\_a^abWaVaQ\_\_J^]\_`  
@HWI-EAS443:3:88:1086:1829#0/1  
AGGGCTAGTAGTATCAGATGGAGGACCAAACCTTATACAAT  
+HWI-EAS443:3:88:1086:1829#0/1  
`\_Yaaa¥HWb¥aaaaaaaY]U^]`aaaaba]`aaaa\_a^a  
@HWI-EAS443:3:88:1136:1016#0/1  
CCTCCATCTGATACTAATACCCCTACCTTTGATTGGGTTT  
+HWI-EAS443:3:88:1136:1016#0/1  
abbbb`baa`bb`¥Z`YHW]\_]\_]\_a[]Y[\_RVY][P[[  
@HWI-EAS443:3:88:1226:1932#0/1  
GTGGACGACAAACACAGAGACTGGTGCAACCCAGCTCAAC  
+HWI-EAS443:3:88:1226:1932#0/1  
aUa^\_\_bZS\_a\_Z`^^XaG]¥\_QV\_S\_GZZU`UVX¥^`Q  
@HWI-EAS443:3:88:1612:40#0/1  
AACAGATCTTCAGGATCTCAGAGAACTCTTCTTTCTTGAT  
+HWI-EAS443:3:88:1612:40#0/1  
`U`\_b`aV`^a\_H\_X\_\_a`\_aba[^SaWab\_^aaaaYa\_\_  
@HWI-EAS443:3:88:185:1709#0/1  
AGACAATATACTGGTGGGATGGGCTCCAATCATCCCACGA  
+HWI-EAS443:3:88:185:1709#0/1  
`[ab[UI¥R^\_\_U]\_a`TVVX`^VP`a¥N\_aUVGXRaQ  
@HWI-EAS443:3:88:821:1547#0/1  
GTTGTTCTTTATCACTGTTACTCCAATACTCATGTGAGCT  
+HWI-EAS443:3:88:821:1547#0/1  
aaaa`a^^¥`a^`[X[^¥`R\_ZXZ]W]¥X^[MMFTVTR

@HWI-EAS443:3:88:849:148#0/1  
ATCATCATCCCAGGACTCAGTGATGTTGTGCCATCTATTA  
+HWI-EAS443:3:88:849:148#0/1  
`YXGWXPVSOL]YR[¥Y\_[`T]]XRFM[U^FOQOTXXTV  
@HWI-EAS443:3:88:984:862#0/1  
AGAGCACTGACATTAATACGATGACGAAAGATGCAGAGA  
+HWI-EAS443:3:88:984:862#0/1  
abJRa`¥¥JYbaa][YK]`abVaP^¥J]ab`JaYa[JVZa  
@HWI-EAS443:3:89:1513:535#0/1  
TCCTCCATCTGATACTAATAGCCTTACCTTTGATTGGGTT  
+HWI-EAS443:3:89:1513:535#0/1  
aaaaa`\_`a`a\_a\_]aaa``YW¥Ga[N[\_aaaaXXV[[[  
@HWI-EAS443:3:89:173:812#0/1  
GAAACAATGGAAGTCGTTCAACAAACAAGGGTAGATAAAC  
+HWI-EAS443:3:89:173:812#0/1  
abb¥aaaaaaaabP``¥`a`a\_a`a`\_YV]aX\_\_[Z^V`U  
@HWI-EAS443:3:89:533:1725#0/1  
GGAATATGATGCCGGTGCAACTACACATTCCTGGATTCCC  
+HWI-EAS443:3:89:533:1725#0/1  
aab`ab`YZ]^JRHR\_[[\_```S`^^^UNV\_\_XPPIXZ  
@HWI-EAS443:3:89:768:1202#0/1  
CTGGAGTAAATGAATCAGCTGACATGAGTATTGGTGAAC  
+HWI-EAS443:3:89:768:1202#0/1  
ab]^G\_`]^aa`ababb¥¥`abTaa¥^`T¥bba]FRT^\_U  
@HWI-EAS443:3:8:1148:1373#0/1  
ATGATGGGCATGTTTAAACATGCTAAGTACGGTCTTGGGAG  
+HWI-EAS443:3:8:1148:1373#0/1  
a`aYYa¥aaabb\_aab^`aZaaa]P]]aaa^¥N```[\_^  
@HWI-EAS443:3:8:1301:1909#0/1  
GAGCATTTGCGAAAAGCTTGGACAGTCTGGGCTCCCAGTA  
+HWI-EAS443:3:8:1301:1909#0/1  
^XaW]\_Z]aabaa^Qaaa¥^E^^aaU[U^`YYYNS¥YVMX  
@HWI-EAS443:3:8:1333:73#0/1  
AAATCGGCGGATGATTGGAGCCCATCCCACCGATATATTG  
+HWI-EAS443:3:8:1333:73#0/1  
\_aa`UDYa\_NW[\_Y`ba^a[^[\_VUR^]UU\_RSYX\_Y\_  
@HWI-EAS443:3:8:407:1097#0/1  
GTTGAGAATAGAACGATTCTTCTTGGGAATCCATGAATGT  
+HWI-EAS443:3:8:407:1097#0/1  
aZ^\_\_[Y[X`]\_`\_\_^W^^[]^Z]^\_]XNYSYNUXX]G  
@HWI-EAS443:3:8:554:1408#0/1  
ATTTGAGAATTCATGCCTTGAAACAATGGAAGTCGTTCAA  
+HWI-EAS443:3:8:554:1408#0/1  
S[S\_T¥bb^V¥\_`TX¥Y^¥b¥Z\_a\_\_a^]a\_^DLIaVISX  
@HWI-EAS443:3:8:58:1196#0/1  
GGAGCATTTGCGAAAAGCTTGAACAGTCTGCGCTCCCAGT  
+HWI-EAS443:3:8:58:1196#0/1  
aYaZY`P[Q[bb^[^[\_aX\_\_ZSaZaNX\_OF¥UW¥¥VV\_S  
@HWI-EAS443:3:8:673:1710#0/1  
CAGATTAGAGGTTTCGTATACTTTGTTGAAAATTTAGCTA

+HWI-EAS443:3:8:673:1710#0/1  
`aYaVY`Y^]RUaa\_¥^¥abba`¥KJ\_Y`KaH`NU`KL\_b  
@HWI-EAS443:3:8:796:1711#0/1  
GCATTTGCGAAAAGCTTGAACAGTCTGGGCTCCGAGTAGG  
+HWI-EAS443:3:8:796:1711#0/1  
aaaaYUa[a\_aaY\_WGNa^¥U^^G[V`N¥\_GN[HNUSQW  
@HWI-EAS443:3:8:993:1791#0/1  
CACTGCTGCTTGTATTCCCTCATGGTTTGGTGCATTCACT  
+HWI-EAS443:3:8:993:1791#0/1  
`^b¥H\_X\_YZa`\_bbS\_XUbK[[b\_aaabbYY[bYYU\_T`  
@HWI-EAS443:3:90:1144:1346#0/1  
GGAGGATTTGCGAAAAGCTTGAACAGTCTGGGCTCCAGT  
+HWI-EAS443:3:90:1144:1346#0/1  
ZVTVL¥Z\_^\_V\_YTUX`][`[\_X]\_``XMX`¥¥X¥^]] [a\_  
@HWI-EAS443:3:90:1419:644#0/1  
TGGGATTCTTCAAGGAAAGCCATAGCGTCTAGAACACAGT  
+HWI-EAS443:3:90:1419:644#0/1  
``\_[IW]VYRP``¥V[]a]¥¥a¥L]UGUY`]Z\_RVPKS\_G  
@HWI-EAS443:3:90:1433:1044#0/1  
CTCTTACTCTCCTTTTCTTTGAAAGTGGGTTGTTATCTC  
+HWI-EAS443:3:90:1433:1044#0/1  
`babbbbbb\_bbbbabbbbbb[] []b`abbababab\_  
@HWI-EAS443:3:90:176:735#0/1  
GGCTAATTTTAGCATGGAGCTACCCGGCTTTGGAGTGTCT  
+HWI-EAS443:3:90:176:735#0/1  
ab\_`Ua^Z[WT\_\_YYaU^^Z\_bZPa\_¥Ta^a\_U^V^GHV  
@HWI-EAS443:3:90:281:983#0/1  
AGTTTATCTACCCTTGTGGTTGAACGACTTCCATTGTTT  
+HWI-EAS443:3:90:281:983#0/1  
^¥Y[b^aaa^aaa`b[[T`]WW\_U`a\_IT[a\_V\_b\_¥NQX  
@HWI-EAS443:3:90:65:217#0/1  
AAAAATTTCTCCAATAGATTGCAGCACTTCTGGTACATCT  
+HWI-EAS443:3:90:65:217#0/1  
a`[^aaaaba¥GRa^aaa`[a`\_`a\_\_\_Z[]`^)^^\_\_-]  
@HWI-EAS443:3:90:737:1061#0/1  
CTGCAACGGCCAGATGGCTTCAATGGTTCATCAAAGA  
+HWI-EAS443:3:90:737:1061#0/1  
aba`V[XPT\_NXRUXYQ[GT[\_UU^VGQ^UU^BBBBBBB  
@HWI-EAS443:3:90:963:967#0/1  
CCGGATTGATGCGAGGGTCGACTTCGAGTCTGGACGGATC  
+HWI-EAS443:3:90:963:967#0/1  
``aa`\_baaabTFW[\_b[aa`bba^`]aTbbbb^^a[X[X  
@HWI-EAS443:3:90:966:575#0/1  
GAAACAATGGAAGTCGTTCAACAAACAAGGGTAGATAAAC  
+HWI-EAS443:3:90:966:575#0/1  
a`^^^aN\_^[\_^\_WLY[`X¥¥]Q\_RMNPY¥]FR\_WSU]SZ  
@HWI-EAS443:3:91:1101:1109#0/1  
GTGCTTATGGCAGTTTGCCTGGAATTTTTAGGAAAAGTA  
+HWI-EAS443:3:91:1101:1109#0/1  
aY`SSV[IR`]ZN]]\_^\_VLN[SULYX¥UMWTY]]QWV]



@HWI-EAS443:3:91:1784:403#0/1  
AAAAATTCCAGCGCAAATGCCATAAGCACAAACATTCCCT  
+HWI-EAS443:3:91:1784:403#0/1  
^`\_\_a\_a^HTaa`PU^ZYV^ZTU`Y¥WOSYFWW[^^^TYQV  
@HWI-EAS443:3:91:879:96#0/1  
ATCGAGACTCCCAAGACCGTACTTAGCATGTAAACATGC  
+HWI-EAS443:3:91:879:96#0/1  
a`ab`¥a[bb¥a]aa[]aY\_\_a`aa]]``\_baa\_Wa\_Y¥  
@HWI-EAS443:3:92:1253:353#0/1  
TTCAGGAATGAGAAGATTCCGTATATTGTATAAGTTTGGT  
+HWI-EAS443:3:92:1253:353#0/1  
```bbaI`[¥Ga\_\_`\_]aS\_]P]`aaaa^a^^]aH`^]]S  
@HWI-EAS443:3:92:1320:81#0/1  
GTCCATCAATCGGGATGAGCTGGGGTGCACCAGTCTCTGT  
+HWI-EAS443:3:92:1320:81#0/1  
aZaTWPWNG[Ya`^G[¥W]¥]V^]¥P¥UHIH¥]U¥US¥^U  
@HWI-EAS443:3:92:172:201#0/1  
GCCAGGGTCGACTTCGAGTATGGACGGATCAAGAAAGAAG  
+HWI-EAS443:3:92:172:201#0/1  
`a`UVZ^G^]WQSPSXVWUP[RUNLZGRLELXSVXUUURY  
@HWI-EAS443:3:92:282:683#0/1  
AAAAATTCCAGCGCAAATGCAATAAGCACACATTCCCT  
+HWI-EAS443:3:92:282:683#0/1  
`[SZQOZ]]P\_Y\_[SXYSL[SDLUZSPTQUJY\_]¥P[OT  
@HWI-EAS443:3:92:454:1684#0/1  
CAAAGCATACGAAACCTCTAATCTGCATCCCAGGTGTTGC  
+HWI-EAS443:3:92:454:1684#0/1  
¥XZTZRVWXTT\_\_aWU]^`¥]X¥ZW¥``XZK[Y\_NXYQ¥Y  
@HWI-EAS443:3:92:590:214#0/1  
TGTTTACTGTGCCATGGTGTATCCTGTTCCCTGTTCCATG  
+HWI-EAS443:3:92:590:214#0/1  
````aa\_a\_Z\_]VT[abaT`T\_\_[[`^[\_]\_¥a¥`¥WW\_^  
@HWI-EAS443:3:92:65:348#0/1  
AGTAAACAGAGCACACCAATACTCAGAAAAGGGAAAGTGG  
+HWI-EAS443:3:92:65:348#0/1  
[]LYTQ]`\_TH]Zb]abb\_\_Z]bab`Z¥V``]]SaVaN[J  
@HWI-EAS443:3:93:1123:708#0/1  
GAAAAACAAGACTGAACAAGAGAGGCTATCTAATAAGA  
+HWI-EAS443:3:93:1123:708#0/1  
a``a\_\_a````a^^aa`\_]Xaaa\_^a^\_^YQUQUVSXBB  
@HWI-EAS443:3:93:1266:307#0/1  
GGGCAATGAAAAGAAGGCCAAACCGCAAATGTTGTGAGA  
+HWI-EAS443:3:93:1266:307#0/1  
a^V^Y]a\_[SX]]`XX[ZZYa\_SUTXV]aU[Y\_aaY]\_] [  
@HWI-EAS443:3:93:1298:288#0/1  
ATTTGTGGCTAATTTTAGCATGGAGCTAACCAGCTTTGGA  
+HWI-EAS443:3:93:1298:288#0/1  
a\_b^baabYaaJ¥Z^]`aPY\_[[GKR`\_GZR\_\_N\_YBBBB  
@HWI-EAS443:3:93:1401:1519#0/1  
CAGACTCGAAGTCGACCCTGGCATCAATCCGGGACCTAGA

+HWI-EAS443:3:93:1401:1519#0/1  
`a]]]abaaaaaV`a`OUYUa\_bbGZ^BBBBBBBBBBBBBB  
@HWI-EAS443:3:93:946:704#0/1  
ACTTGCAGGTCCTGTAGAATCTGACCACTCCTGCTTGTAT  
+HWI-EAS443:3:93:946:704#0/1  
aaaa`^\_bab`baaaaaaa¥KS[aU`U`aV`aa^\_`  
@HWI-EAS443:3:94:1119:1148#0/1  
ATGGGCTGGCATTACCACAGCATTGTTTACAGAATGAATC  
+HWI-EAS443:3:94:1119:1148#0/1  
[``^^`¥a¥I`¥`]`Z^\_`\_Y¥UW^aWQO`]^\_PHa^a`  
@HWI-EAS443:3:94:1240:1157#0/1  
CATCACTGAGTCCTGGGATGATGATGGGCATGTTAACAT  
+HWI-EAS443:3:94:1240:1157#0/1  
abbabbbbaabbbbaaabbabbbbbb[bbbbbaaba  
@HWI-EAS443:3:94:1351:1390#0/1  
GCTGTGGGAATGCCAGCCCATGGTCCAGCCAAAAGCATGG  
+HWI-EAS443:3:94:1351:1390#0/1  
aXREZWXRR`Sa\_\_`PXVUU[VBBBBBBBBBBBBBBBBBB  
@HWI-EAS443:3:94:1421:1010#0/1  
TCGAGTCTGGACGGATCAAGAAAGAGGAGTTCTCTGAGAT  
+HWI-EAS443:3:94:1421:1010#0/1  
W\_T[TVV\_QZU0\_a00XUSa`^[]RH]R\_LZ^[]P\_```  
@HWI-EAS443:3:94:470:1683#0/1  
CTTCTAGTCTGGACGGATCAAGAAAGAAGAGTTCTCTGAG  
+HWI-EAS443:3:94:470:1683#0/1  
Xbb\_JZb[\_]a]`aVb`T¥ZXS]a\_\_aT\_\_JW^`S^`a]  
@HWI-EAS443:3:94:667:1013#0/1  
CAAACAAGGGAAGATAAACTAACTCAAGGTCGCCAGACTT  
+HWI-EAS443:3:94:667:1013#0/1  
aa]a\_\_Z\_ab^^a`aaaab`aaaaa`\_YYSY`\_\_]\_a\_  
@HWI-EAS443:3:95:1195:1227#0/1  
AGACTTTGTAATCCCCTGAATACCTTTGTCAGTCATAAAG  
+HWI-EAS443:3:95:1195:1227#0/1  
abaabbb`RabbbT`b`b\_aaJ\_]YZ\_b^^bbTS`a¥^`\_`  
@HWI-EAS443:3:95:1516:371#0/1  
ATTTGTGGCTAATTTTAGCATGGAGCTACCCAGATTTGGA  
+HWI-EAS443:3:95:1516:371#0/1  
[Yba[V¥a\_bbaabbbb[DHXa`G`XW]SEESUK[^a\_BB  
@HWI-EAS443:3:95:443:1405#0/1  
AAGAAATCTCTGTCTTGTGTTAATTAGTCATCATCTTTCT  
+HWI-EAS443:3:95:443:1405#0/1  
a^b¥abbaaab]WZa\_]W^HU`aR]GZV^\_W[S]Y¥`a  
@HWI-EAS443:3:95:449:795#0/1  
GATAACAATGACCTTGGACCTGCAACGGCCGAGATGGCT  
+HWI-EAS443:3:95:449:795#0/1  
\_Z]\_XZW^QZ\_SUFVP\_^YLR]aXWXYGWa\_SV^HN[FS[  
@HWI-EAS443:3:95:465:327#0/1  
ATTTGTGTTCCAATCTTCATTCTTTTACTCTCGAACATGT  
+HWI-EAS443:3:95:465:327#0/1  
abbbbaab^b^IX`a`a`aa^Yaa`X\_a^]\_¥`^\_]^`V

@HWI-EAS443:3:95:469:1029#0/1  
GCCCTACCCTTGATTGGGTTTGGATCCCACAGCTTCTTTAA  
+HWI-EAS443:3:95:469:1029#0/1  
a`YaaTa\_`¥a]SX^Q¥S[^[\_a\_[Y^\_^\_a^]^^`\_W^  
@HWI-EAS443:3:95:548:64#0/1  
CAATTGAAGAGCCATCGGGCCGTTGCAGGTCCAAGGTCA  
+HWI-EAS443:3:95:548:64#0/1  
a[ `ab^]aYa^VUaTYD[\_SWU]ZX]VXZ¥FFPU[ `HMDK  
@HWI-EAS443:3:95:566:1594#0/1  
AACCCGATTGATGGAGCACTACCTGAGGATAATGAACCAA  
+HWI-EAS443:3:95:566:1594#0/1  
`abb`b\_b\_U]`ab[TZa^\_b\_a`\_aU[VU````\_aaZ]¥a  
@HWI-EAS443:3:95:594:1403#0/1  
GTTGATTCCCACTAACTCGCAGGTCCTGTAGAATCTGTCC  
+HWI-EAS443:3:95:594:1403#0/1  
¥Y¥\_Xaba`a^`aabba]`aYa^R\_X\_aabaaaa^aY[R  
@HWI-EAS443:3:95:785:1849#0/1  
AATCATCATCCATCAGCTCCCATTTTAAAGCAGACTTCAGG  
+HWI-EAS443:3:95:785:1849#0/1  
a`aa\_\_`aa\_`aaa\_a`\_a\_aaaaaaa`\_a^\_\_a\_¥\_a`  
@HWI-EAS443:3:95:953:1269#0/1  
ATTTGAGAATTCATGCCTTGAAACAATGGAAGTCGTTCAA  
+HWI-EAS443:3:95:953:1269#0/1  
aab```ba\_bbabaabab]aaaa`baaaaaa[\_]R¥PY]  
@HWI-EAS443:3:96:1099:1641#0/1  
ATTTGAGAATTCATGCCTTGAAACAATGGAAGTCGTTCAA  
+HWI-EAS443:3:96:1099:1641#0/1  
aab`bb^baa`Xaaaaabaaa\_b¥b\_aaaa`aZY^`a]``  
@HWI-EAS443:3:96:392:947#0/1  
AAAAATTCCAGCGCAAACCTGCCATAAGCACCATTCCT  
+HWI-EAS443:3:96:392:947#0/1  
]\_`a¥¥Y\_¥^a^]b`KXI^baaa[aab\_^]^[ `aaY]00b  
@HWI-EAS443:3:96:657:276#0/1  
CAATGGAAGTCGTTCAACAAACAAGGGTAGATAAACTAAC  
+HWI-EAS443:3:96:657:276#0/1  
aabbbbbbab`ab\_a\_]`P`aaYa\_\_\_aX\_a[[aa`N\_\_`X  
@HWI-EAS443:3:96:739:2016#0/1  
AACAAATGGAAGTCGTTCAACAAACAAGGGTAGATAAACTA  
+HWI-EAS443:3:96:739:2016#0/1  
a` `bab`ab\_`\_^a0a¥a¥G`aaX^¥\_¥OMW\_\_WX` `MBB  
@HWI-EAS443:3:96:890:705#0/1  
GAAAGTGGACGACAAACACAGACACTGGTGCACCCCAGCT  
+HWI-EAS443:3:96:890:705#0/1  
a\_`a`Xa`YQZ\_¥`a[OZV^`YKYS^¥XUVUVZXUUZRSB  
@HWI-EAS443:3:97:1205:294#0/1  
CTGATTCATTTACTCCAGACACTCCAAAGCTGGGGAGCTC  
+HWI-EAS443:3:97:1205:294#0/1  
^]b]aba]bbb\_Xbaaab¥a\_aaT`a]PQ^a]]G]aWZD  
@HWI-EAS443:3:97:310:1610#0/1  
CTCCCCTATGGCACCTATATGTGTATCTGTAGTATTTGAT

+HWI-EAS443:3:97:310:1610#0/1  
aaaa\_`aa\_a`a`a`a`aa\_a^`^aa]aaZQ\_`\_]a\_  
@HWI-EAS443:3:98:1040:285#0/1  
CAGATACACATATAGGCGCCATAGGGGAGACACACAAATT  
+HWI-EAS443:3:98:1040:285#0/1  
]`aa^`^Zaaa^]a]F\_]\_Ya``WUWa\_`aYa\_a`X]`  
@HWI-EAS443:3:98:1329:377#0/1  
AGTTTATCTACCCTTGTGGTTGAACGACTTCCATTGTTT  
+HWI-EAS443:3:98:1329:377#0/1  
ab^bbababa`^^abbaba¥^]a[¥^\_Pa^VZ]a¥a\_YY  
@HWI-EAS443:3:98:250:87#0/1  
CCCATTGATTGTGAAAGAAATCTCTGTGTCTTGTGAATTA  
+HWI-EAS443:3:98:250:87#0/1  
¥``aaaa`ba¥a^^`a\_a^b``bb`b`a^a^]aZ\_`\_]`  
@HWI-EAS443:3:98:406:1151#0/1  
GAAACAATGGAAGTCGTTCAACAAACAAGGGTAGATAAAC  
+HWI-EAS443:3:98:406:1151#0/1  
a`]bbabbabaaa^`\_aaa\_Yaaaa\_`Wa]UaaZ^^^a^  
@HWI-EAS443:3:99:1511:1809#0/1  
ACTACACATTCTGGATTACCAAGAGGAATCGTTCTATTC  
+HWI-EAS443:3:99:1511:1809#0/1  
^^ab¥a^aWaW]V\_a\_WaHZVU`ba\_\_V`¥0`[¥H\_\_^JW  
@HWI-EAS443:3:99:1602:127#0/1  
ATTTCTTTTGTCCAAGATTCAAGTATGGAGACTCCCAAGAC  
+HWI-EAS443:3:99:1602:127#0/1  
\_ba\_GXa`ZaNaa¥`¥`]a`]a¥\_`aG¥`T`0\_IRGT0`]B  
@HWI-EAS443:3:99:1629:1667#0/1  
TACAGATACATATATAGGTGCCATAGGGGAGACACACAAA  
+HWI-EAS443:3:99:1629:1667#0/1  
ab]`ababYaG^baaaba]aY[`aaa\_a\_abaZb0a]aaa  
@HWI-EAS443:3:99:162:898#0/1  
AGTTTATCTACCCTTGTGGTTGAACGACTTCCATTGTTT  
+HWI-EAS443:3:99:162:898#0/1  
aaaU^b\_abbab`ab`abbaa`aab[`\_`^aaaUaaab^a`  
@HWI-EAS443:3:99:181:630#0/1  
GAAAGTGGACGACAAACGCAGAGACTGGTGCACCCAGCT  
+HWI-EAS443:3:99:181:630#0/1  
aaaab[a]``b\_\_a`a\_a\_^a¥\_^^\_¥\_N\_R[UV^W][W¥  
@HWI-EAS443:3:99:607:214#0/1  
GAACAATTGAAGAGCCATCTGGGCCGGTGCAGGTCCAAGG  
+HWI-EAS443:3:99:607:214#0/1  
\_V\_¥`^b``^Wa]LZUPZPa]`ZN\_JV]V[`^PUZ[BBB  
@HWI-EAS443:3:99:77:621#0/1  
GGAATCAATGAACAAAGAGGAAATAGAGATAACACCCAC  
+HWI-EAS443:3:99:77:621#0/1  
]aYWRHY^b\_RZ[YRWa[\_b`[\_^]`\_ZR\_`W\_[ZX[\_```  
@HWI-EAS443:3:9:318:370#0/1  
AAAGGGATTGAGGGATTACAAAGTCTTCCCCGAAAATCA  
+HWI-EAS443:3:9:318:370#0/1  
\_U\_Z¥RV¥]\_S^PNOTWOTQ]`WZBBBBBBBBBBBBBBBB

@HWI-EAS443:3:9:609:359#0/1  
ATTTGAGAATTCATGCCTTGAAACAATGGAAGTCGTTCAA  
+HWI-EAS443:3:9:609:359#0/1  
ZJZSO]Z`aOLXa[LX¥V]TKP¥Wa\_^\_¥`ZURMTPUM  
@HWI-EAS443:3:100:1622:952#0/1  
GAGGGATCAAGAAAGAAGAGTTCTCTGAGATCATGAAGAT  
+HWI-EAS443:3:100:1622:952#0/1  
a\_J\_bab^^aa]^`baaa`Z`X]b`aaa]^\_S`^¥`a]B  
@HWI-EAS443:3:100:880:155#0/1  
ACGACTTCCATTGTTTCAAGGCATGAATTCTCAAATATTC  
+HWI-EAS443:3:100:880:155#0/1  
aaba\_ab`aaaa`\_`a`a[`^W]``\_S[V]XXWV]\_ZHB  
@HWI-EAS443:3:10:244:1689#0/1  
AGCGAATGCACCAAACCATGAGGGAATACAAGCAGGAGTG  
+HWI-EAS443:3:10:244:1689#0/1  
Z¥NW]W]`aaba\_^XTZOTU^][\_S]a\_\_[[SXZZHWZ  
@HWI-EAS443:3:10:40:782#0/1  
TGCCCTTCTTTTTAACTTGCCTCTCTGCATCTTTGGCC  
+HWI-EAS443:3:10:40:782#0/1  
`b`\_]aa^b[\_^Taaabb^]a`LZV^OHY]aa`HW^^Q[  
@HWI-EAS443:3:11:207:708#0/1  
TCAGTATCGAGACTCCCAAGACCGTACTTAGCATGTTAAA  
+HWI-EAS443:3:11:207:708#0/1  
abbaababaaaaaaba]aabaa\_Taaa[a\_a`\_a`aa`a  
@HWI-EAS443:3:12:243:637#0/1  
GAGGGGAGCTAATGGATGATGATTATCGGGGAAGACTTTG  
+HWI-EAS443:3:12:243:637#0/1  
aT]N\_\_][J][T\_\_\_`VLSU¥a][[\_][Y[XLT\_XRVYV[  
@HWI-EAS443:3:13:207:1212#0/1  
GAATATTTGAGAATTCATGCCTTGAAACAATGGAAGTCGT  
+HWI-EAS443:3:13:207:1212#0/1  
a]]M^`\_¥Z`RYaaa`Y`aYa`aUYaXb\_`¥Y`\_]PR¥Q  
@HWI-EAS443:3:14:1135:1172#0/1  
GAGCCGGTCTCCTATATGAACTGCTAGGGAAAAATTTCTC  
+HWI-EAS443:3:14:1135:1172#0/1  
abbbba\_b```\_b^^bYaaa¥aab^[aabaab`a¥`aaS  
@HWI-EAS443:3:14:737:876#0/1  
CAGCATCACTGAGTCCTGGGATGATGATGGGCATGTTTAA  
+HWI-EAS443:3:14:737:876#0/1  
aaabaa``aaa]]Va`aaaa^`a\_aa\_a`\_^¥\_\_`V\_^\_^  
@HWI-EAS443:3:15:1359:469#0/1  
GAATATTTGAGAATTCATGCCTTGAAACAATGGAAGTCGT  
+HWI-EAS443:3:15:1359:469#0/1  
a¥[\_b^[\_¥``ab`[^ba^a`aaaS¥]a¥Y]`¥`^aWX]]  
@HWI-EAS443:3:16:1471:1378#0/1  
GCNTATGGCATTGCGCTGGAATTTTTAGGAAAAGTAGA  
+HWI-EAS443:3:16:1471:1378#0/1  
\_]D]abba\_`bbaaa[`]bb\_aaaaabaaa^aaaaa]a`a  
@HWI-EAS443:3:17:273:240#0/1  
CATCAATCGGGTTGAGCTGGGGTGCACCAGTCTCTGTNTT

+HWI-EAS443:3:17:273:240#0/1  
aaaaa\_a`a`a\_a\_\_\_\_\_^`¥¥`W`¥`\_`\_\_\_\_¥\_\_^`\_`KDV¥  
@HWI-EAS443:3:18:1553:1499#0/1  
ACGACTTCCATTGTTTCAAGGCATGAATTCTCAAATATTC  
+HWI-EAS443:3:18:1553:1499#0/1  
````aWS¥bSQ¥T`b]aV\_VbTX`^`RYa]J`ab]`X[\_PL  
@HWI-EAS443:3:19:313:1334#0/1  
ACACATATAGGTGCCATAGGGGAGACACACAAATCAAAC  
+HWI-EAS443:3:19:313:1334#0/1  
a`Z``^a`a`]GT[a^¥`]ZQZZX]aaa\_ax0¥Z][\_a^  
@HWI-EAS443:3:1:609:908#0/1  
GTGTGGAGTAAATGAATCAGCTGACATGAGTATTGGAGTA  
+HWI-EAS443:3:1:609:908#0/1  
aTF¥`]T¥VaaP]YR^WWY]U\_`^MZYZQ[XO¥UUZBBBB  
@HWI-EAS443:3:22:424:130#0/1  
CGAGGCTCCAATCATCCGACGATTTTGCTCTCATAGTGAA  
+HWI-EAS443:3:22:424:130#0/1  
ab\_Y\_aa\_aa\_^\_\_`Z`a¥¥a``\_a`a]^¥\_]^^\_Y`^`  
@HWI-EAS443:3:24:772:125#0/1  
GAATATTTGAGAATTCATGCCTTGAAACAATGGAAGTCGT  
+HWI-EAS443:3:24:772:125#0/1  
a\_[U^¥YL]\_[¥\_]UZ\_X]]PYZ[V\_¥Va¥^\_^]Y[FMQT  
@HWI-EAS443:3:25:1558:1545#0/1  
AGTGGGTATGCACAAACAGACTGTGTTCTAGAGGCTAAGG  
+HWI-EAS443:3:25:1558:1545#0/1  
`a`b``abbbab]bbā]a`]aa`[]`bZ`\_a`aa\_`BBBB  
@HWI-EAS443:3:25:1559:481#0/1  
GATTGGAACACAAATACCAGCAGAAATGCTAGCAAGCGTT  
+HWI-EAS443:3:25:1559:481#0/1  
aM[[JOR¥\_SYKQY\_]\_] [Y\_X^¥YYU]XS`]OX^[UGOX  
@HWI-EAS443:3:26:298:1534#0/1  
CAGCATCACTGAGTCCTGGGATGATGATGGGCATGTTTAA  
+HWI-EAS443:3:26:298:1534#0/1  
a]`^`^a`aa``\_Y\_]\_`^\_\_^]]][\_^]OX\_][][]]^^^  
@HWI-EAS443:3:26:831:289#0/1  
GCCTGTGTTGAGAATAGAACGATTCCTCTTGGAATCCAG  
+HWI-EAS443:3:26:831:289#0/1  
a\_\_aaab\_aa`aaaa`ba^a\_``]\_`^\_\_\_\_\_`\_^`V¥\_\_  
@HWI-EAS443:3:28:405:185#0/1  
GGCCGACTTCGAGTCTGGACGGATCAAGAAAGAAGAGTTC  
+HWI-EAS443:3:28:405:185#0/1  
`WHbXY\_aaa¥\_¥G`aaa\_a^Z\_\_URT^Z\_]Y¥]]^VVT  
@HWI-EAS443:3:28:68:856#0/1  
GAATATTTGAGAATTCATGCCTTGAAACAATGGAAGTCGT  
+HWI-EAS443:3:28:68:856#0/1  
ababbbabbbbaaaaaabaabbaaaa]aabaaaaaaZ\_^X  
@HWI-EAS443:3:29:1556:1394#0/1  
CTCCTATATGAACTGCTAGGGAAAAATTTCTCGAATATCA  
+HWI-EAS443:3:29:1556:1394#0/1  
aa``\_0[V`I\_\_\_\_^aKTVZU¥]`aZ`^]`babSPYX¥]]

@HWI-EAS443:3:2:1618:1516#0/1  
CAACTGCATTGGCCAACACCATAGAAAGTCTTTAGATCNAA  
+HWI-EAS443:3:2:1618:1516#0/1  
aaaZa`aaa`b\_aa^0a[W`aa`\_a\_`\_`\_]aIDQ^  
@HWI-EAS443:3:2:829:1144#0/1  
GTCGTTCAACAAACAAGGGTAGATAAACTAACTCAAGGTC  
+HWI-EAS443:3:2:829:1144#0/1  
`TU^Y¥a¥SPYa`Y^\_\_\_YN]`S¥RZZQ^\_UU]O`]^`OY  
@HWI-EAS443:3:2:86:1926#0/1  
AAAAATTCCAGCGCAAATGCCATAAGCACCATTCCTACT  
+HWI-EAS443:3:2:86:1926#0/1  
a^a\_\_^ZNW[WS\_W¥]XX^SXXWX^Z^S]XXXOZZZWGBB  
@HWI-EAS443:3:30:528:286#0/1  
CACGTGTTCTGTTTACTGTGTCCATGGTGTATCCTGTTCC  
+HWI-EAS443:3:30:528:286#0/1  
ab\_ba`Xa`ababQ\_aba^a\_b]aab^ZaZa`a`\_`^`^`  
@HWI-EAS443:3:31:892:1187#0/1  
GGCCCTCCATCTGATACTAATAGCCCTACCTTTGATTGGG  
+HWI-EAS443:3:31:892:1187#0/1  
SaZ\_b^^]S\_a^ab]\_Z`bbW^^aaaZb]^aUZ^Z\_\_ZZa  
@HWI-EAS443:3:32:1099:1207#0/1  
TCAGTATCGAGACTCCCAAGACCGTACTTAGCATGTTAAA  
+HWI-EAS443:3:32:1099:1207#0/1  
`^`ba`a^`aaa^¥¥aZXY]^aS\_¥`\_]V\_YX¥QQ]]`  
@HWI-EAS443:3:32:378:1398#0/1  
ATTTGTGGCTAATTTTAGCATGGAGCTACCCAGCTTTTGA  
+HWI-EAS443:3:32:378:1398#0/1  
\_baaa]`bb`b`SZaa^Ua¥]\_¥aZa[a\_\_]XYX^`NGZR  
@HWI-EAS443:3:33:426:1739#0/1  
ACACATATAGGTGCCATAGGGGAGACACACAAATTCAAAC  
+HWI-EAS443:3:33:426:1739#0/1  
abaab`b\_a\_VMR\_a\_`\_`[^Y\_\_`^`^`\_]Z¥\_a\_Z  
@HWI-EAS443:3:33:482:688#0/1  
CAGCATCACTGAGTCCTGGGATGATGATGGGCATGTTTAA  
+HWI-EAS443:3:33:482:688#0/1  
aaabaUaab]`b^`^a[a^L^ba\_[`a]S`QZW\_VZ\_a  
@HWI-EAS443:3:34:1592:1513#0/1  
ACACATATAGGTGCCATAGGGGAGACACACAAATTCAAAC  
+HWI-EAS443:3:34:1592:1513#0/1  
aababbbbaa`baaaaabaaa`aaX\_\_a\_a`\_a]X]\_]Y  
@HWI-EAS443:3:34:1629:1433#0/1  
TCGGGTCCCTCCATCTGATACTAATAGCCCTACCTTTGATT  
+HWI-EAS443:3:34:1629:1433#0/1  
aaa`Y[aaa`a`[a\_¥`a^a`X[^\_\_^]XVX]^XXYX  
@HWI-EAS443:3:35:1506:1015#0/1  
TGTGTCCTCCATCTGATACTAATAGCCCTACCTTTGATTG  
+HWI-EAS443:3:35:1506:1015#0/1  
a`^a\_\_`aaa\_a^^`^^`\_\_`\_[YaY]V]^`[^[\_U]  
@HWI-EAS443:3:35:809:529#0/1  
CCCTCTTTTTAACTTGCCTCTCTCTGCATCTTTGGTCATC

+HWI-EAS443:3:35:809:529#0/1  
aaa\_]Yaa^` [ `\_\_aaa` `aa\_\_WW` ^`\_a` ]\_]X^^\_`  
@HWI-EAS443:3:36:1162:478#0/1  
TGCTGGGTTGTTATCTCTATTTCTCTTTGTTTCATTGATT  
+HWI-EAS443:3:36:1162:478#0/1  
aaabbab^aa\_\_^`Z`aa¥\_a[]^` ` \_`a\_]^[ ` \_`[W]]  
@HWI-EAS443:3:36:644:1393#0/1  
CCTGGGTCGACTTCGAGTCTGGACGGATCAAGAAAGA  
+HWI-EAS443:3:36:644:1393#0/1  
aa]\_]`Ua`aaaa` ]Z\_Wa` []]^` ^`W` a\_Z]` [[PXVQ  
@HWI-EAS443:3:36:717:1676#0/1  
AGTAAACAGAACACACCAATACTCAGAAAAGGAAAGCGG  
+HWI-EAS443:3:36:717:1676#0/1  
aP[ `W]UX]aZ[U\_a\_[XVSa\_aa[JVR\_]YVGP[^TNVP  
@HWI-EAS443:3:37:1708:361#0/1  
CTNTTACTCTCCTTTTTCTTTGAAAGTGGGTTGTTATCTC  
+HWI-EAS443:3:37:1708:361#0/1  
a^D^bbbbb`abbbbbb] ]^bbaba\_abbbbabbba  
@HWI-EAS443:3:39:530:33#0/1  
TGAGAATAGAACGATTCTTGGGAATCCAGGAATGNGT  
+HWI-EAS443:3:39:530:33#0/1  
\_\_GYa^] `a^a\_\_S\_aaa]Y¥^]\_¥^] ] [[^]\_QM¥XDPU  
@HWI-EAS443:3:39:545:230#0/1  
ACGACTTCCATTGTTTCAAGGCATGAATTCTCAAATATTC  
+HWI-EAS443:3:39:545:230#0/1  
abba`¥ab` `ZV[^aaa¥a]\_W¥¥]V]\_\_TKRYX]\_` [P  
@HWI-EAS443:3:43:1265:1559#0/1  
ACGGGGAGCCCAGACTGTTCAAGCTTTTCGCAAATGCTCC  
+HWI-EAS443:3:43:1265:1559#0/1  
aabbba¥aaaa]aa\_\_baa` \_`\_a]a^\_ZR¥\_\_^]TZ\_Z]  
@HWI-EAS443:3:44:674:22#0/1  
CAGCATCACTGAGTCCTGGGATGATGATGGGCATGTTTAA  
+HWI-EAS443:3:44:674:22#0/1  
[¥ab[Kb^H` ] [aXTL\_]TZ`SaVa¥GTa[aa\_\_a] `Z`U  
@HWI-EAS443:3:47:209:428#0/1  
GTATTCTGTTTACTGTGTCCATGGTGTATCCTGTTCCCTGT  
+HWI-EAS443:3:47:209:428#0/1  
aZ`\_`a`aa¥a`\_U\_\_` `YYZ`^Z^Y^V]^`^^`\_X]^X]]X  
@HWI-EAS443:3:4:1099:897#0/1  
TTTGTGGCTAATTTTAGCATGGAGCTACCCAGCTTTGTAG  
+HWI-EAS443:3:4:1099:897#0/1  
^Z`\_OV\_OQ` ` \_Y`^V^JTYQOO^QWZXL¥Y[EY\_aYHYU  
@HWI-EAS443:3:4:241:1217#0/1  
GCCCCCTACTGGGAGCCCAGACTGTTCAAGCTTTTCGGAA  
+HWI-EAS443:3:4:241:1217#0/1  
aaa]bXb` ^Z^Z\_OZ^U]T0]XZ` T[]Wa]KN[S^KHKXO  
@HWI-EAS443:3:50:368:444#0/1  
CTTGGGAGTCTCGATACTGAATCTTGGACAAAAGAAAAC  
+HWI-EAS443:3:50:368:444#0/1  
`abbaZbaUYb\_bbb\_VY¥Z` [ `S` XbabbYbaaaaaH[a



@HWI-EAS443:3:51:1075:1394#0/1  
GAATATTTGAGAATTCATGCCTTGAAACAATGGAAGTCGT  
+HWI-EAS443:3:51:1075:1394#0/1  
aaaa`bbbbabaaaa^aa\_a^ba\_a`a\_a^aaa\_`a]X[]  
@HWI-EAS443:3:51:326:750#0/1  
GGCTCCTCCATCTGATACTAATAGCCCTACCTTTGATTGG  
+HWI-EAS443:3:51:326:750#0/1  
abaaaa`\_aaaa^aaYa`aa`)\_`\_a`\_¥aaaa`\_`\_a  
@HWI-EAS443:3:51:32:470#0/1  
GTCGGCCAATGCAGTTGCTGCCGTTGATTTCTGTTTAAT  
+HWI-EAS443:3:51:32:470#0/1  
aQDYYY¥VUKUWZ¥]Ta\_¥[WP^VPRPDRSYLPUKBBBBB  
@HWI-EAS443:3:51:828:1064#0/1  
AGCAGACTTCAGGAATGTGAAGATTCCTGATATTGTAAAG  
+HWI-EAS443:3:51:828:1064#0/1  
aa]aaaaa`babaabYb`\_a\_a`^Xa^`aaaa`\_`\_a  
@HWI-EAS443:3:54:507:25#0/1  
GGACGGATCAAGAAAGAAGAGTTCTCTGAGATCATGANGA  
+HWI-EAS443:3:54:507:25#0/1  
`b\_abb`b`\_a\_ba¥aaaa`Ya\_a]a`aa¥a`\_^`aaXD¥\_  
@HWI-EAS443:3:55:1323:1305#0/1  
GCAAAATCGTCCGATGATTGGAGCCCATCCCACCAGTGCA  
+HWI-EAS443:3:55:1323:1305#0/1  
Q¥VQYU¥S[Sabb^R^HTQ`]¥aW]aSZ[U]I`]M]LDDR  
@HWI-EAS443:3:57:577:138#0/1  
CAATAATCCCCTGAATCCCCTTTGTGAGTCATAAAGAGATT  
+HWI-EAS443:3:57:577:138#0/1  
ababbbaba¥\_bba\_baa^`bb\_\_a`\_¥\_aaa^a`aZaa  
@HWI-EAS443:3:58:1171:803#0/1  
ACACATATAGGTGCCATAGGGGAGACACACAAATTCAAAC  
+HWI-EAS443:3:58:1171:803#0/1  
a\_aP`abaaaa]a\_a`a]`\_a^`\_^[]¥^a`\_a^¥¥a\_S  
@HWI-EAS443:3:5:1220:886#0/1  
AGGGGCCTTCTTTTCATTGCCCTACTGGGAGCCCAGAC  
+HWI-EAS443:3:5:1220:886#0/1  
ab¥abbbbaaabbbabaaaaaXW]aa`b^RW¥a`WJ]b\_Y  
@HWI-EAS443:3:5:34:457#0/1  
ACGACTTCCATTGTTTCAAGGCATGAATTCTCAAATATTC  
+HWI-EAS443:3:5:34:457#0/1  
aab^aaaabbbaa`\_aa\_aaaa^`\_^a\_\_`¥^^`\_a``[  
@HWI-EAS443:3:61:681:1334#0/1  
GTCGTTCAACAAACAAGGTAGATAAACTAACTCAAGGTC  
+HWI-EAS443:3:61:681:1334#0/1  
a`\_^`^`\_Z[¥YS¥T[[YVYPRZQQS0^¥XX[BBBBBBBBB  
@HWI-EAS443:3:63:1363:1432#0/1  
GGGTGCCATGCTCAGGATGTTTCTGAACCACTCGGGTGGA  
+HWI-EAS443:3:63:1363:1432#0/1  
a`bFLM^aSaa\_X\_aaXQ\_[`X]]ZTZXRFSV¥BBBBBB  
@HWI-EAS443:3:64:631:988#0/1  
GATGCAGAGAGAGGCAAGTTAAAAAGAAGGGCTATCGTAA

+HWI-EAS443:3:64:631:988#0/1  
J\_`b]¥[Wbb`T¥`b`[ZSabbay¥UYa`aaba``a¥`  
@HWI-EAS443:3:65:1313:105#0/1  
ACCTCCTCTTTGTTTCATTGATTCCATTACATCCTTTAAGA  
+HWI-EAS443:3:65:1313:105#0/1  
^Vabaab\_aaaa[aZ\_a\_`^]`aZ\_a^a\_\_`]^a\_\_\_\_]\_\_\_  
@HWI-EAS443:3:65:1696:251#0/1  
GGGTATGCACAAACAGACTGTGTTCTAGAGGCTATGGGGT  
+HWI-EAS443:3:65:1696:251#0/1  
W`\_UY¥^\_aaYa`]a\_¥U¥`]b[HO\_`\_T\_\_BBBBBBBBB  
@HWI-EAS443:3:65:25:755#0/1  
GAATATTTGAGAATTCATGCCTTGAAACAATGGAAGTCGT  
+HWI-EAS443:3:65:25:755#0/1  
\_ba\_V¥^`^`]^aa\_a`¥^aaa`a\_\_P\_^L[aa^¥^JVVP  
@HWI-EAS443:3:66:1256:1132#0/1  
GAGCTCAGAGAACTCTTCTTTCTTGATCCGTCAGACTCG  
+HWI-EAS443:3:66:1256:1132#0/1  
aa^a\_aaa]^`a``aaaaa`¥a\_V`\_¥\_\_\_Y`\_^`\_U¥U  
@HWI-EAS443:3:66:295:1728#0/1  
CACGGGCTATCGCAACACCTGGGATGCAGATTAGAGGTTT  
+HWI-EAS443:3:66:295:1728#0/1  
`R`¥ULTY\_V\_\_aa`[a]TKSGW^VFYHS\_]R\_]VWSGUH  
@HWI-EAS443:3:67:1115:559#0/1  
AGTGGGTATGCACAAACAGACTGTGTTCTAGAGGCTAAGG  
+HWI-EAS443:3:67:1115:559#0/1  
ab`bbb`bbaaa`aaa]aa`[aaaa^a¥aZ]^`¥BBBBBB  
@HWI-EAS443:3:68:1225:629#0/1  
CTGGGCTCTTCAATTGTTTCATCAAAGACTACAGATACACA  
+HWI-EAS443:3:68:1225:629#0/1  
aaZ¥a]\_Yaa``\_] ^¥Pa]^`aaY`a``Taba^`\_a`¥]W]  
@HWI-EAS443:3:6:396:1960#0/1  
AATAGAGCACTGACATTAATACGATGACCAAAGATGCAG  
+HWI-EAS443:3:6:396:1960#0/1  
[YVSWabbb\_¥`b^Y^[¥G\_[aaa]XO\_[a`aaab\_b\_^W  
@HWI-EAS443:3:70:571:1542#0/1  
GGCGTGTCTGTTTACTGTGTCCATGGTGTATCCTGTTCC  
+HWI-EAS443:3:70:571:1542#0/1  
]\_H\_[\_Xab]b\_]bbaa\_a[bbaaaaU`\_]\_^baaa\_\_^^  
@HWI-EAS443:3:71:1293:1529#0/1  
GGTCGACTTCGAGTCTGGACGGATCAAGAAAGAAGAGATC  
+HWI-EAS443:3:71:1293:1529#0/1  
aaIaT^Za`[RaKLSP]\_SOVb`TU\_[TP`IPZ`ZaaG[W  
@HWI-EAS443:3:71:1503:1433#0/1  
ATGGGGCTCCAATCATCCGACGATTTTGCTCTCATAGTGA  
+HWI-EAS443:3:71:1503:1433#0/1  
¥a¥W]aab]bbbb¥¥\_``a¥\_``bbV\_W\_aa]]Tbbaba  
@HWI-EAS443:3:71:55:869#0/1  
TGCGATTCTTCAAGGAAAGCCATAGCCTCTAGAACACAGT  
+HWI-EAS443:3:71:55:869#0/1  
`YF[T^`b]U¥^V^^^`^baa[Ta\_aa\_^\_a¥[XY`\_\_^T

@HWI-EAS443:3:71:592:1900#0/1  
GGCGCATCTTTGGTCATCGTATTTAATGTCAGTGCTCTTA  
+HWI-EAS443:3:71:592:1900#0/1  
a[aa`Yabaa`[TL```a\_YRaa^`]`\_^baYPV^U\_^^\_  
@HWI-EAS443:3:72:161:1580#0/1  
CCTCCATCTGATACTAATAGCCCTACCTTTGATTGGGCTT  
+HWI-EAS443:3:72:161:1580#0/1  
^\_Y\_\_WR`¥SFQTYVR¥\_aUBBBBBBBBBBBBBBBBBBBB  
@HWI-EAS443:3:73:1710:656#0/1  
CTTGGGAATCCAGGAATGTGTAGTTGCAACGGCATCANAT  
+HWI-EAS443:3:73:1710:656#0/1  
aabbbbbbbb`bbbabb`ba`\_bb`^aabbabaZYDZb  
@HWI-EAS443:3:73:580:1879#0/1  
GTCGTTCAACAAACAAGGTTAGATAAACTAACTCAAGGTC  
+HWI-EAS443:3:73:580:1879#0/1  
aabaa]a\_a]`abZ^`^aaQa```ab`NV`aXIW^^0^R\_  
@HWI-EAS443:3:75:1112:300#0/1  
CCACTTTGTTTCATTGATTCCATTACATCCTTTAAGAAATC  
+HWI-EAS443:3:75:1112:300#0/1  
a^`aab^baa`J\_\_`ab¥R\_aaa]^]GM\_aa`a]¥\_F`a  
@HWI-EAS443:3:75:721:1756#0/1  
TGGGTCTGGACGGATCAAGAAAGAAGAGTTCTCTGAGATC  
+HWI-EAS443:3:75:721:1756#0/1  
\_```Zaa`\_\_baa``\_a^`]ab\_\_aaaa\_aa`aaaa^\_\_`  
@HWI-EAS443:3:77:376:67#0/1  
ACGACTTCCATTGTTTCAAGGCATGAATTCTCAAATATTC  
+HWI-EAS443:3:77:376:67#0/1  
aab[abaaaaaaaa`aaa\_a\_a`\_a^^aa\_\_^\_^^`\_`\_¥  
@HWI-EAS443:3:78:911:542#0/1  
GTTTGAATTTGTGTCTCCCCTATGGCACCTATATGTGT  
+HWI-EAS443:3:78:911:542#0/1  
`UW`]TW]^]\_¥W[`a`V\_NW[P\_TYPULY¥]\_^MXYP  
@HWI-EAS443:3:79:886:337#0/1  
ACGACTTCCATTGTTTCAAGGCATGAATTCTCAAATATTC  
+HWI-EAS443:3:79:886:337#0/1  
aaba]ababbbb\_a^`baaaaaa`[`aaa\_]¥a`a`a]  
@HWI-EAS443:3:84:973:1294#0/1  
GTCTTGGTGTGTTCTGTTTACTGTGTCCATGGTGTATCCT  
+HWI-EAS443:3:84:973:1294#0/1  
aWD[aba0a[\_Xa[\_a`a[[S``]^\_aaa\_``Y\_Y`a\_]^  
@HWI-EAS443:3:86:1688:620#0/1  
TGGAGGTCCAAGGTCATTGTTTATCATGTTGTTCTTTATC  
+HWI-EAS443:3:86:1688:620#0/1  
¥[FO]\_X]T`b^WR¥[`bbUU\_aaV`a^`[\_`\_aZ^\_\_Z`¥  
@HWI-EAS443:3:88:1208:1533#0/1  
GGGGTGTCTGTTTACTGTGTCCATGGTGTATCCTGTTC  
+HWI-EAS443:3:88:1208:1533#0/1  
aaGaXa`a\_a^RYa\_Z^aYa`\_]\_a``Y]U`X¥NGV\_]P[  
@HWI-EAS443:3:88:1313:1715#0/1  
TAGTGGTGGGATGGGCTCCAATCATCCGACGATTTTGCTC

+HWI-EAS443:3:88:1313:1715#0/1  
aaL^Z\_J\_b`Z¥QOX`aab`]`bZ\_bZa`^aaaa]^`a  
@HWI-EAS443:3:88:266:254#0/1  
GGCTGGCTTTCCTTGAAGAATCCCACCCAGGAATATTTGA  
+HWI-EAS443:3:88:266:254#0/1  
ababb`abb\_baa\_]ab\_^]ab`aaa]X`\_Y\_a`]a  
@HWI-EAS443:3:88:542:239#0/1  
AGTGGGTATGCACAAACAGACTGTGTTCTAGAGGCTAAAG  
+HWI-EAS443:3:88:542:239#0/1  
aZF\_aaRS`aYY\_a\_\_Y\_^\_a\_]TZZ\_^W^\_BBBBBBBBB  
@HWI-EAS443:3:90:1018:1822#0/1  
GCCGTTGCAACTACACATTCCTGGATTCCCAAGAGGANTC  
+HWI-EAS443:3:90:1018:1822#0/1  
aaa`P`ba`ba`aaaa\_`a\_¥`a`a`a]Y`^DS]  
@HWI-EAS443:3:92:1632:1877#0/1  
ACCCTGCTTAAATGGGAGCTAATGGATGATGATTATCGG  
+HWI-EAS443:3:92:1632:1877#0/1  
`\_P¥aaWa^a[¥`a`¥]baaaa`]aWW\_\_a^\_aY\_\_]\_RQ  
@HWI-EAS443:3:99:1664:760#0/1  
ACACATATAGGTGCCATAGGGGAGACACACAAATTCAAAC  
+HWI-EAS443:3:99:1664:760#0/1  
aZaZ0bbba`aWa`YS`baa[`[Y¥a^`\_a^`\_¥`a]X  
@HWI-EAS443:3:9:995:618#0/1  
GTGCCTTCTTTTCATTGCCCTACTGGGAGCCCAGACT  
+HWI-EAS443:3:9:995:618#0/1  
aaaba\_baaabab`aaaa\_\_aa\_a`^`\_a\_^\_]¥`^¥`  
@HWI-EAS443:3:100:866:787#0/1  
GGGTGCCATGCTNAGGATGTTTCTGAACCACTCGGGTTGA  
+HWI-EAS443:3:100:866:787#0/1  
`bbZaaaabba¥DUaW`a^a]R\_a¥`\_U`[¥P`\_S`B  
@HWI-EAS443:3:10:1527:1928#0/1  
ATGATAAACAATGACCTTGACCTGCAACGCCCCNGATGG  
+HWI-EAS443:3:10:1527:1928#0/1  
^bb]T]a^\_Ua`\_a[U^`b\_aR`¥YZ`¥W^TLFIDQ^Y^R  
@HWI-EAS443:3:12:1705:552#0/1  
ATTCGATCTAAAGACTTCTATGGTGTGGCCANTGCAGTT  
+HWI-EAS443:3:12:1705:552#0/1  
a^aa\_aa\_baaX`ZQ^]V^\_a^\_RR`¥¥UNYDW¥NT^¥B  
@HWI-EAS443:3:12:94:1691#0/1  
GTTGAGAATAGAACGATTCTTCTTGGGAATCCAGGNATGT  
+HWI-EAS443:3:12:94:1691#0/1  
`Q[H^Z`ZV[\_W^]^¥YY^`U[[OLNYHUNV`BBBBBBBB  
@HWI-EAS443:3:13:1655:969#0/1  
GGACGACAAACACAGAGACTGGTGCNCCCAGCTCAACCC  
+HWI-EAS443:3:13:1655:969#0/1  
aa\_V`[\_aa¥`UZZ\_^VVZ^SGWKDITUWWWGWWWUHU  
@HWI-EAS443:3:13:216:1271#0/1  
GGGGCAATGAAAAGAAGCCAAACTGGCANATGTTGTGAG  
+HWI-EAS443:3:13:216:1271#0/1  
a`Z\_aS]aaaaaa\_aaY]\_`WWa`aa\_a¥DVaa]\_a]aaa

@HWI-EAS443:3:13:402:449#0/1  
CAGCTAATGAGTCAGGAAGGCTAATAGNTTCTTAAAGGA  
+HWI-EAS443:3:13:402:449#0/1  
aabbabbabab`babaaabaaaaaa]DXaaaaaaaaaaaa  
@HWI-EAS443:3:13:703:1666#0/1  
CTAGGGAAAGGGTACATGTTTCGAGAGTAAAAGNATGAAGA  
+HWI-EAS443:3:13:703:1666#0/1  
aa`baaaaa`a`]aaaabZ`aa\_`^a^`\_`ZD]`aa`^a  
@HWI-EAS443:3:14:1714:851#0/1  
GGTGTCTAGGGCCCGATTGATGCCANGTTCGACTTCGAG  
+HWI-EAS443:3:14:1714:851#0/1  
a`S`ZSSX]^TNyr^Z^^ZTPTDTTTSZYTTN#TB  
@HWI-EAS443:3:16:110:872#0/1  
CGCAAAGAACAATAGGGAAGNAAAAACAAGACTGAATAA  
+HWI-EAS443:3:16:110:872#0/1  
ababb`babaaabb`bbaa]D]a`¥`baaabaaba`aaa  
@HWI-EAS443:3:16:1383:1785#0/1  
GGCTTGTGTTGAGNATAGAACGATTCCTCTTGGGAATCCA  
+HWI-EAS443:3:16:1383:1785#0/1  
a`Zaa]Z`^b`^XD[\_a^\_a¥`¥Y^WY]X^^R^]UZZSGW  
@HWI-EAS443:3:16:508:1124#0/1  
GGCTTTCCTTGAAGAATCCCACCCAGGNATATTTGAGAAT  
+HWI-EAS443:3:16:508:1124#0/1  
`PUXX[aa]`WVQZV`VYN]PUV¥S¥IDUT\_\_0][[T¥L^  
@HWI-EAS443:3:17:904:1184#0/1  
GGCTAATTTTAGCATGGAGCTACCCAGNTTTGGAGTGTCT  
+HWI-EAS443:3:17:904:1184#0/1  
abbbbbbbbbbbbabbaaababa\_a`¥D^aaa`[¥]b\_`a  
@HWI-EAS443:3:18:1479:337#0/1  
AGAACATTATGGGTGNCATGCTCAGGATGTTTCTGAACCA  
+HWI-EAS443:3:18:1479:337#0/1  
a]\_`X\_aa\_aba``[DM`a]ZLQ[¥Y\_]Z\_]ZVZZZZ  
@HWI-EAS443:3:18:1565:928#0/1  
CAGATTAGAGGTTTTCGTATANTTTGTTGAACTTTAGCTA  
+HWI-EAS443:3:18:1565:928#0/1  
\_UYW`W^^¥\_a\_aa]`aaZD¥`aa^WWU\_¥\_\_][`X\_^  
@HWI-EAS443:3:18:1593:1411#0/1  
AAAACAAAGACTGAATAAGAGAGGNTATCTAATAAGAGCA  
+HWI-EAS443:3:18:1593:1411#0/1  
`X`aX[a\_]`^\_baa`aaaa`\_aZDXZOUVMWYWXOZOES  
@HWI-EAS443:3:1:1060:564#0/1  
GAAGATGGTCACGCAAAGAACAATAGGGAAGANAAAACAA  
+HWI-EAS443:3:1:1060:564#0/1  
aaYb\_[bYGN\_a]Z[Q[a]\_U¥\_\_Oaa^`¥]ZDU]\_\_]BB  
@HWI-EAS443:3:22:1387:767#0/1  
CCAGTAGGGGCAATGAAAAGAAGCCAANCTGGCAAATG  
+HWI-EAS443:3:22:1387:767#0/1  
Z¥Z`^^aba]\_^VS\_¥`W^`aX0^a``¥[DRa`\_¥X`]aa  
@HWI-EAS443:3:22:303:729#0/1  
CCCAGTGGTTCAGAAACANCCTGAGCATGGCACCCATAA

+HWI-EAS443:3:22:303:729#0/1  
aaaaaa]aa\_`[aa\_aaaZDV\_^^`\_]a^[\_[X]`\_\_\_\_\_]  
@HWI-EAS443:3:23:450:983#0/1  
AAAAATTCCAGCGCAAATGCCATAAGCACCATTCNCCT  
+HWI-EAS443:3:23:450:983#0/1  
aaab\_``aaa`U\_]\_\_^^^]\_^`^a^[^a\_V]^^¥MDMZ^  
@HWI-EAS443:3:23:813:1672#0/1  
CAATTGTNCATCAAAGACTACAGATACACATATAGGTGCC  
+HWI-EAS443:3:23:813:1672#0/1  
\_Z``abZD]b`aaa\_abaaa`a\_aaa\_a`a\_bXa^ZQ\_^]  
@HWI-EAS443:3:24:1501:1987#0/1  
CTGAAGTANTTCAATGAATCAACAAAGAAGAAAATTGAGA  
+HWI-EAS443:3:24:1501:1987#0/1  
^\_bbbb`^D]abbbbabb`babbbbababbbabbbbaab  
@HWI-EAS443:3:24:223:504#0/1  
CCGANAATCATCATCCATTAGCTCCCATTTTAAGCAGACT  
+HWI-EAS443:3:24:223:504#0/1  
aa]MDV¥\_a]¥a]W]\_a]X\_`\_[a`XU\_]\_¥ZQ\_KOX[]^  
@HWI-EAS443:3:25:109:542#0/1  
GTTCTGTTTACTGTGNCCATGGTGTATCCTGTTCCCTGTTTC  
+HWI-EAS443:3:25:109:542#0/1  
`X\_aa``a``aa^VDXa\_`a`Wa[Y[\_`Y]\_\_`\_¥ZUZ\_  
@HWI-EAS443:3:26:1188:638#0/1  
ACAACATGATAAACAANGACCTTGGACCTGCAACGGCCCA  
+HWI-EAS443:3:26:1188:638#0/1  
a^bbaaZ^`a`T\_``VDWa^]aaa\_\_[[`a\_`\_\_\_\_\_V¥¥  
@HWI-EAS443:3:27:702:806#0/1  
GATTNATGCCAGGGTCGACTTCGAGTCTGGACGGATCAAG  
+HWI-EAS443:3:27:702:806#0/1  
`^a¥DZ``a^a\_\_\_Xa\_]^\_\_^^ZUW^)`\_]^\_\_XV]\_YV  
@HWI-EAS443:3:27:739:725#0/1  
GGCTCTTNAATTGTTTCATCAAAGACTACAGATACACATAT  
+HWI-EAS443:3:27:739:725#0/1  
ababbb]D]bba¥Zbbbaab\_baaaab`aaaa\_¥a\_bab`  
@HWI-EAS443:3:28:199:1296#0/1  
GAAATCAACCCGAGTGGTTCAGAAACATCCTNAGCATGGC  
+HWI-EAS443:3:28:199:1296#0/1  
abbbbb[abbbb[a\_ba\_`aaX`bb]b\_aaYD[abba\_^a  
@HWI-EAS443:3:29:1089:999#0/1  
GAGCATGGCACCCATAATNTTCTCAAACAAAATGGCAAGA  
+HWI-EAS443:3:29:1089:999#0/1  
a\_bb^\_]W]ba\_bb]b`]DXa`a`a\_\_aa\_aa`]a]`\_`\_  
@HWI-EAS443:3:30:35:611#0/1  
CACTTGGTTCATTATCCTCNGGTAGTGGTCCATCAATCGG  
+HWI-EAS443:3:30:35:611#0/1  
a`aaaa\_aa`aa]aaa¥D[^W\_`V¥\_U```¥``^[^W  
@HWI-EAS443:3:31:571:529#0/1  
GAGCTAATGGATGATGATTATNGGGGAAGACTTTGTAATC  
+HWI-EAS443:3:31:571:529#0/1  
aabbbbabbbaaaaaaabab¥D^aa\_R`a`\_aaaa^]aa`

@HWI-EAS443:3:31:751:1240#0/1  
GCCTTATTTTCTCAATTTTCTTCTTTGTTGATTCNTTGAA  
+HWI-EAS443:3:31:751:1240#0/1  
aa````\_bbaaaba^X`a\_abaa`aba\_^a`\_a`^DX^a\_^  
@HWI-EAS443:3:32:1018:1312#0/1  
GCTAATTTTAGCATGNAGCTACCCAGCTTTGGAGTGTCTG  
+HWI-EAS443:3:32:1018:1312#0/1  
abaaaaaaaaaaaa¥DW\_a`aa`^]¥`\_^a]T]T\_X\_``  
@HWI-EAS443:3:32:96:1585#0/1  
TGTGGTGCTTATGGCNTTTTGCCTGGAATTTTAGGAAA  
+HWI-EAS443:3:32:96:1585#0/1  
aa^`^^`babb`]\_ZD^aa`V`aa`aW^aaaa``aa\_a^^  
@HWI-EAS443:3:33:1238:1053#0/1  
CTTTAGATCGAATGGCCTAACAGCTAATGAGNCAGGAAGG  
+HWI-EAS443:3:33:1238:1053#0/1  
abbbbb\_abbababbaabbbbaab\_aaaba\_[DI`a`\_\_`]  
@HWI-EAS443:3:34:1757:1812#0/1  
GTCTGTNAAAATGGGAGCTAATGGATGATGATTATCGGG  
+HWI-EAS443:3:34:1757:1812#0/1  
Yaabaa^D]abbbbaa\_bbaaba`aab^V`aaaaX[\_a  
@HWI-EAS443:3:34:553:1516#0/1  
AAAATTCCAGCGCAAANGCCATAAGCACCACATTCCTT  
+HWI-EAS443:3:34:553:1516#0/1  
aa\_``aaba^a]\_]`ZVDL\_a`\_`\_V\_a^a`\_`^¥^Y]^]  
@HWI-EAS443:3:34:557:680#0/1  
GCTTGTGTTGAGAATAGAACGATTCTTGGGAATCCAG  
+HWI-EAS443:3:34:557:680#0/1  
abbbba]baba^`aaaZab`a```¥DYaa`a`\_`^\_Y\_]`  
@HWI-EAS443:3:35:1361:380#0/1  
AAAAATTCCAGCGCAANATGCCATAAGCACCACATTCCTT  
+HWI-EAS443:3:35:1361:380#0/1  
aaaaaaaa`a\_a``[\_UDX`a^]]`\_]\_N^Y\_^^¥\_YY^Z\_  
@HWI-EAS443:3:35:20:1996#0/1  
GATGCAGAGAGAGCAAGTTAAAAAGAAGGGCNATCGCAA  
+HWI-EAS443:3:35:20:1996#0/1  
abUO^a`¥```]`\_Yaa[[]]\_aa`\_P`a\_]W[DZZ^[^\_\_  
@HWI-EAS443:3:35:665:1195#0/1  
TGGTCTCCATCTGATACTAANAGCCCTACCTTTGATTGG  
+HWI-EAS443:3:35:665:1195#0/1  
aaa`baabbaaba\_babbbb^D^``aaaaaa\_aa\_\_\_^\_^  
@HWI-EAS443:3:36:1510:736#0/1  
CAGGAAGGCTAATAGATTNCTTAAAGGATGTAATGGAATC  
+HWI-EAS443:3:36:1510:736#0/1  
aabbbbaWabbababab]DZaaaaaab^ab\_a`a^^a\_`a  
@HWI-EAS443:3:36:1669:1443#0/1  
CAAGACAATATACTNGTGGGATGGGCTCCAATCATCCGAC  
+HWI-EAS443:3:36:1669:1443#0/1  
]abbabbbbab\_[D[abbbUba]aX¥¥ba`a]bb]a\_^`  
@HWI-EAS443:3:38:452:636#0/1  
CAAGAATTCCTTTNGCTTGTGTTGAGAATAGAACGATT

+HWI-EAS443:3:38:452:636#0/1  
aa`][aaaa\_a`\_`[D[aa`XQa]`\_XV]\_]^U\_]NZZX¥  
@HWI-EAS443:3:38:523:1368#0/1  
CAAANATGCAGAGAGAGGCAAGTTAAAAAGAAGGGCTATC  
+HWI-EAS443:3:38:523:1368#0/1  
ab\_YD]`baaba`aab`b\_\_aT\_bV0Zaa^a`\_\_a`a\_Z  
@HWI-EAS443:3:39:1150:1868#0/1  
ATGGGCTGGCATTACCACAGNATTGTTTACAGAATCAATC  
+HWI-EAS443:3:39:1150:1868#0/1  
aaX¥Ta\_^]\_baababaa\_LDYaaaa`\_aa^¥a\_]\_\_`N  
@HWI-EAS443:3:39:1345:2041#0/1  
GAACCAAGTGGGTATGNACAAACAGACTGTGTTCTAGAGG  
+HWI-EAS443:3:39:1345:2041#0/1  
a[a`aab]`^^0^]RDSW`V¥J[ZXPY]NBBBBBBBBBB  
@HWI-EAS443:3:39:1434:673#0/1  
GTCCCCAGTGATNGTGAAAGAAATCTCTGTGTCTTGAA  
+HWI-EAS443:3:39:1434:673#0/1  
a[baaba\_aba¥D]\_b\_a`a`\_Y\_aa[a\_\_\_X¥a]Q¥VVZ  
@HWI-EAS443:3:39:51:1627#0/1  
CAGTAAACAGAACACACCAATACTCAGNAAAGGGAAAGTG  
+HWI-EAS443:3:39:51:1627#0/1  
`a\_aaa`baba\_b`baaa`aaaaaba[DZ^a``\_a\_aYIW  
@HWI-EAS443:3:40:738:1947#0/1  
ATGGGCTCCAATCATCNGACGATTTTGCTCTCATAGTGAA  
+HWI-EAS443:3:40:738:1947#0/1  
aaa`a^aaaa`\_a\_YDT]\_\_a\_]\_]a]\_]\_`Ya^Z]^  
@HWI-EAS443:3:42:1260:1766#0/1  
GACGGATCAAGAAAGAAGAGTTCTCTGAGATNATGAAGAT  
+HWI-EAS443:3:42:1260:1766#0/1  
a`^WW]bb\_\_abYa]`aa¥YP\_W`\_^IU`\_VD¥\_\_aa\_`]  
@HWI-EAS443:3:42:496:1340#0/1  
AAAATTCCAGCGCAAANTGCCATAAGCACACATTCCTT  
+HWI-EAS443:3:42:496:1340#0/1  
a]aa`aa`\_`\_`[UDX^]\_]`[]^`\_]`^^^]`^\_`^V  
@HWI-EAS443:3:43:190:788#0/1  
GAAAGAANTCTCTGTGTCTTGGAATTAGTCATCATCTTT  
+HWI-EAS443:3:43:190:788#0/1  
a\_bbbb]D]bababbaabb¥¥aa`a`Z^aaa]bba`aa  
@HWI-EAS443:3:44:1487:1117#0/1  
CGTTGCAANTACACATTCCTGGATTCCCAAGGAATCGT  
+HWI-EAS443:3:44:1487:1117#0/1  
W\_`aX¥]D]`T^`b\_a`]ZaRZaS[Z\_IaT]W`a]`¥Z  
@HWI-EAS443:3:44:1546:443#0/1  
TGGGAGCTAATGGATGATGNTTATCGGGGAAGACTTTGTA  
+HWI-EAS443:3:44:1546:443#0/1  
abbba`]b¥`b¥P^babYD[[]]WI^aa\_TVXW\_YXUK¥  
@HWI-EAS443:3:44:1649:381#0/1  
ATCTGTCCACTCCTGCTTGTATTNCNCTCATGGTTTGGTGC  
+HWI-EAS443:3:44:1649:381#0/1  
aaa`a¥aaa\_\_aa```aaa^^a\_SDV\_\_[\_]`\_^UUW



@HWI-EAS443:3:45:1412:1147#0/1  
GTGGCTAATTTTAGCATGGAGCTACCCAGCTNTGGAGTGT  
+HWI-EAS443:3:45:1412:1147#0/1  
a\_a`Y``]aaa\_]^[^`R`[^\_] ^OFYZXD¥^VF¥V\_S  
@HWI-EAS443:3:46:1489:1574#0/1  
TCTGTCCACTCCTGCTTGTATTCCCTCATGGNTTGGTGCA  
+HWI-EAS443:3:46:1489:1574#0/1  
a`^^a`\_a\_]¥SZ]\_\_TY`¥]\_VUUU^XTDX^ZZHXNQ  
@HWI-EAS443:3:48:1030:1156#0/1  
CCAGGGTCGACTTCGAGTCTGGACGGATCNAGAAAGAAGA  
+HWI-EAS443:3:48:1030:1156#0/1  
`abbbb\_abbabb`a]`bbbaa]aaaaWD^baaa`\_a\_a  
@HWI-EAS443:3:49:1411:2041#0/1  
AGCTGATTCATTTACTCCAGACTCCAAAGCTNGGTAGC  
+HWI-EAS443:3:49:1411:2041#0/1  
ab`baaabaaaaa\_aaaaa\_a]a[\_a`Z^TDZZU\_] ^  
@HWI-EAS443:3:49:1572:1780#0/1  
AAGAGACAACATGANCAAGAAGATGGTCACGCAAAGAACA  
+HWI-EAS443:3:49:1572:1780#0/1  
abbaabaabaaaa¥DUaaaaa`aaa^\_a^a]``\_a^\_Z`  
@HWI-EAS443:3:50:1046:557#0/1  
CTGGAGTAAATGAATCAGCTGACATGAGTATNGGAGTAAC  
+HWI-EAS443:3:50:1046:557#0/1  
X```\_ ^ab` ^abb\_baa^UZ`a`]¥aab`a]DT`¥¥``^]  
@HWI-EAS443:3:52:1454:1842#0/1  
GGTAGGGCTATTAGTNTCAGATGGAGGACCAAACCTATAC  
+HWI-EAS443:3:52:1454:1842#0/1  
¥aabaa\_baab¥bb[DZaabab`¥bba`aaa``bbbb``  
@HWI-EAS443:3:52:1599:1270#0/1  
AGCCTCTCTTATTCAGTCNTTGTNTTTTCTTCCCTATTGT  
+HWI-EAS443:3:52:1599:1270#0/1  
ababbabaaaabaaaa\_YD^bbaabaab^baaa`aaaa`a  
@HWI-EAS443:3:52:781:1480#0/1  
CAAAGATGCAGAGAGAGNCAAGTTAAAAAGAAGGGCTATC  
+HWI-EAS443:3:52:781:1480#0/1  
W¥\_[S`b`b`b^\_a[^YDQ]Xa]`[YM]U`U¥\_aaa`a`Z  
@HWI-EAS443:3:53:112:679#0/1  
GAAATTTTTCCCTAGCAGTTCATATAGGAGACCCNGTTGGA  
+HWI-EAS443:3:53:112:679#0/1  
aaa`a`aa``^¥\_¥`Wa^\_\_^\_]Y\_\_^\_] [NDZZ^\_^^  
@HWI-EAS443:3:53:574:1923#0/1  
ATTGATGCCAGGGTCGACTTCGAGTCTGGACGGATCNAGA  
+HWI-EAS443:3:53:574:1923#0/1  
a`bba`¥a] [¥XaV^`\_T`\_[aSX]S[[RS`¥`RQRD[`\_  
@HWI-EAS443:3:53:687:1301#0/1  
AGACTAGGGAAAGGTACANGTTCGAGAGTAAAAGAATGA  
+HWI-EAS443:3:53:687:1301#0/1  
\_ ^W\_¥Z`\_`^\_^\_^ [Y¥TD]`\_\_\_\_^Z\_SZW^\_baZaaX  
@HWI-EAS443:3:54:1677:1050#0/1  
CCCAGGTGTTGCGATAGCCCTTNTTTTTAACTTGCCCTC

+HWI-EAS443:3:54:1677:1050#0/1  
aaab\_`abab`aaabaab`\_bZD¥babaa`aaTY`aa\_a]  
@HWI-EAS443:3:55:1680:931#0/1  
GGCCGTTGCAGGTCCAAGGTCATTGTTTATNATGTTGTTC  
+HWI-EAS443:3:55:1680:931#0/1  
`baaa\_aR\_ab`T\_\_`a¥ZW[`a^H]bbZYDT`S\_\_aY^X  
@HWI-EAS443:3:56:1486:815#0/1  
ACCAGAANTGCTGCAATCTATTTCGAGAAATTTTTCCCTAG  
+HWI-EAS443:3:56:1486:815#0/1  
aa``aaTDIR]¥W\_`¥Yaa`[[a]aY^Ja```a[XP¥¥W  
@HWI-EAS443:3:56:702:1884#0/1  
ATTGGTGTGTTCTGTTTACTGTGTCCNTGGTGTATCCTGT  
+HWI-EAS443:3:56:702:1884#0/1  
aaabb[a\_aZ`aaaSa\_`\_`T]¥Z]UDR]^GaN]\_¥a[]^  
@HWI-EAS443:3:58:1143:1536#0/1  
ATCCCANCCAGGAATATTTGAGAATTCATGCCTTGAAACA  
+HWI-EAS443:3:58:1143:1536#0/1  
aa\_`a^DTa\_a``aa`abaaaa`aa`aa``¥a\_``\_a^a  
@HWI-EAS443:3:59:1315:811#0/1  
ACACAGTANACAGAACACACCAATACTCAGAAAAGGGAAA  
+HWI-EAS443:3:59:1315:811#0/1  
aa\_a]V\_^D^b`a`^\_aaUa[]`baaa\_YbaXa¥YDDXYW  
@HWI-EAS443:3:59:1329:1067#0/1  
AACAGATCTTCATGATCTCAGAGAACTCTTCTTTNTTGAT  
+HWI-EAS443:3:59:1329:1067#0/1  
ab^aaaaW¥aaabaaaa\_\_][b¥`^b`ba\_\_a[DR[a]¥  
@HWI-EAS443:3:5:1169:1221#0/1  
ATGGAATCAATGAACAAAGAGNAAATAGAGATAACAACCC  
+HWI-EAS443:3:5:1169:1221#0/1  
abaaaaaba^a`a`a\_a`ab`WDX]\_b^^b\_``\_Y`\_^]]  
@HWI-EAS443:3:5:1511:166#0/1  
TGGAATCNATGAACAAAGAGGAAATAGAGATAACAACCCA  
+HWI-EAS443:3:5:1511:166#0/1  
aab`aaYD¥aaa^W```a]ba^`]\_\_a\_`\_\_a\_Y\_^[QX^  
@HWI-EAS443:3:60:1492:466#0/1  
GGGAGCTAATGGATGATGATTATCGNGGAAGACTTTGTAA  
+HWI-EAS443:3:60:1492:466#0/1  
ab`^ba\_aaab^`a`a`aa\_\_aaZYD¥`]YaWRSVa\_NQT  
@HWI-EAS443:3:60:25:1540#0/1  
CAGGNATATTTGAGAATTCATGCCTTGAAACAATGGAAGT  
+HWI-EAS443:3:60:25:1540#0/1  
aaaWD]abaabab¥baaaaa`\_b¥aa``¥b`b^\_`\_``UQ  
@HWI-EAS443:3:60:28:1701#0/1  
GACCTGCAACGGCCCAGATGGCTCTTCAATTGTNCATCAA  
+HWI-EAS443:3:60:28:1701#0/1  
abbbabbbbb`^`^`^\_aaa[Z]a`aa[`aaaQZDVa\_^a`  
@HWI-EAS443:3:61:1222:1151#0/1  
CAGTGATTGTGAAAGAAATCTNTGTGTCTTGTGAATTAGT  
+HWI-EAS443:3:61:1222:1151#0/1  
abaabbbbababbbabbb^D^b`baaba^\_\_]`\_`XTX

@HWI-EAS443:3:61:576:1504#0/1  
CATGAGTATTGGAGTAACAGTGATNAAGAACAACATGATA  
+HWI-EAS443:3:61:576:1504#0/1  
]baa`VZ`b^b¥bY`ab`\_]a[XDT\_a]aa]]][a]\_`  
@HWI-EAS443:3:62:1706:260#0/1  
TGGGCCGTTGNAGGTCCAAGGTCATTGTTTATCATGTTGT  
+HWI-EAS443:3:62:1706:260#0/1  
a\_ababbaa]D^b`Q\_baabb`a]^a\_]ab`aa````\_aa`  
@HWI-EAS443:3:63:852:1405#0/1  
GGCAAGACTAGGGAAAGGGTACATGTTTCGAGAGTNAAGA  
+HWI-EAS443:3:63:852:1405#0/1  
aaa`^a`aaaa\_\_`aa`aaWaaaa\_```aa``PD[X`\_a  
@HWI-EAS443:3:64:1155:651#0/1  
GTTCTGAATCNTCATTCTTTTACTCTCGAACATGTACCCTT  
+HWI-EAS443:3:64:1155:651#0/1  
aa¥`baaaXD^aaaa\_aaa\_a]a`\_`^`\_\_\_\_`a^`W]\_`  
@HWI-EAS443:3:64:1394:274#0/1  
CATGGAGCTNCCCAGCTTTGGAGTGTCTGGAGTAAATGAA  
+HWI-EAS443:3:64:1394:274#0/1  
a`baa]aa^D0]a`aZaaa]a]^Z\_\_^a`]Pa^^``^]Z\_  
@HWI-EAS443:3:64:1683:1759#0/1  
GTCCTCNATCTGATACTAATAGCCCTACCTTTGATTGGGT  
+HWI-EAS443:3:64:1683:1759#0/1  
XW¥Z\_ZD¥a¥bbbb`ZZ]\_\_^`RW]a`Wa¥a````\_`\_¥X  
@HWI-EAS443:3:65:185:1036#0/1  
GAATCCCCCTTTGGCNTGTGTTGAGAATAGAACGATTCCT  
+HWI-EAS443:3:65:185:1036#0/1  
]Z^^aaaaa`\_]`ZZD¥`[]X¥]ZZR[^^W[YZYVXZ[ZT  
@HWI-EAS443:3:65:573:1997#0/1  
GTGGGATGGGCTCCAATCATCCGACGATTTNGCTCTCATA  
+HWI-EAS443:3:65:573:1997#0/1  
a]a^`^aaXabaaaaabb`aa[``X]a\_ZDZaa`Waa\_\_  
@HWI-EAS443:3:66:1166:728#0/1  
GTGCCATGCTCNGGATGTTTCTGAACCACTCGGGTTGATT  
+HWI-EAS443:3:66:1166:728#0/1  
SZ`ZS¥S`Y]D]VY¥\_`¥XWa`]^b\_Z`a]^`a^WMOYV]  
@HWI-EAS443:3:66:1610:1419#0/1  
CTTTCCTTGAAGAANCCACCCAGGAATATTTGAGAATTC  
+HWI-EAS443:3:66:1610:1419#0/1  
ab`bbbbbbbaabbYD¥aaaaaaaaaaa[aaa`baaa\_``\_\_  
@HWI-EAS443:3:66:705:472#0/1  
GTAAACAGAACANACCAATACTCAGAAAAGGGAAAGTGGA  
+HWI-EAS443:3:66:705:472#0/1  
aaa`X`\_aaaa¥DVaa`[`a`\_`a`a]¥[`a`\_`\_ZU]Qa^\_  
@HWI-EAS443:3:66:838:1860#0/1  
TGCAGGTCCAAGGTCATTGTTTATCATGTTGNTCTTTATC  
+HWI-EAS443:3:66:838:1860#0/1  
aaaba\_Y``a``X[abb`bVaa^abaab\_b[D]abaaa`[  
@HWI-EAS443:3:68:1478:1374#0/1  
GTTGCGATAGCCNTTCTTTTAACTTGCCTCTCTCTGCAT

+HWI-EAS443:3:68:1478:1374#0/1  
\_Nabb¥aba¥a[D[aaabaab¥\_RaaaZY\_\_a` `\_\_\_¥a`  
@HWI-EAS443:3:68:857:459#0/1  
CGACGATTTTGCTCNCATAGTGAATGCACCAAACCATGAG  
+HWI-EAS443:3:68:857:459#0/1  
\_b`b`a^abbbb^D^baa` `a^aaababab^a^a]` `ab  
@HWI-EAS443:3:69:1332:241#0/1  
GGGCTCCAATCATCCGACGNTTTTGCTCTCATAGTGAATG  
+HWI-EAS443:3:69:1332:241#0/1  
\_Sa`^`aa]]a¥Wa`Z\_\_XDUWa`aX[^\_]`\_`\_aTav^a`  
@HWI-EAS443:3:69:311:702#0/1  
GGATGGGCTCCAATCATCCGACGATTTTGCTNTCATAGTG  
+HWI-EAS443:3:69:311:702#0/1  
]`abaaabaabaaaabaaa`a`aaaaaaaa¥DWaa`\_a^a  
@HWI-EAS443:3:69:643:1209#0/1  
GTTGATCCCACTAACTTGCNGGTCCTGTAGAATCTGTCC  
+HWI-EAS443:3:69:643:1209#0/1  
a` `^`aabbaabaaaaaa¥DZ\_Waaa`\_a` `a`a` `V`\_`  
@HWI-EAS443:3:6:1315:2032#0/1  
GCGAAAAGCTTGAACAGTCTGGGCNCCCAGTAGGGGGCAA  
+HWI-EAS443:3:6:1315:2032#0/1  
a`\_`a` `¥a\_\_XaR`RZ[U¥¥¥¥¥PDHLNT^S¥[W^WXVZB  
@HWI-EAS443:3:6:1544:1288#0/1  
TTGNGCATACCCACTTGGTTCATTATCCTCAGGTAGTGGT  
+HWI-EAS443:3:6:1544:1288#0/1  
aa¥D^T]ab^\_bY`aaaa`^Q]aT[a^\_\_Y`a`V\_\_^`UB  
@HWI-EAS443:3:6:400:1766#0/1  
GATTGATGCCAGGGTCGACTTCGAGTCTGGACGNATCAAG  
+HWI-EAS443:3:6:400:1766#0/1  
`]aVYXa`ba`\_XTHaaa[Y\_]`\_VN^¥[Z\_`¥DPP¥[\_]  
@HWI-EAS443:3:6:736:50#0/1  
GGTAGATAAANTAACCTCAAGGTCGCCAGACTTATGATTGG  
+HWI-EAS443:3:6:736:50#0/1  
ab`bbaaba¥D^a`¥a\_a`a`Y\_a^Y\_b^U\_a^`a\_aaa\_  
@HWI-EAS443:3:70:1105:71#0/1  
GTTCGAATCTTCATTCTTTTANTCTCGAACATGTACCCTT  
+HWI-EAS443:3:70:1105:71#0/1  
a\_aab` `aaaa`\_`a`\_]`^WDLT¥Y]X^¥P`^V^VSY^]  
@HWI-EAS443:3:71:1492:578#0/1  
TAGCCCTTCTTTTNAACTTGCCTCTCTCTGCATCTTTGGT  
+HWI-EAS443:3:71:1492:578#0/1  
aaaYR^bXaba^DV`\_Y^aUJUMU[\_X\_ZHabI\_¥`L\_Q  
@HWI-EAS443:3:72:433:1494#0/1  
GGAACAGATCTTCATGATCTNAGAGAACTCTTCTTTCTTG  
+HWI-EAS443:3:72:433:1494#0/1  
`bbbbbbbbbaabb`a]baYD^\_b]]baaba\_baaaab` [  
@HWI-EAS443:3:73:1098:826#0/1  
GCTTGTATCCCTCATGGTTTGGNGCATTCACTATGAGAG  
+HWI-EAS443:3:73:1098:826#0/1  
aabbbbaabaa`a` `aaa`\_aa[DY\_\_a`\_`Za\_aa` `]`\_

@HWI-EAS443:3:73:1220:537#0/1  
GGGATGGGCTCCAATCATCCNACGATTTTGCTCTCATAGT  
+HWI-EAS443:3:73:1220:537#0/1  
aaba\_bba^aaaaa`aaaXD[aa\_`a`aa^a`^`a```U  
@HWI-EAS443:3:73:1323:1871#0/1  
GAAGTNTTCAGGTCAATGCTTGCTAGCATTCTGCTGGT  
+HWI-EAS443:3:73:1323:1871#0/1  
aaba[DZabbaaa\_bbaaaaa`bababaaa\_aaaaaba0  
@HWI-EAS443:3:73:637:246#0/1  
AGAATCTGTCNACTCCTGCTTGTATTCCCTCATGGTTTGG  
+HWI-EAS443:3:73:637:246#0/1  
a\_^Xaaaa]WDWVaZW¥YV\_`aVY¥^W[^QZS[WYZ\_XFZ  
@HWI-EAS443:3:74:942:802#0/1  
AGGCCANGGTGTCTAGGGCCCGATTGATGCCAGGGTCGA  
+HWI-EAS443:3:74:942:802#0/1  
a\_`a\_[DY`a\_Xa`^^`^`^aa^^a`Za]]^Z^^YGPUZ  
@HWI-EAS443:3:76:1486:1548#0/1  
AATTTTAGCATGGAGCTACCNAGCTTTGGAGTGTCTGGAG  
+HWI-EAS443:3:76:1486:1548#0/1  
abbaaaba[^bbaaa^aa]ZDX`\_aaaba]aY`\_\_a`]^\_  
@HWI-EAS443:3:77:1231:1349#0/1  
AATTGAAGNGCCATCTGGGCCGTTGCAGGTCCAAGTCAT  
+HWI-EAS443:3:77:1231:1349#0/1  
aabb` `aYDZa`\_]\_` `aaaT^][Y]TH[^RZPV]``SVVa  
@HWI-EAS443:3:77:604:353#0/1  
GGAGCATTGNGAAAAGCTTGAACAGTCTGGGCTCCCAGT  
+HWI-EAS443:3:77:604:353#0/1  
``^abaaa¥D¥aaa`a^\_aa```¥^Z\_]¥[[[\_`¥VZ`Z  
@HWI-EAS443:3:78:458:1587#0/1  
TCCCATAACTTNCAGGTCCTGTAGAATCTGTCCACTCCT  
+HWI-EAS443:3:78:458:1587#0/1  
aabaaba¥baa[DZ`]^`^aa\_W[`]a`^```[\_a\_\_ZV`[  
@HWI-EAS443:3:78:640:368#0/1  
GTGCTTATGGCATTGCGCTGGAATNTTTAGGAAAAGTA  
+HWI-EAS443:3:78:640:368#0/1  
`XZ\_aaaa\_`ZM^[]aXS^N\_a]TT¥DYWWY]SVYSVYS]  
@HWI-EAS443:3:78:968:1419#0/1  
AAGAGATTGATTCTGTAAACAATGCTGTGGNAATGCCAGC  
+HWI-EAS443:3:78:968:1419#0/1  
aa\_]`^`aa`^N\_aX]``aa\_\_\_]\_]`[`YDZ\_YZU^]QX  
@HWI-EAS443:3:78:995:1038#0/1  
CAAGAATTCCCCTTTGGCTTGTGTTGAGAATAGAACNATT  
+HWI-EAS443:3:78:995:1038#0/1  
aaa\_^Y`aa`a` `aaa\_\_a`aYa^\_\_]`¥¥\_`¥^]TDOWY  
@HWI-EAS443:3:79:1054:1707#0/1  
GGCCATGGTGTCTAGGGCCCGATTGATGCCAGGGNCGAC  
+HWI-EAS443:3:79:1054:1707#0/1  
\_aaaa\_V[[`X`¥^\_WW\_`¥\_`a¥¥a\_]\_\_^¥Y\_SDWMSP  
@HWI-EAS443:3:7:1389:1082#0/1  
AAAAATTCCAGCGCAAATGCCATAAGCACCACANTCCCT

+HWI-EAS443:3:7:1389:1082#0/1  
ab^X^aa`\_aaaa`T`a`Y[\_\_\_a`JaaZUX]WDRS[Za  
@HWI-EAS443:3:82:119:1672#0/1  
CATCATCATCCCAGNACTCAGTGATGCTGTGCCATCTATT  
+HWI-EAS443:3:82:119:1672#0/1  
\_\_`aa]])Waa`VDWa`[]aXX]X¥\_\_aZ`a`\_Y\_¥^[\_  
@HWI-EAS443:3:82:1324:1344#0/1  
CTACTTTTCCTAANAATTCCAGCGCAAATGCCATAAGCA  
+HWI-EAS443:3:82:1324:1344#0/1  
`b[]a`Y¥b\_bbZD]Vba`a\_babaaaa`baaab`^^a  
@HWI-EAS443:3:82:652:1623#0/1  
CTCCANTCATCCGACGATTTTGCTCTCATAGTGAATGCAC  
+HWI-EAS443:3:82:652:1623#0/1  
aaba¥D¥baaaaaa`\_aaaaaa\_aa\_aaY`\_\_a]a¥  
@HWI-EAS443:3:84:1081:1167#0/1  
ATTTACTCCAGACTCCAAAGCTGGGTAGCTCCANGCTA  
+HWI-EAS443:3:84:1081:1167#0/1  
`^`ab`]ZZZ\_a]\_``\_`a¥^aa`Y\_`Z¥]XXDWW]¥  
@HWI-EAS443:3:84:1358:274#0/1  
CGCTGGNATTTTTAGGAAAAGTAGAGTCGGATTGACATCC  
+HWI-EAS443:3:84:1358:274#0/1  
ab`b`]D^bbbbbbb`aaaab]a^bb`ab`a`\_]`aaaaM  
@HWI-EAS443:3:84:1649:1067#0/1  
CATTATCCTCAGGTAGTNGTCCATCAATCGGGTTGAGCTG  
+HWI-EAS443:3:84:1649:1067#0/1  
abbbb\_]`b\_abb\_abYDY`aba`aaa\_aa`Wa^`\_`\_  
@HWI-EAS443:3:85:1519:1350#0/1  
CACTACCTGAGGATNATGAACCAAGTGGGTATGCACAAAC  
+HWI-EAS443:3:85:1519:1350#0/1  
ab`^S\_`^Xba`YD¥ba[Y[XT^¥F]TJSa\_a[aZ\_a`0  
@HWI-EAS443:3:85:182:1301#0/1  
CTAACTTGCAGGTCCTGNAGAATCTGTCCACTCCTGCTTG  
+HWI-EAS443:3:85:182:1301#0/1  
aaaaaaaa`aa^YaaaZD¥`[\_\_\_\_`[^Z\_¥S\_^YX[^Z  
@HWI-EAS443:3:86:1156:1096#0/1  
GATAAACAATGACCNTGGACCTGCAACGGCCAGATGGCT  
+HWI-EAS443:3:86:1156:1096#0/1  
`bbbabbbabb]¥D^bab`abaaaaabba\_\_`b`aa\_\_`  
@HWI-EAS443:3:86:765:1294#0/1  
ACCAATACTCAGAAAAGGNAAGTGGACGACAAACACAGA  
+HWI-EAS443:3:86:765:1294#0/1  
`aa`a\_````aa]])^¥DX``]aaa`a`]¥`[\_]a\_\_  
@HWI-EAS443:3:87:1136:1627#0/1  
CAGTAGGGGCAATGAAAANAAGGCCAAACTGGCAAATGT  
+HWI-EAS443:3:87:1136:1627#0/1  
`a\_[baba^`abbabbb^D]b]`aWabb`bb`\_aabab`  
@HWI-EAS443:3:87:1183:1226#0/1  
GTTCTNTTTACTGTGTCCATGGTGTATCCTGTTCTGTTT  
+HWI-EAS443:3:87:1183:1226#0/1  
aaba[D]aaaa`b]b`aa\_bbbTbYa\_aaaa\_a`\_a`\_a¥

@HWI-EAS443:3:87:538:1499#0/1  
ATGGAATCAATGAACAANGAGGAAATAGAGATAACAACCC  
+HWI-EAS443:3:87:538:1499#0/1  
``a`\_`ba\_baa`aa^DY]W\_]`a`Xaa\_\_\_aaa]`¥a  
@HWI-EAS443:3:89:420:1770#0/1  
AAAAATTCCAGNGCAAATGCCATAAGCACCACATTCCCT  
+HWI-EAS443:3:89:420:1770#0/1  
aa`aa`^`\_XaRDSaaaa`\_\_a\_a\_Z``\_`a^aa\_\_¥aWXZ  
@HWI-EAS443:3:8:1034:1098#0/1  
GCCCTTCTTTTTAACTTGCCTCTCTGCATCTTTGNTCA  
+HWI-EAS443:3:8:1034:1098#0/1  
a`]XT\_aa^aa`]\_]`\_]\_[W\_]RjX¥\_^[Y\_^`Y^WDTXX  
@HWI-EAS443:3:8:1220:478#0/1  
TCTTGCCATTTTGTGGAGAACATTATGGGTGCCNTGCTC  
+HWI-EAS443:3:8:1220:478#0/1  
ab]\_b¥W]aaaab`baZb¥`W\_``^aa\_aW^]RDMZ[Z]  
@HWI-EAS443:3:90:1520:757#0/1  
CTTGAGGATGAACAGATGTACCAGANGTGTGCAATCTAT  
+HWI-EAS443:3:90:1520:757#0/1  
``TSO^¥aP¥]aZVV`XYMY`XR\_OD[GXXX`S\_`XY`\_\_  
@HWI-EAS443:3:90:380:1480#0/1  
AGGGGGCAATNAAAAGAAGCCAAACTGGCAAATGTTGTG  
+HWI-EAS443:3:90:380:1480#0/1  
ab`a`abba[DZaaa`\_Z\_\_aaaa\_``a`aa``¥^UZ^U\_  
@HWI-EAS443:3:90:401:806#0/1  
CTAATGGATGATGATTANCGGGGAAGACTTTGTAATCCCC  
+HWI-EAS443:3:90:401:806#0/1  
aa\_babaa\_a`abaaa[D¥a\_a\_\_\_\_\_¥]`aaaZa\_`\_\_\_\_  
@HWI-EAS443:3:90:916:161#0/1  
AGGCNTTATTTTCTCAATTTTCTTCTTTGTTGATTCATTG  
+HWI-EAS443:3:90:916:161#0/1  
abb^D^bababaab`a\_baab`bb\_aaabab`aaa`aaaa  
@HWI-EAS443:3:91:1523:614#0/1  
CGGTCTTGGGAGTCTCGATACTGAATCTTGNACAAAAGAA  
+HWI-EAS443:3:91:1523:614#0/1  
`a`SL\_a``bbbbZTab\_a\_¥bb`]aa]Z]DW^¥`\_b]a\_  
@HWI-EAS443:3:92:975:670#0/1  
CTCCAATCATCCGACGATTTTGCTCTCATAGNGAATGCAC  
+HWI-EAS443:3:92:975:670#0/1  
abaabaaaaa````baaaaa\_a`a\_aaa¥DY^aaa¥``  
@HWI-EAS443:3:93:1363:478#0/1  
TGTTTCATCAAAGACTACAGATACACATATAGGTNCCATAG  
+HWI-EAS443:3:93:1363:478#0/1  
U`VX\_Z`^aa\_V]L\_^aa^[`U`\_a[`^YOVMdORVa]b  
@HWI-EAS443:3:93:878:512#0/1  
GGTGCATTNACTATGAGAGCAAATCGTCGGATGATTGGA  
+HWI-EAS443:3:93:878:512#0/1  
aa^`S`aZDZ[a\_`^V\_\_a[\_\_\_\_`]]^VRZ\_\_X]]N]¥]  
@HWI-EAS443:3:94:1387:645#0/1  
CAAAGATGCAGAGAGAGGCAAGTTAAAAAGAANGGCTATC

+HWI-EAS443:3:94:1387:645#0/1  
`bbabbaaa`bababaabbbbbabaaaaaaaa[D[^`\_a`W  
@HWI-EAS443:3:95:407:24#0/1  
GCATACCCACTTGGTTCATTATCNTCAGGTAGTGGTCCAT  
+HWI-EAS443:3:95:407:24#0/1  
aaa\_UTa\_aaaaaa]a`\_ba\_aUDX^^a`\_]\_^a]SPP^¥  
@HWI-EAS443:3:96:810:401#0/1  
CAAGCATNGACCTGAAGTACTTCAATGAATCAACAAAGAA  
+HWI-EAS443:3:96:810:401#0/1  
abbba]]D]aa\_^baaaSb^aaaaaba`a[`a[`a\_a\_`  
@HWI-EAS443:3:97:409:1999#0/1  
GAAAAGCTTGAACAGTCTGGGCNCCCAGTAGGGGGCAATG  
+HWI-EAS443:3:97:409:1999#0/1  
abbabaaaaabba`[]aaa`VODUaaab¥`a`a`aaa\_\_¥  
@HWI-EAS443:3:99:470:1719#0/1  
ATAAGGGAATGTGGTGCTTATGGCATTNTGCGCTGGAATT  
+HWI-EAS443:3:99:470:1719#0/1  
`abaaaa\_aaaTb`\_aabbbbaa^ba^DZ\_^a\_aaa\_`aa  
@HWI-EAS443:3:99:564:1986#0/1  
CTTCGAGTCTGGACGATCAAGAAAGAAGAGTNCTCTGAG  
+HWI-EAS443:3:99:564:1986#0/1  
aabaababbbb`^`bbabbbbabb^bb`ab¥DYbab`ba  
@HWI-EAS443:3:10:1042:130#0/1  
AACAGGAACAGGATACACCATGGACACAGTAAACAGAAAA  
+HWI-EAS443:3:10:1042:130#0/1  
U¥]aa\_a\_a^\_b]]`¥YS]¥aaa`I[LU\_T¥a\_P[[R\_F¥  
@HWI-EAS443:3:10:1773:181#0/1  
TGATTGTGAAAGAAATCTCTGTGTCTTGTGAATTAGTCGT  
+HWI-EAS443:3:10:1773:181#0/1  
aa\_aaa\_`\_^aa\_]\_Ya[`\_^\_[T¥`^XPLV\_^W^VVQW  
@HWI-EAS443:3:12:1275:1596#0/1  
TACACATATAGGTGCCATAGGGGAGACACACAAATTCAAA  
+HWI-EAS443:3:12:1275:1596#0/1  
a````aabab^]W¥]T\_\_ba\_a`\_aa]aUbZa\_`aa[a\_`  
@HWI-EAS443:3:12:343:1664#0/1  
CGCCAATCATCCGACGATTTTGCTCTCATAGTGAATGCAC  
+HWI-EAS443:3:12:343:1664#0/1  
¥K`X\_]ORWSaaW]`SS¥[Wa^YZaaabX^]ZXZ\_YTPTB  
@HWI-EAS443:3:12:962:133#0/1  
GTCTGGGCTCCCAGTAGGGGCAATGAAAAGAAGGCCACA  
+HWI-EAS443:3:12:962:133#0/1  
a`¥M\_PQQQVMTRWLY[L¥PYRNKNSUWBBBBBBBBBBBB  
@HWI-EAS443:3:13:1737:621#0/1  
TACACATATAGGTGCCATAGGGGAGACACACAAATTCAAA  
+HWI-EAS443:3:13:1737:621#0/1  
a\_\_`\_aaYa¥VZ\_TZ\_`^`\_`ZX\_YZ¥^`W^`^Z^U^^[  
@HWI-EAS443:3:14:638:1367#0/1  
CAAAGATGCAGAGAGAGGCAAGTTAAAAAGAAGGGCTAAC  
+HWI-EAS443:3:14:638:1367#0/1  
aaaaa`\_a`[\_^a\_a\_\_\_a`\_a¥a`\_U^`\_^a``\_\_\_a\_Z



@HWI-EAS443:3:15:1684:831#0/1  
CGACTTCCATTGTTTCAAGGCATGAATTCTCAAATATTCC  
+HWI-EAS443:3:15:1684:831#0/1  
`a^`RXP\_bb¥ZSYa[bU^U^^`b¥ROSQ[`[^a^^b`Z  
@HWI-EAS443:3:15:698:1757#0/1  
ACCTCCTGCTTGTATTCCCTCATGGTTTGGTGCATTCACT  
+HWI-EAS443:3:15:698:1757#0/1  
aaaaaaa\_a`a`]aaa`a\_`^```\_Z`\_\_^]a^`\_^\_\_W^  
@HWI-EAS443:3:18:1151:336#0/1  
CTGGGTCGACTTCGAGTCTGGACGGATCAAGAAAGAAGAG  
+HWI-EAS443:3:18:1151:336#0/1  
abbababbbbbbabaa^abaaaabbaa`aaaaaabaaaa  
@HWI-EAS443:3:18:1565:130#0/1  
GGAAACAGAACACACCAATACTCAGAAAAGGGAAAGTGGA  
+HWI-EAS443:3:18:1565:130#0/1  
]GYS¥][XX`YWZ^VWWSWRWVMRWFVTU^YZ¥YVPTPVU  
@HWI-EAS443:3:18:423:1905#0/1  
ACGGGGGCAATGAAAAGAAGGCCAAACTGGCAAATGTTGT  
+HWI-EAS443:3:18:423:1905#0/1  
`^a`a^[`¥\_¥b¥^```]]¥[baa¥a[[`I¥NY^ZLL^S  
@HWI-EAS443:3:1:1736:948#0/1  
CCGGTATTTGTGTTCGAATCTTCATTCTTTTACTCTCGAA  
+HWI-EAS443:3:1:1736:948#0/1  
a^b`Z`babaabba\_b\_^a\_aba`ba\_bbbaa`bRb\_a\_B  
@HWI-EAS443:3:1:422:1281#0/1  
GGGTGGCTAATTTTAGCATGGAGCTACCCAGCTTTGGAGT  
+HWI-EAS443:3:1:422:1281#0/1  
abaNba[^`ZVa[]a``]]````\_`Z¥[`a\_V¥¥`BBBB  
@HWI-EAS443:3:20:1123:927#0/1  
CGGGTCTCCATCTGATACTAATAGCCCTACCTTTGATTG  
+HWI-EAS443:3:20:1123:927#0/1  
aabb`babbaaaaabaaa\_aaaaaa\_a`a\_aaa`a]aaX  
@HWI-EAS443:3:20:1324:170#0/1  
TACACATATAGGTGCCATAGGGGAGACACACAAATTCAAA  
+HWI-EAS443:3:20:1324:170#0/1  
^\_R¥`a[\_V^¥UW¥PVZ¥a^^]Z]V`][X\_] [X[]]  
@HWI-EAS443:3:20:536:838#0/1  
AGACAACATGACCAAGAAGATGGTCACGCAAAGAACAACA  
+HWI-EAS443:3:20:536:838#0/1  
aabb¥[\_]\_a\_a`¥```]aaaa^\_aaa\_\_`a```aa^a  
@HWI-EAS443:3:21:1050:1614#0/1  
CGTGGTGTCTAGGGCCCGGATTGATGCCAGGGTCGACTTC  
+HWI-EAS443:3:21:1050:1614#0/1  
X`\_`[\_`¥a[[\_PIZaXaa```a`ZaaQ`aa`XI`¥`[]V  
@HWI-EAS443:3:21:1439:526#0/1  
GCTGTCTCTTACTCTCCTTTTTCTTTGAAAGTGGGTTGTT  
+HWI-EAS443:3:21:1439:526#0/1  
]I^aWQW]V\_\_W¥XXUQV\_^`\_[YY`]LSU`Y\_[^M[\_PT  
@HWI-EAS443:3:21:1744:207#0/1  
GCTGTGTTCTGTTTACTGTGTCCATGGTGTATCCTGTTCC

+HWI-EAS443:3:21:1744:207#0/1  
a^¥TZ] []X`a¥^`PR]aWaNVPY^GVZY[SJYXSQQB  
@HWI-EAS443:3:22:1716:717#0/1  
TTCGCTATGGATTTGTGGCTAATTTTAGCATGGAGCTACG  
+HWI-EAS443:3:22:1716:717#0/1  
STU[VZ¥`\_^HYX¥]Z\_XU¥OQWS¥BBBBBBBBBBBBBBB  
@HWI-EAS443:3:22:469:294#0/1  
GGCTAATTTTAGCATGGAGCTACCCAGCTTTGGAGTGTAT  
+HWI-EAS443:3:22:469:294#0/1  
aXa[Q¥\_R]ZW[LV`aaYZV]VZV[\_a¥Z`X\_ZH[UXTFV  
@HWI-EAS443:3:23:1272:1326#0/1  
CGACTTCCATTGTTTCAAGGCATGAATTCTCAAATATTCC  
+HWI-EAS443:3:23:1272:1326#0/1  
aaXWabbb¥bbb\_]a]a`aaa\_a^¥]b^\_a`a^`^b\_\_\_\_  
@HWI-EAS443:3:23:1477:1567#0/1  
TNCAGGTCCAAGGTCATTGTTTATCATGTTGTTCTTTATC  
+HWI-EAS443:3:23:1477:1567#0/1  
¥D[b^``bbbaa\_\_abb`aaaa\_abaaa`a]aba`aa  
@HWI-EAS443:3:23:863:749#0/1  
GGAATATTTGAGAATTCATGCCTTGAACAATGGAAGTCG  
+HWI-EAS443:3:23:863:749#0/1  
aaa\_\_`abaa`aa]a\_\_a```[aa```a\_b`a`^`WY[  
@HWI-EAS443:3:24:1119:269#0/1  
TGGTCAGTGCTTATTAGATAGCCTCTCTTATTAGTCT  
+HWI-EAS443:3:24:1119:269#0/1  
ab]T\_\_^¥b`^]`aaa`aa\_^]`ST``^Saa`a`U`^SW]  
@HWI-EAS443:3:25:144:1224#0/1  
TACACATATAGGTGCCATAGGGGAGACACACAAATTCAAA  
+HWI-EAS443:3:25:144:1224#0/1  
abbbbabbb`a`Wbaabaaa`aa\_ba\_baaaabVaaaaba  
@HWI-EAS443:3:25:975:237#0/1  
TGGGGCCCGGATTGATGCCAGGGTCGACTTCGAGTCTGGA  
+HWI-EAS443:3:25:975:237#0/1  
aa\_aaaaZ``\_a`aa]X^NUa]UMW`]SUWU\_UaSG\_\_^T  
@HWI-EAS443:3:26:278:1877#0/1  
CGGGTCTCCATCTGATACTAATAGCCCTACCTTTGATTG  
+HWI-EAS443:3:26:278:1877#0/1  
a`XSHaaX`a¥]`a^X`^`[a\_]¥`[[^\_^]Z^^VNZUR  
@HWI-EAS443:3:26:286:1907#0/1  
GACTGGAGTAAATGAATCAGCTGACATGAGTATTGGAGTA  
+HWI-EAS443:3:26:286:1907#0/1  
aYZYaXUFL^^a`¥¥\_]aZb`[Zaa[T] []a\_^[QJQDX  
@HWI-EAS443:3:26:350:691#0/1  
TACACATATAGGTGCCATAGGGGAGACACACAAATTCAAA  
+HWI-EAS443:3:26:350:691#0/1  
¥^^baaba^\_aN\_aba^]`\_a]^^XXa`aaa^^`\_\_aaa  
@HWI-EAS443:3:27:1348:1549#0/1  
CCAGCCCTTCTTTTAACTTGCCTCTCTCTGCATCTTTGG  
+HWI-EAS443:3:27:1348:1549#0/1  
abbbab\_ba[`baaabb^b`aaaU`a\_aHb]Taa`b^`\_Y

@HWI-EAS443:3:27:265:1468#0/1  
GCCCTCCATCTGATACTAATAGCCCTACCTTTGATTGGGT  
+HWI-EAS443:3:27:265:1468#0/1  
\_XaYY^aRRb`]PPa\_`^Y^]aa^aJXa^]W\$\_\_\_]G]ZYX  
@HWI-EAS443:3:28:245:230#0/1  
CGACCTTGAGTTAGTTTATCTACCCTTGTTTGTGAACGA  
+HWI-EAS443:3:28:245:230#0/1  
aabaabaaa`aaa\_aaaaaaaaa\_\_aa\_\_aa]a\_[PT^[  
@HWI-EAS443:3:28:569:1306#0/1  
CTCCAATCATCCGACGATTTTGCTCTCATAGTGAATGCNC  
+HWI-EAS443:3:28:569:1306#0/1  
`\_¥^`U\_b`bbbaa[^a^`aa¥]\_a\_]a^`^Ta`X]ZLDL  
@HWI-EAS443:3:28:955:42#0/1  
GCTGGTCCATCTGATACTAATAGCCCTACCTTTGATT  
+HWI-EAS443:3:28:955:42#0/1  
`N`aaT][``\_`X\_\_`¥M^\_\_\_Z^XXUTWNX\_\_\_\_Y[V  
@HWI-EAS443:3:29:1563:1373#0/1  
CAAGGAAAGCCATAGCCTCTAGAACACAGTCTGTTTGTNG  
+HWI-EAS443:3:29:1563:1373#0/1  
abbbbUb`VQ\_aa]¥QV\_VaY]ba^aR\_aLSabY`BBBBB  
@HWI-EAS443:3:29:598:1038#0/1  
AAAAATTCCAGCGCAAATGCCATAAGCACCACATTCCAT  
+HWI-EAS443:3:29:598:1038#0/1  
Y¥WSS]P¥Z\_]XT¥¥\_WWQ`Z¥RXV]]Y`P]TZX^[`BB  
@HWI-EAS443:3:31:1040:1836#0/1  
GGCCTCCATCTGATACTAATAGCCCTACCTTTGATTGGGT  
+HWI-EAS443:3:31:1040:1836#0/1  
\_J]b`]¥]S¥aa\_]\_[a`¥^a`X[]XN\_\_`]VNVYSWO  
@HWI-EAS443:3:31:774:1464#0/1  
TCGACCTGCAACGCCAGATGGCTCTTCAATTGTTTCATC  
+HWI-EAS443:3:31:774:1464#0/1  
VHQ]Y\_ba]a^U`aaX][aaRUZWRUSU^`aa]YP\_Z^^]  
@HWI-EAS443:3:31:983:103#0/1  
GGATATGATGCCGTTGCAACTACACATTCCCTGGATTCCCA  
+HWI-EAS443:3:31:983:103#0/1  
aaaa^0[a\_a`[[a¥VV]¥`^\_\_W\_\_\_^\_]\_WOW[VWSS  
@HWI-EAS443:3:32:750:43#0/1  
ATAAATTCCAGCGCAAATGCCATAAGCACCACATTCCCT  
+HWI-EAS443:3:32:750:43#0/1  
a\_aa`\_\_`\_\_`\_\_`\_\_`^`^`Z]]^Z^^\_Z^^^X]Z^ZZZ  
@HWI-EAS443:3:33:461:541#0/1  
GCGGGATGGGCTCCAATCATCCGACGATTTTGCTCTCATA  
+HWI-EAS443:3:33:461:541#0/1  
Wa` `b\_X\_b]b]`bb\_a\_baabaa]b\_baab^PX\_`a`aa  
@HWI-EAS443:3:34:1784:1511#0/1  
CATGCTTTTGGCTGGACCATGGGCTGGCATTACCACAGAA  
+HWI-EAS443:3:34:1784:1511#0/1  
M`bb\_aabbabbabb[a]\_UZ`\_U\_`]M\_\_b`G`]S\_^FT  
@HWI-EAS443:3:34:816:1217#0/1  
ATAACAATGACCTTGACCTGCAACGCCAGATGGCGC

+HWI-EAS443:3:34:816:1217#0/1  
aa\_S\$]HVa`aaa[\_ZZZ]¥Z\_aa`\_[L^a\_YWVPS^WGY  
@HWI-EAS443:3:35:1189:1974#0/1  
CATCCACTTTCCCTTTTCTGAGTATTGGTGTGTTCTGTTT  
+HWI-EAS443:3:35:1189:1974#0/1  
``¥W¥^[]\_V`^`aa`\_]YQR]`\_NMU^\_W¥Z[^XYW  
@HWI-EAS443:3:35:1481:1709#0/1  
AAAAATTCCAGCGCAAATGCCATAAGCACCACATTCCAT  
+HWI-EAS443:3:35:1481:1709#0/1  
\_^ab`¥QYa^a]\_N`Yaaa]a¥WTJZO\_Z`[Ub^R¥aQV  
@HWI-EAS443:3:35:587:970#0/1  
TGGGTCCTCCATCTGATACTAATAGCCCTACCTTTGATTG  
+HWI-EAS443:3:35:587:970#0/1  
a]^Rbaab`aZaaa`aY\_a][a\_\_\_Z\_[\_a\_U¥ZVY^W  
@HWI-EAS443:3:36:663:586#0/1  
GGAATATTTGAGAATTCATGCCTTGAAACAATGGAAGTCG  
+HWI-EAS443:3:36:663:586#0/1  
aaY^`^`````\_aa]`\_aa^\_a`\_\_\_¥^\_aRQ]ZV^¥VX¥  
@HWI-EAS443:3:38:1701:546#0/1  
TACACATATAGGTGCCATAGGGGAGACACACAAATTCAA  
+HWI-EAS443:3:38:1701:546#0/1  
aaaaabbbbab\_X\_¥aaa\_a`aa\_a`a`X[\_a]TW\_Z  
@HWI-EAS443:3:38:237:1990#0/1  
GTCCCCAGTGATTGTGAAAGAAATCTCTGTGTCTTGTGGA  
+HWI-EAS443:3:38:237:1990#0/1  
^Y`a`\_NUZ¥]Wb[aWbZZWq\_] []a]aYSXLZaY¥RFN  
@HWI-EAS443:3:38:246:1863#0/1  
TCGGCTCCAATCATCCGACGATTTTGCTCTCATAGTGAAT  
+HWI-EAS443:3:38:246:1863#0/1  
^W^¥a\_b[^X`X^[\_aZ]\_\_\_[¥\_Q`¥¥^GTUaZW[Q¥T  
@HWI-EAS443:3:39:1319:678#0/1  
TGGCACTGACATTAATACGATGACCAAAGATGCAGAGAG  
+HWI-EAS443:3:39:1319:678#0/1  
]aa\_Z^bV`]aZZ]\_aaa\_\_a`a`\_\_WXaZ^aV`]\_  
@HWI-EAS443:3:39:1362:1491#0/1  
GCGTTTCAAGGCATGAATTCTCAAATATTCCTGGGTGGGA  
+HWI-EAS443:3:39:1362:1491#0/1  
a\_b¥¥ab`\_a]W^X]SU[^\_]\_OW^aZ`Z`SYZN\_U^[[X  
@HWI-EAS443:3:39:1441:551#0/1  
GGGGGCTATCGCAACACCTGGGATGCAGATTAGAGGTTTC  
+HWI-EAS443:3:39:1441:551#0/1  
aaa`aabb`\_a\_a^`a¥`aaa]\_\_Y\_\_`\_W\_U`\_[]`V  
@HWI-EAS443:3:39:490:772#0/1  
GGGTTCTGTTTACTGTGTCCATGGTGTATCCTGTTCTGT  
+HWI-EAS443:3:39:490:772#0/1  
aaa^abaa¥aaaaaaY]^\_a^`a^Qa¥`aa\_\_`\_\_\_^`\_¥  
@HWI-EAS443:3:39:788:999#0/1  
GGGTAAATGAATCAGCTGACATGAGTATTGGAGTAACAGT  
+HWI-EAS443:3:39:788:999#0/1  
`ba]ab¥b^`aa^`a\_a`^`\_¥¥W\_a`\_\_W`[\_`a`\_X

@HWI-EAS443:3:43:394:1848#0/1  
TACACATATAGGTGCCATAGGGGAGACACACAAATTCAAA  
+HWI-EAS443:3:43:394:1848#0/1  
aba^babb`b[]Ia\_aaaa`¥P]aaaaaab`bba]Uaa`U  
@HWI-EAS443:3:43:477:1329#0/1  
AGCCGGTCTCCTATATGAACTGCTAGGGAAAAATTTCTCG  
+HWI-EAS443:3:43:477:1329#0/1  
`¥\_\_^`b`a\_aa`^a`]`^XZaaaa`\_a`\_`\_Y  
@HWI-EAS443:3:44:902:1547#0/1  
GGAGGCCATGGTGTCTAGGGCCCGATTGATGCCAGGGAG  
+HWI-EAS443:3:44:902:1547#0/1  
\_VO`\_PVV¥YJOMTUNMMT[VZQ¥YBBBBBBBBBBBBBB  
@HWI-EAS443:3:46:1457:714#0/1  
GACTGGAGTAAATGAATCAGCTGACATGAGTATTGGAGTA  
+HWI-EAS443:3:46:1457:714#0/1  
a\_abaa]b¥aa`aa`\_a`\_]`a`^`a`¥`X``aa`^`Y^  
@HWI-EAS443:3:46:1486:1238#0/1  
TACACATATAGGTGCCATAGGGGAGACACACAAATTCAAA  
+HWI-EAS443:3:46:1486:1238#0/1  
abab\_bbbab`]ZNa`aa[]`\_Z\_U^¥aa`¥0^a\_  
@HWI-EAS443:3:46:965:110#0/1  
TACACATATAGGTGCCATAGGGGAGACACACAAATTCAAA  
+HWI-EAS443:3:46:965:110#0/1  
a`aaaabbaab]b]aaa\_aaaa\_ba^`\_a\_]\_aa`\_`\_  
@HWI-EAS443:3:47:337:782#0/1  
TACACATATAGGTGCCATAGGGGAGACACACAAATTCAAA  
+HWI-EAS443:3:47:337:782#0/1  
aba\_¥aa`^`a`Ub``aaWa\_\_a\_a]Z\_W`\_`\_`\_`\_`a^  
@HWI-EAS443:3:49:1087:1564#0/1  
TTTCTCAATTTCTTCTTTGTTGATTCATTGAAGTACTCC  
+HWI-EAS443:3:49:1087:1564#0/1  
aa]]WKY^\_VabJ]]Tabbb\_a`\_aU[]aaaa`¥[\_`YF  
@HWI-EAS443:3:4:719:1206#0/1  
TACACATATAGGTGCCATAGGGGAGACACACAAATTCAAA  
+HWI-EAS443:3:4:719:1206#0/1  
ab`b`bbbab`bYb]\_`baaaaa`aaa\_a¥a`^a``aaa  
@HWI-EAS443:3:50:1120:1255#0/1  
GCCACCCATAATGTTCTCAAACAAAATGGCAAGACTAGGG  
+HWI-EAS443:3:50:1120:1255#0/1  
\_MXY[P^[\_RI`¥NWR\_]\_Z]\_YZ^¥]LSZP^NTYTZYS  
@HWI-EAS443:3:50:1595:554#0/1  
AGAGGCTATGGCTTTCCTTGAAGAATCCCACCCAGGAAAA  
+HWI-EAS443:3:50:1595:554#0/1  
ababbab`^^Y`a``YRLIVNQ\_TOYXSHY`GTWBBBB  
@HWI-EAS443:3:50:573:190#0/1  
GCTGATTCATTTACTCCAGACTCCAAAGCTGGGTAGAT  
+HWI-EAS443:3:50:573:190#0/1  
aaaaU\_a^G`\_a`\_`b^a^\_U]aY]MS`a]^\_Ya0``GU  
@HWI-EAS443:3:51:194:417#0/1  
AAAGATGCAGAGAGAGGCAAGTAAAAAGAAGGGCTATTG

+HWI-EAS443:3:51:194:417#0/1  
\_\_a\_]a]]¥^`PYVJ\_^`XW]]G\_]HRXZYBBBBBBBB  
@HWI-EAS443:3:52:544:72#0/1  
GGCGGATCAAGAAAGAAGAGTTCTCTGAGATCATGAAGAT  
+HWI-EAS443:3:52:544:72#0/1  
aaaba]^\_``\_\_La`\_a^`V\_]\_Xa^^\_[^X]^\_`^`]^`^`  
@HWI-EAS443:3:52:855:842#0/1  
TGCTTTTCTAAAAATCCAGCGCAAATGCCATAAGCAC  
+HWI-EAS443:3:52:855:842#0/1  
`aa\_aab]¥aaa^Z^``\_a¥b\_b\_a^aa]\_\_\_a```a\_a\_  
@HWI-EAS443:3:54:633:37#0/1  
GTTTCCCCTAACTTGCAGGTCCTGTAGAATCTGTCCACT  
+HWI-EAS443:3:54:633:37#0/1  
a\_aa``aa^aa`\_a\_a`\_``\_]\_X\_a^`a\_^\_`\_`ZWU[Z^`  
@HWI-EAS443:3:55:599:408#0/1  
TGTGGCTAATTTTAGCATGGAGCTACCCAGCTTTGGAGGG  
+HWI-EAS443:3:55:599:408#0/1  
abOWabb[a`\_]¥a`a``Z]]R^\_¥¥P`XU^[^`U^ZY[F[  
@HWI-EAS443:3:55:74:779#0/1  
GGGGTGTGTTCTGTTTACTGTGTCCATGGTGTATCCTGTT  
+HWI-EAS443:3:55:74:779#0/1  
a]T]MYQ^VV¥¥`X\_V]¥[¥[[XZRV[]]QX¥SMQ[PPPVR  
@HWI-EAS443:3:56:1609:589#0/1  
CGCCCCATTGATGGACCACTACCTGAGGATAATGAACCAA  
+HWI-EAS443:3:56:1609:589#0/1  
]]\_Z^b]ab`\_baaa[¥a]¥[PVaaT]a`\_aaba`]VR\_]`  
@HWI-EAS443:3:57:119:1098#0/1  
GGCTATGGCTTTTCTTGAAGAATCCCACCCAGGAATATAT  
+HWI-EAS443:3:57:119:1098#0/1  
aVXS]PWY\_]¥\_TULYWP[¥LWUTYX¥GQ\_QQLQWFXBBB  
@HWI-EAS443:3:59:1490:700#0/1  
TACACATATAGGTGCCATAGGGGAGACACACAAATTCAAA  
+HWI-EAS443:3:59:1490:700#0/1  
abaaabbbabaa^aaaaa\_`aaaabaa`aba\_aa`ZSaa\_  
@HWI-EAS443:3:59:317:956#0/1  
ATAAGAGCACTGACATTAATACGATGACCAAAGATGCCT  
+HWI-EAS443:3:59:317:956#0/1  
abaa`baabaabaaabaaaaa``\_`^\_aaaZ^\_V\_  
@HWI-EAS443:3:5:92:219#0/1  
GCTCTGTTTACTGTGTCCATGGTGTATCCTGTTCTCCTGTT  
+HWI-EAS443:3:5:92:219#0/1  
YHX]^\_```^aa\_a`[U^¥baWW]``Y`\_aR^`]]`\_]B  
@HWI-EAS443:3:61:39:1439#0/1  
TGGGTATGCACAAACAGACTGTGTTCTAGAGGCTATGGGG  
+HWI-EAS443:3:61:39:1439#0/1  
\_]ZLZZU\_b\_``X\_\_a\_\_[\_L¥VV^]]BBBBBBBBBBBB  
@HWI-EAS443:3:62:654:378#0/1  
CGGGGTGCCATGCTCAGGATGTTTCTGAACCACTCGGGTT  
+HWI-EAS443:3:62:654:378#0/1  
`^`a\_]baa\_aa`ab`ab`ab`ababbbaa```a\_[TX^]^`

@HWI-EAS443:3:63:1127:972#0/1  
GGGGTTTTCGTATACTTTGTTGAACTTTAGCTAGGAGCAT  
+HWI-EAS443:3:63:1127:972#0/1  
aa¥PR\_b`¥aab`\_bbbb\_T\_]\_\_^X^\_XVa`X0[a]]a  
@HWI-EAS443:3:63:1330:370#0/1  
TACACATATAGGTGCCATAGGGGAGACACAAAATTCAAA  
+HWI-EAS443:3:63:1330:370#0/1  
abaa\_babaaaa^b`\_aaabaaaaaaaaa^a^aa\_aaa\_a\_  
@HWI-EAS443:3:63:1396:293#0/1  
GACTTTCCTTGAAGAATCCCACCCAGGAATATTTGAGAAT  
+HWI-EAS443:3:63:1396:293#0/1  
`JZbbbaababababbaa`aaaaaab`^a`baaaaaaa  
@HWI-EAS443:3:64:1211:757#0/1  
TTAACATGCTAAGTACGGTCTTGGGAGTCTCGATACTGAA  
+HWI-EAS443:3:64:1211:757#0/1  
\_aaVbbbbbb¥bX]babaZ¥ab¥baaa]a`ba¥b]^\_`X  
@HWI-EAS443:3:64:1571:582#0/1  
TTGAGGACCAAACCTTATACAATATACGGAATCTTCACATT  
+HWI-EAS443:3:64:1571:582#0/1  
ab`V`baaaaa]baaa`\_aaaa[a\_a`a\_a`^\_^]\_`  
@HWI-EAS443:3:65:1568:102#0/1  
GGAATATTTGAGAATTCATGCCTTGAACAATGGAAGTCG  
+HWI-EAS443:3:65:1568:102#0/1  
]SLTQXS\_T^^\_¥]aa¥Q[YZJ¥[[WO]\_b[`ZXBBBBBB  
@HWI-EAS443:3:65:766:1765#0/1  
AGCTGATTCATTTACTCCAGACACTCCAAAGCTGGGTANC  
+HWI-EAS443:3:65:766:1765#0/1  
a\_`a```aaaa`a\_a^\_a\_\_\_a¥^`R]^`^PU\_]`^VZUDH  
@HWI-EAS443:3:66:260:564#0/1  
CAACATTTGCCAGTTTGGCCTTCTTTTCATTGCCCCCTCC  
+HWI-EAS443:3:66:260:564#0/1  
\_`^W¥ZZ^Z`a\_`b]^`aZX^abZL\_aaXH]\_\_\_G\_VaVHM  
@HWI-EAS443:3:67:187:381#0/1  
ACGGTCTCCATCTGATACTAATAGCCCTACCTTTGATTG  
+HWI-EAS443:3:67:187:381#0/1  
aabaRaaYbaa`a\_a`]^`\_\_a\_`[[[\_`\_V\_\_\_`\_^\_Y^\_  
@HWI-EAS443:3:67:676:1137#0/1  
TTTGAATTTGTGTGTCTCCCCTATGGCACCTATATGTGTA  
+HWI-EAS443:3:67:676:1137#0/1  
aba`Y\_baX][XI`]aXa`Z[\_YZ\_]aStA^TX[VWQLO]  
@HWI-EAS443:3:68:1042:664#0/1  
TGGCTTTCCTTGAAGAATCCCACCCAGGAATATTTGAGNA  
+HWI-EAS443:3:68:1042:664#0/1  
`bbbabaaababaaa`aab`a\_aaaaaa[`a`a`aa`YD^  
@HWI-EAS443:3:68:1276:991#0/1  
TACACATATAGGTGCCATAGGGGAGACACAAAATTCAAA  
+HWI-EAS443:3:68:1276:991#0/1  
¥XONWbaUY^ZRX¥\_abb^aa\_b`WPJ`\_aS\_aL`a¥aaa  
@HWI-EAS443:3:68:663:147#0/1  
ATTCCCAGTAGGGGCAATGAAAAGAAGGCCAAACTGGCA

+HWI-EAS443:3:68:663:147#0/1  
aa`aaaaa]\_`aa^a^[\_```\V\_[[^\_WW]^]YW\_`^]^  
@HWI-EAS443:3:69:209:81#0/1  
TAGTGTCTAGGGCCCGATTGATGCCAGGGTCGACTTCGA  
+HWI-EAS443:3:69:209:81#0/1  
^0\_]b[aaaaaa`[\_aa¥\_a`\_^]W^¥\_`LJYUW[^^¥S  
@HWI-EAS443:3:69:749:2046#0/1  
NTACACATATAGGTGCCATAGGGGAGACACACAAATTCAA  
+HWI-EAS443:3:69:749:2046#0/1  
DMZXXXVVYWXRXWUZXVZRVUWXXZZYZZZZXZXTW  
@HWI-EAS443:3:6:81:691#0/1  
TACACATATAGGTGCCATAGGGGAGACACACAAATTCAAA  
+HWI-EAS443:3:6:81:691#0/1  
^^^GN¥aX¥^`VU¥a¥]\_\_Z]Q[aa¥][^a\_Y^`^`aY]  
@HWI-EAS443:3:70:1476:237#0/1  
CGACTTCCATTGTTTCAAGGCATGAATTCTCAAATATTCC  
+HWI-EAS443:3:70:1476:237#0/1  
abbbbbbbbabbbabb\_bbababbbb`bbabaaaababb\_\_  
@HWI-EAS443:3:70:286:595#0/1  
TTCCGGCAGCAACTGCATTGGCCAACACCATAGAAGTCTT  
+HWI-EAS443:3:70:286:595#0/1  
a\_aa\_a`S]WLY¥\_\_`\_]YZ\_\_ZDUV\_\_RX^]\_ZLZY^]  
@HWI-EAS443:3:71:1651:1294#0/1  
TACACATATAGGTGCCATAGGGGAGACACACAAATTCAAA  
+HWI-EAS443:3:71:1651:1294#0/1  
aa`a`baba`a`Xaa^aa`aaaa`a`aaa\_aaa`a]a`^  
@HWI-EAS443:3:71:792:1405#0/1  
TGCTCCAATACTCATGTCAGCTGATTCAATTTACTCCAGAC  
+HWI-EAS443:3:71:792:1405#0/1  
aaba`bbbabaaaaaa\_aaaaa`aaaaaa``aaaa`a\_a^  
@HWI-EAS443:3:72:1110:24#0/1  
TACACATATAGGTGCCATAGGGGAGACACACAAATTCAAA  
+HWI-EAS443:3:72:1110:24#0/1  
a\_M\_]`^\_b`\_a^QY]\_a`]abaa\_aTM[¥a\_aaXa`V]^\_  
@HWI-EAS443:3:72:1498:1175#0/1  
TACACATATAGGTGCCATAGGGGAGACACACAAATTCAAA  
+HWI-EAS443:3:72:1498:1175#0/1  
aa\_a`abbaba¥b`Xaa^aaaa]`\_^aW``\_]a\_¥a\_¥  
@HWI-EAS443:3:72:974:749#0/1  
AATGAACCAAGTGGGTATGCACAAACAGACTGTGTTCTTG  
+HWI-EAS443:3:72:974:749#0/1  
¥^U¥TNQZX\_a`a]THWLZ]VMOWN\_RPWaY]¥¥]F`IO  
@HWI-EAS443:3:73:172:1971#0/1  
GACTGGAGTAAATGAATCAGCTGACATGAGTATTGGAGTA  
+HWI-EAS443:3:73:172:1971#0/1  
abaa\_aaa]`bbaY^`abaaaaaaa\_\_a\_Za`\_]\_\_Sa  
@HWI-EAS443:3:74:1354:996#0/1  
GCTCTGTTTACTGTGTCCATGGTGTATCCTGTTCTGTTT  
+HWI-EAS443:3:74:1354:996#0/1  
^¥\_]aa`bbabb\_¥`a¥abbb`baabb`ababb`bb`b]



@HWI-EAS443:3:74:724:1513#0/1  
TCGCCGTTGCAACTACACATTCCTGGATTCCCAAGAGGAA  
+HWI-EAS443:3:74:724:1513#0/1  
abaaaaa`abbaa`\_abaaba`a\_aaaa^`Waaa\_Ga  
@HWI-EAS443:3:75:349:1623#0/1  
GATGTGGTAATGCCAGCCCATGGTCCAGCCAAAAGCATGG  
+HWI-EAS443:3:75:349:1623#0/1  
a`]][[[a[\_`^0`VXbaba¥a[Qaa`V`aaa`a¥aaUXY  
@HWI-EAS443:3:77:906:1025#0/1  
GGGTGGGTATGCACAAACAGACTGTGTTCTAGAGGCTATG  
+HWI-EAS443:3:77:906:1025#0/1  
abaYaab¥`b`^aaabaaa\_aaa`a\_`\_\_a\_`\_\_`^`^BB  
@HWI-EAS443:3:78:1192:1506#0/1  
CAATTGAAGAGCCATCTGGGCCGTTGCAGGTCCAAGGTAA  
+HWI-EAS443:3:78:1192:1506#0/1  
`)`¥^a^aY`M`a^`S`XL[S^Y\_^\_[SZ]T[YUH[  
@HWI-EAS443:3:78:697:809#0/1  
CGTCCATCTGATACTAATAGCCCTACCTTTGATTGGGTTT  
+HWI-EAS443:3:78:697:809#0/1  
aa]aaaaaa^`a\_`Z^aa\_`\_^[[^^`aaU^^Z`^YX^  
@HWI-EAS443:3:78:774:661#0/1  
TTGGCTCCAATCATCCGACGATTTTGCTCTCATAGTGAAT  
+HWI-EAS443:3:78:774:661#0/1  
`baa`a`aaaa`aa]a`¥a^^`a`aa\_`\_aa[aaX`\_a`  
@HWI-EAS443:3:79:213:1169#0/1  
GGCTCTTTATTTCAGTCTTTGTTTTTTCTCCCTATTGTT  
+HWI-EAS443:3:79:213:1169#0/1  
\_`abbbb`bba`bbUaV]\_baaababbbbaabbb`S^]GW^  
@HWI-EAS443:3:7:1033:769#0/1  
CATGGACACAGTAAACAGAACACACCAATACTCAGAAATG  
+HWI-EAS443:3:7:1033:769#0/1  
a`babbaabbbaba]a`S]b\_baaaaab`[aTaa\_abab  
@HWI-EAS443:3:7:1313:1282#0/1  
AGCCACTCCTGCTTGTATTCCCTCATGGTTTGGTGCATTC  
+HWI-EAS443:3:7:1313:1282#0/1  
`bZH¥a\_]aaUa]P\_¥¥\_]HPSSY`a\_`\_^BBBBBBBBB  
@HWI-EAS443:3:7:57:1401#0/1  
CCTCCCTATTGTTCTTTGCGTGACCATCTTCTTGGTCATG  
+HWI-EAS443:3:7:57:1401#0/1  
aba\_abaaba`[abaaa¥a[aZTVX`\_aa\_`Y\_Q\_`  
@HWI-EAS443:3:81:460:682#0/1  
GNTCTGTTTACTGTGTCCATGGTGTATCCTGTTCTGTTT  
+HWI-EAS443:3:81:460:682#0/1  
¥D¥`aaaaa`\_aa\_a`aaaa`W\_^`\_`^`\_^]\_\_`¥^^  
@HWI-EAS443:3:82:1110:1957#0/1  
TACACATATAGGTGCCATAGGGGAGACACACAAATTCAA  
+HWI-EAS443:3:82:1110:1957#0/1  
ab\_babbbabaa^ba`abbaaaaa`a\_a`babbaa`^aba  
@HWI-EAS443:3:83:178:849#0/1  
CACCGGATTGATGCCAGGGTGCAGTTCGAGTCTGGACGGA

+HWI-EAS443:3:83:178:849#0/1  
aabbba^aa`a\_aa\_UX\_\_N`\_^]^^V^`V^\_\_¥^\_\_`¥  
@HWI-EAS443:3:84:209:224#0/1  
GGGTGGGTTGTTATCTCTATTTCTCTTTGTTTCATTGATT  
+HWI-EAS443:3:84:209:224#0/1  
aab[abbYab^¥H\_\_a`a\_``\_]\_`aa\_\_^a\_^a^^^^^\_[  
@HWI-EAS443:3:85:163:1366#0/1  
GAATGTGTAGTTGCAACGGCATCATATTCCATGCTTTTCT  
+HWI-EAS443:3:85:163:1366#0/1  
aSa\_a`a^a`]aaa`^``\_aa\_`a`\_````]\_\_\_\_]\_\_\_\_]\_\_  
@HWI-EAS443:3:86:270:1709#0/1  
CTAATAAGAGCACTGACATTAAATACGATGACCAAAGAGG  
+HWI-EAS443:3:86:270:1709#0/1  
aaaba`\_QSV\_`a`M^aa`aa¥bba\_a\_aYa^a\_\_`\_YZ[  
@HWI-EAS443:3:86:396:752#0/1  
CAGGTGGGATGGGCTCCAATCATCCGACGATTTTGCTCTC  
+HWI-EAS443:3:86:396:752#0/1  
abab]aba```a`a`a]aaaa```aa`a``aab`a¥`\_  
@HWI-EAS443:3:86:954:1766#0/1  
GGAATATTTGAGAATTCATGCCTTGAAACAATGGAAGTAG  
+HWI-EAS443:3:86:954:1766#0/1  
V¥b^V`SSW^^a\_X[\_[Y^T`¥¥a¥a^[\_S\_¥Xbbbb\_UH\_  
@HWI-EAS443:3:88:424:1572#0/1  
CGGTGGTGTATGGCATTGCGCTGGAATTTTATAGGAA  
+HWI-EAS443:3:88:424:1572#0/1  
\_]`Ta]^]aa`a0QV¥J]ba\_\_a\_aaYa]aa^baaaab[\_  
@HWI-EAS443:3:90:1625:271#0/1  
GCCTCCAATACTCATGTCAGCTGATTCATTTACTCCAGAC  
+HWI-EAS443:3:90:1625:271#0/1  
a\_babbbbbb^aaabbbabbabbaaaa`bbbaa\_\_[aaa[  
@HWI-EAS443:3:90:952:1217#0/1  
TACACATATAGGTGCCATAGGGGAGACACAAAATTCAAA  
+HWI-EAS443:3:90:952:1217#0/1  
`¥bbbbbabab^b^bbbabbbbaaabababaaba\_aba  
@HWI-EAS443:3:91:1132:726#0/1  
ATCCCCCTGAATCCCTTTGTCAGTCATAAAGAGATTGATT  
+HWI-EAS443:3:91:1132:726#0/1  
\_¥VQZ```\_\_V\_[ZW\_^]Xa\_Y¥¥[¥Z]^]]][[`^^Y  
@HWI-EAS443:3:92:1337:1673#0/1  
TACACATATAGGTGCCATAGGGGAGACACAAAATTCAAA  
+HWI-EAS443:3:92:1337:1673#0/1  
ab`aab`baaa\_^a\_^aa^a\_a\_`a`X`¥a]`a\_a`\_\_a\_  
@HWI-EAS443:3:92:139:1095#0/1  
CCGTGTTGAGAATAGAACGATTCCTCTTGGGAATCCAGGA  
+HWI-EAS443:3:92:139:1095#0/1  
a\_\_F\_`\_U[aa^^aa]`WZSOYQZVZY[[]`TV¥ZFLVZT  
@HWI-EAS443:3:92:1658:178#0/1  
CACGGATTGATGCCAGGGTCGACTTCGAGTCTGGACGGAT  
+HWI-EAS443:3:92:1658:178#0/1  
¥FRbZY\_bba`a\_X¥^S\_HD¥SXaa\_YXX]F]]]Q¥`^NK

@HWI-EAS443:3:92:326:104#0/1  
CGGGGCTCCAATCATCCGACGATTTTGCTCTCATAGTGAA  
+HWI-EAS443:3:92:326:104#0/1  
abbbbbbabab`aaa\_aa`\_b\_aaabZ`\_`¥`\_`\_aY`\_`\_`  
@HWI-EAS443:3:93:1138:1939#0/1  
GGCAATCCGACTCTACTTTTCCTAAAAATTCCAGCGCAAA  
+HWI-EAS443:3:93:1138:1939#0/1  
aH¥W]\_]XUWPUJPV¥\_[\_[WMV^\_Z[W]S]QG]MXZUYY  
@HWI-EAS443:3:93:288:885#0/1  
GGAATATTTGAGAATTCATGCCTTGAAACAATGGAAGTCG  
+HWI-EAS443:3:93:288:885#0/1  
^`X`\_XZ¥\_a`a^¥]X\_]\_a`a\_Y`VFW^`LU\_\_[Z^BBB  
@HWI-EAS443:3:94:1246:457#0/1  
TGTGGCTAATTTTAGCATGGAGCTACCCAGCTTTGGAGGG  
+HWI-EAS443:3:94:1246:457#0/1  
a\_Y`aY`UY¥\_aZZ\_LZTa]Q]^¥IXFXROJ[aZQYFRG]  
@HWI-EAS443:3:94:862:852#0/1  
GTCTTCTTTTCATTGCCCCCTACTGGGAGCCCAGACTGTT  
+HWI-EAS443:3:94:862:852#0/1  
aHU`a`\_]\_aaa¥GSQ¥YV[UY[aVT`WU^ZX^\_\_XVT^VZ  
@HWI-EAS443:3:95:31:1410#0/1  
GCCTATCTAATAAGAGCACTGACATTAATACGATGACCA  
+HWI-EAS443:3:95:31:1410#0/1  
[IX¥Z^ZRXYTOUXWZ¥^RUXV¥^Y¥YY[W[X[]¥YZ]XW  
@HWI-EAS443:3:95:538:551#0/1  
GCGGGATTCTTCAAGGAAAGCCATAGCCTCTAGAACACAG  
+HWI-EAS443:3:95:538:551#0/1  
\_TZ^YO[a[^[\_UNFSZ\_]VQYa\_`[LJF^ULNZQNUZBB  
@HWI-EAS443:3:96:412:1382#0/1  
GGAATATTTGAGAATTCATGCCTTGAAACAATGGAAGTCG  
+HWI-EAS443:3:96:412:1382#0/1  
aa`¥]^¥¥]aaV^b¥aab[\_a^\_] ^YM^¥b` `b\_aa]VIU  
@HWI-EAS443:3:97:1073:330#0/1  
GAGCCTTCTTTTCATTGCCCCCTACTGGGAGCCCAGACTG  
+HWI-EAS443:3:97:1073:330#0/1  
aa¥^a`Pab` `X`\_X\_WSN^¥`¥¥[¥T¥¥^WUUXZXWW^  
@HWI-EAS443:3:97:1368:993#0/1  
TGGGTATGCACAAACAGACTGTGTTCTAGAGGCTATGGGT  
+HWI-EAS443:3:97:1368:993#0/1  
\_Z`aI` `aa^^a[^W^a`0\_bRa]^`^ZX`\_`\_ [BBBBBBB  
@HWI-EAS443:3:98:528:155#0/1  
TTCCCATCATCATCCAGACTCAGTGATGCTGTGCCATC  
+HWI-EAS443:3:98:528:155#0/1  
a\_YPG¥` [X¥S\_\_ [VS[[`^PY[ZU]\_ZUQQ]\_U[^VUUN  
@HWI-EAS443:3:98:822:1832#0/1  
GGGATAAAGAACAACATGATAAACAATGACCTTGGACCTG  
+HWI-EAS443:3:98:822:1832#0/1  
YT\_Y\_ZV¥R^a¥[RUOTZXaXXYQXYK\_WLWFDVYSaWH  
@HWI-EAS443:3:99:916:1199#0/1  
ATGGGCCCCGATTGATGCCAGGGTCGACTTCGAGTCTGGA

+HWI-EAS443:3:99:916:1199#0/1  
aaa[Q^a\_RXaUZW¥abbZbbabR`a`aa\_aXaX]bb]a  
@HWI-EAS443:3:100:1753:679#0/1  
TGTGGGTATGCACAAACAGACTGTGTTCTAGAGGCTATGG  
+HWI-EAS443:3:100:1753:679#0/1  
aaP^a]I^`[P\_a]a`¥aa]^aa¥SW`SZ¥BBBBBBBBBB  
@HWI-EAS443:3:100:585:1610#0/1  
TGGGCTATTAGTATCAGATGGAGGACCAAACCTTATACAAT  
+HWI-EAS443:3:100:585:1610#0/1  
a^bYa`b^ba`0\_aYab\_a`[[\_[[NS`\_\_[\_a`\_^\_^\_  
@HWI-EAS443:3:10:1423:1011#0/1  
TCGGTCTTGGGAGTCTCGATACTGAATCTTGGACAAAAGA  
+HWI-EAS443:3:10:1423:1011#0/1  
a`baTLaa`a`^^\_W\_X\_YGXY^[^X\_YOUPV]¥U^WZ  
@HWI-EAS443:3:10:280:1949#0/1  
CGCCATTTTGTGTTGAGAACATTATGGGTGCCATGCTCAGG  
+HWI-EAS443:3:10:280:1949#0/1  
ababbaaaaa`a\_bba]aaaa`\_\_\_\_NR[Ta`¥Y^VY\_\_¥  
@HWI-EAS443:3:10:429:498#0/1  
GATGATTGGAGCCCATCCCACCAGTATATTGTCTTGGTGA  
+HWI-EAS443:3:10:429:498#0/1  
`\_YRYZ]T¥][TFR^`\_YR\_S]¥NP`^\_[SJOYZYFYOQF  
@HWI-EAS443:3:10:470:713#0/1  
GCGGTCTTGGGAGTCTCGATACTGAATCTTGGACAAAAGA  
+HWI-EAS443:3:10:470:713#0/1  
a[ZWPZ]\_\_\_\_\_OTQRWU¥ZZ]OZ]ZWZOV^X]SPV]ZXZZ  
@HWI-EAS443:3:10:628:980#0/1  
ACCCCTTTGGCTTGTGTTGAGAATAGAACGATTCCTCTTG  
+HWI-EAS443:3:10:628:980#0/1  
abbbbaabaabaaXR^`baaY`[`¥aaZUX\_Z[\_`\_Z`  
@HWI-EAS443:3:10:817:1452#0/1  
CAAACACAGAGACTGGTGCACCCCAGCTCAACCCGATTGT  
+HWI-EAS443:3:10:817:1452#0/1  
`babbbbaaba]b]baaIbaab[[baa`\_abaaV¥a\_aZaN  
@HWI-EAS443:3:11:101:482#0/1  
CGTGGCTAATTTTAGCATGGAGCTACCCAGCTTTGGAGTG  
+HWI-EAS443:3:11:101:482#0/1  
a`aaaX\_aaaa`aaaa¥^a[\_\_\_\_`\_a`U\_\_]\_aa\_S`U\_  
@HWI-EAS443:3:11:756:18#0/1  
CACAGCATCACTGAGTCCTGGGATGATGATGGGCATGTTT  
+HWI-EAS443:3:11:756:18#0/1  
\_abbaaaaababb^a^aaabaa^aa\_aa\_a`\_\_`\_`a^\_\_  
@HWI-EAS443:3:11:925:1456#0/1  
CGGGCTCCAATCATCCGACGATTTTGCTCTCATAGTGAAT  
+HWI-EAS443:3:11:925:1456#0/1  
\_b`aa^`ZZ\_ba`^\_aabba\_\_^ba^Z`aaaa\_\_a`a  
@HWI-EAS443:3:12:1042:250#0/1  
GTTCCCTATTGTTCTTTGCGTGACCATCTTCTTGGTCATG  
+HWI-EAS443:3:12:1042:250#0/1  
`X`QQLY]aaa^URR]^WT]]aWMPQVG[OLPPYZBBBBB

@HWI-EAS443:3:12:1326:1129#0/1  
CGCCGTTGCAACTACACATTCCTGGATTCCCAAGAGGAAT  
+HWI-EAS443:3:12:1326:1129#0/1  
abbababaaababaaaaabaa`a]\_^`a\_[M]`a`\_\_`^  
@HWI-EAS443:3:12:1442:1584#0/1  
CTGCTGTGGTAATGCCAGCCCATGGTCCAGCCAAAAGCAT  
+HWI-EAS443:3:12:1442:1584#0/1  
\_bb^bbab[L[a`^K`aU^¥`[[`YZOV`R^a`a`\_\_aV  
@HWI-EAS443:3:12:1563:687#0/1  
AGCTGTGGTAATGCCAGCCCATGGTCCAGCCAAAAGCATG  
+HWI-EAS443:3:12:1563:687#0/1  
aaa\_a¥a`^a`\_\_`\_Z`\_\_`\_\_[^\_VU\_¥¥W¥^^\_]UU¥¥U  
@HWI-EAS443:3:12:300:216#0/1  
GACTTCCATTGTTTCAAGGCATGAATTCTCAAATATTCCT  
+HWI-EAS443:3:12:300:216#0/1  
a\_aab`\_abbbaa`a[\_aaaa`\_\_`\_a^a\_¥`¥a\_a[\_]\_`  
@HWI-EAS443:3:13:1019:1189#0/1  
ACCCGGATTGATGCCAGGGTCGACTTCGAGTCTGGACGGA  
+HWI-EAS443:3:13:1019:1189#0/1  
Z`Xbb`Ya`Z`¥KV`^aQ¥aaS`\_aa`a¥VX\_[¥\_a\_^  
@HWI-EAS443:3:13:1219:297#0/1  
GGTCCCCAGTGATTGTGAAAGAAATCTCTGTGTCTTGTGA  
+HWI-EAS443:3:13:1219:297#0/1  
aba`aaa]Z^b[a]`V`\_a`a[^`XZN`\_\_`WZ``¥YTIM  
@HWI-EAS443:3:13:1230:1652#0/1  
AGGAATATTTGAGAATTCATGCCTTGAAACAATGGAAGTC  
+HWI-EAS443:3:13:1230:1652#0/1  
\_`Ybba¥baabaaba`aaa`aaaaabbaaaa`\_\_`aabbap¥  
@HWI-EAS443:3:13:1397:1784#0/1  
GATCCCACCAGTATATTGTCTTGGTGTATTTCTTTTGTCC  
+HWI-EAS443:3:13:1397:1784#0/1  
`bab`[b[aabaYaUaab\_^abaa\_a`\_aaa\_bab\_a]\_^  
@HWI-EAS443:3:13:595:734#0/1  
CACTCCAATACTCATGTCAGCTGATTCAATTTACTCCAGAC  
+HWI-EAS443:3:13:595:734#0/1  
a]aaaa`aaa`\_\_aa]aaa`^`\_\_`\_\_`\_a^`^]\_\_[^`\_Z  
@HWI-EAS443:3:14:276:634#0/1  
TCCCGAGTGGTTCAGAAACATCCTGAGCATGGCACCCATA  
+HWI-EAS443:3:14:276:634#0/1  
`bbbbaaR`[X]XKZ^\_b`S[]\_P\_a`[a^[Z^a]aa[U\_  
@HWI-EAS443:3:14:289:256#0/1  
CAAGTGGGTATGCACAAACAGACTGTGTTCTAGAGGCTAA  
+HWI-EAS443:3:14:289:256#0/1  
a`[aXaaaWaaaa`\_\_`\_\_`\_a]`\_\_`aZ\_¥]]]\_Z]]^BBBB  
@HWI-EAS443:3:15:1277:1702#0/1  
GGCCTCTCTTATTTCAGTCTTTGTTTTTTCTTCCCTATTGT  
+HWI-EAS443:3:15:1277:1702#0/1  
aaaabababbabbaab`ababb\_aaaa`aaa\_\_aaaa\_  
@HWI-EAS443:3:15:1335:250#0/1  
AGGTGTGTTCTGTTTACTGTGTCCATGGTGTATCCTGTTC

+HWI-EAS443:3:15:1335:250#0/1  
L\_¥]\_`aabbba`^^a\_a`¥`ba`\_Za^abaaaa\_a[  
@HWI-EAS443:3:15:1529:931#0/1  
GGCCCTTCTTTTAACTTGCCTCTCTCTGCATCTTTGGTC  
+HWI-EAS443:3:15:1529:931#0/1  
``^a``\_bbbbba``a`VY`^aa`a^`a`[`aa`]X`  
@HWI-EAS443:3:15:1733:180#0/1  
CGTCCCCAGTGATTGTGAAAGAAATCTCTGTGTCTTGTGA  
+HWI-EAS443:3:15:1733:180#0/1  
T\_`aaaT^`aaI`a\_\_\_Qba¥X`baaa`b`[a]aa`Z^ZP  
@HWI-EAS443:3:15:1756:711#0/1  
ATTCAGTATCGAGACTCCCAAGACCGTACTTAGCATGTTA  
+HWI-EAS443:3:15:1756:711#0/1  
^ZZ`¥XZ^\_Q¥^YO\_`SGOWb¥RX^b`]EY¥]YJQ`Z\_¥Y  
@HWI-EAS443:3:16:1793:1007#0/1  
NTTCTGTTTACTGTGTCCATGGTGTATCCTGTTCCCTGTTC  
+HWI-EAS443:3:16:1793:1007#0/1  
DMVYVYYYYYYYYYXYVYXVXVYXVYXVWUYYYYYXVB  
@HWI-EAS443:3:16:255:68#0/1  
CGGCACCTATATGTGTATCTGTAGTCTTTGATGAACAATT  
+HWI-EAS443:3:16:255:68#0/1  
X\_VZ`aab¥a`aa]bV`a^VYX]S\_^^¥a]Y`¥VZ[XYX  
@HWI-EAS443:3:16:930:74#0/1  
AGCGCTGGAATTTTTAGGAAAAGTAGAGTCGGATTGACAT  
+HWI-EAS443:3:16:930:74#0/1  
abbbbaabab`a]]b`Vba\_]TI^Z`b\_aX`\_YV\_WYXRPX  
@HWI-EAS443:3:16:977:333#0/1  
CCCCCAGTGATTGTGAAAGAAATCTCTGTGTCTTGTGAAT  
+HWI-EAS443:3:16:977:333#0/1  
aa`aabb\_a\_aaa\_a`aa`\_Y]\_a^b`\_`]\_a^\_\_YXZ`  
@HWI-EAS443:3:16:983:1005#0/1  
GCTTTTCTAAAAATCCAGCGCAAATGCCATAAGCACC  
+HWI-EAS443:3:16:983:1005#0/1  
aaZ]`Z`a^ba\_PO]¥^Z`U`aY[\_V]\_^U]Zaa[^Za^¥  
@HWI-EAS443:3:17:1049:1824#0/1  
AGTCCCCAGTGATTGTGAAAGAAATCTCTGTGTCTTGTGA  
+HWI-EAS443:3:17:1049:1824#0/1  
aaW\_aaaaX^a`\_\_\_X\_^`a\_\_^^]]\_^\_\_X]W]X\_XZV]  
@HWI-EAS443:3:17:1605:173#0/1  
GCCGGATTGATGCCAGGGTCGACTTCGAGTCTGGACGGAT  
+HWI-EAS443:3:17:1605:173#0/1  
G[\_¥W\_¥`bb¥WZ¥bba\_0\_[V\_[VZ`bYH[\_][WQWO  
@HWI-EAS443:3:17:1792:609#0/1  
NATCCCCTGAATCCCTTTGTGAGTCATAAAGAGATTGATT  
+HWI-EAS443:3:17:1792:609#0/1  
DMZYWYZWZZZYXVZZXZZZXZZXZZZZZZZZZZZZXZ  
@HWI-EAS443:3:17:1793:810#0/1  
NACGGATCAAGAAAGAAGAGTTCTCTGAGATCATGAAGAT  
+HWI-EAS443:3:17:1793:810#0/1  
DOWXWZZZZZZXZZZZZXZZZXZZZZZZZZZZZZXZZZ

@HWI-EAS443:3:17:991:1924#0/1  
AGGTCCTCCATCTGATACTAATAGCCCTACCTTTGATTGG  
+HWI-EAS443:3:17:991:1924#0/1  
aba[]`aabbaba`\_a`aa\_YaY[Q^^a^[\_^\_a]Y[^  
@HWI-EAS443:3:18:283:1048#0/1  
ATTCAGTATCGAGACTCCCAAGACCGTACTTAGCATGTTA  
+HWI-EAS443:3:18:283:1048#0/1  
^\_a[\_^`\_X`\_a\_a^`ab[P]\_\_a^W\_HY]`XX`S]W¥\_  
@HWI-EAS443:3:19:572:680#0/1  
GGGTGCTTATGGCATTGCGCTGGAATTTTTAGGAAAAG  
+HWI-EAS443:3:19:572:680#0/1  
ab]¥aa`[\_a`TPDX]XR]PXX¥X`\_a¥`\_a^`a^]\_^`  
@HWI-EAS443:3:1:118:671#0/1  
CATTCATATGAGAGCAAAATCGTCGGATGATTGGAGCCG  
+HWI-EAS443:3:1:118:671#0/1  
a`QP]```[\_`¥Z^aV`V0]WTPT\_[[Y\_Z]^^BBBBBBB  
@HWI-EAS443:3:1:510:926#0/1  
ATACACATATAGGTGCCATAGGGGAGACACACAAATCAA  
+HWI-EAS443:3:1:510:926#0/1  
aa\_Wba^^aba`Pb\_\_\_\_`aa\_aa\_aXQ\_\_^¥`a\_\_\_\_]BB  
@HWI-EAS443:3:1:696:726#0/1  
GGTGGTCTTATGGCATTGCGCTGGAATTTTTAGGAAA  
+HWI-EAS443:3:1:696:726#0/1  
aaPZVTa\_a\_a`a]V`\_a`\_T\_X]`[^`]\_^a]aBBB  
@HWI-EAS443:3:20:197:784#0/1  
AAACAAAGACTGAATAAGAGAGGCTATCTAATAAGAGCAA  
+HWI-EAS443:3:20:197:784#0/1  
a\_baa]\_a`aa^a`^a\_a^¥a`a[GLG[YS]ZGRUGWH  
@HWI-EAS443:3:20:298:461#0/1  
CGTGGGTATGCACAAACAGACTGTGTTCTAGAGGCTATGG  
+HWI-EAS443:3:20:298:461#0/1  
a`JO]a¥a\_aaXY^[aX¥\_[V[`X¥[W^P[\_BBBBBBBBB  
@HWI-EAS443:3:20:72:1629#0/1  
AAAAATCCAGCGCAAATGCCATAAGCACCATTCN  
+HWI-EAS443:3:20:72:1629#0/1  
a[]`V]¥`a`\_a¥a\_\_\_\_\_[^ZT\_```^a¥\_\_ZW]]MD  
@HWI-EAS443:3:21:1121:1466#0/1  
ACCCAGTGATTGTGAAAGAAATCTCTGTGTCTTGTGAAT  
+HWI-EAS443:3:21:1121:1466#0/1  
\_ab]¥W`RaaaabYa]a\_[¥K]aT`[¥X¥^¥`\_`ZVX[WSW  
@HWI-EAS443:3:21:1354:605#0/1  
GTGGTCTCCATCTGATACTAATAGCCCTACCTTTGATTG  
+HWI-EAS443:3:21:1354:605#0/1  
aU[aPV]^`X]TX[Z[Y]N]]X]VVLSQZVYNZ\_`\_QLU]  
@HWI-EAS443:3:21:1651:279#0/1  
TAGGAGCATTGCGAAAAGCTTGAACAGTCTGGGCTCCCG  
+HWI-EAS443:3:21:1651:279#0/1  
a`a^]]aab\_^]¥]^^^¥UUYOZSWYBBBBBBBBBBBBB  
@HWI-EAS443:3:21:1793:692#0/1  
NTGGTATTTGTGTTCGAATCTTCATTCTTTACTCTCGAA

+HWI-EAS443:3:21:1793:692#0/1  
DM[[Y[YXPUYZVWLWYXPXW[[XTSZY[[WWW[SVUZ[  
@HWI-EAS443:3:21:690:1858#0/1  
AGACAACATGACCAAGAAGATGGTCACGCAAAGAACAATG  
+HWI-EAS443:3:21:690:1858#0/1  
a^¥baa\_S]U]b`WPV\_\_`\_]U[N^`\_]W`^]X^Z¥]Z^V  
@HWI-EAS443:3:21:817:1692#0/1  
AGACAACATGACCAAGAAGATGGTCACGCAAAGAACAATT  
+HWI-EAS443:3:21:817:1692#0/1  
a¥aaaaaa]Zaaa`a`\_`[]]XW`aZ\_]\_]\_^\_^^\_^^]  
@HWI-EAS443:3:21:962:792#0/1  
GTGGTCTCCATCTGATACTAATAGCCCTACCTTTGATTG  
+HWI-EAS443:3:21:962:792#0/1  
`\_]QT\_[a]\_aaa]\_WaWOa\_a`ZPX[RYXUQY^\_YQ[^\_  
@HWI-EAS443:3:22:1792:1369#0/1  
NAGTGATTGTGAAAGAAATCTCTGTGTCTTGTGAATTAGT  
+HWI-EAS443:3:22:1792:1369#0/1  
DMXMWYXXWVWVYVYTYUXXX[ZXVXXWSPWXXXRFF  
@HWI-EAS443:3:22:326:604#0/1  
CGTGGCTAATTTTAGCATGGAGCTACCCAGCTTTGGAGTG  
+HWI-EAS443:3:22:326:604#0/1  
ab\_aaa`baabaaaaa\_Y¥]]aa]\_a``aa`aa`\_a]a  
@HWI-EAS443:3:22:409:826#0/1  
CGTGGTGCTTATGGCATTGCGCTGGAATTTTAGGAAA  
+HWI-EAS443:3:22:409:826#0/1  
ab`\_a]aaaa\_aa]\_`aa`aaaa\_aaaa`````\_`a^``  
@HWI-EAS443:3:22:492:619#0/1  
GAATCTGTCCACTCCTGCTTGTATTCCCTCATGGTTTGGG  
+HWI-EAS443:3:22:492:619#0/1  
^TRO\_QHV]]`ZMQYV^T]X[\_Y¥VRVSXPP¥\_RR\_ZRQ  
@HWI-EAS443:3:23:1493:419#0/1  
TGGATGGGCTCCAATCATCCGACGATTTTGCTCTCATAGT  
+HWI-EAS443:3:23:1493:419#0/1  
aba\_^``abaaaaba]¥WWaa\_aZ\_\_`\_W¥\_]\_W``\_ZX  
@HWI-EAS443:3:23:264:278#0/1  
CGGTGTCTAGGGCCCGATTGATGCCAGGGTCGACTTCGA  
+HWI-EAS443:3:23:264:278#0/1  
I\_\_RRV[Xaaaa`Xa\_Za``b[¥S\_\_a¥`R¥U0]¥¥a`Z  
@HWI-EAS443:3:23:302:633#0/1  
CGTCTGGCGACCTTGAGTTAGTTTATCTACCCTTGTGT  
+HWI-EAS443:3:23:302:633#0/1  
abaaaaabbaaaaaaaa`aaa\_aaa`\_aaa]`\_aa^`a¥]  
@HWI-EAS443:3:23:784:262#0/1  
CTGTATCTGTAGTCTTTGATGAACAATTGAAGAGCCATCT  
+HWI-EAS443:3:23:784:262#0/1  
GZ` [bbbbbbbbb\_bbbbaa`bb`bbbbbbabbb[bbbaa  
@HWI-EAS443:3:24:637:178#0/1  
GGGGCTCCAATCATCCGACGATTTTGCTCTCATAGTGAAT  
+HWI-EAS443:3:24:637:178#0/1  
a^aa`]a^Q^Z^]\_V\_a]\_\_Z\_]^[RTV[¥^]W¥¥TUT^Y



@HWI-EAS443:3:24:935:1799#0/1  
TTGGGTGCCATGCTCAGGATGTTTCTGAACCACTCGGGTT  
+HWI-EAS443:3:24:935:1799#0/1  
abaaa^abaaabbaaa`a]\_\_\_`]a`\_`a]Za\_\_\_^`\_XZ  
@HWI-EAS443:3:25:1110:1188#0/1  
GAGTAAACAGAACACACCAATACTCAGAAAAGGGAAAGTG  
+HWI-EAS443:3:25:1110:1188#0/1  
H^UY`\_\_a`¥`¥W¥`baabbbbaaZ]a`bb¥X\_bYbbR`  
@HWI-EAS443:3:25:1413:1132#0/1  
CTTCGAGTCTGGACGGATCAAGAAAGAAGAGTTCTCTGAN  
+HWI-EAS443:3:25:1413:1132#0/1  
G]bbbabbbbbbabbab\_\_bbabababbbbaabab]D  
@HWI-EAS443:3:25:1510:888#0/1  
ACCCCTTTGGCTTGTGTTGAGAATAGAACGATTCCTCTTG  
+HWI-EAS443:3:25:1510:888#0/1  
aaaaa`aaabaaaa[a\_a¥W`\_]`\_\_`]U¥]]ZW^V^^\_  
@HWI-EAS443:3:25:1520:1118#0/1  
AGTCCCCAGTGATTGTGAAAGAAATCTCTGTGTCTTGTGA  
+HWI-EAS443:3:25:1520:1118#0/1  
aba^aabb`b`bbb`baaaa`a^a]a\_aa`a^^ab^^` [  
@HWI-EAS443:3:25:338:29#0/1  
AGCAGGTCCAAGGTCATTGTTTATCATGTTGTTCTTTATC  
+HWI-EAS443:3:25:338:29#0/1  
aaa`ba`aa`aaaZaaaa\_a`\_\_`\_`a]^\_\_\_\_`^\_\_^  
@HWI-EAS443:3:25:493:630#0/1  
ATTCAGTATCGAGACTCCAAGACCGTACTTAGCATGTTA  
+HWI-EAS443:3:25:493:630#0/1  
abbb`babababbaab`baa¥aaa\_\_\_a^`\_`a\_aaa^\_a  
@HWI-EAS443:3:26:1118:377#0/1  
CGTTCAACAACAAGGGTAGATAAACTAACTCAAGGTCGC  
+HWI-EAS443:3:26:1118:377#0/1  
`babX^a`aab``aab\_aa^aaa\_aaa^][aaaa]W`\_  
@HWI-EAS443:3:26:1470:612#0/1  
CGTGGCTAATTTTAGCATGGAGCTACCCAGCTTTGGAGTG  
+HWI-EAS443:3:26:1470:612#0/1  
aba`¥bbba`bbaaaa`aba]`P`a[^`\_`a\_a`^^Ya]]  
@HWI-EAS443:3:26:1695:297#0/1  
AGGAAATAGAGATAACAACCCACTTTCAAAGAAAAAGGAA  
+HWI-EAS443:3:26:1695:297#0/1  
Z\_aVaaaaa`]^V\_aa`R¥^`aaaaUS]\_a\_\_aZY]`a[  
@HWI-EAS443:3:26:265:1741#0/1  
GGTGTCTGGAGTAAATGAATCAGCTGACATGAGTATTGGA  
+HWI-EAS443:3:26:265:1741#0/1  
O]a`K`ba\_aa`\_`bbbab\_ab¥babbbbbb`aa\_bba`a`  
@HWI-EAS443:3:27:1188:643#0/1  
CCCACCCAGGAATATTTGAGAATTCATGCCTTGAAACAAG  
+HWI-EAS443:3:27:1188:643#0/1  
aaaba`\_`abaaa\_baa\_ba`aa`a`a`WN`abaa¥[]a^  
@HWI-EAS443:3:27:1243:1658#0/1  
CGGGCTGGCATTACCACAGCATTGTTTACAGAATCAATCT

+HWI-EAS443:3:27:1243:1658#0/1  
ab`a`bbbbbbbabaa^babbbbaababbaba``aaaa  
@HWI-EAS443:3:27:1256:475#0/1  
TCTCCATCTGATACTAATAGCCCTACCTTTGATTGGGTTT  
+HWI-EAS443:3:27:1256:475#0/1  
aaabaaa`aba`a`aaaaa]YZ`a]``\_a¥Va`¥a\_] ]^  
@HWI-EAS443:3:27:1602:1717#0/1  
CACAGCATCACTGAGTCCTGGGATGATGATGGGCATGTTT  
+HWI-EAS443:3:27:1602:1717#0/1  
S]b`bbbbbababab`\_Ubbaaaab\_a\_ab^\_aabb\_a\_  
@HWI-EAS443:3:27:1699:1352#0/1  
GAGACAACATGACCAAGAAGATGGTCACGCAAAGAACAAA  
+HWI-EAS443:3:27:1699:1352#0/1  
a`^aabb`a`aa]^`aa`\_a`Z`\_]Za¥`[\_^^]¥]]^]  
@HWI-EAS443:3:27:528:445#0/1  
CAGGAACAGGATACACCATGGACACAGTAAACAGAACACC  
+HWI-EAS443:3:27:528:445#0/1  
a``\_bbbbbabbb`a`babbaaabab^babaa``b^baa  
@HWI-EAS443:3:28:1314:372#0/1  
GGGAGGACCAAACCTTATACAATATACGGAATCTTCACATT  
+HWI-EAS443:3:28:1314:372#0/1  
SabXb]ZI^aaaa`ab`aabbaaaaa]aaX`\_]a\_ab]  
@HWI-EAS443:3:28:1565:1384#0/1  
TGTGCATTCACTATGAGAGCAAAATCGTCGGATGATTGGA  
+HWI-EAS443:3:28:1565:1384#0/1  
Y^R^\_b\_Z¥[baaa¥^a`[\_`a¥a^¥`]Y\_a`]a\_`]V¥^  
@HWI-EAS443:3:29:1020:1800#0/1  
CGCCAGGGTCGACTTCGAGTCTGGACGGATCAAGAAAGAA  
+HWI-EAS443:3:29:1020:1800#0/1  
a^b`\_XXYJ^^`\_\_Z`[S`P¥[ZVWP``^R^\_a¥^¥\_¥¥B  
@HWI-EAS443:3:29:285:318#0/1  
CGGTGGGATTCTTCAAGGAAAGCCATAGCCTCTAGAACAC  
+HWI-EAS443:3:29:285:318#0/1  
abZFabb][aa`aa`\_]V`[a^ZU¥V¥\_\_`^`^]U[^B  
@HWI-EAS443:3:29:567:951#0/1  
CGCCAGTTTGGCCTTCTTTTCATTGCCCCCTACTGGGAGC  
+HWI-EAS443:3:29:567:951#0/1  
a`a`[\_`a```a`aa`````aa][```X``]¥`^¥[¥¥ZX  
@HWI-EAS443:3:29:708:726#0/1  
CGGTCCCTCCATCTGATACTAATAGCCCTACCTTTGATTGG  
+HWI-EAS443:3:29:708:726#0/1  
aa`¥aa`b`]a\_\_a]`aaaa`\_ba¥a]a`\_a\_a`a\_\_a\_  
@HWI-EAS443:3:29:780:1397#0/1  
CGGGTGCCATGCTCAGGATGTTTCTGAACCACTCGGGTTG  
+HWI-EAS443:3:29:780:1397#0/1  
ab\_WYR\_\_I]ab`YaaWPZ`^aX]]a]TZUQZX`]\_\_SY]  
@HWI-EAS443:3:29:885:80#0/1  
CACAGCATCACTGAGTCCTGGGATGATGATGGGCATGTTT  
+HWI-EAS443:3:29:885:80#0/1  
`ba`abbaabbab\_b\_a[bb`a`^bQaa`\_a\_]\_\_¥aZZ\_

@HWI-EAS443:3:2:234:361#0/1  
CAGTGATTGTGAAAGAAATCTCTGTGTCTTGTGAATTAGC  
+HWI-EAS443:3:2:234:361#0/1  
`ba\_b`¥`b`b^\_]a^aaa`a``a\_Y\_\_a\_^¥^\_\_a\_LTO  
@HWI-EAS443:3:2:391:462#0/1  
AGGTGCTTATGGCATTGCGCTGGAATTTTTAGGAAAAG  
+HWI-EAS443:3:2:391:462#0/1  
aba]aaa`a\_aaa\_aa\_aa`b\_aaa``aaa``\_a\_]\_\_]a  
@HWI-EAS443:3:31:1524:872#0/1  
GTCCAATCATCCGACGATTTTGTCTCATAGTGAATGCAC  
+HWI-EAS443:3:31:1524:872#0/1  
H\_ab`KYa`¥VR[`]ab¥bbb¥`babbabb`YaUb`aR`X  
@HWI-EAS443:3:31:1540:968#0/1  
CACAGCATCACTGAGTCCTGGGATGATGATGGGCATGTTT  
+HWI-EAS443:3:31:1540:968#0/1  
YY`\_Ybaabb`bb`]`bbbbba]b`^a\_baH`ab[a^aa  
@HWI-EAS443:3:31:169:1784#0/1  
AAGCAGGAGTGGACAGATTCTACAGGACCTGCAAGTTAGG  
+HWI-EAS443:3:31:169:1784#0/1  
\_W]aaZ[¥ZT^^`^VV[TX\_UN]BBBBBBBBBBBBBBBB  
@HWI-EAS443:3:31:718:1307#0/1  
ATCAGCTGACATGAGTATTGGAGTAACAGTGATAAAGAAA  
+HWI-EAS443:3:31:718:1307#0/1  
X[`a^ba]^¥W^^W```¥V¥¥`a¥baVZSUU`a\_^YQaVF  
@HWI-EAS443:3:32:1014:1558#0/1  
ACCAGTTTGGCCTTCTTTTCATTGCCCTACTGGGAGCC  
+HWI-EAS443:3:32:1014:1558#0/1  
Z\_\_IU]aV¥^[Xa^[^^`¥^\_aa^PN]a\_\_VOZUUSXU¥  
@HWI-EAS443:3:32:200:674#0/1  
GGCCCTTCTTTTAACTTGCCTCTCTCTGCATCTTTGGTC  
+HWI-EAS443:3:32:200:674#0/1  
V\_bbbabbbb]^\_V^baYaabbbbV^Ra^[[```b^RYa  
@HWI-EAS443:3:32:702:1661#0/1  
ATACACATATAGGTGCCATAGGGGAGACACACAAATTCAA  
+HWI-EAS443:3:32:702:1661#0/1  
a^`aaa^aa[OYTL^^[`V]¥aXY^`\_`]\_\_^VU[TQ^¥[  
@HWI-EAS443:3:32:900:2023#0/1  
CGGTGCTTATGGCATTGCGCTGGAATTTTTAGGAAAAG  
+HWI-EAS443:3:32:900:2023#0/1  
[aYHaaa`b^abbbaa`]aaa`Y`^a^¥a\_aaaa`^S¥aa  
@HWI-EAS443:3:33:1147:278#0/1  
ATTCCATGCTTTTGGCTGGACCATGGGCTGGCATTACCAT  
+HWI-EAS443:3:33:1147:278#0/1  
aa`a`ba`aaaa``^`[ZRRW\_\_a[Q]V[LGJUX¥VVYF  
@HWI-EAS443:3:33:23:1985#0/1  
TCCCAGCTTTGGAGTGTCTGGAGTAAATGAATCAGCTGAC  
+HWI-EAS443:3:33:23:1985#0/1  
U`a\_LZ`^`a`\_[aX]\_`a]Y[]V¥\_a\_\_¥^ZO\_] [V[Y  
@HWI-EAS443:3:33:811:985#0/1  
GTGGGCTCCAATCATCCGACGATTTTGTCTCATAGTGAA

+HWI-EAS443:3:33:811:985#0/1  
[KFL¥XNW]`aSZa\_¥a`[¥YGL[]WLN]]MRSYSUTT]V  
@HWI-EAS443:3:34:1039:1785#0/1  
GTAAGAGACAACATGACCAAGAAGATGGTCACGCAAAGAC  
+HWI-EAS443:3:34:1039:1785#0/1  
^`aa¥`\_abbb`aV¥a^ba^a^`[aa``[[`V¥[¥```^I  
@HWI-EAS443:3:34:1346:987#0/1  
NGAATATGATGCCGTTGCAACTACACATTCCTGGATTCCC  
+HWI-EAS443:3:34:1346:987#0/1  
DKZZVWVWXZZZZZXYYZZXZZZZZZWXZZXRZVZVX  
@HWI-EAS443:3:34:1356:537#0/1  
GACTTCCATTGTTTCAAGGCATGAATTCTCAAATATTCCT  
+HWI-EAS443:3:34:1356:537#0/1  
aaabbbbbb`aabbbaaaaaa\_\_a`aaaa^``\_`^]X`  
@HWI-EAS443:3:34:400:1275#0/1  
CTCCCTCATGGTTTGGTGCATTCACTATGAGAGCAAAATC  
+HWI-EAS443:3:34:400:1275#0/1  
aaabbabbaa\_\_a\_Y]¥`bbaaaaabaaa`a^Pa\_aaa`\_  
@HWI-EAS443:3:34:609:1878#0/1  
GCCCTATTGTTCTTTGCGTGACCATCTTCTTGGTCATGTT  
+HWI-EAS443:3:34:609:1878#0/1  
abbb]aaa`]abbaaaa\_]aabaaa\_aabaaa\_[]`\_```  
@HWI-EAS443:3:34:934:112#0/1  
GGTGTGTCTCCCCTATGGCACCTATATGTGTATCTGTAGT  
+HWI-EAS443:3:34:934:112#0/1  
aaTaYa\_a¥TW]0¥XRT\_P\_\_a¥UYQBBBBBBBBBBBBBB  
@HWI-EAS443:3:35:1169:1490#0/1  
TTRACTCCAGACTCCAAAGCTGGGTAGCTCCATGCTAAC  
+HWI-EAS443:3:35:1169:1490#0/1  
`^^`\_\_]¥a^]Z]]\_ZXY[M]ZZW]N]Y¥X\_[RUS[T]VG  
@HWI-EAS443:3:35:761:998#0/1  
GTCCTCCATCTGATACTAATAGCCCTACCTTTGATTGGGC  
+HWI-EAS443:3:35:761:998#0/1  
a]abaaa)`aa`\_aaaaba`\_a\_a\_]`aa``a[\_\_¥¥`V  
@HWI-EAS443:3:35:847:541#0/1  
CGCCTCTCTGTCATCTTTGGTCATCGTATTTAATGTCAG  
+HWI-EAS443:3:35:847:541#0/1  
``baa\_``[`Z]¥]W\_]\_\_YZ]URYZ\_PW```Y¥WFK]OS  
@HWI-EAS443:3:36:1023:140#0/1  
CGGCTCCAATCATCCGACGATTTTGTCTCATAGTGAATG  
+HWI-EAS443:3:36:1023:140#0/1  
abbbabaS\_aba`\_baabb`abbbbaa¥b\_¥^]`NVO¥a`  
@HWI-EAS443:3:36:1412:1338#0/1  
AACGGTCTTGGGAGTCTCGATACTGAATCTTGGACAAAAG  
+HWI-EAS443:3:36:1412:1338#0/1  
aabab\_bba^a\_aaX```b`\_```aaaa`aaYZ^\_YMYZ¥  
@HWI-EAS443:3:36:168:1479#0/1  
TGCCTCTTATTTCAGTCTTTGTTTTTCTTCCCTATTGT  
+HWI-EAS443:3:36:168:1479#0/1  
aababbbab^Z\_aaaa^aaaa\_`aaa`aa``aa]a^]MS

@HWI-EAS443:3:36:671:1561#0/1  
TCGGCCCAGATGGCTCTTCAATTGTTTCATCAAAGACTACA  
+HWI-EAS443:3:36:671:1561#0/1  
[ba`bbaS¥` [ZT`] ^`baaaaZ¥Z¥aa^^JY^YXSX^]X  
@HWI-EAS443:3:36:981:176#0/1  
TGGGTCGACTTCGAGTCTGGACGGATCAAGAAAGAAGAGT  
+HWI-EAS443:3:36:981:176#0/1  
`ZaU]aU^TaUaa`QNXa\_`^\_[YQ[Z\_ZP¥^U]]VU¥S  
@HWI-EAS443:3:37:1199:899#0/1  
CGCTAATTTTAGCATGGAGCTACCCAGCTTTGGAGTGTCT  
+HWI-EAS443:3:37:1199:899#0/1  
G[ba^`¥b]^¥`bb`bb\_b`T^`aba\_\_0[¥aYa\_T¥^b  
@HWI-EAS443:3:37:1218:1895#0/1  
GCCTCTTTGTTTCATTGATTCCATTACATCCTTTAAGAAAT  
+HWI-EAS443:3:37:1218:1895#0/1  
ab^a]Xa^`a[\_][X]LYa`X[aaa\_^]FT[Y`\_\_\_]W^P  
@HWI-EAS443:3:37:729:1500#0/1  
TGGGCTATTAGTATCAGATGGAGGACCAAACCTTATACAAT  
+HWI-EAS443:3:37:729:1500#0/1  
`aaa`aa[^]¥]¥¥aa^a]a`[¥\_a\_¥HLaa^^¥Y`¥]Y  
@HWI-EAS443:3:39:1351:699#0/1  
GTTCCCTATTGTTCTTTGCGTGACCATCTTCTTGGTCATG  
+HWI-EAS443:3:39:1351:699#0/1  
aa`¥a`¥Z[Z`W[L¥Y`THTOaRLW¥]QVNOWTB BBBB  
@HWI-EAS443:3:39:600:1512#0/1  
GTCCCTTTGTCAGTCATAAAGAGATTGATTCTGTAAACAA  
+HWI-EAS443:3:39:600:1512#0/1  
[`bbba`\_]b\_`[]K\_aab\_baa\_\_`aaaa]^`a\_a\_  
@HWI-EAS443:3:39:793:508#0/1  
CGTGGTAATGCCAGCCCATGGTCCAGCCAAAAGCATGGAA  
+HWI-EAS443:3:39:793:508#0/1  
ababa\_a^baab\_]\_baaaaa\_`^^a¥aa¥`[[Zaa`\_¥¥  
@HWI-EAS443:3:3:1039:423#0/1  
TGGGCTATCGCAACACCTGGGATGCAGATTAGAGGTTTCG  
+HWI-EAS443:3:3:1039:423#0/1  
a^abbaaa``aaa^\_W^abaa`]aU`a\_`]`a`\_\_]\_^^`  
@HWI-EAS443:3:3:1551:1966#0/1  
ACCCTATTGTTCTTTGCGTGACCATCTTCTTGGTCATGTT  
+HWI-EAS443:3:3:1551:1966#0/1  
]a\_]X^b\_] [\_Y\_a`a¥^aa^R[a^P[a^a\_\_`UOS\_`^\_  
@HWI-EAS443:3:3:1587:1194#0/1  
GAATCTGTCCACTCCTGCTTGTATTCCCTCATGGTTTGGC  
+HWI-EAS443:3:3:1587:1194#0/1  
aabbabbbabbababababbbbaabaaaa¥`bbbXb`aa\_  
@HWI-EAS443:3:3:587:1231#0/1  
GGGTCCATCAATCGGGTTGAGCTGGGGTGCACCAGTCTCT  
+HWI-EAS443:3:3:587:1231#0/1  
a]a¥babaabbaZbbb`aaaaaaYaX¥a¥a^\_aa]Qa¥a  
@HWI-EAS443:3:3:889:2047#0/1  
NTTCGATCTAAAGACTTCTATGGTGTGGCCAATGCAGTT

+HWI-EAS443:3:3:889:2047#0/1  
DMSRPLKKVYULTVVUVXYGVVPXYVVYVNFJQVVB BBBB  
@HWI-EAS443:3:3:996:1022#0/1  
AAGATGCAGAGAGAGGCAAGTTAAAAAGAAGGGCTATCGA  
+HWI-EAS443:3:3:996:1022#0/1  
XW\_`aaZ¥^WX¥`XT\_`^V]ZY\_X]b]Z\_]VG\_aTHPG  
@HWI-EAS443:3:40:872:1187#0/1  
TTGGGTGCCATGCTCAGGATGTTTCTGAACCACTCGGGTT  
+HWI-EAS443:3:40:872:1187#0/1  
SX`b^G\_b`babaV``bababb\_ab^`\_aab`W`a`aX`  
@HWI-EAS443:3:42:1162:1783#0/1  
CAGGGGCAATGAAAAGAAGGCCAAACTGGCAAATGTTGT  
+HWI-EAS443:3:42:1162:1783#0/1  
]Z¥\_`¥Y\_bababaa`abaaabaa`aa``^``aaa\_aa`  
@HWI-EAS443:3:42:1493:327#0/1  
GCCTCCATCTGATACTAATAGCCCTACCTTTGATTGGGTT  
+HWI-EAS443:3:42:1493:327#0/1  
Z\_b¥a¥baa]Zaaaaba\_baaaa\_¥PU\_\_Y¥aa`\_`^\_QZ  
@HWI-EAS443:3:43:1080:549#0/1  
ATTCAGTATCGAGACTCCCAAGACCGTACTTAGCATGTTA  
+HWI-EAS443:3:43:1080:549#0/1  
]Z¥a\_]babba`bba\_^\_ababa\_baa`\_]a]\_aaa\_aa  
@HWI-EAS443:3:43:1375:1827#0/1  
GGGTGGGATTCTTCAAGGAAAGCCATAGCCTCTAGAACAG  
+HWI-EAS443:3:43:1375:1827#0/1  
abaHbbaaY\_V[a]a\_b\_[^Uaa[aa\_TVZ`N[\_a\_]\_G  
@HWI-EAS443:3:43:1719:147#0/1  
ACTCCTTTTTCTTTGAAAGTGGGTTGTTATCTCTATTCC  
+HWI-EAS443:3:43:1719:147#0/1  
¥^b`bbbba```b`baaa`Nabb\_b```^`[``a`aaaZV  
@HWI-EAS443:3:43:353:1808#0/1  
GATGGTTTGGTGCATTCACTATGAGAGCAAAATCGTCGGA  
+HWI-EAS443:3:43:353:1808#0/1  
J\_aa^abbaVUaaaa`baba^[a`[a^bVba\_PVT\_^]  
@HWI-EAS443:3:43:773:1880#0/1  
AGCTGATTCATTTACTCCAGACACTCCAAAGCTGGGTAGG  
+HWI-EAS443:3:43:773:1880#0/1  
\_WR`WY`¥\_]`^^XTRYWP¥Y LX\_W\_]`YUN¥YZSTYG  
@HWI-EAS443:3:44:1405:657#0/1  
TGGCCTTATTTCTCAATTTCTTCTTTGTTGATTCATTG  
+HWI-EAS443:3:44:1405:657#0/1  
`bbb^ba^aaaaaa\_Zabaa]aaaaaaa`a\_aaa\_a`¥  
@HWI-EAS443:3:44:156:595#0/1  
CGCACTGACATTAATACGATGACCAAAGATGCAGAGAGA  
+HWI-EAS443:3:44:156:595#0/1  
aabbabbabbbbbbbbbbaaaaaa^`a`a``baaaa`  
@HWI-EAS443:3:44:487:612#0/1  
CGGTCTCCATCTGATACTAATAGCCCTACCTTTGATTGG  
+HWI-EAS443:3:44:487:612#0/1  
aba[]Tabbbbab]abaabaaaaaaabbaZaaba\_\_]^

@HWI-EAS443:3:44:518:1188#0/1  
GGGTGGGATGGGCTCCAATCATCCGACGATTTTGCTCTCA  
+HWI-EAS443:3:44:518:1188#0/1  
abaWbbb`ababaaaaaa\_aa^aaa\_ba`a^aaa\_\_`a`  
@HWI-EAS443:3:44:90:704#0/1  
CCCCCTTTGGCTTGTGTTGAGAATAGAACGATTCCTCTTG  
+HWI-EAS443:3:44:90:704#0/1  
a`ab]aba`aba[`b\_aa]\_[a`aa`^YaZV¥[U[^\_^\_  
@HWI-EAS443:3:45:1527:318#0/1  
GGCCCTTCTTTTTAACTTGCCTCTCTGCATCTTTGGTC  
+HWI-EAS443:3:45:1527:318#0/1  
abaabaa\_abbbaaabba\_aaabaa\_ab``a`aaaba^\_  
@HWI-EAS443:3:46:1353:1001#0/1  
ATTCAGTATCGAGACTCCCAAGACCGTACTTAGCATGTTA  
+HWI-EAS443:3:46:1353:1001#0/1  
abbaababaa``a`Vaa\_`]`\_`a]aY`^\_]`^[\_`\_]`\_  
@HWI-EAS443:3:46:1383:1950#0/1  
TGCCCTTCTTTTTAACTTGCCTCTCTGCATCTTTGGTC  
+HWI-EAS443:3:46:1383:1950#0/1  
I\_XZZa¥^^Z^`¥a`^bbb¥]V`a\_U\_a``Vaab`Zab\_]`  
@HWI-EAS443:3:46:628:1790#0/1  
GACTTCCATTGTTTCAAGGCATGAATTCTCAAATATTCCT  
+HWI-EAS443:3:46:628:1790#0/1  
a`aaa¥]aa\_`\_^`Ya\_a]`\_\_\_\_`L^a]aZ\_\_a``a^^I\_  
@HWI-EAS443:3:46:685:1661#0/1  
ACCAGGTGTTGCGATAGCCCTTCTTTTTAACTTGCCTCTC  
+HWI-EAS443:3:46:685:1661#0/1  
a`babaU`\_ba\_a¥^aa\_\_aY\_\_\_a\_aaZ\_RaaY^¥¥]\_Y  
@HWI-EAS443:3:47:1688:574#0/1  
CAGCTCTCTTATTAGTCTTTGTTTTTCTCCCTATTG  
+HWI-EAS443:3:47:1688:574#0/1  
`bbaabbbbbbabbbabababbbbabbbbaaaa\_aabb^  
@HWI-EAS443:3:47:216:535#0/1  
TTGGGTGCCATGCTCAGGATGTTTCTGAACCACTCGGGTT  
+HWI-EAS443:3:47:216:535#0/1  
a]VVWLWO¥^^`XYWU¥\_Q^\_X[]^`\_`XYZYZXZVVVWYZ  
@HWI-EAS443:3:47:490:675#0/1  
GTTTCATATAGGAGACCGTTGGAATTTCTAGCATGGTGGT  
+HWI-EAS443:3:47:490:675#0/1  
a]RR^aa`¥Za\_]RLZYJYH[`^SG\_¥HaaRSa\_ZOSG  
@HWI-EAS443:3:47:718:659#0/1  
CGGGATGGGCTCCAATCATCCGACGATTTTGCTCTCATAG  
+HWI-EAS443:3:47:718:659#0/1  
`bba]baabbbba`¥\_ab^\_a\_aabaa`abaa`\_a`aaaa  
@HWI-EAS443:3:48:1113:720#0/1  
GAGGCTATGGCTTTCTTGAAGAATCCCACCCAGGAATAA  
+HWI-EAS443:3:48:1113:720#0/1  
aa\_aaaa^aba\_aa[¥Ya\_^]Ya`\_^\_\_\_a¥\_^^\_¥\_Q`a  
@HWI-EAS443:3:48:414:1861#0/1  
GCCCAGGACTCAGTGATGCTGTGCCATCTATTAGAAGAGG

+HWI-EAS443:3:48:414:1861#0/1  
a`^U¥TN\_^)`bV[\_[aa¥UVPSYIYVR`\_\_[[WNTNXL[  
@HWI-EAS443:3:48:708:313#0/1  
AGGGCTCCAATCATCCGACGATTTTGCTCTCATAGTGAAT  
+HWI-EAS443:3:48:708:313#0/1  
abaa]aabaaaabaaaa]b`aaaab\_a\_a`a\_aa\_a``a  
@HWI-EAS443:3:49:1221:1477#0/1  
CGGTGCATTCACTATGAGAGCAAATCGTCGGATGATTGG  
+HWI-EAS443:3:49:1221:1477#0/1  
abbabbbbbbbbbbbabbabbabb\_a`abaaaaaaaa  
@HWI-EAS443:3:4:804:544#0/1  
GCGACCTTGAGTTAGTTTATCTACCCTTGTGTTGAACG  
+HWI-EAS443:3:4:804:544#0/1  
a^a^YRXVPZ\_[YXOW]\_`XFVOOOS¥PVP[WUW¥WX]BB  
@HWI-EAS443:3:50:1704:1489#0/1  
GTGTCTAGGGCCCGATTGATGCCAGGGTCGACTTCGAGN  
+HWI-EAS443:3:50:1704:1489#0/1  
]OZU]R^¥UZU]^[]JX`RVQ¥VXU¥`ZPXXTZVOEZKVB  
@HWI-EAS443:3:50:397:388#0/1  
CGTTCAACAAACAAGGGTAGATAAACTAACTCAAGGTCGC  
+HWI-EAS443:3:50:397:388#0/1  
a\_aa\_ab\_bbbababbb`bbbbabbbbbbababaaba\_b¥  
@HWI-EAS443:3:51:1256:804#0/1  
TGGGCTATTAGTATCAGATGGAGGACCAAATTATACAAT  
+HWI-EAS443:3:51:1256:804#0/1  
aa\_a^bb`aab`aa``baa``aa¥Z¥\_a`\_\_aa\_a`Z`aa  
@HWI-EAS443:3:51:403:58#0/1  
CGTCCCCAGTGATTGTGAAAGAAATCTCTGTGTCTTGTGA  
+HWI-EAS443:3:51:403:58#0/1  
`bbbab`bb\_b`bba`ba`abaaba`a`baaab^baa\_¥S  
@HWI-EAS443:3:51:819:1916#0/1  
CACAGCATCACTGAGTCCTGGGATGATGATGGGCATGTTT  
+HWI-EAS443:3:51:819:1916#0/1  
`\_T\_]a¥[XUT^\_Yba[0\_bbbS¥\_Q^aa``¥]`¥^[PZZ  
@HWI-EAS443:3:51:994:120#0/1  
GCCTCTTTGTTTCATTGATTCCATTACATCCTTTAAGAAAT  
+HWI-EAS443:3:51:994:120#0/1  
aaab`bbbab`aaabaaa`^aaaaYaa\_]aaa``a\_\_^a  
@HWI-EAS443:3:52:117:571#0/1  
CGAAAAGCTTGAACAGTCTGGGCTCCCAGTAGGGGGCAAG  
+HWI-EAS443:3:52:117:571#0/1  
abZZ]ZS¥X¥]YO[QZQ`a^YP^[\_T¥V¥L¥aYT¥XIUVF  
@HWI-EAS443:3:52:1576:1434#0/1  
AAGCCCTTCTTTTAACTTGCCTCTCTCTGCATCTTTGGT  
+HWI-EAS443:3:52:1576:1434#0/1  
aba]\_[baabbabba\_^ba`\_\_a\_a\_b)`a\_\_b\_aba^\_^  
@HWI-EAS443:3:52:1704:642#0/1  
GTGGTCTCCATCTGATACTAATAGCCCTACCTTTGATTG  
+HWI-EAS443:3:52:1704:642#0/1  
``aa^`baaaaa¥a¥]aa\_a`aa``^\_\_``¥¥aaaZU`a]



@HWI-EAS443:3:52:1727:105#0/1  
CCAGCTGATTCATTTACTCCAGACTCCAAAGCTGGGTA  
+HWI-EAS443:3:52:1727:105#0/1  
a`]a``^aa\_`ab\_\_\_\_`\_]\_aZ^`¥]\_WPWVZ¥Z[XQWO  
@HWI-EAS443:3:52:446:1132#0/1  
CGTCTGGGCTCCCAGTAGGGGCAATGAAAAGAAGGCCAA  
+HWI-EAS443:3:52:446:1132#0/1  
ab\_b`a`aaaba`^a^abbaab`\_aaaa`\_a`aa`\_aY\_`  
@HWI-EAS443:3:52:509:623#0/1  
CGCCAGGGTCTGACTTCGAGTCTGGACGGATCAAGAAAGAA  
+HWI-EAS443:3:52:509:623#0/1  
ababbaab[bbaaaaab\_^\_aaaa\_`b`\_`aa`b\_aa]^`  
@HWI-EAS443:3:52:77:1222#0/1  
TACCCGATTGATGGACCACTACCTGAGGATAATGAACCAA  
+HWI-EAS443:3:52:77:1222#0/1  
^^^abbbbb`a`]bUW]a]^abbab`a^baa^]Z`S\_  
@HWI-EAS443:3:53:238:150#0/1  
CGTCTCCATCTGATACTAATAGCCCTACCTTTGATTGGG  
+HWI-EAS443:3:53:238:150#0/1  
ab\_bbbbbabbabaabaa`a`ba\_aa`\_\_baba]aaa]T  
@HWI-EAS443:3:53:669:1931#0/1  
CGGGCTCCAATCATCCGACGATTTTGCTCTCATAGTGAAT  
+HWI-EAS443:3:53:669:1931#0/1  
\_`M^\_Ybb[S\_`aXN[`aI\_aa]a]^[^RZ\_aaabV`^U¥  
@HWI-EAS443:3:53:92:451#0/1  
TACCCGATTGATGGACCACTACCTGAGGATAATGAACCAA  
+HWI-EAS443:3:53:92:451#0/1  
`aX]ba]^a¥RZ\_USa¥X[¥VN^)`Zbaa[aaYa\_`]^a¥  
@HWI-EAS443:3:54:1629:1939#0/1  
GTCTCTATTTCTCTTTGTTTCATTGATTCCATTACATCCT  
+HWI-EAS443:3:54:1629:1939#0/1  
^GZ]]YYY^[ROTKX^VYW^Z]ZP¥T]]SOV^[MJXWHM[  
@HWI-EAS443:3:54:344:1294#0/1  
CGTTCAACAAACAAGGGTAGATAAACTAACTCAAGGTCGC  
+HWI-EAS443:3:54:344:1294#0/1  
ababa`babab^baaba¥aaab^aaaaa`\_aaaa\_\_[^`^  
@HWI-EAS443:3:55:1488:699#0/1  
CGGGATTCTTCAAGGAAAGCCATAGCCTCTAGAACACAGT  
+HWI-EAS443:3:55:1488:699#0/1  
abab`baabbbbb\_\_`baabbbb`aaaa`aaa`ab\_aa`  
@HWI-EAS443:3:55:1546:853#0/1  
AGGCATTTTGCCTGGAATTTTGTAGAAAAGTAGAGTCGG  
+HWI-EAS443:3:55:1546:853#0/1  
[a¥¥Ybb^SUL\_RXY]^abbaa]a\_]```\_UaR[^¥`XZ]`  
@HWI-EAS443:3:55:313:99#0/1  
TGGCCCGATTGATGCCAGGGTCTGACTTCGAGTCTGGACG  
+HWI-EAS443:3:55:313:99#0/1  
TX\_\_W`a^LY`a]SY[PM^YVNV^NSNSYVLNJQ[`ZOX]  
@HWI-EAS443:3:56:552:1368#0/1  
CGGTGGGATGGGCTCCAATCATCCGACGATTTTGCTCTCA

+HWI-EAS443:3:56:552:1368#0/1  
`XZSabbabaa`ba`b\_bbb^aaabb`baabba]X\_ab\_a  
@HWI-EAS443:3:56:890:1879#0/1  
ATCCAAGATTTCAGTATCGAGACTCCCAAGACCGTACTTAG  
+HWI-EAS443:3:56:890:1879#0/1  
\_aaTb`a`[YPZYTQWPN^WWR¥BBBBBBBBBBBBBBBB  
@HWI-EAS443:3:57:107:295#0/1  
GCCCCGATTGATGGACCACTACCTGAGGATAATGAACCAAG  
+HWI-EAS443:3:57:107:295#0/1  
[`bbbbU¥WZab\_YX]`aa]` ` `Va`\_]ba\_a]Z[`¥[\_  
@HWI-EAS443:3:57:1451:988#0/1  
TGGGAAAGGGTACATGTTTCGAGAGTAAAAGAATGAAGATT  
+HWI-EAS443:3:57:1451:988#0/1  
^`\_`^HV` `Yb][a`I^Ta`¥X^W¥R][R¥X`\_Z^\_RYZ¥¥  
@HWI-EAS443:3:57:1607:1569#0/1  
CGGCCTAACAGCTAATGAGTCAGGAAGGCTAATAGATTTC  
+HWI-EAS443:3:57:1607:1569#0/1  
abaa¥bbb]aaXaaa`a\_`¥\_\_`[``\_a`\_a`\_\_a\_[¥^X  
@HWI-EAS443:3:57:202:1065#0/1  
CCCCAGGTGTTGCGATAGCCCTTCTTTTTAACTTGCCCTCT  
+HWI-EAS443:3:57:202:1065#0/1  
ababbbbaZbaa`aa\_a\_aa\_aa`a`aaa¥¥^Ua\_Y`Z^^a  
@HWI-EAS443:3:57:426:1241#0/1  
CATGCCCATCATCATCCCAGGACTCAGTGATGCTGTGCCG  
+HWI-EAS443:3:57:426:1241#0/1  
T\_a`WTVWXQ[]bXGX\_[bZ]]SYU\_\_` ` `aRW]¥G` `RF  
@HWI-EAS443:3:58:1709:828#0/1  
AGCCGTTGCAACTACACATTCCTGGATTCCCAAGAGGAAT  
+HWI-EAS443:3:58:1709:828#0/1  
aa`Za`aaa`\_]\_aa\_`J\_a\_[UQFNX` `UN[\_`\_]\_aWYO]  
@HWI-EAS443:3:58:456:73#0/1  
CGACGGATCAAGAAAGAAGAGTTCTCTGAGATCATGAAGA  
+HWI-EAS443:3:58:456:73#0/1  
abaabbaaab]a]^aaaabab\_aabaaa\_a\_`\_^aa\_`^`\_  
@HWI-EAS443:3:58:532:1640#0/1  
GGGGGGCAATGAAAAGAAGCCAACTGGCAAATGTTGTG  
+HWI-EAS443:3:58:532:1640#0/1  
U\_b`bbaZZ`\_a^^aa`abbbb\_Ybabbbabbbaba`bab  
@HWI-EAS443:3:58:57:1180#0/1  
AGGGCTCCAATCATCCGACGATTTTGCTCTCATAGTGAAT  
+HWI-EAS443:3:58:57:1180#0/1  
UbbaY^ab`aaa` ` `]a\_[U`\_a]` `^a\_\_S`\_]\_`^  
@HWI-EAS443:3:58:951:409#0/1  
GGTGCTTATGGCATTGCGCTGGAATTTTTAGGAAAAGA  
+HWI-EAS443:3:58:951:409#0/1  
aaPIZ^\_aaaa^^a`aa¥J[[]\_¥T`\_`^`aZ[]JW^¥UG  
@HWI-EAS443:3:59:1100:456#0/1  
TGCCTCTCTTATTCAGTCTTTGTTTTTCTTCCCTATTGT  
+HWI-EAS443:3:59:1100:456#0/1  
^`\_`\_ab`]¥\_YXG[J[Y^UZ^TaY[`aa`J\_OSYOJV\_RN

@HWI-EAS443:3:59:1507:721#0/1  
CGGGAGCTAATGGATGATGATTATCGGGGAAGACTTTGTA  
+HWI-EAS443:3:59:1507:721#0/1  
abababbbbabbbbbb`^`bbbaabbbba\_WXXaaYVZ]`  
@HWI-EAS443:3:59:50:1911#0/1  
CGTGGCTAATTTTAGCATGGAGCTACCCAGCTTTGGAGTG  
+HWI-EAS443:3:59:50:1911#0/1  
a]\_bbabbaabbab¥babaaaab¥\_`b`U`aV`aTZN\_¥]  
@HWI-EAS443:3:59:663:521#0/1  
TGAGGCAAGTTAAAAAGAAGGGCTATCGCAACACCTGGGA  
+HWI-EAS443:3:59:663:521#0/1  
``aa^aaababaa\_a]ba^^a`aaa```]a`R^WXV^\_`]  
@HWI-EAS443:3:59:846:439#0/1  
CGGGCTCCAATCATCCGACGATTTTGCTCTCATAGTGAAT  
+HWI-EAS443:3:59:846:439#0/1  
abba`baabbbaba\_bbaab`abbbbabbba``aaUZ\_\_`  
@HWI-EAS443:3:60:1138:1281#0/1  
ATCCGTATATTGTATAAGTTTGGTCCTCCATCTGATACTA  
+HWI-EAS443:3:60:1138:1281#0/1  
^¥`]¥\_`aaaaaX`a\_\_a^aa\_a]a^`\_]a^\_\_]\_\_\_Y\_\_  
@HWI-EAS443:3:60:134:1037#0/1  
GGGGATTCTTCAAGGAAAGCCATAGCCTCTAGAACACAGT  
+HWI-EAS443:3:60:134:1037#0/1  
I[VbbUb\_S\_bb^^^Z¥Z¥bbaaU^`WQ\_OJQ¥`b`K^\_^  
@HWI-EAS443:3:60:1365:1481#0/1  
AGGGTGCCATGCTCAGGATGTTTCTGAACCACTCGGGTTG  
+HWI-EAS443:3:60:1365:1481#0/1  
\_baa^baaabbaaa`ba\_aa\_aa]`aaa^^a\_\_Y\_\_^V\_^  
@HWI-EAS443:3:60:1617:1713#0/1  
TCCGGCAGCAACTGCATTGGCCAACACCATAGAAGTCTTT  
+HWI-EAS443:3:60:1617:1713#0/1  
aaaaa`b`]aaV^^[aa]T¥\_\_a]M^U¥[a]]Y\_Y\_S````  
@HWI-EAS443:3:60:692:1533#0/1  
CGGCACCTATATGTGTATCTGTAGTCTTTGATGAACAATT  
+HWI-EAS443:3:60:692:1533#0/1  
aab`^]a¥]\_abb`aV]aa]`Yaa]aaa``aa\_^`[^\_[V  
@HWI-EAS443:3:60:692:25#0/1  
GCGACTTCGAGTCTGGACGGATCAAGAAAGAAGAGTTCTC  
+HWI-EAS443:3:60:692:25#0/1  
abaaaba`b]ba`abba`ba\_\_`\_\_a^\_`^`a`\_aY`\_]`  
@HWI-EAS443:3:60:836:1172#0/1  
GCCTATATGTGTATCTGTAGTCTTTGATGAACAATTGAAG  
+HWI-EAS443:3:60:836:1172#0/1  
Vaa`a\_Zaaaa`aaaab\_ab[^`a\_\_baaa`\_a\_a`[a`[  
@HWI-EAS443:3:61:1391:1550#0/1  
CTTGAAGAATCCCACCCAGGAATTTGAGAATTCATGCG  
+HWI-EAS443:3:61:1391:1550#0/1  
``¥Y`^baaabbbab`Z^a^aababbbbaa\_`Wa\_YMY[^ED  
@HWI-EAS443:3:61:281:64#0/1  
CGTCTGGAGTAAATGAATCAGCTGACATGAGTATTGGAGT

+HWI-EAS443:3:61:281:64#0/1  
abaabba`b\_abaaa`aa`a\_\_^aY^X^`^`Z^\_\_`¥Z\_W  
@HWI-EAS443:3:61:506:1988#0/1  
TGATTCTGTAAACAATGCTGTGGTAATGCCAGCCCATGGG  
+HWI-EAS443:3:61:506:1988#0/1  
K\_\_]b[a\_abbb\_\_¥¥R`WV\_ZV`^\_TYU[G]NW`[QG  
@HWI-EAS443:3:61:882:1613#0/1  
CACAGCATCACTGAGTCCTGGGATGATGATGGGCATGTTT  
+HWI-EAS443:3:61:882:1613#0/1  
abbbba`abbbb]ba`bbbaabbb\_baaaa`[`a^[]¥  
@HWI-EAS443:3:62:1494:1054#0/1  
CGTGGCTAATTTTAGCATGGAGCTACCCAGCTTTGGAGTG  
+HWI-EAS443:3:62:1494:1054#0/1  
abaabb\_ababaaaa`aaa]\_a\_`Q]`\_```aa``\_a\_a  
@HWI-EAS443:3:63:107:904#0/1  
ACTGGAGTAAATGAATCAGCTGACATGAGTATTGGAGTAA  
+HWI-EAS443:3:63:107:904#0/1  
abba\_]b\_a`\_^ab`N\_]aa`\_a`aa^`aS`a]a\_\_aY`¥  
@HWI-EAS443:3:63:1110:404#0/1  
TGCTAGGAGCATTTGCGAAAAGCTTGAACAGTCTGGGCTC  
+HWI-EAS443:3:63:1110:404#0/1  
Zba]]`\_P\_`¥`\_]`\_\_Z``a`a]ab¥ZLS¥S¥`WM^R¥\_  
@HWI-EAS443:3:63:1234:1678#0/1  
GGCGATAGCCCTTCTTTTAACTTGCCTCTCTCTGCATCT  
+HWI-EAS443:3:63:1234:1678#0/1  
aabbba]X[a`X`]\_abb`[\_W^XU\_ZSZYXV¥YBBBBBB  
@HWI-EAS443:3:63:540:996#0/1  
CGGTGGGATTCTTCAAGGAAAGCCATAGCCTCTAGAACAC  
+HWI-EAS443:3:63:540:996#0/1  
aba^babaaabaaa`abaaaa]\_a`\_a^`\_\_\_\_aa`X[\_`  
@HWI-EAS443:3:63:588:1030#0/1  
NAAATTCCAGCGCAAAATGCCATAAGCACCACATTCCTT  
+HWI-EAS443:3:63:588:1030#0/1  
DMVUYXXVYYYYYYYYYYYYYXXYXWYXYVYXVUYX  
@HWI-EAS443:3:64:203:189#0/1  
AGCCTCTCTCTGCATCTTTGGTCATCGTATTTAATGTCAG  
+HWI-EAS443:3:64:203:189#0/1  
abab^^`[b^b`¥`T`aaa^][Za^aVTZa\_`]`a]^Y`  
@HWI-EAS443:3:64:455:667#0/1  
CGCCCTACCTTTGATTGGTTTGATCCACAGCTTCTTTA  
+HWI-EAS443:3:64:455:667#0/1  
aaaaaaaaaaaaaaaaaaa`a[\_aaaa`a````\_a``a````  
@HWI-EAS443:3:66:1485:363#0/1  
CGGTCCTCCATCTGATACTAATAGCCCTACCTTTGATTGG  
+HWI-EAS443:3:66:1485:363#0/1  
abbababbabaababbbabbbbbb`aaaaabbbb`aaaa  
@HWI-EAS443:3:66:347:75#0/1  
GTTCCCACTAATTGCAGGTCCTGTAGAATCTGTCCACTC  
+HWI-EAS443:3:66:347:75#0/1  
a^\_`\_`[\_a\_\_\_\_\_`[\_`\_Y[¥a^[Z^^[\_]^YWX]SXX

@HWI-EAS443:3:66:998:1737#0/1  
GGTCCCCAGTGATTGTGAAAGAAATCTCTGTGTCTTGTGA  
+HWI-EAS443:3:66:998:1737#0/1  
¥aaa¥aa`a^babb`S`abb`]aa^Zba`¥a````aVZZV  
@HWI-EAS443:3:67:1205:513#0/1  
GTTGATTCCCACTAACTTGCAGGTCCTGTAGAATCTGTGCG  
+HWI-EAS443:3:67:1205:513#0/1  
``U\_\_a^^\_a`X¥Y`\_¥YFTYUJZZ[]RZZ[TZBBBBBB  
@HWI-EAS443:3:68:1006:1345#0/1  
NTGTGGTAATGCCAGCCCATGGTCCAGCCAAAAGCATGGA  
+HWI-EAS443:3:68:1006:1345#0/1  
DNVVVWWWWWVYVUWWWWWVUUUWUWWWWWVUWVXYWWW  
@HWI-EAS443:3:68:1200:452#0/1  
GGGTCCTCCATCTGATACTAATAGCCCTACCTTTGATTGG  
+HWI-EAS443:3:68:1200:452#0/1  
aa`]UUaaXQa\_\_a\_a]R`Y`^aa])^ZWVW^\_\_[\_¥Z]R  
@HWI-EAS443:3:68:1450:24#0/1  
CGGTCCATCAATCGGGTTGAGCTGGGGTGCACCAGTCTCT  
+HWI-EAS443:3:68:1450:24#0/1  
`ba[Saa¥XZ^HYW^b¥`a]^`¥S`[TaY`Pa\_aZS^TQ  
@HWI-EAS443:3:68:595:1776#0/1  
CGGTGTCTAGGGCCCGGATTGATGCCAGGGTCGACTTCGA  
+HWI-EAS443:3:68:595:1776#0/1  
a`TKVY\_V^]X\_\_[]^]KV^YZQ]X\_¥SV[PBBBBBBBBB  
@HWI-EAS443:3:68:928:1025#0/1  
CGGTGCTTATGGCATTTCGCGTGGAAATTTTAGGAAAAG  
+HWI-EAS443:3:68:928:1025#0/1  
\_bW[`¥a`b`b``bbbbbaa\_[aaba]\_bbbaab\_a`\_\_`  
@HWI-EAS443:3:69:204:467#0/1  
CAGGTAGGGCTATTAGTATCAGATGGAGGACCAAATTAT  
+HWI-EAS443:3:69:204:467#0/1  
aaaaZa```a`a`a`a\_S`\_`a]^a`Sa\_^\_^\_\_^W\_\_`\_  
@HWI-EAS443:3:69:280:913#0/1  
GCTGGCGACCTTGAGTTAGTTTATCTACCCTGTTTGTG  
+HWI-EAS443:3:69:280:913#0/1  
aba¥abaaaaa\_T`Xa^\_[``¥\_\_a\_Z`a[\_\_\_]]`]Z\_[  
@HWI-EAS443:3:69:727:868#0/1  
TGCCCGGATTGATGCCAGGGTCGACTTCGAGTCTGGACGG  
+HWI-EAS443:3:69:727:868#0/1  
a``babb¥aaaaaaa`\_```[^`^`a\_\_\_`¥\_\_`^¥[a^  
@HWI-EAS443:3:70:1098:1000#0/1  
GTCATAAAGAGATTGATTCTGTAAACAATGCTGTGGTAAG  
+HWI-EAS443:3:70:1098:1000#0/1  
aaaaa\_\_[\_a\_a^aaa`aaa`\_[aa`]a`\_^`\_\_X``Z\_\_^  
@HWI-EAS443:3:70:1531:892#0/1  
AAAAACAAAGACTGAATAAGAGAGGCTATCTAATAAGAGA  
+HWI-EAS443:3:70:1531:892#0/1  
¥aa`WUZ]W[Z`a``baa]^a¥]¥BBBBBBBBBBBBBBB  
@HWI-EAS443:3:70:1610:621#0/1  
ATTCAGTATCGAGACTCCCAAGACCGTACTTAGCATGTTA

+HWI-EAS443:3:70:1610:621#0/1  
abb\_abab`\_bab\_\_`V`^^Y\_`GV^RQM[\_Z^W^ZXR[^  
@HWI-EAS443:3:70:495:907#0/1  
GGCTAATGGATGATGATTATCGGGGAAGACTTTGTAATCC  
+HWI-EAS443:3:70:495:907#0/1  
^M^WYSY[SY[XWY^0¥V]U][RQLNZXM¥\_U]NGW¥SZT  
@HWI-EAS443:3:70:887:297#0/1  
CACAGCATCACTGAGTCCTGGGATGATGATGGGCATGTTT  
+HWI-EAS443:3:70:887:297#0/1  
]`ba`a\_ZI\_\_\_a`]ZR`aba^\_]aS`aa]^`^P`]b``X  
@HWI-EAS443:3:71:116:2047#0/1  
NATGCCATCATCATCCCAGGACTCAGTGATGCTGTGCCA  
+HWI-EAS443:3:71:116:2047#0/1  
DOWTWWWPWXXUWVVYXWVVVWYUWWYWYYTYWWWVWVY  
@HWI-EAS443:3:71:1191:1013#0/1  
AATGAACCAAGTGGGTATGCACAAACAGACTGTGTTCTAN  
+HWI-EAS443:3:71:1191:1013#0/1  
aa`\_\_\_a`\_\_aW`\_`Z^\_]\_]YZX¥^`Z\_^XX[XTLTPD  
@HWI-EAS443:3:71:1440:519#0/1  
CGCCTCTCTGCATCTTTGGTCATCGTATTTAATGTCAG  
+HWI-EAS443:3:71:1440:519#0/1  
a\_bbbbbbbbab`babbbbbbYaabbbbaabaababaaW` [  
@HWI-EAS443:3:71:1696:255#0/1  
CGGTCCTCCATCTGATACTAATAGCCCTACCTTTGATTGG  
+HWI-EAS443:3:71:1696:255#0/1  
abba``bbbbbbba^\_bbabbbba¥\_`baZ`abb``ba¥U  
@HWI-EAS443:3:71:653:671#0/1  
CCCCGGATTGATGCCAGGGTCGACTTCGAGTCTGGACGGA  
+HWI-EAS443:3:71:653:671#0/1  
abbbbbbTbaaaaaaaaaaaaa¥aaa^aaaaaaZaaaa`¥a`^  
@HWI-EAS443:3:72:896:1098#0/1  
CGGGCTCCAATCATCCGACGATTTTGCTCTCATAGTGAAT  
+HWI-EAS443:3:72:896:1098#0/1  
a`aSb`bbbbbaaaaaaa\_aaa`aaa`a`a\_a``^¥\_\_`  
@HWI-EAS443:3:73:1581:126#0/1  
CTCCTGGGTGGGATTCTTCAAGGAAAGCCATAGCCTCTAG  
+HWI-EAS443:3:73:1581:126#0/1  
aba`bbb`abb`]a]bba`\_aaa`aaa`ba`a\_aU\_[aa  
@HWI-EAS443:3:73:322:389#0/1  
ATTCAGTATCGAGACTCCCAAGACCGTACTTAGCATGTTA  
+HWI-EAS443:3:73:322:389#0/1  
]aaaa`a`^]aa`a`\_\_aa`a`]\_W`\_]¥¥R¥Z[^]^\_  
@HWI-EAS443:3:73:503:210#0/1  
GCTTCGAGTCTGGACGGATCAAGAAAGAAGAGTTCTCTGA  
+HWI-EAS443:3:73:503:210#0/1  
a\_a\_\_`¥]^`a`X`¥V]X[P`^\_]`^XTXYXVWV]YY  
@HWI-EAS443:3:73:505:1038#0/1  
AGTGTCTCCCCTATGGCACCTATATGTGTATCTGTAGTCT  
+HWI-EAS443:3:73:505:1038#0/1  
¥a\_bababaaa^^aaaa]Y\_\_`a`a\_a\_\_a`a`a[\_`Y\_¥



+HWI-EAS443:3:77:853:924#0/1  
ab`^aaaaa\_aaaa`[¥aa¥`aaa^`\_]\_aa^[\_`\_`\_]^  
@HWI-EAS443:3:78:1321:859#0/1  
GTGGAGCTACCCAGCTTTGGAGTGTCTGGAGTAAATGAAT  
+HWI-EAS443:3:78:1321:859#0/1  
a^b`\_a\_a`a\_a^a\_aaa\_\_Y`X`^\_a\_]aV\_`]^`^^X  
@HWI-EAS443:3:78:250:1369#0/1  
GCCCCTTTGGCTTGTGTTGAGAATAGAACGATTCCTCTTG  
+HWI-EAS443:3:78:250:1369#0/1  
Zab\_Z\_b^X^\_`aURUR¥XX[^Y¥T¥a\_`¥QT`]V]^W¥  
@HWI-EAS443:3:78:902:327#0/1  
CATGGGTGCCATGCTCAGGATGTTTCTGAACCACTCGGGT  
+HWI-EAS443:3:78:902:327#0/1  
a[\_a\_¥Y`[Ra¥V]a\_^^^Q^a]a`Z\_Z^^X¥U[YV`X`U  
@HWI-EAS443:3:79:370:1415#0/1  
AGGCACCTATATGTGTATCTGTAGTCTTTGATGAACAATT  
+HWI-EAS443:3:79:370:1415#0/1  
a`\_a\_baW^^X`[\_`TPaaa\_aQ\_a\_a\_]Qa[R\_]`aa]¥  
@HWI-EAS443:3:79:609:594#0/1  
CGGGCCGTTGCAGGTCCAAGGTCATTGTTTATCATGTTGT  
+HWI-EAS443:3:79:609:594#0/1  
a`\_]\_bb`baaaaa\_aaaaa\_aaaabaaaa\_aaaa\_a`  
@HWI-EAS443:3:79:675:1155#0/1  
GTGGTCTCCATCTGATACTAATAGCCCTACCTTTGATTG  
+HWI-EAS443:3:79:675:1155#0/1  
aXY¥aa`a[TZ^Za\_]Z^\_aa\_\_PU\_\_^]WY[\_]\_^]Y  
@HWI-EAS443:3:7:1104:1548#0/1  
GGGACGGATCAAGAAAGAAGAGTTCTCTGAGATCATGAAG  
+HWI-EAS443:3:7:1104:1548#0/1  
aba]Zaaa^a`ab`\_\_`a```aU^^`^a\_`a\_`\_`\_a^\_\_  
@HWI-EAS443:3:7:1553:1552#0/1  
NTGTGTTCTGTTTACTGTGTCCATGGTGTATCCTGTTCCCT  
+HWI-EAS443:3:7:1553:1552#0/1  
DOXUVWVYYUYXYRVYXYXUGXYTVXYXXUYVXPVSBB  
@HWI-EAS443:3:7:166:490#0/1  
TGAGTCTGGACGGATCAAGAAAGAAGAGTTCTCTGAGATC  
+HWI-EAS443:3:7:166:490#0/1  
abba`abbbaabbaaababaaaa`aab¥a]babaaaaa  
@HWI-EAS443:3:7:374:1251#0/1  
CGGTGCATTCACTATGAGAGCAAATCGTCCGATGATTGG  
+HWI-EAS443:3:7:374:1251#0/1  
`TXPa^Za¥0`[aaaaaa`U\_`\_`Y`S`X`aYPYZU\_\_  
@HWI-EAS443:3:80:1479:851#0/1  
CATGTGGTGCTTATGGCATTGCGCTGGAATTTTATAGGA  
+HWI-EAS443:3:80:1479:851#0/1  
aabb[bbYb`abbbbaabaZaa]bbba`babbbabaa  
@HWI-EAS443:3:80:197:1423#0/1  
CGCTTGTGTTGAGAATAGAACGATTCCTCTTGGGAATCCA  
+HWI-EAS443:3:80:197:1423#0/1  
aabbababaaaY^abbbYbaaa[\_`a\_a\_`a¥][X`\_`X`



@HWI-EAS443:3:81:1069:1450#0/1  
AATCCGACTCTACTTTTCCTAAAAATCCAGCGCAAAATC  
+HWI-EAS443:3:81:1069:1450#0/1  
aaaa\_a^a]``\_a`a``\_`baaa`a\_\_^a\_\_`\_a\_a`\_L  
@HWI-EAS443:3:83:1497:16#0/1  
AAAAGGAAAGTGGACGACAAACACAGAGACTGGTGACACA  
+HWI-EAS443:3:83:1497:16#0/1  
\_]\_]abba\_`b]a[``^aQ`\_`S\_G]NY`PQR[XQXR¥¥G  
@HWI-EAS443:3:83:47:1137#0/1  
TGGCTATCTAATAAGAGCACTGACATTAATACGATGACC  
+HWI-EAS443:3:83:47:1137#0/1  
abab`b]a``aaa]`^abaa\_aaaa`aV\_```a`\_a\_a^a  
@HWI-EAS443:3:83:672:926#0/1  
CGGAGCCCATCCCACCAGTATATTGTCTTGGTGTATTTCT  
+HWI-EAS443:3:83:672:926#0/1  
aa\_\_`aaaa^aaa```\_a^`Z`\_`XZa\_\_\_\_]aY]`a`\_]\_  
@HWI-EAS443:3:84:1198:1847#0/1  
AGTCCCCAGTGATTGTGAAAGAAATCTCTGTGTCTTGTGA  
+HWI-EAS443:3:84:1198:1847#0/1  
a\_```baaa]aaaa`b`aa\_aaaa``\_``^¥^\_``\_]\_¥  
@HWI-EAS443:3:84:1626:165#0/1  
TGCCTCTTTATTTCAGTCTTTGTTTTTTCTTCCCTATTGT  
+HWI-EAS443:3:84:1626:165#0/1  
ab\_^a\_bTa`¥bb\_Laa[\_abb``aaabYa\_XZ\_a\_¥]PV  
@HWI-EAS443:3:84:1641:1649#0/1  
GGCTCCAATCATCCGACGATTTTGCTCTCATAGTGAATGT  
+HWI-EAS443:3:84:1641:1649#0/1  
aVNZTWLUa`WRQJZZYNS[`¥[^YRLFHXR\_\_FY^[a\_V  
@HWI-EAS443:3:84:1647:1353#0/1  
CGCTGTGGTAATGCCAGCCCATGGTCCAGCCAAAAGCATG  
+HWI-EAS443:3:84:1647:1353#0/1  
abbbbabb`aabb]^aa`YU\_bb^`P]a^¥R\_a]a]R\_aY  
@HWI-EAS443:3:84:192:798#0/1  
ACCAGGTGTTGCGATAGCCCTTCTTTTTAACTTGCCTCTC  
+HWI-EAS443:3:84:192:798#0/1  
`aaaaVa\_a`aa`\_aa\_aaaaa`aa`a]W]^`^\_]`\_\_\_\_  
@HWI-EAS443:3:84:236:1938#0/1  
TGGCCTCTTCTAATAGATGGCACAGCATCACTGAGTCCTG  
+HWI-EAS443:3:84:236:1938#0/1  
aYH\_b]aaaa\_aa^X]XZVZaaa`^a^¥\_\_`[[NX][^Z  
@HWI-EAS443:3:84:349:545#0/1  
GGCCCTTCTTTTTAACTTGCCTCTCTGCATCTTTGGTC  
+HWI-EAS443:3:84:349:545#0/1  
aabaaaabbbaaaa^aaaaaaaaaaaaaaaaabaaaaaaaaa[a  
@HWI-EAS443:3:85:1281:1043#0/1  
GGAGGCCATGGTGTCTAGGGCCCGATTGATGCCAGGGTT  
+HWI-EAS443:3:85:1281:1043#0/1  
`a`a\_\_\_\_a`a\_Y`U`Q¥^\_\_U\_a\_]RZ]^ZXK^ZBBBBB  
@HWI-EAS443:3:85:283:1406#0/1  
TGGCCTCTTCTAATAGATGGCACAGCATCACTGAGTCCTG

+HWI-EAS443:3:85:283:1406#0/1  
Va\_\_\_b`[a^U]`Y`\_\_\_]Z`^`U[\_`\_X\_Y[R¥YG]XX`  
@HWI-EAS443:3:85:550:1293#0/1  
CGGGCTATTAGTATCAGATGGAGGACCAAACCTTATACAAT  
+HWI-EAS443:3:85:550:1293#0/1  
\_S[\_`ab`\_[a]a\_\_^a``\_T`\_¥]`\_]a\_a`¥^\_a  
@HWI-EAS443:3:85:601:872#0/1  
TGGGCTATTAGTATCAGATGGAGGACCAAACCTTATACAAT  
+HWI-EAS443:3:85:601:872#0/1  
[ba`a`bbaba^T[\_\_\_W\_a`Z¥ZM[]^W\_¥a``\_0\_^`a  
@HWI-EAS443:3:85:684:1517#0/1  
CCCCAGTGATTGTGAAAGAAATCTCTGTGTCTTGTGAATG  
+HWI-EAS443:3:85:684:1517#0/1  
`bbbaaababba\_a^`]^baa^^a`aaa``aaR]¥aa`\_  
@HWI-EAS443:3:86:1515:676#0/1  
GAACAACATGATAACAATGACCTTGGACCTGCAACGGCA  
+HWI-EAS443:3:86:1515:676#0/1  
\_Nabaaaaaa`]baabbbYaaaaa]H]I^[DUaaa`\_VF  
@HWI-EAS443:3:86:1783:915#0/1  
GCGACCTTGAGTTAGTTTATCTACCCTTGTGGTTGAACG  
+HWI-EAS443:3:86:1783:915#0/1  
ababbb`aaab\_aaaabaa`\_aa`\_aaa¥¥a```\_Y`\_¥Z  
@HWI-EAS443:3:86:178:2022#0/1  
CGTGGGATCAAACCAATCAAAGGTAGGGCTATTAGTATC  
+HWI-EAS443:3:86:178:2022#0/1  
a\_a\_XZa¥`¥``abba]aba\_[]YN`[]`b¥b^V``S`\_`a  
@HWI-EAS443:3:86:368:1811#0/1  
CGCACCTATATGTGTATCTGTAGTCTTTGATGAACAATTG  
+HWI-EAS443:3:86:368:1811#0/1  
aabaabba\_Y\_a¥a\_aZ^]¥\_]N][Y`Ra\_\_a\_¥Z^YY[  
@HWI-EAS443:3:86:751:1272#0/1  
GAGATTTCTTTCACAATCACTGGGGACAACACTAAGTGGT  
+HWI-EAS443:3:86:751:1272#0/1  
abaZb`a[^`^`aba`aa\_bbaa`aaaa\_a\_b`abRa\_^  
@HWI-EAS443:3:86:880:425#0/1  
CCTTCCCTATTGTTCTTTGCGTGACCATCTTCTTGGTCAT  
+HWI-EAS443:3:86:880:425#0/1  
Ybbb\_a`b^aaU¥aZba\_ZZ`¥bYaa^b]aa^^\_Sa`R^b  
@HWI-EAS443:3:87:113:456#0/1  
GTTCCCACTAACTTGCAGGCCTGTAGAATCTGTCCACTC  
+HWI-EAS443:3:87:113:456#0/1  
]aaaab¥bb`\_aaaab\_a\_Z`aab\_]a`\_aa\_a\_\_`Y]^a  
@HWI-EAS443:3:87:1170:327#0/1  
CAGAGCACTGACATTAATACGATGACCAAAGATGCAGAG  
+HWI-EAS443:3:87:1170:327#0/1  
¥`bababaabb`babbbbbb\_bba¥\_\_`bbbbbab`bbab  
@HWI-EAS443:3:87:1725:775#0/1  
TGGGCTATTAGTATCAGATGGAGGACCAAACCTTATACAAT  
+HWI-EAS443:3:87:1725:775#0/1  
¥b^ZRab\_a]bS\_^I\_ba\_a`Q`\_YPX[\_aW\_a¥`\_^¥Y`

@HWI-EAS443:3:88:1237:815#0/1  
GCCCACTTTCAAAGAAAAAGGAGAGTAAGAGACAACATGA  
+HWI-EAS443:3:88:1237:815#0/1  
¥\_Ua¥IY¥`ZY]0\_¥`]¥P\_¥\_``W`ba\_ba\_^Zb`ba  
@HWI-EAS443:3:8:1515:356#0/1  
GTGAGGATGAACAGATGTACCAGAAGTGCTGCAATCTATT  
+HWI-EAS443:3:8:1515:356#0/1  
aaa\_baa`a`\_^\_a\_aaX`W`a]\_ZX^W]\_[[]]0]]¥Z  
@HWI-EAS443:3:8:216:2047#0/1  
NCCACTCCTGCTTGTATTCCCTCATGGTTTGGTGCATTCA  
+HWI-EAS443:3:8:216:2047#0/1  
DMUSRNSVQLQSQTQVTRVVUVVRSWYURWVNGVYYNLLY  
@HWI-EAS443:3:8:556:363#0/1  
CCCCAGGTGTTGCGATAGCCCTTCTTTTTAACTTGCCTCT  
+HWI-EAS443:3:8:556:363#0/1  
aab`bbbW`K\_aabaaaa^¥\_\_a¥`aaaa\_aW\_``RZ`¥a  
@HWI-EAS443:3:90:1097:1589#0/1  
CGGGCCCGGATTGATGCCAGGGTCGACTTCGAGTCTGGAC  
+HWI-EAS443:3:90:1097:1589#0/1  
aba\_^``bbaaab\_aaaaa`¥`aa\_\_\_`a`aWUaa\_a\_  
@HWI-EAS443:3:90:1119:545#0/1  
GGGGTGGGATTCTTCAAGGAAAGCCATAGCCTCTAGAACA  
+HWI-EAS443:3:90:1119:545#0/1  
`b`¥Lbba\_aa\_\_\_a^b``Z`aQa`a¥\_]a`\_`¥\_a`\_  
@HWI-EAS443:3:90:1399:1511#0/1  
ATCCTCTTTGTTTCATTGATTCCATTACATCCTTTAAGAAA  
+HWI-EAS443:3:90:1399:1511#0/1  
aaa^a`aaaa\_``aabaaaa\_aaa\_Y\_aaZaa\_\_\_a\_\_`  
@HWI-EAS443:3:90:1728:267#0/1  
GTCCTGCTTGTATTCCCTCATGGTTTGGTGCATTCACTAT  
+HWI-EAS443:3:90:1728:267#0/1  
J\_``^¥abba`b\_bbbbbVZabb]b¥XSaabaaTR[babb  
@HWI-EAS443:3:90:686:1819#0/1  
CGCCCTACCTTTGATTGGGTTTGATCCCACAGCTTCTTTA  
+HWI-EAS443:3:90:686:1819#0/1  
Zb`bbZbaXbVbbaa]]Vb¥\_a]`UZZ^b\_Xbab\_aV`]^  
@HWI-EAS443:3:90:912:1145#0/1  
CGGCCAATGCAGTTGCTGCCGTTGATTTCTGTTTAATGT  
+HWI-EAS443:3:90:912:1145#0/1  
\_`babbbabab`abbbbabbbbab^]\_`b`b\_a\_b]ba^`  
@HWI-EAS443:3:91:1027:293#0/1  
TTGGGTGCCATGCTCAGGATGTTTCTGAACCACTCGGGTT  
+HWI-EAS443:3:91:1027:293#0/1  
`]a\_YS````a`\_`V\_a`]]a[\_\_\_`\_]\_]\_]\_WTQ``]NY  
@HWI-EAS443:3:91:1063:1316#0/1  
CGGGCTCCAATCATCCGACGATTTTGCTCTCATAGTGAAT  
+HWI-EAS443:3:91:1063:1316#0/1  
a\_b\_]bbb`bbbbabbbbab`a`bbbbabbbba  
@HWI-EAS443:3:91:1611:1363#0/1  
CGCCTCTCTTATTACAGTCTTTGTTTTTCTTCCCTATTGT

+HWI-EAS443:3:91:1611:1363#0/1  
`baabbbbbbabbabbbbbbabbabbb` `` `abbab\_  
@HWI-EAS443:3:91:910:668#0/1  
CGGAGGACCAAACCTTATACAATATACGGAATCTTCACATT  
+HWI-EAS443:3:91:910:668#0/1  
abbbba\_abbabbbbabbaabbbb`bbba`ba\_a`aa^  
@HWI-EAS443:3:91:915:72#0/1  
CAGTGATTGTGAAAGAAATCTCTGTGTCTTGTGAATTAGC  
+HWI-EAS443:3:91:915:72#0/1  
\_b^Y]bbbabbbbbbabbababaYabaaba`aa`\_X  
@HWI-EAS443:3:93:246:1825#0/1  
AGGTCCTCCATCTGATACTAATAGCCCTACCTTTGATTGG  
+HWI-EAS443:3:93:246:1825#0/1  
]^Y]a` `aab`a]\_a^Z\_\_aa\_aaa`\_\_`V`\_\_`¥¥^][  
@HWI-EAS443:3:94:221:1472#0/1  
CGCCAGGGTCGACTTCGAGTCTGGACGGATCAAGAAAGAA  
+HWI-EAS443:3:94:221:1472#0/1  
aaabaaa¥V[aaaaaaX`W\_aa`a\_aa`\_\_a`\_`aa\_\_¥  
@HWI-EAS443:3:95:1638:255#0/1  
GGGTCTTGGGAGTCTCGATACTGAATCTTGGACAAAAGAA  
+HWI-EAS443:3:95:1638:255#0/1  
K`bbbbb^¥` [bb]b\_bbbbabba`baaSS`b]` `bb  
@HWI-EAS443:3:96:1793:479#0/1  
NTAAGTTTGGTCTCCATCTGATACTAATAGCCCTACCTT  
+HWI-EAS443:3:96:1793:479#0/1  
DKVTXWYXUXNTXYXUUTTTYZYUZYUZYXYTYWRBBB  
@HWI-EAS443:3:97:163:1922#0/1  
AGGCCTTCTTTTTCATTGCCCTACTGGGAGCCCAGACTG  
+HWI-EAS443:3:97:163:1922#0/1  
Xa` `` `aaaaaaa\_a[aa` `]T¥a` \_`^¥¥^SU[\_U\_]`  
@HWI-EAS443:3:97:423:424#0/1  
CGTTCAACAAACAAGGGTAGATAAACTAACTCAAGGTCGC  
+HWI-EAS443:3:97:423:424#0/1  
aaZ`a^`\_\_`b`XYZY`I^^` [bbbYaa`a`\_`aba]Y[`¥  
@HWI-EAS443:3:98:434:474#0/1  
CGCCCTTCTTTTAACTTGCCTCTCTGCATCTTGGTC  
+HWI-EAS443:3:98:434:474#0/1  
aba\_\_ab`ababa\_]`^abb[aaaa\_a^ab`aa^aaa\_a\_^  
@HWI-EAS443:3:99:1511:366#0/1  
CGCCTCTCTGCATCTTGGTCATCGTATTTAATGTCAG  
+HWI-EAS443:3:99:1511:366#0/1  
Q\_0` `abV\_\_babZV` \_`ab`aaba\_\_bbabaaba\_F^b  
@HWI-EAS443:3:9:1428:995#0/1  
TCGGCAGCAACTGCATTGGCCAACACCATAGAAGTCTTTA  
+HWI-EAS443:3:9:1428:995#0/1  
a]`Z^` `[^` ]][V\_]a^` ]\_`^`^[XY]R¥ZR^\_NU^\_\_Y  
@HWI-EAS443:3:9:1570:872#0/1  
CGCTGATTCACTTACTCCAGACACTCCAAAGCTGGGTAGC  
+HWI-EAS443:3:9:1570:872#0/1  
aWV^b]bbabbab\_Z\_[`bba\_^H\_X\_^\_]UZ^aa^ZaZL

@HWI-EAS443:3:9:232:579#0/1  
CGTGGCTAATTTTAGCATGGAGCTACCCAGCTTTGGAGTG  
+HWI-EAS443:3:9:232:579#0/1  
ab]abaabababa`]a\_a`baa`aa`¥U^\_^a\_abaYaY`  
@HWI-EAS443:3:100:1006:403#0/1  
CTTCTTTTCATTGCCCTACTGGGAGCCAGACTGTTCA  
+HWI-EAS443:3:100:1006:403#0/1  
ab`Zb``bbaZ^`¥aaaZaa\_^\_aa¥a[T[\_`a`abP[Wa  
@HWI-EAS443:3:100:1021:165#0/1  
GAACAATTGAAGAGCCATCTGGGCCGTTGCAGGTCCAAGG  
+HWI-EAS443:3:100:1021:165#0/1  
aa``a\_```[a`¥aWU`¥Q`\_¥a¥V\_¥^TU\_ZYUU¥UBB  
@HWI-EAS443:3:100:1032:133#0/1  
ATCCGACTCTACTTTTCCTAAAAATTCCAGCGCAAATGC  
+HWI-EAS443:3:100:1032:133#0/1  
aaa\_b^Ua\_aa]`a`a\_\_aaa`aba]]^`Z^Z^\_^]\_`¥  
@HWI-EAS443:3:100:1056:1071#0/1  
GGTCCCTCATCTGATACTAATAGCCCTACCTTTGATTGGG  
+HWI-EAS443:3:100:1056:1071#0/1  
Z[]Z[bbabbabbaba`aaaababa\_aYUaabaaa`aab\_  
@HWI-EAS443:3:100:1085:1678#0/1  
AATGAACCAAGTGGGTATGCACAAACAGACTGTGTTCTAG  
+HWI-EAS443:3:100:1085:1678#0/1  
a^\_^Z\_W^^]\_Z\_]OX¥WPHUZZ]RZ^\_\_X]^ZYRWZWB  
@HWI-EAS443:3:100:1108:1374#0/1  
GCCGTTGCAACTACACATTCCTGGATTCCCAAGAGGAATC  
+HWI-EAS443:3:100:1108:1374#0/1  
aX\_]PZLY¥^`YU\_\_]Q]UVHV]]MRUUUU^¥V`]VBBB  
@HWI-EAS443:3:100:1124:299#0/1  
CAGATCTTCATGATCTCAGAGAACTCTTCTTTCTTGATCC  
+HWI-EAS443:3:100:1124:299#0/1  
W¥QY\_Y\_¥`^`^`¥R\_H¥Zab^^N^]b\_]a¥`^^aaa¥B  
@HWI-EAS443:3:100:114:798#0/1  
CAGATCTTCATGATCTCAGAGAACTCTTCTTTCTTGATCC  
+HWI-EAS443:3:100:114:798#0/1  
aaa^aaa][`Z`YY`\_[¥`\_bY`\_Z\_\_\_^[NWX[\_`\_^\_W  
@HWI-EAS443:3:100:1159:484#0/1  
GTTCCAGAAACATCCTGAGCATGGCACCCATAATGTTCTCA  
+HWI-EAS443:3:100:1159:484#0/1  
aV`Z`a`\_a\_a[\_Z`a`\_\_\_\_^[^UPX]a\_^`\_]X]^W`  
@HWI-EAS443:3:100:115:400#0/1  
AGCCCTTCTTTTAACTTGCCTCTCTCTGCATCTTTGGTC  
+HWI-EAS443:3:100:115:400#0/1  
aab^¥aaa\_`b`aa\_¥`aa^`a\_a``Z`]`\_a^a\_a¥\_X]  
@HWI-EAS443:3:100:1165:1383#0/1  
GGGAAAGGTACATGTTTCGAGAGTAAAAGAATGAAGATTC  
+HWI-EAS443:3:100:1165:1383#0/1  
T^aab`¥\_`R[TYa^`b``HQ\_aXa]aZ]\_[ba^a¥P^BB  
@HWI-EAS443:3:100:1257:1154#0/1  
ATGAGAGCAAATCGTCGGATGATTGGAGCCCATCCCACC

+HWI-EAS443:3:100:1257:1154#0/1  
aaaaa`a`aa`a¥\_\_\_\_a^^a``]¥`\_^\_VU]^\_]OZZYV  
@HWI-EAS443:3:100:1262:865#0/1  
CATTCACTATGAGAGCAAATCGTCGGATGATTGGAGCCC  
+HWI-EAS443:3:100:1262:865#0/1  
abbbaabbbbbbaabbbbbbaabbbbaaaabbbba[a`  
@HWI-EAS443:3:100:1303:1085#0/1  
ATTTCTTTCACAATCACTGGGACAACACTAAGTGAATG  
+HWI-EAS443:3:100:1303:1085#0/1  
ababaabbaa\_bab`aabb`\_`a\_aa]a^ba`aZa\_aaab  
@HWI-EAS443:3:100:1348:1351#0/1  
TGCAGATTAGAGTTTCGTATACTTTGTTGAACTTTAGC  
+HWI-EAS443:3:100:1348:1351#0/1  
abbaaaaXbbaa`Pa`aa`aaa]aaaaa\_a\_\_Sa\_`aaB  
@HWI-EAS443:3:100:1407:648#0/1  
AGCCCATCCCACCAGTATATTGTCTTGGTGTATTTCTTTT  
+HWI-EAS443:3:100:1407:648#0/1  
Uab\_a`\_V^[b]U\_a`ba`b`\_\_babaNa^)`aa[[^]a  
@HWI-EAS443:3:100:141:552#0/1  
GCCAGGTTCGACTTCGAGTCTGGACGGATCAAGAAAGAAG  
+HWI-EAS443:3:100:141:552#0/1  
a\_baa]¥Tbb`\_aa[X\_a]UabbaXb\_T¥aaab`\_`aX`B  
@HWI-EAS443:3:100:1442:820#0/1  
AACGATTCTCTTGGGAATCCAGGAATGTGTAGTTGCAAC  
+HWI-EAS443:3:100:1442:820#0/1  
a^\_`W`a]^`^0\_`T`\_R`\_RR^^\_HIV¥WVW^^X\_BBBBB  
@HWI-EAS443:3:100:1537:526#0/1  
AATTGAAGAGCCATCTGGGCCGTTGCAGGTCCAAGGTCAT  
+HWI-EAS443:3:100:1537:526#0/1  
abb`\_ab`a`¥[aaZ\_a^\_U¥a]aa^\_aY]VDN\_¥YXR\_B  
@HWI-EAS443:3:100:1595:62#0/1  
GTTCTGTTTACTGTGTCCATGGTGTATCCTGTTCCCTGTTC  
+HWI-EAS443:3:100:1595:62#0/1  
a^`^[aU[`aV`aVa]XVTYa\_Ra\_RZIQ\_¥0]YVV\_BBB  
@HWI-EAS443:3:100:1736:524#0/1  
GAATCCCCCTTTGGCTTGTGTTGAGAATAGAACGATTCCT  
+HWI-EAS443:3:100:1736:524#0/1  
``a`a`¥¥`\_a`X]aa\_ZJ[`\_`^`^\_aWYSD¥BBBBBB  
@HWI-EAS443:3:100:1756:969#0/1  
AGGAAGGCTAATAGATTTCTTAAAGGATGTAATGGAATCA  
+HWI-EAS443:3:100:1756:969#0/1  
^^`V\_ba^T`a]\_b\_V\_ab``aaaaZZaRDW]`\_]¥\_U\_a  
@HWI-EAS443:3:100:219:1324#0/1  
ATTCGAGAAATTTTTCCCTAGCAGTTCATATAGGAGACCG  
+HWI-EAS443:3:100:219:1324#0/1  
a]Z\_aaa`\_]\_]\_\_\_\_]S\_a^^Z^\_X^]\_\_^^\_]OZZ]BBB  
@HWI-EAS443:3:100:247:1596#0/1  
ATCCGACTCTACTTTTCCTAAAAATCCAGCGCAAATGC  
+HWI-EAS443:3:100:247:1596#0/1  
a`aaaa\_aabb`abaaaabbabaaa\_\_a`aa[`a`a`U

@HWI-EAS443:3:100:247:415#0/1  
ACATGACCAAGAAGATGGTCACGCAAAGAACAATAGGGAA  
+HWI-EAS443:3:100:247:415#0/1  
a\_W]SY^[YP`[a^UL]¥G`[Xa^¥¥\_V\_^TLZ][`^BB  
@HWI-EAS443:3:100:262:613#0/1  
GATTGATGCCAGGGTCGACTTCGAGTCTGGACGGATCAAG  
+HWI-EAS443:3:100:262:613#0/1  
VT\_`aSZ\_]¥\_a¥M[\_[]\_`Yaa`W[]a`TO]^YY^^\_B  
@HWI-EAS443:3:100:286:138#0/1  
TGGTAATGCCAGCCCATGGTCCAGCCAAAAGCATGGAATA  
+HWI-EAS443:3:100:286:138#0/1  
aa`^aaaU`Y`\_[]Z[^^WW[Z^ZWZUWYXVW¥[UXYBB  
@HWI-EAS443:3:100:28:706#0/1  
GGCTCTTCAATTGTTTCATCAAAGACTACAGATACACATAT  
+HWI-EAS443:3:100:28:706#0/1  
a^JZ`a]T\_aa`T`[aa]]ZT`¥X`^`\_VY^[Z\_[]a^B  
@HWI-EAS443:3:100:366:1351#0/1  
AGGCCATGGTGTCTAGGGCCCGATTGATGCCAGGGTCGA  
+HWI-EAS443:3:100:366:1351#0/1  
\_a¥¥a\_\_aa¥aW^Za`a[a\_¥a\_U`a\_`^`[PZ^O\_KBBB  
@HWI-EAS443:3:100:392:235#0/1  
ATTCTCAAATATTCCTGGGTGGGATTCTTCAAGGAAAGCC  
+HWI-EAS443:3:100:392:235#0/1  
\_bbbbbbaba]baWbbbbbb\_bbbaba\_ba\_a`baa`^a\_`  
@HWI-EAS443:3:100:406:844#0/1  
TTGGCTTGTGTTGAGAATAGAACGATTCCCTTGGGAATC  
+HWI-EAS443:3:100:406:844#0/1  
aaaaaa`X]a^`[X\_\_\_Z]Q]aQ`U[^[¥^]^^V¥¥VZBB  
@HWI-EAS443:3:100:445:927#0/1  
ACTTGTTTCATTATCCTCAGGTAGTGGTCCATCAATCGGG  
+HWI-EAS443:3:100:445:927#0/1  
aabb\_babaabbbbaaaabbb\_bb`aaaRaaa^aaaY`aa  
@HWI-EAS443:3:100:458:1811#0/1  
GTTCTGTTTACTGTGTCCATGGTGTATCCTGTTCTGTTCT  
+HWI-EAS443:3:100:458:1811#0/1  
^IYYs^X`\_]TW]V[WLT[]SSF[NUDTNT\_V\_BBBBBBB  
@HWI-EAS443:3:100:480:995#0/1  
CAGATACACATATAGGTGCCATAGGGGAGACACACAAATT  
+HWI-EAS443:3:100:480:995#0/1  
abbabbabbbbaabb^ba`abaaaa``aaaa\_a\_aa`aa  
@HWI-EAS443:3:100:481:115#0/1  
GTATTGGTGTGTTCTGTTTACTGTGTCCATGGTGTATCCT  
+HWI-EAS443:3:100:481:115#0/1  
ab¥baba``YaV``¥b\_aaSUaa\_aZ`M]aa\_VaQ]\_WT^  
@HWI-EAS443:3:100:500:448#0/1  
GGTCGACTTCGAGTCTGGACGGATCAAGAAAGAAGAGTTC  
+HWI-EAS443:3:100:500:448#0/1  
ab¥ba[`¥`aaba^a`aba¥baa\_\_aaa`aa``\_\_\_V[a\_  
@HWI-EAS443:3:100:523:1365#0/1  
CAATCCGACTCTACTTTTCCTAAAAATTCCAGCGCAAAAT

+HWI-EAS443:3:100:523:1365#0/1  
abaaJab\_`abab]bbb\_aYabbbbbaaa^`a\_\_aaaa\_aa  
@HWI-EAS443:3:100:549:1769#0/1  
TAAAAATTCCAGCGCAAATGCCATAAGCACCATTTCCC  
+HWI-EAS443:3:100:549:1769#0/1  
VbVY[F¥\_¥[]aa\_]aaaaaaPZV\_¥aa\_a`P[\_a`\_]BB  
@HWI-EAS443:3:100:553:705#0/1  
CTGCTTGTATTCCCTCATGGTTTGGTGCATTCACTATGAG  
+HWI-EAS443:3:100:553:705#0/1  
abb]bbbabba\_a\_aaabba]aaa`\_a``aa^`\_a\_a`aa  
@HWI-EAS443:3:100:561:600#0/1  
TGGGCTCCAATCATCCGACGATTTTGCTCTCATAGTGAAT  
+HWI-EAS443:3:100:561:600#0/1  
ab`¥Y¥Z^^``\_b`a`aa`\_WV\_\_aa]Y[[]a`WJP\_ZP\_  
@HWI-EAS443:3:100:579:427#0/1  
CTCTATTTCTCTTTGTTTCATTGATTCCATTACATCCTTT  
+HWI-EAS443:3:100:579:427#0/1  
a\_bMaZ]\_X\_Wba^`b`XV^Z]a`aaaaaaaa[X`aTb`b  
@HWI-EAS443:3:100:592:894#0/1  
GGTGCTTATGGCATTTCGCGCTGGAATTTTTAGGAAAAGT  
+HWI-EAS443:3:100:592:894#0/1  
`MHDR`SS\_a^XIV[QVXR¥[^`XOOV^XRRPUWBBBBBB  
@HWI-EAS443:3:100:612:318#0/1  
ACCAATACTCAGAAAAGGGAAAGTGGACGACAAACACAGA  
+HWI-EAS443:3:100:612:318#0/1  
a]`aa`aa`a`a\_a^¥a`\_¥Y]aW\_a^Xa\_^\_\_\_^^]B  
@HWI-EAS443:3:100:614:1306#0/1  
CAAAGTCTTCCCCGATAATCATCATCCATTAGCTCCCATT  
+HWI-EAS443:3:100:614:1306#0/1  
abaaa\_aaa\_a\_ab``a\_]`\_a\_\_^a\_`\_¥`\_]Y^``  
@HWI-EAS443:3:100:645:402#0/1  
GTAGTCTTTGATGAACAATTGAAGAGCCATCTGGGCCGTT  
+HWI-EAS443:3:100:645:402#0/1  
^V\_HN[b^`a]`a]NXVWY\_a\_a`[\_U¥[]V[RS[TW¥BB  
@HWI-EAS443:3:100:651:429#0/1  
AAGATGGTCACGCAAAGAACAATAGGGAAGAAAAACAAA  
+HWI-EAS443:3:100:651:429#0/1  
aab``ab^^a\_a`\_``a\_a\_`¥a`a``]^a\_]\_\_^]]^^  
@HWI-EAS443:3:100:652:1406#0/1  
GAAGAGCCATCTGGGCCGTTGCAGGTCCAAGTCATTGTT  
+HWI-EAS443:3:100:652:1406#0/1  
a\_\_b\_U]Z¥`b¥YZ\_^Xa¥^\_W\_Z[SZYWZ[SKUX`[WPa  
@HWI-EAS443:3:100:658:110#0/1  
TTCTTCAAGGAAAGCCATAGCCTCTAGAACACAGTCTGTT  
+HWI-EAS443:3:100:658:110#0/1  
aa`aa]aaaa`\_`a]`\_a``\_¥a\_\_XUV^XZ^\_]U]NBB  
@HWI-EAS443:3:100:721:619#0/1  
AAAAATTTCTCGAATAGATTGCAGCACTTCTGGTACATCT  
+HWI-EAS443:3:100:721:619#0/1  
aaaaaaaa`^a\_a^¥aa^[``a\_`a\_`^``]\_\_`]^`\_`Y\_



@HWI-EAS443:3:100:744:657#0/1  
ATGGGCTCCAATCATCCGACGATTTTGCTCTCATAGTGAA  
+HWI-EAS443:3:100:744:657#0/1  
abb]`TS]aa¥S`aYY^]WZ`\_]P\_Z`\_UPSRZ`^BBBBB  
@HWI-EAS443:3:100:751:1200#0/1  
GTTGAGAATAGAACGATTCTTGGGAATCCAGGAATGT  
+HWI-EAS443:3:100:751:1200#0/1  
a`UTXWZ¥aVSQUNY[R\_\_^Z]\_TVLUUYSPNPX]WQ\_BB  
@HWI-EAS443:3:100:770:1890#0/1  
GAACAGGATACACCATGGACACAGTAAACAGAACACACCA  
+HWI-EAS443:3:100:770:1890#0/1  
abb¥`a``\_b`R¥^aaVM]H¥a\_\_aaOaWVUMYWYBBB  
@HWI-EAS443:3:100:777:545#0/1  
GAATCCCACCCAGGAATATTTGAGAATTCATGCCTTGAAA  
+HWI-EAS443:3:100:777:545#0/1  
\_Va^¥XXb`b`a\_ba``abbbabaaab[aab\_\_b\_aUaa  
@HWI-EAS443:3:100:79:1403#0/1  
AAAAATTCCAGCGCAAATGCCATAAGCACCATTCCT  
+HWI-EAS443:3:100:79:1403#0/1  
aaaa]aaa`aa\_]`\_\_aa\_\_^a`\_^\_\_\_\_^`\_`\_]S]X\_  
@HWI-EAS443:3:100:86:501#0/1  
CGACGATTTTGCTCTCATAGTGAATGCACCAAACCATGAG  
+HWI-EAS443:3:100:86:501#0/1  
ababbba`Y¥I^b¥^a[bbabb[a¥H\_WVa\_\_a\_Tabab  
@HWI-EAS443:3:100:910:1314#0/1  
TCTGGGCTCCCAGTAGGGGCAATGAAAAGAAGCCAAAC  
+HWI-EAS443:3:100:910:1314#0/1  
a```aa\_a```\_a^^^^`\_¥^`aa\_¥\_\_\_\_^\_¥SW\_¥¥X  
@HWI-EAS443:3:100:925:615#0/1  
CAAGAAGATGGTCACGCAAAGAACAATAGGGAAGAAAAA  
+HWI-EAS443:3:100:925:615#0/1  
`bbbbbbbaabbbb`baabaa`babbbbaabaaaaab  
@HWI-EAS443:3:100:947:1041#0/1  
GAAGTACTTCAGGTCAATGCTTGCTAGCATTCTGCTGGT  
+HWI-EAS443:3:100:947:1041#0/1  
¥]Y\_0\_bb`W\_ab\_TVZba[b¥abbaZ]a\_ba\_ba````\_  
@HWI-EAS443:3:100:962:594#0/1  
GAAACATCTGAGCATGGCACCCATAATGTTCTCAAACAA  
+HWI-EAS443:3:100:962:594#0/1  
\_]`\_X\_[[a\_a]]Vb]NQZV]Yaa\_H\_b`\_W\_LZ^¥R¥B  
@HWI-EAS443:3:100:966:455#0/1  
CCAGGGTCTGACTTCGAGTCTGGACGGATCAAGAAAGAAGA  
+HWI-EAS443:3:100:966:455#0/1  
abbb]b\_abaYa`ZaabQ\_aaa`\_bb\_\_¥`aba¥aa`\_aa  
@HWI-EAS443:3:10:1020:706#0/1  
TGCAGGTCCAAGGTCATTGTTTATCATGTTGTTCTTTATC  
+HWI-EAS443:3:10:1020:706#0/1  
aa`abb`]aaaaaT`aaaa`a\_\_\_\_\_a`\_a]a\_a`a^`W  
@HWI-EAS443:3:10:1047:1854#0/1  
ATCCCACCCAGGAATATTTGAGAATTCATGCCTTGAAACA

+HWI-EAS443:3:10:1047:1854#0/1  
a^`aaaa`aaa\_a`\_\_\_aa¥aa`\_`¥`]W\_] [X\_^Zb  
@HWI-EAS443:3:10:106:167#0/1  
CCTGCTTGTATTCCCTCATGGTTTGGTGCATTCACTATGA  
+HWI-EAS443:3:10:106:167#0/1  
abbbaaba\_`aabaa`a\_aa`Ya]^\_Y`\_\_\_`\_\_V`]-`^  
@HWI-EAS443:3:10:1157:539#0/1  
TGAGCATGGCACCCATAATGTTCTCAAACAAAATGGCAAG  
+HWI-EAS443:3:10:1157:539#0/1  
aab`Y`ba`a`a`]`aaa¥aa]^`\_a`\_`^a^`\_`\_a^`\_]-  
@HWI-EAS443:3:10:1186:1514#0/1  
CTTCGAGTCTGGACGGATCAAGAAAGAAGAGTTCTCTGAG  
+HWI-EAS443:3:10:1186:1514#0/1  
aba^[¥`bbb`abbbabbabbbbabbaabab`a[aaba  
@HWI-EAS443:3:10:1286:1585#0/1  
CTTCCCTATTGTTCTTTGCGTGACCATCTTCTTGGTCATG  
+HWI-EAS443:3:10:1286:1585#0/1  
^aba`abbbbbbabbbaabbaaaaa`bbbb`bb`a^aaba  
@HWI-EAS443:3:10:1424:669#0/1  
CCTCCATCTGATACTAATAGCCCTACCTTTGATTGGGTTT  
+HWI-EAS443:3:10:1424:669#0/1  
aababbb¥babbb¥babbb¥^^bb\_a\_baba\_Sab`aaa  
@HWI-EAS443:3:10:1432:459#0/1  
CAAAGACTACAGATACACATATAGGTGCCATAGGGGAGAC  
+HWI-EAS443:3:10:1432:459#0/1  
]aabb^X`bXbbbbbaaaa`bbba\_b`\_ab`baaa`aYG  
@HWI-EAS443:3:10:143:94#0/1  
CTTAGTGTGTCGCCAGTGATTGTGAAAGAAATCTCTGTG  
+HWI-EAS443:3:10:143:94#0/1  
abbabaa\_a`abbaaa`baaba`baaba\_aaa\_a`aa^`  
@HWI-EAS443:3:10:1444:610#0/1  
CAACTGCATTGGCCAACACCATAGAAGTCTTTAGATCGAA  
+HWI-EAS443:3:10:1444:610#0/1  
aa`\_bbbb`bbaa`b`a``aaba\_Z]a`aa`\_`X]a`  
@HWI-EAS443:3:10:1459:590#0/1  
GGTCGACTTCGAGTCTGGACGGATCAAGAAAGAAGAGTTC  
+HWI-EAS443:3:10:1459:590#0/1  
a\_MVXX¥¥]JOSWQR^\_WWRUPSURWWWYXWZVVZZRXH  
@HWI-EAS443:3:10:1472:724#0/1  
GGGCTCCAATCATCCGACGATTTTGCTCTCATAGTGAATG  
+HWI-EAS443:3:10:1472:724#0/1  
a\_Z[a\_\_\_a`Z`\_]Y`\_`^a`\_Z`\_aVZSYX^`\_\_X` [^^\_  
@HWI-EAS443:3:10:147:1930#0/1  
TTCCCACTAACTTGCAGGTCCTGTAGAATCTGTCCACTCC  
+HWI-EAS443:3:10:147:1930#0/1  
`baabbaab`]^`[ba^XYaab\_^`aa^X¥^VZ^]¥`¥V  
@HWI-EAS443:3:10:1525:359#0/1  
AGCCTCTCTTATTTCAGTCTTTGTTTTTTCTTCCCTATTGT  
+HWI-EAS443:3:10:1525:359#0/1  
[\_b^bbb¥`aabbbaba\_abbaababbabb`\_\_baaa\_\_

@HWI-EAS443:3:10:1528:1311#0/1  
TGGAATCAATGAACAAAGAGGAAATAGAGATAACAACCCA  
+HWI-EAS443:3:10:1528:1311#0/1  
[`aYZV]\_aY^[\_^][`T`][^^^¥a]a[N]\_[^ZUOFV  
@HWI-EAS443:3:10:1532:984#0/1  
ATTCCACTTAGTGTGCCCCAGTGATTGTGAAAGAAATC  
+HWI-EAS443:3:10:1532:984#0/1  
aaaaa^`abab^`\_^`a\_a\_\_^a]\_]a\_dW`]\_^V^^]^W  
@HWI-EAS443:3:10:1612:617#0/1  
AGCTGATTCATTTACTCCAGACACTCCAAAGCTGGGTAGC  
+HWI-EAS443:3:10:1612:617#0/1  
`a`b`aa[`a`aQ^¥Z]Q]U¥R`VUY`¥\_W[TY[GYWV  
@HWI-EAS443:3:10:1617:439#0/1  
CTCCAAAGCTGGGTAGCTCCATGCTAAAATTAGCCACAAA  
+HWI-EAS443:3:10:1617:439#0/1  
`\_\_^a¥`V\_aa¥TZ\_U\_¥¥X`WZT¥a`]^aY¥aTRTL]\_W  
@HWI-EAS443:3:10:1720:601#0/1  
TCAAGAATTCCTTTGGCTTGTGTTGAGAATAGAACGAT  
+HWI-EAS443:3:10:1720:601#0/1  
a\_a`\_`\_`a¥]Va\_^a\_X\_^Y[Y]`X¥ZXZ^Z]XU]ZZ  
@HWI-EAS443:3:10:1723:910#0/1  
TGACCTGAAGTACTTCAATGAATCAACAAAGAAGAAAATT  
+HWI-EAS443:3:10:1723:910#0/1  
YX`X^¥`^¥`^a¥\_¥K[aa^¥``Z¥WZYWT^`\_`a]][^a`  
@HWI-EAS443:3:10:1747:238#0/1  
CAGGGTCGACTTCGAGTCTGGACGGATCAAGAAAGAAGAG  
+HWI-EAS443:3:10:1747:238#0/1  
Va`ababbbabb¥aabaabbba`bb\_aYa`a`\_aaa\_\_aa  
@HWI-EAS443:3:10:1751:417#0/1  
CTTCCCTATTGTTCTTTGCGTGACCATCTTCTTGGTCATG  
+HWI-EAS443:3:10:1751:417#0/1  
abb\_aabbbbbbbbbbbbabaaa^P`b^ba\_aaba\_\_\_aa  
@HWI-EAS443:3:10:186:966#0/1  
TGGTTTGGTGCATTCACTATGAGAGCAAAATCGTCGGATG  
+HWI-EAS443:3:10:186:966#0/1  
\_`\_^][WR¥Qa\_]JXX[]][U[L\_ZT¥FJ^^[¥HY¥MP^  
@HWI-EAS443:3:10:207:23#0/1  
AGGCCATGGTGTCTAGGGCCCGATTGATGCCAGGGTCGA  
+HWI-EAS443:3:10:207:23#0/1  
aZZ\_`¥[`¥[JQRX¥a¥P[]aaYX¥a`Y^Y[Y^^[V¥^[  
@HWI-EAS443:3:10:214:1306#0/1  
AAGGAAAGCCATAGCCTCTAGAACACAGTCTGTTTGTGCA  
+HWI-EAS443:3:10:214:1306#0/1  
a[\_WZSR¥`\_aa¥Sa`\_a\_a\_a[`^`\_`¥`YSQS]XXSZ\_  
@HWI-EAS443:3:10:225:931#0/1  
AAGACAATATACTGGTGGGATGGGCTCCAATCATCCGACG  
+HWI-EAS443:3:10:225:931#0/1  
^Zaab`W^abbaaa¥Naaa[`^¥][Zaa`\_`\_W\_ZZ¥`XZ^  
@HWI-EAS443:3:10:234:1128#0/1  
GAACGATTCTTGGGAATCCAGGAATGTGTAGTTGCAA

+HWI-EAS443:3:10:234:1128#0/1  
\_\_\_\_`[b`¥U``L^U^^b¥ab`b^¥a^aaN^YUZb\_a^  
@HWI-EAS443:3:10:258:822#0/1  
ATTGTCTTGGTGTATTTCTTTTGTCCAAGATTCAGTATCG  
+HWI-EAS443:3:10:258:822#0/1  
abb`\_`abbbb`b\_aabbbbbbaa`bbbabaababbaba^b  
@HWI-EAS443:3:10:317:545#0/1  
AATGTGTAGTTGCAACGGCATCATATTCATGCTTTTGGC  
+HWI-EAS443:3:10:317:545#0/1  
aabb`ba``\_a\_aaa`b`aaa^`aaaaaaaa\_aa\_\_\_\_]^  
@HWI-EAS443:3:10:355:1511#0/1  
CGATACTGAATCTTGGACAAAAGAAATACACCAAGACAAT  
+HWI-EAS443:3:10:355:1511#0/1  
abaaaabbabbabbbbabbabababaabba\_baba`b`b  
@HWI-EAS443:3:10:379:475#0/1  
AACATGATAACAATGACCTTGGACCTGCAACGGCCCAGA  
+HWI-EAS443:3:10:379:475#0/1  
\_Waaaa]]aaa`aa]]Z^^`^¥`\_\_[¥\_^]`Y¥\_]PQQ]Z  
@HWI-EAS443:3:10:386:322#0/1  
CTAATGGATGATGATTATCGGGGAAGACTTTGTAATCCCC  
+HWI-EAS443:3:10:386:322#0/1  
abb^bbbabbaaa`aaaaaaaa`\_`\_a`\_aaaa]aaa\_\_X]  
@HWI-EAS443:3:10:400:1727#0/1  
GATTCTTCAAGGAAAGCCATAGCCTCTAGAACACAGTCTG  
+HWI-EAS443:3:10:400:1727#0/1  
`b`bb^a[ba`\_`baTIab`b\_\_^a\_^a^[a\_aVbURX`P  
@HWI-EAS443:3:10:401:809#0/1  
CAGCTGATTCATTTACTCCAGACTCCAAAGCTGGGTAG  
+HWI-EAS443:3:10:401:809#0/1  
aaba`\_Zaaabaaaa\_abaaaaaaaa\_aaa\_^`¥``aZa`  
@HWI-EAS443:3:10:456:978#0/1  
CCCGGATTGATGCCAGGGTCGACTTCGAGTCTGGACGGAT  
+HWI-EAS443:3:10:456:978#0/1  
`bbb``bbbbabbbbabNaaa`\_aabab`\_aba`\_baa[  
@HWI-EAS443:3:10:468:616#0/1  
GCTAATTTTAGCATGGAGCTACCCAGCTTTGGAGTGTCTG  
+HWI-EAS443:3:10:468:616#0/1  
a][¥Y^XPVHZ[U¥ZTSY^VNN[MSTFKYYRWV]UTUYQW  
@HWI-EAS443:3:10:475:526#0/1  
CTGGAGTAAATGAATCAGCTGACATGAGTATTGGAGTAAC  
+HWI-EAS443:3:10:475:526#0/1  
abaa\_\_a`\_bbb^]^aabb`ba\_aa```¥U`ba`]ZX`a^  
@HWI-EAS443:3:10:476:287#0/1  
CAATTGAAGAGCCATCTGGGCCGTTGCAGGTCCAAGGTCA  
+HWI-EAS443:3:10:476:287#0/1  
abbbbbabbbb`abbabbaba`b`aaaaaaZ^aaa``S[^  
@HWI-EAS443:3:10:506:252#0/1  
AAAAATTCCAGCGCAAATGCCATAAGCACCATTCCT  
+HWI-EAS443:3:10:506:252#0/1  
aaaa`\_a`\_a`\_`\_]QTT]\_¥Z^^¥Y¥\_^WVV[]¥WUWSY

@HWI-EAS443:3:10:556:266#0/1  
GACGGATCAAGAAAGAAGAGTTCTCTGAGATCATGAAGAT  
+HWI-EAS443:3:10:556:266#0/1  
aa\_`aZRW^Z\_\_\_\_][W]X\_^Z]U]V^]X]]ZW]ZZZXVZR  
@HWI-EAS443:3:10:591:269#0/1  
CAGATCTTCATGATCTCAGAGAACTCTTCTTTCTTGATCC  
+HWI-EAS443:3:10:591:269#0/1  
aba`bababbbbabaaaabaaa`aa`a`\_ba\_\_aaaa\_\_^  
@HWI-EAS443:3:10:647:1610#0/1  
ATGGGCTCCAATCATCCGACGATTTTGCTCTCATAGTGAA  
+HWI-EAS443:3:10:647:1610#0/1  
a`^^[aa\_^abaabaXaW\_T[\_\_\_a\_a^QZY[JaXZZM]a`  
@HWI-EAS443:3:10:674:1595#0/1  
TTGTGCATACCCACTTGGTTCATTATCCTCAGGTAGTGGT  
+HWI-EAS443:3:10:674:1595#0/1  
a`a``abab\_baa`aaaa\_aaaaaaaa^`[a`^Q``VZQW  
@HWI-EAS443:3:10:677:542#0/1  
GGAGGACCAAACTTATACAATATACGGAATCTTCACATTC  
+HWI-EAS443:3:10:677:542#0/1  
a[J[TJHSOZTOSXSJQQVTM¥M`U[S¥RLLWYX^PPTW  
@HWI-EAS443:3:10:725:985#0/1  
AATCTGTCCACTCCTGCTTGTATTCCCTCATGGTTTGGTG  
+HWI-EAS443:3:10:725:985#0/1  
a`ba^)^`b`a]a``]a¥]]^a`\_`Z`^`^`a`Q\_\_a[Wa  
@HWI-EAS443:3:10:76:1005#0/1  
CTGCATTGGCCAACACCATAGAAGTCTTTAGATCGAATGG  
+HWI-EAS443:3:10:76:1005#0/1  
aaabbaabbabaa\_aaaaaa`a`a]aaaaaa\_`aaa`a\_  
@HWI-EAS443:3:10:770:289#0/1  
AAAAATTCCAGCGCAAATGCCATAAGCACCATTCCT  
+HWI-EAS443:3:10:770:289#0/1  
aa^]U[]\_]\_[\_¥W`Y[a\_a[\_`[[\_\_\_a[0\_\_[SYNNV\_  
@HWI-EAS443:3:10:78:697#0/1  
GTGGGATTCTTCAAGGAAAGCCATAGCCTCTAGAACACAG  
+HWI-EAS443:3:10:78:697#0/1  
`O`][LQ^[\_]XRYWWN]]YQSZ\_VYTPPY]][]UT]¥Y]  
@HWI-EAS443:3:10:803:72#0/1  
TGCAGATTAGAGGTTTCTGATACTTTGTTGAACTTTAGC  
+HWI-EAS443:3:10:803:72#0/1  
abaab`aaaaaaa^aa^a\_aa`¥`a`a`\_`\_\_^Z`\_\_^`W  
@HWI-EAS443:3:10:804:1147#0/1  
ATTACCACAGCATTGTTTACAGAATCAATCTCTTTATGAC  
+HWI-EAS443:3:10:804:1147#0/1  
`Ta]\_\_TG^UQ¥`]aU[]]YW[WLWXVPYY¥\_UFTT]\_WV  
@HWI-EAS443:3:10:900:569#0/1  
CTTGCAGTCTCTGTAGAATCTGTCCACTCCTGCTTGTATT  
+HWI-EAS443:3:10:900:569#0/1  
a]aaabbbabbbbaabaaba]aaa`a¥`a`\_aa\_\_\_\_a  
@HWI-EAS443:3:10:903:15#0/1  
CTCTCTTATTACAGTCTTTGTTTTTTCTTCCCTATTGTTCT

+HWI-EAS443:3:10:903:15#0/1  
aabbbaabbbabbabbabb^bbbbbbabb`bb\_b`baabb  
@HWI-EAS443:3:10:908:754#0/1  
AGAACATTATGGGTGCCATGCTCAGGATGTTTCTGAACCA  
+HWI-EAS443:3:10:908:754#0/1  
aa\_b`^`aba`aa`\_\_aa`\_]R¥`VY[P\_`]\_a\_\_PP¥  
@HWI-EAS443:3:10:92:1548#0/1  
GGGATTGAGGGATTACAAAGTCTTCCCCGATAATCATCA  
+HWI-EAS443:3:10:92:1548#0/1  
`R`X[]a[a^^a`\_`a`]W]\_X`^^`[\_aX\_¥¥\_[^^^  
@HWI-EAS443:3:10:954:208#0/1  
TGTGTATCTGTAGTCTTTGATGAACAATTGAAGAGCCATC  
+HWI-EAS443:3:10:954:208#0/1  
[`[¥aa`\_]`a\_bb`aabab^baUaM]`a`\_`a\_[YaPHY[X  
@HWI-EAS443:3:10:96:1076#0/1  
CACTAACTTGCAGGTCCTGTAGAATCTGTCCACTCCTGCT  
+HWI-EAS443:3:10:96:1076#0/1  
aabb\_¥bbba`a`aabbabaaabbb]aaa````a`\_`  
@HWI-EAS443:3:10:975:952#0/1  
AAAATTCCAGCGCAAATGCCATAAGCACACATTCCCTT  
+HWI-EAS443:3:10:975:952#0/1  
aT^Uaaaa`baa\_a`aaa\_ZW]Y^\_XaZR¥YY]ZZPP]\_  
@HWI-EAS443:3:10:991:1721#0/1  
TATCGCAACACCTGGGATGCAGATTAGAGTTTCGTATAC  
+HWI-EAS443:3:10:991:1721#0/1  
ab`a^abaaa`aabaaa\_R]\_\_a\_aa^a]X`\_\_\_Z\_`a]  
@HWI-EAS443:3:10:996:1865#0/1  
TGGAGTAAATGAATCAGCTGACATGAGTATTGGAGTAACA  
+HWI-EAS443:3:10:996:1865#0/1  
a`a`^aaaaaba`\_]`^`\_`[\_a^`W\_\_\_\_\_]^WX^\_Z^  
@HWI-EAS443:3:11:1013:739#0/1  
GCTGATTCATTTACTCCAGACACTCCAAAGCTGGGTAGCT  
+HWI-EAS443:3:11:1013:739#0/1  
aaaa`aa[``aaa`\_`^`¥\_\_\_\_\_`^`\_`\_`Z^\_\_\_R^]V^  
@HWI-EAS443:3:11:1015:282#0/1  
CCGGATTGATGCCAGGGTCGACTTCGAGTCTGGACGGATC  
+HWI-EAS443:3:11:1015:282#0/1  
abbbbbbbbbbbabb`bbbaaaaaa¥`abbaaa]\_R  
@HWI-EAS443:3:11:1029:94#0/1  
TGGACGACAAACACAGAGACTGGTGCACCCAGCTCAACC  
+HWI-EAS443:3:11:1029:94#0/1  
aba^aba`baaa`\_aa\_a]\_`\_W\_\_\_^]SZ¥`SXXVRWQ  
@HWI-EAS443:3:11:1033:1737#0/1  
GTAAGAGACAACATGACCAAGAAGATGGTCACGCAAAGAA  
+HWI-EAS443:3:11:1033:1737#0/1  
a`]¥a\_aaab\_a\_\_\_\_\_a`^^^`^`\_\_\_^ZX\_Z\_¥^]]^]  
@HWI-EAS443:3:11:1077:1020#0/1  
GTCAGTCATAAAGAGATTGATTCTGTAAACAATGCTGTGG  
+HWI-EAS443:3:11:1077:1020#0/1  
aaabb`\_ababba`a`aaaaaaaa^aaa\_a`aX^\_]a^

@HWI-EAS443:3:11:1114:1749#0/1  
AAAGATGCAGAGAGAGGCAAGTTAAAAAGAAGGGCTATCG  
+HWI-EAS443:3:11:1114:1749#0/1  
a\_`¥[^a\_\_\_\_[aY\_[aaa\_¥` ]`\_\_^\_\_]V]]NTPR¥UPU  
@HWI-EAS443:3:11:1123:1230#0/1  
AGAAATCTCTGTGTCTTGTGAATTAGTCATCATCTTTCTC  
+HWI-EAS443:3:11:1123:1230#0/1  
a^^abaabaab`aaaa^\_\_¥aaa]¥]\_a`^`^W`a`Xa`  
@HWI-EAS443:3:11:112:116#0/1  
GCTCTCATAGTGAATGCACCAAACCATGAGGGAATACAAG  
+HWI-EAS443:3:11:112:116#0/1  
`TTa[G\_aZ]TN¥\_\_^XV]YX^X`^VUPU\_V]ZQ[TSYVU  
@HWI-EAS443:3:11:1136:424#0/1  
GACCTGCAACGGCCCAGATGGCTCTTCAATTGTTTCATCAA  
+HWI-EAS443:3:11:1136:424#0/1  
aaaaaaaaabaaaaa`aaaa\_\_X`a`a`a\_\_]ZY^Z^\_]\_\_  
@HWI-EAS443:3:11:1162:604#0/1  
CATTACCACAGCATTGTTTACAGAATCAATCTCTTTATGA  
+HWI-EAS443:3:11:1162:604#0/1  
abbabaaaabaaabb`¥aba`abb^aaa\_b]aaaaaaaaa  
@HWI-EAS443:3:11:118:493#0/1  
CTGTCCACTCCTGCTTGTATTCCCTCATGGTTTGGTGCAT  
+HWI-EAS443:3:11:118:493#0/1  
aab]a`aa^aa`a`aa]a\_aaaa\_`^aa\_N`^S\_Ua\_\_]  
@HWI-EAS443:3:11:1190:1441#0/1  
GAGGAAATAGAGATAACAACCCACTTTCAAAGAAAAAGGA  
+HWI-EAS443:3:11:1190:1441#0/1  
^M\_]S\_`a`a¥]`a\_`a¥]¥\_¥[Y`W¥Z\_a]]\_Z^\_] ^  
@HWI-EAS443:3:11:127:2004#0/1  
GCTATTAGTATCAGATGGAGGACCAAACCTTATACAATATA  
+HWI-EAS443:3:11:127:2004#0/1  
aa¥a\_¥` `Wa^a[^RP¥`\_PM[M\_¥]R\_ZU^Y\_\_\_\_\_[^\_\_  
@HWI-EAS443:3:11:1286:133#0/1  
GTTCATTGATTCCATTACATCCTTTAAGAAATCTATTAGC  
+HWI-EAS443:3:11:1286:133#0/1  
U`¥XYU`a[¥aaab¥a\_bab\_\_ab`^ab^Z`a^ba` `` `\_  
@HWI-EAS443:3:11:1292:1032#0/1  
AACAATTGAAGAGCCATCTGGGCCGTTGCAGGTCCAAGGT  
+HWI-EAS443:3:11:1292:1032#0/1  
a[[`^aaabbaS\_[W¥][`a[WNN\_]\_]\_\_\_\_]TVPN]V^VB  
@HWI-EAS443:3:11:1302:1170#0/1  
ACTCCTGCTTGTATTCCCTCATGGTTTGGTGCATTCACTA  
+HWI-EAS443:3:11:1302:1170#0/1  
^Y\_aaaUaU\_]¥Y]`S^VXQQ\_YS]aVUZ[\_YZQYPTW[[  
@HWI-EAS443:3:11:1306:1129#0/1  
GGCCTCTTCTAATAGATGGCACAGCATCACTGAGTCCTGG  
+HWI-EAS443:3:11:1306:1129#0/1  
aab`a]aaa^Q[a\_\_`\_a\_aa\_\_a¥[^^[U]XZ\_XUU\_a^  
@HWI-EAS443:3:11:1326:947#0/1  
CAACTGCATTGGCCAACCCATAGAAGTCTTTAGATCGAA

+HWI-EAS443:3:11:1326:947#0/1  
``\_U]ZT^a`bbV]a`XX`]``\_]a`¥[a\_aaaZ^\_a]\_  
@HWI-EAS443:3:11:140:1367#0/1  
AAAATTCCAGCGCAAATGCCATAAGCACCATTCCTT  
+HWI-EAS443:3:11:140:1367#0/1  
aaa`baaa^\_a¥a`^`\_\_`\_\_\_\_`^\_a\_\_¥\_a^``W^\_^  
@HWI-EAS443:3:11:141:1690#0/1  
GTGACTTCGAGTCTGGACGGATCAAGAAAGAAGAGTTCT  
+HWI-EAS443:3:11:141:1690#0/1  
]\_abYUaa[UY^abSY\_\_Oab\_U¥a[`^a¥\_abaaXT]aa  
@HWI-EAS443:3:11:1433:372#0/1  
CAGATCTTCATGATCTCAGAGAACTCTTCTTTCTTGATCC  
+HWI-EAS443:3:11:1433:372#0/1  
abb`¥Ybbb`a`a\_^`b`aaaa`a\_abaaa`^aaaa\_\_[  
@HWI-EAS443:3:11:1440:584#0/1  
GGTATGCACAAACAGACTGTGTTCTAGAGGCTATGGCTTT  
+HWI-EAS443:3:11:1440:584#0/1  
T^[\_`\_b]b[ab^J]bZY\_a`]PY\_^SaY`^XBBBBBBBB  
@HWI-EAS443:3:11:1479:1355#0/1  
GTCTGGAGTAAATGAATCAGCTGACATGAGTATTGGAGTA  
+HWI-EAS443:3:11:1479:1355#0/1  
`aab]babaabbbaaaaab^a`a`\_ab`b¥`aaaZ^\_^a  
@HWI-EAS443:3:11:1535:736#0/1  
CTTCCATTGTTTCAAGGCATGAATTCTCAAATATTCCTGG  
+HWI-EAS443:3:11:1535:736#0/1  
abbTa\_baabab\_a^¥a^b¥Y`\_baWa[^]]aaa`[Xaaa  
@HWI-EAS443:3:11:153:999#0/1  
ATTCGATCTAAAGACTTCTATGGTGTGGCCAATGCAGTT  
+HWI-EAS443:3:11:153:999#0/1  
ababa]XWZ`[XZ`Y`V[\_W]]T^Ua^`VT[\_`WRRZM¥  
@HWI-EAS443:3:11:155:566#0/1  
ATTCCATGCTTTTGGCTGGACCATGGGCTGGCATTACCAC  
+HWI-EAS443:3:11:155:566#0/1  
a``baa^a\_a\_`\_^]\_\_WN][^P[R[^`^¥SY\_[^V[\_V  
@HWI-EAS443:3:11:1578:70#0/1  
CATTAATACGATGACCAAAGATGCAGAGAGAGGCAAGTT  
+HWI-EAS443:3:11:1578:70#0/1  
ab`a]abbabaabbb^]ba\_b`b`[a[]]^Pa\_S]X\_L[  
@HWI-EAS443:3:11:163:2032#0/1  
AAAAATTCCAGCGCAAATGCCATAAGCACCATTCCTT  
+HWI-EAS443:3:11:163:2032#0/1  
Z^`¥I00Va\_U\_¥]\_¥Q¥`a`^^UK`Y`Z`T`S[`aa\_  
@HWI-EAS443:3:11:167:1183#0/1  
AAAAATTCCAGCGCAAATGCCATAAGCACCATTCCTT  
+HWI-EAS443:3:11:167:1183#0/1  
ab`[\_`\_\_`\_^^`\_^Y^Z`\_^`^^`\_]Z¥`^]^^`¥XZ^]W  
@HWI-EAS443:3:11:1753:1295#0/1  
CACCAATACTCAGAAAAGGGAAAGTGGACGACAAACACAG  
+HWI-EAS443:3:11:1753:1295#0/1  
]\_b`^a`¥a`¥b¥N]M\_Zb]\_]`ZITYUYSZ¥`ab`][]a



@HWI-EAS443:3:11:1774:480#0/1  
GATTCAGTATCGAGACTCCCAAGACCGTACTTAGCATGTT  
+HWI-EAS443:3:11:1774:480#0/1  
^W]SN¥a`a\_R\_YaYJ¥UYLU^]RXLZW\_UYLUYLVGSBBB  
@HWI-EAS443:3:11:194:278#0/1  
GGAAGGCTAATAGATTTCTTAAAGGATGTAATGGAATCAA  
+HWI-EAS443:3:11:194:278#0/1  
aa\_S\_a^\_[SW`YP`VOUSJZM¥¥WMXWXPTYTVRVUSBB  
@HWI-EAS443:3:11:201:817#0/1  
AATCTGTCCACTCCTGCTTGTATTCCCTCATGTTTGGTG  
+HWI-EAS443:3:11:201:817#0/1  
XHO¥]`Xa`¥Xa¥VVX\_``[W]Z`Z`\_MW[UY`Z`aa`V]  
@HWI-EAS443:3:11:22:304#0/1  
GCCATGGTGTCTAGGGCCCGATTGATGCCAGGGTCGACT  
+HWI-EAS443:3:11:22:304#0/1  
\_aaVVX\_OSM]EQT¥M\_`\_UT[U`SV¥`XTS]BBBBBBB  
@HWI-EAS443:3:11:237:320#0/1  
GGGAGCTAATGGATGATGATTATCGGGGAAGACTTTGTAA  
+HWI-EAS443:3:11:237:320#0/1  
\_a\_0\_a\_`¥¥b`W[b]W\_b\_`baaaa^\_XR\_[``\_aa`Z`  
@HWI-EAS443:3:11:251:333#0/1  
CCTAGCTAAAGTTTCAACAAAGTATACGAAACCTCTAATC  
+HWI-EAS443:3:11:251:333#0/1  
ab`)]`a^Y`¥\_FX\_b`a[\_Rwa\_a`baa]aZS``\_aaaQ]  
@HWI-EAS443:3:11:368:829#0/1  
GCGCTGGAATTTTTAGGAAAAGTAGAGTCGGATTGACATC  
+HWI-EAS443:3:11:368:829#0/1  
aaba`aa¥]aaaa\_aa`a`\_aZa\_a`Z`W¥\_[¥\_]`^¥  
@HWI-EAS443:3:11:371:1897#0/1  
GGGAGCTAATGGATGATGATTATCGGGGAAGACTTTGTAA  
+HWI-EAS443:3:11:371:1897#0/1  
ab]^`aa¥\_`b`aa¥R^`baabab\_WY]\_a\_a\_][YRNaa  
@HWI-EAS443:3:11:389:1982#0/1  
TATGGCTTTCCTTGAAGAATCCCACCCAGGAATATTTGAG  
+HWI-EAS443:3:11:389:1982#0/1  
`ba][aa`a^R¥F[ba``S\_\_aaaa\_`G]Y\_\_a`SVX  
@HWI-EAS443:3:11:411:1241#0/1  
CTGACATGAGTATTGGAGTAACAGTGATAAAGAACAACAT  
+HWI-EAS443:3:11:411:1241#0/1  
`a`aa`aa`a^¥aa\_\_\_\_\_^a`\_aa[a```]`\_a\_`[\_``^^  
@HWI-EAS443:3:11:413:1879#0/1  
GAAGTACTTCAGGTCAATGCTTGCTAGCATTTCTGCTGGT  
+HWI-EAS443:3:11:413:1879#0/1  
aaba\_bbbabbb`¥aababbaaababaaaaaaaaaaaaaYK  
@HWI-EAS443:3:11:453:1239#0/1  
GCTCCAATCATCCGACGATTTTGCTCTCATAGTGAATGCA  
+HWI-EAS443:3:11:453:1239#0/1  
``Za^a\_]^[Y\_\_aaZ¥R]]W¥¥U¥Y\_\_\_\_]\_`N[`ZXSJY  
@HWI-EAS443:3:11:475:25#0/1  
GGCTATTAGTATCAGATGGAGGACCAAACCTTATACAATAT

+HWI-EAS443:3:11:475:25#0/1  
aa]\_b[YWaZ\_]XV`\_]\_`L^\_MUWST[OX]\_U¥XZ]W^B  
@HWI-EAS443:3:11:489:1967#0/1  
CATGACCAAGAAGATGGTCACGCAAAGAACAATAGGGAAG  
+HWI-EAS443:3:11:489:1967#0/1  
a\_J`b\_baab`bZN]b\_\_`ba\_a`aaYa^\_a\_Yaa¥a``a  
@HWI-EAS443:3:11:503:723#0/1  
CATGACCAAGAAGATGGTCACGCAAAGAACAATAGGGAAG  
+HWI-EAS443:3:11:503:723#0/1  
aaaa`ba`aaa\_a`\_a\_[aaaa`\_\_^a[^S^^``a\_[RXa  
@HWI-EAS443:3:11:511:482#0/1  
AAAAATTCCAGCGCAAATGCCATAAGCACCATTCCT  
+HWI-EAS443:3:11:511:482#0/1  
aaababbabaaX]aa\_a`aa\_\_aabaa``¥\_`\_`\_a^^`  
@HWI-EAS443:3:11:546:119#0/1  
GATTCCATTACATCCTTTAAGAAATCTATTAGCCTTCCTG  
+HWI-EAS443:3:11:546:119#0/1  
aba`aababaaaaaaabbaa`aaa`baaaaaa`\_\_^`\_  
@HWI-EAS443:3:11:566:506#0/1  
CATGAGTATTGGAGTAACAGTGATAAAGAACAACATGATA  
+HWI-EAS443:3:11:566:506#0/1  
abbbab^`\_abbab`aaaaa`aaaaaaaaa\_aaaa`aa`a  
@HWI-EAS443:3:11:570:199#0/1  
ATTGATGCCAGGGTCGACTTCGAGTCTGGACGGATCAAGA  
+HWI-EAS443:3:11:570:199#0/1  
a`\_aa\_\_aa`abaV\_\_\_aa`\_\_`¥\_\_ZaWV`\_SUQW^\_V  
@HWI-EAS443:3:11:575:1441#0/1  
GCATACCCACTTGGTTCATTATCCTCAGGTAGTGGTCCAT  
+HWI-EAS443:3:11:575:1441#0/1  
ab``aaa`a`a`a`a`aabaaa````\_Xa\_Ua\_Z`^S¥a`^`  
@HWI-EAS443:3:11:577:1747#0/1  
CATGAATTCTCAAATATTCCTGGGTGGGATTCTTCAAGGA  
+HWI-EAS443:3:11:577:1747#0/1  
aaa¥baaabaabb`aaa`a`a`]UKYa[a\_a^a\_\_a\_Y\_`  
@HWI-EAS443:3:11:593:981#0/1  
AATTGAAGAGCCATCTGGGCCGTTGCAGGTCCAAGTCCAT  
+HWI-EAS443:3:11:593:981#0/1  
aaaaaaaaZ\_baa¥`[`aZaP`][a[[\_UT^¥G\_\_U][^  
@HWI-EAS443:3:11:594:342#0/1  
GTCTTGCCATTTTGTGTTGAGAACATTATGGGTGCCATGCT  
+HWI-EAS443:3:11:594:342#0/1  
a^abababaaaaab`aaa`aaa`^`aa`a`\_Xa`]`^\_Z]  
@HWI-EAS443:3:11:597:812#0/1  
CTCCAATCATCCGACGATTTTGTCTCATAGTGAATGCAC  
+HWI-EAS443:3:11:597:812#0/1  
aaaabaabaa\_aaa`aa\_\_aa`\_`^aa\_[\_R`\_\_`X\_Z  
@HWI-EAS443:3:11:612:1154#0/1  
CCACTAACTTGCAGGTCTGTAGAATCTGTCCACTCCTGC  
+HWI-EAS443:3:11:612:1154#0/1  
aa`a`a\_a\_a\_\_a`aaX\_```\_\_\_\_\_]^`^`YV\_^^^\_Y^X]

@HWI-EAS443:3:11:622:189#0/1  
GATTTCAGTATCGAGACTCCCAAGACCGTACTTAGCATGTT  
+HWI-EAS443:3:11:622:189#0/1  
aaaaaaaa`baaa`a\_`aaa^`\_^]\_`Z]Y]]^W]]^^\_^^  
@HWI-EAS443:3:11:651:1101#0/1  
ATAAACAAATGACCTTGGACCTGCAACGGCCAGATGGCTC  
+HWI-EAS443:3:11:651:1101#0/1  
^^^Q\_bb^`^`a^]a^]`b^[`baba\_`\_Q\_`\_P\_UV[H  
@HWI-EAS443:3:11:663:1165#0/1  
CGGTCTTGGGAGTCTCGATACTGAATCTTGGACAAAAGAA  
+HWI-EAS443:3:11:663:1165#0/1  
`TRR`\_\_`[]Q[L¥ZN\_¥[] [UURYXZMVU[XZORZV]ZZ  
@HWI-EAS443:3:11:671:334#0/1  
CTGTTTACTGTGTCCATGGTGTATCCTGTTCCCTGTTCCAT  
+HWI-EAS443:3:11:671:334#0/1  
abba`^`aa\_Q^^\_HOXZ^GZVT¥]a\_`]Za[``\_TQ\_`H[  
@HWI-EAS443:3:11:690:1344#0/1  
TGGGATTCTTCAAGGAAAGCCATAGCCTCTAGAACACAGT  
+HWI-EAS443:3:11:690:1344#0/1  
XVSV[U^aW]`XV[aZPYW\_a]aRY^]]YY\_Y[¥PUF¥YB  
@HWI-EAS443:3:11:71:616#0/1  
TGCCAGGGTCGACTTCGAGTCTGGACGGATCAAGAAAGAA  
+HWI-EAS443:3:11:71:616#0/1  
]`a\_]b^RS\_aX¥`]`ba]abbbb¥NZ`]¥Ra]aPX`Y`a  
@HWI-EAS443:3:11:730:233#0/1  
GAAACATCCTGAGCATGGCACCCATAATGTTCTCAAACAA  
+HWI-EAS443:3:11:730:233#0/1  
aab\_ababab`aaaa`\_a^`\_\_a\_aa^]]\_^^\_^^^U\_Z  
@HWI-EAS443:3:11:759:1099#0/1  
AGATTTCTTAAAGGATGTAATGGAATCAATGAACAAAGAG  
+HWI-EAS443:3:11:759:1099#0/1  
aaabbbbbbbabb^aaaaaaabbbbaaa`aaaa]a^`\_``\_a  
@HWI-EAS443:3:11:794:1353#0/1  
ACCAAACCATGAGGGAATACAAGCAGGAGTGGACAGATTC  
+HWI-EAS443:3:11:794:1353#0/1  
aabaXa\_a`aaaaZU\_````\_a\_\_a\_\_a]\_[aU`\_Z]XXUG  
@HWI-EAS443:3:11:79:587#0/1  
CTCCCAGTAGGGGCAATGAAAAGAAGGCCAAACTGGCAA  
+HWI-EAS443:3:11:79:587#0/1  
aaaaaaaa[\_aa`aaa`a`````\_`a\_a[\_````¥``\_a\_^^  
@HWI-EAS443:3:11:806:427#0/1  
CATGGGCTGGCATTACCACAGCATTGTTTACAGAATCAAT  
+HWI-EAS443:3:11:806:427#0/1  
abaRK`XR`bYS`bVZWbbba]ab]bbbbS]ba`\_\_\_\_X\_a  
@HWI-EAS443:3:11:831:1813#0/1  
CATGTTGTTCTTTATCACTGTTACTCCAATACTCATGTCA  
+HWI-EAS443:3:11:831:1813#0/1  
ababaab\_abaaaaabaaa`aaaa`aaaa^a\_a\_a\_a^]a  
@HWI-EAS443:3:11:836:373#0/1  
CCCAGTGATTGTGAAAGAAATCTCTGTGTCTTGTGAATTA

+HWI-EAS443:3:11:836:373#0/1  
\_ba]\_`aaaab`bY`ab`b`Y`\_aa\_aS`a\_P]]V[[ZT  
@HWI-EAS443:3:11:846:1420#0/1  
GAGATAACAACCCACTTTCAAAGAAAAAGGAGAGTAAGAG  
+HWI-EAS443:3:11:846:1420#0/1  
a^]\_\_a`\_`[a^^\_[\_a\_aa`]a`\_ZZa`\_¥a\_aXaa\_\_\_\_  
@HWI-EAS443:3:11:899:1498#0/1  
GAACGATTCTTCTTGGGAATCCAGGAATGTGTAGTTGCAA  
+HWI-EAS443:3:11:899:1498#0/1  
a`bbbaaaba`aaaa\_V]T\_\_`\_W```a`]`W`aYN]\_[\_`  
@HWI-EAS443:3:11:917:2043#0/1  
AGGGCTATTAGTATCAGATGGAGGACCAAACCTTATACAAT  
+HWI-EAS443:3:11:917:2043#0/1  
aaaaaaba`b`^aa\_a`\_```\_\_\_\_]\_\_a\_a^`\_`\_`]\_\_^`  
@HWI-EAS443:3:11:919:1376#0/1  
AAGGGAATGTGGTCTTATGGCATTGCGCTGGAATTTT  
+HWI-EAS443:3:11:919:1376#0/1  
a[bbb]`bbabaWb][aa]a\_SU\_a`\_a``Waa`^\_a`\_a`  
@HWI-EAS443:3:11:957:1144#0/1  
AACAGATCTTCATGATCTCAGAGAACTCTTCTTTCTTGAT  
+HWI-EAS443:3:11:957:1144#0/1  
]Z^`YWZa^bb¥XSTR¥`¥`YU¥`UG¥aa^¥S\_X`]\_]ZU  
@HWI-EAS443:3:11:973:1270#0/1  
GGGGCAATGAAAAGAAGGCCAAACTGGCAAATGTTGTGAG  
+HWI-EAS443:3:11:973:1270#0/1  
a^Z\_]a`]]^¥XSY][`\_S\_]][V¥^¥OXYUZ\_TZ^V\_Y\_  
@HWI-EAS443:3:11:980:547#0/1  
GCAATCTATTCGAGAAATTTTTCCCTAGCAGTTCATATAG  
+HWI-EAS443:3:11:980:547#0/1  
a¥][^T¥]\_ZPW¥`[OMWV[¥ZTUQYQ^XXZXUYX^S\_]B  
@HWI-EAS443:3:12:1065:1956#0/1  
CTTTGTTGATTCATTGAAGTACTTCAGGTCAATGCTTGCT  
+HWI-EAS443:3:12:1065:1956#0/1  
aab`Sa\_bba\_^b\_a¥`ba[aaaaWaa`a\_\_^`a`\_`^`¥`  
@HWI-EAS443:3:12:1074:985#0/1  
GCAGAGAGAGGCAAGTTAAAAAGAAGGGCTATCGCAACAC  
+HWI-EAS443:3:12:1074:985#0/1  
\_`a`[\_`\_]Yaa`]X¥Z^^\_VR\_a[U]QYWZZ¥X\_WT¥FWB  
@HWI-EAS443:3:12:109:88#0/1  
ACTCGAAGTCGACCCTGGCATCAATCCGGGCCCTAGACAC  
+HWI-EAS443:3:12:109:88#0/1  
aaXaaab`PYa`U^`]SVOJR[XQU[X\_\_][BBBBBBBBBB  
@HWI-EAS443:3:12:1112:1732#0/1  
CAATCCGACTCTACTTTTCTTAAAAATTCCAGCGCAAAT  
+HWI-EAS443:3:12:1112:1732#0/1  
abbb¥aaa`baa`^]baaababaabaaaW\_abYa`aa`\_`  
@HWI-EAS443:3:12:113:211#0/1  
AGAAATGCTAGCAAGCATTGACCTGAAGTACTTCAATGAA  
+HWI-EAS443:3:12:113:211#0/1  
aa¥Z\_\_bb`]a[SSVVSU¥\_\_\_\_ZHR^ZYJSTTMOX[YWW[

@HWI-EAS443:3:12:1201:110#0/1  
GCCTTATTTTCTCAATTTTCTTCTTTGTTGATTCATTGAA  
+HWI-EAS443:3:12:1201:110#0/1  
a^\_a^¥\_a^V^`¥^P\_a\_`^\_W^\_\_]aY^^]\_[SXXUY[  
@HWI-EAS443:3:12:1217:812#0/1  
CTTCGAGTCTGGACGGATCAAGAAAGAAGAGTTCTCTGAG  
+HWI-EAS443:3:12:1217:812#0/1  
S[¥¥\_H¥`¥`WabZU\_Z`a¥¥`^[`ba]b\_`Z¥\_a]bab^  
@HWI-EAS443:3:12:1239:1984#0/1  
CAGTGATTGTGAAAGAAATCTCTGTGTCTTGTGAATTAGT  
+HWI-EAS443:3:12:1239:1984#0/1  
\_`ba`^^abab\_bbbbbaba]`ba`b]Q\_b\_Y`a`ba`aa  
@HWI-EAS443:3:12:1239:470#0/1  
GACAATATACTGGTGGGATGGGCTCCAATCATCCGACGAT  
+HWI-EAS443:3:12:1239:470#0/1  
a``a`a\_aa\_aaaXaaa]¥VX]W]X]Y]^WUXUT^XX^UX  
@HWI-EAS443:3:12:1274:1853#0/1  
TCCCCGATAATCATCATCCATTAGCTCCCATTTTAAGCAG  
+HWI-EAS443:3:12:1274:1853#0/1  
`aa\_b`aa\_[a\_\_`X\_`^`\_\_`^`\_\_]Y\_\_\_\_`\_`WZM^\_  
@HWI-EAS443:3:12:1278:1225#0/1  
CCACCCAGGAATATTTGAGAATTCATGCCTTGAAACAATG  
+HWI-EAS443:3:12:1278:1225#0/1  
aa`aWL]aaaaa`aab`a^X`\_``]a[\_`a^aU\_\_  
@HWI-EAS443:3:12:1340:1376#0/1  
AGCTTGAACAGTCTGGGCTCCCAGTAGGGGGCAATGAAAA  
+HWI-EAS443:3:12:1340:1376#0/1  
abab[WT\_]\_TWX`XYX^K¥^S]SZZX`]Z[¥`\_a\_\_\_\_`  
@HWI-EAS443:3:12:134:104#0/1  
AATTGAAGAGCCATCTGGGCCGTTGCAGGTCCAAGGTCAT  
+HWI-EAS443:3:12:134:104#0/1  
aaaaaaaaa`a`\_``\_``\_``^\_X^`]^^^YYYYW\_YVZR[  
@HWI-EAS443:3:12:1360:233#0/1  
TGGATGTCAATCCGACTCTACTTTTCTAAAAATTCAGC  
+HWI-EAS443:3:12:1360:233#0/1  
abbaab``ab`]\_aX\_a`ba^`aa`\_\_aaa`a^a\_[¥```]  
@HWI-EAS443:3:12:1391:1131#0/1  
AATCCAGCGCAAAATGCCATAAGCACCACATTCCTTAT  
+HWI-EAS443:3:12:1391:1131#0/1  
]`\_`]a¥S]\_\_]aY\_WKZ[S\_]0`^a]¥\_[R\_\_ZLR^M]U  
@HWI-EAS443:3:12:1398:152#0/1  
GTATTGGTGTGTTCTGTTTACTGTGTCCATGGTGTATCCT  
+HWI-EAS443:3:12:1398:152#0/1  
aaabbab`b\_a```\_aa`aaa\_aa^a]\_Z\_\_^a^`Z^aZW^  
@HWI-EAS443:3:12:1403:1301#0/1  
GTTTGGCCTTCTTTTCATTGCCCCCTACTGGGAGCCCAGA  
+HWI-EAS443:3:12:1403:1301#0/1  
aSW\_MW\_T`¥\_\_aX^GZ\_[a¥ZNPP`HUZ\_V\_WWSSUVWB  
@HWI-EAS443:3:12:1417:1328#0/1  
GTCTCCTATATGAACTGCTAGGGAAAAATTTCTCGAATAG

+HWI-EAS443:3:12:1417:1328#0/1  
Y`^ba`aabb¥bbbbbbbbb`babbba`bb[V\_abba\_^\_  
@HWI-EAS443:3:12:1429:1137#0/1  
TCCACTTAGTGTGTCCCCAGTGATTGTGAAAGAAATCTC  
+HWI-EAS443:3:12:1429:1137#0/1  
aaaaYbbaa[b`baa\_]\_\_aa]a^aba\_a\_a\_`\_``\_P`Y  
@HWI-EAS443:3:12:143:660#0/1  
CTTTGATGAACAATTGAAGAGCCATCTGGGCCGTTGCAGG  
+HWI-EAS443:3:12:143:660#0/1  
ababbbab`a``¥bba`]^aaaa`a\_\_\_aa\_a¥^^][`\_  
@HWI-EAS443:3:12:1466:320#0/1  
AAAAATTCCAGCGCAAATGCCATAAGCACCACATTCCCT  
+HWI-EAS443:3:12:1466:320#0/1  
aaaa]aa¥Z^`Z`^`\_\_`aY]\_]^a\_\_WWZZ^`^TSV^  
@HWI-EAS443:3:12:1512:1141#0/1  
AAATTCCAGCGCAAATGCCATAAGCACCACATTCCCTTA  
+HWI-EAS443:3:12:1512:1141#0/1  
a^aaa`\_`aX`^`\_\_`]Z\_\_]^QaYW^^^\_¥]WW\_^\_  
@HWI-EAS443:3:12:1547:347#0/1  
CACTGTTACTCCAATACTCATGTCAGCTGATTCATTTACT  
+HWI-EAS443:3:12:1547:347#0/1  
ab`Z[H¥^]YSS¥ZYRS`[]`RVRNIQ[]BBBBBBBBBB  
@HWI-EAS443:3:12:1601:425#0/1  
GGCTCCAATCATCCGACGATTTTGCTCTCATAGTGAATGC  
+HWI-EAS443:3:12:1601:425#0/1  
\_WRN¥^\_\_a]STUP¥W`^^TK¥Z¥Z[^NWWUVYU\_BBBBBB  
@HWI-EAS443:3:12:1602:1359#0/1  
AATGAATCAGCTGACATGAGTATTGGAGTAACAGTGATAA  
+HWI-EAS443:3:12:1602:1359#0/1  
a`\_V`\_`[`Z]^WPV¥¥¥^SY\_¥]YU[YY]W[]SXXVXB  
@HWI-EAS443:3:12:1619:257#0/1  
ACCAAGACAATATACTGGTGGGATGGGCTCCAATCATCCG  
+HWI-EAS443:3:12:1619:257#0/1  
aaaaabSbaab\_aZ\_aa\_]Z¥XQ^[a`T[U]Y^]T\_\_VT[  
@HWI-EAS443:3:12:1634:1504#0/1  
GTCCAATCATAAGTCTGGCGACCTTGAGTTAGTTTATCTA  
+HWI-EAS443:3:12:1634:1504#0/1  
aW\_[^a`Y^^X¥UY[\_^S¥\_]\_]Y\_[ZRWY\_W^Z]XZZZ  
@HWI-EAS443:3:12:1653:1797#0/1  
ATTCGATCTAAAGACTTCTATGGTGTGGCCAATGCAGTT  
+HWI-EAS443:3:12:1653:1797#0/1  
a\_a^a`^^a\_\_NQY[aWa\_^GPMT^Y]BBBBBBBBBBBB  
@HWI-EAS443:3:12:1707:619#0/1  
AAGAATCCCACCCAGGAATATTTGAGAATTCATGCCTTGA  
+HWI-EAS443:3:12:1707:619#0/1  
abab`b`^X\_XRVZ\_ZXaa`aaaa\_aa¥a`S`^WUSa`\_\_  
@HWI-EAS443:3:12:1709:1063#0/1  
AGGGATTGAGGGATTACAAAGTCTTCCCCGATAATCATC  
+HWI-EAS443:3:12:1709:1063#0/1  
aab`]`Z`bb^`aaaa\_Z`a`a^`aa[SS\_a^`\_]\_\_R

@HWI-EAS443:3:12:1712:221#0/1  
ATTGGTGTGTTCTGTTTACTGTGTCCATGGTGTATCCTGT  
+HWI-EAS443:3:12:1712:221#0/1  
abbbb^b`bab`abaaa\_aa`a`^`\_\_aa]Xa^` `[N^\_^  
@HWI-EAS443:3:12:1740:1462#0/1  
AATTCCCCTTTGGCTTGTGTTGAGAATAGAACGATTCCCTC  
+HWI-EAS443:3:12:1740:1462#0/1  
aaba¥` `\_baaaaZY` [`VYaaG^^`\_Z^]XQY[¥RBBBB  
@HWI-EAS443:3:12:1753:155#0/1  
CAGCTGATTCATTTACTCCAGACACTCCAAAGCTGGGTAG  
+HWI-EAS443:3:12:1753:155#0/1  
ab[D]abbaaaa`R\_Xaaa`Ta]`a]]X[TT[] [XG]¥  
@HWI-EAS443:3:12:281:714#0/1  
AAAAATTCCAGCGAAAATGCCATAAGCACCATTCCT  
+HWI-EAS443:3:12:281:714#0/1  
abaa^a`a`a^a\_]^`Z]^`a`\_\_[]\_Z\_^]ZX^^^  
@HWI-EAS443:3:12:33:293#0/1  
CTCCAATCATCCGACGATTTTGTCTCATAGTGAATGCAC  
+HWI-EAS443:3:12:33:293#0/1  
a`aaVJ\_]Z``[XV\_Pa`UR\_U[]ZQ¥ZZ^Z`WS\_YY]X  
@HWI-EAS443:3:12:349:812#0/1  
GAACAATTGAAGAGCCATCTGGGCCGTTGCAGGTCCAAGG  
+HWI-EAS443:3:12:349:812#0/1  
aaaabbbbabbaaabaab`ba`a`\_`\_]\_aX`Wa````a  
@HWI-EAS443:3:12:356:511#0/1  
GATGGCTCTTCAATTGTTTCATCAAAGACTACAGATACACA  
+HWI-EAS443:3:12:356:511#0/1  
a`^`\_a\_a\_`¥^W[\_a]^]\_X¥^]\_W\_UX^V\_Z]X\_0]V\_  
@HWI-EAS443:3:12:362:1837#0/1  
GTAGAATCTGTCCACTCCTGCTTGTATTCCCTCATGGTTT  
+HWI-EAS443:3:12:362:1837#0/1  
a`^`b`ba`b`\_baaaa`b`¥^aa`Xaa`\_`W\_a`\_¥\_^\_^  
@HWI-EAS443:3:12:398:557#0/1  
GCCAGGTTCGACTTCGAGTCTGGACGGATCAAGAAAGAAG  
+HWI-EAS443:3:12:398:557#0/1  
`ba`a`R` `[^]\_^]U]QZ`aaa^aa\_U`aaa\_`a`][\_  
@HWI-EAS443:3:12:40:757#0/1  
TCCTGCTTGTATTCCCTCATGGTTTGGTGCATTCACTATG  
+HWI-EAS443:3:12:40:757#0/1  
a]a[b`]``RUZZ\_¥XP]IY`\_IZWbWa`\_YaO[W`Y\_¥[  
@HWI-EAS443:3:12:410:361#0/1  
CCAGGTGTTGCGATAGCCCTTCTTTTTAACTTGCCCTCTCT  
+HWI-EAS443:3:12:410:361#0/1  
ab]\_b^b\_aaabaa^```aaa\_aa`aa`a\_\_^\_Z\_a]`^a  
@HWI-EAS443:3:12:41:1100#0/1  
AGACTTTGTAATCCCCTGAATCCCCTTGTGTCAGTCATAAAG  
+HWI-EAS443:3:12:41:1100#0/1  
`a\_\_abba]aaaaa`a`\_``\_``\_` [``\_W`^^^Z^\_  
@HWI-EAS443:3:12:425:240#0/1  
TAATGCCAGCCCATGGTCCAGCCAAAAGCATGGAATATGA

+HWI-EAS443:3:12:425:240#0/1  
abbababb`a]a^a]``aaa`UX]````Ja[¥\_`a\_\_\_\_`\_  
@HWI-EAS443:3:12:427:193#0/1  
ATCCTTTAAGAAATCTATTAGCCTTCCTGACTCATTAGCT  
+HWI-EAS443:3:12:427:193#0/1  
abV\_`\_aaabP^`^aaaaa`[`¥X\_ZXTTP]```\_\_a¥Y  
@HWI-EAS443:3:12:42:2041#0/1  
ATGGGCTCCAATCATCCGACGATTTTGCTCTCATAGTGAA  
+HWI-EAS443:3:12:42:2041#0/1  
aa]^¥`aa\_¥`\_aa`\_aaZ`\_a\_\_a]]X`\_`\_\_[\_`^`^^  
@HWI-EAS443:3:12:45:1196#0/1  
ACAGAACACACCAATACTCAGAAAAGGGAAAGTGGACGAC  
+HWI-EAS443:3:12:45:1196#0/1  
Wab¥S¥ab`aaaaUa¥[[b`ZR¥a]`¥VYVY¥0[RSYa` [  
@HWI-EAS443:3:12:45:1226#0/1  
TGGGTTGTTATCTCTATTTCTCTTTGTTTCATTGATTCCA  
+HWI-EAS443:3:12:45:1226#0/1  
U`W`Tab`Z[b`bba]X¥[¥ba^TWTV`Y00[\_LPa\_ZO\_  
@HWI-EAS443:3:12:490:1315#0/1  
GGTGGGATGGGCTCCAATCATCCGACGATTTTGCTCTCAT  
+HWI-EAS443:3:12:490:1315#0/1  
aaX[`Z`Y]\_a^VW\_aa]]`\_\_a\_¥0Y\_[¥]ZXRv]Q`¥  
@HWI-EAS443:3:12:524:1703#0/1  
GAACAATTGAAGAGCCATCTGGGCCGTTGCAGGTCCAAGG  
+HWI-EAS443:3:12:524:1703#0/1  
abbbaa``\_bbaabZaaab]a`aa\_a\_]aaa\_\_¥Yaa\_^^  
@HWI-EAS443:3:12:600:1517#0/1  
ATGATAAACAATGACCTTGGACCTGCAACGGCCCAGATGG  
+HWI-EAS443:3:12:600:1517#0/1  
`a`ba`abaa\_Za\_^^`\_\_^\_a\_\_`a\_\_¥¥]X]]BBBBB  
@HWI-EAS443:3:12:614:638#0/1  
ACCTGAAGTACTTCAATGAATCAACAAAGAAGAAAATTGA  
+HWI-EAS443:3:12:614:638#0/1  
aaa[\_a`aSb\_`\_`aaa]^^`[W[\_`\_`Y]a^`\_`^\_\_\_\_^  
@HWI-EAS443:3:12:661:1136#0/1  
AACAGAAATCAACCGCAGCAACTGCATTGGCCAACACCA  
+HWI-EAS443:3:12:661:1136#0/1  
ab`b\_`aW`a`a`\_¥R\_a[X]\_TFZ]a]¥Y^^^VY\_\_V^]  
@HWI-EAS443:3:12:681:877#0/1  
GGGCTCCAATCATCCGACGATTTTGCTCTCATAGTGAATG  
+HWI-EAS443:3:12:681:877#0/1  
aab`aaa`[^\_ZaSaa`aaaaba`U]aaZ\_`\_]aQ`a¥  
@HWI-EAS443:3:12:727:879#0/1  
GTAGTCTTTGATGAACAATTGAAGAGCCATCTGGGCCGTT  
+HWI-EAS443:3:12:727:879#0/1  
aQU¥X`Y\_aM]VZ`Z^`\_[aZ\_P[Za¥¥U`\_\_Z¥YUQaBB  
@HWI-EAS443:3:12:746:1869#0/1  
AGACAATATACTGGTGGGATGGGCTCCAATCATCCGACGA  
+HWI-EAS443:3:12:746:1869#0/1  
[b\_X]Nb^\_S\_a`\_X`\_a`HS`^]0aa¥¥^\_^VXa^ZXa[



@HWI-EAS443:3:12:759:1991#0/1  
GAAAAGGGAAAGTGGACGACAAACACAGAGACTGGTGAC  
+HWI-EAS443:3:12:759:1991#0/1  
aaaaaa]Waa`aNaa`a`aaaaa\_`a[V\_`S¥¥UUVUBB  
@HWI-EAS443:3:12:849:1685#0/1  
GATTGATGCCAGGGTCTGACTTCGAGTCTGGACGGATCAAG  
+HWI-EAS443:3:12:849:1685#0/1  
`abaabab`aaZ\_aS`Za`aZa`R`N`aa\_]KZ`\_VTaa\_  
@HWI-EAS443:3:12:864:1488#0/1  
TGGATGTCAATCCGACTCTACTTTTCCTAAAAATCCAGC  
+HWI-EAS443:3:12:864:1488#0/1  
`bbbab`bb`][ab`aa][aaaabaa`abaabaaaa`a\_X  
@HWI-EAS443:3:12:91:1278#0/1  
ATTCCTGAAGTCTGCTTAAAATGGGAGCTAATGGATGATG  
+HWI-EAS443:3:12:91:1278#0/1  
a^]YTWYY]\_UaTTP`\_QTPJW`VTO`UWWGR`LY]XOUZ  
@HWI-EAS443:3:12:954:231#0/1  
AACCCGATTGATGGACCACTACCTGAGGATAATGAACCAA  
+HWI-EAS443:3:12:954:231#0/1  
\_¥]¥aa`bba^^a`[ZT]a^Z`Xa\_]X\_VZa]]\_T\_^  
@HWI-EAS443:3:12:95:544#0/1  
CTTTTCCTAAAAATCCAGCGCAAATGCCATAAGCACCA  
+HWI-EAS443:3:12:95:544#0/1  
abb\_b`a^\_bab¥bbaa`aabb`\_`abbaabbaaabbbaa  
@HWI-EAS443:3:12:983:1929#0/1  
GTAGAATCTGTCCACTCCTGCTTGTATTCCCTCATGGTTT  
+HWI-EAS443:3:12:983:1929#0/1  
aZaYaaY^^\_RRO^PLV^X]X\_OOLTU^UWXOR]¥XBBBB  
@HWI-EAS443:3:12:986:1771#0/1  
ATGGAATCAATGAACAAAGAGGAAATAGAGATAACAACCC  
+HWI-EAS443:3:12:986:1771#0/1  
Y[¥\_X¥`^TZ¥^`¥WY^a`W[^a`ab\_^a`\_ab^`\_bbWQ  
@HWI-EAS443:3:13:1007:658#0/1  
GTAGTCTTTGATGAACAATTGAAGAGCCATCTGGGCCGTT  
+HWI-EAS443:3:13:1007:658#0/1  
a\_aaaabaabbbaa\_\_^a`aaaaa\_\_\_\_\_a^\_a`aX]aY\_  
@HWI-EAS443:3:13:1008:783#0/1  
GATGGCACAGCATCACTGAGTCCTGGGATGATGATGGGCA  
+HWI-EAS443:3:13:1008:783#0/1  
a\_\_`a`a`a`\_]\_]`a\_a^\_]\_]`^^a^]a^\_^]]U^  
@HWI-EAS443:3:13:1011:1946#0/1  
CTGGAGTAAATGAATCAGCTGACATGAGTATTGGAGTAAC  
+HWI-EAS443:3:13:1011:1946#0/1  
aa`aaa]abb`^aaaYaa`aa`^\_a`a`Ya\_\_^\_]^[a\_^  
@HWI-EAS443:3:13:1068:778#0/1  
ATGGAATCAATGAACAAAGAGGAAATAGAGATAACAACCC  
+HWI-EAS443:3:13:1068:778#0/1  
abbaaabababa\_`a`aab^ba\_\_aaa`a`\_a\_\_a\_^]`^  
@HWI-EAS443:3:13:1087:568#0/1  
CCTCCATCTGATACTAATAGCCCTACCTTTGATTGGGTTT

+HWI-EAS443:3:13:1087:568#0/1  
aabaaaa`aaaaa\_a`aa`\_\_\_\_`^^`aa\_\_^`a\_`Z`^  
@HWI-EAS443:3:13:108:1530#0/1  
GAGAAAATAAGGCCTCTTCTAATAGATGGCACAGCATCAC  
+HWI-EAS443:3:13:108:1530#0/1  
\_V\_]ZXR¥UQU[`US]\_\_a]¥]TZTOS¥[\_\_¥^W]SUZU]  
@HWI-EAS443:3:13:1095:1286#0/1  
AAAATCGTCGGATGATTGGAGCCCATCCCACCAGTATATT  
+HWI-EAS443:3:13:1095:1286#0/1  
aaaaa`\_]a\_a`\_]a\_\_\_aW\_\_\_\_\_¥\_Z^X\_W¥\_]\_^  
@HWI-EAS443:3:13:1107:484#0/1  
ACTGCATTGGCCAACACCATAGAAGTCTTTAGATCGAATG  
+HWI-EAS443:3:13:1107:484#0/1  
aaabaa``aaa\_aa`a^`^\_\_`a`^`aa\_\_\_]a]a^`\_^  
@HWI-EAS443:3:13:1132:1726#0/1  
CAGAAATCAACCGGCAGCAACTGCATTGGCCAACACCATA  
+HWI-EAS443:3:13:1132:1726#0/1  
a`Z``bb\_aba[b\_bb\_X\_a][¥aa`a]\_a`Z\_\_X\_a]a  
@HWI-EAS443:3:13:1176:1907#0/1  
AAAAATTCCAGCGCAAATGCCATAAGCACCACATTCCCT  
+HWI-EAS443:3:13:1176:1907#0/1  
abaa`a\_]`^`\_`^`^`\_]`WX`^`X\_]a]V\_X`^YRWWZ  
@HWI-EAS443:3:13:1179:761#0/1  
ATGAACCAAGTGGGTATGCACAAACAGACTGTGTTCTAGA  
+HWI-EAS443:3:13:1179:761#0/1  
a^\_aa]\_`Y``b]bU]]ZQZW`\_`\_]`^^`]G\_XPQFSBB  
@HWI-EAS443:3:13:117:730#0/1  
AATTGAAGAGCCATCTGGGCCGTTGCAGGTCCAAGGTCAT  
+HWI-EAS443:3:13:117:730#0/1  
aaaaa\_a\_\_¥aa`\_]`\_]`^`^`^^`]`\_]Y^U^Y\_^U^]`  
@HWI-EAS443:3:13:1222:1048#0/1  
CACCAAACCATGAGGGAATACAAGCAGGAGTGGACAGATT  
+HWI-EAS443:3:13:1222:1048#0/1  
ab\_aaaa``abaaabaaaa\_`aaa`a`¥aWaa`Zaa`^^  
@HWI-EAS443:3:13:1248:724#0/1  
CGATACTGAATCTTGGACAAAAGAAATACACCAAGACAAT  
+HWI-EAS443:3:13:1248:724#0/1  
aa^`\_]`a`aXaaa`[aaa`\_`a\_aa\_W\_XWW`a^X^]`  
@HWI-EAS443:3:13:1353:1939#0/1  
CACTGACATTAATACGATGACCAAAGATGCAGAGAGAGG  
+HWI-EAS443:3:13:1353:1939#0/1  
`babbb`bbbaabaabbbba`b``bbba`b\_b^b`b[  
@HWI-EAS443:3:13:1382:733#0/1  
AGGTAGTGGTCCATCAATCGGGTTGAGCTGGGGTGCACCA  
+HWI-EAS443:3:13:1382:733#0/1  
aa[Q]b¥X¥R\_[`^PYRZV[`\_P¥YYV^\_VQT`W`SYPQM  
@HWI-EAS443:3:13:1408:420#0/1  
TTTTGTTTGAGAACATTATGGGTGCCATGCTCAGGATGTT  
+HWI-EAS443:3:13:1408:420#0/1  
aaaaaaaa`aaa`]`[^`\_`a`aa\_Z`WX¥^^]]WXa`Z¥`^^

@HWI-EAS443:3:13:1424:517#0/1  
CCCAGTGATTGTGAAAGAAATCTCTGTGTCTTGTGAATTA  
+HWI-EAS443:3:13:1424:517#0/1  
a`aaa^a\_abbZ` `a\_a` `a`¥`¥^a\_\_^\_a\_`V`X]\_^R  
@HWI-EAS443:3:13:1432:1088#0/1  
AATCTGCATCCCAGGTGTTGCGATAGCCCTTCTTTTAAAC  
+HWI-EAS443:3:13:1432:1088#0/1  
TUH¥aY^YW`a]PXXQXYUZY¥¥XTWTV[P[W\_X]PBBBB  
@HWI-EAS443:3:13:146:1784#0/1  
ATTCCCACTAACTTGCAGGTCCTGTAGAATCTGTCCACTC  
+HWI-EAS443:3:13:146:1784#0/1  
]aaWX`^^¥W`aY\_aX\_aUTYaa\_VV[\_\_\_^X^^WZ^\_YRU  
@HWI-EAS443:3:13:1470:313#0/1  
TGGGTGCCATGCTCAGGATGTTTCTGAACCACTCGGGTTG  
+HWI-EAS443:3:13:1470:313#0/1  
abbb\_a\_\_aab`a¥aaa\_aa^aa\_aaa`]T]X[V^`XW¥`  
@HWI-EAS443:3:13:1476:792#0/1  
GCCATGCTCAGGATGTTTCTGAACCACTCGGGTTGATTTC  
+HWI-EAS443:3:13:1476:792#0/1  
a`a\_ab^][[\_a¥\_\_^a\_Y`a\_\_^UZ^^[\_^PER\_W]\_]S  
@HWI-EAS443:3:13:1508:391#0/1  
TTGGACCTGCAACGGCCAGATGGCTCTTCAATTGTTCAT  
+HWI-EAS443:3:13:1508:391#0/1  
abba^^aa`]a\_`a`X^]Z^QYV\_PY\_\_^Z^^\_YWT]Z]  
@HWI-EAS443:3:13:1532:717#0/1  
ACACATTCCTGGATTCCCAAGAGGAATCGTTCTATTCTCA  
+HWI-EAS443:3:13:1532:717#0/1  
a`a`aa`Za`\_¥\_^[]]\_^\_\_¥^\_]\_Z^]]\_^YZUW  
@HWI-EAS443:3:13:1537:1337#0/1  
TGGCACCTATATGTGTATCTGTAGTCTTTGATGAACAATT  
+HWI-EAS443:3:13:1537:1337#0/1  
a\_a[````X`aa`\_]\_\_b`a^]]aVWa`\_a^X^\_]MY¥\_`  
@HWI-EAS443:3:13:1578:393#0/1  
CTTGGGAGTCTCGATACTGAATCTTGGACAAAAGAAATAC  
+HWI-EAS443:3:13:1578:393#0/1  
abbbbbbbbaabababaaaaabbaa\_babb\_^aa\_abaaaaa]  
@HWI-EAS443:3:13:1582:206#0/1  
ATTCTTTTACTCTCGAACATGTACCCTTTCCCTAGTCTTG  
+HWI-EAS443:3:13:1582:206#0/1  
`bbaX`^ba\_b\_^abU^a^bbYP\_`ZaaaZYI¥\_X[XYTG  
@HWI-EAS443:3:13:1628:1580#0/1  
AAAGACTACAGATACACATATAGGTGCCATAGGGGAGACA  
+HWI-EAS443:3:13:1628:1580#0/1  
aXbb^abababa^a]^¥abaaaba0a\_Y\_aa\_`b\_\_a`^`  
@HWI-EAS443:3:13:1683:1247#0/1  
TGTCCCCAGTGATTGTGAAAGAAATCTCTGTGTCTTGTGA  
+HWI-EAS443:3:13:1683:1247#0/1  
ab\_`]`]abYaWa\_bIaaaa`Ya`\_]¥`a\_`\_¥aZUU]B  
@HWI-EAS443:3:13:1684:1033#0/1  
AAAAATTCCAGCGCAAATGCCATAAGCACCATTCCT



@HWI-EAS443:3:13:533:1967#0/1  
TGGTGGGATGGGCTCCAATCATCCGACGATTTTGCTCTCA  
+HWI-EAS443:3:13:533:1967#0/1  
abaY`a`aa`\_^`a\_aa\_a`¥\_a]aaY\_\_\_]\_]`TKR\_Wa  
@HWI-EAS443:3:13:545:504#0/1  
AAGAGAGGCTATCTAATAAGAGCACTGACATTAATACGA  
+HWI-EAS443:3:13:545:504#0/1  
``baa``baaYZN\_T]Q]a`\_YRYSZW\_S]X`\_\_PV]QOP  
@HWI-EAS443:3:13:551:347#0/1  
GTGGGTTGTTATCTCTATTTCTCTTTGTTTCATTGATTCC  
+HWI-EAS443:3:13:551:347#0/1  
a\_baa^ab\_a^aaa^aa`a`aa^^`\_^`a`^^`\_\_\_^^  
@HWI-EAS443:3:13:565:1793#0/1  
AGTAAATGAATCAGCTGACATGAGTATTGGAGTAACAGTG  
+HWI-EAS443:3:13:565:1793#0/1  
]YK\_bbaaV¥^`YLZY[¥Pa\_\_^¥K¥`Z^YYUW\_\_S]^W]  
@HWI-EAS443:3:13:589:1084#0/1  
GTTTCGAGAGTAAAAGAATGAAGATTGCAACACAAATACCA  
+HWI-EAS443:3:13:589:1084#0/1  
`]\_Z\_[T^`Ya]`baabaa]aaV`\_aa`T¥`Zaaa\_]VXa  
@HWI-EAS443:3:13:610:181#0/1  
CTTGGGAGTCTCGATACTGAATCTTGGACAAAAGAAATAC  
+HWI-EAS443:3:13:610:181#0/1  
``a]MZ^\_[[a`\_X\_\_Q]`^XZR^a\_]X^]\_]\_^\_Z]Z  
@HWI-EAS443:3:13:640:795#0/1  
TTTAGCTAGGAGCATTGCGAAAAGCTTGAACAGTCTGGG  
+HWI-EAS443:3:13:640:795#0/1  
a]W¥]¥T[^T¥\_aa[HU]WX`a\_V]ITS¥^Z¥V\_QSX^\_\_  
@HWI-EAS443:3:13:649:1167#0/1  
CTACTTTTCTAAAAATTCCAGCGCAAATGCCATAAGCA  
+HWI-EAS443:3:13:649:1167#0/1  
a`aaa`aabaabaab`a`aaaaUa\_aa\_aa`]\_aa``\_0a  
@HWI-EAS443:3:13:658:944#0/1  
GATGCCAGGGTCGACTTCGAGTCTGGACGGATCAAGAAAG  
+HWI-EAS443:3:13:658:944#0/1  
]YX¥b`]Y\_R\_XYYXTV\_V¥R¥\_a]\_Y[YPX^`[¥[\_\_\_[  
@HWI-EAS443:3:13:742:884#0/1  
CATCCCAGGTGTTGCGATAGCCCTTCTTTTTAACTTGCCT  
+HWI-EAS443:3:13:742:884#0/1  
¥WL¥a[a[\_[\_aab``TZVZa]¥a[^^[``YT^a``ZZ]B  
@HWI-EAS443:3:13:754:663#0/1  
GCATTTGCGAAAAGCTTGAACAGTCTGGGCTCCCAGTAGG  
+HWI-EAS443:3:13:754:663#0/1  
a[LS]VRPXa`\_XVXX\_Z[UVV]S]VDUN[MVSYP]VUYT  
@HWI-EAS443:3:13:793:1174#0/1  
TGTTGATTCCCACCTAAGTGCAGGTCCTGTAGAATCTGTC  
+HWI-EAS443:3:13:793:1174#0/1  
a][aaaaabaaa\_aaa`]¥[`aa]a`Y]\_\_\_\_]\_\_\_\_]NZ  
@HWI-EAS443:3:13:83:60#0/1  
CACTAACTTGCAGGTCCTGTAGAATCTGTCCACTCCTGCT

+HWI-EAS443:3:13:83:60#0/1  
aa\_a\_a`\_\_\_\_\_`^`]^\_a\_]\_a^WZ^^`W][ZV[WVTVVV  
@HWI-EAS443:3:13:877:988#0/1  
GAAGGGCTATCGCAACACCTGGGATGCAGATTAGAGGTTT  
+HWI-EAS443:3:13:877:988#0/1  
a\_aa`a\_a^`\_]U¥[]]W¥\_`V\_`^Z\_]\_^\_¥[\_¥W\_]`  
@HWI-EAS443:3:13:904:97#0/1  
CTCCAATCATCCGACGATTTTGTCTCATAGTGAATGCAC  
+HWI-EAS443:3:13:904:97#0/1  
aa\_ba`\_b[`I`\_Gb`a`a`\_`^^a^W\_aYa^V`\_`^Y  
@HWI-EAS443:3:13:978:335#0/1  
TTGAAGTACTTCAGGTCAATGCTTGCTAGCATTCTGCTG  
+HWI-EAS443:3:13:978:335#0/1  
Y]babb]`^`aa`^\_Saa\_]V`aab\_a`aPaa`a\_a]^a  
@HWI-EAS443:3:13:979:390#0/1  
GTTTGGTGCATTCACTATGAGAGCAAATCGTCGGATGAT  
+HWI-EAS443:3:13:979:390#0/1  
aQ`]]`V^\_a[W^YGV]^\_Y]S^VTVTVX[^XYUVU][VG  
@HWI-EAS443:3:13:991:1883#0/1  
ATTTTGTCTCATAGTGAATGCACCAAACCATGAGGGAAT  
+HWI-EAS443:3:13:991:1883#0/1  
````abbabaaaaba]aa\_aaaa`aab`\_aaaaa\_``^a  
@HWI-EAS443:3:14:1010:321#0/1  
ATCAGATGGAGGACCAAACCTTATACAATATACGGAATCTT  
+HWI-EAS443:3:14:1010:321#0/1  
ababb¥abbaa][\_aa`\_aaaaaU`\_aa`aWa[¥`\_^\_^  
@HWI-EAS443:3:14:1025:1709#0/1  
GCTAATGGATGATGATTATCGGGGAAGACTTTGTAATCCC  
+HWI-EAS443:3:14:1025:1709#0/1  
aba`aabaab`aaaaab`\_a\_a^]`^`aa\_`^`a\_`^]  
@HWI-EAS443:3:14:1052:1026#0/1  
GAACGATTCTCTTGGGAATCCAGGAATGTGTAGTTGCAA  
+HWI-EAS443:3:14:1052:1026#0/1  
abbbbbaaaaaabaa`aaa`aa`a`]aaa]a^aaZ]`\_a^  
@HWI-EAS443:3:14:105:1432#0/1  
AAAAATTCCAGCGCAAATGCCATAAGCACCACATTCCCT  
+HWI-EAS443:3:14:105:1432#0/1  
ab¥ZX`aZV`\_`\_T`\_]\_^¥a¥Z^^^\_]]]]]WQXX  
@HWI-EAS443:3:14:1060:948#0/1  
TTCTGAGTATTGGTGTGTTCTGTTTACTGTGTCCATGGTG  
+HWI-EAS443:3:14:1060:948#0/1  
aaaba]aX[ab`bYa^¥`\_`\_a`\_]\_\_Y\_X]Q]^a`S`  
@HWI-EAS443:3:14:1087:1074#0/1  
CAGGGTCGACTTCGAGTCTGGACGGATCAAGAAAGAAGAG  
+HWI-EAS443:3:14:1087:1074#0/1  
aT`b`W¥a[`aab]]a\_aaa`¥]aa^`\_W`a`\_`Za`\_`a  
@HWI-EAS443:3:14:1098:1540#0/1  
GTGGACGACAAACACAGAGACTGGTGCACCCCAGCTCAAC  
+HWI-EAS443:3:14:1098:1540#0/1  
]S]¥Q0[\_U`]SGR\_Z^Y]]TKW¥RNUXUUUSWZTNSKTU

@HWI-EAS443:3:14:1145:765#0/1  
CATATTCCATGCTTTTGGCTGGACCATGGGCTGGCATTAC  
+HWI-EAS443:3:14:1145:765#0/1  
aZbab`aa`aa`a`aa`^aa`XYVFU\_\_XS\_a\_\_^\_ZW¥  
@HWI-EAS443:3:14:1150:334#0/1  
AGCTGATTCATTTACTCCAGACACTCCAAAGCTGGGTAGC  
+HWI-EAS443:3:14:1150:334#0/1  
^\_bb`¥Vab`a`¥H¥¥Z\_ZX¥aaaa[YT^N\_¥``PS\_PK  
@HWI-EAS443:3:14:1207:210#0/1  
TCTGTTTACTGTGTCCATGGTGTATCCTGTTCCCTGTTCCA  
+HWI-EAS443:3:14:1207:210#0/1  
aaaa`a`a`aaQ\_]`\_a`aUaX^`^]\_¥]\_X¥^\_Y]]VT  
@HWI-EAS443:3:14:1220:1206#0/1  
GATTGATGCCAGGGTCGACTTCGAGTCTGGACGGATCAAG  
+HWI-EAS443:3:14:1220:1206#0/1  
a```a]\_\_\_\_`^^UT[a\_Y^][RZ\_V^WR[WX^¥TWW¥WWW  
@HWI-EAS443:3:14:1237:1267#0/1  
AGCTGATTCATTTACTCCAGACACTCCAAAGCTGGGTAGC  
+HWI-EAS443:3:14:1237:1267#0/1  
aa]a]T]Zaaaaa[a^V`V^aY^XY`]MTT\_^USXXYFW  
@HWI-EAS443:3:14:1270:1851#0/1  
TGCAGGTCCAAGGTCATTGTTTATCATGTTGTTCTTTATC  
+HWI-EAS443:3:14:1270:1851#0/1  
\_\_bZX\_^bab`baJ\_\_^`aab`\_Lb\_ZWZ¥PaXaa]`VX  
@HWI-EAS443:3:14:1302:1313#0/1  
GGCGACCTTGAGTTAGTTTATCTACCCTTGTGTTGTTGAAC  
+HWI-EAS443:3:14:1302:1313#0/1  
\_X\_ba]¥V\_a¥PZa^a]aa^a¥[¥YZWW[`Z`^^[W]V\_W  
@HWI-EAS443:3:14:1312:781#0/1  
ATCCCTCATGGTTTGGTGCATTCACTATGAGAGCAAAT  
+HWI-EAS443:3:14:1312:781#0/1  
TYa`\_Z^Ub¥\_V^`\_V^bab]baabbaXX¥K]`Zbbb\_b  
@HWI-EAS443:3:14:133:183#0/1  
GGCCCCGATTGATGCCAGGGTCGACTTCGAGTCTGGACGG  
+HWI-EAS443:3:14:133:183#0/1  
`QbVLW[SP¥NKR¥]UKSY¥LER[UYYSUUT¥UUUTPTB  
@HWI-EAS443:3:14:1386:652#0/1  
GTAGTCTTTGATGAACAATTGAAGAGCCATCTGGGCCGTT  
+HWI-EAS443:3:14:1386:652#0/1  
a\_]b`\_babab`aa`\_aa`aa`aa\_a\_¥``¥\_`^`¥UaW^  
@HWI-EAS443:3:14:1393:671#0/1  
CTAACAGCTAATGAGTCAGGAAGGCTAATAGATTTCTTAA  
+HWI-EAS443:3:14:1393:671#0/1  
abab`a`aa\_aab]a`^aab^\_aa\_a```\_`\_¥\_`a[\_a]]  
@HWI-EAS443:3:14:1406:368#0/1  
CTTCGAGTCTGGACGGATCAAGAAAGAAGATTCTCTGAG  
+HWI-EAS443:3:14:1406:368#0/1  
a]b¥\_¥a^`\_a`^aba`\_Y]aaaaLba]a`b\_a]b`ab\_b  
@HWI-EAS443:3:14:1423:144#0/1  
GTCTGTTTGTGCATACCCACTTGGTTCATTATCCTCAGGT

+HWI-EAS443:3:14:1423:144#0/1  
aT^` [Z[Z`X\_XT¥YJP]]VU^Y^UWTR^`VVSLSRRPV  
@HWI-EAS443:3:14:1469:1065#0/1  
CAGATTAGAGGTTTCGTATACTTTGTTGAAACTTTAGCTA  
+HWI-EAS443:3:14:1469:1065#0/1  
a`a`aa``Xa¥M^^`\_\_aaaa```\_\_\_\_Z]^U^\_\_\_\_^U¥\_  
@HWI-EAS443:3:14:1486:1738#0/1  
GAAGATGGTCACGCAAAGAACAATAGGGAAGAAAAACAA  
+HWI-EAS443:3:14:1486:1738#0/1  
a]^`\_[ZPYUaX`QUKU^\_^Y][MZI]Y[`S\_`\_]X[^  
@HWI-EAS443:3:14:1541:563#0/1  
CAGAAATCAACCGCAGCAACTGCATTGGCCAACACCATA  
+HWI-EAS443:3:14:1541:563#0/1  
abb`a`a\_aa\_`aa\_a\_]a\_^a\_`\_\_`\_]\_RZ[] [YU\_]V  
@HWI-EAS443:3:14:1575:1538#0/1  
AGCCCATCCCACCAGTATATTGTCTTGGTGTATTTCTTTT  
+HWI-EAS443:3:14:1575:1538#0/1  
aaa`]aaa\_^[`ZUbX\_a\_aa`\_\_aaaaUZPRa`a^\_a\_a  
@HWI-EAS443:3:14:1576:772#0/1  
AGCCTCTCTTATTCAGTCTTTGTTTTTCTTCCCTATTGT  
+HWI-EAS443:3:14:1576:772#0/1  
ababaab`abaababb`abaab`aaabb\_ba¥]aa\_aaYY  
@HWI-EAS443:3:14:1628:1217#0/1  
GTCTTTGATGAACAATTGAAGAGCCATCTGGGCCGTTGCA  
+HWI-EAS443:3:14:1628:1217#0/1  
aZbbbaaaaba\_```aaaaa\_\_ZVa\_XZ`aZRR\_VN\_UV  
@HWI-EAS443:3:14:1699:436#0/1  
AAAAACAAAGACTGAATAAGAGAGGCTATCTAATAAGAGC  
+HWI-EAS443:3:14:1699:436#0/1  
aa[\_\_\_Y]UaaR]aa^\_Va\_a`aZ^`\_Z\_RKXNZ]SYNROB  
@HWI-EAS443:3:14:1720:1673#0/1  
TGCCATGCTCAGGATGTTTCTGAACCACTCGGGTTGATTT  
+HWI-EAS443:3:14:1720:1673#0/1  
^[\`a^\_I]`ZSaS^a\_\_aU^[\`V^^QNV]TSW\_\_W]X^  
@HWI-EAS443:3:14:1757:419#0/1  
CAATTGAAGAGCCATCTGGGCCGTTGCAGGTCCAAGGTCA  
+HWI-EAS443:3:14:1757:419#0/1  
ababababb`a`aaa`aaaa^]b\_aa\_Y\_a[^R^[aa]]\_  
@HWI-EAS443:3:14:1758:1021#0/1  
GATTGATGCCAGGGTCGACTTCGAGTCTGGACGGATCAAG  
+HWI-EAS443:3:14:1758:1021#0/1  
a`a`aa^aa][\_\_X\_YV`^¥\_\_^\_^\_^\_\_¥`]W\_\_¥VN¥¥`  
@HWI-EAS443:3:14:175:1112#0/1  
GGGAAAGTGGACGACAAACACAGAGACTGGTGCACCCAG  
+HWI-EAS443:3:14:175:1112#0/1  
\_\_ZHYWXV`¥YZ\_U``\_T\_^]``Q¥T]SVSK¥¥Z^^[¥ZX  
@HWI-EAS443:3:14:1788:1365#0/1  
CTGGACGGATCAAGAAAGAAGAGTTCTCTGAGATCATGAA  
+HWI-EAS443:3:14:1788:1365#0/1  
a``a`abb`a]aaaa[Xab`aa\_a\_aYaaaa\_a`\_`a`\_`



@HWI-EAS443:3:14:184:2021#0/1  
ATTTTGTCTCATAGTGAATGCACCAAACCATGAGGGAAT  
+HWI-EAS443:3:14:184:2021#0/1  
abbaaaa]baba`bT^aa`aaaa`[\`aadW`a\_a\_a\_\_  
@HWI-EAS443:3:14:220:518#0/1  
TGCATTCATGAGAGCAAAATCGTCGGATGATTGGAGC  
+HWI-EAS443:3:14:220:518#0/1  
`baababaaaabbabaabaaaaaaa^``a^a\_a\_`¥^\_  
@HWI-EAS443:3:14:224:1348#0/1  
ATAACAATGACCTTGGACCTGCAACGGCCAGATGGCTC  
+HWI-EAS443:3:14:224:1348#0/1  
aa\_a`a\_a\_`^\_Y\_`Y`^X\_\_`[\_][^\_U]R¥]Y]WWYY  
@HWI-EAS443:3:14:236:1336#0/1  
TGATTCTGTAAACAATGCTGTGGTAATGCCAGCCCATGGT  
+HWI-EAS443:3:14:236:1336#0/1  
ab^\_Q[\_Ya¥aZa\_ZaY]TX\_[Q\_\_U^\_WUG]`a¥\_^¥V  
@HWI-EAS443:3:14:257:1818#0/1  
GCCGTTGCAACTACACATTCCTGGATTCCCAAGAGGAATC  
+HWI-EAS443:3:14:257:1818#0/1  
a^ZDSaaba`aT^UZaaY¥\_aYYI¥S\_]Sa`\_SQYIX[GV  
@HWI-EAS443:3:14:293:434#0/1  
AAAAACAAAGACTGAATAAGAGAGGCTATCTAATAAGAGC  
+HWI-EAS443:3:14:293:434#0/1  
abbaaaaaaba`a]Vaa[aab\_`a\_[BBBBBBBBBBBBBB  
@HWI-EAS443:3:14:307:507#0/1  
CTACACATTCCTGGATTCCCAAGAGGAATCGTTCTATTCT  
+HWI-EAS443:3:14:307:507#0/1  
aa\_\_a\_`a`aZI^XM`\_a\_X[`X]^[\_^\_\_OV¥YV\_U]V  
@HWI-EAS443:3:14:336:1472#0/1  
GGGAGCTAATGGATGATGATTATCGGGGAAGACTTTGTAA  
+HWI-EAS443:3:14:336:1472#0/1  
]a¥V\_\_P\_aa`a`YS¥\_aab[a]^X\_^`W\_S\_\_YGW^  
@HWI-EAS443:3:14:372:1014#0/1  
CGAGAGTAAAAGAATGAAGATTGCAACACAAATACCAGCA  
+HWI-EAS443:3:14:372:1014#0/1  
aaaa[a\_ababbaaaa`aa`a^\_a\_aaa`a``\_aa\_a`\_a  
@HWI-EAS443:3:14:378:1884#0/1  
AATGAACCAAGTGGGTATGCACAAACAGACTGTGTTCTAG  
+HWI-EAS443:3:14:378:1884#0/1  
a\_¥¥\_```\_]XXUUG`UV\_^^^Y^]\_ZZ^RZSVRVZVXB  
@HWI-EAS443:3:14:381:969#0/1  
CAGGGTGCAGTTCGAGTCTGGACGGATCAAGAAAGAAGAG  
+HWI-EAS443:3:14:381:969#0/1  
]aUa\_S`H]a[YO[[]TX`¥\_a¥a^UO[PSZ^\_\_[Ua[X`  
@HWI-EAS443:3:14:388:1049#0/1  
ATGGAATCAATGAACAAAGAGGAAATAGAGATAACAACCC  
+HWI-EAS443:3:14:388:1049#0/1  
aabb\_`aaaaabaaaaZaaabb]a`aUabba`a\_aaaa`\_  
@HWI-EAS443:3:14:393:1570#0/1  
CCTCCATCTGATACTAATAGCCCTACCTTTGATTGGGTTT

+HWI-EAS443:3:14:393:1570#0/1  
a¥[`Za`\_a[\_]`)\_`[\_Y[PZ\_\_VUZY¥[Z^]`\_¥G\_]`  
@HWI-EAS443:3:14:421:1553#0/1  
GAACAATTGAAGAGCCATCTGGGCCGTTGCAGGTCCAAGG  
+HWI-EAS443:3:14:421:1553#0/1  
a\_` `babaabb]^aYaa`a`a`a`Ya[U^aaa`UVa`\_]¥  
@HWI-EAS443:3:14:455:281#0/1  
TGGATGTCAATCCGACTCTACTTTTCCTAAAAATCCAGC  
+HWI-EAS443:3:14:455:281#0/1  
aba[bb]a^ZZKZ`\_\_^aTa\_^aR]Q^\_bJ^]Wa\_XV^a\_  
@HWI-EAS443:3:14:480:1254#0/1  
AAAGAACAACATGATAAACAATGACCTTGGACCTGCAACG  
+HWI-EAS443:3:14:480:1254#0/1  
aa])abaa` ``a\_\_aa` `aa` `]Y^\_^a`X\_W^^`\_Z\_  
@HWI-EAS443:3:14:484:485#0/1  
GAGGAAATAGAGATAACAACCCACTTTCAAAGAAAAAGGA  
+HWI-EAS443:3:14:484:485#0/1  
a[ba]Z\_a`a\_a\_a\_aT\_`]^`a\_`aaW^`^a¥]^a^Sa\_^  
@HWI-EAS443:3:14:48:871#0/1  
GAAAAGGGAAAGTGGACGACAAACACAGAGACTGGTGCAC  
+HWI-EAS443:3:14:48:871#0/1  
a^ [R^`WZ\_aa`S`^` `aaU`aVV\_\_V¥¥T¥UW`WZXZX  
@HWI-EAS443:3:14:506:91#0/1  
TGATTATCGGGGAAGACTTTGTAATCCCCTGAATCCCCTTT  
+HWI-EAS443:3:14:506:91#0/1  
abaaa`aaaaa`\_^a\_^` `aW\_`\_^]\_]` `]^a^SXZ^Z  
@HWI-EAS443:3:14:511:1799#0/1  
GTTATCTCTATTTCTCTTTGTTTCATTGATTCCATTACAT  
+HWI-EAS443:3:14:511:1799#0/1  
aabYbbb`aabaabbaabba`aaaaaaaa`\_aaaa`a`  
@HWI-EAS443:3:14:561:360#0/1  
ATTAGCTGTTAGGCCATTTCGATCTAAAGACTTCTATGGTG  
+HWI-EAS443:3:14:561:360#0/1  
a`aab` `bVZPS][UTQ`Z^ZX¥[¥`\_UVS^ZMUZ¥P^NI  
@HWI-EAS443:3:14:573:1544#0/1  
CAGATCTTCATGATCTCAGAGAACTTCTTTCTTGATCC  
+HWI-EAS443:3:14:573:1544#0/1  
a\_\_\_\_\_¥¥a][`\_^\_¥`\_¥\_Y]^a`^\_^\_YZ^R^\_]Z]VZ  
@HWI-EAS443:3:14:618:661#0/1  
AAACACAGAGACTGGTGCACCCCAGCTCAACCCGATTGAT  
+HWI-EAS443:3:14:618:661#0/1  
WZ^\_U\_XH¥\_aabIT]\_a`]b]P`U^`]a^[K`^NYY]]T  
@HWI-EAS443:3:14:627:908#0/1  
ACTGACATTAATAACGATGACCAAAGATGCAGAGAGAGGC  
+HWI-EAS443:3:14:627:908#0/1  
aaaaaaaa`aaa`aaa`a`\_\_`¥` `a^]\_\_a^^`^^\_[Z  
@HWI-EAS443:3:14:646:2011#0/1  
CAGATCTTCATGATCTCAGAGAACTTCTTTCTTGATCC  
+HWI-EAS443:3:14:646:2011#0/1  
ab^aa`abbaX\_a`a`aaa\_¥aaabaaaX`aaaa`]ZRW

@HWI-EAS443:3:14:673:1501#0/1  
ATGGAATCAATGAACAAAGAGGAAATAGAGATAACAACCC  
+HWI-EAS443:3:14:673:1501#0/1  
aa`b^a`ababaaaaba`a`Y\_a`\_abaa`a\_aa\_aa\_W]  
@HWI-EAS443:3:14:687:302#0/1  
GCTCCCAGTAGGGGCAATGAAAAGAAGGCCAAACTGGCA  
+HWI-EAS443:3:14:687:302#0/1  
ab`[\`XP`¥]^`\_\_WVXW`V`ZUWYGVZYSY\_\_V`a[^`  
@HWI-EAS443:3:14:703:935#0/1  
TGAGTATTGGTGTGTTCTGTTTACTGTGTCCATGGTGTAT  
+HWI-EAS443:3:14:703:935#0/1  
ab`b[\`aaba]aY]^a`a`\_aaa`\_`^a]`^^\_a`Wa[\_^  
@HWI-EAS443:3:14:751:1808#0/1  
AACAGATCTTCATGATCTCAGAGAACTCTTCTTTCTTGAT  
+HWI-EAS443:3:14:751:1808#0/1  
aaba\_\_T¥Yaaa^[`SW`^`X`\_`\_\_O`T¥^Y\_WY\_]Z]^U  
@HWI-EAS443:3:14:77:146#0/1  
GTTCTGTTTACTGTGTCCATGGTGTATCCTGTTCCCTGTTC  
+HWI-EAS443:3:14:77:146#0/1  
aU\_\_Xa]\_ZYXPRL[T\_ZWXVTQ]X^VW[X^XTVVWXYXW  
@HWI-EAS443:3:14:805:1879#0/1  
GGATGTCAATCCGACTCTACTTTTCCTAAAAATTCCAGCG  
+HWI-EAS443:3:14:805:1879#0/1  
`a`]\`Tabb]0]]\_[\`¥Vaa`\_`]\`aTZaa^`b`a[\`¥Qaa^^  
@HWI-EAS443:3:14:846:867#0/1  
TTAGAGGTTTCGTATACTTTGTTGAAACTTTAGCTAGGAG  
+HWI-EAS443:3:14:846:867#0/1  
`aY\_HYV`ba`\_Taa`a`\_[aR[SV`¥X\_U`\_`^`^YUYUD  
@HWI-EAS443:3:14:869:1274#0/1  
GACGGATCAAGAAAGAAGAGTTCTCTGAGATCATGAAGAT  
+HWI-EAS443:3:14:869:1274#0/1  
`babaaV^bb\_baa`abaa`Za`a`a`\_aaa`\_a`aa`aa`  
@HWI-EAS443:3:14:871:693#0/1  
CATGCTCAGGATGTTTCTGAACCACTCGGGTTGATTTCTG  
+HWI-EAS443:3:14:871:693#0/1  
aaaaa\_aa`a`\_`\_\_a`\_`\_\_X¥^S`\_a`\_U]^`X`\_Z`\_¥  
@HWI-EAS443:3:14:886:695#0/1  
AATCAATGAACAAAGAGGAAATAGAGATAACAACCCACTT  
+HWI-EAS443:3:14:886:695#0/1  
\_a`babbaa`a\_a\_a\_a`\_\_\_`Ya`a`\_`a`\_`a^`\_¥`^`\_`\_`  
@HWI-EAS443:3:14:94:1133#0/1  
AGCCTCTCTTATTTCAGTCTTTGTTTTTTCTTCCCTATTGT  
+HWI-EAS443:3:14:94:1133#0/1  
QYb\_babaa`bbbab^¥abb\_Y^a\_bbb]^`bbaaababb  
@HWI-EAS443:3:14:981:1357#0/1  
AAAAATTCCAGCGCAAATGCCATAAGCACCACATTCCCT  
+HWI-EAS443:3:14:981:1357#0/1  
a^a\_Z]¥\_\_[XY¥\_`^\_]¥[\_\_\_\_\_^\_a\_R]^`[[Y[UP^  
@HWI-EAS443:3:14:991:1733#0/1  
GGCTAATTTTAGCATGGAGCTACCCAGCTTTGGAGTGTCT

+HWI-EAS443:3:14:991:1733#0/1  
\_¥¥aaZ¥baa`aaaa\_\_V¥^W\_[[T\_aRa¥a\_\_][\_¥^W`  
@HWI-EAS443:3:14:992:1409#0/1  
ATGGGCTCCAATCATCCGACGATTTTGCTCTCATAGTGAA  
+HWI-EAS443:3:14:992:1409#0/1  
ab`ab]YR\_S``T`PY^a¥a]WU`a`\_\_¥¥RZNZ]N]XY  
@HWI-EAS443:3:15:1009:1294#0/1  
GGGCTCCAATCATCCGACGATTTTGCTCTCATAGTGAATG  
+HWI-EAS443:3:15:1009:1294#0/1  
aabaabbbbb`ba\_aaa\_a`aaaa]\_\_aaa``aYaa`aa  
@HWI-EAS443:3:15:1019:246#0/1  
AACCCGAGTGGTTCAGAAACATCCTGAGCATGGCACCCAT  
+HWI-EAS443:3:15:1019:246#0/1  
abaaaaa```¥a`a`a\_\_a^Z\_]\_]`Ua\_^ZY^^]^^^  
@HWI-EAS443:3:15:1023:1006#0/1  
CTCTTATTGAGTCTTTGTTTTTTCTTCCCTATTGTTCTTT  
+HWI-EAS443:3:15:1023:1006#0/1  
^\_a[¥V`a\_Y\_[\_\_bbb]`bbbaaab``ab`a\_[Za¥^ba  
@HWI-EAS443:3:15:1044:785#0/1  
GAAGATTCCGTATATTGTATAAGTTTGGTCCCTCCATCTGA  
+HWI-EAS443:3:15:1044:785#0/1  
abbbabaaaa\_`aaaa^aaa¥^^aaa`]\_\_a\_^aa\_aa`  
@HWI-EAS443:3:15:1048:765#0/1  
CGAAAAGCTTGAACAGTCTGGGCTCCCAGTAGGGGGCAAT  
+HWI-EAS443:3:15:1048:765#0/1  
aaa`a\_ababb]\_]`b\_ab^^`]a]¥Q¥a\_aaa]ab\_a`a  
@HWI-EAS443:3:15:1049:879#0/1  
ATAGATTGCAGCACTTCTGGTACATCTGTTTCATCCTCAAG  
+HWI-EAS443:3:15:1049:879#0/1  
`^T^^[aba`a`Zaaaa^WLS^][[¥¥TSOQN¥[UUZ¥\_  
@HWI-EAS443:3:15:1177:1678#0/1  
GATTCTTCAAGGAAAGCCATAGCCTCTAGAACACAGTCTG  
+HWI-EAS443:3:15:1177:1678#0/1  
ZVKXS^]b\_SSa\_aVW]``]`\_OZ`Z]S`]ZYU[`aa]Y`  
@HWI-EAS443:3:15:1205:185#0/1  
AAGACTTCTATGGTGTGGCCAATGCAGTTGCTGCCGGTT  
+HWI-EAS443:3:15:1205:185#0/1  
`[ `[V`\_abaaaaX¥^aaa\_X¥`\_aa`a\_\_Y¥`\_TV``LT  
@HWI-EAS443:3:15:1211:288#0/1  
GAAGATGGTCACGCAAAGAACAATAGGGAAGAAAAAACA  
+HWI-EAS443:3:15:1211:288#0/1  
a[[^\_Za¥N[Za^UU`^`aU]U`\_Y\_V[Q^`Z^^Y\_`[`  
@HWI-EAS443:3:15:121:115#0/1  
GACGGATCAAGAAAGAAGAGTTCTCTGAGATCATGAAGAT  
+HWI-EAS443:3:15:121:115#0/1  
aaabb`\_aaaa\_Ya\_\_`\_aa¥^\_``a``¥\_¥^`a^X`^]  
@HWI-EAS443:3:15:1220:1054#0/1  
GAACAATTGAAGAGCCATCTGGGCCGTTGCAGGTCCAAGG  
+HWI-EAS443:3:15:1220:1054#0/1  
a`ab`aba`baaa\_aaaa\_a`a`b\_aa^aa[V\_X\_\_`]

@HWI-EAS443:3:15:122:225#0/1  
AAGAAATCTATTAGCCTTCCTGACTCATTAGCTGTTAGGC  
+HWI-EAS443:3:15:122:225#0/1  
\_`\_`a`\_`a`aaa`a`\_`aaaaaaaa`aaa``\_`\_`[^X`\_  
@HWI-EAS443:3:15:1242:968#0/1  
ATTGATGCCAGGGTCGACTTCGAGTCTGGACGGATCAAGA  
+HWI-EAS443:3:15:1242:968#0/1  
abb`[[aba^^¥\_Ua\_\_a`a]aaa^\_\_a\_a[aa]^Y^^P\_  
@HWI-EAS443:3:15:1248:732#0/1  
GACTCATTAGCTGTTAGGCCATTGATCTAAAGACTTCTA  
+HWI-EAS443:3:15:1248:732#0/1  
aba`\_\_aaaa\_aa¥a\_\_a`\_\_\_\_\_W\_\_¥\_`^[XUR\_X^]  
@HWI-EAS443:3:15:1264:636#0/1  
ATTCCATGCTTTTGGCTGGACCATGGGCTGGCATTACCAC  
+HWI-EAS443:3:15:1264:636#0/1  
a`\_U\_\_`\_aaZW\_US`W[[¥]]Z\_J\_UY\_aX0\_¥ZYP¥T^  
@HWI-EAS443:3:15:130:671#0/1  
GAGAACTCTTCTTTCTTGATCCGTCAGACTCGAAGTCGA  
+HWI-EAS443:3:15:130:671#0/1  
\_W[H\_`Z`T\_bT`]baR`aYaabSabNbabXaa`\_YDPWP  
@HWI-EAS443:3:15:1320:883#0/1  
GACCAAGAAGATGGTCACGCAAAGAACAATAGGGAAGAAA  
+HWI-EAS443:3:15:1320:883#0/1  
\_¥b\_bbab`b`ba`\_bbaaaaabaaaaabab`aaabbaa  
@HWI-EAS443:3:15:1321:441#0/1  
ATCGGGTTGAGCTGGGGTGCACCAGTCTCTGTGTTTGTGCG  
+HWI-EAS443:3:15:1321:441#0/1  
aaa`aa¥a[aa\_aVP]a\_a\_`\_aaa`^\_Saa¥a¥a\_\_PPX  
@HWI-EAS443:3:15:1329:1786#0/1  
CATGCTCAGGATGTTTCTGAACCACTCGGGTTGATTTCTG  
+HWI-EAS443:3:15:1329:1786#0/1  
abab`baaabbbbbabaaa]bbabaabbbb\_aabbab\_bb  
@HWI-EAS443:3:15:1353:596#0/1  
GGCTTTCCTTGAAGAATCCCACCCAGGAATATTTGAGAAT  
+HWI-EAS443:3:15:1353:596#0/1  
abb```babbbbbbbabba]bR\_[\_]abaababaaabbaa`  
@HWI-EAS443:3:15:1361:570#0/1  
ACCCGAGTGGTTCAGAAACATCCTGAGCATGGCACCCATA  
+HWI-EAS443:3:15:1361:570#0/1  
a`aaaa\_ab`]Taaa`a\_``\_\_\_aW[U\_\_^^]^Z\_[\_]`^  
@HWI-EAS443:3:15:1378:1179#0/1  
ATGGGCTCCAATCATCCGACGATTTTGCTCTCATAGTGAA  
+HWI-EAS443:3:15:1378:1179#0/1  
a\_Z¥a\_VX]a]¥]aaXS`VU`aa`aaaa\_a`\_Y^aa^a¥U  
@HWI-EAS443:3:15:1378:1998#0/1  
CAACTGCATTGGCCAACACCATAGAAGTCTTTAGATCGAA  
+HWI-EAS443:3:15:1378:1998#0/1  
abbabbaabbbb`\_bbbaabbaaaba`abbaa`baa\_aa  
@HWI-EAS443:3:15:1381:942#0/1  
GAGATAACAACCCACTTTCAAAGAAAAAGGAGAGTAAGAG

+HWI-EAS443:3:15:1381:942#0/1  
aaaaa`a`^0[`[a\_a^\_T`^H^\_]Z¥Xa]aW[U` ]`  
@HWI-EAS443:3:15:147:1585#0/1  
GTGGTAATGCCAGCCCATGGTCCAGCCAAAAGCATGGAAT  
+HWI-EAS443:3:15:147:1585#0/1  
a\_a`Zbb\_\_baa`aba`\_\_ZQ`\_P`\_`¥¥]\_aa[\_¥[`\_`  
@HWI-EAS443:3:15:1518:459#0/1  
TGTGGCTAATTTTAGCATGGAGCTACCCAGCTTTGGAGTG  
+HWI-EAS443:3:15:1518:459#0/1  
aaWT\_¥\_a^\_abaZ]\_\_]^¥YZZ[[TOW]\_Z]^[[Z\_¥R\_  
@HWI-EAS443:3:15:1536:969#0/1  
AAGGGATTGAGGGATTACAAAGTCTTCCCGATAATCAT  
+HWI-EAS443:3:15:1536:969#0/1  
^ab``bbb]`a\_`\_`\_abb^aa`aX\_\_a\_]`\_a`a`aa`a\_  
@HWI-EAS443:3:15:1553:1157#0/1  
AACAATTGAAGAGCCATCTGGGCCGTTGCAGGTCCAAGGT  
+HWI-EAS443:3:15:1553:1157#0/1  
aa]aaaaa^aZ\_Z[]\_`\_]\_^]]S¥\_]^[R]^\_VVRYX]RR  
@HWI-EAS443:3:15:1611:1317#0/1  
ATTCTGTAAACAATGCTGTGGTAATGCCAGCCCATGGTCC  
+HWI-EAS443:3:15:1611:1317#0/1  
abbaab[bbaabb`baabb`aabaa`Yaab`\_U\_aaa][a  
@HWI-EAS443:3:15:1612:479#0/1  
GTGGCTAATTTTAGCATGGAGCTACCCAGCTTTGGAGTGT  
+HWI-EAS443:3:15:1612:479#0/1  
a`ba\_aa]\_aaa`aU^\_aaW`\_]`YYYZYV`\_\_[\_[ZZ^]  
@HWI-EAS443:3:15:1631:984#0/1  
GTTTACTGTGTCCATGGTGTATCCTGTTCCCTGTTCCATGG  
+HWI-EAS443:3:15:1631:984#0/1  
\_\_b\_a\_ba]\_I^`\_aaa[]ZZ^U^`a^aN^\_XZ^TW]\_\_Z  
@HWI-EAS443:3:15:1666:339#0/1  
CACTAACTTGCAGGTCCTGTAGAATCTGTCCACTCCTGCT  
+HWI-EAS443:3:15:1666:339#0/1  
VXZWabb¥\_bb\_bbT[Zab`bba]babaYP[]L[WZ`aRa  
@HWI-EAS443:3:15:1718:27#0/1  
TGTTTACTGTGTCCATGGTGTATCCTGTTCCCTGTTCCATG  
+HWI-EAS443:3:15:1718:27#0/1  
Yaa[baaa¥]aY`]Za]aT]V`^^\_a]¥`\_Z^[P^^R^`V  
@HWI-EAS443:3:15:1738:354#0/1  
CTCCAATCATCCGACGATTTTGCTCTCATAGTGAATGCAC  
+HWI-EAS443:3:15:1738:354#0/1  
^[aYYb\_I[[[QTV¥U¥]\_aZ\_a\_¥¥ZOZ`^SubZWV]MSH  
@HWI-EAS443:3:15:1764:25#0/1  
CAAAGACTGAATAAGAGAGGCTATCTAATAAGAGCACTGA  
+HWI-EAS443:3:15:1764:25#0/1  
\_`^a`a`^abb`aba^a\_\_UaaTOS]¥0`YXVQQ¥XFWW  
@HWI-EAS443:3:15:1779:1402#0/1  
CTGGGTGGGATTCTTCAAGGAAAGCCATAGCCTCTAGAAC  
+HWI-EAS443:3:15:1779:1402#0/1  
a`\_b[Q\_babbb`bb\_bab`baaaa^abbaa\_a\_aaabaa

@HWI-EAS443:3:15:193:1941#0/1  
GTATTGGTGTCTGTTTACTGTGTCCATGGTGTATCCT  
+HWI-EAS443:3:15:193:1941#0/1  
^]aa]¥PV`[\_`\_a`a]`aaaXZ`P`]\_\_\_\_`¥YU\_W\_\_a]\_  
@HWI-EAS443:3:15:213:940#0/1  
GAACGATTCTCTGGGAATCCAGGAATGTGTAGTTGCAA  
+HWI-EAS443:3:15:213:940#0/1  
a^aaa`aaaaaaa^aaa`^aaa`a`^Z`dW`Z^`¥`^`\_`\_  
@HWI-EAS443:3:15:222:1963#0/1  
CTGGAGTAAATGAATCAGCTGACATGAGTATTGGAGTAAC  
+HWI-EAS443:3:15:222:1963#0/1  
abbbabaabbbbaabbbbaabaaaa`^aaa`aa\_]aa`  
@HWI-EAS443:3:15:253:1405#0/1  
CCGGCAGCAACTGCATTGGCCAACACCATAGAAGTCTTTA  
+HWI-EAS443:3:15:253:1405#0/1  
aa^a\_Z\_^]]W`¥SZVVY[¥VVZ[V[XZYX[¥RMKXST]  
@HWI-EAS443:3:15:310:209#0/1  
AAAAATTCCAGCGCAAATGCCATAAGCACCATTCCT  
+HWI-EAS443:3:15:310:209#0/1  
ab]UW\_aaa`\_\_`\_`^`\_`¥`\_`\_`a^X`]Y]\_^^^Z]Z]  
@HWI-EAS443:3:15:397:267#0/1  
CGCAAAGAACAATAGGGAAGAAAAACAAGACTGAATAA  
+HWI-EAS443:3:15:397:267#0/1  
a`bbb`\_abbbbaa^a`abaaa`bb`aa`a]aaba\_aba  
@HWI-EAS443:3:15:42:527#0/1  
AAGAGACAACATGACCAAGAAGATGGTCACGCAAAGAACA  
+HWI-EAS443:3:15:42:527#0/1  
]aa\_bbbUbb`a``ba\_Paaabaaa\_`^`aa\_aaaaa`aa^  
@HWI-EAS443:3:15:447:825#0/1  
AAATCTGTGTCTTGTGAATTAGTCATCATCTTTCTCAC  
+HWI-EAS443:3:15:447:825#0/1  
^`a\_babbb\_aTba`]P^¥a\_TS[X`aaaa¥\_a^]X]a¥Y  
@HWI-EAS443:3:15:452:1747#0/1  
GTGGGATGGGCTCCAATCATCCGACGATTTTGCTCTCATA  
+HWI-EAS443:3:15:452:1747#0/1  
`Yaa¥\_VabVVaT^bb`¥`Va`aZQ¥aa`TUabZ^X\_a`b  
@HWI-EAS443:3:15:460:535#0/1  
AAGAGACAACATGACCAAGAAGATGGTCACGCAAAGAACA  
+HWI-EAS443:3:15:460:535#0/1  
ababbbabaaa`a\_aaaaa`aaa]\_aJa`aa``\_aa`\_`\_`^  
@HWI-EAS443:3:15:480:1439#0/1  
ACTTTTCTAAAAATTCCAGCGCAAATGCCATAAGCACC  
+HWI-EAS443:3:15:480:1439#0/1  
G^bbbabbbbaab¥b\_babaab`¥bb^b\_M]ba\_Ka¥b^]  
@HWI-EAS443:3:15:491:316#0/1  
CTCCATCTGATACTAATAGCCCTACCTTTGATTGGGTTTG  
+HWI-EAS443:3:15:491:316#0/1  
abb`aa]a`¥`a[aa[aa]][[`Z[a``\_a¥\_aa^\_`^`\_R  
@HWI-EAS443:3:15:559:832#0/1  
TGCGAAAAGCTTGAACAGTCTGGGCTCCAGTAGGGGGCA

+HWI-EAS443:3:15:559:832#0/1  
abaa¥\_a\_\_baaaabaaa\_aaa]]a`aa`b\_aa\_`a\_[-  
@HWI-EAS443:3:15:567:139#0/1  
CAGATCTTCATGATCTCAGAGAACTCTTCTTTCTTGATCC  
+HWI-EAS443:3:15:567:139#0/1  
aabaaabb`babbba`bbbabaaaa\_abaa``ba\_aaa\_\_  
@HWI-EAS443:3:15:574:1368#0/1  
AAAAATTCCAGCGCAAATGCCATAAGCACCACATTCCT  
+HWI-EAS443:3:15:574:1368#0/1  
aabbYa`a`a\_a`\_aa\_aa`\_\_aaa`¥a`Wa^`\_^]]Z^  
@HWI-EAS443:3:15:589:83#0/1  
GGACGGATCAAGAAAGAAGAGTTCTCTGAGATCATGAAGA  
+HWI-EAS443:3:15:589:83#0/1  
aa`aaa\_`\_`\_a\_a`a`^a\_`Z\_\_`\_`\_aa^^^`\_\_^Z^^  
@HWI-EAS443:3:15:58:1092#0/1  
CAACTGCATTGGCCAACACCATAGAAGTCTTTAGATCGAA  
+HWI-EAS443:3:15:58:1092#0/1  
a^^\_babaaabba^`a`baaabbaaa^P]`a`aaa\_aaaa  
@HWI-EAS443:3:15:609:504#0/1  
CCCCAGTGATTGTGAAAGAAATCTCTGTGTCTTGTGAATT  
+HWI-EAS443:3:15:609:504#0/1  
abbbbb¥babbb\_baaaba`aaaaabb`aaabb^W`aaaa  
@HWI-EAS443:3:15:610:1236#0/1  
GCTGATTCATTTACTCCAGACACTCCAAAGCTGGGTAGCT  
+HWI-EAS443:3:15:610:1236#0/1  
`a`aXX`[Ya¥Y\_`a`XU¥]\_[^^`\_`\_¥[]\_]`P^YQ¥  
@HWI-EAS443:3:15:717:476#0/1  
CTGGCGACCTTGAGTTAGTTTATCTACCCTTGTGTTGA  
+HWI-EAS443:3:15:717:476#0/1  
aa\_b`U`aabbaabaa[`aba`aaa^`[[`aaaabaabV^  
@HWI-EAS443:3:15:731:815#0/1  
GTTCGAATCTTCATTCTTTTACTCTCGAACATGTACCCTT  
+HWI-EAS443:3:15:731:815#0/1  
aabbba`baba^Z\_baaaaaa`aa`a`a`aaa]a\_a\_\_`  
@HWI-EAS443:3:15:732:421#0/1  
GCCTCTTTATTTCAGTCTTTGTTTTTCTTCCCTATTGTT  
+HWI-EAS443:3:15:732:421#0/1  
aaaaa^]abaaaZ^a\_aaaab]`aaab\_\_^OR^a^aa`\_a  
@HWI-EAS443:3:15:74:708#0/1  
GGACGACAAACACAGAGACTGGTGCACCCAGCTCAACCC  
+HWI-EAS443:3:15:74:708#0/1  
aaJ¥]]^]aaaa`^^V^`\_]\_]R`]^Y]\_¥X[`]TY`SSU  
@HWI-EAS443:3:15:758:1385#0/1  
ATCCAGGAATGTGTAGTTGCAACGGCATCATATTCCATGC  
+HWI-EAS443:3:15:758:1385#0/1  
XZb\_\_bb`abab```SRSX`Ua]b[]`aaa\_\_aa`aba`\_  
@HWI-EAS443:3:15:760:1206#0/1  
CGGATTGATGCCAGGGTCGACTTCGAGTCTGGACGGATCA  
+HWI-EAS443:3:15:760:1206#0/1  
abb]a``\_ab`\_a\_aaQab`]aaa`\_^H`ab\_\_[aa\_Z`a



@HWI-EAS443:3:15:824:205#0/1  
GCTAATTTTAGCATGGAGCTACCCAGCTTTGGAGTGTCTG  
+HWI-EAS443:3:15:824:205#0/1  
a[aabb`a`abT\_\_aW\_b[\_\_\_¥a\_Q[\_Y^\_\_[Z\_V\_VWQN  
@HWI-EAS443:3:15:825:1639#0/1  
ATCCGACTCTACTTTTCCTAAAAATCCAGCGCAAATGC  
+HWI-EAS443:3:15:825:1639#0/1  
]babbbaabaaabaaaaabbbabaaa¥bbbaa\_baaa`\_a  
@HWI-EAS443:3:15:825:644#0/1  
TGTCCCCAGTGATTGTGAAAGAAATCTCTGTGTCTTGTGA  
+HWI-EAS443:3:15:825:644#0/1  
aaaaaa`aa^a¥aaaZa`a`a`\_aa`\_\_`a]\_X[\_]JXVS  
@HWI-EAS443:3:15:891:1286#0/1  
ATGGTGTCTAGGGCCCGATTGATGCCAGGGTCTCGACTTCG  
+HWI-EAS443:3:15:891:1286#0/1  
aaa\_¥aQbX\_X¥¥^aaaa¥`\_]^]\_^¥ZQS¥PY^¥]\_^VY  
@HWI-EAS443:3:15:898:428#0/1  
AGAATCCCCTTTGGCTTGTGTTGAGAATAGAACGATTCC  
+HWI-EAS443:3:15:898:428#0/1  
V`]H\_\_SY`aab]aba\_W¥^aSVXW\_]aaZW\_WMZV\_`V¥  
@HWI-EAS443:3:15:901:1754#0/1  
GCTAATTTTAGCATGGAGCTACCCAGCTTTGGAGTGTCTG  
+HWI-EAS443:3:15:901:1754#0/1  
abbb``Zb]aW\_`]\_\_XH]¥\_Q^W\_a\_`a]Z[U`aQa]b  
@HWI-EAS443:3:15:901:869#0/1  
AGCTGATTCATTTACTCCAGACTCCAAAGCTGGGTAGC  
+HWI-EAS443:3:15:901:869#0/1  
Y¥\_`b`bbb^X[bVb``^[aaaa^UXVR^]\_[Y[QVR^Y  
@HWI-EAS443:3:15:928:1139#0/1  
GGAGAGTAAGAGACAACATGACCAAGAAGATGGTCACGCA  
+HWI-EAS443:3:15:928:1139#0/1  
`Z`bababa^`bbabbabaaabaaa`a`\_`a`b^aabSa  
@HWI-EAS443:3:15:932:1412#0/1  
AGATAGCCTCTCTTATTTCAGTCTTTGTTTTTTCTCCCTA  
+HWI-EAS443:3:15:932:1412#0/1  
[^\_\_Y\_\_\_bbaa^`^`\_`\_`aabbba``aba^ab^]^aba  
@HWI-EAS443:3:15:953:1027#0/1  
GGCACCTATATGTGTATCTGTAGTCTTTGATGAACAATTG  
+HWI-EAS443:3:15:953:1027#0/1  
aaba``bbbaaa``aaaabX^\_¥\_aa`a]ab]Z]]aa`a  
@HWI-EAS443:3:16:1020:1627#0/1  
AAGAGACAACATGACCAAGAAGATGGTCACGCAAAGAACA  
+HWI-EAS443:3:16:1020:1627#0/1  
a^[[bbab`a`aaa\_aaaa````\_`\_]`a`^a\_\_V\_\_^Z^  
@HWI-EAS443:3:16:1026:472#0/1  
GGCTTGTGTTGAGAATAGAACGATTCCCTCTTGGGAATCCA  
+HWI-EAS443:3:16:1026:472#0/1  
^a^^aZa]OYZZS]]^^`J[G^]P]OT^[^YKJY`WTLT  
@HWI-EAS443:3:16:1027:166#0/1  
CGCTGGAATTTTAGGAAAAGTAGAGTCGGATTGACATCC

+HWI-EAS443:3:16:1027:166#0/1  
`abbbba^abbbbab¥bba^Z^^Rbabb^]aaa\_`\_]`a\_U`  
@HWI-EAS443:3:16:1052:194#0/1  
GAAGAGCCATCTGGGCCGTTGCAGGTCCAAGGTCATTGTT  
+HWI-EAS443:3:16:1052:194#0/1  
aaa^`\_`\_^\_]U`^`\_`\_aYX¥V¥`^`V^`[\_¥V¥T[W\_W`WW  
@HWI-EAS443:3:16:1062:574#0/1  
GACGGATCAAGAAAGAAGAGTTCTCTGAGATCATGAAGAT  
+HWI-EAS443:3:16:1062:574#0/1  
a]abaPW\_` `[GVHX]TNO`TW\_WRO[ZRY[OX]XJYaXV  
@HWI-EAS443:3:16:106:1134#0/1  
TTTGCGAAAAGCTTGAACAGTCTGGGCTCCCAGTAGGGGG  
+HWI-EAS443:3:16:106:1134#0/1  
aaaabaaaba`a\_``aa`^`a`^`a`^`]a`a\_dW\_` ` \_\_\_\_  
@HWI-EAS443:3:16:1100:618#0/1  
CTCCAATCATCCGACGATTTTGCTCTCATAGTGAATGCAC  
+HWI-EAS443:3:16:1100:618#0/1  
^`b`^`^`a]bbba]^`^`¥aaaaaaaaaab`aX[]\_[\_Y  
@HWI-EAS443:3:16:1139:1768#0/1  
AAAAGCTTGAACAGTCTGGGCTCCCAGTAGGGGGCAATGA  
+HWI-EAS443:3:16:1139:1768#0/1  
aba\_a\_`]XX`a`aU[`^`^`a^aZa`MHO\_\_N`X^X¥\_¥  
@HWI-EAS443:3:16:1165:1792#0/1  
TAGAGATAACAACCCACTTTCAAAGAAAAAGGAGAGTAAG  
+HWI-EAS443:3:16:1165:1792#0/1  
ab^^`ba]aabbba]a`aaba`a`aa]XU`¥a`Ya\_aG\_`^  
@HWI-EAS443:3:16:1178:1184#0/1  
GAAGTACTTCAATGAATCAACAAAGAAGAAAATTGAGAAA  
+HWI-EAS443:3:16:1178:1184#0/1  
aaaa^aa`^`aaaa`[aa\_`^`\_Y`]^`\_Y\_]a\_\_]\_^`\_  
@HWI-EAS443:3:16:119:276#0/1  
TCGACTTCGAGTCTGGACGGATCAAGAAAGAAGAGTTCTC  
+HWI-EAS443:3:16:119:276#0/1  
aabbaaaabbaVabaaaaba\_`aa`^`Qaba^aa`a]`^`a`  
@HWI-EAS443:3:16:1207:503#0/1  
GGTCCATCAATCGGGTTGAGCTGGGGTGCACCAGTCTCTG  
+HWI-EAS443:3:16:1207:503#0/1  
^^\_T¥[\_JZ^)`a\_^J[WU]VT\_`aa[]¥\_baVaV]a[^¥  
@HWI-EAS443:3:16:1228:814#0/1  
CAGGATACACCATGGACACAGTAAACAGAACACACCAATA  
+HWI-EAS443:3:16:1228:814#0/1  
`YI^aaa¥]aab`]a\_aaa¥XYaa]`¥Ya^XQ^GU^^`Y  
@HWI-EAS443:3:16:1250:1139#0/1  
GAGGCTATGGCTTTCCCTTGAAGAATCCCACCCAGGAATAT  
+HWI-EAS443:3:16:1250:1139#0/1  
abYZaa\_0^a`[a`R[Z`TZ\_[[VOPY\_\_]\_^¥^WQZG]^  
@HWI-EAS443:3:16:1254:629#0/1  
CCAATGCAGTTGCTGCCGTTGATTTCTGTTTAATGTCCA  
+HWI-EAS443:3:16:1254:629#0/1  
abbaababbbbbbbaabb\_b`^`aabaaa`bba`^`b¥\_¥a

@HWI-EAS443:3:16:1266:1070#0/1  
TGTCCACTCCTGCTTGTATTCCCTCATGGTTTGGTGCATT  
+HWI-EAS443:3:16:1266:1070#0/1  
aa\_\_a^`a^\_\_\_Waa\_\_]`a^^X^Y]a\_\_^\_\_Y\_R^YY^]  
@HWI-EAS443:3:16:126:1044#0/1  
GCTAATTTTAGCATGGAGCTACCCAGCTTTGGAGTGTCTG  
+HWI-EAS443:3:16:126:1044#0/1  
aba`\_aaaaa¥]`a``\_a`\_a\_\_\_Y\_\_\_`\_X\_¥^Z]^`\_`  
@HWI-EAS443:3:16:1302:1119#0/1  
TGCATACCCACTTGGTTCATTATCCTCAGGTAGTGGTCCA  
+HWI-EAS443:3:16:1302:1119#0/1  
ababbbb\_]a\_abb`^a`aab`aa\_a`\_`\_]Z``^]`N^X\_  
@HWI-EAS443:3:16:1317:949#0/1  
GAACAATTGAAGAGCCATCTGGGCCGTTGCAGGTCCAAGG  
+HWI-EAS443:3:16:1317:949#0/1  
a`¥^[S^[P^a^[a\_YY[SRXSVX[[WVZU[^VRUSVVUX  
@HWI-EAS443:3:16:1369:50#0/1  
CAGATCTTCATGATCTCAGAGAACTCTTCTTTCTTGATCC  
+HWI-EAS443:3:16:1369:50#0/1  
\_QQX^Xa]\_\_\_^W\_aY``bWavVYZ[`V[]ZWUa[\_^\_XH  
@HWI-EAS443:3:16:1416:634#0/1  
GGTGTGTTCTGTTTACTGTGTCCATGGTGTATCCTGTTCC  
+HWI-EAS443:3:16:1416:634#0/1  
\_a]babaaaaa\_aba\_aa\_a^`^a`\_aXa]a`]]`dW^U¥  
@HWI-EAS443:3:16:1443:1436#0/1  
GGCATTACCACAGCATTGTTTACAGAATCAATCTCTTTAT  
+HWI-EAS443:3:16:1443:1436#0/1  
aa\_\_`V`[Z][\_\_W\_]N]UP^[[T]VRW]SPWYYW]Z]Z]  
@HWI-EAS443:3:16:145:1691#0/1  
CTGGAGTAAATGAATCAGCTGACATGAGTATTGGAGTAAC  
+HWI-EAS443:3:16:145:1691#0/1  
a\_\_^`^FQZY¥a\_`bab]¥a`X¥`aa`Z`^`WU¥]^X]Y  
@HWI-EAS443:3:16:1468:1674#0/1  
GGGCTCCAATCATCCGACGATTTTGCTCTCATAGTGAATG  
+HWI-EAS443:3:16:1468:1674#0/1  
aa`^`\_a\_aa`a^\_\_\_`Z`¥^[[Y]S\_\_\_[^`^[[M`WTN[  
@HWI-EAS443:3:16:1472:436#0/1  
CAGAAACATCCTGAGCATGGCACCATAATGTTCTCAAAC  
+HWI-EAS443:3:16:1472:436#0/1  
XaZ]ab\_b`X`ZW]Y`a]ba`adWYb\_baaba\_X]``Saa  
@HWI-EAS443:3:16:1473:710#0/1  
CTGAGCATGGCACCATAATGTTCTCAAACAAAATGGCAA  
+HWI-EAS443:3:16:1473:710#0/1  
abbbbabb`aaaa\_abaaba`a\_a\_a`a\_b\_aa`a\_Z\_\_\_  
@HWI-EAS443:3:16:1496:1052#0/1  
AAAGAAATCTCTGTGTCTTGTGAATTAGTCATCATCTTTC  
+HWI-EAS443:3:16:1496:1052#0/1  
a`abaab`^aba¥a\_\_aaaXa``a[W][¥\_`[^``aaa\_  
@HWI-EAS443:3:16:1507:232#0/1  
GAGACAACATGACCAAGAAGATGGTCACGCAAAGAACAAT

+HWI-EAS443:3:16:1507:232#0/1  
abbbaaaa`b`\_^aaaa`^a\_]¥`^a^]W¥a]\_^\_^\_  
@HWI-EAS443:3:16:1512:104#0/1  
GGCTATTAGTATCAGATGGAGACCAAACCTTATACAATAT  
+HWI-EAS443:3:16:1512:104#0/1  
abaaaabab\_aa\_]aY\_aa[`a`YLW\_\_S`\_^X[^^\_¥  
@HWI-EAS443:3:16:155:1029#0/1  
TTCCTGACTCATTAGCTGTTAGCCATTCGATCTAAAGAC  
+HWI-EAS443:3:16:155:1029#0/1  
aaabYIWaaaa`a\_aaa]`Z[¥`\_^¥[[UUX\_^`^WX^  
@HWI-EAS443:3:16:1565:607#0/1  
TGAGTATTGGTGTGTTCTGTTTACTGTGTCCATGGTGTAT  
+HWI-EAS443:3:16:1565:607#0/1  
¥a[aPY[¥ZZRa[[`¥ZaZY\_YST]WaLQ\_\_TVT\_ZRBB  
@HWI-EAS443:3:16:1645:365#0/1  
TTGGTCTCCATCTGATACTAATAGCCCTACCTTTGATTG  
+HWI-EAS443:3:16:1645:365#0/1  
abb`^`b\_Vaaaa^a`aa]b`aaa\_F¥^\_aa]^Z^a\_\_\_Y  
@HWI-EAS443:3:16:167:326#0/1  
ATTGGTGTGTTCTGTTTACTGTGTCCATGGTGTATCCTGT  
+HWI-EAS443:3:16:167:326#0/1  
abb`aWZ^]Q^`^`a\_]^^[\_]X^¥b]W¥a`0a[`V\_]¥]Y  
@HWI-EAS443:3:16:1685:475#0/1  
AGAAGATGGTCACGCAAAGAACAATAGGGAAGAAAAACA  
+HWI-EAS443:3:16:1685:475#0/1  
abaa`a`aa^a[a¥\_\_\_a^\_¥\_`a^a\_a\_\_\_`^`^`\_W\_  
@HWI-EAS443:3:16:1706:1654#0/1  
CTGGCGACCTTGAGTTAGTTTATCTACCCTGTTTGTGGA  
+HWI-EAS443:3:16:1706:1654#0/1  
abaa\_¥NZa]]a`\_PY]b\_b`\_\_\_\_\_^`ZMQa\_\_\_Za]]ZR  
@HWI-EAS443:3:16:1722:565#0/1  
GGAGTGTCTGGAGTAAATGAATCAGCTGACATGAGTATTG  
+HWI-EAS443:3:16:1722:565#0/1  
ab`b\_a`\_bbb\_a\_aaab\_``[aaXaa\_Za`\_\_\_W]]^L  
@HWI-EAS443:3:16:1747:712#0/1  
CTTTTCATTGCCCCCTACTGGGAGCCCAGACTGTTCAAGC  
+HWI-EAS443:3:16:1747:712#0/1  
`ab`\_`\_baaba\_T\_Ya^]`¥`aaa`T]a`^\_aaZ]^`a[  
@HWI-EAS443:3:16:1765:1341#0/1  
AAAAATTCCAGCGCAAATGCCATAAGCACCATTCCT  
+HWI-EAS443:3:16:1765:1341#0/1  
aaa]aaa\_]\_W]`[[[\_Z^\_¥^\_^X\_^][\_XRXV\_  
@HWI-EAS443:3:16:191:1513#0/1  
ATGTACCAGAAGTGTGCAATCTATTGAGAAATTTTCC  
+HWI-EAS443:3:16:191:1513#0/1  
TP^]a\_aYIZHXMZ\_Ubba][bWa¥Waaab^Z^`aU[^\_a  
@HWI-EAS443:3:16:193:674#0/1  
TGGTGGGATGGGCTCCAATCATCCGACGATTTTGCTCTCA  
+HWI-EAS443:3:16:193:674#0/1  
abbGaba\_`a]P]QX`b`\_\_\_a^`\_^Y\_aS\_[¥¥\_`¥[SZ`

@HWI-EAS443:3:16:260:1831#0/1  
CTTTTGTCCAAGATTCAGTATCGAGACTCCCAAGACCGTA  
+HWI-EAS443:3:16:260:1831#0/1  
a`a\_a\_]babbbba\_`b`Lq]\_ababaa\_`a`babaaa¥a  
@HWI-EAS443:3:16:269:1776#0/1  
CATTTGAGTTAAAGAAGCTGTGGGATCAAACCCAATCAAA  
+HWI-EAS443:3:16:269:1776#0/1  
a¥VS]VVaS\_``UZ`]UW]YNXW\_USZ\_a[ZNR`¥P¥]W[  
@HWI-EAS443:3:16:296:828#0/1  
TGAAGAATCCCACCCAGGAATATTTGAGAATTCATGCCTT  
+HWI-EAS443:3:16:296:828#0/1  
abbaa`a`\_`abaaaa`aa[\_`aa¥VZaaaa[aa]]\_a`  
@HWI-EAS443:3:16:304:195#0/1  
ATCCCACCCAGGAATATTTGAGAATTCATGCCTTGAAACA  
+HWI-EAS443:3:16:304:195#0/1  
aaUYU¥ba¥VY`ZNZ[\_\_\_aa^a\_\_\_VS¥WWZX^¥^MX]]a  
@HWI-EAS443:3:16:341:1713#0/1  
CAAGAATCCCCTTTGGCTTGTGTTGAGAATAGAACGATT  
+HWI-EAS443:3:16:341:1713#0/1  
`\_b`a\_aaaaaaaaa^\_a\_[]^Y`0\_¥\_aP^^a[JU^0^  
@HWI-EAS443:3:16:361:460#0/1  
ACTGTTACTCCAATACTCATGTCAGCTGATTCATTTACTC  
+HWI-EAS443:3:16:361:460#0/1  
ab``Z]YYLW``]`^]a`^aU^a\_\_¥Zaa\_`¥^[\_`Y`^Y\_  
@HWI-EAS443:3:16:376:790#0/1  
GGGGCAATGAAAAGAAGCCAAACTGGCAAATGTTGTGAG  
+HWI-EAS443:3:16:376:790#0/1  
aaU`\_WQZYWXU^^ZP¥][\_\_Za]M``XW[aS¥WG]]`  
@HWI-EAS443:3:16:403:972#0/1  
AAATTCCAGCGAAAATGCCATAAGCACCACATTCCTTA  
+HWI-EAS443:3:16:403:972#0/1  
\_`^aaabaaaa]abaa]`aaaaaaaa\_a``a``a\_]\_``\_a  
@HWI-EAS443:3:16:426:1165#0/1  
GGGATGGGCTCCAATCATCCGACGATTTTGCTCTCATAGT  
+HWI-EAS443:3:16:426:1165#0/1  
aaa`aa`ab\_aaaa\_\_^Y[`a[`b```^aaaZ\_```^¥\_S  
@HWI-EAS443:3:16:467:1351#0/1  
CTTTCCTTGAAGAATCCCACCCAGGAATATTTGAGAATTC  
+HWI-EAS443:3:16:467:1351#0/1  
abbaaa¥^\_ba]¥baaaab`^abbaaaaa`aaa¥Z`aa^  
@HWI-EAS443:3:16:499:195#0/1  
GCCAGTTTGGCCTTCTTTTCATTGCCCCCTACTGGGAGCC  
+HWI-EAS443:3:16:499:195#0/1  
a]TZ`G`XP\_Z`X^^OX\_[U¥¥^¥¥ROZS¥¥XN¥¥BBBBB  
@HWI-EAS443:3:16:523:1451#0/1  
GCCAGGGTCGACTTCGAGTCTGGACGGATCAAGAAAGAAG  
+HWI-EAS443:3:16:523:1451#0/1  
aa]\_\_aa^ab\_a``XX`aZa\_¥V¥\_a\_a[^\_\_\_\_\_aY[YR  
@HWI-EAS443:3:16:548:964#0/1  
GATTTCTTTCACAATCACTGGGGACAACACTAAGTGGAAT

+HWI-EAS443:3:16:548:964#0/1  
\_Q\_aaaaaabaaaaaa\_aa\_[\_`a`\_aa`\_a\_aZa\_\_\_`  
@HWI-EAS443:3:16:570:1029#0/1  
TGCCATGCTCAGGATGTTTCTGAACCACTCGGGTTGATTT  
+HWI-EAS443:3:16:570:1029#0/1  
a`aab`ba`a`a^U¥\_[aa`a]T\_\_`\_a\_\_\_]\_Z`a\_\_\_]^  
@HWI-EAS443:3:16:572:1989#0/1  
TAATGGATGATGATTATCGGGGAAGACTTTGTAATCCCCT  
+HWI-EAS443:3:16:572:1989#0/1  
\_ZaYZ`\_]a`X^aaaa\_`Yaaaa]`\_aa\_[`\_W]\_XVW  
@HWI-EAS443:3:16:591:1728#0/1  
ACTTTTCCTAAAAATTCCAGCGCAAATGCCATAAGCACC  
+HWI-EAS443:3:16:591:1728#0/1  
\_a\_Za\_ababa^]aa`a\_a]aaaY\_\_\_^¥a\_a\_\_\_]\_\_aR^  
@HWI-EAS443:3:16:622:1100#0/1  
CCCATTTTAAGCAGACTTCAGGAATGTGAAGATTCCGTAT  
+HWI-EAS443:3:16:622:1100#0/1  
aba\_`abb`\_a`\_`a\_X\_bbba[``^\_\_^]aa``a``]`a  
@HWI-EAS443:3:16:672:1723#0/1  
TGCCAGGGTCGACTTCGAGTCTGGACGGATCAAGAAAGAA  
+HWI-EAS443:3:16:672:1723#0/1  
a\_Y`b`a\_]\_bab`ba]aa`\_`a^U^aaa\_`a`\_`aa`\_aa  
@HWI-EAS443:3:16:698:631#0/1  
ATTAGCTGTTAGGCCATTCGATCTAAAGACTTCTATGGTG  
+HWI-EAS443:3:16:698:631#0/1  
`baaa`aaX`[QYP]Q[^[]TT]YS]VMQWW]LTWQ]UO[  
@HWI-EAS443:3:16:712:1633#0/1  
GGCACCTATATGTGTATCTGTAGTCTTTGATGAACAATTG  
+HWI-EAS443:3:16:712:1633#0/1  
YO¥aaa¥`aaa`]¥Zaaa^bZW¥]\_`a^`a`a\_aXaa\_¥a  
@HWI-EAS443:3:16:713:626#0/1  
GAAAAATTTCTCGAATAGATTGCAGCACTTCTGGTACATC  
+HWI-EAS443:3:16:713:626#0/1  
aaaaaaa`\_\_aa\_\_`\_a`\_\_]¥\_^^^`^^^^`^W`\_`Y]  
@HWI-EAS443:3:16:765:1353#0/1  
GAACATTATGGGTGCCATGCTCAGGATGTTTCTGAACCAC  
+HWI-EAS443:3:16:765:1353#0/1  
abbabbbabaaaaabbbaab^aa`aaa^\_abba\_`aX[]J  
@HWI-EAS443:3:16:768:1652#0/1  
GGCAAGACTAGGGAAAGGTACATGTTTCGAGAGTAAAAGA  
+HWI-EAS443:3:16:768:1652#0/1  
abbbbbbbabba`abbaa`b\_baba`\_`Q\_baba^bbbaYa  
@HWI-EAS443:3:16:772:39#0/1  
AGCTAATGGATGATGATTATCGGGGAAGACTTTGTAATCC  
+HWI-EAS443:3:16:772:39#0/1  
`baa\_]aa]aa^`b[^Y]a\_aa^XZWa¥^`^`^`^`^`YJT  
@HWI-EAS443:3:16:784:347#0/1  
CAACAAAGTATACGAAACCTCTAATCTGCATCCCAGGTGT  
+HWI-EAS443:3:16:784:347#0/1  
ab`aVR¥`X]S¥T]a]Q]a\_\_[a\_\_`YY^aZ]]`Wa\_X`W

@HWI-EAS443:3:16:820:1484#0/1  
GAGATAACAACCCACTTTCAAAGAAAAAGGAGAGTAAGAG  
+HWI-EAS443:3:16:820:1484#0/1  
a`\_`a]R`¥W¥[R^^YXSG¥^Z]XQOWQVOOYQR¥[UY  
@HWI-EAS443:3:16:837:1579#0/1  
AAAAATTCCAGCGCAAATGCCATAAGCACCACATTC CCT  
+HWI-EAS443:3:16:837:1579#0/1  
^\_Z[HZOZaWWUL[¥N\_RYRT[\_XYYZUaY¥URH]UDVBB  
@HWI-EAS443:3:16:842:1118#0/1  
TCCAATCATCCGACGATTTTGCTCTCATAGTGAATGCACC  
+HWI-EAS443:3:16:842:1118#0/1  
abaaaabbbaaab`^aaaa\_a\_a`\_a`\_a```a^\_\_^  
@HWI-EAS443:3:16:872:279#0/1  
CAGGGTCGACTTCGAGTCTGGACGGATCAAGAAAGAAGAG  
+HWI-EAS443:3:16:872:279#0/1  
a\_aaa^aaa`aaa`a`\_aa\_\_aa^^[\_^aZ`\_\_\_\_\_  
@HWI-EAS443:3:16:874:1438#0/1  
CAGGAATATTTGAGAATTCATGCCTTGAAACAATGGAAGT  
+HWI-EAS443:3:16:874:1438#0/1  
¥V^babbbbaaab[a][`^a`aaYaa]\_S`bb`aaaa`0  
@HWI-EAS443:3:16:877:314#0/1  
GTGGGATTCTTCAAGGAAAGCCATAGCCTCTAGAACACAG  
+HWI-EAS443:3:16:877:314#0/1  
a\_aaa`aaaaa`aa``¥]Z`a\_^\_]`¥]`\_\_^^^X]]  
@HWI-EAS443:3:16:892:465#0/1  
TGCATTCACTATGAGAGCAAATCGTCGGATGATTGGAGC  
+HWI-EAS443:3:16:892:465#0/1  
`babab`aaaaaab`baaa`aaa\_\_aaa`\_a\_a`¥\_\_\_\_  
@HWI-EAS443:3:16:898:960#0/1  
AATGACCTTGGACCTGCAACGGCCAGATGGCTCTTCAAT  
+HWI-EAS443:3:16:898:960#0/1  
]]abNVZ]b[ba¥Z[]^[]aTY`a`a]]^Ra`aU\_a\_\_XX  
@HWI-EAS443:3:16:913:1836#0/1  
GGGCTCCAATCATCCGACGATTTTGCTCTCATAGTGAATG  
+HWI-EAS443:3:16:913:1836#0/1  
VbbaQaaba\_\_baaba`aa^a\_[S\_a`a\_b\_aaW\_\_\_Y\_  
@HWI-EAS443:3:16:936:1403#0/1  
TCTGTTTACTGTGTCCATGGTGTATCCTGTTCCCTGTTCCA  
+HWI-EAS443:3:16:936:1403#0/1  
aba`aaaa`\_a¥^]`\_`T\_T][Z^¥\_W^]]^ZW^X]Y  
@HWI-EAS443:3:16:965:247#0/1  
GAGAGAGGCAAGTTAAAAAGAAGGGCTATCGCAACACCTG  
+HWI-EAS443:3:16:965:247#0/1  
]`a^]`aaa¥V[Y`UV]\_XYYVNRTUTURVTQTZVVLVYB  
@HWI-EAS443:3:16:992:196#0/1  
GTCCAATCATAAGTCTGGCGACCTTGAGTTAGTTTATCTA  
+HWI-EAS443:3:16:992:196#0/1  
a\_\_`a`a`a```\_a`\_`\_\_^X]\_]Z`Y]Y\_Z^^]Y]Y  
@HWI-EAS443:3:17:1025:1590#0/1  
CTCCCCTATGGCACCTATATGTGTATCTGTAGTCTTTGAT

+HWI-EAS443:3:17:1025:1590#0/1  
aab^`aYYa]]Y^^U¥]]U\_[QYYOW[aYTOTL\_\_\_\_]WYX  
@HWI-EAS443:3:17:105:623#0/1  
ATGGGCTCCAATCATCCGACGATTTTGCTCTCATAGTGAA  
+HWI-EAS443:3:17:105:623#0/1  
\_bbabaa\_\_^a`aaa]`\_`\_a\_]````\_a`\_\_`Y^^¥  
@HWI-EAS443:3:17:1064:783#0/1  
CTCCAATCATCCGACGATTTTGCTCTCATAGTGAATGCAC  
+HWI-EAS443:3:17:1064:783#0/1  
aab`aa`^abaa^b^a`aaa\_a\_aa\_X\_bYa`\_^a¥a\_  
@HWI-EAS443:3:17:1073:59#0/1  
GATTGATGCCAGGGTCGACTTCGAGTCTGGACGGATCAAG  
+HWI-EAS443:3:17:1073:59#0/1  
a`aaaa`a\_^a`Ya`\_^`aY`¥\_WT`\_^W\_\_W¥¥¥^\_  
@HWI-EAS443:3:17:1095:619#0/1  
GCCCTTCTTTTAACTTGCCTCTCTGCATCTTTGGTCA  
+HWI-EAS443:3:17:1095:619#0/1  
aa^M[]^XZX\_aZQT^L[]]PZ`^^Z¥\_X¥XVXG  
@HWI-EAS443:3:17:1112:516#0/1  
CAGAAACATCCTGAGCATGGCACCCATAATGTTCTCAAAC  
+HWI-EAS443:3:17:1112:516#0/1  
aaaba`babababa`aaaa`ba\_aaaaaab¥a`aaa\_a\_  
@HWI-EAS443:3:17:1117:685#0/1  
GCTTGTGTTGAGAATAGAACGATTCCTCTTGGGAATCCAG  
+HWI-EAS443:3:17:1117:685#0/1  
a`aaa\_b\_ab\_a]aaa^\_a] []^a\_W¥`\_^`\_W\_]RZ\_  
@HWI-EAS443:3:17:1122:1702#0/1  
GGGAGCTAATGGATGATGATTATCGGGGAAGACTTTGTAA  
+HWI-EAS443:3:17:1122:1702#0/1  
ab`\_`aaa`aa`a^\_a\_aa`````\_a```^\_]\_X¥^\_V^\_  
@HWI-EAS443:3:17:1141:1120#0/1  
GTAAGAGACAACATGACCAAGAAGATGGTCACGCAAAGAA  
+HWI-EAS443:3:17:1141:1120#0/1  
a`a`\_`aa`a`\_\_`\_`]]`\_`````^`\_`Z]`\_`^\_]`^\_]`  
@HWI-EAS443:3:17:1162:904#0/1  
CAAAATCGTCGGATGATTGGAGCCCATCCCACAGTATAT  
+HWI-EAS443:3:17:1162:904#0/1  
a`b`bb\_]¥aaabab^baababaa`aaa\_S[aaab[\_baa  
@HWI-EAS443:3:17:117:1370#0/1  
CTCCAATCATCCGACGATTTTGCTCTCATAGTGAATGCAC  
+HWI-EAS443:3:17:117:1370#0/1  
a`\_`SSZa`XTY[^^^ZVPY^Y¥[`Y¥^YULX[ZUZQZ[  
@HWI-EAS443:3:17:1182:1510#0/1  
TGGACGACAAACACAGAGACTGGTGCACCCCAGCTCAACC  
+HWI-EAS443:3:17:1182:1510#0/1  
]WJRVb^Zb^J\_bb`b\_a^a^`\_]aPQ¥aYQ]aUUaY¥U¥  
@HWI-EAS443:3:17:1218:1773#0/1  
CAGATCTTCATGATCTCAGAGAACTTCTTTCTTGATCC  
+HWI-EAS443:3:17:1218:1773#0/1  
aaa¥X`aaaa\_aa`\_`\_a\_[\_\_\_\_¥`]a```\_`\_]`\_`^O\_



@HWI-EAS443:3:17:1293:1743#0/1  
CATCAATCGGGTTGAGCTGGGGTGCACCAGTCTCTGTGTT  
+HWI-EAS443:3:17:1293:1743#0/1  
a\_0\_b\_b`\_\_QVb`W`a^a\_`^H\_QUbaa]JUQUVYRWT^  
@HWI-EAS443:3:17:1332:713#0/1  
CAGATCTTCATGATCTCAGAGAACTCTTCTTTCTTGATCC  
+HWI-EAS443:3:17:1332:713#0/1  
aaaaaaaa\_a`a^a^`¥^a]`^N¥a]a`\_\_`^\_\_]a`]WP  
@HWI-EAS443:3:17:1341:834#0/1  
GGCTAATTTTAGCATGGAGCTACCCAGCTTTGGAGTGTCT  
+HWI-EAS443:3:17:1341:834#0/1  
aaab`aaabaaa`aa`a`aa^`\_\_^a]a^aa`ZaZa]]\_  
@HWI-EAS443:3:17:1356:90#0/1  
AACAGATCTTCATGATCTCAGAGAACTCTTCTTTCTTGAT  
+HWI-EAS443:3:17:1356:90#0/1  
abaa`\_a\_aaaa`aa`\_WY\_a\_a^`¥a^`\_]aa^]a`\_`\_`  
@HWI-EAS443:3:17:1362:732#0/1  
GTTGATCCCACTAACTTGCAGGTCCTGTAGAATCTGTCC  
+HWI-EAS443:3:17:1362:732#0/1  
aaaaaaaa`[``aaa`\_aa`\_aa]\_Za]^`````]a\_^X\_  
@HWI-EAS443:3:17:140:600#0/1  
GATTGATGCCAGGGTCGACTTCGAGTCTGGACGGATCAAG  
+HWI-EAS443:3:17:140:600#0/1  
`Y\_WZ¥]a`\_`[XUR^`[``^^ZTX[YR\_]VU^XKTW]R  
@HWI-EAS443:3:17:1459:810#0/1  
AAAAATCCAGCGCAAATGCCATAAGCACCATTCCT  
+HWI-EAS443:3:17:1459:810#0/1  
a`V¥a`b`a^a\_a`\_]PZ`aW\_\_`\_¥aW[Y]\_W]\_^XOZ`  
@HWI-EAS443:3:17:1460:775#0/1  
GCAAAGAACAATAGGGAAGAAAAACAAAGACTGAATAAG  
+HWI-EAS443:3:17:1460:775#0/1  
aa`\_aa`a`\_\_b\_baa\_\_aa\_]`^]a\_\_`\_^aa`\_`\_^`  
@HWI-EAS443:3:17:1479:429#0/1  
CAAAGACTACAGATACACATATAGGTGCCATAGGGGAGAC  
+HWI-EAS443:3:17:1479:429#0/1  
aba`a]`baaab`aa\_a\_baaaa`Xa`````aa`\_`\_`\_Y  
@HWI-EAS443:3:17:1514:1776#0/1  
GTTGGCCAATGCAGTTGCTGCCGTTGATTTCTGTTAAT  
+HWI-EAS443:3:17:1514:1776#0/1  
`M]aaaa```^Z]`\_\_Y\_XR0[XS^\_SZ\_a\_¥UF`\_OQT  
@HWI-EAS443:3:17:1515:1251#0/1  
GAACAATTGAAGAGCCATCTGGGCCGTTGCAGGTCCAAGG  
+HWI-EAS443:3:17:1515:1251#0/1  
W¥[R[\_\_\_¥\_ab\_¥^UX]\_`QYWZ¥]Y`SZ]a`UYZRVaa  
@HWI-EAS443:3:17:1519:591#0/1  
ATCCCTCATGGTTTGGTGCATTCACTATGAGAGCAAAT  
+HWI-EAS443:3:17:1519:591#0/1  
aba\_S\_bbaabbabba[[ba`baaa]baaa`b^aRaZ]\_a  
@HWI-EAS443:3:17:1527:696#0/1  
CAAAGAAGAAAATTGAGAAAATAAGGCCTTCTAATAGA

+HWI-EAS443:3:17:1527:696#0/1  
abbbbaabbbbbbabb\_bbaaaa\_aabaabaabab`aa  
@HWI-EAS443:3:17:1582:128#0/1  
TTTGATGAACAATTGAAGAGCCATCTGGGCCGTTGCAGGT  
+HWI-EAS443:3:17:1582:128#0/1  
`b`\_a`aa^^`aa^`^\_^^^]XX^^RX^Y]UVWTWW  
@HWI-EAS443:3:17:1585:251#0/1  
ATGCCAGGGTCGACTTCGAGTCTGGACGGATCAAGAAAGA  
+HWI-EAS443:3:17:1585:251#0/1  
aaab^aa`aSR]\_aaZW¥\_a^\_\_\_\_TZ^[TWU¥¥¥^\_YQ^  
@HWI-EAS443:3:17:1627:1482#0/1  
CAGGGTCGACTTCGAGTCTGGACGGATCAAGAAAGAAGAG  
+HWI-EAS443:3:17:1627:1482#0/1  
ab`aaabbaabababa]bb\_baab`abba`aaa[aaaa\_  
@HWI-EAS443:3:17:1658:732#0/1  
CTATTCGAGAAATTTTTCCCTAGCAGTTCATATAGGAGAC  
+HWI-EAS443:3:17:1658:732#0/1  
abbaaabbbay]baaaaa`a`a^^a\_```a`a```¥\_^^  
@HWI-EAS443:3:17:1683:928#0/1  
TGCAGGTCCAAGGTCATTGTTTATCATGTTGTTCTTTATC  
+HWI-EAS443:3:17:1683:928#0/1  
abb\_W\_Z`\_a¥b^OU`R`\_aW]\_`Y^\_ZSZ\_`TX[`^XXN  
@HWI-EAS443:3:17:1685:1109#0/1  
AAAAATTCCAGCGCAAATGCCATAAGCACCACATTCCT  
+HWI-EAS443:3:17:1685:1109#0/1  
a`V^TXS\_\_\_\_Y]Z0¥\_\_\_\_[a^W`Y\_0`T`QY\_W\_]XWUS^  
@HWI-EAS443:3:17:1707:925#0/1  
GTCCTCCATCTGATACTAATAGCCCTACCTTTGATTGGGT  
+HWI-EAS443:3:17:1707:925#0/1  
a^Y\_VXX^[RZ^T¥V[YYVJY[YRV[WRLX^]`XVUXLQM  
@HWI-EAS443:3:17:170:1414#0/1  
CAGGAATATTTGAGAATTCATGCCTTGAAACAATGGAAGT  
+HWI-EAS443:3:17:170:1414#0/1  
aa]Y\_aa^abaaba¥W``baa\_a\_a````a`b\_aaa[a`^  
@HWI-EAS443:3:17:170:474#0/1  
GGAATACAAGCAGGAGTGGACAGATTCTACAGGACCTGCA  
+HWI-EAS443:3:17:170:474#0/1  
aaa\_a^Q\_^[\_X\_WWSVW\_]VRUMV^ZUNUYXUX]VVVX  
@HWI-EAS443:3:17:1740:1455#0/1  
TAGGGCTATTAGTATCAGATGGAGGACCAAACCTATACAA  
+HWI-EAS443:3:17:1740:1455#0/1  
a\_Z¥`a`bbba`]`a¥a`]\_aaY^¥`a`a`a^`]\_Y`[\_  
@HWI-EAS443:3:17:1781:1442#0/1  
CACCAGTATATTGTCTTGGTGTATTTCTTTTGTCCAAGAT  
+HWI-EAS443:3:17:1781:1442#0/1  
aaaa`b`babbab^aabb`aaWaa`b\_baba\_a¥]b`\_aa  
@HWI-EAS443:3:17:207:1158#0/1  
CACTAACTTGCAGGTCCTGTAGAATCTGTCCACTCCTGCT  
+HWI-EAS443:3:17:207:1158#0/1  
^`aRUV¥\_ORZ[\_Z\_b\_[Y]Ua\_\_`]^]Z]VT¥VG^aR\_R



+HWI-EAS443:3:17:539:1047#0/1  
a[]\_]TUV^a`T^Z]a\_LV^^][ZU¥MJJTLQENP[UY  
@HWI-EAS443:3:17:573:1538#0/1  
AAAAATTCCAGCGCAAATGCCATAAGCACCATTCCT  
+HWI-EAS443:3:17:573:1538#0/1  
a`Y\_QTZa^¥TY\_`^[¥^YW`^]\_^W^^\_YRWY]ZZ]YUU  
@HWI-EAS443:3:17:585:403#0/1  
GTGGTAATGCCAGCCCATGGTCCAGCCAAAAGCATGGAAT  
+HWI-EAS443:3:17:585:403#0/1  
aVa\_U`^`aa\_X\_]SPZ`\_SU^VTP\_¥\_¥`U\_¥SQ\_Q¥W  
@HWI-EAS443:3:17:58:545#0/1  
CCTCCATCTGATACTAATAGCCCTACCTTTGATTGGGTTT  
+HWI-EAS443:3:17:58:545#0/1  
ababaaaa`a`aaaa`a`aa```\_\_`a`^`\_``]\_X\_Y  
@HWI-EAS443:3:17:624:1778#0/1  
GTATTGGTGTGTTCTGTTTACTGTGTCCATGGTGTATCCT  
+HWI-EAS443:3:17:624:1778#0/1  
a\_aaaaaW`]`\_`a\_[^aa\_]^[[]]a\_\_a\_\_Q^W`^]]^  
@HWI-EAS443:3:17:62:1060#0/1  
CTGGTATTTGTGTTTGAATCTTCATTCTTTTACTCTCGAA  
+HWI-EAS443:3:17:62:1060#0/1  
aaa^R]aaa`\_a`aa\_\_\_`aaa`a```a`aa`a]aaa\_\_  
@HWI-EAS443:3:17:707:72#0/1  
GGGTTGTATCTCTATTTCTCTTTGTTTATTGATTCCAT  
+HWI-EAS443:3:17:707:72#0/1  
aaaYaa\_a^\_[^\_]```\_`^¥]`^^[\_^^\_]\_^[[ZY^^  
@HWI-EAS443:3:17:70:1550#0/1  
ATGCCGTTGCAACTACACATTCCTGGATCCCAAGAGGAA  
+HWI-EAS443:3:17:70:1550#0/1  
\_`S`aaaaaaaaaaaa\_``a``]¥¥WW]`aa[^`a[LV]  
@HWI-EAS443:3:17:717:773#0/1  
GATGAACAATTGAAGAGCCATCTGGGCCGTTGCAGGTCCA  
+HWI-EAS443:3:17:717:773#0/1  
aaab]N]]]aaaa\_a\_Y`a[a]a¥Z[]`\_W\_\_^]N^ZY  
@HWI-EAS443:3:17:742:360#0/1  
CGCAACACCTGGGATGCAGATTAGAGTTTTCGTATACTTT  
+HWI-EAS443:3:17:742:360#0/1  
aaa`Z¥a^b`b]ZZ\_a\_\_a[a`aaaa\_VU\_^^S``\_¥`VV  
@HWI-EAS443:3:17:809:329#0/1  
ATCCGACTCTACTTTTCTAAAAATTCAGCGCAAATGC  
+HWI-EAS443:3:17:809:329#0/1  
`aaabaaa`aaaaaaaaabbab^aa]]ab`aaaa`\_a`\_  
@HWI-EAS443:3:17:833:61#0/1  
ACTGAATCTTGACAAAAGAAATACACCAAGACAATATAC  
+HWI-EAS443:3:17:833:61#0/1  
abaa¥\_bbbbab`aa¥`\_a`aaa`b`\_```\_a`^a^`a^  
@HWI-EAS443:3:17:848:242#0/1  
CCCATAATCATCATCCATTAGCTCCCATTTAAGCAGAC  
+HWI-EAS443:3:17:848:242#0/1  
aa`a]a\_\_a\_aaaaa```aa`\_\_a\_Za\_\_\_\_\_a]]^[^`\_W

@HWI-EAS443:3:17:855:1100#0/1  
CCCAGCTCAACCCGATTGATGGACCACTACCTGAGGATAA  
+HWI-EAS443:3:17:855:1100#0/1  
aabaaaaba¥aaabaabababaa\_`aaaa`aa\_a\_aab\_  
@HWI-EAS443:3:17:856:905#0/1  
GTTTCGTATACTTTGTTGAACTTTAGCTAGGAGCATTTG  
+HWI-EAS443:3:17:856:905#0/1  
\_[\`a`a]aaaaa````\_aa````]````\_``a]¥\_\_aX[^]\_\_  
@HWI-EAS443:3:17:961:289#0/1  
CTTTATGACTGACAAAGGGATTGAGGGATTACAAAGTCT  
+HWI-EAS443:3:17:961:289#0/1  
`bbbaabaa\_aa^a`\_aa\_]RZ\_a\_TDN[[[Z`YXPKT  
@HWI-EAS443:3:17:966:1376#0/1  
CCCGGATTGATGCCAGGGTCGACTTCGAGTCTGGACGGAT  
+HWI-EAS443:3:17:966:1376#0/1  
aba¥PW¥ab]`\_]\_¥aa^S^a[Xa[¥`aa^`a`Z¥¥a^\_  
@HWI-EAS443:3:17:985:598#0/1  
ATTGGTGTGTTCTGTTTACTGTGTCCATGGTGTATCCTGT  
+HWI-EAS443:3:17:985:598#0/1  
abba\_[bab\_aaaa`baaab`aZa`\_aaa]a\_\_``````\_  
@HWI-EAS443:3:18:1009:1811#0/1  
TAACTTGCAGGTCCTGTAGAATCTGTCCACTCCTGCTTGT  
+HWI-EAS443:3:18:1009:1811#0/1  
abba`a`a`a`^aa`a\_a\_a\_a`^\_U\_]\_a^\_^]X\_] [Y  
@HWI-EAS443:3:18:1015:1118#0/1  
AAAAATTCCAGCGCAAATGCCATAAGCACCATTCCT  
+HWI-EAS443:3:18:1015:1118#0/1  
aaaa```\_`\_\_\_\_\_]\_^\_¥^^\_W\_]^^^`Z^ZZ^WWX  
@HWI-EAS443:3:18:1027:930#0/1  
CTTCGAGTCTGGACGGATCAAGAAAGAAGAGTTCTCTGAG  
+HWI-EAS443:3:18:1027:930#0/1  
aab]bWPTbbaaZbba]^Ua`a]Ya^\_a^a`]aaaa¥a\_  
@HWI-EAS443:3:18:1045:1428#0/1  
TGTGGCTAATTTTAGCATGGAGCTACCCAGCTTTGGAGTG  
+HWI-EAS443:3:18:1045:1428#0/1  
a`YOXW\_a\_R¥a`VWTPW¥YV[`^`\_aZW[W]a^Z¥WUP^  
@HWI-EAS443:3:18:1061:1185#0/1  
GCTAATTTTAGCATGGAGCTACCCAGCTTTGGAGTGTCTG  
+HWI-EAS443:3:18:1061:1185#0/1  
aa]RRXS\_RSP\_RQT¥LT^[VNZQLSN¥\_SRLRBBBBBBB  
@HWI-EAS443:3:18:1072:1036#0/1  
CAGATACACATATAGGTGCCATAGGGGAGACACAAATT  
+HWI-EAS443:3:18:1072:1036#0/1  
abbbabbbbbbbbbbaabb\_abaababab`aaababaaaa  
@HWI-EAS443:3:18:1141:906#0/1  
GACGGATCAAGAAAGAAGAGTTCTCTGAGATCATGAAGAT  
+HWI-EAS443:3:18:1141:906#0/1  
aa\_baa\_abbababaaaaaZaaa`aaa`aaa`aaa\_\_a  
@HWI-EAS443:3:18:1158:273#0/1  
CTCCTAGCTAAAGTTTCAACAAAGTATACGAAACCTCTAA

+HWI-EAS443:3:18:1158:273#0/1  
`a`a`ab``¥ab^\_a`a`\_a^^^a`\_]\_^[]\_X\_``  
@HWI-EAS443:3:18:1173:1520#0/1  
CATTATGGGTGCCATGCTCAGGATGTTTCTGAACCACTCG  
+HWI-EAS443:3:18:1173:1520#0/1  
aabbababa^baaaaa\_aaba\_\_a\_a\_aaa\_a\_`\_U\_¥X  
@HWI-EAS443:3:18:1186:1592#0/1  
ATGGAATCAATGAACAAAGAGGAAATAGAGATAACAACCC  
+HWI-EAS443:3:18:1186:1592#0/1  
¥¥baa`\_aab`\_a^\_aaaa¥YZ`^`aaa`````\_\_`[[W  
@HWI-EAS443:3:18:1186:507#0/1  
GAACAACATGATAAACAATGACCTTGGACCTGCAACGGCC  
+HWI-EAS443:3:18:1186:507#0/1  
a`a`aa`\_`0```\_`^`\_a`\_`^X\_]`^`^U\_]`^`^]`^XX  
@HWI-EAS443:3:18:1204:136#0/1  
GTGCATTCACTATGAGAGCAAAATCGTCCGATGATTGGAG  
+HWI-EAS443:3:18:1204:136#0/1  
a`aY`aa]`\_a^aa[\_¥`Q`^SU¥U^UT\_\_Y¥¥¥WWWWWY  
@HWI-EAS443:3:18:1221:48#0/1  
TCGACTTCGAGTCTGGACGGATCAAGAAAGAAGAGTTCTC  
+HWI-EAS443:3:18:1221:48#0/1  
abaa`a`\_a`aaabaa\_Wba^Y^\_]¥^`\_W^\_]WaW\_V`U  
@HWI-EAS443:3:18:1240:1445#0/1  
CTGTTTACTGTGTCCATGGTGTATCCTGTTCCCTGTTCCAT  
+HWI-EAS443:3:18:1240:1445#0/1  
abbaaabaa`\_aab[`aaa]`]aa^a\_a`aZ[a`a\_]U]a  
@HWI-EAS443:3:18:125:1281#0/1  
GCGCTGGAATTTTTAGGAAAAGTAGAGTCCGATTGACATC  
+HWI-EAS443:3:18:125:1281#0/1  
a`RX`a^V]`aa[`aa`\_aa\_a]aaa`Sa`^X]\_S\_]`^]  
@HWI-EAS443:3:18:1304:1550#0/1  
TAGTGAATGCACCAAACCATGAGGGAATACAAGCAGGAGT  
+HWI-EAS443:3:18:1304:1550#0/1  
abbabaabbabaaaaa`aaaabaaaaa`aa```\_a`^aY  
@HWI-EAS443:3:18:130:1687#0/1  
CTGGAGTAAATGAATCAGCTGACATGAGTATTGGAGTAAC  
+HWI-EAS443:3:18:130:1687#0/1  
aaaY[^Y¥baaZ^P]`aa`^```^`\_\_\_\_[\_\_\_\_^]\_\_\_\_]`^`Z  
@HWI-EAS443:3:18:1312:646#0/1  
TTGTGTTGAGAATAGAACGATTCCCTCTTGGGAATCCAGGA  
+HWI-EAS443:3:18:1312:646#0/1  
aab]aaaaV^]\_]a`a`\_a`^a`\_aW`\_aW]\_]\_] [TX^`W  
@HWI-EAS443:3:18:1327:1103#0/1  
CTGGGATGCAGATTAGAGTTTCGTATACTTTGTTGAAAC  
+HWI-EAS443:3:18:1327:1103#0/1  
abb`aV\_ba\_\_`^b`Z`b\_YQ¥`bXX`^`\_a`a`\_a`\_`^V  
@HWI-EAS443:3:18:1333:638#0/1  
CAGGGTGCACTTCGAGTCTGGACGGATCAAGAAAGAAGAG  
+HWI-EAS443:3:18:1333:638#0/1  
`Q^XVfV[] [aV`\_a\_U\_]ZaabJ^` [X]X\_`]¥ZZP\_^ [

@HWI-EAS443:3:18:1355:1727#0/1  
CAGGAACAGGATACACCATGGACACAGTAAACAGAACACA  
+HWI-EAS443:3:18:1355:1727#0/1  
]bYabbbbbbbabba¥IXba`aaabab\_b`bb`\_baa`Z  
@HWI-EAS443:3:18:1374:190#0/1  
GATCCGTCCAGACTCGAAGTCGACCCTGGCATCAATCCGG  
+HWI-EAS443:3:18:1374:190#0/1  
`^\_aZa¥`^`\_`S¥N`Z^QKRSVTUPZBBBBBBBBBBBBB  
@HWI-EAS443:3:18:1382:246#0/1  
GATACACATATAGGTGCCATAGGGGAGACACACAAATTCA  
+HWI-EAS443:3:18:1382:246#0/1  
aabaYbabbbbaaaa¥a`aa\_b\_aa]a\_\_\_Z`^\_\_\_`^^`  
@HWI-EAS443:3:18:1382:524#0/1  
TATGACTGACAAAGGGATTGAGGGATTACAAAGTCTTCC  
+HWI-EAS443:3:18:1382:524#0/1  
[`¥¥^YZ\_¥V]¥\_¥RS[^[]Q¥X]]X]TRY`¥TRP^UZ[  
@HWI-EAS443:3:18:1394:202#0/1  
GAAACCTCTAATCTGCATCCCAGGTGTTGCGATAGCCCTT  
+HWI-EAS443:3:18:1394:202#0/1  
Y`a`a\_ab[^\_a\_]U\_\_`a^`aa][HW¥\_\_W[FR]SRKX  
@HWI-EAS443:3:18:1511:905#0/1  
CTGGTATTTGTGTTGCAATCTTCATTCTTTTACTCTCGAA  
+HWI-EAS443:3:18:1511:905#0/1  
a\_RQUJ[\_a¥T]\_\_OGX[¥G^LPD]UXV[STY¥ULULBBB  
@HWI-EAS443:3:18:151:880#0/1  
ATATGATGCCGTTGCAACTACACATTCCTGGATTCCCAAG  
+HWI-EAS443:3:18:151:880#0/1  
`bba^¥aab]aabbaaaaaaaaaaaa\_a`^Y`Z``a\_aa`\_  
@HWI-EAS443:3:18:1521:1268#0/1  
CTTCCCTATTGTTCTTTGCGTGACCATCTTCTTGGTCATG  
+HWI-EAS443:3:18:1521:1268#0/1  
^abbbb`Uabb^`\_`a`ab]\_X¥^[aN^bbbbbaaaabb  
@HWI-EAS443:3:18:1544:933#0/1  
ATGGTGTCTAGGGCCCGATTGATGCCAGGGTCGACTTCG  
+HWI-EAS443:3:18:1544:933#0/1  
Va\_`TV^aa\_`a^`a`[```¥X]`¥¥`[¥`¥¥```a^[¥  
@HWI-EAS443:3:18:1553:1191#0/1  
GCAACACCTGGGATGCAGATTAGAGGTTTCGTATACTTTG  
+HWI-EAS443:3:18:1553:1191#0/1  
`^ab]bbbbab`aab`aaaaba\_aba`aa`b`\_aa`b`aa  
@HWI-EAS443:3:18:1570:314#0/1  
AAATCAACCGGCAGCAACTGCATTGGCCAACACCATAGAA  
+HWI-EAS443:3:18:1570:314#0/1  
aaaa\_aaa\_aa`a^`\_[^WNU^¥X^]V]ZUZSPVVU^WV  
@HWI-EAS443:3:18:1575:1019#0/1  
CATTAATACGATGACCAAAGATGCAGAGAGAGGCAAGTT  
+HWI-EAS443:3:18:1575:1019#0/1  
abbbbbbb`abbbbaaabaaaaaaaaaab`b`a^¥`\_a\_a  
@HWI-EAS443:3:18:1611:1338#0/1  
ATCCGACTCTACTTTTCCTAAAAATTCAGCGCAAAATGC





@HWI-EAS443:3:18:349:1947#0/1  
GTGGCTAATTTTAGCATGGAGCTACCCAGCTTTGGAGTGT  
+HWI-EAS443:3:18:349:1947#0/1  
a[aaaa\_babaaa\_a]a`a]Xa^a\_¥a^V^^a`K\_W]O¥W  
@HWI-EAS443:3:18:381:1878#0/1  
GACGGATCAAGAAAGAAGAGTTCTCTGAGATCATGAAGAT  
+HWI-EAS443:3:18:381:1878#0/1  
aa]`]HV`bbba`¥\_b`a^I^^Ra`Y\_`]Zaa¥\_`aY`^  
@HWI-EAS443:3:18:42:1361#0/1  
GAATTCTCAAATATTCCTGGGTGGGATTCTTCAAGGAAAG  
+HWI-EAS443:3:18:42:1361#0/1  
\_STTTX[QYQ``]YUWYTWUaaaXX[ZZ^`\_]\_[S^[HW  
@HWI-EAS443:3:18:430:1493#0/1  
CCCTACCTTTGATTGGGTTTGATCCACAGCTTCTTTAAC  
+HWI-EAS443:3:18:430:1493#0/1  
a^Z`^^`\_Y^`\_[U[Z[Z\_WW¥NZa\_Z]\_R\_¥^Z¥]]][QV  
@HWI-EAS443:3:18:458:740#0/1  
ATTCGATCTAAAGACTTCTATGGTGTGGCCAATGCAGTT  
+HWI-EAS443:3:18:458:740#0/1  
a\_aaa^^`\_¥[^]^\_Y\_]Y]YZW^^\_YY^]Y]Z\_ZX  
@HWI-EAS443:3:18:463:1144#0/1  
GTCCTCCATCTGATACTAATAGCCCTACCTTTGATTGGGT  
+HWI-EAS443:3:18:463:1144#0/1  
a[XXW[¥a^[G`YYWS^\_¥XLLZR\_OYH]^ZNVV]GXVOR  
@HWI-EAS443:3:18:465:763#0/1  
GATGACCAAAGATGCAGAGAGAGGCAAGTAAAAAGAAGG  
+HWI-EAS443:3:18:465:763#0/1  
abaa`a[a]a¥\_XYb`\_`\_`\_aa`\_`Z\_aX]Y[\_¥a[\_aO  
@HWI-EAS443:3:18:490:399#0/1  
GATTGATGCCAGGGTCGACTTCGAGTCTGGACGGATCAAG  
+HWI-EAS443:3:18:490:399#0/1  
\_\_bb`bb]a`¥b]a`TZ]Ua\_]^^Q^`\_aW^]`ZX[\_X  
@HWI-EAS443:3:18:494:1948#0/1  
ATTGATGCCAGGGTCGACTTCGAGTCTGGACGGATCAAGA  
+HWI-EAS443:3:18:494:1948#0/1  
\_P]`a^V]a\_¥]^WYSQLTWPRYLLZ[\_]^UQYN¥[^T¥  
@HWI-EAS443:3:18:494:899#0/1  
AGAAGATGGTCACGCAAAGAACAATAGGGAAGAAAAACA  
+HWI-EAS443:3:18:494:899#0/1  
a`V^^\_aaSaaY^a`a\_`Wa`]]`^^`^\_a]aO`a^\_  
@HWI-EAS443:3:18:498:1745#0/1  
CGGATTGATGCCAGGGTCGACTTCGAGTCTGGACGGATCA  
+HWI-EAS443:3:18:498:1745#0/1  
^abb\_a]]SX`^\_\_^XG[`Ya\_]WYJ[WQ\_^TGH`[PRS\_  
@HWI-EAS443:3:18:500:566#0/1  
GTTCTGTTTACTGTGTCCATGGTGTATCCTGTTCTGTTTC  
+HWI-EAS443:3:18:500:566#0/1  
a\_a`abaaaaa\_`b¥a\_ZaadWa\_`^\_a\_\_\_\_\_¥]]`\_`\_`  
@HWI-EAS443:3:18:501:297#0/1  
GTCCTCCATCTGATACTAATAGCCCTACCTTTGATTGGGT

+HWI-EAS443:3:18:501:297#0/1  
a\_aaaaaaa^aa`\_\_^`a`\_a\_\_^^^`\_]`^\_V`^^YVW  
@HWI-EAS443:3:18:510:1457#0/1  
ACTGCTAGGGAAAAATTTCTCGAATAGATTGCAGCACTTC  
+HWI-EAS443:3:18:510:1457#0/1  
aa]aaaY^]aaa\_Y`aaa\_aa`\_aX^\_\_`aa`^\_\_``[  
@HWI-EAS443:3:18:515:708#0/1  
GCTTGAACAGTCTGGGCTCCCAGTAGGGGCAATGAAAAG  
+HWI-EAS443:3:18:515:708#0/1  
aaa[^aZOMZO¥U\_¥a`\_YY^PaPYXG`^M`[Q¥XS¥Y^  
@HWI-EAS443:3:18:526:1127#0/1  
CACTCCTGCTTGTATTCCCTCATGGTTTGGTGCATTCACT  
+HWI-EAS443:3:18:526:1127#0/1  
a]a`]a[aaa^\_\_aaa`a`\_\_^`a\_]`^^R\_\_Y`]^^Z\_  
@HWI-EAS443:3:18:556:751#0/1  
GCTAATTTTAGCATGGAGCTACCCAGCTTTGGAGTGTCTG  
+HWI-EAS443:3:18:556:751#0/1  
``ZV¥^aa]YYY`VZ`\_TX¥`^Y[[[T`\_aV\_]aR]HS[`  
@HWI-EAS443:3:18:560:1689#0/1  
AAAAATTCCAGCGAAAATGCCATAAGCACCACATTCCCT  
+HWI-EAS443:3:18:560:1689#0/1  
a`aa`\_a¥[^`^\_[Q^\_[UZ`^[]a\_]\_XW¥`Z^]]]XQLQW  
@HWI-EAS443:3:18:571:752#0/1  
CCCAGTGATTGTGAAAGAAATCTCTGTGTCTTGTGAATTA  
+HWI-EAS443:3:18:571:752#0/1  
abaaa`Z`a\_\_\_\_]\_aa\_¥]`\_`^`a[\_X[^\_W[[[^]¥W  
@HWI-EAS443:3:18:572:943#0/1  
ACGGTCTTGGGAGTCTCGATACTGAATCTTGGACAAAAGA  
+HWI-EAS443:3:18:572:943#0/1  
aaaYZa\_[aa\_[^0\_[\_\_QTX[`\_[[\_\_¥Z^^[¥[\_T\_\_Z  
@HWI-EAS443:3:18:615:1296#0/1  
ATGGCTTTCCTTGAAGAATCCCACCCAGGAATATTTGAGA  
+HWI-EAS443:3:18:615:1296#0/1  
a\_[ST`\_]]][Y[^]YT`Y^]aVJYVHO¥PTT\_YS\_^[]^  
@HWI-EAS443:3:18:638:484#0/1  
GAAAGAAATCTCTGTGTCTTGTGAATTAGTCATCATCTTT  
+HWI-EAS443:3:18:638:484#0/1  
ababb`aabaaaba`a`abaaaPZXb]UVVaa`a¥aaa  
@HWI-EAS443:3:18:699:1456#0/1  
TCCCCTATGGCACCTATATGTGTATCTGTAGTCTTTGATG  
+HWI-EAS443:3:18:699:1456#0/1  
¥`baba`¥\_aXabaaaa^a\_a[[]a]a\_U`]`^`a`\_S`\_`  
@HWI-EAS443:3:18:707:2026#0/1  
CGACTTCGAGTCTGGACGGATCAAGAAAGAAGAGTTCTCT  
+HWI-EAS443:3:18:707:2026#0/1  
`a\_¥]`\_\_aa`a`¥Wa`]`W^V`\_a\_a¥\_X`]`\_^^Y\_  
@HWI-EAS443:3:18:718:450#0/1  
GAACAATTGAAGAGCCATCTGGGCCGTTGCAGGTCCAAGG  
+HWI-EAS443:3:18:718:450#0/1  
a\_\_\_\_]\_aa`Y`\_aZ\_^V^\_X\_^\_]`VY`]S\_WX^[]Y^]



+HWI-EAS443:3:19:1063:1261#0/1  
a\_`^a`\_]`a^`\_]aaaWZ¥`W]ZR^`\_`aaSa¥Za`XMT`  
@HWI-EAS443:3:19:1092:852#0/1  
GTTCTGTTTACTGTGTCCATGGTGTATCCTGTTCCCTGTTC  
+HWI-EAS443:3:19:1092:852#0/1  
`L[`YR`QU]HVZ^OYZLPUX^F^MTYZSVSNTVPTSSUU  
@HWI-EAS443:3:19:1101:342#0/1  
AGATTAGAGGTTTTCGTATACTTTGTTGAACTTTAGCTAG  
+HWI-EAS443:3:19:1101:342#0/1  
ababbbbaab\_baab`bbbaaaaaa`aa`\_aaa`a¥` `Z  
@HWI-EAS443:3:19:1106:1445#0/1  
TTTCCTCTTTGTTTCATTGATTCCATTACATCCTTTAAGAA  
+HWI-EAS443:3:19:1106:1445#0/1  
a¥Y\_WU¥R]WZOW`^PX\_¥`^R\_aa¥aba\_\_[\_`[\_PXW[  
@HWI-EAS443:3:19:114:239#0/1  
GGGCTCCAATCATCCGACGATTTTGCTCTCATAGTGAATG  
+HWI-EAS443:3:19:114:239#0/1  
\_abaaabbbbababababbaabbaaaaaaa`\_aaa\_aa`a\_  
@HWI-EAS443:3:19:1189:884#0/1  
GCACCCATAATGTTCTCAAACAAAATGGCAAGACTAGGGA  
+HWI-EAS443:3:19:1189:884#0/1  
[Zbbb\_aaa\_¥bbb[babbb^baabb` `b\_bbbb\_bbXb  
@HWI-EAS443:3:19:1205:938#0/1  
AGCTGTAGGCCATTTCGATCTAAAGACTTCTATGGTGTG  
+HWI-EAS443:3:19:1205:938#0/1  
abbaa[]YX\_abaa`ab`\_`a^\_YTP^`]`][Y]Ta[VV\_\_  
@HWI-EAS443:3:19:1231:396#0/1  
ATTCAGGGGATTACAAAGTCTTCCCCGATAATCATCATCC  
+HWI-EAS443:3:19:1231:396#0/1  
aa]aaabbbabba^aaaa`\_aaa]a^b`aU[ `[\_a^ZPW  
@HWI-EAS443:3:19:1256:881#0/1  
GGGATTCTTCAAGGAAAGCCATAGCCTCTAGAACACAGTC  
+HWI-EAS443:3:19:1256:881#0/1  
¥`RHVX`VW^aWV]XSZ\_U`^bX]¥U^aa`]V¥`]X^QBB  
@HWI-EAS443:3:19:1277:1933#0/1  
GCAAAATCGTCGGATGATTGGAGCCCATCCCACCAGTATA  
+HWI-EAS443:3:19:1277:1933#0/1  
X\_b\_aa\_ab[`¥`aTaa]b\_a`]`^\_a`]`]WYba`[V0`^Y  
@HWI-EAS443:3:19:1295:1915#0/1  
TGGTGTGTTCTGTTTACTGTGTCCATGGTGTATCCTGTTC  
+HWI-EAS443:3:19:1295:1915#0/1  
aba[aabR[Y\_ZX]]bSa[\_aNu`\_aa`H]I\_S\_]`\_VV[  
@HWI-EAS443:3:19:1313:1417#0/1  
GGGATGGGCTCCAATCATCCGACGATTTTGCTCTCATAGT  
+HWI-EAS443:3:19:1313:1417#0/1  
abbaabb`\_a` `aaaa`\_aa]b`aa` `a]a`\_a` `aU  
@HWI-EAS443:3:19:1425:1910#0/1  
GAGATTTCTTTCACAATCACTGGGACAACACTAAGTGGA  
+HWI-EAS443:3:19:1425:1910#0/1  
a`Ya^[\_`a\_]`aY^`]0\_]`^VQT¥`\_` `a^aa\_]`SRU

@HWI-EAS443:3:19:1475:2026#0/1  
CTCCATCTGATACTAATAGCCCTACCTTTGATTGGGTTTG  
+HWI-EAS443:3:19:1475:2026#0/1  
a\_Y\_^a`]^`^]ZU```]\_\_]^`^^W`a``TY\_`\_]Y\_]\_  
@HWI-EAS443:3:19:1500:958#0/1  
GGGGCAATGAAAAGAAGGCCAAACTGGCAAATGTTGTGAG  
+HWI-EAS443:3:19:1500:958#0/1  
aab]R`a\_\_¥aY\_aSZ\_Y¥\_]XWTaaa[\_[VW^Ya[X\_]\_  
@HWI-EAS443:3:19:1502:629#0/1  
AATGGATGATGATTATCGGGGAAGACTTTGTAATCCCCCTG  
+HWI-EAS443:3:19:1502:629#0/1  
aaabaZabaaabaaa\_\_\_\_\_a]\_\_`^\_aa¥^^\_\_[XZ¥W`  
@HWI-EAS443:3:19:1505:1499#0/1  
GCCAGGGTTCGACTTCGAGTCTGGACGGATCAAGAAAGAAG  
+HWI-EAS443:3:19:1505:1499#0/1  
\_¥`a^T\_Zbaaab`aaaZ]abaaSaaa`\_aaaaaaaa`^  
@HWI-EAS443:3:19:1517:643#0/1  
TGCTCAGGATGTTTCTGAACCACTCGGGTTGATTTCTGGT  
+HWI-EAS443:3:19:1517:643#0/1  
ab`ba`a`\_aa`aa`aaa`^\_\_a`^aa`¥a`\_]\_\_`X]a`Z  
@HWI-EAS443:3:19:1547:1169#0/1  
ATCAATGAACAAAGAGGAAATAGAGATAACAACCCACTTT  
+HWI-EAS443:3:19:1547:1169#0/1  
`abbbbaaabbbb\_abaaaab][]aaaa^aa\_^¥a\_a`^  
@HWI-EAS443:3:19:1557:602#0/1  
AGCTGATTCATTTACTCCAGACTCCAAAAGCTGGGTAGC  
+HWI-EAS443:3:19:1557:602#0/1  
`baa`\_abaaaaa`a]a\_a\_`\_```a\_\_`\_`a\_\_U]\_^  
@HWI-EAS443:3:19:1564:1485#0/1  
GAGATAACAACCCACTTTCAAAGAAAAAGGAGAGTAAGAG  
+HWI-EAS443:3:19:1564:1485#0/1  
`aba^```aa\_^RQLabaaabT``SRaZ`TZa`aXT[a`\_  
@HWI-EAS443:3:19:1614:199#0/1  
GGTAATGCCAGCCCATGGTCCAGCCAAAAGCATGGAATAT  
+HWI-EAS443:3:19:1614:199#0/1  
aa^b\_`a^Z\_¥\_XZZ[]QZU[^\_VVZUW¥UG¥W¥WWWB  
@HWI-EAS443:3:19:1615:1187#0/1  
CAGTGATTGTGAAAGAAATCTCTGTGTCTTGTGAATTAGT  
+HWI-EAS443:3:19:1615:1187#0/1  
aaaa`abba\_a\_abbaaab[a\_a``]aabaa\_```\_aW\_\_  
@HWI-EAS443:3:19:1659:279#0/1  
GAACGATTCCTCTTGGGAATCCAGGAATGTGTAGTTGCAA  
+HWI-EAS443:3:19:1659:279#0/1  
aaa\_a\_aaU]`Y`a\_^\_]`ZU^a\_]`^a`Z`^¥\_^\_`^W[Z  
@HWI-EAS443:3:19:1676:451#0/1  
GTTGTCCCCAGTGATTGTGAAAGAAATCTCTGTGTCTTGT  
+HWI-EAS443:3:19:1676:451#0/1  
aaaaa`\_\_¥`a^a\_aab^a`a`a]```¥`^\_\_^a^Z\_]VU  
@HWI-EAS443:3:19:1677:410#0/1  
GACGGATCAAGAAAGAAGAGTTCTCTGAGATCATGAAGAT

+HWI-EAS443:3:19:1677:410#0/1  
a#P\_a`Z`\_`\_]\_\_]\_`¥VXY¥` `\_\_`\_¥^¥T[S\_\_XZ^BB  
@HWI-EAS443:3:19:1686:1260#0/1  
AAAAATTCCAGCGCAAATGCCATAAGCACCATTCCT  
+HWI-EAS443:3:19:1686:1260#0/1  
a^^^Z^a[[`a\_¥Z¥]\_] ^WYFU` ` \_YT[YY[^`\_]V]Z]  
@HWI-EAS443:3:19:1709:972#0/1  
GCTGTGGTAATGCCAGCCCATGGTCCAGCCAAAAGCATGG  
+HWI-EAS443:3:19:1709:972#0/1  
a\_aa` `a¥aa`\_^`\_\_[[ ] ` ` \_a¥W¥¥\_WY^\_¥\_]U¥¥^]  
@HWI-EAS443:3:19:1750:1764#0/1  
AAGAAATACACCAAGACAATATACTGGTGGGATGGGCTCC  
+HWI-EAS443:3:19:1750:1764#0/1  
\_Sabb`aba`aX\_bba`J¥aba`^`aa]b^]]\_] `OWPT  
@HWI-EAS443:3:19:185:1166#0/1  
AGCTGTTAGCCATTCGATCTAAAGACTTCTATGGTGTG  
+HWI-EAS443:3:19:185:1166#0/1  
aaaa`WXaQ` `aa]`a]`^`\_` `a\_] ^Y`\_ZL]]WLFW¥W  
@HWI-EAS443:3:19:189:1714#0/1  
GGCCTTCTTTTCATTGCCCTACTGGGAGCCCAGACTGT  
+HWI-EAS443:3:19:189:1714#0/1  
`\_\_\_\_GONX¥X\_^¥R]Xaa^]aNSV¥SNPX¥]VBBBBBBB  
@HWI-EAS443:3:19:190:390#0/1  
CTCAAGAATTCCCCTTTGGCTTGTGTTGAGAATAGAACGA  
+HWI-EAS443:3:19:190:390#0/1  
abbabaaabaaa`abaaaaaa^]a^aa\_\_¥`aa^a`^] ^  
@HWI-EAS443:3:19:192:1245#0/1  
AAGAATCCCCTTTGGCTTGTGTTGAGAATAGAACGATTC  
+HWI-EAS443:3:19:192:1245#0/1  
a\_] ^aaba]\_\_aa^a`\_]a]\_^]] ^`\_a\_a]a\_VTX[\_Y  
@HWI-EAS443:3:19:217:1428#0/1  
TAGTCTTTGATGAACAATTGAAGAGCCATCTGGGCCGTTG  
+HWI-EAS443:3:19:217:1428#0/1  
aaa\_bbabbbabaaaabaaabbaaaaa^\_^aa\_\_^\_\_  
@HWI-EAS443:3:19:235:1623#0/1  
CAACCCGAGTGGTTCAGAAACATCCTGAGCATGGCACCCA  
+HWI-EAS443:3:19:235:1623#0/1  
aa[a\_PaaZGZQU\_Z¥¥[ `a`US[^G[[[a\_VZ]\_^RY]a  
@HWI-EAS443:3:19:277:942#0/1  
GATTGATGCCAGGGTCGACTTCGAGTCTGGACGGATCAAG  
+HWI-EAS443:3:19:277:942#0/1  
aaaa\_a`aa^a\_¥]Wa\_\_\_\_a^a^\_Y`^`\_^Z^\_¥¥^\_\_\_\_  
@HWI-EAS443:3:19:289:1088#0/1  
GCATACCCACTTGGTTCATTATCCTCAGGTAGTGGTCCAT  
+HWI-EAS443:3:19:289:1088#0/1  
abbb`baa` `aaaa\_aaa\_\_` `a\_a` `a`Xa\_\_a^N]Va]  
@HWI-EAS443:3:19:316:271#0/1  
AAGAAATACACCAAGACAATATACTGGTGGGATGGGCTCC  
+HWI-EAS443:3:19:316:271#0/1  
aaa`baa`aa\_aa\_a`\_]S\_a`\_^` `Z`\_]¥\_Z]WYW^

@HWI-EAS443:3:19:318:2037#0/1  
GGGGCAATGAAAAGAAGGCCAAACTGGCAAATGTTGTGAG  
+HWI-EAS443:3:19:318:2037#0/1  
R\_¥T`bb`b`aZ\_Za¥\_\_a`aYababbaab`ba\_aa\_baa  
@HWI-EAS443:3:19:367:1116#0/1  
CTTATGGCATTGCGCTGGAATTTTAGGAAAAGTAGAG  
+HWI-EAS443:3:19:367:1116#0/1  
a^a\_]^[Z]]\_`a`aa``[a\_K`\_\_a`TZX\_]Z\_aaH`[Za  
@HWI-EAS443:3:19:387:1893#0/1  
AAAAATTCCAGCGCAAATGCCATAAGCACCATTCCT  
+HWI-EAS443:3:19:387:1893#0/1  
`a]]Swwaa]SaT```Y`\_\_Y^\_`^`aaZ\_`^`^^\_XZ^  
@HWI-EAS443:3:19:444:1055#0/1  
CACTGTTACTCCAATACTCATGTCAGCTGATTCATTTACT  
+HWI-EAS443:3:19:444:1055#0/1  
abaaaabaab\_ba\_baaaaa\_`aaa]aba`a\_`aaa^]a  
@HWI-EAS443:3:19:460:1044#0/1  
TTCCATGCTTTTGGCTGGACCATGGGCTGGCATTACCACA  
+HWI-EAS443:3:19:460:1044#0/1  
``bba`a`Y`ba\_\_aaa`a\_Sa\_]`^`Y]Ma\_aZ][[Y\_Ya  
@HWI-EAS443:3:19:466:1777#0/1  
CAGTGCTCTTATTAGATAGCCTCTTATTAGTCTTTGT  
+HWI-EAS443:3:19:466:1777#0/1  
a`a\_abaa`bb`baaaa\_a`aa`a`aa`aaaaW\_\_``^¥  
@HWI-EAS443:3:19:496:293#0/1  
GGTGTCTAGGGCCCGATTGATGCCAGGGTCGACTTCGAG  
+HWI-EAS443:3:19:496:293#0/1  
aZMIM¥RX¥¥`XX[]X0]VKVXR¥BBBBBBBBBBBBBB  
@HWI-EAS443:3:19:506:744#0/1  
GATCTTCATGATCTCAGAGAACTCTTCTTTCTTGATCCGT  
+HWI-EAS443:3:19:506:744#0/1  
aaaa`aa`aa`b`Za^a][``Y[[aa^a`a\_a]T^`aV`\_  
@HWI-EAS443:3:19:514:978#0/1  
TGGGTTTGATCCCACAGCTTCTTTAACTCAAATGATCTTC  
+HWI-EAS443:3:19:514:978#0/1  
^a]SV^^`^`ab¥¥ZI\_^^b`aaa\_Zaab\_`^`^[]]QW\_^  
@HWI-EAS443:3:19:520:496#0/1  
AAACAAAGACTGAATAAGAGAGGCTATCTAATAAGAGCAC  
+HWI-EAS443:3:19:520:496#0/1  
aa`\_a[aa^\_\_a\_aa`\_\_`Ua\_``]UFZW]SZBBBBBBB  
@HWI-EAS443:3:19:546:1460#0/1  
GTTGATCCCACTAATTGCAGGTCCTGTAGAATCTGTCC  
+HWI-EAS443:3:19:546:1460#0/1  
`]aaaaaba`aaa`^aa``aa`aX\_aa\_\_a\_`aa\_a^[^]  
@HWI-EAS443:3:19:583:174#0/1  
ATTGATGCCAGGGTCGACTTCGAGTCTGGACGGATCAAGA  
+HWI-EAS443:3:19:583:174#0/1  
¥¥`bbaba¥aa`aS``\_U^\_^Xa¥¥YTavY\_`V¥Q^¥^¥  
@HWI-EAS443:3:19:596:144#0/1  
GATACACATATAGGTGCCATAGGGGAGACACACAAATTCA

+HWI-EAS443:3:19:596:144#0/1  
\_Y]X]aZ^[Y[aa\_TX`\_[[]T\_\_ZN`X]¥UY[U[YSR^  
@HWI-EAS443:3:19:618:922#0/1  
GCCCCGATTGATGCCAGGGTCGACTTCGAGTCTGGACGGA  
+HWI-EAS443:3:19:618:922#0/1  
aaa`b]¥\_aa¥aa`^STG^`^`^S¥`XXV^\_a]QUYWT  
@HWI-EAS443:3:19:664:1376#0/1  
CAGATCTTCATGATCTCAGAGAACTCTTCTTTCTTGATCC  
+HWI-EAS443:3:19:664:1376#0/1  
aaa`aaaaaaa`a```\_`a`a`a\_a\_a`````^`^^`\_\_`^  
@HWI-EAS443:3:19:695:2018#0/1  
CTCCTATATGAACTGCTAGGGAAAAATTTCTCGAATAGAT  
+HWI-EAS443:3:19:695:2018#0/1  
MMaa`b]\_Xbb`^a¥]a¥bbb`b`\_`^ab`ba¥b¥`aaH  
@HWI-EAS443:3:19:707:252#0/1  
CAGAAATCAACCGGCAGCAACTGCATTGGCCAACACCATA  
+HWI-EAS443:3:19:707:252#0/1  
abbaaVa`aaabaUaab\_a^V[[\_`\_Y\_¥\_W`]`]]\_X\_  
@HWI-EAS443:3:19:719:1595#0/1  
GACGGATCAAGAAAGAAGAGTTCTCTGAGATCATGAAGAT  
+HWI-EAS443:3:19:719:1595#0/1  
abY¥[``a]^aaab\_\_]`b]^a\_\_\_a\_\_a]\_¥^Y`b\_¥a`  
@HWI-EAS443:3:19:731:396#0/1  
TGAATCAGCTGACATGAGTATTGGAGTAACAGTGATAAAG  
+HWI-EAS443:3:19:731:396#0/1  
^aZV]\_a\_bb^¥Z\_baa`]T[H`ZaaZXaY0`Pb]Y`YUa  
@HWI-EAS443:3:19:745:1487#0/1  
CTTCCCTATTGTTCTTTGCGTGACCATCTTCTTGGTCATG  
+HWI-EAS443:3:19:745:1487#0/1  
ababbabaaba\_baaaaaaa\_a\_]`]^`^a``aa]a\_`]aa  
@HWI-EAS443:3:19:748:480#0/1  
GAACAATTGAAGAGCCATCTGGGCCGTTGCAGGTCCAAGG  
+HWI-EAS443:3:19:748:480#0/1  
aa\_aaaaa^Va`X`\_`\_`\_Y\_\_`[[MHZ^P]^R[WUQ¥S  
@HWI-EAS443:3:19:789:944#0/1  
GAAGATGGTCACGCAAAGAACAATAGGGAAGAAAAAACAA  
+HWI-EAS443:3:19:789:944#0/1  
\_[abbaaa]abaa`aaaaa\_a]¥a`aa`a\_a\_``a\_`\_  
@HWI-EAS443:3:19:820:78#0/1  
CAACATTTGCCAGTTTGGCCTTCTTTTCATTGCCCCCTAC  
+HWI-EAS443:3:19:820:78#0/1  
a]bbbbbbZbVbbabbbbbWT\_babbbbbbaba`V`Zaaa^  
@HWI-EAS443:3:19:830:993#0/1  
AATAAGAGCACTGACATTAATACGATGACCAAAGATGCA  
+HWI-EAS443:3:19:830:993#0/1  
aab]`aaaaaaaa`aaa]\_`aa\_a`\_`\_¥\_\_a`\_`Va^`  
@HWI-EAS443:3:19:855:885#0/1  
AAAGACTTCTATGGTGTGGCCAATGCAGTTGCTGCCGGT  
+HWI-EAS443:3:19:855:885#0/1  
¥¥\_bVabaab]\_\_aU\_`a`]`\_b`^aaa`Ua^P]aa¥aVO



@HWI-EAS443:3:19:934:384#0/1  
GGGATGGGCTCCAATCATCCGACGATTTTGCTCTCATAGT  
+HWI-EAS443:3:19:934:384#0/1  
aaa[\_Xa^\_Y`\_aXaXUY`\_¥`¥^¥\_\_aU]]\_¥^¥\_^U  
@HWI-EAS443:3:19:941:1924#0/1  
AAATCGTCGGATGATTGGAGCCCATCCCACAGTATATTG  
+HWI-EAS443:3:19:941:1924#0/1  
aT^\_]XL\_a`^J`^\_^\_]XQ^^\_]^Z^]\_\_¥]]YY]^W]]  
@HWI-EAS443:3:19:995:1573#0/1  
ATCCCCCTTTGGCTTGTGTTGAGAATAGAACGATTCCTCT  
+HWI-EAS443:3:19:995:1573#0/1  
a`\_`^W\_aaa]`WaY[U\_] [\_U\_^\_\_\_V\_¥VUYQWXXU^¥  
@HWI-EAS443:3:1:1025:841#0/1  
ATCCGACTCTACTTTTCTAAAAATTCCAGCGCAAATGC  
+HWI-EAS443:3:1:1025:841#0/1  
]`b`b^`\_aa[a`abb`abaaRZVaa``\_aab\_a\_b^BBB  
@HWI-EAS443:3:1:1027:33#0/1  
ATTCGATCTAAAGACTTCTATGGTGTGGCCAATGCAGTT  
+HWI-EAS443:3:1:1027:33#0/1  
aaa\_a\_]a`\_^\_¥V\_\_]\_^\_a¥W\_]\_^\_YV]]]YTTBBB  
@HWI-EAS443:3:1:1092:1170#0/1  
GGTGTCTAGGGCCCGGATTGATGCCAGGGTCGACTTCGAG  
+HWI-EAS443:3:1:1092:1170#0/1  
\_a¥\_\_`^aUa````\_¥`a`a`\_Za[\_^S¥YZT^^P\_^B  
@HWI-EAS443:3:1:1102:901#0/1  
TGATGAACAATTGAAGAGCCATCTGGGCCGTTGCAGGTCC  
+HWI-EAS443:3:1:1102:901#0/1  
abbabaa`babaaba¥a`^ab\_aa``^Ya^¥`Q\_``¥BB  
@HWI-EAS443:3:1:1124:280#0/1  
GTGTTCTGTTTACTGTGTCCATGGTGTATCCTGTTCTGT  
+HWI-EAS443:3:1:1124:280#0/1  
a`a`baba`aaaaZ[`¥\_\_\_ba`]\_\_^a^`` [\_\_XYBBB  
@HWI-EAS443:3:1:1131:728#0/1  
CAACTGCATTGGCCAACACCATAGAAGTCTTTAGATCGAA  
+HWI-EAS443:3:1:1131:728#0/1  
abb`bb`bbb`a`a`^a¥`\_aaa^^a]Yaa`\_a`^X\_aB  
@HWI-EAS443:3:1:1246:1482#0/1  
GGTCTCCATCTGATACTAATAGCCCTACCTTTGATTGGG  
+HWI-EAS443:3:1:1246:1482#0/1  
aa]Z[aT\_aa^aa[\_`\_\_a`\_`\_XX^\_]0`\_`a`XVaBB  
@HWI-EAS443:3:1:1265:707#0/1  
CTGGGCTCCCAGTAGGGGCAATGAAAAGAAGGCCAAACT  
+HWI-EAS443:3:1:1265:707#0/1  
aab`bba`baa`aabbba]aaabaaa`ab^\_`a]Xa^`^B  
@HWI-EAS443:3:1:1372:777#0/1  
GTGCCATGCTCAGGATGTTTCTGAACCACTCGGGTTGATT  
+HWI-EAS443:3:1:1372:777#0/1  
aab]`a`aa\_\_\_a\_¥^`Zaa¥``\_\_S¥\_Y^ [Y^\_V¥\_YBB  
@HWI-EAS443:3:1:1408:158#0/1  
CACTAACTTGCAGTCTGTAGAATCTGTCCACTCCTGCT

+HWI-EAS443:3:1:1408:158#0/1  
`\_`aaa`aa\_]b\_L\_Xaa`¥`aaaX`ZZY\_SZMUZBBB  
@HWI-EAS443:3:1:1487:864#0/1  
ACTCTTCTTTCTTGATCCGTCAGACTCGAAGTCGACCCT  
+HWI-EAS443:3:1:1487:864#0/1  
a\_[U`b^]baVbaa\_]\_[aY[Z\_aa\_aSa\_][¥SPTUBBBB  
@HWI-EAS443:3:1:1527:1312#0/1  
AACAGATCTTCATGATCTCAGAGAACTCTTCTTTCTTGAT  
+HWI-EAS443:3:1:1527:1312#0/1  
aJ\_a\_¥V¥bbI`\_`¥a\_a\_]`\_a\_\_YZa`aaXaI`BBBB  
@HWI-EAS443:3:1:1549:1179#0/1  
TCCCATTTTAAGCAGACTTCAGGAATGTGAAGATTCCGTA  
+HWI-EAS443:3:1:1549:1179#0/1  
`\_a\_\_aa[aTH^]a^V¥\_¥^\_aa]]`aX`\_]`^`¥YV\_]B  
@HWI-EAS443:3:1:1559:1180#0/1  
AAAGGGATTACAGGGGATTACAAAGTCTTCCCCGATAATCA  
+HWI-EAS443:3:1:1559:1180#0/1  
abbaabaaa^baaaaaaba`]aa^\_aa\_X][a\_aV^`WB  
@HWI-EAS443:3:1:1656:596#0/1  
GTTATCTCTATTTCTCTTTGTTTCATTGATTCCATTACAT  
+HWI-EAS443:3:1:1656:596#0/1  
a[a^a\_]b`a`a`a^a^\_aa`aN^\_\_`^\_aYS]\_\_\_\_YBB  
@HWI-EAS443:3:1:1681:1292#0/1  
GTACCCTTCCCTAGTCTTGCCATTTTGTGTTGAGAACATT  
+HWI-EAS443:3:1:1681:1292#0/1  
a\_bYa^aaa]]\_\_\_\_]]W\_aX¥]^`\_`]]]¥\_¥OUZ^OBBB  
@HWI-EAS443:3:1:1741:864#0/1  
GGGGCAATGAAAAGAAGGCCAAACTGGCAAATGTTGTGAG  
+HWI-EAS443:3:1:1741:864#0/1  
`JTNYY][\_GPU\_`W[V[^JVS]U[¥LP[JXBBBBBBBBB  
@HWI-EAS443:3:1:204:1201#0/1  
CAAAGAAGAAAATTGAGAAAATAAGGCCTCTTCTAATAGA  
+HWI-EAS443:3:1:204:1201#0/1  
ab\_¥b`^[]`\_`a^b`\_a^\_a¥b^bb^WNYZ`a^`a]aBBB  
@HWI-EAS443:3:1:258:838#0/1  
GAGGCCTTATTTCTCAATTTTCTTCTTTGTTGATTTCATT  
+HWI-EAS443:3:1:258:838#0/1  
a\_baaabb`bbba`baaababb\_ba\_bbbbaaa`a`aaa  
@HWI-EAS443:3:1:409:437#0/1  
CAGTAAACAGAACACACCAATACTCAGAAAAGGAAAAGTG  
+HWI-EAS443:3:1:409:437#0/1  
\_XbbbababaaVabb¥\_\_aababa^bbaababa]]^¥b`a  
@HWI-EAS443:3:1:485:1107#0/1  
AATCTGTCCACTCCTGCTTGATTCCCTCATGGTTTGGTG  
+HWI-EAS443:3:1:485:1107#0/1  
aaa\_a`W\_\_a\_\_\_\_[\_\_\_`\_aaGaa`\_Z^V]]^a^Z^BBBBB  
@HWI-EAS443:3:1:511:1367#0/1  
GCGCTGGAATTTTGTAGGAAAAGTAGAGTCGGATTGACATC  
+HWI-EAS443:3:1:511:1367#0/1  
a¥aaa`UJSba\_aLa\_a\_\_\_\_`a[\_aaWKZaTRZ\_BBBBBB

@HWI-EAS443:3:1:529:803#0/1  
GGGCAATGAAAAGAAGGCCAAACTGGCAAATGTTGTGAGA  
+HWI-EAS443:3:1:529:803#0/1  
abb\_bb`aaa`aaa^[\_`^aa`^a`a`a`u]^`[aa]a\_\_B  
@HWI-EAS443:3:1:581:508#0/1  
AATCAACCCGAGTGGTTCAGAAACATCCTGAGCATGGCAC  
+HWI-EAS443:3:1:581:508#0/1  
aaa[ba\_\_`a`bWaa\_aaa\_aaa^`dWRaaa`Ra^`^¥BB  
@HWI-EAS443:3:1:585:592#0/1  
GTCTGGAGTAAATGAATCAGCTGACATGAGTATTGGAGTA  
+HWI-EAS443:3:1:585:592#0/1  
a\_aa`a\_a^`a\_\_`\_`^`^`\_Xaa`W\_`\_\_aZ^`\_\_^X\_BB  
@HWI-EAS443:3:1:661:907#0/1  
AGCTGATTCATTTACTCCAGACACTCCAAAGCTGGGTAGC  
+HWI-EAS443:3:1:661:907#0/1  
` `]^`]^`^`abb\_aaa` [`WFZa][[U¥R¥\_\_]]YN`ZBBBBB  
@HWI-EAS443:3:1:665:334#0/1  
ATACTAATAGCCCTACCTTTGATTGGGTTTGGATCCCACAG  
+HWI-EAS443:3:1:665:334#0/1  
``aY`ba`ba`a[aaV^aaa` ````W\_¥\_\_\_\_]^`Ia^BB  
@HWI-EAS443:3:1:698:292#0/1  
TGGGCTCCAATCATCCGACGATTTTGTCTCATAGTGAAT  
+HWI-EAS443:3:1:698:292#0/1  
abaaaa`^aaa`aa\_]aa^`^aa`aYa\_\_]`adWKZZBB  
@HWI-EAS443:3:1:713:395#0/1  
CACTAACTTGCAGGTCCTGTAGAATCTGTCCACTCCTGCT  
+HWI-EAS443:3:1:713:395#0/1  
`babbbabbaabb\_\_`\_ab` `aaaaaabZQ[XGYS¥BBBB  
@HWI-EAS443:3:1:71:1126#0/1  
GACGGATCAAGAAAGAAGAGTTCTCTGAGATCATGAAGAT  
+HWI-EAS443:3:1:71:1126#0/1  
aabbb`\_`\_ba^aaa` `aaa^Z`\_a¥` ```a`]^`\_`a`aaBB  
@HWI-EAS443:3:1:768:1205#0/1  
GGGAAAGGTACATGTTTCGAGAGTAAAAGAATGAAGATTC  
+HWI-EAS443:3:1:768:1205#0/1  
aaa`baaab¥a\_a\_aa\_ab\_bab\_a^a`a]\_aa\_\_a\_BBB  
@HWI-EAS443:3:1:781:705#0/1  
AAAGGGATTACAGGGATTACAAAGTCTTCCCCGATAATCA  
+HWI-EAS443:3:1:781:705#0/1  
a`aaa`^]a¥a\_a] ` ```aZ`\_a`ZW`a`^`[]`^`\_O\_ZB  
@HWI-EAS443:3:1:78:585#0/1  
ATGGGCTCCAATCATCCGACGATTTTGTCTCATAGTGAA  
+HWI-EAS443:3:1:78:585#0/1  
ab\_W[V[Yaaa\_\_` `^`\_`YW`\_`^`\_¥VW`\_`^`ZZ`\_`¥Z\_BB  
@HWI-EAS443:3:1:790:693#0/1  
GTGGGATCAAACCCAATCAAAGGTAGGGCTATTAGTATCA  
+HWI-EAS443:3:1:790:693#0/1  
a[a[aXR¥a\_\_SW]\_Z\_YYY]^`\_Z`^`\_XW\_]Z]^VZBBB  
@HWI-EAS443:3:1:820:646#0/1  
GTTCTGTTTACTGTGTCATGGTGTATCCTGTTCTGTTCT

+HWI-EAS443:3:1:820:646#0/1  
a\_aYb`\_abb\_aa\_b\_\_\_]a]¥]Mb`\_a]Z`a]\_^W```BB  
@HWI-EAS443:3:1:838:1148#0/1  
CACTGACATTAATACGATGACCAAAGATGCAGAGAGAGG  
+HWI-EAS443:3:1:838:1148#0/1  
abaaabaabbbb`bb\_babbbbaabbbb`ba`abbaaab`  
@HWI-EAS443:3:1:873:875#0/1  
AAACAGAAATCAACCGGCAGCAACTGCATTGGCCAACACC  
+HWI-EAS443:3:1:873:875#0/1  
aaa]a`\_aaa]aa^\_aa¥``X\_\_\_[VV[]`W^VYQVBBBB  
@HWI-EAS443:3:1:898:124#0/1  
GTAGGGCTATTAGTATCAGATGGAGGACCAAATTATACA  
+HWI-EAS443:3:1:898:124#0/1  
a^a`\_a]\_a^\_a[\_^Y\_a]^``[aWW[VY^[H^Z[BBBB  
@HWI-EAS443:3:1:904:1066#0/1  
GACCACTACCTGAGGATAATGAACCAAGTGGGTATGCACA  
+HWI-EAS443:3:1:904:1066#0/1  
a`]`bbbb`abbbbabbbabbaabaa^bGabb`[\_bHaaB  
@HWI-EAS443:3:1:904:1313#0/1  
AAAAATTCCAGCGCAAATGCCATAAGCACCATTCCT  
+HWI-EAS443:3:1:904:1313#0/1  
a\_aa^SORRaWS]V`WaaRR]^YJW]aW\_SY^UBBBBBBB  
@HWI-EAS443:3:1:955:217#0/1  
GACGGATCAAGAAAGAAGAGTTCTCTGAGATCATGAAGAT  
+HWI-EAS443:3:1:955:217#0/1  
a`^a\_\_\_]^``\_\_a\_^^a^\_X^VaZ`\_\_`]^XZ^\_]BBBB  
@HWI-EAS443:3:20:1001:352#0/1  
TGGTGTGGCCAATGCAGTTGCTGCCGTTGATTTCTGTT  
+HWI-EAS443:3:20:1001:352#0/1  
a`\_Ya```aa`aa\_a\_\_\_`\_`````^`\_aT\_\_Q]\_^W]aW\_  
@HWI-EAS443:3:20:1002:740#0/1  
CTTGTGTTGAGAATAGAACGATTCCTCTTGGGAATCCAGG  
+HWI-EAS443:3:20:1002:740#0/1  
aba\_^bbaaabbab`ab`]]`ab\_[`\_aab`a\_aa^^`a`  
@HWI-EAS443:3:20:1011:794#0/1  
CTATTCGAGAAATTTTTCCCTAGCAGTTCATATAGGAGAC  
+HWI-EAS443:3:20:1011:794#0/1  
\_`\_a`\_a^`UR\_a^\_\_\_\_Z¥a``Z]W\_dW`¥aa¥Z¥`¥Q  
@HWI-EAS443:3:20:1038:601#0/1  
GCACCTATATGTGTATCTGTAGTCTTTGATGAACAATTGA  
+HWI-EAS443:3:20:1038:601#0/1  
aV00]\_\_WLWPN]^XLY¥WP^PW\_S[RZ^VPUUWNTPLY  
@HWI-EAS443:3:20:1077:721#0/1  
TGGACATTAACAGAAATCAACCGGCAGCAACTGCATTGG  
+HWI-EAS443:3:20:1077:721#0/1  
abba`Zabbab`bbaa`aaaa^[aa]aa^\_a``a^`\_`\_`  
@HWI-EAS443:3:20:1120:1233#0/1  
CGGATTGATGCCAGGGTCGACTTCGAGTCTGGACGGATCA  
+HWI-EAS443:3:20:1120:1233#0/1  
a\_\_^\_bbZ```bbbaaXbbaa`aabbb^aaaa`\_b``a\_\_

@HWI-EAS443:3:20:1145:797#0/1  
GGCTAATTTTAGCATGGAGCTACCCAGCTTTGGAGTGTCT  
+HWI-EAS443:3:20:1145:797#0/1  
aa`baaaaabbbaabbbbbaaaa`a`baabbb\_\_a^a\_`a  
@HWI-EAS443:3:20:1159:1304#0/1  
GTATTTCTTTTGTCCAAGATTCAGTATCGAGACTCCCAAG  
+HWI-EAS443:3:20:1159:1304#0/1  
aYR`a]Y```\_[`\_\_`\_``[W[a]\_`W[]\_Z\_^[[ZYX[  
@HWI-EAS443:3:20:1173:1141#0/1  
GTAAGAGACAACATGACCAAGAAGATGGTCACGCAAAGAA  
+HWI-EAS443:3:20:1173:1141#0/1  
aZ]]¥YZ`\_][`¥[^^\_Y¥Y`VWZZ]¥VTX¥Z\_^ZWZ\_^X  
@HWI-EAS443:3:20:1273:1749#0/1  
GTTCTGTTTACTGTGTCCATGGTGTATCCTGTTCCCTGTT  
+HWI-EAS443:3:20:1273:1749#0/1  
\_Uabb`\_`\_\_aa\_¥Z)`bbaa``Z[Zaaa^``])`PX\_`PPR  
@HWI-EAS443:3:20:1275:961#0/1  
GCCTCTCTTATTAGTCTTTGTTTTTCTTCCCTATTGTT  
+HWI-EAS443:3:20:1275:961#0/1  
a`a`aaaa`aa`a`aaaa¥``aa`^`aW`\_\_\_\_\_¥W^  
@HWI-EAS443:3:20:1301:575#0/1  
GTTCTGTTTACTGTGTCCATGGTGTATCCTGTTCCCTGTT  
+HWI-EAS443:3:20:1301:575#0/1  
a`a`aa\_a`\_`aa\_Wa¥\_\_\_TUU¥U`^UWZ^TYMMU¥TUU  
@HWI-EAS443:3:20:1310:1137#0/1  
TCCCCAGTGATTGTGAAAGAAATCTCTGTGTCTTGTGAAT  
+HWI-EAS443:3:20:1310:1137#0/1  
`a`^`\_`a`aaa\_a][\_\_]a`^`\_`ZQ[[Z^\_WZZXNQ  
@HWI-EAS443:3:20:1346:1690#0/1  
GAGCTAATGGATGATGATTATCGGGGAAGACTTTGTAATC  
+HWI-EAS443:3:20:1346:1690#0/1  
`[YX`\_ZWa]\_ZR^T]LZaa`V]MOSR^`¥\_a[Y]UYZUO  
@HWI-EAS443:3:20:1348:733#0/1  
TCTAATAAGAGCACTGACATTAATACGATGACCAAAGAT  
+HWI-EAS443:3:20:1348:733#0/1  
a^aaaa`aWa\_\_Y\_`^a\_a\_`¥^`\_]``\_\_\_\_][\_[^^^Z  
@HWI-EAS443:3:20:1382:20#0/1  
ATGGGCTCCAATCATCCGACGATTTTGCTCTCATAGTGAA  
+HWI-EAS443:3:20:1382:20#0/1  
a`aaabaYR]a^^a`[\_`[]`^^[Z\_]W^MW]¥Z^^M[V]  
@HWI-EAS443:3:20:1427:1390#0/1  
CAAGGAAAGCCATAGCCTCTAGAACACAGTCTGTTTGTGC  
+HWI-EAS443:3:20:1427:1390#0/1  
abbb`abb\_aaabbaaa`^a`\_`a\_\_`aaR\_aa[a`SZWV  
@HWI-EAS443:3:20:1449:1849#0/1  
GACAGATTCTACAGGACCTGCAAGTTAGTGGGAATCAACA  
+HWI-EAS443:3:20:1449:1849#0/1  
a``]aaa)`U¥\_`b^]TV]a[[^¥YT\_]S[a`WLZUW\_X\_  
@HWI-EAS443:3:20:1457:882#0/1  
GCTATGGCTTTCCTTGAAGAATCCCACCCAGGAATATTG

+HWI-EAS443:3:20:1457:882#0/1  
`TUS[P[PYQXVMMLY[[OJQOTX¥RQOP[YVQLFMTRB  
@HWI-EAS443:3:20:1479:57#0/1  
ATCCTTTAAGAAATCTATTAGCCTTCCTGACTCATTAGCT  
+HWI-EAS443:3:20:1479:57#0/1  
aa]^abab\_baaab]babbaa]^aa\_]aaa\_a\_\_a`\_aVa  
@HWI-EAS443:3:20:1497:1233#0/1  
CTAACTTGCAGGTCCTGTAGAATCTGTCCACTCCTGCTTG  
+HWI-EAS443:3:20:1497:1233#0/1  
[[bbbb`b`ab`Z\_ba]b]abbaab]T]a^]a]S[baa  
@HWI-EAS443:3:20:1509:1307#0/1  
AATAAGAGCACTGACATTAAATACGATGACCAAAGATGCA  
+HWI-EAS443:3:20:1509:1307#0/1  
U`XT`Ua````aZ`^¥aaZYabab\_abZGXUa\_\_]a¥]^  
@HWI-EAS443:3:20:1567:720#0/1  
GAGTAAATGAATCAGCTGACATGAGTATTGGAGTAACAGT  
+HWI-EAS443:3:20:1567:720#0/1  
\_a¥]^`^`^^`a^[\`a\_a]Ya]J]YPWa\_a`^a]\_\_\_\_\_¥X  
@HWI-EAS443:3:20:1602:160#0/1  
AGGGAAAAATTTCTCGAATAGATTGCAGCACTTCTGGTAC  
+HWI-EAS443:3:20:1602:160#0/1  
aaaaaabaaaa`\_`^a^`a\_a\_^^\_Z\_\_X`X^^W\_\_\_Z^Z  
@HWI-EAS443:3:20:1604:996#0/1  
ATCTAATAAGAGCACTGACATTAAATACGATGACCAAAGA  
+HWI-EAS443:3:20:1604:996#0/1  
abb`\_abbabbab`^babaabbaaa`aab`aaa^\_a``aa  
@HWI-EAS443:3:20:163:468#0/1  
GCGAAAAGCTTGAACAGTCTGGGCTCCCAGTAGGGGGCAA  
+HWI-EAS443:3:20:163:468#0/1  
aaaaaaaaUaaaa\_aa¥`¥^^aa\_\_^¥\_]V^S^]T^VW\_UV  
@HWI-EAS443:3:20:1651:1876#0/1  
ATGTTGATTCCCACTAACTTGCAGGTCCTGTAGAATCTGT  
+HWI-EAS443:3:20:1651:1876#0/1  
`^][M]aaa\_QX^a¥`aa\_]`^]`]ZN]Y]`]a[^\_VSZLR  
@HWI-EAS443:3:20:165:31#0/1  
CAATCCGACTCTACTTTTCTAAAAATTCCAGCGCAAAAT  
+HWI-EAS443:3:20:165:31#0/1  
¥TL\_ZY`V\_ZaVOYaR`ZUOZ`W``^[¥a\_T\_a`]YGS]Q  
@HWI-EAS443:3:20:1696:1237#0/1  
TGATGCCGTTGCAACTACACATTCCTGGATTCCCAAGAGG  
+HWI-EAS443:3:20:1696:1237#0/1  
V¥]¥¥\_ZX\_aY^`\_T¥\_WZHV]a`¥U\_aLNODPLXMHO^`  
@HWI-EAS443:3:20:1706:1158#0/1  
CTCCATCTGATACTAATAGCCCTACCTTTGATTGGGTTTG  
+HWI-EAS443:3:20:1706:1158#0/1  
Zbbbbba]abbaa`bbbbbbababba`aabbaa\_ba\_a\_`  
@HWI-EAS443:3:20:1709:1962#0/1  
GGTCCCTCATCTGATACTAATAGCCCTACCTTTGATTGGG  
+HWI-EAS443:3:20:1709:1962#0/1  
]bMZLV00\_XNPa]XaJ]a\_Z¥XSRST¥ZLU`RXR¥HZZ^

@HWI-EAS443:3:20:1727:119#0/1  
CTGGAGTAAATGAATCAGCTGACATGAGTATTGGAGTAAC  
+HWI-EAS443:3:20:1727:119#0/1  
`bb\_a^b\_babb`a^[\`a\_aaa`\`aa\_`]^aaaa¥\_P]\_Z  
@HWI-EAS443:3:20:175:1599#0/1  
AAAAGCTTGAACAGTCTGGGCTCCCAGTAGGGGGCAATGA  
+HWI-EAS443:3:20:175:1599#0/1  
a]aa\_a^\_\_a\_a\_[[\_\_\_Z¥U^[\\_\_\_^WV[XZ\_X¥^^^\_UT  
@HWI-EAS443:3:20:186:1119#0/1  
AAGAGAGGCTATCTAATAAGAGCACTGACATTAATACGA  
+HWI-EAS443:3:20:186:1119#0/1  
aa`baa\_`a`\_ORWR¥PUSQYYXSBBBBBBBBBBBBBBB  
@HWI-EAS443:3:20:193:1502#0/1  
CCAGGAATATTTGAGAATTCATGCCTTGAAACAATGGAAG  
+HWI-EAS443:3:20:193:1502#0/1  
^bb`WS[Z[Ybb`babb\_]Za^^^a`VWPZaadU`aaaW  
@HWI-EAS443:3:20:206:1569#0/1  
CAGAAATCAACCGCAGCAACTGCATTGGCCAACACCATA  
+HWI-EAS443:3:20:206:1569#0/1  
ababaaababaaaa`a\_Y\_RDU\_\_N\_]^V^^]Y][ ]YV  
@HWI-EAS443:3:20:244:1934#0/1  
GGGAGCTAATGGATGATGATTATCGGGGAAGACTTTGTAA  
+HWI-EAS443:3:20:244:1934#0/1  
^]ab]a\_baabbaabb`bb`^b^]¥a\_aa]`\_LZYSa^aa  
@HWI-EAS443:3:20:262:1496#0/1  
ATTCATATGAGAGCAAAATCGTCGGATGATTGGAGCCCA  
+HWI-EAS443:3:20:262:1496#0/1  
aa\_`\_a`¥``aa\_`^`aaaY`\_a]¥\_\_`Y\_`^^^^^]¥^]`  
@HWI-EAS443:3:20:310:779#0/1  
GAGCATTTGCGAAAAGCTTGAACAGTCTGGGCTCCCAGTA  
+HWI-EAS443:3:20:310:779#0/1  
`abbbba`b`baaba`\_abaaaaa]`a`^a\_`a¥`\_a¥\_  
@HWI-EAS443:3:20:320:850#0/1  
ATTCATGCTTTTGGCTGGACCATGGGCTGGCATTACCAC  
+HWI-EAS443:3:20:320:850#0/1  
aaaaaa[aXW`aa`a\_aa`Y`Y\_VS[\_\_\_]a]Y`]\_\_ZZ^V  
@HWI-EAS443:3:20:324:1951#0/1  
AGTCTGGCGACCTTGAGTTAGTTTATCTACCCTTGTGT  
+HWI-EAS443:3:20:324:1951#0/1  
a\_^a\_^\_a^`^`^`^]\_Z^`\_X]]I]^[]^V`W^ZVX[HM  
@HWI-EAS443:3:20:371:1080#0/1  
GAAGTACTTCAATGAATCAACAAAGAAGAAAATTGAGAAA  
+HWI-EAS443:3:20:371:1080#0/1  
[a¥\_PaYZ¥\_WR`b^Yb^^Z^`[[[]`aa`^R``]a¥a`\_\_  
@HWI-EAS443:3:20:424:1981#0/1  
GATCATTTGAGTTAAAGAAGCTGTGGGATCAAACCCAATC  
+HWI-EAS443:3:20:424:1981#0/1  
abbb`]\_baa]]abbb`bbaa`T`\_adWWa`a0a[a`¥\_  
@HWI-EAS443:3:20:460:642#0/1  
GGCACCCATAATGTTCTCAAACAAAATGGCAAGACTAGGG

+HWI-EAS443:3:20:460:642#0/1  
^\_aab\_a`aba\_a`aa\_aaaa\_a\_]\_aa\_aS\_`X]Z` `a]  
@HWI-EAS443:3:20:508:250#0/1  
AAACAATGCTGTGGTAATGCCAGCCCATGGTCCAGCCAAA  
+HWI-EAS443:3:20:508:250#0/1  
aUa`aa\_]\_\_a]\_\_T\_]LY¥\_^]]Z¥\_]^UXZXXUU^UX  
@HWI-EAS443:3:20:518:926#0/1  
CAAAGAAGAAAATTGAGAAAATAAGGCCTCTTCTAATAGA  
+HWI-EAS443:3:20:518:926#0/1  
a`\_Ua`\_\_aa`aaaa`aa`^^`a`^^`\_\_aaaa`\_¥\_  
@HWI-EAS443:3:20:529:993#0/1  
ATCTGCATCCCAGGTGTTGCGATAGCCCTTCTTTTAACT  
+HWI-EAS443:3:20:529:993#0/1  
``a`aaaa`a`YV][a`^^a\_a`a`\_`^`^`^`a`\_`\_Z  
@HWI-EAS443:3:20:548:1288#0/1  
CAAAGATGCAGAGAGAGGCAAGTTAAAAAGAAGGGCTATC  
+HWI-EAS443:3:20:548:1288#0/1  
`b`bbb`baaa[^aaa`aaaa^Za^a^`a`\_`a`\_`a`\_`\_¥\_  
@HWI-EAS443:3:20:619:1614#0/1  
GTCCTCCATCTGATACTAATAGCCCTACCTTTGATTGGGT  
+HWI-EAS443:3:20:619:1614#0/1  
`\_b^S^I]Y`¥Q\_]^[^^a`a[YaY^\_ZYa`YVY]V\_\_Z^  
@HWI-EAS443:3:20:654:1219#0/1  
TTTACTGTGTCCATGGTGTATCCTGTTCCCTGTTCCATGGC  
+HWI-EAS443:3:20:654:1219#0/1  
a`a`aa\_\_a\_aa`aa`Ha\_aa`aa^\_a`\_`\_`a\_]`\_V\_  
@HWI-EAS443:3:20:692:936#0/1  
CAAGAAGATGGTCACGCAAAGAACAATAGGGAAGAAAAA  
+HWI-EAS443:3:20:692:936#0/1  
a^a]¥SaT\_Z¥Y^aaaa\_aYb\_a]]^a`aaaa\_a`a^a^a  
@HWI-EAS443:3:20:696:807#0/1  
CCCGGATTGATGCCAGGGTCGACTTCGAGTCTGGACGGAT  
+HWI-EAS443:3:20:696:807#0/1  
¥\_]XQW]ZNT]\_\_`¥OYIQX`¥OFXY[[]YZ]YSZUZ]XP  
@HWI-EAS443:3:20:702:365#0/1  
CTGGGATGCAGATTAGAGGTTTCGTATACTTTGTTGAAAC  
+HWI-EAS443:3:20:702:365#0/1  
Ya^\_^¥a^a`\_¥]`bab`aZ`Q\_Za¥\_^¥\_`^bY`]a]]I  
@HWI-EAS443:3:20:707:100#0/1  
AACCTCTAATCTGCATCCCAGGTGTTGCGATAGCCCTTCT  
+HWI-EAS443:3:20:707:100#0/1  
abaabaabaaaaaaaaaaaa\_aaUaaa\_]a]^\_`^Y]¥^Y]  
@HWI-EAS443:3:20:728:2032#0/1  
AAATCGTCGGATGATTGGAGCCCATCCCACAGTATATTG  
+HWI-EAS443:3:20:728:2032#0/1  
`]Z\_`^^`^`a[¥]^\_¥QZZ\_`\_\_\_\_\_]W\_Y^N\_]Y]ZU  
@HWI-EAS443:3:20:730:296#0/1  
ATACTAATAGCCCTACCTTTGATTGGGTTTGTATCCCACAG  
+HWI-EAS443:3:20:730:296#0/1  
aaaaaaaa]a`\_`a\_a^]`aa^^]^\_^^]]`\_\_XXV^^^



@HWI-EAS443:3:20:772:774#0/1  
CACTAACTTGCAGGTCCTGTAGAATCTGTCCACTCCTGCT  
+HWI-EAS443:3:20:772:774#0/1  
ab`abaaa````a`\_aaaa\_a```a`a¥^[¥`U^\_]]U\_  
@HWI-EAS443:3:20:773:996#0/1  
TGATGACTAATTCACAAGACACAGAGATTTCTTTCACAAT  
+HWI-EAS443:3:20:773:996#0/1  
]`a\_¥a\_ab\_aaaaaa`a`aaaa\_a`a^\_¥a`aa`aaa\_\_  
@HWI-EAS443:3:20:802:952#0/1  
GCAGGTCCAAGGTCATTGTTTATCATGTTGTTCTTTATCA  
+HWI-EAS443:3:20:802:952#0/1  
aaaaa]aa```^F^\_aaa^`aa`Z^``^^]]`[\_\_^]¥X[  
@HWI-EAS443:3:20:831:912#0/1  
TGGCACCTATATGTGTATCTGTAGTCTTTGATGAACAATT  
+HWI-EAS443:3:20:831:912#0/1  
\_ab]`aaab`aaZZ^L`\_Ta\_TVa^\_aaa\_a\_`\_]¥\_a[V  
@HWI-EAS443:3:20:835:126#0/1  
CTTCTTTTCATTGCCCCCTACTGGGAGCCCAGACTGTTCA  
+HWI-EAS443:3:20:835:126#0/1  
`a\_abbba\_bbbabaabbb`bbbbb`aaabaQab\_a\_\_  
@HWI-EAS443:3:20:889:1377#0/1  
CGTCGGATGATTGGAGCCCATCCCACCAGTATATTGTCTT  
+HWI-EAS443:3:20:889:1377#0/1  
aa\_\_[]ZSX¥\_]W]^`a\_\_^R^^\_[\_V^`ZZ^^]Z^Z  
@HWI-EAS443:3:20:889:1695#0/1  
GGCCATGGTGTCTAGGGCCCGATTGATGCCAGGGTCGAC  
+HWI-EAS443:3:20:889:1695#0/1  
\_[aaa\_ZWS¥JMV¥```\_¥`\_\_¥X^]Z`¥aZ^]Z¥KP¥ZZ  
@HWI-EAS443:3:20:889:2035#0/1  
GAACAAAGAGGAAATAGAGATAACAACCCACTTTCAAAGA  
+HWI-EAS443:3:20:889:2035#0/1  
aba`aa[a\_aa^aabbabaaaabaaaaaa````a`\_`^^  
@HWI-EAS443:3:20:889:81#0/1  
GAGATAACAACCCACTTTCAAAGAAAAAGGAGAGTAAGAG  
+HWI-EAS443:3:20:889:81#0/1  
aaa\_\_PTY]^]^\_¥V\_]\_\_X^N^UWXIZ¥\_XaZ^UXW^V]  
@HWI-EAS443:3:20:890:503#0/1  
TTTCTTCCCTATTGTTCTTTGCGTGACCATCTTCTTGCTC  
+HWI-EAS443:3:20:890:503#0/1  
Y`\_aa]a`\_`V¥aaQY``^ZVUaW\_T\_S]a]aaGW]Ya¥\_  
@HWI-EAS443:3:20:898:724#0/1  
ATTAATACGATGACCAAAGATGCAGAGAGAGGCAAGTTA  
+HWI-EAS443:3:20:898:724#0/1  
aabbaaaaaababaaaaa]^`^a`aaa`a```a\_a\_a\_aU¥`  
@HWI-EAS443:3:20:901:959#0/1  
ATTGAAGAGCCATCTGGGCCGTTGCAGGTCCAAGGTCATT  
+HWI-EAS443:3:20:901:959#0/1  
[bY\_T\_T[aba^`a[QV\_\_QUPa`\_ZaZUa`[[`MWV[[  
@HWI-EAS443:3:20:924:662#0/1  
GTTGTCCCCAGTGATTGTGAAAGAAATCTCTGTGTCTTGT

+HWI-EAS443:3:20:924:662#0/1  
``aa^aa`\_^`^a`\_`aS`\_`^`\_`^`^`^`^]]`W^Y^\_]UW  
@HWI-EAS443:3:20:943:160#0/1  
GGTGTCTAGGGCCCGATTGATGCCAGGGTCGACTTCGAG  
+HWI-EAS443:3:20:943:160#0/1  
`YD^^a]a`aa[Z\_aaW\_`]]`¥a[SW¥a\_TV]TSX\_S`^`\_  
@HWI-EAS443:3:20:951:1045#0/1  
GCACCCAGCTCAACCCGATTGATGGACCACTACCTGAGG  
+HWI-EAS443:3:20:951:1045#0/1  
aaaabbaa^\_a`^a`\_a\_aaaaaa`V`X]]`\_`^`a`V[^  
@HWI-EAS443:3:20:962:1987#0/1  
GAACAATTGAAGAGCCATCTGGGCCGTTGCAGGTCCAAGG  
+HWI-EAS443:3:20:962:1987#0/1  
aaaabba`aaa\_aaaaa`a``¥`\_`\_`^`^U`^XZ]¥Z\_]`  
@HWI-EAS443:3:20:997:1664#0/1  
GCCATGGTGTCTAGGGCCCGATTGATGCCAGGGTCGACT  
+HWI-EAS443:3:20:997:1664#0/1  
a`^aa`\_Z`]]`^`¥^`\_`a`\_`^`^`¥^U]^¥]^¥ZP¥]ZT¥  
@HWI-EAS443:3:21:1040:1643#0/1  
ATACCATGGACACAGTAAACAGAACACACCAATACTCA  
+HWI-EAS443:3:21:1040:1643#0/1  
`T^`\_XUY`^PZ`\_GLX^]ZZ]^X¥¥S\_S[UV¥]XZUTS^  
@HWI-EAS443:3:21:1064:984#0/1  
TGCAGTCTGTAGAATCTGTCCACTCCTGCTTGTATTCC  
+HWI-EAS443:3:21:1064:984#0/1  
V`\_Sa¥aXZa^b`aa\_aaa¥]JXaU¥a\_Zaa\_\_N]U\_\_^]  
@HWI-EAS443:3:21:1072:1013#0/1  
CAATTGAAGAGCCATCTGGGCCGTTGCAGGTCCAAGGTCA  
+HWI-EAS443:3:21:1072:1013#0/1  
\_a[a`b]X\_¥`\_`baa\_bab`\_`b^¥`[U`¥Wa`XV\_]PTX  
@HWI-EAS443:3:21:1082:357#0/1  
ATCATCATCCATTAGCTCCCATTTTAAAGCAGACTTCAGGA  
+HWI-EAS443:3:21:1082:357#0/1  
Vba^aabaaVaXaXU¥b^IS\_¥]\_abaa]aaYYU\_^\_¥\_T  
@HWI-EAS443:3:21:1108:143#0/1  
GTTTGGTGCATTCACTATGAGAGCAAATCGTCGGATGAT  
+HWI-EAS443:3:21:1108:143#0/1  
aaaaaa^aa`aa`a\_a\_aa\_a\_a`^`\_`\_Y]]\_]`^]V\_¥^  
@HWI-EAS443:3:21:1139:810#0/1  
AGACACTCCAAAGCTGGGTAGCTCCATGCTAAAATTAGCC  
+HWI-EAS443:3:21:1139:810#0/1  
aaa\_a`\_`\_`a`]\_]`X\_\_W`^[\_]Z`^[^^^^^W¥  
@HWI-EAS443:3:21:1144:99#0/1  
ACTACACATTCCTGGATTCCCAAGAGGAATCGTTCTATTC  
+HWI-EAS443:3:21:1144:99#0/1  
a`^a`a\_aa\_a¥^a\_WaaZZ¥[\_a]¥]¥G]^U^]^[U  
@HWI-EAS443:3:21:1170:1256#0/1  
AAGAGCCATCTGGGCCGTTGCAGGTCCAAGGTCAATTGTTT  
+HWI-EAS443:3:21:1170:1256#0/1  
a`aaa[a^¥aa\_¥SX\_a]WY¥`\_`[G]N\_]`\_X^\_Q]aRV]

@HWI-EAS443:3:21:1182:1866#0/1  
GTCCACTCCTGCTTGTATTCCCTCATGGTTTGGTGCATTC  
+HWI-EAS443:3:21:1182:1866#0/1  
a\_\_a`R\_`a^X^`\_a^a[Z]]T]X\_aaZ¥\_]Y]W]W\_\_ZW  
@HWI-EAS443:3:21:1213:1090#0/1  
CAAGAATTCCCCTTTGGCTTGTGTTGAGAATAGAACGATT  
+HWI-EAS443:3:21:1213:1090#0/1  
`bbb`[Y¥aS\_aaaabaaaaY`]aa\_a\_\_a`]a\_Z][VX  
@HWI-EAS443:3:21:1238:800#0/1  
CTAATAAGAGCACTGACATTAATACGATGACCAAAGATG  
+HWI-EAS443:3:21:1238:800#0/1  
`\_^`aaabbbbaa`aaaaaaaa\_\_a`]a\_`aX`\_a`]`^`  
@HWI-EAS443:3:21:1244:1454#0/1  
AGCTGATTCATTTACTCCAGACTCCAAAGCTGGGTAGC  
+HWI-EAS443:3:21:1244:1454#0/1  
\_\_babaaabaaaabaaaaa`aa\_a`Xa`a[¥¥\_a\_Y`[X  
@HWI-EAS443:3:21:1327:1726#0/1  
CCCGATTGATGGACCACTACCTGAGGATAATGAACCAAGT  
+HWI-EAS443:3:21:1327:1726#0/1  
abab`ababa]]Q]\_b]aa\_`ba`aaaa`aaaa\_`^`^`  
@HWI-EAS443:3:21:1375:1640#0/1  
CGAATGGCCTAACAGCTAATGAGTCAGGAAGGCTAATAGA  
+HWI-EAS443:3:21:1375:1640#0/1  
aaaa¥aa^^^aaa^QTU`aT\_a`]\_WS\_a^`Z\_L0¥\_\_`^`\_  
@HWI-EAS443:3:21:1393:1077#0/1  
ATTGGTGTGTTCTGTTTACTGTGTCCATGGTGTATCCTGT  
+HWI-EAS443:3:21:1393:1077#0/1  
abb]\_X`]`aaabbaabaaa`b`\_^aa`Y`[\_`¥]\_Z]  
@HWI-EAS443:3:21:139:216#0/1  
CCAATACTCAGAAAAGGGAAAGTGGACGACAAACACAGAG  
+HWI-EAS443:3:21:139:216#0/1  
aaaXV[]`¥PWHRPZ]\_Z^[U`N^`^^¥N¥^¥KDN¥\_XNV  
@HWI-EAS443:3:21:1409:1042#0/1  
AATCTGTCCACTCCTGCTTGTATTCCCTCATGGTTTGGTG  
+HWI-EAS443:3:21:1409:1042#0/1  
`Zaaaa[aaWU^Yaab`\_baY¥baZUX\_R`]X\_TT\_\_YQZ  
@HWI-EAS443:3:21:1410:150#0/1  
ATGGGCTCCAATCATCCGACGATTTTGCTCTCATAGTGAA  
+HWI-EAS443:3:21:1410:150#0/1  
aab\_a]aa`aaa`a`[^a`¥\_V^`\_`¥^\_Y\_W^[\_`V\_^^  
@HWI-EAS443:3:21:153:1305#0/1  
TGCCAGGGTCTGACTTCGAGTCTGGACGGATCAAGAAAGAA  
+HWI-EAS443:3:21:153:1305#0/1  
a^\_``aa^Saaa`L[RU`\_U\_ab`ZW^`]Ya]aWZ`]R\_Y  
@HWI-EAS443:3:21:1541:1074#0/1  
CAAAGATGCAGAGAGAGGCAAGTTAAAAAGAAGGGCTATC  
+HWI-EAS443:3:21:1541:1074#0/1  
\_\_X¥\_WRaTU^0\_YY^¥]PY[[U[UP`[T]W]WN[Z^¥BB  
@HWI-EAS443:3:21:1627:977#0/1  
CCAGTGATTGTGAAAGAAATCTCTGTGTCTTGTGAATTAG

+HWI-EAS443:3:21:1627:977#0/1  
ab¥^\_baabb\_bababa`aa`a]ba\_U`Wba[X`U¥aaXW  
@HWI-EAS443:3:21:1631:1968#0/1  
ACCAAAGATGCAGAGAGAGGCAAGTTAAAAAGAAGGGCTA  
+HWI-EAS443:3:21:1631:1968#0/1  
a``aaa`a\_aa`^^`\_¥\_Y\_^^^]^^^\_^^\_XXV]`  
@HWI-EAS443:3:21:1679:997#0/1  
CATGCTTTTGGCTGGACCATGGGCTGGCATTACCACAGCA  
+HWI-EAS443:3:21:1679:997#0/1  
\_Za\_Ubbba^\_]¥UaaTS\_bb¥MZ¥Ya`b`b^a[]^\_K^b  
@HWI-EAS443:3:21:1688:1780#0/1  
GCGAAAAGCTTGAACAGTCTGGGCTCCCAGTAGGGGGCAA  
+HWI-EAS443:3:21:1688:1780#0/1  
¥\_Z\_ba\_]aabbaaaaa\_`]aZUW¥TZaa`^a\_\_[^[U\_  
@HWI-EAS443:3:21:1739:1268#0/1  
AAAAATCCAGCGCAAATGCCATAAGCACCATTCCT  
+HWI-EAS443:3:21:1739:1268#0/1  
\_¥`¥`bb^¥`ba^\_\_[\_I¥^TZ\_\_Z¥RQ`SV\_^]\_XMOSY  
@HWI-EAS443:3:21:195:1633#0/1  
CTTGTGTTGAGAATAGAACGATTCCTCTTGGGAATCCAGG  
+HWI-EAS443:3:21:195:1633#0/1  
abb`\_\_abba\_abaaaaba`aa`\_``aaa\_M\_aa`\_`\_`a\_  
@HWI-EAS443:3:21:240:1804#0/1  
GGCCCCGATTGATGCCAGGGTCGACTTCGAGTCTGGACGG  
+HWI-EAS443:3:21:240:1804#0/1  
]abbbbaabaabbbbbbbbYN^`bbbabaaa\_bbabbbbb  
@HWI-EAS443:3:21:248:1722#0/1  
GCCATGGTGTCTAGGGCCCCGATTGATGCCAGGGTCGACT  
+HWI-EAS443:3:21:248:1722#0/1  
aaaaa`\_K`Za`a^a^a`\_]W\_¥`^`a]\_\_`^WKT^^X`  
@HWI-EAS443:3:21:25:995#0/1  
GAAGATCATTTGAGTTAAAGAAGCTGTGGGATCAAACCCA  
+HWI-EAS443:3:21:25:995#0/1  
aaaa`b^aaaa\_a\_a`]aaaa\_`W`][¥\_]\_\_XZ\_^  
@HWI-EAS443:3:21:290:624#0/1  
CAACTGCATTGGCCAACACCATAGAAGTCTTTAGATCGAA  
+HWI-EAS443:3:21:290:624#0/1  
aaa`aaa`a\_a`a`^\_\_\_\_^[\_Y^^^][Z[^]]^Y  
@HWI-EAS443:3:21:32:355#0/1  
TGTTCTGTTTACTGTGTCCATGGTGTATCCTGTTCTGTT  
+HWI-EAS443:3:21:32:355#0/1  
\_a]¥^¥¥[\_aaa`ba]M\_aaa`^UaXZ\_]`a[``V¥]UQ  
@HWI-EAS443:3:21:337:995#0/1  
TCTATTCCTCTTTGTTTCATTGATTCCATTACATCCTTTA  
+HWI-EAS443:3:21:337:995#0/1  
aaaa\_a`baa\_aaaa¥\_\_`\_a¥`\_\_V^`\_`a]\_\_¥\_\_¥[  
@HWI-EAS443:3:21:340:426#0/1  
GGTGTGTTCTGTTTACTGTGTCCATGGTGTATCCTGTTCC  
+HWI-EAS443:3:21:340:426#0/1  
U\_P\_\_aaaa\_\_Uaa^S]b\_R^\_]`a\_YU]Z\_aT`\_`^\_]`

@HWI-EAS443:3:21:378:1801#0/1  
CAGAAACATCCTGAGCATGGCACCCATAATGTTCTCAAAC  
+HWI-EAS443:3:21:378:1801#0/1  
a\_]\_\_][N]]][S][a`Z¥V]aa^W^^¥^\_`YZ^¥\_\_[[Y  
@HWI-EAS443:3:21:380:1445#0/1  
GTGTTCTGTTTACTGTGTCCATGGTGTATCCTGTTCTCCTGT  
+HWI-EAS443:3:21:380:1445#0/1  
aaaV`a\_a\_a¥^Y^\_^^\_`aaa\_]aR^\_XRX\_^\_\_\_]S]  
@HWI-EAS443:3:21:382:850#0/1  
GATTGATGCCAGGGTCGACTTCGAGTCTGGACGGATCAAG  
+HWI-EAS443:3:21:382:850#0/1  
aa`ba`aaabaaaaUa\_a```a`^]`^`\_[\_¥Z``\_¥^\_¥\_  
@HWI-EAS443:3:21:392:1005#0/1  
ACTACACATTCCTGGATTCCCAAGAGGAATCGTTCTATTC  
+HWI-EAS443:3:21:392:1005#0/1  
a`a`aaaa`\_aa`^\_^^a`\_`^^]]\_]\_\_`Z]^^`\_]Z  
@HWI-EAS443:3:21:410:210#0/1  
GGGAGCTAATGGATGATGATTATCGGGGAAGACTTTGTAA  
+HWI-EAS443:3:21:410:210#0/1  
aa`)`\_aY`aa\_]a^\_a^^[[^^^Y]]YT[^Y]YY^  
@HWI-EAS443:3:21:41:1035#0/1  
GAAGAATCCCACCCAGGAATATTTGAGAATTCATGCCTTG  
+HWI-EAS443:3:21:41:1035#0/1  
`¥`aaa`aa]Wa`¥^\_V\_\_¥¥\_a`[^\_]Z[^`^]¥\_  
@HWI-EAS443:3:21:429:565#0/1  
ACTACCTGAGGATAATGAACCAAGTGGGTATGCACAAACA  
+HWI-EAS443:3:21:429:565#0/1  
`\_]aa`]Z[b]¥aaa\_]a¥\_`\_Z`\_U\_\_\_^W\_]`SU  
@HWI-EAS443:3:21:481:580#0/1  
TTTAAGCAGACTTCAGGAATGTGAAGATTCGGTATATTGT  
+HWI-EAS443:3:21:481:580#0/1  
aaababbaaaaaaaaaaaa\_aaa\_aa`a`\_a\_\_a^\_a\_\_`a¥  
@HWI-EAS443:3:21:48:1418#0/1  
CCCTCATGTTTGGTGCATTCACTATGAGAGCAAAATCGT  
+HWI-EAS443:3:21:48:1418#0/1  
aaa\_^U[a]Ta`\_WTZ¥Xa¥^`^`^`\_][[¥¥[^`^`\_]`]  
@HWI-EAS443:3:21:503:409#0/1  
GCCAGGGTCGACTTCGAGTCTGGACGGATCAAGAAAGAAG  
+HWI-EAS443:3:21:503:409#0/1  
aa`aaaaUaa\_]ZX[^^^S\_¥`\_`\_`^TY^[^¥^WZ^¥  
@HWI-EAS443:3:21:528:1858#0/1  
CACTGACATTAATACGATGACCAAAGATGCAGAGAGAGG  
+HWI-EAS443:3:21:528:1858#0/1  
aaa^[aaaa`aa`\_aa`a`\_`\_aaaa^a]^^^]\_`^\_]0  
@HWI-EAS443:3:21:56:1508#0/1  
TTCGAGTCTGGACGGATCAAGAAAGAAGATTCTCTGAGA  
+HWI-EAS443:3:21:56:1508#0/1  
Z¥\_¥\_]Z\_^]`^]XRX`¥¥^[a[X]VZ¥\_X[[`\_^]T^  
@HWI-EAS443:3:21:622:88#0/1  
GAGTAAATGAATCAGCTGACATGAGTATTGGAGTAACAGT

+HWI-EAS443:3:21:622:88#0/1  
aaa`^a\_ab\_aY\_^\_Za[SU\_\_Y`G]\_\_^Y[[[]ZY^U  
@HWI-EAS443:3:21:660:153#0/1  
TTTGAGTTAAAGAAGCTGTGGGATCAAACCCAATCAAAGG  
+HWI-EAS443:3:21:660:153#0/1  
aaba]a`aaa\_aaa`\_aa]a`a\_\_]``X]]^^^]\_]\_^`  
@HWI-EAS443:3:21:67:1619#0/1  
GATTGATGCCAGGGTCGACTTCGAGTCTGGACGGATCAAG  
+HWI-EAS443:3:21:67:1619#0/1  
]K]ZSb`]ab`[RSWaaaaXa\_ZU\_aa¥`]`]V[[[\_`¥  
@HWI-EAS443:3:21:708:1010#0/1  
AAGAAATCTATTAGCCTTCCTGACTCATTAGCTGTTAGGC  
+HWI-EAS443:3:21:708:1010#0/1  
aa`a]aaabab`a\_aaaaa\_``a\_a^a`````a`]^\_Z^^  
@HWI-EAS443:3:21:728:987#0/1  
TAGAACGATTCCCTCTTGGGAATCCAGGAATGTGTAGTTGC  
+HWI-EAS443:3:21:728:987#0/1  
\_b\_¥Zaaaab[`]`]^V]X\_Q\_b\_aa`V`aP\_QZ`Y\_[Z  
@HWI-EAS443:3:21:732:1336#0/1  
AAAACAAAGACTGAATAAGAGAGGCTATCTAATAAGAGCA  
+HWI-EAS443:3:21:732:1336#0/1  
aaa`\_a`\_aaaaa`a`aa\_a`\_a`^\_\_TW[I[W^\_WQ[H[  
@HWI-EAS443:3:21:743:212#0/1  
CCCACCCAGGAATATTTGAGAATTCATGCCTTGAAACAAT  
+HWI-EAS443:3:21:743:212#0/1  
a`abbabba^aba`aaaaaaa`aa`a```\_`aa`\_a^a^`  
@HWI-EAS443:3:21:776:432#0/1  
CCTCTTTGTTTCATTGATTCCATTACATCCTTTAAGAAATC  
+HWI-EAS443:3:21:776:432#0/1  
`babbbbbbbaaaaaaaabaa`baa``aa`\_`aaa`a`a\_a\_  
@HWI-EAS443:3:21:79:1225#0/1  
GGATGGGCTCCAATCATCCGACGATTTTGCTCTCATAGTG  
+HWI-EAS443:3:21:79:1225#0/1  
aa\_aa`aaabbbbaaaaaa\_a¥a```aaaaaaa`aaY`  
@HWI-EAS443:3:21:820:1857#0/1  
GTGTGTTCTGTTTACTGTGTCCATGGTGTATCCTGTTCCCT  
+HWI-EAS443:3:21:820:1857#0/1  
a¥b\_\_[[[aa\_]aa`a`\_U`]ZX`^`\_Xa¥Y]^\_W\_UZ\_N¥  
@HWI-EAS443:3:21:835:538#0/1  
AAAATTCCAGCGCAAAATGCCATAAGCACACATTCCTT  
+HWI-EAS443:3:21:835:538#0/1  
]Z¥NG¥¥`[YR\_^a[Z\_[WXZX¥Y[XR\_VXZMW^¥^X\_US  
@HWI-EAS443:3:21:838:1938#0/1  
GTTCTGTTTACTGTGTCCATGGTGTATCCTGTTCCCTGTT  
+HWI-EAS443:3:21:838:1938#0/1  
\_SQ]]ZS]XaaYVYa\_a[a¥[YQRQ`]][T^VW]\_X[UQUZ  
@HWI-EAS443:3:21:900:190#0/1  
CTTGAGGATGAACAGATGTACCAGAAGTGCTGCAATCTAT  
+HWI-EAS443:3:21:900:190#0/1  
\_babaaabbb`a``baab[``\_a^a`\_\_[\_````\_`a^a`\_`

@HWI-EAS443:3:21:959:1611#0/1  
GGGCTATTAGTATCAGATGGAGGACCAAACCTTATACAATA  
+HWI-EAS443:3:21:959:1611#0/1  
]``bb`X``^`^b\_¥baaaa`ab[aaZZXab`a`¥^a``X  
@HWI-EAS443:3:21:96:36#0/1  
TTCCTAAAAATTCCAGCGCAAATGCCATAAGCACCACAT  
+HWI-EAS443:3:21:96:36#0/1  
aabaab`bY`aaaaabaaaa`W`\_\_``aaa\_a`a^Z\_\_`\_  
@HWI-EAS443:3:22:1012:1945#0/1  
GCCAGGGTCGACTTCGAGTCTGGACGGATCAAGAAAGAAG  
+HWI-EAS443:3:22:1012:1945#0/1  
a\_YX]aV[^``^\_R[[`¥\_a^XV[\_[\_`\_W[`YPZ\_WY[^P  
@HWI-EAS443:3:22:1033:697#0/1  
ACTGCATTGGCCAACACCATAGAAGTCTTTAGATCGAATG  
+HWI-EAS443:3:22:1033:697#0/1  
a`\_aWY]^\_[aaVDNZ^`Y\_Y]MNOJUOYO[ZZU^\_TTZ]  
@HWI-EAS443:3:22:104:486#0/1  
CTAATAGCCCTACCTTTGATTGGGTTTGATCCCACAGCTT  
+HWI-EAS443:3:22:104:486#0/1  
abbbbaabbb`abbbbbaaaa`a¥a\_aa\_aa`Z`aa`aaaa  
@HWI-EAS443:3:22:105:1635#0/1  
CCCTATTGTTCTTTGCGTGACCATCTTCTTGGTCATGTTG  
+HWI-EAS443:3:22:105:1635#0/1  
\_UTGYRQQQ]\_`ZUV^SL]YYXJQYZR`YRV]N[VSUSOM  
@HWI-EAS443:3:22:1101:2030#0/1  
ATTTCTTTTGTCCAAGATTCAAGTATCGAGACTCCCAAGAC  
+HWI-EAS443:3:22:1101:2030#0/1  
a\_aa]b^¥^]Paab`¥a¥a^bVH^RLQY¥^\_UWI[Y`^aG  
@HWI-EAS443:3:22:1159:1270#0/1  
AATGAATCAGCTGACATGAGTATTGGAGTAACAGTGATAA  
+HWI-EAS443:3:22:1159:1270#0/1  
a]¥`a`a\_\_^``\_]\_X\_]\_Z\_]\_]\_]¥P¥UU[XX][]^]  
@HWI-EAS443:3:22:1195:88#0/1  
TCCAGACACTCCAAAGCTGGGTAGCTCCATGCTAAAATTA  
+HWI-EAS443:3:22:1195:88#0/1  
a`^^`^`\_aa\_\_\_\_\_``aa`aaU]]YY^Y^Z¥Z]^`^^¥]\_  
@HWI-EAS443:3:22:1208:1202#0/1  
GGTGTGTTCTGTTTACTGTGTCCATGGTGTATCCTGTTCC  
+HWI-EAS443:3:22:1208:1202#0/1  
aaW¥^[MQZa\_X\_]\_^`^`^`Y[]]TY]]X]Y^XXYUY  
@HWI-EAS443:3:22:1217:795#0/1  
CAACTGCATTGGCCAACACCATAGAAGTCTTTAGATCGAA  
+HWI-EAS443:3:22:1217:795#0/1  
aaa]]\_]aa`aaa`aaZa`\_`a```\_aX¥aa\_]`]^`^\_\_\_\_  
@HWI-EAS443:3:22:1286:969#0/1  
AGTAAACAGAACACACCAATACTCAGAAAAGGGAAAGTGG  
+HWI-EAS443:3:22:1286:969#0/1  
`\_`\_]`aaabbaaaaa\_a`aaa¥Va^^]]\_baR^\_XaW^^  
@HWI-EAS443:3:22:1298:1232#0/1  
AAAAATTCCAGCGCAAATGCCATAAGCACCACATTCCCT

+HWI-EAS443:3:22:1298:1232#0/1  
`^`^aaa¥aaa`[[a`[``]W`\_^`VWR`Z¥^XZY[]ZU\_  
@HWI-EAS443:3:22:1316:832#0/1  
TGTGGCTAATTTTAGCATGGAGCTACCCAGCTTTGGAGTG  
+HWI-EAS443:3:22:1316:832#0/1  
\_[T\_baZ`¥Za\_Ya[0¥TXWYWWa\_Z\_YVSZ[[W^Q]PY  
@HWI-EAS443:3:22:1340:881#0/1  
GGGATGGGCTCCAATCATCCGACGATTTTGCTCTCATAGT  
+HWI-EAS443:3:22:1340:881#0/1  
abb\_abab`aaaa`aaa\_`a]a\_\_a`a`\_`^\_\_\_`\_\_Y  
@HWI-EAS443:3:22:1353:1292#0/1  
GACGGATCAAGAAAGAAGAGTTCTCTGAGATCATGAAGAT  
+HWI-EAS443:3:22:1353:1292#0/1  
aaa``[aaa¥`[`¥[`X\_¥aXa]a```\_\_\_¥¥\_`¥`]-]]  
@HWI-EAS443:3:22:1361:151#0/1  
GGCCCGGATTGATGCCAGGGTCGACTTCGAGTCTGGACGG  
+HWI-EAS443:3:22:1361:151#0/1  
aa]Ra^Z]baaU¥XQW^ba¥R^a¥TX^V^¥bWS^a`ZK]a  
@HWI-EAS443:3:22:137:999#0/1  
GTTGATCCCACTAACTTGCAGGTCCTGTAGAATCTGTCC  
+HWI-EAS443:3:22:137:999#0/1  
aR\_a`^`ba\_W¥`\_aa`aY]Y[\_Q\_aXa¥a\_¥U][\_\_¥¥`  
@HWI-EAS443:3:22:1382:1691#0/1  
GAACAGGATACACCATGGACACAGTAAACAGAACACACCA  
+HWI-EAS443:3:22:1382:1691#0/1  
^a\_]\_aa[^aa`¥[^W\_aZZ[SZ]0¥\_\_UY[RUO[JYTN  
@HWI-EAS443:3:22:1419:128#0/1  
GGTGTCTAGGGCCCGGATTGATGCCAGGGTCGACTTCGAG  
+HWI-EAS443:3:22:1419:128#0/1  
aZL¥`a`^baaaVaba¥aa]¥aaZV¥a]^W]^WS\_¥S`Sa  
@HWI-EAS443:3:22:143:1693#0/1  
GTGTATCTGTAGTCTTTGATGAACAATTGAAGAGCCATCT  
+HWI-EAS443:3:22:143:1693#0/1  
a]Y`\_abaa`aa¥baa``ba`aaba``¥ab\_a]^ba\_`]  
@HWI-EAS443:3:22:1474:1289#0/1  
ATCTGATACTAATAGCCCTACCTTTGATTGGGTTTGATCC  
+HWI-EAS443:3:22:1474:1289#0/1  
aa`a`aaaaaa\_a\_R^`a\_]`\_aaa\_\_^\_\_LMWa]^\_Z]  
@HWI-EAS443:3:22:1497:1040#0/1  
GAACATTATGGGTGCCATGCTCAGGATGTTTCTGAACCAC  
+HWI-EAS443:3:22:1497:1040#0/1  
^^\_¥¥a\_\_^^UV][XYZYZS]¥[OSYWRZ\_YSVSZQPVI  
@HWI-EAS443:3:22:1538:1397#0/1  
TGGTCTCCATCTGATACTAATAGCCCTACCTTTGATTGG  
+HWI-EAS443:3:22:1538:1397#0/1  
K^aOH\_^^QYYV]¥aZYRYbabbb^VZ^]YJ]a`aWa^^Z  
@HWI-EAS443:3:22:1539:376#0/1  
TAAACAATGACCTTGACCTGCAACGGCCAGATGGCTCT  
+HWI-EAS443:3:22:1539:376#0/1  
`a`¥Z`]`aa\_\_`a`[``]`a`\_]`]^ZUP\_\_\_^¥PT[W]



@HWI-EAS443:3:22:1554:151#0/1  
GAGATAACAACCCACTTTCAAAGAAAAAGGAGAGTAAGAG  
+HWI-EAS443:3:22:1554:151#0/1  
a\_a^\_aa\_aa\_^]\_S]\_a[¥[W^^[]]¥^¥X\_[][[Z^[^  
@HWI-EAS443:3:22:1597:1407#0/1  
TGCTCTTATTAGATAGCCTCTCTTATTTCAGTCTTTGTTTT  
+HWI-EAS443:3:22:1597:1407#0/1  
aaaa\_aaabb^HYa[^^`a\_`aaa^aa\_¥\_\_Ya`ab\_`aa  
@HWI-EAS443:3:22:1701:1665#0/1  
GTCTTTGATGAACAATTGAAGAGCCATCTGGGCCGTTGCA  
+HWI-EAS443:3:22:1701:1665#0/1  
`^`aaaabbbbaa\_aaaaaa`aa\_``a]\_``\_a^Y`V\_\_UZ  
@HWI-EAS443:3:22:1747:99#0/1  
GATTGATGCCAGGGTCGACTTCGAGTCTGGACGGATCAAG  
+HWI-EAS443:3:22:1747:99#0/1  
`Wa^^T^^]RZY\_¥TT^\_`XH¥ZTRLaQY¥YT^R[FZ^`  
@HWI-EAS443:3:22:175:1379#0/1  
GAACAACATGATAAACAATGACCTTGGACCTGCAACGGCC  
+HWI-EAS443:3:22:175:1379#0/1  
a]a\_`b`ZLTSQRYOR`¥Z`[¥VWXGHHSGVU]YXTXTUU  
@HWI-EAS443:3:22:178:446#0/1  
AGTGATTGTGAAAGAAATCTCTGTGTCTTGTGAATTAGTC  
+HWI-EAS443:3:22:178:446#0/1  
aa`a\_``^`\_][aaX\_a\_Waa`WWX^`a]¥\_]]\_¥YXY  
@HWI-EAS443:3:22:227:1972#0/1  
GTGCCATGCTCAGGATGTTTCTGAACCACTCGGGTTGATT  
+HWI-EAS443:3:22:227:1972#0/1  
a\_\_`b]¥aaba\_a`a\_`a\_\_^a\_\_aa\_¥``\_\_J\_^Y\_a  
@HWI-EAS443:3:22:279:477#0/1  
GAACAATTGAAGAGCCATCTGGGCCGTTGCAGGTCCAAGG  
+HWI-EAS443:3:22:279:477#0/1  
aa]``a\_\_a\_a]\_`\_¥\_a\_]`Y\_]X`]UV`RY¥Z\_U\_X  
@HWI-EAS443:3:22:27:838#0/1  
AAAAATTCCAGCGAAAATGCCATAAGCACCATTCCT  
+HWI-EAS443:3:22:27:838#0/1  
a\_PTJU^a[Z]`a\_\_[UH[Q\_XYUVJU\_]¥RX¥RLX^]YY  
@HWI-EAS443:3:22:335:1438#0/1  
CTTTTCCTAAAAATTCCAGCGAAAATGCCATAAGCACCA  
+HWI-EAS443:3:22:335:1438#0/1  
][RHUVXa`b`\_aaa`b`a\_RQ¥R\_Y\_aaa\_Y\_¥`\_\_YS¥  
@HWI-EAS443:3:22:339:561#0/1  
GTTGTTCTTTATCACTGTTACTCCAATACTCATGTCAGCT  
+HWI-EAS443:3:22:339:561#0/1  
aaaa¥aaaaa`^\_``a\_`¥^\_\_`^^\_]\_]^\_^[[^\_]`  
@HWI-EAS443:3:22:386:826#0/1  
GGCTCCAATCATCCGACGATTTTGCTCTCATAGTGAATGC  
+HWI-EAS443:3:22:386:826#0/1  
W\_[]Z^¥^V^^XU\_\_X^a¥\_aa\_``Za][][]\_W`¥``aaaa  
@HWI-EAS443:3:22:407:1449#0/1  
GGGCAATGAAAAGAAGGCCAAACTGGCAAATGTTGTGAGA

+HWI-EAS443:3:22:407:1449#0/1  
^bbbbbabbbaabbbbabababbbab`ba\_ba`a  
@HWI-EAS443:3:22:409:1758#0/1  
AGTGAATGCACCAAACCATGAGGGAATACAAGCAGGAGTG  
+HWI-EAS443:3:22:409:1758#0/1  
`bZa\_Z¥Ua]^aa^X\_aU`aa[a¥`\_^aaaaY`\_\_[ZS[  
@HWI-EAS443:3:22:429:1642#0/1  
GCAGACTTCAGGAATGTGAAGATTCCGTATATTGTATAAG  
+HWI-EAS443:3:22:429:1642#0/1  
`bbbb`babb^]abaaaaba\_aaaaa]^aaaaa`baa`  
@HWI-EAS443:3:22:446:1327#0/1  
ACTCCAGACACTCCAAAGCTGGGTAGCTCCATGCTAAAAT  
+HWI-EAS443:3:22:446:1327#0/1  
Za\_aaa``aaa```a]\_^`]^V`Z\_V^`¥Z]]]]U]^  
@HWI-EAS443:3:22:461:2038#0/1  
GGCTTTCCTTGAAGAATCCCACCCAGGAATATTTGAGAAT  
+HWI-EAS443:3:22:461:2038#0/1  
]bbbbbbbabbbbabababbbbbbababbaabbbba`  
@HWI-EAS443:3:22:461:228#0/1  
TTCGAATCTTATTCTTTTACTCTCGAACATGTACCCTTT  
+HWI-EAS443:3:22:461:228#0/1  
^X\_a[ta\_ab^[a[MV]Q^^KTMRR^QJWUa`TMFN^¥\_B  
@HWI-EAS443:3:22:483:540#0/1  
GTGGGATCAAACCCAATCAAAGGTAGGGCTATTAGTATCA  
+HWI-EAS443:3:22:483:540#0/1  
a]aa¥^Yaaa`\_`aa`aa`[a\_Q``aYaaa`Za\_U`^^`  
@HWI-EAS443:3:22:605:531#0/1  
GAGATTTCTTTCACAATCACTGGGGACAACACTAAGTGGA  
+HWI-EAS443:3:22:605:531#0/1  
a][\_aa\_a```a`\_a`a`]^`a`a`^^`\_^`^`Za\_\_  
@HWI-EAS443:3:22:626:1637#0/1  
AAATTCCAGCGCAAAATGCCATAAGCACACATTCCCTTA  
+HWI-EAS443:3:22:626:1637#0/1  
a¥Q\_aaaa\_a\_aaa`Za]`\_^]Z`\_\_`\_^`][\_Z]^\_  
@HWI-EAS443:3:22:632:20#0/1  
TTCGAGAGTAAAAGAATGAAGATTCGAACACAAATACCAG  
+HWI-EAS443:3:22:632:20#0/1  
]W]\_`R\_[a\_Y¥aa`b`[`\_Z\_a\_]¥YZ``¥[¥XXFW^  
@HWI-EAS443:3:22:636:275#0/1  
GCCGTTGCAACTACACATTCTGGATTCCCAAGAGGAATC  
+HWI-EAS443:3:22:636:275#0/1  
abaaa\_b`bbaaaaaa`a`a^\_a\_]`^^`\_\_\_\_Z``\_]U  
@HWI-EAS443:3:22:685:370#0/1  
GATAACAATGACCTTGGACCTGCAACGGCCAGATGGCT  
+HWI-EAS443:3:22:685:370#0/1  
aaaaab\_aaaa`a```aa\_\_Ua\_\_^aY\_]\_^X^`]^`^XY  
@HWI-EAS443:3:22:692:1483#0/1  
GGCCATGGTGTCTAGGGCCCGGATTGATGCCAGGGTCGAC  
+HWI-EAS443:3:22:692:1483#0/1  
`aaaaaaa^\_a^a`\_`a`aaa`````^\_a`¥\_YLP``¥



+HWI-EAS443:3:22:98:549#0/1  
a`[a[aa`a]bYQZ]PW\_aU`\_`WW`^`^`\_ZZ\_a¥YRSa  
@HWI-EAS443:3:23:1065:347#0/1  
GAATGTGTAGTTGCAACGGCATCATATCCATGCTTTTGG  
+HWI-EAS443:3:23:1065:347#0/1  
a]VO^Q`WW]RVZ`[YMS[[[^WV]RX\_WYV¥YVZ^ZNVV  
@HWI-EAS443:3:23:1167:519#0/1  
GGAGTAAATGAATCAGCTGACATGAGTATTGGAGTAACAG  
+HWI-EAS443:3:23:1167:519#0/1  
¥`[`Qbabab^aa`aa¥^^¥[UY`^^Y¥aaaaZ\_Z]XUN`  
@HWI-EAS443:3:23:1168:848#0/1  
TGCTGGTATTTGTGTTCGAATCTTCATTCTTTTACTCTCG  
+HWI-EAS443:3:23:1168:848#0/1  
a`abbb`abbbb¥\_]aaaaa^b`\_aaa\_aaaaa`\_\_\_\_]a  
@HWI-EAS443:3:23:1197:166#0/1  
AGCCATGGAACAGGAACAGGATACACCATGGACACAGTAA  
+HWI-EAS443:3:23:1197:166#0/1  
\_`X\_aVV`W\_Q]]aaa\_`^bWaaUYNG\_[`]¥^`X^aI[W  
@HWI-EAS443:3:23:122:1201#0/1  
CTAACTTGCAGTCTGTAGAATCTGTCCACTCCTGCTTG  
+HWI-EAS443:3:23:122:1201#0/1  
ababaaa`aabU^`\_a`abb`aa\_aa^\_\_\_\_\_a[[`a\_  
@HWI-EAS443:3:23:1237:1802#0/1  
GGATTGATGCCAGGGTCGACTTCGAGTCTGGACGGATCAA  
+HWI-EAS443:3:23:1237:1802#0/1  
abbbaabaa\_aa\_a`¥aab`\_aa`aa\_Zaa^`\_ZY]\_Za`  
@HWI-EAS443:3:23:1273:1323#0/1  
GAACAGTCTGGGCTCCCAGTAGGGGCAATGAAAAGAAGG  
+HWI-EAS443:3:23:1273:1323#0/1  
`^`Z`[\_]UaXX`aaXXST[[a^]\_\_aa^ZZZ¥\_UZ^  
@HWI-EAS443:3:23:1288:707#0/1  
GTGTGTTCTGTTTACTGTGTCCATGGTGTATCCTGTTCCCT  
+HWI-EAS443:3:23:1288:707#0/1  
a[a¥^R`[ab\_aa\_]\_\_a]\_[]`¥VZ[]`[V^¥¥TPW¥  
@HWI-EAS443:3:23:1310:1043#0/1  
ATGGAATCAATGAACAAAGAGGAAATAGAGATAACAACCC  
+HWI-EAS443:3:23:1310:1043#0/1  
abb``baa\_bbaaaaa`ab\_a`]¥^aaaaaaaaa^aaXYX  
@HWI-EAS443:3:23:133:1345#0/1  
TGATGCCGTTGCAACTACACATTCCTGGATTCCCAAGAGG  
+HWI-EAS443:3:23:133:1345#0/1  
a\_\_`^baa`\_a`a`a`aaa`\_a`^\_X][`a\_`W]]Z  
@HWI-EAS443:3:23:1353:1155#0/1  
AGGAAATAGAGATAACAACCCACTTTCAAAGAAAAAGGAG  
+HWI-EAS443:3:23:1353:1155#0/1  
^aa^``bbbbbbba^`\_abbL`bbaZ`abba^abbaab  
@HWI-EAS443:3:23:1386:266#0/1  
TGGATGATGATTATCGGGGAAGACTTTGTAATCCCCTGAA  
+HWI-EAS443:3:23:1386:266#0/1  
aba\_aaaaaaaaaa]``a\_`^Z`\_``[^^^^ZZW\_^Z^

@HWI-EAS443:3:23:1470:1598#0/1  
TTTTGTTTGAGAACATTATGGGTGCCATGCTCAGGATGTT  
+HWI-EAS443:3:23:1470:1598#0/1  
ab`ab`baa\_\_`\_`a`aa[W\_]^[X\_[TUXSSZ^ZXYY^  
@HWI-EAS443:3:23:1496:1285#0/1  
ATTGATTCCATTACATCCTTTAAGAAATCTATTAGCCTTC  
+HWI-EAS443:3:23:1496:1285#0/1  
aa`b`baa`bbbaab\_\_abbaba`aaaa^baa^aa]aa`]  
@HWI-EAS443:3:23:152:713#0/1  
TTTGCGAAAAGCTTGAACAGTCTGGGCTCCCAGTAGGGGG  
+HWI-EAS443:3:23:152:713#0/1  
\_]^[`\_Z0]^[TXVV]TNPQ[NV¥TS[WNVVYZSQV¥VXXV  
@HWI-EAS443:3:23:1530:914#0/1  
GCCCATCCCACCAGTATATTGTCTTGGTGTATTTCTTTTG  
+HWI-EAS443:3:23:1530:914#0/1  
`a`bbbaabb¥Xa`R]ZS]`Y]a`YWU][P`aaXaaaa`  
@HWI-EAS443:3:23:161:210#0/1  
CCCATTTTAAGCAGACTTCAGGAATGTGAAGATTCCGTAT  
+HWI-EAS443:3:23:161:210#0/1  
abb`bbbba``bbbaaaaba`a]`Ya]¥¥\_\_aaab^\_a  
@HWI-EAS443:3:23:1657:933#0/1  
CACCAGTATATTGTCTTGGTGTATTTCTTTTGTCCAAGAT  
+HWI-EAS443:3:23:1657:933#0/1  
aaT¥\_a`bb`bab`Zbaaa[\_^\_aa`¥aaaaZ¥UTa``]^  
@HWI-EAS443:3:23:1659:1172#0/1  
GATGCCAGGGTCGACTTCGAGTCTGGACGGATCAAGAAAG  
+HWI-EAS443:3:23:1659:1172#0/1  
QV[``a[`¥\_QY\_ba¥\_P\_``[Z^a\_PR\_b]UGY\_aa^]]  
@HWI-EAS443:3:23:1660:538#0/1  
TGGATGTCAATCCGACTCTACTTTTCCTAAAAATCCAGC  
+HWI-EAS443:3:23:1660:538#0/1  
`aba`b`a\_aa`^a^]a\_aa[aaab\_`aabaa\_aaX¥\_\_G  
@HWI-EAS443:3:23:1687:991#0/1  
TCTGTTTACTGTGTCCATGGTGTATCCTGTTCCCTGTTCCA  
+HWI-EAS443:3:23:1687:991#0/1  
^\_`b^bbbaa`\_ba\_`\_a^ZVaVY]V]\_a^`[\_\_\_\_]`¥]Y  
@HWI-EAS443:3:23:177:1181#0/1  
TGCCAGGGTCGACTTCGAGTCTGGACGGATCAAGAAAGAA  
+HWI-EAS443:3:23:177:1181#0/1  
`abbabaa[b`aabababbaaba`aaaa^`abaabab`ab  
@HWI-EAS443:3:23:208:2026#0/1  
GTGGACGACAAACACAGAGACTGGTGCACCCAGCTCAAC  
+HWI-EAS443:3:23:208:2026#0/1  
a¥^]]a¥S`]]]a`a`¥RQT\_WUTPP`]Z``YTS¥P¥¥a]  
@HWI-EAS443:3:23:211:1167#0/1  
ATCTAATAAGAGCACTGACATTAATACGATGACCAAAGA  
+HWI-EAS443:3:23:211:1167#0/1  
aabaaa`aNaa`aaaaaaa^a^^`a\_`\_[]`a¥Y  
@HWI-EAS443:3:23:223:1777#0/1  
GATGGCACAGCATCACTGAGTCCTGGGATGATGATGGGCA

+HWI-EAS443:3:23:223:1777#0/1  
abaa[bbbbabbaab`aaa`^aaa^\_a`aaaa]aa\_] [[¥  
@HWI-EAS443:3:23:286:1043#0/1  
TGGTGTGTTCTGTTTACTGTGTCCATGGTGTATCCTGTTC  
+HWI-EAS443:3:23:286:1043#0/1  
abbZbZaabaabaaaaa`^`aaaa]Ua[[`\_`\_`\_`\_`a  
@HWI-EAS443:3:23:287:188#0/1  
CACAGTAAACAGAACACACCAATACTCAGAAAAGGGAAAG  
+HWI-EAS443:3:23:287:188#0/1  
abb`aa\_a]ba`^baaaa`a`aaaaaabaa`aaa\_aa\_a  
@HWI-EAS443:3:23:306:821#0/1  
CTTGTGTTGAGAATAGAACGATTCCTCTTGGGAATCCAGG  
+HWI-EAS443:3:23:306:821#0/1  
abbbbaabbaabaabbbabbb\_aaabaaaa`aa`\_aa]\_a  
@HWI-EAS443:3:23:336:1471#0/1  
CATTGAAGTACTTCAGGTCAATGCTTGCTAGCATTCTGC  
+HWI-EAS443:3:23:336:1471#0/1  
][^`b`Z]S`ab]b`^Ua`¥`¥ba``aYb\_]`^\_aaba`\_  
@HWI-EAS443:3:23:346:1064#0/1  
GTACTTCAATGAATCAACAAAGAAGAAAATTGAGAAAATA  
+HWI-EAS443:3:23:346:1064#0/1  
]V^^SXXX]`a^`^]¥^a\_WVOH^TGNT^^]Q]RX[W[R  
@HWI-EAS443:3:23:359:430#0/1  
CTGTGGTAATGCCAGCCCATGGTCCAGCCAAAAGCATGGA  
+HWI-EAS443:3:23:359:430#0/1  
W\_[ab`ab¥a\_a\_¥aZXabaa]F]`\_X``¥UZa]¥^\_a`X  
@HWI-EAS443:3:23:369:1596#0/1  
TGCTCTCATAGTGAATGCACCAAACCATGAGGGAATACAA  
+HWI-EAS443:3:23:369:1596#0/1  
abbbbabbaa[`bbb`abbaabbbbaaaabb``\_aa`baba  
@HWI-EAS443:3:23:394:1584#0/1  
GAAAAATTTCTCGAATAGATTGCAGCACTTCTGGTACATC  
+HWI-EAS443:3:23:394:1584#0/1  
\_a``RK¥aXTa``X^Xb`¥^\_SY`a¥a```¥aI`M]`\_`a  
@HWI-EAS443:3:23:412:691#0/1  
AAAAATTCAGCGCAAATGCCATAAGCACCATTCCT  
+HWI-EAS443:3:23:412:691#0/1  
^`aa]aa`\_\_aa\_aabaa`aaa]aY^b`¥aaba\_¥YT  
@HWI-EAS443:3:23:481:484#0/1  
GCTCCCAGTAGGGGCAATGAAAAGAAGGCCAAACTGGCA  
+HWI-EAS443:3:23:481:484#0/1  
aaa`a]`M0^aa`aa\_\_¥ZTT]U`^^[\_Z`W]\_X`\_`R^  
@HWI-EAS443:3:23:489:2006#0/1  
GATTCCTCTTGGGAATCCAGGAATGTGTAGTTGCAACGGC  
+HWI-EAS443:3:23:489:2006#0/1  
O\_bbbbabbbbaabbbbaaaab\_babababaaab^abbbab  
@HWI-EAS443:3:23:566:1394#0/1  
GTGCCATGCTCAGGATGTTTCTGAACCACTCGGGTTGATT  
+HWI-EAS443:3:23:566:1394#0/1  
\_R`^`a\_ab\_\_YZ``\_W\_aaaa\_\_aaa\_a¥``\_`^PV\_]\_0

@HWI-EAS443:3:23:591:858#0/1  
GTGCTTATGGCATTGCGCTGGAATTTTAGGAAAAGTA  
+HWI-EAS443:3:23:591:858#0/1  
ZSVWSYM^`a]H`X\_XFX[P[¥UY\$]YUY\_`\_`\_]^TY  
@HWI-EAS443:3:23:611:167#0/1  
GTCCTCCATCTGATACTAATAGCCCTACCTTTGATTGGGT  
+HWI-EAS443:3:23:611:167#0/1  
ZU\_ZZa`aS]aaaa\_\_`Y]Yaa¥NZ]GXZZ``^`\_¥QNXW  
@HWI-EAS443:3:23:637:621#0/1  
ACCTATATGTGTATCTGTAGTCTTTGATGAACAATTGAAG  
+HWI-EAS443:3:23:637:621#0/1  
Vbbabb```\_bb`]ab^`bXaaba`aa`a\_a]aa``a^  
@HWI-EAS443:3:23:640:279#0/1  
GGGGCAATGAAAAGAAGCCAAACTGGCAAATGTTGTGAG  
+HWI-EAS443:3:23:640:279#0/1  
aaaaa]YX^Y[XZ`^\_^[]]\_^]\_¥VZ[SYR[Y]]Z]X^  
@HWI-EAS443:3:23:658:1793#0/1  
GTGTGTTCTGTTTACTGTGTCCATGGTGTATCCTGTTCCCT  
+HWI-EAS443:3:23:658:1793#0/1  
aZWTYV`a^R¥aa`aa`a\_aa`\_`a[`Va\_``\_]X\_]`  
@HWI-EAS443:3:23:761:44#0/1  
GAACAATTGAAGAGCCATCTGGGCCGTTGCAGGTCCAAGG  
+HWI-EAS443:3:23:761:44#0/1  
0¥]]]bb\_ab```¥`\_baab\_S¥`aT\_^a]aa¥YXVY\_`  
@HWI-EAS443:3:23:768:1125#0/1  
CCCGGATTGATGCCAGGGTCGACTTCGAGTCTGGACGGAT  
+HWI-EAS443:3:23:768:1125#0/1  
^b`bab`abaa`bbaaab^a`[^`Y^\_X]Y^ab\_\_\_a`\_¥  
@HWI-EAS443:3:23:770:1666#0/1  
GTAAGAGACAACATGACCAAGAAGATGGTCACGCAAAGAA  
+HWI-EAS443:3:23:770:1666#0/1  
a\_aaaaaaab`^a\_\_`\_a`\_\_a`\_]\_\_Xa`X\_]\_^\_\_^]  
@HWI-EAS443:3:23:788:453#0/1  
TGCCAGGGTCGACTTCGAGTCTGGACGGATCAAGAAAGAA  
+HWI-EAS443:3:23:788:453#0/1  
aY\_`^\_bb¥aY]`aabaa]¥`]Y\_^`a`Z`]¥\_`a`\_`\_`  
@HWI-EAS443:3:23:797:1017#0/1  
GGCTCCAATCATCCGACGATTTTGCTCTCATAGTGAATGC  
+HWI-EAS443:3:23:797:1017#0/1  
aabaabY[`]`abZ``a\_NXaa]\_]\_a^aaU\_[OaZK¥\_]`  
@HWI-EAS443:3:23:798:110#0/1  
GAAAGAAATCTCTGTGTCTTGTGAATTAGTCATCATCTTT  
+HWI-EAS443:3:23:798:110#0/1  
aaaaaabba^baba\_a`aaa\_aY^`X\_\_\_\_\_`]\_\_^`\_`\_`  
@HWI-EAS443:3:23:813:653#0/1  
GGCCCCGATTGATGCCAGGGTCGACTTCGAGTCTGGACGG  
+HWI-EAS443:3:23:813:653#0/1  
ab`b`ba^XaX\_\_b\_J¥a^RP^XM[`a^]X^0`\_X¥IS^`  
@HWI-EAS443:3:23:829:381#0/1  
GAACGATTCTCTTGGGAATCCAGGAATGTGTAGTTGCAA

+HWI-EAS443:3:23:829:381#0/1  
`bbbbbbbbb`aaaaaaa]aa^aaaa]^ab\_b`aa\_aaaa\_  
@HWI-EAS443:3:23:851:1954#0/1  
CGAGTCTGGACGGATCAAGAAAGAAGAGTTCTCTGAGATC  
+HWI-EAS443:3:23:851:1954#0/1  
abbaVa`]^a[ba\_Z¥ba`\_`aa`a¥a^XaZ\_aa\_a`]^P  
@HWI-EAS443:3:23:856:735#0/1  
TCTCTTATTTCAGTCTTTGTTTTTTCTTCCCTATTGTTCTT  
+HWI-EAS443:3:23:856:735#0/1  
abaaaaaaaaaaaaaaa`aaaab\_aaaaa\_aa`\_a`a`a^a\_a`  
@HWI-EAS443:3:23:898:146#0/1  
GGGCTCCAATCATCCGACGATTTTGCTCTCATAGTGAATG  
+HWI-EAS443:3:23:898:146#0/1  
abaaaaabba`aaa\_aaaaa`aa`a^`\_`\_\_\_`\_]a^\_]`  
@HWI-EAS443:3:23:920:946#0/1  
ATGGGCTCCAATCATCCGACGATTTTGCTCTCATAGTGAA  
+HWI-EAS443:3:23:920:946#0/1  
`TU^\_a\_a`[]\_Z`]YPY¥Q\_Z\_[]\_\_\_W\_ZR]N]ZUa\_W  
@HWI-EAS443:3:23:932:19#0/1  
ACGGTCTTGGGAGTCTCGATACTGAATCTTGGACAAAAGA  
+HWI-EAS443:3:23:932:19#0/1  
`b\_bWaba]``ab[``T^aa]\_aa[aa`aaX¥Y]`\_Y]\_\_\_  
@HWI-EAS443:3:23:953:103#0/1  
CCCCGAGTGGTTCAGAAACATCCTGAGCATGGCACCCATAA  
+HWI-EAS443:3:23:953:103#0/1  
a`bbbbbbbbb\_b^bbaab\_aaaaaaaaa\_ab`\_^\_H`a`\_`\_`\_  
@HWI-EAS443:3:23:957:307#0/1  
GATTCTTCAAGGAAAGCCATAGCCTCTAGAACACAGTCTG  
+HWI-EAS443:3:23:957:307#0/1  
aa`a\_a\_\_\_\_\_a`\_]`^¥\_^^`\_[X^X]Q]\_^Z]UY^WZ^B  
@HWI-EAS443:3:23:967:1978#0/1  
GAAGAGCCATCTGGGCCGTTGCAGGTCCAAGGTCATTGTT  
+HWI-EAS443:3:23:967:1978#0/1  
aa`TZ]^bbaY\_]WX`YUZZ¥W]aYFY¥¥JYZGMP^PUVL  
@HWI-EAS443:3:23:975:1314#0/1  
GAGGAAATAGAGATAACAACCCACTTTCAAAGAAAAAGGA  
+HWI-EAS443:3:23:975:1314#0/1  
¥^ababbbabbbbaababba\_abaa\_a^baab`aaaaaaa  
@HWI-EAS443:3:24:1024:231#0/1  
CAGATCTTCATGATCTCAGAGAACTTTCTTTCTTGATCC  
+HWI-EAS443:3:24:1024:231#0/1  
`b`bbba`ba\_aa`UbTa^ab\_aabYaa\_abaaaaa¥a\_]`  
@HWI-EAS443:3:24:1065:1619#0/1  
GACAACATGACCAAGAAGATGGTCACGCAAAGAACAATAG  
+HWI-EAS443:3:24:1065:1619#0/1  
aa¥\_b`bV\_b¥^T\_bab]a^¥^^`bJ]^aT[b`aK\_``aa  
@HWI-EAS443:3:24:1066:1673#0/1  
ATTGATGCCAGGTCGACTTCGAGTCTGGACGGATCAAGA  
+HWI-EAS443:3:24:1066:1673#0/1  
aZa`bZ`aa]^b[HY^aUR[TKVNS¥`a]R[Z\_]RTL`\_U



@HWI-EAS443:3:24:1074:973#0/1  
GCTAATTTTAGCATGGAGCTACCCAGCTTTGGAGTGTCTG  
+HWI-EAS443:3:24:1074:973#0/1  
]\_a`]'`\_`a\_\_\_aa`a\_\_\_a`]\_^]]``aaa`\_S`Y]a  
@HWI-EAS443:3:24:1092:1151#0/1  
GATTGATGCCAGGGTCGACTTCGAGTCTGGACGGATCAAG  
+HWI-EAS443:3:24:1092:1151#0/1  
aaaabaaaaaaaa[a\_`\_a\_\_``\_V\_a[\_PX``ZZ^`a\_  
@HWI-EAS443:3:24:1097:1715#0/1  
GAAGAATCCCACCCAGGAATATTTGAGAATTCATGCCTTG  
+HWI-EAS443:3:24:1097:1715#0/1  
aaaZ`baab\_bbaaaaaaaaaa\_aab^b`aaaa\_^a`\_^a  
@HWI-EAS443:3:24:1105:2034#0/1  
ATGGCTTTCCTTGAAGAATCCCACCCAGGAATATTTGAGA  
+HWI-EAS443:3:24:1105:2034#0/1  
`aa\_``¥`Z`Y`Q`a]¥bWY`\_]PZ¥^¥^\_\_\_\_\_]T[  
@HWI-EAS443:3:24:1142:1700#0/1  
CCCGAGTGGTTCAGAAACATCCTGAGCATGGCACCCATAA  
+HWI-EAS443:3:24:1142:1700#0/1  
abY¥SS¥[VaYyb^Vb\_0\_V\_bI[\_baa][bba``Paaab  
@HWI-EAS443:3:24:1143:1047#0/1  
AATTGAAGAGCCATCTGGGCCGTTGCAGGTCCAAGTTCAT  
+HWI-EAS443:3:24:1143:1047#0/1  
abaa`abaab`aaa^a\_a`^\_a\_\_]]]a\_Y`Ya\_a\_Y¥\_\_  
@HWI-EAS443:3:24:1149:1720#0/1  
GTTGCGATAGCCCTTCTTTTAACTTGCCTCTCTCTGCAT  
+HWI-EAS443:3:24:1149:1720#0/1  
a\_a``aaaa`a]a\_aa\_\_aa`^NZZV^`\_`\_\_[^`^^Z^^  
@HWI-EAS443:3:24:1169:1438#0/1  
GATCATTTGAGTTAAAGAAGCTGTGGGATCAAACCAATC  
+HWI-EAS443:3:24:1169:1438#0/1  
`baabbbbbbbbabbb`babbaba`a`aa\_babaabba`a  
@HWI-EAS443:3:24:1169:270#0/1  
AGGGTACATGTTTCGAGAGTAAAAGAATGAAGATTGGAACA  
+HWI-EAS443:3:24:1169:270#0/1  
Ta`X`b[V`]a`^`^`aUaaa`\_`aabaab\_a`[^aa`^`  
@HWI-EAS443:3:24:1174:513#0/1  
AGGCATGAATTCTCAAATATTCCTGGGTGGGATTCTTCAA  
+HWI-EAS443:3:24:1174:513#0/1  
aa`ba^¥`^^^`\_U]¥`\_bbYVHa`XaRaba`^`\_aa\_`]  
@HWI-EAS443:3:24:1181:101#0/1  
CAATTGAAGAGCCATCTGGGCCGTTGCAGGTCCAAGGTCA  
+HWI-EAS443:3:24:1181:101#0/1  
`bbbbbbbbbbbbbbbbbbbbbbbababb`bbbaababb\_aa  
@HWI-EAS443:3:24:1196:1190#0/1  
CTCCAATCATCCGACGATTTTGCTCTCATAGTGAATGCAC  
+HWI-EAS443:3:24:1196:1190#0/1  
`bbbbbbbbbbbbbbabaabbbbaababaab`baaaa]a\_  
@HWI-EAS443:3:24:1210:595#0/1  
TGAATCTTGGACAAAAGAAATACACCAAGACAATATACTG

+HWI-EAS443:3:24:1210:595#0/1  
RU]\_\_\_\_\_a`V¥^`baaaaa^TWRQV\_Z¥]a^¥b[aa\_a]  
@HWI-EAS443:3:24:1212:1758#0/1  
GAGAGAGGCAAGTTAAAAAGAAGGGCTATCGCAACACCTG  
+HWI-EAS443:3:24:1212:1758#0/1  
`UaK`^]Z¥^Ya`a^)]\_aba]Sa[`]\_[[Y¥¥[a[]a¥  
@HWI-EAS443:3:24:1220:1100#0/1  
GCAACGGCCAGATGGCTCTTCAATTGTTTCATCAAAGACT  
+HWI-EAS443:3:24:1220:1100#0/1  
aaaaa`\_abaM]`\_^a\_`\_`\_]a^`WTT\_\_\_\_\_^¥\_X0^  
@HWI-EAS443:3:24:122:1106#0/1  
GTCTGGAGTAAATGAATCAGCTGACATGAGTATTGGAGTA  
+HWI-EAS443:3:24:122:1106#0/1  
aaa]abab\_bb\_aaa\_aaa`aaa\_aa`a`a]`\_`a```]a  
@HWI-EAS443:3:24:1256:752#0/1  
AACCAAGTGGGTATGCACAAACAGACTGTGTTCTAGAGGC  
+HWI-EAS443:3:24:1256:752#0/1  
abaaabb\_¥T¥\_b\_¥\_`aaaaXab\_\_`b[a\_\_U\_¥aX\_a]  
@HWI-EAS443:3:24:1288:472#0/1  
GACGGATCAAGAAAGAAGAGTTCTCTGAGATCATGAAGAT  
+HWI-EAS443:3:24:1288:472#0/1  
aa`ab`aaaaaba`aaaaRa\_a\_a`aaaP\_aaa^a`a  
@HWI-EAS443:3:24:1289:958#0/1  
GCTTGATTCCCTCATGGTTTGGTGCATTCACTATGAGAG  
+HWI-EAS443:3:24:1289:958#0/1  
aa``aaba\_a¥a`Sa¥¥H\_aa`Y\_\_`a\_Q`¥aa\_\_Z]]\_  
@HWI-EAS443:3:24:1320:623#0/1  
GTCCTCCATCTGATACTAATAGCCCTACCTTTGATTGGGT  
+HWI-EAS443:3:24:1320:623#0/1  
aZYa\_]Y¥^]Z\_\_TXWYaaaa]¥[]`[^V\_a\_ZZ]\_WQIP  
@HWI-EAS443:3:24:1385:838#0/1  
TTTATGACTGACAAAGGGATTACAGGGATTACAAAGTCTT  
+HWI-EAS443:3:24:1385:838#0/1  
[`bbbaa\_^]¥bbb`^`[Xa[[abU]0^]a`abab¥U]a  
@HWI-EAS443:3:24:1412:120#0/1  
CATGGGCTGGCATTACCACAGCATTGTTTACAGAATCAAT  
+HWI-EAS443:3:24:1412:120#0/1  
]bbbbbabababbbabbbbbb`bbabbbb`bbbbbb^abb  
@HWI-EAS443:3:24:1434:350#0/1  
GCTGGCATTACCACAGCATTGTTTACAGAATCAATCTCTT  
+HWI-EAS443:3:24:1434:350#0/1  
a\_aaaa`aa\_U\_`\_aZSZ`^`^]`US]a]\_^R[^ZZ]\_\_  
@HWI-EAS443:3:24:1470:1564#0/1  
GAACAATTGAAGAGCCATCTGGGCCGTTGCAGGTCCAAGG  
+HWI-EAS443:3:24:1470:1564#0/1  
abaabbbbabbab\_\_aaa\_\_\_\_\_a`a`]a`[aa\_T¥a`a`a  
@HWI-EAS443:3:24:1491:1734#0/1  
CTAGGAGCATTTGCGAAAAGCTTGAACAGTCTGGGCTCCC  
+HWI-EAS443:3:24:1491:1734#0/1  
aWZSTX[H]aaaaSba`Ja]WYXba[Q`RTRbWTNEPXXW

@HWI-EAS443:3:24:1539:1014#0/1  
CAGCTGATTCATTTACTCCAGACACTCCAAAGCTGGGTAG  
+HWI-EAS443:3:24:1539:1014#0/1  
abbaa`Z`a`a¥`^`\_`^`[¥a¥^aaa¥`\_`^Z]`a`\_`^`\_`\_`  
@HWI-EAS443:3:24:1570:889#0/1  
ATCCGACGATTTTGTCTCATAGTGAATGCACCAAACCAT  
+HWI-EAS443:3:24:1570:889#0/1  
abba^^Y`\_`b`ZU]Z`\_\_a`a^a\_\_\_aY]O[¥^`YY^`  
@HWI-EAS443:3:24:1594:1539#0/1  
AACAGATCTTCATGATCTCAGAGAACTCTTCTTTCTTGAT  
+HWI-EAS443:3:24:1594:1539#0/1  
`¥Y]XRa\_a^FZX[W\_ZTX`TXa]^¥`¥^`Y\_^\_Xa\_\_^^  
@HWI-EAS443:3:24:1630:1094#0/1  
GCCCTTCTTTTTAACTTGCCTCTCTCTGCATCTTTGGTCA  
+HWI-EAS443:3:24:1630:1094#0/1  
`^aababbbbaa`baba\_baaaa\_aa`\_a`aaaa\_Z\_  
@HWI-EAS443:3:24:1637:537#0/1  
GAGCTAATGGATGATGATTATCGGGGAAGACTTTGTAATC  
+HWI-EAS443:3:24:1637:537#0/1  
a`aU`Za`X\_aaHNZa`\_`UNZ]^`^YO]YRa]R]]U]^B  
@HWI-EAS443:3:24:1668:566#0/1  
TGATTATCGGGGAAGACTTTGTAATCCCCTGAATCCCTTT  
+HWI-EAS443:3:24:1668:566#0/1  
`b[aab\_V[\_Vba`a\_^Vaa][`\_`YT^)`TY`\_`XQ][\_\_  
@HWI-EAS443:3:24:1700:735#0/1  
GAAGTACTTCAGGTCAATGCTTGCTAGCATTCTGCTGGT  
+HWI-EAS443:3:24:1700:735#0/1  
abbb[`]baabba^a]\_b\_^babab`bXabba`ba]b¥aY  
@HWI-EAS443:3:24:1705:35#0/1  
AAAAATTCCAGCGCAAATGCCATAAGCACCATTCCT  
+HWI-EAS443:3:24:1705:35#0/1  
Xaba`¥bbaabbaU]Ua`aa][`b`^aY`X[\_^]¥aNN[]  
@HWI-EAS443:3:24:1718:1223#0/1  
ATGGGCTCCAATCATCCGACGATTTTGTCTCATAGTGAA  
+HWI-EAS443:3:24:1718:1223#0/1  
`ba`\_`\_`[aTa`a\_a\_]JT[SNZ^[WaUQ]X^^¥^V\_BBBB  
@HWI-EAS443:3:24:1722:1770#0/1  
AATAGAACGATTCCTCTTGGGAATCCAGGAATGTGTAGTT  
+HWI-EAS443:3:24:1722:1770#0/1  
abb^[^bab\_^]\_[\_Y`\_`\_`a\_aY^T]a\_S]¥`X\_W^¥^]  
@HWI-EAS443:3:24:1729:824#0/1  
GGCTAATTTTAGCATGGAGCTACCCAGCTTTGGAGTGTCT  
+HWI-EAS443:3:24:1729:824#0/1  
\_b[`bbb`a]`bb\_abaX\_ab^a\_`\_`b^a]\_a\_^\_aa\_^^  
@HWI-EAS443:3:24:1777:1624#0/1  
GACAACATGACCAAGAAGATGGTCACGCAAAGAACAATAG  
+HWI-EAS443:3:24:1777:1624#0/1  
aaabaa`aaa0`b`\_`\_`¥a`]]VaXa\_`^`\_\_\_\_X`Z`\_`\_`  
@HWI-EAS443:3:24:194:258#0/1  
CATTCTGAAGTCTGCTTAAAATGGGAGCTAATGGATGAT

+HWI-EAS443:3:24:194:258#0/1  
a\_bbbbabbaabbabbabb\_bbbbbabaababba`abaa  
@HWI-EAS443:3:24:219:487#0/1  
TGTGAAAGAAATCTCTGTGTCTTGTGAATTAGTCATCATC  
+HWI-EAS443:3:24:219:487#0/1  
ab^\_U¥^\_``[abbabaaabaa`T`XV]aaaV``YV¥` [  
@HWI-EAS443:3:24:220:316#0/1  
AAACAATGCTGTGGTAATGCCAGCCCATGGTCCAGCCAAA  
+HWI-EAS443:3:24:220:316#0/1  
``]``Z\_\_aa[VY¥]RW`XWLRZZYYZUTGNRTYXKYTU  
@HWI-EAS443:3:24:227:860#0/1  
GATGGCTCTTCAATTGTTTCATCAAAGACTACAGATACACA  
+HWI-EAS443:3:24:227:860#0/1  
WQV\_HXV`aaaa\_0^V\_^\_Z`XZW\_XaaY`]VNY][[L]  
@HWI-EAS443:3:24:230:1380#0/1  
CAGGAACAGGATACACCATGGACACAGTAAACAGAACACA  
+HWI-EAS443:3:24:230:1380#0/1  
aaa]^`\_\_YZ\_\_a`\_a\_] [YJY^Z^\_WPW^^Z`WQ]\_]X^  
@HWI-EAS443:3:24:247:361#0/1  
GGCCGTTGCAGGTCCAAGGTCATTGTTTATCATGTTGTTC  
+HWI-EAS443:3:24:247:361#0/1  
`baba0\_SXZ`\_P\_\_aabG`[^a`\_aa[]LW^X\_``]WY  
@HWI-EAS443:3:24:275:259#0/1  
CCTCCATCTGATACTAATAGCCCTACCTTTGATTGGGTTT  
+HWI-EAS443:3:24:275:259#0/1  
ab`bbbabbbbb`bbaba\_]aaa`¥\_baaaa`aaa[^\_  
@HWI-EAS443:3:24:288:1592#0/1  
GACGGATCAAGAAAGAAGAGTTCTCTGAGATCATGAAGAT  
+HWI-EAS443:3:24:288:1592#0/1  
abbbbbaaa`bbba\_ab]b`aaaabba\_]`a`aab\_b^aa  
@HWI-EAS443:3:24:373:1714#0/1  
CTTTTGTCCAAGATTCAGTATCGAGACTCCCAAGACCGTA  
+HWI-EAS443:3:24:373:1714#0/1  
abbbb`abbbbbbaabaa¥baaaaa\_[aaaaaaaa`¥[^a  
@HWI-EAS443:3:24:375:1978#0/1  
ATCCCACCCAGGAATATTTGAGAATTCATGCCTTGAACA  
+HWI-EAS443:3:24:375:1978#0/1  
\_T^a`aa`\_]\_W^`Z[Z]WS`L^\_RQ[YW[a^P][NTZWb  
@HWI-EAS443:3:24:379:554#0/1  
GGGCTATTAGTATCAGATGGAGACCAAACCTTATACAATA  
+HWI-EAS443:3:24:379:554#0/1  
\_V]\_Xaa¥^]]a^`¥`\_[V`Z^`\_\_[a\_[]`^`Q[`\_\_  
@HWI-EAS443:3:24:460:1888#0/1  
AATACTCAGAAAAGGGAAAGTGGACGACAAACACAGAGAC  
+HWI-EAS443:3:24:460:1888#0/1  
abaabb`\_bbbb^)`aaaa[VZI`a`aaabZ]\_`\_a\_a^  
@HWI-EAS443:3:24:460:567#0/1  
CAAAGAAGAAAATTGAGAAAATAAGGCCTCTTCTAATAGA  
+HWI-EAS443:3:24:460:567#0/1  
ab¥aba\_ab`a`bbbabaaaaaa\_aaaaaaaaaWaaaa



+HWI-EAS443:3:24:835:1380#0/1  
abbb`aaa`abbbbaaaaaS\_\_a\_```]a¥\_]``^`\_\_^\_  
@HWI-EAS443:3:24:839:100#0/1  
AACAGATCTTCATGATCTCAGAGAACTCTTCTTTCTTGAT  
+HWI-EAS443:3:24:839:100#0/1  
aa]abababbabbb\_a\_aaaa\_aaa`a\_aa^aaa\_a\_a^a  
@HWI-EAS443:3:24:841:677#0/1  
ATGATGATTATCGGGGAAGACTTTGTAATCCCCTGAATCC  
+HWI-EAS443:3:24:841:677#0/1  
ab``ababaa\_`a^`a\_aaa`aa\_a\_a```][\_Za`\_\_]]\_  
@HWI-EAS443:3:24:860:272#0/1  
ATTAGTATCAGATGGAGGACCAAACCTTATACAATATACGG  
+HWI-EAS443:3:24:860:272#0/1  
aa\_^aaa`¥\_^)`aZY]S\_¥P[]`a]aaYS]S[[`^L¥Y  
@HWI-EAS443:3:24:873:1889#0/1  
ATTCCATGCTTTTGGCTGGACCATGGGCTGGCATTACCAC  
+HWI-EAS443:3:24:873:1889#0/1  
aa[aY`[aaaU^\_^aZQ\_Z\_]RPVWVZYI^Wa^[UMUYT¥  
@HWI-EAS443:3:24:936:1343#0/1  
GGCTAATTTTAGCATGGAGCTACCCAGCTTTGGAGTGTCT  
+HWI-EAS443:3:24:936:1343#0/1  
abaabaaaaaaa`aa\_````aa`a`\_a``a`¥aWa^`\_  
@HWI-EAS443:3:24:950:39#0/1  
ACCCGATTGATGGACCACTACCTGAGGATAATGAACCAAG  
+HWI-EAS443:3:24:950:39#0/1  
a```\_bbba\_bba¥S`]aa`UabXbb[aa`aa`a[Y\_ab  
@HWI-EAS443:3:24:960:1980#0/1  
GACCAAGAAGATGGTCACGCAAAGAACAATAGGGAAGAAA  
+HWI-EAS443:3:24:960:1980#0/1  
SWXab`Zb[R[M^0[]T\_XXXY`)`¥^T]a```^aab¥b^  
@HWI-EAS443:3:24:984:788#0/1  
CTTGTGTTGAGAATAGAACGATTCCTCTTGGGAATCCAGG  
+HWI-EAS443:3:24:984:788#0/1  
`bbbababbbbbbabbbaa`aaa^bYaaaaaaa`a`a\_a  
@HWI-EAS443:3:24:990:35#0/1  
AATCAACCCGAGTGGTTCAGAAACATCCTGAGCATGGCAC  
+HWI-EAS443:3:24:990:35#0/1  
aabaab`aaa\_baaa\_Y```]aa]\_`]\_^\_¥\_]`YV]U  
@HWI-EAS443:3:25:1007:1506#0/1  
AGCTGATTCATTTACTCCAGACACTCCAAAGCTGGGTAGC  
+HWI-EAS443:3:25:1007:1506#0/1  
`ab`bbbbbbbabbaabaaa\_Zbab`aba`a`aaaaY`^`  
@HWI-EAS443:3:25:1064:837#0/1  
TCAGCTGACATGAGTATTGGAGTAACAGTGATAAAGAACA  
+HWI-EAS443:3:25:1064:837#0/1  
[[^bb¥`a^]aaaa\_a^aa\_Y\_^]]Y\_a^¥`\_\_a\_Z¥ZG\_  
@HWI-EAS443:3:25:1067:208#0/1  
CAGATACACATATAGGTGCCATAGGGGAGACACAAATT  
+HWI-EAS443:3:25:1067:208#0/1  
``abbbbaabbbbababbabb`bab`b`aa¥bWabbba

@HWI-EAS443:3:25:1081:1038#0/1  
ACAACATGATAACAATGACCTTGGACCTGCAACGGCCCA  
+HWI-EAS443:3:25:1081:1038#0/1  
aa^\_]Z\_VX¥]WYXN^aTWLQ`SZ]PL]S]WW]TTS[[^B  
@HWI-EAS443:3:25:1146:1998#0/1  
TGGCCAATGCAGTTGCTGCCGTTGATTTCTGTTAATGT  
+HWI-EAS443:3:25:1146:1998#0/1  
\_¥`a`a¥Z¥``UT\_Xa[\_YW\_UUZWTV\_OU¥MFYZY\_OPH  
@HWI-EAS443:3:25:1310:1536#0/1  
ATTCTTCAAGGAAAGCCATAGCCTCTAGAACACAGTCTGT  
+HWI-EAS443:3:25:1310:1536#0/1  
\_YU]\_`¥\_TI0¥^V¥`S\_^a^]WYZRYX]]^VT\_XEX\_\_U  
@HWI-EAS443:3:25:1356:1230#0/1  
ATTGAAGAGCCATCTGGGCCGTTGCAGGTCCAAGTCATT  
+HWI-EAS443:3:25:1356:1230#0/1  
abbbbbbb`bbabaa`baa`b`]aaa\_aa¥a`a\_b`Y`aaa  
@HWI-EAS443:3:25:1387:2035#0/1  
ATCTCTGTGTCTTGTGAATTAGTCATCATCTTTCTCACAA  
+HWI-EAS443:3:25:1387:2035#0/1  
aaaa`aa¥a`aaa`^[][\_a\_aUZa\_[]`^a`a^¥\_\_]\_`  
@HWI-EAS443:3:25:1393:970#0/1  
CCGGCAGCAACTGCATTGGCCAACACCATAGAAGTCTTTA  
+HWI-EAS443:3:25:1393:970#0/1  
a`aa\_¥ab`bbbbbbaa]]]¥¥aX\_V]W`WSZ`TR[Z[[Z  
@HWI-EAS443:3:25:1402:1619#0/1  
TTAGCCTTCCTGACTCATTAGCTGTTAGCCATTCGATCT  
+HWI-EAS443:3:25:1402:1619#0/1  
aa`]`\_aaa\_baaaa^aa`\_]a`\_^U¥^Z\_\_^\_]\_]¥Y\_  
@HWI-EAS443:3:25:1420:1591#0/1  
ACGAAACCTCTAATCTGCATCCCAGGTGTTGCGATAGCCC  
+HWI-EAS443:3:25:1420:1591#0/1  
`aU^Ub`S¥S¥bbaI`¥¥Z`a]Q`a^Wb^a\_JXaT^\_X[R  
@HWI-EAS443:3:25:1460:1113#0/1  
CTTCTTTTCATTGCCCCCTACTGGGAGCCCAGACTGTTCA  
+HWI-EAS443:3:25:1460:1113#0/1  
aba\_¥bbb`abababb\_W\_a[a`bZaa`]`aaba`ab`a`b  
@HWI-EAS443:3:25:1462:1823#0/1  
AGAACTCTTCTTTCTTGATCCGTCAGACTCGAAGTCGAC  
+HWI-EAS443:3:25:1462:1823#0/1  
^^\_aa\_aabbbb```baab`\_]\_W]a]\_]`\_`\_a\_ZZZ`X  
@HWI-EAS443:3:25:1496:1710#0/1  
CTTTAAGAAATCTATTAGCCTTCCTGACTCATTAGCTGTT  
+HWI-EAS443:3:25:1496:1710#0/1  
^`bbbabababbbbabba`bbb`bbabbabab`abbbbb  
@HWI-EAS443:3:25:1539:1107#0/1  
CAAATATTCCTGGGTGGGATTCTTCAAGGAAAGCCATAGC  
+HWI-EAS443:3:25:1539:1107#0/1  
aa^abbab`ba¥`¥abb\_bba``abbaabba`a[^bba`[  
@HWI-EAS443:3:25:1541:1819#0/1  
ATTCAGTCTTTGTTTTTTCTTCCCTATTGTTCTTTGCGTG

+HWI-EAS443:3:25:1541:1819#0/1  
abbaba`bbbaabbbbbbbbaaabbbbaababbbbaaaaa  
@HWI-EAS443:3:25:1543:676#0/1  
AAAAATTCCAGCGCAAATGCCATAAGCACCATTCCT  
+HWI-EAS443:3:25:1543:676#0/1  
abbb`bbaaaaa`aba\_aaaaaaaaa\_a`^\_`a\_`]]Va  
@HWI-EAS443:3:25:1580:538#0/1  
AGGAAATAGAGATAACAACCCACTTTCAAAGAAAAAGGAG  
+HWI-EAS443:3:25:1580:538#0/1  
^^b`aZaab¥¥¥b^b¥bbY\_La]\_b^T`S[aaSZZ][J^  
@HWI-EAS443:3:25:1604:1391#0/1  
GGGCTCCAATCATCCGACGATTTTGCTCTCATAGTGAATG  
+HWI-EAS443:3:25:1604:1391#0/1  
aba]]a\_a¥VUPXV^UN\_\_NUQ¥`\_`HXNZNSWQRNVTT^\_  
@HWI-EAS443:3:25:1609:1242#0/1  
ATGGGCTCCAATCATCCGACGATTTTGCTCTCATAGTGAA  
+HWI-EAS443:3:25:1609:1242#0/1  
¥\_`^`[`aaaa```a¥¥a`^]`a`b\_Q\_¥bbaaa\_Y`ab`]  
@HWI-EAS443:3:25:1609:737#0/1  
CATTCTTTTACTCTCGAACATGTACCCTTTCCCTAGTCTT  
+HWI-EAS443:3:25:1609:737#0/1  
ab^aUa`ba\_aaaaa`¥`babb`I`bb`bK`b`b]]ab  
@HWI-EAS443:3:25:1688:447#0/1  
CCGGTCTCTATATGAACTGCTAGGGAAAAATTTCTCGAA  
+HWI-EAS443:3:25:1688:447#0/1  
[````X`abbaa`aa`bbb\_\_b`aabbbbab`a`Ybba  
@HWI-EAS443:3:25:1693:1191#0/1  
CAATTGAAGAGCCATCTGGGCCGTTGCAGGTCCAAGTCA  
+HWI-EAS443:3:25:1693:1191#0/1  
abbbbbbbbbbbbbbbbbbbabbabbabbaaaZbabb^\_a  
@HWI-EAS443:3:25:207:202#0/1  
CCCAGGTGTTGCGATAGCCCTTCTTTTTAACTTGCCTCTC  
+HWI-EAS443:3:25:207:202#0/1  
a\_aa`R\_aaaaabb\_WJ]`¥aaabba`¥Z\_b\_a]]baaX  
@HWI-EAS443:3:25:210:1071#0/1  
CCCCTAACTTGCAGGTCCTGTAGAATCTGTCCACTCCTG  
+HWI-EAS443:3:25:210:1071#0/1  
abbb^bba^`a`aaaaZb``\_\_\_\_a\_\_a`RQ\_\_ZVa`^R  
@HWI-EAS443:3:25:210:654#0/1  
AAAAGAATGAAGATTCGAACACAAATACCAGCAGAAATGC  
+HWI-EAS443:3:25:210:654#0/1  
aW^baa^aaaa\_\_aa]\_\_\_\_`\_a`[a`]]\_\_a\_`^[I^`\_^  
@HWI-EAS443:3:25:253:2015#0/1  
CAATTGAAGAGCCATCTGGGCCGTTGCAGGTCCAAGTCA  
+HWI-EAS443:3:25:253:2015#0/1  
a\_`aaa\_\_GX]b`W^aU^PTSa`^Y^Z\_YYMZY]`XYLV`  
@HWI-EAS443:3:25:286:1002#0/1  
GCGAAAAGCTTGAACAGTCTGGGCTCCCAGTAGGGGGCAA  
+HWI-EAS443:3:25:286:1002#0/1  
`^\_`^`\_O¥aX¥]Y]Y¥^PYY]S¥YSY[^¥^TS¥[MZW\_¥Y



@HWI-EAS443:3:25:296:1702#0/1  
CAAAGATGCAGAGAGAGGCAAGTTAAAAAGAAGGGCTATC  
+HWI-EAS443:3:25:296:1702#0/1  
abbbbabbbbabababbbbaa]\_abaabaabb\_ZYaabaa  
@HWI-EAS443:3:25:318:409#0/1  
GATTGATGCCAGGGTCGACTTCGAGTCTGGACGGATCAAG  
+HWI-EAS443:3:25:318:409#0/1  
`aa^\_a`aaaa][¥Pa`a^P^\_a`S¥`a]Z[\_]NUZ\_Z^  
@HWI-EAS443:3:25:369:486#0/1  
TAATGAACCAAGTGGGTATGCACAAACAGACTGTGTTCTA  
+HWI-EAS443:3:25:369:486#0/1  
X`YWZRX]TUIRU``\_Y]`ZQaZ`\_a`^a`X^QHWa¥\_V  
@HWI-EAS443:3:25:403:2004#0/1  
AATCTGTCCACTCCTGCTTGTATTCCCTCATGGTTTGGTG  
+HWI-EAS443:3:25:403:2004#0/1  
ab\_[\_[]`a`\_]aa``\_\_\_\_Z\_\_\_\_a^^\_]^[W[]¥^X[  
@HWI-EAS443:3:25:41:285#0/1  
CTTTAAGAAATCTATTAGCCTTCCTGACTCATTAGCTGTT  
+HWI-EAS443:3:25:41:285#0/1  
^abbb`aa¥abbbb`¥a¥¥`[[ab`\_ba¥^ab`b``[\_  
@HWI-EAS443:3:25:451:1678#0/1  
AGCTGATTCATTTACTCCAGACTCCAAAGCTGGGTAGC  
+HWI-EAS443:3:25:451:1678#0/1  
a`baab`abbaabaaaR`ZUaa[\_a[aa^\_Z^`WNWWW  
@HWI-EAS443:3:25:454:718#0/1  
TGGGTGGGATTCTTCAAGGAAAGCCATAGCCTCTAGAACA  
+HWI-EAS443:3:25:454:718#0/1  
a`aa]aaa`aaa`aaaa```aa\_\_\_\_\_`^\_\_^^¥^X\_  
@HWI-EAS443:3:25:463:2033#0/1  
ACTACACATTCCTGGATTCCCAAGAGGAATCGTTCTATTC  
+HWI-EAS443:3:25:463:2033#0/1  
aa`baaaa`^ba^[Z\_]`^`\_`\_`[`]¥\_\_Y^XXZ¥X`]X]  
@HWI-EAS443:3:25:525:349#0/1  
CGTTCTATTCTCAACACAAGCCAAAGGGGAATTCTTGAGG  
+HWI-EAS443:3:25:525:349#0/1  
aa`bbbbbbbbbbbbbbba`\_aa\_b`ba`aa`\_baa\_ba  
@HWI-EAS443:3:25:538:373#0/1  
AAAAATTTCTCGAATAGATTGCAGCACTTCTGGTACATCT  
+HWI-EAS443:3:25:538:373#0/1  
aabbbbabaaabaaaaaa`\_\_aa`a^`\_\_a`\_\_aaa\_]`  
@HWI-EAS443:3:25:540:1382#0/1  
CGATTGATGGACCACTACCTGAGGATAATGAACCAAGTGG  
+HWI-EAS443:3:25:540:1382#0/1  
abbabbaaaabbababbbbaaaa`abaaaabaaaaa\_aa  
@HWI-EAS443:3:25:545:713#0/1  
TGCTTATGGCATTTTTCGCTGGAATTTTTAGGAAAAGTAG  
+HWI-EAS443:3:25:545:713#0/1  
a`aba^b``]`^a\_WY^Zba`Z^a\_aaa^`Y^``\_b]a`  
@HWI-EAS443:3:25:552:138#0/1  
CTGGGATGCAGATTAGAGGTTTCGTATACTTTGTTGAAAC

+HWI-EAS443:3:25:552:138#0/1  
a[\_[aa`a`[V\_\_\_\_`V`X^¥aaS]\_`\_^\_^ZZ^¥X]ZY  
@HWI-EAS443:3:25:55:162#0/1  
CCCAGGTGTTGCGATAGCCCTTCTTTTTAACTTGCCTCTC  
+HWI-EAS443:3:25:55:162#0/1  
`bbbb`b\_`aaZ\_\_abaaaa\_]\_a\_Y^¥\_``\_a\_a\_\_  
@HWI-EAS443:3:25:561:58#0/1  
CCCAGTGATTGTGAAAGAAATCTCTGTGTCTTGTGAATTA  
+HWI-EAS443:3:25:561:58#0/1  
K`¥a^Z\_`bb\_^¥\_\_bbbbbb\_bbbba^baaba[^`Y`a]  
@HWI-EAS443:3:25:565:1373#0/1  
ATGCAGAGAGAGGCAAGTTAAAAAGAAGGGCTATCGCAAC  
+HWI-EAS443:3:25:565:1373#0/1  
^abbbabba\_^`abbaa[aaaaaaaaa\_\_\_a\_a\_\_^`aa\_  
@HWI-EAS443:3:25:583:621#0/1  
GAACAATTGAAGAGCCATCTGGGCCGTTGCAGGTCCAAGG  
+HWI-EAS443:3:25:583:621#0/1  
`UY[aUHV¥]\_`R`X^]WVL[[ZS¥\_ZX\_RJRUHITXV]V  
@HWI-EAS443:3:25:636:1326#0/1  
GGTCTCCATCTGATACTAATAGCCCTACCTTTGATTGGG  
+HWI-EAS443:3:25:636:1326#0/1  
aaT`a]SZW¥^RRHLYZS¥\_LY]`ZPR^aaTR\_`WWW\_`B  
@HWI-EAS443:3:25:64:867#0/1  
GGTGTCTAGGGCCCGATTGATGCCAGGGTCGACTTCGAG  
+HWI-EAS443:3:25:64:867#0/1  
aa[a\_b][\_\_`baaaaaaaaa^aa`]^`Uaa¥^^Y^[[`  
@HWI-EAS443:3:25:658:640#0/1  
TCCTGCTTGTATTCCCTCATGTTTGGTGCATTCACTATG  
+HWI-EAS443:3:25:658:640#0/1  
^YVTQRa`\_FZa[¥STVaaWTT^]HMQRXU]RXXNZ\_¥R  
@HWI-EAS443:3:25:700:1755#0/1  
AACAGATCTTCATGATCTCAGAGAACTCTTCTTTCTTGAT  
+HWI-EAS443:3:25:700:1755#0/1  
`baaa`[\_`aab\_\_a^a`\_a\_`^a``\_\_^^]\_\_\_U`\_^\_`^  
@HWI-EAS443:3:25:720:638#0/1  
TAAAAATTCCAGCGCAAATGCCATAAGCACCATTCCTC  
+HWI-EAS443:3:25:720:638#0/1  
¥a\_X]X^a¥W]Z]¥¥`baaWQWX\_]\_VU¥¥P\_`V\_VZPJ0  
@HWI-EAS443:3:25:749:2022#0/1  
AAAACAAAGACTGAATAAGAGAGGCTATCTAATAAGAGCA  
+HWI-EAS443:3:25:749:2022#0/1  
ab`ba\_¥aaabbbabba^\_Q¥^X``aFPVV\_U¥^ZLHDO  
@HWI-EAS443:3:25:801:185#0/1  
GAACAGATCTTCATGATCTCAGAGAACTCTTCTTTCTTGA  
+HWI-EAS443:3:25:801:185#0/1  
a`aa`aaaaaa`aaaaaa`a`a\_a\_\_\_\_\_^^\_  
@HWI-EAS443:3:25:85:311#0/1  
CCCAGTGATTGTGAAAGAAATCTCTGTGTCTTGTGAATTA  
+HWI-EAS443:3:25:85:311#0/1  
ababb`babaa^baabaa`baabaaZ\_`aaa¥R¥\_`a^\_`

@HWI-EAS443:3:25:897:1542#0/1  
CAGCAACTGCATTGGCCAACACCATAGAAGTCTTTAGATC  
+HWI-EAS443:3:25:897:1542#0/1  
abaabbbabbbbbbbaabbbabbbbbb`bbbaaaabbbaa\_  
@HWI-EAS443:3:25:916:629#0/1  
CTCTATTTCTCTTTGTTTCATTGATTCCATTACATCCTTT  
+HWI-EAS443:3:25:916:629#0/1  
^bb^Xabbbbbb`bbbbbbbba`abbbabbbbbb  
@HWI-EAS443:3:25:932:1941#0/1  
ATGTCAATCCGACTCTACTTTTCTAAAAATCCAGCGCA  
+HWI-EAS443:3:25:932:1941#0/1  
a]W[bab`aaaX```\_a¥¥^`\_^a`a`a`\_`]]^^\_\_\_\_  
@HWI-EAS443:3:25:973:20#0/1  
CAGTAGGGGCAATGAAAAGAAGCCAAACTGGCAAATGT  
+HWI-EAS443:3:25:973:20#0/1  
abbabbbabbbbbbba`babbbbaababa  
@HWI-EAS443:3:25:97:789#0/1  
CTTCATGATCTCAGAGAACTCTTCTTTCTTGATCCGTCCA  
+HWI-EAS443:3:25:97:789#0/1  
`[¥\_SWbabbb`\_ababbbbbbba`\_abbb  
@HWI-EAS443:3:25:984:2006#0/1  
GTCTGGGCTCCCAGTAGGGGCAATGAAAAGAAGCCAAA  
+HWI-EAS443:3:25:984:2006#0/1  
a\$¥]Q]ZTMUURTUNQ¥WQ[STWWWUUNWUTRRVTUQU  
@HWI-EAS443:3:25:992:310#0/1  
TGATTGGAGCCCATCCCACAGTATATTGTCTTGGTGTAT  
+HWI-EAS443:3:25:992:310#0/1  
abaaaa`baa^aaa`\_] ^aX^\_^`^^`^`^Y\_YZ^  
@HWI-EAS443:3:25:996:549#0/1  
TCTGAGTATTGGTGTCTGTTTACTGTGCCATGGTGT  
+HWI-EAS443:3:25:996:549#0/1  
aabb`a`\_`aba^a\_a\_a^aa`aa\_^aa^a^X`\_]`Z`Z  
@HWI-EAS443:3:26:1006:1920#0/1  
CTTTGTCAGTCATAAAGAGATTGATTCTGTAAACAATGCT  
+HWI-EAS443:3:26:1006:1920#0/1  
`bb`a¥baa\_aba`baa`aa```aaa\_aa[aaa`\_\_\_a^\_  
@HWI-EAS443:3:26:1041:1579#0/1  
ATGGGCTCCAATCATCCGACGATTTTGCTCTCATAGTGAA  
+HWI-EAS443:3:26:1041:1579#0/1  
^^ZLW^`\_¥¥a`\_¥U^\_Z]¥]ZX¥`ZP\_a¥^`^V^]H]a\_  
@HWI-EAS443:3:26:105:1893#0/1  
GGCAAGACTAGGAAAGGTACATGTTTCGAGAGTAAAAGA  
+HWI-EAS443:3:26:105:1893#0/1  
aabb`\_`aaabaaaa`^[a\_Ubaaaa`abaaaa^aaaaa  
@HWI-EAS443:3:26:1073:502#0/1  
TGCCGTTGCAACTACACATTCCTGGATTCCCAAGAGGAAT  
+HWI-EAS443:3:26:1073:502#0/1  
^`aba^`\_`aa`aaa^aaaa`^aa\_aa¥]V`\_a\_^YW`\_  
@HWI-EAS443:3:26:1106:1228#0/1  
CCCAGGTGTTGCGATAGCCCTTCTTTTTAACTTGCCCTC

+HWI-EAS443:3:26:1106:1228#0/1  
\_b[bb`a\_abbabaa`ba`aababbbbaa\_aaaaa[b\_ba  
@HWI-EAS443:3:26:1109:610#0/1  
GAACAATAGGGAAGAAAAACAAAGACTGAATAAGAGAGG  
+HWI-EAS443:3:26:1109:610#0/1  
T\_Zbbbbabbb]`¥bbbbbb`Y^`aa`bbb`bbabbaa`a  
@HWI-EAS443:3:26:1140:249#0/1  
TGTTTACTGTGCCATGGTGTATCCTGTTCCCTGTTCCATG  
+HWI-EAS443:3:26:1140:249#0/1  
\_\_U[`Z`UZZ\_Q][`aaaN]LZ[¥[`^]\_YMY[¥TPMSYR  
@HWI-EAS443:3:26:1156:685#0/1  
GTGACTTCGAGTCTGGACGGATCAAGAAAGAAGAGTTCT  
+HWI-EAS443:3:26:1156:685#0/1  
aSb[\_\_[`\_a[aW`a]aaaYa^Y\_Z\_a]\_`YV¥^Y\_Q^VY  
@HWI-EAS443:3:26:1171:1607#0/1  
CTCCATCTGATACTAATAGCCCTACCTTTGATTGGGTTTG  
+HWI-EAS443:3:26:1171:1607#0/1  
ababbbbabbbababbbbaaaaa`\_a\_aaaaaaaaa]`\_a  
@HWI-EAS443:3:26:1177:1705#0/1  
GTTGTGAGAAAGATGATGACTAATTCACAAGACACAGAGA  
+HWI-EAS443:3:26:1177:1705#0/1  
a]a^[^Z]`a\_Z]aaa```V`a\_aY\_\_\_a`[^U\_U\_\_[`^  
@HWI-EAS443:3:26:1193:890#0/1  
GTGGGATTCTTCAAGGAAAGCCATAGCCTCTAGAACACAG  
+HWI-EAS443:3:26:1193:890#0/1  
a^aaa`a[aa\_a\_a^`^`^\_a\_\_`]\_\_X]^\_\_[]X]\_  
@HWI-EAS443:3:26:1208:442#0/1  
GAGAATAGAACGATTCCTCTTGGGAATCCAGGAATGTGTA  
+HWI-EAS443:3:26:1208:442#0/1  
a\_baaab`aaab`\_`\_`a]aa`\_a\_\_`\_]\_aa\_````]`^^  
@HWI-EAS443:3:26:1233:726#0/1  
TGTCAGTGCTCTTATTAGATAGCCTCTCTTATTAGTCTT  
+HWI-EAS443:3:26:1233:726#0/1  
aa]`aa]`\_a\_aa```aa\_`\_]`[\_`^`^`^`^]`\_YY^\_  
@HWI-EAS443:3:26:1304:1310#0/1  
ATACAAGCAGGAGTGGACAGATTCTACAGGACCTGCAAGT  
+HWI-EAS443:3:26:1304:1310#0/1  
aababaaaaabaa`aaaaa]\_a\_```\_`\_]YRYR[^\_X  
@HWI-EAS443:3:26:1318:925#0/1  
TCTGTTTACTGTGCCATGGTGTATCCTGTTCCCTGTTCCA  
+HWI-EAS443:3:26:1318:925#0/1  
aabaabaa`bb]a[`aaabbYa^`aa[a\_^a`aa`]a\_Z[  
@HWI-EAS443:3:26:1345:1603#0/1  
ACAAAGTATACGAAACCTCTAATCTGCATCCCAGGTGTTG  
+HWI-EAS443:3:26:1345:1603#0/1  
aabbbbZbabaaaaaaaa\_abb]^`aaaaaaaa``\_0a\_\_a  
@HWI-EAS443:3:26:138:388#0/1  
CTGGGTGGGATTCTTCAAGGAAAGCCATAGCCTCTAGAAC  
+HWI-EAS443:3:26:138:388#0/1  
`L\_X]Xbb`¥a`aaaaXQYa`X\_aa`\_a\_a^`\_]`\_a`[`



+HWI-EAS443:3:26:1649:494#0/1  
aabbab^`aaaaY\_[ab`aa\_]Z`aaa\_`\_`aa^U^^Q[  
@HWI-EAS443:3:26:1676:1985#0/1  
GTCCTCCATCTGATACTAATAGCCCTACCTTTGATTGGGT  
+HWI-EAS443:3:26:1676:1985#0/1  
`¥bbbbbbbababbbbaaaa`\_a`a\_aaaaaaba`aa`\_  
@HWI-EAS443:3:26:17:449#0/1  
GAAATCTATTAGCCTTCCTGACTCATTAGCTGTTAGGCCA  
+HWI-EAS443:3:26:17:449#0/1  
a\_]abba`bababb`ba\_aabbbbbaaaaaa[\_\_\_Z\_\_\_]V  
@HWI-EAS443:3:26:224:971#0/1  
GAAAAATTTCTCGAATAGATTGCAGCACTTCTGGTACATC  
+HWI-EAS443:3:26:224:971#0/1  
abbabaaababab`aaba\_aaaaaa\_\_a`\_aa`]`a^a  
@HWI-EAS443:3:26:245:424#0/1  
GAAAATAAGGCCTCTTCTAATAGATGGCACAGCATCACTG  
+HWI-EAS443:3:26:245:424#0/1  
aa``aaa¥`Y`aaaaaaaa`\_aa\_]`a\_`\_`]]\_U\_^  
@HWI-EAS443:3:26:24:148#0/1  
GATGTACCAGAAGTGCTGCAATCTATTCGAGAAATTTTTC  
+HWI-EAS443:3:26:24:148#0/1  
^ab\_T¥b`^a\_[\_¥aa^baaaaaaa]]^`\_Z]]\_a`\_a\_  
@HWI-EAS443:3:26:251:437#0/1  
CGATCTAAAGACTTCTATGGTGTGGCCAATGCAGTTGCT  
+HWI-EAS443:3:26:251:437#0/1  
aabababb`b`aaaab`aa`^`\_\_aba`aaaa`a`[`a^a  
@HWI-EAS443:3:26:265:690#0/1  
TGATTATCGGGGAAGACTTTGTAATCCCCTGAATCCCTTT  
+HWI-EAS443:3:26:265:690#0/1  
abbbbaaaaa\_baaa`aaaaZ\_a[aaa`aaaa`\_\_\_\_\_^^  
@HWI-EAS443:3:26:298:306#0/1  
CTTTCCTTGAAGAATCCCACCCAGGAATATTTGAGAATTC  
+HWI-EAS443:3:26:298:306#0/1  
aYL]P]XT`Q]a`WS]]^a\_¥`[^SK[S\_Z][^]P[VS  
@HWI-EAS443:3:26:300:1068#0/1  
TGGGCTCCAATCATCCGACGATTTTGCTCTCATAGTGAAT  
+HWI-EAS443:3:26:300:1068#0/1  
aabaaaab`\_`Raaaa`\_T\_a`[[a]¥^\_`]]Wa^^Y  
@HWI-EAS443:3:26:323:1885#0/1  
TCCCTATTGTTCTTTGCGTGACCATCTTCTTGGTCATGTT  
+HWI-EAS443:3:26:323:1885#0/1  
aabbabba]aaaaaaba`\_aa\_a``aaaaa\_]aaaa^\_  
@HWI-EAS443:3:26:333:785#0/1  
GTCCAGACTCGAAGTCGACCCTGGCATCAATCCGGGCCCT  
+HWI-EAS443:3:26:333:785#0/1  
`U`X¥[`^a[^S[¥]VW`X^XW¥Z^]¥KZa¥V]Y`]Z  
@HWI-EAS443:3:26:403:324#0/1  
TAAACAATGACCTTGGACCTGCAACGGCCCAGATGGCTCT  
+HWI-EAS443:3:26:403:324#0/1  
¥¥\_UXaYV]\_aa\_\_b\_]\_a^aY\_S[]`]¥Y¥]H[S`R]X



+HWI-EAS443:3:26:726:2011#0/1  
a\_babaaaa`b`aa^`XTa`aaa`^`¥Z`\_\_`\_¥\_Z`  
@HWI-EAS443:3:26:748:682#0/1  
GTGGGATTCTTCAAGGAAAGCCATAGCCTCTAGAACACAG  
+HWI-EAS443:3:26:748:682#0/1  
^]bbaa`a`a`aa`]^¥ba``\_aaaa\_a\_\_a\_a`[^X]]  
@HWI-EAS443:3:26:787:411#0/1  
ATTGGTGTGTTCTGTTTACTGTGTCCATGGTGTATCCTGT  
+HWI-EAS443:3:26:787:411#0/1  
abba\_\_b`bababaabbbabbaaaaaaaaaa^a¥`\_a¥]T¥  
@HWI-EAS443:3:26:799:87#0/1  
GATTGATGCCAGGGTCGACTTCGAGTCTGGACGGATCAAG  
+HWI-EAS443:3:26:799:87#0/1  
aKaa\_a]WR`\_`U^`VRZZU[X\_VWZ[XQT^`SWSSSU  
@HWI-EAS443:3:26:819:1808#0/1  
CTAATAAGAGCACTGACATTAAATACGATGACCAAAGATG  
+HWI-EAS443:3:26:819:1808#0/1  
\_a¥Jaa`Y`\_bbaa`a¥bbaaa\_\_`a``¥aaaa^\_a\_^  
@HWI-EAS443:3:26:828:397#0/1  
CAAGAATTCCCCTTTGGCTTGTGTTGAGAATAGAACGATT  
+HWI-EAS443:3:26:828:397#0/1  
aabbabbaabbababbbabab`b`a`\_a`aaa\_aa\_a\_¥\_  
@HWI-EAS443:3:26:839:119#0/1  
CAAGATTCAGTATCGAGACTCCCAAGACCGTACTTAGCAT  
+HWI-EAS443:3:26:839:119#0/1  
aabaaaaTabb]\_\_¥abaW`Y]aa¥bZP^P\_aLYY^PZWV  
@HWI-EAS443:3:26:841:1468#0/1  
TGTTATCTCTATTTCTCTTTGTTTCATTGATTCCATTACA  
+HWI-EAS443:3:26:841:1468#0/1  
a¥aa`aaaaabaaaY^`aa\_]`aa^`a`\_\_`\_aa`\_`\_`  
@HWI-EAS443:3:26:911:1684#0/1  
GTCTGCTTAAAATGGGAGCTAATGGATGATGATTATCGGG  
+HWI-EAS443:3:26:911:1684#0/1  
`Yaa\_a^a`\_]a`[X¥`\_]\_\_`\_^]^^`\_]\_Z^W¥Z  
@HWI-EAS443:3:26:984:895#0/1  
CTCCAATACTCATGTCAGCTGATTCACTTACTCCAGACAC  
+HWI-EAS443:3:26:984:895#0/1  
ab`bbabbbbab`bb`a\_\_aaaaaa]`a`aaaU\_\_  
@HWI-EAS443:3:27:1004:1161#0/1  
AAAATTCCAGCGCAAATGCCATAAGCACACATTCCCTT  
+HWI-EAS443:3:27:1004:1161#0/1  
aaaa`a`a`a\_]\_\_aY]]`\_a]]`\_^]Y\_Z^^Z]X]]  
@HWI-EAS443:3:27:1039:46#0/1  
TGCATTCACTATGAGAGCAAATCGTCCGATGATTGGAGC  
+HWI-EAS443:3:27:1039:46#0/1  
S\_\_YV¥RXbbb`b\_b]`[\_^`U¥\_Zabaa¥PVa\_UPa[  
@HWI-EAS443:3:27:1049:1146#0/1  
CACATTCCCTGGATTCCCAAGAGGAATCGTTCTATTCTCAA  
+HWI-EAS443:3:27:1049:1146#0/1  
aaaaa`ab[M¥Uab`aa`aa]a\_0\_aab[\_]¥aab`]¥aa



@HWI-EAS443:3:27:1067:121#0/1  
CAACTGCATTGGCCAACACCATAGAAGTCTTTAGATCGAA  
+HWI-EAS443:3:27:1067:121#0/1  
abbaabbbababa]bbabY]ababb\_baabababaaabaa  
@HWI-EAS443:3:27:1085:1204#0/1  
AAGAGCACTGACATTAATACGATGACCAAAGATGCAGAG  
+HWI-EAS443:3:27:1085:1204#0/1  
aaaaabaaaba\_`aaaaaa`aa`\_aa\_]``\_`^a^`a^`  
@HWI-EAS443:3:27:1095:179#0/1  
ATTTACTCCAGACACTCCAAAGCTGGGTAGCTCCATGCTA  
+HWI-EAS443:3:27:1095:179#0/1  
`ababab]abb]aa`aa\_a`\_^`Za^^\_`¥^\_W]\_Z`V\_`  
@HWI-EAS443:3:27:1130:1533#0/1  
ATTTGAGTTAAAGAAGCTGTGGGATCAAACCCAATCAAAG  
+HWI-EAS443:3:27:1130:1533#0/1  
aaab`aa\_bbaaaaa`a`aZ^a`\_]aa\_\_\_\_Z\_\_\_\_W`^^\_  
@HWI-EAS443:3:27:115:1026#0/1  
CAACATTTGCCAGTTTGGCCTTCTTTTCATTGCCCCCTAC  
+HWI-EAS443:3:27:115:1026#0/1  
ab`abaa[b\_a`aY`aXX¥VU[aa\_[aa^^\_\_a\_a\_\_\_\_`  
@HWI-EAS443:3:27:115:1525#0/1  
CATGTTGTTCTTTATCACTGTTACTCCAATACTCATGTCA  
+HWI-EAS443:3:27:115:1525#0/1  
[T0[\_]]Ya```aa`\_`a``[\_`\_^aa`]]^]¥¥WVY\_  
@HWI-EAS443:3:27:1169:1004#0/1  
GTTGTTCTTTATCACTGTTACTCCAATACTCATGTCAGCT  
+HWI-EAS443:3:27:1169:1004#0/1  
^^abaabbbba`\_]aaa^^XZa`\_aa]aa`\_`\_] [WY¥[`  
@HWI-EAS443:3:27:1172:595#0/1  
ATGGTTTGGTGCATTCACTATGAGAGCAAAATCGTCGGAT  
+HWI-EAS443:3:27:1172:595#0/1  
a`\_¥Wb¥bWV]]`aSS^XV`aa]a`Q[`] ^VR¥[[a^VY  
@HWI-EAS443:3:27:119:245#0/1  
ATTCCTGAAGTCTGCTTAAAATGGGAGCTAATGGATGATG  
+HWI-EAS443:3:27:119:245#0/1  
aaaaa`baaaXa`aa`Yaa`\_`\_`a`\_`a`\_`aa\_\_\_\_^\_\_\_\_  
@HWI-EAS443:3:27:1227:520#0/1  
CTCTCTCTGCATCTTTGGTCATCGTATTTAATGTCAAGTGC  
+HWI-EAS443:3:27:1227:520#0/1  
abbbabbbbabbbababba`bab`baabbaaaba`aaa^] ^  
@HWI-EAS443:3:27:1265:1532#0/1  
GAACAATTGAAGAGCCATCTGGGCCGTTGCAGGTCCAAGG  
+HWI-EAS443:3:27:1265:1532#0/1  
ab^Y\_`aaba\_Z\_X\_\_a`\_`a]¥U¥`¥]\_\_[\_`W]VYO¥V  
@HWI-EAS443:3:27:1292:209#0/1  
AAAAATTCCAGCGCAAAATGCCATAAGCACCATTCCT  
+HWI-EAS443:3:27:1292:209#0/1  
aaab`ab`\_aa\_a¥a`\_`a``[^aa]`]aYM¥Y`a]WOS^  
@HWI-EAS443:3:27:1298:22#0/1  
GCTCCAATCATCCGACGATTTTGCTCTCATAGTGAATGCA

+HWI-EAS443:3:27:1298:22#0/1  
a\_\_a]a`^Z`YZZQZ[\_Z\_`^`VF[X^]^^UZU^VZYYP  
@HWI-EAS443:3:27:1324:364#0/1  
GACGGATCAAGAAAGAAGAGTTCTCTGAGATCATGAAGAT  
+HWI-EAS443:3:27:1324:364#0/1  
a`a^`\_]\_\_\_\_[\_^\_]`Z\_V\_¥\_\_^`]¥R¥\_`ZZ^] ^  
@HWI-EAS443:3:27:1327:485#0/1  
GATTGATGCCAGGGTCGACTTCGAGTCTGGACGGATCAAG  
+HWI-EAS443:3:27:1327:485#0/1  
aabbaaab`ab`aaP]aaXa\_]a¥a]aaaa`\_aa\_\_`\_X\_  
@HWI-EAS443:3:27:1328:659#0/1  
GCCAGGGTCGACTTCGAGTCTGGACGGATCAAGAAAGAAG  
+HWI-EAS443:3:27:1328:659#0/1  
abaaaaYaba\_aa`aaa^aaaa]^a^`\_\_¥\_\_`\_\_^Z`  
@HWI-EAS443:3:27:1352:1526#0/1  
AGCCTCTAGAACACAGTCTGTTTGTGCATACCCACTTGGT  
+HWI-EAS443:3:27:1352:1526#0/1  
aaaa`bbab\_\_\_\_aa`a``aa^\_\_a[X[^Z\_] ^UZ\_\_\_\_\_]  
@HWI-EAS443:3:27:1368:890#0/1  
CAGCATTGTTTACAGAATCAATCTCTTTATGACTGACAAA  
+HWI-EAS443:3:27:1368:890#0/1  
abbbbbbbbaabbbba\_bab\_babbbabaa`ab` `a`a  
@HWI-EAS443:3:27:1370:2040#0/1  
CCCAGCTCAACCCGATTGATGGACCACTACCTGAGGATAA  
+HWI-EAS443:3:27:1370:2040#0/1  
\_\_bVb[¥¥baZZ`b[Z¥aHWabaT^JX^[a[]`\_``\_Qb\_  
@HWI-EAS443:3:27:1475:1051#0/1  
ATTTGTGGCTAATTTTAGCATGGAGCTACCCAGCTTTGGA  
+HWI-EAS443:3:27:1475:1051#0/1  
SYa` `a¥\_aa¥[T\_^a\_\_Y^¥a]VYK¥]]¥¥V]Y^`\_W[X  
@HWI-EAS443:3:27:1480:1246#0/1  
AGAATCCCACCCAGGAATATTTGAGAATTCATGCCTTGAA  
+HWI-EAS443:3:27:1480:1246#0/1  
^L[Xa`aa`\_[\_]RRR]]UU[^\_]\_Z^`ZX[] ^^\_]W]Z^  
@HWI-EAS443:3:27:1485:1452#0/1  
ACCGTCTCCTATATGAACTGCTAGGGAAAAATTTCTCGA  
+HWI-EAS443:3:27:1485:1452#0/1  
¥WOXTJ^¥¥U\_]Zb^¥aaR]^aW]b]^b`]a]`aa¥a\_[[  
@HWI-EAS443:3:27:1520:653#0/1  
GCGAAAAGCTTGAACAGTCTGGGCTCCCAGTAGGGGGCAA  
+HWI-EAS443:3:27:1520:653#0/1  
a\_a\_aaaa]\_a`^¥`^Z\_¥¥¥W^VV[¥^U¥^\_\_W\_VV\_  
@HWI-EAS443:3:27:1552:984#0/1  
GTGTTCTGTTTACTGTGTCCATGGTGTATCCTGTTCTGT  
+HWI-EAS443:3:27:1552:984#0/1  
[aRI\_^V`bb`abV¥ZYPLSNVaabIa[aU]ITU` ¥aaa  
@HWI-EAS443:3:27:1567:1030#0/1  
CTGTGGTAATGCCAGCCCATGGTCCAGCCAAAAGCATGGA  
+HWI-EAS443:3:27:1567:1030#0/1  
a¥\_Za\_]\_¥]`aaa\_QVZZT¥`Y]\_aa\_] ^[T`X¥Y`^U

@HWI-EAS443:3:27:1573:319#0/1  
CAAAGAGGAAATAGAGATAACAACCCACTTTCAAAGAAAA  
+HWI-EAS443:3:27:1573:319#0/1  
RY`babbab¥bb\_abbabbabaaM[\_`¥aa`^`]^`bbbb  
@HWI-EAS443:3:27:1597:323#0/1  
GATAACAACCCACTTTCAAAGAAAAAGGAGAGTAAGAGAC  
+HWI-EAS443:3:27:1597:323#0/1  
aa\_][`b[¥X^ZF]ba\_aPX`a\_W\_]aa\_a\_aY]^`a`\_X  
@HWI-EAS443:3:27:1602:1587#0/1  
AAAGCTTGAACAGTCTGGGCTCCCAGTAGGGGGCAATGAA  
+HWI-EAS443:3:27:1602:1587#0/1  
a^P[¥Z\_UR]F]aVZa\_a\_[[`[RV]U]XX`\_^VY^[`\_Y  
@HWI-EAS443:3:27:1602:259#0/1  
GTCTGCTTAAAATGGGAGCTAATGGATGATGATTATCGGG  
+HWI-EAS443:3:27:1602:259#0/1  
aVfY^Z\_\_a\_\_\_\_\_V^W¥\_R`OXR`^]Y^Z]^XP^Z]SW^^  
@HWI-EAS443:3:27:1662:240#0/1  
GTCTGGAGTAAATGAATCAGCTGACATGAGTATTGGAGTA  
+HWI-EAS443:3:27:1662:240#0/1  
aa\_bbb\_a`a\_ab\_`a^]a¥a^^Z\_`\_\_aY[\_`Y]Y^Y[  
@HWI-EAS443:3:27:167:645#0/1  
CTCCAATCATCCGACGATTTTGCTCTCATAGTGAATGCAC  
+HWI-EAS443:3:27:167:645#0/1  
ababb\_`[\_`Z```Z^`aaa`Z^Z`^```X\_`]^Za`¥Z\_`  
@HWI-EAS443:3:27:1692:1333#0/1  
CTGTTTACTGTGTCCATGGTGTATCCTGTTCTGTTCCAT  
+HWI-EAS443:3:27:1692:1333#0/1  
\_bbbbbbbabbb`aabbb^abaa\_XZbbab^]a``a\_VZa  
@HWI-EAS443:3:27:1694:1573#0/1  
GTCCTCCATCTGATACTAATAGCCCTACCTTTGATTGGGT  
+HWI-EAS443:3:27:1694:1573#0/1  
a^Z`\_aaa```a\_\_\_\_]\_^\_\_[YMMZ¥[V^UUW]]]UTUWW  
@HWI-EAS443:3:27:1720:420#0/1  
TGGTGGGATGGGCTCCAATCATCCGACGATTTTGCTCTCA  
+HWI-EAS443:3:27:1720:420#0/1  
ab`Hb`a[aab^RSP[Yaa\_\_a`^bUZZ^b^\_a^L]]aH]  
@HWI-EAS443:3:27:1725:381#0/1  
TAAAAATTCCAGCGCAAATGCCATAAGCACCCACATTCCC  
+HWI-EAS443:3:27:1725:381#0/1  
aa````aa^]¥¥F\_V]\_\_[\_Z\_RYa^]\_X`RZS\_¥`\_UPR  
@HWI-EAS443:3:27:175:795#0/1  
GTGCTTATGGCATTGCGCTGGAATTTTTAGGAAAAGTA  
+HWI-EAS443:3:27:175:795#0/1  
a¥¥Y^]b]¥`XR\_a`aab\_]a\_Z``a\_aaaaa`¥aa\_[W]  
@HWI-EAS443:3:27:1775:1165#0/1  
CTGGAGTAAATGAATCAGCTGACATGAGTATTGGAGTAAC  
+HWI-EAS443:3:27:1775:1165#0/1  
aaS^\_[aVV\_baXN\_Y[\_Q]aWKM\_S^]T0¥`\_^]WX[^W  
@HWI-EAS443:3:27:188:462#0/1  
CAGCCATGGAACAGGAACAGGATACACCATGGACACAGTA



@HWI-EAS443:3:27:445:726#0/1  
CTAACTTGCAGGTCCTGTAGAATCTGTCCACTCCTGCTTG  
+HWI-EAS443:3:27:445:726#0/1  
a^W\_W`\_^XN\_[[XY[Z\_X`\_¥TTZ`XQZY[VS]][  
@HWI-EAS443:3:27:479:198#0/1  
GGGCTCCAATCATCCGACGATTTTGCTCTCATAGTGAATG  
+HWI-EAS443:3:27:479:198#0/1  
`K^^`a`b\_Uaa`UX[Y\_UT]^`\_Y\_\_`[Y¥X`T\_X¥Z^  
@HWI-EAS443:3:27:500:501#0/1  
GGTGTCTTATGGCATTGCGCTGGAATTTTAGGAAAAGT  
+HWI-EAS443:3:27:500:501#0/1  
Xa\_\_bb`[¥^¥bb`abab\_\_`\_`\_]abb`abaab^^]a]  
@HWI-EAS443:3:27:510:361#0/1  
AACCAAGTGGGTATGCACAAACAGACTGTGTTCTAGAGGC  
+HWI-EAS443:3:27:510:361#0/1  
aaa`aaaZb`bRa`a^a`aa\_¥^^Z`aU`]^S\_¥[^^^]B  
@HWI-EAS443:3:27:512:972#0/1  
CATCATCCCAGGACTCAGTGATGCTGTGCCATCTATTAGA  
+HWI-EAS443:3:27:512:972#0/1  
abaa`bbaa`bbababbb¥ab`a\_aa¥aba`aaaa`aaa  
@HWI-EAS443:3:27:526:754#0/1  
GGAGGACCAAACCTTATACAATATACGGAATCTTCACATTC  
+HWI-EAS443:3:27:526:754#0/1  
aaa\_aaaa^]``\_aa\_aa^]a\_a`a`a^`a`^`Z`\_]\_  
@HWI-EAS443:3:27:533:1888#0/1  
CCAGTAGGGGCAATGAAAAGAAGGCCAAACTGGCAAATG  
+HWI-EAS443:3:27:533:1888#0/1  
abaa]aaaab^bbbbbabaaaba`aba`aaaa\_baaaaa  
@HWI-EAS443:3:27:555:131#0/1  
GAGATAACAACCCACTTTCAAAGAAAAAGGAGAGTAAGAG  
+HWI-EAS443:3:27:555:131#0/1  
XT¥^bXTHYbab\_aWaVa\_\_NUaQaaa\_aaS`Ya0`U]^a  
@HWI-EAS443:3:27:556:723#0/1  
AAAAATTCCAGCGCAAATGCCATAAGCACCATTCCT  
+HWI-EAS443:3:27:556:723#0/1  
aaaa^]``a`^^`^`^Y`\_]\_\_\_^a\_a`]``^`^TZ]  
@HWI-EAS443:3:27:56:1676#0/1  
GTCTGGAGTAAATGAATCAGCTGACATGAGTATTGGAGTA  
+HWI-EAS443:3:27:56:1676#0/1  
aaaba^[Z\_abba\_a\_ab^a`aa`^^`aX`a`^XY\_  
@HWI-EAS443:3:27:578:987#0/1  
GTTGATTCATTGAAGTACTTCAGGTCAATGCTTGCTAGCA  
+HWI-EAS443:3:27:578:987#0/1  
`b`abbbbaaaY`^baa`aaa`^baaa`aaaa`aaa\_a  
@HWI-EAS443:3:27:610:926#0/1  
CAGATACACATATAGGTGCCATAGGGGAGACACACAAATT  
+HWI-EAS443:3:27:610:926#0/1  
a^SZ`^bab`\_Z¥^]Z[U^aUM\_V[Z^\_]`]]aa`]U[Z  
@HWI-EAS443:3:27:632:304#0/1  
GAGAGGCTATCTAATAAGAGCACTGACATTAATACGATG

+HWI-EAS443:3:27:632:304#0/1  
ab\_aX\_aaa¥NT`aRT\_[XSRYLN]VSMX[WVa[`PYW^\_  
@HWI-EAS443:3:27:698:363#0/1  
CTTTGATGAACAATTGAAGAGCCATCTGGGCCGTTGCAGG  
+HWI-EAS443:3:27:698:363#0/1  
aabSV\_b`\_`babaa\_aa\_\_aaa]^[[`aa[\_Z\_a^]\_  
@HWI-EAS443:3:27:794:871#0/1  
AATCCGACTCTACTTTTCCTAAAAATCCAGCGCAAATG  
+HWI-EAS443:3:27:794:871#0/1  
aabbababbaaaabaaa\_\_abbab`a`^aa`aaa`\_a\_^  
@HWI-EAS443:3:27:812:206#0/1  
CTTTTCCTAAAAATCCAGCGCAAATGCCATAAGCACCA  
+HWI-EAS443:3:27:812:206#0/1  
`]b^`ZW`abaa`b\_a`^`aW`Y[`¥a¥U\_a[`GaQF^  
@HWI-EAS443:3:27:81:120#0/1  
GGGCTCCAATCATCCGACGATTTTGCTCTCATAGTGAATG  
+HWI-EAS443:3:27:81:120#0/1  
`bbbbabbbaabbabbabSaaaaaaababab[TYbaab  
@HWI-EAS443:3:27:824:702#0/1  
GATGGCTCTTCAATTGTTTCATCAAAGACTACAGATACACA  
+HWI-EAS443:3:27:824:702#0/1  
aaaa`abbbb`aab]¥aaa`\_aaaa^aaaa`a`a[aRb  
@HWI-EAS443:3:27:834:1512#0/1  
CTCCAATCATCCGACGATTTTGCTCTCATAGTGAATGCAC  
+HWI-EAS443:3:27:834:1512#0/1  
\_S¥a^^^¥¥a^^`[T¥`\_\_]¥¥[^\_`aUO^¥\_`\_]ZX^[  
@HWI-EAS443:3:27:864:458#0/1  
CCCAGGTGTTGCGATAGCCCTTCTTTTTAACTTGCCTCTC  
+HWI-EAS443:3:27:864:458#0/1  
aX¥]\_aPaXX]\_`a^[a`SLY^V]]aaa^`Z`\_`RQYM[\_  
@HWI-EAS443:3:27:864:850#0/1  
GATGGGCTCCAATCATCCGACGATTTTGCTCTCATAGTGA  
+HWI-EAS443:3:27:864:850#0/1  
\_UU\_\_\_\_a¥SW`\_a^¥W\_ZI\_``[aa`\_`[`XTa]¥^NUa  
@HWI-EAS443:3:27:91:620#0/1  
CATGTTGATTCCCCTAACTTGCAGGTCCTGTAGAATCTG  
+HWI-EAS443:3:27:91:620#0/1  
abaa\_aaba\_aaa`aa\_a`\_a```aaXaa^a\_a`a```\_\_  
@HWI-EAS443:3:27:974:1548#0/1  
GGGCAATGAAAAGAAGGCCAAACTGGCAAATGTTGTGAGA  
+HWI-EAS443:3:27:974:1548#0/1  
aXbb][]aa`aVa^`Ta\_`aaWaaa`ba\_\_a\_a\_^\_^`  
@HWI-EAS443:3:27:982:872#0/1  
GGCTAATTTTAGCATGGAGCTACCCAGCTTTGGAGTGTCT  
+HWI-EAS443:3:27:982:872#0/1  
a¥¥M`WNPVYaPQ]T¥YISVT¥\_YPY[URUSU^P¥X]XXX  
@HWI-EAS443:3:27:991:1141#0/1  
GATTGATGCCAGGTCGACTTCGAGTCTGGACGGATCAAG  
+HWI-EAS443:3:27:991:1141#0/1  
aZab`\_\_aaa`]^\_R¥\_\_RVa]¥]`¥¥aa`[[[TXSZ^``\_`



+HWI-EAS443:3:28:1276:1925#0/1  
`a]]bbaaa¥`aaa]aa`aVX\_^a^]]`a`¥`a¥VWa\_a\_  
@HWI-EAS443:3:28:1333:1561#0/1  
GTTGATTCCCCTAACTTGCAGGTCCTGTAGAATCTGTCC  
+HWI-EAS443:3:28:1333:1561#0/1  
a`Y¥`aaaa]PYa`a\_\_a\_a\_a\_W[``\_]`^aVVV  
@HWI-EAS443:3:28:1352:1029#0/1  
AACATCCTGAGCATGGCACCCATAATGTTCTCAAACAAAA  
+HWI-EAS443:3:28:1352:1029#0/1  
aba^aZ`¥b\_T]aaY^]]\_[``]a\_aY]R\_ZRUYM[\_\_[  
@HWI-EAS443:3:28:1353:1042#0/1  
AAAGGGATTCCAGGGATTACAAAGTCTTCCCCGATAATCA  
+HWI-EAS443:3:28:1353:1042#0/1  
aa^¥YZ]GX\_W`N\_aWVYRO¥BBBBBBBBBBBBBBBBBBB  
@HWI-EAS443:3:28:1364:588#0/1  
ACCGGCAGCAACTGCATTGGCCAACACCATAGAAGTCTTT  
+HWI-EAS443:3:28:1364:588#0/1  
aaaaa\_]\_YZ]FTOL[Z\_¥YKZ\_`NXMP\_Z[¥GX^IITY^  
@HWI-EAS443:3:28:1454:1544#0/1  
GGCTAATTTTAGCATGGAGCTACCCAGCTTTGGAGTGTCT  
+HWI-EAS443:3:28:1454:1544#0/1  
ab\_TaZ]a\_a^[^`\_^`^a\_a^``]¥^¥Y`\_`]G^0`^0^  
@HWI-EAS443:3:28:1465:1292#0/1  
CTCCTATATGAACTGCTAGGGAAAAATTTCTCGAATAGAT  
+HWI-EAS443:3:28:1465:1292#0/1  
abbbbababab\_babbaaababab`aaaa\_a`aaaaaaa\_  
@HWI-EAS443:3:28:1541:863#0/1  
GCTAATTTTAGCATGGAGCTACCCAGCTTTGGAGTGTCTG  
+HWI-EAS443:3:28:1541:863#0/1  
U`aZ\_Y]a]a¥ab¥^^b`\_`bY`\_ZZV`[^aSPaa\_aaaY  
@HWI-EAS443:3:28:1573:971#0/1  
AAAAATTCAGCGCAAATGCCATAAGCACCATTCCT  
+HWI-EAS443:3:28:1573:971#0/1  
a`Z¥W]]¥`Zb]]F^```¥P\_WZ^a`[S^[X¥\_\_¥¥QGPU  
@HWI-EAS443:3:28:1587:969#0/1  
GGCCCGGATTGATGCCAGGGTCGACTTCGAGTCTGGACGG  
+HWI-EAS443:3:28:1587:969#0/1  
abaabbbbaabb\_]\_babaZaa`a`]a¥a`^aaaa¥ba  
@HWI-EAS443:3:28:163:468#0/1  
CCCCAGTGATTGTGAAAGAAATCTCTGTGTCTTGTGAATT  
+HWI-EAS443:3:28:163:468#0/1  
abb`\_]PUQ\_SZMa`SX`VI¥\_a\_\_\_\_\_]ZLZW^XPXORSV  
@HWI-EAS443:3:28:1675:1679#0/1  
CACCAATACTCAGAAAAGGGAAAGTGGACGACAAACACAG  
+HWI-EAS443:3:28:1675:1679#0/1  
QXabbb\_\_abbb`a[^````\_baaPa\_[UbaaaU\_`^^^Z  
@HWI-EAS443:3:28:170:417#0/1  
TCAGCTGATTACTTACTCCAGACACTCCAAAGCTGGGTA  
+HWI-EAS443:3:28:170:417#0/1  
aba`aababbbabbb`aabaaa`bbbab`]aaaa`a`a¥a



@HWI-EAS443:3:28:194:1570#0/1  
CTCTCTTATTAGTCTTTGTTTTTCTTCCCTATTGTTCT  
+HWI-EAS443:3:28:194:1570#0/1  
¥\_b¥bbaZ^bbb^^baabaaaabbbbbaabba\_`baaabb  
@HWI-EAS443:3:28:200:1067#0/1  
GCTCCAATCATCCGACGATTTTGCTCTCATAGTGAATGCA  
+HWI-EAS443:3:28:200:1067#0/1  
ab`bb]aaaaaaaaaaaaa\_aaaaaaaa`^^`[^`a`[¥  
@HWI-EAS443:3:28:214:502#0/1  
GAGTAAATGAATCAGCTGACATGAGTATTGGAGTAACAGT  
+HWI-EAS443:3:28:214:502#0/1  
a\_aZaaaaa\_\_`^^`\_`a\_\_\_`\_\_Y\_^\_^Y¥\_[]\_\_^\_[  
@HWI-EAS443:3:28:216:1780#0/1  
CCCAGTGGTTCAGAAACATCCTGAGCATGGCACCCATAA  
+HWI-EAS443:3:28:216:1780#0/1  
abba`]aa\_^aQYZ`^^^aa¥\_] [ZU]¥V`a`][W]  
@HWI-EAS443:3:28:222:1215#0/1  
ATTTTGTCTCATAGTGAATGCACCAAACCATGAGGGAAT  
+HWI-EAS443:3:28:222:1215#0/1  
aaaaaaaaaaaaaLa\_]\_]\_\_aa`a^\_\_\_]\_[]\_V\_\_\_]  
@HWI-EAS443:3:28:252:1647#0/1  
AGAGGCTATCTAATAAGAGCACTGACATTAATACGATGA  
+HWI-EAS443:3:28:252:1647#0/1  
a\_a¥Za\_XTTZV]Z\_[MWKPPPYXTQX¥TU\_]XRVXPTW  
@HWI-EAS443:3:28:259:1439#0/1  
CGAGTGGTTCAGAAACATCCTGAGCATGGCACCCATAATG  
+HWI-EAS443:3:28:259:1439#0/1  
a`aYZ¥]^`\_UV\_a\_XXZS^JS¥\_`a\_\_\_[a`\_X]\_a\_\_\_  
@HWI-EAS443:3:28:301:1044#0/1  
GCCAGGTTCGACTTCGAGTCTGGACGGATCAAGAAAGAAG  
+HWI-EAS443:3:28:301:1044#0/1  
abba]UU[bVP]`a`¥`RQ^`]`a\_\_aZJUYO`¥0`\_V\_\_\_  
@HWI-EAS443:3:28:321:1221#0/1  
GAGGAAATAGAGATAACAACCCACTTTCAAAGAAAAGGA  
+HWI-EAS443:3:28:321:1221#0/1  
aa\_a`bb`]\_aababaabaaaaa`a^a`a\_a`¥`\_]`^^`  
@HWI-EAS443:3:28:347:81#0/1  
GCCAGGTTCGACTTCGAGTCTGGACGGATCAAGAAAGAAG  
+HWI-EAS443:3:28:347:81#0/1  
aa\_aaaa¥aaa\_\_a[\_\_\_bQa`aa[¥aa¥VQ\_`\_^\_`¥]`]  
@HWI-EAS443:3:28:354:65#0/1  
CTTCTTTTTCATTGCCCTACTGGGAGCCCAGACTGTTCA  
+HWI-EAS443:3:28:354:65#0/1  
ab``aa`aa`ZH]a`^Q`aV`W[¥aNZ[UNN`QSN]PGP^  
@HWI-EAS443:3:28:365:1721#0/1  
CAATCATCCGACGATTTTGCTCTCATAGTGAATGCACCAA  
+HWI-EAS443:3:28:365:1721#0/1  
a¥U`Y`a\_N\_\_ZRaa¥`W[W\_`\_aY\_]P^`\_\_`[UaR\_\_\_  
@HWI-EAS443:3:28:379:988#0/1  
CATGAGTATTGGAGTAACAGTGATAAAGAACAACATGATA

+HWI-EAS443:3:28:379:988#0/1  
aa^`ba]`a[a^]]]¥X`aG^¥^`YY`^a^]^^U^\_\_V\_  
@HWI-EAS443:3:28:37:1566#0/1  
AAAATTTCTCGAATAGATTGCAGCACTTCTGGTACATCTG  
+HWI-EAS443:3:28:37:1566#0/1  
]T``abbba`X`aaaa`\_\_`^¥^^`a\_aa`YUa\_a\_\_WT  
@HWI-EAS443:3:28:454:763#0/1  
CTGTCCACTCCTGCTTGTATTCCCTCATGGTTTGGTGCAT  
+HWI-EAS443:3:28:454:763#0/1  
`\_ZUba`aa\_abaaabaabbbbaabaaa][\_a\_a^aW]`  
@HWI-EAS443:3:28:494:1068#0/1  
GATCATTTGAGTTAAAGAAGCTGTGGGATCAAACCCAATC  
+HWI-EAS443:3:28:494:1068#0/1  
`X[```])a`a^VV¥Z`\_K]\_\_`ZXHUTW]`\_\_]`^]WQQ  
@HWI-EAS443:3:28:516:1055#0/1  
GCTAATTTTAGCATGGAGCTACCCAGCTTTGGAGTGTCTG  
+HWI-EAS443:3:28:516:1055#0/1  
a`a\_\_aZ\_aa\_`¥]¥\_^\_]`\_Y\_\_^^¥ZWU\_U\_XX^^  
@HWI-EAS443:3:28:519:834#0/1  
GGCCCCGATTGATGCCAGGGTCGACTTCGAGTCTGGACGG  
+HWI-EAS443:3:28:519:834#0/1  
`^bba^\_bbW\_Y`]^[ZTPZ^\_R]]¥aaa¥\_J[Va\_R]a¥  
@HWI-EAS443:3:28:554:2000#0/1  
GATTCTTCAAGGAAAGCCATAGCCTCTAGAACACAGTCTG  
+HWI-EAS443:3:28:554:2000#0/1  
aba`aabb`^`]b`\_abab\_a`b\_b^aaaaba`\_]a^a  
@HWI-EAS443:3:28:555:1092#0/1  
CACCAGTATATTGTCTTGGTGTATTTCTTTTGTCCAAGAT  
+HWI-EAS443:3:28:555:1092#0/1  
a]aa`\_`¥SWa\_a\_`\_\_aYa¥J]Y\_^Y[\_a\_[a`ZTK\_R  
@HWI-EAS443:3:28:572:683#0/1  
GTAAACAGAACACACCAATACTCAGAAAAGGGAAAGTGGA  
+HWI-EAS443:3:28:572:683#0/1  
aa\_]`¥^^[][aaaaaZ^aa`aa`a\_a^^a`\_\_`aaZa\_`  
@HWI-EAS443:3:28:615:290#0/1  
CATCCGACGATTTTGTCTCATAGTGAATGCACCAAACCA  
+HWI-EAS443:3:28:615:290#0/1  
abaa`bbbaaaaaabaaaaaaa`aaaa`a``aaa¥X`  
@HWI-EAS443:3:28:633:550#0/1  
GGCTCCAATCATCCGACGATTTTGTCTCATAGTGAATGC  
+HWI-EAS443:3:28:633:550#0/1  
abba`a`aaabbaaaaaaaabaa\_X`ab`TYa`aa\_  
@HWI-EAS443:3:28:663:41#0/1  
GTGGGATCAAACCAATCAAAGGTAGGGCTATTAGTATCA  
+HWI-EAS443:3:28:663:41#0/1  
a^aaaa`\_aa`\_\_a\_`\_`\_^`aX`^^]`^^^`Y^]V]  
@HWI-EAS443:3:28:702:923#0/1  
CACCAATACTCAGAAAAGGGAAAGTGGACGACAAACACAG  
+HWI-EAS443:3:28:702:923#0/1  
V\_\_a[Wbbbb\_\_ba`[¥\_WY^bb\_N]\_ba`^b\_VZ¥\_]`\_`

@HWI-EAS443:3:28:712:1953#0/1  
CAGATCTTCATGATCTCAGAGAACTCTTCTTTCTTGATCC  
+HWI-EAS443:3:28:712:1953#0/1  
abaa`bbaabaUb^aaa````aa`aa```a]`aaa`b^a^  
@HWI-EAS443:3:28:772:818#0/1  
CCAGGGTCGACTTCGAGTCTGGACGGATCAAGAAAGAAGA  
+HWI-EAS443:3:28:772:818#0/1  
`abbbaQaabbbaa\_baa`aab`a\_`a^aaaaaaaaa[]aZa  
@HWI-EAS443:3:28:822:1913#0/1  
GACGGATCAAGAAAGAAGAGTTCTCTGAGATCATGAAGAT  
+HWI-EAS443:3:28:822:1913#0/1  
]Q^`baS\_`abbb`^aa`]PL]`\_a```¥\_\_\_a[aaZT^Z  
@HWI-EAS443:3:28:841:1640#0/1  
GGGCTCCAATCATCCGACGATTTTGCTCTCATAGTGAATG  
+HWI-EAS443:3:28:841:1640#0/1  
aa\_a\_bbaaaaa\_a[aaaa`]¥¥``a\_a\_```¥aZVY^`Y]  
@HWI-EAS443:3:28:856:1669#0/1  
CCAGGAATATTTGAGAATTCATGCCTTGAAACAATGGAAG  
+HWI-EAS443:3:28:856:1669#0/1  
abbbaababaaa`a`aaaaba`aa`a`aab`ba`a\_aa^  
@HWI-EAS443:3:28:891:1791#0/1  
GTGCCATGCTCAGGATGTTTCTGAACCACTCGGGTTGATT  
+HWI-EAS443:3:28:891:1791#0/1  
RXW]a^^`b^b^]¥X¥]a]b\_a[\_]T¥`^`\_^]P[\_`ZW  
@HWI-EAS443:3:28:897:1870#0/1  
ACAGGAACAGGATACACCATGGACACAGTAAACAGAACAC  
+HWI-EAS443:3:28:897:1870#0/1  
aab^¥a`baaaaY``a`\_]T\_]\_Y\_^aW\_]aU[]\_YZ^V  
@HWI-EAS443:3:28:912:469#0/1  
TCCGTATATTGTATAAGTTTGGTCCTCCATCTGATACTAA  
+HWI-EAS443:3:28:912:469#0/1  
a\_ab\_aaaabb]a`a\_a\_aaa``\_aa\_]a`\_aa\_aa]a\_a  
@HWI-EAS443:3:28:928:1439#0/1  
TTCCTTGAAGAATCCCACCCAGGAATATTTGAGAATTCAT  
+HWI-EAS443:3:28:928:1439#0/1  
aaabaab^baaab\_`aaaaa\_a]aaaa\_a`aaa\_\_a\_  
@HWI-EAS443:3:28:93:1219#0/1  
ATTATGGGTGCCATGCTCAGGATGTTTCTGAACCACTCGG  
+HWI-EAS443:3:28:93:1219#0/1  
^`ab`aaa]ab`\_a`a``[]```a[a`a``a]\_a]a\_`\_¥  
@HWI-EAS443:3:28:992:1444#0/1  
ACAGTCTGGGCTCCCAGTAGGGGCAATGAAAAGAAGGCC  
+HWI-EAS443:3:28:992:1444#0/1  
]abb\_a]a^Z\_¥U\_a\_aX¥ab\_a`V^aaa`¥`aRR¥`YYH  
@HWI-EAS443:3:29:1004:1267#0/1  
CAGTGATTGTGAAAGAAATCTCTGTGTCTTGTGAATTAGT  
+HWI-EAS443:3:29:1004:1267#0/1  
a^\_\_aaaab`]\_]a`¥`\_aaa\_a¥¥[U\_``Z]W[V¥VX^W  
@HWI-EAS443:3:29:1008:730#0/1  
CTCCATCTGATACTAATAGCCCTACCTTTGATTGGGTTTG

+HWI-EAS443:3:29:1008:730#0/1  
abbb^[a\_\_Vba`Z[Xab[`¥`[`¥aaa\_aab\_b`[^a`  
@HWI-EAS443:3:29:1033:1788#0/1  
TGCTAAGTACGGTCTTGGGAGTCTCGATACTGAATCTTGG  
+HWI-EAS443:3:29:1033:1788#0/1  
a\_aab`\_]baaa¥W\_\_^^Z]\_Wa\_``]]a^]\_a`\_]`[Q[  
@HWI-EAS443:3:29:1051:713#0/1  
TTTTAAGCAGACTTCAGGAATGTGAAGATTCCGTATATTG  
+HWI-EAS443:3:29:1051:713#0/1  
V^JYU^\_VT\_\_`a\_`¥bbaabbZ`\_GTJSIFa¥HV\_R`\_B  
@HWI-EAS443:3:29:1058:31#0/1  
AATTGAAGAGCCATCTGGGCCGTTGCAGGTCCAAGGTCAT  
+HWI-EAS443:3:29:1058:31#0/1  
^^\_a\_R\_bbbaa[^a^`aZTa]aa¥SYVWXOO[\_¥NY\_\_  
@HWI-EAS443:3:29:1081:920#0/1  
GAGGAATCGTTCTATTCTCAACACAAGCCAAAGGGGAATT  
+HWI-EAS443:3:29:1081:920#0/1  
]\_[XQ`b`TW^\_`WZ\_T¥[SY]\_^Z]¥Za]X^[^b`^a`  
@HWI-EAS443:3:29:1092:1212#0/1  
GGTGTGTTCTGTTTACTGTGTCCATGGTGTATCCTGTTCC  
+HWI-EAS443:3:29:1092:1212#0/1  
`b\_b`aRabb[aabaXZfV`X^aa`a`XUN^]Z\_[^]a^B  
@HWI-EAS443:3:29:1108:953#0/1  
AGGGAATACAAGCAGGAGTGGACAGATTCTACAGGACCTG  
+HWI-EAS443:3:29:1108:953#0/1  
^a¥a\_Z^^^W\_bbb]aaZa`aa^Q]V]^[\_]]`^^`¥`  
@HWI-EAS443:3:29:1157:598#0/1  
GGGCTCCAATCATCCGACGATTTTGCTCTCATAGTGAATG  
+HWI-EAS443:3:29:1157:598#0/1  
]WTY¥0]XO^QQ\_OHRHT]T^U^a`U^VTY][V^ZBBBBB  
@HWI-EAS443:3:29:1157:897#0/1  
AAACAAGGGTAGATAAACTAACTCAAGGTCGCCAGACTTA  
+HWI-EAS443:3:29:1157:897#0/1  
aaa`a\_]aQ\_a\_\_\_\_\_`]]`^`\_\_\_X`^V]^`^^]^`^Z`^\_  
@HWI-EAS443:3:29:1171:1020#0/1  
GTGATAAAGAACAACATGATAAACAATGACCTTGGACCTG  
+HWI-EAS443:3:29:1171:1020#0/1  
]aa`aaaabab`a`\_aaaa`aaaZa^`Ya\_\_aa`V]^`V``  
@HWI-EAS443:3:29:1195:1613#0/1  
CTTTTCCTAAAAATTCCAGCGCAAATGCCATAAGCACCA  
+HWI-EAS443:3:29:1195:1613#0/1  
^^aab¥aa`¥[Q\_Y]Y¥^^`a^`]^`a]IX¥^a^[b\_a\_  
@HWI-EAS443:3:29:1218:1568#0/1  
CTTTGATGAACAATTGAAGAGCCATCTGGGCCGTTGCAGG  
+HWI-EAS443:3:29:1218:1568#0/1  
abbbbbbbbbbbbababbb`aaabbaa\_aa\_aaaaaa`aa\_  
@HWI-EAS443:3:29:1260:873#0/1  
TTTTCTGAGTATTGGTGTGTTCTGTTTACTGTGTCCATGG  
+HWI-EAS443:3:29:1260:873#0/1  
a\_`aaa^[bU]aa^]UaZYVX¥bVZ`\_a]aa`a\_\_\_\_\_¥X

@HWI-EAS443:3:29:1365:1279#0/1  
ACAGTCTGGGCTCCCAGTAGGGGGCAATGAAAAGAAGGCC  
+HWI-EAS443:3:29:1365:1279#0/1  
aaab` `ababa]aaaab^\_aaaba^aaa`\_aaaaa^a\_a^  
@HWI-EAS443:3:29:1379:1171#0/1  
ACTAACTTGCAGGTCCTGTAGAATCTGTCCACTCCTGCTT  
+HWI-EAS443:3:29:1379:1171#0/1  
^O^Z\_RQVX]`R\_\_ZVW\_XXaaaaaZRDMTQRDV`¥¥BBB  
@HWI-EAS443:3:29:139:1154#0/1  
GCTCCAATCATCCGACGATTTTGCTCTCATAGTGAATGCA  
+HWI-EAS443:3:29:139:1154#0/1  
`bbbb]`bbaabbaaaa[aaaaaaaaaaa\_`a]\_Yaaaaa  
@HWI-EAS443:3:29:1429:523#0/1  
CTTGGGAGTCTCGATACTGAATCTTGGACAAAAGAAATAC  
+HWI-EAS443:3:29:1429:523#0/1  
abb\_bbaa`aaababaU` `ba`Pa`\_`¥R]aabbb^a`aU  
@HWI-EAS443:3:29:143:23#0/1  
GCCCCGATTGATGCCAGGGTCGACTTCGAGTCTGGACGGA  
+HWI-EAS443:3:29:143:23#0/1  
abaaba]`aaa\_aa]aaa`S^a^\_¥^^`U^U[^^^^Z`YO  
@HWI-EAS443:3:29:1441:1103#0/1  
GCCATGGTGTCTAGGGCCCGATTGATGCCAGGGTCGACT  
+HWI-EAS443:3:29:1441:1103#0/1  
\_V]]^a`OMY]WUMOXJ JMVQMQP¥¥]BBBBBBBBBBBBB  
@HWI-EAS443:3:29:1463:760#0/1  
CTTCAATGAATCAACAAAGAAGAAAATTGAGAAAATAAGG  
+HWI-EAS443:3:29:1463:760#0/1  
`^baaab\_b`b` `a`ba\_bZHaa]¥\_aabaa` ``aaa\_\_`  
@HWI-EAS443:3:29:1465:1255#0/1  
CTGGGATGCAGATTAGAGGTTTCGTATACTTTGTTGAAAC  
+HWI-EAS443:3:29:1465:1255#0/1  
ab^bbaabb`babbbab`^]`bbaa^^`ababa`^a\_aa  
@HWI-EAS443:3:29:1508:842#0/1  
GGCTAATTTTAGCATGGAGCTACCCAGCTTTGGAGTGTCT  
+HWI-EAS443:3:29:1508:842#0/1  
``aba\_bbbaa]aaaa\_`^`a\_\_\_]`^]\_aa]Y^\_X`XX^  
@HWI-EAS443:3:29:1520:1704#0/1  
AAATCGTCGGATGATTGGAGCCCATCCCACCAGTATATTG  
+HWI-EAS443:3:29:1520:1704#0/1  
]\_`YHYU]\_Z\_SUYFR[a\_`Y¥]WVQZ¥P[Z\_[LZV` [¥B  
@HWI-EAS443:3:29:1529:864#0/1  
AACAGATCTTCATGATCTCAGAGAACTTTCTTTCTTGAT  
+HWI-EAS443:3:29:1529:864#0/1  
aab^aabaabaaaaa^]Y\_^\_aa]Y]\_\_aU^b\_\_aa\_a`  
@HWI-EAS443:3:29:153:409#0/1  
TGGAATCAATGAACAAAGAGGAAATAGAGATAACAACCCA  
+HWI-EAS443:3:29:153:409#0/1  
a`]][^a`aa¥a`\_]\_aab]aV]a\_` `¥X\_V\_aa`aaa` `a  
@HWI-EAS443:3:29:1542:1503#0/1  
CATGGCACCCATAATGTTCTCAAACAAAATGGCAAGACTA

+HWI-EAS443:3:29:1542:1503#0/1  
ab`]abaaabaaaa\_aaaaaa`aa`aa`aa`a`Z`\_  
@HWI-EAS443:3:29:1632:635#0/1  
CTCAGAAAAGGGAAAAGTGGACGACAAACACAGAGACTGGT  
+HWI-EAS443:3:29:1632:635#0/1  
a`abaYX\_aaaaaaa]a\_abYbbaaaaabaaaa`aa¥  
@HWI-EAS443:3:29:1649:327#0/1  
TGCCGTTGCAACTACACATTCCTGGATTCCCAAGAGGAAT  
+HWI-EAS443:3:29:1649:327#0/1  
aab\_a¥\_abaa\_`0aX`^^^\_]\_Y\_RW]`^^^UTWB  
@HWI-EAS443:3:29:1678:1274#0/1  
CCGGATTGATGCCAGGGTCGACTTCGAGTCTGGACGGATC  
+HWI-EAS443:3:29:1678:1274#0/1  
aaaaRbbaZ`WZPZZa\_XaX\_Ua^PZPY[JY¥XOYR\_SXH  
@HWI-EAS443:3:29:1702:1115#0/1  
GCTGTGGTAATGCCAGCCCATGGTCCAGCCAAAAGCATGG  
+HWI-EAS443:3:29:1702:1115#0/1  
a\_aa]`¥a\_a`[UN]ZT^[¥W¥QT\_WXPUWZX^WV[QVB  
@HWI-EAS443:3:29:1781:386#0/1  
TGAACAAAGAGGAAATAGAGATAACAACCCACTTTCAAAG  
+HWI-EAS443:3:29:1781:386#0/1  
abab^abaa`abaaab^b`aa`aa^aa`G¥a\_`\_b\_`\_a  
@HWI-EAS443:3:29:202:1451#0/1  
CAAGACAATATACTGGTGGGATGGGCTCCAATCATCCGAC  
+HWI-EAS443:3:29:202:1451#0/1  
a\_^`[a\_b`^Saa]¥R[`[]^a^[\_`Y`¥]aUaa]a^POV  
@HWI-EAS443:3:29:220:1162#0/1  
GTGATTGTGAAAGAAATCTCTGTGTCTTGTGAATTAGTCA  
+HWI-EAS443:3:29:220:1162#0/1  
`^^`baa\_`aaa\_\_^`baa`W[¥^aa]¥[\_\_\_\_\_XUWZ`  
@HWI-EAS443:3:29:228:1247#0/1  
AGAATCTGTCCACTCCTGCTTGTATTCCCTCATGGTTTGG  
+HWI-EAS443:3:29:228:1247#0/1  
a`\_`\_a]\_PW\_XYT\_`Z^^^^`UWUU\_Z[GTHZZRURVBB  
@HWI-EAS443:3:29:247:319#0/1  
GCCCTACCTTTGATTGGTTTGGATCCCACAGTTCTTTAA  
+HWI-EAS443:3:29:247:319#0/1  
a`aa[`a^[^aa[]Z[\_\_\_X^ZY`Z[\_\_\_QU]^USX^^X]B  
@HWI-EAS443:3:29:293:1699#0/1  
GGGCTCCAATCATCCGACGATTTTGTCTCATAGTGAATG  
+HWI-EAS443:3:29:293:1699#0/1  
`¥`b`baa^]baaaaaba\_aa\_\_aaa\_a`aa\_a\_U^\_\_^^  
@HWI-EAS443:3:29:337:1468#0/1  
CCCCTTTGGCTTGTGTTGAGAATAGAACGATTCCTCTTGG  
+HWI-EAS443:3:29:337:1468#0/1  
ab`^a`]RT\_]TULSRZVS]SVX^V]\_VXBBBBBBBBBBBB  
@HWI-EAS443:3:29:350:724#0/1  
AAAAATTCCAGCGAAAATGCCATAAGCACCATTCCT  
+HWI-EAS443:3:29:350:724#0/1  
aaa]SY\_¥aVaa`\_]¥`\_\_a\_[[`]\_]a\_\_\_\_^^]V¥XX



+HWI-EAS443:3:29:703:538#0/1  
` ` aabbb`bb\_b^¥abaabbaa`Z`aaaaZaabaaaaaba  
@HWI-EAS443:3:29:704:862#0/1  
ATCTTCATTCTTTACTCTCGAACATGTACCCTTCCCTA  
+HWI-EAS443:3:29:704:862#0/1  
a`a`ab\_`aabbb`\_a`aa^aaaa`a\_`aaaa` `a^[\_^  
@HWI-EAS443:3:29:706:1530#0/1  
CTTGTGTTGAGAATAGAACGATTCTCTTGGGAATCCAGG  
+HWI-EAS443:3:29:706:1530#0/1  
\_YZ]WUa\_]Z`^`\_`X[^`^`^\_U`a[a]]a` [¥^^[\_Y]X  
@HWI-EAS443:3:29:724:2041#0/1  
GGTCCTCCATCTGATACTAATAGCCCTACCTTTGATTGGG  
+HWI-EAS443:3:29:724:2041#0/1  
`` `a`Ub`\_bb\_b]PaYYa` ` `aaaa^\_[aaa`\_a\_a  
@HWI-EAS443:3:29:728:953#0/1  
CTTTCCTTGAAGAATCCCACCCAGGAATATTTGAGAATTC  
+HWI-EAS443:3:29:728:953#0/1  
ababa^aabbbbaaaaaaaaaaa^^\_W] `aaaa\_aa^\_^  
@HWI-EAS443:3:29:744:1823#0/1  
CATTCTTTTACTCTCGAACATGTACCCTTCCCTAGTCTT  
+HWI-EAS443:3:29:744:1823#0/1  
a`aK`b]a¥ab]]\_[a` `a]a`\_a\_Z[\_`\_aaa`Y[[SUS^  
@HWI-EAS443:3:29:786:2010#0/1  
GCTAATTTTAGCATGGAGCTACCCAGCTTTGGAGTGTCTG  
+HWI-EAS443:3:29:786:2010#0/1  
aa]` [\_`aaab` `Y] `Y[a¥]aa`^`\_a`\_\_\_\_\_X¥T`X^`\_`  
@HWI-EAS443:3:29:797:589#0/1  
TGGACGGATCAAGAAAGAAGAGTTCTCTGAGATCATGAAG  
+HWI-EAS443:3:29:797:589#0/1  
aaZaaaaa\_aa[a\_]\_^a\_\_a\_]`\_` `]`\_a\_]\_^\_]\_\_^]  
@HWI-EAS443:3:29:803:613#0/1  
GATTGATGCCAGGGTCGACTTCGAGTCTGGACGGATCAAG  
+HWI-EAS443:3:29:803:613#0/1  
a\_aa[\_` [aa` ^^\_]S\_¥¥[\_\_\_Z\_Z¥WY^^^ [U^ [QSZ^¥B  
@HWI-EAS443:3:29:889:724#0/1  
GTGTGTTCTGTTTACTGTGTCCATGGTGTATCCTGTTCCCT  
+HWI-EAS443:3:29:889:724#0/1  
aa]] ` ` ^` a¥a` `^\_WL¥ZX¥aaaaQaZ^\_a^]\_^ [V[^  
@HWI-EAS443:3:29:896:205#0/1  
GATCTAAAGACTTCTATGGTGTGGCCAATGCAGTTGCTG  
+HWI-EAS443:3:29:896:205#0/1  
\_L^R\_Y\_^^T[ZTU]ZU^OV^KDMX]V[HRUUVHXVBBBB  
@HWI-EAS443:3:29:926:341#0/1  
GTGTGTTCTGTTTACTGTGTCCATGGTGTATCCTGTTCCCT  
+HWI-EAS443:3:29:926:341#0/1  
a]a0`Y^\_aa`\_\_^`\_^V\_V]^^[[^X`YY^XU^^Y^VR]  
@HWI-EAS443:3:29:948:1587#0/1  
GATGAACAATTGAAGAGCCATCTGGGCCGTTGCAGGTCCA  
+HWI-EAS443:3:29:948:1587#0/1  
ababbbbbbaaabbaaabbaaaaa\_aaa` ` ` ` `a` aT` a`



@HWI-EAS443:3:29:955:317#0/1  
CCCAGTAGGGGCAATGAAAAGAAGCCAACTGGCAAAT  
+HWI-EAS443:3:29:955:317#0/1  
S]Yababb`\_bb`ab`bbbbbbbaaab]bba`ab`abaaa  
@HWI-EAS443:3:29:990:1006#0/1  
GCCCTTCTTTTTAACTTGCCTCTCTCTGCATCTTTGGTCA  
+HWI-EAS443:3:29:990:1006#0/1  
aX`^S^V¥a¥`R`M[ZM[¥RLUGU]MZGQLZ¥ZPXBBBB  
@HWI-EAS443:3:2:1023:953#0/1  
CAAGCAGGAGTGGACAGATTCTACAGGACCTGCAAGTTAG  
+HWI-EAS443:3:2:1023:953#0/1  
a[a`ZU\_]Y\_]`\_[S[\_`aa]``\_[X][PX¥W^Y\_]`]a  
@HWI-EAS443:3:2:1044:839#0/1  
TAATGCCAGCCCATGGTCCAGCCAAAAGCATGGAATATGA  
+HWI-EAS443:3:2:1044:839#0/1  
\_]\_a[\_\_\_aaaa\_]a`[[`\_WF]X^aVa`]W``^`\_`\_`\_`a^  
@HWI-EAS443:3:2:1046:47#0/1  
GATTGATGCCAGGGTCGACTTCGAGTCTGGACGGATCAAG  
+HWI-EAS443:3:2:1046:47#0/1  
a`aaaa[``\_`\_\_\_\_N¥a^T\_\_¥^¥`YH^`\_YQ```¥YUZY`  
@HWI-EAS443:3:2:1091:476#0/1  
GTTTGGTGCATTCACTATGAGAGCAAATCGTCGGATGAT  
+HWI-EAS443:3:2:1091:476#0/1  
a^`¥`^VYYT^^^`^WWU\_\_U\_]`^UWV^^YUXXXX]XY]XB  
@HWI-EAS443:3:2:1092:2020#0/1  
GCCTTATTTTCTCAATTTTCTTCTTTGTTGATTCATTGAA  
+HWI-EAS443:3:2:1092:2020#0/1  
``\_`ababbbbaaaaababa\_ba\_aaaa\_aaa`aaa`\_aa\_  
@HWI-EAS443:3:2:1120:1398#0/1  
CTGGACGGATCAAGAAAGAAGAGTTCTCTGAGATCATGAA  
+HWI-EAS443:3:2:1120:1398#0/1  
^PZaU`b[[aa¥aaaW^`\_`¥aYaX^^^a^]`]^R\_Y`\_B  
@HWI-EAS443:3:2:1133:583#0/1  
GTTTCGAGAGTAAAAGAATGAAGATTCGAACACAAATACCA  
+HWI-EAS443:3:2:1133:583#0/1  
a^a`bab\_b\_a`aaa`abaa\_\_\_aa``^`\_]\_Va\_``\_`\_\_\_\_  
@HWI-EAS443:3:2:1137:475#0/1  
GTGTGTTCTGTTTACTGTGTCCATGGTGTATCCTGTTCC  
+HWI-EAS443:3:2:1137:475#0/1  
a¥aTaYT[`a¥^\_¥¥¥^U[[Y¥W¥\_`W\_TYZSSZQV¥UW¥  
@HWI-EAS443:3:2:1160:1067#0/1  
GGCTCCAATCATCCGACGATTTTGCTCTCATAGTGAATGC  
+HWI-EAS443:3:2:1160:1067#0/1  
aa\_\_\_]RU\_aU\_\_X[`Y¥a]]V]¥`Y^^\_V^YZVVVV\_YZR  
@HWI-EAS443:3:2:1178:426#0/1  
GGTGTGTTCTGTTTACTGTGTCCATGGTGTATCCTGTTCC  
+HWI-EAS443:3:2:1178:426#0/1  
a\_Q[RYLRZ[``[¥UTYP]L]ZZVW¥¥]G¥RTRUW[VVXBB  
@HWI-EAS443:3:2:1206:742#0/1  
TAGAGGTTTCGTATACTTTGTTGAACTTTAGCTAGGAGC

+HWI-EAS443:3:2:1206:742#0/1  
U`a[a][aba`V¥]`V^U\_a^YZ[YTR`]`^[GZ[`]¥H  
@HWI-EAS443:3:2:1284:2028#0/1  
ATCCGACTCTACTTTTCCTAAAAATTCCAGCGCAAATGC  
+HWI-EAS443:3:2:1284:2028#0/1  
a``Ya\_]\_[\_][P`aR^YZaUaa`\_\_[UQ[\_Q\_[\_^X\_^SG  
@HWI-EAS443:3:2:1371:1513#0/1  
GTGGGTTGTTATCTCTATTTCTCTTTGTTTCATTGATTCC  
+HWI-EAS443:3:2:1371:1513#0/1  
aX`\_[Va\_]`\_`Y¥[\_\_a``][\_]\_[a``Z[`]^]\_^\_¥^\_VY  
@HWI-EAS443:3:2:1377:1055#0/1  
AAAAATTCCAGCGCAAATGCCATAAGCACCATTCCT  
+HWI-EAS443:3:2:1377:1055#0/1  
aaa¥`YaJ`\_[[\_Ya¥^a\_\_`X\_Z`^\_\_¥]]¥^]ZZZYUU  
@HWI-EAS443:3:2:1386:573#0/1  
CAATTGTTTCATCAAAGACTACAGATACACATATAGGTGCC  
+HWI-EAS443:3:2:1386:573#0/1  
aaaabb[a\_aa^aa`a`aaaa¥`aaY\_\_\_aaaa\_aSaVP  
@HWI-EAS443:3:2:1445:1073#0/1  
ATCTATTCGAGAAATTTTCCCTAGCAGTTCATATAGGAG  
+HWI-EAS443:3:2:1445:1073#0/1  
U`bbba]bb\_\_b\_\_aababb\_Tba`aTaa^S[bababSaY  
@HWI-EAS443:3:2:1470:1033#0/1  
GTGTGTTCTGTTTACTGTGTCCATGGTGTATCCTGTTCCCT  
+HWI-EAS443:3:2:1470:1033#0/1  
a^`V]]\_U\_`^a`[¥^¥VW¥[SV^[\_UaSY^STXSUZRRX  
@HWI-EAS443:3:2:148:1293#0/1  
AAAACAAAGACTGAATAAGAGAGGCTATCTAATAAGAGCA  
+HWI-EAS443:3:2:148:1293#0/1  
aabaaa`\_a`\_aa\_aa\_aaa\_\_\_\_\_^a`ST[[]Y¥\_WBBBB  
@HWI-EAS443:3:2:1512:1103#0/1  
CACCTATATGTGTATCTGTAGTCTTTGATGAACAATTGAA  
+HWI-EAS443:3:2:1512:1103#0/1  
abaa\_ab``]W``aaU]a[[b\_Gaa^[][\_V\_]][[\_^T¥`  
@HWI-EAS443:3:2:1525:816#0/1  
AAAAATTCCAGCGCAAATGCCATAAGCACCATTCCT  
+HWI-EAS443:3:2:1525:816#0/1  
aaaa[aa`\_aa^aX\_]`\_a\_XW^``¥^X^ZU^^]^ZZZXZ  
@HWI-EAS443:3:2:1535:920#0/1  
AGAAGATGGTCACGCAAAGAACAATAGGGAAGAAAAACA  
+HWI-EAS443:3:2:1535:920#0/1  
\_abaa]¥a`H]¥`\_SZO]a[a^Q[a^^``VY^Y¥^]J`]]  
@HWI-EAS443:3:2:154:863#0/1  
GGGATGGGCTCCAATCATCCGACGATTTTGCTCTCATAGT  
+HWI-EAS443:3:2:154:863#0/1  
`aa\_aaab^`aab\_a`aa`\_aa^a\_`aa``Ya\_a\_^`\_YM  
@HWI-EAS443:3:2:1579:1580#0/1  
ATGGTGTCTAGGGCCCGATTGATGCCAGGGTCGACTTCG  
+HWI-EAS443:3:2:1579:1580#0/1  
aba]`¥]]aaaa¥¥`Xaa`a`]`a`^¥a\_\_PLN\_S¥^¥UZ

@HWI-EAS443:3:2:1657:549#0/1  
AATCTGTCCACTCCTGCTTGTATTCCCTCATGGTTTGGTG  
+HWI-EAS443:3:2:1657:549#0/1  
a`a^aaa[`a\_a\_]`^\_a\_a]a`\_^X^`^U\_aU]]\_\_\_\_ZU  
@HWI-EAS443:3:2:1676:1575#0/1  
GATTGATGCCAGGGTCGACTTCGAGTCTGGACGGATCAAG  
+HWI-EAS443:3:2:1676:1575#0/1  
a^PS^a]X[DUa^VLLTYSX]Z]ZSYT\_]QN^NUZ¥NYWB  
@HWI-EAS443:3:2:1679:1734#0/1  
GGGCAATGAAAAGAAGGCCAAACTGGCAAATGTTGTGAGA  
+HWI-EAS443:3:2:1679:1734#0/1  
ab^^a\_a`aa^`a`\_W```\_\_`^`a\_]\_\_]¥`X[`Z\_[`[  
@HWI-EAS443:3:2:1707:1026#0/1  
GGCCTCTTCTAATAGATGGCACAGCATCACTGAGTCCTGG  
+HWI-EAS443:3:2:1707:1026#0/1  
abbZb`bbaaba`bbabbbaaaaa`aa\_\_\_\_aa``¥U¥aa`  
@HWI-EAS443:3:2:174:86#0/1  
GTTCTGTTTACTGTGTCCATGGTGTATCCTGTTCTGTTTC  
+HWI-EAS443:3:2:174:86#0/1  
`R]UXYM¥\_`[U`^[Q^YT^a\_Q\_Q[T^W^¥U\_QVT¥BBB  
@HWI-EAS443:3:2:208:82#0/1  
CAATCATCCGACGATTTTGTCTCATAGTGAATGCACCAA  
+HWI-EAS443:3:2:208:82#0/1  
abbb`abaaaaaabbbab\_aab`\_aab`\_aa\_`a]S``  
@HWI-EAS443:3:2:231:1536#0/1  
CAAGAATCCCCTTTGGCTTGTGTTGAGAATAGAACGATT  
+HWI-EAS443:3:2:231:1536#0/1  
abb\_\_`aa][¥]aa\_aaaa]Ya]a\_]\_¥]^`^`^GSREU  
@HWI-EAS443:3:2:234:2038#0/1  
CAATTGAAGAGCCATCTGGGCCGTTGCAGGTCCAAGGTCA  
+HWI-EAS443:3:2:234:2038#0/1  
ab[]`Y^aa]V]Xaa\_HQ\_PUaa[PUETXVRYG]Z\_OFOB  
@HWI-EAS443:3:2:257:680#0/1  
ACAGTCTGGGCTCCCAGTAGGGGGCAATGAAAAGAAGGCC  
+HWI-EAS443:3:2:257:680#0/1  
abbb\_]a`a]a^`\_¥\_a¥aaa\_a`\_a^a`T\_¥a\_]``UR  
@HWI-EAS443:3:2:259:613#0/1  
ACAGATCTTCATGATCTCAGAGAACTCTTCTTTCTTGATC  
+HWI-EAS443:3:2:259:613#0/1  
a`aa`\_aa\_a`\_\_W`\_a]^`^`X\_]\_\_R\_\_\_\_^`^`^AW  
@HWI-EAS443:3:2:267:1416#0/1  
ATCTGTCCACTCCTGCTTGTATTCCCTCATGGTTTGGTGC  
+HWI-EAS443:3:2:267:1416#0/1  
a\_a\_aS`]aUZLH\_aX]^a]]¥JV[Z]]Z\_ZU^BBBBBBB  
@HWI-EAS443:3:2:284:793#0/1  
AACAGAAATCAACCGGCAGCAACTGCATTGGCCAACACCA  
+HWI-EAS443:3:2:284:793#0/1  
a`\_aa\_a`aaaa^Z``¥aaY\_aY]`ZYY^R]X]^ZXZWXU  
@HWI-EAS443:3:2:285:715#0/1  
ACCTGAAGTACTTCAATGAATCAACAAAGAAGAAAATTGA

+HWI-EAS443:3:2:285:715#0/1  
\_a\_U]`abX\_]aa\_`aaaa]aa` `` `` \_aX¥a\_¥Y\_` `a¥  
@HWI-EAS443:3:2:32:723#0/1  
AAAAATTCCAGCGCAAATGCCATAAGCACCACATTCCCT  
+HWI-EAS443:3:2:32:723#0/1  
aa` `Xa` \_\_U\_ZYZ\_]Z¥¥[ `^ ]^ [ ]Z\_^0^^^ ]ONX¥  
@HWI-EAS443:3:2:426:1981#0/1  
CACAGAGATTTCTTTCACAATCACTGGGGACAACACTAAG  
+HWI-EAS443:3:2:426:1981#0/1  
aVG\_aaba`aaa`a`a`bb`]aaabb\_aab`a`ab\_\_a^a  
@HWI-EAS443:3:2:475:442#0/1  
ACATTAATACGATGACCAAAGATGCAGAGAGAGGCAAGT  
+HWI-EAS443:3:2:475:442#0/1  
a\_aaa\_Y\_\_\_`a\_`\_^ [ [ \_ ` \_a ] [ \_ ` \_ ` [a]^ ]\_ ^YRNT [   
@HWI-EAS443:3:2:478:707#0/1  
AATGAACCAAGTGGGTATGCACAAACAGACTGTGTTCTAG  
+HWI-EAS443:3:2:478:707#0/1  
`IY¥]^ [HMVZVZTVQPX]LVQXRMO¥\_]MX^VFS]VBBB  
@HWI-EAS443:3:2:490:580#0/1  
TGTCCCAGTGATTGTGAAAGAAATCTCTGTGTCTTGTGA  
+HWI-EAS443:3:2:490:580#0/1  
ab`a` \_`aa^a^aa`S` \_\_aa\_[a\_^\_\_\_`W\_¥^`^`\_^`^`  
@HWI-EAS443:3:2:591:841#0/1  
AATGGATGATGATTATCGGGGAAGACTTTGTAATCCCCTG  
+HWI-EAS443:3:2:591:841#0/1  
`a¥ba\_\_\_^` `a]\_aa¥\_^P[^` `S\_` \_\_\_X\_TXZ^Z]R^  
@HWI-EAS443:3:2:660:207#0/1  
CCCATTGATGGACACTACCTGAGGATAATGAACCAAGT  
+HWI-EAS443:3:2:660:207#0/1  
aaabaaabaabaaaa`aa` `aa`aa`aba`aaa\_Va¥`W  
@HWI-EAS443:3:2:691:561#0/1  
AAGTGGACGACAAACACAGAGACTGGTGCACCCCAGCTCA  
+HWI-EAS443:3:2:691:561#0/1  
abb^bababaaabaa` `ba\_aa\_`a`Ua¥`Z[\_\_\_`\_¥\_¥\_  
@HWI-EAS443:3:2:807:60#0/1  
AAAAATTCCAGCGCAAATGCCATAAGCACCACATTCCCT  
+HWI-EAS443:3:2:807:60#0/1  
a¥[ `¥` `YY]YOVT¥\_\_` ] [JM]\_ZVYTZQUVKXSMPUQB  
@HWI-EAS443:3:2:886:1710#0/1  
GGGGCAATGAAAAGAAGGCCAAACTGGCAAATGTTGTGAG  
+HWI-EAS443:3:2:886:1710#0/1  
a`a]\_\_aaa^aa^\_\_\_[^H\_]\_]Z`aX¥` ` \_YY\_W\_]\_  
@HWI-EAS443:3:2:919:362#0/1  
GATACACATATAGGTGCCATAGGGGAGACACACAAATTCA  
+HWI-EAS443:3:2:919:362#0/1  
aaa\_a[ \_a`a\_\_a`0` \_\_\_^\_\_ ] ^U\_]Z\_^X`^ ]]BBB  
@HWI-EAS443:3:2:937:233#0/1  
AAAAATTCCAGCGCAAATGCCATAAGCACCACATTCCCT  
+HWI-EAS443:3:2:937:233#0/1  
aaaa^`a[YXa\_]R¥]\_\_\_`^]\_` `^\_]\_XN]Z]^XXXRX

@HWI-EAS443:3:2:954:587#0/1  
TAAGAGACAACATGACCAAGAAGATGGTCACGCAAAGAAC  
+HWI-EAS443:3:2:954:587#0/1  
S¥R`^¥]SW]^a[^L¥UNSTW]a]N[ZPXYMYUW[[[^B  
@HWI-EAS443:3:2:956:492#0/1  
CACCAATACTCAGAAAAGGGAAAGTGGACGACAAACACAG  
+HWI-EAS443:3:2:956:492#0/1  
aaaaabaa\_aa`b`[^`baa`a\_aWbaa^aaZaaa¥\_V`a  
@HWI-EAS443:3:2:969:713#0/1  
CCCCGAGTGGTTCAGAAACATCCTGAGCATGGCACCCATAA  
+HWI-EAS443:3:2:969:713#0/1  
a\_aaab\_bbbbaaaa\_aaa\_`aa`¥aYa`^¥]`\_Z[``a`  
@HWI-EAS443:3:2:989:450#0/1  
CAAGAATTCCCCTTTGGCTTGTGTTGAGAATAGAACGATT  
+HWI-EAS443:3:2:989:450#0/1  
aVSab\_bbaaWU¥ZU`a¥\_`b\_b\_ab^aZ¥U`[\_\_R`]¥Z  
@HWI-EAS443:3:2:991:42#0/1  
GAACAATTGAAGAGCCATCTGGGCCGTTGCAGGTCCAAGG  
+HWI-EAS443:3:2:991:42#0/1  
\_ababbbbabaab\_aabbabba``b`ab\_abb\_a]Z\_ba  
@HWI-EAS443:3:30:1019:815#0/1  
ATTCACTATGAGAGCAAATCGTCCGATGATTGGAGCCCA  
+HWI-EAS443:3:30:1019:815#0/1  
aba\_`aba`a`b\_b`ZT][a\_b[XZU`]T`a\_\_ZTY`Y\_  
@HWI-EAS443:3:30:1027:392#0/1  
AACAGGAACAGGATACACCATGGACACAGTAAACAGAACA  
+HWI-EAS443:3:30:1027:392#0/1  
^R\_¥S\_¥La\_VZ]a`a`a`^]\_XY¥OXZ\_\_\_\_\_TVYL\_  
@HWI-EAS443:3:30:1030:720#0/1  
TCCTCCATCTGATACTAATAGCCCTACCTTTGATTGGGTT  
+HWI-EAS443:3:30:1030:720#0/1  
U¥WQ\_UX^\_UX¥V^\_UZa[`¥]\_a]QJ\_aaaX\_bWU¥R`  
@HWI-EAS443:3:30:1038:1180#0/1  
GGCTAATTTTAGCATGGAGCTACCCAGCTTTGGAGTGTCT  
+HWI-EAS443:3:30:1038:1180#0/1  
aZ¥`\_`[¥VR¥]\_TYZ\_¥XTV`[X[`¥ZOX`^WQTVJNX  
@HWI-EAS443:3:30:1058:296#0/1  
GGGATTCAGGGATTACAAAGTCTTCCCCGATAATCATCA  
+HWI-EAS443:3:30:1058:296#0/1  
^`a]VbaaZWbS][VYa[b`]OS`^b]XV[aXRHNQa^U  
@HWI-EAS443:3:30:1064:447#0/1  
TCCATGCTTTTGGCTGGACCATGGGCTGGCATTACCACAG  
+HWI-EAS443:3:30:1064:447#0/1  
aaab¥^Wab`aaa`b]a][^[\_]`aa\_] [`a\_`S\_  
@HWI-EAS443:3:30:1079:55#0/1  
CAAACCATGAGGGAATACAAGCAGGAGTGGACAGATTCTA  
+HWI-EAS443:3:30:1079:55#0/1  
abaa`\_[babb`ababbbaba[`baY`Za^`[\_a\_]a^]`  
@HWI-EAS443:3:30:1093:110#0/1  
GAAAAGCTTGAACAGTCTGGGCTCCCAGTAGGGGCAATG

+HWI-EAS443:3:30:1093:110#0/1  
\_aba]abbaab`a^b`]aa\_`^\_]V]^MZaaa\_`S¥X¥\_  
@HWI-EAS443:3:30:1094:352#0/1  
CAATACTCATGTCAGCTGATTCATTTACTCCAGACACTCC  
+HWI-EAS443:3:30:1094:352#0/1  
abab`abb`a`aaaa[aabaa`\_bbaaab`\_aaaa`Wa^]  
@HWI-EAS443:3:30:1106:1443#0/1  
TAATGCCAGCCCATGGTCCAGCCAAAAGCATGGAATATGA  
+HWI-EAS443:3:30:1106:1443#0/1  
\_WZ^\_aa`U[\_a¥Q]\_Naa^X\_YOPVOQX^S[^aYYZVTU  
@HWI-EAS443:3:30:1148:295#0/1  
CAATGACCTTGGACCTGCAACGGCCAGATGGCTCTTCAA  
+HWI-EAS443:3:30:1148:295#0/1  
`]¥W]`\_Z^abb`OZUa[ZK¥aa[]\_]`¥XRRVXTWSU[R  
@HWI-EAS443:3:30:1166:1092#0/1  
ATGGAATATGATGCCGTTGCAACTACACATTCCTGGATTC  
+HWI-EAS443:3:30:1166:1092#0/1  
aa^¥Zaaa]]]aaa^\_ZYVYX^^[¥X¥^`\_^`¥XTWWVW  
@HWI-EAS443:3:30:1172:1002#0/1  
TAGGGGGCAATGAAAAGAAGGCCAAACTGGCAAATGTTGT  
+HWI-EAS443:3:30:1172:1002#0/1  
`aa\_babbbbbb`\_abaabb`a`bbbbaaaabbaa`]a^]  
@HWI-EAS443:3:30:1209:1436#0/1  
ATTGAAGAGCCATCTGGGCCGTTGCAGGTCCAAGGTCATT  
+HWI-EAS443:3:30:1209:1436#0/1  
aaba\_a\_aX^^X¥aS`YXWMXNT^NV¥¥FUN]V[¥KDRG]  
@HWI-EAS443:3:30:1213:145#0/1  
ATCAAAGACTACAGATACACATATAGGTGCCATAGGGGAG  
+HWI-EAS443:3:30:1213:145#0/1  
abaaaaa`abaa`baaaaa\_aaaa`\_`]a\_\_\_\_\_``\_[]\_  
@HWI-EAS443:3:30:1301:1295#0/1  
GTCCTCCATCTGATACTAATAGCCCTACCTTTGATTGGGT  
+HWI-EAS443:3:30:1301:1295#0/1  
a^a\_]aabaaaa¥\_a`aa```a`^XZS]\_`a\_]^\_Z\_]U  
@HWI-EAS443:3:30:1304:969#0/1  
TGCACCCAGCTCAACCCGATTGATGGACCACTACCTGAG  
+HWI-EAS443:3:30:1304:969#0/1  
abbbb`^a\_aaaaba\_a`baaaaaa]a`Zaaaa]^aa^`  
@HWI-EAS443:3:30:1339:48#0/1  
TTTGTAAATCCCCTGAATCCCTTTGTCAGTCATAAAGAGAT  
+HWI-EAS443:3:30:1339:48#0/1  
^ab`Y`a`YW]V^a`UaZ^^`\_`\_`^U^\_]Y[^\_]X^Y]  
@HWI-EAS443:3:30:1365:1165#0/1  
ACACATTCCTGGATTCCCAAGAGGAATCGTTCTATTCTCA  
+HWI-EAS443:3:30:1365:1165#0/1  
a`Xb^bV^bV`\_b¥^X^^R`a\_aa\_`^`Y\_G``¥`WW^X^  
@HWI-EAS443:3:30:1376:1369#0/1  
ATGGGCTCCAATCATCCGACGATTTTGCTCTCATAGTGAA  
+HWI-EAS443:3:30:1376:1369#0/1  
W¥¥\_`^Z`¥J`¥\_ZH^`a\_\_a`\_Z`Y]^MWRZ\_¥Z¥[HXM]

@HWI-EAS443:3:30:1440:496#0/1  
TGCAATCTATTCGAGAAATTTTTCCCTAGCAGTTCATATA  
+HWI-EAS443:3:30:1440:496#0/1  
[]LYa`a\_`^`\_X`aU\_¥`]`aWYQaa\_RZZWZWTZ\_Z  
@HWI-EAS443:3:30:1481:1464#0/1  
AAAAATCCAGCGCAAATGCCATAAGCACCATTCCT  
+HWI-EAS443:3:30:1481:1464#0/1  
aba``]a`]\_`aaaa`^a`a`\_`\_a`^^a^U^]a\_]WYY`  
@HWI-EAS443:3:30:1489:771#0/1  
GTTCTGTTTACTGTGTCCATGGTGTATCCTGTTCCCTGTTC  
+HWI-EAS443:3:30:1489:771#0/1  
¥WSVX\_^Ya\_H\_\_L]PPX`S]ZL\_[`ZJVWRZN\_a¥`\_R  
@HWI-EAS443:3:30:14:1441#0/1  
TTCAGGGGATTACAAAGTCTTCCCCGATAATCATCATCCA  
+HWI-EAS443:3:30:14:1441#0/1  
aaaX)`ZZ]aaab\_\_`a^aaa`aaaa``[\_aYW][\_\_^^  
@HWI-EAS443:3:30:156:1406#0/1  
CTCTTCAATTGTTTCATCAAAGACTACAGATACACATATAG  
+HWI-EAS443:3:30:156:1406#0/1  
a`aaaa]`aaa\_\_aa`a\_¥\_\_\_`a`\_\_\_^V]`\_a^a]`]  
@HWI-EAS443:3:30:1586:1173#0/1  
GTCTGTTTGTGCATACCCACTTGGTTCATTATCCTCAGGT  
+HWI-EAS443:3:30:1586:1173#0/1  
aTQXNUa\_]VY`\_Y[VYSPQa`^\_`^¥[]\_\_`]V[]UV\_^X  
@HWI-EAS443:3:30:1590:1373#0/1  
CAGAGACTGGTGCACCCAGCTCAACCCGATTGATGGACC  
+HWI-EAS443:3:30:1590:1373#0/1  
a¥aa`X[¥PXa`a\_\_`a^`\_ZU\_a^¥[``Z`\_^N]]¥P^  
@HWI-EAS443:3:30:1592:950#0/1  
GTCCTCCATCTGATACTAATAGCCCTACCTTTGATTGGGT  
+HWI-EAS443:3:30:1592:950#0/1  
ab`baabbbabaabaababbaa[a\_a\_\_ababbaaa[a^`  
@HWI-EAS443:3:30:1598:1567#0/1  
ATTTTGTGTTGAGAACATTATGGGTGCCATGCTCAGGATGT  
+HWI-EAS443:3:30:1598:1567#0/1  
abbbabababa^aa\_]aaa`a\_XP\_[\_a]¥\_^]``PGXN^  
@HWI-EAS443:3:30:1598:803#0/1  
CACCATAGAAGTCTTTAGATCGAATGGCCTAACAGCTAAT  
+HWI-EAS443:3:30:1598:803#0/1  
abaabbbbabbaabbbbab`baaaba`\_aaaZ`aT`^^a  
@HWI-EAS443:3:30:159:921#0/1  
ATTCGATCTAAAGACTTCTATGGTGTGGCCAATGCAGTT  
+HWI-EAS443:3:30:159:921#0/1  
a]`ba]aa¥a`a^U`a`\_\_`\_`]]Y\_Y¥`\_^[JQ¥^UBB  
@HWI-EAS443:3:30:1639:119#0/1  
CACCAAACCATGAGGAATACAAGCAGGAGTGGACAGATT  
+HWI-EAS443:3:30:1639:119#0/1  
aba`bba`\_bbabbbbabbbabaa`bab``\_baa]`\_\_^a  
@HWI-EAS443:3:30:1651:870#0/1  
ATCATGTTGTTCTTTATCACTGTTACTCCAATACTCATGT

+HWI-EAS443:3:30:1651:870#0/1  
¥\_Y\_\_aaaSW\_bbb\_\_`Y^P]aa\_0[`]a\_¥ab^a\_[\_Y¥  
@HWI-EAS443:3:30:1658:695#0/1  
GTGGGATTCTTCAAGGAAAGCCATAGCCTCTAGAACACAG  
+HWI-EAS443:3:30:1658:695#0/1  
`^aaaYW^Ya\_aa`\_\_\_\_[[[]][Q\_]UVV\_X^`\_^]X^0VY  
@HWI-EAS443:3:30:1762:62#0/1  
TTATCACTGTTACTCCAATACTCATGTCAGCTGATTCATT  
+HWI-EAS443:3:30:1762:62#0/1  
U^TbVOZa`WYTV[GXZQWX¥\_SRYUSQX]TW\_MO]SUW[  
@HWI-EAS443:3:30:189:1229#0/1  
GCTTAAAATGGGAGCTAATGGATGATGATTATCGGGGAAG  
+HWI-EAS443:3:30:189:1229#0/1  
`bbaababbbbaaaabbaabaaaaaaa`^a\_X^^`aa^Z`  
@HWI-EAS443:3:30:230:638#0/1  
GAGCTAATGGATGATGATTATCGGGGAAGACTTTGTAATC  
+HWI-EAS443:3:30:230:638#0/1  
aab`aa`b\_\_aa\_YQa`abba`a\_T`aL`\_a\_a\_\_W\_\_¥Z  
@HWI-EAS443:3:30:282:919#0/1  
GGTTCATTATCCTCAGGTAGTGGTCCATCAATCGGGTTGA  
+HWI-EAS443:3:30:282:919#0/1  
a^`ababab`ababaaa¥aa^aX^aa`¥aaa`a]^V¥]XY  
@HWI-EAS443:3:30:286:334#0/1  
GTCTAGGGCCCCGATTGATGCCAGGGTCGACTTCGAGTCT  
+HWI-EAS443:3:30:286:334#0/1  
a``ZI\_``\_`a`¥]V\_TZ¥`[X[]¥XK¥¥]SK\_]VNSZ]  
@HWI-EAS443:3:30:36:953#0/1  
GGTGTGTTCTGTTTACTGTGTCCATGGTGTATCCTGTTCC  
+HWI-EAS443:3:30:36:953#0/1  
abXa^`^aaaa`aa]aaa^`¥aa\_\_a]R¥^aaaa\_\_^^`\_`  
@HWI-EAS443:3:30:477:948#0/1  
CACCAAACCATGAGGAATACAAGCAGGAGTGGACAGATT  
+HWI-EAS443:3:30:477:948#0/1  
aaaa]``aa\_abaaa]]`\_J\_a\_\_a^`[`aZaa]^\_^YUW  
@HWI-EAS443:3:30:481:1242#0/1  
GAGCCATCTGGGCCGTTGCAGGTCCAAGTTCATTGTTTAT  
+HWI-EAS443:3:30:481:1242#0/1  
`b`bbabbaaaaab`aaabaaWaaaa`]aaaa`\_^a`]  
@HWI-EAS443:3:30:492:431#0/1  
GAGATTTCTTTCACAATCACTGGGACAACACTAAGTGGA  
+HWI-EAS443:3:30:492:431#0/1  
aaa]abbbabbbbaa¥abbbbaaaaaaaa`aaa`\_aVa`\_`  
@HWI-EAS443:3:30:50:1787#0/1  
CACAGTAAACAGAACACACCAATACTCAGAAAAGGGAAAG  
+HWI-EAS443:3:30:50:1787#0/1  
abb^\_[b^^b^[]`aaaaaaaaaaa`a`\_¥¥]`\_\_]\_Z`]  
@HWI-EAS443:3:30:534:2021#0/1  
GGGATGGGCTCCAATCATCCGACGATTTTGCTCTCATAGT  
+HWI-EAS443:3:30:534:2021#0/1  
aa\_`^UI\_`Saa^Y]^`aa`X\_\_\_\_\_¥\_G[^a^`a^¥\_W



@HWI-EAS443:3:30:538:1334#0/1  
GACTAATTCACAAGACACAGAGATTTCTTTCACAATCACT  
+HWI-EAS443:3:30:538:1334#0/1  
Y^bba^a¥aaab^bb\_abbab][^aaaaaa^bb`[[b\_\_  
@HWI-EAS443:3:30:549:1175#0/1  
GACCAAGAAGATGGTCACGCAAAGAACAATAGGGAAGAAA  
+HWI-EAS443:3:30:549:1175#0/1  
\_¥bba`\_aa`aaXa[a¥Yaaa\_\_`^Zaa`a\_Uaa\_\_\_\_]`  
@HWI-EAS443:3:30:573:1479#0/1  
ACAATGCTGTGGTAATGCCAGCCCATGGTCCAGCCAAAAG  
+HWI-EAS443:3:30:573:1479#0/1  
aa[^]W\_a`]a`Vb`^^baa\_aa\_aUZXU\_]X[`Z`\_]U  
@HWI-EAS443:3:30:576:333#0/1  
CAGCTGACATGAGTATTGGAGTAACAGTGATAAAGAACAA  
+HWI-EAS443:3:30:576:333#0/1  
ababaaabbab`a^aaaabaa\_aaaa]a`a`aa\_\_`^aa  
@HWI-EAS443:3:30:619:304#0/1  
GGGCTCCAATCATCCGACGATTTTGCTCTCATAGTGAATG  
+HWI-EAS443:3:30:619:304#0/1  
aa`aa`^a\_0¥^\_aaaaa\_¥¥]a]]`^a\_`aV`^^Z\_  
@HWI-EAS443:3:30:627:1545#0/1  
CTTTTGTCCAAGATTCAGTATCGAGACTCCCAAGACCGTA  
+HWI-EAS443:3:30:627:1545#0/1  
aa`aaa^bba`aaaaaa^aaa`\_`\_a\_a`aaa]]\_]Wa  
@HWI-EAS443:3:30:648:1374#0/1  
GTTCTGTTTACTGTGTCCATGGTGTATCCTGTTCTGTTTC  
+HWI-EAS443:3:30:648:1374#0/1  
a^a\_`^`^\_a\_aaV]^aa¥\_\_\_S\_Y\_\_a\_`\_]\_]\_AT[RY]  
@HWI-EAS443:3:30:658:1246#0/1  
CAAAGAGGAAATAGAGATAACAACCCACTTTCAAAGAAAA  
+HWI-EAS443:3:30:658:1246#0/1  
`S]UW¥\_TNY\_aa]]¥)`a\_^]\_`[`\_\_^`^`^`[Z^¥WZZ  
@HWI-EAS443:3:30:668:1267#0/1  
CTCTTCTAATAGATGGCACAGCATCACTGAGTCCTGGGAT  
+HWI-EAS443:3:30:668:1267#0/1  
aaa^X]a]T\_]U^Z`^]ZYa^TXZUV[VVSWQWZVVSU  
@HWI-EAS443:3:30:677:885#0/1  
CTCCAATCATCCGACGATTTTGCTCTCATAGTGAATGCAC  
+HWI-EAS443:3:30:677:885#0/1  
```b^```\_\_aa]IX]Z¥]]^¥[YZYYY^^W[]ZS^ZSF  
@HWI-EAS443:3:30:719:714#0/1  
CAAGAATTCCTTTGGCTTGTGTTGAGAATAGAACGATT  
+HWI-EAS443:3:30:719:714#0/1  
`b`bYbbaaa\_abb`a`aaY^S[]VaTQ¥`¥¥aY]¥LL  
@HWI-EAS443:3:30:760:1414#0/1  
GGCTCCAATCATCCGACGATTTTGCTCTCATAGTGAATGC  
+HWI-EAS443:3:30:760:1414#0/1  
]SZ]a`W¥aaOV¥Z¥Z^W[^[`\_\_a^a\_`ZNLRRYYVYUY  
@HWI-EAS443:3:30:774:977#0/1  
CTTGGTTCATTATCCTCAGGTAGTGGTCCATCAATCGGGT

+HWI-EAS443:3:30:774:977#0/1  
ab````bbbbbbabbabb`aa\_aa\_aa`a`^¥a`a^[Z  
@HWI-EAS443:3:30:783:790#0/1  
GTCCACTCCTGCTTGTATTCCCTCATGGTTTGGTGATTC  
+HWI-EAS443:3:30:783:790#0/1  
aabaaaaaaaaaab`aaaaaaaa`aaa^``\_aUa`\_`\_\_  
@HWI-EAS443:3:30:789:1034#0/1  
GATTGATGCCAGGGTCGACTTCGAGTCTGGACGGATCAAG  
+HWI-EAS443:3:30:789:1034#0/1  
a[a`aaaaa^`\_a¥a^`a`aaa\_]N¥\_a``¥[`^Z\_\_\_^  
@HWI-EAS443:3:30:841:227#0/1  
GATGACCAAAGATGCAGAGAGAGGCAAGTTAAAAAGAAGG  
+HWI-EAS443:3:30:841:227#0/1  
aaab`\_`aaaa\_aa¥`^a\_\_¥\_\_Z\_[\_]W\_]`^\_`W]¥]V^  
@HWI-EAS443:3:30:862:1854#0/1  
CTCCATCTGATACTAATAGCCCTACCTTTGATTGGGTTTG  
+HWI-EAS443:3:30:862:1854#0/1  
^]b]bW`R¥Z`bb`aaX]abbbW`WX\_a\_N`]`\_[YM\_RW  
@HWI-EAS443:3:30:894:1895#0/1  
GCAGCAACTGCATTGGCCAACACCATAGAAGTCTTTAGAT  
+HWI-EAS443:3:30:894:1895#0/1  
abba`bbaabbaaa^`abaaa\_aaaaaa`\_Y```````\_`\_  
@HWI-EAS443:3:30:956:569#0/1  
GAGGTTTCGTATACTTTGTTGAACTTTAGCTAGGAGCAT  
+HWI-EAS443:3:30:956:569#0/1  
a`Ub^ab^TGQ^PLYM[````]`\_\_¥a`\_`YV[a^aRX]\_`  
@HWI-EAS443:3:30:95:1531#0/1  
GTTCTATTCTCAACACAAGCCAAAGGGGAATTCTTGAGGA  
+HWI-EAS443:3:30:95:1531#0/1  
¥NU^U¥OY`Y`¥Ya^a[QZa]ZSMSY]VLLSS¥YQOW\_R]  
@HWI-EAS443:3:30:971:513#0/1  
CCTCCATCTGATACTAATAGCCCTACCTTTGATTGGGTTT  
+HWI-EAS443:3:30:971:513#0/1  
aaaa^bbabbaUaa`aaaa\_aa`a\_\_\_`M]a\_a]\_Z\_U]\_  
@HWI-EAS443:3:30:974:1586#0/1  
GAAACATCCTGAGCATGGCACCCATAATGTTCTCAAACAA  
+HWI-EAS443:3:30:974:1586#0/1  
\_abbbabb^¥b`\_baaa^aa\_Q`aba`a`\_aaaa\_`]aa  
@HWI-EAS443:3:30:983:725#0/1  
ACAGATCTTCATGATCTCAGAGAACTCTTCTTTCTTGATC  
+HWI-EAS443:3:30:983:725#0/1  
aabbaaabaaaab`aaaa`\_`aa\_baba`baaaaa```]  
@HWI-EAS443:3:31:1009:886#0/1  
GTCCTCCATCTGATACTAATAGCCCTACCTTTGATTGGGT  
+HWI-EAS443:3:31:1009:886#0/1  
aaaaababbabb`aaaabaabaaaaaaaa`aa`\_]`^\_W  
@HWI-EAS443:3:31:1059:1505#0/1  
AATGAACCAAGTGGGTATGCACAAACAGACTGTGTTCTAG  
+HWI-EAS443:3:31:1059:1505#0/1  
aXX¥PLT^¥]YR^QWV^TTY\_VLZ¥Z]W¥]]YJVWSQQVS

@HWI-EAS443:3:31:1061:1016#0/1  
TAAGAGAGGCTATCTAATAAGAGCACTGACATTAATACG  
+HWI-EAS443:3:31:1061:1016#0/1  
aababaaaaaa]TNZW]X0aTSJXZGTROOSR¥OY^WTGT  
@HWI-EAS443:3:31:1064:182#0/1  
GTCCTCCATCTGATACTAATAGCCCTACCTTTGATTGGGT  
+HWI-EAS443:3:31:1064:182#0/1  
aaabba`aaabbaaaabaaaaaa]a\_^`aaaaaaa^aZ  
@HWI-EAS443:3:31:1080:742#0/1  
CGATACTGAATCTTGACAAAAGAAATACACCAAGACAAT  
+HWI-EAS443:3:31:1080:742#0/1  
a^aaaabba]aaaab`^[aa`a\_`¥\_a]aa\_`^`]]`aa  
@HWI-EAS443:3:31:1089:297#0/1  
ATTGATGCCAGGGTCGACTTCGAGTCTGGACGGATCAAGA  
+HWI-EAS443:3:31:1089:297#0/1  
`]¥¥b\_¥[Q\_a^aP\_b]a\_]\_¥`\_\_ZT\_VWaa^R\_]Y  
@HWI-EAS443:3:31:1107:891#0/1  
GGCCCGGATTGATGCCAGGGTCGACTTCGAGTCTGGACGG  
+HWI-EAS443:3:31:1107:891#0/1  
ababb`bbbbbbbababb^abb`bbba`a\_abaa`ba  
@HWI-EAS443:3:31:1108:307#0/1  
CATGGTGTCTAGGGCCCGATTGATGCCAGGGTCGACTTC  
+HWI-EAS443:3:31:1108:307#0/1  
abbbba\_`babbaabbabba`b`aaaaa]]]aYaZ`a`aP  
@HWI-EAS443:3:31:110:1052#0/1  
AAAAATTCCAGCGCAAATGCCATAAGCACCATTCCT  
+HWI-EAS443:3:31:110:1052#0/1  
aaa\_P^`\_aa\_`a\_`\_\_^`\_`\_`Z¥`\_\_^\_Y]^Z\_\_^^  
@HWI-EAS443:3:31:115:1002#0/1  
CTGGGCCGTTGCAGGTCCAAGTCATTGTTTATCATGTTG  
+HWI-EAS443:3:31:115:1002#0/1  
a]aXS\_Y\_aZaURW]Waa^]`\_N]Xa`[^¥QYb¥TIVLQ  
@HWI-EAS443:3:31:1176:522#0/1  
CAGTGATTGTGAAAGAAATCTCTGTGTCTTGTGAATTAGT  
+HWI-EAS443:3:31:1176:522#0/1  
aaabbbbbb\_aabbb`bbbbbabbb`\_abb\_[aa`\_aaWa[  
@HWI-EAS443:3:31:1182:1710#0/1  
CTTTGATGAACAATTGAAGAGCCATCTGGGCCGTTGCAGG  
+HWI-EAS443:3:31:1182:1710#0/1  
aabbbb¥a¥\_ab`\_`\_bba`Xaabaa\_a`a\_aaVS^`^¥  
@HWI-EAS443:3:31:1184:1429#0/1  
GTTGTCCCAGTGATTGTGAAAGAAATCTCTGTGTCTTGT  
+HWI-EAS443:3:31:1184:1429#0/1  
`G¥\_^`aaa^X¥a¥R[XUXY\_a^YTNT¥[\_ZZY`N]^OH  
@HWI-EAS443:3:31:1193:178#0/1  
GATGATTGGAGCCCATCCCACCAGTATATTGTCTTGGTGT  
+HWI-EAS443:3:31:1193:178#0/1  
¥Y`\_a`bX¥`XaX^Z\_ZXM\_a^a\_GUb`Z]aYPa¥WZF]F  
@HWI-EAS443:3:31:125:297#0/1  
CAGATCTTCATGATCTCAGAGAACTCTTCTTTCTTGATCC

+HWI-EAS443:3:31:125:297#0/1  
a]Z[[\_`a\_ZX^Za\_^\_¥\$S¥SXW]XY¥\_\_]Y¥Z[^[]U  
@HWI-EAS443:3:31:1268:33#0/1  
GGGTTGTTATCTCTATTTCTCTTTGTTTCATTGATTCCAT  
+HWI-EAS443:3:31:1268:33#0/1  
abaZ^\_S¥0ZP¥¥a`a`a`a]aaaa¥VQ^^^`^\_^^VS]  
@HWI-EAS443:3:31:1280:1327#0/1  
CCCCGATAATCATCATCCATTAGCTCCCATTTTAAGCAGA  
+HWI-EAS443:3:31:1280:1327#0/1  
abbababaaaaabaabaabbaabaaaaa`aababaa`aa`  
@HWI-EAS443:3:31:129:1739#0/1  
CATGGGCTGGCATTACCACAGCATTGTTTACAGAATCAAT  
+HWI-EAS443:3:31:129:1739#0/1  
`TYVNG`W`Wa^Z[\_`\_`\_]YR]Q^Z^^`W[YPQT\_ZKS  
@HWI-EAS443:3:31:129:1792#0/1  
CTTCAAGGAAAGCCATAGCCTCTAGAACACAGTCTGTTTG  
+HWI-EAS443:3:31:129:1792#0/1  
aa`a`TH]UYNaZUR`aaS¥V¥U^\_`X[^ZY\_YVPVWP  
@HWI-EAS443:3:31:1375:567#0/1  
GTGGACGACAAACACAGAGACTGGTGCACCCAGCTCAAC  
+HWI-EAS443:3:31:1375:567#0/1  
`VOWY`[¥aXZ`ZURW¥[XYXN][XTRQVNQ^Y¥PL¥[N  
@HWI-EAS443:3:31:1431:68#0/1  
GGCTTTCCTTGAAGAATCCCACCCAGGAATATTTGAGAAT  
+HWI-EAS443:3:31:1431:68#0/1  
a`^Y\_baabaa`\_]`aa]`a\_¥^Z`a\_\_¥]¥``]a^`Za]  
@HWI-EAS443:3:31:1446:1574#0/1  
CAAAGATGCAGAGAGAGGCAAGTTAAAAAGAAGGGCTATC  
+HWI-EAS443:3:31:1446:1574#0/1  
aabaaaabab]\_b`b[a^VU`aaba^aaaa\_^[aaaZL  
@HWI-EAS443:3:31:1510:402#0/1  
GTCCACTCCTGCTTGTATTCCCTCATGGTTTGGTGCATTC  
+HWI-EAS443:3:31:1510:402#0/1  
\_]a`\_a^a]XXTX\_]^[[]SY[]Z`¥[]YYYS]TTXSL  
@HWI-EAS443:3:31:1519:894#0/1  
AAAGGTAGGGCTATTAGTATCAGATGGAGGACCAAACCTTA  
+HWI-EAS443:3:31:1519:894#0/1  
a`aa^\_ba`aa`aaaa]aa]aa`ab¥^]a^UV`\_`Y\_\_]  
@HWI-EAS443:3:31:1567:1973#0/1  
ACCAATACTCAGAAAAGGAAAGTGGACGACAAACACAGA  
+HWI-EAS443:3:31:1567:1973#0/1  
]TZ`a¥U]Q^ZNZU^`aaX`\_XDZ^¥`\_QT^a¥]\_\_\_Y  
@HWI-EAS443:3:31:1582:1648#0/1  
GATTGATGCCAGGGTCGACTTCGAGTCTGGACGGATCAAG  
+HWI-EAS443:3:31:1582:1648#0/1  
a`a\_aa`\_XV^^¥U\_\_\_V\_Z[^`\_VZ`\_ZWR^VUUUU^V  
@HWI-EAS443:3:31:1634:697#0/1  
CATTGAAGTACTTCAGGTCAATGCTTGCTAGCATTTCTGC  
+HWI-EAS443:3:31:1634:697#0/1  
abbaababaaabaabba\_abaaaaabbaaaa\_abaa`ba^

@HWI-EAS443:3:31:1691:949#0/1  
AAAACAAAGACTGAATAAGAGAGGCTATCTAATAAGAGCA  
+HWI-EAS443:3:31:1691:949#0/1  
`bbaab¥bb`ab\_abbabba\_`aaZa^SFWR[¥X`SU]YX  
@HWI-EAS443:3:31:169:1870#0/1  
CTACTTTTCCTAAAAATTCCAGCGCAAATGCCATAAGCA  
+HWI-EAS443:3:31:169:1870#0/1  
a`^b`aaaa\_V`b¥`V`aaaa`b\_aa^Z\_\_]aa]¥]a[aa  
@HWI-EAS443:3:31:1732:1065#0/1  
ATACTGGTGGGATGGGCTCCAATCATCCGACGATTTTGCT  
+HWI-EAS443:3:31:1732:1065#0/1  
abaabbaaaaa`aaa¥`aaaab^\_aU\_a`]a``aa`][  
@HWI-EAS443:3:31:180:1988#0/1  
CTCCTGCTTGTATTCCCTCATGGTTTGGTGCATTCACTAT  
+HWI-EAS443:3:31:180:1988#0/1  
aYaawYQGUZP^[]`\_YV]VTNTXUTTSGRUVVWZZ^WUU  
@HWI-EAS443:3:31:194:637#0/1  
CAATCCGACTCTACTTTTCCTAAAAATTCCAGCGCAAAT  
+HWI-EAS443:3:31:194:637#0/1  
a`Wbabb\_b`bbb``[abZ`bbbbba]Taa^aa\_`aaaaW  
@HWI-EAS443:3:31:209:744#0/1  
CACCAATACTCAGAAAAGGAAAGTGGACGACAAACACAG  
+HWI-EAS443:3:31:209:744#0/1  
`aa\_Ta\_Ra`aaa\_aa`\_YQ]^X`Pa¥ZZ^W^\_J^a\_`\_\_  
@HWI-EAS443:3:31:223:720#0/1  
CCCGGATTGATGCCAGGGTCGACTTCGAGTCTGGACGGAT  
+HWI-EAS443:3:31:223:720#0/1  
a¥`WTURZWPY¥a`WJUTLUZRRTPVYNWS\_]YS]VYYZS  
@HWI-EAS443:3:31:284:1243#0/1  
GGACGGATCAAGAAAGAAGAGTTCTCTGAGATCATGAAGA  
+HWI-EAS443:3:31:284:1243#0/1  
aZUa`^]aa^a^¥^Y^a`¥Y[[[`a`]RZ[[Y^\_ZTZ`\_  
@HWI-EAS443:3:31:326:514#0/1  
GGGATGGGCTCCAATCATCCGACGATTTTGCTCTCATAGT  
+HWI-EAS443:3:31:326:514#0/1  
aaTM[¥[`]a`^][\_a\_\_YV^]`Z^\_\_[\_`[[Z]]][RU  
@HWI-EAS443:3:31:34:2036#0/1  
TTAGCTAGGAGCATTTGCGAAAAGCTTGAACAGTCTGGGC  
+HWI-EAS443:3:31:34:2036#0/1  
abbabaa\_aaab[`]aaa\_`a`^a^\_a\_`SaSa^\_¥``  
@HWI-EAS443:3:31:373:73#0/1  
GTGGTTCAGAAACATCCTGAGCATGGCACCCATAATGTTC  
+HWI-EAS443:3:31:373:73#0/1  
a\_T`ZY¥YWV\_[QGOXYQWVZUZO\_]WWWXVVTQFUWRHV  
@HWI-EAS443:3:31:373:807#0/1  
CTAACTTGCAGGTCTGTAGAATCTGTCCACTCCTGCTTG  
+HWI-EAS443:3:31:373:807#0/1  
aabbaa``baa`^aaaa\_a`\_`aa\_^\_`\_`X`\_]\_`\_\_\_\_  
@HWI-EAS443:3:31:417:1426#0/1  
GTGGTAATGCCAGCCCATGGTCCAGCCAAAAGCATGGAAT

+HWI-EAS443:3:31:417:1426#0/1  
a\_\_\_Vaa^Vb`W[aa^^]ZVUaa\_`a``]WUW^\_V¥¥^\_¥  
@HWI-EAS443:3:31:433:168#0/1  
ATTGATGCCAGGGTCGACTTCGAGTCTGGACGGATCAAGA  
+HWI-EAS443:3:31:433:168#0/1  
`ba`b\_``^`[abUZXW`a]^aa`a\_\_a\_\_aaXUX\_\_\_Y  
@HWI-EAS443:3:31:445:609#0/1  
GAGGGAATACAAGCAGGAGTGGACAGATTCTACAGGACCT  
+HWI-EAS443:3:31:445:609#0/1  
abbaa`bbaabbbabbaaXaaaa`\_R\_a\_a[^`^\_a\_`X  
@HWI-EAS443:3:31:452:1286#0/1  
GTTTGGCCTTCTTTTCATTGCCCCCTACTGGGAGCCCAGA  
+HWI-EAS443:3:31:452:1286#0/1  
^]\_a```baabaaaaaa`aaaaaaa`a]V]^```adW]  
@HWI-EAS443:3:31:460:677#0/1  
GGTGGGATGGGCTCCAATCATCCGACGATTTTGCTCTCAT  
+HWI-EAS443:3:31:460:677#0/1  
ab\_aaaaaa[¥aaaaaaaaaaaaa[aaa\_\_a`a`\_```a`\_  
@HWI-EAS443:3:31:468:1259#0/1  
GCTGGCATTACCACAGCATTGTTTACAGAATCAATCTCTT  
+HWI-EAS443:3:31:468:1259#0/1  
aaaaabbbbaaab\_b`abbabb`aa`aabaaa`a`\_````\_  
@HWI-EAS443:3:31:469:1763#0/1  
AGCTGGGTAGCTCCATGCTAAAATTAGCCACAAATCCATA  
+HWI-EAS443:3:31:469:1763#0/1  
a¥a\_a\_\_Xaaa`aa`^\_a`aa`a`\_`ZaYa\_``\_\_^`\_¥\_  
@HWI-EAS443:3:31:472:500#0/1  
AAAAATTCCAGCGAAAATGCCATAAGCACCACATTCCT  
+HWI-EAS443:3:31:472:500#0/1  
ababaa`aaaa`¥`aaY^]^`aaa^]``[ ]\_``\_]a\_``  
@HWI-EAS443:3:31:473:680#0/1  
ATTGATGCCAGGGTCGACTTCGAGTCTGGACGGATCAAGA  
+HWI-EAS443:3:31:473:680#0/1  
aaabbaaa^\_]abZa]aa[`aaaa[a\_]Y^a^M]\_\_\_[  
@HWI-EAS443:3:31:49:353#0/1  
AGCTGATTCATTTACTCCAGACACTCCAAAGCTGGGTAGC  
+HWI-EAS443:3:31:49:353#0/1  
a`a\_¥\_aaa\_a^a```\_\_``\_\_`]PXIY`W^¥WUSV]  
@HWI-EAS443:3:31:509:1245#0/1  
CTCTCTTATTCAGTCTTTGTTTTTCTTCCCTATTGTTCT  
+HWI-EAS443:3:31:509:1245#0/1  
^W^]XW^RU`\_WRMYSY\_\_XUY`TVX]¥¥a[X[[WVOTWT  
@HWI-EAS443:3:31:53:61#0/1  
ATTAACAGAAATCAACCGCAGCAACTGCATTGGCCAAC  
+HWI-EAS443:3:31:53:61#0/1  
aaa^`baab]VZabaaaa`aa`a^TZ]¥\_¥Z¥^`\_¥\_]^]  
@HWI-EAS443:3:31:576:743#0/1  
AAGGGATTCAGGGATTACAAAGTCTTCCCCGATAATCAT  
+HWI-EAS443:3:31:576:743#0/1  
a``\_V]`[b^RZ^`^]^`aaa]X`a``\_a`\_``\_`^`^\_Y

@HWI-EAS443:3:31:577:1913#0/1  
AGCTGATTCATTTACTCCAGACACTCCAAAGCTGGGTAGC  
+HWI-EAS443:3:31:577:1913#0/1  
^W^U\_`a]SV\_W\_T^\_aS\_YRbaRXaaR¥]`YGZOXX\_UG  
@HWI-EAS443:3:31:591:268#0/1  
AAACAAGGTTAGATAAACTAACTCAAGGTCGCCAGACTTA  
+HWI-EAS443:3:31:591:268#0/1  
abbabbbbaa\_abaaaaaaaaa\_aaaaa`Z`[\_`^`^`\_`^Y[  
@HWI-EAS443:3:31:670:285#0/1  
GGGAATCCAGGAATGTGTAGTTGCAACGGCATCATATTCC  
+HWI-EAS443:3:31:670:285#0/1  
abbb\_ababaaabbb`b\_bb`aaaaaaaaaa`^baaa\_\_^  
@HWI-EAS443:3:31:672:1608#0/1  
AAAAATCCAGCGCAAATGCCATAAGCACCACATTCCCT  
+HWI-EAS443:3:31:672:1608#0/1  
abab\_`a`\_`^`\_`^`\_`^`\_`^`\_`X^¥^a`\_`\_[¥a`^`X\_]X¥Z]Z  
@HWI-EAS443:3:31:696:1459#0/1  
GAGGAATCGTTCTATTCTCAACACAAGCCAAAGGGGAATT  
+HWI-EAS443:3:31:696:1459#0/1  
¥` `b[Sabb^Ya`a\_aa`b\_\_abbb^^`\_R`b^b]b`Z`a  
@HWI-EAS443:3:31:700:1066#0/1  
ATGGGCTCCAATCATCCGACGATTTTGCTCTCATAGTGAA  
+HWI-EAS443:3:31:700:1066#0/1  
abaI^bRab¥a`b`b[a^`\_b\_Z`\_ab`aa`b`\_`\_NY[\_]  
@HWI-EAS443:3:31:721:126#0/1  
GTTCTGTTTACTGTGTCCATGGTGTATCCTGTTCTGTTTC  
+HWI-EAS443:3:31:721:126#0/1  
^^aN`bb^`S[ab[Ub`bb`a`PZ\_b^`aV]Y^^`^]Z\_X  
@HWI-EAS443:3:31:761:161#0/1  
GGGCAATGAAAAGAAGGCCAAACTGGCAAATGTTGTGAGA  
+HWI-EAS443:3:31:761:161#0/1  
[P\_` `aa^¥ZYZ]TYX^]VS]`\_T` `[\_`aU\_]MQ]P\_\_P[  
@HWI-EAS443:3:31:788:56#0/1  
GGATGATTGGAGCCCATCCACCAGTATATTGCTTGGTG  
+HWI-EAS443:3:31:788:56#0/1  
ababbb\_baabbaaba\_[]`¥aa`\_bGabaa`aZ\_\_ba\_\_\_\_  
@HWI-EAS443:3:31:810:569#0/1  
CAGTGATTGTGAAAGAAATCTCTGTGTCTTGTGAATTAGT  
+HWI-EAS443:3:31:810:569#0/1  
``a]b`aab[aaaa`U\_aaaaaaaa`a¥`a`¥]ZPZ]]UN  
@HWI-EAS443:3:31:821:639#0/1  
GACTCATTAGCTGTTAGGCCATTCGATCTAAAGACTTCTA  
+HWI-EAS443:3:31:821:639#0/1  
WVaba^`¥¥¥` `¥JV]G\_]a^^`Y¥TVZ¥]SWX[GQSTVH  
@HWI-EAS443:3:31:827:1133#0/1  
CTATGAGAGCAAATCGTCCGATGATTGGAGCCCATCCCA  
+HWI-EAS443:3:31:827:1133#0/1  
ababb`baabbbabaaa\_aaa`aaa`\_\_a^`^\_aa`aP]\_  
@HWI-EAS443:3:31:828:1880#0/1  
TTAGCATGGAGCTACCCAGCTTTGGAGTGTCTGGAGTAAA

+HWI-EAS443:3:31:828:1880#0/1  
abaabbaaa`^aaab`baU`aaaa`¥a]a\_aaaJ`a[aaa  
@HWI-EAS443:3:31:841:341#0/1  
GCTAGGAGCATTTCGCGAAAAGCTTGAACAGTCTGGGCTCC  
+HWI-EAS443:3:31:841:341#0/1  
aaa]aa`[aaa\_aaX`^``\_\_^^^a\_^`\_W¥\_¥\_[PWQ  
@HWI-EAS443:3:31:854:842#0/1  
ATTCCCCTAACTTGCAGGTCCTGTAGAATCTGTCCACTC  
+HWI-EAS443:3:31:854:842#0/1  
Y[VS]JR¥\_]`aYaUa`aXTN^`VUT[\_a^aYRQZaQVF  
@HWI-EAS443:3:31:910:686#0/1  
TGCAGGTCCTGTAGAATCTGTCCACTCCTGCTTGTATTCC  
+HWI-EAS443:3:31:910:686#0/1  
aaabab\_aaaa`a\_a\_^[aa\_¥¥\_^`¥aaa^\_]\_`\_^U  
@HWI-EAS443:3:31:937:781#0/1  
GATACACATATAGGTGCCATAGGGGAGACACACAAATTCA  
+HWI-EAS443:3:31:937:781#0/1  
aaabababbbbaaaa]a`\_a`a`\_]`\_a^a\_aa^`\_¥  
@HWI-EAS443:3:31:986:1898#0/1  
AAGACTACAGATACACATATAGGTGCCATAGGGGAGACAC  
+HWI-EAS443:3:31:986:1898#0/1  
aaabababbaababaaabab`XT[`aaaa`a\_]`aaa`Z  
@HWI-EAS443:3:32:1010:1048#0/1  
CACCCAGGAATATTTGAGAATTCATGCCTTGAACAATGG  
+HWI-EAS443:3:32:1010:1048#0/1  
aWXU\_a]¥\_aa`^V^WX]\_\_^W^]\_U]US[^^^UYFY\_Q  
@HWI-EAS443:3:32:1010:185#0/1  
ATCCGACTCTACTTTTCCTAAAAATTCCAGCGCAAAATGC  
+HWI-EAS443:3:32:1010:185#0/1  
abaaaa\_b`ba`aaaa`bbaaaaa\_\_a\_\_`\_^\_aaa`  
@HWI-EAS443:3:32:1019:1795#0/1  
ATCCGACTCTACTTTTCCTAAAAATTCCAGCGCAAAATGC  
+HWI-EAS443:3:32:1019:1795#0/1  
aaaa^`\_`abaaaa\_`^aaaa`a`\_`\_]\_\_a`\_aV^[a  
@HWI-EAS443:3:32:1030:517#0/1  
GGCTATTAGTATCAGATGGAGGACCAAATTATACAATAT  
+HWI-EAS443:3:32:1030:517#0/1  
ababb\_abaaaaabbaaaaaa`a[a`a`\_`aab`a`^aaa  
@HWI-EAS443:3:32:1089:1282#0/1  
GGCTAATTTTAGCATGGAGCTACCCAGCTTTGGAGTGTCT  
+HWI-EAS443:3:32:1089:1282#0/1  
R\_a\_bbabbb`a\_a\_\_b`]baba\_b¥^\_aabbaab\_b`ba  
@HWI-EAS443:3:32:1098:1714#0/1  
CAGTAAACAGAACACACCAATACTCAGAAAAGGGAAAGTG  
+HWI-EAS443:3:32:1098:1714#0/1  
aba`bbabb\_aa¥a\_a`¥aa`a\_a\_aaaa`^^¥^`Qa  
@HWI-EAS443:3:32:1134:493#0/1  
CAGAAATCAACCCGAGTGGTTCAGAAACATCCTGAGCATG  
+HWI-EAS443:3:32:1134:493#0/1  
abab`\_`\_`bbaaabba]bbaa^aa\_aaaa¥^Za`aab`aa



@HWI-EAS443:3:32:1173:949#0/1  
CAGGAACAGGATACACCATGGACACAGTAAACAGAACACA  
+HWI-EAS443:3:32:1173:949#0/1  
^\_b`b``ababbabbab`b\_\_babababa`aaaabb`ba`  
@HWI-EAS443:3:32:121:618#0/1  
AAAGAAATCTCTGTGTCTTGTGAATTAGTCATCATCTTTC  
+HWI-EAS443:3:32:121:618#0/1  
^a`\_S\_``bbba```bb`a]NZ\_``[M¥¥`b`]`¥a``  
@HWI-EAS443:3:32:1229:103#0/1  
CAGATGGAGGACCAAACCTTATACAATATACGGAATCTTCA  
+HWI-EAS443:3:32:1229:103#0/1  
abbabbbaa\_a`ba^Xaaaaa``````\_Zaa^\_aYaaaa  
@HWI-EAS443:3:32:127:1853#0/1  
GTCCACTTCCCTTTCTGAGTATTGGTGTGTTCTGTTTA  
+HWI-EAS443:3:32:127:1853#0/1  
`]bbbabbb`abXa`aa\_^]Wa`a\_Y¥¥^\_^VQ^Y^`[`  
@HWI-EAS443:3:32:127:729#0/1  
GGGCCGTTGCAGGTCCAAGGTCATTGTTTATCATGTTGTT  
+HWI-EAS443:3:32:127:729#0/1  
aaabaa\_\_]aa^a]a\_[X`\_T`^a`\_¥`\_Y]`X^^\_¥[ZY  
@HWI-EAS443:3:32:138:82#0/1  
CAGTAGGGGCAATGAAAAGAAGCCAAACTGGCAAATGT  
+HWI-EAS443:3:32:138:82#0/1  
aabaabbbaabaabba`aaaaa\_a`aa`^aa`^^^G^aY  
@HWI-EAS443:3:32:1420:875#0/1  
AAGAAGAAAATTGAGAAAATAAGGCCTCTTCTAATAGATG  
+HWI-EAS443:3:32:1420:875#0/1  
\_`^[\_bZ]Y^a\_a``\_aabaaaa]¥\_a]aa`a`\_a^baab  
@HWI-EAS443:3:32:1456:44#0/1  
GTTGATTCCCACTAACTTGCAGGTCCTGTAGAATCTGTCC  
+HWI-EAS443:3:32:1456:44#0/1  
aaaaaba^`aa`\_a\_NZX`¥WUR[W\_^\_Q]\_Z]aXP¥  
@HWI-EAS443:3:32:1512:1423#0/1  
TGAGAAAGATGATGACTAATTCACAAGACACAGAGATTTTC  
+HWI-EAS443:3:32:1512:1423#0/1  
abaa`a`baaaaa`a``aaa`aa`aa`^\_\_`\_^`^\_\_a\_  
@HWI-EAS443:3:32:1525:530#0/1  
CGATACTGAATCTTGGACAAAAGAAATACACCAAGACAAT  
+HWI-EAS443:3:32:1525:530#0/1  
aaWaa^``\_b\_]b`¥Za[babab\_aaaa^aa\_aYb`baab  
@HWI-EAS443:3:32:153:1664#0/1  
GGCTATCGCAACACCTGGGATGCAGATTAGAGGTTTCGTA  
+HWI-EAS443:3:32:153:1664#0/1  
``bbb^`^a^``\_`baaabbaaab`bbba^[\_`\_abbY]`  
@HWI-EAS443:3:32:1544:429#0/1  
GCCAGGGTCGACTTCGAGTCTGGACGGATCAAGAAAGAAG  
+HWI-EAS443:3:32:1544:429#0/1  
\_X\_¥T`\_L¥YSNUVNYU[VLV`\_VSY^URQPW\_LRLRYLL  
@HWI-EAS443:3:32:1551:1482#0/1  
TTGCGAAAAGCTTGAACAGTCTGGGCTCCAGTAGGGGGC

+HWI-EAS443:3:32:1551:1482#0/1  
aab`aa`^)]abaa`\_\_\_a`^a`R¥¥` `V[ ]^WaYXa\_\_  
@HWI-EAS443:3:32:1558:1315#0/1  
GTCTGGAGTAAATGAATCAGCTGACATGAGTATTGGAGTA  
+HWI-EAS443:3:32:1558:1315#0/1  
\_abbbabaabbaba\_b\_ababaa`baaaa`baa\_ab^a  
@HWI-EAS443:3:32:1560:503#0/1  
CAGAAACATCCTGAGCATGGCACCCATAATGTTCTCAAAC  
+HWI-EAS443:3:32:1560:503#0/1  
abbabaaba`bbba]baaaaa`]a`ba`a\_a]aWa`aa  
@HWI-EAS443:3:32:156:398#0/1  
AAATCCAGCGCAAATGCCATAAGCACCATTCCTTA  
+HWI-EAS443:3:32:156:398#0/1  
a`^abaaaa^aa[ `a`\_aaa`¥` \_` ` ` ` ^ ` ` \_\_WO  
@HWI-EAS443:3:32:1580:35#0/1  
ATGGGCTCCAATCATCCGACGATTTTGCTCTCATAGTGAA  
+HWI-EAS443:3:32:1580:35#0/1  
^`aZ\_W\_bbbab¥b`R]a]¥`aaa]^\_aaUaU`¥]YO\_[`  
@HWI-EAS443:3:32:1595:1745#0/1  
GATTGATGCCAGGTCGACTTCGAGTCTGGACGGATCAAG  
+HWI-EAS443:3:32:1595:1745#0/1  
\_`^aaba\_a^aaU¥QZa\_a`\_S^a`UZa\_Z\_¥`\_^Maaa\_  
@HWI-EAS443:3:32:1599:765#0/1  
CTGGAGTAAATGAATCAGCTGACATGAGTATTGGAGTAAC  
+HWI-EAS443:3:32:1599:765#0/1  
aabb]`)bbbababaab`^aaa`a\_aa`Z\_aaaa`S`aaa  
@HWI-EAS443:3:32:1662:1126#0/1  
AAGATGGTCACGCAAAGAACAATAGGGAAGAAAAACAAA  
+HWI-EAS443:3:32:1662:1126#0/1  
\_Vb]QMN[¥XR¥[YRU^[^NX`YWS^ZT\_V^¥^W\_^\_]a`  
@HWI-EAS443:3:32:1666:1445#0/1  
TAGAATCTGTCCACTCCTGCTTGTATTCCCTCATGGTTTG  
+HWI-EAS443:3:32:1666:1445#0/1  
`Ya`a^aaaRTHO¥\_VPQWW] `ULWTVVRTQLRTZWWURQ  
@HWI-EAS443:3:32:1743:1732#0/1  
CGATAATCATCATCCATTAGCTCCCATTTTAAAGCAGACTT  
+HWI-EAS443:3:32:1743:1732#0/1  
\_\_QW`\_^Q¥a^[ `YDT¥XS`P[ ]X[TY]^Z^¥^`\_\_VZY  
@HWI-EAS443:3:32:174:1733#0/1  
ATTTGCCAGTTTGGCCTTCTTTTCATTGCCCCCTACTGGG  
+HWI-EAS443:3:32:174:1733#0/1  
a\_`¥`a¥` `Z`]^Ga`Ya`¥¥\_\_QaWYHUWa\_\_¥¥[VTQV  
@HWI-EAS443:3:32:1789:833#0/1  
GAATCTTGGACAAAAGAAATACACCAAGACAATATACTGG  
+HWI-EAS443:3:32:1789:833#0/1  
\_abbabbbaa] `Yb\_aaaaaa`] `aaba^^`aa`aaaaa  
@HWI-EAS443:3:32:198:149#0/1  
AGATTCAGTATCGAGACTCCCAAGACCGTACTTAGCATGT  
+HWI-EAS443:3:32:198:149#0/1  
aa` `aaaa\_a\_a\_` `^` ` ` `W\_¥YZ^]Z]\_ZZ]PXXY^X

@HWI-EAS443:3:32:205:723#0/1  
GGGCTCCAATCATCCGACGATTTTGCTCTCATAGTGAATG  
+HWI-EAS443:3:32:205:723#0/1  
a`a`[``¥\_\_\_a\_aa\_a`a\_\_``\_\_\_a\_``W\_\_U`\_`^\_  
@HWI-EAS443:3:32:216:831#0/1  
ATGGCATTGCGCTGGAATTTTAGGAAAAGTAGAGTCG  
+HWI-EAS443:3:32:216:831#0/1  
SY`\_W\_^X\_``Y\_\_TZJZ^]¥V````T\_QIPFXU¥ST^\_  
@HWI-EAS443:3:32:228:1300#0/1  
GGGATGGGCTCCAATCATCCGACGATTTTGCTCTCATAGT  
+HWI-EAS443:3:32:228:1300#0/1  
`\_b`abaababb`Q\_ababaaab^¥`\_aaaa`a`aaZUTW  
@HWI-EAS443:3:32:25:1867#0/1  
CTTCAAGGAAAGCCATAGCCTCTAGAACACAGTCTGTTTG  
+HWI-EAS443:3:32:25:1867#0/1  
abba\_aaa]baabbbababaaa\_a^aaa]]\_`\_QIW]Y  
@HWI-EAS443:3:32:311:413#0/1  
GTTTCGTATACTTTGTTGAAACTTTAGCTAGGAGCATTG  
+HWI-EAS443:3:32:311:413#0/1  
\_``^ba\_aaZaaWZV\_]\_\_Y]]\_X`\_U\_[XMV\_`WX¥[  
@HWI-EAS443:3:32:313:314#0/1  
AGACTTTGTAATCCCCTGAATCCCCTTGTGAGTCATAAAG  
+HWI-EAS443:3:32:313:314#0/1  
a`aaaa]Ub``aaa`[]^\_R]``[[^]O\_Z\_PQOVMNVU  
@HWI-EAS443:3:32:318:1044#0/1  
CACACCAATACTCAGAAAAGGAAAGTGGACGACAAACAC  
+HWI-EAS443:3:32:318:1044#0/1  
aaa[^SZ[VF[UVVVV^Y^\_]YWTT]XWVVYX¥TUVVTUX  
@HWI-EAS443:3:32:335:413#0/1  
CTCAAATATTCCTGGGTGGGATTCTTCAAGGAAAGCCATA  
+HWI-EAS443:3:32:335:413#0/1  
aabaaab\_aaa`aaaaUaaaa`a`a\_aaa`\_a\_\_\_\_a`]a  
@HWI-EAS443:3:32:375:1486#0/1  
GAGATAACAACCCACTTTCAAAGAAAAAGGAGAGTAAGAG  
+HWI-EAS443:3:32:375:1486#0/1  
`]SX]ZXa^X``\_]`aa]]^XV]`¥`^^`W\_[\_`U\_Z]\_¥  
@HWI-EAS443:3:32:381:528#0/1  
AAAAATTCCAGCGCAAATGCCATAAGCACCACATTCCCT  
+HWI-EAS443:3:32:381:528#0/1  
a\_a^V^¥```aaa\_\_WPV\_\_`¥\_¥`MS\_`]\_\_^¥Y]]]Z  
@HWI-EAS443:3:32:387:1571#0/1  
ACAGATCTTCATGATCTCAGAGAACTCTTCTTCTTGATC  
+HWI-EAS443:3:32:387:1571#0/1  
aaa¥\_`a``aa`\_a\_``\_]\_\_\_\_`a^^\_\_^^`\_^]]\_UM¥  
@HWI-EAS443:3:32:406:560#0/1  
GTGCTCTTATTAGATAGCCTCTTATTAGTCTTTGTTT  
+HWI-EAS443:3:32:406:560#0/1  
a`U^\_aababba`\_`aaa`abaaa¥Sa`XM\_\_^`a`]`ONW  
@HWI-EAS443:3:32:443:1671#0/1  
ATGTACCCTTCCCTAGTCTTGCCATTTTGTGAGAACA



@HWI-EAS443:3:32:660:1555#0/1  
AGGGCTATTAGTATCAGATGGAGGACCAAACCTTATACAAT  
+HWI-EAS443:3:32:660:1555#0/1  
aa\_\_bab`\_aZa`a`\_`^a`^XWVa\_a\_\_\_\_`^`aa`\_  
@HWI-EAS443:3:32:706:109#0/1  
GCATTTGCGAAAAGCTTGAACAGTCTGGGCTCCCAGTAGG  
+HWI-EAS443:3:32:706:109#0/1  
aaa^b\_abbS\_aZ]ZbZ\_a`a\_UYa`[`QW\_\_ZZVVZT\_  
@HWI-EAS443:3:32:706:302#0/1  
TCTTCATGATCTCAGAGAACTCTTCTTTCTTGATCCGTCC  
+HWI-EAS443:3:32:706:302#0/1  
aa\_Xaa^`a`\_`^^`ZY^VVU]PVZ]V\_aXX\_^UXKXLZ[  
@HWI-EAS443:3:32:718:588#0/1  
GGGTGCCATGCTCAGGATGTTTCTGAACCACTCGGGTTGA  
+HWI-EAS443:3:32:718:588#0/1  
aab[a\_aaa]a^\_a`a\_\_aY````\_a````\_]\_````X\_\_Z  
@HWI-EAS443:3:32:761:2039#0/1  
TCATGATCTCAGAGAACTCTTCTTTCTTGATCCGTCCAGA  
+HWI-EAS443:3:32:761:2039#0/1  
a`F\_]\_a]\_USUHZ]X`a`\_\_a^\_]X^IY\_ZXQ^X`]\_\_  
@HWI-EAS443:3:32:799:688#0/1  
CTGATTCATTTACTCCAGACACTCCAAAGCTGGGTAGCTC  
+HWI-EAS443:3:32:799:688#0/1  
abbaabbbbaabaaa\_aaaaa`aa`aaa`[````Z`\_^]a  
@HWI-EAS443:3:32:821:1147#0/1  
CTCCTGCTTGTATTCCCTCATGTTTGGTGCATTCACTAT  
+HWI-EAS443:3:32:821:1147#0/1  
aa``\_\_\_\_`\_`[a\_\_^a`]Z^NPU\_^SUX\_Y^^^V\_^[\_]  
@HWI-EAS443:3:32:872:56#0/1  
GCCCCGATTGATGCCAGGGTCGACTTCGAGTCTGGACGGA  
+HWI-EAS443:3:32:872:56#0/1  
a\_Z\_bb]`bbaaaa\_\_aaU`a]^`[ZX]^`^`]^`Z]X  
@HWI-EAS443:3:32:892:683#0/1  
AATTCCAGCGCAAATGCCATAAGCACACATTCCCTTAT  
+HWI-EAS443:3:32:892:683#0/1  
\_abbb\_\_\_\_a`aaa`aa^a`ba``abY`aX]`aYaY\_a`a  
@HWI-EAS443:3:32:923:1663#0/1  
ATTTGCGAAAAGCTTGAACAGTCTGGGCTCCCAGTAGGGG  
+HWI-EAS443:3:32:923:1663#0/1  
aaaa`aa`aa`\_`^`\_`\_`\_\_^\_^V]\_`X]\_^`Z`R`XXX]  
@HWI-EAS443:3:32:938:838#0/1  
GTCAGCTGATTCATTTACTCCAGACACTCCAAAGCTGGGT  
+HWI-EAS443:3:32:938:838#0/1  
abaY]S\$babbbbb[bbbbbaY]`Z`Q\_SUX``ZKTY\_Za]Y  
@HWI-EAS443:3:32:956:1116#0/1  
AGAGAGGCTATCTAATAAGAGCACTGACATTAATAACGAT  
+HWI-EAS443:3:32:956:1116#0/1  
aa^Vaa^a\_XNTW\_a\_\_aZ]WLXLLULGVO\_SX^[^]U\$T  
@HWI-EAS443:3:32:965:1957#0/1  
GTTCCAGAAACATCCTGAGCATGGCACCCATAATGTTCTCA

+HWI-EAS443:3:32:965:1957#0/1  
T^VZab^¥`b¥`]a`]aaabXS[^aY`aba`ba\_TZb^aa  
@HWI-EAS443:3:32:981:1430#0/1  
ATGGGTGCCATGCTCAGGATGTTTCTGAACCACTCGGGTT  
+HWI-EAS443:3:32:981:1430#0/1  
aabaa\_\_aaa\_`\_`^¥[^^[Z\_`]`\_`aN]^^U]Y[\_UY  
@HWI-EAS443:3:33:1015:1029#0/1  
GATCAAACCCAATCAAAGGTAGGGCTATTAGTATCAGATG  
+HWI-EAS443:3:33:1015:1029#0/1  
aaabbbbaabab^abb^bba\_aaa^aaba]baX\_a[`a`\_\_  
@HWI-EAS443:3:33:1047:773#0/1  
CTGTGTTTGTGCTCCACTTTCCCTTTTCTGAGTATTGGTG  
+HWI-EAS443:3:33:1047:773#0/1  
aba[b`bb[aaaaaaZ]bbb`a\_baaa\_`^¥VaW]\_a`\_GS  
@HWI-EAS443:3:33:1052:1895#0/1  
GTGGTGCTTATGGCATTTCGCGCTGGAATTTTTAGGAAAA  
+HWI-EAS443:3:33:1052:1895#0/1  
`a\_b^bbaabaaaabaaaU`a`a`[]a`aaa^\_\_\_\_\_a]  
@HWI-EAS443:3:33:1052:931#0/1  
TGATTCCCACTAACTTGCAGGTCCTGTAGAATCTGTCCAC  
+HWI-EAS443:3:33:1052:931#0/1  
aabbbabaaaab^aaaa`aaa]``a`]\_a¥Z`Y\_\_¥¥S¥U  
@HWI-EAS443:3:33:1055:237#0/1  
GAGACAACATGACCAAGAAGATGGTCACGCAAAGAACAAT  
+HWI-EAS443:3:33:1055:237#0/1  
aa`a`aaaaaaa\_`````aa\_`a\_X\_¥^^XXZW^X]Z[^  
@HWI-EAS443:3:33:1062:828#0/1  
CCCGGATTGATGCCAGGGTCGACTTCGAGTCTGGACGGAT  
+HWI-EAS443:3:33:1062:828#0/1  
abbab\_`aaaabaaa\_ab[aaaa`aa\_`a^aaXa`\_a``^  
@HWI-EAS443:3:33:1150:1563#0/1  
AAGGGATTGAGGGATTACAAAGTCTTCCCGATAATCAT  
+HWI-EAS443:3:33:1150:1563#0/1  
`QGURQ^Raaa`Y]^\_¥Ya]a\_S\_[¥`WH^^Z]]Z¥Z^Z  
@HWI-EAS443:3:33:1158:952#0/1  
GTCCACTCCTGCTTGTATTCCCTCATGGTTTGGTGCATTC  
+HWI-EAS443:3:33:1158:952#0/1  
Z^]a`\_]\_\_\_\_¥a``^]`\_ba\_]\_]`a]¥`^WKZ`]a`a\_  
@HWI-EAS443:3:33:1170:1968#0/1  
GGGCAATGAAAAGAAGGCCAAACTGGCAAATGTTGTGAGA  
+HWI-EAS443:3:33:1170:1968#0/1  
^`\_`a`bbbbbbY\_¥Vbbabba`a^Z]¥aba^Saa^^\_a\_  
@HWI-EAS443:3:33:1174:560#0/1  
TCCAATCATCCGACGATTTTGCTCTCATAGTGAATGCACC  
+HWI-EAS443:3:33:1174:560#0/1  
aaaaabaaaa\_baab`aaaa`aaa\_aaa\_`V^`\_¥\_\_R  
@HWI-EAS443:3:33:1280:209#0/1  
ATTCCCACTAACTTGCAGGTCCTGTAGAATCTGTCCACTC  
+HWI-EAS443:3:33:1280:209#0/1  
ab`baaa\_a\_a\_\_a`\_aaa^Y¥\_a^^]^^^YWURY]Y YNU

@HWI-EAS443:3:33:1280:984#0/1  
ATTCATTTACTCCAGACTCCAAAGCTGGGTAGCTCCAT  
+HWI-EAS443:3:33:1280:984#0/1  
ababbbbbbbaaaababbq]aaa]V\_X^a^`UN\_\_[\_^\_X  
@HWI-EAS443:3:33:1290:211#0/1  
AACAGATCTTCATGATCTCAGAGAACTCTTCTTTCTTGAT  
+HWI-EAS443:3:33:1290:211#0/1  
a]a`\_`bbb`Yaaba^ba`ZZba[a\_]aa^aY\_0``\_\_`  
@HWI-EAS443:3:33:1292:760#0/1  
GGCTAATTTTAGCATGGAGCTACCCAGCTTTGGAGTGTCT  
+HWI-EAS443:3:33:1292:760#0/1  
ab`a¥aaba`a``aa\_a`¥aa]UZ\_R]aaa\_N[^`RZa  
@HWI-EAS443:3:33:1301:1454#0/1  
GATTTCTTTACAATCACTGGGACAACACTAAGTGGAAT  
+HWI-EAS443:3:33:1301:1454#0/1  
a[a\_abbaaZaaaa`\_aa\_a`a\_\_\_`]¥^^`VMTX\_^Y^]  
@HWI-EAS443:3:33:1314:179#0/1  
GTTGATCCCACTAACTTGCAAGTCCTGTAGAATCTGTCC  
+HWI-EAS443:3:33:1314:179#0/1  
a``bbbbbaababaa\_a`a`aaa`\_`ab\_aa\_UaXa\_¥YR  
@HWI-EAS443:3:33:133:259#0/1  
GAGATTTCTTTACAATCACTGGGACAACACTAAGTGGA  
+HWI-EAS443:3:33:133:259#0/1  
aabaaabaabaaba^aaaaaaaa\_aaaa`a^\_T\_aVa^\_  
@HWI-EAS443:3:33:1380:115#0/1  
GGATGAACAGATGTACCAGAAGTGCTGCAATCTATTCGAG  
+HWI-EAS443:3:33:1380:115#0/1  
ababbbbabbaaaaaaaaa`b^\_`aa`\_`aUX`a]V[aa  
@HWI-EAS443:3:33:1385:1960#0/1  
GAAAAGCTTGAACAGTCTGGGCTCCAGTAGGGGGCAATG  
+HWI-EAS443:3:33:1385:1960#0/1  
aZ^b^[\_a]`aa\_a`PWaYNR]\_`S\_¥`Y\_\_PV\_ZS\_¥V\_  
@HWI-EAS443:3:33:1430:1528#0/1  
CCTATTGTTCTTTGCGTGACCATCTTCTTGGTCATGTTGT  
+HWI-EAS443:3:33:1430:1528#0/1  
aaa`\_`b\_\_a`aa[`¥`^aa`W\_a`aaX`\_a\_YO\_[a^\_a[  
@HWI-EAS443:3:33:1477:402#0/1  
ATTCCATGCTTTTGGCTGGACCATGGGCTGGCATTACCAC  
+HWI-EAS443:3:33:1477:402#0/1  
abba`\_a`aaaa\_``]aZTWHDY\_\_`MR[UWNT]MPPPYV  
@HWI-EAS443:3:33:1484:1623#0/1  
CAGGTCCAAGGTCATTGTTTATCATGTTGTTCTTTATCAC  
+HWI-EAS443:3:33:1484:1623#0/1  
aV`\_`¥abbbb`aabababbaa`\_`ab[aZZaW^\_\_\_\_`Z\_]`  
@HWI-EAS443:3:33:149:1027#0/1  
TGTTGATCCCACTAACTTGCAAGTCCTGTAGAATCTGTC  
+HWI-EAS443:3:33:149:1027#0/1  
aa\_aabaabbaabaaaaa`\_`aa`\_V\_\_`\_[a\_\_\_\_^``\_\_\_\_  
@HWI-EAS443:3:33:1503:1394#0/1  
GCCAGGTTCGACTTCGAGTCTGGACGGATCAAGAAAGAAG

+HWI-EAS443:3:33:1503:1394#0/1  
`\_]\_RZ[X`^[ZJQ`N`a[U00``ZN[^NNYXYUYUZUU¥W  
@HWI-EAS443:3:33:1510:1494#0/1  
GAGATTTCTTTCACAATCACTGGGGACAACACTAAGTGGA  
+HWI-EAS443:3:33:1510:1494#0/1  
a\_ababaabbabaabbbaba`aaY\_a^aa`aSY^[`[\_^\_  
@HWI-EAS443:3:33:151:1974#0/1  
GGCTTGTGTTGAGAATAGAACGATTCTTCTTGGGAATCCA  
+HWI-EAS443:3:33:151:1974#0/1  
a`baa[[\_]`\_TWaa\_a^a`X]ZZ\_\_[ZaY[QNTZVUP¥[  
@HWI-EAS443:3:33:1556:1640#0/1  
CAGGAATGTGTAGTTGCAACGGCATCATATTCCATGCTTT  
+HWI-EAS443:3:33:1556:1640#0/1  
Wa[¥abaabbaa[Wbb`bbabb``babbbba^Qa\_aa``a  
@HWI-EAS443:3:33:1576:368#0/1  
ATGGGCTGGCATTACCACAGCATTGTTTACAGAATCAATC  
+HWI-EAS443:3:33:1576:368#0/1  
aa\_aaa`Y^¥^`^`^`¥]0\_[V^\_¥[S¥\_ZV¥UU]YXYZXU  
@HWI-EAS443:3:33:1680:728#0/1  
CAAGAATCCCCTTTGGCTTGTGTTGAGAATAGAACGATT  
+HWI-EAS443:3:33:1680:728#0/1  
aaa`[\_`\_[]^\_\_a`\_`^`aX^ZX\_BBBBBBBBBBBBBBBB  
@HWI-EAS443:3:33:1721:1935#0/1  
CATGGGCTGGCATTACCACAGCATTGTTTACAGAATCAAT  
+HWI-EAS443:3:33:1721:1935#0/1  
abb``b`abbbbab``bb`b`\_aaab\_a\_ba\_^a\_a`\_a`  
@HWI-EAS443:3:33:1742:1088#0/1  
CATCCTGAGCATGGCACCCATAATGTTCTCAAACAAAATG  
+HWI-EAS443:3:33:1742:1088#0/1  
abbabbbbbb`babb^¥bbbbbb`a]a`a\_QG]a`]aa  
@HWI-EAS443:3:33:217:1134#0/1  
GTAGAATCTGTCCACTCCTGCTTGTATTCCCTCATGGTTT  
+HWI-EAS443:3:33:217:1134#0/1  
a]¥aa`aaaa[aa``Xaa[\_a`\_`¥[^aaa]Z^[[^ZX\_]`  
@HWI-EAS443:3:33:243:993#0/1  
CCCATAATCATCATCCATTAGCTCCCATTTAAGCAGAC  
+HWI-EAS443:3:33:243:993#0/1  
aa]\_U\_]WXX[] [YZ\_] ]W]]^X¥^XWSWYZZYYTXWWW  
@HWI-EAS443:3:33:316:1883#0/1  
CTTCGAGTCTGGACGGATCAAGAAAGAAGATTCTCTGAG  
+HWI-EAS443:3:33:316:1883#0/1  
\_]\_a¥a]P\_¥XU^`^`[^b^b\_abb¥Q]^`^`[U0[`^^Ua\_  
@HWI-EAS443:3:33:330:1051#0/1  
GGGCAATGAAAAGAAGCCAAACTGGCAAATGTTGTGAGA  
+HWI-EAS443:3:33:330:1051#0/1  
aaabaabbXbbaaaa`\_bbaaaaaaaa`a`X`\_]\_\_`\_  
@HWI-EAS443:3:33:368:1681#0/1  
TTCCTCTTTGTTTATTGATTCCATTACATCCTTTAAGAAA  
+HWI-EAS443:3:33:368:1681#0/1  
^abb\_bbbbb^bb¥\_`^abb^b\_b`^Z\_baaaaX[ba^\_aa



@HWI-EAS443:3:33:369:297#0/1  
AAAAATTCCAGCGCAAATGCCATAAGCACCATTCCT  
+HWI-EAS443:3:33:369:297#0/1  
aaaa\_aa`a^\_a^`\_]\_\_\_\_\_^a^\_a^`]^\_X[YZXZZX  
@HWI-EAS443:3:33:386:1360#0/1  
TTCCCCTTTGGCTTGTGTTGAGAATAGAACGATTCCTCTT  
+HWI-EAS443:3:33:386:1360#0/1  
ababaaaababaaaZ¥`\_]`^]`¥a\_aQ`a^¥ZMZRU\_]`]  
@HWI-EAS443:3:33:397:377#0/1  
ATTAAATACGATGACCAAAGATGCAGAGAGAGGCAAGTTA  
+HWI-EAS443:3:33:397:377#0/1  
aaaaaaWG[ ]\_]aa\_\_\_V]¥]\_a\_\_\_`^aaY\_X\_¥G^UZW  
@HWI-EAS443:3:33:399:887#0/1  
GCCTCTCTGCATCTTTGGTCATCGTATTTAATGTCAGT  
+HWI-EAS443:3:33:399:887#0/1  
abbabbbababbaaaaaaaa\_aXaba[aaaaa^`\_[a\_¥  
@HWI-EAS443:3:33:404:349#0/1  
CCCAGGAATATTTGAGAATTCATGCCTTGAAACAATGGAA  
+HWI-EAS443:3:33:404:349#0/1  
aba\_aa¥aaaaaaaaaaaa`a\_aa\_a\_a\_a`Z^Yb^`^^\_  
@HWI-EAS443:3:33:413:1210#0/1  
CACCCAGGAATATTTGAGAATTCATGCCTTGAAACAATGG  
+HWI-EAS443:3:33:413:1210#0/1  
``aaa\_Z¥Ta`S¥\_L\_ab`¥^a]`bbaaaa`[0a`^X`a]  
@HWI-EAS443:3:33:423:185#0/1  
CATTAAACAGAAATCAACCGGCAGCAACTGCATTGGCCAA  
+HWI-EAS443:3:33:423:185#0/1  
`baba\_[aab\_baababaaaa`a`aaa`^aa\_Z]\_\_\_]YP`  
@HWI-EAS443:3:33:426:227#0/1  
AACAGATCTTCATGATCTCAGAGAACTCTTCTTTCTTGAT  
+HWI-EAS443:3:33:426:227#0/1  
aaaaa`aaaaa`aa`\_a`\_\_¥Z^`\_`^`^`^^`\_`^X]  
@HWI-EAS443:3:33:465:887#0/1  
AAGACTTCTATGGTGTGGCCAATGCAGTTGCTGCCGTT  
+HWI-EAS443:3:33:465:887#0/1  
aaY[aaaaa^a`aWa`\_a^aa`a]`¥LY\_\_Y\_0]]W`XOV  
@HWI-EAS443:3:33:515:1681#0/1  
GTTGAGAATAGAACGATTCCTCTTGGGAATCCAGGAATGT  
+HWI-EAS443:3:33:515:1681#0/1  
ZYb`aU`ab\_bbbbbba`baVbXOZOH¥[Z`[[^^^Ua^Z  
@HWI-EAS443:3:33:546:213#0/1  
AAAGCTTGAACAGTCTGGGCTCCCAGTAGGGGGCAATGAA  
+HWI-EAS443:3:33:546:213#0/1  
\_]T`\_[^\_Y\_]`^a]aa\_\_^Za`aaa\_RT\_ZY\_[[[V][Z^  
@HWI-EAS443:3:33:554:718#0/1  
CTTTGATGAACAATTGAAGAGCCATCTGGGCCGTTGCAGG  
+HWI-EAS443:3:33:554:718#0/1  
abb\_bb]W[^aaaaWHY`[ `[ \_`aaa`¥` [ ]\_ ]TY\_]\_`W  
@HWI-EAS443:3:33:573:477#0/1  
GTGCATTCACTATGAGAGCAAATCGTCGGATGATTGGAG

+HWI-EAS443:3:33:573:477#0/1  
\_TUQWaaZZ\_¥UZXQWOPTXV^`Z]YRYL[[RVNRR¥USU  
@HWI-EAS443:3:33:600:530#0/1  
AGCTTGAACAGTCTGGGCTCCCAGTAGGGGCAATGAAAA  
+HWI-EAS443:3:33:600:530#0/1  
`]^`^]a^[aV^\_a[a¥^a\_` `[VTLZ^\_] [[UT¥[`ZZ\_¥  
@HWI-EAS443:3:33:603:423#0/1  
AATCCAGGAATGTGTAGTTGCAACGGCATCATATTCCATG  
+HWI-EAS443:3:33:603:423#0/1  
^Yabab\_¥\_aba\_`Jba¥¥`\_a¥a\_^\_a\_aa`¥` `[[`\_`  
@HWI-EAS443:3:33:611:525#0/1  
GTAAACAGAACACACCAATACTCAGAAAAGGGAAAGTGGA  
+HWI-EAS443:3:33:611:525#0/1  
Y^¥[H\_^]QYaaa\_a[\_[Z`^]Q]ZWSH^]aa[\_a]]a^^  
@HWI-EAS443:3:33:617:131#0/1  
GGATGATGATTATCGGGGAAGACTTTGTAATCCCCTGAAT  
+HWI-EAS443:3:33:617:131#0/1  
`aaaaa\_aaaaa`a`a\_a^a`]`\_\_\_\_\_X`\_\_ZW^^V^]]X  
@HWI-EAS443:3:33:627:1293#0/1  
GGAGCATTTCGAAAAGCTTGAACAGTCTGGGCTCCCAGT  
+HWI-EAS443:3:33:627:1293#0/1  
aZ]^bbaaaabaabbaaaaaaaaaaZ\_Wa\_]\_\_TW^\_]Z]V  
@HWI-EAS443:3:33:644:791#0/1  
GGCTCCAATCATCCGACGATTTTGCTCTCATAGTGAATGC  
+HWI-EAS443:3:33:644:791#0/1  
\_0¥]^`aW`\_aaa`X¥a¥\_\_`\_]\_\_]\_^a¥^ZV^^^]¥X  
@HWI-EAS443:3:33:684:2026#0/1  
GGGGCAATGAAAAGAAGCCAAACTGGCAAATGTTGTGAG  
+HWI-EAS443:3:33:684:2026#0/1  
`aab`bb```aaaWXba\_aaab\_aabaab`baY\_^aU\_aa  
@HWI-EAS443:3:33:687:1398#0/1  
GTCCAATCATAAGTCTGGCGACCTTGAGTTAGTTTATCTA  
+HWI-EAS443:3:33:687:1398#0/1  
a\_bb]^`aaa\_aU^Ua\_a`b]\_\_\_\_\_^¥\_^^¥[ZX\_]WX]\_  
@HWI-EAS443:3:33:742:48#0/1  
TGCCGTTGCAACTACACATTCCTGGATTCCCAAGAGGAAT  
+HWI-EAS443:3:33:742:48#0/1  
a```\_\_aaaaaaa`aaaaa\_\_`^\_V\_\_^\_]U^Z^UV^V  
@HWI-EAS443:3:33:754:1274#0/1  
CTAAAAATTCCAGCGAAAATGCCATAAGCACCACATTCC  
+HWI-EAS443:3:33:754:1274#0/1  
aa\_``^^babb¥bbbbbb`\_aab```\_bb^bbaPbaba^`\_  
@HWI-EAS443:3:33:84:543#0/1  
TGCCGTTGCAACTACACATTCCTGGATTCCCAAGAGGAAT  
+HWI-EAS443:3:33:84:543#0/1  
]Xa[bRT\_a\_abXSa]^`[^X¥`Zaa\_\_`]^`¥VXQ¥J^]X  
@HWI-EAS443:3:33:857:114#0/1  
ATGGGCTCCAATCATCCGACGATTTTGCTCTCATAGTGAA  
+HWI-EAS443:3:33:857:114#0/1  
a``^^aa`[^`\_\_`\_¥a`[]bX\_`\_`M¥U[\_ZW[TZGU^Z

@HWI-EAS443:3:33:871:1053#0/1  
GGCTTTCCTTGAAGAATCCCACCCAGGAATATTTGAGAAT  
+HWI-EAS443:3:33:871:1053#0/1  
aabaaabbabbbaaaabbbbbaaaaaaaaaaaaaa\_a`a`aa\_  
@HWI-EAS443:3:33:878:48#0/1  
CAACTGCATTGGCCAACACCATAGAAGTCTTTAGATCGAA  
+HWI-EAS443:3:33:878:48#0/1  
`aba]aaaaa````\_Ua\_\_[\_`aa`Z[[S[[\_Q\_]^^Z]Z  
@HWI-EAS443:3:33:893:969#0/1  
GAGGCCATGGTGTCTAGGGCCCGATTGATGCCAGGGTCG  
+HWI-EAS443:3:33:893:969#0/1  
P]`aaaaZV¥¥\_X\_`[a[WZ``\_XTX``a¥`YEWVZ¥N¥V  
@HWI-EAS443:3:33:915:898#0/1  
GATGCCAGGGTCGACTTCGAGTCTGGACGGATCAAGAAAG  
+HWI-EAS443:3:33:915:898#0/1  
[ `ab[WV\_V^UU^TWU¥\_\_abW]Wa[OQZXVGFRRX\_¥`X  
@HWI-EAS443:3:33:925:1259#0/1  
CCCACCAGTATATTGTCTTGGTGTATTTCTTTTGTCCAAG  
+HWI-EAS443:3:33:925:1259#0/1  
abb\_bb\_ba]a\_aaaYbbaaaNY]X\_`aaaab]aY\_b]`¥  
@HWI-EAS443:3:33:92:744#0/1  
GTCCTCCATCTGATACTAATAGCCCTACCTTTGATTGGGT  
+HWI-EAS443:3:33:92:744#0/1  
aWaaaaab\_\_^`\_\_a`aa`aYa\_\_\_\_a\_] [\_^\_¥WVU]V  
@HWI-EAS443:3:33:935:1209#0/1  
AATACTCAGAAAAGGGAAAGTGGACGACAAACACAGAGAC  
+HWI-EAS443:3:33:935:1209#0/1  
`\_a^aaa`baa\_aa¥\_¥aa`UX[\_a`^aa\_a¥S^\_\_¥¥`\_  
@HWI-EAS443:3:33:952:107#0/1  
CAAAGCTGGGTAGCTCCATGCTAAAATTAGCCACAAATCC  
+HWI-EAS443:3:33:952:107#0/1  
abb¥`bbbaa\_baaaa`a`\_`aa\_a`^`¥^V]\_\_^^X0  
@HWI-EAS443:3:33:958:1235#0/1  
CAGTGATTGTGAAAGAAATCTCTGTGTCTTGTGAATTAGT  
+HWI-EAS443:3:33:958:1235#0/1  
abaab`abb^b`baa\_bbaaaaaa``aaaV\_SY^]aZX[  
@HWI-EAS443:3:33:970:1705#0/1  
CCCCTTTGGCTTGTGTTGAGAATAGAACGATTCCTCTTGG  
+HWI-EAS443:3:33:970:1705#0/1  
ab¥^]¥U]\_Z¥U¥PWSX\_]XW\_W]P]\_ZN[XKKPTXPLTH  
@HWI-EAS443:3:34:1027:142#0/1  
GCACAGCATCACTGAGTCCTGGGATGATGATGGGCATGTT  
+HWI-EAS443:3:34:1027:142#0/1  
]baabbaabaaa^]X\_\_a^aaaa\_aa^^`^] ^W[UUY]TW  
@HWI-EAS443:3:34:1032:1322#0/1  
CAACTGCATTGGCCAACACCATAGAAGTCTTTAGATCGAA  
+HWI-EAS443:3:34:1032:1322#0/1  
````\_`\_bbbZZZaaUZ¥`ab¥YabaaaYa`]`¥NX^[V[`  
@HWI-EAS443:3:34:1076:1025#0/1  
AACGATTCCTCTTGGGAATCCAGGAATGTGTAGTTGCAAC

+HWI-EAS443:3:34:1076:1025#0/1  
\_\_`aa`a`¥¥\_`a`a[P`a`a`a`^M`^¥`V[[V`UNUXV  
@HWI-EAS443:3:34:1120:1979#0/1  
AGAATTCCCCTTTGGCTTGTGTTGAGAATAGAACGATTCC  
+HWI-EAS443:3:34:1120:1979#0/1  
[`^¥`[`a`¥Y\_U¥UQZaaYNXP¥SWSZ\_S^S)`]XIWWUB  
@HWI-EAS443:3:34:1146:1841#0/1  
GATACACATATAGGTGCCATAGGGGAGACACACAAATTCA  
+HWI-EAS443:3:34:1146:1841#0/1  
abbbbabbbbb```aaaabaaaa^``aab`a]aa`^\_R\_  
@HWI-EAS443:3:34:1186:681#0/1  
GGCCCGGATTGATGCCAGGGTCGACTTCGAGTCTGGACGG  
+HWI-EAS443:3:34:1186:681#0/1  
abbaaab^aba``aa`b¥^]U]aa`aa]aa`VK¥a`ZN\_U  
@HWI-EAS443:3:34:1210:1388#0/1  
GCTGATTCATTTACTCCAGACACTCCAAAGCTGGGTAGCT  
+HWI-EAS443:3:34:1210:1388#0/1  
^`b`aYaY\_b```TR]\_^UWZU[][\_R\_X[[¥XNXZYU  
@HWI-EAS443:3:34:1225:365#0/1  
GCCAGGTTCGACTTCGAGTCTGGACGGATCAAGAAAGAAG  
+HWI-EAS443:3:34:1225:365#0/1  
aa\_aaab[aba``a^a`a^`aa\_¥`\_ZW\_ZZ\_W¥^W^WW  
@HWI-EAS443:3:34:1267:308#0/1  
TGCCGTTGCAACTACACATTCCTGGATTCCCAAGAGGAAT  
+HWI-EAS443:3:34:1267:308#0/1  
abaaaaaaaaa^]]¥[`^Z[¥Z``¥]Y¥XQZY]Y\_XYBB  
@HWI-EAS443:3:34:1276:1735#0/1  
AACTTGCAGGTCTCTAGAAATCTGTCCACTCCTGCTTGTA  
+HWI-EAS443:3:34:1276:1735#0/1  
\_^`a`X`ab\_]baa^a`b`bab\_]`aa¥[]^][[PTYT  
@HWI-EAS443:3:34:1286:1516#0/1  
CTGGGAGCCCAGACTGTTCAAGCTTTTCGCAAATGCTCCT  
+HWI-EAS443:3:34:1286:1516#0/1  
abbbb`bab`bbabba\_baaaaaa`b`]`aaa\_UY\_^XV  
@HWI-EAS443:3:34:1290:1573#0/1  
AATTTCTCGAATAGATTGCAGCACTTCTGGTACATCTGTT  
+HWI-EAS443:3:34:1290:1573#0/1  
``abaa`bbaaaa`a\_\_`¥aa`\_`aaa`\_¥\_Z``\_Z\_S]  
@HWI-EAS443:3:34:1294:72#0/1  
GGGAGCTAATGGATGATGATTATCGGGGAAGACTTTGTAA  
+HWI-EAS443:3:34:1294:72#0/1  
a`X\_aWWWYa`a^TVOR¥^[WYYSY¥\_XLXZSMWVBBBB  
@HWI-EAS443:3:34:1336:1788#0/1  
GGGCTATCGCAACACCTGGGATGCAGATTAGAGGTTTCGT  
+HWI-EAS443:3:34:1336:1788#0/1  
a[^``aa\_b`aaaa`aa\_]U``\_^a\_a^]\_^X[TVYK  
@HWI-EAS443:3:34:1376:1248#0/1  
GCCCTTCTTTTAACTTGCCTCTCTCTGCATCTTTGGTCA  
+HWI-EAS443:3:34:1376:1248#0/1  
abbbbbbb]\_bbbbbbbaa\_aTaaaa\_a`a\_[\_U\_

@HWI-EAS443:3:34:1392:506#0/1  
GAACAATTGAAGAGCCATCTGGGCCGTTGCAGGTCCAAGG  
+HWI-EAS443:3:34:1392:506#0/1  
``^`aaaaaba\_a\_aaaa`^]`^`\_]`\_a^WYSSSMRRB  
@HWI-EAS443:3:34:1395:1263#0/1  
GGGTGGGATTCTTCAAGGAAAGCCATAGCCTCTAGAACAC  
+HWI-EAS443:3:34:1395:1263#0/1  
a`[Ga`V]\_\_a`\_\_\_¥U^^Q`YY\_0\_]\_Y]Y\_XTLUBBB  
@HWI-EAS443:3:34:1399:189#0/1  
AAAAATTCCAGCGCAAATGCCATAAGCACCACATTCCCT  
+HWI-EAS443:3:34:1399:189#0/1  
aaaaaaaa`a`a`\_\_^Y^^\_]\_^\_^\_]\_^]ZZ^XYYQSY  
@HWI-EAS443:3:34:1425:75#0/1  
GCCATTTTGTGGAGAACATTATGGGTGCCATGCTCAGGA  
+HWI-EAS443:3:34:1425:75#0/1  
a`^`aaa\_a\_aaa\_b`\_X\_aa^`aTMXX^XYWBBBBBBB  
@HWI-EAS443:3:34:144:821#0/1  
AGTAAATGAATCAGCTGACATGAGTATTGGAGTAACAGTG  
+HWI-EAS443:3:34:144:821#0/1  
ab`bbabb^TaaabaaaaYa`[a]aa`a^¥`Za``\_`]  
@HWI-EAS443:3:34:145:401#0/1  
CTGACATTAATACGATGACCAAAGATGCAGAGAGAGGCA  
+HWI-EAS443:3:34:145:401#0/1  
aabbaaaa^a\_\_R``\_\_`\_aWa]X^^[X^P[W^]^[^]V^  
@HWI-EAS443:3:34:150:2022#0/1  
GCAACGGCCCAGATGGCTCTTCAATTGTTTCATCAAAGACT  
+HWI-EAS443:3:34:150:2022#0/1  
`bb]bbabbaS\_aa¥abaaaabaa`\_\_^`aa]Y\_PHWVZ  
@HWI-EAS443:3:34:1517:1549#0/1  
CTAAAGTTTCAACAAAGTATACGAAACCTCTAATCTGCAT  
+HWI-EAS443:3:34:1517:1549#0/1  
ab`bbbbbbbbbbabb`bbbaaaba\_aaaba`aYa]\_\_W  
@HWI-EAS443:3:34:1537:1687#0/1  
GTCTCCTATATGAACTGCTAGGGAAAAATTTCTCGAATAG  
+HWI-EAS443:3:34:1537:1687#0/1  
N^\_¥`Z`¥a¥ba`¥b[Yab`aZb^^\_¥`J^I]]bb¥\_aN  
@HWI-EAS443:3:34:1552:1797#0/1  
GCCTCTCTGCATCTTTGGTCATCGTATTTAATGTCAGT  
+HWI-EAS443:3:34:1552:1797#0/1  
ababbbbbbbbbbaabba^aaaa^abbaa\_aa¥\_]S  
@HWI-EAS443:3:34:1563:1098#0/1  
CGATTGATGGACCACTACCTGAGGATAATGAACCAAGTGG  
+HWI-EAS443:3:34:1563:1098#0/1  
ababbaabaaa¥^`aa`aa\_b`^\_a`aaa^RVW]^U^]  
@HWI-EAS443:3:34:1564:1104#0/1  
AACTTGCAGGTCCTGTAGAATCTGTCCACTCCTGCTTGTA  
+HWI-EAS443:3:34:1564:1104#0/1  
]¥H^Zabbb[¥V\_WT\_XY`baaa^XT¥[¥^V^ZR^XTPV  
@HWI-EAS443:3:34:1604:909#0/1  
CTCCAATCATCCGACGATTTTGCTCTCATAGTGAATGCAC

+HWI-EAS443:3:34:1604:909#0/1  
aaaa`X\_a[a\_`ba`a\_ababa`a`aa`a\_^PZZ\_`^]`^Y  
@HWI-EAS443:3:34:1696:1259#0/1  
AAAGACTTCTATGGTGTGGCCAATGCAGTTGCTGCCGGT  
+HWI-EAS443:3:34:1696:1259#0/1  
aa\_aZUaabb`ba]V[\_`X`ZY\_aYY^^`^a\_Z^BBBBBB  
@HWI-EAS443:3:34:1745:128#0/1  
CATGCTCAGGATGTTTCTGAACCACTCGGGTTGATTTCTG  
+HWI-EAS443:3:34:1745:128#0/1  
abbbaaaabbaaaba^ba\_`\_^`^^¥aaaX`X]^WRV^  
@HWI-EAS443:3:34:190:603#0/1  
CTTGTGTTGAGAATAGAACGATTCCTCTTGGGAATCCAGG  
+HWI-EAS443:3:34:190:603#0/1  
`b`b\_b\_abb[abb`Yab]aaababa`aaaaaa`a^^  
@HWI-EAS443:3:34:190:839#0/1  
TGCTTATGGCATTGCGCTGGAATTTTTAGGAAAAGTAG  
+HWI-EAS443:3:34:190:839#0/1  
abbaaM^b^babbbaaaba^Q]a\_aaaa``\_P\_`aaU`Y  
@HWI-EAS443:3:34:205:606#0/1  
CTGGTGGGATGGGCTCCAATCATCCGACGATTTTGCTCTC  
+HWI-EAS443:3:34:205:606#0/1  
^T\_SNa`^GQ\_NX]QZXXYYa]PW]U]^]TXZV¥V]ZSPB  
@HWI-EAS443:3:34:221:837#0/1  
CTTTGTCAGTCATAAAGAGATTGATTCTGTAACAATGCT  
+HWI-EAS443:3:34:221:837#0/1  
`^[a\_V\_a`\_^R\_QIV\_U][Y[V`a[\_]]L¥¥^`WUWTWB  
@HWI-EAS443:3:34:276:1582#0/1  
AAACAAGGGTAGATAAACTAACTCAAGGTCGCCAGACTTA  
+HWI-EAS443:3:34:276:1582#0/1  
\_\_ab`ZQS\_X`\_`W`\_a`]XU]WZ`\_Y¥0`Y\_] []ZSXZ^  
@HWI-EAS443:3:34:328:231#0/1  
CTCAATTTTCTTCTTTGTTGATTCATTGAAGTACTTCAGG  
+HWI-EAS443:3:34:328:231#0/1  
`\_bb`bbbbbbbbbbabaaaabaaaa¥`^\_aaa` [ `a]  
@HWI-EAS443:3:34:373:658#0/1  
CCGGATTGATGCCAGGGTCGACTTCGAGTCTGGACGGATC  
+HWI-EAS443:3:34:373:658#0/1  
abb\_` `a`] ` `^aaaVaaaa\_`\_Z\_aUa`a` [¥`aZZ^  
@HWI-EAS443:3:34:414:708#0/1  
TGAGAGCAAAATCGTCGGATGATTGGAGCCCATCCCACCA  
+HWI-EAS443:3:34:414:708#0/1  
aa`a`\_a\_a` ` `a\_Y^] `\_]¥^Y^V]Y^^`\_NY^X^YYXY  
@HWI-EAS443:3:34:454:1171#0/1  
GAACAATTGAAGAGCCATCTGGGCCGTTGCAGGTCCAAGG  
+HWI-EAS443:3:34:454:1171#0/1  
aa\_baaaaa`baa`aaaa`\_\_Q`^a\_\_Y\_`\_]TX\_Z]X^B  
@HWI-EAS443:3:34:506:649#0/1  
CCATGGGCTGGCATTACCACAGCATTGTTTACAGAATCAA  
+HWI-EAS443:3:34:506:649#0/1  
aa\_\_\_\_`]^X¥^bb`\_`bb\_baa`]\_aa\_a^aaba]\_\_aa

@HWI-EAS443:3:34:511:604#0/1  
GAAAGGTACATGTTTCGAGAGTAAAAGAATGAAGATTTCGA  
+HWI-EAS443:3:34:511:604#0/1  
Y\_¥\_VQ^JRb¥YT¥^b¥aa]bT`\_¥^abb¥\_bb`\_aPS` [  
@HWI-EAS443:3:34:540:1269#0/1  
CCCAGTGATTGTGAAAGAAATCTCTGTGTCTTGTGAATTA  
+HWI-EAS443:3:34:540:1269#0/1  
aba^`\_aS`ab^^[X`¥Laab`aa`]`XaaaVVVSZGYW  
@HWI-EAS443:3:34:554:1428#0/1  
GTCTGGAGTAAATGAATCAGCTGACATGAGTATTGGAGTA  
+HWI-EAS443:3:34:554:1428#0/1  
a`bbaabaVa¥` [¥a`Xa^ZXY\_\_\_\_\_`aa\_G\_P[^aIYX^  
@HWI-EAS443:3:34:569:83#0/1  
CAAAATCGTCGGATGATTGGAGCCCATCCCACCAGTATAT  
+HWI-EAS443:3:34:569:83#0/1  
abb`baab\_b`aaa`a\_\_aa\_aa\_`a`\_a^\_ZWX^VX[V^  
@HWI-EAS443:3:34:575:147#0/1  
GAAACATCCTGAGCATGGCACCCATAATGTTCTCAAACAA  
+HWI-EAS443:3:34:575:147#0/1  
abbbbaaabaaaaaaa\_baa\_`aaa\_Z\_WW^`\_`\_^]Z^^  
@HWI-EAS443:3:34:613:1545#0/1  
GGTTGTTATCTCTATTTCTCTTTGTTTCATTGATTCCATT  
+HWI-EAS443:3:34:613:1545#0/1  
\_`I\_¥\_`SYYab`X\_Z[a\_V\_Y][[¥a^ZOX]``\_`\_aBB  
@HWI-EAS443:3:34:655:1131#0/1  
GTTCTGTTTACTGTGTCCATGGTGTATCCTGTTCTCCTGTTCT  
+HWI-EAS443:3:34:655:1131#0/1  
a`bbab`a`]aa\_\_a]a```a`]a]a\_`a^\_[\_\_^\_\_]^X  
@HWI-EAS443:3:34:724:895#0/1  
AGAGATAACAACCCACTTTCAAAGAAAAAGGAGAGTAAGA  
+HWI-EAS443:3:34:724:895#0/1  
Z^`babbbb¥YaababaaabaaaaZ`b```\_a`a\_a^\_\_a\_  
@HWI-EAS443:3:34:748:1152#0/1  
GTCCCCAGTGATTGTGAAAGAAATCTCTGTGTCTTGTGAA  
+HWI-EAS443:3:34:748:1152#0/1  
a]ba]AY`U^^¥a¥ONV]a` [a\_a^¥Y`X¥Q\_^^BBBBB  
@HWI-EAS443:3:34:772:1434#0/1  
CAGATTAGAGGTTTTCGTATACTTTGTTGAACTTTAGCTA  
+HWI-EAS443:3:34:772:1434#0/1  
abbababaaaa`abaa^aabaaaa\_\_a`a`a]\_\_`^Y[^  
@HWI-EAS443:3:34:807:1851#0/1  
GATTGATGCCAGGGTCGACTTCGAGTCTGGACGGATCAAG  
+HWI-EAS443:3:34:807:1851#0/1  
Zbabbbbbb\_`¥a¥b\_ba\_abaa^Yabb\_a\_Xa[TN\_aW  
@HWI-EAS443:3:34:909:343#0/1  
GCCAGGGTCGACTTCGAGTCTGGACGGATCAAGAAAGAAG  
+HWI-EAS443:3:34:909:343#0/1  
abaaaaa¥aaaaaaa^a[aaaa`\_`\_\_\_\_`a\_\_\_\_\_R^VW  
@HWI-EAS443:3:34:930:146#0/1  
GGCTCCAATCATCCGACGATTTTGTCTCATAGTGAATGC

+HWI-EAS443:3:34:930:146#0/1  
Za`^^\_OV¥¥^`a`^¥WXRU\_a\_¥X]]V\_^]^XVZZ^HWWB  
@HWI-EAS443:3:35:1012:1567#0/1  
CTCAAGAATCCCCCTTGGCTTGTGTTGAGAATAGAACGA  
+HWI-EAS443:3:35:1012:1567#0/1  
aa`^\_YaaaaaaS\_aaa]`\_\_a`]a]aUY¥^\_\_`Q\_Z¥P^  
@HWI-EAS443:3:35:1015:1193#0/1  
AATCTGTCCACTCCTGCTTGTATTCCCTCATGGTTTGGTG  
+HWI-EAS443:3:35:1015:1193#0/1  
aaa`aa\_aaa\_\_aaa\_\_aa`ZY`\_^`a]¥X]\_ZY^^\_[Z¥  
@HWI-EAS443:3:35:1029:551#0/1  
TCTTTGATGAACAATTGAAGAGCCATCTGGGCCGTTGCAG  
+HWI-EAS443:3:35:1029:551#0/1  
aba`^^bbaa`X[aaa[b[`a\_`[a\_]a[aa`] [¥U\_V^  
@HWI-EAS443:3:35:1037:637#0/1  
GGAATGTGGTGCTTATGGCATTTCGCGCTGGAATTTTGTAG  
+HWI-EAS443:3:35:1037:637#0/1  
aaY[`a\_ba¥aaa`a]\_^`X^`\_`\_¥aZ`a¥YP[a^`] ^`  
@HWI-EAS443:3:35:1066:1223#0/1  
GGCTTGTGTTGAGAATAGAACGATTCCCTCTTGGGAATCCA  
+HWI-EAS443:3:35:1066:1223#0/1  
XO\_^^^T\_JW`UYT`X`\_`¥Xa[X`] `PaZQX\_XLTT[VV  
@HWI-EAS443:3:35:1072:1032#0/1  
GTTGATCCCACTAACTTGCAGGTCCTGTAGAATCTGTCC  
+HWI-EAS443:3:35:1072:1032#0/1  
UKY¥^\_aaWP\_a]`¥^aa`a^b¥¥]a`a^Y^Ya^aa\_NT`  
@HWI-EAS443:3:35:1072:483#0/1  
GGGCTCCAATCATCCGACGATTTTGTCTCATAGTGAATG  
+HWI-EAS443:3:35:1072:483#0/1  
aa\_\_a``aa``Ya\_¥\_\_^`^^^Ya\_U\_Y[a^Z^¥V^\_]X  
@HWI-EAS443:3:35:110:76#0/1  
GACGGATCAAGAAAGAAGAGTTCTCTGAGATCATGAAGAT  
+HWI-EAS443:3:35:110:76#0/1  
abba`Oaaa\_aaa``]a\_^`\_aaaa`\_]\_^`\_\_a\_\_^`^  
@HWI-EAS443:3:35:1134:1565#0/1  
ATGATAAACAATGACCTTGGACCTGCAACGCCAGATGG  
+HWI-EAS443:3:35:1134:1565#0/1  
aa[aaaaZ^`^[YT¥I^`¥V^`X\_\_LZXa\_^`a[XNQ][R  
@HWI-EAS443:3:35:1136:316#0/1  
GATTGATGGACCACTACCTGAGGATAATGAACCAAGTGGG  
+HWI-EAS443:3:35:1136:316#0/1  
^`baa`\_^`a```aaaa`a\_`ba`a``]a`\_W\_[]Y  
@HWI-EAS443:3:35:1152:234#0/1  
CTGTTTACTGTGTCCATGGTGTATCCTGTTCCCTGTTCCAT  
+HWI-EAS443:3:35:1152:234#0/1  
ab`[aaaa^aYb[aaaaba¥bZaaa\_aa``a\_ab\_YS]T`  
@HWI-EAS443:3:35:1173:1347#0/1  
AAAAATCCAGCGCAAATGCCATAAGCACCATTCCT  
+HWI-EAS443:3:35:1173:1347#0/1  
aba`V\_¥a`a`a\_\_\_^`¥^\_]\_\_`\_\_W\_a`\_]\_Y]`Z^



@HWI-EAS443:3:35:117:723#0/1  
GAATCCCCTTTGGCTTGTGTTGAGAATAGAACGATTCCT  
+HWI-EAS443:3:35:117:723#0/1  
``^\_Ub``aa[Z¥W`]a\_a]R¥PYWGOZ^YRY[¥PU\_LX  
@HWI-EAS443:3:35:1207:1899#0/1  
AATCCGACTCTACTTTTCCTAAAAATCCAGCGCAAAATG  
+HWI-EAS443:3:35:1207:1899#0/1  
^¥`bbaaaa`Sa[^Z`a][`bb`b]\_a[\_a]\_\_a`aZbLQ  
@HWI-EAS443:3:35:1225:1758#0/1  
TAAAAATCCAGCGCAAAATGCCATAAGCACCATTCCTCC  
+HWI-EAS443:3:35:1225:1758#0/1  
ab]`¥V\_]a^`]]\_]¥`\_`^a`]a¥¥Vaaa\_aa`X`]0]  
@HWI-EAS443:3:35:122:210#0/1  
GACGGATCAAGAAAGAAGAGTTCTCTGAGATCATGAAGAT  
+HWI-EAS443:3:35:122:210#0/1  
aZaaa^`b¥Z¥¥`\_`a\_]a]aa`[a\_`\_^]¥]a]Y[`]  
@HWI-EAS443:3:35:1255:1812#0/1  
CAAATATTCCTGGGTGGGATTCTTCAAGGAAAGCCATAGC  
+HWI-EAS443:3:35:1255:1812#0/1  
]\_]``\_baa`a\_]XFY\_]¥^a[a\_^]Y`^Z`\_a[^aZ\_  
@HWI-EAS443:3:35:1258:669#0/1  
TCTGGACGGATCAAGAAAGAAGAGTTCTCTGAGATCATGA  
+HWI-EAS443:3:35:1258:669#0/1  
abbbbaabaaa\_aaaaa`a`aa^aaaaaaaaa````\_\_  
@HWI-EAS443:3:35:1263:845#0/1  
CACCTATATGTGTATCTGTAGTCTTTGATGAACAATTGAA  
+HWI-EAS443:3:35:1263:845#0/1  
aa[¥a]^bba\_`^`bbaYP\_ZYa\_\_¥a]]aa`[aa\_`a\_b  
@HWI-EAS443:3:35:1264:1730#0/1  
GAGGCTATCTAATAAGAGCACTGACATTAATACGATGAC  
+HWI-EAS443:3:35:1264:1730#0/1  
aabbbba\_`\_`b`a^a`a\_`^`[aaaa`baa`^¥`Za  
@HWI-EAS443:3:35:1287:580#0/1  
AGCTGATTCATTTACTCCAGACACTCCAAAGCTGGGTAGC  
+HWI-EAS443:3:35:1287:580#0/1  
aaaabaaaaabaaaa^aa\_\_a`a]a\_`^^`\_`X`]a  
@HWI-EAS443:3:35:1292:257#0/1  
GGGATGGGCTCCAATCATCCGACGATTTTGCTCTCATAGT  
+HWI-EAS443:3:35:1292:257#0/1  
aba`aaabaaa\_aaa\_`\_]a\_¥a]^a¥\_a\_`\_`^Y\_]Y  
@HWI-EAS443:3:35:1295:661#0/1  
GCAACGGCCCAGATGGCTCTTCAATTGTTTCATCAAAGACT  
+HWI-EAS443:3:35:1295:661#0/1  
aaaaaYQ[\_¥[^[[[R[WZ]UUU[ZXW^\_[[RZWZRN  
@HWI-EAS443:3:35:1311:360#0/1  
GACGGATCAAGAAAGAAGAGTTCTCTGAGATCATGAAGAT  
+HWI-EAS443:3:35:1311:360#0/1  
\_Z`X]a\_a\_aaaa]]aaaaZa`b\_aa^a``[``a`^a^\_  
@HWI-EAS443:3:35:1372:1387#0/1  
CACTAACTTGCAGGTCCTGTAGAATCTGTCCACTCCTGCT

+HWI-EAS443:3:35:1372:1387#0/1  
\_[abb`b[`b`bbaI]ab`aabbbb`aa\_b¥WR`S]\_aN  
@HWI-EAS443:3:35:1410:310#0/1  
GCCTCTTCTAATAGATGGCACAGCATCACTGAGTCCTGGG  
+HWI-EAS443:3:35:1410:310#0/1  
`ababbababbbbabbaaaaabaaa`\_aabaa`^[aaaa  
@HWI-EAS443:3:35:1434:959#0/1  
GTAAGAGACAACATGACCAAGAAGATGGTCACGCAAAGAA  
+HWI-EAS443:3:35:1434:959#0/1  
a[a^b`bba`a^YU`[¥]X[\_aWW`LKY¥Ta`\_]V^[V  
@HWI-EAS443:3:35:1436:1534#0/1  
ATGCTCAGGATGTTTCTGAACCACTCGGGTTGATTTCTGG  
+HWI-EAS443:3:35:1436:1534#0/1  
aaaa\_b]U[\_`]S`[[ba`aaa¥`TNXY`Xa¥P[\_WYaY[  
@HWI-EAS443:3:35:1450:487#0/1  
AGAGAGGCTATCTAATAAGAGCACTGACATTAATACGAT  
+HWI-EAS443:3:35:1450:487#0/1  
aaaa`aa\_a\_OFZQZ^SQLR]SWTQOOFRP\_S[\_UXOXBB  
@HWI-EAS443:3:35:1465:1129#0/1  
GAAATCTATTAGCCTTCCTGACTCATTAGCTGTTAGGCCA  
+HWI-EAS443:3:35:1465:1129#0/1  
aYV¥aK\_W[aaY[\_a`WQaaXWaWRaaH[a`ZBBBBBBB  
@HWI-EAS443:3:35:1524:1514#0/1  
CAGATCTTCATGATCTCAGAGAACTCTTCTTTCTTGATCC  
+HWI-EAS443:3:35:1524:1514#0/1  
]`a]\_bbaaaV^^a`[aaa¥`aaa\_Q`Z`aabaa``\_`Na  
@HWI-EAS443:3:35:1540:15#0/1  
GTTTGGTCTCCATCTGATACTAATAGCCCTACCTTTGAT  
+HWI-EAS443:3:35:1540:15#0/1  
a¥`^a`ZRY`YNT]L[aZY¥WVZTVRXPXRRNSWWWVWSV  
@HWI-EAS443:3:35:1556:1003#0/1  
GAGGAAATAGAGATAACAACCCACTTTCAAAGAAAAAGGA  
+HWI-EAS443:3:35:1556:1003#0/1  
¥Y`\_SVT\_V]]`S\_`a`aa]¥R¥]`aWJT]\_aab^^¥aR]  
@HWI-EAS443:3:35:1563:353#0/1  
ATCCCCCTTTGGCTTGTGTTGAGAATAGAACGATTCCTCT  
+HWI-EAS443:3:35:1563:353#0/1  
a¥US¥Z`¥`a¥a\_YY]P\_[\_\_V\_[TN]U¥^[[]SYQQTIP  
@HWI-EAS443:3:35:1617:1299#0/1  
GTCAGTGCTCTTATTAGATAGCCTCTCTTATTGAGTCTTT  
+HWI-EAS443:3:35:1617:1299#0/1  
a¥^¥]TR[`]0\_[[WZ`T]VW[VVNV¥Y^Z[[[XROWP[  
@HWI-EAS443:3:35:1715:294#0/1  
AAGAAATACACCAAGACAATATACTGGTGGGATGGGCTCC  
+HWI-EAS443:3:35:1715:294#0/1  
¥\_X\_bba\_baZ`bb\_Z[`^aa`b]\_a]F\_ba]\_\_a]ZZR\_  
@HWI-EAS443:3:35:1733:830#0/1  
GGCCATGGTGTCTAGGGCCCGGATTGATGCCAGGGTCGAC  
+HWI-EAS443:3:35:1733:830#0/1  
a`a`a`a``¥`^^X`^Z[\_R]¥¥¥YY]^X`aTSX`RX

@HWI-EAS443:3:35:1743:1977#0/1  
GATGTCAATCCGACTCTACTTTTCCTAAAAATCCAGCGC  
+HWI-EAS443:3:35:1743:1977#0/1  
[\_PP¥\_]\_¥X\_¥[YX\_]\_Z¥¥¥Y[DP\_`¥abb¥R^H^V¥  
@HWI-EAS443:3:35:1759:95#0/1  
GAACAATTGAAGAGCCATCTGGGCCGTTGCAGGTCCAAGG  
+HWI-EAS443:3:35:1759:95#0/1  
aa`^aaaaaaaa`aX[\_a]`a[\_VV]^`\_]a`YUTWUWZ  
@HWI-EAS443:3:35:1785:845#0/1  
GTGATTGTGAAAGAAATCTCTGTGTCTTGTGAATTAGTCA  
+HWI-EAS443:3:35:1785:845#0/1  
aZ`U`aa\_a``a\_\_\_\_\_]a]`^^XU`¥XW\_[U]XNZTRY  
@HWI-EAS443:3:35:1789:359#0/1  
GAACAATTGAAGAGCCATCTGGGCCGTTGCAGGTCCAAGG  
+HWI-EAS443:3:35:1789:359#0/1  
¥\_^\_\_Z\_babaXXST\_b`abbbbaSb¥abbabbI¥`aZY]  
@HWI-EAS443:3:35:297:1818#0/1  
CTGGAGTAAATGAATCAGCTGACATGAGTATTGGAGTAAC  
+HWI-EAS443:3:35:297:1818#0/1  
aba^Y^^bbababbaba[aa[baa``a\_]a\_`\_\_`VU¥`a  
@HWI-EAS443:3:35:342:165#0/1  
ATCATAAGTCTGGCGACCTTGAGTTAGTTTATCTACCCCT  
+HWI-EAS443:3:35:342:165#0/1  
¥MT`Y`X[WaX¥Z]`¥Y^YY^LW¥THWRSXZWSUZXXWV  
@HWI-EAS443:3:35:349:325#0/1  
ATAGGAGACCGTTGGAATTTCTAGCATGGTGGAGGCCAT  
+HWI-EAS443:3:35:349:325#0/1  
aaUb`Sa\_UbX]SaXaa]V\_^a]XY[J^aXU\_ZFXDL`UM  
@HWI-EAS443:3:35:395:556#0/1  
TGGCTCTTCAATTGTTTCATCAAAGACTACAGATACACATA  
+HWI-EAS443:3:35:395:556#0/1  
a`\_a^`b\_b`\_`aTQ¥]W]LZ^[^]]`]]]XY]aWQTZ  
@HWI-EAS443:3:35:450:501#0/1  
GTCCTCCATCTGATACTAATAGCCCTACCTTTGATTGGGT  
+HWI-EAS443:3:35:450:501#0/1  
a]a`a\_\_¥\_a\_\_^`\_]`^`^XUX^`\_Z\_XZZV[^Z^XRZ  
@HWI-EAS443:3:35:454:836#0/1  
ATTCTTTTACTCTCGAACATGTACCCTTTCCCTAGTCTTG  
+HWI-EAS443:3:35:454:836#0/1  
¥aaaaababbabaaaaaa^`^aaaa\_a]baa]KRV`^`[  
@HWI-EAS443:3:35:460:1297#0/1  
ATCCGACTCTACTTTTCCTAAAAATCCAGCGCAAAATGC  
+HWI-EAS443:3:35:460:1297#0/1  
¥R¥]UX\_]b^]`^`]aa]`a¥P^NX^¥0¥¥`X^]a]\_SOW  
@HWI-EAS443:3:35:495:135#0/1  
CATTGCCCCCTACTGGGAGCCCAGACTGTTCAAGCTTTTC  
+HWI-EAS443:3:35:495:135#0/1  
a`XZZ\_]aaa`^V¥Y``aa¥ZU[¥Z¥\_W\_[M]`¥¥[\_Z[  
@HWI-EAS443:3:35:511:1075#0/1  
CTCCATCTGATACTAATAGCCCTACCTTTGATTGGGTTTG

+HWI-EAS443:3:35:511:1075#0/1  
aaba]aaaba`aaaa^aaa`aa\_`^`\_`a\_`^`\_`W]^]  
@HWI-EAS443:3:35:517:1579#0/1  
GTCCTCCATCTGATACTAATAGCCCTACCTTTGATTGGGT  
+HWI-EAS443:3:35:517:1579#0/1  
a^ababaaaaa\_`aaaab`aa\_a`aaY^`\_]`^`\_`\_`U`Z  
@HWI-EAS443:3:35:546:65#0/1  
TAGCTGTTAGGCCATTTCGATCTAAAGACTTCTATGGTGTT  
+HWI-EAS443:3:35:546:65#0/1  
`ba`bba\_`ababb`]U^`^`[TWWVM]VPT\_[]^XNVWU  
@HWI-EAS443:3:35:568:1850#0/1  
CACCTATATGTGTATCTGTAGTCTTTGATGAACAATTGAA  
+HWI-EAS443:3:35:568:1850#0/1  
a^`a`b`a`a`X`ab`]`a`a`VRX`aaY`]`\_`aaa]a`\_]W`a  
@HWI-EAS443:3:35:598:454#0/1  
GAATCCCACCCAGGAATATTTGAGAATTCATGCCTTGAAA  
+HWI-EAS443:3:35:598:454#0/1  
`^`^`aaa`aaaaaaa`aaa`^`aaa`\_`\_`X]`a`^`\_`\_`Y`Y  
@HWI-EAS443:3:35:611:1067#0/1  
GAGACAACATGACCAAGAAGATGGTCACGCAAAGAACAAT  
+HWI-EAS443:3:35:611:1067#0/1  
ab^^aaaa^`abaaaaaa`\_`\_`\_]a`^`\_`\_`\_`\_]`^`^`]  
@HWI-EAS443:3:35:659:304#0/1  
CTTTAAGAAATCTATTAGCCTTCCTGACTCATTAGCTGTT  
+HWI-EAS443:3:35:659:304#0/1  
\_abaYZWZ`^Za^`\_`\_`^`aaa`Z`^`Z]Z`^`Y]`aY`^`]OJ  
@HWI-EAS443:3:35:663:541#0/1  
CCTTTGGCTTGTGTTGAGAATAGAACGATTCCTCTTGGGA  
+HWI-EAS443:3:35:663:541#0/1  
`aRZ`bb^`]Z0]`\_`YU[`\_`\_`a]`\_`^`OXITJ[]]Q[T`^`^`ZS  
@HWI-EAS443:3:35:674:1185#0/1  
ACTGCATTGGCCAACACCATAGAAGTCTTTAGATCGAATG  
+HWI-EAS443:3:35:674:1185#0/1  
aa^Z`aXa`W]`\_`\_`^`\_`\_`aa`\_`X`X[ZKZY]UW`\_`\_`[S`\_`XT  
@HWI-EAS443:3:35:701:372#0/1  
ATAACAACCCACTTTCAAAGAAAAAGGAGAGTAAGAGACA  
+HWI-EAS443:3:35:701:372#0/1  
`ba]aaaaaaaa`\_`\_`aaa`\_`\_`\_`X`a]a^`Zaa`\_`\_`aZa  
@HWI-EAS443:3:35:712:1525#0/1  
GAAGTACTTCAATGAATCAACAAAGAAGAAAATTGAGAAA  
+HWI-EAS443:3:35:712:1525#0/1  
]Za^a^^`Ra^]`\_`^`V`^`]aaaaa[JYZVZ^`]Q[Ya`^`  
@HWI-EAS443:3:35:733:1765#0/1  
CCGGCAGCAACTGCATTGGCCAACACCATAGAAGTCTTTA  
+HWI-EAS443:3:35:733:1765#0/1  
ab\_abbabbba`aba`aaaa`a`a`a`b`^S]`^`^`\_`\_`^`  
@HWI-EAS443:3:35:739:572#0/1  
CCCAGGTGTTGCGATAGCCCTTCTTTTTAACTTGCCCTCTC  
+HWI-EAS443:3:35:739:572#0/1  
aba`\_`S`]`^`^`]aZV`]a\_a`[^]`^`]SYXa\_[][\_a`^`

@HWI-EAS443:3:35:73:982#0/1  
TGCCAGGGTCGACTTCGAGTCTGGACGGATCAAGAAAGAA  
+HWI-EAS443:3:35:73:982#0/1  
aabb`baa\_b`^`aaaa`^\_aa]a`\_^`OVa\_U\_[`a^`U  
@HWI-EAS443:3:35:744:846#0/1  
GAACAATTGAAGAGCCATCTGGGCCGTTGCAGGTCCAAGG  
+HWI-EAS443:3:35:744:846#0/1  
ZZZb`abba`baababaabab`b`a`\_aaa¥aaVaaaaa\_  
@HWI-EAS443:3:35:746:1177#0/1  
GGGCTATTAGTATCAGATGGAGGACCAAACCTTATACAATA  
+HWI-EAS443:3:35:746:1177#0/1  
[`a^X`^`^`[[abaaa[Va^W^`]]\_Xa^`\_a\_S\_aaa\_Y  
@HWI-EAS443:3:35:755:946#0/1  
GTTGAGAATAGAACGATTCCCTCTTGGGAATCCAGGAATGT  
+HWI-EAS443:3:35:755:946#0/1  
aY]^Ma\_\_¥b\_aa]a[S\_^`\_]Y`]Y\_P¥T\_ZQ¥ZRTX[R  
@HWI-EAS443:3:35:75:940#0/1  
GCCATGGTGTCTAGGGCCCGATTGATGCCAGGGTCGACT  
+HWI-EAS443:3:35:75:940#0/1  
\_`a``aa¥a`T`\_a]a`a`Z`X]]`a\_J¥a]N`]TZU  
@HWI-EAS443:3:35:763:430#0/1  
GGCTAATTTTAGCATGGAGCTACCCAGCTTTGGAGTGTCT  
+HWI-EAS443:3:35:763:430#0/1  
aaU\_aZ`bb¥H]a¥a]^ab\_aaba\_\_b]a\_aba`aGa\_\_a  
@HWI-EAS443:3:35:787:1345#0/1  
AGCAGACTTCAGGAATGTGAAGATTCCGTATATTGTATAA  
+HWI-EAS443:3:35:787:1345#0/1  
]ab¥YM^Y]a\_\_]TZ`aUTVW]^]^T^]RPX\_\_X]]^^WZ  
@HWI-EAS443:3:35:804:586#0/1  
CAGCAACTGCATTGGCCAACACCATAGAAGTCTTTAGATC  
+HWI-EAS443:3:35:804:586#0/1  
a\_X\_a\_abbaba\_a^ab\_a`][`\_]`\_WHX¥a``¥`aa\_a  
@HWI-EAS443:3:35:806:53#0/1  
GTACCCTTTCCCTAGTCTTGCCATTTTGTGAGAACATT  
+HWI-EAS443:3:35:806:53#0/1  
a\_]\_aa\_]Y^a¥RT^V]]]V\_VT\_YWXXRXY]^SLUVV]Y  
@HWI-EAS443:3:35:816:1099#0/1  
CTCCTGCTTGTATTCCCTCATGGTTTGGTGCATTCACTAT  
+HWI-EAS443:3:35:816:1099#0/1  
a^]a\_a`¥ab^`\_a]UYW\_U\_`¥^XUYTQ`UQYZ`ZR][Z  
@HWI-EAS443:3:35:81:1072#0/1  
GATTCCGTATATTGTATAAGTTTGGTCCCTCCATCTGATAC  
+HWI-EAS443:3:35:81:1072#0/1  
`\_abbbb\_¥abbbb`^aa[`baba\_baabbbabaaa\_aa  
@HWI-EAS443:3:35:843:41#0/1  
GGTGCTTATGGCATTGCGCTGGAATTTTGTAGGAAAAGT  
+HWI-EAS443:3:35:843:41#0/1  
aZL\_aWN]^¥[]¥XRX¥YQWNNNV]LNPUXUZZZTQSSSR  
@HWI-EAS443:3:35:968:713#0/1  
ATCGCTATGGATTTGTGGCTAATTTTGTAGCATGGAGCTACC

+HWI-EAS443:3:35:968:713#0/1  
`¥^¥`¥a`\_¥^`\_QZ][Y^^^\_a`]PLYXYLVPVJNUIX  
@HWI-EAS443:3:35:975:921#0/1  
GGGCTATCGCAACACCTGGGATGCAGATTAGAGGTTTCGT  
+HWI-EAS443:3:35:975:921#0/1  
^^`bbbbba¥^\_aaaab\_]a`a^^a\_a\_^]]a`]]`a\_\_  
@HWI-EAS443:3:35:977:200#0/1  
CCCCAGTGATTGTGAAAGAAATCTCTGTGTCTTGTGAATT  
+HWI-EAS443:3:35:977:200#0/1  
ab^abbab^aba^a```a`a\_``]X`a\_aXaa^PXWWWYV  
@HWI-EAS443:3:36:1000:456#0/1  
CGTTCTATTCTCAACACAAGCCAAAGGGGAATTCTTGAGG  
+HWI-EAS443:3:36:1000:456#0/1  
aaTaa¥¥^`V\_S]``]`Zab`a\_\_]aa]`KKT]]\_\_]Q\_[  
@HWI-EAS443:3:36:1003:1184#0/1  
TGAACAAAGAGGAAATAGAGATAACAACCCACTTTCAAAG  
+HWI-EAS443:3:36:1003:1184#0/1  
^aabba`V`aaa^^abbbabaaab\_\_\_Zaa\_Waa\_`a¥[`  
@HWI-EAS443:3:36:1005:1927#0/1  
CTCCCAGTAGGGGCAATGAAAAGAAGCCAAACTGGCAA  
+HWI-EAS443:3:36:1005:1927#0/1  
aabbba`b```aaaabbaababb^bba`bb`\_a¥a``baa  
@HWI-EAS443:3:36:1008:1255#0/1  
AGGAATCGTTCTATTCTCAACACAAGCCAAAGGGGAATTC  
+HWI-EAS443:3:36:1008:1255#0/1  
`NWZaUWZ\_HSSWTZNZ^W[\_PYR```]H`NNZ]^WTXZT[  
@HWI-EAS443:3:36:1025:931#0/1  
TTCCCCTTTGGCTTGTGTTGAGAATAGAACGATTCCCTCTT  
+HWI-EAS443:3:36:1025:931#0/1  
a[aaaaaaaa`a`^a\_a\_YaW\_\_`\_\_^Za]Y^\_]R]^]  
@HWI-EAS443:3:36:1032:154#0/1  
AGAAGATGGTCACGCAAAGAACAATAGGGAAGAAAAACA  
+HWI-EAS443:3:36:1032:154#0/1  
abbbb]bba][`aaa`aaa¥\_\_^^`\_`aZY]\_^]\_\_aT^  
@HWI-EAS443:3:36:1036:422#0/1  
GAATCTGTCCACTCCTGCTTGTATTCCCTCATGGTTTGGT  
+HWI-EAS443:3:36:1036:422#0/1  
a`\_aabb`baaa```aaa`aa^`a`^aV`\_`^]^[`^a\_Y  
@HWI-EAS443:3:36:1044:469#0/1  
GATTGATGCCAGGGTCGACTTCGAGTCTGGACGGATCAAG  
+HWI-EAS443:3:36:1044:469#0/1  
aa```\_`\_a¥U¥^]aU[ZYY¥]V^`\_W¥[¥`ZW^`^X[YZ[  
@HWI-EAS443:3:36:1093:637#0/1  
GTCCAAGATTGAGTATCGAGACTCCAAGACCGTACTTAG  
+HWI-EAS443:3:36:1093:637#0/1  
a``Y````^^ZUa]a\_[[`^`^^]V][R[]]XVNU^YX\_V  
@HWI-EAS443:3:36:109:243#0/1  
CAAAATCGTCGGATGATTGGAGCCCATCCCACCGTATAT  
+HWI-EAS443:3:36:109:243#0/1  
aa`¥b\_b`^aa^^^`^^\_\_ZP[\_aWSZ\_\_][W¥]W[VYVVV

@HWI-EAS443:3:36:1102:1581#0/1  
ATCCCACCCAGGAATATTTGAGAATTCATGCCTTGAAACA  
+HWI-EAS443:3:36:1102:1581#0/1  
a`bbaab`aa\_Ya`\_aa¥[\_¥aa`\_a\_\_\_\_[T^X\_\_K]^  
@HWI-EAS443:3:36:1116:1592#0/1  
GGCTAATTTTAGCATGGAGCTACCCAGCTTTGGAGTGTCT  
+HWI-EAS443:3:36:1116:1592#0/1  
R[\_\_\_YT`\_a^¥`\_W\_]¥`b`¥a\_aWa`\_X¥¥¥0Za^b  
@HWI-EAS443:3:36:1138:903#0/1  
GTGCATTCACTATGAGAGCAAATCGTCGGATGATTGGAG  
+HWI-EAS443:3:36:1138:903#0/1  
a\_babbbba^\_a`aa`aaa`\_]a`a``\_\_aaa]^`^`\_`X\_  
@HWI-EAS443:3:36:1153:581#0/1  
GCTGGTATTTGTGTTCGAATCTTCATTCTTTACTCTCGA  
+HWI-EAS443:3:36:1153:581#0/1  
a`aba\_]`a\_a`X`aa`Z`Za]a\_a`]a\_\_\_\_^`\_`^`Y  
@HWI-EAS443:3:36:1208:773#0/1  
AAAAATTCCAGCGCAAATGCCATAAGCACCATTCCT  
+HWI-EAS443:3:36:1208:773#0/1  
a\_Y`]a`aa`^a`\_\_`¥\_\_Z¥a`\_^`U`\_\_^^`\_`^Y]  
@HWI-EAS443:3:36:1209:1669#0/1  
GGGTTGTTATCTCTATTTCTCTTTGTTTCATTGATTCCAT  
+HWI-EAS443:3:36:1209:1669#0/1  
¥^b`bbababbaba\_bbaaaabaaaa`aaba^`\_a`baaa  
@HWI-EAS443:3:36:1224:791#0/1  
GAAAAGGGAAAGTGGACGACAAACACAGAGACTGGTGCAC  
+HWI-EAS443:3:36:1224:791#0/1  
aa\_a`aa\_Ya\_aYa^^a``]a`]Z]¥\_\_W¥\_Y^UWU¥¥¥\_  
@HWI-EAS443:3:36:1230:92#0/1  
TATTGGTGTGTTCTGTTTACTGTGTCCATGGTGTATCCTG  
+HWI-EAS443:3:36:1230:92#0/1  
a`babb^b^a\_a]aa]`a`]`\_]a\_Y`\_\_VXY]Z[\_\_\_Y  
@HWI-EAS443:3:36:1247:1898#0/1  
GGTCCATCAATCGGGTTGAGCTGGGGTGCACCAGTCTCTG  
+HWI-EAS443:3:36:1247:1898#0/1  
abKb` `[`ZaZ^aa`W\_]¥¥a^`^`RRT¥aaS]\_YU``]`  
@HWI-EAS443:3:36:1266:948#0/1  
GGGCTCCAATCATCCGACGATTTTGCTCTCATAGTGAATG  
+HWI-EAS443:3:36:1266:948#0/1  
\_TZ¥QSYSXZ]UZL[[]X]YR^X^ZV[NUYTLTGXVFLT¥  
@HWI-EAS443:3:36:1268:565#0/1  
ACATGTTTCGAGAGTAAAAGAATGAAGATTCGAACACAAAT  
+HWI-EAS443:3:36:1268:565#0/1  
a`a`a^`a\_aa`a\_aa`aaaaaaIZ[\_\_\_`^]`\_`^`\_\_  
@HWI-EAS443:3:36:128:712#0/1  
GCTAGGAGCATTGCGAAAAGCTTGAACAGTCTGGGCTCC  
+HWI-EAS443:3:36:128:712#0/1  
]b`bba[`abaa`^ab^SaX\_aa`aY0[Z^[\_\_\_]T]aZaa  
@HWI-EAS443:3:36:1294:29#0/1  
ATCCGACTCTACTTTTCCTAAAAATCCAGCGCAAATGC

+HWI-EAS443:3:36:1294:29#0/1  
ababa`abab¥^aaaaaaaa`a`aa`V`aa\_]\_``^``]  
@HWI-EAS443:3:36:1301:769#0/1  
CAGACTTCAGGAATGTGAAGATTCCGTATATTGTATAAGT  
+HWI-EAS443:3:36:1301:769#0/1  
\_`babbab`\_bababaabbbbabababbabba\_bbbba\_  
@HWI-EAS443:3:36:1313:523#0/1  
ATTGGAGCCCATCCCACCAGTATATTGTCTTGGTGTATTT  
+HWI-EAS443:3:36:1313:523#0/1  
`aa`b^\_bbaaaa`¥aaa\_a^^^a`aX`^`^WQT]VQY\_Z  
@HWI-EAS443:3:36:1346:1436#0/1  
GCTGGCATTACCACAGCATTGTTTACAGAATCAATCTCTT  
+HWI-EAS443:3:36:1346:1436#0/1  
abbbbbbbbbbbbabbbbabbbbaaabab\_aababaaa  
@HWI-EAS443:3:36:1369:1670#0/1  
TGGGAGCTAATGGATGATGATTATCGGGGAAGACTTTGTA  
+HWI-EAS443:3:36:1369:1670#0/1  
`b\_[T\_a\_W]``\_`^a\_\_\_aa`b]¥]a``YQYZU¥a[ZSW  
@HWI-EAS443:3:36:1380:1708#0/1  
ACTGCATTGGCCAACACCATAGAAGTCTTTAGATCGAATG  
+HWI-EAS443:3:36:1380:1708#0/1  
\_`^b¥b`aa`baaa`aaa\_aaaa]¥Ya`\_`a`^``]]`W^  
@HWI-EAS443:3:36:144:1502#0/1  
GTGGGATGGGCTCCAATCATCCGACGATTTTGCTCTCATA  
+HWI-EAS443:3:36:144:1502#0/1  
aZ^¥`[a^a\_b\_ab`])`aa\_\_\_`\_Z``^`\_\_\_\_`\_`W`\_ZQ  
@HWI-EAS443:3:36:1456:1442#0/1  
GATTGATGCCAGGGTCGACTTCGAGTCTGGACGGATCAAG  
+HWI-EAS443:3:36:1456:1442#0/1  
```a`^aab^aY]^WZY\_Za\_Y]^`^a^a`\_T`\_Ya^Za  
@HWI-EAS443:3:36:1466:1834#0/1  
AATAAGAGCACTGACATTAATACGATGACCAAAGATGCA  
+HWI-EAS443:3:36:1466:1834#0/1  
`a`X\_a^[a\_b^[aaa¥`[a]aba\_\_aS]0]QZ^aa\_bSa  
@HWI-EAS443:3:36:1489:286#0/1  
CTGGAGTAAATGAATCAGCTGACATGAGTATTGGAGTAAC  
+HWI-EAS443:3:36:1489:286#0/1  
abbbaaaabba`aababbabba`bbaaa\_aaaaa`^Za\_a  
@HWI-EAS443:3:36:1502:1973#0/1  
CTTCTAATAGATGGCACAGCATCACTGAGTCTGGGATGA  
+HWI-EAS443:3:36:1502:1973#0/1  
a¥W`abaaaa[VYXUaaa`a`]YYJZaU`P¥NWZXUZ]X\_  
@HWI-EAS443:3:36:150:1964#0/1  
AGACAATATACTGGTGGGATGGGCTCCAATCATCCGACGA  
+HWI-EAS443:3:36:150:1964#0/1  
aabb`X]aaaa\_aa]\_``^]\_]`])`aV^)`\_]`^`SU\_[T  
@HWI-EAS443:3:36:1534:867#0/1  
TGTTGATTCCCATAACTTGCAGGTCCTGTAGAATCTGTC  
+HWI-EAS443:3:36:1534:867#0/1  
aa`a`])`aaZa`aa`aaa\_^aa\_Y^a^a^a\_]\_``\_`\_V^



@HWI-EAS443:3:36:1541:533#0/1  
GATACACATATAGGTGCCATAGGGGAGACACACAAATTCA  
+HWI-EAS443:3:36:1541:533#0/1  
a`baaaaabaa`[a^aa^`^a\_a\_\_a]\_\_^\_\_`]a\_N`  
@HWI-EAS443:3:36:1567:728#0/1  
AGTCTTCCCCGATAATCATCATCCATTAGCTCCCATTTTA  
+HWI-EAS443:3:36:1567:728#0/1  
abJ`WU``YY`Y^WP\_a\_a]Z\_ZQ[]WR\_¥ZVLW]^`^^]^  
@HWI-EAS443:3:36:1569:1346#0/1  
GAACAATTGAAGAGCCATCTGGGCCGTTGCAGGTCCAAGG  
+HWI-EAS443:3:36:1569:1346#0/1  
`Z^aa¥aaaa^]\_a`]a\_V^]^\_\_Z[WFY]PLKXYQYUX  
@HWI-EAS443:3:36:1569:774#0/1  
TTTCATTGCCCCCTACTGGGAGCCCAGACTGTTCAAGCTT  
+HWI-EAS443:3:36:1569:774#0/1  
V^a\_\_¥\_\_baa\_aZ^QaaZ[]^]^TVQR`]XQYZ\_^[]TY  
@HWI-EAS443:3:36:1588:849#0/1  
CACCAAGACAATATACTGGTGGGATGGGCTCCAATCATCC  
+HWI-EAS443:3:36:1588:849#0/1  
abab\_X\_aaabbb`\_aaba[bbbaabb]\_^\_Ua\_b`baVa  
@HWI-EAS443:3:36:1589:1124#0/1  
CTGCATTGGCCAACACCATAGAAGTCTTTAGATCGAATGG  
+HWI-EAS443:3:36:1589:1124#0/1  
`bbaabbbbaaaaaa``aaaa`\_a\_\_b`aa`^`^a\_a`[`  
@HWI-EAS443:3:36:159:1731#0/1  
AAAGACTTCTATGGTGTGGCCAATGCAGTTGCTGCCGGT  
+HWI-EAS443:3:36:159:1731#0/1  
a`Y[K]aaaa\_\_QYY^^\_Waaa`^^b^[]¥R¥\_]``[UW  
@HWI-EAS443:3:36:1626:282#0/1  
CTGGAGTAAATGAATCAGCTGACATGAGTATTGGAGTAAC  
+HWI-EAS443:3:36:1626:282#0/1  
abbbbaabbbbaab`bb`aaa`aabaa\_aaaa`\_`]a^`  
@HWI-EAS443:3:36:1673:466#0/1  
CGATGACCAAAGATGCAGAGAGAGGCAAGTTAAAAAGAAG  
+HWI-EAS443:3:36:1673:466#0/1  
abbaba\_aaaaaa¥ba`aba[[]`¥b\_baaaa`aaa`a]  
@HWI-EAS443:3:36:16:565#0/1  
GTCTGGGCTCCCAGTAGGGGCAATGAAAAGAAGGCCAAA  
+HWI-EAS443:3:36:16:565#0/1  
aa¥WWWV\_a`]\_`aVV]aX```XVN]QZ^^VVZXU\_]Y`^  
@HWI-EAS443:3:36:1700:484#0/1  
GAAATCTCTGTGTCTTGTGAATTAGTCATCATCTTTCTCA  
+HWI-EAS443:3:36:1700:484#0/1  
aaa¥a`bab\_\_`aaaa\_]aW\_`\_U]Z]^aYQ]T^a^`¥ST  
@HWI-EAS443:3:36:1703:1347#0/1  
GACGATTTTGTCTCATAGTGAATGCACCAAACCATGAGG  
+HWI-EAS443:3:36:1703:1347#0/1  
a\_ab]`]aa```]`V]a`][[V^\_YP[UYXUSVV]`aZZ`  
@HWI-EAS443:3:36:1789:811#0/1  
CCAGCTTTGGAGTGTCTGGAGTAAATGAATCAGCTGACAT

+HWI-EAS443:3:36:1789:811#0/1  
aabbababaaabWb`bba`a`a`aa``a^aVaaa^\_a  
@HWI-EAS443:3:36:1791:670#0/1  
CTTGAACAGTCTGGGCTCCCAGTAGGGGCAATGAAAAGA  
+HWI-EAS443:3:36:1791:670#0/1  
abbb`bba^`\_aa`¥¥aa\_W`aZ`\_`a¥a]a^``\_``\_Y\_  
@HWI-EAS443:3:36:199:460#0/1  
AACAGATCTTCATGATCTCAGAGAACTCTTCTTTCTTGAT  
+HWI-EAS443:3:36:199:460#0/1  
\_Y^VXXT¥UQaa`TIRTVLWZH\_[P[[]SU\_ZO]ZWUW^R  
@HWI-EAS443:3:36:203:1399#0/1  
GAACAATTGAAGAGCCATCTGGGCCGTTGCAGGTCCAAGG  
+HWI-EAS443:3:36:203:1399#0/1  
a^R\_¥a`^]`^b]^`^a\_aa]^`^\_aaZ`^HZ[W¥SGSUV  
@HWI-EAS443:3:36:211:1445#0/1  
AGCCTCTCTTATTTCAGTCTTTGTTTTTTCTTCCCTATTGT  
+HWI-EAS443:3:36:211:1445#0/1  
]\_babbbbbb`bababb`aaaaabbSbabb`a`U¥  
@HWI-EAS443:3:36:218:1950#0/1  
AAAGAGGAAATAGAGATAACAACCCACTTTCAAAGAAAA  
+HWI-EAS443:3:36:218:1950#0/1  
aaaa`aa`aaa^a\_a\_]bbaaaa`a`\_\_^b\_````\_\_\_\_  
@HWI-EAS443:3:36:230:1574#0/1  
CCTTCTTTTTAACTTGCCTCTCTGCATCTTTGGTCATC  
+HWI-EAS443:3:36:230:1574#0/1  
ababaaa\_bbbaabaabaaaaa`a\_a`aa\_XYb\_a`  
@HWI-EAS443:3:36:253:1617#0/1  
AAGAGCACTGACATTAATACGATGACCAAAGATGCAGAG  
+HWI-EAS443:3:36:253:1617#0/1  
]^X`bbba^a`\_`^baa`\_aaP]^T^V^`b]][\_]UX`\_  
@HWI-EAS443:3:36:276:1220#0/1  
AGAATCCCACCCAGGAATATTTGAGAATTCATGCCTTGAA  
+HWI-EAS443:3:36:276:1220#0/1  
aU^a\_baa`aa`[\_^XZ`\_\_\_\_a^`]aZ`\_\_]\_`X]^¥  
@HWI-EAS443:3:36:296:188#0/1  
GTCCACTTTCCTTTCTGAGTATTGGTGTGTTCTGTTTA  
+HWI-EAS443:3:36:296:188#0/1  
`abb`ab`baaabbaab`V^]\_baa`^`\_a`a`\_]Zaaa  
@HWI-EAS443:3:36:306:1515#0/1  
CTGGGTGGGATTCTTCAAGGAAAGCCATAGCCTCTAGAAC  
+HWI-EAS443:3:36:306:1515#0/1  
ababaVaa\_V\_abaab`\_a`a^a\_aaa`b\_a`a`a`\_aab  
@HWI-EAS443:3:36:336:12#0/1  
CAAAGATGCAGAGAGAGGCAAGTTAAAAAGAAGGGCTATC  
+HWI-EAS443:3:36:336:12#0/1  
aa`bbaaba]^`SaYaZ]^`\_]aX^U^Y^ZY^PY\_Y[aRPNS  
@HWI-EAS443:3:36:348:532#0/1  
TGGATGTCAATCCGACTCTACTTTTCCCTAAAAATCCAGC  
+HWI-EAS443:3:36:348:532#0/1  
ZZ\_¥Z\_T]G[¥\_UWY^^a]Q`[[ZU`^T``[Y]¥X^`]`

@HWI-EAS443:3:36:358:1542#0/1  
GTGGGATTCTTCAAGGAAAGCCATAGCCTCTAGAACACAG  
+HWI-EAS443:3:36:358:1542#0/1  
S\_aaaZ`^abb`\_abaU[`a]Z`^`a¥`\_^X]\_W¥0^]\_  
@HWI-EAS443:3:36:365:1081#0/1  
GGGCTCCAATCATCCGACGATTTTGCTCTCATAGTGAATG  
+HWI-EAS443:3:36:365:1081#0/1  
aaababa`aaabaaa```aaaaaaaaaa\_`^`aa]aW\_\_`  
@HWI-EAS443:3:36:381:697#0/1  
GCTAATTTTAGCATGGAGCTACCCAGCTTTGGAGTGTCTG  
+HWI-EAS443:3:36:381:697#0/1  
a``\_UX^`^^aaaaXWZabaUa[^¥[^Z¥a\_a^\_G[L][  
@HWI-EAS443:3:36:431:1007#0/1  
CCCCTATGGCACCTATATGTGTATCTGTAGTCTTTGATGA  
+HWI-EAS443:3:36:431:1007#0/1  
aabbaaa\_\_aa`\_`a`a\_Z`Y``aa`]\_\_Y^`\_^¥[¥YX  
@HWI-EAS443:3:36:444:28#0/1  
ATTCCATGCTTTTGGCTGGACCATGGGCTGGCATTACCAC  
+HWI-EAS443:3:36:444:28#0/1  
abbabaa`aa`aaaa`\_`\_`\_^X^^\_Y\_]\_^][a\_]W  
@HWI-EAS443:3:36:512:1337#0/1  
CAGGAATATTTGAGAATTCATGCCTTGAAACAATGGAAGT  
+HWI-EAS443:3:36:512:1337#0/1  
abaa\_`abaaa`a`aXaabba^baaaa`abab\_\_`Y`W  
@HWI-EAS443:3:36:551:274#0/1  
CACCTGGGATGCAGATTAGAGGTTTCGTATACTTTGTTGA  
+HWI-EAS443:3:36:551:274#0/1  
a^\_aW[^\_\_`\_]Za][`R^U^[X``¥ZZ[¥[XXU¥VTV[Z  
@HWI-EAS443:3:36:553:753#0/1  
AGTCTGGGCTCCCAGTAGGGGGCAATGAAAAGAAGGCCAA  
+HWI-EAS443:3:36:553:753#0/1  
`a\_aaa`\_b`aa`aZ]``aa`a\_\_``[\_^¥\_`\_]\_`\_`^  
@HWI-EAS443:3:36:567:1133#0/1  
GTTCTGTTTACTGTGTCCATGGTGTATCCTGTTCCCTGTTTC  
+HWI-EAS443:3:36:567:1133#0/1  
\_¥S`\_YVV[[]a`VTZYaa[¥V¥LXLJR¥^Z^`\_\_\_\_\_]V^^  
@HWI-EAS443:3:36:56:1227#0/1  
GCAGACTTCAGGAATGTGAAGATTCCGTATATTGTATAAG  
+HWI-EAS443:3:36:56:1227#0/1  
aa]V^`Y`aba\_QWXTR^J^aa[[aaa[I¥^a\_SQ¥JPMY  
@HWI-EAS443:3:36:571:1035#0/1  
GGCTATGGCTTTTCTTGAAGAATCCCACCCAGGAATATTT  
+HWI-EAS443:3:36:571:1035#0/1  
aaba`bbbbbbbabaaY`a]aba`baa\_aa^Va¥JZ`\_a\_  
@HWI-EAS443:3:36:599:360#0/1  
TAATGCCAGCCCATGGTCCAGCCAAAAGCATGGAATATGA  
+HWI-EAS443:3:36:599:360#0/1  
`\_^X]\_\_]`\_¥a[O[RQUQYV`S[¥\_WF^X]HTXNT]RZ¥  
@HWI-EAS443:3:36:657:949#0/1  
TTCCCTATTGTTCTTTGCGTGACCATCTTCTTGGTCATGT

+HWI-EAS443:3:36:657:949#0/1  
^abbbb^aa\_\_`a\_a\_Zaa^a^aXa[a^`^`^\_[W`Y\_\_X  
@HWI-EAS443:3:36:682:1905#0/1  
GATTGATGCCAGGGTCGACTTCGAGTCTGGACGGATCAAG  
+HWI-EAS443:3:36:682:1905#0/1  
T¥^aXL\_a\_\_a\_V^T\_`]¥U]\_0^WQ`I\_]WGUPRZb^YJ  
@HWI-EAS443:3:36:687:76#0/1  
ATCCCAGGTGTTGCGATAGCCCTTCTTTTTAACTTGCCTC  
+HWI-EAS443:3:36:687:76#0/1  
aUbaaZba]bZX`\_`U\_`YNZ`aa^\_]¥\_ZZXV\_`^`^\_  
@HWI-EAS443:3:36:699:819#0/1  
GTGGTAATGCCAGCCCATGGTCCAGCCAAAAGCATGGAAT  
+HWI-EAS443:3:36:699:819#0/1  
]ab\_V^W¥S\_baZ`a]V\_Z\_S\_^][a^^SJXX[¥Z^¥\_X  
@HWI-EAS443:3:36:724:516#0/1  
GATGCAGAGAGAGGCAAGTTAAAAAGAAGGGCTATCGCAA  
+HWI-EAS443:3:36:724:516#0/1  
abaaaaaaaa\_a`aaaa^a`aX¥]Xa^U¥[^`\_[a`\_\_\_\_a^  
@HWI-EAS443:3:36:730:997#0/1  
AGTGGACGACAAACACAGAGACTGGTGCACCCCAGCTCAA  
+HWI-EAS443:3:36:730:997#0/1  
aa^`abbbaa]aa`¥Va`[`a`[[\_S]T][aM\_ZSYLW^]  
@HWI-EAS443:3:36:763:1830#0/1  
CAAAATCGTCGGATGATTGGAGCCCATCCCACCAGTATAT  
+HWI-EAS443:3:36:763:1830#0/1  
`baabaaWY`a`\_[]`aYY\_¥^a^UU\_YYO\_TENQTX[  
@HWI-EAS443:3:36:764:667#0/1  
ATTCTGTAAACAATGCTGTGGTAATGCCAGCCCATGGTCC  
+HWI-EAS443:3:36:764:667#0/1  
Z\_`X`a]¥^Tabbba^S][FY]\_RZTQa`^Q\_V\_]YYOPPX  
@HWI-EAS443:3:36:800:925#0/1  
AATCTGTCCACTCCTGCTTGTATTCCCTCATGGTTTGGTG  
+HWI-EAS443:3:36:800:925#0/1  
aaabab\_aaaa`aaaaaaaa\_aaaaa\_`\_`X[\_\_¥^Y\_  
@HWI-EAS443:3:36:817:222#0/1  
CAGATCTTCATGATCTCAGAGAACTTCTTTCTTGATCC  
+HWI-EAS443:3:36:817:222#0/1  
abbaabbabbbbaaabbbaaaaaaaaa`aa`a``aa`aZ^  
@HWI-EAS443:3:36:831:729#0/1  
GTTGAGAATAGAACGATTCTTCTTGGGAATCCAGGAATGT  
+HWI-EAS443:3:36:831:729#0/1  
^\_`aaa¥bbba`]`aV]aaaab\_\_`aa]\_`a\_`aa\_``aV  
@HWI-EAS443:3:36:890:1489#0/1  
TGGGAATCCAGGAATGTGTAGTTGCAACGGCATCATATTC  
+HWI-EAS443:3:36:890:1489#0/1  
`aaa`babb`b`\_`b\_`Wa`¥`aa`^UYR¥`\_[a\_¥^\_\_  
@HWI-EAS443:3:36:984:1747#0/1  
CAAGAATTCCCCTTTGGCTTGTGTTGAGAATAGAACGATT  
+HWI-EAS443:3:36:984:1747#0/1  
aabaabaaaaZ`aaa^^aa¥^\_]\_]^W\_`^\_Y\_\_\_\_\_`Z^

@HWI-EAS443:3:37:1002:1364#0/1  
TTTTGCTCATAGTGAATGCACCAAACCATGAGGGAATA  
+HWI-EAS443:3:37:1002:1364#0/1  
^Z`UP\_`a\_¥a^a^aa[a\_`a\_\_^aX]L\_XP\_^[[WX^]\_  
@HWI-EAS443:3:37:1023:1162#0/1  
GGCCCGGATTGATGCCAGGGTCGACTTCGAGTCTGGACGG  
+HWI-EAS443:3:37:1023:1162#0/1  
a`[V]``aaa``^a`a`〕`^S`[[[\_a]WVE00a^〕^Y``X  
@HWI-EAS443:3:37:1063:2030#0/1  
GTAGGGGGCAATGAAAAGAAGCCAAACTGGCAAATGTTG  
+HWI-EAS443:3:37:1063:2030#0/1  
`aaaaa\_a\_S\_a]\_aa`a\_\_]\_a\_`[\_^\_W]aa]\_\_\_W]]  
@HWI-EAS443:3:37:1086:300#0/1  
GGTTGTTATCTCTATTTCTCTTTGTTTCATTGATTCCATT  
+HWI-EAS443:3:37:1086:300#0/1  
a]SV]\_[LZ`¥[ZQ[a\_¥¥Z^`\_]VYZQRQRVNXYYSYP  
@HWI-EAS443:3:37:1088:231#0/1  
CTCCAATCATCCGACGATTTTGCTCTCATAGTGAATGCAC  
+HWI-EAS443:3:37:1088:231#0/1  
abb\_`aaaabaaaV[baaaaaaaaa\_`[X¥¥`\_`\_aa^W  
@HWI-EAS443:3:37:1089:408#0/1  
AAATCGTCGGATGATTGGAGCCCATCCCACCAGTATATTG  
+HWI-EAS443:3:37:1089:408#0/1  
aabbaa¥]]aa\_]Zaaaa[\_aaaa\_b^ZOKa[`SU`\_]\_Z`  
@HWI-EAS443:3:37:1102:415#0/1  
GTGTGTTCTGTTTACTGTGTCCATGGTGTATCCTGTTCCCT  
+HWI-EAS443:3:37:1102:415#0/1  
aTa\_`\_aaaa\_a`\_`\_aVaX`\_`\_a\_U\_XW\_\_\_¥\_¥]\_X¥  
@HWI-EAS443:3:37:1115:1789#0/1  
TCTGTTTACTGTGTCCATGGTGTATCCTGTTCCCTGTTCCA  
+HWI-EAS443:3:37:1115:1789#0/1  
abba\_aaaa]\_``[aa\_`ZUa^`aba[[G``a\_\_^\_aU[  
@HWI-EAS443:3:37:1119:417#0/1  
CCCAGTGATTGTGAAAGAAATCTCTGTGTCTTGTGAATTA  
+HWI-EAS443:3:37:1119:417#0/1  
abaababbabbZa^Zbb`b^aaaaab\_a]Yaa`^a^aaa\_  
@HWI-EAS443:3:37:1120:1493#0/1  
GGTGTGTTCTGTTTACTGTGTCCATGGTGTATCCTGTTCC  
+HWI-EAS443:3:37:1120:1493#0/1  
ab]`^bU`bba]\_`aaaaZaabaaaa^aGL]`[aa\_\_a^  
@HWI-EAS443:3:37:1186:154#0/1  
CAACGGCCCAGATGGCTCTTCAATTGTTTCATCAAAGACTA  
+HWI-EAS443:3:37:1186:154#0/1  
a¥`Vba^a`[ba\_aRH]R\_\_a`\_aUa^\_[MMDPa]NU][  
@HWI-EAS443:3:37:1193:1895#0/1  
TGGTCTCCATCTGATACTAATAGCCCTACCTTTGATTGG  
+HWI-EAS443:3:37:1193:1895#0/1  
^¥ZDT`b]`aa¥]a`\_]\_`aba`Y]\_Q¥\_Gb]``\_P\_a\_X  
@HWI-EAS443:3:37:1203:1912#0/1  
TATTAGTATCAGATGGAGGACCAAACCTTATACAATATACG

+HWI-EAS443:3:37:1203:1912#0/1  
abaabbXaaa`aaaa`b`\_ab^aaa\_aT¥\_ba`a`b`\_  
@HWI-EAS443:3:37:1236:189#0/1  
GACGGATCAAGAAAGAAGAGTTCTCTGAGATCATGAAGAT  
+HWI-EAS443:3:37:1236:189#0/1  
aa\_aaaa]aaaaa`aa`^^^aa`\_a^TIX\_`a^`\_`^  
@HWI-EAS443:3:37:1293:1373#0/1  
CAGTGATTGTGAAAGAAATCTCTGTGTCTTGTGAATTAGT  
+HWI-EAS443:3:37:1293:1373#0/1  
``a^`aa\_L\_¥abbaaaaa\_a]aaaPZaS]XaVPWZGVV  
@HWI-EAS443:3:37:129:428#0/1  
AATGAACCAAGTGGGTATGCACAAACAGACTGTGTTCTAG  
+HWI-EAS443:3:37:129:428#0/1  
`[]a^aaa`]a]aa`Xa]aaaa^]aaaaTTVaX^XY\_¥\_]`  
@HWI-EAS443:3:37:1303:1639#0/1  
GATTCTTCAAGGAAAGCCATAGCCTCTAGAACACAGTCTG  
+HWI-EAS443:3:37:1303:1639#0/1  
aaa]abbaba`R[a\_a\_aa`^^`aa\_aaU]^\_ba`Za`\_  
@HWI-EAS443:3:37:134:535#0/1  
TTGCAGGTCCTGTAGAATCTGTCCACTCCTGCTTGTATTC  
+HWI-EAS443:3:37:134:535#0/1  
aaab\_ba^bbbb`\_b\_V`baa\_\_aaa\_aa\_Z^Z]YRY¥`  
@HWI-EAS443:3:37:1352:347#0/1  
GGTGTGTTCTGTTTACTGTGTCCATGGTGTATCCTGTTCC  
+HWI-EAS443:3:37:1352:347#0/1  
]aHa^\_¥b\_a`¥a^aaaaXaZ^]aabaYbR\_`a][`ZT^T  
@HWI-EAS443:3:37:1355:1671#0/1  
GGGATTCTTCAAGGAAAGCCATAGCCTCTAGAACACAGTC  
+HWI-EAS443:3:37:1355:1671#0/1  
aba\_aa`SZ^]abaab`aa\_a`a`[``]aJLQ]¥a^\_\_VU  
@HWI-EAS443:3:37:1366:532#0/1  
AAGGGAAAGTGGACGACAAACACAGAGACTGGTGCACCCC  
+HWI-EAS443:3:37:1366:532#0/1  
abab^ZbX¥`bbaabaabbaabaa]aa¥aU\_RM`aa`aa\_  
@HWI-EAS443:3:37:1381:1995#0/1  
ATGTTTCGAGAGTAAAAGAATGAAGATTCGAACACAAATAC  
+HWI-EAS443:3:37:1381:1995#0/1  
Xba¥¥aba`abGabababaaaaaaaaa]`Qa\_babaa`a¥  
@HWI-EAS443:3:37:1418:796#0/1  
GTGGGATGGGCTCCAATCATCCGACGATTTTGCTCTCATA  
+HWI-EAS443:3:37:1418:796#0/1  
aa\_V\_\_^bbaaa\_aaaaaa\_aab`\_\_Z`aUa``]`a]a\_\_  
@HWI-EAS443:3:37:1440:450#0/1  
ATGCCAGGGTTCGACTTCGAGTCTGGACGGATCAAGAAAGA  
+HWI-EAS443:3:37:1440:450#0/1  
aaZU]aaaaYaa\_\_\_¥^`V^Ra`¥a\_Z`aM]QO^a[]^\_^  
@HWI-EAS443:3:37:1445:460#0/1  
AAAAGAAATACACCAAGACAATATACTGGTGGGATGGGCT  
+HWI-EAS443:3:37:1445:460#0/1  
\_b`]aaa]b^aaaaa\_\_`\_`ab¥aaa``aXaab^]TDT

@HWI-EAS443:3:37:1455:1231#0/1  
ATTTTAGCATGGAGCTACCCAGCTTTGGAGTGTCTGGAGT  
+HWI-EAS443:3:37:1455:1231#0/1  
aabaaaa`ab\_\_^^\_aa\_[]\_]a`a`X[W\_\_\_`a`UT¥Y  
@HWI-EAS443:3:37:1482:386#0/1  
GGGGCAATGAAAAGAAGGCCAAACTGGCAAATGTTGTGAG  
+HWI-EAS443:3:37:1482:386#0/1  
aa`^\_aaaa`\_`^a\_a[`ZX```]\_a]YaX^^`Z^\_]\_^]  
@HWI-EAS443:3:37:1491:395#0/1  
TGTGGCTAATTTTAGCATGGAGCTACCCAGCTTTGGAGTG  
+HWI-EAS443:3:37:1491:395#0/1  
aa^`a``aaVaa^SS[SYFYTVVPY`ZVGL]¥]`TWSQRQ  
@HWI-EAS443:3:37:1504:750#0/1  
ATGGGCTCCAATCATCCGACGATTTTGTCTCATAGTGAA  
+HWI-EAS443:3:37:1504:750#0/1  
Y\_bbb¥\_aab`¥S`a`\_¥Za]G[`aaa\_`PWZ\_]``Ua^`  
@HWI-EAS443:3:37:1535:570#0/1  
GCCCATCCCACCAGTATATTGTCTTGGTGTATTTCTTTTG  
+HWI-EAS443:3:37:1535:570#0/1  
\_`H\_a\_aY¥R[[aT\_^^aY[^`aa\_Z[aNGXa`]Z^a\_X  
@HWI-EAS443:3:37:1610:1803#0/1  
GATTGATGCCAGGGTCGACTTCGAGTCTGGACGGATCAAG  
+HWI-EAS443:3:37:1610:1803#0/1  
abaUab`ab\_aa\_a¥a\_a]aa```aa]\_bZ^YbaY[Qa\_Z  
@HWI-EAS443:3:37:1620:253#0/1  
GAAACATCCTGAGCATGGCACCCATAATGTTCTCAAACAA  
+HWI-EAS443:3:37:1620:253#0/1  
a^S[aX`]`[Y]YX^]RYW^]R]\_`\_]`R]X\_]Z]^WR  
@HWI-EAS443:3:37:1633:559#0/1  
GAGGCTATGGCTTTCCTTGAAGAATCCCACCCAGGAATAT  
+HWI-EAS443:3:37:1633:559#0/1  
`]`¥¥aaa`[X]aaL\_Z^UW`U\_a[^[]¥HZJJZ\_¥W¥]  
@HWI-EAS443:3:37:167:1537#0/1  
CAGTAAACAGAACACACCAATACTCAGAAAAGGGAAAGTG  
+HWI-EAS443:3:37:167:1537#0/1  
ab`W`Ubb][bbbbbbbabbbbbbbba¥GRG\_b`]ab`[a  
@HWI-EAS443:3:37:1731:379#0/1  
GAAATCAACCCGAGTGGTTCAGAAACATCCTGAGCATGGC  
+HWI-EAS443:3:37:1731:379#0/1  
^baVba]aTa¥`^bY`UNZWZaa\_a\_\_\_\_\_RY\_a`a`\_`^V  
@HWI-EAS443:3:37:1746:332#0/1  
CATTTGCGAAAAGCTTGAACAGTCTGGGCTCCCAGTAGGG  
+HWI-EAS443:3:37:1746:332#0/1  
abbbbaabbbbbb`bbbbbaabb`abbaabNa`babZab``  
@HWI-EAS443:3:37:208:1953#0/1  
CTTTAAGAAATCTATTAGCCTTCTGACTCATTAGCTGTT  
+HWI-EAS443:3:37:208:1953#0/1  
a]aa^^Z`aa`aa^ZXa^`a`\_a\_]P]\_[U]`[aTa]^¥¥  
@HWI-EAS443:3:37:217:1304#0/1  
CATGCTTTTGGCTGGACCATGGGCTGGCATTACCACAGCA

+HWI-EAS443:3:37:217:1304#0/1  
``aaaaaaa`aaaaa\_aaa`U`a\_Ya`X^Xaa`Z]a]``  
@HWI-EAS443:3:37:241:1106#0/1  
AAAATTTCTCGAATAGATTGCAGCACTTCTGGTACATCTG  
+HWI-EAS443:3:37:241:1106#0/1  
`X]Qaa\_a\_a`\_\_`¥Y]¥\_[[X`a\_]`^X]XX[^`]\_ZZ  
@HWI-EAS443:3:37:253:1715#0/1  
ATTGATGCCAGGGTCGACTTCGAGTCTGGACGGATCAAGA  
+HWI-EAS443:3:37:253:1715#0/1  
a^a¥a[ab\_^[]ND[SRZ```[]XN\_ZV^S`\_VHV\_¥NT^  
@HWI-EAS443:3:37:267:1699#0/1  
AGAGAGGCAAGTTAAAAAGAAGGGCTATCGCAACACCTGG  
+HWI-EAS443:3:37:267:1699#0/1  
a`baba^abbRaaaaa\_\_`a\_\_[a\_a[^`^a\_Y\_a\_aY\_R  
@HWI-EAS443:3:37:282:1707#0/1  
GTGGGATTCTTCAAGGAAAGCCATAGCCTCTAGAACACAG  
+HWI-EAS443:3:37:282:1707#0/1  
^S\_\_UZQS^]SU^aZX¥T\_Waa`Ua[ZVZU[`V[^`\_`\_`T  
@HWI-EAS443:3:37:308:995#0/1  
GCCTCTCTGCATCTTTGGTCATCGTATTTAATGTCAGT  
+HWI-EAS443:3:37:308:995#0/1  
`bbaabbababaaaaaaaa`a`aa^`]`Y`V\_\_[a\_]S  
@HWI-EAS443:3:37:310:35#0/1  
GTCCTGTAGAATCTGTCCACTCCTGCTTGTATTCCTCAT  
+HWI-EAS443:3:37:310:35#0/1  
a\_aaaaaaaa\_a`\_aa]``aUZ``^\_\_^`]TGZX`\_`VSZR[  
@HWI-EAS443:3:37:368:1396#0/1  
TGCCAGGGTCGACTTCGAGTCTGGACGGATCAAGAAAGAA  
+HWI-EAS443:3:37:368:1396#0/1  
aUbbb`¥`G`aaa`b`^`Xba`]ab`\_VQaaV`]Ua[Ya  
@HWI-EAS443:3:37:390:192#0/1  
TAATGCCAGCCCATGGTCCAGCCAAAAGCATGGAATATGA  
+HWI-EAS443:3:37:390:192#0/1  
abbaaab`baaaa`S`\_aaa\_a```ZaVM^[YRYa]Y^  
@HWI-EAS443:3:37:393:1784#0/1  
GTCCTCCATCTGATACTAATAGCCCTACCTTTGATTGGGT  
+HWI-EAS443:3:37:393:1784#0/1  
\_H\_^ZW^aa`\_bY¥a^TXZ`\_`HbU[\_YLRLLTZaV[JUNK  
@HWI-EAS443:3:37:408:672#0/1  
CACTAACTTGCAGGTCCTGTAGAATCTGTCCACTCCTGCT  
+HWI-EAS443:3:37:408:672#0/1  
`\_`aa^aaaaaaaa\_aaaa`a`X`aaa[W\_]\_^`a`]`]  
@HWI-EAS443:3:37:410:1838#0/1  
CGCAACACCTGGGATGCAGATTAGAGGTTTCGTATACTTT  
+HWI-EAS443:3:37:410:1838#0/1  
`b\_[bb\_bb`\_`aabaaaa]aabbYa`HH¥Sb¥Zb\_aa`^\_  
@HWI-EAS443:3:37:412:1364#0/1  
GATTCATTTACTCCAGACACTCCAAAGCTGGGTAGCTCCA  
+HWI-EAS443:3:37:412:1364#0/1  
aaaa^X`baaaaaaaaaaaaa`aaa\_SZa]XZ\_X¥[``\_a`\_`



@HWI-EAS443:3:37:413:1397#0/1  
CCGGCAGCAACTGCATTGGCCAACACCATAGAAAGTCTTTA  
+HWI-EAS443:3:37:413:1397#0/1  
ab``aa`a`a\_a`aa``Zaa^aaa``¥UX¥QVW`\_^\_\_  
@HWI-EAS443:3:37:413:395#0/1  
CCCTATGGCACCTATATGTGTATCTGTAGTCTTTGATGAA  
+HWI-EAS443:3:37:413:395#0/1  
`abbaaba`\_Xb]a^Va]]b`bba\_`ZZ[[`Y^aaa][\_`^  
@HWI-EAS443:3:37:419:348#0/1  
GAAAAGGGAAAAGTGGACGACAAACACAGAGACTGGTGAC  
+HWI-EAS443:3:37:419:348#0/1  
a`\_]`\_a`aa]`a¥`\_a`\_]`^`a`\_`a^^SUS¥W¥WP^¥¥S  
@HWI-EAS443:3:37:430:1292#0/1  
AACAGATCTTCATGATCTCAGAGAACTCTTCTTTCTTGAT  
+HWI-EAS443:3:37:430:1292#0/1  
aaa`\_\_a^a\_]¥V¥`[[VWY¥¥`\_`[VTV^\_RS]\_]`^a]  
@HWI-EAS443:3:37:482:1418#0/1  
AGCTGATTCATTTACTCCAGACACTCCAAAGCTGGGTAGC  
+HWI-EAS443:3:37:482:1418#0/1  
\_baQ`\_LX\_baaabaXaaa`\_ab`\_a`\_]NG¥U]YVP[ZS  
@HWI-EAS443:3:37:505:744#0/1  
AATGAACCAAGTGGGTATGCACAAACAGACTGTGTTCTAG  
+HWI-EAS443:3:37:505:744#0/1  
`\_\_`\_^^YO¥Y\_¥\_T¥W]WYW[RW]Z]ZUZ]V]ZYWSUR  
@HWI-EAS443:3:37:527:185#0/1  
CAGTGATTGTGAAAGAAATCTCTGTGTCTTGTGAATTAGT  
+HWI-EAS443:3:37:527:185#0/1  
aV\_Ya`aaa^\_UZ`]¥Z`]¥^^[U¥VVT¥SQQJNYVPQM  
@HWI-EAS443:3:37:539:1223#0/1  
GGTGTCTAGGGCCCGATTGATGCCAGGGTCGACTTCGAG  
+HWI-EAS443:3:37:539:1223#0/1  
a`Z`^\_Y]``^aa\_R]NQ`[UTS\_XRZYUG`¥S¥YVRSYY  
@HWI-EAS443:3:37:547:626#0/1  
ACTAACTTGCAGGTCCTGTAGAATCTGTCCACTCCTGCTT  
+HWI-EAS443:3:37:547:626#0/1  
`bbaaabaaaaa^aaaaa`Y]aaa`^¥HH^a`ZV¥X`  
@HWI-EAS443:3:37:586:480#0/1  
ATCGCAACACCTGGGATGCAGATTAGAGGTTTCGTATACT  
+HWI-EAS443:3:37:586:480#0/1  
Zaa^^ba^[^`[^`^`ab]O`\_ab\_Z\_\_XUWaba^WR]aa  
@HWI-EAS443:3:37:625:1536#0/1  
ATGGGCTCCAATCATCCGACGATTTTGCTCTCATAGTGAA  
+HWI-EAS443:3:37:625:1536#0/1  
¥^YSY[\_bb^a]Z]R[a¥[^a`^a\_[U\_VFJYXR[]T]a¥  
@HWI-EAS443:3:37:652:551#0/1  
AGTGTCTGGAGTAAATGAATCAGCTGACATGAGTATTGGA  
+HWI-EAS443:3:37:652:551#0/1  
abaa\_bbaU`]Xbaaaaa`aa`\_a\_a`WZ\_\_\_LN¥a¥a^  
@HWI-EAS443:3:37:653:806#0/1  
GGAGTAAATGAATCAGCTGACATGAGTATTGGAGTAACAG

+HWI-EAS443:3:37:653:806#0/1  
`aW^¥bbTZa\_[aa^`a^X¥HXX]\_YWOKO\_Y\_Z^S^]^  
@HWI-EAS443:3:37:680:1940#0/1  
TCCTCTTTGTTTCATTGATTCCATTACATCCTTTAAGAAAT  
+HWI-EAS443:3:37:680:1940#0/1  
\_b\_Va\_aa`^^`¥Z\_a\_\_¥ba^\_bbaYaV[ `[aa\_\_I\_\_  
@HWI-EAS443:3:37:762:113#0/1  
TGCGCTGGAATTTTTAGGAAAAGTAGAGTCGGATTGACAT  
+HWI-EAS443:3:37:762:113#0/1  
[¥\_ZZ¥aa`^^`ba^`^`Y^aWaaa]OIZ^JS[YS^^T  
@HWI-EAS443:3:37:795:686#0/1  
GGCCAATGCAGTTGCTGCCGTTGATTTCTGTTAATGTC  
+HWI-EAS443:3:37:795:686#0/1  
aababbab\_abaabaaaa`a^a]PZaa`U` `\_\_Z^a` `\_  
@HWI-EAS443:3:37:808:1360#0/1  
CTACTTTTCCTAAAAATTCCAGCGCAAATGCCATAAGCA  
+HWI-EAS443:3:37:808:1360#0/1  
\_`[H[ba`b`Y^^b\_[a]b\_aaa]\_aa\_00^Paa¥a^[J]  
@HWI-EAS443:3:37:82:1104#0/1  
GGCTCCAATCATCCGACGATTTTGCTCTCATAGTGAATGC  
+HWI-EAS443:3:37:82:1104#0/1  
a`a`a\_aa\_aa\_a¥P^a^X^`\_]U`Z`[aUPTZLVO[TZX  
@HWI-EAS443:3:37:842:1971#0/1  
CTCCTGCTTGATTCCCTCATGGTTTGGTGCATTCACTAT  
+HWI-EAS443:3:37:842:1971#0/1  
ab\_`^]aa\_\_^baaabaa` `UXR\_\_^UW^ba\_`baa\_a`  
@HWI-EAS443:3:37:842:586#0/1  
GGCCCCGATTGATGCCAGGGTCGACTTCGAGTCTGGACGG  
+HWI-EAS443:3:37:842:586#0/1  
aZb]]^X`ba`aaaa¥\_a]K\_]W\_]`aMWT\_X`ZZZ^\_  
@HWI-EAS443:3:37:853:910#0/1  
GGTGGGATGGGCTCCAATCATCCGACGATTTTGCTCTCAT  
+HWI-EAS443:3:37:853:910#0/1  
`S]XT`UU\_TR`NX[OW^[`a[WOU]]SFP[PZ`\_[PZ[R  
@HWI-EAS443:3:37:927:2020#0/1  
TCATGGTTTGGTGCATTCACTATGAGAGCAAATCGTCGG  
+HWI-EAS443:3:37:927:2020#0/1  
abab` `baaa¥abbbaababa`bbaa`[KH`bab]^a]X  
@HWI-EAS443:3:38:1052:63#0/1  
GCTCCTAGCTAAAGTTTCAACAAAGTATACGAAACCTCTA  
+HWI-EAS443:3:38:1052:63#0/1  
aa`a\_a`a`aa\_\_b^`\_`\_]^^`\_]`^`WXUX^RPXX^X  
@HWI-EAS443:3:38:1065:77#0/1  
GCGAAAAGCTTGAACAGTCTGGGCTCCCAGTAGGGGGCAA  
+HWI-EAS443:3:38:1065:77#0/1  
aM[I\_SS¥`\_XaXaU¥R^\_SYRaSY¥^MZUKNSV¥WRNVG  
@HWI-EAS443:3:38:1078:687#0/1  
GGTCGACTTCGAGTCTGGACGGATCAAGAAAGAAGAGTTC  
+HWI-EAS443:3:38:1078:687#0/1  
W^Ub[G^¥\_` `Raabb`[ `aaa\_aa\_N\_WaWZZa[ `b¥^L

@HWI-EAS443:3:38:1138:897#0/1  
GTCCCCAGTGATTGTGAAAGAAATCTCTGTGTCTTGTGAA  
+HWI-EAS443:3:38:1138:897#0/1  
a¥aaa`bWaa`aaWb`ba`aaaa]aa¥`X]SV\_¥YX^[X  
@HWI-EAS443:3:38:1144:706#0/1  
GATTGAGTATCGAGACTCCCAAGACCGTACTTAGCATGTT  
+HWI-EAS443:3:38:1144:706#0/1  
aaaaab¥^a``]W¥``\_``ZZ]`\_¥a\_¥^UVV]YX]^]YW  
@HWI-EAS443:3:38:1184:261#0/1  
GATTGATGCCAGGGTCGACTTCGAGTCTGGACGGATCAAG  
+HWI-EAS443:3:38:1184:261#0/1  
`¥^`\_Xaa\_^a¥Yaabb]]`^]`aaY`aa\_NUU[^UZ¥¥N  
@HWI-EAS443:3:38:118:878#0/1  
CACGCAAAGAACAATAGGGAAGAAAAACAAAGACTGAAT  
+HWI-EAS443:3:38:118:878#0/1  
aabb``Y``^`a`aaaa\_aaa`a\_J`a`\_\_aR`aa\_``  
@HWI-EAS443:3:38:1200:2025#0/1  
CTGACATTAATACGATGACCAAAGATGCAGAGAGAGGCA  
+HWI-EAS443:3:38:1200:2025#0/1  
\_Uba^¥^`b[PWZI\_[V¥^\_\_Raba`[`a¥^TVYa``VXR  
@HWI-EAS443:3:38:1219:2045#0/1  
ACATGACCAAGAAGATGGTCACGCAAAGAACAATAGGGAA  
+HWI-EAS443:3:38:1219:2045#0/1  
`aa\_aaaaab\_]a`a]aa[]a]aaa\_\_\_\_\_]ZZX\_^¥]]^Z  
@HWI-EAS443:3:38:1245:655#0/1  
AAATGAATCAGCTGACATGAGTATTGGAGTAACAGTGATA  
+HWI-EAS443:3:38:1245:655#0/1  
^`b`¥]T\_\_```[`WV^]a`a[aa\_a\_aaSS[W]^0\_Z^P  
@HWI-EAS443:3:38:1300:327#0/1  
CCAGTCTGTGTTTGTCTGCCACTTTCCCTTTTCTGAGT  
+HWI-EAS443:3:38:1300:327#0/1  
\_`a`Y^`bbb¥b\_bbWWWYTX[OZ]a\_¥]YU\_a\_W¥[PYU  
@HWI-EAS443:3:38:1323:128#0/1  
CAATTGAAGAGCCATCTGGCCGTTGCAGGTCCAAGGTCA  
+HWI-EAS443:3:38:1323:128#0/1  
aababbaa¥\_b\_aaaa\_b\_a`aaZ[`\_]a\_TSST[]VPWS  
@HWI-EAS443:3:38:1323:1442#0/1  
TGCCGTTGCAACTACACATTCTGGATTCCCAAGAGGAAT  
+HWI-EAS443:3:38:1323:1442#0/1  
abab`^baa`b\_aaab`a`Y^a``\_a`\_`PR¥Y\_[`YZaY  
@HWI-EAS443:3:38:1341:1584#0/1  
GACTAATTCACAAGACACAGAGATTTCTTTCACAATCACT  
+HWI-EAS443:3:38:1341:1584#0/1  
a`[`aaab`a]``\_\_aa\_a[\_a\_``\_a`a^0^X\_U^a\_^W  
@HWI-EAS443:3:38:1342:491#0/1  
ACACAGTAAACAGAACACACCAATACTCAGAAAAGGGAAA  
+HWI-EAS443:3:38:1342:491#0/1  
\_Xaba`aaaaaaa\_a^`aa^`aa`aaaaa]\_[[¥aa^`Z  
@HWI-EAS443:3:38:1361:464#0/1  
ACTTTTCTATAAAAATCCAGCGCAAATGCCATAAGCACC

+HWI-EAS443:3:38:1361:464#0/1  
a`b```a`baa`Y\_a^][a`X¥¥b`bSDR```]\_¥VH  
@HWI-EAS443:3:38:1364:755#0/1  
GAACAATTGAAGAGCCATCTGGGCCGTTGCAGGTCCAAGG  
+HWI-EAS443:3:38:1364:755#0/1  
`a`bababba`\_aaab``\_a]a``a`aNT¥ZVSY[Y`0  
@HWI-EAS443:3:38:136:1687#0/1  
GAACAACATGATAACAATGACCTTGGACCTGCAACGGCC  
+HWI-EAS443:3:38:136:1687#0/1  
a\_bbbbbbaabaaaababaWaa`aaa]ab```a]aa[`a^  
@HWI-EAS443:3:38:1383:383#0/1  
GCATGGAGCTACCCAGCTTTGGAGTGTCTGGAGTAAATGA  
+HWI-EAS443:3:38:1383:383#0/1  
aaQXa^P[a`VVRVY`Ua\_`Z^Z^V^[W[XVX^RU][PRT  
@HWI-EAS443:3:38:1393:1302#0/1  
AATTGAAGAGCCATCTGGGCCGTTGCAGGTCCAAGGTCAT  
+HWI-EAS443:3:38:1393:1302#0/1  
a`b`a`baaaa`a^a\_a\_a^\_\_Y\_]YZW\_YZXYWY¥YU]X  
@HWI-EAS443:3:38:1420:550#0/1  
TCCTGACTCATTAGCTGTTAGGCCATTTCGATCTAAAGACT  
+HWI-EAS443:3:38:1420:550#0/1  
aaababaaaaa`a`aa\_`Y\_a\_¥\_\_`S^]XU^Y]X]XUY  
@HWI-EAS443:3:38:1475:1548#0/1  
GCCATCTGGGCCGTTGCAGGTCCAAGGTCATTGTTTATCA  
+HWI-EAS443:3:38:1475:1548#0/1  
aaaa`aWUDRXWYSV`UTXROR\_\_]`\_H\_WSW¥QVSSQOJ  
@HWI-EAS443:3:38:1479:1314#0/1  
CAGTGATTGTGAAAGAAATCTCTGTGTCTTGTGAATTAGT  
+HWI-EAS443:3:38:1479:1314#0/1  
\_`a¥b`ab^^b^]Z\_`b^^^aaaaa^a`bYX]]XNZ\_]\_Y  
@HWI-EAS443:3:38:1524:1106#0/1  
TAGGGCTATTAGTATCAGATGGAGGACCAAACCTATACAA  
+HWI-EAS443:3:38:1524:1106#0/1  
]^`b`\_\_`a`a\_UW`a`[ES\_a¥aa\_aW]ZRQV]]^RVYL  
@HWI-EAS443:3:38:1530:215#0/1  
AAAAGAAATACACCAAGACAATATACTGGTGGGATGGGCT  
+HWI-EAS443:3:38:1530:215#0/1  
abaabbbb````\_aaa`[aaaaaaaaXY\_¥V]\_aXVL  
@HWI-EAS443:3:38:1557:1080#0/1  
GGGATTACAAAGTCTTCCCCGATAATCATCATCCATTAGC  
+HWI-EAS443:3:38:1557:1080#0/1  
^a`\_bbaaabW`\_\_ba¥aa\_b]a`^aa^a¥Z`Y^X^¥X\_H  
@HWI-EAS443:3:38:1566:944#0/1  
AAATCTATTAGCCTTCTGACTCATTAGCTGTTAGGCCAT  
+HWI-EAS443:3:38:1566:944#0/1  
aabbababbba`\_aba\_aaa`aa`aaaaa^]Z][[^WVVV  
@HWI-EAS443:3:38:156:494#0/1  
GACGGATCAAGAAAGAAGAGTTCTCTGAGATCATGAAGAT  
+HWI-EAS443:3:38:156:494#0/1  
aaaaaa`aaabaaaaa^`aa]aaaaa`\_]^^`\_aa\_\_a`^

@HWI-EAS443:3:38:1575:526#0/1  
CCTTTGTCAGTCATAAAGAGATTGATTCTGTAAACAATGC  
+HWI-EAS443:3:38:1575:526#0/1  
``babbbaaab]\_aaaaab`a\_aab\_aa¥aZU^][P[`^^Q  
@HWI-EAS443:3:38:1605:308#0/1  
GATTGATGCCAGGGTCGACTTCGAGTCTGGACGGATCAAG  
+HWI-EAS443:3:38:1605:308#0/1  
a`¥ZV]¥TP\_XZPYV]¥V[Z¥¥Y^W][a]PVV[PLPNUT  
@HWI-EAS443:3:38:1609:1862#0/1  
GTCACGCAAAGAACAATAGGGAAGAAAAACAAAGACTGA  
+HWI-EAS443:3:38:1609:1862#0/1  
a`a`Z``\_aa\_¥\_^a\_]\_aTYV`a\_¥]^\_[[[YV]WPU][  
@HWI-EAS443:3:38:1641:219#0/1  
GTCTCCTATATGAACTGCTAGGGAATAATTTCTCGAATAG  
+HWI-EAS443:3:38:1641:219#0/1  
`W^aaa^`aaaaY]\_\_\_\_^\_`aaa`\_\_\_\_XaXWW]VWV^ZYY  
@HWI-EAS443:3:38:1641:353#0/1  
ATTTTGTCTCATAGTGAATGCACCAAACCATGAGGGAAT  
+HWI-EAS443:3:38:1641:353#0/1  
abbbbaaaaa`\_\_a\_aaa`a```\_aaaaWZ\_\_^\_\_`Z\_Z  
@HWI-EAS443:3:38:1657:925#0/1  
GGCCTCTTCTAATAGATGGCACAGCATCACTGAGTCCTGG  
+HWI-EAS443:3:38:1657:925#0/1  
¥bb`^a`^`\_aaa\_^Ya`\_Yaa^\_Za`¥]VN\_NQQYPW]P  
@HWI-EAS443:3:38:165:234#0/1  
CAGATACACATATAGGTGCCATAGGGGAGACACAAAATT  
+HWI-EAS443:3:38:165:234#0/1  
aYPWHJ^^Z`a\_SSSX[W[OV`^YXOMRPVMWPVW\_VYVM  
@HWI-EAS443:3:38:1682:320#0/1  
TGAGAATAGAACGATTCTCTTGGGAATCCAGGAATGTGT  
+HWI-EAS443:3:38:1682:320#0/1  
a`X¥]aaaa\_\_R[QU`[V`]]Y\_\_]^\_¥^XXZZX]Z^Z^U  
@HWI-EAS443:3:38:1751:1701#0/1  
AGGAATCGTTCTATTCTCAACACAAGCCAAAGGGGAATTC  
+HWI-EAS443:3:38:1751:1701#0/1  
aaa`aaaa\_aY^`¥a```\_`\_^\_a\_\_`X`VU]WXXZZXR  
@HWI-EAS443:3:38:1779:345#0/1  
CAGGAATATTTGAGAATTCATGCCTTGAAACAATGGAAGT  
+HWI-EAS443:3:38:1779:345#0/1  
a]babbb^\_baaa^`babaaba```ab\_b\_Ya]`a\_a\_\_H  
@HWI-EAS443:3:38:223:939#0/1  
AGCCCTTCTTTTAACTTGCCTCTCTGCATCTTTGGTC  
+HWI-EAS443:3:38:223:939#0/1  
SZ\_bb`^`b]bbZ\_ab\_^\_¥aba]``a`a]S^aa`\_`NO]  
@HWI-EAS443:3:38:261:1789#0/1  
TGCCATGCTCAGGATGTTTCTGAACCACTCGGGTTGATTT  
+HWI-EAS443:3:38:261:1789#0/1  
a`bbbaaaaba`\_a`a\_a`baa`a``aa\_]\_\_XMZ]`¥\_]`  
@HWI-EAS443:3:38:310:1562#0/1  
CACCAATACTCAGAAAAGGGAAAGTGGACGACAAACACAG

+HWI-EAS443:3:38:310:1562#0/1  
aa\_baa\_bbaa`a`aa`^`^`\_a^W^^`bY¥¥^a`X¥\_\_\_\_  
@HWI-EAS443:3:38:375:1541#0/1  
TGTTGATTCCTACTAAGTTCAGGTCCTGTAGAATCTGTC  
+HWI-EAS443:3:38:375:1541#0/1  
aaU`\_b\_abaaa\_aaba\_\_^ba\_]Ua`^`XXX[^\_\_XXUX  
@HWI-EAS443:3:38:438:1005#0/1  
GCCCTTCTTTTTAACTTGCCTCTCTCTGCATCTTTGGTCA  
+HWI-EAS443:3:38:438:1005#0/1  
abababbab`aaaaa`^^\_aaabab\_a`Q[aaa`Y]Za[  
@HWI-EAS443:3:38:455:964#0/1  
GTTCTGTTTACTGTGTCCATGGTGTATCCTGTTCTGTTTC  
+HWI-EAS443:3:38:455:964#0/1  
a`aV`]VR\_a\_\_a\_]\_LNVU\_a^P¥W\_ZT[WXXUYX\_]¥UU  
@HWI-EAS443:3:38:483:45#0/1  
CCCTTTGGCTTGTGTTGAGAATAGAACGATTCCTCTTGGG  
+HWI-EAS443:3:38:483:45#0/1  
abbbbabbbba\_a]aa\_a`] [\_`\_aa`\_RY\_\_Y\_^^^\_^^\_  
@HWI-EAS443:3:38:490:817#0/1  
GGTCTTGGGAGTCTCGATACTGAATCTTGGACAAAAGAAA  
+HWI-EAS443:3:38:490:817#0/1  
a`\_aaaa`\_`\_]\_a`\_S\_\_aaa^^`a\_\_Z]\_¥\_`\_`^a^  
@HWI-EAS443:3:38:503:1069#0/1  
TGGGCTGGCATTACCACAGCATTGTTTACAGAATCAATCT  
+HWI-EAS443:3:38:503:1069#0/1  
^W`aa``aaaaab^b¥abaUXbaa]\_]\_aa\_`a^\_a¥]``  
@HWI-EAS443:3:38:51:1358#0/1  
TAGGGGGCAATGAAAAGAAGGCCAAACTGGCAAATGTTGT  
+HWI-EAS443:3:38:51:1358#0/1  
ababaaaaaaaaaaaaabaaa`aaaaaa`aa\_¥`````Z``^  
@HWI-EAS443:3:38:555:947#0/1  
GAAAAGGGAAAGTGGACGACAAACACAGAGACTGGTGCAC  
+HWI-EAS443:3:38:555:947#0/1  
aTZUZ¥aa` [ ]Z\_\_aa`\_`aaa\_`ZI¥R^W[UUVFWZ]K  
@HWI-EAS443:3:38:589:1807#0/1  
CATCCTTTAAGAAATCTATTAGCCTTCCTGACTCATTAGC  
+HWI-EAS443:3:38:589:1807#0/1  
abaaaaaabba`aaaa`aaa`Ybaa`aa`^^X^aaa\_`aZ  
@HWI-EAS443:3:38:593:230#0/1  
GTGTTCTGTTTACTGTGTCCATGGTGTATCCTGTTCTGTTTC  
+HWI-EAS443:3:38:593:230#0/1  
a]a`aaaa`aa`^aa]a\_a\_[ ]a]Y\_Y[[VV\_^^]^^\_\_]  
@HWI-EAS443:3:38:614:1722#0/1  
CAGGAATATTTGAGAATTCATGCCTTGAAACAATGGAAGT  
+HWI-EAS443:3:38:614:1722#0/1  
a`a¥abaaaaa``aa`\_a\_a\_\_\_\_\_`\_Ub]\_^Z^\_ZV  
@HWI-EAS443:3:38:615:348#0/1  
ATGACCAAGAAGATGGTCACGCAAAGAACAATAGGGAAGA  
+HWI-EAS443:3:38:615:348#0/1  
a\_`babbaaaa`\_]``Wa`\_a` [ ]`\_`^]\_^\_\_¥]`\_^

@HWI-EAS443:3:38:668:1280#0/1  
ATTCGATCTAAAGACTTCTATGGTGTGGCCAATGCAGTT  
+HWI-EAS443:3:38:668:1280#0/1  
a`\_aaa`aa\_\_\_\_\_Z`\_\_`\_\_`]¥WW^WZ]YR]^Z][ZZU^  
@HWI-EAS443:3:38:670:533#0/1  
CACCTATATGTGTATCTGTAGTCTTTGATGAACAATTGAA  
+HWI-EAS443:3:38:670:533#0/1  
abbbbababb`b\_babbb¥^baaabaaaa`\_Xaaaaaa`  
@HWI-EAS443:3:38:714:1004#0/1  
GAGTAAATGAATCAGCTGACATGAGTATTGGAGTAACAGT  
+HWI-EAS443:3:38:714:1004#0/1  
a`a]bb\_babaaa`ab````a```a¥]\_a\_^]][]`\_\_a0  
@HWI-EAS443:3:38:739:137#0/1  
CTTGGGAATCCAGGAATGTGTAGTTGCAACGGCATCATAT  
+HWI-EAS443:3:38:739:137#0/1  
a\_Q\_ab¥Taaaaba`\_`aZa¥a`\_`aa\_][]^a¥a\_aY  
@HWI-EAS443:3:38:764:440#0/1  
AGAATCCCACCCAGGAATATTTGAGAATTCATGCCTTGAA  
+HWI-EAS443:3:38:764:440#0/1  
^aX`^`aab^`WaZUZURW¥```a`\_OYYULQOZ¥XSS`X  
@HWI-EAS443:3:38:785:1068#0/1  
CAGATACACATATAGGTGCCATAGGGGAGACACACAAATT  
+HWI-EAS443:3:38:785:1068#0/1  
abaa^]baaaaa`\_]`Ua\_[\_a^aa`\_\_`¥Z^^aZ\_\_]\_Z  
@HWI-EAS443:3:38:817:619#0/1  
GCATTTGCGAAAAGCTTGAACAGTCTGGGCTCCCAGTAGG  
+HWI-EAS443:3:38:817:619#0/1  
aVUX¥aaZX^¥PVS]^a[¥`[XRN\_TLRL[N[\_XNRQWYQ  
@HWI-EAS443:3:38:86:567#0/1  
TGGCACCCATAATGTTCTCAAACAAAATGGCAAGACTAGG  
+HWI-EAS443:3:38:86:567#0/1  
aa^bbbaa^aaaab\_aabaaaaaaWaaa`\_]U^]\_`\_`[  
@HWI-EAS443:3:38:891:1077#0/1  
GTACATGTTGAGAGTAAAAGAATGAAGATTGGAACACAA  
+HWI-EAS443:3:38:891:1077#0/1  
aabbbaa\_aa\_Z`\_a]a`^aa]`aa^^`a^¥T`^a¥aVa^  
@HWI-EAS443:3:38:898:1058#0/1  
GTCCCCAGTGATTGTGAAAGAAATCTCTGTGTCTTGTGAA  
+HWI-EAS443:3:38:898:1058#0/1  
aaaabbaa`^`^aaa\_aaa`aaaaaaaaaa]T]^a`XW^YY  
@HWI-EAS443:3:38:910:723#0/1  
CATACCCACTTGGTTCATTATCCTCAGGTAGTGGTCCATC  
+HWI-EAS443:3:38:910:723#0/1  
aabbabbaabbaa¥aaababaaaa`aaa¥`¥Y\_a¥¥[\_`W  
@HWI-EAS443:3:38:913:916#0/1  
GAGATAACAACCCACTTTCAAAGAAAAAGGAGAGTAAGAG  
+HWI-EAS443:3:38:913:916#0/1  
\_Y\_\_a\_Y^ZR[]^Z]¥`aZXN\_Y\_\_[Z`\_[]X\_Z[W[\_Y  
@HWI-EAS443:3:38:933:1617#0/1  
TGAACAAAGAGGAAATAGAGATAACAACCCACTTTCAAAG





@HWI-EAS443:3:39:1194:179#0/1  
CATGAGGGAATACAAGCAGGAGTGGACAGATTCTACAGGA  
+HWI-EAS443:3:39:1194:179#0/1  
a`¥`baZ¥W]`a`¥`baa\_\_Zb[a¥XSZ\_^RWR]WNLVVT  
@HWI-EAS443:3:39:1204:1266#0/1  
GCTCCAATCATCCGACGATTTTGCTCTCATAGTGAATGCA  
+HWI-EAS443:3:39:1204:1266#0/1  
`aa\_aaaaaaaX]b`U`^`^a]^\_aV`\_\_XX`\_\_aVPY  
@HWI-EAS443:3:39:1219:1064#0/1  
GAACATTATGGGTGCCATGCTCAGGATGTTTCTGAACCAC  
+HWI-EAS443:3:39:1219:1064#0/1  
aaba¥X``abbaG`a`]aa\_^Z^[\_^a`aaQ\_T¥a\_\_\_V  
@HWI-EAS443:3:39:1224:1604#0/1  
GAGACAACATGACCAAGAAGATGGTCACGCAAAGAACAAT  
+HWI-EAS443:3:39:1224:1604#0/1  
Sabb\_bbb`a`abaaa`a`a]`Xaaaa^\_Z\_a]aZaaW  
@HWI-EAS443:3:39:1230:981#0/1  
TGGTGCTTATGGCATTGCGCTGGAATTTTAGGAAAAG  
+HWI-EAS443:3:39:1230:981#0/1  
]a^\_¥^^¥SZ\_SQ¥WV[[JTW[Z`X`Z]`VW]OVSZV  
@HWI-EAS443:3:39:1234:274#0/1  
AACAGATCTTCATGATCTCAGAGAACTCTTCTTCTTGAT  
+HWI-EAS443:3:39:1234:274#0/1  
`a]Y`Yba]\_^U``[aaa^R`a`¥a\_a\_aa^`a`a\_a\_W  
@HWI-EAS443:3:39:1236:1268#0/1  
GTCCTCCATCTGATACTAATAGCCCTACCTTTGATTGGGT  
+HWI-EAS443:3:39:1236:1268#0/1  
a`aaaa`baa`a`a`aaa\_`a`Z`^`\_`\_\_\_\_^¥¥^X  
@HWI-EAS443:3:39:1239:577#0/1  
GATTCTTCAAGGAAAGCCATAGCCTCTAGAACACAGTCTG  
+HWI-EAS443:3:39:1239:577#0/1  
a^`a\_a`aa`aa`\_\_\_\_`V^^^\_¥R\_^X[]^U]]Y]Y]^X  
@HWI-EAS443:3:39:1258:31#0/1  
TGCCGTTGCAACTACACATTCCTGGATTCCCAAGAGGAAT  
+HWI-EAS443:3:39:1258:31#0/1  
`b`^ba`a^^`\_`\_`V\_YNYTU^TQV[]]UUZZ¥TTX  
@HWI-EAS443:3:39:1268:1809#0/1  
GGGCAATGAAAAGAAGCCAAACTGGCAAATGTTGTGAGA  
+HWI-EAS443:3:39:1268:1809#0/1  
a`aaabbbababaaaa\_a^`\_a\_a`a[aa`]TNZa]\_^VN  
@HWI-EAS443:3:39:133:677#0/1  
CTCCAATCATCCGACGATTTTGCTCTCATAGTGAATGCAC  
+HWI-EAS443:3:39:133:677#0/1  
aaabaaaaaaa^¥`a^^`\_\_aa`a^^`^`^X^`X^^^T  
@HWI-EAS443:3:39:136:1383#0/1  
CTCATGGTTTGGTGCATTCACTATGAGAGCAAAATCGTCG  
+HWI-EAS443:3:39:136:1383#0/1  
aaa]`aa\_aa[Uaa`aa`a`\_¥0][[]`][\_a^\_\_W^`  
@HWI-EAS443:3:39:1396:159#0/1  
GGAAGACTTTGTAATCCCCTGAATCCCCTTTGTCAGTCATA

+HWI-EAS443:3:39:1396:159#0/1  
aX[Y[[\_`\_`\_W[[]^ZVY¥PQVSSTWW]UTRVXUTNUY[  
@HWI-EAS443:3:39:1410:1770#0/1  
AAAAATTCCAGCGCAAATGCCATAAGCACCATTCCT  
+HWI-EAS443:3:39:1410:1770#0/1  
`ZY`^Za^HY\_XX[]\_YUO]TXQV¥X¥`^YNOU[[¥WQLQ  
@HWI-EAS443:3:39:1412:450#0/1  
GCCAGGGTCGACTTCGAGTCTGGACGGATCAAGAAAGAAG  
+HWI-EAS443:3:39:1412:450#0/1  
aaabaaaW`b`\_a`\_a`\_¥¥`\_`W^`¥¥\_`^V^^^`¥\_W  
@HWI-EAS443:3:39:1439:1268#0/1  
CAATTGTTTCATCAAAGACTACAGATACACATATAGGTGCC  
+HWI-EAS443:3:39:1439:1268#0/1  
aaa`\_b`\_b`aa`aZV[^Waa¥`a]]][[\_a[Z¥`\_]X^UG  
@HWI-EAS443:3:39:1529:619#0/1  
CAATCCGACTCTACTTTTCCTAAAAATTCCAGCGCAAAT  
+HWI-EAS443:3:39:1529:619#0/1  
a\_b`\_a`Raa\_aa`a`\_]Z^\_aa[`Y^\_\_X^XZaa\_¥`\_X  
@HWI-EAS443:3:39:1555:338#0/1  
GATTGATGCCAGGGTCGACTTCGAGTCTGGACGGATCAAG  
+HWI-EAS443:3:39:1555:338#0/1  
`\_`\_]a¥`\_WOXYPNNRYVWYWNWU[VS[¥\_TWSTRRWSQW  
@HWI-EAS443:3:39:1563:46#0/1  
ACTTTTCCTAAAAATTCCAGCGCAAATGCCATAAGCACCC  
+HWI-EAS443:3:39:1563:46#0/1  
aabbbbbbbbbbb`bb`^^bY`\_]`W^a`\_]\_^`]Y`YO  
@HWI-EAS443:3:39:1597:777#0/1  
ATGGGCTCCAATCATCCGACGATTTTGCTCTCATAGTGAA  
+HWI-EAS443:3:39:1597:777#0/1  
^¥aU\_ab\_a[]aW¥`a`\_`S\_aVLYaa^RZ`HGV[TSMPZY  
@HWI-EAS443:3:39:160:1031#0/1  
ATCCGACTCTACTTTTCCTAAAAATTCCAGCGCAAATGC  
+HWI-EAS443:3:39:160:1031#0/1  
aaaa`]`aa`¥`\_`\_aaaaaaa`\_a`a`\_]`^a`\_]`^`  
@HWI-EAS443:3:39:1623:307#0/1  
CTTTCCTTGAAGAATCCCACCCAGGAATATTTGAGAATTC  
+HWI-EAS443:3:39:1623:307#0/1  
abbababbbbbbbbaa`\_`[\_`\_`aaa\_aaa`\_]`\_a`\_`^W  
@HWI-EAS443:3:39:1635:1090#0/1  
CGCAAAGAACAATAGGGAAGAAAAACAAGACTGAATAA  
+HWI-EAS443:3:39:1635:1090#0/1  
abb`a\_bbb\_U¥babbb\_a^Y`\_`^[\_`\_`[\_`bYX^b\_\_a`X  
@HWI-EAS443:3:39:1678:689#0/1  
ATTTTCTCAATTTTCTTCTTTGTTGATTCATTGAAGTACT  
+HWI-EAS443:3:39:1678:689#0/1  
abbbbbbb`^abbbabbabaababa^`aaaaXa\_`^`\_`a`\_`  
@HWI-EAS443:3:39:1728:1911#0/1  
AGAAGATGGTCACGCAAAGAACAATAGGGAAGAAAAACA  
+HWI-EAS443:3:39:1728:1911#0/1  
aabaa`\_`\_`^\_aaa[a`\_`[RQX\_]a`\_`\_`^`^`^`^`^`YFF

@HWI-EAS443:3:39:1776:1099#0/1  
CGGATTGATGCCAGGGTCGACTTCGAGTCTGGACGGATCA  
+HWI-EAS443:3:39:1776:1099#0/1  
]`babbbbaaaa\_\_Xaa^^]¥NaaW`[V\_\_aaUZ\_b`^^¥W  
@HWI-EAS443:3:39:1785:775#0/1  
GCTAATTTTAGCATGGAGCTACCCAGCTTTGGAGTGTCTG  
+HWI-EAS443:3:39:1785:775#0/1  
aaaabbbababaaaaaa`\_`\_`^^^a¥a`a\_YY`X\_]X`V  
@HWI-EAS443:3:39:179:1232#0/1  
AAGAATCCCCTTTGGCTTGTGTTGAGAATAGAACGATTC  
+HWI-EAS443:3:39:179:1232#0/1  
SW\_¥OY\_b`^\_\_¥S`a\_`¥[DWOTW[\_]XQZX¥SYPTX[U  
@HWI-EAS443:3:39:197:971#0/1  
GATGCCAGGGTCGACTTCGAGTCTGGACGGATCAAGAAAG  
+HWI-EAS443:3:39:197:971#0/1  
\_ab`bbabaa\_aaaaaa`aa\_¥a`aa`aa``¥\_a[\_]\_aaZ  
@HWI-EAS443:3:39:228:214#0/1  
GTATTGGTGTGTTCTGTTTACTGTGTCCATGGTGTATCCT  
+HWI-EAS443:3:39:228:214#0/1  
^FVW\_^]Y[Y[Y]]^XX^X^X]]YYYYTNTYQN[RTQXWV  
@HWI-EAS443:3:39:245:2017#0/1  
CTGGCGACCTTGAGTTAGTTTATCTACCCTTGTGTTGTTGA  
+HWI-EAS443:3:39:245:2017#0/1  
`[^T]XT¥a]X¥LSW[RVMW^¥Z\_Y^¥`]0¥VYVMV0^ZN  
@HWI-EAS443:3:39:259:1862#0/1  
GACGGATCAAGAAAGAAGAGTTCTCTGAGATCATGAAGAT  
+HWI-EAS443:3:39:259:1862#0/1  
aba]\_\_ab`aa`]aWabaa`^`aaa\_^Y^a¥S]][\_]`UaY  
@HWI-EAS443:3:39:320:1568#0/1  
CAATCCGACTCTACTTTTCCTAAAAATCCAGCGCAAAAT  
+HWI-EAS443:3:39:320:1568#0/1  
`Y^]aZSaa\_\_a`\_\_a`Ta^^`¥a`^aX\_V\_\_\_\_\_]aa¥  
@HWI-EAS443:3:39:328:1333#0/1  
TGTGGTAATGCCAGCCCATGGTCCAGCCAAAAGCATGGAA  
+HWI-EAS443:3:39:328:1333#0/1  
a^0\_¥Q\_]`a¥S\_ba`[XRX\_Y\_]`ab^ZZX\_^S[aa`Y  
@HWI-EAS443:3:39:328:848#0/1  
CCCAGGTGTGCGATAGCCCTTCTTTTTAACTTGCCTCTC  
+HWI-EAS443:3:39:328:848#0/1  
aaa`[^G`\_``aaa`\_`\_`a`\_a`a`\_aZ\_YY`\_`\_`^V  
@HWI-EAS443:3:39:32:140#0/1  
GATTGATGCCAGGGTCGACTTCGAGTCTGGACGGATCAAG  
+HWI-EAS443:3:39:32:140#0/1  
aV\_¥\_`^\_^Z¥ZV[W[XUUUYU^TWUVV[ZRUYTRRWWQM  
@HWI-EAS443:3:39:339:682#0/1  
ATCCTTTAAGAAATCTATTAGCCTTCCTGACTCATTAGCT  
+HWI-EAS443:3:39:339:682#0/1  
abbaaa`VHZ\_aXaa`aa`aa`^`^`\_`\_`\_a^^^a\_]a¥\_\_  
@HWI-EAS443:3:39:375:975#0/1  
CAGTGATTGTGAAAGAAATCTCTGTGTCTTGTGAATTAGT

+HWI-EAS443:3:39:375:975#0/1  
aab]aa`ab^[aab^aaaaaa`a^`Z``]\_W]\_`[\_^¥  
@HWI-EAS443:3:39:393:1246#0/1  
GTGTGTTCTGTTTACTGTGTCCATGGTGTATCCTGTTCCCT  
+HWI-EAS443:3:39:393:1246#0/1  
[QZZYQNZYYVT`ZZTZOOFOXQY[SW\_RQT[¥VHMVXR  
@HWI-EAS443:3:39:414:1020#0/1  
GAAGAGCCATCTGGGCCGTTGCAGGTCCAAGTCCATTGTT  
+HWI-EAS443:3:39:414:1020#0/1  
abbabababaaaaaaa\_a¥a`aaa\_Y`````]Y\_a\_a\_\_]  
@HWI-EAS443:3:39:440:876#0/1  
GGCCATGGTGTCTAGGGCCCGATTGATGCCAGGGTCGAC  
+HWI-EAS443:3:39:440:876#0/1  
`\_aaaa\_`¥a```\_\_`[a\_````^aa`XR\_a`^`ZRZXY  
@HWI-EAS443:3:39:493:640#0/1  
ACGGTCTTGGGAGTCTCGATACTGAATCTTGGACAAAAGA  
+HWI-EAS443:3:39:493:640#0/1  
aaaaN^`a[``]aU`\_\_aUZ`\_^^^R[\_\_\_]RUSGQZ\_SV  
@HWI-EAS443:3:39:503:763#0/1  
CTCCTATATGAAGTCTAGGGAAAAATTTCTCGAATAGAT  
+HWI-EAS443:3:39:503:763#0/1  
aa`aba¥`\_aaaaaaaaabaaa`]a```\_\_aZ`[\_U^`\_  
@HWI-EAS443:3:39:523:1871#0/1  
GTTCTGTTTACTGTGTCCATGGTGTATCCTGTTCCCTGTT  
+HWI-EAS443:3:39:523:1871#0/1  
a]]`]a\_\_QP\_XYWaRb]Z^`^W\_[aZa[Z]¥[\_\_XYV^Q  
@HWI-EAS443:3:39:529:1816#0/1  
CATAGTGAATGCACCAAACCATGAGGGAATACAAGCAGGA  
+HWI-EAS443:3:39:529:1816#0/1  
\_\_XUYXYZ^ZWYV^^\_ZXV]NZZ^XSHZ`^WDX[RWHOQQ  
@HWI-EAS443:3:39:550:1148#0/1  
GTCGACTTCGAGTCTGGACGGATCAAGAAAGAAGAGTTCT  
+HWI-EAS443:3:39:550:1148#0/1  
\_abaa`]H\_``a¥]Z]a¥¥[[HT^`ZXV]`\_Waa```]^\_Y  
@HWI-EAS443:3:39:578:1834#0/1  
GCTGTGGTAATGCCAGCCCATGGTCCAGCCAAAAGCATGG  
+HWI-EAS443:3:39:578:1834#0/1  
Ua]ZW^^J^\_ZPab\_^a`]^\_[]^ab\_YXa`X\_]GUWL[V  
@HWI-EAS443:3:39:601:1065#0/1  
GCAGCAACTGCATTGGCCAACACCATAGAAGTCTTTAGAT  
+HWI-EAS443:3:39:601:1065#0/1  
a`Z`\_Y¥]aa^aZ`¥```]VUSUY\_[\_^][LYSYXYZZW  
@HWI-EAS443:3:39:666:895#0/1  
GGCTAATTTTATGATGGAGCTACCCAGCTTTGGAGTGTCT  
+HWI-EAS443:3:39:666:895#0/1  
`aba``bbbaa^`ababaaaaba`a`a\_a\_a^`^a]a]\_a  
@HWI-EAS443:3:39:674:1491#0/1  
CTCCATCTGATACTAATAGCCCTACCTTTGATTGGGTTTG  
+HWI-EAS443:3:39:674:1491#0/1  
aab\_WVaaaaaV```^[] [ZUZR\_```Q\_^WUTWXTRMORP

@HWI-EAS443:3:39:692:479#0/1  
CAGTGATTGTGAAAGAAATCTCTGTGTCTTGTGAATTAGT  
+HWI-EAS443:3:39:692:479#0/1  
a¥bab`abb`baaaaa]aaaaaaaa]aaa`X\_[[a`^\_Y  
@HWI-EAS443:3:39:759:580#0/1  
GGACGGATCAAGAAAGAAGAGTTCTCTGAGATCATGAAGA  
+HWI-EAS443:3:39:759:580#0/1  
a\_]aaaaaa`]aaaaaa^a\_\_^\_``\_\_\_\_``]\_`\_\_\_\_\_¥  
@HWI-EAS443:3:39:760:377#0/1  
CAGATACACATATAGGTGCCATAGGGGAGACACACAAATT  
+HWI-EAS443:3:39:760:377#0/1  
a\_aaaaaabaaaaa^ba\_^a`a`\_\_aaa`^]`a\_\_\_\_`]  
@HWI-EAS443:3:39:772:1311#0/1  
CTGTGGTAATGCCAGCCCATGGTCCAGCCAAAAGCATGGA  
+HWI-EAS443:3:39:772:1311#0/1  
\_`]V\_^Waa\_Za^^^\_¥VPWQ¥ba][a]Xa\_U^`aZZaY  
@HWI-EAS443:3:39:774:946#0/1  
TGGGATTCTTCAAGGAAAGCCATAGCCTCTAGAACACAGT  
+HWI-EAS443:3:39:774:946#0/1  
Z]Z^F[bWWa¥\_\_\_\_[YU]^¥VW^`\_]a^U[¥X]¥X]]P  
@HWI-EAS443:3:39:821:1245#0/1  
CTGCATTGCCAACACCATAGAAGTCTTTAGATCGAATGG  
+HWI-EAS443:3:39:821:1245#0/1  
¥T\_aa\_`S`¥aa]X[\_a\_a\_a[X[0\_a\_]WKK][Y]`Y¥S  
@HWI-EAS443:3:39:850:1612#0/1  
GATTGATGCCAGGTCGACTTCGAGTCTGGACGGATCAAG  
+HWI-EAS443:3:39:850:1612#0/1  
`aa`\_`a\_Yaabb^]^b```aaa\_`\_¥a`a¥ZQ[Q]Y¥aXZ  
@HWI-EAS443:3:39:869:680#0/1  
GAACAATTGAAGAGCCATCTGGGCCGTTGCAGGTCCAAGG  
+HWI-EAS443:3:39:869:680#0/1  
`bbabaabbbba`babaa`\_aaa`aaU^`a\_^\_Xa]\_\_aV  
@HWI-EAS443:3:39:870:116#0/1  
ATTAGAGTTTCGTATACTTTGTTGAACTTTAGCTAGGA  
+HWI-EAS443:3:39:870:116#0/1  
abbababb\_bbbaabaa\_babbaaaaaaaaaa\_aa`aaa^  
@HWI-EAS443:3:39:880:513#0/1  
CTCTTTGTTCAATTGATTCCATTACATCCTTTAAGAAATCT  
+HWI-EAS443:3:39:880:513#0/1  
aab\_bbbbabbbbaababbaaab``abaabab`abaaa`a\_  
@HWI-EAS443:3:39:903:341#0/1  
ATTCGATCTAAAGACTTCTATGGTGTGGCCAATGCAGTT  
+HWI-EAS443:3:39:903:341#0/1  
aabaabaaaaaaaa`\_aa\_a`aaaYa^`\_aa^]`\_\_^`\_]`^  
@HWI-EAS443:3:39:91:619#0/1  
TGCATTCACTATGAGAGCAAATCGTCGGATGATTGGAGC  
+HWI-EAS443:3:39:91:619#0/1  
aa^[\_a`[aa[`bab¥T[aaaa`aaYaa^[^\_\_\_\_[]Y[\_Y  
@HWI-EAS443:3:39:925:1015#0/1  
TTTTGTTTGAGAACATTATGGGTGCCATGCTCAGGATGTT

+HWI-EAS443:3:39:925:1015#0/1  
ab\_a`^b]VM]SWQaaa^\_Y[[La`aX¥`a]X\_[MSWZY^  
@HWI-EAS443:3:39:972:951#0/1  
GTGGGATGGGCTCCAATCATCCGACGATTTTGCTCTCATA  
+HWI-EAS443:3:39:972:951#0/1  
^Gabaaaaba`a\_a\_W]aa`Za\_] [aU```\_W`^aa¥¥\_¥  
@HWI-EAS443:3:3:1022:571#0/1  
AAAAATTCCAGCGAAAATGCCATAAGCACCACATTCCT  
+HWI-EAS443:3:3:1022:571#0/1  
aaa\_\_a`\_\_`a]aZ^^W\_\_^]]^a]]]XaXX^Z¥^]VYY\_  
@HWI-EAS443:3:3:1031:144#0/1  
ATTAACAGAAATCAACCGCAGCAACTGCATTGGCCAAC  
+HWI-EAS443:3:3:1031:144#0/1  
aababb[abaaaa`aaaaa^a``\_aX`\_ZYY^\_[PW¥]Y  
@HWI-EAS443:3:3:1096:1745#0/1  
GTTGATCCCACTAATTGCAGGTCCTGTAGAATCTGTCC  
+HWI-EAS443:3:3:1096:1745#0/1  
`\_abaaa`a`b`\_aa[`aZL]a`UX`\_a^\_ZX\_\_N\_aWTM  
@HWI-EAS443:3:3:116:619#0/1  
GAAAGAAATCTCTGTCTTGTGAATTAGTCATCATCTTT  
+HWI-EAS443:3:3:116:619#0/1  
aabaa`\_a^aa\_aa¥a^`\_`\_`\_`\_Y^\_¥`][`\_W^][`\_`  
@HWI-EAS443:3:3:1202:84#0/1  
CTCCTATATGAACTGCTAGGGAAAAATTTCTCGAATAGAT  
+HWI-EAS443:3:3:1202:84#0/1  
`baabaaaabab`aa^aaaaa`aaa`aaa^a\_a\_\_a\_a`^  
@HWI-EAS443:3:3:1213:23#0/1  
GATAACAATGACCTTGACCTGCAACGCCAGATGGCT  
+HWI-EAS443:3:3:1213:23#0/1  
a\_a``\_\_`aaa\_¥T\_\_Z\_^YW^\_¥^\_U¥TQQU¥¥¥¥¥WNW  
@HWI-EAS443:3:3:1241:1432#0/1  
GGAGCTAATGGATGATGATTATCGGGGAAGACTTTGTAAT  
+HWI-EAS443:3:3:1241:1432#0/1  
aYRa`ZVRZ`U\_^Z¥XTQS[WFMaS[^]\_a^0\_`BBBBBB  
@HWI-EAS443:3:3:1316:1431#0/1  
CTGCATTGGCCAACCATAGAAAGTCTTTAGATCGAATGG  
+HWI-EAS443:3:3:1316:1431#0/1  
abbabbbabYY`\_aa^abbbba]aX\_aba\_baa]\_aaaa`  
@HWI-EAS443:3:3:1344:309#0/1  
CCCGATAATCATCATCCATTAGCTCCCATTTAAGCAGAC  
+HWI-EAS443:3:3:1344:309#0/1  
a]bbabbbb¥bb`bb\_abbbbb`b^a\_bbbbbbab\_a`a\_  
@HWI-EAS443:3:3:1412:1469#0/1  
AGAATAGAACGATTCTCTTGGGAATCCAGGAATGTGTAG  
+HWI-EAS443:3:3:1412:1469#0/1  
ZUQ[SUP¥[aa\_S¥]\_\_`T`\_OGO[SO^PDPNS`G\_X[\_  
@HWI-EAS443:3:3:1459:1422#0/1  
GGCTCCAATCATCCGACGATTTTGCTCTCATAGTGAATGC  
+HWI-EAS443:3:3:1459:1422#0/1  
aa`\_Y^T¥\_Z\_[V^\_U`VV^R[YW¥LYWWWXX]UXXU]BB

@HWI-EAS443:3:3:1479:425#0/1  
GCTAGGGAAAAATTTCTCGAATAGATTGCAGCACTTCTGG  
+HWI-EAS443:3:3:1479:425#0/1  
aaa`b`aaaa`a`\_U\_^¥¥\_\_`\_^`X]\_^\_Z\_\_Z\_^W  
@HWI-EAS443:3:3:1495:1442#0/1  
GCTTGTATCCCTCATGGTTTGGTGCATTCACTATGAGAG  
+HWI-EAS443:3:3:1495:1442#0/1  
WWUY\_T[00¥NRXPXPPWRZOZUQYO¥YSS¥T\_T\_]QH[¥  
@HWI-EAS443:3:3:1508:853#0/1  
ATTTGCGAAAAGCTTGAACAGTCTGGGCTCCCAGTAGGGG  
+HWI-EAS443:3:3:1508:853#0/1  
`bba`^bab\_\_`]^aa\_\_\_\_`¥^^`¥¥YWWW[\_aR¥`Ya\_  
@HWI-EAS443:3:3:1575:1023#0/1  
GGAAAAATTTCTCGAATAGATTGCAGCACTTCTGGTACAT  
+HWI-EAS443:3:3:1575:1023#0/1  
aa¥\_ba[`W¥a\_a`aa`\_`TY\_U`0\_\_\_\_^a`^Z`  
@HWI-EAS443:3:3:1586:1509#0/1  
CTTGGGAGTCTCGATACTGAATCTTGGACAAAAGAAATAC  
+HWI-EAS443:3:3:1586:1509#0/1  
ab`\_abbaaa`a`^S`^YaaTbTb¥^a]\_\_\_a\_\_\_]aYW  
@HWI-EAS443:3:3:1626:831#0/1  
GATTGATGCCAGGGTCGACTTCGAGTCTGGACGGATCAAG  
+HWI-EAS443:3:3:1626:831#0/1  
a^a`aaaa`a`S\_aa\_^\_¥`\_[¥Z`^VZ]¥¥U¥\_^\_  
@HWI-EAS443:3:3:1673:1094#0/1  
GACTCATTAGCTGTTAGGCCATTTCGATCTAAAGACTTCTA  
+HWI-EAS443:3:3:1673:1094#0/1  
aV¥b`baYa\_]a[Qbaba[[a`M]K\_\_\_]S\_\_aYG`\_aB  
@HWI-EAS443:3:3:1684:1135#0/1  
GATGGTCACGCAAAGAACAATAGGGAAGAAAAACAAGA  
+HWI-EAS443:3:3:1684:1135#0/1  
aZabb¥aa¥`^\_a^^]`^`^\_aa^Y`¥\_\_\_^\_[\_¥\_`^  
@HWI-EAS443:3:3:1690:1281#0/1  
TAGAGATAACAACCCACTTTCAAAGAAAAAGGAGAGTAAG  
+HWI-EAS443:3:3:1690:1281#0/1  
a`a\_a`aaa\_a\_]\_\_\_]a`^\_AY`W^^Y[`^^^\_Y]]\_  
@HWI-EAS443:3:3:1691:844#0/1  
AATGTGTAGTTGCAACGGCATCATATCCATGCTTTTGGC  
+HWI-EAS443:3:3:1691:844#0/1  
Z\_`ba`ba¥`b`a\_X\_\_^b\_N`aba\_]Y``[``Z]¥¥P  
@HWI-EAS443:3:3:1703:1282#0/1  
GTTCTGTTTACTGTGTCCATGGTGTATCCTGTTCCCTGTT  
+HWI-EAS443:3:3:1703:1282#0/1  
abbbbbbbabbabbab`aab\_bSb\_b`aWaa\_a`]aa`a]  
@HWI-EAS443:3:3:1704:1139#0/1  
GACTGACAAAGGGATTTCAGGGGATTACAAAGTCTTCCCG  
+HWI-EAS443:3:3:1704:1139#0/1  
aaaa^aaaba`aaYaa`aa`aaaa\_a¥Y[\_a]S[^¥SW¥\_  
@HWI-EAS443:3:3:1762:1601#0/1  
AAAAATTCCAGCGCAAATGCCATAAGCACCATTCCT

+HWI-EAS443:3:3:1762:1601#0/1  
aaaaaa`\_]`X]W^]Y^^X]^\_Z]W`XY[ZZZXWVS^  
@HWI-EAS443:3:3:1768:1711#0/1  
ATTCCAGCGAAAATGCCATAAGCACACATTCCCTTATA  
+HWI-EAS443:3:3:1768:1711#0/1  
aabaabb¥`ab\_T\_aaN`abaaT\_a`YaSaaa`ZLaaa\_a  
@HWI-EAS443:3:3:1773:179#0/1  
ATTAGCTGTTAGGCCATTTCGATCTAAAGACTTCTATGGTG  
+HWI-EAS443:3:3:1773:179#0/1  
aabaa\_b`]`YV[SVVS¥XWTYM¥U¥XWRKTWG[S¥PSBB  
@HWI-EAS443:3:3:209:227#0/1  
ATGGCACCTATATGTGTATCTGTAGTCTTTGATGAACAAT  
+HWI-EAS443:3:3:209:227#0/1  
a¥bab`ZV`YWUJ``\_Na^VX`X^SHFaaa^FNSFISBB  
@HWI-EAS443:3:3:248:455#0/1  
GGGATTCAGGGATTACAAAGTCTTCCCCGATAATCATCA  
+HWI-EAS443:3:3:248:455#0/1  
aabbaabbbb]baabb\_abab]aaaa]\_\_aaa\_aa^`aV\_  
@HWI-EAS443:3:3:295:64#0/1  
ATGGGCTCCAATCATCCGACGATTTTGCTCTCATAGTGAA  
+HWI-EAS443:3:3:295:64#0/1  
aa\_S¥`Z]^IXXYX^LR[\_WVPPXLSN\_]UVTKKVBBBB  
@HWI-EAS443:3:3:32:48#0/1  
ATCGCAACACCTGGGATGCAGATTAGAGGTTTCGTATACT  
+HWI-EAS443:3:3:32:48#0/1  
aba\_]`\_]aa\_aaaaZVb^Y`RZXaS¥`\_G\_]`^YV\_`^¥S]  
@HWI-EAS443:3:3:389:658#0/1  
AGAATCCCACCCAGGAATATTTGAGAATTCATGCCTTGAA  
+HWI-EAS443:3:3:389:658#0/1  
^Y\_aaZa\_a]\_[R]]\_Z`aaa`\_a^\_]`\_¥\_]`]^`ZV  
@HWI-EAS443:3:3:434:276#0/1  
AAAAATTTCTCGAATAGATTGCAGCACTTCTGGTACATCT  
+HWI-EAS443:3:3:434:276#0/1  
a`V[X^]Wa]a^ZJ¥]WXZ]a¥^a¥ZU¥[WY`WU]G¥BBB  
@HWI-EAS443:3:3:446:330#0/1  
GAATCCCACCCAGGAATATTTGAGAATTCATGCCTTGAAA  
+HWI-EAS443:3:3:446:330#0/1  
\_W`M^aa`¥WRabZY\_\_a`b]]`^]RRa]`GU\_\_ba^a  
@HWI-EAS443:3:3:457:1041#0/1  
TTGATGCCAGGGTCGACTTCGAGTCTGGACGGATCAAGAA  
+HWI-EAS443:3:3:457:1041#0/1  
¥bb[Ya]^bb\_[a`XU`WN`][\_Yaa^TNa]XR¥a`^a  
@HWI-EAS443:3:3:470:1519#0/1  
GTGGGATGGGCTCCAATCATCCGACGATTTTGCTCTCATA  
+HWI-EAS443:3:3:470:1519#0/1  
a\_baa\_ababa`a`a\_aaba^\_aa[\_\_a^`\_a\_[MYX\_a`  
@HWI-EAS443:3:3:503:1222#0/1  
CGGATTGATGCCAGGGTCGACTTCGAGTCTGGACGGATCA  
+HWI-EAS443:3:3:503:1222#0/1  
abb`bbbbaaa`aaa`^`b`^aa``a^V¥a^a\_¥`a\_XW`





+HWI-EAS443:3:3:750:1204#0/1  
aabba]aa\_aaabUaaaa`ba`\_a\_aa[\_]\_Y^\_XW\_V^\_  
@HWI-EAS443:3:3:750:558#0/1  
CAGATGTACCAGAAGTGCTGCAATCTATTCGAGAAATTTT  
+HWI-EAS443:3:3:750:558#0/1  
ababbb\_b`aba`aa^a\_abaaaa^aaaaXaaaa\_aa\_^  
@HWI-EAS443:3:3:774:1512#0/1  
GACCTGAAGTACTTCAATGAATCAACAAAGAAGAAAATTG  
+HWI-EAS443:3:3:774:1512#0/1  
`aX`]bb[aIaYbb]a¥bb\_^a`a`]aa`^^\_a`[\_[```  
@HWI-EAS443:3:3:783:1029#0/1  
GGCTCCAATCATCCGACGATTTTGCTCTCATAGTGAATGC  
+HWI-EAS443:3:3:783:1029#0/1  
^b`]`a]\_aZWZ[\_baYb\_`a`a¥L[¥]`]W][U`\_Y`]P  
@HWI-EAS443:3:3:834:465#0/1  
AGCCTCTCTTATTCAGTCTTTGTTTTTTCTCCCTATTGT  
+HWI-EAS443:3:3:834:465#0/1  
U`^\_W^`QR``aZS`a]\_`ba[\_abb^Qa`\_W^a^`abW  
@HWI-EAS443:3:3:85:286#0/1  
GGATGGGCTCCAATCATCCGACGATTTTGCTCTCATAGTG  
+HWI-EAS443:3:3:85:286#0/1  
aZHY`XaVYJQYVZLZPVSUYUNXPUBBBBBBBBBBBBBB  
@HWI-EAS443:3:3:864:161#0/1  
ATCCGACTCTACTTTTCCTAAAAATTCCAGCGCAAATGC  
+HWI-EAS443:3:3:864:161#0/1  
a^`]`¥baa]^`abb\_]a`a`a`¥aQS\_^XZM``\_`]`Y  
@HWI-EAS443:3:3:876:726#0/1  
ATGGGCTCCAATCATCCGACGATTTTGCTCTCATAGTGAA  
+HWI-EAS443:3:3:876:726#0/1  
`bbaaUaY[\_^b\_`aa^baaN]a\_aaaa¥\_`\_a`aZ`\_\_  
@HWI-EAS443:3:3:895:2014#0/1  
TAATGCCAGCCCATGGTCCAGCCAAAAGCATGGAATATGA  
+HWI-EAS443:3:3:895:2014#0/1  
abbbbaa`S[aa[aVT¥aaa\_] [SY[X^a[VW[aZBBBB  
@HWI-EAS443:3:3:898:913#0/1  
TCCCCAGTGATTGTGAAAGAAATCTCTGTGTCTTGTGAAT  
+HWI-EAS443:3:3:898:913#0/1  
aaa`\_V`[a^]aa]aaaa`a``\_\_a\_G¥Z\_``\_X`Z^¥  
@HWI-EAS443:3:3:922:1275#0/1  
AGAATCCCACCCAGGAATATTTGAGAATTCATGCCTTGAA  
+HWI-EAS443:3:3:922:1275#0/1  
\_\_R]XZba`RUYaWa\_a[¥¥X^`Ta[PW]X^X]]`S]SO  
@HWI-EAS443:3:3:927:1149#0/1  
CTGACATTAATACGATGACCAAAGATGCAGAGAGAGGCA  
+HWI-EAS443:3:3:927:1149#0/1  
abba`abbaaaaa\_baaaa`aa`aaa`a\_¥a\_a`a`\_a¥^  
@HWI-EAS443:3:3:930:1464#0/1  
CAAACCATGAGGAATACAAGCAGGAGTGGACAGATTCTA  
+HWI-EAS443:3:3:930:1464#0/1  
a`]`RNW`¥\_SX¥XN\_TX\_[\_\_NLWZ]`UU^ZNL]SPLBBB

@HWI-EAS443:3:3:95:1902#0/1  
ACCAAGTGGGTATGCACAAACAGACTGTGTTCTAGAGGCT  
+HWI-EAS443:3:3:95:1902#0/1  
``\_]\_aU[X¥Na\_a\_``]\_V\_[\_^0a`0\_R^\_\_\_^[`JRB  
@HWI-EAS443:3:3:971:405#0/1  
CAATGCTTGCTAGCATTCTGCTGGTATTTGTGTTCTGAAT  
+HWI-EAS443:3:3:971:405#0/1  
abab`abbbbabaaabb`abaaabaWbbaab\_aaa\_b`\_a  
@HWI-EAS443:3:3:977:843#0/1  
CAGATTAGAGGTTTCGTATACTTTGTTGAACTTTAGCTA  
+HWI-EAS443:3:3:977:843#0/1  
aabababaabb\_bbaa`bba`aaaaaba\_`a\_baa`a\_a\_  
@HWI-EAS443:3:3:980:1745#0/1  
GAGGCTATCTAATAAGAGCACTGACATTAAATACGATGAC  
+HWI-EAS443:3:3:980:1745#0/1  
U^\_babba`aaabb\_Q¥¥baab\_b^babaabbb^`b`aaa  
@HWI-EAS443:3:40:1000:923#0/1  
GGGTTGTTATCTCTATTTCTCTTTGTTTCATTGATTCCAT  
+HWI-EAS443:3:40:1000:923#0/1  
aaa^`a¥\_[\_^a^a]```\_^]\_``\_\_[^^^][[]][\_YXW  
@HWI-EAS443:3:40:1039:1963#0/1  
AAAAATTCCAGCGCAAATGCCATAAGCACCACATTCCCT  
+HWI-EAS443:3:40:1039:1963#0/1  
aaaaa\_\_ZQ\_a[XW^\_\_`]¥\_\_`\_^]YZ\_¥W\_]\_Z\_W]¥  
@HWI-EAS443:3:40:1069:933#0/1  
GTGTTCTGTTTACTGTGTCCATGGTGTATCCTGTTCCCTGT  
+HWI-EAS443:3:40:1069:933#0/1  
aGRXX`Y]QR\_¥]XFMNT]¥XX[UNYNTTVGRFRYVVXVU  
@HWI-EAS443:3:40:1121:1467#0/1  
CCCAGTGATTGTGAAAGAAATCTCTGTGTCTTGTGAATTA  
+HWI-EAS443:3:40:1121:1467#0/1  
a``abbbbbbaabbbbbbb`bbbbbaaXa¥aaa\_¥^]\_^a\_  
@HWI-EAS443:3:40:1141:1605#0/1  
CGCTGGAATTTTTAGGAAAAGTAGAGTCGGATTGACATCC  
+HWI-EAS443:3:40:1141:1605#0/1  
`b`a`aXX`b`^^^¥abbbbW¥`abVba\_ZW^Z\_^Y\_aP  
@HWI-EAS443:3:40:1181:1181#0/1  
TTTTGCTCTCATAGTGAATGCACCAAACCATGAGGGAATA  
+HWI-EAS443:3:40:1181:1181#0/1  
abbbabaab\_\_\_ba\_aaaaa\_aaaa[J\_a\_aa`a`\_L]```  
@HWI-EAS443:3:40:1188:980#0/1  
GGTGTCTAGGGCCCGATTGATGCCAGGGTCTGACTTCGAG  
+HWI-EAS443:3:40:1188:980#0/1  
a]Y`K`YY``¥¥¥YZ`Y^^XXSRVSSR^UNQX¥¥QQaUPR  
@HWI-EAS443:3:40:1198:1832#0/1  
GAAGAGCCATCTGGGCCGTTGCAGGTCCAAGGTCATTGTT  
+HWI-EAS443:3:40:1198:1832#0/1  
`SWLUT[TYBBBBBBBBBBBBBBBBBBBBBBBBBBBBBBB  
@HWI-EAS443:3:40:1252:261#0/1  
TGCAGTCTGTAGAATCTGTCCACTCCTGCTTGTATTCC

+HWI-EAS443:3:40:1252:261#0/1  
abaabb^aaaaaa\_a\_a`ab`[^^\\$^aaV\_W`\_`\_`\_`V  
@HWI-EAS443:3:40:1267:211#0/1  
GGACCATGGGCTGGCATTACCACAGCATTGTTTACAGAAT  
+HWI-EAS443:3:40:1267:211#0/1  
aa\_]YKT`>`R[[\_]Z^ZZZ[S^¥OLQWZVTUXUYXYXW  
@HWI-EAS443:3:40:1282:2041#0/1  
AATCCGACTCTACTTTTCTAAAAATCCAGCGCAAAATG  
+HWI-EAS443:3:40:1282:2041#0/1  
`aa\_I]\_W[V]`U\_\_¥\_`¥\_aaaa^¥Z[a`][\_`^a[^]  
@HWI-EAS443:3:40:1378:2013#0/1  
TGGTCACGCAAAGAACAATAGGGAAGAAAAACAAAGACT  
+HWI-EAS443:3:40:1378:2013#0/1  
aa`\_\_b`aaa^`^a]`a`a\_`\_`Y^a[^`^a`aa`a\_a[  
@HWI-EAS443:3:40:1406:1494#0/1  
CAACAAACAAGGGTAGATAAACTAACTCAAGGTCGCCAGA  
+HWI-EAS443:3:40:1406:1494#0/1  
abaa`bb^bbbaa[`bab`aaba¥Wta`[\_¥Q\_a`\_`^`  
@HWI-EAS443:3:40:1408:1261#0/1  
TCGACTTCGAGTCTGGACGGATCAAGAAAGAAGAGTTCTC  
+HWI-EAS443:3:40:1408:1261#0/1  
¥¥`^^^a\_Ua][\_]aaa`\_W\_``[YQ[0^Y\_\_¥`[`X\_¥  
@HWI-EAS443:3:40:1436:516#0/1  
CAGTGATTGTGAAAGAAATCTCTGTGTCTTGTGAATTAGT  
+HWI-EAS443:3:40:1436:516#0/1  
abbabbbbababbbabbb\_bbbbab\_bbbba^V`baaa`  
@HWI-EAS443:3:40:1446:273#0/1  
CATGGACACAGTAAACAGAACACACCAATACTCAGAAAAG  
+HWI-EAS443:3:40:1446:273#0/1  
W`ba¥W`\_Ybb[aL]a`\_aa\_]`^WTL^`\_V`\_aaY¥^\_a  
@HWI-EAS443:3:40:1453:1437#0/1  
TCTTTGTTTCATTGATTCCATTACATCCTTTAAGAAATCTA  
+HWI-EAS443:3:40:1453:1437#0/1  
Y^a^¥aY\_a`Z]\_¥`[\_`^ba]U¥^R`\_Z^UYWV\_S`^a\_  
@HWI-EAS443:3:40:1458:843#0/1  
CAGATCTTCATGATCTCAGAGAACTTTCTTTCTTGATCC  
+HWI-EAS443:3:40:1458:843#0/1  
N¥]K\_\_bb\_b`b\_abaY¥babb^`WG¥`\_``bba`Y0Xaa]  
@HWI-EAS443:3:40:1544:1460#0/1  
CAACATTTGCCAGTTTGGCCTTCTTTTCATTGCCCCCTAC  
+HWI-EAS443:3:40:1544:1460#0/1  
`\_abb`aaaabbbba]`b`bbbb`bbbb`bababba]a  
@HWI-EAS443:3:40:1548:1414#0/1  
GATTGATGCCAGGGTCGACTTCGAGTCTGGACGGATCAAG  
+HWI-EAS443:3:40:1548:1414#0/1  
`^baa\_VGYQX`\_`\_MO]]W`\_Z[¥ZT\_`\_`YUU^¥RQVRPT  
@HWI-EAS443:3:40:1578:559#0/1  
AAAAATCCAGCGCAAAATGCCATAAGCACCATTCCT  
+HWI-EAS443:3:40:1578:559#0/1  
abb`W]aaa`\_`\_`[[\_W\_a]`\_]\_aa\_[[][\_Z^\_^]X`P`\_`

@HWI-EAS443:3:40:1585:1734#0/1  
CTTTTCTGAGTATTGGTGTGTTCTGTTTACTGTGTCCATG  
+HWI-EAS443:3:40:1585:1734#0/1  
abbbabb`^a\_abbab]a^babbbba]ba`] `b`babbaaa  
@HWI-EAS443:3:40:1592:525#0/1  
AGAATTCCCCTTTGGCTTGTGTTGAGAATAGAACGATTCC  
+HWI-EAS443:3:40:1592:525#0/1  
abbbbbba\_a\_bbaaa`bab\_a`a[Z\_Zaaa\_aa\_aa]`\_W  
@HWI-EAS443:3:40:1609:1095#0/1  
CCAAGAAGATGGTCACGCAAAGAACAATAGGGAAGAAAAA  
+HWI-EAS443:3:40:1609:1095#0/1  
\_abbbbbbbaaa`babaabab\_^^aab`babbababa  
@HWI-EAS443:3:40:1637:1204#0/1  
AGTAAACAGAACACACCAATACTCAGAAAAGGAAAGTGG  
+HWI-EAS443:3:40:1637:1204#0/1  
^b`bbVbabaZ`a`¥]baabaa`]b`]aaabaabb\_Pba  
@HWI-EAS443:3:40:1644:1025#0/1  
GGAGCCCATCCCACCAGTATATTGTCTTGGTGTATTTCTT  
+HWI-EAS443:3:40:1644:1025#0/1  
a\_W]`[\_[\_Y\_PIU^TOX][SWM^RPSZX[WTONY]¥VWX  
@HWI-EAS443:3:40:1657:437#0/1  
TGCAGGTCTGTAGAATCTGTCCACTCCTGCTTGTATTCC  
+HWI-EAS443:3:40:1657:437#0/1  
aaaaba\_\_`aa`a`a`\_¥\_Y`W¥a\_T[R^`W\_^\_¥¥  
@HWI-EAS443:3:40:1662:542#0/1  
TCCTGACTCATTAGCTGTTAGCCATTTCGATCTAAAGACT  
+HWI-EAS443:3:40:1662:542#0/1  
Y][aba`^Y\_a`]V¥^ZRPXVITMKM]]YQURXTFYNRB  
@HWI-EAS443:3:40:1675:211#0/1  
CCTAAAAATTCCAGCGCAAATGCCATAAGCACCATTC  
+HWI-EAS443:3:40:1675:211#0/1  
abbbbbbbbbbbbbba`bbbbba`aaaZa\_bab`baaa\_  
@HWI-EAS443:3:40:1712:1757#0/1  
AGCCCATCCCACCAGTATATTGTCTTGGTGTATTTCTTTT  
+HWI-EAS443:3:40:1712:1757#0/1  
aaY^\_bb`] `a]¥]a¥aaaaa\_\_a[]\_``U] `a`] `aZ  
@HWI-EAS443:3:40:171:1178#0/1  
GGTGTCTAGGGCCCGATTGATGCCAGGGTCGACTTCGAG  
+HWI-EAS443:3:40:171:1178#0/1  
aaH[¥b]baaa]abab]]aaa\_aaaaU]^Q\_\_XY[RaWQS  
@HWI-EAS443:3:40:1743:1128#0/1  
CAATCCGACTCTACTTTTCTAAAAATTCCAGCGCAAAT  
+HWI-EAS443:3:40:1743:1128#0/1  
abbb`bba]bbbaabbbabbbbbbbaabaababb¥¥\_]a  
@HWI-EAS443:3:40:1753:587#0/1  
CCGGTCTCTATATGAACTGCTAGGGAATAATTTCTCGAA  
+HWI-EAS443:3:40:1753:587#0/1  
a`bbabbaaa]abababaa`X`aaa\_¥\_T^aaaa^`^`\_  
@HWI-EAS443:3:40:1783:1047#0/1  
GACCTGAAGTACTTCAATGAATCAACAAAGAAGAAAATTG

+HWI-EAS443:3:40:1783:1047#0/1  
a^\_^`^^ZIVPY¥¥^\_W^`][^RNDU[WRMKZ[[YTTZB  
@HWI-EAS443:3:40:184:1598#0/1  
ATTCTTCAAGGAAAGCCATAGCCTCTAGAACACAGTCTGT  
+HWI-EAS443:3:40:184:1598#0/1  
¥^ab^^b`X]^ZSXU\_`aaaaa`^G[K\_aZa][Yaa\_^  
@HWI-EAS443:3:40:207:760#0/1  
GAGATTTCTTTCACAATCACTGGGACAACACTAAGTGGA  
+HWI-EAS443:3:40:207:760#0/1  
`]aYbbaab\_aa\_abab¥`ababaa`a`Y^a`a``a¥aa`  
@HWI-EAS443:3:40:241:953#0/1  
TGTAATCCCCTGAATCCCTTTGTCAGTCATAAAGAGATTG  
+HWI-EAS443:3:40:241:953#0/1  
[OVDT`[P\_YPRLHR^Va`LNV^XBBBBBBBBBBBBBBBB  
@HWI-EAS443:3:40:277:1054#0/1  
ATGGGTGCCATGCTCAGGATGTTTCTGAACCACTCGGGTT  
+HWI-EAS443:3:40:277:1054#0/1  
a\_aZ`Z`aa\_a]a`a\_`]]^`Z\_\_^]X^S¥^\_W^]\_\_WW  
@HWI-EAS443:3:40:306:1304#0/1  
GAAGAATCCCACCCAGGAATATTTGAGAATTCATGCCTTG  
+HWI-EAS443:3:40:306:1304#0/1  
a`K[\_YSMY[^a\_VW^`\_\_^XW]TTYX¥X[YY^WW\_^^XX  
@HWI-EAS443:3:40:319:250#0/1  
AATGAATCAGCTGACATGAGTATTGGAGTAACAGTGATAA  
+HWI-EAS443:3:40:319:250#0/1  
aa`\_\_W¥]\_^\_^\_`^]Z]VYZ][[[Z]^^[W[XUU[Z  
@HWI-EAS443:3:40:31:1558#0/1  
AGGGATTCAGGGGATTACAAAGTCTTCCCCGATAATCATC  
+HWI-EAS443:3:40:31:1558#0/1  
¥\_U[\_^]`a¥Z^¥\_\_aa`a`V`^\_aaa`¥^XSZ]X[a  
@HWI-EAS443:3:40:327:853#0/1  
GTTGTTATCTCTATTTCTCTTTGTTTCATTGATTCCATTA  
+HWI-EAS443:3:40:327:853#0/1  
aY^XV\_]YXY¥X[^]]XWYY]HVYYXRZ00QZZTSTSV  
@HWI-EAS443:3:40:349:495#0/1  
CAGTAGGGGGCAATGAAAAGAAGCCAAACTGGCAAATGT  
+HWI-EAS443:3:40:349:495#0/1  
a^b`bbbbbbbbb`bb\_`a^Y\_`b\_Q¥a\_aaaaa\_TYa\_  
@HWI-EAS443:3:40:392:699#0/1  
AAAGACTTCTATGGTGTGGCCAATGCAGTTGCTGCCGGT  
+HWI-EAS443:3:40:392:699#0/1  
V^aaV`a\_¥[\_\_ZYW```bba¥`^VZX¥aa`^Y¥]¥^^W  
@HWI-EAS443:3:40:476:2029#0/1  
AGCATTTGCGAAAAGCTTGAACAGTCTGGGCTCCCAGTAG  
+HWI-EAS443:3:40:476:2029#0/1  
^\_ab[^^^bbb\_\_\_\_a[\_WZ¥`a\_UVL¥Z^^[[\_]LJFWN  
@HWI-EAS443:3:40:552:1530#0/1  
CCCTTTGGCTTGTGTTGAGAATAGAACGATTCCCTCTTGGG  
+HWI-EAS443:3:40:552:1530#0/1  
a`b`]`ZU¥SYY¥a]SZVX¥]\_]¥\_YRQRZ[S^U¥YW]

@HWI-EAS443:3:40:564:1538#0/1  
GCTCCAATCATCCGACGATTTTGCTCTCATAGTGAATGCA  
+HWI-EAS443:3:40:564:1538#0/1  
`^T]ZU][^^`\_Y]\_[^0\_YQV`UUUV\_RR¥^VRVVZU¥Y  
@HWI-EAS443:3:40:575:29#0/1  
TATTTGTGTTGCAATCTTCATTCTTTTACTCTCGAACATG  
+HWI-EAS443:3:40:575:29#0/1  
a^a`a`aaaaaba\_aaaaaa^aa`a`W^`a\_\_`aY¥\_\_`a  
@HWI-EAS443:3:40:640:1292#0/1  
ATCCGACTCTACTTTTCCTAAAAATTCCAGCGCAAATGC  
+HWI-EAS443:3:40:640:1292#0/1  
ab````[aa``\_`aa[aaaaa``a`a`^¥Z¥W[^X[ZXa  
@HWI-EAS443:3:40:707:1914#0/1  
AATCCGACTCTACTTTTCCTAAAAATTCCAGCGCAAATG  
+HWI-EAS443:3:40:707:1914#0/1  
aa\_aa`^V`a\_a¥``\_\_``\_aaaa^¥Wa`\_]\_]aaY]`]]  
@HWI-EAS443:3:40:740:1590#0/1  
AACTGCATTGGCCAACACCATAGAAGTCTTTAGATCGAAT  
+HWI-EAS443:3:40:740:1590#0/1  
\_Za`\_`a]aYaaXaaYaaa¥]aa\_Y]Vb^\_\_\_\_\_`^a`\_\_^  
@HWI-EAS443:3:40:742:242#0/1  
CTTCGAGTCTGGACGGATCAAGAAAGAAGAGTTCTCTGAG  
+HWI-EAS443:3:40:742:242#0/1  
abbbbbbabbaabbb^\_aaaabaab\_]aaab¥aaaaaaaa  
@HWI-EAS443:3:40:83:489#0/1  
GAGAGGCTATCTAATAAGAGCACTGACATTAATACGATG  
+HWI-EAS443:3:40:83:489#0/1  
a`\_Q\_aa^YW¥SV]]XZWJY[VLQZ¥]IW^[R^Q\_ZX[UP  
@HWI-EAS443:3:40:854:648#0/1  
TGCCCCCTACTGGGAGCCCAGACTGTTCAAGCTTTTCGCA  
+HWI-EAS443:3:40:854:648#0/1  
]ba]]aa\_]aaaa`aaX\_a[[\_``\_VXLR[RRY[T`P^Z  
@HWI-EAS443:3:40:872:1875#0/1  
ATGGAATCAATGAACAAAGAGGAAATAGAGATAACAACCC  
+HWI-EAS443:3:40:872:1875#0/1  
abbbbbbaababaa`aaaaaa`aa\_\_P`aaaaa^aaa[a\_  
@HWI-EAS443:3:40:889:347#0/1  
AAAAATTCCAGCGCAAATGCCATAAGCACCACATTCCT  
+HWI-EAS443:3:40:889:347#0/1  
a\_ZXGRUQ¥`]S]W[XTQPULQ`YLOT[RKRZZWTU\_ZYQ  
@HWI-EAS443:3:40:914:750#0/1  
CTGGGATGCAGATTAGAGGTTTCGTATACTTTGTTGAAAC  
+HWI-EAS443:3:40:914:750#0/1  
a`bbabab`¥`bba]babb\_aaba\_aZZ`aaaa\_\_a]Y]U  
@HWI-EAS443:3:40:91:673#0/1  
AAAAATTCCAGCGCAAATGCCATAAGCACCACATTCCT  
+HWI-EAS443:3:40:91:673#0/1  
\_^QT]aaaaZ\_b\_U^RT\_aaaa`UVR\_¥\_]a][Q^`aY  
@HWI-EAS443:3:40:952:144#0/1  
TCATATCCATGCTTTTGGCTGGACCATGGGCTGGCATT

+HWI-EAS443:3:40:952:144#0/1  
aabbabaaaaZ`\_aa`aaaa`YSY¥WZ\_W^Z]T[W[  
@HWI-EAS443:3:40:957:296#0/1  
GTGATAAAGAACAACATGATAAACAATGACCTTGGACCTG  
+HWI-EAS443:3:40:957:296#0/1  
a¥\_[]b^`][`T`PaY]\_W\_]a[RXYVQT\_\_\_\_^P¥R  
@HWI-EAS443:3:40:994:1297#0/1  
ATGGTGTCTAGGGCCCGGATTGATGCCAGGGTCGACTTCG  
+HWI-EAS443:3:40:994:1297#0/1  
[^^aX\_Xb]`\_]Zaa]aa]Z`¥RV^Z¥VPY`Uaa^¥U¥aY  
@HWI-EAS443:3:42:1002:819#0/1  
AGGGAATACAAGCAGGAGTGGACAGATTCTACAGGACCTG  
+HWI-EAS443:3:42:1002:819#0/1  
abaa\_aaa\_a`aaaaaa^`a\_`\_]Y`a\_`G\_¥ZR]RV  
@HWI-EAS443:3:42:1022:712#0/1  
GGGCTCCAATCATCCGACGATTTTGCTCTCATAGTGAATG  
+HWI-EAS443:3:42:1022:712#0/1  
]bbabbb]bbbabbbbaabbaabbbbbbababaaabbaba  
@HWI-EAS443:3:42:1024:155#0/1  
AAAAATTCCAGCGAAAATGCCATAAGCACCATTCCT  
+HWI-EAS443:3:42:1024:155#0/1  
ab\_a`b\_a\_b`ab]\_a``¥U¥a\_]a`^aaP`\_aYSSa]\_  
@HWI-EAS443:3:42:1040:1020#0/1  
GTCCTCCATCTGATACTAATAGCCCTACCTTTGATTGGGT  
+HWI-EAS443:3:42:1040:1020#0/1  
aaaabbabaabb`aa`aaaaa`\_aa`\_aaaa]aaa\_]`^  
@HWI-EAS443:3:42:1042:555#0/1  
CTTTTCATTGCCCCCTACTGGGAGCCCAGACTGTTCAAGC  
+HWI-EAS443:3:42:1042:555#0/1  
abbbbbbbbbbbbaaba`bbb`a`bbaaba\_ab`a`aa\_X  
@HWI-EAS443:3:42:1060:497#0/1  
GAAGAATCCCACCCAGGAATATTTGAGAATTCATGCCTTG  
+HWI-EAS443:3:42:1060:497#0/1  
a\_ba\_Za]V]\_]]`a`aa\_^]]`aa`a^[]^ZX^]  
@HWI-EAS443:3:42:1062:387#0/1  
GATTCCATTACATCCTTTAAGAAATCTATTAGCCTTCCTG  
+HWI-EAS443:3:42:1062:387#0/1  
\_]\_aa\_V\_baa`a[X`aa`\_a¥T]]`aa`aa`\_\_\_\_`a``  
@HWI-EAS443:3:42:1064:1599#0/1  
GGCTAATAGATTTCTTAAAGGATGTAATGGAATCAATGAA  
+HWI-EAS443:3:42:1064:1599#0/1  
]abbabaabaaababbabbabb`\_`abbaabb`aba`aa  
@HWI-EAS443:3:42:1122:432#0/1  
CTTGAACAGTCTGGGCTCCCAGTAGGGGCAATGAAAAGA  
+HWI-EAS443:3:42:1122:432#0/1  
abbaabaaaabaaa`aa`aa\_a¥`aaaa`aaaa\_aaa``  
@HWI-EAS443:3:42:1143:115#0/1  
GGGTTGTTATCTCTATTTCTCTTTGTTTTCATTGATTCCAT  
+HWI-EAS443:3:42:1143:115#0/1  
abb^bbabab`bababba`\_a\_abaaaaaaa`^b`\_\_a`



@HWI-EAS443:3:42:1143:837#0/1  
CTCCATCTGATACTAATAGCCCTACCTTTGATTGGGTTTG  
+HWI-EAS443:3:42:1143:837#0/1  
aba`aaabbbbabbb`\_aaaabbb`\_\_`abaa\_aa`  
@HWI-EAS443:3:42:1159:822#0/1  
CAAGAATCCCCTTTGGCTTGTGTTGAGAATAGAACGATT  
+HWI-EAS443:3:42:1159:822#0/1  
a`bbbYbbaaaabbbbaaaaaYaZa\_]a`a]¥QZ¥]\_]S]  
@HWI-EAS443:3:42:1178:682#0/1  
AAATCGTCGGATGATTGGAGCCCATCCCACCAGTATATTG  
+HWI-EAS443:3:42:1178:682#0/1  
^^aaa`\_bbaaaaa```\_aa`]\_a]\_]`¥^X`a^`\_]  
@HWI-EAS443:3:42:1213:1276#0/1  
CATGGGCTGGCATTACCACAGCATTGTTTACAGAATCAAT  
+HWI-EAS443:3:42:1213:1276#0/1  
]bb`a`abba`ababa`a`baaaa`aa``]a`aa\_Z```  
@HWI-EAS443:3:42:1220:1139#0/1  
CTGGTATTTGTGTTCGAATCTTCATTCTTTTACTCTCGAA  
+HWI-EAS443:3:42:1220:1139#0/1  
\_`aa\_bbbb`abab`b`^aabb`bb`bbbaaaaa`aa  
@HWI-EAS443:3:42:1252:931#0/1  
CTCTTTATGACTGACAAAGGGATTACAGGGATTACAAAGT  
+HWI-EAS443:3:42:1252:931#0/1  
abbbba`abbabbbabbbbaaaaaabbaabaabbababb\_  
@HWI-EAS443:3:42:1258:830#0/1  
CGAGTCTGGACGGATCAAGAAAGAAGAGTTCTCTGAGATC  
+HWI-EAS443:3:42:1258:830#0/1  
a¥^YPYYO¥a\_]\_ZTOXQFU^YYZY\_\_TG]¥```¥JXN]¥  
@HWI-EAS443:3:42:1266:722#0/1  
CCTGGGTGGGATTCTTCAAGGAAAGCCATAGCCTCTAGAA  
+HWI-EAS443:3:42:1266:722#0/1  
aabbbb`bbbbbbbabab]bbabb`bbbaaa\_aaaabb`  
@HWI-EAS443:3:42:1275:1568#0/1  
CAGAGATTTCTTTCACAATCACTGGGGACAACACTAAGTG  
+HWI-EAS443:3:42:1275:1568#0/1  
aa``Z`aa`baaaa`a\_baa\_aaa\_aaaa`a\_a`^aY\_  
@HWI-EAS443:3:42:1288:1935#0/1  
CAGGAACAGGATACACCATGGACACAGTAAACAGAACACA  
+HWI-EAS443:3:42:1288:1935#0/1  
]a[`a`abaaa`a`S`aab`Z[\_Tbaaaa\_N¥\_]b^a^a  
@HWI-EAS443:3:42:1289:616#0/1  
CTGAGCATGGCACCCATAATGTTCTCAAACAAAATGGCAA  
+HWI-EAS443:3:42:1289:616#0/1  
aabbbabababbbaaaabaaaa\_a\_aaaaaaaa\_abbbaa\_  
@HWI-EAS443:3:42:1298:913#0/1  
GGCTAATTTTAGCATGGAGCTACCCAGCTTTGGAGTGTCT  
+HWI-EAS443:3:42:1298:913#0/1  
aa\_aaaaaa```\_]a^]^[^a\_T\_W^`\_aXXSYS`VV\_  
@HWI-EAS443:3:42:1321:1495#0/1  
TGCAGATTAGAGGTTTCGTATACTTTGTTGAAACTTTAGC

+HWI-EAS443:3:42:1321:1495#0/1  
ZaYHZ[a`a`¥a\_Za\_]\_^bbb`a`¥`¥¥\_SR[at[a`  
@HWI-EAS443:3:42:1338:238#0/1  
CCTCCATCTGATACTAATAGCCCTACCTTTGATTGGGTTT  
+HWI-EAS443:3:42:1338:238#0/1  
abbababab`a`aabaaaa```a`aaaa^\_aa\_]`\_  
@HWI-EAS443:3:42:1356:366#0/1  
GTCGGATGATTGGAGCCCATCCCACCAGTATATTGTCTTG  
+HWI-EAS443:3:42:1356:366#0/1  
`Ya\_\_babaaa`a^`\_`\_aa]`YY¥Wa]Y^]]ZX[]a`  
@HWI-EAS443:3:42:1363:1161#0/1  
ATTATGGGTGCCATGCTCAGGATGTTTCTGAACCACTCGG  
+HWI-EAS443:3:42:1363:1161#0/1  
abbaaab¥aaaaba`aa^Z]R^`¥aa\_aa^`XO[\_\_\_¥X  
@HWI-EAS443:3:42:1384:676#0/1  
CATGAGTATTGGAGTAACAGTGATAAAGAACAACATGATA  
+HWI-EAS443:3:42:1384:676#0/1  
`bbb`baabbbbab`abaab\_aaaaaaaaabaaa`aaaaa  
@HWI-EAS443:3:42:1406:780#0/1  
ATTTACTCCAGACTCCAAAGCTGGGTAGCTCCATGCTA  
+HWI-EAS443:3:42:1406:780#0/1  
abbabbbaaaa`a\_ba`aaa`aa]a\_aa^YYYY`\_a\_  
@HWI-EAS443:3:42:1458:851#0/1  
GGTGTGTTCTGTTTACTGTGTCCATGGTGTATCCTGTTCC  
+HWI-EAS443:3:42:1458:851#0/1  
ab\_a^baaabbb`aaa\_a`^a`^\_abbYa^\_]\_[aa^`U  
@HWI-EAS443:3:42:1471:1481#0/1  
GTCTGGAGTAAATGAATCAGCTGACATGAGTATTGGAGTA  
+HWI-EAS443:3:42:1471:1481#0/1  
a\_aaaaaa`abaaaa`a`a`^`]aaa`a]\_a\_a^a^`X^  
@HWI-EAS443:3:42:1474:1427#0/1  
ATTTGTGTGCTCCCCTATGGCACCTATATGTGTATCTGT  
+HWI-EAS443:3:42:1474:1427#0/1  
J^abb\_aa`bba^¥ababaabaaY`a\_aaaa`b^aa`aa^  
@HWI-EAS443:3:42:1543:1238#0/1  
GCTTGAACAGTCTGGGCTCCCAGTAGGGGGCAATGAAAAG  
+HWI-EAS443:3:42:1543:1238#0/1  
\_aab\_bb`Zbaab¥Iba`¥``b\_aVa`aaZ\_[aa\_\_[] [  
@HWI-EAS443:3:42:1548:1314#0/1  
TTCCCTAGCAGTTCATATAGGAGACCGGTTGGAATTTCTA  
+HWI-EAS443:3:42:1548:1314#0/1  
]ZT]^b¥^[abaa\_\_a\_aab`Y`Z`]aa\_aaaa`[¥^Z^¥  
@HWI-EAS443:3:42:1561:1879#0/1  
AGGCCATGGTGTCTAGGGCCCGGATTGATGCCAGGGTCGA  
+HWI-EAS443:3:42:1561:1879#0/1  
\_a^OVZaX¥K¥K`U¥^^[UWFZ[RP¥ZRTBBBBBBBBBBB  
@HWI-EAS443:3:42:1595:1355#0/1  
CGGATCAAGAAAGAAGAGTTCTCTGAGATCATGAAGATCT  
+HWI-EAS443:3:42:1595:1355#0/1  
aba\_a`ba`abbbbabbb¥babbbbaabaabaaaaabaa\_a

@HWI-EAS443:3:42:1668:699#0/1  
GTGGGATGGGCTCCAATCATCCGACGATTTTGCTCTCATA  
+HWI-EAS443:3:42:1668:699#0/1  
aYbaaaaa`¥aaa\_a`a\_\_\_a\_[a^a\_a[\_^\_`\_\_  
@HWI-EAS443:3:42:1674:1584#0/1  
ACAAAGAGGAAATAGAGATAACAACCCACTTTCAAAGAAA  
+HWI-EAS443:3:42:1674:1584#0/1  
]\_]U^aU`bbaaaYaabbaa^`baW¥V]aba¥WZ\_ab]ZQ  
@HWI-EAS443:3:42:1676:71#0/1  
GATTCTTCAAGGAAAGCCATAGCCTCTAGAACACAGTCTG  
+HWI-EAS443:3:42:1676:71#0/1  
]abbbbabbaaa\_ab¥N¥bbbaabbabba\_`\_ab^]¥^  
@HWI-EAS443:3:42:171:643#0/1  
GTTCTGTTTACTGTGTCCATGGTGTATCCTGTTCTGTTTC  
+HWI-EAS443:3:42:171:643#0/1  
a\_aa`Z[\_`\_\_aaWa\_a`a`\_a\_¥aVa^^`\_a¥\_[^\_]WYW  
@HWI-EAS443:3:42:1738:1651#0/1  
GCAGGTCCAAGGTCATTGTTTATCATGTTGTTCTTTATCA  
+HWI-EAS443:3:42:1738:1651#0/1  
a`a`a^`\_`a`Z\_\_a`a`^`^`\_]\_\_\_\_]¥X^\_\_^\_[¥  
@HWI-EAS443:3:42:1746:677#0/1  
GAGCTAATGGATGATGATTATCGGGGAAGACTTTGTAATC  
+HWI-EAS443:3:42:1746:677#0/1  
`Z^\_aa`¥`aaa^^\_a\_\_\_`^a\_[¥YZ¥¥Ua^YUY¥[TQ  
@HWI-EAS443:3:42:1775:1361#0/1  
GTCCCCAGTGATTGTGAAAGAAATCTCTGTGTCTTGTGAA  
+HWI-EAS443:3:42:1775:1361#0/1  
`ba\_ab\_U\_^aab^aa^aaYZ\_ZYZ¥aa\_\_¥Y\_^`\_`Y¥  
@HWI-EAS443:3:42:1776:1065#0/1  
CATTGAAGTACTTCAGGTCAATGCTTGCTAGCATTCTGC  
+HWI-EAS443:3:42:1776:1065#0/1  
Z^¥T\_¥\_¥`]^\_\_`\_]\_\_Y\_ZUXa]^\_\_^\_¥¥¥\_¥^a`Z  
@HWI-EAS443:3:42:25:1101#0/1  
CAGATCTTCATGATCTCAGAGAACTTTCTTTCTTGATCC  
+HWI-EAS443:3:42:25:1101#0/1  
abaabbbababaaba`aaaaa\_\_¥`\_`aaaaaaa`a`\_`\_  
@HWI-EAS443:3:42:309:342#0/1  
CATCAAAGACTACAGATACACATATAGGTGCCATAGGGGA  
+HWI-EAS443:3:42:309:342#0/1  
Z`a¥`\_`¥`^`^¥V¥a^aZ¥ab^babbaabaaaaT^ab`\_`  
@HWI-EAS443:3:42:338:1802#0/1  
GCCAGGTGCGACTTCGAGTCTGGACGGATCAAGAAAGAAG  
+HWI-EAS443:3:42:338:1802#0/1  
UbbbbabYbVNZbbaYa]]`]b]babab\_abbaabaRa`a  
@HWI-EAS443:3:42:343:810#0/1  
AAAGTCTTCCCCGATAATCATCATCCATTAGCTCCCATTT  
+HWI-EAS443:3:42:343:810#0/1  
a\_^`^`b`^^aa^¥]a`]]`a`aa`\_`\_`Y¥a\_a\_`Z^`a  
@HWI-EAS443:3:42:351:1227#0/1  
CTCCCCTATGGCACCTATATGTGTATCTGTAGTCTTTGAT

+HWI-EAS443:3:42:351:1227#0/1  
aa^abaWba^]\_`]aaaaaaa````aaa\_^]VM``\_aab¥  
@HWI-EAS443:3:42:351:210#0/1  
ATGGATGTCAATCCGACTCTACTTTTCCTAAAAATTCCAG  
+HWI-EAS443:3:42:351:210#0/1  
\_`[`a¥\_a¥a`^[^b`QW\_aaWaab\_`aaa^aa\_¥\_^^\_Z  
@HWI-EAS443:3:42:378:1593#0/1  
CAAGAATTCCCCTTTGGCTTGTGTTGAGAATAGAACGATT  
+HWI-EAS443:3:42:378:1593#0/1  
abb`bbbbbbbabbbba`bbaa]^baabababZbb`]^`aa  
@HWI-EAS443:3:42:379:277#0/1  
GGTGCATTCACTATGAGAGCAAATCGTCGGATGATTGGA  
+HWI-EAS443:3:42:379:277#0/1  
ab[aaaa\_`a\_a\_aaabab^\_aa\_`¥¥[aaa`\_a]^`\_`^Y  
@HWI-EAS443:3:42:406:101#0/1  
AAAAATTCCAGCGCAAATGCCATAAGCACCATTCCT  
+HWI-EAS443:3:42:406:101#0/1  
abaa`aaa`\_b`aaaW`\_a]R¥\_\_`]^`\_`^]^]]W]  
@HWI-EAS443:3:42:418:912#0/1  
ATTCATCTATGAGAGCAAATCGTCGGATGATTGGAGCCCA  
+HWI-EAS443:3:42:418:912#0/1  
ababbbababaaabaa^`aaaa\_`a`a[¥\_]a\_S]^`\_`¥a  
@HWI-EAS443:3:42:432:2012#0/1  
CTCTTACTCTCCTTTTTCTTTGAAAGTGGGTTGTTATCTC  
+HWI-EAS443:3:42:432:2012#0/1  
\_¥aV\_`X\_\_b^H]Z`¥[Z`\_`YW\_ZXUHWXX[W]Z[^]  
@HWI-EAS443:3:42:497:860#0/1  
ATTAACAGAAATCAACCGCAGCAACTGCATTGGCCAAC  
+HWI-EAS443:3:42:497:860#0/1  
abbabbababa`b`bab\_aaaaa\_aa`\_a\_[]`\_`\_a^a\_`^  
@HWI-EAS443:3:42:501:1946#0/1  
TTGAGGATGAACAGATGTACCAGAAGTGCTGCAATCTATT  
+HWI-EAS443:3:42:501:1946#0/1  
`bba¥¥T[VaVba¥\_aba¥^X¥V^TaS`[^`aa\_`a¥^`a]  
@HWI-EAS443:3:42:526:862#0/1  
AAGAGCCATCTGGGCCGTTGCAGGTCCAAGTCATTGTTT  
+HWI-EAS443:3:42:526:862#0/1  
aaa\_a`aaaaa\_`a`\_a^\_`\_¥a\_Z`\_`\_`\_W\_`\_`\_]  
@HWI-EAS443:3:42:529:12#0/1  
AGAATCTGTCCACTCCTGCTTGTATTCCCTCATGGTTTGG  
+HWI-EAS443:3:42:529:12#0/1  
Va]aaaa]^SX¥\_\_a\_UT`]^`\_V^\_\_[\_V`Z]^XM]YZ^  
@HWI-EAS443:3:42:545:1614#0/1  
CTTGGGAATCCAGGAATGTGTAGTTGCAACGGCATCATAT  
+HWI-EAS443:3:42:545:1614#0/1  
Saba¥`\_`ba^a`]^¥¥]\_WZaZT]¥^\_`\_Z\_]`V]^`\_`aa  
@HWI-EAS443:3:42:569:1279#0/1  
GTCCACTCCTGCTTGTATTCCCTCATGGTTTGGTGCATTC  
+HWI-EAS443:3:42:569:1279#0/1  
``abaabaaaaaaa\_aaaaa`a`ZGYZU\_`]^XS¥\_\_^[[

@HWI-EAS443:3:42:572:980#0/1  
CAATTGAAGAGCCATCTGGGCCGTTGCAGGTCCAAGGTCA  
+HWI-EAS443:3:42:572:980#0/1  
a`ba\_¥]\_¥¥baZa^¥¥` [ `Yaa[]a`^aa]\_`\_¥aa¥V[  
@HWI-EAS443:3:42:577:1662#0/1  
GTAAAAAGAAGGGCTATCGCAACACCTGGGATGCAGATT  
+HWI-EAS443:3:42:577:1662#0/1  
[ `^\_Zba]]ab]` [^aRVTX^b¥^]XY`VZ¥[^YXY`\_X  
@HWI-EAS443:3:42:628:1857#0/1  
AGGGTAGATAAACTAACTCAAGGTCGCCAGACTTATGATT  
+HWI-EAS443:3:42:628:1857#0/1  
aaaa\_babaaabaabaaaaaa`]aa`a`aaaa` `aa`a  
@HWI-EAS443:3:42:638:1663#0/1  
ATTCATATGAGAGCAAAATCGTCGGATGATTGGAGCCCA  
+HWI-EAS443:3:42:638:1663#0/1  
TWabYYSaa\_a` `^a^[a]`ZN\_XX\_X[\_[¥FM[DO^a`  
@HWI-EAS443:3:42:661:885#0/1  
TAGCAGTTCATATAGGAGACCGTTGGAATTTCTAGCATG  
+HWI-EAS443:3:42:661:885#0/1  
`bb` `aY^aaa]¥^a\_T\_[]^aa\_\_a`SORa[X[[ `^¥^`  
@HWI-EAS443:3:42:693:513#0/1  
GGCTAATTTTATGAGCTGGAGCTACCCAGCTTTGGAGTGTCT  
+HWI-EAS443:3:42:693:513#0/1  
abbbbbbbbbbaabbaaabab`aaaababba`a¥^aa  
@HWI-EAS443:3:42:722:1380#0/1  
GTTGTTCTTTATCACTGTTACTCCAATACTCATGTCAGCT  
+HWI-EAS443:3:42:722:1380#0/1  
a^a` []Za`\_`Y]^W]][]^a\_X^¥`a`\_\_ [QQ¥¥¥]¥  
@HWI-EAS443:3:42:734:169#0/1  
CAGGAACAGGATACCCATGGACACAGTAAACAGAACACA  
+HWI-EAS443:3:42:734:169#0/1  
a`a`^bb\_]`WSX¥¥`NXT]`\_\_\_\_X[LS][XPWY]R]Y¥  
@HWI-EAS443:3:42:751:514#0/1  
AGTAAATGAATCAGCTGACATGAGTATTGGAGTAACAGTG  
+HWI-EAS443:3:42:751:514#0/1  
ab^bbaabaaaaaabb` `aaaab]aaaa\_a\_a\_`aa]a  
@HWI-EAS443:3:42:766:105#0/1  
ATTACATCCTTTAAGAAATCTATTAGCCTTCCTGACTCAT  
+HWI-EAS443:3:42:766:105#0/1  
abbabbaa`bbb`\_`¥a\_baaab\_^a\_\_a\_^]aa^`^¥^`  
@HWI-EAS443:3:42:77:784#0/1  
AAAAATCCAGCGCAAATGCCATAAGCACCACATTCCCT  
+HWI-EAS443:3:42:77:784#0/1  
abaaX`aaa]` `aaZL¥aa`^aaa\_aa` `VTGLYKZ[PB  
@HWI-EAS443:3:42:796:1664#0/1  
TGTCCCAGTGATTGTGAAAGAAATCTCTGTGTCTTGTGA  
+HWI-EAS443:3:42:796:1664#0/1  
ZY¥¥ab¥VaYbb\_abP^aa[a`baa` `aaaS`Y^a¥00Y[  
@HWI-EAS443:3:42:828:97#0/1  
GTGGGATTCTTCAAGGAAAGCCATAGCCTCTAGAACACAG

+HWI-EAS443:3:42:828:97#0/1  
aWaY\_P`\_\_¥RaXXYVOW\_WZ^^UQFXR\_R¥QN[RYZ]  
@HWI-EAS443:3:42:861:675#0/1  
GGCCCGGATTGATGCCAGGGTCGACTTCGAGTCTGGACGG  
+HWI-EAS443:3:42:861:675#0/1  
aaaaabaX]aa\_\_a¥`aa`S^a[^`^]a^\_UYW^aQ[`Z  
@HWI-EAS443:3:42:898:250#0/1  
CTCCCATTTTAAGCAGACTTCAGGAATGTGAAGATTCCGT  
+HWI-EAS443:3:42:898:250#0/1  
aaaababbbbbbaabaabaabba`abb\_ba`b\_`aa`b]  
@HWI-EAS443:3:42:898:435#0/1  
GGGATGGGCTCCAATCATCCGACGATTTTGCTCTCATAGT  
+HWI-EAS443:3:42:898:435#0/1  
\_\_[GVabbaaa`ba^ZTV`^^`a\_`\_[ZaXV¥a`[U^XF  
@HWI-EAS443:3:42:925:851#0/1  
CTGACATTAATACGATGACCAAAGATGCAGAGAGAGGCA  
+HWI-EAS443:3:42:925:851#0/1  
\_`ZN^TT```a`b\_b`]a`]`WS\_a¥]`b]b]¥Zab^`a\_  
@HWI-EAS443:3:42:930:1014#0/1  
GGGATGGGCTCCAATCATCCGACGATTTTGCTCTCATAGT  
+HWI-EAS443:3:42:930:1014#0/1  
aa¥Z[a]HRU¥U¥TS]aTSPY^Z]UW^¥^¥T[\_VRXJPTW  
@HWI-EAS443:3:42:970:749#0/1  
GTGCCATGCTCAGGATGTTTCTGAACCACTCGGGTTGATT  
+HWI-EAS443:3:42:970:749#0/1  
a¥^]aaaa`[^`aaZ\_\_\_\_\_a\_`^]]]¥\_\_\_\_\_]``[U]  
@HWI-EAS443:3:42:982:300#0/1  
GTCCTCCATCTGATACTAATAGCCCTACCTTTGATTGGGT  
+HWI-EAS443:3:42:982:300#0/1  
a`\_a]a`aa^aa\_\_`^`a`^`a`^^]a\_\_^`a\_Y^aa\_\_X  
@HWI-EAS443:3:43:1034:1885#0/1  
CCGATAATCATCATCCATTAGCTCCCATTTTAAGCAGACT  
+HWI-EAS443:3:43:1034:1885#0/1  
X`b`b^¥^a¥¥aVL]bb`abY¥¥ba^babaa`¥VVb`TN  
@HWI-EAS443:3:43:1065:356#0/1  
GTGGGATTCTTCAAGGAAAGCCATAGCCTCTAGAACACAG  
+HWI-EAS443:3:43:1065:356#0/1  
UN\_b`X\_]Y¥a`aY^]]¥aaW¥[a^a^U`aaVQRW^VP¥^  
@HWI-EAS443:3:43:109:502#0/1  
TCCAATCATCCGACGATTTTGCTCTCATAGTGAATGCACC  
+HWI-EAS443:3:43:109:502#0/1  
abbaaaa\_`aa`aa`aaaa\_````aa^¥a¥\_`a[^`^`  
@HWI-EAS443:3:43:1120:376#0/1  
CCCGGATTGATGCCAGGGTCGACTTCGAGTCTGGACGGAT  
+HWI-EAS443:3:43:1120:376#0/1  
a\_\_`bab\_Z]a\_aaba`¥a`aaWU`X`]\_aadWZ`\_[^  
@HWI-EAS443:3:43:1128:1693#0/1  
CCGGATTGATGCCAGGGTCGACTTCGAGTCTGGACGGATC  
+HWI-EAS443:3:43:1128:1693#0/1  
abW¥Xb\_a\_abaaba`ZQ¥`¥L`]T[X]¥]X`YP^[`\_\_

@HWI-EAS443:3:43:1177:1663#0/1  
CCCAGTGTGTTGAAAGAAATCTCTGTGTCTTGTGAATTA  
+HWI-EAS443:3:43:1177:1663#0/1  
ababaababbbYaaabbabaaaa`aa\_a`b\_]`\_`aaa^  
@HWI-EAS443:3:43:1180:1761#0/1  
GAAGAATCCCACCCAGGAATATTTGAGAATTCATGCCTTG  
+HWI-EAS443:3:43:1180:1761#0/1  
``]bba`[aaaS[]aY[\_\_\_¥a`\_`a[^a¥^U¥`VYP`\_]\_  
@HWI-EAS443:3:43:1182:420#0/1  
ACCGGCAGCAACTGCATTGGCCAACCCATAGAAGTCTTT  
+HWI-EAS443:3:43:1182:420#0/1  
aaaa`aaa\_¥aVN¥[¥[^a[Z¥M^YYYYVY\_W\_^SQ[\_\_\_  
@HWI-EAS443:3:43:1189:504#0/1  
AAATTCCAGCGCAAATGCCATAAGCACCATTCCTTA  
+HWI-EAS443:3:43:1189:504#0/1  
V¥HWb]]][T`b\_bUaT`aK]]]\_a`][H`TUT]\_NZ]]  
@HWI-EAS443:3:43:1207:1285#0/1  
ACTTTTCCTAAAAATCCAGCGCAAATGCCATAAGCACC  
+HWI-EAS443:3:43:1207:1285#0/1  
a^abbbbababbaa`aZaaaaa^\_aa\_aa`aaaY`aTN  
@HWI-EAS443:3:43:1212:917#0/1  
TCCCCGATAATCATCATCCATTAGCTCCCATTTAAGCAG  
+HWI-EAS443:3:43:1212:917#0/1  
`]¥WY\_Z\_WHY[]JWWPW[`aZWV]UM[VQV\_¥¥¥]`UU¥  
@HWI-EAS443:3:43:1275:461#0/1  
CACTAACTTGCAGGTCCTGTAGAATCTGTCCACTCCTGCT  
+HWI-EAS443:3:43:1275:461#0/1  
aVI\_Z]aab`Y`[¥TV`]ZG[a¥Y`¥abXa[^[OXXX`a`  
@HWI-EAS443:3:43:1311:1904#0/1  
TGGGTGGGATTCTTCAAGGAAAGCCATAGCCTCTAGAACA  
+HWI-EAS443:3:43:1311:1904#0/1  
abaaYaaa`\_a\_a`^a`a^`a`\_\_\_\_\_`\_\_`T\_]^^¥\_\_¥W  
@HWI-EAS443:3:43:133:436#0/1  
AAAAGCATGGAATATGATGCCGTTGCAACTACACATTCCT  
+HWI-EAS443:3:43:133:436#0/1  
a`aaaaa¥\_\_\_`\_a\_a]W`]\_a^Ya\_^\_]\_Z\_]^[X]Z  
@HWI-EAS443:3:43:1406:1109#0/1  
GTCCACTCCTGCTTGTATTCCCTCATGGTTTGGTGCATTC  
+HWI-EAS443:3:43:1406:1109#0/1  
a^`]]`aa`]]Xa`a`aaW]]`W^\_[W NX]`VP`]\_`\_T  
@HWI-EAS443:3:43:1434:1965#0/1  
CAGGAATGTGTAGTTGCAACGGCATCATATCCATGCTTT  
+HWI-EAS443:3:43:1434:1965#0/1  
H¥YbVb`````\_abb`bb`b`b`b`b`baHSURa[aa`  
@HWI-EAS443:3:43:143:1941#0/1  
ATTTTAGCATGGAGCTACCCAGCTTTGGAGTGTCTGGAGT  
+HWI-EAS443:3:43:143:1941#0/1  
`\_`aaaaaabbaa\_aa^¥aaQ]]W^a]HU]XZYWa]XKVI  
@HWI-EAS443:3:43:1559:1677#0/1  
GGGATGGGCTCCAATCATCCGACGATTTTGTCTCATAGT

+HWI-EAS443:3:43:1559:1677#0/1  
aaaMFQ\_V[¥]RY^YL]UMV\_¥PXM[XPY`¥WY^VWRUWW  
@HWI-EAS443:3:43:1561:1390#0/1  
GGACGACAAACACAGAGACTGGTGCACCCCAGCTCAACCC  
+HWI-EAS443:3:43:1561:1390#0/1  
ab`aaa`abaa\_XZaS`^`a\_R`¥`ZV\_^[]R[[`V¥S  
@HWI-EAS443:3:43:159:1895#0/1  
GGGCTCCAATCATCCGACGATTTTGTCTCATAGTGAATG  
+HWI-EAS443:3:43:159:1895#0/1  
^¥\_bbbb`bbabbbabb]aaaabbbbbaabba]^aaba  
@HWI-EAS443:3:43:1625:131#0/1  
CAAAATCGTCGGATGATTGGAGCCCATCCCACCAGTATAT  
+HWI-EAS443:3:43:1625:131#0/1  
`^)`bb`¥baa`[^a`aa\_\_LYX][NXX[ZWWTPR^XY  
@HWI-EAS443:3:43:1648:32#0/1  
GTAGGGCTATTAGTATCAGATGGAGGACCAAACCTTATACA  
+HWI-EAS443:3:43:1648:32#0/1  
aZ]a[^a`a^^`Y\_\_]^a^\_\_Y`^][[ZZYY[[]^YV¥  
@HWI-EAS443:3:43:1655:1662#0/1  
TCCAGGAATGTGTAGTTGCAACGGCATCATATCCATGCT  
+HWI-EAS443:3:43:1655:1662#0/1  
`b`)^b^[b`\_`R`bW`bYaaN]aT`^L`a\_\_\_\_T[^`[Q\_  
@HWI-EAS443:3:43:1661:224#0/1  
TGGTGCATTCACTATGAGAGCAAAATCGTCGGATGATTGG  
+HWI-EAS443:3:43:1661:224#0/1  
aa`M`Waaa`aaaa`a¥b\_\_\_\_\_`\_Y\_\_[\_\_\_\_^VX\_\_\_\_  
@HWI-EAS443:3:43:1705:1180#0/1  
AGTAAACAGAACACACCAATACTCAGAAAAGGGAAAGTGG  
+HWI-EAS443:3:43:1705:1180#0/1  
abaa]ababbaaa`aaaaaba`b`aa`][\_aa`a\_\_aWa`  
@HWI-EAS443:3:43:1712:2012#0/1  
AGAATCTGTCCACTCCTGCTTGTATTCCCTCATGGTTTGG  
+HWI-EAS443:3:43:1712:2012#0/1  
a]aaa^aa\_WR`0]^¥\_a]a\_HTY`a]V]\_RV\_¥SX\_\_NY  
@HWI-EAS443:3:43:175:401#0/1  
CCTCCATCTGATACTAATAGCCCTACCTTTGATTGGGTTT  
+HWI-EAS443:3:43:175:401#0/1  
abaaabbabbbbaa`b]^babaabab`baaababaaaa\_aa  
@HWI-EAS443:3:43:1777:1274#0/1  
GAACAATTGAAGAGCCATCTGGGCCGTTGCAGGTCCAAGG  
+HWI-EAS443:3:43:1777:1274#0/1  
a`V]^`aaabaaa\_\_a`a]^a¥aa]^\_^Z¥WX^URQWV]Y  
@HWI-EAS443:3:43:178:1731#0/1  
CTCTTTATGACTGACAAAGGGATTGAGGGATTACAAAGT  
+HWI-EAS443:3:43:178:1731#0/1  
aaaab`aaaba`^W`aa`\_¥`\_^aa^[\_``\_aa`\_`)\_X  
@HWI-EAS443:3:43:206:1422#0/1  
TAATTCACAAGACACAGAGATTTCTTTTCACAATCACTGGG  
+HWI-EAS443:3:43:206:1422#0/1  
```aabba]a\_aa`aaaaa\_aababaaaaaaa^aaaaWX



@HWI-EAS443:3:43:250:1075#0/1  
ATTCCCCTAACTTGCAGGTCCTGTAGAATCTGTCCACTC  
+HWI-EAS443:3:43:250:1075#0/1  
abaa\_baba\_b]aa`baba`\_aaa`aaaa^]`ZNX¥`\_¥  
@HWI-EAS443:3:43:325:1068#0/1  
TAACAACCCACTTTCAAAGAAAAAGGAGAGTAAGAGACAA  
+HWI-EAS443:3:43:325:1068#0/1  
abbaaaa\_aaaa`a`\_`aX\_\_\_\_\_aa^`Va^`a`aaa^aa  
@HWI-EAS443:3:43:330:1249#0/1  
CTTGCAGGTCCTGTAGAATCTGTCCACTCCTGCTTGTATT  
+HWI-EAS443:3:43:330:1249#0/1  
abbbbaa`baab\_aaabaabaaa]aaa````\_aaa^\_a`  
@HWI-EAS443:3:43:382:1119#0/1  
AATTCTCAAATATTCTGGGTGGGATTCTTCAAGGAAAGC  
+HWI-EAS443:3:43:382:1119#0/1  
KK[\_aaa¥aabbb\_abbb^`V`\_aa\_abbbaabbbbaabb  
@HWI-EAS443:3:43:406:429#0/1  
GATTGATGCCAGGGTCGACTTCGAGTCTGGACGGATCAAG  
+HWI-EAS443:3:43:406:429#0/1  
a`aa`a\_a`[\_aX\_]`^`Wa][`a[ZT`\_]XX]^]  
@HWI-EAS443:3:43:419:1626#0/1  
GTGCCATGCTCAGGATGTTTCTGAACCACTCGGGTTGATT  
+HWI-EAS443:3:43:419:1626#0/1  
V]``Saaa`a\_¥\_baaVabbbbbbb^S\_aa^^a`aba[aa  
@HWI-EAS443:3:43:423:1095#0/1  
AAAAATTCCAGCGCAAATGCCATAAGCACCATTCCT  
+HWI-EAS443:3:43:423:1095#0/1  
H\_aZa`^`a\_\_a][Y\_\_a\_bY0`ba^`^`[V0^a\_YVUZN¥  
@HWI-EAS443:3:43:480:434#0/1  
CAAGAATTCCCCTTTGGCTTGTGTTGAGAATAGAACGATT  
+HWI-EAS443:3:43:480:434#0/1  
aabbb¥W\_ba[bababbabaabab]bbaaaa`aab`\_baaa  
@HWI-EAS443:3:43:481:895#0/1  
CCCAGTGGTTCAGAAACATCCTGAGCATGGCACCCATAA  
+HWI-EAS443:3:43:481:895#0/1  
\_a¥b\_aab`bb]\_`a¥a\_b]ab^\_]b^baaa^^`a\_b`a`  
@HWI-EAS443:3:43:48:1131#0/1  
ACAGTCTGGGCTCCCAGTAGGGGGCAATGAAAAGAAGGCC  
+HWI-EAS443:3:43:48:1131#0/1  
a\_b\_V\_abaab`aa`Y\_VZ]\_]`^aZaaa````aa\_a]aaa  
@HWI-EAS443:3:43:491:1250#0/1  
CGCAACACCTGGGATGCAGATTAGAGGTTTCGTATACTTT  
+HWI-EAS443:3:43:491:1250#0/1  
abZ[¥SV`\_PZ\_ZU¥a`W`UaVYP¥\_\_R\_\_Q`^\_\_R]^\_]`  
@HWI-EAS443:3:43:495:1669#0/1  
AAAGCATGGAATATGATGCCGTTGCAACTACACATTCCTG  
+HWI-EAS443:3:43:495:1669#0/1  
\_b^UabaaaYa`^aa`^\_a`0\_]`\_\_`a]¥\_\_^W^]^^  
@HWI-EAS443:3:43:550:537#0/1  
TTACATCCTTTAAGAAATCTATTAGCCTTCCTGACTCATT

+HWI-EAS443:3:43:550:537#0/1  
\_ [Z `ba^ab\_^a^R` []^^aa]W\_^a\_W¥]\_`\_a`aa`  
@HWI-EAS443:3:43:571:1997#0/1  
AATCTGTCCACTCCTGCTTGTATTCCCTCATGGTTTGGTG  
+HWI-EAS443:3:43:571:1997#0/1  
aa¥X`ba¥\_]¥\_a`^XM^U]aaRF¥`MI¥¥`\_Qa[\_aLL  
@HWI-EAS443:3:43:574:1175#0/1  
ACCTGAAGTACTTCAATGAATCAACAAAGAAGAAAATTGA  
+HWI-EAS443:3:43:574:1175#0/1  
\_` `[^Xab\_a¥^aaab`\_^` `]`aa^a¥a^Y` `¥\_¥aaY\_  
@HWI-EAS443:3:43:576:220#0/1  
ATGGGTGCCATGCTCAGGATGTTTCTGAACCACTCGGGTT  
+HWI-EAS443:3:43:576:220#0/1  
a^abaZa\_a\_aa`\_\_a`aW`^`a¥`Y^ZRUYXX[^a¥O]  
@HWI-EAS443:3:43:582:508#0/1  
GTCCTCCATCTGATACTAATAGCCCTACCTTTGATTGGGT  
+HWI-EAS443:3:43:582:508#0/1  
a¥Z`P]ZV\_^QaaXZNT[XU\_NSPRJWL]S¥[aR^SI`TL  
@HWI-EAS443:3:43:613:1336#0/1  
GAGTAAATGAATCAGCTGACATGAGTATTGGAGTAACAGT  
+HWI-EAS443:3:43:613:1336#0/1  
^Q¥S)`\_]a`YY[] [V[X]¥`YYSVY^¥\_TUQUR[^[TXU  
@HWI-EAS443:3:43:626:237#0/1  
ATCGTCGGATGATTGGAGCCCATCCCACCAGTATATTGTC  
+HWI-EAS443:3:43:626:237#0/1  
aaaaaaba^` [``a`^`\_`\_\_`\_\_\_^\_UJZPVZ¥¥`]]]  
@HWI-EAS443:3:43:631:703#0/1  
GAGGAATCGTTCTATTCTCAACACAAGCCAAAGGGGAATT  
+HWI-EAS443:3:43:631:703#0/1  
V)`a)`baba[I[a`][^\_\_X)`^ab^WPR¥aab\_]YZZ  
@HWI-EAS443:3:43:634:1896#0/1  
AGATAACAACCCACTTTCAAAGAAAAAGGAGAGTAAGAGA  
+HWI-EAS443:3:43:634:1896#0/1  
a\_a`a`\_aa\_\_`\_^`\_\_a`]^`^`]¥\_\_]^\_Z\_X^^^`¥a  
@HWI-EAS443:3:43:647:1297#0/1  
GATTGATGCCAGGGTCGACTTCGAGTCTGGACGGATCAAG  
+HWI-EAS443:3:43:647:1297#0/1  
aZ]a`aW\_]\_Z`X`G][UW]¥P[¥]V[`]X\_]\_\_YTPX]\_  
@HWI-EAS443:3:43:665:1293#0/1  
ATTGATGCCAGGGTCGACTTCGAGTCTGGACGGATCAAGA  
+HWI-EAS443:3:43:665:1293#0/1  
aba`aa`a`\_\_` `X\_]XZ`] ]\_aUX` \_[VZ\_\_¥G¥`^Q¥  
@HWI-EAS443:3:43:666:729#0/1  
AAATTCCAGCGCAAATGCCATAAGCACCATTCCTTA  
+HWI-EAS443:3:43:666:729#0/1  
aa`a`aaaa`a`a]a` `a\_\_aaaa]a`\_a`a^aW`\_`\_`  
@HWI-EAS443:3:43:670:615#0/1  
GAGTAAGAGACAACATGACCAAGAAGATGGTCACGCAAAG  
+HWI-EAS443:3:43:670:615#0/1  
a`a^\_aa`a` `aa\_\_\_` `\_\_`^`^^`\_]` [UX]]`X\_] ]\_

@HWI-EAS443:3:43:677:1599#0/1  
GTGTGTTCTGTTTACTGTGTCCATGGTGTATCCTGTTCCCT  
+HWI-EAS443:3:43:677:1599#0/1  
`LVHSVW¥W^T]P`S\_VSYUXUNR\_`P\_FZSWRV\_VRVZG  
@HWI-EAS443:3:43:677:621#0/1  
GGTGTGTTCTGTTTACTGTGTCCATGGTGTATCCTGTTCC  
+HWI-EAS443:3:43:677:621#0/1  
ab`b\_b`aabbaaaaab\_a\_``aaaaZb\_``^`aa`\_\_\_\_  
@HWI-EAS443:3:43:707:1457#0/1  
CTTAAATGGGAGCTAATGGATGATGATTATCGGGGAAGA  
+HWI-EAS443:3:43:707:1457#0/1  
`a`¥bbb\_¥aa^aaab`a^\_a\_b^babb`baa]]V[]aaS  
@HWI-EAS443:3:43:729:1014#0/1  
CAAAGATGCAGAGAGAGGCAAGTTAAAAAGAAGGGCTATC  
+HWI-EAS443:3:43:729:1014#0/1  
aabaab`Y\_\_`ab^a\_\_baa]`U\_aaaUaa`^`\_¥P`aTT  
@HWI-EAS443:3:43:785:956#0/1  
GTAGATAAACTAACTCAAGGTCGCCAGACTTATGATTGGA  
+HWI-EAS443:3:43:785:956#0/1  
a¥X\_Zb`U]W`[W^]PWTTYUU`XWW\_XQZZ^^[PZ¥`^T  
@HWI-EAS443:3:43:797:1044#0/1  
TGGCCTTCTTTTCATTGCCCCCTACTGGGAGCCCAGACTG  
+HWI-EAS443:3:43:797:1044#0/1  
a]G\_P]a\_aaa`a\_`^a`Z`a[Y^\_\_Z¥^UUUVUQU\_\_  
@HWI-EAS443:3:43:836:147#0/1  
GGCCGTTGCAGGTCCAAGGTCATTGTTTATCATGTTGTTC  
+HWI-EAS443:3:43:836:147#0/1  
abaaaT]^VLT¥MXVRR]^`TYRa^YZU[TYMTU^WY[SVU  
@HWI-EAS443:3:43:847:698#0/1  
CTAATGGATGATGATTATCGGGGAAGACTTTGTAATCCCC  
+HWI-EAS443:3:43:847:698#0/1  
abaabba`aba`b`ab\_a`b\_a^]a`a^aaaa\_`\_`W`\_^  
@HWI-EAS443:3:43:857:1274#0/1  
GCCCAGACTGTTCAAGCTTTTCGCAAATGCTCCTAGCTAA  
+HWI-EAS443:3:43:857:1274#0/1  
abaaabaa`ba\_aaa`aaaa¥`^`Y`]¥`\_`\_`\_Y^\_aZ  
@HWI-EAS443:3:43:869:29#0/1  
CGATTTTGTCTCATAGTGAATGCACCAAACCATGAGGGA  
+HWI-EAS443:3:43:869:29#0/1  
]]bbbbbbbaaaaa`babababaaaa`a`\_aaa`aaa\_  
@HWI-EAS443:3:43:871:784#0/1  
GGAGCTAATGGATGATGATTATCGGGGAAGACTTTGTAAT  
+HWI-EAS443:3:43:871:784#0/1  
a\_\_a\_a\_V]a`\_\_a\_`^`aa\_`¥^`\_\_XW\_]X^`\_`\_]`[\_\_  
@HWI-EAS443:3:43:880:1663#0/1  
CCCGGATTGATGCCAGGGTCGACTTCGAGTCTGGACGGAT  
+HWI-EAS443:3:43:880:1663#0/1  
abbb\_``bababb^a]Ub¥\_a]a\_\_a\_S`^^\_aaZX``aS  
@HWI-EAS443:3:43:888:1439#0/1  
AGAATCTGTCCACTCCTGCTTGTATTCCCTCATGGTTTGG

+HWI-EAS443:3:43:888:1439#0/1  
a^\_`\_\_b`aa`\_0^\_\_`RYaa`W\_Z\_\_¥\_NZZ^`S\_  
@HWI-EAS443:3:43:929:20#0/1  
AACATGATAACAATGACCTTGGACCTGCAACGGCCCAGA  
+HWI-EAS443:3:43:929:20#0/1  
^^^)\_aba`aaaaa)`aa`Z`a\_a\_a[^aaZ\_¥^aW  
@HWI-EAS443:3:43:938:1182#0/1  
GATCCGTCCAGACTCGAAGTCGACCCTGGCATCAATCCGG  
+HWI-EAS443:3:43:938:1182#0/1  
`a\_\_a\_\_a`a[^`\_a^aT¥Y¥^Q¥UVFV¥XQR\_`FUUUZ  
@HWI-EAS443:3:43:973:1219#0/1  
CTGGACGGATCAAGAAAGAAGAGTTCTCTGAGATCATGAA  
+HWI-EAS443:3:43:973:1219#0/1  
`bbbaaabababab`bbbbaaa`aababbaaaaaabaa`  
@HWI-EAS443:3:43:99:1664#0/1  
GACAACATGACCAAGAAGATGGTCACGCAAAGAACAATAG  
+HWI-EAS443:3:43:99:1664#0/1  
VabVba``abbab\_¥bbabb^aY`aa`aba`aba`Uaaa  
@HWI-EAS443:3:43:9:1230#0/1  
TGTATCTGTAGTCTTTGATGAACAATTGAAGAGCCATCTG  
+HWI-EAS443:3:43:9:1230#0/1  
aaabbbb`¥a`Z`ab`\_\_W][^aaab^^a^^]ZX¥aYQ^  
@HWI-EAS443:3:44:1007:1069#0/1  
TGTTGATTCCCCTAACTTGCAGGTCCTGTAGAATCTGTGTC  
+HWI-EAS443:3:44:1007:1069#0/1  
``a`aY\_b[aa[Zbaa`X¥¥^aaWaW\_a[^`a\_\_Z¥^QT  
@HWI-EAS443:3:44:1010:1882#0/1  
TGGTCCTCCATCTGATACTAATAGCCCTACCTTTGATTGG  
+HWI-EAS443:3:44:1010:1882#0/1  
WaZ\_baZ^b\_`\_\_\_X`Pab\_Vaa]TSabaa`aa][baaa  
@HWI-EAS443:3:44:1012:334#0/1  
CACTAACTTGCAGGTCCTGTAGAATCTGTCCACTCCTGCT  
+HWI-EAS443:3:44:1012:334#0/1  
`abbYb]b`aa`¥\_\_aa]ba`a\_a`a`[P`\_`¥\_\_^Z\_T]  
@HWI-EAS443:3:44:1032:743#0/1  
AACCAAGTGGGTATGCACAAACAGACTGTGTTCTAGAGGC  
+HWI-EAS443:3:44:1032:743#0/1  
a`aa]ab^abaW]aa`a\_aY]\_\_`\_\_aaX`]^`^`\_`^`\_G  
@HWI-EAS443:3:44:1048:563#0/1  
CAAAGCTGGGTAGCTCCATGCTAAAATTAGCCACAAATCC  
+HWI-EAS443:3:44:1048:563#0/1  
a`bb^abbab`a]aaa¥b^b^^`aaaaaaaaabaa\_WW  
@HWI-EAS443:3:44:1067:1746#0/1  
GCCGTTGCAACTACACATTCCTGGATTCCCAAGAGGAATC  
+HWI-EAS443:3:44:1067:1746#0/1  
aaa^P]]VP\_[^]N¥X]\_¥¥[NT\_U^ZKRQ[\_¥W[¥[\_RY  
@HWI-EAS443:3:44:1078:1915#0/1  
TATTGGTGTGTTCTGTTTACTGTGTCCATGGTGTATCCTG  
+HWI-EAS443:3:44:1078:1915#0/1  
a^bbaaXa^a\_aaaa^aa`aa\_Xa\_\_\_\_\_`a`T^]\_\_YX¥^

@HWI-EAS443:3:44:1120:1898#0/1  
AGCTAATGGATGATGATTATCGGGGAAGACTTTGTAATCC  
+HWI-EAS443:3:44:1120:1898#0/1  
ab\_b^J^a^`\_a\_¥b`bbab```abbab\_R`aa^D^b``¥  
@HWI-EAS443:3:44:1167:823#0/1  
CAGATCTTCATGATCTCAGAGAACTCTTCTTTCTTGATCC  
+HWI-EAS443:3:44:1167:823#0/1  
aba\_bbbba``babab`aaaba\_aa`a]¥aaa^aaa\_aXM  
@HWI-EAS443:3:44:1228:1527#0/1  
GTGGGATGGGCTCCAATCATCCGACGATTTTGCTCTCATA  
+HWI-EAS443:3:44:1228:1527#0/1  
]P\_`^Taa``P[H]U^^¥a`UX``U]]\_\_\_\_\_`L]MVVY\_\_  
@HWI-EAS443:3:44:1231:721#0/1  
CTCGAATAGATTGCAGCACTTCTGGTACATCTGTTCATCC  
+HWI-EAS443:3:44:1231:721#0/1  
abaaaabbbabbbaabaabaabba`aaaaa`^a``a`]  
@HWI-EAS443:3:44:1253:234#0/1  
AATCTGTCCACTCCTGCTTGTATTCCCTCATGGTTTGGTG  
+HWI-EAS443:3:44:1253:234#0/1  
`[`Z]YP``aa`]NWOY^[JWV]YOV^WT[\_`SJV¥SIK  
@HWI-EAS443:3:44:1258:894#0/1  
GAGAGGCTATCTAATAAGAGCACTGACATTAATACGATG  
+HWI-EAS443:3:44:1258:894#0/1  
a]]GVaaa]WU^]\_¥VZXVSSXJUWYYY`\_X`^^XKXTYZ  
@HWI-EAS443:3:44:1312:321#0/1  
TAAAGAACAACATGATAAACAATGACCTTGGACCTGCAAC  
+HWI-EAS443:3:44:1312:321#0/1  
ZRQ¥\_RU`VWW`aaVYYY[S]`\_XHT^Z`¥TXX]W]]Y  
@HWI-EAS443:3:44:1350:81#0/1  
AGCTGATTCATTTACTCCAGACACTCCAAAGCTGGGTAGC  
+HWI-EAS443:3:44:1350:81#0/1  
abbab`bbababba`a\_`ab\_\_`^^`\_\_\_\_`\_\_`\_`Z\_]Y  
@HWI-EAS443:3:44:1364:666#0/1  
GCTAATTTTAGCATGGAGCTACCCAGCTTTGGAGTGTCTG  
+HWI-EAS443:3:44:1364:666#0/1  
a\_ba]aaaaaaaa`aaa\_aaa\_`\_`^a¥\_a`a\_`^`Wa^Z`\_  
@HWI-EAS443:3:44:1380:552#0/1  
TCCCAGGTGTTGCGATAGCCCTTCTTTTTAACTTGCCTCT  
+HWI-EAS443:3:44:1380:552#0/1  
\_`aVSba\_H^aa\_¥PV`\_WULa`\_U[Y^ZY^[\_YV¥^^[]  
@HWI-EAS443:3:44:1399:1662#0/1  
GGGCAATGAAAAGAAGGCCAAACTGGCAAATGTTGTGAGA  
+HWI-EAS443:3:44:1399:1662#0/1  
`WaH][a[T\_]aT\_\_\_\_^X\_\_^^Y\_Z¥XY^YY^W]\_]`]]W  
@HWI-EAS443:3:44:139:1688#0/1  
GGGGCAATGAAAAGAAGGCCAAACTGGCAAATGTTGTGAG  
+HWI-EAS443:3:44:139:1688#0/1  
aaaaabbbbbb`baabbaaaabba`aaabbaabaababba  
@HWI-EAS443:3:44:1414:538#0/1  
AATAAGAGCACTGACATTAATACGATGACCAAAGATGCA

+HWI-EAS443:3:44:1414:538#0/1  
abbaab`baaabb^a`baaaaba`b`aba^^a\_aaa`a\_\_\_  
@HWI-EAS443:3:44:141:33#0/1  
GAACAACATGATAAACAATGACCTTGACCTGCAACGGCC  
+HWI-EAS443:3:44:141:33#0/1  
aa]`\_a]\_\_a]\_]`\_YZ\_a\_VY\_\_\_\_`U[WZ`RW^Y^¥ST  
@HWI-EAS443:3:44:1473:1294#0/1  
AGAATCTGTCCACTCCTGCTTGTATTCCCTCATGGTTTGG  
+HWI-EAS443:3:44:1473:1294#0/1  
ab`aaaaaXa`a`^\_Y¥`\_a\_Z[¥`^^^¥Z^][^a\_Y[  
@HWI-EAS443:3:44:1473:54#0/1  
GAAAGTGGACGACAAACACAGAGACTGGTGACCCCCAGCT  
+HWI-EAS443:3:44:1473:54#0/1  
aa]`b`baaaba\_`aa\_¥a`a`\_U`\_U`^\_ZU^Z¥\_QU  
@HWI-EAS443:3:44:1475:973#0/1  
ATGCCAGGGTCGACTTCGAGTCTGGACGGATCAAGAAAGA  
+HWI-EAS443:3:44:1475:973#0/1  
abaaaaa`^\_a`]a`\_aaa^`a`\_]aa\_]\_[[^\_a]\_  
@HWI-EAS443:3:44:1554:989#0/1  
CCAGGGTCGACTTCGAGTCTGGACGGATCAAGAAAGA  
+HWI-EAS443:3:44:1554:989#0/1  
```[\_]a\_ZW`^`]]\_b`^a¥aa¥P\_]YXa]```\_X]^  
@HWI-EAS443:3:44:1562:1406#0/1  
CTGGGAGCCCAGACTGTTCAAGCTTTTCGCAAATGCTCCT  
+HWI-EAS443:3:44:1562:1406#0/1  
a`\_^\_PY]^^[aP^a\_0X^\_^^NR^Y]ZYV[Z^]^RQRQV  
@HWI-EAS443:3:44:1569:1751#0/1  
ATGGAATCAATGAACAAAGAGGAAATAGAGATAACAACCC  
+HWI-EAS443:3:44:1569:1751#0/1  
abb\_[aa`ab`aaa^a^^a]aaY\_\_a```a\_aa^Wa`^]U  
@HWI-EAS443:3:44:1582:604#0/1  
GTAAGAGACAACATGACCAAGAAGATGGTCACGCAAAGAA  
+HWI-EAS443:3:44:1582:604#0/1  
VVbbbaWaa¥aS^U\_YYQ¥V¥\_S`^^aRF¥Y^aaJ`Z`Y\_  
@HWI-EAS443:3:44:167:703#0/1  
GATGAACAATTGAAGAGCCATCTGGGCCGTTGCAGGTCCA  
+HWI-EAS443:3:44:167:703#0/1  
abaaa`^`aaaaaba`a`aaa`\_a`a`\_a]\_`^\_a^Y`\_^  
@HWI-EAS443:3:44:1727:1033#0/1  
AATAAGAGCACTGACATTAATACGATGACCAAAGATGCA  
+HWI-EAS443:3:44:1727:1033#0/1  
S\_a`^`aa^b¥Vaaa`^aba[`a`^aa]`^V¥]^`a```OR  
@HWI-EAS443:3:44:1737:1838#0/1  
GAGGCTATCTAATAAGAGCACTGACATTAATACGATGAC  
+HWI-EAS443:3:44:1737:1838#0/1  
S¥^UV]`Y^Q\_¥[`^`[Ya^G[YZV]]\_¥]WZY`^]V^SD  
@HWI-EAS443:3:44:1747:116#0/1  
CCTATATGTGTATCTGTAGTCTTTGATGAACAATTGAAGA  
+HWI-EAS443:3:44:1747:116#0/1  
aabbbbaabaab`bb^aa\_aabaa`\_aa^\_\_aa```\_`^

@HWI-EAS443:3:44:194:427#0/1  
GAAGAGCCATCTGGGCCGTTGCAGGTCCAAGGTCATTGTT  
+HWI-EAS443:3:44:194:427#0/1  
aaa[Y`aa`\_``a\_\_\_]\_`\_^`\_Z^`\_¥^[WZ^\_^`X\_  
@HWI-EAS443:3:44:202:411#0/1  
GCATTGGCCAACACCATAGAAAGTCTTTAGATCGAATGGCC  
+HWI-EAS443:3:44:202:411#0/1  
[a`aabaa^Ta`X\_\_`aa`^\_V\_\_a^`]]\_a``\_\_^\_Z  
@HWI-EAS443:3:44:204:614#0/1  
CCAAAGCTGGGTAGCTCCATGCTAAAATTAGCCACAAATC  
+HWI-EAS443:3:44:204:614#0/1  
]W`aa`^`¥^¥]G[Xaa^Y\_[a\_\_X[]¥]Z]`XZ¥RX]\_]Y  
@HWI-EAS443:3:44:233:1218#0/1  
GTCTGGAGTAAATGAATCAGCTGACATGAGTATTGGAGTA  
+HWI-EAS443:3:44:233:1218#0/1  
``a\_]^[^]]^``a\_Y^¥]\_[[¥WVZ]^^[R]`\_]`¥T¥P[  
@HWI-EAS443:3:44:273:251#0/1  
CCCGGATTGATGCCAGGGTCGACTTCGAGTCTGGACGGAT  
+HWI-EAS443:3:44:273:251#0/1  
aab`b`ababaaa`Z`\_\_Za`\_¥^\_\_\_\_YT^``\_[N^`¥U  
@HWI-EAS443:3:44:27:249#0/1  
GTGTGTTCTGTTTACTGTGTCCATGGTGTATCCTGTTCCCT  
+HWI-EAS443:3:44:27:249#0/1  
aa\_[a[[`aaaa`\_`[XZ[YPV^aSI^U`^^[[[R^US^  
@HWI-EAS443:3:44:289:1848#0/1  
AAAAATCCAGCGCAAATGCCATAAGCACCATTCCT  
+HWI-EAS443:3:44:289:1848#0/1  
aa\_a^`^Y`\_`^`\_]\_\_^\_\_\_\_^]`^`^`]]\_Z^]XVWX]  
@HWI-EAS443:3:44:343:272#0/1  
GGCTGGCATTACCACAGCATTGTTTACAGAATCAATCTCT  
+HWI-EAS443:3:44:343:272#0/1  
aa]]`^`aa]¥`a^S[¥¥][Y¥Y\_\_L]a\_\_TR][Q]^`  
@HWI-EAS443:3:44:406:710#0/1  
CTTTCCTTGAAGAATCCCACCCAGGAATATTTGAGAATTC  
+HWI-EAS443:3:44:406:710#0/1  
abbabbbbbbbba`bbba`bbbbbaaaaaabbaa`  
@HWI-EAS443:3:44:412:1584#0/1  
CTTTCCTTGAAGAATCCCACCCAGGAATATTTGAGAATTC  
+HWI-EAS443:3:44:412:1584#0/1  
KYaaaTaa\_¥bbb\_\_b`aMa\_ab\_b\_aba`aaaaaba`]  
@HWI-EAS443:3:44:467:235#0/1  
GGGGCAATGAAAAGAAGGCCAAACTGGCAAATGTTGTGAG  
+HWI-EAS443:3:44:467:235#0/1  
aa¥NU^\_aaa]¥aa¥a^\_\_^^\_Z`\_\_Z^a^`\_X^aZ`X\_  
@HWI-EAS443:3:44:469:894#0/1  
TGCCAGGGTCGACTTCGAGTCTGGACGGATCAAGAAAGAA  
+HWI-EAS443:3:44:469:894#0/1  
a^baa`bb]aba^aaXXUZPRa`\_`\_\_¥UZ``X^a\_\_`^  
@HWI-EAS443:3:44:501:830#0/1  
GGTATGCACAAACAGACTGTGTTCTAGAGGCTATGGCTTT

+HWI-EAS443:3:44:501:830#0/1  
aa^aaabaaaaYaaa`\_aa]a^`\_^\_^``BBBBBBBBBB  
@HWI-EAS443:3:44:510:64#0/1  
GTGGACGACAAACACAGAGACTGGTGCACCCCAGCTCAAC  
+HWI-EAS443:3:44:510:64#0/1  
aX`a)`a`¥]`]]Y¥^^¥^UMYY^UUUPS¥¥¥USSTTTWT  
@HWI-EAS443:3:44:566:445#0/1  
AATTGAAGAGCCATCTGGGCCGTTGCAGGTCCAAGTCAT  
+HWI-EAS443:3:44:566:445#0/1  
W\_a]Zb\_Za^^`YYW]`]ab¥¥`W\_X\_PSYa^a`Q[R¥  
@HWI-EAS443:3:44:607:1191#0/1  
GACTGACAAAGGGATTACAGGGATTACAAAGTCTTCCCCG  
+HWI-EAS443:3:44:607:1191#0/1  
a\_\_)`^^aa`^`\_a`baaa`[]X`[\_`\_aXW]`Y[ZZ`  
@HWI-EAS443:3:44:646:1289#0/1  
TAAGTTTGGTCTCCATCTGATACTAATAGCCCTACCTTT  
+HWI-EAS443:3:44:646:1289#0/1  
a`a^aba`^`a`\_`a\_\_\_[\_\_\_^\_a\_\_`^\_\_^\_^]Z^^Z  
@HWI-EAS443:3:44:647:680#0/1  
TGCCAGGGTCGACTTCGAGTCTGGACGGATCAAGAAAGAA  
+HWI-EAS443:3:44:647:680#0/1  
`abaZ\_^\_WH\_Ubbaa\_W\_OHRXUNTWWW]OU\_¥RUN\_R  
@HWI-EAS443:3:44:68:309#0/1  
GAGCATTTGCGAAAAGCTTGAACAGTCTGGGCTCCCAGTA  
+HWI-EAS443:3:44:68:309#0/1  
a`aaaababba`aa`baabaaa`aaaaaaXbaa`^`\_`W^  
@HWI-EAS443:3:44:737:654#0/1  
GTCCTCCATCTGATACTAATAGCCCTACCTTTGATTGGGT  
+HWI-EAS443:3:44:737:654#0/1  
\_Ya`^``)`¥^a¥X]X[\_\_\_^`^^\_Z[TZ[\_^^^Z^^^YVP  
@HWI-EAS443:3:44:753:242#0/1  
ATAGATTGCAGCACTTCTGGTACATCTGTTTCATCCTCAAG  
+HWI-EAS443:3:44:753:242#0/1  
`b`¥aaaa\_¥Yaaa^Raa]Ua¥\_[\_\_`]\_[`]UUZY^\_^  
@HWI-EAS443:3:44:813:319#0/1  
AGAAATCAACCGGCAGCAACTGCATTGGCCAACACCATAG  
+HWI-EAS443:3:44:813:319#0/1  
aaaWR[`\_¥[R\_]\_]\_UWVXW[WWWQPUPWYRTUSVUUX  
@HWI-EAS443:3:44:823:114#0/1  
GCCTTCTTTTCATTGCCCCCTACTGGGAGCCCAGACTGTT  
+HWI-EAS443:3:44:823:114#0/1  
aZ`\_[XXZZ^¥P^UMPVPUZJR¥¥¥¥S¥USGTWWRWUPT  
@HWI-EAS443:3:44:845:1277#0/1  
CAGGGTCGACTTCGAGTCTGGACGGATCAAGAAAGAAGAG  
+HWI-EAS443:3:44:845:1277#0/1  
a`aabUba`^aaaa`\_^\_aa``\_aa]\_``\_aa^[^\_\_^`\_  
@HWI-EAS443:3:44:846:193#0/1  
GGGCAATGAAAAGAAGGCCAAACTGGCAAATGTTGTGAGA  
+HWI-EAS443:3:44:846:193#0/1  
aaaa¥aaa\_a][`\_\_`^`^`\_`\_`^`[^`^]`Y¥^X`¥¥X



@HWI-EAS443:3:44:866:955#0/1  
GTTGATTCCCACTAACTTGCAGGTCCTGTAGAATCTGTCC  
+HWI-EAS443:3:44:866:955#0/1  
\_`aa\_baa`\_`aaa\_\_\_aaa`\_]X^a`^`^`\_V^`^UUZ  
@HWI-EAS443:3:44:883:1864#0/1  
GGCTATCTAATAAGAGCACTGACATTAAATACGATGACCA  
+HWI-EAS443:3:44:883:1864#0/1  
¥ba^\_bbba¥^abaaS`\_P\_YSaabaab¥a]`¥H\_`FO]  
@HWI-EAS443:3:44:897:283#0/1  
CAAAATCGTCGGATGATTGGAGCCCATCCCACCAGTATAT  
+HWI-EAS443:3:44:897:283#0/1  
a\_\_\_\_\_aa\_[^^aa]\_\_\_\_\_a`\_]a\_\_VVX^^X¥^TW\_SX^]Y  
@HWI-EAS443:3:44:947:754#0/1  
AAGATGGTCACGCAAAGAACAATAGGGAAGAAAAACAAA  
+HWI-EAS443:3:44:947:754#0/1  
aa`]¥ba]`^\_b¥ZY`^Z`UZ]T`a```a^W[^X`^¥WU  
@HWI-EAS443:3:44:953:1082#0/1  
GTCGACTTCGAGTCTGGACGGATCAAGAAAGAAGAGTTCT  
+HWI-EAS443:3:44:953:1082#0/1  
^`b`a\_`a`\_ab`abaaaaa\_a`a`aaaa`aa`aaYa\_`  
@HWI-EAS443:3:45:1004:1548#0/1  
AAAAATTCCAGCGCAAATGCCATAAGCACCACATTCCT  
+HWI-EAS443:3:45:1004:1548#0/1  
``Z\_YZ¥X^[\_RVHXXZN¥`[U`\_``[]YJM[S`\_XWG[[  
@HWI-EAS443:3:45:1013:604#0/1  
GGATGGGCTCCAATCATCCGACGATTTTGCTCTCATAGTG  
+HWI-EAS443:3:45:1013:604#0/1  
aa][a`]^`^^U]`a\_`\_\_\_a]U`¥¥\_`Z\_U\_Z^¥\_`^¥^¥\_  
@HWI-EAS443:3:45:1020:79#0/1  
GATTGATGCCAGGGTCGACTTCGAGTCTGGACGGATCAAG  
+HWI-EAS443:3:45:1020:79#0/1  
a^`aa`a¥[Z[^W]\_[Y]^V`^^XU^`\_ZW\_^SWUZ[^  
@HWI-EAS443:3:45:1035:1241#0/1  
CAACCGGCAGCAACTGCATTGGCCAACCCATAGAAGTCT  
+HWI-EAS443:3:45:1035:1241#0/1  
aX^¥¥U¥`[\_WZ\_W]Q]^aaa]¥TR¥ZX¥¥TRZZQ¥^TXY  
@HWI-EAS443:3:45:1082:744#0/1  
TGTAAGTCTGTCCACTCCTGCTTGTATTCCCTCATGGTT  
+HWI-EAS443:3:45:1082:744#0/1  
aaaab`aaaba]a\_\_Y\_\_\_`a^`aa\_`a\_Y\_¥`\_\_\_\_\_aZa  
@HWI-EAS443:3:45:1084:1964#0/1  
TAGATCGAATGGCCTAACAGCTAATGAGTCAGGAAGGCTA  
+HWI-EAS443:3:45:1084:1964#0/1  
`ba\_V¥bab`^aQP`aaWa`\_`a`]aSXY]\_\_\_\_\_[]\_[^\_  
@HWI-EAS443:3:45:1085:267#0/1  
ACGGCCCAGATGGCTCTTCAATTGTTTCATCAAAGACTACA  
+HWI-EAS443:3:45:1085:267#0/1  
a`aa[\_Xab¥X\_]ZZ]aa\_WQXYaWY¥YQU]YZa^GY¥WZ  
@HWI-EAS443:3:45:1093:296#0/1  
CCTTTGTCAGTCATAAAGAGATTGATTCTGTAACAATGC

+HWI-EAS443:3:45:1093:296#0/1  
aabbbaabaaa]a`ab`a]aabaaa^`a\_`aa[``\_a¥  
@HWI-EAS443:3:45:1101:933#0/1  
TGGGCTCCCAGTAGGGGGCAATGAAAAGAAGCCAAACTG  
+HWI-EAS443:3:45:1101:933#0/1  
ab\_\_Sab`\_ba[ab]bb[[babaTY`aa`ba[[[aUbb  
@HWI-EAS443:3:45:1112:351#0/1  
ATGGTTTGGTGCATTCACTATGAGAGCAAATCGTCGGAT  
+HWI-EAS443:3:45:1112:351#0/1  
\_W¥babba\_Q\_`bb`\_X]ZR\_a^^V)`Z[S`a^bZG]`[^  
@HWI-EAS443:3:45:1117:1138#0/1  
TGCCATGCTCAGGATGTTTCTGAACCACTCGGGTTGATTT  
+HWI-EAS443:3:45:1117:1138#0/1  
Y\_`a\_`a`a`bb`ab`\_¥^b`^`aa`]SYa\_YY\_]U\_a`  
@HWI-EAS443:3:45:1144:410#0/1  
GATTAGAGGTTTCGTATACTTTGTTGAACTTTAGCTAGG  
+HWI-EAS443:3:45:1144:410#0/1  
aaW\_\_[aWRQH[``VTLLW\_YTTHVa[^\_Z¥WNXX]]\_]  
@HWI-EAS443:3:45:1156:926#0/1  
GAAGATGGTCACGCAAAGAACAATAGGGAAGAAAAACAA  
+HWI-EAS443:3:45:1156:926#0/1  
aa`a`aa`^[^]`¥¥[^]¥^Z^^^`^VOUZU]\_[UG[¥  
@HWI-EAS443:3:45:1169:761#0/1  
CAGGAATGTGTAGTTGCAACGGCATCATATCCATGCTTT  
+HWI-EAS443:3:45:1169:761#0/1  
abab\_abb\_b\_`ba`a`^aaaa`a\_aaaaba`])`aa\_a^a  
@HWI-EAS443:3:45:1195:808#0/1  
GGAGCATTTCGAAAAGCTTGAACAGTCTGGGCTCCCAGT  
+HWI-EAS443:3:45:1195:808#0/1  
a`T^])\_\_a\_V\_\_ZXR\_Y`\_`^^TY\_UZ^^[W[U[W[R^V  
@HWI-EAS443:3:45:1234:529#0/1  
TTGCCATTTTGTGGAGAACATTATGGGTGCCATGCTCAG  
+HWI-EAS443:3:45:1234:529#0/1  
abba`abbabbaabab`^^aaaaabaa\_a^^`aa]\_¥\_a  
@HWI-EAS443:3:45:1284:817#0/1  
CAATTGAAGAGCCATCTGGGCCGTTGCAGGTCCAAGGTCA  
+HWI-EAS443:3:45:1284:817#0/1  
¥bbb`^abaab`^^ba`[^a`^`aaaa\_`][W`aSRG  
@HWI-EAS443:3:45:1297:486#0/1  
AAGAGACAACATGACCAAGAAGATGGTCACGCAAAGAACA  
+HWI-EAS443:3:45:1297:486#0/1  
aaabab\_a\_\_a\_ba[^\_aaaa\_\_aaY`a\_a^\_\_aZ]^`  
@HWI-EAS443:3:45:1374:1029#0/1  
GAACATTATGGGTGCCATGCTCAGGATGTTTCTGAACCAC  
+HWI-EAS443:3:45:1374:1029#0/1  
aYaa`aaa`a\_a¥a]\_¥\_\_\_\_^\_\_`])\_`^`^^^XW¥X  
@HWI-EAS443:3:45:1388:1048#0/1  
GTTCTGTTTACTGTGTCCATGGTGTATCCTGTTCTGTTT  
+HWI-EAS443:3:45:1388:1048#0/1  
aab`aaaaaa\_aa\_a````aaaVa]``^^aa^\_Z^^^[\_]

@HWI-EAS443:3:45:1418:476#0/1  
GCCTCTCTGCATCTTTGGTCATCGTATTTAATGTCAGT  
+HWI-EAS443:3:45:1418:476#0/1  
aa`aaaaaaba\_a\_aaaa]\_`a\_a]\_aaa`\_`a]¥`\_`T  
@HWI-EAS443:3:45:1436:1642#0/1  
GTGCTTATGGCATTGCGCTGGAATTTTTAGGAAAAGTA  
+HWI-EAS443:3:45:1436:1642#0/1  
aY]LT`^`aaX\_X]T]Y]WY]`a[RLY^\_\_[^`ZZWX\_LV  
@HWI-EAS443:3:45:1445:1440#0/1  
AAAAGAAATACACCAAGACAATATACTGGTGGGATGGGCT  
+HWI-EAS443:3:45:1445:1440#0/1  
`\_a`[^ZaVSZaa`aaZ\_Y]\_`a^0`ZZR\_\_\_\_[X¥`ZHJ  
@HWI-EAS443:3:45:147:1551#0/1  
AAGATGCAGAGAGAGGCAAGTTAAAAAGAAGGGCTATCGC  
+HWI-EAS443:3:45:147:1551#0/1  
abaa\_baabaab`a]`a``\_\_aa\_\_^[^`]^`^`a`V¥`^`^`  
@HWI-EAS443:3:45:1489:1314#0/1  
AGGTAGTGGTCCATCAATCGGTTGAGCTGGGGTGCACCA  
+HWI-EAS443:3:45:1489:1314#0/1  
ab`\_ba`ab`]aaaaaa`aaa\_ba]^V`UZ\_XQ¥V^U^`^`  
@HWI-EAS443:3:45:1524:72#0/1  
AGACAACATGACCAAGAAGATGGTCACGCAAAGAACAATA  
+HWI-EAS443:3:45:1524:72#0/1  
`^aa`ba^aaaa`aa`aa\_]aa\_\_\_Ya^]a]¥Z]Z\_]`  
@HWI-EAS443:3:45:1552:1446#0/1  
AAAAAACAAGACTGAATAAGAGAGGCTATCTAATAAGAG  
+HWI-EAS443:3:45:1552:1446#0/1  
^a^¥bbababa``baaabaaaaaa\_aaa^UV^¥¥Y[\_XWU  
@HWI-EAS443:3:45:1566:162#0/1  
GCTGGAATTTTTAGGAAAAGTAGAGTCGGATTGACATCCA  
+HWI-EAS443:3:45:1566:162#0/1  
aaaba`^aabaaaa``^aY`a^`]a`]]\_]`]]XY]]`  
@HWI-EAS443:3:45:1586:1798#0/1  
CTAGGGAAAGGGTACATGTTTCGAGAGTAAAAGAATGAAGA  
+HWI-EAS443:3:45:1586:1798#0/1  
abbbbaabbbbaa\_b`bbb\_a\_aaaab\_aaaaaaaaaaa`a`  
@HWI-EAS443:3:45:1609:689#0/1  
ATGGAATCAATGAACAAAGAGGAAATAGAGATAACAACCC  
+HWI-EAS443:3:45:1609:689#0/1  
`^aM[aba\_aaa`\_^^[V^VXU]\_a``a\_a\_a]a\_\_^]]`  
@HWI-EAS443:3:45:1616:690#0/1  
GATTGATGCCAGGGTCGACTTCGAGTCTGGACGGATCAAG  
+HWI-EAS443:3:45:1616:690#0/1  
aX`\_`Y[\_[\_Z\_ZYXLWW[U\_WUMQMPLTRVSPSWWUJVMF  
@HWI-EAS443:3:45:1664:1188#0/1  
CAGATTAGAGGTTTCGTATACTTTGTTGAAACTTTAGCTA  
+HWI-EAS443:3:45:1664:1188#0/1  
a]b\_bbbbaba\_b``baaaa]ba`\_aa\_\_`a^\_a`]W`\_`  
@HWI-EAS443:3:45:1680:892#0/1  
GGTGTGTTCTGTTTACTGTGTCCATGGTGTATCCTGTTCC

+HWI-EAS443:3:45:1680:892#0/1  
ab\_a\_a\_b`aa\_aa\_aaa^a\_\_aaa]`^¥^`^^^a`^\_\_^  
@HWI-EAS443:3:45:1681:1316#0/1  
GAGTATTGGTGTCTGTTTACTGTGTCCATGGTGTATC  
+HWI-EAS443:3:45:1681:1316#0/1  
`]`\_abba¥¥b^`^aba`\_abaa`]`a]a\_\_aa`Z`\_a\_\_  
@HWI-EAS443:3:45:1683:603#0/1  
TGGTGTGTTCTGTTTACTGTGTCCATGGTGTATCCTGTTC  
+HWI-EAS443:3:45:1683:603#0/1  
aba^b\_b\_aZa]`a`a[`a\_a\_\_Y[aaaUaU¥ZZ[^¥[\_W  
@HWI-EAS443:3:45:1708:1899#0/1  
ACCAAACCATGAGGGAATACAAGCAGGAGTGGACAGATTC  
+HWI-EAS443:3:45:1708:1899#0/1  
a\_\_a`\_^Y`^^`\_a\_\_\_Z\_\_W]¥\_UV\_^T^W^[YYWUWW\_W  
@HWI-EAS443:3:45:1728:1156#0/1  
TATTTTCTCAATTTTCTTCTTTGTTGATTCATTGAAGTAC  
+HWI-EAS443:3:45:1728:1156#0/1  
aabbababaaabbab\_aa\_baaaaa\_aa`a`a¥W\_]\_^  
@HWI-EAS443:3:45:1737:1757#0/1  
GGCAAGTTAAAAAGAAGGGCTATCGCAACACCTGGGATGC  
+HWI-EAS443:3:45:1737:1757#0/1  
]\_b`aaaaa¥a`a`aa`^babbaa^a[a`a`^aa\_\_a^`\_  
@HWI-EAS443:3:45:1769:1342#0/1  
CTGGGCCGTTGCAGGTCCAAGGTCATTGTTTATCATGTTG  
+HWI-EAS443:3:45:1769:1342#0/1  
abaaa`ab^aaaaab]X\_`a`\_`^^`^^`\_a\_\_¥\_\_^\_\_\_W  
@HWI-EAS443:3:45:1772:681#0/1  
GAGTAAATGAATCAGCTGACATGAGTATTGGAGTAACAGT  
+HWI-EAS443:3:45:1772:681#0/1  
\_[b`aaabb\_a`^abaaaaUa`aaaXaa[a^`\_`\_P`aY  
@HWI-EAS443:3:45:1777:1298#0/1  
CAATTGAAGAGCCATCTGGGCCGTTGCAGGTCCAAGGTCA  
+HWI-EAS443:3:45:1777:1298#0/1  
abbabbbbbb\_aabaaababa`baaa\_aaa]\_aa`aaX¥^  
@HWI-EAS443:3:45:205:930#0/1  
AAGGGTACATGTTTCGAGAGTAAAAGAATGAAGATTCGAAC  
+HWI-EAS443:3:45:205:930#0/1  
aaaa^W`abaa\_a^`^^`\_aYaa`aaaa]a`\_\_aa\_\_\_`Z  
@HWI-EAS443:3:45:220:913#0/1  
CGATGACCAAAGATGCAGAGAGAGGCAAGTTAAAAAGAAG  
+HWI-EAS443:3:45:220:913#0/1  
a\_]\_ababababaabbbbabaaabaa`\_a¥aaaaa\_aa`  
@HWI-EAS443:3:45:246:1364#0/1  
GCTGGGGTGCACCAGTCTCTGTGTTTGTCTGTCCTCACTTCC  
+HWI-EAS443:3:45:246:1364#0/1  
aa`a\_b\_V\_\_aa\_¥`\_aa\_aa[\_]aa^U^¥ZZ`U^Z[^^^\_  
@HWI-EAS443:3:45:26:314#0/1  
GAAGAATCCCACCCAGGAATATTTGAGAATTCATGCCTTG  
+HWI-EAS443:3:45:26:314#0/1  
aabbabab\_aa\_]`aaa\_\_aaaa`Waa\_aa`[aaa\_]`^^`

@HWI-EAS443:3:45:362:784#0/1  
AATGAACCAAGTGGGTATGCACAAACAGACTGTGTTCTAG  
+HWI-EAS443:3:45:362:784#0/1  
ababbaa]V\_`V\_]aMa]aQUG\_a[ `[\_^¥ZS]ZaY¥\_[  
@HWI-EAS443:3:45:386:1440#0/1  
CAGATCTTCATGATCTCAGAGAACTCTTCTTTCTTGATCC  
+HWI-EAS443:3:45:386:1440#0/1  
`][a\_ba[bbaa[a\_]N[ba[b\_babbaaa`aba`Y```  
@HWI-EAS443:3:45:395:1461#0/1  
GTTCTGTTTACTGTGTCCATGGTGTATCCTGTTCCCTGTTC  
+HWI-EAS443:3:45:395:1461#0/1  
a\_a¥aZ]aab\_aaXa\_aa`XZ\_`]aa^^\_a``^^\_`^\_`^  
@HWI-EAS443:3:45:400:851#0/1  
GGACGGATCAAGAAAGAAGAGTTCTCTGAGATCATGAAGA  
+HWI-EAS443:3:45:400:851#0/1  
abaaab`a\_bab`aaaabaaa[aaaa`aaaa`\_aaa`]a`  
@HWI-EAS443:3:45:414:1028#0/1  
TGGCTTGTGTTGAGAATAGAACGATTCCCTCTGGGAATCC  
+HWI-EAS443:3:45:414:1028#0/1  
a]TVabY¥`^a]]a¥`a`a¥`U`NU\_]a`U^\_QL[X`^^Z  
@HWI-EAS443:3:45:432:628#0/1  
GTTTGAGAACATTATGGGTGCCATGCTCAGGATGTTTCTG  
+HWI-EAS443:3:45:432:628#0/1  
a\_aabaaaa]^aaa`]U\_^a[Ua\_`\_]`^W\_QTQUU\_^[[T  
@HWI-EAS443:3:45:45:1091#0/1  
AAAAATTCCAGCGCAAATGCCATAAGCACCACATTCCCT  
+HWI-EAS443:3:45:45:1091#0/1  
`a`baZ^\_]\_XX]]WZXaY` `\_\_`^WP]]¥]Y]XRYV¥]  
@HWI-EAS443:3:45:506:603#0/1  
GTTCTGTTTACTGTGTCCATGGTGTATCCTGTTCCCTGTTC  
+HWI-EAS443:3:45:506:603#0/1  
aY¥Z[`\_a]¥\_^\_ZQ¥a`\_T[`V\_Y¥Z]Z^VX\_[Y[\_Y\_W  
@HWI-EAS443:3:45:513:1144#0/1  
GAAACATCCTGAGCATGGCACCCATAATGTTCTCAAACAA  
+HWI-EAS443:3:45:513:1144#0/1  
a\_b\_aYb^`a¥]^`^a\_]b`b0a¥aaa`bY`Ob\_\_\_\_aWaa  
@HWI-EAS443:3:45:527:826#0/1  
TTCCCCTTTGGCTTGTGTTGAGAATAGAACGATTCCCTCTT  
+HWI-EAS443:3:45:527:826#0/1  
ab^V]abXa]aXb]ba[a`[H¥¥`]]a]YZY¥^[^^VG\_\_  
@HWI-EAS443:3:45:537:1139#0/1  
GTTGTTCTTTATCACTGTTACTCCAATACTCATGTCAGCT  
+HWI-EAS443:3:45:537:1139#0/1  
a[UR`S`¥\_TVU\_VH[W[TWUX^[W¥P][QYX[Z]JJP[FP  
@HWI-EAS443:3:45:538:353#0/1  
AAAAATTCCAGCGCAAATGCCATAAGCACCACATTCCCT  
+HWI-EAS443:3:45:538:353#0/1  
aa]a\_a\_]`^a\_Z\_\_\_\_^`]\_]\_S^^\_`^^¥]0\_`]ZZWVZZ  
@HWI-EAS443:3:45:555:1029#0/1  
CTTTCCTTGAAGAATCCCACCCAGGAATATTTGAGAATTC



@HWI-EAS443:3:45:758:1110#0/1  
CTCCAGACTCCAAAGCTGGGTAGCTCCATGCTAAAATT  
+HWI-EAS443:3:45:758:1110#0/1  
abaaabbaaab`aaaa\_aaaa`\_aa\_a\_\_aaa]ba`a\_aa  
@HWI-EAS443:3:45:783:1317#0/1  
CAAAGCTGGGTAGCTCCATGCTAAAATTAGCCACAAATCC  
+HWI-EAS443:3:45:783:1317#0/1  
abbbabbb\_`bbabbaaababaaaabaaaa`aaa`aaYY  
@HWI-EAS443:3:45:785:852#0/1  
TAGCCTCTTATTTCAGTCTTTGTTTTTCTTCCCTATTG  
+HWI-EAS443:3:45:785:852#0/1  
aX`a\_a`¥aba^aa\_\_`[^a`a]\_aa\_aaa`X[\_`^]\_`  
@HWI-EAS443:3:45:824:331#0/1  
GGGCTCCAATCATCCGACGATTTTGCTCTCATAGTGAATG  
+HWI-EAS443:3:45:824:331#0/1  
abbbba`aZaabaaaa`aaa`aabbaa`a\_\_`aX`\_`  
@HWI-EAS443:3:45:82:1510#0/1  
CATGTTGTTCTTTATCACTGTTACTCCAATACTCATGTCA  
+HWI-EAS443:3:45:82:1510#0/1  
`¥^ZX`a^\_[ba]`bb^^\_HZ`R\_J\_a\_a^^Y`Z]]aa  
@HWI-EAS443:3:45:834:1232#0/1  
GCCATGGTGTCTAGGGCCCGATTGATGCCAGGGTCGACT  
+HWI-EAS443:3:45:834:1232#0/1  
aa^T^PWTQX¥`¥\_a\_ZVV]PV¥Y]\_YXRU^YYLKZLFT  
@HWI-EAS443:3:45:851:1211#0/1  
ATTCGATCTAAAGACTTCTATGGTGTGGCCAATGCAGTT  
+HWI-EAS443:3:45:851:1211#0/1  
aabaaa`aaaa`Z[¥Za]a\_`]\_\_Z¥\_]`^X^\_a][U¥¥V^`  
@HWI-EAS443:3:45:861:1857#0/1  
AAAAATTCCAGCGCAAATGCCATAAGCACCATTCCT  
+HWI-EAS443:3:45:861:1857#0/1  
aaaa\_aa¥¥`VU^\_\_ZZ`WXZ]^\_Z\_]\_VDWPX^BBBBB  
@HWI-EAS443:3:45:888:306#0/1  
TCTGGAGTAAATGAATCAGCTGACATGAGTATTGGAGTAA  
+HWI-EAS443:3:45:888:306#0/1  
a\_]ZPWF[^ZW[\_¥ZMOTWW^YSL[[N]SSQW`a¥M[OOU  
@HWI-EAS443:3:45:909:723#0/1  
GGTCCATCAATCGGGTTGAGCTGGGGTGCACCAGTCTCTG  
+HWI-EAS443:3:45:909:723#0/1  
aa`a]aaaXa``¥XT]aa¥ZS]S^¥a¥^MY]K]a¥Ua^`a  
@HWI-EAS443:3:45:917:240#0/1  
CACCAGTCTCTGTGTTTGTCTGCTCCACTTCCCTTTTCTGA  
+HWI-EAS443:3:45:917:240#0/1  
ababab`aaabb\_a^aaa]`a]\_^W^\_aa]]]\_a`a]\_^T  
@HWI-EAS443:3:45:924:1192#0/1  
ATTTCTTTTGTCCAAGATTCAGTATCGAGACTCCCAAGAC  
+HWI-EAS443:3:45:924:1192#0/1  
a`baU`U¥^YY¥a¥bVZV]\_ZHV^[¥a]X]\_ZN^`[VTV  
@HWI-EAS443:3:45:929:1419#0/1  
GGCTATTAGTATCAGATGGAGGACCAAACCTTATACAATAT

+HWI-EAS443:3:45:929:1419#0/1  
`b¥bbaabaabbbabaa`a^a`\_\_aaa\_aaaa`\_aaaa\_  
@HWI-EAS443:3:45:99:1205#0/1  
GTTCTTTATCACTGTTACTCCAATACTCATGTCAGCTGAT  
+HWI-EAS443:3:45:99:1205#0/1  
a\_]aaabaaaa`a`\_`^X`\_[Z`^^`^\_\_\_aaUX`YG[  
@HWI-EAS443:3:46:1001:977#0/1  
GGCAAGACTAGGGAAAGGTACATGTTTCGAGAGTAAAAGA  
+HWI-EAS443:3:46:1001:977#0/1  
¥\_^¥¥b[]\_babbXaaabaQX[S\_a¥aTb[a\_\_\_aaaa`\_  
@HWI-EAS443:3:46:1010:728#0/1  
GGGATTCTTCAAGGAAAGCCATAGCCTCTAGAACACAGTC  
+HWI-EAS443:3:46:1010:728#0/1  
aaa[a`\_`^`XU`\_`¥[^]Z^\_a[¥\_TZ¥\_¥^]`^Y]^YY  
@HWI-EAS443:3:46:1054:293#0/1  
AGCCCTTCTTTTTAACTTGCCTCTCTGCATCTTTGGTC  
+HWI-EAS443:3:46:1054:293#0/1  
aabaaaa`aaaa\_`aa`a`\_a\_a\_`¥`\_`[\_^a]`a]WW  
@HWI-EAS443:3:46:1080:1170#0/1  
AGGGGGCAATGAAAAGAAGGCCAAACTGGCAAATGTTGTG  
+HWI-EAS443:3:46:1080:1170#0/1  
¥Y\_NS`aVabb`[]^`^`b]\_`a\_a`aa^a\_\_¥b\_a`]K  
@HWI-EAS443:3:46:1093:1663#0/1  
GAATGCACCAAACCATGAGGGAATACAAGCAGGAGTGGAC  
+HWI-EAS443:3:46:1093:1663#0/1  
^O[``^Y\_WZ^]YS¥``aa]]`^^¥¥^a¥\_a]S¥U^¥^X  
@HWI-EAS443:3:46:1127:194#0/1  
GGGATGGGCTCCAATCATCCGACGATTTTGCTCTCATAGT  
+HWI-EAS443:3:46:1127:194#0/1  
aaa[Ya`\_\_¥`\_\_\_¥[¥\_¥\_\_Z^WZW¥Z[P[¥W¥¥UW¥W  
@HWI-EAS443:3:46:1160:153#0/1  
GTAGGGGGCAATGAAAAGAAGGCCAAACTGGCAAATGTTG  
+HWI-EAS443:3:46:1160:153#0/1  
a\_aaaaaa`]``a\_^`Z[]U]\_[V]^XKX\_TL]]VW`WRW  
@HWI-EAS443:3:46:1169:48#0/1  
GAAGATGGTCACGCAAAGAACAATAGGGAAGAAAAAACAA  
+HWI-EAS443:3:46:1169:48#0/1  
\_[YbY]a`I]]abaX]X`\_\_\_S\_`X`aa^Pa\_a\_`^]L]^  
@HWI-EAS443:3:46:1227:1020#0/1  
GGTAGTGGTCCATCAATCGGGTTGAGCTGGGGTGCACCAG  
+HWI-EAS443:3:46:1227:1020#0/1  
a`\_aa` `[XZa]]Z\_]¥`\_]Y` `^a^\_P^¥aUY^]VU^¥  
@HWI-EAS443:3:46:1228:1001#0/1  
CAATCATCCGACGATTTTGCTCTCATAGTGAATGCACCAA  
+HWI-EAS443:3:46:1228:1001#0/1  
\_bbaababbabaa`ab\_bbaba]a\_Ya`]aaabaaaaaaa  
@HWI-EAS443:3:46:1267:228#0/1  
CATTACATCCTTTAAGAAATCTATTAGCCTTCCTGACTCA  
+HWI-EAS443:3:46:1267:228#0/1  
abbbbbbbbaabbbbaababbaababaaba`bba`abaabaa



@HWI-EAS443:3:46:1293:1584#0/1  
TCTGTTTACTGTGCCATGGTGTATCCTGTTCCCTGTTCCA  
+HWI-EAS443:3:46:1293:1584#0/1  
aaaa\_aa`Ya^¥a\_`a```aVa]\_^^^``¥^^]\_]^^^U  
@HWI-EAS443:3:46:131:266#0/1  
GTGGTCCATCAATCGGGTTGAGCTGGGGTGCACCAGTCTC  
+HWI-EAS443:3:46:131:266#0/1  
aaaa^^aaa]aa```a`¥a][\_Y^TY\_a¥`^^^Y^`YV^  
@HWI-EAS443:3:46:1445:376#0/1  
CAAAGATGCAGAGAGAGGCAAGTTAAAAAGAAGGGCTATC  
+HWI-EAS443:3:46:1445:376#0/1  
a`bbaab\_\_b]ab\_\_bb`^\_]b`aaba``ba``^]`ab`Q  
@HWI-EAS443:3:46:1447:580#0/1  
GAGTAAATGAATCAGCTGACATGAGTATTGGAGTAACAGT  
+HWI-EAS443:3:46:1447:580#0/1  
aaa\_abaaa`a`\_¥^`ba]Y`a`a[`aaa`]aX\_\_^]\_Y  
@HWI-EAS443:3:46:1459:65#0/1  
ATCTGATACTAATAGCCCTACCTTTGATTGGGTTTGATCC  
+HWI-EAS443:3:46:1459:65#0/1  
a]baa`aa`ba¥``\_`^]`a^`a`adW```^`Z\_\_`^`\_`¥  
@HWI-EAS443:3:46:1487:1111#0/1  
CAAAGATGCAGAGAGAGGCAAGTTAAAAAGAAGGGCTATC  
+HWI-EAS443:3:46:1487:1111#0/1  
S\_Q\_a]a]¥Yb[b\_TXb\_Ua\_bPb\_0QbbaXXX^Z`a]PP  
@HWI-EAS443:3:46:1489:1935#0/1  
CTACAGATACACATATAGGTGCCATAGGGGAGACACACAA  
+HWI-EAS443:3:46:1489:1935#0/1  
aTXR¥¥RZ]R`^X]WXMqF\_R]¥XU[\_R]\_aRF[M^U]Y  
@HWI-EAS443:3:46:1495:611#0/1  
GCTGTGGTAATGCCAGCCCATGGTCCAGCCAAAAGCATGG  
+HWI-EAS443:3:46:1495:611#0/1  
a`aa[`\_Za`\_\_^¥¥¥¥^[\_¥^^VWWWURTYU[VT[V[W  
@HWI-EAS443:3:46:14:516#0/1  
GCTTGAACAGTCTGGGCTCCCAGTAGGGGGCAATGAAAAG  
+HWI-EAS443:3:46:14:516#0/1  
^\_\_`Y\_``^a^``¥^\_\_]YZZ[a^[X¥Z^¥[^Y`a¥[[¥V  
@HWI-EAS443:3:46:1501:289#0/1  
CAGCTTTGGAGTGTCTGGAGTAAATGAATCAGCTGACATG  
+HWI-EAS443:3:46:1501:289#0/1  
aababbbbVaaba`a\_a`a`aa`\_``\_]¥]\_`\_^^^  
@HWI-EAS443:3:46:151:1473#0/1  
CAACGGCCCAGATGGCTCTTCAATTGTTTCATCAAAGACTA  
+HWI-EAS443:3:46:151:1473#0/1  
`b\_aa``]Ubab^a¥[aa^`abaaaaI¥`]X]HaS`0[R  
@HWI-EAS443:3:46:1549:144#0/1  
CCCAGTGATTGTGAAAGAAATCTCTGTGTCTTGTGAATTA  
+HWI-EAS443:3:46:1549:144#0/1  
ab¥Q\_SW0¥RaXXHY`aYV[XSUa^aT¥S^ZZa\_\_SSYXX  
@HWI-EAS443:3:46:1579:1640#0/1  
CCCGGATTGATGCCAGGGTCGACTTCGAGTCTGGACGGAT



@HWI-EAS443:3:46:388:1001#0/1  
AAGAAATCTCTGTGTCTTGTGAATTAGTCATCATCTTTCT  
+HWI-EAS443:3:46:388:1001#0/1  
^X`\_`aaaaaa[\_[aaa^a\_aa^¥PVJZ\_^]\_\_^`WDR  
@HWI-EAS443:3:46:418:780#0/1  
ATCTGATACTAATAGCCCTACCTTTGATTGGGTTTGATCC  
+HWI-EAS443:3:46:418:780#0/1  
¥Z^^`¥]X[RG[¥¥\_a`]^ZZ¥YU\_¥XH[]YHLXb\_S[S  
@HWI-EAS443:3:46:433:137#0/1  
GGTGTGTTCTGTTTACTGTGTCCATGGTGTATCCTGTTCC  
+HWI-EAS443:3:46:433:137#0/1  
aZVaS[[`¥`¥[¥]Z\_\_]S][YZ[^\_`W`XQTSST[RWWW  
@HWI-EAS443:3:46:46:708#0/1  
ATCTCTATTTCTCTTTGTTTCATTGATTCCATTACATCCT  
+HWI-EAS443:3:46:46:708#0/1  
a`bbba`abababbababbaabaababaaaba`\_¥`^`^`  
@HWI-EAS443:3:46:471:821#0/1  
ATGGTGTCTAGGGCCCGATTGATGCCAGGGTCGACTTCG  
+HWI-EAS443:3:46:471:821#0/1  
\_]ZQITP\_]ba```Z\_^V`]W]W`¥^^]¥WQ] []Y¥¥¥U  
@HWI-EAS443:3:46:537:1550#0/1  
GTCCTCCATCTGATACTAATAGCCCTACCTTTGATTGGGT  
+HWI-EAS443:3:46:537:1550#0/1  
ZVQ\_Y¥a[`Sab`YZGYaa`¥[\_`^Z]\_`^^]`][L  
@HWI-EAS443:3:46:584:1966#0/1  
TCCCCGATAATCATCATCCATTAGCTCCCATTTTAAGCAG  
+HWI-EAS443:3:46:584:1966#0/1  
¥aabaaa]aJ`[\_`^`[[Z`aa\_^\_\_^]`\_\_^aa\_\_¥\_`^`\_`  
@HWI-EAS443:3:46:585:1722#0/1  
GGGCTATTAGTATCAGATGGAGGACCAAACCTTATACAATA  
+HWI-EAS443:3:46:585:1722#0/1  
a`X[Xa¥\_aZP\_]PG`¥`\_`[\_`WJMY\_[P]]^^\_S]^\_W  
@HWI-EAS443:3:46:598:715#0/1  
GAGATTTCTTTCAATCACTGGGGACAACACTAAGTGGA  
+HWI-EAS443:3:46:598:715#0/1  
```abbb¥bbb`a`aba\_ababaa¥a\_````a\_^aUb`\_  
@HWI-EAS443:3:46:603:2020#0/1  
GTGGGATTCTTCAAGGAAAGCCATAGCCTCTAGAACACAG  
+HWI-EAS443:3:46:603:2020#0/1  
``Z^a^aa`aa```bb^b¥[S[^]`a¥\_\_TG^UaR^^GZY  
@HWI-EAS443:3:46:603:219#0/1  
AGCTAATGGATGATGATTATCGGGGAAGACTTTGTAATCC  
+HWI-EAS443:3:46:603:219#0/1  
a[Z`]W]aaYV[R]\_Y¥X¥[P\_\_\_\_[RR]]^^V¥NY`^`¥Y  
@HWI-EAS443:3:46:604:1431#0/1  
GCTCCAATCATCCGACGATTTTGTCTCATAGTGAATGCA  
+HWI-EAS443:3:46:604:1431#0/1  
]I]¥`\_Z\_a]a`Sa]\_`Y]^aa^XZa`¥`[VZXX\_\_\_\_]SY  
@HWI-EAS443:3:46:626:1160#0/1  
GAATCCCACCCAGGAATATTTGAGAATTCATGCCTTGAAA

+HWI-EAS443:3:46:626:1160#0/1  
`bbaabbbbaaabaabaaaaabaaa\_aaa`aa`\_\_aaa`]  
@HWI-EAS443:3:46:634:203#0/1  
GCCCTTCTTTTAACTTGCCTCTCTGCATCTTTGGTCA  
+HWI-EAS443:3:46:634:203#0/1  
abbbbabbbbaaaabb`abbaa`aa]`a`aaaa`a]\_  
@HWI-EAS443:3:46:665:1031#0/1  
CAGTAGGGGGCAATGAAAAGAAGCCAACTGGCAAATGT  
+HWI-EAS443:3:46:665:1031#0/1  
aabaabbbbaaa]baaaaaaaaaaaaaa`\_`a`a]aaa]  
@HWI-EAS443:3:46:68:186#0/1  
GTCTCCCCTATGGCACCTATATGTGTATCTGTAGTCTTTG  
+HWI-EAS443:3:46:68:186#0/1  
a]`^^aa`a`aa]^\_S]]\_`aa^`[¥`^aaW^`SX[``Y  
@HWI-EAS443:3:46:68:1972#0/1  
ATGGGCTCCAATCATCCGACGATTTTGCTCTCATAGTGAA  
+HWI-EAS443:3:46:68:1972#0/1  
aaWPY`a]`b\_```[`¥a[a`¥`aa`a¥Q¥]]\_Y]^[\_^V  
@HWI-EAS443:3:46:708:591#0/1  
GTCCTCCATCTGATACTAATAGCCCTACCTTTGATTGGGT  
+HWI-EAS443:3:46:708:591#0/1  
`aaaabbab`baaaa\_aaaaa\_\_\_a`\_\_a`aaaa`aa]  
@HWI-EAS443:3:46:739:801#0/1  
CAAAGCTGGGTAGCTCCATGCTAAAATTAGCCACAAATCC  
+HWI-EAS443:3:46:739:801#0/1  
aaaaaaabab\_`aaaa[V`\_b\_a\_aaaa\_`a^a\_a\_[`P  
@HWI-EAS443:3:46:758:546#0/1  
CCCCAGTGATTGTGAAAGAAATCTCTGTGTCTTGTGAATT  
+HWI-EAS443:3:46:758:546#0/1  
abbbb`abaabb¥aaa^baaaa`aba\_a`aa¥`WOZ]`\_  
@HWI-EAS443:3:46:764:479#0/1  
CAGATACACATATAGGTGCCATAGGGGAGACACACAAATT  
+HWI-EAS443:3:46:764:479#0/1  
aababaabaabba\_aa\_baaabaaaaaa`\_a`aaaa`aa  
@HWI-EAS443:3:46:769:91#0/1  
GGTGTGTTCTGTTTACTGTGTCCATGGTGTATCCTGTTCC  
+HWI-EAS443:3:46:769:91#0/1  
aa¥b^b\_`¥`\_`a¥]`a\_aV\_`¥`\_aU¥¥¥¥XW^\_¥¥WV  
@HWI-EAS443:3:46:773:658#0/1  
TTTGTGATTCAATTGAAGTACTTCAGGTCAATGCTTGCTA  
+HWI-EAS443:3:46:773:658#0/1  
aab`\_a`\_`aa`\_a^\_a¥^¥a\_[^`¥ZWV[`^Z\_\_\_Z\_^  
@HWI-EAS443:3:46:786:226#0/1  
CCCGGATTGATGCCAGGGTCGACTTCGAGTCTGGACGGAT  
+HWI-EAS443:3:46:786:226#0/1  
^aa`\_W¥bb`ZY[aabb\_FXb^```]\_H\_IW^b`TR`^RR  
@HWI-EAS443:3:46:797:1593#0/1  
CGGATTGATGCCAGGGTCGACTTCGAGTCTGGACGGATCA  
+HWI-EAS443:3:46:797:1593#0/1  
`bbbbbbbaa`bbaUa\_¥baaaabbaaaaaa`aa¥a`¥\_¥`

@HWI-EAS443:3:46:833:1093#0/1  
CTGGAGTAAATGAATCAGCTGACATGAGTATTGGAGTAAC  
+HWI-EAS443:3:46:833:1093#0/1  
abbaaa\_bbbabaaaaaaaaaaaa`aa\_a^aaaaa]`^aa]  
@HWI-EAS443:3:46:84:1234#0/1  
CAACTGCATTGGCCAACACCATAGAAGTCTTTAGATCGAA  
+HWI-EAS443:3:46:84:1234#0/1  
`UR\_]Z\_¥X^WY`OQXX¥T0]]¥PLU\_]NY]]Ya¥[QSP\_  
@HWI-EAS443:3:46:867:690#0/1  
CTCTTCTAATAGATGGCACAGCATCACTGAGTCCTGGGAT  
+HWI-EAS443:3:46:867:690#0/1  
^]¥[^^¥YW`ab[[Ybbb]]^W]XHHOb`a]HR``aXaZ^  
@HWI-EAS443:3:46:892:844#0/1  
CTGGTATTTGTGTTCGAATCTTCATTCTTTACTCTCGAA  
+HWI-EAS443:3:46:892:844#0/1  
aabaP[abaa\_bababaababbaabbabbbbabbaaaaa  
@HWI-EAS443:3:46:901:1559#0/1  
TAAAAATTCCAGCGCAAATGCCATAAGCACCATTTCCC  
+HWI-EAS443:3:46:901:1559#0/1  
aaba``aaaaaaaa`aa`a\_]`a`a`\_`a^\_a^``^ZYV  
@HWI-EAS443:3:46:901:584#0/1  
CAGGGTCGACTTCGAGTCTGGACGGATCAAGAAAGAAGAG  
+HWI-EAS443:3:46:901:584#0/1  
abbbbabbaaabaabaabbbaabbaa`aaa`abaaa\_aa  
@HWI-EAS443:3:46:929:773#0/1  
TGCCGTTGCAACTACACATTCCTGGATTCCCAAGAGGAAT  
+HWI-EAS443:3:46:929:773#0/1  
abaab^a`aaa`aaWaaaa``\_]a^a`\_a\_\_^\_\_\_\_^\_  
@HWI-EAS443:3:46:980:589#0/1  
AAGGGATTGAGGGATTACAAAGTCTTCCCGATAATCAT  
+HWI-EAS443:3:46:980:589#0/1  
aaa`XKU^``\_\_^`¥a\_\_\_\_^`UV\_]`]WY\_Z\_ZZ^UW\_  
@HWI-EAS443:3:46:992:47#0/1  
GGACCATGGGCTGGCATTACCACAGCATTGTTTACAGAAT  
+HWI-EAS443:3:46:992:47#0/1  
aaa`¥`a`a`\_abb¥\_aa`¥``\_]a¥¥`^a`aZXU^aYZ^  
@HWI-EAS443:3:47:1000:397#0/1  
AAAAATTCCAGCGCAAATGCCATAAGCACCATTTCCCT  
+HWI-EAS443:3:47:1000:397#0/1  
aaaa\_`^^^`\_a^a\_¥`\_`XW^\_]X`ZZ^\_\_\_\_^XXV]  
@HWI-EAS443:3:47:1019:215#0/1  
ATTTTGTGTTGAGAACATTATGGGTGCCATGCTCAGGATGT  
+HWI-EAS443:3:47:1019:215#0/1  
aabbababbbabaaaabbaabb]`\_Y`aa\_WYZaZP¥\_]`  
@HWI-EAS443:3:47:1062:1424#0/1  
GTTTATTATCCTCAGGTAGTGGTCCATCAATCGGGTTGAG  
+HWI-EAS443:3:47:1062:1424#0/1  
`H]¥^¥\_V\_\_\_\_`VN\_XNZ\_V\_`PNRVVUUSMDVUUUSWWW  
@HWI-EAS443:3:47:1086:1436#0/1  
GCTCCAATCATCCGACGATTTTGCTCTCATAGTGAATGCA

+HWI-EAS443:3:47:1086:1436#0/1  
aba\_`aaaaaa\_`aa^aa`a`aa^`\_\_]\_\_\_\_\_^a`\_`^^\_  
@HWI-EAS443:3:47:1114:777#0/1  
CAATTGTTTCATCAAAGACTACAGATACACATATAGGTGCC  
+HWI-EAS443:3:47:1114:777#0/1  
ab\_bbbb\_`]ZRabbb`]`aab\_b\_¥^aaaa^\_¥^WaWL  
@HWI-EAS443:3:47:112:439#0/1  
CTACACATTCTGGATTCCCAAGAGGAATCGTTCTATTCT  
+HWI-EAS443:3:47:112:439#0/1  
abbZ`bbbbba¥babb^RZ`a`]```]`¥¥]V]abbY^  
@HWI-EAS443:3:47:1157:1212#0/1  
GCCGTTGCAACTACACATTCTGGATTCCCAAGAGGAATC  
+HWI-EAS443:3:47:1157:1212#0/1  
aabaaba^bYbb\_aa\_aa``]a[`aaaa^`\_\_`a`\_P  
@HWI-EAS443:3:47:1247:826#0/1  
AAGAATCCCCTTTGGCTTGTGTTGAGAATAGAACGATTC  
+HWI-EAS443:3:47:1247:826#0/1  
a`a]Xa\_\_\_R[¥¥]`a`Z¥Z\_Y`\_YYY]]^XZ^XZXXUN  
@HWI-EAS443:3:47:1249:808#0/1  
CTGGGCTCCCAGTAGGGGCAATGAAAAGAAGGCCAAACT  
+HWI-EAS443:3:47:1249:808#0/1  
X\_bbbbWQ\_^S[SS]ba[]0[a\_b[`\_\_a^V\_a`QTR\_``  
@HWI-EAS443:3:47:1275:166#0/1  
GTGGGATGGGCTCCAATCATCCGACGATTTTGCTCTCATA  
+HWI-EAS443:3:47:1275:166#0/1  
^PaWO^a¥X¥UVVL]¥VZ\_HGL\_PN¥MURUU]QLPRRTGN  
@HWI-EAS443:3:47:1301:117#0/1  
GAGTAAATGAATCAGCTGACATGAGTATTGGAGTAACAGT  
+HWI-EAS443:3:47:1301:117#0/1  
a```ababbaaa]`a`\_b`\_`aa]a]\_aaaa[a^^[[Z\_W  
@HWI-EAS443:3:47:1306:380#0/1  
GGTTTGGTGCATTCATGAGAGCAAATCGTCCGATGA  
+HWI-EAS443:3:47:1306:380#0/1  
aa`abaWb\_`a`\_a¥baba^a`Z`\_^`\_T\_¥Z`¥`\_\_Z  
@HWI-EAS443:3:47:1316:1311#0/1  
GAACATTATGGGTGCCATGCTCAGGATGTTTCTGAACCAC  
+HWI-EAS443:3:47:1316:1311#0/1  
[U[HYbbabaaTUaaI`]b`]0^¥VTYJN`\_R^YYVLSY  
@HWI-EAS443:3:47:1320:625#0/1  
GAGATAACAACCCACTTTCAAAGAAAAAGGAGTAAGAG  
+HWI-EAS443:3:47:1320:625#0/1  
\_`b^a`aaaaa`\_`[`aaa^`aa\_\_a`\_Yaa`a`a]\_`a`a  
@HWI-EAS443:3:47:1324:12#0/1  
AGCCTCTCTTATTCAGTCTTTGTTTTTTCTCCCTATTGT  
+HWI-EAS443:3:47:1324:12#0/1  
X\_``a`baa\_U\_b```^bbbbbbb``aaaa¥`\_babaa`  
@HWI-EAS443:3:47:1366:919#0/1  
GTCTGGACGGATCAAGAAAGAAGAGTTCTCTGAGATCATG  
+HWI-EAS443:3:47:1366:919#0/1  
\_T\_Z¥]RT[TT[W[V[WYV^XTYSYRXX\_Y¥]¥XZZNX]^

@HWI-EAS443:3:47:1367:1035#0/1  
AAACCATGAGGGAATACAAGCAGGAGTGGACAGATTCTAC  
+HWI-EAS443:3:47:1367:1035#0/1  
]]\_ [WWY^`¥`Z\_] [F[^aZ]¥WQ\_¥^a]KX\_N¥VNXTR  
@HWI-EAS443:3:47:138:292#0/1  
TGGTGTGTTCTGTTTACTGTGTCCATGGTGTATCCTGTTC  
+HWI-EAS443:3:47:138:292#0/1  
abaZb`b\_a`aa\_aa`\_aa^`\_\_Y\_\_`\_Ta[\_\_\_[Z`\_^Z  
@HWI-EAS443:3:47:1405:1082#0/1  
TGAAGAATCCCACCCAGGAATATTTGAGAATTCATGCCTT  
+HWI-EAS443:3:47:1405:1082#0/1  
abb¥abb`b`abaaa`a`\_\_a\_`a\_a\_a`U\_\_^`\_]Y[\_`\_`  
@HWI-EAS443:3:47:1468:1240#0/1  
GGTAATGCCAGCCCATGGTCCAGCCAAAAGCATGGAATAT  
+HWI-EAS443:3:47:1468:1240#0/1  
ab`aaabaaaa^Z^aaa¥\_Z\_aZ[`a\_\_\_\_[^`^`\_]U^^`\_  
@HWI-EAS443:3:47:146:1909#0/1  
CAGATCTTCATGATCTCAGAGAACTCTTCTTTCTTGATCC  
+HWI-EAS443:3:47:146:1909#0/1  
aa\_V`bbba`aZWZa[]aaa^`\_Za]aVV\_a`aYa\_a\_¥\_  
@HWI-EAS443:3:47:1481:832#0/1  
GGGCAATGAAAAGAAGGCCAAACTGGCAAATGTTGTGAGA  
+HWI-EAS443:3:47:1481:832#0/1  
aab`abbbaa`^^`^^`a[a`^`\_]\_a^^`\_`^]aZa^aY  
@HWI-EAS443:3:47:1483:1674#0/1  
GTGGGTTGTTATCTCTATTTCTCTTTGTTTCATTGATTCC  
+HWI-EAS443:3:47:1483:1674#0/1  
a¥^Z¥R¥ba¥FZ`^^`¥`a`^SYX[aa`Y\_\_RZ\_\_^U]¥WM  
@HWI-EAS443:3:47:1503:312#0/1  
GGTTGTTATCTCTATTTCTCTTTGTTTCATTGATTCCATT  
+HWI-EAS443:3:47:1503:312#0/1  
`b^aaab`aaa[a¥aaa\_\_`\_]`a\_`X¥X[^\_\_\_\_^]¥^\_  
@HWI-EAS443:3:47:153:1421#0/1  
TGCTGTGGTAATGCCAGCCCATGGTCCAGCCAAAAGCATG  
+HWI-EAS443:3:47:153:1421#0/1  
aaaa]ab¥\_a\_¥[\_Yaaaa[\_]\_¥\_\_^`a\_Za\_]¥¥XZ^  
@HWI-EAS443:3:47:1549:1527#0/1  
GAGATTTCTTTACAATCACTGGGGACAACACTAAGTGGA  
+HWI-EAS443:3:47:1549:1527#0/1  
aaa`aaab`baa`a\_`a\_`a`Y`\_[[[[^`a\_W]X\_^Z  
@HWI-EAS443:3:47:1556:120#0/1  
GTGGGATGGGCTCCAATCATCCGACGATTTTGCTCTCATA  
+HWI-EAS443:3:47:1556:120#0/1  
aX^[]^`\_`aT\_QUW¥YY^UJ[VW\_VVYVUTTTWWWVWXX  
@HWI-EAS443:3:47:1556:1242#0/1  
GCAGACTTCAGGAATGTGAAGATTCCGTATATTGTATAAG  
+HWI-EAS443:3:47:1556:1242#0/1  
a`aa`^`aa\_aa¥¥a\_UaZ\_\_¥^\_Y[\_W]\_^\_\_\_\_WWY¥P^  
@HWI-EAS443:3:47:1580:184#0/1  
GATTGATGCCAGGGTCGACTTCGAGTCTGGACGGATCAAG

+HWI-EAS443:3:47:1580:184#0/1  
a`]'`b\_aa[a]abb^Y]a\_\_`']ZaZ[\_aaHS``\_S¥¥\_\_  
@HWI-EAS443:3:47:1580:1875#0/1  
AATAGATGGCACAGCATCACTGAGTCCTGGGATGATGATG  
+HWI-EAS443:3:47:1580:1875#0/1  
ab`aaa[a`aa`a`aa`W`]\_\_a`Q^['`¥ZZ]^¥Y^\_]]  
@HWI-EAS443:3:47:1594:635#0/1  
TGTTGTTCTTTATCACTGTTACTCCAATACTCATGTCAGC  
+HWI-EAS443:3:47:1594:635#0/1  
['`a`a¥a]aaaa^\_U\_a``¥U[\_T^^^`Y¥]^ [WZ¥\_]Q  
@HWI-EAS443:3:47:1606:1585#0/1  
CCTGGGATGCAGATTAGAGTTTCGTATACTTTGTTGAAA  
+HWI-EAS443:3:47:1606:1585#0/1  
aba`````\_baaa¥a^aaR`\_¥WYXV¥^]SRFY`a`^Z¥Y][  
@HWI-EAS443:3:47:1637:1407#0/1  
AAAAATTCCAGCGCAAATGCCATAAGCACCCACATTCCT  
+HWI-EAS443:3:47:1637:1407#0/1  
abaa`a`¥\_\_a¥a\_a^\_a\_¥W^\_]\_\_^]a\_R]\_^X¥XZZ  
@HWI-EAS443:3:47:1646:1533#0/1  
ATATTCCTGGGTGGGATTCTTCAAGGAAAGCCATAGCCTC  
+HWI-EAS443:3:47:1646:1533#0/1  
abaaa\_ab`aa[a`a]a`\_a^`\_`S^^V]OY\_\_\_\_\_QU^X  
@HWI-EAS443:3:47:1676:550#0/1  
TCTAGGGCCCGGATTGATGCCAGGGTCGACTTCGAGTCTG  
+HWI-EAS443:3:47:1676:550#0/1  
aa``abaa`\_ba]\_]`\_TY`\_Z^QXZZTV]^]VY[`  
@HWI-EAS443:3:47:1683:174#0/1  
GAAGATTCCTATATTGTATAAGTTTGGTCCTCCATCTGA  
+HWI-EAS443:3:47:1683:174#0/1  
`abbabbaaaaababab`aa`^a\_aa``^¥X^`¥`^Y` [Y  
@HWI-EAS443:3:47:1749:1679#0/1  
GGCCTCTTCTAATAGATGGCACAGCATCACTGAGTCCTGG  
+HWI-EAS443:3:47:1749:1679#0/1  
a`U\_Z¥`bb`aXZ`]\_\_\_\_]SV\_aa^RS[GJY` `[MFFTZV  
@HWI-EAS443:3:47:20:234#0/1  
CAGATCTTCATGATCTCAGAGAACTTTCTTTCTTGATCC  
+HWI-EAS443:3:47:20:234#0/1  
`a`WW¥abbbaaa`\_^aaZa¥Z\_\_ZXV¥[`\_¥]\_\_W]¥¥¥  
@HWI-EAS443:3:47:217:1748#0/1  
GTTTCATATAGGAGACCGTTGGAATTTCTAGCATGGTGGA  
+HWI-EAS443:3:47:217:1748#0/1  
\_a`J`a[``^^Za\_Zaa\_aa[\_X[`b`[^`Ma\_OFKL^U\_  
@HWI-EAS443:3:47:251:1447#0/1  
ACCATGGACACAGTAAACAGAACACACCAATACTCAGAAA  
+HWI-EAS443:3:47:251:1447#0/1  
\_Ub`X`Z`bb\_\_¥RWTa^¥¥ba``\_aa]bab^]`Vabba\_  
@HWI-EAS443:3:47:295:806#0/1  
GACTGACAAAGGGATTACAGGGATTACAAAGTCTTCCCCG  
+HWI-EAS443:3:47:295:806#0/1  
``a`baabbbb\_baa``aaaa`[a^``aa`WT`^X`¥Wa



@HWI-EAS443:3:47:308:382#0/1  
ATGGTGTCTAGGGCCCGGATTGATGCCAGGGTCGACTTCG  
+HWI-EAS443:3:47:308:382#0/1  
\_AQ\_abaU`[\`abb\_abbab`aaab]`a`aaXaaa¥^X]]  
@HWI-EAS443:3:47:312:888#0/1  
AAAAATTCCAGCGCAAATGCCATAAGCACCATTCCT  
+HWI-EAS443:3:47:312:888#0/1  
a^`]UZa^aY`[ZR\_[U[[\_ZZ\_`^ZYWaUZ^]\_`YUZU`  
@HWI-EAS443:3:47:326:382#0/1  
CACTAACTTGCAGGTCCTGTAGAATCTGTCCACTCCTGCT  
+HWI-EAS443:3:47:326:382#0/1  
abbbbbabbaba`ba\_abb\_`bbaaaaa\_`^aa`\_a\_\_a  
@HWI-EAS443:3:47:341:85#0/1  
GAGTAAATGAATCAGCTGACATGAGTATTGGAGTAACAGT  
+HWI-EAS443:3:47:341:85#0/1  
aab`abbbba`a\_`b\_ab\_\_]aa^a^`aaa`]a]]`]^aZ`  
@HWI-EAS443:3:47:343:1420#0/1  
ATAAGTTTGGTCTCCATCTGATACTAATAGCCCTACCTT  
+HWI-EAS443:3:47:343:1420#0/1  
aaY\_`[ababa`a`]]`aa`a¥^aa`aaa`]^a\_¥0¥\_  
@HWI-EAS443:3:47:349:387#0/1  
CTTGTGTTGAGAATAGAACGATTCCTCTTGGGAATCCAGG  
+HWI-EAS443:3:47:349:387#0/1  
Z\_`a\_a\_]X^¥bbaa\_abbab\_`Zabbb`b`babZ\_\_b`  
@HWI-EAS443:3:47:354:1119#0/1  
ATCTAATAAGAGCACTGACATTAATACGATGACCAAAGA  
+HWI-EAS443:3:47:354:1119#0/1  
`bababbbbab`aabaa`aabaaba`aaaaXN¥a`^\_  
@HWI-EAS443:3:47:373:293#0/1  
GCCATTTTGTGGAGAACATTATGGGTGCCATGCTCAGGA  
+HWI-EAS443:3:47:373:293#0/1  
abbbbbbbbabbbabaa`baaab`a¥aa`aa\_`^\_a`\_  
@HWI-EAS443:3:47:390:1222#0/1  
GGATTCTTCAAGGAAAGCCATAGCCTCTAGAACACAGTCT  
+HWI-EAS443:3:47:390:1222#0/1  
a``\_a`^`^`\_VW¥¥`\_\_`^`QYY\_`¥\_\_]H^`¥¥\_[VY]  
@HWI-EAS443:3:47:402:1309#0/1  
AATTTCTCGAATAGATTGCAGCACTTCTGGTACATCTGTT  
+HWI-EAS443:3:47:402:1309#0/1  
^a\_a\_Z`ab\_^X[\_a`ab]]Z]\_`^`\_a^]OZ[RT]Y¥T]\_  
@HWI-EAS443:3:47:462:1241#0/1  
CTCCAATCATCCGACGATTTTGCTCTCATAGTGAATGCAC  
+HWI-EAS443:3:47:462:1241#0/1  
abbaaababb`bbaaaaabaaaaaa\_aaaa¥a^`a[^¥  
@HWI-EAS443:3:47:491:551#0/1  
ATCTAATAAGAGCACTGACATTAATACGATGACCAAAGA  
+HWI-EAS443:3:47:491:551#0/1  
\_`a`¥Y\_\_]aa`]`\_\_a\_]Z`aaa^aa\_ba`a\_Z\_\_]`a^  
@HWI-EAS443:3:47:538:430#0/1  
GCCATGCTCAGGATGTTTCTGAACCACTCGGGTTGATTTC

+HWI-EAS443:3:47:538:430#0/1  
ab`bbbbbbbaa`^aabbaba\_b`^a^aaa`^a^S\_aaR  
@HWI-EAS443:3:47:550:1997#0/1  
AGTGCTCTTATTAGATAGCCTCTCTTATTTCAGTCTTTGTT  
+HWI-EAS443:3:47:550:1997#0/1  
]b]`abab^bb`\_a\_aa^]`aaa\_ab`\_a\_Wa\_\_`aaa¥a  
@HWI-EAS443:3:47:564:1420#0/1  
TGAAGAATCCCACCCAGGAATATTTGAGAATTCATGCCTT  
+HWI-EAS443:3:47:564:1420#0/1  
]ba\_[ba`b^X`aaa\_]`^a\_a^a`\_a`\_]\_aXX`\_aXZ]\_  
@HWI-EAS443:3:47:695:546#0/1  
GAGCCATCTGGCCGTTGCAGTCCAAGTCATTGTTTAT  
+HWI-EAS443:3:47:695:546#0/1  
aabaaaa]abaa`^^`aa\_\_`\_^\_\_\_^a`Y`\_a\_a]\_a^`  
@HWI-EAS443:3:47:698:408#0/1  
ATTGATGCCAGGGTCGACTTCGAGTCTGGACGGATCAAGA  
+HWI-EAS443:3:47:698:408#0/1  
aaa]aa^aYRYa^\_]P^\_^]\_\_`U]\_aaXYaaJ^M]^WV  
@HWI-EAS443:3:47:720:822#0/1  
CTCCCATTTTAAGCAGACTTCAGGAATGTGAAGATTCCGT  
+HWI-EAS443:3:47:720:822#0/1  
Z]^`bbb`\_`a`^^`aaa^a\_¥¥\_ab`^a¥`a^aba`\_\_`]  
@HWI-EAS443:3:47:723:298#0/1  
AGGCTATGGCTTTCCTTGAAGAATCCCACCCAGGAATATT  
+HWI-EAS443:3:47:723:298#0/1  
aaaaab\_aaaaaa`aa`a`\_`\_]a^]\_]`YaaW^\_\_¥`  
@HWI-EAS443:3:47:725:1433#0/1  
ATTTCTTTTGTCCAAGATTTCAGTATCGAGACTCCCAAGAC  
+HWI-EAS443:3:47:725:1433#0/1  
¥abbbbbbbbab^ba`aabaabaaaa\_Z\_a]`^a\_a`\_aS  
@HWI-EAS443:3:47:72:1505#0/1  
CTTGACCTGCAACGGCCAGATGGCTCTTCAATTGTTCA  
+HWI-EAS443:3:47:72:1505#0/1  
a`^^`a`^\_WZ\_]\_^`a`^`¥[\_ZXEWQZ`\_T]^SYTYX¥`  
@HWI-EAS443:3:47:730:1969#0/1  
CCATGGTGTCTAGGGCCCGATTGATGCCAGGGTCGACTT  
+HWI-EAS443:3:47:730:1969#0/1  
T[\_`\_WYO\_QYT¥b¥MWaTbbaZa]T¥b]WTYW^HRaaa`Q  
@HWI-EAS443:3:47:732:422#0/1  
CAATTGAAGAGCCATCTGGCCGTTGCAGTCCAAGGTCA  
+HWI-EAS443:3:47:732:422#0/1  
ab`bbbbbb`^^`ab`bbaaa\_b`aba]aa`\_\_aVa\_Y\_]\_  
@HWI-EAS443:3:47:749:926#0/1  
ACGGATCAAGAAAGAAGAGTTCTCTGAGATCATGAAGATC  
+HWI-EAS443:3:47:749:926#0/1  
a]]^[[¥WVb\_a`^[\_`¥XOXJ]OV\_]U[TKX]a^MUQ]G  
@HWI-EAS443:3:47:769:940#0/1  
TCCGACTCTACTTTTCCTAAAAATTCAGCGCAAAATGCC  
+HWI-EAS443:3:47:769:940#0/1  
aaaa\_\_`\_a\_\_a`aaa`aaaa`Uaa`Y\_a`^^`^^Va\_\_Z

@HWI-EAS443:3:47:770:532#0/1  
GGATTGAGGGATTACAAAGTCTTCCCCGATAATCATCAT  
+HWI-EAS443:3:47:770:532#0/1  
]X\_\_^bbabbaaaaa¥a\_aa\_\_a\_\_a`]a]WV\_\_¥\_a[^\_  
@HWI-EAS443:3:47:77:186#0/1  
GTGGTAATGCCAGCCCATGGTCCAGCCAAAAGCATGGAAT  
+HWI-EAS443:3:47:77:186#0/1  
a\_a¥L¥a¥]`\_^¥¥]^YV]UPZWZNTXX\_UVSRVSS[VWU  
@HWI-EAS443:3:47:79:518#0/1  
GATTCCATTACATCCTTTAAGAAATCTATTAGCCTTCCTG  
+HWI-EAS443:3:47:79:518#0/1  
abb`aaaab`aaa`aaaaaaa`a\_a[a`a`a`a[¥`a\_]`\_  
@HWI-EAS443:3:47:863:1130#0/1  
GGACCATGGGCTGGCATTACCACAGCATTGTTTACAGAAT  
+HWI-EAS443:3:47:863:1130#0/1  
aba`aa`\_a`aaaaaaa\_\_a^\_a`^`^`^`\_aa^^\_a`^`  
@HWI-EAS443:3:47:863:701#0/1  
CAAAGAGGAAATAGAGATAACAACCCACTTTCAAAGAAAA  
+HWI-EAS443:3:47:863:701#0/1  
a`\_¥ba`\_babababb`\_^aa^]aaaaa^`^¥b`a`\_  
@HWI-EAS443:3:47:902:578#0/1  
ATGATAAACAATGACCTTGGACCTGCAACGGCCAGATGG  
+HWI-EAS443:3:47:902:578#0/1  
abbbb\_a^abbabb]aa`aaa`^baa^`aa`\_`\_baa]X  
@HWI-EAS443:3:47:914:575#0/1  
GACGGATCAAGAAAGAAGAGTTCTCTGAGATCATGAAGAT  
+HWI-EAS443:3:47:914:575#0/1  
a`a]^V`\_aab`^`^`^`]Ya\_Va]aaaa\_a^\_X\_\_\_\_¥^]^  
@HWI-EAS443:3:47:930:312#0/1  
TGGACCACTACCTGAGGATAATGAACCAAGTGGGTATGCA  
+HWI-EAS443:3:47:930:312#0/1  
[bab`ba`ab]T¥aV]¥`aa`]YY`\_\_a^bUaa`X``[HU  
@HWI-EAS443:3:47:942:1077#0/1  
GGGTGGGATTCTTCAAGGAAAGCCATAGCCTCTAGAACAC  
+HWI-EAS443:3:47:942:1077#0/1  
abaUba^X]^ba[] [a^Z¥a`\_`\_`\_`\_¥`\_V\_\_^Z[\_^W  
@HWI-EAS443:3:47:969:848#0/1  
CAAACACAGAGACTGGTGCACCCAGCTCAACCCGATTGA  
+HWI-EAS443:3:47:969:848#0/1  
abbbbaababbaaaaa^aaa\_\_\_[\_a`\_`\_aa¥`\_a`\_`a`\_  
@HWI-EAS443:3:47:982:195#0/1  
GTTGAGAATAGAACGATTCTTCTTGGGAATCCAGGAATGT  
+HWI-EAS443:3:47:982:195#0/1  
a`]Y¥^LP¥ZWXT[]TOXSXXURXTVWSUTQVWZWPVXTX  
@HWI-EAS443:3:47:988:1399#0/1  
TGAAGAATCCCACCCAGGAATATTTGAGAATTCATGCCTT  
+HWI-EAS443:3:47:988:1399#0/1  
`a`\_`[]F][Y`V`\_¥]¥Pa\_¥^a`\_¥¥a`[[\_a\_aY^`Z  
@HWI-EAS443:3:48:1002:971#0/1  
GGTGTCTAGGGCCCGATTGATGCCAGGGTCTGACTTCGAG

+HWI-EAS443:3:48:1002:971#0/1  
a^Sa`aaa`a]¥]¥aaZaaa`\_`^^^\_aW^`¥^\_YU^¥a  
@HWI-EAS443:3:48:1028:668#0/1  
CCCACCCAGGAATATTTGAGAATTCATGCCTTGAAACAAT  
+HWI-EAS443:3:48:1028:668#0/1  
a^``aba]Z\_^Uaaaa\_`a``baa`\_aa\_ab`\_]`a\_bY[  
@HWI-EAS443:3:48:1054:1259#0/1  
GGTGTCTAGGGCCCGGATTGATGCCAGGGTCGACTTCGAG  
+HWI-EAS443:3:48:1054:1259#0/1  
`¥P\_UVXXZ^a\_P`a^NZXHMxXG\_QNXUSTYUPXBBBB  
@HWI-EAS443:3:48:1070:1178#0/1  
TCTCTGTGTTTGTCTCCACTTTCCCTTTTCTGAGTATTG  
+HWI-EAS443:3:48:1070:1178#0/1  
`]¥^aa^]R]b]XXY[XXQRZ^aX^\_X`\_^\_P[WP^KOY\_W  
@HWI-EAS443:3:48:1114:876#0/1  
GAACAATTGAAGAGCCATCTGGGCCGTTGCAGGTCCAAGG  
+HWI-EAS443:3:48:1114:876#0/1  
`ba\_abab\_bbbbb^aaa`aaa``abS`aa¥aaX`\_WYb]  
@HWI-EAS443:3:48:1143:1589#0/1  
AACTTGCAGTCTGTAGAATCTGTCCACTCCTGCTTGTA  
+HWI-EAS443:3:48:1143:1589#0/1  
a^¥¥V^`a[a[a[¥`^`\_a][Va\_] [U\_X]Y][QV[\_ [TV  
@HWI-EAS443:3:48:1184:1081#0/1  
CTCCCATTTTAAGCAGACTTCAGGAATGTGAAGATTCCGT  
+HWI-EAS443:3:48:1184:1081#0/1  
abbba`bbbbbaabbabbbabbbYbbbabaabbbaa`ba  
@HWI-EAS443:3:48:1192:129#0/1  
CATATCCATGCTTTTGGCTGGACCATGGGCTGGCATTAC  
+HWI-EAS443:3:48:1192:129#0/1  
abbbbbbb`bba`bbbbbaab]aZ]^aaa`ZaaaUXb\_WR  
@HWI-EAS443:3:48:119:1811#0/1  
ATTGGAGCCCATCCCACCAGTATATTGTCTTGGTGTATTT  
+HWI-EAS443:3:48:119:1811#0/1  
]\_bba\_\_`a^bb`\_aaaa^¥`abab][[aaa¥a^a[]a``  
@HWI-EAS443:3:48:11:618#0/1  
TAAACAATGACCTTGGACCTGCAACGGCCAGATGGCTCT  
+HWI-EAS443:3:48:11:618#0/1  
aabbab`\_`aaaba`\_aaaaaaaa\_\_aa[^\_^\_ZZ¥S^Z[\_  
@HWI-EAS443:3:48:1289:730#0/1  
GTTCTGTTTACTGTGTCCATGGTGTATCCTGTTCTGTTTC  
+HWI-EAS443:3:48:1289:730#0/1  
a]`\_`aUa`^`^`aY\_X\_]\_\_\_\_]U^X^^^¥^]Y]YX]YUYU  
@HWI-EAS443:3:48:1290:224#0/1  
GTCCTCCATCTGATACTAATAGCCCTACCTTTGATTGGGT  
+HWI-EAS443:3:48:1290:224#0/1  
`Ybab[MbabaaRS\_`b¥W¥`\_]`T`W`\_`\_]Pa`\_^U¥  
@HWI-EAS443:3:48:1292:490#0/1  
TCCTCCATCTGATACTAATAGCCCTACCTTTGATTGGGT  
+HWI-EAS443:3:48:1292:490#0/1  
aa^\_\_Y`aW^`^bZ`baa^aa``\_a\_\_\_aaab\_¥Z\_]P[Z

@HWI-EAS443:3:48:1307:1054#0/1  
GGACGACAAACACAGAGACTGGTGCACCCCAGCTCAACCC  
+HWI-EAS443:3:48:1307:1054#0/1  
\_WZ`][WZRTWQWZ]Z^`^RZS\_ZPY[ZXYSYSZGSU  
@HWI-EAS443:3:48:1337:122#0/1  
CATGGACACAGTAAACAGAACACACCAATACTCAGAAAAG  
+HWI-EAS443:3:48:1337:122#0/1  
aaab`a`aba`][aaaba`aaa`[a`a]S`\_aZ\_\_^a  
@HWI-EAS443:3:48:1339:593#0/1  
CTAAAGACTTCTATGGTGTGGCCAATGCAGTTGCTGCCG  
+HWI-EAS443:3:48:1339:593#0/1  
Z^W`\_T^XaZ]`\_][Z]\_`TYY\_V]VT\_Y[\_XZ^DZ`  
@HWI-EAS443:3:48:1349:164#0/1  
GGCTAATTTTAGCATGGAGCTACCCAGCTTTGGAGTGTCT  
+HWI-EAS443:3:48:1349:164#0/1  
aaaaaababaa`aaa\_a`\_\_\_^^^a[aaaa]aYa[W\_  
@HWI-EAS443:3:48:1353:512#0/1  
CAGGAACAGGATACCCATGGACACAGTAAACAGAACACA  
+HWI-EAS443:3:48:1353:512#0/1  
`bbbabbbbabbbaaaabbaa`aaa`aba[`b`aaa0a  
@HWI-EAS443:3:48:1360:949#0/1  
ATGGTGTCTAGGGCCCGATTGATGCCAGGGTCGACTTCG  
+HWI-EAS443:3:48:1360:949#0/1  
\_[QWN\_^TX\_]\_T`\_ZW\_]^Y]YZHYZW]XIGYZH^XJU  
@HWI-EAS443:3:48:1364:665#0/1  
ATTTGTGGCTAATTTTAGCATGGAGCTACCCAGCTTTGGA  
+HWI-EAS443:3:48:1364:665#0/1  
abbbaab\_abaababaZa`aaVaZ`aa]N\_a[[^`aaZYV  
@HWI-EAS443:3:48:1386:974#0/1  
CCTCCATCTGATACTAATAGCCCTACCTTTGATTGGGTTT  
+HWI-EAS443:3:48:1386:974#0/1  
aaa\_abbbba`bbaaaa`aaaZ`\_a^aabZ^`aaa`a  
@HWI-EAS443:3:48:1444:1295#0/1  
TTTTGTTTGAGAACATTATGGGTGCCATGCTCAGGATGTT  
+HWI-EAS443:3:48:1444:1295#0/1  
aa`aa\_aaaaba\_\_aaaaa\_ZZ`^]`\_]WXW`[WY]^  
@HWI-EAS443:3:48:1508:629#0/1  
GTCAGTGCTCTTATTAGATAGCCTCTCTTATTCAGTCTTT  
+HWI-EAS443:3:48:1508:629#0/1  
aW\_]aP^Z[\_a`a\_Z]aY[VTUX`Y`S[ZVZ\_XUZNT]^  
@HWI-EAS443:3:48:1558:316#0/1  
GTCCTCATCTGATACTAATAGCCCTACCTTTGATTGGGT  
+HWI-EAS443:3:48:1558:316#0/1  
aba`ab`bbaba\_aa`baaaaaa[^`\_\_aaa]\_\_`\_a`V  
@HWI-EAS443:3:48:1683:1388#0/1  
CAATTGAAGAGCCATCTGGGCCGTTGCAGGTCCAAGGTCA  
+HWI-EAS443:3:48:1683:1388#0/1  
`bbbbaaaaaaba\_a`aaaU`aa\_aZa]aZaXa`X\_^  
@HWI-EAS443:3:48:1720:1606#0/1  
TGAACAAAGAGGAAATAGAGATAACAACCCACTTCAAAG

+HWI-EAS443:3:48:1720:1606#0/1  
^`\_b`\_abaaba\_aaaaaaaaaaaaaa\_]aa\_aa`\_`\_`\_`  
@HWI-EAS443:3:48:1726:250#0/1  
AAAGAATGAAGATTCGAACACAAATACCAGCAGAAATGCT  
+HWI-EAS443:3:48:1726:250#0/1  
aaaa]aaa`a`\_a`\_aa`]`^a\_\_`a\_Y`a\_\_`^^[^^S[  
@HWI-EAS443:3:48:173:833#0/1  
TTTTGTTTGAGAACATTATGGGTGCCATGCTCAGGATGTT  
+HWI-EAS443:3:48:173:833#0/1  
aabbaab]babaa^aaaaaaaa¥U^]]][a]¥NYa\_^¥VY`  
@HWI-EAS443:3:48:1762:1421#0/1  
ATGGCACCCATAATGTTCTCAAACAAAATGGCAAGACTAG  
+HWI-EAS443:3:48:1762:1421#0/1  
aa``aaaaaaaa]`a[``a`\_^YU]`\_`^`\_`\_]`[^TLZ^a  
@HWI-EAS443:3:48:1775:191#0/1  
GGCTCTTCAATTGTTTCATCAAAGACTACAGATACACATAT  
+HWI-EAS443:3:48:1775:191#0/1  
aaaY¥a\_VUR]`XL[RSYMS¥U`RTW[RW`UXXXWP[]]Z  
@HWI-EAS443:3:48:223:444#0/1  
GGGAGCTAATGGATGATGATTATCGGGGAAGACTTTGTAA  
+HWI-EAS443:3:48:223:444#0/1  
abaa`aaaabbbaabaabaaba`aaaa`````Za\_a`\_a\_  
@HWI-EAS443:3:48:235:825#0/1  
CTCCATCTGATACTAATAGCCCTACCTTTGATTGGGTTTG  
+HWI-EAS443:3:48:235:825#0/1  
aaaaabab`Lb``baaabZL[bYTaaa]^S[a]aaX`ba  
@HWI-EAS443:3:48:246:1315#0/1  
CAGGTAGTGGTCCATCAATCGGGTTGAGCTGGGGTGCACC  
+HWI-EAS443:3:48:246:1315#0/1  
`a`\_]`ba^T^¥ZW`[`b`a`a\_]aa^aa^aYa`IZS`]V  
@HWI-EAS443:3:48:26:103#0/1  
TTTCATTGCCCCCTACTGGGAGCCCAGACTGTTCAAGCTT  
+HWI-EAS443:3:48:26:103#0/1  
aaaaaaaa`\_`\_`^^`\_`^`[^[[W]`WU^[Z\_\_^ZZW[W  
@HWI-EAS443:3:48:32:1289#0/1  
CACCAGTCTCTGTGTTTGTCTCCACTTTCCCTTTTCTGA  
+HWI-EAS443:3:48:32:1289#0/1  
aaaa\_^\_aaabb`a`bba`]\_YaZPR^a`XX[\_``^Q[GO  
@HWI-EAS443:3:48:38:1711#0/1  
GGTGTCTAGGGCCCGGATTGATGCCAGGGTCTGACTTCGAG  
+HWI-EAS443:3:48:38:1711#0/1  
a`¥aU[T\_aV¥`P¥`\_^]Y]X\_]¥¥]¥^SU¥UVS\_^UYTZ  
@HWI-EAS443:3:48:39:347#0/1  
CTGTCCACTCCTGCTTGTATTCCCTCATGGTTTGGTGCAT  
+HWI-EAS443:3:48:39:347#0/1  
aaa\_[aaa\_a^a\_ababaaa^XX`aXa```]a`aa\_a\_\_^  
@HWI-EAS443:3:48:41:1315#0/1  
CTTGAGGATGAACAGATGTACCAGAAGTGCTGCAATCTAT  
+HWI-EAS443:3:48:41:1315#0/1  
abbbbaaaabbbbaa`aaa`\_aab`\_`ab\_babb`bbbaaba

@HWI-EAS443:3:48:444:102#0/1  
CTTTCCTTGAAGAATCCCACCCAGGAATATTTGAGAATTC  
+HWI-EAS443:3:48:444:102#0/1  
ab\_SVQ¥X`[abb^]b]b\_a`^\_aa¥[aaaaaa\_aSaaa^  
@HWI-EAS443:3:48:445:671#0/1  
TGCATTCACTATGAGAGCAAAATCGTCGGATGATTGGAGC  
+HWI-EAS443:3:48:445:671#0/1  
ab\_P]aaUbb\_a`P`Z^^`¥Ra`X`¥Y\_¥`^`S`a]¥T¥Z  
@HWI-EAS443:3:48:45:823#0/1  
TTTTGTTTGAACAATTATGGGTGCCATGCTCAGGATGTT  
+HWI-EAS443:3:48:45:823#0/1  
aaaaa\_aaa`aaa`aaa`aa\_\_]^Z\_^[]]¥¥\_YZZZ^  
@HWI-EAS443:3:48:461:970#0/1  
GTGGGATTCTTCAAGGAAAGCCATAGCCTCTAGAACACAG  
+HWI-EAS443:3:48:461:970#0/1  
a^ba`Q[[]a[\_Z]aa`¥X\_\_N`¥`a]Ua]^PZUW[\_X]  
@HWI-EAS443:3:48:498:748#0/1  
GATCCGTCCAGACTCGAAGTCGACCCTGGCATCAATCCGG  
+HWI-EAS443:3:48:498:748#0/1  
`aa\_^¥]aa`a`^a\_^a^P¥]^`^`X``X¥¥ZZ]PX[X]  
@HWI-EAS443:3:48:506:925#0/1  
TATTAGTATCAGATGGAGGACCAAATTATACAATATACG  
+HWI-EAS443:3:48:506:925#0/1  
ababaaaaaa]baaaaaaa\_\_aa`Z[a]]]a\_\_\_\_```a\_a  
@HWI-EAS443:3:48:507:29#0/1  
ATCCCAAGAGGAATCGTTCTATTCTCAACACAAGCCAAA  
+HWI-EAS443:3:48:507:29#0/1  
a`^`^]a`b\_bbaa\_aba¥W`a\_^aaa```\_^]aXR¥W^  
@HWI-EAS443:3:48:51:1233#0/1  
AAAAATTCCAGCGCAAATGCCATAAGCACCATTCCTCCT  
+HWI-EAS443:3:48:51:1233#0/1  
`aaa¥a`\_`\_`\_¥\_aXU[a\_^aa`]^Y`WU\_]\_\_YS¥X`  
@HWI-EAS443:3:48:526:1087#0/1  
GTTTATCATGTTGTTCTTTATCACTGTTACTCCAATACTC  
+HWI-EAS443:3:48:526:1087#0/1  
a[¥S]W[```SOU[]VZ`a\_]RY[Q\_QW^`¥TQ[YPQOVO  
@HWI-EAS443:3:48:583:1019#0/1  
GGTTGTTATCTCTATTTCTCTTTGTTTCATTGATTCCATT  
+HWI-EAS443:3:48:583:1019#0/1  
aa\_aa\_^J[X`\_a`a`\_`\_]M]aV][^¥^\_]XZ[^YPZ^O  
@HWI-EAS443:3:48:590:975#0/1  
CAATTGAAGAGCCATCTGGGCCGTTGCAGGTCCAAGGTCA  
+HWI-EAS443:3:48:590:975#0/1  
a`abbbba`aaabbaaaabaaa`aa``ba]a^a`aa]\_\_  
@HWI-EAS443:3:48:62:1413#0/1  
GTTTCAAGGCATGAATTCTCAAATATTCCTGGGTGGGATT  
+HWI-EAS443:3:48:62:1413#0/1  
a^``\_\_a`aaa\_\_aa\_a\_a\_]`\_a^[Y``a^S`\_\_Z^^  
@HWI-EAS443:3:48:632:1229#0/1  
CCCAGGAATATTTGAGAATTCATGCCTTGAACAATGGAA

+HWI-EAS443:3:48:632:1229#0/1  
`^`bb`^¥a`bab\_a\_]aaa`b^`bab`Z`a`^`a`a`a  
@HWI-EAS443:3:48:635:209#0/1  
GGTCTTGGGAGTCTCGATACTGAATCTTGGACAAAAGAAA  
+HWI-EAS443:3:48:635:209#0/1  
a^U^aaaa`a^`[a^\_ZT]`^`\_[^``aZWZ^^^`¥\_`^  
@HWI-EAS443:3:48:653:2043#0/1  
GCCTCTCTTATTTCAGTCTTTGTTTTTCTTCCCTATTGTT  
+HWI-EAS443:3:48:653:2043#0/1  
aZR\_`¥a`^`aRNZVV¥a[]`[a``¥[TYQST¥^`\_`X^  
@HWI-EAS443:3:48:657:64#0/1  
GAGAAAGATGATGACTAATTCACAAGACACAGAGATTCT  
+HWI-EAS443:3:48:657:64#0/1  
a\_a`ab\_ab`aa\_\_`a\_aa^]`\_\_`\_Z^^`a^a]`\_\_\_Z`  
@HWI-EAS443:3:48:659:174#0/1  
GTTGATCCCACTAACTTGCAGGTCCTGTAGAATCTGTCC  
+HWI-EAS443:3:48:659:174#0/1  
a`aa\_aa```\_`a^`\_\_\_\_`^`\_`U]^`\_`^]^`\_`^]`]]^XXX  
@HWI-EAS443:3:48:668:506#0/1  
GGAGGCCATGGTGTCTAGGGCCCGATTGATGCCAGGGTC  
+HWI-EAS443:3:48:668:506#0/1  
a`\_a^`aa`aa0]```\_````¥Z`\_```Z`a`¥`¥¥]¥¥`SS  
@HWI-EAS443:3:48:678:619#0/1  
ACTTCCCTTTTCTGAGTATTGGTGTGTTCTGTTTACTGT  
+HWI-EAS443:3:48:678:619#0/1  
\_aababa`abbbaa\_¥b¥^baa\_]b\_b`b`aaaaaa\_aa]  
@HWI-EAS443:3:48:67:353#0/1  
GAAACATCCTGAGCATGGCACCATAATGTTCTCAAACAA  
+HWI-EAS443:3:48:67:353#0/1  
aaababaaaaaaaaab`aa`aaa`aaaa^`]`\_\_`\_a`\_`a  
@HWI-EAS443:3:48:710:1206#0/1  
CTCCAATCATCCGACGATTTTGCTCTCATAGTGAATGCAC  
+HWI-EAS443:3:48:710:1206#0/1  
`ZTT^b\_H\_a`SZQW]T\_\_WS[IZ^Y[Z[RWOWU`STLUJ  
@HWI-EAS443:3:48:738:488#0/1  
AAAAATTCCAGCGAAAATGCCATAAGCACCACATTCCCT  
+HWI-EAS443:3:48:738:488#0/1  
aaaa¥bb`aab]a\_a``]a\_a`aa`\_`a`a`\_\_`^aa\_[W]\_`  
@HWI-EAS443:3:48:747:773#0/1  
GACGGATCAAGAAAGAAGAGTTCTCTGAGATCATGAAGAT  
+HWI-EAS443:3:48:747:773#0/1  
aa[] []T\_a`bW\_a`\_`a\_aU`¥a\_a`^a`\_Z^a```]`\_\_`  
@HWI-EAS443:3:48:747:996#0/1  
GGGTTGTTATCTCTATTTCTCTTTGTTTCATTGATTCCAT  
+HWI-EAS443:3:48:747:996#0/1  
abb`\_`^a`\_`aaaa^aaa`]a\_aaaa\_a`aa`\_`aa`\_¥¥]`  
@HWI-EAS443:3:48:751:1766#0/1  
AATGGAATCAATGAACAAAGAGGAAATAGAGATAACAACC  
+HWI-EAS443:3:48:751:1766#0/1  
a]b`aaaababbbaaaabaaa`ba\_aaaaaa`aaaa\_aa`^



@HWI-EAS443:3:48:767:1613#0/1  
CAATGCAGTTGCTGCCGTTGATTTCTGTTTAATGTCCAA  
+HWI-EAS443:3:48:767:1613#0/1  
abaaa`ababaa` `a\_bbSaYX`aaJ`Y\_a\_[a\_YVP¥]^  
@HWI-EAS443:3:48:779:990#0/1  
CAGCTGACATGAGTATTGGAGTAACAGTGATAAAGAACAA  
+HWI-EAS443:3:48:779:990#0/1  
Y¥`^b^WZa\_\_\_\_b\_abb^¥RYa^XT\_bXOZaa^^\_] []^Q  
@HWI-EAS443:3:48:795:1034#0/1  
ACCATGAGGGAATACAAGCAGGAGTGGACAGATTCTACAG  
+HWI-EAS443:3:48:795:1034#0/1  
aa]aabaabbabaabbbaaaaaaaZbaa\_aa^¥a`\_`Q\_\_  
@HWI-EAS443:3:48:795:901#0/1  
AGACAATATACTGGTGGGATGGGCTCCAATCATCCGACGA  
+HWI-EAS443:3:48:795:901#0/1  
]a¥` ``aaa`\_^ZZKabb` `V]ZT^Q]]a`X`aXSU[P¥¥  
@HWI-EAS443:3:48:856:1743#0/1  
GGTTGTTATCTCTATTTCTCTTTGTTTCATTGATTCCATT  
+HWI-EAS443:3:48:856:1743#0/1  
^`^`]SVZ\_Q^S]VSXQMV¥R]Xa¥`a]PW`VT¥aXUWa\_  
@HWI-EAS443:3:48:87:920#0/1  
CAGTAGGGGCAATGAAAAGAAGCCAAACTGGCAAATGT  
+HWI-EAS443:3:48:87:920#0/1  
aabaa`aabbbbbbabbabb`^abbbaabaaaaab`  
@HWI-EAS443:3:48:882:914#0/1  
AAAGAAATCTCTGTGTCTTGTGAATTAGTCATCATCTTTC  
+HWI-EAS443:3:48:882:914#0/1  
`\_Yb`\_[Y^\_S\_aa`¥VX[PQ^Z]URNWNRN\_WY^S[]^R  
@HWI-EAS443:3:48:890:78#0/1  
ATTCGAGAAATTTTTCCCTAGCAGTTCATATAGGAGACCG  
+HWI-EAS443:3:48:890:78#0/1  
abbaabba`Zabbbb\_\_\_\_baa^^a\_a\_\_aaa`aa\_a\_]Za  
@HWI-EAS443:3:48:911:1478#0/1  
GTTTGAGAACATTATGGGTGCCATGCTCAGGATGTTTCTG  
+HWI-EAS443:3:48:911:1478#0/1  
a]a`Y]a` `aa`a\_aaa` `XV]^\_]X]\_\_\_\_VV`\_]\_^Y^N  
@HWI-EAS443:3:48:956:55#0/1  
GCCCCCTACTGGGAGCCAGACTGTTCAAGCTTTTCGCAA  
+HWI-EAS443:3:48:956:55#0/1  
aab\_a`babbbbbb[b`ba`ba\_bb`b`a`a`a`ba^a\_\_`  
@HWI-EAS443:3:48:963:1262#0/1  
AATCAACCCGAGTGGTTCAGAAACATCCTGAGCATGGCAC  
+HWI-EAS443:3:48:963:1262#0/1  
abaaaaaa]a^\_^aa`a`\_XW\_]\_]\_X\_S[^[[^^]^XV  
@HWI-EAS443:3:48:963:731#0/1  
GGCCCGGATTGATGCCAGGGTCGACTTCGAGTCTGGACGG  
+HWI-EAS443:3:48:963:731#0/1  
a\_baaab`bb`bbbbabaab`abaabaa`aa\_`aba\_`ab  
@HWI-EAS443:3:48:991:1152#0/1  
GATTGATGCCAGGGTCGACTTCGAGTCTGGACGGATCAAG

+HWI-EAS443:3:48:991:1152#0/1  
a`aaaa`^`Z\_a`[a``\_\_`^`¥a`\_\_`^XZ\_aUUY¥V¥  
@HWI-EAS443:3:49:1061:1215#0/1  
GTGCCATGCTCAGGATGTTTCTGAACCACTCGGGTTGATT  
+HWI-EAS443:3:49:1061:1215#0/1  
a`ba`bbbbbaaba[a^ab`\_b^^`QX\_^a``a`\_a^aa  
@HWI-EAS443:3:49:1065:1187#0/1  
GACTGGTGCACCCCAGCTCAACCCGATTGATGGACCACTA  
+HWI-EAS443:3:49:1065:1187#0/1  
aaVT\_]¥[a``\_\_\_`\_\_`^]`^SSOQ\_¥\_[RJFMVW¥S¥V  
@HWI-EAS443:3:49:1067:919#0/1  
GGTTGTTATCTCTATTTCTCTTTGTTTCATTGATTCCATT  
+HWI-EAS443:3:49:1067:919#0/1  
abY¥`aa¥`XaaaV\_b]`]aP]a¥UZbX`a`aaaaU[\_\_\_a  
@HWI-EAS443:3:49:106:776#0/1  
CCTCCATCTGATACTAATAGCCCTACCTTTGATTGGGTTT  
+HWI-EAS443:3:49:106:776#0/1  
abab]babbbba`bbaa`^aaaaba\_abb]b`¥¥T]a\_  
@HWI-EAS443:3:49:1074:239#0/1  
CAAACCATGAGGAATACAAGCAGGAGTGGACAGATTCTA  
+HWI-EAS443:3:49:1074:239#0/1  
`ab`bbbbbbaabbbbaabbbabb]babaab`a\_]aba`  
@HWI-EAS443:3:49:1148:456#0/1  
ATTTTGTGGAGAACATTATGGGTGCCATGCTCAGGATGT  
+HWI-EAS443:3:49:1148:456#0/1  
abbbbabbaabaabbbaba`a`a`\_`\_`a\_a`aaa^\_a\_  
@HWI-EAS443:3:49:1187:1247#0/1  
CCCGGATTGATGCCAGGGTCGACTTCGAGTCTGGACGGAT  
+HWI-EAS443:3:49:1187:1247#0/1  
aaW^\_NV]XH[]XZ^X\_U]XNZR¥\_URV^QULZ¥VHWZ]`  
@HWI-EAS443:3:49:1205:322#0/1  
GAGAGAGGCAAGTTAAAAAGAAGGGCTATCGCAACACCTG  
+HWI-EAS443:3:49:1205:322#0/1  
abbababbaaab`baaaaaaaaa`¥aa]^`\_a`^a^Z\_a  
@HWI-EAS443:3:49:1205:574#0/1  
CCTCTCTCTGCATCTTTGGTCATCGTATTTAATGTCAGTG  
+HWI-EAS443:3:49:1205:574#0/1  
Xbaabba``baaab`bbbb`]\_babaabbb\_b\_XU`]`¥  
@HWI-EAS443:3:49:1225:97#0/1  
ATGGGCTCCAATCATCCGACGATTTTGCTCATAGTGAA  
+HWI-EAS443:3:49:1225:97#0/1  
aba`aabaabbbabbabbaab`babab]aaa\_\_aaa[a\_a  
@HWI-EAS443:3:49:1236:678#0/1  
TGGTCTCCATCTGATACTAATAGCCCTACCTTTGATTGG  
+HWI-EAS443:3:49:1236:678#0/1  
`ba`J\_P]ab``\_Y]^aYaaaa]aS`¥OZW¥V\_Z¥¥R\_[Y  
@HWI-EAS443:3:49:1295:1806#0/1  
ATCAAACCAATCAAAGGTAGGGCTATTAGTATCAGATGG  
+HWI-EAS443:3:49:1295:1806#0/1  
`aaa`]GT`V``HTaaa¥Z^`SWO`a`¥¥[Va`¥Z]]][[

@HWI-EAS443:3:49:1313:1010#0/1  
GTGAAAGAAATCTCTGTGTCTTGTGAATTAGTCATCATCT  
+HWI-EAS443:3:49:1313:1010#0/1  
`[babbababbabababb`aab\_\_^U\_aaW]]\_`a`aa^b  
@HWI-EAS443:3:49:131:781#0/1  
GAGATTTCTTTCACAATCACTGGGGACAACACTAAGTGGA  
+HWI-EAS443:3:49:131:781#0/1  
ab`Y`ababb`a\_a^b`a`^ba`aYa`a\_baaa]\_Gab\_  
@HWI-EAS443:3:49:1361:1558#0/1  
GACAAACACAGAGACTGGTGCACCCAGCTCAACCCGATT  
+HWI-EAS443:3:49:1361:1558#0/1  
aaYaab¥]aa\_\_a^^a]`UY^\_\_X]``]^^¥^^USW^W¥¥  
@HWI-EAS443:3:49:1389:478#0/1  
CTTGGGAGTCTCGATACTGAATCTTGGACAAAAGAAATAC  
+HWI-EAS443:3:49:1389:478#0/1  
`abbbbaabbabbbbbb\_ba`baabbabb`babab\_bbb^H  
@HWI-EAS443:3:49:1407:1091#0/1  
ACCAATACTCAGAAAAGGGAAAGTGGACGACAAACACAGA  
+HWI-EAS443:3:49:1407:1091#0/1  
a[\_Saa`a\_H`aa\_\_\_\_a\_¥\_Ta¥^a\_\_a\_¥aa\_W^\_\_`^  
@HWI-EAS443:3:49:1418:482#0/1  
CTCTTCTTTCTTGATCCGTCAGACTCGAAGTCGACCCTG  
+HWI-EAS443:3:49:1418:482#0/1  
ab`bbbbbbabaabbbaaa\_]\_ba`YZaaaVX]`[¥Za[  
@HWI-EAS443:3:49:1433:1449#0/1  
AATCAACCGCAGCAACTGCATTGGCCAACACCATAGAAG  
+HWI-EAS443:3:49:1433:1449#0/1  
aabaaa\_aa`aaa]\_aWZ\_\_`\_\_\_\_\_]^[Q\_]^[Y]^W^Z`  
@HWI-EAS443:3:49:1462:373#0/1  
GTCCATCAATCGGGTTGAGCTGGGGTGCACCACTCTCTGT  
+HWI-EAS443:3:49:1462:373#0/1  
aa`aba]`aa`ba\_]aaaa`\_¥WZwa^a¥X^a¥¥\_W`T  
@HWI-EAS443:3:49:1492:1454#0/1  
TTTCCTTGAAGAATCCCACCCAGGAATATTTGAGAATTCA  
+HWI-EAS443:3:49:1492:1454#0/1  
aaT\_ababbaaabba\_Vba\_]ba]Xa]aaaa`aaaaaG\_  
@HWI-EAS443:3:49:1504:401#0/1  
GGTGGGATGGGCTCCAATCATCCGACGATTTTGCTCTCAT  
+HWI-EAS443:3:49:1504:401#0/1  
`\_PU¥OU[a```ZQ0]QUN¥J[] [X^aZ[PZQ]WUKX^ZV  
@HWI-EAS443:3:49:1509:168#0/1  
AATTGAAGAGCCATCTGGGCCGTTGCAGGTCCAAGGTCAT  
+HWI-EAS443:3:49:1509:168#0/1  
a`aabbb\_aaaabaa\_aX`\_a¥^X\_]`S¥¥`R\_]W^Z`  
@HWI-EAS443:3:49:1509:476#0/1  
TGGGATGGGCTCCAATCATCCGACGATTTTGCTCTCATAG  
+HWI-EAS443:3:49:1509:476#0/1  
a\_^`R\_b¥L¥a\_a]Z^`aa]RP]R]]Q]a`S¥^`Z^^`\_  
@HWI-EAS443:3:49:1525:666#0/1  
CACCTATATGTGTATCTGTAGTCTTTGATGAACAATTGAA

+HWI-EAS443:3:49:1525:666#0/1  
a`a\_abbba`aaaa`aZ^b\_]`baaaabaY`aaa`aa  
@HWI-EAS443:3:49:153:869#0/1  
GGACGACAAACACAGAGACTGGTGCACCCAGCTCAACCC  
+HWI-EAS443:3:49:153:869#0/1  
aba`aaa`bbaaab`ba`a`^V`^aY^Y\_]`^]`^``\_YX  
@HWI-EAS443:3:49:1558:1272#0/1  
TGGACGGATCAAGAAAGAAGAGTTCTCTGAGATCATGAAG  
+HWI-EAS443:3:49:1558:1272#0/1  
aa\_¥b`]XW]`aa\_¥\_\_\_a^aW`Z\_¥^``^¥\_TYaa`¥a  
@HWI-EAS443:3:49:1562:1765#0/1  
AGGAAATAGAGATAACAACCCACTTTCAAAGAAAAAGGAG  
+HWI-EAS443:3:49:1562:1765#0/1  
Ya¥`[^bb`aUabbb`a\_]\_X^abba`aaY`\_a`\_aa\_b  
@HWI-EAS443:3:49:1564:329#0/1  
GAGAGAGCAAGTTAAAAAGAAGGGCTATCGCAACACCTG  
+HWI-EAS443:3:49:1564:329#0/1  
a`aY]\_aaaa`\_a`a``^^]¥¥^```[¥¥Y^]M]¥^\_]`  
@HWI-EAS443:3:49:1567:615#0/1  
CAGATACACATATAGGTGCCATAGGGGAGACACAAATT  
+HWI-EAS443:3:49:1567:615#0/1  
`baabbb\_abbbbb\_b\_bbbbaZ`aababa`aab`abab`  
@HWI-EAS443:3:49:1590:843#0/1  
AAAGAATGAAGATTCGAACACAAATACCAGCAGAAATGCT  
+HWI-EAS443:3:49:1590:843#0/1  
abaaaa`b`¥a\_aa^a^a^a\_\_`````U\_\_[\_W\_]^[Z[  
@HWI-EAS443:3:49:1627:639#0/1  
GAACTCTTCTTTCTTGATCCGTCAGACTCGAAGTCGACC  
+HWI-EAS443:3:49:1627:639#0/1  
T`T`^a¥VW\_b\_W`aa\_¥TbaZ[W]QX^aa[\_TZ]\_¥Z  
@HWI-EAS443:3:49:1647:1610#0/1  
GATGATTATCGGGGAAGACTTTGTAATCCCCTGAATCCCT  
+HWI-EAS443:3:49:1647:1610#0/1  
aX\_aaaaY`^^\_W[VOVU]Z¥T^[^WXU^]\_Z]XXWYW  
@HWI-EAS443:3:49:1687:1708#0/1  
GCCATGGTGTCTAGGGCCCGATTGATGCCAGGGTCGACT  
+HWI-EAS443:3:49:1687:1708#0/1  
`^^``\_`XQ`V¥[RT`Z¥V¥YT]ZX¥[^UT[U]¥RS^XPZ  
@HWI-EAS443:3:49:170:755#0/1  
CTGGACGGATCAAGAAAGAAGAGTTCTCTGAGATCATGAA  
+HWI-EAS443:3:49:170:755#0/1  
abbbbabbbaabbbbbbbbabbb^bababbbaba`abba  
@HWI-EAS443:3:49:1726:269#0/1  
ACAGTCTGGGCTCCCAGTAGGGGCAATGAAAAGAAGGCC  
+HWI-EAS443:3:49:1726:269#0/1  
aaa`abaaabaaa`\_\_^Vaa]`a``[``aW\_\_`\_Z[\_U^  
@HWI-EAS443:3:49:1731:846#0/1  
CTCCTAGCTAAAGTTTCAACAAAGTATACGAAACCTCTAA  
+HWI-EAS443:3:49:1731:846#0/1  
a```a`b`bbb`b¥bba```baab]bbaabaaa]]\_ab```

@HWI-EAS443:3:49:1735:1929#0/1  
AGATTTCTTTCACAATCACTGGGGACAACACTAAGTGGAA  
+HWI-EAS443:3:49:1735:1929#0/1  
¥Z¥\_aa`^a`^`aa`¥b[a`]^a``X^Xa\_¥]S^`\_]  
@HWI-EAS443:3:49:1755:814#0/1  
CTGTTTACTGTGTCCATGGTGTATCCTGTTCCCTGTTCCAT  
+HWI-EAS443:3:49:1755:814#0/1  
abbabbbbbbbbbbaabZ``[abab`bbabaabbabaaaa  
@HWI-EAS443:3:49:234:1964#0/1  
AGGGCTATTAGTATCAGATGGAGGACCAAACCTTATACAAT  
+HWI-EAS443:3:49:234:1964#0/1  
a\_`Z]\_b``a^ba`aaa`a`[a^a[\_`aa```a`a\_`^a  
@HWI-EAS443:3:49:254:384#0/1  
CAGGAACAGGATACACCATGGACACAGTAAACAGAACACA  
+HWI-EAS443:3:49:254:384#0/1  
abb`bbabbbbab`bababbba`baba\_a\_a\_aa`a\_b`b  
@HWI-EAS443:3:49:261:1169#0/1  
GGCAATGAAAAGAAGGCCAAACTGGCAAATGTTGTGAGAA  
+HWI-EAS443:3:49:261:1169#0/1  
`¥^^bb\_aaaaa`aaaa\_\_`]aa`\_^`aa^`dWaXaZZ  
@HWI-EAS443:3:49:267:1292#0/1  
GATGCAGAGAGAGGCAAGTTAAAAAGAAGGGCTATCGCAA  
+HWI-EAS443:3:49:267:1292#0/1  
aa\_a\_ab[b[Y\_a`\_`\_a\_````\_`\_`\_]`Z``YU`U^Y  
@HWI-EAS443:3:49:277:1992#0/1  
GGGAGCTAATGGATGATGATTATCGGGGAAGACTTTGTAA  
+HWI-EAS443:3:49:277:1992#0/1  
`\_[Z\_a\_JUab\_W^W¥\_a`aa]^QZ```]a`aRJ][Z¥L\_a  
@HWI-EAS443:3:49:278:1707#0/1  
TCCGACTCTACTTTTCTAAAAATCCAGCGCAAATGCC  
+HWI-EAS443:3:49:278:1707#0/1  
a`\_aaababaabbbbaa^bb`aa`aa`aaaa\_a`aaaaXT  
@HWI-EAS443:3:49:337:634#0/1  
AAAAATCCAGCGCAAATGCCATAAGCACCATTCCT  
+HWI-EAS443:3:49:337:634#0/1  
aaaaZabababaa\_a`a`aa`aaa`^Y[a^^^\_\_aZY¥^a  
@HWI-EAS443:3:49:406:265#0/1  
GATCCCCTAACTTGCAGGTCCTGTAGAATCTGTCCACT  
+HWI-EAS443:3:49:406:265#0/1  
¥[baa^[¥TabUN\_b`\_aZ¥VXZ]a\_Zaaaa`aYZVR`ZU  
@HWI-EAS443:3:49:444:993#0/1  
CCCGGATTGATGCCAGGGTCGACTTCGAGTCTGGACGGAT  
+HWI-EAS443:3:49:444:993#0/1  
aba`bbbb]ZZbaZVR`^H`aaa\_a`a]a`]a`b\_¥`a][  
@HWI-EAS443:3:49:458:1170#0/1  
GAACGATTCTCTTGGGAATCCAGGAATGTGTAGTTGCAA  
+HWI-EAS443:3:49:458:1170#0/1  
ab`[`ba\_aa`abbbbbaaa^a`aba\_abb\_a`ba\_`aYba  
@HWI-EAS443:3:49:464:677#0/1  
CAAAGTCTTCCCCGATAATCATCATCCATTAGCTCCCATT

+HWI-EAS443:3:49:464:677#0/1  
`baba`abbaaaaa`aa`a`aaaa\_aa\_aX\_`aaaa`  
@HWI-EAS443:3:49:545:205#0/1  
GAACAATTGAAGAGCCATCTGGGCCGTTGCAGGTCCAAGG  
+HWI-EAS443:3:49:545:205#0/1  
`baabaabbbbaab`]abaab`a\_`baaa\_aba^\_[\_`^a¥  
@HWI-EAS443:3:49:56:1258#0/1  
CACTAACTTGCAGGTCCTGTAGAATCTGTCCACTCCTGCT  
+HWI-EAS443:3:49:56:1258#0/1  
abbabaaa\_[bb`bbbabbab`abbaa`b\_ab\_b]abaab  
@HWI-EAS443:3:49:579:1540#0/1  
GACGGATCAAGAAAGAAGAGTTCTCTGAGATCATGAAGAT  
+HWI-EAS443:3:49:579:1540#0/1  
a\_[V\_`¥Z\_`aa]\_```]a\_W¥]``aa]a`a^a`^aaa`\_  
@HWI-EAS443:3:49:673:1973#0/1  
ATTGATTCCATTACATCCTTTAAGAAATCTATTAGCCTTC  
+HWI-EAS443:3:49:673:1973#0/1  
aa\_aaWa`baaab^aa\_a\_[M`¥^aa]\_\_^\_\_S\_[¥W[[]  
@HWI-EAS443:3:49:721:1695#0/1  
AGCTAATGGATGATGATTATCGGGGAAGACTTTGTAATCC  
+HWI-EAS443:3:49:721:1695#0/1  
ababbbbbbbbbbbabbbbbbbabba\_aa`a\_bbba\_baa^U  
@HWI-EAS443:3:49:769:1554#0/1  
GAGATAACAACCCACTTTCAAAGAAAAAGGAGAGTAAGAG  
+HWI-EAS443:3:49:769:1554#0/1  
`a``bb^bba`^`^`bb\_Y\_a]`]]XX````ab\_a[^^^a\_  
@HWI-EAS443:3:49:776:66#0/1  
GGTGTGTTCTGTTTACTGTGTCCATGGTGTATCCTGTTCC  
+HWI-EAS443:3:49:776:66#0/1  
ab¥b\_baa`aa`aa`\_ab¥a\_\_\_\_aaW\_`^``\_S\_\_W\_`^¥  
@HWI-EAS443:3:49:783:206#0/1  
GCCTCTCTGCATCTTTGGTCATCGTATTTAATGTCAGT  
+HWI-EAS443:3:49:783:206#0/1  
a````aa``Xa^Xa\_WaX\_a\_PT^\_ZaZ[``\_Z^P^¥ULR`B  
@HWI-EAS443:3:49:794:253#0/1  
GTTGTTATCTCTATTTCCCTCTTTGTTTCATTGATTCCATTA  
+HWI-EAS443:3:49:794:253#0/1  
a`^]¥a``[a`a``aa``a`aaa\_aa^\_\_a\_a\_TT]\_\_^  
@HWI-EAS443:3:49:818:946#0/1  
CAAACACAGAGACTGGTGCACCCCAGCTCAACCCGATTGA  
+HWI-EAS443:3:49:818:946#0/1  
abbbbbbbbaabbbbbbb[abbaaaabb\_baaaa\_\_baaaa\_  
@HWI-EAS443:3:49:832:136#0/1  
CTGAGCATGGCACCCATAATGTTCTCAAACAAAATGGCAA  
+HWI-EAS443:3:49:832:136#0/1  
abbaabbbab]baa]ab`ba][babaaab\_aabaaaaa^  
@HWI-EAS443:3:49:853:1418#0/1  
TACAGATACACATATAGGTGCCATAGGGGAGACACACAAA  
+HWI-EAS443:3:49:853:1418#0/1  
\_bba¥¥a``aabaaaa¥0L^Y\_`aX]\_\_`\_\_`^a\_a`aa\_

@HWI-EAS443:3:49:853:289#0/1  
ATCCCACCCAGGAATATTTGAGAATTCATGCCTTGAACA  
+HWI-EAS443:3:49:853:289#0/1  
aa^^`a`^`aa\_\_aaaaaa\_\_^a\_\_`a`\_Xaa`\_\_\_^b  
@HWI-EAS443:3:49:879:1676#0/1  
AGCTTGAACAGTCTGGGCTCCCAGTAGGGGCAATGAAAA  
+HWI-EAS443:3:49:879:1676#0/1  
abXb\_aabXb[\_aU¥\_aZ\_]S^[aH[aaU`\_]`a\_`¥\_\_\_\_  
@HWI-EAS443:3:49:884:1094#0/1  
TTGATTCCCCTAACTTGCAGTCTGTAGAATCTGTCCA  
+HWI-EAS443:3:49:884:1094#0/1  
ab\_ab]aaaabbba`abbaaa`\_a`aaaa```¥aa]^^\_  
@HWI-EAS443:3:49:907:157#0/1  
GAAACCTCTAATCTGCATCCCAGGTGTTGCGATAGCCCTT  
+HWI-EAS443:3:49:907:157#0/1  
Q\_bbbaabbbbaabbbbbbabbabbbba\_bbabb¥[abb  
@HWI-EAS443:3:49:909:858#0/1  
CCCGGATTGATGCCAGGTCGACTTCGAGTCTGGACGGAT  
+HWI-EAS443:3:49:909:858#0/1  
ababbabbbbab\_abab`aaaaaba`ba`ab^`Zaa`\_  
@HWI-EAS443:3:49:916:275#0/1  
CAAAGATGCAGAGAGAGCAAGTAAAAAGAAGGGCTATC  
+HWI-EAS443:3:49:916:275#0/1  
ab`baabbbbaabbbbaabbbbbbabbabba`bbb^  
@HWI-EAS443:3:49:917:484#0/1  
GAGTAAATGAATCAGCTGACATGAGTATTGGAGTAACAGT  
+HWI-EAS443:3:49:917:484#0/1  
\_Xa\_aaab\_Q[^Y]Z¥aaa\_`aaaa][\_aaa\_aMS¥UaaX  
@HWI-EAS443:3:49:929:1335#0/1  
GAGAGGCTATCTAATAAGAGCACTGACATTAATACGATG  
+HWI-EAS443:3:49:929:1335#0/1  
abaaba^aa]XY]]Y^\_]`X]U¥\_\_\_^^a^`[]Q\_]Z\_  
@HWI-EAS443:3:49:933:231#0/1  
GATTCTTCAAGGAAAGCCATAGCCTCTAGAACACAGTCTG  
+HWI-EAS443:3:49:933:231#0/1  
abbbbbbabbabbbabaabba^aa^aaaa\_`\_aa\_\_aa  
@HWI-EAS443:3:49:975:1312#0/1  
CCCAGCTTTGGAGTGTCTGGAGTAAATGAATCAGCTGACA  
+HWI-EAS443:3:49:975:1312#0/1  
aab]U^bbb``\_b\_baabb]]\_^bbbaa`a\_[a``aa]\_  
@HWI-EAS443:3:4:1008:430#0/1  
CTGGAGTAAATGAATCAGCTGACATGAGTATTGGAGTAAC  
+HWI-EAS443:3:4:1008:430#0/1  
\_aab^aabbbba\_a`abaaba`aaaabZaa``b\_a]aa[  
@HWI-EAS443:3:4:1056:493#0/1  
ATTTGCGAAAAGCTTGAACAGTCTGGGCTCCCAGTAGGGG  
+HWI-EAS443:3:4:1056:493#0/1  
aabaa`baaaaa\_aaa^a^`aWZa\_\_`Z^^^Y^`\_]`¥]\_  
@HWI-EAS443:3:4:1083:258#0/1  
CTTTCCTTGAAGAATCCCACCCAGGAATATTTGAGAATTC

+HWI-EAS443:3:4:1083:258#0/1  
a¥ba¥R\_ababb`b^`Z[`a`\_a`]]\_`[]]a`a`````PP  
@HWI-EAS443:3:4:1096:333#0/1  
GGGGGCAATGAAAAGAAGGCCAAACTGGCAAATGTTGTGA  
+HWI-EAS443:3:4:1096:333#0/1  
[abab]ba\_^Y\_\_`\_aaaaZWa\_Y^ab```\_^\_a¥\_a]a\_  
@HWI-EAS443:3:4:1118:143#0/1  
GGTATGCACAAACAGACTGTGTTCTAGAGGCTATGGCTTT  
+HWI-EAS443:3:4:1118:143#0/1  
aa\_aaaa`a`\_X\_a`Yaa]aZ^W]^^^\_YQUBBBBBBBBB  
@HWI-EAS443:3:4:1119:954#0/1  
GGTGTGTTCTGTTTACTGTGTCCATGGTGTATCCTGTTCC  
+HWI-EAS443:3:4:1119:954#0/1  
``H]]ZUa\_aa\_`a`^^[[a\_UNV\_\_^UaY¥¥VZ`][`XU  
@HWI-EAS443:3:4:1133:1135#0/1  
GAGATAACAACCCACTTTCAAAGAAAAAGGAGAGTAAGAG  
+HWI-EAS443:3:4:1133:1135#0/1  
a`a\_a\_a\_\_a]^Y¥aa\_^\_^`\_]\_^]`Y]]\_`  
@HWI-EAS443:3:4:1135:1651#0/1  
GTGTGTTCTGTTTACTGTGTCCATGGTGTATCCTGTTCCCT  
+HWI-EAS443:3:4:1135:1651#0/1  
aab]a\_a^aabbbaa\_aaaa]\_\_\_aa\_Ta\_aa\_\_aa`\_^¥`  
@HWI-EAS443:3:4:1183:1825#0/1  
GTTTCGTATACTTTGTTGAAACTTTAGCTAGGAGCATTG  
+HWI-EAS443:3:4:1183:1825#0/1  
`\_aaaaYaa\_]``aaaaa^`[aa``\_a]^\_^U\_V]^[\_^  
@HWI-EAS443:3:4:1221:1196#0/1  
GGCTTTCCTTGAAGAATCCCACCCAGGAATATTTGAGAAT  
+HWI-EAS443:3:4:1221:1196#0/1  
aa`aaaa`ba`a\_a`a`\_]\_^Z\_\_`]`\_\_\_]`]a^a\_\_`  
@HWI-EAS443:3:4:1231:483#0/1  
AAAAATTTCTCGAATAGATTGCAGCACTTCTGGTACATCT  
+HWI-EAS443:3:4:1231:483#0/1  
aaaa\_aaa\_bYa\_^^`\_````^^^\_^[`\_Wa^]^[`][Y  
@HWI-EAS443:3:4:1272:1294#0/1  
ACCCGAGTGGTTCAGAAACATCCTGAGCATGGCACCCATA  
+HWI-EAS443:3:4:1272:1294#0/1  
aa`aa\_¥[aa[a^`\_`a^```\_\_\_`^`Ya\_\_]R`Y]X`^B  
@HWI-EAS443:3:4:1280:486#0/1  
GATTGATGCCAGGGTCGACTTCGAGTCTGGACGGATCAAG  
+HWI-EAS443:3:4:1280:486#0/1  
WPW]a¥\_b^Sa`^`VY\_`a`\_T¥X^VR`]aWR]aXUOZ]^  
@HWI-EAS443:3:4:1375:161#0/1  
CAGTGATTGTGAAAGAAATCTCTGTGTCTTGTGAATTAGT  
+HWI-EAS443:3:4:1375:161#0/1  
a`a^aaaaa\_a[`^a\_]a\_]aY`\_Y\_]Wa^[^][Y][P¥W  
@HWI-EAS443:3:4:1452:1029#0/1  
ATGGGCTCCAATCATCCGACGATTTTGCTCTCATAGTGAA  
+HWI-EAS443:3:4:1452:1029#0/1  
Z\_bb^Y\_\_\_bX\_Iaa^aa^¥Y\_`^Y¥[ZYXLTV]¥]L\_[]`



@HWI-EAS443:3:4:1453:473#0/1  
GCCTTCCTGACTCATTAGCTGTTAGGCCATTCGATCTAAA  
+HWI-EAS443:3:4:1453:473#0/1  
a\_aaaaabaaZaZ\_aa\_a\_`a^^\_¥^WS[TXYYW]U]VBB  
@HWI-EAS443:3:4:1481:881#0/1  
CCCCGATTGATGCCAGGGTCGACTTCGAGTCTGGACGGAT  
+HWI-EAS443:3:4:1481:881#0/1  
ab^a\_M\_aa^¥\_ZVPWU^VT\_\_[a`Q¥Z]UG[aX\_RaaBB  
@HWI-EAS443:3:4:1483:198#0/1  
AAATTCCAGCGCAAATGCCATAAGCACCACATTCCTTA  
+HWI-EAS443:3:4:1483:198#0/1  
a¥QVba`\_a`a^aZUI`a^`a^a`\_\_¥¥P^Z`^`S^V[X\_  
@HWI-EAS443:3:4:1492:1868#0/1  
TAGAGATAACAACCCACTTTCAAAGAAAAAGGAGAGTAAG  
+HWI-EAS443:3:4:1492:1868#0/1  
aab`aaaaaX`aZ]\_a\_aaa`\_\_\_a]^\_\_^aa^`[aY\_\_\_  
@HWI-EAS443:3:4:1559:846#0/1  
AGATAAACTAACTCAAGGTCGCCAGACTTATGATTGGACA  
+HWI-EAS443:3:4:1559:846#0/1  
abaa^^^¥)`\_`¥^`aa¥VY]]\_`^`¥Ya\_]Y\_V\_Y[¥XV[  
@HWI-EAS443:3:4:1560:2001#0/1  
ATTTCTTTTGTCCAAGATTCAGTATCGAGACTCCCAAGAC  
+HWI-EAS443:3:4:1560:2001#0/1  
a\_bb¥aabbb\_\_\_baaab`^aa[aa`aaa`^^0`Y`\_a\_W  
@HWI-EAS443:3:4:1566:1170#0/1  
CCTCCATCTGATACTAATAGCCCTACCTTTGATTGGGTTT  
+HWI-EAS443:3:4:1566:1170#0/1  
a`W^¥bba`aa[¥Sa\_¥a`[]VS\_a\_T\_^^^`a`a\_aYZV  
@HWI-EAS443:3:4:1587:1094#0/1  
TGCCGTTGCAACTACACATTCCTGGATTCCCAAGAGGAAT  
+HWI-EAS443:3:4:1587:1094#0/1  
`a`\_a¥abXaa\_aa^a\_a``[¥Z\_a^\_]VVSZ`a^\_]`^]B  
@HWI-EAS443:3:4:1623:417#0/1  
CTCCCATTTTAAGCAGACTTCAGGAATGTGAAGATTCCGT  
+HWI-EAS443:3:4:1623:417#0/1  
`WGP^bbaabaaaXaa\_[Y[`\_`a\_]\_a]a^\_a]\_`SPZ^  
@HWI-EAS443:3:4:1638:1643#0/1  
GGGATGGGCTCCAATCATCCGACGATTTTGCTCTCATAGT  
+HWI-EAS443:3:4:1638:1643#0/1  
H¥b¥[¥I¥a`¥`aKabb]aba\_\_[\_aba¥VYa`[aaab`  
@HWI-EAS443:3:4:1638:30#0/1  
GGGATGGGCTCCAATCATCCGACGATTTTGCTCTCATAGT  
+HWI-EAS443:3:4:1638:30#0/1  
aaba¥Z^]Z\_R[SZ]RK¥NQ\_]U\_HUU[¥GRSHVR]YXBB  
@HWI-EAS443:3:4:1667:1357#0/1  
GAGATAACAACCCACTTTCAAAGAAAAAGGAGAGTAAGAG  
+HWI-EAS443:3:4:1667:1357#0/1  
a]a^aa^V]a\_^X¥Y`^]PXX]M]WY^]]\_aW\_]`^`\_`^  
@HWI-EAS443:3:4:1724:559#0/1  
AAGAGATTGATTCTGTAAACAATGCTGTGGTAATGCCAGC

+HWI-EAS443:3:4:1724:559#0/1  
a`a]TRaa`]W\_R\_]T¥aXOV\_]XW[]N¥UBBBBBBBBBBB  
@HWI-EAS443:3:4:1762:256#0/1  
GGGCTATTAGTATCAGATGGAGGACCAAACCTATACAATA  
+HWI-EAS443:3:4:1762:256#0/1  
aa\_^aa^^]aZaYSV^M¥`\_W\_\_ZZX[]¥¥S¥W]]Z]ZZ^  
@HWI-EAS443:3:4:176:278#0/1  
ATGTTCTCAAACAAAATGGCAAGACTAGGGAAAGGGTACA  
+HWI-EAS443:3:4:176:278#0/1  
aa`T¥\_YW]\_`\_¥`¥¥^¥X`\_a][^Z\_a`ZXZ^YYS¥RW  
@HWI-EAS443:3:4:1777:1598#0/1  
GACAGATTCTACAGGACCTGCAAGTTAGTGGGAATCAACA  
+HWI-EAS443:3:4:1777:1598#0/1  
abbbbabbbb`aaaa]bbbaaaa\_aaa\_aaa`aa]aaY`  
@HWI-EAS443:3:4:188:1412#0/1  
AACAGATCTTCATGATCTCAGAGAACTCTTCTTTCTTGAT  
+HWI-EAS443:3:4:188:1412#0/1  
aaaa\_TaZ¥`\_a\_b\_a`a`a`\_a`a`a`a`a`a`Za\_\_^Y`\_  
@HWI-EAS443:3:4:243:403#0/1  
AGCTGATTCACTTACTCCAGACACTCCAAAGCTGGGTAGC  
+HWI-EAS443:3:4:243:403#0/1  
^aaa`\_]a`a¥aaa\_ZGTUUIWa\_X[``[U¥TFX\_[XS[B  
@HWI-EAS443:3:4:392:640#0/1  
CTCCATCTGATACTAATAGCCCTACCTTTGATTGGGTTTG  
+HWI-EAS443:3:4:392:640#0/1  
ab]a]b¥baaaababaa\_b`aaa^]]aaa``aaaa\_\_\_\_\_a  
@HWI-EAS443:3:4:410:1558#0/1  
ATTCGATCTAAAGACTTCTATGGTGTGGCCAATGCAGTT  
+HWI-EAS443:3:4:410:1558#0/1  
a^a^abaaaba¥`[\_a\_aaa`aY^`^^a`[[`¥aZ¥Y\_¥  
@HWI-EAS443:3:4:426:212#0/1  
GCCCCGATTGATGCCAGGGTCGACTTCGAGTCTGGACGGA  
+HWI-EAS443:3:4:426:212#0/1  
a\_X]a`U]¥a¥^¥U[^`aaS[Y^USUU`U¥USU^SMM^UU  
@HWI-EAS443:3:4:43:366#0/1  
TGGCATTGCGCTGGAATTTTAGGAAAAGTAGAGTCGG  
+HWI-EAS443:3:4:43:366#0/1  
abb`bbbb`ababbababbaaaabaa`aa]a\_ab^\_aa  
@HWI-EAS443:3:4:442:1976#0/1  
ATACCCACTTGGTTCATTATCCTCAGGTAGTGGTCCATCA  
+HWI-EAS443:3:4:442:1976#0/1  
aab``\_a`a`^UMZ\_a`aa\_]\_^a[]^`]X^Y^\_U^]U^  
@HWI-EAS443:3:4:451:1670#0/1  
ATGAACTGCTAGGGAAAAATTTCTCGAATAGATTGCAGCA  
+HWI-EAS443:3:4:451:1670#0/1  
¥G`aa[\_aaa`b`a`b`ba`^\_a`¥aaaaa]`¥\_aS`Y[a  
@HWI-EAS443:3:4:478:378#0/1  
GTTGATTCCCACTAACTTGCAGGTCCTGTAGAATCTGTCC  
+HWI-EAS443:3:4:478:378#0/1  
aaa``aa`\_Ya\_a`a^`aa\_``^X]`a\_\_\_\_^]LT\_a]X]

@HWI-EAS443:3:4:49:122#0/1  
CTTTCTCACAACTTTGCCAGTTTGGCCTTCTTTTCATTG  
+HWI-EAS443:3:4:49:122#0/1  
`abbaa`a`aab`\_a\_a\_b`aaa`^\_\_0`\_`\_]`^`  
@HWI-EAS443:3:4:520:826#0/1  
AAAAGCTTGAACAGTCTGGGCTCCCAGTAGGGGGCAATGA  
+HWI-EAS443:3:4:520:826#0/1  
\_\_WU\_^^^a^aaXPX`]Z\_a¥^`¥[YaZ`a\_Yaa\_YUW`B  
@HWI-EAS443:3:4:564:1094#0/1  
ACAGAATCAATCTCTTTATGACTGACAAAGGGATTCAGGG  
+HWI-EAS443:3:4:564:1094#0/1  
a\_aabaa\_ba^^^[a`ab`\_`\_`^a\_Ya\_aW\_[SQTZ\_a][  
@HWI-EAS443:3:4:637:1187#0/1  
AGAGCACTGACATTAATACGATGACCAAAGATGCAGAGA  
+HWI-EAS443:3:4:637:1187#0/1  
a`aa¥^\_`baNaaaaaaaaaaaaaaaaa\_U`aU\_`a\_`^`X`\_  
@HWI-EAS443:3:4:686:737#0/1  
AAAAAACAAAGACTGAATAAGAGAGGCTATCTAATAAGAG  
+HWI-EAS443:3:4:686:737#0/1  
\_`aaaaaaaaa\_bb`\_aabbba`\_aaa\_ZP`¥\_N]\_\_WQ  
@HWI-EAS443:3:4:727:1037#0/1  
GGCCTCTTCTAATAGATGGCACAGCATCACTGAGTCCTGG  
+HWI-EAS443:3:4:727:1037#0/1  
aaa`a`\_aab`aaaa`\_a\_aa^`a`\_`\_`^a`\_aSZ\_aa\_  
@HWI-EAS443:3:4:749:1387#0/1  
TGGGATTCTTCAAGGAAAGCCATAGCCTCTAGAACACAGT  
+HWI-EAS443:3:4:749:1387#0/1  
aaab\_`\_`a`U`]TZ[V`W\_a]\_\_\_\_\_]¥^`\_]X]^BB  
@HWI-EAS443:3:4:750:175#0/1  
CTAATTTTAGCATGGAGCTACCCAGCTTTGGAGTGTCTGG  
+HWI-EAS443:3:4:750:175#0/1  
abbbbbbbba`P\_baa\_aaab\_\_`\_a\_\_`\_aa]aX`V]aaB  
@HWI-EAS443:3:4:762:1490#0/1  
CAGATTAGAGGTTTTCGTATACTTTGTTGAACTTTAGCTA  
+HWI-EAS443:3:4:762:1490#0/1  
aababb`\_`ba`aba^Xb`\_H¥ab`\_`b`a\_]\_a`baa`\_¥  
@HWI-EAS443:3:4:786:356#0/1  
ACCTGAAGTACTTCAATGAATCAACAAAGAAGAAAATTGA  
+HWI-EAS443:3:4:786:356#0/1  
aa`aaaa^Xa]\_`^a`aa\_]`[\_]`ZUa\_]`¥^^^\_\_\_\_]  
@HWI-EAS443:3:4:790:1843#0/1  
CAAAGATGCAGAGAGAGGCAAGTTAAAAAGAAGGGCTATC  
+HWI-EAS443:3:4:790:1843#0/1  
`aab\_bbbba`a`bbbbbb`\_`bbaG`\_`a`bbUbabU¥Sa^YN  
@HWI-EAS443:3:4:825:1201#0/1  
ATTAGCTGTTAGGCCATTTCGATCTAAAGACTTCTATGGTG  
+HWI-EAS443:3:4:825:1201#0/1  
aaaaaa\_a[SIOWZP^Q]^aWWWUO¥`\_RGT¥L]QTN]BB  
@HWI-EAS443:3:4:842:1891#0/1  
AATCTGTCCACTCCTGCTTGTATTCCCTCATGGTTTGGTG

+HWI-EAS443:3:4:842:1891#0/1  
`\_]P]aXYVaXWOJL[Uaa\_0`\_HKZUQUQZWLQYNR[OB  
@HWI-EAS443:3:4:861:720#0/1  
GTTGATTCCCCTAACTTGCAGGTCCTGTAGAATCTGTCC  
+HWI-EAS443:3:4:861:720#0/1  
a\_]`a^X]aaa]\_\_\_`a`a`\_\_\_aa]^aW^`^\_a^T]  
@HWI-EAS443:3:4:864:316#0/1  
CTTTTCCTAAAAATTCCAGCGCAAATGCCATAAGCACCA  
+HWI-EAS443:3:4:864:316#0/1  
abbbbaabbbbbabaa\_abab\_aaaabaY\_aabaa¥b^]a  
@HWI-EAS443:3:4:903:697#0/1  
GGGGCAATGAAAAGAAGGCCAAACTGGCAAATGTTGTGAG  
+HWI-EAS443:3:4:903:697#0/1  
aa`a¥Z\_aa]]Y[[]^`]U¥W]X\_a]U^Y]]^V^\_Y\_Y^  
@HWI-EAS443:3:4:910:222#0/1  
ATGGCTTTCCTTGAAGAATCCCACCCAGGAATATTTGAGA  
+HWI-EAS443:3:4:910:222#0/1  
aaaaa`aaa]a`\_aa\_a\_ZZX`[¥`]\_`Z]]^^[Y^^  
@HWI-EAS443:3:4:915:452#0/1  
GAATCAGCTGACATGAGTATTGGAGTAACAGTGATAAAGA  
+HWI-EAS443:3:4:915:452#0/1  
a^`\_`aa\_aa`^`a^aY^`\_a]`[^aSZ\_Z]]^]^^[  
@HWI-EAS443:3:4:920:691#0/1  
GTTCATTATCCTCAGGTAGTGGTCCATCAATCGGGTTGAG  
+HWI-EAS443:3:4:920:691#0/1  
a^a¥a`a`\_¥SWQ\_\_^W\_\_¥VRUUVV^¥WSWW¥¥WUZZWB  
@HWI-EAS443:3:4:924:994#0/1  
AGAATCTGTCCACTCCTGCTTGTATTCCCTCATGGTTTGG  
+HWI-EAS443:3:4:924:994#0/1  
aaaaa\_aa`aaU¥[\_`aa`a\_Y\_\_\_^^`\_]`\_0\_\_U^  
@HWI-EAS443:3:4:962:1137#0/1  
GTGGGATTCTTCAAGGAAAGCCATAGCCTCTAGAACACAG  
+HWI-EAS443:3:4:962:1137#0/1  
aaa\_\_Za^X`\_`\_a`^]`WV]\_\_]]Y]]^]\_^\_]Y]]  
@HWI-EAS443:3:4:982:1260#0/1  
TATCGCAACACCTGGGATGCAGATTAGAGTTTCGTATAC  
+HWI-EAS443:3:4:982:1260#0/1  
aabaaUbabbaaTa`a\_]\_]\_^`a`\_W^a^Za\_aX\_a`a[  
@HWI-EAS443:3:4:991:629#0/1  
AAAAATTCCAGCGCAAATGCCATAAGCACCATTCCT  
+HWI-EAS443:3:4:991:629#0/1  
abaa^`a¥`aa¥a`\_\_\_]]]¥\_¥\_\_\_W^]G\_Z\_]WUR]  
@HWI-EAS443:3:4:999:296#0/1  
CAGAGAGAGGCAAGTTAAAAAGAAGGGCTATCGCAACACC  
+HWI-EAS443:3:4:999:296#0/1  
]\_`Ubabbb[\_bbabbb`a\_a\_[0\_a]bU]`b`bb\_I  
@HWI-EAS443:3:50:1006:787#0/1  
CAAATCGTCGGATGATTGGAGCCCATCCCACAGTATAT  
+HWI-EAS443:3:50:1006:787#0/1  
aaba\_a¥a¥[b\_¥\_¥bab`\_`\_`a\_a`\_[Ua]^]]\_`a^a

@HWI-EAS443:3:50:1011:546#0/1  
CTTCCCTATTGTTCTTTGCGTGACCATCTTCTTGGTCATG  
+HWI-EAS443:3:50:1011:546#0/1  
0]a¥`¥`a`bbaa`abab\_b`a`^`Y`ZbbabbZ\_Z¥S`b  
@HWI-EAS443:3:50:1021:307#0/1  
GAGCTAATGGATGATGATTATCGGGGAAGACTTTGTAATC  
+HWI-EAS443:3:50:1021:307#0/1  
aab\_ababbbaabaabaaaa\_`\_\_`\_]`a\_]aaaa\_`\_\_`\_  
@HWI-EAS443:3:50:1039:423#0/1  
GAGATAACAACCCACTTTCAAAGAAAAAGGAGAGTAAGAG  
+HWI-EAS443:3:50:1039:423#0/1  
`bbabbbaab\_`aaa`bba`aa\_aa\_a``ba\_`aaa¥a\_`aaa  
@HWI-EAS443:3:50:105:1809#0/1  
TGTCCCCAGTGATTGTGAAAGAAATCTCTGTGTCTTGTGA  
+HWI-EAS443:3:50:105:1809#0/1  
a`^`^`^`a`\_a\_a`aZa¥` [Za\_Y``\_\_]V]U``WW[VP  
@HWI-EAS443:3:50:1101:1165#0/1  
TTGGTCTCCATCTGATACTAATAGCCCTACCTTTGATTG  
+HWI-EAS443:3:50:1101:1165#0/1  
aab]IY`\_^`]]]\_¥X\_]aa\_]WXYZ``Z[`[^`a\_`^`  
@HWI-EAS443:3:50:1125:1732#0/1  
GCTTGTGTTGAGAATAGAACGATTCCCTCTTGGGAATCCAG  
+HWI-EAS443:3:50:1125:1732#0/1  
`^`^`a]\_`\_]\_a`\_aa¥\_`^`a]]¥[V[^`^`\_`^`a]`[[W]^`  
@HWI-EAS443:3:50:1141:273#0/1  
ATCCCACCCAGGAATATTTGAGAATTCATGCCTTGAACA  
+HWI-EAS443:3:50:1141:273#0/1  
aba`abaa`abb`abbbbaaaaa`aa\_a`a\_\_aaa\_]`Ub  
@HWI-EAS443:3:50:1202:226#0/1  
GGTCTCCATCTGATACTAATAGCCCTACCTTTGATTGGG  
+HWI-EAS443:3:50:1202:226#0/1  
a]\_]`b\_`aaaY`^^ba`b`aaab¥[^a[]\_aaba¥`YZ`^`  
@HWI-EAS443:3:50:1276:1555#0/1  
CAATGAACAAAGAGGAAATAGAGATAACAACCCACTTTCA  
+HWI-EAS443:3:50:1276:1555#0/1  
VTTT\_`^^^[\_[X\_WW^W]^a[\_XUW\_P]NMN[TFX]]WH  
@HWI-EAS443:3:50:1299:249#0/1  
CTTTGTAATCCCCTGAATCCCTTTGTCAGTCATAAAGAGA  
+HWI-EAS443:3:50:1299:249#0/1  
abbbbbbbbbbbbbbbbbbbbbbbbbabababbbbbbbbb  
@HWI-EAS443:3:50:1339:1328#0/1  
CATGCTCAGGATGTTTCTGAACCACTCGGGTTGATTTCTG  
+HWI-EAS443:3:50:1339:1328#0/1  
aabb[`a\_b`\_`\_`b[`aabb¥[\_a`^`¥a^aaYaa¥`aa\_a\_  
@HWI-EAS443:3:50:1378:366#0/1  
GCAAAATCGTCGGATGATTGGAGCCCATCCCACCAGTATA  
+HWI-EAS443:3:50:1378:366#0/1  
`\_`\_`abb\_\_^]U`]QYaX]XW]T]FUX`\_`NGYT[NX\_KXYW  
@HWI-EAS443:3:50:1384:1746#0/1  
AGCTGACATGAGTATTGGAGTAACAGTGATAAAGAACAAC

+HWI-EAS443:3:50:1384:1746#0/1  
a`abbb`a]a`¥aab`a\_a]aa^aa^`¥a`a`a^`\_a`¥  
@HWI-EAS443:3:50:1384:1993#0/1  
AGTGTCTGGAGTAAATGAATCAGCTGACATGAGTATTGGA  
+HWI-EAS443:3:50:1384:1993#0/1  
ab`babbbbaababaaaa\_a^Za\_a\_aaa`^Yaaa`\_]  
@HWI-EAS443:3:50:1385:288#0/1  
AAAAATTCCAGCGCAAATGCCATAAGCACCACATTCCT  
+HWI-EAS443:3:50:1385:288#0/1  
abababba`aaab\_a`aab]]\_a^\_Sa]^\_Y\_a`YXN\_  
@HWI-EAS443:3:50:139:166#0/1  
CCTAGCTAAAGTTTCAACAAAGTATACGAAACCTCTAATC  
+HWI-EAS443:3:50:139:166#0/1  
¥`a¥`\_`bba`\_aVa`\_ab`aZ`\_a^`ba]¥`aaaab  
@HWI-EAS443:3:50:1408:1247#0/1  
GCCATGGTGTCTAGGGCCCGATTGATGCCAGGGTCGACT  
+HWI-EAS443:3:50:1408:1247#0/1  
`]a\_^a¥VaY`^`aaa]^aaUa`X^XVX^TZ]`UY^VVY  
@HWI-EAS443:3:50:1413:525#0/1  
GATACACATATAGGTGCCATAGGGGAGACACAAATTCA  
+HWI-EAS443:3:50:1413:525#0/1  
^bbaabbbbbbbbababbbbbbbbbbbbabbbbaa  
@HWI-EAS443:3:50:1469:1149#0/1  
ACTCCAGACTCCAAAGCTGGGTAGCTCCATGCTAAAAT  
+HWI-EAS443:3:50:1469:1149#0/1  
aab`abaaaaa\_aa`\_a`\_a`Z¥a]]X^^[Z\_]TVW[  
@HWI-EAS443:3:50:1470:722#0/1  
GAGGCTATCTAATAAGAGCACTGACATTAATACGATGAC  
+HWI-EAS443:3:50:1470:722#0/1  
aaa`abb`\_baaaaa`\_¥aa^a]W]aa[a`\_]W`]][¥N  
@HWI-EAS443:3:50:1507:83#0/1  
CATTGAAGTACTTCAGGTCAATGCTTGCTAGCATTCTGC  
+HWI-EAS443:3:50:1507:83#0/1  
abbbbabbbbabbbbaabbbba`bbbabb`bbbbWbb`  
@HWI-EAS443:3:50:1556:1001#0/1  
GAAGATGGTCACGCAAAGAACAATAGGGAAGAAAAACAA  
+HWI-EAS443:3:50:1556:1001#0/1  
ab\_a^abYY`aa^`bWaTUY]]b\_ab`Y\_a[aUa^\_Y^\_  
@HWI-EAS443:3:50:1610:384#0/1  
GAACAACATGATAACAATGACCTTGGACCTGCAACGGCC  
+HWI-EAS443:3:50:1610:384#0/1  
Z¥¥\_¥\_\_^¥Xa`ZV^YWW[\_SWV]VYaPXKTZUOYSYZZQ  
@HWI-EAS443:3:50:1657:1570#0/1  
ATGGGCTCCAATCATCCGACGATTTTGCTCTCATAGTGAA  
+HWI-EAS443:3:50:1657:1570#0/1  
ab^ZaaaU]abb`\_`bbbaTb`aa\_[[]aaba]SaP^Y`  
@HWI-EAS443:3:50:1689:1694#0/1  
GTGTTCTGTTTACTGTGTCCATGGTGTATCCTGTTCTGT  
+HWI-EAS443:3:50:1689:1694#0/1  
a¥baaaaa`aa\_\_a\_\_`¥\_\_\_`^¥W`¥aa`W`^W\_YY¥¥¥

@HWI-EAS443:3:50:1698:323#0/1  
GAGATAACAACCCACTTTCAAAGAAAAAGGAGAGTAAGAG  
+HWI-EAS443:3:50:1698:323#0/1  
^Ya^¥b`a¥X^aaa`bb]``a\_XX¥`ba\_``^`TT¥¥  
@HWI-EAS443:3:50:1734:1887#0/1  
AGGGAATACAAGCAGGAGTGGACAGATTCTACAGGACCTG  
+HWI-EAS443:3:50:1734:1887#0/1  
`bba`bab\_ba`[aa`\_aaa\_^Wb\_\_bab`aYaa[T[O\_T  
@HWI-EAS443:3:50:1763:170#0/1  
ATTAGTATCAGATGGAGGACCAAACCTTATACAATATACGG  
+HWI-EAS443:3:50:1763:170#0/1  
`babb^`^`ab]Kab`ba¥a^aa\_\_baaa\_\_a`aaaa`a  
@HWI-EAS443:3:50:193:1177#0/1  
ATGGAATCAATGAACAAAGAGGAAATAGAGATAACAACCC  
+HWI-EAS443:3:50:193:1177#0/1  
aaaaaaaaVaaab`a`\_ba^¥ba`aaba¥`U`a`aa`\_`[  
@HWI-EAS443:3:50:194:1418#0/1  
GAAAAATTTCTCGAATAGATTGCAGCACTTCTGGTACATC  
+HWI-EAS443:3:50:194:1418#0/1  
^`bb\_^ab¥aaab\_a^aaXb[bb`baababa`a\_ab\_  
@HWI-EAS443:3:50:20:1286#0/1  
AGCTACCCAGCTTTGGAGTGTCTGGAGTAAATGAATCAGC  
+HWI-EAS443:3:50:20:1286#0/1  
aa\_a`a^]aa`\_aaaa^\_]`V`a`W`Z`aa`\_]XUUZ  
@HWI-EAS443:3:50:229:1147#0/1  
TTGGACCTGCAACGGCCAGATGGCTCTTCAATTGTTTCAT  
+HWI-EAS443:3:50:229:1147#0/1  
`aba¥QWa`^a^WY¥aYa^]RZ`]YW`[SXY`¥R¥[LWT  
@HWI-EAS443:3:50:230:1091#0/1  
TGCCAGTTTGGCCTTCTTTTCATTGCCCCCTACTGGGAGC  
+HWI-EAS443:3:50:230:1091#0/1  
¥a^\_^bbabbbbbbabb`^\_bb^ZY\_a`aaaXabbaa]  
@HWI-EAS443:3:50:239:337#0/1  
CTTCCCTATTGTTCTTTGCGTGACCATCTTCTTGGTCATG  
+HWI-EAS443:3:50:239:337#0/1  
abbbbabbbbbbabbab^aaaaaaYbbabb`aaa`bb  
@HWI-EAS443:3:50:327:729#0/1  
GGACGACAAACACAGAGACTGGTGCACCCCAGCTCAACCC  
+HWI-EAS443:3:50:327:729#0/1  
\_X]]]¥¥aaaa`SaaZ`[[¥a]TV¥^^`^`Y^¥Y[`]OX^  
@HWI-EAS443:3:50:329:1999#0/1  
AAGAATCCCACCCAGGAATATTTGAGAATTCATGCCTTGA  
+HWI-EAS443:3:50:329:1999#0/1  
abaaaabaaaa`\_aaa`\_a\_]aaa`a\_a\_]aa\_] [`]\_a  
@HWI-EAS443:3:50:340:1755#0/1  
GCCTTATTTTCTCAATTTTCTTCTTTGTTGATTCATTGAA  
+HWI-EAS443:3:50:340:1755#0/1  
U¥a¥\_b`abaaaa]^aaa`\_baabbb\_abbabbb\_baa^]  
@HWI-EAS443:3:50:360:908#0/1  
ATGTGTAGTTGCAACGGCATCATATTCCATGCTTTTGGCT

+HWI-EAS443:3:50:360:908#0/1  
abbTR][a\_aa`bbaaaa\_a\_bbbb^aaa`^Ra\_`a]aU^  
@HWI-EAS443:3:50:380:597#0/1  
GGATGGGCTCCAATCATCCGACGATTTTGCTCTCATAGTG  
+HWI-EAS443:3:50:380:597#0/1  
ab[aabbabaabbaabaa¥¥¥Zbaaaaa\_aXa\_`\_`\_]a  
@HWI-EAS443:3:50:395:1670#0/1  
AACAAATGCTGTGGTAATGCCAGCCCATGGTCCAGCCAAAA  
+HWI-EAS443:3:50:395:1670#0/1  
^¥]aaab`a^]Z]^`a`\_`\_¥`\_]Z[`aaZ\_¥[^[Xa\_¥`  
@HWI-EAS443:3:50:414:1558#0/1  
CATATTCCATGCTTTTGGCTGGACCATGGGCTGGCATTAC  
+HWI-EAS443:3:50:414:1558#0/1  
abbbab`^abaabaab`a`\_`ab\_[X\_`\_`a\_[R^aV`^\_`X  
@HWI-EAS443:3:50:43:1760#0/1  
CCTGGGTGGGATTCTTCAAGGAAAGCCATAGCCTCTAGAA  
+HWI-EAS443:3:50:43:1760#0/1  
abbbba\_bb`\_`bbabb`\_abaaaabaabaaaaa\_a`a  
@HWI-EAS443:3:50:458:1621#0/1  
CTTTCCTTGAAGAATCCCACCCAGGAATATTTGAGAATTC  
+HWI-EAS443:3:50:458:1621#0/1  
Y\_QPZ`^b\_] [^`Y¥¥]U¥X`W¥`YQWY[WKZ\_a^a]Y]W  
@HWI-EAS443:3:50:458:295#0/1  
CCACAGCATTGTTTACAGAATCAATCTCTTTATGACTGAC  
+HWI-EAS443:3:50:458:295#0/1  
`a\_bbbbbbbbbbbbbbb`\_`a`\_`aa^aabbba`^`babba  
@HWI-EAS443:3:50:514:287#0/1  
TGTCAATCCGACTCTACTTTTCCTAAAAATCCAGCGCAA  
+HWI-EAS443:3:50:514:287#0/1  
aba`bbaabbaabbbb`babbaabbaabba\_[ab\_b`aa  
@HWI-EAS443:3:50:519:1581#0/1  
GAACAATTGAAGAGCCATCTGGGCCGTTGCAGGTCCAAGG  
+HWI-EAS443:3:50:519:1581#0/1  
`bb]^`aa^a`Z^aaaa\_aYaa`\_`WT¥]^`S`aa^a\_\_\_\_`^  
@HWI-EAS443:3:50:527:1029#0/1  
GACGGATCAAGAAAGAAGAGTTCTCTGAGATCATGAAGAT  
+HWI-EAS443:3:50:527:1029#0/1  
a¥Ha`\_`aaaabVa]aY^a^]F]Y\_N¥^`Y\_`\_`\_`\_`\_`\_`a\_\_\_  
@HWI-EAS443:3:50:540:1693#0/1  
GAGAACATTATGGGTGCCATGCTCAGGATGTTTCTGAACC  
+HWI-EAS443:3:50:540:1693#0/1  
abbbbabbbb`\_`baaaaa\_`¥aa`^a`\_`\_`\_`a[aa\_I]Y  
@HWI-EAS443:3:50:594:1835#0/1  
GCTGACATGAGTATTGGAGTAACAGTGATAAAGAACAACA  
+HWI-EAS443:3:50:594:1835#0/1  
a^[^]S^]a\_`PXa¥b^[^`UV¥MY\_NRZY[N¥¥YN\_WGY  
@HWI-EAS443:3:50:594:999#0/1  
GCCATGCTCAGGATGTTTCTGAACCACTCGGGTTGATTTC  
+HWI-EAS443:3:50:594:999#0/1  
ab\_^aaa^\_a`Y¥¥a¥\_a\_` [``][`] `aaVH[`Uaa`^`



@HWI-EAS443:3:50:614:1546#0/1  
TTGGCCTTCTTTTCATTGCCCCCTACTGGGAGCCCAGACT  
+HWI-EAS443:3:50:614:1546#0/1  
UQZMF¥]``Z\_`\_^`¥]N\_\_WOYV^\_ZU[U\_ZYT]ZVR`  
@HWI-EAS443:3:50:630:1981#0/1  
AAGTACTTCAGGTCAATGCTTGCTAGCATTCTGCTGGTA  
+HWI-EAS443:3:50:630:1981#0/1  
aa`Uaa``ba`a\_bbab¥Q]]``a^X\_aaa^aaa\_\_a`P`  
@HWI-EAS443:3:50:71:1074#0/1  
GGTGGGATGGGCTCCAATCATCCGACGATTTTGCTCTCAT  
+HWI-EAS443:3:50:71:1074#0/1  
\_a`aa```\_^XV\_S]a```]`Z^R]\_a`Z`a`^\_]X```W  
@HWI-EAS443:3:50:738:895#0/1  
GGGCAATGAAAAGAAGGCCAAACTGGCAAATGTTGTGAGA  
+HWI-EAS443:3:50:738:895#0/1  
ab`YV\_]¥VXSPZ^Z^```Z^[^`]`]a^[`¥U[a^aWbZ  
@HWI-EAS443:3:50:786:423#0/1  
GTCTTGCCATTTTGTGGAGAACATTATGGGTGCCATGCT  
+HWI-EAS443:3:50:786:423#0/1  
aa^babaa`babbbabaa`b``[Yaaba\_`[`ZT[^[U¥  
@HWI-EAS443:3:50:89:1122#0/1  
GGATAATGAACCAAGTGGGTATGCACAAACAGACTGTGTT  
+HWI-EAS443:3:50:89:1122#0/1  
ababbab]SSWV]U^T\_U`]TV[FZ0¥V^XXJ¥L\_[Q[]\_  
@HWI-EAS443:3:51:1064:1773#0/1  
ATTCGAACACAAATACCAGCAGAAATGCTAGCAAGCATTG  
+HWI-EAS443:3:51:1064:1773#0/1  
^aaaa`bb`]abbb`\_`aba`a`a`aaba`]aaa```aa  
@HWI-EAS443:3:51:1065:1974#0/1  
GACCACTACCTGAGGATAATGAACCAAGTGGGTATGCACA  
+HWI-EAS443:3:51:1065:1974#0/1  
]J[R[\_V^ZT]]¥`]¥[\_UT]]¥LJYS\_N¥`YFOV¥SUPV  
@HWI-EAS443:3:51:1067:1858#0/1  
AACAGTCTGGGCTCCCAGTAGGGGGCAATGAAAAGAAGGC  
+HWI-EAS443:3:51:1067:1858#0/1  
aa`aa\_a`]¥^a`¥WX`b\_aaa\_X^Z]aaa^\_a\_```V¥Q  
@HWI-EAS443:3:51:1067:582#0/1  
GGGAGCTAATGGATGATGATTATCGGGGAAGACTTTGTAA  
+HWI-EAS443:3:51:1067:582#0/1  
[\_`\_S\_¥a`aZab¥`b`aaaZ]]YPaWXYa]``YY`ba`\_Z  
@HWI-EAS443:3:51:1069:714#0/1  
GATTGGGTTTGATCCCACAGCTTCTTTAACTCAAATGATC  
+HWI-EAS443:3:51:1069:714#0/1  
`bbbbbbbababbaa`aaaaaba`baaba`aaa`aaa`\_Z  
@HWI-EAS443:3:51:1089:1330#0/1  
ATGACCAAGAAGATGGTCACGCAAAGAACAATAGGGAAGA  
+HWI-EAS443:3:51:1089:1330#0/1  
a`\_`aa`a]``aaaa\_\_`a]\_\_a]a¥\_`a\_`^`^`^`^`\_`  
@HWI-EAS443:3:51:1102:1020#0/1  
GAGATAACAACCCACTTTCAAAGAAAAAGGAGAGTAAGAG

+HWI-EAS443:3:51:1102:1020#0/1  
`aaaaba`aa\_abb`a^aa`a`]aaa^a`aWa\_\_^\_  
@HWI-EAS443:3:51:1140:1810#0/1  
AATGGAATCAATGAACAAAGAGGAAATAGAGATAACAACC  
+HWI-EAS443:3:51:1140:1810#0/1  
¥\_¥Q\_P\_^baa¥b`^V¥[¥[aa¥Pa`^`b\_b[H\_aXa¥\_^  
@HWI-EAS443:3:51:1223:64#0/1  
TCTGATACTAATAGCCCTACCTTTGATTGGGTTTGTATCCC  
+HWI-EAS443:3:51:1223:64#0/1  
¥a`a¥`a^abbba\_WV`a\_XY\_aabb` `a`aXa`b`\_OYZ  
@HWI-EAS443:3:51:1248:366#0/1  
ATCAAACCCAATCAAAGGTAGGGCTATTAGTATCAGATGG  
+HWI-EAS443:3:51:1248:366#0/1  
ab`babaaaaabaa\_`bb]aaa`\_ababaa^aa^ab` `a`  
@HWI-EAS443:3:51:1250:252#0/1  
CTTGTGTTGAGAATAGAACGATTCTCTTGGGAATCCAGG  
+HWI-EAS443:3:51:1250:252#0/1  
^bbbabbbb`bbbbbbbabababababb` `aab^` `] `a  
@HWI-EAS443:3:51:1263:319#0/1  
TGAGAATAGAACGATTCTCTTGGGAATCCAGGAATGTGT  
+HWI-EAS443:3:51:1263:319#0/1  
abaa]aaa`a`aaaa\_a^W^\_[S^\_aaYS]\_^]\_aa¥`Z  
@HWI-EAS443:3:51:1328:1554#0/1  
CCGGTCTCTATATGAACTGCTAGGGAAAAATTTCTCGAA  
+HWI-EAS443:3:51:1328:1554#0/1  
aabaabbbabbbbbbabbbbababbbabbbbab`baa  
@HWI-EAS443:3:51:1370:2013#0/1  
AAATCGTCGGATGATTGGAGCCCATCCCACAGTATATTG  
+HWI-EAS443:3:51:1370:2013#0/1  
`bbbabaaa`aaba\_]a\_aa^¥^aa¥\_\_a^¥^aZ^\_`a`X  
@HWI-EAS443:3:51:1382:1342#0/1  
GCCCCGATTGATGCCAGGGTCGACTTCGAGTCTGGACGGA  
+HWI-EAS443:3:51:1382:1342#0/1  
a\_XQabSbaa\_`XR]\_¥`WVTKP^[\_a[QXXV^\_¥Sa`¥  
@HWI-EAS443:3:51:1391:1831#0/1  
TAACTTGCAGGTCCTGTAGAATCTGTCCACTCCTGCTTGT  
+HWI-EAS443:3:51:1391:1831#0/1  
ab`U` [aabb]Z[X`VaaaaaXabUQU^M]R¥Q`^a]\_^  
@HWI-EAS443:3:51:1466:132#0/1  
GATTGATGCCAGGGTCGACTTCGAGTCTGGACGGATCAAG  
+HWI-EAS443:3:51:1466:132#0/1  
`S¥^^[ `aa¥YWV`a]Y\_YSV¥\_Y¥[[[]^][¥ZUV^^  
@HWI-EAS443:3:51:1491:1573#0/1  
GGGCTCCAATCATCCGACGATTTTGTCTCATAGTGAATG  
+HWI-EAS443:3:51:1491:1573#0/1  
aba`][a`^a[a^[^b¥L^`\_]\_\_aX[\_\_\_]\_a^\_¥a`^^V  
@HWI-EAS443:3:51:1544:1215#0/1  
AATGGAATCAATGAACAAAGAGGAAATAGAGATAACAACC  
+HWI-EAS443:3:51:1544:1215#0/1  
abbbaaaa\_abaa\_SO^[]]]b[T`¥aa`\_a\_a\_a]`¥¥G

@HWI-EAS443:3:51:1566:478#0/1  
ATTTAATGTCAGTGCTCTTATTAGATAGCCTCTCTTATTC  
+HWI-EAS443:3:51:1566:478#0/1  
a^bbaaabb`b\_UaaT\_aaab^a¥a`¥¥Y\_YaY`a^\_aU  
@HWI-EAS443:3:51:1569:1241#0/1  
GCATCCCAGGTGTTGCGATAGCCCTTCTTTTTAACTTGCC  
+HWI-EAS443:3:51:1569:1241#0/1  
`baaX\_\_\_b]^`\_]¥]aaaa\_`Z¥a`]bbaaaaUa[^` [  
@HWI-EAS443:3:51:156:1232#0/1  
GTTGCGATAGCCCTTCTTTTTAACTTGCCCTCTCTGCGAT  
+HWI-EAS443:3:51:156:1232#0/1  
a`b`ba`a]a`\_a`a`aa\_\_\_^a\_a`\_`\_]\_\_\_\_\_ZS  
@HWI-EAS443:3:51:1587:1564#0/1  
GTGGTAATGCCAGCCCATGGTCCAGCCAAAAGCATGGAAT  
+HWI-EAS443:3:51:1587:1564#0/1  
a\_a¥F\_]\_[a]Z\_\_\_ZZa`\_\_NQ\_W[WUP^^URV¥Q`\_WZW  
@HWI-EAS443:3:51:1592:424#0/1  
ATGGTGTCTAGGGCCCGGATTGATGCCAGGGTCGACTTCG  
+HWI-EAS443:3:51:1592:424#0/1  
J\_¥¥`abbb^\_\_`aab`aa\_^`a```ba\_b\_\_a\_Z\_]a  
@HWI-EAS443:3:51:161:1432#0/1  
GTCCCCAGTGATTGTGAAAGAAATCTCTGTGTCTTGTGAA  
+HWI-EAS443:3:51:161:1432#0/1  
Jabbbbbbb¥Vb¥Uab`a`a`\_bbaabb`a¥X¥`Z]¥Y]  
@HWI-EAS443:3:51:1624:867#0/1  
TACAAGCAGGAGTGGACAGATTCTACAGGACCTGCAAGTT  
+HWI-EAS443:3:51:1624:867#0/1  
abaa`\_baba[^]¥R\_a`V]W¥PN][\_Y¥VN¥]XXYYVQZ  
@HWI-EAS443:3:51:1647:1906#0/1  
CACTACCTGAGGATAATGAACCAAGTGGGTATGCACAAAC  
+HWI-EAS443:3:51:1647:1906#0/1  
[aabb[]baYba]aaa[aabZP^\_\_R`bb^[\_baSZTa^N  
@HWI-EAS443:3:51:1676:260#0/1  
GTTCTGTTTACTGTGTCCATGGTGTATCCTGTTCTGTTTC  
+HWI-EAS443:3:51:1676:260#0/1  
^ababaaabaaa¥aba]^aVaX\_aaaa`ab\_a][]aaZ[  
@HWI-EAS443:3:51:1682:757#0/1  
TGGCTCTTCAATTGTTTCATCAAAGACTACAGATACACATA  
+HWI-EAS443:3:51:1682:757#0/1  
aaa^aX`^\_¥Z`ZZZa^a^RX`\_NZTZ^KWX]aXZ[[¥Xa  
@HWI-EAS443:3:51:171:1525#0/1  
GGGCTATTAGTATCAGATGGAGGACCAAACCTTATACAATA  
+HWI-EAS443:3:51:171:1525#0/1  
ab]¥Z`\_a]SW^`ZST`a¥T][FNY¥[RS`]^a¥^]XXY  
@HWI-EAS443:3:51:1766:553#0/1  
CCTCCATCTGATACTAATAGCCCTACCTTTGATTGGGTTT  
+HWI-EAS443:3:51:1766:553#0/1  
abbbabb\_bZ]bbaaabbay[``aa`ba`\_aa\_YY]Xa`  
@HWI-EAS443:3:51:22:650#0/1  
AAAAAACAAAGACTGAATAAGAGAGGCTATCTAATAAGAG

+HWI-EAS443:3:51:22:650#0/1  
¥]Q[Y[^Z^Xa^`\_a[\_\_\_]^baa\_W]ZZBBBBBBBBBBBB  
@HWI-EAS443:3:51:235:521#0/1  
CAATATACGGAATCTTCACATTCTGAAGTCTGCTTAAAA  
+HWI-EAS443:3:51:235:521#0/1  
aabbbbbabbbbbbbbabbaa`bbbbabb`bbba`a  
@HWI-EAS443:3:51:249:496#0/1  
GATTCCCAAGAGGAATCGTTCTATTCTCAACACAAGCCAA  
+HWI-EAS443:3:51:249:496#0/1  
^X]^ZZa\_V¥aa¥T¥\_ab[] [aa` `[`a¥V¥` `]]YSURI  
@HWI-EAS443:3:51:251:1044#0/1  
CCTCCATCTGATACTAATAGCCCTACCTTTGATTGGGTTT  
+HWI-EAS443:3:51:251:1044#0/1  
^a`^`abbaa\_abaa\_aa^^]YZ`b)`aaa\_]aab` `X][  
@HWI-EAS443:3:51:252:553#0/1  
AACATCCTGAGCATGGCACCCATAATGTTCTCAAACAAAA  
+HWI-EAS443:3:51:252:553#0/1  
abaaaaabaaaa\_\_`\_\_aaaa\_\_a\_a`a\_\_\_`\_`\_`\_`  
@HWI-EAS443:3:51:268:2016#0/1  
AAGTGCTGCAATCTATTCGAGAAATTTTTCCCTAGCAGTT  
+HWI-EAS443:3:51:268:2016#0/1  
a\_aFVZR¥[Z¥[S[SQR^R¥Y^YO¥W[^UJVXQ\_`]WTDI  
@HWI-EAS443:3:51:291:1418#0/1  
AGCTGATTCATTTACTCCAGACACTCCAAAGCTGGGTAGC  
+HWI-EAS443:3:51:291:1418#0/1  
]a]¥XY`a]abbX^aZ`aaa^^¥\_a\_aY]^QY]]N]YW  
@HWI-EAS443:3:51:325:360#0/1  
AACCAAGTGGGTATGCACAAACAGACTGTGTTCTAGAGGC  
+HWI-EAS443:3:51:325:360#0/1  
abababbabab\_aaaaaaaaaa\_aa]\_ab\_a^]¥` `a¥[aB  
@HWI-EAS443:3:51:33:996#0/1  
GGGCTCCAATCATCCGACGATTTTGCTCTCATAGTGAATG  
+HWI-EAS443:3:51:33:996#0/1  
ababaaaaaa`aa\_\_aa`aZ`aaaa` `` ` `\_\_Ya\_\_\_`  
@HWI-EAS443:3:51:340:542#0/1  
GCTTTCCTTGAAGAATCCCACCCAGGAATATTTGAGAATT  
+HWI-EAS443:3:51:340:542#0/1  
a` `aaa`aba`aaaa`a` \_\_\_\_¥\_a\_¥\_\_\_\_` `^a¥\_`^  
@HWI-EAS443:3:51:353:514#0/1  
AACAGATCTTCATGATCTCAGAGAACTTTCTTTCTTGAT  
+HWI-EAS443:3:51:353:514#0/1  
aa^Z\_Va¥`aaaaa\_a`\_\_a\_aa` `aaaa`aa`a` `a`a  
@HWI-EAS443:3:51:361:180#0/1  
CACGCAAAGAACAATAGGGAAGAAAAACAAAGACTGAAT  
+HWI-EAS443:3:51:361:180#0/1  
aabbbab^bYaZa¥baab\_`abaaabaaa`aabaabbaab  
@HWI-EAS443:3:51:381:1849#0/1  
GCCAAAAGCATGGAATATGATGCCGTTGCAACTACACATT  
+HWI-EAS443:3:51:381:1849#0/1  
aaabaaaabaaaaaabb\_a`a\_\_\_\_`a^aZU[ `W\_`^`^W

@HWI-EAS443:3:51:413:845#0/1  
AGTGGGTATGCACAAACAGACTGTGTTCTAGAGGCTATGG  
+HWI-EAS443:3:51:413:845#0/1  
`¥bbaabbba^^^\_babaa\_aa\_a\_a^a¥a`aa[^[BBB  
@HWI-EAS443:3:51:444:863#0/1  
ATCTAATAAGAGCACTGACATTAATACGATGACCAAAGA  
+HWI-EAS443:3:51:444:863#0/1  
ab`aaaba`a\_aaa`aaa`aaa`^^`a`a\_aa`\_R^Z``\_  
@HWI-EAS443:3:51:451:23#0/1  
AGCCTCTCTTATTCAGTCTTTGTTTTTTCTTCCCTATTGT  
+HWI-EAS443:3:51:451:23#0/1  
¥a¥ba^^a\_a^a`a`aa^abba¥\_bbbbb^ba^^a]^bba  
@HWI-EAS443:3:51:469:320#0/1  
TTCTCGAATAGATTGCAGCACTTCTGGTACATCTGTTCAT  
+HWI-EAS443:3:51:469:320#0/1  
a`aa`ba```aaa`a`a\_a\_aa]aa`¥\_Xa\_^^`\_^`]^\_  
@HWI-EAS443:3:51:479:1635#0/1  
AAAGTGGACGACAAACACAGAGACTGGTGCACCCAGCTC  
+HWI-EAS443:3:51:479:1635#0/1  
abab[^ba^`W^\_¥Xaa^a[aa\_a\_\_YYY[`]a``\_VZ¥  
@HWI-EAS443:3:51:490:462#0/1  
AGGCTATCTAATAAGAGCACTGACATTAATACGATGACC  
+HWI-EAS443:3:51:490:462#0/1  
aZZY¥\_bZPa`¥`Ra`ZX¥bR]^`a^¥0¥aWabZaa`\_  
@HWI-EAS443:3:51:509:274#0/1  
GACGATTTTGCTCTCATAGTGAATGCACCAAACCATGAGG  
+HWI-EAS443:3:51:509:274#0/1  
a\_U\_]a\_]Za]^¥`a`aa[`Y`aZV^U]]a^[YZa`¥`a  
@HWI-EAS443:3:51:526:580#0/1  
GAACAATTGAAGAGCCATCTGGGCCGTTGCAGGTCCAAGG  
+HWI-EAS443:3:51:526:580#0/1  
a`aaa`aa`aaaa`a`a`\_]\_\_[^a\_]`ZQW^\_P[^  
@HWI-EAS443:3:51:535:39#0/1  
GGGGATTACAAAGTCTTCCCCGATAATCATCATCCATTAG  
+HWI-EAS443:3:51:535:39#0/1  
\_^`babb\_babaa\_aa\_W^`S¥`^¥``Y^`]aa`^a`\_]  
@HWI-EAS443:3:51:537:1719#0/1  
ATCCTTTAAGAAATCTATTAGCCTTCCTGACTCATTAGCT  
+HWI-EAS443:3:51:537:1719#0/1  
aaa\_aaba`a`a^aa`ba```\_`^`a¥aa\_\_a`aa```^\_  
@HWI-EAS443:3:51:542:1940#0/1  
ATCCGACTCTACTTTTCCTAAAAATCCAGCGCAAATGC  
+HWI-EAS443:3:51:542:1940#0/1  
abbbbaabaaaaa`baaababa\_baaaa`aa`aaa`a\_\_  
@HWI-EAS443:3:51:546:1170#0/1  
CCACCCAGGAATATTTGAGAATTCATGCCTTGAACAATG  
+HWI-EAS443:3:51:546:1170#0/1  
ab^^a\_I\_¥]\_`b`a`bab]a^[aaaa`]``a``^\_\_a`  
@HWI-EAS443:3:51:571:1109#0/1  
AAAAATCCAGCGCAAATGCCATAAGCACCATTCCT





+HWI-EAS443:3:52:115:633#0/1  
a[a`^aWa\_`^V`¥^\_\_¥^V¥^VV¥¥¥¥WWWV¥UU¥¥  
@HWI-EAS443:3:52:118:481#0/1  
TGCCATGCTCAGGATGTTTCTGAACCACTCGGGTTGATTT  
+HWI-EAS443:3:52:118:481#0/1  
]bbbb^b`\_`\_bbaababba`[^`¥¥[\_a\_a\_]`aZaa^  
@HWI-EAS443:3:52:1235:1437#0/1  
AGATAAACTAACTCAAGGTCGCCAGACTTATGATTGGACA  
+HWI-EAS443:3:52:1235:1437#0/1  
`X]\_TJT`YUZ`a\_\_`]V^N\_Z]Z\_\_X`aX\_a`a\_]LU[  
@HWI-EAS443:3:52:1270:1275#0/1  
AGTGATTGTGAAAGAAATCTCTGTGTCTTGTGAATTAGTC  
+HWI-EAS443:3:52:1270:1275#0/1  
abYb]aaa]\_¥`aa]^a\_]a]a\_]`^^a\_]TSR[^aSNP]  
@HWI-EAS443:3:52:1289:1784#0/1  
CTATATGTGTATCTGTAGTCTTTGATGAACAATTGAAGAG  
+HWI-EAS443:3:52:1289:1784#0/1  
¥a`bbbbbbabbbbaa`]ab`\_`\_]a¥a`bbbb]V`  
@HWI-EAS443:3:52:1311:182#0/1  
GGTGCATTCACTATGAGAGCAAAATCGTCGGATGATTGGA  
+HWI-EAS443:3:52:1311:182#0/1  
aaZba`bb```aaaaaaa\_`aa\_\_\_]V[\_YZ[\_\_\_]V  
@HWI-EAS443:3:52:1330:177#0/1  
GGGCTCCAATCATCCGACGATTTTGCTCTCATAGTGAATG  
+HWI-EAS443:3:52:1330:177#0/1  
aaba`abaaaaa`\_a`\_\_`aaaa```Z`\_`]Y`^^\_  
@HWI-EAS443:3:52:1335:767#0/1  
ATGGATTTGTGGCTAATTTTAGCATGGAGCTACCCAGCTT  
+HWI-EAS443:3:52:1335:767#0/1  
^^`^^aba¥]\_Y^`b`¥`bb]b]aYZ`\_`RZ^¥^Z^aU^a  
@HWI-EAS443:3:52:1353:109#0/1  
AACAGATCTTCATGATCTCAGAGAACTCTTCTTTCTTGAT  
+HWI-EAS443:3:52:1353:109#0/1  
aaKb^^a^b][ab^M¥HbYHYWVa`RaSaaNabZGXaa\_\_  
@HWI-EAS443:3:52:1391:53#0/1  
CAACTGCATTGGCCAACACCATAGAAGTCTTTAGATCGAA  
+HWI-EAS443:3:52:1391:53#0/1  
aa¥P`b^aabbZaa`H]a]Q[Y`¥0\_S^``\_]W[¥S`UY  
@HWI-EAS443:3:52:1403:1825#0/1  
CAGGAATGTGTAGTTGCAACGGCATCATATCCATGCTTT  
+HWI-EAS443:3:52:1403:1825#0/1  
a\_bbbbbbabaaabbabbaa`abb\_abbbaa]bba^`ab  
@HWI-EAS443:3:52:1490:283#0/1  
GATAAAGAACAACATGATAAACAATGACCTTGGACCTGCA  
+HWI-EAS443:3:52:1490:283#0/1  
\_L]VZW¥]XTXY]ZX`Z^`^PVYV`aZGFY^]]¥L[VBBB  
@HWI-EAS443:3:52:1507:916#0/1  
AATCTTCATTCTTTTACTCTCGAACATGTACCCTTCCCT  
+HWI-EAS443:3:52:1507:916#0/1  
aab`aaaaba`abbaa\_ba`^`\_]`]`a`\_`^¥`\_`\_^[]`





+HWI-EAS443:3:52:1708:1404#0/1  
`\_aa\_\_aa`[a\_`^^a^`^`\_\_\_\_^`\_`¥Uaa]\_W\_\_\_\_R\_\_  
@HWI-EAS443:3:52:1710:1925#0/1  
CACTCCTGCTTGTATTCCCTCATGGTTTGGTGCATTCACT  
+HWI-EAS443:3:52:1710:1925#0/1  
abaa]\_`aaa`a\_aaa\_¥S]Z[aa\_WaZF]Za]\_a`LVS`  
@HWI-EAS443:3:52:1741:1099#0/1  
ATGGAATCAATGAACAAAGAGGAAATAGAGATAACAACCC  
+HWI-EAS443:3:52:1741:1099#0/1  
abba`aaaaabaaa]a`a]0[^¥\_`a\_`\_aaaaa`a`¥X¥  
@HWI-EAS443:3:52:1760:1574#0/1  
ATGGCTTTCCTTGAAGAATCCCACCCAGGAATATTTGAGA  
+HWI-EAS443:3:52:1760:1574#0/1  
`\_\_\_\_abb\_\_Y\_\_Y¥\_`Vb¥ZT]^U`\_YU`Z``¥XaaSWU]  
@HWI-EAS443:3:52:1765:1703#0/1  
AACCAAGTGGGTATGCACAAACAGACTGTGTTCTAGAGGC  
+HWI-EAS443:3:52:1765:1703#0/1  
abbaa\_a¥aa^Wa`^[[¥\_\_\_\_\_]\_^¥\_[W\_U[S]UBBBBB  
@HWI-EAS443:3:52:207:1830#0/1  
AAACAATGCTGTGGTAATGCCAGCCCATGGTCCAGCCAAA  
+HWI-EAS443:3:52:207:1830#0/1  
a]]\_b\_a`aaa¥a`[a\_a\_\_\_\_a^^¥]^¥¥UUW\_\_[U[¥¥]  
@HWI-EAS443:3:52:263:297#0/1  
AGCTGATTCATTTACTCCAGACACTCCAAAGCTGGGTAGC  
+HWI-EAS443:3:52:263:297#0/1  
a\_aYF[a^bab\_bbaba]`^`^abaa]a`\_]a`abaaM`a]  
@HWI-EAS443:3:52:352:619#0/1  
TGGAATCAATGAACAAAGAGGAAATAGAGATAACAACCCA  
+HWI-EAS443:3:52:352:619#0/1  
aa`\_`aaaa`]]a`\_`¥a[a`^\_`aZa\_aa`\_\_[^`^]]U^  
@HWI-EAS443:3:52:387:155#0/1  
GCACAGCATCACTGAGTCCTGGGATGATGATGGGCATGTT  
+HWI-EAS443:3:52:387:155#0/1  
abaaaa`aa^b\_aa\_a\_a\_aaaa¥`aZa`\_`aY`\_\_\_\_aV`  
@HWI-EAS443:3:52:38:274#0/1  
GATCATTTGAGTTAAAGAAGCTGTGGGATCAAACCCAATC  
+HWI-EAS443:3:52:38:274#0/1  
^¥`baab`\_Zb\_]Yaa`][W]SaMa\_^PTRX[RN[Z\_SZZ  
@HWI-EAS443:3:52:396:1160#0/1  
GGGCTCCAATCATCCGACGATTTTGCTCTCATAGTGAATG  
+HWI-EAS443:3:52:396:1160#0/1  
a]]`X`[V[\_^\_N\_`]¥YGY`W^SZ]VVV]XVWM^QUY]  
@HWI-EAS443:3:52:405:512#0/1  
GTCCTGTAGAATCTGTCCACTCCTGCTTGTATTCCCTCAT  
+HWI-EAS443:3:52:405:512#0/1  
a`\_`\_a`\_a`^`^`aaa]\_a`^`\_`^`\_]`^SZY`\_`^`\_]YV\_  
@HWI-EAS443:3:52:419:901#0/1  
GGGCTCCAATCATCCGACGATTTTGCTCTCATAGTGAATG  
+HWI-EAS443:3:52:419:901#0/1  
a`aaa`\_`aaa`a^\_a`a`a`\_XNVa`\_`\_]`\_\_\_\_^¥S¥UU\_`

@HWI-EAS443:3:52:449:1511#0/1  
TGCCGTTGCAACTACACATTCCTGGATTCCCAAGAGGAAT  
+HWI-EAS443:3:52:449:1511#0/1  
a^aaa`\_Z\_\_aV`]`a\_a``[¥ZTQ[^T^Z^[^^^Z\_  
@HWI-EAS443:3:52:476:273#0/1  
AACCCGAGTGGTTCAGAAACATCCTGAGCATGGCACCCAT  
+HWI-EAS443:3:52:476:273#0/1  
a\_aa¥\_GaYaaSUG]ZQQ`VLLG¥][U[PQPLOKMURYBB  
@HWI-EAS443:3:52:53:13#0/1  
GCTGGTATTTGTGTTCGAATCTTCATTCTTTTACTCTCGA  
+HWI-EAS443:3:52:53:13#0/1  
aa`aaXS\_aY]Q]ZZZ^T¥XR¥YTNXUSS^]VPVXXYX¥X  
@HWI-EAS443:3:52:545:1398#0/1  
AAGAGAGGCTATCTAATAAGAGCACTGACATTAATACGA  
+HWI-EAS443:3:52:545:1398#0/1  
aaaaa`aaaa`[W[L\_V\_WJVRPYS^VORZ[¥RZ\_IXJOV  
@HWI-EAS443:3:52:553:171#0/1  
GTTCTGTTTACTGTGTCCATGGTGTATCCTGTTCTGTTCT  
+HWI-EAS443:3:52:553:171#0/1  
a\_\_X`a]`^^`a\_aXYWY\_\_U]WX\_X]`]ZTV\_\_]UY  
@HWI-EAS443:3:52:567:1677#0/1  
CAATCCGACTCTACTTTTCTAAAAATTCCAGCGCAAAAT  
+HWI-EAS443:3:52:567:1677#0/1  
aabbbab`abbbbabbaaaabbb^`baa`^a\_aa`aVa`a  
@HWI-EAS443:3:52:603:475#0/1  
CAGGAATGTGAAGATTCCGTATATTGTATAAGTTTGGTCC  
+HWI-EAS443:3:52:603:475#0/1  
a]V]`aa]^`^^`\_VZb^\_a`aab`^ZV``a\_]QV]¥  
@HWI-EAS443:3:52:620:1110#0/1  
GGTGGGATGGGCTCCAATCATCCGACGATTTTGCTCTCAT  
+HWI-EAS443:3:52:620:1110#0/1  
\_\_Y`Z\_X^`\_Y¥\_\_\_`\_\_T\_X`WZ\_]``\_a]¥`\_^XY  
@HWI-EAS443:3:52:62:814#0/1  
AAAAATTCCAGCGCAAAATGCCATAAGCACCCACATTCCCT  
+HWI-EAS443:3:52:62:814#0/1  
aa`U``aaaaa\_a````^`]]\_]\_[X¥]^]Y]Z^]YWZZ^  
@HWI-EAS443:3:52:649:1831#0/1  
GGGATTACAAAGTCTTCCCCGATAATCATCATCCATTAGC  
+HWI-EAS443:3:52:649:1831#0/1  
abb`bbbabbbb`aaaaa\_a`aaaaa\_aaaaaa^aaa``\_  
@HWI-EAS443:3:52:651:1023#0/1  
CGGATTGATGCCAGGGTCTGACTTCGAGTCTGGACGGATCA  
+HWI-EAS443:3:52:651:1023#0/1  
\_`XWYbbaaa]¥`aW^Yaaa\_aZUZXaYZ`a[\_\_\_aaX^Z]  
@HWI-EAS443:3:52:657:973#0/1  
GTCCATCAATCGGGTTGAGCTGGGGTGCACCAGTCTCTGT  
+HWI-EAS443:3:52:657:973#0/1  
aaaa``aaaa``aa[¥Y¥^[¥aZZ[N¥[\_\_\_¥Y]UU]X^\_V  
@HWI-EAS443:3:52:679:1523#0/1  
GCAAAATCGTCCGATGATTGGAGCCCATCCCACCAGTATA

+HWI-EAS443:3:52:679:1523#0/1  
abb^baaba^aaa`\_\_`aa¥¥`\_`\_a\_]`\_`\_]YaZ^` [  
@HWI-EAS443:3:52:700:1047#0/1  
ATCCGACTCTACTTTTCCTAAAAATTCCAGCGCAAAATGC  
+HWI-EAS443:3:52:700:1047#0/1  
\_ababa]`a\_^]abaaaaabba\_]aa``bZ``a\_ZZ``Y  
@HWI-EAS443:3:52:707:552#0/1  
CGAATCTTCATTCTTTTACTCTCGAACATGTACCCTTCC  
+HWI-EAS443:3:52:707:552#0/1  
abb\_aabbabbbaabbababab[``\_aa`ab\_aa\_`baaa¥  
@HWI-EAS443:3:52:730:875#0/1  
GACCAAGAAGATGGTCACGCAAAGAACAATAGGGAAGAAA  
+HWI-EAS443:3:52:730:875#0/1  
a`aa]aaa`a[Ta\_T`\_`¥[^¥`^U\_\_\_^aX`a¥[P\_XV[  
@HWI-EAS443:3:52:731:954#0/1  
GTTCTGTTTACTGTGTCCATGGTGTATCCTGTTCTGTTCC  
+HWI-EAS443:3:52:731:954#0/1  
a]a\_a`aa]\_aa¥a]\_]`aaX\_Y\_\_UX`\_X^]W\_`Y^X  
@HWI-EAS443:3:52:736:1419#0/1  
GTTTACTGTGTCCATGGTGTATCCTGTTCTGTTCCATGG  
+HWI-EAS443:3:52:736:1419#0/1  
`X\_`\_[]aX\_P^Z¥]Z^N¥¥¥YZLX\_[Z¥¥YVV[]][¥[Z¥  
@HWI-EAS443:3:52:740:1316#0/1  
CATTTGCGAAAAGCTTGAACAGTCTGGGCTCCCAGTAGGG  
+HWI-EAS443:3:52:740:1316#0/1  
abba`abaaaaabaaaa\_a\_a¥\_a`\_a\_`\_\_a^aWS¥\_\_  
@HWI-EAS443:3:52:758:67#0/1  
AGATAACAACCCACTTCAAAGAAAAAGGAGAGTAAGAGA  
+HWI-EAS443:3:52:758:67#0/1  
aa\_baa^aaS`\_`X`aa`^X[a\_\_ZV^b`]a]b\_`\_a\_`\_  
@HWI-EAS443:3:52:759:1244#0/1  
GCTAATTTTAGCATGGAGCTACCCAGCTTTGGAGTGTCTG  
+HWI-EAS443:3:52:759:1244#0/1  
ab\_\_W`bb``]¥abaa^\_\_aaa^¥]aaba`\_X\_bZaa^ba  
@HWI-EAS443:3:52:776:148#0/1  
CAACCCGAGTGGTTCAGAAACATCCTGAGCATGGCACCCA  
+HWI-EAS443:3:52:776:148#0/1  
`ba^U^bbb\_bbaa^^Y`aaXa¥VZ[Y^aWa\_\_\_\_]\_ZWW`  
@HWI-EAS443:3:52:786:154#0/1  
GAACAATTGAAGAGCCATCTGGGCCGTTGCAGGTCCAAGG  
+HWI-EAS443:3:52:786:154#0/1  
aaa`aaaaab\_\_a\_^`a\_a^a]`^^a]^\_ZX`\_YY]]X\_[  
@HWI-EAS443:3:52:80:394#0/1  
CCGGATTGATGCCAGGGTCGACTTCGAGTCTGGACGGATC  
+HWI-EAS443:3:52:80:394#0/1  
aabbabbaZaaba\_a`aZbabaa]UaaaWabb`a`a`0¥]  
@HWI-EAS443:3:52:817:851#0/1  
ATTGATGCCAGGGTCGACTTCGAGTCTGGACGGATCAAGA  
+HWI-EAS443:3:52:817:851#0/1  
aaa`aaaaaaaa`a`a```Y]W]`a`^]\_^]^^`[]X

@HWI-EAS443:3:52:836:937#0/1  
GGCTATTAGTATCAGATGGAGGACCAAACTTATACAATAT  
+HWI-EAS443:3:52:836:937#0/1  
ab`aba^a`¥```a`^ab]``YX¥^aaZaa```^¥a\_``  
@HWI-EAS443:3:52:863:140#0/1  
GGCAAGTTAAAAAGAAGGGCTATCGCAACACCTGGGATGC  
+HWI-EAS443:3:52:863:140#0/1  
^V[a\_a\_aa]¥\_`a````\_\_``[Xa]\_\_Y^XU\_`a\_]\_\_]  
@HWI-EAS443:3:52:865:2016#0/1  
GGCTAATTTTAGCATGGAGCTACCCAGCTTTGGAGTGTCT  
+HWI-EAS443:3:52:865:2016#0/1  
`abbbab][^ab`abaa`a\_aa¥`a\_aabaa\_¥WZU^\_  
@HWI-EAS443:3:52:881:501#0/1  
TTGATGCCAGGGTCGACTTCGAGTCTGGACGGATCAAGAA  
+HWI-EAS443:3:52:881:501#0/1  
abaa```¥Z[¥ZQ¥¥^¥aZZ]W\_Y]aaXV`YS[[[] []]  
@HWI-EAS443:3:52:890:1503#0/1  
GGTGTGTTCTGTTTACTGTGTCCATGGTGTATCCTGTTCC  
+HWI-EAS443:3:52:890:1503#0/1  
aaNaY\_^`\_a[`aa^¥\_a^a^^Z¥^^WTaY¥\_^]\_^Z`WW  
@HWI-EAS443:3:52:89:1293#0/1  
GAGTAAATGAATCAGCTGACATGAGTATTGGAGTAACAGT  
+HWI-EAS443:3:52:89:1293#0/1  
]N\_R^\_^ZZYYY¥\_W`Vaa[]``WWDU¥a^LDXN[`[QZO  
@HWI-EAS443:3:52:915:1744#0/1  
TGCAGATTAGAGGTTTCGTATACTTTGTTGAAACTTTAGC  
+HWI-EAS443:3:52:915:1744#0/1  
Ya`ab`^bb\_Y\_¥^\_Y[S]b`Z]X\_ba¥RU``Yba^HQ]  
@HWI-EAS443:3:52:915:413#0/1  
CGATAATCATCATCCATTAGCTCCCATTTTAAGCAGACTT  
+HWI-EAS443:3:52:915:413#0/1  
aba`[^aaaa\_aba¥`ab^a`a`\_``aa^^^aXaa`X]W  
@HWI-EAS443:3:52:942:1858#0/1  
GGGATTACAAAGTCTTCCCCGATAATCATCATCCATTAGC  
+HWI-EAS443:3:52:942:1858#0/1  
`aa]U^b`b`aaSabaRaYa\_]a\_\_a¥`\_\_\_\_]`^\_a\_W`\_  
@HWI-EAS443:3:52:997:1402#0/1  
CCGGCAGCAACTGCATTGGCCAACACCATAGAAGTCTTTA  
+HWI-EAS443:3:52:997:1402#0/1  
^b`\_aa\_^\_]bba`\_abaa\_]\_aa\_aaaaa\_``ZVaaaa  
@HWI-EAS443:3:53:1007:1755#0/1  
GTAGTCTTTGATGAACAATTGAAGAGCCATCTGGGCCGTT  
+HWI-EAS443:3:53:1007:1755#0/1  
a\_`[S``aaaaaa^`]^a`][a\_]¥`a^Z\_\_\_\_]T`R]  
@HWI-EAS443:3:53:100:25#0/1  
GAACAATTGAAGAGCCATCTGGGCCGTTGCAGGTCCAAGG  
+HWI-EAS443:3:53:100:25#0/1  
a\_\_\_\_`^aa]]`\_\_`]^\_^]a^^]Z`TRXUW^ZQTWTMY]  
@HWI-EAS443:3:53:1011:365#0/1  
GAAATACACCAAGACAATATACTGGTGGGATGGGCTCCAA



@HWI-EAS443:3:53:1289:901#0/1  
AGGCCATGGTGTCTAGGGCCCGATTGATGCCAGGGTCGA  
+HWI-EAS443:3:53:1289:901#0/1  
]a`a]`^^¥XWW]Z¥\_\_]¥¥^W]\_^]]\_`UVZ^[DV]Y  
@HWI-EAS443:3:53:1334:640#0/1  
ATCCGACTCTACTTTTCTAAAAATTCCAGCGCAAATGC  
+HWI-EAS443:3:53:1334:640#0/1  
aa\_aaaabaaa\_aabbaababa`aa`aa\_a\_aaa\_a`Z  
@HWI-EAS443:3:53:1391:1040#0/1  
TGAAGATTCGAACACAAATACCAGCAGAAATGCTAGCAAG  
+HWI-EAS443:3:53:1391:1040#0/1  
abaa`abaa\_a^a\_aaab\_a\_aa`a`aab\_]aaa¥`\_]`  
@HWI-EAS443:3:53:1393:564#0/1  
GTCCTCCATCTGATACTAATAGCCCTACCTTTGATTGGGT  
+HWI-EAS443:3:53:1393:564#0/1  
`¥VP\_aaaaVZaaaaYb`aaa]Y`aa]]a`Q`[V]^\_[0  
@HWI-EAS443:3:53:1400:1933#0/1  
AGCTGATTCATTTACTCCAGACACTCCAAAGCTGGGTAGC  
+HWI-EAS443:3:53:1400:1933#0/1  
aa]bbabb`abbaaba\_aa`Za]a\_¥a\_a\_Z\_a^MX^  
@HWI-EAS443:3:53:1429:775#0/1  
GGGGCAATGAAAAGAAGCCAAACTGGCAAATGTTGTGAG  
+HWI-EAS443:3:53:1429:775#0/1  
J\_¥^Y[`bb^W]]¥ba\_\_a`¥Z\_X`^a`b`aa[abb[VZa  
@HWI-EAS443:3:53:1442:1395#0/1  
CTCTTACTCTCCTTTTCTTTGAAAGTGGGTTGTTATCTC  
+HWI-EAS443:3:53:1442:1395#0/1  
ababaabbab\_abbbb`\_babab`bbaba`abbaaY`¥`Z  
@HWI-EAS443:3:53:1532:1121#0/1  
GGCTAATTTTAGCATGGAGCTACCCAGCTTTGGAGTGTCT  
+HWI-EAS443:3:53:1532:1121#0/1  
ab]`Ua[bV]\_aN]aba]S[a[¥`]]aY[`ba^Y\_T\_^W`  
@HWI-EAS443:3:53:1553:902#0/1  
CCAAAGCTGGGTAGCTCCATGCTAAAATTAGCCACAAATC  
+HWI-EAS443:3:53:1553:902#0/1  
`b\_ba`¥bb`aa[[¥aab^a]``Ya```a`DDRHa\_a\_U  
@HWI-EAS443:3:53:1582:472#0/1  
CCCAGTGATTGTGAAAGAAATCTCTGTGTCTTGTGAATTA  
+HWI-EAS443:3:53:1582:472#0/1  
a`a[GWZ^bb^aaabaaaaab\_babba`a`b`U[UJ\_aaU  
@HWI-EAS443:3:53:1591:1750#0/1  
GGCTTTCCTTGAAGAATCCCACCCAGGAATATTTGAGAAT  
+HWI-EAS443:3:53:1591:1750#0/1  
ab[a`Y¥abaaaa`Vba\_aQ`]a[\_bbZ^b\_\_aa[a]Q]\_`  
@HWI-EAS443:3:53:1623:891#0/1  
CAGATCTTCATGATCTCAGAGAACTCTTCTTTCTTGATCC  
+HWI-EAS443:3:53:1623:891#0/1  
a``bbbb`aabbbbbbb`Ya]bbbbbbbabba\_bbbabaR  
@HWI-EAS443:3:53:1633:952#0/1  
ATCCCACTAACTTGCAGGTCCTGTAGAATCTGTCCACTC

+HWI-EAS443:3:53:1633:952#0/1  
abaab\_]bbbbM\_abbaZa[a\_a¥\_[aabb`b`^aa¥`Z  
@HWI-EAS443:3:53:1647:1254#0/1  
AAGAGAGGCTATCTAATAAGAGCACTGACATTAATACGA  
+HWI-EAS443:3:53:1647:1254#0/1  
aa\_ababb]b\_XRU0^XX^QYXLQTY¥LTY^ZRZ`VVNYS  
@HWI-EAS443:3:53:1667:416#0/1  
ATCGTATTTAATGTCAGTGCTCTTATTAGATAGCCTCTCT  
+HWI-EAS443:3:53:1667:416#0/1  
abb\_X\_\_abbaZ`aaaaVPT\_G`bbbb^\_^bTWSM]Y\_Y`  
@HWI-EAS443:3:53:1679:1281#0/1  
ATGTTGATCCCACTAACTTGCAGGTCCTGTAGAATCTGT  
+HWI-EAS443:3:53:1679:1281#0/1  
Z\_\_[a`U`bb`aaabbab[]aaab`aYb`aa`a`babb¥  
@HWI-EAS443:3:53:1708:1505#0/1  
TTTTGTTTGAACAATTATGGGTGCCATGCTCAGGATGTT  
+HWI-EAS443:3:53:1708:1505#0/1  
ab``aabb`]U^^[aaaa^a¥¥][Xa\_W[UR]`[^Y\_Y^  
@HWI-EAS443:3:53:1722:342#0/1  
AATTTTAGCATGGAGCTACCCAGCTTTGGAGTGTCTGGAG  
+HWI-EAS443:3:53:1722:342#0/1  
a^¥bbbaa\_]aa]``aba^a\_a]aa\_L[a^TV`\_b^\_ZN  
@HWI-EAS443:3:53:1733:568#0/1  
CGGATTGATGCCAGGGTCGACTTCGAGTCTGGACGGATCA  
+HWI-EAS443:3:53:1733:568#0/1  
abaaba]abZ`a]bbb]b¥`bab\_bbbba\_[I`]bbb]Z^  
@HWI-EAS443:3:53:1745:968#0/1  
GAGCTAATGGATGATGATTATCGGGGAAGACTTTGTAATC  
+HWI-EAS443:3:53:1745:968#0/1  
a]]`ba\_ba^[\_a^`ba[^Y`^OY^^[PZa`[`¥Z[]  
@HWI-EAS443:3:53:1747:1619#0/1  
GACAACATGACCAAGAAGATGGTCACGCAAAGAACAATAG  
+HWI-EAS443:3:53:1747:1619#0/1  
ab``^`b^aa\_a\_abaaaa\_aa\_\_a`a``\_a`Z`\_a``  
@HWI-EAS443:3:53:221:1147#0/1  
AACAAAGACTGAATAAGAGAGGCTATCTAATAAGAGCACT  
+HWI-EAS443:3:53:221:1147#0/1  
^ba```b`bbbbba^Zbb`]\_abb`a\_]`\_^]WPI[YQBB  
@HWI-EAS443:3:53:264:807#0/1  
CACCAATACTCAGAAAAGGGAAAGTGGACGACAAACACAG  
+HWI-EAS443:3:53:264:807#0/1  
abababbabb]bbbaabb`aaba`aab`bbbaabbbabb  
@HWI-EAS443:3:53:298:918#0/1  
CTAGGGAAAGGGTACATGTTTCGAGAGTAAAAGAATGAAGA  
+HWI-EAS443:3:53:298:918#0/1  
Y`\_a\_\_\_\_¥^¥NaVab`¥bXbbabbaaY^a[S[`b\_S[bba  
@HWI-EAS443:3:53:344:1167#0/1  
AATGGAATCAATGAACAAAGAGGAAATAGAGATAACAACC  
+HWI-EAS443:3:53:344:1167#0/1  
aaba`abbbbabaabbaaaaa`bbbbbb`ab`abaaa`]Y



@HWI-EAS443:3:53:351:2023#0/1  
ACCCGAGTGGTTCAGAAACATCCTGAGCATGGCACCCATA  
+HWI-EAS443:3:53:351:2023#0/1  
\_a^\_a^V^X[\_\_\_^\_¥`aaa]]^\_`^^a\_YNYa``[]`[  
@HWI-EAS443:3:53:359:1821#0/1  
CTACTTTTCCTAAAAATTCCAGCGCAAAATGCCATAAGCA  
+HWI-EAS443:3:53:359:1821#0/1  
]b^U[¥a`\_X`YRZQZ`bYL^Waabb`aaa`P\_babb^ba  
@HWI-EAS443:3:53:363:578#0/1  
CAGAAATCAACCGGCAGCAACTGCATTGGCCAACACCATA  
+HWI-EAS443:3:53:363:578#0/1  
abbb`\_bbbbbabbbbaaaaab`U`aa```a`Z\_\_`\_`a  
@HWI-EAS443:3:53:384:1089#0/1  
ACCAATACTCAGAAAAGGGAAAGTGGACGACAAACACAGA  
+HWI-EAS443:3:53:384:1089#0/1  
[`baX`abbb^^aaa^aa\_Y[¥]H\_b¥Xaa\_ab]\_]`aa]  
@HWI-EAS443:3:53:398:1582#0/1  
CAGAATCAATCTCTTTATGACTGACAAAGGGATTGAGGGG  
+HWI-EAS443:3:53:398:1582#0/1  
`\_\_bba`bbbbabb\_b\_bbbaababb`a```a\_ba]\_[  
@HWI-EAS443:3:53:404:501#0/1  
GGCCATGGTGTCTAGGGCCCGATTGATGCCAGGGTCGAC  
+HWI-EAS443:3:53:404:501#0/1  
W)`aa`¥`]b`aa``aaa`]b`\_\_a``aa`]`aaV\_aZW  
@HWI-EAS443:3:53:486:403#0/1  
ATCCCTCATGGTTTGGTGCATTCACTATGAGAGCAAAAT  
+HWI-EAS443:3:53:486:403#0/1  
aaaa¥abaZabbaa`a`Y`\_aab``]aabb`\_^\_Q^``^\_  
@HWI-EAS443:3:53:503:1512#0/1  
GGGATGGGCTCCAATCATCCGACGATTTTGCTCTCATAGT  
+HWI-EAS443:3:53:503:1512#0/1  
^aWVab[a[\_`^\_¥a\_ba\_U[```\_aaaa^```]a\_]ZK  
@HWI-EAS443:3:53:519:873#0/1  
CATGGTGTCTAGGGCCCGATTGATGCCAGGGTCGACTTC  
+HWI-EAS443:3:53:519:873#0/1  
¥\_¥]X]XW]]T[a`X^]T¥\_`b`\_ba`[```a^a\_ZX``^  
@HWI-EAS443:3:53:528:1137#0/1  
AAAAATTCCAGCGCAAAATGCCATAAGCACCATTCCT  
+HWI-EAS443:3:53:528:1137#0/1  
][Ya`aa`S\_Z`¥]^[[^]Z\_`]\_b`b[a]aa`a````]`a  
@HWI-EAS443:3:53:53:1714#0/1  
TTGCGAAAAGCTTGAACAGTCTGGGCTCCCAGTAGGGGGC  
+HWI-EAS443:3:53:53:1714#0/1  
`bba\_R\_T^^]\_^]bab\_R^a\_¥aaYMZ]T^R`a¥¥X^]  
@HWI-EAS443:3:53:570:847#0/1  
GGCTAATTTTAGCATGGAGCTACCCAGCTTTGGAGTGTCT  
+HWI-EAS443:3:53:570:847#0/1  
abbbb\_bb`bbbaa`b`\_a^baaa`Vq]aaa`]]a\_a\_[a  
@HWI-EAS443:3:53:596:684#0/1  
GTGTGTTCTGTTTACTGTGTCCATGGTGTATCCTGTTCT



@HWI-EAS443:3:53:736:112#0/1  
GGTGTCTAGGGCCCGGATTGATGCCAGGGTCCGACTTCGAG  
+HWI-EAS443:3:53:736:112#0/1  
^b¥a`aaaaa[^Zab\_\_`¥`^\_^^`\_\_W^^W^^U^U^  
@HWI-EAS443:3:53:740:806#0/1  
GGCCAATGCAGTTGCTGCCGTTGATTTCTGTTAATGTC  
+HWI-EAS443:3:53:740:806#0/1  
`aabababaababbabb\_S¥b\_a]¥abaVaZ`bbaaa`^Z  
@HWI-EAS443:3:53:741:1822#0/1  
TGTCTCCCCTATGGCACCTATATGTGTATCTGTAGTCTTT  
+HWI-EAS443:3:53:741:1822#0/1  
a[bb`¥[abaaabab`\_Y]I`YbSaaaT`\_ab\_`^WP]aX  
@HWI-EAS443:3:53:742:475#0/1  
GCTTGAACAGTCTGGGCTCCCAGTAGGGGCAATGAAAAG  
+HWI-EAS443:3:53:742:475#0/1  
a\_a`aaaa`\_]\_\_¥`^\_] [¥aUS]^`\_a¥W^`\_Y^^^  
@HWI-EAS443:3:53:749:1569#0/1  
AACAGATCTTCATGATCTCAGAGAACTCTTCTTTCTTGAT  
+HWI-EAS443:3:53:749:1569#0/1  
])aab^`\_a`[a`aaa\_a`Ya\_b`a[\_Z``aT¥\_\_¥QBBB  
@HWI-EAS443:3:53:75:1543#0/1  
GCCTTATTTTCTCAATTTTCTTCTTTGTTGATTCATTGAA  
+HWI-EAS443:3:53:75:1543#0/1  
a^Za\_`abb^`aJ\_\_`^YZ[¥a[`aa^abaa`\_a\_aY`\_`  
@HWI-EAS443:3:53:777:683#0/1  
GAATCCCACCCAGGAATATTTGAGAATTCATGCCTTGAAA  
+HWI-EAS443:3:53:777:683#0/1  
aa`b`\_aa````aa`abaaaa\_aa`aa\_\_a^`^a\_a`]`  
@HWI-EAS443:3:53:78:1791#0/1  
CCTCTTTGTTTCATTGATTCCATTACATCCTTTAAGAAATC  
+HWI-EAS443:3:53:78:1791#0/1  
¥ba\_a\_`^W`^`a\_\_UYa`a\_`^`\_`\_¥W\_[a\_`W][^`]  
@HWI-EAS443:3:53:841:419#0/1  
CAGGAACAGGATACACCATGGACACAGTAAACAGAACACA  
+HWI-EAS443:3:53:841:419#0/1  
abbbbbb`b\_\_bbbbbbbbbbbaabbbabbb`bbbb`bab  
@HWI-EAS443:3:53:851:1201#0/1  
ACCTATATGTGTATCTGTAGTCTTTGATGAACAATTGAAG  
+HWI-EAS443:3:53:851:1201#0/1  
`bbaa¥S\_bbb^aaabbaa¥S¥ab`bbb`abSZ`abba]Y  
@HWI-EAS443:3:53:851:1801#0/1  
GGGTACATGTTGAGAGTAAAAGAATGAAGATTCGAACAC  
+HWI-EAS443:3:53:851:1801#0/1  
`bbbbbbbbbbbabbbbabbbbabbbbabbbbabbbbab\_  
@HWI-EAS443:3:53:867:237#0/1  
CAAGACTAGGGAAAGGTACATGTTGAGAGTAAAAGAAT  
+HWI-EAS443:3:53:867:237#0/1  
^\_Y`ba\_abb`Zaa^a\_Xa]`abaa^`aaaaSa¥abbaaa  
@HWI-EAS443:3:53:902:785#0/1  
CTTCTTTTTCATTGCCCCCTACTGGGAGCCCAGACTGTTCA

+HWI-EAS443:3:53:902:785#0/1  
abbbbbbaabaa`a`aaaa\_abab\_a^aaaaaaaZaX\_  
@HWI-EAS443:3:53:912:1933#0/1  
AATTCCCCTTTGGCTTGTGTTGAGAATAGAACGATTCCTC  
+HWI-EAS443:3:53:912:1933#0/1  
abaaababb`baa\_`baZb^`b\_`Y\_aa\_aaWa^]a]X`Z  
@HWI-EAS443:3:53:927:1072#0/1  
GGCTATTAGTATCAGATGGAGGACCAAACCTTATACAATAT  
+HWI-EAS443:3:53:927:1072#0/1  
[ `b\_bab¥`^Vbaa\_`ab`b`]L\_aXbS¥^bb¥Vb¥Y`a  
@HWI-EAS443:3:53:939:2024#0/1  
GTGGGATGGGCTCCAATCATCCGACGATTTTGCTCTCATA  
+HWI-EAS443:3:53:939:2024#0/1  
`V\_baa`aa`aSPU]WS^`[a\_\_[]a^Ta\_`]W^¥`Q\_Z¥  
@HWI-EAS443:3:53:940:95#0/1  
TGGATGTCAATCCGACTCTACTTTTCCTAAAAATTCAGC  
+HWI-EAS443:3:53:940:95#0/1  
]b``¥\_H\_R\_a\_U`NXa¥V\_Zaaaa\_`^ [VY¥\_a\_]SU]R  
@HWI-EAS443:3:53:995:130#0/1  
CTGACATTAATACGATGACCAAAGATGCAGAGAGAGGCA  
+HWI-EAS443:3:53:995:130#0/1  
aa`abbbbbbbbbbabbbb``bbbbbbbbbb`babaaa¥a  
@HWI-EAS443:3:54:1004:1217#0/1  
ATGGTGTCTAGGGCCCGATTGATGCCAGGGTCGACTTCG  
+HWI-EAS443:3:54:1004:1217#0/1  
\_MY¥X`[ ` [¥a¥]RZb\_N^a`\_a`0]T]aaRS\_NX\_^^¥  
@HWI-EAS443:3:54:102:798#0/1  
GACGGATCAAGAAAGAAGAGTTCTCTGAGATCATGAAGAT  
+HWI-EAS443:3:54:102:798#0/1  
aaaab\_`aaaa\_a\_]\_a\_`a[ \_` ``aa\_a\_` `` \_` [^^^  
@HWI-EAS443:3:54:1032:2045#0/1  
CATGGAGCTACCCAGCTTTGGAGTGTCTGGAGTAAATGAA  
+HWI-EAS443:3:54:1032:2045#0/1  
a\_U\_\_b[aI`W\_SW`UYabaOREL¥RYaaSWT]`aaHS\_\_  
@HWI-EAS443:3:54:107:1007#0/1  
TGGACGACAAACACAGAGACTGGTGACCCAGCTCAACC  
+HWI-EAS443:3:54:107:1007#0/1  
`ab]]baaaaa]`Xa\_aa`aa`a¥]\_`¥aZaK^^^adWEVX  
@HWI-EAS443:3:54:1099:1300#0/1  
CAGATACACATATAGGTGCCATAGGGGAGACACAAAATT  
+HWI-EAS443:3:54:1099:1300#0/1  
ab`ababbbbbaba^`\_baabbabaaa`bb`bab`bbaaa  
@HWI-EAS443:3:54:1100:227#0/1  
GACCTGAAGTACTTCAATGAATCAACAAAGAAGAAAATTG  
+HWI-EAS443:3:54:1100:227#0/1  
Z`babbaab\_bbbbbbbbbbb^bba`^ababbb`aabaa  
@HWI-EAS443:3:54:1125:850#0/1  
CCCGATTGATGCCAGGGTCGACTTCGAGTCTGGACGGAT  
+HWI-EAS443:3:54:1125:850#0/1  
abbbbbbbbbbb`aabbb\_aba[aa\_aaa]¥^]baaba`\_`

@HWI-EAS443:3:54:1169:1106#0/1  
ATTGATGCCAGGGTCGACTTCGAGTCTGGACGGATCAAGA  
+HWI-EAS443:3:54:1169:1106#0/1  
ababaaa`\_]\_a`¥KU¥]¥\_]U]T^\_]¥TU`^MXQNU[L  
@HWI-EAS443:3:54:1171:303#0/1  
AGCCTCTCTTATTCAGTCTTTGTTTTTTCTTCCCTATTGT  
+HWI-EAS443:3:54:1171:303#0/1  
^b`aabb`bbabbab\_babbbaababbb]bb\_abbbbbbaa  
@HWI-EAS443:3:54:1173:1961#0/1  
GTCTTTAGATCGAATGGCCTAACAGCTAATGAGTCAGGAA  
+HWI-EAS443:3:54:1173:1961#0/1  
`YG\_aVaa^`^\_a¥V`U`\_[GUZGOTZ^a]^VG¥SXQN  
@HWI-EAS443:3:54:1210:158#0/1  
CAGAAATCAACCGGCAGCAACTGCATTGGCCAACACCATA  
+HWI-EAS443:3:54:1210:158#0/1  
Iabbabb`aba`bbabb`]^`^`\_W\_bb`^^abbTaa[U]a^  
@HWI-EAS443:3:54:1253:1190#0/1  
ATCTGTCCACTCCTGCTTGTATTCCCTCATGGTTTGGTGC  
+HWI-EAS443:3:54:1253:1190#0/1  
Zabbaabbbab`a\_a\_ab\_\_b`aaa`aaaaba\_aaaXT\_]`  
@HWI-EAS443:3:54:1266:423#0/1  
GATCCGTCCAGACTCGAAGTCGACCCTGGCATCAATCCGG  
+HWI-EAS443:3:54:1266:423#0/1  
^`aa`aaaaaa`\_\_`^`\_a\_R[]OU`¥`^`[X]`]]UO¥`¥  
@HWI-EAS443:3:54:126:895#0/1  
ATCCGACTCTACTTTTCCTAAAAATCCAGCGCAAAATGC  
+HWI-EAS443:3:54:126:895#0/1  
aaaaa`aa`a^`aaa^`aaaaaaaa`W`^`^`\_a`^`\_\_\_\_  
@HWI-EAS443:3:54:1275:1056#0/1  
ACTGCATTGGCCAACACCATAGAAGTCTTTAGATCGAATG  
+HWI-EAS443:3:54:1275:1056#0/1  
a]\_¥\_bbaVZ\_W¥]PabJa^aaaaa^^aaaaaa\_aa\_`^`  
@HWI-EAS443:3:54:1296:2012#0/1  
CAGTGATTGTGAAAGAAATCTCTGTGTCTTGTGAATTAGT  
+HWI-EAS443:3:54:1296:2012#0/1  
U`a`a`a`b¥`^`abb¥]¥baaQ]\_a`^`^`aaZZ]\_a\_TX`0  
@HWI-EAS443:3:54:1301:1346#0/1  
GCAAAATCGTCGGATGATTGGAGCCCATCCCACCAGTATA  
+HWI-EAS443:3:54:1301:1346#0/1  
a`aKa\_]`[TR`Y`\_`\_Z^`\_`\_W`^`\_T`\_]¥]XWWUXW][  
@HWI-EAS443:3:54:1327:23#0/1  
GAGGAAATAGAGATAACAACCCACTTTCAAAGAAAAAGGA  
+HWI-EAS443:3:54:1327:23#0/1  
`^`bbaa`b]bbbabbaaaaa`^`^`aa\_\_\_\_]b[Z]a^aa`  
@HWI-EAS443:3:54:132:316#0/1  
CTTCTTTTCATTGCCCTACTGGGAGCCCAGACTGTTCA  
+HWI-EAS443:3:54:132:316#0/1  
abbbabbbbaaaabaaa¥`Xa\_aaa]\_^^`\_`a[[`aW^^]  
@HWI-EAS443:3:54:1342:795#0/1  
GTGGGTTGTTATCTCTATTTCTCTTTGTTTCATTGATTCC

+HWI-EAS443:3:54:1342:795#0/1  
`G`a\_I^^]ZJS^\_aYZ`aa`\_``^\_a^\_\_^^^\_]^`^¥  
@HWI-EAS443:3:54:1345:722#0/1  
CTGGGATGCAGATTAGAGGTTTCGTATACTTTGTTGAAAC  
+HWI-EAS443:3:54:1345:722#0/1  
aaXa`X]ba`¥Xbbbaaababb`\_aaa\_bbbba`\_\_ba\_  
@HWI-EAS443:3:54:1355:505#0/1  
AATCCGACTCTACTTTTCCTAAAAATCCAGCGCAAAATG  
+HWI-EAS443:3:54:1355:505#0/1  
abbaaaa\_baba`bbbaaaabbaaaaa\_aaa\_b`aaa`a`  
@HWI-EAS443:3:54:1367:692#0/1  
GATGTCAATCCGACTCTACTTTTCCTAAAAATCCAGCGC  
+HWI-EAS443:3:54:1367:692#0/1  
aaaa`\_aaa^`]]`a]`aaa^aaaa`aa^]\_]¥`Z  
@HWI-EAS443:3:54:1406:37#0/1  
ATTGAAGAGCCATCTGGGCCGTTGCAGGTCCAAGGTCATT  
+HWI-EAS443:3:54:1406:37#0/1  
abb`bbbbWbab\_bbaba`abbY^\_aba`^aaaa^Qab`  
@HWI-EAS443:3:54:153:1508#0/1  
GCTAATTTTAGCATGGAGCTACCCAGCTTTGGAGTGTCTG  
+HWI-EAS443:3:54:153:1508#0/1  
`X`ZYZ]]^VZ^\_\_RDIV^YX]]Y¥RNYZ¥UVNWSWFN^Y  
@HWI-EAS443:3:54:1595:1474#0/1  
AGGCCATGGTGTCTAGGGCCCGATTGATGCCAGGGTCGA  
+HWI-EAS443:3:54:1595:1474#0/1  
`\_\_]TZW¥\_VT[I\_aaTaZY`bb]a\_P\_aaZRaa]`SP`¥  
@HWI-EAS443:3:54:1617:996#0/1  
GACTAGGGAAAGGGTACATGTTTCGAGAGTAAAAGAAATGAA  
+HWI-EAS443:3:54:1617:996#0/1  
Z[bb`bbaba¥Xaa¥bbbbabbbabbbb\_aa`a\_bbb`bb  
@HWI-EAS443:3:54:1635:310#0/1  
TGGGCTCCAATCATCCGACGATTTTGCTCTCATAGTGAAT  
+HWI-EAS443:3:54:1635:310#0/1  
abbb\_a`a`ba\_b\_]aaZb\_a^^^`Y\_WLU^`\_W]a\_\_[  
@HWI-EAS443:3:54:1636:974#0/1  
GAAGAATCCCACCCAGGAATATTTGAGAATTCATGCCTTG  
+HWI-EAS443:3:54:1636:974#0/1  
¥`bbabbababaaababbabbbbaabbbababaaaba\_ab`Y  
@HWI-EAS443:3:54:167:83#0/1  
CTGCTAGGGAAAAATTTCTCGAATAGATTGCAGCACTTCT  
+HWI-EAS443:3:54:167:83#0/1  
abbababbbababaaabaa`bab\_\_a\_b`aaaa`a\_`aa`a  
@HWI-EAS443:3:54:1739:1667#0/1  
GTTGATCCCACTAACTTGAGGTCCTGTAGAATCTGTCC  
+HWI-EAS443:3:54:1739:1667#0/1  
a\_`a[aaa\_U^[`\_\_V^\_T^\_\_W^Q`][V[[]^W\_]VQQ  
@HWI-EAS443:3:54:1742:1755#0/1  
CAAAGAGGAAATAGAGATAACAACCCACTTTCAAAGAAAA  
+HWI-EAS443:3:54:1742:1755#0/1  
¥aa^`bbbababbbbaabbbb\_aaabaa\_``^Z`\_```

@HWI-EAS443:3:54:1771:1511#0/1  
CAACATTTGCCAGTTTGGCCTTCTTTTCATTGCCCCCTAC  
+HWI-EAS443:3:54:1771:1511#0/1  
¥[``Vabb`¥`\_b\_]babb`b¥¥a\_bbabaa`[\_a^`a^U  
@HWI-EAS443:3:54:196:1158#0/1  
ATCTGTCCACTCCTGCTTGTATTCCCTCATGGTTTGGTGC  
+HWI-EAS443:3:54:196:1158#0/1  
abaaaaaaaaaaaa\_aa`aa\_\_aa\_]\_`\_`aa¥\_a`]ZTa^  
@HWI-EAS443:3:54:213:1046#0/1  
TGGGATTCTTCAAGGAAAGCCATAGCCTCTAGAACACAGT  
+HWI-EAS443:3:54:213:1046#0/1  
ab`^Pa^¥aRI\_Q¥T`^[UZRYNSS[MRTVNX^UMVGZQV  
@HWI-EAS443:3:54:243:1280#0/1  
GGGTGGGATTCTTCAAGGAAAGCCATAGCCTCTAGAACAC  
+HWI-EAS443:3:54:243:1280#0/1  
ab]Za``aaa]a`a]a`X^`a]VZ\_\_^`Y^\_``\_Z\_]^V  
@HWI-EAS443:3:54:27:915#0/1  
GTCCTCCATCTGATACTAATAGCCCTACCTTTGATTGGGT  
+HWI-EAS443:3:54:27:915#0/1  
aSa`a`\_]``aa`¥\_`\_\_a\_\_\_\_][[Z]\_`\_`\_]X\_^WZ  
@HWI-EAS443:3:54:300:1295#0/1  
CTCCAATCATCCGACGATTTTGCTCTCATAGTGAATGCAC  
+HWI-EAS443:3:54:300:1295#0/1  
abaa`bb\_bab`]\_[\_\_aaa`b\_a`a][\_a\_\_ba^^a`][  
@HWI-EAS443:3:54:301:34#0/1  
AAATCGTCGGATGATTGGAGCCCATCCCACCAGTATATTG  
+HWI-EAS443:3:54:301:34#0/1  
\_baaab\_]a]abU``a]¥b\_a[Z`ZX^[\_WaS[]X\_^  
@HWI-EAS443:3:54:315:748#0/1  
GCGAAAAGCTTGAACAGTCTGGGCTCCCAGTAGGGGGCAA  
+HWI-EAS443:3:54:315:748#0/1  
aaaaa``baaab]aa]`]ZI¥\_aaaa]]S]PZ`a\_a[¥\_¥  
@HWI-EAS443:3:54:319:508#0/1  
GGAAATAGAGATAACAACCCACTTTCAAAGAAAAAGGAGA  
+HWI-EAS443:3:54:319:508#0/1  
aa\_]a`ba\_^`aaaa`^^`^^aaa```^a^\_]a`YZa¥  
@HWI-EAS443:3:54:340:334#0/1  
ATTGAAGAGCCATCTGGGCCGTTGCAGGTCCAAGGTCATT  
+HWI-EAS443:3:54:340:334#0/1  
a^`¥Yaba\_[VZU^Z[\_aUT]SX]Z¥a`ITIZ`aVDEM]Y  
@HWI-EAS443:3:54:342:50#0/1  
GTCCACTTTCCCTTTTCTGAGTATTGGTGTGTTCTGTTTA  
+HWI-EAS443:3:54:342:50#0/1  
abba]`abbV]\_\_a`^]aaG\_¥L\_aaa¥a\_b\_a[aa\_\_\_\_Z  
@HWI-EAS443:3:54:369:1423#0/1  
ATTTTGTGGAGAACATTATGGGTGCCATGCTCAGGATGT  
+HWI-EAS443:3:54:369:1423#0/1  
abbbb\_abbabb`ab\_a\_a`\_`\_0\_^`Y¥]]^]]^W]UX  
@HWI-EAS443:3:54:40:850#0/1  
GCAACTGCATTGGCCAACACCATAGAAGTCTTTAGATCGA

+HWI-EAS443:3:54:40:850#0/1  
aaaa\_a\_aaaaaaaaaa\_\_^a`\_\_a[V`]`a``\_\_\_\_`\_Y  
@HWI-EAS443:3:54:459:938#0/1  
CTCTACTTTTCTAAAAATCCAGCGCAAATGCCATAAG  
+HWI-EAS443:3:54:459:938#0/1  
ab[Z][```abbbbZ^baaba`Zab^ba`a\_Y\_babaa  
@HWI-EAS443:3:54:45:655#0/1  
GGTGTGTTCTGTTTACTGTGTCCATGGTGTATCCTGTTCC  
+HWI-EAS443:3:54:45:655#0/1  
a^U¥[T\_Qaa\_`\_\_a^^S[W[¥W[]UZU^\_\_V\_\_WUUU  
@HWI-EAS443:3:54:469:1792#0/1  
AAAGAATGAAGATTCGAACACAAATACCAGCAGAAATGCT  
+HWI-EAS443:3:54:469:1792#0/1  
aaaaaaaa`a\_aXa`¥a`\_a\_a\_Z`\_\_`Z^\_]^\_]\_Z^  
@HWI-EAS443:3:54:479:792#0/1  
CCAGGGTCGACTTCGAGTCTGGACGGATCAAGAAAGAAGA  
+HWI-EAS443:3:54:479:792#0/1  
abbbbb`bbaaaaaab\_abbba`aaaaa^aaaa`Ya`a  
@HWI-EAS443:3:54:488:22#0/1  
TAGCTGTTAGGCCATTTCGATCTAAAGACTTCTATGGTGTT  
+HWI-EAS443:3:54:488:22#0/1  
a¥GP[^```abZ¥N`^]\_VYX¥XZ]UGROXV]\_[STG^[Y  
@HWI-EAS443:3:54:50:529#0/1  
CAGGGTCGACTTCGAGTCTGGACGGATCAAGAAAGAAGAG  
+HWI-EAS443:3:54:50:529#0/1  
`bbaaaabbaaabababbaa\_abb`aa]`b\_aaba\_b]b  
@HWI-EAS443:3:54:513:693#0/1  
GTCTGGAGTAAATGAATCAGCTGACATGAGTATTGGAGTA  
+HWI-EAS443:3:54:513:693#0/1  
\_Zb`\_¥abaaba`[\_`a`¥ZZa\_S]]``]b`\_a¥SYYYYX^  
@HWI-EAS443:3:54:538:1785#0/1  
GATTCAGTATCGAGACTCCCAAGACCGTACTTAGCATGTT  
+HWI-EAS443:3:54:538:1785#0/1  
`Ua\_[a```\_]V\_a`]T`]X]Z¥]]YP\_VU^TR¥^[\_U\_  
@HWI-EAS443:3:54:572:1789#0/1  
AAAAATCCAGCGCAAATGCCATAAGCACCATTCCT  
+HWI-EAS443:3:54:572:1789#0/1  
]a`aa\_aaaab\_aaaaa`\_\_\_\_`\_\_a\_a`\_``a`\_]\_]\_^  
@HWI-EAS443:3:54:613:1904#0/1  
GCATTTGCGAAAAGCTTGAACAGTCTGGGCTCCAGTAGG  
+HWI-EAS443:3:54:613:1904#0/1  
ab¥bb`ba`ZT`b\_¥]U`V^^]`^aa`\_[`Q\_a]Ma¥^^^  
@HWI-EAS443:3:54:655:2012#0/1  
CAGAAATCAACCGCAGCAACTGCATTGGCCAACACCATA  
+HWI-EAS443:3:54:655:2012#0/1  
Xaaabbbabbaa¥W[[]]``]`RO\_¥¥^H¥]a^X]a¥U^[  
@HWI-EAS443:3:54:672:660#0/1  
CACTACCTGAGGATAATGAACCAAGTGGGTATGCACAAAC  
+HWI-EAS443:3:54:672:660#0/1  
`b`babbaa\_\_\_abbbba\_ba`^bbHbb^R[ab^aa\_ab[



@HWI-EAS443:3:54:673:1129#0/1  
AGCTGATTCATTTACTCCAGACACTCCAAAGCTGGGTAGC  
+HWI-EAS443:3:54:673:1129#0/1  
\_`aX¥J\_a^aaZ]X¥`]^bba]0`^`]]IZa^`a`Y¥ZWX  
@HWI-EAS443:3:54:683:17#0/1  
GGACACAGTAAACAGAACACACCAATACTCAGAAAAGGGA  
+HWI-EAS443:3:54:683:17#0/1  
aa\_``^b`a^\_\_^a\_^`W\_^]^^\_^]\_^]aZSW\_\_\_`Z  
@HWI-EAS443:3:54:689:938#0/1  
CAGTGATTGTGAAAGAAATCTCTGTGTCTTGTGAATTAGT  
+HWI-EAS443:3:54:689:938#0/1  
abb¥^Y`bb`baaaba`aa\_baaa^Y^`baa`YU[a\_PYX  
@HWI-EAS443:3:54:694:1073#0/1  
TCCTGCTTGTATTCCCTCATGGTTTGGTGCATTCATG  
+HWI-EAS443:3:54:694:1073#0/1  
\_[ZY\_`a^TVb\_ZNSa`\_`X`[Ma]NGFWYX\_^XTQ¥`TU  
@HWI-EAS443:3:54:69:1191#0/1  
GGCTCCAATCATCCGACGATTTTGTCTCATAGTGAATGC  
+HWI-EAS443:3:54:69:1191#0/1  
a\_^`a`a`¥aa\_\_`\_a`^^\_aa[aaa^a^\_\_V`U¥¥YP  
@HWI-EAS443:3:54:702:397#0/1  
CTTGCCTCTCTGCATCTTTGGTCATCGTATTTAATGTC  
+HWI-EAS443:3:54:702:397#0/1  
abaa`ab`\_\_baab`aa\_aa`a`\_^Z`a¥^\_aaaX]`a^R  
@HWI-EAS443:3:54:733:830#0/1  
GGCAATGAAAAGAAGCCAAACTGGCAAATGTTGTGAGAA  
+HWI-EAS443:3:54:733:830#0/1  
aba^\_abaaaaaZW^aa[^\_`^\_aa``\_]\_aa]``^aWa`^  
@HWI-EAS443:3:54:737:1403#0/1  
AGCCTCTCTTATTCAGTCTTTGTTTTTCTCCCTATTGT  
+HWI-EAS443:3:54:737:1403#0/1  
^`]¥^`bbbbbbb`b`]^bbbbbabba¥^ab^^`^bbba  
@HWI-EAS443:3:54:758:1598#0/1  
ATCCGACTCTACTTTTCTAAAAATTCCAGCGCAAATGC  
+HWI-EAS443:3:54:758:1598#0/1  
\_\_¥]\_`aa`a`\_]aa``aaba`X``¥¥\_a[`\_^`\_]`X  
@HWI-EAS443:3:54:775:332#0/1  
TGGACCACTACCTGAGGATAATGAACCAAGTGGGTATGCA  
+HWI-EAS443:3:54:775:332#0/1  
¥X]ZY[QG¥^WDJ]PZ[N`\_W]X[WOO[VZG[YRJSV\_NR  
@HWI-EAS443:3:54:777:221#0/1  
ATGACCAAGAAGATGGTCACGCAAAGAACAATAGGGAAGA  
+HWI-EAS443:3:54:777:221#0/1  
^bbbbabbbbbbaab`R`aabaa\_^a````aaa`a`b``ba  
@HWI-EAS443:3:54:799:603#0/1  
ATTTACTCCAGACACTCCAAAGCTGGGTAGCTCCATGCTA  
+HWI-EAS443:3:54:799:603#0/1  
abbbbabbaabaaaaaaaaba\_a`a`¥Q\_`^``]\_\_`¥``  
@HWI-EAS443:3:54:813:585#0/1  
GTGTATCTGTAGTCTTTGATGAACAATTGAAGAGCCATCT



@HWI-EAS443:3:55:1174:789#0/1  
TGGGCTCCCAGTAGGGGGCAATGAAAAGAAGGCCAAACTG  
+HWI-EAS443:3:55:1174:789#0/1  
`baaab]a[\_b^aaaa`ba\_¥a`\_a`\_`a[a`a\_\_[\_M]a  
@HWI-EAS443:3:55:1196:217#0/1  
GTCACGCAAAGAACAATAGGGAAGAAAAACAAAGACTGA  
+HWI-EAS443:3:55:1196:217#0/1  
aa\_`\_a`\_`¥\_]YRW\_\_¥a\_\_[]a¥]Y]\_\_]^\_]\_]Y\_\_Y  
@HWI-EAS443:3:55:1207:592#0/1  
GGCCCGGATTGATGCCAGGGTCGACTTCGAGTCTGGACGG  
+HWI-EAS443:3:55:1207:592#0/1  
abbbabbbabababab`bba^aaa\_ab^b`aaababa¥bb  
@HWI-EAS443:3:55:1223:989#0/1  
ATTTTCTCAATTTTCTTCTTTGTTGATTCATTGAAGTACT  
+HWI-EAS443:3:55:1223:989#0/1  
^bba^aba`bbbbaaba`babaabb`bbbabaaaa`aaa  
@HWI-EAS443:3:55:1260:1226#0/1  
ATGGGCTCCAATCATCCGACGATTTTGCTCTCATAGTGAA  
+HWI-EAS443:3:55:1260:1226#0/1  
aaba\_bba\_aaa`¥aXTQ` `a`]a` `¥¥a]aZa`aa]\_`^  
@HWI-EAS443:3:55:1293:2000#0/1  
TAGTCTTGCCATTTTGTGGAGAACATTATGGGTGCCATG  
+HWI-EAS443:3:55:1293:2000#0/1  
aa\_`\_b[baa`aaaba\_\_aY\_baa^aa`a^aS¥KVOZ¥[Y  
@HWI-EAS443:3:55:1300:1747#0/1  
ATAAGGGAATGTGGTGCTTATGGCATTTTGCGCTGGAATT  
+HWI-EAS443:3:55:1300:1747#0/1  
Vb^Sa\_W\_\_abSb\_G\_0`b\_`S`X¥^J^Z`GaIGab¥^\_Z  
@HWI-EAS443:3:55:1313:459#0/1  
ATAAGTTTGGTCTCCATCTGATACTAATAGCCCTACCTT  
+HWI-EAS443:3:55:1313:459#0/1  
abaabababba` `a^`\_a`bbaaaaaabaa]\_\_` `W`\_`  
@HWI-EAS443:3:55:1318:1333#0/1  
GGCTCCAATCATCCGACGATTTTGCTCTCATAGTGAATGC  
+HWI-EAS443:3:55:1318:1333#0/1  
aa]X]¥aVM]aaY[^T[aYT`^\_YNR[a^^\_TQU][`^a[  
@HWI-EAS443:3:55:1390:389#0/1  
ACCCGAGTGGTTCAGAAACATCCTGAGCATGGCACCCATA  
+HWI-EAS443:3:55:1390:389#0/1  
aU[\_abaa^aa`^a\_aa^L]^S\_[U¥aRa`^\_`aY^Z\_\_a  
@HWI-EAS443:3:55:1391:1761#0/1  
ATTTTGTCTCATAGTGAATGCACCAAACCATGAGGGAAT  
+HWI-EAS443:3:55:1391:1761#0/1  
]b]^`Ta^`aa\_`X` `Zb`a`^^[X]\_` `TN[¥b`aaa\_`^¥  
@HWI-EAS443:3:55:1413:1010#0/1  
GCTTGTGTTGAGAATAGAACGATTCCTCTTGGAATCCAG  
+HWI-EAS443:3:55:1413:1010#0/1  
^` `Z¥Y\_`^Q]UV^`XY[L¥\_X\_VITLYYXV[N[OORXU  
@HWI-EAS443:3:55:1419:170#0/1  
GGTGTGTTCTGTTTACTGTGTCCATGGTGTATCCTGTTC

+HWI-EAS443:3:55:1419:170#0/1  
aaRUQ\_[aV`UX^[\_^NST¥RSTaaM^V¥WYWV][VWU  
@HWI-EAS443:3:55:1448:279#0/1  
AGCTGATTCATTTACTCCAGACACTCCAAAGCTGGGTAGC  
+HWI-EAS443:3:55:1448:279#0/1  
ab`b`aab\_bbaaaYa¥`aaa\_a^aU[``\_U\_[T]X\_^W  
@HWI-EAS443:3:55:1459:72#0/1  
AAGTGGACGACAAACACAGAGACTGGTGCACCCCAGCTCA  
+HWI-EAS443:3:55:1459:72#0/1  
aa]Sa]¥¥a`\_aaaYPZ`aQb¥U[ZKP`]VYOVQ¥XNQ¥  
@HWI-EAS443:3:55:1510:692#0/1  
AAAATTCCAGCGCAAATGCCATAAGCACCATTCCTT  
+HWI-EAS443:3:55:1510:692#0/1  
aa]`aaa`abaa]\_a\_````\_`^Y]PZa]a\_`aZ\_^0a\_  
@HWI-EAS443:3:55:1532:291#0/1  
GTCCACTCCTGCTTGTATTCCCTCATGGTTTGGTGCATTC  
+HWI-EAS443:3:55:1532:291#0/1  
aa`\_aaaa]b`[aaa`ba\_\_\_a]\_a`\_`a`]W]`aY  
@HWI-EAS443:3:55:1565:168#0/1  
GAGATAACAACCCACTTTCAAAGAAAAAGGAGAGTAAGAG  
+HWI-EAS443:3:55:1565:168#0/1  
aaaa]aa^aa`[[^`\_`]a\_]OTY^¥^^^W^\_X]^  
@HWI-EAS443:3:55:1607:20#0/1  
CCAGGTGTTGCGATAGCCCTTCTTTTTAACTTGCCTCTCT  
+HWI-EAS443:3:55:1607:20#0/1  
G]a¥¥¥bbaY[`bbbaZ]¥\_\_\_\_bbba]a`a\_\_ZX\_Vaa\_  
@HWI-EAS443:3:55:1658:1274#0/1  
ATCCGACTCTACTTTTCTAAAAATCCAGCGCAAATGC  
+HWI-EAS443:3:55:1658:1274#0/1  
abbaVa[abaa¥\_a`ab[aaa[`¥RYaY¥`aWY`[`aR  
@HWI-EAS443:3:55:1678:1172#0/1  
AAGAAATCTATTAGCCTTCCTGACTCATTAGCTGTTAGGC  
+HWI-EAS443:3:55:1678:1172#0/1  
Vb`I¥ba`b\_0]^]aZU^^T^`\_^`\_^`V¥\_OMPL]R  
@HWI-EAS443:3:55:1694:32#0/1  
AAATCGTCGGATGATTGGAGCCCATCCCACCAGTATATTG  
+HWI-EAS443:3:55:1694:32#0/1  
Z\_bZ`¥Z^\_a`Y^a[¥^¥`XT¥aaa`K\_ZY`TPY[[`a  
@HWI-EAS443:3:55:1719:471#0/1  
TGTCTAGGGCCCGGATTGATGCCAGGGTCGACTTCGAGTC  
+HWI-EAS443:3:55:1719:471#0/1  
ab\_a`ZZ```^]a`^Z`[VX]a]\_QW¥[X\_^Q[¥VZV  
@HWI-EAS443:3:55:1731:243#0/1  
CCCCTTTCAAAGAAAAAGGAGAGTAAGAGACAACATGAC  
+HWI-EAS443:3:55:1731:243#0/1  
aaababb\_Zaa[^`aaaaa`^`\_\_a`aa`a`aaZa\_]^^  
@HWI-EAS443:3:55:173:793#0/1  
AACCAAGTGGGTATGCACAAACAGACTGTGTTCTAGAGGC  
+HWI-EAS443:3:55:173:793#0/1  
`aaaaab^aba^aaa`\_`aaaa`aa]^`^a^¥[X]\_¥

@HWI-EAS443:3:55:1741:211#0/1  
AAACAGAACACACCAATACTCAGAAAAGGGAAAGTGGACG  
+HWI-EAS443:3:55:1741:211#0/1  
`\_^W`ba^]aUaXU\_a\_aY^^X\_\_`\_XK`H[]`aR[¥QJQ  
@HWI-EAS443:3:55:1778:443#0/1  
GTAGGGGGCAATGAAAAGAAGCCAAACTGGCAAATGTTG  
+HWI-EAS443:3:55:1778:443#0/1  
`LVQ\_aWSFWXJ[K¥^X[YUUOPL¥UFYTORMWUWN]PUZ  
@HWI-EAS443:3:55:185:1695#0/1  
CGATACTGAATCTTGGACAAAAGAAATACACCAAGACAAT  
+HWI-EAS443:3:55:185:1695#0/1  
aaaaaaaaYaaaaaa]`]aba`aW]`\_\_`\_`a\_a]\_``\_\_\_\_  
@HWI-EAS443:3:55:193:1733#0/1  
AGACAACATGACCAAGAAGATGGTCACGCAAAGAACAATA  
+HWI-EAS443:3:55:193:1733#0/1  
a\_a\_aa^\_^\_a`\_aaa`\_`\_]^[\_[^\_\_\_\_]\_^\_]^[Z]]\_\_  
@HWI-EAS443:3:55:20:1527#0/1  
GGAATCGTTCTATTCTCAACACAAGCCAAAGGGGAATTCT  
+HWI-EAS443:3:55:20:1527#0/1  
aaabaaba\_a`^`aaaaZaYa]^[^\_\_\_\_]^[`[^\_ZZ^  
@HWI-EAS443:3:55:224:1022#0/1  
AGGGCTATTAGTATCAGATGGAGGACCAAACCTATACAAT  
+HWI-EAS443:3:55:224:1022#0/1  
¥][X]a`aa\_^Waa]]aaaaT\_aWXTSV``aaaa``^[[  
@HWI-EAS443:3:55:229:2031#0/1  
CAATCCGACTCTACTTTTCTAAAAATTCCAGCGCAAAT  
+HWI-EAS443:3:55:229:2031#0/1  
`a`a\_aa`]aaaaW`aa`[abb`a^aa`\_aa`\_`\_\_`a\_  
@HWI-EAS443:3:55:282:57#0/1  
ATTGATGCCAGGGTCGACTTCGAGTCTGGACGGATCAAGA  
+HWI-EAS443:3:55:282:57#0/1  
\_ba\_Q\_b`^`aa¥]b^^aa^\_N\_¥T]`a¥W`\_V]¥Y^`U  
@HWI-EAS443:3:55:30:822#0/1  
GACGGATCAAGAAAGAAGAGTTCTCTGAGATCATGAAGAT  
+HWI-EAS443:3:55:30:822#0/1  
ab`¥X^\_aa`a¥a^^`]`\_aXa`a`a\_0\_``\_\_`a\_\_\_\_`^  
@HWI-EAS443:3:55:311:854#0/1  
CTGGGCTCCCAGTAGGGGGCAATGAAAAGAAGCCAAACT  
+HWI-EAS443:3:55:311:854#0/1  
abb\_[\_T`^`]a[\_^`aaaY^¥aa\_QUW^`][^^^¥`\_`¥  
@HWI-EAS443:3:55:344:1774#0/1  
GGGGCAATGAAAAGAAGCCAAACTGGCAAATGTTGTGAG  
+HWI-EAS443:3:55:344:1774#0/1  
```b]`[aba]¥¥]X`baaaa`aaaaaa``^a`a^a\_a  
@HWI-EAS443:3:55:360:1223#0/1  
GCCTCTCTTATTTCAGTCTTTGTTTTTTCTTCCCTATTGTT  
+HWI-EAS443:3:55:360:1223#0/1  
aaaa`aaaa^aa`a^\_\_abab`aaaba\_aa`a\_`]`^ZZ]  
@HWI-EAS443:3:55:386:627#0/1  
CTTAAAATGGGAGCTAATGGATGATGATTATCGGGGAAGA



@HWI-EAS443:3:55:549:204#0/1  
CTCCATCTGATACTAATAGCCCTACCTTTGATTGGGTTTG  
+HWI-EAS443:3:55:549:204#0/1  
abbabba`a\_`a\_baa`^`[\_`\_a^V¥aab`[\_a\_a`\_W\_aa  
@HWI-EAS443:3:55:55:286#0/1  
ATGGTTTGGTGCATTCACTATGAGAGCAAAATCGTCGGAT  
+HWI-EAS443:3:55:55:286#0/1  
ZWaba^b\_a\_ba^baabbbbbbaaab`]¥]abbb\_ab\_\_a  
@HWI-EAS443:3:55:587:39#0/1  
GAAACATCCTGAGCATGGCACCCATAATGTTCTCAAACAA  
+HWI-EAS443:3:55:587:39#0/1  
abbabbb`bbbaaaabba\_]a`aa\_ab\_``a``[\_`\_a\_  
@HWI-EAS443:3:55:598:1432#0/1  
ATGCCAGGGTGCAGTTCGAGTCTGGACGGATCAAGAAAGA  
+HWI-EAS443:3:55:598:1432#0/1  
aaa`aaaaa[aaa\_\_a`^aa`\_\_Y`^a¥X^^`\_\_PPV  
@HWI-EAS443:3:55:657:1095#0/1  
CGGCCAGATGGCTCTTCAATTGTTTCATCAAAGACTACAG  
+HWI-EAS443:3:55:657:1095#0/1  
abaa`aZb\_`¥`Ya\_`aaa`aa`\_`\_`\_¥a`aa^a^`a  
@HWI-EAS443:3:55:689:224#0/1  
GTTGATCCCACTAACTTGCAGGTCCTGTAGAATCTGTCC  
+HWI-EAS443:3:55:689:224#0/1  
aaS]]b`]PXQU`a\_[a`]L\_a[MMMa\_WX¥[Y`QUBBBB  
@HWI-EAS443:3:55:719:402#0/1  
CCCAGTGTGAAAGAAATCTCTGTGTCTTGTGAATTA  
+HWI-EAS443:3:55:719:402#0/1  
abaab`b^bbbab``abaaab`aaabaa`aaa\_a\_aaa`  
@HWI-EAS443:3:55:736:349#0/1  
GAATCTGTCCACTCCTGCTTGTATTCCCTCATGGTTTGGT  
+HWI-EAS443:3:55:736:349#0/1  
a\_[aaaa^\_a\_\_\_\_\_``````\_``\_]`^`^`^`a\_]\_\_\_\_`V  
@HWI-EAS443:3:55:738:940#0/1  
TTGATCCCACTAACTTGCAGGTCCTGTAGAATCTGTCCA  
+HWI-EAS443:3:55:738:940#0/1  
^F]`^aa]¥a`\_[]\_aaa`\_a\_Y^^]`^`^`]`^`^VYV^  
@HWI-EAS443:3:55:779:412#0/1  
GACGGATCAAGAAAGAAGAGTTCTCTGAGATCATGAAGAT  
+HWI-EAS443:3:55:779:412#0/1  
aaaaa]a`aba`]a`\_aaa^aaa\_aa\_a````aaaa`a`^  
@HWI-EAS443:3:55:824:1512#0/1  
ATTATGGGTGCCATGCTCAGGATGTTTCTGAACCACTCGG  
+HWI-EAS443:3:55:824:1512#0/1  
aabba][`^aaaUa`\_`^`a`a^ab]\_\_a`SN\_¥TX]]Xab  
@HWI-EAS443:3:55:844:1219#0/1  
GGACGACAAACACAGAGACTGGTGCACCCAGCTCAACCC  
+HWI-EAS443:3:55:844:1219#0/1  
a^¥bababbb¥^a`^a][¥0¥^a`\_]\_\_a^[Y]ZaaV^\_  
@HWI-EAS443:3:55:845:731#0/1  
ATGGTGTCTAGGGCCCGATTGATGCCAGGGTCTGACTTCG

+HWI-EAS443:3:55:845:731#0/1  
`aZHXa`aZ^`RXa`[^`\_Z[[[¥¥a\_`]^ [QY]ZVU  
@HWI-EAS443:3:55:857:295#0/1  
TGGCTCTTCAATTGTTTCATCAAAGACTACAGATACACATA  
+HWI-EAS443:3:55:857:295#0/1  
aba`aa¥a\_`aaaZ¥a^`^Z`\_```\_\_\_\_[`a]Y]Z^^`\_\_\_\_  
@HWI-EAS443:3:55:884:1042#0/1  
CTCAAGAATTCCCCTTTGGCTTGTGTTGAGAATAGAACGA  
+HWI-EAS443:3:55:884:1042#0/1  
`bababbabbaaaabbbb` `bba\_b` ab`aaaaaaa`¥a\_  
@HWI-EAS443:3:55:894:341#0/1  
GCCAGGTTCGACTTCGAGTCTGGACGGATCAAGAAAGAAG  
+HWI-EAS443:3:55:894:341#0/1  
a^U[Y^a]]a\_W^[W`\_]\_[U¥VZ^VZQT[XS¥Z^^T[Y^Y  
@HWI-EAS443:3:55:90:564#0/1  
GTGTAATGCCAGCCCATGGTCCAGCCAAAAGCATGGAAT  
+HWI-EAS443:3:55:90:564#0/1  
a¥`UW]XU^^\_HVQ]SX]X[V[GUVSZSZSV]^PS^^TT  
@HWI-EAS443:3:55:949:594#0/1  
AAACATCCTGAGCATGGCACCCATAATGTTCTCAAACAAA  
+HWI-EAS443:3:55:949:594#0/1  
^^^\_ZW¥¥U¥]]a\_b`TZ`\_XR` `a]]a[a`]Z\_` `V]a  
@HWI-EAS443:3:55:993:100#0/1  
GGCAAGACTAGGGAAAGGGTACATGTTTCGAGAGTAAAAGA  
+HWI-EAS443:3:55:993:100#0/1  
ab^`\_b\_`\_ab\_]^^`aaU\_^]aa^`\_` `ZaX^]\_\_`^  
@HWI-EAS443:3:56:1068:1727#0/1  
CAGCTAATGAGTCAGGAAGGCTAATAGATTTCTTAAAGGA  
+HWI-EAS443:3:56:1068:1727#0/1  
ab` `^` ab\_aZQaa^X[aaaa^[\_`Wa` ` `a^aaa`aa`\_`  
@HWI-EAS443:3:56:1074:708#0/1  
GGGGATTACAAAGTCTTCCCCGATAATCATCATCCATTAG  
+HWI-EAS443:3:56:1074:708#0/1  
a`^`^Y[T\_aaa^`^`aa[Y^`^V`XW\_XKXY¥R¥¥[[VW  
@HWI-EAS443:3:56:1102:1517#0/1  
ATTATCCTCAGGTAGTGGTCCATCAATCGGGTTGAGCTGG  
+HWI-EAS443:3:56:1102:1517#0/1  
]¥\_b`a^\_L^\_]X` `¥TYY¥]]aXY]a]¥[\_S\_aXZ[aPQ  
@HWI-EAS443:3:56:1119:1064#0/1  
CAGCTGACATGAGTATTGGAGTAACAGTGATAAAGAACAA  
+HWI-EAS443:3:56:1119:1064#0/1  
a^^¥aV`bb^¥a`abbaZa\_` `aaaa`^b¥aaab^[a\_ba  
@HWI-EAS443:3:56:1135:1203#0/1  
CTTTTCATTGCCCCCTACTGGGAGCCCAGACTGTTCAAGC  
+HWI-EAS443:3:56:1135:1203#0/1  
a[bbbbbb\_`baa` `\_^Raba][abSaa`ba\_aa^aaaaa[  
@HWI-EAS443:3:56:1139:1328#0/1  
TGGCACAGCATCACTGAGTCCTGGGATGATGATGGGCATG  
+HWI-EAS443:3:56:1139:1328#0/1  
^a\_\_[\_`aa\_aaaa\_aa`X]\_a\_a` [¥a` `\_\_aa`]Z\_¥\_a



@HWI-EAS443:3:56:11:1414#0/1  
AATCAATCTCTTTATGACTGACAAAGGGATTGAGGGGATT  
+HWI-EAS443:3:56:11:1414#0/1  
a`aba\_baaaaaaa`\_aa]a\_aaa\_]a^^^a`Z\_\_^^^  
@HWI-EAS443:3:56:1204:1493#0/1  
GAGGAAATAGAGATAACAACCCACTTTCAAAGAAAAAGGA  
+HWI-EAS443:3:56:1204:1493#0/1  
a`ab\_\_`a`a\_a`aaa\_aaSX^\_]`a`]`Y\_a\_\_\_\_]``\_¥  
@HWI-EAS443:3:56:1219:737#0/1  
GATTGATGCCAGGGTCGACTTCGAGTCTGGACGGATCAAG  
+HWI-EAS443:3:56:1219:737#0/1  
[JaaZaUaa\_^[\`a[\`Xa]`[\`\_H\_\_`T]]SYMVNU^]U]  
@HWI-EAS443:3:56:1247:518#0/1  
CAAACCATGAGGGAATACAAGCAGGAGTGGACAGATTCTA  
+HWI-EAS443:3:56:1247:518#0/1  
\_\_b``ba``abbbaa`aabab`aba]a]aaa^Wa[``\_V]]  
@HWI-EAS443:3:56:1286:228#0/1  
CAATTTTCTTCTTTGTTGATTCATTGAAGTACTTCAGGTC  
+HWI-EAS443:3:56:1286:228#0/1  
abbbbab`baYbbbb`abaab\_aabaaa\_aaba\_aba¥\_  
@HWI-EAS443:3:56:1306:1617#0/1  
GACGGATCAAGAAAGAAGAGTTCTCTGAGATCATGAAGAT  
+HWI-EAS443:3:56:1306:1617#0/1  
a[¥``aa]aaaa`Y`\_WZ]X^Ya]a``\_a¥F[\_^]\_X\_X  
@HWI-EAS443:3:56:1309:1782#0/1  
GGGATTGAGGGATTACAAAGTCTTCCCCGATAATCATCA  
+HWI-EAS443:3:56:1309:1782#0/1  
`babaabbaab\_aaabYbbbaa\_aaa`a``ba\_`¥a¥a\_\_\_\_  
@HWI-EAS443:3:56:1324:964#0/1  
ACCAAACCATGAGGGAATACAAGCAGGAGTGGACAGATTC  
+HWI-EAS443:3:56:1324:964#0/1  
`ZF[¥b`TZSU[]^aZN¥VYVZBBBBBBBBBBBBBBBBBB  
@HWI-EAS443:3:56:1348:850#0/1  
GATTGATGCCAGGGTCGACTTCGAGTCTGGACGGATCAAG  
+HWI-EAS443:3:56:1348:850#0/1  
]P[aa\_aaX]VSUQG¥VYP[XR\_SPL[ZX¥RHwUJG¥RR  
@HWI-EAS443:3:56:1362:1722#0/1  
CCCCGATTGATGCCAGGGTCGACTTCGAGTCTGGACGGAT  
+HWI-EAS443:3:56:1362:1722#0/1  
`aaaaa`aaa\_``R^TVJSU]UU\_[L[X¥PNZa]XW`YS¥  
@HWI-EAS443:3:56:1416:177#0/1  
ACTACAGATACACATATAGGTGCCATAGGGGAGACACACA  
+HWI-EAS443:3:56:1416:177#0/1  
a\_aaaaaaaa\_aaaaa\_aa`Za^^^a^a`\_`\_[a\_Z]\_\_^\_  
@HWI-EAS443:3:56:142:1348#0/1  
GTTGATTCCCCTAACTTGCAGGTCCTGTAGAATCTGTCC  
+HWI-EAS443:3:56:142:1348#0/1  
a`aa`aaa`Vaaa`a^V`]^^^Y\_^\_^¥`a\_\_\_\_]\_\_\_\_Q¥^  
@HWI-EAS443:3:56:1441:926#0/1  
CAGGAATGTGTAGTTGCAACGGCATCATATTCCATGCTTT

+HWI-EAS443:3:56:1441:926#0/1  
aaa^bb`bab`aba\_bb[\_`aab^ababa¥^aaaabaa  
@HWI-EAS443:3:56:1484:606#0/1  
AACAGATCTTCATGATCTCAGAGAACTCTTCTTTCTTGAT  
+HWI-EAS443:3:56:1484:606#0/1  
aa\_abaaaa`baaa`^aaaa`\_a^\_aa^aaa\_a`a`\_`  
@HWI-EAS443:3:56:152:1857#0/1  
GATACACATATAGGTGCCATAGGGGAGACACACAAATTCA  
+HWI-EAS443:3:56:152:1857#0/1  
`a[`]^b`bb`Z`RZ¥`Za]NV]a]0]\_]`Y`\_\_[[\_\_  
@HWI-EAS443:3:56:1542:1530#0/1  
GATCTTCATGATCTCAGAGAACTCTTCTTTCTTGATCCGT  
+HWI-EAS443:3:56:1542:1530#0/1  
a\_^[\_`\_\_a\_P\_XN\_GW\_]aV]^]V`aXa]]T``^\_NFNS  
@HWI-EAS443:3:56:1548:52#0/1  
GGCTAATTTTAGCATGGAGCTACCCAGCTTTGGAGTGTCT  
+HWI-EAS443:3:56:1548:52#0/1  
a\_Iaa\_bbb¥`¥`\_`^R`\_0¥]aa`^Q^aba`\_aab]TY  
@HWI-EAS443:3:56:1550:1348#0/1  
GATTGGAACACAAATACCAGCAGAAATGCTAGCAAGCATT  
+HWI-EAS443:3:56:1550:1348#0/1  
aaaa`babaa`b`\_aba`aa^aaa`\_aaaa^a`]]`\_a  
@HWI-EAS443:3:56:1558:1654#0/1  
ATTCCATGCTTTTGGCTGGACCATGGGCTGGCATTACCAC  
+HWI-EAS443:3:56:1558:1654#0/1  
aaa\_T\_Wa¥`^U]\_]\_]W[NY^UY[Y¥[^]V¥aaZ]NRS  
@HWI-EAS443:3:56:1563:1550#0/1  
CAGAGAACTCTTCTTTCTTGATCCGTCCAGACTCGAAGTC  
+HWI-EAS443:3:56:1563:1550#0/1  
aba\_bab\_bbab`bbbRbbbbZZ\_\_aaaa\_\_baba``^W  
@HWI-EAS443:3:56:1563:79#0/1  
CAAGACTAGGGAAAGGTACATGTTTCGAGAGTAAAAGAAT  
+HWI-EAS443:3:56:1563:79#0/1  
\_bbbbbb\_bbaabbab^aaaaababa`bab\_aaaabaaa  
@HWI-EAS443:3:56:1584:1448#0/1  
CAAGCATTGACCTGAAGTACTTCAATGAATCAACAAAGAA  
+HWI-EAS443:3:56:1584:1448#0/1  
`bbababb`bbababaa`abbaabbbbabbb`b`bbab  
@HWI-EAS443:3:56:1618:59#0/1  
GTCTTTAGATCGAATGGCCTAACAGCTAATGAGTCAGGAA  
+HWI-EAS443:3:56:1618:59#0/1  
aa`bab`\_`a\_ba`aa`^^`\_a^S[[S[\_^¥[U\_WTSa^WV  
@HWI-EAS443:3:56:1648:1549#0/1  
TGGCACCTATATGTGTATCTGTAGTCTTTGATGAACAATT  
+HWI-EAS443:3:56:1648:1549#0/1  
^^R^XTP^a^ab¥PZNS]WXWT`UM]bU\_\_Ra]QRX]\_^  
@HWI-EAS443:3:56:168:1529#0/1  
ATACTCAGAAAAGGAAAGTGGACGACAAACACAGAGACT  
+HWI-EAS443:3:56:168:1529#0/1  
Zab^[aS\_ZaaS]aa¥]Y\_U¥`aaa^Z`\_aa^a`^^^Z^

@HWI-EAS443:3:56:1715:954#0/1  
GAGTAAATGAATCAGCTGACATGAGTATTGGAGTAACAGT  
+HWI-EAS443:3:56:1715:954#0/1  
aUWFY`]aa^W^]^[U[]`]X^^[]RZ^^SXVaX¥[PVWT  
@HWI-EAS443:3:56:1764:1534#0/1  
ATCCCCCTTTGGCTTGTGTTGAGAATAGAACGATTCCCTCT  
+HWI-EAS443:3:56:1764:1534#0/1  
`abQO[Ib\_`b\_\_`\_\_WU`^`^aX\_`^Pa`Ya^NWPWYVY  
@HWI-EAS443:3:56:1781:1199#0/1  
AAGGGATTACAGGGATTACAAAGTCTTCCCCGATAATCAT  
+HWI-EAS443:3:56:1781:1199#0/1  
¥a]¥R]a`\_¥¥RYW[QS\_\_Z`YMDVTV[SYTVRQYZVBBB  
@HWI-EAS443:3:56:189:1151#0/1  
AAAGACTTCTATGGTGTGGCCAATGCAGTTGCTGCCGGT  
+HWI-EAS443:3:56:189:1151#0/1  
aa`X¥^aa¥\_\_aTKFX\_YaSUXX^I`\_HXYOW¥0^R^W  
@HWI-EAS443:3:56:215:592#0/1  
GCTTATGGCATTGCGCTGGAATTTTAGGAAAAGTAGA  
+HWI-EAS443:3:56:215:592#0/1  
a\_aa\_`aa\_`a\_]a\_`a`^X\_\_`^`^aWY^X^`X^\_\_  
@HWI-EAS443:3:56:252:875#0/1  
AACAGATCTTCATGATCTCAGAGAACTCTTCTTTCTTGAT  
+HWI-EAS443:3:56:252:875#0/1  
aaa`^`aaaaaaaa`a`\_a\_a^[^a`a`\_````\_`\_\_^`  
@HWI-EAS443:3:56:261:1163#0/1  
CTCTCTTATTCAGTCTTTGTTTTTCTTCCCTATTGTTCT  
+HWI-EAS443:3:56:261:1163#0/1  
abbbbbbbbbbbbbbbbbbbbbbbbbbbbbbbbbbbabb  
@HWI-EAS443:3:56:269:87#0/1  
GTCGGATGATTGGAGCCCATCCCACAGTATATTGTCTTG  
+HWI-EAS443:3:56:269:87#0/1  
^[`a¥¥¥aU^^baT\_X\_ZSTZXZZ¥]P^XYQ[W\_QL¥^]  
@HWI-EAS443:3:56:369:736#0/1  
AGGGTCGACTTCGAGTCTGGACGGATCAAGAAAGAAGAGT  
+HWI-EAS443:3:56:369:736#0/1  
¥b\_WFYa`a\_`^YXJMwb^Q\_b¥NXaXaaa\_\_^O[[RVR  
@HWI-EAS443:3:56:37:605#0/1  
TGTGGCTAATTTTAGCATGGAGCTACCCAGCTTTGGAGTG  
+HWI-EAS443:3:56:37:605#0/1  
aa\_b\_\_^\_\_\_a\_a\_a`Z\_^]RZW\_YZ^\_R^Z^^`H^Z\_] ]  
@HWI-EAS443:3:56:383:504#0/1  
ATTCGAACACAAATACCAGCAGAAATGCTAGCAAGCATTG  
+HWI-EAS443:3:56:383:504#0/1  
aaab^]a`aab`\_baa^aa\_abXX`aaa`]a``\_\_\_\_\_]\_^  
@HWI-EAS443:3:56:426:944#0/1  
ATTGTCTTGGTGTATTTCTTTTGTCCAAGATTAGTATCG  
+HWI-EAS443:3:56:426:944#0/1  
aaababba\_b\_a^aaaaababaY^`aaa\_`aaa]a``a  
@HWI-EAS443:3:56:43:1441#0/1  
GGGATTACAGGGATTACAAAGTCTTCCCCGATAATCATCA

+HWI-EAS443:3:56:43:1441#0/1  
ab\_[]`aaa^^`b\_aaababaaZ`aa¥]a\_a¥`a\_a\_`\_\_\_\_  
@HWI-EAS443:3:56:516:293#0/1  
TAAAGAACAACATGATAACAATGACCTTGGACCTGCAAC  
+HWI-EAS443:3:56:516:293#0/1  
aa`aa`a`a¥^a`a`\_\_`a`\_`¥Z^\_]\_]\_^\_^\_]\_^\_^\_Z  
@HWI-EAS443:3:56:532:1864#0/1  
ATGTGTATCTGTAGTCTTTGATGAACAATTGAAGAGCCAT  
+HWI-EAS443:3:56:532:1864#0/1  
`\_a[]`[ba``]U^b\_aaabbaaba`\_`a`aa`a`aa^^`\_`  
@HWI-EAS443:3:56:582:642#0/1  
GAAAAGGGAAAGTGGACGACAAACACAGAGACTGGTGCAC  
+HWI-EAS443:3:56:582:642#0/1  
a`\_aaaaa]T^`¥aa`^Ha\_aa\_\_\_\_\_a` `[Z[]`ZQ\_¥`Z  
@HWI-EAS443:3:56:594:812#0/1  
GCCTCTCTGCATCTTTGGTCATCGTATTTAATGTCAGT  
+HWI-EAS443:3:56:594:812#0/1  
\_bbbababababaaaaaaaaa[]]```^\_aaaaaaaa^a`\_Y  
@HWI-EAS443:3:56:599:138#0/1  
ATGCCAGGGTTCGACTTCGAGTCTGGACGGATCAAGAAAGA  
+HWI-EAS443:3:56:599:138#0/1  
ZT]R¥[]`\_^`]\_SZ`¥VZ\_a^YZ\_a^W\_aXZR[]`Z`^^Y  
@HWI-EAS443:3:56:604:141#0/1  
GCCTCTCTTATTTCAGTCTTTGTTTTTTCTTCCCTATTGTT  
+HWI-EAS443:3:56:604:141#0/1  
S`\_]aS\_[YS`\_`¥VT]b]a`XTab]a`a`]]VaT^^^PY  
@HWI-EAS443:3:56:605:1293#0/1  
GTCTGGACGGATCAAGAAAGAAGAGTTCTCTGAGATCATG  
+HWI-EAS443:3:56:605:1293#0/1  
a\_aa]ba`aa``\_a`a\_aa]aa\_\_\_\_\_``\_\_\_\_`aa\_\_a\_a`  
@HWI-EAS443:3:56:615:62#0/1  
CAAAGACTACAGATACACATATAGGTGCCATAGGGGAGAC  
+HWI-EAS443:3:56:615:62#0/1  
aa\_bb¥bbaabaa`^^^aVbbaa`b]baa`a\_ba`^Haa\_  
@HWI-EAS443:3:56:624:1727#0/1  
GTACCCTTTCCCTAGTCTTGCCATTTTGTGTTGAGAACATT  
+HWI-EAS443:3:56:624:1727#0/1  
]L\_\_\_\_aaa`\_[a`\_]`^a\_a\_\_\_\_\_^`¥P\_\_`W\_]^^`\_S  
@HWI-EAS443:3:56:630:106#0/1  
GGTGCATTCACTATGAGAGCAAATCGTCGGATGATTGGA  
+HWI-EAS443:3:56:630:106#0/1  
aa¥`^`aa^\_[a^aa^aZa[^^]\_\_Z\_W[\_ZLR`W¥Z[[[S  
@HWI-EAS443:3:56:63:864#0/1  
CATACCCACTTGGTTCATTATCCTCAGGTAGTGGTCCATC  
+HWI-EAS443:3:56:63:864#0/1  
abbb`\_\_`aa]`b[aa\_\_b]a^`\_a`baW]]Sa\_P¥¥[]`X  
@HWI-EAS443:3:56:642:1340#0/1  
AGCCCTTCTTTTTAACTTGCCTCTCTCTGCATCTTTGGTC  
+HWI-EAS443:3:56:642:1340#0/1  
a`VT0]`aa`aa^YV¥Y[R]¥][]`a`[]¥¥[[[LY``\_]XX

@HWI-EAS443:3:56:688:1009#0/1  
GAGTAAATGAATCAGCTGACATGAGTATTGGAGTAACAGT  
+HWI-EAS443:3:56:688:1009#0/1  
`YYSN]\_\_[[W[\_Z¥]][\_`Z]]¥¥YPW^Q^YWYQYZX¥WN  
@HWI-EAS443:3:56:696:181#0/1  
TGGACCACTACCTGAGGATAATGAACCAAGTGGGTATGCA  
+HWI-EAS443:3:56:696:181#0/1  
abaa^aa\_aa\_aaa\_`\_`a`aa^\_^`\_`Yaa`Y\_\_]Y¥  
@HWI-EAS443:3:56:706:1683#0/1  
GGACGGATCAAGAAAGAAGAGTTCTCTGAGATCATGAAGA  
+HWI-EAS443:3:56:706:1683#0/1  
]abbabababbbbbb\_\_baaa`aababbbbaaababab`  
@HWI-EAS443:3:56:714:835#0/1  
GCCCCGATTGATGCCAGGGTCTGACTTCGAGTCTGGACGGA  
+HWI-EAS443:3:56:714:835#0/1  
aaababaaa`aa^baaaabSα]X\_`a\_a\_a]`aaa\_^a¥]  
@HWI-EAS443:3:56:736:1281#0/1  
TGGTCCTCCATCTGATACTAATAGCCCTACCTTTGATTGG  
+HWI-EAS443:3:56:736:1281#0/1  
`a`X^bba^¥`baaaa\_a`aaa^`S]^`¥P¥a`\_`[YV[  
@HWI-EAS443:3:56:770:71#0/1  
GTTTCATTATCCTCAGGTAGTGGTCCATCAATCGGGTTGAG  
+HWI-EAS443:3:56:770:71#0/1  
a¥^[aa`a\_`a¥^a`UZaZaUYVW¥\_UTV^V``[U\_\_V^  
@HWI-EAS443:3:56:814:1269#0/1  
GAGACAACATGACCAAGAAGATGGTCACGCAAAGAACAAT  
+HWI-EAS443:3:56:814:1269#0/1  
`aaaa]aa\_`a`aaa`a`\_`a\_\_Z\_`aaa`V¥^¥`]¥]`  
@HWI-EAS443:3:56:815:1193#0/1  
CCTATATGTGTATCTGTAGTCTTTGATGAACAATTGAAGA  
+HWI-EAS443:3:56:815:1193#0/1  
ab`^]\_a]^`b^`a`]^`b\_`aa]Z\_`]¥YP]\_a`aaa\_\_  
@HWI-EAS443:3:56:888:1092#0/1  
GGCCGTTGCAGGTCCAAGGTCATTGTTTATCATGTTGTTC  
+HWI-EAS443:3:56:888:1092#0/1  
aaaab\_`]^`[^R[XW0^aW[V`\_0]aa[aZ\_`[\_a]\_`U  
@HWI-EAS443:3:56:8:955#0/1  
GTCTGGAGTAAATGAATCAGCTGACATGAGTATTGGAGTA  
+HWI-EAS443:3:56:8:955#0/1  
a`aaaa[`¥^Z]^`aY^^¥¥\_`\_¥^\_`\_`[^X\_\_[]YW¥XQ  
@HWI-EAS443:3:56:91:12#0/1  
AAAAACAAAGACTGAATAAGAGAGGCTATCTAATAAGAGC  
+HWI-EAS443:3:56:91:12#0/1  
^b`^]^`aabaabb\_`aaab^b\_`aaa`SFNMLTUY^^BBB  
@HWI-EAS443:3:56:920:1271#0/1  
ACCAAACCTTATACAATATACGGAATCTTCACATTCCTGAA  
+HWI-EAS443:3:56:920:1271#0/1  
\_\_`[\_]ababaa`aaaaa`\_`\_`aZa`]a\_aa`a\_`aaa\_  
@HWI-EAS443:3:57:1048:1471#0/1  
CTCCATCTGATACTAATAGCCCTACCTTTGATTGGGTTTG

+HWI-EAS443:3:57:1048:1471#0/1  
aba`bb`bbb[b[bbbaba`\_^aaY]a`¥aaaa\_\_aYaaa  
@HWI-EAS443:3:57:1053:1524#0/1  
CAAAGATGCAGAGAGAGGCAAGTAAAAAGAAGGGCTATC  
+HWI-EAS443:3:57:1053:1524#0/1  
a[RaM\_a^[a^¥TZ\_\_`b¥XXba`aaY]XaaYaR][aa[J  
@HWI-EAS443:3:57:1087:194#0/1  
GTTTGAGAACATTATGGGTGCCATGCTCAGGATGTTTCTG  
+HWI-EAS443:3:57:1087:194#0/1  
aWa`\_^a[\_W\_\_\_Z`aa\_U`UNX[[UUYU¥^U^W[[XKTU  
@HWI-EAS443:3:57:1094:1197#0/1  
ACTACCTGAGGATAATGAACCAAGTGGGTATGCACAAACA  
+HWI-EAS443:3:57:1094:1197#0/1  
]a\_a`aab]b`aab`baaa\_aa¥`[]aaY]aa\_^\_\_`^^[  
@HWI-EAS443:3:57:1102:1126#0/1  
GTCCTCCATCTGATACTAATAGCCCTACCTTTGATTGGGT  
+HWI-EAS443:3:57:1102:1126#0/1  
a^^\_¥aa`aa`Ya]\_a`a`YY]\_\_GZ]^^\_X`X^]\_X  
@HWI-EAS443:3:57:1122:990#0/1  
CCAGCTCAACCCGATTGATGGACCACTACCTGAGGATAAT  
+HWI-EAS443:3:57:1122:990#0/1  
aaa`[\_`bbbaa`¥`^a`^aa\_]\_]aaa\_\_aaa`ZaQ\_`a\_  
@HWI-EAS443:3:57:1158:421#0/1  
ACTGAATCTTGACAAAAGAAATACACCAAGACAATATAC  
+HWI-EAS443:3:57:1158:421#0/1  
a\_bbaaaaaabaaa`^a`a\_aa\_\_^aa¥``a\_\_¥\_aaa\_^  
@HWI-EAS443:3:57:1170:247#0/1  
GTCCTCCATCTGATACTAATAGCCCTACCTTTGATTGGGT  
+HWI-EAS443:3:57:1170:247#0/1  
aaaa]X[\_[ZZ`RSZ]b`a`\_]\_]\_UX]\_aa^^YSX`R  
@HWI-EAS443:3:57:1172:1933#0/1  
TGTCATCCGACTCTACTTTTCCTAAAAATCCAGCGCAA  
+HWI-EAS443:3:57:1172:1933#0/1  
a`VRabaYN¥\_\_bX`^\_\_`\_`Xa\_\_\_a[\_`¥\_^\_]\_S¥\_  
@HWI-EAS443:3:57:1177:1312#0/1  
TAATGCCAGCCCATGGTCCAGCCAAAAGCATGGAATATGA  
+HWI-EAS443:3:57:1177:1312#0/1  
abbbbaa`b``aaaaX^`[\_Z[]`a`^[\_`^a¥Za`a`\_\_  
@HWI-EAS443:3:57:1183:842#0/1  
GAAGAGCCATCTGGGCCGTTGCAGGTCCAAGTCATTGTT  
+HWI-EAS443:3:57:1183:842#0/1  
]``Z```aa`^a`a```[]\_[]\_[U[]\_¥a`U^^\_¥^S¥  
@HWI-EAS443:3:57:1193:1889#0/1  
TGCCAGGGTCGACTTCGAGTCTGGACGGATCAAGAAAGAA  
+HWI-EAS443:3:57:1193:1889#0/1  
Yb]\_bbabSba`Y¥ba`ab\_aabaa]\_aV^¥`a]a\_]aaa  
@HWI-EAS443:3:57:1215:817#0/1  
AATGGATGATGATTATCGGGGAAGACTTTGTAATCCCCTG  
+HWI-EAS443:3:57:1215:817#0/1  
a`\_aZaaa`aa[abaa\_`^¥a^`\_\_X`\_a`\_]¥Y¥^[^\_

@HWI-EAS443:3:57:1216:501#0/1  
GTGGTAATGCCAGCCCATGGTCCAGCCAAAAGCATGGAAT  
+HWI-EAS443:3:57:1216:501#0/1  
a`ba¥aaaaa`\_aa`[\_`\_`¥¥[\_\_^]`^`\_ZX\_``¥^`\_`  
@HWI-EAS443:3:57:121:17#0/1  
GCGAAAAGCTTGAACAGTCTGGGCTCCCAGTAGGGGGCAA  
+HWI-EAS443:3:57:121:17#0/1  
``Z^Z\_]`^``aZ`\_a`^[^ZZSZRR]]S][QPN  
@HWI-EAS443:3:57:1230:246#0/1  
CCCAGCTTTGGAGTGTCTGGAGTAAATGAATCAGCTGACA  
+HWI-EAS443:3:57:1230:246#0/1  
`ba`babbbbb]b\_b\_aba]`a\_ababa`aa`aaa`^aR`  
@HWI-EAS443:3:57:1232:513#0/1  
ATTCGATCTAAAGACTTCTATGGTGTGGCCAATGCAGTT  
+HWI-EAS443:3:57:1232:513#0/1  
][\_a`^`abaaab\_\_abaa^`¥M]`VX^aaaa]a`Va`a  
@HWI-EAS443:3:57:1242:248#0/1  
GAAAAAACAAAGACTGAATAAGAGAGGCTATCTAATAAGA  
+HWI-EAS443:3:57:1242:248#0/1  
`a^aaa`\_aaaa\_abbaaa`\_aaaaa\_a\_ZUXW]WBBBB  
@HWI-EAS443:3:57:1249:816#0/1  
CATGCTTTTGGCTGGACCATGGGCTGGCATTACCACAGCA  
+HWI-EAS443:3:57:1249:816#0/1  
^¥\_¥\_abbbbbb\_b`]`^`^`a\_Y\_a]^`Y^X¥Z`a`[  
@HWI-EAS443:3:57:1264:1104#0/1  
CATGGACACAGTAAACAGAACACACCAATACTCAGAAAAG  
+HWI-EAS443:3:57:1264:1104#0/1  
aba`]`a`^bbaaba^`bababaaa]aabba\_aab`\_a\_a  
@HWI-EAS443:3:57:129:252#0/1  
GGACGACAAACACAGAGACTGGTGCACCCCAGCTCAACCC  
+HWI-EAS443:3:57:129:252#0/1  
^`]baa]bbaa^^]a¥a\_aa¥YY`]`^^¥PT^¥^Y¥U[^  
@HWI-EAS443:3:57:1334:570#0/1  
AGCTGTTAGGCCATTCTGATCTAAAGACTTCTATGGTGTG  
+HWI-EAS443:3:57:1334:570#0/1  
\_\_[\_aab```\_X¥a`]baaZYHZ\_]LNV¥¥]V¥H]SN]^Y  
@HWI-EAS443:3:57:1351:905#0/1  
CTCCAATCATCCGACGATTTTGCTCTCATAGTGAATGCAC  
+HWI-EAS443:3:57:1351:905#0/1  
aa]Xabbabbaabaaa¥`aab```\_a`aaa`¥aa`aa\_a^  
@HWI-EAS443:3:57:1356:852#0/1  
GTGGGATGGGCTCCAATCATCCGACGATTTTGCTCTCATA  
+HWI-EAS443:3:57:1356:852#0/1  
aZ``^W¥a```\_`¥`\_¥`\_WW¥¥W\_W^\_]^^Y¥¥\_Y¥^^  
@HWI-EAS443:3:57:1362:1139#0/1  
GAGTAAATGAATCAGCTGACATGAGTATTGGAGTAACAGT  
+HWI-EAS443:3:57:1362:1139#0/1  
]`b¥bbba`a\_aaaaabb¥P¥bba\_aaba``Za`aa¥`b`  
@HWI-EAS443:3:57:140:493#0/1  
GCCATGGTGTCTAGGGCCCGATTGATGCCAGGGTCGACT

+HWI-EAS443:3:57:140:493#0/1  
\_a`aaa\_[]`Z`¥¥aa`a`a^`a`a`¥^^¥aNY`[R]  
@HWI-EAS443:3:57:142:1927#0/1  
AAATCGTCGGATGATTGGAGCCCATCCCACCAGTATATTG  
+HWI-EAS443:3:57:142:1927#0/1  
aaaa\_]\_a`a`\_\_Z`a^¥Y`\_\_^]]^[U`Y^\_X`\_^  
@HWI-EAS443:3:57:1452:28#0/1  
CAATGACCTTGACCTGCAACGGCCAGATGGCTCTTCAA  
+HWI-EAS443:3:57:1452:28#0/1  
ababbbbabbb^¥[aba[aa`b^P[``b`]aaaaZaa\_a¥  
@HWI-EAS443:3:57:1462:444#0/1  
ATTAGAAGAGGCCTTATTTTCTCAATTTTCTTCTTTGTTG  
+HWI-EAS443:3:57:1462:444#0/1  
ababaa^a^^`aabaaaa^\_a`\_\_ababaaa\_aba`\_aa  
@HWI-EAS443:3:57:1468:1616#0/1  
AGTACTTCAGGTCAATGCTTGCTAGCATTCTGCTGGTAT  
+HWI-EAS443:3:57:1468:1616#0/1  
ab\_a[aa\_\_aa[¥`aa`\_aaa```a¥\_aaa]aa]a`^X^a  
@HWI-EAS443:3:57:1473:140#0/1  
CCCGGATTGATGCCAGGGTCGACTTCGAGTCTGGACGGAT  
+HWI-EAS443:3:57:1473:140#0/1  
H¥W\_TW`\_¥¥b\_Z]W\_W\_\_¥Z\_T¥]OS^b^Z`¥]XXZQ`a  
@HWI-EAS443:3:57:1577:190#0/1  
CAAGGCATGAATTCTCAAATATTCCTGGGTGGGATTCTTC  
+HWI-EAS443:3:57:1577:190#0/1  
`\_abb\_bbbb^ababb`b\_bbb`\_`bbb[`b]a`bb\_ba^  
@HWI-EAS443:3:57:1578:1487#0/1  
CTCCAATCATCCGACGATTTTGCTCTCATAGTGAATGCAC  
+HWI-EAS443:3:57:1578:1487#0/1  
ababbabbbbab]bb`bbbbbabab\_abbU^aaabaaaa  
@HWI-EAS443:3:57:1578:256#0/1  
CTTAAAATGGGAGCTAATGGATGATGATTATCGGGGAAGA  
+HWI-EAS443:3:57:1578:256#0/1  
a\_ba\_baaba\_LJSbaaabab^ZJ`ZX`aaab]F[a[``\_  
@HWI-EAS443:3:57:1585:80#0/1  
GCCTTATTTTCTCAATTTTCTTCTTTGTTGATTATTGAA  
+HWI-EAS443:3:57:1585:80#0/1  
aa\_]RFWaa\_Y[Y^a\_XRZ¥`R]^`\_aa[\_\_¥Y[MTPX  
@HWI-EAS443:3:57:1586:2035#0/1  
CCAGGTGTTGCGATAGCCCTTCTTTTAACTTGCCTCTCT  
+HWI-EAS443:3:57:1586:2035#0/1  
abaaaWa`aa`a`\_\_aaaa`\_\_aa`[]\_`]WY^Q]U  
@HWI-EAS443:3:57:1587:779#0/1  
GGGCTATTAGTATCAGATGGAGGACCAAATTATACAATA  
+HWI-EAS443:3:57:1587:779#0/1  
XbY¥bbbbbab^baaX¥aaab^ab\_a````baabaaaaa  
@HWI-EAS443:3:57:1644:1862#0/1  
AATTGAAGAGCCATCTGGGCCGTTGCAGTCCAAGTCCAT  
+HWI-EAS443:3:57:1644:1862#0/1  
a``¥``]XY^a`\_\_N¥^aaXZ`[]\_XU\_VRKMNJZYVYXT



@HWI-EAS443:3:57:1672:878#0/1  
TAGGGGGCAATGAAAAGAAGGCCAAACTGGCAAATGTTGT  
+HWI-EAS443:3:57:1672:878#0/1  
aba\_\_ab\_Ybaaaaa\_`^N]`\_\_a```a\_a\_`]aa^\_aZ  
@HWI-EAS443:3:57:1678:527#0/1  
GTGTATCTGTAGTCTTTGATGAACAATTGAAGAGCCATCT  
+HWI-EAS443:3:57:1678:527#0/1  
aaa\_`a¥baaab¥^aaab\_a``\_Q`\_a``aa]`]VV\_aZB  
@HWI-EAS443:3:57:1743:758#0/1  
CATGGACACAGTAAACAGAACACACCAATACTCAGAAAAG  
+HWI-EAS443:3:57:1743:758#0/1  
aab]]a\_a`]XNa`\_]\_`a\_dW\_Saaa`\_a`\_\_\_\_\_``]\_``  
@HWI-EAS443:3:57:1780:477#0/1  
GATACACATATAGGTGCCATAGGGGAGACACACAAATTCA  
+HWI-EAS443:3:57:1780:477#0/1  
abbaababbbbbYa^aaa`aaaa\_aaa`aaaa``^a\_\_a  
@HWI-EAS443:3:57:1781:683#0/1  
AAGAGACAACATGACCAAGAAGATGGTCACGCAAAGAACA  
+HWI-EAS443:3:57:1781:683#0/1  
^`abbbabaababa]aa`aa`a^UaaWW^`^^^\_]Z^P`  
@HWI-EAS443:3:57:17:1349#0/1  
GTTTGGTGCATTCACTATGAGAGCAAATCGTCGGATGAT  
+HWI-EAS443:3:57:17:1349#0/1  
a\_aa]^W`a\_a\_a^a`aa\_a]\_`a\_\_`]^^ZZZ\_^SSX\_  
@HWI-EAS443:3:57:181:1869#0/1  
CGGTCTCCTATATGAACTGCTAGGGAAAAATTTCTCGAAT  
+HWI-EAS443:3:57:181:1869#0/1  
`VSP]\_aa¥Z]¥`Y^\_a`U`[ZW[X¥N]^`U[RZVKX[UY  
@HWI-EAS443:3:57:18:1476#0/1  
GAGGCTATGGCTTTCCTTGAAGAATCCCACCCAGGAATAT  
+HWI-EAS443:3:57:18:1476#0/1  
a\_HQZaaY]Z\_T\_`S`Y¥FYaU]YR]a\_`Y^^XKWWXBBB  
@HWI-EAS443:3:57:264:1710#0/1  
GAAACATCCTGAGCATGGCACCATAATGTTCTCAAACAA  
+HWI-EAS443:3:57:264:1710#0/1  
`ba[^abaa\_OW¥Vaa\_[]R\_]`^Y[b``^Ya\_a\_`bbaa`  
@HWI-EAS443:3:57:266:633#0/1  
CCTCCATCTGATACTAATAGCCCTACCTTTGATTGGGTTT  
+HWI-EAS443:3:57:266:633#0/1  
aaababaabbaaa`aa`aa```^aaa`\_`aaZ^\_a^[^\_\_  
@HWI-EAS443:3:57:273:1315#0/1  
GTTGATTCCCCTAACTTGCAGGTCCTGTAGAATCTGTCC  
+HWI-EAS443:3:57:273:1315#0/1  
aY`\_TaaaU¥a]a\_`\_`^¥\_aa¥W\_\_^^`Z[^X¥¥YUV¥  
@HWI-EAS443:3:57:274:945#0/1  
TTTCTTCCCTATTGTTCTTTGCGTGACCATCTTCTTGGTC  
+HWI-EAS443:3:57:274:945#0/1  
aa^`aa]^^a`aa\_][]`^Z]`X\_WSRU\_W\_[X\_\_ZZX]  
@HWI-EAS443:3:57:286:1129#0/1  
CCAGTGATTGTGAAAGAAATCTCTGTGTCTTGTGAATTAG

+HWI-EAS443:3:57:286:1129#0/1  
`abababba¥aababa`Z^`ba`^\_]aa`VXYZ\_aaX0  
@HWI-EAS443:3:57:290:256#0/1  
GGCCATGGTGTCTAGGGCCCGATTGATGCCAGGGTCGAC  
+HWI-EAS443:3:57:290:256#0/1  
aa\_\_\_`aa¥a¥`¥VXK]U`W¥`SLVTPV^¥¥X`ZQFUBBB  
@HWI-EAS443:3:57:302:20#0/1  
CACCATAGAAGTCTTTAGATCGAATGGCCTAACAGCTAAT  
+HWI-EAS443:3:57:302:20#0/1  
abaaabbb`ab`abbaab`a\_b``aaa`\_`\_]^^^\_W^`  
@HWI-EAS443:3:57:353:794#0/1  
GGTGTGTTCTGTTTACTGTGTCCATGGTGTATCCTGTTCC  
+HWI-EAS443:3:57:353:794#0/1  
ab^b\_a\_aaaaaa]aaa\_a\_^^aaaUa^\_a^\_aZ`\_`  
@HWI-EAS443:3:57:400:232#0/1  
TGCAGATTAGAGGTTTCTGATACTTTGTTGAACTTTAGC  
+HWI-EAS443:3:57:400:232#0/1  
abbabaab`baaa\_`aaa\_aa\_\_b`ab`aa\_\_^Xaa```\_`  
@HWI-EAS443:3:57:422:1196#0/1  
AAAGAACAATAGGGAAGAAAAACAAAGACTGAATAAGAG  
+HWI-EAS443:3:57:422:1196#0/1  
a[X]J¥aa`bLba`^a`\_`\_]a\_\_aWa¥`aa^`aa]\_a^`  
@HWI-EAS443:3:57:430:987#0/1  
CTCCAATCATCCGACGATTTTGCTCTCATAGTGAATGCAC  
+HWI-EAS443:3:57:430:987#0/1  
`bb`ZQWbaabZ¥]¥bb^X`TZUXb¥`b\_^J^U]U^WZT]  
@HWI-EAS443:3:57:463:720#0/1  
TCCCCTATGGCACCTATATGTGTATCTGTAGTCTTTGATG  
+HWI-EAS443:3:57:463:720#0/1  
abaaaa`b^`a`]a`baaa`^aaaa^]a]\_`aaa`a`  
@HWI-EAS443:3:57:469:1733#0/1  
CCACTTTCAAAGAAAAAGGAGAGTAAGAGACAACATGACC  
+HWI-EAS443:3:57:469:1733#0/1  
a\_\_aab`babaabaa¥ab``aa`I¥aaa`[[ba`a```0\_  
@HWI-EAS443:3:57:469:1983#0/1  
CTTGCAGGTCTGTAGAATCTGTCCACTCCTGCTTGTATT  
+HWI-EAS443:3:57:469:1983#0/1  
^TT^^`]XH`\_]\_¥aaaZNH]\_RLNT`aYV^TFS]ZUZBB  
@HWI-EAS443:3:57:496:351#0/1  
GGCTCCAATCATCCGACGATTTTGCTCTCATAGTGAATGC  
+HWI-EAS443:3:57:496:351#0/1  
aaaY^\_aX¥X[][\_`]P`YS¥]^]U[WV][]^]V¥^]]^V  
@HWI-EAS443:3:57:536:1722#0/1  
GAGGAAATAGAGATAACAACCCACTTTCAAAGAAAAAGGA  
+HWI-EAS443:3:57:536:1722#0/1  
aX`\_\_a``aaaaabb`aa\_]\_\_W\_a`]aa\_a^^^\_\_`\_^`  
@HWI-EAS443:3:57:551:1617#0/1  
AAAAACAAGACTGAATAAGAGAGGCTATCTAATAAGAGC  
+HWI-EAS443:3:57:551:1617#0/1  
aaaaab`a`a`ab]aaaaab\_`aa`aaXSZR\_X]\_UUBB



+HWI-EAS443:3:57:859:1058#0/1  
aaaaaaaa^aa^a`a`^`^`aa`\_a`aa^aa`\_`\_  
@HWI-EAS443:3:57:891:1449#0/1  
CGCAACACCTGGGATGCAGATTAGAGGTTTCGTATACTTT  
+HWI-EAS443:3:57:891:1449#0/1  
aa^`baba`aabba`a`ab`a`aa\_aaXaa^`]a``Wa\_\_  
@HWI-EAS443:3:58:1022:837#0/1  
GTTGTCCCCAGTGATTGTGAAAGAAATCTCTGTGTCTTGT  
+HWI-EAS443:3:58:1022:837#0/1  
a\_aaaba`a^^Z\_T\_]ZDV¥`^`^`[¥Z]V\_USSUX^[YZ  
@HWI-EAS443:3:58:1056:1871#0/1  
ACCTGAAGTACTTCAATGAATCAACAAAGAAGAAAATTGA  
+HWI-EAS443:3:58:1056:1871#0/1  
a\_\_¥^aaaWa\_aa]a``\_^`^`][\_]`^`^`][\_\_\_\_^  
@HWI-EAS443:3:58:1067:662#0/1  
GCTGGTATTTGTGTTCGAATCTTCATTCTTTTACTCTCGA  
+HWI-EAS443:3:58:1067:662#0/1  
^[abb[`aba`[`^¥`\_^\_Ua\_^\_aYR\_a``````\_[W\_^  
@HWI-EAS443:3:58:1088:860#0/1  
TGGTGGGATGGGCTCCAATCATCCGACGATTTTGCTCTCA  
+HWI-EAS443:3:58:1088:860#0/1  
abaUZab\_b``^SXa`a^a\_\_b`^a\_\_a`a\_a^WV`¥`^^  
@HWI-EAS443:3:58:1098:411#0/1  
ATGGGCTCCAATCATCCGACGATTTTGCTCTCATAGTGAA  
+HWI-EAS443:3:58:1098:411#0/1  
a^a`XYX]`Vaa¥a^^[ZYNVOPW]]UYT`¥NLXR\_UXY¥  
@HWI-EAS443:3:58:10:1460#0/1  
GTGGGATGGGCTCCAATCATCCGACGATTTTGCTCTCATA  
+HWI-EAS443:3:58:10:1460#0/1  
¥H]\_ZT]Z^``````a]a`^TTT¥]U[[^\_\_]¥]^^^]Z^  
@HWI-EAS443:3:58:1102:355#0/1  
AAATCGTCGGATGATTGGAGCCCATCCCACCAGTATATTG  
+HWI-EAS443:3:58:1102:355#0/1  
\_abab`X\_b`aa\_Ya^\_b]aa`\_`a````\_]N[a¥`a^\_YW  
@HWI-EAS443:3:58:1149:179#0/1  
GGGCAATGAAAAGAAGGCCAAACTGGCAAATGTTGTGAGA  
+HWI-EAS443:3:58:1149:179#0/1  
aba`aabaaa`aaa\_\_\_\_\_^`^^`\_^`a^\_a]^a^`\_`]  
@HWI-EAS443:3:58:1188:105#0/1  
GTTCTGTTTACTGTGTCCATGGTGTATCCTGTTCTTCTGTTT  
+HWI-EAS443:3:58:1188:105#0/1  
a`a`ab\_aa\_\_\_a^a]ZSZ^a`TaW]]ZR^`]^WV¥Y^W  
@HWI-EAS443:3:58:1197:603#0/1  
ATGGAATCAATGAACAAAGAGGAAATAGAGATAACAACCC  
+HWI-EAS443:3:58:1197:603#0/1  
aaaaa`a\_aaa`\_a\_\_^`^`aa\_\_^a\_aaa`a`\_`^a`^^¥  
@HWI-EAS443:3:58:1213:504#0/1  
ATTCCATGCTTTTGGCTGGACCATGGGCTGGCATTACCAC  
+HWI-EAS443:3:58:1213:504#0/1  
]]a`VZabba```ab`abaZT\_\_b^]¥a[Z\_Y\_]¥T^T

@HWI-EAS443:3:58:1245:615#0/1  
GAACAATTGAAGAGCCATCTGGGCCGTTGCAGGTCCAAGG  
+HWI-EAS443:3:58:1245:615#0/1  
^[QT\_aa\_a`a\_YX]Z]^V^^\_AY`XR^YW¥YMYMUP¥W  
@HWI-EAS443:3:58:125:834#0/1  
TCTGTTTACTGTGTCCATGGTGTATCCTGTTCCCTGTTCCA  
+HWI-EAS443:3:58:125:834#0/1  
abba\_aaaba`Z^aaaVaa`R¥\_``^`^Zaa\_`a^`^^[  
@HWI-EAS443:3:58:1275:885#0/1  
GGTGTCTAGGGCCCGGATTGATGCCAGGGTTCGACTTCGAG  
+HWI-EAS443:3:58:1275:885#0/1  
ab`aaaaab`\_aaaaaabaa`]a``\_aa¥`\_YP^a\_a^a  
@HWI-EAS443:3:58:1377:1875#0/1  
GTCGTCCACTTCCCTTTTCTGAGTATTGGTGTGTTCTGT  
+HWI-EAS443:3:58:1377:1875#0/1  
\_T`a\_\_`XT\_aa\_\_^Zaa`^^`W`[^`aa\_]a`]WLQX\_^  
@HWI-EAS443:3:58:1388:699#0/1  
GGCTAATTTTAGCATGGAGCTACCCAGCTTTGGAGTGTCT  
+HWI-EAS443:3:58:1388:699#0/1  
aa`aabaa`]^^^a[Z[\_`\_\_\_U[^a¥a^]\_^W\_Wa¥]`  
@HWI-EAS443:3:58:139:557#0/1  
GAGGATAATGAACCAAGTGGTATGCACAAACAGACTGTG  
+HWI-EAS443:3:58:139:557#0/1  
a`baaabaaaa`a`]^aVaa`Va^a``\_^`\_X`^^W^`Z^  
@HWI-EAS443:3:58:1427:679#0/1  
GTTGATCCCACTAACTTGCAGGTCCTGTAGAATCTGTCC  
+HWI-EAS443:3:58:1427:679#0/1  
aZZZZ]¥a\_\_¥J]^Z\_a`Y¥`T[\_]Y\_\_N]^`\_^a`[UU  
@HWI-EAS443:3:58:1435:412#0/1  
CGACGATTTTGTCTCATAGTGAATGCACCAAACCATGAG  
+HWI-EAS443:3:58:1435:412#0/1  
\_bbbbbbbbbbbababbbb]bbabbbb]a`]a`]bbbab  
@HWI-EAS443:3:58:1458:1630#0/1  
TGCCGTTGCAACTACACATTCCTGGATTCCCAAGAGGAAT  
+HWI-EAS443:3:58:1458:1630#0/1  
``a`\_Z\_b\_aaZba`a¥`aaZU^W`Yaa`\_U\_\_```YT`\_  
@HWI-EAS443:3:58:14:971#0/1  
GGGGCAATGAAAAGAAGGCCAAACTGGCAAATGTTGTGAG  
+HWI-EAS443:3:58:14:971#0/1  
`aaaa^aaaaa\_]\_]a`aa^a`]^`aa¥]S^\_a^^^^`Z\_  
@HWI-EAS443:3:58:157:1744#0/1  
ATTTTAAGCAGACTTCAGGAATGTGAAGATTCGGTATATT  
+HWI-EAS443:3:58:157:1744#0/1  
`^]aaaaa`a``a[¥`VSS]^^^\_\_\_```^`\_\_Y^\_\_\_X  
@HWI-EAS443:3:58:1598:1716#0/1  
TCTGTTTACTGTGTCCATGGTGTATCCTGTTCCCTGTTCCA  
+HWI-EAS443:3:58:1598:1716#0/1  
Va``UZ\_a`^Va^]VSS\_aaV]^\_YHQ][¥VFWVX^SSG  
@HWI-EAS443:3:58:1605:1151#0/1  
GATTCTTCAAGGAAAGCCATAGCCTCTAGAACACAGTCTG



@HWI-EAS443:3:58:352:319#0/1  
CTCAAGAATTCCCCTTTGGCTTGTGTTGAGAATAGAACGA  
+HWI-EAS443:3:58:352:319#0/1  
abbbab\_bbbbaababbaaa`aaa\_`[a`Y`\_\_\_a[aa\_`Y  
@HWI-EAS443:3:58:40:607#0/1  
GATTCAGTATCGAGACTCCCAAGACCGTACTTAGCATGTT  
+HWI-EAS443:3:58:40:607#0/1  
¥¥¥abaaY[\_\_\_baU\_ba¥`^]NY[^a][aa\_¥XY]Z^HY\_  
@HWI-EAS443:3:58:454:1304#0/1  
ATAATGAACCAAGTGGGTATGCACAAACAGACTGTGTTCT  
+HWI-EAS443:3:58:454:1304#0/1  
aab`][ ]`\_\_a\_aW`\_ZL]`^¥[^\_\_^¥ZZ¥W\_^XWX[VW  
@HWI-EAS443:3:58:480:564#0/1  
TGACTCATTAGCTGTTAGGCCATTGATCTAAAGACTTCT  
+HWI-EAS443:3:58:480:564#0/1  
aaaaa`aa`W`a`^\_\_T^]\_X[[V^XVW¥¥XVXRZ^\_U^  
@HWI-EAS443:3:58:493:547#0/1  
CAATGAACAAAGAGGAAATAGAGATAACAACCCACTTTCA  
+HWI-EAS443:3:58:493:547#0/1  
a`a`a`a`a`\_aaXa¥Z`a\_a\_a`\_`\_\_\_\_^\_YTaa\_\_[]  
@HWI-EAS443:3:58:506:1543#0/1  
GTCCTCCATCTGATACTAATAGCCCTACCTTTGATTGGGT  
+HWI-EAS443:3:58:506:1543#0/1  
aRaa`baa\_\_aaaa¥T^aaa[W\_^`\_\_\_\_]\_]\_¥\_^^^\_\_W  
@HWI-EAS443:3:58:514:1580#0/1  
CAACGGCCCAGATGGCTCTTCAATTGTTTCATCAAAGACTA  
+HWI-EAS443:3:58:514:1580#0/1  
aabbbabaa\_aaaaaa`a\_R\_aaa]\_a\_¥a`aa[a]`a  
@HWI-EAS443:3:58:619:747#0/1  
CACTAACTTGCAGGTCCTGTAGAATCTGTCCACTCCTGCT  
+HWI-EAS443:3:58:619:747#0/1  
aa\_aa]aaaaabaX\_aaa¥a\_\_\_\_`\_\_a\_V\_\_\_\_\_]\_`\_Z^  
@HWI-EAS443:3:58:633:115#0/1  
AGAAATCAACCCGAGTGGTTCAGAAACATCCTGAGCATGG  
+HWI-EAS443:3:58:633:115#0/1  
aaaa`aaaa^\_\_`a^aaZXYV]Y\_\_^]]Y]^X\_X¥¥X¥  
@HWI-EAS443:3:58:65:1694#0/1  
GTTGATTCATTGAAGTACTTCAGGTCAATGCTTGCTAGCA  
+HWI-EAS443:3:58:65:1694#0/1  
^^a^Y`aaa\_[L[ba`bab\_aa¥XP`baaaaaaaaaaa\_aa  
@HWI-EAS443:3:58:727:656#0/1  
AAACACAGAGACTGGTGCACCCCAGCTCAACCCGATTGAT  
+HWI-EAS443:3:58:727:656#0/1  
a\_aaaaa`aa`aaaTa\_aZ`a\_]TXY\_aQ¥`¥¥Y`\_`RY  
@HWI-EAS443:3:58:738:550#0/1  
CATTAAATACGATGACCAAAGATGCAGAGAGAGGCAAGTT  
+HWI-EAS443:3:58:738:550#0/1  
^bbbbb\_bbbba`[^Zab\_`^`bbabbaaaaaaba```a\_a  
@HWI-EAS443:3:58:745:1821#0/1  
GTTTGAGAACATTATGGGTGCCATGCTCAGGATGTTTCTG

+HWI-EAS443:3:58:745:1821#0/1  
a`bababaaaabaabaa\_a^^a`\_a^`\_a`\_\_\_\_^`\_`Va\_  
@HWI-EAS443:3:58:746:1656#0/1  
GTGGACGACAAACACAGAGACTGGTGCACCCCAGCTCAAC  
+HWI-EAS443:3:58:746:1656#0/1  
aLNZ```\_^[ba\_\_\_\_]ZG\_VPT\_WM¥¥^XX`\_U^¥WV^PR  
@HWI-EAS443:3:58:761:1416#0/1  
GTCTGGAGTAAATGAATCAGCTGACATGAGTATTGGAGTA  
+HWI-EAS443:3:58:761:1416#0/1  
aaaaa\_`b`bbabaa`aaaa`aaa\_aaa\_^^`aaa¥^\_`]  
@HWI-EAS443:3:58:782:2010#0/1  
GTAATGCCAGCCCATGGTCCAGCCAAAAGCATGGAATATG  
+HWI-EAS443:3:58:782:2010#0/1  
a`aaa\_``aa`\_`aa\_aQ¥¥\_¥^Y``a`W^^`¥¥¥W^^\_`^\_  
@HWI-EAS443:3:58:809:741#0/1  
CCCCTATGGCACCTATATGTGTATCTGTAGTCTTTGATGA  
+HWI-EAS443:3:58:809:741#0/1  
a¥^\_ab`^aaa\_aaaaab\_]b``a\_\_\_\_\_ab¥`aaab`]a  
@HWI-EAS443:3:58:829:840#0/1  
CCCAGTGATTGTGAAAGAAATCTCTGTGTCTTGTGAATTA  
+HWI-EAS443:3:58:829:840#0/1  
aaa^aabaaaa^aaaaa\_a[a[^`a]a^aa`Y]WTY``W  
@HWI-EAS443:3:58:835:209#0/1  
GGGCTCCAATCATCCGACGATTTTGCTCTCATAGTGAATG  
+HWI-EAS443:3:58:835:209#0/1  
aaa\_`\_a`]]^^a]¥``^a\_\_`^`\_`^W^[\_T]TZ\_]`  
@HWI-EAS443:3:58:836:712#0/1  
ACCAAAGATGCAGAGAGAGGCAAGTTAAAAAGAAGGGCTA  
+HWI-EAS443:3:58:836:712#0/1  
``b`a``Uaa\_S\_¥\_Ya^`a`\_Z`¥^^`a`^aaaa[a\_aa  
@HWI-EAS443:3:58:859:1229#0/1  
AAGACTTTGTAATCCCCTGAATCCCCTTTGTGAGTCATAAA  
+HWI-EAS443:3:58:859:1229#0/1  
aa]]aa`aa`a`\_PX`\_a\_\_PY[Z\_\_a\_^\_]¥^^`\_[-¥  
@HWI-EAS443:3:58:880:45#0/1  
CACTAACTTGCAGGTCCTGTAGAATCTGTCCACTCCTGCT  
+HWI-EAS443:3:58:880:45#0/1  
aaabaaaabbaabb]X\_`b`\_a\_aa`aa]ZTVL[NV[\_Za  
@HWI-EAS443:3:58:900:1147#0/1  
CAGATCTTCATGATCTCAGAGAACTTTCTTTCTTGATCC  
+HWI-EAS443:3:58:900:1147#0/1  
a\_b`aabab]aba`V¥\_a¥U[\_```Z`baa`a]\_a]a^`X  
@HWI-EAS443:3:58:944:742#0/1  
CCATGGGCTGGCATTACCACAGCATTGTTTACAGAATCAA  
+HWI-EAS443:3:58:944:742#0/1  
aaab[aaa`bbYaab\_W\_aa`a`baaaaaaaaaaaa\_[aa  
@HWI-EAS443:3:58:946:513#0/1  
GCCAGGGTGCAGCTTCGAGTCTGGACGGATCAAGAAAGAAG  
+HWI-EAS443:3:58:946:513#0/1  
aa\_STT]LZ]ZW]]^^V\_G]V\_aVV`¥UZVZW[¥\_a]¥T[



@HWI-EAS443:3:58:962:827#0/1  
GCCATGCTCAGGATGTTTCTGAACCACTCGGGTTGATTTC  
+HWI-EAS443:3:58:962:827#0/1  
aa`^`aa`\_a`SU¥NZ[S\_]X[RTX]\_¥\_]RW]W¥Z^S  
@HWI-EAS443:3:58:966:629#0/1  
GCGAAAAGCTTGAACAGTCTGGGCTCCCAGTAGGGGGCAA  
+HWI-EAS443:3:58:966:629#0/1  
\_abababb`aa`aba`aa`^¥a\_aaaaa¥`a^a```\_`  
@HWI-EAS443:3:58:990:1711#0/1  
CAACACCTGGGATGCAGATTAGAGTTTCGTATACTTTGT  
+HWI-EAS443:3:58:990:1711#0/1  
aab`babb`[babbabbab`aaaaab`aabb`bbbab  
@HWI-EAS443:3:59:1055:1006#0/1  
AACAAAGAGGAAATAGAGATAACAACCACTTTCAAAGAA  
+HWI-EAS443:3:59:1055:1006#0/1  
abbbabb\_bbababbbabbbbbbbaabb`\_baYNTb^[  
@HWI-EAS443:3:59:1105:1261#0/1  
CATAAGTCTGGCGACCTTGAGTTAGTTTATCTACCCTTGT  
+HWI-EAS443:3:59:1105:1261#0/1  
a`Zbbba`bbb\_Y]abbabbbabbaba\_a\_aW]a[U  
@HWI-EAS443:3:59:112:1754#0/1  
GGGTGGGATTCTTCAAGGAAAGCCATAGCCTCTAGAACAC  
+HWI-EAS443:3:59:112:1754#0/1  
aa]G\_`¥YTT]]RX[[`^]X]]\_]SXX^\_XT[XXVQ][V  
@HWI-EAS443:3:59:1136:247#0/1  
AATCCGACTCTACTTTTCCTAAAAATCCAGCGCAAAATG  
+HWI-EAS443:3:59:1136:247#0/1  
abba`b\_ba`baabbbabbbabbbbaabb^a`aZW`\_`\_`  
@HWI-EAS443:3:59:1196:1128#0/1  
CTTTGATGAACAATTGAAGAGCCATCTGGGCCGTTGCAGG  
+HWI-EAS443:3:59:1196:1128#0/1  
\_ZZZ\_\_ba`^abaabaZa¥ZW\_\_bab`ba\_]J]`VJN`Q  
@HWI-EAS443:3:59:1207:1556#0/1  
CAAGTAAAAAGAAGGGCTATCGCAACACCTGGGATGCAG  
+HWI-EAS443:3:59:1207:1556#0/1  
`bbbab\_\_abb`ab`]aab`a^abaabaa\_`^^TZZ^Y  
@HWI-EAS443:3:59:1253:671#0/1  
GGAAAGGGTACATGTTTCGAGAGTAAAAGAATGAAGATTCG  
+HWI-EAS443:3:59:1253:671#0/1  
aa^aaaba]``a\_aa\_\_`\_a\_bW`aaaa```]\_\_aZX\_0[  
@HWI-EAS443:3:59:1300:863#0/1  
GTGTTTGTCTCCACTTTCCCTTTTCTGAGTATTGGTGTG  
+HWI-EAS443:3:59:1300:863#0/1  
aaa`aba`a\_\_\_\_\_ [aa¥W]\_]`a\_Y`XJWWZ`\_]NLNVR  
@HWI-EAS443:3:59:1327:581#0/1  
CTCATTAGCTGTTAGCCATTCGATCTAAAGACTTCTATG  
+HWI-EAS443:3:59:1327:581#0/1  
aa`bbbb`^bbabab^^`aa`a[bb\_W`\_GZ¥aNR\_b0  
@HWI-EAS443:3:59:1376:1694#0/1  
TGTTGCGATAGCCCTTCTTTTTAACTTGCCTCTCTGCA

+HWI-EAS443:3:59:1376:1694#0/1  
abaaaa`ababaa`aabaaaaaaaaaaa\_aaVa]\_]^[`U^  
@HWI-EAS443:3:59:1417:171#0/1  
GTAGAATCTGTCCACTCCTGCTTGTATTCCCTCATGGTTT  
+HWI-EAS443:3:59:1417:171#0/1  
aa`a`aaaa`\_] [\_¥^YU^]\_`a]]aa]`YY]Z\_ULVZZ  
@HWI-EAS443:3:59:1476:1104#0/1  
CTCTCTTATTAGTCTTTGTTTTTTCTTCCCTATTGTTCT  
+HWI-EAS443:3:59:1476:1104#0/1  
abbbba¥`b¥bbba^bbb]baaabbbb¥aXaYba]]aaa  
@HWI-EAS443:3:59:1516:1069#0/1  
GCCATGGTGTCTAGGGCCCGATTGATGCCAGGGTCGACT  
+HWI-EAS443:3:59:1516:1069#0/1  
\_Z]`¥OU`]]PYR]]Z\_baa`QZa\_¥]^UaaYUKYJQ  
@HWI-EAS443:3:59:1526:1034#0/1  
GTCCCCAGTGATTGTGAAAGAAATCTCTGTGTCTTGAA  
+HWI-EAS443:3:59:1526:1034#0/1  
aYZPX`J]¥¥SY]aa]^\_]`^W`\_]TXa^ZL\_N\_Z\_XVWTP  
@HWI-EAS443:3:59:1567:292#0/1  
GCTAATTTTAGCATGGAGCTACCCAGCTTTGGAGTGTCTG  
+HWI-EAS443:3:59:1567:292#0/1  
aaba`abaaaa`abaa`\_`a`\_\_\_`aa\_aa`PX`^ZW]^  
@HWI-EAS443:3:59:1667:1494#0/1  
AAAAATTCCAGCGCAAATGCCATAAGCACCATTCCT  
+HWI-EAS443:3:59:1667:1494#0/1  
Vb]WZ[bISaa`M`aba¥aYZ\_a[a^ba^N\_\_WGUZZ  
@HWI-EAS443:3:59:166:1214#0/1  
TGAGAATAGAACGATTCTTGGGAATCCAGGAATGTGT  
+HWI-EAS443:3:59:166:1214#0/1  
^\_R[\_`b`\_¥[\_aSYa\_S[````\_TMU¥]]]NQJKET[S  
@HWI-EAS443:3:59:1671:1238#0/1  
GTGGGATTCTTCAAGGAAAGCCATAGCCTCTAGAACACAG  
+HWI-EAS443:3:59:1671:1238#0/1  
aVaaa\_aa]a`\_]`aa\_\_`aY`\_aaY]\_a\_aW`Z\_PVX]^  
@HWI-EAS443:3:59:1688:1120#0/1  
ATCTTCATGATCTCAGAGAACTCTTCTTTCTTGATCCGTC  
+HWI-EAS443:3:59:1688:1120#0/1  
\_babbababab\_bbbbaa]bbbbbabab^`\_bVW`\_U  
@HWI-EAS443:3:59:1713:1383#0/1  
GCCCCGATTGATGCCAGGGTCGACTTCGAGTCTGGACGGA  
+HWI-EAS443:3:59:1713:1383#0/1  
a^]^a¥]^`\_Z\_[HYaaa¥^a[^`\_ZZJ][SNVWXMKWXR  
@HWI-EAS443:3:59:1725:585#0/1  
GATTTCTTTACAATCACTGGGACAACACTAAGTGAAT  
+HWI-EAS443:3:59:1725:585#0/1  
^`\_aa`bbb^Y^aaa¥a`abbbbaaa\_\_`abX]^¥UU¥Z[  
@HWI-EAS443:3:59:1728:826#0/1  
ATCATCATCCCAGGACTCAGTGATGCTGTGCCATCTATTA  
+HWI-EAS443:3:59:1728:826#0/1  
ab`bbaaa^`aYa`]`^aY`aW`a^a`\_a]`\_S\_\_¥XT^]R

@HWI-EAS443:3:59:1779:799#0/1  
CAAGAATTCCCCTTTGGCTTGTGTTGAGAATAGAACGATT  
+HWI-EAS443:3:59:1779:799#0/1  
abbaaaba^T[`a`aa[a`W]^¥aY[\_¥][SW]^MWW]Z  
@HWI-EAS443:3:59:199:692#0/1  
AAACCATGAGGGAATACAAGCAGGAGTGGACAGATTCTAC  
+HWI-EAS443:3:59:199:692#0/1  
aaa`^b`^`aaa¥`^`\_aaaa\_a`aYaQ\_aY[Z[Z^XV[VY  
@HWI-EAS443:3:59:221:1432#0/1  
CCCCGATTGATGCCAGGGTCGACTTCGAGTCTGGACGGAT  
+HWI-EAS443:3:59:221:1432#0/1  
aa\_TW[aaZY^a`^`\_ZRaU\_\_V[¥X\_Y]PSZRPSSSWW  
@HWI-EAS443:3:59:226:261#0/1  
GTCCTCCATCTGATACTAATAGCCCTACCTTTGATTGGGT  
+HWI-EAS443:3:59:226:261#0/1  
a`\_a[Z]¥\_a^Z`WY]U^¥^^^\_]XTX^^])^STU[VZX  
@HWI-EAS443:3:59:236:1143#0/1  
AAAAAACAAAGACTGAATAAGAGAGGCTATCTAATAAGAG  
+HWI-EAS443:3:59:236:1143#0/1  
\_]a^aa`aaY[`aa`^^]aaaaa`aa]BBBBBBBBBBB  
@HWI-EAS443:3:59:266:1463#0/1  
AAAAATTCCAGCGCAAATGCCATAAGCACCATTCCT  
+HWI-EAS443:3:59:266:1463#0/1  
aaa]H\_aa\_a`[U]^¥YZ`\_a\_a\_aa]\_[^\_]XUVW¥  
@HWI-EAS443:3:59:284:2031#0/1  
CTAGGAGCATTTGCGAAAAGCTTGAACAGTCTGGGCTCCC  
+HWI-EAS443:3:59:284:2031#0/1  
`^`aaa`¥a`R¥\_a`[^[a^^\_¥`^`¥\_]U^XRKRMUQP  
@HWI-EAS443:3:59:320:345#0/1  
CATCCGACGATTTTGTCTCATAGTGAATGCACCAAACCA  
+HWI-EAS443:3:59:320:345#0/1  
aba`^`bbabbabaabba]aaa`Ya\_aaaaba\_a¥¥[X`\_  
@HWI-EAS443:3:59:325:185#0/1  
CCTCCATCTGATACTAATAGCCCTACCTTTGATTGGGTTT  
+HWI-EAS443:3:59:325:185#0/1  
aaabaaaaaaa\_\_\_a`aa`\_\_^`\_`]\_\_\_¥X¥]VOZVY]  
@HWI-EAS443:3:59:330:928#0/1  
AAAAATTCCAGCGCAAATGCCATAAGCACCATTCCT  
+HWI-EAS443:3:59:330:928#0/1  
^¥abTa`a^\_a`]^`a`[\_`^`\_`\_`^aaZ\_Z\_¥¥]SYY]  
@HWI-EAS443:3:59:368:624#0/1  
CAAAGAGGAAATAGAGATAACAACCCACTTTCAAAGAAAA  
+HWI-EAS443:3:59:368:624#0/1  
abaab\_ba`abbabaaaaaaaaaaaaaaaaa^a]a\_Y^^]  
@HWI-EAS443:3:59:378:287#0/1  
GAAACATCCTGAGCATGGCACCCATAATGTTCTCAAACAA  
+HWI-EAS443:3:59:378:287#0/1  
aaa`^`aaaa`a`a`^`\_`\_`a^^`\_`\_]`^`]YSZ]^XX¥]Z  
@HWI-EAS443:3:59:404:689#0/1  
GAAAAGCTTGAACAGTCTGGGCTCCCAGTAGGGGCAATG

+HWI-EAS443:3:59:404:689#0/1  
aaaa¥aaaaaa`^^^a`^`a\_^^^a`[^\_Z\_Z\_UUW[¥  
@HWI-EAS443:3:59:439:1602#0/1  
GTCCACTCCTGCTTGTATTCCCTCATGGTTTGGTGCATTC  
+HWI-EAS443:3:59:439:1602#0/1  
a¥abb`[a[SP^`¥]]`a]aUaVP\_Y`Wa\_[SUaTN[^V  
@HWI-EAS443:3:59:446:426#0/1  
GGAGCTAATGGATGATGATTATCGGGGAAGACTTTGTAAT  
+HWI-EAS443:3:59:446:426#0/1  
abaaabaabbbbaaaaabbaaaaaaab`aa^Q\_aaXX`\_\_  
@HWI-EAS443:3:59:458:603#0/1  
AATAGATTTCTTAAAGGATGTAATGGAATCAATGAACAAA  
+HWI-EAS443:3:59:458:603#0/1  
aaa`a`aaaaa`\_aaY`a^^`a`a¥\_\_]]`a][Z\_^]  
@HWI-EAS443:3:59:470:844#0/1  
GGGGATTACAAAGTCTTCCCCGATAATCATCATCCATTAG  
+HWI-EAS443:3:59:470:844#0/1  
aa`a]aYaaa]a\_aabbbbaa^ZaYR[b^Yba\_b\_X]LTP  
@HWI-EAS443:3:59:47:1905#0/1  
GGGGCAATGAAAAGAAGGCCAAACTGGCAAATGTTGTGAG  
+HWI-EAS443:3:59:47:1905#0/1  
ab`X`aba¥ba`¥]`YW[aZa]^a`a`a`¥SXYU¥¥VU]U  
@HWI-EAS443:3:59:498:1184#0/1  
CAGTCATAAAGAGATTGATTCTGTAACAATGCTGTGGTA  
+HWI-EAS443:3:59:498:1184#0/1  
ab`b`bbbbbb`abaab`\_b`bbaZ]ba``]]`aa]N`a¥\_  
@HWI-EAS443:3:59:505:135#0/1  
TAAAGAACAACATGATAAACAATGACCTTGGACCTGCAAC  
+HWI-EAS443:3:59:505:135#0/1  
`a`a]T¥ab^^]`^a¥a^X^a`a`a`\_`\_`\_^`[\_YW^]Y  
@HWI-EAS443:3:59:54:1442#0/1  
GGACCATGGGCTGGCATTACCACAGCATTGTTTACAGAAT  
+HWI-EAS443:3:59:54:1442#0/1  
aa]\_WWZWH¥Z`a^¥`\_`¥\_\_a]\_[M[¥^W[]\_[¥XTW]H  
@HWI-EAS443:3:59:577:893#0/1  
ACCTGAAGTACTTCAATGAATCAACAAAGAAGAAAATTGA  
+HWI-EAS443:3:59:577:893#0/1  
a\_baab`bZbaaaabbaaa\_aaaaa]aa]a`\_`\_`¥]\_\_^  
@HWI-EAS443:3:59:591:1318#0/1  
CCCAGTAGGGGCAATGAAAAGAAGGCCAAACTGGCAAAT  
+HWI-EAS443:3:59:591:1318#0/1  
abaMa]¥¥b`\_ba¥X`\_I^b`a^Z`\_b[bb]F]b]QY¥VZ  
@HWI-EAS443:3:59:598:1643#0/1  
TGTCAGTGCTCTTATTAGATAGCCTCTCTTATTTCAGTCTT  
+HWI-EAS443:3:59:598:1643#0/1  
aaaaaa]aaaaaa`aa^[¥`Y`a\_a`aa`a`\_`\_`^WV\_^^  
@HWI-EAS443:3:59:662:365#0/1  
CAATTGAAGAGCCATCTGGGCCGTTGCAGGTCCAAGGTCA  
+HWI-EAS443:3:59:662:365#0/1  
aa]ab`]baTa^a]\_^abbb\_ab^T\_^^^Z]^^[T[YQOV

@HWI-EAS443:3:59:672:501#0/1  
CGGTCTTGGGAGTCTCGATACTGAATCTTGGACAAAAGAA  
+HWI-EAS443:3:59:672:501#0/1  
a\_¥]a`a^\_abaabab\_ab\_`aaa]W\_ZFY`ZG[X]`  
@HWI-EAS443:3:59:729:941#0/1  
ATTGATGCCAGGGTCGACTTCGAGTCTGGACGGATCAAGA  
+HWI-EAS443:3:59:729:941#0/1  
abaaa`ba^aXTa`\_aa`W^aaaaaa[a\_\_NU^]¥  
@HWI-EAS443:3:59:749:1623#0/1  
GATTCTTCAAGGAAAGCCATAGCCTCTAGAACACAGTCTG  
+HWI-EAS443:3:59:749:1623#0/1  
a^PY^`\_`\_¥X[^^^T\_\_\_\_[\_Z[]]UUNUVSVVV  
@HWI-EAS443:3:59:752:637#0/1  
GTTCTGTTTACTGTGTCCATGGTGTATCCTGTTCCCTGTTCC  
+HWI-EAS443:3:59:752:637#0/1  
`babbababaaa`abaaaab\_b`abbaaa^aa`¥\_`[  
@HWI-EAS443:3:59:778:505#0/1  
CCAATACTCAGAAAAGGAAAGTGGACGACAAACACAGAG  
+HWI-EAS443:3:59:778:505#0/1  
abbbb`abaab`aa`bbbaaab\_babbb\_aaaa]`VZa^\_  
@HWI-EAS443:3:59:785:81#0/1  
GTGTGTTCTGTTTACTGTGTCCATGGTGTATCCTGTTCCCT  
+HWI-EAS443:3:59:785:81#0/1  
a^`Z\_X\_\_^`Z[`¥¥Z\_N`¥^¥\_a`U`WZVT[¥\_WUGNQ  
@HWI-EAS443:3:59:792:1425#0/1  
GTGAAAGAAATCTCTGTGTCTTGTGAATTAGTCATCATCT  
+HWI-EAS443:3:59:792:1425#0/1  
¥X`¥abba[TRabba¥abK\_]¥J\_S¥ZF¥¥LOSPaMMKH]  
@HWI-EAS443:3:59:812:1241#0/1  
CCCCAGTGATTGTGAAAGAAATCTCTGTGTCTTGTGAATT  
+HWI-EAS443:3:59:812:1241#0/1  
aa`aaa\_b\_aab^b^aaaaaaaa`a\_\_`\_\_\_a\_]YW]^U  
@HWI-EAS443:3:59:820:1879#0/1  
TAATAAGAGCACTGACATTAATACGATGACCAAAGATGC  
+HWI-EAS443:3:59:820:1879#0/1  
aaaaaa`ab\_a\_aaa`aaaaa`\_aaa\_aaaIa^`[^V^H  
@HWI-EAS443:3:59:824:443#0/1  
GCCGTTGCAACTACACATTCCTGGATTCCCAAGAGGAATC  
+HWI-EAS443:3:59:824:443#0/1  
aaabaaabaaabaaaaabaa\_\_`\_\_aaaba`^a\_aMW`^S  
@HWI-EAS443:3:59:860:119#0/1  
CCAATCAAAGGTAGGGCTATTAGTATCAGATGGAGGACCA  
+HWI-EAS443:3:59:860:119#0/1  
ab\_b`a]`a`PY\_babab¥`¥b¥`b`aZaaa]`\_U[Z\_  
@HWI-EAS443:3:59:890:453#0/1  
AGTAAATGAATCAGCTGACATGAGTATTGGAGTAACAGTG  
+HWI-EAS443:3:59:890:453#0/1  
ab\_bbbbbbbbaabbb`bababaababaUa`a`U[b\_`  
@HWI-EAS443:3:59:895:1929#0/1  
AACAGATCTTCATGATCTCAGAGAACTCTTCTTTCTTGAT

+HWI-EAS443:3:59:895:1929#0/1  
aa0baa`^b\_ba\_`abab`[^aZ`a¥^aa`QK[a^VVRXR  
@HWI-EAS443:3:59:900:1605#0/1  
TGGCATTGCGCTGGAATTTTAGGAAAAGTAGAGTCGG  
+HWI-EAS443:3:59:900:1605#0/1  
^^`bbbb`[aa`a`b`bbbaa`a`^^YaR^aa\_Y`^\_  
@HWI-EAS443:3:59:900:1924#0/1  
GGGCAATGAAAAGAAGGCCAAACTGGCAAATGTTGTGAGA  
+HWI-EAS443:3:59:900:1924#0/1  
aaXZaX0]]a\_\_Sa```\_]\_a\_^]W\_¥\_a\_\_`VZ¥\_ZXX[Z  
@HWI-EAS443:3:59:901:170#0/1  
GGGAATACAAGCAGGAGTGGACAGATTCTACAGGACCTGC  
+HWI-EAS443:3:59:901:170#0/1  
aba`\_`^`[^¥\_YZaa\_]\_V[^UTXYJW¥S[TTLVZSGSVUU  
@HWI-EAS443:3:59:925:993#0/1  
GTATTGGTGTGTTCTGTTTACTGTGTCCATGGTGTATCCT  
+HWI-EAS443:3:59:925:993#0/1  
a\_\_aba]Xa`a`\_`aaaaaa]aa\_a\_aa``aYVaUVY]V^  
@HWI-EAS443:3:59:962:1582#0/1  
GTGCTTATGGCATTGCGCTGGAATTTTAGGAAAAGTA  
+HWI-EAS443:3:59:962:1582#0/1  
a\_baaab`aaaaaaaaaaaaabbaaabaabaU`\_\_PGYV\_  
@HWI-EAS443:3:59:964:1187#0/1  
CTATATGAAGTCTAGGGAAAAATTTCTCGAATAGATTGC  
+HWI-EAS443:3:59:964:1187#0/1  
abbbbbbababbababaabbaaabbabbba`baa]`baS  
@HWI-EAS443:3:5:104:55#0/1  
CAGAAATCAACCGCAGCAACTGCATTGGCCAACACCATA  
+HWI-EAS443:3:5:104:55#0/1  
\_abbababa]aP[]Zbb[aa`\_`a`SS`bJY^aa`^Ya`B  
@HWI-EAS443:3:5:105:723#0/1  
ATCATGTTGTTCTTTATCACTGTTACTCCAATACTCATGT  
+HWI-EAS443:3:5:105:723#0/1  
ab`aaa\_bba\_aa`aa`aaaa¥X¥VY`aa][a`^`\_`UB  
@HWI-EAS443:3:5:1164:1937#0/1  
GAACAATTGAAGAGCCATCTGGGCCGTTGCAGGTCCAAGG  
+HWI-EAS443:3:5:1164:1937#0/1  
a`\_]`]]^Z`Z`a`aVa`][aa``SP^ZZ¥N¥``P¥T`^BB  
@HWI-EAS443:3:5:1178:171#0/1  
GATGGCTCTTCAATTGTTTCATCAAAGACTACAGATACACA  
+HWI-EAS443:3:5:1178:171#0/1  
aababYb\_aaU]aaa¥[``^X`Y`]Xa\_\_]`^Z]¥]\_BB  
@HWI-EAS443:3:5:117:642#0/1  
AAATCGTCGGATGATTGGAGCCCATCCCACCAGTATATTG  
+HWI-EAS443:3:5:117:642#0/1  
^`aX\_XUTb^aWQUUW\_WZ¥¥]ZWX^`a¥UR[\_UT¥]BBB  
@HWI-EAS443:3:5:1184:102#0/1  
TGAGTCAGGAAGGCTAATAGATTTCTTAAAGGATGTAATG  
+HWI-EAS443:3:5:1184:102#0/1  
ab`aa`\_b`Z\_\_a^^\_\_^a]^`\_`[^`^¥^`\_]aVY^`B

@HWI-EAS443:3:5:1312:176#0/1  
CAGTCTGTTTGTGCATACCCACTTGGTTCATTATCCTCAG  
+HWI-EAS443:3:5:1312:176#0/1  
^bbbbbabbbaabbbba`bb\_abbabb`bbab\_abb`b  
@HWI-EAS443:3:5:1399:168#0/1  
GGGCTCCAATCATCCGACGATTTTGCTCTCATAGTGAATG  
+HWI-EAS443:3:5:1399:168#0/1  
a¥WU¥SaQ¥ZONJQ]]Va\_[Z\_`VXIFUS``BBBBBBB  
@HWI-EAS443:3:5:1406:1393#0/1  
CTGACATGAGTATTGGAGTAACAGTGATAAAGAACAACAT  
+HWI-EAS443:3:5:1406:1393#0/1  
abbbbab]\_Zabbbb`b\_baaab^aabbbbab^aa`ba  
@HWI-EAS443:3:5:1414:1491#0/1  
CAGTGATTGTGAAAGAAATCTCTGTGTCTTGTGAATTAGT  
+HWI-EAS443:3:5:1414:1491#0/1  
ab\_aaT\_`bTaaaa\_`Ya`a¥]ba\_a\_\_a]XZWZ^)`BBB  
@HWI-EAS443:3:5:1418:884#0/1  
TTTGAGAACATTATGGGTGCCATGCTCAGGATGTTTCTGA  
+HWI-EAS443:3:5:1418:884#0/1  
abbaaaaa¥abb`aaaa^a\_\_\_`a]^Y^a\_Y\_\_Va`Y`\_B  
@HWI-EAS443:3:5:1428:1006#0/1  
AATCTGTCCACTCCTGCTTGTATTCCCTCATGGTTTGGTG  
+HWI-EAS443:3:5:1428:1006#0/1  
aabaaa`b`baaaabbabb\_\_aba¥^\_b^aaa`^aa]aXa  
@HWI-EAS443:3:5:1457:214#0/1  
AATCTGTCCACTCCTGCTTGTATTCCCTCATGGTTTGGTG  
+HWI-EAS443:3:5:1457:214#0/1  
[W^aY`[]W`YWYaXa^`QOW^\_`]SHbY\_]USU^VB BBB  
@HWI-EAS443:3:5:1577:733#0/1  
CAGAAACATCCTGAGCATGGCACCATAATGTTCTCAAAC  
+HWI-EAS443:3:5:1577:733#0/1  
¥¥abb`abba`a`b`\_ba¥a\_a]^\_abbbbababWbab^  
@HWI-EAS443:3:5:1600:1287#0/1  
AAAAATTCCAGCGAAAATGCCATAAGCACCATTCCT  
+HWI-EAS443:3:5:1600:1287#0/1  
]ba\_Y`UZ0\_[TVVa¥`ZT¥R^`a^Z[``[``\_][SYHBB  
@HWI-EAS443:3:5:1620:1179#0/1  
GGGCTCCAATCATCCGACGATTTTGCTCTCATAGTGAATG  
+HWI-EAS443:3:5:1620:1179#0/1  
abb^a\_ab\_a\_aa^aa^a\_a`aaa^a]a¥aa`aU`\_^\_`  
@HWI-EAS443:3:5:1622:191#0/1  
AACCAAGTGGGTATGCACAAACAGACTGTGTTCTAGAGGC  
+HWI-EAS443:3:5:1622:191#0/1  
ab`\_\_bb]bU`^\_aa`^aaaUaa`]aa\_`a`S]¥VB BBB  
@HWI-EAS443:3:5:1624:355#0/1  
GACGATTTTGCTCTCATAGTGAATGCACCAAACCATGAGG  
+HWI-EAS443:3:5:1624:355#0/1  
ababaaaaa\_a`a¥a`aa\_``aaa]\_Y]```YX\_\_`\_\_B  
@HWI-EAS443:3:5:1627:469#0/1  
GCTTAAAATGGGAGCTAATGGATGATGATTATCGGGGAAG

+HWI-EAS443:3:5:1627:469#0/1  
Z[`babbbba¥aab\_babbbbabba\_bbbbb\_babbb`]  
@HWI-EAS443:3:5:163:1174#0/1  
TGGCTTTCCTTGAAGAATCCCACCCAGGAATATTTGAGAA  
+HWI-EAS443:3:5:163:1174#0/1  
abbabab`bbbb`aabbaaab\_`a]aaaaaa`aaaaaa  
@HWI-EAS443:3:5:168:672#0/1  
ACGATTTTGTCTCATAGTGAATGCACCAAACCATGAGGG  
+HWI-EAS443:3:5:168:672#0/1  
ab\_¥]ab`aaaa^a\_ZaZb\_`a`\_`\_`a¥`Y^\_`a`a`a  
@HWI-EAS443:3:5:175:197#0/1  
GGACATTAACAGAAATCAACCGGCAGCAACTGCATTGGC  
+HWI-EAS443:3:5:175:197#0/1  
aaa\_aaa]]`ab`a\_aa\_`\_\_]\_^\_`]]VW^V^]VXBB  
@HWI-EAS443:3:5:32:804#0/1  
AATGCCAGCCCATGGTCCAGCCAAAAGCATGGAATATGAT  
+HWI-EAS443:3:5:32:804#0/1  
abaabaaaa¥`aa`[``\_`^¥Y]`S\_`Y\_a^\_]`^`^`  
@HWI-EAS443:3:5:34:1028#0/1  
AGAATCTGTCCACTCCTGCTTGTATTCCCTCATGGTTTGG  
+HWI-EAS443:3:5:34:1028#0/1  
ZXaU\_ZW\_OX[W]^TZ^[RX]^`^U]```Zaaab^QT^BB  
@HWI-EAS443:3:5:35:915#0/1  
CAATACTCATGTCAGCTGATTCATTTACTCCAGACACTCC  
+HWI-EAS443:3:5:35:915#0/1  
a`bbb`bbba\_aaaaa`\_`aaaaaaaa]a`aaaaaaaa`Z  
@HWI-EAS443:3:5:393:1474#0/1  
CATTAGCTGTTAGCCATTCGATCTAAAGACTTCTATGGT  
+HWI-EAS443:3:5:393:1474#0/1  
abbbab`bbZ]bb\_N^P\_`[`S`aaa]^\_aa`a`^`^`B  
@HWI-EAS443:3:5:41:121#0/1  
CACCCATAATGTTCTCAAACAAAATGGCAAGACTAGGGAA  
+HWI-EAS443:3:5:41:121#0/1  
abb`bbbb¥ababba`aabaaa\_aba\_`^aa]aaa^a\_a  
@HWI-EAS443:3:5:428:1175#0/1  
CACAGTAAACAGAACACACCAATACTCAGAAAAGGGAAAG  
+HWI-EAS443:3:5:428:1175#0/1  
aabbbbaabbaaabbbabbbbaabbbab`ababab`ab^  
@HWI-EAS443:3:5:473:751#0/1  
ACGATGACCAAAGATGCAGAGAGAGGCAAGTAAAAAGAA  
+HWI-EAS443:3:5:473:751#0/1  
^ba\_baaT`b[R^bbaYbYbab]V`LaabL^\_\_aabbaa  
@HWI-EAS443:3:5:500:23#0/1  
ATTGATGCCAGGGTCGACTTCGAGTCTGGACGGATCAAGA  
+HWI-EAS443:3:5:500:23#0/1  
aabbaaa\_R\_aabVZa`\_`S`]a\_X[a]SWa`^SRY^aS  
@HWI-EAS443:3:5:504:1235#0/1  
ATTCTTTTACTCTCGAACATGTACCCTTTCCCTAGTCTTG  
+HWI-EAS443:3:5:504:1235#0/1  
abaaabaaa\_bbb`aa^`bb]^\_`aaa¥ZVL``\_Wa]^a



@HWI-EAS443:3:5:509:120#0/1  
CTTGTGTTGAGAATAGAACGATTCCCTCTTGGGAATCCAGG  
+HWI-EAS443:3:5:509:120#0/1  
abbb`baab^ba`baabb\_b\_a\_^`^a\_aZ]^\_`^^\_a`  
@HWI-EAS443:3:5:511:1485#0/1  
CAGATCTTCATGATCTCAGAGAACTCTTCTTTCTTGATCC  
+HWI-EAS443:3:5:511:1485#0/1  
abaab`bbbabbbbababbbbaabaab`bba`babbba^  
@HWI-EAS443:3:5:518:218#0/1  
AATCAGCTGACATGAGTATTGGAGTAACAGTGATAAAGAA  
+HWI-EAS443:3:5:518:218#0/1  
aa`[aaaab`^`a\_aV\_aaa`\_`Y^\_^\_aZa]]]Z]\_Z^  
@HWI-EAS443:3:5:550:475#0/1  
GTCCTCCATCTGATACTAATAGCCCTACCTTTGATTGGGT  
+HWI-EAS443:3:5:550:475#0/1  
¥\_a^aababbbbabbWbabbbba\_aba`bbbbb\_a\_baM  
@HWI-EAS443:3:5:617:574#0/1  
CAGGAATATTTGAGAATTCATGCCTTGAAACAATGGAAGT  
+HWI-EAS443:3:5:617:574#0/1  
abbaabbbabbaabbbabaaa`aabbab`aabbaaa[  
@HWI-EAS443:3:5:671:175#0/1  
AAACAAGGGTAGATAAACTAACTCAAGGTCGCCAGACTTA  
+HWI-EAS443:3:5:671:175#0/1  
a`a`a\_]b\_Q\_`a`a`V`a\_]\_Vaa`\_Z^\_VUV^^Z^]B  
@HWI-EAS443:3:5:718:2017#0/1  
AGCTAATGGATGATGATTATCGGGGAAGACTTTGTAATCC  
+HWI-EAS443:3:5:718:2017#0/1  
ab^aba`ab`a`abaaaba\_aaaa`\_a`^a\_aa^aa\_^\_  
@HWI-EAS443:3:5:813:701#0/1  
GATTGATGCCAGGGTCGACTTCGAGTCTGGACGGATCAAG  
+HWI-EAS443:3:5:813:701#0/1  
T[YW\_Y\_[X\_]¥^`GW\_[aa`^`bb^babba`ab][aZZ\_  
@HWI-EAS443:3:5:868:49#0/1  
AAAAATTCCAGCGAAAATGCCATAAGCACCATTCCT  
+HWI-EAS443:3:5:868:49#0/1  
\_bbaba`¥^^`X^a`aaaX`[RaaabTaG[^\_\_W¥WQBB  
@HWI-EAS443:3:5:886:198#0/1  
GAATGGCCTAACAGCTAATGAGTCAGGAAGGCTAATAGAT  
+HWI-EAS443:3:5:886:198#0/1  
aaa`bb`a`^¥\_¥`\_\_a`S\_]W^\_UZ`XXZ^^ZX¥BB  
@HWI-EAS443:3:5:904:502#0/1  
CTTCCCTATTGTTCTTTGCGTGACCATCTTCTTGATCATG  
+HWI-EAS443:3:5:904:502#0/1  
abbbbbbbbbbbbababbb^abbabbababbbbaabba  
@HWI-EAS443:3:5:92:847#0/1  
GGGTTGTTATCTCTATTTCTCTTTGTTTCATTGATCCAT  
+HWI-EAS443:3:5:92:847#0/1  
\_SZ\_\_PM]JWUPTXTTaa¥XVTO¥^GTa[aZ]]Y^^`BBB  
@HWI-EAS443:3:5:965:1140#0/1  
ACCATGGGCTGGCATTACCACAGCATTGTTTACAGAATCA

+HWI-EAS443:3:5:965:1140#0/1  
a`aa```aa¥a^]aaaa`aaa`aa``aa^a\_\_Z\_`a\_\_Xa  
@HWI-EAS443:3:5:969:1312#0/1  
AATGAACCAAGTGGGTATGCACAAACAGACTGTGTTCTAG  
+HWI-EAS443:3:5:969:1312#0/1  
aa`aaa[Q]\_\_Z\_`\_X\_`\_]\_Z^\_^]^^ZZ\_^Z\_XYBBBB  
@HWI-EAS443:3:5:972:1775#0/1  
ATAGGAGACCGGTTGGAATTTCTAGCATGGTGGAGGCCAT  
+HWI-EAS443:3:5:972:1775#0/1  
`b]b`aaaaZZ`]aaaaaT]GZ\_]`\_`\_VHX]J¥BBBBB  
@HWI-EAS443:3:5:988:701#0/1  
CTGTGGTAATGCCAGCCCATGGTCCAGCCAAAAGCATGGA  
+HWI-EAS443:3:5:988:701#0/1  
`bb[b`ababbabb[bUbba`b\_Z\_baa`babbbUba`a[  
@HWI-EAS443:3:60:1014:915#0/1  
CCAGTAGGGGCAATGAAAAGAAGGCCAAACTGGCAAATG  
+HWI-EAS443:3:60:1014:915#0/1  
aa`^aaaaaaaabaa]a`aa`a\_\_`\_aaa`\_\_^`\_`a  
@HWI-EAS443:3:60:1054:1622#0/1  
CTCCTAGCTAAAGTTTCAACAAAGTATACGAAACCTCTAA  
+HWI-EAS443:3:60:1054:1622#0/1  
ab[a`bb`aabab]bbabb`aaaa^aaa^`a`aR`\_]`aa  
@HWI-EAS443:3:60:1056:236#0/1  
GGACGACAAACACAGAGACTGGTGCACCCCAGCTCAACCC  
+HWI-EAS443:3:60:1056:236#0/1  
aaXX`X[Y^[^Y¥^^¥^SU¥^ZTTU[UXUUU¥VSPOTUUU  
@HWI-EAS443:3:60:1069:373#0/1  
ATTATGGGTGCCATGCTCAGGATGTTTCTGAACCACTCGG  
+HWI-EAS443:3:60:1069:373#0/1  
aaa¥H`aa\_b`]^aa^Y\_]`aW¥YYa¥]\_a]\_XPWZPX^\_  
@HWI-EAS443:3:60:10:794#0/1  
GTGGTAATGCCAGCCCATGGTCCAGCCAAAAGCATGGAAT  
+HWI-EAS443:3:60:10:794#0/1  
a^aaZ]]```\_U]`aa^\_[TYXS]^[[^][RUTZ[ZRQY[  
@HWI-EAS443:3:60:1110:647#0/1  
CTGGATCCCAAGAGGAATCGTTCTATTCTCAACACAAGC  
+HWI-EAS443:3:60:1110:647#0/1  
a[[aa¥]aaaY]Y`\_SYV]]a\_¥Y¥`\_YMVU[VT¥UYTUY  
@HWI-EAS443:3:60:1123:1258#0/1  
GAGGCTATCTAATAAGAGCACTGACATTAATAACGATGAC  
+HWI-EAS443:3:60:1123:1258#0/1  
aVFZY^OWSWY^Zaa^]]TTZ^\_TSYa[XVUYW``SSYU  
@HWI-EAS443:3:60:1136:1157#0/1  
GCTAATTTTAGCATGGAGCTACCCAGCTTTGGAGTGTCTG  
+HWI-EAS443:3:60:1136:1157#0/1  
aa^]a``]`[[`]Y¥`\_Y`YZXPX¥`]`\_`\_YPRJVXZ\_a  
@HWI-EAS443:3:60:1144:1411#0/1  
CAATACTCATGTCAGCTGATTCATTTACTCCAGACACTCC  
+HWI-EAS443:3:60:1144:1411#0/1  
aab`aaa\_\_aa^`ab\_a\_\_\_[\_aa`\_]aT^`\_]O¥U\_^Y

@HWI-EAS443:3:60:1170:284#0/1  
ATCAAACCCAATCAAAGGTAGGGCTATTAGTATCAGATGG  
+HWI-EAS443:3:60:1170:284#0/1  
aa`^`a`abaaaaa`a`^`\_`aa^aaa\_``]]`\_a^^^`  
@HWI-EAS443:3:60:1194:1539#0/1  
GGGATCAAACCCAATCAAAGGTAGGGCTATTAGTATCAGA  
+HWI-EAS443:3:60:1194:1539#0/1  
aaaYa]aa`\_`\_a\_a\_a\_^a¥X\_``\_``\_``]`\_X\_]X^\_^  
@HWI-EAS443:3:60:1218:1924#0/1  
CAAAGAGGAAATAGAGATAACAACCCACTTTCAAAGAAAA  
+HWI-EAS443:3:60:1218:1924#0/1  
\_```]¥¥¥U\_bbaSaX¥Y\_b^b[HM`a^`\_U[aaaa^aa^  
@HWI-EAS443:3:60:1246:1094#0/1  
CTCCAATCATCCGACGATTTTGCTCTCATAGTGAATGCAC  
+HWI-EAS443:3:60:1246:1094#0/1  
`bbaabb`bbaaa`abbbaaaaaaaaabaaaXa\_a`a]aY  
@HWI-EAS443:3:60:1271:593#0/1  
GTTCAACAAACAAGGGTAGATAAACTAACTCAAGGTCGCC  
+HWI-EAS443:3:60:1271:593#0/1  
a\_aaaaa`aba`aab]aa\_```\_a``Y\_\_\_\_\_`ZYa^[  
@HWI-EAS443:3:60:1297:1809#0/1  
CCCCTTTGGCTTGTGTTGAGAATAGAACGATTCCTCTTGG  
+HWI-EAS443:3:60:1297:1809#0/1  
aa`¥``ab`^^`\_Ya[\_ZT^]\_\_\_\_]^^`¥V^\_YVW[¥Y[  
@HWI-EAS443:3:60:1300:1045#0/1  
GGGATGGGCTCCAATCATCCGACGATTTTGCTCTCATAGT  
+HWI-EAS443:3:60:1300:1045#0/1  
aaa\_aaaaaa^a`a`ba`\_a`\_```aaaa[`\_\_\_\_`\_^]W  
@HWI-EAS443:3:60:1318:1699#0/1  
AATCGTCGGATGATTGGAGCCCATCCCACCAGTATATTGT  
+HWI-EAS443:3:60:1318:1699#0/1  
aaaaaY\_aa\_]¥^]]`ZY¥]\_]\_^\_X¥[^^^VX\_^\_]YV  
@HWI-EAS443:3:60:1335:1393#0/1  
CGATTTTGCTCTCATAGTGAATGCACCAAACCATGAGGGA  
+HWI-EAS443:3:60:1335:1393#0/1  
\_`]aab`aaa\_b``aaaS\_a`aa\_a¥[\_`¥\_¥\_`]\_\_\_\_]\_`  
@HWI-EAS443:3:60:1353:910#0/1  
GACCTGAAGTACTTCAATGAATCAACAAAGAAGAAAATTG  
+HWI-EAS443:3:60:1353:910#0/1  
a¥^[¥a¥``]bb\_baabbaSa¥a`\_aaa`b`b\_X]\_^R`  
@HWI-EAS443:3:60:1417:1001#0/1  
AAAAATTCCAGCGAAAATGCCATAAGCACCACATTCCCT  
+HWI-EAS443:3:60:1417:1001#0/1  
```abaaa^TZb`a\_\_Y]a^`Z`\_a\_\_[^`^aZZ[]]ZHSQX^  
@HWI-EAS443:3:60:1423:990#0/1  
AAAACAAAGACTGAATAAGAGAGGCTATCTAATAAGAGCA  
+HWI-EAS443:3:60:1423:990#0/1  
\_¥¥U]a`¥a`\_baa````a\_\_Z^^`aVHHWHKSSY¥NVXZ  
@HWI-EAS443:3:60:1442:1399#0/1  
ATTGAAGAGCCATCTGGGCCGTTGCAGGTCCAAGGTCATT

+HWI-EAS443:3:60:1442:1399#0/1  
aaaa`babba`bbaaa^bbQ]`ab]\_a^`^`]a\_W^\_\_`  
@HWI-EAS443:3:60:1444:430#0/1  
AAAAGCATGGAATATGATGCCGTTGCAACTACACATTCCT  
+HWI-EAS443:3:60:1444:430#0/1  
a\_aaaaa[ab`]Za`a`\_a\_^`[^a^a\_^][0]^VZ\_]  
@HWI-EAS443:3:60:1459:1504#0/1  
GCGAAAAGCTTGAACAGTCTGGGCTCCCAGTAGGGGGCAA  
+HWI-EAS443:3:60:1459:1504#0/1  
aabaaa]]^aba\_\_\_`\_]\_YZa[\_\_\_\_ZaZ^`\_\_\_¥UZ^  
@HWI-EAS443:3:60:1460:336#0/1  
CTCCAATCATCCGACGATTTTGCTCTCATAGTGAATGCAC  
+HWI-EAS443:3:60:1460:336#0/1  
aa`^`ab]bba`^`b]baaabaaaa\_aaaa]a¥Ya\_QST  
@HWI-EAS443:3:60:1461:1949#0/1  
CAGGAATATTTGAGAATTCATGCCTTGAAACAATGGAAGT  
+HWI-EAS443:3:60:1461:1949#0/1  
a^b^^aL¥abb`aaaaa]```\_aSaa`bUb\_`\_`a`aY\_G  
@HWI-EAS443:3:60:1474:625#0/1  
CGATTTTGCTCTCATAGTGAATGCACCAAACCATGAGGGA  
+HWI-EAS443:3:60:1474:625#0/1  
ab\_aaa`a`a\_a^``aa\_aa\_`b^a¥\_a\_\_Z```\_\_\_\_aa^  
@HWI-EAS443:3:60:1484:200#0/1  
CACTGTTACTCCAATACTCATGTCAGCTGATTCATTTACT  
+HWI-EAS443:3:60:1484:200#0/1  
ab\_abab^S\_Q\_Y\_]Y`\_aa\_a^XZ\_V^]\_a^FLaa`]Z  
@HWI-EAS443:3:60:1496:1768#0/1  
GTCTGGAGTAAATGAATCAGCTGACATGAGTATTGGAGTA  
+HWI-EAS443:3:60:1496:1768#0/1  
^Ta\_QWWXT]abab`TTM^`WQU¥]RUSFUZNWNXTLXYV  
@HWI-EAS443:3:60:1498:1206#0/1  
GCCTCTCTGTCATCTTTGGTCATCGTATTTAATGTCAGT  
+HWI-EAS443:3:60:1498:1206#0/1  
`abbabababaaabaabbaa\_aaa`b`aabaa^aa\_[]]  
@HWI-EAS443:3:60:1538:1261#0/1  
TGGAATCAATGAACAAAGAGGAAATAGAGATAACAACCCA  
+HWI-EAS443:3:60:1538:1261#0/1  
XU¥PZba^aa¥LYS]\_[]ZW]`Xa`XV^a^aZR]\_VQS\_  
@HWI-EAS443:3:60:1539:197#0/1  
GTGGACGACAAACACAGAGACTGGTGCACCCCAGCTCAAC  
+HWI-EAS443:3:60:1539:197#0/1  
a]bbaaaa¥aaa\_\_Z\_]^^YQ^\_[Q\_[ZKYVYWRRS[WN  
@HWI-EAS443:3:60:153:1370#0/1  
GCGAAAAGCTTGAACAGTCTGGGCTCCCAGTAGGGGGCAA  
+HWI-EAS443:3:60:153:1370#0/1  
aa`SZ`¥R`aa^aWaZXN^aKU¥TU^VaN`U¥¥¥XXZWS¥  
@HWI-EAS443:3:60:154:53#0/1  
GTAGAATCTGTCCACTCCTGCTTGTATTCCCTCATGGTTT  
+HWI-EAS443:3:60:154:53#0/1  
aOIRLNQYV¥MULSNGQZY]VTSLRTRSLVPMJQQRQPT

@HWI-EAS443:3:60:1550:1181#0/1  
ATTCGATCTAAAGACTTCTATGGTGTGGCCAATGCAGTT  
+HWI-EAS443:3:60:1550:1181#0/1  
aa`aaa¥aa`^`[^`\_a\_\_aaU¥^`]OQ^[ZWZZUYZW  
@HWI-EAS443:3:60:1611:72#0/1  
AAAATTCCAGCGCAAATGCCATAAGCACCATTCCTT  
+HWI-EAS443:3:60:1611:72#0/1  
aaaa`a`]`a\_a^\_\_\_^aaZ]^`\_^\_W\_WW^Z^]^]ZX^]  
@HWI-EAS443:3:60:1657:83#0/1  
TTGAGGATGAACAGATGTACCAGAAGTGCTGCAATCTATT  
+HWI-EAS443:3:60:1657:83#0/1  
aa`aba\_a\_`X\_a\_`^^Z]]`^^^Z\_Z\_`S]Z^Z\_^^^  
@HWI-EAS443:3:60:166:731#0/1  
CAGATTAGAGGTTTCGTATACTTTGTTGAACTTTAGCTA  
+HWI-EAS443:3:60:166:731#0/1  
a`\_\_a[]Va\_\_`¥aaS`\_\_UT¥]TU]\_YP¥]^X¥TZXZ]  
@HWI-EAS443:3:60:1683:341#0/1  
TGTGTCTCCCCTATGGCACCTATATGTGTATCTGTAGTCT  
+HWI-EAS443:3:60:1683:341#0/1  
aa]ba`^^`\_a\_^]]Z^R[\_]\_Ua[V[T[`]^\_S^RTT[  
@HWI-EAS443:3:60:1703:1206#0/1  
AGAATCCCACCCAGGAATATTTGAGAATTCATGCCTTGAA  
+HWI-EAS443:3:60:1703:1206#0/1  
aaaaaaaa`aa`[a`[[`aa`aa`a`\_a^\_\_\_^PZ`\_]T  
@HWI-EAS443:3:60:1725:189#0/1  
AGAAATCTCTGTGTCTTGTGAATTAGTCATCATCTTTCTC  
+HWI-EAS443:3:60:1725:189#0/1  
ab`a\_a\_b\_bba\_`\_bb`a^Y^a`Ua^X\_a\_]aW`a\_Wa[  
@HWI-EAS443:3:60:1745:1513#0/1  
CAGATACACATATAGGTGCCATAGGGGAGACACACAAATT  
+HWI-EAS443:3:60:1745:1513#0/1  
\_\_babaababbbaaba\_baaaaabaaa`a`a`a`a`a`a`  
@HWI-EAS443:3:60:1750:779#0/1  
CCACTAACTTGAGGTCCTGTAGAATCTGTCCACTCCTGC  
+HWI-EAS443:3:60:1750:779#0/1  
abaabaaaaa`aaa]\_`aaa^aa^aa`aa[[¥\_\_^[[¥W¥  
@HWI-EAS443:3:60:180:1832#0/1  
AGGAAATAGAGATAACAACCCACTTTCAAAGAAAAAGGAG  
+HWI-EAS443:3:60:180:1832#0/1  
a`aa]aaaaa`aa`aaa`aaaaa^`\_\_a`\_\_`\_\_^`\_^^^  
@HWI-EAS443:3:60:232:1103#0/1  
AGAATCCCACCCAGGAATATTTGAGAATTCATGCCTTGAA  
+HWI-EAS443:3:60:232:1103#0/1  
\_[]a\_¥¥aYT][YS^Y\_]\_]`^^[U`ZT¥X]]STUWWHW^Z  
@HWI-EAS443:3:60:23:297#0/1  
CAAAGACTACAGATACACATATAGGTGCCATAGGGGAGAC  
+HWI-EAS443:3:60:23:297#0/1  
aa`\_`bbaaaaaaaaaa^^^aa`\_]Ya\_\_\_`Ya\_`^`^X  
@HWI-EAS443:3:60:351:1497#0/1  
CCCAGTAGGGGCAATGAAAAGAAGCCAAACTGGCAAAT

+HWI-EAS443:3:60:351:1497#0/1  
`\_aTa¥` `a^` Sa` \_a`¥a\_a`\_\_^[L]^¥` `a]]][U]\_]  
@HWI-EAS443:3:60:409:1786#0/1  
CAATGAACAAAGAGGAAATAGAGATAACAACCCACTTTCA  
+HWI-EAS443:3:60:409:1786#0/1  
abba`aaabbbbab^`\_\_`bbabaaabbbbaaaaaa`aa``  
@HWI-EAS443:3:60:444:540#0/1  
GATTCCATTACATCCTTTAAGAAATCTATTAGCCTTCCTG  
+HWI-EAS443:3:60:444:540#0/1  
aa`aaaaabaaaa`aabaaa`aa`aaaa````\_`^````^\_`  
@HWI-EAS443:3:60:581:251#0/1  
GATACACATATAGGTGCCATAGGGGAGACACAAATTCA  
+HWI-EAS443:3:60:581:251#0/1  
aaaaaX^aab`aaGa`aY^\_\_ab`\_\_YR`\_`\_VNWWW¥Z  
@HWI-EAS443:3:60:587:321#0/1  
GGTTTGGTGCACTTCACTATGAGAGCAAAATCGTCGGATGA  
+HWI-EAS443:3:60:587:321#0/1  
aaX`aa]a```a\_^[\_````^`^`\_]^^\_YTXN][ZWVR  
@HWI-EAS443:3:60:628:1855#0/1  
TAGAGATAACAACCCACTTTCAAAGAAAAAGGAGAGTAAG  
+HWI-EAS443:3:60:628:1855#0/1  
¥a¥Z\_¥aaa`ab\_^bbbq]bZQ`¥\_X^^a[^a\_Q¥aYaaa  
@HWI-EAS443:3:60:682:303#0/1  
TGTCATCCGACTCTACTTTTCCTAAAAATCCAGCGCAA  
+HWI-EAS443:3:60:682:303#0/1  
abaaaa```a^a\_aa\_aaaa`aaaa\_a``\_a\_`\_\_^`  
@HWI-EAS443:3:60:689:741#0/1  
ATGAGAGCAAAATCGTCGGATGATTGGAGCCCATCCCACC  
+HWI-EAS443:3:60:689:741#0/1  
abbaaabab`X\_aaa\_\_ab`\_U```¥^\_\_^\_^\_`[a^^][  
@HWI-EAS443:3:60:731:1655#0/1  
GTGGGATCAAACCAATCAAAGGTAGGGCTATTAGTATCA  
+HWI-EAS443:3:60:731:1655#0/1  
`Y]RVZWXR^aS[NZWVQ`aYK]`¥OLUaaXVTNL\_Y]\_  
@HWI-EAS443:3:60:754:154#0/1  
AAAATTTCTCGAATAGATTGCAGCACTTCTGGTACATCTG  
+HWI-EAS443:3:60:754:154#0/1  
[`¥R^\_aa`baYaa]^a][`¥X¥a``\_`[ZXXP\_^YV^Y^`  
@HWI-EAS443:3:60:764:1388#0/1  
GAGTAAATGAATCAGCTGACATGAGTATTGGAGTAACAGT  
+HWI-EAS443:3:60:764:1388#0/1  
a\_a^a¥`aaaaa\_\_]\_aa]]\_`\_\_[\_`^^`\_]^\_U^[X  
@HWI-EAS443:3:60:778:165#0/1  
AGCTGATTCATTTACTCCAGACACTCCAAAGCTGGGTAGC  
+HWI-EAS443:3:60:778:165#0/1  
[a^^YX]a\_[\_baa[[Y`^WX`]]`WTS`aaaWXY¥aGTU¥`  
@HWI-EAS443:3:60:77:980#0/1  
GTGGGATGGGCTCCAATCATCCGACGATTTTGCTCTCATA  
+HWI-EAS443:3:60:77:980#0/1  
\_WZ`ZX¥XU`\_Q\_\_Y\_]\_] [\_^ZTZ]XYX[VZQNWTRXX[

@HWI-EAS443:3:60:781:1307#0/1  
GGGCTATTAGTATCAGATGGAGGACCAAACCTTATACAATA  
+HWI-EAS443:3:60:781:1307#0/1  
aWQ`b\_b\_a^Q`\_\_\_aR]bbaSb\_`aa\_¥`a¥a\_Y¥\_^^`  
@HWI-EAS443:3:60:785:947#0/1  
CAACTACACATTCTGGATTCCCAAGAGGAATCGTTCTAT  
+HWI-EAS443:3:60:785:947#0/1  
abbabaab`baaa\_aaaaaa`aa`aaaaa``\_`a\_\_\_\_`a  
@HWI-EAS443:3:60:805:1537#0/1  
TGGGATTCTTCAAGGAAAGCCATAGCCTCTAGAACACAGT  
+HWI-EAS443:3:60:805:1537#0/1  
`a]¥[^b\_]V`ZZZ`[Q¥\_¥T`a]``^U\_^a^\_]`¥\_\_S  
@HWI-EAS443:3:60:809:648#0/1  
TGTGTTCTGTTTACTGTGTCCATGGTGTATCCTGTTCTG  
+HWI-EAS443:3:60:809:648#0/1  
ababababbabba`aaab`aaaaaa^^`a]`^a¥^a]`^a\_  
@HWI-EAS443:3:60:872:333#0/1  
TGCTGTGGTAATGCCAGCCCATGGTCCAGCCAAAAGCATG  
+HWI-EAS443:3:60:872:333#0/1  
aaabb]aa¥ab\_a\_\_`¥\_a\_`\_a¥\_¥\_\_\_\_[]\_X^\_T\_^\_  
@HWI-EAS443:3:60:880:1790#0/1  
AATGCTGTGGTAATGCCAGCCCATGGTCCAGCCAAAAGCA  
+HWI-EAS443:3:60:880:1790#0/1  
\_P[aa[MV`\_Nb\_H^T\_UYU¥XQXQ¥URY`W\_HTVN^Z  
@HWI-EAS443:3:60:907:433#0/1  
GGACGGATCAAGAAAGAAGAGTTCTCTGAGATCATGAAGA  
+HWI-EAS443:3:60:907:433#0/1  
aa[`aa\_`a`aa\_\_```a`\_`^`^a\_``\_`]^^^]``\_\_\_\_  
@HWI-EAS443:3:60:913:495#0/1  
CAGGAGTGGACAGATTCTACAGGACCTGCAAGTTAGTGGG  
+HWI-EAS443:3:60:913:495#0/1  
`abbab`b\_b\_¥\_¥\_a\_¥\_V]aaX¥ZZ\_] []¥V[X\_P]`\_  
@HWI-EAS443:3:60:927:1864#0/1  
GCATTCACTATGAGAGCAAATCGTCCGATGATTGGAGCC  
+HWI-EAS443:3:60:927:1864#0/1  
ab\_PPa\_`a¥[]\_W\_¥YX^a]LRQNQ\_RW¥UZ\_WWUQT  
@HWI-EAS443:3:60:988:1587#0/1  
CCAGTGATTGTGAAAGAAATCTCTGTGTCTTGTGAATTAG  
+HWI-EAS443:3:60:988:1587#0/1  
`abbUbbaaaWa```aaabaab`a¥\_\_`aba`^a`\_\_]\_  
@HWI-EAS443:3:61:101:1856#0/1  
AGTAGGGGGCAATGAAAAGAAGGCCAAACTGGCAAATGTT  
+HWI-EAS443:3:61:101:1856#0/1  
``Y¥\_¥`X¥a``aa\_^^`]ab`]bb``M]aUT``¥¥Y\_MZ  
@HWI-EAS443:3:61:1034:1907#0/1  
AGGAAATAGAGATAACAACCCACTTTCAAAGAAAAAGGAG  
+HWI-EAS443:3:61:1034:1907#0/1  
abb]bbbbbbababbbb`babababbbbbaaa\_\_```a\_^\_  
@HWI-EAS443:3:61:1038:756#0/1  
CAGGAACAGGATACACCATGGACACAGTAAACAGAACACA

+HWI-EAS443:3:61:1038:756#0/1  
abb`\_^aaaaab`^aabbab^¥aba^`\_\_a^U\_¥XYP[FY  
@HWI-EAS443:3:61:1060:278#0/1  
CCCAGTGATTGTGAAAGAAATCTCTGTGTCTTGTGAATTA  
+HWI-EAS443:3:61:1060:278#0/1  
abbbbabbbbaababbbb`bbbaabaa[aaW^a]V\_`W  
@HWI-EAS443:3:61:1100:554#0/1  
ATCTAATAAGAGCACTGACATTAATACGATGACCAAAGA  
+HWI-EAS443:3:61:1100:554#0/1  
ababaabbababaaaabaabba^^`abaaaa\_^]`^`\_\_  
@HWI-EAS443:3:61:115:304#0/1  
TGTTTATCATGTTGTTCTTTATCACTGTACTCCAATACT  
+HWI-EAS443:3:61:115:304#0/1  
ab`aaaabaab`aa`a\_aaaa^a``\_a\_`\_]\_X¥^`^`Z\_  
@HWI-EAS443:3:61:1190:1251#0/1  
ATTTTGTGGAGAACATTATGGGTGCCATGCTCAGGATGT  
+HWI-EAS443:3:61:1190:1251#0/1  
aabb`¥abab]aaaabaabaaa]aaaa`a^aY\_\_]W¥[Y  
@HWI-EAS443:3:61:1231:2020#0/1  
ATAAGAGCACTGACATTAATACGATGACCAAAGATGCAG  
+HWI-EAS443:3:61:1231:2020#0/1  
aaa\_\_a`baa`bSababaaaabab`aa^Wa``\_\_^\_W]W  
@HWI-EAS443:3:61:1235:1685#0/1  
TGCAACTACACATTCTGGATTCCCAAGAGGAATCGTTCT  
+HWI-EAS443:3:61:1235:1685#0/1  
a`abaabbbabab`b`aaa`abb^j`aaa\_a\_^[\_Z][[  
@HWI-EAS443:3:61:1359:1825#0/1  
CAGATACACATATAGGTGCCATAGGGGAGACACACAAATT  
+HWI-EAS443:3:61:1359:1825#0/1  
ababaabbbbbbb`\_abbbbbbbbabaaabGa`a`a\_]`  
@HWI-EAS443:3:61:1361:852#0/1  
ATCCCCTAACTTGCAGGTCCTGTAGAATCTGTCCACTC  
+HWI-EAS443:3:61:1361:852#0/1  
aaa^`^[aaaa\_`aa`a`]Z\_aaa\_\_a^\_`\_^ZZPPRTTN  
@HWI-EAS443:3:61:1370:960#0/1  
GCCCTACCTTTGATTGGGTTTGATCCCACAGCTTCTTTAA  
+HWI-EAS443:3:61:1370:960#0/1  
\_`^aYQ[`\_\_aWZ\_`¥a][\_`]¥`\_]`^¥Y¥XWTTUXNR  
@HWI-EAS443:3:61:1381:159#0/1  
GTGTGTTCTGTTTACTGTGTCCATGGTGTATCCTGTTCCCT  
+HWI-EAS443:3:61:1381:159#0/1  
a[\_W^^¥Y`a^X\_ZQX]V\_W^VZU^\_W\_W^WSLU^YWUQR  
@HWI-EAS443:3:61:138:801#0/1  
TGGACCATGGGCTGGCATTACCACAGCATTGTTTACAGAA  
+HWI-EAS443:3:61:138:801#0/1  
ababaabaa`aaaba`[\_`abaaaaa`¥a`a\_a\_`^`^`\_`^`  
@HWI-EAS443:3:61:1418:730#0/1  
TGAAGATTCCGTATATTGTATAAGTTTGGTCCCTCCATCTG  
+HWI-EAS443:3:61:1418:730#0/1  
a`aaaaaaaab\_aaaaab\_`a¥^a`aaa`\_\_`\_`\_`\_]`\_`^`



@HWI-EAS443:3:61:1443:1112#0/1  
ATGAGGGAATACAAGCAGGAGTGGACAGATTCTACAGGAC  
+HWI-EAS443:3:61:1443:1112#0/1  
ab`bbbbbbbabababbab`bba`[\_[`aa^`\_\_ZXUR  
@HWI-EAS443:3:61:1535:1367#0/1  
ATTTGAGTTAAAGAAGCTGTGGGATCAAACCAATCAAAG  
+HWI-EAS443:3:61:1535:1367#0/1  
`bbbbbbbab`aaWabbaabb]aa¥`aa`V`¥[^][Y^  
@HWI-EAS443:3:61:1543:1885#0/1  
CAGATCTTCATGATCTCAGAGAACTCTTCTTTCTTGATCC  
+HWI-EAS443:3:61:1543:1885#0/1  
^`\_`\_R`b\_b]`Ua¥aa`aa`a``aaa[¥]\_P\_G`a\_VW  
@HWI-EAS443:3:61:1548:866#0/1  
AATTGAAGAGCCATCTGGGCCGTTGCAGGTCCAAGGTCAT  
+HWI-EAS443:3:61:1548:866#0/1  
aabbbbbb`aab`aaaa\_baabaa]`\_[Ua\_TUX]  
@HWI-EAS443:3:61:1574:1552#0/1  
CTATGGCACCTATATGTGTATCTGTAGTCTTTGATGAACA  
+HWI-EAS443:3:61:1574:1552#0/1  
aX¥R\_XR[\_baM^Y`aa][bb`¥¥ZLWbabb][¥a]WSGZ  
@HWI-EAS443:3:61:1577:1694#0/1  
AAATACGATGACCAAAGATGCAGAGAGAGGCAAGTAAAA  
+HWI-EAS443:3:61:1577:1694#0/1  
aaa`bSbbaX[a^aaaab`abab\_\_\_b\_aa]aVYRXSQZ¥  
@HWI-EAS443:3:61:1607:503#0/1  
GTCCTCCATCTGATACTAATAGCCCTACCTTTGATTGGGT  
+HWI-EAS443:3:61:1607:503#0/1  
a`\_\_a`\_`\_`a\_\_\_\_\_]a\_a`a\_a`a`^¥\_`\_`\_TY\_ZMRYZ  
@HWI-EAS443:3:61:1639:1553#0/1  
GGCTAATTTTAGCATGGAGCTACCCAGCTTTGGAGTGTCT  
+HWI-EAS443:3:61:1639:1553#0/1  
aZJ`¥P`^aYa`MMR¥R``[`]a\_a`\_]`\_[Z[UVRXXXV  
@HWI-EAS443:3:61:1643:653#0/1  
AAAAATTCCAGCGCAAATGCCATAAGCACCACATTCCCT  
+HWI-EAS443:3:61:1643:653#0/1  
a^^[]aaa\_\_b]P][Z^`a^]b````adW\_WFTU]\_\_NTVW  
@HWI-EAS443:3:61:1688:1762#0/1  
AAGACTTCTATGGTGTGGCCAATGCAGTTGCTGCCGGTT  
+HWI-EAS443:3:61:1688:1762#0/1  
a^``¥ab\_baa\_^GQW`ba[abbabaaa]`\_¥Q[LN^^GP  
@HWI-EAS443:3:61:1695:1575#0/1  
GGAGCTAATGGATGATGATTATCGGGGAAGACTTTGTAAT  
+HWI-EAS443:3:61:1695:1575#0/1  
aaXa]\_\_a\_aa\_^a``aaaa`aa]a`\_]`^¥[]\_\_V]XX  
@HWI-EAS443:3:61:1715:642#0/1  
TGAAGAGCCATCTGGGCCGTTGCAGGTCCAAGGTCATTGT  
+HWI-EAS443:3:61:1715:642#0/1  
`a`a``aaaaaaa`\_aab]\_\_b\_aaZ\_^\_\_\_ZOTZ[YYU  
@HWI-EAS443:3:61:1776:478#0/1  
AAAAATTCCAGCGCAAATGCCATAAGCACCACATTCCCT

+HWI-EAS443:3:61:1776:478#0/1  
aaaaaa]\_[XZ\_[Y[\_\_\_`a`¥\_YUV\_¥¥¥X¥Y^]]XST  
@HWI-EAS443:3:61:231:411#0/1  
AATCTGTCCACTCCTGCTTGTATTCCCTCATGGTTTGGTG  
+HWI-EAS443:3:61:231:411#0/1  
``aabb`bab`]\_\_\_\_]``\_\_WY]\_aaaZ¥¥]`^[¥WX[TZ  
@HWI-EAS443:3:61:259:1511#0/1  
GGGATGGGCTCCAATCATCCGACGATTTTGCTCTCATAGT  
+HWI-EAS443:3:61:259:1511#0/1  
X`baY`bbaabbaaaa^^baXI^`Z]aa\_¥]\_\_\_\_^]W\_SR  
@HWI-EAS443:3:61:285:1517#0/1  
ATTGAAGAGCCATCTGGGCCGTTGCAGGTCCAAGGTCATT  
+HWI-EAS443:3:61:285:1517#0/1  
abb]abaaa\_aba\_a`\_aba`^\_\_a^^]\_]\_¥\_\_VYNU¥]^  
@HWI-EAS443:3:61:29:1321#0/1  
AAAAATTCCAGCGAAAATGCCATAAGCACCACATTCCCT  
+HWI-EAS443:3:61:29:1321#0/1  
[]\_SS[¥aaa^^\_¥`UVR`¥\_^W]X\_`b\_S\_a\_\_`[WXGT  
@HWI-EAS443:3:61:300:1661#0/1  
GTAGAATCTGTCCACTCCTGCTTGTATTCCCTCATGGTTT  
+HWI-EAS443:3:61:300:1661#0/1  
aa`TYRX]`aX\_`^`Y``ZY^W¥X]\_^ZUZ^^]QUZYRYU  
@HWI-EAS443:3:61:301:1279#0/1  
ATTCTTCAAGGAAAGCCATAGCCTCTAGAACACAGTCTGT  
+HWI-EAS443:3:61:301:1279#0/1  
aaaaaabaaaa`¥a`aaa`a\_aa\_a^`\_`\_`\_Y]\_X]^YX  
@HWI-EAS443:3:61:34:699#0/1  
AAAAATTCCAGCGAAAATGCCATAAGCACCACATTCCCT  
+HWI-EAS443:3:61:34:699#0/1  
abaa`a```a\_\_\_\_\_^Y\_^\_\_¥Z[HUY\_^^]]Y]]YYXX]  
@HWI-EAS443:3:61:357:499#0/1  
TACAAGCAGGAGTGGACAGATTCTACAGGACCTGCAAGTT  
+HWI-EAS443:3:61:357:499#0/1  
aaa`])`b[a^[a]aa`^L^VW]^WX]\_\_^Y]\_QVSRYYNU  
@HWI-EAS443:3:61:39:1195#0/1  
CAATGAAAAGAAGGCCAAACTGGCAAATGTTGTGAGAAAAG  
+HWI-EAS443:3:61:39:1195#0/1  
a\_a`b\_RVb\_b`aabb`Xabbba`Y\_`aa]aaaba\_`^\_  
@HWI-EAS443:3:61:420:1573#0/1  
TGCCGTTGCAACTACACATTCTGGATTCCCAAGAGGAAT  
+HWI-EAS443:3:61:420:1573#0/1  
aaaa\_^a\_\_\_\_a`\_a[Y]aa[a\_U[\_\_\_V]\_¥V`YUTTVXYY  
@HWI-EAS443:3:61:440:1080#0/1  
CTGTGGTAATGCCAGCCCATGGTCCAGCCAAAAGCATGGA  
+HWI-EAS443:3:61:440:1080#0/1  
`ab^`bYba^U^[Yaaaa``\_]a`X]``[UP[T^UUWWW  
@HWI-EAS443:3:61:464:172#0/1  
TGCTGGTATTTGTGTTTGAATCTTCATTCTTTTACTCTCG  
+HWI-EAS443:3:61:464:172#0/1  
abaabb[Yaaab`a`aaaa\_\_\_\_```\_a\_\_`a`\_\_^\_]\_Z\_

@HWI-EAS443:3:61:494:1506#0/1  
GTGGTGCTTATGGCATTGCGCTGGAATTTTAGGAAAA  
+HWI-EAS443:3:61:494:1506#0/1  
a\_aJF0b\_\_\_Y]YZ^`\_`Y¥Z\_[[PZ]^`¥^^]SNT¥U¥  
@HWI-EAS443:3:61:497:506#0/1  
TGGACGACAAACACAGAGACTGGTGCACCCCAGCTCAACC  
+HWI-EAS443:3:61:497:506#0/1  
aabaabbab^aaabaaa\_Z`aaaV`a^\_\_a\_a\_[^``\_¥U  
@HWI-EAS443:3:61:508:114#0/1  
GGGGCAATGAAAAGAAGGCCAAACTGGCAAATGTTGTGAG  
+HWI-EAS443:3:61:508:114#0/1  
abaaa\_\_ab]^``a\_`\_`[N¥\_]\_^`^^[^\_]\_`Y^X\_  
@HWI-EAS443:3:61:513:1185#0/1  
CTCCATCTGATACTAATAGCCCTACCTTTGATTGGGTTTG  
+HWI-EAS443:3:61:513:1185#0/1  
R\_Y]WW\_\_\_aNZW\_\_Y¥WN]^`¥^\_`U¥\_a^^XHJFOYSP  
@HWI-EAS443:3:61:525:509#0/1  
CCGGCAGCAACTGCATTGGCCAACCCATAGAAGTCTTTA  
+HWI-EAS443:3:61:525:509#0/1  
abbbbaabbab`aaabbbbaS¥`abaaaaa^Za```\_  
@HWI-EAS443:3:61:549:1448#0/1  
GGTTGTTATCTCTATTTCTCTTTGTTTCATTGATTCCATT  
+HWI-EAS443:3:61:549:1448#0/1  
a¥aaa\_aababa`baba`aa`aa`a`a][\_`^`\_`[^`\_  
@HWI-EAS443:3:61:554:1255#0/1  
TAAAGAACAACATGATAAACAATGACCTTGGACCTGCAAC  
+HWI-EAS443:3:61:554:1255#0/1  
ab`a`^bbb``aa`aa`\_\_`]G¥a^¥^]a\_U^XZ\_]`^ZZ  
@HWI-EAS443:3:61:563:1757#0/1  
TGGCACCTATATGTGTATCTGTAGTCTTTGATGAACAATT  
+HWI-EAS443:3:61:563:1757#0/1  
`^`a`aaa`^^`]¥¥^`]a`PR\_Sa\_`^¥^^U^[Z\_[ZY  
@HWI-EAS443:3:61:597:1595#0/1  
GAACAATTGAAGAGCCATCTGGGCCGTTGCAGGTCCAAGG  
+HWI-EAS443:3:61:597:1595#0/1  
¥KMaSH[^La]JJXWZ]P]¥]^`\_\_ZLXW¥UZRFVPPPTN  
@HWI-EAS443:3:61:602:348#0/1  
GGGATTCAGGGATTACAAAGTCTTCCCCGATAATCATCA  
+HWI-EAS443:3:61:602:348#0/1  
Z^^\_¥`^`^`\_\_`^`aaba¥UY^Xb``bb\_Y¥[HZW]a]ZOU  
@HWI-EAS443:3:61:689:1473#0/1  
AGACAATATACTGGTGGGATGGGCTCCAATCATCCGACGA  
+HWI-EAS443:3:61:689:1473#0/1  
aababaaaaaaa`aUa\_a`\_a``a[aaa\_\_]¥Z\_^`^[UV  
@HWI-EAS443:3:61:713:900#0/1  
ACCAAACCATGAGGGAATACAAGCAGGAGTGGACAGATTC  
+HWI-EAS443:3:61:713:900#0/1  
V\_bZZZ`^[^baaaaZ¥Z`^`Q\_`UZ¥]`^a^^]\_Z\_[Z  
@HWI-EAS443:3:61:715:1554#0/1  
TTGTGTTCGAATCTTCATTCTTTACTCTCGAACATGTAC

+HWI-EAS443:3:61:715:1554#0/1  
aa^^`aaaa`a`aaaaaaaa`aaaaa`\_Y`^]\_\_W]^Y  
@HWI-EAS443:3:61:736:578#0/1  
GGTGGGATGGGCTCCAATCATCCGACGATTTTGCTCTCAT  
+HWI-EAS443:3:61:736:578#0/1  
aa[a^aaaa`aa\_`aaaa\_a``¥aaX`a]\_[\_^\_VZV  
@HWI-EAS443:3:61:797:1179#0/1  
GTCCATCAATCGGGTTGAGCTGGGGTGCACCAGTCTCTGT  
+HWI-EAS443:3:61:797:1179#0/1  
`ab\_\_^bb^bbb\_b^ba`\_a\_]\_^a]ab^a]a¥Y¥a[`X  
@HWI-EAS443:3:61:817:499#0/1  
GAAGATGGTCACGCAAAGAACAATAGGGAAGAAAAACAA  
+HWI-EAS443:3:61:817:499#0/1  
a`^a[R^]NZ¥^\_WXY¥RY¥XK¥I][ZYPYJRYU¥XXXX  
@HWI-EAS443:3:61:83:1833#0/1  
AATTGAAGAGCCATCTGGGCCGTTGCAGGTCCAAGTCAT  
+HWI-EAS443:3:61:83:1833#0/1  
a`aa¥ab\_a\_aaa\_a\_¥]a`^X]^a`^]Z\_^\_ZXUWZVZ  
@HWI-EAS443:3:61:83:759#0/1  
CTGCATCTTTGGTCATCGTATTTAATGTCAGTGCTCTTAT  
+HWI-EAS443:3:61:83:759#0/1  
ab`^bV`b¥abZa]\_¥VS[`aaa¥abVLY\_T¥J][LTLJF  
@HWI-EAS443:3:61:848:71#0/1  
TTCCATTGTTTCAAGGCATGAATTCTCAAATATTCCTGGG  
+HWI-EAS443:3:61:848:71#0/1  
]¥Ya]¥ZR\_aVQVZ`Y\_`VN\_a``[¥ZUaY^\_[ZUWRL  
@HWI-EAS443:3:61:857:769#0/1  
TATTGTATAAGTTTGGTCCTCCATCTGATACTAATAGCCC  
+HWI-EAS443:3:61:857:769#0/1  
a`b`^`a¥\_Q]`\_a]a`aa]\_\_a\_\_`\_X\_\_^^\_[ZVP  
@HWI-EAS443:3:61:876:1851#0/1  
CTGTGGTAATGCCAGCCCATGGTCCAGCCAAAAGCATGGA  
+HWI-EAS443:3:61:876:1851#0/1  
aababaabbbbabab^ababbb]bb`baaa`a]\_[a¥TQ¥  
@HWI-EAS443:3:61:912:27#0/1  
GAGGCCATGGTGTCTAGGGCCCGATTGATGCCAGGGTCG  
+HWI-EAS443:3:61:912:27#0/1  
`\_`]¥]^`aZ^YXSP`^[^]Ra]NU¥WKPBBBBBBBBBB  
@HWI-EAS443:3:62:1004:1449#0/1  
GGCTATCGCAACACCTGGGATGCAGATTAGAGTTTCGTA  
+HWI-EAS443:3:62:1004:1449#0/1  
aabbbbaa`^`\_baaa`Z¥a`^\_aaa]`aa`aa¥`\_]]a  
@HWI-EAS443:3:62:1008:670#0/1  
CTTGTGTTGAGAATAGAACGATTCCTCTTGGGAATCCAGG  
+HWI-EAS443:3:62:1008:670#0/1  
abbb¥aabaabaaaabbbbaa`\_`\_`aaaa^`^V\_\_aa  
@HWI-EAS443:3:62:1039:371#0/1  
TATGGCTTTCCTTGAAGAATCCCACCCAGGAATATTTGAG  
+HWI-EAS443:3:62:1039:371#0/1  
```baaZZ\_S[\_aYV\_Z`a\_\_\_a\_Y\_]\_[\_aS\_]\_[ZYU]W

@HWI-EAS443:3:62:1047:767#0/1  
CAGTGATTGTGAAAGAAATCTCTGTGTCTTGTGAATTAGT  
+HWI-EAS443:3:62:1047:767#0/1  
aaa^aabaa]\_X\_aa`aa`a`aa^a[a\_\_XXXL]Y^Y\_X  
@HWI-EAS443:3:62:1050:418#0/1  
AACAAATGCTGTGGTAATGCCAGCCCATGGTCCAGCCAAAA  
+HWI-EAS443:3:62:1050:418#0/1  
aaaaaaaaa\_a\_¥`^`\_`a\_\_\_\_^ZSa\_^\_Z^^\_\_  
@HWI-EAS443:3:62:1067:1361#0/1  
AGCTGACATGAGTATTGGAGTAACAGTGATAAAGAACAAC  
+HWI-EAS443:3:62:1067:1361#0/1  
Y`¥abbbabbbb\_bbbbbababaabb^bbaaaa]aaX`ba  
@HWI-EAS443:3:62:1078:840#0/1  
GAACATTATGGGTGCCATGCTCAGGATGTTTCTGAACCAC  
+HWI-EAS443:3:62:1078:840#0/1  
aaa`baaaaaa\_aa\_a\_aa\_\_aa]S\_a^aa\_\_[Y\_^\_\_`  
@HWI-EAS443:3:62:1098:1715#0/1  
CTACACATTCCTGGATTCCCAAGAGGAATCGTTCTATTCT  
+HWI-EAS443:3:62:1098:1715#0/1  
a\_aabbababaJ¥]a^abaaaV]]`a`[\_\_\_]\_^a\_Yaa  
@HWI-EAS443:3:62:1115:783#0/1  
AAAAATTCCAGCGCAAATGCCATAAGCACCACATTCCCT  
+HWI-EAS443:3:62:1115:783#0/1  
aa`a^a\_^\_a`\_\_\_\_^V¥Za`\_\_^^^a\_^Z^^Z¥^]]  
@HWI-EAS443:3:62:113:530#0/1  
CCTAGCTAAAGTTTCAACAAAGTATACGAAACCTCTAATC  
+HWI-EAS443:3:62:113:530#0/1  
aaaaaaaa`T^aZaa¥ab`\_¥\_aW¥`a\_XWXZa`]\_¥VOXa  
@HWI-EAS443:3:62:114:611#0/1  
ACAAAGTCTTCCCCGATAATCATCATCCATTAGCTCCCAT  
+HWI-EAS443:3:62:114:611#0/1  
aaabab^`a`aa`a\_WO¥a]\_a^`\_\_\_\_^]]^]]^\_W[  
@HWI-EAS443:3:62:1151:51#0/1  
CTTGCAGTCTCTGTAGAATCTGTCCACTCCTGCTTGTATT  
+HWI-EAS443:3:62:1151:51#0/1  
abbbbbbbbabbbbbbbbbbbba\_ba\_baaaa^aba[aaa  
@HWI-EAS443:3:62:1164:1805#0/1  
ACCTGAAGTACTTCAATGAATCAACAAAGAAGAAAATTGA  
+HWI-EAS443:3:62:1164:1805#0/1  
`\_Z]\_a`T\_b\_\_`R`baaaWYQUa¥LM]]XQVSY]^`]]  
@HWI-EAS443:3:62:1198:718#0/1  
GGGATGGGCTCCAATCATCCGACGATTTTGCTCTCATAGT  
+HWI-EAS443:3:62:1198:718#0/1  
`\_¥\_\_¥aZZaa]U\_] [\_\_\_[`ba`Z`RaZWaa^Z`¥`^aaa  
@HWI-EAS443:3:62:1222:1491#0/1  
GGCTCCAATCATCCGACGATTTTGCTCTCATAGTGAATGC  
+HWI-EAS443:3:62:1222:1491#0/1  
ab^]PYa]Q][OWOaZU]UNXX[SZVLXTY\_VVOY][[VYZ  
@HWI-EAS443:3:62:1231:755#0/1  
ATTAATACGATGACCAAAGATGCAGAGAGAGGCAAGTTA

+HWI-EAS443:3:62:1231:755#0/1  
abYVV``^`[\_Yb`\_aS]aa^b`\_`P\_¥a^\_\_QQ^aX\_U  
@HWI-EAS443:3:62:1248:1040#0/1  
TGGATGATGATTATCGGGGAAGACTTTGTAATCCCCTGAA  
+HWI-EAS443:3:62:1248:1040#0/1  
ababaabbaabbbbabaaaa`a\_abbaabaa`Y[\_a`[a  
@HWI-EAS443:3:62:1255:1092#0/1  
CCAGTGATTGTGAAAGAAATCTCTGTGTCTTGTGAATTAG  
+HWI-EAS443:3:62:1255:1092#0/1  
abbb`b`bbbabaabbaabaabaaaaab^a\_¥^\_\_^\_  
@HWI-EAS443:3:62:1260:940#0/1  
TGTGGTAATGCCAGCCCATGGTCCAGCCAAAAGCATGGAA  
+HWI-EAS443:3:62:1260:940#0/1  
ab\_ba`aaa`a``[aba]aaaV``a`\_`aa^`\_[`X\_[``  
@HWI-EAS443:3:62:1275:613#0/1  
CTTCATTCTTTACTCTCGAACATGTACCCTTCCCTAGT  
+HWI-EAS443:3:62:1275:613#0/1  
abaabbabbbbabababbbbababbaaa\_aabba`a`aab\_  
@HWI-EAS443:3:62:1317:190#0/1  
GAACAAAGAGGAAATAGAGATAACAACCCACTTTCAAAGA  
+HWI-EAS443:3:62:1317:190#0/1  
a\_a^U[Z\_Ra[^]]`\_`Y`^^^X^WIY^ZY\_^[TVQ][  
@HWI-EAS443:3:62:1352:842#0/1  
CCGGCAGCAACTGCATTGGCCAACACCATAGAAGTCTTTA  
+HWI-EAS443:3:62:1352:842#0/1  
aaZa\_aaWK]¥\_SMLZa`\_a\_\_TVXN¥a\_T`ZZ]UVYQ]\_  
@HWI-EAS443:3:62:1353:889#0/1  
GCTTGTGTTGAGAATAGAACGATTCTCTTGGGAATCCAG  
+HWI-EAS443:3:62:1353:889#0/1  
Y`bb`a]]bb`b`aaaYa^`baa¥`aaabbaa^a^P\_\_\_\_  
@HWI-EAS443:3:62:1371:1583#0/1  
ATGGAATCAATGAACAAAGAGGAAATAGAGATAACAACCC  
+HWI-EAS443:3:62:1371:1583#0/1  
aaab\_aa```bbaa\_aa`^`ba\_\_`aa`abaaaa\_a`a``  
@HWI-EAS443:3:62:1376:2039#0/1  
GAACAACATGATAAACAATGACCTTGGACCTGCAACGGCC  
+HWI-EAS443:3:62:1376:2039#0/1  
aQYM^\_\_Y\_aX`Q`Z`[\_[WaGX\_UZXZ`^`^XW^NGX[¥  
@HWI-EAS443:3:62:1442:927#0/1  
ATTAGCTGTTAGGCCATTTCGATCTAAAGACTTCTATGGTG  
+HWI-EAS443:3:62:1442:927#0/1  
\_bb``ab¥P[Y]]L]¥[^OXWZY[]\_ZPOOY]S]FWOXWU  
@HWI-EAS443:3:62:1445:831#0/1  
CTCCATCTGATACTAATAGCCCTACCTTTGATTGGGTTTG  
+HWI-EAS443:3:62:1445:831#0/1  
]bbbbabbbbbaaaa\_V\_b`ba^\_^`\_abbaaabaa\_aab  
@HWI-EAS443:3:62:1456:1178#0/1  
TTCCAACCGGTCTCCTATATGAACTGCTAGGGAAAAATTT  
+HWI-EAS443:3:62:1456:1178#0/1  
aaaabbaaaa\_`a\_aaaaaa`\_\_aa\_aaaaaa`\_`\_a\_

@HWI-EAS443:3:62:1493:316#0/1  
GGGCAATGAAAAGAAGGCCAAACTGGCAAATGTTGTGAGA  
+HWI-EAS443:3:62:1493:316#0/1  
a`\_aaabaaabaaaaabaab`baaa`Maaaab^aa^b\_ba  
@HWI-EAS443:3:62:1515:517#0/1  
ACAGGAACAGGATACACCATGGACACAGTAAACAGAACAC  
+HWI-EAS443:3:62:1515:517#0/1  
a\_aaaaa`aba`\_\_aY^`\_aa]^]^V^aX``\_Z^\_]^]\_\_  
@HWI-EAS443:3:62:1517:897#0/1  
CCCATTTTAAGCAGACTTCAGGAATGTGAAGATTCCGTAT  
+HWI-EAS443:3:62:1517:897#0/1  
a`aabbbaab]abaaa`aab`a\_aaVa\_]aaaaa^b\_`a  
@HWI-EAS443:3:62:1522:1472#0/1  
GAATAAGAGAGGCTATCTAATAAGAGCACTGACATTAAT  
+HWI-EAS443:3:62:1522:1472#0/1  
abaaababaaa\_]aa]RVZ¥XTa]Q^NYGZaW\_[V\_X\_a`  
@HWI-EAS443:3:62:1618:771#0/1  
TGCCAGGGTCGACTTCGAGTCTGGACGGATCAAGAAAGAA  
+HWI-EAS443:3:62:1618:771#0/1  
abaaabbb\_[b\_aaaba\_¥`a`b`\_[aa`\_aaaa\_[aaa\_  
@HWI-EAS443:3:62:1619:1030#0/1  
TCCAGACACTCCAAAGCTGGGTAGCTCCATGCTAAAATTA  
+HWI-EAS443:3:62:1619:1030#0/1  
aaa`^`a]Xbaaaa``]aaa]\_]¥¥\_`¥a^a[a¥¥\_`a\_a  
@HWI-EAS443:3:62:1660:669#0/1  
GTCCTCCATCTGATACTAATAGCCCTACCTTTGATTGGGT  
+HWI-EAS443:3:62:1660:669#0/1  
aU]^\_\_\_\_\_Z`Y\_]\_]][\_\_`WSX^YXZ\_\_]\_Y^X¥\_\_W  
@HWI-EAS443:3:62:166:1289#0/1  
TTGCGAAAAGCTTGAACAGTCTGGGCTCCCAGTAGGGGGC  
+HWI-EAS443:3:62:166:1289#0/1  
a``]`\_¥^aTbaaa``ba`[aaaJa``¥aa\_\_¥¥\_Q\_`\_`  
@HWI-EAS443:3:62:1726:20#0/1  
GCTTTTGGCTGGACCATGGGCTGGCATTACCACAGCATTG  
+HWI-EAS443:3:62:1726:20#0/1  
YNVV¥]aWJO^BBBBBBBBBBBBBBBBBBBBBBBBBBBBB  
@HWI-EAS443:3:62:1731:1050#0/1  
CTCCAATCATCCGACGATTTTGCTCTCATAGTGAATGCAC  
+HWI-EAS443:3:62:1731:1050#0/1  
\_UT\_]`^aY\_WWUZSXV[]T^`]]¥[SQY`\_NYLVV[WZU  
@HWI-EAS443:3:62:1754:376#0/1  
GCTAATTTTAGCATGGAGCTACCCAGCTTTGGAGTGTCTG  
+HWI-EAS443:3:62:1754:376#0/1  
aabba`bbaa`aaabbabba`aa``\_aaaaa^a\_\_\_\_`ab  
@HWI-EAS443:3:62:1765:14#0/1  
CAGTAGGGGGCAATGAAAAGAAGGCCAAACTGGCAAATGT  
+HWI-EAS443:3:62:1765:14#0/1  
abaabbbbbbabb`bbbab]ab`\_aa`^aba¥a]\_aa`  
@HWI-EAS443:3:62:1776:870#0/1  
TCTGTTTACTGTGTCCATGGTGTATCCTGTTCTGTTCCA

+HWI-EAS443:3:62:1776:870#0/1  
aab`abbaaa\_\_a`a\_aba¥a``\_\_\_\_`\_^`[\_[¥\_\_@  
@HWI-EAS443:3:62:177:1637#0/1  
AATCTGTCCACTCCTGCTTGTATTCCCTCATGGTTTGGTG  
+HWI-EAS443:3:62:177:1637#0/1  
aa¥a]^Xa`aa\_`Yaaa\_¥UY`a`a¥`]ZYYVUZ\_WW¥  
@HWI-EAS443:3:62:191:236#0/1  
GGACGACAAACACAGAGACTGGTGCACCCCAGCTCAACCC  
+HWI-EAS443:3:62:191:236#0/1  
aa^`aa`a^a]^`\_¥]^¥U^U¥W¥W^W]¥U¥W¥WWWWW  
@HWI-EAS443:3:62:191:641#0/1  
CATGCTCAGGATGTTTCTGAACCACTCGGGTTGATTCTG  
+HWI-EAS443:3:62:191:641#0/1  
`ba`a[\_Y¥ZW[V^aba\_SY]¥R[^^ON\_XHPYG[]U[Z¥  
@HWI-EAS443:3:62:271:360#0/1  
GTTTACAGAATCAATCTCTTTATGACTGACAAAGGGATTC  
+HWI-EAS443:3:62:271:360#0/1  
aabbaabaaaab`^a`aaaaaaaa\_a^T]^`¥^¥X`  
@HWI-EAS443:3:62:277:400#0/1  
CAGATACACATATAGGTGCCATAGGGGAGACACACAAATT  
+HWI-EAS443:3:62:277:400#0/1  
ab`]^aa`bababaa¥aba`aaaa`Y`a`aaaa`W^¥  
@HWI-EAS443:3:62:289:531#0/1  
GGGGCAATGAAAAGAAGGCCAAACTGGCAAATGTTGTGAG  
+HWI-EAS443:3:62:289:531#0/1  
ababaaaaba\_`aa]W]aaaa\_aa`a\_a`\_\_a`^`\_`]aY`  
@HWI-EAS443:3:62:28:727#0/1  
AATCAATCTCTTTATGACTGACAAAGGGATTCAGGGGATT  
+HWI-EAS443:3:62:28:727#0/1  
aaabbaaaaaabaaa`aaa\_aa¥aY[^\_¥^^`\_^\_]U  
@HWI-EAS443:3:62:300:197#0/1  
ATTAGCTGTTAGGCCATTTCGATCTAAAGACTTCTATGGTG  
+HWI-EAS443:3:62:300:197#0/1  
`bbbbbbbaZ`¥P\_]`V\_`\_[TTV^Y]aXR¥a``a¥TUPHZ  
@HWI-EAS443:3:62:307:1116#0/1  
AACTCTTCTTTCTTGATCCGTCAGACTCGAAGTCGACCC  
+HWI-EAS443:3:62:307:1116#0/1  
`a\_a]T]^aZN^]Z]^`a`ZVa`\_\_a\_a^\_\_VT¥V¥US\_  
@HWI-EAS443:3:62:330:1889#0/1  
GTTTGAGAACATTATGGGTGCCATGCTCAGGATGTTTCTG  
+HWI-EAS443:3:62:330:1889#0/1  
a\_aaaaaabaaa`aaa\_`Y`^^`\_a^`a`]]^PV^]XL  
@HWI-EAS443:3:62:331:1649#0/1  
GTCCATCAATCGGGTTGAGCTGGGGTGCACCAGTCTCTGT  
+HWI-EAS443:3:62:331:1649#0/1  
a\_^\_W]b¥^^`YOLM]XMYQPX[XQJU^X[¥SQKYMJUTN  
@HWI-EAS443:3:62:336:91#0/1  
CGTCCACTTTCCCTTTTCTGAGTATTGGTGTGTTCTGTTT  
+HWI-EAS443:3:62:336:91#0/1  
abbbbbbbbbbbabbbaabb^b\_\_abba\_a]X¥`^`\_^\_Y



@HWI-EAS443:3:62:344:1717#0/1  
TGTTAGGCCATTTCGATCTAAAGACTTCTATGGTGTGGCC  
+HWI-EAS443:3:62:344:1717#0/1  
\_UY[a`aS`U]^Y^^\_U[PZ`Z^Y\_]TLQS[SV\_X  
@HWI-EAS443:3:62:377:251#0/1  
GGCAAGACTAGGAAAGGTACATGTTTCGAGAGTAAAAGA  
+HWI-EAS443:3:62:377:251#0/1  
aR]NFOYP\_UX¥¥SYSRYOT¥QZX¥YVPRTBBBBBBBBBB  
@HWI-EAS443:3:62:395:532#0/1  
GCCCGGATTGATGCCAGGGTCGACTTCGAGTCTGGACGGA  
+HWI-EAS443:3:62:395:532#0/1  
aaaba\_0\_aaa`]aa`a`S``[^`\_\_¥TZU^[^\_^\_[VR  
@HWI-EAS443:3:62:408:499#0/1  
ACAGATCTTCATGATCTCAGAGAACTCTTCTTTCTTGATC  
+HWI-EAS443:3:62:408:499#0/1  
a`Y\_Z```^`a\_¥¥```^M^]¥S[^`Z^ZZ\_\_`]U[Z^  
@HWI-EAS443:3:62:433:1563#0/1  
CAGGAATATTTGAGAATTCATGCCTTGAAACAATGGAAGT  
+HWI-EAS443:3:62:433:1563#0/1  
ab`abababbbababbbabbaab`aaabbbba`aa`aa`]  
@HWI-EAS443:3:62:433:1825#0/1  
GAAAGAAATCTCTGTGTCTTGTGAATTAGTCATCATCTTT  
+HWI-EAS443:3:62:433:1825#0/1  
\_bbXX`a^^Ybba[^`ba][VR]\_Y`]¥Sa\_\_[^^^a\_  
@HWI-EAS443:3:62:441:489#0/1  
TGTCAGCTGATTCATTTACTCCAGACACTCCAAAGCTGGG  
+HWI-EAS443:3:62:441:489#0/1  
`a\_a`b`a\_aa`aaaa]aaa\_`aaaaa`\_\_`\_\_¥]^WW  
@HWI-EAS443:3:62:504:1575#0/1  
GATAAAGAACAACATGATAAACAATGACCTTGGACCTGCA  
+HWI-EAS443:3:62:504:1575#0/1  
`^^^a\_V\_abaa^^X``]aaa`^\_]`a[^aP`]S[\_`Y  
@HWI-EAS443:3:62:527:1154#0/1  
ATTAGCTGTTAGGCCATTTCGATCTAAAGACTTCTATGGTG  
+HWI-EAS443:3:62:527:1154#0/1  
a`^^a^`\_T^RVPT][QQQZQO¥^T]BBBBBBBBBBBBBB  
@HWI-EAS443:3:62:544:32#0/1  
GCCAGGGTCGACTTCGAGTCTGGACGGATCAAGAAAGAAG  
+HWI-EAS443:3:62:544:32#0/1  
a¥[VX]¥VYYNPVQY¥U^T[U¥XWPPPNNRVUBBBBBBBB  
@HWI-EAS443:3:62:574:224#0/1  
TGGACGGATCAAGAAAGAAGAGTTCTCTGAGATCATGAAG  
+HWI-EAS443:3:62:574:224#0/1  
Za\_V¥bbV¥aa]babaW`aa¥IMaaaZX``[[RT\_a]Z`  
@HWI-EAS443:3:62:649:1072#0/1  
CGACAAACACAGAGACTGGTGCACCCAGCTCAACCCGAT  
+HWI-EAS443:3:62:649:1072#0/1  
\_bb]T]ab`b\_]¥b`a`^^¥^bbaaaba][^`¥Ya]J]  
@HWI-EAS443:3:62:679:60#0/1  
ATCATATTCATGCTTTTGGCTGGACCATGGGCTGGCATT

+HWI-EAS443:3:62:679:60#0/1  
abbbbbbb^aaabaaaabab`ba^a]UY\_``¥[^`Y¥V[  
@HWI-EAS443:3:62:67:1619#0/1  
ATGGAATCAATGAACAAAGAGGAAATAGAGATAACAACCC  
+HWI-EAS443:3:62:67:1619#0/1  
a^^SR¥a]^¥^NWaa[YY\_`^`WZ]`\_W]\_]`\_]\_\_\_\_]^]TX  
@HWI-EAS443:3:62:684:598#0/1  
AAATTCAGCGCAAATGCCATAAGCACCACATTCCCTTA  
+HWI-EAS443:3:62:684:598#0/1  
a]aabab\_]a[aa\_S]aaa\_aaa`\_`a`\_aa`\_^\_Y^\_^a  
@HWI-EAS443:3:62:729:1984#0/1  
CTGGTATTTGTGTTCGAATCTTCATTCTTTACTCTCGAA  
+HWI-EAS443:3:62:729:1984#0/1  
abbaIa`\_]\_]\_Waaa]^`aa``[\_`\_``a`adW^Y\_YZ¥  
@HWI-EAS443:3:62:73:2025#0/1  
ATGGAATCAATGAACAAAGAGGAAATAGAGATAACAACCC  
+HWI-EAS443:3:62:73:2025#0/1  
\_Qyb`aUR]^\_T^a\_\_aY^`J`\_`aU^I\_I]aa\_]```Ta  
@HWI-EAS443:3:62:740:661#0/1  
GCCAGGTTCGACTTCGAGTCTGGACGGATCAAGAAAGAAG  
+HWI-EAS443:3:62:740:661#0/1  
aba^\_aaZ^`a¥YUa`¥a[\_[\_[^`^SZ]RU\_X¥S[Z[Z  
@HWI-EAS443:3:62:777:48#0/1  
CATGGTTTGGTGCATTCACTATGAGAGCAAATCGTCGGA  
+HWI-EAS443:3:62:777:48#0/1  
abbbbbbbbabbbbbbabababbbbabbbabbaba\_`baa  
@HWI-EAS443:3:62:842:1593#0/1  
ATCAAACCCAATCAAAGGTAGGGCTATTAGTATCAGATGG  
+HWI-EAS443:3:62:842:1593#0/1  
aaaaa]aS[\_]\_`^YUV[I\_\_W\_¥]W^\_\_USW¥¥U^¥ZWU  
@HWI-EAS443:3:62:849:1107#0/1  
AAGAATGAAGATTCGAACACAAATACCAGCAGAAATGCTA  
+HWI-EAS443:3:62:849:1107#0/1  
a`a^a^¥¥a\_a`aaa`aaY]^``aaa\_a\_a]\_QX]``a`\_  
@HWI-EAS443:3:62:856:978#0/1  
TGTGGTAATGCCAGCCCATGGTCCAGCCAAAAGCATGGAA  
+HWI-EAS443:3:62:856:978#0/1  
aW\_abab[QW\_aaab`a\_Ub`Lab[b``Y\_baaR^`\_^\_V  
@HWI-EAS443:3:62:866:628#0/1  
ATTCATATGAGAGCAAATCGTCGGATGATTGGAGCCCA  
+HWI-EAS443:3:62:866:628#0/1  
abaaaabaa`]ba^`ababbaa¥¥a`\_\_aa\_``[Y\_`^\_`^a  
@HWI-EAS443:3:62:878:364#0/1  
GTTGATCCCACTAACTTGCAGGTCCTGTAGAATCTGTCC  
+HWI-EAS443:3:62:878:364#0/1  
UW`aabbb`ababa\_0]bababaV`¥Zbabaa``^ab[\_`Y  
@HWI-EAS443:3:62:889:493#0/1  
CATCCCAGGACTCAGTGATGCTGTGCCATCTATTAGAAGA  
+HWI-EAS443:3:62:889:493#0/1  
¥`¥`Z]]ROURWZJ¥R\_ZUYQZ`\_TNRXTZ^S¥[ZXODOU

@HWI-EAS443:3:62:896:697#0/1  
GTCAATCCGACTCTACTTTTCCTAAAAATTCCAGCGCAAA  
+HWI-EAS443:3:62:896:697#0/1  
a`b\_aabaa`aaaa`aaaaaaaa`[^Xaaa]\_\_` `[\_`\_`  
@HWI-EAS443:3:62:943:449#0/1  
AATTGAAGAGCCATCTGGGCCGTTGCAGGTCCAAGGTCAT  
+HWI-EAS443:3:62:943:449#0/1  
a`^`a`\_aabY`]V\_X`aaa`[U`^^]aWF¥TZY\_ZTVUW  
@HWI-EAS443:3:62:943:604#0/1  
ATTGATGCCAGGGTCGACTTCGAGTCTGGACGGATCAAGA  
+HWI-EAS443:3:62:943:604#0/1  
aaaba`aa]a\_aaVaaaW\_a\_a`a[Zaaa[``a¥YVZ¥V`  
@HWI-EAS443:3:62:980:1954#0/1  
TGGGTTGTTATCTCTATTTCTCTTTGTTTCATTGATTCCA  
+HWI-EAS443:3:62:980:1954#0/1  
a\_^[\_abaaab`aab`aa`aa`^aa\_a`aYa\_`T^a\_^aa  
@HWI-EAS443:3:63:102:1926#0/1  
GGGCTCCAATCATCCGACGATTTTGCTCTCATAGTGAATG  
+HWI-EAS443:3:63:102:1926#0/1  
abIb]bb\_[Q\_\_V¥^ZZ^¥S^OG0`Q`¥BBBBBBBBBBB  
@HWI-EAS443:3:63:1034:970#0/1  
GACGGATCAAGAAAGAAGAGTTCTCTGAGATCATGAAGAT  
+HWI-EAS443:3:63:1034:970#0/1  
Z\_\_bb^`babababaa\_a`abbbbbbaab`bbbabbaaa  
@HWI-EAS443:3:63:1038:1169#0/1  
AAATCAACCCGAGTGGTTCAGAAACATCCTGAGCATGGCA  
+HWI-EAS443:3:63:1038:1169#0/1  
abbbaaaab`aaa\_aaaaa`\_`a`]^`\_`[^a\_a^\_Xa^  
@HWI-EAS443:3:63:1061:535#0/1  
GTACGGTCTTGGGAGTCTCGATACTGAATCTTGGACAAAA  
+HWI-EAS443:3:63:1061:535#0/1  
a\_baaa]\_aaaa\_\_Z`\_^\_]\_\_^\_YX¥]]^a^`]W^\_Y`  
@HWI-EAS443:3:63:111:586#0/1  
ATTCCCACTAACTTGCAGGTCCTGTAGAATCTGTCCACTC  
+HWI-EAS443:3:63:111:586#0/1  
S\_bbbba`\_```a]aa^\_aVa^\_a^\_^]`aa`X`\_XW^^  
@HWI-EAS443:3:63:1190:884#0/1  
TGCCCCCTACTGGGAGCCCAGACTGTTCAAGCTTTTCGCA  
+HWI-EAS443:3:63:1190:884#0/1  
aababbbbaababa`\_bba`aaaabaaa``a\_aaa`a``^  
@HWI-EAS443:3:63:1264:957#0/1  
GTGGACGACAAACACAGAGACTGGTGCACCCCAGCTCAAC  
+HWI-EAS443:3:63:1264:957#0/1  
a¥aaa\_a``aaa`\_]a`\_^^[a¥^U^¥^U^[\_YTZ^\_¥]¥  
@HWI-EAS443:3:63:1290:1032#0/1  
CTTGGGAGTCTCGATACTGAATCTTGGACAAAAGAAATAC  
+HWI-EAS443:3:63:1290:1032#0/1  
abbb`babaaaa\_aaaaaaaaaaaaa\_\_a`abaaa`a`  
@HWI-EAS443:3:63:1308:666#0/1  
ATTAGTATCAGATGGAGGACCAAACCTTATACAATATACGG

+HWI-EAS443:3:63:1308:666#0/1  
`aaa`¥aa`aa^`\_¥\_`[¥[¥`]a\_a`\_`Z^Z``^a[\_^  
@HWI-EAS443:3:63:1328:631#0/1  
GATTGATGCCAGGGTCGACTTCGAGTCTGGACGGATCAAG  
+HWI-EAS443:3:63:1328:631#0/1  
\_[]aa\_X^\_T¥a[]U]Zaa\_W¥Z[]U`]a¥MYXXSZYP]  
@HWI-EAS443:3:63:1409:871#0/1  
AGATGGTCACGCAAAGAACAATAGGGAAGAAAAACAAAG  
+HWI-EAS443:3:63:1409:871#0/1  
Z¥b`^a`Saa`b\_a^`abbbbab``\_TZ`````aaaVZa  
@HWI-EAS443:3:63:1435:1835#0/1  
GCTAGGAGCATTTCGAAAAGCTTGAACAGTCTGGGCTCC  
+HWI-EAS443:3:63:1435:1835#0/1  
\_P`ZZ`\_[[Z]\_T`¥aX]U]]aa`¥]SZ¥PNK^SBBBBBB  
@HWI-EAS443:3:63:1461:823#0/1  
CAATCGGGTTGAGCTGGGGTGCACCAGTCTCTGTGTTTGT  
+HWI-EAS443:3:63:1461:823#0/1  
a]aa\_VZba^TXJYVIF\_¥U\_YMYRDXNBTTTTTTTTTTTT  
@HWI-EAS443:3:63:1473:664#0/1  
ATTCACTATGAGAGCAAATCGTCGGATGATTGGAGCCCA  
+HWI-EAS443:3:63:1473:664#0/1  
`U¥¥U[WTWb\_XMMN`ZXQV\_a\_\_[¥OTNVYBBBBBBBBBB  
@HWI-EAS443:3:63:1474:898#0/1  
TGGCCTTCTTTTCATTGCCCTACTGGGAGCCCAGACTG  
+HWI-EAS443:3:63:1474:898#0/1  
abaaaaaaba^\_a^a`a\_]\_a\_`a`\_`^`¥]\_\_\_\_[¥^a  
@HWI-EAS443:3:63:1478:1410#0/1  
TGGTCCCTCCATCTGATACTAATAGCCCTACCTTTGATTGG  
+HWI-EAS443:3:63:1478:1410#0/1  
a^YW^^ZXa\_]ZaW\_XT`aaaa`XXX[Y[\_¥ZZXaZBB  
@HWI-EAS443:3:63:1535:435#0/1  
CTTTGATGAACAATTGAAGAGCCATCTGGGCCGTTGCAGG  
+HWI-EAS443:3:63:1535:435#0/1  
abbbabaaba`\_]baa`baa`abaabaaaY`\_a`a`¥^]  
@HWI-EAS443:3:63:1555:1396#0/1  
TGATCCCACTAACTTGCAGGTCCTGTAGAATCTGTCCAC  
+HWI-EAS443:3:63:1555:1396#0/1  
X[X`\_\_QQ¥X`^`¥]^\_[\_\_¥V`W`^]U`\_Y`U^YBBBBBB  
@HWI-EAS443:3:63:1567:1620#0/1  
ATGGGCTCCAATCATCCGACGATTTTGCTCTCATAGTGAA  
+HWI-EAS443:3:63:1567:1620#0/1  
a``a\_baabbaaaaaaba`aaaaabaW`a]Zaaaa]\_aa  
@HWI-EAS443:3:63:1570:994#0/1  
ATCGCTATGGATTTGTGGCTAATTTTAGCATGGAGCTACC  
+HWI-EAS443:3:63:1570:994#0/1  
`a\_ZY`\_[baT¥b``\_aa\_\_aaaa^JZJJLHBBBBBBBB  
@HWI-EAS443:3:63:1586:658#0/1  
AAGAGCACTGACATTAATACGATGACCAAAGATGCAGAG  
+HWI-EAS443:3:63:1586:658#0/1  
aa``aaaa````aaaa`aa`baa\_a^`a\_a`^a```ab

@HWI-EAS443:3:63:1588:1108#0/1  
GATTGATGCCAGGGTCGACTTCGAGTCTGGACGGATCAAG  
+HWI-EAS443:3:63:1588:1108#0/1  
aaaaaa\_a\_\_`\_]^X^a\_]a\_\_`X\_^¥`\_]XX`\_Y¥¥]^\_  
@HWI-EAS443:3:63:1613:1736#0/1  
GATTCCGTATATTGTATAAGTTTGGTCCTCCATCTGATAC  
+HWI-EAS443:3:63:1613:1736#0/1  
^Ya¥\_\_Za\_]R\_]\_\_aa]Y¥[\_ZZZ]WO]Z`aZQ\_a^`aa  
@HWI-EAS443:3:63:1628:576#0/1  
AAAAATTCCAGCGCAAATGCCATAAGCACCACATTCCCT  
+HWI-EAS443:3:63:1628:576#0/1  
ab^Y\_aa\_Yaa\_aXaa^Maa\_¥a`\_\_N\_\_S[]\_\_¥\_N\_^  
@HWI-EAS443:3:63:1645:522#0/1  
CAGGAACAGGATACACCATGGACACAGTAAACAGAACACA  
+HWI-EAS443:3:63:1645:522#0/1  
abbbaa`bbbaaaaaaaaaaaaaa`a`aa\_^aaaa`aa  
@HWI-EAS443:3:63:1673:346#0/1  
AGAGATTGATTCTGTAAACAATGCTGTGGTAATGCCAGCC  
+HWI-EAS443:3:63:1673:346#0/1  
\_WR\_S`]a`\_]a`U\_aa^T]^VSUV¥N]ZY\_YRZBBBBBB  
@HWI-EAS443:3:63:1685:349#0/1  
TGCCAGGGTCGACTTCGAGTCTGGACGGATCAAGAAAGAA  
+HWI-EAS443:3:63:1685:349#0/1  
abaabaaaUaaa[``^`[\_ab`[U`XYL\_\_a``aQaB  
@HWI-EAS443:3:63:1696:1896#0/1  
TGTGGCTAATTTTAGCATGGAGCTACCCAGCTTTGGAGTG  
+HWI-EAS443:3:63:1696:1896#0/1  
ab\_]ZR XUZOY[\_ZZOSZRPPR[UQYZSQ[S^[¥X¥YVOZ  
@HWI-EAS443:3:63:1710:812#0/1  
AGACAACATGACCAAGAAGATGGTCACGCAAAGAACAATA  
+HWI-EAS443:3:63:1710:812#0/1  
aaa`aaaa`aaaa`aaaab`baXY^`^X¥^^a\_aZ\_]a\_  
@HWI-EAS443:3:63:1755:452#0/1  
GTTGCAACTACACATTCTGGATTCCCAAGAGGAATCGTT  
+HWI-EAS443:3:63:1755:452#0/1  
a\_a]]\_`^T\_VW^N¥]P¥WZSPP]P]]¥OLOM^¥]XNFYBB  
@HWI-EAS443:3:63:1758:408#0/1  
GTCTGCTTAAAATGGGAGCTAATGGATGATGATTATCGGG  
+HWI-EAS443:3:63:1758:408#0/1  
a`aab[aaaaa\_aaa\_a\_a`\_aa^¥`\_]`^¥¥``\_\_X¥`^  
@HWI-EAS443:3:63:178:227#0/1  
CAGGTGTTGCGATAGCCCTTCTTTTTAACTTGCCTCTCTC  
+HWI-EAS443:3:63:178:227#0/1  
abbbab\_baabaaa```aaa`aaaaaaaaa^Z^`\_]a\_\_\_\_  
@HWI-EAS443:3:63:187:1081#0/1  
CCGGCAGCAACTGCATTGGCCAACACCATAGAAGTCTTTA  
+HWI-EAS443:3:63:187:1081#0/1  
abaS¥¥Z¥W^`^JYZ\_aX```^`[\_[^`^^[[a¥LX¥^Z]  
@HWI-EAS443:3:63:189:1476#0/1  
GATTGATGCCAGGGTCGACTTCGAGTCTGGACGGATCAAG

+HWI-EAS443:3:63:189:1476#0/1  
T\_babba^bab`b]aa\_aaba\_aW\_aaa]b`ba\_Xa\_RX  
@HWI-EAS443:3:63:189:418#0/1  
GGGGCAATGAAAAGAAGCCAACTGGCAAATGTTGTGAG  
+HWI-EAS443:3:63:189:418#0/1  
aaYaa\_^[\_aQH^VZ\_[\_Y\_aa[]]\_XY¥`¥]XZ[[Y  
@HWI-EAS443:3:63:232:1878#0/1  
CATCATCCATTAGCTCCCATTTTAAGCAGACTTCAGGAAT  
+HWI-EAS443:3:63:232:1878#0/1  
a\_Sa¥X`\_\_^\_PVZU\_\_`S]¥R[X0^aX`^URQ^VW\_[¥Y  
@HWI-EAS443:3:63:302:223#0/1  
AAAAATTCCAGCGCAAATGCCATAAGCACCACATTCCCT  
+HWI-EAS443:3:63:302:223#0/1  
aa`a\_\_\_\_]\_\_`^`\_\_\_\_]]X]]\_]W\_ZV]]^X^ZXZZ  
@HWI-EAS443:3:63:307:724#0/1  
CTCTGCATCTTTGGTCATCGTATTTAATGTCAGTGCTCTT  
+HWI-EAS443:3:63:307:724#0/1  
^ab\_``\_\_`babbaababbb^bababbbbbbba^\_H¥HW^  
@HWI-EAS443:3:63:315:1515#0/1  
GTGGAGGCCATGGTGTCTAGGGCCCGATTGATGCCAGGG  
+HWI-EAS443:3:63:315:1515#0/1  
[\_\_\_\_]\_^\_baX]R]UU]`¥QZWab`]]YR[^LT]J\_Z\_T^W  
@HWI-EAS443:3:63:320:68#0/1  
ATGCCGTTGCAACTACACATTCCTGGATTCCCAAGAGGAA  
+HWI-EAS443:3:63:320:68#0/1  
aaabab¥`aaaa^\_\_`\_^\_^[\_`WW\_X\_^WVSWVZX]XW  
@HWI-EAS443:3:63:33:424#0/1  
CGATACTGAATCTTGACAAAAGAAATACACCAAGACAAT  
+HWI-EAS443:3:63:33:424#0/1  
ab`aaaaa`^aaaaa^aVZ`a``aa\_\_aa`\_]a¥\_\_\_\_]  
@HWI-EAS443:3:63:356:1255#0/1  
AAAAATTCCAGCGCAAATGCCATAAGCACCACATTCCCT  
+HWI-EAS443:3:63:356:1255#0/1  
\_Y^T^]¥a``^¥N^NV[X¥[S[]UXV[Z¥[¥^^[ZY^^Y  
@HWI-EAS443:3:63:356:841#0/1  
GGGATGGGCTCCAATCATCCGACGATTTTGCTCTCATAGT  
+HWI-EAS443:3:63:356:841#0/1  
`aaaaba`aababaa`aaaa`^ba`\_`aaa`\_a\_aa^a[X  
@HWI-EAS443:3:63:36:1632#0/1  
AGAATCTGTCCACTCCTGCTTGTATTCCCTCATGGTTTGG  
+HWI-EAS443:3:63:36:1632#0/1  
aaaaaaaa\_[aaa\_\_aa^V\_^\_[Y]]\_\_^^^ [P^Z^WZ^WY  
@HWI-EAS443:3:63:383:1897#0/1  
TCTTCCCTATTGTTCTTTGCGTGACCATCTTCTTGGTCAT  
+HWI-EAS443:3:63:383:1897#0/1  
a\_]bbab\_a`S¥QS[`a]SXa[X` ]`X¥WXUBBBBBBBBB  
@HWI-EAS443:3:63:409:1981#0/1  
GTCTGGACGGATCAAGAAAGAAGAGTTCTCTGAGATCATG  
+HWI-EAS443:3:63:409:1981#0/1  
^R¥\_[\_`aZY^W`\_]a``\_[\_XX]¥ZZV^a`Za`\_]aYU

@HWI-EAS443:3:63:413:731#0/1  
CAGTGATTGTGAAAGAAATCTCTGTGTCTTGTGAATTAGT  
+HWI-EAS443:3:63:413:731#0/1  
a¥aWTZTZxN`YaWZVPQ^]Y¥^]WMXRW\_^VPTVU]X[U  
@HWI-EAS443:3:63:433:1335#0/1  
GAGATTTCTTTCACAATCACTGGGGACAACACTAAGTGGA  
+HWI-EAS443:3:63:433:1335#0/1  
`aYL¥a\_\_baabbabbbbaaa`a`abaXaaaaaaaaZa`a  
@HWI-EAS443:3:63:452:760#0/1  
CACAGAGATTTCTTTCACAATCACTGGGGACAACACTAAG  
+HWI-EAS443:3:63:452:760#0/1  
aaY]]a[[¥[T`^^^aaa`\_]a[\_¥X[T¥^]]\_`\_[^\_] ]  
@HWI-EAS443:3:63:455:530#0/1  
AATCAGCTGACATGAGTATTGGAGTAACAGTGATAAAGAA  
+HWI-EAS443:3:63:455:530#0/1  
QSWZ¥X^a¥¥¥\_`^ba\_NUY]`TN]OX^WW\_N\_X]YX\_Z]a  
@HWI-EAS443:3:63:470:1174#0/1  
GCCATGGTGTCTAGGGCCCGGATTGATGCCAGGGTCGACT  
+HWI-EAS443:3:63:470:1174#0/1  
\_a^ZZ`WZ¥FU`RTXYX\_YR`ZQ¥Z\_XU`^¥ZQ¥Z`^PSQ  
@HWI-EAS443:3:63:496:1313#0/1  
AAAAATTCCAGCGCAAATGCCATAAGCACCACATTCCT  
+HWI-EAS443:3:63:496:1313#0/1  
aa\_]`^^`\_`\_^`^`^\_a\_\_\_^`^`\_a^]]`^X^^`\_`^ZZ]]  
@HWI-EAS443:3:63:512:1078#0/1  
ACTACAGATACACATATAGGTGCCATAGGGGAGACACACA  
+HWI-EAS443:3:63:512:1078#0/1  
R^`¥[^K^U]baaY¥\_WR[UR`ZTS]`^a[\_`^UY\_H  
@HWI-EAS443:3:63:55:1284#0/1  
CCTATATGTGTATCTGTAGTCTTTGATGAACAATTGAAGA  
+HWI-EAS443:3:63:55:1284#0/1  
aa`Y]VUXQaZJV¥[`MZ¥UW¥X]¥ZWL YPTUZ]^T^^VT  
@HWI-EAS443:3:63:562:1503#0/1  
AATGAACCAAGTGGGTATGCACAAACAGACTGTGTTCTAG  
+HWI-EAS443:3:63:562:1503#0/1  
a`]]\_`^`^]YTU[^]Z`¥^^^W]]^Z]WXTWXXWYZWYWB  
@HWI-EAS443:3:63:563:637#0/1  
CTTCTTTCTTGATCCGTCCAGACTCGAAGTCGACCCTGGC  
+HWI-EAS443:3:63:563:637#0/1  
ab`Z`bb\_aaaaaabb]^\_a\_]ababTVVU¥BBBBBBBBB  
@HWI-EAS443:3:63:565:244#0/1  
GGCACCTATATGTGTATCTGTAGTCTTTGATGAACAATTG  
+HWI-EAS443:3:63:565:244#0/1  
^``¥¥]`a`RXXU[¥P¥\_a0]¥J¥`\_`[^a\_a]R[^X`\_`  
@HWI-EAS443:3:63:573:735#0/1  
AGAATCCCACCCAGGAATATTTGAGAATTCATGCCTTGAA  
+HWI-EAS443:3:63:573:735#0/1  
\_`^`Z`aa`a\_a`a\_\_a^^^a\_\_a\_\_`^^`\_`^a^`[U  
@HWI-EAS443:3:63:579:1521#0/1  
GTGCCATGCTCAGGATGTTTCTGAACCACTCGGGTTGATT

+HWI-EAS443:3:63:579:1521#0/1  
aaaaaaa`aab\_a`Xaa\_a`aa[aaa\_``¥a[¥\_W]\_\_Y\_  
@HWI-EAS443:3:63:583:455#0/1  
TAATGAACCAAGTGGGTATGCACAAACAGACTGTGTTCTA  
+HWI-EAS443:3:63:583:455#0/1  
aaaa`abaaabb]babXa`a`aaaa\_aaa`\_\_aW^V[UZV  
@HWI-EAS443:3:63:586:402#0/1  
ATCAGCTGACATGAGTATTGGAGTAACAGTGATAAAGAAC  
+HWI-EAS443:3:63:586:402#0/1  
aaaaaaabaaa`a\_a]`a```\_a]`\_\_`a¥`^\_a``\_\_\_\_  
@HWI-EAS443:3:63:625:721#0/1  
GGCCCGGATTGATGCCAGGGTCGACTTCGAGTCTGGACGG  
+HWI-EAS443:3:63:625:721#0/1  
\_Za`^\_a^a^\_\_`]aa\_\_]`Q^`V]¥^Ya]XNVaaa^UZV  
@HWI-EAS443:3:63:627:756#0/1  
AGAATCTGTCCACTCCTGCTTGTATTCCCTCATGGTTTGG  
+HWI-EAS443:3:63:627:756#0/1  
a``¥aaa\_T^`]¥`^`]\_]a\_OV]]aY¥`\_] []W]S`^\_U  
@HWI-EAS443:3:63:630:1314#0/1  
CCCGGATTGATGCCAGGGTCGACTTCGAGTCTGGACGGAT  
+HWI-EAS443:3:63:630:1314#0/1  
abbbbb`]]\_`^Z]WZX]XF\_XXW\_¥a\_[¥PTS[TON¥]`Q  
@HWI-EAS443:3:63:643:1428#0/1  
GTGCCATGCTCAGGATGTTTCTGAACCACTCGGGTTGATT  
+HWI-EAS443:3:63:643:1428#0/1  
aQ\_Y[aZ¥Y]ZV`\_`\_aY[\_\_aaa\_[ZSNPZROLG[NRVN  
@HWI-EAS443:3:63:645:1343#0/1  
AAAAATTCCAGCGCAAATGCCATAAGCACCATTCCT  
+HWI-EAS443:3:63:645:1343#0/1  
Y\_b`¥`a]TVT\_a^]aS¥`]a`\_^^¥N]a`]`aa\_¥YR¥\_  
@HWI-EAS443:3:63:645:1394#0/1  
GAGATAACAACCCACTTTCAAAGAAAAAGGAGAGTAAGAG  
+HWI-EAS443:3:63:645:1394#0/1  
aa`abaaaa`aa```a\_a`\_\_a`¥¥\_\_`^a^\_Y]`\_]`  
@HWI-EAS443:3:63:653:1448#0/1  
CCTACCTTTGATTGGGTTTGATCCCACAGTTCTTTAACT  
+HWI-EAS443:3:63:653:1448#0/1  
ab`a^ababbb`X`a``aaaaaba`ba[Z`a^`a\_a¥]aa  
@HWI-EAS443:3:63:685:658#0/1  
GTCCTCCATCTGATACTAATAGCCCTACCTTTGATTGGGT  
+HWI-EAS443:3:63:685:658#0/1  
a`aaaaaaaaaaaa]aaaaa`a``]``¥`a\_a\_\_a`\_Y  
@HWI-EAS443:3:63:702:198#0/1  
GTTGATCCCACTAATTGCAGGTCCTGTAGAATCTGTCC  
+HWI-EAS443:3:63:702:198#0/1  
aaaa`a]```\_`aa`\_]`^aaZa`a]`]]^\_]\_\_U^]  
@HWI-EAS443:3:63:705:183#0/1  
GCCTTCTTTTCATTGCCCTACTGGGAGCCCAGACTGTT  
+HWI-EAS443:3:63:705:183#0/1  
aaaS\_\_a`aa\_aa¥^Xa``[VR¥\_\_[RMV\_¥[[YV[YBBB



@HWI-EAS443:3:63:705:467#0/1  
AGACTTTGTAATCCCCTGAATCCCCTTTGTCAGTCATAAAG  
+HWI-EAS443:3:63:705:467#0/1  
]¥Sa\_XX`bbbaabaaa`aX^abb]\_¥¥¥aaa[Z\_`aa\_`  
@HWI-EAS443:3:63:709:108#0/1  
CTCCAATACTCATGTCAGCTGATTCACTTTACTCCAGACAC  
+HWI-EAS443:3:63:709:108#0/1  
ababbbbaabbabbabababb`aaaaabaa[\_aa\_a\_]a\_  
@HWI-EAS443:3:63:716:878#0/1  
AACAGATCTTCATGATCTCAGAGAACTCTTCTTTCTTGAT  
+HWI-EAS443:3:63:716:878#0/1  
a\_aaa`\_aaa`aa`a\_]Ya\_`\_aa`^`a`````\_``^`^`  
@HWI-EAS443:3:63:721:465#0/1  
CACCAATACTCAGAAAAGGGAAAGTGGACGACAAACACAG  
+HWI-EAS443:3:63:721:465#0/1  
]\_[¥^[\_PV¥aaWXIZ^V\_a\_\_W[R\_¥UZYRX\_\_bb\_]XZ  
@HWI-EAS443:3:63:752:475#0/1  
GGTGCTTATGGCATTGCGCTGGAATTTTAGGAAAAGT  
+HWI-EAS443:3:63:752:475#0/1  
a^¥aa`\_Y\_^aYaX[^`¥a^ab[X]]a\_`^Z^`\_WY`aR  
@HWI-EAS443:3:63:756:1036#0/1  
TGCTGTGGTAATGCCAGCCCATGGTCCAGCCAAAAGCATG  
+HWI-EAS443:3:63:756:1036#0/1  
aabaa^bb`bba]aa\_\_bbaabb][abaa\_aaaY``aa\_a  
@HWI-EAS443:3:63:773:415#0/1  
GTGTTCTGTTTACTGTGTCCATGGTGTATCCTGTTCTGT  
+HWI-EAS443:3:63:773:415#0/1  
a\_aaaabbabaa`ba`b\_a`aaaa]b\_aa`\_aa\_aa\_a][  
@HWI-EAS443:3:63:78:349#0/1  
CTCCCCTATGGCACCTATATGTGTATCTGTAGTCTTTGAT  
+HWI-EAS443:3:63:78:349#0/1  
`X]\_b\_YV¥aUaa[SWY[W]\_TTQXT`WTLRXNUWXUNYQ  
@HWI-EAS443:3:63:805:1213#0/1  
GAATGTGTAGTTGCAACGGCATCATATCCATGCTTTTGG  
+HWI-EAS443:3:63:805:1213#0/1  
WXWYG]aZNR\_QT^a^ZOR\_QT^a^GZ¥Q¥aBBBBBBB  
@HWI-EAS443:3:63:821:195#0/1  
GACGGATCAAGAAAGAAGAGTTCTCTGAGATCATGAAGAT  
+HWI-EAS443:3:63:821:195#0/1  
aaabaaSZ`Z\_Za`[\_^ab`aaa[aa`^¥Y^]\_`ZP^\_]`  
@HWI-EAS443:3:63:845:1128#0/1  
GTGCCATGCTCAGGATGTTTCTGAACCACTCGGGTTGATT  
+HWI-EAS443:3:63:845:1128#0/1  
\_Ub``ba\_a``^`[`b`\_ba`b\_^[aa^`a\_aa^Zb`^`^`  
@HWI-EAS443:3:63:927:150#0/1  
ATTCATATGAGAGCAAATCGTCGGATGATTGGAGCCCA  
+HWI-EAS443:3:63:927:150#0/1  
`abbbabaabaaaa`aaa```]`a``^a¥`\_`a\_]W[`  
@HWI-EAS443:3:63:936:385#0/1  
GTGGGATTCTTCAAGGAAAGCCATAGCCTCTAGAACACAG

+HWI-EAS443:3:63:936:385#0/1  
\_PW¥aY\_\_]\_a]ST[\_a¥`Xaa^]YV\_\_[^Z`a]\_[VYU\_  
@HWI-EAS443:3:63:956:460#0/1  
AAAGAAATCTCTGTGTCTTGTGAATTAGTCATCATCTTTC  
+HWI-EAS443:3:63:956:460#0/1  
ab`aba`]aaaa`a¥aaaa[a¥]\_`]ZWX]``a¥SZ`\_`  
@HWI-EAS443:3:63:975:797#0/1  
GTACTTCAATGAATCAACAAAGAAGAAAATTGAGAAAATA  
+HWI-EAS443:3:63:975:797#0/1  
`aababa`baaa¥aaaa\_a`^aaaaZaa`aaa\_a\_]U]`\_  
@HWI-EAS443:3:63:999:1838#0/1  
AGCTGATTCATTTACTCCAGACACTCCAAAGCTGGGTAGC  
+HWI-EAS443:3:63:999:1838#0/1  
\_`\_^WTR]bbZYY`R^abba]]`^]aa\_[aTQY\_\_TG¥[^  
@HWI-EAS443:3:64:1021:1779#0/1  
GAGCTAATGGATGATGATTATCGGGGAAGACTTTGTAATC  
+HWI-EAS443:3:64:1021:1779#0/1  
aaZ`¥`\_\_a^X^^Z¥]a`^]ZaZ¥UVY]T¥T¥\_[^L¥¥R[  
@HWI-EAS443:3:64:1055:974#0/1  
GAACAATTGAAGAGCCATCTGGGCCGTTGCAGGTCCAAGG  
+HWI-EAS443:3:64:1055:974#0/1  
a¥USVKa\_U¥¥VaW]V]ZW]US[^0\_`[^PWYIVUSSYRY  
@HWI-EAS443:3:64:1056:364#0/1  
CAGGTGTTGCGATAGCCCTTCTTTTTAACTTGCCTCTCTC  
+HWI-EAS443:3:64:1056:364#0/1  
abbb\_b`bbbaaaaa`aa`a\_babaaaa^aa`a`a`aa`a  
@HWI-EAS443:3:64:1066:1834#0/1  
CATTGGCCAACACCATAGAAGTCTTTAGATCGAATGGCCT  
+HWI-EAS443:3:64:1066:1834#0/1  
^\_Y^aaaaaba`a]aba\_\_a[abaaaba`aaa\_^Z`Z`\_  
@HWI-EAS443:3:64:1103:1409#0/1  
AACTCTTCTTTCTTGATCCGTCAGACTCGAAGTCGACCC  
+HWI-EAS443:3:64:1103:1409#0/1  
``[]`bbbbbab`¥¥bab\_]\_a`ba]T`aa`]`P[X\_SI¥  
@HWI-EAS443:3:64:110:1418#0/1  
GGCTTTCCTTGAAGAATCCCACCCAGGAATATTTGAGAAT  
+HWI-EAS443:3:64:110:1418#0/1  
abbbbbbbbabbbabbbbaa`b``a¥aaaaabaaaaaaaaa  
@HWI-EAS443:3:64:1113:1046#0/1  
ATGGGCTCCAATCATCCGACGATTTTGCTCTCATAGTGAA  
+HWI-EAS443:3:64:1113:1046#0/1  
\_ZZ^`^]baZR^¥^`Y]aZR\_[aa\_``[\_Y¥X]W^¥VZ[V  
@HWI-EAS443:3:64:1135:1181#0/1  
TCCAATCATCCGACGATTTTGCTCTCATAGTGAATGCACC  
+HWI-EAS443:3:64:1135:1181#0/1  
`b`^`b`bb`baaaaabaab`aaa```aa`\_a\_a`X]]`  
@HWI-EAS443:3:64:1182:684#0/1  
ATCCGTCAGACTCGAAGTCGACCCTGGCATCAATCCGGG  
+HWI-EAS443:3:64:1182:684#0/1  
a`¥ZWZ\_a¥]^[^]]^U]^YSa`¥USV`XYUZXGSXOY\_

@HWI-EAS443:3:64:1192:99#0/1  
CCAGGGTCGACTTCGAGTCTGGACGGATCAAGAAAGA  
+HWI-EAS443:3:64:1192:99#0/1  
a\_OW]aRa^\_`b`b`b[T^b`[^a^P[V^\_`¥¥^¥]^`a  
@HWI-EAS443:3:64:1197:1594#0/1  
ATGCTAGAAATTCCAACCGGTCTCCTATATGAACTGCTAG  
+HWI-EAS443:3:64:1197:1594#0/1  
¥R\_baa¥`a^]^^]aa`a^]Z]``Pa]aa\_aa`R``¥``[  
@HWI-EAS443:3:64:1206:117#0/1  
TGGTGCATTCACTATGAGAGCAAATCGTCCGATGATTGG  
+HWI-EAS443:3:64:1206:117#0/1  
`bWQ\_b\_a]aa^bb`Z\_bWXU\_\_\_a`\_bTF\_aZ^a`a¥UN  
@HWI-EAS443:3:64:1206:530#0/1  
CCCGGATTGATGCCAGGGTCGACTTCGAGTCTGGACGGAT  
+HWI-EAS443:3:64:1206:530#0/1  
a`abb`a````a^[]a\_aV[[]^a\_\_a\_aZR]`X[Wa\_¥[  
@HWI-EAS443:3:64:1235:172#0/1  
GCTATGGATTTGTGGCTAATTTTAGCATGGAGCTACCCAG  
+HWI-EAS443:3:64:1235:172#0/1  
¥T`\_aba¥^`aX^a`[U]¥X`\_[NLHRYYPYNXSTZWTR  
@HWI-EAS443:3:64:1255:702#0/1  
TAAAGAGATTGATTCTGTAAACAATGCTGTGGTAATGCCA  
+HWI-EAS443:3:64:1255:702#0/1  
``a^a\_aU`\_a^]^[[]M`\_\_[]^`]]\_V\_\_VV]]^YWS  
@HWI-EAS443:3:64:1263:1958#0/1  
TGTTATCTCTATTTCTCTTTGTTTCATTGATTCCATTACA  
+HWI-EAS443:3:64:1263:1958#0/1  
\_\_U[] [VXU]`bb]GW]a\_¥XV]¥^\_RR\_aaa[DXRISQa  
@HWI-EAS443:3:64:1276:62#0/1  
CCTCAGGTAGTGGTCCATCAATCGGGTTGAGCTGGGGTGC  
+HWI-EAS443:3:64:1276:62#0/1  
abbaabaaaa`b]^`^\_a`\_`a¥a`¥Y\_^`^]^`\_`TaT  
@HWI-EAS443:3:64:1281:1211#0/1  
CATGCTTTTGGCTGGACCATGGGCTGGCATTACCACAGCA  
+HWI-EAS443:3:64:1281:1211#0/1  
`ab¥bbbbaa\_]`b]a`aZR[^^V][[]\_`\_]aa]U¥XaY¥^  
@HWI-EAS443:3:64:1310:1012#0/1  
CCCGATTGATGGACCACTACCTGAGGATAATGAACCAAGT  
+HWI-EAS443:3:64:1310:1012#0/1  
abb`bbbaabbaaaababb`abbabaaabaabaaa`a\_a]  
@HWI-EAS443:3:64:1332:1184#0/1  
CAATCATCCGACGATTTTGCTCTCATAGTGAATGCACCAA  
+HWI-EAS443:3:64:1332:1184#0/1  
NY[Wa`b\_b\_a`¥T`\_a\_^\_ab`PRP\_[YY``a¥Z``^a[  
@HWI-EAS443:3:64:1365:466#0/1  
GATTCAGTATCGAGACTCCCAAGACCGTACTTAGCATGTT  
+HWI-EAS443:3:64:1365:466#0/1  
\_a`Zaab¥b^¥b`Y`a[UX\_\_\_NVZ]¥\_]\_Ya^]^^]S]  
@HWI-EAS443:3:64:1371:1279#0/1  
CTGAAGTACTTCAATGAATCAACAAAGAAGAAAATTGAGA

+HWI-EAS443:3:64:1371:1279#0/1  
aUaaaa`¥]]^S[a`¥]] [LST¥[VQS[¥[RUYW¥\_`\_aZ  
@HWI-EAS443:3:64:1395:445#0/1  
GGTGTCTAGGGCCCGGATTGATGCCAGGGTCGACTTCGAG  
+HWI-EAS443:3:64:1395:445#0/1  
¥TWTY\_UR\_¥ZP\_]Q¥ZZ`OXX^YRV`\_RPDWUDV\_QWR\_  
@HWI-EAS443:3:64:1413:1230#0/1  
AGCCCTTCTTTTTAACTTGCCTCTCTCTGCATCTTTGGTC  
+HWI-EAS443:3:64:1413:1230#0/1  
YV`a¥aaaZS`^`RTX`\_QMH]WN[¥PL\_bW\_^`JXY¥R[  
@HWI-EAS443:3:64:1479:703#0/1  
CGAAAAGCTTGAACAGTCTGGGCTCCCAGTAGGGGGCAAT  
+HWI-EAS443:3:64:1479:703#0/1  
abaaaaabbbbaaaaa`\_a¥P\_a`\_QXaa\_]T`aaa^``a  
@HWI-EAS443:3:64:1501:320#0/1  
GAAATTCCAACCGGTCTCCTATATGAACTGCTAGGGAAAA  
+HWI-EAS443:3:64:1501:320#0/1  
\_a\_\_bbb`]aaaba^aaaa\_^aa\_YZa[aa¥[`aaa`aa`  
@HWI-EAS443:3:64:1510:274#0/1  
AGCCCTTCTTTTTAACTTGCCTCTCTCTGCATCTTTGGTC  
+HWI-EAS443:3:64:1510:274#0/1  
^Y^`]`X[aaZaa\_¥W]^a[PRY]UNP]`[QUQ[ZZ]XQV  
@HWI-EAS443:3:64:1517:1345#0/1  
GAGACAACATGACCAAGAAGATGGTCACGCAAAGAACAAT  
+HWI-EAS443:3:64:1517:1345#0/1  
abba`a```[baaabbaaaaaa^¥¥\_a\_\_\_aa\_\_^\_]a  
@HWI-EAS443:3:64:1558:1219#0/1  
CTCCAGACACTCCAAAGCTGGGTAGCTCCATGCTAAAATT  
+HWI-EAS443:3:64:1558:1219#0/1  
abbabbbbbbbaababbaa^a\_a`a`aaaa`\_]`aaa  
@HWI-EAS443:3:64:1658:1303#0/1  
GCCAGGGTCGACTTCGAGTCTGGACGGATCAAGAAAGAAG  
+HWI-EAS443:3:64:1658:1303#0/1  
aaaaabbT\_ba[aa`\_S¥¥^aaa\_RT\_YSS]S][`\_\_[\_^  
@HWI-EAS443:3:64:1664:204#0/1  
AATTTCTCGAATAGATTGCAGCACTTCTGGTACATCTGTT  
+HWI-EAS443:3:64:1664:204#0/1  
abbaaab`ba`baba`ab[]a`a¥aaXa¥a¥^a`a```\_\_  
@HWI-EAS443:3:64:1684:1591#0/1  
AAAAACAAAGACTGAATAAGAGAGGCTATCTAATAAGAGC  
+HWI-EAS443:3:64:1684:1591#0/1  
\_a\_a`]a`a`\_abaaa\_[a\_V\_ba[aZIHZTTBBBBBBB  
@HWI-EAS443:3:64:1709:795#0/1  
ATCATCCATTAGCTCCCATTTTAAGCAGACTTCAGGAATG  
+HWI-EAS443:3:64:1709:795#0/1  
abaabaaaaaa`\_`]^\_a`a]^`\_¥]^`[^`]]`\_`  
@HWI-EAS443:3:64:1709:962#0/1  
GAATCCCCTTTGGCTTGTGTTGAGAATAGAACGATTCCCT  
+HWI-EAS443:3:64:1709:962#0/1  
aaabbbbaabab`baaaba`aa`\_^aa`WaaUa\_[a¥W`

@HWI-EAS443:3:64:187:1270#0/1  
CTGGAGTAAATGAATCAGCTGACATGAGTATTGGAGTAAC  
+HWI-EAS443:3:64:187:1270#0/1  
aabaaa[baaaa`]`aa]``aa```\_a%a`aZ\_`]\_a^  
@HWI-EAS443:3:64:262:1701#0/1  
CTGGTATTTGTGTTCCAATCTTCATTCTTTTACTCTCGAA  
+HWI-EAS443:3:64:262:1701#0/1  
aaZTMZ^a\_`T\_``PZ[\_Z`aa%a`[¥`[¥Q¥a]]¥RORX  
@HWI-EAS443:3:64:300:605#0/1  
CATGGTGTCTAGGGCCCGATTGATGCCAGGGTCGACTTC  
+HWI-EAS443:3:64:300:605#0/1  
XWZZW\_]¥Z`T¥`bbb^\_^^`]`aa`a`]`aaGa[PU\_]V  
@HWI-EAS443:3:64:30:1217#0/1  
AAATTCAGCGAAAATGCCATAAGCACCATTCCTTA  
+HWI-EAS443:3:64:30:1217#0/1  
\_Z]^a`T`¥0[Z]]V^a\_\_a\_a`^`\_a]]`\_^^`X^¥Z]  
@HWI-EAS443:3:64:328:1350#0/1  
GGAGCATTTGCGAAAAGCTTGAACAGTCTGGGCTCCCAGT  
+HWI-EAS443:3:64:328:1350#0/1  
X\_YOUXZbZSZ`\_QYUR\_T¥¥RZPVY[\_V¥M\_¥]]UQVaH  
@HWI-EAS443:3:64:343:1866#0/1  
ATGTGTAGTTGCAACGGCATCATATTCCATGCTTTTGGCT  
+HWI-EAS443:3:64:343:1866#0/1  
\_aa\_a¥a[\_aa\_aa`[]aa\_``\_a\_``\_`ZQZ^^]]NNWT  
@HWI-EAS443:3:64:367:1444#0/1  
GAAGATGGTCACGCAAAGAACAATAGGGAAGAAAAACAA  
+HWI-EAS443:3:64:367:1444#0/1  
abbaaabVbaba\_aaba\_\_\_\_`a`a`\_Z\_a^``aaaVaa  
@HWI-EAS443:3:64:384:1094#0/1  
CATGGAATATGATGCCGTTGCAACTACACATTCCTGGATT  
+HWI-EAS443:3:64:384:1094#0/1  
abWYRWX\_aa`^`\_]X¥V[[`aWIP^]¥W[\_a^Z[QRX¥  
@HWI-EAS443:3:64:393:480#0/1  
AATGAACCAAGTGGGTATGCACAAACAGACTGTGTTCTAG  
+HWI-EAS443:3:64:393:480#0/1  
a\_]\_MU^^ZY]X^]WUV\_ZZZ^]Z\_W¥]W^VQVXWBBB  
@HWI-EAS443:3:64:39:487#0/1  
GGCCTTCTTTTCATTGCCCCCTACTGGGAGCCCAGACTGT  
+HWI-EAS443:3:64:39:487#0/1  
aaaaaaaaaaaaaaaa\_aa``]aaa\_``[a[[Z``^`\_¥\_`W  
@HWI-EAS443:3:64:431:666#0/1  
GATGCCAGGGTCGACTTCGAGTCTGGACGGATCAAGAAAG  
+HWI-EAS443:3:64:431:666#0/1  
aa^^aa`V¥\_¥^^\_\_`\_`Za^\_\_\_\_^`\_`¥V^\_`\_¥¥^V  
@HWI-EAS443:3:64:464:1790#0/1  
GAGACAACATGACCAAGAAGATGGTCACGCAAAGAACAAT  
+HWI-EAS443:3:64:464:1790#0/1  
\_`aaaab^`^^\_aaa``\_VbbbabK\_a]XabZ`¥a`\_aab  
@HWI-EAS443:3:64:483:1712#0/1  
AAAGCTTGAACAGTCTGGGCTCCCAGTAGGGGGCAATGAA

+HWI-EAS443:3:64:483:1712#0/1  
]aZ`bZS]\_Y]``TYGH^`aXZPTS\_^T[\_aWQa`a^¥  
@HWI-EAS443:3:64:528:116#0/1  
TAATGCCAGCCCATGGTCCAGCCAAAAGCATGGAATATGA  
+HWI-EAS443:3:64:528:116#0/1  
aaa`a\_\_a`^^`\_]NW¥^`W\_\_^¥W^¥U¥^VTW[¥¥\_¥  
@HWI-EAS443:3:64:534:322#0/1  
CTTGGGAGTCTCGATACTGAATCTTGGACAAAAGAAATAC  
+HWI-EAS443:3:64:534:322#0/1  
Z`b`a¥bbX`aaa`b`ababbbbaZab\_b\_bbbbabX  
@HWI-EAS443:3:64:54:1153#0/1  
CAGCTGATTCATTTACTCCAGACACTCCAAAGCTGGGTAG  
+HWI-EAS443:3:64:54:1153#0/1  
aaababaabaaaaaaaaabaa]aaaa`a^¥`\_]\_[¥W]PU[Y  
@HWI-EAS443:3:64:56:403#0/1  
GTCCTCCATCTGATACTAATAGCCCTACCTTTGATTGGGT  
+HWI-EAS443:3:64:56:403#0/1  
aabaab`baaaaW`aaa\_aaaaa`\_\_`\_`a`]L]\_[\_WZ  
@HWI-EAS443:3:64:585:866#0/1  
GTTGATTCCTACTAATTGCAGGTCCTGTAGAATCTGTCC  
+HWI-EAS443:3:64:585:866#0/1  
a\_bbaaabaaaaaaaaa\_\_\_`aa][a\_aS]^\_\_`aaaZW`  
@HWI-EAS443:3:64:638:1843#0/1  
GAGCTAATGGATGATGATTATCGGGGAAGACTTTGTAATC  
+HWI-EAS443:3:64:638:1843#0/1  
`a`abaab`abaab`aaaaa`\_]\_a\_a`\_a\_a^a``\_  
@HWI-EAS443:3:64:644:723#0/1  
AAACAATGCTGTGGTAATGCCAGCCCATGGTCCAGCCAAA  
+HWI-EAS443:3:64:644:723#0/1  
aa[a^^abaab^)`]^`aa`aaaa\_a``aa]``aa\_\_^Z  
@HWI-EAS443:3:64:646:1344#0/1  
AAAGAACAACATGATAAACAATGACCTTGGACCTGCAACG  
+HWI-EAS443:3:64:646:1344#0/1  
^`^aVg¥\_a¥XY]a\_Z¥Z`^[[`\_] ^OVDT[`¥S^UU`]  
@HWI-EAS443:3:64:654:734#0/1  
ACTTTTCCTAAAAATTCCAGCGCAAATGCCATAAGCACC  
+HWI-EAS443:3:64:654:734#0/1  
`aaaabaabbbababb`aaa\_abaaaaa^`abbaa``]  
@HWI-EAS443:3:64:697:2007#0/1  
GACAGATTCTACAGGACCTGCAAGTTAGTGGGAATCAACA  
+HWI-EAS443:3:64:697:2007#0/1  
Ybbbbbbabbbababbbabbbbbb¥bbb^ba¥baa`bSb  
@HWI-EAS443:3:64:723:166#0/1  
GTTGATTCCTACTAATTGCAGGTCCTGTAGAATCTGTCC  
+HWI-EAS443:3:64:723:166#0/1  
K\_baU[b\_````[\_`\_abaaUWY^UWZ¥¥]X\_TYZaa\_BBB  
@HWI-EAS443:3:64:729:1160#0/1  
GGGATGGGCTCCAATCATCCGACGATTTTGCTCTCATAGT  
+HWI-EAS443:3:64:729:1160#0/1  
aaaaaaaaaabaa]a`\_`\_`a`aa`aa^`a`````\_\_`\_¥

@HWI-EAS443:3:64:753:1727#0/1  
GCATTTGCGAAAAGCTTGAACAGTCTGGGCTCCCAGTAGG  
+HWI-EAS443:3:64:753:1727#0/1  
`\_¥]b\_Zab[¥ababaaba`Y`a\_aaaa^`¥aa\_`b\_]`Y  
@HWI-EAS443:3:64:770:52#0/1  
ACCATGGGCTGGCATTACCACAGCATTGTTTACAGAATCA  
+HWI-EAS443:3:64:770:52#0/1  
a``a\_a\_``^aa\_\_`\_`\_\_`\_`a^\_\_\_a^`\_\_^`^^^]]  
@HWI-EAS443:3:64:780:844#0/1  
CCCAGTAGGGGCAATGAAAAGAAGGCCAAACTGGCAAAT  
+HWI-EAS443:3:64:780:844#0/1  
aZRIUY¥```b\_Y\_\_ZT\_V\_YR`X`[\_XV`[VP]]a`ZR]  
@HWI-EAS443:3:64:816:1011#0/1  
TGGGCTCCAATCATCCGACGATTTTGCTCTCATAGTGAAT  
+HWI-EAS443:3:64:816:1011#0/1  
Za^bb`aaa`baabaabba]a\_bb`[\_\_\_aba`Xa]Uaa^a  
@HWI-EAS443:3:64:820:1995#0/1  
TGTTGTCCCCAGTGATTGTGAAAGAAATCTCTGTGTCTTG  
+HWI-EAS443:3:64:820:1995#0/1  
aa¥ababaaPXa]`QY\_XZ^Y¥a`]UZTDY\_[\_U^PR¥XY  
@HWI-EAS443:3:64:835:1050#0/1  
CTTTTGTCCAAGATTCAGTATCGAGACTCCCAAGACCGTA  
+HWI-EAS443:3:64:835:1050#0/1  
abbbba`bbbbbbbbbb\_abbababaaaaabab``\_aa^a  
@HWI-EAS443:3:64:840:494#0/1  
CCCGGATTGATGCCAGGGTCGACTTCGAGTCTGGACGGAT  
+HWI-EAS443:3:64:840:494#0/1  
abbbbabbbbaaaaabbbaV`\_a\_\_aaa\_`^\_aaa]Za\_\_¥  
@HWI-EAS443:3:64:855:218#0/1  
TCGTCGGATGATTGGAGCCCATCCCACCAGTATATTGTCT  
+HWI-EAS443:3:64:855:218#0/1  
a`a\_`ba\_]a`a`aa^^¥¥Z[aa^Z`¥QY`WW]X\_\_`WY]  
@HWI-EAS443:3:64:857:1474#0/1  
TGGGTTGTTATCTCTATTTCTCTTTGTTTCATTGATTCCA  
+HWI-EAS443:3:64:857:1474#0/1  
^a\_aZ`a¥YI^`a`a``\_^[^`\_`a\_^^`]\_\_[R[`]\_]`^  
@HWI-EAS443:3:64:870:56#0/1  
ATTTGCGAAAAGCTTGAACAGTCTGGGCTCCCAGTAGGGG  
+HWI-EAS443:3:64:870:56#0/1  
abbabbbbaabaa]aaaaZ`a^\_`a`\_T¥XSY^`SV[`\_\_  
@HWI-EAS443:3:64:871:965#0/1  
CAAAGATGCAGAGAGAGGCAAGTTAAAAAGAAGGGCTATC  
+HWI-EAS443:3:64:871:965#0/1  
aa`\_bba\_aaba`a\_`baaX\_a\_a\_¥^a^a`\_a`a\_`\_\_^  
@HWI-EAS443:3:64:875:708#0/1  
CACAGAGACTGGTGCACCCAGCTCAACCCGATTGATGGA  
+HWI-EAS443:3:64:875:708#0/1  
abaabaaaaaa]^aaaaa]`]¥]^a`\_`¥V^`[T\_`^¥\_  
@HWI-EAS443:3:64:882:1649#0/1  
AAAAATTCCAGCGCAAATGCCATAAGCACCATTCCT

+HWI-EAS443:3:64:882:1649#0/1  
`YX`YL`^`^[]OZ`¥¥^]Y^¥¥^a[YZYM][X[\_XW¥Z[  
@HWI-EAS443:3:64:934:211#0/1  
GGTGCTTATGGCATTGCGCTGGAATTTTAGGAAAAGT  
+HWI-EAS443:3:64:934:211#0/1  
aa`aaaa`aaa\_aaa`]`a\_aaa\_\_aaaa\_aa\_\_\_\_]`W  
@HWI-EAS443:3:64:976:1366#0/1  
CATCAATCGGGTTGAGCTGGGTGCACCAGTCTCTGTGTT  
+HWI-EAS443:3:64:976:1366#0/1  
abaa\_\_aaa\_¥[`aa`a`TV[Z]]^a]¥a]N\_`S[\_TZP^  
@HWI-EAS443:3:64:983:1093#0/1  
AATCTGTCCACTCCTGCTTGTATTCCCTCATGGTTTGGTG  
+HWI-EAS443:3:64:983:1093#0/1  
]`]`^`a`\_aa`U¥¥]^`^Z^a`XSQU`\_`¥VP¥`YSJ\_`  
@HWI-EAS443:3:65:1061:1951#0/1  
TGAGTATTGGTGTGTTCTGTTTACTGTGTCCATGGTGTAT  
+HWI-EAS443:3:65:1061:1951#0/1  
¥a`\_Xaaa`aXZ]a`aaaY]aaa^aa[aaaa`a`WaZaa  
@HWI-EAS443:3:65:1065:19#0/1  
ATTTGTGGCTAATTTTAGCATGGAGCTACCCAGCTTTGGA  
+HWI-EAS443:3:65:1065:19#0/1  
aba^`\_bbabbabbbbaa`aaZ`]]\_ZZGW]X^NVa[Va\_  
@HWI-EAS443:3:65:1072:258#0/1  
AAAAATTCCAGCGCAAATGCCATAAGCACCATTTCCCT  
+HWI-EAS443:3:65:1072:258#0/1  
`aa`¥`\_\_`\_Ya`^^`\_\_\_\_\_^]`^a\_\_\_\_^^Z^^^\_^]XX]  
@HWI-EAS443:3:65:1084:1250#0/1  
CAACCGGCAGCAACTGCATTGGCCAACACCATAGAAAGTCT  
+HWI-EAS443:3:65:1084:1250#0/1  
WYZVaY`ba^[]T¥XXZOZ\_aMa\_XW\_a`\_MRZYVZ\_PVW  
@HWI-EAS443:3:65:1157:976#0/1  
ATCAGATGGAGGACCAAACCTTATACAATATACGGAATCTT  
+HWI-EAS443:3:65:1157:976#0/1  
aaaba\_aaaU\_aa`aba`]a\_a`\_`a`a`a`a`a`a`\_`  
@HWI-EAS443:3:65:1163:339#0/1  
CATCATCCATTAGCTCCCATTTTAAGCAGACTTCAGGAAT  
+HWI-EAS443:3:65:1163:339#0/1  
aababbaaabbaa`bab`abbbbaab\_aaa`^`a\_a\_\_\_a  
@HWI-EAS443:3:65:1170:385#0/1  
AACAGATCTTCATGATCTCAGAGAACTTTCTTTCTTGAT  
+HWI-EAS443:3:65:1170:385#0/1  
abbaa`aabaaaba^\_baaaaaa^a`a`Yab`\_a`]``  
@HWI-EAS443:3:65:1203:910#0/1  
GTGGGATCAAACCAATCAAAGGTAGGGCTATTAGTATCA  
+HWI-EAS443:3:65:1203:910#0/1  
^L^a`]a`Z`]XZZ¥`]\_^Z]XM`\_`¥Wa^]¥¥V\_[S¥  
@HWI-EAS443:3:65:1204:475#0/1  
AAAAATTCCAGCGCAAATGCCATAAGCACCATTTCCCT  
+HWI-EAS443:3:65:1204:475#0/1  
aa`baaaaa`ab`aa\_aaaa`aa`a\_aa\_aaaaa`^^`



@HWI-EAS443:3:65:1220:966#0/1  
ATCAAGAAAGAAGAGTTCTCTGAGATCATGAAGATCTGTT  
+HWI-EAS443:3:65:1220:966#0/1  
aa`aaaaab^ab^\_\_^aaaa`a`a`^\_aaaa````\_a`^^  
@HWI-EAS443:3:65:1237:1032#0/1  
GACTAATTCACAAGACACAGAGATTTCTTTTACAATCACT  
+HWI-EAS443:3:65:1237:1032#0/1  
aaabba^ba`aaa`\_`\_`aaaa`\_`aaaa``\_a`a`\_``\_`  
@HWI-EAS443:3:65:123:610#0/1  
CATCTGGGCCGTTGCAGGTCCAAGTTCATTGTTTATCATG  
+HWI-EAS443:3:65:123:610#0/1  
Za^ba\_bbbbbaa`Z^`bab`U¥\_R¥ZTa[^`]^]\_a`aa  
@HWI-EAS443:3:65:1261:1959#0/1  
TGAGAATAGAACGATTCCCTCTTGGGAATCCAGGAATGTGT  
+HWI-EAS443:3:65:1261:1959#0/1  
aa]aaaa\_H¥b^Y`TUb^aaabU¥\_a`^¥a`W[M^UP[W  
@HWI-EAS443:3:65:1298:639#0/1  
ACTAACTTGCAGGTCCTGTAGAATCTGTCCACTCCTGCTT  
+HWI-EAS443:3:65:1298:639#0/1  
abbaaaa`a`aba¥aaba]`aaa`a`\_`^`a`Z\_¥\_[\_`\_`  
@HWI-EAS443:3:65:1338:1049#0/1  
GACGGATCAAGAAAGAAGAGTTCTCTGAGATCATGAAGAT  
+HWI-EAS443:3:65:1338:1049#0/1  
abbb]¥Ub^aaabaaabaaa¥aaa`aaaa`\_a`a`^`\_`  
@HWI-EAS443:3:65:1373:807#0/1  
AATGCCAGCCCATGGTCCAGCCAAAAGCATGGAATATGAT  
+HWI-EAS443:3:65:1373:807#0/1  
\_\_`a`aW[`aaaaaa[a¥^`[¥¥U``[]]^`^`]^`a^^`\_`  
@HWI-EAS443:3:65:1433:1523#0/1  
GAACAATTGAAGAGCCATCTGGGCCGTTGCAGGTCCAAGG  
+HWI-EAS443:3:65:1433:1523#0/1  
aaa`aaaa`aaaa`\_aa^a`¥aZ`a`\_`Z`adW^W`\_`\_`^`  
@HWI-EAS443:3:65:1567:198#0/1  
AGCCTCTCTTATTTCAGTCTTTGTTTTTTCTTCCCTATTGT  
+HWI-EAS443:3:65:1567:198#0/1  
`b`bbababaa`b`bbbabbbbbbbbb^H\_baabbbb`a`  
@HWI-EAS443:3:65:1582:445#0/1  
CAGCTGACATGAGTATTGGAGTAACAGTGATAAAGAACAA  
+HWI-EAS443:3:65:1582:445#0/1  
^a`a¥`a`¥Yb¥UW]^`^]\_U0^YXJT00¥XTT¥\_ZVZV^]  
@HWI-EAS443:3:65:1620:930#0/1  
ATTTCTTTTGTCCAAGATTCAGTATCGAGACTCCCAAGAC  
+HWI-EAS443:3:65:1620:930#0/1  
abbbabbbba`aaababbabaaabbaabaaaa`aaaa`¥`  
@HWI-EAS443:3:65:1636:1992#0/1  
ATGGAATCAATGAACAAAGAGGAAATAGAGATAACAACCC  
+HWI-EAS443:3:65:1636:1992#0/1  
^[\_`\_\_\_a`aba`\_Y`]Va\_[\_`^`a]]Q^a]`aaa`\_`[ZU  
@HWI-EAS443:3:65:1697:1324#0/1  
ATGAATCAGCTGACATGAGTATTGGAGTAACAGTGATAAA

+HWI-EAS443:3:65:1697:1324#0/1  
\_aa`Z\_Y]^Q\_\_T\_]\_^Z[W^\_]T^MS`¥QUESJSZ[[  
@HWI-EAS443:3:65:1713:828#0/1  
ATTCCCCTAACTTGCAGGTCCTGTAGAATCTGTCCACTC  
+HWI-EAS443:3:65:1713:828#0/1  
`aaa`\_aaba`aabaa`baWR^a]\_aa\_a`^\_aW¥X\_]M  
@HWI-EAS443:3:65:1729:392#0/1  
GGGCTCCAATCATCCGACGATTTTGTCTCATAGTGAATG  
+HWI-EAS443:3:65:1729:392#0/1  
abaa`aababaab`\_baabaaaba[\_a`baaaaa]b``aa  
@HWI-EAS443:3:65:1763:650#0/1  
CCACAGCATTGTTTACAGAATCAATCTCTTTATGACTGAC  
+HWI-EAS443:3:65:1763:650#0/1  
aababbabbbbabbab``bb`bab`b`bbbb`a\_baa\_  
@HWI-EAS443:3:65:17:599#0/1  
CTCCCAGTAGGGGCAATGAAAAGAAGGCCAAACTGGCAA  
+HWI-EAS443:3:65:17:599#0/1  
aaaab\_aVaaa\_\_\_a^`a\_\_\_\_^`\_]\_\_\_\_]^Y`]]^\_  
@HWI-EAS443:3:65:22:1594#0/1  
CAATACTCAGAAAAGGAAAGTGGACGACAAACACAGAGA  
+HWI-EAS443:3:65:22:1594#0/1  
aabbbbaa]b^`^`a¥Z\_a^\_ZY\_a]`W]aa`a¥\_`\_]U  
@HWI-EAS443:3:65:241:564#0/1  
CACTCCTGCTTGTATTCCCTCATGGTTTGGTGCATTCACT  
+HWI-EAS443:3:65:241:564#0/1  
abaabbababbaaabaaba\_`aaa\_abaYa\_]a\_`¥]`  
@HWI-EAS443:3:65:26:1422#0/1  
ATCCCACCCAGGAATATTTGAGAATTCATGCCTTGAACA  
+HWI-EAS443:3:65:26:1422#0/1  
`)]`\_aa\_`\_`\_^\_¥X\_\_\_\_^`\_]\_\_\_\_]`¥X\_]`^W]]\_Z`  
@HWI-EAS443:3:65:297:546#0/1  
TCATTGATTCCATTACATCCTTTAAGAAATCTATTAGCCT  
+HWI-EAS443:3:65:297:546#0/1  
aa^`aaaaaaaaaaaaaaaaaaaaa\_]a^aaaaa\_a`a`a  
@HWI-EAS443:3:65:306:216#0/1  
GATTGATGCCAGGGTCGACTTCGAGTCTGGACGGATCAAG  
+HWI-EAS443:3:65:306:216#0/1  
XJ\_aa^aaa^a[\_aT\_aS[\_Z\_`^`¥¥[^[[V[YT[WZSU  
@HWI-EAS443:3:65:319:587#0/1  
TGTGGGATCAAACCAATCAAAGGTAGGGCTATTAGTATC  
+HWI-EAS443:3:65:319:587#0/1  
U\_RYU\_Sa[\_[U]aZUXUZ]YLZWDH¥^0]^]SWYW[a]\_  
@HWI-EAS443:3:65:320:600#0/1  
AACAGATCTTCATGATCTCAGAGAACTCTTCTTTCTTGAT  
+HWI-EAS443:3:65:320:600#0/1  
]aaa\_R`abaaa`\_\_Zaa```Ya[\_\_\_]\_`\_\_a\_\_``]¥[\_  
@HWI-EAS443:3:65:323:733#0/1  
CTCTTCTAATAGATGGCACAGCATCACTGAGTCCTGGGAT  
+HWI-EAS443:3:65:323:733#0/1  
aaa\_]abaa]P¥^\_a`b\_] ]^]aaa`aaaa]Y``aaaS^

@HWI-EAS443:3:65:325:946#0/1  
CAAGAATTCCCCTTTGGCTTGTGTTGAGAATAGAACGATT  
+HWI-EAS443:3:65:325:946#0/1  
^¥WT`]ZY^]aY``Xaa`\_[XU`UNHQR]]NYXKS[^S  
@HWI-EAS443:3:65:338:760#0/1  
CCCCGATTGATGCCAGGGTCGACTTCGAGTCTGGACGGAT  
+HWI-EAS443:3:65:338:760#0/1  
aabaa]aa`\_aaa`][aV`a``\_a`^`Z`^^[S[¥\_[[  
@HWI-EAS443:3:65:346:952#0/1  
GCCTCTTCTAATAGATGGCACAGCATCACTGAGTCCTGGG  
+HWI-EAS443:3:65:346:952#0/1  
aa`^aa`\_aa`\_JY\_\_aYa`]^`a]^\_\_`aUYQ`\_\_^\_  
@HWI-EAS443:3:65:411:1152#0/1  
AATGAACCAAGTGGGTATGCACAAACAGACTGTGTTCTAG  
+HWI-EAS443:3:65:411:1152#0/1  
a`[SYZZ\_[U^[^XXX^XPXXX¥¥]]X]YYXWSXWUUXB  
@HWI-EAS443:3:65:414:1112#0/1  
AAGAAGATGGTCACGCAAAGAACAATAGGGAAGAAAAAAC  
+HWI-EAS443:3:65:414:1112#0/1  
\_```bbaaba^b^aaaaaaa`aaa^a^`]`¥\_aaa\_Z\_`a  
@HWI-EAS443:3:65:461:1272#0/1  
GAATCTGTCCACTCCTGCTTGTATTCCCTCATGGTTTGGT  
+HWI-EAS443:3:65:461:1272#0/1  
\_U`¥a\_0Xaba^]a`^]\_\_a¥Q\_\_Yaa^]¥VXWVZa[PPK  
@HWI-EAS443:3:65:462:1155#0/1  
ATCCCAGGACTCAGTGATGCTGTGCCATCTATTAGAAGAG  
+HWI-EAS443:3:65:462:1155#0/1  
^ab\_ab¥`\_a]R^]R^a^`\_`XY``]K]a`^`XRYRUPJ  
@HWI-EAS443:3:65:487:356#0/1  
AAACCATGAGGGAATACAAGCAGGAGTGGACAGATTCTAC  
+HWI-EAS443:3:65:487:356#0/1  
Z\_W]aabbabaaaa`a`\_aa`aaa\_a^a`\_``\_Z^^¥]Y  
@HWI-EAS443:3:65:49:1013#0/1  
TGCTCTTATTAGATAGCCTCTCTTATTTCAGTCTTTGTTTT  
+HWI-EAS443:3:65:49:1013#0/1  
a`a\_baa`aX[aY`^`a`\_aa`\_]a\_\_^`[\_\_\_``\_]`^\_  
@HWI-EAS443:3:65:503:1324#0/1  
ACGGAATCTTCACATTCCTGAAGTCTGCTTAAAATGGGAG  
+HWI-EAS443:3:65:503:1324#0/1  
^`^^aa[aa^aaa]a^aa¥^\_aW\_\_^`\_`\_`[\_\_\_]^]  
@HWI-EAS443:3:65:507:676#0/1  
GTGTGTTCTGTTTACTGTGTCCATGGTGTATCCTGTTCCCT  
+HWI-EAS443:3:65:507:676#0/1  
a`a\_a\_aaa`\_aa¥`a`^a^aa`\_`\_Waa`\_```\_`¥¥\_^[  
@HWI-EAS443:3:65:539:812#0/1  
CCCCGAGTGGTTCAGAAACATCCTGAGCATGGCACCCATAA  
+HWI-EAS443:3:65:539:812#0/1  
aab\_[^]a\_\_aY¥VXaaa^`\_]XZ```^^[\_\_\_[QV]\_]  
@HWI-EAS443:3:65:55:234#0/1  
GCCCATCATCATCCCAGGACTCAGTGATGCTGTGCCATCT

+HWI-EAS443:3:65:55:234#0/1  
T\_b\_WZ\_Z^a^\_aa\_]\_¥]Y\_` `a\_[^\_]¥GW\_Z\_[Y¥]¥]  
@HWI-EAS443:3:65:566:137#0/1  
TCTGTTTACTGTGTCCATGGTGTATCCTGTTCCCTGTTCCA  
+HWI-EAS443:3:65:566:137#0/1  
\_]^^Xb`T`¥]]SMY`X^]YDZU¥Q]\_`VF\_]VVPYNL]U  
@HWI-EAS443:3:65:593:700#0/1  
TGGGCTCCAATCATCCGACGATTTTGCTCTCATAGTGAAT  
+HWI-EAS443:3:65:593:700#0/1  
abaaa`abbaa`b`aaaaaa\_aa`aaaa` `a`aaa^a\_\_\_\_  
@HWI-EAS443:3:65:617:933#0/1  
AAATCGTCGGATGATTGGAGCCCATCCCACCAGTATATTG  
+HWI-EAS443:3:65:617:933#0/1  
`U^aaaUa`aa\_]`a\_^]`a`aa\_aa`\_a^X\_VX\_\_\_\_^\_  
@HWI-EAS443:3:65:650:247#0/1  
CAACGGCCCAGATGGCTCTTCAATTGTTTCATCAAAGACTA  
+HWI-EAS443:3:65:650:247#0/1  
aabbabaaa`baa`a\_`a\_`aaa` `]a\_a^^¥\_`¥\_X]\_  
@HWI-EAS443:3:65:659:147#0/1  
CAACCGGCAGCAACTGCATTGGCCAACCCATAGAAGTCT  
+HWI-EAS443:3:65:659:147#0/1  
aba` `bbbabW^\_^[\_]`aaaaa`a[a]VV[aa\_^`Q¥`  
@HWI-EAS443:3:65:664:1776#0/1  
ATTGATGCCAGGGTCGACTTCGAGTCTGGACGGATCAAGA  
+HWI-EAS443:3:65:664:1776#0/1  
]\_\_\_\_¥W¥\_`¥[TUOW[Z¥WQYZTQK^ZOO^]XYXSW`XTV  
@HWI-EAS443:3:65:677:1278#0/1  
GGGCAATGAAAAGAAGGCCAAACTGGCAAATGTTGTGAGA  
+HWI-EAS443:3:65:677:1278#0/1  
]a¥a` `Y]aX[Z`Za¥a¥¥`^X¥` ` ` \_HZabU]^UYQ\_`  
@HWI-EAS443:3:65:689:1161#0/1  
CAACCCGATTGATGGACCACTACCTGAGGATAATGAACCA  
+HWI-EAS443:3:65:689:1161#0/1  
\_`^` ` `a\_ba^^\_a]Z\_aaaa[\_aa^I^]¥aba`\_aS[Z`  
@HWI-EAS443:3:65:693:131#0/1  
AGCCCTTCTTTTTAACTTGCCTCTCTCTGCATCTTTGGTC  
+HWI-EAS443:3:65:693:131#0/1  
aaa`aaa\_aaaaa`\_aaa`^a\_a` `\_\_a^\_]` ` \_\_XY^  
@HWI-EAS443:3:65:71:993#0/1  
CACCAATACTCAGAAAAGGGAAAGTGGACGACAAACACAG  
+HWI-EAS443:3:65:71:993#0/1  
]ba`\_Ua`b]]bbba`Y\_\_XSa\_\_Ua]^aXaa]bTabaa^  
@HWI-EAS443:3:65:744:1124#0/1  
GGCCCGGATTGATGCCAGGGTCGACTTCGAGTCTGGACGG  
+HWI-EAS443:3:65:744:1124#0/1  
XO\_` `T]Y¥¥Z^UR]X]] [¥QX¥\_^\_\_\_\_]ZRP[XXY` `¥  
@HWI-EAS443:3:65:750:1081#0/1  
TTCCCTTTTCTGAGTATTGGTGTGTTCTGTTTACTGTGTC  
+HWI-EAS443:3:65:750:1081#0/1  
aaabaaaa]`a`Za[aaaa]a[aVaaZ¥]aaa^` [¥a¥¥

@HWI-EAS443:3:65:753:877#0/1  
ATCCCACCCAGGAATATTTGAGAATTCATGCCTTGAAACA  
+HWI-EAS443:3:65:753:877#0/1  
Y]bb\_X]\_\_¥]TPa¥FWSY^Z]Y¥aW`S[¥SUVV¥\_Pa]`  
@HWI-EAS443:3:65:75:201#0/1  
GCCATGCTCAGGATGTTTCTGAACCACTCGGGTTGATTTC  
+HWI-EAS443:3:65:75:201#0/1  
a`\_^]a\_\_[[T^W[]V]Y¥ZVX^VVXTOY^^¥VSLNNTT  
@HWI-EAS443:3:65:773:1160#0/1  
CGTCGGATGATTGGAGCCCATCCCACCAGTATATTGTCTT  
+HWI-EAS443:3:65:773:1160#0/1  
aZP\_aaWZ\_\_\_\_\_ [Z]aaa`aaa`X`]Y\_0Ta`a[Z¥\_\_`  
@HWI-EAS443:3:65:822:483#0/1  
GGCCAATGCAGTTGCTGCCGTTGATTTCTGTTAATGTC  
+HWI-EAS443:3:65:822:483#0/1  
\_^baaa`a`aa\_ba\_`a\_``aVaa0^aaVaa\_a`¥```[^  
@HWI-EAS443:3:65:833:543#0/1  
CCGAGTGGTTCAGAAACATCCTGAGCATGGCACCCATAAT  
+HWI-EAS443:3:65:833:543#0/1  
aa`^`Z]\_OXRW^bbba`a`[^`Za\_¥]^Z[X[¥X¥]`^X  
@HWI-EAS443:3:65:839:1877#0/1  
GAACCAAGTGGGTATGCACAAACAGACTGTGTTCTAGAGG  
+HWI-EAS443:3:65:839:1877#0/1  
`bbbabb`¥bba]baa`baaa`aa\_a``a[^`Pa``aY]]\_  
@HWI-EAS443:3:65:841:76#0/1  
ATTGAAGAGCCATCTGGGCCGTTGCAGTCCAAGGTCATT  
+HWI-EAS443:3:65:841:76#0/1  
abbbaab]baaaa`aaaa\_`a```\_`a`U]\_\_¥a\_W]^`\_  
@HWI-EAS443:3:65:848:1816#0/1  
ATGGGCTCCAATCATCCGACGATTTTGCTCTCATAGTGAA  
+HWI-EAS443:3:65:848:1816#0/1  
[baa\_bab]`ba`a\_aaa]`aaa`aa¥^a`\_aa\_^Y^\_\_`  
@HWI-EAS443:3:65:878:62#0/1  
GAAGAATCCCACCCAGGAATATTTGAGAATTCATGCCTTG  
+HWI-EAS443:3:65:878:62#0/1  
aYa`aa`^[\_a]^\_\_\_\_\_¥¥\_\_\_\_\_`^`^a]^`]]\_]V[]\_  
@HWI-EAS443:3:65:904:1991#0/1  
GGTTGTTATCTCTATTTCTCTTTGTTTCATTGATTCCATT  
+HWI-EAS443:3:65:904:1991#0/1  
``\_`a\_ZXX^XY^[UKXVX^^^ZPPX^^[PPV^WWWVY]]  
@HWI-EAS443:3:65:904:744#0/1  
ATTGATGCCAGGTCGACTTCGAGTCTGGACGGATCAAGA  
+HWI-EAS443:3:65:904:744#0/1  
ababa\_bb\_Y]aa¥ba\_a`Y^RH][aZ`a``aa\_^[\_a\_\_  
@HWI-EAS443:3:65:912:573#0/1  
GGGCAATGAAAAGAAGGCCAAACTGGCAAATGTTGTGAGA  
+HWI-EAS443:3:65:912:573#0/1  
aV`RR¥aa\_^Y[`\_\_Ta[¥Y\_`\_\_][Z`R[``a^\_¥\_^a¥  
@HWI-EAS443:3:65:919:1426#0/1  
GCATTTGCGAAAAGCTTGAACAGTCTGGGCTCCCAGTAGG

+HWI-EAS443:3:65:919:1426#0/1  
aaY`a¥Z\_Y\_]Z]]^Z^RY^]aa\_aYVX^]^a^PVXQ^Z^  
@HWI-EAS443:3:65:953:603#0/1  
GACAAACACAGAGACTGGTGCACCCAGCTCAACCCGATT  
+HWI-EAS443:3:65:953:603#0/1  
aaabbaaaaabaaa`aYMY[aa\_``^`^a\_aaa^Za\_`a  
@HWI-EAS443:3:65:982:229#0/1  
CTAGCTAAAGTTTCAACAAAGTATACGAAACCTCTAATCT  
+HWI-EAS443:3:65:982:229#0/1  
\_a¥bbb`[WaW\_`Rwa]a\_¥^aaa`a\_abbWW][`X\_\_T\_  
@HWI-EAS443:3:65:996:476#0/1  
ACTTAGTGTTGTCCCCAGTGATTGTGAAAGAAATCTCTGT  
+HWI-EAS443:3:65:996:476#0/1  
\_bbb`b``a``aaaaa]^`abbaba\_]\_aaaaa^^]^  
@HWI-EAS443:3:66:1015:1875#0/1  
CTCCCCTATGGCACCTATATGTGTATCTGTAGTCTTTGAT  
+HWI-EAS443:3:66:1015:1875#0/1  
ababbabbba\_abaaaa[baa^b¥aaaaa^\_a``a`a\_a\_  
@HWI-EAS443:3:66:1061:1223#0/1  
TAATGAACCAAGTGGGTATGCACAAACAGACTGTGTTCTA  
+HWI-EAS443:3:66:1061:1223#0/1  
aba\_a`aaaaa^aaaZa`\_`````[¥a`\_^\_\_V`¥^Y]]  
@HWI-EAS443:3:66:1080:1772#0/1  
CAGTGATTGTGAAAGAAATCTCTGTGTCTTGTGAATTAGT  
+HWI-EAS443:3:66:1080:1772#0/1  
`b`Vaa^`]a^`bababbbbabba`a`[^a¥\_XQa]a]]Y  
@HWI-EAS443:3:66:1090:356#0/1  
AGAACAACATGATAAACAATGACCTTGGACCTGCAACGGC  
+HWI-EAS443:3:66:1090:356#0/1  
`babaabaaaaaaaaaaaaa\_aa``^aaaaa\_aa`^`\_``^  
@HWI-EAS443:3:66:109:1152#0/1  
CTCCCCTATGGCACCTATATGTGTATCTGTAGTCTTTGAT  
+HWI-EAS443:3:66:109:1152#0/1  
`U`aa\_[Z[ZOXTTTQ[[JYWTVSV]^SXUQPVY\_XTZT  
@HWI-EAS443:3:66:1110:787#0/1  
ATGGTTTGGTGCATTCACTATGAGAGCAAATCGTCGGAT  
+HWI-EAS443:3:66:1110:787#0/1  
abbb`bbab[\_ababaabaababab`a]\_aaaaY¥^S^`  
@HWI-EAS443:3:66:111:129#0/1  
GCCAGGGTCGACTTCGAGTCTGGACGGATCAAGAAAGAAG  
+HWI-EAS443:3:66:111:129#0/1  
^ba^U^^G¥a`aa¥\_aY\_]\_`X`[YaTLYW[¥WWW`\_^PV  
@HWI-EAS443:3:66:1126:1694#0/1  
GTGGTCCATCAATCGGGTTGAGCTGGGGTGCACCAGTCTC  
+HWI-EAS443:3:66:1126:1694#0/1  
^^`^]¥aa\_a\_\_\_YaaaS]S¥aW^ZZ^WU\_Y¥^[\_¥SX¥V  
@HWI-EAS443:3:66:1130:990#0/1  
GTAGGGGGCAATGAAAAGAAGCCAAACTGGCAAATGTTG  
+HWI-EAS443:3:66:1130:990#0/1  
a¥¥``a`a\_a`a`a`\_````\_`^`^^`^`\_\_`\_`^^`Y]\_

@HWI-EAS443:3:66:1141:349#0/1  
GGGCTATTAGTATCAGATGGAGGACCAAACCTTATACAATA  
+HWI-EAS443:3:66:1141:349#0/1  
abaaabbbb`Uabaabaaaa`aa`a`a`aaaa\_```a  
@HWI-EAS443:3:66:1151:1928#0/1  
AAGTTAAAAAGAAGGGCTATCGCAACACCTGGGATGCAGA  
+HWI-EAS443:3:66:1151:1928#0/1  
aa`]abbaaaa`aa^`aaa\_`^^`dWa^a\_\_a\_\_^\_\_^^\_  
@HWI-EAS443:3:66:1240:1044#0/1  
AGTTAAAGAAGCTGTGGGATCAAACCCAATCAAAGGTAGG  
+HWI-EAS443:3:66:1240:1044#0/1  
aa`a^`a^`]ab\_\_\_\_\_X`^]¥^`a\_U[^]¥0\_\_YR[\_  
@HWI-EAS443:3:66:1246:624#0/1  
GTTTGGTGCATTCACTATGAGAGCAAAATCGTCGGATGAT  
+HWI-EAS443:3:66:1246:624#0/1  
a\_a`a\_Ya`\_````]a`a^a\_a^`\_\_\_\_\_^\_]^^^]\_^\_^^  
@HWI-EAS443:3:66:1267:463#0/1  
GGGTGCACCAGTCTCTGTGTTTGTCTCCACTTCCCTTT  
+HWI-EAS443:3:66:1267:463#0/1  
^a¥0\_X^^baba]a`\_a]^R\_b\_W`UX`¥¥[``]`a`^^a  
@HWI-EAS443:3:66:1284:80#0/1  
TGATGCCGTTGCAACTACACATTCCTGGATCCCAAGAGG  
+HWI-EAS443:3:66:1284:80#0/1  
aa`baaaa`aaa\_\_T^`¥`Y^`^UZ]`WV]\_`Y\_`^\_Y^]  
@HWI-EAS443:3:66:1316:722#0/1  
AAGACAATATACTGGTGGGATGGGCTCCAATCATCCGACG  
+HWI-EAS443:3:66:1316:722#0/1  
`¥aaaaaa^a`aaa¥a\_a\_`]\_W¥]\_¥\_``]]^\_Z¥]X\_  
@HWI-EAS443:3:66:1317:339#0/1  
CCCGGATTGATGCCAGGGTCGACTTCGAGTCTGGACGGAT  
+HWI-EAS443:3:66:1317:339#0/1  
`]`baababaa`aa`aa`Y\_a\_\_aa`a^a^aaa]0`^¥Y  
@HWI-EAS443:3:66:1324:981#0/1  
CACTGACATTAATACGATGACCAAAGATGCAGAGAGAGG  
+HWI-EAS443:3:66:1324:981#0/1  
abbbbbbaabbaabaabaa`aaaa`aaaa\_aa\_a\_a\_a`  
@HWI-EAS443:3:66:1341:605#0/1  
ATTGATGCCAGGGTCGACTTCGAGTCTGGACGGATCAAGA  
+HWI-EAS443:3:66:1341:605#0/1  
ababaaab``aaaY`\_a^aa\_^^`\_\_\_aa\_\_aa^U¥\_a^  
@HWI-EAS443:3:66:1368:528#0/1  
GTTGATCCCACTAACTTGCAGGTCCTGTAGAATCTGTCC  
+HWI-EAS443:3:66:1368:528#0/1  
^`bbabaaZ`aba`]`aaaa`a\_`^¥\_b^aa`[\_`a\_aQOU  
@HWI-EAS443:3:66:1425:1474#0/1  
AAACAATGCTGTGGTAATGCCAGCCCATGGTCCAGCCAAA  
+HWI-EAS443:3:66:1425:1474#0/1  
``aaaaaaa\_a`\_a^¥R][aXXX¥`\_]YW^]\_ZRUZ\_\_  
@HWI-EAS443:3:66:1433:650#0/1  
CCCAGTGATTGTGAAAGAAATCTCTGTGTCTTGTGAATTA

+HWI-EAS443:3:66:1433:650#0/1  
ab`ab\_b`aabYbabba`aaa`aaaa`^aaa`Y\_U\_]T  
@HWI-EAS443:3:66:1434:721#0/1  
CCCTCATGGTTTGGTGCATTCACTATGAGAGCAAAATCGT  
+HWI-EAS443:3:66:1434:721#0/1  
]bbb`abbaZb^bbaba`baaaaaabbb\_aa`b\_\_a`^a`  
@HWI-EAS443:3:66:1530:1222#0/1  
AACATTTGCCAGTTTGGCCTTCTTTTCATTGCCCCCTACT  
+HWI-EAS443:3:66:1530:1222#0/1  
\_`bbbbabb]^abbbbaZ`babbabaa`aa`a`]]aa`a  
@HWI-EAS443:3:66:1533:2027#0/1  
ATCGTATTTAATGTCAGTGCCTTATTAGATAGCCTCTCT  
+HWI-EAS443:3:66:1533:2027#0/1  
ab`b`aabbaaaa\_aaa][Q[\_`a`a``\_]RSPZ¥Y`  
@HWI-EAS443:3:66:1548:325#0/1  
AATAGATGGCACAGCATCACTGAGTCCTGGGATGATGATG  
+HWI-EAS443:3:66:1548:325#0/1  
a^`aaaa`]^`aaa\_`[a¥\_`^`aU[W`^\_]`^Z]YY¥\_W^]  
@HWI-EAS443:3:66:1558:1857#0/1  
CTTCCCTAGTCTTGCCATTTTGTGGAGAACATTATGGG  
+HWI-EAS443:3:66:1558:1857#0/1  
ababb`\_bbbYabb`a`bbbb`baabaa\_a`¥\_aa\_aa^\_  
@HWI-EAS443:3:66:1580:2001#0/1  
TATTTTCTCAATTTTCTTCTTTGTTGATTCATTGAAGTAC  
+HWI-EAS443:3:66:1580:2001#0/1  
abaabbaaa``aaaaaba`aaa`aaaaaaa`a\_aa\_`^aU  
@HWI-EAS443:3:66:159:1858#0/1  
GATGTCAATCCGACTCTACTTTTCCTAAAAATCCAGCGC  
+HWI-EAS443:3:66:159:1858#0/1  
Y\_bK^abbb`\_ZWVaaa`]aabXbaab``aa`aa¥`aaXa  
@HWI-EAS443:3:66:162:560#0/1  
AAGGGATTCAGGGGATTACAAAGTCTTCCCCGATAATCAT  
+HWI-EAS443:3:66:162:560#0/1  
Z¥¥\_VN]Z`a^``a]T`]YZ¥T¥`\_\_`^^[QWRWY¥[W  
@HWI-EAS443:3:66:1697:1269#0/1  
CTTTATGACTGACAAAGGGATTACAAAGTCT  
+HWI-EAS443:3:66:1697:1269#0/1  
¥`\_] [WZ¥`RY\_^[XX\_a`a]0]` `a`¥WWWaTZ¥WIPV  
@HWI-EAS443:3:66:1705:1266#0/1  
GTCCTCCATCTGATACTAATAGCCCTACCTTTGATTGGGT  
+HWI-EAS443:3:66:1705:1266#0/1  
\_``[aa\_aba\_^\_` ` `[\_aaa`]aa`a``aa[`¥[]WW  
@HWI-EAS443:3:66:1713:791#0/1  
GGGATGGGCTCCAATCATCCGACGATTTTGCTCTCATAGT  
+HWI-EAS443:3:66:1713:791#0/1  
\_b\_`aaaaaa`a` `a\_`a\_a\_aaa]`a`a`^\_\_a`^¥^Z  
@HWI-EAS443:3:66:1737:1149#0/1  
GCAGACTTCAGGAATGTGAAGATTCCGTATATTGTATAAG  
+HWI-EAS443:3:66:1737:1149#0/1  
aa^^^^aaaaa¥XY¥`[\_` `a\_\_`Z]a]W¥Za` `]^`]T\_



@HWI-EAS443:3:66:186:849#0/1  
AATGGATGATGATTATCGGGGAAGACTTTGTAATCCCCTG  
+HWI-EAS443:3:66:186:849#0/1  
aa^`\_Xa`^^aa^`a`a^a]Z^]]a\_\_SYM¥]]\_¥][Z  
@HWI-EAS443:3:66:191:1521#0/1  
ATGGGCTCCAATCATCCGACGATTTTGCTCTCATAGTGAA  
+HWI-EAS443:3:66:191:1521#0/1  
aaY`\_a\_aaaa`\_]`¥]`\_^]`^`\_`\_`\_]U[^  
@HWI-EAS443:3:66:192:1235#0/1  
GCCAGTTTGGCCTTCTTTTCATTGCCCCCTACTGGGAGCC  
+HWI-EAS443:3:66:192:1235#0/1  
aa\_] [¥aa\_]ab`aaa`aaaa`aaa^aa`¥a`]PV^\_ZN  
@HWI-EAS443:3:66:205:739#0/1  
CCCGGATTGATGCCAGGGTCGACTTCGAGTCTGGACGGAT  
+HWI-EAS443:3:66:205:739#0/1  
aa\_¥[T^`VVV]]YUZRRR^SMQZX^[[YRZUWUZZ[[TW  
@HWI-EAS443:3:66:223:1226#0/1  
ATTTCTTTTGTCCAAGATTCAGTATCGAGACTCCCAAGAC  
+HWI-EAS443:3:66:223:1226#0/1  
S`baabbb`W\_bb`a`aaaa`^baaa``aa`b\_aaY^^a  
@HWI-EAS443:3:66:230:1988#0/1  
GCTGTGGTAATGCCAGCCCATGGTCCAGCCAAAAGCATGG  
+HWI-EAS443:3:66:230:1988#0/1  
aba`W`^aa`\_a^Z¥aaaa\_[\_T\_a\_\_`^`\_\_TY^WUW  
@HWI-EAS443:3:66:240:30#0/1  
CAGGACTCAGTGATGCTGTGCCATCTATTAGAAGAGGCCT  
+HWI-EAS443:3:66:240:30#0/1  
aba`aba`aab]`\_\_aa¥aaaa`a`a`]`^^aWa\_]\_\_  
@HWI-EAS443:3:66:264:302#0/1  
TGTAGTCTTTGATGAACAATTGAAGAGCCATCTGGGCCGT  
+HWI-EAS443:3:66:264:302#0/1  
ab````ababaaaaa`aaaa`X`]Z^`a`aa^\_\_^^`¥  
@HWI-EAS443:3:66:358:810#0/1  
ATGCTCAGGATGTTTCTGAACCACTCGGGTTGATTTCTGG  
+HWI-EAS443:3:66:358:810#0/1  
`^¥aa¥^W`R]a[SYa\_a^]]\_a]^a```Y[U]`\_`\_`\_  
@HWI-EAS443:3:66:36:1007#0/1  
ACAGGAACAGGATACACCATGGACACAGTAAACAGAACAC  
+HWI-EAS443:3:66:36:1007#0/1  
aaa]Y¥`\_Q¥ZY[\_\_\_S[a]X¥]\_]\_]\_^X\_[Y^\_Q]UU[X  
@HWI-EAS443:3:66:417:1663#0/1  
ATTGTTTCATCAAAGACTACAGATACACATATAGGTGCCAT  
+HWI-EAS443:3:66:417:1663#0/1  
\_]`¥U]\_T]`X`¥YQa]^aVZa`[¥aab[b\_`ZVF¥][YY  
@HWI-EAS443:3:66:424:719#0/1  
GCAGACTTCAGGAATGTGAAGATTCCGTATATTGTATAAG  
+HWI-EAS443:3:66:424:719#0/1  
abaaaaa`aa^aaa^a`aa\_``aa^a\_``aa^aa[^`  
@HWI-EAS443:3:66:431:1393#0/1  
CAGATCTTCATGATCTCAGAGAACTTCTTTCTTGATCC

+HWI-EAS443:3:66:431:1393#0/1  
a^`[aaaaba^a`[\_aS`[\_U^\_b]^`^^]`[\_\_Xa]U]  
@HWI-EAS443:3:66:434:1724#0/1  
TCCCCGATAATCATCATCCATTAGCTCCCATTTTAAGCAG  
+HWI-EAS443:3:66:434:1724#0/1  
\_bbaa]aa]]abY^a```aa`\_`^`^Y]`\_\_a`\_]XU^¥  
@HWI-EAS443:3:66:448:677#0/1  
CAATTGAAGAGCCATCTGGGCCGTTGCAGGTCCAAGGTCA  
+HWI-EAS443:3:66:448:677#0/1  
]\_``abb^b`[a[Z`\_aaaaaab\_]X`¥]ZX`aaYa^U\_\_  
@HWI-EAS443:3:66:495:875#0/1  
CCATCTGATACTAATAGCCCTACCTTTGATTGGGTTTGAT  
+HWI-EAS443:3:66:495:875#0/1  
aaa``aaaa\_a`a`[\_`\_`U[\_`^`\_`XX\_]`^ZZ]`^`  
@HWI-EAS443:3:66:534:1228#0/1  
AAGAATCCCACCCAGGAATATTTGAGAATTCATGCCTTGA  
+HWI-EAS443:3:66:534:1228#0/1  
a```a`baaa\_aa]`]][^aa`\_`^`¥\_Z`\_`^`Z`^`^^  
@HWI-EAS443:3:66:555:108#0/1  
TGGATGATGATTATCGGGGAAGACTTTGTAATCCCCTGAA  
+HWI-EAS443:3:66:555:108#0/1  
abaaaba`aaaaaa\_aa`a`^`\_`Y`^a`\_`^`^`]]^`\_`W`  
@HWI-EAS443:3:66:569:488#0/1  
GAACAATTGAAGAGCCATCTGGGCCGTTGCAGGTCCAAGG  
+HWI-EAS443:3:66:569:488#0/1  
aa¥`\_`a`a`b`\_`\_`a`aa^^`\_`a`a]`\_`\_`\_`W`V^^]]  
@HWI-EAS443:3:66:582:1987#0/1  
GACGACAAACACAGAGACTGGTGCACCCCAGCTCAACCCG  
+HWI-EAS443:3:66:582:1987#0/1  
a`^`a``baaRaa`^^Y`ZYVHIT`X``^^[Y[^]^[Y^U  
@HWI-EAS443:3:66:705:1653#0/1  
ATTAGCCTTCCTGACTCATTAGCTGTTAGGCCATTCGATC  
+HWI-EAS443:3:66:705:1653#0/1  
aaaaYa`baaaYT]^aaTaaaZ[\_^FUaSQD¥`USY\_]MW  
@HWI-EAS443:3:66:706:322#0/1  
GCCCTACCTTTGATTGGGTTTGATCCCACAGCTTCTTTAA  
+HWI-EAS443:3:66:706:322#0/1  
aba`a`aa`ab`b`a`aa`aaaa`\_`a`aaa`\_`a`\_`\_`\_`a`  
@HWI-EAS443:3:66:715:1732#0/1  
GCGAAAAGCTTGAACAGTCTGGGCTCCCAGTAGGGGGCAA  
+HWI-EAS443:3:66:715:1732#0/1  
aaZ¥a`a]abbaba[`]\_aaa\_\_a`aa^[\_VW`X`\_`^`\_aa  
@HWI-EAS443:3:66:73:1888#0/1  
CCCATTTTAAGCAGACTTCAGGAATGTGAAGATTCCGTAT  
+HWI-EAS443:3:66:73:1888#0/1  
abb`\_`aaaababa`a]\_`aa\_]`[[\_Y`\_`a\_]`^^a`aVa`  
@HWI-EAS443:3:66:789:1441#0/1  
GAGATAACAACCCACTTTCAAAGAAAAAGGAGAGTAAGAG  
+HWI-EAS443:3:66:789:1441#0/1  
a`a`aaa`aaa`\_`[\_`aaa]`\_`\_`\_]`W]R]^]\_`^`V`\_`¥`\_`\_`

@HWI-EAS443:3:66:808:721#0/1  
GAGCACTGACATTAATACGATGACCAAAGATGCAGAGAG  
+HWI-EAS443:3:66:808:721#0/1  
aa`a`bbbaabb¥`aaa\_ba`\_aa`]a`aa`a^aaYaa`  
@HWI-EAS443:3:66:812:1804#0/1  
GCCCTACCTTTGATTGGGTTTGGTCCACAGCTTCTTTAA  
+HWI-EAS443:3:66:812:1804#0/1  
aaabaa`abbaa`aaa`^`\_aaaaaaaa`\_`aaa\_`a`  
@HWI-EAS443:3:66:817:1666#0/1  
CCCACCCAGGAATATTTGAGAATTCATGCCTTGAACAAT  
+HWI-EAS443:3:66:817:1666#0/1  
aaabaabaaa`aa`\_aaaa\_aaa` `a`a]a` `^`\_`\_`  
@HWI-EAS443:3:66:835:1816#0/1  
AAAAATTCAGCGCAAATGCCATAAGCACCATTCCT  
+HWI-EAS443:3:66:835:1816#0/1  
aa`^YY^Y` [XYKR¥Z[¥¥Q[T¥R^TY\_Y[QZ^\_XXOMQY  
@HWI-EAS443:3:66:867:635#0/1  
GGGGCAATGAAAAGAAGGCCAACTGGCAAATGTTGTGAG  
+HWI-EAS443:3:66:867:635#0/1  
aa`]`aa`Z]a`a`aa`\_`aa`\_`^`\_`\_` [aa^aa`\_`\_`  
@HWI-EAS443:3:66:908:23#0/1  
GCTCCCAGTAGGGGCAATGAAAAGAAGGCCAACTGGCA  
+HWI-EAS443:3:66:908:23#0/1  
a`X`¥]T\_TU¥^[ `^[]]\_`RV[^[UVW[VUYUWUV[UXU  
@HWI-EAS443:3:66:942:980#0/1  
GAAAGATGATGACTAATTCACAAGACACAGAGATTTCTTT  
+HWI-EAS443:3:66:942:980#0/1  
aa])aaaaaaaa`baaaaaaaaa`aaa`a` ` ` \_\_\_\_\_`  
@HWI-EAS443:3:67:1011:1845#0/1  
CTCCAATCATCCGACGATTTTGCTCTCATAGTGAATGCAC  
+HWI-EAS443:3:67:1011:1845#0/1  
a`a[aTaaWX\_[QTQUFY]]¥Y]U¥Y` [Y[aQ`T^WPRZ]  
@HWI-EAS443:3:67:1013:1118#0/1  
AGGGGGCAATGAAAAGAAGGCCAACTGGCAAATGTTGTG  
+HWI-EAS443:3:67:1013:1118#0/1  
U\_ba`\_b`^bbbbbba` ` `baabbbbaaaaaababbb`abaa  
@HWI-EAS443:3:67:1020:1106#0/1  
GATTGATGCCAGGGTCGACTTCGAGTCTGGACGGATCAAG  
+HWI-EAS443:3:67:1020:1106#0/1  
aa`a[]`ab`\_`Z^Ua`\_`\_]`\_] [Y^`\_Z]^¥^^YU^\_\_  
@HWI-EAS443:3:67:1024:508#0/1  
GATGGGCTCCAATCATCCGACGATTTTGCTCTCATAGTGA  
+HWI-EAS443:3:67:1024:508#0/1  
aaa\_X`¥`a^` `a\_\_aV`\_^ [a^`\_a^a`\_]`\_`\_`\_¥`W^^  
@HWI-EAS443:3:67:1026:1784#0/1  
AAAGAACAACATGATAAACAATGACCTTGGACCTGCAACG  
+HWI-EAS443:3:67:1026:1784#0/1  
XY]RR\_ [^¥`^YabR]\_ZYYaaWL`\_aa\_NYZNP^U`a`\_  
@HWI-EAS443:3:67:1102:1429#0/1  
GTTCTGTTTACTGTGTCCATGGTGTATCCTGTTCTGTTCTGTTCT

+HWI-EAS443:3:67:1102:1429#0/1  
a`^^`^`aabaaZ[^\_a`]aaa\_`¥\_aa\_\_\_\_\_ [X]\_] ^Y  
@HWI-EAS443:3:67:1106:1466#0/1  
CAGCTGATTCATTTACTCCAGACACTCCAAAGCTGGGTAG  
+HWI-EAS443:3:67:1106:1466#0/1  
aYFYVa¥b¥^Y^^SZ[[^aZTY`]YZ]a\_`\_R```Y[R¥W  
@HWI-EAS443:3:67:112:1456#0/1  
CCCAGTGATTGTGAAAGAAATCTCTGTGTCTTGTGAATTA  
+HWI-EAS443:3:67:112:1456#0/1  
``bb]\_`VaabTaa^aaabbaaaaa`\_^aa`R]XXa\_`S  
@HWI-EAS443:3:67:1191:116#0/1  
CTTTGTCAGTCATAAAGAGATTGATTCTGTAAACAATGCT  
+HWI-EAS443:3:67:1191:116#0/1  
abaab\_bbba\_abba\_b^b]a\_baa`\_ab\_`a`Z````^^  
@HWI-EAS443:3:67:1195:850#0/1  
ATGAACCAAGTGGGTATGCACAAACAGACTGTGTTCTAGA  
+HWI-EAS443:3:67:1195:850#0/1  
\_aZbaabba`U``` [b¥SZTU` [[[]\_¥`] ^TU\_aT a\_YP  
@HWI-EAS443:3:67:1203:331#0/1  
AAAGGGATTCAGGGGATTACAAAGTCTTCCCCGATAATCA  
+HWI-EAS443:3:67:1203:331#0/1  
^`bbbb]aaaa]b^a\_Xaaaa^^Z`aaa` `¥¥\_a¥ZaY]  
@HWI-EAS443:3:67:1233:337#0/1  
CAACGGCCCAGATGGCTCTTCAATTGTTTCATCAAAGACTA  
+HWI-EAS443:3:67:1233:337#0/1  
aaa`Y[^` [[^YXWNS\_^^¥VRVY][FPDM^PO]YUYHY[  
@HWI-EAS443:3:67:1234:817#0/1  
GAAGCTGTGGGATCAAACCCAATCAAAGGTAGGGCTATTA  
+HWI-EAS443:3:67:1234:817#0/1  
]``^`\_a`aaY^a)`aa[a`aaa]\_``]¥SZ` [VQXa` \_\_  
@HWI-EAS443:3:67:1252:1418#0/1  
GAGATAACAACCCACTTTCAAAGAAAAAGGAGAGTAAGAG  
+HWI-EAS443:3:67:1252:1418#0/1  
\_```babbabbbbaab\_bb`abaa^aabaab`a^aabba  
@HWI-EAS443:3:67:1372:747#0/1  
CAAGAAGATGGTCACGCAAAGAACAATAGGGAAGAAAAAA  
+HWI-EAS443:3:67:1372:747#0/1  
a^^bbbaaba\_bb^^ba\_aaababbbabbb\_baabaab  
@HWI-EAS443:3:67:1433:90#0/1  
TAGGGCCCGGATTGATGCCAGGGTCGACTTCGAGTCTGGA  
+HWI-EAS443:3:67:1433:90#0/1  
abbbaba`bbaabbaab`aaaab^\_a\_Waa^a^a^\_a\_a^  
@HWI-EAS443:3:67:1458:1156#0/1  
GATTCCCCTAACTTGCAGGTCCTGTAGAATCTGTCCACT  
+HWI-EAS443:3:67:1458:1156#0/1  
aabaaaaabaa\_aa`aaa\_¥`a` `aaaa\_a`^U[\_]\_  
@HWI-EAS443:3:67:1458:1918#0/1  
ATCCGACTCTACTTTTCTAAAAATTCCAGCGCAAATGC  
+HWI-EAS443:3:67:1458:1918#0/1  
¥QH[SQ` [```aaaaaYaa^`` \_\_aYP]] [ `¥X] `` [¥P



+HWI-EAS443:3:67:199:942#0/1  
TRZa]US`bZ]\_XX[]W[`a]WZRYM[`^TMOVXDHJWTT  
@HWI-EAS443:3:67:202:370#0/1  
TGCCTCTCTGCATCTTTGGTCATCGTATTTAATGTCAG  
+HWI-EAS443:3:67:202:370#0/1  
aaabaaaaZ[^\_X\_aaa`WVU`^` `[Z\_`]Z]`^\_TY  
@HWI-EAS443:3:67:226:1598#0/1  
AGATTAGAGGTTTTCGTATACTTTGTTGAACTTTAGCTAG  
+HWI-EAS443:3:67:226:1598#0/1  
aaaaaaP^Y^`\_ab`aaa`\_\_a`]\_a¥`Y^` `\_\_\_\_^`^  
@HWI-EAS443:3:67:240:1068#0/1  
CACCATGGACACAGTAAACAGAACACACCAATACTCAGAA  
+HWI-EAS443:3:67:240:1068#0/1  
aabbaaaaaaaaaa\_ba\_aa\_\_aaa` `\_\_a`a\_` `a]a  
@HWI-EAS443:3:67:244:985#0/1  
AGCAGTTCATATAGGAGACCGTTGGAATTTCTAGCATGG  
+HWI-EAS443:3:67:244:985#0/1  
`baab\_ab¥\_baaa\_a`a^aU\_Y`a]S][H[`aT¥`\_]\_U]  
@HWI-EAS443:3:67:26:1332#0/1  
GCATTGGCCAACACCATAGAAGTCTTTAGATCGAATGGCC  
+HWI-EAS443:3:67:26:1332#0/1  
aab`WR\_SaUZaaaZQZXUV\_]Y`Z[^`^ZY]ZV]`^[VV\_  
@HWI-EAS443:3:67:271:1455#0/1  
GCTACCCAGCTTTGGAGTGTCTGGAGTAAATGAATCAGCT  
+HWI-EAS443:3:67:271:1455#0/1  
`abbbbbbaab\_YYWa\_bZaaba]Z\_bba`Va`]aX^a  
@HWI-EAS443:3:67:286:1376#0/1  
GACGATTTTGTCTCATAGTGAATGCACCAAACCATGAGG  
+HWI-EAS443:3:67:286:1376#0/1  
``aa\_]Z`` `T¥^`a]X]]aaaY[]\_a]^]TW`YZ\_^XR  
@HWI-EAS443:3:67:316:107#0/1  
CCCAGTAGGGGCAATGAAAAGAAGCCAAACTGGCAAAT  
+HWI-EAS443:3:67:316:107#0/1  
aaa`a`abbaaaaa`a`\_\_\_\_]a\_a` `^`^^¥\_`\_\_\_\_^^]  
@HWI-EAS443:3:67:371:999#0/1  
AAACAGAAATCAACCGGCAGCAACTGCATTGGCCAACACC  
+HWI-EAS443:3:67:371:999#0/1  
aaabb`]baa`aaa`^]aa\_` `a]Wa¥\_^]V\_^¥U]Y\_V]  
@HWI-EAS443:3:67:406:170#0/1  
GAAGTACTTCAGGTCAATGCTTGCTAGCATTCTGCTGGT  
+HWI-EAS443:3:67:406:170#0/1  
aaY`W`abaaa` `Uaaaa`aaaa^aaaa\_\_`a` `a`X  
@HWI-EAS443:3:67:42:1577#0/1  
CTCCTAGCTAAAGTTTCAACAAAGTATACGAAACCTCTAA  
+HWI-EAS443:3:67:42:1577#0/1  
]RT]]\_]\_]¥ZY0[OWU¥Y]\_]NGVPTKHXMU]Y]T]RBB  
@HWI-EAS443:3:67:443:2042#0/1  
GTGATAAAGAACAACATGATAAACAATGACCTTGGACCTG  
+HWI-EAS443:3:67:443:2042#0/1  
ZP^`abaa`aaaa[a^]aa`aaaaaaa`a]\_a¥Z` `X]

@HWI-EAS443:3:67:456:1693#0/1  
CTGTGGGATCAAACCCAATCAAAGGTAGGGCTATTAGTAT  
+HWI-EAS443:3:67:456:1693#0/1  
¥¥`^]Z^b`^^]`abb`¥Z[aZSZS[^YZ¥\_YbXVa^G\_\_  
@HWI-EAS443:3:67:461:1675#0/1  
ATTAGAAGAGGCCTTATTTTCTCAATTTTCTTCTTTGTTG  
+HWI-EAS443:3:67:461:1675#0/1  
a\_Y]Z`Z]^^UU^]ZY[^Y][ ]WT[¥^[O[^Z[^YVZZ  
@HWI-EAS443:3:67:463:533#0/1  
GCCAGGGTTCGACTTCGAGTCTGGACGGATCAAGAAAGAAG  
+HWI-EAS443:3:67:463:533#0/1  
aaaa\_ZXmb[\_\_\_SaaWTT¥\_aZZ^ZV]¥\_XM¥``\_W^¥¥  
@HWI-EAS443:3:67:477:1602#0/1  
AGAAATCCAACCGGTCTCCTATATGAACTGCTAGGGAAA  
+HWI-EAS443:3:67:477:1602#0/1  
TOPZ¥]]\_¥Y]RU\_¥X¥TP\_] [^a` [K]\_¥a[R`YMW¥\_X  
@HWI-EAS443:3:67:504:1060#0/1  
CATGCTTTTGGCTGGACCATGGGCTGGCATTACCACAGCA  
+HWI-EAS443:3:67:504:1060#0/1  
]aW¥b^`aaaa^aa^a`T¥a\_a`\_\_]HJ^SI][¥[RZYZ  
@HWI-EAS443:3:67:510:44#0/1  
AACAGATCTTCATGATCTCAGAGAACTCTTCTTTCTTGAT  
+HWI-EAS443:3:67:510:44#0/1  
a\_aaa`b\_bb^`aa\_baa\_aa\_aa`a`^a`^a`^`a\_\_\_\_  
@HWI-EAS443:3:67:525:1634#0/1  
GAGATAACAACCCACTTTCAAAGAAAAAGGAGAGTAAGAG  
+HWI-EAS443:3:67:525:1634#0/1  
a\_Xa^a^^X`aa`a\_aaa\_¥^aaa\_a¥QX]¥\_\_Y```\_`\_  
@HWI-EAS443:3:67:528:551#0/1  
GGCCTTCTTTTCATTGCCCTACTGGGAGCCCAGACTGT  
+HWI-EAS443:3:67:528:551#0/1  
¥W\_^W\_bbbbaa¥abbbbbb^¥`\_`bbbbb`\_`\_R¥\_\_`\_`\_a  
@HWI-EAS443:3:67:563:1525#0/1  
ACCGGTCTCCTATATGAACTGCTAGGGAAAAATTTCTCGA  
+HWI-EAS443:3:67:563:1525#0/1  
]^aaYUa`aa`aa]W\_`¥Y\_a\_\_\_\_\_Z````\_`^`\_[XY  
@HWI-EAS443:3:67:59:1619#0/1  
AAAGGGATTGAGGGATTACAAAGTCTTCCCCGATAATCA  
+HWI-EAS443:3:67:59:1619#0/1  
[aa\_[Xa\_\_aa¥X][T]\_a`\_`¥[Z\_]\_\_]a^UZ]\_X]]Z  
@HWI-EAS443:3:67:60:193#0/1  
GTGTGTTCTGTTTACTGTGTCCATGGTGTATCCTGTTCCCT  
+HWI-EAS443:3:67:60:193#0/1  
aaaa``abbbbab`aaa\_a`a`aa`Za]\_a`\_`a^`^`^]  
@HWI-EAS443:3:67:637:1819#0/1  
GATTCTTCAAGGAAAGCCATAGCCTCTAGAACACAGTCTG  
+HWI-EAS443:3:67:637:1819#0/1  
aba`bbabbb`\_]a[abbb`¥aaaaaaaaaaaa`a]R\_```  
@HWI-EAS443:3:67:646:1864#0/1  
GGCCATGGTGTCTAGGGCCCGATTGATGCCAGGGTCGAC

+HWI-EAS443:3:67:646:1864#0/1  
`XaaaaaTPP¥a\_a\_```aaa\_\_`a\_`^\_\_a`R`¥UP^^T  
@HWI-EAS443:3:67:662:620#0/1  
AGAATCCCACCCAGGAATATTTGAGAATTCATGCCTTGAA  
+HWI-EAS443:3:67:662:620#0/1  
aaaaaaaaaa`aaZaaa`a\_``aaa`\_\_a``\_\_\_\_`^  
@HWI-EAS443:3:67:667:275#0/1  
GTCTCCCCTATGGCACCTATATGTGTATCTGTAGTCTTTG  
+HWI-EAS443:3:67:667:275#0/1  
^Vb\_a[a`a\_]\_\_a\_a\_a\_]\_`aSa\_a```a\_]TZ``[[  
@HWI-EAS443:3:67:681:830#0/1  
AGATACACATATAGGTGCCATAGGGGAGACACACAAATTC  
+HWI-EAS443:3:67:681:830#0/1  
a```ababbaba```\_ba\_a\_`^```a\_`\_`a`a[`a[`\_Y  
@HWI-EAS443:3:67:684:239#0/1  
TGCCGTTGCAACTACACATTCCTGGATTCCCAAGAGGAAT  
+HWI-EAS443:3:67:684:239#0/1  
W¥`\_S\_aZWYb¥)`K¥X`[^\_[^baaT^)]\_`RY]Y``\_Z  
@HWI-EAS443:3:67:688:367#0/1  
GGGAAAGTGGACGACAAACACAGAGACTGGTGCACCCAG  
+HWI-EAS443:3:67:688:367#0/1  
aab`^b\_aaaa`a\_`N`\_`\_a\_`^`\_¥]^W[V`^^¥¥]¥  
@HWI-EAS443:3:67:726:624#0/1  
CAACCGGCAGCAACTGCATTGGCCAACACCATAGAAGTCT  
+HWI-EAS443:3:67:726:624#0/1  
aaab\_\_^\_b\_V\_W\_]RT\_aaa``a\_\_\_XX\_a]XS^`]G^  
@HWI-EAS443:3:67:748:1478#0/1  
ATGGGCTCCAATCATCCGACGATTTTGCTCTCATAGTGAA  
+HWI-EAS443:3:67:748:1478#0/1  
a]abab`\_baa\_aa]baaaa\_\_^^aa\_aa]Y^a\_``^a`a  
@HWI-EAS443:3:67:751:750#0/1  
GCTCCAATCATCCGACGATTTTGCTCTCATAGTGAATGCA  
+HWI-EAS443:3:67:751:750#0/1  
aabbaabbaabbaaaaaaaaaabaaa`aaa`a]a^````a  
@HWI-EAS443:3:67:761:133#0/1  
GCCCCGATTGATGCCAGGGTCGACTTCGAGTCTGGACGGA  
+HWI-EAS443:3:67:761:133#0/1  
aa`aba\_aa`````a\_a[aaW`\_`¥`\_\_\_\_W`a\_`^¥\_^V  
@HWI-EAS443:3:67:768:1167#0/1  
CACCCAGGAATATTTGAGAATTCATGCCTTGAACAATGG  
+HWI-EAS443:3:67:768:1167#0/1  
abaa^a`]aa``aaa\_[``\_aba`a`¥a`a`[¥aa\_\_a^  
@HWI-EAS443:3:67:76:1515#0/1  
CACCCATAATGTTCTCAAACAAAATGGCAAGACTAGGGAA  
+HWI-EAS443:3:67:76:1515#0/1  
a^aaaa\_RI\_^Z\_a\_a\_\_aa`\_\_\_\_^ZX`\_]\_]Z][Z^X¥[  
@HWI-EAS443:3:67:773:1340#0/1  
CATGGTGTCTAGGGCCCCGATTGATGCCAGGGTCGACTTC  
+HWI-EAS443:3:67:773:1340#0/1  
a]]`]WX]b`]]\_```aaaa`aaa^\_\_¥`¥^`VT`Y^^[[`



@HWI-EAS443:3:67:810:1715#0/1  
GTCCTCCATCTGATACTAATAGCCCTACCTTTGATTGGGT  
+HWI-EAS443:3:67:810:1715#0/1  
aa]XZ`aaa``^aa\_aa`a]`^\_\_\_\_`\_^\_aa\_]PT¥^  
@HWI-EAS443:3:67:861:662#0/1  
AGACAATATACTGGTGGGATGGGCTCCAATCATCCGACGA  
+HWI-EAS443:3:67:861:662#0/1  
\_bbbababbabbaa\_aba\_abaTaaaaa[a[Za\_Ya]Ua¥  
@HWI-EAS443:3:67:875:1122#0/1  
AAAAATTCCAGCGCAAATGCCATAAGCACCATTCCT  
+HWI-EAS443:3:67:875:1122#0/1  
a`XZP[WLYYW¥V\_[J0]YTY¥^[U¥WW[OPS\_ZX\_]MY  
@HWI-EAS443:3:67:90:883#0/1  
AGGACTCAGTGATGCTGTGCCATCTATTAGAAGAGGCCTT  
+HWI-EAS443:3:67:90:883#0/1  
a]]aaabba\_a][\_a^^ZF¥¥`^W^`UP¥^^\_[Y[Z¥  
@HWI-EAS443:3:67:929:137#0/1  
GACTCATTAGCTGTTAGGCCATTCGATCTAAAGACTTCTA  
+HWI-EAS443:3:67:929:137#0/1  
abaa`aaa[a^`a\_\_\_aaYY\_¥]Va`\_]aY[^XV^¥G]V  
@HWI-EAS443:3:67:943:630#0/1  
CATGACCAAGAAGATGGTCACGCAAAGAACAATAGGGAAG  
+HWI-EAS443:3:67:943:630#0/1  
aaa`bb`^baaa`aaa^a\_\_aaaa`XYa\_aaaa`aa  
@HWI-EAS443:3:67:952:274#0/1  
GTGTGTCTCCCCTATGGCACCTATATGTGTATCTGTAGTC  
+HWI-EAS443:3:67:952:274#0/1  
a``\_a`a`a\_\_`\_`\_¥`Z\_]¥\_\_`^`a^]¥Y]S\_]¥]RS  
@HWI-EAS443:3:67:964:789#0/1  
AAAATTCCAGCGCAAATGCCATAAGCACCATTCCTT  
+HWI-EAS443:3:67:964:789#0/1  
a^Q\_`]a`a]\_a¥aW¥\_N\_¥PY^\_W`]bSKHUY`^TFMS^  
@HWI-EAS443:3:67:973:796#0/1  
CAGAAACATCCTGAGCATGGCACCCATAATGTTCTCAAAC  
+HWI-EAS443:3:67:973:796#0/1  
a\_Q^a`bba]abbaa`\_aa\_a```aaa`¥`aV][a[a^^\_  
@HWI-EAS443:3:68:1016:462#0/1  
ATTATGGGTGCCATGCTCAGGATGTTTCTGAACCACTCGG  
+HWI-EAS443:3:68:1016:462#0/1  
aaaaabbb^aaaaaaaa`aa¥`a^`a`aa`\_]\_\_\_\_^``  
@HWI-EAS443:3:68:1060:261#0/1  
AGAAGATGGTCACGCAAAGAACAATAGGGAAGAAAAACA  
+HWI-EAS443:3:68:1060:261#0/1  
aba`\_aaba\_Gaaba`a\_a\_a``\_a`aaa\_aa`Ya\_a`  
@HWI-EAS443:3:68:109:582#0/1  
AATTGAAGAGCCATCTGGGCCGTTGCAGGTCCAAGGTCAT  
+HWI-EAS443:3:68:109:582#0/1  
aa`\_aaa\_]`Za\_\_`]^[^^]\_X]]SS¥^W\_[]Z]ZZQT¥  
@HWI-EAS443:3:68:1130:681#0/1  
GCCCCGATTGATGCCAGGGTCGACTTCGAGTCTGGACGGA



@HWI-EAS443:3:68:1468:725#0/1  
CAGGGTGCAGTTCGAGTCTGGACGGATCAAGAAAGAAGAG  
+HWI-EAS443:3:68:1468:725#0/1  
ab`¥`\_baa\_Z¥X]bba^ab]`abbba^aa\_aa`bbabab  
@HWI-EAS443:3:68:1479:145#0/1  
GGATTGATGCCAGGGTGCAGTTCGAGTCTGGACGGATCAA  
+HWI-EAS443:3:68:1479:145#0/1  
abaabaa\_``a`aaaWaaa¥\_a\_``\_Q`\_^S^aaWTG^\_  
@HWI-EAS443:3:68:147:187#0/1  
GATGGCTCTTCAATTGTTTCATCAAAGACTACAGATACACA  
+HWI-EAS443:3:68:147:187#0/1  
a`aaa`\_a\_a\_aa\_a¥]\_XZ\_ZH\_\_ZZ\_]\_^U^^Z]]^^`  
@HWI-EAS443:3:68:1498:470#0/1  
GGGCTCCAATCATCCGACGATTTTGCTCTCATAGTGAATG  
+HWI-EAS443:3:68:1498:470#0/1  
aaba\_aaaaa\_¥^`\_XY\_a`\_aa\_a\_`[a¥`^`^`]]YV  
@HWI-EAS443:3:68:1545:1514#0/1  
GGAGCATTTGCGAAAAGCTTGAACAGTCTGGGCTCCCAGT  
+HWI-EAS443:3:68:1545:1514#0/1  
^]Z]`]]]aaaa`\_a`aaa\_]aaZ\_`\_\_\_\_]¥]RX[H  
@HWI-EAS443:3:68:1549:1648#0/1  
GTTTCGAGAGTAAAAGAATGAAGATTCGAACACAAATACCA  
+HWI-EAS443:3:68:1549:1648#0/1  
aabbb\_baaaaabaabbbbbbaa`ba\_aababab`aaa\_\_a  
@HWI-EAS443:3:68:1560:668#0/1  
AGCTGATTCATTTACTCCAGACACTCCAAAGCTGGGTAGC  
+HWI-EAS443:3:68:1560:668#0/1  
aab`a`aaa`aa]```aa`\_]`a]\_`aW[``\_^a[[]X\_\_]  
@HWI-EAS443:3:68:1615:1089#0/1  
GGCTCCAATCATCCGACGATTTTGCTCTCATAGTGAATGC  
+HWI-EAS443:3:68:1615:1089#0/1  
a`bb]bbbbabba\_^aa^aab`b`abab^`aaa]baaa\_V  
@HWI-EAS443:3:68:161:1119#0/1  
CAGCTGATTCATTTACTCCAGACACTCCAAAGCTGGGTAG  
+HWI-EAS443:3:68:161:1119#0/1  
aaaaaabaabbaaa]aab`a\_aaab\_a`¥QZY[¥\_\_YQ\_U  
@HWI-EAS443:3:68:1631:1692#0/1  
GGTGGGATGGGCTCCAATCATCCGACGATTTTGCTCTCAT  
+HWI-EAS443:3:68:1631:1692#0/1  
a`Waaa\_aaa¥a````a`Xa^\_aa\_¥a\_\_a^Z`\_^¥^[^X  
@HWI-EAS443:3:68:1680:1213#0/1  
CGACTCTACTTTTCTAAAAATTCCAGCGCAAATGCCAT  
+HWI-EAS443:3:68:1680:1213#0/1  
\_bb\_bbabb`aabbVb`abbb`aY[a```a\_^`aa]RUab  
@HWI-EAS443:3:68:1727:1421#0/1  
TTTGTGTGTCTCCCCTATGGCACCTATATGTGTATCTGTA  
+HWI-EAS443:3:68:1727:1421#0/1  
abaa[babaaaYaa`]a\_^^]`^`a`a\_\_S[\_]\_\_[\_]¥]  
@HWI-EAS443:3:68:176:418#0/1  
ATTTGCCAGTTTGGCCTTCTTTTCATTGCCCCCTACTGGG

+HWI-EAS443:3:68:176:418#0/1  
a`aa`abaa]\_aa`aa\_]`aa`a\_\_\_^`a`a[U[ZW\_U¥  
@HWI-EAS443:3:68:176:490#0/1  
ATGGAATATGATGCCGTTGCAACTACACATTCCTGGATTC  
+HWI-EAS443:3:68:176:490#0/1  
a]^MXU\_[`a`a]TVU]¥XZ`YJZ`]^`aaaY^¥Z\_\_`^  
@HWI-EAS443:3:68:181:1183#0/1  
GAGGGAATACAAGCAGGAGTGGACAGATTCTACAGGACCT  
+HWI-EAS443:3:68:181:1183#0/1  
abbb`a`\_baab\_baaaa`\_\_aa]`]WWa\_\_]`\_\_[W\_`V  
@HWI-EAS443:3:68:197:991#0/1  
ATTTGAGTTAAAGAAGCTGTGGGATCAAACCAATCAAAG  
+HWI-EAS443:3:68:197:991#0/1  
]^b^bY\_Y^b\_NSVaa`¥`Zaa\_WZ\_^aa[ZR\_¥ZHU^\_\_  
@HWI-EAS443:3:68:237:455#0/1  
AACCAAGTGGGTATGCACAAACAGACTGTGTTCTAGAGGC  
+HWI-EAS443:3:68:237:455#0/1  
^`aQJ^]X`ZWQabaS\_U^YTXxa\_PS\_R`XBBBBBBBBB  
@HWI-EAS443:3:68:23:924#0/1  
GTAGAATCTGTCCACTCCTGCTTGTATTCCCTCATGGTTT  
+HWI-EAS443:3:68:23:924#0/1  
a^aaZ`aaaa]`aa\_`\_`\_\_`\_a][`\_\_`aa]`]^`RU^^  
@HWI-EAS443:3:68:247:1876#0/1  
CTGGAGTAAATGAATCAGCTGACATGAGTATTGGAGTAAC  
+HWI-EAS443:3:68:247:1876#0/1  
aa`Z`aU`aa`a`a`^`¥Z`^Y]^`a^W`¥Y`^^[X]WX\_`¥  
@HWI-EAS443:3:68:272:1538#0/1  
ATTGAAGTACTTCAGGTCAATGCTTGCTAGCATTCTGCT  
+HWI-EAS443:3:68:272:1538#0/1  
a][aX¥]ZY^¥`a``UK[`\_[^aWW[a]`X]\_]`¥¥^`Y  
@HWI-EAS443:3:68:273:1676#0/1  
CTTCCCTATTGTTCTTTGCGTGACCATCTTCTTGGTCATG  
+HWI-EAS443:3:68:273:1676#0/1  
ab`bb`\_``aa]a`aaa]a^¥\_`a]^`a`\_`\_``[Y`\_\_`  
@HWI-EAS443:3:68:280:521#0/1  
AATATGATGCCGTTGCAACTACACATTCCTGGATTCCTCAA  
+HWI-EAS443:3:68:280:521#0/1  
ISZ\_b`W\_^b``QVZ\_R]\_a\_aaa\_Y^a`¥ZaYX`VYV¥U  
@HWI-EAS443:3:68:33:1297#0/1  
GAGCATGGCACCATAATGTTCTCAAACAAAATGGCAAGA  
+HWI-EAS443:3:68:33:1297#0/1  
ab`bbb``bbbbbaa]aa\_aabaaaaaaZaaa\_`\_]a`  
@HWI-EAS443:3:68:33:2045#0/1  
AAAAATTCCAGCGCAAATGCCATAAGCACCATTCCT  
+HWI-EAS443:3:68:33:2045#0/1  
a^W`\_`^^aa^^`[]a¥\_`^Y^]]]^YT`U]^`^ZZXZZZ  
@HWI-EAS443:3:68:363:1904#0/1  
GTGGAGGCCATGGTGTCTAGGGCCCGGATTGATGCCAGGG  
+HWI-EAS443:3:68:363:1904#0/1  
\_\_\_¥`UU```UX\_FSR^FZ¥^S¥a]¥¥BBBBBBBBBBBBB

@HWI-EAS443:3:68:366:689#0/1  
ACCTATATGTGTATCTGTAGTCTTTGATGAACAATTGAAG  
+HWI-EAS443:3:68:366:689#0/1  
abaaaa`aa\_b^X^aba^`a^`ab\_aa`\_a\_] [[`^T^aY  
@HWI-EAS443:3:68:371:1674#0/1  
AGCATTTCGAAAAGCTTGAACAGTCTGGGCTCCCAGTAG  
+HWI-EAS443:3:68:371:1674#0/1  
a`aa`aa\_a\_\_a¥aaa\_\_^`¥`\_\_Ua]YY¥\_¥\_\_¥¥\_V\_¥  
@HWI-EAS443:3:68:371:215#0/1  
CATTTCGATCTAAAGACTTCTATGGTGTGGCCAATGCAGT  
+HWI-EAS443:3:68:371:215#0/1  
abaaaba`aaT\_a]\_`aY\_]\_aZZ[\_\_\_\_`V[¥ZW\_]Y^]  
@HWI-EAS443:3:68:395:898#0/1  
AAGAGACAACATGACCAAGAAGATGGTCACGCAAAGAACA  
+HWI-EAS443:3:68:395:898#0/1  
\_Y`abbabbaaaba¥^aaaa\_\_aaY\_^``` [ ]\_\_^]`W  
@HWI-EAS443:3:68:421:365#0/1  
AGCTGATTCATTTACTCCAGACACTCCAAAGCTGGGTAGC  
+HWI-EAS443:3:68:421:365#0/1  
``a`bbbabbab\_aabaa\_ab`ab]aaaa^a`a`W\_`¥  
@HWI-EAS443:3:68:422:234#0/1  
CATGACCAAGAAGATGGTCACGCAAAGAACAATAGGGAAG  
+HWI-EAS443:3:68:422:234#0/1  
] ]XYa`¥`aa\_Y]``\_YaZ`^`^¥\_W¥X^\_¥]\_^ZY]  
@HWI-EAS443:3:68:428:1909#0/1  
GAACTGCTAGGGAAAAATTTCTCGAATAGATTGCAGCACT  
+HWI-EAS443:3:68:428:1909#0/1  
\_aTab`abb`¥\_bb`b^bbbabaaaZ[a`a`a`baa\_aaa  
@HWI-EAS443:3:68:505:360#0/1  
GTTCTTTATCACTGTTACTCCAATACTCATGTCAGCTGAT  
+HWI-EAS443:3:68:505:360#0/1  
a\_babbb^ababaa`aaaa`abaaaaaaaa`]aaa\_\_`\_\_  
@HWI-EAS443:3:68:52:1751#0/1  
GATTGATGCCAGGGTCGACTTCGAGTCTGGACGGATCAAG  
+HWI-EAS443:3:68:52:1751#0/1  
[HX[Za`]baaY[^YaW\_\_Q^]Z]P[`Y¥ZY\_]\_XXV^\_Y  
@HWI-EAS443:3:68:566:864#0/1  
CAGCTGATTCATTTACTCCAGACACTCCAAAGCTGGGTAG  
+HWI-EAS443:3:68:566:864#0/1  
abb\_bb`babVbbb[\_baaa\_]bba`aaba\_^[^a^\_Wa`  
@HWI-EAS443:3:68:58:128#0/1  
CAACATGATAAACAATGACCTTGGACCTGCAACGGCCCAG  
+HWI-EAS443:3:68:58:128#0/1  
aVaaa[aaV^T`\_Ya\_`\_]`\_\_aQG^\_]^^\_] ]^`^^X^V  
@HWI-EAS443:3:68:610:693#0/1  
GGGCCCGGATTGATGCCAGGGTCGACTTCGAGTCTGGACG  
+HWI-EAS443:3:68:610:693#0/1  
`a`babX¥IQa\_TW\_Y]a\_YXT\_`]a]V`ZZa[Z]]\_\_^T  
@HWI-EAS443:3:68:652:762#0/1  
TGTTGTTCTTTATCACTGTTACTCCAATACTCATGTCAGC

+HWI-EAS443:3:68:652:762#0/1  
ab\_a]aab^aaa\_^S\_X\_L\_\_\_\_\_`^`^`^aaYaWRXU¥W\_  
@HWI-EAS443:3:68:667:1901#0/1  
CAGAAAAGGGAAAAGTGGACGACAAACACAGAGACTGGTGC  
+HWI-EAS443:3:68:667:1901#0/1  
aa\_[a\_a`a\_\_\_\_aXPZ``a`a`aa``\_a`\_]X\_WWVKHR^  
@HWI-EAS443:3:68:681:1729#0/1  
GTAAGAGACAACATGACCAAGAAGATGGTCACGCAAAGAA  
+HWI-EAS443:3:68:681:1729#0/1  
aaaba`a\_bbaa`\_aaa\_^aaaa\_a`a`]aa]`^^^`\_\_\_\_  
@HWI-EAS443:3:68:68:1243#0/1  
GAAGATTCGAACACAAATACCAGCAGAAATGCTAGCAAGC  
+HWI-EAS443:3:68:68:1243#0/1  
\_`^¥`\_bbbb`[\_`b``T]`^`]`abaa\_X`aaaa¥aaaZ`b  
@HWI-EAS443:3:68:698:826#0/1  
GATTCCATTACATCCTTTAAGAAATCTATTAGCCTTCCTG  
+HWI-EAS443:3:68:698:826#0/1  
abaaabaaabaaa`aaaaaaaa`a`[\_`\_``a`\_`a``a  
@HWI-EAS443:3:68:713:1980#0/1  
CAATCCGACTCTACTTTTCTAAAAATCCAGCGCAAAT  
+HWI-EAS443:3:68:713:1980#0/1  
aababbaaaab`aaaaabaababaaa`aaaabaaaaa`  
@HWI-EAS443:3:68:745:111#0/1  
CTTGGGAGTCTCGATACTGAATCTTGGACAAAAGAAATAC  
+HWI-EAS443:3:68:745:111#0/1  
`abbbba`abba\_abbbba`abbbba``\_`a^\_S`]\_`a\_Z  
@HWI-EAS443:3:68:778:1358#0/1  
GCAGATTAGAGTTTTCGTATACTTTGTTGAACTTTAGCT  
+HWI-EAS443:3:68:778:1358#0/1  
ab]]Y``Z]ZZa\_babaaa^b^\_a^`a¥`a`^`aa\_\_^`¥  
@HWI-EAS443:3:68:779:1016#0/1  
CCGGCAGCAACTGCATTGGCCAACACCATAGAAGTCTTTA  
+HWI-EAS443:3:68:779:1016#0/1  
ab^Yaa`^^`\_Z]`Z`UY^¥^^`][a^[a^aaa`Y[\_`a`\_  
@HWI-EAS443:3:68:786:1974#0/1  
CTTCTTTTTAAGTTGCCTCTCTCTGCATCTTTGGTCATCG  
+HWI-EAS443:3:68:786:1974#0/1  
a`¥aaa`aaaaa`Y¥a`a^a\_a^\_a`]`\_\_\_\_\_]X`^\_^^  
@HWI-EAS443:3:68:79:333#0/1  
ATCCCTCATGGTTTGGTGCATTCATATGAGAGCAAAT  
+HWI-EAS443:3:68:79:333#0/1  
S^b\_RUZ\_bZba\_a¥T[\_a[HX\_a]]^\_b``\_¥UXa\_a]  
@HWI-EAS443:3:68:816:1071#0/1  
GTGTGTTCTGTTTACTGTGTCCATGGTGTATCCTGTTCCCT  
+HWI-EAS443:3:68:816:1071#0/1  
a¥aZZ^aaa\_aaa¥`^a\_\_Yaaa`¥U[¥a\_\_\_\_]`U]]\_\_  
@HWI-EAS443:3:68:826:1332#0/1  
AAAAATCCAGCGCAAATGCCATAAGCACCATTCCT  
+HWI-EAS443:3:68:826:1332#0/1  
aaaYZ\_[R\_XMZ^¥`^[\_]^X\_Z¥]^ZZ]^]]]W\_^^Z]]Z

@HWI-EAS443:3:68:827:1851#0/1  
GTCCTCCATCTGATACTAATAGCCCTACCTTTGATTGGGT  
+HWI-EAS443:3:68:827:1851#0/1  
a`ababbbb\_aaa¥aa`aa\_a``\_`^``\_aa^``^Z^^^¥  
@HWI-EAS443:3:68:852:1515#0/1  
GGCTAATTTTAGCATGGAGCTACCCAGCTTTGGAGTGTCT  
+HWI-EAS443:3:68:852:1515#0/1  
¥^ba`¥`\_`bba`¥¥a`¥bb`^```bbbaaaa]a[^`Zab  
@HWI-EAS443:3:68:878:1851#0/1  
TCCCAGGTGTTGCGATAGCCCTTCTTTTTAACTTGCCTCT  
+HWI-EAS443:3:68:878:1851#0/1  
ababa\_U\_aabab`]Xa\_aabaaabaaa``\_a`aa`aaa  
@HWI-EAS443:3:68:891:640#0/1  
GATTGATGCCAGGGTCGACTTCGAGTCTGGACGGATCAAG  
+HWI-EAS443:3:68:891:640#0/1  
`a\_a`b``\_¥\_`^`aW]a`V^`a¥`Z`\_aaSua[FRY^YN  
@HWI-EAS443:3:68:900:834#0/1  
GGATTCCCAAGAGGAATCGTTCTATTCTCAACACAAGCCA  
+HWI-EAS443:3:68:900:834#0/1  
ab\_aabbbb`¥aab`\_`b^a``\_aaaabaaa¥a]``]a  
@HWI-EAS443:3:68:902:1630#0/1  
TTCGAACACAAATACCAGCAGAAATGCTAGCAAGCATTGA  
+HWI-EAS443:3:68:902:1630#0/1  
aaaaa`abaabbaa^a`¥abY[K^aa`]a`aa`Xa`\_]¥a  
@HWI-EAS443:3:68:978:1337#0/1  
CACCCAGGAATATTTGAGAATTCATGCCTTGAACAATGG  
+HWI-EAS443:3:68:978:1337#0/1  
abbaaaaaaab`aaaababaa\_aaaaa\_\_\_a``\_`^a¥`\_`[  
@HWI-EAS443:3:68:999:338#0/1  
GTGGGATGGGCTCCAATCATCCGACGATTTTGCTCTCATA  
+HWI-EAS443:3:68:999:338#0/1  
a\_bab¥]a\_a`\_a¥\_\_`Q``]`^`W¥\_`^`\_`^`¥^Y`\_`¥^Y^  
@HWI-EAS443:3:69:1075:169#0/1  
GCAAGTAAAAAGAAGGGCTATCGCAACACCTGGGATGCA  
+HWI-EAS443:3:69:1075:169#0/1  
aa^``\_a]aa`]``\_\_\_a^Z`\_`^`\_]`[ZPZV[¥^¥VV[[W[  
@HWI-EAS443:3:69:1079:1500#0/1  
ATTGGTGTGTTCTGTTTACTGTGTCCATGGTGTATCCTGT  
+HWI-EAS443:3:69:1079:1500#0/1  
W\_b`Sa\_U`\_`¥aWZV\_T`bbZ`\_`\_a\_ZZ\_H\_R^¥YU\_\_¥  
@HWI-EAS443:3:69:1083:1161#0/1  
CCCCAGTGATTGTGAAAGAAATCTCTGTGTCTTGTGAATT  
+HWI-EAS443:3:69:1083:1161#0/1  
aaabab\_baaab^a`aaaaaaa`aa`a^\_\_\_`a¥Z^X\_\_\_  
@HWI-EAS443:3:69:1088:1131#0/1  
AGCATTTGCGAAAAGCTTGAACAGTCTGGGCTCCCAGTAG  
+HWI-EAS443:3:69:1088:1131#0/1  
ab`bbaabbaaaa¥b`a`aaa\_a`^aaa`P`^aa`\_a¥`\_`  
@HWI-EAS443:3:69:1113:178#0/1  
GTGTGTTCTGTTTACTGTGTCCATGGTGTATCCTGTTCCT

+HWI-EAS443:3:69:1113:178#0/1  
a^a%aV`a`a^`a^\_`Z`VYR\_[\_`V\_V^[WWW\_VUVW[  
@HWI-EAS443:3:69:1125:1515#0/1  
TAGAACGATTCCTCTTGGAATCCAGGAATGTGTAGTTGC  
+HWI-EAS443:3:69:1125:1515#0/1  
¥\_ZXV]]\_`a¥[XZY¥XNQOX^`ZUYO[a[RL¥ORWUQSY  
@HWI-EAS443:3:69:1137:345#0/1  
ACTTGCAGGTCCTGTAGAATCTGTCCACTCCTGCTTGTAT  
+HWI-EAS443:3:69:1137:345#0/1  
aaaaa`a`a`\_aa]\_`\_aa[\_a\_Z¥\_¥[T^[Z[\_``]\_`\_  
@HWI-EAS443:3:69:1199:1317#0/1  
GTCTAGGGCCCAGGATTGATGCCAGGGTCGACTTCGAGTCT  
+HWI-EAS443:3:69:1199:1317#0/1  
``bZWWZ`\_Y]`a¥Z`¥TQ`^¥]Z`U`^[TZYRSY[Y^\_  
@HWI-EAS443:3:69:1208:1575#0/1  
GACGGATCAAGAAAGAAGAGTTCTCTGAGATCATGAAGAT  
+HWI-EAS443:3:69:1208:1575#0/1  
ZS]b`WT\_Y]bWSVJ]W^^aU\_`Z\_aSOTSS]`TaRHZNG  
@HWI-EAS443:3:69:1225:38#0/1  
GAAATGCTAGCAAGCATTGACCTGAAGTACTTCAATGAAT  
+HWI-EAS443:3:69:1225:38#0/1  
\_AY`baaab^^`H¥`a`T^^[a]Xa%a^\_`¥]a^¥\_^[  
@HWI-EAS443:3:69:1250:18#0/1  
GGTCGACTTCGAGTCTGGACGGATCAAGAAAGAAGAGTTC  
+HWI-EAS443:3:69:1250:18#0/1  
ab^`baaa`¥``b\_\_ab`\_\_ba`^^`a\_\_^a\_\_\_Y`¥\_]`  
@HWI-EAS443:3:69:1266:1693#0/1  
TGCATTCATATGAGAGCAAAATCGTCGGATGATTGGAGC  
+HWI-EAS443:3:69:1266:1693#0/1  
aaaaaaaaab`aabaaa`a\_a`aaaaa^`\_`\_\_\_\_`\_`\_]]^\_]`  
@HWI-EAS443:3:69:1280:803#0/1  
GTAATGCCAGCCCATGGTCCAGCCAAAAGCATGGAATATG  
+HWI-EAS443:3:69:1280:803#0/1  
aaaaaaa`aa\_aa`aa`W`[\_```a^\_\_^`a¥¥\_\_``\_a\_`  
@HWI-EAS443:3:69:1295:620#0/1  
GGCTCCAATCATCCGACGATTTTGTCTCATAGTGAATGC  
+HWI-EAS443:3:69:1295:620#0/1  
`a]Qaa```aa[\_`\_a¥a¥a^`\_`a^\_`^Y[V]¥PX[^aV  
@HWI-EAS443:3:69:1327:106#0/1  
GGCTAATTTTAGCATGGAGCTACCCAGCTTTGGAGTGTCT  
+HWI-EAS443:3:69:1327:106#0/1  
a¥Rab`b\_baa]aabaaUbaba^\_V\_b\_aaa^¥ZaX`\_\_a`  
@HWI-EAS443:3:69:134:432#0/1  
GGGCTCCAATCATCCGACGATTTTGTCTCATAGTGAATG  
+HWI-EAS443:3:69:134:432#0/1  
abababbbaab`aaaa\_a`\_aaaaa\_a\_``\_]`\_`\_`^`  
@HWI-EAS443:3:69:1374:82#0/1  
CAGGGATTACAAAGTCTTCCCCGATAATCATCATCCATT  
+HWI-EAS443:3:69:1374:82#0/1  
abbbbbbbbbbabbbaabba\_`\_babbab\_ab`ab\_]aba



@HWI-EAS443:3:69:1399:929#0/1  
GTGATTGTGAAAGAAATCTCTGTGTCTTGTGAATTAGTCA  
+HWI-EAS443:3:69:1399:929#0/1  
aT`ZUZ`WYY`\_\_UZ¥`Z^Z\_XOWQX\_] [[¥PYY¥0¥WQN  
@HWI-EAS443:3:69:1414:1478#0/1  
ATTTGCCAGTTTGGCCTTCTTTTCATTGCCCTACTGGG  
+HWI-EAS443:3:69:1414:1478#0/1  
a\_\_\_\_\_aaaa`aa\_\_a\_a`]aaaa\_a`\_]W^U¥\_\_^¥¥¥[U  
@HWI-EAS443:3:69:1467:511#0/1  
CAGGAATATTTGAGAATTCATGCCTTGAAACAATGGAAGT  
+HWI-EAS443:3:69:1467:511#0/1  
`abbbZSPPa¥W\_J¥`aSPbSGO¥b^[aa]^VL^aYa\_[  
@HWI-EAS443:3:69:1482:1005#0/1  
AGGGGGCAATGAAAAGAAGCCAAACTGGCAAATGTTGTG  
+HWI-EAS443:3:69:1482:1005#0/1  
ab`]b^a\_aaZaaa\_^^^a`\_aaa`ab`\_a`aaa\_aa^a  
@HWI-EAS443:3:69:1490:1713#0/1  
CCCATTTTAAGCAGACTTCAGGAATGTGAAGATTCCGTAT  
+HWI-EAS443:3:69:1490:1713#0/1  
aaba^^bab`Y\_`]ba¥^\_\_a[`W]VMa\_aa\_`XZbX`\_  
@HWI-EAS443:3:69:1533:667#0/1  
AGCCTCTCTTATTTCAGTCTTTGTTTTTTCTTCCCTATTGT  
+HWI-EAS443:3:69:1533:667#0/1  
¥bbaabbabb`bbabbaabbbbabbbbabba\_aaabb`  
@HWI-EAS443:3:69:1550:326#0/1  
CCCGAGTGGTTCAGAAACATCCTGAGCATGGCACCCATAA  
+HWI-EAS443:3:69:1550:326#0/1  
aabbabbbba`a\_aabbPaaa^]a\_b¥\_a\_ZW]\_0`\_`a`  
@HWI-EAS443:3:69:1555:1616#0/1  
AAACATCCTGAGCATGGCACCCATAATGTTCTCAAACAAA  
+HWI-EAS443:3:69:1555:1616#0/1  
UY¥`¥^^bb`aX¥`\_H\_a¥WOZ`\_W[\_]¥`Y`\_a\_a[[  
@HWI-EAS443:3:69:1560:1345#0/1  
GTATTTGTGTTGGAATCTTCATTCTTTTACTCTCGAACAT  
+HWI-EAS443:3:69:1560:1345#0/1  
a[`bbbb`\_aa`a``baba`\_aa\_aaa`\_`a^\_\_\_\_\_ [aa  
@HWI-EAS443:3:69:1595:78#0/1  
GCCATGGAACAGGAACAGGATACACCATGGACACAGTAAA  
+HWI-EAS443:3:69:1595:78#0/1  
aZ\_aab]`a]]Za\_\_[\_`\_\_`W¥U]\_¥Z`ZR[U^¥V^][  
@HWI-EAS443:3:69:166:17#0/1  
CGACTCTACTTTTCTAAAAATTCCAGCGCAAATGCCAT  
+HWI-EAS443:3:69:166:17#0/1  
ab`aaaaa`\_\_`bbbbbbbbbaa``aaaaaa`SV]a^a]a  
@HWI-EAS443:3:69:1697:1909#0/1  
GTGCCATGCTCAGGATGTTTCTGAACCACTCGGGTTGATT  
+HWI-EAS443:3:69:1697:1909#0/1  
`\_¥Y`\_a^]R]TVRM]ZX^W[W\_UU^VWZPX\_Y[Q[¥OZ^  
@HWI-EAS443:3:69:16:1517#0/1  
GAAATCTATTAGCCTTCCTGACTCATTAGCTGTTAGGCCA



@HWI-EAS443:3:69:545:1128#0/1  
TGAAGTACTTCAGGTCAATGCTTGCTAGCATTCTGCTGG  
+HWI-EAS443:3:69:545:1128#0/1  
^b^\_^^ba` `aaba]aa[ab`\_]W\_a`\_]\_b\_` `` `a\_^] `a  
@HWI-EAS443:3:69:605:1899#0/1  
TTGGTGTGTTCTGTTTACTGTGTCCATGGTGTATCCTGTT  
+HWI-EAS443:3:69:605:1899#0/1  
XQ\_[PR[a[aa`Z[ZaY`X[\_`PYZ¥[WWP¥HXSr`aPZ¥  
@HWI-EAS443:3:69:649:1710#0/1  
GTCCTCCATCTGATACTAATAGCCCTACCTTTGATTGGGT  
+HWI-EAS443:3:69:649:1710#0/1  
aaabaa` `baa`aaaabbbbaa`aaaa`aaaa]a`a¥\_]`  
@HWI-EAS443:3:69:688:238#0/1  
CCTTTGGCTTGTGTTGAGAATAGAACGATTCCTCTTGGGA  
+HWI-EAS443:3:69:688:238#0/1  
aabbbbabaa` `abaaaaabaabaaaaa¥aa\_`aa\_`^  
@HWI-EAS443:3:69:743:163#0/1  
TGGGCTCCAATCATCCGACGATTTTGCTCTCATAGTGAAT  
+HWI-EAS443:3:69:743:163#0/1  
¥W\_WZ^]b^^^b` `[¥][TZQXaaZXZa^^¥\_a]NZ`\_Y  
@HWI-EAS443:3:69:748:1163#0/1  
AGATGGCACAGCATCACTGAGTCCTGGGATGATGATGGGC  
+HWI-EAS443:3:69:748:1163#0/1  
]S¥ab[aZa]I` `aaYT]QV¥Q¥PTXaVZWYUPL\_`\_OFT  
@HWI-EAS443:3:69:750:1230#0/1  
CTCTGCATCTTTGGTCATCGTATTTAATGTCAGTGCTCTT  
+HWI-EAS443:3:69:750:1230#0/1  
aaaVaaY`aaaaY^P^a` ` \_VP`a\_]\_\_SM\_] ^W]VT^¥  
@HWI-EAS443:3:69:750:277#0/1  
ATTGTATAAGTTTGGTCCTCCATCTGATACTAATAGCCCT  
+HWI-EAS443:3:69:750:277#0/1  
abab` bbbab\_bbaa`aaaaaaaaabaaa`aa`aaa[\_`a  
@HWI-EAS443:3:69:760:767#0/1  
GTGGGATCAAACCAATCAAAGGTAGGGCTATTAGTATCA  
+HWI-EAS443:3:69:760:767#0/1  
a`baa`aaaaabaa\_baa[`aa^aa\_\_\_aaa` `\_^` `^  
@HWI-EAS443:3:69:76:1602#0/1  
GCCTCTTCTAATAGATGGCACAGCATCACTGAGTCCTGGG  
+HWI-EAS443:3:69:76:1602#0/1  
Uaa\_a\_\_b¥aa¥ZV¥UZUa` `babbaba¥\_a]]Y\_[HYQV  
@HWI-EAS443:3:69:797:145#0/1  
AATGAACCAAGTGGGTATGCACAAACAGACTGTGTTCTAG  
+HWI-EAS443:3:69:797:145#0/1  
a\_`^]]¥ZT¥WU^\_¥KXYW^Y^YWQZXXX[SMXUBBBBB  
@HWI-EAS443:3:69:821:1066#0/1  
GTGGGATTCTTCAAGGAAAGCCATAGCCTCTAGAACACAG  
+HWI-EAS443:3:69:821:1066#0/1  
a)` `a¥aaba`\_]¥[^aa`]` `a]¥\_ [¥¥\_ZWVX`^\_\_YU  
@HWI-EAS443:3:69:823:1922#0/1  
AACAGATCTTCATGATCTCAGAGAACTCTTCTTTCTTGAT

+HWI-EAS443:3:69:823:1922#0/1  
a\_baaa\_aa`aaa`a\_aaa`[\_[a`a\_\_\_\_\_`\_```\_\_\_\_a\_  
@HWI-EAS443:3:69:866:489#0/1  
CAAGAAAGAAGAGTTCTCTGAGATCATGAAGATCTGTTCC  
+HWI-EAS443:3:69:866:489#0/1  
aba\_aaaaabaab`a`aaa`a`\_`a`aaa\_aa\_^`a\_\_\_]X  
@HWI-EAS443:3:69:866:581#0/1  
CAAGAATTCCCCTTTGGCTTGTGTTGAGAATAGAACGATT  
+HWI-EAS443:3:69:866:581#0/1  
```a\_aa\_bYaaaaa]T]\_`KVUZ¥¥\_`ZZ[aM\_P[a\_]Y  
@HWI-EAS443:3:69:870:1263#0/1  
CTCAAATATTCCTGGTGGGATTCTTCAAGGAAAGCCATA  
+HWI-EAS443:3:69:870:1263#0/1  
XS^Z¥Sa`^`[bX^abQ][b]]ab`a`\_]\_\_TRba\_^bab  
@HWI-EAS443:3:69:898:1637#0/1  
GACTCGAAGTCGACCCTGGCATCAATCCGGGCCCTAGACA  
+HWI-EAS443:3:69:898:1637#0/1  
aV^`aaa\_aH`X`ZaZ`VZ`\_Xa`a^``]X`]a¥]\_`^`  
@HWI-EAS443:3:69:910:749#0/1  
CTTTTCCTAAAAATTCCAGCGCAAATGCCATAAGCACCA  
+HWI-EAS443:3:69:910:749#0/1  
abbbbbbbbbbbbbbbbbbb`bbaYabbbabbbabababab  
@HWI-EAS443:3:69:932:1691#0/1  
CAACTACACATTCTGGATTCCCAAGAGGAATCGTTCTAT  
+HWI-EAS443:3:69:932:1691#0/1  
aaaa`aab`a`^a`]XG\_]\_a\_a\_`\_\_`[\_¥^`^]\_^`\_`  
@HWI-EAS443:3:69:954:984#0/1  
ATGGGCTCCAATCATCCGACGATTTTGCTCTCATAGTGAA  
+HWI-EAS443:3:69:954:984#0/1  
a^`abbaba\_^^`^`Z`\_````a`Z```]`a]Q]^a  
@HWI-EAS443:3:69:958:584#0/1  
GGGAAAGGGTACATGTTGAGAGTAAAAGAATGAAGATTC  
+HWI-EAS443:3:69:958:584#0/1  
aaaaaaaaaXa`aaa^a`a\_a\_a\_aa\_`\_\_`a`^\_\_a^^  
@HWI-EAS443:3:69:980:1517#0/1  
CAAAGAGGAAATAGAGATAACAACCCACTTTCAAAGAAAA  
+HWI-EAS443:3:69:980:1517#0/1  
abaabaaba]^`a[baba]^`^`Xaabab\_\_¥\_aa\_a\_aa`  
@HWI-EAS443:3:6:1000:751#0/1  
CTTTTGTCCAAGATTCAGTATCGAGACTCCAAGACCGTA  
+HWI-EAS443:3:6:1000:751#0/1  
abbbbbbbbbbbbbbbbbbbbaabbabaa\_`bbaabbab  
@HWI-EAS443:3:6:1053:17#0/1  
ACAAGAGGAAATAGAGATAACAACCCACTTTCAAAGAAA  
+HWI-EAS443:3:6:1053:17#0/1  
ab\_ba]\_`a[`a`^bbaaba\_]a`[WPa\_aaaW]a\_b]\_a  
@HWI-EAS443:3:6:106:1229#0/1  
CCCATTTTAAGCAGACTTCAGGAATGTGAAGATTCCGTAT  
+HWI-EAS443:3:6:106:1229#0/1  
abb\_bbbabababbaabababb`aaaaba`baaa^bbaaa

@HWI-EAS443:3:6:1129:323#0/1  
CTCTATTTCTCTTTGTTTCATTGATTCCATTACATCCTTT  
+HWI-EAS443:3:6:1129:323#0/1  
aaPbbb`aaWa¥bbbbWa^bbXbabbT]bba`H[baaaba  
@HWI-EAS443:3:6:1140:87#0/1  
AGAAAAACAAAGACTGAATAAGAGAGGCTATCTAATAAG  
+HWI-EAS443:3:6:1140:87#0/1  
ababbaaaaa`aba¥bb``baaa`a\_ba¥aaPU\_W^UBBB  
@HWI-EAS443:3:6:116:1325#0/1  
CTTCTTTGTTGATTGATTGAAGTACTTCAGGTCAATGCTT  
+HWI-EAS443:3:6:116:1325#0/1  
abaabbbaabbaaaaba\_aaaa^a```baba^aa`aaa`a  
@HWI-EAS443:3:6:1171:229#0/1  
TGGACGACAAACACAGAGACTGGTGCACCCCAGCTCAACC  
+HWI-EAS443:3:6:1171:229#0/1  
`b\_aaaa`a`V¥R[b¥]`TYa]P¥S[ROKS`¥Y¥X`UBB  
@HWI-EAS443:3:6:1237:898#0/1  
TCCCAGGTGTTGCGATAGCCCTTCTTTTTAACTTGCCTCT  
+HWI-EAS443:3:6:1237:898#0/1  
aa¥RV`a`a`\_aa]]a`aIVZ\_ZMaaa[\_^\_Z[\_ZXaX^  
@HWI-EAS443:3:6:123:22#0/1  
CAGTCTCTGTGTTTGTCTCCACTTTCCCTTTTCTGAGTA  
+HWI-EAS443:3:6:123:22#0/1  
ab`bbaab]a\_aa]\_`Z\_\_\_X¥`a^]\_^\_aR`SX`UU  
@HWI-EAS443:3:6:1243:1929#0/1  
CATGTCAGCTGATTCACTTACTCCAGACACTCCAAAGCTG  
+HWI-EAS443:3:6:1243:1929#0/1  
\_bbbbbbbab`bbbbbbbbbabbbb\_bbbbaaabbbb[bb  
@HWI-EAS443:3:6:1274:1181#0/1  
GGCCCGGATTGATGCCAGGGTCTGACTTCGAGTCTGGACGG  
+HWI-EAS443:3:6:1274:1181#0/1  
`\_abbbbbbbabb]bb`bab¥ab]aba¥baaaaaaaaaaba  
@HWI-EAS443:3:6:1277:607#0/1  
GGATTGATGCCAGGGTCTGACTTCGAGTCTGGACGGATCAA  
+HWI-EAS443:3:6:1277:607#0/1  
ab[\_^`^^]RMW^[aWwoQQ[XR]S¥WU[X`WR^¥¥^BBB  
@HWI-EAS443:3:6:1308:2016#0/1  
CAGTGATTGTGAAAGAAATCTCTGTGTCTTGTGAATTAGT  
+HWI-EAS443:3:6:1308:2016#0/1  
`U^^aaabbVabaabba`Y^Uba`\_ZTaa¥aa¥^a`S\_`  
@HWI-EAS443:3:6:1380:536#0/1  
GATTCTTCAAGGAAAGCCATAGCCTCTAGAACACAGTCTG  
+HWI-EAS443:3:6:1380:536#0/1  
¥OV]]`¥V^]V]^`Za\_^\_``\_¥T¥¥\_X[XPDT]WUBBBB  
@HWI-EAS443:3:6:1391:1803#0/1  
CAGTGATTGTGAAAGAAATCTCTGTGTCTTGTGAATTAGT  
+HWI-EAS443:3:6:1391:1803#0/1  
aZ`^bbbbbbXaba\_T\_abaVbLab]¥]abb]a`aaa``\_`  
@HWI-EAS443:3:6:1397:1139#0/1  
CTTTGTAATCCCCTGAATCCCCTTTGTCAGTCATAAAGAGA

+HWI-EAS443:3:6:1397:1139#0/1  
aabbbbbbbb\_aab\_bab\_bbbbab`abab]`babaa`bb  
@HWI-EAS443:3:6:1400:454#0/1  
TAGGAGCATTTCGCGAAAAGCTTGAACAGTCTGGGCTCCCA  
+HWI-EAS443:3:6:1400:454#0/1  
a\_`aa\_aaa]aZa\_`¥\_¥QZ`¥¥V¥`UU`¥^`WWWsBB  
@HWI-EAS443:3:6:141:1722#0/1  
AGGAAATAGAGATAACAACCCACTTTCAAAGAAAAAGGAG  
+HWI-EAS443:3:6:141:1722#0/1  
abb`aaaaabababbbba`aabaaaa`aaaa\_aa\_^aa`  
@HWI-EAS443:3:6:1433:182#0/1  
CATCATCATCCAGGACTCAGTGATGCTGTGCCATCTATT  
+HWI-EAS443:3:6:1433:182#0/1  
`baaba\_bba[`aaa`\_a`aRZ`^¥`¥\_SR^[R^\_\_B  
@HWI-EAS443:3:6:1471:1681#0/1  
CACAGAGATTTCTTTCACAATCACTGGGGACAACACTAAG  
+HWI-EAS443:3:6:1471:1681#0/1  
aaLa\_`babab¥a`aa`baba¥Zbbaabb\_abbaXa\_^`  
@HWI-EAS443:3:6:1484:386#0/1  
GGAGCATTTCGCGAAAAGCTTGAACAGTCTGGGCTCCCAGT  
+HWI-EAS443:3:6:1484:386#0/1  
aa`ba\_a`Ua¥aa`a]`a\_\_\_\_\_`[[W\_\_WaN\_ZUuw\_V  
@HWI-EAS443:3:6:1508:1402#0/1  
GCTCCAATCATCCGACGATTTTGCTCTCATAGTGAATGCA  
+HWI-EAS443:3:6:1508:1402#0/1  
a^U]`¥[[U¥^ZY\_]T`YZ[X^[V¥U^Y^]^[U\_[IT]XB  
@HWI-EAS443:3:6:1514:1286#0/1  
TATGAGAGCAAAATCGTCCGATGATTGGAGCCCATCCCAC  
+HWI-EAS443:3:6:1514:1286#0/1  
a[aa\_aX^PaYZ[^P`[Y]a^LV\_`[aYMVUXU[XPRBBB  
@HWI-EAS443:3:6:1573:1360#0/1  
GTCCTCCATCTGATACTAATAGCCCTACCTTTGATTGGGT  
+HWI-EAS443:3:6:1573:1360#0/1  
aaTT]X[aaXab]aaabb`a\_TVQ]^Z\_a\_a`\_¥]`]]  
@HWI-EAS443:3:6:1579:973#0/1  
ATCGCAACACCTGGGATGCAGATTAGAGTTTCGTATACT  
+HWI-EAS443:3:6:1579:973#0/1  
ababaaa`aT[b\_aaaaa\_aa\_a`\_\_a`Zaa\_a^\_a\_X^  
@HWI-EAS443:3:6:1581:404#0/1  
ATTGATGCCAGGTTCGACTTCGAGTCTGGACGGATCAAGA  
+HWI-EAS443:3:6:1581:404#0/1  
aa`aUaaaJaQ]^¥WV]VT¥VGW`¥M^TaYR[^¥GG¥\_U\_  
@HWI-EAS443:3:6:1697:938#0/1  
ATTCGATCTAAAGACTTCTATGGTGTGGCCAATGCAGTT  
+HWI-EAS443:3:6:1697:938#0/1  
abbab\_a\_ba\_aa¥]aa\_`a`a^ZJ¥aa^]]^\_aaU^`^\_  
@HWI-EAS443:3:6:189:661#0/1  
GTAGGGGGCAATGAAAAGAAGGCCAAACTGGCAAATGTTG  
+HWI-EAS443:3:6:189:661#0/1  
\_aab[[bb`aabb`Ubaaaaa`aaa\_ba\_aaaaab`ab

@HWI-EAS443:3:6:225:626#0/1  
TGGTAATGCCAGCCCATGGTCCAGCCAAAAGCATGGAATA  
+HWI-EAS443:3:6:225:626#0/1  
aa`Zaa`aa]a```\_a`\_`X^]\_\_\_\_\_][Z\_^\_^\_]Y\_  
@HWI-EAS443:3:6:257:1574#0/1  
GGATTGATGCCAGGGTCGACTTCGAGTCTGGACGGATCAA  
+HWI-EAS443:3:6:257:1574#0/1  
aa\_X]Y]\_¥a^^¥TYRa\_[¥X`VUa`WSS^\_\_\_\_\_ZPUX¥  
@HWI-EAS443:3:6:331:645#0/1  
CCCCATTGATGGACCACTACCTGAGGATAATGAACCAAGT  
+HWI-EAS443:3:6:331:645#0/1  
aabaab¥]a]S\_aa`a`aaa`a\_a\_`\_a`a\_a`^P]Q\_R  
@HWI-EAS443:3:6:340:1447#0/1  
GTGTTCTGTTTACTGTGTCCATGGTGTATCCTGTTCTGT  
+HWI-EAS443:3:6:340:1447#0/1  
a]a¥aYaa[\_]TN)`XaZTXU`^N`ZXVPT[[U^R[UBB  
@HWI-EAS443:3:6:380:1925#0/1  
ACTGCATTGGCCAACACCATAGAAGTCTTTAGATCGAATG  
+HWI-EAS443:3:6:380:1925#0/1  
`a\_a`aa^a^\_aaa]a\_```\_\_\_\_U¥\_\_^`^]ZU`\_]\_YB  
@HWI-EAS443:3:6:425:1403#0/1  
GAGGCTATCTAATAAGAGCACTGACATTAATACGATGAC  
+HWI-EAS443:3:6:425:1403#0/1  
][`]bbV`\_Y¥`¥\_^][`Z`[[a`UIZ`[\_``^^\_\_``\_\_  
@HWI-EAS443:3:6:444:560#0/1  
TGGTGCTTATGGCATTGCGCTGGAATTTTTAGGAAAAG  
+HWI-EAS443:3:6:444:560#0/1  
aa`Pa`abaaab`\_aaa`U^\_aaab``aa\_aa\_ba^]\_`a  
@HWI-EAS443:3:6:446:462#0/1  
GAGTAAATGAATCAGCTGACATGAGTATTGGAGTAACAGT  
+HWI-EAS443:3:6:446:462#0/1  
^`¥F]bbaa`a\_a`\_[aaa\_\_a\_b\_a`ba[^aZ\_\_U]`P  
@HWI-EAS443:3:6:480:597#0/1  
CCGGATTGATGCCAGGGTCGACTTCGAGTCTGGACGGATC  
+HWI-EAS443:3:6:480:597#0/1  
aabbabbbbababab^baa\_a^aa\_a`aab`a`ba^^]  
@HWI-EAS443:3:6:506:1244#0/1  
GATTGATGGACCACTACCTGAGGATAATGAACCAAGTGGG  
+HWI-EAS443:3:6:506:1244#0/1  
a`W¥OVXa`P]P][YMWYSTNX^\_a]X^USIM^V\_BBBB  
@HWI-EAS443:3:6:521:1553#0/1  
CCGGTCTCTATATGAACTGCTAGGGAAAAATTTCTCGAA  
+HWI-EAS443:3:6:521:1553#0/1  
abbbbaa\_abb[aba\_baaab`b\_b\_aababbaa[\_^][¥aa  
@HWI-EAS443:3:6:533:1524#0/1  
GAGCACTGACATTAATACGATGACCAAAGATGCAGAGAG  
+HWI-EAS443:3:6:533:1524#0/1  
aabbbaabaabbbbaaba^aaba`aaaaa`a^abaa`a  
@HWI-EAS443:3:6:554:784#0/1  
GTGTGTTCTGTTTACTGTGTCCATGGTGTATCCTGTTCT

+HWI-EAS443:3:6:554:784#0/1  
a^\_¥RWUT^aQa]¥U[aWa]\_`Y]Y\_N`^`]^R\_]^Y^¥Y  
@HWI-EAS443:3:6:574:451#0/1  
GATTGGAGCCCATCCCACCAGTATATTGTCTTGGTGTATT  
+HWI-EAS443:3:6:574:451#0/1  
`\_\_\_\_U[`\_^Za\_]\_]Z^`Z^^]^\_\_X^`^`^X]]ZZ^  
@HWI-EAS443:3:6:575:903#0/1  
AATGAACCAAGTGGGTATGCACAAACAGACTGTGTTCTAG  
+HWI-EAS443:3:6:575:903#0/1  
a`^W][¥¥XZ`V^\_\_V\_\_\_\_]^ ^^Z]]Z^^Z]XYZ]BB  
@HWI-EAS443:3:6:606:789#0/1  
GCCGTTGCAACTACACATTCTGGATTCCCAAGAGGAATC  
+HWI-EAS443:3:6:606:789#0/1  
a`X`\_¥¥]VYPZWVZ`XX¥VYRS[^\_]YWL^UWPUY\_QMR  
@HWI-EAS443:3:6:626:798#0/1  
CAATGAACAAAGAGGAAATAGAGATAACAACCCACTTTCA  
+HWI-EAS443:3:6:626:798#0/1  
abbbbbbbabbababbaabbbbbbbbbbbbaa`b\_baa``  
@HWI-EAS443:3:6:638:1144#0/1  
TTCCATTACATCCTTTAAGAAATCTATTAGCCTTCCTGAC  
+HWI-EAS443:3:6:638:1144#0/1  
aa`aaaaaaaa`aaaaa``\_` ``````````]\_\_^a`]Z  
@HWI-EAS443:3:6:654:490#0/1  
TTTTATTGCCCTACTGGGAGCCCAGACTGTTCAAGCT  
+HWI-EAS443:3:6:654:490#0/1  
abbb^aa\_b`[^]V]a[aa`aaa[SN¥aa[`bU\_Z`a`\_\_  
@HWI-EAS443:3:6:665:815#0/1  
GGAGCATTGCGAAAAGCTTGAACAGTCTGGGCTCCCAGT  
+HWI-EAS443:3:6:665:815#0/1  
aa\_^\_a`\_\_a\_[Y^`¥\_^ZZ¥¥^ZW\_¥^¥^¥^]UZU^W  
@HWI-EAS443:3:6:695:1553#0/1  
GCTAGGAGCATTGCGAAAAGCTTGAACAGTCTGGGCTCC  
+HWI-EAS443:3:6:695:1553#0/1  
aa`a`\_Y`\_\_[`ZaZa^\_\_^\_Z¥\_^W\_U¥¥W[¥W]WWWXSB  
@HWI-EAS443:3:6:69:1374#0/1  
AGACAATATACTGGTGGGATGGGCTCCAATCATCCGACGA  
+HWI-EAS443:3:6:69:1374#0/1  
``baaba]abUaaaYS`^`V]a]V^VV^VFWaQPWVS\_\_B  
@HWI-EAS443:3:6:758:1163#0/1  
GTCCACTTTCCCTTTCTGAGTATTGGTGTGTTCTGTTA  
+HWI-EAS443:3:6:758:1163#0/1  
a`\_VPYaW[ST¥`\_a]]\_[Z\_X¥\_\_\_\_]W\_W[W¥X^^T]W^  
@HWI-EAS443:3:6:807:1246#0/1  
GAGTGTCTGGAGTAAATGAATCAGCTGACATGAGTATTGG  
+HWI-EAS443:3:6:807:1246#0/1  
aaaZbabbbb^^^aaa`a^\_a\_a`^a`a\_``a\_a¥\_aa\_a  
@HWI-EAS443:3:6:849:79#0/1  
ACAAAGTATACGAAACCTCTAATCTGCATCCCAGGTGTTG  
+HWI-EAS443:3:6:849:79#0/1  
aaabab¥bbb`aaaa^\_a\_a`a`¥`a]a`^¥]\_aaX`^^a



@HWI-EAS443:3:6:86:935#0/1  
GAGATAACAACCCACTTTCAAAGAAAAAGGAGAGTAAGAG  
+HWI-EAS443:3:6:86:935#0/1  
abba`bbbbbbbabbaabaaab`aaaabaaaab[aaaab  
@HWI-EAS443:3:6:896:1823#0/1  
CAGCTCAACCCGATTGATGGACCTACCTGAGGATAATG  
+HWI-EAS443:3:6:896:1823#0/1  
aaababbb`a\_baaabaaaS[a\_aaaa\_\_\_a\_\_\_]`ba`\_  
@HWI-EAS443:3:6:905:1209#0/1  
AACTTATACAATATACGGAATCTTCACATTCCTGAAGTCT  
+HWI-EAS443:3:6:905:1209#0/1  
abaa^bb`a`baaab]^aT\_aRa\_a¥Ua`a`¥aa^[a]\_^  
@HWI-EAS443:3:6:905:257#0/1  
ATTGATGCCAGGGTCGACTTCGAGTCTGGACGGATCAAGA  
+HWI-EAS443:3:6:905:257#0/1  
\_`¥abaa`^T[`bXab]\_abab\_a¥VabaXG`b¥\_[a¥aa  
@HWI-EAS443:3:6:920:995#0/1  
ATTACCACAGCATTGTTTACAGAATCAATCTCTTTATGAC  
+HWI-EAS443:3:6:920:995#0/1  
aaa`abaaaaaaaaaaaa`a`\_aa^a`\_a`aaaa\_a¥  
@HWI-EAS443:3:6:97:1752#0/1  
AGGGGGCAATGAAAAGAAGCCAAACTGGCAAATGTTGTG  
+HWI-EAS443:3:6:97:1752#0/1  
^^TTWa]^`a^a[[]]S\_`[\_\_\_`¥¥GX\_\_TVa¥I\_^FS`Sb  
@HWI-EAS443:3:70:101:158#0/1  
ACCGGTCTCCTATATGAACTGCTAGGGAAAAATTTCTCGA  
+HWI-EAS443:3:70:101:158#0/1  
aaaa¥JZbbNZ]XUWN`Z¥[ZY[Q[R\_\_\_]PHMVSWPX¥UT  
@HWI-EAS443:3:70:1038:1410#0/1  
GATTGATGCCAGGGTCGACTTCGAGTCTGGACGGATCAAG  
+HWI-EAS443:3:70:1038:1410#0/1  
a\_abab`^[`XRZTTb¥]X`[a¥a^P[`^`XVSY\_U`^YV  
@HWI-EAS443:3:70:1039:920#0/1  
GCTGTGGTAATGCCAGCCCATGGTCCAGCCAAAAGCATGG  
+HWI-EAS443:3:70:1039:920#0/1  
ab]\_Ta¥[`^^^]`\_\_`^¥a\_QV]LZW\_[\_\_¥QRSR¥\_  
@HWI-EAS443:3:70:1042:1095#0/1  
CGATACTGAATCTTGGACAAAAGAAATACACCAAGACAAT  
+HWI-EAS443:3:70:1042:1095#0/1  
[`aZ\_`ab\_^^^`bb`[`a]^a`^`\_`b`aa``^babY^a  
@HWI-EAS443:3:70:1073:1364#0/1  
AAGGGATTGAGGGATTACAAAGTCTTCCCGATAATCAT  
+HWI-EAS443:3:70:1073:1364#0/1  
[^SO¥RYa\_[XYGUa]`\_\_`a`a]a`\_`][Z\_^\_X¥RZM  
@HWI-EAS443:3:70:1092:1820#0/1  
GGGCTCCAATCATCCGACGATTTTGCTCTCATAGTGAATG  
+HWI-EAS443:3:70:1092:1820#0/1  
aabbabbbba\_abbaabbbbaababba`aaa`aa\_aaaa^  
@HWI-EAS443:3:70:1107:1392#0/1  
AAAAACAAAGACTGAATAAGAGAGGCTATCTAATAAGAGC

+HWI-EAS443:3:70:1107:1392#0/1  
a`YY\_[^VY¥^YWVOZ`\_^BBBBBBBBBBBBBBBBBBBB  
@HWI-EAS443:3:70:1126:84#0/1  
CAGTGATTGTGAAAGAAATCTCTGTGTCTTGTGAATTAGT  
+HWI-EAS443:3:70:1126:84#0/1  
\_^`\_bbbaZ¥^^aa^`````V]\_ab[L]\_U^JSP`\_Y\_W  
@HWI-EAS443:3:70:114:138#0/1  
GGGCTATTAGTATCAGATGGAGGACCAAACCTTATACAATA  
+HWI-EAS443:3:70:114:138#0/1  
abababaaab\_aaa```aaa¥`^^\_\_\_\_^\_``\_\_^\_\_^\_  
@HWI-EAS443:3:70:1237:758#0/1  
TGAAGTCTAGGGAAAAATTTCTCGAATAGATTGCAGCAC  
+HWI-EAS443:3:70:1237:758#0/1  
[aSaR][a`¥[N`\_]Z\_L[a]\_a¥\_\_\_\_VQ[^VZXTG¥Z  
@HWI-EAS443:3:70:1267:733#0/1  
CATTACCACAGCATTGTTTACAGAATCAATCTCTTTATGA  
+HWI-EAS443:3:70:1267:733#0/1  
aaX\_b`a\_¥¥`U`bW`Saa\_\_b^a\_]ZYa¥`^W`]aaaaY  
@HWI-EAS443:3:70:1324:618#0/1  
CAAGAATCCCCTTTGGCTTGTGTTGAGAATAGAACGATT  
+HWI-EAS443:3:70:1324:618#0/1  
abbaaaaaaababa]\_aabb]a`a]Ya\_aaa\_\_aORY`^  
@HWI-EAS443:3:70:142:473#0/1  
CACCAGTATATTGTCTTGGTGTATTTCTTTTGTCCAAGAT  
+HWI-EAS443:3:70:142:473#0/1  
a\_aa]`Paba¥]a\_aabaaX`NSa\_\_a`]aaa[¥a`Z\_VY  
@HWI-EAS443:3:70:142:638#0/1  
TCCCACCCAGGAATATTTGAGAATTCATGCCTTGAAACAA  
+HWI-EAS443:3:70:142:638#0/1  
\_babaaab¥^b^WYKaaa\_S\_[S`\_\_aa\_a`]Z`\_``]bS  
@HWI-EAS443:3:70:1436:1535#0/1  
TGTTGATTCCCCTAAGTGCAGGTCCTGTAGAATCTGTC  
+HWI-EAS443:3:70:1436:1535#0/1  
ab`babb[baabaaaa]bbaaabb[I[[a\_aaaa`Y\_\_a\_  
@HWI-EAS443:3:70:150:239#0/1  
GGGCTCCAATCATCCGACGATTTTGTCTCATAGTGAATG  
+HWI-EAS443:3:70:150:239#0/1  
Y^a^Zabba]aba`Xa``aa\_aa]aaa\_`a``Z`P]^^\_^  
@HWI-EAS443:3:70:1514:704#0/1  
GAGGTTTCGTATACTTTGTTGAACTTTAGCTAGGAGCAT  
+HWI-EAS443:3:70:1514:704#0/1  
^bbb¥bbbbbbbabbbbbbabbab\_bbaba\_bb`\_aa¥aa  
@HWI-EAS443:3:70:1570:603#0/1  
GTTGATCCCCTAAGTGCAGGTCCTGTAGAATCTGTCC  
+HWI-EAS443:3:70:1570:603#0/1  
`b]X]b`\_U^a\_aa\_¥`aa[Yaa\_]P]a^aW^X\_RTTZVR  
@HWI-EAS443:3:70:1575:1906#0/1  
GCAGGTCCAAGGTCATTGTTTATCATGTTGTTCTTTATCA  
+HWI-EAS443:3:70:1575:1906#0/1  
ab`\_IRabbb^^Xbaba`\_abaa]\_ab^`b`a`\_aa\_WZ

@HWI-EAS443:3:70:1639:28#0/1  
AGATTCAGTATCGAGACTCCCAAGACCGTACTTAGCATGT  
+HWI-EAS443:3:70:1639:28#0/1  
ab`ab^`a`aa^a`]]Z`W\_\_`a`[RQZW\_T^]`^YW]^`¥Y  
@HWI-EAS443:3:70:1663:198#0/1  
CAGGAACAGGATACACCATGGACACAGTAAACAGAACACA  
+HWI-EAS443:3:70:1663:198#0/1  
abb`bbbbabbbbbbb`baa``abaa\_aabbaabaaaa\_a  
@HWI-EAS443:3:70:1697:909#0/1  
AAATTTCTCGAATAGATTGCAGCACTTCTGGTACATCTGT  
+HWI-EAS443:3:70:1697:909#0/1  
`Y`a`b]\_T\_L\_ZV\_^T¥Y`^T^W¥¥Y]]a`]P[a`a`a]  
@HWI-EAS443:3:70:1707:122#0/1  
GCTATTAGTATCAGATGGAGGACCAAACCTTATACAATATA  
+HWI-EAS443:3:70:1707:122#0/1  
G^abab`a`b`abbbba`abbbab`aaabbbba\_abbbb  
@HWI-EAS443:3:70:1713:837#0/1  
GCTGTGGTAATGCCAGCCCATGGTCCAGCCAAAAGCATGG  
+HWI-EAS443:3:70:1713:837#0/1  
`bba`ba`[``Z^\_aaa`[a^^\_]aV¥]a`]\_N¥a^`  
@HWI-EAS443:3:70:173:1546#0/1  
AGATCTTCATGATCTCAGAGAACTCTTCTTTCTTGATCCG  
+HWI-EAS443:3:70:173:1546#0/1  
aaaaaa`ab¥^]\_a\_aa\_Y^\_Ma^]^\_a^^a^Z\_\_Y^\_\_  
@HWI-EAS443:3:70:1746:1685#0/1  
CTGGGCTCCCAGTAGGGGCAATGAAAAGAAGGCCAAACT  
+HWI-EAS443:3:70:1746:1685#0/1  
`aa]abbb`a]bV`aZabaaa`a`^a\_ab`¥[X^`a^`  
@HWI-EAS443:3:70:1782:1287#0/1  
CTGAGTATTGGTGTGTTCTGTTTACTGTGTCCATGGTGTA  
+HWI-EAS443:3:70:1782:1287#0/1  
abb`babbb`ba`ababbbba^aaaaaaaaaaaaa`[a\_a  
@HWI-EAS443:3:70:18:815#0/1  
GCCATGGTGTCTAGGGCCCGATTGATGCCAGGGTCGACT  
+HWI-EAS443:3:70:18:815#0/1  
aababaa`aab\_baabababaaaaaaaaa]aa`Sa\_`aZ  
@HWI-EAS443:3:70:20:1158#0/1  
ATAGGGAAGAAAAACAAAGACTGAATAAGAGAGGCTATC  
+HWI-EAS443:3:70:20:1158#0/1  
\_\_V\_aW`RUa¥YO\_a[S¥aaYaWY[\_a^¥\_\_a^X\_¥MO  
@HWI-EAS443:3:70:269:2011#0/1  
GGGCTCCAATCATCCGACGATTTTGCTCTCATAGTGAATG  
+HWI-EAS443:3:70:269:2011#0/1  
]abb\_ba`aab\_\_b`¥^a\_baaaaaa\_b`^[[`X\_``\_`[  
@HWI-EAS443:3:70:273:1073#0/1  
CAAAGATGCAGAGAGAGGCAAGTTAAAAAGAAGGGCTATC  
+HWI-EAS443:3:70:273:1073#0/1  
a\_^aaaaaaa]^X][`]a`\_`V\_`X^\_\_^[\_`¥W¥Z\_\_]^  
@HWI-EAS443:3:70:27:1243#0/1  
GAGACAACATGACCAAGAAGATGGTCACGCAAAGAACAAT

+HWI-EAS443:3:70:27:1243#0/1  
]WI^\_\_]b`Wbbba`aaa]aa^]\_bab]X`aa\_`aaa  
@HWI-EAS443:3:70:31:1160#0/1  
ATGTTTCGAGAGTAAAAGAATGAAGATTCGAACACAAATAC  
+HWI-EAS443:3:70:31:1160#0/1  
`abWbbb`YaT^YaK`Ra^[^aba\_aaaa`a\_a[MYaa  
@HWI-EAS443:3:70:344:934#0/1  
TATTGGTGTGTTCTGTTTACTGTGTCCATGGTGTATCCTG  
+HWI-EAS443:3:70:344:934#0/1  
aa^X]\_S[XWXTZ\_^\_^`a^VZa\_aa\_¥VR][a\_]^Z`  
@HWI-EAS443:3:70:351:358#0/1  
ACTTTTCCTAAAAATTCCAGCGCAAATGCCATAAGCACC  
+HWI-EAS443:3:70:351:358#0/1  
`b`]`b`abbbb^aZP`aaba\_]`a]Z`a\_b][[]]Y  
@HWI-EAS443:3:70:420:704#0/1  
GTGGGATGGGCTCCAATCATCCGACGATTTTGCTCTCATA  
+HWI-EAS443:3:70:420:704#0/1  
a^aaa`\_aa`a`aaa`a`a\_a]`a\_\_^\_a\_\_\_^\_\_[\_  
@HWI-EAS443:3:70:434:423#0/1  
GATCCCCTAACTTGCAGGTCCTGTAGAATCTGTCCACT  
+HWI-EAS443:3:70:434:423#0/1  
aaabababaaabaaa`aa`a]aaaaaX`aaaa`¥Sa¥[P  
@HWI-EAS443:3:70:448:518#0/1  
GGACGACAAACACAGAGACTGGTGCACCCCAGCTCAACCC  
+HWI-EAS443:3:70:448:518#0/1  
``]b`baW¥baa`a`aaaV\_a\_G]aa`aaaP\_`aa]]Ma  
@HWI-EAS443:3:70:457:623#0/1  
GCGCTGGAATTTTTAGGAAAAGTAGAGTCGGATTGACATC  
+HWI-EAS443:3:70:457:623#0/1  
aa^aab``````aa`aaZ^`aaZ^`a^U\_\_^¥Y[^`a^\_  
@HWI-EAS443:3:70:461:740#0/1  
GCATGGAGCTACCCAGCTTTGGAGTGTCTGGAGTAAATGA  
+HWI-EAS443:3:70:461:740#0/1  
`babaWW`¥¥V\_\_\_Y\_a`^Z\_]`SYUX\_bbV\_Ra\_IX[^  
@HWI-EAS443:3:70:502:1118#0/1  
ATGCCGTTGCAACTACACATTCCTGGATTCCCAAGAGGAA  
+HWI-EAS443:3:70:502:1118#0/1  
aa^aa^```aaXa`a`a[\_\_\_``]]X[X]`V\_]^^^Y\_^  
@HWI-EAS443:3:70:570:1182#0/1  
CTCCAATCATCCGACGATTTTGCTCTCATAGTGAATGCAC  
+HWI-EAS443:3:70:570:1182#0/1  
aaabaa`aaaa`a`aa\_aa`\_a\_a\_\_\_]X^`\_\_\_\_]\_]  
@HWI-EAS443:3:70:577:1071#0/1  
TGGGTGGGATTCTTCAAGGAAAGCCATAGCCTCTAGAACA  
+HWI-EAS443:3:70:577:1071#0/1  
aa^\_X^]P^]ba`¥`aa`W¥^aY`b`aa]b]a[J]aa  
@HWI-EAS443:3:70:580:889#0/1  
GGGCTCCCAGTAGGGGCAATGAAAAGAAGGCCAAACTGG  
+HWI-EAS443:3:70:580:889#0/1  
¥a^`bbbUY¥Z`]¥aaa]aa\_P`\_aaa]\_aa^Xaaa`

@HWI-EAS443:3:70:589:549#0/1  
CCCAGTGATTGTGAAAGAAATCTCTGTGTCTTGTGAATTA  
+HWI-EAS443:3:70:589:549#0/1  
aba`a]a`\_abM`\_aaaXZ^\_a]\_Z\_\_\_\_]\_`\_]XWWQR[XX  
@HWI-EAS443:3:70:601:455#0/1  
GAACAATTGAAGAGCCATCTGGGCCGTTGCAGGTCCAAGG  
+HWI-EAS443:3:70:601:455#0/1  
ab¥¥a`aaaab\_``aaaa`a]\_aa]a¥\_```\_\_\_Y`XVZa\_  
@HWI-EAS443:3:70:645:1502#0/1  
GTCCAAGATTGAGTATCGAGACTCCCAAGACCGTACTTAG  
+HWI-EAS443:3:70:645:1502#0/1  
a\_b`ba`ba^baaSbaaa`Z^`^`a^aaXaa`Ra``^a^  
@HWI-EAS443:3:70:647:629#0/1  
GTCTGGACGGATCAAGAAAGAAGAGTTCTCTGAGATCATG  
+HWI-EAS443:3:70:647:629#0/1  
a\_`a```aaaaZa]aa``]Xa`Zaa]a\_aaaaa\_\_[\_`\_`  
@HWI-EAS443:3:70:698:1042#0/1  
GGAAAGTGGACGACAAACACAGAGACTGGTGCACCCAGC  
+HWI-EAS443:3:70:698:1042#0/1  
abab^aSb`ababaaabaaaaa`a^^`Waaa`a\_a\_^`  
@HWI-EAS443:3:70:708:1117#0/1  
CAGCTGATTCATTTACTCCAGACACTCCAAAGCTGGGTAG  
+HWI-EAS443:3:70:708:1117#0/1  
W\_\_QZ]WU`ZSa¥``b]```abaaaaabb^T`a`aa]]a\_  
@HWI-EAS443:3:70:708:938#0/1  
ATTGATGCCAGGGTCGACTTCGAGTCTGGACGGATCAAGA  
+HWI-EAS443:3:70:708:938#0/1  
^bbb`aabaaaZ`¥`a`aaa`]][\_`\_]a¥^a`XVVR]``  
@HWI-EAS443:3:70:729:30#0/1  
GTGTTCTGTTTACTGTGTCCATGGTGTATCCTGTTCCCTGT  
+HWI-EAS443:3:70:729:30#0/1  
aYaT`\_`a^^a\_[^^ZaY\_`[Y``S`VZWZT\_`TZWW^VM  
@HWI-EAS443:3:70:764:799#0/1  
GACTAGGGAAAGGGTACATGTTTCGAGAGTAAAAGAATGAA  
+HWI-EAS443:3:70:764:799#0/1  
aa]b`]^aYb`abb\_babbbabbb``bb^bbaababa\_aa  
@HWI-EAS443:3:70:765:966#0/1  
CAACCGGCAGCAACTGCATTGGCCAACACCATAGAAGTCT  
+HWI-EAS443:3:70:765:966#0/1  
¥Z\_a``aa¥MXIZ]``¥][W^`aa\_\_^]]aXSWRX¥UNNU  
@HWI-EAS443:3:70:767:742#0/1  
GTCCTCCATCTGATACTAATAGCCCTACCTTTGATTGGGT  
+HWI-EAS443:3:70:767:742#0/1  
aabbaaaaaaaaa`aaba`aaaa`aa`\_`a`aa\_`]a\_^Z  
@HWI-EAS443:3:70:784:353#0/1  
GAACAACATGATAACAATGACCTTGGACCTGCAACGGCC  
+HWI-EAS443:3:70:784:353#0/1  
aaaaabaaabaaaaa`aaa`a`a`\_a\_`\_\_^`^a`Y`]X^  
@HWI-EAS443:3:70:826:348#0/1  
GCATGGAATATGATGCCGTTGCAACTACACATTCCTGGAT

+HWI-EAS443:3:70:826:348#0/1  
H\_bababaaa[bbabbaabbbabbabba`bbbbabaaaab  
@HWI-EAS443:3:70:83:1209#0/1  
AGCTTGAACAGTCTGGGCTCCCAGTAGGGGCAATGAAAA  
+HWI-EAS443:3:70:83:1209#0/1  
aab\_aaaba^`Za^^Q^a\_aaa\_`PZ`\_`X\_`\_\_[\_`\_^Va  
@HWI-EAS443:3:70:899:173#0/1  
CTTTCCTTGAAGAATCCCACCCAGGAATATTTGAGAATTC  
+HWI-EAS443:3:70:899:173#0/1  
aaPOUH]XWT``]W[ZN\_XO]\_WT]STZW^WYaW^WSYRO  
@HWI-EAS443:3:70:911:1018#0/1  
GATAGCCTCTCTTATTAGTCTTTGTTTTTTCTTCCCTAT  
+HWI-EAS443:3:70:911:1018#0/1  
aab``bbaa`baa`aaaaY`aaa`^^`aaaaaa\_aa`a  
@HWI-EAS443:3:70:912:611#0/1  
TAAAGACTTCTATGGTGTGGCCAATGCAGTTGCTGCCGG  
+HWI-EAS443:3:70:912:611#0/1  
aZW[]R[a^Y\_W]`aST^YXRXY^MN¥OVUWVMSYBBBB  
@HWI-EAS443:3:70:918:790#0/1  
CATTACCACAGCATTGTTTACAGAATCAATCTCTTTATGA  
+HWI-EAS443:3:70:918:790#0/1  
abbbbbbbbbbbbbbbabb`abab`b`a]b`babaabaah  
@HWI-EAS443:3:70:923:1811#0/1  
GATAACAATGACCTTGGACCTGCAACGGCCAGATGGCT  
+HWI-EAS443:3:70:923:1811#0/1  
abbbbbbbbbbabaabaaaabaabbbaa\_baa`aa]`[\_^  
@HWI-EAS443:3:70:951:510#0/1  
CCCAGTAGGGGCAATGAAAAGAAGCCAAACTGGCAAAT  
+HWI-EAS443:3:70:951:510#0/1  
a``aZLRa^V¥`¥UW[^QR]aS^\_`YX\_]^\_T[``]V`a`Y  
@HWI-EAS443:3:70:974:857#0/1  
ATTGAAGAGCCATCTGGGCCGTTGCAGTCCAAGGTCATT  
+HWI-EAS443:3:70:974:857#0/1  
`a\_ab^XZ¥`\_^ab^abbb``]`baaaaUaaZab`M\_`^`  
@HWI-EAS443:3:70:986:1007#0/1  
GCCTCTCTTATTAGTCTTTGTTTTTTCTTCCCTATTGTT  
+HWI-EAS443:3:70:986:1007#0/1  
a\_aaaaaaaWaa`\_a`a``aa¥\_aaaa^`aa`^a``a`]\_  
@HWI-EAS443:3:70:999:86#0/1  
ATGCCAGGGTCGACTTCGAGTCTGGACGGATCAAGAAAGA  
+HWI-EAS443:3:70:999:86#0/1  
`\_X\_`¥^^`^abaa\_SU]]a^a```¥X``VHY\_¥]V`\_`\_  
@HWI-EAS443:3:71:1015:980#0/1  
GGGCTCCAATCATCCGACGATTTTGCTCTCATAGTGAATG  
+HWI-EAS443:3:71:1015:980#0/1  
ab``abbb`bbaaaaa`aa\_aa`aaaaaa\_a\_aa]\_a``a  
@HWI-EAS443:3:71:107:1986#0/1  
AGAAAAACAAGACTGAATAAGAGAGGCTATCTAATAAG  
+HWI-EAS443:3:71:107:1986#0/1  
aaaab¥TZaa\_``aa^`aaaa¥]a`aUZb^]BBBBBBBB

@HWI-EAS443:3:71:1104:461#0/1  
ATTTTGTGGGACATTATGGGTGCCATGCTCAGGATGT  
+HWI-EAS443:3:71:1104:461#0/1  
abbaab\_abbba`a^`bbbabaabUaa\_aaa\_`a\_aa^`\_X  
@HWI-EAS443:3:71:1107:449#0/1  
GTGGGATCAAACCCAATCAAAGGTAGGGCTATTAGTATCA  
+HWI-EAS443:3:71:1107:449#0/1  
aW]`\_aaaaaa`^\_aZ``a\_\_`W\_a]^\_aa`\_a\_Z\_\_¥\_  
@HWI-EAS443:3:71:111:1625#0/1  
CCTCCATCTGATACTAATAGCCCTACCTTTGATTGGGTTT  
+HWI-EAS443:3:71:111:1625#0/1  
aa\_bbbababba`b\_¥¥aa`aaaa]`b\_`aa^aa[\_\_\_Z\_[  
@HWI-EAS443:3:71:1123:1447#0/1  
CACTAACTTGCAGGTCCTGTAGAATCTGTCCACTCCTGCT  
+HWI-EAS443:3:71:1123:1447#0/1  
aaab\_bbbbaab\_a^bbbaabaaaaaba` `X`a][][Z`  
@HWI-EAS443:3:71:1152:371#0/1  
GATTCTTCAAGGAAAGCCATAGCCTCTAGAACACAGTCTG  
+HWI-EAS443:3:71:1152:371#0/1  
a[\_Z` `]a`a\_[\_YZ\_]¥]` `a]Y^a^[\_`\_Z[¥^¥ULY[  
@HWI-EAS443:3:71:1189:668#0/1  
ACAGTCTGGGCTCCCAGTAGGGGCAATGAAAAGAAGGCC  
+HWI-EAS443:3:71:1189:668#0/1  
aa[[\_^`W]V\_aa^\_]Z` `^\_W^a`T^]]S^\_W\_\_V`\_P¥  
@HWI-EAS443:3:71:119:660#0/1  
GAACAATTGAAGAGCCATCTGGGCCGTTGCAGGTCCAAGG  
+HWI-EAS443:3:71:119:660#0/1  
aT[\_T^`a^a\_\_aa`]]`^aX^\_\_VZ\_^Y^¥Z]X]WWY  
@HWI-EAS443:3:71:1330:1904#0/1  
ATGGAATATGATGCCGTTGCAACTACACATTCCTGGATTC  
+HWI-EAS443:3:71:1330:1904#0/1  
aa¥¥abb`]Z`\_aaaa\_\_SYXa\_`aY^O\_\_]`aZ]Y^ZYP  
@HWI-EAS443:3:71:1345:1297#0/1  
GATTGATGCCAGGTCGACTTCGAGTCTGGACGGATCAAG  
+HWI-EAS443:3:71:1345:1297#0/1  
¥THZb[\_^\_Ubb[YYO\_]`^a^YV[NUUaXY[Wab\_Wa^WQ[  
@HWI-EAS443:3:71:1358:1667#0/1  
GCCATGCTCAGGATGTTTCTGAACCACTCGGGTTGATTTT  
+HWI-EAS443:3:71:1358:1667#0/1  
abbbbbbbbabbbbaab`bb\_a`bb`[ababbaa\_aaaaaa\_  
@HWI-EAS443:3:71:1359:620#0/1  
CATTCACTATGAGAGCAAAATCGTCGGATGATTGGAGCCC  
+HWI-EAS443:3:71:1359:620#0/1  
`]b\_ab\_bbabbabbbababbSb\_a^baababaaaaa\_aH  
@HWI-EAS443:3:71:1400:731#0/1  
CTTGGGAGTCTCGATACTGAATCTTGGACAAAAGAAATAC  
+HWI-EAS443:3:71:1400:731#0/1  
``\_Z`Y[aa¥abX\_¥bb]RYbabX¥\_[^bbabba^bb\_G  
@HWI-EAS443:3:71:1466:957#0/1  
AAAAATTCCAGCGCAAAATGCCATAAGCACCATTCCT





@HWI-EAS443:3:71:274:1242#0/1  
CCTATATGTGTATCTGTAGTCTTTGATGAACAATTGAAGA  
+HWI-EAS443:3:71:274:1242#0/1  
abba\_aaa\_`TaaaaT\_a^aa`a\_a`^a\_^^aaa`\_a¥\_  
@HWI-EAS443:3:71:278:67#0/1  
GAGATAACAACCCACTTTCAAAGAAAAAGGAGAGTAAGAG  
+HWI-EAS443:3:71:278:67#0/1  
^¥`aa^b^a^^^a\_aaa^`^Z]H]\_\_aaa\_]X`X¥G]^X  
@HWI-EAS443:3:71:40:175#0/1  
ATCCTGAGCATGGCACCCATAATGTTCTCAAACAAAATGG  
+HWI-EAS443:3:71:40:175#0/1  
Zaaaa`aaaa`\_]`\_^\_]\_]¥[\_^\_\_^^^]^\_\_XR\_] ] ] ]  
@HWI-EAS443:3:71:411:1619#0/1  
GGGCTCCAATCATCCGACGATTTTGCTCTCATAGTGAATG  
+HWI-EAS443:3:71:411:1619#0/1  
^L[aabb]aaab`aaaa`^````a`a\_\_aa]`\_Xaa\_\_^  
@HWI-EAS443:3:71:424:915#0/1  
CAACTACACATTCTGGATTCCCAAGAGGAATCGTTCTAT  
+HWI-EAS443:3:71:424:915#0/1  
`V`a`[aab]aaaa`a\_a[\_a`b`P[[RV^\_\_\_`^^a]\_`  
@HWI-EAS443:3:71:448:325#0/1  
AGCCCTTCTTTTTAACTTGCCTCTCTCTGCATCTTTGGTC  
+HWI-EAS443:3:71:448:325#0/1  
aaba\_aaaaaa`\_a\_^`W]````]\_a``\_\_^\_]\_`^Y]  
@HWI-EAS443:3:71:448:479#0/1  
GCAACGGCCCAGATGGCTCTTCAATTGTTTCATCAAAGACT  
+HWI-EAS443:3:71:448:479#0/1  
aaUaaaab`\_K]W\_¥¥¥`\_`\_\_W^\_aY]\_\_^`\_Y^]]X^  
@HWI-EAS443:3:71:449:949#0/1  
GGCCCAGATGGCTCTTCAATTGTTTCATCAAAGACTACAGA  
+HWI-EAS443:3:71:449:949#0/1  
ab`]aa]Wa\_U\_¥`]aaPO\_]^^RZ]a]XNU]]`\_]XZ[^  
@HWI-EAS443:3:71:455:26#0/1  
GGCAATGAAAAGAAGGCCAAACTGGCAAATGTTGTGAGAA  
+HWI-EAS443:3:71:455:26#0/1  
aa^`aa\_WX¥`b^T\_a^\_a]X[[^`X¥\_\_aW[^X`^`\_¥  
@HWI-EAS443:3:71:580:129#0/1  
AGAAATCCAACCGTCTCCTATATGAACTGCTAGGGAAA  
+HWI-EAS443:3:71:580:129#0/1  
a`a¥Va`a\_aa\_]\_`[]]Y[ZU\_]`^`^[^\_YQY\_]U\_\_]  
@HWI-EAS443:3:71:602:148#0/1  
GAGCTAATGGATGATGATTATCGGGGAAGACTTTGTAATC  
+HWI-EAS443:3:71:602:148#0/1  
a^a\_a\_]aba\_aaa`\_aa\_[\_Za`\_\_Z[\_]]]X\_]U[\_]T  
@HWI-EAS443:3:71:628:1099#0/1  
GTAGAATCTGTCCACTCCTGCTTGTATTCCCTCATGGTTT  
+HWI-EAS443:3:71:628:1099#0/1  
a\_baab`bba[baaa^`aa`a`a^\_a\_\_baaYaYa^\_^\_\_  
@HWI-EAS443:3:71:645:1637#0/1  
GGCCATGGTGTCTAGGGCCCGATTGATGCCAGGGTCGAC

+HWI-EAS443:3:71:645:1637#0/1  
\_`aaa^`VYZ`¥a`a¥a^`^¥¥XZZ¥aZ`Z¥^R¥R¥T  
@HWI-EAS443:3:71:657:538#0/1  
ATTTGTGTTCGAATCTTCATTCTTTTACTCTCGAACATGT  
+HWI-EAS443:3:71:657:538#0/1  
aabaaSbaaabaa`aaaaa`aaaaa`aaa``Ya^``\_U  
@HWI-EAS443:3:71:682:1695#0/1  
CTGAAGTACTTCAATGAATCAACAAAGAAGAAAATTGAGA  
+HWI-EAS443:3:71:682:1695#0/1  
\_NWV]SFZa`^]ZaY^^S¥`^`\_\_`RRT]¥¥Z¥^W¥]\_¥  
@HWI-EAS443:3:71:702:228#0/1  
GCCATGCTCAGGATGTTTCTGAACCACTCGGGTTGATTTC  
+HWI-EAS443:3:71:702:228#0/1  
a`^\_YY\_\_a[aP^`TY^Xaaa`UHVPVSQ^]OVaXa^NK  
@HWI-EAS443:3:71:725:988#0/1  
GATGGGCTCCAATCATCCGACGATTTTGCTCTCATAGTGA  
+HWI-EAS443:3:71:725:988#0/1  
\_\_X\_ZZ[Z\_] [Z] `Z] `^Z`^VX[\_\_aaY]¥]SYa\_P]Y  
@HWI-EAS443:3:71:75:1378#0/1  
AATTGAAGAGCCATCTGGGCCGTTGCAGGTCCAAGGTCAT  
+HWI-EAS443:3:71:75:1378#0/1  
`^aaaZb¥][^`aaa\_^][^`\_VZ] `¥SYWa\_\_`^ZUQ[^  
@HWI-EAS443:3:71:76:412#0/1  
AAGGGATTGAGGGATTACAAAGTCTTCCCCGATAATCAT  
+HWI-EAS443:3:71:76:412#0/1  
a`]]aa`\_aa]] `¥`¥0[`\_\_`U[^^^`¥`\_\_YYWT¥  
@HWI-EAS443:3:71:856:1005#0/1  
GGCTCCAATCATCCGACGATTTTGCTCTCATAGTGAATGC  
+HWI-EAS443:3:71:856:1005#0/1  
aaa]aaa``¥a^aa\_a\_aaaaa]]]¥`\_a``\_ZY]aa\_\_  
@HWI-EAS443:3:71:896:1962#0/1  
AATCAGCTGACATGAGTATTGGAGTAACAGTGATAAAGAA  
+HWI-EAS443:3:71:896:1962#0/1  
a^\_aaab``baaa``aYaa\_¥]a`Yaa\_a`X`¥\_aa]0]  
@HWI-EAS443:3:71:908:481#0/1  
GGCTTTCCTTGAAGAATCCCACCCAGGAATATTTGAGAAT  
+HWI-EAS443:3:71:908:481#0/1  
a\_abaaaa^`¥]\_T\_a[]ZY^]a`\_R¥`\_]aZabba`aaa  
@HWI-EAS443:3:71:918:1517#0/1  
GATTCATTACATCCTTTAAGAAATCTATTAGCCTTCCTG  
+HWI-EAS443:3:71:918:1517#0/1  
a¥`X\_aa[Z^ZH[U¥[\_\_\_\_[]\_OQNT`a[HX¥`Z]``]WX  
@HWI-EAS443:3:71:93:1029#0/1  
AGAATTCCCCTTTGGCTTGTGTTGAGAATAGAACGATTCC  
+HWI-EAS443:3:71:93:1029#0/1  
a`Y`a\_ba``a`\_\_]`\_a\_]\_Y\_\_^[U][WW`Y[[]WYYU  
@HWI-EAS443:3:71:969:373#0/1  
CACTATGAGAGCAAAATCGTCGGATGATTGGAGCCCATCC  
+HWI-EAS443:3:71:969:373#0/1  
ab¥a¥\_VX`WSX\_a^N^b]ZZ`ZX]b]]H]\_[b]XI]`\_V

@HWI-EAS443:3:71:978:1669#0/1  
ATTGTCTTGGTGTATTTCTTTTGTCCAAGATTCAGTATCG  
+HWI-EAS443:3:71:978:1669#0/1  
abb\_UabbY\_]^Ia\_aa``^\_RH`b^`aa\_\_a]^Gaa^Q\_  
@HWI-EAS443:3:71:998:1569#0/1  
CAATTGAAGAGCCATCTGGGCCGTTGCAGGTCCAAGGTCA  
+HWI-EAS443:3:71:998:1569#0/1  
aaabaabbaa^aaaaa\_aaa``^\_aa`a[Z^aa`\_\_VW^  
@HWI-EAS443:3:72:1001:1180#0/1  
CAGTGCTCTTATTAGATAGCCTCTCTTATTCACTTTGT  
+HWI-EAS443:3:72:1001:1180#0/1  
aa\_]\_a`\_a`[a`^a^\_\_\_¥[\_\_\_^^[\_^\_^¥[]`\_\_[  
@HWI-EAS443:3:72:1031:1140#0/1  
TAAAAATTCCAGCGCAAATGCCATAAGCACCATTTCCC  
+HWI-EAS443:3:72:1031:1140#0/1  
abbbbaabbaaaaa`aaaaaaa`ba`aba^a`aa`a\_¥  
@HWI-EAS443:3:72:1043:411#0/1  
TTGAGGATGAACAGATGTACCAGAAGTGCTGCAATCTATT  
+HWI-EAS443:3:72:1043:411#0/1  
\_baaab\_aa[^aYZZa`T`^]a\_\_\_^a`ba]W\_^aaa^  
@HWI-EAS443:3:72:1046:612#0/1  
AATTGAAGAGCCATCTGGGCCGTTGCAGGTCCAAGGTCA  
+HWI-EAS443:3:72:1046:612#0/1  
abaabaaaa`¥]aa[\_a\_a\_\_\_V]a]V]ZRY]a^a\_Y\_^`  
@HWI-EAS443:3:72:1055:342#0/1  
CAGATCTTCATGATCTCAGAGAACTCTTCTTTCTTGATCC  
+HWI-EAS443:3:72:1055:342#0/1  
]\_bba`¥aa`U[Y]a\_aab^TaaaI\_OYbaaaaaaUZGX  
@HWI-EAS443:3:72:1109:964#0/1  
TAGATTTCTTAAAGGATGTAATGGAATCAATGAACAAAGA  
+HWI-EAS443:3:72:1109:964#0/1  
aa¥S\_`bbbabb^\_a`b`aa^aaa`a\_aa`a`aaaa^]  
@HWI-EAS443:3:72:1154:1919#0/1  
GGGTTGTTATCTCTATTTCTCTTTGTTTCATTGATTCCAT  
+HWI-EAS443:3:72:1154:1919#0/1  
aaa[a]YTI]\_b¥]a¥WZZaa[]\_ZYWZaa¥YJY`¥¥Y`]  
@HWI-EAS443:3:72:1166:1001#0/1  
GGTGTGTTCTGTTTACTGTGTCCATGGTGTATCCTGTTCC  
+HWI-EAS443:3:72:1166:1001#0/1  
\_babaabbabaabab\_bb`aaa`aaaa\_a`aaa`aa`\_\_\_  
@HWI-EAS443:3:72:117:1283#0/1  
GAGACAACATGACCAAGAAGATGGTCACGCAAAGAACAAT  
+HWI-EAS443:3:72:117:1283#0/1  
aa\_babbbV¥a`a^^a`aaaa^Raaa\_b]Q^`[\_WY\_  
@HWI-EAS443:3:72:117:322#0/1  
CCCGGATTGATGCCAGGGTCGACTTCGAGTCTGGACGGAT  
+HWI-EAS443:3:72:117:322#0/1  
a\_bbba`TbSb\_XO\_]`YWPTPP\_\_\_TXN[[]FVOQNYU  
@HWI-EAS443:3:72:1182:1965#0/1  
CTTCTTTTCATTGCCCCCTACTGGGAGCCCAGACTGTTCA

+HWI-EAS443:3:72:1182:1965#0/1  
\_bbb[babbbabXY\_abaIUb\_`QWVZGW^b`aaZaQU[b  
@HWI-EAS443:3:72:1188:109#0/1  
ATGGAATCAATGAACAAAGAGGAAATAGAGATAACAACCC  
+HWI-EAS443:3:72:1188:109#0/1  
aaaba`aa`abaaa`a`a\_aa]\_\_b\_a`aaaa\_\_\_\_Z[\_  
@HWI-EAS443:3:72:1189:1620#0/1  
CACCTATATGTGTATCTGTAGTCTTTGATGAACAATTGAA  
+HWI-EAS443:3:72:1189:1620#0/1  
]aYbbbbbb`ab¥`\_^\_baaaaa\_aaa`aaaVW\_a`aaaa  
@HWI-EAS443:3:72:1195:1431#0/1  
GTGGGATGGGCTCCAATCATCCGACGATTTTGCTCTCATA  
+HWI-EAS443:3:72:1195:1431#0/1  
aXX`P^a`aa^V`\_]Ua`[XW¥W[X^[aZ^[PVXRR[]^  
@HWI-EAS443:3:72:1273:67#0/1  
AACAGATCTTCATGATCTCAGAGAACTCTTCTTTCTTGAT  
+HWI-EAS443:3:72:1273:67#0/1  
a[X^a`X¥V¥aaaa`X`aaaaTq]Pa[`a\_ab`Wa¥a`a  
@HWI-EAS443:3:72:1280:173#0/1  
GGGGCAATGAAAAGAAGCCAAACTGGCAAATGTTGTGAG  
+HWI-EAS443:3:72:1280:173#0/1  
a`a][^]\_a][[YZXY[\_PS[^ZZ^]¥SWY¥¥]RXXUYUX  
@HWI-EAS443:3:72:1294:253#0/1  
ATTTGTGGCTAATTTTAGCATGGAGCTACCCAGCTTTGGA  
+HWI-EAS443:3:72:1294:253#0/1  
abab`abbaab`abbbabYaa]aaaXa`T^]]aZa`b]aZ  
@HWI-EAS443:3:72:1300:553#0/1  
GACGGATCAAGAAAGAAGAGTTCTCTGAGATCATGAAGAT  
+HWI-EAS443:3:72:1300:553#0/1  
aa]aa[U¥ba\_]\_]\_bab^`H[`aX^ZY`[`aa\_a¥ZZ`\_  
@HWI-EAS443:3:72:1303:935#0/1  
GATTCAGTATCGAGACTCCCAAGACCGTACTTAGCATGTT  
+HWI-EAS443:3:72:1303:935#0/1  
`R¥¥¥IP]]UW]`¥`\_YTZY\_ZY][LLQY]]NU[Y]VU  
@HWI-EAS443:3:72:132:241#0/1  
ACTGACATTAATACGATGACCAAAGATGCAGAGAGAGGC  
+HWI-EAS443:3:72:132:241#0/1  
aaaaaaaaaaaaaaaa`aaa`aaa`a^a\_\_a\_\_\_\_`X\_\_\_\_  
@HWI-EAS443:3:72:1355:605#0/1  
ACAGAATCAATCTCTTTATGACTGACAAAGGGATTGAGGG  
+HWI-EAS443:3:72:1355:605#0/1  
a]babbb`baaa\_aaaaaa\_a`^a`\_]¥`\_aaa\_^`X^\_Za  
@HWI-EAS443:3:72:1399:534#0/1  
GTCCCCAGTGATTGTGAAAGAAATCTCTGTGTCTTGTGAA  
+HWI-EAS443:3:72:1399:534#0/1  
aZR^^`aa`a`aaUa\_a¥T[\_\_\_\_^`Z\_`¥\_U\_`\_\_[-]\_  
@HWI-EAS443:3:72:1427:1626#0/1  
CAGATACACATATAGGTGCCATAGGGGAGACACACAAATT  
+HWI-EAS443:3:72:1427:1626#0/1  
`aab\_`b`bbbabab\_abaWbbb\_\_^bbbaababbbaba

@HWI-EAS443:3:72:1461:238#0/1  
AAGGAGAGTAAGAGACAACATGACCAAGAAGATGGTCACG  
+HWI-EAS443:3:72:1461:238#0/1  
`aaaababWaa]a\_\_`a^a^a\_X^¥\_``a\_\_\_`VV\_]\_  
@HWI-EAS443:3:72:1469:500#0/1  
AACAGATCTTCATGATCTCAGAGAACTCTTCTTTCTTGAT  
+HWI-EAS443:3:72:1469:500#0/1  
^IM\_````a`UY]a`^¥P`]W\_[[G`Y`a`aaaa``]X^  
@HWI-EAS443:3:72:1520:1017#0/1  
GGTGGGATGGGCTCCAATCATCCGACGATTTTGCTCTCAT  
+HWI-EAS443:3:72:1520:1017#0/1  
aa¥aabZaaaa\_a\_\_\_aa^`a^^a^^\_¥``a¥`Q`¥^¥^Y  
@HWI-EAS443:3:72:1524:460#0/1  
GGCACCTATATGTGTATCTGTAGTCTTTGATGAACAATTG  
+HWI-EAS443:3:72:1524:460#0/1  
`bb]Ybb`bbbb¥b`aaabb\_abaaaab¥baaba^aaaa`  
@HWI-EAS443:3:72:154:971#0/1  
GAACATTATGGGTGCCATGCTCAGGATGTTTCTGAACCAC  
+HWI-EAS443:3:72:154:971#0/1  
`XI^`\_Z\_\_\_X[U^a\_]¥Z^[\`a`\_PYTXX\_^YWF¥ZVV[  
@HWI-EAS443:3:72:1559:1211#0/1  
AATACACCAAGACAATATACTGGTGGGATGGGCTCCAATC  
+HWI-EAS443:3:72:1559:1211#0/1  
\_R`a`bbaab`^`bababaRaaa^baa`\_]\_aa\_]R[]aY  
@HWI-EAS443:3:72:1598:1060#0/1  
TCATTGATTCCATTACATCCTTTAAGAAATCTATTAGCCT  
+HWI-EAS443:3:72:1598:1060#0/1  
aa`aaaaaa\_`bba\_aa]aaaa\_a¥¥\_`aaa```Z`]a  
@HWI-EAS443:3:72:1612:1800#0/1  
TTCTTTTTAACTTGCCTCTCTCTGCATCTTTGGTCATCGT  
+HWI-EAS443:3:72:1612:1800#0/1  
a```abb`aaa\_aa¥^aa`¥`aaa``a\_a\_aa\_¥\_]\_\_`^  
@HWI-EAS443:3:72:1617:254#0/1  
ACTAACTTGCAGGTCCTGTAGAATCTGTCCACTCCTGCTT  
+HWI-EAS443:3:72:1617:254#0/1  
a`aaa\_abaPaaa^][ab^`\_^\_a]\_\_XX]\_U\_X\_UWT^\_  
@HWI-EAS443:3:72:1669:1838#0/1  
AATCAACCCGAGTGGTTCAGAAACATCCTGAGCATGGCAC  
+HWI-EAS443:3:72:1669:1838#0/1  
Z\_bbbbaa\_aaa^aa^\_\_````a`a^ZY^`\_``\_^^^]\_W  
@HWI-EAS443:3:72:1693:222#0/1  
CAGTAAACAGAACACACCAATACTCAGAAAAGGGAAAGTG  
+HWI-EAS443:3:72:1693:222#0/1  
aabaa`a\_a``¥SaaaY\_\_ab\_``S`\_¥`\_U¥\_Z^a\_a^`  
@HWI-EAS443:3:72:1698:883#0/1  
ATTGAAGTACTTCAGGTCAATGCTTGCTAGCATTCTGCT  
+HWI-EAS443:3:72:1698:883#0/1  
abVaSY[abbba`a^V[bbaaaaaaaaaba^a``aaa``]  
@HWI-EAS443:3:72:1722:177#0/1  
CAGATACACATATAGGTGCCATAGGGGAGACACACAAATT

+HWI-EAS443:3:72:1722:177#0/1  
aa^aa`abaabbbb`\_aaY¥]aa^\_a\_a[[a`a\_\_\_`a`  
@HWI-EAS443:3:72:1753:147#0/1  
GATTCCCCTAACTTGCAGGTCCTGTAGAATCTGTCCACT  
+HWI-EAS443:3:72:1753:147#0/1  
a`b`aab\_aa\_[`a\_aVaY\_\_aa\_\_a^\_aXa`\_WT\_T^  
@HWI-EAS443:3:72:1759:1663#0/1  
AAAAATTCCAGCGCAAATGCCATAAGCACCACATTCCT  
+HWI-EAS443:3:72:1759:1663#0/1  
ab[`[ba`[]¥`SXZW^aTaJX¥aa\_[R]\_`\_`[a]\_\_]¥  
@HWI-EAS443:3:72:1766:1498#0/1  
GAGTAAATGAATCAGCTGACATGAGTATTGGAGTAACAGT  
+HWI-EAS443:3:72:1766:1498#0/1  
PRX`\_aaaa¥b`baYbbab^b]aa\_bbbaaaa`^bab\_¥X  
@HWI-EAS443:3:72:1770:123#0/1  
AGATCTTCATGATCTCAGAGAACTCTTCTTTCTTGATCCG  
+HWI-EAS443:3:72:1770:123#0/1  
a`\_aa`aaa][YSXMU`Ra]\_Xa[a`a`b\_¥`]LOXMI\_  
@HWI-EAS443:3:72:1771:425#0/1  
CGGATCAAGAAAGAAGAGTTCTCTGAGATCATGAAGATCT  
+HWI-EAS443:3:72:1771:425#0/1  
abaaaaabbbbbbabaabb\_a`abaaaa`aaabaaa`\_`  
@HWI-EAS443:3:72:1772:1138#0/1  
GGTAATGCCAGCCCATGGTCCAGCCAAAAGCATGGAATAT  
+HWI-EAS443:3:72:1772:1138#0/1  
a\_N`aa]]`a`]]][\_[R[\_^^\_V¥`\_Z`XT^¥QLV¥^  
@HWI-EAS443:3:72:1791:227#0/1  
CCTCCATCTGATACTAATAGCCCTACCTTTGATTGGGTTT  
+HWI-EAS443:3:72:1791:227#0/1  
\_`a`\_¥\_\_^]]`^¥\_]ZX[¥[¥YQVYUZ][XLJWROTU  
@HWI-EAS443:3:72:191:1059#0/1  
CTGCAACGGCCAGATGGCTCTTCAATTGTTTCATCAAAGA  
+HWI-EAS443:3:72:191:1059#0/1  
`Sab`Wa`^aa[^`]¥[P^`\_[Z`]¥¥¥TK¥a¥[]¥¥YZZ  
@HWI-EAS443:3:72:210:513#0/1  
CCCGGATTGATGCCAGGGTCGACTTCGAGTCTGGACGGAT  
+HWI-EAS443:3:72:210:513#0/1  
a`\_aabaa`[ab`^`[a`¥a^]]]aa`X`]aaa`][[]]TV  
@HWI-EAS443:3:72:242:1786#0/1  
CTTGGGAGTCTCGATACTGAATCTTGGACAAAAGAAATAC  
+HWI-EAS443:3:72:242:1786#0/1  
aVY`VNJZ[bYMZ\_¥`\_XQ¥QZ`]X\_Z^^^\_[^¥[^X\_\_  
@HWI-EAS443:3:72:266:81#0/1  
AATACTCAGAAAAGGGAAAGTGGACGACAAACACAGAGAC  
+HWI-EAS443:3:72:266:81#0/1  
a`a\_\_aaaa¥aYaaaa`Z`Saa`\_a`\_`a]\_^¥`aW]]U  
@HWI-EAS443:3:72:267:404#0/1  
CACTGACATTAATACGATGACCAAAGATGCAGAGAGAGG  
+HWI-EAS443:3:72:267:404#0/1  
a\_bba]`S^aaaaabaab`^aaaaaaaaaaaaaaaa`a`a^

@HWI-EAS443:3:72:274:137#0/1  
CTGCTTAAAATGGGAGCTAATGGATGATGATTATCGGGGA  
+HWI-EAS443:3:72:274:137#0/1  
a```aa¥`¥`aaa]aaa````¥abbaaaa\_aa\_¥Ua``^  
@HWI-EAS443:3:72:274:2002#0/1  
TGCATTCACTATGAGAGCAAATCGTCGGATGATTGGAGC  
+HWI-EAS443:3:72:274:2002#0/1  
¥\_\_\_aa`¥```aXa]b^b``¥`\_aZHa\_S]PX[GWWU]a\_  
@HWI-EAS443:3:72:286:1295#0/1  
GGGAGCTAATGGATGATGATTATCGGGGAAGACTTTGTAA  
+HWI-EAS443:3:72:286:1295#0/1  
aaaaabbZZbaab`bbabbbbabbbaabaabaaaaa^aa  
@HWI-EAS443:3:72:328:304#0/1  
AGATAAACTAACTCAAGGTCGCCAGACTTATGATTGGACA  
+HWI-EAS443:3:72:328:304#0/1  
aaaa`[^`^aaa`aaaaZ\_a\_\_`〕``\_`Ta\_\_\_\_YU]`¥\_  
@HWI-EAS443:3:72:33:1921#0/1  
CCAGGGTCGACTTCGAGTCTGGACGGATCAAGAAAGAAGA  
+HWI-EAS443:3:72:33:1921#0/1  
aa][WZV`Z\_`YWZSUUW[TRN[\_UV¥USWVSRY[V[[VZ  
@HWI-EAS443:3:72:341:1717#0/1  
AAAAATTCCAGCGCAAATGCCATAAGCACCACATTCCCT  
+HWI-EAS443:3:72:341:1717#0/1  
aa`ZQ\_R]^\_\_\_Ya`]Z¥SU)`\_X[Z¥[[\_a]^ZY)`[]¥  
@HWI-EAS443:3:72:344:533#0/1  
ATGGATTTGTGGCTAATTTTAGCATGGAGCTACCCAGCTT  
+HWI-EAS443:3:72:344:533#0/1  
0]aa`abba`[[`[¥V`aa[[a[V[^a¥aXQ`]\_dWT[^a  
@HWI-EAS443:3:72:423:1706#0/1  
ATTCGATCTAAAGACTTCTATGGTGTGGCCAATGCAGTT  
+HWI-EAS443:3:72:423:1706#0/1  
a``a]a\_a\_`a]Y^\_\_^`\_]a[VUWYWYY\_`[\_V^^X]Y  
@HWI-EAS443:3:72:42:1293#0/1  
TGCAGGTCCAAGGTCATTGTTTATCATGTTGTTCTTTATC  
+HWI-EAS443:3:72:42:1293#0/1  
Zab``Z\_baT\_b`aa[aaaa^`a^a[]YaY`aab]aaa`  
@HWI-EAS443:3:72:430:1728#0/1  
CGATACTGAATCTTGGACAAAAGAAATACACCAAGACAAT  
+HWI-EAS443:3:72:430:1728#0/1  
aaa\_Za`Ka`ab`a[[R\_\_ZVT``a\_]abaa^^`\_\_a`^  
@HWI-EAS443:3:72:480:1405#0/1  
GGCTATTAGTATCAGATGGAGGACCAAACCTTATAACAATAT  
+HWI-EAS443:3:72:480:1405#0/1  
`bbbbbb]¥Y\_baba]`a\_ZQ[¥Y\_b\_]``baaabaaaa`  
@HWI-EAS443:3:72:484:1295#0/1  
AGCTGATTCATTTACTCCAGACACTCCAAAGCTGGGTAGC  
+HWI-EAS443:3:72:484:1295#0/1  
aa`\_W``b\_\_b`aaaabaa`aaa``aa¥Va[^`ZZ`U\_R\_  
@HWI-EAS443:3:72:486:1782#0/1  
GGCTTGTTGAGAATAGAACGATTCTCTTGGGAATCCA

+HWI-EAS443:3:72:486:1782#0/1  
aa`¥YV\_]a^^^aa^U^b\_VTY^`]¥\_^¥]Z^\_WY` [ `  
@HWI-EAS443:3:72:492:625#0/1  
TGGACCTGCAACGGCCAGATGGCTCTTCAATTGTTTCATC  
+HWI-EAS443:3:72:492:625#0/1  
abaa\_aa`aa`aa`aa`U`\_` [T[\_`aa\_WR` ``¥` \_\_\_`  
@HWI-EAS443:3:72:497:595#0/1  
GTGGGATGGGCTCCAATCATCCGACGATTTTGCTCTCATA  
+HWI-EAS443:3:72:497:595#0/1  
aXaa`aa\_]\_\_`\_]SG¥`\_\_\_aZZ\_\_^^\_¥\_¥US]W  
@HWI-EAS443:3:72:509:834#0/1  
CAGGTCCTGTAGAATCTGTCCACTCCTGCTTGTATTCCCT  
+HWI-EAS443:3:72:509:834#0/1  
abab\_aabaaa\_]aaaaY`\_`]\_]\_a`X`aa````\_```a]  
@HWI-EAS443:3:72:517:17#0/1  
GCATTTGCGAAAAGCTTGAACAGTCTGGGCTCCCAGTAGG  
+HWI-EAS443:3:72:517:17#0/1  
a`a`a`a\_[IX]`\_X^`\_¥^¥^\_W¥¥\_WWZUZ^YY¥VUW^  
@HWI-EAS443:3:72:531:176#0/1  
GGGATGGGCTCCAATCATCCGACGATTTTGCTCTCATAGT  
+HWI-EAS443:3:72:531:176#0/1  
aaa```aa`aa`\_`^`^W`]\_\_\_\_\_]\_\_^\_]Y^^^^]Y  
@HWI-EAS443:3:72:536:1441#0/1  
GTTCTGTTTACTGTGTCCATGGTGTATCCTGTTCCCTGTTC  
+HWI-EAS443:3:72:536:1441#0/1  
a\_abaa`\_abaaa]`\_aa`a`\_Xa`a`a`\_]\_a\_\_\_\_^\_\_\_\_  
@HWI-EAS443:3:72:54:409#0/1  
GTCCAAGATTGAGTATCGAGACTCCCAAGACCGTACTTAG  
+HWI-EAS443:3:72:54:409#0/1  
aZa\_XZ``^a```W````\_\_\_\_^[[^\_XZ^UZ^YQYS[]]ZU  
@HWI-EAS443:3:72:564:178#0/1  
TTTTGCTCTCATAGTGAATGCACCAAACCATGAGGGAATA  
+HWI-EAS443:3:72:564:178#0/1  
[¥bTTX]aU[[]]`bY]]abbaa`]]\_]Z^a`aa^`]UZ`  
@HWI-EAS443:3:72:56:1068#0/1  
ACCCGAGTGGTTCAGAAACATCCTGAGCATGGCACCCATA  
+HWI-EAS443:3:72:56:1068#0/1  
aaaaY`]Y]aSU`¥¥]U[ZV]\_UZU[YU[WS[\_[[¥^]]  
@HWI-EAS443:3:72:603:2036#0/1  
TGGTCCTCCATCTGATACTAATAGCCCTACCTTTGATTGG  
+HWI-EAS443:3:72:603:2036#0/1  
`\_FH[\_abbbaaXaaQ`¥aa`\_RZ`TTV[[[[\_^\_VTVR  
@HWI-EAS443:3:72:607:1304#0/1  
ACAGAATCAATCTCTTTATGACTGACAAAGGGATTGAGGG  
+HWI-EAS443:3:72:607:1304#0/1  
]\_¥¥¥aY\_X`VaW¥\_^^Y`PU¥^^\_Sba^VXZWVa]P[T  
@HWI-EAS443:3:72:615:2006#0/1  
CCTTTCCCTAGTCTTGCCATTTTGTGTTGAGAACATTATGG  
+HWI-EAS443:3:72:615:2006#0/1  
abaabbbba[\_`ba\_]`aaaa\_aZ``````aaa```\_a`ZY



@HWI-EAS443:3:72:656:1559#0/1  
GAACTGCTAGGGAAAAATTTCTCGAATAGATTGCAGCACT  
+HWI-EAS443:3:72:656:1559#0/1  
abbaa\_a¥Z[Ubbba^[aaaa`aa\_aaYza`aY]^Z`a\_a  
@HWI-EAS443:3:72:809:101#0/1  
CAGGAATGTGTAGTTGCAACGGCATCATATCCATGCTTT  
+HWI-EAS443:3:72:809:101#0/1  
abaaa`baZa]babbbba\_abbYbbabbbbaZ`a\_X`a`  
@HWI-EAS443:3:72:873:1247#0/1  
GAGAGGCTATCTAATAAGAGCACTGACATTAATACGATG  
+HWI-EAS443:3:72:873:1247#0/1  
abba\_[aaa`a`[]aa`U¥]S\_\_PZX\_\_`\_`a^^\_]UZX  
@HWI-EAS443:3:72:885:1584#0/1  
ATGGGCTCCAATCATCCGACGATTTTGCTCTCATAGTGAA  
+HWI-EAS443:3:72:885:1584#0/1  
`a`Ya`¥`^V¥`a\_aaaaaV``\_a\_aa`aa`\_`\_]^[^\_  
@HWI-EAS443:3:72:916:1452#0/1  
ACAAACAAGGGTAGATAAACTAACTCAAGGTCGCCAGACT  
+HWI-EAS443:3:72:916:1452#0/1  
`a`a^`baZ^aTab]]aa`\_ZOM^U\_a\_aV[a`QUQ¥\_  
@HWI-EAS443:3:72:937:1047#0/1  
CCAGGAATGTGTAGTTGCAACGGCATCATATCCATGCTT  
+HWI-EAS443:3:72:937:1047#0/1  
ababb`abbabaabaabb``aaa`aa`aaaaaaaa`a`a`  
@HWI-EAS443:3:72:95:1230#0/1  
GAACAACATGATAAACAATGACCTTGGACCTGCAACGGCC  
+HWI-EAS443:3:72:95:1230#0/1  
\_ZQ\_¥\_aK¥WX\_^¥^]abYZV``X`U[ab¥]``\_a][`  
@HWI-EAS443:3:72:965:389#0/1  
GTCTGGACGGATCAAGAAAGAAGAGTTCTCTGAGATCATG  
+HWI-EAS443:3:72:965:389#0/1  
]^bb^a`\_bbbaaba`[bbabbaba`babbbbaa]aa]abb  
@HWI-EAS443:3:72:96:1379#0/1  
GAGCACTGACATTAATACGATGACCAAAGATGCAGAGAG  
+HWI-EAS443:3:72:96:1379#0/1  
^\_baabaaaaababba`Xb`¥a`bbbbb`aa``aaa^aa  
@HWI-EAS443:3:72:987:647#0/1  
GAAATTTTTCCCTAGCAGTTCATATAGGAGACCGGTTGGA  
+HWI-EAS443:3:72:987:647#0/1  
a\_a`aa^[U¥¥Z]\_X[T^U^\_^\_]`^`ZV\_WWYZ]X]]ZZ  
@HWI-EAS443:3:73:1019:753#0/1  
CAGCTGATTCATTTACTCCAGACTCCAAAGCTGGGTAG  
+HWI-EAS443:3:73:1019:753#0/1  
aaaabaaaba\_baaa`ba\_aa``a[a^\_a`a\_\_\_\_^aX\_\_  
@HWI-EAS443:3:73:1023:1421#0/1  
CGAGTCTGGACGGATCAAGAAAGAAGAGTTCTCTGAGATC  
+HWI-EAS443:3:73:1023:1421#0/1  
aaZb^babb``aaa\_aabaaabaaa\_ba\_\_\_baaa`aaaa  
@HWI-EAS443:3:73:1037:1111#0/1  
GAGAATAGAACGATTCCTCTTGGGAATCCAGGAATGTGTA

+HWI-EAS443:3:73:1037:1111#0/1  
]\_]S``WZbXT¥\_YLP[^`P`]]YZ¥]ZPNGL`]X^OX  
@HWI-EAS443:3:73:1049:564#0/1  
CCCGGATTGATGCCAGGGTCGACTTCGAGTCTGGACGGAT  
+HWI-EAS443:3:73:1049:564#0/1  
ababbbbbbbabbaabbb]aaaaaabaa\_abbaaYaaa`  
@HWI-EAS443:3:73:104:1155#0/1  
CTCAGAAAAGGGAAAGTGGACGACAAACACAGAGACTGGT  
+HWI-EAS443:3:73:104:1155#0/1  
aT`W\_PWPP[^[UZW`S\_V^\_ZSTW\_Z^^]¥U¥¥XWWWWU  
@HWI-EAS443:3:73:1053:475#0/1  
TGGGTTGTTATCTCTATTTCTCTTTGTTTCATTGATTCCA  
+HWI-EAS443:3:73:1053:475#0/1  
a\_ZZ]`¥WYH[Y\_Y]¥Z`¥TR[YT^\_aUYZ[\_`a[\_]VY  
@HWI-EAS443:3:73:1059:1297#0/1  
CTCCAATCATCCGACGATTTTGCTCTCATAGTGAATGCAC  
+HWI-EAS443:3:73:1059:1297#0/1  
aa`aa`aaaa``a\_`^\_aaa`a`aaa`aa`¥`\_^a`^`Z  
@HWI-EAS443:3:73:1063:1646#0/1  
AAGAGGAATCGTTCTATTCTCAACACAAGCCAAAGGGGAA  
+HWI-EAS443:3:73:1063:1646#0/1  
`baaa]¥`\_`bYU]TMRV`YI]GYV[a\_^]VT\_X]¥¥ZW\_  
@HWI-EAS443:3:73:1076:626#0/1  
CTAAAGACTTCTATGGTGTGGCCAATGCAGTTGCTGCCG  
+HWI-EAS443:3:73:1076:626#0/1  
[ab``\_ZX``aba``VXUZa\_a\_a¥RPNXZSZ]Y]\_T[b  
@HWI-EAS443:3:73:107:1153#0/1  
AAAATTTCTCGAATAGATTGCAGCACTTCTGGTACATCTG  
+HWI-EAS443:3:73:107:1153#0/1  
`U\_J]`aa\_\_PY[^R[^¥¥\_^[Z^Z^]^YZ^VX^\_][][]  
@HWI-EAS443:3:73:1098:1062#0/1  
AAAAATTCAGCGCAAATGCCATAAGCACACATTCCCT  
+HWI-EAS443:3:73:1098:1062#0/1  
abbaV[abaaaaaaaa]\_a`aaa`\_aa\_\_`a`a^\_`V`  
@HWI-EAS443:3:73:111:1233#0/1  
GACGGATCAAGAAAGAAGAGTTCTCTGAGATCATGAAGAT  
+HWI-EAS443:3:73:111:1233#0/1  
abab^a^bbaaaa````\_`a^ab\_ba\_\_\_\_]a`a`aX``a\_  
@HWI-EAS443:3:73:1237:1518#0/1  
TGGAATATGATGCCGTTGCAACTACACATTCTGGATTCC  
+HWI-EAS443:3:73:1237:1518#0/1  
X\_SX`baba`a[bXbab¥Ya```ba\_\_aa\_aaS][0\_\_\_a  
@HWI-EAS443:3:73:1252:1600#0/1  
GAAGAGCCATCTGGGCCGTTGCAGGTCCAAGGTCATTGTT  
+HWI-EAS443:3:73:1252:1600#0/1  
aaa\_¥`Y¥` [TV`\_a^X`UXTU¥\_ZW\_Z^^[VSZ^[^YVY  
@HWI-EAS443:3:73:1254:26#0/1  
ATTTCTTTTGTCCAAGATTTCAGTATCGAGACTCCCAAGAC  
+HWI-EAS443:3:73:1254:26#0/1  
abbbabbbbb``^bbabb`a`aab`babaRaa\_`aaa\_Z

@HWI-EAS443:3:73:1336:307#0/1  
CTTGGTTCATTATCCTCAGGTAGTGGTCCATCAATCGGGT  
+HWI-EAS443:3:73:1336:307#0/1  
^`^\_W`T\_b`bb\_\_¥b`W\_T\_a`a`UOY\_aaaa\_¥`b]Z  
@HWI-EAS443:3:73:1346:1423#0/1  
AAAAATTCCAGCGCAAATGCCATAAGCACCATTCCT  
+HWI-EAS443:3:73:1346:1423#0/1  
aa`Y[aa¥^\_Q\_^X¥\_\_WW\_X\_a\_[ ]aUa^RY^`XSY\_X[  
@HWI-EAS443:3:73:1347:1598#0/1  
CCCTATTGTTCTTTGCGTGACCATCTTCTTGGTCATGTTG  
+HWI-EAS443:3:73:1347:1598#0/1  
aabbabbbbaababaaa`a\_[\_]aZ`a]aaaV`\_aaa`]^  
@HWI-EAS443:3:73:1390:443#0/1  
GAAATCTATTAGCCTTCCTGACTCATTAGCTGTTAGCCA  
+HWI-EAS443:3:73:1390:443#0/1  
aaaaaaabaaa`\_a`^aa`^a`aaa`\_` `[\_\_\_\_^ZV]  
@HWI-EAS443:3:73:1401:1424#0/1  
TTGGGTTTGATCCCACAGCTTCTTTAACTCAAATGATCTT  
+HWI-EAS443:3:73:1401:1424#0/1  
^Z`\_aJ^bbaaabab`^`aabbaaaa`aabaa\_a`aa¥aa  
@HWI-EAS443:3:73:1418:1423#0/1  
AAAAAACAAAGACTGAATAAGAGAGGCTATCTAATAAGAG  
+HWI-EAS443:3:73:1418:1423#0/1  
[\_^¥Y^bbaaa¥\_a]^aUR¥` `b`¥Y^^[BBBBBBBBBBB  
@HWI-EAS443:3:73:1434:522#0/1  
GGCCTCTTCTAATAGATGGCACAGCATCACTGAGTCCTGG  
+HWI-EAS443:3:73:1434:522#0/1  
abaabbbbbbbbababbbba^aabaabb`\_a\_bbaba`\_abb  
@HWI-EAS443:3:73:1435:1443#0/1  
ACGGTCTTGGGAGTCTCGATACTGAATCTTGGACAAAAGA  
+HWI-EAS443:3:73:1435:1443#0/1  
abaa\_baaaa\_a`a`\_^`\_a\_U\_a\_\_aa`\_]a^\_aZY  
@HWI-EAS443:3:73:1444:205#0/1  
AAAAATTCCAGCGCAAATGCCATAAGCACCATTCCT  
+HWI-EAS443:3:73:1444:205#0/1  
aaaaa`\_¥¥\_URU][ ]W¥VJFO]Y^¥^P^SOXZ]^XXX¥¥  
@HWI-EAS443:3:73:1459:186#0/1  
GCTCCAATCATCCGACGATTTTGCTCTCATAGTGAATGCA  
+HWI-EAS443:3:73:1459:186#0/1  
a`\_aaaa\_a`YU`\_Va`^\_\_aaV^^^X\_^][Z^^^`]UV  
@HWI-EAS443:3:73:1464:523#0/1  
CAGGAACAGGATACACCATGGACACAGTAAACAGAACACA  
+HWI-EAS443:3:73:1464:523#0/1  
ab`aabaabbaa`a` `aabaa\_a¥\_a`aa`Yaa\_a]\_^`  
@HWI-EAS443:3:73:1508:1431#0/1  
GTGATTGTGAAAGAAATCTCTGTGTCTTGTGAATTAGTCA  
+HWI-EAS443:3:73:1508:1431#0/1  
a^a\_aa^[^^^¥`\_\_`[¥^\_\_\_\_]\_\_\_\_\_`]W[Y]^TZTKO  
@HWI-EAS443:3:73:1537:1391#0/1  
AAAATTCCAGCGCAAATGCCATAAGCACCATTCCT

+HWI-EAS443:3:73:1537:1391#0/1  
a]\_Y\_aaa`[``[`]X`a\_]a`¥`\_a\_[``]`a]WXW`^  
@HWI-EAS443:3:73:1559:2019#0/1  
AGACTAGGGAAAGGGTACATGTTTCGAGAGTAAAAGAATGA  
+HWI-EAS443:3:73:1559:2019#0/1  
`]^ZV¥a`Y`S\_U[SO\_\_YT]Y[[WQ¥VaV`\_\_^`^^Z  
@HWI-EAS443:3:73:1594:843#0/1  
GGGATGGGCTCCAATCATCCGACGATTTTGCTCTCATAGT  
+HWI-EAS443:3:73:1594:843#0/1  
`b`aabbbaa`aa^aaaa\_\_aaa]]aaaa\_a\_a`aaaa\_  
@HWI-EAS443:3:73:1652:250#0/1  
AAAAATTCCAGCGCAAATGCCATAAGCACCATTCCT  
+HWI-EAS443:3:73:1652:250#0/1  
aaVa`aZNY`¥S¥G\_\_^^\_aTP^`\_[[Q`UU[MZa^XLUV  
@HWI-EAS443:3:73:1655:1537#0/1  
GTCTAGGGCCCGATTGATGCCAGGGTCGACTTCGAGTCT  
+HWI-EAS443:3:73:1655:1537#0/1  
aaa^]`baaaYab`^a`a`^\_]Sa``W\_a^SaaYa^^VU`  
@HWI-EAS443:3:73:1692:1756#0/1  
GGCTCCAATCATCCGACGATTTTGCTCTCATAGTGAATGC  
+HWI-EAS443:3:73:1692:1756#0/1  
Y]`Y^aba`a`a[\_aaaa[`aaa¥aa`^V[¥`aV\_]\_\_]\_  
@HWI-EAS443:3:73:1774:1097#0/1  
TGGCTCTTCAATTGTTTCATCAAAGACTACAGATACACATA  
+HWI-EAS443:3:73:1774:1097#0/1  
aa^aaa`a^[^]\_[[¥X\_\_R\_`¥SYO[]T]Y]]¥[^U`]  
@HWI-EAS443:3:73:1789:829#0/1  
GTTTCGAGAGTAAAAGAATGAAGATTCGAACACAAATACCA  
+HWI-EAS443:3:73:1789:829#0/1  
¥\_`^a[Z\_HXVW]V`YTW\_Z]a¥X[R\_Z[P[P[XX¥¥TT[  
@HWI-EAS443:3:73:183:51#0/1  
GTGGTAATGCCAGCCCATGGTCCAGCCAAAAGCATGGAAT  
+HWI-EAS443:3:73:183:51#0/1  
aaaa¥aa`]`\_\_\_\_\_^V¥\_\_WW[VFVY^¥¥VXZ¥W¥YYWW  
@HWI-EAS443:3:73:223:1590#0/1  
GTCCTCCATCTGATACTAATAGCCCTACCTTTGATTGGGT  
+HWI-EAS443:3:73:223:1590#0/1  
a\_aa\_aab^a]aaNX[]`W¥\_XaaaR[`Z^X[¥NZL]¥¥U  
@HWI-EAS443:3:73:249:167#0/1  
AACGATTCTCTTGGGAATCCAGGAATGTGTAGTTGCAAC  
+HWI-EAS443:3:73:249:167#0/1  
a¥\_``S]`\_^^^\_¥`W]^]UUX]]UY^]W^XX]YXWWUXX  
@HWI-EAS443:3:73:254:1045#0/1  
ATCAAACCCAATCAAAGGTAGGGCTATTAGTATCAGATGG  
+HWI-EAS443:3:73:254:1045#0/1  
`aaaa^aaa`aaaa`a`Za\_\_\_a\_aa```\_Z`\_]`\_]\_\_  
@HWI-EAS443:3:73:269:1947#0/1  
TATTGGTGTGTTCTGTTTACTGTGTCCATGGTGTATCCTG  
+HWI-EAS443:3:73:269:1947#0/1  
aaaaV¥¥``abba`\_aaabbab\_aYaaba`\_Q¥[`W`a`¥

@HWI-EAS443:3:73:305:1844#0/1  
AAGAAATCTATTAGCCTTCCTGACTCATTAGCTGTTAGGC  
+HWI-EAS443:3:73:305:1844#0/1  
]a[NV^\_b\_¥Yab`bb`^`a\_^aa\_aa¥[ `[a\_`WX\_TQ]  
@HWI-EAS443:3:73:369:316#0/1  
AACAGATCTTCATGATCTCAGAGAACTCTTCTTTCTTGAT  
+HWI-EAS443:3:73:369:316#0/1  
abaaaa\_a`baaaa`aa`aYa\_`aaaa\_a\_a`aaa^a`^  
@HWI-EAS443:3:73:418:1270#0/1  
GTGTCTAGGGCCCGATTGATGCCAGGGTCGACTTCGAGT  
+HWI-EAS443:3:73:418:1270#0/1  
aWRU`QJOLV\_]\_]YVOSYL^[¥¥VOFY[[YZQVPQVU  
@HWI-EAS443:3:73:442:626#0/1  
TGGGTGGGATTCTCAAGGAAAGCCATAGCCTCTAGAACA  
+HWI-EAS443:3:73:442:626#0/1  
]\_U¥QaYa\_IJ¥[TPaY\_HP`a`a`a`aaRQR[¥`\_aQ[`  
@HWI-EAS443:3:73:467:1634#0/1  
GGGCAATGAAAAGAAGGCCAAACTGGCAAATGTTGTGAGA  
+HWI-EAS443:3:73:467:1634#0/1  
abab\_bbbbabaa\_^[abaaabba`\_abaaa\_]`aYZ¥\_`  
@HWI-EAS443:3:73:47:1582#0/1  
AATCTGTCCACTCCTGCTTGTATTCCCTCATGGTTTGGTG  
+HWI-EAS443:3:73:47:1582#0/1  
\_Z]a^L[baa\_[a`aa`]RYa^\_[`aW[W[WWY^SJSZU  
@HWI-EAS443:3:73:541:1170#0/1  
CATTTGCGAAAAGCTTGAACAGTCTGGGCTCCCAGTAGGG  
+HWI-EAS443:3:73:541:1170#0/1  
`TW]P]a\_¥^¥Yab\_]¥R]]\_[a]\_Z`\_`a`aTY[X^SN  
@HWI-EAS443:3:73:562:1355#0/1  
GGCCCGGATTGATGCCAGGGTCGACTTCGAGTCTGGACGG  
+HWI-EAS443:3:73:562:1355#0/1  
¥J\_ababZ^ba`\_`baaX\_\_^aaa]a^`¥^S`¥]`[T[Z  
@HWI-EAS443:3:73:574:630#0/1  
CAGCTAATGAGTCAGGAAGGCTAATAGATTTCTTAAAGGA  
+HWI-EAS443:3:73:574:630#0/1  
aaabbbbbbbba`a`bb`]aaaaabaa`aba\_aaaaabaa  
@HWI-EAS443:3:73:63:122#0/1  
GTGTTCTGTTACTGTGTCCATGGTGTATCCTGTTCTGT  
+HWI-EAS443:3:73:63:122#0/1  
`]baaabbb\_ba^\_aa\_a\_\_\_\_aaaXaX\_`\_\_\_\_`^\_^`\_Y  
@HWI-EAS443:3:73:667:134#0/1  
GGGTTGTTATCTCTATTTCTCTTTGTTTCATTGATTCCAT  
+HWI-EAS443:3:73:667:134#0/1  
aaaWaa`a^`\_a¥`\_aa`X]\_¥\_a`\_^\_]\_`a^`][W^^  
@HWI-EAS443:3:73:744:749#0/1  
CAGTGATGCTGTGCCATCTATTAGAAGAGCCCTATTTTC  
+HWI-EAS443:3:73:744:749#0/1  
\_S\_[a]INaaa^a[`Ta`aXY¥a`YS^\_\_ZWFXX`^VM^¥  
@HWI-EAS443:3:73:749:62#0/1  
ATCCTTTAAGAAATCTATTAGCCTTCCTGACTCATTAGCT



@HWI-EAS443:3:74:1273:432#0/1  
GAAAAATTTCTCGAATAGATTGCAGCACTTCTGGTACATC  
+HWI-EAS443:3:74:1273:432#0/1  
abaa^aba`¥\_\_\_]\_\_]aab[\_]I]aMaW^[^`a`Ya^aWG  
@HWI-EAS443:3:74:1301:1534#0/1  
GAGTATTGGTGTGTTCTGTTTACTGTGTCCATGGTGTATC  
+HWI-EAS443:3:74:1301:1534#0/1  
aa`0\_aaa\_[^W]^aa^`a\_a`a]¥[\_a[aaUX[\_^T  
@HWI-EAS443:3:74:1314:1535#0/1  
CAGTGATTGTGAAAGAAATCTCTGTGTCTTGTGAATTAGT  
+HWI-EAS443:3:74:1314:1535#0/1  
Y`\_I\_\_S`\_`a`\_b`\_T`^bba`^b[0^YHOU`````U\_  
@HWI-EAS443:3:74:1340:171#0/1  
CATCATCATCCCAGGACTCAGTGATGCTGTGCCATCTATT  
+HWI-EAS443:3:74:1340:171#0/1  
T\_^WabObbKS`a`bUUaa\_babb``aba\_\_Q\_\_\_bbTbb  
@HWI-EAS443:3:74:1361:1981#0/1  
AGCTAATGGATGATGATTATCGGGGAAGACTTTGTAATCC  
+HWI-EAS443:3:74:1361:1981#0/1  
Y`bbbabbabbabbababaaaa\_`aaa\_aaaa\_aaaa  
@HWI-EAS443:3:74:1399:1699#0/1  
CATTTGCGAAAAGCTTGAACAGTCTGGGCTCCCAGTAGGG  
+HWI-EAS443:3:74:1399:1699#0/1  
abbbbbbbbab`baabbabba\_aa\_a^ba`a\_aa`\_Z  
@HWI-EAS443:3:74:142:123#0/1  
GCGAAAAGCTTGAACAGTCTGGGCTCCCAGTAGGGGGCAA  
+HWI-EAS443:3:74:142:123#0/1  
aaaa^]¥aaaaba\_a^bX`^\_a\_[0¥^\_J]WW`\_]U`WWR  
@HWI-EAS443:3:74:1434:1532#0/1  
CATGGTTTGGTGCATTCACTATGAGAGCAAAATCGTCGGA  
+HWI-EAS443:3:74:1434:1532#0/1  
abaab\_ba[Z`b`]\_baaabbaaab\_b^aba`a^a]R`\_`  
@HWI-EAS443:3:74:1446:1733#0/1  
GCCTCTTCTAATAGATGGCACAGCATCACTGAGTCCTGGG  
+HWI-EAS443:3:74:1446:1733#0/1  
aa\_a`\_`\_`aaa`Ta`\_^TX``a\_U]R\_[W`U^XY]] [RX  
@HWI-EAS443:3:74:1467:1355#0/1  
GAACAAAGAGGAAATAGAGATAACAACCCACTTTCAAAGA  
+HWI-EAS443:3:74:1467:1355#0/1  
^]abbb^baab`aababb\_bbab\_a`bY\_¥b\_a¥aaaaaa  
@HWI-EAS443:3:74:1467:1629#0/1  
TCTGCATCCCAGGTGTTGCGATAGCCCTTCTTTTAACTT  
+HWI-EAS443:3:74:1467:1629#0/1  
aabaab``aabb`b\_aa\_a\_\_aa[\_aaab`a`ba`TU\_a  
@HWI-EAS443:3:74:1475:344#0/1  
CATGTACCCTTTCCCTAGTCTTGCCATTTTGTGAGAAC  
+HWI-EAS443:3:74:1475:344#0/1  
^Z`Z`ba`aabbbbNa`bbaa`b`[^abaX[bbaK^aa¥N  
@HWI-EAS443:3:74:1496:1071#0/1  
TTGGGAATCCAGGAATGTGTAGTTGCAACGGCATCATATT

+HWI-EAS443:3:74:1496:1071#0/1  
`W\_aa]` `X¥\_]` `a\_` ] `ba\_a¥ab^a^Q\_` `M` aL\_a` a\_  
@HWI-EAS443:3:74:1533:1886#0/1  
CAAACACAGAGACTGGTGCACCCCAGCTCAACCCGATTGA  
+HWI-EAS443:3:74:1533:1886#0/1  
abUaaaaababb^ba^P` a^¥Ta]]]a]Uab¥Z]^a^a¥]  
@HWI-EAS443:3:74:1535:878#0/1  
CCCAGTGGTTCAGAAACATCCTGAGCATGGCACCCATAA  
+HWI-EAS443:3:74:1535:878#0/1  
aaa` abab` ab` bbbbabbaabbaab` bbaU` aVaaaa`  
@HWI-EAS443:3:74:1555:1231#0/1  
TGTCAATCCGACTCTACTTTTCCTAAAAATCCAGCGCAA  
+HWI-EAS443:3:74:1555:1231#0/1  
RYJWX\_V]¥\_` \_^T^\_Z\_\_¥\_]W\_a` R¥¥a¥XXaa\_Z]` [  
@HWI-EAS443:3:74:159:1984#0/1  
GGTCCCTCATCTGATACTAATAGCCCTACCTTTGATTGGG  
+HWI-EAS443:3:74:159:1984#0/1  
`NV\_]`[^` [Ra\_\_RXW^ZW\_V]Y\_^` W[VZ\_¥]NXRV¥PP  
@HWI-EAS443:3:74:1658:1124#0/1  
AAAGAACAACATGATAAACAATGACCTTGGACCTGCAACG  
+HWI-EAS443:3:74:1658:1124#0/1  
abbbab\_ab` abaabbaa]a` `b` `\_\_aaaa¥\_ba\_]\_\_¥  
@HWI-EAS443:3:74:1670:53#0/1  
CATGATCTCAGAGAACTCTTCTTTCTTGATCCGTCAGAC  
+HWI-EAS443:3:74:1670:53#0/1  
`ab^`[[a^abaaaa` aabbabba\_bba` b\_¥` \_¥` \_` \_W  
@HWI-EAS443:3:74:1677:655#0/1  
ATGGGCTCCAATCATCCGACGATTTTGCTCTCATAGTGAA  
+HWI-EAS443:3:74:1677:655#0/1  
abbbb` baaaaaS` a\_\_ba¥b` abaab[a` aRaa\_a^a^  
@HWI-EAS443:3:74:1704:983#0/1  
GCTCCAATCATCCGACGATTTTGCTCTCATAGTGAATGCA  
+HWI-EAS443:3:74:1704:983#0/1  
\_` babbbb` bba\_ba]baabaab\_aaaaaba` a[aa]^\_  
@HWI-EAS443:3:74:1768:2044#0/1  
TGTGGGATCAAACCAATCAAAGGTAGGGCTATTAGTATC  
+HWI-EAS443:3:74:1768:2044#0/1  
`] [aaab\_aaaa\_\_` aaaaa` \_aa0\_a` ]` \_aa\_` a]\_\_^  
@HWI-EAS443:3:74:1769:507#0/1  
CCAGTGATTGTGAAAGAAATCTCTGTGTCTTGTGAATTAG  
+HWI-EAS443:3:74:1769:507#0/1  
aaabaaaaaUa` aaaaaa` a` a` ^]]\_baTXa]aaaXZ  
@HWI-EAS443:3:74:243:178#0/1  
GTGAAGATTCCGTATATTGTATAAGTTTGGTCCTCCATCT  
+HWI-EAS443:3:74:243:178#0/1  
a` aa^aaaa\_aa\_¥a\_aaa\_` a^^a^` `\_\_¥¥\_\_¥[^\_]\_  
@HWI-EAS443:3:74:245:443#0/1  
ATTCGATCTAAAGACTTCTATGGTGTGGCCAATGCAGTT  
+HWI-EAS443:3:74:245:443#0/1  
a\_[aa` \_Z` \_\_]RWY\_^U]^` \_\_Z]]Z\_^\_\_¥¥¥¥X^V^



@HWI-EAS443:3:74:290:1580#0/1  
GACGGATCAAGAAAGAAGAGTTCTCTGAGATCATGAAGAT  
+HWI-EAS443:3:74:290:1580#0/1  
\_`ab`babbbb\_bbabaaZ]^aaaaa`a¥^aaaa\_]a`a`  
@HWI-EAS443:3:74:292:1672#0/1  
GTCTGGAGTAAATGAATCAGCTGACATGAGTATTGGAGTA  
+HWI-EAS443:3:74:292:1672#0/1  
H¥U`^bababbbbaa¥bbb\_aa``babbaaa\_\_baaa\_b^b  
@HWI-EAS443:3:74:29:772#0/1  
CACCTATATGTGTATCTGTAGTCTTTGATGAACAATTGAA  
+HWI-EAS443:3:74:29:772#0/1  
aabb]bbbbbaba^bbbbaaaaabbbbbbbbaaaaaaaaaab  
@HWI-EAS443:3:74:309:193#0/1  
CAGAAACATCCTGAGCATGGCACCCATAATGTTCTCAAAC  
+HWI-EAS443:3:74:309:193#0/1  
`b`abbbaabbababb`bba`bb\_aabaaa`aa\_\_a`^`  
@HWI-EAS443:3:74:347:206#0/1  
AGACAACATGACCAAGAAGATGGTCACGCAAAGAACAATA  
+HWI-EAS443:3:74:347:206#0/1  
aaa`aa`aZ^^a]^`\_`\_a`^^\_Z`^`X[]`]]]ZW^]  
@HWI-EAS443:3:74:360:2028#0/1  
AGAGAGGCAAGTTAAAAAGAAGGGCTATCGCAACACCTGG  
+HWI-EAS443:3:74:360:2028#0/1  
a\_a^]aaaa\_W]^`a^aaa^aa\_¥[a\_aU`Y^\_aa`^^TXW  
@HWI-EAS443:3:74:36:682#0/1  
ACTTTGTAATCCCCTGAATCCCCTTTGTCTAGTCATAAAGAG  
+HWI-EAS443:3:74:36:682#0/1  
ababab\_babb\_baaa[HXa`a\_a\_aUZYa]^`^\_\_PVY]^`  
@HWI-EAS443:3:74:420:907#0/1  
ATGGCTTTCCTTGAAGAATCCCACCCAGGAATATTTGAGA  
+HWI-EAS443:3:74:420:907#0/1  
aaaaaa`aa`a``aaaa^`aa`aa\_Q]XPV`\_\_\_`¥Y^\_  
@HWI-EAS443:3:74:467:1706#0/1  
AGTGGGTATGCACAAACAGACTGTGTTCTAGAGGCTATGG  
+HWI-EAS443:3:74:467:1706#0/1  
Y^WaY^PYUZbK¥UY^a]\_T¥a¥\_a^aaa]O[^`BBBBBB  
@HWI-EAS443:3:74:476:1393#0/1  
AGTAAACAGAACACACCAATACTCAGAAAAGGGAAAGTGG  
+HWI-EAS443:3:74:476:1393#0/1  
aaabb`baa]^`a`b`bbababbaba`aY`aaaaX[`a]a`  
@HWI-EAS443:3:74:506:1862#0/1  
CTCAAACAAAATGGCAAGACTAGGGAAAGGGTACATGTTC  
+HWI-EAS443:3:74:506:1862#0/1  
\_a\_¥[`UY`^`\_]`^^\_aa^T\_a]VX`a\_X[F[aa\_^ZXa  
@HWI-EAS443:3:74:507:387#0/1  
GCCCCGATTGATGCCAGGGTCGACTTCGAGTCTGGACGGA  
+HWI-EAS443:3:74:507:387#0/1  
ababbbbaaba]abbaaaaa¥aa^\_aaa`aaY]aaaa]^a¥  
@HWI-EAS443:3:74:629:1443#0/1  
TGTTGGGATGGGCTCCAATCATCCGACGATTTTGCTCTCA

+HWI-EAS443:3:74:629:1443#0/1  
`ZZ¥ZVW[\_^GMQWMRabb[`P`^^ORRW\_]a\_VY\_X  
@HWI-EAS443:3:74:644:497#0/1  
GATCCGTCCAGACTCGAAGTCGACCCTGGCATCAATCCGG  
+HWI-EAS443:3:74:644:497#0/1  
\_aa`\_XUa\_a\_a\_[a`a`PQ^¥^^`IZ¥\_¥VFW[`S¥P^  
@HWI-EAS443:3:74:645:1487#0/1  
ATTGGTGTGTTCTGTTTACTGTGTCCATGGTGTATCCTGT  
+HWI-EAS443:3:74:645:1487#0/1  
]ba]]Y\_\_`[aa`¥Ya]Z`ab\_`aZ]aa]L]Z`P^[`¥V  
@HWI-EAS443:3:74:658:432#0/1  
GAGATTTCTTTCACAATCACTGGGACAACACTAAGTGGGA  
+HWI-EAS443:3:74:658:432#0/1  
^`a¥aa`XYUZ`aaa^]]]]aa`[[a^Va`\_aa`P¥^T  
@HWI-EAS443:3:74:697:1017#0/1  
GGGCTCCAATCATCCGACGATTTTGCTCTCATAGTGAATG  
+HWI-EAS443:3:74:697:1017#0/1  
ababbbba\_Zabbbbbb\_bab[aaaaaaaaabba]\_`baaaa  
@HWI-EAS443:3:74:702:771#0/1  
GAAAAGCTTGAACAGTCTGGGCTCCCAGTAGGGGGCAATG  
+HWI-EAS443:3:74:702:771#0/1  
a\_a^X\_^]]aa^]WaU`aa]]\_\_[^¥`Z`X`\_`WR][\_  
@HWI-EAS443:3:74:757:1961#0/1  
GTTCTGTTTACTGTGTCCATGGTGTATCCTGTTCCCTGTTC  
+HWI-EAS443:3:74:757:1961#0/1  
a\_abaa¥^aaaa\_]aUbaa\_[a0\_SZZ``ZUH^`V\_^¥V\_  
@HWI-EAS443:3:74:75:709#0/1  
GAGATAACAACCCACTTTCAAAGAAAAAGGAGAGTAAGAG  
+HWI-EAS443:3:74:75:709#0/1  
aZWXsa`a]Z\_VTRS\_ZW]WXO]R\_\_XWV^ZaQ^FZW\_Z]  
@HWI-EAS443:3:74:781:933#0/1  
CAGAAAAGGGAAAAGTGGACGACAAACACAGAGACTGGTGC  
+HWI-EAS443:3:74:781:933#0/1  
R`aaaaZV^V^XZ`Z\_\_a\_]Wa\_¥¥^\_Zab¥T¥ZP`]RUQ  
@HWI-EAS443:3:74:810:239#0/1  
GTGAGAAAGATGATGACTAATTCACAAGACACAGAGATTT  
+HWI-EAS443:3:74:810:239#0/1  
a]a`a`\_a^aa`aa`a`\_`^`\_a`\_`\_]\_\_a^[]^  
@HWI-EAS443:3:74:811:759#0/1  
GGGCTATTAGTATCAGATGGAGGACCAAACCTTATACAATA  
+HWI-EAS443:3:74:811:759#0/1  
a`]`abb```\_aaaa`]^aaaa\_a`aaaaaaaa``\_aaa  
@HWI-EAS443:3:74:814:383#0/1  
TGACCTGAAGTACTTCAATGAATCAACAAAGAAGAAAATT  
+HWI-EAS443:3:74:814:383#0/1  
`a`[¥¥[V¥¥W^[`S¥[`¥\_] [¥¥Wbb`PFYT\_a[[\_aba  
@HWI-EAS443:3:74:848:1467#0/1  
GGGGCAATGAAAAGAAGCCAAACTGGCAAATGTTGTGAG  
+HWI-EAS443:3:74:848:1467#0/1  
a\_aa]0[aa`YZX\_JS0``X`\_Y[QaUX`S`PYM`aY]X`

@HWI-EAS443:3:74:84:216#0/1  
ATCTGCATCCCAGGTGTTGCGATAGCCCTTCTTTTAACT  
+HWI-EAS443:3:74:84:216#0/1  
aa` `aaaaaaa`a`Za\_\_aaa^]\_\_Z^\_^]\_\_\_\_`^][W^  
@HWI-EAS443:3:74:855:1345#0/1  
CTTGTGTTGAGAATAGAACGATTCTTGGGAATCCAGG  
+HWI-EAS443:3:74:855:1345#0/1  
abba\_bbbaab`bab`abba\_^a\_` `aaaaa^abaa\_a`a  
@HWI-EAS443:3:74:902:790#0/1  
GTCTGGGCTCCCAGTAGGGGCAATGAAAAGAAGGCCAAA  
+HWI-EAS443:3:74:902:790#0/1  
aaaaababaabaaaaaaaabaa`aaaaa]aa` `a\_` ``  
@HWI-EAS443:3:74:906:1743#0/1  
ATGGAATCAATGAACAAAGAGGAAATAGAGATAACAACCC  
+HWI-EAS443:3:74:906:1743#0/1  
aabaabb`bbaaaa¥`baaaaa\_^Yabaaaa\_aaaaa]SZ  
@HWI-EAS443:3:74:927:1469#0/1  
TTCCTCTTTGTTTCATTGATTCCATTACATCCTTTAAGAAA  
+HWI-EAS443:3:74:927:1469#0/1  
UaaS\_¥` `]QP[`\_ZJZ¥¥¥J¥\_¥Q¥\_b]MZSPP`YXK¥^  
@HWI-EAS443:3:74:936:673#0/1  
CCAGTATATTGTCTTGGTGTATTTCTTTTGTCCAAGATTC  
+HWI-EAS443:3:74:936:673#0/1  
^`a\_SW\_Z`^¥G\_W\_YaW`\_S¥\_¥¥¥`b[ZW^XU`\_^`^X  
@HWI-EAS443:3:74:946:1776#0/1  
CAATCCGACTCTACTTTTCCTAAAAATTCCAGCGCAAAAT  
+HWI-EAS443:3:74:946:1776#0/1  
\_]bbaaaa¥¥`J¥a`aa]a`babbb^Ya^aaa\_Vb\_` `[YR  
@HWI-EAS443:3:74:958:1088#0/1  
GGGCTCCAATCATCCGACGATTTTGCTCTCATAGTGAATG  
+HWI-EAS443:3:74:958:1088#0/1  
\_abb\_`abbbbbbbab`ab`\_a]^aa` `abbaa` [a`a`b  
@HWI-EAS443:3:74:961:285#0/1  
CTGGGCTCCCAGTAGGGGCAATGAAAAGAAGGCCAAACT  
+HWI-EAS443:3:74:961:285#0/1  
RZ\_` [Tb[^Wababbbb¥[b¥¥a]\_`\_Tbb`b^`]`bbaX  
@HWI-EAS443:3:75:1005:1914#0/1  
CAACCGTCTCCTATATGAACTGCTAGGGAAAAATTTCTC  
+HWI-EAS443:3:75:1005:1914#0/1  
\_\_`a^^]Yaa]a`aa\_\_aaaa\_aa` `` `aa`aaaa`a\_a`  
@HWI-EAS443:3:75:1006:754#0/1  
GGCTAATTTTAGCATGGAGCTACCCAGCTTTGGAGTGTCT  
+HWI-EAS443:3:75:1006:754#0/1  
ab\_b\_babaababaaba¥aaaaaa^[\_`a`\_]¥U`^aW^a  
@HWI-EAS443:3:75:1029:388#0/1  
AAGAAATCTATTAGCCTTCCTGACTCATTAGCTGTTAGGC  
+HWI-EAS443:3:75:1029:388#0/1  
aab]aababababa\_aaaa\_baa\_a\_abaaaaaa[[\_`¥]\_  
@HWI-EAS443:3:75:1031:1705#0/1  
AACATCCTGAGCATGGCACCCATAATGTTCTCAAACAAAA

+HWI-EAS443:3:75:1031:1705#0/1  
`[aaW\_^UUZaba¥YZW`\_]J[\_`Q`a^a`]T[]aX\_¥a`  
@HWI-EAS443:3:75:1032:511#0/1  
GAATCCCCTTTGGCTTGTGTTGAGAATAGAACGATTCCT  
+HWI-EAS443:3:75:1032:511#0/1  
a]bbaaababbbbb\_bbbababa`aaaabaaa\_a\_a`^]a  
@HWI-EAS443:3:75:1081:417#0/1  
GTGGGTTGTTATCTCTATTTCTCTTTGTTTCATTGATTCC  
+HWI-EAS443:3:75:1081:417#0/1  
a[\_`\_\_[aaTaXaZa`aab`V^\_a```````\_`a`\_`\_`]  
@HWI-EAS443:3:75:1154:1827#0/1  
TAACTTGCAGGTCCTGTAGAATCTGTCCACTCCTGCTTGT  
+HWI-EAS443:3:75:1154:1827#0/1  
UbbbVb[bbaU`[\_`UbbVbab`abaa\_Z¥^W¥MTRWW]U^  
@HWI-EAS443:3:75:1160:1707#0/1  
CGAGTCTGGACGGATCAAGAAAGAAGAGTTCTCTGAGATC  
+HWI-EAS443:3:75:1160:1707#0/1  
abb`\_bbbbbaa`ba]\_`bbababaa`babaa]aabb^U`  
@HWI-EAS443:3:75:1170:692#0/1  
GTCCTCCATCTGATACTAATAGCCCTACCTTTGATTGGGT  
+HWI-EAS443:3:75:1170:692#0/1  
aabbbaabaaa`aaaaa`a`Z^a`\_`aa`a^aaaa\_\_  
@HWI-EAS443:3:75:1199:614#0/1  
GGCTTGTGTTGAGAATAGAACGATTCCTCTTGGGAATCCA  
+HWI-EAS443:3:75:1199:614#0/1  
Z`bbba`¥]baab`b`b\_bYK]aYa\_a]abba`a`a`\_`\_\_  
@HWI-EAS443:3:75:1219:1987#0/1  
GCAAAGAACAATAGGGAAGAAAAACAAAGACTGAATAAG  
+HWI-EAS443:3:75:1219:1987#0/1  
a\_\_V\_¥Pa`¥`^]ZU`]HZ`\_`K\_]¥P`\_S[\_`^^^U¥`¥^]  
@HWI-EAS443:3:75:1223:1144#0/1  
GCATTACCACAGCATTGTTTACAGAATCAATCTCTTTATG  
+HWI-EAS443:3:75:1223:1144#0/1  
Xbabababbabbabbbbabbbabbbb\_babab^bbaaaa  
@HWI-EAS443:3:75:1239:1092#0/1  
CAATCGGGTTGAGCTGGGGTGCACCAGTCTCTGTGTTTGT  
+HWI-EAS443:3:75:1239:1092#0/1  
ababbaaZaabbaYaaQ\_UZ^baaba^a`babb`b[aa][  
@HWI-EAS443:3:75:1252:1451#0/1  
AACAACATGATAAACAATGACCTTGGACCTGCAACGGCCC  
+HWI-EAS443:3:75:1252:1451#0/1  
aba```abbba[]^aaaaaa`aa\_aaY`ba`aaaa[Ra  
@HWI-EAS443:3:75:1274:1102#0/1  
CCAGGTGTTGCGATAGCCCTTCTTTTAACTTGCCTCTCT  
+HWI-EAS443:3:75:1274:1102#0/1  
aYaTYWZYa^^^YU[UGRP`aH]aXUYOWVVSU[R¥SYNX  
@HWI-EAS443:3:75:1306:126#0/1  
GCCAAAAGCATGGAATATGATGCCGTTGCAACTACACATT  
+HWI-EAS443:3:75:1306:126#0/1  
a^a`aa`a`aaaa`aaa^`a\_]a^Y`]\_\_[\_][R^^^

@HWI-EAS443:3:75:1335:334#0/1  
GTTCTGTTTACTGTGTCCATGGTGTATCCTGTTCCCTGTTC  
+HWI-EAS443:3:75:1335:334#0/1  
]QV`\_[ZX\_`YSL[MPVVS\_]MYFQZLF]XFQNN^]P[[  
@HWI-EAS443:3:75:141:704#0/1  
GTAGGGGGCAATGAAAAGAAGCCAAACTGGCAAATGTTG  
+HWI-EAS443:3:75:141:704#0/1  
`Y¥aaaba]\_a`a`a`\_`a\_¥\_`[\_`\_`\_¥\_`\_`\_`[\_`\_`X^\_  
@HWI-EAS443:3:75:1431:1409#0/1  
GTGGGTTGTTATCTCTATTTCTCTTTGTTTCATTGATTCC  
+HWI-EAS443:3:75:1431:1409#0/1  
R[UU¥`\_`\_`XXWWV`aU^¥`aaYaZ^^¥`b`bV^\_NRaa`\_`  
@HWI-EAS443:3:75:1447:272#0/1  
GGTGTGTTCTGTTTACTGTGTCCATGGTGTATCCTGTTCC  
+HWI-EAS443:3:75:1447:272#0/1  
aa^bYbaa`bbaab\_abb\_b]Zaa`aaWb`aa¥Za`\_`aX¥  
@HWI-EAS443:3:75:1508:1137#0/1  
CGAGTGGTTCAGAAACATCCTGAGCATGGCACCCATAATG  
+HWI-EAS443:3:75:1508:1137#0/1  
aabbabb`bbbbaab\_bab]ababababaab`b\_abaaab  
@HWI-EAS443:3:75:1518:1546#0/1  
CTTTGTTTCATTGATTCCATTACATCCTTTAAGAAATCTAT  
+HWI-EAS443:3:75:1518:1546#0/1  
U`¥bbXbbba\_aTbbbVbbaab\_a^^ab¥b\_Ybbaa¥b¥b  
@HWI-EAS443:3:75:1622:1955#0/1  
GAGAGGCTATCTAATAAGAGCACTGACATTAATAACGATG  
+HWI-EAS443:3:75:1622:1955#0/1  
aabba\_aaaa`a]a\_\_a`\_`\_Z\_]VSZY\_aa`\_`aa`Y`\_`¥a  
@HWI-EAS443:3:75:1664:105#0/1  
TCCTGCTTGTATTCCCTCATGGTTTGGTGCATTCACTATG  
+HWI-EAS443:3:75:1664:105#0/1  
^aa\_ZYabb]a`b][aaaa\_¥W\_\_a^Va]¥)`[YX`]]\_  
@HWI-EAS443:3:75:1698:1438#0/1  
TGTCAGCTGATTCACTTACTCCAGACACTCCAAAGCTGGG  
+HWI-EAS443:3:75:1698:1438#0/1  
aa]a]`bbabbbbabbba`a\_aba\_U^^a`aaaaa¥a`¥`  
@HWI-EAS443:3:75:1752:1098#0/1  
GGGCTCCAATCATCCGACGATTTTGCTCTCATAGTGAATG  
+HWI-EAS443:3:75:1752:1098#0/1  
aa\_`\_`aababaaa]baabaaaab^¥^\_a`\_`aa`\_`a`\_`aa  
@HWI-EAS443:3:75:1766:1639#0/1  
GTCCTCCATCTGATACTAATAGCCCTACCTTTGATTGGGT  
+HWI-EAS443:3:75:1766:1639#0/1  
\_aaaa\_\_aaaaaa`a\_aa]`aX^\_\_`\_`^Z\_\_\_\_a`^^a\_ZX  
@HWI-EAS443:3:75:194:531#0/1  
AAGAGAGGCTATCTAATAAGAGCACTGACATTAATAACGA  
+HWI-EAS443:3:75:194:531#0/1  
abb¥ab`\_`\_`a[YJSZSa]¥EX^XXURDRZ\_WYU[¥V][VW  
@HWI-EAS443:3:75:200:516#0/1  
AGAAAAACAAAGACTGAATAAGAGAGGCTATCTAATAAG

+HWI-EAS443:3:75:200:516#0/1  
[`W¥`baR]abaM¥a`[[a]¥W\_bZbaaYZRVS[BBBBB  
@HWI-EAS443:3:75:216:1236#0/1  
TTGGCTTGTGTTGAGAATAGAACGATTCCCTTGGGAATC  
+HWI-EAS443:3:75:216:1236#0/1  
a^]\_Z`a[[Y^a]QX¥S]\_W\_\_U]UL¥`\_Z^] ^WW¥[^][  
@HWI-EAS443:3:75:267:1224#0/1  
AGGGATTGAGGGATTACAAAGTCTTCCCCGATAATCATC  
+HWI-EAS443:3:75:267:1224#0/1  
[`^¥ZXX\_]RJP[URP]a^M^L\_]W\_ZW\_^YZUTOQSYP  
@HWI-EAS443:3:75:303:1169#0/1  
GGCAAGTTAAAAAGAAGGGCTATCGCAACACCTGGGATGC  
+HWI-EAS443:3:75:303:1169#0/1  
aabb]`^a^`aaa^`aa\_aaa\_¥]]`aa\_```¥¥^`\_^``  
@HWI-EAS443:3:75:30:1536#0/1  
CATCGTATTTAATGTCAGTGCTCTTATTAGATAGCCTCTC  
+HWI-EAS443:3:75:30:1536#0/1  
abY\_\_ab^b[T0^`Ib^a[\_Y]aaa^^[XUSZSS¥`Y^[P  
@HWI-EAS443:3:75:310:871#0/1  
GTTTGAGAACATTATGGGTGCCATGCTCAGGATGTTTCTG  
+HWI-EAS443:3:75:310:871#0/1  
a]aa¥aa]ZbXbUZ¥a`\_\_`a[``\_`^R``LY\_Q\_¥RX\_  
@HWI-EAS443:3:75:335:577#0/1  
AAAAATTCCAGCGCAAATGCCATAAGCACCATTCCTCCT  
+HWI-EAS443:3:75:335:577#0/1  
[X¥UU\_ZTZ^^aaaab`\_\_^¥aa\_S]\_\_\_¥^]a`R\_XDIJ  
@HWI-EAS443:3:75:347:1165#0/1  
CTCCATCTGATACTAATAGCCCTACCTTTGATTGGGTTTG  
+HWI-EAS443:3:75:347:1165#0/1  
a\_aaa¥a^`\_\_`\_```Ya\_\_`^W\_^\_]^^^]X\_Z¥X]^Z  
@HWI-EAS443:3:75:376:990#0/1  
GAGGCCATGGTGTCTAGGGCCCGATTGATGCCAGGGTCG  
+HWI-EAS443:3:75:376:990#0/1  
\_`\_a\_`aa\_¥QX¥¥M[^¥```\_`¥XXZ¥X`\_YZ¥ZUKUV  
@HWI-EAS443:3:75:435:182#0/1  
ACGCAAAGAACAATAGGGAAGAAAAACAAAGACTGAATA  
+HWI-EAS443:3:75:435:182#0/1  
aaabaaab`aa\_ababbbbaaaab`aaaa`\_a`aaa```a  
@HWI-EAS443:3:75:452:489#0/1  
CAACGGCCCAGATGGCTCTTCAATTGTTTCATCAAAGACTA  
+HWI-EAS443:3:75:452:489#0/1  
ababbbbaa]a`aY[aaa`a\_aaaaa`\_aaa\_¥[``a`\_aa  
@HWI-EAS443:3:75:454:675#0/1  
ATGGTTTGGTGCATTCACTATGAGAGCAAATCGTCGGAT  
+HWI-EAS443:3:75:454:675#0/1  
abbaaabab\_b`ababaababbaaaaa`abaa\_\_a``aa  
@HWI-EAS443:3:75:472:1423#0/1  
ACCCAGGAATATTTGAGAATTCATGCCTTGAAACAATGGA  
+HWI-EAS443:3:75:472:1423#0/1  
a^aaaaaaaaa```\_a\_\_a```a\_`\_]`\_\_aa\_b\_`^¥\_



+HWI-EAS443:3:75:760:712#0/1  
aa¥\_]ababbbbaaUJ\_aaaa\_`baa`ab`baaa```aaM[  
@HWI-EAS443:3:75:776:1187#0/1  
CTTGTGTTGAGAATAGAACGATTCCTCTTGGGAATCCAGG  
+HWI-EAS443:3:75:776:1187#0/1  
abYbab```ab¥aaba^ba\_TZa``]Vaa\_]ZYa]\_\_aaT  
@HWI-EAS443:3:75:777:1560#0/1  
GGAATGTGGTGCTTATGGCATTTCGCGCTGGAATTTTGTAG  
+HWI-EAS443:3:75:777:1560#0/1  
a\_`^`a^aa]aaaaaa`aaaa\_````a\_`\_`aa\_aa`\_a  
@HWI-EAS443:3:75:801:524#0/1  
ATGGGCTCCAATCATCCGACGATTTTGCTCTCATAGTGAA  
+HWI-EAS443:3:75:801:524#0/1  
ababa`abaabbbbaaaaaab^`aaaa`aaaaaaaa[aaa  
@HWI-EAS443:3:75:825:47#0/1  
CTTGTGTTGAGAATAGAACGATTCCTCTTGGGAATCCAGG  
+HWI-EAS443:3:75:825:47#0/1  
abbbababbbba`bbbbbbabaaaaa`aaaba``a\_]aba  
@HWI-EAS443:3:75:858:1730#0/1  
CACTGACATTAATACGATGACCAAAGATGCAGAGAGAGG  
+HWI-EAS443:3:75:858:1730#0/1  
\_bbbabba`^`bbaab`baabaababbb\_abaaaa``a\_Y  
@HWI-EAS443:3:75:90:1579#0/1  
CTGGAGTAAATGAATCAGCTGACATGAGTATTGGAGTAAC  
+HWI-EAS443:3:75:90:1579#0/1  
aa^a\_`^`a`aY^abaaaaa¥X\_aaa\_a`\_`^Y]X\_`]  
@HWI-EAS443:3:75:921:1632#0/1  
AGAAGTGCTGCAATCTATTCGAGAAATTTTCCCTAGCAG  
+HWI-EAS443:3:75:921:1632#0/1  
a\_]\_\_S\_aUaX¥W]¥a`¥^^`\_a]Z[\_]\_^^]]]¥^X^¥  
@HWI-EAS443:3:76:1002:1629#0/1  
GAAAAGGGAAAGTGGACGACAAACACAGAGACTGGTGCAC  
+HWI-EAS443:3:76:1002:1629#0/1  
a^\_X`aa][ ]VG[ `S[ `^[ ` \_¥UQV\_¥WUSSUUSMWNW  
@HWI-EAS443:3:76:1022:1499#0/1  
GGCTAATTTTAGCATGGAGCTACCCAGCTTTGGAGTGTCT  
+HWI-EAS443:3:76:1022:1499#0/1  
]abbb`aab[\_U`[\_`ZW^¥0[\_SSaVVG[]]JHb`\_YT  
@HWI-EAS443:3:76:1029:1332#0/1  
CTTGGGAGTCTCGATACTGAATCTTGGACAAAAGAAATAC  
+HWI-EAS443:3:76:1029:1332#0/1  
abbbbaabbbabababaaa]bbabbaaaaa`aaaba\_a`  
@HWI-EAS443:3:76:102:1708#0/1  
AGCCTCTCTTATTCAGTCTTTGTTTTTCTCCCTATTGT  
+HWI-EAS443:3:76:102:1708#0/1  
]\_aa``aa`aa\_X]aa^``Xa\_`\_`a`¥`[a```]VU  
@HWI-EAS443:3:76:1044:1486#0/1  
AAAAATTCCAGCGCAAATGCCATAAGCACCATTCCT  
+HWI-EAS443:3:76:1044:1486#0/1  
^a`\_R\_aaa``a\_a]TW¥aa`aa[a¥YY`\_]\_U\_[^NFQ^



@HWI-EAS443:3:76:1056:703#0/1  
GCCCTACCTTTGATTGGGTTTGGATCCCACAGCTTCTTTAA  
+HWI-EAS443:3:76:1056:703#0/1  
a`\_aa^\_`aaa\_Z^a`\_]`a`\_\_V\_\_`\_ZU\_^Va\_\_][  
@HWI-EAS443:3:76:1071:304#0/1  
TGATGCCAGGTTCGACTTCGAGTCTGGACGGATCAAGAAA  
+HWI-EAS443:3:76:1071:304#0/1  
abaa`Z`\_]`]]TY]Y[\_VU^¥YRZ[^^WV\_¥SLW\_[TT]^  
@HWI-EAS443:3:76:1076:569#0/1  
GATTGATGCCAGGTTCGACTTCGAGTCTGGACGGATCAAG  
+HWI-EAS443:3:76:1076:569#0/1  
a]\_aY¥\_a^a¥^¥US¥]¥W\_¥^^U\_WZ¥\_\_UW\_¥QSSYW¥  
@HWI-EAS443:3:76:1087:1402#0/1  
AGCCTCTCTTATTTCAGTCTTTGTTTTTTCTTCCCTATTGT  
+HWI-EAS443:3:76:1087:1402#0/1  
aa`abbbbbbbba`a`abbaa]baaaa`aaY\_abaaaa`  
@HWI-EAS443:3:76:108:1462#0/1  
GGGATGGGCTCCAATCATCCGACGATTTTGCTCTCATAGT  
+HWI-EAS443:3:76:108:1462#0/1  
aa¥Za[\_`b`\_`\_¥]^]Z`Ua¥U]]SZVZ^\_[^`^^¥¥[ZN  
@HWI-EAS443:3:76:1104:1892#0/1  
TGTGTATCTGTAGTCTTTGATGAACAATTGAAGAGCCATC  
+HWI-EAS443:3:76:1104:1892#0/1  
aXTaSZVb]¥OPQQ`]a`^^YNTWH¥V`]^`^`\_V^]WU\_]`  
@HWI-EAS443:3:76:1139:87#0/1  
AACATTTGCCAGTTTGGCCTTCTTTTCATTGCCCCCTACT  
+HWI-EAS443:3:76:1139:87#0/1  
abababbbbaababbbba`bbaabbaaaaa`\_¥\_]\_a\_¥`  
@HWI-EAS443:3:76:1155:62#0/1  
GAAATCTATTAGCCTTCCTGACTCATTAGCTGTTAGGCCA  
+HWI-EAS443:3:76:1155:62#0/1  
a`aaa`babaa`\_U`\_\_\_aa\_\_a`\_a\_¥\_\_WZ]^GWO  
@HWI-EAS443:3:76:115:911#0/1  
TGGCCTTCTTTTCATTGCCCCCTACTGGGAGCCCAGACTG  
+HWI-EAS443:3:76:115:911#0/1  
aabbbbbbbbabbaabbabaaaaa```aaa`\_`Z```\_\_`  
@HWI-EAS443:3:76:1168:1015#0/1  
ATCCTGAGCATGGCACCCATAATGTTCTCAAACAAAATGG  
+HWI-EAS443:3:76:1168:1015#0/1  
\_]\_a¥a\_]`aVFT`]X^P[\_a^[SLYZZU[\_ZN]UY^[UT  
@HWI-EAS443:3:76:1181:553#0/1  
CTGTCCACTCCTGCTTGTATTCCCTCATGGTTTGGTGCAT  
+HWI-EAS443:3:76:1181:553#0/1  
abab`bbbbbaabaab`abbbab^aaabaa\_aaaa\_b]aa  
@HWI-EAS443:3:76:1191:1498#0/1  
CTTCCCTAGTCTTGCCATTTTGTGGAGAACATTATGGG  
+HWI-EAS443:3:76:1191:1498#0/1  
`bbb]b`bbaaaa`b\_Taabaaaaaabaa\_a^a\_aaa^aa  
@HWI-EAS443:3:76:1288:1247#0/1  
AAACCATGAGGGAATACAAGCAGGAGTGGACAGATTCTAC

+HWI-EAS443:3:76:1288:1247#0/1  
a^X\_\_a^^a\_^\_¥\_[]^V¥[]a^¥QFTY^PZ^PVZ^[NZ  
@HWI-EAS443:3:76:128:1872#0/1  
AGGGCTATTAGTATCAGATGGAGGACCAAACCTTATACAAT  
+HWI-EAS443:3:76:128:1872#0/1  
aa^^babaaba\_babbaaaa`aa\_aaaaaa`aaaaaa`  
@HWI-EAS443:3:76:1298:1289#0/1  
ATGCCAGGGTCGACTTCGAGTCTGGACGGATCAAGAAAAGA  
+HWI-EAS443:3:76:1298:1289#0/1  
aaaa\_aaa\_Z]`\_]aa\_`a¥a\_a`\_¥a`\_^¥\_^^\_^^  
@HWI-EAS443:3:76:1309:1043#0/1  
GACTAGGGAAAGGGTACATGTTTCGAGAGTAAAAGAAATGAA  
+HWI-EAS443:3:76:1309:1043#0/1  
^a¥a¥^^`^`a`]^WWQZa`YRFV^[O^W`N[a`aY`]\_\_  
@HWI-EAS443:3:76:1338:1041#0/1  
GGACCACTACCTGAGGATAATGAACCAAGTGGGTATGCAC  
+HWI-EAS443:3:76:1338:1041#0/1  
a`[^RT^`^V`\_Y[S^^^^\_^]\_[RW]\_Y]]VU]X]XVV  
@HWI-EAS443:3:76:1341:2038#0/1  
AAAAATTCCAGCGCAAATGCCATAAGCACCATTCCT  
+HWI-EAS443:3:76:1341:2038#0/1  
V`ab`bYXXQX`]\_a¥`a\_aZ0]¥\_^SWa[PX^a]VROPV  
@HWI-EAS443:3:76:1346:1405#0/1  
TGCCGTTGCAACTACACATTCCTGGATTCCCAAGAGGAAT  
+HWI-EAS443:3:76:1346:1405#0/1  
a]b\_Pabbaaa`^V]a`a\_]\_\_¥M^]`a\_\_\_\_`\_`X\_^  
@HWI-EAS443:3:76:1418:461#0/1  
CTTTTCTAAAAATTCCAGCGCAAATGCCATAAGCACCA  
+HWI-EAS443:3:76:1418:461#0/1  
[abbb`]abbbbbba`bbabb\_aaaaaaab\_bab`a`Ra  
@HWI-EAS443:3:76:1445:454#0/1  
AAGAGACAACATGACCAAGAAGATGGTCACGCAAAGAACA  
+HWI-EAS443:3:76:1445:454#0/1  
ababbaaabaaaaa]abaa`aa^`^¥a\_a^aaaa]^Z\_  
@HWI-EAS443:3:76:146:337#0/1  
AATTGAAGAGCCATCTGGGCCGTTGCAGTCCAAGGTCAT  
+HWI-EAS443:3:76:146:337#0/1  
a`aa^aba]`baaa`aa`\_a`Z`\_`\_]V^]`Za\_WZZ`  
@HWI-EAS443:3:76:1495:1954#0/1  
ATTGATGCCAGGGTCGACTTCGAGTCTGGACGGATCAAGA  
+HWI-EAS443:3:76:1495:1954#0/1  
aa\_bbababaaaaVaaaaa^baa¥`aaa^\_aa\_\_`\_\_a  
@HWI-EAS443:3:76:1502:472#0/1  
CTTCATGATCTCAGAGAACTCTTCTTTCTTGATCCGTCCA  
+HWI-EAS443:3:76:1502:472#0/1  
¥^¥aba`aba\_T\_aba`\_^\_bbaW`aa]bbbabXT`\_SO¥  
@HWI-EAS443:3:76:1505:1056#0/1  
CTTGGGAGTCTCGATACTGAATCTTGGACAAAAGAAATAC  
+HWI-EAS443:3:76:1505:1056#0/1  
^`^V`aa\_aa`^`aaaab`aa^ababaaa`a`bba\_aa`P





@HWI-EAS443:3:76:512:1273#0/1  
AGCTGATTCATTTACTCCAGACACTCCAAAGCTGGGTAGC  
+HWI-EAS443:3:76:512:1273#0/1  
^`aa\_]`ababa`ba`ba^a^^Z\_\_a`]]U\_^\_Z`V`^¥  
@HWI-EAS443:3:76:512:1540#0/1  
ATTGATGCCAGGGTCGACTTCGAGTCTGGACGGATCAAGA  
+HWI-EAS443:3:76:512:1540#0/1  
`ZWaaV\_baa\_]QW^^a\_UL`^] ^UVV\_\_¥WP]]]\_\_YU]  
@HWI-EAS443:3:76:519:170#0/1  
GGTGTCTAGGGCCCGGATTGATGCCAGGGTCGACTTCGAG  
+HWI-EAS443:3:76:519:170#0/1  
a]¥a^\_]R¥¥^¥¥^ZU^^]^^^UU^WWWUVU¥TWUWWW  
@HWI-EAS443:3:76:549:1693#0/1  
CCCATTTTAAGCAGACTTCAGGAATGTGAAGATTCCGTAT  
+HWI-EAS443:3:76:549:1693#0/1  
aa^^¥\_]YY^`]ZZ\_ZU\_ZZTWZ[YS\_```]¥[]¥[R[^  
@HWI-EAS443:3:76:549:212#0/1  
CCAACCGGTCTCCTATATGAACTGCTAGGGAAAAATTTCT  
+HWI-EAS443:3:76:549:212#0/1  
ababbbbb^aaabbaaaaaaaaa`aabaaaa`aaa]a  
@HWI-EAS443:3:76:555:456#0/1  
CCTCCATCTGATACTAATAGCCCTACCTTTGATTGGGTTT  
+HWI-EAS443:3:76:555:456#0/1  
aba`\_Ya`XWV\_QYaZV[aa\_`\_`aTYT]Za\_`^`a]W]\_`  
@HWI-EAS443:3:76:555:750#0/1  
TAAACAGAACACACCAATACTCAGAAAAGGGAAAGTGGAC  
+HWI-EAS443:3:76:555:750#0/1  
^RUX¥\_¥X\_Q\_]¥V¥]Za``Q^]a¥TUOU][VXU^ZZU]^  
@HWI-EAS443:3:76:573:1009#0/1  
AGGCCATGGTGTCTAGGGCCCGGATTGATGCCAGGGTCGA  
+HWI-EAS443:3:76:573:1009#0/1  
^aab^aa`a^`^X¥`]^`aa]a`^] ^\_`Ya^Z^¥`T`¥^  
@HWI-EAS443:3:76:593:332#0/1  
TTGGTGTGTTCTGTTTACTGTGTCCATGGTGTATCCTGTT  
+HWI-EAS443:3:76:593:332#0/1  
]bb]M]P\_V[`T`NX]¥TZ]\_`^a]V][]Q\_TYV]XU^P^  
@HWI-EAS443:3:76:605:929#0/1  
GTGTGTTCTGTTTACTGTGTCCATGGTGTATCCTGTTCCCT  
+HWI-EAS443:3:76:605:929#0/1  
a\_`U`\_aaa\_¥\_[S\_`\_W`¥\_`^W[^Y\_¥W¥^\_¥^¥YT¥Y  
@HWI-EAS443:3:76:656:1120#0/1  
GGCTCTTCAATTGTTTCATCAAAGACTACAGATACACATAT  
+HWI-EAS443:3:76:656:1120#0/1  
aa`a`aabYbaa`\_\_a\_]\_^`aa]¥\_a\_\_\_\_\_`W`^a`a\_  
@HWI-EAS443:3:76:665:2008#0/1  
AAAATTTCTCGAATAGATTGCAGCACTTCTGGTACATCTG  
+HWI-EAS443:3:76:665:2008#0/1  
\_V`Q\_\_`a`\_]\_\_a`YaX\_[`¥SZ^W^Y\_]\_Sa^^]XS^  
@HWI-EAS443:3:76:677:1883#0/1  
ATGGAATCAATGAACAAAGAGGAAATAGAGATAACAACCC

+HWI-EAS443:3:76:677:1883#0/1  
a[P]a]YbbbTa\_ba[]YX\_QU[X\_Ya¥a^\_]aaa`¥RUO  
@HWI-EAS443:3:76:682:215#0/1  
GAACAACATGATAACAATGACCTTGGACCTGCAACGGCC  
+HWI-EAS443:3:76:682:215#0/1  
abbabba)`aaab`a\_aaaaa`\_``^`^`\_`^``¥`][X  
@HWI-EAS443:3:76:699:475#0/1  
GGCCCCGATTGATGCCAGGGTCGACTTCGAGTCTGGACGG  
+HWI-EAS443:3:76:699:475#0/1  
`bbabb`^`a\_aaa\_bb`ab\_baaa`aabaa\_aaaa^^a`  
@HWI-EAS443:3:76:736:223#0/1  
TCTGTTTACTGTGTCCATGGTGTATCCTGTTCCCTGTTCCA  
+HWI-EAS443:3:76:736:223#0/1  
aaab\_aaaaaa]a)`\_``\_N\_¥\_[TZ[a^\_U[WU[\_VWV  
@HWI-EAS443:3:76:779:1264#0/1  
TCTAGGGCCCGATTGATGCCAGGGTCGACTTCGAGTCTG  
+HWI-EAS443:3:76:779:1264#0/1  
abZZY]abb\_\_XZYX^^W`a`Z]^aS`^Z^OT]Y`a^Z^X  
@HWI-EAS443:3:76:787:599#0/1  
GGCCCCGATTGATGCCAGGGTCGACTTCGAGTCTGGACGG  
+HWI-EAS443:3:76:787:599#0/1  
W\_`]]^¥X]ZR`a^\_a`adW[b¥RUa]NGQN\_¥`ZE[`Z  
@HWI-EAS443:3:76:820:1667#0/1  
GCCAGGGTCGACTTCGAGTCTGGACGGATCAAGAAAGAAG  
+HWI-EAS443:3:76:820:1667#0/1  
aaa\_]aP`[[[]PZZZ\_L[Z¥a\_ab`]T``\_a^`a\_aZ  
@HWI-EAS443:3:76:827:268#0/1  
CAATTGAAGAGCCATCTGGGCCGTTGCAGGTCCAAGGTCA  
+HWI-EAS443:3:76:827:268#0/1  
``bbbbbbabbbbaabbabbbab`\_a]ab^DX`babaG`\_  
@HWI-EAS443:3:76:831:573#0/1  
ACCATGGACACAGTAAACAGAACACACCAATACTCAGAAA  
+HWI-EAS443:3:76:831:573#0/1  
aaaaa`]^aaaaa]a`aaaaa`\_`\_`^`¥`\_a¥^`\_a^\_]`  
@HWI-EAS443:3:76:84:1499#0/1  
GGTGCTTATGGCATTGCGCTGGAATTTTAGGAAAAGT  
+HWI-EAS443:3:76:84:1499#0/1  
aXLWbX\_X`TI[aa^\_^^`\_`\_[]Y\_\_Z^\_\_TT¥^^^SI  
@HWI-EAS443:3:76:853:1627#0/1  
CAGGAATGTGTAGTTGCAACGGCATCATATCCATGCTTT  
+HWI-EAS443:3:76:853:1627#0/1  
\_\_^ZZab`Xb\_^¥W^a`]`]^`a^^¥aaa`\_`\_`^`aY\_¥[  
@HWI-EAS443:3:76:867:545#0/1  
AGCCTTCTGACTCATTAGCTGTTAGGCCATTTCGATCTAA  
+HWI-EAS443:3:76:867:545#0/1  
aaaa^aa`^aaaa¥¥aa]Y\_aaV\_]VZWYSZWY[GQWP¥W  
@HWI-EAS443:3:76:87:1625#0/1  
AGTGATGCTGTGCCATCTATTAGAAGAGGCCTTATTTTCT  
+HWI-EAS443:3:76:87:1625#0/1  
a\_`aaaabaa\_aabaaaaa\_\_\_\_\_`\_`^a`\_a]a\_`\_`¥

@HWI-EAS443:3:76:921:1443#0/1  
TATCACTGTTACTCCAATACTCATGTCAGCTGATTCATTT  
+HWI-EAS443:3:76:921:1443#0/1  
aaba]b\_b`a`\_aaa¥aaa`\_aa\_\_a^^`[[^a^`]-`  
@HWI-EAS443:3:76:939:1325#0/1  
CAGTGATTGTGAAAGAAATCTCTGTGTCTTGTGAATTAGT  
+HWI-EAS443:3:76:939:1325#0/1  
a^aa`aa^Qaabbbb`abbabb\_]\_baa\_aaaaa`a¥  
@HWI-EAS443:3:76:956:564#0/1  
CTTTTCTGAGTATTGGTGTGTTCTGTTTACTGTGTCCATG  
+HWI-EAS443:3:76:956:564#0/1  
`abbbbaZ\_b`bbba]ba`aaa`\_`b¥]ba^a`[]`ab  
@HWI-EAS443:3:76:959:1680#0/1  
ATTTACTCCAGACTCCAAAGCTGGTAGCTCCATGCTA  
+HWI-EAS443:3:76:959:1680#0/1  
aa^[[aaaaa`a`a`a\_aa\_^[[^^[Z\_Y]][^\_]XU^  
@HWI-EAS443:3:76:97:1430#0/1  
CGGATTGATGCCAGGGTCGACTTCGAGTCTGGACGGATCA  
+HWI-EAS443:3:76:97:1430#0/1  
`b\_Z^b`\_¥\_bbaaaa¥baa`\_`a¥^¥¥a`a^]`^`\_S`\_`  
@HWI-EAS443:3:77:101:1232#0/1  
CTTTCCTTGAAGAATCCCACCCAGGAATATTTGAGAATTC  
+HWI-EAS443:3:77:101:1232#0/1  
aaa`\_a\_aa\_aX`a\_aa\_aaa\_V`\_XZ]]\_\_\_\_a\_W`\_^¥  
@HWI-EAS443:3:77:1040:1174#0/1  
GAAGAATCCCACCCAGGAATATTTGAGAATTCATGCCTTG  
+HWI-EAS443:3:77:1040:1174#0/1  
\_\_b\_W¥YS]¥^\_¥Ya``¥`QXZ^0)`\_`a[OS`¥[\_[YT\_  
@HWI-EAS443:3:77:1081:565#0/1  
CCCGGATTGATGCCAGGGTCGACTTCGAGTCTGGACGGAT  
+HWI-EAS443:3:77:1081:565#0/1  
aabbbabbbbabbbbba¥aaa`abaaaa\_aabaaba\_  
@HWI-EAS443:3:77:1184:1900#0/1  
GAACAATTGAAGAGCCATCTGGGCCGTTGCAGTCCAAGG  
+HWI-EAS443:3:77:1184:1900#0/1  
ab\_WXaabbab`aaa[a[Y]YL¥aaaZ`\_`aa]R`\_\_\_\_aW  
@HWI-EAS443:3:77:1195:1162#0/1  
CCTCCATCTGATACTAATAGCCCTACCTTTGATTGGGTTT  
+HWI-EAS443:3:77:1195:1162#0/1  
aabbabbb`ba\_\_bbb\_bb^bbbbbbaabbbbaabbbba\_aa  
@HWI-EAS443:3:77:1209:1113#0/1  
CAACTGCATTGGCCAACACCATAGAAGTCTTTAGATCGAA  
+HWI-EAS443:3:77:1209:1113#0/1  
a\_bbbbabbbbabababaababaaab`abbabbaa^`a\_  
@HWI-EAS443:3:77:1285:1433#0/1  
GAGACAACATGACCAAGAAGATGGTCACGCAAAGAACAAT  
+HWI-EAS443:3:77:1285:1433#0/1  
aabaabaaabba]aaabaaaa`^`aab````]a`a\_`^a  
@HWI-EAS443:3:77:1295:1045#0/1  
CAGTGATTGTGAAAGAAATCTCTGTGTCTTGTGAATTAGT

+HWI-EAS443:3:77:1295:1045#0/1  
T^`bbbaaa\_ba\_a[a`aJ`^`\_\_b\_aa`¥Z`bbbb`b\_  
@HWI-EAS443:3:77:1317:930#0/1  
TAAAGAACAACATGATAACAATGACCTTGGACCTGCAAC  
+HWI-EAS443:3:77:1317:930#0/1  
ab\_a`\_aabaZaa`^a`a`]^`^aaa¥\_a\_aa¥\_Yaa\_\_`Z  
@HWI-EAS443:3:77:1336:163#0/1  
GATTCCCCTAACTTGCAGGTCCTGTAGAATCTGTCCACT  
+HWI-EAS443:3:77:1336:163#0/1  
abaa]a`a`a`\_`^`\_`a`\_`]^`Z`\_`^`]^`^\_N`YXU]U^  
@HWI-EAS443:3:77:136:1749#0/1  
CCCAGTGATTGTGAAAGAAATCTCTGTGTCTTGTGAATTA  
+HWI-EAS443:3:77:136:1749#0/1  
abb`¥W\_a`^aW`[\_\_VR`\_`]^`^`\_AY`S`^¥PV^YY][Y  
@HWI-EAS443:3:77:1382:132#0/1  
TTGGTGCATTCACTATGAGAGCAAAATCGTCGGATGATTG  
+HWI-EAS443:3:77:1382:132#0/1  
`bbba]aMbbay[]Ya`Xb[aaaa[`WMYa`\_a\_aaT\_\_\_\_  
@HWI-EAS443:3:77:1396:1142#0/1  
GTTCTGTTTACTGTGTCCATGGTGTATCCTGTTCCCTGTTT  
+HWI-EAS443:3:77:1396:1142#0/1  
a^M]^`¥[\_QTX`WM[\_\_WN`¥GYZN]ZU]\_V^TU¥]UVT  
@HWI-EAS443:3:77:144:394#0/1  
AAAAATTCCAGCGCAAAATGCCATAAGCACCACATTCCT  
+HWI-EAS443:3:77:144:394#0/1  
a^SZX`^XT\_\_ZMZ[WTU][TT[PUSSR`V^W¥RNQZ^R  
@HWI-EAS443:3:77:1455:1920#0/1  
CAAAGATGCAGAGAGAGGCAAGTTAAAAAGAAGGGCTATC  
+HWI-EAS443:3:77:1455:1920#0/1  
`bbaab^`a`b\_\_]Va]ab`\_S\_aa^\_aSa`a]GTU^a\_V  
@HWI-EAS443:3:77:1467:371#0/1  
CCTCTTTGTTTACTTATTGATTCCATTACATCCTTTAAGAAATC  
+HWI-EAS443:3:77:1467:371#0/1  
^bbbbbbbbbbabbbbbbbbabbbbbbb``bbbbababbbba  
@HWI-EAS443:3:77:148:170#0/1  
GTCGACTTCGAGTCTGGACGGATCAAGAAAGAAGAGTTCT  
+HWI-EAS443:3:77:148:170#0/1  
`[aZU`\_\_^¥`\_Z`\_\_RYW^ZRV[UL^RX\_ZWZW]ZXWWB  
@HWI-EAS443:3:77:1508:738#0/1  
GCCCCGATTGATGCCAGGGTCGACTTCGAGTCTGGACGGA  
+HWI-EAS443:3:77:1508:738#0/1  
abbb```a`bbbbbaa`a`V`baaaba]ab`¥baaa]¥``  
@HWI-EAS443:3:77:1515:815#0/1  
GTGTTCTGTTTACTGTGTCCATGGTGTATCCTGTTCCCTGT  
+HWI-EAS443:3:77:1515:815#0/1  
a\_a\_a`ba\_aa^Zaa]b\_\_\_\_\_aaa¥`U]\_¥Y[[^\_V¥¥`¥  
@HWI-EAS443:3:77:1581:1788#0/1  
GGCCTCTTCTAATAGATGGCACAGCATCACTGAGTCCTGG  
+HWI-EAS443:3:77:1581:1788#0/1  
a]baabbabbbabbbbbabbbba\_bb\_babbbababYbab



@HWI-EAS443:3:77:1663:1452#0/1  
CAACTGCATTGGCCAACACCATAGAAAGTCTTTAGATCGAA  
+HWI-EAS443:3:77:1663:1452#0/1  
`¥ZZab\_ab`^`ZZ\_HVaRabTb`[¥XPabaaaa¥WQ]`  
@HWI-EAS443:3:77:1667:617#0/1  
GTCCTCCATCTGATACTAATAGCCCTACCTTTGATTGGGT  
+HWI-EAS443:3:77:1667:617#0/1  
a\_S\_\_YWY`U)`S^[OWa\_]\_`RKUU[NQ\_[`\_X][RULQ  
@HWI-EAS443:3:77:1682:1669#0/1  
CATTACCACAGCATTGTTTACAGAATCAATCTCTTTATGA  
+HWI-EAS443:3:77:1682:1669#0/1  
ab`babbaababbbbababb`bbbb\_baa¥`abba`bbb  
@HWI-EAS443:3:77:1692:1861#0/1  
GTATCTGTAGTCTTTGATGAACAATTGAAGAGCCATCTGG  
+HWI-EAS443:3:77:1692:1861#0/1  
aZ\_a\_ab]]a\_\_`aaa`\_aZ\_[`[\_^`\_a\_Y\_[U^VVU\_^  
@HWI-EAS443:3:77:1692:390#0/1  
CTCAAGAATTCCCCTTTGGCTTGTGTTGAGAATAGAACGA  
+HWI-EAS443:3:77:1692:390#0/1  
ab`bbbbbbba^ZXbabaX\_a`Y\_bba``\_aa^`X`aIab  
@HWI-EAS443:3:77:1742:201#0/1  
CACTAACTTGCAGGTCCTGTAGAATCTGTCCACTCCTGCT  
+HWI-EAS443:3:77:1742:201#0/1  
abbbbbbbbb`bbbbbbbbbabab`bb``aaX``b¥\_a  
@HWI-EAS443:3:77:1760:684#0/1  
GACGGATCAAGAAAGAAGAGTTCTCTGAGATCATGAAGAT  
+HWI-EAS443:3:77:1760:684#0/1  
abaa`\_a`aaaaaaaaa`b`a`a`a`a`\_Va`aa\_\_a`  
@HWI-EAS443:3:77:1769:701#0/1  
AGCTGATTCATTTACTCCAGACTCCAAAGCTGGGTAGC  
+HWI-EAS443:3:77:1769:701#0/1  
ab¥bbba\_]¥aa\_bb\_a`a]aaa`a]\_aaaYYa^abQ]\_\_  
@HWI-EAS443:3:77:184:947#0/1  
ATGGGCTCCAATCATCCGACGATTTTGCTCTCATAGTGAA  
+HWI-EAS443:3:77:184:947#0/1  
aa`\_ab\_a\_ZH^`a^\_Ya^]a\_W¥\_``]X`[\_W^W\_^\_  
@HWI-EAS443:3:77:192:1839#0/1  
CACTAACTTGCAGGTCCTGTAGAATCTGTCCACTCCTGCT  
+HWI-EAS443:3:77:192:1839#0/1  
`U``aaa^V[\_VZ^Ya\_\_\_Za[^X[\_^¥V`\_^\_Y\_[QQUU  
@HWI-EAS443:3:77:215:1430#0/1  
TGATAACAATGACCTTGGACCTGCAACGGCCAGATGGC  
+HWI-EAS443:3:77:215:1430#0/1  
```]bb\_Ubb[]\_b\_aZ¥IS]]YS¥X^a]W\_]`¥^TUVQ`  
@HWI-EAS443:3:77:271:354#0/1  
TTGCAACTACACATTCCTGGATTCCCAAGAGGAATCGTTC  
+HWI-EAS443:3:77:271:354#0/1  
SM^Z¥]aZ`S\_aba\_a]`ZUN[aaWaaXQQJZYU^\_LFV  
@HWI-EAS443:3:77:287:974#0/1  
TTTGTCCAAGATTGAGTATCGAGACTCCCAAGACCGTACT

+HWI-EAS443:3:77:287:974#0/1  
aba^\_bb` ` \_¥^^\_a^\_a\_aZWUJW¥a\_aY¥Z^W` ¥W^¥V  
@HWI-EAS443:3:77:292:578#0/1  
CTTCGAGTCTGGACGGATCAAGAAAGAAGAGTTCTCTGAG  
+HWI-EAS443:3:77:292:578#0/1  
aabbba\_aWbbbbbbaab`aaaa] `K` `a`aa^` `a`a`aa  
@HWI-EAS443:3:77:316:170#0/1  
GGGGCAATGAAAAGAAGCCAACTGGCAAATGTTGTGAG  
+HWI-EAS443:3:77:316:170#0/1  
aaaaa` ` \_`\_Y]\_\_\_\_\_¥`\_]¥Y]\_\_`\_]VY¥^P^\_XZ[Z  
@HWI-EAS443:3:77:321:1532#0/1  
GACGGATCAAGAAAGAAGAGTTCTCTGAGATCATGAAGAT  
+HWI-EAS443:3:77:321:1532#0/1  
^ba^^I\_`a¥abab`bba]]`aaaba`aaa]aaaaa`\_a]  
@HWI-EAS443:3:77:366:581#0/1  
GCAGACTTCAGGAATGTGAAGATTCCTGATATTGTATAAG  
+HWI-EAS443:3:77:366:581#0/1  
aaabaa`aaaa` `aaa\_\_a\_a\_`\_MTa\_a`\_a`[\_`a\_]`  
@HWI-EAS443:3:77:386:1805#0/1  
GCCCATCCCACCAGTATATTGTCTTGGTGTATTTCTTTTG  
+HWI-EAS443:3:77:386:1805#0/1  
aabbaababbbbaa¥ba`aba`baa\_` `¥^ab`aababba  
@HWI-EAS443:3:77:400:125#0/1  
CGGATGATTGGAGCCCATCCCACCAGTATATTGTCTTGGT  
+HWI-EAS443:3:77:400:125#0/1  
abbbabbbbbbbaaaaa\_¥b^ababba\_bbba`  
@HWI-EAS443:3:77:445:771#0/1  
GCTGTGGTAATGCCAGCCCATGGTCCAGCCAAAAGCATGG  
+HWI-EAS443:3:77:445:771#0/1  
[bbb]aXR¥aSa`a`]a\_I\_`\_U\_`V]` `W¥a\_\_[YW¥]  
@HWI-EAS443:3:77:460:757#0/1  
GGGCTCCAATCATCCGACGATTTTGCTCTCATAGTGAATG  
+HWI-EAS443:3:77:460:757#0/1  
`b]b`bb]aaaabaa`babaaa`aa`aaaa`aa\_aaa\_a  
@HWI-EAS443:3:77:465:118#0/1  
TGTGGCTAATTTTAGCATGGAGCTACCCAGCTTTGGAGTG  
+HWI-EAS443:3:77:465:118#0/1  
ab\_aaaa^ [aaa`a`^¥aa^V` `\_\_P¥\_]\_¥¥`]U\_WZSX  
@HWI-EAS443:3:77:484:608#0/1  
TATTCGAGAAATTTTCCCTAGCAGTTCATATAGGAGACC  
+HWI-EAS443:3:77:484:608#0/1  
aa[ ` `bbb\_¥V\_baa^`\_a^^aa[^`\_aa\_\_a][WY] `T`  
@HWI-EAS443:3:77:497:2002#0/1  
ACACATTCCTGGATCCCAAGAGGAATCGTTCTATTCTCA  
+HWI-EAS443:3:77:497:2002#0/1  
^abaYYaaa]SZ`\_¥VZ`] ^ZYXSR]VaSHR]a`XWRW\_]`  
@HWI-EAS443:3:77:51:851#0/1  
AAAAATTCCAGCGCAAATGCCATAAGCACCATTCCT  
+HWI-EAS443:3:77:51:851#0/1  
\_`SY¥]J\_^` `^b[VNZ]\_abaaa^^` `¥`OGRRUJ]YWT

@HWI-EAS443:3:77:543:640#0/1  
CAGGGGATTACAAAGTCTTCCCCGATAATCATCATCCATT  
+HWI-EAS443:3:77:543:640#0/1  
ab¥JRYa\_aa`X^\_ZZX¥T`bb\_dWXZYZaXG¥MW[X]\_^  
@HWI-EAS443:3:77:592:1923#0/1  
AGCTGATTCATTTACTCCAGACACTCCAAAGCTGGGTAGC  
+HWI-EAS443:3:77:592:1923#0/1  
abb^S`WaY`b`X`a\_b`a\_]` `][\_aab[aYaa^G`T\_  
@HWI-EAS443:3:77:593:1240#0/1  
GTGGGATGGGCTCCAATCATCCGACGATTTTGCTCTCATA  
+HWI-EAS443:3:77:593:1240#0/1  
a\_baa`abbababaababbaaa^a``aaaaaaaaaaaa`a  
@HWI-EAS443:3:77:70:1223#0/1  
CTGTCCACTCCTGCTTGTATTCCCTCATGGTTTGGTGCAT  
+HWI-EAS443:3:77:70:1223#0/1  
aababb`bXb^H]b\_P[NO\_] [b`^H]OSMJL[a^`\_X]  
@HWI-EAS443:3:77:722:1293#0/1  
AATTGAAGAGCCATCTGGGCCGTTGCAGGTCCAAGGTCAT  
+HWI-EAS443:3:77:722:1293#0/1  
aaaa`abaa\_aaaa`a`\_\_a\_\_\_a^`a\_R¥^\_¥`^Y]\_\_  
@HWI-EAS443:3:77:747:141#0/1  
CTCGAATAGATTGCAGCACTTCTGGTACATCTGTTCATCC  
+HWI-EAS443:3:77:747:141#0/1  
aba`abbbbbbbbbbbbaabbbba¥b`aa]\_a\_a`aa\_\_  
@HWI-EAS443:3:77:773:1712#0/1  
ATTGAAGAGCCATCTGGGCCGTTGCAGGTCCAAGGTCATT  
+HWI-EAS443:3:77:773:1712#0/1  
\_Z]aaa`a\_aaaaa\_`\_\_\_\_\_a^\_\_`\_\_^Wa]^VVYW`\_^\_  
@HWI-EAS443:3:77:806:1972#0/1  
GTTCGAATCTTCATTCTTTTACTCTCGAACATGTACCCTT  
+HWI-EAS443:3:77:806:1972#0/1  
`[]`a\_``aaaabaaba[¥`baaa`]W\_]`a¥YZaaba\_\_  
@HWI-EAS443:3:77:825:168#0/1  
AAAAACAAAGACTGAATAAGAGAGGCTATCTAATAAGAGC  
+HWI-EAS443:3:77:825:168#0/1  
aaa```aaaaa`abaaaaaaaa`a`\_`[JLXW[WXYBBBB  
@HWI-EAS443:3:77:88:970#0/1  
GGGAAAGTGGACGACAAACACAGAGACTGGTGCACCCAG  
+HWI-EAS443:3:77:88:970#0/1  
\_`aabb^\_bababaa\_QZ^aa^¥^aXY`^ZFV^aY[`YUZ  
@HWI-EAS443:3:77:897:358#0/1  
CCAGGAATATTTGAGAATTCATGCCTTGAAACAATGGAAG  
+HWI-EAS443:3:77:897:358#0/1  
aabbbabbbbbbbbaabbab\_aaaa`aabbaa`babb``aa  
@HWI-EAS443:3:77:913:91#0/1  
GTGGGATTCCTCAAGGAAAGCCATAGCCTCTAGAACACAG  
+HWI-EAS443:3:77:913:91#0/1  
aZ¥^]LGL[^00SSTGQNSZZVPSWYSMPUZRUVVVZW  
@HWI-EAS443:3:77:933:73#0/1  
TGCGAAAAGCTTGAACAGTCTGGGCTCCCAGTAGGGGGCA

+HWI-EAS443:3:77:933:73#0/1  
R¥^b¥\_a]aUba\_I[Q`ba[aaaaa\_W]V^PWY]`^0TZ  
@HWI-EAS443:3:77:944:810#0/1  
GGGCAATGAAAAGAAGGCCAAACTGGCAAATGTTGTGAGA  
+HWI-EAS443:3:77:944:810#0/1  
VaZ\_]\_^a¥¥`Y¥Z¥\_bbb\_[Zbb\_¥` `b\_\_ZaSa¥¥`  
@HWI-EAS443:3:77:945:356#0/1  
CTGTAGTCTTTGATGAACAATTGAAGAGCCATCTGGGCCG  
+HWI-EAS443:3:77:945:356#0/1  
` `abb`Za]bbbbbb\_baZbbbbbbbababbb`aabaabbb  
@HWI-EAS443:3:78:1059:300#0/1  
GAAATCTCTGTGTCTTGTGAATTAGTCATCATCTTTCTCA  
+HWI-EAS443:3:78:1059:300#0/1  
aaaaa\_a\_aa[\_\_\_aa`[WY]]\_Z\_[YY\_[^^]a\_\_]YVZ  
@HWI-EAS443:3:78:1062:1233#0/1  
GAGGAATCGTTCTATTCTCAACACAAGCCAAAGGGGAATT  
+HWI-EAS443:3:78:1062:1233#0/1  
aaaaaaaaaba\_aaaa]a\_]\_\_\_\_` ``^\_^\_aa\_aX^\_^\_  
@HWI-EAS443:3:78:1080:669#0/1  
CAAAGAGGAAATAGAGATAACAACCCACTTTCAAAGAAAA  
+HWI-EAS443:3:78:1080:669#0/1  
abaaa`bb\_aabaaa`aabb`aa^aa^bbaaaa`ba^\_\_  
@HWI-EAS443:3:78:1092:921#0/1  
GAGCTAATGGATGATGATTATCGGGGAAGACTTTGTAATC  
+HWI-EAS443:3:78:1092:921#0/1  
\_bbb`]aaUOVL`]ba`Ya]ZQWH]WLOGHOXa`[\_V^]  
@HWI-EAS443:3:78:1108:97#0/1  
AAGAGCACTGACATTAATACGATGACCAAAGATGCAGAG  
+HWI-EAS443:3:78:1108:97#0/1  
aaa`aaa^`a^`\_a`\_\_\_aa^b^aa]^Z\_^`a\_^aW]aZ`  
@HWI-EAS443:3:78:1122:93#0/1  
AGGCTATCTAATAAGAGCACTGACATTAATACGATGACC  
+HWI-EAS443:3:78:1122:93#0/1  
\_ba`ba` ``\_abYX¥Ta[^¥aaS¥^aaa\_^a\_\_\_\_]`\_^XV  
@HWI-EAS443:3:78:116:320#0/1  
CTAATAAGAGCACTGACATTAATACGATGACCAAAGATG  
+HWI-EAS443:3:78:116:320#0/1  
]a¥Z]\_abYb`Yaab]`aaaa\_\_Y\_`bYa[TQ\_V^\_[ ]\_  
@HWI-EAS443:3:78:1170:917#0/1  
ACATGACCAAGAAGATGGTCACGCAAAGAACAATAGGGAA  
+HWI-EAS443:3:78:1170:917#0/1  
a`Z`aa`aa`aa`a\_^aa]a^]`\_\_\_\_]`]^]\_\_`^`\_] ] ] ]  
@HWI-EAS443:3:78:117:875#0/1  
GGTCGACTTCGAGTCTGGACGGATCAAGAAAGAAGAGTTC  
+HWI-EAS443:3:78:117:875#0/1  
abYbbb`aaaaaa`aaaa`aaa`\_`aaa\_aa`a\_````]` ``  
@HWI-EAS443:3:78:1185:1071#0/1  
GAAAAACAAAGACTGAATAAGAGAGGCTATCTAATAAGA  
+HWI-EAS443:3:78:1185:1071#0/1  
a\_`a\_`a][ ] ``UWaa`\_\_\_\_`\_\_\_\_^]\_QFLZTZQY[TP



+HWI-EAS443:3:78:1465:659#0/1  
aa^T^a^\_TZ^`^¥[\_]\_TU^`b\_W¥UU[\_V]P`X`]X\_X^  
@HWI-EAS443:3:78:1533:1240#0/1  
ACCAAACCTTATACAATATACGGAATCTTCACATTCCTGAA  
+HWI-EAS443:3:78:1533:1240#0/1  
XYX¥\_\_Y`[aYDYOY\_aXT\_`a][ZH]Y\_`\_b```]Va\_¥  
@HWI-EAS443:3:78:153:440#0/1  
TCATCATCCATTAGCTCCCATTTTAAGCAGACTTCAGGAA  
+HWI-EAS443:3:78:153:440#0/1  
abaaaa`baaa^^^[\_`\_aaYW\_a`\_`¥¥^^^`^`\_X\_[\_`^V  
@HWI-EAS443:3:78:1545:1446#0/1  
GAGGCTATGGCTTTCCTTGAAGAATCCCACCCAGGAATAT  
+HWI-EAS443:3:78:1545:1446#0/1  
aa`\_`\_]YOXaW\_aWKVZ^\_aZJLW¥N\_]ZO```]NF`YX[  
@HWI-EAS443:3:78:156:1560#0/1  
CGCTGGAATTTTTAGGAAAAGTAGAGTCGGATTGACATCC  
+HWI-EAS443:3:78:156:1560#0/1  
a`^YQT`ba`aa`\_`[a^Vaa\_Za\_`a0a\_S¥WPNZ```]YW  
@HWI-EAS443:3:78:1674:254#0/1  
GAGGTTTCGTATACTTTGTTGAACTTTAGCTAGGAGCAT  
+HWI-EAS443:3:78:1674:254#0/1  
aaaa0baaa\_abUN]bb``b`]`^^a^\_\_I`a\_aWROX\_a  
@HWI-EAS443:3:78:1706:1204#0/1  
GGCCATGGTGTCTAGGGCCCGATTGATGCCAGGGTCGAC  
+HWI-EAS443:3:78:1706:1204#0/1  
`\_a`¥^\_ZEVa[¥¥``\_ZZaaZ````][X]```XS^`PS  
@HWI-EAS443:3:78:1707:1427#0/1  
AACAGATCTTCATGATCTCAGAGAACTCTTCTTTCTTGAT  
+HWI-EAS443:3:78:1707:1427#0/1  
aQV\_[I[Z]^X¥aRVaW\_Z\_^\_\_^\_VaX[WZZ^aW\_]QBB  
@HWI-EAS443:3:78:201:882#0/1  
AATTGAAGAGCCATCTGGGCCGTTGCAGGTCCAAGGTCAT  
+HWI-EAS443:3:78:201:882#0/1  
aaaaabab[``a`aa`a`a`\_]\_aaa\_a\_]`^Y¥`[aY^\_\_  
@HWI-EAS443:3:78:211:1184#0/1  
CCCAGTGATTGTGAAAGAAATCTCTGTGTCTTGTGAATTA  
+HWI-EAS443:3:78:211:1184#0/1  
ab`YV¥a`V`aX`\_`a\_\_WHT]```[X^X\_\_YYS[WYYXX  
@HWI-EAS443:3:78:214:470#0/1  
AAGAGATTGATTCTGTAAACAATGCTGTGGTAATGCCAGC  
+HWI-EAS443:3:78:214:470#0/1  
`^OW]JVUXaRU0JUTW]`TOVTXOTXNXQUSLQ^BBBBB  
@HWI-EAS443:3:78:231:1222#0/1  
CTTTTCTGAGTATTGGTGTGTTCTGTTTACTGTGTCCATG  
+HWI-EAS443:3:78:231:1222#0/1  
aabaa`a^Sa]S\_aaa]aX`\_aaaa\_a\_`^`a]\_]\_YV[a  
@HWI-EAS443:3:78:241:202#0/1  
GTCCTCCATCTGATACTAATAGCCCTACCTTTGATTGGGT  
+HWI-EAS443:3:78:241:202#0/1  
aR`Z[\_\_\_\_a[``\_U^[Z\_^`ZX[\_¥RYW]^\_]W^X]^\_S[V

@HWI-EAS443:3:78:255:1769#0/1  
AAAAATTCCAGCGCAAATGCCATAAGCACCATTCCT  
+HWI-EAS443:3:78:255:1769#0/1  
abaaa`^a\_\_\_a^\_\_\_^YZZ\_] [\_]^Y`]\_\_\_^^ZWXX^  
@HWI-EAS443:3:78:267:452#0/1  
GGGGCAATGAAAAGAAGCCAACTGGCAAATGTTGTGAG  
+HWI-EAS443:3:78:267:452#0/1  
^\_`aba`^`^`¥\_\_\_X¥]\_\_\_U`abbaaaa\_bYaa]aaa  
@HWI-EAS443:3:78:287:665#0/1  
GTGGCTAATTTTAGCATGGAGCTACCCAGCTTTGGAGTGT  
+HWI-EAS443:3:78:287:665#0/1  
^GX]ZOV¥OU^YSYT`ZJWOSJW\_BBBBBBBBBBBBBBB  
@HWI-EAS443:3:78:290:729#0/1  
TGGGAGCCCAGACTGTTCAAGCTTTTCGCAAATGCTCCTA  
+HWI-EAS443:3:78:290:729#0/1  
abbaaa\_abbaaaaaaaaaaaaaaa\_aa`^a\_aaa`\_Za`  
@HWI-EAS443:3:78:304:584#0/1  
GCCCCCTACTGGGAGCCCAGACTGTTCAAGCTTTTCGCAA  
+HWI-EAS443:3:78:304:584#0/1  
a\_`OY`Y`\_VX^RRUVNQ[TZPXBBBBBBBBBBBBBBBB  
@HWI-EAS443:3:78:307:694#0/1  
AAAAATTCCAGCGCAAATGCCATAAGCACCATTCCT  
+HWI-EAS443:3:78:307:694#0/1  
ab^aaa\_a`a`bZY`aa`a\_ba^\_a\_]^^aZ`a`^\_]UX  
@HWI-EAS443:3:78:311:1685#0/1  
ATCCCACCCAGGAATATTTGAGAATTCATGCCTTGAACA  
+HWI-EAS443:3:78:311:1685#0/1  
aaaaaaaa`\_\_][\_``a\_\_¥^`^`\_]\_^\_]SW`\_]a  
@HWI-EAS443:3:78:333:60#0/1  
CATTTGCCAGTTTGGCCTTCTTTTCATTGCCCCCTACTGG  
+HWI-EAS443:3:78:333:60#0/1  
aaaaabaa\_b\_bbab`aba[aaaa\_a`^`T]Z^\_\_\_¥\_\_`  
@HWI-EAS443:3:78:350:1802#0/1  
CGAGTGGTTCAGAAACATCCTGAGCATGGCACCCATAATG  
+HWI-EAS443:3:78:350:1802#0/1  
a`^a^aa][aaYaa]aa^^`^^^\_`\_\_\_¥`aaZ¥¥`\_\_`  
@HWI-EAS443:3:78:427:666#0/1  
GTAGAATCTGTCCACTCCTGCTTGTATTCCCTCATGGTTT  
+HWI-EAS443:3:78:427:666#0/1  
a\_aaaaa`a]a`a`\_`\_`\_`^a`^]a`Y¥\_\_\_]^^\_V^^  
@HWI-EAS443:3:78:449:1543#0/1  
ATGGATGTCAATCCGACTCTACTTTTCCTAAAAATCCAG  
+HWI-EAS443:3:78:449:1543#0/1  
¥ZVWaSZ^`a[TUQSPX¥U\_¥NZaXUS[0^`\_Z^`\_`^ZTO  
@HWI-EAS443:3:78:463:343#0/1  
GGCTATCGCAACACCTGGGATGCAGATTAGAGTTTCGTA  
+HWI-EAS443:3:78:463:343#0/1  
^aba`aaaaaa`aY^`aaa\_\_R]0a\_Xa`¥`\_`W`a`^`W\_  
@HWI-EAS443:3:78:474:906#0/1  
TGGTCTCCATCTGATACTAATAGCCCTACCTTTGATTGG

+HWI-EAS443:3:78:474:906#0/1  
aaaYaa^baa`aaa\_\_aa`a`^¥]\_^a` `` `\_\_^¥^^^][  
@HWI-EAS443:3:78:501:233#0/1  
GTGGTAATGCCAGCCCATGGTCCAGCCAAAAGCATGGAAT  
+HWI-EAS443:3:78:501:233#0/1  
`]b`¥baZ][\_a`Z\_a\_\_a¥\_Z`^STX\_\_\_\_\_¥\_¥^\_]\_^  
@HWI-EAS443:3:78:521:552#0/1  
GTCAGTCATAAAGAGATTGATTCTGTAAACAATGCTGTGG  
+HWI-EAS443:3:78:521:552#0/1  
¥Ha]ZX]HT`^Z[Y\_R]aa¥TY]^¥R]^ZTQTT\_LSWIRF  
@HWI-EAS443:3:78:545:504#0/1  
ATCCTCAAGAATCCCCTTTGGCTTGTGTTGAGAATAGAA  
+HWI-EAS443:3:78:545:504#0/1  
a`]SNXU`^TR\_UUO]a^MYZ^J`\_GLU\_TRHULW`X¥`Y  
@HWI-EAS443:3:78:580:140#0/1  
GTGATTGTGAAAGAAATCTCTGTGTCTTGTGAATTAGTCA  
+HWI-EAS443:3:78:580:140#0/1  
aab`bab\_a\_aaaaa`a\_aaaa]a\_\_aa`[\_]\_\_a^YY\_  
@HWI-EAS443:3:78:580:973#0/1  
CCTCCATCTGATACTAATAGCCCTACCTTTGATTGGGTTT  
+HWI-EAS443:3:78:580:973#0/1  
a`\_aab`aaa[aa`aaa^\_\_aZ`^\_]`^`\_`¥S]`]]\_YWU  
@HWI-EAS443:3:78:583:1984#0/1  
GCTCTTATTAGATAGCCTCTCTTATTTCAGTCTTTGTTTTT  
+HWI-EAS443:3:78:583:1984#0/1  
G]U\_[````]YY¥^^`a`aaa¥ab`bb`¥¥``b\_¥\_ba``  
@HWI-EAS443:3:78:58:1661#0/1  
CAAAGATGCAGAGAGAGGCAAGTTAAAAAGAAGGGCTATC  
+HWI-EAS443:3:78:58:1661#0/1  
aa]U^WP]`]Z\_\_\_\_[V^¥\_\_Z^T[\_\_\_\_]NUPTQWW\_W^X]  
@HWI-EAS443:3:78:595:382#0/1  
GGGTTGTTATCTCTATTTCCCTCTTTGTTTCATTGATTCCAT  
+HWI-EAS443:3:78:595:382#0/1  
abaPaa`a¥aaaaaaaa`\_aaa` `a`a\_\_`\_a\_aa^aa  
@HWI-EAS443:3:78:60:965#0/1  
TATCTAATAAGAGCACTGACATTAATAACGATGACCAAAG  
+HWI-EAS443:3:78:60:965#0/1  
a\_aaa`aaa^`^aa`aaaaaaaa`\_aa`aa\_a`\_\_a\_a\_  
@HWI-EAS443:3:78:633:35#0/1  
GTGTGTTCTGTTTACTGTGTCCATGGTGTATCCTGTTCCCT  
+HWI-EAS443:3:78:633:35#0/1  
aUa^\_[\_`a`]`\_`\_U` `\_ZPVWV^`\_N\_V`^R^VVT[  
@HWI-EAS443:3:78:654:1576#0/1  
GTGCTTATGGCATTGCGCTGGAATTTTTAGGAAAAGTA  
+HWI-EAS443:3:78:654:1576#0/1  
^Y^aV`aaZ^[aaaa` `b`a¥]`aaaab`aaY[[]a\_P]¥b  
@HWI-EAS443:3:78:656:62#0/1  
GTGCCATGCTCAGGATGTTTCTGAACCACTCGGGTTGATT  
+HWI-EAS443:3:78:656:62#0/1  
ZIVXZTXbZ^aU][X[bS^^RWaUa][[Y[HV]a^P¥aVX^



@HWI-EAS443:3:78:676:659#0/1  
GACATTAATACGATGACCAAAGATGCAGAGAGAGGCAAG  
+HWI-EAS443:3:78:676:659#0/1  
aaabbba^X^]aaVaa^]a\_`\_¥a^a``\_\_\_\_\_a`a^I¥\_a  
@HWI-EAS443:3:78:719:103#0/1  
GGACCAAACCTTATACAATATACGGAATCTTCACATTCCTG  
+HWI-EAS443:3:78:719:103#0/1  
aa^\_a`aa^aaaa\_`^`\_aaaa^aa\_¥\_`^`\_[^UW¥]ZU[`  
@HWI-EAS443:3:78:721:401#0/1  
GTTGATCCCACTAACTTGCAGGTCCTGTAGAATCTGTCC  
+HWI-EAS443:3:78:721:401#0/1  
aa\_aaaabaaa\_a```aaa`a`^¥^^a`\_a``\_a[a\_YUW  
@HWI-EAS443:3:78:73:1940#0/1  
CAGCTGATTCATTTACTCCAGACACTCCAAAGCTGGGTAG  
+HWI-EAS443:3:78:73:1940#0/1  
aXZ`] [¥^[\_VUY]a\_Z\_\_]]^^`^^`]XLJQ^VWWSM¥V  
@HWI-EAS443:3:78:759:185#0/1  
GGGCTCCAATCATCCGACGATTTTGCTCTCATAGTGAATG  
+HWI-EAS443:3:78:759:185#0/1  
a`¥WZaaaaaab¥`\_`a`\_Y]\_`^^`^^W^U\_¥\_\_Ta]^^¥  
@HWI-EAS443:3:78:770:463#0/1  
GCCCCGATTGATGCCAGGGTCGACTTCGAGTCTGGACGGA  
+HWI-EAS443:3:78:770:463#0/1  
aabbabaa```aa``aaa`^aaa`aa`a`a]aaba^aaa¥  
@HWI-EAS443:3:78:777:1075#0/1  
CTATTCGAGAAATTTTTCCCTAGCAGTTCATATAGGAGAC  
+HWI-EAS443:3:78:777:1075#0/1  
a\_Y]]^^[\_R[\_XTZSVT]WaZ^\_aG¥OY`^][N[[YXR  
@HWI-EAS443:3:78:795:1384#0/1  
CAGGGTCGACTTCGAGTCTGGACGGATCAAGAAAGAAGAG  
+HWI-EAS443:3:78:795:1384#0/1  
`Ta\_\_ZWWW\_`[\_]bbI[abV¥X`RFZa]Z)`[V```[]]  
@HWI-EAS443:3:78:847:1531#0/1  
AATAAGAGCACTGACATTAATACGATGACCAAAGATGCA  
+HWI-EAS443:3:78:847:1531#0/1  
X`a¥T¥`aa``QH\_a\_`X^]\_`a]ba\_a^Y]]`])`aR``a  
@HWI-EAS443:3:78:85:1460#0/1  
AAAAATTTCTCGAATAGATTGCAGCACTTCTGGTACATCT  
+HWI-EAS443:3:78:85:1460#0/1  
aa``]a`\_``\_``\_ZVX`]^]\_¥0a^]YX]YSRV^\_]X]Y  
@HWI-EAS443:3:78:870:1818#0/1  
CTAACTTGCAGGTCCTGTAGAATCTGTCCACTCCTGCTTG  
+HWI-EAS443:3:78:870:1818#0/1  
aaaa\_``X```[[[Ya``YY\_a\_\_aX\_¥TQZT[Y[[[ZU[]]  
@HWI-EAS443:3:78:886:1179#0/1  
AGGCCATGGTGTCTAGGGCCCGATTGATGCCAGGGTCGA  
+HWI-EAS443:3:78:886:1179#0/1  
aZNZT]ZWW]QXR¥TVXX^`¥^]Y```[X¥¥\_`Z^YXTZX¥  
@HWI-EAS443:3:78:894:1058#0/1  
CTGGACGGATCAAGAAAGAAGAGTTCTCTGAGATCATGAA

+HWI-EAS443:3:78:894:1058#0/1  
ab\_X[abaa`b` `bb\_bba\_`aa`aabaa\_b]ab`aaa\_^  
@HWI-EAS443:3:78:905:1121#0/1  
GTCTTGCCATTTTGTGGAGAACATTATGGGTGCCATGCT  
+HWI-EAS443:3:78:905:1121#0/1  
abbbababbbba]abaa\_aab`\_aba`b]`\_\_\_aa[^H`  
@HWI-EAS443:3:78:927:1308#0/1  
GTTTGGTGCATTCACTATGAGAGCAAATCGTCGGATGAT  
+HWI-EAS443:3:78:927:1308#0/1  
a\_`\_]\_N]a]a\_` `ab`a`SVZWWX`VPaaPT[S[ `Z^Y]  
@HWI-EAS443:3:78:937:902#0/1  
AGCTTGAACAGTCTGGGCTCCCAGTAGGGGCAATGAAAA  
+HWI-EAS443:3:78:937:902#0/1  
\_aaa[W¥aZ[ `H[a\_Y\_aaa¥[ ]]aW[UY]Wa` ` `\_[\_\_  
@HWI-EAS443:3:78:938:188#0/1  
GTTCTGTTTACTGTGTCCATGGTGTATCCTGTTCCCTGTTC  
+HWI-EAS443:3:78:938:188#0/1  
a`a¥baaba`\_a`\_a\_]\_aa`Y`]XV\_` `^¥\_]\_^]  
@HWI-EAS443:3:78:941:1284#0/1  
ATTCGAACACAAATACCAGCAGAAATGCTAGCAAGCATTG  
+HWI-EAS443:3:78:941:1284#0/1  
a\_[X¥\_a^`¥`a^a^]V^Z]`Z\_[[^`\_^`\_XY^\_^[ZXN  
@HWI-EAS443:3:78:950:909#0/1  
GAACAAAGAGGAAATAGAGATAACAACCCACTTTCAAAGA  
+HWI-EAS443:3:78:950:909#0/1  
aaaa`^`a]ba` `baaaaa`aaaaa^\_\_aaaaa`a^a^  
@HWI-EAS443:3:78:958:1937#0/1  
GACGGATCAAGAAAGAAGAGTTCTCTGAGATCATGAAGAT  
+HWI-EAS443:3:78:958:1937#0/1  
^baTZ`bbaabaa\_I\_a\_ab]` `baaaabaaaa` `a¥aa  
@HWI-EAS443:3:78:972:550#0/1  
CCTATATGAACTGCTAGGGAAAAATTTCTCGAATAGATTG  
+HWI-EAS443:3:78:972:550#0/1  
` ` `abab`aa\_b^¥a`a`aa`a]]bab\_a\_b\_^a`a\_\_\_\_  
@HWI-EAS443:3:78:973:475#0/1  
CCCAGTGTGTTGAAAGAAATCTCTGTGTCTTGTGAATTA  
+HWI-EAS443:3:78:973:475#0/1  
aa` `a\_aaa\_a]a\_`a` `\_[a\_a^]\_[aa[¥\_]\_\_\_\_T  
@HWI-EAS443:3:78:990:1179#0/1  
CTTTGTCAGTCATAAAGAGATTGATTCTGTAAACAATGCT  
+HWI-EAS443:3:78:990:1179#0/1  
abaaa` `aaaa`a`¥aa]aaaa`aaaa\_a`\_]a`a\_^\_  
@HWI-EAS443:3:79:1007:856#0/1  
AGCATTTCTGCTGGTATTTGTGTTTGAATCTTCATTCTTT  
+HWI-EAS443:3:79:1007:856#0/1  
ab^aaba`aaaabbXabaabZa\_`aba`aaaXYQa\_Uaa\_  
@HWI-EAS443:3:79:1014:477#0/1  
AAAACAAAGACTGAATAAGAGAGGCTATCTAATAAGAGCA  
+HWI-EAS443:3:79:1014:477#0/1  
a`baa`\_\_b`abbaabbabbb\_baaba]S^T]XX¥LYNPP

@HWI-EAS443:3:79:1017:764#0/1  
CGATGACCAAAGATGCAGAGAGAGGCAAGTTAAAAAGAAG  
+HWI-EAS443:3:79:1017:764#0/1  
abbbbabbbbbbb`bbabababbbbababababababaab  
@HWI-EAS443:3:79:1020:1955#0/1  
CAGATCTTCATGATCTCAGAGAACTCTTCTTTCTTGATCC  
+HWI-EAS443:3:79:1020:1955#0/1  
abaaaaabb`aaa`\_a`a\_a\_aa`a`\_a\_aa`\_a`\_]  
@HWI-EAS443:3:79:1082:1652#0/1  
GCTAATTTTAGCATGGAGCTACCCAGCTTTGGAGTGTCTG  
+HWI-EAS443:3:79:1082:1652#0/1  
ab^¥^`a¥V]]][a`[^X`^^\_Z¥`Y]`^`[W`T^ZZ]¥  
@HWI-EAS443:3:79:1092:1861#0/1  
GCCTTATTTTCTCAATTTTCTTCTTTGTTGATTCATTGAA  
+HWI-EAS443:3:79:1092:1861#0/1  
a`abaabbbbbbabababb`bb`bab`a`\_`bbaba`\_aa  
@HWI-EAS443:3:79:1106:546#0/1  
AAAGAAATCTCTGTGTCTTGTGAATTAGTCATCATCTTTC  
+HWI-EAS443:3:79:1106:546#0/1  
abbabb`bbbbba]`ab`^^^¥`abYY[^Zaa``¥aaaa  
@HWI-EAS443:3:79:1180:18#0/1  
TCAAGAATCCCCTTTGGCTTGTGTTGAGAATAGAACGAT  
+HWI-EAS443:3:79:1180:18#0/1  
Y¥Y\_]a]]Z¥^]¥`^\_a\_T`\_`TV¥``[a]H[\_R^]R¥VF  
@HWI-EAS443:3:79:1193:584#0/1  
GGTGTGTTCTGTTTACTGTGTCCATGGTGTATCCTGTTC  
+HWI-EAS443:3:79:1193:584#0/1  
[aY`\_`\_aa`bbabb`\_ab`aa]`bbbaI`Taba[]a`a`Z  
@HWI-EAS443:3:79:1202:939#0/1  
TTTTCTATAAAATCCAGCGCAAATGCCATAAGCACCAC  
+HWI-EAS443:3:79:1202:939#0/1  
Z[\_V`\_`W[¥`\_`\_`][[\_`\_`]¥^a[NZ]0^a`\_`Z¥^`YX`a  
@HWI-EAS443:3:79:1227:1907#0/1  
GCCCCGATTGATGCCAGGGTCGACTTCGAGTCTGGACGGA  
+HWI-EAS443:3:79:1227:1907#0/1  
abbabb`T^[X`¥TM`]]]aTPWZSY`TabaH¥Z]`]RQ`H  
@HWI-EAS443:3:79:1229:844#0/1  
GAACCAAGTGGGTATGCACAAACAGACTGTGTTCTAGAGG  
+HWI-EAS443:3:79:1229:844#0/1  
`]a`^`^XZ]¥T^S^`\_`\_`\_]T][¥]¥¥SY¥^UZS^[YW  
@HWI-EAS443:3:79:1262:730#0/1  
TAAGAGAGGCTATCTAATAAGAGCACTGACATTAATACG  
+HWI-EAS443:3:79:1262:730#0/1  
`aabaa`a`¥a^WZX`\_`\_`TFQ]G¥NUQXNRM`X`YQ]G\_  
@HWI-EAS443:3:79:130:929#0/1  
CCCAGTGATTGTGAAAGAAATCTCTGTGTCTTGTGAATTA  
+HWI-EAS443:3:79:130:929#0/1  
a]aXYKMDW`][WYVTTZ\_]TY^^VJWT^¥[SBBBBBBB  
@HWI-EAS443:3:79:1378:1159#0/1  
CACTAACTTGCAGGTCCTGTAGAATCTGTCCACTCCTGCT

+HWI-EAS443:3:79:1378:1159#0/1  
aaabaa[ [aaabba[aababa`ab`b`Q¥`R`\_]U` `a`  
@HWI-EAS443:3:79:1380:1005#0/1  
GGGGCAATGAAAAGAAGCCAACTGGCAAATGTTGTGAG  
+HWI-EAS443:3:79:1380:1005#0/1  
]ba`abb` `bab[baabbbVabaaaabbbb` `b\_]¥a^b  
@HWI-EAS443:3:79:1431:854#0/1  
GCCTCTCTTATTTCAGTCTTTGTTTTTTCTCCCTATTGTT  
+HWI-EAS443:3:79:1431:854#0/1  
a^`a[aabb`bb]aa\_N`b^` `¥aaab\_a`YWaaa`aa`a  
@HWI-EAS443:3:79:1520:193#0/1  
GAAAAATTTCTCGAATAGATTGCAGCACTTCTGGTACATC  
+HWI-EAS443:3:79:1520:193#0/1  
ababbbbbbbabW`aababa`ab^aa`a\_\_aZab¥]`X\_aZ  
@HWI-EAS443:3:79:1566:1768#0/1  
CTCCAATCATCCGACGATTTTGCTCTCATAGTGAATGCAC  
+HWI-EAS443:3:79:1566:1768#0/1  
abbabbbbbba]bbabbbbbbb`bbbabba`babbb0a\_  
@HWI-EAS443:3:79:1582:1254#0/1  
CAGCTGATTCATTTACTCCAGACACTCCAAAGCTGGGTAG  
+HWI-EAS443:3:79:1582:1254#0/1  
aa^`babbabbbbbbabbaaa` `babbbbbabba\_Z]Xba  
@HWI-EAS443:3:79:1593:1934#0/1  
GTGGGATGGGCTCCAATCATCCGACGATTTTGCTCTCATA  
+HWI-EAS443:3:79:1593:1934#0/1  
`0a]¥PXa¥LaXXVa]L]XX0\_U]VLDHDV[a[G^YXNZJ  
@HWI-EAS443:3:79:1622:1988#0/1  
CAGATTAGAGGTTTTCGTATACTTTGTTGAACTTTAGCTA  
+HWI-EAS443:3:79:1622:1988#0/1  
^)`aUYab\_aaQaaUb`a\_aRb`aa[\_ba\_\_]]WW[a`]^  
@HWI-EAS443:3:79:163:491#0/1  
CGAGTGGTTCAGAAACATCCTGAGCATGGCACCCATAATG  
+HWI-EAS443:3:79:163:491#0/1  
abababb`b`a]S` `a\_aaaaaaabaaaaab`aaaYab  
@HWI-EAS443:3:79:164:627#0/1  
GGCTTGTGTTGAGAATAGAACGATTCCTCTTGGGAATCCA  
+HWI-EAS443:3:79:164:627#0/1  
aaaaab^`¥abaaaa` `\_a\_aa` `aa`\_]` `a`\_] ^\_X  
@HWI-EAS443:3:79:1678:456#0/1  
AAATCGTCGGATGATTGGAGCCCATCCACCAGTATATTG  
+HWI-EAS443:3:79:1678:456#0/1  
aaa`aaaY` [a\_Waaaab[\_Z\_¥aa\_^aXUYbV^\_^¥aa  
@HWI-EAS443:3:79:1706:894#0/1  
ATGGGCTCCAATCATCCGACGATTTTGCTCTCATAGTGAA  
+HWI-EAS443:3:79:1706:894#0/1  
abbbaabbaZababababb`\_aaabaWZbaa[b` `T^\_aa  
@HWI-EAS443:3:79:176:705#0/1  
ATTAATACGATGACCAAAGATGCAGAGAGAGGCAAGTTA  
+HWI-EAS443:3:79:176:705#0/1  
aaaa`aaaa`Z]\_`\_`\_`UY`\_]` `[[^]Y\_YVY]XN[\_

@HWI-EAS443:3:79:207:133#0/1  
CACCAGTATATTGTCTTGGTGTATTTCTTTTGTCCAAGAT  
+HWI-EAS443:3:79:207:133#0/1  
abb\_¥\_TY`aa`\_Paaa`]JZJQ\_`\_^`^^Z\_Z^```a^[  
@HWI-EAS443:3:79:216:275#0/1  
GTCCCCAGTGATTGTGAAAGAAATCTCTGTGTCTTGTGAA  
+HWI-EAS443:3:79:216:275#0/1  
`)]```\_]XFXOQYYO^Q[X¥VTYP[XWZWLVRVUSUIU  
@HWI-EAS443:3:79:232:731#0/1  
ATTTCTTTTGTCCAAGATTCAGTATCGAGACTCCCAAGAC  
+HWI-EAS443:3:79:232:731#0/1  
¥b^`\_`ba^¥a]^Y^\_ab``^^Va`Z[^`^a`VZ`aab\_a` [  
@HWI-EAS443:3:79:233:653#0/1  
GTTTCGTATACTTTGTTGAAACTTTAGCTAGGAGCATTG  
+HWI-EAS443:3:79:233:653#0/1  
a]aaaa[Z]aaaa`a````\_¥]aa\_`a````\_`\_]`\_\_[\_^\_  
@HWI-EAS443:3:79:237:1151#0/1  
GGAAAGGGTACATGTTTCGAGAGTAAAAGAATGAAGATTCG  
+HWI-EAS443:3:79:237:1151#0/1  
a\_V]\_``[I[[W¥\_Y\_[PY`¥]G¥VY[¥`\_T^TTX[^`]]  
@HWI-EAS443:3:79:256:743#0/1  
CCAAGAAGATGGTCACGCAAAGAACAATAGGGAAGAAAAA  
+HWI-EAS443:3:79:256:743#0/1  
aa]Z\_U¥`WU¥\_[¥Y\_`^]]¥]UL[^[YW]W[T]U[SORJ  
@HWI-EAS443:3:79:274:113#0/1  
GTGTGTTCTGTTTACTGTGTCCATGGTGTATCCTGTTCCCT  
+HWI-EAS443:3:79:274:113#0/1  
`a`¥b^aabbaaa[\_a\_^a^a`Yaa`Xa^^^]a^\_]\_^\_  
@HWI-EAS443:3:79:304:310#0/1  
CTGAATAAGAGAGGCTATCTAATAAGAGCACTGACATTAA  
+HWI-EAS443:3:79:304:310#0/1  
a`^a``````a`aWa[TTXXSXFY[RUWFXRZLYTYV[X¥  
@HWI-EAS443:3:79:415:1254#0/1  
CAGTAAACAGAACACACCAATACTCAGAAAAGGGAAAGTG  
+HWI-EAS443:3:79:415:1254#0/1  
`baa]Vaababbab^abbaVa`aa`Z`aaa\_a`\_`aa[K[  
@HWI-EAS443:3:79:442:723#0/1  
CCCCTTTGGCTTGTGTTGAGAATAGAACGATTCCCTCTTGG  
+HWI-EAS443:3:79:442:723#0/1  
ababbbbaa`aZ^]aa\_aaa]Z0]a``^\_\_a[^[`ZVa  
@HWI-EAS443:3:79:491:2010#0/1  
GGTCCCTCATCTGATACTAATAGCCCTACCTTTGATTGGG  
+HWI-EAS443:3:79:491:2010#0/1  
aaZ[aRa`WT^VXZUaa]a[T[UYa`Z¥WZY\_ZWY[UW^Y  
@HWI-EAS443:3:79:499:1485#0/1  
ATTTTGTCTCATAGTGAATGCACCAAACCATGAGGGAAT  
+HWI-EAS443:3:79:499:1485#0/1  
]aaIO¥[X\_SaUY[]V^[^\_aa]```V]a`ZT\_\_ZUZ¥]T  
@HWI-EAS443:3:79:500:1634#0/1  
CCCAGGAATATTTGAGAATTCATGCCTTGAACAATGGAA

+HWI-EAS443:3:79:500:1634#0/1  
Xba`\_¥V[\_ZUW\_]¥SH[`]QT)`Z`U`\_¥`aa¥]]UVZ  
@HWI-EAS443:3:79:515:803#0/1  
GAACAATTGAAGAGCCATCTGGGCCGTTGCAGGTCCAAGG  
+HWI-EAS443:3:79:515:803#0/1  
\_a`aa^a`a`a\_Z[^\_]\_a\_] []aa`Z¥¥]W]\_Q^XUHW¥  
@HWI-EAS443:3:79:531:613#0/1  
CACTAACTTGCAGGTCCTGTAGAATCTGTCCACTCCTGCT  
+HWI-EAS443:3:79:531:613#0/1  
ababbbabaabaaaWa`a`\_aa\_aa``a¥`\_`a`a\_^X^`  
@HWI-EAS443:3:79:535:1812#0/1  
ATAACAACCCACTTTCAAAGAAAAAGGAGAGTAAGAGACA  
+HWI-EAS443:3:79:535:1812#0/1  
^ab`abbaabaaaaaaa\_a^`U`)\_a[a\_a\_Xa\_\_a\_a`a  
@HWI-EAS443:3:79:567:1819#0/1  
GAAAGAAATCTCTGTGTCTTGTGAATTAGTCATCATCTTT  
+HWI-EAS443:3:79:567:1819#0/1  
^aa`b\_\_b``aab]VaVbbbbaaaa`aVS¥`¥ab]]a^aaa  
@HWI-EAS443:3:79:575:710#0/1  
ATTGATGCCAGGGTCGACTTCGAGTCTGGACGGATCAAGA  
+HWI-EAS443:3:79:575:710#0/1  
abbab`¥\_aaaaa]aa``aaaaaa`\_aa\_a`aa\_\_[\_`\_\_a  
@HWI-EAS443:3:79:582:1210#0/1  
ATTTGTGGCTAATTTTAGCATGGAGCTACCCAGCTTTGGA  
+HWI-EAS443:3:79:582:1210#0/1  
TX^¥U\_\_\_`^[V\_Y`aZ\_^Y\_¥\_P]¥]aa\_[W\_\_\_bb\_¥Z  
@HWI-EAS443:3:79:596:562#0/1  
ATCCCACCCAGGAATATTTGAGAATTCATGCCTTGAAACA  
+HWI-EAS443:3:79:596:562#0/1  
```^^a`¥`b\_a^Z\_^aaaaaa¥`a\_aa`\_V[```aa¥^^`  
@HWI-EAS443:3:79:599:397#0/1  
CAGATCTTCATGATCTCAGAGAACTCTTCTTTCTTGATCC  
+HWI-EAS443:3:79:599:397#0/1  
a[RTYbbNbaaa]a\_a]¥\_\_`a^`\_a`\_a``Y]\_^\_]\_[  
@HWI-EAS443:3:79:59:147#0/1  
CTTGCTAGCATTCTGCTGGTATTTGTGTTGGAATCTTCA  
+HWI-EAS443:3:79:59:147#0/1  
aabbbbabbbbbbabbba\_babab`aaabbaa`aaaa  
@HWI-EAS443:3:79:607:1639#0/1  
CGGTCTCCTATATGAACTGCTAGGGAAAAATTTCTCGAAT  
+HWI-EAS443:3:79:607:1639#0/1  
\_\_VXa¥aa\_\_][^`a`\_a`\_X[`¥aa)`a`\_^`^^YYT`  
@HWI-EAS443:3:79:61:804#0/1  
GGCTCCAATCATCCGACGATTTTGCTCTCATAGTGAATGC  
+HWI-EAS443:3:79:61:804#0/1  
abbab`R¥a`S^a`)]`a[```aaa`a\_]¥a^Q¥X[Z^]  
@HWI-EAS443:3:79:642:91#0/1  
CCCATTTTAAGCAGACTTCAGGAATGTGAAGATTCCGTAT  
+HWI-EAS443:3:79:642:91#0/1  
\_STY\_babbbbaaba\_aa\_aba`\_b^b`\_a`aa[R\_]\_a

@HWI-EAS443:3:79:701:1884#0/1  
AGACTGGTGCACCCCAGCTCAACCCGATTGATGGACCACT  
+HWI-EAS443:3:79:701:1884#0/1  
a]aa]]RZZ\_bbbaba\_b\_abbaaa]a\_]`\_[Y\_`\_a\_\_  
@HWI-EAS443:3:79:710:1471#0/1  
GCTAATTTTAGCATGGAGCTACCCAGCTTTGGAGTGTCTG  
+HWI-EAS443:3:79:710:1471#0/1  
ab^^aaaaabbbaaaaaaaaaa`^]aaa]¥`\_]a^\_\_`  
@HWI-EAS443:3:79:724:1077#0/1  
GAACAATTGAAGAGCCATCTGGGCCGTTGCAGGTCCAAGG  
+HWI-EAS443:3:79:724:1077#0/1  
\_b^\_ab`abaab^\_aaaaaaaa^`aa\_`aaa`]W`]T[\_V  
@HWI-EAS443:3:79:750:192#0/1  
TCAAGAATCCCCCTTTGGCTTGTGTTGAGAATAGAACGAT  
+HWI-EAS443:3:79:750:192#0/1  
abaaaaaaaa`\_aaaaa`\_a]a^`a]a^`a`X\_Z^  
@HWI-EAS443:3:79:765:1134#0/1  
AAATCGTCGGATGATTGGAGCCCATCCCACCAGTATATTG  
+HWI-EAS443:3:79:765:1134#0/1  
a`[aaX`\_[^`\_`a\_[Z`a\_a^`a`\_RUYW^¥¥]Q]  
@HWI-EAS443:3:79:766:1579#0/1  
GCCCTTCTTTTTAACTTGCCTCTCTGCATCTTTGGTCA  
+HWI-EAS443:3:79:766:1579#0/1  
ab[aab`\_\_`]aWXaaaa`Z`aa^aaaa^`aaa[VY]R  
@HWI-EAS443:3:79:845:377#0/1  
GGACGGATCAAGAAAGAAGAGTTCTCTGAGATCATGAAGA  
+HWI-EAS443:3:79:845:377#0/1  
a```a``\_aa`a`a`\_a\_\_\_\_^`a````a`\_]a\_\_]`\_  
@HWI-EAS443:3:79:882:816#0/1  
CAGATCTTCATGATCTCAGAGAACTTCTTTCTTGATCC  
+HWI-EAS443:3:79:882:816#0/1  
ababbabbbbabbaababbababababbabbababaaaa  
@HWI-EAS443:3:79:916:149#0/1  
GTCCCCAGTGATTGTGAAAGAAATCTCTGTGTCTTGAA  
+HWI-EAS443:3:79:916:149#0/1  
aaaabb]b^b`aab`baaaa\_`aa^aaaa`a`\_¥]^\_]]W  
@HWI-EAS443:3:79:91:589#0/1  
GGTGGGATGGGCTCCAATCATCCGACGATTTTGCTCAT  
+HWI-EAS443:3:79:91:589#0/1  
¥WS\_bb^`\_¥W`\_b^LOX¥\_¥XX\_Y\_]\_a¥^\_XXX[QKT  
@HWI-EAS443:3:79:943:1803#0/1  
GTGGGATGGGCTCCAATCATCCGACGATTTTGCTCATA  
+HWI-EAS443:3:79:943:1803#0/1  
aX`aaa`a`]a\_a`aa\_`a[`\_aa\_\_^`a\_\_\_\_`\_\_`  
@HWI-EAS443:3:79:944:991#0/1  
GGCTTTCCTTGAAGAATCCCACCCAGGAATATTTGAGAAT  
+HWI-EAS443:3:79:944:991#0/1  
abbbabb`aa^]a`aa``aa^\_\_`^a^¥^aa`aaaa\_aa  
@HWI-EAS443:3:79:99:908#0/1  
TGAGTATTGGAGTAACAGTGATAAAGAACAACATGATAAA

+HWI-EAS443:3:79:99:908#0/1  
`aNaz¥abb`^¥aM¥aabRaaa`b¥U¥b`b`\_WSWa^\_aa  
@HWI-EAS443:3:7:1013:1260#0/1  
GTCGACCCTGGCATCAATCCGGGCCCTAGACACCATGGCC  
+HWI-EAS443:3:7:1013:1260#0/1  
`Z¥¥`Z`¥`¥¥VZR\_`¥Z]S]¥WZPZ^¥ZX¥SZZTZBBB  
@HWI-EAS443:3:7:1015:34#0/1  
GTTCTGTTTACTGTGTCCATGGTGTATCCTGTTCTGTTC  
+HWI-EAS443:3:7:1015:34#0/1  
[b\_ab`aab`X^aaa`¥^`aab^a^VaUUaa[]\_W\_a[¥M  
@HWI-EAS443:3:7:103:1613#0/1  
GAAGATCCGTATATTGTATAAGTTTGGTCCCTCCATCTGA  
+HWI-EAS443:3:7:103:1613#0/1  
a\_b¥bbbaaa`^`\_`babbababbU`Y`W]`][`\_a`aa  
@HWI-EAS443:3:7:1084:1589#0/1  
GAACGATTCTTGGGAATCCAGGAATGTGTAGTTGCAA  
+HWI-EAS443:3:7:1084:1589#0/1  
abb]b]aa]XU^\_]^^aa\_`[\_`a^`\_a`V¥P]`UU^^\_¥  
@HWI-EAS443:3:7:112:1009#0/1  
TGTAAGATCTGTCCACTCCTGTGTATTCCCTCATGGTT  
+HWI-EAS443:3:7:112:1009#0/1  
ab\_baa\_aaaaaaaaa\_a`^`\_`\_a`]aaa`\_`\_`¥a`aY\_  
@HWI-EAS443:3:7:1146:1895#0/1  
GGCTAATTTTAGCATGGAGCTACCCAGCTTTGGAGTGTCT  
+HWI-EAS443:3:7:1146:1895#0/1  
a`a``bbaaba`baaaa\_a^aaX`^`\_¥aa\_aX]\_T\_ZX`  
@HWI-EAS443:3:7:1152:1232#0/1  
CTTGAAGAATCCCACCCAGGAATTTTGAGAATTCATGCC  
+HWI-EAS443:3:7:1152:1232#0/1  
abbbbabbabbabb]\_Z\_abaabbabbbbbaabb`bba`R  
@HWI-EAS443:3:7:1175:196#0/1  
AAAAATTCCAGCGAAAATGCCATAAGCACCATTCCT  
+HWI-EAS443:3:7:1175:196#0/1  
aaa`\_a]Y^W]`\_`¥R\_]¥ZUZ^`]^`\_VT¥Z^ZZSXY]  
@HWI-EAS443:3:7:1182:1623#0/1  
CTTGAGGATGAACAGATGTACCAGAAGTGCTGCAATCTAT  
+HWI-EAS443:3:7:1182:1623#0/1  
ab`aabbbbbbb`^abbaabbabbbabaaabb\_bbbbbbb  
@HWI-EAS443:3:7:1189:897#0/1  
GCTAATTTTAGCATGGAGCTACCCAGCTTTGGAGTGTCTG  
+HWI-EAS443:3:7:1189:897#0/1  
X\_U`U`^¥aa¥00YV`¥]`ba^a[\_aZbbaa[RaP^HH^a  
@HWI-EAS443:3:7:1196:1882#0/1  
ATGGGCTCCAATCATCCGACGATTTTGCTCTCATAGTGAA  
+HWI-EAS443:3:7:1196:1882#0/1  
aaa`Z[\_\_\_`\_a\_\_\_\_`]a\_Wa\_\_\_\_\_¥]QZW\_Z]]X\_X`^¥  
@HWI-EAS443:3:7:131:1474#0/1  
GGACGACAAACACAGAGACTGGTGCACCCCAGCTCAACCC  
+HWI-EAS443:3:7:131:1474#0/1  
aabbaaa\_b¥]aabba`a^`aW^aa`aa]`aW[`aX[S`



@HWI-EAS443:3:7:1326:1585#0/1  
CCCCAGCTCAACCCGATTGATGGACCACTACCTGAGGATA  
+HWI-EAS443:3:7:1326:1585#0/1  
aa\_aaaaaaab`\_```aaa`Z\_V\_\_¥\_^``\_X¥aT``^\_b  
@HWI-EAS443:3:7:1358:538#0/1  
GGTGTGTTCTGTTTACTGTGTCCATGGTGTATCCTGTTCC  
+HWI-EAS443:3:7:1358:538#0/1  
aaOWN``]W`^`b`^X`a``ZZY\_[\_]a\_`\_[Y[\_]SQR  
@HWI-EAS443:3:7:1389:741#0/1  
GGCTAATTTTAGCATGGAGCTACCCAGCTTTGGAGTGTCT  
+HWI-EAS443:3:7:1389:741#0/1  
ababbabaabbabaaaaa`aaa\_\_`a\_`aaaa^a]a\_]a  
@HWI-EAS443:3:7:1406:1709#0/1  
GAAGAATCCCACCCAGGAATATTTGAGAATTCATGCCTTG  
+HWI-EAS443:3:7:1406:1709#0/1  
\_abbbbbabbbb¥bbababbbabbbabbbbaabaaa]bab  
@HWI-EAS443:3:7:1423:1535#0/1  
TTATGACTGACAAAGGGATTACAGGGATTACAAAGTCTTC  
+HWI-EAS443:3:7:1423:1535#0/1  
¥ba¥^aa`^]T``^`Z^a\_¥N\_¥Y\_^Va¥TU]`a[P¥UST  
@HWI-EAS443:3:7:1433:1200#0/1  
TGATTCATTTACTCCAGACACTCCAAAGCTGGGTAGCTCC  
+HWI-EAS443:3:7:1433:1200#0/1  
MaZ^ [``bbbab¥aV\_b\_`YaV]^`a`^¥[Q^ [ZM¥OPUZG  
@HWI-EAS443:3:7:1442:1995#0/1  
AGATACACATATAGGTGCCATAGGGGAGACACACAAATTC  
+HWI-EAS443:3:7:1442:1995#0/1  
aZDU`W\_Y\_`a\_\_^^Z\_¥W^`]^TY¥WWZZ¥G^V]]ZXUI  
@HWI-EAS443:3:7:1474:867#0/1  
GATGGGCTCCAATCATCCGACGATTTTGCTCTCATAGTGA  
+HWI-EAS443:3:7:1474:867#0/1  
a`aa`TU\_Q[a\_\_¥\_[LZ\_^¥`¥¥a^^\_U\_UYV¥¥V\_T\_B  
@HWI-EAS443:3:7:1487:1857#0/1  
AAGACTACAGATACACATATAGGTGCCATAGGGGAGACAC  
+HWI-EAS443:3:7:1487:1857#0/1  
¥```Jab0\_aaaa`aYaabaa`]WaR^aa\_`a¥X[\_]VaZ  
@HWI-EAS443:3:7:1500:1592#0/1  
AAAAATTCCAGCGCAAATGCCATAAGCACCACATTCCT  
+HWI-EAS443:3:7:1500:1592#0/1  
¥^aa[aa]0`^P`X[]X`X\_YLU]\_Xa\_aNY\_^^^QYUZ  
@HWI-EAS443:3:7:1518:799#0/1  
GGATGATGATTATCGGGGAAGACTTTGTAATCCCCTGAAT  
+HWI-EAS443:3:7:1518:799#0/1  
ab`Y\_Xabaaa\_bU`\_aa]`¥NP`\_\_YJY]YW]RSZ\_¥]B  
@HWI-EAS443:3:7:1531:86#0/1  
GAACGATTCCTCTTGGGAATCCAGGAATGTGTAGTTGCAA  
+HWI-EAS443:3:7:1531:86#0/1  
¥¥¥T¥abXU]KbV\_¥]¥\_UZQYP[`]Y``]aL\_`W[baYX  
@HWI-EAS443:3:7:1586:1475#0/1  
CGACTCTACTTTTCTAAAAATTCCAGCGCAAATGCCAT

+HWI-EAS443:3:7:1586:1475#0/1  
T\_\_babababbbbbbbaaaabbba\_bbbbabb`aabKbab  
@HWI-EAS443:3:7:1609:838#0/1  
ATTTGAGTTAAAGAAGCTGTGGGATCAAACCAATCAAAG  
+HWI-EAS443:3:7:1609:838#0/1  
`bbaba`X`bbaba``a`Ua]`[]V]adW¥V`\_^)`\_\_`  
@HWI-EAS443:3:7:1622:856#0/1  
CACAGTAAACAGAACACACCAATACTCAGAAAAGGGAAAG  
+HWI-EAS443:3:7:1622:856#0/1  
aaaba`bb\_aabb`[`ab[HW`aa¥aa`b^[\_`[]]\_aa  
@HWI-EAS443:3:7:1679:1843#0/1  
CAGCTGACATGAGTATTGGAGTAACAGTGATAAAGAACAA  
+HWI-EAS443:3:7:1679:1843#0/1  
abaabba`bb`bb\_aabaa\_b^aaaab\_a`aa`a^\_a\_a`  
@HWI-EAS443:3:7:1679:923#0/1  
CAGTGATTGTGAAAGAAATCTCTGTGTCTTGTGAATTAGT  
+HWI-EAS443:3:7:1679:923#0/1  
a`^Zb]``babbbZ[a`a^D]````WWF^a[aV^S¥`[¥R  
@HWI-EAS443:3:7:1704:551#0/1  
TGAATCTTGGACAAAAGAAATACACCAAGACAATATACTG  
+HWI-EAS443:3:7:1704:551#0/1  
^`¥^\_Xb`]aa``a\_a\_aa¥\_W\_^]\_\_^]U]]\_^\_]Y^a  
@HWI-EAS443:3:7:1717:977#0/1  
GGAGCATTGCGAAAAGCTTGAACAGTCTGGGCTCCCAGT  
+HWI-EAS443:3:7:1717:977#0/1  
ababaaaaab`aaa\_\_a]``aZPZ\_ZX]a¥\_\_ZPKX[ZaW  
@HWI-EAS443:3:7:1718:44#0/1  
AACCCGAGTGGTTCAGAAACATCCTGAGCATGGCACCCAT  
+HWI-EAS443:3:7:1718:44#0/1  
aY^`^¥^b^aa\_^)`aa`WV`RGY`]^`PX^^YYTPWQ]^  
@HWI-EAS443:3:7:1762:419#0/1  
GGGAGCTAATGGATGATGATTATCGGGGAAGACTTTGTAA  
+HWI-EAS443:3:7:1762:419#0/1  
Zab[\_J\_a`bbbb]ba]ba\_a]\_X\_a]a\_T^PDXX]]R\_B  
@HWI-EAS443:3:7:1781:849#0/1  
TGAAGAATCCCACCCAGGAATATTTGAGAATTCATGCCTT  
+HWI-EAS443:3:7:1781:849#0/1  
ababaaaa\_¥\_a^\_X`aa\_\_a`\_`aa\_\_]\_¥S^]\_ZX^^  
@HWI-EAS443:3:7:1787:1376#0/1  
TTCTGTAAACAATGCTGTGGTAATGCCAGCCCATGGTCCA  
+HWI-EAS443:3:7:1787:1376#0/1  
aa`ab\_aaa\_\_aaZ^`W`W`\_\_V¥T¥^¥UT^^¥UKRWB  
@HWI-EAS443:3:7:190:620#0/1  
TCCCCTTTGGCTTGTGTTGAGAATAGAACGATTCCTCTTG  
+HWI-EAS443:3:7:190:620#0/1  
Z[USa^`TT`T^`TW¥U\_\_\_TH]XWS``^WYdUFMZUa`]  
@HWI-EAS443:3:7:192:1249#0/1  
TGATTGTGAAAGAAATCTCTGTGTCTTGTGAATTAGTCAT  
+HWI-EAS443:3:7:192:1249#0/1  
aba``a[`^a^aaaaaaaaaa^¥aaa^KZ]][[\_W¥TZ^\_

@HWI-EAS443:3:7:193:509#0/1  
CAACTGCATTGGCCAACACCATAGAAGTCTTTAGATCGAA  
+HWI-EAS443:3:7:193:509#0/1  
aaaY^`aaa\_aaa\_\_`\_a\_a\_`\_\_`]a]\_`\_\_\_a¥\_^a^`  
@HWI-EAS443:3:7:202:718#0/1  
CGACCCTGGCATCAATCCGGGCCCTAGACACCATGGCCTC  
+HWI-EAS443:3:7:202:718#0/1  
`¥¥0]]^^`\_]`XPTX^I`^U[SNQW^V]¥¥`ZQBBBBB  
@HWI-EAS443:3:7:216:240#0/1  
CTTGAAGAATCCCACCCAGGAATATTTGAGAATTCATGCC  
+HWI-EAS443:3:7:216:240#0/1  
abbbabaabaaaaaaaaaba\_aaaaa`aaaaa\_\_\_\_\_`\_^  
@HWI-EAS443:3:7:265:200#0/1  
CATCCGACGATTTTGCTCTCATAGTGAATGCACCAAACCA  
+HWI-EAS443:3:7:265:200#0/1  
]\_a^`¥`ba\_aabbbabaa`\_aab]b\_[a\_YZR]^a^TH^  
@HWI-EAS443:3:7:291:75#0/1  
CAATCCGACTCTACTTTTCCTAAAAATCCAGCGCAAAT  
+HWI-EAS443:3:7:291:75#0/1  
aba`Q^b[\_aabaabaa`\_aaa`a\_a\_\_`^`a\_a¥^]W^`  
@HWI-EAS443:3:7:31:833#0/1  
GTTTGGTGCATTCACTATGAGAGCAAATCGTCGGATGAT  
+HWI-EAS443:3:7:31:833#0/1  
a\_aa`[\_aaaaa`\_a`aa[a`\_\_\_\_\_][W¥`\_¥`\_¥`\_`  
@HWI-EAS443:3:7:340:1271#0/1  
CAACAAACAAGGGTAGATAAACTAACTCAAGGTCGCCAGA  
+HWI-EAS443:3:7:340:1271#0/1  
aa\_`Tba]````bWP\_\_`]Z]a[\_X`a`^PT\_]`[[[aa`\_`  
@HWI-EAS443:3:7:343:1292#0/1  
CAGCTGATTCATTTACTCCAGACTCCAAAGCTGGGTAG  
+HWI-EAS443:3:7:343:1292#0/1  
a\_abbbab`\_b[baaaabab````aaa`abaa\_\_a]a^Na^  
@HWI-EAS443:3:7:371:1635#0/1  
GAGATTTCTTTCACAATCACTGGGGACAACACTAAGTGGA  
+HWI-EAS443:3:7:371:1635#0/1  
a]aaaaa`aa`aa`Saa[TZ]Z\_`\_XY^`\_X^a\_UMPW]  
@HWI-EAS443:3:7:423:1192#0/1  
AAAGAACAACATGATAAACAATGACCTTGGACCTGCAACG  
+HWI-EAS443:3:7:423:1192#0/1  
abaa`aabaaaaaaaa\_aa^a\_`````[\_`\_`^`\_WZ\_a¥`\_`^Z`\_`  
@HWI-EAS443:3:7:431:1771#0/1  
GAATAAGAGAGGCTATCTAATAAGAGCACTGACATTAAT  
+HWI-EAS443:3:7:431:1771#0/1  
I\_abbbbbba^`^b`Y\_Y\_`[\_`X^aTq]\_`]WYJ`W`a`\_`  
@HWI-EAS443:3:7:437:194#0/1  
GGGGCAATGAAAAGAAGCCAAACTGGCAAATGTTGTGAG  
+HWI-EAS443:3:7:437:194#0/1  
Zaaa]GObaZ^`\_a]W\_`[R[S^XQ\_WNY]SZ^]Y]W\_`^`\_`  
@HWI-EAS443:3:7:439:1261#0/1  
CATGACCAAGAAGATGGTCACGCAAAGAACAATAGGGAAG

+HWI-EAS443:3:7:439:1261#0/1  
SN¥[ `a`\_\_abZZ^ba\_`a[^\_]V`babXab\_`^b`\_ba  
@HWI-EAS443:3:7:455:1516#0/1  
GAAACATCCTGAGCATGGCACCCATAATGTTCTCAAACAA  
+HWI-EAS443:3:7:455:1516#0/1  
aaaaaaaaaaba\_aaa\_`aaa\_`a^^`\_\_`\_\_W`]  
@HWI-EAS443:3:7:46:1130#0/1  
GTCAATCCGACTCTACTTTTCCTAAAAATTCCAGCGCAAA  
+HWI-EAS443:3:7:46:1130#0/1  
a`a^a`aab\_`b`aaaaaa\_aabaa`aa^`aaaa`a\_  
@HWI-EAS443:3:7:472:497#0/1  
GGTGCTTATGGCATTTCGCGCTGGAATTTTAGGAAAAGT  
+HWI-EAS443:3:7:472:497#0/1  
ab]aa\_a\_a`^Yaaaaa\_[^``\_\_a`a`a^\_\_Z]X\_\_Z  
@HWI-EAS443:3:7:475:60#0/1  
GTCGTCCACTTTCCTTTTCTGAGTATTGGTGTGTTCTGT  
+HWI-EAS443:3:7:475:60#0/1  
a`aba\_`Y]]aa\_`^]aa\_]`aW\_Q]`^]Z`R\_W¥L]Z^  
@HWI-EAS443:3:7:514:1631#0/1  
CTCTTTATGACTGACAAAGGGATTACAGGGATTACAAAGT  
+HWI-EAS443:3:7:514:1631#0/1  
a`LQ`aa\_`aW\_\_`a^`a`\_\_^RX\_a^\_]\_\_W\_\_^\_]\_^W  
@HWI-EAS443:3:7:558:1816#0/1  
AAGGAAAGCCATAGCCTCTAGAACACAGTCTGTTTGTGCA  
+HWI-EAS443:3:7:558:1816#0/1  
aa``aabbaabaa``^aabaa`aVa``TLRX\_X]]OKPO^  
@HWI-EAS443:3:7:578:163#0/1  
GGTGCATTCACTATGAGAGCAAAATCGTCGGATGATTGGA  
+HWI-EAS443:3:7:578:163#0/1  
a`Ha¥Z¥[a`V`aaaa\_¥a``[aZ\_QaUM[\_ZUaSSGL¥B  
@HWI-EAS443:3:7:59:1172#0/1  
ACTCCAGACACTCCAAAGCTGGGTAGCTCCATGCTAAAAT  
+HWI-EAS443:3:7:59:1172#0/1  
aaaa`a\_aaaaaaaaaJa^\_\_aXW\_[U\_\_Y\_^\_¥]^]]\_U  
@HWI-EAS443:3:7:627:1756#0/1  
CAGGAATATTTGAGAATTCATGCCTTGAAACAATGGAAGT  
+HWI-EAS443:3:7:627:1756#0/1  
N`bbba``abX``abba\_Y¥YY\_Yaaa\_¥ba`Ya]¥`aaI  
@HWI-EAS443:3:7:658:429#0/1  
GGTGGGATGGGCTCCAATCATCCGACGATTTTGCTCTCAT  
+HWI-EAS443:3:7:658:429#0/1  
\_b\_bb`aabb\_\_\_`^aaaaa\_\_^aaZaZa``^`^`^]`¥\_\_  
@HWI-EAS443:3:7:671:1333#0/1  
CGGATCAAGAAAGAAGAGTTCTCTGAGATCATGAAGATCT  
+HWI-EAS443:3:7:671:1333#0/1  
U\_¥U¥L^`^`^UT\_\_[`¥aQ¥`b`[ba`\_`^LZb[¥¥\_RBB  
@HWI-EAS443:3:7:675:814#0/1  
GCATTCATGAGAGCAAAATCGTCGGATGATTGGAGCC  
+HWI-EAS443:3:7:675:814#0/1  
aaaa]\_aaaaaaaa\_a`aa\_a`]a\_¥a`a[\_¥\_ZaXU`ZU

@HWI-EAS443:3:7:728:16#0/1  
GATCTAAAGACTTCTATGGTGTGGCCAATGCAGTTGCTG  
+HWI-EAS443:3:7:728:16#0/1  
a`baaa\_]`Waa^a\_aa`Xa]^]a\_U`^a^]a]\_aV^a  
@HWI-EAS443:3:7:796:885#0/1  
TGGTCCTCCATCTGATACTAATAGCCCTACCTTTGATTGG  
+HWI-EAS443:3:7:796:885#0/1  
abaa]aab]baa^Y^`a[``¥\_a^P]Zaa]\_^a[\_^¥^XG  
@HWI-EAS443:3:7:801:1827#0/1  
CAACCCGATTGATGGACCACTACCTGAGGATAATGAACCA  
+HWI-EAS443:3:7:801:1827#0/1  
aab\_b\_`bbbbbabaaaaaab\_aababb\_aa`a``a^H`  
@HWI-EAS443:3:7:814:661#0/1  
TGGAGGACCAAACCTTATACAATATACGGAATCTTCACATT  
+HWI-EAS443:3:7:814:661#0/1  
aa`XY`aaaa¥a¥```a`a\_\_aaaa\_aa\_`a]`^^^]`^\_  
@HWI-EAS443:3:7:855:1182#0/1  
GATGGGCTCCAATCATCCGACGATTTTGCTCTCATAGTGA  
+HWI-EAS443:3:7:855:1182#0/1  
\_W\_`aa`¥a`a]```a`a]^aa`a\_]\_\_X`Za\_\_aQa\_  
@HWI-EAS443:3:7:901:1002#0/1  
CAGTGATTGTGAAAGAAATCTCTGTGTCTTGTGAATTAGT  
+HWI-EAS443:3:7:901:1002#0/1  
Y^`Y^^^bba\_`¥a`a```\_[Y`¥a`\_]¥`[RTZa`a`bY  
@HWI-EAS443:3:7:905:1494#0/1  
ACCAAGTGGGTATGCACAAACAGACTGTGTTCTAGAGGCT  
+HWI-EAS443:3:7:905:1494#0/1  
a\_a`aaWa`aWba\_^a`a\_a^aa`]^`a^a]\_\_\_\_\_^^\_`^B  
@HWI-EAS443:3:7:954:741#0/1  
CTCCTATATGAAGTCTAGGGAAAAATTTCTCGAATAGAT  
+HWI-EAS443:3:7:954:741#0/1  
V¥aabb^V^bbaV`^]a`^baN¥\_\_]b`b`a]a\_^¥\_\_ab  
@HWI-EAS443:3:7:977:111#0/1  
TTGAGGATGAACAGATGTACCAGAAGTGCTGCAATCTATT  
+HWI-EAS443:3:7:977:111#0/1  
aaa^\_a[^a\_a\_¥`\_`a¥^¥a]^`^X^Z\_X^`U^X^V\_^  
@HWI-EAS443:3:7:977:413#0/1  
AAAAATTCCAGCGCAAATGCCATAAGCACCACATTCCCT  
+HWI-EAS443:3:7:977:413#0/1  
aaaa`\_`UW\_aXa\_\_\_^^`a[X\_^`^^[aZZ\_Z^^X]SU]  
@HWI-EAS443:3:80:1029:1509#0/1  
AAAGCTTGAACAGTCTGGGCTCCCAGTAGGGGGCAATGAA  
+HWI-EAS443:3:80:1029:1509#0/1  
aa`aaaa]ab``aUaa¥`Za¥\_aaVa\_^[[```[\_aa¥\_  
@HWI-EAS443:3:80:1043:259#0/1  
ATGGGCTCCAATCATCCGACGATTTTGCTCTCATAGTGAA  
+HWI-EAS443:3:80:1043:259#0/1  
^a\_Z[\_bbbb^a`¥Y¥[^Z^Zaaaa\_T^S`Z¥]^]U`\_  
@HWI-EAS443:3:80:1157:467#0/1  
GGGGCAATGAAAAGAAGCCAAACTGGCAAATGTTGTGAG

+HWI-EAS443:3:80:1157:467#0/1  
abbb`babba`b`bbaaaa`aaa\_aa\_`a`aab\_ba`a`a  
@HWI-EAS443:3:80:1158:1610#0/1  
GGGAATACAAGCAGGAGTGGACAGATTCTACAGGACCTGC  
+HWI-EAS443:3:80:1158:1610#0/1  
aba\_a`aYaaa\_aa`\_aXaa`\_a`^\_S]\_R`\_]`Y]]]X  
@HWI-EAS443:3:80:1181:1823#0/1  
CAGCTGATTCATTTACTCCAGACACTCCAAAGCTGGGTAG  
+HWI-EAS443:3:80:1181:1823#0/1  
aabRb`U\_a[bab[[baa\_bbaXa`aU[bb`\_]Y]T\_¥aG  
@HWI-EAS443:3:80:1208:1098#0/1  
GTTTCGAATCTTCATTCTTTACTCTCGAACATGTACCCTT  
+HWI-EAS443:3:80:1208:1098#0/1  
a\_aaa`\_\_a`^]a\_a`\_`^`^`Z`^^W]^`\_Z\_XV¥`^  
@HWI-EAS443:3:80:1245:619#0/1  
GTAAGAGACAACATGACCAAGAAGATGGTCACGCAAAGAA  
+HWI-EAS443:3:80:1245:619#0/1  
a]ZY^\_VZ`a^`\_a^\_\_[`Va`¥^^`Y\_WU^^aV\_\_]a¥¥  
@HWI-EAS443:3:80:1302:235#0/1  
GGGAGCTAATGGATGATGATTATCGGGGAAGACTTTGTAA  
+HWI-EAS443:3:80:1302:235#0/1  
I\_babUabbb`Wa\_¥I^`b¥a¥¥]Z\_W¥a¥b¥`abb`]Y`  
@HWI-EAS443:3:80:1318:1488#0/1  
GAACAACATGATAACAATGACCTTGGACCTGCAACGGCC  
+HWI-EAS443:3:80:1318:1488#0/1  
^V`Ya\_aba]\_WW^ba`]\_Q\_aaba¥\_ba\_aa`^a\_aZKL  
@HWI-EAS443:3:80:1406:931#0/1  
CTTTTCTAAAAATTCCAGCGCAAATGCCATAAGCACCA  
+HWI-EAS443:3:80:1406:931#0/1  
abbbb`abbbabbbb`bababbbb`abb`^abbabab\_`a  
@HWI-EAS443:3:80:1431:1397#0/1  
AGTAAACAGAACACACCAATACTCAGAAAAGGGAAAGTGG  
+HWI-EAS443:3:80:1431:1397#0/1  
abaaaaa\_\_bbaaa¥`aaba]^T`a`aa\_a]^`^`Wa[a\_  
@HWI-EAS443:3:80:1436:1768#0/1  
GTGTTGAGAATAGAACGATTCTTCTTGGGAATCCAGGAAT  
+HWI-EAS443:3:80:1436:1768#0/1  
aZ`S^^Ya]S[^¥TWX\_\_[GO]WU¥PP[^Z\_ZQI\_WWURZ  
@HWI-EAS443:3:80:1445:1969#0/1  
GTGTGTTCTGTTTACTGTGTCCATGGTGTATCCTGTTCTT  
+HWI-EAS443:3:80:1445:1969#0/1  
a[`S`^`\_Za¥\_\_¥WaZYaY¥¥V¥\_¥Q`¥¥¥HY\_\_U¥OJN  
@HWI-EAS443:3:80:1450:674#0/1  
GTGCCATGCTCAGGATGTTTCTGAACCACTCGGGTTGATT  
+HWI-EAS443:3:80:1450:674#0/1  
`^ba\_abaa``aaa]a^aba`ba`\_Z[``]a[Z^`aZ`\_  
@HWI-EAS443:3:80:1453:250#0/1  
CTTCTTTTAACTTGCCTCTCTCTGCATCTTTGGTCATCG  
+HWI-EAS443:3:80:1453:250#0/1  
Uaa[a^^aXa`abba\_G¥Yba`O\_\_WV\_]Y]^YOT]YaP`

@HWI-EAS443:3:80:151:669#0/1  
ACACATTCTGGATTCCCAAGAGGAATCGTTCTATTCTCA  
+HWI-EAS443:3:80:151:669#0/1  
aaaa`\_aa`[[XY\_`aa`\_^YOYY^]\_\_Z]]^]]^]]V  
@HWI-EAS443:3:80:1535:1303#0/1  
GTTGATTCCCCTAACTTGCAGGTCCTGTAGAATCTGTCC  
+HWI-EAS443:3:80:1535:1303#0/1  
``\_0^`^X)`[Za\_¥T\_a^X^^`^\_V\_`\_\_a^\_aZ^`RUV  
@HWI-EAS443:3:80:1538:1225#0/1  
CTTGAAGAATCCCACCCAGGAATATTTGAGAATTCATGCC  
+HWI-EAS443:3:80:1538:1225#0/1  
a[OX]a`R^a¥N¥X\_U]]\_Q`[U\_N¥UZa^]^\_Z\_X\_MF  
@HWI-EAS443:3:80:1548:377#0/1  
GGGATGGGCTCCAATCATCCGACGATTTTGCTCTCATAGT  
+HWI-EAS443:3:80:1548:377#0/1  
`\_QXQbbVS\_UaaIWP^UaSaba^a¥NXbabPUYaQ\_a[Y¥  
@HWI-EAS443:3:80:1609:677#0/1  
GAGCTAATGGATGATGATTATCGGGGAAGACTTTGTAATC  
+HWI-EAS443:3:80:1609:677#0/1  
¥PNOJP[^`QYY[YYQZVZUM¥\_S¥FX\_HQ^[Z^BBBBB  
@HWI-EAS443:3:80:1633:1034#0/1  
TGGTAATGCCAGCCCATGGTCCAGCCAAAAGCATGGAATA  
+HWI-EAS443:3:80:1633:1034#0/1  
aaa^babaa`aa\_Z`aaaa¥\_\_`\_VS)`a\_¥¥]Wa\_^`\_`\_`  
@HWI-EAS443:3:80:1681:520#0/1  
TCCCCAGTGATTGTGAAAGAAATCTCTGTGTCTTGTGAAT  
+HWI-EAS443:3:80:1681:520#0/1  
a]\_\_¥aa\_b\_aaaT`^a`^`^\_U^N^\_]`]^a\_^Q00U^  
@HWI-EAS443:3:80:1701:1217#0/1  
TGTCAGTCATAAGAGATTGATTCTGTAAACAATGCTGTG  
+HWI-EAS443:3:80:1701:1217#0/1  
V]ab`b\_¥ab\_`aa]aTabbaba\_a\_\_a`aWa`aaX\_aW[  
@HWI-EAS443:3:80:1762:176#0/1  
GCCATGGTGTCTAGGGCCCGGATTGATGCCAGGGTCGACT  
+HWI-EAS443:3:80:1762:176#0/1  
``\_R¥`\_UU]``)`\_WZ¥[¥T\_V¥TKT)`VX¥S`UPPKMSS  
@HWI-EAS443:3:80:1788:714#0/1  
GGTGTCTAGGGCCCGGATTGATGCCAGGGTCGACTTCGAG  
+HWI-EAS443:3:80:1788:714#0/1  
X\_a]Za\_baa]aa`^`^`bZ¥a¥a^][[^][[aVJ^\_X¥Y]  
@HWI-EAS443:3:80:185:1364#0/1  
CAGCTGACATGAGTATTGGAGTAACAGTGATAAAGAACAA  
+HWI-EAS443:3:80:185:1364#0/1  
`T^aaaY]Z\_\_a`W^a\_ZY]a]YLW`^ZW][YZ¥X`[^`^¥  
@HWI-EAS443:3:80:232:417#0/1  
GAGGCTATGGCTTTCCTTGAAGAATCCCACCCAGGAATAT  
+HWI-EAS443:3:80:232:417#0/1  
U`ZV^bb¥[\_aaZUUYEWW[V^ZZ]TQ^YQ^UFDWHRUZ  
@HWI-EAS443:3:80:243:309#0/1  
AAAGGGTACATGTTTCGAGAGTAAAAGAATGAAGATTCGAA

+HWI-EAS443:3:80:243:309#0/1  
¥V\_aaa\_aaaaaaaaa`a`aPa`^``\_\_\_\_a\_^`\_\_\_\_]\_X`  
@HWI-EAS443:3:80:253:54#0/1  
AACAGATCTTCATGATCTCAGAGAAGCTTCTTTCTTGAT  
+HWI-EAS443:3:80:253:54#0/1  
^Y^aaS\_¥¥\_\_Q[\_\_\_Y^TY]UETW\_TPX][T\_V[XYVSR\_  
@HWI-EAS443:3:80:319:64#0/1  
GACAAACACAGAGACTGGTGCACCCCAGCTCAACCCGATT  
+HWI-EAS443:3:80:319:64#0/1  
aaa\_```]V^\_X`^`a^J^¥]QV]¥`\_]NLTRTPP¥PU^  
@HWI-EAS443:3:80:330:51#0/1  
GATTCTTCAAGGAAAGCCATAGCCTCTAGAACACAGTCTG  
+HWI-EAS443:3:80:330:51#0/1  
\_aaaabbaaa``aaaa]\_aaZaa^aa`\_]^\_^\_X]a]^\_a  
@HWI-EAS443:3:80:333:1409#0/1  
GGTGTCTAGGGCCCGATTGATGCCAGGGTCGACTTCGAG  
+HWI-EAS443:3:80:333:1409#0/1  
`Y¥`aY^^aaaa^`]a\_a^a^\_`a^^Wa[^Y\_\_^V\_]`  
@HWI-EAS443:3:80:372:172#0/1  
GGGATTGAGGGATTACAAAGTCTTCCCGATAATCATCA  
+HWI-EAS443:3:80:372:172#0/1  
aaaa^]\_aa[[^T^¥Q\_MG¥X`[STZZGX[VLQW¥VVVV  
@HWI-EAS443:3:80:37:1042#0/1  
AAAAATTCCAGCGCAAATGCCATAAGCACCCACATTCCCT  
+HWI-EAS443:3:80:37:1042#0/1  
ab`¥S[`XX¥NPa]\_KXW`aYULQVL]Y\_]`^Y¥]]\_]X[  
@HWI-EAS443:3:80:402:81#0/1  
AACACACCAATACTCAGAAAAGGAAAGTGGACGACAAAC  
+HWI-EAS443:3:80:402:81#0/1  
aaa`a¥`aa`a`\_a\_ab]\_T[a\_aZZ^`Va¥Y^`\_^`\_T  
@HWI-EAS443:3:80:414:1355#0/1  
ATGCTTTTGGCTGGACCATGGGCTGGCATTACCACAGCAT  
+HWI-EAS443:3:80:414:1355#0/1  
a\_aa\_ab`aabaaa`baaUR\_a^a]\_\_aa`aaaa[a`\_\_  
@HWI-EAS443:3:80:418:995#0/1  
TAATGCCAGCCCATGGTCCAGCCAAAAGCATGGAATATGA  
+HWI-EAS443:3:80:418:995#0/1  
aa\_`¥bba\_aaa``a\_¥a]YZ[^`[R¥^`\_V`Y`\_`\_Z\_\_  
@HWI-EAS443:3:80:458:707#0/1  
GCGAAAAGCTTGAACAGTCTGGGCTCCCAGTAGGGGGCAA  
+HWI-EAS443:3:80:458:707#0/1  
a`a\_\_aYa`\_a``¥\_\_\_^``aYa¥¥¥\_[Z\_V¥¥Z[\_¥U^¥  
@HWI-EAS443:3:80:488:809#0/1  
AAAAATTCCAGCGCAAATGCCATAAGCACCCACATTCCCT  
+HWI-EAS443:3:80:488:809#0/1  
aaabaaaa^^a`[]aa`\_^`\_`^\_\_\_\_a^a\_¥`^^\_]\_]\_  
@HWI-EAS443:3:80:568:55#0/1  
CATCATCCCAGGACTCAGTGATGCTGTGCCATCTATTAGA  
+HWI-EAS443:3:80:568:55#0/1  
aba`ab\_\_¥¥a\_``aaaa]aa`\_^Z]N`^]\_[\_a\_\_¥Z¥W



@HWI-EAS443:3:80:596:1207#0/1  
CGGATTGATGCCAGGGTCGACTTCGAGTCTGGACGGATCA  
+HWI-EAS443:3:80:596:1207#0/1  
abbab`a`a\_W\_\_aaU`¥a`aaa`\_^\_aa`a``\_\_`[``  
@HWI-EAS443:3:80:615:1115#0/1  
GGGAGCTAATGGATGATGATTATCGGGGAAGACTTTGTAA  
+HWI-EAS443:3:80:615:1115#0/1  
aa`aaaaaZba\_a[baba`a`][\_^\_I]\_\_\_\_`a\_\_^`  
@HWI-EAS443:3:80:630:1026#0/1  
GGACGACAAACACAGAGACTGGTGCACCCCAGCTCAACCC  
+HWI-EAS443:3:80:630:1026#0/1  
a]WTZZaaa\_]Z¥]X]ZW`\_^]Y`^[^\_a][Q`[`][VUV  
@HWI-EAS443:3:80:632:793#0/1  
GATTGATGCCAGGGTCGACTTCGAGTCTGGACGGATCAAG  
+HWI-EAS443:3:80:632:793#0/1  
]a]a`U^a`Y`aW^Y]¥\_\_]S\_XWRY^\_¥Za^W^V^^`  
@HWI-EAS443:3:80:648:1639#0/1  
CTGGGCCGTTGCAGGTCCAAGTTCATTGTTTATCATGTTG  
+HWI-EAS443:3:80:648:1639#0/1  
\_Ybb`¥b`aab^]ZW`b`Z\_a`\_`b]¥aaaY]U]¥`Y^  
@HWI-EAS443:3:80:651:547#0/1  
CTTGGGAATCCAGGAATGTGTAGTTGCAACGGCATCATAT  
+HWI-EAS443:3:80:651:547#0/1  
`]`a\_¥aa`aa`a\_\_aa]a]\_a^\_\_\_\_\_a`\_`^^a`\_`  
@HWI-EAS443:3:80:666:1405#0/1  
AGCTGATTCATTTACTCCAGACTCCAAAGCTGGGTAGC  
+HWI-EAS443:3:80:666:1405#0/1  
\_`aaab`babbbbbbb`baabaabbaa`aaaa^b\_\_  
@HWI-EAS443:3:80:786:1924#0/1  
CTCCCCTATGGCACCTATATGTGTATCTGTAGTCTTTGAT  
+HWI-EAS443:3:80:786:1924#0/1  
aab`aaaaa\_[b^0^aba`a\_Z`a\_\_a`W\_¥M^a\_dWa^  
@HWI-EAS443:3:80:799:89#0/1  
AGATAACAACCCACTTTCAAAGAAAAAGGAGAGTAAGAGA  
+HWI-EAS443:3:80:799:89#0/1  
a\_a`]aaaa`\_^`abba\_\_aa`\_^\_\_aa¥`a]¥Sa\_\_]  
@HWI-EAS443:3:80:846:305#0/1  
CACTAACTTGCAGTCTCTGTAGAATCTGTCCACTCCTGCT  
+HWI-EAS443:3:80:846:305#0/1  
abbbbbbaabbaba^aabbbaabbaa`ab\_[aa`a\_^[\_a  
@HWI-EAS443:3:80:899:1671#0/1  
TGTCCCAGTGATTGTGAAAGAAATCTCTGTGTCTTGTGA  
+HWI-EAS443:3:80:899:1671#0/1  
\_WW`ba\_\_`Y\_aa¥ZZZZ[S¥Ya[]\_a`^U]]Y^WTPKX  
@HWI-EAS443:3:80:902:1383#0/1  
GGCTCCAATCATCCGACGATTTTGCTCTCATAGTGAATGC  
+HWI-EAS443:3:80:902:1383#0/1  
`babbababbaa`aababa`aaa^`aaaaaaaa^a`aaa¥  
@HWI-EAS443:3:80:992:577#0/1  
GGGATGGGCTCCAATCATCCGACGATTTTGCTCTCATAGT

+HWI-EAS443:3:80:992:577#0/1  
a`a)`aa[[]U^\_TN]\_ZUaa]a^¥\_¥^\_X\_Q\_U\_U^¥Q  
@HWI-EAS443:3:81:1002:168#0/1  
GTCAATCCGACTCTACTTTTCCTAAAAATTCCAGCGCAAA  
+HWI-EAS443:3:81:1002:168#0/1  
a\_^]¥a\_¥\_^^a\_W\_]\_aa`ZZ`a`\_`\_\_\_ZY`\_[^]]^  
@HWI-EAS443:3:81:1025:1179#0/1  
ATCCTTTAAGAAATCTATTAGCCTTCCTGACTCATTAGCT  
+HWI-EAS443:3:81:1025:1179#0/1  
\_\_`\_\_`b`¥\_]\_]\_ba[`[a^]Y^^]]^\_Y^aaaaaa]]`  
@HWI-EAS443:3:81:109:449#0/1  
GCAAGACTAGGGAAAGGGTACATGTTTCGAGAGTAAAAGAA  
+HWI-EAS443:3:81:109:449#0/1  
aaa^aa`a^aaaaaa\_\_`¥aa`a\_\_\_a``^aZa\_\_a`\_  
@HWI-EAS443:3:81:1139:473#0/1  
ATCCAGGAATGTGTAGTTGCAACGGCATCATATTCCATGC  
+HWI-EAS443:3:81:1139:473#0/1  
ab]^]^L^aaSa\_[]Zaa\_a````\_`\_X^a\_]\_`S^]^T  
@HWI-EAS443:3:81:1152:419#0/1  
AGAATCCCACCCAGGAATATTTGAGAATTCATGCCTTGAA  
+HWI-EAS443:3:81:1152:419#0/1  
aa`aaa]\_a]\_\_\_\_\_^\_\_`a`a`\_`\_`^^`\_^]]`\_^\_Z  
@HWI-EAS443:3:81:1175:1958#0/1  
GGCTTTCCTTGAAGAATCCCACCCAGGAATATTTGAGAAT  
+HWI-EAS443:3:81:1175:1958#0/1  
a]IV^¥\_aaYaa¥^^adM`Wa`P^`aa^\_^W`aaaaa\_\_W  
@HWI-EAS443:3:81:1186:233#0/1  
GCTAATTTTAGCATGGAGCTACCCAGCTTTGGAGTGTCTG  
+HWI-EAS443:3:81:1186:233#0/1  
a^aa\_aaaaaa`a`a`a^`a^\_V]`[```\_\_^W`Z`^W\_^  
@HWI-EAS443:3:81:1192:703#0/1  
AGCCCTTCTTTTTAACTTGCCTCTCTCTGCATCTTTGGTC  
+HWI-EAS443:3:81:1192:703#0/1  
aaaaaaaaabbaabaa`aa]\_]aaa\_a\_aa`a^aaa`\_`W  
@HWI-EAS443:3:81:1273:1996#0/1  
ATGGGCTCCAATCATCCGACGATTTTGCTCTCATAGTGAA  
+HWI-EAS443:3:81:1273:1996#0/1  
a`^]\_¥\_TX^a`TZP\_[Y[Y¥X[WZ¥\_NXV¥ZZZa^P]`P  
@HWI-EAS443:3:81:1277:1169#0/1  
AGAAATCAACCGCAGCAACTGCATTGGCCAACCATAG  
+HWI-EAS443:3:81:1277:1169#0/1  
]OPa¥X`a[NH]ZQZVHQZ\_YL¥¥¥XMY]¥`[]`a[`R]X  
@HWI-EAS443:3:81:1305:1805#0/1  
AAAGTATACGAAACCTCTAATCTGCATCCCAGGTGTTGCG  
+HWI-EAS443:3:81:1305:1805#0/1  
`\_`]V\_]a`a¥`\_`a^a^aa`¥W^]^[N[^a\_Y`P¥¥Q¥  
@HWI-EAS443:3:81:1342:160#0/1  
GTGCCATGCTCAGGATGTTTCTGAACCACTCGGGTTGATT  
+HWI-EAS443:3:81:1342:160#0/1  
aW`\_]aaaZWPXa\_T\_a]\_¥]`[UTFRVPXY\_\_^VX]G]Y

@HWI-EAS443:3:81:1362:1362#0/1  
AACAGATCTTCATGATCTCAGAGAACTCTTCTTTCTTGAT  
+HWI-EAS443:3:81:1362:1362#0/1  
`a]Yaa]Y^[^a`\_aa]W]M¥aVVO\_][]\_\_`ZZ^\_]\_Z  
@HWI-EAS443:3:81:1362:317#0/1  
GCTAATTTTAGCATGGAGCTACCCAGCTTTGGAGTGTCTG  
+HWI-EAS443:3:81:1362:317#0/1  
aW`aaabaa`a\_\_aa`\_a^\_\_\_\_]R]\_]a`aaYT[X\_\_Z`\_  
@HWI-EAS443:3:81:1375:707#0/1  
ATTGAAGAGCCATCTGGGCCGTTGCAGGTCCAAGGTCATT  
+HWI-EAS443:3:81:1375:707#0/1  
aa\_b`baaa\_\_aa^aa\_a^`a\_a`XKZ[VZ¥^^^\_ ^PU[`\_  
@HWI-EAS443:3:81:1418:449#0/1  
ATTCGATCTAAAGACTTCTATGGTGTGGCCAATGCAGTT  
+HWI-EAS443:3:81:1418:449#0/1  
ab`¥^^^]b^`ab`^aaaa[[Z\_UUVa`\_RX\_\_\_\_\_F¥\_]`  
@HWI-EAS443:3:81:1507:391#0/1  
GGGATTCAGGGGATTACAAAGTCTTCCCCGATAATCATCA  
+HWI-EAS443:3:81:1507:391#0/1  
abbaaa^a`aaaaaaaa`a\_\_aaUV[Wbaa\_\_aUa\_R^  
@HWI-EAS443:3:81:1515:169#0/1  
ATCGCTATGGATTTGTGGCTAATTTTAGCATGGAGCTACC  
+HWI-EAS443:3:81:1515:169#0/1  
a¥Y¥XaU]aa¥a]TJTYOW`a`\_[S[\_\_\_S^YGS][UUVXG  
@HWI-EAS443:3:81:151:154#0/1  
GAGGATGAACAGATGTACCAGAAGTGCTGCAATCTATTCG  
+HWI-EAS443:3:81:151:154#0/1  
]b]aS^baYW[bb¥¥PX]\_S`a]`W[Y`aU`[\_^\_a]^W\_  
@HWI-EAS443:3:81:1525:1480#0/1  
TCACTGTTACTCCAATACTCATGTCAGCTGATTCATTTAC  
+HWI-EAS443:3:81:1525:1480#0/1  
YTX\_ZV^b^JYMOXV`a`PQY`aNT[TF[]LWVU`\_`RVG  
@HWI-EAS443:3:81:155:236#0/1  
AAAAATTCCAGCGAAAATGCCATAAGCACCATTC CCT  
+HWI-EAS443:3:81:155:236#0/1  
aba¥\_¥\_a\_\_`\_^^\_^^^Z\_a`^`Z^Z`]U¥ZXZZVZXZ  
@HWI-EAS443:3:81:1583:972#0/1  
GAAATTTTCCCTAGCAGTTCATATAGGAGACCGGTTGGA  
+HWI-EAS443:3:81:1583:972#0/1  
X\_babbbbb`ab`ba`abab^bbaba`^^^^`[\_ab^baWa  
@HWI-EAS443:3:81:1588:869#0/1  
GGCCCGGATTGATGCCAGGGTCGACTTCGAGTCTGGACGG  
+HWI-EAS443:3:81:1588:869#0/1  
aba\_abbab]abab``babaZab]\_abX\_¥b[`ba`aUba  
@HWI-EAS443:3:81:159:1740#0/1  
ATGGGCTCCAATCATCCGACGATTTTGCTCTCATAGTGAA  
+HWI-EAS443:3:81:159:1740#0/1  
aaa^¥a]a`V¥^aa\_`^[T\_Z[Z]\_^N\_\_\_\_]]-[[PUU]^  
@HWI-EAS443:3:81:1610:1183#0/1  
AAGAAATACACCAAGACAATATACTGGTGGGATGGGCTCC

+HWI-EAS443:3:81:1610:1183#0/1  
aab`aaaa\_a`\_a^`aa`a\_\_a^aaa^a`a]a^a\_W^^V  
@HWI-EAS443:3:81:1612:1168#0/1  
CAGGAATATTTGAGAATTCATGCCTTGAAACAATGGAAGT  
+HWI-EAS443:3:81:1612:1168#0/1  
abbbabaabbb`b`abbbabba\_^bab`\_aaa`bbaa\_\_^  
@HWI-EAS443:3:81:1628:2032#0/1  
CATTGAAGTACTTCAGGTCAATGCTTGCTAGCATTCTGC  
+HWI-EAS443:3:81:1628:2032#0/1  
`bbbabbb^baba^bbb`\_bb\_ab`baaaaaIabba`baG  
@HWI-EAS443:3:81:1629:1298#0/1  
GTCTGTTTGTGCATACCCACTTGGTTCATTATCCTCAGGT  
+HWI-EAS443:3:81:1629:1298#0/1  
a\_\_a\_]a\_]^Z^`a`\_Y[^`a`\_Y`G^^^a]NZ^X^^^Y  
@HWI-EAS443:3:81:1679:1160#0/1  
CAGGAATATTTGAGAATTCATGCCTTGAAACAATGGAAGT  
+HWI-EAS443:3:81:1679:1160#0/1  
a]`[]VVVb^V[ab`aaa`aaa¥^aa¥K¥\_¥`¥aaaaTaW  
@HWI-EAS443:3:81:1683:733#0/1  
CCCAGGTGTTGCGATAGCCCTTCTTTTTAACTTGCCCTC  
+HWI-EAS443:3:81:1683:733#0/1  
aba`bb\_aabaaaa`baa`a`\_babaaaa\_aa`ZZ\_Xa\_  
@HWI-EAS443:3:81:1711:1044#0/1  
CTTTGTAATCCCCTGAATCCCTTTGTCAGTCATAAAGAGA  
+HWI-EAS443:3:81:1711:1044#0/1  
J\_^a`]Ybaab^b`b¥V`^^`¥b]¥¥¥\_]`a^a`\_\_  
@HWI-EAS443:3:81:200:781#0/1  
ATCCGACTCTACTTTTCCTAAAAATCCAGCGCAAAATGC  
+HWI-EAS443:3:81:200:781#0/1  
aaab]SJ\_aaa`V^aaaaaabaaaa\_a\_aa^\_a]\_\_^\_\_  
@HWI-EAS443:3:81:242:2022#0/1  
CTAATTTTAGCATGGAGCTACCCAGCTTTGGAGTGTCTGG  
+HWI-EAS443:3:81:242:2022#0/1  
a`a\_aa`a`aaa`^[b`aaaa^Y\_\_a`\_^]¥X\_Z``\_X  
@HWI-EAS443:3:81:274:1810#0/1  
GATCCCACTAACTTGACGGTCTGTAGAATCTGTCCACT  
+HWI-EAS443:3:81:274:1810#0/1  
\_`abbbaaabbb[\_\_aaa¥Xaa\_¥\_a^Zaa`N`a\_[V  
@HWI-EAS443:3:81:313:684#0/1  
AATCTGTCCACTCCTGCTTGTATTCCCTCATGGTTTGGTG  
+HWI-EAS443:3:81:313:684#0/1  
a\_[\_WaW^X`]Z[ZX`[[XaS]a]OUU[[[Y[]W\_ROVZV  
@HWI-EAS443:3:81:345:1258#0/1  
GCCAGGGTCGACTTCGAGTCTGGACGGATCAAGAAAGAAG  
+HWI-EAS443:3:81:345:1258#0/1  
abbbaa`\_baaaa`aaaa\_aaaaa`aa`\_aaa`a`]\_aaZ  
@HWI-EAS443:3:81:386:623#0/1  
GCATTTGCGAAAAGCTTGAACAGTCTGGGCTCCCAGTAGG  
+HWI-EAS443:3:81:386:623#0/1  
aaaa\_aaaaa^SY^`\_^]Y]V]¥\_\_^^Y¥]¥XL^X[YU

@HWI-EAS443:3:81:399:161#0/1  
CAACCCGAGTGGTTCAGAAACATCCTGAGCATGGCACCCA  
+HWI-EAS443:3:81:399:161#0/1  
aaaaaaaa`aa]`^`a`^`\_a\_\_a\_\_`\_`\_a\_\_]][^N\_^  
@HWI-EAS443:3:81:425:1116#0/1  
GGTGGGATGGGCTCCAATCATCCGACGATTTTGCTCTCAT  
+HWI-EAS443:3:81:425:1116#0/1  
^WX][ZS`¥U[[[I]]ZT]U^]]US^aWOS[^[UUN[[`VN  
@HWI-EAS443:3:81:438:706#0/1  
ATTGAAGAGCCATCTGGGCCGTTGCAGGTCCAAGGTCATT  
+HWI-EAS443:3:81:438:706#0/1  
W\_^R^bZX^`a`[a^`^`\_`^0\_[[a\_SGaXZXW]G]WU¥  
@HWI-EAS443:3:81:468:2032#0/1  
GTTGTCCCCAGTGATTGTGAAAGAAATCTCTGTGTCTTGT  
+HWI-EAS443:3:81:468:2032#0/1  
`^baabbbbbbaaaaab`aa`baabbababa\_`a\_aaaX¥  
@HWI-EAS443:3:81:506:480#0/1  
TAATCCCCTGAATCCCTTTGTCAGTCATAAAGAGATTGAT  
+HWI-EAS443:3:81:506:480#0/1  
aaX\_abaaaaa`a^aaa`\_[a`a`\_`\_`\_`a\_a`\_\_`\_X  
@HWI-EAS443:3:81:553:1532#0/1  
GGTAATGCCAGCCCATGGTCCAGCCAAAAGCATGGAATAT  
+HWI-EAS443:3:81:553:1532#0/1  
a`bb\_abbbabaaaaa\_]aa^aaaa]a)`aa\_\_[\_\_\_aa  
@HWI-EAS443:3:81:554:1638#0/1  
ACTCCTGCTTGTATTCCCTCATGGTTTGGTGCATTCACTA  
+HWI-EAS443:3:81:554:1638#0/1  
ab¥baaabab^[`aa`[aY`a^a`\_a`]^Waa¥¥X\_\_¥^^`  
@HWI-EAS443:3:81:588:152#0/1  
GGAGCATTTGCGAAAAGCTTGAACAGTCTGGGCTCCCAGT  
+HWI-EAS443:3:81:588:152#0/1  
abbbabb``aabaaa`[^`bb\_\_Xa\_]a[`ZTZ[LR`aQ  
@HWI-EAS443:3:81:596:796#0/1  
CTCCAATCATCCGACGATTTTGCTCTCATAGTGAATGCAC  
+HWI-EAS443:3:81:596:796#0/1  
a`\_a[WR¥^)`\_Z]]\_0¥[aYaaaa`\_`¥^]Y¥YIZ`[[[  
@HWI-EAS443:3:81:621:1799#0/1  
GATTCAGTATCGAGACTCCCAAGACCGTACTTAGCATGTT  
+HWI-EAS443:3:81:621:1799#0/1  
aa¥[bbaXa¥WX^UW]\_baa\_XX`\_`\_U[`ZV`Zaaa`^]  
@HWI-EAS443:3:81:67:737#0/1  
GTGCCATGCTCAGGATGTTTCTGAACCACTCGGGTTGATT  
+HWI-EAS443:3:81:67:737#0/1  
a`aaaa\_aa\_a`\_`^¥`]\_\_\_\_\_`^\_]¥^]]\_`^\_XLU\_ZX^  
@HWI-EAS443:3:81:693:1418#0/1  
AGTAAACAGAACACACCAATACTCAGAAAAGGGAAAGTGG  
+HWI-EAS443:3:81:693:1418#0/1  
a^]aaaaaaaaa`a[`a^`\_a`\_`\_`^`\_`\_`a]a^\_\_\_\_[\_`^  
@HWI-EAS443:3:81:735:353#0/1  
CAAGAGGAATCGTTCTATTCTCAACACAAGCCAAAGGGGA

+HWI-EAS443:3:81:735:353#0/1  
a`bb`aTabaabbab`¥`\_Z\_aab^]Ia]^H]V]a`]U`Y  
@HWI-EAS443:3:81:769:1687#0/1  
ACATTAATACGATGACCAAAGATGCAGAGAGAGGCAAGT  
+HWI-EAS443:3:81:769:1687#0/1  
a]^`]]\_[]`a`ZNU]a^``\_TWa[Q\_[]`[OYY\_YZ^`Y  
@HWI-EAS443:3:81:778:881#0/1  
GGCTAATTTTATGATGGAGCTACCCAGCTTTGGAGTGTCT  
+HWI-EAS443:3:81:778:881#0/1  
aaaaaaabaaaaaab```aaaaaa`aaaaa]^a]a^aa  
@HWI-EAS443:3:81:783:1032#0/1  
GTCCTCCATCTGATACTAATAGCCCTACCTTTGATTGGGT  
+HWI-EAS443:3:81:783:1032#0/1  
¥L\_bba¥bbbabaaa]bbbab\_aaaa``Xabbbb\_¥ZWa^  
@HWI-EAS443:3:81:798:1410#0/1  
GATCTTCATGATCTCAGAGAACTCTTCTTTCTTGATCCGT  
+HWI-EAS443:3:81:798:1410#0/1  
WU[b\_abbYWWY]US¥^bba\_bba[¥]\_\_aaZ\_]b`a`TW  
@HWI-EAS443:3:81:864:1110#0/1  
AGAATCTGTCCACTCCTGCTTGTATTCCCTCATGGTTTGG  
+HWI-EAS443:3:81:864:1110#0/1  
\_\_\_Za\_]\_T^¥]]¥Z\_][][]Z\_Z[]`]]^¥\_Y¥^]Q^¥]W  
@HWI-EAS443:3:81:903:1065#0/1  
GCCCCGATTGATGCCAGGGTCGACTTCGAGTCTGGACGGA  
+HWI-EAS443:3:81:903:1065#0/1  
X`aaa\_U¥ab`[^abbab`Sbb\_MQbaa`¥\_a`a[]`\_^aV  
@HWI-EAS443:3:81:921:719#0/1  
TGGACATTAACAGAAATCAACCGGCAGCAACTGCATTGG  
+HWI-EAS443:3:81:921:719#0/1  
aaa`\_aaaa`\_`aa`Z[]`aa`\_`\_`a`^\_\_]Z^[\_^]^^  
@HWI-EAS443:3:81:931:1927#0/1  
CCCCGATTGATGCCAGGGTCGACTTCGAGTCTGGACGGAT  
+HWI-EAS443:3:81:931:1927#0/1  
`baabSa`X[a^aaVEN[Z\_Y`^^aX`\_`Y^`\_^\_¥X`ZZ  
@HWI-EAS443:3:81:950:1650#0/1  
GCGAAAAGCTTGAACAGTCTGGGCTCCAGTAGGGGGCAA  
+HWI-EAS443:3:81:950:1650#0/1  
a`]ZQUM]¥¥VRW¥^\_XKTRYUVRSZZZR`MUXQNZ]NZV  
@HWI-EAS443:3:81:994:660#0/1  
ATCAAGAAAGAAGAGTTCTCTGAGATCATGAAGATCTGTT  
+HWI-EAS443:3:81:994:660#0/1  
aaaaaaaaa\_aaa`\_`\_a\_aaa`\_`^a```\_a[\_\_\_`a]¥  
@HWI-EAS443:3:82:1019:802#0/1  
GTCTGGAGTAAATGAATCAGCTGACATGAGTATTGGAGTA  
+HWI-EAS443:3:82:1019:802#0/1  
\_UMT\_]aP`bbaYI`a`U\_]b^RY`aa\_\_Z]`^a`V\_YR  
@HWI-EAS443:3:82:1022:2002#0/1  
AATGAACCAAGTGGGTATGCACAAACAGACTGTGTTCTAG  
+HWI-EAS443:3:82:1022:2002#0/1  
aa[¥aa\_\_\_\_\_0^`\_Z]Y]UU¥\_\_¥^^X¥Y][V[Z]UUXZ

@HWI-EAS443:3:82:1039:549#0/1  
ATCATGTTGTTCTTTATCACTGTTACTCCAATACTCATGT  
+HWI-EAS443:3:82:1039:549#0/1  
ababbbbbbababbbbbbaaabab`\_a\_aaaabaaaa`a  
@HWI-EAS443:3:82:1043:879#0/1  
GGGCTCCAATCATCCGACGATTTTGCTCTCATAGTGAATG  
+HWI-EAS443:3:82:1043:879#0/1  
aaba`abbaaaaba`ba`b\_aaaa`a^aabaab]ba`aa  
@HWI-EAS443:3:82:1056:1442#0/1  
GGAGCTAATGGATGATGATTATCGGGGAAGACTTTGTAAT  
+HWI-EAS443:3:82:1056:1442#0/1  
abaaab`[aba`b`aaaaa\_b``^```¥a\_\_baa`\_aaa  
@HWI-EAS443:3:82:1062:1361#0/1  
GCTGTGGTAATGCCAGCCCATGGTCCAGCCAAAAGCATGG  
+HWI-EAS443:3:82:1062:1361#0/1  
abba`\_a`bbbaaaa`aaaaabaVaY`\_aaaa`aP]a^^a  
@HWI-EAS443:3:82:1072:335#0/1  
CAGCCATGGAACAGGAACAGGATACCCATGGACACAGTA  
+HWI-EAS443:3:82:1072:335#0/1  
\_b`bba\_aaabbbbbbabab\_bbbb]\_`I`babbab]^`ab  
@HWI-EAS443:3:82:1073:513#0/1  
TCTGCTGGTATTTGTGTTTGAATCTTCATTCTTTTACTCT  
+HWI-EAS443:3:82:1073:513#0/1  
`a[`a`[^VW^a\_^Y^`aXa\_a\_U\_`]\_]a\_[W\_Z`[Q  
@HWI-EAS443:3:82:1110:1223#0/1  
GATGCCAGGGTCGACTTCGAGTCTGGACGGATCAAGAAAG  
+HWI-EAS443:3:82:1110:1223#0/1  
aa[XR]a`aV^`a\_¥[^]XULXa`¥a\_`a[Va\_[\_\_Za[  
@HWI-EAS443:3:82:1114:1238#0/1  
GAGACAACATGACCAAGAAGATGGTCACGCAAAGAACAAT  
+HWI-EAS443:3:82:1114:1238#0/1  
abbbababaaaaab`abaab`aba^aa\_a\_a\_\_a^a^aa  
@HWI-EAS443:3:82:1138:701#0/1  
GATTCCATTACATCCTTTAAGAAATCTATTAGCCTTCCTG  
+HWI-EAS443:3:82:1138:701#0/1  
a¥ba¥`abaaaaa\_baa`aa^aaa\_a\_``aaaa\_\_`G`a  
@HWI-EAS443:3:82:1157:1318#0/1  
CAGTGATTGTGAAAGAAATCTCTGTGTCTTGTGAATTAGT  
+HWI-EAS443:3:82:1157:1318#0/1  
`a`ab]a\_a]aabbbababba`b`a`^\_bbVaV0]\_\_SIQ  
@HWI-EAS443:3:82:1161:1537#0/1  
TATTGGTGTGTTTCTGTTTACTGTGTCCATGGTGTATCCTG  
+HWI-EAS443:3:82:1161:1537#0/1  
````\_`[a\_a[^\_Ja\_a`a]^a^U\_¥aR`a`0aN\_a\_¥H\_a  
@HWI-EAS443:3:82:1169:1580#0/1  
GCCAGGGTCGACTTCGAGTCTGGACGGATCAAGAAAGAAG  
+HWI-EAS443:3:82:1169:1580#0/1  
`Y[bb\_Z¥Ma[FWZP\_]\_^`aaaaX\_aQW\_b`aaba`a¥¥  
@HWI-EAS443:3:82:1184:1461#0/1  
GGGAGCTAATGGATGATGATTATCGGGGAAGACTTTGTAA

+HWI-EAS443:3:82:1184:1461#0/1  
\_¥`^\_]````ba`a`a`^aa\_````aa\_]W````aaa\_¥a\_  
@HWI-EAS443:3:82:119:1948#0/1  
ATTTGCGAAAAGCTTGAACAGTCTGGGCTCCCAGTAGGGG  
+HWI-EAS443:3:82:119:1948#0/1  
`a]S¥^)^`ZXaZ[ZT\_\_\_\_Q`Z[UU]UUZ\_W¥G¥QV¥Y  
@HWI-EAS443:3:82:1237:1333#0/1  
CAGGAACAGGATACACCATGGACACAGTAAACAGAACACA  
+HWI-EAS443:3:82:1237:1333#0/1  
abbbabbbbbbbbb\_Z\_bababbbbabbaab\_bbab`b  
@HWI-EAS443:3:82:1272:107#0/1  
CGATGACCAAAGATGCAGAGAGAGGCAAGTAAAAAGAAG  
+HWI-EAS443:3:82:1272:107#0/1  
]bbbb\_¥``bbbabbaabab\_abb`ab\_V\_`bbbbbbab  
@HWI-EAS443:3:82:1284:822#0/1  
GATTCTTCAAGGAAAGCCATAGCCTCTAGAACACAGTCTG  
+HWI-EAS443:3:82:1284:822#0/1  
¥abbbabba`bbabbbbabbbabb^abbbaa^]`bb  
@HWI-EAS443:3:82:1288:755#0/1  
GAAGTACTTCAGGTCAATGCTTGCTAGCATTCTGCTGGT  
+HWI-EAS443:3:82:1288:755#0/1  
abaa^a\_bba`\_aZaa^a`aaaa^\_aa\_`aa¥``\_^`YH  
@HWI-EAS443:3:82:1289:1888#0/1  
GGGCAATGAAAAGAAGGCCAAACTGGCAAATGTTGTGAGA  
+HWI-EAS443:3:82:1289:1888#0/1  
abbabbbbbbaaaaaabababbabaaaabbb`bb\_aabb  
@HWI-EAS443:3:82:1328:370#0/1  
CACTAACTTGCAGTCTGTAGAATCTGTCCACTCCTGCT  
+HWI-EAS443:3:82:1328:370#0/1  
NU¥\_¥aaT¥\_V\_b\_JX\_X````¥aX^bb\_H\_[M¥X`VUHT  
@HWI-EAS443:3:82:1388:237#0/1  
GCCCTTCTTTTAACTTGCCTCTCTCTGCATCTTTGGTCA  
+HWI-EAS443:3:82:1388:237#0/1  
`a`]ba]abbbbbabbb]ab[baabbaab`bbbaV]ba  
@HWI-EAS443:3:82:1488:228#0/1  
ATCCTTTAAGAAATCTATTAGCCTTCCTGACTCATTAGCT  
+HWI-EAS443:3:82:1488:228#0/1  
¥b`b\_bbbbabaaa]a¥baaaaaba^\_aaa`aa`a`\_\_^a  
@HWI-EAS443:3:82:1527:175#0/1  
CTTGGGAGTCTCGATACTGAATCTTGGACAAAAGAAATAC  
+HWI-EAS443:3:82:1527:175#0/1  
`bba``bbaba\_\_bbbVbbabbbbabbaaabba`abbbb`  
@HWI-EAS443:3:82:1563:377#0/1  
AGCTGTTAGGCCATTGATCTAAAGACTTCTATGGTGTG  
+HWI-EAS443:3:82:1563:377#0/1  
ab`aaaabb\_a[aaa¥\_aaa\_`a`a`¥\_aZb\_b[]`Y]a¥  
@HWI-EAS443:3:82:158:2015#0/1  
AAAAATTCCAGCGCAAATGCCATAAGCACCATTCCT  
+HWI-EAS443:3:82:158:2015#0/1  
a`\_\_`^Zaa\_¥ZV`¥M¥¥]X^`\_]a`U\_^^^]ZXZ]]ZS



@HWI-EAS443:3:82:1655:1390#0/1  
ACAAAGTATACGAAACCTCTAATCTGCATCCCAGGTGTTG  
+HWI-EAS443:3:82:1655:1390#0/1  
ababb`^b`¥aa`]a]Ja]aa`]T¥ba^^\_aT\_ba]a\_`a  
@HWI-EAS443:3:82:1695:43#0/1  
CACCCAGGAATATTTGAGAATTCATGCCTTGAAACAATGG  
+HWI-EAS443:3:82:1695:43#0/1  
^b`babbbbbbbbababa^¥a\_bbbbb]Xbbbabbb\_\_abbZ  
@HWI-EAS443:3:82:1713:419#0/1  
ATGCCAGGGTCGACTTCGAGTCTGGACGGATCAAGAAAGA  
+HWI-EAS443:3:82:1713:419#0/1  
[\_\_^]W^)`aabaH]bGaab]^\_b`[WYY]`]aXZ[\_ZT[  
@HWI-EAS443:3:82:199:636#0/1  
CAGTGATTGTGAAAGAAATCTCTGTGTCTTGTGAATTAGT  
+HWI-EAS443:3:82:199:636#0/1  
a`XaXaaa^aaaa^^babaaaa\_[\_\_aa``¥U]`aZPZ  
@HWI-EAS443:3:82:20:124#0/1  
TAAAAATTCAGCGCAAATGCCATAAGCACCATTTCCC  
+HWI-EAS443:3:82:20:124#0/1  
aaaabbba[b]b\_bb`Z¥N\_a`V¥aa\_aa\_^XVW\_`\_aXZ  
@HWI-EAS443:3:82:232:1685#0/1  
ACTGCATTGGCCAACACCATAGAAGTCTTTAGATCGAATG  
+HWI-EAS443:3:82:232:1685#0/1  
aa\_a``\_¥\_\_aa^^Ya`\_]\_¥\_\_¥W\_YY[[Z^Z^]W\_ZZ  
@HWI-EAS443:3:82:260:1688#0/1  
ACGATGACCAAAGATGCAGAGAGAGGCAAGTTAAAAAGAA  
+HWI-EAS443:3:82:260:1688#0/1  
abaaaa`a````\_Gaaa`Z]^```aYX^WZU^\_\_XW\_X  
@HWI-EAS443:3:82:291:1261#0/1  
CCGGATTGATGCCAGGGTCGACTTCGAGTCTGGACGGATC  
+HWI-EAS443:3:82:291:1261#0/1  
aa]\_]`\_Z`^`\_`^`[`S`\_`W`^`¥¥^U\_U`^Y¥]]TW\_  
@HWI-EAS443:3:82:301:84#0/1  
CCTCCATCTGATACTAATAGCCCTACCTTTGATTGGGTTT  
+HWI-EAS443:3:82:301:84#0/1  
aab`baaa`bW[aab[aaaa`a`])`\_`aa`a\_a\_aaa]\_\_  
@HWI-EAS443:3:82:328:281#0/1  
CTGGGATGCAGATTAGAGGTTTCGTATACTTTGTTGAAAC  
+HWI-EAS443:3:82:328:281#0/1  
abbbababbabbaa\_¥aaaabaab^abaV`aab`bb`aa\_  
@HWI-EAS443:3:82:34:1835#0/1  
CTTTCCTTGAAGAATCCCACCCAGGAATATTTGAGAATTC  
+HWI-EAS443:3:82:34:1835#0/1  
a`YaZ]aa`aaX``a`\_[aaY`YQOTWUJPU[\_^UVUUXZ  
@HWI-EAS443:3:82:36:502#0/1  
GTTCTGTTTACTGTGTCCATGGTGTATCCTGTTCTGTTCTC  
+HWI-EAS443:3:82:36:502#0/1  
a^bbab`aaaba`^b\_baa`^a]a^aaaaa\_\_``\_``\_`  
@HWI-EAS443:3:82:373:97#0/1  
CTGCAATCTATTTCGAGAAATTTTTCCCTAGCAGTTCATAT

+HWI-EAS443:3:82:373:97#0/1  
abbaa`baaaaa`bba`aaaaaa`\_\_\_\_`\_aXXaZ\_]U]Z\_  
@HWI-EAS443:3:82:417:1477#0/1  
GCGAAAAGCTTGAACAGTCTGGGCTCCCAGTAGGGGGCAA  
+HWI-EAS443:3:82:417:1477#0/1  
aa]VUR[Ta¥USUO\_W]R[TWPP]U^^\_^^NUX[URTXSS  
@HWI-EAS443:3:82:421:62#0/1  
CTCCTGCTTGTATTCCCTCATGGTTTGGTGCATTCACTAT  
+HWI-EAS443:3:82:421:62#0/1  
abbabbabbabba]`bababbbabbab`babb`]Z^ba`  
@HWI-EAS443:3:82:435:465#0/1  
GCTTAAAATGGGAGCTAATGGATGATGATTATCGGGGAAG  
+HWI-EAS443:3:82:435:465#0/1  
ababa`\_aaa\_`^aaaaaaaa`aa`\_`a`aaaa`\_`a^^RY  
@HWI-EAS443:3:82:449:1039#0/1  
CGGATTGATGCCAGGGTCGACTTCGAGTCTGGACGGATCA  
+HWI-EAS443:3:82:449:1039#0/1  
aa]\_aabaabbaa¥a]Waaaa``aaa^``a¥^^aa\_Z\_\_  
@HWI-EAS443:3:82:458:177#0/1  
CAACATTTGCCAGTTTGGCCTTCTTTTCATTGCCCCCTAC  
+HWI-EAS443:3:82:458:177#0/1  
X¥abbX`X\_WNF[ZUP`b[`R`^Z^TSZSOW\_WKSZ]R]O  
@HWI-EAS443:3:82:467:585#0/1  
CCCCAGTGATTGTGAAAGAAATCTCTGTGTCTTGTGAATT  
+HWI-EAS443:3:82:467:585#0/1  
`bb¥b¥aaababab`a`bZP¥ab]bb\_^aZ\_a¥[]SM\_]a  
@HWI-EAS443:3:82:470:1584#0/1  
GATGGAGGACCAAACCTTATACAATATACGGAATCTTCACA  
+HWI-EAS443:3:82:470:1584#0/1  
a^ab^a\_\_a`b`[`bbabaa\_bbabab\_aZaaaa¥aa\_a  
@HWI-EAS443:3:82:497:1522#0/1  
ATCATATTCCATGCTTTTGGCTGGACCATGGGCTGGCATT  
+HWI-EAS443:3:82:497:1522#0/1  
¥¥aa^WW`\_a`WR]Y^YOWXRUZ¥SUZ[M¥¥S^YUTUWXK  
@HWI-EAS443:3:82:499:79#0/1  
ATTGATGCCAGGGTCGACTTCGAGTCTGGACGGATCAAGA  
+HWI-EAS443:3:82:499:79#0/1  
`bbbaaaababbbU`aaaa\_S`]`\_[aaa\_\_a`T¥ZQZ^X  
@HWI-EAS443:3:82:512:681#0/1  
GCTGACATGAGTATTGGAGTAACAGTGATAAAGAACAACA  
+HWI-EAS443:3:82:512:681#0/1  
aa`aa`\_a^`^a]R]aaa^aaa`]V\_``\_X\_`]````[a  
@HWI-EAS443:3:82:520:237#0/1  
CAAAATCGTCGGATGATTGGAGCCCATCCCACCAGTATAT  
+HWI-EAS443:3:82:520:237#0/1  
abbbbaababbb\_a`[\_`ba^baa^baab^`\_a[\_X`\_¥a  
@HWI-EAS443:3:82:557:68#0/1  
TTTTCTAAAAATTCCAGCGCAAATGCCATAAGCACCAC  
+HWI-EAS443:3:82:557:68#0/1  
abbbbbbba`Q`baaab`aaaaaaaa`aaaaa^a\_]a]

@HWI-EAS443:3:82:567:251#0/1  
CATAAGTCTGGCGACCTTGAGTTAGTTTATCTACCCCTGT  
+HWI-EAS443:3:82:567:251#0/1  
abb^`[[aY\_\_^`aVWaW`R\_¥ZZW\_aa]``a\_^¥a]\_^  
@HWI-EAS443:3:82:591:59#0/1  
AAAAATTCCAGCGAAAATGCCATAAGCACCACATTCCCT  
+HWI-EAS443:3:82:591:59#0/1  
^`\_ZZ`\_\_Z`\_YZ¥Y¥^^¥SYX¥]YULY]R[Z^[YZYU^  
@HWI-EAS443:3:82:603:564#0/1  
GGTGGAGGCCATGGTGTCTAGGGCCCGATTGATGCCAGG  
+HWI-EAS443:3:82:603:564#0/1  
\_aZ`¥```\_^]¥P¥¥[SXQ^¥Y^]P]S¥XYZZ^^YP  
@HWI-EAS443:3:82:60:478#0/1  
ACGGTCTTGGGAGTCTCGATACTGAATCTTGGACAAAAGA  
+HWI-EAS443:3:82:60:478#0/1  
a[aYQ¥`^`aWXV\_^0\_VSUOU[RTVZUHT^^ZZXVOTUT  
@HWI-EAS443:3:82:619:900#0/1  
GGCCATGGTGTCTAGGGCCCGATTGATGCCAGGGTTCGAC  
+HWI-EAS443:3:82:619:900#0/1  
aaaa`\_`[^a[^\_a`aaa\_a`^`\_\_¥W^a¥]¥¥R```¥  
@HWI-EAS443:3:82:643:56#0/1  
ATATGATGCCGTTGCAACTACACATTCCTGGATTCCCAAG  
+HWI-EAS443:3:82:643:56#0/1  
aaaab`ab^^aQaaaZ\_\_a\_Va\_Z\_]`S`^¥Z^V¥]^]  
@HWI-EAS443:3:82:651:1378#0/1  
GTGGGATTCTTCAAGGAAAGCCATAGCCTCTAGAACACAG  
+HWI-EAS443:3:82:651:1378#0/1  
`\_aaaa`aaaaaba\_aaa`^`aaa`\_`a\_a`a`a`\_a`  
@HWI-EAS443:3:82:686:175#0/1  
ATTGATGCCAGGGTCGACTTCGAGTCTGGACGGATCAAGA  
+HWI-EAS443:3:82:686:175#0/1  
ababa`aa[]\_¥YR\_aa\_\_\_`¥S`^^`\_`^a\_\_XU[]^\_  
@HWI-EAS443:3:82:692:435#0/1  
GAACACAGTCTGTTTGTGCATACCCACTTGGTTCATTATC  
+HWI-EAS443:3:82:692:435#0/1  
``bab`bb`bb^aa`a`\_a\_a`a^\_aa`V`\_`a\_a`a`  
@HWI-EAS443:3:82:702:80#0/1  
ATTATGGGTGCCATGCTCAGGATGTTTCTGAACCACTCGG  
+HWI-EAS443:3:82:702:80#0/1  
abbabbba[a]`\_`aaa`a`]^`¥\_a]\_SZ]ZZYZYS`\_`  
@HWI-EAS443:3:82:746:98#0/1  
AAGCAGGAGTGGACAGATTCTACAGGACCTGCAAGTTAGT  
+HWI-EAS443:3:82:746:98#0/1  
a]T¥ab`^b\_b^a[VK¥¥`\_`\_¥^¥^]WWZ`¥¥[XPWV^U  
@HWI-EAS443:3:82:762:126#0/1  
CAGTGATTGTGAAAGAAATCTCTGTGTCTTGTGAATTAGT  
+HWI-EAS443:3:82:762:126#0/1  
`aa\_bbabbababba^baaaaab]`aY````]ZTY¥aaPQV  
@HWI-EAS443:3:82:792:1973#0/1  
ATGAACCAAGTGGGTATGCACAAACAGACTGTGTTCTAGA

+HWI-EAS443:3:82:792:1973#0/1  
aaaaaaaa`]`¥\_a`\_`a\_aaa`\_\_\_\_^^`V[]Z`Z`  
@HWI-EAS443:3:82:884:770#0/1  
CTTTTCTGAGTATTGGTGTGTTCTGTTTACTGTGTCCATG  
+HWI-EAS443:3:82:884:770#0/1  
SabbbaWY\_`bb`b`babaZ`¥```]bb^a`Z`\_]a\_`¥  
@HWI-EAS443:3:82:891:473#0/1  
GGGCTCCAATCATCCGACGATTTTGCTCTCATAGTGAATG  
+HWI-EAS443:3:82:891:473#0/1  
ab`a`\_`aaaaaaaaa^a`\_`aaa`a\_^]N\_`aa]a^\_\_a  
@HWI-EAS443:3:82:914:247#0/1  
CCTAGCTAAAGTTTCAACAAAGTATACGAAACCTCTAATC  
+HWI-EAS443:3:82:914:247#0/1  
abbbbaabbb\_babb`bbabbbb]abba`babaabaababa  
@HWI-EAS443:3:82:943:1918#0/1  
CAGTGATTGTGAAAGAAATCTCTGTGTCTTGTGAATTAGT  
+HWI-EAS443:3:82:943:1918#0/1  
VbbObbabbVbaba\_b`bb`^ab`\_`bbababbababbYa^  
@HWI-EAS443:3:82:974:1132#0/1  
CTGTGGTAATGCCAGCCCATGGTCCAGCCAAAAGCATGGA  
+HWI-EAS443:3:82:974:1132#0/1  
a]Z]^\_U\_aa]¥\_ZUWX`]ZZ]U```¥V`^]^[[`a^^^\_  
@HWI-EAS443:3:82:987:1920#0/1  
AAGAAATCTCTGTGTCTTGTGAATTAGTCATCATCTTTCT  
+HWI-EAS443:3:82:987:1920#0/1  
Y`]^aa\_¥^b^¥G]\_aa`]Ua`[^\_``[[XZY]]]aaaaV  
@HWI-EAS443:3:83:1034:991#0/1  
CTTCTTTGTTGATTCAATGAAGTACTTCAGGTCAATGCTT  
+HWI-EAS443:3:83:1034:991#0/1  
abbabbababbbbaabbaba\_a^aaab^aba\_babaaaa`  
@HWI-EAS443:3:83:1053:252#0/1  
ATGGGCTCCAATCATCCGACGATTTTGCTCTCATAGTGAA  
+HWI-EAS443:3:83:1053:252#0/1  
ab`aa`\_ZY^a^`aa\_]a`\_aaaaa`^`\_^¥`^`][a[^  
@HWI-EAS443:3:83:1196:240#0/1  
GGTTGTTATCTCTATTTCTCTTTGTTTATTGATTCCATT  
+HWI-EAS443:3:83:1196:240#0/1  
aa[ab\_aUYZ\_Y]a`a\_^W`\_aaa^`\_^\_\_T`\_]LW\_`^  
@HWI-EAS443:3:83:1214:1738#0/1  
GGCAATGAAAAGAAGCCAAACTGGCAAATGTTGTGAGAA  
+HWI-EAS443:3:83:1214:1738#0/1  
a^a\_a`[\_`\_`Z¥a^`aaa`a\_X`\_`^``aaX^a^`\_`\_^]  
@HWI-EAS443:3:83:1237:1066#0/1  
CAATTGAAGAGCCATCTGGGCCGTTGCAGGTCCAAGGTCA  
+HWI-EAS443:3:83:1237:1066#0/1  
GY`^\_aba^`b\_\_`\_]ba¥`]``ZS\_V\_a`J```bbbZZS  
@HWI-EAS443:3:83:1256:600#0/1  
GGTGTCTAGGGCCCGATTGATGCCAGGGTCGACTTCGAG  
+HWI-EAS443:3:83:1256:600#0/1  
^JUZa]TaU```aU[a^^]¥ZUKN¥\_aXQTa\_Wa¥^X\_]`

@HWI-EAS443:3:83:127:1746#0/1  
ATGGATGTCAATCCGACTCTACTTTTCCTAAAAATTCCAG  
+HWI-EAS443:3:83:127:1746#0/1  
a`a\_a`a]\_R^`a^`a`\_`a`\_`a^`aaaa``^[\_X  
@HWI-EAS443:3:83:1287:1105#0/1  
AAATCGTCGGATGATTGGAGCCCATCCCACCGTATATTG  
+HWI-EAS443:3:83:1287:1105#0/1  
abb`b`b`baaaa`^aab^`ZQDX\_\_ZX`\_OYWIRZ^^`\_`  
@HWI-EAS443:3:83:129:1279#0/1  
AGGCTATCTAATAAGAGCACTGACATTAATACGATGACC  
+HWI-EAS443:3:83:129:1279#0/1  
`a\_\_aWN`LV`L^Y^aaaT]P]UV\_\_ZYU]^[\_`UYT`Y\_  
@HWI-EAS443:3:83:1400:194#0/1  
CACCAATACTCAGAAAAGGAAAGTGGACGACAAACACAG  
+HWI-EAS443:3:83:1400:194#0/1  
\_T^ZX`b^Qa^\_\_][aaXb`]^`^aV`H`aZa\_QFZ`a`  
@HWI-EAS443:3:83:1401:603#0/1  
AGAAATCTCTGTGTCTTGTGAATTAGTCATCATCTTTCTC  
+HWI-EAS443:3:83:1401:603#0/1  
X\_^]a`]ZH`a`a`\_a`[UYV]^`[KRU^a`^aaWa[^VWR  
@HWI-EAS443:3:83:1403:277#0/1  
ATGGAATCAATGAACAAAGAGAAATAGAGATAACAACCC  
+HWI-EAS443:3:83:1403:277#0/1  
abba\_aa\_abbbaa\_a`aa\_aa[\_`a\_aaa\_aa^`^^Y[  
@HWI-EAS443:3:83:1438:124#0/1  
AAGATGGTCACGCAAAGAACAATAGGGAAGAAAAACAAA  
+HWI-EAS443:3:83:1438:124#0/1  
aaaa[b`YX`\_X]^`^a\_a`^]a\_b\_\_YQa]]a\_]\_`^\_W  
@HWI-EAS443:3:83:1441:743#0/1  
GTGGCTAATTTTAGCATGGAGCTACCCAGCTTTGGAGTGT  
+HWI-EAS443:3:83:1441:743#0/1  
a`ba\_ba\_`\_aa`TP`aa\_W\_`\_\_\_\_X`P`a`\_`Y\_VNR  
@HWI-EAS443:3:83:1492:459#0/1  
TGGACCACTACCTGAGGATAATGAACCAAGTGGGTATGCA  
+HWI-EAS443:3:83:1492:459#0/1  
^abJaUaR\_aa\_a\_Q]aZ]aHaa0]VRa`aGa\_aVa`\_U\_  
@HWI-EAS443:3:83:1505:578#0/1  
AGAGATAACAACCCACTTTCAAAGAAAAAGGAGAGTAAGA  
+HWI-EAS443:3:83:1505:578#0/1  
abbababaabb`a\_aabaa`aa`a`\_aa\_aa\_a\_bY`\_`a\_  
@HWI-EAS443:3:83:1506:1415#0/1  
ACACATTCCTGGATCCCAAGAGGAATCGTTCTATTCTCA  
+HWI-EAS443:3:83:1506:1415#0/1  
V^`¥S\_\_[`]RZ`X\_YR^Waa`YZV]YPMO\_XPPXZRO  
@HWI-EAS443:3:83:153:1231#0/1  
GAATCAATGAACAAAGAGGAAATAGAGATAACAACCCACT  
+HWI-EAS443:3:83:153:1231#0/1  
a`aTa\_\_`X`[LYa\_a\_NY\_a`aYaa\_aX\_a`\_`^\_\_\_\_  
@HWI-EAS443:3:83:1564:487#0/1  
CCCCTATGGCACCTATATGTGTATCTGTAGTCTTTGATGA



@HWI-EAS443:3:83:324:1063#0/1  
GATTCTTCAAGGAAAGCCATAGCCTCTAGAACACAGTCTG  
+HWI-EAS443:3:83:324:1063#0/1  
a]]abbaaa\_aba`aabaaa^\_a\_aaaaa\_a\_a\_`Y\_\_`  
@HWI-EAS443:3:83:326:1352#0/1  
CTGATTCACTTACTCCAGACACTCCAAAGCTGGGTAGCTC  
+HWI-EAS443:3:83:326:1352#0/1  
aaaa\_aa]a`aaa`aaa\_\_\_\_\_aaa`a`\_\_a\_`\_]^^W\_]`  
@HWI-EAS443:3:83:340:1751#0/1  
GTTCTGTTTACTGTGTCCATGGTGTATCCTGTTCCCTGTTTC  
+HWI-EAS443:3:83:340:1751#0/1  
`aa]a]Z\_Zaaabababb^]\_aWa``abaa`\_`a`¥Y][a  
@HWI-EAS443:3:83:350:1095#0/1  
ATCCGACTCTACTTTTCTAAAAATTCCAGCGCAAAATGC  
+HWI-EAS443:3:83:350:1095#0/1  
a`¥I¥P\_]`^Y¥Z]\_a\_]Z]¥Q[[a\_a]U]``]SXH¥^\_^  
@HWI-EAS443:3:83:359:1085#0/1  
CAGTAGGGGCAATGAAAAGAAGGCCAAACTGGCAAATGT  
+HWI-EAS443:3:83:359:1085#0/1  
aaa`\_^`aabaaab`^aaa]a`ab`aaa\_aa```P\_\_aZ  
@HWI-EAS443:3:83:402:1874#0/1  
TGTTTATCATGTTGTTCTTTATCACTGTTACTCCAATACT  
+HWI-EAS443:3:83:402:1874#0/1  
a`\_aaba`aaaa`\_]\_aaa``ba¥`aa`^`a]¥a^]a\_a\_\_  
@HWI-EAS443:3:83:403:677#0/1  
AAAATTCCAGCGCAAAATGCCATAAGCACCATTCCTT  
+HWI-EAS443:3:83:403:677#0/1  
a`aa^`[¥¥X¥aa[G]U¥WU\_Q¥`\_`YYSYa]\_]`^\_\_\_\_R[\_Z  
@HWI-EAS443:3:83:414:1839#0/1  
AAAAATTCCAGCGCAAAATGCCATAAGCACCATTCCTT  
+HWI-EAS443:3:83:414:1839#0/1  
aaaa\_`\_¥[\_^\_\_\_\_[\_^\_]X¥]]¥]^`^X]^\_WX^YXX  
@HWI-EAS443:3:83:454:82#0/1  
ATGGAATCAATGAACAAAGAGGAAATAGAGATAACAACCC  
+HWI-EAS443:3:83:454:82#0/1  
ababaababbba^]`WUaaaba\_Y`a\_aabaa\_aaaa]^]  
@HWI-EAS443:3:83:478:251#0/1  
CCTCTTTGTTTCATTGATTCCATTACATCCTTTAAGAAATC  
+HWI-EAS443:3:83:478:251#0/1  
aaa`aaa`¥aaaa`aaaa`^^`a`a\_\_a````\_\_`\_^\_^  
@HWI-EAS443:3:83:529:1759#0/1  
GACAAAAGAAATACACCAAGACAATATACTGGTGGGATGG  
+HWI-EAS443:3:83:529:1759#0/1  
a`abb^aaaba]a`aa¥\_aaa``\_aa\_\_^\_a`Z\_N]`UUZ  
@HWI-EAS443:3:83:534:154#0/1  
GCTTGAACAGTCTGGGCTCCCAGTAGGGGGCAATGAAAAG  
+HWI-EAS443:3:83:534:154#0/1  
aa`\_`¥`aa`^`\_[\_a\_\_\_\_Z[\_`W\_]¥\_¥¥¥^¥\_¥ZW^¥  
@HWI-EAS443:3:83:543:595#0/1  
ATTCGAGAAATTTTTCCCTAGCAGTTCATATAGGAGACCG

+HWI-EAS443:3:83:543:595#0/1  
aaa`b]Uaa`a`a`a`\_`^Z`^\_]`^`^`^`][^Y`  
@HWI-EAS443:3:83:561:1591#0/1  
CACCCAGGAATATTTGAGAATTCATGCCTTGAAACAATGG  
+HWI-EAS443:3:83:561:1591#0/1  
abba\_HX`^a^aY`\_\_a`¥`\_\_`^`^`^`\_X`\_a^Z]S  
@HWI-EAS443:3:83:574:1593#0/1  
CAGTGATTGTGAAAGAAATCTCTGTGTCTTGTGAATTAGT  
+HWI-EAS443:3:83:574:1593#0/1  
aa^IZ`\_aa`^][aa¥]a`\_\_a`\_ZOYa`[FU[W\_0]YZQ  
@HWI-EAS443:3:83:619:531#0/1  
GATTGATGCCAGGGTCGACTTCGAGTCTGGACGGATCAAG  
+HWI-EAS443:3:83:619:531#0/1  
aaaaab`a`a]`aa^a`\_`a```\_a]`\_aa```aa[[`\_\_\_\_`  
@HWI-EAS443:3:83:634:240#0/1  
TAAGAGCACTGACATTAAATACGATGACCAAAGATGCAGA  
+HWI-EAS443:3:83:634:240#0/1  
X]babbb`P^b`]abb`W]aab\_a]aaa`a`aaa\_aZ`VY  
@HWI-EAS443:3:83:634:396#0/1  
CTAACTTGCAGGTCCTGTAGAATCTGTCCACTCCTGCTTG  
+HWI-EAS443:3:83:634:396#0/1  
a`¥a`a]aaa`XH\_]`b`\_a¥aa`\_¥GZ`[W^Z[^]ZV[\_  
@HWI-EAS443:3:83:643:408#0/1  
GAACAAAGAGGAAATAGAGATAACAACCCACTTTCAAAGA  
+HWI-EAS443:3:83:643:408#0/1  
aaaa\_]¥bY¥bU\_[a\_aaaa^aaaa`\_`aa`a```\_`^`\_`  
@HWI-EAS443:3:83:763:426#0/1  
CTCCATCTGATACTAATAGCCCTACCTTTGATTGGGTTTG  
+HWI-EAS443:3:83:763:426#0/1  
ab^b`\_S`bbbaSP\_a`^`^`a¥```[a]RZ`]TH]\_]`  
@HWI-EAS443:3:83:766:1068#0/1  
GGCTATTAGTATCAGATGGAGGACCAAACCTTATACAATAT  
+HWI-EAS443:3:83:766:1068#0/1  
`aba`^\_Y[Y\_[]]S[Y\_`a[JZ`¥]`\_`^`\_]\_K¥```  
@HWI-EAS443:3:83:771:772#0/1  
AAAATTCCAGCGCAAATGCCATAAGCACCATTCCTT  
+HWI-EAS443:3:83:771:772#0/1  
abbaaaa`aaaa\_aYaa`a`\_¥aaa`\_aa`\_aa`\_`a`a`^`  
@HWI-EAS443:3:83:79:946#0/1  
GGGCTATCGCAACACCTGGGATGCAGATTAGAGGTTTCGT  
+HWI-EAS443:3:83:79:946#0/1  
J`bb^a\_aVb`b`^aaab]]b]aaba\_a`ba]ab]a`Z^^  
@HWI-EAS443:3:83:807:424#0/1  
TGTGGTAATGCCAGCCCATGGTCCAGCCAAAAGCATGGAA  
+HWI-EAS443:3:83:807:424#0/1  
aa\_aa[ab^¥`^`]\_aaaa`^¥a`a^^aa¥```\_a`a^^`  
@HWI-EAS443:3:83:862:147#0/1  
AATCGTCGGATGATTGGAGCCCATCCCACCGATATATTGT  
+HWI-EAS443:3:83:862:147#0/1  
aaa¥a`\_aaa`a`\_aa`^]T¥Z`\_]`^Y^XZX^TV^Z\_]V



@HWI-EAS443:3:83:871:601#0/1  
GAAAAACAAAGACTGAATAAGAGAGGCTATCTAATAAGA  
+HWI-EAS443:3:83:871:601#0/1  
a`^^`[\_a\_]\_`¥ab^`aaaa`aa\_^`]TSZQQNSZHX  
@HWI-EAS443:3:83:880:1656#0/1  
AAAGAACAACATGATAAACAATGACCTTGGACCTGCAACG  
+HWI-EAS443:3:83:880:1656#0/1  
abaaaa`aaaa`¥a`aa`a`a\_a`\_\_\_\_\_¥\_\_\_^\_a\_]`  
@HWI-EAS443:3:83:906:1568#0/1  
GCCCATCCCACCAGTATATTGTCTTGGTGTATTTCTTTTG  
+HWI-EAS443:3:83:906:1568#0/1  
ab\_X¥Q\_[\_ba^H[XSVSV¥¥NQU^`¥MZYJ\_\_\_WU\_[XP  
@HWI-EAS443:3:83:936:394#0/1  
ACCTATATGTGTATCTGTAGTCTTTGATGAACAATTGAAG  
+HWI-EAS443:3:83:936:394#0/1  
a\_`a\_a\_aYUaZY^^aa^VXY`\_^`\_`\_]V]¥`Z`]\_X  
@HWI-EAS443:3:83:943:1927#0/1  
ATAGTGAATGCACCAAACCATGAGGGAATACAAGCAGGAG  
+HWI-EAS443:3:83:943:1927#0/1  
`\_`]X[a]``[aa\_aa`V^^aaa]Y\_`\_aa`aa^`a\_\_¥\_  
@HWI-EAS443:3:83:979:1022#0/1  
TGGCCTTCTTTTCATTGCCCCCTACTGGGAGCCCAGACTG  
+HWI-EAS443:3:83:979:1022#0/1  
a`\_Zaa\_ZYUa`a\_Z^¥VSTP]R`\_\_\_\_][U`VYRS\_\_^Y\_  
@HWI-EAS443:3:84:1034:488#0/1  
CGATGACCAAAGATGCAGAGAGAGGCAAGTAAAAAGAAG  
+HWI-EAS443:3:84:1034:488#0/1  
aa^aaaaaa]aa\_`b\_\_b\_a\_`aaa^a\_a\_`\_\_\_\_^a\_`\_  
@HWI-EAS443:3:84:1108:1253#0/1  
CCAGTAGGGGCAATGAAAAGAAGGCCAAACTGGCAAATG  
+HWI-EAS443:3:84:1108:1253#0/1  
aa`a`\_abbabbaabaabbabaaaaabab\_aaaabaaba  
@HWI-EAS443:3:84:1113:823#0/1  
CACTAACTTGCAGGTCCTGTAGAATCTGTCCACTCCTGCT  
+HWI-EAS443:3:84:1113:823#0/1  
abab`bbbaaaba\_aabbaabb\_baba`aa`a`a[]¥`  
@HWI-EAS443:3:84:1143:2023#0/1  
CGAAAAGCTTGAACAGTCTGGGCTCCCAGTAGGGGGCAAT  
+HWI-EAS443:3:84:1143:2023#0/1  
aaa^aaaaaaaa`^a\_\_\_`Y]a\_\_\_Z[[QY\_\_¥^\_\_¥[¥  
@HWI-EAS443:3:84:1152:307#0/1  
GTGGGATTCTTCAAGGAAAGCCATAGCCTCTAGAACACAG  
+HWI-EAS443:3:84:1152:307#0/1  
a^aaa[^`\_a`Y\_^aa\_^^`]^\_\_\_`V]\_^`\_^\_X^X]^  
@HWI-EAS443:3:84:1196:1957#0/1  
CACCCAGGAATATTTGAGAATTCATGCCTTGAACAATGG  
+HWI-EAS443:3:84:1196:1957#0/1  
a¥T`bbbab\_^`bb]R^]\_W`bV`Ma¥S^¥a`a`^aT^^Z  
@HWI-EAS443:3:84:119:674#0/1  
GGGGGCAATGAAAAGAAGGCCAAACTGGCAAATGTTGTGA

+HWI-EAS443:3:84:119:674#0/1  
a`baaaa`aa`ZXaa`X¥`a`^IZ]\_`\_\_\_\_\_`\_`X]`Za\_  
@HWI-EAS443:3:84:1206:1127#0/1  
GGTGTGTTCTGTTTACTGTGTCCATGGTGTATCCTGTTCC  
+HWI-EAS443:3:84:1206:1127#0/1  
a^P`Waa]G[a^aa`Q`P`\_WQQ\_`M]RT¥¥Va`\_¥PL  
@HWI-EAS443:3:84:1273:547#0/1  
AAGTTTGGTCCCTCCATCTGATACTAATAGCCCTACCTTTG  
+HWI-EAS443:3:84:1273:547#0/1  
abb`bba\_`Ybbaaa`abbaaababba\_ab^`Ta`ab  
@HWI-EAS443:3:84:1285:1821#0/1  
CCCAGTGATTGTGAAAGAAATCTCTGTGTCTTGTGAATTA  
+HWI-EAS443:3:84:1285:1821#0/1  
`bbaabaabVa\_R`abaaa`[\_\_`^`][ba`Ra\_T`\_a]  
@HWI-EAS443:3:84:1363:703#0/1  
GTCCTCCATCTGATACTAATAGCCCTACCTTTGATTGGGT  
+HWI-EAS443:3:84:1363:703#0/1  
aa`aaaaaa\_ab`\_`a\_aa\_a¥S`\_U]`a`Y`¥YT  
@HWI-EAS443:3:84:1389:1338#0/1  
TGAATCCCTTTGTCAGTCATAAAGAGATTGATTCTGTAAA  
+HWI-EAS443:3:84:1389:1338#0/1  
`]bba\_aa`aa\_Z^a]Y[\_`a`¥^a`\_`a\_aa]a`]`\_W  
@HWI-EAS443:3:84:1414:869#0/1  
GTTCTGTTTACTGTGTCCATGGTGTATCCTGTTCCCTGTTCC  
+HWI-EAS443:3:84:1414:869#0/1  
]bb`bbaabaZbb\_aa¥Y`aaaT¥[\_`\_`a\_a[\_a`[\_¥  
@HWI-EAS443:3:84:1443:1241#0/1  
GGCTATCGCAACACCTGGGATGCAGATTAGAGGTTTCGTA  
+HWI-EAS443:3:84:1443:1241#0/1  
`\_]`\_a[H\_aa\_ZVP]PTP`[T[[Q]\_^aRY^`¥GT`\_aUZ  
@HWI-EAS443:3:84:1501:166#0/1  
ATCGTCGGATGATTGGAGCCCATCCCACCAGTATATTGTC  
+HWI-EAS443:3:84:1501:166#0/1  
a`^^`a`X`^¥P\_ZUT¥X`TYVTROZ¥UU^]]]\_TR  
@HWI-EAS443:3:84:151:2014#0/1  
ACGCAAAGAACAATAGGGAAGAAAAACAAAGACTGAATA  
+HWI-EAS443:3:84:151:2014#0/1  
ab`]\_]\_]W\_^\_P\_W^W][Y][]]][UWWX[YXXZ  
@HWI-EAS443:3:84:1533:808#0/1  
GACTCATTAGCTGTTAGCCATTTCGATCTAAAGACTTCTA  
+HWI-EAS443:3:84:1533:808#0/1  
`a`a^Q¥a`S`a¥ZT]]W[^]]][P]N[RNT^[T^\_[[M  
@HWI-EAS443:3:84:1546:2009#0/1  
CAAAATCGTCGGATGATTGGAGCCCATCCCACCAGTATAT  
+HWI-EAS443:3:84:1546:2009#0/1  
¥U`\_\_\_[a\_X\_ZY`aaaYa\_a]]]JaSIOH]`XZa]Ya\_\_\_  
@HWI-EAS443:3:84:156:852#0/1  
ACAGAATCAATCTCTTTATGACTGACAAAGGGATTTCAGGG  
+HWI-EAS443:3:84:156:852#0/1  
`aaaaS¥bba^aa]`ab]`]bXa^aa`^Y]¥\_]Y]¥¥V

@HWI-EAS443:3:84:1592:2001#0/1  
ATTCAGTCTTTGTTTTTTCTTCCCTATTGTTCTTTGCGTG  
+HWI-EAS443:3:84:1592:2001#0/1  
`b^T^b`¥a``V^aVb¥\_TSbabaab\_a^`Y`bYb  
@HWI-EAS443:3:84:1621:1365#0/1  
GTCTTTAGATCGAATGGCCTAACAGCTAATGAGTCAGGAA  
+HWI-EAS443:3:84:1621:1365#0/1  
`UX`aabaa^\_baaaY`^Waaa`^`S]a\_aaQ`Va^`aX\_  
@HWI-EAS443:3:84:1685:307#0/1  
CGATACTGAATCTTGGACAAAAGAAATACACCAAGACAAT  
+HWI-EAS443:3:84:1685:307#0/1  
aaa^babb`aaSbaaa[]aaa\_]`aaaa`a¥Wa]a¥\_a`a  
@HWI-EAS443:3:84:1711:545#0/1  
AGAATCTGTCCACTCCTGCTTGTATTCCCTCATGGTTTGG  
+HWI-EAS443:3:84:1711:545#0/1  
aba`Z`]\_¥Z[]Q¥X\_]¥][YW]^]OWT`X¥a[^W`a\_U  
@HWI-EAS443:3:84:1783:1090#0/1  
GATACACATATAGGTGCCATAGGGGAGACACAAAATTCA  
+HWI-EAS443:3:84:1783:1090#0/1  
aaaaa\_a`aa`¥TTa`\_\_a`^S`[a\_^`a`a`a`\_X\_  
@HWI-EAS443:3:84:19:333#0/1  
AGAGGTTTCGTATACTTTGTTGAACTTTAGCTAGGAGCA  
+HWI-EAS443:3:84:19:333#0/1  
`¥Q]ZV\_\_b]T^^Z^\_X\_[0[¥QGV]^Y^\_`]YXXX[[X]  
@HWI-EAS443:3:84:220:820#0/1  
CAACCGGCAGCAACTGCATTGGCCAACACCATAGAAGTCT  
+HWI-EAS443:3:84:220:820#0/1  
aaa`aaa`aa^[\_¥\_\_^^\_`\_¥^VU[¥¥W¥¥¥^^ZWUW^  
@HWI-EAS443:3:84:223:1106#0/1  
ACCGGCAGCAACTGCATTGGCCAACACCATAGAAGTCTTT  
+HWI-EAS443:3:84:223:1106#0/1  
`a`Zaa\_\_UWX¥Q¥V\_WYN[¥WR[Y\_T^QVTSWWYTWYYW  
@HWI-EAS443:3:84:247:216#0/1  
GGTGTGTTCTGTTTACTGTGTCCATGGTGTATCCTGTTCC  
+HWI-EAS443:3:84:247:216#0/1  
abQbXbY\_a``a`\_aa`Wb\_\_`\_`\_U^[a\_]``\_aZX  
@HWI-EAS443:3:84:257:349#0/1  
ATACCCACTTGGTTCATTATCCTCAGGTAGTGGTCCATCA  
+HWI-EAS443:3:84:257:349#0/1  
\_bbaabaaaabb`X^aaaaa`^X`aa\_U¥`Z¥^^aa`^`\_  
@HWI-EAS443:3:84:28:924#0/1  
GAGCCATCTGGCCGTTGCAGGTCCAAGTTCATTGTTTAT  
+HWI-EAS443:3:84:28:924#0/1  
`Taa``\_Q\_Wa\_ZQTY\_YO¥[U^^][¥[W]Z[V[SRVV[  
@HWI-EAS443:3:84:292:1045#0/1  
GTCCTCCATCTGATACTAATAGCCCTACCTTTGATTGGGT  
+HWI-EAS443:3:84:292:1045#0/1  
^Yabababbbbaabab\_a`a`aa`a`aa`aa`Xaa`\_V  
@HWI-EAS443:3:84:298:719#0/1  
AGATCTTCATGATCTCAGAGAACTCTTCTTTCTTGATCCG

+HWI-EAS443:3:84:298:719#0/1  
]JV a`\_ab^a\_\_YX\_a\_Y\_[YVa\_[¥U¥aa`a\_a`HX]X`  
@HWI-EAS443:3:84:324:629#0/1  
TGTTACTCCAATACTCATGTCAGCTGATTCACTTACTCCA  
+HWI-EAS443:3:84:324:629#0/1  
ab]ba`\_]`baaaaba`aaa\_aa`]V\_\_^^\_a`a`]``Z`  
@HWI-EAS443:3:84:332:1233#0/1  
GGTGCATTCACTATGAGAGCAAATCGTCGGATGATTGGA  
+HWI-EAS443:3:84:332:1233#0/1  
`aYaabaaaa]aa`a`ZPR`a\_\_[VWWW^ZRR^\_YU]^W  
@HWI-EAS443:3:84:363:14#0/1  
GGCTCCAATCATCCGACGATTTTGCTCTCATAGTGAATGC  
+HWI-EAS443:3:84:363:14#0/1  
aa\_^`Q][\_\_[\_a\_]aW[^¥]`YSWXUUU^\_UZNZY[X  
@HWI-EAS443:3:84:377:609#0/1  
GTTCTGTTTACTGTGTCCATGGTGTATCCTGTTCTGTTTC  
+HWI-EAS443:3:84:377:609#0/1  
a\_aaaa`\_`\_`a[a\_a`\_\_a\_VaW\_\_¥`[X¥\_]Z^VU^\_  
@HWI-EAS443:3:84:427:1502#0/1  
AGAACATTATGGGTGCCATGCTCAGGATGTTTCTGAACCA  
+HWI-EAS443:3:84:427:1502#0/1  
aW[[aba^\_\_QR]Y]`a¥[`] [\_\_\_\_¥LT¥P¥X`¥TST]\_]`  
@HWI-EAS443:3:84:434:1741#0/1  
GTCCTCCATCTGATACTAATAGCCCTACCTTTGATTGGGT  
+HWI-EAS443:3:84:434:1741#0/1  
¥Q\_aabbb`^baa`ab]a^`\_`aab`¥a^`\_`\_`^aR][  
@HWI-EAS443:3:84:459:531#0/1  
AGAATCCCACCCAGGAATATTTGAGAATTCATGCCTTGAA  
+HWI-EAS443:3:84:459:531#0/1  
`¥^aab`aa^a\_\_\_\_]\_`\_\_\_\_\_`\_`^a^^^\_`¥^\_Z\_^\_  
@HWI-EAS443:3:84:488:164#0/1  
ATTGGTGTGTTCTGTTTACTGTGTCCATGGTGTATCCTGT  
+HWI-EAS443:3:84:488:164#0/1  
aa`\_]0\_V]^`\_[Y^^][\_]Y]X¥]XYX¥W^YXXYXYV  
@HWI-EAS443:3:84:530:1107#0/1  
CTGAATAAGAGAGGCTATCTAATAAGAGCACTGACATTAA  
+HWI-EAS443:3:84:530:1107#0/1  
a`a`\_aaaa`aa\_[\_^SMX^[Y[^SQW]\_¥U\_^\_¥][UY  
@HWI-EAS443:3:84:588:617#0/1  
GGACGACAAACACAGAGACTGGTGCACCCAGCTCAACCC  
+HWI-EAS443:3:84:588:617#0/1  
aa\_\_V`RX`aa^`a`\_QW`]WVZaa^`¥a\_J\_Z`]`^¥¥  
@HWI-EAS443:3:84:595:960#0/1  
ATTGATGCCAGGGTCGACTTCGAGTCTGGACGGATCAAGA  
+HWI-EAS443:3:84:595:960#0/1  
ab` []aaaa]]]`[Q[]aa`\_]aXN¥\_^[\X]]\_\_`^^`  
@HWI-EAS443:3:84:617:923#0/1  
CCCGGATTGATGCCAGGGTCGACTTCGAGTCTGGACGGAT  
+HWI-EAS443:3:84:617:923#0/1  
`\_a`a`a`a`a`a`^[\`\_Y`\_U¥¥\_\_\_\_U\_^`\_¥\_W¥W

@HWI-EAS443:3:84:634:1707#0/1  
GGCTAATTTTAGCATGGAGCTACCCAGCTTTGGAGTGTCT  
+HWI-EAS443:3:84:634:1707#0/1  
\_]\_`a`V`]TZ`a\_\_Z\_ab^b^YZaa\_¥`a`a`[¥a]\_`  
@HWI-EAS443:3:84:651:1124#0/1  
GGTGCATTCACTATGAGAGCAAAATCGTCGGATGATTGGA  
+HWI-EAS443:3:84:651:1124#0/1  
aaabbbbbbbabbabbbabbbbab`abb`aa`aaa`a`  
@HWI-EAS443:3:84:672:347#0/1  
CTGTTTACTGTGCCATGGTGTATCCTGTTCCCTGTTCCAT  
+HWI-EAS443:3:84:672:347#0/1  
aabY\_baab`a\_a`aba`b[a`aaX`b`a\_\_\_a^aa`a\_X  
@HWI-EAS443:3:84:692:263#0/1  
GGCTTTCCTTGAAGAATCCCACCCAGGAATATTTGAGAAT  
+HWI-EAS443:3:84:692:263#0/1  
^M][Z`X\_\_\_\_\_a]PT`^^][^\_\_0^¥Z^]Z][^^]Z]XY  
@HWI-EAS443:3:84:693:41#0/1  
TAGGGCTATTAGTATCAGATGGAGGACCAAACCTATACAA  
+HWI-EAS443:3:84:693:41#0/1  
aabaaaabaaaa\_aa\_aa^`aa\_a`]\_\_\_\_\_^\_\_\_\_`\_\_\_\_^  
@HWI-EAS443:3:84:783:1870#0/1  
CCCAGTGATTGTGAAAGAAATCTCTGTGTCTTGTGAATTA  
+HWI-EAS443:3:84:783:1870#0/1  
aba][VX]XR¥aNWU¥Z^X\_]V¥^Y^YS¥¥`^XFUGQYPNR  
@HWI-EAS443:3:84:793:1662#0/1  
GATTGATGCCAGGGTCGACTTCGAGTCTGGACGGATCAAG  
+HWI-EAS443:3:84:793:1662#0/1  
`b\_b\_b`baaaba\_Vbaaaa`bb``\_aab[\_baa`]a\_Y\_  
@HWI-EAS443:3:84:810:1557#0/1  
GAGCTAATGGATGATGATTATCGGGGAAGACTTTGTAATC  
+HWI-EAS443:3:84:810:1557#0/1  
a^`ab`]\_]\_[aa\_]a`aaa[¥][[]U^\_HVa`]VTX\_ZZ  
@HWI-EAS443:3:84:836:750#0/1  
GTGGTGCTTATGGCATTTCGCTGGAATTTTAGGAAAA  
+HWI-EAS443:3:84:836:750#0/1  
a\_a¥Raaa\_\_\_a``\_a`\_`\_\_`\_`aa\_\_aaaa\_Y]YX^\_Z  
@HWI-EAS443:3:84:872:1312#0/1  
GGGATGGGCTCCAATCATCCGACGATTTTGCTCTCATAGT  
+HWI-EAS443:3:84:872:1312#0/1  
aaaa`aaaa`aaa`ab`\_`\_a`\_`^aa\_¥\_\_^`\_`\_`ZU  
@HWI-EAS443:3:84:877:1157#0/1  
GATTCTTCAAGGAAAGCCATAGCCTCTAGAACACAGTCTG  
+HWI-EAS443:3:84:877:1157#0/1  
a\_abbbbababbbb\_aa`baa``aaa`babaaaa`a[bba  
@HWI-EAS443:3:84:878:1032#0/1  
TTTCATTGCCCCCTACTGGGAGCCCAGACTGTTCAAGCTT  
+HWI-EAS443:3:84:878:1032#0/1  
aaa`\_a\_aa\_\_`\_`\_\_aa]\_[`\_¥\_`\_¥\_`]\_¥\_^[¥^\_  
@HWI-EAS443:3:84:911:353#0/1  
AAAAATTCCAGCGCAAATGCCATAAGCACCATTCCT

+HWI-EAS443:3:84:911:353#0/1  
a¥X`Z¥X`S^UX`[XaWZZ\_OMZ]\_X¥KXIXBBBBBBBBBB  
@HWI-EAS443:3:84:917:1632#0/1  
TGGTCCTCCATCTGATACTAATAGCCCTACCTTTGATTGG  
+HWI-EAS443:3:84:917:1632#0/1  
aa]Qaaaabaaaa`a`aaa`a\_aaX`\_`\_aaaa^a`\_`]  
@HWI-EAS443:3:84:921:964#0/1  
GCCTCTCTTATTTCAGTCTTTGTTTTTTCTCCCTATTGTT  
+HWI-EAS443:3:84:921:964#0/1  
a^`aaaaab^aba`aaaaaa\_aaabaZaa\_a^a\_aa`^a  
@HWI-EAS443:3:84:933:517#0/1  
CTTCTTTTCATTGCCCTACTGGGAGCCAGACTGTTCA  
+HWI-EAS443:3:84:933:517#0/1  
`bbbbbbbabaa`ababbabbbabaaaaaba\_bb`aaa  
@HWI-EAS443:3:84:959:301#0/1  
AGCCCTTCTTTTAACTTGCCTCTCTGCATCTTTGGTC  
+HWI-EAS443:3:84:959:301#0/1  
^`]M^aaaab`\_]`a^aaa`^`aaaa`a`\_a]^`¥`¥¥  
@HWI-EAS443:3:84:972:157#0/1  
CATTCTGAAGTCTGCTTAAAATGGGAGCTAATGGATGAT  
+HWI-EAS443:3:84:972:157#0/1  
\_bbbbbbbabbbabbabbbbbbbaabbabbbaabaa  
@HWI-EAS443:3:84:989:983#0/1  
GCTGTGGTAATGCCAGCCCATGGTCCAGCCAAAAGCATGG  
+HWI-EAS443:3:84:989:983#0/1  
aaa`Yaa`````\_`\_V\_[Xa]a[aaaa^a\_]\_]PRY\_\_  
@HWI-EAS443:3:85:1004:1077#0/1  
GCTGTGGTAATGCCAGCCCATGGTCCAGCCAAAAGCATGG  
+HWI-EAS443:3:85:1004:1077#0/1  
]aba`ba]baaaaa`\_]aaaa`V`^¥`\_`\_aa¥^aa`\_`a  
@HWI-EAS443:3:85:1022:1320#0/1  
GGTCCTCCATCTGATACTAATAGCCCTACCTTTGATTGGG  
+HWI-EAS443:3:85:1022:1320#0/1  
`a`\_\_abbbbaabaaaa`aaa\_a`\_`a\_a\_a\_aaa`\_XYP  
@HWI-EAS443:3:85:1039:1639#0/1  
GGACCAAACCTTATACAATATACGGAATCTTCACATTCCTG  
+HWI-EAS443:3:85:1039:1639#0/1  
abaaVa¥b\_baababaaabaaaa`aa\_\_baabaa`\_`\_aa  
@HWI-EAS443:3:85:1050:946#0/1  
TGGATGTCAATCCGACTCTACTTTTCTAAAAATTCAGC  
+HWI-EAS443:3:85:1050:946#0/1  
aba`aaaaaaaaaZ```a`^aa\_\_\_\_aaa\_a````\_W`a]  
@HWI-EAS443:3:85:106:529#0/1  
GGGAAAGGTACATGTTTCGAGAGTAAAAGAATGAAGATTC  
+HWI-EAS443:3:85:106:529#0/1  
^^^JVaaa¥RU]Z]^][aa`[^`Xa\_`^¥`\_`a`\_[M]\_\_Z\_  
@HWI-EAS443:3:85:1089:291#0/1  
AGCTTGAACAGTCTGGGCTCCCAGTAGGGGCAATGAAAA  
+HWI-EAS443:3:85:1089:291#0/1  
ababbbbaaaaa`\_`aaaa\_a`^a`a\_\_a\_aaa[\_\_aaa`\_`\_`

@HWI-EAS443:3:85:111:1018#0/1  
GATTCTGTAAACAATGCTGTGGTAATGCCAGCCCATGGTC  
+HWI-EAS443:3:85:111:1018#0/1  
aaaaaaaa`[\`abaaa``^aaWa\_a`\_aT^`\_\_\_¥\_ZV[  
@HWI-EAS443:3:85:1127:1032#0/1  
GTAGTCTTTGATGAACAATTGAAGAGCCATCTGGGCCGTT  
+HWI-EAS443:3:85:1127:1032#0/1  
aaabaabbbbaaaa``a`aaa`a`aa`\_a`[\_`\_]a`X`YX  
@HWI-EAS443:3:85:1132:1857#0/1  
GTTGATTCCCACTAACTTGCAGGTCCTGTAGAATCTGTCC  
+HWI-EAS443:3:85:1132:1857#0/1  
a^bbbaX`]`¥bbbaabaaa`aaaa`baaba`aa`aaJU¥  
@HWI-EAS443:3:85:1164:1888#0/1  
TCCTCTTTGTTCAATTGATTCCATTACATCCTTTAAGAAAT  
+HWI-EAS443:3:85:1164:1888#0/1  
N]TT]¥V\_^b^Maabb``¥a^¥¥Y\_NUb[D[^R^`\_^a]\_  
@HWI-EAS443:3:85:1242:803#0/1  
TCCATCTGATACTAATAGCCCTACCTTTGATTGGGTTTGA  
+HWI-EAS443:3:85:1242:803#0/1  
aba`\_a^\_aa`V`]`]]]¥¥[Za]Y\_aaaZ¥¥ZZa]\_\_\_\_\_`  
@HWI-EAS443:3:85:1244:1329#0/1  
ACCACTACCTGAGGATAATGAACCAAGTGGGTATGCACAA  
+HWI-EAS443:3:85:1244:1329#0/1  
]b\_US]\_V][¥Q¥WZQ^\_]a\_]a[UF]\_a]`Y[[`\_]a¥  
@HWI-EAS443:3:85:1262:378#0/1  
GGTGGGATGGGCTCCAATCATCCGACGATTTTGCTCTCAT  
+HWI-EAS443:3:85:1262:378#0/1  
a`Vaaa\_aa`a`R`]`a`¥`\_¥¥`\_Qa¥`\_`\_`aW`^¥W\_¥  
@HWI-EAS443:3:85:1283:2028#0/1  
ACAAGCAGGAGTGGACAGATTCTACAGGACCTGCAAGTTA  
+HWI-EAS443:3:85:1283:2028#0/1  
aZ`XUa`XI`Z^^R]]R[[\_QYPU\_^Q\_RSLR[]]VGVR  
@HWI-EAS443:3:85:1286:430#0/1  
CAGTGATTGTGAAAGAAATCTCTGTGTCTTGTGAATTAGT  
+HWI-EAS443:3:85:1286:430#0/1  
ab¥X\_bbaa`b`a`\_ab^]`^baa``a¥^b`YTYX\_aa¥TT  
@HWI-EAS443:3:85:1286:515#0/1  
TGAAGAGCCATCTGGGCCGTTGCAGGTCCAAGGTCATTGT  
+HWI-EAS443:3:85:1286:515#0/1  
ababaaaaabaa`aa`b`\_a`\_a^^\_\_\_\_]`\_V\_\_a]\_V  
@HWI-EAS443:3:85:133:1247#0/1  
TGGTCTCCATCTGATACTAATAGCCCTACCTTTGATTGG  
+HWI-EAS443:3:85:133:1247#0/1  
\_]S\_ba\_\_\_\_a]]¥¥T^T^`^`ab^[S^`]^`¥ZX[ZUVSVX  
@HWI-EAS443:3:85:1357:1334#0/1  
GGGCTCCAATCATCCGACGATTTTGCTCTCATAGTGAATG  
+HWI-EAS443:3:85:1357:1334#0/1  
aX[[]]\_`a\_\_\_\_a\_\_`a]a]\_a`^a`\_X`]a^\_a^a]\_^`  
@HWI-EAS443:3:85:1455:1354#0/1  
CCTCCATCTGATACTAATAGCCCTACCTTTGATTGGGTTT

+HWI-EAS443:3:85:1455:1354#0/1  
aabbbaa\_\_aaba^bb`¥[`aaa¥`a`a`¥ba\_^a[  
@HWI-EAS443:3:85:146:576#0/1  
AGCTGATTCATTTACTCCAGACTCCAAAGCTGGGTAGC  
+HWI-EAS443:3:85:146:576#0/1  
]b[]UT[baa¥`abb`^X¥aaP]SZ\_`\_M[\_^a[^]`UV  
@HWI-EAS443:3:85:1479:554#0/1  
ATCCCACCCAGGAATATTTGAGAATTCATGCCTTAAAACA  
+HWI-EAS443:3:85:1479:554#0/1  
aaXYRbX`a]aa\_aa\_]`T]`a^Y^`¥^Pa\_a\_Y`Y\_  
@HWI-EAS443:3:85:1507:533#0/1  
ATGGGCTCCAATCATCCGACGATTTTGTCTCATAGTGAA  
+HWI-EAS443:3:85:1507:533#0/1  
VH\_Z¥ZM\_`a`aYaa^b\_^baaaa[aYaZ][a`aaXRUR  
@HWI-EAS443:3:85:154:656#0/1  
CATCAATCGGGTTGAGCTGGGGTGCACCAGTCTCTGTGTT  
+HWI-EAS443:3:85:154:656#0/1  
aa\_TZZ]a`^VP¥¥Y^]YXYTVFTX^PYYYYBBBBBBBBBB  
@HWI-EAS443:3:85:1550:765#0/1  
CCCTATTGTTCTTTGCGTGACCATCTTCTTGGTCATGTTG  
+HWI-EAS443:3:85:1550:765#0/1  
aabbbaabababbbab^aaaaaaaaa\_aaba`\_aaaaa  
@HWI-EAS443:3:85:1562:1447#0/1  
GGGCAATGAAAAGAAGGCCAAACTGGCAAATGTTGTGAGA  
+HWI-EAS443:3:85:1562:1447#0/1  
a]a\_P\_`\_WXRVNXYJVNX[RLY`UWWYIP]Y\_VLZZ`V  
@HWI-EAS443:3:85:1571:804#0/1  
ATGGAATCAATGAACAAAGAGGAAATAGAGATAACAACCC  
+HWI-EAS443:3:85:1571:804#0/1  
aaaba\_b`\_aab\_a\_a`\_]\_aa\_\_`\_`aaa`aa`\_`\_¥OS  
@HWI-EAS443:3:85:1604:1240#0/1  
GCTAATTTTAGCATGGAGCTACCCAGCTTTGGAGTGTCTG  
+HWI-EAS443:3:85:1604:1240#0/1  
`\_babbaabab`aaba\_a`baa^`\_\_``abaa¥`^b¥^a`  
@HWI-EAS443:3:85:1630:316#0/1  
CTCTCTTATTCAGTCTTTGTTTTTTCTTCCCTATTGTTCT  
+HWI-EAS443:3:85:1630:316#0/1  
a^`aaababa`VbXaab\_ab¥aba\_ababXbbbbba`bab  
@HWI-EAS443:3:85:164:202#0/1  
GGTCTCCTATATGAACTGCTAGGGAAAAATTTCTCGAATA  
+HWI-EAS443:3:85:164:202#0/1  
a\_[aaa^]¥\_]a]P¥```\_\_\_\_\_¥S¥\_]\_^`aX^^\_  
@HWI-EAS443:3:85:1657:1650#0/1  
TGGGTATGCACAAACAGACTGTGTTCTAGAGGCTATGGCT  
+HWI-EAS443:3:85:1657:1650#0/1  
a\_aa[a^a`\_\_aa`\_a^ZXa`\_`\_]`X^¥\_\_^ZX`\_GGPNY  
@HWI-EAS443:3:85:1666:1703#0/1  
CTCCATCTGATACTAATAGCCCTACCTTTGATTGGGTTTG  
+HWI-EAS443:3:85:1666:1703#0/1  
abbbb``bbbbbbb[aabba[aaba`babbb`a]H\_\_aba



@HWI-EAS443:3:85:1713:673#0/1  
ATGGTGTCTAGGGCCCGATTGATGCCAGGGTCGACTTCG  
+HWI-EAS443:3:85:1713:673#0/1  
aba`K`]aa\_]a`S]`a^UaaaZa^U¥]\_`XUU¥^S¥¥VT  
@HWI-EAS443:3:85:1715:330#0/1  
TGTC AATCCGACTCTACTTTTCCTAAAAATCCAGCGCAA  
+HWI-EAS443:3:85:1715:330#0/1  
aaa\_abaa\_a^^a\_aa^aaaa\_aaaa`aaWZ`aO\_Za\_  
@HWI-EAS443:3:85:1733:1528#0/1  
AGTAGGGGCAATGAAAAGAAGGCCAAACTGGCAAATGTT  
+HWI-EAS443:3:85:1733:1528#0/1  
aba\_a`a`a\_]a\_b¥`bbabaaaPYaaa^aa\_\_aaa`a\_a  
@HWI-EAS443:3:85:1772:788#0/1  
CAGTCATAAAGAGATTGATTCTGTAAACAATGCTGTGGTA  
+HWI-EAS443:3:85:1772:788#0/1  
^`aUa\_aaaa\_aa\_`a`a`a^ab^a\_a\_a`^^^\_a\_]¥[`  
@HWI-EAS443:3:85:212:756#0/1  
GATGGGCTCCAATCATCCGACGATTTTGCTCTCATAGTGA  
+HWI-EAS443:3:85:212:756#0/1  
]aZTQ^X`]XYXaaWQYY^]\_a`a]WW`[a`UYO[W[V^V  
@HWI-EAS443:3:85:246:820#0/1  
GTTGAGAATAGAACGATTCTTGGGAATCCAGGAATGT  
+HWI-EAS443:3:85:246:820#0/1  
`a\_¥¥^^\_aZW^^`\_\_^^`]^\_]^aaY]]ZXGZ]¥Y]a^  
@HWI-EAS443:3:85:256:1044#0/1  
GTTCTGTTTACTGTGTCCATGGTGTATCCTGTTCTGTTCTC  
+HWI-EAS443:3:85:256:1044#0/1  
a\_baaaabbaaaa`aaaaa`aX`^`aa\_aa\_\_aaa^)`^  
@HWI-EAS443:3:85:264:336#0/1  
ATTGATGCCAGGGTCGACTTCGAGTCTGGACGGATCAAGA  
+HWI-EAS443:3:85:264:336#0/1  
aa¥a`aa`[\_^^W`^^¥^\_a¥\_V^[\_`[[U][V^VZ[^  
@HWI-EAS443:3:85:267:1469#0/1  
ACATTATGGGTGCCATGCTCAGGATGTTTCTGAACCACTC  
+HWI-EAS443:3:85:267:1469#0/1  
aaa\_a]bbaa[aa]a\_aY\_aaa`]QYLY^a[X[^[aPPVX  
@HWI-EAS443:3:85:298:190#0/1  
CAGGAACAGGATACACCATGGACACAGTAAACAGAACACA  
+HWI-EAS443:3:85:298:190#0/1  
a\_¥^abaa`[ab`Z`¥aa^`¥aaa^\_X\_\_¥PTZU^Y\_Y\_  
@HWI-EAS443:3:85:30:277#0/1  
GATTGATGCCAGGGTCGACTTCGAGTCTGGACGGATCAAG  
+HWI-EAS443:3:85:30:277#0/1  
a\_a\_[¥]`a`^`\_¥FY\_UY]\_`\_¥]UZ]\_]Y\_]UVSS[]  
@HWI-EAS443:3:85:316:830#0/1  
TGAGAACATTATGGGTGCCATGCTCAGGATGTTTCTGAAC  
+HWI-EAS443:3:85:316:830#0/1  
Za¥`aa`¥¥b`^abb[``]Q]\_``]a\_J¥a\_aTa^XRTb  
@HWI-EAS443:3:85:328:384#0/1  
GGAGCATTTCGAAAAGCTTGAACAGTCTGGGCTCCCAGT



@HWI-EAS443:3:85:559:603#0/1  
TGTCATCCGACTCTACTTTTCCTAAAAATCCAGCGCAA  
+HWI-EAS443:3:85:559:603#0/1  
a^`babaaaa`aa`]\_aaaa`abbaaa\_`aaa`a`^  
@HWI-EAS443:3:85:561:2039#0/1  
CTTTCCTTGAAGAATCCCACCCAGGAATTTTGAGAATTC  
+HWI-EAS443:3:85:561:2039#0/1  
Ybbb^aaa\_abba^b\_^a^abbb\_Y`]`aaa`bba]a`b  
@HWI-EAS443:3:85:600:2007#0/1  
GGTGCTTATGGCATTTCGCTGGAATTTTAGGAAAAGT  
+HWI-EAS443:3:85:600:2007#0/1  
a`\_b`aaZPY^`^]SZaY[[ZH\_YS¥U^a\_\_\_\_\_XX^[Z¥Z  
@HWI-EAS443:3:85:610:428#0/1  
GAAGTACTTCAGGTCAATGCTTGCTAGCATTCTGCTGGT  
+HWI-EAS443:3:85:610:428#0/1  
\_\_\_\_P¥bbbaaaaaabbabaabbaaab`aa``aaaa`\_Z  
@HWI-EAS443:3:85:612:387#0/1  
GACGGATCAAGAAAGAAGAGTTCTCTGAGATCATGAAGAT  
+HWI-EAS443:3:85:612:387#0/1  
aa`ab]]ba¥aV\_aaa`b^b^aaaab`aa\_a\_`abaa`a\_  
@HWI-EAS443:3:85:619:183#0/1  
TGATGCCAGGGTCGACTTCGAGTCTGGACGGATCAAGAAA  
+HWI-EAS443:3:85:619:183#0/1  
ab\_aaaa]\_aWa`^^`\_`Z`Z\_`\_`\_`^`[ZS¥\_\_V\_[  
@HWI-EAS443:3:85:621:679#0/1  
GCCCATCCCACCAGTATATTGTCTTGGTGTATTTCTTTTG  
+HWI-EAS443:3:85:621:679#0/1  
aaaa\_abb`a`baa\_`aaa`aaaababZ[]]\_aa`aaa`a  
@HWI-EAS443:3:85:645:1722#0/1  
TTTTGTCCAAGATTCAGTATCGAGACTCCCAAGACCGTAC  
+HWI-EAS443:3:85:645:1722#0/1  
^^^^`]bbb¥\_aY^aZab`aa^]TZP\_Ya`aa\_]\_QZ\_  
@HWI-EAS443:3:85:670:1446#0/1  
AGGGATTCAGGGGATTACAAAGTCTTCCCCGATAATCATC  
+HWI-EAS443:3:85:670:1446#0/1  
[[J[aaU^a`ba`aaaaaa[aaaa\_Z]\_`\_`a\_`[`[  
@HWI-EAS443:3:85:702:868#0/1  
CAGGAATATTTGAGAATTCATGCCTTGAAACAATGGAAGT  
+HWI-EAS443:3:85:702:868#0/1  
a`\_\_baaaaaaab`a`a`aa`aaa\_T`ab`aaa`¥^Y  
@HWI-EAS443:3:85:706:1302#0/1  
GGGTGCCATGCTCAGGATGTTTCTGAACCACTCGGGTTGA  
+HWI-EAS443:3:85:706:1302#0/1  
¥\_^`aa¥¥W^\_T¥^`]\_Z]T`Za\_¥\_\_^\_WW]`\_\_\_\_YY^]  
@HWI-EAS443:3:85:720:216#0/1  
GGAAAGGGTACATGTTTCGAGAGTAAAAGAATGAAGATTCG  
+HWI-EAS443:3:85:720:216#0/1  
^aaaV\_^ZL¥Z¥X\_]U]a¥\_Za\_a¥]Z]\_``]ZY\_\_^[¥a  
@HWI-EAS443:3:85:730:993#0/1  
ACAGATGTACCAGAAGTGCTGCAATCTATTCGAGAAATTT

+HWI-EAS443:3:85:730:993#0/1  
ab`Y#a[^a\_^]^[V^R\_`\_]\_\_aaa`aa`\_`aaaa`\_\_]\_  
@HWI-EAS443:3:85:769:132#0/1  
ATCTGATACTAATAGCCCTACCTTTGATTGGGTTTGATCC  
+HWI-EAS443:3:85:769:132#0/1  
aaaa`aa\_a`aa`\_\_\_\_`^Z\_`^`\_]\_^\_]YY]^^^]X  
@HWI-EAS443:3:85:776:612#0/1  
GTCCACTCCTGCTTGTATTCCCTCATGGTTTGGTGCATTC  
+HWI-EAS443:3:85:776:612#0/1  
\_Xaabbbbb`abbb¥aaa`]¥aa`ba`¥aa`a^b^[`a`  
@HWI-EAS443:3:85:784:1610#0/1  
TTACTGTGCCATGGTGTATCCTGTTCCCTGTTCCATGGCT  
+HWI-EAS443:3:85:784:1610#0/1  
\_]\_`^`\_]\_\_a]aaXL]Y\_`\_aa^^\_\_aa\_``\_`\_`\_`¥`  
@HWI-EAS443:3:85:787:689#0/1  
TTGAGGATGAACAGATGTACCAGAAGTGCTGCAATCTATT  
+HWI-EAS443:3:85:787:689#0/1  
abbaa`a``aaaaaaaa\_a`[`aa`a]a\_`a`^`\_`aa`^`  
@HWI-EAS443:3:85:832:248#0/1  
CAAGAATCCCCTTTGGCTTGTGTTGAGAATAGAACGATT  
+HWI-EAS443:3:85:832:248#0/1  
abbbabaaaa`\_aabba`aaa`^aa\_`aa`\_a\_Va]\_\_  
@HWI-EAS443:3:85:891:139#0/1  
CCCCGATTGATGCCAGGGTCGACTTCGAGTCTGGACGGAT  
+HWI-EAS443:3:85:891:139#0/1  
aabbbbaa\_]`abaaaa^M]aa`a`a\_a\_`aa`[``[[  
@HWI-EAS443:3:85:891:451#0/1  
ATTTGCGAAAAGCTTGAACAGTCTGGGCTCCCAGTAGGGG  
+HWI-EAS443:3:85:891:451#0/1  
aa^abbbbbZa`aabaaaa\_aaaaa`a\_`[a¥aa`aa  
@HWI-EAS443:3:85:961:1735#0/1  
GAACAACATGATAACAATGACCTTGGACCTGCAACGGCC  
+HWI-EAS443:3:85:961:1735#0/1  
ababbbbaaaa`\_a]^aba`baa\_``a`Z`aaa`aYa\_a\_  
@HWI-EAS443:3:86:1014:392#0/1  
CCTCCATCTGATACTAATAGCCCTACCTTTGATTGGGTTT  
+HWI-EAS443:3:86:1014:392#0/1  
aaaabbbba`^`a^¥W^\_aba¥V^]\_aaaba`WV`baU^[  
@HWI-EAS443:3:86:1016:1052#0/1  
GTTGATTCATTGAAGTACTTCAGGTCAATGCTTGCTAGCA  
+HWI-EAS443:3:86:1016:1052#0/1  
aabbbbaabaaaaab\_aaaa`\_aa\_\_aaaa^aaa\_aa`a`  
@HWI-EAS443:3:86:1041:1262#0/1  
TCTGGCCGTTGCAGGTCCAAGGTCATTGTTTATCATGTT  
+HWI-EAS443:3:86:1041:1262#0/1  
a\_\_V]aS`ba[U`Wba\_b¥¥V¥RN`a`aZO`a``Q\_]`J¥  
@HWI-EAS443:3:86:1056:772#0/1  
CAGATACACATATAGGTGCCATAGGGGAGACACAAATT  
+HWI-EAS443:3:86:1056:772#0/1  
ab^\_aab`abbbbbbbabaa\_bbbba\_abaabab`aba

@HWI-EAS443:3:86:1059:1957#0/1  
GAGCTACCCAGCTTTGGAGTGTCTGGAGTAAATGAATCAG  
+HWI-EAS443:3:86:1059:1957#0/1  
a¥aa`a\_a\_a`¥aa`\_^`Wq]\_aa\_]aY``\_\_[U\_^]`^`  
@HWI-EAS443:3:86:1068:680#0/1  
AAAAATTCCAGCGCAAATGCCATAAGCACCATTCCT  
+HWI-EAS443:3:86:1068:680#0/1  
abaaaaa\_aaa^a`aaa```\_^`a\_\_\_\_\_]`^`]]a^RZZ`  
@HWI-EAS443:3:86:1106:1804#0/1  
GTTGTTATCTCTATTTCTCTTTGTTTCATTGATTCCATTA  
+HWI-EAS443:3:86:1106:1804#0/1  
]\_YYZ]U\_SZLWYaaa¥[ ]\_\_`aa¥]J`Z^[\_aWfQ]^`^`  
@HWI-EAS443:3:86:1122:411#0/1  
TGGAGTGTCTGGAGTAAATGAATCAGCTGACATGAGTATT  
+HWI-EAS443:3:86:1122:411#0/1  
aa`a]¥^^`a]aI^[\_a\_V[^^^`^^`ZY]\_Y¥[[TaZ[Z^  
@HWI-EAS443:3:86:112:321#0/1  
AAAAATTCCAGCGCAAATGCCATAAGCACCATTCCT  
+HWI-EAS443:3:86:112:321#0/1  
abaa`a\_aa^`````^T[\_\_\_^^`^\_]`¥X^\_^]Y]ZWZ  
@HWI-EAS443:3:86:1153:1322#0/1  
ATTTGTGGCTAATTTTAGCATGGAGCTACCCAGCTTTGGA  
+HWI-EAS443:3:86:1153:1322#0/1  
`bbb^T[aZ[\_b\_bb\_X]a]]`R^¥ZQINSHXWYaWZPZW  
@HWI-EAS443:3:86:1166:135#0/1  
GAAAAATTTCTCGAATAGATTGCAGCACTTCTGGTACATC  
+HWI-EAS443:3:86:1166:135#0/1  
S\_\_a[¥[`a\_abb]U]ba¥Xa]I\_`X]Y^[\_GXb]aa`aYG  
@HWI-EAS443:3:86:116:1487#0/1  
GGCTTGTTGAGAATAGAACGATTCCTCTTGGGAATCCA  
+HWI-EAS443:3:86:116:1487#0/1  
¥bbbbYzab]abaa^b`baaaa\_`aa`aaaaWa`][\_\_\_\_  
@HWI-EAS443:3:86:1170:742#0/1  
GGTCTTGGGAGTCTCGATACTGAATCTTGGACAAAAGAAA  
+HWI-EAS443:3:86:1170:742#0/1  
\_Z[aabba```\_\_^aaab`abaab`baa¥a[abaaaaba  
@HWI-EAS443:3:86:1177:1001#0/1  
GAACAATTGAAGAGCCATCTGGGCCGTTGCAGTCCAAGG  
+HWI-EAS443:3:86:1177:1001#0/1  
Z¥¥OV^\_a\_`\_^WZL\_aH]R]aHU^SXVU``[[a]\_LTX  
@HWI-EAS443:3:86:1235:904#0/1  
AAGAGAGGCTATCTAATAAGAGCACTGACATTAATACGA  
+HWI-EAS443:3:86:1235:904#0/1  
`abbaabaab\_ZJ¥X]^`^¥^\_PZP`WYFUPYY\_\_L^K[W  
@HWI-EAS443:3:86:1359:658#0/1  
GGGCTCCAATCATCCGACGATTTTGCTCTCATAGTGAATG  
+HWI-EAS443:3:86:1359:658#0/1  
]J[[¥a]aa]^`\_a\_\_`^[\_¥\_\_\_\_XFZ\_¥\_\_\_\_^QW^^[^^^  
@HWI-EAS443:3:86:1376:669#0/1  
TGTGGCTAATTTTAGCATGGAGCTACCCAGCTTTGGAGTG

+HWI-EAS443:3:86:1376:669#0/1  
aa`b\_aaabbabb]`[`a]a¥aYa¥]Ra` `^aaaRaW\_Z\_  
@HWI-EAS443:3:86:1470:1557#0/1  
CATGGAGCTACCCAGCTTTGGAGTGTCTGGAGTAAATGAA  
+HWI-EAS443:3:86:1470:1557#0/1  
`b`a^bb\_ba]`aZb`bba`a`^`aa\_baa`a][baaa\_`  
@HWI-EAS443:3:86:1531:1528#0/1  
GCGCTGGAATTTTTAGGAAAAGTAGAGTCGGATTGACATC  
+HWI-EAS443:3:86:1531:1528#0/1  
\_P\_¥SQTVWZa\_]aaaa`\_R¥WX\_` `^]PZWYa^\_BBBB  
@HWI-EAS443:3:86:1540:1783#0/1  
GATTCTTCAAGGAAAGCCATAGCCTCTAGAACACAGTCTG  
+HWI-EAS443:3:86:1540:1783#0/1  
ab\_a`bbabbbaaab`\_aaaa0a`aa\_`a`a^^\_a]^` `^`  
@HWI-EAS443:3:86:1566:744#0/1  
ATCCCACCCAGGAATATTTGAGAATTCATGCCTTGAACA  
+HWI-EAS443:3:86:1566:744#0/1  
`baa^aV[ `aWDXaa\_baXV]¥a^]T^`aaTF¥a\_a^`Za  
@HWI-EAS443:3:86:159:1596#0/1  
GACGGATCAAGAAAGAAGAGTTCTCTGAGATCATGAAGAT  
+HWI-EAS443:3:86:159:1596#0/1  
^V\_W[\_a^T\_`a¥Z[\_IT\_`Y`a` `^\_a\_\_Y^a` [YHY]Z  
@HWI-EAS443:3:86:1689:1237#0/1  
GAACAATTGAAGAGCCATCTGGGCCGTTGCAGGTCCAAGG  
+HWI-EAS443:3:86:1689:1237#0/1  
aa\_\_`bba¥aaaaaY^bb]`a`a^Wa[aa]\_\_\_[Q\_]\_\_\_N  
@HWI-EAS443:3:86:179:397#0/1  
AAAAATTCCAGCGCAAATGCCATAAGCACCATTCCT  
+HWI-EAS443:3:86:179:397#0/1  
abb^X`aa`aaaaa\_R`a` `^\_a`a^\_]\_a\_`¥\_]`^]  
@HWI-EAS443:3:86:184:1596#0/1  
CGACGATTTTGCTCTCATAGTGAATGCACCAAACCATGAG  
+HWI-EAS443:3:86:184:1596#0/1  
]\_ZXTZa`a\_[`W\_]W`\_KZZXZZX\_T\_¥a`WJV\_ZW]  
@HWI-EAS443:3:86:216:991#0/1  
GATTCCATTACATCCTTTAAGAAATCTATTAGCCTTCCTG  
+HWI-EAS443:3:86:216:991#0/1  
U`¥YMO\_¥\_Z[^YSHUYQ\_`a\_[\_¥0]b^`a`WQR^¥G\_b  
@HWI-EAS443:3:86:288:1809#0/1  
GTTCTTTATCACTGTTACTCCAATACTCATGTCAGCTGAT  
+HWI-EAS443:3:86:288:1809#0/1  
\_PXZabaaa`a^a\_¥0]\_^Yab¥`\_^Ya\_]T\_`Z^\_Y^W  
@HWI-EAS443:3:86:293:1145#0/1  
GGGCTCCAATCATCCGACGATTTTGCTCTCATAGTGAATG  
+HWI-EAS443:3:86:293:1145#0/1  
ab`b`aaba]a]¥baaaaa\_` ]`\_a` `a]^a` \_\_Ra\_\_\_\_`  
@HWI-EAS443:3:86:293:727#0/1  
CGGTCTTGGGAGTCTCGATACTGAATCTTGGACAAAAGAA  
+HWI-EAS443:3:86:293:727#0/1  
aaa¥babababaabbaaaaa^abaaa¥aba`\_a` `a\_a`a`a

@HWI-EAS443:3:86:333:923#0/1  
GGGAGCTAATGGATGATGATTATCGGGGAAGACTTTGTAA  
+HWI-EAS443:3:86:333:923#0/1  
aa`a`X`Yaa\_`[^¥aa[^]YZ]^\_]Z^\_X^Y\_^YR^Z  
@HWI-EAS443:3:86:368:355#0/1  
AAAAATTCCAGCGAAAATGCCATAAGCACCACATTCCCT  
+HWI-EAS443:3:86:368:355#0/1  
aa¥¥\_`]Z¥TaYZZP^^]TSVS`\_YWUW^\_]^\_a[OMHP¥  
@HWI-EAS443:3:86:375:1088#0/1  
GGGCTCCAATCATCCGACGATTTTGCTCTCATAGTGAATG  
+HWI-EAS443:3:86:375:1088#0/1  
aaababbbbaabaabaab^aaaab`abaaaaa`a`aaa  
@HWI-EAS443:3:86:376:77#0/1  
GTAAGAGACAACATGACCAAGAAGATGGTCACGCAAAGAA  
+HWI-EAS443:3:86:376:77#0/1  
a^`aaa`\_`\_`\_a`\_`\_Z`\_`\_`^`\_Y^]`\_¥]S]^XZ  
@HWI-EAS443:3:86:433:1271#0/1  
GATGCCAGGGTCGACTTCGAGTCTGGACGGATCAAGAAAG  
+HWI-EAS443:3:86:433:1271#0/1  
aaaab^aaaa\_b\_a\_aaa^ba`aaaaaaaa[X`^aa\_`a]  
@HWI-EAS443:3:86:440:1449#0/1  
CGAAAAGCTTGAACAGTCTGGGCTCCCAGTAGGGGGCAAT  
+HWI-EAS443:3:86:440:1449#0/1  
ab[[ababa]a\_W`W\_U¥aaaaa`X`R`Z¥]a\_aX^X\_]`  
@HWI-EAS443:3:86:475:326#0/1  
CTCTACTTTTCCTAAAAATTCCAGCGAAAATGCCATAAG  
+HWI-EAS443:3:86:475:326#0/1  
^^\_`WT`b`\_`\_]a\_`^\_]\_\_\_\_`^b^a`^^`YW^^\_Z]]`  
@HWI-EAS443:3:86:480:1483#0/1  
TTCATATGAGAGCAAATCGTCCGATGATTGGAGCCCAT  
+HWI-EAS443:3:86:480:1483#0/1  
aaaaaaaa\_W`a`aaaaa`^a\_\_`\_`a^\_]\_\_\_\_]^`\_`  
@HWI-EAS443:3:86:497:1069#0/1  
TGGCTCTTCAATTGTTTCATCAAAGACTACAGATACACATA  
+HWI-EAS443:3:86:497:1069#0/1  
a^]YY`YL¥UUUUU[^`^ZSLS[]¥]USU¥OO]PR[\_I^`  
@HWI-EAS443:3:86:524:1426#0/1  
GGTAATGCCAGCCCATGGTCCAGCCAAAAGCATGGAATAT  
+HWI-EAS443:3:86:524:1426#0/1  
aa`abaabaabaabbbaV\_aaa`abba`aaa`\_`aaaba  
@HWI-EAS443:3:86:539:21#0/1  
CAGTCATAAAGAGATTGATTCTGTAACAATGCTGTGGTA  
+HWI-EAS443:3:86:539:21#0/1  
a`baabb`aababababaaaabb\_aaa\_aa`a`aa¥b^Xa  
@HWI-EAS443:3:86:543:1474#0/1  
GAAGAATCCCACCCAGGAATATTTGAGAATTCATGCCTTG  
+HWI-EAS443:3:86:543:1474#0/1  
aba]abaT^aa\_]`\_`VZP`Z`a¥aaa`aa[^`^^`^U^\_\_`  
@HWI-EAS443:3:86:556:280#0/1  
ATGGAATCAATGAACAAAGAGGAAATAGAGATAACAACCC

+HWI-EAS443:3:86:556:280#0/1  
a`]a^a`a\_`ab`a`a\_W¥`a^NV]aaa`aaa\_^Sa`YVY  
@HWI-EAS443:3:86:605:778#0/1  
GCTGTGGTAATGCCAGCCCATGGTCCAGCCAAAAGCATGG  
+HWI-EAS443:3:86:605:778#0/1  
aaZaVaa^]Z^W^\_Q¥aa`P¥U`N\_Z^[UZZ^\_\_[P^¥\_¥  
@HWI-EAS443:3:86:656:1931#0/1  
CAATCATCCGACGATTTTGCTCTCATAGTGAATGCACCAA  
+HWI-EAS443:3:86:656:1931#0/1  
R`bY`b[ab\_`bbbbbb]abba`bbba\_ab`bbbabbbW  
@HWI-EAS443:3:86:662:1252#0/1  
GAACAGGATACCCATGGACACAGTAAACAGAACACACCA  
+HWI-EAS443:3:86:662:1252#0/1  
aaaab`aa``a\_aa`aa\_[a\_```[a`\_Z`\_`aaaa\_]`  
@HWI-EAS443:3:86:68:278#0/1  
AGGCAAGTTAAAAAGAAGGGCTATCGCAACACCTGGGATG  
+HWI-EAS443:3:86:68:278#0/1  
abbaa`baaa`¥abaaaa`a^0^`a`a``a]\_^[[^]]`  
@HWI-EAS443:3:86:709:409#0/1  
GAAGTACTTCAGGTCAATGCTTGCTAGCATTCTGCTGGT  
+HWI-EAS443:3:86:709:409#0/1  
`b`\_`aaaaba`b`aaaabaabaabba\_a``aaaa`aa]  
@HWI-EAS443:3:86:723:1001#0/1  
CCAGGGTCTGACTTCGAGTCTGGACGGATCAAGAAAGAAGA  
+HWI-EAS443:3:86:723:1001#0/1  
Z\_\_\_\_`TaZWZ¥Ua\_0\_U`]a\_a`aa^UU^[`^aaa\_ZZ`  
@HWI-EAS443:3:86:726:396#0/1  
ATCTCTATTTCTCTTTGTTTCATTGATTCCATTACATCCT  
+HWI-EAS443:3:86:726:396#0/1  
Xbb`bbbb`ababbabaabba\_`bbbabbaabbbbbbbbbb  
@HWI-EAS443:3:86:738:665#0/1  
ACTGAATCTTGACAAAAGAAATACACCAAGACAATATAC  
+HWI-EAS443:3:86:738:665#0/1  
\_a`bba]abbbbaabaaw\_b`a]baaa^b\_bYa`ab\_aa\_  
@HWI-EAS443:3:86:752:65#0/1  
GAACAACATGATAACAATGACCTTGACCTGCAACGGCC  
+HWI-EAS443:3:86:752:65#0/1  
abb`bb`bababbaabaaa`a`aaa\_L[``a\_aa\_a^¥[  
@HWI-EAS443:3:86:811:1159#0/1  
GAACAATTGAAGAGCCATCTGGGCCGTTGCAGGTCCAAGG  
+HWI-EAS443:3:86:811:1159#0/1  
]Z¥¥aabb`[`Xaa`Y]a\_`aV``[\_\_aV^^ZXUZ[X[]`\_  
@HWI-EAS443:3:86:815:1418#0/1  
ATGATGCCGTTGCAACTACACATTCCTGGATTCCCAAGAG  
+HWI-EAS443:3:86:815:1418#0/1  
`ZV¥\_`a`aaa`]aa^`Xa`aa]Ya`a\_`]`^]]aY¥\_\_  
@HWI-EAS443:3:86:891:977#0/1  
GCTAATTTTAGCATGGAGCTACCCAGCTTTGGAGTGTCTG  
+HWI-EAS443:3:86:891:977#0/1  
aa]\_]`\_aa`]`^`aaX`aY^`a\_`]`[W```]WZ`W\_`TaY



@HWI-EAS443:3:86:894:359#0/1  
GGGGCAATGAAAAGAAGGCCAAACTGGCAAATGTTGTGAG  
+HWI-EAS443:3:86:894:359#0/1  
abaaaa`b`\_aaab\_`a`^`a`a`a`]`\_\_aaV\_a]`]`  
@HWI-EAS443:3:86:915:893#0/1  
AAAAATTCCAGCGCAAATGCCATAAGCACCATTCCT  
+HWI-EAS443:3:86:915:893#0/1  
X\_^`¥WV^\_UbbbbZ^`b`Y^¥a^babTX\_\_\_\_ba`T\_  
@HWI-EAS443:3:86:941:452#0/1  
GGTGCATTCACTATGAGAGCAAATCGTCGGATGATTGGA  
+HWI-EAS443:3:86:941:452#0/1  
a^D¥]abbbaaa^^a[b^XY]Z\_aaa]YZ^\_[a^a`]Y¥  
@HWI-EAS443:3:87:1021:181#0/1  
GACTCATTAGCTGTTAGGCCATTCGATCTAAAGACTTCTA  
+HWI-EAS443:3:87:1021:181#0/1  
aaaaabaaa¥a`Z`\_aa^U^\_\_TVS[S`Y][XTPY`W\_¥  
@HWI-EAS443:3:87:1024:1181#0/1  
GAGTGGTTCAGAAACATCCTGAGCATGGCACCCATAATGT  
+HWI-EAS443:3:87:1024:1181#0/1  
abb`bbab\_bbabaababaab`bbba¥D^baaabbaab`  
@HWI-EAS443:3:87:1055:1488#0/1  
ATAGCCTCTAGAACACAGTCTGTTTGTGCATACCCACTTG  
+HWI-EAS443:3:87:1055:1488#0/1  
aaaa]`ba``[\_`a``baU]`aUZYGWXYVY\_LZTY\_`]R  
@HWI-EAS443:3:87:1095:990#0/1  
GACAGATTCTACAGGACCTGCAAGTTAGTGGGAATCAACA  
+HWI-EAS443:3:87:1095:990#0/1  
\_ba]b]abaab[aaa¥]a\_aaa]a`^[bUaaa`a`\_\_a¥`  
@HWI-EAS443:3:87:1099:465#0/1  
GCAGATTAGAGTTTCGTATACTTTGTTGAACTTTAGCT  
+HWI-EAS443:3:87:1099:465#0/1  
`YJ`U[[]¥Ua`WZZZ`[\_[G]\_WxYRVW[W¥]WPVYFQ  
@HWI-EAS443:3:87:1143:1092#0/1  
CTAACTTGACAGTCTGTAGAATCTGTCCACTCTGCTTG  
+HWI-EAS443:3:87:1143:1092#0/1  
\_ababbb`bbbbabbbbabbbbaabUabbaaaaabab\_Y  
@HWI-EAS443:3:87:1151:486#0/1  
GCTCCAATCATCCGACGATTTTGCTCTCATAGTGAATGCA  
+HWI-EAS443:3:87:1151:486#0/1  
aa]Y[[]`aaU\_a¥V\_a`\_¥a\_\_Z¥\_a[[]`\_`\_]\_ZO[  
@HWI-EAS443:3:87:1187:764#0/1  
GTCCTCCATCTGATACTAATAGCCCTACCTTTGATTGGGT  
+HWI-EAS443:3:87:1187:764#0/1  
aX¥U[[]`\_`\_a\_] [YY\_V¥\_]TZ`]\_]¥a\_^ZZ]]\_]VY  
@HWI-EAS443:3:87:118:668#0/1  
AAACATCCTGAGCATGGCACCCATAATGTTCTCAAACAAA  
+HWI-EAS443:3:87:118:668#0/1  
aaaaaaaaaaaa`aa`Yaa\_a\_\_aa`a]^`\_\_[G[^^^]  
@HWI-EAS443:3:87:1217:520#0/1  
CAGATGGAGGACCAAACCTTATACAATATACGGAATCTTCA



@HWI-EAS443:3:87:1522:313#0/1  
AACCGGCAGCAACTGCATTGGCCAACACCATAGAAAGTCTT  
+HWI-EAS443:3:87:1522:313#0/1  
`b]]^`ba\_aa]aa\_aa\_\_`]]`a¥\_UY\_\_`\_\_\_\_]Y^\_  
@HWI-EAS443:3:87:1550:1149#0/1  
GTCTGGAGTAAATGAATCAGCTGACATGAGTATTGGAGTA  
+HWI-EAS443:3:87:1550:1149#0/1  
[D[OZYPZYZ`YP\_\_GRU[WQPVX¥¥YRMX^Y[ZZUMXUW  
@HWI-EAS443:3:87:1570:1211#0/1  
CCCCTTGGTTCATTATCCTCAGGTAGTGGTCCATCAATC  
+HWI-EAS443:3:87:1570:1211#0/1  
\_^\_a]`\_¥\_¥Yabbb`T`abbaV]^aaaUEY^`Xa\_]^  
@HWI-EAS443:3:87:1627:1504#0/1  
GACGGATCAAGAAAGAAGAGTTCTCTGAGATCATGAAGAT  
+HWI-EAS443:3:87:1627:1504#0/1  
aa]aaaa^aaa¥aaaaa`aa\_a\_aYaa`adWN\_a``\_\_\_\_`  
@HWI-EAS443:3:87:163:1622#0/1  
AAAAATTCCAGCGCAAATGCCATAAGCACCATTCCT  
+HWI-EAS443:3:87:163:1622#0/1  
a\_]aaa`a``\_\_\_\_aYQZ]^\_\_a`\_Y^a^\_\_`\_\_Z\_¥¥]  
@HWI-EAS443:3:87:1672:1854#0/1  
CGGATCAAGAAAGAAGAGTTCTCTGAGATCATGAAGATCT  
+HWI-EAS443:3:87:1672:1854#0/1  
\_aba`\_bbbab\_aab^abab]^`aaaa`\_a`a^aaa¥aaZa  
@HWI-EAS443:3:87:1706:198#0/1  
CAGGAATATTTGAGAATTCATGCCTTGAAACAATGGAAGT  
+HWI-EAS443:3:87:1706:198#0/1  
aWTZV^\_¥ba`Z]Z`Sb^D^\_`^U^¥`L[NFXI\_¥S]\_SW  
@HWI-EAS443:3:87:1752:1213#0/1  
AATAGAGATAACAACCCACTTTCAAAGAAAAAGGAGAGTA  
+HWI-EAS443:3:87:1752:1213#0/1  
ab¥¥¥]\_b^`bab`a^Y`aa`^a¥S¥```^`a\_¥\_[\_a¥^  
@HWI-EAS443:3:87:200:298#0/1  
TGCCAGGGTCGACTTCGAGTCTGGACGGATCAAGAAAGAA  
+HWI-EAS443:3:87:200:298#0/1  
abbbbbbb\_bbbbbbabaaaabbaa`baaaabaabaaaa  
@HWI-EAS443:3:87:213:402#0/1  
GTCCTCCATCTGATACTAATAGCCCTACCTTTGATTGGGT  
+HWI-EAS443:3:87:213:402#0/1  
aaaa`aa`\_a\_a`aaa`a`\_a`\_`^\_\_`\_\_]^`^\_Y^\_`YX  
@HWI-EAS443:3:87:253:1733#0/1  
TTCCAGTCTGGACGGATCAAGAAAGAAGAGTTCTCTGAGA  
+HWI-EAS443:3:87:253:1733#0/1  
V^¥][W^a¥\_Q\_`¥``ZU\_`aZ`^D^X¥[Y]ZXVXP[US\_  
@HWI-EAS443:3:87:31:246#0/1  
CCTGCTTGATTCCCTCATGGTTTGGTGCATTCACTATGA  
+HWI-EAS443:3:87:31:246#0/1  
W`^\_\_Z\_¥\_U`a¥¥XXUVX^^G^¥OXL\_T¥LHQMT]^`SQ  
@HWI-EAS443:3:87:384:1315#0/1  
TTCATTATCCTCAGGTAGTGGTCCATCAATCGGGTTGAGC



@HWI-EAS443:3:87:673:620#0/1  
GGGTGCCATGCTCAGGATGTTTCTGAACCACTCGGGTTGA  
+HWI-EAS443:3:87:673:620#0/1  
`baVabbbabaaa\_baa``aaaa`aaaa`\_abaa]`a]  
@HWI-EAS443:3:87:712:69#0/1  
GGATGATGATTATCGGGGAAGACTTTGTAATCCCCTGAAT  
+HWI-EAS443:3:87:712:69#0/1  
ababbaabbbbab`ba`a^a`a`abaaaaa[\_^\_aa\_\_a  
@HWI-EAS443:3:87:742:1477#0/1  
GCTTGTGTTGAGAATAGAACGATTCTTCTTGGGAATCCAG  
+HWI-EAS443:3:87:742:1477#0/1  
`Y\_V\_XYVLR`]\_YZW¥XV[QWaa`[]ZYOTMQQT¥FY\_  
@HWI-EAS443:3:87:746:383#0/1  
CAGTGATTGTGAAAGAAATCTCTGTGTCTTGTGAATTAGT  
+HWI-EAS443:3:87:746:383#0/1  
^`^Vba`Vbbbabbaaa`bbbaZ]baa`aa^¥`aab`bW  
@HWI-EAS443:3:87:749:1130#0/1  
CAATGACCTTGACCTGCAACGCCAGATGGCTCTTCAA  
+HWI-EAS443:3:87:749:1130#0/1  
^[bba[ZW^\_a[bb]b[aba[bbS````V[R[^\_b^aa\_  
@HWI-EAS443:3:87:826:318#0/1  
ACCAGTCTCTGTGTTTGTCTGCTCCACTTCCCTTTTCTGAG  
+HWI-EAS443:3:87:826:318#0/1  
a]a`]Y`aaa`Zb¥¥aaQTLW]S]¥Y\_\_`¥Z`\_ZT[WW^  
@HWI-EAS443:3:87:83:232#0/1  
TGATAAAGAACAACATGATAAACAATGACCTTGACCTGC  
+HWI-EAS443:3:87:83:232#0/1  
abaaa`bbabab]aaaa`aa\_a`a\_aaY\_\_a\_a^\_\_]\_^\_  
@HWI-EAS443:3:87:870:310#0/1  
GACTAGGGAAAGGGTACATGTTTCGAGAGTAAAAGAAATGAA  
+HWI-EAS443:3:87:870:310#0/1  
abababbbbbbbaba`babbbbaa`babab`baaaabaaaaa  
@HWI-EAS443:3:87:905:836#0/1  
GCGAAAAGCTTGAACAGTCTGGGCTCCCAGTAGGGGGCAA  
+HWI-EAS443:3:87:905:836#0/1  
abababbbbaabaaaaaaaabaa`a^a``b^^a``aa`\_a  
@HWI-EAS443:3:87:921:1664#0/1  
GATCCGTCCAGACTCGAAGTCGACCCTGGCATCAATCCGG  
+HWI-EAS443:3:87:921:1664#0/1  
`a\_``^``\_aaY\_aa`aa^W`\_a`a`]`¥^`\_`\_`Va¥^¥  
@HWI-EAS443:3:87:927:1691#0/1  
GTCTGGAGTAAATGAATCAGCTGACATGAGTATTGGAGTA  
+HWI-EAS443:3:87:927:1691#0/1  
aaaba¥`b\_bbaabaa`a\_^a`a\_a\_aa`[\_a^\_```Va  
@HWI-EAS443:3:87:941:1348#0/1  
ATAAAGAACAACATGATAAACAATGACCTTGACCTGCAA  
+HWI-EAS443:3:87:941:1348#0/1  
\_baa`¥bbbb`a`\_aab`aabbba`ab^aa\_^`\_\_a`\_  
@HWI-EAS443:3:87:944:1258#0/1  
CCCTAGTCTTGCCATTTTGTGTTGAGAACATTATGGGTGCC

+HWI-EAS443:3:87:944:1258#0/1  
a\_\_\_ZXP^\_aZVWUY^b`aUZA¥`a\_\_a¥\_^aa¥]¥P\_\_W  
@HWI-EAS443:3:87:964:467#0/1  
CAGATTAGAGGTTTCGTATACTTTGTTGAACTTTAGCTA  
+HWI-EAS443:3:87:964:467#0/1  
]b\_\_b`^Y\_bbZbbbabbbbabba^aa\_\_`Y`bba`b\_a`  
@HWI-EAS443:3:87:96:663#0/1  
GAACAACATGATAACAATGACCTTGGACCTGCAACGGCC  
+HWI-EAS443:3:87:96:663#0/1  
^a`^`^`ZJ]`\_^a]aaX`a^]a\_a\_¥Zabaaa\_Y^^^`  
@HWI-EAS443:3:87:998:742#0/1  
CAAGAATCCCCTTTGGCTTGTGTTGAGAATAGAACGATT  
+HWI-EAS443:3:87:998:742#0/1  
abb`a^bbba\_aabbab\_bb\_aaaaXSaaaa\_aa`¥`^  
@HWI-EAS443:3:88:1056:1817#0/1  
GTTGATCCCACTAACTTGCAGGTCCTGTAGAATCTGTCC  
+HWI-EAS443:3:88:1056:1817#0/1  
^a`aabbbaababaaaabb`bba\_aRab^abbaa``b[Ya  
@HWI-EAS443:3:88:1070:1218#0/1  
CAGTGATTGTGAAAGAAATCTCTGTGTCTTGTGAATTAGT  
+HWI-EAS443:3:88:1070:1218#0/1  
\_Z\_]aabb`\_]`¥aa]`\_`^a^\_Z¥]]aa]G[XS¥^\_X`T  
@HWI-EAS443:3:88:1102:945#0/1  
ATATCCATGCTTTTTGGCTGGACCATGGGCTGGCATTACC  
+HWI-EAS443:3:88:1102:945#0/1  
aa\_aaaaaab`aaa^`ba`\_a[\_\_\_]`][[^]aa^\_]`\_WX  
@HWI-EAS443:3:88:1134:1511#0/1  
AAGACAATATACTGGTGGGATGGGCTCCAATCATCCGACG  
+HWI-EAS443:3:88:1134:1511#0/1  
aaaaaaabbaa^aaaYaaa^`^`^`]a`a][[a^^a\_Xa  
@HWI-EAS443:3:88:1160:786#0/1  
TCCCAGGTGTTGCGATAGCCCTTCTTTTTAACTTGCCTCT  
+HWI-EAS443:3:88:1160:786#0/1  
``a`]abZ`b^WZbZ\_ab\_\_aa`Xaaaa\_\_]\_aaaQ\_^a  
@HWI-EAS443:3:88:1178:390#0/1  
GGGAAAGTGGACGACAAACACAGAGACTGGTGCACCCAG  
+HWI-EAS443:3:88:1178:390#0/1  
aaa\_aab¥\_b\_¥aa`aa`X]¥`\_¥]UU^U¥W¥U^¥S¥W¥¥  
@HWI-EAS443:3:88:120:1349#0/1  
GTCTTGCCATTTTGTGTTGAGAACATTATGGGTGCCATGCT  
+HWI-EAS443:3:88:120:1349#0/1  
aYaaa`\_\_aaa]`aaaaaa`^aaaa`^YV`]``\_¥[  
@HWI-EAS443:3:88:1234:1413#0/1  
CTAACTTGCAGGTCCTGTAGAATCTGTCCACTCCTGCTTG  
+HWI-EAS443:3:88:1234:1413#0/1  
]b\_aaabbaabbUVaYb\_bb`a`P`aaa`\_]`^W^abXR]a  
@HWI-EAS443:3:88:1242:664#0/1  
GCTAATTTTAGCATGGAGCTACCCAGCTTTGGAGTGTCTG  
+HWI-EAS443:3:88:1242:664#0/1  
aaaaaabbbbaa]aaa`\_a`\_a`\_\_a]a`\_a[X\_X\_[\_]`

@HWI-EAS443:3:88:1281:1425#0/1  
GCATTTGCGAAAAGCTTGAACAGTCTGGGCTCCCAGTAGG  
+HWI-EAS443:3:88:1281:1425#0/1  
\_a\_VX[``^P\_^`aa`TZ`a`\_`aa^U`\_`VQTQL[^  
@HWI-EAS443:3:88:1289:1437#0/1  
ATGAGAGCAAAATCGTCGGATGATTGGAGCCCATCCCACC  
+HWI-EAS443:3:88:1289:1437#0/1  
I]¥W\_Xb]b`a`bbbbb^[\_[]bbbK`aMQa^VWZbGX  
@HWI-EAS443:3:88:1419:163#0/1  
CAATCGGGTTGAGCTGGGGTGCACCAGTCTCTGTGTTTGT  
+HWI-EAS443:3:88:1419:163#0/1  
abaabbbbabbbbab`^^^bbbab`aaab]ab\_bab`b]  
@HWI-EAS443:3:88:1425:566#0/1  
CCACTACCTGAGGATAATGAACCAAGTGGGTATGCACAAA  
+HWI-EAS443:3:88:1425:566#0/1  
aaXaSSYL0[]\_Yba^`a]T`a]]`bab¥^^aTOK\_XT  
@HWI-EAS443:3:88:148:1138#0/1  
TGTCCCAGTGATTGTGAAAGAAATCTCTGTGTCTTGTGA  
+HWI-EAS443:3:88:148:1138#0/1  
]babbababaaa^]\_^aaaabaa`ba``abZ[¥\_a^\_aU  
@HWI-EAS443:3:88:1512:1661#0/1  
GATTTCTTTTACAATCACTGGGACAACACTAAGTGGGAAT  
+HWI-EAS443:3:88:1512:1661#0/1  
aaaab\_aabaa\_baaaa\_aa`a`^a```a\_a`\_b]a[TXa  
@HWI-EAS443:3:88:154:732#0/1  
GGCCCGGATTGATGCCAGGGTCGACTTCGAGTCTGGACGG  
+HWI-EAS443:3:88:154:732#0/1  
``\_a``¥^^``aababa]]L^aa`^[[^]J]`^^`  
@HWI-EAS443:3:88:1553:2029#0/1  
AGCCCTTCTTTTAACTTGCCTCTCTCTGCATCTTTGGTC  
+HWI-EAS443:3:88:1553:2029#0/1  
a][T\_aa`aaa^a\_a^\_]\_\_a]`\_`\_aa^\_\_^`\_`¥Z]  
@HWI-EAS443:3:88:1560:1058#0/1  
AGTGAATGCACCAAACCATGAGGGAATACAAGCAGGAGTG  
+HWI-EAS443:3:88:1560:1058#0/1  
aaH`bbbaaba\_a]b]aabaaa¥aaaaa]aa`a\_b^`aZb  
@HWI-EAS443:3:88:1619:1331#0/1  
CTTGGGAGTCTCGATACTGAATCTTGGACAAAAGAAATAC  
+HWI-EAS443:3:88:1619:1331#0/1  
X^aaabba^a`^`ab^[aa^baaa^aaab\_aa^`bbba`  
@HWI-EAS443:3:88:1624:181#0/1  
TTTAGATCGAATGGCCTAACAGCTAATGAGTCAGGAAGGC  
+HWI-EAS443:3:88:1624:181#0/1  
^^Xa]Z```]ZV`WUJ`\_[OQVF¥YYU^\_a]SVSWUSWFJ  
@HWI-EAS443:3:88:1672:130#0/1  
GATTGATGCCAGGGTCGACTTCGAGTCTGGACGGATCAAG  
+HWI-EAS443:3:88:1672:130#0/1  
a`b`baa[a[```]YbaNaa`Wa`R`]\_\_¥aa¥\_W^[a  
@HWI-EAS443:3:88:1677:279#0/1  
CTGGACGGATCAAGAAAGAAGAGTTCTCTGAGATCATGAA

+HWI-EAS443:3:88:1677:279#0/1  
^¥]UUbba\_UbbbaU`aaabab`b\_b\_\_KZbb`\_abbbZ  
@HWI-EAS443:3:88:168:759#0/1  
AAAAGCTTGAACAGTCTGGGCTCCCAGTAGGGGCAATGA  
+HWI-EAS443:3:88:168:759#0/1  
^Yaabaaaba^`Za]`a`\_a`^`^`W¥`\_`\_`[\_`\_`\_`V  
@HWI-EAS443:3:88:1691:1655#0/1  
ATCTGGGCCGTTGCAGGTCCAAGGTCATTGTTTATCATGT  
+HWI-EAS443:3:88:1691:1655#0/1  
ab`\_a¥aUZaZRa¥aaa\_^[\_`\_a^XNUa\_b^\_a\_a]W^\_Y  
@HWI-EAS443:3:88:1702:871#0/1  
AAAAATTCCAGCGCAAATGCCATAAGCACCATTCCT  
+HWI-EAS443:3:88:1702:871#0/1  
a^Y\_\_^a`Sab]¥Z\_aa]Z`\_`a[\_]T\_a`\_\_\_\_a\_]U¥\_  
@HWI-EAS443:3:88:1727:1208#0/1  
TATGGCTTTCCTTGAAGAATCCCACCCAGGAATATTTGAG  
+HWI-EAS443:3:88:1727:1208#0/1  
\_babaaaba¥a`a^]a`aa`WYPZZQY`X\_Y]`a`\_^\_  
@HWI-EAS443:3:88:1751:1128#0/1  
AAAAATTCCAGCGCAAATGCCATAAGCACCATTCCT  
+HWI-EAS443:3:88:1751:1128#0/1  
aba^aaa^`aa[\_a`\_aa`^^`aa\_H`a\_U\_\_^\_\_]WVa  
@HWI-EAS443:3:88:214:311#0/1  
GGCTATCGCAACACCTGGGATGCAGATTAGAGGTTTCGTA  
+HWI-EAS443:3:88:214:311#0/1  
¥`abaa¥`\_`bb¥X^babbaaa`PYZab]^`\_¥0`ba]Y`  
@HWI-EAS443:3:88:216:886#0/1  
CAGTCTTTGTTTTTCTTCCCTATTGTTCTTTGCGTGACC  
+HWI-EAS443:3:88:216:886#0/1  
`\_]\_Zabbabaa`aa`aaaaaaaa`aa\_\_\_aa`aaa^aWZ]  
@HWI-EAS443:3:88:239:1075#0/1  
CTTTCCTTGAAGAATCCCACCCAGGAATATTTGAGAATTC  
+HWI-EAS443:3:88:239:1075#0/1  
```]Zaa\_aa`\_^aa`a`\_a`\_`[^`¥\_]\_\_`[Y\_^  
@HWI-EAS443:3:88:270:1095#0/1  
CATTGAAGTACTTCAGGTCAATGCTTGCTAGCATTCTGC  
+HWI-EAS443:3:88:270:1095#0/1  
a]`\_`a^a]a`a`a\_\_\_^a`TY\_^\_¥`a`\_`\_`\_^\_]^\_  
@HWI-EAS443:3:88:285:1702#0/1  
GAAGAGCCATCTGGGCCGTTGCAGGTCCAAGGTCATTGTT  
+HWI-EAS443:3:88:285:1702#0/1  
K`]Wb^aba`abbbabab\_bb[bZUObaba]\_[\_ab\_b¥0  
@HWI-EAS443:3:88:286:1010#0/1  
CTAGGGAAAGGGTACATGTTTCGAGAGTAAAAGAATGAAGA  
+HWI-EAS443:3:88:286:1010#0/1  
``[^`\_`[¥Z\_]¥YaYU^aV[]¥^a\_aS]T^^[[[]`\_[RX]  
@HWI-EAS443:3:88:287:92#0/1  
GGAGTAAATGAATCAGCTGACATGAGTATTGGAGTAACAG  
+HWI-EAS443:3:88:287:92#0/1  
ab`a\_¥a\_\_\_aa^\_\_`\_\_`\_]a`\_`¥\_X^\_^\_[W`S]YXX^



@HWI-EAS443:3:88:374:848#0/1  
GGTGCTTATGGCATTGCGCTGGAATTTTAGGAAAAGT  
+HWI-EAS443:3:88:374:848#0/1  
a`\_aaaaaaaaaaaa`aaaaaaaa`¥`aaa`a[Z\_```W  
@HWI-EAS443:3:88:37:373#0/1  
TTGGACATTAACAGAAATCAACCGGCAGCAACTGCATTG  
+HWI-EAS443:3:88:37:373#0/1  
`bba^`[abaaa`a]Xa`a`^`aaaaaa]Z¥`¥][¥\_\_a  
@HWI-EAS443:3:88:402:1309#0/1  
TTCCGAGTCTGGACGGATCAAGAAAGAAGAGTTCTCTGAGA  
+HWI-EAS443:3:88:402:1309#0/1  
a]a\_abHa`[Y\_]GX^`a\_a\_`\_\_\_\_\_U`\_G¥\_`^\_Y\_^  
@HWI-EAS443:3:88:484:1691#0/1  
AACAAAGTATACGAAACCTCTAATCTGCATCCCAGGTGTT  
+HWI-EAS443:3:88:484:1691#0/1  
^`^ba^a\_W¥`bb]a`ba]`abUabaaaZXUI\_b]X`U¥  
@HWI-EAS443:3:88:48:2013#0/1  
AAAAATTCCAGCGCAAATGCCATAAGCACCATCCCT  
+HWI-EAS443:3:88:48:2013#0/1  
`ZV^VI\_[F^VW¥\_`aXUUW[Z¥^\_W[Y`Y^ZRvVZ^WV  
@HWI-EAS443:3:88:493:105#0/1  
AATCAATGAACAAAGAGGAAATAGAGATAACAACCCACTT  
+HWI-EAS443:3:88:493:105#0/1  
¥[]ZaWbW`]ZS¥\_¥a\_M]]^`aa[]Q\_\_XTR[^]Z[`  
@HWI-EAS443:3:88:572:1653#0/1  
GAACAATTGAAGAGCCATCTGGGCCGTTGCAGGTCCAAGG  
+HWI-EAS443:3:88:572:1653#0/1  
abbb\_bba`ababbabbT]a\_`aaa]`\_aa^\_Za\_a``a  
@HWI-EAS443:3:88:591:292#0/1  
CACCCAGGAATATTTGAGAATTCATGCCTTGAACAATGG  
+HWI-EAS443:3:88:591:292#0/1  
abbabbaa`bbbabbba`a\_`aa\_baa^babb`bababbb  
@HWI-EAS443:3:88:615:47#0/1  
GGTGCATTCACTATGAGAGCAAATCGTCGGATGATTGGA  
+HWI-EAS443:3:88:615:47#0/1  
W^DMRTUU\_N]Z[\_ba\_^\_M\_¥P^^Z]XY\_a`b]GN]`]T  
@HWI-EAS443:3:88:671:1060#0/1  
ATCCCTCATGGTTTGGTGCATTCACTATGAGAGCAAAT  
+HWI-EAS443:3:88:671:1060#0/1  
SQ\_[`bZaNU]XZ`aU[\_b\_U\_`V^^UXbaZ\_V`Sa][R  
@HWI-EAS443:3:88:674:530#0/1  
CTGTTTACTGTGTCCATGGTGTATCCTGTTCCCTGTTCCAT  
+HWI-EAS443:3:88:674:530#0/1  
aabbbbbbababbbbbbbbaababbb\_bbabb\_bbaba]¥b  
@HWI-EAS443:3:88:678:1143#0/1  
AAATCAACCCGAGTGGTTCAGAAACATCCTGAGCATGGCA  
+HWI-EAS443:3:88:678:1143#0/1  
abaa\_aaaaa`a]a\_Y\_¥^]`\_aa^`[^\_\_`^^T]\_  
@HWI-EAS443:3:88:709:1597#0/1  
CACTGACATTAATACGATGACCAAAGATGCAGAGAGAGG

+HWI-EAS443:3:88:709:1597#0/1  
`bab^^ab\_bab`W`b¥bbab]^bWbab\_b` ``b¥aa^aa  
@HWI-EAS443:3:88:710:1623#0/1  
GTGGGATTCTTCAAGGAAAGCCATAGCCTCTAGAACACAG  
+HWI-EAS443:3:88:710:1623#0/1  
a[bZ¥Z0¥Z¥Ta\_aa[IO`XUQMa\_XU`^a[VTSWS¥YY^  
@HWI-EAS443:3:88:715:208#0/1  
GGCCCCGATTGATGCCAGGGTCGACTTCGAGTCTGGACGG  
+HWI-EAS443:3:88:715:208#0/1  
`[¥TX`R`V]VVYNOQ^\_VNU¥ZUVXTRXX^XPVY[TRZZ  
@HWI-EAS443:3:88:790:2017#0/1  
GACCAAAGATGCAGAGAGAGGCAAGTTAAAAAGAAGGGCT  
+HWI-EAS443:3:88:790:2017#0/1  
U\_bba`¥bb`bbaaab^aabab\_[^babab`bbababUa  
@HWI-EAS443:3:88:792:375#0/1  
CTTGGGAGTCTCGATACTGAATCTTGGACAAAAGAAATAC  
+HWI-EAS443:3:88:792:375#0/1  
abbbbbbbbabababbabbaababaaaa\_baaabaaaaaa  
@HWI-EAS443:3:88:794:353#0/1  
ATAGGAGACCGTTGGAATTTCTAGCATGGTGGAGGCCAT  
+HWI-EAS443:3:88:794:353#0/1  
\_`Z\_aT`^a[]\_R\_bab^[^aa`a]aaabb`aZ[]`JXaX  
@HWI-EAS443:3:88:796:1445#0/1  
GGGCTCCAATCATCCGACGATTTTGCTCTCATAGTGAATG  
+HWI-EAS443:3:88:796:1445#0/1  
]ba\_`bbabab`]bZ]Ubabbbbaab` `a^ba`b`^` ]\_`  
@HWI-EAS443:3:88:842:301#0/1  
TGAATCTTGGACAAAAGAAATACACCAAGACAATATACTG  
+HWI-EAS443:3:88:842:301#0/1  
\_TTNPV` [aTUSYNSNXRYR]\_S\_\_^^`¥KOZU[¥PUIZY  
@HWI-EAS443:3:88:896:844#0/1  
TGTCAATCCGACTCTACTTTTCCTAAAAATCCAGCGCAA  
+HWI-EAS443:3:88:896:844#0/1  
aaaaabbbab^Yabbabbbb` `aabb\_ab` `abaa`\_bb  
@HWI-EAS443:3:88:912:501#0/1  
GTGATGCTGTGCCATCTATTAGAAGAGGCCTTATTTTCTC  
+HWI-EAS443:3:88:912:501#0/1  
a^aaaaaaa^aa\_aa`aa`aaa` ]\_\_`a\_¥a^\_aaa\_\_`\_`  
@HWI-EAS443:3:88:938:1813#0/1  
AAGAACAACATGATAAACAATGACCTTGGACCTGCAACGG  
+HWI-EAS443:3:88:938:1813#0/1  
^babaaa¥\_Z[W¥ab`\_`a[ `bXP¥P`YaaUa^aababP`  
@HWI-EAS443:3:88:957:552#0/1  
GGATGGGCTCCAATCATCCGACGATTTTGCTCTCATAGTG  
+HWI-EAS443:3:88:957:552#0/1  
ab`aaaaaaaaa]` `aa^`]V^a`aaa\_`` `a` `` `a^a  
@HWI-EAS443:3:88:96:377#0/1  
GTGGGATGGGCTCCAATCATCCGACGATTTTGCTCTCATA  
+HWI-EAS443:3:88:96:377#0/1  
a^a`a`\_aaaa\_a^V`\_aa^\_\_aU\_a\_\_\_\_` ]` ^^Z\_\_^W¥

@HWI-EAS443:3:88:98:1066#0/1  
GTCCTCCATCTGATACTAATAGCCCTACCTTTGATTGGGT  
+HWI-EAS443:3:88:98:1066#0/1  
NK\_a¥^bbYbbZb^^]aY`\_]¥aaYaa[a\_aaaaa]\_\_  
@HWI-EAS443:3:88:992:1533#0/1  
ACTCATTAGCTGTTAGGCCATTTCGATCTAAAGACTTCTAT  
+HWI-EAS443:3:88:992:1533#0/1  
`aa\_QTaaaa`^a\_`V]SXaaXT`UR¥`W\_]LV\_\_^O\_BB  
@HWI-EAS443:3:89:1008:304#0/1  
CCTGGATTCCCAAGAGGAATCGTTCTATTCTCAACACAAG  
+HWI-EAS443:3:89:1008:304#0/1  
abbbbbba\_a`aaa^abaaaababababbbba^`aaaa\_`\_  
@HWI-EAS443:3:89:1012:614#0/1  
TGATGGACCACTACCTGAGGATAATGAACCAAGTGGGTAT  
+HWI-EAS443:3:89:1012:614#0/1  
abbab]TMWaTaaa```aa\_^aa\_\_aY[UPa`aR^`^Oa\_  
@HWI-EAS443:3:89:1019:1986#0/1  
ATTGATGCCAGGGTCGACTTCGAGTCTGGACGGATCAAGA  
+HWI-EAS443:3:89:1019:1986#0/1  
aaa\_]`^aaa^\_¥Ra\_\_\_^¥\_\_Z]UUa[R^Z`\_`N^``PS  
@HWI-EAS443:3:89:1030:1748#0/1  
CTCCAATCATCCGACGATTTTGCTCTCATAGTGAATGCAC  
+HWI-EAS443:3:89:1030:1748#0/1  
^^^¥a`bbb`\_a````babbbba^aaababZb`aaa]^W  
@HWI-EAS443:3:89:1046:1550#0/1  
GTGTTCTGTTTACTGTGTCCATGGTGTATCCTGTTCTGT  
+HWI-EAS443:3:89:1046:1550#0/1  
`^b\_aaaa`baa`ab\_a\_a]a`\_a]^Ya`\_Z^\_\_a¥`a\_\_  
@HWI-EAS443:3:89:1079:79#0/1  
AAAAATTTCTCGAATAGATTGCAGCACTTCTGGTACATCT  
+HWI-EAS443:3:89:1079:79#0/1  
aaaaabba`a]a`ab`aa``a\_\_`]\_]`\_^a```\_]`[\_T^  
@HWI-EAS443:3:89:1081:1238#0/1  
CAAGAATCCCCTTTGGCTTGTGTTGAGAATAGAACGATT  
+HWI-EAS443:3:89:1081:1238#0/1  
`a[^`XV\_TZ]`b[`aba¥`^]¥ZUZ¥V][`\_TVUOS  
@HWI-EAS443:3:89:1084:761#0/1  
CTGGGCTCCCAGTAGGGGCAATGAAAAGAAGGCCAAACT  
+HWI-EAS443:3:89:1084:761#0/1  
a\_baa`\_b```aU\_bb`aaa]abaa]^ZU`aaaa`]a`^b  
@HWI-EAS443:3:89:1096:1189#0/1  
ATGGAATCAATGAACAAAGAGGAAATAGAGATAACAACCC  
+HWI-EAS443:3:89:1096:1189#0/1  
`[b^]¥¥a\_b^a^V`¥XZ`LU`YV[``\_¥`][``\_`aXYU\_  
@HWI-EAS443:3:89:1118:702#0/1  
CGGATTGATGCCAGGGTCGACTTCGAGTCTGGACGGATCA  
+HWI-EAS443:3:89:1118:702#0/1  
abbabbbabababbbb\_abbabaabab`abbaabaaaaa  
@HWI-EAS443:3:89:1185:477#0/1  
ATTTTGTGTTGAGAACATTATGGGTGCCATGCTCAGGATGT





+HWI-EAS443:3:89:305:2043#0/1  
ab\_aaa`a`b^a\_ab`ba^aa^^Y^\_a\_aaRPW`\_\_WWLL  
@HWI-EAS443:3:89:347:1254#0/1  
GAGCTAATGGATGATGATTATCGGGGAAGACTTTGTAATC  
+HWI-EAS443:3:89:347:1254#0/1  
aa`aa`aaaaa^¥aaaa`a\_`^I^]Y^\_a]]a^[^  
@HWI-EAS443:3:89:37:1094#0/1  
GGAGCCCAGACTGTTCAAGCTTTTCGCAAATGCTCCTAGC  
+HWI-EAS443:3:89:37:1094#0/1  
aa`aaaa`a]^aa]``]``\_``\_]\_^Y¥^\_\_^]^\_^^  
@HWI-EAS443:3:89:384:1024#0/1  
TACTGGGAGCCCAGACTGTTCAAGCTTTTCGCAAATGCTC  
+HWI-EAS443:3:89:384:1024#0/1  
¥WU¥`baa^W\_UVW\_Mab¥b\_`¥V`]]b¥P\_`]]`PO¥]X  
@HWI-EAS443:3:89:425:49#0/1  
ATTGATGCCAGGGTCGACTTCGAGTCTGGACGGATCAAGA  
+HWI-EAS443:3:89:425:49#0/1  
abbababaaabbbXaaaa\_a\_aaaW\_`ba\_]``YTQ\_X`^  
@HWI-EAS443:3:89:470:1943#0/1  
ATTGATGCCAGGGTCGACTTCGAGTCTGGACGGATCAAGA  
+HWI-EAS443:3:89:470:1943#0/1  
V\_a\_\_I\_\_`\_b]aQQ\_b\_R\_U\_b`P]b^Y^YXXZaaaaa`  
@HWI-EAS443:3:89:50:1612#0/1  
TTGTGGCTAATTTTAGCATGGAGCTACCCAGCTTTGGAGT  
+HWI-EAS443:3:89:50:1612#0/1  
`ZVQ`¥b]`b¥\_]][`aSZ][V[a^]^\_¥GSa\_`¥SYRYW  
@HWI-EAS443:3:89:565:1012#0/1  
CAGGAACAGGATACACCATGGACACAGTAAACAGAACACA  
+HWI-EAS443:3:89:565:1012#0/1  
¥\_¥Y`^a[`a¥a\_ba¥ab`a`bbbb\_baabab``^\_bab  
@HWI-EAS443:3:89:592:1734#0/1  
GAGAAAATAAGGCCTCTTCTAATAGATGGCACAGCATCAC  
+HWI-EAS443:3:89:592:1734#0/1  
\_¥a^ab`b`a¥^`aa\_baaba^a\_aaa`ab\_\_aa\_a\_[]`Q  
@HWI-EAS443:3:89:609:1261#0/1  
CTGGGATGCAGATTAGAGTTTTCGTATACTTTGTTGAAAC  
+HWI-EAS443:3:89:609:1261#0/1  
aXa\_b¥KQVQ`a\_aXSYY\_S^¥a`Rb]TNZ^^^YU]\_[[`  
@HWI-EAS443:3:89:624:1901#0/1  
ACCCAGGAATATTTGAGAATTCATGCCTTGAAACAATGGA  
+HWI-EAS443:3:89:624:1901#0/1  
a`]b\_Y¥`aa`\_\_`a\_a`S`\_]Y`[S]a`R]\_b[\_\_\_]^  
@HWI-EAS443:3:89:629:1456#0/1  
GCTCCAATCATCCGACGATTTTGCTCTCATAGTGAATGCA  
+HWI-EAS443:3:89:629:1456#0/1  
aa`ZaaYYUaP[Z`\_^`\_`¥`abG^UZ^^V\_W[IOY\_\_R[  
@HWI-EAS443:3:89:65:1745#0/1  
AGCCTCTCTTATTCAGTCTTTGTTTTTTCTTCCCTATTGT  
+HWI-EAS443:3:89:65:1745#0/1  
HV\_bbb\_bba`Y¥VZ`^a¥`b¥Z^Q\_bbb``aaXYaVa]Y

@HWI-EAS443:3:89:666:438#0/1  
CGGATTGATGCCAGGGTCGACTTCGAGTCTGGACGGATCA  
+HWI-EAS443:3:89:666:438#0/1  
^`b^¥ZbbabaY\_bbaJaa[bbb\_`]T\_^b\_b`^abaS]a  
@HWI-EAS443:3:89:680:527#0/1  
ACCCGATTGATGGACCACTACCTGAGGATAATGAACCAAG  
+HWI-EAS443:3:89:680:527#0/1  
a`Vaa`aa``a`a`aYa\_aa\_`\_`¥a\_\_\_a\_\_`a`^R\_]Y  
@HWI-EAS443:3:89:699:1749#0/1  
AGCTGATTCATTTACTCCAGACACTCCAAAGCTGGGTAGC  
+HWI-EAS443:3:89:699:1749#0/1  
\_aaabbaa`baaabbaaaabbba`a`ba`a`\_`a`[a^\_  
@HWI-EAS443:3:89:720:125#0/1  
GGAAAGTGGACGACAAACACAGAGACTGGTGCACCCCAGC  
+HWI-EAS443:3:89:720:125#0/1  
aaaaaa]aa\_`aa`aa`\_a^\_a`\_`¥^^\_¥aW\_¥PUS]\_U  
@HWI-EAS443:3:89:722:1724#0/1  
GTAGAATCTGTCCACTCCTGCTTGTATTCCCTCATGGTTT  
+HWI-EAS443:3:89:722:1724#0/1  
\_Z¥[S^a0\_[V`\_] [Laa]bPX`a^\_`T]]NQR[[L[TK  
@HWI-EAS443:3:89:727:1080#0/1  
AATCCGACTCTACTTTTCTAAAAATCCAGCGCAAAATG  
+HWI-EAS443:3:89:727:1080#0/1  
aaaaaa\_\_aaba\_aaaa``abaa\_^`a`aaa\_aaa\_\_a\_\_  
@HWI-EAS443:3:89:754:1227#0/1  
ATGGGCTCCAATCATCCGACGATTTTGCTCTCATAGTGAA  
+HWI-EAS443:3:89:754:1227#0/1  
aaaaaaaa`aa\_a`\_aa`aa\_\_a`\_```aa\_a^\_WK[`\_  
@HWI-EAS443:3:89:789:749#0/1  
GTTCTGTTTACTGTGTCCATGGTGTATCCTGTTCCCTGTTC  
+HWI-EAS443:3:89:789:749#0/1  
[¥a`aaa``aaba`a\_aaaaab\_aZb\_\_[aaa`\_V`\_aa`  
@HWI-EAS443:3:89:802:1686#0/1  
CTGGACGGATCAAGAAAGAAGAGTTCTCTGAGATCATGAA  
+HWI-EAS443:3:89:802:1686#0/1  
abaabbbbabbbbabbbbabb¥\_a\_bbaaababaaaa  
@HWI-EAS443:3:89:862:1814#0/1  
GGAAAGTGGACGACAAACACAGAGACTGGTGCACCCCAGC  
+HWI-EAS443:3:89:862:1814#0/1  
aaab\_`¥\_bb]]abbab\_¥abaa\_aaU`aM`aa\_ab]`aa  
@HWI-EAS443:3:89:922:1240#0/1  
AGCCTCTCTTATTCAGTCTTTGTTTTTCTTCCCTATTGT  
+HWI-EAS443:3:89:922:1240#0/1  
\_VZ`\_abb`bbaabaa^bbbbbbaaaaaabababaa  
@HWI-EAS443:3:89:925:1750#0/1  
CAGTGATTGTGAAAGAAATCTCTGTGTCTTGTGAATTAGT  
+HWI-EAS443:3:89:925:1750#0/1  
`ba]a`aba`\_\_abaaababa`aa¥a\_aa\_aNWF¥\_a^\_]`  
@HWI-EAS443:3:89:926:947#0/1  
CAGCTGACATGAGTATTGGAGTAACAGTGATAAAGAACAA

+HWI-EAS443:3:89:926:947#0/1  
ZX¥Y`b^XZ`H\_N¥`a\_U[MTYSYXW\_\_\_\_\_RRN`\_\_^  
@HWI-EAS443:3:89:933:1846#0/1  
ATCGCAACACCTGGGATGCAGATTAGAGTTTCGTATACT  
+HWI-EAS443:3:89:933:1846#0/1  
aa\_¥]ba\_aa\_aaaaa`a[aa\_aaa\_^[\`W`^a`\_`\_`Z`  
@HWI-EAS443:3:89:937:1051#0/1  
GATTGATGCCAGGGTCGACTTCGAGTCTGGACGGATCAAG  
+HWI-EAS443:3:89:937:1051#0/1  
^)`aabbaabaaba[\`aa`baaaaa\_[aYa[VW` `[DW\_a  
@HWI-EAS443:3:89:940:949#0/1  
TAAAGAGATTGATTCTGTAAACAATGCTGTGGTAATGCCA  
+HWI-EAS443:3:89:940:949#0/1  
aaaaaaaaabaaaaa`aa`aa`a`\_\_a\_Wa`^^^\_  
@HWI-EAS443:3:89:956:308#0/1  
AAAAATTCCAGCGCAAATGCCATAAGCACCATTCCT  
+HWI-EAS443:3:89:956:308#0/1  
ab^¥\_¥aZaZ`\_]a[\_V\_^a]Y\_a\_Y^]¥]a`¥`aZ[¥`  
@HWI-EAS443:3:89:959:1556#0/1  
GATTGATGCCAGGGTCGACTTCGAGTCTGGACGGATCAAG  
+HWI-EAS443:3:89:959:1556#0/1  
abaaaa`a`aa`aWaaa¥aa`a`a`^aaa]¥aa\_]`\_`]  
@HWI-EAS443:3:89:963:855#0/1  
TTGGAGTGTCTGGAGTAAATGAATCAGCTGACATGAGTAT  
+HWI-EAS443:3:89:963:855#0/1  
`\_^¥YaWaZ¥`a`\_\_XN]^\_\_]WPKUXS[^LGN¥^X]GUZ  
@HWI-EAS443:3:89:979:618#0/1  
CTTGTGTTGAGAATAGAACGATTCCTCTTGGGAATCCAGG  
+HWI-EAS443:3:89:979:618#0/1  
abbb`babaabaabbabaabaaaaa`aabaa`aa`\_`aa  
@HWI-EAS443:3:89:998:337#0/1  
AGAATCTGTCCACTCCTGCTTGTATTCCCTCATGGTTTGG  
+HWI-EAS443:3:89:998:337#0/1  
a^aba`\_aa]a¥T\_]`aZX]^\_aaa]¥Z^[Y`bZYa¥X\_  
@HWI-EAS443:3:8:104:370#0/1  
TTCCCCTTTGGCTTGTGTTGAGAATAGAACGATTCCTCTT  
+HWI-EAS443:3:8:104:370#0/1  
[[b¥aaa`UZ\_aa]aY`T\_URTSXT]a\_]X¥NTZZ][VYV  
@HWI-EAS443:3:8:1078:1766#0/1  
GATTGATGCCAGGGTCGACTTCGAGTCTGGACGGATCAAG  
+HWI-EAS443:3:8:1078:1766#0/1  
aaUaaa`Ma[a`aaT`^^][\_[aSa¥Ia^\_aG\_VNUQXZ\_  
@HWI-EAS443:3:8:109:1086#0/1  
CAGTGATTGTGAAAGAAATCTCTGTGTCTTGTGAATTAGT  
+HWI-EAS443:3:8:109:1086#0/1  
aab\_bbbbb\_aaabbabaaaaab^\_a`abaa`\_`a`Y`\_  
@HWI-EAS443:3:8:1125:1127#0/1  
GAAATACACCAAGACAATATACTGGTGGGATGGGCTCCAA  
+HWI-EAS443:3:8:1125:1127#0/1  
aaaa`a\_ba^aa\_\_`aaaa`^\_aaX\_a`^^^X]X]X^[



@HWI-EAS443:3:8:1135:933#0/1  
ACGGTCTTGGGAGTCTCGATACTGAATCTTGGACAAAAGA  
+HWI-EAS443:3:8:1135:933#0/1  
a]¥UPV^\_Y]aY^VRaaa`aX\_`a\_\_[]`aX\_T\_^]\_\_^¥  
@HWI-EAS443:3:8:1155:1182#0/1  
ACTACACATTCTGGATTCCCAAGAGGAATCGTTCTATTC  
+HWI-EAS443:3:8:1155:1182#0/1  
abababab`aaa`\_aa\_a\_\_`a\_a`\_`a`W\_\_^^^`^^X  
@HWI-EAS443:3:8:1161:633#0/1  
TTTTAAGCAGACTTCAGGAATGTGAAGATTCCGTATATTG  
+HWI-EAS443:3:8:1161:633#0/1  
ab`aa`\_^\_a`[aaaa\_b\_abb\_ba¥b`aa`[\_a`\_`\_a`a  
@HWI-EAS443:3:8:1163:715#0/1  
AAAAGAAATACACCAAGACAATATACTGGTGGGATGGGCT  
+HWI-EAS443:3:8:1163:715#0/1  
abbbbaabaaaa`babaa`aabba\_aba^aaa\_\_\_a`W\_  
@HWI-EAS443:3:8:1183:1074#0/1  
CATGCTCAGGATGTTTCTGAACCACTCGGGTTGATTCTG  
+HWI-EAS443:3:8:1183:1074#0/1  
ab`^`bbaba¥`bWW`ba]a[¥]`][ab`\_\_```aa^a¥  
@HWI-EAS443:3:8:1204:769#0/1  
TGCCATTTTGTGTTGAGAACATTATGGGTGCCATGCTCAGG  
+HWI-EAS443:3:8:1204:769#0/1  
aaa[aaaa^aaaabaa\_a]aa`\_aa`\_]a]]\_`^`^TX\_`  
@HWI-EAS443:3:8:1205:841#0/1  
GGTGTGTTCTGTTTACTGTGTCCATGGTGTATCCTGTTCC  
+HWI-EAS443:3:8:1205:841#0/1  
a^Za\_b\_Z¥a`]a`a[`aZaR¥T`[a[RaV\_^WWYR¥VPT  
@HWI-EAS443:3:8:1263:522#0/1  
GGTCCATCAATCGGGTTGAGCTGGGGTGCACCAGTCTCTG  
+HWI-EAS443:3:8:1263:522#0/1  
aaXaaaaaa`aSbaaU]a]]`^SP^aWaZ`^\_\_a¥S`S¥a  
@HWI-EAS443:3:8:1266:549#0/1  
ATCTGTCCACTCCTGCTTGTATTCCCTCATGGTTTGGTGC  
+HWI-EAS443:3:8:1266:549#0/1  
aa`bb``aaU^aW\_X]baa\_\_]a[SS`\_`\_a`¥T`\_\_\_V\_W  
@HWI-EAS443:3:8:1279:1092#0/1  
TTGCTAGCATTCTGCTGGTATTTGTGTTCGAATCTTCAT  
+HWI-EAS443:3:8:1279:1092#0/1  
^^`¥a¥[`¥\_a`\_]N]a]X`aa`\_`\_TY][XZZ¥WDVW  
@HWI-EAS443:3:8:1291:153#0/1  
TTTTCTGAGTATTGGTGTGTTCTGTTTACTGTGTCCATGG  
+HWI-EAS443:3:8:1291:153#0/1  
aa]`Ra\_U\_TZ\_aaaX`X^S^¥`^X^]]^X¥¥]WYWX^X  
@HWI-EAS443:3:8:1326:1319#0/1  
CACAGTAAACAGAACACACCAATACTCAGAAAAGGGAAAG  
+HWI-EAS443:3:8:1326:1319#0/1  
\_¥bbb[babb`abaaa`b]b\_Vbba¥a^\_babbbb¥^\_bb  
@HWI-EAS443:3:8:1328:770#0/1  
AAGAATCCCACCCAGGAATATTTGAGAATTCATGCCTTGA



@HWI-EAS443:3:8:1694:46#0/1  
AGCTGATTCATTTACTCCAGACACTCCAAAGCTGGGTAGC  
+HWI-EAS443:3:8:1694:46#0/1  
aa¥¥bYa` [ `aaaa\_YP[¥a[U]]R]]^ [NVSYZVVBB  
@HWI-EAS443:3:8:1733:1081#0/1  
TAGCCCTTCTTTTTAACTTGCCTCTCTGCATCTTTGGT  
+HWI-EAS443:3:8:1733:1081#0/1  
`aaa`\_aaZbaaaaa\_`aa^\_aUa^`^`^¥\_aU` ]\_¥\_]  
@HWI-EAS443:3:8:1760:1314#0/1  
GTGGGATGGGCTCCAATCATCCGACGATTTTGCTCTCATA  
+HWI-EAS443:3:8:1760:1314#0/1  
`HPa`TS]]WQT][YX^]\_ [F[]RWTYQVVGSLWXXVWMV  
@HWI-EAS443:3:8:1785:1735#0/1  
ATGGTGTCTAGGGCCCGATTGATGCCAGGGTCGACTTCG  
+HWI-EAS443:3:8:1785:1735#0/1  
aWTVK`WPLT` ]FFLT¥^¥TZ¥^WUFSRXZBBBBBBBBBB  
@HWI-EAS443:3:8:195:1458#0/1  
GCCTCTCTTATTACAGTCTTTGTTTTTTCTCCCTATTGTT  
+HWI-EAS443:3:8:195:1458#0/1  
aa`aaa\_`b\_`aa`a\_a`aaa^\_a`aaa`a` ``\_`a`\_ ]\_  
@HWI-EAS443:3:8:205:1429#0/1  
CTCCCCTATGGCACCTATATGTGTATCTGTAGTCTTTGAT  
+HWI-EAS443:3:8:205:1429#0/1  
`UbbababV]U^b`babV`^¥\_aSa\_a\_bY[ `W`^SP¥aZ  
@HWI-EAS443:3:8:206:590#0/1  
GTCTTGCCATTTTGTGAGAACATTATGGGTGCCATGCT  
+HWI-EAS443:3:8:206:590#0/1  
aYa¥aaa¥X\_aa]^Xa`^P\_W`\_`\_`\_`^^`W^VQSZXRY  
@HWI-EAS443:3:8:239:105#0/1  
CGGGTTGAGCTGGGTGCACCAGTCTCTGTGTTTGTCTGTC  
+HWI-EAS443:3:8:239:105#0/1  
aba^abab`a`a` `bQb¥`S]Zaa\_aQba\_ [¥aa^SU` ¥¥  
@HWI-EAS443:3:8:255:966#0/1  
GTTGTCCCCAGTGATTGTGAAAGAAATCTCTGTGTCTTGT  
+HWI-EAS443:3:8:255:966#0/1  
]\_bbabaababUbaaa`V`bb`ba]a`aaa^a]aZaaa\_¥  
@HWI-EAS443:3:8:294:151#0/1  
GCCCTACCTTTGATTGGGTTTGATCCCACAGCTTCTTTAA  
+HWI-EAS443:3:8:294:151#0/1  
aa\_`\_\_]\_a\_`aYY[\_` `UTV\_`ZZPWW^Y[VY]TTX[TG  
@HWI-EAS443:3:8:341:1590#0/1  
TAGGGCCCGATTGATGCCAGGGTCGACTTCGAGTCTGGA  
+HWI-EAS443:3:8:341:1590#0/1  
aaaaa\_`abaa`]¥S[aaaa^aaGa`^¥a^]`V]]¥\_`\_¥  
@HWI-EAS443:3:8:370:842#0/1  
ATGGGCTCCAATCATCCGACGATTTTGCTCTCATAGTGAA  
+HWI-EAS443:3:8:370:842#0/1  
abbbaa\_aabbaaa` `a\_b\_a\_`a\_\_`\_` ``\_`\_a\_ [\_\_a  
@HWI-EAS443:3:8:389:1388#0/1  
ATCTTCATTCTTTACTCTCGAACATGTACCCTTCCCTA

+HWI-EAS443:3:8:389:1388#0/1  
a]aVXY^\_^V^\_\_`\_]¥\_W^^ZZ\_TW^WM^YS^ZXOV]U  
@HWI-EAS443:3:8:40:888#0/1  
CGCAAAGAACAATAGGGAAGAAAAACAAGACTGAATAA  
+HWI-EAS443:3:8:40:888#0/1  
aaaaaa^S\_a`\_a\_aa`^aa`\_\_\_\_[``\_`\_a``\_a\_\_`\_\_  
@HWI-EAS443:3:8:411:752#0/1  
TAGTGGTCCATCAATCGGGTTGAGCTGGGGTGCACCAGTC  
+HWI-EAS443:3:8:411:752#0/1  
aaaT\_aUa\_\_a`a`\_^aa`¥`¥^U^^¥^`W^U`]]\_\_UZ  
@HWI-EAS443:3:8:418:731#0/1  
ATCCCACCCAGGAATATTTGAGAATTCATGCCTTGAACA  
+HWI-EAS443:3:8:418:731#0/1  
aaaa`a`a`aaa``aaaaaaaa`\_a\_a``aX\_\_\_\_Ua]b  
@HWI-EAS443:3:8:441:442#0/1  
GTTGAGAATAGAACGATTCTTCTTGGGAATCCAGGAATGT  
+HWI-EAS443:3:8:441:442#0/1  
a\_aa\_a\_]`a¥``]a]^\_^]\_^\_^\_]^^X]^X]^\_aZ  
@HWI-EAS443:3:8:442:2002#0/1  
GGTGGGATGGGCTCCAATCATCCGACGATTTTGCTCAT  
+HWI-EAS443:3:8:442:2002#0/1  
a^W^bbbbbaabbbbbbbbbbbaba`aab\_b`baaa`\_`ba  
@HWI-EAS443:3:8:448:953#0/1  
CATTTACTCCAGACACTCCAAAGCTGGGTAGCTCCATGCT  
+HWI-EAS443:3:8:448:953#0/1  
`S`aaa\_`¥`]]^¥``a\_`a````W]^`X\_a]^Q^]]^R^  
@HWI-EAS443:3:8:449:1566#0/1  
CAATGCTGTGGTAATGCCAGCCCATGGTCCAGCCAAAAGC  
+HWI-EAS443:3:8:449:1566#0/1  
abbaabaa^aa`aUa\_ba`\_`abaa`XPZ^\_a]\_aaa\_N]  
@HWI-EAS443:3:8:44:1094#0/1  
CCCGGATTGATGCCAGGGTCGACTTCGAGTCTGGACGGAT  
+HWI-EAS443:3:8:44:1094#0/1  
abbaa`aaaaaaaaa\_a`W`\_`\_`^`\_`^`WW\_\_¥¥¥\_`WU  
@HWI-EAS443:3:8:455:943#0/1  
CAACTGCATTGGCCAACACCATAGAAGTCTTTAGATCGAA  
+HWI-EAS443:3:8:455:943#0/1  
aaaa`baaaaaaaaaa\_a``aaa`\_\_`^\_aa``^^`\_`^`\_  
@HWI-EAS443:3:8:456:1340#0/1  
GCCTCCACCATGCTAGAAATCCAACCGGTCTCTATATG  
+HWI-EAS443:3:8:456:1340#0/1  
`a^Wabbbba]bb[ab\_]\_a\_abbaU`a`a^baaa``aa  
@HWI-EAS443:3:8:461:1132#0/1  
TTGTGGCTAATTTTAGCATGGAGCTACCCAGCTTTGGAGT  
+HWI-EAS443:3:8:461:1132#0/1  
aaaa`aba[aa[Z¥aa¥X]\_XXT[LY^aU\_[\_]\_^UPRT  
@HWI-EAS443:3:8:511:1395#0/1  
ATTTTAGCATGGAGCTACCCAGCTTTGGAGTGTCTGGAGT  
+HWI-EAS443:3:8:511:1395#0/1  
aabaab]aa\_a`aWa\_a]\_aYVa^`Y\_\_SaG¥SI]]RJ¥G

@HWI-EAS443:3:8:615:760#0/1  
ATCTATTAGCCTTCCTGACTCATTAGCTGTTAGGCCATTC  
+HWI-EAS443:3:8:615:760#0/1  
aaa`abaaa\_\_ba\_aaaaaaaaa`\_\_aa\_\_]X\_^T`^]]  
@HWI-EAS443:3:8:628:680#0/1  
GAATCCCACCCAGGAATATTTGAGAATTCATGCCTTGAAA  
+HWI-EAS443:3:8:628:680#0/1  
ababaaaba\_RZa``a^`aaaa`aa```[a`[\_a\_a\_\_a  
@HWI-EAS443:3:8:632:1114#0/1  
ATTGATGCCAGGGTCGACTTCGAGTCTGGACGGATCAAGA  
+HWI-EAS443:3:8:632:1114#0/1  
a`baaa\_\_aa\_¥\_W`\_¥U`a\_aa`¥¥¥Ya^`\_a^\_U¥\_\_]  
@HWI-EAS443:3:8:711:1110#0/1  
GCTGTTAGGCCATTCGATCTAAAGACTTCTATGGTGTGG  
+HWI-EAS443:3:8:711:1110#0/1  
a\_]`H^aaaX`aR\_ZW`^WV\_\_]\_RUY]UPR¥\_\_TTTTY]V  
@HWI-EAS443:3:8:71:619#0/1  
GGCCTCTTCTAATAGATGGCACAGCATCACTGAGTCCTGG  
+HWI-EAS443:3:8:71:619#0/1  
ababbbbbbbbabbbabaabaaaaaaaaa`a\_``aab  
@HWI-EAS443:3:8:743:357#0/1  
GAACAATTGAAGAGCCATCTGGGCCGTTGCAGGTCCAAGG  
+HWI-EAS443:3:8:743:357#0/1  
`^aW[aaa]\_a^[¥aaa`XU^\_]Y)`PV\_¥`]aU¥Z¥V`^`  
@HWI-EAS443:3:8:753:88#0/1  
CGCAAAGAACAATAGGGAAGAAAAACAAGACTGAATAA  
+HWI-EAS443:3:8:753:88#0/1  
abYa`abXa^`¥a`baa^\_aaa\_\_\_\_\_Y^^^\_]Vaa\_^^^\_  
@HWI-EAS443:3:8:771:1547#0/1  
CACCAATACTCAGAAAAGGAAAGTGGACGACAAACACAG  
+HWI-EAS443:3:8:771:1547#0/1  
ab``[ba\_ba`^aa\_`^bab`^aaZbabab`aa`\_aNb\_  
@HWI-EAS443:3:8:775:1647#0/1  
GCCGTTGCAACTACACATTCCTGGATTCCCAAGAGGAATC  
+HWI-EAS443:3:8:775:1647#0/1  
aab[a^bbaaY`aaaU]\_QRWX\_\_XUS]a\_\_^\_]\_\_UU  
@HWI-EAS443:3:8:77:88#0/1  
GCCCCGATTGATGCCAGGGTCGACTTCGAGTCTGGACGGA  
+HWI-EAS443:3:8:77:88#0/1  
aa^abbU\_aa``a\_a\_aa\_U\_a¥¥\_\_]a^aW^`aZWT\_^¥  
@HWI-EAS443:3:8:808:757#0/1  
CTGCATCCCAGGTGTTGCGATAGCCCTTCTTTTTAACTTG  
+HWI-EAS443:3:8:808:757#0/1  
`Uaaaa\_`a\_b]La\_aa`\_\_aS\_`V¥a]Y\_a\_aa\_YU]\_]  
@HWI-EAS443:3:8:839:1207#0/1  
GAACGATTCCTCTTGGGAATCCAGGAATGTGTAGTTGCAA  
+HWI-EAS443:3:8:839:1207#0/1  
\_abbbbZb\_bbab`ba`\_aba`bab`aaa¥ba`b\_ab\_aa  
@HWI-EAS443:3:8:839:557#0/1  
GGGGCAATGAAAAGAAGCCAAACTGGCAAATGTTGTGAG

+HWI-EAS443:3:8:839:557#0/1  
aa````\_aYV[^]^\_````]\_aU[ZY]\_``]aZ]^Z`  
@HWI-EAS443:3:8:856:980#0/1  
ATTATCCTCAGGTAGTGGTCCATCAATCGGGTTGAGCTGG  
+HWI-EAS443:3:8:856:980#0/1  
aa`aaa`a`\_aVY`\_U`\_]YZ¥^¥^Z¥V^`\_MY]UY¥WUY  
@HWI-EAS443:3:8:883:603#0/1  
AAAAATTTCTCGAATAGATTGCAGCACTTCTGGTACATCT  
+HWI-EAS443:3:8:883:603#0/1  
aa`\_Ybbbab^b`aaRa`a`a`^a`\_`^a`Zb`a^a[\_a¥\_  
@HWI-EAS443:3:8:896:699#0/1  
AAAAGAATGAAGATTCGAACACAAATACCAGCAGAAATGC  
+HWI-EAS443:3:8:896:699#0/1  
aababaaab`aaaa`^a\_a\_a\_a\_\_`\_`^`a^`\_`^`\_]\_a^  
@HWI-EAS443:3:8:898:1471#0/1  
GTCTGGAGTAAATGAATCAGCTGACATGAGTATTGGAGTA  
+HWI-EAS443:3:8:898:1471#0/1  
a^ab````\_ZP¥]baaY]W^]S`a`\_`[a`\_¥\_T¥^`[^PY  
@HWI-EAS443:3:8:930:897#0/1  
GGGATTACAAAGTCTTCCCCGATAATCATCATCCATTAGC  
+HWI-EAS443:3:8:930:897#0/1  
Q]b¥`bbba`bba\_Xaab]abab[N¥^abJaa\_aa`U\_`^\_  
@HWI-EAS443:3:8:967:26#0/1  
GAACCAAGTGGGTATGCACAAACAGACTGTGTTCTAGAGG  
+HWI-EAS443:3:8:967:26#0/1  
abba`b`b`b`bUaab`\_`^a\_a`^bWY\_b^a]`X`X\_U]B  
@HWI-EAS443:3:8:970:1700#0/1  
GGTGCTTATGGCATTTCGCGCTGGAATTTTAGGAAAAGT  
+HWI-EAS443:3:8:970:1700#0/1  
RY`¥XSaba\_b^baa\_RR`¥^b\_\_`Y`a¥Y¥bb\_YV]F]Y  
@HWI-EAS443:3:8:976:354#0/1  
CTTTCCTTGAAGAATCCCACCCAGGAATATTTGAGAATTC  
+HWI-EAS443:3:8:976:354#0/1  
Y`aZ]L[^`ba[¥¥a¥SSZ^`YZW\_`a`baa]baa]^bZN  
@HWI-EAS443:3:8:982:994#0/1  
GTGTGTTCTGTTTACTGTGTCCATGGTGTATCCTGTTCCCT  
+HWI-EAS443:3:8:982:994#0/1  
a¥aZa`a`aa`ba``aa^`^^^\_aaaZa\_a^Z[`a¥\_\_T`  
@HWI-EAS443:3:8:986:1584#0/1  
CCCGAGTGGTTCAGAAACATCCTGAGCATGGCACCCATAA  
+HWI-EAS443:3:8:986:1584#0/1  
^bbabb``aXJabb\_baa\_b\_abaa\_Pabaaaaa^b`ab  
@HWI-EAS443:3:90:1013:1659#0/1  
GAGTAAGAGACAACATGACCAAGAAGATGGTCACGCAAAG  
+HWI-EAS443:3:90:1013:1659#0/1  
^Y¥aaabb`bbbbbbbbbabaab\_aa`^ab0\_aYaaaaa\_  
@HWI-EAS443:3:90:1037:1805#0/1  
AGAGCACTGACATTAATACGATGACCAAAGATGCAGAGA  
+HWI-EAS443:3:90:1037:1805#0/1  
\_aY`abb¥^Y]a``U]aa]¥aaaaa\_`\_]\_a]YU``]`aY\_

@HWI-EAS443:3:90:1054:1573#0/1  
CTATGGCACCTATATGTGTATCTGTAGTCTTTGATGAACA  
+HWI-EAS443:3:90:1054:1573#0/1  
aaZ^ZJ]\_a\_a^TT\_`0aY\_a^`TOQZY¥\_`^]]][[\_U\_  
@HWI-EAS443:3:90:1057:1747#0/1  
AGCCCTTCTTTTAACTTGCCTCTCTGCATCTTTGGTC  
+HWI-EAS443:3:90:1057:1747#0/1  
a`aaaa``aaaa``a^^a]a^```U^Z\_a¥]`\_]\_\_RON  
@HWI-EAS443:3:90:1093:558#0/1  
ACTAACTTGCAGGTCCTGTAGAATCTGTCCACTCCTGCTT  
+HWI-EAS443:3:90:1093:558#0/1  
Vbaa\_a]a\_Ua`aIK\_abZZaYa\_TO¥H\_aa^RT¥MZP¥H  
@HWI-EAS443:3:90:1146:582#0/1  
CTTTCCTTGAAGAATCCCACCCAGGAATATTTGAGAATTC  
+HWI-EAS443:3:90:1146:582#0/1  
a``ababab`SaYab\_^V^]TaZ`\_^\_ZS`aaba``]`YQ  
@HWI-EAS443:3:90:1159:1608#0/1  
CTTTGTCAGTCATAAAGAGATTGATTCTGTAAACAATGCT  
+HWI-EAS443:3:90:1159:1608#0/1  
abbbbaabba\_^aabaabaaaabaaaa\_aa\_aab]a\_^\_^a  
@HWI-EAS443:3:90:1249:1312#0/1  
GGCTAATTTTAGCATGGAGCTACCCAGCTTTGGAGTGTCT  
+HWI-EAS443:3:90:1249:1312#0/1  
abbbbbbbbabbbbbbbbabbbba^abababbbababb^b  
@HWI-EAS443:3:90:1259:1374#0/1  
ATTCCCACTAACTTGCAGGTCCTGTAGAATCTGTCCACTC  
+HWI-EAS443:3:90:1259:1374#0/1  
YXW¥babaabbaaaaa¥aa`X]\_b`T`b^^[aaaU\_¥¥]]Q  
@HWI-EAS443:3:90:1307:1726#0/1  
CACCTGGGATGCAGATTAGAGTTTCGTATACTTTGTTGA  
+HWI-EAS443:3:90:1307:1726#0/1  
`babaabbb`aa¥baaab\_ab`abab`bbb`babaab`a  
@HWI-EAS443:3:90:1326:948#0/1  
AGACAACATGACCAAGAAGATGGTCACGCAAAGAACAATA  
+HWI-EAS443:3:90:1326:948#0/1  
aba¥aa\_baa\_]¥Vaba`````^0^]W`^a¥S\_^`\_Z\_\_[  
@HWI-EAS443:3:90:1358:153#0/1  
CCCCTATGGCACCTATATGTGTATCTGTAGTCTTTGATGA  
+HWI-EAS443:3:90:1358:153#0/1  
\_^aababb`abbbbaababbaab`bb^a\_b`bbbaaab  
@HWI-EAS443:3:90:1362:872#0/1  
CCTCCATCTGATACTAATAGCCCTACCTTTGATTGGGTTT  
+HWI-EAS443:3:90:1362:872#0/1  
abbbabaabbb`bbbbbbbaaaaba\_bbbbaabbbabb  
@HWI-EAS443:3:90:1377:391#0/1  
ACATGTTTCGAGAGTAAAAGAATGAAGATTCGAACACAAAT  
+HWI-EAS443:3:90:1377:391#0/1  
aaabbababbbbaa\_aabaaaabbaaa¥aa\_baa[a\_a`aa  
@HWI-EAS443:3:90:1388:669#0/1  
AACAGATCTTCATGATCTCAGAGAACTCTTCTTTCTTGAT

+HWI-EAS443:3:90:1388:669#0/1  
`\_bZ¥\_aY^`\_b¥bbabaaaab¥aa\_bab[VbbY^babaa  
@HWI-EAS443:3:90:1424:1126#0/1  
GGTGTGTTCTGTTTACTGTGTCCATGGTGTATCCTGTTCC  
+HWI-EAS443:3:90:1424:1126#0/1  
`\_a\_babababb\_baa¥ba\_bb\_`aaaa^a^aa\_`aa\_aYR  
@HWI-EAS443:3:90:1503:1086#0/1  
AAAGAATGAAGATTCGAACACAAATACCAGCAGAAATGCT  
+HWI-EAS443:3:90:1503:1086#0/1  
ababbbbba`a`^b^b\_b\_`aba¥`\_\_¥`b`aa^^¥aa^\_  
@HWI-EAS443:3:90:1514:1319#0/1  
AAAATTCCAGCGCAAATGCCATAAGCACCATTCCTT  
+HWI-EAS443:3:90:1514:1319#0/1  
abaaa`aa`b`\_`\_a\_`aaa\_`^aa`\_`aZ`\_]a\_a^\_]QV`\_  
@HWI-EAS443:3:90:1514:930#0/1  
GCAGGTCCTGTAGAATCTGTCCACTCCTGCTTGTATTCCC  
+HWI-EAS443:3:90:1514:930#0/1  
`ba`^]b`a\_abaa`b`\_a`X[`Y`H^\_aZ]aaT^aa^\_¥  
@HWI-EAS443:3:90:1515:504#0/1  
ACCCAGGAATATTTGAGAATTCATGCCTTGAAACAATGGA  
+HWI-EAS443:3:90:1515:504#0/1  
aaaaabbaabaaaaaaaa^aaaaa\_\_aaaa`a]a\_a```  
@HWI-EAS443:3:90:1551:1193#0/1  
CTCCAATCATCCGACGATTTTGCTCTCATAGTGAATGCAC  
+HWI-EAS443:3:90:1551:1193#0/1  
ab`a`baabbaZ¥b\_bab`b`a^a`\_`aabab``¥]a\_¥^Y  
@HWI-EAS443:3:90:1579:653#0/1  
AAAAATTCCAGCGCAAATGCCATAAGCACCATTCCTT  
+HWI-EAS443:3:90:1579:653#0/1  
`[\_^\_]¥TT\_Z]a\_P[X\_YWR¥ZX`\_`V[\_X¥\_]¥R]TXLR  
@HWI-EAS443:3:90:1595:960#0/1  
AGCTGATTCATTTACTCCAGACACTCCAAAGCTGGGTAGC  
+HWI-EAS443:3:90:1595:960#0/1  
aba\_\_VZZbbb]b^S¥aa\_SXa\_aaZ[aa[b\_a^\_a\_`]S  
@HWI-EAS443:3:90:1671:471#0/1  
TGTTTACTGTGTCCATGGTGTATCCTGTTCCCTGTTCCATG  
+HWI-EAS443:3:90:1671:471#0/1  
S\_T`\_Z¥MYL^WaV\_J^\_L\_X¥`[T]T)`a][ZFZGWaV^  
@HWI-EAS443:3:90:1693:1097#0/1  
AATTGAAGAGCCATCTGGGCCGTTGCAGGTCCAAGGTCAT  
+HWI-EAS443:3:90:1693:1097#0/1  
[ab`\_`YaXWUOH^^`bbba\_Q\_]\_\_Q¥\_UV^X`QX¥[FX]  
@HWI-EAS443:3:90:1700:779#0/1  
GAGACAACATGACCAAGAAGATGGTCACGCAAAGAACAAT  
+HWI-EAS443:3:90:1700:779#0/1  
aaa`aba`aaaaY^aabaaaa`baX¥\_¥b\_\_\_\_`\_`\_`\_¥Z^  
@HWI-EAS443:3:90:1717:1621#0/1  
AAAAATTCCAGCGCAAATGCCATAAGCACCATTCCTT  
+HWI-EAS443:3:90:1717:1621#0/1  
abaa^a`\_`\_`a\_`]a\_`a`a\_\_\_\_`^\_]a]¥^\_`^`^]WV\_



@HWI-EAS443:3:90:1770:1124#0/1  
AGGCCATGGTGTCTAGGGCCCCGATTGATGCCAGGGTCGA  
+HWI-EAS443:3:90:1770:1124#0/1  
aaa[aa\_`QZaX`X` `[IW^]¥VX^¥ZZ¥ZTS^RG`KTZR  
@HWI-EAS443:3:90:1782:456#0/1  
TTTCATTGCCCCCTACTGGGAGCCCAGACTGTTCAAGCTT  
+HWI-EAS443:3:90:1782:456#0/1  
a\_baaaaa`]^X^\_\_\_ba\_a\_aRYQY^\_[`a\_]S¥\_\_Z\_  
@HWI-EAS443:3:90:195:1904#0/1  
GAACAATTGAAGAGCCATCTGGGCCGTTGCAGGTCCAAGG  
+HWI-EAS443:3:90:195:1904#0/1  
ab`aaaaabaaaba^Y¥a`\_]\_a`aU]^Y]^`[W¥VPY[]  
@HWI-EAS443:3:90:206:1961#0/1  
CTGTTTACTGTGTCCATGGTGTATCCTGTTCCCTGTTCCAT  
+HWI-EAS443:3:90:206:1961#0/1  
aaa`aa`bbaa^\_aa\_a`aXa]aaaX^R^`a`\_\_Y¥\_a\_\_  
@HWI-EAS443:3:90:262:434#0/1  
GAATCTTGGACAAAAGAAATACACCAAGACAATATACTGG  
+HWI-EAS443:3:90:262:434#0/1  
aa`^`aaaaa\_[a]a`\_`]aa][`\_a^a]\_\_\_]\_\_\_]\_Ya  
@HWI-EAS443:3:90:263:1705#0/1  
GCTGGTATTTGTGTTCGAATCTTCATTCTTTTACTCTCGA  
+HWI-EAS443:3:90:263:1705#0/1  
^aaaaSaabbaVa¥\_bb` `aba\_Z^a`aaa^\_aS\_\_\_]^Va  
@HWI-EAS443:3:90:270:1347#0/1  
GCATCCCAGGTGTTGCGATAGCCCTTCTTTTAACTTGCC  
+HWI-EAS443:3:90:270:1347#0/1  
abaaabaaa\_Za]`````XW^a```]``\_`\_`^]\_\_\_TT[  
@HWI-EAS443:3:90:289:443#0/1  
GTCCTCCATCTGATACTAATAGCCCTACCTTTGATTGGGT  
+HWI-EAS443:3:90:289:443#0/1  
a`\_\_a^Q`^Q]Z^PZ[\_`W\_\_aVV¥R]\_\_WXN^^U^TUT  
@HWI-EAS443:3:90:28:1072#0/1  
GCTCCAATCATCCGACGATTTTGCTCTCATAGTGAATGCA  
+HWI-EAS443:3:90:28:1072#0/1  
ab\_T`]]]`a\_a`X]``a[^^^UZZZX^`V^U[T\_]Y  
@HWI-EAS443:3:90:290:1411#0/1  
TTGATTCCCCTAACTTGCAGTCTGTAGAATCTGTCCA  
+HWI-EAS443:3:90:290:1411#0/1  
`Y¥aaaababbaaaa`aaba`Zaaa` `a\_[`\_¥^\_X^a\_  
@HWI-EAS443:3:90:322:1050#0/1  
GATTGATGCCAGGGTCGACTTCGAGTCTGGACGGATCAAG  
+HWI-EAS443:3:90:322:1050#0/1  
`aaa\_aaaaaa`^aWa\_a`\_\_`\_\_\_¥\_\_`^]]`\_¥^`\_¥\_  
@HWI-EAS443:3:90:339:293#0/1  
GATCTAAAGACTTCTATGGTGTGGCCAATGCAGTTGCTG  
+HWI-EAS443:3:90:339:293#0/1  
aaa\_a`^`^L]\_aaa`aa\_U^V]``YY][[\_[^TW\_]\_]\_  
@HWI-EAS443:3:90:343:380#0/1  
CACCATAGAAGTCTTTAGATCGAATGGCCTAACAGCTAAT

+HWI-EAS443:3:90:343:380#0/1  
\_a[\_W^H^R]QOZY`Za[[Uaa`Vaa]¥Sa]ZH]Z`U\_Y  
@HWI-EAS443:3:90:345:447#0/1  
GAACAATTGAAGAGCCATCTGGGCCGTTGCAGGTCCAAGG  
+HWI-EAS443:3:90:345:447#0/1  
a\_RX[YV]^`]^XXR]a`[ZLL¥[^aZQVZQYQPZSRL]Z  
@HWI-EAS443:3:90:350:852#0/1  
CGACTTCGAGTCTGGACGGATCAAGAAAGAAGAGTTCTCT  
+HWI-EAS443:3:90:350:852#0/1  
a]``a`a¥S[Zaa`a\_a\_[RY[^ZZ`[T\_[`ZY\_Z[\_[  
@HWI-EAS443:3:90:354:63#0/1  
GGCTAATAGATTTCTTAAAGGATGTAATGGAATCAATGAA  
+HWI-EAS443:3:90:354:63#0/1  
¥``````^`a`a`\_ab]\_\_bbabaX`abba`[¥LSSUa`]  
@HWI-EAS443:3:90:379:1093#0/1  
CTTGGGAGTCTCGATACTGAATCTTGGACAAAAGAAATAC  
+HWI-EAS443:3:90:379:1093#0/1  
`bbaba]bab`^aaaaaaa][a`aa`a\_``aaWaa`a\_`a  
@HWI-EAS443:3:90:412:1789#0/1  
CAGACTCGAAGTCGACCCTGGCATCAATCCGGGCCCTAGA  
+HWI-EAS443:3:90:412:1789#0/1  
a[```````\_a`NaZ]a^`[¥``¥^[¥\_S[a]]YP¥]¥YX]  
@HWI-EAS443:3:90:447:40#0/1  
CGAGTGGTTCAGAAACATCCTGAGCATGGCACCCATAATG  
+HWI-EAS443:3:90:447:40#0/1  
\_aX^]abb`J¥`¥ba`bb`aab\_a[^[ba`\_\_a`aKaa]b  
@HWI-EAS443:3:90:509:448#0/1  
GGCTTGTGTTGAGAATAGAACGATTCCTCTTGGGAATCCA  
+HWI-EAS443:3:90:509:448#0/1  
`b¥`¥X]¥^b^X^][\_aZUT\_QX¥`P]¥a`^VY\_YQ¥UW  
@HWI-EAS443:3:90:513:1618#0/1  
CAGATCTTCATGATCTCAGAGAACTCTTCTTTCTTGATCC  
+HWI-EAS443:3:90:513:1618#0/1  
Y\_XRH¥Z`ababYb`^ba`a^Yb`]X`[`a[aaa\_`ba¥\_  
@HWI-EAS443:3:90:52:845#0/1  
CTTTTCCTAAAAATCCAGCGCAAATGCCATAAGCACCA  
+HWI-EAS443:3:90:52:845#0/1  
]¥abba\_abbbaaXa¥bbbabbb^]b\_ba`ba¥abbbbaa  
@HWI-EAS443:3:90:533:1455#0/1  
CTGAGTATTGGTGTGTTCTGTTTACTGTGTCCATGGTGTA  
+HWI-EAS443:3:90:533:1455#0/1  
a]a]aVZbbbZ\_aabYaba`\_a]b]\_S^a\_\_W^\_a`U\_UZ  
@HWI-EAS443:3:90:54:1717#0/1  
GAGACAACATGACCAAGAAGATGGTCACGCAAAGAACAAT  
+HWI-EAS443:3:90:54:1717#0/1  
a^]aabbaaaaaba`¥[\_]ZPXa\_V\_a\_]a\_\_\_Y^^\_¥ZZ  
@HWI-EAS443:3:90:589:317#0/1  
ATTGAAGTACTTCAGGTCAATGCTTGCTAGCATTCTGCT  
+HWI-EAS443:3:90:589:317#0/1  
a\_aaaaa\_a`\_a`a\_a¥aa`a`\_]a¥[\_`\_^]]\_`ZU

@HWI-EAS443:3:90:615:1774#0/1  
CACCAGTATATTGTCTTGGTGTATTTCTTTTGTCCAAGAT  
+HWI-EAS443:3:90:615:1774#0/1  
abbbbaY\_b¥baa\_bb```[¥[aabaabb`^`a^`a\_\_  
@HWI-EAS443:3:90:669:693#0/1  
CCCAGGACTCAGTGATGCTGTGCCATCTATTAGAAGAGGC  
+HWI-EAS443:3:90:669:693#0/1  
abaaaa`aaaab`aaa`aaa[aa^aaaaaaaa`a[\_\_\_]`][  
@HWI-EAS443:3:90:676:916#0/1  
AAAATCGTCGGATGATTGGAGCCCATCCCACCAGTATATT  
+HWI-EAS443:3:90:676:916#0/1  
WWQ^`\_0J^¥\_¥U¥a`\_RXWT\_[```[KZ`\_[aI`a^]a  
@HWI-EAS443:3:90:68:1513#0/1  
TGGCTTTCCTTGAAGAATCCCACCCAGGAATTTTGAGAA  
+HWI-EAS443:3:90:68:1513#0/1  
abbbb\_ababa`Zaabbababbba`ba`\_a`a`¥^`baaa  
@HWI-EAS443:3:90:703:879#0/1  
TTCTCGAATAGATTGCAGCACTTCTGGTACATCTGTTCAT  
+HWI-EAS443:3:90:703:879#0/1  
`a¥¥bb`b]R\_R\_IX]¥]aSa]aabaUabb`b¥aMYa\_\_  
@HWI-EAS443:3:90:713:563#0/1  
CTCCATCTGATACTAATAGCCCTACCTTTGATTGGGTTTG  
+HWI-EAS443:3:90:713:563#0/1  
aabab]`b\_\_bY^ab`aa[aaaab`\_a`T[^``YZ^ZX`\_`  
@HWI-EAS443:3:90:746:840#0/1  
GTCTGGAGTAAATGAATCAGCTGACATGAGTATTGGAGTA  
+HWI-EAS443:3:90:746:840#0/1  
`\_abbbbbabb`bbbabbbbbbaabbbbb`ab^aaab\_a  
@HWI-EAS443:3:90:766:1917#0/1  
GGTGCATTCATGAGAGCAAATCGTCGGATGATTGGA  
+HWI-EAS443:3:90:766:1917#0/1  
a\_FZZa]`[aR[aaaa`aaa`S`aa¥\_QUGX^\_VT^VXUY  
@HWI-EAS443:3:90:826:178#0/1  
CAGGTGTTGCGATAGCCCTTCTTTTTAACTTGCCTCTCTC  
+HWI-EAS443:3:90:826:178#0/1  
WZa`¥\_Zab^aaab`\_X^\_]Y]\_Za\_a``Ya]UO\_R`Z^S  
@HWI-EAS443:3:90:873:1447#0/1  
CCCCAGTGATTGTGAAAGAAATCTCTGTGTCTTGTGAATT  
+HWI-EAS443:3:90:873:1447#0/1  
`abaaa\_\_aa`¥``aaaa^Ra\_`^`[\_\_^\_a\_P[\_`^¥]  
@HWI-EAS443:3:90:884:762#0/1  
ATAGGAGACCGTTGGAATTTCTAGCATGGTGGAGGCCAT  
+HWI-EAS443:3:90:884:762#0/1  
ab`abbaba]a\_Vbabaabbbabaa^`aZa¥bS`\_\_\_]\_]\_  
@HWI-EAS443:3:90:885:685#0/1  
GCTCCAATCATCCGACGATTTTGCTCTCATAGTGAATGCA  
+HWI-EAS443:3:90:885:685#0/1  
```a\_YY¥a``b\_]bbabaabbbbab`b¥^aab`\_¥N\_baa  
@HWI-EAS443:3:90:889:773#0/1  
AATAAGAGCACTGACATTAATACGATGACCAAAGATGCA

+HWI-EAS443:3:90:889:773#0/1  
TT`\_]\_^aaaba\_b¥`bbaT`[`¥abaaba\_aa]bba\_baa  
@HWI-EAS443:3:90:90:1527#0/1  
AATCTCTTTATGACTGACAAAGGGATTGAGGGATTACAA  
+HWI-EAS443:3:90:90:1527#0/1  
````ababbb^^^aaaa\_ZaS^a^[\`^]^¥aXSY^Xa\_]\_  
@HWI-EAS443:3:90:934:1072#0/1  
GATACACATATAGGTGCCATAGGGGAGACACACAAATTCA  
+HWI-EAS443:3:90:934:1072#0/1  
aZ`aabbbbaaaaa¥ba\_^aaba]aa`\_a`a`a`a`\_[\_a  
@HWI-EAS443:3:90:952:814#0/1  
AATCTGTCCACTCCTGCTTGTATTCCCTCATGGTTTGGTG  
+HWI-EAS443:3:90:952:814#0/1  
aaabbbTaa¥ab^aaa\_a\_a`¥`a`\_\_\_\_\_`a`\_aa¥XVa  
@HWI-EAS443:3:90:99:543#0/1  
AGAACAACATGATAAACAATGACCTTGGACCTGCAACGGC  
+HWI-EAS443:3:90:99:543#0/1  
aaa^[b`S^`\_\_aaRY]Y¥\_`]VaVRJTXN\_aVV^V^^  
@HWI-EAS443:3:91:1018:684#0/1  
CCGACTCTACTTTTCCTAAAAATTCCAGCGCAAATGCCA  
+HWI-EAS443:3:91:1018:684#0/1  
abb`^Z\_\_aaabbb\_aba`abbbbT`^b^b`H`]W\_\_WY]  
@HWI-EAS443:3:91:1034:1100#0/1  
AAATTCCAGCGCAAATGCCATAAGCACCATTCCTTA  
+HWI-EAS443:3:91:1034:1100#0/1  
\_\_X\_aVvaba¥a`^b\_b]Va]a`a`a`\_`aaa]\_X¥^^a  
@HWI-EAS443:3:91:1043:566#0/1  
TGTTACTCCAATACTCATGTCAGCTGATTCATTTACTCCA  
+HWI-EAS443:3:91:1043:566#0/1  
[```V^a`])`baaab`aa`\_Za\_a`Y[\_¥]a`\_a^]W]\_  
@HWI-EAS443:3:91:1048:1894#0/1  
ATTCAGGGGATTACAAAGTCTTCCCCGATAATCATCATCC  
+HWI-EAS443:3:91:1048:1894#0/1  
a^^\_bba`¥`aaaaaaaa\_a`\_aaYY^a\_\_\_a^a\_\_`]\_  
@HWI-EAS443:3:91:1094:656#0/1  
TTGTGGCTAATTTTAGCATGGAGCTACCCAGCTTTGGAGT  
+HWI-EAS443:3:91:1094:656#0/1  
abbaababbbbbb¥```\_^\_b^aaa^aa`\_Y^aab\_\_\_Y  
@HWI-EAS443:3:91:1097:407#0/1  
TGGCCTTCTTTTCATTGCCCCCTACTGGGAGCCAGACTG  
+HWI-EAS443:3:91:1097:407#0/1  
^^a^a`\_`Z^a^\_]YaZ]Q`^WVQ^aa`\_`TK¥`^SY]  
@HWI-EAS443:3:91:1100:2006#0/1  
TGGTCTCCATCTGATACTAATAGCCCTACCTTTGATTGG  
+HWI-EAS443:3:91:1100:2006#0/1  
aaaZabaaabbaaaaaabaabbaaaa\_aaa`a`^\_aaa\_\_^  
@HWI-EAS443:3:91:1137:2013#0/1  
GATTGATGCCAGGGTCGACTTCGAGTCTGGACGGATCAAG  
+HWI-EAS443:3:91:1137:2013#0/1  
a[SL\_QGZ`a`\_ZaS]Y]QSS]XV[NNLY¥YNZW[LNSZP

@HWI-EAS443:3:91:1156:680#0/1  
GAGCCATCTGGGCCGTTGCAGGTCCAAGGTCATTGTTTAT  
+HWI-EAS443:3:91:1156:680#0/1  
aa`[a`aa`a]\_\_VaU\_ZGYa^Ha^^V`[RY^`[Z[^\_]R  
@HWI-EAS443:3:91:1172:1676#0/1  
ATTGAAGAGCCATCTGGGCCGTTGCAGGTCCAAGGTCATT  
+HWI-EAS443:3:91:1172:1676#0/1  
abbbbb`ba`aaa`aaa\_\_a[\_a`adW\_a\_\_aaX]\_\_¥  
@HWI-EAS443:3:91:1220:1490#0/1  
CAGATACACATATAGGTGCCATAGGGGAGACACACAAATT  
+HWI-EAS443:3:91:1220:1490#0/1  
a¥bbbbbbbabbbbaab^b\_abaabaaaaaaaaaaa^a\_aa\_  
@HWI-EAS443:3:91:1222:1277#0/1  
TTCCTATGAGAGCAAAATCGTCCGATGATTGGAGCCCAT  
+HWI-EAS443:3:91:1222:1277#0/1  
aaaZ\_b]a]``\_ab[aa`[\_¥`a]`\_a]\_\_\_^]UZT\_^  
@HWI-EAS443:3:91:1226:755#0/1  
CTGTGGTAATGCCAGCCCATGGTCCAGCCAAAAGCATGGA  
+HWI-EAS443:3:91:1226:755#0/1  
aab`bb\_bbbb\_ab\_aaaaaba\_a`aa^`aaaa\_`a`\_\_`  
@HWI-EAS443:3:91:1274:869#0/1  
CTTGTATTCCCTCATGGTTTGGTGCATTCACTATGAGAGC  
+HWI-EAS443:3:91:1274:869#0/1  
\_aa`abbbb`abbbbb\_bbbb^aUbbb¥babbbbbbbaba  
@HWI-EAS443:3:91:127:100#0/1  
CATTCTGGATTCCCAAGAGGAATCGTTCTATTCTCAACA  
+HWI-EAS443:3:91:127:100#0/1  
`bbbbbaaa`aaaaa`aaa`a\_\_\_a^`Sa\_a\_^a]\_]Y^  
@HWI-EAS443:3:91:1299:529#0/1  
TGCTCAGGATGTTTCTGAACCACTCGGGTTGATTTCTGGT  
+HWI-EAS443:3:91:1299:529#0/1  
abbaaabb`abaaa\_b\_¥]Y\_aa¥X`a^Ua`^]aa^`a\_]`  
@HWI-EAS443:3:91:1308:467#0/1  
AAACAAGGTTAGATAAACTAACTCAAGGTCGCCAGACTTA  
+HWI-EAS443:3:91:1308:467#0/1  
aa^]aaa\_PG\_`aXa`XR\_a\_`aaa`P``[\_Y]``\_]`\_`  
@HWI-EAS443:3:91:1321:1081#0/1  
CGAGTGGTTCAGAAACATCCTGAGCATGGCACCCATAATG  
+HWI-EAS443:3:91:1321:1081#0/1  
\_\_aaW`T]a``¥bV\_aS\_Y[b\_aa`ab`a`b`\_`Wb\_abb  
@HWI-EAS443:3:91:1333:1794#0/1  
AAAAATTCCAGCGCAAAATGCCATAAGCACCACATTCCCT  
+HWI-EAS443:3:91:1333:1794#0/1  
abaa`a^^aa\_a^\_aaa\_a`[aaa``]a^\_a`\_\_\_TUU[  
@HWI-EAS443:3:91:1344:45#0/1  
CACCTATATGTGTATCTGTAGTCTTTGATGAACAATTGAA  
+HWI-EAS443:3:91:1344:45#0/1  
`aZZbbb`a`b\_bbaab]`b[aaaa\_aaaa]¥^\_a]V\_a  
@HWI-EAS443:3:91:134:1057#0/1  
GAGTAAATGAATCAGCTGACATGAGTATTGGAGTAACAGT

+HWI-EAS443:3:91:134:1057#0/1  
aaaPU¥aT]]Z]SR` `]aWa^Ta¥^FVVX`a]\_VRX^¥`H  
@HWI-EAS443:3:91:134:1309#0/1  
TTTGGCTTGTGTTGAGAATAGAACGATTCCTCTTGGGAAT  
+HWI-EAS443:3:91:134:1309#0/1  
aaaaaaaaa^^^a\_\_\_\_\_a` `]aaST¥Z[[]¥]]X^YX]U]Z  
@HWI-EAS443:3:91:1374:815#0/1  
CTCCAATACTCATGTCAGCTGATTCATTTACTCCAGACAC  
+HWI-EAS443:3:91:1374:815#0/1  
abbbbbbb`bbbbabbba`bbabbabbbba^ba\_bbbab]  
@HWI-EAS443:3:91:1387:1010#0/1  
CACCATAGAAGTCTTTAGATCGAATGGCCTAACAGCTAAT  
+HWI-EAS443:3:91:1387:1010#0/1  
a\_a`bbbb`bb`abbaab\_a\_aab\_aa]^`aa^`Xaa` `^  
@HWI-EAS443:3:91:139:1559#0/1  
ATCCGACTCTACTTTTCCTAAAAATCCAGCGCAAATGC  
+HWI-EAS443:3:91:139:1559#0/1  
^aa\_aZa\_Za`aaaaaaaaab`U\_S`a` `a[aba\_`^` `Y  
@HWI-EAS443:3:91:140:1523#0/1  
GGGAGCTAATGGATGATGATTATCGGGGAAGACTTTGTAA  
+HWI-EAS443:3:91:140:1523#0/1  
a\_a]aa¥`\_a\_]QS`][\_\_^`UY`\_UT`^RXVZ\_[XVV[Y  
@HWI-EAS443:3:91:1436:1971#0/1  
ATCCCTTGTGAGTCATAAAGAGATTGATTCTGTAACAA  
+HWI-EAS443:3:91:1436:1971#0/1  
`a]Q\_¥a\_[`¥^bSWbba\_ab`a\_\_¥^aa\_]\_aG¥aaQ`a  
@HWI-EAS443:3:91:1467:1669#0/1  
TGCTCTCATAGTGAATGCACCAAACCATGAGGAATACAA  
+HWI-EAS443:3:91:1467:1669#0/1  
abaaaa`aab]aaaa`aWaaaa` `[ab\_a[a^a^`U` `^  
@HWI-EAS443:3:91:146:182#0/1  
GTCTGGAGTAAATGAATCAGCTGACATGAGTATTGGAGTA  
+HWI-EAS443:3:91:146:182#0/1  
a¥¥^`SPYT]\_XYV[UUTUUPoyTTTTXRZWWYWUSYYVOR  
@HWI-EAS443:3:91:1489:1650#0/1  
TGTCTGGAGTAAATGAATCAGCTGACATGAGTATTGGAGT  
+HWI-EAS443:3:91:1489:1650#0/1  
aaa]aaa`W]\_bab`aS]]\_aYa` `Ia\_baTZa^\_\_\_^UN  
@HWI-EAS443:3:91:1498:1093#0/1  
CTTTGTAATCCCCTGAATCCCCTTGTGAGTCATAAAGAGA  
+HWI-EAS443:3:91:1498:1093#0/1  
aabbbbbbbabbbabbabb¥aabbabaaab\_aabbbabaaa  
@HWI-EAS443:3:91:1509:1858#0/1  
CAACTGCATTGGCCAACACCATAGAAGTCTTTAGATCGAA  
+HWI-EAS443:3:91:1509:1858#0/1  
aba\_bb^¥`¥bbW]^`bbbGH¥aab\_ab`b\_ab]a` `^aYa  
@HWI-EAS443:3:91:1615:1872#0/1  
TGAACAAAGAGGAAATAGAGATAACAACCCACTTTCAAAG  
+HWI-EAS443:3:91:1615:1872#0/1  
`b` `Yaa]aaba]Yabaa\_aaaba`^`¥a[ `[`¥^`\_aXa

@HWI-EAS443:3:91:1656:1785#0/1  
GGGGCAATGAAAAGAAGGCCAACTGGCAAATGTTGTGAG  
+HWI-EAS443:3:91:1656:1785#0/1  
aaJO[\_a`\_\_`\_^\_\_¥a\_XU\_^¥\_]`SX^^X\_`WZ^Z^Y\_  
@HWI-EAS443:3:91:1697:1232#0/1  
TATAGGAGACCGTTGGAATTTCTAGCATGGTGGAGGCCA  
+HWI-EAS443:3:91:1697:1232#0/1  
a`bZ]``aa\_XWXZa`aa]bba\_aa]JaaaR[]VGR`XSV  
@HWI-EAS443:3:91:1728:952#0/1  
GTGGGATTCTTCAAGGAAAGCCATAGCCTCTAGAACACAG  
+HWI-EAS443:3:91:1728:952#0/1  
aWNXa]Y^[a`U¥\_YSR]^ [NH\_\_] ]YN]X\_X\_UXY^UXX  
@HWI-EAS443:3:91:197:1009#0/1  
GAGGTTTCGTATACTTTGTTGAACTTTAGCTAGGAGCAT  
+HWI-EAS443:3:91:197:1009#0/1  
¥T\_a0`^`a\_\_\_\_`\_\_`\_\_\_\_`¥S¥VZ\_^^`^\_\_]\_¥VYX]X  
@HWI-EAS443:3:91:241:1444#0/1  
CTAACTTGCAGGTCCTGTAGAATCTGTCCACTCCTGCTTG  
+HWI-EAS443:3:91:241:1444#0/1  
aabaabbbbabaRaabbabbbabaaaa`aa``a\_\_a]\_a\_  
@HWI-EAS443:3:91:251:1304#0/1  
TGGTATTTGTGTTCGAATCTTCATTCTTTTACTCTCGAAC  
+HWI-EAS443:3:91:251:1304#0/1  
aba]Jb^baY`¥[a`aa^[]^b^a]^]a\_aa\_\_\_a`Y`a  
@HWI-EAS443:3:91:254:1262#0/1  
AACAGGATACACCATGGACACAGTAAACAGAACACACCAA  
+HWI-EAS443:3:91:254:1262#0/1  
\_¥`Sa]a¥b```a`Wa¥``baaTb]QX[aMaa\_PX```^\_  
@HWI-EAS443:3:91:276:121#0/1  
ATGGGCTCCAATCATCCGACGATTTTGCTCTCATAGTGAA  
+HWI-EAS443:3:91:276:121#0/1  
`abaa^a\_X\_````\_a````\_a¥\_aa^a\_\_`\_¥W^]¥Y` []  
@HWI-EAS443:3:91:289:1781#0/1  
CTCCAATCATCCGACGATTTTGCTCTCATAGTGAATGCAC  
+HWI-EAS443:3:91:289:1781#0/1  
^\_b`bbba`bbbabbabbbbbb`bbbabb`\_bbaabbb]  
@HWI-EAS443:3:91:293:272#0/1  
TCCAATACTCATGTCAGCTGATTCATTTACTCCAGACACT  
+HWI-EAS443:3:91:293:272#0/1  
aaaa`aaaaa\_a\_`^`aa\_\_\_] ] ] ] `\_\_]`\_] ] ] ^ ] ^X]ZXX  
@HWI-EAS443:3:91:300:1279#0/1  
CAGAGAACTCTTCTTTCTTGATCCGTCAGACTCGAAGTC  
+HWI-EAS443:3:91:300:1279#0/1  
]baZbbaba`bbba^abaaa`bab`baabbabb\_`^Z`aUZ  
@HWI-EAS443:3:91:317:701#0/1  
GGTGTGTTCTGTTTACTGTGTCCATGGTGTATCCTGTTC  
+HWI-EAS443:3:91:317:701#0/1  
a\_W\_Q¥V¥¥a\_[]`\_]U^a]`VZW\_^[^U\_TW¥WT[¥W¥WW  
@HWI-EAS443:3:91:331:1488#0/1  
AGAATCTGTCCACTCCTGCTTGTATTCCCTCATGGTTTGG

+HWI-EAS443:3:91:331:1488#0/1  
abbbbaabZab` `[bbbb\_aaaWa`aaa]\_a^`aR`YU\_  
@HWI-EAS443:3:91:347:476#0/1  
GATTGATGCCAGGGTCGACTTCGAGTCTGGACGGATCAAG  
+HWI-EAS443:3:91:347:476#0/1  
aaaaaa\_aaa\_Za[Tb\_a^`\_`a[^a¥`Y¥\_a\_¥U\_¥¥\_  
@HWI-EAS443:3:91:34:1710#0/1  
CTCCCCTATGGCACCTATATGTGTATCTGTAGTCTTTGAT  
+HWI-EAS443:3:91:34:1710#0/1  
aabbbaaa\_a\_baab][aa\_]S^S\_[P¥\_^^ZSWY^W[\_Z  
@HWI-EAS443:3:91:369:1929#0/1  
CTAACTTGCAGGTCCTGTAGAATCTGTCCACTCCTGCTTG  
+HWI-EAS443:3:91:369:1929#0/1  
abbbbbbabbbbababbabbbbbb` `Zabaa\_ab\_`¥a\_\_  
@HWI-EAS443:3:91:388:1123#0/1  
AAAAATTCCAGCGCAAATGCCATAAGCACCATTCCT  
+HWI-EAS443:3:91:388:1123#0/1  
ab`ZR`aaaa` `\_]`a\_\_Z` `` `^`\_`\_]`\_`\_]YZ  
@HWI-EAS443:3:91:397:1549#0/1  
CTGGAGTAAATGAATCAGCTGACATGAGTATTGGAGTAAC  
+HWI-EAS443:3:91:397:1549#0/1  
aaab\_a`a^bba\_`bbbaabb\_X`aabSbabaa\_\_^aa\_  
@HWI-EAS443:3:91:405:1459#0/1  
GTCCTCCATCTGATACTAATAGCCCTACCTTTGATTGGGT  
+HWI-EAS443:3:91:405:1459#0/1  
a[UYPPOP]\_\_¥^TSZZQ]¥U]]RZWZUZZ^ZX\_WVTTZME  
@HWI-EAS443:3:91:41:507#0/1  
CTTCGAGTCTGGACGGATCAAGAAAGAAGAGTTCTCTGAG  
+HWI-EAS443:3:91:41:507#0/1  
`bba`abbbbbbba]aa¥bba` `bbb]bbababaa]ab  
@HWI-EAS443:3:91:449:1664#0/1  
AGCCTCTCTTATTCAGTCTTTGTTTTTTCTTCCCTATTGT  
+HWI-EAS443:3:91:449:1664#0/1  
]a\_WT\_` `]\_YY^T¥]G]\_T[Z]Z`\_a]ZX^`a`RQR¥`X  
@HWI-EAS443:3:91:472:372#0/1  
GGTGTATGGCATTGCGCTGGAATTTTAGGAAAAGT  
+HWI-EAS443:3:91:472:372#0/1  
aZQQZ¥¥[^\_]Z[[Z[W]R][V^¥VVZ\_^]\_]YT]Y]R  
@HWI-EAS443:3:91:493:575#0/1  
TGCCTCTCTGCATCTTTGGTCATCGTATTTAATGTCAG  
+HWI-EAS443:3:91:493:575#0/1  
`bb`bb\_`a^ab^` `aaa`Ya¥`¥\_`a^Za`a¥\_`^^¥¥V  
@HWI-EAS443:3:91:494:1710#0/1  
CAGAAACATCCTGAGCATGGCACCCATAATGTTCTCAAAC  
+HWI-EAS443:3:91:494:1710#0/1  
ZbUa` `Xbbba\_aa` `¥]U\_` `^\_`aba^\_L^WaKa` `R  
@HWI-EAS443:3:91:51:105#0/1  
AGTCTGGCGACCTTGAGTTAGTTTATCTACCCTTGTGT  
+HWI-EAS443:3:91:51:105#0/1  
ab` `a\_baa`a`a` `^aZ^Y` `]a]¥OX^¥^ZZ^W^][W



@HWI-EAS443:3:91:533:282#0/1  
AGTAAACAGAACACACCAATACTCAGAAAAGGGAAAGTGG  
+HWI-EAS443:3:91:533:282#0/1  
Xa¥ZaYa`a\_b^`W¥]aaZ[\_`a¥ba¥aaaaaa]\_bXa`  
@HWI-EAS443:3:91:584:1572#0/1  
GATTTCTTAAAGGATGTAATGGAATCAATGAACAAAGAGG  
+HWI-EAS443:3:91:584:1572#0/1  
a`¥\_`¥`[\_`\_\_Y`\_^`Z]^`\_Y^`\_[[`]Z\_]Z]V]ZT][  
@HWI-EAS443:3:91:633:772#0/1  
AATCTGTCCACTCCTGCTTGTATTCCCTCATGGTTTGGTG  
+HWI-EAS443:3:91:633:772#0/1  
YU[YZ\_aaY^^a`^`^[aa]ZY^^`X`XVWT]^a`UOPV  
@HWI-EAS443:3:91:705:1794#0/1  
TTCCCACTAACTTGCAGGTCCTGTAGAATCTGTCCACTCC  
+HWI-EAS443:3:91:705:1794#0/1  
aaaYaaaaba\_a`aab[\_Y`aaa\_\_a`\_`\_`\_aY^^\_]`^XW  
@HWI-EAS443:3:91:730:699#0/1  
ATATGATGCCGTTGCAACTACACATTCCCTGGATTCCCAAG  
+HWI-EAS443:3:91:730:699#0/1  
aT`XRa\_bba\_NY`aUa\_\_a]aWSOTLLWH[`XXTWH[[U  
@HWI-EAS443:3:91:748:1234#0/1  
ACTTTTCTAAAAATTCCAGCGCAAATGCCATAAGCACC  
+HWI-EAS443:3:91:748:1234#0/1  
Y`U`a¥\_a`^aX`UUV[Z]`\_XYaYab\_\_\_Yaa^TZa^[]  
@HWI-EAS443:3:91:749:1805#0/1  
GGATTCTTCAAGGAAAGCCATAGCCTCTAGAACACAGTCT  
+HWI-EAS443:3:91:749:1805#0/1  
abbbba^a`Z`\_`\_^\_baZN\_\_^aa\_S`\_a`aaa\_aa`X¥\_  
@HWI-EAS443:3:91:75:1002#0/1  
GGTGTGTTCTGTTTACTGTGTCCATGGTGTATCCTGTTCC  
+HWI-EAS443:3:91:75:1002#0/1  
a`UaHa^a]`X¥`^W\_`¥aU¥¥¥Y\_\_U\_]W¥WZZ`SSWY  
@HWI-EAS443:3:91:762:196#0/1  
GCCCTACCTTTGATTGGGTTTGATCCCACAGTCTCTTTAA  
+HWI-EAS443:3:91:762:196#0/1  
aX`^\_ZZ`]`\_Z[\_ZR\_¥TP^^`\_Z[[WX[]YY¥ZZ^]]ZZ  
@HWI-EAS443:3:91:76:1793#0/1  
AAAAACAAAGACTGAATAAGAGAGGCTATCTAATAAGAGC  
+HWI-EAS443:3:91:76:1793#0/1  
a\_ba\_abaaaaaaaaaaaaaaaaabaa`\_a]I\_[]\_QZ`G¥LV  
@HWI-EAS443:3:91:792:1977#0/1  
GACTGACAAAGGGATTACAGGGATTACAAAGTCTTCCCCG  
+HWI-EAS443:3:91:792:1977#0/1  
abb`W`b]a`W`a[WMU]`Z]\_a`J`baa^UPa^Ua]X\_a  
@HWI-EAS443:3:91:813:669#0/1  
TAGAATCTGTCCACTCCTGCTTGTATTCCCTCATGGTTTG  
+HWI-EAS443:3:91:813:669#0/1  
abb`ababbaaaa`a`aa`aba`\_`aa\_a`aaaa\_Yaaa  
@HWI-EAS443:3:91:816:659#0/1  
TAACAACCCACTTTCAAAGAAAAAGGAGAGTAAGAGACAA

+HWI-EAS443:3:91:816:659#0/1  
XH[Z]ZWX\_¥`a¥UZYR]¥0[ZW^Z¥`S`N^[a\_\_¥W\_\_  
@HWI-EAS443:3:91:84:1526#0/1  
CTTTTGTCCAAGATTCAGTATCGAGACTCCCAAGACCGTA  
+HWI-EAS443:3:91:84:1526#0/1  
aaaa[ `[aaaa`aab\_b`ab\_^\_\_\_\_`aa`\_Z^a\_H\_  
@HWI-EAS443:3:91:857:1620#0/1  
CATATTCATGCTTTTGGCTGGACCATGGGCTGGCATTAC  
+HWI-EAS443:3:91:857:1620#0/1  
U`bba^aa\_\_a¥abbabba\_b`\_V\_bbbb`^`bb`bb`a  
@HWI-EAS443:3:91:864:1051#0/1  
GGGGCAATGAAAAGAAGCCAAACTGGCAAATGTTGTGAG  
+HWI-EAS443:3:91:864:1051#0/1  
aaaaa`aaaaa`a`aa`\_\_aa`a`a`a`a`aaX\_a]a`  
@HWI-EAS443:3:91:874:380#0/1  
CTAATAGATGGCACAGCATCACTGAGTCCTGGGATGATGA  
+HWI-EAS443:3:91:874:380#0/1  
abb`bbb`bbbaZabb`bbbbaabab[ `abbbaa`b^^aa  
@HWI-EAS443:3:91:880:1240#0/1  
TTTGTAAATCCCCTGAATCCCTTTGTCAGTCATAAAGAGAT  
+HWI-EAS443:3:91:880:1240#0/1  
aab`^]a]`a`a`a`a`T^a`]\_\_`X\_]PU^\_\_V^  
@HWI-EAS443:3:91:880:47#0/1  
CGAGTCTGGACGGATCAAGAAAGAAGAGTTCTCTGAGATC  
+HWI-EAS443:3:91:880:47#0/1  
abbbaabbbbabbabbbabaabaaabab`a`babaabaaa  
@HWI-EAS443:3:91:889:929#0/1  
CTCTGTGTTTGTCTCCACTTTCCCTTTTCTGAGTATTGG  
+HWI-EAS443:3:91:889:929#0/1  
S¥bbba`bbb`\_bYbb`a^`b`\_baabbbaaaa]ab``\_  
@HWI-EAS443:3:91:924:1248#0/1  
AAAAATTCCAGCGCAAATGCCATAAGCACCATTCCT  
+HWI-EAS443:3:91:924:1248#0/1  
^Zba`a`a¥]aYR\_HV]RW\_\_a\_a¥^\_a]aa`a^YSVY  
@HWI-EAS443:3:91:925:152#0/1  
CAAAGTCTTCCCCGATAATCATCATCCATTAGCTCCCATT  
+HWI-EAS443:3:91:925:152#0/1  
aabbba`bbab\_\_babaabba]bb\_aabb````a¥\_\_a`  
@HWI-EAS443:3:91:952:1764#0/1  
AAGTACTTCAGGTCAATGCTTGCTAGCATTCTGCTGGTA  
+HWI-EAS443:3:91:952:1764#0/1  
^¥`Z```¥\_R[HNT¥aa`^¥[Za¥V¥\_]VaXZ][a]aWOZ  
@HWI-EAS443:3:91:987:1808#0/1  
GCTTTCTTGAAGAATCCCACCCAGGAATATTTGAGAATT  
+HWI-EAS443:3:91:987:1808#0/1  
aa\_^\_¥aa^UY`aL]Y^S]\_a\_¥\_XN^^^J¥SO^W^\_OIV  
@HWI-EAS443:3:91:987:85#0/1  
GACGGATCAAGAAAGAAGAGTTCTCTGAGATCATGAAGAT  
+HWI-EAS443:3:91:987:85#0/1  
a`V]a^\_¥^aa\_^]a]aZ`Z\_X`V^\_]`]]X^\_\_^X^ZZ

@HWI-EAS443:3:92:1039:1405#0/1  
GATCATTTGAGTTAAAGAAGCTGTGGGATCAAACCCAATC  
+HWI-EAS443:3:92:1039:1405#0/1  
ab^`abab` `b\_aaa^a]ab\_ab^aa\_`^aa`^RX¥`^\_X  
@HWI-EAS443:3:92:1040:350#0/1  
ATTCGATCTAAAGACTTCTATGGTGTGGCCAATGCAGTT  
+HWI-EAS443:3:92:1040:350#0/1  
ababb\_PZ\_`\_`][U^`^\_`]X[[XV]]aX]]^^¥VWSV\_  
@HWI-EAS443:3:92:1117:220#0/1  
TTCGAATCTTCATTCTTTTACTCTCGAACATGTACCCTTT  
+HWI-EAS443:3:92:1117:220#0/1  
a`aba]XRbaaaa^V^ba`]Ya^a\_\_RTPa^Y¥VRR¥]Z\_  
@HWI-EAS443:3:92:1122:144#0/1  
GTCCACTTTCCCTTTTCTGAGTATTGGTGTGTTCTGTTTA  
+HWI-EAS443:3:92:1122:144#0/1  
a]¥W`\_a`aR][aa\_a^a`X\_ZZa\_\_\_Wa¥`X\_Z\_^Z\_]Z  
@HWI-EAS443:3:92:1132:1726#0/1  
ATGACCTTGACCTGCAACGGCCAGATGGCTCTTCAATT  
+HWI-EAS443:3:92:1132:1726#0/1  
`a`a¥Va)`Za\_\_\_Y\_`\_`]`Y\_[\_]`\_U`\_X[a\_X]\_^`]  
@HWI-EAS443:3:92:1180:1754#0/1  
GCCATGCTCAGGATGTTTCTGAACCACTCGGGTTGATTTC  
+HWI-EAS443:3:92:1180:1754#0/1  
aa\_`\_`a¥`^Y`\_`\_`^`][\_\_^\_Z]]G[\_]¥W^¥Z[^]Z  
@HWI-EAS443:3:92:1203:1397#0/1  
CACTAACTTGCAGGTCCTGTAGAATCTGTCCACTCCTGCT  
+HWI-EAS443:3:92:1203:1397#0/1  
`aabbb`a`aaaaYaaaa\_a`ab\_] ^NR¥`N\_]X`]  
@HWI-EAS443:3:92:1233:1621#0/1  
TAGAATCTGTCCACTCCTGCTTGTATTCCCTCATGGTTTG  
+HWI-EAS443:3:92:1233:1621#0/1  
\_ba`babaaaaaZSa\_T\_abaa`aaSa\_a\_G`aS[OS`¥  
@HWI-EAS443:3:92:1242:781#0/1  
TCCAATCATCCGACGATTTTGCTCTCATAGTGAATGCACC  
+HWI-EAS443:3:92:1242:781#0/1  
aa]aaa`aaX]aa\_ba^¥\_aa^\_¥^\_]\_^]R`\_^\_`[¥Y\_  
@HWI-EAS443:3:92:1244:1335#0/1  
TGATTCCCACTAACTTGCAGGTCCTGTAGAATCTGTCCAC  
+HWI-EAS443:3:92:1244:1335#0/1  
ab`baa`bbVbba`\_S^`ab`\_a\_ab]Ta```]a\_¥NQLY  
@HWI-EAS443:3:92:1247:1275#0/1  
CAAACCATGAGGGAATACAAGCAGGAGTGGACAGATTCTA  
+HWI-EAS443:3:92:1247:1275#0/1  
[aY`]V\_`^`^bbb)`aa\_aYaaa^a¥Q¥\_T[`Ya¥`]L[[  
@HWI-EAS443:3:92:1379:265#0/1  
AGCCAAAAGCATGGAATATGATGCCGTTGCAACTACACAT  
+HWI-EAS443:3:92:1379:265#0/1  
aa]\_aa`a\_]\_\_`¥\_a\_^\_]\_\_Y^[X\_] ^YX]THT0^]  
@HWI-EAS443:3:92:1391:110#0/1  
AGCCTCTCTTATTCAGTCTTTGTTTTTCTTCCCTATTGT

+HWI-EAS443:3:92:1391:110#0/1  
aa`abbaVab\_bb¥\_b`bbbbabbbbbb\_bby^¥b\_ba`a  
@HWI-EAS443:3:92:1463:314#0/1  
CCCAGTGTGAAAGAAATCTCTGTGTCTTGTGAATTA  
+HWI-EAS443:3:92:1463:314#0/1  
abaabab^bbb\_b`aab\_aaa\_a\_aa\_aa\_a`b¥a\_\_\_a\_  
@HWI-EAS443:3:92:1472:1136#0/1  
AAAAGCTTGAACAGTCTGGGCTCCCAGTAGGGGGCAATGA  
+HWI-EAS443:3:92:1472:1136#0/1  
abaaabaaa\_aaaa\_aa\_\_`a[¥`^\_S`a\_\_`\_\_`a\_\_  
@HWI-EAS443:3:92:1511:1991#0/1  
AGGGCTATTAGTATCAGATGGAGGACCAAACCTTATACAAT  
+HWI-EAS443:3:92:1511:1991#0/1  
abaZ¥ba^ab`^`\_YZY`^aS¥``a[¥a`[\_a`\_a\_a\_a  
@HWI-EAS443:3:92:1586:796#0/1  
CTGGAGTAAATGAATCAGCTGACATGAGTATTGGAGTAAC  
+HWI-EAS443:3:92:1586:796#0/1  
ababaababbbbaa`baab`bab\_bbbab`ababbab]^`a  
@HWI-EAS443:3:92:1694:1306#0/1  
CAGTGTGAAAGAAATCTCTGTGTCTTGTGAATTAGT  
+HWI-EAS443:3:92:1694:1306#0/1  
aababa¥a^Saabaa¥ba`^a`a`]]a^¥``]ZOG[] [G^U  
@HWI-EAS443:3:92:1711:858#0/1  
CCCTATGGCACCTATATGTGTATCTGTAGTCTTTGATGAA  
+HWI-EAS443:3:92:1711:858#0/1  
abL^`\_b¥¥^`ab]aba]I`ba^aab^`a¥]`abab`aa[  
@HWI-EAS443:3:92:180:1280#0/1  
GTCGTCCACTTTCCCTTTTCTGAGTATTGGTGTGTTCTGT  
+HWI-EAS443:3:92:180:1280#0/1  
a^a`V`^^`\_\_^\_]`a`a`a`a]a`^\_X¥V`V]Z^]X  
@HWI-EAS443:3:92:332:1906#0/1  
GTCTGGAGTAAATGAATCAGCTGACATGAGTATTGGAGTA  
+HWI-EAS443:3:92:332:1906#0/1  
aHbab^aa]a\_aa`aU`a`a`a`aa¥TQ^^Wa]``\_[RIY  
@HWI-EAS443:3:92:368:1810#0/1  
GGGATGGGCTCCAATCATCCGACGATTTTGCTCTCATAGT  
+HWI-EAS443:3:92:368:1810#0/1  
a^Z^SX^)`Ta``[X[WFQa^^URYZXGR\_] [VNLLSUVF  
@HWI-EAS443:3:92:377:18#0/1  
CTTGCAGTCCCTGTAGAATCTGTCCACTCCTGCTTGTATT  
+HWI-EAS443:3:92:377:18#0/1  
a\_\_bbbb`abbbabba`aabaY^`a`\_\_`a¥`\_aV``\_  
@HWI-EAS443:3:92:392:1867#0/1  
AAAATCGTGGATGATTGGAGCCCATCCCACCAGTATATT  
+HWI-EAS443:3:92:392:1867#0/1  
ababaaaX\_Z^`\_]a`\_\_`^``[^`^W^\_a^R]¥W^^Z^]  
@HWI-EAS443:3:92:402:1504#0/1  
AGCTAATGGATGATGATTATCGGGGAAGACTTTGTAATCC  
+HWI-EAS443:3:92:402:1504#0/1  
[aaabaaaa`aaa`a^aaa`\_[\_\_`^^`\_\_a\_aWV``ZZ^

@HWI-EAS443:3:92:406:242#0/1  
CATGTTGATTCCCCTAACTTGCAGGTCCTGTAGAATCTG  
+HWI-EAS443:3:92:406:242#0/1  
ab[\_`\_`aaa]R[ZaaS\_¥M]\_]XU`\_`U`]a^\_U`UW\_Naa  
@HWI-EAS443:3:92:465:1683#0/1  
GCTAATTTTAGCATGGAGCTACCCAGCTTTGGAGTGTCTG  
+HWI-EAS443:3:92:465:1683#0/1  
`]`^a[a`Y]YQ]W\_WS\_a`¥a¥Y`\_TSX]\_ZNYGaS][^  
@HWI-EAS443:3:92:473:177#0/1  
GTGCCATGCTCAGGATGTTTCTGAACCACTCGGGTTGATT  
+HWI-EAS443:3:92:473:177#0/1  
aY]¥X^] ^ZUWS[]R¥YY^XO]WYZURUXXZ]XZVWXWZZ  
@HWI-EAS443:3:92:481:1153#0/1  
CTTCTTTTCATTGCCCCCTACTGGGAGCCCAGACTGTTCA  
+HWI-EAS443:3:92:481:1153#0/1  
ababbbbababaaaaaaaaaaaaaaaa\_\_\_\_aaaa\_a`\_aa`\_`^a  
@HWI-EAS443:3:92:527:1344#0/1  
GTCTTTGATGAACAATTGAAGAGCCATCTGGGCCGTTGCA  
+HWI-EAS443:3:92:527:1344#0/1  
`Na`\_[Ua\_]`¥S\_\_SS`S\_YUT\_[]\_Z[`UaV^aTTBBB  
@HWI-EAS443:3:92:530:418#0/1  
TGCCATGCTCAGGATGTTTCTGAACCACTCGGGTTGATTT  
+HWI-EAS443:3:92:530:418#0/1  
abaaaaaaaa`abb`aaaaa`b`a` `` `a\_aaaa]`a\_a`a  
@HWI-EAS443:3:92:532:112#0/1  
GCGAAAAGCTTGAACAGTCTGGGCTCCCAGTAGGGGGCAA  
+HWI-EAS443:3:92:532:112#0/1  
a`ba`baa[`aa\_a`aa` `\_\_a^^Y¥\_]a¥^` ` `T¥^  
@HWI-EAS443:3:92:543:1520#0/1  
GTCTGGAGTAAATGAATCAGCTGACATGAGTATTGGAGTA  
+HWI-EAS443:3:92:543:1520#0/1  
¥`abaZa¥\_babbaabba`abaabaabaa^aaa¥aa\_Ya  
@HWI-EAS443:3:92:560:1174#0/1  
GGATCAAGAAAGAAGAGTTCTCTGAGATCATGAAGATCTG  
+HWI-EAS443:3:92:560:1174#0/1  
\_UQMI`XPRWOW][ROPQXLQR`a^a\_G\_\_a\_]^^ZZZY^  
@HWI-EAS443:3:92:568:574#0/1  
ATCTGATACTAATAGCCCTACCTTTGATTGGGTTTGTATCC  
+HWI-EAS443:3:92:568:574#0/1  
aaaa[^aa\_a\_a\_aaaa^\_a^\_\_\_\_^]`aa\_ZMR\_a\_]^[  
@HWI-EAS443:3:92:579:1359#0/1  
GATTGATGCCAGGGTCGACTTCGAGTCTGGACGGATCAAG  
+HWI-EAS443:3:92:579:1359#0/1  
a¥S\_]`\_aa` ``a[YaaV[``^]X]RX^]]W^` `ZZ[\_`^  
@HWI-EAS443:3:92:579:307#0/1  
GTGAGAAAGATGATGACTAATTCACAAGACACAGAGATTT  
+HWI-EAS443:3:92:579:307#0/1  
a^^`a^`\_a^\_a^^`\_Z]\_\_^^\_\_\_\_`\_] ^\_Y]^¥\_^[[]]  
@HWI-EAS443:3:92:595:1651#0/1  
GTTGTTATCTCTATTTCTCTTTGTTTTCATTGATTCCATTA

+HWI-EAS443:3:92:595:1651#0/1  
`aa^abaaaaaaaa`aaaaa`a`\_aaaa\_a``\_a]a`\_a  
@HWI-EAS443:3:92:597:1410#0/1  
ATAAGAGCACTGACATTAATACGATGACCAAAGATGCAG  
+HWI-EAS443:3:92:597:1410#0/1  
a`aa]a`^aaa`\_^]`^Y``aaa`\_``a[Z]``^`V^a  
@HWI-EAS443:3:92:59:1528#0/1  
CAGATACACATATAGGTGCCATAGGGGAGACACACAAATT  
+HWI-EAS443:3:92:59:1528#0/1  
aaaaa[```aaa`a`Zaa^``aa\_¥^^`\_^aaaa`\_¥]  
@HWI-EAS443:3:92:614:1081#0/1  
GAACGATTCTCTTGGGAATCCAGGAATGTGTAGTTGCAA  
+HWI-EAS443:3:92:614:1081#0/1  
YT\_`^¥¥[\_W`ab\_^¥XQ¥¥a¥JXV`\_]`^Qa]UV``ba  
@HWI-EAS443:3:92:644:451#0/1  
GAAGAATCCCACCCAGGAATATTTGAGAATTCATGCCTTG  
+HWI-EAS443:3:92:644:451#0/1  
^`Zbabbb]L[`V\_a\_\_`^`aa[]a^]ZZYUaY`[R[Ua  
@HWI-EAS443:3:92:686:1447#0/1  
ATCCGACTCTACTTTTCCTAAAAATTCCAGCGCAAATGC  
+HWI-EAS443:3:92:686:1447#0/1  
a^]Y¥Ia[]baa```a[`ab`a]T`^\_\_aa`\_aaa^a\_^\_  
@HWI-EAS443:3:92:694:1650#0/1  
GATTGATGCCAGGGTCGACTTCGAGTCTGGACGGATCAAG  
+HWI-EAS443:3:92:694:1650#0/1  
[abaabbbbabbaV0¥bb[bba^`a`\_baba]^a`a\_ba`  
@HWI-EAS443:3:92:703:597#0/1  
GGCTCCAATCATCCGACGATTTTGCTCTCATAGTGAATGC  
+HWI-EAS443:3:92:703:597#0/1  
^a`]aa`aXQ\_W[Z]ZQ]]¥a``aZP\_[aXX`ZNQ^VaVY  
@HWI-EAS443:3:92:709:1622#0/1  
CAGCATTGTTTACAGAATCAATCTCTTTATGACTGACAAA  
+HWI-EAS443:3:92:709:1622#0/1  
`\_\_aaabbVZa\_bbbb]]¥baaY[aa\_aaaba¥aaa\_`[`  
@HWI-EAS443:3:92:717:1430#0/1  
ATTTGCGAAAAGCTTGAACAGTCTGGGCTCCAGTAGGGG  
+HWI-EAS443:3:92:717:1430#0/1  
Zbb[bbb`ab`]aaba`\_aa¥aa]aZa\_b]\_^`Waa^U]  
@HWI-EAS443:3:92:733:347#0/1  
AGCTGTTAGGCCATTCGATCTAAAGACTTCTATGGTGTG  
+HWI-EAS443:3:92:733:347#0/1  
aba\_a[Q]]X¥a`\_]ZZN]V`\_^aWG``aYU\_Z¥TXYQ\_  
@HWI-EAS443:3:92:743:159#0/1  
CCCAGGAATATTTGAGAATTCATGCCTTGAACAATGGAA  
+HWI-EAS443:3:92:743:159#0/1  
`babbbb\_\_b`¥ababbab^ab]b`aa`aa``]b`\_a\_a`  
@HWI-EAS443:3:92:755:1081#0/1  
CAATCATAAGTCTGGCGACCTTGAGTTAGTTTATCTACCC  
+HWI-EAS443:3:92:755:1081#0/1  
^ZWZ`a^`^``Y`YZaX^`\_`a`b\_a]a^a\_a¥\_a\_[L]

@HWI-EAS443:3:92:820:1109#0/1  
GGCCAATGCAGTTGCTGCCGTTGATTTCTGTTTAATGTC  
+HWI-EAS443:3:92:820:1109#0/1  
^R^UZ\_\_\_\_\_ [^\W] [^\ [^\ ]MZXLZ] \^^\_RX\_ZY^JUX  
@HWI-EAS443:3:92:821:1895#0/1  
GAGATAACAACCCACTTTCAAAGAAAAAGGAGAGTAAGAG  
+HWI-EAS443:3:92:821:1895#0/1  
ab\_bbab\_b``\_aaaaaaaa\_aaaa\_\_`aa`\_`aX`\_`a\_  
@HWI-EAS443:3:92:853:1895#0/1  
ACCGGCAGCAACTGCATTGGCCAACACCATAGAAGTCTTT  
+HWI-EAS443:3:92:853:1895#0/1  
a``\_a`\_a¥[aXZXTX[ZOVRV^¥UYPP¥UUVPP¥PTTWWU  
@HWI-EAS443:3:92:873:511#0/1  
CAGATCTTCATGATCTCAGAGAACTCTTCTTTCTTGATCC  
+HWI-EAS443:3:92:873:511#0/1  
]b¥Ja[a[^baXQaS[[Y^`\_Z` [¥S^\_aba`]a\_\_ [YYU  
@HWI-EAS443:3:92:874:1833#0/1  
GGAAAGTGGACGACAAACACAGAGACTGGTGCACCCAGC  
+HWI-EAS443:3:92:874:1833#0/1  
aaaaaa^aa`\_aa\_aaa^`aaa\_a`\_^^^U`\_`a^`¥^^Y¥  
@HWI-EAS443:3:92:874:2009#0/1  
GTCCTCCATCTGATACTAATAGCCCTACCTTTGATTGGGT  
+HWI-EAS443:3:92:874:2009#0/1  
```abbaaa\_abaaaaaabab```aaa`aa`aaaa^` [\_X  
@HWI-EAS443:3:92:914:1962#0/1  
CAGGAATGTGTAGTTGCAACGGCATCATATCCATGCTTT  
+HWI-EAS443:3:92:914:1962#0/1  
aba`^`¥[¥`Xb\_^a]^aaaaaaaY[`\_\_\_X\_aa`\_\_dU^  
@HWI-EAS443:3:92:918:795#0/1  
CAAACACAGAGACTGGTGCACCCAGCTCAACCCGATTGA  
+HWI-EAS443:3:92:918:795#0/1  
abbaaaaa`a`\_a`\_S`aa]``\_a\_]`a``Y\_a\_^`a`  
@HWI-EAS443:3:92:919:660#0/1  
TTCGAGTCTGGACGGATCAAGAAAGAAGAGTTCTCTGAGA  
+HWI-EAS443:3:92:919:660#0/1  
aaa`Y`^ab\_a[`W`^RZ]Yaaa\_¥ZVa\_dU¥W¥`a]^\_]  
@HWI-EAS443:3:92:943:909#0/1  
GTTTGGTGCATTCACTATGAGAGCAAAATCGTCGGATGAT  
+HWI-EAS443:3:92:943:909#0/1  
a\_]XVOFY]a^[`\_Q`\_`YT\_] [ `aY[ `Z` ]R\_`MYX\_\_X  
@HWI-EAS443:3:92:94:1753#0/1  
GGCTAATTTTAGCATGGAGCTACCCAGCTTTGGAGTGTCT  
+HWI-EAS443:3:92:94:1753#0/1  
abbaa`ab`abab^a````aa]ab\_]¥`\_`^¥¥¥aZa]\_`  
@HWI-EAS443:3:92:998:572#0/1  
ATTGATTCCATTACATCCTTTAAGAAATCTATTAGCCTTC  
+HWI-EAS443:3:92:998:572#0/1  
aaaaaaaa\_aaaaZ`a`\_aa`\_aa^`\_aaa\_\_`\_a\_]^[ ]]  
@HWI-EAS443:3:92:99:155#0/1  
GTCTGGAGTAAATGAATCAGCTGACATGAGTATTGGAGTA





@HWI-EAS443:3:93:1479:942#0/1  
ACGGCCCAGATGGCTCTTCAATTGTTTCATCAAAGACTACA  
+HWI-EAS443:3:93:1479:942#0/1  
a\_ba`]^`a````¥a`aa`^^aaa^a^`Y^`\_\_]ZZ^Z\_  
@HWI-EAS443:3:93:1507:755#0/1  
ATGTTGTTCTTTATCACTGTTACTCCAATACTCATGTCAG  
+HWI-EAS443:3:93:1507:755#0/1  
`ba`\_\_`ababb`bb`bbabaaaUY`aaVa^aa`¥F[a  
@HWI-EAS443:3:93:1539:1231#0/1  
ATTTGCGAAAAGCTTGAACAGTCTGGGCTCCCAGTAGGGG  
+HWI-EAS443:3:93:1539:1231#0/1  
aaaa^¥^`]^`Zaab]Z```QX`SV`[OJVQVGLVSPV  
@HWI-EAS443:3:93:1576:348#0/1  
GTTTACTGTGTCCATGGTGTATCCTGTTCCCTGTTCCATGG  
+HWI-EAS443:3:93:1576:348#0/1  
a`aa\_N\_]Ya[QOU[`]GXGa`\_PVYPXSW^[ZWZUTUZB  
@HWI-EAS443:3:93:1579:1550#0/1  
AAAAATTCCAGCGCAAATGCCATAAGCACACATTCCT  
+HWI-EAS443:3:93:1579:1550#0/1  
a]Z`Zaaaa¥\_]Z`\_^`Y`aaYaa\_[\_WT\_0^Y\_\_¥SGW^  
@HWI-EAS443:3:93:1587:945#0/1  
ATGCTCAGGATGTTTCTGAACCACTCGGGTTGATTTCTGG  
+HWI-EAS443:3:93:1587:945#0/1  
]L]a[USRXQaaW``XXHT\_[[¥PYT[[`RV]Z`^YFX\_a  
@HWI-EAS443:3:93:1658:767#0/1  
GTAATGGAATCAATGAACAAAGAGGAAATAGAGATAACAA  
+HWI-EAS443:3:93:1658:767#0/1  
a^^a\_aa\_\_`T`a]^`Y`YY`^a^U[W\_¥`\_^]^`¥[Y\_  
@HWI-EAS443:3:93:1754:1135#0/1  
GGGCTATCGCAACACCTGGGATGCAGATTAGAGTTTCGT  
+HWI-EAS443:3:93:1754:1135#0/1  
\_OR^\_aa`a^P¥VYXY`aa`SY`]Ra[[`] [V]\_Y¥TVXB  
@HWI-EAS443:3:93:1770:987#0/1  
GGACCATGGGCTGGCATTACCACAGCATTGTTTACAGAAT  
+HWI-EAS443:3:93:1770:987#0/1  
^JR]V¥]\_[[¥^]\_aa`\_[P^] ^0YVY^a]a]¥T][ZZW  
@HWI-EAS443:3:93:191:1065#0/1  
AAAAATTCCAGCGCAAATGCCATAAGCACACATTCCT  
+HWI-EAS443:3:93:191:1065#0/1  
aa]ZY`^a^[RRU^X^\_]`^\_YFY^^\_]\_X[^\_WWX]WVX  
@HWI-EAS443:3:93:203:1239#0/1  
CATGGTGTCTAGGGCCCGATTGATGCCAGGGTCGACTTC  
+HWI-EAS443:3:93:203:1239#0/1  
a``\_WV]¥`V^[X¥[¥]``]¥¥^¥X¥¥Y¥VRTJQ¥YSXNS  
@HWI-EAS443:3:93:277:1371#0/1  
CAGATCTTCATGATCTCAGAGAACTCTTCTTTCTTGATCC  
+HWI-EAS443:3:93:277:1371#0/1  
`ab^aababbabbabb`[b^aba`aaaa`abaaa`U\_  
@HWI-EAS443:3:93:29:788#0/1  
CACTGACATTAATACGATGACCAAAGATGCAGAGAGAGG



@HWI-EAS443:3:93:660:769#0/1  
GTGCTTATGGCATTGCGCTGGAATTTTAGGAAAAGTA  
+HWI-EAS443:3:93:660:769#0/1  
¥D¥\_aa]¥^P¥PPYa^WV\_S¥Y]]S[N]a\_aa`M[]Q\_G\_  
@HWI-EAS443:3:93:665:1309#0/1  
GACAACATGACCAAGAAGATGGTCACGCAAAGAACAATAG  
+HWI-EAS443:3:93:665:1309#0/1  
^a\_RPP^Z]Xa[[Y`\_X\_WO]a]^Z]WTY]W¥V^T]W]¥Z  
@HWI-EAS443:3:93:677:1197#0/1  
AATGCCAGCCCATGGTCCAGCCAAAAGCATGGAATATGAT  
+HWI-EAS443:3:93:677:1197#0/1  
a¥^ZQ^`V`\_aa[IYWXM]ZX]U¥`OWX^R^¥¥\_\_\_\_^X[`  
@HWI-EAS443:3:93:735:1526#0/1  
AGGTCCAAGGTCATTGTTTATCATGTTGTTCTTTATCACT  
+HWI-EAS443:3:93:735:1526#0/1  
aaa¥\_aa\_aa¥`\_a`a^\_]`]\_\_\_\_\_`WUW^\_`^¥¥]W\_  
@HWI-EAS443:3:93:758:1801#0/1  
CAAAGTATACGAAACCTCTAATCTGCATCCCAGGTGTTGC  
+HWI-EAS443:3:93:758:1801#0/1  
abab`abbbaabbba`abbbabaa`baa\_abaa^a^`a\_  
@HWI-EAS443:3:93:759:522#0/1  
CTTTAAGAAATCTATTAGCCTTCCTGACTCATTAGCTGTT  
+HWI-EAS443:3:93:759:522#0/1  
]Z¥V\_X\_[]\_T\_\_S^`aa\_[U¥aaa`\_Z^^]]]a]^`^Y[  
@HWI-EAS443:3:93:763:1422#0/1  
GCCTCTTATTAGTCTTTGTTTTTTCTCCCTATTGTT  
+HWI-EAS443:3:93:763:1422#0/1  
aaaaaababaaaa`a`aaaab]aaaa`^a`]a`a\_a`\_[]`  
@HWI-EAS443:3:93:799:631#0/1  
AAAATGGGAGCTAATGGATGATGATTATCGGGGAAGACTT  
+HWI-EAS443:3:93:799:631#0/1  
¥¥¥R^X\_] [\_\_a\_a^ [PPab^aa`\_a`a^RT\_^]T[]`WWa  
@HWI-EAS443:3:93:822:87#0/1  
ATGGGCTCCAATCATCCGACGATTTTGCTCTCATAGTGAA  
+HWI-EAS443:3:93:822:87#0/1  
aab^\_¥a`\_aa]\_a` [\_\_]a\_aa```W\_Y`]^[\_\_X\_] ]  
@HWI-EAS443:3:93:844:1377#0/1  
CGATAATCATCATCCATTAGCTCCCATTTTAAGCAGACTT  
+HWI-EAS443:3:93:844:1377#0/1  
a^[¥TWa\_] [^VW^^Z`\_] ^]W\_Z^]\_]\_]\_^ [TZZ^XY]  
@HWI-EAS443:3:93:849:1190#0/1  
AAAGACTTCTATGGTGTGGCCAATGCAGTTGCTGCCGGT  
+HWI-EAS443:3:93:849:1190#0/1  
a\_a\_W`a\_\_\_\_\_] [^\_VXU]\_[]\_S^U\_^^`V^WYW]XY^UK  
@HWI-EAS443:3:93:856:1097#0/1  
TTCCCCTAACTTGCAGGTCCTGTAGAATCTGTCCACTCC  
+HWI-EAS443:3:93:856:1097#0/1  
aaa\_^a`a^aaa`\_aa\_XU]``]\_\_X^a¥\_`UU]]Y^X^  
@HWI-EAS443:3:93:867:400#0/1  
GAGATTTCTTTACAATCACTGGGGACAACACTAAGTGGA

+HWI-EAS443:3:93:867:400#0/1  
aa\_`aaaaaaaaa\_aaaaa`aa\_`a]`a#^`\_`\_\_aYa[\_  
@HWI-EAS443:3:93:974:1168#0/1  
GTCCATCAATCGGGTTGAGCTGGGGTGCACCAGTCTCTGT  
+HWI-EAS443:3:93:974:1168#0/1  
`R`\_`aa`a]aa]^X#Y^`]#Z`W`Y]W```WVa]]`Q  
@HWI-EAS443:3:94:1016:1986#0/1  
CACTAACTTGCAGGTCCTGTAGAATCTGTCCACTCCTGCT  
+HWI-EAS443:3:94:1016:1986#0/1  
aaaabb[\_aaa`\_]SL]a`\_aa\_aVVa^VWVa]NP^\_]V^  
@HWI-EAS443:3:94:1034:412#0/1  
CACTAACTTGCAGGTCCTGTAGAATCTGTCCACTCCTGCT  
+HWI-EAS443:3:94:1034:412#0/1  
abbbbbbbbabba`Xaabbabbaaaaaa\_\_\_aa`]`a\_\_\_`  
@HWI-EAS443:3:94:1053:559#0/1  
GATGGCTCTTCAATTGTTTCATCAAAGACTACAGATACACA  
+HWI-EAS443:3:94:1053:559#0/1  
a^\_\_\_\_^\_\_W\_[ZT[R\_TU`[]][XZVQV^SVZZWXWTP^  
@HWI-EAS443:3:94:1056:567#0/1  
CTCCAATCATCCGACGATTTTGCTCTCATAGTGAATGCAC  
+HWI-EAS443:3:94:1056:567#0/1  
^a`#`\_baabaababaaaaaba`aaaa[\_aa\_ab`^`b[``  
@HWI-EAS443:3:94:1062:905#0/1  
GGGCAATGAAAAGAAGGCCAAACTGGCAAATGTTGTGAGA  
+HWI-EAS443:3:94:1062:905#0/1  
aa```aa^^#Z^a`a```YZ```aaa``a^`aa^\_a]a^a\_  
@HWI-EAS443:3:94:1087:224#0/1  
AAAGACTACAGATACACATATAGGTGCCATAGGGGAGACA  
+HWI-EAS443:3:94:1087:224#0/1  
\_``]SaabaabY]^b`]]\_babbaPb`#[\_aaa]a^b]]`  
@HWI-EAS443:3:94:1217:681#0/1  
AGAAAAGGGAAAGTGGACGACAAACACAGAGACTGGTGCA  
+HWI-EAS443:3:94:1217:681#0/1  
aa`#`^a^aSVZaWa\_\_\_\_\_]\_aa\_W#^][^\_^U#ZZV^U#  
@HWI-EAS443:3:94:1232:1991#0/1  
GGCTAATTTTAGCATGGAGCTACCCAGCTTTGGAGTGTCT  
+HWI-EAS443:3:94:1232:1991#0/1  
aba]b[`bbbb`bUbba`]a`Ub`^a#`baba^\_Wa\_`a  
@HWI-EAS443:3:94:1263:982#0/1  
GGGATGGGCTCCAATCATCCGACGATTTTGCTCTCATAGT  
+HWI-EAS443:3:94:1263:982#0/1  
Q\_#^YaSXT\_S\_X\_#]Z0\_b\_b\_aa`^b#baadU]\_aV  
@HWI-EAS443:3:94:1281:474#0/1  
GGAGTGGACAGATTCTACAGGACCTGCAAGTTAGTGGGAA  
+HWI-EAS443:3:94:1281:474#0/1  
`UZ`W\_a]\_#\_QYZ`#]VZ^ZU#]Y]XXXYPUT\_X]]]XT  
@HWI-EAS443:3:94:128:139#0/1  
AACTACACATTCCTGGATTCCCAAGAGGAATCGTTCTATT  
+HWI-EAS443:3:94:128:139#0/1  
W[\_[J[]a`#WZV]SXPR^#[T^[\_`]VYVQXUO[PWQ[O

@HWI-EAS443:3:94:1392:196#0/1  
CTTGGGAATCCAGGAATGTGTAGTTGCAACGGCATCATAT  
+HWI-EAS443:3:94:1392:196#0/1  
abbbabbbbabbbaabbaba`b\_bb`aa`ba`aa\_baaa  
@HWI-EAS443:3:94:1435:1008#0/1  
AAAAATTCCAGCGCAAATGCCATAAGCACCACATTCCCT  
+HWI-EAS443:3:94:1435:1008#0/1  
aa\_]a`aa`a`Xa`\_\_[QX\_`^^R^[a^V^Y]YXWXX`  
@HWI-EAS443:3:94:1487:191#0/1  
TCCTCTTTGTTTCATTGATTCCATTACATCCTTTAAGAAAT  
+HWI-EAS443:3:94:1487:191#0/1  
`Ra¥0`a`a]a][`\_aa\_WX¥^U\_N\_YRH[Y\_]¥`Z[Z]  
@HWI-EAS443:3:94:1540:1015#0/1  
CGAAACCTCTAATCTGCATCCCAGGTGTTGCGATAGCCCT  
+HWI-EAS443:3:94:1540:1015#0/1  
abbbbaaba\_0\_baab`ab`a`aba]b`ab[aaaaa[\_Va  
@HWI-EAS443:3:94:1627:104#0/1  
GACGGATCAAGAAAGAAGAGTTCTCTGAGATCATGAAGAT  
+HWI-EAS443:3:94:1627:104#0/1  
aY`¥W]T¥\_a^]Y\_\_OR\_^\_^^W^\_[^VMU\_YZQY]X  
@HWI-EAS443:3:94:1643:1170#0/1  
TGCTTGATTCCCTCATGGTTTGGTGCATTCACTATGAGA  
+HWI-EAS443:3:94:1643:1170#0/1  
ababbbbaabba^aa`ab\_a\_aabaZ`\_aaaa`^a`aa`a^  
@HWI-EAS443:3:94:1659:1518#0/1  
GAACAATTGAAGAGCCATCTGGGCCGTTGCAGGTCCAAGG  
+HWI-EAS443:3:94:1659:1518#0/1  
abaaaabababababbababbb^b^b`abS\_b`^`a\_a`  
@HWI-EAS443:3:94:1661:1697#0/1  
CAGGAATATTTGAGAATTCATGCCTTGAAACAATGGAAGT  
+HWI-EAS443:3:94:1661:1697#0/1  
¥bbbabbbb`abbbabaabab¥[\_aaaab\_baab\_\_aaU  
@HWI-EAS443:3:94:1736:1806#0/1  
ATCTGCATCCCAGGTGTTGCGATAGCCCTTCTTTTAACT  
+HWI-EAS443:3:94:1736:1806#0/1  
aaY\_b`aa\_[`a\_]VaaaY]a]\_\_Z^[\_a`¥aaaa^]\_^a  
@HWI-EAS443:3:94:173:1780#0/1  
GGCAGCAACTGCATTGGCCAACACCATAGAAGTCTTTAGA  
+HWI-EAS443:3:94:173:1780#0/1  
aa]aaY`aaa\_Xbaa]^[^]X`Qa¥^[[]^a\_aTX`a]]V]  
@HWI-EAS443:3:94:212:597#0/1  
CAGCTGACATGAGTATTGGAGTAACAGTGATAAAGAACAA  
+HWI-EAS443:3:94:212:597#0/1  
aabbaba\_]abaaWaaaa`aa^a`^aa¥aa`\_X\_\_\_\_`\_`a  
@HWI-EAS443:3:94:263:1081#0/1  
CCCAGTGATTGTGAAAGAAATCTCTGTGTCTTGTGAATTA  
+HWI-EAS443:3:94:263:1081#0/1  
a`^Z\_Y`[^`a¥¥NT]\_¥\_\_^¥^^\_]\_WVZ[PVVWTWXM  
@HWI-EAS443:3:94:271:849#0/1  
CAACTGCATTGGCCAACACCATAGAAGTCTTTAGATCGAA

+HWI-EAS443:3:94:271:849#0/1  
abbabbabaaa`^aaaabab`Z^a\_a[Waaaaaa\_a\_aa\_  
@HWI-EAS443:3:94:327:855#0/1  
TCTCTATTTCTCTTTGTTTCATTGATTCCATTACATCCTT  
+HWI-EAS443:3:94:327:855#0/1  
abaa]\_aaaa`\_aaaa^Q^`¥aaa\_aaaa`\_`\_`RX`]  
@HWI-EAS443:3:94:349:646#0/1  
CAAAGACTGAATAAGAGAGGCTATCTAATAAGAGCACTGA  
+HWI-EAS443:3:94:349:646#0/1  
ab]Q\_]bb`X^ba¥^`\_Paab]¥Sj]RVGTaQY[T`XUVH  
@HWI-EAS443:3:94:39:905#0/1  
GCTGTGGTAATGCCAGCCCATGGTCCAGCCAAAAGCATGG  
+HWI-EAS443:3:94:39:905#0/1  
aaab]`WJ\_aaa`a]aa`\_]`aV``[]\_`\_\_\_`^`PY¥  
@HWI-EAS443:3:94:405:518#0/1  
GTTGATTCCCACTAACTTGCAGGTCCTGTAGAATCTGTCC  
+HWI-EAS443:3:94:405:518#0/1  
a`^¥P]XX`ZXY^aa^`^Z]]`Y]]^\_X]ZZ\_]X^\_XX]  
@HWI-EAS443:3:94:40:1535#0/1  
AACCGGCAGCAACTGCATTGGCCAACACCATAGAAGTCTT  
+HWI-EAS443:3:94:40:1535#0/1  
abab`^^aa[^[]`a^\_]``\_`^Z[¥[^\_`W^^MR[V  
@HWI-EAS443:3:94:43:1972#0/1  
GAGACAACATGACCAAGAAGATGGTCACGCAAAGAACAAT  
+HWI-EAS443:3:94:43:1972#0/1  
aa^a¥bbbabab`ab^ab\_aa`b\_\_aba````ba\_b`aaa  
@HWI-EAS443:3:94:46:172#0/1  
ATGGAATCAATGAACAAAGAGGAAATAGAGATAACAACCC  
+HWI-EAS443:3:94:46:172#0/1  
aab``]aaabaa`\_\_a]Ya\_aa[]\_a`^Y`\_\_`^\_]ZVS  
@HWI-EAS443:3:94:471:2025#0/1  
CTATCGCAACACCTGGGATGCAGATTAGAGTTTCGTATA  
+HWI-EAS443:3:94:471:2025#0/1  
abb`\_SaV¥XY¥OY^a`a`^`aaa`\_X`aaXQL[`\_\_XaSa  
@HWI-EAS443:3:94:471:583#0/1  
TCCATCTGATACTAATAGCCCTACCTTTGATTGGGTTTGA  
+HWI-EAS443:3:94:471:583#0/1  
]bb`aZ^`aWN¥^`YVYZ^¥ZZ]^YZa]a[Y^`X`ZG\_] [  
@HWI-EAS443:3:94:48:561#0/1  
GGGAAAGGGTACATGTTTCGAGAGTAAAAGAATGAAGATTC  
+HWI-EAS443:3:94:48:561#0/1  
aaZ`baaa\_\_`Z`bb`\_ba\_`^b]`a`aa``a\_a[a¥]^ [  
@HWI-EAS443:3:94:491:357#0/1  
GAGACAACATGACCAAGAAGATGGTCACGCAAAGAACAAT  
+HWI-EAS443:3:94:491:357#0/1  
aYa`^^`[¥WW]`a`¥]]¥`¥¥X`WLYY`]VW^YU^]WX [  
@HWI-EAS443:3:94:501:85#0/1  
CATCCCAGGACTCAGTGATGCTGTGCCATCTATTAGAAGA  
+HWI-EAS443:3:94:501:85#0/1  
aaaa`bbabZ]aaab]b\_aa\_aa]a¥Q^a\_a\_a\_\_`]^`]

@HWI-EAS443:3:94:525:231#0/1  
CTTGTGTTGAGAATAGAACGATTCCCTCTTGGGAATCCAGG  
+HWI-EAS443:3:94:525:231#0/1  
a\_aaV¥abb[aaa`aa`¥U¥\_[QR[X`¥[UZ¥\_W¥^P`\_  
@HWI-EAS443:3:94:537:1076#0/1  
ATTTGCGAAAAGCTTGAACAGTCTGGGCTCCCAGTAGGGG  
+HWI-EAS443:3:94:537:1076#0/1  
Y^^^^`^^^`]^`aaaaa^`^a^`¥¥RY\_\_`[`P\_]YXX  
@HWI-EAS443:3:94:553:85#0/1  
CTAGCATTCTGCTGGTATTTGTGTTCGAATCTTCATTCT  
+HWI-EAS443:3:94:553:85#0/1  
abbbaaaaa^bba`bb¥abaab\_a^a`aa^a\_aa`a\_Va  
@HWI-EAS443:3:94:577:1502#0/1  
ATCCGACTCTACTTTTCCTAAAAATTCCAGCGCAAATGC  
+HWI-EAS443:3:94:577:1502#0/1  
a]a^aa\_aaYa`[R`\_aZ`\_`a\_]`¥\_]\_\_\_\_`X\_^^^  
@HWI-EAS443:3:94:587:1557#0/1  
TCCATGCTTTTGGCTGGACCATGGGCTGGCATTACCACAG  
+HWI-EAS443:3:94:587:1557#0/1  
abaaaaa\_]`aX[aa\_]\_[[X¥]\_]`^a^Z`a`aY¥\_[]`  
@HWI-EAS443:3:94:588:554#0/1  
GCTTGCTAGCATTTCTGCTGGTATTTGTGTTCGAATCTTC  
+HWI-EAS443:3:94:588:554#0/1  
abbbbbabbaabbabaa`bab\_bbbab`ba`aba`aabaa  
@HWI-EAS443:3:94:596:2016#0/1  
AAAGCTTGAACAGTCTGGGCTCCCAGTAGGGGGCAATGAA  
+HWI-EAS443:3:94:596:2016#0/1  
aba¥aaaa\_\_\_aaY\_\_\_Z¥\_\_\_[\_W[`WYY\_\_\_[Z¥¥^`\_¥Y  
@HWI-EAS443:3:94:629:68#0/1  
GTAATGCCAGCCCATGGTCCAGCCAAAAGCATGGAATATG  
+HWI-EAS443:3:94:629:68#0/1  
Z\_babU]^Uaa¥Jab`a\_aUaa[Q[\_\_\_XaV\_\_\_Ya¥]^\_¥  
@HWI-EAS443:3:94:630:999#0/1  
AAGAGATTGATTCTGTAAACAATGCTGTGGTAATGCCAGC  
+HWI-EAS443:3:94:630:999#0/1  
V¥ba\_ab`¥\_b^abb`¥¥`\_`aaaaa]`aX^\_ZP¥Z]WJ  
@HWI-EAS443:3:94:633:195#0/1  
GAGTAAATGAATCAGCTGACATGAGTATTGGAGTAACAGT  
+HWI-EAS443:3:94:633:195#0/1  
a`a`ababaa\_aYaa`aa`[\_aa^aY^a]`\_]`X]\_]\_\_Y  
@HWI-EAS443:3:94:658:825#0/1  
GTGTGTTCTGTTTACTGTGTCCATGGTGTATCCTGTTCCT  
+HWI-EAS443:3:94:658:825#0/1  
aYVYa[aaaaa`]Y\_ZZZa^aa``aWaZ``\_a`^¥\_Z[\_  
@HWI-EAS443:3:94:667:518#0/1  
GGTGTGTTCTGTTTACTGTGTCCATGGTGTATCCTGTTCCT  
+HWI-EAS443:3:94:667:518#0/1  
^RRZDYV\_\_a\_Z\_\_YV[¥\_a[WW\_]`IDXLYWV`V]¥[  
@HWI-EAS443:3:94:692:637#0/1  
CAACATGATAAACAATGACCTTGGACCTGCAACGGCCCAG

+HWI-EAS443:3:94:692:637#0/1  
\_baaY`\_a`¥\_aa`\_a`\_`aaabaa` `` `[` `a[a¥]¥YVT  
@HWI-EAS443:3:94:769:1738#0/1  
GGGCTCCAATCATCCGACGATTTTGCTCTCATAGTGAATG  
+HWI-EAS443:3:94:769:1738#0/1  
aa[`V^\_\_\_\_\_a\_Va`¥a\_\_a]\_]\_`T\_U`\_a\_^a\_¥U^  
@HWI-EAS443:3:94:771:1315#0/1  
TAATGCCAGCCCATGGTCCAGCCAAAAGCATGGAATATGA  
+HWI-EAS443:3:94:771:1315#0/1  
`aVbbabb]Zababaa`aa\_a[\_]aaaZaba\_aaa\_aaaa  
@HWI-EAS443:3:94:796:552#0/1  
ATGGTGTCTAGGGCCCGATTGATGCCAGGGTCGACTTCG  
+HWI-EAS443:3:94:796:552#0/1  
a`a`Za^a¥aa`^\_a^` `^`\_`a^a^aa` `S\_\_^Y^` ¥Z  
@HWI-EAS443:3:94:799:1486#0/1  
CAAAGCTGGGTAGCTCCATGCTAAAATTAGCCACAAATCC  
+HWI-EAS443:3:94:799:1486#0/1  
[^Ya`aba]Q[]aVP\_I^aaaUaaab`a\_]\_a[a\_\_aTP  
@HWI-EAS443:3:94:830:767#0/1  
CCCGATTGATGCCAGGGTCGACTTCGAGTCTGGACGGAT  
+HWI-EAS443:3:94:830:767#0/1  
a\_abZW`aa`aU[]` `TXa` [\_a` `^`S[\_a` ^[\_a¥a`  
@HWI-EAS443:3:94:842:1910#0/1  
CTCCCCTATGGCACCTATATGTGTATCTGTAGTCTTTGAT  
+HWI-EAS443:3:94:842:1910#0/1  
aabaa]a\_¥^`a[\_b` \_\_\_`a^a]\_\_]`aZ^[X]\_\_\_¥` ]  
@HWI-EAS443:3:94:855:531#0/1  
TTTACTCCAGACTCCAAAGCTGGGTAGCTCCATGCTAA  
+HWI-EAS443:3:94:855:531#0/1  
^¥[0OVUTURWaaa¥WX¥^W¥[aXY` ]^a]WX\_¥YXMQ]V  
@HWI-EAS443:3:94:869:500#0/1  
AAGATTGAGTATCGAGACTCCCAAGACCGTACTTAGCATG  
+HWI-EAS443:3:94:869:500#0/1  
aaa`\_aa`b\_aa\_\_\_\_` ` \_`\_a` ]\_\_]]]aX\_Z`^\_[^\_`^\_  
@HWI-EAS443:3:94:870:2025#0/1  
ATTGATGCCAGGGTCGACTTCGAGTCTGGACGGATCAAGA  
+HWI-EAS443:3:94:870:2025#0/1  
aa^¥\_VO¥` ` ]`a0a` `^^\_aa\_USZ\_\_` ^¥V¥U[ `a\_^  
@HWI-EAS443:3:94:981:709#0/1  
GAGATTTCTTTCACAATCACTGGGACAACACTAAGTGGA  
+HWI-EAS443:3:94:981:709#0/1  
aZYDVY`Xa^\_Y\_Y¥]^WWW]\_¥]WF[[¥]^[\_¥Z`J\_^]  
@HWI-EAS443:3:95:1011:1035#0/1  
GGTTGTTATCTCTATTTCTCTTTGTTTCATTGATTCCATT  
+HWI-EAS443:3:95:1011:1035#0/1  
aaabbabab`aababbba`\_`\_bbba`a`aaaaaa\_^`\_`\_  
@HWI-EAS443:3:95:1016:362#0/1  
TGCAGATTAGAGGTTTCGTATACTTTGTTGAACTTTAGC  
+HWI-EAS443:3:95:1016:362#0/1  
`aYaa¥aaa` `a`Waaaa\_\_a`Waaaa\_a\_^a^\_a`^aU



@HWI-EAS443:3:95:1021:1749#0/1  
GTGGGATTCTTCAAGGAAAGCCATAGCCTCTAGAACACAG  
+HWI-EAS443:3:95:1021:1749#0/1  
\_S^ZY`\_Zaa`T`¥ba]`ba^b\_^[^Vba[ba`bKb[  
@HWI-EAS443:3:95:1036:1382#0/1  
CTTGGGAATCCAGGAATGTGTAGTTGCAACGGCATCATAT  
+HWI-EAS443:3:95:1036:1382#0/1  
Vabaaaabbabbaababb\_\_a`babbabbbab`bb\_bbba  
@HWI-EAS443:3:95:1053:983#0/1  
AAGAGAGGCTATCTAATAAGAGCACTGACATTAATACGA  
+HWI-EAS443:3:95:1053:983#0/1  
abaabaa]aa`ZQ]Y^^]ZYW\_\_\_\_\_]\_]PL^\_[DYaSXG\_`  
@HWI-EAS443:3:95:1122:1184#0/1  
GTCTGGAGTAAATGAATCAGCTGACATGAGTATTGGAGTA  
+HWI-EAS443:3:95:1122:1184#0/1  
aaabb^[b\_ababa````aa\_aa\_\_Y`baaZ`aaaa]a]\_  
@HWI-EAS443:3:95:1135:398#0/1  
TGTCATCCGACTCTACTTTTCCTAAAAATCCAGCGCAA  
+HWI-EAS443:3:95:1135:398#0/1  
abaab^¥T`X`aaY¥T`aaaaRabaaaUa\_NV\_¥S`Ia`  
@HWI-EAS443:3:95:1177:1245#0/1  
GCGAAAAGCTTGAACAGTCTGGGCTCCCAGTAGGGGGCAA  
+HWI-EAS443:3:95:1177:1245#0/1  
aaaa`aaaaaaa`a\_aaS\_aaa````\_`Z`W]`\_¥`a\_Z¥  
@HWI-EAS443:3:95:1218:643#0/1  
AGATAACAACCCACTTTCAAAGAAAAAGGAGAGTAAGAGA  
+HWI-EAS443:3:95:1218:643#0/1  
`[[`Y`a\_T^YX\_aa`ULW\_a`[¥`ba¥Z[aZa[V¥\_^  
@HWI-EAS443:3:95:1221:742#0/1  
CAAGAATTCCCCTTTGGCTTGTGTTGAGAATAGAACGATT  
+HWI-EAS443:3:95:1221:742#0/1  
abbababbba\_babbbbab\_¥b\_bb¥bbabb`baGa\_`^  
@HWI-EAS443:3:95:1259:372#0/1  
AGAAAAGGAAAGTGGACGACAAACACAGAGACTGGTGCA  
+HWI-EAS443:3:95:1259:372#0/1  
]bTLXab\_OQ¥\_a]Z`MX\_b^b\_bW]aababbI^Wa^a\_a  
@HWI-EAS443:3:95:1259:458#0/1  
GGCTATTAGTATCAGATGGAGGACCAAACCTTATACAATAT  
+HWI-EAS443:3:95:1259:458#0/1  
S¥`\_a`bab`aa\_\_bZV[`abbaYRZaa\_a¥ba`M`^]aG  
@HWI-EAS443:3:95:1346:615#0/1  
GCCCATCCCACCAGTATATTGTCTTGGTGTATTTCTTTTG  
+HWI-EAS443:3:95:1346:615#0/1  
`b\_¥^\_P\_R\_T[^a]K\_Xaa^S``]aa]aX[aa\_a`]a\_`  
@HWI-EAS443:3:95:1421:1287#0/1  
GATGGCACAGCATCACTGAGTCCTGGGATGATGATGGGCA  
+HWI-EAS443:3:95:1421:1287#0/1  
abaaaaa`a`bb[a[aa`a]aaba][Zab\_a`\_`\_a`H`  
@HWI-EAS443:3:95:1489:145#0/1  
GCCCATCCCACCAGTATATTGTCTTGGTGTATTTCTTTTG

+HWI-EAS443:3:95:1489:145#0/1  
a]GYX]L\_Y`\_ZTVX]aZ^SUWX]^ZST^VMV^XM[]YY]  
@HWI-EAS443:3:95:1492:750#0/1  
CCCACCTTTCAAAGAAAAAGGAGAGTAAGAGACAACATGAC  
+HWI-EAS443:3:95:1492:750#0/1  
a` `babbbbbbbbab¥bbbaabbbbbbbabb`bababbb^  
@HWI-EAS443:3:95:1496:1438#0/1  
CTTTTCTGAGTATTGGTGTGTTCTGTTTACTGTGTCCATG  
+HWI-EAS443:3:95:1496:1438#0/1  
ab\_bZb`^Y`K` `bbb`b]b`aSabb¥b^bb\_b\_\_Wba]b  
@HWI-EAS443:3:95:1504:107#0/1  
GAGAAAGATGATGACTAATTCACAAGACACAGAGATTTCT  
+HWI-EAS443:3:95:1504:107#0/1  
¥`¥`aab\_ab\_ba\_baaaabKbb`a^aababbbbaab`¥b  
@HWI-EAS443:3:95:1550:926#0/1  
CTCCAATCATCCGACGATTTTGCTCTCATAGTGAATGCAC  
+HWI-EAS443:3:95:1550:926#0/1  
¥`¥^babb`]a`b`\_\_abbba\_V\_b` `^babbbbaabbb]\_  
@HWI-EAS443:3:95:1567:1199#0/1  
CCCACCAGTATATTGTCTTGGTGTATTTCTTTTGTCCAAG  
+HWI-EAS443:3:95:1567:1199#0/1  
^`b`b`b`b`^a^`bbba\_bbba`a]bbbb`bbbbbba[[b]b  
@HWI-EAS443:3:95:1573:2003#0/1  
CTCCTAGCTAAAGTTTCAACAAAGTATACGAAACCTCTAA  
+HWI-EAS443:3:95:1573:2003#0/1  
ab^baW^Y\_\_]\_b` ``¥¥Va\_a`bba[ `b¥a\_aaab`a  
@HWI-EAS443:3:95:1676:625#0/1  
ATGACTAATTCACAAGACACAGAGATTTCTTTTACAATCA  
+HWI-EAS443:3:95:1676:625#0/1  
`bbbabbabbab\_aaba\_a\_aaa^aab\_baaaaaaaZ`  
@HWI-EAS443:3:95:1697:150#0/1  
GGGCTCCAATCATCCGACGATTTTGCTCTCATAGTGAATG  
+HWI-EAS443:3:95:1697:150#0/1  
\_b^^`aaaaaNa]Z\_b^]^ZY¥^aa][[\_^\_] ^TDV[^T  
@HWI-EAS443:3:95:170:522#0/1  
CTGGCGACCTTGAGTTAGTTTATCTACCCTTGTTTGTGA  
+HWI-EAS443:3:95:170:522#0/1  
abb]]baaabaab\_aab`aa`a`aaTZ`aaa\_a\_Y\_`a\_  
@HWI-EAS443:3:95:1745:469#0/1  
GAAGAATCCCACCCAGGAATATTTGAGAATTCATGCCTTG  
+HWI-EAS443:3:95:1745:469#0/1  
aba\_b`XQTM]aZM[]ROZY` `aW[GQ`a\_\_¥]UXKKSZY  
@HWI-EAS443:3:95:228:438#0/1  
AAAAATTCCAGCGCAAATGCCATAAGCACCATTCCT  
+HWI-EAS443:3:95:228:438#0/1  
aaaa`aa\_a\_a\_a^`Y[¥\_\_\_\_aa\_\_`¥a\_]`^^^UYU^  
@HWI-EAS443:3:95:246:195#0/1  
CCCAGTGATTGTGAAAGAAATCTCTGTGTCTTGTGAATTA  
+HWI-EAS443:3:95:246:195#0/1  
ab`aa]baa\_\_X\_Y^`a`]^a\_a\_aa\_aX^`a`\_`LU^`Y

@HWI-EAS443:3:95:262:495#0/1  
CAGCTTTGGAGTGTCTGGAGTAAATGAATCAGCTGACATG  
+HWI-EAS443:3:95:262:495#0/1  
`^babbbbb`]a\_aabb\_b^abaaaa\_`aaa\_`a\_U\_`a  
@HWI-EAS443:3:95:267:758#0/1  
GTAAGAGACAACATGACCAAGAAGATGGTCACGCAAAGAA  
+HWI-EAS443:3:95:267:758#0/1  
aP^[VTFUZ^ZX\_]XY¥L`X¥\_UY^Y^^G]^Z¥SWSOYRR  
@HWI-EAS443:3:95:294:301#0/1  
TCCAAAGCTGGGTAGCTCCATGCTAAAATTAGCCACAAAT  
+HWI-EAS443:3:95:294:301#0/1  
aaaaaaaa`aabY\_\_`\_\_\_`\_aXa`\_\_`a]\_\_\_XXR^^]]  
@HWI-EAS443:3:95:315:921#0/1  
ATTGAAGAGCCATCTGGGCCGTTGCAGGTCCAAGGTCATT  
+HWI-EAS443:3:95:315:921#0/1  
aaababaaba`aa\_`a^a\_\_a\_\_`a¥aaV\_]V]`\_Y^U\_a  
@HWI-EAS443:3:95:343:177#0/1  
CTCTTCAATTGTTTCATCAAAGACTACAGATACACATATAG  
+HWI-EAS443:3:95:343:177#0/1  
a\_Q¥\_[\_S]Z]Y`]XW\_^RW¥W¥TTX[`Z¥[Z[\_Y\_^\_[  
@HWI-EAS443:3:95:424:2001#0/1  
ATTTTCTCAATTTTCTTCTTTGTTGATTGATTGAAGTACT  
+HWI-EAS443:3:95:424:2001#0/1  
abbbbbbbabbaba\_bbaabaaaaXbaabbaaaaaa]a`a  
@HWI-EAS443:3:95:464:1669#0/1  
TACAGAATCAATCTCTTTATGACTGACAAAGGGATTGAGG  
+HWI-EAS443:3:95:464:1669#0/1  
ZV`bbXU]¥bbbaabWR^`abaYaaa\_]\_]aa][`¥Y^  
@HWI-EAS443:3:95:514:308#0/1  
GGGAATACAAGCAGGAGTGGACAGATTCTACAGGACCTGC  
+HWI-EAS443:3:95:514:308#0/1  
aaa`aaa\_aa`\_`a\_]aW\_^¥^``¥¥\_\_¥\_Y\_`]¥WW¥¥Q  
@HWI-EAS443:3:95:523:1271#0/1  
CACTGTTACTCCAATACTCATGTCAGCTGATTGATTACT  
+HWI-EAS443:3:95:523:1271#0/1  
\_bbX^`\_a`bbaa¥babbbaK`[`bRbb¥b\_ba`a^\_aa  
@HWI-EAS443:3:95:523:700#0/1  
ATCCGACTCTACTTTTCTAAAAATTCCAGCGCAAATGC  
+HWI-EAS443:3:95:523:700#0/1  
aaa\_`^\_a`a^\_aaa¥\_a`aa^W`a\_]aW`^`^^¥^]W  
@HWI-EAS443:3:95:543:1813#0/1  
AAAATTCCAGCGCAAATGCCATAAGCACCACATTCCCTT  
+HWI-EAS443:3:95:543:1813#0/1  
^a]^`^Y`PI¥]]^`R]S[[ZP[\_Y\_`a\_YXPOLLXOS  
@HWI-EAS443:3:95:552:858#0/1  
GTCTGGAGTAAATGAATCAGCTGACATGAGTATTGGAGTA  
+HWI-EAS443:3:95:552:858#0/1  
aUbaa]TbY]^`Xa[[Va¥aL^\_a`[^`^^`W`S[^`¥VX\_  
@HWI-EAS443:3:95:578:1110#0/1  
ACCTGAGGATAATGAACCAAGTGGGTATGCACAAACAGAC

+HWI-EAS443:3:95:578:1110#0/1  
a\_]baabbaa\_¥\_b\_¥` `a^`W^`\_Taaaa`aa\_a\_a`a`  
@HWI-EAS443:3:95:62:1116#0/1  
AATCAATGAACAAAGAGGAAATAGAGATAACAACCCACTT  
+HWI-EAS443:3:95:62:1116#0/1  
a]b`aa\_a\_aaa\_¥aaa`\_^`a`a\_aa^^]`\_`¥` `]^  
@HWI-EAS443:3:95:731:586#0/1  
AACTTGCAGGTCCTGTAGAATCTGTCCACTCCTGCTTGTA  
+HWI-EAS443:3:95:731:586#0/1  
ababbabbbb\_bb[b`baaaa`abaQaaV¥^`\_LU^`\_]X[\_  
@HWI-EAS443:3:95:748:95#0/1  
CAGTGATTGTGAAAGAAATCTCTGTGTCTTGTGAATTAGT  
+HWI-EAS443:3:95:748:95#0/1  
S¥bbbbbb`babbbabbbab`^bbbabbb`bb¥Vb¥` `b`\_^  
@HWI-EAS443:3:95:772:1765#0/1  
ATCGCAACACCTGGGATGCAGATTAGAGGTTTCGTATACT  
+HWI-EAS443:3:95:772:1765#0/1  
a`baaaa`ab`a`aY`Uaa\_a`\_a`\_¥^U`\_¥`\_a\_aX\_  
@HWI-EAS443:3:95:789:914#0/1  
CAGATACACATATAGGTGCCATAGGGGAGACACACAAATT  
+HWI-EAS443:3:95:789:914#0/1  
ab\_bbbababbbbbbb]b`abbabbabbaa\_a]`\_aa`ba  
@HWI-EAS443:3:95:825:1553#0/1  
GTGGGATGGGCTCCAATCATCCGACGATTTTGCTCTCATA  
+HWI-EAS443:3:95:825:1553#0/1  
a[aaaa`aYXWa\_\_\_a\_[a\_]\_\_\_a\_]a`\_`X\_^`W^`\_  
@HWI-EAS443:3:95:827:1669#0/1  
GAGAGAGGCAAGTTAAAAAGAAGGGCTATCGCAACACCTG  
+HWI-EAS443:3:95:827:1669#0/1  
a\_aa[aaaabbTS]abaaa`aba]U]\_a`\_a`^b`Z\_X`a  
@HWI-EAS443:3:95:838:940#0/1  
GTCGTCCACTTTCCTTTTCTGAGTATTGGTGTGTTCTGT  
+HWI-EAS443:3:95:838:940#0/1  
a`ab¥\_aa`aaaa`\_aaaa¥aa¥`^]aa[aZ`]a]`X` `\_  
@HWI-EAS443:3:95:853:176#0/1  
CCCCTTTCAAAGAAAAAGGAGAGTAAGAGACAACATGAC  
+HWI-EAS443:3:95:853:176#0/1  
ab` `bbbaaabba` `ab` `babaababaaabaa`aa\_  
@HWI-EAS443:3:95:861:1451#0/1  
GAGGCTATGGCTTTCCTTGAAGAATCCCACCCAGGAATAT  
+HWI-EAS443:3:95:861:1451#0/1  
aaa`aa]`Y¥Y\_¥`Y]XZPS` [ ` [WSU` ` \_Z\_R¥`V\_YYT  
@HWI-EAS443:3:95:914:1488#0/1  
AATTGAAGAGCCATCTGGGCCGTTGCAGGTCCAAGTCAT  
+HWI-EAS443:3:95:914:1488#0/1  
aaaaabaa`a`aa\_]`a\_a^]a^]`X\_\_\_YR^^` `VV^\_  
@HWI-EAS443:3:95:948:716#0/1  
GATTGATGCCAGGGTCGACTTCGAGTCTGGACGGATCAAG  
+HWI-EAS443:3:95:948:716#0/1  
a[XXa^VYS]W0^`L`\_Y^U¥XXY`\_R`\_YU\_TNV^W¥VX

@HWI-EAS443:3:95:94:703#0/1  
CATGCTCAGGATGTTTCTGAACCACTCGGGTTGATTTCTG  
+HWI-EAS443:3:95:94:703#0/1  
aab¥`a`^^a\_[b`aab[^b^X[\_a``baa``a\_`^``¥a[  
@HWI-EAS443:3:95:953:1151#0/1  
GGCTAATTTTAGCATGGAGCTACCCAGCTTTGGAGTGTCT  
+HWI-EAS443:3:95:953:1151#0/1  
^VZX¥W¥ab`¥\_ba\_]\_TYU]\_0[a`[b¥[W^PUV¥T]WSa  
@HWI-EAS443:3:95:977:979#0/1  
GGCTAATTTTAGCATGGAGCTACCCAGCTTTGGAGTGTCT  
+HWI-EAS443:3:95:977:979#0/1  
aaabbbba\_ba\_]b`b\_a`\_b\_`a`aaabaaa`bWa\_¥a  
@HWI-EAS443:3:96:1030:1296#0/1  
CAAAGAACAATAGGGAAGAAAAACAAAGACTGAATAAGA  
+HWI-EAS443:3:96:1030:1296#0/1  
a¥^]aUaaa\_aaaaaabbaaa^]Za^aaaa]`a`\_aa^ab  
@HWI-EAS443:3:96:1039:1210#0/1  
GGGAGCTAATGGATGATGATTATCGGGGAAGACTTTGTAA  
+HWI-EAS443:3:96:1039:1210#0/1  
a`a^abaabbaaaa`aaa`aaa^a\_`a]` `]`\_\_\_aX\_`  
@HWI-EAS443:3:96:1040:362#0/1  
CCTGAAGTACTTCAATGAATCAACAAAGAAGAAAATTGAG  
+HWI-EAS443:3:96:1040:362#0/1  
]`abbaaabbaaa¥bb\_abba``a^b`\_b^aba\_`\_a[a\_a  
@HWI-EAS443:3:96:1047:1353#0/1  
AAAGAATGAAGATTGAACACAAATACCAGCAGAAATGCT  
+HWI-EAS443:3:96:1047:1353#0/1  
a^`^QQaa]OVUZ` `[a^Y]]P\_`^`^^]\_\_`^UHO]`  
@HWI-EAS443:3:96:1085:1094#0/1  
CAGATCTTCATGATCTCAGAGAACTCTTCTTTCTTGATCC  
+HWI-EAS443:3:96:1085:1094#0/1  
RG]aX]\_a` `V`\_]¥X¥Z[aX¥`^H[][\_VTX[Za¥P¥^  
@HWI-EAS443:3:96:1099:1306#0/1  
GATGGGCTCCAATCATCCGACGATTTTGCTCTCATAGTGA  
+HWI-EAS443:3:96:1099:1306#0/1  
aVW`\_`^¥ZXRZQ¥aTU]^][RJY\_¥^WHY]UXTT\_¥M[B  
@HWI-EAS443:3:96:1121:89#0/1  
TGCCCATCATCATCCAGGACTCAGTGATGCTGTGCCATC  
+HWI-EAS443:3:96:1121:89#0/1  
a\_\_ZNa`¥aa¥\_a\_ZU`aVTNa¥^^W`¥^^T`aY^WS¥¥Q  
@HWI-EAS443:3:96:1184:1206#0/1  
GTCTTTAGATCGAATGGCCTAACAGCTAATGAGTCAGGAA  
+HWI-EAS443:3:96:1184:1206#0/1  
aVJUY`ZXVXVQQW^ZZWS¥\_POOXDW^XXXT^RJRORTU  
@HWI-EAS443:3:96:1221:931#0/1  
GGGCTATCGCAACACCTGGGATGCAGATTAGAGTTTCGT  
+HWI-EAS443:3:96:1221:931#0/1  
aaaaaaa\_aaaa\_` `aaaa`^a\_Za\_aa\_a\_aZTWaX\_\_  
@HWI-EAS443:3:96:1336:395#0/1  
GGAGCTAATGGATGATGATTATCGGGGAAGACTTTGTAAT

+HWI-EAS443:3:96:1336:395#0/1  
aa`aYba`ab\_\_a\_aaaaaa¥`aa\_a\_^`ZG\_`]`G[\_a  
@HWI-EAS443:3:96:1357:1791#0/1  
ACCTATATGTGTATCTGTAGTCTTTGATGAACAATTGAAG  
+HWI-EAS443:3:96:1357:1791#0/1  
a^`Y[ba¥Z`\_W\_a`ba`¥TXZaa\_]a]a`XGaaX`\_\_^B  
@HWI-EAS443:3:96:1361:987#0/1  
ATGCCAGGGTCGACTTCGAGTCTGGACGGATCAAGAAAAGA  
+HWI-EAS443:3:96:1361:987#0/1  
aa^aab`\_a\_[aa\_a\_\_b`\_¥\_aaa\_V`aVWM`\_`\_^\_\_\_\_`  
@HWI-EAS443:3:96:147:1025#0/1  
GATTGATGCCAGGGTCGACTTCGAGTCTGGACGGATCAAG  
+HWI-EAS443:3:96:147:1025#0/1  
aX`\_`[]W]TZWY`VaXVRLTUP^QFJ[XVKZ\_TSBBBBB  
@HWI-EAS443:3:96:147:82#0/1  
ATTCGAGAAATTTTTCCCTAGCAGTTCATATAGGAGACCG  
+HWI-EAS443:3:96:147:82#0/1  
a`\_^\_`aa^aY]a^TY\_a^`¥H]Y¥\_Z\_\_\_\_\_a]WaXSVa  
@HWI-EAS443:3:96:1549:960#0/1  
GTTCGAATCTTCATTCTTTACTCTCGAACATGTACCCTT  
+HWI-EAS443:3:96:1549:960#0/1  
a^\_\_a`\_bTa`PXba[aa`^^`X\_Ha]ZU\_\_`U¥GVHW`  
@HWI-EAS443:3:96:1580:613#0/1  
AGCTGATTCATTTACTCCAGACACTCCAAAGCTGGGTAGC  
+HWI-EAS443:3:96:1580:613#0/1  
]V¥¥0\_ba]¥b`^^`^T[\_`]¥aP]L¥]¥YYXaa^aYSBB  
@HWI-EAS443:3:96:1586:917#0/1  
AATGGAATCAATGAACAAAGAGGAAATAGAGATAACAACC  
+HWI-EAS443:3:96:1586:917#0/1  
¥]bbbb¥]Yba]b`\_]a`a`\_a\_¥^\_aa^aa¥bb\_Y\_¥]H  
@HWI-EAS443:3:96:1596:225#0/1  
ACCTGAAGTACTTCAATGAATCAACAAAGAAGAAAATTGA  
+HWI-EAS443:3:96:1596:225#0/1  
`\_\_aaaaa]aWaa`a^\_`¥\_W^]Y`\_YZZ^\_^]P¥a`a]  
@HWI-EAS443:3:96:1674:694#0/1  
ATAGGAGACCGTTGGAATTTCTAGCATGGTGGAGGCCAT  
+HWI-EAS443:3:96:1674:694#0/1  
aaabbaba\_abb\_bbabaaaaZa`bU`\_]\_S`\_`\_`¥V]`  
@HWI-EAS443:3:96:1742:1475#0/1  
AGAATCCCACCCAGGAATATTTGAGAATTCATGCCTTGAA  
+HWI-EAS443:3:96:1742:1475#0/1  
aaab`\_]aYY]\_¥]\_\_aa`\_a[\_]Z\_\_¥`^\_]\_]\_]\_]`  
@HWI-EAS443:3:96:1742:1585#0/1  
ATGATAAACAATGACCTTGGACCTGCAACGGCCAGATGG  
+HWI-EAS443:3:96:1742:1585#0/1  
[baaabaa^aaaa]SaabX\_¥^ab^\_aV`\_`SY]Y\_¥XVB  
@HWI-EAS443:3:96:175:1032#0/1  
AGTACCCAGCTTTGGAGTGTCTGGAGTAAATGAATCAGC  
+HWI-EAS443:3:96:175:1032#0/1  
aaaaabaaP¥`aaa`\_]a^a`\_`a[^\_X^Z`\_`\_`\_U]\_XX

@HWI-EAS443:3:96:1767:1496#0/1  
AACAAAGGGTAGATAAACTAACTCAAGGTCGCCAGACTTAT  
+HWI-EAS443:3:96:1767:1496#0/1  
a^\_\_^`XV[a^X\_aa^U`\_X¥[`\_]\_RQWTV^ZSMU]]B  
@HWI-EAS443:3:96:223:1922#0/1  
ATGTTGATTCCCCTAACTTGCAGGTCCTGTAGAATCTGT  
+HWI-EAS443:3:96:223:1922#0/1  
ZMMPVW`a^aS^abaWRR^`Q`\_a^RPW`\_J`¥[¥BBBBB  
@HWI-EAS443:3:96:245:1119#0/1  
GAGCATGGCACCCATAATGTTCTCAAACAAAATGGCAAGA  
+HWI-EAS443:3:96:245:1119#0/1  
a]FQ¥`[^ba`a`aab`aaVaXa`a¥a[``W¥`aa\_US`V  
@HWI-EAS443:3:96:245:1460#0/1  
GGTGGGATGGGCTCCAATCATCCGACGATTTTGCTCTCAT  
+HWI-EAS443:3:96:245:1460#0/1  
aaYYOZXR`a^S^[V`\_```]¥a\_XQ\_Z¥Y¥^UZZSYWZ]  
@HWI-EAS443:3:96:265:147#0/1  
TCCCTATTGTTCTTTGCGTGACCATCTTCTTGGTCATGTT  
+HWI-EAS443:3:96:265:147#0/1  
aabaa``abaa`aaaa\_a\_a\_]Y\_Z`^Z^`]^PVY\_\_]]  
@HWI-EAS443:3:96:298:1728#0/1  
CAGATTAGAGGTTTCGTATACTTTGTTGAACTTTAGCTA  
+HWI-EAS443:3:96:298:1728#0/1  
`T`a¥a`^X]^\_ZYa`\_aZS`\_a^\_]a`[^\_a\_dH¥]  
@HWI-EAS443:3:96:355:494#0/1  
GTCTGCTTAAAATGGGAGCTAATGGATGATGATTATCGGG  
+HWI-EAS443:3:96:355:494#0/1  
^`W\_ba\_aa[aaaba`VZTX`S\_a¥[Z¥\_Za][ ]`\_`V¥  
@HWI-EAS443:3:96:396:1068#0/1  
ATGGGCTCCAATCATCCGACGATTTTGCTCTCATAGTGAA  
+HWI-EAS443:3:96:396:1068#0/1  
a``aa^`a\_0\_a`\_`¥W\_^]`aaa^aaX^\_]V^`[aRZ^P  
@HWI-EAS443:3:96:404:43#0/1  
CAAAGAAGAAAATTGAGAAAATAAGGCCTCTTCTAATAGA  
+HWI-EAS443:3:96:404:43#0/1  
]bbXabY\_Q\_]aa`b\_a`¥SN]^\_Xa[^VL]^`\_a`Z`YaB  
@HWI-EAS443:3:96:42:603#0/1  
GCGAAAAGCTTGAACAGTCTGGGCTCCCAGTAGGGGGCAA  
+HWI-EAS443:3:96:42:603#0/1  
aaa¥`aaaa^aa]]`^^Y^V^^¥^^YU^UQUZX¥^UBB  
@HWI-EAS443:3:96:457:545#0/1  
ATGGATTTGTGGCTAATTTTAGCATGGAGCTACCCAGCTT  
+HWI-EAS443:3:96:457:545#0/1  
abbb\_babb\_aa\_aaaaaa`aaa`Pa`\_Z`\_`aZUZ^]`a  
@HWI-EAS443:3:96:521:1330#0/1  
TGGTAATGCCAGCCCATGGTCCAGCCAAAAGCATGGAATA  
+HWI-EAS443:3:96:521:1330#0/1  
`]^`SaaaZ\_a^aaaaXbaa[a]b]¥X]aa^¥[``\_`TWPYB  
@HWI-EAS443:3:96:534:1420#0/1  
TGTTGATTCCCCTAACTTGCAGGTCCTGTAGAATCTGTC

+HWI-EAS443:3:96:534:1420#0/1  
\_]aWZ^aabaU`\_]aa]¥aZWZ¥`\_a`\_a\_a¥` `aZX\_  
@HWI-EAS443:3:96:567:105#0/1  
TAAACAATGACCTTGGACCTGCAACGGCCCAGATGGCTCT  
+HWI-EAS443:3:96:567:105#0/1  
aba\_¥`bbbaQW\_ab]` `a` `aa\_aa`SUN`\_N¥`^]V¥  
@HWI-EAS443:3:96:590:1352#0/1  
AGATGGCACAGCATCACTGAGTCCTGGGATGATGATGGGC  
+HWI-EAS443:3:96:590:1352#0/1  
VZ\_a]bbX¥\_b\_Y¥]V]\_Y`b¥\_a\_NX\_XZ]U`\_R¥`¥¥¥  
@HWI-EAS443:3:96:590:1850#0/1  
CACTAACTTGCAGGTCCTGTAGAATCTGTCCACTCCTGCT  
+HWI-EAS443:3:96:590:1850#0/1  
ababbaabbabbbb\_bbbbbbbbbabbXabaaaNaaa\_b  
@HWI-EAS443:3:96:591:562#0/1  
CCTGCTTGTATTCCCTCATGGTTTGGTGCATTCACTATGA  
+HWI-EAS443:3:96:591:562#0/1  
aabbabba`bbaaabba`abbYa`aa` `ba` `]a`aba  
@HWI-EAS443:3:96:610:384#0/1  
AGCTGTTAGGCCATTTCGATCTAAAGACTTCTATGGTGTG  
+HWI-EAS443:3:96:610:384#0/1  
a]baaQaab^¥Y`]aa`^]U`\_aQ`^U`\_K¥[baTVW¥^Z  
@HWI-EAS443:3:96:647:1791#0/1  
CTGGAGTAAATGAATCAGCTGACATGAGTATTGGAGTAAC  
+HWI-EAS443:3:96:647:1791#0/1  
abaabaIaababbaaab`a\_aaa` `aabZaa` `a\_aV\_\_\_\_  
@HWI-EAS443:3:96:747:1764#0/1  
CAGATCTTCATGATCTCAGAGAACTTCTTTCTTGATCC  
+HWI-EAS443:3:96:747:1764#0/1  
abb\_^b^^Yaabaab\_T¥b¥¥baa]GY¥Y`a]a`ba`a]a  
@HWI-EAS443:3:96:758:720#0/1  
CTGGTATTTGTGTTGCGAATCTTCATTCTTTTACTCTCGAA  
+HWI-EAS443:3:96:758:720#0/1  
abbb\_abbbb\_\_\_\_`bbaab\_aa`aba\_`abaaaaYaaa`a  
@HWI-EAS443:3:96:770:393#0/1  
CCTATTGTTCTTTGCGTGACCATCTTCTTGGTCATGTTGT  
+HWI-EAS443:3:96:770:393#0/1  
Ma\_¥^Z¥[¥\_abab`Y^`]^`^^b\_b^¥a`abYGX` `^aa¥  
@HWI-EAS443:3:96:780:1549#0/1  
TATAGGAGACCGGTTGGAATTTCTAGCATGGTGGAGGCCA  
+HWI-EAS443:3:96:780:1549#0/1  
TTbaZbbbabZaaUbb`baNaL` `` `Rabab`aXV]\_`¥Z  
@HWI-EAS443:3:96:783:1598#0/1  
TGATGATTATCGGGGAAGACTTTGTAATCCCCTGAATCCC  
+HWI-EAS443:3:96:783:1598#0/1  
aaaa^a`aa`^aa\_` `aaa[aa\_\_^\_` `]¥TR`aa\_^XZ¥  
@HWI-EAS443:3:96:79:921#0/1  
CACTCCTGCTTGTATTCCCTCATGGTTTGGTGCATTCACT  
+HWI-EAS443:3:96:79:921#0/1  
`bbaababbabbaaba`aaaa^aaaXaa`a]a]aaa`\_\_^



@HWI-EAS443:3:96:82:1105#0/1  
CCCCGATTGATGCCAGGGTCGACTTCGAGTCTGGACGGAT  
+HWI-EAS443:3:96:82:1105#0/1  
ab]]`VZa\_a^a`a`a[\_\_\_ZV¥`XYZaZ]X\_`Y\_^¥QaSW  
@HWI-EAS443:3:96:832:1649#0/1  
GTCTGGAGTAAATGAATCAGCTGACATGAGTATTGGAGTA  
+HWI-EAS443:3:96:832:1649#0/1  
aUb]\_aU\_[aa^^]aa\_aa]Y[^aQ[\_¥]a0\_\_\_\_a\_S]0`  
@HWI-EAS443:3:96:848:1098#0/1  
AGTAAACAGAACACACCAATACTCAGAAAAGGGAAAGTGG  
+HWI-EAS443:3:96:848:1098#0/1  
aaWa`]]`aaaa\_\_`a`a`a\_\_a\_\_a\_\_`^a``\_`¥`Z`\_  
@HWI-EAS443:3:96:861:1778#0/1  
GAACAATTGAAGAGCCATCTGGGCCGTTGCAGGTCCAAGG  
+HWI-EAS443:3:96:861:1778#0/1  
ab`a¥`b`aaaabW^W^aba`aR[b\_\_a^¥``[PPQb`\_V  
@HWI-EAS443:3:96:90:1223#0/1  
TGGATGTCAATCCGACTCTACTTTTCCTAAAAATCCAGC  
+HWI-EAS443:3:96:90:1223#0/1  
abaaa`\_abaaaa]aaaaaaaaa`aaaba^Taa]]aaa  
@HWI-EAS443:3:96:920:325#0/1  
CCACTTTCAAAGAAAAAGGAGAGTAAGAGACAACATGACC  
+HWI-EAS443:3:96:920:325#0/1  
`WHa]WTZ\_NRVXY^^a`\_`RYR`^`\_ZSROX¥ZW]\_]ZB  
@HWI-EAS443:3:96:942:542#0/1  
GTCGACTTCGAGTCTGGACGGATCAAGAAAGAAGAGTTCT  
+HWI-EAS443:3:96:942:542#0/1  
aa]aaaa`aab\_abbaa\_aa\_a\_a^a`aa`\_\_\_\_aV\_¥a  
@HWI-EAS443:3:96:99:774#0/1  
GTGATTGTGAAAGAAATCTCTGTGTCTTGTGAATTAGTCA  
+HWI-EAS443:3:96:99:774#0/1  
``a\_aaa`a`a`\_\_\_\_````]`a^\_]\_a\_\_[a]^`W`YXS  
@HWI-EAS443:3:97:1070:1542#0/1  
CCTCTTTGTTTATTGATTCCATTACATCCTTTAAGAAATC  
+HWI-EAS443:3:97:1070:1542#0/1  
`\_`abbbbbbb`bbbbbabababbbbaab\_Rbbbbbbba`bb  
@HWI-EAS443:3:97:1081:1289#0/1  
GATTGATGCCAGGGTCGACTTCGAGTCTGGACGGATCAAG  
+HWI-EAS443:3:97:1081:1289#0/1  
\_aaaaa`aa`a`aZaa`aa\_a`a`aa^W`a¥\_Y\_]`  
@HWI-EAS443:3:97:1082:1748#0/1  
GCCTCTTCTAATAGATGGCACAGCATCACTGAGTCCTGGG  
+HWI-EAS443:3:97:1082:1748#0/1  
a`\_\_Na``aa``\_a`\_`a¥\_¥]\_S`\_S`^T`ZaYSPY^\_\_  
@HWI-EAS443:3:97:1100:748#0/1  
GTCCCCAGTGATTGTGAAAGAAATCTCTGTGTCTTGTGAA  
+HWI-EAS443:3:97:1100:748#0/1  
a\_X[Raaa\_]`^aa]T¥Z`aa```a\_`]a\_Y\_WTaYX[[QZ  
@HWI-EAS443:3:97:1110:1920#0/1  
GAGATAACAACCCACTTTCAAAGAAAAAGGAGAGTAAGAG

+HWI-EAS443:3:97:1110:1920#0/1  
[bbbWa`aa`Z¥`a]\_\_aa^UYba`\_¥a`bb\_a``aa\_^a  
@HWI-EAS443:3:97:1252:1750#0/1  
AAGAAATCTCTGTGCTTGTGAATTAGTCATCATCTTTCT  
+HWI-EAS443:3:97:1252:1750#0/1  
abbb`ab]b[bbaaa]`aW\_Y[¥W¥MPUY\_\_SX\_H`a]GV  
@HWI-EAS443:3:97:1310:1375#0/1  
GCCTCTCTGTCATCTTTGGTCATCGTATTTAATGTCAGT  
+HWI-EAS443:3:97:1310:1375#0/1  
aaab\_aaaabaaabaabab`Z\_`a]a¥aaaa\_^a\_\_[\_X  
@HWI-EAS443:3:97:1474:175#0/1  
CTCTTTGTTTCATTGATTCCATTACATCCTTTAAGAAATCT  
+HWI-EAS443:3:97:1474:175#0/1  
U¥]\_X¥bP^^`^bb`a``bbaba`a[`I`baba]bb\_Va  
@HWI-EAS443:3:97:165:714#0/1  
GAATCAATCTCTTTATGACTGACAAAGGGATTGAGGGGAT  
+HWI-EAS443:3:97:165:714#0/1  
a[``Y¥aa\_a`aa`aaaa`aaaa`YXY[Y\_`XZ[\_]P  
@HWI-EAS443:3:97:1668:1044#0/1  
GAGATAACAACCCACTTTCAAAGAAAAAGGAGAGTAAGAG  
+HWI-EAS443:3:97:1668:1044#0/1  
ab`b`aba\_^Q0^aZaaaa`aaa``S]¥aY]aY``¥a]  
@HWI-EAS443:3:97:168:1789#0/1  
TACAAAGTCTTCCCCGATAATCATCATCCATTAGCTCCCA  
+HWI-EAS443:3:97:168:1789#0/1  
ab`abaa\_ab`a]abb`\_a`a\_`a``\_a\_`^¥`\_]\_`NX`  
@HWI-EAS443:3:97:1737:115#0/1  
AGCTGTTAGGCCATTTCGATCTAAAGACTTCTATGGTGTG  
+HWI-EAS443:3:97:1737:115#0/1  
aa\_aaabaaaXUaaa\_a\_a]a\_a]`YU`\_V`YaZJVZ]¥N  
@HWI-EAS443:3:97:1740:841#0/1  
ATGGGCTCCAATCATCCGACGATTTTGCTCTCATAGTGAA  
+HWI-EAS443:3:97:1740:841#0/1  
aa]b`^aa`baaYbaQ\_a]Sa[\_aaa`^\_ZaW^`\_[\_Z0^  
@HWI-EAS443:3:97:1764:722#0/1  
ATCAAGAAAGAAGAGTTCTCTGAGATCATGAAGATCTGTT  
+HWI-EAS443:3:97:1764:722#0/1  
[`````bVaX¥]\_a]T`T\_Xa\_aa^ZaYZ`[Y\_a\_YJVa\_  
@HWI-EAS443:3:97:211:323#0/1  
GAGACAACATGACCAAGAAGATGGTCACGCAAAGAACAAT  
+HWI-EAS443:3:97:211:323#0/1  
`abb`baaaabaaaaab`aaaaa^`^aa\_^]a]`^\_`^`  
@HWI-EAS443:3:97:250:1176#0/1  
ATTGGTGTGTTCTGTTTACTGTGTCCATGGTGTATCCTGT  
+HWI-EAS443:3:97:250:1176#0/1  
a\_ba\_]b]`b`N^aVba¥\_b\_^baababab¥^]\_[a`a]a  
@HWI-EAS443:3:97:251:1710#0/1  
CATGAGTATTGGAGTAACAGTGATAAAGAACAACATGATA  
+HWI-EAS443:3:97:251:1710#0/1  
\_`bb\_`¥aaa^abb`bba`^Qaaa^^aa]abbaaba`aaa



+HWI-EAS443:3:97:846:1676#0/1  
\_b`a]aZ\_Z`Y`I`a`a\_Ya\_\_a`^^a]\_^YQZX]0¥  
@HWI-EAS443:3:97:852:32#0/1  
GTCTGCTTAAAATGGGAGCTAATGGATGATGATTATCGGG  
+HWI-EAS443:3:97:852:32#0/1  
a\_XaaZaa`^\_aaaa]aX\_]^\_]^^^X^^]^ZZ\_X  
@HWI-EAS443:3:97:858:1065#0/1  
CACAGAGATTTCTTTCACAATCACTGGGGACAACACTAAG  
+HWI-EAS443:3:97:858:1065#0/1  
GYaa`^^`W[aa`a^Z`Zb`Z¥baaa`\_aaabaMb0a\_bb  
@HWI-EAS443:3:97:864:1923#0/1  
GGGCTCCAATCATCCGACGATTTTGCTCTCATAGTGAATG  
+HWI-EAS443:3:97:864:1923#0/1  
\_ab\_WZ\_UZ\_V\_a[FW\_Wab^aaX`OY\_K`a]ZaaaaV[\_  
@HWI-EAS443:3:97:888:1420#0/1  
GAAACATCCTGAGCATGGCACCCATAATGTTCTCAAACAA  
+HWI-EAS443:3:97:888:1420#0/1  
^]``ba^^[baaa`^bZ`YY]]][a\_a`¥¥aT]V]aRZ¥V  
@HWI-EAS443:3:97:943:1830#0/1  
ATTTCTTTTGTCCAAGATTCAGTATCGAGACTCCCAAGAC  
+HWI-EAS443:3:97:943:1830#0/1  
ab\_bY`]a\_^JYVaaa\_\_a\_aV¥a\_L¥a¥a\_]J][a```]  
@HWI-EAS443:3:97:990:1855#0/1  
ATTTCTTTTGTCCAAGATTCAGTATCGAGACTCCCAAGAC  
+HWI-EAS443:3:97:990:1855#0/1  
]\_¥a]Va\_a¥XMF^`aZWYP`UP`\_]a`\_]GVJW[\_a\_[M  
@HWI-EAS443:3:98:1004:252#0/1  
CCCGGATTGATGCCAGGGTCGACTTCGAGTCTGGACGGAT  
+HWI-EAS443:3:98:1004:252#0/1  
`^^a\_\_ab`W]`]aba\_VS\_\_G[]¥]\_¥^WWbaP¥a\_\_\_  
@HWI-EAS443:3:98:1010:536#0/1  
GCGAAAAGCTTGAACAGTCTGGGCTCCCAGTAGGGGGCAA  
+HWI-EAS443:3:98:1010:536#0/1  
a`\_`aX`\_`\_`\_`^`Za¥W¥R^`\_¥Z^¥Wa¥Z\_]ZY\_[R[  
@HWI-EAS443:3:98:101:1394#0/1  
CACCAATACTCAGAAAAGGGAAAGTGGACGACAAACACAG  
+HWI-EAS443:3:98:101:1394#0/1  
a`V[PX]\_a\_SSaaaa[aa[aa[^G`¥`N\_]GY`[G`UBB  
@HWI-EAS443:3:98:1025:1155#0/1  
GTCCTCCATCTGATACTAATAGCCCTACCTTTGATTGGGT  
+HWI-EAS443:3:98:1025:1155#0/1  
aaaaba`aa`ab`aa\_baaaa`\_\_aa\_`aa\_aa\_`aZ\_^  
@HWI-EAS443:3:98:1099:327#0/1  
GTTGATTCCCACTAACTTGCAGGTCCTGTAGAATCTGTCC  
+HWI-EAS443:3:98:1099:327#0/1  
a`\_a\_a`[`]RVZ^a\_aa`Z\_aaW\_]\_`[^\_]¥`R)`UUU  
@HWI-EAS443:3:98:1120:1955#0/1  
AAATTCCAGCGAAAATGCCATAAGCACCACATTCCCTTA  
+HWI-EAS443:3:98:1120:1955#0/1  
aaaa`^a\_aW`\_aaaa\_a\_0\_aaa^¥`]Z\_^^`]^ZZ]\_\_

@HWI-EAS443:3:98:114:1267#0/1  
GGCCATGGTGTCTAGGGCCCGATTGATGCCAGGGTCGAC  
+HWI-EAS443:3:98:114:1267#0/1  
`\_[aRZ\_`UTE¥QXVMOYQV[YJOM`VNW¥YOSYYSXXBB  
@HWI-EAS443:3:98:1168:1669#0/1  
CATGCTCAGGATGTTTCTGAACCACTCGGGTTGATTTCTG  
+HWI-EAS443:3:98:1168:1669#0/1  
abba¥babaa\_a`bba\_Z`a^`\_`abX`baaa`^`b  
@HWI-EAS443:3:98:1191:1294#0/1  
GAATCAGCTGACATGAGTATTGGAGTAACAGTGATAAAGA  
+HWI-EAS443:3:98:1191:1294#0/1  
a`\_a\_¥bYbVb\_baabb]`abaa`\_^aaZb`ab\_b^¥ab\_  
@HWI-EAS443:3:98:1244:628#0/1  
AAAAATTCCAGCGCAAATGCCATAAGCACCACATTCCCT  
+HWI-EAS443:3:98:1244:628#0/1  
a[`]a\_[S]\_aUXT[]aX[ZRG`a^PWL\_¥G¥P[\_\_\_SMGa  
@HWI-EAS443:3:98:124:946#0/1  
CCAGTATATTGTCTTGGTGTATTTCTTTTGTCCAAGATTC  
+HWI-EAS443:3:98:124:946#0/1  
a`U`^Z]T¥a^]a[[a`X[GU[\_UPW^\_\_\_X]V]YWTSVY  
@HWI-EAS443:3:98:1250:1901#0/1  
GGCTTTCCTTGAAGAATCCCACCCAGGAATATTTGAGAAT  
+HWI-EAS443:3:98:1250:1901#0/1  
ab]Z^]^[Xa`ba`a]ONQRIa\_abb^a`\_L¥Zaa`a¥`  
@HWI-EAS443:3:98:1252:1404#0/1  
CACATTCCTGGATTCCCAAGAGGAATCGTTCTATTCTCAA  
+HWI-EAS443:3:98:1252:1404#0/1  
aba]`b^aaa\_a\_a`a\_aaa`aa\_a`aa\_`^`^ba\_`0ba  
@HWI-EAS443:3:98:1276:176#0/1  
AATAAGAGCACTGACATTAATACGATGACCAAAGATGCA  
+HWI-EAS443:3:98:1276:176#0/1  
\_\_\_`^b]Y\_aaaa^Y[ba`^`a\_`a^aaXWP¥P^`^WVN\_  
@HWI-EAS443:3:98:1346:605#0/1  
AAATTCCAGCGCAAATGCCATAAGCACCACATTCCCTTA  
+HWI-EAS443:3:98:1346:605#0/1  
a^[\_Y]¥Ta`\_]`\_\_aa]¥\_aa\_aS\_]Z^`¥\_`OLG]¥`  
@HWI-EAS443:3:98:1351:970#0/1  
GATTCGAACACAAATACCAGCAGAAATGCTAGCAAGCATT  
+HWI-EAS443:3:98:1351:970#0/1  
a`aa`b\_baa`aaaba`aaaaaa`\_aaa^aaa[a`a]`aa  
@HWI-EAS443:3:98:1369:346#0/1  
GGGCTCCAATCATCCGACGATTTTGTCTCATAGTGAATG  
+HWI-EAS443:3:98:1369:346#0/1  
aaaaa\_aaaaUab[\_`a`b`a\_`a¥aX`Y``aa]a`[aa  
@HWI-EAS443:3:98:1395:1359#0/1  
ATCAATCTCTTTATGACTGACAAAGGGATTGAGGGATTA  
+HWI-EAS443:3:98:1395:1359#0/1  
]bUbb\_aX[aba¥`^¥aYbZI¥PP[b\_aa\_I^^bS`a^Y`  
@HWI-EAS443:3:98:1425:1334#0/1  
ATTGTTTCAAGGCATGAATTCTCAAATATTCTCGGGTGGG

+HWI-EAS443:3:98:1425:1334#0/1  
`bb]bX\_aa`b[aaaa\_aa`a`b`Y`aaY[\_baYMZ`a  
@HWI-EAS443:3:98:1431:1369#0/1  
TGGTCCTCCATCTGATACTAATAGCCCTACCTTTGATTGG  
+HWI-EAS443:3:98:1431:1369#0/1  
abbYF0a`bb\_II¥`a^\_a\_Y¥\_]ITTa\_G\_baa`]`a`]  
@HWI-EAS443:3:98:1479:841#0/1  
GGGAAAGTGGACGACAAACACAGAGACTGGTGCACCCAG  
+HWI-EAS443:3:98:1479:841#0/1  
aa\_¥aaW`a^`ba]aa`\_]\_`^`¥W^]W^W^U¥W¥]^  
@HWI-EAS443:3:98:1515:778#0/1  
TCCCCGATAATCATCATCCATTAGCTCCCATTTTAAGCAG  
+HWI-EAS443:3:98:1515:778#0/1  
a[^`ab`ba^`aaa\_a^`a`a`\_`^`^`¥^`\_`^`]^`\_`\_`\_`  
@HWI-EAS443:3:98:1520:1043#0/1  
GTTTGGTGCATTCACTATGAGAGCAAATCGTCGGATGAT  
+HWI-EAS443:3:98:1520:1043#0/1  
`Y\_]aY¥[ZX]S`Z]a`aSaU^SVL[\_][RU^]ZX]TY  
@HWI-EAS443:3:98:1536:1760#0/1  
TAGAGATAACAACCCACTTTCAAAGAAAAAGGAGAGTAAG  
+HWI-EAS443:3:98:1536:1760#0/1  
a`a`aaaba[aa`Y\_^[\_ba]^a^a¥`\_`\_`^`aS\_a[ ]\_¥  
@HWI-EAS443:3:98:1647:971#0/1  
CATCTGGGCCGTTGCAGGTCCAAGGTCATTGTTTATCATG  
+HWI-EAS443:3:98:1647:971#0/1  
aab\_ababaabab\_abba`Yaa^bb[\_bbab\_aba`\_`ba  
@HWI-EAS443:3:98:1752:718#0/1  
GTGGGATTCTTCAAGGAAAGCCATAGCCTCTAGAACACAG  
+HWI-EAS443:3:98:1752:718#0/1  
aQaa\_^`¥\_a`\_]\_[V[Y`Y^R]Z\_VVVVVR^Y^VTKR^  
@HWI-EAS443:3:98:232:1193#0/1  
GTAAGAGACAACATGACCAAGAAGATGGTCACGCAAAGAA  
+HWI-EAS443:3:98:232:1193#0/1  
aSVW]W]aa]\_R`a`YV`a]`VJTZWY`]^`\_`PRV^R¥RZ  
@HWI-EAS443:3:98:243:1149#0/1  
ATTCGAGAAATTTTTCCCTAGCAGTTCATATAGGAGACCG  
+HWI-EAS443:3:98:243:1149#0/1  
a`^aab`¥`¥aaa`a\_a^`\_]`^`^`a^`\_`^`^`^`[Y`  
@HWI-EAS443:3:98:245:1417#0/1  
AATAAGAGCACTGACATTAATACGATGACCAAAGATGCA  
+HWI-EAS443:3:98:245:1417#0/1  
aab\_aa]aaa\_aaaaaa`]aaa`baaaa`\_\_aaaa`\_`\_`  
@HWI-EAS443:3:98:261:338#0/1  
CATTATCCTCAGGTAGTGGTCCATCAATCGGGTTGAGCTG  
+HWI-EAS443:3:98:261:338#0/1  
aa^`¥b¥`\_`\_`aaV`\_]`¥U[¥`aaa`aaaa`\_`\_`a^aU^¥  
@HWI-EAS443:3:98:274:1969#0/1  
CAGATACACATATAGGTGCCATAGGGGAGACACACAAATT  
+HWI-EAS443:3:98:274:1969#0/1  
`a`\_`a^¥^`aaaa[AS`a[```a\_^Y^]a`a^a`\_`\_`^]X

@HWI-EAS443:3:98:303:1813#0/1  
GATAACAATGACCTTGGACCTGCAACGGCCAGATGGCT  
+HWI-EAS443:3:98:303:1813#0/1  
aa]WY\_aaba\_`b\_YY^[^`^`a]X][X^`\_U`][X  
@HWI-EAS443:3:98:449:1684#0/1  
TGTGGCTAATTTAGCATGGAGCTACCCAGCTTTGGAGTG  
+HWI-EAS443:3:98:449:1684#0/1  
¥Q[M^bb¥Z^\_T\_X[XZ^\_XQ¥¥^`\_YaTXLX\_RRV]`Y[  
@HWI-EAS443:3:98:454:111#0/1  
GTCCCCAGTGATTGTGAAAGAAATCTCTGTGTCTTGAA  
+HWI-EAS443:3:98:454:111#0/1  
a`\_aa`a\_a^\_\_a]\_`\_a^\_\_\_^`^`X\_ZX`\_`^]VX  
@HWI-EAS443:3:98:461:1871#0/1  
CAAAGATGCAGAGAGGCAAGTTAAAAAGAAGGGCTATC  
+HWI-EAS443:3:98:461:1871#0/1  
aaaaaa]aaaa`aa]aaa`]]Z`\_a`\_^^`^`W^a^\_  
@HWI-EAS443:3:98:487:832#0/1  
GACTAGGGAAAGGGTACATGTTTCGAGAGTAAAAGAATGAA  
+HWI-EAS443:3:98:487:832#0/1  
aa\_aaa\_aaa`\_`W`^\_a^\_a^a`Z`\_\_[-`]-Z\_]  
@HWI-EAS443:3:98:492:1432#0/1  
GATGCCAGGGTCGACTTCGAGTCTGGACGGATCAAGAAAG  
+HWI-EAS443:3:98:492:1432#0/1  
aaa\_]Wa`aaQaaa`\_aa`a`¥`aaa`[a`\_`^a^U`a^  
@HWI-EAS443:3:98:507:1258#0/1  
GCTATCTAATAAGAGCACTGACATTAATACGATGACCAA  
+HWI-EAS443:3:98:507:1258#0/1  
`bbaaaaabb[N\_a^aaba`\_a\_a`aaa¥a`aaa\_a\_  
@HWI-EAS443:3:98:50:1620#0/1  
GCCAGGGTCGACTTCGAGTCTGGACGGATCAAGAAAGAAG  
+HWI-EAS443:3:98:50:1620#0/1  
a`\_Q\_\_VWb\_a¥a`\_`bbaabbaaaaaX\_aaaTaaaba`\_`  
@HWI-EAS443:3:98:511:1645#0/1  
GGACCACTACCTGAGGATAATGAACCAAGTGGGTATGCAC  
+HWI-EAS443:3:98:511:1645#0/1  
aa\_a`U^ab\_N]b\_b[aVba`\_aS`\_aa]`^OVa[^Xa[  
@HWI-EAS443:3:98:530:1282#0/1  
AGAATCCCACCCAGGAATTTGAGAATTCATGCCTTGAA  
+HWI-EAS443:3:98:530:1282#0/1  
^baHM\_]\_aa\_¥ZV]^a\_U^VD[aa`NUTR¥]RQWUTO^a  
@HWI-EAS443:3:98:539:485#0/1  
AACCCACTTTCAAAGAAAAAGGAGAGTAAGAGACAACATG  
+HWI-EAS443:3:98:539:485#0/1  
aa`aa`abbb`a\_ab`a[^`^ba`a`b^a\_aaa`\_a\_Z`\_a  
@HWI-EAS443:3:98:627:505#0/1  
GCGAAAAGCTTGAACAGTCTGGGCTCCAGTAGGGGGCAA  
+HWI-EAS443:3:98:627:505#0/1  
aa\_\_\_a\_aa\_abaaaab`Saa^a`T^Z^a`^a`\_`\_`\_`\_`  
@HWI-EAS443:3:98:630:1791#0/1  
CAAAGAGGAAATAGAGATAACAACCCACTTTCAAAGAAAA

+HWI-EAS443:3:98:630:1791#0/1  
abbbbbbabbbbbb`ababbbbbbbaabbbbbb`abbaaba¥  
@HWI-EAS443:3:98:647:572#0/1  
GAATCAGCTGACATGAGTATTGGAGTAACAGTGATAAAGA  
+HWI-EAS443:3:98:647:572#0/1  
aa]`\_`a\_aa`\_a`a\_aY``aa\_^a]\_`[^aW\_\_\_\_^\_\_\_\_  
@HWI-EAS443:3:98:668:652#0/1  
AGGCCATGGTGTCTAGGGCCCGGATTGATGCCAGGGTCGA  
+HWI-EAS443:3:98:668:652#0/1  
aXZ\_M]a\_aX¥]aWV\_U]a`^a``XX[^ [a¥Z[a`SX^]  
@HWI-EAS443:3:98:704:1239#0/1  
CTTTCCTTGAAGAATCCCACCCAGGAATATTTGAGAATTC  
+HWI-EAS443:3:98:704:1239#0/1  
abbabbbbbb`Sab`a¥b¥b`bbb¥b\_\_abbbabaaa\_a  
@HWI-EAS443:3:98:733:770#0/1  
TATTCGAGAAATTTTTCCCTAGCAGTTCATATAGGAGACC  
+HWI-EAS443:3:98:733:770#0/1  
aaab\_`a]¥]`bbbab^\_SXYa¥^][a`\_aaa\_\_a\_a`PR  
@HWI-EAS443:3:98:738:356#0/1  
CCCCGATAATCATCATCCATTAGCTCCCATTTAAGCAGA  
+HWI-EAS443:3:98:738:356#0/1  
abb`aabaab^aa`abaabaabaaa`aaabaaaaZaaa  
@HWI-EAS443:3:98:750:1648#0/1  
ATTTGTGGCTAATTTTAGCATGGAGCTACCCAGCTTTGGA  
+HWI-EAS443:3:98:750:1648#0/1  
]ITO\_WRQ]\_`]J]P]WZ^R[WYX`Z]ZLR^VQZ¥H]`]G  
@HWI-EAS443:3:98:756:1279#0/1  
AAAATTCCAGCGCAAATGCCATAAGCACCATTCCT  
+HWI-EAS443:3:98:756:1279#0/1  
S\_``bbbaaabaa``a`aabb`\_ZZ\_aa¥]`aa`S\_¥a\_  
@HWI-EAS443:3:98:788:890#0/1  
AAAAATTCCAGCGCAAATGCCATAAGCACCATTCCT  
+HWI-EAS443:3:98:788:890#0/1  
aaaa\_a`¥Y[\_¥`X\_\_`^`\_Y^`\_^\_]^^Z^Z\_\_ZVXX\_  
@HWI-EAS443:3:98:81:814#0/1  
GTCTGGAGTAAATGAATCAGCTGACATGAGTATTGGAGTA  
+HWI-EAS443:3:98:81:814#0/1  
a\_abaa`b\_aaaaaa`aab^aaa[[aa]aX\_`a\_a]\_U]  
@HWI-EAS443:3:98:829:908#0/1  
AAGAGGAATCGTTCTATTCTCAACACAAGCCAAAGGGGAA  
+HWI-EAS443:3:98:829:908#0/1  
abaa`bbaaaba]a^^`^^a]aaaaaaY^a\_\_b`aa`a  
@HWI-EAS443:3:98:840:81#0/1  
AATTGAAGAGCCATCTGGCCGTTGCAGGTCCAAGTCAT  
+HWI-EAS443:3:98:840:81#0/1  
a]]bbbaab`a^]SUaaa]H^]Z`0`aaG\_V^]\_aUL[a  
@HWI-EAS443:3:98:841:775#0/1  
AAGAGACAACATGACCAAGAAGATGGTCACGCAAAGAACA  
+HWI-EAS443:3:98:841:775#0/1  
aZ^Z]a[`aa]a]YNY¥]¥¥`¥0¥\_RQHWS`OMUN`SWW]



@HWI-EAS443:3:98:874:971#0/1  
GTTTGAGAACATTATGGGTGCCATGCTCAGGATGTTTCTG  
+HWI-EAS443:3:98:874:971#0/1  
aaa\_]aa`\_aaaaaaaa^aaZ^`]^\_`\_]`^aXaa  
@HWI-EAS443:3:98:87:2025#0/1  
AGGCCATGGTGTCTAGGGCCCGATTGATGCCAGGGTCGA  
+HWI-EAS443:3:98:87:2025#0/1  
aQL]\_`¥ZWN¥]aZ]¥X¥¥`Z^X¥R^Y]W¥^ZVZQNRP]B  
@HWI-EAS443:3:98:87:974#0/1  
GATTCTTCAAGGAAAGCCATAGCCTCTAGAACACAGTCTG  
+HWI-EAS443:3:98:87:974#0/1  
aaaaababaa`^X¥\_aaaa\_a`a`\_`aa```\_]aa]^`a  
@HWI-EAS443:3:98:905:1222#0/1  
AAAGAGGAAATAGAGATAACAACCCACTTTCAAAGAAAAA  
+HWI-EAS443:3:98:905:1222#0/1  
aabbabba``baaabbabb\_ba``aa\_aaaa\_`b\_\_`a`  
@HWI-EAS443:3:98:92:807#0/1  
AATTGAAGAGCCATCTGGGCCGTTGCAGGTCCAAGGTCAT  
+HWI-EAS443:3:98:92:807#0/1  
^a\_aa^`a`\_]a\_\_^\_aa]\_a]`S`Va\_]ZZ\_Y]RMU]¥  
@HWI-EAS443:3:98:938:470#0/1  
CCTGAGCATGGCACCCATAATGTTCTCAAACAAAATGGCA  
+HWI-EAS443:3:98:938:470#0/1  
abbbabbaba`aa\_\_`abbabb]a`b`\_`aab]abbba`b  
@HWI-EAS443:3:98:945:2014#0/1  
TGGGCTCCAATCATCCGACGATTTTGCTCTCATAGTGAAT  
+HWI-EAS443:3:98:945:2014#0/1  
aa`\_`\_`aa]a\_a`a\_a`aa`]^`\_aa\_\_[\_\_\_\_^`Na\_`]  
@HWI-EAS443:3:98:945:812#0/1  
CTAATTTTAGCATGGAGCTACCCAGCTTTGGAGTGTCTGG  
+HWI-EAS443:3:98:945:812#0/1  
a`V]^`aZVOJN¥XYX^^`YN¥¥VX^`[WTH\_]a\_Y^\_Q  
@HWI-EAS443:3:98:956:544#0/1  
GCTGGCATTACCACAGCATTGTTTACAGAATCAATCTCTT  
+HWI-EAS443:3:98:956:544#0/1  
`a`abbabba\_aaaaaabab`bba\_ba`aaU`aaK\_]aa  
@HWI-EAS443:3:98:95:1776#0/1  
GGGCTATTAGTATCAGATGGAGGACCAAACCTTATACAATA  
+HWI-EAS443:3:98:95:1776#0/1  
aaabab]]ab\_````baaa`aaaa```a^`\_aa`\_`\_`[^a  
@HWI-EAS443:3:98:966:770#0/1  
GGCCATGGTGTCTAGGGCCCGATTGATGCCAGGGTCGAC  
+HWI-EAS443:3:98:966:770#0/1  
`aY]¥`a`S¥¥¥XZ^^`YYS^^Z¥¥¥Z¥¥XZZZ¥¥TT¥ZT  
@HWI-EAS443:3:99:1005:267#0/1  
GATTCCTACTAACTTGCAGGTCCTGTAGAATCTGTCCACT  
+HWI-EAS443:3:99:1005:267#0/1  
aaaaa^`aabaaaaa`aaa¥\_\_aa`\_`\_`\_]\_aUXUTET  
@HWI-EAS443:3:99:1027:481#0/1  
GAAGAGCCATCTGGGCCGTTGCAGGTCCAAGGTCATTGTT

+HWI-EAS443:3:99:1027:481#0/1  
Z\_bbbbaabaabbbabbaabaabb`aaaaba¥aaa^aaa  
@HWI-EAS443:3:99:1036:137#0/1  
CCAAGACAATATACTGGTGGGATGGGCTCCAATCATCCGA  
+HWI-EAS443:3:99:1036:137#0/1  
Z\_b\_bbb]aabaaV\_b\_`bbI`bb^J\_`^aRa\_a\_QNK`  
@HWI-EAS443:3:99:1086:935#0/1  
ATTAGAGTTTTCGTATACTTTGTTGAACTTTAGCTAGGA  
+HWI-EAS443:3:99:1086:935#0/1  
abaa`bb`bb\_aaaababaaaaaaaa]aaa`b\_`\_aa\_  
@HWI-EAS443:3:99:1101:1341#0/1  
GCTAATTTTAGCATGGAGCTACCCAGCTTTGGAGTGTCTG  
+HWI-EAS443:3:99:1101:1341#0/1  
a\_¥U`a]a`aa\_ba`¥`^`\_VL\_aG`\_a]]aRaHY\_a  
@HWI-EAS443:3:99:1126:385#0/1  
GAGGAATCGTTCTATTCTCAACACAAGCCAAAGGGGAATT  
+HWI-EAS443:3:99:1126:385#0/1  
a`\_¥\_b`W`bbaaaa[\_\_baaaR\_a`Paa`Ya`^]\_¥`a  
@HWI-EAS443:3:99:1137:374#0/1  
CTGGAGTAAATGAATCAGCTGACATGAGTATTGGAGTAAC  
+HWI-EAS443:3:99:1137:374#0/1  
aa[¥¥`N¥ba`XZT]\_aa\_`aaPW\_^ab]ba\_YV]a[\_R]  
@HWI-EAS443:3:99:1137:471#0/1  
CCAGCTTTGGAGTGTCTGGAGTAAATGAATCAGCTGACAT  
+HWI-EAS443:3:99:1137:471#0/1  
ababUbbbb`\_babaabbb]a`abaaaaa`a[`]\_¥^`  
@HWI-EAS443:3:99:1216:513#0/1  
GGGGGCAATGAAAAGAAGGCCAAACTGGCAAATGTTGTGA  
+HWI-EAS443:3:99:1216:513#0/1  
``\_`]bba`UR`aaab`YNabbaaa^K¥aaaba`b^`a  
@HWI-EAS443:3:99:122:1002#0/1  
GCTGGTATTTGTGTTCGAATCTTCATTCTTTTACTCTCGA  
+HWI-EAS443:3:99:122:1002#0/1  
aaa\_\_[^aa`X^a\_`aX\_^[a`V^^``a``\_]`^\_¥\_`^  
@HWI-EAS443:3:99:1262:140#0/1  
TTTTGCTCTCATAGTGAATGCACCAAACCATGAGGGAATA  
+HWI-EAS443:3:99:1262:140#0/1  
a``XL\_U`]a[``]`Z\_\_Z^\_RX`Y^XX^Z`^`^VXYXY  
@HWI-EAS443:3:99:1311:1283#0/1  
AAAAATCCAGCGCAAATGCCATAAGCACCATTCCT  
+HWI-EAS443:3:99:1311:1283#0/1  
\_a]QI`¥XVX¥¥¥]`a`U`]^\_]aU[[\_a]P]ZaadWIDZ  
@HWI-EAS443:3:99:1312:529#0/1  
CCCCAGTGATTGTGAAAGAAATCTCTGTGTCTTGTGAATT  
+HWI-EAS443:3:99:1312:529#0/1  
abY^aaaaabbb]TYa`b`aaaaQaa¥a\_aaaa\_a^¥\_\_  
@HWI-EAS443:3:99:1366:1711#0/1  
AAAAATCCAGCGCAAATGCCATAAGCACCATTCCT  
+HWI-EAS443:3:99:1366:1711#0/1  
abaa`a`Y\_aa0a\_aaa`\_\_WUaa`\_`\_0\_Z[^X\_\_^WZR\_

@HWI-EAS443:3:99:1368:669#0/1  
GAAACATCCTGAGCATGGCACCCATAATGTTCTCAAACAA  
+HWI-EAS443:3:99:1368:669#0/1  
abaa]bbaabaab^`aaa`aa]\_aaa`ba\_a^aa\_\_`Z\_`  
@HWI-EAS443:3:99:137:1610#0/1  
GGACGACAAACACAGAGACTGGTGCACCCAGCTCAACCC  
+HWI-EAS443:3:99:137:1610#0/1  
]bab`ababbb`\_bbbaaaaa`^a]¥N\_]aa\_^^`a[G¥Y  
@HWI-EAS443:3:99:1387:1860#0/1  
GAGGCTATCTAATAAGAGCACTGACATTAATACGATGAC  
+HWI-EAS443:3:99:1387:1860#0/1  
Y]YaSb\_a]b^`baa^aaPaHaa`Ha`a¥[Z\_aS\_a\_\_XH  
@HWI-EAS443:3:99:1465:1712#0/1  
CATTAATACGATGACCAAAGATGCAGAGAGAGGCAAGTT  
+HWI-EAS443:3:99:1465:1712#0/1  
abab\_a\_bbb\_aaabaa\_bb¥`bbbbba`bbaa\_`a`a\_`  
@HWI-EAS443:3:99:150:261#0/1  
TGCATTCATGAGAGCAAATCGTCGGATGATTGGAGC  
+HWI-EAS443:3:99:150:261#0/1  
a\_]`bbabba[bbabaabaaa`a\_a^[a\_aYa^`Q^\_¥a\_  
@HWI-EAS443:3:99:154:580#0/1  
TCGACTTCGAGTCTGGACGGATCAAGAAAGAAGAGTTCTC  
+HWI-EAS443:3:99:154:580#0/1  
Y`b^[aaaba`QXU^`]^`aaV`SXSaaaaa[ ]a\_\_Ua`aa  
@HWI-EAS443:3:99:1565:397#0/1  
AAAAATCCAGCGCAAATGCCATAAGCACCATTCCT  
+HWI-EAS443:3:99:1565:397#0/1  
ab^b`aaa`^a\_a[aa\_aaa¥]\_`\_`^a^U\_X`a^XWVa  
@HWI-EAS443:3:99:1596:1160#0/1  
ACTACACATTCCTGGATTCCCAAGAGGAATCGTTCTATTC  
+HWI-EAS443:3:99:1596:1160#0/1  
a\_aa\_b^aaa\_W]a^RIW\_ZX^\_¥V¥WWRUW\_VMMT^\_^Z  
@HWI-EAS443:3:99:1623:1970#0/1  
CACTGTTACTCCAATACTCATGTCAGCTGATTCACTTACT  
+HWI-EAS443:3:99:1623:1970#0/1  
VbXbbbb\_a\_a\_¥]^`aa`ISa¥`\_\_bWabba`Yabbbab`b  
@HWI-EAS443:3:99:1681:1015#0/1  
ACCTGAAGTACTTCAATGAATCAACAAAGAAGAAAATTGA  
+HWI-EAS443:3:99:1681:1015#0/1  
aa\_a\_abb^baa`\_abb``ab\_aa\_a`aaa`a\_\_\_\_\_a\_`^  
@HWI-EAS443:3:99:1740:2040#0/1  
GAAACATCCTGAGCATGGCACCCATAATGTTCTCAAACAA  
+HWI-EAS443:3:99:1740:2040#0/1  
aa\_b`bbbabbbbKbb``Z^ba\_bbaabaabUabbabPY^  
@HWI-EAS443:3:99:1776:147#0/1  
TAACAACCCACTTTCAAAGAAAAAGGAGAGTAAGAGACAA  
+HWI-EAS443:3:99:1776:147#0/1  
abba¥aaa\_a]aXaXZa]^`aaa\_aWXZYUV^[ ]^`S\_Y  
@HWI-EAS443:3:99:185:117#0/1  
CATGGAGCTACCCAGCTTTGGAGTGTCTGGAGTAAATGAA

+HWI-EAS443:3:99:185:117#0/1  
aUYbaXb[¥aU\_¥\_`P¥a\_ZSZbT`[¥aX^S\_¥U`SS\_¥W  
@HWI-EAS443:3:99:200:91#0/1  
TGGATGATGATTATCGGGGAAGACTTTGTAATCCCCTGAA  
+HWI-EAS443:3:99:200:91#0/1  
abb^`a^aaabaaa`aaa`^[a]Va\_``\_\_\_\_\_ZXXZ^\_^Z  
@HWI-EAS443:3:99:203:269#0/1  
AATCTGTCCACTCCTGCTTGTATTCCCTCATGGTTTGGTG  
+HWI-EAS443:3:99:203:269#0/1  
aaaa``````[\_a`\_`a`aaa\_X``¥V[^U^\_a`Y^`\_ZW\_  
@HWI-EAS443:3:99:232:1302#0/1  
GATTTGTGGCTAATTTTAGCATGGAGCTACCCAGCTTTGG  
+HWI-EAS443:3:99:232:1302#0/1  
[`bbbb\_ab]bbabbbbbaa[``^^V`Ya\_[``YY\_\_`]  
@HWI-EAS443:3:99:235:583#0/1  
CAGGAATATTTGAGAATTCATGCCTTGAAACAATGGAAGT  
+HWI-EAS443:3:99:235:583#0/1  
Q\_bb```b`bbba`bbbab¥bab`a^aa\_^`^Zb`\_bbtT  
@HWI-EAS443:3:99:250:827#0/1  
CAAGCAGGAGTGGACAGATTCTACAGGACCTGCAAGTTAG  
+HWI-EAS443:3:99:250:827#0/1  
abba`bbb]b\_bbbbabaababa\_aaa\_`\_\_a]\_abYb\_b  
@HWI-EAS443:3:99:253:1291#0/1  
ATTATCTCAGGTAGTGGTCCATCAATCGGGTTGAGCTGG  
+HWI-EAS443:3:99:253:1291#0/1  
TW¥\_\_\_W¥XW]^MZ¥R\_\_LZ^¥`ba\_\_Y¥a¥]]`a)`[ZT  
@HWI-EAS443:3:99:267:1033#0/1  
CCGGCAGCAACTGCATTGGCCAACACCATAGAAGTCTTTA  
+HWI-EAS443:3:99:267:1033#0/1  
a`^`\_\_Z\_]^X]abaaa```¥`X]^U¥^``a¥Y][Y\_^¥Y  
@HWI-EAS443:3:99:283:277#0/1  
AAAAATTCCAGCGCAAATGCCATAAGCACACATTCCCT  
+HWI-EAS443:3:99:283:277#0/1  
a``````a]^`a]\_X¥UX¥[¥[^\_¥VZXaY]^W^WWWVPB  
@HWI-EAS443:3:99:284:412#0/1  
AATGAACCAAGTGGGTATGCACAAACAGACTGTGTTCTAG  
+HWI-EAS443:3:99:284:412#0/1  
a^`a`aaaa]¥R¥a]0[¥aYWS``¥\_\_a^]]\_W\_ZXTU[B  
@HWI-EAS443:3:99:305:1867#0/1  
CCTTATTTTCTCAATTTTCTTCTTTGTTGATTCAATTGAAG  
+HWI-EAS443:3:99:305:1867#0/1  
a`bbbbbbbabbbbbbbbabbbbbbbbabababbbb  
@HWI-EAS443:3:99:323:1207#0/1  
AAAGACTACAGATACACATATAGGTGCCATAGGGGAGACA  
+HWI-EAS443:3:99:323:1207#0/1  
W]a`a\_^[]bb`baa`\_aa¥\_YaQD]Z\_aab`^]aaa]Y\_  
@HWI-EAS443:3:99:323:516#0/1  
CAGTAAACAGAACACACCAATACTCAGAAAAGGGAAAGTG  
+HWI-EAS443:3:99:323:516#0/1  
aababb`abaa`abaaaaabaab`ab\_`a`baa`aabXa

@HWI-EAS443:3:99:348:1941#0/1  
CAATTGTTTCATCAAAGACTACAGATACACATATAGGTGCC  
+HWI-EAS443:3:99:348:1941#0/1  
a\_aa`¥^abbbaabaaaabbabaa\_a`a\_babab\_XRX]Y  
@HWI-EAS443:3:99:353:821#0/1  
AGAGCACTGACATTAATACGATGACCAAAGATGCAGAGA  
+HWI-EAS443:3:99:353:821#0/1  
aaab¥W¥``Z¥`Z^]P\_`Sb]Yaa\_¥a`Yaaa`\_^aa`]  
@HWI-EAS443:3:99:356:488#0/1  
CTTGGGAATCCAGGAATGTGTAGTTGCAACGGCATCATAT  
+HWI-EAS443:3:99:356:488#0/1  
aabbbaYbb`abba`bbb\_babba`baaaa`a\_aaaaaba  
@HWI-EAS443:3:99:366:511#0/1  
AACATTTGCCAGTTTGGCCTTCTTTTCATTGCCCCCTACT  
+HWI-EAS443:3:99:366:511#0/1  
a]a`aa\_`aaU\_`aaa`a`a`\_`aaa``\_]\_`\_\_a¥¥\_`\_  
@HWI-EAS443:3:99:405:921#0/1  
TGGCCTTCTTTTCATTGCCCCCTACTGGGAGCCCAGACTG  
+HWI-EAS443:3:99:405:921#0/1  
`\_]\_[aaaaaaa`\_a]¥V^`^`a`^a[[^`a\_¥`a  
@HWI-EAS443:3:99:415:1616#0/1  
AAAAATTCCAGCGCAAATGCCATAAGCACCACATTCCT  
+HWI-EAS443:3:99:415:1616#0/1  
abba^a\_Wa\_¥^a]¥`\_`\_0Z``\_^Wao¥\_V`^X00IS  
@HWI-EAS443:3:99:433:551#0/1  
CAATTGAAGAGCCATCTGGGCCGTTGCAGGTCCAAGGTCA  
+HWI-EAS443:3:99:433:551#0/1  
abbbbbbabbbaabbaaaaa`]aaaaaa\_`^`\_aaaW\_a  
@HWI-EAS443:3:99:43:1134#0/1  
ATTAGAGTTTCGTATACTTTGTTGAACTTTAGCTAGGA  
+HWI-EAS443:3:99:43:1134#0/1  
¥bbbbbb\_bab`b`aaa\_`^b^]Y]`a`\_YUOZaa^a  
@HWI-EAS443:3:99:445:1430#0/1  
ACTAATTGCAGGTCCTGTAGAATCTGTCCACTCCTGCTT  
+HWI-EAS443:3:99:445:1430#0/1  
aUa```\_\_aa`aVMX^\_Y[a\_^\_aa`ZZU]^YXZ]\_\_YX\_  
@HWI-EAS443:3:99:453:571#0/1  
ACCGGCAGCAACTGCATTGGCCAACACCATAGAAGTCTTT  
+HWI-EAS443:3:99:453:571#0/1  
a```bbb\_YZ[EXSX¥¥YVUXQQXUYH[ZO^¥Z^^FR^\_B  
@HWI-EAS443:3:99:478:1385#0/1  
TTTTCTAAAAATTCCAGCGCAAATGCCATAAGCACCAC  
+HWI-EAS443:3:99:478:1385#0/1  
Xb`¥`babXSSHQ\_QSY`]K`¥]a`baY¥K^^b\_b^H[a  
@HWI-EAS443:3:99:487:750#0/1  
ATTCCCTCATGGTTTGGTGCATTCACTATGAGAGCAAAT  
+HWI-EAS443:3:99:487:750#0/1  
``a``\_a`^abaZ`bbb`babba]babaab¥a``T````\_  
@HWI-EAS443:3:99:494:1037#0/1  
ATGGGCTCCAATCATCCGACGATTTTGCTCTCATAGTGAA

+HWI-EAS443:3:99:494:1037#0/1  
aaba\_aabb\_baa`aaaa`[aX`a`a`\_aa\_a\_a\_S\_a\_`  
@HWI-EAS443:3:99:557:1364#0/1  
GGATCAAGAAAGAAGAGTTCTCTGAGATCATGAAGATCTG  
+HWI-EAS443:3:99:557:1364#0/1  
a`Y\_aZZ¥Y\_ba`\_aaa0\_aaa¥ba\_a]Y\_aaa[\_`\_\_WB  
@HWI-EAS443:3:99:578:580#0/1  
GAAATGCTAGCAAGCATTGACCTGAAGTACTTCAATGAAT  
+HWI-EAS443:3:99:578:580#0/1  
^YMR¥`^^¥a^`W^a`^a^]]WWa`^J¥R]][^a`aVTY  
@HWI-EAS443:3:99:582:873#0/1  
AAGGGATTcAGGGATTACAAAGTCTCCCCGATAATCAT  
+HWI-EAS443:3:99:582:873#0/1  
`¥\_Z^a^Z`a`aabaa`bb```aU`^] ^SRa\_a^]]`\_`  
@HWI-EAS443:3:99:591:557#0/1  
GCCAGGTCGACTTCGAGTCTGGACGGATCAAGAAAGAAG  
+HWI-EAS443:3:99:591:557#0/1  
aaa[aa`^ab¥Za\_a\_aa¥\_aa`a`\_\_\_\_a¥`a^`^`\_a  
@HWI-EAS443:3:99:615:231#0/1  
GTCCTCCATCTGATACTAATAGCCCTACCTTTGATTGGGT  
+HWI-EAS443:3:99:615:231#0/1  
a]\_\_[V`a]]SaXY`N[[QZZ`Z]]YX^U^]]^^]RTWXB  
@HWI-EAS443:3:99:615:357#0/1  
ATGGGCTCCAATCATCCGACGATTTTGCTCTCATAGTGAA  
+HWI-EAS443:3:99:615:357#0/1  
abbabaaaaaaaa`a\_a^\_a\_a\_\_`aaa\_\_\_\_a`\_`\_`aYa\_\_  
@HWI-EAS443:3:99:628:455#0/1  
GGGAGCTAATGGATGATGATTATCGGGGAAGACTTTGTAA  
+HWI-EAS443:3:99:628:455#0/1  
abba`bbbabbbbaaaaaaabab\_aaaa\_a\_Y]aaaaY``  
@HWI-EAS443:3:99:650:277#0/1  
AAAAGAAATACACCAAGACAATATACTGGTGGGATGGGCT  
+HWI-EAS443:3:99:650:277#0/1  
\_\_`Ya\_bb` `[bV]W]\_Yaaa`aa\_YaaYD[a`Z[0``Q[  
@HWI-EAS443:3:99:658:1536#0/1  
AGTTCATATAGGAGACCGTTGGAATTTCTAGCATGGTGG  
+HWI-EAS443:3:99:658:1536#0/1  
`\_`aaab\_bbbat]^ab\_aNb\_WX`abb^baa`\_aaWJ]a  
@HWI-EAS443:3:99:668:970#0/1  
GTCCACTTTCCCTTTTCTGAGTATTGGTGTGTTCTGTTA  
+HWI-EAS443:3:99:668:970#0/1  
aa`\_\_`aaaaa`\_`aa\_aaVaWR]\_a`Ua\_aZ\_¥\_]^^\_\_  
@HWI-EAS443:3:99:66:343#0/1  
CATTGACCTGAAGTACTTCAATGAATCAACAAAGAAGAAA  
+HWI-EAS443:3:99:66:343#0/1  
abbaabaaabaab\_aaaaaabaab`aaaa`\_a`\_]`\_`\_`  
@HWI-EAS443:3:99:672:564#0/1  
GCCTCTTATTcAGTCTTTGTTTTTTCTCCCTATTGTT  
+HWI-EAS443:3:99:672:564#0/1  
aaa\_G^abbaaaaaba\_aaab`aaaaa\_aa\_\_\_\_a`\_aa]`

@HWI-EAS443:3:99:679:1067#0/1  
GATAAAGAACAACATGATAAACAATGACCTTGGACCTGCA  
+HWI-EAS443:3:99:679:1067#0/1  
a]ba\_UXW[^aaab`WY¥Y]aa`\_VSW^I`]\_\_\_W`a`XB  
@HWI-EAS443:3:99:723:349#0/1  
ATTTCTTTTGTCCAAGATTTCAGTATCGAGACTCCCAAGAC  
+HWI-EAS443:3:99:723:349#0/1  
aab`^`baaaa`^bbaabb`bbab¥`]`aaW]\_VaTZaa\_\_  
@HWI-EAS443:3:99:737:484#0/1  
GTCCACTTTCCTTTTCTGAGTATTGGTGTGTTCTGTTTA  
+HWI-EAS443:3:99:737:484#0/1  
aY[aaaba[HN]\_aaaZ^aRa^`a\_a\_G]U¥NU]aa]X`\_  
@HWI-EAS443:3:99:785:1002#0/1  
AAAATTCCAGCGCAAATGCCATAAGCACCACATTCCCTT  
+HWI-EAS443:3:99:785:1002#0/1  
abaaaa\_aaa\_baaabaaa`aaa```aa\_\_a`a\_a¥\_]``  
@HWI-EAS443:3:99:795:224#0/1  
AGGGCTATTAGTATCAGATGGAGGACCAAATTATACAAT  
+HWI-EAS443:3:99:795:224#0/1  
ab\_baabbbaa`ab`ab`^`]`a\_X`\_\_`¥a`\_a\_^\_a  
@HWI-EAS443:3:99:798:463#0/1  
AAAAATTCCAGCGCAAATGCCATAAGCACCACATTCCCT  
+HWI-EAS443:3:99:798:463#0/1  
aa]\_aaba`aa\_a\_aa`\_aa]ZVbaa^`a^`]`Waa`\_0]a  
@HWI-EAS443:3:99:833:1853#0/1  
AAAAGAAGGGCTATCGCAACACCTGGGATGCAGATTAGAG  
+HWI-EAS443:3:99:833:1853#0/1  
aaa```a[aaabbaa`]ba]b^```ZW][`¥Ua`\_aY`\_  
@HWI-EAS443:3:99:840:39#0/1  
AAAAGGAAAGTGGACGACAAACACAGAGACTGGTGCACC  
+HWI-EAS443:3:99:840:39#0/1  
\_`V`\_bb]¥Z`XbaaXba]aba^^aa]`¥`^`N^V]ZN  
@HWI-EAS443:3:99:866:1791#0/1  
GTCCTCCATCTGATACTAATAGCCCTACCTTTGATTGGGT  
+HWI-EAS443:3:99:866:1791#0/1  
`U`]aaa^JT^a^Y``a\_\_\_X[WX\_\_\_Xaaa`a`\_^VZ^  
@HWI-EAS443:3:99:868:1386#0/1  
CAAAGATGCAGAGAGAGGCAAGTTAAAAAGAAGGGCTATC  
+HWI-EAS443:3:99:868:1386#0/1  
abb[bb\_baaV]aababbaaaba`abaa\_aaaX0```^`  
@HWI-EAS443:3:99:869:1414#0/1  
CATGAATTCTCAAATATTCTGGGTGGGATTCTTCAAGGA  
+HWI-EAS443:3:99:869:1414#0/1  
`bbbaabbbbabaababaaabbbb^bbbabbbaaaba`b  
@HWI-EAS443:3:99:885:349#0/1  
TCCTATATGAAGTCTAGGGAAAAATTTCTCGAATAGATT  
+HWI-EAS443:3:99:885:349#0/1  
aba`UZ[`bb]¥\_`^`aa`aa\_baa\_aa\_[aPa]SZ^aR`¥  
@HWI-EAS443:3:99:905:1301#0/1  
TGAAGAGCCATCTGGGCCGTTGCAGGTCCAAGGTCATTGT

+HWI-EAS443:3:99:905:1301#0/1  
abbbbb\_aa\_b`baa`aab\_baaaba^a`aabJN[`ba[a  
@HWI-EAS443:3:99:95:602#0/1  
GTTGATTCCCCTAACTTGAGGTCCTGTAGAATCTGTCC  
+HWI-EAS443:3:99:95:602#0/1  
a\_aaaaaaa`\_`aa[\_\_\_a`````]\_\_\_a^`\_^`\_^`\_`VBB  
@HWI-EAS443:3:99:976:1887#0/1  
AAACAAGGGTAGATAAACTAACTCAAGGTCGCCAGACTTA  
+HWI-EAS443:3:99:976:1887#0/1  
aa`^baa`aN`^aa`^a[Sa\_\_aYaa`\_U\_a`0[a]Za`^  
@HWI-EAS443:3:99:97:226#0/1  
GGGGCAATGAAAAGAAGCCAAACTGGCAAATGTTGTGAG  
+HWI-EAS443:3:99:97:226#0/1  
`b`ba[aa]VXZ\_Y]\_\_T\_\_\_\_\_a^\_\_^^`\_]V\$SYaV`W\_  
@HWI-EAS443:3:99:993:1789#0/1  
AGGGCTATTAGTATCAGATGGAGGACCAAACCTATACAAT  
+HWI-EAS443:3:99:993:1789#0/1  
XbYa[abaabbWaa\$]ba\_aaab]`\$aaa^`ba`^`a\_  
@HWI-EAS443:3:9:1012:364#0/1  
TGCTTGTATTCCCTCATGGTTTGGTGCATTCACTATGAGA  
+HWI-EAS443:3:9:1012:364#0/1  
abbbbaa\_a`[[aaaaaba`aa`a^\_]aaaYa^`a`a\_aa  
@HWI-EAS443:3:9:1036:820#0/1  
AGAAATCTCTGTGTCTTGTGAATTAGTCATCATCTTTCTC  
+HWI-EAS443:3:9:1036:820#0/1  
]^```\$RY\_ZI`ZO\_^TOVIYN[U^TH\_`[K]\_^T^V\_B  
@HWI-EAS443:3:9:1076:1688#0/1  
CATGGTTTGGTGCATTCACTATGAGAGCAAAATCGTCGGA  
+HWI-EAS443:3:9:1076:1688#0/1  
`\$Y\$[GX^a`Za`Uaa]\_\_`\_]\_U\_aNaHU`XGU\$ZNNZBB  
@HWI-EAS443:3:9:1093:692#0/1  
GGGCTCCAATCATCCGACGATTTTGTCTCATAGTGAATG  
+HWI-EAS443:3:9:1093:692#0/1  
aYMSLPU`\_^T]^RZ`UZ\_V\$V\_U[VVV]XUXY[M[TUBB  
@HWI-EAS443:3:9:1117:1141#0/1  
TGCTTGTATTCCCTCATGGTTTGGTGCATTCACTATGAGA  
+HWI-EAS443:3:9:1117:1141#0/1  
aa[`ab`aabaaaa`abb\_aaaaObaaaa^`Wa`a`\_a`  
@HWI-EAS443:3:9:1125:741#0/1  
TGCTTGTATTCCCTCATGGTTTGGTGCATTCACTATGAGA  
+HWI-EAS443:3:9:1125:741#0/1  
a`aa\_a`\_a`a`\_`\_aaW`a`\_Y`]`^`\_^`\_Wa]``^`]  
@HWI-EAS443:3:9:1130:1537#0/1  
CAGTGATTGTGAAAGAAATCTCTGTGTCTTGTGAATTAGT  
+HWI-EAS443:3:9:1130:1537#0/1  
a\$YZ\_[P]\_Y]\$`^[RX```aV`aX^Xxaa`BBBBBBBBB  
@HWI-EAS443:3:9:1136:1538#0/1  
CTGGTATTTGTGTTTGAATCTTCACTTTTACTCTCGAA  
+HWI-EAS443:3:9:1136:1538#0/1  
a^aaP^a\_aaYba^a^a]`aa`^^`\_`\_a`a\_X`X\_\_a`\_`





+HWI-EAS443:3:9:1600:1468#0/1  
ab\_bbbab`[aaba`aaaaaa`a```\_aa\_aa\_a]``aa  
@HWI-EAS443:3:9:1609:1213#0/1  
ATGGGCTCCAATCATCCGACGATTTTGCTCTCATAGTGAA  
+HWI-EAS443:3:9:1609:1213#0/1  
a)`a¥aa[a`\_a[X`S0][Wa\_^\_]`Y¥R^RS^[T]][  
@HWI-EAS443:3:9:1712:428#0/1  
GAACAATTGAAGAGCCATCTGGGCCGTTGCAGGTCCAAGG  
+HWI-EAS443:3:9:1712:428#0/1  
a\_P¥`^]Y\_¥][^][^`^`\_^UN]MT[PY``VMP^U\_  
@HWI-EAS443:3:9:171:1034#0/1  
GGGGGCAATGAAAAGAAGGCCAAACTGGCAAATGTTGTGA  
+HWI-EAS443:3:9:171:1034#0/1  
aa`bbbbbbbbbbab`a`aaaabaaaaaa\_a^`a\_a`  
@HWI-EAS443:3:9:1781:1172#0/1  
CAATGAACAAAGAGGAAATAGAGATAACAACCCACTTTCA  
+HWI-EAS443:3:9:1781:1172#0/1  
a\_abb\_ZS[baba^]`\_ab```aaaa`^aaXNY^¥`\_a\_\_  
@HWI-EAS443:3:9:202:529#0/1  
CTCCAATCATCCGACGATTTTGCTCTCATAGTGAATGCAC  
+HWI-EAS443:3:9:202:529#0/1  
aa`aZa^ba\_```aa]aa`aa]`a\_\_a^aaV```\_\_\_Z\_^  
@HWI-EAS443:3:9:237:432#0/1  
GTCCTCCATCTGATACTAATAGCCCTACCTTTGATTGGGT  
+HWI-EAS443:3:9:237:432#0/1  
```a\_X^ZX¥¥\_P[Y`]S]\_RVYZWHR[XZU[OZTO]^BB  
@HWI-EAS443:3:9:24:1165#0/1  
CATTCTTTTACTCTCGAACATGTACCCTTCCCTAGTCTT  
+HWI-EAS443:3:9:24:1165#0/1  
aabaaaaaabaaaaa¥W]aa`^a\_\_\_a```^`[\_`\_]`^]`  
@HWI-EAS443:3:9:261:532#0/1  
CAAAGCTGGGTAGCTCCATGCTAAAATTAGCCACAAATCC  
+HWI-EAS443:3:9:261:532#0/1  
ab\_bababb`YX\_aab`Z`a`^``\_aa`^``a\_Ya\_`\_¥R  
@HWI-EAS443:3:9:321:659#0/1  
GAGGCCATGGTGTCTAGGGCCCGATTGATGCCAGGGTCG  
+HWI-EAS443:3:9:321:659#0/1  
\_^aaaa`aaZ`¥aT`a[`````¥¥^`\_a\_```a^]Wa`  
@HWI-EAS443:3:9:330:1564#0/1  
GATTGATGCCAGGGTCGACTTCGAGTCTGGACGGATCAAG  
+HWI-EAS443:3:9:330:1564#0/1  
]`^TZbXa^^a`^`]b][ab\_\_`aXQ\_\_a`\_`U\_Y`aXaR  
@HWI-EAS443:3:9:330:903#0/1  
CCCGGATTGATGCCAGGGTCGACTTCGAGTCTGGACGGAT  
+HWI-EAS443:3:9:330:903#0/1  
^¥a`a\_¥¥TUY^a`\_\_V[UY^`V\_\_YZ¥\_SSZa]T¥^Y¥Z  
@HWI-EAS443:3:9:356:623#0/1  
CTACTTTTCTAAAAATTCCAGCGCAAATGCCATAAGCA  
+HWI-EAS443:3:9:356:623#0/1  
`\_^[]`baXbbbaa]``TH^aaa\_bY`Va]ZSaa\_aYaa

@HWI-EAS443:3:9:381:1568#0/1  
AAAAATTCCAGCGCAAATGCCATAAGCACCATTCCT  
+HWI-EAS443:3:9:381:1568#0/1  
abaa``\_`a\_^`\_\_\_\_[a^`a^`\_\_a\_X`¥a]]^^X^  
@HWI-EAS443:3:9:414:469#0/1  
AAACAAAATGGCAAGACTAGGGAAAGGGTACATGTTTCGAG  
+HWI-EAS443:3:9:414:469#0/1  
aaa`abaabbaaaaa\_a\_aaa```a`aXa]``a\_\_^a``  
@HWI-EAS443:3:9:446:1988#0/1  
ATTGAAGAGCCATCTGGGCCGTTGCAGGTCCAAGGTCATT  
+HWI-EAS443:3:9:446:1988#0/1  
a\_]`aaa¥Z`aaa\_a``aa[X\_`\_a\_^VaW\_\_`VU^`^\_  
@HWI-EAS443:3:9:456:151#0/1  
GGTGTGTTCTGTTTACTGTGTCCATGGTGTATCCTGTTCC  
+HWI-EAS443:3:9:456:151#0/1  
aaZ\_V`Z`^^ZZ^]\_W\_\_¥VWWTW\_^U]YWVTTY]UXWW  
@HWI-EAS443:3:9:457:1516#0/1  
GTGCCATGCTCAGGATGTTTCTGAACCACTCGGGTTGATT  
+HWI-EAS443:3:9:457:1516#0/1  
[aab\_¥]b`a`Z]\_Ya\_baaa\_\_aWa`aaa\_YZ[`[X`\_  
@HWI-EAS443:3:9:467:1934#0/1  
ATTCATATGAGAGCAAATCGTCCGATGATTGGAGCCCA  
+HWI-EAS443:3:9:467:1934#0/1  
aa````\_aa`aa\_^`\_aaa[a^V][¥^[[^^¥\_]XZ]\_^  
@HWI-EAS443:3:9:489:341#0/1  
CACTGACATTAATACGATGACCAAAGATGCAGAGAGAGG  
+HWI-EAS443:3:9:489:341#0/1  
ababb\_\_aa\_b`aab]b`aaa¥aa\_aaaa```ab\_aa[\_aY  
@HWI-EAS443:3:9:565:1491#0/1  
GATGCCAGGGTCGACTTCGAGTCTGGACGGATCAAGAAAG  
+HWI-EAS443:3:9:565:1491#0/1  
I¥`bbba¥VY`bWW^ab\_\_Z\_Y``R\_bbZ`baab`a`bb`  
@HWI-EAS443:3:9:608:1781#0/1  
GCTGTGGTAATGCCAGCCCATGGTCCAGCCAAAAGCATGG  
+HWI-EAS443:3:9:608:1781#0/1  
^a`US][OZ]TU]¥Q]SYZ]VNSUKNTTRZ`\_^VQUXUYB  
@HWI-EAS443:3:9:614:1931#0/1  
AGACAACATGACCAAGAAGATGGTCACGCAAAGAACAATA  
+HWI-EAS443:3:9:614:1931#0/1  
aa\_\_aa\_\_GXaa`aa^``aa]`^Z¥a]a^`\_\_U^W\_\_\_\_  
@HWI-EAS443:3:9:625:489#0/1  
GGATTTGTGGCTAATTTTAGCATGGAGCTACCCAGCTTTG  
+HWI-EAS443:3:9:625:489#0/1  
aaa`aaa^aaaaaaa`Y`\_```^Z^V¥\_^\_]ZU^\_\_]  
@HWI-EAS443:3:9:667:208#0/1  
TGAAGAGCCATCTGGGCCGTTGCAGGTCCAAGGTCATTGT  
+HWI-EAS443:3:9:667:208#0/1  
\_Wab`aa\_a`aZ`\_a`aW^]^^\_ZYW^^]VTHXUXUW  
@HWI-EAS443:3:9:719:362#0/1  
GGGATGGGCTCCAATCATCCGACGATTTTGCTCTCATAGT

+HWI-EAS443:3:9:719:362#0/1  
a`a^a\_a]]X]\_^\_a^]\_`X\_YX^^`\_]XYU]X]\_X  
@HWI-EAS443:3:9:739:367#0/1  
GACGGATCAAGAAAGAAGAGTTCTCTGAGATCATGAAGAT  
+HWI-EAS443:3:9:739:367#0/1  
aaabb````aaaa`a`````a]`^^^`\_^]\_````^`\_^  
@HWI-EAS443:3:9:758:1390#0/1  
ATGCTGTGGTAATGCCAGCCCATGGTCCAGCCAAAAGCAT  
+HWI-EAS443:3:9:758:1390#0/1  
a\_a¥a`[\_Ua\_a]X]^¥\_Z`]\_¥VW^¥W[¥[Z¥\_^Z¥\_Y  
@HWI-EAS443:3:9:761:462#0/1  
GATGCCAGGGTCGACTTCGAGTCTGGACGGATCAAGAAAG  
+HWI-EAS443:3:9:761:462#0/1  
a]aa`\_Z``\_S`\_UWZ`^^\_W]\_`¥ZW`^W[GZS¥¥¥¥¥  
@HWI-EAS443:3:9:778:501#0/1  
GTCCTCCATCTGATACTAATAGCCCTACCTTTGATTGGGT  
+HWI-EAS443:3:9:778:501#0/1  
a\_^\_aaaaaaa]`a^aa`a\_a^^^`\_]¥^W]``Z]\_`\_]  
@HWI-EAS443:3:9:784:708#0/1  
GCCCTACCTTTGATTGGGTTTGATCCCACAGTTCTTTAA  
+HWI-EAS443:3:9:784:708#0/1  
\_Z`ba[a^]¥`b\_]^^YbT^aaab[OXaY¥Z`\_a]]\_^Xa  
@HWI-EAS443:3:9:811:1953#0/1  
CTCCAATCATCCGACGATTTTGCTCTCATAGTGAATGCAC  
+HWI-EAS443:3:9:811:1953#0/1  
aa`aba\_b\_aaaaa`\_\_a`^\_``[``^a`X\_a^]\_\_aX  
@HWI-EAS443:3:9:848:821#0/1  
GTGTGTTCTGTTTACTGTGTCCATGGTGTATCCTGTTCCCT  
+HWI-EAS443:3:9:848:821#0/1  
aTWXaWXXaU\_¥¥]H¥[XaWXY]\_\_YV[VUYX]\_aURQQ^  
@HWI-EAS443:3:9:931:742#0/1  
GTGGTAATGCCAGCCCATGGTCCAGCCAAAAGCATGGAAT  
+HWI-EAS443:3:9:931:742#0/1  
a]ba\_aaaaa\_``aaa\_aba¥``\_`\_^```\_^[`W\_`¥]`  
@HWI-EAS443:3:9:993:435#0/1  
GCCTTCCTGACTCATTAGCTGTTAGGCCATTGATCTAAA  
+HWI-EAS443:3:9:993:435#0/1  
a¥^\_a]]\_`^[\_^¥`]]`\_^XKR]]]YWZSWY[SWWSWZW  
@HWI-EAS443:3:14:1281:216#0/1  
CACGTTCCATTGTCTGAACTAGGTGTTCCACAATGTAGG  
+HWI-EAS443:3:14:1281:216#0/1  
`[\_`Y`^]`¥Z\_Z]Q\_[\_]T¥DT]FX¥YXOOQ]VZXWBB  
@HWI-EAS443:3:12:498:685#0/1  
TGCAGGGATAACTGGCATGGCTCGAATCGACCGGGGGGGG  
+HWI-EAS443:3:12:498:685#0/1  
a`a\_baa`aba\_aaa]a[``]^¥VVRPLPLLYUEXaaBBB  
@HWI-EAS443:3:20:221:643#0/1  
AGACAATCCACGCCCTAATGATAAGACAGGCAGGAGTGGG  
+HWI-EAS443:3:20:221:643#0/1  
aaZ[\_Yabab````¥[O^S^a¥\_`Y`^U`BBBBBBBBBBBB

@HWI-EAS443:3:24:1370:1696#0/1  
CAATTGGAATTTCTGGCCCAGACAATGGGGCAGGGGGTGG  
+HWI-EAS443:3:24:1370:1696#0/1  
aabbbY¥bbaaaa`aba`\_aab\_[aabbbb[`[BBBBBBB  
@HWI-EAS443:3:29:462:1002#0/1  
ATCCTTTTGTGGTGTAAACAGTGACACTGTGGGCCTGCTG  
+HWI-EAS443:3:29:462:1002#0/1  
\_aaa`baab[aaVUZ^¥Ra`V^`\_\_aa¥\_V\_[^¥YZZ^Y¥  
@HWI-EAS443:3:29:740:39#0/1  
ATGATTTGGGATCCGAACGGATGGACTGGGACACGGGATA  
+HWI-EAS443:3:29:740:39#0/1  
aba`bababb`\_[\_ba`Yaa\_\_aa¥]\_\_\_`][\_\_X\_`X]]  
@HWI-EAS443:3:40:1789:1176#0/1  
TGCAGGGATAACTGGCATGGCTCGAATCGACCGGGGGGGT  
+HWI-EAS443:3:40:1789:1176#0/1  
`aaaaba\_]Za\_aaa`X\_a`\_^`[UNPXTDMYBBBBBBBB  
@HWI-EAS443:3:45:190:365#0/1  
AGACAATCCACGCCCTAATGATAAGACAGGCAGGTGGGGG  
+HWI-EAS443:3:45:190:365#0/1  
aa`aa]bZ`]\_a\_\_Z¥ZO^YSV¥`Y`WBBBBBBBBBBBB  
@HWI-EAS443:3:4:1213:773#0/1  
AGACAATCCACGCCCTAATGATAAGACAGGCAGGTAAAC  
+HWI-EAS443:3:4:1213:773#0/1  
aa\_\_a\_a`^a\_aY^)`a`a\_¥`^`^S^[^BBBBBBBBBB  
@HWI-EAS443:3:58:602:1574#0/1  
AAACCAGACATATGTTAACATCAGCAACACCAACTTTCCT  
+HWI-EAS443:3:58:602:1574#0/1  
a`^ab¥PM[aa`a^a`a\_[PYYXQ]`aY`aYYQL`\_R]J\_  
@HWI-EAS443:3:60:724:687#0/1  
GAATTTCTGGCCCAGACAATGGGGCAGTGGCTGGGGTTAA  
+HWI-EAS443:3:60:724:687#0/1  
ab]]bbbaa`baaabaa][^aaa[```QBBBBBBBBBBBB  
@HWI-EAS443:3:60:906:1139#0/1  
GGGATAACTGGCATGGCTCGAATCGACCGTGGGGGGCTTT  
+HWI-EAS443:3:60:906:1139#0/1  
a\_a\_abb\_bba`¥Y]Zaa]PQZQGOJ[ZNQBBBBBBBB  
@HWI-EAS443:3:69:1542:1692#0/1  
CATTAGACGATACTGGACCACAACACTGCCTGTCTCAAAAAA  
+HWI-EAS443:3:69:1542:1692#0/1  
\_bab^baba\_baZPH][\_\_aQ`a`YNT^¥R^¥\_Wa\_\_`a\_  
@HWI-EAS443:3:74:974:657#0/1  
GGGATAACTGGCATGGCTCGAATCGACCGTGGGGGTTTTT  
+HWI-EAS443:3:74:974:657#0/1  
a`[a`aa`aa^a`a\_aa`[ML¥TXPHL[OHH`L¥BBBBB  
@HWI-EAS443:3:83:418:1850#0/1  
AGACAATCCACGCCCTAATGATAAGACAGGCAGGTGGGG  
+HWI-EAS443:3:83:418:1850#0/1  
abaaaaaab`a\_a`^R[]X\_\_\_a[\_^\_BBBBBBBBBBBB  
@HWI-EAS443:3:87:411:814#0/1  
AGACAATCCACGCCCTAATGATAAGACAGGCAGGTGTGT

+HWI-EAS443:3:87:411:814#0/1  
a\_a`^a`bbaYUWaaaaaaa\_\_aaaaV`[\_BBBBBBBBBB  
@HWI-EAS443:3:8:409:1334#0/1  
AGACAATCCACGCCCTAATGATAAGACAGGCAGGGTTGCA  
+HWI-EAS443:3:8:409:1334#0/1  
^YV\_\_¥]\_[aa¥]`^\_TZa[[`a¥L\_]\_]¥a[BBBBBB  
@HWI-EAS443:3:95:975:1822#0/1  
AGACAATCCACGCCCTAATGATAAGACAGGCAGGTGTTTG  
+HWI-EAS443:3:95:975:1822#0/1  
aab`[a`]UVF]a¥T]a`aUS\_\_XVUQ\_BBBBBBBBBBBB  
@HWI-EAS443:3:98:250:1068#0/1  
GATGATTTGGGATCCGAACGGATGGACTGGGACTACAGGC  
+HWI-EAS443:3:98:250:1068#0/1  
a`^YV]\_`\_^`a]```]`]]VaZYY^a\_a]]¥RIY\_`\_  
@HWI-EAS443:3:96:1381:1511#0/1  
AGGATATGCTGCTCCCGCTAGTCCAGATNGTGTCTGTTT  
+HWI-EAS443:3:96:1381:1511#0/1  
Z^\_Z`\_WUa]a`bX\_I¥PPXb[VMZ^UPDRWLQ]W[MVBB  
@HWI-EAS443:3:12:1592:893#0/1  
ATATCTTGCTTTATTGAGAAGTTATTGTCTGTGCCAGCGC  
+HWI-EAS443:3:12:1592:893#0/1  
UY[OR\_R\_[\_]UZ]`\_`U\_ZQXW]BBBBBBBBBBBBBBB  
@HWI-EAS443:3:22:900:1685#0/1  
CGCTTCTTGAACCTAATGCTTTTGGTTCTCCCTATCCAAAC  
+HWI-EAS443:3:22:900:1685#0/1  
abK[Z`\_^`Ya^[¥]Za\_[\_]WFJUYFNXR]^^^aX\_^\_  
@HWI-EAS443:3:23:25:1364#0/1  
GTGGCCCGCTAATTTACGGAAACCACTGACTGGCCAGCA  
+HWI-EAS443:3:23:25:1364#0/1  
]S]Y¥W[RYXNRTZ\_¥Y¥XPIIYTBTTTTTTTTTTTTTTT  
@HWI-EAS443:3:56:1403:1008#0/1  
GCTCGCTAATTTACGGAAACCACTTACTGTCCAGCAGCA  
+HWI-EAS443:3:56:1403:1008#0/1  
\_]`^^^aaba\_¥]a]NSa]VOYDVFYQ¥^OBBBBBBBBBB  
@HWI-EAS443:3:5:1700:639#0/1  
GGGCGCTTCTGATTAGTTCAACCCAGAAGCAAGGTCTTA  
+HWI-EAS443:3:5:1700:639#0/1  
MbaabWaaba`aa]bbabZ\_[^aab^bb\_aab^INa\_`  
@HWI-EAS443:3:66:1106:79#0/1  
ATAAGGGCGTGGATTGTCTCCGAAAATACCACTGCATATG  
+HWI-EAS443:3:66:1106:79#0/1  
aVHVba`R¥YZ\_^a`baa`]YUH\_aaPFGF^\_¥VPXZZ\_U  
@HWI-EAS443:3:68:757:130#0/1  
GGGGCCTTGCTACATGACAAACATTCCAATGGAACCACTA  
+HWI-EAS443:3:68:757:130#0/1  
KVKK`[[[WYGP[RYM[PMW[UYPG^WW[[W[UUWLZP  
@HWI-EAS443:3:6:1131:786#0/1  
CAGCAAAGTTGGTGTGCTGATGTAAAATATGTCTGGAC  
+HWI-EAS443:3:6:1131:786#0/1  
`]a¥IW^VNZ[¥J\_\_Vba`WYZBBBBBBBBBBBBBBBBBB

@HWI-EAS443:3:84:201:473#0/1  
TGCAGGGATAACTGGCATGGCTCGAATGGACCGTGGGGGG  
+HWI-EAS443:3:84:201:473#0/1  
abbaabTTb`bbbb\_`¥aaa]^UJUyF¥VXUVIaQTM`B  
@HWI-EAS443:3:92:125:939#0/1  
ATCAAAATCAGATTGAAACATGCAATCAACGCGTCATAAC  
+HWI-EAS443:3:92:125:939#0/1  
\_`b\_Y^`aX`a`abY^[NS¥U[WSR¥b^YBBBBBBBBBB  
@HWI-EAS443:3:95:742:451#0/1  
CAGGGATAACTGGCATGGCTCGAATCGAACGTGGGTGGCT  
+HWI-EAS443:3:95:742:451#0/1  
``]b\_bbab]Ub]]]aba\_`\_]F]UPWaHaXxaaH\_GWR  
@HWI-EAS443:3:99:1028:20#0/1  
TGCAGGGATAACTGGCATGGCTCGAATTGACCGTGGGGGT  
+HWI-EAS443:3:99:1028:20#0/1  
abb`bbb`baa`bb`¥aab```\_a[[QFSZRM¥L]aaBBB  
@HWI-EAS443:3:14:1624:1015#0/1  
GTAAACAGCGNCACTGTGGTTGGTCTTGCCAGACGGTG  
+HWI-EAS443:3:14:1624:1015#0/1  
aX[ZP[VRLTDVXWXXRVVXPTNYPHXRG[BBBBBBBBBB  
@HWI-EAS443:3:21:458:651#0/1  
TGCAGGGATAACTGGCATGGCTCGAATCGACNGGGGGTGT  
+HWI-EAS443:3:21:458:651#0/1  
`aaLTW`¥`aa`aa^baZaaa`aXNTPQYZRDOFY\_`BBB  
@HWI-EAS443:3:54:1166:531#0/1  
ATACAACCAAGNTTGGAGTCAGTCGTTTGGTCAGCAAGT  
+HWI-EAS443:3:54:1166:531#0/1  
^baaa]]`^bXRDMV``[aa^\_a]^¥[a\_RaV]U]Y¥Y¥^  
@HWI-EAS443:3:61:1757:1771#0/1  
ATTAGGGCGTGGTTTGTCTCCGAAAATCCCACTGCANATG  
+HWI-EAS443:3:61:1757:1771#0/1  
aaba`Wa`V`b¥\_aabababababV`a]]a\_^V\_TDWYT  
@HWI-EAS443:3:73:1141:366#0/1  
CAGNAGCATTCTCACAGTGATAATTAGGGGCATTCAATTT  
+HWI-EAS443:3:73:1141:366#0/1  
ab]D¥babbaaaaab`abVa\_a\_aaaaaaaaa^aa```aa]  
@HWI-EAS443:3:84:1631:116#0/1  
GGGGATGTGTTNGTCATAAGGGAACCATTTATCATGCT  
+HWI-EAS443:3:84:1631:116#0/1  
abbb\_aaZb`[D¥]Xaa`aaa\_`\_^aa`\_aaaa]\_a]^\_  
@HWI-EAS443:3:21:1103:1722#0/1  
TGCAGGGATACTGGCATGGCTCGAATCGACCGTGGGTGTC  
+HWI-EAS443:3:21:1103:1722#0/1  
abaaa``\_ababaZaaaa\_aa`\_\_aQKRS¥¥YV[^`GaGW  
@HWI-EAS443:3:57:560:1144#0/1  
GTCCCAGTCCATCCGTTCCGATCCAAATCATCTCAAACC  
+HWI-EAS443:3:57:560:1144#0/1  
`¥``aaaaaa`\_``]\_`aZQX`\_YV[XUYZZXUU¥^`UT  
@HWI-EAS443:3:18:723:1776#0/1  
GGAATTTCTGGCCAGACAATGGGGCAGTGGCTGGGTTTA

+HWI-EAS443:3:18:723:1776#0/1  
\_`a`^`^`^`Xa`a`\_aa^\_]`^]Y`^QB  
@HWI-EAS443:3:20:87:1076#0/1  
GGAATTTCTGGCCAGACAATGGGGCAGTGGCTGGGGGGA  
+HWI-EAS443:3:20:87:1076#0/1  
aa]`^]U^U`^PWXR`T`^YIXaRNZ`BBBBBBBBBBBB  
@HWI-EAS443:3:24:913:1079#0/1  
GCGCTTCATTAGACGATACTGGACCACAACTGCCTGTCTT  
+HWI-EAS443:3:24:913:1079#0/1  
a`b]ba`U`abaaaa`WNQ`[R`VS[XFVY`SZHMDXa  
@HWI-EAS443:3:26:1273:716#0/1  
AACCAAACATATGTTAACATCAGCAACCAACTTTGCTG  
+HWI-EAS443:3:26:1273:716#0/1  
a`^ZFPZa`JYTT`W`T`\_\_\_a`[W`S`aWa`\_WLRaS`[`  
@HWI-EAS443:3:34:174:1878#0/1  
CCCTAATTTACGAAACCACTGACTGTCCAGCAGCGAAG  
+HWI-EAS443:3:34:174:1878#0/1  
]HZ`^`VQaR`UX`[`aa]`Ua`R`]BBBBBBBBBBBBBBBB  
@HWI-EAS443:3:34:365:886#0/1  
GGAATTTCTGGCCAGACAATGGGGCAGTGGCTGGGGTTT  
+HWI-EAS443:3:34:365:886#0/1  
a`[``aaaa`\_\_\_`aa]`^aa`^^^]`^`\_UWBBBBBBBBBBBB  
@HWI-EAS443:3:35:402:1365#0/1  
AGATGATTTGGGATCCGAACGGATGGACTGGGACCCCTTT  
+HWI-EAS443:3:35:402:1365#0/1  
\_]Z`^][a`\_`aXXVaa`aa`\_`\_`X`\_[VVRYXM`\_]`RS`  
@HWI-EAS443:3:44:444:308#0/1  
GGAATTTCTGGCCAGACAATGGGGCAGTGGCTGGGGTTA  
+HWI-EAS443:3:44:444:308#0/1  
aa`^``aaaa`a`X`Z`^`^]T`[[Z`W`W`\_BBBBBBBBBBBB  
@HWI-EAS443:3:49:1183:1346#0/1  
CCAGCAGCAAAGTTGGTGTGCTGATGTTAACATGTCTGG  
+HWI-EAS443:3:49:1183:1346#0/1  
aa`a`^aaa`aab`a`a`aaba`b`a`a]a`^`\_]`^``\_\_aa  
@HWI-EAS443:3:56:660:1253#0/1  
GTGCAGGGATAACTGGCATGGCTCGAATCGACCGGGGGGG  
+HWI-EAS443:3:56:660:1253#0/1  
]ZY`^Q`\_\_ZWYQZ]ZZZ`Y`Z`ZW`UPHPRUTTB  
@HWI-EAS443:3:59:1051:89#0/1  
GCCCCGCTAGTCCAGATTGTGTTCTCTTTGGGTCGCGTA  
+HWI-EAS443:3:59:1051:89#0/1  
aba\_]aaa`[aSS`[^`S`b`^b`^`a``\_\_WM`^QWVU`^`S  
@HWI-EAS443:3:63:633:1588#0/1  
TGTGCAGGGATAACTGGCATGGCTCGAATCGACCGGGGGGG  
+HWI-EAS443:3:63:633:1588#0/1  
abZ`\_bbbbbabbaa`^a`\_YJb`\_`GTTMJOX`^QJXVBB  
@HWI-EAS443:3:64:1453:1161#0/1  
GTGCAGGGATAACTGGCATGGCTCGAATCGACCGGGGGGG  
+HWI-EAS443:3:64:1453:1161#0/1  
a\_]OV`T`\_`Y`aX`a[Y]VYBBBBBBBBBBBBBBBBBBBB



@HWI-EAS443:3:65:394:610#0/1  
AGGGGAGCAAGTGTTCATGATGGCATCAATTGGCTA  
+HWI-EAS443:3:65:394:610#0/1  
abb`]aabaaYa`abaab^a`aa[aa`a`a`\_a`[\_a`\_`\_`  
@HWI-EAS443:3:68:1109:1212#0/1  
GATGATTTGGGATCCGAACGGATGGACTGGGACAAGACTT  
+HWI-EAS443:3:68:1109:1212#0/1  
T]\_`bb`b]b``a`[\_`bbaababa`````bbaa\_Xa`¥`a  
@HWI-EAS443:3:81:910:539#0/1  
ACCAGTCATATGTTAACATCAGCAACACCAACTTTGCTGC  
+HWI-EAS443:3:81:910:539#0/1  
aaaa`0]a`aaa`aaaa^aaa\_a`\_aaV\_`\_````]\_`Y  
@HWI-EAS443:3:93:1140:13#0/1  
ATGGCATCAATTGGCTAACCAATTGGAATNTCTGGCCNGA  
+HWI-EAS443:3:93:1140:13#0/1  
aabaY^aaaaaaa``\_a`\_`\_aa\_a^XDW]^`¥[T]HDMB  
@HWI-EAS443:3:13:1663:357#0/1  
ACCAGACATATGTTAACATCAGCAAGACCAACTTTGCTGC  
+HWI-EAS443:3:13:1663:357#0/1  
]\_TXVZZH`a\_X\_a[¥RX^Q¥`RWTLVIKWOJYN[[P^ZB  
@HWI-EAS443:3:18:197:278#0/1  
ACCAGACATATGTTACCATCAGCAACACCAACTTTGCTGC  
+HWI-EAS443:3:18:197:278#0/1  
S`^Ya^^\_Xa]QYbbb¥b`a¥\_aa\_Y^\_]`^`aa^`a\_Z\_\_  
@HWI-EAS443:3:1:1258:466#0/1  
GCAGGGATAACTGGCATGGCTCGAATCGACCGGGGTGGC  
+HWI-EAS443:3:1:1258:466#0/1  
^\_a\_Z¥W[aaIX¥a`aaVY`aTOQVTJ]VYBBBBBBBBBB  
@HWI-EAS443:3:44:1790:758#0/1  
CGCAGGGATAACTGGCATGGCTCGAATCGACCGGGGTGG  
+HWI-EAS443:3:44:1790:758#0/1  
ab]UbbbaZaabb]aaabbaa\_^XYBBBBBBBBBBBBBB  
@HWI-EAS443:3:48:795:1718#0/1  
ATTGGAATTTCTGGCCAGACAATGGGGCAGTTGCTGTTG  
+HWI-EAS443:3:48:795:1718#0/1  
Kb[\_ab`ba`Z`KaU\_aY`K`Kb\_[Y``a]BBBBBBBBBB  
@HWI-EAS443:3:81:224:1521#0/1  
CGCTTGGTCAGCAAGTGTTCATGATGGCCTCAATTCCG  
+HWI-EAS443:3:81:224:1521#0/1  
aa`[TTT[`ZS\_WVWL[`TDKTWXMVTV[BBBBBBBBBB  
@HWI-EAS443:3:11:277:1213#0/1  
TCTGATATTCCAGATTCTGGTTGAAAGACACCCACCCATT  
+HWI-EAS443:3:11:277:1213#0/1  
]a¥¥¥W¥\_]`^aYZY]UaXb]^a\_a`[¥XSVJMZ^[\_`Z^  
@HWI-EAS443:3:14:555:1987#0/1  
CAGGGATAACTGGCATGGCTCGAATCGACCGTGGGGGGCC  
+HWI-EAS443:3:14:555:1987#0/1  
`[\_`baJaabb^R``a`XaaSZMX^E¥\_PBBBBBBBBBBBB  
@HWI-EAS443:3:19:743:1128#0/1  
CAGGGATAACTGGCATGGCTCGAATCGACCGTGGGGGGCT



@HWI-EAS443:3:84:636:1830#0/1  
TTAGGGTTTCGATATGGGCTCCTGTCTTTAATGGTTNCNTT  
+HWI-EAS443:3:84:636:1830#0/1  
MZX^\_¥T^]I¥T]ZOX`¥¥^`a]U]P`]aa`¥RFOD¥D[`  
@HWI-EAS443:3:86:54:492#0/1  
GAGACAATCCACGCCCTAATGATAAGACAGGCAGTATTGG  
+HWI-EAS443:3:86:54:492#0/1  
\_K\_a[YY\_`a\_aaQ\_\_YULX¥]\_^YSUBBBBBBBBBBBBBB  
@HWI-EAS443:3:91:420:1372#0/1  
AATCCACGCCCTAATGATAAGACAGGCAGTTGTGGGGCGG  
+HWI-EAS443:3:91:420:1372#0/1  
`]¥¥\_¥Z`a`ba`\_`a^aab`aa``BBBBBBBBBBBBBBB  
@HWI-EAS443:3:91:743:244#0/1  
CAGGGATAACTGGCATGGCTCGAATCGACCGTGGGGGGCT  
+HWI-EAS443:3:91:743:244#0/1  
abbbbbbbbbbbbbbaaab`¥ZaZ]aVU¥XN\_aaZ¥FOP  
@HWI-EAS443:3:99:578:1488#0/1  
CAGGGATAACTGGCATGGCTCGAATCGACCGTGGGGGGCT  
+HWI-EAS443:3:99:578:1488#0/1  
a`aa`aaab\_`a`a`aaa`]RHQKQSO¥VPSaBBBBBB  
@HWI-EAS443:3:65:1564:371#0/1  
TGGCCCGCTAATTTACGGAAACCACTGNCTGTCCAGCAG  
+HWI-EAS443:3:65:1564:371#0/1  
ab`¥¥`¥Z^aaaa]U^L\_^`a[P^[ZVDR]^RRU^RUT  
@HWI-EAS443:3:77:1459:1742#0/1  
ACCAGACATATGTTAACATNAGCAACACCAACTTTGCTGC  
+HWI-EAS443:3:77:1459:1742#0/1  
aaa]\_ba[bb¥[Uaaa\_bVD]]`bbaa^``[Saa\_`a`a]  
@HWI-EAS443:3:95:869:1769#0/1  
ACCAGACATATGTTAACATCAGCAACACCAACTTTNCTGC  
+HWI-EAS443:3:95:869:1769#0/1  
`baRZaaaXQxb^`]¥aY]L\_NQaS\_Y^a\_S\_XHDF^\_^  
@HWI-EAS443:3:11:1186:1126#0/1  
CGCGTCATTACTTATGAAAACAACACTTGGGTAAACCAGA  
+HWI-EAS443:3:11:1186:1126#0/1  
abaaa``aba\_abbaa`^^^a``\_`]a`\_^S[a\_\_^[aa^  
@HWI-EAS443:3:13:1526:1231#0/1  
GATTTTCGGAGACAATCCACGCCCTAATGAAAAGACAGGA  
+HWI-EAS443:3:13:1526:1231#0/1  
^`a`]ZU`baa^`aaaX[^QZXYX\_BBBBBBBBBBBBBBB  
@HWI-EAS443:3:15:428:844#0/1  
TGCAGGGATAACTGGCATGGCTCGAATCGAACGTGGGTGG  
+HWI-EAS443:3:15:428:844#0/1  
]U[b`YaWZX\_abaYbaabaa[`Y`YQYLLGX[DL]¥F^F  
@HWI-EAS443:3:16:455:132#0/1  
ATAAACAGCGACACTGTGGGTTGGTCTTGCCAGACGGTG  
+HWI-EAS443:3:16:455:132#0/1  
a^`WZ`aa]aX`a^Z]]a^^VNa\_OJMW^[`TDRP¥]RBB  
@HWI-EAS443:3:18:1655:408#0/1  
CAGCAAGTGCTTGCATGATGGCATCAATTGACTAACAAA

+HWI-EAS443:3:18:1655:408#0/1  
aaba`b\_\_^aaa`^`a`a¥\_[^\_X^^a]¥^^¥]\_^[^X  
@HWI-EAS443:3:18:1664:1196#0/1  
TCTTGCTTTATTGAGAAGTTATTGTCTGTCCCCGTCCATG  
+HWI-EAS443:3:18:1664:1196#0/1  
aaab`\_XaY`a`\_N\_]\_b]]]Z`]BBBBBBBBBBBBBBBB  
@HWI-EAS443:3:28:1352:1036#0/1  
GGCGGGGGCAGCATATCCTTTTGTGGTGTAACAGTGACA  
+HWI-EAS443:3:28:1352:1036#0/1  
aaa`Wba\_S]X[Q[¥XV^```\_a[¥VRX\_^`]\_¥`Y`^YY  
@HWI-EAS443:3:30:214:912#0/1  
GGGGCTCCTGTCTTTAATGGTCCACTGGAATGTTTGTCA  
+HWI-EAS443:3:30:214:912#0/1  
^\_a`bababa`XH[b^ZW]YN^abXHZ¥V[[]][]ZYJYI  
@HWI-EAS443:3:38:1016:421#0/1  
CGCAGGGATAACTGGCATGGCTCGAATCGAACGTGGGTGT  
+HWI-EAS443:3:38:1016:421#0/1  
abbY]a\_]babZaaaa`aaYBBBBBBBBBBBBBBBBBBBB  
@HWI-EAS443:3:38:1481:1161#0/1  
CGGGGCCTTGCTAAATGACAAACATTCCAATGGAATCATT  
+HWI-EAS443:3:38:1481:1161#0/1  
¥`¥T`aa¥Y0\_\_ab^`a`a`\_\_R^aV^WLF¥]NTGR]a]  
@HWI-EAS443:3:38:1670:750#0/1  
TCCCAGTCCATCCGTTCCGATCCCAAATCATATCAAAACG  
+HWI-EAS443:3:38:1670:750#0/1  
Y\_[P^\_Z\_V[`]a[Z¥XWWTQ^`]\_]LIPMMMS[^\_XDH  
@HWI-EAS443:3:40:968:551#0/1  
TGCCTCATTACTTATGAAAACAACACTTGGGTAAACCAGA  
+HWI-EAS443:3:40:968:551#0/1  
aa`a\_aaaa¥^aaaaa`a`a^]¥`\_]X^Z^]X¥\_\_`a\_\_^  
@HWI-EAS443:3:45:1043:1926#0/1  
CGGTGTAACAGTGACACTGTGGGTTGGTCTTGGCGAGAC  
+HWI-EAS443:3:45:1043:1926#0/1  
ab`\_\_^T¥aaabRb¥KY]^\_aba\_PWb`S[[]aaa\_GJ¥[U  
@HWI-EAS443:3:45:770:1190#0/1  
TGCAGGGATAACTGGCATGGCTCGAATCGACCGGGGGTGG  
+HWI-EAS443:3:45:770:1190#0/1  
abaaa\_b[ba`^abaaaaaa^HPY^[`RNVNG[`aG`Q  
@HWI-EAS443:3:47:1505:1044#0/1  
TTCGATTCGAGCCATGCCAGTTATCCCTGCACAGACATGT  
+HWI-EAS443:3:47:1505:1044#0/1  
`^]W^Y]]`\_aa[X^`¥YW\_[\_\_`]ZUZ^Z\_\_SFV^`\_\_U  
@HWI-EAS443:3:53:728:1022#0/1  
AGGCTGTGTTAAAGTACAACGACATAATAACAGACACTAT  
+HWI-EAS443:3:53:728:1022#0/1  
R]¥]`Z^[S\_^T]PR\_^]V[PSU\_\_ZUY\_\_UUYZZX  
@HWI-EAS443:3:56:1262:257#0/1  
CGCCCCTAATTTACGGAAACCACTGACTGGCCAGCAGC  
+HWI-EAS443:3:56:1262:257#0/1  
a¥\_]`]OT]TZ\_\_UZ`]UZb``VX¥aa`Y[DMXZKKQWF

@HWI-EAS443:3:5:1365:185#0/1  
GGGCAATGGTGTGGATAGGGAGAATTAAGCATTAGT  
+HWI-EAS443:3:5:1365:185#0/1  
PX[R[aYaN\_S\_a`\_N\_baV\_^\_¥I]`a¥\_`ZZa\_^aB  
@HWI-EAS443:3:63:1561:567#0/1  
ACCCTCTCCATACTCAAGATTTGAGTTAGTCGCTTGG  
+HWI-EAS443:3:63:1561:567#0/1  
a\_baaaaaa]X`a`aba]a`baaaa\_a^`YXaY`\_`]  
@HWI-EAS443:3:68:124:1545#0/1  
CGCCCCGTAATTTGACGAAACCACTGACTGTCCAGCAGC  
+HWI-EAS443:3:68:124:1545#0/1  
aabb`ba`baa]G\_aa¥\_aaaa`a`\_aa\_\_V^^¥^^X\_  
@HWI-EAS443:3:68:1420:2017#0/1  
GTTTTGAGATGATTTGGGATCCGAACGGATGGAGTGGGAG  
+HWI-EAS443:3:68:1420:2017#0/1  
a[```Y`[a`Y^^]^^SZ¥P]\_\_ULZ[[YXWRLVMXUPG  
@HWI-EAS443:3:70:1204:262#0/1  
ATGCCCGCTAATTTACGAAACCACTGACTGTACAGCAG  
+HWI-EAS443:3:70:1204:262#0/1  
`b\_UU`ab`YZY`NWL\_a\_\_a^\_YJY^ZLX\_NFNP[WQY  
@HWI-EAS443:3:71:806:1383#0/1  
CACGCCCTAATGATAAGACAGGCAGTTGTGGGCCAGTATA  
+HWI-EAS443:3:71:806:1383#0/1  
abbabaaaaa`^aaaa`baaaBBBBBBBBBBBBBBBBBB  
@HWI-EAS443:3:72:406:495#0/1  
CGGGCCTCGCTAAATGACAAACATTC CAATGGAACCATT  
+HWI-EAS443:3:72:406:495#0/1  
^`bbabbabb`ba`a`aabbaabbabbaaa[aaaa`aba  
@HWI-EAS443:3:74:796:116#0/1  
TGCCACTCAATTCAACCTGGGAATCAAAATCAGATTGAAA  
+HWI-EAS443:3:74:796:116#0/1  
[^RO\_H\_S`^^`^\_¥VbbYV]`a[``bTa]aaa\_bb\_\_]  
@HWI-EAS443:3:75:483:483#0/1  
CGTGGTCAGGATATAGCGGGAGGTTTGTTCAGCATCCAGA  
+HWI-EAS443:3:75:483:483#0/1  
abbb`bababbbabbbZ\_H\_bb\_a`a^babaaU\_\_`  
@HWI-EAS443:3:80:1071:1990#0/1  
CGCCCCGCTACTAACAGGGCAGAGAGGAATTGCCCGCT  
+HWI-EAS443:3:80:1071:1990#0/1  
aabb`abbaabaaba`baaba``babbaaba`a^a`\_a  
@HWI-EAS443:3:80:30:126#0/1  
GTAAATGGCAACTCAGCACCGTCTGGCCAAGAACAACCCG  
+HWI-EAS443:3:80:30:126#0/1  
a¥aaXZ``\_a`]¥`\_\_a¥SXGVP[^SW¥Y]BBBBBBBB  
@HWI-EAS443:3:82:1229:1958#0/1  
GGTTGAAAGACACCCACGGTCGATTCGAGCCATGGCAGTG  
+HWI-EAS443:3:82:1229:1958#0/1  
aa]bbaaabbU\_aa`\_VUYFJY^]TYZ]aaZWV\_GZX`HD  
@HWI-EAS443:3:85:1334:1587#0/1  
GCAGGGATAACTGGCATGGCTCGGATCGACCGTGGGTGTT



@HWI-EAS443:3:18:111:1298#0/1  
CCGCTAATTTACGGAAACCACTGACTGTCCAGCAGGATA  
+HWI-EAS443:3:18:111:1298#0/1  
aXQ\_NQYVZR¥[]X¥UY[¥UX]NR[BBBBBBBBBBBBBBB  
@HWI-EAS443:3:19:1569:1057#0/1  
TGGGGAAGTTCCCTCTCCATACTCAAGATTTGAGTCA  
+HWI-EAS443:3:19:1569:1057#0/1  
``[FW\_Zaa`]^Z¥a`]]`aaQ^^`a`^Q^\_```a\_`]-`  
@HWI-EAS443:3:21:1010:1567#0/1  
TTGGAATTTCTGGCCAGACAATGGGGCAGTGGCTGGGGG  
+HWI-EAS443:3:21:1010:1567#0/1  
\_XU\_VU\_aX¥a[QX^UVWUYR[]¥Xa^^[QBBBBBBBBBBB  
@HWI-EAS443:3:23:1267:235#0/1  
GCCCCGCTAATTTACGGAAACCACTGACTGTCCAGCCGCA  
+HWI-EAS443:3:23:1267:235#0/1  
`ab\_]Y\_a`\_\_a`aW`]\_R\_¥^¥SY]¥PBBBBBBBBBBBBB  
@HWI-EAS443:3:23:922:435#0/1  
GCGACCCAAAGAGAACAATCTGGACTAGCGGGAGAAGC  
+HWI-EAS443:3:23:922:435#0/1  
X`b`^`\_ab``abaaaY^`]aa[```aa\_abaY``aUFWFTU  
@HWI-EAS443:3:26:1268:1545#0/1  
AGCCCATCCACTAACAGGGCAGAGAGGAATTGCCGGCT  
+HWI-EAS443:3:26:1268:1545#0/1  
`R]G^AT`WYW`a\_WOVZY[¥UOWPKLOU`QPαMOFNS[  
@HWI-EAS443:3:27:305:1192#0/1  
CGGGGCTCCCGCTAGTCCAGATTGTGTTCTCTTTGGGTCG  
+HWI-EAS443:3:27:305:1192#0/1  
aa]]¥a\_aaa\_`YQUW\_XUVM[[PU¥U¥¥YTVWUMWSPUV  
@HWI-EAS443:3:30:406:1405#0/1  
TCCCTTAGACGATACTGGACCACAACCTGCCTGTCTTATCA  
+HWI-EAS443:3:30:406:1405#0/1  
W\_\_HZa\_VX^\_QZ`a[PV\_¥b`]X]bZKaWYOZa^]BBBB  
@HWI-EAS443:3:32:1065:808#0/1  
CAAGAAACGGTTTTGAGATGATTTGGGATCCGAACGTATG  
+HWI-EAS443:3:32:1065:808#0/1  
ababbbaabb\_baaa\_a^a`\_]\_`[```\_\_^a^`\_aX\_\_`  
@HWI-EAS443:3:32:451:156#0/1  
TATCAAGAGTTGGAGAAACAATATATTGAGAACACACGAG  
+HWI-EAS443:3:32:451:156#0/1  
aaa^`a\_baaa`aaaYaa`\_\_\_\_\_a```Z`\_\_\_\_`^G[[`  
@HWI-EAS443:3:36:235:1271#0/1  
GTCGCTTGGTCAGCAAGTGCTTGTGCATGATGGCATCCATT  
+HWI-EAS443:3:36:235:1271#0/1  
]aa\_ba\_QS^b\_Zb[Y[DXZX]PT`[^R¥[[¥[FS`IV`[  
@HWI-EAS443:3:36:468:431#0/1  
GTCCCAGTCCATCCGTTCGGATCCCAAATCATCTCACAAC  
+HWI-EAS443:3:36:468:431#0/1  
a`aba`\_baba`aa\_^^`^^\_`a`U]Y¥]\_\_^\_XFUX]  
@HWI-EAS443:3:36:843:363#0/1  
CGGAGACAATCCACGCCCTAATGATAAGACAGGCAGGTGT

+HWI-EAS443:3:36:843:363#0/1  
aababab\_\_abbaba`aa`a` `[aaa\_` ]`\_^BBBBBBBB  
@HWI-EAS443:3:43:1348:702#0/1  
CAATTGGAATTTCTGGCCAGACAATGGGGCAGTGGGTGG  
+HWI-EAS443:3:43:1348:702#0/1  
\_^`abbbaaaa[a^G[abMTab`aaY`WJ¥NV[NS`LLbR  
@HWI-EAS443:3:43:1474:1347#0/1  
AAGCGTCATTACTTATGAAAACAACACTTGGGTAAACCAG  
+HWI-EAS443:3:43:1474:1347#0/1  
aaaab`ababa`b`\_a`a`a`^aZU`^`^`^YW`\_\_]W\_\_  
@HWI-EAS443:3:44:190:499#0/1  
CGCTCTGTTAGTGGATGGGCTATATACAGTAAAGACAACA  
+HWI-EAS443:3:44:190:499#0/1  
\_baa\_a[`a\_ba\_aaaa\_b[\_[\_YT¥H`S¥a]\_[Q[`N[  
@HWI-EAS443:3:48:1542:188#0/1  
CTGGCATGGCTCGAATCGACCGTGGGTGTCTTTCAAACAG  
+HWI-EAS443:3:48:1542:188#0/1  
abbaaabababab\_X]\_XRYVNXYL[\_`\_BBBBBBBBBBBBBB  
@HWI-EAS443:3:48:695:1390#0/1  
GTTCCCTCTCCATACAACACTCAAGATTTGAGTCAGTCACTT  
+HWI-EAS443:3:48:695:1390#0/1  
aaaT¥]`ZPT]`][`¥¥[VOT\_dWZW^X¥^GZ\_¥V¥SYPR  
@HWI-EAS443:3:49:1243:1851#0/1  
GCAGGGATAACTGGCATGGCTCGAATCGACCGTGGGGGGG  
+HWI-EAS443:3:49:1243:1851#0/1  
aaabba\_abba\_\_a]a`aab`[XDxVNzHGsof[]aBBBB  
@HWI-EAS443:3:49:707:1413#0/1  
CAACTGCCTGTCTTATCATTAGGGCGTGGATTGTCTACGA  
+HWI-EAS443:3:49:707:1413#0/1  
aTX``\_]`^`RXOX\_b`R]SYV]TDQ`Ya]U`O\_KKNF`]B  
@HWI-EAS443:3:49:830:1643#0/1  
CATCAATTGGCTAACAATTGGAATTTCTGGCCAGAAAAT  
+HWI-EAS443:3:49:830:1643#0/1  
aa[YaaYYab\_aaaU^aaa`¥^\_a^]U`\_Y\_]\_]\_PFZU\_  
@HWI-EAS443:3:50:1107:1726#0/1  
AAACCAGACATATGTTAACATCAGCAACACCAACTTTGCT  
+HWI-EAS443:3:50:1107:1726#0/1  
abbbababbbbbb`Saba¥aa]`^`aa\_a\_aaa[```a\_`  
@HWI-EAS443:3:56:1722:1967#0/1  
CTCTTGCTTTAATGGTTCCATTGGAATGTTTGTCTTTA  
+HWI-EAS443:3:56:1722:1967#0/1  
\_aabaa`\_bbaaaaba\_`aa\_\_a`a]`^`a`a`a`UWa`a[  
@HWI-EAS443:3:64:1717:64#0/1  
AAGGCACCCACGGTCGATTCGAGCCATGCCAGTTATCCCT  
+HWI-EAS443:3:64:1717:64#0/1  
aaaIab]\_\_a^aBBBBBBBBBBBBBBBBBBBBBBBBBBBBBB  
@HWI-EAS443:3:64:201:741#0/1  
AAACCAGACATATGTTAACATCAGCAACACCAACTTTGCT  
+HWI-EAS443:3:64:201:741#0/1  
¥^^¥\_]UZaZ^aa\_\_`][`Z]\_a`a`aa``]QVY\_^\_\_^Y



@HWI-EAS443:3:67:1486:472#0/1  
AAACCAGACATATGTTAACATCAGCAACACCAACTTTGCT  
+HWI-EAS443:3:67:1486:472#0/1  
¥Z\_V\_ZS[`Y[`YOTWZOYW\_HR\_¥X¥Z]XY`YYa\_¥TVU  
@HWI-EAS443:3:69:1518:391#0/1  
GCAGGGATAACTGGCATGGCTCGAATCGACCGTGGGGGTC  
+HWI-EAS443:3:69:1518:391#0/1  
^\_aa`^^T]^¥^baa]]\_ZaYLJWVDXWLFofZ`\_BBBB  
@HWI-EAS443:3:73:465:460#0/1  
CAGACACTGCCCATTTGTCTGGGCCAGAAATTCOAATTGT  
+HWI-EAS443:3:73:465:460#0/1  
ab`bbabaaaaaa^aab\_`¥a`a`V\_a]a``\_\_\_\_`[a\_]  
@HWI-EAS443:3:75:276:211#0/1  
TTGGAATTTCTGGCCAGACAATGGGGCAGTGGCTGGGGG  
+HWI-EAS443:3:75:276:211#0/1  
abab\_]aaab^a\_¥`a`^`^^`¥[`[S]BBBBBBBBBB  
@HWI-EAS443:3:79:726:870#0/1  
GGGGGTCTTTCAACCAGAATCTGGAATATCAGATAGGATA  
+HWI-EAS443:3:79:726:870#0/1  
\_a\_F\_S¥W\_\_`\_Y`a`\_ZY¥a^Z]U]\_\_\_a\_^W^^]^\_XX  
@HWI-EAS443:3:81:1278:1162#0/1  
AAGCGTCATTACTTATGAAAACAACACTTGGGTAAACCAG  
+HWI-EAS443:3:81:1278:1162#0/1  
aa[\_^\_Xa`a\_a`aaaaaa\_`Y`\_`\_`^\_H\_`\_\_[^\_  
@HWI-EAS443:3:83:1191:1492#0/1  
GAATCGGTTCCAAGGGGGATGTGTTTGCATAAGGGTACA  
+HWI-EAS443:3:83:1191:1492#0/1  
abb`aaY]¥`^\_aaa^`0^`YG][UHRKV]^¥YZGZRV  
@HWI-EAS443:3:83:989:1037#0/1  
GCAGGGATAACTGGCATGGCTCGAATCGACCGTGGGGGAG  
+HWI-EAS443:3:83:989:1037#0/1  
aaa\_a`a\_^aa`]¥`^\_aY]`]BBBBBBBBBBBBBBBBBB  
@HWI-EAS443:3:85:828:1925#0/1  
GCAGGGATAACTGGCATGGCTCGAATCGACCGTGGGGGTC  
+HWI-EAS443:3:85:828:1925#0/1  
```a`\_`W]Z^a`\_`a¥`¥`]BBBBBBBBBBBBBBBBBB  
@HWI-EAS443:3:87:855:1935#0/1  
AAGCGTCATTACTTATGAAAACAACACTTGGGTAAACCAG  
+HWI-EAS443:3:87:855:1935#0/1  
aaaaa`a`a\_U\_`aaa\_a`baa`a`^^YY[^`]¥\_]`  
@HWI-EAS443:3:88:410:184#0/1  
AGGGATAACTGGCATGGCTCGAATCGACCGTGGGTGGGTT  
+HWI-EAS443:3:88:410:184#0/1  
ab```\_aba\_aa\_a^aW\_]HRZT^US¥¥[T\_¥BBBBBBB  
@HWI-EAS443:3:89:494:1715#0/1  
ATCATGCTCCCCCTTGAATGCAGAACCTTCTTCTTCACT  
+HWI-EAS443:3:89:494:1715#0/1  
`\_\_Z\_^a\_\_b`]Y¥U\_X[[XUa¥ZUa\_[NZ¥][YaVGTZV  
@HWI-EAS443:3:90:378:153#0/1  
CGGGCATTACAGTAAAGCAAGAACCATTTACACATGCACA

+HWI-EAS443:3:90:378:153#0/1  
aaTQ^]aLYa¥^0QYL[^¥YaT\_X¥]]MPWTTT^^[TTUX  
@HWI-EAS443:3:90:957:1621#0/1  
GATGGCATCAATTGGCTAACAATTGGAATTTCTGGCGCAN  
+HWI-EAS443:3:90:957:1621#0/1  
`XQG^R`[[¥[^¥\_\_`a`R\_R^\_\_Za`a`\_^ZXYQXDMSD  
@HWI-EAS443:3:91:1135:1333#0/1  
AAACCAGACATATGTTAACATCAGCAACACCAACTTTGCT  
+HWI-EAS443:3:91:1135:1333#0/1  
aa`\_a`\_aa\_\_\_]aaa`a`a`a`a`a]aW`\_V`\_`]]\_  
@HWI-EAS443:3:91:325:1133#0/1  
GCTCCTGTCTTTAATGGTTCCATTGGAATGTTTGCCTTT  
+HWI-EAS443:3:91:325:1133#0/1  
a`[^PPUYRX`TX¥`YN¥\_SY¥RZVOVTXVVYXFLFMYT  
@HWI-EAS443:3:93:587:1181#0/1  
AAACCAGACATATGTTAACATCAGCAACACCAACTTTGCT  
+HWI-EAS443:3:93:587:1181#0/1  
¥^bbbaaabaa\_a^aaa^aaaaabaaZ`a^aaaa[a\_`aa  
@HWI-EAS443:3:95:462:81#0/1  
GGGATAACTGGCATGGCTCGAATCGACCGTGGGTGTGTTT  
+HWI-EAS443:3:95:462:81#0/1  
aaa¥\_\_\_¥`\_`TY[\_\_\_[^VRMRKHVNMP[V¥¥¥HUFFQUU  
@HWI-EAS443:3:95:87:559#0/1  
CGGAGACAATCCACGCCCTAATGATAAGACAGGCAGGTGT  
+HWI-EAS443:3:95:87:559#0/1  
`aa`aaaaaa`¥`¥`aaa\_`a`\_`\_Y^a0^`]BBBBBBB  
@HWI-EAS443:3:99:1373:1225#0/1  
AAACCAGACATATGTTAACATCAGCAACACCAACTTTGCT  
+HWI-EAS443:3:99:1373:1225#0/1  
a[]a[a`^b[\_\_\_ba`baba\_\_\_aXP]\_Za\_^`^Va¥\_¥Za  
@HWI-EAS443:3:99:370:26#0/1  
GAGGCTGAATGTGCATGTGTAATGGTTCTTGCTTTACTG  
+HWI-EAS443:3:99:370:26#0/1  
a]¥F^`bZ\_\_baba\_aa`a]¥]`aa\_\_U`\_a]`\_a`Z`a  
@HWI-EAS443:3:24:1286:1527#0/1  
CGCATGTGTAATGGTTCTTNTTTACTGTAATGACCGAT  
+HWI-EAS443:3:24:1286:1527#0/1  
Z¥`¥ab\_a`^b]bbbabbbZDR\_bbaZ`b\_bbbbb^IYaa  
@HWI-EAS443:3:36:1424:1031#0/1  
CGGGTGTCTTTCANCCAGAATCTGGAATATCAGATAGGAT  
+HWI-EAS443:3:36:1424:1031#0/1  
abbb^ababbba]D^bbbabbabbba`abbbaa\_aaaa^^  
@HWI-EAS443:3:37:1694:454#0/1  
TGCCACTNAATTCAACTTGGGAATCAAAATCAGATTGAAA  
+HWI-EAS443:3:37:1694:454#0/1  
aa^U^a^D]baaa¥\_aab`\_`\_`¥bY\_aXb\_^\_a`aaa\_  
@HWI-EAS443:3:86:570:705#0/1  
CGGGCTCCTGTCTTTAATGGTTCCATTGGAATGTTNGTCA  
+HWI-EAS443:3:86:570:705#0/1  
¥`]aW[`b^WU]aaaabaaaTX^¥¥\_Ta`]U`\_`TWFDP][

@HWI-EAS443:3:100:1159:660#0/1  
GTGCAGGGATAACTGGCATGGCTCGAATCGAACGTGGGTG  
+HWI-EAS443:3:100:1159:660#0/1  
aaaaabba\_`bb\_aaaaaa`aaZ\_TaXG`[Q[]KU\_BBB  
@HWI-EAS443:3:100:1168:1503#0/1  
AATTGATGCCATCATGACAAGCACTTGCTGAGCAAGCGAC  
+HWI-EAS443:3:100:1168:1503#0/1  
aaaab`aba]aa`aa`\_¥`\_\_\_^^\_aa^aa`GG`X`0`¥V  
@HWI-EAS443:3:100:1294:1047#0/1  
CCGCTAATTTACGGAACCCTGACTGTCCAACAGCAAA  
+HWI-EAS443:3:100:1294:1047#0/1  
Waaaa¥]abba\_¥`b\_Q^ZG[baa\_W¥¥\_\_WYF^a`^`]Z  
@HWI-EAS443:3:100:143:2012#0/1  
GGTGTGGATAGGGAGAAATAAAGCATTAGTTCAAGAA  
+HWI-EAS443:3:100:143:2012#0/1  
YaG]^U^a]^\_`^a]^¥aHa\_aa¥\_QPLW]IPW\_UWRHB  
@HWI-EAS443:3:100:386:1917#0/1  
TAAGAATCGGTTCCAAGGGGATGGGTTTGTCCATAAGGGA  
+HWI-EAS443:3:100:386:1917#0/1  
a`b`bb\_¥WRG^YJ[[\_ZWU\_QNXUXGJ]SUG^^[W\_BBB  
@HWI-EAS443:3:100:556:261#0/1  
TAAACCAGACATATGTTAACATCAGCAACACCAACTTGC  
+HWI-EAS443:3:100:556:261#0/1  
aaaa\_`\_a`\_]\_]^a¥^Y\_]\_]\_`\_a^U\_]V]¥W][\_\_X  
@HWI-EAS443:3:100:822:1555#0/1  
GATATTCCAGATTCTGGTTGAAAGACACCCACGGTGGATT  
+HWI-EAS443:3:100:822:1555#0/1  
a`a`\_`\_]a\_`aUa`a]ab^a\_\_a^aGG][V¥\_SGZBBB  
@HWI-EAS443:3:10:1019:1029#0/1  
CTGATTTGACTATCTTCCCTTTCTCTTCTGAAGATCTT  
+HWI-EAS443:3:10:1019:1029#0/1  
a\_aJ^^`Y]XZ]b\_a^\_\_XOY[[OS[OURG¥JRU[Y^YXX  
@HWI-EAS443:3:10:1147:2041#0/1  
ACTTATGAAAACAACACTTGGGTAAACCAGACATATGTTA  
+HWI-EAS443:3:10:1147:2041#0/1  
Y\_b`T`abab^ba]]]^`\_aY`aa`a``[\_Z\_[^U^`  
@HWI-EAS443:3:10:1765:183#0/1  
AGGTCTTATACTATCCAGCCCTGTTAGTTCTGGATGCTGA  
+HWI-EAS443:3:10:1765:183#0/1  
\_]\_¥Yaa`ba`\_ab`S`aWXT¥\_\_`\_a]]R¥¥¥]QVNN[U  
@HWI-EAS443:3:10:819:489#0/1  
TTGAAAGACACCCACGGTCTGACTCGAGCCATGCCAGTTAT  
+HWI-EAS443:3:10:819:489#0/1  
aab\_aaa\_`^`^¥^a\_aVPX^Q`RUZU[PM¥SWUPUTTSSW  
@HWI-EAS443:3:11:1697:676#0/1  
ACTTGCTGACCAAGCGACTGACTCAAATCTTGACTTGTAT  
+HWI-EAS443:3:11:1697:676#0/1  
a\_baaab`a]V\_\_`\_a\_]ba^Wa\_Z\_`aN`a`UWKMRTYB  
@HWI-EAS443:3:11:1770:1270#0/1  
CATTGTCTGGGCCAGAAATTCTGAATTGTTAGCCAATTGAT

+HWI-EAS443:3:11:1770:1270#0/1  
\_baaZZaabbba`b^[`YFFXb^bVb`¥aZ^a``aaaa  
@HWI-EAS443:3:11:29:985#0/1  
GCTCCATTAGACGATACTGGACCACAACCTGCCTGGCTTAT  
+HWI-EAS443:3:11:29:985#0/1  
ab`\_`baa^]\_abaUVXVXSVS¥HT`]XKVIPSSGN]BBB  
@HWI-EAS443:3:11:698:201#0/1  
CATGTGTAAATGGTTCCTGCTTTACGGTAATGACCGATGG  
+HWI-EAS443:3:11:698:201#0/1  
aabbab^a^aaaa¥a\_a]aa[a\_^W`^a\_[a`¥¥a`Saa  
@HWI-EAS443:3:12:1224:1293#0/1  
TTCAACCAGAATCTGGAATATCAGATAGGATAGATATGCA  
+HWI-EAS443:3:12:1224:1293#0/1  
\_b\_a\_a¥`\_¥^a\_a`¥Z\_ba`[]`W]aUW`\_¥MY`[¥``¥  
@HWI-EAS443:3:12:23:865#0/1  
CTGTCCCAGTCCATCCGTTCCGATCCCAAATCATTTCAAA  
+HWI-EAS443:3:12:23:865#0/1  
a]^¥¥`^`^PN]¥a¥Y¥]L\_RY`^VLU¥]Z]BBBBBBBBBB  
@HWI-EAS443:3:12:261:1318#0/1  
AGCGTCATTACTTATGAAAACAACACTTGGGTAAACCAGA  
+HWI-EAS443:3:12:261:1318#0/1  
a`\_a]a¥a^a``]a`\_`aa`a`a^a`\_``RMX^\_Z^^\_]`  
@HWI-EAS443:3:12:460:616#0/1  
AATGGCGTTTGGATAGGGGAGAACTAAAAGCATTAGTTCAA  
+HWI-EAS443:3:12:460:616#0/1  
Q\_\_ZbTa^a`]¥¥[`Za\_YY`bb¥`Y[Naba`]`bXGYa¥  
@HWI-EAS443:3:13:126:1702#0/1  
TTCATATCATGCTCCCCCTTGAATGCAGAACCTACTTCT  
+HWI-EAS443:3:13:126:1702#0/1  
^a\_\_^H\_a\_Z¥¥]\_]`aab`¥¥Z\_]Ua¥Z\_aY^XF\_]aK  
@HWI-EAS443:3:13:470:1293#0/1  
AGCCACTGCCCCATTGTCTGGGCCAGAAATCCCATTGTT  
+HWI-EAS443:3:13:470:1293#0/1  
aaa`SbXSbaZa`XZ\_¥ZXRZ¥\_VPXQ\_aS[NZHWWZUBB  
@HWI-EAS443:3:13:762:205#0/1  
GGGGCCTTGCTAAATGACAAATATTCCAATGGAACCATTA  
+HWI-EAS443:3:13:762:205#0/1  
`RY`a¥MPaZa`W\_\_`WYa[[]^`VXU¥^^^YT]]U^]X[  
@HWI-EAS443:3:14:1204:1990#0/1  
ATTGTATAAGACCTTGTCTGGGTTGAACTAATCAGAGG  
+HWI-EAS443:3:14:1204:1990#0/1  
aa]PXaa^RZ¥XQF¥NF¥\_\_`RLW[^SLV\_a[Y`X]Y^UZ  
@HWI-EAS443:3:14:1428:225#0/1  
CAAATACGGCAATGGGGTTTGGATAGGGGAGAACTAAAAGC  
+HWI-EAS443:3:14:1428:225#0/1  
a`\_S\_¥[\_`\_`\_]FXS¥aa`MYLXa]¥¥\_`^W¥Y¥W`UR  
@HWI-EAS443:3:14:1564:1353#0/1  
AGTTATTGTCTGTCCCAGGCCATCCGTTCCGGATCCCAAAT  
+HWI-EAS443:3:14:1564:1353#0/1  
aaZb`a]a\_aa]LVW]QMFQO[]^PJRW¥]BBBBBBBBBB

@HWI-EAS443:3:14:1565:148#0/1  
GCCCCAATTATCACTATGAGGAATGCTGCTGTTATCCTG  
+HWI-EAS443:3:14:1565:148#0/1  
aVYG[QVMWQZRRYWRWYN[PXB  
@HWI-EAS443:3:14:1683:131#0/1  
GAACTAACAGGGTGGATTGTATAAGACCTTGCTTCTGGG  
+HWI-EAS443:3:14:1683:131#0/1  
a[a^\_\_\_W`\_\_^V`\_Z]U]ZZZWWWZUXZZZXZZOZZTY  
@HWI-EAS443:3:14:984:958#0/1  
GATATTCCAGATTCTGGTTGAAAGACACCCACGGGCGATT  
+HWI-EAS443:3:14:984:958#0/1  
\_Y]W\_UX]VSTXYa¥aaabba^SLV^¥VZS`^BBBBBBBB  
@HWI-EAS443:3:15:1284:1834#0/1  
ACTGGCATGGCTCGAATCGACCGTGGGGGTCTTCAACCA  
+HWI-EAS443:3:15:1284:1834#0/1  
aa`a`ab\_a\_¥a^WQ[UX]\_XYRG¥`\_G]KPNZ^KQVOG\_  
@HWI-EAS443:3:15:695:344#0/1  
ATTATGCCGTTGTACTTTAACACAGCCACTGTCCCATTGT  
+HWI-EAS443:3:15:695:344#0/1  
aa`bab^aa\_aa`\_``[aa`\_a\_]Z^\_]YFV[[[`^\_W  
@HWI-EAS443:3:15:795:330#0/1  
GATAACTGGCATGGCTCGAATCGACCGTGGGGGTCTTCA  
+HWI-EAS443:3:15:795:330#0/1  
\_P\_ab`aaab¥Q\_^¥¥^NLWSWVMJVXDP^BBBBBBBBBB  
@HWI-EAS443:3:16:1007:1619#0/1  
GGCTCCTGTCTTTAATGGGTCCATTGGAATGTTTGTCA  
+HWI-EAS443:3:16:1007:1619#0/1  
a]b\_a^^¥¥]a[a`^WTG[S`NNNN^VFL\_SRY^Q\_[MV  
@HWI-EAS443:3:16:1768:603#0/1  
TCCAAGGGGATGTATTTGTCATAAGGGAACCATTTCATAT  
+HWI-EAS443:3:16:1768:603#0/1  
]^aYVR]aWZNQWWHL^^a]WORWY`YMO]^]XWBBBBBB  
@HWI-EAS443:3:17:1009:14#0/1  
TGCCGTTGGACTTTAACACAGCCACTGCCCATTTGTCTGG  
+HWI-EAS443:3:17:1009:14#0/1  
abaab\_a\_P\_a`aaaa\_a`aa\_a`a\_a`¥``\_]`¥¥¥^^  
@HWI-EAS443:3:17:130:551#0/1  
GGCCTTGCTAAATGACAAACATTCCACTGGAACCATTAAA  
+HWI-EAS443:3:17:130:551#0/1  
a]¥SL¥b\_ZZPUYYZa]¥XV^TXZSEFO¥Q]U^\_XQPTPH  
@HWI-EAS443:3:17:1413:729#0/1  
GTCATTACTTATGAAAACAACACTTGGGTAAACCAGACAT  
+HWI-EAS443:3:17:1413:729#0/1  
a\_aaab`aaaaaaaa`aa```a`\_`^`aa`]````]^`^  
@HWI-EAS443:3:17:1506:1715#0/1  
CTCCTGTCTTTAATGGTTCCATTGGAATGTTTGTAAATTA  
+HWI-EAS443:3:17:1506:1715#0/1  
`^L]\_YZaabX¥RUPT]V`VFMQa¥Pa^[`PJF¥[UY^  
@HWI-EAS443:3:17:1677:1761#0/1  
CCTTGAGTCAAGAAGACGGTTCTGCATTCCAAGGGGGAGC

+HWI-EAS443:3:17:1677:1761#0/1  
OIW\_a[``b]]a`Vb\_`YbIa``^`[`W[R[]ba`\_^FZW  
@HWI-EAS443:3:17:25:582#0/1  
CTTTATTGAGAAGTTATTGTCTGTCCCCGTCATCCGTTC  
+HWI-EAS443:3:17:25:582#0/1  
aba``bbb\_b`^aabbaababb^L0]\_LTGV[FFQa^PVP  
@HWI-EAS443:3:17:332:1375#0/1  
TAAGAATCGGTACCAAGGGGATGTGTTTGCATAAGGGA  
+HWI-EAS443:3:17:332:1375#0/1  
aababaa`aaW¥a\_\_`][\_\_`^[UY\_XX¥ZXYUTV\_¥^^X  
@HWI-EAS443:3:17:903:162#0/1  
GGCTCTTGTCTTTAATGGTTCCATTGGAATGTTTGCATT  
+HWI-EAS443:3:17:903:162#0/1  
abbb\_ba`aaabbaaaaa\_```\_aaa]OX\_^\_b`a[[[]a  
@HWI-EAS443:3:18:1159:1159#0/1  
CTGTCCAGCAGCACAGTTGGTGTGCTGATGTTAACATAT  
+HWI-EAS443:3:18:1159:1159#0/1  
aaa`a^]\_````\_IP[L^`\_U]X¥]Z\_^[^]V]NHZ[Z  
@HWI-EAS443:3:18:1461:1441#0/1  
CTTTACTGTATATAGCCCATCCACTAAGAGGGCAGAGAGA  
+HWI-EAS443:3:18:1461:1441#0/1  
abbVKabVSVbbbbIOQaaUZH\_aaa`GaaaaX`[U]H]Y  
@HWI-EAS443:3:18:1637:1309#0/1  
CTTTAACACAGCCACTGCCCATTTGTATGGGCCAGAAATT  
+HWI-EAS443:3:18:1637:1309#0/1  
V]ba]\_]IaaU`TR]ZSZR```a¥LF]JNUZNX^^YSU  
@HWI-EAS443:3:18:867:734#0/1  
GCCCCGTAATTTACGGAAACCACTGACTGTTCCAGCAGCA  
+HWI-EAS443:3:18:867:734#0/1  
aa````a\_]\_aaa\_[]^ZY\_]\_]Z]aaU]`[]XUSTXRZ  
@HWI-EAS443:3:1:1087:95#0/1  
CGGCAATGGTGTGGATAGGGAGAAATAAAAGCATTAGT  
+HWI-EAS443:3:1:1087:95#0/1  
abb`[^^^bX^XabaaRVVaaa\_a[]M`^`\_^PBBBBBBB  
@HWI-EAS443:3:1:143:841#0/1  
TACTTATGAAAACAACACTTGGGTAAACCAGACATATGTT  
+HWI-EAS443:3:1:143:841#0/1  
ab`\_baaaabaaaaX\_\_aaa`a\_aa`UVa¥aY¥^]\_aBB  
@HWI-EAS443:3:1:480:128#0/1  
CATTAGGGCGTGGATTGTCTCCGAAAATACCACTGCATAT  
+HWI-EAS443:3:1:480:128#0/1  
ab¥\_aa`XZ]]Xa`Ya]ZRZZQMU\_\_aSO`U^PZaZBBBB  
@HWI-EAS443:3:20:1063:1551#0/1  
CTTATGAAAACAACACTTGGGTAAACCAGACATATGTTAA  
+HWI-EAS443:3:20:1063:1551#0/1  
aa¥^V¥]T\_ba`\_\_\_V^WZaZM]aa^YURYZa\_^a`[Y]a  
@HWI-EAS443:3:20:1534:190#0/1  
CCGCTAATTTACGGAAACCACTGACTGTCAAGCAGCAAA  
+HWI-EAS443:3:20:1534:190#0/1  
a`\_aYY\_aaaa^\_a\_]XWHZZTX\_¥U[]TRHOYMRBBBBB

@HWI-EAS443:3:20:1567:469#0/1  
GCTAATTTACGGAAACCACTGACTGGCCAGCAGCAAAGT  
+HWI-EAS443:3:20:1567:469#0/1  
aa\_a`aU]¥X\_a[^[¥LN]YWPZ]¥VFNO^UPWVPTBBBB  
@HWI-EAS443:3:21:1047:688#0/1  
AAGCGACTGACTCAAATCTTGAGTTGTATGGAGGGGGAAC  
+HWI-EAS443:3:21:1047:688#0/1  
SUTbbb\_]SX]]bU`Zaab¥\_UZVb\_^]\_aI\_¥GY]`GYa  
@HWI-EAS443:3:21:1305:1772#0/1  
TTACTTATGAAAACAACACTTGGGTAAACCAGACATATGT  
+HWI-EAS443:3:21:1305:1772#0/1  
a\_a\_aa`a``\_aaY\_¥^`^\_^[]W[\_^^[]]\_`[\_WY\_^Z  
@HWI-EAS443:3:21:1321:265#0/1  
CCAGCACTAACAGGGCTGGATTGTATAAGACCTTGCTTCT  
+HWI-EAS443:3:21:1321:265#0/1  
`SOSGORZZ]`ZU[YLZ[ZM¥U¥PZ^¥[^IUTTP`WZ[UZ  
@HWI-EAS443:3:21:1507:820#0/1  
GCTCCTGTCTTTAATGGTTCCGTTGGAATGTTTGTCAATTT  
+HWI-EAS443:3:21:1507:820#0/1  
aaa[\_`a\_aaba\_``\_a]\_Y[[Z^\_]`\_a^aa¥[^]\_\_`  
@HWI-EAS443:3:21:429:1299#0/1  
CTGCCTGTCTTATCATCAGGGCGTGGATTGTCTCCGAAAA  
+HWI-EAS443:3:21:429:1299#0/1  
aaa^^`b^abb]a]aaaa\_\_[^^^]`\_aa\_¥\_a\_\_V`a\_  
@HWI-EAS443:3:22:539:1649#0/1  
TAGCGGGCAATTCCTCTCTCTGCCCTGCTAGTGGATGGGC  
+HWI-EAS443:3:22:539:1649#0/1  
`baa`aabbaaab`aab]\_[]`aa`\_\_\_\_[\_aR^\_`^¥^¥P  
@HWI-EAS443:3:22:578:914#0/1  
TTGGAATGTTTGTCAATTTAGCAAGGCCCTTGAGCCAAGA  
+HWI-EAS443:3:22:578:914#0/1  
aaaa¥aaa\_aa`\_aaaa\_a]\_``\_^^]`^\_\_^^`W\_`\_]`  
@HWI-EAS443:3:22:784:475#0/1  
GCGTCATTACTTATGAAAACAACACTTGGGTAAACCAGAC  
+HWI-EAS443:3:22:784:475#0/1  
aa\_J]`a[]]aaP]¥FX[^a]\_[]\_a``aM^\_X¥RN\_`[S  
@HWI-EAS443:3:23:1463:410#0/1  
ATGCAATCAGAGCGTCATTACTTATGAAAACAACACTTGG  
+HWI-EAS443:3:23:1463:410#0/1  
¥TX][U]¥]GZ^`Y^WT`UIPX`ab^U```¥NON]a^`S  
@HWI-EAS443:3:23:552:131#0/1  
GAAGTTATTGTCTGTCCCAGTCCATCCGTTCCGATCCCAA  
+HWI-EAS443:3:23:552:131#0/1  
`aa`\_aaaa\_Z[aaRV¥BBBBBBBBBBBBBBBBBBBBBBB  
@HWI-EAS443:3:24:1295:1544#0/1  
CAAAATCAGATTGAAACACGCAATCAAAGCGTCATTACTT  
+HWI-EAS443:3:24:1295:1544#0/1  
a^`[L¥]abb¥^Z^\_aV\_`^a\_`¥`^^¥UMX\_a``X]FX^  
@HWI-EAS443:3:24:66:481#0/1  
GTCAGGATATAGCGGGAGTTTTGTTTCAGCATCCAGCACTA

+HWI-EAS443:3:24:66:481#0/1  
a]a¥aaWaaaaaaaa`bY`a`\_Y]^¥T¥P[\_`¥VG[\_`\_`  
@HWI-EAS443:3:24:814:383#0/1  
AGCCCGTCCACTAACAGGGCAGAGAGGAATTGCCCGCT  
+HWI-EAS443:3:24:814:383#0/1  
`^\_¥Z]Zaa^aa^`YVQ¥XaVa^a\_aa^X]\_]NZWVNQ  
@HWI-EAS443:3:24:819:57#0/1  
CATGATATGAATGGTTCCCTTATGACAAACAAATCCCCCT  
+HWI-EAS443:3:24:819:57#0/1  
aa`0`\_bb`bbbbSa\_b`aaa]\_VR`Y`^aGaUGRFFV¥  
@HWI-EAS443:3:25:1112:1585#0/1  
CTTTAACACAGCCACTGCCCATTTGTCTGGGGCAGAAATT  
+HWI-EAS443:3:25:1112:1585#0/1  
`babb`bbbabbb`a`I`]bbabbb`aaa`YD[aaabaV^  
@HWI-EAS443:3:25:1301:428#0/1  
AGCGTCATTACTTATGAAAACAACACTTGGGTAAACCAGA  
+HWI-EAS443:3:25:1301:428#0/1  
abaab^bbba]bbabbaaababaaa`baaa^¥`aa`¥aaa  
@HWI-EAS443:3:25:512:422#0/1  
CAGTCGCCTGGTCAGCAAGTGCTTGCATGATGGCATCAA  
+HWI-EAS443:3:25:512:422#0/1  
a\_baaabbbbaabbbbbbbbbbbbaa\_bbbbbbbbabbbba  
@HWI-EAS443:3:25:917:529#0/1  
CTTATGAAAACAACACTTGGGTAAACCAGACATATGTTAA  
+HWI-EAS443:3:25:917:529#0/1  
a^abaab`bb`\_`bab`]¥^ababbab]`abaabaa\_bb  
@HWI-EAS443:3:26:364:973#0/1  
GTTCCCTCTCCATACAACACTCAAGATTTTCAGTCAGTCGCTT  
+HWI-EAS443:3:26:364:973#0/1  
\_¥Zaa]\_`[\_`US^^Xaa[¥YNZVa\_]HT]T^T^UP`]BB  
@HWI-EAS443:3:26:513:1768#0/1  
GACCACAACACTGCCTGTCTTATCATTAGGTCGTGGATTGTC  
+HWI-EAS443:3:26:513:1768#0/1  
N`bbba\_baaaabU`\_]b\_bababb`KWH¥MN`[U^a[^R  
@HWI-EAS443:3:26:929:617#0/1  
GCAAAGTTGGTGTGCTGATGTTAACATATGTCTGGTTTA  
+HWI-EAS443:3:26:929:617#0/1  
abaaVa^bbaYa^aaaaY`b`a\_\_^[[\_\_a\_\_[aa^`\_¥  
@HWI-EAS443:3:27:1348:777#0/1  
GTGTGCAGGGATAACTGGCATGGCTCCAATCGACCGTGGG  
+HWI-EAS443:3:27:1348:777#0/1  
]X]U`]X^\_X\_]¥[ORR]\_BBBBBBBBBBBBBBBBBBB  
@HWI-EAS443:3:27:294:1872#0/1  
AGAGTCTGAATGCGCATGTGTAAATGGTTCTTGCTTTACT  
+HWI-EAS443:3:27:294:1872#0/1  
`ba`Xaaaaa`]G\_\_`\_aSaU`\_\_`^QOUa`0^`¥XXa\_^  
@HWI-EAS443:3:27:691:1392#0/1  
GTTGAAAGACACCCACGGGCGATTCCGAGCCATGCCAGTTA  
+HWI-EAS443:3:27:691:1392#0/1  
¥T`a`ZZZZ`bbb`baaZGYZQY^\_USRZZMOZYRPBBBB



@HWI-EAS443:3:28:1181:1332#0/1  
CTTATGAAAACAACACTTGGGTAAACCAGACATATGTTAA  
+HWI-EAS443:3:28:1181:1332#0/1  
¥baX`^T\_aaa\_VZ^¥baa^Yababb\_Waaaaaa`ba]  
@HWI-EAS443:3:28:1361:1924#0/1  
GAATAAATGAGTGGTCAGGATATAGCGGGAGGTTTGTTC  
+HWI-EAS443:3:28:1361:1924#0/1  
abaabaab\_abRbaY\_^aa\_[[aa[\_a``\_H]a`SOSZU  
@HWI-EAS443:3:28:437:370#0/1  
CTTTAACACAGACACTGCCCCATTGTCTGGGCCAGAAATT  
+HWI-EAS443:3:28:437:370#0/1  
a^b¥bb`bbabKb¥Rab`Nb\_Z`abaSababSabU\_ba\_¥  
@HWI-EAS443:3:28:607:1247#0/1  
GTAAACCAGACATATGTTAACATCAGCAACACCAACTTTG  
+HWI-EAS443:3:28:607:1247#0/1  
``a\_`\_`¥^``ab`[aYZ]b^bb`\_bba\_baa`aa\_\_a  
@HWI-EAS443:3:29:1237:433#0/1  
GCCGTTGTGCTTTAACACAGCCACTGCCCCATTGTCTGGG  
+HWI-EAS443:3:29:1237:433#0/1  
aa^\_W[TFK]`XXXO^^VL¥U¥YBBBBBBBBBBBBBBB  
@HWI-EAS443:3:29:1734:615#0/1  
ACTCAATTCAACTTGGGAATCAAATAAGATTGAAACATG  
+HWI-EAS443:3:29:1734:615#0/1  
a\_aY]a]^Z^`]WW]^`[^V¥T]\_\_K\_G^¥V^X\_]¥R^\_B  
@HWI-EAS443:3:29:677:1177#0/1  
AAGCGACTGCCTCAAATCTTGAGTTGTATGGAGAGGGAAC  
+HWI-EAS443:3:29:677:1177#0/1  
]^`^WPVUaSI\_Ua`¥XXYWWWVW\_^[PMWR\_YRM¥UDDWB  
@HWI-EAS443:3:2:167:1902#0/1  
CAGTAGGATTTTCGGAGACAATCCACGCCCTAATGATAAG  
+HWI-EAS443:3:2:167:1902#0/1  
aa^LHSUZWW\_SXY¥¥`\_]a`\_]a`^aZ\_[P[]\_^WN\_YU  
@HWI-EAS443:3:2:895:1432#0/1  
CGGTCGATTCGAGCCATGCCAGTTATACCTGCACACACAT  
+HWI-EAS443:3:2:895:1432#0/1  
`^^KUBaZbb\_ab^]aa^XZaaV`^aP]U¥^PaaUZa^XS  
@HWI-EAS443:3:30:1359:489#0/1  
GGCTGGGTAAAGTACAACGGCATAATAACAGACACTATC  
+HWI-EAS443:3:30:1359:489#0/1  
aaYaaHTY\_YWY^OT][][\_[V¥\_¥`\_a¥]^a\_QTT\_[WY  
@HWI-EAS443:3:30:485:119#0/1  
CTGGACCACAACACTGCCTGTATTATCATTAGGGCGTGGATT  
+HWI-EAS443:3:30:485:119#0/1  
Y`TW¥TaS`a^a`^NbQNXS\_]YZ[WZRLO¥^H]Ua\_B  
@HWI-EAS443:3:30:759:1670#0/1  
TTCATATCATGCTCCCCCTTGAATGCAGCACCTTCTTCT  
+HWI-EAS443:3:30:759:1670#0/1  
aXXR¥aZaUX^`]`\_aaZI^NZ]¥VT]LNFNaUWW\_GWBB  
@HWI-EAS443:3:30:775:728#0/1  
GCTCCTGTCTTTAATGGTCCATTGGCATGTTTGTCTTT

+HWI-EAS443:3:30:775:728#0/1  
aaTUQZ`U¥\_T`NGM^PP]BBBBBBBBBBBBBBBBBBBB  
@HWI-EAS443:3:30:866:1381#0/1  
TACTTATGAAAACAACACTTGGGTAAACCAGACATATGTT  
+HWI-EAS443:3:30:866:1381#0/1  
abbbaab`\_Zbbbaaaaaa^aa^aabaabaaaaa`a]\_  
@HWI-EAS443:3:31:1695:70#0/1  
TTACTTATGAAAACAACACTTGGGTAAACCAGACATATGT  
+HWI-EAS443:3:31:1695:70#0/1  
abb`ababbaaab`aa\_`^a\_aaaVa``Y^\_\_`\_`\_`aaY  
@HWI-EAS443:3:31:36:1823#0/1  
GTCTGGGCCAGAACTTCCAATTGTTAGCCAATTGATGCCA  
+HWI-EAS443:3:31:36:1823#0/1  
SZaa`\_`bbWW¥¥JQaabVa^^`Y`T^`ba¥YX^[W]`ba  
@HWI-EAS443:3:31:663:1945#0/1  
GCCCCGTAATTTCCCGAAACCACTGACTGTCCAGCAGCA  
+HWI-EAS443:3:31:663:1945#0/1  
X¥`¥\_`¥¥¥W\_`a\_W¥¥M[^¥¥[LSZ^XJN^^BBBBBBB  
@HWI-EAS443:3:32:1120:1285#0/1  
CAAGAAACAGTTTTGAGATGATTTGGGATCCGAACGGATG  
+HWI-EAS443:3:32:1120:1285#0/1  
a\_aa\_XY[LY\_`a^`¥\_aaa`aaa``a`\_\_a`\_`a\_``]`  
@HWI-EAS443:3:32:1225:250#0/1  
TAAGAATCGGTTCCAAGGGGGATGTGTTTGTCCATAGGGGA  
+HWI-EAS443:3:32:1225:250#0/1  
a`aaba¥¥``VU[S00]¥0]`T¥PZZVG¥PTUZYUQTSWN  
@HWI-EAS443:3:32:1308:1517#0/1  
GCTCGAATCGACCGTGGGTGTCTTTCAACCAGAATTTGGA  
+HWI-EAS443:3:32:1308:1517#0/1  
`a`````^WZ[SX^Zaaa^[PK[a[DRZNGTU[S]NZQWR  
@HWI-EAS443:3:32:1357:773#0/1  
GGGGGATGTGTTTGTCCATAAGGGAACCATTCATATAATGC  
+HWI-EAS443:3:32:1357:773#0/1  
abba]bbb\_bT`b[YH`b`]\_aaaXJT¥\_PT``\_]G`[[[  
@HWI-EAS443:3:32:306:325#0/1  
CAAGAGTTGGAGAAACAGTATATTGAGAACACAAGAGTCT  
+HWI-EAS443:3:32:306:325#0/1  
aaab¥a`bbaaaaa\_aab\_aa```aa`aa\_`aa\_^\_\_X\_^  
@HWI-EAS443:3:32:537:849#0/1  
CAGGGATAACTGGCATGGCTCGAATCGACCGTGGGGGTCT  
+HWI-EAS443:3:32:537:849#0/1  
a^^a``baa]aaaa`Z^a`\_WVU[BBBBBBBBBBBBBBBB  
@HWI-EAS443:3:32:653:96#0/1  
AAATACGGCAATGGTGTGGATAGGGAGAAATAAAAGCA  
+HWI-EAS443:3:32:653:96#0/1  
abbb`abbaaa``aSa`aa`[\_ZQ]Y^`\_^F^`^`^`\_]`  
@HWI-EAS443:3:32:682:99#0/1  
TACTTATGAAAACAACACTTGGGTAAACCAGACATATGTT  
+HWI-EAS443:3:32:682:99#0/1  
aa^^\_`aa^`aaaaa]`\_\_\_\_\_PQ\_``^][`¥\_\_^¥^]V^

@HWI-EAS443:3:33:1383:493#0/1  
GACGATACTGGACCACAACACTGCCTGTATTATCATTAGGGC  
+HWI-EAS443:3:33:1383:493#0/1  
¥^`ba`YT¥a]VMS\_Y`^¥]]Z\_]YUFYSQUSLWYTRSPR  
@HWI-EAS443:3:33:1614:1286#0/1  
CAAATACGGCAATGGTGTGGATAGGGAGAAGTAAAAGC  
+HWI-EAS443:3:33:1614:1286#0/1  
``bbbbba`^ab^¥\_T^]aaa\_`aaX\_\_[]]YFY^)`^VW  
@HWI-EAS443:3:33:1684:734#0/1  
GAGGAATGCTCCTGTTATCATGATTCTAGTGAAATCACAT  
+HWI-EAS443:3:33:1684:734#0/1  
^`baU`¥¥¥]\_^ab]ab^YH]ZNO[¥YXT^\_UVYTQSS¥\_  
@HWI-EAS443:3:34:1768:1309#0/1  
ACCATTTACACATGCACATTCAGACTCTTGTGTTGTCAAT  
+HWI-EAS443:3:34:1768:1309#0/1  
aaab\_babbaababa^aaa`a¥\_W`\_V`]R[W\_QGWLYG^  
@HWI-EAS443:3:34:338:173#0/1  
CATCAGCAACACCAACTTTGCTGCTGGACAGTCAGCGGTT  
+HWI-EAS443:3:34:338:173#0/1  
aa`bbabbaaaa`SZZ¥]`a^`\_a\_]¥\_\_Z\_S\_[^QYBBB  
@HWI-EAS443:3:35:100:1311#0/1  
CATTAGGGTTTCGATATGGGCTCCTGTCTTTGATGGTTCCA  
+HWI-EAS443:3:35:100:1311#0/1  
]R¥Z\_ZYIOYa]a`a\_¥\_\_\_`aZ]T[\_[]YZ¥Z\_]Y[LF  
@HWI-EAS443:3:35:1677:697#0/1  
ATCATGCTCCCCCTTGAATGCAGAACGTTCTTCTTACT  
+HWI-EAS443:3:35:1677:697#0/1  
\_¥Z]^T¥¥XaZaX\_a`¥Z¥\_U[]\_`XG[a`^]]\_a\_`ST  
@HWI-EAS443:3:35:503:958#0/1  
CATTTAGCAAGGCCCTTGAGTCAAGAAGCAGGTTCTGCA  
+HWI-EAS443:3:35:503:958#0/1  
VU[V[\_V\_bW^V```bbaa\_WS[]WZ¥\_¥KWaaPRVS¥\_V  
@HWI-EAS443:3:36:1299:1486#0/1  
GGATAACAGGAGTATTCTCATAGTGATAATTAGGGGCAT  
+HWI-EAS443:3:36:1299:1486#0/1  
^bb`bbbaababSaaa`aa`aaaZ```^aaa\_\_`a^a]\_  
@HWI-EAS443:3:36:1466:593#0/1  
GCGACTGACTCATATCTTGAGTTGTATGGAGAGGGAACCT  
+HWI-EAS443:3:36:1466:593#0/1  
a¥]baab¥^baY[]^`aaa]a`aa^a\_`a\_a]`^aW]^VY  
@HWI-EAS443:3:36:1591:1463#0/1  
GTCCCAGACCATCCGTTCCGATCCCAAATCATCTCAAAC  
+HWI-EAS443:3:36:1591:1463#0/1  
aa`aab\_N^Xba\_\_a`¥X\_``\_¥]]\_U¥]V[W]X`\_]`\_\_  
@HWI-EAS443:3:36:782:560#0/1  
CAGGAGCATTCTCATAGCGATAATTAGGGCATTCAATTT  
+HWI-EAS443:3:36:782:560#0/1  
a^TQXTXZ¥V¥Y[LR`]NFQU\_NYZ[NFTXQERX¥FY[LM  
@HWI-EAS443:3:37:1053:1357#0/1  
CGCTTGGCCAGCAAGTGCTTGTGCATGATGGCATCAATTGG

+HWI-EAS443:3:37:1053:1357#0/1  
aaZSV`¥F\_S\_\_¥GXHRa^MQO\_T]Xaa\_S`HX[^Y[N]R  
@HWI-EAS443:3:37:1108:553#0/1  
CAATTGTTAGCCAATTGATGCCATCATGAAAAGCACTTGC  
+HWI-EAS443:3:37:1108:553#0/1  
ZYW]]\_`^W`¥YU\_`^¥`a[\_¥¥¥WR\_aZFKIQ\_a]VNTZO  
@HWI-EAS443:3:37:1304:1523#0/1  
ATAAGACCTTGCTTCTGGGTTGAACTAATAAGAGGGCGAC  
+HWI-EAS443:3:37:1304:1523#0/1  
`b\_aaabRaaa]X\_^baRVZ^G]baa`\_XF^Va\_^X[^`Z  
@HWI-EAS443:3:37:1437:317#0/1  
CTGGACCACAACCTGCCTGTCTTATCATTATGGCGTGGATT  
+HWI-EAS443:3:37:1437:317#0/1  
`a¥¥bYabbb]`ba]`aba]bbabaUab^K[RaaaXSa\_^  
@HWI-EAS443:3:37:477:1409#0/1  
CGCTAATTTACGGAACCCTGACTGTCCCGCAGCAAAG  
+HWI-EAS443:3:37:477:1409#0/1  
H\_bV`bbb^ab\_aZY¥b]b\_bbb``]b]bHI¥aUW\_M¥aa  
@HWI-EAS443:3:37:555:249#0/1  
CTTTAACACAGCCACTGCCCCATTGTCTGTGCCAGAAATT  
+HWI-EAS443:3:37:555:249#0/1  
a`aa\_a^a\_\_` `[W\_]Ya`\_`JPRYW\_]HEK\_ZW^YWSU^  
@HWI-EAS443:3:37:581:1353#0/1  
TTCATATCATGCTCCCCCTTGAATGCAGACCCTTCTTCT  
+HWI-EAS443:3:37:581:1353#0/1  
aabb`bbbab]baabaa`a`aa\_\_`[ZXH¥a\_\_`\_`\_`a  
@HWI-EAS443:3:37:71:553#0/1  
CACACACATGTGATTTCACTAGAATCAGGATACCAGGAGC  
+HWI-EAS443:3:37:71:553#0/1  
aabaaaaaa`\_W\_a`aaaa`a¥Q[a`T^O\_J\_V`\_Z`a  
@HWI-EAS443:3:37:819:1768#0/1  
CTCAAATCTTGAGTTGTATGGAGAGGGAAATTCACCAATA  
+HWI-EAS443:3:37:819:1768#0/1  
aaaa\_b`aaaa`\_aa^aa`aaaa\_¥aH`\_aa`\_a`\_a  
@HWI-EAS443:3:37:934:1575#0/1  
ATCAAAATCAGATTGAAACATGCAATCAATGCGTCATTAC  
+HWI-EAS443:3:37:934:1575#0/1  
Ya`\_]\_aa`aK\_[W^Y\_^V]^aaa`a`WRDP\_a\_aa¥L]Q  
@HWI-EAS443:3:38:50:1914#0/1  
CATGCACATTCAGACTCTTGTGTTCTCACTATATTGTTTC  
+HWI-EAS443:3:38:50:1914#0/1  
aaOL^`aaXbab`aa\_¥`W¥[[`Y]`ZHU\_[W\_Q¥G]^\_  
@HWI-EAS443:3:38:892:1800#0/1  
CGGGAGTTTTGTTTCAGCATCCAGAACTAAAAGGGCTGGAT  
+HWI-EAS443:3:38:892:1800#0/1  
`\_]\_\_¥]a\_bW`a\_b[bba\_[a¥`a`\_a¥HTGJQN[aO\_W  
@HWI-EAS443:3:39:1748:266#0/1  
CGTGGATTGTCTCCTAAAATCCCCTGCATATGTATCCTA  
+HWI-EAS443:3:39:1748:266#0/1  
Y``bbbbba\_\_a\_aa`bba\_W^Z\_aaZa`a^RTXaZXT¥X

@HWI-EAS443:3:39:514:1300#0/1  
TCCCAGTCCATCCGTTCCGATCCCAAACCATCTCAAAACC  
+HWI-EAS443:3:39:514:1300#0/1  
``abb]aba]aa`][Y^a^][^\_ZS\_XR\_OKNaaaa]U  
@HWI-EAS443:3:3:1083:1757#0/1  
GCATGTGTAATGGTTCTTGCTTTACTGTAATGACGGATG  
+HWI-EAS443:3:3:1083:1757#0/1  
a`]]\_YJQY00Y]RWLTRZaVX]WWMG]G[]X^[MJQXHY  
@HWI-EAS443:3:3:1410:619#0/1  
CAGGGATAACTGGCATGGCTCGAATCGACCGTGGGGGTCT  
+HWI-EAS443:3:3:1410:619#0/1  
ab`U^\_a^[`ZT\_`a`XT`]RVXTS\_\_¥TS]G\_[]BBBBB  
@HWI-EAS443:3:3:1503:1240#0/1  
GATTAGTTCAACCCAGAAGAAAGGTCTTATACAATCCAGC  
+HWI-EAS443:3:3:1503:1240#0/1  
aW`\_]¥RW^\_TZVX\_^^^[M]ZV¥NT^TZ^\_]¥VPTTB  
@HWI-EAS443:3:3:1534:1534#0/1  
ATCACTATGAGGAATGCTCCTGTTAACCTGATTCTAGTGA  
+HWI-EAS443:3:3:1534:1534#0/1  
a`a[a^]aa`a[GZ`UT]RI`^]aYDEUWa]a\_Y^\_[Xa]  
@HWI-EAS443:3:3:164:276#0/1  
GAGGGATGCTCCTGTTATCCTGATTCTAGTAAATCACAT  
+HWI-EAS443:3:3:164:276#0/1  
ab```a^abaS`\_a`a`aa`a```¥^\_TXP[¥]^\_]^\_`^  
@HWI-EAS443:3:3:353:1372#0/1  
TACTTATGAAAACAACACTTGGGTAAACCAGACATATGTT  
+HWI-EAS443:3:3:353:1372#0/1  
``Y`baaaa`bbab\_\_\_`a`X`^^aa^\_Ka`a]¥\_\_aa`S  
@HWI-EAS443:3:3:622:964#0/1  
CGGGAGCAGCATATCCTTTTGTAGTGTAACAGTGACACT  
+HWI-EAS443:3:3:622:964#0/1  
a`bb`\_b`baabaa\_\_`aaa`^aa]b\_a`\_[a`V`a¥\_Wa  
@HWI-EAS443:3:40:1281:1957#0/1  
GCCTCATACAAGATCTTCAGAATAGACAAGGGAAAGATAG  
+HWI-EAS443:3:40:1281:1957#0/1  
aa]`Xa``Ra\_\_\_^]Xa\_\_\_`\_aa`MOF[``V\_R\_aa`X`]  
@HWI-EAS443:3:40:1788:712#0/1  
ACTTATGAAAACAACACTTGGGTAAACCAGACATATGTTA  
+HWI-EAS443:3:40:1788:712#0/1  
aabbabbaaaa`aa`a`a`a`\_`^a`aaa^a\_aaaaaa\_``  
@HWI-EAS443:3:40:258:395#0/1  
TGCAGTGGGATTTTCGGAGACAATCCATGCCCTAATGATA  
+HWI-EAS443:3:40:258:395#0/1  
abb\_b`aabaababba`a`ab^aaTLG[\_`a`ZT[\_`¥a  
@HWI-EAS443:3:40:271:211#0/1  
GTTCTGCATTCCAAGGGGAGCATGATACGAATGGTTCCC  
+HWI-EAS443:3:40:271:211#0/1  
a¥\_N¥`\_Y^U\_¥UU¥\_T\_XPVW¥Y¥WYWYVNWWSYTVVWVW  
@HWI-EAS443:3:40:328:1363#0/1  
TATTGGCGAAGTTCCTCTCCATACAACCTCAAGATTTGAG

+HWI-EAS443:3:40:328:1363#0/1  
aabWaaHaba[Zaaaaa\_b`Z]`aN^Za`\_^`^\_\_\_\_Y  
@HWI-EAS443:3:40:62:65#0/1  
CCCCTGCATATGTATCCTATCTGATCTTCCAGATTCTGG  
+HWI-EAS443:3:40:62:65#0/1  
abaW`W\_^R^a\_`YU^``\_W¥`[]P]GYN[^YXRTR¥[TV  
@HWI-EAS443:3:40:674:935#0/1  
TCAGGATATAGCGGGAGTTTTGTTCCAGCCTCCAGAACTAA  
+HWI-EAS443:3:40:674:935#0/1  
`a`ba`aba`\_\_aabab]`a^R[\_QZT]GU[]]WU¥UVR^  
@HWI-EAS443:3:40:710:502#0/1  
CTTTCAACCAGAATCTGGAATATCAGCTAGGATACATATG  
+HWI-EAS443:3:40:710:502#0/1  
aaa`¥a¥XX^a\_]abbbbbba`ab`aHaT\_Ya`QVJM]Y`  
@HWI-EAS443:3:42:103:304#0/1  
CAAATACGGCAATGGGGTTTGGATAGGGAGAACTAAAAGC  
+HWI-EAS443:3:42:103:304#0/1  
a`abbab`b[QXaa`G`PbYV\_PV]aa]T]¥¥]`X[a`]  
@HWI-EAS443:3:42:1050:170#0/1  
TGGGCTCTTGTCTTTAATGGTTCCATTGGAATGTTTGTCA  
+HWI-EAS443:3:42:1050:170#0/1  
¥aab`aa`¥a¥`¥Z\_``¥a`Ra[LZ`aZ^V\_``¥Y]VY\_  
@HWI-EAS443:3:42:369:1939#0/1  
GACCAACCCACAGAGTCACTGTTTACACCACAAAAGGATA  
+HWI-EAS443:3:42:369:1939#0/1  
`ab[a`b]a\_aRMOWTVP[RIZTWDtaa`\_`YPBBBBBB  
@HWI-EAS443:3:42:654:836#0/1  
TGCCCCGTAATTTACGGAAACCTCTGACTGTCCAGCAGC  
+HWI-EAS443:3:42:654:836#0/1  
\_bab^bba^U\_`baa\_ab\_a`\_]\_PY[``[aaZaa¥WNUa[  
@HWI-EAS443:3:42:775:1053#0/1  
GATTTTCGGAGACAATCCACGCACTAATGATAAGACAGGC  
+HWI-EAS443:3:42:775:1053#0/1  
a\_bbbbaab`a\_bbbbaaaaa`a\_a`aaaaa`aa]a\_aa\_B  
@HWI-EAS443:3:43:122:356#0/1  
GTTCAAGAAGCGGTTTTGAGATGATTTGGGATCCGAACGG  
+HWI-EAS443:3:43:122:356#0/1  
a\_`\_\_aa¥\_a^aaT\_`\_QQZT¥\_V\_]WR^WRU]WSSSZ[  
@HWI-EAS443:3:43:1313:557#0/1  
TTACTTATGAAAACAACACTTGGGTAAACCAGACATATGT  
+HWI-EAS443:3:43:1313:557#0/1  
ababaaa`ba\_aaa^]U\_¥aa]`]L]a`Y^^a\_W\_`aaa\_  
@HWI-EAS443:3:43:187:1062#0/1  
TGAGAACACAAGAGTCGGAATGTGCATGTGTAATGGTTC  
+HWI-EAS443:3:43:187:1062#0/1  
abbbbaaa`aaabaaZab```aa^a\_\_a`]aY¥T[a`^]`^V  
@HWI-EAS443:3:43:773:583#0/1  
GAGAAGTTATTGTCTGTCCCAGACCATCCGTTCCGGATCCC  
+HWI-EAS443:3:43:773:583#0/1  
`X`[^^X\_aabaY`a\_LS[BBBBBBBBBBBBBBBBBBBB

@HWI-EAS443:3:44:185:1403#0/1  
TGAGTCAAGAAGAAGGCTCTGCATTCCAAGGGGGAGCATG  
+HWI-EAS443:3:44:185:1403#0/1  
`bW\_`aa[Z]a[^V¥Y^]baU`\_a\_\_\_HJQ`]M`R¥`X]\_  
@HWI-EAS443:3:44:355:1859#0/1  
CAACTGCCTGTCTTATCATTAGGTCGTGGATTGTCTCCGA  
+HWI-EAS443:3:44:355:1859#0/1  
O\_\_HHY`¥0\_MZ¥a`SS^Ub`bRF]G[¥¥ZMaU\_`WWZab  
@HWI-EAS443:3:44:996:783#0/1  
GGATAACTGGCATGGCTCGAATCGACCGTGGGTGGCTTTC  
+HWI-EAS443:3:44:996:783#0/1  
aa`a`a`a`a`a`a`\_`VVV^TSZUU[ TGya^HZFLU\_[]  
@HWI-EAS443:3:45:1452:1430#0/1  
GCTCCATTAGACGATACTGGACCACAACTGACTGTCTTAT  
+HWI-EAS443:3:45:1452:1430#0/1  
aZZYT[a^]\_[P[¥S^N[QVTEPZJSBBBBBBBBBBBBBB  
@HWI-EAS443:3:46:1092:927#0/1  
ATCATGACAAGCACTTGCTGACCAAGCGACTGAATCAAAT  
+HWI-EAS443:3:46:1092:927#0/1  
Q¥[K\_bSS\_ab¥WV¥WZ\_`b]YVVba\_R^VSLVFYW^`aa  
@HWI-EAS443:3:46:520:125#0/1  
GCTCGAATCGACCGTGGGGTCTTTCAACCAGAATCTGGA  
+HWI-EAS443:3:46:520:125#0/1  
aabbbaababa\_`M`aaGaPR[aaMV\_G\_`^^\_ZM^^a]  
@HWI-EAS443:3:47:1025:1250#0/1  
GCTGCTCCCCTAGTCCAGATTGGGTTCTCTTTGGGTTCGC  
+HWI-EAS443:3:47:1025:1250#0/1  
`¥\_a^^¥]a]U^[[^\_XT`U[\_]H¥WYTPP[WYQ¥¥SYQM  
@HWI-EAS443:3:47:265:1184#0/1  
GAAAGACACCCACGGTTGATTCGAGCCATGCCAGTTATCC  
+HWI-EAS443:3:47:265:1184#0/1  
aaa`¥^W¥aaaa[a`¥^]R]ZVTV\_XUY[^U[]^PW[^WW  
@HWI-EAS443:3:47:497:1454#0/1  
TTTTCGGAGACAATCCACGCCCTAATGATAAGAAAGGCAG  
+HWI-EAS443:3:47:497:1454#0/1  
abbab¥\_\_a]Z¥S\_^X^^YR]]]V[^`^Z¥]PR¥BBBBBBB  
@HWI-EAS443:3:49:1249:1389#0/1  
CTTGGCCCGACGGTGCTGAGTTGCCATTTACCATTGACAA  
+HWI-EAS443:3:49:1249:1389#0/1  
`ba\_]^^^aa^\_\_RXXa[XTR^XQOUX\_YSOZUXX^RQQ[  
@HWI-EAS443:3:49:1308:587#0/1  
CAGGGATAACTGGCATGGCTCGAATCGACCGTGGGGGTCT  
+HWI-EAS443:3:49:1308:587#0/1  
Za\_a^^baba\_]¥\_¥[b]\_a¥RL¥UPMYWU]Q\_\_\_RXHNU  
@HWI-EAS443:3:49:1659:78#0/1  
CAACTGCCTGTCTTATCATTAGGGCGTGGATTGTTTCCGA  
+HWI-EAS443:3:49:1659:78#0/1  
J`\_abbaab¥Y[aabbZ``bbbab\_`a]`bbb\_[H¥XM\_]\_  
@HWI-EAS443:3:49:177:1225#0/1  
TACTTATGAAAACAACACTTGGGTAAACCAGACATATGTT

+HWI-EAS443:3:49:177:1225#0/1  
aaabbbbaa\_[aa`aa`\_b``aa^a^a\_aaa^\_a```¥`b  
@HWI-EAS443:3:49:372:606#0/1  
GATAGGGAGA ACTAAAAGCATTAGTTCAAGAAGCGGTTTT  
+HWI-EAS443:3:49:372:606#0/1  
a¥`b\_Q`\_bba`a\_a\_aba`babb^aa^¥a\_`aaaaR^`a  
@HWI-EAS443:3:49:609:835#0/1  
CAACTGCCTGTCTTATCATTAGGGCGTGGATTGTATCCGA  
+HWI-EAS443:3:49:609:835#0/1  
^V¥RSaZ\_¥YRRXaa]``a]aZHO]Y^]XYVX]YDUVX¥U  
@HWI-EAS443:3:49:858:1676#0/1  
CAGGGATAACTGGCATGGCTCGAATCGACCGGGGGTGTCT  
+HWI-EAS443:3:49:858:1676#0/1  
ZaZw[aba[bba]\_\_\_Y^WUY^UPJD^HTLTKUBBBBBBB  
@HWI-EAS443:3:4:1214:1751#0/1  
CATTTAGCAAGGACCCTTGAGTCAAGAAGAAGTTCTGCA  
+HWI-EAS443:3:4:1214:1751#0/1  
`abbab[bbb^`Ia[^`\_babS`aba^`baaa`Y\_`aaHa  
@HWI-EAS443:3:4:1565:129#0/1  
ATCATGCTCCGCTTGAATGCAGAACCTTCTTCTTACT  
+HWI-EAS443:3:4:1565:129#0/1  
a`¥aaa`a`¥GWTSV¥^¥W¥¥W¥VHUSNS¥VWUQUUBBB  
@HWI-EAS443:3:4:1774:342#0/1  
GCCTGTCTTATCATTAGGGCGTGGATTGTCTCGGAAAATC  
+HWI-EAS443:3:4:1774:342#0/1  
a\_\_\_a\_`^Y\_`S^[Q^L¥]UYURZ¥YNJHMLGT[YBBBB  
@HWI-EAS443:3:4:303:35#0/1  
AAATGAGTGGTCAGGATATAGCGGGAGGTTTGTTCAGCAT  
+HWI-EAS443:3:4:303:35#0/1  
\_baab`b^bb^¥]ab^`a`a\_aaaZ`GV¥\_[W^XZ^G^X  
@HWI-EAS443:3:4:382:2020#0/1  
ATGCAGAACCTTCTTCTTACTCAAGGGCCTTGCGAAAT  
+HWI-EAS443:3:4:382:2020#0/1  
aaa`aa`[``]¥\_P[Y^`a]UTNNW[[TMU^XGT`PG[¥[]  
@HWI-EAS443:3:4:597:1004#0/1  
TGCCCTGTAGTGGATGGGCTATATATAGTAAAGACAACA  
+HWI-EAS443:3:4:597:1004#0/1  
`b^a]`babaa\_aabba[a\_\_NS]YSFTaWa\_aWaY¥\_V\_  
@HWI-EAS443:3:4:632:316#0/1  
CACAAAAGGATATGCTGCTCCCGTAGTCAAGATTGTGTT  
+HWI-EAS443:3:4:632:316#0/1  
\_P\_P\_TN\_]U`UPX^U[¥PLY^XWRXBBBBBBBBBBBBBB  
@HWI-EAS443:3:4:700:802#0/1  
TAATAACAGACACTATCAAGAGTTGGTGAACAATATATT  
+HWI-EAS443:3:4:700:802#0/1  
`a`baaaaaa\_a]`a\_\_^`\_\_\_^\_Y`U\_^\_Y¥^^`\_^`^  
@HWI-EAS443:3:4:828:1402#0/1  
GCAGGGATAACTGGCATGGCTCGAATCGACCGGGGGTGTCT  
+HWI-EAS443:3:4:828:1402#0/1  
a^aaaa^`\_a\_^`\_]\_\_`¥`\_XSS]BBBBBBBBBBBBBB



@HWI-EAS443:3:50:1435:298#0/1  
GTCTGGGCCAGAAATTCCAATTGTTAGCCAATTGCTGCCA  
+HWI-EAS443:3:50:1435:298#0/1  
`aab]ba`a¥bababba`aaaa]aaaa\_`aaaaI]DNQO^  
@HWI-EAS443:3:50:558:66#0/1  
GCTGTGTTAAAGTAAAACGGCATAATAACAGACACTATCA  
+HWI-EAS443:3:50:558:66#0/1  
aabb[bb`^`b`baaa¥`abb¥\_aaaa`a^aa\_\_`Ya^[TX  
@HWI-EAS443:3:51:1010:426#0/1  
ATCAAAGCGTCATTACTTATTAACAACACTTGGGTAAA  
+HWI-EAS443:3:51:1010:426#0/1  
]ab¥H]\_^X\_Tbbba`abb\_J\_b\_[Ia`aa`bYPZUDH]^  
@HWI-EAS443:3:51:1277:1411#0/1  
ATCTTGCTTTATTGAGAAGTTATTGTCTGGCCCAGTCCAT  
+HWI-EAS443:3:51:1277:1411#0/1  
`^bbbbbbaa¥aaa`a]ZRa]\_YUJZ¥S\_\_JBBBBBBBBB  
@HWI-EAS443:3:51:1609:1341#0/1  
CAGTGTCCTGTTTACACCACAAAAGGATTTGCTGCTCCC  
+HWI-EAS443:3:51:1609:1341#0/1  
]bbabbbbbbbaSaba\_[bX]Ybaab\_¥¥a`a`Ra]RW]TG  
@HWI-EAS443:3:51:358:1233#0/1  
CAGGGATAACTGGCATGGCTCGAATCGACCGTGGGGGTCT  
+HWI-EAS443:3:51:358:1233#0/1  
aab```baa^aa`aaaa^`a\_ZKZZZ¥YORRK¥BBBBBBBB  
@HWI-EAS443:3:51:919:1552#0/1  
ATTACTTATGAAAACAACACTTGGGTAAACCAGACATATG  
+HWI-EAS443:3:51:919:1552#0/1  
abb¥\_ab^`b`baa]`aaa[a`aa\_[aa`aa\_aaaa`ab  
@HWI-EAS443:3:52:1167:1102#0/1  
CAGTGGTTTCCGGGAAATTAGCGGGCAATTCCTCTCTCTG  
+HWI-EAS443:3:52:1167:1102#0/1  
\_[\_Z\_bbU\_Vb\_H[aW``]JXXa\_^^U]¥`]LZa]b^QUb  
@HWI-EAS443:3:52:1216:694#0/1  
ATTAGGGCGGGGATTGTCTCCGAAAATCCCACTGCATATG  
+HWI-EAS443:3:52:1216:694#0/1  
aba[`[b¥RGZ\_\_\_`[XVVTR]WSX\_^]YY[WRXZKXYVZ  
@HWI-EAS443:3:52:1500:421#0/1  
ACAATCCACGCCCTAATGATAAGACAGGCAGGTGTGGTCC  
+HWI-EAS443:3:52:1500:421#0/1  
X`b`]Z]ab]a`a`b`baa`aa\_XBBBBBBBBBBBBBBB  
@HWI-EAS443:3:52:1532:757#0/1  
ATGGTAAATGGCAACTCAGCACCGTCTGGCCAACACCAAC  
+HWI-EAS443:3:52:1532:757#0/1  
`bbVR]a]aT\_]ab[\_a`\_^`aPY`\_aaUX\_\_^0[FX\_`a  
@HWI-EAS443:3:52:1752:1303#0/1  
GTGGTCCAGTATCGTCTAATGGACCAAATGGAGTAAAAGG  
+HWI-EAS443:3:52:1752:1303#0/1  
a\_aa]]`\_`N^^[a]X]WZ]¥]LFIIY]]^\_N\_OS]]^^ZX  
@HWI-EAS443:3:52:875:1241#0/1  
GTTTTGAGATGATTTGGGATCCGAACGGATGGAGTGGGAC

+HWI-EAS443:3:52:875:1241#0/1  
YR]YY]N\_TY[Y`¥X`¥¥TZZU]N]L\_a¥0`^XBBBBBBBB  
@HWI-EAS443:3:53:597:73#0/1  
CGCTAATTTGACGGAAACCACTGACTGTCCAGCAGCAAAG  
+HWI-EAS443:3:53:597:73#0/1  
`bbb\_aXaPH]ab`a^Y^\_YZ\_^\_bb\_T]IH^^]¥LFJX  
@HWI-EAS443:3:54:15:1216#0/1  
CCGCTAATTTACGGAAACCACTGACTGTCCGGCAGCAAA  
+HWI-EAS443:3:54:15:1216#0/1  
a`Z`U¥¥ZZ`^\_RMO\_`[WOVXTXWRLM[RJVWR[BBBB  
@HWI-EAS443:3:54:585:193#0/1  
GTCATTACTTATGAAAACAACACTTGGGTAAACCAGACAT  
+HWI-EAS443:3:54:585:193#0/1  
a`\_abaa^aa`aa`a^Y¥]]]^\_\_\_YU^`\_XX^\_]Z\_^  
@HWI-EAS443:3:55:1086:964#0/1  
GCTCCATTAGACGATACTGGACCACAACCTGCCTGTTTTAT  
+HWI-EAS443:3:55:1086:964#0/1  
abab^Y^aaaa\_aa\_WOFX]^U¥\_\_^¥^[`L[QDXDW^F¥  
@HWI-EAS443:3:55:141:1596#0/1  
CAGAAGCAAGGTCTTATACAATCCAGCCCTTTTAGTTCTG  
+HWI-EAS443:3:55:141:1596#0/1  
a``aaaa¥`a^^\_¥a\_a`a`^`^`]^`S\_^`]YY^WV\_  
@HWI-EAS443:3:55:1439:988#0/1  
CAGCCCTGTTAGTTCTGGATGCTGAACAAAACCTGCCGCTA  
+HWI-EAS443:3:55:1439:988#0/1  
`[LUWX¥\_U`\_XYW]\_RL¥[O^[UBBBBBBBBBBBBBBBB  
@HWI-EAS443:3:55:214:797#0/1  
CTCGAATCGACCGGGGTGTCTTTCAACCAGAATCTGGAA  
+HWI-EAS443:3:55:214:797#0/1  
abbb\_¥bbaba`]PZbbUaJQaabaSU^)^N]\_^aRGQ  
@HWI-EAS443:3:55:947:88#0/1  
GTGTAACAGTGACACTGGGGTTGGTCTTGCCAGACGG  
+HWI-EAS443:3:55:947:88#0/1  
aaa\_Vaa`\_\_[b\_]^[^abMa`aZ\_a[VRN^``SNKZTNX`  
@HWI-EAS443:3:56:1054:481#0/1  
TGCTGCTCCCGCTAGGCCAGATTGTGTTCTCTTTGGGTCG  
+HWI-EAS443:3:56:1054:481#0/1  
]`b`abbbb][PZVZH^YUZ][LMZ^b¥]^`\_XGQ`RU`  
@HWI-EAS443:3:56:118:663#0/1  
GTGGGTGCCTTTCAACCAGAATCTGGAATATCAGATAGGA  
+HWI-EAS443:3:56:118:663#0/1  
`SZV\_]`HLTUQVYRVQV¥VYVRR\_[NRRTTSBBBBBBBBB  
@HWI-EAS443:3:56:1203:1692#0/1  
TGATATTCCAGATTCTGGTTGAAAGACACACACGGTCGAT  
+HWI-EAS443:3:56:1203:1692#0/1  
[b\_aa`aa[[aaQXXY\_bV`a\_`\_\_`\_YKU^¥\_[WRZ[U  
@HWI-EAS443:3:56:1598:1361#0/1  
GAGCAGCATAACCTTTTGTGGTGTAAACAGTGACACTGTG  
+HWI-EAS443:3:56:1598:1361#0/1  
abb\_ab`baa`\_`baaab^]\_\_aa]\_]\_aa¥`a¥`]a`\_a

@HWI-EAS443:3:56:516:81#0/1  
AGCGTCATTACTTATGAAAACAACACTTGGGTAAACCAGA  
+HWI-EAS443:3:56:516:81#0/1  
abbbbaabbaabaaba`\_``aa`a`aaa\_]`\_``]`\_a^  
@HWI-EAS443:3:56:837:1441#0/1  
GTGTGTGCAGGGATAACTGGCATGGCTCGAATCGAACGTG  
+HWI-EAS443:3:56:837:1441#0/1  
aYQX^VZ]¥^^WX[`¥U`^[WZBBBBBBBBBBBBBBBBBBB  
@HWI-EAS443:3:57:1789:311#0/1  
CGTCATTACTTATGAAAACAACACTTGGGTAAACCAGACA  
+HWI-EAS443:3:57:1789:311#0/1  
ab^\_\_bbaabbbbaaba`aa^a\_a`aa^^`aa``aa^Z`  
@HWI-EAS443:3:57:442:1839#0/1  
ATCAGATAGGATACATATGCAGTGGGCTTTTCGGAGACAA  
+HWI-EAS443:3:57:442:1839#0/1  
`a`a`a`Z```¥JV`^]YYaYH^UZFW¥aUSYQUNY^B  
@HWI-EAS443:3:57:883:1979#0/1  
TTACTTATGAAAACAACACTTGGGTAAACCAGACATATGT  
+HWI-EAS443:3:57:883:1979#0/1  
`aa\_]¥aa\_a¥abXa`\_\_[]\_Z^ZW\_\_`WP\_a\_[\_`^¥[\_U  
@HWI-EAS443:3:58:1210:255#0/1  
AAAGGATATGCTGCTCCCGCTAGCCAGATTGTGTTCTCT  
+HWI-EAS443:3:58:1210:255#0/1  
aaaabbaa^`aaa¥^`a^a¥]VVLr^V]RTZ]Y¥Y^WZNT  
@HWI-EAS443:3:58:1435:740#0/1  
GACCGCGGGTGTCTTTCAACCAGAATCTGGAATATCAGAT  
+HWI-EAS443:3:58:1435:740#0/1  
\_PZT\_FY¥[ZZV\_aaXPZ\_\_^a]\_0`aY]]``¥aW``^\_  
@HWI-EAS443:3:58:1563:106#0/1  
AGTTATTGTCTGTCCCAGTCCATCCGTTCCGGTCCCAAAT  
+HWI-EAS443:3:58:1563:106#0/1  
¥a`babbb^a\_HPZWZ``[S[RSW¥¥[S[^BBBBBBBBBB  
@HWI-EAS443:3:58:857:1310#0/1  
AAGATTTGAGTCAGTCGCTTGGTCAACAAGTGCTTGTCAT  
+HWI-EAS443:3:58:857:1310#0/1  
a`aaabb\_b``^`\_\_\_a\_]QYYYYVDT\_¥ZW[RX\_OY]]`  
@HWI-EAS443:3:59:1705:423#0/1  
ATTCTAGTAAAATCACATGTGTGTGCAGGGATAAGTGGCA  
+HWI-EAS443:3:59:1705:423#0/1  
IVZZZbb¥aa[a\_Yaba]\_\_^`^[a^^`bbbQaVDOV\_FW  
@HWI-EAS443:3:59:250:1194#0/1  
GAACCCTAATGAGCTGCCTATTGGTGACGTTCCCTCTCC  
+HWI-EAS443:3:59:250:1194#0/1  
a[]O¥``Y¥Y¥\_]`^`¥XZW¥bb]\_]Va\_JXHRYT\_XNZ^Q  
@HWI-EAS443:3:59:252:1531#0/1  
GTTATTATGCCGTTGTACTTTAACACAGCCACTGCGCCAT  
+HWI-EAS443:3:59:252:1531#0/1  
a`[aZN\_¥Z¥`WUZXWZ`\_]W\_]^`\_R`\_YQN]^MQVQW  
@HWI-EAS443:3:59:255:1262#0/1  
AACTGCCTGTCTTATAATTAGGGCGTGGATTGTCTCCGAA

+HWI-EAS443:3:59:255:1262#0/1  
abaa]\_b\_[abba`\_V¥¥`a`a\_aT¥aa\_a^Z¥¥TQV]Y  
@HWI-EAS443:3:59:621:853#0/1  
TAAACAGTGACACTGTGGGTTGGGCTTGGCCAGACGGTGC  
+HWI-EAS443:3:59:621:853#0/1  
]`Zabb`[a`abaab\_]¥]P]a[D[aaaa\_SZa[WNVNW  
@HWI-EAS443:3:59:66:520#0/1  
CATTACTTATGAAAACAACACTTGGGTAAACCAGACATAT  
+HWI-EAS443:3:59:66:520#0/1  
¥`a¥UYb¥Z`\_RT\_NaaX`XP]`S¥H^\_YU^G^Y]^T¥aa  
@HWI-EAS443:3:59:923:1483#0/1  
GATTTTCGGAGACAATCCACGCCCTAATGATAAGAAAGGC  
+HWI-EAS443:3:59:923:1483#0/1  
]V¥aab¥ZX0\_]a`aa]][^`[¥^^\_W¥ZBBBBBBBBB  
@HWI-EAS443:3:5:1256:1594#0/1  
AATGGTGTGGATAGGGAGAATAAAAGCATTGGTTCAA  
+HWI-EAS443:3:5:1256:1594#0/1  
KVbb^Kb`¥`S`X\_a\_V`b\_bab¥`aZT^XaabbR`^aa  
@HWI-EAS443:3:5:1670:736#0/1  
CATCAATTGGCTAACAAATTGGAATTTCTGTCCCAGACAAT  
+HWI-EAS443:3:5:1670:736#0/1  
a``VbabaaS`aa`a]``aUR[`U^`YOU[XX¥W[^`[a  
@HWI-EAS443:3:5:423:526#0/1  
CGTTCCGATCCTAAATCATCTCAAACCCTTTCTTGAAC  
+HWI-EAS443:3:5:423:526#0/1  
\_a]Ya`b^I^^W`a[]H¥Z^Vaa\_]\_`Ua\_\_\_¥TKa^aWB  
@HWI-EAS443:3:5:44:395#0/1  
TCAGCACCGTCAGCCAAGACCAACCCACAGTGTCACTGT  
+HWI-EAS443:3:5:44:395#0/1  
abbbb\_aab`a^aa`]^`^aa^^aa[^`\_]a^aS¥U^`aP  
@HWI-EAS443:3:5:474:556#0/1  
GGTTGAAAGACACCCACGGTTCGATTCGAGACATGCCAGTT  
+HWI-EAS443:3:5:474:556#0/1  
aZNU^`\_Z`\_]XXVPV\_]LL\_]QR^XZNBTTTTTTTTT  
@HWI-EAS443:3:60:831:1522#0/1  
AAGAGGCTGAATGTGCATGTGTAATGGTTCTTGCTTTAC  
+HWI-EAS443:3:60:831:1522#0/1  
XRX`[HSaaa^X\_SVa`^Z`M[^W`aaODWZTYI]X]^W  
@HWI-EAS443:3:61:1007:1574#0/1  
GCAAAGTTGGTGTGCTGATGTTAACATATGTCTGGTTTA  
+HWI-EAS443:3:61:1007:1574#0/1  
a[JXR[RXP\_W]SN]X^RXS^]]MKVZWWWYSXYW]XSWS  
@HWI-EAS443:3:61:1056:1169#0/1  
ATCCCAAATCATCTCAAACCCTTCTTGAACATAATGCTT  
+HWI-EAS443:3:61:1056:1169#0/1  
aaa^aaYa]Z¥aaa^a^aa`\_`[¥\_\_¥¥`¥X`V^`¥[¥X  
@HWI-EAS443:3:61:1069:69#0/1  
GTTCTGAATATATTGTTTCTCCAACCTTGTAGTGTCTG  
+HWI-EAS443:3:61:1069:69#0/1  
`HOGKROQ[]¥PUZVVUSYYN]QJSQNY[UBBBBBBBBBB

@HWI-EAS443:3:61:1097:781#0/1  
GCAAGAACCAATTACACATGCACATTCAGACTCTTGTGTT  
+HWI-EAS443:3:61:1097:781#0/1  
a\_]\_¥^\_\_XM`\_\_^\_\_a\_\_\_\_[`¥\_\_`[\_][\_U\_]SXY[[  
@HWI-EAS443:3:61:1596:418#0/1  
AGCGTCATTACTTATGAAAACAACACTTGGGTAAACCAGA  
+HWI-EAS443:3:61:1596:418#0/1  
aab`aabbbaabbbabb¥bbaabab`ba````[a\_a\_^\_^^  
@HWI-EAS443:3:61:677:1712#0/1  
CTTGCTTTATTGAGAAGTTATTGTCTGTCCCCGTCCATCC  
+HWI-EAS443:3:61:677:1712#0/1  
abb]bbaabbaaa][^babb`aa\_baaBBBBBBBBBBBBBB  
@HWI-EAS443:3:62:1000:411#0/1  
TCGGATCCCAAATCATCTCAAACCGCTTCTTGAACATAAT  
+HWI-EAS443:3:62:1000:411#0/1  
a\_^\_aa¥]^`a````a`ZO\_`a]]\_¥\_Za\_¥¥WZ^aa\_^  
@HWI-EAS443:3:62:1079:897#0/1  
ATCAGATAGGGTACATATGCAGTGGGATTTTCGGAGACAA  
+HWI-EAS443:3:62:1079:897#0/1  
a¥aaaa`aaaa^aaaa`\_`a]`Z][a`\_a```^`\_`^`\_`\_`  
@HWI-EAS443:3:62:1394:1822#0/1  
AGCCACTCAATTGACTTGGGAATCAAATCAGATTGAAA  
+HWI-EAS443:3:62:1394:1822#0/1  
ZV\_X^^aba\_V^WH[^¥\_Y\_b\_ba]¥U¥aXaaa`aabb¥  
@HWI-EAS443:3:62:851:1212#0/1  
TAAGAATCGGTTCCAAGGTGGATGTGTTTGCATAAGGGA  
+HWI-EAS443:3:62:851:1212#0/1  
aaaaba`aaaY[``\_\_a`M`]^[ZV¥WV[VUSXX\_[UZ[Y  
@HWI-EAS443:3:63:1073:1998#0/1  
GATTCTGGTTGAAAGACACCCACGGTCGATGCGAGCCATG  
+HWI-EAS443:3:63:1073:1998#0/1  
]XWXR]UOZR]]¥TW^\_baaa]ZLN\_P]BBBBBBBBBBBB  
@HWI-EAS443:3:63:1536:631#0/1  
ATTCATATCATGCTCCCCCTTGAATGAAGAACCTTCTTC  
+HWI-EAS443:3:63:1536:631#0/1  
Za^`][a`][YZNNTaa\_¥Y^SV]a`LYSSYPOX^BBBB  
@HWI-EAS443:3:63:351:868#0/1  
AGGGATAACTGGCATGGCTCGAATCGACCGTGGGGGTCTT  
+HWI-EAS443:3:63:351:868#0/1  
Va\_OZZab`ba]^aZ[`a``MG]VUNX`QXBBBBBBBBBB  
@HWI-EAS443:3:63:788:1521#0/1  
CGATATCTTGCTTTATTGAGAAGTTATTGTCTGGCCCAGT  
+HWI-EAS443:3:63:788:1521#0/1  
aaaa`a\_``]a`aaa`aa\_^][a[`a\_YRY^`BBBBBBBB  
@HWI-EAS443:3:63:865:27#0/1  
GCCGTTGGACTTTAACACAGCCACTGCCCATTTGTCTGGG  
+HWI-EAS443:3:63:865:27#0/1  
aMO¥^\_WDVS]QZ^YZVKVNN[PUZSNUNSUQWBBBBBBBB  
@HWI-EAS443:3:64:1373:1019#0/1  
CTCCATTAGACGATACTGGACCACAAATGCCTGTCTTATC

+HWI-EAS443:3:64:1373:1019#0/1  
aababba`¥b`^`¥^\_\_aZY]YZ]\_H^W]]^X[\_aa\_]S  
@HWI-EAS443:3:64:219:1826#0/1  
AGCGTCATTACTTATGAAAACAACACTTGGGTAAACCAGA  
+HWI-EAS443:3:64:219:1826#0/1  
a`^Q\_`^a\_VW\_`[`a`]aaa\_a`YSSJYM``][WWR[  
@HWI-EAS443:3:64:438:1907#0/1  
CTGCTCCCGCTAGTCCAGATTGTGTTCTCTTTGGGGCGCC  
+HWI-EAS443:3:64:438:1907#0/1  
a\_^^`\_Z^]\_^^XNM[YVYZ\_PYXY`YYQV[^MUUGSVYY  
@HWI-EAS443:3:64:468:832#0/1  
CAGGGATAACTGGCATGGCTCGAATCGACCGTGGGGGTCT  
+HWI-EAS443:3:64:468:832#0/1  
¥R\_`\_ZW`a`^Raa`aXba\_QY]]YVONYBBBBBBBBBB  
@HWI-EAS443:3:64:743:567#0/1  
TGCTGCTCCCGCTAGTCCAGATTGTGTTCTCTTTGGTCCG  
+HWI-EAS443:3:64:743:567#0/1  
a`ba\_b`baa\_a`¥\_T]]][a[YZHR¥H`NIHZ`]HR\_NVW  
@HWI-EAS443:3:64:862:488#0/1  
AGACACCCACTGTCGATTTCGAGCCATGCCAGTTATCCCTG  
+HWI-EAS443:3:64:862:488#0/1  
aaaaaaaaa`a\_`a^[^]^^Z`\_^\_¥^¥\_\_W¥V`^ZZ¥^  
@HWI-EAS443:3:64:939:1020#0/1  
CCTGTCTTTGATGGTTCATTGGAATGTTTGTCTTTAGC  
+HWI-EAS443:3:64:939:1020#0/1  
aabbabbbabb\_a\_abbaab]\_\_abaabb`aaabbaaY\_  
@HWI-EAS443:3:65:110:1413#0/1  
CTCAATCCAACCTGGGAATCAAAATCAGATTGAAACATGC  
+HWI-EAS443:3:65:110:1413#0/1  
a\_]V^b]]U¥GQSFNMTS]VUTXSVJOVVSXUYVYYYYXY  
@HWI-EAS443:3:65:1591:946#0/1  
GTCCCAGTCCATCCGTTCCGATCCCCAATCATCTCAAAC  
+HWI-EAS443:3:65:1591:946#0/1  
a\_\_Z`J^`^aaS\_]a\_\_]\_\_^a]]LSR^VU]^]^WV]]0  
@HWI-EAS443:3:65:365:445#0/1  
GTGTAACAGTGACACTTTGGGTTGGTCTTGCCAGACGG  
+HWI-EAS443:3:65:365:445#0/1  
\_[aJZ0¥`¥aY`Y^[\_aa`b\_^\_¥a`W\_`¥U\_`RZ`[R^\_  
@HWI-EAS443:3:65:611:1170#0/1  
GTCTGCTATTATGCCGTTGTACTTTAACACAGCCACTGCC  
+HWI-EAS443:3:65:611:1170#0/1  
a]]Z[DWU\_]`¥`]aaZa`^X`a`\_`^X[\_\_\_a`W¥^\_`  
@HWI-EAS443:3:65:701:1364#0/1  
CTTATGAAAACAACACTTGGGTAAACCAGACATATGTAA  
+HWI-EAS443:3:65:701:1364#0/1  
ab^aba\_[\_`ba\_abaa\_\_\_ZX`aaaabaaaa\_a```a\_  
@HWI-EAS443:3:66:1045:300#0/1  
ACTTGGTCCATCGGTCATTACAGTAAAGCAAGAACAATTT  
+HWI-EAS443:3:66:1045:300#0/1  
[M[]¥XZ`baa\_VSTYaY¥]X^^¥\_Z^Z¥\_`^`¥YXa]^¥



+HWI-EAS443:3:69:833:1880#0/1  
aa]YY#NbT#aY`a\_]a[V#`aaa[]\_\_HZUYUX#^^Z^  
@HWI-EAS443:3:6:1151:755#0/1  
ATGACAAGCTCTTGCTGACCAAGCGACTGACTCAAATCTT  
+HWI-EAS443:3:6:1151:755#0/1  
aa`\_]a`a[MY\_Y\_X`\_Y#\_#W`Y`\_Z#YRG[] [W]VLV]  
@HWI-EAS443:3:6:125:1505#0/1  
CATTACTTATGAAAACAACACTTGGGTAAACCAGACATAT  
+HWI-EAS443:3:6:125:1505#0/1  
abbababbabbbababba`^`\_XY^baba^a`aaaa`a  
@HWI-EAS443:3:6:1434:835#0/1  
TTCATATCATGCTCCCCCTTGAATGCAGAACGTTCTTCT  
+HWI-EAS443:3:6:1434:835#0/1  
a]Zaa#^]aaa\_a]XRZU\_VUXZ^VXF#VYXTGS[U\_#BB  
@HWI-EAS443:3:6:1520:662#0/1  
AGCAAGTGCTTGTGCATGATGGGATCAATTGGCTAACAAATT  
+HWI-EAS443:3:6:1520:662#0/1  
`babZb`baa^`#[[ba[\_]ZDX`R[\_aa]a^a\_QZa`]^  
@HWI-EAS443:3:6:364:401#0/1  
TCCAGATTCTGGTTGAAAGACACCCACGGCGATTTCGAGC  
+HWI-EAS443:3:6:364:401#0/1  
\_\_T`a`Z\_a]aa]aaaaa``a\_[]\_\_aYDIaZZU#a#\_B  
@HWI-EAS443:3:70:1517:310#0/1  
CTTGCTTTATTGAGAAGTTATTGTCTGTGCCAGTCCATCC  
+HWI-EAS443:3:70:1517:310#0/1  
#\_abbbbaababbbababbbbab[FH[ZG#[Z\_UFW[  
@HWI-EAS443:3:70:1620:444#0/1  
TGGCTGTGTTAAAGTAAAACGGCATAATAACAGACACTAT  
+HWI-EAS443:3:70:1620:444#0/1  
aaa```]a##[X\_OWGT]YS\_\_Y^]\_\_^XNSPSP#PZZW  
@HWI-EAS443:3:70:710:1667#0/1  
ATCATTAGGGCGTGGATTGTCACCGAAAATCCCCTGCGAT  
+HWI-EAS443:3:70:710:1667#0/1  
aY\_aaa\_]`b^^`aa`\_][J^`\_\_`\_^`a`^`\_`^]`^]  
@HWI-EAS443:3:70:829:1287#0/1  
GGTTGAAAGACACCCACGGTCGACTCGAGCCATGCCAGTT  
+HWI-EAS443:3:70:829:1287#0/1  
V]VW]^aZN#\_abb\_bb`KV\_KFPaaa`a\_RTQ]XT#W]  
@HWI-EAS443:3:71:1726:1636#0/1  
CTGGCACAGACAATAACTTCTCAATAAAGCAAGATATCGT  
+HWI-EAS443:3:71:1726:1636#0/1  
aa\_^OWSTWSV^X#aa`]#`WRYZZYZ]#aW[[[Z#X  
@HWI-EAS443:3:71:801:1095#0/1  
GGGCTCTTGTCTTTAATGGTTCCATTGGAATGTTTGTGCAT  
+HWI-EAS443:3:71:801:1095#0/1  
XR[``aSaa]a#\_aa\_RR]H[a``S\_#a[I[\_`^`^` [Wfy  
@HWI-EAS443:3:71:875:1229#0/1  
ATCATGCTCCCCCTTCAATGCAGAACCTTCTTCTTACT  
+HWI-EAS443:3:71:875:1229#0/1  
`#Sa`\_`YRX^TS`#DQQZaUSa`[\_`aSX#ZaVQXX#IT



@HWI-EAS443:3:72:1306:1242#0/1  
CGTCATTACTTATGAAAACAACACTTGGGTAAACCAGACA  
+HWI-EAS443:3:72:1306:1242#0/1  
^aY\_P]b`[a\_]Z^Qa¥a\_``¥baaa`Za`\_Z\_]`aaa  
@HWI-EAS443:3:72:1358:167#0/1  
CTTATGAAAACAACACTTGGGTAAACCAGACATATGTTAA  
+HWI-EAS443:3:72:1358:167#0/1  
`S`[\_]\_X]\_R\_a`\_XWQ[]¥0^Y¥YOSa^a]a¥`a]\_a\_  
@HWI-EAS443:3:72:1481:1416#0/1  
AAATACGGCAATGGTGTGGATAGGGAGAGCTAAAAGCA  
+HWI-EAS443:3:72:1481:1416#0/1  
aaaa`\_ba[a`\_`\_]\_\_aaWaX][[[]VF¥ZZ^`^`UW^  
@HWI-EAS443:3:73:1138:598#0/1  
TACTTATGAAAACAACACTTGGGTAAACCAGACATATGTT  
+HWI-EAS443:3:73:1138:598#0/1  
^¥a`a`¥`a¥a`bb\_]ab\_¥]Vb``aa`baaa`a]a\_a  
@HWI-EAS443:3:73:37:401#0/1  
GCCTGTGTTATCATTAGGGCGTGGATTGTCTCCGAAAATC  
+HWI-EAS443:3:73:37:401#0/1  
aaaaaab`aba`a```\_a`\_`\_\_^`^`\_]`\_`^a\_\_^^  
@HWI-EAS443:3:73:67:475#0/1  
GTTATTGTCTGTCCCAGTCCATCCGTTCCGATCCCCAATC  
+HWI-EAS443:3:73:67:475#0/1  
a`\_X]`YX`¥¥RN[]RBBBBBBBBBBBBBBBBBBBBBBB  
@HWI-EAS443:3:73:703:148#0/1  
TAAGAATCGGTTCCAAGGGGATGGGTTTGCATAAGGGA  
+HWI-EAS443:3:73:703:148#0/1  
]a\_a`a¥a[OPDRPXNW^¥BBBBBBBBBBBBBBBBBBBBBBB  
@HWI-EAS443:3:74:1186:822#0/1  
AACTGGCATGGCTCGAATCGACCGTGGGGTCTTTCAACC  
+HWI-EAS443:3:74:1186:822#0/1  
`ba^¥¥JaXb¥b``WBBBBBBBBBBBBBBBBBBBBBBBBB  
@HWI-EAS443:3:74:1210:1194#0/1  
ATCATGACAAGCACTTGCTGACCAAGCGACTGACACAAAT  
+HWI-EAS443:3:74:1210:1194#0/1  
aabbba\_Zaab\_abaaaaaba]```aaY\_aaa`a\_a]^\_a  
@HWI-EAS443:3:74:1508:1360#0/1  
GGATTGTCTCCGAAATCCCCTGCATATGTATCCTATCT  
+HWI-EAS443:3:74:1508:1360#0/1  
a\_b\_YS^b[U^\_G\_``[b`a[abW¥S`R\_a^TH]YIQRS¥  
@HWI-EAS443:3:75:161:558#0/1  
GTCTGTTATTATGCCGTTGGACTTTAACACAGCCACTGCC  
+HWI-EAS443:3:75:161:558#0/1  
aV```[U^R`]ZaaU`I]\_L\_T]\_¥ZZXX`¥R^ZZ^]MY`  
@HWI-EAS443:3:75:1723:1335#0/1  
ATTCAAATACGGCAATGGTGTGGATAGGGAGAAATAAA  
+HWI-EAS443:3:75:1723:1335#0/1  
J`\_^`bbaaab`¥`aa¥\_Xb]a`¥¥Xbaab\_\_¥`]D]\_ab  
@HWI-EAS443:3:75:518:1606#0/1  
TGCAGAACCTTCTTAGACTCAAGGGCCTTGCTAAATG

+HWI-EAS443:3:75:518:1606#0/1  
X[a`b``ababb`ba\_H¥Xb``\_W\_\_\_\_[[`babb\_baWab  
@HWI-EAS443:3:75:84:2004#0/1  
AGCGTCATTACTTATGAAAACAACACTTGGGTAAACCAGA  
+HWI-EAS443:3:75:84:2004#0/1  
Y^b¥ab``Z\_a\_ab]Z\_]V\_baaaaW[U]YVS\_a\_`]X\_  
@HWI-EAS443:3:76:1043:531#0/1  
GAAAATCCCCTGCATATGTATCCTATCTGTTATTCCAGA  
+HWI-EAS443:3:76:1043:531#0/1  
`aa`aaaaaUa`abU00\_aVZ\_BBBBBBBBBBBBBBBBBB  
@HWI-EAS443:3:76:1280:1365#0/1  
GAGTTGGAGAAACAATATATTGAGGACACAAGAGTCTGAA  
+HWI-EAS443:3:76:1280:1365#0/1  
a]ZY`^ZQXZ\_SI0]`Y¥W^¥¥]`¥MTSSZO\_Z\_GU^Z^B  
@HWI-EAS443:3:76:1352:591#0/1  
CTTTAACACAGCCACTGCCCATTTGTCTGGGCGAGAAATT  
+HWI-EAS443:3:76:1352:591#0/1  
[Yb`R¥ba¥U``¥\_Q¥a[M¥SZ¥\_\_WfUbaZUIPZaaba  
@HWI-EAS443:3:76:676:448#0/1  
CTGGCATGGCTCGAATCGACCGTGGGTGGCTTTCAACCAG  
+HWI-EAS443:3:76:676:448#0/1  
abbbabbabba`aS\_¥¥ZWPZTN]a^GRFJP¥]NU]SPPS  
@HWI-EAS443:3:76:959:697#0/1  
CTTATGAAAACAACACTTGGGTAAACCAGACATATGTTAA  
+HWI-EAS443:3:76:959:697#0/1  
abbbbaabbbbb`aaaabaa^babaabab`aaaabaaaa  
@HWI-EAS443:3:77:1282:669#0/1  
GCTCCTGTTATCCTGATTCTAGTGAAATAACATGTGTGTG  
+HWI-EAS443:3:77:1282:669#0/1  
abbYb``¥ba¥V``\_¥b\_U¥PZ¥S\_a\_YFXWVZ`¥a\_[]Y  
@HWI-EAS443:3:77:144:1487#0/1  
CTTATGAAAACAACACTTGGGTAAACCAGACATATGTTAA  
+HWI-EAS443:3:77:144:1487#0/1  
aaaaY``\_U^\_]a^¥¥]UTZ]P^``^`\_X^][[]\_]YZ¥[  
@HWI-EAS443:3:77:41:25#0/1  
CAACTGCCTGTCTTATCATTAGGGCGTGGATTGTCCCCGA  
+HWI-EAS443:3:77:41:25#0/1  
a`]`a^^\_b¥`\_XV`\_^\_]`¥a\_aRa\_\_\_¥aPYPZ¥P  
@HWI-EAS443:3:77:608:586#0/1  
GAGTTGAGAAACAATATATTGAGAACACAAGAGTCTGAA  
+HWI-EAS443:3:77:608:586#0/1  
`ab\_¥N][\_``\_^WZ`\_\_^\_\_\_`¥]`\_¥[^\_W[\_[V^^^^  
@HWI-EAS443:3:78:1248:1497#0/1  
GCTCCTGTCTTTAATGGGTCCATTGGAATGTTTGTCTTT  
+HWI-EAS443:3:78:1248:1497#0/1  
aa^¥^abH[baaaa`QaW^`^\_Y]GV`\_ZT¥^aY^]U\_\_^  
@HWI-EAS443:3:78:1257:1439#0/1  
CAAATACGGCAATGGGGTTTGGATAGGGAGAACTAAAAGC  
+HWI-EAS443:3:78:1257:1439#0/1  
aaaa```a¥^a`a^^Ga\_aa]\_\_]^`\_]S^\_W\_^a\_a]Q

@HWI-EAS443:3:78:258:628#0/1  
TCCCAGGCCATCCGTTCCGATCCCAAATCATCTCAAAACC  
+HWI-EAS443:3:78:258:628#0/1  
ababbaabab`aa]`abY^\_\_`^aaa`\_\_`a``aaZ\_U  
@HWI-EAS443:3:78:458:485#0/1  
TGCAGGGATAACTGGCATGGCTCGAATCGACCGGGGGTGT  
+HWI-EAS443:3:78:458:485#0/1  
abaa`bbTabab\_J^aa\_]\_aaQXBBBBBBBBBBBBBBB  
@HWI-EAS443:3:79:140:1344#0/1  
AGCCCATCCACTAACAGGGCAGGGAGAGGAATTGCCCGCT  
+HWI-EAS443:3:79:140:1344#0/1  
aaba`SYbaaa^]a`a^]W\_Y[OY^[^Y[\_\_\_W^^^V\_Y  
@HWI-EAS443:3:79:1413:720#0/1  
CAATCGTTAGCCAATTGATGCCATCATGACAAGCACTTGC  
+HWI-EAS443:3:79:1413:720#0/1  
\_`b\_I\_bbb]a``bbbb`baab`\_\_`aa^aZ[ObXb\_^\_  
@HWI-EAS443:3:79:274:1075#0/1  
GGCTGTGTTAAAGTACAACGGCCTAATAACAGACACTATC  
+HWI-EAS443:3:79:274:1075#0/1  
`aaaaV[P]YOP`Z`^a[a]TGTXXYW\_WRZFP`^\_U`  
@HWI-EAS443:3:79:383:530#0/1  
TTATGAAAACAACACTTGGGTAAACCAGACATATGTAAAC  
+HWI-EAS443:3:79:383:530#0/1  
aaaaaa`W0^aa^`aaa[[Y\_\_PZ\_a\_\_]\_]T[aZ`]R\_  
@HWI-EAS443:3:79:69:391#0/1  
CAAAGTTGGTGTGCTGATGTTAACATATGTCTGGTTTAC  
+HWI-EAS443:3:79:69:391#0/1  
\_\_J[a`babY`b[`bbb^\_ZZUXZY^Q^]V)`a^U`V`N  
@HWI-EAS443:3:7:1558:950#0/1  
AGCGGGAGCAGTATATCCTTTTGTGGTGTAACAGTGACA  
+HWI-EAS443:3:7:1558:950#0/1  
`bab`aa[a]J^a`a^`aa`U[`^ba`\_]Y\_\_U`^U\_  
@HWI-EAS443:3:7:1594:74#0/1  
TGCCCCGTAATTCACGGAAATCACTGACTGTCCAGCAGC  
+HWI-EAS443:3:7:1594:74#0/1  
[b`ab^\_N\_\_`]]`a`aaa`bG\_aZbU`[[`Y`BBBBBB  
@HWI-EAS443:3:7:527:414#0/1  
GTCATTACTTATGAAAACAACACTTGGGTAAACCAGACAT  
+HWI-EAS443:3:7:527:414#0/1  
a\_a\_a`a`aaabaaaa`a`\_\_^`\_`ZaY```[^\_`^a\_  
@HWI-EAS443:3:7:64:1474#0/1  
CAACTGCCTGTCTTATCATTCCGGCGTGGATTGTCTCCGA  
+HWI-EAS443:3:7:64:1474#0/1  
[baaMbbbbZ\_a`ZV\_M^YHQ[bU^\_U]bb\_[FGZWF[\_  
@HWI-EAS443:3:7:71:1367#0/1  
GTCATTACTTATGAAAACAACACTTGGGTAAACCAGACAT  
+HWI-EAS443:3:7:71:1367#0/1  
`Za`V`aaaa^\_a`Y`aaaa\_\_`[[YLY``]]ZRY`\_  
@HWI-EAS443:3:7:766:1614#0/1  
ATTACTTATGAAAACAACACTTGGGTAAACCAGACATATG

+HWI-EAS443:3:7:766:1614#0/1  
aa`Y\_[[Z^^]¥[\_G]`¥[a]\_`\_^[\_a\_`\_]`^\_\_^^][^  
@HWI-EAS443:3:80:1645:1667#0/1  
CACCGTCTGGCCAAGACCAACCCACAGTGTAACTGTTTAC  
+HWI-EAS443:3:80:1645:1667#0/1  
X\_bbaaa`b]Ta^]b[RWb^Y¥aaIbZaaaS\_J^WXab`\_  
@HWI-EAS443:3:80:299:258#0/1  
ATGCAATCAAATCGTCATTACTTATGAAAACAACACTTGG  
+HWI-EAS443:3:80:299:258#0/1  
aaba\_[aaaaaa\_a`aa\_a\_`aa`\_`¥`^a`\_]`^^]^[  
@HWI-EAS443:3:81:1406:1717#0/1  
CGTTTCTTGAACAAATGCTTTTAGTTCTGCCTATCCAAAC  
+HWI-EAS443:3:81:1406:1717#0/1  
\_aI`\_`\_`\_a^¥^\_`^^^¥¥ba`a\_b`\_IRJzb\_Z]Ka]X  
@HWI-EAS443:3:81:1419:1620#0/1  
TGAGAAGTTATTGTCTGTCCCAGTCCATTCGTTCCGGATCC  
+HWI-EAS443:3:81:1419:1620#0/1  
`b]aY^\_\_a\_a`\_Ua\_`BBBBBBBBBBBBBBBBBBBBBBBB  
@HWI-EAS443:3:81:338:1282#0/1  
CAGGGATAACTGGCATGGCTCGAATCGACCGTGGGGGTCT  
+HWI-EAS443:3:81:338:1282#0/1  
^^`\_aaaaZ\_aa[aaa`\_b^\_WJR[X\_¥`VTHP[ZG[U[\_  
@HWI-EAS443:3:81:782:1526#0/1  
GCGTCATTACTTATGAAAACAACACTTGGGTAAACCAGAC  
+HWI-EAS443:3:81:782:1526#0/1  
\_baab^abb`bbbb`bb`]b\_bbbbbaaaa`bbbaabb\_  
@HWI-EAS443:3:81:796:386#0/1  
TATCATGCTCCCCCTTGAATGCAGAGCCTTCTTCTTGAC  
+HWI-EAS443:3:81:796:386#0/1  
aba`aaaa`\_a`a`a`aaa``\_]`\_[\_X[`\_`\_`\_aa\_¥\_¥  
@HWI-EAS443:3:82:156:925#0/1  
ATACATATGCAGTGGGATTTTCGGAGACAATCCACACCCT  
+HWI-EAS443:3:82:156:925#0/1  
aYb[]^aa`b¥VV`aaa^a[`a^`X`a[`a¥a`[YFY^]Y  
@HWI-EAS443:3:83:48:367#0/1  
CGCTAATTTACGGAAACCACTGACTGTCCAGCCGCAAAG  
+HWI-EAS443:3:83:48:367#0/1  
abaa[]aa\_ba]a`XUa`]]`\_a`\_`\_a^X]VYM]QSNKTU  
@HWI-EAS443:3:83:755:492#0/1  
CTGGCATGGCTCGAATCGACCGTGGGGGTCTTCAACCAG  
+HWI-EAS443:3:83:755:492#0/1  
abbababbaba^]]]]`¥TZ^NZ^]F[FSW`^JGY]`YS  
@HWI-EAS443:3:83:905:242#0/1  
CATTACTTATGAAAACAACACTTGGGTAAACCAGACATAT  
+HWI-EAS443:3:83:905:242#0/1  
aabbabbbbabbaababaaa\_aa`a\_Wa``ZVaa¥Z`\_`\_  
@HWI-EAS443:3:83:93:1587#0/1  
GTAAACCAGACATATGTTAACATCAGCAACACCAACTTTG  
+HWI-EAS443:3:83:93:1587#0/1  
\_[\_X`b\_¥[\_^Xa\_¥\_`bbaaa]Yaba`aaaa^a\_T\_a

@HWI-EAS443:3:84:1301:1107#0/1  
ATTGTCTCCGAAAATCCCACTGCGTATGTATCCTATCTGA  
+HWI-EAS443:3:84:1301:1107#0/1  
`bab\_baa`a\_a`aa]a`a^abYG]aaa\_aa``a`a\_a^^  
@HWI-EAS443:3:84:146:895#0/1  
GGATTGTCTCCGAAAATCCCACTGCGTATGTATCCTATCT  
+HWI-EAS443:3:84:146:895#0/1  
abbabb]babbbabbaaab`aaaaba^aab\_b``aaaaa  
@HWI-EAS443:3:84:539:786#0/1  
TGTCTGGCCAGAAATTCTAATTGTTAGCCAATTGATGCC  
+HWI-EAS443:3:84:539:786#0/1  
a`I\_Ya\_[ba\_a\_`¥`aaaa`a`\_Y`]WZaaV``a\_¥]U[  
@HWI-EAS443:3:84:618:142#0/1  
GCTTTATTGAGAAGTTATTGTCTGTCCCCGTCCATCCGTT  
+HWI-EAS443:3:84:618:142#0/1  
aaaa\_Z`aY`a\_a]^a`aaaZBBBBBBBBBBBBBBBBBB  
@HWI-EAS443:3:85:1195:230#0/1  
GAAACAATATATCGAGAACACAAGAGTCTGAATGTGCATG  
+HWI-EAS443:3:85:1195:230#0/1  
aa^a\_\_`a\_aaaaa`a\_\_`ZRaW^\_a¥Zaa]W]`Ua]]\_a  
@HWI-EAS443:3:85:1707:1856#0/1  
GGGTTGGGCTTGGCCAGACGGTGCTGAGTTGCCATTTACC  
+HWI-EAS443:3:85:1707:1856#0/1  
a`TVQ`PHSaaa]RWQPXVX^RSUEXRWXUGLG]\_\_ZZ  
@HWI-EAS443:3:85:822:1411#0/1  
AGCCCATCCACTAACAGGGCAGAGAGGAATTGCTCGCT  
+HWI-EAS443:3:85:822:1411#0/1  
ZW`b¥¥U¥ab^R]`ZX\_]NRMW\_X\_a][[Z]^¥V\_G^X¥V  
@HWI-EAS443:3:85:829:37#0/1  
CCAGATTCTGGTTGAAAGACACCCGCGTTCGATTCGAGCC  
+HWI-EAS443:3:85:829:37#0/1  
aaababaabbbaaba``\_\_a``^`a`aZGM¥SKVNVU^QU  
@HWI-EAS443:3:86:204:1730#0/1  
ACTTATGAAAACAACACTTGGGTAAACCAGACATATGTTA  
+HWI-EAS443:3:86:204:1730#0/1  
\_bbab```bbb^aaaaa\_^^\_Naaa`a``]aa``\_\_Z\_a  
@HWI-EAS443:3:87:1029:1732#0/1  
ATTAGTTCAACTCAGAAGCAAGTCTTATACAATCCAGCC  
+HWI-EAS443:3:87:1029:1732#0/1  
ab`a`Xaabb^GY`Z^a[`a\_a¥P¥aa`aa\_aa`\_T\_`Z\_  
@HWI-EAS443:3:87:298:273#0/1  
ACTTATGAAAACAACACTTGGGTAAACCAGACATATGTTA  
+HWI-EAS443:3:87:298:273#0/1  
a]ab¥^bab\_babb\_aa`b¥\_^S\_`\_aaa\_]`a[\_a`[U  
@HWI-EAS443:3:87:940:1853#0/1  
CGTCTGGCCAAGACCAACCCACAGTGTCACTGTCTACACC  
+HWI-EAS443:3:87:940:1853#0/1  
`a`aX`]a`a`\_Zaba``SM\_[a\_¥ZUWXN\_^]a]^a¥[  
@HWI-EAS443:3:88:1194:407#0/1  
CACTGCTTATGTATCCTATCTGATATTCCAGATTCTGGTT

+HWI-EAS443:3:88:1194:407#0/1  
^babb]P\_bbb`abaabbbabbaabbb\_a`a`baaaba\_a  
@HWI-EAS443:3:88:123:249#0/1  
AGCGTCATTACTTATGAAAACAACACTTGGGTAAACCAGA  
+HWI-EAS443:3:88:123:249#0/1  
abbb`^^aaYO\_]`aaaa[`aaa`VZ^^^WX]UYYY¥R  
@HWI-EAS443:3:88:1405:235#0/1  
GTGGTCAGGATATAGCGGGAGTTTTGTTCCAGAATCCAGAA  
+HWI-EAS443:3:88:1405:235#0/1  
^X`¥TY[^ [XVaNXPa\_US]I]\_VTH[JO]GSUNQWYRS  
@HWI-EAS443:3:88:194:1393#0/1  
ATCAAGAGTTGGAGAAACAATATATCGAGAACACAAGAGT  
+HWI-EAS443:3:88:194:1393#0/1  
a^aaa\_P`\_baaa`b`aaaaa`b\_N]]aaabaa``a`aZ  
@HWI-EAS443:3:89:1290:980#0/1  
CCAGCAGCAAAGTTGGTGTGCTGATGTTAACATGTGTCT  
+HWI-EAS443:3:89:1290:980#0/1  
a`a`bab\_]aaXaa^Ybaabaaa`a^`aa`Va]F[^^^[  
@HWI-EAS443:3:89:1470:956#0/1  
GTCATTACTTATGAAAACAACACTTGGGTAAACCAGACAT  
+HWI-EAS443:3:89:1470:956#0/1  
a`[]¥]ZW]````\_`aa\_[[MSP[[^WYT[XWKDM\_[RWQ  
@HWI-EAS443:3:8:1011:331#0/1  
GTGCAGGGATAACTGGCATGGCTCGAATCGAACGTGGGGTG  
+HWI-EAS443:3:8:1011:331#0/1  
a¥a\_abba\_aaa\_aa\_\_\_a`\_]\_UVUWQQSMGPSHPBBBB  
@HWI-EAS443:3:8:1017:1277#0/1  
TTGCTTTATTGAGAAGTTATTGTCTGGCCCAGTCCATCCG  
+HWI-EAS443:3:8:1017:1277#0/1  
abaaaabbbbaaaaa\_aa`aa\_\_a^HUVX^VPPP^ZUXQ  
@HWI-EAS443:3:8:1697:206#0/1  
CATATGTTAACATCAGCAACGCCAACTTTGCTGCTGGACA  
+HWI-EAS443:3:8:1697:206#0/1  
aab\_b``]¥bSbbJa`a]aaa\_U\_]DTabMHW^]\_^UBB  
@HWI-EAS443:3:8:1716:964#0/1  
AGGGGCCTTGCTAAATGACAAAGATTCCAATGGAACCATT  
+HWI-EAS443:3:8:1716:964#0/1  
a\_aa\_aaaab\_b^`abba^a^aGaa[WY\_`a`\_^G[\_\_\_`  
@HWI-EAS443:3:8:339:219#0/1  
GTCATTACTTATGAAAACAACACTTGGGTAAACCAGACAT  
+HWI-EAS443:3:8:339:219#0/1  
a]¥`^^VV\_SMZ^[XYX¥Z^]WTSW\_X]GUVTTTTV\_YXXT  
@HWI-EAS443:3:8:410:244#0/1  
CAAGAGCCTGAATGTGCATGTGTAAATGGTTCTTGCTTTA  
+HWI-EAS443:3:8:410:244#0/1  
`ZZ\_abJb\_^Yaba\_YXSabI]]aba\_U\_]¥HZb¥R^``[  
@HWI-EAS443:3:8:573:1707#0/1  
TGCAATCAAAGCGTCATTACTTATGAAAACAAAACCTGGG  
+HWI-EAS443:3:8:573:1707#0/1  
abbbbb``b`abaY^bbba]ababaabababaa`aa`a`X

@HWI-EAS443:3:90:1178:36#0/1  
GCCCTAATTATCAGTATGAGGAATGCTCCTGTTATCCTG  
+HWI-EAS443:3:90:1178:36#0/1  
¥^^]\_Y```abaZ]DY¥abaa\_bZ`b^^]^^`\_SYa[\_W`¥  
@HWI-EAS443:3:90:1269:1842#0/1  
TGTCATGATGGCATCAATTGGCTAATAATTGGAATTTCTG  
+HWI-EAS443:3:90:1269:1842#0/1  
ab¥```[^bUWQYaXaaY]Xaa^^WKWIa^^`aa¥^NFX]F  
@HWI-EAS443:3:90:198:1501#0/1  
GGGCTCCTCTTTAATGGTCCATTGGAATGTTTGTGCAT  
+HWI-EAS443:3:90:198:1501#0/1  
aabbbbaabbbbab]bbaabbbabb\_bbbbaabbaab[b  
@HWI-EAS443:3:90:855:1100#0/1  
GAGAAGTTATTGTCTGTCCCAGTCCATCCGTTCCGGTCCC  
+HWI-EAS443:3:90:855:1100#0/1  
aababbaabaaaaab\_`a`TJMZ`KUQXW[\_XPWFNZT\_  
@HWI-EAS443:3:91:545:1642#0/1  
TGCCCCGTAATCTCACGGAAACCACTGACTGTCCAGCAGC  
+HWI-EAS443:3:91:545:1642#0/1  
abbaaaaa¥a\_¥Ya\_aaaa\_Y\_aa`¥\_]`\_V\_\_XS¥]¥S  
@HWI-EAS443:3:91:934:707#0/1  
GGGTTGGGCTTGGCCAGACGGTGCTGAGTTGCCATTTACC  
+HWI-EAS443:3:91:934:707#0/1  
a`¥R[]]U[UYZKLYXRR[`NXQXUFPKY¥LGSRSV¥BB  
@HWI-EAS443:3:92:1182:1743#0/1  
CATGTGTAAGGTTCTTGCTTTACTGTAATGACCGATGG  
+HWI-EAS443:3:92:1182:1743#0/1  
S\_\_Y]a]\_SV¥`X^^¥a`[¥`baab]a`\_b^Z]U^TZaa  
@HWI-EAS443:3:92:1444:143#0/1  
TACTTATGAAAACAACACTTGGGTAAACCAGACATATGTT  
+HWI-EAS443:3:92:1444:143#0/1  
aaaaaaaa\_ab\_aa^\_\_`aa`\_^`\_^`^^`^^`\_\_\_\_\_]]  
@HWI-EAS443:3:92:907:996#0/1  
GACCACTCCTTTATTCCTACGATATCTTGCTTTATTGAGA  
+HWI-EAS443:3:92:907:996#0/1  
a``Waaba^babaaabaabab`a`aaaabaababbaaaaa  
@HWI-EAS443:3:93:1130:1526#0/1  
GGTTGAAAGACACCCACGGTCGATTCGAGACATGCCAGTT  
+HWI-EAS443:3:93:1130:1526#0/1  
abaab`b`Y`aa`W`baa]¥NaXVUJMXRMO][RXZ¥\_N\_  
@HWI-EAS443:3:93:1743:1097#0/1  
GATATTCCAGATTCTGGTTGAAAGACACCCACGGGCGATT  
+HWI-EAS443:3:93:1743:1097#0/1  
a`ba`abTab¥ba]aaZS\_\_aa`^aS`QVRXVaTBBBBBB  
@HWI-EAS443:3:93:294:139#0/1  
GGATAACTGGCATGGCTCGAATCGACCGTGGGGGTCTTTC  
+HWI-EAS443:3:93:294:139#0/1  
ab```aaaa`^¥¥`¥^VMPNRRLTSRLX^BBBBBBBBB  
@HWI-EAS443:3:93:376:566#0/1  
GCAAAGTTGGTGTGCTGATGTTAACATATGTCTGGTTTA

+HWI-EAS443:3:93:376:566#0/1  
a\_^UX¥^TKPXSWX[Y\_`[^a¥RWSPTVNU¥YW]XXRZTB  
@HWI-EAS443:3:93:588:103#0/1  
AGCCCATCCACTAACAGGGCAGAGAGAGAGTTGCCCGCT  
+HWI-EAS443:3:93:588:103#0/1  
`^`¥`^\_¥`aaa[Za`XP`OZOb[`SZ\_GFUMWXTFVPB  
@HWI-EAS443:3:93:844:741#0/1  
AGAGGGCGACCCAACGAGAACAATCTGGACTAGCGGGA  
+HWI-EAS443:3:93:844:741#0/1  
`R]ZZ\_a^[TWWaXJ¥]XZabZ`X^\_HZaJYM¥M[YXXBB  
@HWI-EAS443:3:94:1049:1357#0/1  
TGCCCCGCTAATTTACGGAGACCACTGACTGTCCAGCAGC  
+HWI-EAS443:3:94:1049:1357#0/1  
aabaababa\_aaaab\_aa]Y\_aa\_^aa\_`aaUO¥^¥¥[\_¥  
@HWI-EAS443:3:94:1170:1454#0/1  
CGGCAATGGGGTTTGATAGGGAGAACTAAAAGCATTAGT  
+HWI-EAS443:3:94:1170:1454#0/1  
aa\_]H¥babGaXaa\_[UYa`[Z\_a^\_`^`\_`^`\_`^`\_a[YZ  
@HWI-EAS443:3:94:340:377#0/1  
CTTATGAAAACAACACTTGGGTAAACCAGACATATGTAA  
+HWI-EAS443:3:94:340:377#0/1  
abbbbbbbbbbbbababbbbab\_baba`abaaaaaab\_aaa  
@HWI-EAS443:3:94:472:1440#0/1  
GTGTTTGGATAGGGAGAAGTAAAAGCATTAGTTCAAGAAA  
+HWI-EAS443:3:94:472:1440#0/1  
X^TSY[\_Y¥`VSX\_SZYaP¥¥ZS\_QV¥YQXYHGA^[]WXB  
@HWI-EAS443:3:94:549:1779#0/1  
CATGGCTCGAATCGACCGTGGGGTCTTTCAACCAGAATC  
+HWI-EAS443:3:94:549:1779#0/1  
aaa`]baaU[]TXVSQ^YM¥X`PZLLW¥VBBBBBBBBBBB  
@HWI-EAS443:3:94:557:546#0/1  
GCGTCATTACTTATGAAAACAACACTTGGGTAAACCAGAC  
+HWI-EAS443:3:94:557:546#0/1  
aaba`abababbaaaabaaaaaaa`aaa\_a[aaaa`a```  
@HWI-EAS443:3:94:630:1506#0/1  
GTCCATTCGTTCCGATCCCAAATCATCTCAAACCGTTTC  
+HWI-EAS443:3:94:630:1506#0/1  
aabbbbaXbaaaaa\_aaaaaab\_a`aa\_`aaaa\_`^`\_\_\_\_  
@HWI-EAS443:3:94:663:1350#0/1  
AGCAACACCAACTTTGCTGCTGGACAGTCAGGGGTTTCCG  
+HWI-EAS443:3:94:663:1350#0/1  
]VZ`^a`a[\_]^[\_`\_¥¥ba¥UW¥H¥[ZFQYLWVN[]  
@HWI-EAS443:3:94:751:737#0/1  
CAGGGATAACTGGCATGGCTCGAATCGACCGGGGTGTCT  
+HWI-EAS443:3:94:751:737#0/1  
aT`b]T\_RO¥[\_``]]XXaa\_NJXWBBBBBBBBBBBBBBB  
@HWI-EAS443:3:94:910:733#0/1  
CGGCAATGGTGTGGATAGGGAGAACTAAAAGCGTTAGT  
+HWI-EAS443:3:94:910:733#0/1  
abb\_`]bbb]b`bbba`Zabaab\_`^aaa\_`b`\_`\_aa]



@HWI-EAS443:3:94:99:610#0/1  
GGCTGTGTAAAGTACAACGGCATAATAACACACACTATC  
+HWI-EAS443:3:94:99:610#0/1  
a`V\_b\_]S\$aaaa]a[Ya`¥aX[\_`¥`^^YYbBBBBBBBB  
@HWI-EAS443:3:95:1469:1153#0/1  
GGAGACAATCCACGCCCTAATGATAAGACAGGCAGGTGTG  
+HWI-EAS443:3:95:1469:1153#0/1  
aa]aa`a]¥a\_aaaYS]]YT`a^]`S`\_U¥aBBBBBBBBBB  
@HWI-EAS443:3:95:395:1845#0/1  
TGACTGTCCAGCAGCAAAGTTGGGGTTGCTGATGTTAACA  
+HWI-EAS443:3:95:395:1845#0/1  
a^aba`\_\_`a`aa`a]a[^UW^aG\_J\_[a]QIY[ZP^X]\_  
@HWI-EAS443:3:95:467:1721#0/1  
GGCTCCTGACTTTAATGGTTCCATTGGAATGTTTGCATT  
+HWI-EAS443:3:95:467:1721#0/1  
aX`Z^XN[DWY`UW¥T¥`]]`]]S]^WRZI¥`T[]P`\_B  
@HWI-EAS443:3:95:502:1574#0/1  
CGCTAGTCCAGATTGTGTTCTCTTTGGGTCACCCTCTGAT  
+HWI-EAS443:3:95:502:1574#0/1  
^\_]aT`\_a¥U]aaa\_VL]\_aaaaa[]`Z`T¥a)`aaa`a  
@HWI-EAS443:3:95:695:208#0/1  
CTTTACTGTATATAGCCCTTCCACTAACAGGGCAGAGAGA  
+HWI-EAS443:3:95:695:208#0/1  
¥`\_`\_U`b]bb`¥Y[W`\_b`P\_ab`\_b`]`ab`S]Y`Z\_\_  
@HWI-EAS443:3:95:976:809#0/1  
CAAGAGTTGGAGAAACAATATATTGAGAAAACAAGAGTCT  
+HWI-EAS443:3:95:976:809#0/1  
\_bbbabababab]baaaabaabbbbab^baaaab`b`\_b  
@HWI-EAS443:3:96:1217:1557#0/1  
GTTCTGCATTCAAAGGGGAGCATGATATGAATGGTTCCC  
+HWI-EAS443:3:96:1217:1557#0/1  
aP`\_`S[a¥aYHJYTSZ\_PLLYWaSWW`a^GNWX^WBBBBB  
@HWI-EAS443:3:96:1332:1460#0/1  
AGCGTCATTACTTATGAAAACAACACTTGGGTAAACCAGA  
+HWI-EAS443:3:96:1332:1460#0/1  
aa`b\_aa`aa\_aaaaaaaaa\_aa[^a\_a\_[Wa`¥[]Z\_\_  
@HWI-EAS443:3:96:1496:536#0/1  
ATCATGCTCCCCCTTGAATGCAGAACCTTCCTCTTGACT  
+HWI-EAS443:3:96:1496:536#0/1  
ZZab\_aNa\_NXMK`\_^\_RXP\_Q\_WIRBBBBBBBBBBBBBB  
@HWI-EAS443:3:96:1646:1030#0/1  
ATTCCAGATTCTGGTTGAAAGACACCCACGGTGGATTCGA  
+HWI-EAS443:3:96:1646:1030#0/1  
aY[¥XY`^\_`^aa\_Y]aaa\_]\_\_Y\_LTY\_PR^TFVFWRLGV  
@HWI-EAS443:3:96:1742:1820#0/1  
ACTGTATATAGCCCATCCACTAACAGGGCAGGGAGAGGAA  
+HWI-EAS443:3:96:1742:1820#0/1  
`\_`b[aaX`\_b`\_LZ`\_VaTZ^\_HaZPVYZOFUVY¥aBBB  
@HWI-EAS443:3:96:502:261#0/1  
CGTCATTACTTATGAAAACAACACTTGGGTAAACCAGACA

+HWI-EAS443:3:96:502:261#0/1  
`\_^]a`\_RZ\_aba`ZPP\_UYVVR^^[MT[W\_^Y\_\_XTP  
@HWI-EAS443:3:96:561:2033#0/1  
CAGAGATATGTTAACATCAGCAACACCAACTTTGCTGCTG  
+HWI-EAS443:3:96:561:2033#0/1  
^[TbR¥NYab[XTWWJ`\_]JaU\_\_bGQ^[¥aYRPWYUI\_  
@HWI-EAS443:3:97:1218:1948#0/1  
AGCCCATATCGAACCTAATGAGCTGTCATATTGGTGAAG  
+HWI-EAS443:3:97:1218:1948#0/1  
aa\_^0a\_a`0¥`^UW]\_a\_^WX]G¥ZRDHVQP^\_BBBBBB  
@HWI-EAS443:3:97:1340:1959#0/1  
AGCGTCATTACTTATGAAAACAACACTTGGGTAAACCAGA  
+HWI-EAS443:3:97:1340:1959#0/1  
aaZ`YVaabbWaa\_aaaaa`Ua^[Y`\_¥aa`W`a`aU\_aa  
@HWI-EAS443:3:97:966:1289#0/1  
TCCGAAAATCCCACTGCTTATGTATCCTATCTGATATTCC  
+HWI-EAS443:3:97:966:1289#0/1  
^Y`aY`aZ`\_SZVaa^F[a^aTb`¥abI`Ia```JIOF[  
@HWI-EAS443:3:98:1549:1043#0/1  
GACACCCACGGTCGATTCGAGCCATGCCAGATATCCCTGC  
+HWI-EAS443:3:98:1549:1043#0/1  
aa\_aa`a``aaS¥^QFUBBBBBBBBBBBBBBBBBBBBBBBB  
@HWI-EAS443:3:98:1721:391#0/1  
TGCCTGTCTTATCATTAGGGCGTGGATTGGCTCCGAAAAT  
+HWI-EAS443:3:98:1721:391#0/1  
ab^`RW^\_]V^W\_`T^`NNU`ZF¥0[UDDKGU\_VYYBB  
@HWI-EAS443:3:98:1791:1754#0/1  
CCCTCTGATTAGTTCAACCCAGAAGGAAGTCTTATACAA  
+HWI-EAS443:3:98:1791:1754#0/1  
S[PU[]babbK[IWZ\_babUU\_Va[HZ`KVL SRXaab]B  
@HWI-EAS443:3:98:219:1728#0/1  
ATGCCGTTGAACCTTAAACACAGCCACTGCCCATTTGTCTG  
+HWI-EAS443:3:98:219:1728#0/1  
]OZ[`\_0^TMW\_]SababaaJaW^bBBBBBBBBBBBBBBB  
@HWI-EAS443:3:99:1367:240#0/1  
CCCATATCGAATCCTAATGAGCTGCCTATTGGTGAAGTT  
+HWI-EAS443:3:99:1367:240#0/1  
```abbb\_ba¥DRaabUb\_^bIab\_\_`aabaaa\_a^`\_^`  
@HWI-EAS443:3:99:1410:365#0/1  
GGACCACAAGTGCCTGTCTTATCATTAGGGCGTGGATTGT  
+HWI-EAS443:3:99:1410:365#0/1  
aWH\_Qa^Y\_Z`\_Y][b\_¥[Qa\_X¥`Q^`XU`GaZQ]BBB  
@HWI-EAS443:3:99:245:1792#0/1  
ATTACTTATGAAAACAACACTTGGGTAAACCAGACATATG  
+HWI-EAS443:3:99:245:1792#0/1  
\_bb\_bbbbaaaabbbabb`\_a`a`[aab\_aa\_\_aa^aaa  
@HWI-EAS443:3:99:324:2010#0/1  
CGCTAGTCCAGATTGTGTTCTCTTTGGGTGGCCCTCTGAT  
+HWI-EAS443:3:99:324:2010#0/1  
a\_L\_¥a]Kb^WY]XOG¥¥XKZXV`XQ^aMG^[W\_a\_Z\_¥Z

@HWI-EAS443:3:9:1278:827#0/1  
CTTGTCAATGGTAAATGGCAACTCAGCACCGTCTGTCCAA  
+HWI-EAS443:3:9:1278:827#0/1  
a[bbYV`a^\_\_a]abb]\_V¥\_M¥SV`W^V]]`a`WO^VYN  
@HWI-EAS443:3:9:197:1646#0/1  
CAGGATATAGCGGGAGTTTTGTTTCATCATCCAGAACTAAC  
+HWI-EAS443:3:9:197:1646#0/1  
aa`X`baab`Wab^^ZN\_¥a[W\_ZYFWZ[L^`¥Q\_QY]UR  
@HWI-EAS443:3:100:1352:944#0/1  
CATAACCGTTTTCTTGAACCTAATGCTTTTTAGTTCTCCCTAT  
+HWI-EAS443:3:100:1352:944#0/1  
V`[`a^U`b\_T\_a^\_aaaaab[G¥¥bb\_`\_¥][EX^aab  
@HWI-EAS443:3:100:1629:74#0/1  
ATGAAAATCAGATTGAAACATGCAATCAAAGCGTCATTAC  
+HWI-EAS443:3:100:1629:74#0/1  
`aJ^aa\_b¥¥aa¥a\_aaaa`[]¥`\_H\_\_]\_LWV]Wa^JB  
@HWI-EAS443:3:10:1280:309#0/1  
GCCCCAATTATCACTATGAGGAATGCTCCTGTTATCGTG  
+HWI-EAS443:3:10:1280:309#0/1  
a^ZWZ¥`Ta`\_\_WRZ[V^aQSSRTRMKTQYZ^^¥]ZMDMX  
@HWI-EAS443:3:10:1451:89#0/1  
CAGACATATGTTAACATCAGCAACACCAACTTTGCTGATG  
+HWI-EAS443:3:10:1451:89#0/1  
aU^`VXaX`^^baSRT¥Pa`HZSQ¥HHR[L]`BBBBBBBB  
@HWI-EAS443:3:11:397:110#0/1  
TGCAGGGATAACTGGCATGGCTCGAATCGACCGTGGGGGG  
+HWI-EAS443:3:11:397:110#0/1  
abaabbbbaaaabaa^aaa\_a\_^`S\_S¥\_RGW\_H¥aBBBB  
@HWI-EAS443:3:19:1022:1723#0/1  
CTTGCTTTATTGAGAAGTTATTGTCTGTCCCAGTCCAACC  
+HWI-EAS443:3:19:1022:1723#0/1  
\_`abab`b`[a^`a¥a^WbZab`\_aaBBBBBBBBBBBBBB  
@HWI-EAS443:3:20:1331:793#0/1  
GTAGGAATAAATGAGTGGTCAGGATATAGCGGGAGTTGAC  
+HWI-EAS443:3:20:1331:793#0/1  
a\_`a```¥\_a\_a`ZaZaa¥\_]a\_]YZ\_\_^\_\_a\_WZBBBBBB  
@HWI-EAS443:3:22:539:974#0/1  
CGGAGACAATCCACGCCCTAATGATAAGACAGGCAGTGGT  
+HWI-EAS443:3:22:539:974#0/1  
aaa[]a`M]``X¥¥\_Z`]¥¥^\_\_¥^[X¥Z^BBBBBBBBBB  
@HWI-EAS443:3:23:1476:619#0/1  
GGGATTTTCGGAGACAATCCACGCCCTAATGATAAGANAG  
+HWI-EAS443:3:23:1476:619#0/1  
^a`b[`a`ab`^[[`a[]^a`bX^aW^abbaaaaHDYa  
@HWI-EAS443:3:23:756:699#0/1  
CAGACATATGTTAACATCAGCAACACCAACTTTGCTGGTG  
+HWI-EAS443:3:23:756:699#0/1  
[]ZSWW\_\_aUFW`aXaR\_Z]]]\_YSYU]0][VW\_¥PZLBB  
@HWI-EAS443:3:23:81:531#0/1  
CAGCAAAGTTGGTGTGCTGATGTTAACATATGTCTGGTT

+HWI-EAS443:3:23:81:531#0/1  
a`¥\_]Xa¥Jb`ZX`¥`a`\_YT]R[¥\_Y\_] ]^]X0^X]L\_  
@HWI-EAS443:3:24:636:651#0/1  
CACCCACGGTTCGATTCGAGCCATGCCAGTTATCCCTGAGA  
+HWI-EAS443:3:24:636:651#0/1  
]bbbab\_b\_QZV00YW)`a` `[ ]` ` `][DYZROY¥WaU]S  
@HWI-EAS443:3:24:996:1660#0/1  
AGCAGGGAGAACTAAAAGCATTAGTTCAAGAAACGGTTTT  
+HWI-EAS443:3:24:996:1660#0/1  
]T^aaaaaba]aaaaa^a`Sb\_PUL^^[ ` ` ^\_U¥\_¥  
@HWI-EAS443:3:26:532:732#0/1  
AACCAGACATATGTTAACATCAGCAACACCAACTTTGCTG  
+HWI-EAS443:3:26:532:732#0/1  
WU\_\_\_b\_^\_WMa]X\_`a` ` `ZWZ]XHL\_`a` \_\_]XPZX¥S  
@HWI-EAS443:3:27:703:1503#0/1  
CGCGGCTCCTGTCTTTAATGGTTCCATTGGAATGTTTGTC  
+HWI-EAS443:3:27:703:1503#0/1  
aaa`aa`aaPDJ] ]\_`Z^M^[WZ`\_ZZ\_TUUYQWU¥]OU]  
@HWI-EAS443:3:28:1401:1604#0/1  
GTGCAGGGATAACTGGCATGGCTCGAATCGACCGTGGCGG  
+HWI-EAS443:3:28:1401:1604#0/1  
]ababa` ` `bababa^aab\_a`a][Y]ZSTXUWXN¥ZBBB  
@HWI-EAS443:3:28:690:314#0/1  
TGCAGGGATAACTGGCATGGCTCGAATCGACCGTGGGGGT  
+HWI-EAS443:3:28:690:314#0/1  
aa]abaaaaab\_aa`aaa` ` `a`YZXHNVR LXZKTaXS\_B  
@HWI-EAS443:3:30:1639:1101#0/1  
GCGACTGACTCAAATCTTGAGTTGTATGGAGAGGGAAATT  
+HWI-EAS443:3:30:1639:1101#0/1  
`]ZMF[\_OP\_TQ\_¥OJY¥¥WaQPZTN^YRBBBBBBBBBBB  
@HWI-EAS443:3:33:1233:1390#0/1  
GACCTGTCTATTGGTGAAGTTCCCTCTCCATACAACCTCA  
+HWI-EAS443:3:33:1233:1390#0/1  
¥TH[¥VQ¥YU]YYOZRZTXLZ^[YZY]X^ZVRVVM^P^^  
@HWI-EAS443:3:34:243:635#0/1  
GTCTTCCGTGAAATTAGCGGGCAATTCCTCTCTCTGCCCT  
+HWI-EAS443:3:34:243:635#0/1  
VZ\_` `b\_¥\_\_\_TZ\_a` `]W^`a\_]` ` ` `^^]` ` ¥X[Y]  
@HWI-EAS443:3:36:1635:1387#0/1  
ACCCAGTCCATCCGTTCCGATCCCAAATCATCTCAAAAAC  
+HWI-EAS443:3:36:1635:1387#0/1  
aaaaa\_\_baa\_^ZRH¥` ]]STYW[RWUPX¥SNFP[U\_`J]  
@HWI-EAS443:3:36:469:1679#0/1  
GTCTTATACAATCCAGCCCTGTTAGTTCTGGATGCTGCAC  
+HWI-EAS443:3:36:469:1679#0/1  
\_¥b`M[U\_ba[ `a` ]]\_aa^XUW^TZ]V¥VX\_[SY`RF¥`  
@HWI-EAS443:3:38:511:1137#0/1  
CACGCCACTCAATTCAACTTGGGAATCAAAATCAGATTGA  
+HWI-EAS443:3:38:511:1137#0/1  
a\_a\_b\_aZaba\_aaa`a\_aa\_`\_a`aaaa^\_¥]` ` \_\_\_\_\_

@HWI-EAS443:3:39:151:522#0/1  
CAATTGGAATTTCTGGCCAGACAATGGGGCAGTGGCGGG  
+HWI-EAS443:3:39:151:522#0/1  
`IYW¥W]GTxaaa¥^¥`V^`\_WQJOBbbbbbbbbbb  
@HWI-EAS443:3:3:1399:2032#0/1  
ATGGGCTCCTGTCTTTAATGGTTCCATTGGAATGTTTTTC  
+HWI-EAS443:3:3:1399:2032#0/1  
a\_aaa\_]W¥`aZY`\_\_\_a\_\_\_Z]^S\_^^NX^\_ZSZZBBB  
@HWI-EAS443:3:3:350:1821#0/1  
ATCGGTTCCAAGGGGATGTGTTTGCATAAGGGAECTAT  
+HWI-EAS443:3:3:350:1821#0/1  
aaaa`U]T\_R\_\_`WXY¥ZIWWFFUKTX¥BBBBBBBBBBB  
@HWI-EAS443:3:40:976:370#0/1  
GGCGTTTGGATAGGGAGAACTAAAAGCATTAGTTCAAGAA  
+HWI-EAS443:3:40:976:370#0/1  
a\_g¥R\_]aYW[N[^\_Y\_^]RXPZP¥YXQJQX[XSSMSWXS  
@HWI-EAS443:3:43:347:338#0/1  
CAGGGATAACTGGCATGGCTCGAATCGACCGTGGGTGGCT  
+HWI-EAS443:3:43:347:338#0/1  
abbbbaabaaaa]aa`\_aa]MQ^QOZPZNDX`BBBBBB  
@HWI-EAS443:3:44:1758:346#0/1  
TGCAGGGATAACTGGCATGGCTCGAATCGACCGTGGGGGG  
+HWI-EAS443:3:44:1758:346#0/1  
Z\_\_\_\_\_]`baabaa`¥Z]a``[UZ¥RBBBBBBBBBBB  
@HWI-EAS443:3:44:885:1068#0/1  
GGGGCTCCTGTCTTTAATGGTTCCATTGGAATGTTTGTTA  
+HWI-EAS443:3:44:885:1068#0/1  
ab`\_`aaa`Y^aaaa`aM]¥\_]^V`aYaY]^`\_aaI¥0]  
@HWI-EAS443:3:45:1477:1305#0/1  
AGCAGGGAGAACTAAAAGCATTAGTTCAAGAAACGGTTTT  
+HWI-EAS443:3:45:1477:1305#0/1  
ab`^^^aabba\_a\_[aaba`aaa]R]\_`\_a]\_a`^Waa`  
@HWI-EAS443:3:46:1206:1430#0/1  
AACCAGACATATGTTAACATCAGCAACACCAACTTTGCTG  
+HWI-EAS443:3:46:1206:1430#0/1  
a]SNZZ\_]`Z¥VY¥[UYT[RQYWR]^ [RZXZT[VYW]Z\_] [Z  
@HWI-EAS443:3:47:1356:712#0/1  
GCGGGCAATTCCTCTCTCTGCCCTGTTAGTGGATGGGATA  
+HWI-EAS443:3:47:1356:712#0/1  
aa^`aaaab`a\_a\_a¥a\_^a[^]\_a\_\_Va]a`X`\_]`GWY  
@HWI-EAS443:3:48:1775:342#0/1  
TGCAGGGATAACTGGCATGGCTCGAATCGACCGTGGGGGG  
+HWI-EAS443:3:48:1775:342#0/1  
ab`aabaaaa]aa`aaaaa\_`aYJ[VS\_LLWYGS^`HYF  
@HWI-EAS443:3:48:39:185#0/1  
GATAACAGGAGCATTCCATAGTGATAATTAGGGGCTTT  
+HWI-EAS443:3:48:39:185#0/1  
`\_aab^¥ba`b\_aaa¥V\_`\_`a\_a¥a`\_\_\_a`\_aa\_[¥\_`\_`  
@HWI-EAS443:3:4:1414:819#0/1  
TGTCTGTCCCAGTCCATCCGTTCCGATCCCAAATCATATC

+HWI-EAS443:3:4:1414:819#0/1  
^¥\_0¥a¥RY]abTVV[QPPaW^Q]aX\_`^VSP¥ZFZWFGR  
@HWI-EAS443:3:50:1450:1070#0/1  
TGCAGGGATAACTGGCATGGCTCGAATCGACCGTGGGGGT  
+HWI-EAS443:3:50:1450:1070#0/1  
a``abaa`baaabbb`aaa\_``a^G\_^QRQGXWDRaBBBB  
@HWI-EAS443:3:50:731:1305#0/1  
CTAACTGTCCAGCAGCAAAGTTGGTGTGCTGATGTTAAC  
+HWI-EAS443:3:50:731:1305#0/1  
a]aZ]ab`bbaaa`aa\_INb\_\_aa^`\_a^¥\_TYa\_`Z\_\_I  
@HWI-EAS443:3:50:783:1264#0/1  
AACCAGACATATGTTAACATCAGCAACACCAACTTTGCTG  
+HWI-EAS443:3:50:783:1264#0/1  
a`Sbb\_SbabbaUaa`\_``]aa\_aa`\_\_X`a^\_a^NZ`a  
@HWI-EAS443:3:50:893:576#0/1  
TGCAGGGATAACTGGCATGGCTCGAATCGACCGTGGGGGG  
+HWI-EAS443:3:50:893:576#0/1  
ab`abbbabab`bbabbb`aaa\_ZR]¥UYTFO\_GVa`GXE  
@HWI-EAS443:3:51:1114:1133#0/1  
AGCTCCCTCTCCATACAACCTCAAGATTTGAGTCAGTCGCT  
+HWI-EAS443:3:51:1114:1133#0/1  
XabbUba\_\_a^Y`]aUa`abUaa]a`bb`ab\_`aa`^`[P  
@HWI-EAS443:3:51:298:652#0/1  
ACNATATCTTGCTTTATTGAGAAGTTATTGTCTGTCCCAG  
+HWI-EAS443:3:51:298:652#0/1  
a[DY`aa`aaaaaaaaa^`\_`a^aaa\_^^^`[JQQXLB  
@HWI-EAS443:3:54:1714:783#0/1  
ACCAGACATATGTTAACATCAGCAACACCAACTTTGCTGT  
+HWI-EAS443:3:54:1714:783#0/1  
`XW\_]V`a]\_`T\_¥`a`a\_\_\_\_]`\_a]a\_]\_\_^`^]a[]QF  
@HWI-EAS443:3:54:863:764#0/1  
CACGCCACTCAATTCAACTTGGGAATCAAAATCAGATTGA  
+HWI-EAS443:3:54:863:764#0/1  
ab`b`ab`bababb\_]\_`bbbabab```abaaabb`bbba  
@HWI-EAS443:3:55:692:1224#0/1  
CAGCAAAGTTGGTGTGCTGATGTTAACATATGTCTGGTT  
+HWI-EAS443:3:55:692:1224#0/1  
`^U`X\_\_`¥aa^QX\_a`[`\_[XOW`\_XS^YX`[]X`^WZa  
@HWI-EAS443:3:56:665:462#0/1  
TGCAGGGATAACTGGCATGGCTCGAATCGACCGTGGGGGG  
+HWI-EAS443:3:56:665:462#0/1  
aaa`bbb`babbaa`b\_b^^aa][SZOF^VUYPHUa[YZB  
@HWI-EAS443:3:57:330:1102#0/1  
GAAAGACACCCACGGTCGATTCGAGCCATGCCAGTTACCA  
+HWI-EAS443:3:57:330:1102#0/1  
abbba`babaabaaaZ`a[QYZR¥[YZ]^^]^[[U^aXTB  
@HWI-EAS443:3:59:429:1894#0/1  
CTGTGATTAGTTCAACCCAGAAGCAAGTCTTATACAATC  
+HWI-EAS443:3:59:429:1894#0/1  
a`I]TH\_b^`XaS`aab\_aRW`JaaU]HQa[Z`\_\_WX¥^R

@HWI-EAS443:3:61:910:74#0/1  
TGCAGGGATAACTGGCATGGCTCGAATCGACCGTGGGGGT  
+HWI-EAS443:3:61:910:74#0/1  
ab\_W^b\_^\_X¥a]TXTVZXXXZBBBBBBBBBBBBBB  
@HWI-EAS443:3:62:1605:1661#0/1  
GGCCTCCTGTCTTTAATGGTTCCATTGGAATGTTTGTTCAT  
+HWI-EAS443:3:62:1605:1661#0/1  
[RI\_¥VbWbV]aabbaa` `` `]bUab`¥ab[F[\_MQ^bb  
@HWI-EAS443:3:62:31:43#0/1  
CTTGTGTTCTCAATATATTGTTTCTCCAACCTCTTGATCGT  
+HWI-EAS443:3:62:31:43#0/1  
abbb` ` \_\_V\_¥SN\_VZ\_^Z\_JUV\_Z¥LRV[RBBBBBBBBBB  
@HWI-EAS443:3:63:492:1947#0/1  
CAATATATTGTTTCTCCAACCTCTTGATAGTGTCTGTTTTT  
+HWI-EAS443:3:63:492:1947#0/1  
aa^^aaa`a`^`\_\_a¥X`Z[WaY\_Z`\_`PJOBBSBBBBBB  
@HWI-EAS443:3:64:826:955#0/1  
ATCGCCCCTAATTATCACTATGAGGAATGCTCCTGTTATC  
+HWI-EAS443:3:64:826:955#0/1  
abbaabbaaaa^aaaaaaaa`b\_aa` ` \_aaa` `a^` ` ` ` ` ^  
@HWI-EAS443:3:65:1053:1224#0/1  
ACTTGGTCCATCGGTCATTACAGTAAAGCAAGAACCANTT  
+HWI-EAS443:3:65:1053:1224#0/1  
`aba^\_]bab^` ` \_Q]\_\_` [¥YWS`]T][\_` ` ` QPTDY\_  
@HWI-EAS443:3:65:1533:877#0/1  
TGCAGGGATAACTGGCATGGCTCGAATCGACCGTGGGGGT  
+HWI-EAS443:3:65:1533:877#0/1  
aaaabbaaaaa\_bb`aa`]aaa^VU[OJYNXZ^FY¥ZBBB  
@HWI-EAS443:3:65:707:281#0/1  
CAACTGCCTGTCTTATCATTAGGGCGTGGATTGTCTCGGA  
+HWI-EAS443:3:65:707:281#0/1  
WO¥^^aa¥X\_Q\_]`\_]X\_ba^aZ\_YT^\_\_ZZ][QR[DX[  
@HWI-EAS443:3:68:1093:1719#0/1  
AGGGTGGCTGTGTTAAAGTACAACGGCATAATAACAGACA  
+HWI-EAS443:3:68:1093:1719#0/1  
a¥]\_Oabb\_baa[bab\_0Za¥W`a\_a[ ` `aa\_bb^`U`\_^  
@HWI-EAS443:3:69:448:1246#0/1  
GTTTGGATAGGGAGAACTAAAAGCATTAGTTCAAGAAGCG  
+HWI-EAS443:3:69:448:1246#0/1  
a` `ba]\_^SXaa\_YJ]aaaYaa\_aY`]^Y^]aZJ¥SZ` `a  
@HWI-EAS443:3:72:254:136#0/1  
GATATGGGCTCCTGTCTTTAATGGTTCCATTGGAATGCTT  
+HWI-EAS443:3:72:254:136#0/1  
ZNP]Z\_RJRSLYVP¥^Y¥YX[SVUGPWTU^]^NRTNFGNV  
@HWI-EAS443:3:74:1056:208#0/1  
CTCCATTAGACGATACTGGACCACAACCTGCCTGTCTTCCT  
+HWI-EAS443:3:74:1056:208#0/1  
ab`^`bbbaabbaaaV`a]GW^ZPY`UTTYWMWPPa^NXU  
@HWI-EAS443:3:75:556:1054#0/1  
GGCCCACTCAATTCAACTTGGGAATCAAAATCAGATTGAA

+HWI-EAS443:3:75:556:1054#0/1  
abbbbbbababababaaaaba`\_a\_aaaa`aaaa¥` `a\_]`  
@HWI-EAS443:3:76:206:1446#0/1  
ATCTGGGATCCGAACGGATGGACTGGGACAGACAATAACT  
+HWI-EAS443:3:76:206:1446#0/1  
^RHYY` `S]aa^T^[^a^\_`RN]N^\_¥OLU¥PV¥^WXSQO  
@HWI-EAS443:3:77:1195:983#0/1  
AGTTGTGGTCCAGTATCGTCTAATGGAGCAAATGGAGGAA  
+HWI-EAS443:3:77:1195:983#0/1  
a^Y` ` `bb`\_XX`]TaaV[^`aUQXWD¥FY¥W[TTL[HY`  
@HWI-EAS443:3:77:469:934#0/1  
CATGTGTAATGGTCTTGCTTTACTGTAATGACCGAAGG  
+HWI-EAS443:3:77:469:934#0/1  
Y[¥aab` `^¥ab\_W\_b` `a^b]`^¥a¥]Z]]bbbbbbaba  
@HWI-EAS443:3:78:1516:83#0/1  
GGCCCCAGTCCATCCGTTCCGATCCCAAATCATCTCAAAA  
+HWI-EAS443:3:78:1516:83#0/1  
Y\_a\_aaabRZNa`TQaZ\_H]^][¥YHY^\_\_Q^]R¥Z\_^`\_`  
@HWI-EAS443:3:78:1741:1425#0/1  
AACCAGACATATGTTAACATCAGCAACACCAACTTTGCTG  
+HWI-EAS443:3:78:1741:1425#0/1  
`aYa]TZb\_UIaPPabaa`¥YaUFU]W[\_Q]aUYY]ZW^`  
@HWI-EAS443:3:7:882:1157#0/1  
CAGACATATGTTAACATCAGCAACACCAACTTTGCTGGTG  
+HWI-EAS443:3:7:882:1157#0/1  
V¥^Vaabb¥aa\_b`^baaa`aba\_`aaaa¥GTb`\_\_G¥a  
@HWI-EAS443:3:81:1081:80#0/1  
GTTTGGATAGGGAGAATAAAAGCATTAGTTCAAGAAGCG  
+HWI-EAS443:3:81:1081:80#0/1  
a\_aaaa]` `¥J^^aV[X^^¥`¥`X]\_\_Y`Z^X[]\_VW^Z`  
@HWI-EAS443:3:81:1298:1419#0/1  
CAGCAAAGTTGGTGTGCTGATGTTAACATATGTCTGGTT  
+HWI-EAS443:3:81:1298:1419#0/1  
aWRRRTGM`HH¥Z^`0[ `\_ZSZWaSZN¥]WYSY¥PUV\_ZPX  
@HWI-EAS443:3:81:461:885#0/1  
TGCAGGGATAACTGGCATGGCTCGAATCGACCGTGGGGGT  
+HWI-EAS443:3:81:461:885#0/1  
aabb\_\_baabbbaaaa]` `aba`]TSWZ]VSYYK^aZKTG  
@HWI-EAS443:3:81:890:858#0/1  
CAGCAAAGTTGGTGTGCTGATGTTAACATATGTCTGGTT  
+HWI-EAS443:3:81:890:858#0/1  
abbb¥X]b^aba` `ab`abaaabaaaa`aaaa]aaa\_[a  
@HWI-EAS443:3:83:645:1956#0/1  
TGCAGGGATAACTGGCATGGCTCGAATCGACCGTGGGGGG  
+HWI-EAS443:3:83:645:1956#0/1  
¥¥a` ` `[a\_\_\_\_`a`^` `W]]^¥^]GZVV\_VII¥NZ`^HaG  
@HWI-EAS443:3:84:1215:1468#0/1  
AGGGGGAGTTTTGTTTCAGCATCCAGAATAACAGGGCTGG  
+HWI-EAS443:3:84:1215:1468#0/1  
ZRH\_`]QYYW`VU¥a]MTS\_aU^T]\_¥Q\_^KYPIYGNWKJ



@HWI-EAS443:3:84:663:1350#0/1  
ATCAGCAACACCAACTTTGCTGCTGGACAGTCAGTGGNTT  
+HWI-EAS443:3:84:663:1350#0/1  
\_aaaXbab`b\_b]\_\_aaa\_aSa\_[\_`U]R`MDX`¥\_PDUY  
@HWI-EAS443:3:86:208:509#0/1  
GGCGGCTCCTGTCTTTAATGGTTCCATTGGAATGTTTGTC  
+HWI-EAS443:3:86:208:509#0/1  
aaaa`^^]\_RTU¥^\_\_X[VUYS[¥XQU[GTS[XNR¥WGRN  
@HWI-EAS443:3:87:326:47#0/1  
AAAGTACAACGGCATAATAACAGACACTATCAAGAGTCAT  
+HWI-EAS443:3:87:326:47#0/1  
aa^aZa` `aWbaa^\_a¥a`\_] ^a\_V` [a^¥]Y\_a\_TKMW\_  
@HWI-EAS443:3:89:1132:1871#0/1  
GGGAGCAGCATATCCTTTTGTGGTGTAAACAGTGACAATG  
+HWI-EAS443:3:89:1132:1871#0/1  
a\_YZVI[Va`¥¥bbbbVYY`b[Uaabb]b`bb]\_]aG`b  
@HWI-EAS443:3:89:139:1656#0/1  
GAGTGATTTGACTATCTTCCCTTTTCTATTCTGAAGATC  
+HWI-EAS443:3:89:139:1656#0/1  
Y` `abbbbbabbbbbbbbabbaaabbbb]R[b`aaa  
@HWI-EAS443:3:8:1342:1309#0/1  
AGCCCCTAATTATCACTATGAGGAATGCTCCTGTTATCAT  
+HWI-EAS443:3:8:1342:1309#0/1  
¥¥^`^aa¥TWZb]ZWXZ¥^[ `[] `]NWZHZW¥[ ` ]\_LG\_  
@HWI-EAS443:3:8:200:1417#0/1  
AGCTTGGTCAGCAAGTGCTTGTCATGATGGCATCAATTAG  
+HWI-EAS443:3:8:200:1417#0/1  
aaa[ [Y^X\_[a`a] `abb][ `Va]aa¥K` [\_^Q[Y`\_RZX  
@HWI-EAS443:3:8:220:881#0/1  
TGGCTCCGAAAATCCCACTGCATATGTATCCTATCTGATA  
+HWI-EAS443:3:8:220:881#0/1  
^aV¥aU^`JSZZ[ `a\_X\_^`a^¥HUZZ¥W[¥[\_aQOTa\_¥  
@HWI-EAS443:3:90:307:1549#0/1  
GCTGGATTGTATAAGACCTTGCTTCTGGGTTGAACTATTA  
+HWI-EAS443:3:90:307:1549#0/1  
abbbba¥\_ab[] `aaaa` ` `a^aaaa` `^]aaa`aaa^aa  
@HWI-EAS443:3:92:1157:1645#0/1  
CACGGGCTGGATTGTATAAGACCTTGCTTCTGGGTTGAAC  
+HWI-EAS443:3:92:1157:1645#0/1  
]bQb`babb\_Zaaa`bba\_`a\_\_`aaYab`babb\_a[Yb\_  
@HWI-EAS443:3:95:1595:162#0/1  
CAACTGCCTGTCTTATCATTAGGGCGTGGATTGTCTCAGA  
+HWI-EAS443:3:95:1595:162#0/1  
a\_[ISbab\_\_][ [bbab[aabbaa]b\_Uab¥`\_ `TabaUBBB  
@HWI-EAS443:3:96:1218:679#0/1  
CAGCAAAGTTGGTGTGCTGATGTTAACATATGTCTGGTT  
+HWI-EAS443:3:96:1218:679#0/1  
abb\_baababbaYaaababa\_aabb] `0`a^aba]abaZb  
@HWI-EAS443:3:96:473:1211#0/1  
CACGTTCCCTCTCCATACAACCTCAAGATTTGAGTCAGTCG

+HWI-EAS443:3:96:473:1211#0/1  
aaaX`baaa`aaaaaa¥`a`\_a¥^`\_\_\_a]\_a\_W\_`  
@HWI-EAS443:3:98:1202:1842#0/1  
TACTCCATTTGCTCCATTAGACGATACTGGACCACAAATG  
+HWI-EAS443:3:98:1202:1842#0/1  
a\_P\_Zab\_`b^Q\_^^baa¥Za\_aa\_aZ`^SMDYKa^G^\_  
@HWI-EAS443:3:98:1500:64#0/1  
CGNGAATCAAAATCAGATTGAAACATGCAATCAAAGCGTC  
+HWI-EAS443:3:98:1500:64#0/1  
a]D]aababba`b[`bbbbba`aaaabS`\_`U^a\_`V`^^  
@HWI-EAS443:3:99:1248:1514#0/1  
GCGCCATTAGACGATACTGGACCACAACTGCCTGTCTTAT  
+HWI-EAS443:3:99:1248:1514#0/1  
aX\_TTX\_Z]`\_X`\_aZR`WR`]a`[\_SZW¥a[PSDLX]PB  
@HWI-EAS443:3:99:1436:503#0/1  
GTATGTTATTATGCCGTTGTACTTTAACACAGCCACTGCC  
+HWI-EAS443:3:99:1436:503#0/1  
aWD]]ababbaaa`^aaba\_a^abbb^`\_`\_a\_NX^ZaX^]  
@HWI-EAS443:3:9:898:476#0/1  
AACCAGACATATGTTAACATCAGCAACACCAACTTTGCTG  
+HWI-EAS443:3:9:898:476#0/1  
a¥V\_abaTaa`abG\_``aaaX^YW\_`WaXR`\_Q\_\_W`WW]  
@HWI-EAS443:3:10:824:2036#0/1  
AGCCCATCCACTAACAGGGCAGANAGAGGAATTGCCCGCT  
+HWI-EAS443:3:10:824:2036#0/1  
a`a`\_aa`aa\_\_aa]a\_¥¥V\_\_UDV^`\_¥Z\_^QW^TVYWW¥  
@HWI-EAS443:3:11:317:1937#0/1  
GCTTTNTTGAGAAGTTATTGTCTGTCCCAGTCCATCCGTT  
+HWI-EAS443:3:11:317:1937#0/1  
abbb[D¥[a]^`^`\_a]bba]a`]M``a]OLZ¥SVXaBBB  
@HWI-EAS443:3:11:933:541#0/1  
ACTCAATTCAACTTGGGAATCAAAATCNGATTGAAACATG  
+HWI-EAS443:3:11:933:541#0/1  
a^a\_``aa\_\_`]]`\_\_`\_`^`^[]aRD[]\_\_`]Y][\_`^`  
@HWI-EAS443:3:12:490:1283#0/1  
AACTGCCTGTCTTATCATTAGGGCNTGGATTGTCTCCGAA  
+HWI-EAS443:3:12:490:1283#0/1  
aaaa`aaaa`aaaa`^aa`a]V¥[DU`\_\_\_\_^]]^`^\_W`  
@HWI-EAS443:3:13:1164:1127#0/1  
ATTCATATCANGCTCCCCCTTGAATGCAGAACCTTCTTC  
+HWI-EAS443:3:13:1164:1127#0/1  
`bbbbba[^`^DUab\_aXT``aaba\_¥¥^`a\_\_\_\_``W\_VX  
@HWI-EAS443:3:13:457:124#0/1  
CAGCAAGTGCTTGCATGATGGCATCANTTGGCTAACAAT  
+HWI-EAS443:3:13:457:124#0/1  
abaabba^¥]S[QFWb`aUaa^S¥\_SYD^PaSJ¥^aaaV¥  
@HWI-EAS443:3:14:330:1397#0/1  
ATTGGCTAACAATTGGAATTNCTGGCCCAGACAATGGGGC  
+HWI-EAS443:3:14:330:1397#0/1  
]WUX¥`\_W¥VP]LX\_KXa¥UDT`[V]VWa`¥V[XQQ`T\_B

@HWI-EAS443:3:15:398:1090#0/1  
ATGCCGTTGTACTTTAACACAGCCACTGCCCCATTNTCTG  
+HWI-EAS443:3:15:398:1090#0/1  
aaabba\_aa]a`aaabaaa]\_a```\_`¥\_a]`\_\_[DP`¥]  
@HWI-EAS443:3:17:1350:1852#0/1  
ATTGAAACATNCAATCAAAGCGTCATTACTTATGAAAACA  
+HWI-EAS443:3:17:1350:1852#0/1  
aaabaaa`a¥DZaaa\_a\_\_\_Y\_\_```\_\_¥a\_````\_\_\_\_[\_  
@HWI-EAS443:3:17:1490:1803#0/1  
GACCGTGGGTGTCTTTCNACCAGAATCTGGAATATCAGAT  
+HWI-EAS443:3:17:1490:1803#0/1  
\_`Z¥WV`^ZT^[X¥Ya[DYUU```aW]```a¥]`ZN]Ya^T  
@HWI-EAS443:3:18:1618:1452#0/1  
GTCTGAATGTGCATGTGTAAATGGTTCTTGCTTTNCTGTA  
+HWI-EAS443:3:18:1618:1452#0/1  
Z]Y\_b`bbaQaaaa\_]aY\_Y]aba¥`]]Z\_]¥ODRX\_U¥  
@HWI-EAS443:3:19:336:119#0/1  
CGGGAGCAGCATATCCTTTTGNNGGTGTAAACAGTGACACT  
+HWI-EAS443:3:19:336:119#0/1  
`b`a]a`^aZ]ZZ`R¥¥Z`a¥DY`MTPU¥U\_W\_N`WS¥QT  
@HWI-EAS443:3:20:1739:227#0/1  
GGCCTTGCTANATGACAAACATTCCAATGGAACCATTAAA  
+HWI-EAS443:3:20:1739:227#0/1  
aQ[¥Z¥¥S^TDW\_\_\_\_[^^]`]^RWUR^]W]VVVWOYZZX  
@HWI-EAS443:3:20:213:823#0/1  
CTGGACCACAACCTGCCTTATCANTAGGGCGTGGATT  
+HWI-EAS443:3:20:213:823#0/1  
aT]RKP\_T^¥V]ZbbWZ¥aa]^]]bMD[aaYaa^Z```\_\_\_\_  
@HWI-EAS443:3:23:1082:811#0/1  
AGCCCATCCACTAACNGGGCAGAGAGGAATTGCCCGCT  
+HWI-EAS443:3:23:1082:811#0/1  
`aa`aaa]aaaa`bYDYaaa\_¥Ua[a¥a```\_`XX^`¥`W¥  
@HWI-EAS443:3:23:779:524#0/1  
AGTCCATCCGTTCCGATCCCNAATCATCTCAAACCGTTT  
+HWI-EAS443:3:23:779:524#0/1  
`a\_a\_baaaa````^`¥`SD[\_`\_`\_^\_\_\_\_`\_\_U^\_Z]^  
@HWI-EAS443:3:24:827:1272#0/1  
GTTTGGATAGGGAGAACTAAAAGCATTNGTTCAAGAAACG  
+HWI-EAS443:3:24:827:1272#0/1  
aabba^]aa`\_aYZ¥^Xa`]]`a`Za`XDU[YU^`]Y¥]]a  
@HWI-EAS443:3:25:466:798#0/1  
ATCGACCGTGGGTGTCTTTCNACCAGAATCTGGAATATCA  
+HWI-EAS443:3:25:466:798#0/1  
a\_aaa¥][ML\_`R\_RTS¥[[DXX^]Q^SQZ^QWY[Y¥T[W  
@HWI-EAS443:3:2:1613:603#0/1  
CCACGGTCGATTCCGAGCCATGCCAGTTANCCCTGCACACA  
+HWI-EAS443:3:2:1613:603#0/1  
aab`baV]^Za`aa```\_abaa]`aa^`VDHVQ\_a¥`X`^\_  
@HWI-EAS443:3:31:835:2043#0/1  
AGCAAGTGCTTGTGCATGATGGCATCAATTGGCTNACAATT

+HWI-EAS443:3:31:835:2043#0/1  
aabbaY[ab\_`^Waaa\_aV`¥`a]^a` `^¥YWLD¥a^^Y]  
@HWI-EAS443:3:31:849:1461#0/1  
GCATGTGTAATGGTTCTNGCTTTACTGTAATGACCGATG  
+HWI-EAS443:3:31:849:1461#0/1  
aZTSaXXQX^¥a` [0¥bWDX^]¥]XZU\_`\_\_\_\_`XORFKX  
@HWI-EAS443:3:34:1115:879#0/1  
GTCAGGATATAGCGGGAGTTTTGTTGAGCANCCAGAACTA  
+HWI-EAS443:3:34:1115:879#0/1  
a`abbb\_a\_aa`\_aaaV¥M¥`a\_V`Y[\_`\_XDT^¥W[\_`WW¥  
@HWI-EAS443:3:36:1511:1398#0/1  
GCTGGATTGTATAAGACCTTGCTTCTGGGTTGAANTAATC  
+HWI-EAS443:3:36:1511:1398#0/1  
¥\_\_a\_[X¥¥`\_a`aa`ba`a`]X\_\_WXaaa[D]Kaab  
@HWI-EAS443:3:36:826:1724#0/1  
CGATACTGGACCACAANTGCCTGTCTTATCATTAGGGCGT  
+HWI-EAS443:3:36:826:1724#0/1  
`ab\_`b\_bb\_` `abb¥D^^\_aaa` `bab\_]`aaVHWaH^  
@HWI-EAS443:3:38:1657:1105#0/1  
CAGCATCCAGAACTAACAGGGCTGGATTGTATNAGACCTT  
+HWI-EAS443:3:38:1657:1105#0/1  
a\_bbaab`aaaa^a\_baba^a`bb`XaaBBBBBBBBBBBB  
@HWI-EAS443:3:39:1717:1609#0/1  
ATGCAATCAAAGCGTCNTTACTTATGAAAACAACACTTGG  
+HWI-EAS443:3:39:1717:1609#0/1  
^\_ba\_]aa\_¥aW\_`¥D¥Y\_¥baaaaP^\_\_]U]`aR¥[\_M  
@HWI-EAS443:3:3:1095:1012#0/1  
CACCNACGGTTCGATTCGAGCCATGCCAGTTATCCCTGCAC  
+HWI-EAS443:3:3:1095:1012#0/1  
T`a¥D¥bababZU^b`J¥]`¥`]SWba^X`aZaZaba]`\_  
@HWI-EAS443:3:3:1399:1286#0/1  
TCCTTTTGTGGTNTAAACAGTGACACTGTGGGTTGGTCTT  
+HWI-EAS443:3:3:1399:1286#0/1  
^a^ababaab\_MD¥`\_aaa`^a`\_a\_aaPa\_a¥Y` `[\_  
@HWI-EAS443:3:42:316:1310#0/1  
GCCACTCAATTCAACTTGGGAATCAANATCAGATTGAAAC  
+HWI-EAS443:3:42:316:1310#0/1  
abaaaaaa]\_a`a¥a`\_`a`aaaa[D]`aaa^\_` `a`VV  
@HWI-EAS443:3:42:680:1263#0/1  
CCCCTGCANATGTATCCTATCTGATATTCCAGATTCTGG  
+HWI-EAS443:3:42:680:1263#0/1  
ab^[]WX¥[D^VSW\_a^a` [ `^^`\_^]]]a`a\_`X` [\_`  
@HWI-EAS443:3:44:1038:858#0/1  
CCCACGGTTCGATTCGNGCCATGCCAGTTATCCCTGCACAC  
+HWI-EAS443:3:44:1038:858#0/1  
abbbabb¥\_aT]¥a¥D[^a` `a\_`¥^`\_a`\_` [aZ¥^VU  
@HWI-EAS443:3:44:1490:35#0/1  
AGCATATCCTTTTGTGGTGTAAACNGTGACACTGTGGGTT  
+HWI-EAS443:3:44:1490:35#0/1  
a¥aRa¥aaaaaba\_a]¥a` ]`^XDZWa`¥\_¥` `W`^ZV¥

@HWI-EAS443:3:44:938:232#0/1  
ATTGTCTGGGCCAGAAANTCCAATTGTTAGCCAATTGATG  
+HWI-EAS443:3:44:938:232#0/1  
aaab\_a`aa\_T\_^a]]XDY]^a\_^]TY^YYQW^[S]XYV^  
@HWI-EAS443:3:45:900:41#0/1  
ACCGTGGGTGTCTTTCAACCAGAATCTNGAATATCAGATA  
+HWI-EAS443:3:45:900:41#0/1  
a[`aaa]¥[a]^aa¥^Z`¥X\_`]^`^V[D¥][\_T^RQ\_[\_`^  
@HWI-EAS443:3:47:1101:1249#0/1  
GTCATTACAGTAAAGCAAGAACCATTTACACATGCANATT  
+HWI-EAS443:3:47:1101:1249#0/1  
^M¥`aa`aa¥a\_\_`a^^^\_\_\_\_`aa\_^^`^`¥TDZ^\_  
@HWI-EAS443:3:49:1251:1168#0/1  
GGCTCCTGTCTTTAATGGTTCCANTGGAATGTTTGTCTATT  
+HWI-EAS443:3:49:1251:1168#0/1  
abbbb\_bb]abb¥b`Z¥`ba]WD^^`a\_\_S^baba\_`ba  
@HWI-EAS443:3:50:1571:1960#0/1  
GTTAACATCAGCAACACCAACTTTGCTNCTGGACAGTCAG  
+HWI-EAS443:3:50:1571:1960#0/1  
`aaba`aaaa`ba\_b\_^\_\_Xa\_\_a]¥DU\_``]]`Y]^  
@HWI-EAS443:3:52:1207:204#0/1  
CACAGTGTCACTNTTTACACCACAAAAGGATATGCTGCTC  
+HWI-EAS443:3:52:1207:204#0/1  
a^`[a^¥W¥¥]^DZ\_`\_X`¥T^TZ]\_]\_\_TZ\_\_[FS[OWH  
@HWI-EAS443:3:52:1645:1694#0/1  
ATCNGATTGAAACATGCAATCAAAGCGTCATTACTTATGA  
+HWI-EAS443:3:52:1645:1694#0/1  
a`VD[ababZa\_^a`a\_aa\_P\_\_\_aPbY^aaaa[a``aa\_  
@HWI-EAS443:3:52:465:1307#0/1  
CAACTGCCTNTCTTATCATTAGGGCGTGGATTGTCTCCGA  
+HWI-EAS443:3:52:465:1307#0/1  
aZ`abbaa^D0¥bb`aaaaaba`a`\_ab``aba\_\_a^Ua`  
@HWI-EAS443:3:53:1447:1494#0/1  
TGCAATCAAAGCGTCATTACTTNTGAAAACAACACTTGGG  
+HWI-EAS443:3:53:1447:1494#0/1  
abYaa^a`a[¥\_`WUa`aa]a¥D¥a```a¥a\_¥`\_a^]\_P  
@HWI-EAS443:3:53:598:479#0/1  
CAANATCAGATTGAAACATGCAATCAAAGCGTCATTACTT  
+HWI-EAS443:3:53:598:479#0/1  
aaYD]aa\_¥`abab`abbbbbb\_]bbaaaab`¥abb`^bb  
@HWI-EAS443:3:54:967:2020#0/1  
CAGGGCTGGATTGTATAAGACCTTGCTTCTGGNTTGAAC  
+HWI-EAS443:3:54:967:2020#0/1  
UUY]aa]ZabVbaU¥V\_bbWb]b\_b\_ba`U`ZDG\_]a[aN  
@HWI-EAS443:3:55:247:543#0/1  
CTGATTAGTTCAACCCAGAAGCAAGGTCNTATACAATCCA  
+HWI-EAS443:3:55:247:543#0/1  
ab`bab¥bbbab`abbb`ab\_\_aba\_[D^aab`bbaaaa  
@HWI-EAS443:3:57:261:902#0/1  
TCAGCACCGTCTGGCCAAGACNAACCCACAGTGTCACTGT





+HWI-EAS443:3:87:1130:1039#0/1  
aba]]a¥a`a`XV`a`¥VDY[\_`^[XZ[¥K¥`]VXY[]N  
@HWI-EAS443:3:89:1284:525#0/1  
TGGCTGTGTTAAAGTACAACGGCATAATAACAGACANTAT  
+HWI-EAS443:3:89:1284:525#0/1  
aaa\_a]M[]`Z¥^XNVOZa[aa\_\_`a\_a\_YFY\_UQYDS[]  
@HWI-EAS443:3:89:335:338#0/1  
GTGAAATCACATGTGTGTGNAGGGATAACTGGCATGGCTC  
+HWI-EAS443:3:89:335:338#0/1  
a\_aaaa¥`aaaa^a^`[[DQa\_`^\_T\_]\_\_\_\_`\_¥^¥S^\_  
@HWI-EAS443:3:89:837:1838#0/1  
CAGGGATAACTGGCATGGCTCGAATCGACCGTNGTGTCT  
+HWI-EAS443:3:89:837:1838#0/1  
abbb`bbbbbabbbb`abb^[¥\_\_^]T[]ZPYD¥HZHY¥  
@HWI-EAS443:3:8:994:476#0/1  
AGTGNTTCCGTGAAATTAGCGGGCAATTCCTCTCTCTGC  
+HWI-EAS443:3:8:994:476#0/1  
abZ]DTa`^`[]Y\_`\_`X]\_a\_UY[\_¥TS^R[R^^`V  
@HWI-EAS443:3:92:1637:700#0/1  
GTATNAGACCTTGCTTCTGGGTTGAACTAATCAGAGGGCG  
+HWI-EAS443:3:92:1637:700#0/1  
a^]YD^VR\_\_a\_]`^¥S\_a\_a^N]\_¥bNaa```[aa``\_\_¥\_  
@HWI-EAS443:3:98:358:1290#0/1  
CGCTTGGTCAGCAAGTGCTTNTCATGATGGCATCAATTGG  
+HWI-EAS443:3:98:358:1290#0/1  
`baaabaU`a`aaa\_a^`ZDWaaa````a^\_\_`\_`a^^\_  
@HWI-EAS443:3:98:992:670#0/1  
CGATNCTGGACCACAACCTGCCTGTCTTATCATTAGGGCGT  
+HWI-EAS443:3:98:992:670#0/1  
ab`[DYabU\_YS[Y[bW[\_\_OWaVbaW^aJVbaX]QYIU]  
@HWI-EAS443:3:9:210:257#0/1  
ACTCAAGGGCCTTGCTAAATGACAAACANTCCAATGGAA  
+HWI-EAS443:3:9:210:257#0/1  
aaa`a`\_`\_``aaa]\_`\_]\_`^\_W^`\_`^XDZ\_]\_`^\_`\_`\_`  
@HWI-EAS443:3:100:693:589#0/1  
ACCAGACATATGTTAACATCAGCAACACCAACTTTGCTGC  
+HWI-EAS443:3:100:693:589#0/1  
a\_aaa\_\_a`\_a^aa`````\_\_^aa\_a]U\_^Z¥\_]\_ZZ\_]`  
@HWI-EAS443:3:10:1694:1075#0/1  
ACCAGACATATGTTAACATCAGCAACACCAACTTTGCTGC  
+HWI-EAS443:3:10:1694:1075#0/1  
a`]`aa`aaaab\_aaaVaa]``]a`Y`[S^^X`\_`^\_V]\_V  
@HWI-EAS443:3:11:1048:1393#0/1  
CGGCAATGGTGTGGATAGGGAGAACTAAAAGCATTACT  
+HWI-EAS443:3:11:1048:1393#0/1  
`aaa\_abbaTbVbab\_Vbaa`abaaa\_^Vaaba]`YXBBB  
@HWI-EAS443:3:11:1133:1929#0/1  
GCCTGGGCCAGAAATTCCAATTGTTAGCCAATTGATGCCA  
+HWI-EAS443:3:11:1133:1929#0/1  
aG`\_a`Va\_`[\_`ZaX^T^\_Z]U\_]`\_]LU\_X\_NYUHRNQB





+HWI-EAS443:3:1:1129:708#0/1  
[D^\_baZ^` `aZaaa]a¥\_` `a`^`VT]\_V\_\_UBBBBB  
@HWI-EAS443:3:1:1539:1288#0/1  
ACCAGACATATGTTAACATCAGCAACACCAACTTTGCTGC  
+HWI-EAS443:3:1:1539:1288#0/1  
a[a\_aZNV` `a`¥^\_\_a\_X\_\_^\_^\_\_ZSUPLNSBBBBBB  
@HWI-EAS443:3:1:1586:986#0/1  
GCGGGCTCCTGTCTTTAATGGTTCCATTGGAATGTTTGTC  
+HWI-EAS443:3:1:1586:986#0/1  
aTZTX0`]\_ZYRX^^a^[\_aa[ `[TL[ [¥` ^LTUPBBBBBB  
@HWI-EAS443:3:21:973:604#0/1  
TTCGGAGACAATCCACGCCCTAATGATAAGACAGGCAGGT  
+HWI-EAS443:3:21:973:604#0/1  
aaa^VDVZ[\_NPa\_[ZU¥RLP\_^YRY^BBBBBBBBBBBBBB  
@HWI-EAS443:3:22:475:227#0/1  
GCCAGGATATAGCGGGAGTTTTGTTCCAGCATCCAGAACTA  
+HWI-EAS443:3:22:475:227#0/1  
^FS^^STUZ¥XX]]V¥PTRNXLTRNUNPQJJSTTUNWMUB  
@HWI-EAS443:3:23:1199:904#0/1  
GTGTCTTTCAACCAGAATCTGGAATATCAGATAGGATAAA  
+HWI-EAS443:3:23:1199:904#0/1  
a]ZLFSXWU^aZOZP[^UW¥]QV]OP` ¥¥¥BBBBBBBBBBB  
@HWI-EAS443:3:24:1108:1111#0/1  
ACCAGACATATGTTAACATCAGCAACACCAACTTTGCTGC  
+HWI-EAS443:3:24:1108:1111#0/1  
aba`bbbaaW` `aaabba^`^]a^^]]YaR]^` \_aa\_aa  
@HWI-EAS443:3:24:1335:1386#0/1  
GAGCTGGATTGTATAAGACCTTGCTTCTGGGTTGAACTAA  
+HWI-EAS443:3:24:1335:1386#0/1  
a¥` `TZ[L[T` ^^\_Zaa`\_]RX¥[^` Z\_b]]Z\_aabYaZ[  
@HWI-EAS443:3:25:1066:948#0/1  
ACCAGACATATGTTAACATCAGCAACACCAACTTTGCTGC  
+HWI-EAS443:3:25:1066:948#0/1  
[bYbab` `][^aZVabbY]^VaY\_ba\_Z[]a[\_a\_ab[WY  
@HWI-EAS443:3:25:242:64#0/1  
ACCAGACATATGTTAACATCAGCAACACCAACTTTGCTGC  
+HWI-EAS443:3:25:242:64#0/1  
ababbb^aaaba` aaaaaaaaaaaaYa][\_a\_` `^` ^^aX  
@HWI-EAS443:3:27:1327:1962#0/1  
GGCTGAATGTGCATGTGTAATGGTTCTTGCTTTACTGTA  
+HWI-EAS443:3:27:1327:1962#0/1  
¥F\_`bbW^^N^aa]aZ` ]^aaaaa^Yaa\_b¥` U[\_]a\_Va  
@HWI-EAS443:3:27:1474:736#0/1  
ACCAGACATATGTTAACATCAGCAACACCAACTTTGCTGC  
+HWI-EAS443:3:27:1474:736#0/1  
a]` `^YWU¥` a\_\_ab\_]a` ¥a\_U\_`YaZ\_\_a\_` ` `X`\_^  
@HWI-EAS443:3:30:1361:908#0/1  
TGACTGTCCAGCAGCAAAGTTGGTGTGCTGATGTTAAAA  
+HWI-EAS443:3:30:1361:908#0/1  
ab`Y^Y\_a[\_]` a[Z` ZaV\_a` Z¥^aZY\_\_¥\_aXXSWHZ

@HWI-EAS443:3:30:1635:227#0/1  
CAGTCCATCCGTTCCGATCCCAAATCATCTCAAACCGCT  
+HWI-EAS443:3:30:1635:227#0/1  
^Ta^^a^]W`b[^`a#a`b`a^Y]aX\_Y^` ]\_PS`S^  
@HWI-EAS443:3:30:1704:1007#0/1  
ATCCTATCTGATATTCCAGATTCTGGTTGAAAGACACCTC  
+HWI-EAS443:3:30:1704:1007#0/1  
aY`\_`\_YaaZ[Ya^[[LL`TXTZY\_Y]PV`NX`Z^RUPPSR  
@HWI-EAS443:3:32:1313:218#0/1  
ATGGGAACCATTTCATATCATGCTCCCCCTTGAATGCAGA  
+HWI-EAS443:3:32:1313:218#0/1  
[^U\_ab#XRZ\_UTP#a\_QZ` `V\_NYSSL[#` `#Y#V]Z[]  
@HWI-EAS443:3:32:275:2033#0/1  
GTCCTGTTAGTTCTGGATGCTGAACAAAACCTCCCGCTATA  
+HWI-EAS443:3:32:275:2033#0/1  
a`bbaaaa[ `aab^` `a\_` `` `aa\_aab^X^`aa^a[\_^W  
@HWI-EAS443:3:34:1111:1154#0/1  
AGCCCATCCACTAACAGGGCAGAGAGGAATTGCCCGGT  
+HWI-EAS443:3:34:1111:1154#0/1  
\_]a\_Y\_#aba]aa`a]ZX]]Z#SMTXVVY#\_WR]MZNLFQ  
@HWI-EAS443:3:34:253:945#0/1  
TNCGGGAGCAGCATATCCTTTTGTGGTGTAACAGTGACA  
+HWI-EAS443:3:34:253:945#0/1  
^D[b]X\_`^`aaba`U`\_baaaa^#a#VT#]^` `a`Y\_YPY  
@HWI-EAS443:3:34:569:446#0/1  
TTCGGAGACAATCCACGCCCTAATGATAAGACAGGCAGGT  
+HWI-EAS443:3:34:569:446#0/1  
a\_\_Z\_W\_Z^#WW\_#^ZaaYVP]\_]ZRU]]XOLO[BBBBBB  
@HWI-EAS443:3:35:373:221#0/1  
ACCAGACATATGTTAACATCAGCAACACCAACTTTGCTGC  
+HWI-EAS443:3:35:373:221#0/1  
aZZ]\_#^[]U[aVY[XaaXX]aZ^^T]^]SI[UVWYTPUY  
@HWI-EAS443:3:35:824:274#0/1  
GCCTGTCCCAGTCCATCCGTTCCGATCCCAAATCATCTCA  
+HWI-EAS443:3:35:824:274#0/1  
ababbababaa`aaaa` `a\_\_`\_#]#\_`^aWTTUX\_#Y#UX  
@HWI-EAS443:3:36:211:1469#0/1  
AACCCGCTAGTCCAGATTGTGTTCTTTTGGGTCGCCCTC  
+HWI-EAS443:3:36:211:1469#0/1  
a`aab`a#^RL\_a\_\_[^#\_YUXX`#\_#VVXVZV[T^^\_V\_  
@HWI-EAS443:3:36:415:637#0/1  
ACCAGACATATGTTAACATCAGCAACACCAACTTTGCTGC  
+HWI-EAS443:3:36:415:637#0/1  
a\_ba`a`Y`aaa\_\_`[aa`^aaaa\_`^^\_\_V\_\_^`\_`#^  
@HWI-EAS443:3:36:617:1775#0/1  
GTGTCTTTCAACCAGAATCTGGAATATCAGATAGGATAAA  
+HWI-EAS443:3:36:617:1775#0/1  
]ZXQWY^XU\_GRaa^`ZOXJLU]XVGQNPT`BBBBBB  
@HWI-EAS443:3:36:656:141#0/1  
GACCGCTAATTTACGGAAACCACTGACTGTCCAGCAGCA



@HWI-EAS443:3:45:587:1612#0/1  
ACCAGACATATGTTAACATCAGCAACACCAACTTTGCTGC  
+HWI-EAS443:3:45:587:1612#0/1  
`¥aa\_a\_a\_aba^a`aa`aaa\_`aa^a^`¥[]aa``¥Ya^  
@HWI-EAS443:3:46:538:470#0/1  
GTAAACAGTGACTGTGGGTTGGTCTTGGCCAGACGGGG  
+HWI-EAS443:3:46:538:470#0/1  
aaaaa\_`a\_`a\_aZ\_a¥`a\_SYa\_V[\_\_^`¥^Z`YPa¥G¥  
@HWI-EAS443:3:46:931:1115#0/1  
GNATTGTCTCCGAAAATCCCACTGCATATGTATCCTATCT  
+HWI-EAS443:3:46:931:1115#0/1  
^D^bbbabbbabaaabbaabaaaaabaaababaa`aaa`a  
@HWI-EAS443:3:47:1466:810#0/1  
GTGCAGGGATAACTGGCATGGCTCGAATCGACCGTGGGGG  
+HWI-EAS443:3:47:1466:810#0/1  
a`ba^bbbaaaa`ba`[aba`\_\_¥ZSYSOUGPLZP]BBBB  
@HWI-EAS443:3:48:1211:1753#0/1  
ATCTCCTGTCTTTAATGGTTCCATTGGAATGTTTGTCTATT  
+HWI-EAS443:3:48:1211:1753#0/1  
U[a^\_\_a\_WZ^a^Z\_```Z\_\_Q]b\_b`S```ZZ\_aU¥F[^a  
@HWI-EAS443:3:48:826:184#0/1  
ACCAGACATATGTTAACATCAGCAACACCAACTTTGCTGC  
+HWI-EAS443:3:48:826:184#0/1  
¥X¥^b`¥b`babaa`¥R]aaa\_Ya`]a\_[]`[a\_\_dW^`T  
@HWI-EAS443:3:4:75:768#0/1  
TACCCTCTCCATACAACCTCAAGATTTGAGTCAGTCGCTTG  
+HWI-EAS443:3:4:75:768#0/1  
a\_¥W¥Z\_a]ZM^aa`RTXN[WS`\_]\_Z¥R]]PZa[NZBBBB  
@HWI-EAS443:3:50:672:465#0/1  
ACGGTTTTGAGATGATTTGGGATCCGAACGGATGGACTTG  
+HWI-EAS443:3:50:672:465#0/1  
aab]`baba[bab\_`bbbaaaX`P^a\_\_a\_YaVNNT^][  
@HWI-EAS443:3:51:1159:175#0/1  
GTTCACTATGAGGAATGCTCCTGTTATCCTGATTCTAGTG  
+HWI-EAS443:3:51:1159:175#0/1  
XVbaababb`\_`^aaaab`\_aaaabaaa¥a\_\_aaaaa¥`  
@HWI-EAS443:3:51:402:606#0/1  
CCGGGCTCCTGTCTTTAATGGTTCCATTGGAATGTTTGTCT  
+HWI-EAS443:3:51:402:606#0/1  
`\_aaaaaaaab```bbaaa``aaaa`aaa]``ba`aaa[\_  
@HWI-EAS443:3:52:376:1459#0/1  
GCTTGGATAGGGGAGAACTAAAAGCATTAGTTCAAGAAACG  
+HWI-EAS443:3:52:376:1459#0/1  
]FTQOYUX]U\_UYX]X]WZ]X]U]XWWW]SXWZM¥XQTXZ  
@HWI-EAS443:3:54:281:1385#0/1  
ACCAGACATATGTTAACATCAGCAACACCAACTTTGCTGC  
+HWI-EAS443:3:54:281:1385#0/1  
aab\_^`aaa\_aa\_aa\_aaa```[`a\_a^¥^^]\_`\_`\_`\_`]  
@HWI-EAS443:3:55:544:840#0/1  
GTGCAGGGATAACTGGCATGGCTCGAATCGACCGTGGGGG

+HWI-EAS443:3:55:544:840#0/1  
aYa`[aXSW\_`¥\_\_^QXULWT]¥WKVSPMKNVBBBBBBB  
@HWI-EAS443:3:56:1048:1745#0/1  
GGGGTCAGCAAGTGCTTGTCATGATGGCATCAATTGGCTA  
+HWI-EAS443:3:56:1048:1745#0/1  
]aaaX\_`baaa\_Hba`][H^]baab`a^^¥a\_aaaa\_`  
@HWI-EAS443:3:58:504:1255#0/1  
CAGTCCATCCGTTCCGATCCCAAATCATCTCAAACCGCT  
+HWI-EAS443:3:58:504:1255#0/1  
aaaaa`aba`a``\_aa`\_`\_]`a`a]N]\_\_a\_] [W¥[Z  
@HWI-EAS443:3:58:797:1326#0/1  
ACCAGACATATGTTAACATCAGCAACACCAACTTTGCTGC  
+HWI-EAS443:3:58:797:1326#0/1  
a`aU`a```\_\_\_\_\_]a\_]\_\_^\_\_\_\_a\_]`^]\_\_Z\_]`]Y]Z]  
@HWI-EAS443:3:59:94:96#0/1  
GACACCCACGGTCGATTCGAGCCATGCCAGTTATCCCTCC  
+HWI-EAS443:3:59:94:96#0/1  
aa`\_\_a`aabbROULY\_\_\_V¥BBBBBBBBBBBBBBBBBB  
@HWI-EAS443:3:5:50:914#0/1  
ACCAGACATATGTTAACATCAGCAACACCAACTTTGCTGC  
+HWI-EAS443:3:5:50:914#0/1  
aababaaaaa`b¥a^`aaaVaaaaa```^```\_`\_`B  
@HWI-EAS443:3:60:849:948#0/1  
ACCAGACATATGTTAACATCAGCAACACCAACTTTGCTGC  
+HWI-EAS443:3:60:849:948#0/1  
WS[IU`TW\_Y\_b]S]`aX¥ZVX[^a`^\_X¥QZXT]V`TL  
@HWI-EAS443:3:61:1530:747#0/1  
TTCGGAGACAATCCACGCCCTAATGATAAGACAGGCAGGT  
+HWI-EAS443:3:61:1530:747#0/1  
^[VQ¥`\_TUXXXVYUV¥[[VW]`^^ZX]ZBBBBBBBBBB  
@HWI-EAS443:3:62:1474:1666#0/1  
CAAAGCGTCATTACTTATGAAAACAACACTTGGGTAAACC  
+HWI-EAS443:3:62:1474:1666#0/1  
ababaab^GZa\_`baWbaaaa`Va[`¥a`W[]^\_abSa  
@HWI-EAS443:3:63:1353:1634#0/1  
CACCTCTCCATACAACTCAAGATTTGAGTCAGTCGCTTGG  
+HWI-EAS443:3:63:1353:1634#0/1  
\_baabbaa\_baabaaaba\_aabbbaSb^^aa`[\_Q]Z\_B  
@HWI-EAS443:3:64:530:1343#0/1  
TTCGGAGACAATCCACGCCCTAATGATAAGACAGGCAGGG  
+HWI-EAS443:3:64:530:1343#0/1  
]Z\_a\_Wa[b\_Z\_aa\_]W\_a`RXQ¥XOW\_Q[``BBBBBBB  
@HWI-EAS443:3:68:454:154#0/1  
GGCCCCTATATCCTGACCACTCATTATTCTACGATAT  
+HWI-EAS443:3:68:454:154#0/1  
aaaaabaa^aaaa`a`\_`\_a^^]```\_`\_`\_`\_Z¥`]^]^  
@HWI-EAS443:3:68:652:861#0/1  
ATTGGAATGTTTGTCTTTAGCAAGGCCCTTGAGTCACG  
+HWI-EAS443:3:68:652:861#0/1  
abZaa¥bbYS^bb]aaaa][[a`aa[aa`a]`YV¥VaZG[

@HWI-EAS443:3:6:505:1992#0/1  
CAAAGCGTCATTACTTATGAAAACAACACTTGGGTAAACC  
+HWI-EAS443:3:6:505:1992#0/1  
`bTa`RUQV\_`ZO\_Y]\_``aaaVZ¥`^¥X^WSFJM[\_`BB  
@HWI-EAS443:3:6:964:893#0/1  
GGTTGAAAGACACCCACGGTCGATTTCGAGCCATGCCAGGT  
+HWI-EAS443:3:6:964:893#0/1  
a`W]\_aaa[\_[\_RLVZN\_aQBBBBBBBBBBBBBBBBBBBB  
@HWI-EAS443:3:70:163:1123#0/1  
ACCAGACATATGTTAACATCAGCAACACCAACTTTGCTGC  
+HWI-EAS443:3:70:163:1123#0/1  
aabYZ^aZ]aaa\_`a^aa\_aX^aa`^¥^^V¥`Y]ZN]]]^  
@HWI-EAS443:3:70:792:168#0/1  
ACCAGACATATGTTAACATCAGCAACACCAACTTTGCTGC  
+HWI-EAS443:3:70:792:168#0/1  
aa`aaaaaaaab`aa\_`\_`a`aa`]^¥`\_^^^]^]^\_X  
@HWI-EAS443:3:71:1371:1515#0/1  
CAAAGCGTCATTACTTATGAAAACAACACTTGGGTAAACC  
+HWI-EAS443:3:71:1371:1515#0/1  
abbbbabbbbbbabbabbbbbbabbabab\_bbaabbaa\_  
@HWI-EAS443:3:71:1470:190#0/1  
ACCAGACATATGTTAACATCAGCAACACCAACTTTGCTGC  
+HWI-EAS443:3:71:1470:190#0/1  
]aa^aba`a^a`^aaba`aaaaY`a[bU`aaZaaaa¥\_\_Y  
@HWI-EAS443:3:72:671:737#0/1  
ACCAGACATATGTTAACATCAGCAACACCAACTTTGCTGC  
+HWI-EAS443:3:72:671:737#0/1  
aaaaaa`aaaba`aaaaaa`\_aaaa\_a\_\_\_``a\_a`^\_\_]  
@HWI-EAS443:3:75:392:925#0/1  
CACCTCTCCATACTCAAGATTTGAGTCAGTCGCTTG  
+HWI-EAS443:3:75:392:925#0/1  
ab`bb¥babaaaba\_Tb]^`^]aaa`\_a`a^`aaZ\_`\_`ZP  
@HWI-EAS443:3:75:680:799#0/1  
CAAGGTCTTATACAATCCAGCCCTGTTAGTTCTGGATGGT  
+HWI-EAS443:3:75:680:799#0/1  
a]aabIbbaaabbbaa`\_WX\_Yba]Ia`U\_Xa[I¥`^¥DZ  
@HWI-EAS443:3:80:1699:1746#0/1  
GAGGGATGTGTTTGTGATAAGGGAACCATTCATATCATGC  
+HWI-EAS443:3:80:1699:1746#0/1  
aa¥[``ZT\_^^VVXRZa`[]TFS`OPZ[XP¥`VGX[S[Q  
@HWI-EAS443:3:80:811:557#0/1  
TCCCAGTCCATCCGTTCCGATCCCAAATCATCTCAAATC  
+HWI-EAS443:3:80:811:557#0/1  
`a`Z`b`aababa\_Z[a\_UHTZXKW]WTWVUWYT]TY[FN  
@HWI-EAS443:3:82:276:1676#0/1  
CNAATACGGCAATGGTGTGGATAGGGAGAACTAAAAGC  
+HWI-EAS443:3:82:276:1676#0/1  
[D^bbbbb`T^^aaS\_[]W]\_\_a`]YSY\_`aa\_]Z¥Z¥  
@HWI-EAS443:3:83:236:1658#0/1  
GCGGGCGACCCAAAGAGAACAATCTGGACTAGCGGGAG

+HWI-EAS443:3:83:236:1658#0/1  
a^JWZ`\_]aZS\_¥YPY[X¥a]Z¥^¥]]S¥¥^¥XBBBBBBBB  
@HWI-EAS443:3:83:490:1896#0/1  
ACCAGACATATGTTAACATCAGCAACACCAACTTTGCTGC  
+HWI-EAS443:3:83:490:1896#0/1  
`\_aa\_`a[Y]a`\_aa\_a]Z`ZRaaa¥`\_]\_\_Z[ZWVaZ]]  
@HWI-EAS443:3:83:898:1877#0/1  
AGATATGTTAACATCAGCAACACCAACTTTGCTGCTGGAC  
+HWI-EAS443:3:83:898:1877#0/1  
YE^a[]aQ¥¥a^`Yaaaa¥aZ\_aaP[J^\_]`^`WZR  
@HWI-EAS443:3:84:697:599#0/1  
CAGCCATCATGACAAGCACTTGCTGACCAAGCGACTGACT  
+HWI-EAS443:3:84:697:599#0/1  
`UQ\_]`aa[`]a^]Ya`Ya[0`^`[\_a\_QYa\_XVVaZ`Z  
@HWI-EAS443:3:85:207:237#0/1  
CTGACCACAACCTGCCTGTCTTATCATTAGGGCGTGGATTG  
+HWI-EAS443:3:85:207:237#0/1  
aaaZQVsx^X¥`PJQ[^PRXP\_V^]SXXX]BBBBBBBBBB  
@HWI-EAS443:3:88:1032:227#0/1  
ANCACAACCTGCCTGTCTTATCATTAGGGCGTGGATTGTCT  
+HWI-EAS443:3:88:1032:227#0/1  
YDRaaZ\_^a`]`aaU]]bbaaabaa`Y```^`aaaa\_]`^a  
@HWI-EAS443:3:88:1458:1306#0/1  
ACCAGACATATGTTAACATCAGCAACACCAACTTTGCTGC  
+HWI-EAS443:3:88:1458:1306#0/1  
W\_[abaaaba`b`aa`a`Yaa`aaRa`^`Zaaaa]^`  
@HWI-EAS443:3:88:1496:1027#0/1  
GCCCCGTAATTTACGGAACCACTGACTGTCCAGCAGAA  
+HWI-EAS443:3:88:1496:1027#0/1  
H¥Xaa¥bbbaaZ\_b`]`^`ba`b[baa[baIRO¥ZUa¥]a  
@HWI-EAS443:3:88:1708:1548#0/1  
CATGTGTGTGCAGGGATAACTGGCATGGCTCGAATCGAAC  
+HWI-EAS443:3:88:1708:1548#0/1  
abbbababbb\_aabbbbababba`bba`aba`W`ZGaXFX  
@HWI-EAS443:3:92:729:769#0/1  
CAGCCGTTGTAACACAGCCACTGCCCCATTGTCTG  
+HWI-EAS443:3:92:729:769#0/1  
aba`^`a`UWX\_aa````a`^¥\_a\_\_a\_ZZ¥^a`QZVY  
@HWI-EAS443:3:92:777:1320#0/1  
GCCCCCTCCATACAACCTCAAGATTTGAGTCAGTCGCTTG  
+HWI-EAS443:3:92:777:1320#0/1  
]````\_```]]¥]`\_\_\_\_\_]¥\_ababaab]aa\_^]`X\_a^  
@HWI-EAS443:3:92:997:390#0/1  
GTGCAGGGATAACTGGCATGGCTCGAATCGACCGTGGGGG  
+HWI-EAS443:3:92:997:390#0/1  
aab]aaaaa\_a`¥aaa`T^`\_Y`¥^Z^LEUUSTUQ\_`¥UB  
@HWI-EAS443:3:93:1204:541#0/1  
ACCAGACATATGTTAACATCAGCAACACCAACTTTGCTGC  
+HWI-EAS443:3:93:1204:541#0/1  
]U\_Y]^b\_\_^^a^]`\_]T[aaba`b[Y^a\_a`]M]¥Q



@HWI-EAS443:3:93:1502:1032#0/1  
ACCAGACATATGTTAACATCAGCAACACCAACTTTGCTGC  
+HWI-EAS443:3:93:1502:1032#0/1  
a\_`a`aUa`abb^\_``a\_^a`¥aa]^^^a``W¥X^  
@HWI-EAS443:3:93:814:573#0/1  
ACCAGACATATGTTAACATCAGCAACACCAACTTTGCTGC  
+HWI-EAS443:3:93:814:573#0/1  
a\_aa¥`aaZabaaaa`aVaa¥]Y``]]U`Ya^`aI\_] ]  
@HWI-EAS443:3:95:1715:1083#0/1  
GACCCATTGTCTGGGCCAGAAATTCCAATTGTTAGCCAAT  
+HWI-EAS443:3:95:1715:1083#0/1  
^abbabbbb`\_bbb]\_aaUabbbbaZabbbU`b``]bbbb  
@HWI-EAS443:3:96:1279:951#0/1  
ATCGTGGGTGTCTTTCAACCAGAATCTGGAATATCAGATA  
+HWI-EAS443:3:96:1279:951#0/1  
aa`b`bbb]a\_aabb`aa`[abaaa^aaaa`aaa^`a\_`a  
@HWI-EAS443:3:96:1644:983#0/1  
ANCGACCGTGGGTGTCTTTCAACCAGAATCTGGAATATCA  
+HWI-EAS443:3:96:1644:983#0/1  
[DVabb]b`aab]^`ZabaWaaa``TY`a\_]H^Q`¥`aG`  
@HWI-EAS443:3:97:703:940#0/1  
TGCATGTGTAATGGTTCTTGCTTTACTGTAATGACCGGT  
+HWI-EAS443:3:97:703:940#0/1  
aaaaab`b`aaaaba\_`\_aaa]aa`a`aa\_aaaaa\_\_\_MZ  
@HWI-EAS443:3:97:894:1359#0/1  
CGTGCAGGGATAACTGGCATGGCTCGAATCGACCGTGGGG  
+HWI-EAS443:3:97:894:1359#0/1  
\_bbabbbabaaabaababbabX\_aaRR¥[Q`SPSaZa^`G  
@HWI-EAS443:3:98:183:1091#0/1  
TCGCCACTCAATTCAACTTGGGAATCAAAATCAGATTGAA  
+HWI-EAS443:3:98:183:1091#0/1  
aa\_a\_aaaaaaaaa`aaaa`aaaa\_\_aa````\_aaa\_`aaa  
@HWI-EAS443:3:98:465:1937#0/1  
ACCAGACATATGTTAACATCAGCAACACCAACTTTGCTGC  
+HWI-EAS443:3:98:465:1937#0/1  
ab]`Y\_TZaa\_a\_a````aU`a¥^a[a\_\_`¥W\_\_X\_YZ]P  
@HWI-EAS443:3:9:418:1577#0/1  
ACCTTGGTCAGCAAGTGCTTGTGCATGATGGCATCAATTGG  
+HWI-EAS443:3:9:418:1577#0/1  
ZN¥aXUSG\_a[``]\_^Y[Y`YS[^\_LP]\_WN^W[\_^\_\_VJ  
@HWI-EAS443:3:100:1392:80#0/1  
GGGGGATGTGTTTGCATAAGGGAACCATTCATATCATGT  
+HWI-EAS443:3:100:1392:80#0/1  
aba`bX\_`[aWa\_aYG]I]\_a^[^^RF¥^]V[[Y\_BBBBB  
@HWI-EAS443:3:100:572:488#0/1  
GGAGTGGTCAGGATATAGCGGGAGTTTTGTTTCAGCATCCA  
+HWI-EAS443:3:100:572:488#0/1  
ab`aZbb\_\_\_`aU\_\_a\_`]aaa^aR\_aaY][JSVPZ^VVB  
@HWI-EAS443:3:10:1486:1179#0/1  
CTGGGTGTCTTTCAACCAGAATCTGGAATATCAGATAGGA

+HWI-EAS443:3:10:1486:1179#0/1  
\_bbbbbbbabbbbbbabbbbbbbaabbbbbbb  
@HWI-EAS443:3:10:351:1906#0/1  
TGCCACTCAATTCAACTTGGGAATCAAATCAGATTGAAA  
+HWI-EAS443:3:10:351:1906#0/1  
aaaabaabaaaa\_aa`a`^^aba`aa``aaaa`\_`aaa  
@HWI-EAS443:3:10:570:422#0/1  
TGAGAGGGAACCTCACCAATAGGACAGCTCATTAGGGTTC  
+HWI-EAS443:3:10:570:422#0/1  
\_PVbX[\_Za`\_`X\_\_ZNVWZ^HT[\_VSPU¥T¥NLNQWV  
@HWI-EAS443:3:12:183:1990#0/1  
GAATCGGTTCCAAGGGGATGTGTTTGTCCATAAGGGAACA  
+HWI-EAS443:3:12:183:1990#0/1  
aaaab¥b]GaSaaNOGa^K^USWZ^a]^Sa\_[U\_\_G`WTB  
@HWI-EAS443:3:13:122:276#0/1  
AAATGGTTCTTGCTTTACTGTAATGACCGATGGACCAAGA  
+HWI-EAS443:3:13:122:276#0/1  
`^¥]\_OWb^`^`[aaaZY¥¥T¥a\_a\_^]\_a]aTTSI¥GMF  
@HWI-EAS443:3:15:1235:857#0/1  
CCCCAGTCCATCCGTTCCGATCCCAAATCATCTCAAACC  
+HWI-EAS443:3:15:1235:857#0/1  
aba\_\_b\_b`bbaba]\_abbaaa^abaa\_Y]aQa\_aa\_bSa  
@HWI-EAS443:3:16:203:779#0/1  
CGGGCTCCTGTCTTTAATGGTTCCATTGGAATGTTTGTCA  
+HWI-EAS443:3:16:203:779#0/1  
ab^ab`ab]aababbabaaa^aaa\_ba\_\_[\_`ab\_`a\_```  
@HWI-EAS443:3:16:345:550#0/1  
CGCCCCGTAATTTACGGAAACCACTGACTGTCCAGCAGC  
+HWI-EAS443:3:16:345:550#0/1  
ab`abba\_¥¥a`aaaba¥`a`a`aaa^^aaY¥`\_`\_^^  
@HWI-EAS443:3:16:42:1304#0/1  
AGCTCCATTAGACGATACTGGACCACAACCTGCCTGTCTTA  
+HWI-EAS443:3:16:42:1304#0/1  
aTbaba`\_]a`\_]`\_W]RFRMTPR]RBBBBBBBBBBBB  
@HWI-EAS443:3:17:1090:667#0/1  
CGAGTGGTCAGGATATAGCGGGAGTTTTGTTCCAGCATCCA  
+HWI-EAS443:3:17:1090:667#0/1  
`aTa^ba\_Rab`]\_aa^a`\_a¥TZFXaaR][FXRQYRRZ  
@HWI-EAS443:3:17:1092:554#0/1  
TGTGCAGGGATAACTGGCATGGCTCGAATCGACCGTGGGG  
+HWI-EAS443:3:17:1092:554#0/1  
aaaaa]``aaa`a^aa`\_a]`\_`¥RKYVS]SSPMDV^\_B  
@HWI-EAS443:3:18:1705:1024#0/1  
ACCCTCTCCATACAACTCAAGATTTGAGTCAGTCGCTTGG  
+HWI-EAS443:3:18:1705:1024#0/1  
a[a¥`]a\_`a]a`¥`^\_S[¥^]\_Z^YQQU[RLXUUVRR  
@HWI-EAS443:3:19:64:1464#0/1  
CGCGGGAGTTTTGTTCCAGCATCCAGAACTAACAGGGCTGG  
+HWI-EAS443:3:19:64:1464#0/1  
ababa]¥`\_aaaa]Xaaa`Yaa`a\_¥aa\_a`\_a\_]\_aZ[Z

@HWI-EAS443:3:19:68:918#0/1  
TGCCCATCCACTAACAGGGCAGAGAGGAATTGCCCGCT  
+HWI-EAS443:3:19:68:918#0/1  
aaabbbbaaabaababb`a^aba`a`aaZa``\_a\_\_aa¥a  
@HWI-EAS443:3:1:1253:1999#0/1  
AGCATCAATTGGCTAACAAATTGGAATTTCTGGCCCAGACA  
+HWI-EAS443:3:1:1253:1999#0/1  
`]aa`[abaa¥KI]\_^T`a\_a`[Z`S^aY^YTX^GU`[BB  
@HWI-EAS443:3:1:1343:532#0/1  
TCGAGCCATGCCAGTTATCCCTGCACACACATGTGATTTA  
+HWI-EAS443:3:1:1343:532#0/1  
^\_b`[YUaba¥\_]UaaaVPW`aR`\_a[^R`aa]`]\_BBB  
@HWI-EAS443:3:1:616:269#0/1  
TGGACTAGCGGGAGCAGCATATCCTTTTGTGGTGTAAACG  
+HWI-EAS443:3:1:616:269#0/1  
[abaabaaab`a`a^\_¥R]``a[\_`aa`\_Ya\_Va¥Z¥BBB  
@HWI-EAS443:3:20:1702:142#0/1  
CATCTTGCTTTATTGAGAAGTTATTGTCTGTCCCAGTCCA  
+HWI-EAS443:3:20:1702:142#0/1  
^`babbb`baba\_Q¥`aaa`Taa]a^YWa`BBBBBBBBBB  
@HWI-EAS443:3:20:1792:1164#0/1  
NTCATATCATGCTCCCCCTTGAATGCAGAACCTTCTTCT  
+HWI-EAS443:3:20:1792:1164#0/1  
DNWSRQPTNVWYTWVWTVSSSPUSSUPJNLUNSUHW  
@HWI-EAS443:3:20:588:1961#0/1  
ATGGGCCAGAAATCCAATTGTTAGCCAATTGATGCCATC  
+HWI-EAS443:3:20:588:1961#0/1  
H^b[TWZ`XZ[^ZbaaT^ZXXSaa``]a\_YR]`MbWR`\_^  
@HWI-EAS443:3:21:1585:1014#0/1  
GGCCCCTAATTATCACTATGAGGAATGCTCCTGTTATCCT  
+HWI-EAS443:3:21:1585:1014#0/1  
a`[W^`a`aab\_\_P\_Za`a\_\_\_\_`Y\_^\_U`^U`\_]`\_`RO^  
@HWI-EAS443:3:22:1055:1609#0/1  
TGCGGGAGTTTTGTTTCAGCATCCAGAACTAACAGGGCTGG  
+HWI-EAS443:3:22:1055:1609#0/1  
\_^\_Z\_]\_[a¥`\_X]`a^¥a]`]\_[¥aaZaaaaYU[^`\_`\_`  
@HWI-EAS443:3:23:1234:224#0/1  
ACCCTCTCCATACAACCTCAAGATTTGAGTCAGTCGCTTGG  
+HWI-EAS443:3:23:1234:224#0/1  
a`[LU`ab`aaa[a`Za\_\_\_\_\_`\_\_^^]\_]`ZX\_T]\_ZZ  
@HWI-EAS443:3:23:1245:697#0/1  
CAATTGGAATTTCTGGCCCAGACAATGGGGCAGTGGCTGG  
+HWI-EAS443:3:23:1245:697#0/1  
a\_b\_bbb\_bbbabaab\_a`]^ba`SabbWab\_aBBBBBBBB  
@HWI-EAS443:3:23:20:82#0/1  
CGCCCCGTAATTTACGGAAACCACTGACTGTCCAGCAGC  
+HWI-EAS443:3:23:20:82#0/1  
a]a`]Z^`^aa^a`Y`a^Y`\_]^^X^¥\_BBBBBBBBBBBB  
@HWI-EAS443:3:24:1193:896#0/1  
AGCCGTTGTACTTTAACACAGCCACTGCCCCATTGTCTGG

+HWI-EAS443:3:24:1193:896#0/1  
aabb`aa`^X\_a^]¥^]^aa`aaa^U`\_]`a^VX[WYX  
@HWI-EAS443:3:24:1546:350#0/1  
CGCCCCTAATTACTACTATGAGGAATGCTCCTGTTATCCT  
+HWI-EAS443:3:24:1546:350#0/1  
abb\_X`\_baba`aT\_¥a`bbab`aaba¥aa^Zaa`baZ[a  
@HWI-EAS443:3:24:555:1325#0/1  
AAACTGCCTGTCTTATCATTAGGGCGTGGATTGTCTCCGA  
+HWI-EAS443:3:24:555:1325#0/1  
abb^b`abb``bbaaa\_aa\_a\_]\_aR^aa\_]`P^a\_a\_]`  
@HWI-EAS443:3:24:636:1548#0/1  
CACCGTTTCTTGAACATAATGCTTTTAGTTCTCCCTATCCA  
+HWI-EAS443:3:24:636:1548#0/1  
]b\_a]^WVa`]XZa^`bba`aaaZV\_X^aaV¥a]Ya\_Z¥a  
@HWI-EAS443:3:25:1380:1726#0/1  
TCAAAGCGTCATTACTTATGAAAACAACACTTGGGTAAAC  
+HWI-EAS443:3:25:1380:1726#0/1  
aaabV^aa[aZ[]a]`\_X^\_a]b`aZY]a`Q^`\_^Sa\_]`  
@HWI-EAS443:3:25:1518:1364#0/1  
CGTTCCCTCTCCATACAACACTCAAGATTTGAGTCAGTCGCT  
+HWI-EAS443:3:25:1518:1364#0/1  
\_`aaa`b¥bbbbbb`aab]^\_ab```aab`\_``ba^[aR]  
@HWI-EAS443:3:25:411:1956#0/1  
TGCCACTCAATTCAACTTGGGAATCAAAATCAGATTGAAA  
+HWI-EAS443:3:25:411:1956#0/1  
aabbbaabaabbbb]`aaaV`a`abbbaa`aa\_aa`\_aaa  
@HWI-EAS443:3:25:45:1749#0/1  
CGGGGCCTTGCTAAATGACAAACATTCCAATGGAACCATT  
+HWI-EAS443:3:25:45:1749#0/1  
aaTXS\_bbbbbbb`ba]a```aaaaabbbba]Y`abaa^a  
@HWI-EAS443:3:25:536:742#0/1  
TTCCTGTCTTTAATGGTTCCATTGGAATGTTTGTCTTTA  
+HWI-EAS443:3:25:536:742#0/1  
Lab`a`Xa]b¥aSSXbb\_a¥aZY¥Va`\_^]¥V\_aRR[Xb`  
@HWI-EAS443:3:25:806:374#0/1  
GGCCACTCAATTCAACTTGGGAATCAAAATCAGATTGAAA  
+HWI-EAS443:3:25:806:374#0/1  
a`aaaX`a`\_aa`[¥[^\_aa`^a]a`\_a`\_^\_a`^\_`^`^`  
@HWI-EAS443:3:25:853:895#0/1  
CGTCGCTTGGTCAGCAAGTGCTTGTCTATGATGGCATCAAT  
+HWI-EAS443:3:25:853:895#0/1  
`bbbbbabbb`bbbaabbabbbbbbabbab``baabbbb  
@HWI-EAS443:3:26:1178:1215#0/1  
GGCCCCTAATTTACGGAAACACTGACTGTCCAGCAGC  
+HWI-EAS443:3:26:1178:1215#0/1  
`¥aaaa\_XY`¥¥[Q`\_aTVO¥ZV\_[[TP¥¥UFBBBBBBBB  
@HWI-EAS443:3:26:44:1376#0/1  
TGCCACTCAATTCAACTTGGGAATCAAAATCAGATTGAAA  
+HWI-EAS443:3:26:44:1376#0/1  
XZ\_a^aab\_`¥a```aabb`^Y¥aa[M[^`aaaaa^`baa

@HWI-EAS443:3:27:143:471#0/1  
AGCAGTGGGATTTTCGGAGACAATCCACGCCCTAATGATA  
+HWI-EAS443:3:27:143:471#0/1  
\_RVTO¥SL^[\_UUWPZ]N]^VVZZWQJQZN^¥^^`^^U[B  
@HWI-EAS443:3:27:375:509#0/1  
CGCGGGAGTTTTGTTCCAGCATCCAGAACTAACAGGGCTGG  
+HWI-EAS443:3:27:375:509#0/1  
a`Z^[]V]¥Za^¥`a\_a^aW\_a\_¥aaa^¥W¥Z^aT\_`  
@HWI-EAS443:3:27:53:825#0/1  
ACCCTCTCCATACA ACTCAAGATTTGAGTCAGTCGCTTGG  
+HWI-EAS443:3:27:53:825#0/1  
Z\_bb`^a`b^`¥\_\_a\_\_[^`[\_^\_]aTa\_U[a`a¥YGZ  
@HWI-EAS443:3:27:832:887#0/1  
CGCCCATCCACTAACAGGGCAGAGAGGAATTGCCCGCT  
+HWI-EAS443:3:27:832:887#0/1  
aaaabaaaaababaaaaaX`^b^`Za`^aaa\_^\_^Z^`]  
@HWI-EAS443:3:28:1485:1231#0/1  
AGCAGCAAAGTTGGTGTGCTGATGTTAACATATGTCTGG  
+HWI-EAS443:3:28:1485:1231#0/1  
`^\_ba\_\_\_¥¥a`U]S`^]aa]aT\_a]¥X\_\_Y\_I¥`]SY  
@HWI-EAS443:3:28:536:1765#0/1  
TGCCACTCAATTCAACTTGGGAATCAAATCAGATTGAAA  
+HWI-EAS443:3:28:536:1765#0/1  
aaa`bbbb]babab\_aab`aaaaba\_aaaab\_baaaaa  
@HWI-EAS443:3:29:574:466#0/1  
CGCCCGCTAATTTACGGAAACCACTGACTGTCCAGCAGC  
+HWI-EAS443:3:29:574:466#0/1  
`X)`a\_¥S]RUZ^]V¥FJXTR¥OVVPS[[ZV\_XBBBBBB  
@HWI-EAS443:3:29:850:27#0/1  
CGGGCTCCTGTCTTTAATGGTTCATTGGAATGTTTGTCA  
+HWI-EAS443:3:29:850:27#0/1  
aa^a]X\_\_a^`abaaa\_a`]Z^¥]aZ^a]¥`\_`[^ZYZ¥  
@HWI-EAS443:3:2:1122:850#0/1  
AGCCCCTAATTACTACTATGAGGAATGCTCCTGTTATCCT  
+HWI-EAS443:3:2:1122:850#0/1  
aa]\_a\_aa[aa\_a¥\_^aaa`\_a\_a]`^]a^`\_`OZ\_  
@HWI-EAS443:3:2:1605:196#0/1  
GCCCCGCTAGTCCAGATTGTGTTCTCTTTGGGTCGCCCTCT  
+HWI-EAS443:3:2:1605:196#0/1  
a`[\_\_\_aZ^[T¥¥\_^^\_¥^\_¥\_¥`W\_¥`W\_SW^YY¥WWWZWY  
@HWI-EAS443:3:2:234:174#0/1  
TTTCGGAGACAATCCACGCCCTAATGATAAGACAGGCAGG  
+HWI-EAS443:3:2:234:174#0/1  
a`abbbaba]^R]^\_a]^`^T^aa`X]aM¥[BBBBBB  
@HWI-EAS443:3:2:431:35#0/1  
TGCGGGAGCAGCATATCCTTTTGTGGTGTAAACAGTGACA  
+HWI-EAS443:3:2:431:35#0/1  
ababbaaa`b]\_`a`\_`\_aaaa\_a`YaZa]^Z^\_V`^W\_  
@HWI-EAS443:3:30:156:483#0/1  
GCCTGTTATCCTGATTCTAGTGAAATCACATGTGTGTGCA

+HWI-EAS443:3:30:156:483#0/1  
`bbab`abababaabab`ba\_aaa^aa`b\_aa`a\_`]a]`  
@HWI-EAS443:3:30:228:1223#0/1  
CTCCCTTTTCTATTCTGAAGATCTTGTATGAGGCCTGTCC  
+HWI-EAS443:3:30:228:1223#0/1  
a]abb`abaaa`]`baabbaaabaaa\_aa`a`a`a`\_`a  
@HWI-EAS443:3:31:1258:1380#0/1  
TGCGGGAGCAGCATATCCTTTTGTGGTGTAAACAGTGACA  
+HWI-EAS443:3:31:1258:1380#0/1  
aba\_b\_`]aaba`aa`\_bbbbZYaaUb`aa\_aaaZa``^  
@HWI-EAS443:3:31:1270:1285#0/1  
CGTTCCCTCTCCATACAACCTCAAGATTTGAGTCAGTCGCT  
+HWI-EAS443:3:31:1270:1285#0/1  
aa[[\_^U\_^UX]^\_V¥^[[\_Y^X\_U[^AT[^P[^WWTOWX  
@HWI-EAS443:3:31:1792:938#0/1  
NGGACAGACAATAACTTCTCAATAAAGCAAGATATCGTAG  
+HWI-EAS443:3:31:1792:938#0/1  
DM[WW[[W[[YZYY[Y[V[Y[[[ZW[[UY[[YY[[Y[[Y[[  
@HWI-EAS443:3:31:855:1649#0/1  
CGGGCTCCTGTCTTTAATGGTTCCATTGGAATGTTTGTCA  
+HWI-EAS443:3:31:855:1649#0/1  
¥aaa`b¥ba[\_¥a\_abb`\_U`\_\_bbaab`abaaaabZ]a\_  
@HWI-EAS443:3:32:1235:144#0/1  
TGGTGTCTTTCAACCAGAATCTGGAATATCAGATAGGATA  
+HWI-EAS443:3:32:1235:144#0/1  
\_b`\_a`]^\_aZ`[\_`\_\_a`\_aZaa^^\_^^]LFRZ\_¥Y[XU\_  
@HWI-EAS443:3:33:1313:1217#0/1  
CGGCTCCTGTCTTTAATGGTTCCATTGGAATGTTTGTCA  
+HWI-EAS443:3:33:1313:1217#0/1  
H\_ab\_b^¥\_ZbZ]bba¥\_¥]`\_\_`^T``¥bbVU\_bSJDV]  
@HWI-EAS443:3:33:548:1500#0/1  
CTCCTATTGGTGAAGTCCCTCTCCATACAACCTCAAGATT  
+HWI-EAS443:3:33:548:1500#0/1  
a`bb¥X`a]X\_aba]`abaa`aaaa\_a`aaaV\_\_]`Y^  
@HWI-EAS443:3:33:951:899#0/1  
ATCCCAAATCATCTCAAACCGTTTCTTGAACCTAATGCTC  
+HWI-EAS443:3:33:951:899#0/1  
TQ]]YQX¥b```aZYYWVa\_a^a\_aa`^\_WUMWR`YHG¥G  
@HWI-EAS443:3:34:885:243#0/1  
TGTCGCTTGGTCAGCAAGTGCTTGTGCATGATGGCATCAAT  
+HWI-EAS443:3:34:885:243#0/1  
a¥R\_bba[Q\_Y\_\_¥\_]Z`\_\_Z[a]LX][`TQ[^ZTLSPQB  
@HWI-EAS443:3:35:1666:1471#0/1  
GGTCTTTACTGTATATAGCCCATCCACTAACAGGGCAGAG  
+HWI-EAS443:3:35:1666:1471#0/1  
\_\_PLXVV]\_T\_¥`a`¥^a]¥XY[¥Z^^VXZ¥¥VXZSY\_U]  
@HWI-EAS443:3:35:298:765#0/1  
CGCCCCTAATTATCACTATGAGGAATGCTCCTGTTATCCT  
+HWI-EAS443:3:35:298:765#0/1  
a\_NZ`aZUY`]¥[P[¥S^¥^YYWZ¥WZXOY¥T]LT[PZNR

@HWI-EAS443:3:36:1273:1942#0/1  
AATGTGTAATGGTTCTTGCTTTACTGTAATGACCGATGG  
+HWI-EAS443:3:36:1273:1942#0/1  
KbaXTZ¥bbaab\_I`aa\_babb`b¥abZ\_\_`ba¥\_[a^\_\_  
@HWI-EAS443:3:36:383:633#0/1  
TGCCCATCCACTAACAGGGCAGAGAGAGGAATTGCCCGCT  
+HWI-EAS443:3:36:383:633#0/1  
a^`b^`^\_b`\_]U```a`a`a¥]X\_]X``[\_`a^[\_^U  
@HWI-EAS443:3:37:1019:1656#0/1  
AGCCCCTAATTATCACTATGAGGAATGCTCCTGTTATCCT  
+HWI-EAS443:3:37:1019:1656#0/1  
ab\_bababXbbbbbbaaaaa¥\_`aaaa`b[D^aaaa\_\_b]\_  
@HWI-EAS443:3:37:1526:594#0/1  
CGGTGTAAACAGTGACACTGTGGGTTGGTCTTGCCAGAC  
+HWI-EAS443:3:37:1526:594#0/1  
`bb`Z\_ZWL¥\_b¥ba`bbba`bbb`]b¥[Sa``b\_Z``YL  
@HWI-EAS443:3:38:1132:1481#0/1  
GTGGGATTTTCGGAGACAATCCACGCCCTAATGATAAGAG  
+HWI-EAS443:3:38:1132:1481#0/1  
a[`b^S^aa`XR¥K`a^`[aYZN\_]ZV^YWVZU^[^U`B  
@HWI-EAS443:3:38:1773:1050#0/1  
AGCCCCTAATTATCACTATGAGGAATGCTCCTGTTATCCT  
+HWI-EAS443:3:38:1773:1050#0/1  
`¥ZYbab[K^b``]Yab¥bV¥\_]\_a]aUaGSZ]Y\_[\_GNG  
@HWI-EAS443:3:38:610:1581#0/1  
TTCCTGTCTTTAATGGTTCCATTGGAATGTTTGTCAATTA  
+HWI-EAS443:3:38:610:1581#0/1  
aaaaaa]aa`aaa`\_^]a`^^ZY\_]Y\_Y^[[¥Z^^]^X  
@HWI-EAS443:3:38:70:1855#0/1  
CGTTCCTCTCCATACAACACTCAAGATTTGAGTCAGTCGCT  
+HWI-EAS443:3:38:70:1855#0/1  
aa`abababaaaa`baba`\_a``]\_¥\_^[\_Taa]U\_ZZU  
@HWI-EAS443:3:39:13:549#0/1  
CGCGGGAGCAGCATATCCTTTTGTGGTGTAAACAGTGACA  
+HWI-EAS443:3:39:13:549#0/1  
a]H`aYN`a^a`[`W]\_\_\_\_`\_]ZTXXVZ^SGRRV`U]URZ  
@HWI-EAS443:3:39:792:1011#0/1  
TGCGGGAGTTTTGTTTCAGCATCCAGAACTAACAGGGCTGG  
+HWI-EAS443:3:39:792:1011#0/1  
`ba`Z`[[HVa`a^ab`a\_aaaa`aaaa]YS\_^`\_a[\_]  
@HWI-EAS443:3:39:801:80#0/1  
TGGCCTCATACAAGATCTTCAGAATAGAAAAGGAAAGAT  
+HWI-EAS443:3:39:801:80#0/1  
`^ab^]\_^aaa^^\_^]aaa\_ZaS¥``aYY¥Z\_\_`T¥X`\_]`  
@HWI-EAS443:3:3:1229:1104#0/1  
CGTGCATGTGTAATGGTTCTTGCTTTACTGTAATGACCG  
+HWI-EAS443:3:3:1229:1104#0/1  
aaY\_``bb`b`a`\_bba[b`aab^\_a]^S`aa``\_^aTL\_  
@HWI-EAS443:3:3:1459:1240#0/1  
GTAGGGTTTCGATATGGGCTCCTGTCTTTAATGGTTCCATT

+HWI-EAS443:3:3:1459:1240#0/1  
aYU]WYR`Ya\_\_\_\_]^^^[X]¥VS`^W^X¥X¥XYWYVZX  
@HWI-EAS443:3:3:1565:902#0/1  
AGCCCCTTGAGTCAAGAAGAAGTTCTGCATTCCAAGGGG  
+HWI-EAS443:3:3:1565:902#0/1  
UR`baVZabbb]b```ZabbbbbbbbaY\_aabUaaaaaaaa  
@HWI-EAS443:3:40:1018:289#0/1  
TATATGTTAACATCAGCAACACCAACTTTGCTGCTGGACA  
+HWI-EAS443:3:40:1018:289#0/1  
V\_bbbbabbbbbbbabbbbbabbbb\_aabbb]bbbaba`]]  
@HWI-EAS443:3:40:1501:1392#0/1  
AGCGACCCAAAGAGAACAATCTGGACTAGCGGGAGCAG  
+HWI-EAS443:3:40:1501:1392#0/1  
a`a]bb])a^^```V\_Ua`aW[```a^V`a`\_`aaZO[LLV  
@HWI-EAS443:3:42:240:1081#0/1  
TCGGGAGCAGCATATCCTTTTGTGGTGTAAACAGTGACAC  
+HWI-EAS443:3:42:240:1081#0/1  
abb\_WZZaaaZYWaa]\_]baaaTQ\_NP`\_WL`aaVaaaa  
@HWI-EAS443:3:42:79:1544#0/1  
GCCGTTTCTTGAACATAATGCTTTTAGTTCTCCCTATCCAA  
+HWI-EAS443:3:42:79:1544#0/1  
aba\_\_bab^abbbab\_^aaabaaaa\_\_\_^`a\_a`abbab`  
@HWI-EAS443:3:42:970:761#0/1  
CGCCCCGTAATTTACGGAACCACTGACTGTCCAGCAGC  
+HWI-EAS443:3:42:970:761#0/1  
ab^]aa^a\_aaaa[aaa`aa\_a`^\_aa¥a\_¥\_a\_¥Y¥¥Z  
@HWI-EAS443:3:43:1066:424#0/1  
TGCCCCTAATTATCACTATGAGGAATGCTCCTGTTATCCN  
+HWI-EAS443:3:43:1066:424#0/1  
abba\_abb`babaa\_aaaaaa`aaa\_``a`a`aa\_UD  
@HWI-EAS443:3:43:1403:1151#0/1  
TGCGGGAGTTTTGTTTCAGCATCCAGAACTAACAGGGCTGG  
+HWI-EAS443:3:43:1403:1151#0/1  
^\_\_a```\_aba]Z`¥\_U¥abY[\_aa]M]aa^¥aUUZ`a`  
@HWI-EAS443:3:43:623:685#0/1  
CTGGGCTCCTGTCTTTAATGGTTCCATTGGAATGTTTGTC  
+HWI-EAS443:3:43:623:685#0/1  
aU`\_\_`])aa\_a^a^^Z¥^^¥Y\_\_`TPXa`a\_]V\_\_aWU  
@HWI-EAS443:3:43:759:1207#0/1  
TTTCATATCATGCTCCCCCTTGAATGCAGAACCTTCTTC  
+HWI-EAS443:3:43:759:1207#0/1  
`abaabb`aa`a`aa`aaaa`aa\_\_a`\_^`\_`\_aa]  
@HWI-EAS443:3:44:1658:1607#0/1  
TGTCGCTTGGTCAGCAAGTGCTTGTTCATGATGGCATCAAT  
+HWI-EAS443:3:44:1658:1607#0/1  
`V\_XXYa`¥aXNY[QSV[W`TZ¥HOSL[PT]UWSW¥SWUH  
@HWI-EAS443:3:45:460:602#0/1  
CGGTTCCATTGGAATGTTTGTCATTTAGCAAGGCCCTTG  
+HWI-EAS443:3:45:460:602#0/1  
aaaab\_abbbbbbbba`bbbaaababa`abaaaab`aaa



@HWI-EAS443:3:46:1691:198#0/1  
CGTGGTGTAAACAGTGACACTGTGGGTTGGTCTTGCCAG  
+HWI-EAS443:3:46:1691:198#0/1  
aa\_\_bY]`aWW\_SaHTP`Q\_^X[\_[\_¥MWRHS]S¥¥LQWT  
@HWI-EAS443:3:47:1091:1833#0/1  
TCAGAACCTTCTTCTTGAAGGGCCTTGCTAAATGA  
+HWI-EAS443:3:47:1091:1833#0/1  
IVT\_PX[aS[`Z`X`¥bWRXX0[aaLXPWbXX\_^`aa`^]  
@HWI-EAS443:3:47:1202:1222#0/1  
TGCCCATCCACTAACAGGGCAGAGAGGAATTGCCCGCT  
+HWI-EAS443:3:47:1202:1222#0/1  
abaaaba`aa\_a`aa\_a^a`¥\_¥a¥a^\_\_¥`\_\_`Y^S]T^  
@HWI-EAS443:3:48:1187:87#0/1  
TTGCCGTTGTACTTTAACACAGCCACTGCCCCATTGTCTG  
+HWI-EAS443:3:48:1187:87#0/1  
aaaa[a`aa\_`^`a`aUa]`\_[]\_^]YX]]WX^][W]Y^  
@HWI-EAS443:3:48:1585:111#0/1  
CGATACTGGACCACAACACTGCCTGTCTTATCATTAGGGCGG  
+HWI-EAS443:3:48:1585:111#0/1  
ab`baba`X[¥^a\_QZ`a`PZaUa]`¥a\_R\_YUSZ\_\_ZD  
@HWI-EAS443:3:49:1237:348#0/1  
TGCGGGAGTTTTGTTTCAGCATCCAGAACTAACAGGGCTGG  
+HWI-EAS443:3:49:1237:348#0/1  
ab`]^b[bZaaaa\_a¥\_a\_\_`\_\_\_a]a¥aa`}`\_\_YZ^`a  
@HWI-EAS443:3:51:1178:1753#0/1  
CGCTCCATTAGACGATACTGGACCACAACACTGCCTGTCTTA  
+HWI-EAS443:3:51:1178:1753#0/1  
aa`aa[aabaaa]a`¥aL[]`VLQ[U\_`V^Y[^^^YY¥P  
@HWI-EAS443:3:51:527:426#0/1  
CCCAAATCATCTCAAACCGTTTCTTGAACCTAATGCTTTA  
+HWI-EAS443:3:51:527:426#0/1  
`¥`^HY\_aabb`ZW]\_[\_]Yb`VY¥a^Ta`^^`b\_a¥\_S  
@HWI-EAS443:3:51:803:747#0/1  
GCCGCTAATTTACGGAAACCACTGACTGTCCAGCAGCAA  
+HWI-EAS443:3:51:803:747#0/1  
a[`a``¥Xaba¥`][`[a\_ZZ]^YSN^ZRYVVIUSOYFJT  
@HWI-EAS443:3:52:1685:1317#0/1  
TGTGCTTGTATGATGGCATCAATTGGCTAACAATTGGAA  
+HWI-EAS443:3:52:1685:1317#0/1  
aa`a]^a`]Ua\_a`a^V\_`^U`\_\_`]MPV\_^V]V¥\_UPRY  
@HWI-EAS443:3:52:298:135#0/1  
TGGGTTCCGATATGGGCTCCTGTCTTTAATGGTTCCATTGG  
+HWI-EAS443:3:52:298:135#0/1  
ab¥]V`Ya`YXZ`a`[`^^]`[Y```WT``¥S]NZQ]]^Z  
@HWI-EAS443:3:52:461:1986#0/1  
GCTGCCTGTCTTATCATTAGGGCGTGGATTGTCTCCGAAA  
+HWI-EAS443:3:52:461:1986#0/1  
aaU¥aaa][aaaYb¥V\_aaI`\_a^\_ON`\_`^W^^Z[^]Z¥  
@HWI-EAS443:3:53:284:1778#0/1  
CGCTGTGTTAAAGTACAACGGCATAATAACAGACACTATC

+HWI-EAS443:3:53:284:1778#0/1  
aabbbbbbbba`abbb`aab`bbabababbabbbbaaaa  
@HWI-EAS443:3:55:542:776#0/1  
GGCCCCGTAATTTACGGAAACCACTGACTGTCCAGCAGC  
+HWI-EAS443:3:55:542:776#0/1  
abba\_\_\_aaaaa^`ab\_`Z]``\_`a`¥aaP`XGY^]^[  
@HWI-EAS443:3:56:293:141#0/1  
CCAGACATATGTTAACATCAGCAACACCAACTTTGCTGCT  
+HWI-EAS443:3:56:293:141#0/1  
aaaaaaabbbbaaaa`aaaa`aa\_a`a`\_aaa`^``]\_  
@HWI-EAS443:3:56:459:1058#0/1  
TGTGCTTGTCATGATGGCATCAATTGGCTAACAAATTGGAA  
+HWI-EAS443:3:56:459:1058#0/1  
\_Z¥^`abY\_[```aa¥^a[a``aaa¥Xa^Z¥^``\_¥]\_  
@HWI-EAS443:3:56:518:122#0/1  
GGCATGTGTAATGGTTCTTGCTTTACTGTAATGACCGAT  
+HWI-EAS443:3:56:518:122#0/1  
aa`aaaa^0Za[^aZZ]a\_^Y]\_`^Z^a]\_¥\_`¥NX\_^Z  
@HWI-EAS443:3:56:530:642#0/1  
GGGGCTCCTGTCTTTAATGGTTCCATTGGAATGTTTGTCA  
+HWI-EAS443:3:56:530:642#0/1  
a]```aa`a\_aaaa\_\_]]]``\_^^\_\_\_\_X^\_]`aY^ZZ  
@HWI-EAS443:3:58:18:973#0/1  
TGTGTCCTGTTTACACCACAAAAGGATATGCTGCTCCCG  
+HWI-EAS443:3:58:18:973#0/1  
T^]\_\_\_\_Za\_Uaa\_X\_a[X¥^T\_a\_TXT`¥`^XWRPMOZ`  
@HWI-EAS443:3:59:1197:1272#0/1  
AGCCCCTAATTATCACTATGAGGAATGCTCCTGTTATCCT  
+HWI-EAS443:3:59:1197:1272#0/1  
ab\_\_\_`abbbaabaabaaaa^aaaba``aba^a\_`ZV[WX  
@HWI-EAS443:3:59:1555:832#0/1  
CGTGGTGTAACAGTGACACTGTGGGTTGGTCTTGCCAG  
+HWI-EAS443:3:59:1555:832#0/1  
aba^`abbababbbabbaaaba`bbaabba¥aaaSM`\_\_  
@HWI-EAS443:3:59:661:1082#0/1  
GCAGGGATAACTGGCATGGCTCGAATCGACCGTGGGTGTG  
+HWI-EAS443:3:59:661:1082#0/1  
a`OX\_XZ]WZ`^YTQQ]XWXVBBBBBBBBBBBBBBBBBB  
@HWI-EAS443:3:59:861:1096#0/1  
CCCCTCTCCATACTCAAGATTTGAGTCAGTCGCTTGG  
+HWI-EAS443:3:59:861:1096#0/1  
ababaababba`bbabaaababbaa`aba[``\_aUuaL\_  
@HWI-EAS443:3:5:1313:115#0/1  
CGGGCCCTTGCTAAATGACAAACATTCCAATGGAACCATT  
+HWI-EAS443:3:5:1313:115#0/1  
\_\_Z\_]bKabb]\_aa¥`abababa`¥^W`Uaab\_`bYUaab  
@HWI-EAS443:3:5:329:692#0/1  
GGCTGTGTTAAAGTACAACGGCATAATAACAGACACTATA  
+HWI-EAS443:3:5:329:692#0/1  
`ba^b\_b¥aaab`]`^^`baaa^aaa¥aaba`\_``^aYB

@HWI-EAS443:3:5:579:474#0/1  
ACTCCTGTCTTTAATGGTTCCATTGGAATGTTTGTTCATTT  
+HWI-EAS443:3:5:579:474#0/1  
aabaab`aabaaaa`a`\_a`\_a`\_a`\_a`\_aa^Z^^a\_  
@HWI-EAS443:3:60:372:21#0/1  
CCAGACATATGTTAACATCAGCAACCAACTTTGCTGCT  
+HWI-EAS443:3:60:372:21#0/1  
abbba`^ba^abbbaaabaa`aaaaaG^```aaaa\_a`\_  
@HWI-EAS443:3:61:1789:580#0/1  
CGCCCCGTAATTTACGAAACCACTGACTGTCCAGCAGC  
+HWI-EAS443:3:61:1789:580#0/1  
aabbbaa`abbbababa^a\_\_\_aaaa\_^\_\_ZU^Y[U[XN  
@HWI-EAS443:3:61:968:1520#0/1  
TGCCCCGTAATTTACGAAACCACTGACTGTCCAGCAGA  
+HWI-EAS443:3:61:968:1520#0/1  
aaaa``aaaaa`Z`\_a`aaaa`a`\_`^`\_`T`[USVVG  
@HWI-EAS443:3:62:1138:1213#0/1  
TACCAGAATCTGGAATATCAGATAGGATACATATGCAGTG  
+HWI-EAS443:3:62:1138:1213#0/1  
aaabab`\_a`bbaabbbbaaaa`a`\_a`[a`aZQ[\_Ya  
@HWI-EAS443:3:62:1502:1534#0/1  
GCCCAAGTTGAATTGAGTGGCTAATCCATATTGAGATTAT  
+HWI-EAS443:3:62:1502:1534#0/1  
`[^`bbaabb`bbabb`abbbb`M`^`XY[a`YaWVa`\_`  
@HWI-EAS443:3:62:471:1838#0/1  
CTTTAACACAGCCACTGCCCCATTGTCTGGGCCAGAAATC  
+HWI-EAS443:3:62:471:1838#0/1  
\_b`a`b`\_Yb`]]UV\_aaZHYaaYRNGQVWL[`¥`]HZ[BB  
@HWI-EAS443:3:62:698:121#0/1  
CGGGTTGGTCTTGCCAGACGGTGCTGAGTTGCCATTTAC  
+HWI-EAS443:3:62:698:121#0/1  
abbb`bbbbbbabbaa``abaRa`^aaaX`\_[]\_]`^`¥  
@HWI-EAS443:3:62:965:1036#0/1  
TGCGGGAGTTTTGTTCCAGCATCCAGAACTAACAGGGCTGG  
+HWI-EAS443:3:62:965:1036#0/1  
VWX[ZV\_\_\_[[a\_WW`Za\_R]]Z`[D[WOT]]ZX\_U\_\_Z`  
@HWI-EAS443:3:63:120:1795#0/1  
TGACCGTGGGTGTCTTTCAACCAGAATCTGGAATATCAGA  
+HWI-EAS443:3:63:120:1795#0/1  
`^`a]KQX0^TZWa`aaa^]a\_POTXRY\_S SX`\_\_X`00X  
@HWI-EAS443:3:63:1418:162#0/1  
GGGCAGTTGTGGTCCAGTATCGTCTAATGGAGCAAATGGA  
+HWI-EAS443:3:63:1418:162#0/1  
abbaab\_ab`ba`a][`U`a\_a`\_`^`^`a`S``^]a`a[  
@HWI-EAS443:3:63:156:658#0/1  
TGGCCCCTTGAGTCAAGAAGAAGTTCTGCATTCCAAGGG  
+HWI-EAS443:3:63:156:658#0/1  
ababaabaaa`\_a`\_`]U[\_`a`V^aa`\_\_``````\_\_`\_\_`  
@HWI-EAS443:3:63:699:1758#0/1  
AGGGTGTCTTTCAACCAGAATCTGGAATATCAGATAGGAT



@HWI-EAS443:3:69:373:295#0/1  
ATCAGAGGGCGACCCAAAGAGAACAATCTGGACTAGCC  
+HWI-EAS443:3:69:373:295#0/1  
\_^YZ\_ab¥aaaa^`baaY`\_aaaa\_aaaaa\_aa\_]\_\_\_\_\_

@HWI-EAS443:3:69:48:1336#0/1  
CGTTCAAGAAACGGTTTTGAGATGATTTGGGATCCGAACG  
+HWI-EAS443:3:69:48:1336#0/1  
H¥aab\_b]`bbaaa[ba`¥SZ\_bb`\_¥`^^[a^ZSN¥`a`

@HWI-EAS443:3:69:495:451#0/1  
TGCAGGGATAACTGGCATGGCTCGAATCGACCGTGGGTGG  
+HWI-EAS443:3:69:495:451#0/1  
a`aaabaaaaaaaaaaaa`aaa\_]QHKLUYVHZGTR`[BBB

@HWI-EAS443:3:69:720:1396#0/1  
CCAAGGTCTTATACAATCCAGCCCTGTTAGTTCTGGATGC  
+HWI-EAS443:3:69:720:1396#0/1  
X`\_\_`aU`M`¥]`baZX`[VS\_YaYYXN][^G\_^ZGJH¥b

@HWI-EAS443:3:6:640:147#0/1  
AGCCGTTGTACTTTAACACAGCCACTGCCCCATTGTCTGG  
+HWI-EAS443:3:6:640:147#0/1  
ababb\_aa\_\_Y]aa\_a`N```\_¥[^\_¥\_Y]W\_¥W¥¥BBB

@HWI-EAS443:3:70:1239:1971#0/1  
TGGGCGACCCAAAGAGAACAATCTGGACTAGCGGGAGC  
+HWI-EAS443:3:70:1239:1971#0/1  
Kbb[¥`\_`babbaVbbbaabba[b[aaaMbaaa^RU^aR[N

@HWI-EAS443:3:70:1721:1738#0/1  
GGCATGTGTAATGGTTCTTGCTTTACTGTAATGACCGAT  
+HWI-EAS443:3:70:1721:1738#0/1  
^babbb\_babaabbaabaababb`babb\_bbaaa\_aaaa

@HWI-EAS443:3:70:173:984#0/1  
GCGGTTTTGAGATGATTTGGGATCCGAACGGATGGACTGG  
+HWI-EAS443:3:70:173:984#0/1  
``bb`bbaa^a`a`Z`ba]\_\_¥]baa\_]^aa\_\_aa¥[V]]

@HWI-EAS443:3:71:643:1585#0/1  
CGTGTCTCAATATATTGTTTCTCCAACCTTGATAGTGT  
+HWI-EAS443:3:71:643:1585#0/1  
a\_]a\_[b¥a¥^`\_`a\_aY`\_a[``\_\_^`\_`\_\_¥[¥][W[V

@HWI-EAS443:3:71:740:872#0/1  
AGCCCATCCACTAACAGGGCAGAGAGGAATTGCCCGCA  
+HWI-EAS443:3:71:740:872#0/1  
aa```a^a^a`aaaX`Z`]Y[a`^\_aaa`]aZ`aZU¥^¥¥

@HWI-EAS443:3:71:904:603#0/1  
GGTCCCAGTCCATCCGTTCCGATCCCAAATCATCTCAAAA  
+HWI-EAS443:3:71:904:603#0/1  
\_]Za]]`YPW^]YV^aUJOGOVQKTZ[DUYUNVH]YLSZ[]

@HWI-EAS443:3:72:1465:2046#0/1  
NGTTATTATGCCGTTGTACTTTAACACAGCCACTGCCCCA  
+HWI-EAS443:3:72:1465:2046#0/1  
DOPRRPSURSUNQRRRTTNSULQUUUYWUBBBBBBBBBBBB

@HWI-EAS443:3:72:1491:466#0/1  
ATCTGTCCCAGTCCATCCGTTCCGATCCCAAATCATCTCA

+HWI-EAS443:3:72:1491:466#0/1  
aa]aaaaaaaaV¥`aa\_]`\_[YTTZ¥WZ¥W]]¥Z`V^^Z\_  
@HWI-EAS443:3:72:424:1068#0/1  
NAGCCACTCAATTCAACTTGGGAATCAAATCAGATTGAA  
+HWI-EAS443:3:72:424:1068#0/1  
DKZZXYZYTMWXXZZZZZZXWWZZZXYYZZZZXXWZZZ  
@HWI-EAS443:3:72:53:1346#0/1  
TGCCCATCCACTAACAGGGCAGAGAGGAATTGCCCGCT  
+HWI-EAS443:3:72:53:1346#0/1  
]\_bbbb\_`¥[^ab```\_YZ`¥S]T`RXS\_a[`¥a]\_`Y  
@HWI-EAS443:3:72:844:1561#0/1  
TGGGGCCTTGCTAAATGACAAACATTCCAATGGAACCATT  
+HWI-EAS443:3:72:844:1561#0/1  
a\_V\_bbbaabba\_aabbbb`bbbabaaababbaabaaaa`  
@HWI-EAS443:3:73:1304:937#0/1  
GGCCCCGTAATTTACGGAAACCACTGACTGTCCAGCAGC  
+HWI-EAS443:3:73:1304:937#0/1  
``bbbbbabaabaa`a``aaaabb`aaaabX`¥WZYZSRZ  
@HWI-EAS443:3:73:1792:1305#0/1  
NTCAAGAAGAAGGTTCTGCATTCCAAGGGGAGCATGATA  
+HWI-EAS443:3:73:1792:1305#0/1  
DMTLURNOWRSUXVWYVPTQTVUWWNJOPSRNUVJMRTWW  
@HWI-EAS443:3:75:219:144#0/1  
GAGGCCTCATACAAGATCTTCAGAATAGAAAAGGGAAAGA  
+HWI-EAS443:3:75:219:144#0/1  
HYaaa`b``bbabbbbabbbbbbb`abba`babbb`bbbb  
@HWI-EAS443:3:76:1234:790#0/1  
CTCAGGATATAGCGGGAGTTTTGTTTCAGCATCCAGAACTA  
+HWI-EAS443:3:76:1234:790#0/1  
a\_abaabbbba```ba`Rabbb`baab\_aa¥abbaaZaa  
@HWI-EAS443:3:76:90:876#0/1  
CCAGACATATGTTAACATCAGCAACACCAACTTTGCTGCT  
+HWI-EAS443:3:76:90:876#0/1  
abb`Z¥Y`\_aa[\_aT¥^aaaa`S[\_a\_aba\_`X0`^Z^\_\_  
@HWI-EAS443:3:77:1359:1706#0/1  
ATCCCTCTCCATACAACACTCAAGATTTGAGTCAGTCGCTTG  
+HWI-EAS443:3:77:1359:1706#0/1  
Z¥a`W\_baa¥a\_\_\_\_\_N\_UKb`ba^X\_a\_GU\_bSQ\_a\_QT  
@HWI-EAS443:3:77:762:1071#0/1  
TGCGGGAGTTTTGTTTCAGCATCCAGAACTAACAGGGCTGG  
+HWI-EAS443:3:77:762:1071#0/1  
`baa``)`aab`b[a[ZQ]a`]bb````a[\_^`aRW^\_a[  
@HWI-EAS443:3:78:1099:1359#0/1  
GGTCGCTTGTCAGCAAGTGCTTGTCATGATGGCATCAAT  
+HWI-EAS443:3:78:1099:1359#0/1  
]¥[ba``YU]a^U^Z\_`aa`ZR¥[\_a`Z^abaQ¥```[]  
@HWI-EAS443:3:7:111:1157#0/1  
GTCCTATCTGATATTCCAGATTCTGGTTGAAAGACACCCA  
+HWI-EAS443:3:7:111:1157#0/1  
a`aa\_aa\_`]X^`a\_`Q¥`aa[^a`a^aa\_a`aa\_`\_`^Y`

@HWI-EAS443:3:7:1319:471#0/1  
GGTGCTTGTGCATGATGGCATCAATTGGCTAACCAATTGGAA  
+HWI-EAS443:3:7:1319:471#0/1  
^N]\_RX`¥K^Xa`\_Sa]\_\_\_\_\_a\_UUTPQV]^R[\_\_\_]aS^B  
@HWI-EAS443:3:7:737:497#0/1  
AGCTTGGTCAGCAAGTGTTCATGATGGCATCAATTGG  
+HWI-EAS443:3:7:737:497#0/1  
Za]YY`¥S\_¥`]^^^K[`]^bYTNVaJRU\_`^\_\_\_\_\_^]`a  
@HWI-EAS443:3:7:882:513#0/1  
TGGGGCCTTGCTAAATGACAAACATTCCAATGGAACCATT  
+HWI-EAS443:3:7:882:513#0/1  
`baaa[abab`bba`aaa`bb\_\_aaaa`a`aa`\_aY\_aa`  
@HWI-EAS443:3:80:104:882#0/1  
TGCGGGCAATTCCTCTCTCTGCCCTGTTAGTGGATGGGCT  
+HWI-EAS443:3:80:104:882#0/1  
]bba¥]b`b`]aaaaaaaaabaa]WZ\_```a`aa`aa]ZJQ  
@HWI-EAS443:3:80:1300:595#0/1  
ATTTACGGAAACCACTGACTGTCCAGCAGCAAAGTTGGC  
+HWI-EAS443:3:80:1300:595#0/1  
abba\_aaaa^ab^\_a\_aaa`aa¥¥\_Y\_\_\_\_`]Z[X`X`\_[G  
@HWI-EAS443:3:80:1568:573#0/1  
TCAAAGCGTCATTACTTATGAAAACAACACTTGGGTAAAC  
+HWI-EAS443:3:80:1568:573#0/1  
a``aaa`a^T``a\_¥aba\_a\_aa]S`\_^`Wa^aU^S\_a^V  
@HWI-EAS443:3:81:257:1500#0/1  
TCCGTTTCTTGAACCTAATGCTTTTAGTTCTCCCTATCCAA  
+HWI-EAS443:3:81:257:1500#0/1  
`baYYbaba[\_Y`aa[^Za\_[]aaa][¥aabaa`U\_aa^`  
@HWI-EAS443:3:82:1130:369#0/1  
GGTGTCTTTCAACCAGAATCTGGAATATCAGATAGGATAG  
+HWI-EAS443:3:82:1130:369#0/1  
a`]¥TN\_`^NO¥X[[bP[\_\_\_SJ^aa`P`\_ZSTaOR[G[KD  
@HWI-EAS443:3:82:379:1644#0/1  
GGCGGGAGCAGCATATCCTTTTGTGGTGTAAACAGTGACA  
+HWI-EAS443:3:82:379:1644#0/1  
abbaaa`a¥P¥TJ]a`a`aaa]S[^]¥]^aa`aa\_S``\_`  
@HWI-EAS443:3:82:429:640#0/1  
CGGGGCCTTGCTAAATGACAAACATTCCAATGGAACCATT  
+HWI-EAS443:3:82:429:640#0/1  
a\_T^aababba`aa]``]ab^]aaaXa\_`X`a\_`a[\_\_\_`\_  
@HWI-EAS443:3:82:914:1877#0/1  
TGGGCGACCCAAAGAGAACAATCTGGACTAGCGGGAGC  
+HWI-EAS443:3:82:914:1877#0/1  
`VQ\_`a\_b`¥^a`\_`\_ab`ba\_`^`^aa`b``^X``bVaa  
@HWI-EAS443:3:83:220:168#0/1  
TGCCCATCCACTAACAGGGCAGAGAGGAATTGCCCGCT  
+HWI-EAS443:3:83:220:168#0/1  
\_``b`Z^b]Z\_abbaaaaa`aaaY\_Y``aU][aZ^^`\_^  
@HWI-EAS443:3:83:87:1907#0/1  
CGCCCCTAATTATCACTATGAGGAATGCTCCTGTTATCCT

+HWI-EAS443:3:83:87:1907#0/1  
`Wa` [¥L¥R]SGM`UZQXSY]UUQUNDYW^WWUTSUUY[N  
@HWI-EAS443:3:84:1497:1676#0/1  
GCTCCTGTCTTTAATGGTTCATTGGAATGTTTGTCTTG  
+HWI-EAS443:3:84:1497:1676#0/1  
aYOQT]NJ[[ZNKDOUXUNTQNNXYBBBBBBBBBBBB  
@HWI-EAS443:3:84:697:2000#0/1  
AGCATGTGTAATGGTTCCTTACTGTAATGACCGAT  
+HWI-EAS443:3:84:697:2000#0/1  
^W¥a[`^b\_\_a\_b]WG\_aa¥aTaa]\_PaaYa``aaaS^] ^  
@HWI-EAS443:3:85:1577:912#0/1  
TGCCACTCAATTCAACTTGGGAATCAAAATCAGATTGAAA  
+HWI-EAS443:3:85:1577:912#0/1  
aaaabaaa[Q`a][¥aa^a^^\_aa`[``]¥\_`a\_aaa```]  
@HWI-EAS443:3:85:421:125#0/1  
TGCTGTCTATTGGTGAAGTTCCTCTCCATACAACCTCAA  
+HWI-EAS443:3:85:421:125#0/1  
^aabbbbaababbaaaaaabba\_bbbbaaaabaaa`aaa\_  
@HWI-EAS443:3:86:133:436#0/1  
CGGGTTCGATATGGGCTCCTGTCTTTAATGGTTCATTGG  
+HWI-EAS443:3:86:133:436#0/1  
Xab`Vbbabbbbbb\_ba`^aabbbbaaaababb`bb`  
@HWI-EAS443:3:87:1222:640#0/1  
CCCCTCTCCATACAACCTCAAGATTTGAGTCAGTCGCTTGG  
+HWI-EAS443:3:87:1222:640#0/1  
`ba`aaa\_ababaaaaaa]aaa`aaa\_a¥``^[aU\_¥`Y  
@HWI-EAS443:3:87:1466:428#0/1  
GATCATGACAAGCACTTGCTGACCAAGCGACTGACTCAAA  
+HWI-EAS443:3:87:1466:428#0/1  
GYb`¥`bbabbbba[bbabb]bKba¥¥¥\_R^]bI^aWba  
@HWI-EAS443:3:87:149:582#0/1  
CGCGGGAGCAGCATATCCTTTTGTGGTGTAAACAGTGACA  
+HWI-EAS443:3:87:149:582#0/1  
aabb^aaaaa`aaa`aa]a\_\_`a\_^U[aa`X`a``¥`^\_Z  
@HWI-EAS443:3:87:765:387#0/1  
GAAAGACACCCACGGTCGATTCGAGCCATGCCAGTTATCA  
+HWI-EAS443:3:87:765:387#0/1  
`baZ`baaba`a^^XI^]PLZTq]WIV^YaZKV`GXY`JF  
@HWI-EAS443:3:88:513:715#0/1  
CGCCCCGTAATTTACGGAAACCACTGACTGTCCAGCAGC  
+HWI-EAS443:3:88:513:715#0/1  
`bbbabbb`abababaabZ]aabbabaa`aa]]aaa^¥a`  
@HWI-EAS443:3:89:1250:618#0/1  
TGCTCCCCTAGTCCAGATTGTGTTCTCTTTGGGTCGCCG  
+HWI-EAS443:3:89:1250:618#0/1  
V¥\_U¥Z\_¥`^X`T\_aSaa]^]VbSaX\_¥¥`\_T`]VUGVFJ  
@HWI-EAS443:3:89:62:157#0/1  
ACCCTCTCCATACAACCTCAAGATTTGAGTCAGTCGCTTGG  
+HWI-EAS443:3:89:62:157#0/1  
^`R\_ab`aaaaa]WT[`a[¥]\_`\_`a][^]`\_PY^\_U^[U



@HWI-EAS443:3:89:759:1673#0/1  
GGCCCCGTAATTTACGGAAACCACTGACTGTCCAGCAGC  
+HWI-EAS443:3:89:759:1673#0/1  
Xbbb`abb`]\_bbbb`^]``bbbb`abbbb`^a\_^Ya`]  
@HWI-EAS443:3:89:788:555#0/1  
CAACTGCCTGTCTTATCATTAGGGCGTGGATTGTCTCCGC  
+HWI-EAS443:3:89:788:555#0/1  
aUZ]¥bRRRaV`KQ^\_YQ^\_R`\_aPKUFR¥JUNQHx]BB  
@HWI-EAS443:3:89:840:159#0/1  
CGCCCCGTAATTTACGGAAACCACTGACTGTCCAGCAGC  
+HWI-EAS443:3:89:840:159#0/1  
`baaabaabbbbab`baa`a\_a`aaa\_aaV\_^Z\_U^`Q  
@HWI-EAS443:3:8:428:1609#0/1  
AGACAATCCACGCCCTAATGATAAGACAGGCAGTTGTGGG  
+HWI-EAS443:3:8:428:1609#0/1  
\_¥Z\_aaa`Z]\_¥MX¥]]V]Q^`^`\_[[\_BBBBBBBBBB  
@HWI-EAS443:3:90:132:1462#0/1  
CCGCCCTCTGATTAGTTCAACCCAGAAGCAAGTCTTATA  
+HWI-EAS443:3:90:132:1462#0/1  
abaaabbaabaab`\_aba^abaaa`^`aa\_\_¥P\_`a\_a  
@HWI-EAS443:3:90:1650:1295#0/1  
CGGCTGTGTTAAAGTACAACGGCATAATAACAGACACTAT  
+HWI-EAS443:3:90:1650:1295#0/1  
abbabb¥¥^b[bbZ[a[aa]bbaaa`a`aT``]Ya]\_`\_  
@HWI-EAS443:3:90:378:382#0/1  
ACCTGTCTTATCATTAGGGCGTGGATTGTCTCCGAAAATC  
+HWI-EAS443:3:90:378:382#0/1  
T^`^WI\_\_`b]`V`Y[b^SXUabb\_S^YJY]aab^N¥]a]  
@HWI-EAS443:3:91:1793:228#0/1  
NTGTCCCAGTCCATCCGTTCCGATCCCAAATCATCTCAAA  
+HWI-EAS443:3:91:1793:228#0/1  
DMWXYXZZZXWZZXQXUYXXUXXPZWZZZYXXXPXXXW  
@HWI-EAS443:3:91:264:1368#0/1  
TGCGGGCAATTCCTCTCTCTGCCCTGTTAGTGGATGGGCT  
+HWI-EAS443:3:91:264:1368#0/1  
Ub\_¥VZ`a^\_^Ub]`b`[[\_\_aa\_a¥T¥baNZ^a\_a^WNO  
@HWI-EAS443:3:91:50:779#0/1  
CGCCCCGTAATTTACGGAAACCACTGACTGTCCAGCAGC  
+HWI-EAS443:3:91:50:779#0/1  
aabbbbaa`^bbabb`\_aaaa^a\_Y\_\_¥\_a¥WT[NU\_^]T  
@HWI-EAS443:3:92:1461:1120#0/1  
GCCACTGCATATGTATCCTATCTGATATCCAGATTCTGG  
+HWI-EAS443:3:92:1461:1120#0/1  
`aaaaa¥Y\_aa\_ZVaaZQ]a\_[]`aaa\_aa``\_a``\_R`aa  
@HWI-EAS443:3:92:613:638#0/1  
TGGACAGCTCATTAGGGTTCGATATGGGCTCCTGTCTTTA  
+HWI-EAS443:3:92:613:638#0/1  
abba\_^aaaa\_baaaaYaaaaa^a\_a`a`\_\_Z]^\_aa`  
@HWI-EAS443:3:92:631:484#0/1  
CAACTGCCTGTCTTATCATTAGGGCGTGGATTGTCTCCGG

+HWI-EAS443:3:92:631:484#0/1  
a[[`\_` [Waa]¥\_YW^aZ\_X)`^\_R]G\_¥[\_Y`VUWPY[V  
@HWI-EAS443:3:92:700:842#0/1  
CGGGCCTTGCTAAATGACAAACATTCCAATGGAACCATTA  
+HWI-EAS443:3:92:700:842#0/1  
abbbbbbb`bb`abbbabaaaababaaabbaabababab  
@HWI-EAS443:3:92:724:2035#0/1  
CGCCCCGTAATTTACGGAAACCACTGACTGTCCAGCAGC  
+HWI-EAS443:3:92:724:2035#0/1  
GW`\_b\_baaaaaa\_UUabbbZabUbZZbZTJRbba^\_UU  
@HWI-EAS443:3:92:796:840#0/1  
CGTCGCTTGGTCAGCAAGTGCTTGTTCATGATGGCATCAAT  
+HWI-EAS443:3:92:796:840#0/1  
ab`^aaaa\_`¥aa\_\_`\_\_`a\_\_`a`a\_aa``a[\_\_\_`V\_X\_  
@HWI-EAS443:3:93:414:157#0/1  
TGCGGGAGTTTTGTTTCAGCATCCAGAACTAACAGGGCTGG  
+HWI-EAS443:3:93:414:157#0/1  
abaaabZb\_a`\_a^a\_\_a^`\_\_\_\_^`Y`\_T\_\_\_\_]`Y^\_X  
@HWI-EAS443:3:94:1383:227#0/1  
TCCCAGTCCATCCGTTCCGATCCCAAATCATCTCAAAACA  
+HWI-EAS443:3:94:1383:227#0/1  
\_\_^H]aa`Zb¥ZU`^aVPa¥aW¥G\_¥]\_KUPGXO^]a¥YH  
@HWI-EAS443:3:94:275:1669#0/1  
CACTTGGGAATCAAAATCAGATTGAAACATGCAATCAAAG  
+HWI-EAS443:3:94:275:1669#0/1  
a`aaaa`aa`aa\_aa\_aaa\_a`\_\_a`\_\_`a\_\_^\_\_\_\_^\_`^  
@HWI-EAS443:3:98:1041:263#0/1  
CGCCCCGTAATTTACGGAAACCACTGACTGTCCAGCAGC  
+HWI-EAS443:3:98:1041:263#0/1  
`ab\_ab\_a`abbbaa`bb`\_aZa`\_\_`aQaaXTHZ`R^XN  
@HWI-EAS443:3:98:1190:380#0/1  
ATCATCTCAAAACCGTTTCTTGAACCTAATGCTTTTAGTTA  
+HWI-EAS443:3:98:1190:380#0/1  
^abb`Y`a^bb\_^TY`baY^ababPa^¥a`Vb`abb]aVJ  
@HWI-EAS443:3:98:801:585#0/1  
GGACCGTGGGTGTCTTTCAACCAGAATCTGGAATATCAGA  
+HWI-EAS443:3:98:801:585#0/1  
H¥^`¥a^`^\_M\_a\_[SaZI^00WVR\_SHa[^b]VZb``Y¥  
@HWI-EAS443:3:99:107:2036#0/1  
CCCTGTCTTATCATTAGGGCGTGGATTGTCTCCGAAAATC  
+HWI-EAS443:3:99:107:2036#0/1  
Sa\_ZVS]ab¥Raa\_Z^Z]\_aXST[aaYXLSYa^V¥U\_a[[  
@HWI-EAS443:3:9:1066:808#0/1  
TGCGGGAGTTTTGTTTCAGCATCCAGAACTAACAGGGCTGG  
+HWI-EAS443:3:9:1066:808#0/1  
abbbbaabaaabb\_aaabaaa`\_aaaa^aa`^aa``^]a`  
@HWI-EAS443:3:9:960:1065#0/1  
CGTGTGTGCAGGGATAACTGGCATGGCTCGAATCGACCGT  
+HWI-EAS443:3:9:960:1065#0/1  
`^ [b`a`bb\_bab\_aaZK`aa`\_\_`\_a[VUPKP[GGV[U

@HWI-EAS443:3:100:1035:307#0/1  
CAATGGTGTGGATAGGGAGAACTAAAAGCATTAGTTCA  
+HWI-EAS443:3:100:1035:307#0/1  
a^aaab\_babbba``aaa^a`dWa^\_\_`\_^``\_\_a]\_VB  
@HWI-EAS443:3:100:1062:1629#0/1  
GACCGTGGGTGTCTTTCAACCAGAATCTGGAATATCAGAT  
+HWI-EAS443:3:100:1062:1629#0/1  
``TN\_RbaaZbW\_Y\_\_^\_¥WR`\_aU^Ga\_dMWV`\_X^PBB  
@HWI-EAS443:3:100:1074:241#0/1  
TCCTGTCTTTAATGGTTCATTGGAATGTTTGTCTTTAG  
+HWI-EAS443:3:100:1074:241#0/1  
aa\_`aY\_Z¥\_`V¥]`][XYM`^^XNRY[]`¥USX¥YY]BB  
@HWI-EAS443:3:100:1110:1222#0/1  
CAACTGCCTGTCTTATCATTAGGGCGTGGATTGTCTCCGA  
+HWI-EAS443:3:100:1110:1222#0/1  
ab^baababbbbbbababbaabaa\_aabab^aaa^`b`  
@HWI-EAS443:3:100:1115:1662#0/1  
TGCACATTCAGACTCTTGTGTTCTCAATATATTGTTTCTC  
+HWI-EAS443:3:100:1115:1662#0/1  
abaa]]abbaa\_Iaa`baR\_\_b[a¥a`a`a`^aa\_\_^Ta[  
@HWI-EAS443:3:100:1117:247#0/1  
GAAAGACACCCACGGTCGATTGAGCCATGCCAGTTATCC  
+HWI-EAS443:3:100:1117:247#0/1  
a\_ba\_a\_ba^a¥aa`[R¥`a\_¥a¥^\_]¥^\_TS^\_T¥U[BB  
@HWI-EAS443:3:100:1159:385#0/1  
ATTCAAATACGGCAATGGTGTGGATAGGGAGAACTAAA  
+HWI-EAS443:3:100:1159:385#0/1  
aaa]aaabaaba`a\_aaaW`Yaa`a]\_`[[\_]¥]¥S\_\_`\_  
@HWI-EAS443:3:100:1225:1408#0/1  
TACAACCAAGATTTGAGTCAGTCGCTTGGTCAGCAAGTG  
+HWI-EAS443:3:100:1225:1408#0/1  
`ba`a¥aY`ab\_a[`aa`\_¥`\_XTZY`\_^aWX¥\_]O\_BBB  
@HWI-EAS443:3:100:1359:1267#0/1  
CAGACAATAACTTCTCAATAAAGCAAGATATCGTAGGAAT  
+HWI-EAS443:3:100:1359:1267#0/1  
^`^J[bbbabbaX`baUaJUXZbbX¥a`bbbaabba\_a  
@HWI-EAS443:3:100:1430:1101#0/1  
CAGATTGAAACATGCAATCAAAGCGTCATTACTTATGAAA  
+HWI-EAS443:3:100:1430:1101#0/1  
\_bbabbbbaabbb\_bbbaabbbabaIabb^R]bbb]]^b  
@HWI-EAS443:3:100:146:1384#0/1  
GGATGTGTTTGTCTATAAGGGAACCATTTCATATCATGCTCC  
+HWI-EAS443:3:100:146:1384#0/1  
\_``[a\_YE¥`\_`[^`\_a][aSa\_a`¥^]]\_`RV\_]V\_^X]  
@HWI-EAS443:3:100:1554:1301#0/1  
TCCCCTGCATATGTATCCTATCTGATATTCCAGATTCTG  
+HWI-EAS443:3:100:1554:1301#0/1  
a`]YIILY\_R`Ra^\_^ZFGTFTFY\_]U^BBBBBBBBBBB  
@HWI-EAS443:3:100:1635:1016#0/1  
ATGCAGAACCTTCTTCTTACTCAAGGGCCTTGCTAAAT

+HWI-EAS443:3:100:1635:1016#0/1  
a¥aIbWaaa^W]G`¥^I^`\_[Sa\_aaXKQIY\_aaGa`aB  
@HWI-EAS443:3:100:171:820#0/1  
CAGGATAACAGGAGCATTCCCTCATAGTGATAATTAGGGGC  
+HWI-EAS443:3:100:171:820#0/1  
ab\_bbbbaabb\_aaabababaaaa\_b`a\_[aa`ba`aS  
@HWI-EAS443:3:100:172:1814#0/1  
CGATACTGGACCACAACACTGCCTGTCTTATCATTAGGGCGT  
+HWI-EAS443:3:100:172:1814#0/1  
`a[ab^]ba`^[b[`aQQY\_aba^Xa\_ba]aaQaZUBBBB  
@HWI-EAS443:3:100:201:1957#0/1  
TCCCAGTCCATCCGTTCCGATCCCAAATCATCTCAAAACC  
+HWI-EAS443:3:100:201:1957#0/1  
aaaaa[^aab^bWY\_aabaaa^`a`VXRaaY\_\_aaaBBB  
@HWI-EAS443:3:100:222:1690#0/1  
CTGTGTTAAAGTACAACGGCATAATAACAGACACTATCAA  
+HWI-EAS443:3:100:222:1690#0/1  
¥S\_Z^W`^`\_Y`I`Y]TP]MSaba^]\_aVH^[\_aX[BB  
@HWI-EAS443:3:100:253:463#0/1  
GCTAATTTACGGAAACCACTGACTGTCCAGCAGCAAAGT  
+HWI-EAS443:3:100:253:463#0/1  
a`a`aaa\_`]]`\_\_\_\_`^`^`\_`^^^Y]VZXYYZWVXYBB  
@HWI-EAS443:3:100:322:737#0/1  
ATCTTTCCCTTTTCTATTCTGAAGATCTTGTATGAGGCCT  
+HWI-EAS443:3:100:322:737#0/1  
ababbbbaaaabaaa¥0`aaaaa^`aXa`¥Z``aaaa[BB  
@HWI-EAS443:3:100:373:1382#0/1  
GGGAATCAAAATCAGATTGAAACATGCAATCAAAGCGTCA  
+HWI-EAS443:3:100:373:1382#0/1  
a`aa\_\_^aa][^a^Y¥a\_\_`\_^a``¥\_\_^Z]`¥]S`UUB  
@HWI-EAS443:3:100:489:369#0/1  
CGTTCCGATCCCAAATCATCTCAAAACCGTTTCTTGAAC  
+HWI-EAS443:3:100:489:369#0/1  
abVa`bKbaMSa`^Y`^`UZYSYPNN`^S]W`aaaJ\_¥`  
@HWI-EAS443:3:100:503:1660#0/1  
ATTAGACGATACTGGACCACAACACTGCCTGTCTTATCATT  
+HWI-EAS443:3:100:503:1660#0/1  
\_ZSbbaa`\_Zb^¥XYaaaT]T]UJWZaaRQ\_aYUR]BBB  
@HWI-EAS443:3:100:518:1192#0/1  
GTAGGAATAAATGAGTGGTCAGGATATAGCGGAGTTTTG  
+HWI-EAS443:3:100:518:1192#0/1  
a\_abb`Zaababaaa\_ba`\_aba\_aaaaa`aab`aN\_\_\_B  
@HWI-EAS443:3:100:55:830#0/1  
GCCCTGTTAGTTCTGGATGCTGAACAAAACCTCCCGCTATA  
+HWI-EAS443:3:100:55:830#0/1  
aababb`aaaa`\_aaa\_baaZX]W¥aa`VY¥][a¥\_¥a\_  
@HWI-EAS443:3:100:56:348#0/1  
CATTGTCTGGGCCAGAAATCCAATTGTTAGCCAATTGAT  
+HWI-EAS443:3:100:56:348#0/1  
`SK¥ZY]Y¥ZZ]\_a[OZR`\_]U`¥`\_PQXRXY¥WYRTBB

@HWI-EAS443:3:100:587:1651#0/1  
TGTTATTATGCCGTTGTACTTTAACACAGCCACTGCCCCA  
+HWI-EAS443:3:100:587:1651#0/1  
abX\_aa`ZU\_WFWZV[aa]a`aaaa^RaaT]`UO]P[BBB  
@HWI-EAS443:3:100:660:555#0/1  
TTCGGATCCCAAATCATCTCAAACCCTTTCTTGAACATA  
+HWI-EAS443:3:100:660:555#0/1  
``]aYaaY`L\_baZZ^^\_\_aaZ^¥PXa\_a`UY^VUYX[\_B  
@HWI-EAS443:3:100:68:1278#0/1  
GATGATTTGGGATCCGAACGGATGGACTGGGACAGACAAT  
+HWI-EAS443:3:100:68:1278#0/1  
a\_ab^bab\_a\_Q``\_a^]]a\_^[[^VX^`^V]\_V]BBB  
@HWI-EAS443:3:100:755:1161#0/1  
CGCTAATTTACGGAAACCACTGACTGTCCAGCAGCAAAG  
+HWI-EAS443:3:100:755:1161#0/1  
a`bb`````ab`b]\_b[[^aabaabb`a`]\_a\_]¥WX\_  
@HWI-EAS443:3:100:814:393#0/1  
ATTTGACTATCTTCCCTTTTCTATTCTGAAGATCTTGTA  
+HWI-EAS443:3:100:814:393#0/1  
`bbbaaaaaa^b\_a^bbba^b`ba^aa`ab^aaaa\_a  
@HWI-EAS443:3:100:894:114#0/1  
ACTGTCCAGCAGCAAAGTTGGTGTGCTGATGTTAACATA  
+HWI-EAS443:3:100:894:114#0/1  
a\_baa\_`b\_\_a`]\_¥a\_a`\_Xa`\_aU`¥Z`\_\_\_U¥ZZ`B  
@HWI-EAS443:3:100:902:40#0/1  
ATGCAATCAAAGCGTCATTACTTATGAAAACAACACTTGG  
+HWI-EAS443:3:100:902:40#0/1  
aabZ[LYZaabb]]XY[b`\_`baabb`a\_]SV\_¥YQZBBB  
@HWI-EAS443:3:100:90:651#0/1  
AACAATTGGAATTTCTGGCCAGACAATGGGGCAGTGGCT  
+HWI-EAS443:3:100:90:651#0/1  
]\_bbb\_Uabaababaaaa`]a\_a\_\_[aaa`b\_a`aQ\_BBB  
@HWI-EAS443:3:100:964:1092#0/1  
GAAGAAGTTCTGCATTCCAAGGGGAGCATGATATGAAT  
+HWI-EAS443:3:100:964:1092#0/1  
abbbabababaa`abbbaaa`baaa\_^aZaaaaa`aa`a  
@HWI-EAS443:3:10:100:952#0/1  
CCAAGACCAACCCACAGTGTACTGTTTACACCACAAAAG  
+HWI-EAS443:3:10:100:952#0/1  
]`\_^Y^^[Z0[bb]baUaVTabaa\_[aba]a]U[aTU0^  
@HWI-EAS443:3:10:1014:1325#0/1  
ATTGTCTGGCCAGAAATCCAATTGTTAGCCAATTGATG  
+HWI-EAS443:3:10:1014:1325#0/1  
aaba`a`aX`\_Z\_\_\_\_\_`U]\_\_aa]S][ZKX]¥HXZ]LL  
@HWI-EAS443:3:10:1040:266#0/1  
CACTATCAAGAGTTGGAGAAACAATATATTGAGAACACAA  
+HWI-EAS443:3:10:1040:266#0/1  
`ba`b\_babbabba\_Xbbab]aabbabbbbbbabab\_ba  
@HWI-EAS443:3:10:1129:180#0/1  
ATTCATATCATGCTCCCCCTTGAATGCAGAACCTTCTTC

+HWI-EAS443:3:10:1129:180#0/1  
¥YXUY`¥SS`^\_TZXF[WQ][`Y¥BBBBBBBBBBBBBBBB  
@HWI-EAS443:3:10:1181:1520#0/1  
TAAAAGCATTAGTTCAAGAAACGGTTTTGAGATGATTTGG  
+HWI-EAS443:3:10:1181:1520#0/1  
\_^ZR¥Z\_Y[\_Y\_¥`a``][¥¥]^LX¥`\_Q]R¥¥MHYYVS  
@HWI-EAS443:3:10:1192:612#0/1  
CAGCAACACCAACTTTGCTGCTGGACAGTCAGTGGTTTCC  
+HWI-EAS443:3:10:1192:612#0/1  
aba`\_babb\_\_babab`\_bbYaaV]G`b^Y`aZaUZaXRR  
@HWI-EAS443:3:10:1303:319#0/1  
CGCTTGGTCAGCAAGTGCTTGTTCATGATGGCATCAATTGG  
+HWI-EAS443:3:10:1303:319#0/1  
abbbbaaabbabb\_babbbbaabaaaaa¥aa`\_aa`a\_  
@HWI-EAS443:3:10:146:870#0/1  
CCACGGTCGATTGAGCCATGCCAGTTATCCCTGCACACA  
+HWI-EAS443:3:10:146:870#0/1  
aabbbb[ab`aa`\_¥¥\_aQaaa`a`W^`\_\_a`V[aa```  
@HWI-EAS443:3:10:1620:1032#0/1  
CATCAATTGGCTAACAATTGGAATTTCTGGCCCAGACAAT  
+HWI-EAS443:3:10:1620:1032#0/1  
aaa`\_b`¥abababbbabbbbabbb\_bbb`[]^aa\_N\_[a  
@HWI-EAS443:3:10:165:1906#0/1  
TGGTGTGGATAGGGAGAACTAAAAGCATTAGTTCAAGA  
+HWI-EAS443:3:10:165:1906#0/1  
aaaYa^aaa`\_a`\_¥¥¥]a`a\_\_`^`\_]\_\_Y]]]\_^  
@HWI-EAS443:3:10:1704:1115#0/1  
TTGGGAATCAAATCAGATTGAAACATGCAATCAAAGCGT  
+HWI-EAS443:3:10:1704:1115#0/1  
aaa`aaaaa\_aa^a^\_a`a\_a¥^\_Z`\_`W^\_\_P\_^\_Y\_Y  
@HWI-EAS443:3:10:1709:222#0/1  
AGCACCGTCTGGCCAAGACCAACCCACAGTGTCACTGTTT  
+HWI-EAS443:3:10:1709:222#0/1  
a[[a[YbZa]Z¥YVXVH[U[Z[UVZ¥NWZUYQNHURPRUR  
@HWI-EAS443:3:10:1766:1012#0/1  
AGCGGGAGTTTTGTTTCAGCATCCAGAACTAACAGGGCTGG  
+HWI-EAS443:3:10:1766:1012#0/1  
aa\_bbbbaIbbba`a\_\_aaaa^`\_`[aXaaaNaQZ]Q^``  
@HWI-EAS443:3:10:1769:467#0/1  
AGTTGGAGAAACAATATATTGAGAACACAAGAGTCTGAAT  
+HWI-EAS443:3:10:1769:467#0/1  
abababaabaa`aabababbaaaaa^a^a`aaa`Yaa\_aa  
@HWI-EAS443:3:10:353:1149#0/1  
ACAGACACTATCAAGAGTTGGAGAAACAATATATTGAGAA  
+HWI-EAS443:3:10:353:1149#0/1  
a]X\_X¥V^a\_Ya]Y]\_a[\_`\_¥[XW[^[\_`\_\_\_Z\_\_`\_^\_  
@HWI-EAS443:3:10:356:1926#0/1  
TTCATATCATGCTCCCCCTTGAATGCAGAACCTTCTTCT  
+HWI-EAS443:3:10:356:1926#0/1  
`\_`baaa`aa\_\_a`a`\_]a`\_`a`\_]V`\_`[\_a]¥^\_]YX^

@HWI-EAS443:3:10:363:788#0/1  
ATTAGGGCGTGGATTGTCTCCGAAAATCCCACTGCATATG  
+HWI-EAS443:3:10:363:788#0/1  
ab^Ybaab]W]^aaaaa^a`ab`a\_Z\_\_a^\_\_\_\_[`\_`\_`  
@HWI-EAS443:3:10:390:503#0/1  
AGAAATCCAATTGTTAGCCAATTGATGCCATCATGACAA  
+HWI-EAS443:3:10:390:503#0/1  
a[baaaa\_babaab^^aa^\_a\_]W\_¥\_Z\_]\_]\_\_^`\_^  
@HWI-EAS443:3:10:410:363#0/1  
AGTCGCTTGGTCAGCAAGTGCTTGTTCATGATGGCATCAAT  
+HWI-EAS443:3:10:410:363#0/1  
aaZaba\_\_aNZ`^`\_\_\_\_`\_^Z^\_\_Y^\_\_a\_^\_^]]^]\_^\_  
@HWI-EAS443:3:10:435:116#0/1  
CGTGGGTGTCTTTCAACCAGAATCTGGAATATCAGATAGG  
+HWI-EAS443:3:10:435:116#0/1  
ababa`Xbaabbbbbbb`abbbba`bbb`ab`aXaa]]`aa  
@HWI-EAS443:3:10:559:1683#0/1  
ACTCAATTCAACTTGGGAATCAAAATCAGATTGAAACATG  
+HWI-EAS443:3:10:559:1683#0/1  
a\_\_^`\_]a[Y[]^]¥]]\_^]\_^\_][]`]^^[W[^\_Y]W[  
@HWI-EAS443:3:10:617:1127#0/1  
ATGGTGTGGATAGGGAGAATAAAAGCATTAGTTCAAG  
+HWI-EAS443:3:10:617:1127#0/1  
abba`babb`baaaba`abba`aaaab`^^`aaaa^`¥a`a  
@HWI-EAS443:3:10:645:272#0/1  
CTCCCCTATATCCTGACCACTCATTATTCCTACGATAT  
+HWI-EAS443:3:10:645:272#0/1  
abbbbbbbbbbbbaabbaababaabbabbaa`ababaaa`  
@HWI-EAS443:3:10:698:2024#0/1  
CATTTACACATGCACATTCAGACTCTTGTGTTCTCAATAT  
+HWI-EAS443:3:10:698:2024#0/1  
aa^a`abbVaab`¥\_ab`J\_a\_`S^\_bY\_P]]`aa]]`  
@HWI-EAS443:3:10:714:212#0/1  
TCCCAGTCCATCCGTTCCGATCCCAAATCATCTCAAAACC  
+HWI-EAS443:3:10:714:212#0/1  
Ua^[¥X`RbaaTGWWQ`P^aa^[a\_\_YWS\_^\_[R^^^\_]U  
@HWI-EAS443:3:10:715:361#0/1  
CTCCTGTCTTTAATGGTTCCATTGGAATGTTTGTCTTTA  
+HWI-EAS443:3:10:715:361#0/1  
abaaaX`bb¥I^b`Ta¥a\_]`a\_\_a`aXa`X¥a`a[a  
@HWI-EAS443:3:10:731:1139#0/1  
CGGGAGTTTTGTTTCAGCATCCAGAACTAACAGGGCTGGAT  
+HWI-EAS443:3:10:731:1139#0/1  
abba`aZ`b`a`[^`^^`baaab`a`a]\_aa\_`\_¥\_^`  
@HWI-EAS443:3:10:759:951#0/1  
CTGTCCCAGTCCATCCGTTCCGATCCCAAATCATCTCAAA  
+HWI-EAS443:3:10:759:951#0/1  
abbbabbbbaaabbbaa`aba^aa`\_Z`aaa`Ua`\_\_\_\_`aa  
@HWI-EAS443:3:10:807:403#0/1  
TCCTGTCTTTAATGGTTCCATTGGAATGTTTGTCTTTAG

+HWI-EAS443:3:10:807:403#0/1  
`\_]\_\_bZ` `bba` `aa\_a` `aaa^\_ZZ\_\_Z` aaX[U] `[^`  
@HWI-EAS443:3:10:836:1753#0/1  
AAGGTCTTATAACAATCCAGCCCTGTTAGTTCTGGATGCTG  
+HWI-EAS443:3:10:836:1753#0/1  
aa¥\_N` a[X] `U]ba^aa\_¥X¥L¥\_Va` SXST\_` `YOJQ`  
@HWI-EAS443:3:10:849:347#0/1  
ATTAGGGCGTGGATTGTCTCCGAAAATCCCACTGCATATG  
+HWI-EAS443:3:10:849:347#0/1  
abbbbaabababa`aaa]`aa\_a` ```` \_[\_W\_]\_\_` ``  
@HWI-EAS443:3:10:92:1031#0/1  
TGTTATTATGCCGTTGTACTTTAACACAGCCACTGCCCA  
+HWI-EAS443:3:10:92:1031#0/1  
aa`abaabaa\_aa\_\_aZ]¥\_\_\_a¥^aZ` ^` \_^`]]a\_` \_]  
@HWI-EAS443:3:10:931:1022#0/1  
TGCAATCAAAGCGTCATTACTTATGAAAACAACACTTGGG  
+HWI-EAS443:3:10:931:1022#0/1  
a\_aa` `` `aaa^\_] [\_` ^` ^` \_\_a\_\_ ^` \_W\_^Z^[] ^^[Z  
@HWI-EAS443:3:10:94:688#0/1  
CAGGCAGTTGTGGTCCAGTATCGTCTAATGGAGCAAATGG  
+HWI-EAS443:3:10:94:688#0/1  
a¥ababb^^` ^[Z` aXZ]U¥a` a^aaX` \_¥Y0aa] `¥\_ba  
@HWI-EAS443:3:10:956:969#0/1  
CGCTTGGTCAGCAAGTGCTTGTGCATGATGGCATCAATTGG  
+HWI-EAS443:3:10:956:969#0/1  
\_` `a^W[Q]¥¥^¥\_X\_` a` ^Z]]N^^WV]WSM]W^` ]] `Y  
@HWI-EAS443:3:10:985:692#0/1  
CATTAGACGATACTGGACCACAACCTGCCTGTCTTATCATT  
+HWI-EAS443:3:10:985:692#0/1  
abbbbbbbabbbba] \_^a` aa\_\_a\_\_ [TZ` a]R` a[]N[\_a  
@HWI-EAS443:3:11:1020:297#0/1  
GGATTAGCCACTCAATTCAACTTGGGAATCAAAATCAGAT  
+HWI-EAS443:3:11:1020:297#0/1  
aa^` a` \_` \_\_^` []T¥RV^^[^` \_\_^^^]Y[^[^[Z]^]V  
@HWI-EAS443:3:11:1068:397#0/1  
CGGGAGTTTTTGTTCAGCATCCAGAACTAACAGGGCTGGAT  
+HWI-EAS443:3:11:1068:397#0/1  
abbbbbTaaa]\_a^` `` `aaa]aa` a\_bab\_^aaa^aaaa`  
@HWI-EAS443:3:11:109:431#0/1  
GTTATCCTGATTCTAGTAAAATCACATGTGTGTGCAGGGA  
+HWI-EAS443:3:11:109:431#0/1  
`PV¥QVV^` ` ^` \_\_[\_^V^]PX] `[^` \_]^W\_Y]WZVW¥TTT  
@HWI-EAS443:3:11:110:28#0/1  
GCCCCGTAATTTACGGAAACCACTGACTGTCCAGCAGCA  
+HWI-EAS443:3:11:110:28#0/1  
abbaaa` ^U\_` a` aaa` \_` ` \_` ^¥^\_V[^^U][[UZ^UUBB  
@HWI-EAS443:3:11:1141:1217#0/1  
CTGCCTGTCTTATCATTAGGGCGTGGATTGTCTCCGAAAA  
+HWI-EAS443:3:11:1141:1217#0/1  
abbaaabbbbbb` bbabbbb^ab` a` aaaa]\_a` ^` a` aaa



@HWI-EAS443:3:11:1258:1982#0/1  
ACCGTTTCTTGAACATAATGCTTTTAGTTCTCCCTATCCAA  
+HWI-EAS443:3:11:1258:1982#0/1  
a\_a`]aaXX]\_`a^]\_\_\_\_][\_^^^^Z\_Y]T]P\_]IH^]  
@HWI-EAS443:3:11:128:1250#0/1  
CATGTGTAATGGTTCTTGCTTTACTGTAATGACCGATGG  
+HWI-EAS443:3:11:128:1250#0/1  
aaab`b`babbba]aabab\_aaabaab\_\_a\_aaaaaaaa`  
@HWI-EAS443:3:11:1290:226#0/1  
AAGTACAACGGCATAATAACAGACACTATCAAGAGTTGGA  
+HWI-EAS443:3:11:1290:226#0/1  
aab^baaa`bbaaaaaaaa`aa\_\_^a`^^`a^\_]`\_\_^  
@HWI-EAS443:3:11:129:186#0/1  
CTCCATTAGACGATACTGGACCACAACCTGCCTGTCTTATC  
+HWI-EAS443:3:11:129:186#0/1  
`[a^¥Z^S¥HZZ^Y^KHUXXZ\_[[TZXR][QRVJRBBBBB  
@HWI-EAS443:3:11:1333:1972#0/1  
GAAATTCCAATTGTTAGCCAATTGATGCCATCATGACAAG  
+HWI-EAS443:3:11:1333:1972#0/1  
a¥bbaa^¥baa`a\_^a\_babaa[Y`\_aa]SZM\_YY\_W\_Y\_  
@HWI-EAS443:3:11:1345:875#0/1  
ACTGACTGTCCAGCAGCAAAGTTGGTGTGCTGATGTAA  
+HWI-EAS443:3:11:1345:875#0/1  
aaa\_aabb]a`ZZUY^STZ¥^VZYORa^[OLWRSX[¥[UY  
@HWI-EAS443:3:11:1391:975#0/1  
ATATGCAGTGGGATTTTCGGAGACAATCCACGCCCTAATG  
+HWI-EAS443:3:11:1391:975#0/1  
a\_aaaaaabWb\_aaaaaaaaaPa\_a`aaYU^Q\_STFY[\_\_\_X  
@HWI-EAS443:3:11:1417:1922#0/1  
GGGGGATGTGTTTGTGATAAGGGAACCATTATCATGC  
+HWI-EAS443:3:11:1417:1922#0/1  
ababaaaa\_aaaaa`a\_a[aa`\_`UM]\_`M`a\_\_Q^^]X  
@HWI-EAS443:3:11:1443:1841#0/1  
GTTCTCAATATATTGTTTCTCCAACCTTGATAGTGTCTG  
+HWI-EAS443:3:11:1443:1841#0/1  
a^aaaaaa`aaaa\_a\_aZaa]¥^¥[\_Ta`\_`¥\_^XBBBBB  
@HWI-EAS443:3:11:152:839#0/1  
GATTGTATAAGACCTTGCTTCTGGGTTGAACTAATCAGAG  
+HWI-EAS443:3:11:152:839#0/1  
a`aZ¥NT]I^a[a]a^a\_T[\_^a`a\_]\_`aVHSNX\_\_^X^  
@HWI-EAS443:3:11:1557:827#0/1  
GGGTTGATATGGGCTCCTGTCTTTAATGGTTCCATTGGA  
+HWI-EAS443:3:11:1557:827#0/1  
Y`\_L`\_Y^a]``^`¥b`^a`T`baP``\_`aXGPXaV^a`  
@HWI-EAS443:3:11:1716:785#0/1  
CAGAAATTCCAATTGTTAGCCAATTGATGCCATCATGACA  
+HWI-EAS443:3:11:1716:785#0/1  
¥b`\_`abab`]babba[bbbbbaabaabaWI`aaaaa^^\_  
@HWI-EAS443:3:11:1730:817#0/1  
AGCCCATCCACTAACAGGGCAGAGAGGAATTGCCCGCT

+HWI-EAS443:3:11:1730:817#0/1  
a`aaa`bb``abba^aaab^^`\_a``\_a¥\_\_\_¥aUUW\_N\_  
@HWI-EAS443:3:11:1732:1075#0/1  
AATGTGCATGTGTAAATGGTTCTTGCTTTACTGTAATGAC  
+HWI-EAS443:3:11:1732:1075#0/1  
^a^Za`¥]a\_X^JTY]`a]aabTYV¥`\_`Q`a]`\_aaaQ  
@HWI-EAS443:3:11:1742:647#0/1  
GAGGGAACCTCACCAATAGGACAGCTCATTAGGGTTCGAT  
+HWI-EAS443:3:11:1742:647#0/1  
aZb\_`W][aaa\_XTV\_[J[a^XZ\_UWLYZZZ\_`aYYW]BB  
@HWI-EAS443:3:11:1778:389#0/1  
GTCAGTGGTTTCCGTGAAATTAGCGGGCAATTCCTCTCTC  
+HWI-EAS443:3:11:1778:389#0/1  
a^`\_aV\_]Xa¥WZaU\_Y\_^\_V¥VV^¥¥V¥X¥WUXW¥VWW  
@HWI-EAS443:3:11:180:937#0/1  
ATTCATATCATGCTCCCCCTTGAATGCAGAACCTTCTTC  
+HWI-EAS443:3:11:180:937#0/1  
`abaabaaaa]\_`\_]aa`]Z\_]\_`]`aZ[]```\_]a^^`  
@HWI-EAS443:3:11:320:831#0/1  
AGCGGGAGCAGCATATCCTTTTGTGGTGTAAACAGTGACA  
+HWI-EAS443:3:11:320:831#0/1  
aZa`aa^[`]`a\_``````\_a`a`V`a¥¥^`S¥\_\_`W\_`W¥  
@HWI-EAS443:3:11:325:1369#0/1  
CTTGGGAATCAAATCAGATTGAAACATGCAATCAAAGCG  
+HWI-EAS443:3:11:325:1369#0/1  
a`a`aaabaaaa]a`aaaaa`a\_`a]``a\_`\_\_`\_^\_\_  
@HWI-EAS443:3:11:32:1740#0/1  
CGATACTGGACCACAACCTGCCTGTCTTATCATTAGGGCGT  
+HWI-EAS443:3:11:32:1740#0/1  
aaa\_aaaa¥`a`aaa`a`a`^^[\_a\_``[\_\_]XJOYZV  
@HWI-EAS443:3:11:390:563#0/1  
TGCTTTATTGAGAAGTTATTGTCTGTCCCAGTCCATCCGT  
+HWI-EAS443:3:11:390:563#0/1  
Obab`^^^bb]b^bb`bb\_`b\_aa`HV\_TS]BBBBBBBBB  
@HWI-EAS443:3:11:632:1527#0/1  
AGCCACTGCCCCATTGTCTGGCCAGAAATCCAATTGTT  
+HWI-EAS443:3:11:632:1527#0/1  
\_Z^`UQOZ¥¥\_VPX]Q]ZTNP¥`^Z`VHIU]N[BBBBB  
@HWI-EAS443:3:11:643:1945#0/1  
AATGTGCATGTGTAAATGGTTCTTGCTTTACTGTAATGAC  
+HWI-EAS443:3:11:643:1945#0/1  
^Z`H[ `b`YU^Xb^a\_UUW^a`Za¥¥\_\_TLP¥¥a\_\_YaP  
@HWI-EAS443:3:11:695:545#0/1  
GGGGGATGTGTTTGTGATAAGGGAACCATTATCATGC  
+HWI-EAS443:3:11:695:545#0/1  
aa[aa`]aQ^`\_a^`]WUWHa]X]]^N]]NNX]YN^UBB  
@HWI-EAS443:3:11:734:655#0/1  
TTGTTAGCCAATTGATGCCATCATGACAAGCACTTGCTGA  
+HWI-EAS443:3:11:734:655#0/1  
abb]aaaa`S\_aa```a`^\_\_aa`\_aa``S\_\_a`\_]\_\_\_\_

@HWI-EAS443:3:11:795:389#0/1  
GCTCCATTAGACGATACTGGACCACAACCTGCCTGTCTTAT  
+HWI-EAS443:3:11:795:389#0/1  
aaaabaaaababaa`]V]a^FR[Q^\_\_[\_`\_Z^[SX\_¥[¥  
@HWI-EAS443:3:11:801:352#0/1  
GTTCTCCCTATCCAAACACCATTGCCGTATTTGAATGAAA  
+HWI-EAS443:3:11:801:352#0/1  
`\_aa\_R^ZYaa[¥a\_a]Y`\_]\_^]]]aS\_]``]V¥\_]\_\_^  
@HWI-EAS443:3:11:817:787#0/1  
CATTAGACGATACTGGACCACAACCTGCCTGTCTTATCATT  
+HWI-EAS443:3:11:817:787#0/1  
abaaaa`abaa`¥`]a^aaa\_``\_\_^Q[^`SU^`\_^]Y^\_  
@HWI-EAS443:3:11:819:1087#0/1  
CTTTAACACAGCCACTGCCCATTTGTCTGGGCCAGAAATT  
+HWI-EAS443:3:11:819:1087#0/1  
``\_U¥VT¥a^¥¥Z^Ra]`^`^U]ZTVW\_ZVS¥XW[H]^BB  
@HWI-EAS443:3:11:838:579#0/1  
ATTGTATAAGACCTTGCTTCTGGGTTGAACTAATCAGAGG  
+HWI-EAS443:3:11:838:579#0/1  
S`bbabb`U\_b\_0]Z^``^`[]V¥bbba`b`\_aa`\_a  
@HWI-EAS443:3:11:871:108#0/1  
CAGACATATGTTAACATCAGCAACACCAACTTTGCTGCTG  
+HWI-EAS443:3:11:871:108#0/1  
aabb`abbbbbabaaabbb\_aaabW]baYaab\_\_b`ab  
@HWI-EAS443:3:11:890:1502#0/1  
AAACATTCCAATGGAACCATTAAGACAGGAGCCCATATC  
+HWI-EAS443:3:11:890:1502#0/1  
aaba`aaabaaa````]`a`\_````\_a\_]`^`^U  
@HWI-EAS443:3:11:896:567#0/1  
GGAATAAATGAGTGGTCAGGATATAGCGGGAGTTTTGTTC  
+HWI-EAS443:3:11:896:567#0/1  
a^XP\_YUaUYNY^\_HOS]SW]\_\_^NRY]SSVFXWTRGYB  
@HWI-EAS443:3:11:927:702#0/1  
GACAGACAATAACTTCTCAATAAAGCAAGATATCGTAGGA  
+HWI-EAS443:3:11:927:702#0/1  
aaaaabbb\_bbaabaabaabaaaaa`aaaa`a\_\_aaa  
@HWI-EAS443:3:11:933:992#0/1  
ATGACAAGCACTTGCTGACCAAGCGACTGACTCAAATCTT  
+HWI-EAS443:3:11:933:992#0/1  
abbaaa\_aaaaaa`aa^Z\_``a\_`^R\_`S]]]^`¥^X`\_  
@HWI-EAS443:3:11:943:1565#0/1  
CAGCCACTGCCCCATTGTCTGGGCCAGAAATCCAATTGT  
+HWI-EAS443:3:11:943:1565#0/1  
abaabb`aa]^¥^]Z\_a[aRaa¥HXS[KV^]Q`[YZ[[N¥  
@HWI-EAS443:3:11:991:1965#0/1  
TCCAATTGTTAGCCAATTGATGCCATCATGACAAGCACTT  
+HWI-EAS443:3:11:991:1965#0/1  
`ab\_aaaY[R\_]P^]ab\_X``baa`UD[a\_WH¥a`M`QZS  
@HWI-EAS443:3:12:1097:1447#0/1  
ATCGGTTCCAAGGGGATGTGTTTGCATAAGGGAACCAT

+HWI-EAS443:3:12:1097:1447#0/1  
a\_\_a^ZX`VX]^¥^\_X^UXSY^[RUXZVX0]ZZ]ZXWV  
@HWI-EAS443:3:12:1100:915#0/1  
ATTAGGGCGTGGATTGTCTCCGAAAATCCCCTGCATATG  
+HWI-EAS443:3:12:1100:915#0/1  
aaa`[Z\_`\_`ZY^`]]W¥`[aa```\_a`Z]R¥`[\_a]a`  
@HWI-EAS443:3:12:1147:1972#0/1  
GTTTGGATAGGGGAGAACTAAAAGCATTAGTTCAAGAAACG  
+HWI-EAS443:3:12:1147:1972#0/1  
a]a`aa^aaaa¥\_\_Z`\_a¥a\_¥aa]¥`\_Y¥]]W\_]^[^Y`  
@HWI-EAS443:3:12:1231:978#0/1  
CACTGCATATGTATCCTATCTGATATTCAGATTCTGGTT  
+HWI-EAS443:3:12:1231:978#0/1  
ababa`bbb`baaaabbbbabbaaabab]aaaaaaaa`a  
@HWI-EAS443:3:12:1238:566#0/1  
TGTTGTCTTTACTGTATATAGCCCATCCACTAACAGGGCA  
+HWI-EAS443:3:12:1238:566#0/1  
\_\_`]]`bbbb\_¥Wba]abba[`XWZ^b\_aaa`bbT^ab[[J  
@HWI-EAS443:3:12:1277:1915#0/1  
TGGGACAGACAATAACTTCTCAATAAAGCAAGATATCGTA  
+HWI-EAS443:3:12:1277:1915#0/1  
^``RRa`^\_\_aaZX[Y^a^Y^Xb``^b^Z^¥^`a\_a`LW`  
@HWI-EAS443:3:12:1297:189#0/1  
TCATGACAAGCACTTGCTGACCAAGCGACTGACTCAAATC  
+HWI-EAS443:3:12:1297:189#0/1  
aaaaa^aaaaX¥[\_a\_aa`VY`\_\_]]`VY`\_Y]XUUP]BB  
@HWI-EAS443:3:12:1342:123#0/1  
AGGCAGTTGTGGTCCAGTATCGTCTAATGGAGCAAATGGA  
+HWI-EAS443:3:12:1342:123#0/1  
abaaab]a]Tb`T\_YV][`[\_UWZ\_a[ZaGZFY¥\_a`G  
@HWI-EAS443:3:12:1347:179#0/1  
CCCTCTCCATACAACTCAAGATTTGAGTCAGTCGCTTGGT  
+HWI-EAS443:3:12:1347:179#0/1  
`a`a]]Xa\_a^Z^WZ\_a^VRV\_^[[ZZY^]^UX^]]WNUB  
@HWI-EAS443:3:12:1395:1072#0/1  
CAGCAAGTGCTTGCATGATGGCATCAATTGGCTAACAAAT  
+HWI-EAS443:3:12:1395:1072#0/1  
ab`bb^]JY\_^aa]]Waaba\_b¥bb\_aaaaXQaa`^aaa  
@HWI-EAS443:3:12:1408:837#0/1  
GCTCCTGTCTTTAATGGTTCCATTGGAATGTTTGCATTT  
+HWI-EAS443:3:12:1408:837#0/1  
aba``bbababaaa`ba¥`^W`X[a```\_\_aa]^¥U`\_`  
@HWI-EAS443:3:12:1429:561#0/1  
ATGCAGTGGGATTTTCGGAGACAATCCACGCCCTAATGAT  
+HWI-EAS443:3:12:1429:561#0/1  
^\_\_X¥\_0^baP]]\_\_¥`baa]0]a¥N]\_Y¥JDD[]Z^``B  
@HWI-EAS443:3:12:1441:1582#0/1  
AACAGACACTATCAAGAGTTGGAGAAACAATATATTGAGA  
+HWI-EAS443:3:12:1441:1582#0/1  
a`V]]`a¥abb`[^`aabaa`a`aYaa`\_Ya``a\_aa`a\_

@HWI-EAS443:3:12:1449:1613#0/1  
CGCTAGTCCAGATTGTGTTCTCTTTGGGTCGCCCTCTGAT  
+HWI-EAS443:3:12:1449:1613#0/1  
a\_b[`aaabbbabab`aabab\_aaaaaa]¥\_\_^\_a]aaaa  
@HWI-EAS443:3:12:1493:1953#0/1  
GATATTCCAGATTCTGGTTGAAAGACACCCACGGTCGATT  
+HWI-EAS443:3:12:1493:1953#0/1  
abb\_[`b¥Ma`^XU]aa\_baa\_aUaRaWNR[V`BBBBBBB  
@HWI-EAS443:3:12:1567:1748#0/1  
TGTCTCCGAAAATCCCACTGCATATGTATCCTATCTGATA  
+HWI-EAS443:3:12:1567:1748#0/1  
¥b`^`\_^`¥^^`[]S^]\_\_[Ua\_Ta^a`\_Z``aNva^]\_  
@HWI-EAS443:3:12:172:468#0/1  
CACAAGAGTCTGAATGTGCATGTGTAATGGTTCTTGCTT  
+HWI-EAS443:3:12:172:468#0/1  
aa\_a`a`\_Z```][Z[X``\_\_^]¥FRLTV^MU¥]¥]^X  
@HWI-EAS443:3:12:176:179#0/1  
TTTGAGATGATTTGGGATCCGAACGGATGGACTGGGACAG  
+HWI-EAS443:3:12:176:179#0/1  
aa``\_W]]]¥^``^`^`P[¥^]NTY¥VYYZZYTTRB  
@HWI-EAS443:3:12:23:983#0/1  
TCAAAATCAGATTGAAACATGCAATCAAAGCGTCATTACT  
+HWI-EAS443:3:12:23:983#0/1  
a`X[\_aaab^]aaVV]]`aa\_`Y``a`\_`aa^`\_``\_\_`  
@HWI-EAS443:3:12:30:1430#0/1  
ATCCGAACGGATGGACTGGGACAGACAATAACTTCTCAAT  
+HWI-EAS443:3:12:30:1430#0/1  
\_`aaaU`a\_a^\_a`SRY`a`^YZ]\_a\_\_`[¥^\_\_YaYZR  
@HWI-EAS443:3:12:349:310#0/1  
TCAAAATCAGATTGAAACATGCAATCAAAGCGTCATTACT  
+HWI-EAS443:3:12:349:310#0/1  
\_^]ZN[U`WaY`R^b^^]`\_\_]^HV\_a[\_^]aYMV[UMP[  
@HWI-EAS443:3:12:380:1093#0/1  
CTGGACCACAACCTGCCTGTCTTATCATTAGGGCGTGGATT  
+HWI-EAS443:3:12:380:1093#0/1  
aa\_00ZSI\_a`TZ¥0SR\_``aa]YZXY]]`XEM[YNS^^W  
@HWI-EAS443:3:12:386:815#0/1  
CCAGATTCTGGTTGAAAGACACCCACGGTCGATTGAGCC  
+HWI-EAS443:3:12:386:815#0/1  
aaaa``aa`a¥aaaaa``\_a``a`\_a\_WU[[V[^Z[WW  
@HWI-EAS443:3:12:458:723#0/1  
ATGACAAGCACTTGCTGACCAAGCGACTGACTCAAATCCTT  
+HWI-EAS443:3:12:458:723#0/1  
a]`Ta\_a¥a]^\_aa`YTas\_``\_`¥Z^\_ZW]W]UU^^\_`^  
@HWI-EAS443:3:12:470:2040#0/1  
GCCACTCAATTCAACTTGGGAATCAAAATCAGATTGAAAC  
+HWI-EAS443:3:12:470:2040#0/1  
abbbbab\_aabbbbbaabbababbbbbbaa\_babaabaaba  
@HWI-EAS443:3:12:474:1069#0/1  
GGTTGAAAGACACCCACGGTCGATTGAGCCATGCCAGTT

+HWI-EAS443:3:12:474:1069#0/1  
abYbabb`a\_abba`abbbZ\_a¥\_ ]`[^U`\_ ]\_aZ` `V¥  
@HWI-EAS443:3:12:527:530#0/1  
GCCCCGTAATTTACGGAAACCACTGACTGTCCAGCAGCA  
+HWI-EAS443:3:12:527:530#0/1  
`baababbaaaaa`aaaab\_a]aaa`\_aa\_[R`\_\_` ]\_  
@HWI-EAS443:3:12:600:622#0/1  
GTCATTTAGCAAGGCCCTTGAGTCAAGAAGAAGGTTCTG  
+HWI-EAS443:3:12:600:622#0/1  
` `aaaaaa` `a[V`^[ZZ`^`\_^aRQV`^\_ZTVWUXVP]R`\_  
@HWI-EAS443:3:12:64:1159#0/1  
CTAGAATCAGGATAACAGGAGCATTCCCTCATAGTGATAAT  
+HWI-EAS443:3:12:64:1159#0/1  
a\_\_RMHP`\_`X^ ]` ]WZ`^ ]Z` ] ]` ]` ] ]\_Y\_ZVVTY  
@HWI-EAS443:3:12:679:1343#0/1  
GGGATCCGAACGGATGGACTGGGACAGACAATAACTTCTC  
+HWI-EAS443:3:12:679:1343#0/1  
a`a[ ] ]XSS[DU ] ]UWYU^T[ [¥QR ] ]Y`\_]W^OO\_VYT  
@HWI-EAS443:3:12:691:1287#0/1  
CCCAAATCATCTCAAACCGTTTCTTGAAC TAATGCTTTT  
+HWI-EAS443:3:12:691:1287#0/1  
`\_`\_aa\_\_baaa\_aaaaaaaaa^\_\_a\_¥Y[ `W]aa^\_X]\_\_\_\_  
@HWI-EAS443:3:12:697:86#0/1  
ATTAGGGCGTGGATTGTCTCCGAAAATCCCACTGCATATG  
+HWI-EAS443:3:12:697:86#0/1  
abbaa`aaa\_b^^a`aXS\_Z\_a\_\_a`¥\_Z\_]Z]\_^¥^Z`^  
@HWI-EAS443:3:12:743:95#0/1  
GTGTAAACAGTGACACTGTGGGTTGGTCTTGCCAGACGG  
+HWI-EAS443:3:12:743:95#0/1  
a\_aaa^a\_\_aX`\_¥`Xaa¥^\_[Z`\_`VX`U`\_XNV^¥XBB  
@HWI-EAS443:3:12:788:380#0/1  
AGAAGAAGGTTCTGCATTCCAAGGGGAGCATGATATGAA  
+HWI-EAS443:3:12:788:380#0/1  
aaYab`aaa\_a^a\_\_`a`a`\_^\_\_`\_a^ ]^ [\_\_^`\_`\_^ ]^  
@HWI-EAS443:3:12:807:298#0/1  
CATTCATATCATGCTCCCCCTTGAATGCAGAACCTTCTT  
+HWI-EAS443:3:12:807:298#0/1  
\_YQW]WaaXaaR[VHSVWXLUXT]Q^BBBBBBBBBBBBBB  
@HWI-EAS443:3:12:812:1944#0/1  
CATATGCAGTGGGATTTTCGGAGACAATCCACGCCCTAAT  
+HWI-EAS443:3:12:812:1944#0/1  
abbbb[\_aaab`bb`b`bba\_aba\_b\_\_\_ab^`Jaa`aa[  
@HWI-EAS443:3:12:845:408#0/1  
GGAGAGGGAAC TTCACCAATAGGACAGCTCATTAGGGTTC  
+HWI-EAS443:3:12:845:408#0/1  
aa]`P¥a ]^` [bXaaU`\_^ ]¥R`\_`\_`aRX`\_¥^Z\_a¥¥\_T  
@HWI-EAS443:3:12:96:438#0/1  
GTCATGATGGCATCAATTGGCTAACAATTGGAATTTCTGG  
+HWI-EAS443:3:12:96:438#0/1  
aab^^a` `aZ]Q\_ab` \_\_\_\_\_a\_ZQ] ]`a\_\_^\_\_\_\_^\_^ ]^ ]

@HWI-EAS443:3:12:979:1367#0/1  
TGGGAATCAAAATCAGATTGAAACATGCAATCAAAGCGTC  
+HWI-EAS443:3:12:979:1367#0/1  
abbaaa`aa`Y`aaaa\_aa\_]\_a`\_aa`\_\_\_\_^\_\_^\_Z¥  
@HWI-EAS443:3:12:97:72#0/1  
GAAGTTCCCTCTCCATACAACCTCAAGATTTGAGTCAGTCG  
+HWI-EAS443:3:12:97:72#0/1  
`a\_aY`\_`\_\_\_\_^`\_Z^`\_]XZ\_[Z`Y¥^\_`^V\_XX]ZNVY  
@HWI-EAS443:3:12:980:1443#0/1  
AAACAATATATTGAGAACACAAGAGTCTGAATGTGCATGT  
+HWI-EAS443:3:12:980:1443#0/1  
^PIPT[X\_\_^^Ya\_a\_]`\_b^¥[\_¥aaa^a\_\_\_\_`[aX¥¥  
@HWI-EAS443:3:13:1007:630#0/1  
TGTCTCCGAAAATCCCCTGTCATATGTATCCTATCTGATA  
+HWI-EAS443:3:13:1007:630#0/1  
\_baa`b`]abb\_aa\_\_`a[`Y[\_[^`U^``¥¥TaR^`\_`\_`  
@HWI-EAS443:3:13:1027:118#0/1  
CATTAGGGCGTGGATTGTCTCCGAAAATCCCCTGTCATAT  
+HWI-EAS443:3:13:1027:118#0/1  
abbbbbbbbababb]abb^`aaabaaaa```a\_aa[`a`\_`  
@HWI-EAS443:3:13:1042:1851#0/1  
AATAACAGACACTATCAAGAGTTGGAGAAACAATATATTG  
+HWI-EAS443:3:13:1042:1851#0/1  
YY`UNWRU\_0a`\_b\_\_Ta`\_]J^V[[Z`V`¥V`NPNa]WT  
@HWI-EAS443:3:13:1089:1766#0/1  
ATGCAGAACCTTCTTCTTGGACTCAAGGGCCTTGCTAAAT  
+HWI-EAS443:3:13:1089:1766#0/1  
aT0¥` `[^¥H¥[[VUR^OS^WV¥0¥XWZLNZPNQX^]XW  
@HWI-EAS443:3:13:1128:943#0/1  
CACCAACTTTGCTGCTGGACAGTCAGTGGTTTCCGTGAAA  
+HWI-EAS443:3:13:1128:943#0/1  
\_S][HY`\_\_WXWa\_S\_\_\_VTX\_VZ^ZX]aNZVH][HNVY`  
@HWI-EAS443:3:13:1135:395#0/1  
CACAAAAGGATATGCTGCTCCCGCTAGTCCAGATTGTGTT  
+HWI-EAS443:3:13:1135:395#0/1  
aaaa^¥¥`a`aaaa]¥)`\_`^^^`][\_W^\_\_^[^¥^U` [Y  
@HWI-EAS443:3:13:1156:978#0/1  
ACACCCACGGTCGATTTCGAGCCATGCCAGTTATCCCTGCA  
+HWI-EAS443:3:13:1156:978#0/1  
a` `a`aa\_a]W` [ZWXZ[WZV[¥SUZZX¥NUZUTW¥Z¥¥¥  
@HWI-EAS443:3:13:1169:1287#0/1  
GAAATTCCAATTGTTAGCCAATTGATGCCATCATGACAAG  
+HWI-EAS443:3:13:1169:1287#0/1  
Y`XJ\_] [`\_ [¥\_a`\_]aSZZ]aaQOUGQUaI[[aY`aaa  
@HWI-EAS443:3:13:1180:1385#0/1  
CACAAAAGGATATGCTGCTCCCGCTAGTCCAGATTGTGTT  
+HWI-EAS443:3:13:1180:1385#0/1  
a`\_`aaYaa`\_a\_a` ``\_¥\_^\_\_\_\_¥¥^W]X\_\_V¥\_aT`UW  
@HWI-EAS443:3:13:1222:1338#0/1  
CTGCTCCCGCTAGTCCAGATTGTGTTCTCTTTGGGTCGCC

+HWI-EAS443:3:13:1222:1338#0/1  
aa`aaa`]aaa`a\_\_`a`\_a`T^[\_][^`[¥]``SY\_V[  
@HWI-EAS443:3:13:1223:447#0/1  
GCCCCCTTGAGTCAAGAAGAAGTTCTGCATTCCAAGGGGG  
+HWI-EAS443:3:13:1223:447#0/1  
a]SW^\_]PY\_U^\_¥UXZa\_\_[]^¥[^\_\_^\_Z[\_^¥`YTR¥  
@HWI-EAS443:3:13:1325:357#0/1  
ATCAAAATCAGATTGAAACATGCAATCAAAGCGTCATTAC  
+HWI-EAS443:3:13:1325:357#0/1  
aa`aaaa`a`b`aabaaa`ab`\_`\_`^a\_\_a¥`]S\_\_^\_[  
@HWI-EAS443:3:13:1373:949#0/1  
CCTAATTACTACTATGAGGAATGCTCCTGTTATCCTGATT  
+HWI-EAS443:3:13:1373:949#0/1  
aa^`T`^P`]SGRU]]aVRZ\_aXS^[a\_[U]U]LG^S\_a¥  
@HWI-EAS443:3:13:1434:806#0/1  
GCCACTCAATTCAACTTGGGAATCAAATCAGATTGAAAC  
+HWI-EAS443:3:13:1434:806#0/1  
¥\_\_bbaababbabbaabbbb¥bb`bbabb\_ababbbbba\_  
@HWI-EAS443:3:13:146:1575#0/1  
CTGCATATGTATCCTATCTGATATTCCAGATTCTGGTTGA  
+HWI-EAS443:3:13:146:1575#0/1  
aaaaba`a`¥b`^`aZaaba^`a`aab\_¥aa]\_aa\_Z`W\_  
@HWI-EAS443:3:13:1511:558#0/1  
AGACGATACTGGACCACAACCTGCCTGTCTTATCATTAGGG  
+HWI-EAS443:3:13:1511:558#0/1  
[aabbZS`^^`YJILW]R`YS^[PNNNZV¥YSLQV][[BB  
@HWI-EAS443:3:13:1525:940#0/1  
TGATTAGTTCAACCCAGAAGCAAGTCTTATACAATCCAG  
+HWI-EAS443:3:13:1525:940#0/1  
aaaaaa`\_a`aa^[`aa\_`]`\_`\_`V\_a`aa\_Za\_\_V¥\_`^  
@HWI-EAS443:3:13:1612:328#0/1  
CAGACACTATCAAGAGTTGGAGAAACAATATATTGAGAAC  
+HWI-EAS443:3:13:1612:328#0/1  
`]`a¥a^aaaa\_\_^^]T^aaZZ^\_\_a]a\_\_\_\_a\_\_^¥[V  
@HWI-EAS443:3:13:1652:888#0/1  
CAGGATAACAGGAGCATTCCCTCATAGTGATAATTAGGGGC  
+HWI-EAS443:3:13:1652:888#0/1  
^a\_\_`\_`Z[`aaaba[\_`\_`\_`a`^a]]Y^^\_a`\_\_a`]aa^  
@HWI-EAS443:3:13:1696:1518#0/1  
GTGAAATTAGCGGGCAATTCCTCTCTCTGCCCTGTTAGTG  
+HWI-EAS443:3:13:1696:1518#0/1  
`U`]UZ¥[Y[]PZ^Z^X[[]UYWZUSTT\_SLLZVY[BBBB  
@HWI-EAS443:3:13:1723:329#0/1  
TGCCCTGTTAGTGGATGGGCTATATACAGTAAAGACAACA  
+HWI-EAS443:3:13:1723:329#0/1  
a`aa`ab]^Y\_]`\_^^a`]`^\_Y[P]GU\_TZU`\_]FXWI^  
@HWI-EAS443:3:13:221:413#0/1  
CTTGAGTCAAGAAGAAGTTCTGCATTCCAAGGGGGAGCA  
+HWI-EAS443:3:13:221:413#0/1  
abbbabaaabbab`aa`b^aaaab^aaaaa\_\_a^]a\_a\_a



@HWI-EAS443:3:13:270:761#0/1  
ATTCATATCATGCTCCCCCTTGAATGCAGAACCTTCTTC  
+HWI-EAS443:3:13:270:761#0/1  
[^\b`^`ab]a\_ZWa`baaaZV^^`^a\_\_`a\_\_\_X\_`XQ  
@HWI-EAS443:3:13:275:342#0/1  
GATTCTGTTGAAAGACACCCACGGTCGATTGAGCCATG  
+HWI-EAS443:3:13:275:342#0/1  
aaa¥]R^\_¥GXX]]`\_\_\_Va^XZ]^R\_Y[]ZNQQPB BBBB  
@HWI-EAS443:3:13:283:1662#0/1  
GGTAAATGGCAACTCAGCACCGTCTGGCCAAGACCAACCC  
+HWI-EAS443:3:13:283:1662#0/1  
aaUaaY^]¥aa\_^aaaUaa^\_XLV[LVU^W^W¥Y¥W¥¥BB  
@HWI-EAS443:3:13:290:168#0/1  
CTGTTATTATGCCGTTGTACTTTAACACAGCCACTGCCCC  
+HWI-EAS443:3:13:290:168#0/1  
aab^bbabbabaab]bbYaabba`b\_aaaa`\_a\_\_aY\_\_  
@HWI-EAS443:3:13:334:438#0/1  
CAATTGATGCCATCATGACAAGCACTTGCTGACCAAGCGA  
+HWI-EAS443:3:13:334:438#0/1  
abaaaa`aabaaaa`aa[`a\_aaa\_a]]``]aa`^`^`^`  
@HWI-EAS443:3:13:384:1164#0/1  
ATGGGCTCCTGTCTTTAATGGTTCATTGGAATGTTTGTC  
+HWI-EAS443:3:13:384:1164#0/1  
a\_\_\_ba`a\_a^`a`^a^^WTWZ`^^`\_S[^]\_^\_\_VNL  
@HWI-EAS443:3:13:466:566#0/1  
TTCAAATACGGCAATGGTGTGGATAGGGAGAACTAAAA  
+HWI-EAS443:3:13:466:566#0/1  
\_bbb]ab`aaaa\_]\_\_\_Wa\_baa`Y\_aa`\_``[\_¥\_^\_aa  
@HWI-EAS443:3:13:477:1560#0/1  
GTCTTATAACAATCCAGCCCTGTTAGTTCTGGATGCTGAAC  
+HWI-EAS443:3:13:477:1560#0/1  
`R\_^\_^\_a¥XX\_]X\_\_\_a\_[\_¥WTRW^\_]`Y¥NODL[¥YV  
@HWI-EAS443:3:13:506:621#0/1  
ATCAGATTGAAACATGCAATCAAAGCGTCATTACTTATGA  
+HWI-EAS443:3:13:506:621#0/1  
a`a¥aaa`aa^a\_a^a^\_a`\_\_`````\_Z¥`\_Z\_\_\_\_\_]^\_]\_  
@HWI-EAS443:3:13:632:1922#0/1  
GCCAAGACCAACCCACAGTGTCACTGTTTACACCACAAAA  
+HWI-EAS443:3:13:632:1922#0/1  
`¥aaa\_\_\_bbaaZ^`0aa[]^[a^¥]^\_^a^`Va`Z\_^V^  
@HWI-EAS443:3:13:653:1140#0/1  
CGGGAGCAGCATATCCTTTTGTGGTGTAAACAGTGACACT  
+HWI-EAS443:3:13:653:1140#0/1  
ab^^R\_\_V¥ZZ^0SDMU]S^]U^a^\_[ULO¥GXV\_TNSG[  
@HWI-EAS443:3:13:689:439#0/1  
TGCCGTTGTACTTTAACACAGCCACTGCCCCATTGTCTGG  
+HWI-EAS443:3:13:689:439#0/1  
abbabaab`a\_aaaba`aaaa^\_aaa\_\_`\_\_``aaY\_aY¥  
@HWI-EAS443:3:13:69:29#0/1  
CAAATCATCTCAAACCGTTTTCTTGAACCTAATGCTTTTAG

+HWI-EAS443:3:13:69:29#0/1  
a`aZaYY[a\_a^W\_¥]`Z[Y^]W[Y]^¥T[\_]\_]\_] ]]  
@HWI-EAS443:3:13:719:680#0/1  
GCCCCATTGTCTGGGCCAGAAATCCAATTGTTAGCCAAT  
+HWI-EAS443:3:13:719:680#0/1  
abaab[ab\_`a^aaaRabaa^`aa[\_`aaaa\_]`aVS^a^  
@HWI-EAS443:3:13:81:516#0/1  
CTTGTGTTCTCAATATATTGTTTCTCCAACCTTGATAGT  
+HWI-EAS443:3:13:81:516#0/1  
aa`Ua[aa¥aa`aaaaaaZ`a`\_`\_`\_N[\_\_\_a^XZ^]¥U  
@HWI-EAS443:3:13:838:1253#0/1  
CTATCTTTCCCTTTTCTATTCTGAAGATCTTGTATGAGGC  
+HWI-EAS443:3:13:838:1253#0/1  
abababaaaababba`bbba\_aaaa`aa\_aaa`a`\_`a\_\_\_\_  
@HWI-EAS443:3:13:870:1394#0/1  
TGCATGTGTAATGGTTCTTGCTTTACTGTAATGACCGAT  
+HWI-EAS443:3:13:870:1394#0/1  
`b[YYY`Y^b\_ab^`aa\_aaaa`]^aaa\_aaaa\_]X^\_\_  
@HWI-EAS443:3:13:929:974#0/1  
GGCGTGGATTGTCTCCGAAAATCCCACTGCATATGTATCC  
+HWI-EAS443:3:13:929:974#0/1  
a\_a`Z[¥NZ^UP\_a[`^Q0\_\_`a]YUY\_]\_\_\_\_¥W^U¥W\_Q  
@HWI-EAS443:3:13:92:1409#0/1  
GGGCTGGATTGTATAAGACCTTGCTTCTGGGTTGAACTAA  
+HWI-EAS443:3:13:92:1409#0/1  
abbbaaa`abbabbaabbabaabababaa^`baab`aba  
@HWI-EAS443:3:13:982:1445#0/1  
ATCTGATATTCCAGATTCTGGTTGAAAGACACCCACGGTC  
+HWI-EAS443:3:13:982:1445#0/1  
[¥``baaba¥\_0Zaaaa`a^Waaa`a`¥NRZ\_\_\_\_[BBBB  
@HWI-EAS443:3:13:990:1469#0/1  
CGGGAGTTTTGTTTCAGCATCCAGAATAACAGGGCTGGAT  
+HWI-EAS443:3:13:990:1469#0/1  
ab\_\_\_\_baaba`b`aa`^a`abab\_abaaaaaaab^^a  
@HWI-EAS443:3:13:993:1278#0/1  
AGCCCATCCACTAACAGGGCAGAGAGGAATTGCCCGCT  
+HWI-EAS443:3:13:993:1278#0/1  
`a]Xa\_\_`\_abaaaaX^Ya\_] ]][Z\_aX\_[````\_Z\_\_\_\_  
@HWI-EAS443:3:14:1019:117#0/1  
CGCTTGGTCAGCAAGTGCTTGTTCATGATGGCATCAATTGG  
+HWI-EAS443:3:14:1019:117#0/1  
\_`aSS`ZFYabbUP\_ab`aab¥\_abb]``[``a^a`\_`[`  
@HWI-EAS443:3:14:1064:434#0/1  
CTCCATTTGCTCCATTAGACGATACTGGACCACAACCTGCC  
+HWI-EAS443:3:14:1064:434#0/1  
aaab]a`aaaa`\_`aaa`a`Ya\_`\_]RH]X`\_O]\_VQ  
@HWI-EAS443:3:14:1072:1999#0/1  
GACAAGCACTTGCTGACCAAGCGACTGACTCAAATCTTGA  
+HWI-EAS443:3:14:1072:1999#0/1  
\_Z`^`b¥UNU]^ZX`\_YZb`^SY[aaZ[¥YZYY`]^V`^`

@HWI-EAS443:3:14:1083:268#0/1  
CTCAAATCTTGAGTTGTATGGAGAGGGAACCTCACCAATA  
+HWI-EAS443:3:14:1083:268#0/1  
a[S[0`]^`]]Z[[`¥[`¥\_L\_OYU]FQOUNQYXU¥BBB  
@HWI-EAS443:3:14:1123:1090#0/1  
ATTTTCGGAGACAATCCACGCCCTAATGATAAGACAGGCA  
+HWI-EAS443:3:14:1123:1090#0/1  
Zbbaa`a`\_`a]]`\_\_`^\_\_\_¥\_\_^\_[\_\_\_^R\_GS`BBB  
@HWI-EAS443:3:14:1132:1155#0/1  
TTCAAATACGGCAATGGTGTGGATAGGGAGAACTAAAA  
+HWI-EAS443:3:14:1132:1155#0/1  
a`aaaaa`ab`\_^ZQ]^`\_aaX[S^\_]\_^Z]]][S^Y\_\_`  
@HWI-EAS443:3:14:1167:805#0/1  
ATTTAAAGACAGGAGCCCATATCGAACCTAATGAGCTGTC  
+HWI-EAS443:3:14:1167:805#0/1  
^`]Y¥]^XZaaXV[^\_Y\_Z\_\_^aY[]XV^\_]U\_T`OUUY]  
@HWI-EAS443:3:14:1173:1174#0/1  
ACCCACGGTCGATTTCGAGCCATGCCAGTTATCCCTGCACA  
+HWI-EAS443:3:14:1173:1174#0/1  
a]¥`\_]aYGM\_TVXMTSYU¥LMQLSGXKTZ[QQVPPSPSB  
@HWI-EAS443:3:14:1194:1933#0/1  
CAAGAAACGGTTTTGAGATGATTTGGGATCCGAACGGATG  
+HWI-EAS443:3:14:1194:1933#0/1  
a`^[^\_aX`aNW`]P¥GQQXQa[[V\_RZ]^PJPYRBBBBB  
@HWI-EAS443:3:14:1241:531#0/1  
ATCAAAGCGTCATTACTTATGAAAACAACACTTGGGTAAA  
+HWI-EAS443:3:14:1241:531#0/1  
]S[F[[`[^[X¥]¥^X^^\_aa`]ZWW[S¥`]\_^``\_Q\_\_\_  
@HWI-EAS443:3:14:1307:807#0/1  
GTGGGTTGGTCTTGGCCAGACGGTGCTGAGTTGCCATTTA  
+HWI-EAS443:3:14:1307:807#0/1  
a\_aaa]^`\_UZ``^`aXSXSU[VS^W^ZW^YW[SXZZ^¥R  
@HWI-EAS443:3:14:1362:385#0/1  
CTTTAACACAGCCACTGCCCATTTGTCTGGGCCAGAAATT  
+HWI-EAS443:3:14:1362:385#0/1  
`\_S¥aa]a]ba[Y^^aX^a]\_aaa`]]\_Y`TPX`\_\_WTYZ  
@HWI-EAS443:3:14:1384:1196#0/1  
CGTTTCGGATCCCAAATCATCTCAAACCCTTTCTTGAAC  
+HWI-EAS443:3:14:1384:1196#0/1  
`aSZVaX^XbbVaS\_\_^YV`bZR[[]]H]b\_]a^b[¥¥a^^  
@HWI-EAS443:3:14:1435:250#0/1  
GGGGGATGTGTTTGTCTATAAGGGAACCATTTCATATCATGC  
+HWI-EAS443:3:14:1435:250#0/1  
^R^^a^\_a```^`a`^^X¥¥^^¥YV[ZZ^[^V^^\_]SV^WT  
@HWI-EAS443:3:14:1453:2006#0/1  
TGTGCATGTGTAAATGGTTCTTGCTTTACTGTAATGACCG  
+HWI-EAS443:3:14:1453:2006#0/1  
abaa`aaa\_aUbaab`\_aaaa[]aaaaWaY\_a`]a`]\_^  
@HWI-EAS443:3:14:1498:1238#0/1  
TCAGGATATAGCGGGAGTTTTGTTTCAGCATCCAGAACTAA

+HWI-EAS443:3:14:1498:1238#0/1  
\_`b`¥baaaba`aaP\_Q]``R`Z`\_`^`^W^¥\_W^R`]¥  
@HWI-EAS443:3:14:1561:1611#0/1  
CACATGTGTGTGCAGGGATAACTGGCATGGCTCGAATCGA  
+HWI-EAS443:3:14:1561:1611#0/1  
S¥`U`a^`[`VTaJ¥`aa^`\_`\_a`a`aa`aS\_aZUNRPTBB  
@HWI-EAS443:3:14:1589:1127#0/1  
CACAGTGTCACTGTTTACACCACAAAAGGATATGCTGCTC  
+HWI-EAS443:3:14:1589:1127#0/1  
abbab\_a``aaabaaba¥a\_U`\_``\_\_\_a`\_\_\_a¥^¥Y\_T  
@HWI-EAS443:3:14:1593:224#0/1  
AGCATATCCTTTTGTGGTGTAAACAGTGACACTGTGGGT  
+HWI-EAS443:3:14:1593:224#0/1  
\_ZUU¥]a[¥aaaa` `[Z]]`a[[]]¥PULNFTaR][^MQ  
@HWI-EAS443:3:14:1598:640#0/1  
ATAGCGGGAGTTTTGTTTCAGCATCCAGAACTAACAGGGCT  
+HWI-EAS443:3:14:1598:640#0/1  
aab`aaaa^bPaaa\_GRa\_\_Z`]X]\_aM^U]X`G^`RY]W  
@HWI-EAS443:3:14:1610:1667#0/1  
TGCATGTGTAAATGGTTCTTGCTTTACTGTAATGACCGAT  
+HWI-EAS443:3:14:1610:1667#0/1  
TX`Tb^L`\_a¥S`aaZa^`aa\_\_\_`\_]aX\_\_\_\_\_WT^S\_  
@HWI-EAS443:3:14:1625:199#0/1  
GTGCATGTGTAAATGGTTCTTGCTTTACTGTAATGACCGA  
+HWI-EAS443:3:14:1625:199#0/1  
RWY\_X``a^¥T0]¥baRTFWPUZ\_Y`^`]`a[\_aZ[VQ¥^^  
@HWI-EAS443:3:14:1730:1742#0/1  
CAAAACTCCCGCTATATCCTGACCACTCATTTATTCCTAC  
+HWI-EAS443:3:14:1730:1742#0/1  
aYSX[aa`^H``aa]X^]W`\_\_Q¥\_\_\_0`[]\_`[Y`V¥[^W  
@HWI-EAS443:3:14:1741:261#0/1  
GAGAGGAATTGCCCGCTAATTTACGGAAACCACTGACTG  
+HWI-EAS443:3:14:1741:261#0/1  
aaa\_aa\_\_`\_]N\_U\_]Z^\_]U]U\_\_Y]XWS]XY^XRUX  
@HWI-EAS443:3:14:187:1390#0/1  
CTAACAGGGCAGAGAGGAATTGCCCGCTAATTTACGG  
+HWI-EAS443:3:14:187:1390#0/1  
aba]baba`aU\_a[Xa`aa`aa\_a`aaa`Xa`aa^`a\_QY  
@HWI-EAS443:3:14:193:873#0/1  
CAAATCTTGAGTTGTATGGAGAGGGAACCTCACCAATAGG  
+HWI-EAS443:3:14:193:873#0/1  
a]I]a`\_aaRaU]aXW\_a`X`U`WV[\_W^^]^\_Y\_^]\_^X  
@HWI-EAS443:3:14:284:1528#0/1  
GAGGAATTGCCCGCTAATTTACGGAAACCACTGACTGTC  
+HWI-EAS443:3:14:284:1528#0/1  
a`aa¥aaaabaaa`^]`a\_a``^aa^aa\_\_\_\_\_`\_]`\_¥^  
@HWI-EAS443:3:14:334:1296#0/1  
CAAAATCAGATTGAAACATGCAATCAAAGCGTCATTACTT  
+HWI-EAS443:3:14:334:1296#0/1  
aa\_¥bb`X`aabaab`aaaaaaaa`b\_aaab^aaa\_\_`\_`

@HWI-EAS443:3:14:35:2025#0/1  
GATGATTTGGGATCCGAACGGATGGACTGGGACAGACAAT  
+HWI-EAS443:3:14:35:2025#0/1  
\_YZ][^W\_ZY]R\_`)]¥a^`ZPX¥Z[TPU[YTTXVUQU\_S  
@HWI-EAS443:3:14:37:227#0/1  
CTGGGCCAGAAATTCCAATTGTTAGCCAATTGATGCCATC  
+HWI-EAS443:3:14:37:227#0/1  
aaa`]aaaaaa¥a\_a``aaaa\_\_\_^\_\_\_^``\_¥]`^\_]X  
@HWI-EAS443:3:14:439:1532#0/1  
GCCCCGTAATTTACGGAAACCACTGACTGTCCAGCAGCA  
+HWI-EAS443:3:14:439:1532#0/1  
`bbbaaaaba\_^aba`aa]a\_`a`a`a`a^S`\_\_`¥]¥BB  
@HWI-EAS443:3:14:480:1213#0/1  
GACATATGTTAACATCAGCAACACCAACTTTGCTGCTGGA  
+HWI-EAS443:3:14:480:1213#0/1  
`aa\_baaa^bb]aab\_\_a`aaUba]b`]a]¥aW\_^¥^`¥X  
@HWI-EAS443:3:14:484:151#0/1  
ATCGAACCTAATGAGCTGTCCTATTGGTGAAGTTCCTC  
+HWI-EAS443:3:14:484:151#0/1  
a`a`^`\_]a^SYG¥\_¥S¥aZ[T^GZ\_aY0a\_W]ZRX]^OX  
@HWI-EAS443:3:14:533:920#0/1  
GAATGTGCATGTGTAAATGGTTCTTGCTTTACTGTAATGA  
+HWI-EAS443:3:14:533:920#0/1  
a`bb`aaa`ba]b^aa[baa]aaa`aaaaaaaa`baaaa  
@HWI-EAS443:3:14:557:1871#0/1  
AGCCACTCAATTCAACTTGGGAATCAAAATCAGATTGAAA  
+HWI-EAS443:3:14:557:1871#0/1  
a^X^b¥`aa`[¥[WY¥T^P^W[\_]\_]VP]\_[QaW]^`[^Y  
@HWI-EAS443:3:14:572:1316#0/1  
CAGACTCTTGTTCTCAATATATTGTTTCTCCAACCTT  
+HWI-EAS443:3:14:572:1316#0/1  
abaaaa`[aa\_\_`aa`a^\_a`a`aXa`a`^`aa]]^\_U  
@HWI-EAS443:3:14:598:1494#0/1  
GGAGAAACAATATATTGAGAACACAAGAGTCTGAATGTGC  
+HWI-EAS443:3:14:598:1494#0/1  
``^¥a^[`baaabaaaa`\_]aaa]aa`a^^Za\_a`a\_W\_`  
@HWI-EAS443:3:14:650:1142#0/1  
ACTGACTGTCCAGCAGCAAAGTTGGTGTGCTGATGTTAA  
+HWI-EAS443:3:14:650:1142#0/1  
aaaaaa`W`\_VY\_^^[ZU¥\_Y`X\_Z\_Y¥X¥PVVUW]]X  
@HWI-EAS443:3:14:689:1263#0/1  
CAACTGCCTGTCTTATCATTAGGGCGTGGATTGTCTCCGA  
+HWI-EAS443:3:14:689:1263#0/1  
a`bXZa`baa\_aaaa]aaa`aVZ¥a[UTEU[YJW^W\_]Z^  
@HWI-EAS443:3:14:764:527#0/1  
ACAATTGGAATTTCTGGCCAGACAATGGGGCAGTGGCTG  
+HWI-EAS443:3:14:764:527#0/1  
aaaZaaa`a\_aa`[^`^a\_`\_\_V^^W`a^\_¥UU`S^BBBB  
@HWI-EAS443:3:14:766:1049#0/1  
GCCCCGTAATTTACGGAAACCACTGACTGTCCAGCAGCA

+HWI-EAS443:3:14:766:1049#0/1  
abaaaa]a^aa`\_]¥Y¥a\_XVZ^¥\_W\_^V¥Z[W[UTGT  
@HWI-EAS443:3:14:81:478#0/1  
TGGGTTGGTCTTGGCCAGACGGTGCTGAGTTGCCATTTAC  
+HWI-EAS443:3:14:81:478#0/1  
aaba\_\_a\_\_aaa`aa\_Z```aaT``\_a^^R¥\_`ZVZ^`^^  
@HWI-EAS443:3:14:852:300#0/1  
AACTAATGCTTTTTAGTTCTCCCTATCCAAACACCATTGCC  
+HWI-EAS443:3:14:852:300#0/1  
aZX¥ZaZz\_a\_XX`^`[]Z\_H[0¥\_]\_]\_QZX\_VV^¥W^[[  
@HWI-EAS443:3:14:895:1120#0/1  
CTGATATTCCAGATTCTGGTTGAAAGACACCCACGGTCGA  
+HWI-EAS443:3:14:895:1120#0/1  
abb^bbbaabaaaaaaa`a`¥\_`\_a\_\_`\_Z\_¥a\_VV`^  
@HWI-EAS443:3:14:914:599#0/1  
ATGATTTGGGATCCGAACGGATGGACTGGGACAGACAATA  
+HWI-EAS443:3:14:914:599#0/1  
`\_¥T]¥R\_V\_a^`Ra[aUUWX\_YU[G^RPWHHX`^M^ZV\_  
@HWI-EAS443:3:14:916:1460#0/1  
CCCCTAATTTACGGAAACCACTGACTGTCCAGCAGCAA  
+HWI-EAS443:3:14:916:1460#0/1  
aaa`a^aa`\_a\_]^`\_^\_^^\_¥\_W¥\_^W¥UW¥WN  
@HWI-EAS443:3:14:963:1835#0/1  
CATCAATTGGCTAACAATTGGAATTTCTGGCCCAGACAAT  
+HWI-EAS443:3:14:963:1835#0/1  
[a`ab¥\_a`]\_a`abaa]UV\_a`\_\_a^\_\_UR[^ZZI\_`^  
@HWI-EAS443:3:14:980:1432#0/1  
GATTCTGGTTGAAAGACACCCACGGTCGATTGAGCCATG  
+HWI-EAS443:3:14:980:1432#0/1  
a`X]]ZXYYZZ¥^aaRRZY\_`[RRVIYXYUVSUTRBBBBB  
@HWI-EAS443:3:15:1007:1294#0/1  
CAAACTCCCGCTATATCCTGACCACTCATTTATTCCTAC  
+HWI-EAS443:3:15:1007:1294#0/1  
aaabbabbbbabbbaa`aaba`aaaaabaaaa`aaba  
@HWI-EAS443:3:15:100:690#0/1  
CAACTGCCTGTCTTATCATTAGGGCGTGGATTGTCTCCGA  
+HWI-EAS443:3:15:100:690#0/1  
^bY^^^\_`bbaaba`bab]abbYaa^\_a`aaa¥SV\_aba  
@HWI-EAS443:3:15:1030:515#0/1  
CACTGACTGTCCAGCAGCAAAGTTGGTGTGCTGATGTTA  
+HWI-EAS443:3:15:1030:515#0/1  
abbabbbb\_aa`aaaaV¥\_]b¥a]^`^a\_\_`aWYa^\_`^  
@HWI-EAS443:3:15:1113:139#0/1  
TATGAATGGTCCCTTATGACAAACACATCCCCCTTGAA  
+HWI-EAS443:3:15:1113:139#0/1  
¥Yaba^ab\_Q]a\_]Z`\_\_V\_\_XZa\_^^^`\_¥\_^U]^\_\_  
@HWI-EAS443:3:15:1184:1172#0/1  
CAACTGCCTGTCTTATCATTAGGGCGTGGATTGTCTCCGA  
+HWI-EAS443:3:15:1184:1172#0/1  
ababbbba```a`bbbbabbaaaTaaa\_a`a^a]\_^a\_aa\_

@HWI-EAS443:3:15:1306:477#0/1  
TTGTCATTTAGCAAGGCCCTTGAGTCAAGAAGAAGGTTC  
+HWI-EAS443:3:15:1306:477#0/1  
ab^[^^`a``^`\_Q^\_]a`a^a]UY]^W[\_^\_`¥UUZ  
@HWI-EAS443:3:15:1543:1105#0/1  
ACTGATTTGACTATCTTTCCCTTTTCTATTCTGAAGATCT  
+HWI-EAS443:3:15:1543:1105#0/1  
aabbaabbbba`aab\_bbb`\_`abbaYaaaa\_aa^Y`aa^a  
@HWI-EAS443:3:15:1589:1880#0/1  
ACCACAACTGCCTGTCTTATCATTAGGGCGTGGATTGTCT  
+HWI-EAS443:3:15:1589:1880#0/1  
]a`baaa\_b`]¥aK^a^`a`\_a\_\_a]YP¥]U]]Z\_aLDN  
@HWI-EAS443:3:15:158:706#0/1  
CCCCTAATTATCACTATGAGGAATGCTCCTGTTATCCTGA  
+HWI-EAS443:3:15:158:706#0/1  
abbaaaaaabaabaaaaaaa[Z\_`^`a`aa\_`]aa`]¥  
@HWI-EAS443:3:15:1593:865#0/1  
GGAGCAGCATATCCTTTTGTGGTGTAAACAGTGACACTGT  
+HWI-EAS443:3:15:1593:865#0/1  
abbb`bbabbab\_\_bbba^a`\_aaa`a\_a``baW`¥a^¥  
@HWI-EAS443:3:15:1619:1508#0/1  
GGAATGTTTGTCAATTTAGCAAGGCCCTTGAGTCAAGAAG  
+HWI-EAS443:3:15:1619:1508#0/1  
aa[T^bYaa][ZGZ\_^][]^N^ZX^^`\_XRW^P[NVZSQS  
@HWI-EAS443:3:15:1647:1878#0/1  
ACCATTTACACATGCACATTGACTCTTGTGTTCTCAAT  
+HWI-EAS443:3:15:1647:1878#0/1  
`KY``bb\_a`R¥aa`aba`[¥``¥YR]^`Ua¥S\_¥TaY\_  
@HWI-EAS443:3:15:1704:798#0/1  
GGAATGTTTGTCAATTTAGCAAGGCCCTTGAGTCAAGAAG  
+HWI-EAS443:3:15:1704:798#0/1  
abaabbXa`^`Y\_a``a`YP]^`\_ZXGZ```\_TF]U¥]V]  
@HWI-EAS443:3:15:1712:1759#0/1  
CTGTGTTAAAGTACAACGGCATAATAACAGACACTATCAA  
+HWI-EAS443:3:15:1712:1759#0/1  
`aaUa¥b`\_abWaX`a¥bbb\_b\_`\_[a¥bO^ab`baTKW^  
@HWI-EAS443:3:15:1732:636#0/1  
GCCCCGTAATTTACGGAAACCACTGACTGTCCAGCAGCA  
+HWI-EAS443:3:15:1732:636#0/1  
a`a\_a\_a\_aaaa\_a^aa\_`\_¥V\_`^¥\_]`^W^WXS¥WQW\_QR  
@HWI-EAS443:3:15:1759:106#0/1  
GTGGGATTTTCGGAGACAATCCACGCCCTAATGATAAGAC  
+HWI-EAS443:3:15:1759:106#0/1  
^babbabbbabb\_b`aaaaZ``Xa¥QWq\_`^`a\_a`¥a\_¥  
@HWI-EAS443:3:15:208:1674#0/1  
ATTCCAGATTCTGGTTGAAAGACACCCACGGTTCGATTCTGA  
+HWI-EAS443:3:15:208:1674#0/1  
a\_W\_]a`\_a`\_]`^P\_`Y`^MY\_a`a\_`a\_\_VTQUWV¥MG  
@HWI-EAS443:3:15:231:811#0/1  
CAATAACTTCTCAATAAAGCAAGATATCGTAGGAATAAAT

+HWI-EAS443:3:15:231:811#0/1  
abab\_b`abbabbbbbbababbaabababb^b¥bbb`b  
@HWI-EAS443:3:15:251:527#0/1  
CTGTCCCAGTCCATCCGTTCGGATCCCAAATCATCTCAAA  
+HWI-EAS443:3:15:251:527#0/1  
a]]T\_\_¥R`a^`a`ZVG¥UV`ZYa[[¥\_ZR]\_WYZTZa  
@HWI-EAS443:3:15:309:1498#0/1  
GCCCCTAATTACTATGAGGAATGCTCCTGTTATCCTG  
+HWI-EAS443:3:15:309:1498#0/1  
`aaabaabaaba\_a\_aaa\_a`\_aa^a\_aa\_a\_]a`\_¥a  
@HWI-EAS443:3:15:372:1117#0/1  
ATCCACTAACAGGGCAGAGAGAGGAATTGCCCGCTAATTT  
+HWI-EAS443:3:15:372:1117#0/1  
`UU`^ab\_bba]¥I]a`S^¥`U`b]X\_\_a`[Xa``]Xa\_a  
@HWI-EAS443:3:15:382:696#0/1  
CACCCACGGTCGATTCGAGCCATGCCAGTTATCCCTGCAC  
+HWI-EAS443:3:15:382:696#0/1  
^\_a\_\_[¥\_\_]V\_WTZ[WX]ZU^]\_¥]¥\_N^b\_MJTZP¥U^  
@HWI-EAS443:3:15:394:603#0/1  
GTCTGTTATTATGCCGTTGTACTTTAACACAGCCACTGCC  
+HWI-EAS443:3:15:394:603#0/1  
a]aa]Uaaaa]aa`aYa]Xa\_aaaa`]a`a^^Z¥Y¥\_[V  
@HWI-EAS443:3:15:426:201#0/1  
CAGACATATGTTAACATCAGCAACACCAACTTTGCTGCTG  
+HWI-EAS443:3:15:426:201#0/1  
`abba`abaaaaba^abaa`baaa\_aaa^`Ua\_\_a^¥`  
@HWI-EAS443:3:15:47:1706#0/1  
CATGTGTAATGGTTCTTGCTTTACTGTAATGACCGATGG  
+HWI-EAS443:3:15:47:1706#0/1  
^`baa\_V`¥¥aWaMH\_b]YYa`^Y¥WRGaaV`\_]R^]MX^  
@HWI-EAS443:3:15:489:1121#0/1  
GGCTGTGTTAAAGTACAACGGCATAATAACAGACACTATC  
+HWI-EAS443:3:15:489:1121#0/1  
\_^`abYa[aaaa]`YX\_ZQWUXX]\_`a^Z\_\_^YZ\_]\_U^  
@HWI-EAS443:3:15:495:253#0/1  
GAAAGACACCCACGGTCGATTCGAGCCATGCCAGTTATCC  
+HWI-EAS443:3:15:495:253#0/1  
aa`a\_\_aa\_ZY]¥`S¥VPNWPZNOQKKNWUWPWUWWSRU  
@HWI-EAS443:3:15:547:1906#0/1  
ATTGTATAAGACCTTGCTTCTGGGTTGAACTAATCAGAGG  
+HWI-EAS443:3:15:547:1906#0/1  
aa^aVb`b`\_`\_\_^`\_\_aZS\_^Z`Xabaaa`W^a^`¥W  
@HWI-EAS443:3:15:640:93#0/1  
AACAGACACTATCAAGAGTTGGAGAAACAATATATTGAGA  
+HWI-EAS443:3:15:640:93#0/1  
YS¥Xaaaba^aa`\_VQ`\_`baXOS]\_\_[a¥R`]\_`a^a\_  
@HWI-EAS443:3:15:663:1700#0/1  
AAGAGTTGGAGAAACAATATATTGAGAACACAAGAGTCTG  
+HWI-EAS443:3:15:663:1700#0/1  
YYYY\_V¥¥[Zaa^a^b]ba`aaaZa¥¥aV`Wb^a¥^IZVT



@HWI-EAS443:3:15:682:303#0/1  
CGGGCAATTCCTCTCTCTGCCCTGTTAGTGGATGGGCTAT  
+HWI-EAS443:3:15:682:303#0/1  
aba\_¥¥`\_\_`^\_¥aab^Ya`a]`\_^`TZTaa^]]]]OPJV  
@HWI-EAS443:3:15:693:1157#0/1  
TGGCTGTGTTAAAGTACAACGGCATAATAACAGACACTAT  
+HWI-EAS443:3:15:693:1157#0/1  
a¥`^^^V^Y]aa\_¥K[TY^\_a\_]YT^\_\_\_\_[R¥^]\_YT^[  
@HWI-EAS443:3:15:699:484#0/1  
CAAAACCGTTTCTTGAACATAATGCTTTTAGTTCTCCCTAT  
+HWI-EAS443:3:15:699:484#0/1  
\_OY¥\_¥` [YZ\_[S[^`a]XaYTN]`¥^]\_STLZXQW\_[T  
@HWI-EAS443:3:15:732:1406#0/1  
ATCCCAAATCATCTCAAACCGTTTCTTGAACATAATGCTT  
+HWI-EAS443:3:15:732:1406#0/1  
aaaa[aaaaaaaa`aa\_aa^\_a^\_a^\_a]\_\_\_\_`^]a^\_\_a[]  
@HWI-EAS443:3:15:780:1605#0/1  
ATTGTCTCCGAAAATCCCACTGCATATGTATCCTATCTGA  
+HWI-EAS443:3:15:780:1605#0/1  
`\_aa`b`b¥¥`aa\_`aaaa\_`aZ`^`^`^`^aa^[]`0\_]S]  
@HWI-EAS443:3:15:824:162#0/1  
GGGAACCTCACCAATAGGACAGCTCATTAGGGTTCGATAT  
+HWI-EAS443:3:15:824:162#0/1  
aab\_aaa\_`\_\_\_\_a]`\_^`]^\_]^^Y^^Y`¥]Y^^\_^^Y^  
@HWI-EAS443:3:15:862:347#0/1  
AGAAATCCAATTGTTAGCCAATTGATGCCATCATGACAA  
+HWI-EAS443:3:15:862:347#0/1  
ababbbbbbbbabab`baabaaaaaaaa`aa`\_aaa``aa  
@HWI-EAS443:3:15:953:1013#0/1  
GCGGGAGTTTTGTTTCAGCATCCAGAACTAACAGGGCTGGA  
+HWI-EAS443:3:15:953:1013#0/1  
^]abbX¥```aaZa`ZOQ^`¥ZU\_[V]Xa[¥`UWSaa\_\_  
@HWI-EAS443:3:16:1024:1728#0/1  
CTGTCCCAGTCCATCCGTTCCGATCCCAAATCATCTCAAA  
+HWI-EAS443:3:16:1024:1728#0/1  
aaaaa\_aa`]a`aX\_¥\_PRZ[a^^\_aV[]UY[^RVZV^X]  
@HWI-EAS443:3:16:1039:1476#0/1  
GGCTGTGTTAAAGTACAACGGCATAATAACAGACACTATC  
+HWI-EAS443:3:16:1039:1476#0/1  
aaabb[a\_aaaa\_`^[\_`\_`][a```a`a[a\_\_\_\_\_^\_\_^]  
@HWI-EAS443:3:16:1061:1122#0/1  
CGTTCCGATCCCAAATCATCTCAAACCGTTTCTTGAAC  
+HWI-EAS443:3:16:1061:1122#0/1  
aa```aaa`a^\_a`aaaaaaaa^`a`a`^W`\_\_\_\_\_aa]^a  
@HWI-EAS443:3:16:1076:403#0/1  
CTTCCCTTTTCTATTCTGAAGATCTTGATGAGGCCTGT  
+HWI-EAS443:3:16:1076:403#0/1  
a`]¥]^\_W\_a`UaVZ][U^\_X[R`\_\_\_\_a[\_`a`[[UQ^]X  
@HWI-EAS443:3:16:1142:633#0/1  
GTCTGTCCCAGTCCATCCGTTCCGATCCCAAATCATCTCA

+HWI-EAS443:3:16:1142:633#0/1  
\_ [ ` a [ [ ^ a a ] ^ a T ` a ` ] ^ a X [ ] ` Z Z Z ] \_ [ Z [ ` ^ ¥ Y [ ^ X U ^  
@HWI-EAS443:3:16:1254:956#0/1  
CTCAAATCTTGAGTTGTATGGAGAGGGAACCTCACCAATA  
+HWI-EAS443:3:16:1254:956#0/1  
aaaaaabaaaaab\_aaYaab`\_a¥aaa]\_^a`\_a\_\_a^\_a  
@HWI-EAS443:3:16:1277:1323#0/1  
GGATATAGCGGGAGTTTTGTTTCAGCATCCAGAACTAACAG  
+HWI-EAS443:3:16:1277:1323#0/1  
abaab`bbaaab¥b\_aaaV`\_`a¥\_\_\_\_\_]`\_`\_aY]¥\_X^\_  
@HWI-EAS443:3:16:1351:672#0/1  
CTTGGAATGCAGAACCTTCTTCTTGAAGGGGCCTTG  
+HWI-EAS443:3:16:1351:672#0/1  
^aX\_a`\_¥\_a^a^ba]\_Ybb^Z`\_`a^`¥`b\_[ ` [ ` UN`aa  
@HWI-EAS443:3:16:1382:496#0/1  
GTACTTTAACACAGCCACTGCCCCATTGTCTGGGCCAGAA  
+HWI-EAS443:3:16:1382:496#0/1  
a`\_[a[a]a]^[\_XNY\_\_`\_]Q[T]VU[WYVSV]RTNSX^  
@HWI-EAS443:3:16:1408:1299#0/1  
CCGTTGACTTTAACACAGCCACTGCCCCATTGTCTGGGC  
+HWI-EAS443:3:16:1408:1299#0/1  
abbaabaa`babab`aba^\_aa`\_`\_`\_`\_aaX[V\_\_S¥¥  
@HWI-EAS443:3:16:1410:1348#0/1  
GCGGGAGCAGCATATCCTTTTGTGGTGTAACAGTGACAC  
+HWI-EAS443:3:16:1410:1348#0/1  
¥^a`babbba`bbbbabababb`aa]baab`\_`^a`aa`a\_  
@HWI-EAS443:3:16:1439:120#0/1  
TAAAAGCATTAGTTCAAGAAACGGTTTTGAGATGATTTGG  
+HWI-EAS443:3:16:1439:120#0/1  
abaaaaW^a`aaQ]^W]aXWZ^a\_H[a^UPaZ^aZ^X\_\_^  
@HWI-EAS443:3:16:1448:315#0/1  
GAGCCATGCCAGTTATCCCTGCACACACATGTGATTTAC  
+HWI-EAS443:3:16:1448:315#0/1  
^\_b\_Wa[ ` aZ^baa\_a`X`\_\_aa[^W\_K¥aa]a^\_^ [W\_  
@HWI-EAS443:3:16:1471:410#0/1  
GTTTGGATAGGGGAGAACTAAAAGCATTAGTTCAAGAAACG  
+HWI-EAS443:3:16:1471:410#0/1  
a[aa^^[ ]\_[UYZ\_\_^Z\_]\_\_`UZ[\_\_\_T\_[X]]SS[X\_  
@HWI-EAS443:3:16:169:916#0/1  
CGGCAATGGTGTGGATAGGGGAGAACTAAAAGCATTAGT  
+HWI-EAS443:3:16:169:916#0/1  
a\_R`\_aaaa[ ` aab[Y` ` `]]W^aaaaaaaa\_a]aa^Z  
@HWI-EAS443:3:16:1711:1301#0/1  
CTGGACCACAACCTGCCTGTCTTATCATTAGGGCGTGGATT  
+HWI-EAS443:3:16:1711:1301#0/1  
\_[a^XS[\_¥\_\_¥¥]]^W\_[\_X\_¥^aYPY¥YQUS]YVQQZB  
@HWI-EAS443:3:16:1729:238#0/1  
ATTCAAATACGGCAATGGTGTGGATAGGGGAGAACTAAA  
+HWI-EAS443:3:16:1729:238#0/1  
a\_\_ZX^^\_¥^¥Z\_^Yab¥Y`\_ab`b[Z¥[¥a^a]WFUVZ¥

@HWI-EAS443:3:16:1739:1159#0/1  
CAACTGCCTGTCTTATCATTAGGGCGTGGATTGTCTCCGA  
+HWI-EAS443:3:16:1739:1159#0/1  
\_ababbaabbbbbabbabbabXbaaaaaabbaaWa\_`a`  
@HWI-EAS443:3:16:1753:412#0/1  
CTGGCATGGCTCGAATCGACCGTGGGTGTCTTCAACCAG  
+HWI-EAS443:3:16:1753:412#0/1  
abababbbbbbb^Z[[W^\_USVYM]b]GXLLTa`ZTYFY[Q  
@HWI-EAS443:3:16:230:545#0/1  
GGTGTCTTCAACCAGAATCTGGAATATCAGATAGGATAC  
+HWI-EAS443:3:16:230:545#0/1  
aa[`U\_a`a`\_\_\_`\_^R[``\_^]]Z\_`\_`W]]\_\_XUL  
@HWI-EAS443:3:16:246:1181#0/1  
AGCACCGTCTGGCCAAGACCAACCCACAGTGTCACTGTTT  
+HWI-EAS443:3:16:246:1181#0/1  
]FZa\_aa^`¥a`a`\_a\_[`¥`aV`¥`Z\_W¥Y¥WNWZW^W  
@HWI-EAS443:3:16:34:956#0/1  
GCGGGCAATTCCTCTCTCTGCCCTGTTAGTGGATGGGCTA  
+HWI-EAS443:3:16:34:956#0/1  
ab`a`abaaa^`aa`a`\_a^\_aaa\_\_`a¥¥`]`XPT]  
@HWI-EAS443:3:16:361:1469#0/1  
GTAGGAATAAATGAGTGGTCAGGATATAGCGGGAGTTTTG  
+HWI-EAS443:3:16:361:1469#0/1  
`\_ab[\_\_\_baaaaba\_Za\_V\_[`¥]\_]YX`^a^aG¥\_^B  
@HWI-EAS443:3:16:365:1303#0/1  
TCCCAGTCCATCCGTTCCGATCCCAAATCATCTCAAAACC  
+HWI-EAS443:3:16:365:1303#0/1  
abbabaababaaaa\_\_a[``\_a`^`^`^`\_a`\_`^`a[[  
@HWI-EAS443:3:16:421:711#0/1  
AGTTCAAGAAACGGTTTTGAGATGATTTGGGATCCGAACG  
+HWI-EAS443:3:16:421:711#0/1  
`a\_aaa`a\_\_a\_aa^a`a\_`\_`^`aaaXO`^¥]X¥X^Y`  
@HWI-EAS443:3:16:437:1556#0/1  
GGTGTAAACAGTGACACTGTGGGTTGGTCTTGGCCAGACG  
+HWI-EAS443:3:16:437:1556#0/1  
abYX\_ababa\_S\_babbab\_`]a`aaa¥aaaa]a^a`a\_X  
@HWI-EAS443:3:16:460:1934#0/1  
GCGGGAGCAGCATATCCTTTTGTGGTGTAAACAGTGACAC  
+HWI-EAS443:3:16:460:1934#0/1  
a\_]T`aaa`T¥^[^]aa¥Q^PRSOPQVRK\_[a\_]G`\_M]`  
@HWI-EAS443:3:16:51:1129#0/1  
TGCCCCGTAATTTACGAAACCACTGACTGTCCAGCAGC  
+HWI-EAS443:3:16:51:1129#0/1  
aaabaaaaaabaab```\_]aa````\_\_\_```W^`TR[^Z¥  
@HWI-EAS443:3:16:53:114#0/1  
GTCCCAGTCCATCCGTTCCGATCCCAAATCATCTCAAAAC  
+HWI-EAS443:3:16:53:114#0/1  
aabbaabaa^`\_aa]^^^X\_\_[^X^^^XTPYZ^\_`Z¥YW  
@HWI-EAS443:3:16:584:707#0/1  
CCTCTGATTAGTTCAACCCAGAAGCAAGGTCTTATACAAT

+HWI-EAS443:3:16:584:707#0/1  
X`W]¥a``[`a\_b`]a]¥Q\_a^¥`Z^R¥a`bb¥```aa`a  
@HWI-EAS443:3:16:58:560#0/1  
TCCAGATTCTGGTTGAAAGACCCCACGGTCGATTGAGC  
+HWI-EAS443:3:16:58:560#0/1  
aa`aYaaaa`\_Xaa]^`a\_aa¥^^`a¥[R][NY^Z^ZWZ  
@HWI-EAS443:3:16:600:1074#0/1  
CATGTGTAAATGGTTCCTTGCTTTACTGTAATGACCGATGG  
+HWI-EAS443:3:16:600:1074#0/1  
aabb^b`bbaaaa\_aa`aY`\_aa`aa`^aa`\_aaaa`\_`\_  
@HWI-EAS443:3:16:61:264#0/1  
TGTCTTTCAACCAGAATCTGGAATATCAGATAGGATACAT  
+HWI-EAS443:3:16:61:264#0/1  
abZaaa`a¥a`ab`a\_\_\_Waa\_a\_`\_`\_`ZU^\_[^YXL\_U  
@HWI-EAS443:3:16:676:468#0/1  
GGAGAAACAATATATTGAGAACACAAGAGTCTGAATGTGC  
+HWI-EAS443:3:16:676:468#0/1  
aa``a]``\_`a\_``\_`a\_``^^^`^\_\_\_^^[^\_`^¥[\_[^]  
@HWI-EAS443:3:16:698:371#0/1  
ATCTTGCTTTATTGAGAAGTTATTGTCTGTCCCAGTCCAT  
+HWI-EAS443:3:16:698:371#0/1  
aaa`baaaaaaba`aaaaaaaa`\_`aBBBBBBBBBBBBB  
@HWI-EAS443:3:16:726:422#0/1  
TGTGTTCTCAATATATTGTTTCTCCAACCTTGATAGTGT  
+HWI-EAS443:3:16:726:422#0/1  
ababbab\_ababbbabbbab`ba^baa\_```a\_bab]``^  
@HWI-EAS443:3:16:764:1404#0/1  
CTGGACCACAACCTGCCTGTCTTATCATTAGGGCGTGGATT  
+HWI-EAS443:3:16:764:1404#0/1  
`^[^¥¥ab¥\_\_T[a`¥Z^^\_aa``aba```¥\_¥a\_[-\_T]  
@HWI-EAS443:3:16:783:1566#0/1  
CAAAACTCCCGCTATATCCTGACCACTCATTATTCCCTAC  
+HWI-EAS443:3:16:783:1566#0/1  
`baabaaabbbabbbabaaaaa`a`bbbababaaa`\_a`  
@HWI-EAS443:3:16:794:901#0/1  
CTGCATTCCAAGGGGAGCATGATATGAATGGTCCCTTA  
+HWI-EAS443:3:16:794:901#0/1  
a\_ba\_aaaaa][`a`a\_¥`\_aa\_]a``[Z\_Y]U]\_U\_]  
@HWI-EAS443:3:16:825:1444#0/1  
GGTGTGGATAGGGAGAATAAAAGCATTAGTTCAAGAA  
+HWI-EAS443:3:16:825:1444#0/1  
\_a]b[aaba^^aaa\_``^a\_]a`\_`aa\_a^^`YaS\_^`Y\_  
@HWI-EAS443:3:16:867:1162#0/1  
CTTTCAACCAGAATCTGGAATATCAGATAGGATACATATG  
+HWI-EAS443:3:16:867:1162#0/1  
aab^a\_^abbaaaaaaaaaa]``a`ba\_aaaaa\_aZ`\_a^Y  
@HWI-EAS443:3:16:914:281#0/1  
CAAGAGTCTGAATGTGCATGTGTAAATGGTTCCTTGCTTTA  
+HWI-EAS443:3:16:914:281#0/1  
HY^ababbbbbb`Ua^\_bbbb¥b`b\_Vbba¥bbbabab\_b`

@HWI-EAS443:3:16:931:2014#0/1  
GCCACTCAATTCAACTTGGGAATCAAAATCAGATTGAAAC  
+HWI-EAS443:3:16:931:2014#0/1  
S`b\_aabaaababaa^\_ab\_bbbbbbaaababbabbbb  
@HWI-EAS443:3:16:936:120#0/1  
GTGTAAACAGTGACTGTGGGTTGGTCTTGGCCAGACGG  
+HWI-EAS443:3:16:936:120#0/1  
aZ^Y]]Z[Ta^Z^X\_Z`ZaaaS`^]GU]`a`UZ]BBBBB  
@HWI-EAS443:3:16:956:1200#0/1  
CGGGAGTTTTGTTTCAGCATCCAGAACTAACAGGGCTGGAT  
+HWI-EAS443:3:16:956:1200#0/1  
ab\_aa¥MYa`¥^a`[[`\_`[¥^`\_\_a[a`\_Z\_\_]]`[`\_]^  
@HWI-EAS443:3:17:1005:1630#0/1  
AGTCCATCCGTTCCGATCCCAAATCATCTCAAAACCGTTT  
+HWI-EAS443:3:17:1005:1630#0/1  
¥^¥aaaaaa]aa[ZX¥`aXaa`\_\_a\_\_]\_\_\_\_a]]\_Z^]  
@HWI-EAS443:3:17:1022:1259#0/1  
AGCACTTGCTGACCAAGCGACTGACTCAAATCTTGAGTTG  
+HWI-EAS443:3:17:1022:1259#0/1  
`S¥]^]JQY\_^` `[X`Y^[Z\_W]\_\_S[T\_Z`aVZWa¥  
@HWI-EAS443:3:17:105:1160#0/1  
GAAATTCCAATTGTTAGCCAATTGATGCCATCATGACAAG  
+HWI-EAS443:3:17:105:1160#0/1  
^Zb`bbb`S`b`aababbbba\_aT^baaaabbaVabba  
@HWI-EAS443:3:17:1097:1811#0/1  
GGTGTAAACAGTGACTGTGGGTTGGTCTTGGCCAGACG  
+HWI-EAS443:3:17:1097:1811#0/1  
aa¥aZ\_¥aaba^aaaa`a¥`W\_WY^`^`^`ZT`\_ZP\_  
@HWI-EAS443:3:17:1131:1618#0/1  
GTTGTACTTTAACACAGCCACTGCCCATTTGTCTGGGCCA  
+HWI-EAS443:3:17:1131:1618#0/1  
aa¥WPZLZ¥`b\_X¥S¥`QPWPXNa`]\_VKW¥FRXPJLJWU  
@HWI-EAS443:3:17:1216:513#0/1  
TTCATATCATGCTCCCCCTTGAATGCAGAACCTTCTTCT  
+HWI-EAS443:3:17:1216:513#0/1  
a^VZaaa)`aa`a`^Q^]\_YW\_\_^]`^`^]`^\_U^^\_XU\_  
@HWI-EAS443:3:17:1230:217#0/1  
ATCATGCTCCCCCTTGAATGCAGAACCTTCTTCTTACT  
+HWI-EAS443:3:17:1230:217#0/1  
abababaaa]aaa\_aaa^[^a^\_a^\_Z¥\_¥]\_a¥\_`^`^W¥  
@HWI-EAS443:3:17:1243:598#0/1  
GTGCATTGAGCCATGCCAGTTATCCCTGCACACACATGT  
+HWI-EAS443:3:17:1243:598#0/1  
a\_a^¥aa]aa`\_`aaaa[\_a``¥a]]`]^`^][X\_X\_]`^  
@HWI-EAS443:3:17:1287:1802#0/1  
CAAAATCAGATTGAAACATGCAATCAAAGCGTCATTACTT  
+HWI-EAS443:3:17:1287:1802#0/1  
abbaabbbbababba`abbaabba`\_]bVb`\_\_aaa]a\_  
@HWI-EAS443:3:17:1309:754#0/1  
GGGGGATGTGTTTGTGCATAAGGGAACCATTTCATATCATGC

+HWI-EAS443:3:17:1309:754#0/1  
aa``aaabWb`a`\_^[[aa```\_`\_\_aU`aa\_R`\_\_\_\_]\_^`  
@HWI-EAS443:3:17:1350:472#0/1  
CTGGATTGTATAAGACCTTGCTTCTGGGTTGAACTAATCA  
+HWI-EAS443:3:17:1350:472#0/1  
^abaa\_baR^)`aaa]a^b[aaaaaabUa`^aaa[[\_`\_  
@HWI-EAS443:3:17:1353:864#0/1  
AAATGGCAACTCAGCACCGTCTGGCCAAGACCAACCCACA  
+HWI-EAS443:3:17:1353:864#0/1  
aaaaa`a`babb\_V``Y```\_a`^U¥`]a\_ZU^]R¥[\_V\_  
@HWI-EAS443:3:17:1377:1839#0/1  
ATTCTAGTAAAATCACATGTGTGTGCAGGGATAACTGGCA  
+HWI-EAS443:3:17:1377:1839#0/1  
aa\_WWa`Xaa]Z``UXaaaU^ZaZ\_FXT^YYVaHY\_aXT`  
@HWI-EAS443:3:17:1409:607#0/1  
CAATCAAAGCGTCATTACTTATGAAAACAACACTTGGGTA  
+HWI-EAS443:3:17:1409:607#0/1  
abbbbaabbbab`abbbba\_baabbaaaaaaba`a`a\_aa`Y`  
@HWI-EAS443:3:17:140:380#0/1  
ATCCTTTTGTGGTGTAAACAGTGACACTGTGGGTTGGTCT  
+HWI-EAS443:3:17:140:380#0/1  
aaaZ^]aabRaa[¥X```\_a`^^^^\_adWa\_\_X¥URRZ[  
@HWI-EAS443:3:17:1419:783#0/1  
AGGGCGTGGATTGTCTCCGAAAATCCCCTGCATATGTAT  
+HWI-EAS443:3:17:1419:783#0/1  
[^`^bbb^ab`abb`Y`^RYW\_aaa[`aa\_abaaa`baaaa  
@HWI-EAS443:3:17:144:885#0/1  
ATTCCAGATTCTGGTTGAAAGACACCCACGGTCGATTCGA  
+HWI-EAS443:3:17:144:885#0/1  
a]\_`aa^a[aa`b`\_\_aJTN¥\_\_a\_\_\_\_\_`¥GVQPSVV^V  
@HWI-EAS443:3:17:1456:901#0/1  
CCAAGCGACTGACTCAAATCTTGAGTTGTATGGAGAGGGA  
+HWI-EAS443:3:17:1456:901#0/1  
abaaabb`abbaaba`a`b\_aaa\_a\_aba`aaa]a\_a^b\_  
@HWI-EAS443:3:17:1511:1013#0/1  
GCAGAACCTTCTTCTTACTCAAGGGGCCTTGCTAAATGA  
+HWI-EAS443:3:17:1511:1013#0/1  
aaTKNFJ`a^a`aUTUP]X[RRG]VHX0^V\_X]UJPU\_G  
@HWI-EAS443:3:17:1591:652#0/1  
TGGATAGGGAGAACTAAAAGCATTAGTTCAAGAAACGGTT  
+HWI-EAS443:3:17:1591:652#0/1  
a`^¥¥`a\_\_\_\_`\_\_]\_\_\_\_\_^V^`¥^\_]^[[\_YY[U\_[V^  
@HWI-EAS443:3:17:159:1706#0/1  
GTCAGGATATAGCGGGAGTTTTGTTTCAGCATCCAGAACTA  
+HWI-EAS443:3:17:159:1706#0/1  
`Rb^[UHS^YY]^Z\_Xa][¥WXS[VYVW]]V\_ZV]Y`VOZ  
@HWI-EAS443:3:17:1636:155#0/1  
CATCAATTGGCTAACAATTGGAATTTCTGGCCCAGACAAT  
+HWI-EAS443:3:17:1636:155#0/1  
abbaaabbbbaaaa``aaa]``aa`\_a`^^`U\_\_^W[\_\_\_

@HWI-EAS443:3:17:1752:723#0/1  
TGCAATCAAAGCGTCATTACTTATGAAAACAACACTTGGG  
+HWI-EAS443:3:17:1752:723#0/1  
ab¥V\_]\_¥¥QX[N\_Y]U¥MV`[¥[[J¥`Z[`[[VU^^^B  
@HWI-EAS443:3:17:192:817#0/1  
AAATGAGTGGTCAGGATATAGCGGGAGTTTTGTTTCAGCAT  
+HWI-EAS443:3:17:192:817#0/1  
JP¥¥`^^`Ia^^^Zaa`Z\_a^]VabaXXQ^a\_\_]]ZVIIX[  
@HWI-EAS443:3:17:201:1836#0/1  
GAAGAAGTTCTGCATTCCAAGGGGGAGCATGATATGAAT  
+HWI-EAS443:3:17:201:1836#0/1  
`bbaab^aVaaabbaabbaba^\_`^a\_aa`a^a`a`a\_  
@HWI-EAS443:3:17:210:1269#0/1  
AGCATTAGTTCAAGAAACGGTTTTGAGATGATTTGGGATC  
+HWI-EAS443:3:17:210:1269#0/1  
\_Ya]¥`a`a^a\_\_Z]V\_baY\_aYLP¥[`XL¥^aQ`^XUY  
@HWI-EAS443:3:17:294:1546#0/1  
CTTGGGAATCAAAATCAGATTGAAACATGCAATCAAAGCG  
+HWI-EAS443:3:17:294:1546#0/1  
aa\_^\_¥¥babYMYa[NUITSLLO\_HOYTQNZ^ZL[\_aN]B  
@HWI-EAS443:3:17:316:383#0/1  
CAACTGCCTGTCTTATCATTAGGGCGTGGATTGTCTCCGA  
+HWI-EAS443:3:17:316:383#0/1  
\_U`a`aab\_a\_a`\_aaaa\_]V[¥[[\_W]^W¥\_¥¥^¥¥^¥¥  
@HWI-EAS443:3:17:328:1374#0/1  
TGGGACAGACAATAACTTCTCAATAAAGCAAGATATCGTA  
+HWI-EAS443:3:17:328:1374#0/1  
\_aa`ab\_\_ab\_]aNaaaaaaaa¥aaaba`a`aa\_\_a``¥a  
@HWI-EAS443:3:17:32:368#0/1  
CAGAGGGCGACCCAAAGAGAACAATCTGGACTAGCGGG  
+HWI-EAS443:3:17:32:368#0/1  
```]\_¥[baaZV`^[[W\_KTYXaYX`]T¥aZ^U^X`UXY  
@HWI-EAS443:3:17:384:781#0/1  
GCTGTCTATTGGTGAAGTTCCCTCTCCATACAACACTCAAG  
+HWI-EAS443:3:17:384:781#0/1  
aa`a]a`aa`\_W`\_`a¥^^`^`\_^`\_^`\_]\_\_\_ZZ^]]U`  
@HWI-EAS443:3:17:43:1169#0/1  
TGGTGTGGATAGGGGAGAACTAAAAGCATTAGTTCAAGA  
+HWI-EAS443:3:17:43:1169#0/1  
aa`]aU``]a]^aa\_]\_`^^`\_^`\_\_\_\_\_^^`\_`\_Z][\_]^[^  
@HWI-EAS443:3:17:459:544#0/1  
ATCCGTTTCGGATCCCAAATCATCTCAAACCGTTTCTTGA  
+HWI-EAS443:3:17:459:544#0/1  
a\_¥a^aaZZa\_\_\_\_^\_a\_```X\_^`\_`Y]Z¥\_S]X^XSW^  
@HWI-EAS443:3:17:494:1576#0/1  
GCGGGAGTTTTGTTTCAGCATCCAGAACTAACAGGGCTGGA  
+HWI-EAS443:3:17:494:1576#0/1  
aa\_`aZa^Q¥XZX\_\_\_\_W`a]\_\_\_\_\_`\_]`\_^`^Y¥[Y][Z  
@HWI-EAS443:3:17:505:83#0/1  
TGCAATCAAAGCGTCATTACTTATGAAAACAACACTTGGG

+HWI-EAS443:3:17:505:83#0/1  
abaaaa`M[a\_b\_\_aa`a^a\_\_`\_]`a\_a^\_\_^`\_]T  
@HWI-EAS443:3:17:52:1811#0/1  
CTCAATATGGATTAGCCACTCAATTCAACTTGGGAATCAA  
+HWI-EAS443:3:17:52:1811#0/1  
aabaaaa\_Y\_]`a^`aa`¥]aY\_U]`¥\_Y]\_`aa`a¥  
@HWI-EAS443:3:17:565:1953#0/1  
CATGATGGCATCAATTGGCTAACAATTGGAATTTCTGGCC  
+HWI-EAS443:3:17:565:1953#0/1  
a¥0¥GJR[aa\_\_[WV[¥U`R0]a\_\_]LKF^]\_\_]R[UTN  
@HWI-EAS443:3:17:594:1299#0/1  
ACTCAATTCAACTTGGGAATCAAAATCAGATTGAAACATG  
+HWI-EAS443:3:17:594:1299#0/1  
\_\_XV^XZ`^]XY`V`R^`[`T\_X`\_aa[aa¥`Y[Y¥a]0`  
@HWI-EAS443:3:17:594:132#0/1  
TCCCTCTCCATACTCAAGATTTGAGTCAGTCGCTTGG  
+HWI-EAS443:3:17:594:132#0/1  
abb[a[aa`ab[aab^aa`\_aN^aaaXaT\_`aGH[G[ZZ^  
@HWI-EAS443:3:17:664:1241#0/1  
ATCATGCTCCCCCTTGAATGCAGAACCTTCTTCTTACT  
+HWI-EAS443:3:17:664:1241#0/1  
]X\_^]]\_]\_a^`a`V`^aZ¥`^`\_\_aa\_\_\_\_\_````\_`^  
@HWI-EAS443:3:17:712:2014#0/1  
GATTAGTTCAACCCAGAAGCAAGGTCTTATACAATCCAGC  
+HWI-EAS443:3:17:712:2014#0/1  
aa^\_`SZaab\_S^\_\_\_\_a[FY\_`^X\_\_^\_Y`\_\_`\_0]]XP  
@HWI-EAS443:3:17:738:255#0/1  
CTGTCCCAGTCCATCCGTTCCGATCCCAAATCATCTCAAA  
+HWI-EAS443:3:17:738:255#0/1  
abb`aaaaa`baaaa\_a\_\_\_a\_Z\_Z\_a]`\_]\_Z\_\_¥`]Y\_\_  
@HWI-EAS443:3:17:852:712#0/1  
GCCCCGTAATTTACGGAAACCACTGACTGTCCAGCAGCA  
+HWI-EAS443:3:17:852:712#0/1  
abbba`a\_]`aabb^aaaab`\_a\_\_aaaaT¥]`\_a^NR  
@HWI-EAS443:3:17:891:1870#0/1  
ATCGGTTCCAAGGGGGATGTGTTTGTGATAAGGGAACCAT  
+HWI-EAS443:3:17:891:1870#0/1  
aab\_\_YH\_¥\_Y\_[]^]XYR`¥]]YY[WQ[ZIW\_Z]NNZS  
@HWI-EAS443:3:17:903:1066#0/1  
TCCTGTTATCCTGATTCTAGTGAAATCACATGTGTGTGCA  
+HWI-EAS443:3:17:903:1066#0/1  
ababbabbbbb`aaabbaaabb`bbb`abb`babab^`  
@HWI-EAS443:3:17:921:834#0/1  
TTCAAATACGGCAATGGTGTGGATAGGGAGAATAAAA  
+HWI-EAS443:3:17:921:834#0/1  
a`a¥]]aaba\_`^]`P^\_`¥]T¥\_\_a\_\_^W`^\_\_^\_\_  
@HWI-EAS443:3:17:93:1885#0/1  
GACATATGTTAACATCAGCAACACCACTTTGCTGCTGGA  
+HWI-EAS443:3:17:93:1885#0/1  
¥a]XSbba``¥`abbbb\_bbaabaababaaa[`a]aa^\_`



@HWI-EAS443:3:17:99:233#0/1  
CATGTGTAATGGTTCTTGCTTTACTGTAATGACCGATGG  
+HWI-EAS443:3:17:99:233#0/1  
aaaa[a¥\_`UZa¥R`^a\_aa^`]a\_]aa`a\_\_RaX]^`^  
@HWI-EAS443:3:18:1121:1505#0/1  
ATCAAAGCGTCATTACTTATGAAAACAACACTTGGGTAAA  
+HWI-EAS443:3:18:1121:1505#0/1  
aaaaaa`\_a^`aaaaaa\_`aaa`a`a`a`^`a`\_`^`[``a  
@HWI-EAS443:3:18:1177:1540#0/1  
CATTTAGCAAGGCCCTTGAGTCAAGAAGAAGGTTCTGCA  
+HWI-EAS443:3:18:1177:1540#0/1  
aaaa^b\_[Y]^a]]YT^`\_a^`a]\_[¥`[\_XYS\_[PVXX  
@HWI-EAS443:3:18:1194:1265#0/1  
GGCTCCTGTCTTTAATGGTTCCATTGGAATGTTTGTTCATT  
+HWI-EAS443:3:18:1194:1265#0/1  
a]W\_TUUa]^US]]a`¥QY^VXVXYN[Z^QW\_[VZTXUS  
@HWI-EAS443:3:18:1236:1858#0/1  
CATCAATTGGCTAACAAATTGGAATTTCTGGCCAGACAAT  
+HWI-EAS443:3:18:1236:1858#0/1  
abbbbbbbbaabbbbabbbb^ba\_`ab`a`^a^a`a¥^a\_  
@HWI-EAS443:3:18:1238:1847#0/1  
GGCCTTGCTAAATGACAAACATTCCAATGGAACCATTAAA  
+HWI-EAS443:3:18:1238:1847#0/1  
a\_b^U]^`bbaa`Zaaabba`aaaZ[aaaa`abaaa`````  
@HWI-EAS443:3:18:1264:1080#0/1  
AGCCACTCAATTCAACTTGGGAATCAAAATCAGATTGAAA  
+HWI-EAS443:3:18:1264:1080#0/1  
`^¥a`a^`¥X]a]Y`\_aa\_WWYa\_\_`\_aX^Za`\_\_\_\_\_^  
@HWI-EAS443:3:18:1376:757#0/1  
TTCAAATACGGCAATGGTGTGGATAGGGAGAACTAAAA  
+HWI-EAS443:3:18:1376:757#0/1  
a\_a`UU\_S\_aa\_MIS^\_]`\_aXaaSW^X`X]OW\_OWZUR^  
@HWI-EAS443:3:18:1402:700#0/1  
ACTGACTGTCCAGCAGCAAAGTTGGTGTGGCTGATGTTAA  
+HWI-EAS443:3:18:1402:700#0/1  
`a^]^ab`^``]¥W¥^PXTYZM¥]Z[``YOPXFIU]X[ZT  
@HWI-EAS443:3:18:1407:1678#0/1  
GTTGATATGGGCTCCTGTCTTTAATGGTTCCATTGGAAT  
+HWI-EAS443:3:18:1407:1678#0/1  
`^b\_]`ab]\_]`\_]\_Z[a^YQ]aaa^Y¥]^`^a\_aa\_`Z\_[  
@HWI-EAS443:3:18:1410:1716#0/1  
GGGCGACCCAAAGAGAACAATCTGGACTAGCGGGAGCA  
+HWI-EAS443:3:18:1410:1716#0/1  
`R¥\_VYR]U[¥W`¥aI`X¥RXZNP`\_P^`X¥Y`¥^BBBB  
@HWI-EAS443:3:18:1420:531#0/1  
GTGTAATGGTTCTTGCTTTACTGTAATGACCGATGGACC  
+HWI-EAS443:3:18:1420:531#0/1  
^]aK\_a]aa]T\_\_Z\_^Y\_`^`\_aa`aaWT¥]\_b\_^][PQH  
@HWI-EAS443:3:18:1456:259#0/1  
CAACTGCCTGTCTTATCATTAGGGCGTGGATTGTCTCCGA

+HWI-EAS443:3:18:1456:259#0/1  
`aaaaa\_aabaa`baaaaa^aX¥\_Z¥\_\_Z\_\_`^Q\_WQ`S  
@HWI-EAS443:3:18:1475:1304#0/1  
GTTTGTGATAAGGGAACCATTCATATCATGCTCCCCCTTG  
+HWI-EAS443:3:18:1475:1304#0/1  
a]¥Q\_aa\_]WSaaa`\_\_`\_\_`\_\_a\_\_\_\_XYZ¥\_T¥¥Y\_  
@HWI-EAS443:3:18:1497:235#0/1  
CCCTAATTATCACTATGAGGAATGCTCCTGTTATCCTGAT  
+HWI-EAS443:3:18:1497:235#0/1  
a¥M^`[]\_\_^`X\_`a\_\_¥QX\_YSZ[RRT`] ^URU¥ZZZ  
@HWI-EAS443:3:18:1519:761#0/1  
GCCCCGTAATTTACGGAACCACTGACTGTCCAGCAGCA  
+HWI-EAS443:3:18:1519:761#0/1  
a``[a`a\_a`aa[ `\_a`]\_^\_W¥`^¥\_]V^VRRSUUSQ  
@HWI-EAS443:3:18:1692:993#0/1  
GAATGCCCTAATTATCACTATGAGGAATGCTCCTGTTAT  
+HWI-EAS443:3:18:1692:993#0/1  
]ab[a¥V¥0^`Y]aZQ[[]]L]a\_]L]\_\_I]^\_Ua^\_\_W  
@HWI-EAS443:3:18:170:1833#0/1  
TGCATATGTATCCTATCTGATATTCCAGATTCTGGTTGAA  
+HWI-EAS443:3:18:170:1833#0/1  
¥]`b\_b\_KZbbbbababb\_a]^]\_aaa````a`aTY]R[[  
@HWI-EAS443:3:18:171:1458#0/1  
ATTCATATCATGCTCCCCCTTGAATGCAGAACCTTCTTC  
+HWI-EAS443:3:18:171:1458#0/1  
aaaabab\_aba\_a`\_\_a`^`\_`\_\_a]`\_\_`\_ZRY\_X]^`\_`  
@HWI-EAS443:3:18:1746:743#0/1  
GAAACAATATATTGAGAACAAGAGTCTGAATGTGCATG  
+HWI-EAS443:3:18:1746:743#0/1  
aaa[^a\_`aaa`\_a\_¥\_aa`Xa\_\_\_\_X\_`a\_^\_\_¥WV`\_`  
@HWI-EAS443:3:18:207:883#0/1  
TTCATATCATGCTCCCCCTTGAATGCAGAACCTTCTTCT  
+HWI-EAS443:3:18:207:883#0/1  
`[\_^aababbabbaabaa`W`TKZ`aaa¥^a\_\_`\_`\_`[`  
@HWI-EAS443:3:18:210:1309#0/1  
AATATATTGAGAACAAGAGTCTGAATGTGCATGTGTAA  
+HWI-EAS443:3:18:210:1309#0/1  
Kaba`¥`aa^^`aa\_bbb[aXJ[ba`ba[Ya\_Z\_```]Z]  
@HWI-EAS443:3:18:282:965#0/1  
CGGGAGTTTTGTTTCAGCATCCAGAACTAACAGGGCTGGAT  
+HWI-EAS443:3:18:282:965#0/1  
a]a\_T\_^aaaa^`aZ]aa`\_`a^¥aa\_``\_a\_\_[\_`a]]\_`  
@HWI-EAS443:3:18:33:255#0/1  
GACCACTATTTATTCCTACGATATCTTGCTTTATTGAGA  
+HWI-EAS443:3:18:33:255#0/1  
abbbababbbb`bbabb`\_baaa\_aa\_abaaaaa`Z`a\_  
@HWI-EAS443:3:18:356:798#0/1  
CTTGAATGCAGAACCTTCTTCTTGACTCAAGGGCCTTG  
+HWI-EAS443:3:18:356:798#0/1  
[`aaa`ba`^`Z``\_`\_aba`T^a`\_\_aaab\_]R^U`T`

@HWI-EAS443:3:18:367:1870#0/1  
TGCTGCTCCCGCTAGTCCAGATTGTGTTCTCTTTGGGTCCG  
+HWI-EAS443:3:18:367:1870#0/1  
Ubabbb`bba`a]b`IbaJWTa^SY\_Y`a\_aaSQU¥WYFH  
@HWI-EAS443:3:18:369:1235#0/1  
GGCAGAGAGAGGAATTGCCCGCTAATTTACGGAAACCAC  
+HWI-EAS443:3:18:369:1235#0/1  
¥`ab\_b\_Z\_bb\_ab\_`a]^bab\_babbb\_a\_]`R`]\_Y`\_  
@HWI-EAS443:3:18:423:1230#0/1  
AAATACGCAATGGTGTGGATAGGGAGAACTAAAAGCA  
+HWI-EAS443:3:18:423:1230#0/1  
^baaaabaaa^`ZYTaa^`[]`]\_\_^\_\_¥^[[a`W[]  
@HWI-EAS443:3:18:433:1070#0/1  
CAACTGCCTGTCTTATCATTAGGGCGTGGATTGTCTCCGA  
+HWI-EAS443:3:18:433:1070#0/1  
aaabaaabaa]aaaaUaaaa`UY`¥N\_`[¥Y`\_^\_a¥` [  
@HWI-EAS443:3:18:44:537#0/1  
GTCAGTGGTTTCCGTGAAATTAGCGGGCAATTCCTCTCTC  
+HWI-EAS443:3:18:44:537#0/1  
`\_b`b[b`¥`aa¥[Za`\_aa```a`\_`^]\_`\_`\_`\_Z\_¥  
@HWI-EAS443:3:18:479:322#0/1  
ACCACAACCTGCCTGTCTTATCATTAGGGCGTGGATTGTCT  
+HWI-EAS443:3:18:479:322#0/1  
aaaa]\_``aaaa\_a]a`a```\_a```]\_]X\_]`^\_\_^^^  
@HWI-EAS443:3:18:511:1176#0/1  
GGCCCCTTGAGTCAAGAAGAAGTTCTGCATTCCAAGGGG  
+HWI-EAS443:3:18:511:1176#0/1  
\_UVa^¥]\_Z^)^`XSHX]S\_ZZ[U¥RX^[Y]SV\_¥T[¥¥\_  
@HWI-EAS443:3:18:518:609#0/1  
GGATTGTCTCCGAAAATCCCACTGCATATGTATCCTATCT  
+HWI-EAS443:3:18:518:609#0/1  
G]b\_ba[bbbbbbbbbbbababbbbbbbbbbbbaabbbbab  
@HWI-EAS443:3:18:560:1787#0/1  
GTGTAAATGGTTCTTGCTTTACTGTAATGACCGATGGACC  
+HWI-EAS443:3:18:560:1787#0/1  
^\_a]b`aUaaY`Q]¥VRbba^a¥b`a]\_a^^`a^`b\_S\_^  
@HWI-EAS443:3:18:603:1521#0/1  
CAGCAAGTGCTTGTCATGATGGCATCAATTGGCTAACAAAT  
+HWI-EAS443:3:18:603:1521#0/1  
`baba`S\_`]bbbVba^¥V¥`T`aXH\_\_Z][VX]`ab]RK  
@HWI-EAS443:3:18:639:1889#0/1  
AATGCTTTTAGTTCTCCCTATCCAAACACCATTGCCGTAT  
+HWI-EAS443:3:18:639:1889#0/1  
aaa`a\_a^a``\_\_a]\_`a^a``aa\_aaa^)``[[\_ZQLZ\_  
@HWI-EAS443:3:18:653:465#0/1  
ATTCTGGTTGAAAGACACCCACGGTCGATTGAGCCATGC  
+HWI-EAS443:3:18:653:465#0/1  
aaaaa[\_Zaa^``a¥`aa`\_aa]aUZ\_YTZWZPY¥TR[WV  
@HWI-EAS443:3:18:656:456#0/1  
AAACAGTGACACTGTGGGTTGGTCTTGCCAGACGGTGCT

+HWI-EAS443:3:18:656:456#0/1  
a^bbbb[baab\_bb\_a^a\_¥aa¥`\_a`b\_[\_a\_]aaQ`¥\_  
@HWI-EAS443:3:18:684:980#0/1  
ACCACAACCTGCCTGTCTTATCATTAGGGCGTGGATTGTCT  
+HWI-EAS443:3:18:684:980#0/1  
aaaa¥`aaa¥¥a]UV\_a\_aaVU]Z]P[^\_]\_]W]\_TUV  
@HWI-EAS443:3:18:697:1370#0/1  
CGATACTGGACCACAACCTGCCTGTCTTATCATTAGGGCGT  
+HWI-EAS443:3:18:697:1370#0/1  
aaaabaaaaabbaaaa`[^Z^`\_\_a`a`^YZU\_\_^T  
@HWI-EAS443:3:18:752:490#0/1  
ATTTGCTCCATTAGACGATACTGGACCACAACCTGCCTGTC  
+HWI-EAS443:3:18:752:490#0/1  
[^a\_R`aab^YXR¥]S¥\_]UVX¥P[XU]NVVNTVPRQNR  
@HWI-EAS443:3:18:797:142#0/1  
GAATCGGTTCCAAGGGGGATGTGTTTGTGCATAAGGGAACC  
+HWI-EAS443:3:18:797:142#0/1  
`bbabaaY^`\_^[]\_aUT\_HVX]]YIKTV\_\_PPZVYVS  
@HWI-EAS443:3:18:814:2008#0/1  
CCAGATTCTGGTTGAAAGACACCCACGGTCGATTGAGCC  
+HWI-EAS443:3:18:814:2008#0/1  
`]Z\_Y¥T`\_\_\_Z]]\_Z\_]RZ`BBBBBBBBBBBBBBBBBB  
@HWI-EAS443:3:18:821:553#0/1  
ACCACAACCTGCCTGTCTTATCATTAGGGCGTGGATTGTCT  
+HWI-EAS443:3:18:821:553#0/1  
abba^abaaa`abaaaaaa\_aaa`^`a``]`\_\_\_`\_X^^  
@HWI-EAS443:3:18:844:755#0/1  
TGTGTTCTCAATATATTGTTTCTCCAACCTTGATAGTGT  
+HWI-EAS443:3:18:844:755#0/1  
a\_]`]a`¥```bababab`bab¥^a``abababa`\_a`a\_  
@HWI-EAS443:3:18:854:1252#0/1  
TGTCTCCGAAAATCCCACTGCATATGTATCCTATCTGATA  
+HWI-EAS443:3:18:854:1252#0/1  
`\_N\_a`aa\_aa\_aa`aaa\_]a``aa^`a`\_\_aa^a\_W`a  
@HWI-EAS443:3:18:882:789#0/1  
CAGCACCGTCTGGCCAAGACCAACCCACAGTGTCACTGTT  
+HWI-EAS443:3:18:882:789#0/1  
\_``abbabaaaa]]TaaaaZ\_]^^^\_aa¥LR^¥\_\_\_\_Z\_  
@HWI-EAS443:3:18:889:1047#0/1  
ACAATATATTGAGAACAAGAGTCTGAATGTGCATGTGT  
+HWI-EAS443:3:18:889:1047#0/1  
`VSSW]Y[Wa^XaXV]aXSTQYaG)`^UWY^S\_XN[]P]R  
@HWI-EAS443:3:18:893:1033#0/1  
CGATACTGGACCACAACCTGCCTGTCTTATCATTAGGGCGT  
+HWI-EAS443:3:18:893:1033#0/1  
aa`aaaa`\_\_a`a\_\_aa\_a`\_\_\_¥]a`\_Y¥^[ZUU^]ZU  
@HWI-EAS443:3:18:958:1140#0/1  
CATATGTTAACATCAGCAACACCAACTTTGCTGCTGGACA  
+HWI-EAS443:3:18:958:1140#0/1  
aaaaa\_a`aaa\_]ba]`a`\_\_\_aaX\_\_a`\_^aa`a]ZZ^

@HWI-EAS443:3:19:1000:1135#0/1  
TGAAGTTCCTCTCCATACAACCTCAAGATTTGAGTCAGTC  
+HWI-EAS443:3:19:1000:1135#0/1  
ab^ZST`\_]`a[\_R^XUU\_Za`aaYN\_aX^[a\_\_UV]`P¥  
@HWI-EAS443:3:19:1006:1149#0/1  
CAAATACGGCAATGGTGTGGATAGGGAGAACTAAAAGC  
+HWI-EAS443:3:19:1006:1149#0/1  
aababbbbbbb\_aab\_X`ababX``abaa`[^\_aaa`^X  
@HWI-EAS443:3:19:1039:1448#0/1  
CAAATCAGATTGAAACATGCAATCAAAGCGTCATTACTT  
+HWI-EAS443:3:19:1039:1448#0/1  
abbbbbbbbababbbbaabaaba\_ab`aba^]a\_`a\_a\_  
@HWI-EAS443:3:19:1059:508#0/1  
CCTATCTGATATTCCAGATTCTGGTTGAAAGACACCCACG  
+HWI-EAS443:3:19:1059:508#0/1  
aabaaabbaaaaaa`baa``aaa\_aa^`aaa`\_[^`\_]\_  
@HWI-EAS443:3:19:1093:426#0/1  
AGAACCTTCTTCTTGGACTCAAGGGGCCTTGCTAAATGACA  
+HWI-EAS443:3:19:1093:426#0/1  
abba[[aaaaaa`\_`b`\_a]aaa^aaaa]aa`aa\_]\_  
@HWI-EAS443:3:19:1139:1880#0/1  
CATGTGTGTGCAGGGATAACTGGCATGGCTCGAATCGACC  
+HWI-EAS443:3:19:1139:1880#0/1  
\_b`[\_baa]a^aa\_[^a`\_VZW¥]babb`aa`Z`\_HTZT[  
@HWI-EAS443:3:19:1219:1229#0/1  
AACCTTCTTCTTGGACTCAAGGGGCCTTGCTAAATGACAAA  
+HWI-EAS443:3:19:1219:1229#0/1  
```aaaaaaa`\_`\_`a`^`^XWS^`a[[`\_Z\_\_^\_V`\_`  
@HWI-EAS443:3:19:1230:1011#0/1  
TAAGAATCGGTTCCAAGGGGGATGTGTTTGCATAAGGGA  
+HWI-EAS443:3:19:1230:1011#0/1  
abbbbbba]^b\_ZUZ\_^SYa¥\_aY^a`^a\_[LZ^aVQR[[  
@HWI-EAS443:3:19:1233:553#0/1  
CAGTCGCTTGGTCAGCAAGTGCTTGTGCATGATGGCATCAA  
+HWI-EAS443:3:19:1233:553#0/1  
aa[^]a`\_a\_YFY`SXaWLPX\_aa`^a`^b]ba]GR\_U[\_  
@HWI-EAS443:3:19:1277:152#0/1  
GCTAGTCCAGATTGTGTTCTCTTTGGGTGCCCTCTGATT  
+HWI-EAS443:3:19:1277:152#0/1  
aaa`aW`\_X\_[a`a\_\_[a[\_]\_^`^\_GY\_¥WV\_¥\_\_¥]\_  
@HWI-EAS443:3:19:1332:184#0/1  
AACTTCTCAATAAAGCAAGATATCGTAGGAATAAATGAGT  
+HWI-EAS443:3:19:1332:184#0/1  
\_\_bbabb`babVbbbaaaaaaab\_baaabaVaa^aba\_b]  
@HWI-EAS443:3:19:1344:546#0/1  
CAGTCGCTTGGTCAGCAAGTGCTTGTGCATGATGGCATCAA  
+HWI-EAS443:3:19:1344:546#0/1  
`^^aaabaa[] [W\_^SY¥a^b\_\_\_`Y`\_`¥^`\_`YP¥XP¥`  
@HWI-EAS443:3:19:1357:1319#0/1  
TAAGAATCGGTTCCAAGGGGGATGTGTTTGCATAAGGGA

+HWI-EAS443:3:19:1357:1319#0/1  
a^Va`aa]¥ZJR[WXZTW]`¥GTMFMZW]BBBBBBBBBBB  
@HWI-EAS443:3:19:1358:1260#0/1  
TCCGAAAATCCCCTGCATATGTATCCTATCTGATATTCC  
+HWI-EAS443:3:19:1358:1260#0/1  
aNM\_\_P¥[`\_]UPY\_\_XZ^] ^OR]Z^\_WZVV]QYZXRZU  
@HWI-EAS443:3:19:135:436#0/1  
TACAACCAAGATTTGAGTCAGTCGCTTGGTCAGCAAGTG  
+HWI-EAS443:3:19:135:436#0/1  
aaa\_`\_Y`\_`b`¥aaaa`a\_aab]`aaZQFZGPZ`¥Q¥[XP  
@HWI-EAS443:3:19:139:869#0/1  
GTGGGATTTTCGGAGACAATCCACGCCCTAATGATAAGAC  
+HWI-EAS443:3:19:139:869#0/1  
aP^aa\_abaaaa^aaaa\_`[]a\_\_\_\_`\_`\_\_\_\_`\_\_Z`\_\_U  
@HWI-EAS443:3:19:1415:746#0/1  
ACTCAATTCAACTTGGGAATCAAAATCAGATTGAAACATG  
+HWI-EAS443:3:19:1415:746#0/1  
a^`¥^\_`V`¥V[X^^`\_\_^^X¥^`[\_aX^\_`¥UUX\_W\_  
@HWI-EAS443:3:19:1430:1164#0/1  
AACAATTGGAATTTCTGGCCCAGACAATGGGGCAGTGGCT  
+HWI-EAS443:3:19:1430:1164#0/1  
T`aa[V[b\_b`bV]\_]b[\_]bI¥UHaJ\_aZ\_UG]`N\_\_NB  
@HWI-EAS443:3:19:1529:651#0/1  
CCTGTCTTATCATTAGGGCGTGGATTGTCTCCGAAAATCC  
+HWI-EAS443:3:19:1529:651#0/1  
aab`\_`aabaaa\_aa\_aV`a`\_`\_\_\_\_a^]`\_W[\_[^ZS¥  
@HWI-EAS443:3:19:1580:348#0/1  
TGTCATGATGGCATCAATTGGCTAACAATTGGAATTTCTG  
+HWI-EAS443:3:19:1580:348#0/1  
`[S0¥`^`\_`[\_`RX]\_a\_a`[]¥THV[`\_¥[WXa^\_UVS  
@HWI-EAS443:3:19:1584:426#0/1  
AACAGACACTATCAAGAGTTGGAGAAACAATATATTGAGA  
+HWI-EAS443:3:19:1584:426#0/1  
a\_^`^¥^abab`a`b^a¥ab`\_`a\_a`^a\_aaa`a\_a`a`  
@HWI-EAS443:3:19:1586:129#0/1  
GATTTTCGGAGACAATCCACGCCCTAATGATAAGACAGGC  
+HWI-EAS443:3:19:1586:129#0/1  
a[aba\_\_`Y^a`^`\_][^a^aWRX\_^\_\_\_\_¥^\_]YXOBBBB  
@HWI-EAS443:3:19:1640:302#0/1  
CAACTGCCTGTCTTATCATTAGGGCGTGGATTGTCTCCGA  
+HWI-EAS443:3:19:1640:302#0/1  
```bbb[\_bb[^bb]baabb[[bba]a\_baI`^Va`[X]I  
@HWI-EAS443:3:19:1650:256#0/1  
CATCAATTGGCTAACAATTTGGAATTTCTGGCCCAGACAAT  
+HWI-EAS443:3:19:1650:256#0/1  
¥¥\_XU[`b]ab\_a`^U\_b\_b`VZab\_¥\_^^XFG\_^¥N]R]  
@HWI-EAS443:3:19:1695:237#0/1  
ATTCATATCATGCTCCCCCTTGAATGCAGAACCTTCTTC  
+HWI-EAS443:3:19:1695:237#0/1  
aaba\_baaH`aa`a^PV¥Wa\_\_[^]^\_XWQT¥U[\_UT]WV

@HWI-EAS443:3:19:1721:512#0/1  
AGACACTATCAAGAGTTGGAGAAACAATATATTGAGAACA  
+HWI-EAS443:3:19:1721:512#0/1  
aba`a¥aa`^aaa\_a\_aa`\_a`\_^`a¥\_\_`\_`\_] []P\_  
@HWI-EAS443:3:19:1725:799#0/1  
CAGGAGCATTCTCATAGTGATAATTAGGGGCATTCATTT  
+HWI-EAS443:3:19:1725:799#0/1  
^abbbbbbbbaababbbbbbbbbbb`aabaabbaabab  
@HWI-EAS443:3:19:1785:766#0/1  
GTGAAATCACATGTGTGTGCAGGGATAACTGGCATGGCTC  
+HWI-EAS443:3:19:1785:766#0/1  
`N^^^Z\_SX¥UY^V\_P^G`VP\_¥¥MUMYPU^¥BBBBBBBB  
@HWI-EAS443:3:19:204:1274#0/1  
GTAGGAATAAATGAGTGGTCAGGATATAGCGGGAGTTTTG  
+HWI-EAS443:3:19:204:1274#0/1  
a[a¥\_\_[\_a`a^YR`^`X`\_`\_] [\_^\_\_\_\_^¥\_WUBBB  
@HWI-EAS443:3:19:266:1349#0/1  
GTCCCAGTCCATCCGTTCCGATCCCAAATCATCTCAAAC  
+HWI-EAS443:3:19:266:1349#0/1  
[Zbaab`aaa`[a\_X]`a`\_a]a`\_a\_\_`^^\_a`\_a^  
@HWI-EAS443:3:19:329:115#0/1  
CTCTGATTAGTTCAACCCAGAAGCAAGTCTTATACAATC  
+HWI-EAS443:3:19:329:115#0/1  
`a``baa`aarU`aY¥]\_^a\_¥`\_Z^\_WUT]]\_`X^ZUZ\_  
@HWI-EAS443:3:19:369:954#0/1  
GGCGACCCAAAGAGAACAATCTGGACTAGCGGGAGCAG  
+HWI-EAS443:3:19:369:954#0/1  
a\_]`b^`b`\_a`a\_]aU¥Laa\_a`\_S`\_`^\_\_aW[BBB  
@HWI-EAS443:3:19:408:443#0/1  
AGAGTCTGAATGTGCATGTGTAAATGGTCTTGCTTTACT  
+HWI-EAS443:3:19:408:443#0/1  
aaaa`a`^`aZa`¥`a\_aYya^`\_]`^\_a`a^aaa`^`  
@HWI-EAS443:3:19:420:411#0/1  
GTGGGATTTTCGGAGACAATCCACGCCCTAATGATAAGAC  
+HWI-EAS443:3:19:420:411#0/1  
a\_abb`abbbbbXbaaW^aa\_a`aa`aaa`a``a^\_¥  
@HWI-EAS443:3:19:442:1064#0/1  
CGATACTGGACCACAACACTGCCTGTCTTATCATTAGGGCGT  
+HWI-EAS443:3:19:442:1064#0/1  
a`\_aX`aa`\_\_aa`a`^]`\_\_^aQW``a\_¥\_a¥\_UWN¥¥W  
@HWI-EAS443:3:19:564:271#0/1  
ATGAGTGGTCAGGATATAGCGGGAGTTTTGTTTCAGCATCC  
+HWI-EAS443:3:19:564:271#0/1  
aaaab]baa[a\_ba`aaa\_\_aaa¥a0^a\_\_W^RZW[\_R¥U  
@HWI-EAS443:3:19:603:1303#0/1  
TCAGGATATAGCGGGAGTTTTGTTTCAGCATCCAGAACTAA  
+HWI-EAS443:3:19:603:1303#0/1  
aaabaaaaaaaaa]Y^a[a`a`^`aa\_\_a`^a``\_\_aa  
@HWI-EAS443:3:19:662:861#0/1  
AGAACACAAGAGTCTGAATGTGCATGTGTAAATGGTCTT

+HWI-EAS443:3:19:662:861#0/1  
`aaaab`a\_a\_a^aa`aaaa\_aaaa\_Xa^a\_`aaa]\_\_\_\_\_`  
@HWI-EAS443:3:19:682:137#0/1  
AATGCAGAACCTTCTTCTTGGACTCAAGGGGCCTTGCTAAA  
+HWI-EAS443:3:19:682:137#0/1  
a\_aa`\_\_^a^[\_^]Z^\_\_^Z`^\_^\_\_Y]Z]^Z]ZZ^`  
@HWI-EAS443:3:19:705:1448#0/1  
GTTCCCTTATGACAAACACATCCCCCTTGAACCGATTCT  
+HWI-EAS443:3:19:705:1448#0/1  
a^abba`ab\_a]W\_a`T`a`a^^X^a^`^^a^`\_[]]`  
@HWI-EAS443:3:19:729:1314#0/1  
AGACATATGTTAACATCAGCAACACCACTTTGCTGCTGG  
+HWI-EAS443:3:19:729:1314#0/1  
Z¥Zb`^^W\_\_JX`^`^^W`R^[aba`\_[\_aaaZ\_PYH\_`  
@HWI-EAS443:3:19:76:1032#0/1  
GGATTGTCTCCGAAATCCCCTGACTGATATGTATCCTATCT  
+HWI-EAS443:3:19:76:1032#0/1  
`bbbb`bbba`aZb[`bbbbaaa\_S`baab`Z`baa`b`  
@HWI-EAS443:3:19:796:765#0/1  
GAGGGAACCTCACCAATAGGACAGCTCATTAGGGTTCGAT  
+HWI-EAS443:3:19:796:765#0/1  
aaba^^aaaa\_aaaa\_a\_aa¥¥aa¥\_\_^\_aW`a`Ua\_\_^`  
@HWI-EAS443:3:19:864:444#0/1  
TGCTCCCCTAGTCCAGATTGTGTTCTTTGGGTCGCC  
+HWI-EAS443:3:19:864:444#0/1  
aaab]¥abaaa\_P¥a`a^`a\_a\_\_0\_^a\_\_`¥`¥^^SX\_`  
@HWI-EAS443:3:19:875:607#0/1  
GTAAATGGTTCTTGCTTTACTGTAATGACCGATGGACCAA  
+HWI-EAS443:3:19:875:607#0/1  
a]a\_`aaa^a\_a\_\_¥`a\_^`\_]`]0a\_]Z`^`\_^ZUXZ  
@HWI-EAS443:3:19:879:2042#0/1  
CTGGACCACAACCTGCCTGTCTTATCATTAGGGCGTGGATT  
+HWI-EAS443:3:19:879:2042#0/1  
ab\_bbbbbbbabbaabbb¥abaaaaba`ba\_`aa]`a\_]`  
@HWI-EAS443:3:19:917:212#0/1  
ATGCAATCAAAGCGTCATTACTTATGAAACAACACTTGG  
+HWI-EAS443:3:19:917:212#0/1  
a^a`baa^a^a^Y\_Z\_`a`^a^a`a`a`a`\_a\_]`\_¥¥S`  
@HWI-EAS443:3:19:951:1422#0/1  
GGGAATCAAATCAGATTGAAACATGCAATCAAAGCGTCA  
+HWI-EAS443:3:19:951:1422#0/1  
aa]Y^`\_a\_\_\_Za[\_\_\_Y]¥Y]¥Wa\_a\_^X\_^]aY`SN[  
@HWI-EAS443:3:19:99:1370#0/1  
ATCCTTTTGTGGTGTAACAGTGACTGTGGGTTGGTCT  
+HWI-EAS443:3:19:99:1370#0/1  
`[a`ba\_`a]^^[^aY`bba`bX¥aa`bab¥^]\_\_a\_UST`  
@HWI-EAS443:3:1:103:96#0/1  
GGGATAACTGGCATGGCTCGAATCGACCGTGGGTGTCTTT  
+HWI-EAS443:3:1:103:96#0/1  
aaa\_a`\_]a`\_a\_\_\_\_^^\_¥P¥US[SLHXNV¥¥BBBBBBB`



@HWI-EAS443:3:1:1056:1395#0/1  
CAAAAGGATATGCTGCTCCCGCTAGTCCAGATTGTGTTCT  
+HWI-EAS443:3:1:1056:1395#0/1  
\_abbbabbbbbbba`aaa`b\_aaa[^\_aaa`aaZ`¥BBB  
@HWI-EAS443:3:1:1062:1325#0/1  
CGTTCCGATCCCAAATCATCTCAAACCCTTCTTGA  
+HWI-EAS443:3:1:1062:1325#0/1  
aaa^^`ab\_a\_\_aa`a`b`^a[\_\_\_`a]^b^^`I`[\_^\_XB  
@HWI-EAS443:3:1:1127:788#0/1  
GGTTGAAAGACACCCACGGTCGATTGAGCCATGCCAGTT  
+HWI-EAS443:3:1:1127:788#0/1  
abQ]\_Q¥`X^\_\_KP]\_^]BBBBBBBBBBBBBBBBBB  
@HWI-EAS443:3:1:1143:1434#0/1  
ATTCGAGCCATGCCAGTTATCCCTGCACACACATGTGATT  
+HWI-EAS443:3:1:1143:1434#0/1  
WbaT\_`bI^U[a^aab][aIPRP\_a\_^V^X`\_aaaZa]`B  
@HWI-EAS443:3:1:1213:1514#0/1  
ATTTACGGAAACCACTGACTGTCCAGCAGCAAAGTTGGT  
+HWI-EAS443:3:1:1213:1514#0/1  
abbbab^`a]bb`¥b]`aa^aa\_Yaa`G]YZUX\_\_0\_\_BB  
@HWI-EAS443:3:1:1301:534#0/1  
TGATGGCATCAATTGGCTAACAATTGGAATTTCTGGCCCA  
+HWI-EAS443:3:1:1301:534#0/1  
]^`^¥XVH¥YF]NX¥ZTRWLTGNTXZa¥WRKKPFN]^XBBB  
@HWI-EAS443:3:1:1313:2010#0/1  
AGCCACTCAATTCAACTTGGGAATCAAATCAGATTGAAA  
+HWI-EAS443:3:1:1313:2010#0/1  
a\_VUbI`Oaa\_a¥¥aP`^¥\_`a`^`a`\_a]¥`\_Y`^\_BB  
@HWI-EAS443:3:1:1333:1519#0/1  
CTTGGGAATCAAATCAGATTGAAACATGCAATCAAAGCG  
+HWI-EAS443:3:1:1333:1519#0/1  
¥abab`bbbb`babb¥bababbaabab`b`bbababbb]\_  
@HWI-EAS443:3:1:1387:1838#0/1  
CAAGTGCTTGTCATGATGGCATCAATTGGCTAACAATTGG  
+HWI-EAS443:3:1:1387:1838#0/1  
ab\_a`b\_\_ab¥a\_abaaba\_a`^abbbb\_a¥bbababbbB  
@HWI-EAS443:3:1:1452:474#0/1  
GTCTTTCAACCAGAATCTGGAATATCAGATAGGATACATA  
+HWI-EAS443:3:1:1452:474#0/1  
a^IP]^`^TRS\_\_aa\_`¥Sa`]\_a]^V]```][Y\_¥VBBBB  
@HWI-EAS443:3:1:1546:1290#0/1  
ATCAAAGCGTCATTACTTATGAAAACAACACTTGGGTA  
+HWI-EAS443:3:1:1546:1290#0/1  
aa]aaaa[a\_aaa\_\_¥aaaa``aa]`aV\_^^^\_Y\_BB  
@HWI-EAS443:3:1:1559:1446#0/1  
CAGACACTATCAAGAGTTGGAGAAACAATATATTGAGAAC  
+HWI-EAS443:3:1:1559:1446#0/1  
aaaa`a\_a\_]\_bab\_a`baba`aaaa``a\_a`aaaa`aB  
@HWI-EAS443:3:1:1662:1184#0/1  
ATGCCGTTGACTTTAACACAGCCACTGCCCCATTGTCTG

+HWI-EAS443:3:1:1662:1184#0/1  
aZbVX¥¥`a\_`Gbaa^Z\_`U`a]Q\_S\_S¥GU¥V\_VBBBBB  
@HWI-EAS443:3:1:1681:631#0/1  
GGCAGTTGTGGTCCAGTATCGTCTAATGGAGCAAATGGAG  
+HWI-EAS443:3:1:1681:631#0/1  
a`\_\_aPWDU\_`RVONZTWVGVURQSXZW\_GYNN^BBBBBB  
@HWI-EAS443:3:1:1714:96#0/1  
ACTCAATTCAACTTGGGAATCAAATCAGATTGAAACATG  
+HWI-EAS443:3:1:1714:96#0/1  
`\_]\_Sa^^¥[W^[\_]\_Y`Z^]SS^IZ\_P[^YY[[Y[WBBBB  
@HWI-EAS443:3:1:1752:1303#0/1  
ATTCATATCATGCTCCCCCTTGGGAATGCAGAACCTTCTTC  
+HWI-EAS443:3:1:1752:1303#0/1  
aaa\_aaa\_\_`aaY\_\_Y¥ZYZ]¥^\_\_\_\_X\_\_¥\_WR]ZW\_BB  
@HWI-EAS443:3:1:177:1639#0/1  
CAAACCGTTTCTTGAACATAATGCTTTTAGTTCTCCCTAT  
+HWI-EAS443:3:1:177:1639#0/1  
ab`Ka\_]aVYbUa\_PU`]P]XU\_\_a`^`^^^\_QOH[HaBB  
@HWI-EAS443:3:1:185:1106#0/1  
TCCCTCTCCATACAACACTCAAGATTTGAGTCAGTCGCTTGG  
+HWI-EAS443:3:1:185:1106#0/1  
abaYaaaaaaa\_\_\_\_^`a`a`aaa`a\_aaa[KU`ZBBBB  
@HWI-EAS443:3:1:223:1880#0/1  
TGCACATTCAGACTCTTGTGTTCTCAATATATTGTTTCTC  
+HWI-EAS443:3:1:223:1880#0/1  
abXSOR^a`¥aSV]Ia\_]aV\_`^S^R¥S^`aQ¥XBBBBB  
@HWI-EAS443:3:1:29:14#0/1  
CACCACAAAAGGATATGCTGCTCCCGCTAGTCCAGATTGT  
+HWI-EAS443:3:1:29:14#0/1  
aa`Z\_¥W``a`a\_aa^`X]``\_TU]\_]U`^VY¥BBBBBBB  
@HWI-EAS443:3:1:321:757#0/1  
GCCATCATGACAAGCACTTGCTGACCAAGCGACTGACTCA  
+HWI-EAS443:3:1:321:757#0/1  
aTNXTXY`aY\_TYRRXQNTLLUKZZVO¥NW\_^VBBBBBBB  
@HWI-EAS443:3:1:368:1205#0/1  
TTGTCTCCGAAAATCCCCTGTCATATGTATCCTATCTGAT  
+HWI-EAS443:3:1:368:1205#0/1  
`baaabaab^a`bb]^^a\_aa]abb\_Z[a`\_`aaa\_aaBB  
@HWI-EAS443:3:1:422:1029#0/1  
ATCTTGCTTTATTGAGAAGTTATTGTCTGTCCAGTCCAT  
+HWI-EAS443:3:1:422:1029#0/1  
aa`aaa\_bbbaab\_`^`aa\_`aaa\_Y¥a]FJNO]BBBBBB  
@HWI-EAS443:3:1:469:1318#0/1  
TCCCGCTATATCCTGACCACTCATTTATTCCTACGATATC  
+HWI-EAS443:3:1:469:1318#0/1  
a]a\_`Y`abaa`aaaa`a`^aaa`b`aa`\_`^a`a\_aaBB  
@HWI-EAS443:3:1:510:722#0/1  
AGCCACTCAATTCAACTTGGGAATCAAATCAGATTGAAA  
+HWI-EAS443:3:1:510:722#0/1  
^^FSaZ]^ba`^[\_`]bbabaaaa]bbaaSaa\_a``aBB

@HWI-EAS443:3:1:554:983#0/1  
ATAACAGACACTATCAAGAGTTGGAGAAACAATATATTGA  
+HWI-EAS443:3:1:554:983#0/1  
^W^ZS^[T`XaY]LMJU\_aOH]LVZ`¥[V`SUQNPBBBB  
@HWI-EAS443:3:1:56:456#0/1  
TAGGGCGTGGATTGTCTCCGAAAATCCCACTGCATATGTA  
+HWI-EAS443:3:1:56:456#0/1  
Uba`^\_aT^baabaVX¥a]Z\_]\_U\_¥R]`Z`aU]\_aaaBB  
@HWI-EAS443:3:1:802:1478#0/1  
TAGGGCGTGGATTGTCTCCGAAAATCCCACTGCATATGTA  
+HWI-EAS443:3:1:802:1478#0/1  
aaaS¥H^X`a\_a`RU^T¥``a\_XRPVT\_G]\_W¥ZY^BBB  
@HWI-EAS443:3:1:816:120#0/1  
ATTCATATCATGCTCCCCCTTGAATGCAGAACCTTCTTC  
+HWI-EAS443:3:1:816:120#0/1  
ab[]`a`a]aaa`\_\_[W\_^]\_^\_\_^X`Z]`WXW]W]BBB  
@HWI-EAS443:3:1:817:1490#0/1  
ATGCCGTTGTACTIONAACACAGCCACTGCCCATTTGTCTG  
+HWI-EAS443:3:1:817:1490#0/1  
^\_b\_a``aa`b`Ta^`Xb\_b\_[T¥Y\_aS][H`\_Z\_IYBB  
@HWI-EAS443:3:1:863:1304#0/1  
GCATGATATGAATGGTTCCCTTATGACAAACACATCCCC  
+HWI-EAS443:3:1:863:1304#0/1  
a`QQUG[\_aa\_\_`X[W]QNJNYZR^PUWY^BBBBBBBBBB  
@HWI-EAS443:3:1:901:812#0/1  
CGCTAATTTACGAAACCACTGACTGTCCAGCAGCAAAG  
+HWI-EAS443:3:1:901:812#0/1  
ab`baba[`bb`bb^bba^[]abb[ab\_[R^a\_\_aI^\_aB  
@HWI-EAS443:3:1:959:723#0/1  
TTCTGGTTGAAAGACACCCACGGTCGATTCGAGCCATGCC  
+HWI-EAS443:3:1:959:723#0/1  
Tba`\_\_T\_^V¥``\_a]V¥[\_¥`aHXaPP^R\_PUYN`BBBB  
@HWI-EAS443:3:20:1034:2030#0/1  
GAAGAAGTTCTGCATTCCAAGGGGAGCATGATATGAAT  
+HWI-EAS443:3:20:1034:2030#0/1  
aaa`aY`^W¥aW\_\_\_\_`¥`]\_\_^¥\_^\_¥V^`\_]WBBBBBBB  
@HWI-EAS443:3:20:104:1345#0/1  
GTCCATCCGTTTCGATCCCAAATCATCTCAAACCGTTTC  
+HWI-EAS443:3:20:104:1345#0/1  
aSa[`^a``Xa`W]`Y\_a^]\_T^¥a`\_[aa]``[X]L]^]  
@HWI-EAS443:3:20:1055:527#0/1  
AGCCACTCAATTCAACTTGGGAATCAAATCAGATTGAAA  
+HWI-EAS443:3:20:1055:527#0/1  
`a\_]U``aaaba`a`aaV`abaaa^a[^\_^X`a\_a]a[T]  
@HWI-EAS443:3:20:1114:1264#0/1  
TTGTATAAGACCTTGCTTCTGGGTTGAACTAATCAGAGGG  
+HWI-EAS443:3:20:1114:1264#0/1  
]SVQ][aaaa^]ST[]XV¥aa]aY`^]a``a]\_\_`\_`\_]^  
@HWI-EAS443:3:20:1154:1132#0/1  
TCAGGATATAGCGGGAGTTTTGTTTCAGCATCCAGAACTAA

+HWI-EAS443:3:20:1154:1132#0/1  
abaa[Za^baaaa^]¥`U\_`a\_Qa\_¥RJT^[\_VYS¥W\_]\_  
@HWI-EAS443:3:20:1157:1612#0/1  
GGACCACAACCTGCCTTATCATTAGGGCGTGGATTGT  
+HWI-EAS443:3:20:1157:1612#0/1  
abaaaabbaabaaaa`aaaa\_aaba^a][a\_\_\_\_`a`]¥  
@HWI-EAS443:3:20:1233:1813#0/1  
TTGGTGAAGTTCCTCTCCATACAACCTCAAGATTTGAGTC  
+HWI-EAS443:3:20:1233:1813#0/1  
a`a\_P^[\_a\_`¥PTRU\_aa\_\_[MY]]\_\_^\_\_[^`W`^\_OI  
@HWI-EAS443:3:20:1277:343#0/1  
AGTGGTTCCGTGAAATTAGCGGGCAATTCCTCTCTCTGC  
+HWI-EAS443:3:20:1277:343#0/1  
ab^a`Xaa`\_a^a[Z[aa^RW[\_`W\_`^`\_¥W\_S¥^¥Y¥¥Q  
@HWI-EAS443:3:20:1310:1386#0/1  
CTGTTATTATGCCGTTGTACTTTAACACAGCCACTGCCCC  
+HWI-EAS443:3:20:1310:1386#0/1  
^\_¥\_`^``aaa¥^\_\_aa]\_\_`^`b`]aaa`\_^]``\_]X[Y  
@HWI-EAS443:3:20:1334:31#0/1  
ATTTATTCTACGATATCTTGCTTTATTGAGAAGTTATTG  
+HWI-EAS443:3:20:1334:31#0/1  
aaaabba\_W]b\_baa`baa`a[a]aa`aa^a`ZYY`[^[\_  
@HWI-EAS443:3:20:1345:723#0/1  
ATCATTAGGGCGTGGATTGTCTCCGAAAATCCCCTGCAT  
+HWI-EAS443:3:20:1345:723#0/1  
abaa]T`a`^¥TS[MZ`\_[YYXWJSU`ZOOSKYXRVOB  
@HWI-EAS443:3:20:1421:200#0/1  
CTGATATTCCAGATTCTGGTTGAAAGACACCCACGGTCGA  
+HWI-EAS443:3:20:1421:200#0/1  
UZbVbb\_`UYyb^W^a^XRb]`b\_b\_`\_Tab`aabVTa^  
@HWI-EAS443:3:20:1435:216#0/1  
GAAAGACACCCACGGTCGATTGAGCCATGCCAGTTATCC  
+HWI-EAS443:3:20:1435:216#0/1  
a`a]^`\_a^U^`^a`UU^Z^ZPY¥^UUQXNKPYUU¥SYBB  
@HWI-EAS443:3:20:145:1290#0/1  
GTTGAAAGACACCCACGGTCGATTGAGCCATGCCAGTTA  
+HWI-EAS443:3:20:145:1290#0/1  
aa^¥T\_¥`\_abb]aaa`a^Z[P[`XHRZ]ZOMSSRZQPU^  
@HWI-EAS443:3:20:1460:520#0/1  
GTTGAAAGACACCCACGGTCGATTGAGCCATGCCAGTTA  
+HWI-EAS443:3:20:1460:520#0/1  
aaaa[^\_baVa¥¥S\_QaaUS\_Y^`\_¥\_ZZVW\_¥USSW¥WXU  
@HWI-EAS443:3:20:149:856#0/1  
GACACTATCAAGAGTTGGAGAAACAATATATTGAGAACAC  
+HWI-EAS443:3:20:149:856#0/1  
abbX¥a¥a¥YL\_bb¥a^a¥^ba\_b`Yabaa`aa`aab`a`  
@HWI-EAS443:3:20:1507:567#0/1  
AGCCACTCAATTCAACTTGGGAATCAAAATCAGATTGAAA  
+HWI-EAS443:3:20:1507:567#0/1  
aba`aababaaaa[a\_bbaaaaaaaaa`a¥aaaaa``\_`

@HWI-EAS443:3:20:1586:1660#0/1  
TATCAAGAGTTGGAGAAACAATATATTGAGAACAAGAG  
+HWI-EAS443:3:20:1586:1660#0/1  
abaa\_ab\_a^abaaa````a\_]\_a```a`\_\_\_\_\_[^\_a[\_  
@HWI-EAS443:3:20:158:1168#0/1  
GGGAGCAGCATATCCTTTTGTGGTGTAAACAGTGACACTG  
+HWI-EAS443:3:20:158:1168#0/1  
aaba`b[^a`aaaabaa`aa[a^^a`a^¥\_`aYVa`a¥a`  
@HWI-EAS443:3:20:1600:1086#0/1  
GACGATACTGGACCACAACACTGCCTGTCTTATCATTAGGGC  
+HWI-EAS443:3:20:1600:1086#0/1  
`aaaa^babbbX^\_a`^bb`a`^b[b`baK]ab`abSIST  
@HWI-EAS443:3:20:1622:604#0/1  
TGCCGTTGTACTTTAACACAGCCACTGCCCATTTGTCTGG  
+HWI-EAS443:3:20:1622:604#0/1  
aba\_b]]aaa`aaaa\_b]aa^Wa\_\_]\_\_\_Q\_a[PVX^UY  
@HWI-EAS443:3:20:163:315#0/1  
GCTCCATTAGACGATACTGGACCACAACACTGCCTGTCTTAT  
+HWI-EAS443:3:20:163:315#0/1  
ab]^U^aa[TP¥aWN]XGQ^P]V^`\_a\_^`\_GRN`[Z\_R  
@HWI-EAS443:3:20:1651:562#0/1  
GCTTTATTGAGAAGTTATTGTCTGTCCCAGTCCATCCGTT  
+HWI-EAS443:3:20:1651:562#0/1  
a^aba\_a`a\_a]^`a`aaa``]Va^NNUWYYOROYSKOWVT  
@HWI-EAS443:3:20:1655:1444#0/1  
TGGGAATCAAAATCAGATTGAAACATGCAATCAAAGCGTC  
+HWI-EAS443:3:20:1655:1444#0/1  
]bbaaaaaaaa\_a^aa`baaaaa\_aaa\_a`a\_a\_\_`\_a]W  
@HWI-EAS443:3:20:1781:1065#0/1  
CATTTAGCAAGGCCCTTGAGTCAAGAAGAAGTTCTGCA  
+HWI-EAS443:3:20:1781:1065#0/1  
aabbbbbbaa\_baaa`bbbab``\_aa\_a\_\_\_a\_X`¥^`X^  
@HWI-EAS443:3:20:179:38#0/1  
ATTCATATCATGCTCCCCCTTGAATGCAGAACCTTCTTC  
+HWI-EAS443:3:20:179:38#0/1  
^baaabba`a`aaaa\_a`\_`a`][¥a`\_\_\_^]]^]XYX  
@HWI-EAS443:3:20:200:1526#0/1  
CATTTGCTCCATTAGACGATACTGGACCACAACACTGCCTGT  
+HWI-EAS443:3:20:200:1526#0/1  
a`aba^aab`]\_ZY]aaaa`OYIV[P]THY^LLU¥^SGO  
@HWI-EAS443:3:20:229:306#0/1  
ATTGTCTCCGAAAATCCCACTGCATATGTATCCTATCTGA  
+HWI-EAS443:3:20:229:306#0/1  
]b`^^a\_`\_`Zab`WW``a]Z¥[¥`a^WO]`\_`a\_]a[Y  
@HWI-EAS443:3:20:262:83#0/1  
TCTGAATGTGCATGTGTAAATGGTTCTTGCTTTACTGTAA  
+HWI-EAS443:3:20:262:83#0/1  
abbbaba\_baaab\_b`aa`aaa\_a\_a`\_`aaaa]^`a]`\_  
@HWI-EAS443:3:20:264:249#0/1  
TGAACATAATGCTTTTAGTTCTCCCTATCCAAACACCATTG

+HWI-EAS443:3:20:264:249#0/1  
abYb¥ba\_aba`baa^b\_abaabaaa[SO\_a\_a` ` \_`\_a  
@HWI-EAS443:3:20:264:612#0/1  
CAGTCCATCCGTTCCGATCCCAAATCATCTCAAACCGTT  
+HWI-EAS443:3:20:264:612#0/1  
aa\_`aab`Ua` ` `a\_`aaaa\_aa^R\_\_\_¥W]T\_]W]\_U[  
@HWI-EAS443:3:20:362:1131#0/1  
CTTGGTCCATCGGTCATTACAGTAAAGCAAGAACCATTTA  
+HWI-EAS443:3:20:362:1131#0/1  
ababbabb\_\_bb^H]b`^b^Va]b`baaa\_aa^`aaaaYY  
@HWI-EAS443:3:20:378:687#0/1  
ATCAATTGGCTAACAAATTGGAATTTCTGGCCCAGACAATG  
+HWI-EAS443:3:20:378:687#0/1  
aYab` `]I[Y`aa¥X)` [ ]aaaa\_a]aaaZ\_\_aZTQZ\_a  
@HWI-EAS443:3:20:392:1163#0/1  
CTGTTTACACCACAAAAGGATATGCTGCTCCCGCTAGTCC  
+HWI-EAS443:3:20:392:1163#0/1  
a¥`a`aaa`V`b`aaa¥¥\_a\_aa¥a\_]¥[`¥a\_¥]\_Z]^U  
@HWI-EAS443:3:20:48:824#0/1  
GGTGTCTTTCAACCAGAATCTGGAATATCAGATAGGATAC  
+HWI-EAS443:3:20:48:824#0/1  
aa]bYa`\_a`aa\_ba\_\_¥^` `aa¥a\_\_^[Y[]]^\_\_^]]M  
@HWI-EAS443:3:20:49:372#0/1  
GGCGTGGATTGTCTCCGAAAATCCCCTGCATATGTATCC  
+HWI-EAS443:3:20:49:372#0/1  
aabbaab`baZ]aabb` ]¥aa`bb\_J\_T]^Va`a`^`\_a`  
@HWI-EAS443:3:20:541:376#0/1  
GGGCAGAGAGAGGAATTGCCCGCTAATTTACGGAAACCA  
+HWI-EAS443:3:20:541:376#0/1  
aaaaaa¥b`a^\_a`aaaa`\_`a`aa\_` ` ` \_a\_\_[[\_\_[V\_  
@HWI-EAS443:3:20:57:200#0/1  
GGCTCCTGTCTTTAATGGTTCCATTGGAATGTTTGTTCATT  
+HWI-EAS443:3:20:57:200#0/1  
XaaZabb\_TW¥[ZZXV\_V`¥`¥W¥`ZaY^YWY¥]N]¥V¥[  
@HWI-EAS443:3:20:592:1103#0/1  
AGACACTATCAAGAGTTGGAGAAACAATATATTGAGAACA  
+HWI-EAS443:3:20:592:1103#0/1  
[Z[ ` `a\_]¥`U]aa\_YYU¥YXa)` `XMR¥\_`^RX` `Y]T`  
@HWI-EAS443:3:20:598:504#0/1  
CAAGAGTTGGAGAAACAATATATTGAGAACACAAGAGTCT  
+HWI-EAS443:3:20:598:504#0/1  
aaa¥aa0`\_a`a`^^`aaa[ ` `a\_a\_a\_Z\_`^`^a\_`V[\_  
@HWI-EAS443:3:20:604:1416#0/1  
AGCGGGAGTTTTGTTCCAGCATCCAGAACTAACAGGGCTGG  
+HWI-EAS443:3:20:604:1416#0/1  
aabaaa¥bV\_\_`I` `^^^`aZ\_a\_]aa\_\_aa]a^[\_]^Z  
@HWI-EAS443:3:20:666:1203#0/1  
GTCCAGCAGCAAAGTTGGTGTGCTGATGTTAACATATGT  
+HWI-EAS443:3:20:666:1203#0/1  
a\_`a` [ `aaaY^¥VZ]Z^T`\_a\_^^^Z[WR]^ZV¥]^XSY

@HWI-EAS443:3:20:686:77#0/1  
GTTTGGATAGGGGAGAACTAAAAGCATTAGTTCAAGAAACG  
+HWI-EAS443:3:20:686:77#0/1  
a[aaaa[\_\_\_aa\_^`\_\_\_]\_]Z\_^\_]^\_Y[aUY]Z[^[ZVY]  
@HWI-EAS443:3:20:730:1566#0/1  
AGCGGGAGTTTTGTTCCAGCATCCAGAACTAACAGGGCTGG  
+HWI-EAS443:3:20:730:1566#0/1  
`aa`^VW`M`]ZNVaS^a\_aa`]VGX\_PY`[]\_\_RZL[\_G  
@HWI-EAS443:3:20:768:1338#0/1  
ATTGATGCCATCATGACAAGCACTTGCTGACCAAGCGACT  
+HWI-EAS443:3:20:768:1338#0/1  
a`^\_\_\_\_`\_]`\_`^`\_\_a\_\_\_\_^]\_^^^]]U^^^]]]ZXX  
@HWI-EAS443:3:20:78:1528#0/1  
GTGTAAACAGTGACACTGTGGGTTGGTCTTGCCAGACGG  
+HWI-EAS443:3:20:78:1528#0/1  
N¥^aa\_Z`\_¥``bbbbbbZbaa\_a`a`aababbbb\_UX\_  
@HWI-EAS443:3:20:802:634#0/1  
CATGATATGAATGGTCCCTTATGACAAACACATCCCCCT  
+HWI-EAS443:3:20:802:634#0/1  
ababa`aaaa^^aa\_\_aaa\_aa```^\_\_`Va\_`\_\_^^Z^^  
@HWI-EAS443:3:20:89:1575#0/1  
GGATATGCTGCTCCCGCTAGTCCAGATTGTGTTCTCTTTG  
+HWI-EAS443:3:20:89:1575#0/1  
]RZ[[WZ`a]a[`bbaa\_PZG^a)`XRYQSVR]\_WNLU^M  
@HWI-EAS443:3:20:909:914#0/1  
AGAAACAATATATTGAGAACACAAGAGTCTGAATGTGCAT  
+HWI-EAS443:3:20:909:914#0/1  
V¥Ya`aa`Yb`Y``bZRTVP`aa¥`Ub¥aaaa`\_aSa¥`\_  
@HWI-EAS443:3:20:912:308#0/1  
ATCCGTTCCGATCCCAAATCATCTCAAACCGTTTCTTGA  
+HWI-EAS443:3:20:912:308#0/1  
aa\_a\_\_¥`\_V¥]\_X^\_Z\_]\_\_Z^Z^\_^^X]]Z]]Z]ZXZ  
@HWI-EAS443:3:20:948:1279#0/1  
AGCCCATATCGAACCTAATGAGCTGTCCTATTGGTGAAG  
+HWI-EAS443:3:20:948:1279#0/1  
a]aaabbaa`aaaa\_aa\_`\_`[aa`\_a^`a`\_`X\_`\_]\_  
@HWI-EAS443:3:20:960:1920#0/1  
TGTAACAGTGACACTGTGGGTTGGTCTTGCCAGACGGT  
+HWI-EAS443:3:20:960:1920#0/1  
aa]^abaaUW¥¥Xaaaa\_`^[Y[XQQ[\_^^^[\_`^¥[T^\_T  
@HWI-EAS443:3:20:997:37#0/1  
CAAGAGTCTGAATGTGCATGTGTAATGGTTCTTGCTTTA  
+HWI-EAS443:3:20:997:37#0/1  
T\_`a\_]XW¥\_Y\_Ya^a`\_¥a[\_YW\_\_Y`bW\_[\_^]O[^\_V  
@HWI-EAS443:3:21:1051:89#0/1  
GATTCTGGTTGAAAGACACCCACGGTTCGATTCGAGCCATG  
+HWI-EAS443:3:21:1051:89#0/1  
a`ba[\_ba\_a`\_^`\_XX^\_V[¥a`UYVVX^S\_S¥UHWWV  
@HWI-EAS443:3:21:1086:828#0/1  
CAATGGTGTGGATAGGGGAGAACTAAAAGCATTAGTTCA

+HWI-EAS443:3:21:1086:828#0/1  
¥¥^\_`Y¥`\_Z`XZ^^^`^]¥[`a^aR\_ZU¥a`a`XO[  
@HWI-EAS443:3:21:1161:1266#0/1  
CAGACACTATCAAGAGTTGGAGAAACAATATATTGAGAAC  
+HWI-EAS443:3:21:1161:1266#0/1  
aa\_aaababa`aaaa[a]^\_`\_\_`^[^\_`a`\_\_I\_`\_\_  
@HWI-EAS443:3:21:1198:976#0/1  
CATATGCAGTGGGATTTTCGGAGACAATCCACGCCCTAAT  
+HWI-EAS443:3:21:1198:976#0/1  
abbbbaabbaaaa`aaaab\_aa\_aa\_aaa^`\_]\_^\_]a`\_\_  
@HWI-EAS443:3:21:1224:903#0/1  
GACCACTCATTTATTCCTACGATATCTTGCTTTATTGAGA  
+HWI-EAS443:3:21:1224:903#0/1  
aa`\_`a`aaaa`a`^\_`\_`\_\_\_\_\_]\_\_\_¥\_a`^`\_^\_]\_  
@HWI-EAS443:3:21:1236:1678#0/1  
CGCTTTGATTGCATGTTTCAATCTGATTTTGATTCCCAAG  
+HWI-EAS443:3:21:1236:1678#0/1  
`bbbaababbb`bab\_\_ba`aa`b`aaaababaaa\_\_a¥a  
@HWI-EAS443:3:21:1247:1221#0/1  
GCTAATTTACGGAAACCACTGACTGTCCAGCAGCAAAGT  
+HWI-EAS443:3:21:1247:1221#0/1  
aaaa\_aaaaa`aa`aa^a`\_`\_]`^`\_¥^^\_¥^[\_ZXXX]X  
@HWI-EAS443:3:21:1266:820#0/1  
GGAATATCAGATAGGATACATATGCAGTGGGATTTTCGGA  
+HWI-EAS443:3:21:1266:820#0/1  
aaaabaa\_a`Za\_aa`\_`\_]`^`\_\_R\_^Z¥a^^\_^Z\_]Y  
@HWI-EAS443:3:21:1279:1201#0/1  
AGATGATTTGGGATCCGAACGGATGGACTGGGACAGACAA  
+HWI-EAS443:3:21:1279:1201#0/1  
a¥`^a\_aabbbbaa^`\_aa]`aa`\_a]^`\_\_[a^Za¥^U`\_  
@HWI-EAS443:3:21:1395:1448#0/1  
GACGATACTGGACCACAACCTGCCTGTCTTATCATTAGGGC  
+HWI-EAS443:3:21:1395:1448#0/1  
aaaaa`a`a\_`]`U`\_\_a[\_^[\_`[^a`\_`\_\_^`\_`X^ZU  
@HWI-EAS443:3:21:1396:88#0/1  
GCCCCTAATTATCACTATGAGGAATGCTCCTGTTATCCTG  
+HWI-EAS443:3:21:1396:88#0/1  
a`\_^WaaaaaaaZ\_Z`a`\_`a`\_`\_¥\_XW`^^^\_XS^^  
@HWI-EAS443:3:21:1490:324#0/1  
GGAGAGGGAACCTCACCAATAGGACAGCTCATTAGGGTTC  
+HWI-EAS443:3:21:1490:324#0/1  
aa`\_a\_aba`\_^a`\_`¥Za`\_]Q^W`\_`U]UX`^Wa¥^ZUV  
@HWI-EAS443:3:21:149:1213#0/1  
GTTTGGATAGGGAGAATAAAAGCATTAGTTCAAGAAACG  
+HWI-EAS443:3:21:149:1213#0/1  
a\_a`\_`V\_a\_VZ¥`\_`\_`[`U¥^a`\_a]^`\_]`\_`\_^\_^]Y^\_  
@HWI-EAS443:3:21:1524:1814#0/1  
ACTCAATTCAACTTGGGAATCAAAATCAGATTGAAACATG  
+HWI-EAS443:3:21:1524:1814#0/1  
a]KFLOQLGSXWZTURW\_BBBBBBBBBBBBBBBBBBBBBB



@HWI-EAS443:3:21:1640:1847#0/1  
ATGTTAACATCAGCAACACCAACTTTGCTGCTGGACAGTC  
+HWI-EAS443:3:21:1640:1847#0/1  
`S]\_\_aaV[VF¥^^R`0a`Y\_^VR]]YV]UKT\_¥XWU^ZO  
@HWI-EAS443:3:21:1666:245#0/1  
CCCCGTAATTTACGGAAACCACTGACTGTCCAGCAGCAA  
+HWI-EAS443:3:21:1666:245#0/1  
ab]a\_abaabb]aZabaaaQX^\_\_`S[\_UXRRRF^¥NJRU  
@HWI-EAS443:3:21:171:1192#0/1  
GGTGAAGTTCCTCTCCATACAACCTCAAGATTTGAGTCAG  
+HWI-EAS443:3:21:171:1192#0/1  
`KVa`ab`b]a^\_babaa`Sb```a\_^`][[aaSYa¥aTT  
@HWI-EAS443:3:21:1740:2004#0/1  
ACCGTTTCTTGAACCTAATGCTTTTAGTTCTCCCTATCCAA  
+HWI-EAS443:3:21:1740:2004#0/1  
a\_R][\_V¥```U[R]VGT`NQ¥a^¥VNXWUG^[T]ZT¥][  
@HWI-EAS443:3:21:1764:288#0/1  
ACATATGTTAACATCAGCAACACCAACTTTGCTGCTGGAC  
+HWI-EAS443:3:21:1764:288#0/1  
aa\_Q\_aaZ``b[aaXX``a`W¥\_[^ZG]\_\_`Z]^X^UZVF  
@HWI-EAS443:3:21:220:934#0/1  
TTCAAATACGGCAATGGTGTGGATAGGGAGAACTAAAA  
+HWI-EAS443:3:21:220:934#0/1  
abaab`aabba^aa`]aQ\_\_aa\_]M)`Z`^Y\_\_aYXW\_`\_  
@HWI-EAS443:3:21:22:547#0/1  
CCAGAACTAACAGGGCTGGATTGTATAAGACCTTGCTTCT  
+HWI-EAS443:3:21:22:547#0/1  
a]ab¥^aaaZ``aaa`^]a^aa\_U^]``\_`YTX`]a^```]  
@HWI-EAS443:3:21:23:674#0/1  
GATATTCCAGATTCTGGTTGAAAGACACCCACGGTCGATT  
+HWI-EAS443:3:21:23:674#0/1  
aaa`aababaa\_``aaa\_a^`a`a`\_a`^a`\_^YTXZPBB  
@HWI-EAS443:3:21:304:159#0/1  
CAATCCAGCCCTGTTAGTTCTGGATGCTGAACAAAACCTCC  
+HWI-EAS443:3:21:304:159#0/1  
aa`^baaaa`aaa¥`\_a`\_``\_][YYZ`Z[[\_\_VVV]  
@HWI-EAS443:3:21:304:354#0/1  
GTGAAATTAGCGGGCAATTCCTCTCTCTGCCCTGTTAGTG  
+HWI-EAS443:3:21:304:354#0/1  
a\_a`]aa`\_`^a`]`a\_`^^\_\_[\_[]\_\_\_\_]`\_`]`X\_  
@HWI-EAS443:3:21:314:1004#0/1  
GAGGAATTGCCCGCTAATTTACGGAAACCACTGACTGTC  
+HWI-EAS443:3:21:314:1004#0/1  
[baa`b]`abab`^baaaaaabaVaaabaaaa\_\_Z]¥S]  
@HWI-EAS443:3:21:389:1522#0/1  
CAAATACGGCAATGGTGTGGATAGGGAGAACTAAAAGC  
+HWI-EAS443:3:21:389:1522#0/1  
aa`aa\_baaa`^\_PYMX\_aa\_\_[\_`[^WXY`\_]a^`aW[  
@HWI-EAS443:3:21:39:693#0/1  
GTGTAAACAGTGACACTGTGGGTTGGTCTTGCCAGACGG

+HWI-EAS443:3:21:39:693#0/1  
a^`\_`\_`[\_`\_Ua\_`^`^a^S`\_¥W^]VS^^Z^^^XUQX^  
@HWI-EAS443:3:21:456:1350#0/1  
CGGGAGCAGCATATCCTTTTGTGGTGTAAACAGTGACACT  
+HWI-EAS443:3:21:456:1350#0/1  
a^`aXab^aaaa`\_`a`\_`\_`YTVY`\_`][¥`^V\_\_`\_`T^  
@HWI-EAS443:3:21:479:1917#0/1  
ACTTGGTCCATCGGTCATTACAGTAAAGCAAGAACCATTT  
+HWI-EAS443:3:21:479:1917#0/1  
aa`\_\_\_^aaa\_a\_ZZ^^Z^\_¥\_^V\_[\_`^S]^X`\_]W]]VZ  
@HWI-EAS443:3:21:506:739#0/1  
ACATATGCAGTGGGATTTTCGGAGACAATCCACGCCCTAA  
+HWI-EAS443:3:21:506:739#0/1  
aaaab¥a]Y`\_`aaa^a`\_`aaa]aa]Y¥\_Y\_\_Z\_a\_]\_\_\_\_  
@HWI-EAS443:3:21:537:148#0/1  
GCAGCATATCCTTTTGTGGTGTAAACAGTGACACTGTGGG  
+HWI-EAS443:3:21:537:148#0/1  
ab]^¥X\_aa`\_]aX]]a[]]^aZ¥]V[`dW\_[[\_WY`T\_^W  
@HWI-EAS443:3:21:546:1815#0/1  
GTCAGGATATAGCGGGAGTTTTGTTCAGCATCCAGAACTA  
+HWI-EAS443:3:21:546:1815#0/1  
a[a`]a]\_`\_`\_`\_`^aUaN\_^XPU`\_`¥[LLT^¥SNW[UUW  
@HWI-EAS443:3:21:571:825#0/1  
CACAACTGCCTGTCTTATCATTAGGGCGTGGATTGTCTCC  
+HWI-EAS443:3:21:571:825#0/1  
aa`aa\_\_[aaa\_]a\_\_\_\_\_`\_\_\_\_\_¥XYRS\_^`\_]UU[WV  
@HWI-EAS443:3:21:583:1090#0/1  
AACCACAGTGTCACTGTTTACACCACAAAAGGATATGCT  
+HWI-EAS443:3:21:583:1090#0/1  
a]bbbaa\_a\_[\_a`\_`aR^[\_baaaaa]a]P`\_`a\_RXVaWY  
@HWI-EAS443:3:21:612:1716#0/1  
ATCAAGAGTTGGAGAAACAATATATTGAGAACAACAAGAGT  
+HWI-EAS443:3:21:612:1716#0/1  
U^Y]Q¥`^UOV\_]¥T]^`\_[ULXZXXP[``\_`^Z`\_`ZY^[Y  
@HWI-EAS443:3:21:651:884#0/1  
ATATCATGCTCCCCCTTGAATGCAGAACCTTCTTCTTGA  
+HWI-EAS443:3:21:651:884#0/1  
aa^S[aa[aaa`\_`\_`\_`^\_¥]\_¥]\_\_\_¥\_¥WQ¥]¥YWW¥¥\_  
@HWI-EAS443:3:21:668:941#0/1  
AGAAATTCCAATTGTTAGCCAATTGATGCCATCATGACAA  
+HWI-EAS443:3:21:668:941#0/1  
aaaaaaaaaaaa`^¥`\_`¥[aa\_\_`\_`^¥[^T^^]^ZVZX\_]`  
@HWI-EAS443:3:21:756:303#0/1  
GATTGAAACATGCAATCAAAGCGTCATTACTTATGAAAAC  
+HWI-EAS443:3:21:756:303#0/1  
`\_]`\_`a`\_¥\_`Z`\_`¥UV^UJX^Z`W]]^^]]][RW]\_Y\_]U  
@HWI-EAS443:3:21:757:1887#0/1  
GTCCATCGGTCATTACAGTAAAGCAAGAACCATTACACA  
+HWI-EAS443:3:21:757:1887#0/1  
aTba¥X\_^QTT\_¥^aU^^F¥`\_`¥NR^XL]]PMSS¥]PXS]

@HWI-EAS443:3:21:764:656#0/1  
GCCAGAAATTCCAATTGTTAGCCAATTGATGCCATCATGA  
+HWI-EAS443:3:21:764:656#0/1  
abab`abbaaaaaaaaa`aaaaa]`\_^\_aa\_]\_¥]^Z  
@HWI-EAS443:3:21:78:486#0/1  
CGCTAATTTACGGAAACCACTGACTGTCCAGCAGCAAAG  
+HWI-EAS443:3:21:78:486#0/1  
abb`WPTaaa^[U`¥a^a[XV¥^Z^`\_Y¥QJJ]Z\_SRBBB  
@HWI-EAS443:3:21:845:312#0/1  
CAACTGCCTGTCTTATCATTAGGGCGTGGATTGTCTCCGA  
+HWI-EAS443:3:21:845:312#0/1  
abba``baaa\_aaaaa\_aa`aa¥W]\_^`\_^a^ZZ\_¥]W¥¥  
@HWI-EAS443:3:21:863:91#0/1  
GACATATGTTAACATCAGCAACACCAACTTTGCTGCTGGA  
+HWI-EAS443:3:21:863:91#0/1  
aa``aaaa`a`a\_\_`\_`\_[\_\_\_\_^]\_^]`^\_\_]Z\_XZ\_^Z  
@HWI-EAS443:3:21:865:1817#0/1  
ATTCATATCATGCTCCCCCTTGAATGCAGAACCTTCTTC  
+HWI-EAS443:3:21:865:1817#0/1  
^ZU\_¥Q¥`a`\_a[`\_¥Z^[Z]U^U\_\_^U]\_YUQU]XYX  
@HWI-EAS443:3:21:926:62#0/1  
ATGGGCTCCTGTCTTTAATGGTTCCATTGGAATGTTTGTC  
+HWI-EAS443:3:21:926:62#0/1  
aa\_aaa\_Vaa]\_W`aa\_\_aa`Z]0\_^``^Y^\_\_]^a^ZW  
@HWI-EAS443:3:21:94:731#0/1  
GTTATTATGCCGTTGTACTTTAACACAGCCACTGCCCCAT  
+HWI-EAS443:3:21:94:731#0/1  
aa\_¥``X^\_\_W`S]^`^`¥¥\_Y^^\_¥W¥Y¥]¥Y  
@HWI-EAS443:3:21:999:1701#0/1  
GAAACAATATATTGAGAACACAAGAGTCTGAATGTGCATG  
+HWI-EAS443:3:21:999:1701#0/1  
aaa``aaa`aaaaa`^`\_a]a`\_\_aY^\_a\_^`\_Y\_Y\_\_\_\_  
@HWI-EAS443:3:22:1043:540#0/1  
ATTCATATCATGCTCCCCCTTGAATGCAGAACCTTCTTC  
+HWI-EAS443:3:22:1043:540#0/1  
[b¥Q\_ab^^]\_Y`b]UW\_S\_aU]`TXaUV¥U¥FG¥a¥]Y]  
@HWI-EAS443:3:22:1077:1193#0/1  
AAGACACCCACGGTCGATTCGAGCCATGCCAGTTATCCCT  
+HWI-EAS443:3:22:1077:1193#0/1  
``\_XSba`a]bbYFU`ZV¥[¥[]a`SaZNXGQUW\_VNaY[  
@HWI-EAS443:3:22:1130:1063#0/1  
GGGAGAATAAAAGCATTAGTTCAAGAAACGGTTTTGAGA  
+HWI-EAS443:3:22:1130:1063#0/1  
a`¥Q\_aaa^\_^`VW]Za\_[\_Z^[UOXUQLT\_TT]VZ`KTQ  
@HWI-EAS443:3:22:1233:558#0/1  
GCGACCCAAAGAGAACAATCTGGACTAGCGGGAGCAGC  
+HWI-EAS443:3:22:1233:558#0/1  
Z``P¥¥¥]\_\_aa\_ZXa^H^a`Y`]^`\_UWH\_a`T¥[YFM¥G  
@HWI-EAS443:3:22:1259:1356#0/1  
CTTTAACACAGCCACTGCCCCATTGTCTGGGCCAGAAATT

+HWI-EAS443:3:22:1259:1356#0/1  
abab`\_`bab`aaaaaaaaaS`^`^`\_\_\_\_[[W\_\_^Z^\_\_  
@HWI-EAS443:3:22:1269:1109#0/1  
AGCCATGCCAGTTATCCCTGCACACACATGTGATTTCACT  
+HWI-EAS443:3:22:1269:1109#0/1  
aaaabba`a^`b`aaa`aab`a`\_\_a`aa\_a]^a^M]^`  
@HWI-EAS443:3:22:1272:690#0/1  
CCGCTAATTTACGGAAACCACTGACTGTCCAGCAGCAAA  
+HWI-EAS443:3:22:1272:690#0/1  
a`\_\_a```aa`\_`^`^aaZ`\_[¥][^]PY]UZTPYVVT  
@HWI-EAS443:3:22:1301:65#0/1  
CTTGCTAAATGACAAACATTCCAATGGAACCATTAAGAC  
+HWI-EAS443:3:22:1301:65#0/1  
\_\_ab`abaabbaaab`aba`a`ab```^¥`a^a\_aa\_\_  
@HWI-EAS443:3:22:1303:1552#0/1  
CAACCCAGAAGCAAGGTCTTATACAATCCAGCCCTGTTAG  
+HWI-EAS443:3:22:1303:1552#0/1  
\_^\_RTWaa]T\_V¥Z\_\_\_b`^`\_a`[\_a]R[^XGWX\_^VZI  
@HWI-EAS443:3:22:1312:799#0/1  
CTTGGGAATCAAAATCAGATTGAAACATGCAATCAAAGCG  
+HWI-EAS443:3:22:1312:799#0/1  
abbbba`bbbb``aaaaababaaaaaab\_a`aaa`aa¥a  
@HWI-EAS443:3:22:1349:1899#0/1  
GTATAAGACCTTGCTTCTGGGTTGAACTAATCAGAGGGCG  
+HWI-EAS443:3:22:1349:1899#0/1  
aaaaa]¥]Y\_a\_a¥aaY\_a`W]\_aba\_a`^\_Za\_\_a^Y[W  
@HWI-EAS443:3:22:1360:1970#0/1  
ATCATGCTCCCCCTTGAATGCAGAACCTTCTTCTTACT  
+HWI-EAS443:3:22:1360:1970#0/1  
aa^\_X\_W``¥Xa`Z^YX\_]¥]VZ[^`ZVQ¥^¥TT\_U\_\_¥¥  
@HWI-EAS443:3:22:1362:1582#0/1  
GTCGATTCGAGCCATGCCAGTTATCCCTGCACACACATGT  
+HWI-EAS443:3:22:1362:1582#0/1  
Ua`b]ba\_¥\_]a``\_M\_bY]Qaab\_\_^]aWW¥UaaSa\_b\_  
@HWI-EAS443:3:22:1411:1288#0/1  
CTTGAGTCAAGAAGAAGTTCTGCATTCCAAGGGGAGCA  
+HWI-EAS443:3:22:1411:1288#0/1  
aba`ab`aaaa^a`aaa]Ya``\_\_a`^V\_\_a]\_`[W]U^  
@HWI-EAS443:3:22:1471:177#0/1  
CTCCTGTTATCCTGATTCTAGTAAATCACATGTGTGTGC  
+HWI-EAS443:3:22:1471:177#0/1  
abb`aa\_babbaa`abaaaa]¥a\_a``\_`^`a`^`]a`\_]  
@HWI-EAS443:3:22:1500:1115#0/1  
CAAGAGTTGGAGAAACAATATATTGAGAACACAAGAGTCT  
+HWI-EAS443:3:22:1500:1115#0/1  
ab[\_S^]babaa^a\_Zaaaaaaba`\_\_Ya¥^W`\_aXS]  
@HWI-EAS443:3:22:1508:814#0/1  
CAGTAAAGCAAGAACCATTTACACATGCACATTCAGACTC  
+HWI-EAS443:3:22:1508:814#0/1  
abbababbbb¥\_abbbbaaaabbaaaaa`aaa\_a[

@HWI-EAS443:3:22:1522:617#0/1  
CTGGGACAGACAATAACTTCTCAATAAAGCAAGATATCGT  
+HWI-EAS443:3:22:1522:617#0/1  
¥]``b`^baX^¥\_]`][a^\_]Tab\_aa¥X\_^a`^U\_aaX  
@HWI-EAS443:3:22:1581:1478#0/1  
GACATATGTTAACATCAGCAACACCAACTTTGCTGCTGGA  
+HWI-EAS443:3:22:1581:1478#0/1  
a\_]bbba]bbbaa`a[\_aaaa\_W]\_Y[ab\_]Y\_]Zaa\_  
@HWI-EAS443:3:22:161:394#0/1  
CGGGAGTTTTGTTTCAGCATCCAGAACTAACAGGGCTGGAT  
+HWI-EAS443:3:22:161:394#0/1  
`a\_Q0b]aaaa^¥aZZ\_a[]a```\_`¥``\_\_^\_U\_^a[V^  
@HWI-EAS443:3:22:165:1549#0/1  
CAACTGCCTGTCTTATCATTAGGGCGTGGATTGTCTCCGA  
+HWI-EAS443:3:22:165:1549#0/1  
aa\_a`a¥a`^\_aa\_aaa``aT^YU`[X[QV`]0¥\_^aUT]  
@HWI-EAS443:3:22:1682:1079#0/1  
TGGTGTGGATAGGGAGAACTAAAAGCATTAGTTCAAGA  
+HWI-EAS443:3:22:1682:1079#0/1  
aaaU¥`\_X[]V¥Za`^XaUVS`[PZZPLR^`W[UYJVZZY  
@HWI-EAS443:3:22:1686:1177#0/1  
ATTAGTTCAACCCAGAAGCAAGTCTTATACAATCCAGCC  
+HWI-EAS443:3:22:1686:1177#0/1  
a`baa\_\_bbba^a``\_^Z]]F¥SMUaaYa[\_a^a]FWaZ\_  
@HWI-EAS443:3:22:1758:1269#0/1  
ATTCAACTTGGGAATCAAAATCAGATTGAAACATGCAATC  
+HWI-EAS443:3:22:1758:1269#0/1  
aba[]a`abbba`YaZ^^a\_a¥Wa]a`[aa\_] [\_a[\_[XW  
@HWI-EAS443:3:22:179:1696#0/1  
ATCTTTCCCTTTTCTATTCTGAAGATCTTGTATGAGGCCT  
+HWI-EAS443:3:22:179:1696#0/1  
I¥ab`bbababa\_aab\_Z¥b[abaVaa`¥b`aaVaHK\_a]  
@HWI-EAS443:3:22:193:1158#0/1  
CCCTAATTATCACTATGAGGAATGCTCCTGTTATCCTGAT  
+HWI-EAS443:3:22:193:1158#0/1  
ab`abaaaaaaaa`aa\_a`\_aa`\_a^a\_\_a`\_`\_a\_\_^\_\_  
@HWI-EAS443:3:22:233:1555#0/1  
GTCATTTAGCAAGGCCCTTGAGTCAAGAAGAAGTTCTG  
+HWI-EAS443:3:22:233:1555#0/1  
]Q\_aaaa^abaaa`a\_b`aaaaVa`a^\_Y[``\_Q\_\_\_^  
@HWI-EAS443:3:22:277:1053#0/1  
GGGCTCCTGTCTTTAATGGTTCATTGGAATGTTTGTCTG  
+HWI-EAS443:3:22:277:1053#0/1  
\_¥Wb^aaa`]aaaaZ¥```W]aa[a]K\_\_``aV`a]UTV¥  
@HWI-EAS443:3:22:355:631#0/1  
CACCAATAGGACAGCTCATTAGGGTTCGATATGGGCTCCT  
+HWI-EAS443:3:22:355:631#0/1  
a\_\_Y\_[`[baaaaaZ^\_HT]] [YZT]aa][Z\_\_¥\_[U[UP  
@HWI-EAS443:3:22:402:840#0/1  
AAGCGACTGACTCAAATCTTGAGTTGTATGGAGAGGGAAC

+HWI-EAS443:3:22:402:840#0/1  
 aaaaa`aaa\_\_`¥`aaa\_\_\_Y\_Yaa]^\_\_\_\_]`\_\_\_W\_\_^  
 @HWI-EAS443:3:22:403:1012#0/1  
 ATTCATATCATGCTCCCCCTTGGAATGCAGAACCTTCTTC  
 +HWI-EAS443:3:22:403:1012#0/1  
 aaa^)`aaaa]Z¥^¥a\_aW[[\_`VX`\_`\_`\_]ULV]\_^¥\_  
 @HWI-EAS443:3:22:405:829#0/1  
 ATCTGATATTCCAGATTCTGGTTGAAAGACACCCACGGTC  
 +HWI-EAS443:3:22:405:829#0/1  
 [ZZXWW[[TGSR\_XZPQYH¥aHNZ^`U`¥G]a\_WOPUBBB  
 @HWI-EAS443:3:22:450:1599#0/1  
 ACTCAATTCAACTTGGGAATCAAAATCAGATTGAAACATG  
 +HWI-EAS443:3:22:450:1599#0/1  
 aa\_\_`[^\_a`^\_^^^`\_¥]^\_^^]Y^\_Z]]\_\_`^]  
 @HWI-EAS443:3:22:468:1179#0/1  
 TGCCTGTCTTATCATTAGGGCGTGGATTGTCTCCGAAAAT  
 +HWI-EAS443:3:22:468:1179#0/1  
 `aaS^aXI¥¥a]`a\_]ZZZa`\_UaSW¥]SP¥VY\_VPV\_Y¥  
 @HWI-EAS443:3:22:513:709#0/1  
 GTAAATGGTTCTTGCTTTACTGTAATGACCGATGGACCAA  
 +HWI-EAS443:3:22:513:709#0/1  
 ^^`¥aa`^`aa\_aY^aaa`¥`a¥¥RZaa`^a\_¥a`Z]]]^  
 @HWI-EAS443:3:22:530:634#0/1  
 GCCTTGCTAAATGACAAACATTCCAATGGAACCATTAAAG  
 +HWI-EAS443:3:22:530:634#0/1  
 aaaaaaaaaaaaa`aaa]0\_\_a\_\_aaa`Z¥[aaY`\_^a\_\_`  
 @HWI-EAS443:3:22:599:261#0/1  
 TAGGGCGTGGATTGTCTCCGAAAATCCCACTGCATATGTA  
 +HWI-EAS443:3:22:599:261#0/1  
 a`\_[\_ba]R^`a^a`a]aT[R^]]a\_a\_[\_ZTQZW¥^YM[  
 @HWI-EAS443:3:22:624:131#0/1  
 AACAGACACTATCAAGAGTTGGAGAAACAATATATTGAGA  
 +HWI-EAS443:3:22:624:131#0/1  
 ababaa`aaaa^^\_aa^b\_a`a\_`^`\_`\_`\_`^a\_aa`^  
 @HWI-EAS443:3:22:627:348#0/1  
 TGGTGTGGATAGGGGAGAACTAAAAGCATTAGTTCAAGA  
 +HWI-EAS443:3:22:627:348#0/1  
 `a`Ib[baaaWaZ\_`¥¥`aa^`^`a^a\_a`a\_`\_Y]\_````]  
 @HWI-EAS443:3:22:639:305#0/1  
 CAAGAAACGGTTTTGAGATGATTTGGGATCCGAACGGATG  
 +HWI-EAS443:3:22:639:305#0/1  
 abbbbbaaab`abbaaa`ababba]`ba^\_a\_]aXaa\_\_a  
 @HWI-EAS443:3:22:693:868#0/1  
 CACAGCCACTGCCCCATTGTCTGGGCCAGAAATTCCAATT  
 +HWI-EAS443:3:22:693:868#0/1  
 ab\_aaa]¥\_`S```aU\_aa]\_[Y\_W\_W[U¥V][SZV\_VN[  
 @HWI-EAS443:3:22:699:860#0/1  
 CTCCCCTATATCCTGACCACTCATTTATTCTACGATAT  
 +HWI-EAS443:3:22:699:860#0/1  
 aaabaaaabaaa`aa`aa\_a`aaaa`abaa`[aa`\_a`a`

@HWI-EAS443:3:22:720:1415#0/1  
TAACAGGGCTGGATTGTATAAGACCTTGCTTCTGGGTTGA  
+HWI-EAS443:3:22:720:1415#0/1  
abaab`VU\_aaa^\_\_a`a`aa`aaVX¥\_`[\`XZ`\_YX\_``  
@HWI-EAS443:3:22:734:1310#0/1  
CAGACATATGTTAACATCAGCAACACCAACTTTGCTGCTG  
+HWI-EAS443:3:22:734:1310#0/1  
aa\_PSY[\_aa\_aXLaaa``¥0`^`^\_\_WNL\_`X]LZ\_\_]]  
@HWI-EAS443:3:22:772:1894#0/1  
GTGTAAATGTTCTTGCTTTACTGTAATGACCGATGGACC  
+HWI-EAS443:3:22:772:1894#0/1  
WT`QZY]¥YHOYXY¥^0¥]aaZOY\_\_TUXXFMUFUS`U]  
@HWI-EAS443:3:22:777:1827#0/1  
TAAAAGCATTAGTTCAAGAAACGGTTTTGAGATGATTTGG  
+HWI-EAS443:3:22:777:1827#0/1  
abb`bbbba^ba\_abaaaa`[bba`b`aa^YY^\_\_\_\_]Z^^  
@HWI-EAS443:3:22:786:943#0/1  
AGGGGGATGTGTTTGTGCATAAGGGAACCATTTCATATCATG  
+HWI-EAS443:3:22:786:943#0/1  
]\_^H¥\_`abab[babaXVaabaaa`^a\_aa`aaaaaaaa  
@HWI-EAS443:3:22:869:702#0/1  
CCACAACCTGCCTGTCTTATCATTAGGGCGTGGATTGTCTC  
+HWI-EAS443:3:22:869:702#0/1  
a\_^UWW`\_`U¥U\_]X^YL[a\_]XTKUX]\_\_a^SX[aFRQ[  
@HWI-EAS443:3:22:86:1496#0/1  
GTGTCTTTCAACCAGAATCTGGAATATCAGATAGGATACA  
+HWI-EAS443:3:22:86:1496#0/1  
`H[M\_`\_[a^^a`a\_XX¥¥]`\_^0\_aaa\_[]S\_W[]\_Y]  
@HWI-EAS443:3:22:908:504#0/1  
CGATACTGGACCACAACCTGCCTGTCTTATCATTAGGGCGT  
+HWI-EAS443:3:22:908:504#0/1  
ab]aa^¥¥¥]Z¥\_R\_ZW```bab\_```]¥^`a`]X^`¥\_  
@HWI-EAS443:3:23:1013:1463#0/1  
GCCAGTTATCCCTGCACACACATGTGATTTCACTAGAATC  
+HWI-EAS443:3:23:1013:1463#0/1  
a\_\_¥`\_]`^`a\_\_¥^`[\_V]ZTZ¥\_P\_X[]X]^`^`O[WR  
@HWI-EAS443:3:23:1045:638#0/1  
CAGACACTATCAAGAGTTGGAGAAACAATATATTGAGAAC  
+HWI-EAS443:3:23:1045:638#0/1  
abbb`\_babaaaabX``aaaaaa`a`^X`¥baa`aaa\_\_V  
@HWI-EAS443:3:23:1046:1294#0/1  
AGCCACTCAATTCAACTTGGGAATCAAAATCAGATTGAAA  
+HWI-EAS443:3:23:1046:1294#0/1  
`aaabaaaaaaaa`a\_\_aa`\_aa\_```a\_a\_```\_a\_```a`  
@HWI-EAS443:3:23:1064:599#0/1  
GGTGTAACAGTGACACTGTGGGTTGGTCTTGCCAGACG  
+HWI-EAS443:3:23:1064:599#0/1  
aa[a`aaaa`a[a\_[]`^`a^\_aaV\_a`V[]`\_`\_`R[\_^T0\_  
@HWI-EAS443:3:23:1068:1302#0/1  
ATATCATGCTCCCCCTTGGGAATGCAGAACCTTCTTCTTGA

+HWI-EAS443:3:23:1068:1302#0/1  
`baaX`¥Y¥¥`^` IWXRR¥ZaVMSQ¥a¥N]a\_``S¥BBB  
@HWI-EAS443:3:23:1123:1289#0/1  
CACCAACTTTGCTGCTGGACAGTCAGTGGTTTCCGTGAAA  
+HWI-EAS443:3:23:1123:1289#0/1  
a]bbbbbaY\_ab\_baaaa`\_\_b¥` `\_Taa[^aa\_SZ]^¥]  
@HWI-EAS443:3:23:1203:40#0/1  
AGAAATTCCAATTGTTAGCCAATTGATGCCATCATGACAA  
+HWI-EAS443:3:23:1203:40#0/1  
abaaabaaa`abab\_aaa\_\_`a\_\_\_\_`W]\_`[^\_`^Z^Z  
@HWI-EAS443:3:23:1226:1851#0/1  
CTAAATGACAAACATTCCAATGGAACCATTAAGACAGGA  
+HWI-EAS443:3:23:1226:1851#0/1  
aaabbbbaabbb^aab¥aaaaabab^bbabaaaa\_a]Q`  
@HWI-EAS443:3:23:135:387#0/1  
GTTTGGATAGGGGAGAACTAAAAGCATTAGTTCAAGAAACG  
+HWI-EAS443:3:23:135:387#0/1  
a\_aaa`\_`T`\_Ya\_\_^a`\_`\_Ua^]\_`^[^]¥]]^^¥  
@HWI-EAS443:3:23:1401:1936#0/1  
CGTGGGTGTCTTTCAACCAGAATCTGGAATATCAGATAGG  
+HWI-EAS443:3:23:1401:1936#0/1  
ababba\_\_a`bbbaab\_aaaaaa]aaa`abaa\_`aaa]\_a  
@HWI-EAS443:3:23:1426:1239#0/1  
GACACCCACGGTCGATTCGAGCCATGCCAGTTATCCCTGC  
+HWI-EAS443:3:23:1426:1239#0/1  
]]¥`baaaa]YV0\_a[TP]H\_U`Y[UYXQ`WG^^SURUW¥  
@HWI-EAS443:3:23:1429:1021#0/1  
GTCATTTAGCAAGGCCCTTGAGTCAAGAAGAAGGTTCTG  
+HWI-EAS443:3:23:1429:1021#0/1  
]aaa^ab]aa]^`Z¥]]a^^^\_P\_Y^Za`^X^]SRSPV  
@HWI-EAS443:3:23:1436:728#0/1  
CTGGGCCAGAAATTCCAATTGTTAGCCAATTGATGCCATC  
+HWI-EAS443:3:23:1436:728#0/1  
K[\_V\_baZ`ab`\_`WW\_Zabb^`b`\_W¥b`^a`Ya]G]aa  
@HWI-EAS443:3:23:1482:169#0/1  
ACTTGGTCCATCGGTCATTACAGTAAAGCAAGAACCATTT  
+HWI-EAS443:3:23:1482:169#0/1  
aa¥\_[]UR\_b\_a¥aSPX`WKW`^[]`[F`\_`\_\_^JQ\_\_\_\_^  
@HWI-EAS443:3:23:1496:1353#0/1  
GTCAGGATATAGCGGGAGTTTTGTTTCAGCATCCAGAACTA  
+HWI-EAS443:3:23:1496:1353#0/1  
¥G\_X]``^\_ab`a^`^Xa[`¥`^ [UIZ\_NU^^XUUZXN\_`  
@HWI-EAS443:3:23:1498:1028#0/1  
TGCCCCGTAATTTACGGAAACCACTGACTGTCCAGCAGC  
+HWI-EAS443:3:23:1498:1028#0/1  
abY]Ua]``b`a^Ua^\_]Va\_\_^[Z\_b¥Q`\_W\_¥`PUTNN  
@HWI-EAS443:3:23:1521:848#0/1  
AAAAGCATTAGTTCAAGAAACGGTTTTGAGATGATTTGGG  
+HWI-EAS443:3:23:1521:848#0/1  
^^^[ST^[]¥a\_YY^aa¥HT^[¥TQaa^VV`aQTWZ^¥Z[a



@HWI-EAS443:3:23:1554:1156#0/1  
CTCTGATTAGTTCAACCCAGAAGCAAGTCTTATACAATC  
+HWI-EAS443:3:23:1554:1156#0/1  
ab`¥`aabaaaSVWW^abba\_X¥Y`a]R[`]Z\_KR¥\_¥N  
@HWI-EAS443:3:23:161:1977#0/1  
CTGTCTTATCATTAGGGCGTGGATTGTCTCCGAAAATCCC  
+HWI-EAS443:3:23:161:1977#0/1  
aa\_\_aa`a\_b`]Za^Z\_bXI[^aZ^\_]\_¥\_aWNY\_^¥\_V]  
@HWI-EAS443:3:23:1620:1859#0/1  
GTTTCGGATCCCAAATCATCTCAAACCGTTTCTTGAACTA  
+HWI-EAS443:3:23:1620:1859#0/1  
]^`\_\_bbbaaba`\_bbabaaabbaabb\_b`b`a`aXbb  
@HWI-EAS443:3:23:1704:1532#0/1  
CAAGAGTTGGAGAAACAATATATTGAGAACACAAGAGTCT  
+HWI-EAS443:3:23:1704:1532#0/1  
Z\_\_[aaaa^\_a\_¥`^`bbbbaa`abbab`\_a\_a`PR^  
@HWI-EAS443:3:23:1731:433#0/1  
GCGACTGACTCAAATCTTGAGTTGTATGGAGAGGGAACCT  
+HWI-EAS443:3:23:1731:433#0/1  
aaa\_]aT\_`U¥]\_\_V`¥[^`]\_`XV\_\_]0`Y]\_^VY]^  
@HWI-EAS443:3:23:1753:481#0/1  
CAGAAATTCCAATTGTTAGCCAATTGATGCCATCATGACA  
+HWI-EAS443:3:23:1753:481#0/1  
\_`abbaabbbZbba\_^bUZ¥S\_bbbb¥abXFXaW]bb`Z`  
@HWI-EAS443:3:23:17:1967#0/1  
GAAAATCCCCTGATATGTATCCTATCTGATATTCCAGA  
+HWI-EAS443:3:23:17:1967#0/1  
]`Y^Yaba\_`\_UY\_S¥¥]`Paaa^XISQF[TR`XW\_\_[XS  
@HWI-EAS443:3:23:21:1145#0/1  
ATTCATATCATGCTCCCCCTTGAATGCAGAACCTTCTTC  
+HWI-EAS443:3:23:21:1145#0/1  
U]\_\_a¥Wta]¥ba\_]a]¥¥USWSY]^XV]X`aYXY¥\_¥Z  
@HWI-EAS443:3:23:251:1342#0/1  
TGAACAAATGCTTTTAGTTCTCCCTATCCAAACACCATTG  
+HWI-EAS443:3:23:251:1342#0/1  
abbbbaab`\_babbaa]\_baabbabbaaabababaaa`¥\_  
@HWI-EAS443:3:23:277:358#0/1  
CAGACACTATCAAGAGTTGGAGAAACAATATATTGAGAAC  
+HWI-EAS443:3:23:277:358#0/1  
aa`aabbbbaaa`a¥`^aba\_\_a\_`aW]a``a`a`a`\_a]  
@HWI-EAS443:3:23:280:472#0/1  
GAGGAATTGCCCGCTAATTTACGGAACCACTGACTGTC  
+HWI-EAS443:3:23:280:472#0/1  
a\_bbaaaabaaa\_`a`aaaaaaa^a¥a``\_````\_``\_XY  
@HWI-EAS443:3:23:296:1252#0/1  
CTTTAACACAGCCACTGCCCCATTGTCTGGCCAGAAATT  
+HWI-EAS443:3:23:296:1252#0/1  
abbbbb`bab\_[\_¥]aX\_\_[¥aaa[aaaLL`[¥T\_]WPYa  
@HWI-EAS443:3:23:316:935#0/1  
GGTGTAACAGTGACACTGTGGGTTGGTCTTGGCCAGACG

+HWI-EAS443:3:23:316:935#0/1  
`^]]\_\_^a\_]¥]]^` `` `[[^^W[ ` \_U\_\_[^X^¥]YZU^  
@HWI-EAS443:3:23:446:773#0/1  
GATTTTCGGAGACAATCCACGCCCTAATGATAAGACAGGC  
+HWI-EAS443:3:23:446:773#0/1  
aaY]a\_¥^aaab^¥a^X^aa`\_]SY^V^`¥\_¥YU`^B  
@HWI-EAS443:3:23:454:983#0/1  
GGTGAAGTTCCTCTCCATACAACCTCAAGATTTGAGTCAG  
+HWI-EAS443:3:23:454:983#0/1  
a]Xa]OZNX[ `Y]\_\_a^LZQ\_R]ZZ^^XR[\_[[ `]]^\_Y  
@HWI-EAS443:3:23:485:541#0/1  
CTTTCAACCAGAATCTGGAATATCAGATAGGATACATATG  
+HWI-EAS443:3:23:485:541#0/1  
abbbbbbbab`bbbbbbbabbaa\_abaaaaa`b\_a`a^a  
@HWI-EAS443:3:23:521:422#0/1  
TCAAGAGTTGGAGAAACAATATATTGAGAACAAGAGTC  
+HWI-EAS443:3:23:521:422#0/1  
aaaaa\_b^aaaaa\_\_`a`\_a`a\_a\_aaaa\_^\_^`\_\_`^[^  
@HWI-EAS443:3:23:523:1648#0/1  
CATTCAACTCTTGTGTTCTCAATATATTGTTTCTCCAAC  
+HWI-EAS443:3:23:523:1648#0/1  
aN¥Tabbab`bb\_a¥b` `a[T`aaaa`aa[\_Z\_`]]^\_¥N  
@HWI-EAS443:3:23:608:1235#0/1  
ACTCAATTCAACTTGGGAATCAAAATCAGATTGAAACATG  
+HWI-EAS443:3:23:608:1235#0/1  
a\_]^^\_]^\_W[LY]ZZTZ^V[^X][[S]]¥^[U][^[]Z[  
@HWI-EAS443:3:23:612:361#0/1  
CGGATGGACTGGGACAGACAATAACTTCTCAATAAAGCAA  
+HWI-EAS443:3:23:612:361#0/1  
aa¥QWY\_ZU]aaa][¥TZ]SWa[V¥`]X`]aa`]\_\_a[]¥  
@HWI-EAS443:3:23:650:781#0/1  
CGGGAGTTTTGTTTCAGCATCCAGAATAACAGGGCTGGAT  
+HWI-EAS443:3:23:650:781#0/1  
abbbab\_babbaaaaabaaaaaaa`abaaa\_\_¥\_\_\_\_\_  
@HWI-EAS443:3:23:669:508#0/1  
CAATTGTTAGCCAATTGATGCCATCATGACAAGCACTTGC  
+HWI-EAS443:3:23:669:508#0/1  
`WZ^^b`Za`]\_\_Y[Z^WU^V\_WRQ^`a`[ ` `]GYT]¥a^  
@HWI-EAS443:3:23:687:1234#0/1  
ACCACAACCTGCCTGTCTTATCATTAGGGCGTGGATTGTCT  
+HWI-EAS443:3:23:687:1234#0/1  
abababaaaabaab` `aaaa`aaaa\_¥¥`\_]^^` `a\_[P[  
@HWI-EAS443:3:23:725:1932#0/1  
CAAATACGGCAATGGTGTGGATAGGGAGAATAAAAGC  
+HWI-EAS443:3:23:725:1932#0/1  
ab¥V`abaa`\_^]TP[¥X[V^`SXXFW[\_VUaPR^]\_aOF  
@HWI-EAS443:3:23:869:1327#0/1  
GCTAATTTACGGAAACCACTGACTGTCCAGCAGCAAAGT  
+HWI-EAS443:3:23:869:1327#0/1  
Vbaaaab^\_^UY\_\_a^a^VZU\_R¥ZVPa^VX]KNYR¥VV

@HWI-EAS443:3:23:925:606#0/1  
TATCTTTCCCTTTCTATTCTGAAGATCTTGATGAGGCC  
+HWI-EAS443:3:23:925:606#0/1  
aabababa]ababa\_aaaaaaaaa`aaa\_aaaXaa^`\_aX\_  
@HWI-EAS443:3:23:929:1271#0/1  
CAGGGCTGGATTGTATAAGACCTTGCTTCTGGGTTGAACT  
+HWI-EAS443:3:23:929:1271#0/1  
^]X]]b¥aaaa\_[]\_\_a^Ya¥Wa[]]aa`ba`]T`\_`bW`  
@HWI-EAS443:3:23:963:1362#0/1  
GCCTGTCTTATCATTAGGGCGTGGATTGTCTCCGAAAATC  
+HWI-EAS443:3:23:963:1362#0/1  
abaaa`baaaaaaaaa`^V]`\_[]\_\_`a\_[]`\_^]`^\_[]`^R  
@HWI-EAS443:3:23:963:1710#0/1  
TGCAGAACCTTCTTCTTGAAGGGCCTTGCTAAATG  
+HWI-EAS443:3:23:963:1710#0/1  
`aabbbbaabbbbaabbbbaaaaab```aaaaaWaaaba\_  
@HWI-EAS443:3:23:998:532#0/1  
ATTTGCTCCATTAGACGATACTGGACCACAACTGCCTGTC  
+HWI-EAS443:3:23:998:532#0/1  
aba``\_aaaaaaaa`a\_a^W[^][LLX^S\_[L[¥SS][TV  
@HWI-EAS443:3:24:1007:342#0/1  
ATGCAATCAAAGCGTCATTACTTATGAAAACAACACTTGG  
+HWI-EAS443:3:24:1007:342#0/1  
abbbbaaababbb`\_aab\_aaaabaaaa\_aa¥`\_`\_a\_  
@HWI-EAS443:3:24:100:1494#0/1  
GGGAGAACTAAAAGCATTAGTTCAAGAAACGGTTTTGAGA  
+HWI-EAS443:3:24:100:1494#0/1  
RU]¥\_Z\_a^\_Zaa¥bababYWTZ^`\_YX`[XYHU^\_YGPW  
@HWI-EAS443:3:24:1026:460#0/1  
CTGCCCCATTGTCTGGGCCAGAAATCCAATTGTTAGCCA  
+HWI-EAS443:3:24:1026:460#0/1  
abbbb``aba[¥`a]a`babaaX¥\_abababa`bbbb^bb  
@HWI-EAS443:3:24:1046:731#0/1  
CAAATCAGATTGAAACATGCAATCAAAGCGTCATTACTT  
+HWI-EAS443:3:24:1046:731#0/1  
`^`bbb\_`^`¥babaabbabaaabaK`YW\_[W\_]\_bbbUaa  
@HWI-EAS443:3:24:1079:1304#0/1  
ACTGACTGTCCAGCAGCAAAGTTGGTGTGCTGATGTTAA  
+HWI-EAS443:3:24:1079:1304#0/1  
abaaab`a]]aV`YR]W\_a[`X\_Y]MYT\_TV^S[[\_Y\_S\_  
@HWI-EAS443:3:24:110:453#0/1  
ATCAGATAGGATACATATGCAGTGGGATTTTCGGAGACAA  
+HWI-EAS443:3:24:110:453#0/1  
aaaab``\_X]RU`a]NN^)`\_\_U[\_`]W\_\_]VX^U\_LV`[  
@HWI-EAS443:3:24:1144:1017#0/1  
AGTGGTTTCCGTGAAATTAGCGGGCAATTCCTCTCTCTGC  
+HWI-EAS443:3:24:1144:1017#0/1  
aa]\_ZW]a\_]a`\_\_\_``]]`^^ZW^Za\_[^W]¥``Q]\_`\_\_  
@HWI-EAS443:3:24:1175:1600#0/1  
TGCCTGTCTTATCATTAGGGCGTGGATTGTCTCCGAAAAT

+HWI-EAS443:3:24:1175:1600#0/1  
abaa^YPa]]aba^Z^`aaa`a¥\_aaaaY[`aaaXJVaN  
@HWI-EAS443:3:24:1199:575#0/1  
CAGACATATGTTAACATCAGCAACACCAACTTTGCTGCTG  
+HWI-EAS443:3:24:1199:575#0/1  
H\_]\_[\_`Vbabbb`Taab\_Y]`bb\_`a]b\_bbbbbbb`a  
@HWI-EAS443:3:24:1209:1588#0/1  
ACTTGGTCCATCGGTCATTACAGTAAAGCAAGAACCATTT  
+HWI-EAS443:3:24:1209:1588#0/1  
a\_aa`\_^baa\_`a^Z\_^[\_]\_]\_Na`\_S¥\_Z¥VaPU[]Z\_  
@HWI-EAS443:3:24:1298:731#0/1  
CAAGACCAACCCACAGTGTCAGTGTTCACACCACAAAAGG  
+HWI-EAS443:3:24:1298:731#0/1  
abbbababba[aa`a\_¥\_]aaabaaba`[`a]a````a^a  
@HWI-EAS443:3:24:1330:2011#0/1  
AGACACCCACGGTCGATTGAGCCATGCCAGTTATCCCTG  
+HWI-EAS443:3:24:1330:2011#0/1  
aab][b`]\_a\_aNUPZRYN\_¥\_^\_YJ^ZU[[UV\_\_ZRUY  
@HWI-EAS443:3:24:1364:921#0/1  
GGGATCCGAACGGATGGACTGGGACAGACAATAACTTCTC  
+HWI-EAS443:3:24:1364:921#0/1  
\_b]NU[YST^^`ZVV\_UXKQ]a]JSPVLY¥PZ^RU¥TTVU  
@HWI-EAS443:3:24:1436:867#0/1  
GGCTGGATTGTATAAGACCTTGCTTCTGGGTTGAACTAAT  
+HWI-EAS443:3:24:1436:867#0/1  
a^`baa[a¥Z]aa`VN¥ZN¥¥X`a^S`aTVZ^P¥`Z^[Z\_  
@HWI-EAS443:3:24:144:349#0/1  
ATCCCCTGCATATGTATCCTATCTGATATCCAGATTCT  
+HWI-EAS443:3:24:144:349#0/1  
aaba^a\_`aa`aaaa\_a`aa`a\_a\_`\_`\_[^]\_a\_\_^]\_]\_  
@HWI-EAS443:3:24:148:1540#0/1  
AGCCACTCAATTCAACTTGGGAATCAAAATCAGATTGAAA  
+HWI-EAS443:3:24:148:1540#0/1  
a^a`a`\_a\_ZR[[P[ZVRTXFY[]VTSGU[0^G¥\_^^R\_U  
@HWI-EAS443:3:24:1529:753#0/1  
AGCGACTGACTCAAATCTTGAGTTGTATGGAGAGGGA  
+HWI-EAS443:3:24:1529:753#0/1  
ababbabbaaabbab`abb\_a`aaaabbb\_b`baa\_`\_`\_  
@HWI-EAS443:3:24:1531:1771#0/1  
CAAGAAGAAGTTCTGCATTCCAAGGGGAGCATGATATG  
+HWI-EAS443:3:24:1531:1771#0/1  
`bb^]aVbbaa`aUZ^^bYbZS¥aXSQ`[\_Pa\_a\_a\_V\_  
@HWI-EAS443:3:24:1613:1492#0/1  
GGCTGTGTTAAAGTACAACGGCATAATAACAGACTATC  
+HWI-EAS443:3:24:1613:1492#0/1  
aba`b]bVb\_aaU][X]b\_b\_\_ab\_aaa`\_baa\_`\_`^aa`  
@HWI-EAS443:3:24:1619:1279#0/1  
CAGCAAGTGCTTGTATGATGGCATCAATTGGCTAACAAAT  
+HWI-EAS443:3:24:1619:1279#0/1  
abbb\_bbbababab^a\_a`a`aabb\_abba\_Q[aab\_baa

@HWI-EAS443:3:24:1662:1056#0/1  
GTCTGAATGTGCATGTGTAAATGGTTCTTGCTTTACTGTA  
+HWI-EAS443:3:24:1662:1056#0/1  
aa]aaaaab[a\_a`a\_b\_a`aaaa]a^aaa\_a`aa¥a`\_a  
@HWI-EAS443:3:24:212:1757#0/1  
ATCAAAGCGTCATTACTTATGAAAACAACACTTGGGTAAA  
+HWI-EAS443:3:24:212:1757#0/1  
XT^a`¥bbbZaab`0\_\_`Xa`a\_Zaa`Ua¥`aaa]W`Z^  
@HWI-EAS443:3:24:239:1180#0/1  
AACAAAACCTCCCGCTATATCCTGACCACTCATTTATTCCT  
+HWI-EAS443:3:24:239:1180#0/1  
abaaaa]`aaaa`aa\_``\_`\_`aaaa\_a\_\_\_\_\_a``^\_^  
@HWI-EAS443:3:24:245:232#0/1  
GCCCCATTGTCTGGGCCAGAAATCCAATTGTTAGCCAAT  
+HWI-EAS443:3:24:245:232#0/1  
abaa\_¥Z¥aZ`a^[\_[[Z`[YY^U^^¥¥[^VUZZU]U  
@HWI-EAS443:3:24:310:82#0/1  
GTTTGGATAGGGAGAACTAAAAGCATTAGTTCAAGAAACG  
+HWI-EAS443:3:24:310:82#0/1  
aY\_\_a^PS\_\_\_¥Z\_[]Z]]^^W[SYXXWYXW[Y^Z[[S]  
@HWI-EAS443:3:24:44:201#0/1  
CACCCACGGTTCGATTCGAGCCATGCCAGTTATCCCTGCAC  
+HWI-EAS443:3:24:44:201#0/1  
aabbbaabaUaaQ¥¥^]^X]a\_^U\_^PZ¥Y^^X¥^M[SQ^  
@HWI-EAS443:3:24:477:1365#0/1  
TGTGTAAATGGTTCTTGCTTTACTGTAATGACCGATGGAC  
+HWI-EAS443:3:24:477:1365#0/1  
``^H¥`a]\_^aa`Z^`aaa\_a^aa`Ya^`a`\_a\_\_\_\_  
@HWI-EAS443:3:24:491:181#0/1  
CAAGAGTCTGAATGTGCATGTGTAAATGGTTCTTGCTTTA  
+HWI-EAS443:3:24:491:181#0/1  
`bbbbbabbbbbbb`aabb`b`aaaabb[a`aaa\_baaa  
@HWI-EAS443:3:24:493:653#0/1  
CTCCTGTCTTTAATGGTTCCATTGGAATGTTTGTCTTTA  
+HWI-EAS443:3:24:493:653#0/1  
abbbbbbbbbbba[aa`abaaabbb]baaa`aaaa^aa\_a  
@HWI-EAS443:3:24:516:338#0/1  
CATTTAGCAAGGCCCTTGAGTCAAGAAGAAGTTCTGCA  
+HWI-EAS443:3:24:516:338#0/1  
`\_\_¥\_\_aaU\_^a]a`YM[SaR\_UR¥^`]\_\_\_\_\_T\_aZa\_`  
@HWI-EAS443:3:24:602:554#0/1  
GTCTGGGCCAGAAATCCAATTGTTAGCCAATTGATGCCA  
+HWI-EAS443:3:24:602:554#0/1  
a\_¥\_aaaaaaaa`¥\_\_\_a\_^`a^^a\_R]\_[\_^\_]\_WX\_  
@HWI-EAS443:3:24:604:1840#0/1  
TAACAGACACTATCAAGAGTTGGAGAAACAATATATTGAG  
+HWI-EAS443:3:24:604:1840#0/1  
a^bb^`abbaaaaaaaaaab^aa\_aa`a```\_aa\_`aa^a`  
@HWI-EAS443:3:24:628:648#0/1  
TGGAGAGGGAACCTCACCAATAGGACAGCTCATTAGGGTT

+HWI-EAS443:3:24:628:648#0/1  
]bbab`bb\_Wbbaa\_a\_a`aaaa`aba\_\_aa]Y`aa\_\_Y  
@HWI-EAS443:3:24:637:639#0/1  
GCTAAATGACAAACATTCCAATGGAACCATTAAGACAGG  
+HWI-EAS443:3:24:637:639#0/1  
aabbababb`a^`\_aabaaaa`a`\_a`\_aaabaaaa^aa`  
@HWI-EAS443:3:24:648:1517#0/1  
ACCAGAATCTGGAATATCAGATAGGATACATATGCAGTGG  
+HWI-EAS443:3:24:648:1517#0/1  
^\_Y^¥`b`\_[^¥ba¥`¥aVWX¥TLO¥W\_WYQ]M[FW¥FY  
@HWI-EAS443:3:24:680:366#0/1  
TGGAATGCAGAACCTTCTTCTTACTCAAGGGCCTTGCT  
+HWI-EAS443:3:24:680:366#0/1  
a`¥\_bbba\_aYaa`aaaa\_[aa``\_\_U`^^a\_\_]G[^XY¥  
@HWI-EAS443:3:24:711:516#0/1  
AGCCACTCAATTCAACTTGGGAATCAAAATCAGATTGAAA  
+HWI-EAS443:3:24:711:516#0/1  
`abbbabababbaaaabba\_aaaaa``aaaaaaaa`a  
@HWI-EAS443:3:24:756:76#0/1  
TGTGTAATGGTTCTTGCTTTACTGTAATGACCGATGGAC  
+HWI-EAS443:3:24:756:76#0/1  
^b`b`^`b^¥ZU]]]a]ZY]ZQN[a]\_\_`^UNPSZYTR]  
@HWI-EAS443:3:24:76:58#0/1  
CATATGTTAACATCAGCAACACCAACTTTGCTGCTGGACA  
+HWI-EAS443:3:24:76:58#0/1  
aabbbbbbbb`bbab`bbaab`\_`aa^\_aaaa`¥\_\_`\_]`^  
@HWI-EAS443:3:24:771:419#0/1  
TGCATGTGTAATGGTTCTTGCTTTACTGTAATGACCGAT  
+HWI-EAS443:3:24:771:419#0/1  
abaaabRbabaaaaa`Q`aa\_aaaa^aa]aaaa```^a  
@HWI-EAS443:3:24:794:652#0/1  
CAGACTCTTGTTCTCAATATATTGTTTCTCCAACCTT  
+HWI-EAS443:3:24:794:652#0/1  
abb```ZW\_a\_a]aa^\_a`a`]Y\_aa[aa\_^a[V\_^\_\_`\_  
@HWI-EAS443:3:24:813:1997#0/1  
CTCGAATCGACCGTGGGTGTCTTTCAACCAGAATCTGGAA  
+HWI-EAS443:3:24:813:1997#0/1  
`¥\_R\_bba¥`ab^WZ¥^RbWWT^bba`a]ba\_\_U0]Z^\_V  
@HWI-EAS443:3:24:824:181#0/1  
ATCAGATAGGATACATATGCAGTGGGATTTTCGGAGACAA  
+HWI-EAS443:3:24:824:181#0/1  
S\_I¥`Zb^^`\_aa\_aaVa[[\_R^\_bZVbaa`^¥¥a[¥`^  
@HWI-EAS443:3:24:88:328#0/1  
AAGAGTCTGAATGTGCATGTGTAATGGTTCTTGCTTTAC  
+HWI-EAS443:3:24:88:328#0/1  
abbaa`aaaaab\_abaa\_aa\_\_Q\_aaa`\_aa`a\_aa`aa  
@HWI-EAS443:3:24:915:1442#0/1  
GAACAAAACCTCCCGCTATATCCTGACCACTCATTTATTCC  
+HWI-EAS443:3:24:915:1442#0/1  
^`bbbbabbbbabbbbabbbbabbbbabbbbabbbbabbbb`

@HWI-EAS443:3:24:947:994#0/1  
GGCATCAATTGGCTAACAAATTGGAATTTCTGGCCCAGACA  
+HWI-EAS443:3:24:947:994#0/1  
`baZRQT¥\_ZaZW¥^Z]Xaa`Y^^]\_]`a`a]¥`\_\_YX]T  
@HWI-EAS443:3:24:962:544#0/1  
ACTAAAAGCATTAGTTCAAGAAACGGTTTTGAGATGATTT  
+HWI-EAS443:3:24:962:544#0/1  
aba\_`aY`abbb^b`baaab\_aaaba^aaa\_Q]]aa`aaa  
@HWI-EAS443:3:24:972:978#0/1  
TATTGAGAACACAAGAGTCTGAATGTGCATGTGTAAATGG  
+HWI-EAS443:3:24:972:978#0/1  
aaaabbaaaa`aaaa`a^\_aa\_a`a\_a\_aa`^`\_`a\_`\_\_  
@HWI-EAS443:3:24:981:361#0/1  
CCCCTAATTTACGGAAACCACTGACTGTCCAGCAGCAA  
+HWI-EAS443:3:24:981:361#0/1  
Z`\_bbbbbbbab`bbbaabba`a^ZI]`Y¥]a\_]V^GRV  
@HWI-EAS443:3:25:1012:975#0/1  
CAAGAAGAAGTTCTGCATTCCAAGGGGAGCATGATATG  
+HWI-EAS443:3:25:1012:975#0/1  
\_bbbbbbabbabbbbbbbbbbbbbbbbbbaaaabbbabb  
@HWI-EAS443:3:25:1096:1857#0/1  
CAGACACTATCAAGAGTTGGAGAAACAATATATTGAGAAC  
+HWI-EAS443:3:25:1096:1857#0/1  
a\_bbb`bbbbbbabab\_b¥aaabbbbbbbbbbbabbbbb  
@HWI-EAS443:3:25:1104:1017#0/1  
CTTTCAACCAGAATCTGGAATATCAGATAGGATACATATG  
+HWI-EAS443:3:25:1104:1017#0/1  
abbbbbbbabbb`bbbbbbbbbbbbbbbbabbb`bbba\_  
@HWI-EAS443:3:25:1112:656#0/1  
CAAGAGTCTGAATGTGCATGTGTAAATGGTTCTTGCTTTA  
+HWI-EAS443:3:25:1112:656#0/1  
`abbbbb`bbbb\_I\_abbbbab`bbbbbb`bbbbbb`  
@HWI-EAS443:3:25:1148:1189#0/1  
TTCAGACTCTGTGTTCTCAATATATTGTTTCTCCAATC  
+HWI-EAS443:3:25:1148:1189#0/1  
aabaaaaaaaaa\_a`aaa\_``aaa]`\_a^`\_`\_`]\_\_[-]  
@HWI-EAS443:3:25:1153:897#0/1  
CATCAATTGGCTAACAAATTGGAATTTCTGGCCCAGACAAT  
+HWI-EAS443:3:25:1153:897#0/1  
aabbabbabbabbbbbbbbbbbbbbbbbbbabbb`aaa  
@HWI-EAS443:3:25:1168:621#0/1  
CTCCTGTCTTTAATGGTTCCATTGGAATGTTTGTCAATTA  
+HWI-EAS443:3:25:1168:621#0/1  
Yabbbbbbbbbbbbbbbbbbbbbbbbbbb`bbbbbbbbbb  
@HWI-EAS443:3:25:1196:1656#0/1  
ACAACCTCAAGATTTGAGTCAGTCGCTTGGTCAGCAAGTGC  
+HWI-EAS443:3:25:1196:1656#0/1  
a[b`bba```bbaabbaaba`ba^^a\_a[Uaaa\_\_\_L]]  
@HWI-EAS443:3:25:1211:1665#0/1  
GAATGTGCATGTGTAAATGGTTCTTGCTTTACTGTAATGA

+HWI-EAS443:3:25:1211:1665#0/1  
`^[a\_W\_`ab¥b`aaa\_`[MZ^]\_aaaaa¥aa\_aaa`  
@HWI-EAS443:3:25:1215:1794#0/1  
TTAGTTCAACCCAGAAGCAAGTCTTATACAATCCAGCCC  
+HWI-EAS443:3:25:1215:1794#0/1  
V`bba^b`Zab`]ab`ba`aZbS¥aaaaa`[]`]aXWY  
@HWI-EAS443:3:25:1268:1873#0/1  
TCTGAATGTGCATGTGTAAATGGTTCTTGCTTTACTGTAA  
+HWI-EAS443:3:25:1268:1873#0/1  
aaaaabaa\_b`aaa[aYaaaaba`aa\_aa\_aaaaW`a\_a`  
@HWI-EAS443:3:25:1285:1280#0/1  
GTCCTATTGGTGAAGTCCCTCTCCATACAACCTCAAGATT  
+HWI-EAS443:3:25:1285:1280#0/1  
a\_WU]FTVNZYNNW`WZ¥PLUVYBBBBBBBBBBBBBBBB  
@HWI-EAS443:3:25:1337:1074#0/1  
TTCATATCATGCTCCCCCTTGAATGCAGAACCTTCTTCT  
+HWI-EAS443:3:25:1337:1074#0/1  
abaaaabaaabbbaaaaaa\_a\_aa\_\_\_a`a`XV^\_\_`^a  
@HWI-EAS443:3:25:1346:1194#0/1  
ATCGGTCATTACAGTAAAGCAAGAACCATTTACACATGCA  
+HWI-EAS443:3:25:1346:1194#0/1  
ab¥`^^babb`¥`Z\_bb¥X`a```]S]^a]T¥KX]PX\_  
@HWI-EAS443:3:25:1361:292#0/1  
TCAAATACGGCAATGGTGGTTGGATAGGGAGAACTAAAAG  
+HWI-EAS443:3:25:1361:292#0/1  
aaaabba`bbaa`aYa`aa```]`\_a\_]¥Y]P^`\_`¥  
@HWI-EAS443:3:25:1418:226#0/1  
TTTCAACCAGAATCTGGAATATCAGATAGGATACATATGC  
+HWI-EAS443:3:25:1418:226#0/1  
\_baaaa^Fabaaa\_aaa`aa\_a`b^\_aaaa¥^[^Y\_]\_X  
@HWI-EAS443:3:25:143:455#0/1  
AATGAATGCCCTAATTATCACTATGAGGAATGCTCCTGT  
+HWI-EAS443:3:25:143:455#0/1  
aaaaaaaaaab\_`aa`aa\_\_a^^`a\_\_`Z\_^`\_a^  
@HWI-EAS443:3:25:1455:23#0/1  
ATTGTCTCCGAAAATCCCACTGCATATGTATCCTATCTGA  
+HWI-EAS443:3:25:1455:23#0/1  
aaababa\_a\_X`b]a¥\_\_a\_aa^\_aa`a\_aaZP\_Z\_Yaa¥  
@HWI-EAS443:3:25:1496:1315#0/1  
TGCTCCCCTAGTCCAGATTGTGTTCTTTGGGTCGCCC  
+HWI-EAS443:3:25:1496:1315#0/1  
`b`bbb`\_b\_W[¥aJP\_[a`]PX`aaaaa^H]aUZaYYZ  
@HWI-EAS443:3:25:1518:1883#0/1  
AAATTCCAATTGTTAGCCAATTGATGCCATCATGACAAGC  
+HWI-EAS443:3:25:1518:1883#0/1  
Ybbbbbaabbbb`bba`abb`aaabb`aa\_abaaaabaaa  
@HWI-EAS443:3:25:1527:1449#0/1  
CAAGAGTCTGAATGTGCATGTGTAAATGGTTCTTGCTTTA  
+HWI-EAS443:3:25:1527:1449#0/1  
aabab`bbbbbbbbbbbbbababbbb`bbabbbabba



@HWI-EAS443:3:25:152:885#0/1  
AGAAACAATATATTGAGAACACAAGAGTCTGAATGTGCAT  
+HWI-EAS443:3:25:152:885#0/1  
\_XY[]W]¥^T^Y\_^^^`¥T¥a[¥[``]a]`X¥`KHx]^Z  
@HWI-EAS443:3:25:1531:392#0/1  
AGCCCATCCACTAACAGGGCAGAGAGGAATTGCCCGCT  
+HWI-EAS443:3:25:1531:392#0/1  
\_Z\_[[bb]\_a`\_`b]Y^`^ZSb\_aXX]]NY``^VZZRVT[  
@HWI-EAS443:3:25:1540:643#0/1  
CACAGCCACTGCCCCATTGTCTGGGCCAGAAATCCAATT  
+HWI-EAS443:3:25:1540:643#0/1  
H^`ab`abbbaaWabbabbbbaa`T`bbb]bbaaZ¥\_b\_b  
@HWI-EAS443:3:25:1645:1964#0/1  
CTCAATTCAACTTGGGAATCAAATCAGATTGAAACATGC  
+HWI-EAS443:3:25:1645:1964#0/1  
`bbbbbbba``bbbaabbabaabbbbbbbbbbbbbbb¥  
@HWI-EAS443:3:25:1645:420#0/1  
CAGACATATGTTAACATCAGCAACACCAACTTTGCTGCTG  
+HWI-EAS443:3:25:1645:420#0/1  
K`Va``bbbaabbabaaabbaabba\_bb`bbba0bbGab  
@HWI-EAS443:3:25:1661:147#0/1  
CCCTTTTCTATTCTGAAGATCTTGTATGAGGCCTGTCCAT  
+HWI-EAS443:3:25:1661:147#0/1  
a\_abbbb\_bbbbabbbbabababbbbabb`abaaa`ab  
@HWI-EAS443:3:25:1665:998#0/1  
AATGGTGTGGATAGGGAGAACTAAAAGCATTAGTTCAA  
+HWI-EAS443:3:25:1665:998#0/1  
aabbbabbbabbbbababbbbbbbbabab`ababbabaaa  
@HWI-EAS443:3:25:168:571#0/1  
ATCCTTTTGTGGTGTAACAGTGACACTGTGGGTTGGTCT  
+HWI-EAS443:3:25:168:571#0/1  
Nbababb`]aab]VaUSY`a`\_`a``aa^a\_\_\_\_`\_Za\_  
@HWI-EAS443:3:25:1724:984#0/1  
CTGGACCACAACCTGCCTGTCTTATCATTAGGGCGTGGATT  
+HWI-EAS443:3:25:1724:984#0/1  
YYbbb]aa`\_`b\_bb`bbab]bbbaabbab\_aa\_ba`baa`  
@HWI-EAS443:3:25:1753:398#0/1  
CTTTAACACAGCCACTGCCCCATTGTCTGGGCCAGAAATT  
+HWI-EAS443:3:25:1753:398#0/1  
Q\_bb`ab¥]]\_H\_\_¥SS¥]YLZY\_PZ[a````\_a[`Kb[[^  
@HWI-EAS443:3:25:218:906#0/1  
TGCAGAACCTTCTTCTTACTCAAGGGCCTTGCTAAATG  
+HWI-EAS443:3:25:218:906#0/1  
aa^[a¥S¥]XYZ`Zb\_QQ\_\_V\_]VXVV`aTXZ[aYKZT]\_  
@HWI-EAS443:3:25:240:1626#0/1  
TGTTATTATGCCGTTGTACTTTAACACAGCCACTGCCCCA  
+HWI-EAS443:3:25:240:1626#0/1  
]]^abba`a\_ab[``\_¥W^\_\_\_\_]babaa`a\_aa`\_a\_a¥V  
@HWI-EAS443:3:25:26:52#0/1  
AATGCAGAACCTTCTTCTTACTCAAGGGCCTTGCTAAA



@HWI-EAS443:3:25:584:1217#0/1  
CGATACTGGACCACAACACTGCCTGTCTTATCATTAGGGCGT  
+HWI-EAS443:3:25:584:1217#0/1  
abbbbbbbbbbbbbbaaaaa`¥`a`\_a`a`aa[\_[^[W  
@HWI-EAS443:3:25:635:453#0/1  
AATGCTTTTAGTTCTCCCTATCCAAACACCATTGCCGTAT  
+HWI-EAS443:3:25:635:453#0/1  
a`bbbbbabaaabaaaaaabaab`aaaaa`^a`\_a`^`  
@HWI-EAS443:3:25:674:1292#0/1  
GCCACTCAATTCAACTTGGGAATCAAATCAGATTGAAAC  
+HWI-EAS443:3:25:674:1292#0/1  
a]V]¥¥a]]\_\_aT^^¥\_SLTX^^^Y\_\_¥[]]Y^YY^Z[\_Y  
@HWI-EAS443:3:25:677:1242#0/1  
ACGGTCGATTTCGAGCCATGCCAGTTATCCCTGCACACACA  
+HWI-EAS443:3:25:677:1242#0/1  
aaba]aa[¥\_`aaa]]a\_\_a\_[[W\_\_\_\_Y\_\_^ZTVa\_\_^[  
@HWI-EAS443:3:25:70:380#0/1  
TGCCATCATGACAAGCACTTGCTGACCAAGCGACTGACTC  
+HWI-EAS443:3:25:70:380#0/1  
abbaabbbb\_bbbbaabaababaY\_ab\_X`X`a\_S]aa  
@HWI-EAS443:3:25:743:708#0/1  
CATCAATTGGCTAACAAATTGGAATTTCTGGCCAGACAAT  
+HWI-EAS443:3:25:743:708#0/1  
aababbbbbbbbabbbbaabbbbaaaaa^aaaa` `a  
@HWI-EAS443:3:25:756:2005#0/1  
ATCAGATTGAAACATGCAATCAAAGCGTCATTACTTATGA  
+HWI-EAS443:3:25:756:2005#0/1  
a\_b^X^aaabb`\_a\_\_`a\_¥¥` `SZ\_ZW]Z`\_a`\_^a^[\_  
@HWI-EAS443:3:25:763:1074#0/1  
GCTTGGTCAGCAAGTGCTTGTTCATGATGGCATCAATTGGC  
+HWI-EAS443:3:25:763:1074#0/1  
a`a\_\_a` `bbbaa\_b` `aa\_aaaa`aa`a\_Ya`a`U^^  
@HWI-EAS443:3:25:768:981#0/1  
GTGTTTGGATAGGGAGAACTAAAAGCATTAGTTCAAGAAA  
+HWI-EAS443:3:25:768:981#0/1  
a[`Y` \_\_]U[\_\_\_][XTQVV[[¥^]VM[]Y^[NYYVXT[]¥  
@HWI-EAS443:3:25:793:321#0/1  
CAGCCACTGCCCATTTGTCTGGGCCAGAAATTCOAATTGT  
+HWI-EAS443:3:25:793:321#0/1  
abbabbbbabbabbab]ababb`\_abbaabaZaaaa`\_[  
@HWI-EAS443:3:25:817:1281#0/1  
TTGGAGAAACAATATATTGAGAACAAGAGTCTGAATGT  
+HWI-EAS443:3:25:817:1281#0/1  
WU¥a]^`aaa\_X¥a`\_a\_\_OZYVa`^ZX¥`Y¥[^Y¥W¥WQ  
@HWI-EAS443:3:25:842:1045#0/1  
ATTTATTCTACGATATCTTGCTTTATTGAGAAGTTATTG  
+HWI-EAS443:3:25:842:1045#0/1  
abab`bab\_abb`a`aa` `a\_aa`]a\_\_\_\_aaa`\_\_a`^V  
@HWI-EAS443:3:25:892:1771#0/1  
CAGACATATGTTAACATCAGCAACACCAACTTTGCTGCTG

+HWI-EAS443:3:25:892:1771#0/1  
aaaabbbbabbbbbbba\_bbb`bbbbaaa`a\_`ab`a\_  
@HWI-EAS443:3:25:896:211#0/1  
ACTTCACCAATAGGACAGCTCATTAGGGTTCGATATGGGC  
+HWI-EAS443:3:25:896:211#0/1  
a[bb]ba`b`babaa^ab^aabaaa\_a\_]a¥aaaa\_`\_]^  
@HWI-EAS443:3:25:953:301#0/1  
TGCCCCGTAATTTACGGAAACCACTGACTGTCCAGCAGC  
+HWI-EAS443:3:25:953:301#0/1  
aaaa`a``aaaa`\_]\_`Y^^¥W\_¥^^¥W¥^UVVWUTWYW  
@HWI-EAS443:3:25:997:476#0/1  
AGAGTCTGAATGTGCATGTGTAAATGGTTCTTGCTTTACT  
+HWI-EAS443:3:25:997:476#0/1  
ab`babbbbbbababbbbababbbbbbababbbbbbba`b  
@HWI-EAS443:3:26:1027:1102#0/1  
ATTCTCTCTGCCCTGTTAGTGGATGGGCTATATACAG  
+HWI-EAS443:3:26:1027:1102#0/1  
aaabbbbaabbabaa``¥X`aa]`a[a\_\_^R¥¥W¥]YMYT  
@HWI-EAS443:3:26:103:1445#0/1  
CTCAAACCGTTTCTTGAACCTAATGCTTTTAGTTCTCCCT  
+HWI-EAS443:3:26:103:1445#0/1  
a\_aa^`Za\_S\_W\_b`[]J[\_`¥TZ^^`\_¥U]^WY¥^\_[\_\_  
@HWI-EAS443:3:26:1094:1368#0/1  
GGGCTCCTGTCTTTAATGGTTCCATTGGAATGTTTGTTCAT  
+HWI-EAS443:3:26:1094:1368#0/1  
aa`aaaaaaaabaa]a`a]¥`OL[[[T[a\_UZ`\_\_JNT]`  
@HWI-EAS443:3:26:1130:814#0/1  
CAGACATATGTTAACATCAGCAACACCAACTTTGCTGCTG  
+HWI-EAS443:3:26:1130:814#0/1  
aabaaa`abb`baaa`a\_b\_`bb`aa\_b\_^a`aa`aa\_a`  
@HWI-EAS443:3:26:1150:1696#0/1  
GCTCCATTAGACGATACTGGACCACAACCTGCCTGTCTTAT  
+HWI-EAS443:3:26:1150:1696#0/1  
aaabbbbababaaa`\_[`a]`Ga``aa]¥^`\_[V[N]`\_\_  
@HWI-EAS443:3:26:1185:1816#0/1  
AAGGGGGATGTGTTTGCATAAGGGAACCATTCATATCAT  
+HWI-EAS443:3:26:1185:1816#0/1  
aaaa`b`aa\_a`aa[\_aaaa\_aa\_\_\_\_^`a`]aaa\_Y`^  
@HWI-EAS443:3:26:119:1314#0/1  
CTTATCATTAGGGCGTGGATTGTCTCCGAAAATCCCCTG  
+HWI-EAS443:3:26:119:1314#0/1  
a¥`^[\_`\_`\_[IKLX[Z[XV^[GV^ZU¥¥VG[¥Z]^JXUU  
@HWI-EAS443:3:26:1212:1885#0/1  
AAATTCCAATTGTTAGCCAATTGATGCCATCATGACAAGC  
+HWI-EAS443:3:26:1212:1885#0/1  
aaa`¥`a`\_\_][`\_`\_a`a^Q[`]\_R[]VY`]]\_Va]ZV  
@HWI-EAS443:3:26:1224:481#0/1  
GTGCAGGGATAACTGGCATGGCTCGAATCGACCGTGGGTG  
+HWI-EAS443:3:26:1224:481#0/1  
a¥^`V\_`]a]`a¥a\_YZZX\_^¥\_^¥PGXNYPPWBBBBBBB

@HWI-EAS443:3:26:1227:1674#0/1  
CGCTAGTCCAGATTGTGTTCTCTTTGGGTCGCCCTCTGAT  
+HWI-EAS443:3:26:1227:1674#0/1  
abbbabaabababab`baaaa\_aa`a`a¥aa`a`a`aaaa  
@HWI-EAS443:3:26:1239:521#0/1  
GACCACTCATTTATTCCTACGATATCTTGCTTTATTGAGA  
+HWI-EAS443:3:26:1239:521#0/1  
Ya\_^babb^babb^babb^b^T`b`a`aa¥aa`b¥bb^^¥[X  
@HWI-EAS443:3:26:1330:1162#0/1  
AAGACACCCACGGTCGATTCGAGCCATGCCAGTTATCCCT  
+HWI-EAS443:3:26:1330:1162#0/1  
aaab\_baaaa\_]X\_T^^ZWUU¥\_¥¥Y¥^PU¥R\_Z`NNOZ  
@HWI-EAS443:3:26:1332:1263#0/1  
ATTAGGGCGTGGATTGTCTCCGAAAATCCCACTGCATATG  
+HWI-EAS443:3:26:1332:1263#0/1  
¥R\_]\_b`\_Zabaa`ba```\_a]^`aX]XI[¥]\_P^^\_ZX  
@HWI-EAS443:3:26:1382:1476#0/1  
AAAGAGAACACAATCTGGACTAGCGGGAGCAGCATATCCT  
+HWI-EAS443:3:26:1382:1476#0/1  
a^`b``¥Q\_^Tb¥ZUaZ\_^`STYYT¥]SZRXRU^^ZLUPR  
@HWI-EAS443:3:26:1387:1510#0/1  
GCGGGCAATTCCTCTCTCTGCCCTGTTAGTGGATGGGCTA  
+HWI-EAS443:3:26:1387:1510#0/1  
a^aa\_`a\_aa]`\_^¥aa\_]Z\_\_Z`Ya^\_\_^]^]^NRX  
@HWI-EAS443:3:26:1398:1084#0/1  
ATGTGTAATGGTTCTTGCTTTACTGTAATGACCGATGGA  
+HWI-EAS443:3:26:1398:1084#0/1  
`ba¥aa^b¥`baaa`aa\_abbababaabaaaa\_aba^a\_`  
@HWI-EAS443:3:26:141:912#0/1  
GGCGACCCAAAGAGAACACAATCTGGACTAGCGGGAGCAG  
+HWI-EAS443:3:26:141:912#0/1  
\_^a^ab`bb`ZaaaaaaaaX`a`Z`a\_]`a\_\_W\_[N^  
@HWI-EAS443:3:26:1448:476#0/1  
ATTCTAGTGAATCACATGTGTGTGCAGGGATAACTGGCA  
+HWI-EAS443:3:26:1448:476#0/1  
]\_¥\_\_bbXPZKKaV[abb`QbP^¥a`aaa```a`aba]G\_  
@HWI-EAS443:3:26:1604:826#0/1  
TTCCCTCTCCATACAACCTCAAGATTTGAGTCAGTCGCTTG  
+HWI-EAS443:3:26:1604:826#0/1  
[bb[^`Vaba\_aW`]aa``\_a`aaa^\_a\_] ^PT¥SU\_]`  
@HWI-EAS443:3:26:1668:33#0/1  
CATTCATATCATGCTCCCCCTTGAATGCAGAACCTTCTT  
+HWI-EAS443:3:26:1668:33#0/1  
abbbbbbbbabbb\_baaa``aabaaa¥a`\_aa`\_X`VR`]  
@HWI-EAS443:3:26:1686:84#0/1  
ATTCATATCATGCTCCCCCTTGAATGCAGAACCTTCTTC  
+HWI-EAS443:3:26:1686:84#0/1  
a\_b¥\_\_aa]baaa¥bTVVNX`\_`^`¥`\_^]\_\_VGXRG\_YO  
@HWI-EAS443:3:26:1715:1390#0/1  
TGTGTTTGTGCATAAGGGAACCATTCATATCATGCTCCCC

+HWI-EAS443:3:26:1715:1390#0/1  
aaRWL]¥S[\_aa`\_Xba\_a^`\_`a`\_`\_`aW`aIHOR[PQJ  
@HWI-EAS443:3:26:1733:1298#0/1  
GGCTCCTGTCTTTAATGGTTCCATTGGAATGTTTGTTCATT  
+HWI-EAS443:3:26:1733:1298#0/1  
a`¥^`\_]\_\_][aaZaZX¥^`[XUVY]VWH]QW`]JPR^]¥  
@HWI-EAS443:3:26:174:197#0/1  
CAAGAGTTGGAGAAACAATATATTGAGAACACAAGAGTCT  
+HWI-EAS443:3:26:174:197#0/1  
ZZ\_]N\_T]aVV¥[\_ab\_¥]W`a`\_`aZZZ`\_`\_]OWaaa^a`  
@HWI-EAS443:3:26:188:1723#0/1  
CAAGAGTCTGAATGTGCATGTGTAATGGTTCTTGCTTTA  
+HWI-EAS443:3:26:188:1723#0/1  
a\_]aaY^b\_aa`][TX````]a^`\_]WZ]aa^^^\_`Z`  
@HWI-EAS443:3:26:198:1368#0/1  
AACAATTGGAATTTCTGGCCCAGACAATGGGGCAGTGGCT  
+HWI-EAS443:3:26:198:1368#0/1  
SS\_a[[TQZ[]a[\_aYaa\_aa`[a[^Z]YQZ\_a]BBBBBB  
@HWI-EAS443:3:26:212:66#0/1  
CATCAATTGGCTAACAATTGGAATTTCTGGCCCAGACAAT  
+HWI-EAS443:3:26:212:66#0/1  
aaaaa`b`baaaaaa`aa`a\_V\_``]`^`\_```¥\_\_X]Y^  
@HWI-EAS443:3:26:217:585#0/1  
AGCCACTCAATTCAACTTGGGAATCAAAATCAGATTGAAA  
+HWI-EAS443:3:26:217:585#0/1  
aabbba`aSI^ab`aaa¥¥aaaaaa\_VU\_\_`\_``a\_aa`\_  
@HWI-EAS443:3:26:243:825#0/1  
GATTTGGGATCCGAACGGATGGACTGGGACAGACAATAAC  
+HWI-EAS443:3:26:243:825#0/1  
^]]baab¥N\_aa^YZZaa]ZZ]UY`^]`^NOLYX]T^U``\_  
@HWI-EAS443:3:26:297:1156#0/1  
GTGTAACAGTGACACTGTGGTTGGTCTTGCCAGACGG  
+HWI-EAS443:3:26:297:1156#0/1  
aVa^a`]aaSY`a`a¥`]UEW]TYV]¥¥¥`]¥[^¥Y¥S¥]  
@HWI-EAS443:3:26:374:519#0/1  
CAACTTTGCTGCTGGACAGTCAGTGGTTTCCGTGAAATTA  
+HWI-EAS443:3:26:374:519#0/1  
a`¥¥Z¥]aZUR]aYaT\_Q]L¥]RFZMGSFRFRYNYR`]NVB  
@HWI-EAS443:3:26:381:307#0/1  
CAGGATATAGCGGGAGTTTTGTTTCAGCATCCAGAACTAAC  
+HWI-EAS443:3:26:381:307#0/1  
aabbbaaaababa`[a[aaaX`\_aa]ZN]^aa`\_a`\_``Z  
@HWI-EAS443:3:26:396:13#0/1  
GGGCTCCTGTCTTTAATGGTTCCATTGGAATGTTTGTTCAT  
+HWI-EAS443:3:26:396:13#0/1  
ab`aaaa\_a^`aaaa^aaa^a^Y\_]U\_^`]`^`\_`PWX¥]  
@HWI-EAS443:3:26:398:1636#0/1  
CTGTCCCAGTCCATCCGTTCCGATCCCAAATCATCTCAAA  
+HWI-EAS443:3:26:398:1636#0/1  
abaa^bbba\_bba][U^a\_\_a[V`ZPPaa]aWW^`ZN]aa

@HWI-EAS443:3:26:405:1033#0/1  
AAAACCGTTTCTTGAACATAATGCTTTTAGTTCTCCCTATC  
+HWI-EAS443:3:26:405:1033#0/1  
aa¥¥aba^aa`aaa`aaa``aaa``aa\_a^`a`a^\_a```  
@HWI-EAS443:3:26:411:1494#0/1  
CAGACACTATCAAGAGTTGGAGAAACAATATATTGAGAAC  
+HWI-EAS443:3:26:411:1494#0/1  
aa¥U\_ba\_a`ZLXXY¥T¥YU]Z¥UQaXZ¥Z¥\_`^a¥\_]`^W[  
@HWI-EAS443:3:26:426:134#0/1  
CGCTAATTTACGGAACCACTGACTGTCCAGCAGCAAAG  
+HWI-EAS443:3:26:426:134#0/1  
\_aba\_ababababa`^aaaa\_a`aaaa\_\_`ZVZYQP¥^[[  
@HWI-EAS443:3:26:492:1068#0/1  
CACAGCCACTGCCCCATTGTCTGGGCCAGAAATCCAATT  
+HWI-EAS443:3:26:492:1068#0/1  
`bbb^bbbbbbbaaaaba`baaa¥babaa`a`a\_a``aa  
@HWI-EAS443:3:26:561:1390#0/1  
CTAAAAGCATTAGTTCAAGAAACGGTTTTGAGATGATTTG  
+HWI-EAS443:3:26:561:1390#0/1  
a`^^`b^aab\_\_bW`bbaaaaaa`Sa`a`Y`T\_a\_a`a\_  
@HWI-EAS443:3:26:563:916#0/1  
CAGTGACACTGTGGGTTGGTCTTGGCCAGACGGTGCTGAG  
+HWI-EAS443:3:26:563:916#0/1  
`W`YYXY]``X^PV¥U^YR`]]R]][[[¥Y`¥PZTS^YV  
@HWI-EAS443:3:26:570:1855#0/1  
TCCGAAAATCCCACTGCATATGTATCCTATCTGATATTCC  
+HWI-EAS443:3:26:570:1855#0/1  
abbbba\_bbababababbbbbb\_bb`aababaaaab`\_aa  
@HWI-EAS443:3:26:596:510#0/1  
AGACACTATCAAGAGTTGGAGAAACAATATATTGAGAACA  
+HWI-EAS443:3:26:596:510#0/1  
ababaa`aa`aaa\_a]aaa`^`]a\_\_`a`a``aa`\_`\_`  
@HWI-EAS443:3:26:596:976#0/1  
GTTTTGTTGAGCATCCAGAACTAACAGGGCTGGATTGTAT  
+HWI-EAS443:3:26:596:976#0/1  
a¥UIXaTSZU`aa¥`]]`T`[X^^`\_]Z¥YU``G[¥TUZ¥  
@HWI-EAS443:3:26:625:1049#0/1  
GCTGGATTGTATAAGACCTTGCTTCTGGGTTGAACTAATC  
+HWI-EAS443:3:26:625:1049#0/1  
abab`R^]P]MTTXMYaa`¥TY[ZV¥a¥^Ua¥Rb[[[¥\_X\_  
@HWI-EAS443:3:26:626:359#0/1  
GCGGGCAATTCCTCTCTGCCCCTGTTAGTGGATGGGCTA  
+HWI-EAS443:3:26:626:359#0/1  
aaaaba^aaaaaa\_aaaa`a\_a\_aa`aaUa`\_¥`a\_U[^  
@HWI-EAS443:3:26:659:1460#0/1  
AGCAAGGTCTTATACAATCCAGCCCTGTTAGTTCTGGATG  
+HWI-EAS443:3:26:659:1460#0/1  
aab\_b[[]]b)`^aaY`bb`^Z¥]aa`\_\_[aa]\_]\_aaY]\_]  
@HWI-EAS443:3:26:69:167#0/1  
GTGTAAACAGTGACACTGTGGGTTGGTCTTGGCCAGACGG

+HWI-EAS443:3:26:69:167#0/1  
aa]Wbaaa`b¥`a^a`a`]aaZZ¥a`P]\_\_`¥a\_^\_YU¥B  
@HWI-EAS443:3:26:802:160#0/1  
ACCAAGCGACTGACTCAAATCTTGAGTTGTATGGAGAGGG  
+HWI-EAS443:3:26:802:160#0/1  
aabbbba`aaba`^^aa]^\_Ya``]`¥a\_\_`aa^^^\_WZ  
@HWI-EAS443:3:26:810:813#0/1  
GAATGTGCATGTGTAAATGGTTCTTGCTTTACTGTAATGA  
+HWI-EAS443:3:26:810:813#0/1  
a``¥bV^a^]aV```a`]aa0`aa`aa`a`]Ya[\_[\_[\_]  
@HWI-EAS443:3:26:820:705#0/1  
ATTGTATAAGACCTTGCTTCTGGGTTGAACTAATCAGAGG  
+HWI-EAS443:3:26:820:705#0/1  
`a\_`[a`[]^aaa^Zaa\_aaaa``[aabbYa¥^`¥aa`\_`  
@HWI-EAS443:3:26:842:1808#0/1  
ATTTACACATGCACATTCAGACTCTTGTGTTCTCAATATA  
+HWI-EAS443:3:26:842:1808#0/1  
abbabbbbaaaaaaaaaabaa^aa```\_a^a``aaaaaaaaa  
@HWI-EAS443:3:26:887:91#0/1  
TGCAGTGGGATTTTCGGAGACAATCCACGCCCTAATGATA  
+HWI-EAS443:3:26:887:91#0/1  
ababI\_baa]aaa[]`ZWXRP\_W^ZW\_] [BBBBBBBBBBB  
@HWI-EAS443:3:26:913:1050#0/1  
TTCATATCATGCTCCCCCTTGAATGCAGAACCTTCTTCT  
+HWI-EAS443:3:26:913:1050#0/1  
a`b]`U`abaa\_baba`aa`bS\_b`]\_baaba]\_`\_`\_Na  
@HWI-EAS443:3:26:958:124#0/1  
CGACCGTGGGTGTCTTTCAACCAGAATCTGGAATATCAGA  
+HWI-EAS443:3:26:958:124#0/1  
abababRabaSb]a\_a`]\_\_aYaaaa`Zaaa``\_\_\_\_[\_`W  
@HWI-EAS443:3:27:1024:205#0/1  
GATTTTTCGGAGACAATCCACGCCCTAATGATAAGACAGGC  
+HWI-EAS443:3:27:1024:205#0/1  
a`aaaa\_aa`a^U\_`^XS¥V^YTU\_¥\_¥^[V[¥UPRBBBB  
@HWI-EAS443:3:27:1028:57#0/1  
GATGGCATCAATTGGCTAACAATTGGAATTTCTGGCCCAG  
+HWI-EAS443:3:27:1028:57#0/1  
a[HRRVTZX`]P]YT\_aQR^GLVY¥HQX[WJL\_^aWVGN^  
@HWI-EAS443:3:27:1033:410#0/1  
GTCCATCCGTTTCGGATCCCAAATCATCTCAAACCGTTTC  
+HWI-EAS443:3:27:1033:410#0/1  
aa`^aaa`^[][\_]\_XU`[\_]¥TYX^`\_XS¥\_X^\_X]]^  
@HWI-EAS443:3:27:1048:1172#0/1  
CAAATCAGATTGAAACATGCAATCAAAGCGTCATTACTT  
+HWI-EAS443:3:27:1048:1172#0/1  
``bbbbabaaabb^`ba`\_`b\_\_\_\_aaaaa[b\_`^a\_^Za`  
@HWI-EAS443:3:27:1067:391#0/1  
TGCTCCTGTTATCCTGATTCTAGTGAAATCACATGTGTGT  
+HWI-EAS443:3:27:1067:391#0/1  
\_`a]]`XP\_aZ[]]a`\_[a`a^a]\_a\_\_a[]`a^a^`X



@HWI-EAS443:3:27:1097:795#0/1  
GTCATTTAGCAAGGCCCTTGAGTCAAGAAGAAGGTTCTG  
+HWI-EAS443:3:27:1097:795#0/1  
QN\_]bbUZ¥¥VT¥GT[]a\_]aTXV`[XXU^UUPYGSV^U  
@HWI-EAS443:3:27:1103:397#0/1  
CAACTGCCTGTCTTATCATTAGGGCGTGGATTGTCTCCGA  
+HWI-EAS443:3:27:1103:397#0/1  
aaaaXZ`aab\_aaa`a\_]`\_XYOVZ^`^¥[^^^\_a^Z`\_  
@HWI-EAS443:3:27:1110:1692#0/1  
GTGTCTTTCAACCAGAATCTGGAATATCAGATAGGATACA  
+HWI-EAS443:3:27:1110:1692#0/1  
a[^Y^`\_`^`\_b`]]^¥¥¥\_`\_\_\_\_\_]`\_\_Y\_X]  
@HWI-EAS443:3:27:117:1421#0/1  
GAGGAATTGCCCGCTAATTTACGGAACCACTGACTGTC  
+HWI-EAS443:3:27:117:1421#0/1  
abb]bbbaabb\_``aaaabaabaa`\_Zaaaa`aaa^a  
@HWI-EAS443:3:27:1207:913#0/1  
CAGCAACACCAACTTTGCTGCTGGACAGTCAGTGGTTTCC  
+HWI-EAS443:3:27:1207:913#0/1  
aababba`bab\_`aaZU^b^]a\_aaa\_]J¥\_]`M`PX  
@HWI-EAS443:3:27:1218:1955#0/1  
ATCCACTAACAGGGCAGAGAGAGGAATTGCCCGCTAATTT  
+HWI-EAS443:3:27:1218:1955#0/1  
aXGSa`Yab\_aa`^^\_XY\_¥aVP^SU[XUOG^RUU^X^\_  
@HWI-EAS443:3:27:1243:262#0/1  
CAGTCGCTTGGTCAGCAAGTGCTTGTTCATGATGGCATCAA  
+HWI-EAS443:3:27:1243:262#0/1  
^^\_XY\_]ab\_aU¥YMR`aRTXV[\_aY¥Y\_aZYOV^^MH\_]`  
@HWI-EAS443:3:27:1276:1480#0/1  
CATATGTTAACATCAGCAACACCAACTTTGCTGCTGGACA  
+HWI-EAS443:3:27:1276:1480#0/1  
abab^baaaaaaa\_aaba`aaa`aRU`\_a\_[\_`\_a`¥T^  
@HWI-EAS443:3:27:1277:452#0/1  
CTGTCCCAGTCCATCCGTTCCGATCCCAAATCATCTCAAA  
+HWI-EAS443:3:27:1277:452#0/1  
[ZXPYX¥]aSY^^RU[¥RS[XYZQWMKQ^RTFNWV\_NZ]  
@HWI-EAS443:3:27:1343:461#0/1  
CTCAATATGGATTAGCCACTCAATTCAACTTGGGAATCAA  
+HWI-EAS443:3:27:1343:461#0/1  
aabbabbbbbbbbaabb\_baababaab`bbbaaaaa^ba  
@HWI-EAS443:3:27:1366:1541#0/1  
CCTAATTACTACTATGAGGAATGCTCCTGTTATCCTGATT  
+HWI-EAS443:3:27:1366:1541#0/1  
ab¥`]]^]Va]U¥^T]¥]WT\_R^R[[\_]aS\_\_RUW^\_]UW  
@HWI-EAS443:3:27:1369:430#0/1  
CAAAATCAGATTGAAACATGCAATCAAAGCGTCATTACTT  
+HWI-EAS443:3:27:1369:430#0/1  
P)`Ya`]¥\_\_\_\_\_a\_¥XSaY[V^a^U[\_`\_k]RLZ``YF]^  
@HWI-EAS443:3:27:1450:262#0/1  
GATGATTTGGGATCCGAACGGATGGACTGGGACAGACAAT

+HWI-EAS443:3:27:1450:262#0/1  
a[ `a\_bbabaa `wv]]\_W¥\_ZZ¥ZTNY^\_\_OMO^UPVZY  
@HWI-EAS443:3:27:1637:1601#0/1  
TTGAGAACAAGAGTCTGAATGTGCATGTGTAATGGTT  
+HWI-EAS443:3:27:1637:1601#0/1  
a\_vv`aa`a`a`aYX[\_Y`a]aVa\_a]aG\_\_\_\_`\_^W[  
@HWI-EAS443:3:27:1675:329#0/1  
GGGAGAATAAAAGCATTAGTTCAAGAAACGGTTTTGAGA  
+HWI-EAS443:3:27:1675:329#0/1  
aa``aaa[aaaaaa]a``\_a^\_Z[\_\_\_\_Y]^Z\_\_\_\_V\_X  
@HWI-EAS443:3:27:262:85#0/1  
TTCAAATACGGCAATGGTGTGGATAGGGAGAATAAAA  
+HWI-EAS443:3:27:262:85#0/1  
abbaa`baaba``^`Wa`aba^Y^\_aa¥U^\_aZ^Z\_a`  
@HWI-EAS443:3:27:268:386#0/1  
GGAATATCAGATAGGATACATATGCAGTGGGATTTTCGGA  
+HWI-EAS443:3:27:268:386#0/1  
\_`````a``]TVY\_[]^aU[]]NU[[¥GW[[SW]\_^ZZ[V  
@HWI-EAS443:3:27:288:1480#0/1  
AGGGGGATGTGTTGTCATAAGGGAACCATTCATATCATG  
+HWI-EAS443:3:27:288:1480#0/1  
aXVWSQYJOVQPNQMJZ]]KXY^Z]WX]QQU\$]`ZZ]PU  
@HWI-EAS443:3:27:333:96#0/1  
ATGGTGTGGATAGGGAGAATAAAAGCATTAGTTCAAG  
+HWI-EAS443:3:27:333:96#0/1  
`bbb^a\_bbbbaa`baaaa^a\_aa`aaa^\_a^`aUS\_``a  
@HWI-EAS443:3:27:356:401#0/1  
CGCTAATTTACGGAAACCACTGACTGTCCAGCAGCAAAG  
+HWI-EAS443:3:27:356:401#0/1  
¥V`b`babba`\_HY`ab``bbbbbb`^bV`Y`bV^R`b  
@HWI-EAS443:3:27:380:1067#0/1  
GTCCCAGTCCATCCGTTCGGATCCCAAATCATCTCAAAC  
+HWI-EAS443:3:27:380:1067#0/1  
^abaaIORa^`abba]WaWT[Waa^YQ^Y\_a]`\_a\_L\_aa  
@HWI-EAS443:3:27:380:1461#0/1  
ATTAGACGATACTGGACCACAACCTGCCTGTCTTATCATT  
+HWI-EAS443:3:27:380:1461#0/1  
Y^``a¥baaaaa]ZZ\_b\_^Y[VVW^ZGZN[\_a]\_Q]^]^  
@HWI-EAS443:3:27:384:141#0/1  
AGCATCCAGAATAACAGGGCTGGATTGTATAAGACCTTG  
+HWI-EAS443:3:27:384:141#0/1  
a\_ab\_^\_a^ab^[\_`aWW]¥VVD[a^\_\_`W]WYY¥^YTZY¥  
@HWI-EAS443:3:27:479:55#0/1  
GTTTTGTTGAGCATCCAGAATAACAGGGCTGGATTGTAT  
+HWI-EAS443:3:27:479:55#0/1  
a\_^¥^`]VWY]NT¥\_ZU\_UXLPZ\_YZU\_VUYVTYVX^USY  
@HWI-EAS443:3:27:551:780#0/1  
TGTGGGTTGGTCTTGGCCAGACGGTGCTGAGTTGCCATTT  
+HWI-EAS443:3:27:551:780#0/1  
aaN[[TYNa]Z`] `VX`^Z[YRY\_X¥RUXQUFVYQ\$JV^^

@HWI-EAS443:3:27:591:1503#0/1  
GGACTGGGACAGACAATAACTTCTCAATAAAGCAAGATAT  
+HWI-EAS443:3:27:591:1503#0/1  
aaaabbaabbbaababa`baaaaaaaaaaaaaaa^aa\_aa  
@HWI-EAS443:3:27:664:400#0/1  
GGATTGTCTCCGAAAATCCCACTGCATATGTATCCTATCT  
+HWI-EAS443:3:27:664:400#0/1  
abb`bbabbabaaa`abaaaaaaaaaba^]a`aaaaa`a  
@HWI-EAS443:3:27:746:1269#0/1  
ATGCAATCAAAGCGTCATTACTTATGAAAACAACACTTGG  
+HWI-EAS443:3:27:746:1269#0/1  
VYY\_S]]\_OXRK\_[Q]]Z0¥XX[\_aaYY[YQ¥\_a`¥\_\_YJ  
@HWI-EAS443:3:27:818:161#0/1  
CTTTAACACAGCCACTGCCCATTTGTCTGGGCCAGAAATT  
+HWI-EAS443:3:27:818:161#0/1  
V]abZ`¥a\_¥[`ba\_\_`ZUURT[ZGWL T]YLUX\_JBBBB  
@HWI-EAS443:3:27:854:1260#0/1  
GGGATGTGTTTGT CATAAGGGAACCATT CATATCATGCTC  
+HWI-EAS443:3:27:854:1260#0/1  
aa`aaa\_a\_aa\_Zaaa`a`\_^\_a^\_a`^`aa\_X`\_] [^\_  
@HWI-EAS443:3:27:858:674#0/1  
AGCCACTCAATTCAACTTGGGAATCAAATCAGATTGAAA  
+HWI-EAS443:3:27:858:674#0/1  
aaaababbababaaaa\_baaaaaaaaaaaaa`aa`aaaa`a  
@HWI-EAS443:3:27:993:541#0/1  
GAGGAATGCTCCTGTTATCCTGATTCTAGTGAAATCACAT  
+HWI-EAS443:3:27:993:541#0/1  
Z^abbbba^[\_^]aa\_ba`\_]ababb]ba`]aaaab¥\_\_`a  
@HWI-EAS443:3:28:100:40#0/1  
GGTGTAACAGTGACACTGTGGGTTGGTCTTGGCCAGACG  
+HWI-EAS443:3:28:100:40#0/1  
a\_]Y\_R\_\_`a`aaa`aaT]]a¥^`UP\_\_`\_`^ZYP[^  
@HWI-EAS443:3:28:1074:1047#0/1  
GACATATGTTAACATCAGCAACACCAACTTTGCTGCTGGA  
+HWI-EAS443:3:28:1074:1047#0/1  
aa`\_abaaa`aaaaaa\_aaa\_a\_b]¥^a\_\_¥^]^^`^R  
@HWI-EAS443:3:28:1143:842#0/1  
TGCAATCAAAGCGTCATTACTTATGAAAACAACACTTGGG  
+HWI-EAS443:3:28:1143:842#0/1  
abaabbbbbaaaab`\_abaa`bbaaaaaaa]a`^`aa`[\_  
@HWI-EAS443:3:28:1223:1751#0/1  
ACTTGGTCCATCGGTCATTACAGTAAAGCAAGAACCATTT  
+HWI-EAS443:3:28:1223:1751#0/1  
Z\_bbbb¥b^b]abXJ]VZab]V]\_`\_`a\_W^b[`]\_a`]\_\_  
@HWI-EAS443:3:28:1241:557#0/1  
GTCCTATTGGTGAAGTCCCTCTCCATACAACACTCAAGATT  
+HWI-EAS443:3:28:1241:557#0/1  
a\_^]T¥^V^TQ]a\_\_^NYUa`^¥\_[`]`\_YR¥[\_]V`RUW  
@HWI-EAS443:3:28:1271:341#0/1  
CTTGTCAATGGTAAATGGCAACTCAGCACCGTCTGGCCAA

+HWI-EAS443:3:28:1271:341#0/1  
aaba¥bbaaa[[aa`\_aa^aa]a`\_a\_a``\_¥\_\_a\_Z\_\_]  
@HWI-EAS443:3:28:1321:1482#0/1  
CTGTTATTATGCCGTTGTACTTTAACACAGCCACTGCCCC  
+HWI-EAS443:3:28:1321:1482#0/1  
aab\_bbbabaa¥aaaaaaabaabaaa`aaX`\_aZ¥T[R  
@HWI-EAS443:3:28:1453:316#0/1  
ATTCATATCATGCTCCCCCTTGAATGCAGAACCTTCTTC  
+HWI-EAS443:3:28:1453:316#0/1  
a^^^T^`RXa\_a]\_XKZ^X`\_`]¥\_\_XIP\_^ZRM`^YY\_0  
@HWI-EAS443:3:28:1542:64#0/1  
TCCCTCTCCATACTCAAGATTTGAGTCAGTCGCTTGG  
+HWI-EAS443:3:28:1542:64#0/1  
`aa]ba`[\_ab`\_Y\_\_```\_a`\_a`\_a\_\_^¥\_\_]¥\_]\_\_V[  
@HWI-EAS443:3:28:1547:95#0/1  
TCGGATCCCAAATCATCTCAAACCCTTCTTGAACCTAAT  
+HWI-EAS443:3:28:1547:95#0/1  
\_`bbba¥\_aa^`[W`a¥a¥\_a^\_]Pa^a`S`\_ZX]^`]¥\_  
@HWI-EAS443:3:28:1569:902#0/1  
GAGTGGTCAGGATATAGCGGGAGTTTTGTTTCAGCATCCAG  
+HWI-EAS443:3:28:1569:902#0/1  
a`\_Vaa`^\_a`Y\_X\_\_\_V`aZL^RZ\_\_VSQORYGVVWVXV  
@HWI-EAS443:3:28:162:1260#0/1  
TGGGCTCCTGTCTTTAATGGTTCCATTGGAATGTTTGTCA  
+HWI-EAS443:3:28:162:1260#0/1  
aaaababbbaabbbbbbabba\_abb`aaa]a`aa`aa]\_^Q  
@HWI-EAS443:3:28:166:1951#0/1  
GCTCCTGTTATCCTGATTCTAGTGAAATCACATGTGTGTG  
+HWI-EAS443:3:28:166:1951#0/1  
`bbba`abbbbbbabba\_aaabbbaaba\_aa`\_¥`\_`a  
@HWI-EAS443:3:28:1711:941#0/1  
ATTCATATCATGCTCCCCCTTGAATGCAGAACCTTCTTC  
+HWI-EAS443:3:28:1711:941#0/1  
a¥b]bbba`\_aa\_] [TJa]\_`^^`\_aaY^aa\_\_QaR]\_\_¥  
@HWI-EAS443:3:28:203:1097#0/1  
CAACGGCATAATAACAGACACTATCAAGAGTTGGAGAAAC  
+HWI-EAS443:3:28:203:1097#0/1  
a`bba`ababaaaaaababaaa`\_¥`\_¥`\_a¥^^^V`¥a  
@HWI-EAS443:3:28:20:1898#0/1  
CAAGTGCTTGTGATGATGGCATCAATTGGCTAACCAATTGG  
+HWI-EAS443:3:28:20:1898#0/1  
aaYMS\_b[HYXVQYY\_\_a^\_X[]]Z[YPIXUWJVS[QWQV  
@HWI-EAS443:3:28:226:1052#0/1  
AAACAATATATTGAGAACACAAGAGTCTGAATGTGCATGT  
+HWI-EAS443:3:28:226:1052#0/1  
\_a`a`\_`\_baaa`aa`aab`\_b`a\_a¥\_a\_¥`\_`\_¥`\_`\_`^Y^  
@HWI-EAS443:3:28:260:1486#0/1  
CTTTAACACAGCCACTGCCCCATTGTCTGGGCCAGAAATT  
+HWI-EAS443:3:28:260:1486#0/1  
a^^aabbbbbb¥baZ¥\_¥`\_`ba]S[[[``]\_ZU`\_^ [V\_^TW

@HWI-EAS443:3:28:285:414#0/1  
ATTTGCTCCATTAGACGATACTGGACCACAACCTGCCTGTC  
+HWI-EAS443:3:28:285:414#0/1  
a`a]\_`\_aaa¥`a`\_]a^`\_[M\_XHPZ\_`^`¥GVW[RTTV  
@HWI-EAS443:3:28:326:607#0/1  
GGTTGGTCTTGCCAGACGGTGCTGAGTTGCCATTTACCA  
+HWI-EAS443:3:28:326:607#0/1  
^b[aab`bbbabaaa]UY]a`\_`a^¥a^[Taaa`aba\_a`  
@HWI-EAS443:3:28:358:386#0/1  
CTGGGACAGACAATAACTTCTCAATAAAGCAAGATATCGT  
+HWI-EAS443:3:28:358:386#0/1  
abbb`X`\_]`^abaaa`\_aaaaa`aaaa\_aaa^aaa\_a^  
@HWI-EAS443:3:28:426:207#0/1  
CCAAGACCAACCCACAGTGTCACTGTTTACACCACAAAAG  
+HWI-EAS443:3:28:426:207#0/1  
aa]aaU\_a]SYa\_a``aGa\_a\_a]aU`\_aZ`T¥\_\_\_Y¥\_W  
@HWI-EAS443:3:28:437:290#0/1  
CAGACACTATCAAGAGTTGGAGAAACAATATATTGAGAAC  
+HWI-EAS443:3:28:437:290#0/1  
a]b`a¥bbYaba``P[aa[TS^a`]]a`\_`\_a\_a`aa`\_a`  
@HWI-EAS443:3:28:483:124#0/1  
CGGGAGTTTTGTTTCAGCATCCAGAACTAACAGGGCTGGAT  
+HWI-EAS443:3:28:483:124#0/1  
`bbbab]aa`b``aaa\_a`a\_aa\_a`aa^a`\_^^\_a\_]`  
@HWI-EAS443:3:28:483:1413#0/1  
GATTAGTTCAACCCAGAAGCAAGTCTTATACAATCCAGC  
+HWI-EAS443:3:28:483:1413#0/1  
aaWZXML]aaa`]]`RUQ`[WXZR]ZZ]WV]^GX¥LZOU  
@HWI-EAS443:3:28:498:405#0/1  
TGAGAACACAAGAGTCTGAATGTGCATGTGTAATGGTTC  
+HWI-EAS443:3:28:498:405#0/1  
aaa`][`a`aYaaa¥^aa`\_`aY\_\_\_``[¥X\_]W^`Y^`  
@HWI-EAS443:3:28:517:1512#0/1  
ATTGTATAAGACCTTGCTTCTGGGTTGAACTAATCAGAGG  
+HWI-EAS443:3:28:517:1512#0/1  
aba^[b\_K\_Ya¥a`aS`\_a\_aaXZSTa¥ab`^aaaa`^`\_`^  
@HWI-EAS443:3:28:536:1813#0/1  
GGGGGATGTGTTTGTCTATAAGGGAACCATTCATATCATGC  
+HWI-EAS443:3:28:536:1813#0/1  
aaababaaS\_\_`a\_\_a`[`b]\_`^[aaaa``aa\_a[\_\_\_Z`  
@HWI-EAS443:3:28:635:1582#0/1  
CATTAGGGCGTGGATTGTCTCCGAAAATCCCCTGCATAT  
+HWI-EAS443:3:28:635:1582#0/1  
a]a`\_V\_]J¥``a``Y\_a\_a\_a]\_aa`\_[R]][\_[^`\_]  
@HWI-EAS443:3:28:684:240#0/1  
GCCCCGTAATTTACGGAAACCACTGACTGTCCAGCAGCA  
+HWI-EAS443:3:28:684:240#0/1  
ab`XZ^\_TS\_b¥a`aaa^`X]P]UUQR^^ZZBBBBBBBBB  
@HWI-EAS443:3:28:694:1662#0/1  
AATGCTTTTTAGTTCTCCCTATCCAAACACCATTGCCGTAT



@HWI-EAS443:3:29:1136:535#0/1  
GTTCCCTCTCCATACTCAAGATTTGAGTCAGTCGCTT  
+HWI-EAS443:3:29:1136:535#0/1  
a\_a`a[a````aa`¥\_\_^`\_^\_a¥`\_\_`^`¥\_\_ZX¥^W\_\_  
@HWI-EAS443:3:29:113:1007#0/1  
ATGTGTAAATGGTTCTTGCTTTACTGTAATGACCGATGGA  
+HWI-EAS443:3:29:113:1007#0/1  
\_bb^a\_]aaaa\_\_\_\_aaaaaaaaab`aa\_ba`aaa`a``\_[\_`  
@HWI-EAS443:3:29:114:30#0/1  
GCGGGAGTTTTGTTTCAGCATCCAGAACTAACAGGGCTGGA  
+HWI-EAS443:3:29:114:30#0/1  
a`aaa¥a[a`\_a]^`^`a`\_]\_^`¥S^Y^^\_]^^]]Y]\_WW  
@HWI-EAS443:3:29:1226:192#0/1  
ATCCGTTCCGATCCCAAATCATCTCAAACCGTTTCTTGA  
+HWI-EAS443:3:29:1226:192#0/1  
aba^ZV````]a[ST^`V`Y[]P^R\_```YJJ[^]VMTY[B  
@HWI-EAS443:3:29:127:1286#0/1  
ATCATGACAAGCACTTGCTGACCAAGCGACTGACTCAAAT  
+HWI-EAS443:3:29:127:1286#0/1  
aaa^`a¥a\_```aa\_`\_aa`````a`¥^`^`Y```\_Y\_^a\_YX¥  
@HWI-EAS443:3:29:1282:971#0/1  
GTCTGGGCCAGAAATTCCAATTGTTAGCCAATTGATGCCA  
+HWI-EAS443:3:29:1282:971#0/1  
`S]SVQYaa\_N[\_\_\_ZQXPUUNKZ]X^^PM]R¥]]][PGXBB  
@HWI-EAS443:3:29:1339:975#0/1  
ATCCTGATTCTAGTGAAATCACATGTGTGTGCAGGGATAA  
+HWI-EAS443:3:29:1339:975#0/1  
a`baaaabbbb`¥^`\_a`b\_a^`ba\_[a\_`]aaa[^`\_`aa  
@HWI-EAS443:3:29:1525:553#0/1  
CATATGTTAACATCAGCAACACCAACTTTGCTGCTGGACA  
+HWI-EAS443:3:29:1525:553#0/1  
`\_bbb`Ybb`TabSaa`^bYaa\_aQM¥aa`a`a\_`\_a[``\_`  
@HWI-EAS443:3:29:1630:1401#0/1  
GGGGGATGTGTTTGTGATAAGGGAACCATTCATATCATGC  
+HWI-EAS443:3:29:1630:1401#0/1  
aYa`a]```Xa[[]`¥[W`a]a\_`[ZNN^^`\_^`^^¥]]BB  
@HWI-EAS443:3:29:1645:1430#0/1  
ATCGACCGTGGGTGTCTTTCAACCAGAATCTGGAATATCA  
+HWI-EAS443:3:29:1645:1430#0/1  
a\_\_^\_X¥\_W\_\_YLSTK^aaVXXWZ\_ZX^LDW\_]U^UBBBB  
@HWI-EAS443:3:29:1648:1677#0/1  
CGCTAGTCCAGATTGTGTTCTTTGGGTCGCCCTCTGAT  
+HWI-EAS443:3:29:1648:1677#0/1  
]^abb\_a\_`abaaabX\_[]`]a¥^`^T`Wa`aaaba\_a\_a  
@HWI-EAS443:3:29:1654:750#0/1  
AAGCGACTGACTCAAATCTTGAGTTGTATGGAGAGGGAAC  
+HWI-EAS443:3:29:1654:750#0/1  
^`¥`bYa`ba]Ya\_]\_PN¥¥0Y`¥a]\_\_[a^\_a¥a^a\_BB  
@HWI-EAS443:3:29:1703:980#0/1  
ATTCAACTTGGGAATCAAATCAGATTGAAACATGCAATC

+HWI-EAS443:3:29:1703:980#0/1  
aaab¥b`bbbaaaba[aaab[a`aaaa`aa`bab¥b\_a^  
@HWI-EAS443:3:29:1726:1648#0/1  
AGAAGTTCTGCATTCCAAGGGGAGCATGATATGAATGG  
+HWI-EAS443:3:29:1726:1648#0/1  
abaaaaV\_`a¥`^a¥ZN¥][[PZRU^UVU^¥V\_YXXYVBB  
@HWI-EAS443:3:29:1771:440#0/1  
CCATCCACTAACAGGGCAGAGAGGAATTGCCCCGTAAT  
+HWI-EAS443:3:29:1771:440#0/1  
WWWZS\_Waa^)[\_VRNUNW\_WSa¥`\_U\_ZN\_\_\_\_\_RBB  
@HWI-EAS443:3:29:195:139#0/1  
CCCATATCGAACCTAATGAGCTGTCCTATTGGTGAAGTT  
+HWI-EAS443:3:29:195:139#0/1  
a]\_V\_X`a\_WOLUQ]VF[LUPSY¥UVZV^SQLRTUVGQBB  
@HWI-EAS443:3:29:207:1341#0/1  
ATTGGAATGTTTGTCTTTAGCAAGGCCCTTGAGTCAAG  
+HWI-EAS443:3:29:207:1341#0/1  
abaa\_`^a`¥aaZYa```\_^`\_ZOW`aa¥aa][\_[Ya`^X  
@HWI-EAS443:3:29:228:1586#0/1  
CAGACTCTGTGTTCTCAATATATTGTTTCTCCAACCTCT  
+HWI-EAS443:3:29:228:1586#0/1  
^¥Zab```a`\_a\_Vbb[^Waba^N^`^`[aaa^`^X^`\_`\_`B  
@HWI-EAS443:3:29:255:239#0/1  
GTTATTATGCCGTTGTACTTTAACACAGCCACTGCCCCAT  
+HWI-EAS443:3:29:255:239#0/1  
aH¥`UR^aaaaaQV[[U\_`\_ZSaUPT[\_SHQYY]XTBBBB  
@HWI-EAS443:3:29:396:685#0/1  
CAAGAGTCTGAATGTGCATGTGTAATGGTCTTGCTTTA  
+HWI-EAS443:3:29:396:685#0/1  
ZaaZQ\_W¥`````a`Y\_a`b¥¥`\_S\_abb\_aaaaa]``aZ  
@HWI-EAS443:3:29:432:468#0/1  
GCCGTTGTACTTTAACACAGCCACTGCCCCATTGTCTGGG  
+HWI-EAS443:3:29:432:468#0/1  
aaaa`abaa\_aaa`a`a`a`\_a^`\_¥\_\_¥¥\_\_VW¥¥¥UX  
@HWI-EAS443:3:29:452:159#0/1  
CTTTAACACAGCCACTGCCCCATTGTCTGGGCCAGAAATT  
+HWI-EAS443:3:29:452:159#0/1  
abbaabbbaaaaaaa`^aa`\_¥\_a¥]`^¥¥[¥\_\_Y\_^YU  
@HWI-EAS443:3:29:470:655#0/1  
GCTCGAATCGACCGTGGGTGTCTTTCAACCAGAATCTGGA  
+HWI-EAS443:3:29:470:655#0/1  
abaab\_]^^aa[[\_V]`H`KRV`]TVVNVYMW¥RTUBBB  
@HWI-EAS443:3:29:505:199#0/1  
GAGGAATGCTCCTGTTATCCTGATTCTAGTGAATCACAT  
+HWI-EAS443:3:29:505:199#0/1  
`Z`\_]¥`aV`[[`[RW]R]YZR][ZW¥XM[VXVQSLNW  
@HWI-EAS443:3:29:517:1708#0/1  
CAGGATATAGCGGGAGTTTTGTTCCAGCATCCAGAACTAAC  
+HWI-EAS443:3:29:517:1708#0/1  
a`X[XYSU^\_a\_ZWZ\_HV\_^[U¥]UW^\_]\_[YT]^VVV\_B



@HWI-EAS443:3:29:574:1499#0/1  
CAAATACGGCAATGGTGTGGATAGGGAGAACTAAAAGC  
+HWI-EAS443:3:29:574:1499#0/1  
aaabaaba\_aWW¥]Z]a\_aaXWYV\_^Z[W`^[¥^a`aUB  
@HWI-EAS443:3:29:581:630#0/1  
ATTATGCCGTTGACTTTAACACAGCCACTGCCCCATTGT  
+HWI-EAS443:3:29:581:630#0/1  
^\_\_^^baba`aX`\_\_`\_]aa`Y][`]SS^\_\_`\_\_^W\_[B  
@HWI-EAS443:3:29:669:1714#0/1  
CTCCTGTCTTTAATGGTTCCATTGGAATGTTTGTCTTTA  
+HWI-EAS443:3:29:669:1714#0/1  
ababaa[aaaaaaZ`a^aa\_a¥GW[\_\_\_U]`)\_S¥UYUXZ  
@HWI-EAS443:3:29:689:1305#0/1  
CTCCCCGTAGTCCAGATTGTGTTCTTTGGGTGCGCCCTC  
+HWI-EAS443:3:29:689:1305#0/1  
`Q[]`^^¥\_aQ\_a`T`aPU[R]ZZZY¥`\_UHZZNYR¥  
@HWI-EAS443:3:29:737:1880#0/1  
CTCGAATCGACCGTGGGTGTCTTTCAACCAGAATCTGGAA  
+HWI-EAS443:3:29:737:1880#0/1  
aab\_\_aaa\_a`[ST\_[JWHZW\_]LPU[[]TW\_GUWN^[]  
@HWI-EAS443:3:29:760:700#0/1  
GCGGGAGTTTTGTTTCAGCATCCAGAACTAACAGGGCTGGA  
+HWI-EAS443:3:29:760:700#0/1  
a`aba\_b\_\_aaa^Z`a`]]Z\_\_``[\_\_\_\_`^\_\_^¥\_`^``[  
@HWI-EAS443:3:29:78:1347#0/1  
CTTTAACACAGCCACTGCCCCATTGTCTGGGCCAGAAATT  
+HWI-EAS443:3:29:78:1347#0/1  
abaabbbba^`\_\_Y`\_¥aa`P¥`¥^a[YXQ`]Z¥[Z\_NZ  
@HWI-EAS443:3:29:813:1576#0/1  
TGCCCCGTAATTTACGGAAACCACTGACTGTCCAGCAGC  
+HWI-EAS443:3:29:813:1576#0/1  
Y¥bb```X`WJ^Yaa]\_ab\_`\_^]`¥[^`T[aM[aZBB  
@HWI-EAS443:3:29:863:79#0/1  
GCTTGTCATGATGGCATCAATTGGCTAACAAATTGGAATTT  
+HWI-EAS443:3:29:863:79#0/1  
a]]Z\_\_a`aaaVa``\_\_]\_Y`\_\_VZ]Q]T[]`])`¥VWBB  
@HWI-EAS443:3:29:872:818#0/1  
CAATCCAGCCCTGTTAGTTCTGGATGCTGAACAAAACCTCC  
+HWI-EAS443:3:29:872:818#0/1  
abbaa``aabaababaaaa`\_ba`ab[a\_aaaaaaaaa\_a  
@HWI-EAS443:3:29:894:955#0/1  
ATTCATATCATGCTCCCCCTTGAATGCAGAACCTTCTTC  
+HWI-EAS443:3:29:894:955#0/1  
a\_abbaa^aaaabaaa`aaaa`])`a]`aa¥\_Yaaa`a]^  
@HWI-EAS443:3:29:948:81#0/1  
CAGTCAGTGGTTTCCGTGAAATTAGCGGGCAATTCCTCTC  
+HWI-EAS443:3:29:948:81#0/1  
a]]WPZb\_b^N`b¥Zb¥a[PZ^]^a[\_`NKXX[UBBBBBB  
@HWI-EAS443:3:29:958:1153#0/1  
AAGAGTTGGAGAAACAATATATTGAGAACACAAGAGTCTG

+HWI-EAS443:3:29:958:1153#0/1  
`¥Ybab`\_ab`ZMZ\_¥^a`aQY]\_`a]a^P[P\_\_\_\_  
@HWI-EAS443:3:2:1102:610#0/1  
GTTTGTGATAAGGGAACCATTTCATATCATGCTCCCCCTTG  
+HWI-EAS443:3:2:1102:610#0/1  
a]¥M\_OFLP`T]YaT^^[Y]SXU^X\_INZ]S[]OGVYBBB  
@HWI-EAS443:3:2:1142:104#0/1  
GTTCTCAATATATTGTTTCTCCAACCTTGATAGTGTCTG  
+HWI-EAS443:3:2:1142:104#0/1  
aX`a`¥`a\_aX]`b]\_\_W`SW[U[¥]^^^]\_\_WBBBBB  
@HWI-EAS443:3:2:114:810#0/1  
CAAGAAGAAGGTTCTGCATTCCAAGGGGAGCATGATATG  
+HWI-EAS443:3:2:114:810#0/1  
abbbbb\_aabb`b`\_babbabaab]\_`aaaaU\_aba`aaa  
@HWI-EAS443:3:2:1206:92#0/1  
TGGACAGGCCTCATACAAGATCTTCAGAATAGAAAAGGGA  
+HWI-EAS443:3:2:1206:92#0/1  
aa`a]aaa[\_a\_¥aaU`\_a^\_Y``[\_`a^^\_]`]W]Z^\_\_X  
@HWI-EAS443:3:2:1427:525#0/1  
AGCCACTCAATTCAACTTGGGAATCAAAATCAGATTGAAA  
+HWI-EAS443:3:2:1427:525#0/1  
]ba[^VY`^X`Xa\_aXabaaa^L¥YaY\_aa^[^[]aa\_U^  
@HWI-EAS443:3:2:1444:474#0/1  
CATTAGTTCAAGAAACGGTTTTGAGATGATTTGGGATCCG  
+HWI-EAS443:3:2:1444:474#0/1  
abbab`b`abbbbaa\_bb]bab`¥b`^b\_aabaaa]]`Xa  
@HWI-EAS443:3:2:1445:1435#0/1  
GATGATTTGGGATCCGAACGGATGGACTGGGACAGACAAT  
+HWI-EAS443:3:2:1445:1435#0/1  
Z\_ab`bbaaaba`abababaaaa¥^]`^aa\_^aaaU`YV  
@HWI-EAS443:3:2:1464:518#0/1  
TAGCGGGAGTTTTGTTTCAGCATCCAGAACTAACAGGGCTG  
+HWI-EAS443:3:2:1464:518#0/1  
`a\_^aZ\_ab^^`\_X¥Ua`Y]]¥Y^`Ua0\_]Y]V\_¥XY]  
@HWI-EAS443:3:2:1466:1242#0/1  
CATCCACTAACAGGGCAGAGAGAGGAATTGCCCGCTAATT  
+HWI-EAS443:3:2:1466:1242#0/1  
`ab]U\_U`]b`\_ba\_JYb\_a\_a[`a[¥TXa\_GQb¥]UQV^  
@HWI-EAS443:3:2:152:1262#0/1  
CACATGTGTGTGCAGGGATAACTGGCATGGCTCGAATCGA  
+HWI-EAS443:3:2:152:1262#0/1  
abaabb^b\_\_ba\_aaaa`aaaa]aa`a]a`^VF[BBBB  
@HWI-EAS443:3:2:1746:459#0/1  
ATTGAAACATGCAATCAAAGCGTCATTACTTATGAAAACA  
+HWI-EAS443:3:2:1746:459#0/1  
aaaa\_aa`babPa¥\_S\_a^aYa^Y]\_^[^¥`^^`\_^[\_[^  
@HWI-EAS443:3:2:1747:1115#0/1  
GTGAAATTAGCGGGCAATTCCTCTCTCTGCCCTGTTAGTG  
+HWI-EAS443:3:2:1747:1115#0/1  
aZaRU¥`\_Ya¥\_TNUYPSNVRV¥YLQW[[QQOW[SLU^BB

@HWI-EAS443:3:2:180:352#0/1  
AGGGGGATGTGTTTGCATAAGGGAACCATTCATATCATG  
+HWI-EAS443:3:2:180:352#0/1  
`^baaQ^`aWaU`ZYIRa\_a\_\_ZN]`\_RZ^^S]]\_][WU\_  
@HWI-EAS443:3:2:183:598#0/1  
GGTCGATTTCGAGCCATGCCAGTTATCCCTGCACACACATG  
+HWI-EAS443:3:2:183:598#0/1  
aa^`aa`[aaaa]Ra^aa[\_a^a`\_\_VV\_`\_``^W\_¥]``  
@HWI-EAS443:3:2:190:298#0/1  
CAGTCGCTTGGTCAGCAAGTGCTTGTGCATGATGGCATCAA  
+HWI-EAS443:3:2:190:298#0/1  
^WPH`a][ULTMU[[¥MYVHUX[[Q]NMP^UX\_VQBBBBB  
@HWI-EAS443:3:2:223:1968#0/1  
ACCACAACCTGCCTGTCTTATCATTAGGGCGTGGATTGTCT  
+HWI-EAS443:3:2:223:1968#0/1  
a]\_`\_a\_]Y`Y\_^UX\_]^\_U\_^YVYX]UY^]X^V]YY^  
@HWI-EAS443:3:2:25:226#0/1  
CCGCTAATTTACGGAAACCACTGACTGTCCAGCAGCAAAA  
+HWI-EAS443:3:2:25:226#0/1  
aaa`a[\_`\_`^a\_`¥`¥¥¥¥^\_^¥\_WY¥UQUWWBBBB  
@HWI-EAS443:3:2:308:1868#0/1  
ATTCAAATACGGCAATGGTGTGGATAGGGAGAACTAAA  
+HWI-EAS443:3:2:308:1868#0/1  
aa[aaa`a]``Y\_¥```[¥^`^S\_Y`Y¥[¥S\_\_W[Y`B  
@HWI-EAS443:3:2:332:1076#0/1  
GTGGTCCAGTATCGTCTAATGGAGCAAATGGAGTAAAAGG  
+HWI-EAS443:3:2:332:1076#0/1  
`aaa]Z`]a^\_\_\_\_[X`Y^`\_`U\_W^Y]\_\_\_\_0`S]]]\_\_\_\_  
@HWI-EAS443:3:2:34:1599#0/1  
GACCGTGGGTGTCTTTCAACCAGAATCTGGAATATCAGAT  
+HWI-EAS443:3:2:34:1599#0/1  
aVIb` `baba]VYbabV]]][aba\_[aa\_ba]^aa`X[a`Y  
@HWI-EAS443:3:2:375:784#0/1  
GTCTTATACAATCCAGCCCTGTTAGTTCTGGATGCTGAAC  
+HWI-EAS443:3:2:375:784#0/1  
a^a`aaa^`ba\_a]]a]\_^a^^`^YX¥`\_Y`\_Y^^O^Y  
@HWI-EAS443:3:2:385:1975#0/1  
ACTCAATTCAACTTGGGAATCAAAATCAGATTGAAACATG  
+HWI-EAS443:3:2:385:1975#0/1  
a^QO][¥[YR¥X]^WR]\_\_US`^\_WNV^[]ZP][¥]Z]BB  
@HWI-EAS443:3:2:427:1581#0/1  
GCTGAACAAAACCTCCCGCTATATCCTGACCACTCATTTAT  
+HWI-EAS443:3:2:427:1581#0/1  
a`\_aab\_aaaa^aRaVaa`a`\_\_W\_``]Xa^\_`^`X`\_`\_  
@HWI-EAS443:3:2:438:1666#0/1  
GTTCAAGAAACGGTTTTGAGATGATTTGGGATCCGAACGG  
+HWI-EAS443:3:2:438:1666#0/1  
a\_\_Yaaa`a\_ab`\_`aaaa`¥\_a\_`\_aa^a`Z`\_`¥R`¥  
@HWI-EAS443:3:2:454:1182#0/1  
ATATGAATGGTTCCCTTATGACAAACACATCCCCCTTGGGA

+HWI-EAS443:3:2:454:1182#0/1  
aabaa^]Q\_^Wa`\_^aR]^\_¥\_J^\_a¥X`W\_NNa^]YW  
@HWI-EAS443:3:2:505:1707#0/1  
ATTGGAATGGCTAACTTAATATTACAAATTGGAAACATAA  
+HWI-EAS443:3:2:505:1707#0/1  
`\_^]aaa`ba`\_`Uaaaa`aaaY`[aaaa^`\_`T\_aaa  
@HWI-EAS443:3:2:507:789#0/1  
CGCTAATTTACGGAAACCACTGACTGTCCAGCAGCAAAG  
+HWI-EAS443:3:2:507:789#0/1  
abZ\_aaaa[`aaa]LZ`\_¥\_^\_a^Wa`¥Q¥T\_VGaWWUV¥  
@HWI-EAS443:3:2:549:1604#0/1  
CTGTGTTAAAGTACAACGGCATAATAACAGACACTATCAA  
+HWI-EAS443:3:2:549:1604#0/1  
ab`ababba``Yb`aaaba``baaa\_aaaba¥`aaa\_Wa^  
@HWI-EAS443:3:2:562:23#0/1  
AAATCTTGAGTTGTATGGAGAGGGAACCTCACCAATAGGA  
+HWI-EAS443:3:2:562:23#0/1  
`YY`N[a`a[\_PT^aX¥QVZY\_XTN\_WO]VRVUXZVXX  
@HWI-EAS443:3:2:601:790#0/1  
GTCGCTTGGTCAGCAAGTGCTTGTGCATGATGGCATCAATT  
+HWI-EAS443:3:2:601:790#0/1  
aV¥aaa`aWZ^[Z^¥\_U\_S SX\_WS^]\_NXX^W]UU]VY]  
@HWI-EAS443:3:2:602:1207#0/1  
CACAACTGCCTGTCTTATCATTAGGGCGTGGATTGTCTCC  
+HWI-EAS443:3:2:602:1207#0/1  
a^Y¥W[`H]X[`Va¥^aX^`\_[R[FQY^]^S\_XWVNUVB  
@HWI-EAS443:3:2:712:63#0/1  
TGGAGAAACAATATATTGAGAACACAAGAGTCTGAATGTG  
+HWI-EAS443:3:2:712:63#0/1  
aaa\_a\_]Y]^a\_\_\_\_`\_aaa\_] ^Y\_]`[][[]^[[Y][^  
@HWI-EAS443:3:2:761:867#0/1  
GGACCACAACCTGCCTGTCTTATCATTAGGGCGTGGATTGT  
+HWI-EAS443:3:2:761:867#0/1  
a`^UV\_\_\_aS^`\_¥^aVZ[\_\_\_ZW\_] [GWZZ[¥W^^WW¥\_B  
@HWI-EAS443:3:2:774:295#0/1  
GCCCCTAATTATCACTATGAGGAATGCTCCTGTTATCCTG  
+HWI-EAS443:3:2:774:295#0/1  
aaa`a`aa`\_a`¥\_\_\_\_`aa`\_]\_\_\_\_^X\_] [^`Z^^]Z]]^  
@HWI-EAS443:3:2:782:1451#0/1  
CATGTGTGTGCAGGGATAACTGGCATGGCTCGAATCGACC  
+HWI-EAS443:3:2:782:1451#0/1  
Ja`\_TaU``aTaaZW[YbaabbUbaaaZbaHaZ\_]JSUTDF  
@HWI-EAS443:3:2:90:1245#0/1  
TTCAAATACGGCAATGGTGTGGATAGGGAGAACTAAAA  
+HWI-EAS443:3:2:90:1245#0/1  
^R]aa^a\_¥V` [T`V]N^Xaa\_\_^¥\_]QT\_^Z]^ [¥\_  
@HWI-EAS443:3:2:929:767#0/1  
CAAATCTTGAGTTGTATGGAGAGGGAACCTCACCAATAGG  
+HWI-EAS443:3:2:929:767#0/1  
a^UR\_aaa`V^]aWSSa¥¥ababba]\_```\_`P[`]X`a\_

@HWI-EAS443:3:2:946:552#0/1  
GTTGAAAGACACCCACGGTCGATTTCGAGCCATGCCAGTTA  
+HWI-EAS443:3:2:946:552#0/1  
a\_a^\_\_`\_]¥a]¥V\_W`WQ\_¥¥WV¥W¥WVUWWWV¥WVB  
@HWI-EAS443:3:2:986:696#0/1  
CAACTGCCTGTCTTATCATTAGGGCGTGGATTGTCTCCGA  
+HWI-EAS443:3:2:986:696#0/1  
abaabbaabbaabbbbabbabab`aab`a`ab\_\_a`\_a`  
@HWI-EAS443:3:2:988:770#0/1  
AGCCCATCCACTAACAGGGCAGAGAGGAATTGCCCGCT  
+HWI-EAS443:3:2:988:770#0/1  
aX^]\_aa\_\_\_^\_^`^\_aa`]\_a¥a^`]`^¥¥Z\_`WKHXQW  
@HWI-EAS443:3:2:998:956#0/1  
CATATGTTAACATCAGCAACACCACTTTGCTGCTGGACA  
+HWI-EAS443:3:2:998:956#0/1  
^`U¥]VS`bbaZaMY`a`Y¥`[P\_`\_a]`[\_aZ[a\_\_[X  
@HWI-EAS443:3:30:1012:1468#0/1  
CCTTGGAATGCAGAACCTTCTTCTTACTCAAGGGCCTT  
+HWI-EAS443:3:30:1012:1468#0/1  
ab`^^¥]\_X¥`XY^`^^`aaa[`^aa^\_`WY¥YZQZ]  
@HWI-EAS443:3:30:1025:1854#0/1  
GTGTTCTCAATATATTGTTTCTCCAACCTTGATAGTGTC  
+HWI-EAS443:3:30:1025:1854#0/1  
`]\_]\_^a\_a`^a``¥a\_\_`^Y\_`[`\_\_\_S`]^WY^BB  
@HWI-EAS443:3:30:1138:928#0/1  
GTGTCTTTCAACCAGAATCTGGAATATCAGATAGGATACA  
+HWI-EAS443:3:30:1138:928#0/1  
aaa`aabaaaaaba`\_aaa]a\_\_`aa\_`^a\_a\_^][GY  
@HWI-EAS443:3:30:1152:1499#0/1  
GGTTGAAAGACACCCACGGTCGATTTCGAGCCATGCCAGTT  
+HWI-EAS443:3:30:1152:1499#0/1  
aZV\_^¥Gaa`ba]a^¥aYID¥NU[QSVNU¥N[VZVSB  
@HWI-EAS443:3:30:1161:65#0/1  
GTGGTCCAGTATCGTCTAATGGAGCAAATGGAGTAAAAGG  
+HWI-EAS443:3:30:1161:65#0/1  
aabbY`\_aa]aaaa`\_a\_\_aa\_Ua]\_^\_\_`\_]`X^]\_`\_\_  
@HWI-EAS443:3:30:1167:1232#0/1  
GGTTGGTCTTGCCAGACGGTCTGAGTTGCCATTTACCA  
+HWI-EAS443:3:30:1167:1232#0/1  
``RK\_`\_aaaaVL\_`^`]aWL]VUUDVNYVZ^[V^USGV  
@HWI-EAS443:3:30:1182:1442#0/1  
ATCAAGAGTTGGAGAAACAATATATTGAGAACAAGAGT  
+HWI-EAS443:3:30:1182:1442#0/1  
`¥]¥`a`Ra`W¥\_W^a]]]a\_aVa``\_]`^`ba\_^Z]]]¥  
@HWI-EAS443:3:30:1203:2030#0/1  
AATCAAAATCAGATTGAAACATGCAATCAAAGCGTCATTA  
+HWI-EAS443:3:30:1203:2030#0/1  
^aVN^a¥TUM`a`L\_^`[`\_\_RRaSa\_Ta\_N]RWXW^YPX  
@HWI-EAS443:3:30:1249:306#0/1  
AATCGACCGTGGGTGTCTTTCAACCAGAATCTGGAATATC

+HWI-EAS443:3:30:1249:306#0/1  
aababa[a\_V[bbTb\_\_aaaP]¥\_] ][\_[Za`a^\_] [W¥  
@HWI-EAS443:3:30:1301:441#0/1  
CTGGACCACAACCTGCCTGTCTTATCATTAGGGCGTGGATT  
+HWI-EAS443:3:30:1301:441#0/1  
Zbbbabbbbbbabbabbb\_bbbbbabbaabbbab`aba  
@HWI-EAS443:3:30:1320:1962#0/1  
CACTGCATATGTATCCTATCTGATATTCCAGATTCTGGTT  
+HWI-EAS443:3:30:1320:1962#0/1  
aaaa`abbabaab`b`bbaabaaaaaaaaaaaaa\_a`\_Wa  
@HWI-EAS443:3:30:1357:1775#0/1  
ATGGGCTCCTGTCTTTAATGGTTCCATTGGAATGTTTGTC  
+HWI-EAS443:3:30:1357:1775#0/1  
\_]\_\_^Zab`¥Y¥^`a``]Q]\_]\_WU]`Y¥¥\_[¥S\_[YOS  
@HWI-EAS443:3:30:1366:268#0/1  
GTCGCTTGGTCAGCAAGTGCTTGTGCATGATGGCATCAATT  
+HWI-EAS443:3:30:1366:268#0/1  
abababb]b[`aaY\_aa`aa`ba\_\_\_a]U\_]¥^\_]R\_]`^`  
@HWI-EAS443:3:30:1374:1163#0/1  
GCTTGGTCAGCAAGTGCTTGTGCATGATGGCATCAATTGGC  
+HWI-EAS443:3:30:1374:1163#0/1  
aaaa`b`bbbaa]a`aabab\_a`abaaaa\_aa\_a\_a`PM^  
@HWI-EAS443:3:30:1397:1461#0/1  
GGGGGATGTGTTTGTGCATAAGGGAACCATTTCATATCATGC  
+HWI-EAS443:3:30:1397:1461#0/1  
`\_X`bbbbaa`abaaabbabab``aa`]\_a\_baaa^]\_`a  
@HWI-EAS443:3:30:1439:1632#0/1  
GTGTAAATGGTTCTTGCTTTACTGTAATGACCGATGGACC  
+HWI-EAS443:3:30:1439:1632#0/1  
ZOa^^`\_a`a^\_\_`¥aaa\_aa\_X[Y`^]\_\_^^`\_`^U^Z[  
@HWI-EAS443:3:30:1514:1616#0/1  
GTGGTCCAGTATCGTCTAATGGAGCAAATGGAGTAAAAGG  
+HWI-EAS443:3:30:1514:1616#0/1  
aaab]^Saa`Z^\_Z^Z^`a¥`X]UY\_`a]\_YaN\_`^`\_¥  
@HWI-EAS443:3:30:1544:1450#0/1  
GTCATTTAGCAAGGCCCTTGAGTCAAGAAGAAGGTTCTG  
+HWI-EAS443:3:30:1544:1450#0/1  
\_P]aVaXZ]^^[^\_a[Z\_aa^P\_V¥]aZ[^X[^N]T¥^  
@HWI-EAS443:3:30:1555:419#0/1  
ATTAGACGATACTGGACCACAACCTGCCTGTCTTATCATT  
+HWI-EAS443:3:30:1555:419#0/1  
aabaaaaba`\_Z\_^^X¥\_XFY\_F¥[[\_¥]Y[aaY^[^^]Y  
@HWI-EAS443:3:30:1564:576#0/1  
CGAGCCATGCCAGTTATCCCTGCACACACATGTGATTTCA  
+HWI-EAS443:3:30:1564:576#0/1  
abbaaabbb\_]ababaaa\_a¥aaa`\_a`[\_`aa\_a[``^P`  
@HWI-EAS443:3:30:1663:594#0/1  
TGCACATTCAGACTCTTGTGTTCTCAATATATTGTTTCTC  
+HWI-EAS443:3:30:1663:594#0/1  
\_]ZZUaaaZ\_aXK^¥^]aT][a^\_\_¥`^^`¥`^aY`ZTY[

@HWI-EAS443:3:30:1752:1475#0/1  
AGCCACTCAATTCAACTTGGGAATCAAAATCAGATTGAAA  
+HWI-EAS443:3:30:1752:1475#0/1  
aab][ZaaaH[\_W`Saaa]`¥Y]R\_a\_a^aa^^^V\_^`  
@HWI-EAS443:3:30:1755:1663#0/1  
ACGATATCTTGCTTTATTGAGAAGTTATTGTCTGTCCCAG  
+HWI-EAS443:3:30:1755:1663#0/1  
a\_a`a`a`aaaUa`a`aaa\_\_\_\_\_Zaaaa`^^a[RXSRBB  
@HWI-EAS443:3:30:1758:1735#0/1  
ATCCGTTGCGATCCCAAATCATCTCAAACCGTTTCTTGA  
+HWI-EAS443:3:30:1758:1735#0/1  
aaa`aa``aa`\_\_\_\_`¥]W\_\_]^\_\_\_\_`\_ZZ`Z]^Z^XZZ  
@HWI-EAS443:3:30:1759:994#0/1  
ATTCATATCATGCTCCCCCTTGAATGCAGAACCTTCTTC  
+HWI-EAS443:3:30:1759:994#0/1  
¥X]Z^\_W\_Qaa\_YMX^\_TX\_TZXR[\_^THTT\_¥F]RFNPR  
@HWI-EAS443:3:30:188:1444#0/1  
GAATCGGTTCCAAGGGGGATGTGTTTGCATAAGGGAACC  
+HWI-EAS443:3:30:188:1444#0/1  
abaab^`UUab^\_Z]¥]YO[[\_^\_¥\_YSKQRY]\_ZPZ¥YVZ  
@HWI-EAS443:3:30:219:349#0/1  
AGATAGGATACATATGCAGTGGGATTTTTCGGAGACAATCC  
+HWI-EAS443:3:30:219:349#0/1  
a\_Ta`aa]`\_\_YZ```a`^`a`W`\_aa\_Ya]\_\_\_\_a\_]\_]\_  
@HWI-EAS443:3:30:235:1034#0/1  
GTCATTTAGCAAGGCCCTTGAGTCAAGAAGAAGTTCTG  
+HWI-EAS443:3:30:235:1034#0/1  
aababa`baa[\_abaabaaaa^ba¥aa````\_Y^`¥¥  
@HWI-EAS443:3:30:265:591#0/1  
TGAAATTAGCGGGCAATTCCTCTCTCTGCCCTGTAGTGG  
+HWI-EAS443:3:30:265:591#0/1  
\_aMX`Y`ba\_\_aY`aa`aa\_]\_[a`\_[Y]]`XY\_Z  
@HWI-EAS443:3:30:292:830#0/1  
CATCCACTAACAGGCGAGAGAGGAATTGCCCGTAATT  
+HWI-EAS443:3:30:292:830#0/1  
ab`aababVbbbaaab`b`aaa`aZXaa````X\_\_¥¥\_  
@HWI-EAS443:3:30:383:111#0/1  
CTTGGGAATCAAAATCAGATTGAAACATGCAATCAAAGCG  
+HWI-EAS443:3:30:383:111#0/1  
aaabbaaaa`a``aaabaaaa`a\_aaa`a\_a``\_\_`[`  
@HWI-EAS443:3:30:394:379#0/1  
CATGTGTAATGGTCTTGCTTTACTGTAATGACCGATGG  
+HWI-EAS443:3:30:394:379#0/1  
abbbZ\_^]baa`a\_aa`¥`a`aa¥aa``aa`\_aa\_a]`\_`\_  
@HWI-EAS443:3:30:415:1639#0/1  
ATCATGACAAGCACTTGCTGACCAAGCGACTGACTCAAAT  
+HWI-EAS443:3:30:415:1639#0/1  
V\_a`]W¥¥^\_ZVHYTZYb^VQYbaa\_a\_Y¥HRL[[`JYBB  
@HWI-EAS443:3:30:442:1937#0/1  
GACCGTGGGTGTCTTTCAACCAGAATCTGGAATATCAGAT





@HWI-EAS443:3:30:883:1126#0/1  
AAAGGATATGCTGCTCCCGCTAGTCCAGATTGTGTTCTCT  
+HWI-EAS443:3:30:883:1126#0/1  
XW`\_V]U0¥b^X¥\_`^[\_`TZR]NJKY`U¥]XH]ZYQSLT  
@HWI-EAS443:3:30:894:1864#0/1  
GTCCCAGTCCATCCGTTCCGATCCCAAATCATCTCAAAAC  
+HWI-EAS443:3:30:894:1864#0/1  
aaba\_\_QS\_Ua\_b^^[\_¥]^U[aaZ]]U]¥TTYN\_[``]R  
@HWI-EAS443:3:30:902:326#0/1  
CTCAATTCAACTTGGAATCAAATCAGATTGAAACATGC  
+HWI-EAS443:3:30:902:326#0/1  
abbababbabbbbbbbaaa`a`aaabababaaa\_aaa`  
@HWI-EAS443:3:30:963:1754#0/1  
ATCGGTTCCAAGGGGATGTGTTTGTGCATAAGGGAACCAT  
+HWI-EAS443:3:30:963:1754#0/1  
a^\_]ZX\_\_\_VTYZZZ]Z]V]ZZ]UYVRX^]SVVWZXRZZ  
@HWI-EAS443:3:30:978:1148#0/1  
TTTCAACCAGAATCTGGAATATCAGATAGGATACATATGC  
+HWI-EAS443:3:30:978:1148#0/1  
a\_¥Z\_a\_b\_]^^\_¥¥a^abaab]XaYaa^]aa[D^``[H\_  
@HWI-EAS443:3:31:1038:516#0/1  
CAATGGTGTGGATAGGGAGAACTAAAAGCATTAGTTCA  
+HWI-EAS443:3:31:1038:516#0/1  
aabbbba^aabbbba`bbbababbbababbbba`aaaa`\_\_`  
@HWI-EAS443:3:31:1071:1801#0/1  
ATCCACTAACAGGGCAGAGAGAGGAATTGCCCGCTAATTT  
+HWI-EAS443:3:31:1071:1801#0/1  
`\_abab\_¥¥QZ[^`¥XTFVKa`ZR]\_`\_TN][\_\_\_\_QLZ  
@HWI-EAS443:3:31:1086:833#0/1  
AACAATTGGAATTTCTGGCCAGACAATGGGGCAGTGGCT  
+HWI-EAS443:3:31:1086:833#0/1  
^W^]`bbaba`a^\_]b\_N¥\_]a`ba^¥^a]a\_\_\_bBBBBB  
@HWI-EAS443:3:31:1088:574#0/1  
AGACATATGTTAACATCAGCAACACCAACTTTGCTGCTGG  
+HWI-EAS443:3:31:1088:574#0/1  
\_ab[b^\_Vba``Y¥`¥^T^J¥WWW¥[K\_ba[SZ[J\_``aa\_  
@HWI-EAS443:3:31:1093:1745#0/1  
CAAAGAGAACAATCTGGACTAGCGGGAGCAGCATATCC  
+HWI-EAS443:3:31:1093:1745#0/1  
aXVXa[Za\_Pa`a]]aV^\_\_\_I^]U^YP[^Y]X^^]XX^L  
@HWI-EAS443:3:31:1103:1658#0/1  
GACAGACAATAACTTCTCAATAAAGCAAGATATCGTAGGA  
+HWI-EAS443:3:31:1103:1658#0/1  
a`b¥^aaa\_Z`b]^Y¥abab`babaa`aaaa\_[a`[aaa^  
@HWI-EAS443:3:31:1106:180#0/1  
TCAAATCAGATTGAAACATGCAATCAAAGCGTCATTACT  
+HWI-EAS443:3:31:1106:180#0/1  
ZS\_b`\_a]a^a\_bbbaaa\_a``\_`^`aa¥V^\_^Za\_]`\_`^  
@HWI-EAS443:3:31:1196:98#0/1  
CAAATCAGATTGAAACATGCAATCAAAGCGTCATTACTT

+HWI-EAS443:3:31:1196:98#0/1  
abbbbbbbbbbbbbbbbab`bab`bbab\_b\_aaaaaaba  
@HWI-EAS443:3:31:1200:1944#0/1  
GAGGAATTGCCCGCTAATTTACGGAAACCACTGACTGTC  
+HWI-EAS443:3:31:1200:1944#0/1  
`abbabbbbaaaabbabbbbbbaaaa`aaaa`a`aaa\_  
@HWI-EAS443:3:31:1278:87#0/1  
ACTGACTGTCCAGCAGCAAAGTTGGTGTGCTGATGTAA  
+HWI-EAS443:3:31:1278:87#0/1  
a`bbbbba`\_]a\_a^S¥`\_`¥\_]\_WY^`UV[RSYZP`VO  
@HWI-EAS443:3:31:1291:1003#0/1  
TAATAACAGACACTATCAAGAGTTGGAGAAACAATATATT  
+HWI-EAS443:3:31:1291:1003#0/1  
`a`bb`¥a`abba``b\_¥]bab^`\_`^¥aa`aaaaab]  
@HWI-EAS443:3:31:1327:1956#0/1  
CTTTAACACAGCCACTGCCCATTTGTCTGGGCCAGAAATT  
+HWI-EAS443:3:31:1327:1956#0/1  
`babbbabab`\_a`aaVaaa`\_`a^`\_\_`ZX\_\_]^aa¥V  
@HWI-EAS443:3:31:135:1973#0/1  
TGCAGTGGGATTTTCGGAGACAATCCACGCCCTAATGATA  
+HWI-EAS443:3:31:135:1973#0/1  
aaba¥Za``aaaaabaaY¥aaaa\_aaa`\_`aaY`^¥¥\_[¥  
@HWI-EAS443:3:31:1421:1118#0/1  
GGGGGATGTGTTTGTGCATAAGGGAACCATTTCATATCATGC  
+HWI-EAS443:3:31:1421:1118#0/1  
\_aaababb\_b\_bbbaabbbb\_baaaa``abaabba]a`M  
@HWI-EAS443:3:31:1452:595#0/1  
GGGGGATGTGTTTGTGCATAAGGGAACCATTTCATATCATGC  
+HWI-EAS443:3:31:1452:595#0/1  
a`aba`aa`a]aaa\_\_a``a`a\_\_\_\_\_W\_a\_]^^`\_[a\_\_¥  
@HWI-EAS443:3:31:1458:170#0/1  
CGGGAGTTTTGTTTCAGCATCCAGAACTAACAGGGCTGGAT  
+HWI-EAS443:3:31:1458:170#0/1  
`bW`bb`bbbaababaaaaa``babab^aa^a`ba\_^  
@HWI-EAS443:3:31:1475:685#0/1  
CAGGAGCATTTCCTCATAGTGATAATTAGGGGCATTCATTT  
+HWI-EAS443:3:31:1475:685#0/1  
aabb`\_`aaabaabaaa\_a]b`a`abaaaaaaa`aa^aaa\_  
@HWI-EAS443:3:31:1517:390#0/1  
CGGGAGCAGCATATCCTTTTGTGGTGTAACAGTGACACT  
+HWI-EAS443:3:31:1517:390#0/1  
ababbbabaabbbb`abbbbbaaaa`bbaabababaaaaa  
@HWI-EAS443:3:31:1569:1706#0/1  
AATCCCACTGCATATGTATCCTATCTGATATTCCAGATTC  
+HWI-EAS443:3:31:1569:1706#0/1  
abbbbaaaabaaabaaa^aa`[`aa]baaaaa\_\_a``a`]  
@HWI-EAS443:3:31:161:1093#0/1  
AGCCACTCAATTCAACTTGGGAATCAAATCAGATTGAAA  
+HWI-EAS443:3:31:161:1093#0/1  
a\_ba`bab`T`ab``aaaa\_aaaa`^a[`abaa\_\_`\_a^`

@HWI-EAS443:3:31:1630:1304#0/1  
GGGTGTCTTTCAACCAGAATCTGGAATATCAGATAGGATA  
+HWI-EAS443:3:31:1630:1304#0/1  
`bb\_aa\_bbb\_bb^abbbb\_bbaaabab\_a`aa`\_aaa`  
@HWI-EAS443:3:31:1773:372#0/1  
CAAAATCAGATTGAAACATGCAATCAAAGCGTCATTACTT  
+HWI-EAS443:3:31:1773:372#0/1  
aabXb]]`XaaaaY#a^`bbaY`SUa^U]UaNQ\_a\_UYbS  
@HWI-EAS443:3:31:1774:1365#0/1  
ATGCAATCAAAGCGTCATTACTTATGAAAACAACACTTGG  
+HWI-EAS443:3:31:1774:1365#0/1  
abbab\_a`baaa\_a^aa`a\_a``\_\_aa]a`\_`^`]]]\_[  
@HWI-EAS443:3:31:220:1238#0/1  
GTGGTCCAGTATCGTCTAATGGAGCAAATGGAGTAAAAGG  
+HWI-EAS443:3:31:220:1238#0/1  
a\_aa¥S`aa\_aaba^aaa^¥SY]^][^a`[]\_aZ^` `a`a  
@HWI-EAS443:3:31:319:1295#0/1  
CTGACCACTCATTTATTCCTACGATATCTTGCTTTATTGA  
+HWI-EAS443:3:31:319:1295#0/1  
a[Y]\_a[^`\_\_\_\_]` `^`\_[^Y\_ZZU¥]XR^[^0^]\_ZUW  
@HWI-EAS443:3:31:33:1734#0/1  
ATCAAATCAGATTGAAACATGCAATCAAAGCGTCATTAC  
+HWI-EAS443:3:31:33:1734#0/1  
aab\_[R\_aa\_a` `a\_aa[\_a`aaa` `Z`Z\_`][\_\_\_\_^` [  
@HWI-EAS443:3:31:425:768#0/1  
GTTTGGATAGGGAGAACTAAAAGCATTAGTTCAAGAAACG  
+HWI-EAS443:3:31:425:768#0/1  
\_¥bbba]aa^aa^`ba^a`a`aaaa^`\_W`]a`a`]WU`  
@HWI-EAS443:3:31:444:731#0/1  
TGTTATTATGCCGTTGTACTTTAACACAGCCACTGCCCA  
+HWI-EAS443:3:31:444:731#0/1  
`baababbabaaaaab\_bbaa`aaab\_a`\_`^a`V`aa`\_  
@HWI-EAS443:3:31:449:1536#0/1  
GGGGGATGTGTTTGTGCATAAGGGAACCATTCATATCATGC  
+HWI-EAS443:3:31:449:1536#0/1  
aaa`b`aba\_^`]aY`a^`[]`W`aaa\_aaab`aaZa^a]  
@HWI-EAS443:3:31:457:854#0/1  
CTCCTGTCTTTAATGTTCCATTGGAATGTTTGTCTTTA  
+HWI-EAS443:3:31:457:854#0/1  
aabbbbaaaabbaab]`ab`R`^[`[XWMY^^`\_\_a`\_\_\_\_  
@HWI-EAS443:3:31:459:1400#0/1  
AGCGGGAGCAGCATATCCTTTTGTGGTGTAAACAGTGACA  
+HWI-EAS443:3:31:459:1400#0/1  
aaa\_a^`SaVZ`¥^a`Z]\_a`\_¥\_U¥HW¥[\_\_\_\_XS\_\_^^  
@HWI-EAS443:3:31:463:1665#0/1  
CAGTGGGATTTTCGGAGACAATCCACGCCCTAATGATAAG  
+HWI-EAS443:3:31:463:1665#0/1  
aaaa]abababab\_\_bbb`bbabbbbaaabaab`^a`ab]  
@HWI-EAS443:3:31:477:1910#0/1  
CGGTCATTACAGTAAAGCAAGAACCATTTACACATGCACA

+HWI-EAS443:3:31:477:1910#0/1  
aaa`bba`bbaa\_bababaaa`baaaaaaaaaa\_`a`\_`  
@HWI-EAS443:3:31:515:629#0/1  
CTTGAGTCAAGAAGAAGTTCTGCATTCCAAGGGGAGCA  
+HWI-EAS443:3:31:515:629#0/1  
aaa¥J[abba\_`^TPY]^a^`a]\_`a¥]QGXR\_]XX\_  
@HWI-EAS443:3:31:524:430#0/1  
GGGATCCGAACGGATGGACTGGGACAGACAATAACTTCTC  
+HWI-EAS443:3:31:524:430#0/1  
¥U¥`V\_UUTa[aa¥\_]U[WSOU]^ZYLT SZPT00VYVVQ  
@HWI-EAS443:3:31:616:1266#0/1  
AAAGACACCCACGGTCGATTGAGCCATGCCAGTTATCCC  
+HWI-EAS443:3:31:616:1266#0/1  
``^]aabaaa]aa[JZNVVUZBBBBBBBBBBBBBBBBB  
@HWI-EAS443:3:31:666:247#0/1  
TTCAACTTGGGAATCAAATCAGATTGAAACATGCAATCA  
+HWI-EAS443:3:31:666:247#0/1  
a`b`\_`\_`aaaaaaaaa`a```aaaa```a`\_`^¥^  
@HWI-EAS443:3:31:706:1617#0/1  
TCAAATCAGATTGAAACATGCAATCAAAGCGTCATTACT  
+HWI-EAS443:3:31:706:1617#0/1  
aab][Y\_bY`a`\_`\_`a`aa^a[VWaa`YS`¥^```^\_`^Z  
@HWI-EAS443:3:31:802:116#0/1  
AAGACAGGAGCCCATATCGAACCTAATGAGCTGCCTAT  
+HWI-EAS443:3:31:802:116#0/1  
\_Uaaa\_\_PZ\_]U`\_YZYa\_aa[Z\_`¥ZXY[\_][VUVQ]XU  
@HWI-EAS443:3:31:851:965#0/1  
GCTGGACAGTCAGTGGTTCCGTGAAATTAGCGGGCAATT  
+HWI-EAS443:3:31:851:965#0/1  
`aR\_X]WW\_WZ^`M)`GX\_SZ\_NOJZURZ[Z\_`a]QSVGX  
@HWI-EAS443:3:31:901:167#0/1  
CCGAAAATCCCCTGATATGTATCCTATCTGATATCCA  
+HWI-EAS443:3:31:901:167#0/1  
`¥¥RZXYyb]^Q\_V\_\_`Y^\_¥N`aa^PZZ^`^X``[WVR^  
@HWI-EAS443:3:32:1102:1148#0/1  
GTGTAACAGTGACACTGTGGTTGGTCTTGCCAGACGG  
+HWI-EAS443:3:32:1102:1148#0/1  
a`aabb`bba`abba^ab`baa\_`aa¥`a`aadU`]a\_aa  
@HWI-EAS443:3:32:1122:1820#0/1  
TGGCTGTGTTAAAGTACAACGGCATAATAACAGACACTAT  
+HWI-EAS443:3:32:1122:1820#0/1  
aaZ¥]aQRY¥X\_`XT^\_¥aVZYV]¥a¥S\_aQ¥`]T\_b\_Z]  
@HWI-EAS443:3:32:1122:479#0/1  
GTGAAATTAGCGGGCAATTCCTCTCTCTGCCCTGTTAGTG  
+HWI-EAS443:3:32:1122:479#0/1  
`Z\_\_aa``aa][Q¥¥^]`¥[Z`\_`^^^[^U^[`\_`^VR[Ya  
@HWI-EAS443:3:32:1161:541#0/1  
TAAGACCTTGCTTCTGGGTTGAACTAATCAGAGGGCGACC  
+HWI-EAS443:3:32:1161:541#0/1  
aba`a^`aaaa`aaaaXa\_a\_ab[a``a`[[[\_`^]]`¥]X

@HWI-EAS443:3:32:1182:948#0/1  
AGTTGGAGAAACAATATATTGAGAACACAAGAGTCTGAAT  
+HWI-EAS443:3:32:1182:948#0/1  
a`J]^LR[T]\_b`[aaa\_P`b[a\_`]aaaaaaZaaa^`Z  
@HWI-EAS443:3:32:1187:1495#0/1  
ATGGCATCAATTGGCTAACAAATTGGAATTTCTGGCCCAGA  
+HWI-EAS443:3:32:1187:1495#0/1  
X]^\_`^`[X^^Z^\_\_Y^^\_Z^\_WTY^aaZSNS¥VL^^][  
@HWI-EAS443:3:32:1314:1398#0/1  
TGCATGTGTAATGGTTCTTGCTTTACTGTAATGACCGAT  
+HWI-EAS443:3:32:1314:1398#0/1  
aba`aaab]abbaaaXa\_aaa^a`a\_^aaZ^aa^`Xaa]`  
@HWI-EAS443:3:32:1315:1930#0/1  
GACATATGTTAACATCAGCAACACCAACTTTGCTGCTGGA  
+HWI-EAS443:3:32:1315:1930#0/1  
a\_`^XzbYR\_bY`]YDYYZ`\_^X¥[a[WJV`XVNaTT]`[  
@HWI-EAS443:3:32:1327:685#0/1  
AACGGATGGACTGGGACAGACAATAACTTCTCAATAAAGC  
+HWI-EAS443:3:32:1327:685#0/1  
abaaaa\_ab\_\_a`a`Y[`a[MYa\_``0\_\_X^[\_`¥Za\_¥`  
@HWI-EAS443:3:32:1356:427#0/1  
CTGCCTGTCTTATCATTAGGGCGTGGATTGTCTCCGAAAA  
+HWI-EAS443:3:32:1356:427#0/1  
abbbbbbb`abbabbaabaabaa\_aaabaa\_WaYaaZa]b  
@HWI-EAS443:3:32:1402:1001#0/1  
GGGATTTTCGGAGACAATCCACGCCCTAATGATAAGACAG  
+HWI-EAS443:3:32:1402:1001#0/1  
a^RS]WYX[\_`ZT\_THXZT[`¥\_PXFR]NNWUUBBBBBBB  
@HWI-EAS443:3:32:1416:1830#0/1  
GCTCCCGCTAGTCCAGATTGTGTTCTCTTTGGGTCGCCCT  
+HWI-EAS443:3:32:1416:1830#0/1  
aa`\_aaaa`]¥`\_\_]UXaa^¥[^WP[^`\_\_USWQSR]a`¥  
@HWI-EAS443:3:32:1427:262#0/1  
CTCCCGCTAGTCCAGATTGTGTTCTCTTTGGGTCGCCCTC  
+HWI-EAS443:3:32:1427:262#0/1  
abT\_aa]a]a¥TVN`^`¥`WaV\_^^[^ZY\_[NRYQa[\_\_\_  
@HWI-EAS443:3:32:1470:1167#0/1  
GTTTGGATAGGGAGAACTAAAAGCATTAGTTCAAGAAACG  
+HWI-EAS443:3:32:1470:1167#0/1  
a`bbba]a\_`a\_a`\_]`]a\_`^U\_`^\_¥W^]^[\_`^\_`  
@HWI-EAS443:3:32:1471:1235#0/1  
CCTTGGAAATGCAGAACCTTCTTCTTGACTCAAGGGCCTT  
+HWI-EAS443:3:32:1471:1235#0/1  
aab^^a``][^aaa`]Z``[[aaa¥[\_Z^Y`ZYUa`aa  
@HWI-EAS443:3:32:1527:1298#0/1  
GTGTAATGGTTCTTGCTTTACTGTAATGACCGATGGACC  
+HWI-EAS443:3:32:1527:1298#0/1  
a[^`^a```^]a\_a\_ba^W`a\_`U``^\_\_\_\_^^Xa\_`\_a`¥W  
@HWI-EAS443:3:32:1533:359#0/1  
AAGCGACTGACTCAAATCTTGAGTTGTATGGAGAGGGAAC

+HWI-EAS443:3:32:1533:359#0/1  
abbaba`bbaab`ba`bYbbb`a`aa`abaa`a]b`aaba  
@HWI-EAS443:3:32:1539:1056#0/1  
ATCCACTAACAGGGCAGAGAGAGGAATTGCCCGCTAATTT  
+HWI-EAS443:3:32:1539:1056#0/1  
a`aababbbab`^a]^¥`a^][[`a]¥P[UaZ`[UZa`  
@HWI-EAS443:3:32:1690:992#0/1  
GCCCCGCTAATTTACGGAAACCACTGACTGTCCAGCAGCA  
+HWI-EAS443:3:32:1690:992#0/1  
^b^Uaabbaa\_`]aa¥a^ba\_]\_T`aa`a]RNXX\_R¥[`]  
@HWI-EAS443:3:32:1700:496#0/1  
CAAGAGTTGGAGAAACAATATATTGAGAACACAAGAGTCT  
+HWI-EAS443:3:32:1700:496#0/1  
Sabbababbbabbbbaabbbbbb]babaabbbb  
@HWI-EAS443:3:32:225:1312#0/1  
CAGTCGCTTGGTCAGCAAGTGCTTGCATGATGGCATCAA  
+HWI-EAS443:3:32:225:1312#0/1  
a¥a^babaa[\_\_\_aS]aabYZ\_a\_[[[a\_^WZ^]]`YV^\_\_  
@HWI-EAS443:3:32:251:1614#0/1  
CAAGAGTTGGAGAAACAATATATTGAGAACACAAGAGTCT  
+HWI-EAS443:3:32:251:1614#0/1  
aab`]^`^aaaaa¥¥V`aaaaaa`a]a^`a`aa\_a^Za\_  
@HWI-EAS443:3:32:304:1836#0/1  
CTGTCCCAGTCCATCCGTTCCGATCCCAAATCATCTCAAA  
+HWI-EAS443:3:32:304:1836#0/1  
a¥^YaaaaXZaa\_Z^\_]TPZRUI]VWZSGSYSVZT^YZPUH  
@HWI-EAS443:3:32:320:718#0/1  
AGAAGTTATTGTCTGTCCCAGTCCATCCGTTCCGATCCCA  
+HWI-EAS443:3:32:320:718#0/1  
Va`Zb\_]bbb`]ba]N]¥YHSX[¥¥PGUJIIJORB BBBB  
@HWI-EAS443:3:32:325:1457#0/1  
GTGGATTGTCTCCGAAAATCCCACTGCATATGTATCCTAT  
+HWI-EAS443:3:32:325:1457#0/1  
^SWa]YX¥Raa¥W]]aVa^¥]¥[aKHHXYJFRRUR[UWB  
@HWI-EAS443:3:32:328:274#0/1  
GATATGAATGGTCCCTTATGACAAACACATCCCCCTTGG  
+HWI-EAS443:3:32:328:274#0/1  
aaabaabbaaa\_aa`aa]W]aaa`a`\_\_Y\_\_`[Za]Z]^^  
@HWI-EAS443:3:32:2023#0/1  
GGTGTGGATAGGGAGAACTAAAAGCATTAGTTCAAGAA  
+HWI-EAS443:3:32:2023#0/1  
aaX`bbab`aaaa`aaa^abbbb¥baabaaa`Ya`a\_aaa  
@HWI-EAS443:3:32:455:109#0/1  
GTCCCAGTCCATCCGTTCCGATCCCAAATCATCTCAAAAC  
+HWI-EAS443:3:32:455:109#0/1  
\_aa`]aZa\_aNaa\_HQS]LQUZ^]XYUU]UX]UXPFX¥]  
@HWI-EAS443:3:32:470:258#0/1  
TGCCTGTCTTATCATTAGGGCGTGGATTGTCTCCGAAAAT  
+HWI-EAS443:3:32:470:258#0/1  
a``aaa\_aaaaaaaa`a\_Z`a`^\_]`^``X\_X^\_\_[[]^U

@HWI-EAS443:3:32:500:882#0/1  
CTCTGATTAGTTCAACCCAGAAGCAAGGTCTTATACAATC  
+HWI-EAS443:3:32:500:882#0/1  
a\_aa\_WZ]`TP]a`a]]^R\_YVV][ZRXMS\_\_`\_\_Z^^WY  
@HWI-EAS443:3:32:517:1854#0/1  
CAACTGCCTGTCTTATCATTAGGGCGTGGATTGTCTCCGA  
+HWI-EAS443:3:32:517:1854#0/1  
a`bab¥abba]bbaaab`aab[R^a\_\_\_\_\_a`a\_\_a\_aa[J  
@HWI-EAS443:3:32:563:1592#0/1  
CTGCATTCCAAGGGGAGCATGATATGAATGGTCCCTTA  
+HWI-EAS443:3:32:563:1592#0/1  
a^[`]]`aaaa`\_]\_]`[aaa`\_\_`]\_a\_Z\_ZXW]]aYUX  
@HWI-EAS443:3:32:565:773#0/1  
CAGACATATGTTAACATCAGCAACACCAACTTTGCTGCTG  
+HWI-EAS443:3:32:565:773#0/1  
aW^Z¥¥abba\_\_][\_Z^`\_\_`aZT\_`a]X^\_\_\_\_`a\_¥`[U  
@HWI-EAS443:3:32:566:1859#0/1  
CGCTAATTTACGGAAACCACTGACTGTCCAGCAGCAAAG  
+HWI-EAS443:3:32:566:1859#0/1  
aabaa`aaaaab[`[]aa\_aa`]a`aZ[`^XU`UUPNX[¥  
@HWI-EAS443:3:32:571:176#0/1  
TACATATGCAGTGGGATTTTCGGAGACAATCCACGCCCTA  
+HWI-EAS443:3:32:571:176#0/1  
a`abaaabaab`a`b\_``babaa\_aa\_`\_\_`\_`a[^[a[^`  
@HWI-EAS443:3:32:606:691#0/1  
ATCAATTGGCTAACAATTGGAATTTCTGGCCCAGACAATG  
+HWI-EAS443:3:32:606:691#0/1  
I]`ZX]\_^X^a`aXQ¥Z\_\_UU]WZXU^Y[\_^0`\_RWGZ`  
@HWI-EAS443:3:32:675:133#0/1  
AAACAATATATTGAGAACACAAGAGTCTGAATGTGCATGT  
+HWI-EAS443:3:32:675:133#0/1  
ab\_\_aaa\_\_aaa^a^a\_YW[X`\_\_U^aaZ]`\_U\_[]\_`^Y  
@HWI-EAS443:3:32:699:1190#0/1  
CAATTGATGCCATCATGACAAGCACTTGCTGACCAAGCGA  
+HWI-EAS443:3:32:699:1190#0/1  
abba^[a][\_`X^a\_`\_\_a``\_]\_]]]^^^]]VZ[^\_^^  
@HWI-EAS443:3:32:74:532#0/1  
GTTTTGAGATGATTTGGGATCCGAACGGATGGACTGGGAC  
+HWI-EAS443:3:32:74:532#0/1  
a\_ab`b]aX^a]a`aaa\_¥^Xa[NT[W[]^^\_Y]¥W¥^UW  
@HWI-EAS443:3:32:787:513#0/1  
CGCTAATTTACGGAAACCACTGACTGTCCAGCAGCAAAG  
+HWI-EAS443:3:32:787:513#0/1  
aaaaaZaaa`aaaaaaa\_`a\_H^aZaa`\_\_`\_`a^\_NV^¥^  
@HWI-EAS443:3:32:828:410#0/1  
TTGTTAGCCAATTGATGCCATCATGACAAGCACTTGCTGA  
+HWI-EAS443:3:32:828:410#0/1  
`^^^bb^aa\_\_aa¥`\_\_`a]`\_\_`aa\_\_a`a`a`¥[``UXW  
@HWI-EAS443:3:32:848:819#0/1  
GCAATGGTGTGGATAGGGAGAATAAAAGCATTAGTTC

+HWI-EAS443:3:32:848:819#0/1  
a`\_]^^aWa\_aa]\_]\_a\_\_\_0\_^`Z\_XRY\_\_0¥UZZ`¥GG  
@HWI-EAS443:3:32:925:1556#0/1  
AACAGACACTATCAAGAGTTGGAGAAACAATATATTGAGA  
+HWI-EAS443:3:32:925:1556#0/1  
aab`]bbbbba`a\_a^`^``aa\_aa`a`aaa`^`^`^`[\_  
@HWI-EAS443:3:32:944:1260#0/1  
ATTAGTTCAACCCAGAAGCAAGTCTTATACAATCCAGCC  
+HWI-EAS443:3:32:944:1260#0/1  
a]^^^\_aY`b]^^aY^`Y`^^\_WGY\_\_`]\_aa\_\_\_\_\_  
@HWI-EAS443:3:32:976:133#0/1  
ATTCTAGTGAATCACATGTGTGTGCAGGGATAACTGGCA  
+HWI-EAS443:3:32:976:133#0/1  
abbaaaa^aabbaba`ab\_a\_a\_a]\_aa^`\_`\_^\_a\_a`  
@HWI-EAS443:3:32:996:726#0/1  
ATCCGTTTCGGATCCCAAATCATCTCAAACCGTTTCTTGA  
+HWI-EAS443:3:32:996:726#0/1  
``aaa¥Yab¥]U]a`\_Z\_`a\_¥\_OZ][UY\_a]\_[TT]Y¥  
@HWI-EAS443:3:33:1021:689#0/1  
GAAGAAGTTCTGCATTCCAAGGGGAGCATGATATGAAT  
+HWI-EAS443:3:33:1021:689#0/1  
\_bb`]UbbabaU]a\_b`]^ZWa`b¥``\_b\_]\_\_a]a¥` [  
@HWI-EAS443:3:33:1028:261#0/1  
ATGATGGCATCAATTGGCTAACAATTGGAATTTCTGGCCC  
+HWI-EAS443:3:33:1028:261#0/1  
ab\_]b`bbaa`^abaa¥a^P`Z\_`a\_P¥\_a\_\_N^¥^aY¥^  
@HWI-EAS443:3:33:1032:1113#0/1  
CTCATTATTCTACGATATCTTGCTTTATTGAGAAGTTA  
+HWI-EAS443:3:33:1032:1113#0/1  
ababaabbababaaabbaaaaa\_\_a```aaa`[a^`X`a  
@HWI-EAS443:3:33:111:208#0/1  
CAAAATCAGATTGAAACATGCAATCAAAGCGTCATTA  
+HWI-EAS443:3:33:111:208#0/1  
a¥abaaabbbbaaaaabbbabaaaa`a``aa^\_aa``\_a\_  
@HWI-EAS443:3:33:1126:735#0/1  
GACACCCACGGTCGATTCGAGCCATGCCAGTTATCCCTGC  
+HWI-EAS443:3:33:1126:735#0/1  
`)`aa]aaa¥ZSS\_`\_`[¥Z[[XY¥YP¥¥[SWRWQUUUYT  
@HWI-EAS443:3:33:1224:1065#0/1  
GAACCATTATCATGCTCCCCCTTGAATGCAGAACCT  
+HWI-EAS443:3:33:1224:1065#0/1  
Xaa\_\_Tta`¥ababb\_\_¥YyaX]aaXPTX``aU`X^[XY  
@HWI-EAS443:3:33:1271:1816#0/1  
TTTGGATAGGGAGAACTAAAAGCATTAGTTCAAGAAACGG  
+HWI-EAS443:3:33:1271:1816#0/1  
aabababa`aV\_[a\_[aaaa^`\_`\_\_[\_^][0¥Z^aVaV  
@HWI-EAS443:3:33:1285:720#0/1  
CGCTTGGTCAGCAAGTGTCTTGTGTCATGATGGCATCAATTGG  
+HWI-EAS443:3:33:1285:720#0/1  
ab¥`\_W¥X]a^¥Z]\_^`^^¥b\_^ZY`Va]\_\_`M]\_^[¥ZV



@HWI-EAS443:3:33:1340:1445#0/1  
ATTGGAATGTTTGTCAATTTAGCAAGGCCCTTGAGTCAAG  
+HWI-EAS443:3:33:1340:1445#0/1  
abb`bb`bb`bbbaabaaba\_\_a`ba\_\_`^\_\_a  
@HWI-EAS443:3:33:1415:1097#0/1  
ATATAGCCCATCCACTAACAGGGCAGAGAGGAATTGCC  
+HWI-EAS443:3:33:1415:1097#0/1  
aba`b`b`b`baaaa\_\_`^`\_\_`^`\_Y#WYV^W^ZY[ZXN  
@HWI-EAS443:3:33:1435:995#0/1  
TCTCCATACAACTCAAGATTTGAGTCAGTCGCTTGGTCAG  
+HWI-EAS443:3:33:1435:995#0/1  
a`aabaa\_aaa`a^a`a`^`\_]^U\_WVWYV]SSPUVR  
@HWI-EAS443:3:33:1480:1420#0/1  
CTGGGCCAGAAATTCCAATTGTTAGCCAATTGATGCCATC  
+HWI-EAS443:3:33:1480:1420#0/1  
a`Za[WTZZ[\_][^\_[VLL[]\_WDVNQTRNQWSPRRV  
@HWI-EAS443:3:33:1514:1200#0/1  
ATTAGTTCAACCCAGAAGCAAGTCTTATACAATCCAGCC  
+HWI-EAS443:3:33:1514:1200#0/1  
aa`bb`a#aa]a`a[]`#^a`#`\_\_R\_]V]WQR  
@HWI-EAS443:3:33:1546:487#0/1  
TTCTCCCTATCCAAACACCATTGCCGTTTGAATGAAAA  
+HWI-EAS443:3:33:1546:487#0/1  
a]#RTXYW\_WWZ[V]]\_[]Z[V\_Z]aX#[XX^OXW^ZXXY  
@HWI-EAS443:3:33:1652:1584#0/1  
ACAGACACTATCAAGAGTTGGAGAAACAATATATTGAGAA  
+HWI-EAS443:3:33:1652:1584#0/1  
`aUQX#a\_]#`aaa`\_\_a`Ya`\_`N`\_]^^WZYX]]  
@HWI-EAS443:3:33:165:1073#0/1  
TGTAACAGTGACACTGTGGGTTGGTCTTGGCCAGACGGT  
+HWI-EAS443:3:33:165:1073#0/1  
a^`[T`a\_`^aaaaa#a`Z\_`#Za`\_X\_[^\_Y^^[W  
@HWI-EAS443:3:33:1737:890#0/1  
GGGAGAACTAAAAGCATTAGTTCAAGAAACGGTTTTGAGA  
+HWI-EAS443:3:33:1737:890#0/1  
abb\_aab\_a[bb\_b[\_b`\_Z\_Za[]PV#P]SG^XVJJXN  
@HWI-EAS443:3:33:1783:626#0/1  
GGGTTGATATGGGCTCCTGTCTTTAATGGTTCCATTGGA  
+HWI-EAS443:3:33:1783:626#0/1  
aaa\_a`b`a`ab`a`a\_aa\_#a`a^a`a]]SUYY\_]Q  
@HWI-EAS443:3:33:209:1928#0/1  
AATATATTGAGAACAAGAGTCTGAATGTGCATGTGTAA  
+HWI-EAS443:3:33:209:1928#0/1  
aaab`aaa`a\_\_`a^aaa`\_`Za\_\_\_\_\_^#[]\_\_^#Z^[`a  
@HWI-EAS443:3:33:252:103#0/1  
ATTTGCTCCATTAGACGATACTGGACCACAAGTGCCTGTC  
+HWI-EAS443:3:33:252:103#0/1  
aaaaaaaaabaa[aaa`a]]`\_[]`^V\_UU]TPRWV[TVSP  
@HWI-EAS443:3:33:282:125#0/1  
TGCATGTGTAATGGTTCTTGTCTTTACTGTAATGACCGAT

+HWI-EAS443:3:33:282:125#0/1  
abbaabab`\_abb\_`]aaaaaaaaa\_a`\_^[T``^`a`\_  
@HWI-EAS443:3:33:290:1776#0/1  
GCCCCGCTAATTTACGGAACCACTGACTGTCCAGCAGCA  
+HWI-EAS443:3:33:290:1776#0/1  
`abaaaV\_S[YT]W\_¥\_FLYMKZTBBBBBBBBBBBBBBB  
@HWI-EAS443:3:33:312:1567#0/1  
GTCGCTTGGTCAGCAAGTGCTTGTGCATGATGGCATCAATT  
+HWI-EAS443:3:33:312:1567#0/1  
[abba]a[\_[`R¥ZZX\_HZ^`\_[U`ZYPYU`XDS^`\_Y[]  
@HWI-EAS443:3:33:315:1493#0/1  
GAATATCAGATAGGATACATATGCAGTGGGATTTTCGGAG  
+HWI-EAS443:3:33:315:1493#0/1  
`a`¥aaa^\_Z^b]X¥\_YYO[O[SO^WFQYGVXM^X]RLY[  
@HWI-EAS443:3:33:32:1687#0/1  
CGCTAATTTACGGAACCACTGACTGTCCAGCAGCAAAG  
+HWI-EAS443:3:33:32:1687#0/1  
a]\_RZR^`Y[]a]\_¥\_]```UYX\_¥US¥BBBBBBBBBBB  
@HWI-EAS443:3:33:340:673#0/1  
CAGACATATGTTAACATCAGCAACACCAACTTTGCTGCTG  
+HWI-EAS443:3:33:340:673#0/1  
¥¥IX¥bYaa`\_]`\_`b¥b`bba]ab`Xab`aaa[`a\_`[  
@HWI-EAS443:3:33:342:403#0/1  
CAAGAGTCTGAATGTGCATGTGTAAATGGTTCTTGCTTTA  
+HWI-EAS443:3:33:342:403#0/1  
abba]YZbYWW``\_LZ`a\_a`aZ¥`¥]¥^[\_\_^\_]`^\_`\_]  
@HWI-EAS443:3:33:383:1409#0/1  
AAACAATATATTGAGAACACAAGAGTCTGAATGTGCATGT  
+HWI-EAS443:3:33:383:1409#0/1  
`Z\_aWYZ`\_a`\_\_a¥YO¥\_¥[VU\_LV[¥^TTQWYUTYXWR  
@HWI-EAS443:3:33:393:1118#0/1  
CTCCATTAGACGATACTGGACCACAACCTGCCTGTCTTATC  
+HWI-EAS443:3:33:393:1118#0/1  
aabbab[\_Ta`\_`X)`\_]\_VX]J^UUJS`a^M¥V\_[a[V[  
@HWI-EAS443:3:33:403:379#0/1  
TCGCTTGGTCAGCAAGTGCTTGTGCATGATGGCATCAATTG  
+HWI-EAS443:3:33:403:379#0/1  
aa`aaaaa\_aaaaaa^aaaaa\_aaaa\_aa```\_]a\_a\_\_  
@HWI-EAS443:3:33:411:392#0/1  
GGAATATCAGATAGGATACATATGCAGTGGGATTTTCGGA  
+HWI-EAS443:3:33:411:392#0/1  
aaaaaaaaaaa`aaaaa^YZ[[`^\_a`]Y`\_\_UX\_]`ZW^W  
@HWI-EAS443:3:33:416:767#0/1  
TGGGTGTCTTTCAACCAGAATCTGGAATATCAGATAGGAT  
+HWI-EAS443:3:33:416:767#0/1  
^ZWXL[V```\_]YU`\_\_YZa¥X]WW]RYH¥`YPZ\_^ZZ\_B  
@HWI-EAS443:3:33:462:1666#0/1  
GAGCTGTCTATTGGTGAAGTTCCCTCTCCATACAACTCA  
+HWI-EAS443:3:33:462:1666#0/1  
^^bbbb^abbb\_aba\_abb[aabbbbaabbbba[\_bbbXbb

@HWI-EAS443:3:33:509:716#0/1  
AGGCCCTTGAGTCAAGAAGAAGGTTCTGCATTCCAAGGG  
+HWI-EAS443:3:33:509:716#0/1  
YFWb\_aa\_aV]]Ha`Z¥]WQZ`^[S¥¥Z¥YGGXQDLON^X  
@HWI-EAS443:3:33:597:1516#0/1  
CTTGGAATGCAGAACCTTCTTCTTGACTCAAGGGGCCTTG  
+HWI-EAS443:3:33:597:1516#0/1  
`aaa\_\_\_NR\_bWF]`baaa\_\_\_`^a`^]a`ULFPRP^XY]  
@HWI-EAS443:3:33:629:1414#0/1  
GGGGGATGTGTTTGTGCATAAGGGAACCATTTCATATCATGC  
+HWI-EAS443:3:33:629:1414#0/1  
aa[`\_\_aa`bYbab[aa\_ab`a`abaVaaaaa[a``a¥¥`  
@HWI-EAS443:3:33:640:1111#0/1  
CGCTTGGTCAGCAAGTGCTTGTGCATGATGGCATCAATTGG  
+HWI-EAS443:3:33:640:1111#0/1  
`^aaaaa\_bbaaaaa[aa\_aa^aaaa\_aa\_a\_Y\_`\_^\_\_Q  
@HWI-EAS443:3:33:658:401#0/1  
TGCCCCTAATTATCACTATGAGGAATGCTCCTGTTATCCT  
+HWI-EAS443:3:33:658:401#0/1  
abba^`\_\_V¥bbbbbaaa]bababaa]aYaaaX¥aaaN]^  
@HWI-EAS443:3:33:677:1772#0/1  
GCCCCATTGTCTGGGCCAGAAATCCAATTGTTAGCCAAT  
+HWI-EAS443:3:33:677:1772#0/1  
T\_`b\_VTU\_[aX[Xa`\_^]QXa][]aZZ¥OVNOZV]`a]X  
@HWI-EAS443:3:33:715:338#0/1  
GTCCAGCAGCAAAGTTGGTGTGCTGATGTTAACATATGT  
+HWI-EAS443:3:33:715:338#0/1  
a\_ba¥`baaaZa¥a]aaaGa^a`aa\_^^`¥^¥YX¥]]]]X  
@HWI-EAS443:3:33:736:498#0/1  
GCCTGTCTTATCATTAGGGCGTGGATTGTCTCCGAAAATC  
+HWI-EAS443:3:33:736:498#0/1  
aaaaa\_aaaaa`a\_`\_a\_\_^`\_\_`\_Y\_]Y\_Y^^]]Y  
@HWI-EAS443:3:33:766:46#0/1  
GTGGTCAGGATATAGCGGGAGTTTTGTTTCAGCATCCAGAA  
+HWI-EAS443:3:33:766:46#0/1  
a\_`\_\_W^\_S\_¥``ZZ^Y[V]F¥XX]U¥VLBBBBBBBBBB  
@HWI-EAS443:3:33:770:1619#0/1  
TGTGTTCTCAATATATTGTTTCTCCAACCTTGATAGTGT  
+HWI-EAS443:3:33:770:1619#0/1  
¥bZV^`bab\_`¥aa^abaY[^ba\_ab\_X`aaaI]\_[XRX  
@HWI-EAS443:3:33:771:1655#0/1  
AAAAGCATTAGTTCAAGAAACGGTTTTGAGATGATTTGGG  
+HWI-EAS443:3:33:771:1655#0/1  
`\_``YaR]^PWW\_`^¥^¥^aV]¥N`ZTXR[SSPR^RZ^QL  
@HWI-EAS443:3:33:784:520#0/1  
GGGAGCATGATATGAATGGTCCCTTATGACAAACACATC  
+HWI-EAS443:3:33:784:520#0/1  
abaaa`a`aa`aaa`a\_aa\_`\_\_aa\_\_\_`^X¥X^X^^Z  
@HWI-EAS443:3:33:833:100#0/1  
AGCAAGGTCTTATACAATCCAGCCCTGTTAGTTCTGGATG

+HWI-EAS443:3:33:833:100#0/1  
aa`\_`aa]aa`aaa^aV\_\_\_\_\_^Z]\_\_\_\_^Z\_XWZZ^^ZZZ  
@HWI-EAS443:3:33:877:2024#0/1  
AGCCCATCCACTAACAGGGCAGAGAGAGGAATTGCCCGCT  
+HWI-EAS443:3:33:877:2024#0/1  
^R]a`^Z¥`^`^¥a`aWNX^^¥[VK¥XLP[YSPUZVVGXW  
@HWI-EAS443:3:33:901:1259#0/1  
GGACCACAACCTGCCTGTCTTATCATTAGGGCGTGGATTGT  
+HWI-EAS443:3:33:901:1259#0/1  
ab\_bbbbb\_ababaaa\_babaaaa`aZ`a`W`\_\_`¥`^  
@HWI-EAS443:3:33:90:1725#0/1  
ACAACCTGCCTGTCTTATCATTAGGGCGTGGATTGTCTCCG  
+HWI-EAS443:3:33:90:1725#0/1  
ZaYbba^aba^Xa]^Y`^V\_ab\_[[\_UV¥]¥[YQVa`aa^  
@HWI-EAS443:3:33:933:1299#0/1  
ATCCCAAATCATCTCAAACCGTTTCTTGAACCTAATGCTT  
+HWI-EAS443:3:33:933:1299#0/1  
`aab`a\_`b`baa\_]`aa`^^`^`^`^`]^¥¥W\_]\_`^]  
@HWI-EAS443:3:34:1016:1319#0/1  
AGCGGGAGCAGCATATCCTTTTGTGGTGTAAACAGTGACA  
+HWI-EAS443:3:34:1016:1319#0/1  
aY`a`a^`aa\_ba^a`\_\_a\_\_aaU\_XY\_¥a\_]\_XWX]]UX  
@HWI-EAS443:3:34:1044:29#0/1  
GAAACAATATATTGAGAACACAAGAGTCTGAATGTGCATG  
+HWI-EAS443:3:34:1044:29#0/1  
a`a`\_`a`aaaaaaaa\_```\_a\_a[`aa\_]^^V^RV]W  
@HWI-EAS443:3:34:1088:219#0/1  
GATTAGTTCAACCCAGAAGCAAGTCTTATACAATCCAGC  
+HWI-EAS443:3:34:1088:219#0/1  
``aaaaW¥aaa\_\_^[\_^`^`^`^`\_WO^]\_^\_VX]XUXUWP  
@HWI-EAS443:3:34:1136:664#0/1  
TCATATCATGCTCCCCCTTGAATGCAGAACCTTCTTCTT  
+HWI-EAS443:3:34:1136:664#0/1  
aaaabbaaaaa`aaaa`a\_\_`^`^`^`^`a`Y`^T`XY^]  
@HWI-EAS443:3:34:1163:1782#0/1  
CACTGCATATGTATCCTATCTGATATTCCAGATTCTGGTT  
+HWI-EAS443:3:34:1163:1782#0/1  
Vab`b`bbb`¥bbbababaabb`b`bbb`Xaaa¥aSR[Y  
@HWI-EAS443:3:34:1170:743#0/1  
ACATATGTAAACATCAGCAACCAACTTTGCTGCTGGAC  
+HWI-EAS443:3:34:1170:743#0/1  
a]^`Y`W¥\_abaa]aab\_^¥aaZ`¥a^\_[\_`^`^`^`Y`VR  
@HWI-EAS443:3:34:1175:747#0/1  
AATGAGCTGCTCCTATTGGTGAAGTTCCTCTCCATACAAC  
+HWI-EAS443:3:34:1175:747#0/1  
ababaa`ab^aa`]aaaaWaa\_a^\_Y^`\_a`\_`^`\_X]^Z  
@HWI-EAS443:3:34:1251:1064#0/1  
TCCCGCTATATCCTGACCACTATTTATTCCTACGATATC  
+HWI-EAS443:3:34:1251:1064#0/1  
abab]aabbaaa^aa\_a^a`aaba`aaa`a`RM^]^`^W

@HWI-EAS443:3:34:1256:477#0/1  
TGCCTGTCTTATCATTAGGGCGTGGATTGTCTCCGAAAAT  
+HWI-EAS443:3:34:1256:477#0/1  
aaabbaaaaaaba[aaaaa[\_a\_\_a\_`a]¥Y`^¥^]S\_BB  
@HWI-EAS443:3:34:1295:601#0/1  
TGAGTGGTCAGGATATAGCGGGAGTTTTGTTTCAGCATCCA  
+HWI-EAS443:3:34:1295:601#0/1  
abab\_baVa^a`Z`aa\_Z\_baa\_]ZX``V\_YX]NQXUH  
@HWI-EAS443:3:34:1298:1524#0/1  
GAGAACTAAAAGCATTAGTTCAAGAAACGTTTTGAGATG  
+HWI-EAS443:3:34:1298:1524#0/1  
^a``abbbbbbb`bbbbbbabaaabaaaab`^aaaa\_\_^\_`  
@HWI-EAS443:3:34:1314:1710#0/1  
CAAGAGTTGGAGAAACAATATATTGAGAACAAGAGTCT  
+HWI-EAS443:3:34:1314:1710#0/1  
\_a¥\_]baa¥`¥`\_aababbbaabaa\_`abb]aaa\_\_\_W`  
@HWI-EAS443:3:34:1337:531#0/1  
CTGGGCCAGAAATTCCAATTGTTAGCCAATTGATGCCATC  
+HWI-EAS443:3:34:1337:531#0/1  
abbbbbbbbbbbbbabbbbab\_H^abbbba\_aa\_Z`]^  
@HWI-EAS443:3:34:134:1712#0/1  
CTAATTATCACTATGAGGAATGCTCCTGTTATCCTGATTC  
+HWI-EAS443:3:34:134:1712#0/1  
aabaaa^abaa`a`\_a`Y^]^^a^a```]`a\_\_`\_`\_\_\_^  
@HWI-EAS443:3:34:1506:636#0/1  
TGCATGTGTAATGGTTCTTGCTTTACTGTAATGACCGAT  
+HWI-EAS443:3:34:1506:636#0/1  
[bba`\_¥^abZSX\_PYSaVJ\_X^bbWI^bS`R`ZaYP`¥B  
@HWI-EAS443:3:34:1559:345#0/1  
GATATTCCAGATTCTGGTTGAAAGACACCCACGGTCGATT  
+HWI-EAS443:3:34:1559:345#0/1  
ababbbbaabaa`aaaaabaaaa^aa\_`Y`\_XX^YTV  
@HWI-EAS443:3:34:1744:1459#0/1  
CAGATTCTGGTTGAAAGACACCCACGGTCGATTGAGCCA  
+HWI-EAS443:3:34:1744:1459#0/1  
`aaaXabbb^Z`abb`\_¥a\_\_\_aa\_\_UX\_¥T\_BBBBBBB  
@HWI-EAS443:3:34:21:1464#0/1  
GAACCATTAAAGACAGGAGCCCATATCGAACCCTAATGAG  
+HWI-EAS443:3:34:21:1464#0/1  
`^Ta\_W\_]aaaaa``^^]aa^^`Z`^^Q``aVUYJOSV  
@HWI-EAS443:3:34:22:876#0/1  
GTTTGTGATAAGGGAACCATTCATATCATGCTCCCCCTTG  
+HWI-EAS443:3:34:22:876#0/1  
a]M`]`a]XWVZ\_P`a`T]a¥]^X^`¥]``[[Z]V[VY  
@HWI-EAS443:3:34:285:290#0/1  
TTGGAATGTTTGTCAATTTAGCAAGGCCCTTGAGTCAAGA  
+HWI-EAS443:3:34:285:290#0/1  
Y]Z¥`b[^IZW`]\_\_^aZX¥`WR¥TV¥R¥ZZ^\_\_^ZVS]B  
@HWI-EAS443:3:34:290:2016#0/1  
ATTGAGAACAAGAGTCTGAATGTGCATGTGTAATGGT

+HWI-EAS443:3:34:290:2016#0/1  
`R\_]b`¥¥a^`aa\_]\_Ya`a`a]]V^a`^`[\_VW\_\_V]TV  
@HWI-EAS443:3:34:293:1536#0/1  
CAAAACCGTTTCTTGAACCTAATGCTTTTAGTTCTCCCTAT  
+HWI-EAS443:3:34:293:1536#0/1  
a`aaabb`[bab^`]]``aba\_`baaaaaYW]aaa`\_a\_\_  
@HWI-EAS443:3:34:361:271#0/1  
GCTTTATTGAGAAGTTATTGTCTGTCCCAGTCCATCCGTT  
+HWI-EAS443:3:34:361:271#0/1  
`aaaa`aaa\_b¥]aX]Za`aXa\_aSY¥BBBBBBBBBBBBBB  
@HWI-EAS443:3:34:391:122#0/1  
GCGGGAGTTTGTTCAGCATCCAGAACTAACAGGGCTGGA  
+HWI-EAS443:3:34:391:122#0/1  
aaa```SZL]ZZKZ\_^¥`\_T]^]YV^SUU`]Y^RXXRT^B  
@HWI-EAS443:3:34:452:99#0/1  
ACTCAAGGGCCTTGCTAAATGACAAACATTCCAATGGAA  
+HWI-EAS443:3:34:452:99#0/1  
aaaa`Waaaaa]aaa\_a^^^TXT\_`a\_\_\_\_\_]]\_YWXXXY]  
@HWI-EAS443:3:34:559:1057#0/1  
GTTCGGATCCCAAATCATCTCAAACCGTTTCTTGAACCTA  
+HWI-EAS443:3:34:559:1057#0/1  
¥```^^UY¥a`ba`V`\_]\_^baaaaab^`¥[¥TGZQ][^XW\_  
@HWI-EAS443:3:34:567:572#0/1  
CTCCTGTCTTTAATGGTTCCATTGGAATGTTTGTCTTTA  
+HWI-EAS443:3:34:567:572#0/1  
[W`XZ\_UZ^`[`b^¥[GS¥ba¥`aXa\_TPY`TLU\_]JS^^Y  
@HWI-EAS443:3:34:579:383#0/1  
GGGATGTGTTTGTCTATAAGGGAACCATTTCATATCATGCTC  
+HWI-EAS443:3:34:579:383#0/1  
abbbba`baaababaa\_babaaaaabaaaaa\_``\_[^a  
@HWI-EAS443:3:34:605:364#0/1  
CGCTAATTTTACGGAAACCACTGACTGTCCAGCAGCAAAG  
+HWI-EAS443:3:34:605:364#0/1  
abbb`T[^aa]^``aa¥aa[\_aa\_]U\_]PRYZVU[VU[  
@HWI-EAS443:3:34:692:389#0/1  
TGCCGTTGTACTTTAACACAGCCACTGCCCATTTGTCTGG  
+HWI-EAS443:3:34:692:389#0/1  
Ubaab¥]¥]bbba^ab`abNRbbaaaUaaa`\_`\_aUZ^^X  
@HWI-EAS443:3:34:727:85#0/1  
GATGATTTGGGATCCGAACGGATGGACTGGGACAGACAAT  
+HWI-EAS443:3:34:727:85#0/1  
`^]a`aaa`aa\_\_\_\_]a^`V\_]^^^YX^]]\_VXXXXGUYB  
@HWI-EAS443:3:34:728:913#0/1  
GTCAGGATATAGCGGGAGTTTTGTTTCAGCATCCAGAACTA  
+HWI-EAS443:3:34:728:913#0/1  
`\_aaabX¥U¥^`a[`XU\_V\_``[]aZ^\_\_`]ZW]]X]TT]  
@HWI-EAS443:3:34:766:363#0/1  
CACTAACAGGGCAGAGAGGAATTGCCCGCTAATTTTCCAC  
+HWI-EAS443:3:34:766:363#0/1  
a\_abbbabb`aaabaa]aabb`b`a\_^aaaa\_\_Z[\_Z[^^

@HWI-EAS443:3:34:76:445#0/1  
GCCACTCAATTCAACTTGGGAATCAAAATCAGATTGAAAC  
+HWI-EAS443:3:34:76:445#0/1  
abb^aabaaaaaaaaaaa^]aaa`Wa\_aaa^^^a`````  
@HWI-EAS443:3:34:770:354#0/1  
GGGGATGTGTTTGCATAAGGGAACCATTCATATCATGC  
+HWI-EAS443:3:34:770:354#0/1  
abaabaaaaaaaaa^`\_`aa]aaa`W]a`^¥`^`\_]^\_TT  
@HWI-EAS443:3:34:836:844#0/1  
GGACCACAACCTGCCTGTCTTATCATTAGGGCGTGGATTGT  
+HWI-EAS443:3:34:836:844#0/1  
abbbababb`abbabbabbabaababa`^^`\_]``aa`\_  
@HWI-EAS443:3:34:869:864#0/1  
CAATTGTTAGCCAATTGATGCCATCATGACAAGCACTTGC  
+HWI-EAS443:3:34:869:864#0/1  
aaaa`a¥aa`aa`LX]\_[`\_]NN]\_¥^`\_`WXZW]ZZZZ  
@HWI-EAS443:3:34:86:1641#0/1  
AGCCACTCAATTCAACTTGGGAATCAAAATCAGATTGAAA  
+HWI-EAS443:3:34:86:1641#0/1  
aZaabaaa]V]aaaa````]\_aa`aa[^a\_aa`\_\_\_\_\_`\_  
@HWI-EAS443:3:34:879:95#0/1  
CCATTAGACGATACTGGACCACAACCTGCCTGTCTTATCAT  
+HWI-EAS443:3:34:879:95#0/1  
aaabba`aaaa`aTX`XN[YLR[^U]\_Y]X\_]R]XUUGUB  
@HWI-EAS443:3:34:920:1878#0/1  
GTCAGGATATAGCGGGAGTTTTGTTCCAGCATCCAGAACTA  
+HWI-EAS443:3:34:920:1878#0/1  
a]ba\_`a`\_aaaaa^`\_aW`\_`[S`Z`X[`¥]ZZV[`URZ  
@HWI-EAS443:3:34:999:445#0/1  
TCCCAGTCCATCCGTTCCGATCCCAAATCATCTCAAAACC  
+HWI-EAS443:3:34:999:445#0/1  
ababb\_aabba`ab\_\_\_\_\_T\_^]\_a```]a`^`]\_^¥]YV  
@HWI-EAS443:3:35:1033:570#0/1  
AGCCACTCAATTCAACTTGGGAATCAAAATCAGATTGAAA  
+HWI-EAS443:3:35:1033:570#0/1  
aaaabaaa`baaa``abaaaaaaaa\_aa\_W``aaaa``a\_a  
@HWI-EAS443:3:35:110:122#0/1  
ATCCTATCTGATATTCCAGATTCTGGTTGAAAGACACCCA  
+HWI-EAS443:3:35:110:122#0/1  
a`aaa`a`\_`\_aZNZ^`^W[¥\_¥`^¥W\_`^¥WSS`\_`\_¥\_¥  
@HWI-EAS443:3:35:1160:109#0/1  
TAGTGAATCACATGTGTGTGCAGGGATAACTGGCATGGC  
+HWI-EAS443:3:35:1160:109#0/1  
V\_`T¥QVZSWa\_Za\_RGLYabXHbaaI`Yababaa\_a`[a  
@HWI-EAS443:3:35:1168:102#0/1  
GCTTGGTCAGCAAGTGTGTCATGATGGCATCAATTGGC  
+HWI-EAS443:3:35:1168:102#0/1  
aa`aaaR^`^`\_[aXa`\_`Y^``\_ZYZX^XZ]^`^XTX]  
@HWI-EAS443:3:35:1226:1144#0/1  
CCGCTAATTTACGGAAACCACTGACTGTCCAGCAGCAAA

+HWI-EAS443:3:35:1226:1144#0/1  
`bba``bab````[`ab`aaa`\_^]a\_Ua\_NN[TXSJSI  
@HWI-EAS443:3:35:1248:493#0/1  
CCGCTAGTCCAGATTGTGTTCTCTTTGGGTCGCCCTCTGA  
+HWI-EAS443:3:35:1248:493#0/1  
abbaaaa\_ab`a\_a`SVaa\_\_a[a``¥\_aW\_\_`\_^]a`  
@HWI-EAS443:3:35:1323:425#0/1  
GCCTGTCTTATCATTAGGGCGTGGATTGTCTCCGAAAATC  
+HWI-EAS443:3:35:1323:425#0/1  
abaa]\_aabaa`a\_a\_\_`Y^`^`\_Wa\_aaaZY¥\_]\_  
@HWI-EAS443:3:35:134:109#0/1  
ATTCCTCTCTGCCCTGTTAGTGGATGGGCTATATACAG  
+HWI-EAS443:3:35:134:109#0/1  
aaaaaa`\_a\_a^a\_`\_\_]\_Z`^\_^]Z^ZXUTRT]YTXUV  
@HWI-EAS443:3:35:1365:1190#0/1  
GGGATTTTCGGAGACAATCCACGCCCTAATGATAAGACAG  
+HWI-EAS443:3:35:1365:1190#0/1  
`aa^abaa`aa`b\_]aaaa`aa`\_ZUa]U`\_`ab\_W\_`XQ  
@HWI-EAS443:3:35:136:628#0/1  
GGTGTAACAGTGACACTGTGGGTTGGTCTTGGCCAGACG  
+HWI-EAS443:3:35:136:628#0/1  
a`M\_QNZO^]¥[¥]¥aHVQSEVPVK¥PRM`MP\_XXQ]PTNV  
@HWI-EAS443:3:35:1401:620#0/1  
ATGGGCTCCTGTCTTTAATGGTTCATTGGAATGTTTGTC  
+HWI-EAS443:3:35:1401:620#0/1  
^V\_RQ¥T^`[VSW`Z]R¥PZU\_N[¥VI\_W^]\_Z\_ZaYP\_\_  
@HWI-EAS443:3:35:1402:675#0/1  
ATCTGATATTCCAGATTCTGGTTGAAAGACACCCACGGTC  
+HWI-EAS443:3:35:1402:675#0/1  
ababbbbaaaaaaaaaaaaaaaaaaa\_aa]`aaaaa]\_`Y\_  
@HWI-EAS443:3:35:1403:443#0/1  
CGTAGGAATAAATGAGTGGTCAGGATATAGCGGGAGTTTT  
+HWI-EAS443:3:35:1403:443#0/1  
ab`ab`aaaaabaab^ba\_\_ba\_`a\_a`aaa`¥`^`¥\_  
@HWI-EAS443:3:35:1405:1972#0/1  
ATCAAGAGTTGGAGAAACAATATATTGAGAACAAGAGT  
+HWI-EAS443:3:35:1405:1972#0/1  
aa`aaaa`aaaaaa````a`aaa`aaaa`a`a\_\_a^¥  
@HWI-EAS443:3:35:1478:1609#0/1  
TGCCCCGTAATTTACGGAAACCACTGACTGTCCAGCAGC  
+HWI-EAS443:3:35:1478:1609#0/1  
aaa^aa`aa`aaa`\_`\_a¥aa`¥\_W\_XM¥a\_U¥¥YWUZQS  
@HWI-EAS443:3:35:1551:817#0/1  
ACAAAACCTCCCGCTATATCCTGACCACTCATTTATTCCTA  
+HWI-EAS443:3:35:1551:817#0/1  
aab¥J\_^ba\_baaaa`aaaY`^`\_W\_a`\_Vaaa^aWW`[S  
@HWI-EAS443:3:35:1648:81#0/1  
CTGTCTTATCATTAGGGCGTGGATTGTCTCCGAAAATCCC  
+HWI-EAS443:3:35:1648:81#0/1  
abb`Wabbaabbbbaaa`a\_aa`a```Y`a```\_\_\_]\_Y\_



@HWI-EAS443:3:35:1741:238#0/1  
GGTGTAAACAGTGACACTGTGGGTTGGTCTTGCCAGACG  
+HWI-EAS443:3:35:1741:238#0/1  
ab\_abbbaabb`bbababbabab`\_`UZabbaba0``aMa  
@HWI-EAS443:3:35:190:1170#0/1  
CAGACATATGTTAACATCAGCAACACCAACTTTGCTGCTG  
+HWI-EAS443:3:35:190:1170#0/1  
[``R\_\_abab`bbb`S^bbabbabba]Y`b\_^`a`aaa[]  
@HWI-EAS443:3:35:205:382#0/1  
AACACAGCCACTGCCCATTTGTCTGGGCCAGAAATTCCAA  
+HWI-EAS443:3:35:205:382#0/1  
aaaaaaaa\_X\_\_^\_a`¥I]^[\_ZW^SZXQXQZQZY[¥H  
@HWI-EAS443:3:35:263:360#0/1  
CTCCATTAGACGATACTGGACCACAACCTGCCTGTCTTATC  
+HWI-EAS443:3:35:263:360#0/1  
a\_XZSSaWTL¥¥Za]bZZW`]b[X\_a¥L0[^RPOSQZ[]^  
@HWI-EAS443:3:35:278:1358#0/1  
CCGAAAATCCCCTGTCATATGTATCCTATCTGATATTCCA  
+HWI-EAS443:3:35:278:1358#0/1  
ab\_^¥a^ab`a\_a`]``\_Z¥\_a\_a\_\_`\_a^\_¥^a\_`aHU  
@HWI-EAS443:3:35:319:1507#0/1  
GGCATCAATTGGCTAACAATTGGAATTTCTGGCCCAGACA  
+HWI-EAS443:3:35:319:1507#0/1  
Z]bbbaaab^abaaV`^Wa^]a`a`b¥\_¥bb]\_\_`SR  
@HWI-EAS443:3:35:342:1599#0/1  
AGATAGGATACATATGCAGTGGGATTTTCGGAGACAATCC  
+HWI-EAS443:3:35:342:1599#0/1  
¥`^aaaa`]W\_TU[G^\_[Q¥\_ZV[^`^\_¥NVPZYZ`\_ZS`  
@HWI-EAS443:3:35:387:1748#0/1  
ACCACAACCTGCCTGTCTTATCATTAGGGCGTGGATTGTCT  
+HWI-EAS443:3:35:387:1748#0/1  
a\_¥S]¥\_\_]abb[YJa[]a^\_UZX`YYZ\_[UWX`X[KKYS  
@HWI-EAS443:3:35:392:1781#0/1  
CGATACTGGACCACAACCTGCCTGTCTTATCATTAGGGCGT  
+HWI-EAS443:3:35:392:1781#0/1  
a`aaaa`\_`ba\_^`aa``aaa\_]``a`^a¥\_\_`\_¥\_a\_T  
@HWI-EAS443:3:35:457:266#0/1  
GGAGCAGCATATCCTTTTGTGGTGTAAACAGTGACACTGT  
+HWI-EAS443:3:35:457:266#0/1  
aa^aaaa`¥`a`a`a`a`a`a`¥\_¥VUT\_¥OZ`^ZT``Z``¥\_U  
@HWI-EAS443:3:35:474:30#0/1  
TGCCCCGTAATTTACGAAACCACTGACTGTCCAGCAGC  
+HWI-EAS443:3:35:474:30#0/1  
abababab`bbaaaaaa`aa\_a\_\_aa```\_¥`¥VXRT¥^  
@HWI-EAS443:3:35:491:144#0/1  
CAACTGCCTGTCTTATCATTAGGGCGTGGATTGTCTCCGA  
+HWI-EAS443:3:35:491:144#0/1  
\_aaa`aaaa`ba¥S]a[a]¥UXR¥ZT\_[\_Y]^RYV[`]G  
@HWI-EAS443:3:35:530:1281#0/1  
ATTGTCTCCGAAAATCCCCTGTCATATGTATCCTATCTGA

+HWI-EAS443:3:35:530:1281#0/1  
aaa]Z`Uaa\_[¥\_`^`a`WV]]\_[W[\_VT]```^^]\_[[  
@HWI-EAS443:3:35:548:2006#0/1  
ACAATATATTGAGAACAAGAGTCTGAATGTGCATGTGT  
+HWI-EAS443:3:35:548:2006#0/1  
\_^\_TX`b[`¥aababb`¥¥\_¥SUa\_aYb\_aYbbbaaORY  
@HWI-EAS443:3:35:551:663#0/1  
GAAATTCCAATTGTTAGCCAATTGATGCCATCATGACAAG  
+HWI-EAS443:3:35:551:663#0/1  
a\_W¥ZZa\_¥\_aa]^a\_aaa\_U\_Z^VTV\_\_^[^]]`][U¥  
@HWI-EAS443:3:35:569:1197#0/1  
CAGTGGTTTCCGTGAAATTAGCGGGCAATTCCTCTCTCTG  
+HWI-EAS443:3:35:569:1197#0/1  
[WW\_R\_Zb[\_`aN`bb\_N[J[`[QTTWII\_¥V\_J`aa[[  
@HWI-EAS443:3:35:618:137#0/1  
TCCTTTTGTGGTGAAACAGTGACACTGTGGGTTGGTCTT  
+HWI-EAS443:3:35:618:137#0/1  
abbbaab`aaZa`\_[b`aW\_aa`\_aVNZ`\_W\_\_`WW\_¥  
@HWI-EAS443:3:35:663:1281#0/1  
CATATGTTAACATCAGCAACACCAACTTTGCTGCTGGACA  
+HWI-EAS443:3:35:663:1281#0/1  
abaaaa\_aXa`]^\_Z¥b\_\_^`\_a`[^`\_^\_\_`^^`^aX\_  
@HWI-EAS443:3:35:670:1271#0/1  
GGTTGAAAGACACCCACGGTCGATTCGAGCCATGCCAGTT  
+HWI-EAS443:3:35:670:1271#0/1  
`\_`bba`aabbbba`\_baaZ^]Z¥ZVZ^Z`W[]]a^QZV  
@HWI-EAS443:3:35:743:1016#0/1  
CTGGACCACAACCTGCCTGTCTTATCATTAGGGCGTGGATT  
+HWI-EAS443:3:35:743:1016#0/1  
aaa¥¥ababaaaaa¥[a``\_a`````\_T[\_VW\_Y¥¥W\_^Y  
@HWI-EAS443:3:35:74:116#0/1  
GGCTGTGTTAAAGTACAACGGCATAATAACAGACACTATC  
+HWI-EAS443:3:35:74:116#0/1  
aa`aa¥a\_`¥``]Sa\_\_[X^\_\_\_\_]]V]]^TUZ`\_^WW]  
@HWI-EAS443:3:35:756:1380#0/1  
ACTGCCTGTCTTATCATTAGGGCGTGGATTGTCTCCGAAA  
+HWI-EAS443:3:35:756:1380#0/1  
abaabbaa\_a\_aaaa\_\_^\_]^[aXVXY^^^WSVT^\_VQY[  
@HWI-EAS443:3:35:776:1799#0/1  
GCCCCGTAATTTACGGAAACCACTGACTGTCCAGCAGCA  
+HWI-EAS443:3:35:776:1799#0/1  
aaaaabWZZ\_\_aaa\_]Z[a\_aa[[\_U[Z[R¥aX[\_VJOL  
@HWI-EAS443:3:35:831:641#0/1  
AGCCCATCCACTAACAGGGCAGAGAGGAATTGCCCGCT  
+HWI-EAS443:3:35:831:641#0/1  
]`abb\_[\_ba\_aabaa`Y¥aaaaaaa]^`\_a`\_a\_U[`[`  
@HWI-EAS443:3:35:866:1595#0/1  
ATTCATATCATGCTCCCCCTTGAATGCAGAACCTTCTTC  
+HWI-EAS443:3:35:866:1595#0/1  
a`Ub\_XY¥baaX]Yabab]\_QHV]\_Y[[]^T¥^`\_¥[\_Y\_

@HWI-EAS443:3:35:879:520#0/1  
CAGACACTATCAAGAGTTGGAGAAACAATATATTGAGAAC  
+HWI-EAS443:3:35:879:520#0/1  
aaaaaaaaaaa\_a` `[aa` `\_a` ``\_¥a`\_a` ``aaaY¥a  
@HWI-EAS443:3:35:894:1526#0/1  
CCCAGAAGCAAGGTCTTATACAATCCAGCCCTGTTAGTTC  
+HWI-EAS443:3:35:894:1526#0/1  
ab`QWWZ^b\_\_^WFQY]a¥¥`b\_R]^¥Q`\_\_ [XY[] [NLY  
@HWI-EAS443:3:35:902:839#0/1  
GTGGTCCAGTATCGTCTAATGGAGCAAATGGAGTAAAAGG  
+HWI-EAS443:3:35:902:839#0/1  
\_P^UU` ``]Ya`\_VT¥aX[`¥^R[¥XLY\_``^aX\_Y\_^ZZ  
@HWI-EAS443:3:35:965:1367#0/1  
TGGGTGTCTTTCAACCAGAATCTGGAATATCAGATAGGAT  
+HWI-EAS443:3:35:965:1367#0/1  
a\_W¥XVP`0\_]YTY^Z[Z¥PY\_R[MSYR`R^YJVYBBBBB  
@HWI-EAS443:3:35:980:1693#0/1  
GGGTGTCTTTCAACCAGAATCTGGAATATCAGATAGGATA  
+HWI-EAS443:3:35:980:1693#0/1  
¥^`Y\_aab` `bbababbbbbbb` `b]aa`\_a`\_a`aaaaX^  
@HWI-EAS443:3:36:1013:1399#0/1  
ATCGAACCTAATGAGCTGTCCTATTGGTGAAGTCCCTC  
+HWI-EAS443:3:36:1013:1399#0/1  
aaaaa[aabab`\_^\_a\_\_`aaa^aaa\_Q^` ]\_Z`\_aa\_a  
@HWI-EAS443:3:36:1062:258#0/1  
GGATTGTCTCCGAAAATCCCCTGCATATGTATCCTATCT  
+HWI-EAS443:3:36:1062:258#0/1  
aaaaababbaabaaaaaaa\_a\_aa\_a\_\_`a]^`\_`Y` ]`  
@HWI-EAS443:3:36:113:34#0/1  
AGCCACTCAATTCAACTTGGGAATCAAAATCAGATTGAAA  
+HWI-EAS443:3:36:113:34#0/1  
`aba`\_a`\_ZS\_aa\_aa`aaaa\_a\_a`Qa¥¥a]`\_`\_`a^  
@HWI-EAS443:3:36:1182:1472#0/1  
TGGATAGGGAGAATAAAAGCATTAGTTCAAGAAACGGTT  
+HWI-EAS443:3:36:1182:1472#0/1  
aaa\_a\_]W\_a` `a]`\_Y^]¥[\_\_\_\_\_XQ^`\_^]U]¥` [V]  
@HWI-EAS443:3:36:1191:1877#0/1  
ATAACAGACTATCAAGAGTTGGAGAAACAATATATTGA  
+HWI-EAS443:3:36:1191:1877#0/1  
aab^aaaaaaaaa^`aa^a]a\_\_a\_a^`^`\_^]`\_`\_¥a  
@HWI-EAS443:3:36:122:1004#0/1  
GTAAACAGTGACACTGTGGGTTGGTCTTGGCCAGACGGTG  
+HWI-EAS443:3:36:122:1004#0/1  
a`Y[aa^aW`aa`\_a`\_aYa`\_Z^a\_T]\_`\_`aa`\_`\_\_\_\_W[  
@HWI-EAS443:3:36:1272:186#0/1  
TAACAGGGCAGAGAGGAATTGCCCGCTAATTCACGGA  
+HWI-EAS443:3:36:1272:186#0/1  
aaa`¥aY]^`^`¥]aa¥\_a]a\_\_\_\_\_VaZ\_\_\_\_[¥a]`\_a`\_W[  
@HWI-EAS443:3:36:128:643#0/1  
GTTCCCTCTCCATACAACTCAAGATTTGAGTCAGTCGCTT

+HWI-EAS443:3:36:128:643#0/1  
]Y¥bab\_b`baa\_aaZ0\_\_`U]a]\_^\_a\_`]\_\_\_\_[\_Z]YV  
@HWI-EAS443:3:36:137:664#0/1  
GCCCCATTGTCTGGGCCAGAAATTCOAATTGTTAGCCAAT  
+HWI-EAS443:3:36:137:664#0/1  
aabbb`J^aab`Xa\_baaaa`]]]a]L][^^a`^`a\_L`0  
@HWI-EAS443:3:36:1425:1863#0/1  
TGTCTCCGAAAATCCCACTGCATATGTATCCTATCTGATA  
+HWI-EAS443:3:36:1425:1863#0/1  
`\_¥`babbaaaa^`Zba]`aaaaa[`]aba\_\_\_baa\_a  
@HWI-EAS443:3:36:1436:151#0/1  
TGGGCTCCTGTCTTTAATGGTTCCATTGGAATGTTTGTCA  
+HWI-EAS443:3:36:1436:151#0/1  
abbbbbbbbaabbbbbbaaaaaaaaa`^a^^aab`ZU  
@HWI-EAS443:3:36:1451:251#0/1  
GCAAGTGCTTGCATGATGGCATCAATTGGCTAACAATTG  
+HWI-EAS443:3:36:1451:251#0/1  
`ab]b`baaa`a\_`aaba`\_`a`aa\_`\_a¥^WUZ\_a`a  
@HWI-EAS443:3:36:1543:346#0/1  
CGCTTGGTCAGCAAGTGCTTGCATGATGGCATCAATTGG  
+HWI-EAS443:3:36:1543:346#0/1  
a`bbbababab\_aaa`baaa`aaba`^aab\_\_\_a\_b\_\_Z  
@HWI-EAS443:3:36:1574:1272#0/1  
ATGCTCCTGTTATCCTGATTCTAGTGAAATCACATGTGTG  
+HWI-EAS443:3:36:1574:1272#0/1  
\_a`babb\_[HPUY\_Z0]a]\_YZ^XZ¥aV`\_bVUXYQX\_VZ  
@HWI-EAS443:3:36:1616:839#0/1  
GTTCTCAATATATTGTTTCTCCAACCTTGATAGTGTCTG  
+HWI-EAS443:3:36:1616:839#0/1  
a`aaaaabababababaaa\_``\_Ta`^a`a]\_]\_]\_BB  
@HWI-EAS443:3:36:1644:1630#0/1  
TAAAGCAAGAACCATTTACACATGCACATTCAGACTCTTG  
+HWI-EAS443:3:36:1644:1630#0/1  
^`baa`baaaa\_aabbbb\_a[`aa¥¥^^aab\_^][aa`XW  
@HWI-EAS443:3:36:1647:71#0/1  
AGCGGGAGCAGCATATCCTTTTGTGGTGTAAACAGTGACA  
+HWI-EAS443:3:36:1647:71#0/1  
ababbbab`^aY]`Xa\_aaaaa¥^a`W]\_^]SU[^W]ZUY  
@HWI-EAS443:3:36:1689:1561#0/1  
GATGGCATCAATTGGCTAACAATTGGAATTTCTGGCCCAG  
+HWI-EAS443:3:36:1689:1561#0/1  
a\_[aabba\_b`\_\_¥\_aa\_\_Saab^^`Yaaa[¥W][aYPZ  
@HWI-EAS443:3:36:1709:345#0/1  
AGGCCTCATACAAGATCTTCAGAATAGAAAAGGAAAGAT  
+HWI-EAS443:3:36:1709:345#0/1  
V\_baaaabbaababa`aba^a`^`\_a``¥aaa\_U]Y]aa\_`  
@HWI-EAS443:3:36:262:123#0/1  
GTGTAAACAGTGACACTGTGGGTTGGTCTTGGCCAGACGG  
+HWI-EAS443:3:36:262:123#0/1  
a\_aa`aaaaa^aaaaaaa¥a`\_¥¥a`V[^`\_`\_`[¥]Y\_\_¥

@HWI-EAS443:3:36:294:1903#0/1  
GGCAGAGAGAGGAATTGCCCGCTAATTTACGGAACCAC  
+HWI-EAS443:3:36:294:1903#0/1  
\_\_a¥aaba\_[abba[a`]ZY\_a`b`a`bbb`V[^`bbab  
@HWI-EAS443:3:36:297:387#0/1  
ACTCAATTCAACTTGGGAATCAAAATCAGATTGAAACATG  
+HWI-EAS443:3:36:297:387#0/1  
a`^^]Z^X]WW[]^\_Z^\_aXUTX0][\_^^][XXVLV]HSY  
@HWI-EAS443:3:36:32:421#0/1  
GTTCCCTCTCCATACA ACTCAAGATTTGAGTCAGTCGCTT  
+HWI-EAS443:3:36:32:421#0/1  
a]aaa`\_a\_a]PWU^^[^^^RN¥YR\_UPSRSY]XOXYUVS  
@HWI-EAS443:3:36:333:201#0/1  
CGCTTGGTCAGCAAGTGCTTGTGCATGATGGCATCAATTGG  
+HWI-EAS443:3:36:333:201#0/1  
abbbaba¥b`aaaa¥aa\_aa\_aa``]]``aa\_]a\_]\_a]  
@HWI-EAS443:3:36:411:804#0/1  
AAACAATATATTGAGAACAAGAGTCTGAATGTGCATGT  
+HWI-EAS443:3:36:411:804#0/1  
[[a`XU]a`aaa`aab`a^aaaa\_ZaZV\_\_\_\_`Va`U`[S  
@HWI-EAS443:3:36:461:988#0/1  
GGGCGACCCAAAGAGAACACAATCTGGACTAGCGGGAGCA  
+HWI-EAS443:3:36:461:988#0/1  
Zbbb\_¥`bbaaX\_bbbbbbbabbaaababbaa^^a`\_I¥RZ  
@HWI-EAS443:3:36:490:1518#0/1  
CCTAATTATCACTATGAGGAATGCTCCTGTTATCCTGATT  
+HWI-EAS443:3:36:490:1518#0/1  
abaa^bbbabbbabbaVaa\_ba\_`aabaaaaaab`aaaa  
@HWI-EAS443:3:36:541:1021#0/1  
ATCCGAACGGATGGACTGGGACAGACAATAACTTCTCAAT  
+HWI-EAS443:3:36:541:1021#0/1  
a``bbY¥^\_aaZUQPX¥a^X¥aY\_W`\_Y¥XN[\_Y\_]`X¥Y  
@HWI-EAS443:3:36:593:894#0/1  
GCTCCTGTCTTTAATGGTTCCATTGGAATGTTTGTCAAT  
+HWI-EAS443:3:36:593:894#0/1  
abbbbaaabbbbabaa`aabb`baaaRaaa\_aa`\_`¥^`¥  
@HWI-EAS443:3:36:621:423#0/1  
CGCTAGTCCAGATTGTGTTCTCTTTGGGTCGCCCTCTGAT  
+HWI-EAS443:3:36:621:423#0/1  
abaaab\_aaab```a\_a¥\_aa``\_\_a¥^Y`^\_]^\_\_\_\_a[^  
@HWI-EAS443:3:36:635:589#0/1  
CCGCTATATCCTGACCACTCATTTATTCCTACGATATCTT  
+HWI-EAS443:3:36:635:589#0/1  
aaaa`aaaa`a```\_a\_a`\_``^`\_`^]`Y]\_`^\_`^]  
@HWI-EAS443:3:36:683:1223#0/1  
GGCAATGGTGTGGATAGGGAGA ACTAAAAGCATTAGTT  
+HWI-EAS443:3:36:683:1223#0/1  
ab`^^^a`Y^\_aa]WZ`^a¥YWS^\_a\_¥]]`¥^\_¥XJZ0Q  
@HWI-EAS443:3:36:721:1038#0/1  
GGATTAGCCACTCAATTCAACTTGGGAATCAAAATCAGAT

+HWI-EAS443:3:36:721:1038#0/1  
`b`bb`bbbb`b`Mabbaaaaa`\_[S`a`Yaa`U`Z`a`  
@HWI-EAS443:3:36:752:667#0/1  
CGCTAATTTACGGAAACCACTGACTGTCCAGCAGCAAAG  
+HWI-EAS443:3:36:752:667#0/1  
ab^aaZabbb`^baabbaaaaaaaaaaQ\_aSZZ]V[JTX\_  
@HWI-EAS443:3:36:803:312#0/1  
GCGACTGACTCAAATCTTGAGTTGTATGGAGAGGGAACCT  
+HWI-EAS443:3:36:803:312#0/1  
abbbbbbbabbbbaabbbabababab`bbaaaa\_a`a^^aa\_  
@HWI-EAS443:3:36:811:804#0/1  
TGTATATAGCCCATCCACTAACAGGGCAGAGAGAGGAATT  
+HWI-EAS443:3:36:811:804#0/1  
X^\_W\_a\_[`S`ZZaJ[X^aYW\_^`\_^`T¥F\_PXU`a^][¥  
@HWI-EAS443:3:36:839:1992#0/1  
GTGGGATTTTCGGAGACAATCCACGCCCTAATGATAAGAC  
+HWI-EAS443:3:36:839:1992#0/1  
Q\_I[Z``X¥[``¥¥]a`¥W¥¥¥¥ZPV\_ZR^`^a\_MY\_`ZO  
@HWI-EAS443:3:36:878:602#0/1  
GTGGTTTCCGTGAAATTAGCGGGCAATTCCTCTCTCTGCC  
+HWI-EAS443:3:36:878:602#0/1  
`P`aZ\_¥``a`^RRV`\_\_X``[^N^U]UM^[U[YU¥TLZ[  
@HWI-EAS443:3:36:893:523#0/1  
ACTGACTGTCCAGCAGCAAAGTTGGTGTGCTGATGTTAA  
+HWI-EAS443:3:36:893:523#0/1  
`aaa\_aaa\_\_a¥^]W]]T]X`\_]\_USO^X\_X^RHT[NUXQV  
@HWI-EAS443:3:36:905:729#0/1  
ATGCTCCCCCTTGAATGCAGAACCTTCTTCTTGACTCAA  
+HWI-EAS443:3:36:905:729#0/1  
\_\_baa`a\_\_`^[]`a\_aa\_I\_^ZX``¥]`\_\_PZPY^a\_P  
@HWI-EAS443:3:36:912:949#0/1  
GAAATCACATGTGTGTGCAGGGATAACTGGCATGGCTCGA  
+HWI-EAS443:3:36:912:949#0/1  
aabbaba]R\_b¥Z]`V\_aba\_^Q¥\_Z¥``[`[]aVa¥`XQ  
@HWI-EAS443:3:36:917:414#0/1  
AATTATCACTATGAGGAATGCTCCTGTTATCCTGATTCTA  
+HWI-EAS443:3:36:917:414#0/1  
a\_ab\_abaaaa`aaa`¥S¥aaaa`a]^aa\_Z`aT`[a^T  
@HWI-EAS443:3:36:928:877#0/1  
GGTTGAAAGACACCCACGGTCGATTCGAGCCATGCCAGTT  
+HWI-EAS443:3:36:928:877#0/1  
`aZ\_a\_]`aaaba`aaba`^a[X¥`aa^a`a`^^a]Z[RT  
@HWI-EAS443:3:36:953:691#0/1  
GCTCCTGTCTTTAATGGTTCCATTGGAATGTTTGTCAATTT  
+HWI-EAS443:3:36:953:691#0/1  
```aaa`^`bb`Z]abb\_`]`^aa¥]\_^a`\_`aW¥[O^``  
@HWI-EAS443:3:36:999:2008#0/1  
CAAGAGTCTGAATGTGCATGTGTAAATGGTTCTTGCTTTA  
+HWI-EAS443:3:36:999:2008#0/1  
abb`a`^baaaaa`[aaaa`\_^\_aaa\_\_Y]`Y\_[]\_`\_`[\_

@HWI-EAS443:3:36:99:14#0/1  
CAACTGCCTGTCTTATCATTAGGGCGTGGATTGTCTCCGA  
+HWI-EAS443:3:36:99:14#0/1  
a`V`Z]`aaa^aaa¥^^V^XFZYTAYWa¥¥W¥MJVS¥ZXV  
@HWI-EAS443:3:37:1007:1161#0/1  
GAACTAATGCTTTTAGTTCTCCCTATCCAAACACCATTGC  
+HWI-EAS443:3:37:1007:1161#0/1  
aaa``aaa\_aa`a`\_\_^a\_aa`aa\_a¥]USU`a`^^]`^]  
@HWI-EAS443:3:37:102:849#0/1  
CTGTCCCAGTCCATCCGTTCCGATCCCAAATCATCTCAAA  
+HWI-EAS443:3:37:102:849#0/1  
a`bYbabaaabbbababa]a\_]\_\_`a`QF[Z[VXa\_aW\_a  
@HWI-EAS443:3:37:1067:1562#0/1  
GAATGCAGAACCTTCTTCTTGGACTCAAGGGGCCTTGCTAA  
+HWI-EAS443:3:37:1067:1562#0/1  
ab]L]aaY]a`[U``¥`aZ`^aXTa\_\_\_\_¥X¥``\_T[\_\_\_\_^  
@HWI-EAS443:3:37:1069:1447#0/1  
AGTGGGATTTTCGGAGACAATCCACGCCCTAATGATAAGA  
+HWI-EAS443:3:37:1069:1447#0/1  
`]Y^`\_[\_aa\_`][¥a`^^aa`^U¥UaKM^¥¥¥¥aX[Y  
@HWI-EAS443:3:37:1086:968#0/1  
ATCACTATGAGGAATGCTCCTGTTATCCTGATTCTAGTGA  
+HWI-EAS443:3:37:1086:968#0/1  
\_abaabbbabb\_\_^\_ababa`a`a\_aaaaQI¥`b`a^`\_`]  
@HWI-EAS443:3:37:1101:2035#0/1  
AGCCCATCCACTAACAGGGCAGAGAGGAATTGCCCGCT  
+HWI-EAS443:3:37:1101:2035#0/1  
`aXZZa`\_`bZ^\_a¥`¥¥WU\_a^S¥BBBBBBBBBBBBBBBB  
@HWI-EAS443:3:37:117:200#0/1  
AATAACAGACACTATCAAGAGTTGGAGAAACAATATATTG  
+HWI-EAS443:3:37:117:200#0/1  
Y^abYa[``bbb`¥[a¥aa\_a`a\_a^\_aS\_b\_I[`¥X\_X]  
@HWI-EAS443:3:37:1193:742#0/1  
AGCCACTCAATTCAACTTGGGAATCAAAATCAGATTGAAA  
+HWI-EAS443:3:37:1193:742#0/1  
`^a`baabaaaaaaa]aa][a`aa``XaaXaa^¥`\_`a`a  
@HWI-EAS443:3:37:1267:1171#0/1  
GGTGAAGTTCCTCTCCATACAACACTCAAGATTTGAGTCAG  
+HWI-EAS443:3:37:1267:1171#0/1  
ab\_ab`a[aabaababab`aa[b`abb\_VN¥aaaa`]aaa  
@HWI-EAS443:3:37:1281:435#0/1  
ATGGGCTCCTGTCTTTAATGGTTCATTGGAATGTTTGTC  
+HWI-EAS443:3:37:1281:435#0/1  
`^`^`aaabaa`aab`a`]a]aY^Z```W^W^`U`a\_¥Y  
@HWI-EAS443:3:37:1345:1056#0/1  
TGGGCTCCTGTCTTTAATGGTTCATTGGAATGTTTGTC  
+HWI-EAS443:3:37:1345:1056#0/1  
V[¥W¥¥aa`X\_¥aaW\_aa`a^a]OZa\_¥Z¥``]]][VSZZ  
@HWI-EAS443:3:37:1394:228#0/1  
GCAGAACCTTCTTCTTGGACTCAAGGGGCCTTGCTAAATGA





@HWI-EAS443:3:37:214:243#0/1  
GTCTGAATGTGCATGTGTAAATGGTTCTTGCTTTACTGTA  
+HWI-EAS443:3:37:214:243#0/1  
``a]\_R^^^NI`YY\_Z`HZ]]]¥¥^[]¥\_`^\_LP^\_S]OX  
@HWI-EAS443:3:37:275:681#0/1  
CACGGTTCGATTCGAGCCATGCCAGTTATCCCTGCACACAC  
+HWI-EAS443:3:37:275:681#0/1  
aaaa¥Xa[Qa`X^^a`W]Za][YU\_`\_`Q¥\_¥aT^`\_0¥  
@HWI-EAS443:3:37:283:1105#0/1  
AAACATTCCAATGGAACCATTAAAGACAGGAGCCCATATC  
+HWI-EAS443:3:37:283:1105#0/1  
]TW\_]abb`aVZ0[aaaa¥a\_Y\_]Vaa\_QRY]TSZTUU[  
@HWI-EAS443:3:37:300:206#0/1  
ATGCCATCATGACAAGCACTTGCTGACCAAGCGACTGACT  
+HWI-EAS443:3:37:300:206#0/1  
a\_`aa```aa`aa^`a¥\_^\_a\_]QZYPSNYUVV\_TUY  
@HWI-EAS443:3:37:358:1306#0/1  
CAGAACCTTCTTCTTGACTCAAGGGCCTTGCTAAATGAC  
+HWI-EAS443:3:37:358:1306#0/1  
¥^¥ZQ^a\_¥`a^`a\_Y`aaYZ\_`a`\_aYIYa][W`a\_a`  
@HWI-EAS443:3:37:425:269#0/1  
GGTGTGGATAGGGAGAACTAAAAGCATTAGTTCAAGAA  
+HWI-EAS443:3:37:425:269#0/1  
a\_[a[XYZY^aTQZ\_`^\_WXYUYZSVZLFFTTUW[VTQT  
@HWI-EAS443:3:37:468:486#0/1  
TTCAAATACGGCAATGGTGTGGATAGGGAGAACTAAAA  
+HWI-EAS443:3:37:468:486#0/1  
abaaaaaabaaba`ba]a\_aaaa][\_\_a00[]WW^`¥`a  
@HWI-EAS443:3:37:495:300#0/1  
GGAATAAATGAGTGGTCAGGATATAGCGGGAGTTTTGTTC  
+HWI-EAS443:3:37:495:300#0/1  
abaaaaa`a`a]a`\_]a`]\_\_`\_`^a]RQ`Q]Y^SVXQ  
@HWI-EAS443:3:37:622:1713#0/1  
AAGAAGTTCTGCATTCCAAGGGGAGCATGATATGAATG  
+HWI-EAS443:3:37:622:1713#0/1  
][FZ]`¥Zabaaa]\_aab]¥¥]XX\_[]]PP^`SX\_[U[  
@HWI-EAS443:3:37:625:1046#0/1  
CTGCATATGTATCCTATCTGATATTCCAGATTCTGGTTGA  
+HWI-EAS443:3:37:625:1046#0/1  
aa\_babZbb`baaaa[aaaaa`aabaa`^^aa\_`^[]^`a  
@HWI-EAS443:3:37:679:872#0/1  
CGCTAGTCCAGATTGTGTTCTTTGGGTCGCCCTCTGAT  
+HWI-EAS443:3:37:679:872#0/1  
\_abaab[bbbbba]b\_\_Y\_`ba\_a`\_\_bOF¥bb\_\_aabab  
@HWI-EAS443:3:37:697:1882#0/1  
AGAGAGGAATTGCCCCGTAATTTACGGAACCACTGACT  
+HWI-EAS443:3:37:697:1882#0/1  
a`aa`]aaaa`aa[[a`aaaa`aab\_YOQQ^a`\_¥\_ZVZ  
@HWI-EAS443:3:37:816:1215#0/1  
CAACCAGAATCTGGAATATCAGATAGGATACATATGCAGT

+HWI-EAS443:3:37:816:1215#0/1  
aaaaa`a]X\_\_a`a`\_`\_\_^\_a\_¥a`P\_[Z`YXXX^XT¥W  
@HWI-EAS443:3:37:841:998#0/1  
CAGTAAAGCAAGAACCATTTACACATGCACATTCAGACTC  
+HWI-EAS443:3:37:841:998#0/1  
^¥\_STZ¥Y¥```a````b\_W`¥`\_`^SPKU\_X^]Y\_aa^  
@HWI-EAS443:3:37:874:815#0/1  
GTGGGATTTTCGGAGACAATCCACGCCCTAATGATAAGAC  
+HWI-EAS443:3:37:874:815#0/1  
`aa]^WW]UPZ`VX`\_a\_X¥¥`a][^^\_XLQV[YSWVX^B  
@HWI-EAS443:3:37:880:1517#0/1  
ATCAAATCAGATTGAAACATGCAATCAAAGCGTCATTAC  
+HWI-EAS443:3:37:880:1517#0/1  
a\_T\_[`\_V¥Y`X^b]ZYa^a^Yab`VOLPWZ¥W^`\_\_\_P  
@HWI-EAS443:3:37:909:515#0/1  
GATTGTATAAGACCTTGCTTCTGGGTTGAACTAATCAGAG  
+HWI-EAS443:3:37:909:515#0/1  
aS][QNVX[S]``[QU\_a]\_\_aa^^ZS`¥R\_aRW[U`[^Z  
@HWI-EAS443:3:37:930:1194#0/1  
GTGCATGTGTAATGGTTCTTGCTTTACTGTAATGACCGA  
+HWI-EAS443:3:37:930:1194#0/1  
\_^```abababaabb``bababbabaaaa¥¥aZ\_aabaa`  
@HWI-EAS443:3:37:98:1233#0/1  
GGAGCAGCATATCCTTTTGTGGTGTAAACAGTGACACTGT  
+HWI-EAS443:3:37:98:1233#0/1  
aa`baZabab[bbbbaaa\_]aa\_aa^Z¥aaa`Ua\_a\_a\_  
@HWI-EAS443:3:38:1030:784#0/1  
CAGACACTATCAAGAGTTGGAGAAACAATATATTGAGAAC  
+HWI-EAS443:3:38:1030:784#0/1  
aaaaababaa\_\_\_\_\_`^aa\_\_`\_\_\_````^Z]\_a¥\_\_^Y  
@HWI-EAS443:3:38:1035:1245#0/1  
TCTGGTTGAAAGACACCCACGGTCGATTGAGCCATGCCA  
+HWI-EAS443:3:38:1035:1245#0/1  
`bb\_ba^`a]babbabaa`Q\_T¥ZZ[KFMPVUVD MVR  
@HWI-EAS443:3:38:1037:140#0/1  
TGTCTTTCAACCAGAATCTGGAATATCAGATAGGATACAT  
+HWI-EAS443:3:38:1037:140#0/1  
aa`aaaa`]^V^a\_Y¥`^````a`\_`¥X`XX[\_\_\_[^[FXT  
@HWI-EAS443:3:38:1195:1092#0/1  
ATCAAAGCGTCATTACTTATGAAAACAACACTTGGGTAAA  
+HWI-EAS443:3:38:1195:1092#0/1  
a\_b\_^]a\_a\_\_`a^a`^^a\_\_\_a`\_\_\_Z\_THIVZ[YX^\_^  
@HWI-EAS443:3:38:1201:935#0/1  
CAGAACCTTCTTCTTGACTCAAGGGCCTTGCTAAATGAC  
+HWI-EAS443:3:38:1201:935#0/1  
a`OYaaabaaa[Qa`ba`aY`b\_]ab\_Yb¥X[YW\_]aa`R  
@HWI-EAS443:3:38:1287:169#0/1  
TGCAGAACCTTCTTCTTGACTCAAGGGCCTTGCTAAATG  
+HWI-EAS443:3:38:1287:169#0/1  
aU`a]S`aaYR]V`aa`]LOTYQPWTGYaSLVLT¥VTWYT

@HWI-EAS443:3:38:1310:1334#0/1  
CAATGGTGTGGATAGGGAGAACTAAAAGCATTAGTTCA  
+HWI-EAS443:3:38:1310:1334#0/1  
aa`\_]bM`¥`b\_Y]\_^bR\_T\_`a`]\_\_YaQ¥^`]Y\_[ZSM  
@HWI-EAS443:3:38:1352:933#0/1  
CAGGATATAGCGGGAGTTTTGTTCCAGCATCCAGAACTAAC  
+HWI-EAS443:3:38:1352:933#0/1  
`abaabbbab¥a^`]a[aaaa`aa`a`VW]Y\_\_U`\_\_G  
@HWI-EAS443:3:38:1451:357#0/1  
ACGGCAATGGTGTGGATAGGGAGAACTAAAAGCATTAG  
+HWI-EAS443:3:38:1451:357#0/1  
aa`aaa`aaX`\_aba\_`^`]`Z¥HSY\_]X¥^¥0¥^^YT  
@HWI-EAS443:3:38:1478:1762#0/1  
AGCCCATCCACTAACAGGGCAGAGAGGAATTGCCCGCT  
+HWI-EAS443:3:38:1478:1762#0/1  
aI[abaaU]`YYYU\_a\_\_aQ\_S`]SYY¥XIMNYHKHUYSH  
@HWI-EAS443:3:38:1502:1500#0/1  
GTTGGAGAAACAATATATTGAGAACACAAGAGTCTGAATG  
+HWI-EAS443:3:38:1502:1500#0/1  
`\_baaa^a^a^¥\_a\_aaaaa`a`\_`a`a^`\_]T^\_\_Y^`  
@HWI-EAS443:3:38:1545:1920#0/1  
GATTAGTTCAACCCAGAAGCAAGTCTTATACAATCCAGC  
+HWI-EAS443:3:38:1545:1920#0/1  
a\_a`a^0^aa\_ZXZ`STW\_^`Z]BBBBBBBBBBBBBBBB  
@HWI-EAS443:3:38:154:267#0/1  
GTCCCAGTCCATCCGTTCCGATCCCAAATCATCTCAAAAC  
+HWI-EAS443:3:38:154:267#0/1  
aaabbbba`bbb`aaaY[a\_\_¥^aaa`[`TZ\_\_Y¥YVT\_aQ  
@HWI-EAS443:3:38:1552:1641#0/1  
GGGGGATGTGTTTGTGCATAAGGGAACCATTATCATGC  
+HWI-EAS443:3:38:1552:1641#0/1  
`]`aaaaa^`]`\_\_^\_a`a`\_\_^^^^^aWVW]]]S\_^VU  
@HWI-EAS443:3:38:162:969#0/1  
TCCCTTTTCTATTCTGAAGATCTTGTATGAGGCCTGTCCA  
+HWI-EAS443:3:38:162:969#0/1  
abbaaabbaaaaaaaaaaaaa`aaa\_Z]]``¥\_\_\_\_\_`  
@HWI-EAS443:3:38:1637:983#0/1  
CGCTTGGTCAGCAAGTGCTTGTGCATGATGGCATCAATTGG  
+HWI-EAS443:3:38:1637:983#0/1  
\_]babba`bbb^aab\_baa`ba`\_aaa\_a]R]Y\_`¥`^\_^  
@HWI-EAS443:3:38:1638:1223#0/1  
GCTTTATTGAGAAGTTATTGTCTGTCCCAGTCCATCCGTT  
+HWI-EAS443:3:38:1638:1223#0/1  
aabbbabbb`b^^a`aaaa^`aBBBBBBBBBBBBBBBB  
@HWI-EAS443:3:38:165:786#0/1  
TTGGAATGTTTGTCAATTTAGCAAGGCCCTTGAGTCAAGA  
+HWI-EAS443:3:38:165:786#0/1  
aaaaaaaa^[aaa\_`]aa¥]\_a\_S\_\_a`a`]`\_¥\_T[`¥¥]  
@HWI-EAS443:3:38:1716:1127#0/1  
ATGGGCTCCTGTCTTTAATGGTTCCATTGGAATGTTTGTG

+HWI-EAS443:3:38:1716:1127#0/1  
abba^`aaaaUHPbaa`^Ya\_`WUUa^[MSYY\_]`^`WXX  
@HWI-EAS443:3:38:1763:1592#0/1  
GAGGAATTGCCCGCTAATTTACGGAAACCACTGACTGTC  
+HWI-EAS443:3:38:1763:1592#0/1  
`aaaa[baabQ¥]G\_^`a^\_`a`[^`^aUVGQUXW^STW  
@HWI-EAS443:3:38:183:1361#0/1  
GTTCAGCATCCAGAACTAACAGGGCTGGATTGTATAAGAC  
+HWI-EAS443:3:38:183:1361#0/1  
^]aa\_aa`a\_a`]`^aa`^aa\_\_\_a`]`T^\_`^V\_ZXX]\_S  
@HWI-EAS443:3:38:188:1685#0/1  
CAGTCAGTGGTTTCCGTGAAATTAGCGGGCAATTCCTCTC  
+HWI-EAS443:3:38:188:1685#0/1  
aX^`^ba]PXaU`\_`^a`[^`]^`aZaYaVRHIZ¥Z¥^Z^V^V  
@HWI-EAS443:3:38:21:992#0/1  
GAACCTTCTTCTTGACTCAAGGGCCTTGCTAAATGACAA  
+HWI-EAS443:3:38:21:992#0/1  
]`\_abbabaab\_abXa\_`^a\_aabaa]]]aVV]^aa`aa`  
@HWI-EAS443:3:38:230:15#0/1  
ACTGACTGTCCAGCAGCAAAGTTGGTGTGCTGATGTTAA  
+HWI-EAS443:3:38:230:15#0/1  
]baaaaaa[a^W\_XR[^`[XHXNZXXRZSUNFQRSPSVUW]  
@HWI-EAS443:3:38:233:943#0/1  
CATCAATTGGCTAACAATTGGAATTTCTGGCCCAGACAAT  
+HWI-EAS443:3:38:233:943#0/1  
a^a`[G¥\_\_W\_a\_]aX]Za\_X¥Z][`a`^UN^PY[[ZQ¥[  
@HWI-EAS443:3:38:242:1902#0/1  
GTCAGGATATAGCGGGAGTTTTGTTTCAGCATCCAGAACTA  
+HWI-EAS443:3:38:242:1902#0/1  
a`a`^`a`b`aaaa`[^`a¥[\_\_`^a^V^R\_]`^`R^\_  
@HWI-EAS443:3:38:310:1781#0/1  
CCCCGTAATTTACGGAAACCACTGACTGTCCAGCAGCAA  
+HWI-EAS443:3:38:310:1781#0/1  
aba[^`¥aaaaab`[W\_aaX]a`^^`a\_[UNUPMMXRQZS  
@HWI-EAS443:3:38:342:1561#0/1  
TGGTGAAGTTCCCTCTCCATACAACCTCAAGATTTGAGTCA  
+HWI-EAS443:3:38:342:1561#0/1  
`]VNZba`^]aaa\_a`aaaa]aba`\_a`\_R[^S[\_Y]G^\_  
@HWI-EAS443:3:38:344:202#0/1  
CGCTTGGTCAGCAAGTGCTTGTTCATGATGGCATCAATTGG  
+HWI-EAS443:3:38:344:202#0/1  
abbba`]^bb`^\_U\_PZZX^ZaaXXZZ¥TYNXX[[V`¥XU  
@HWI-EAS443:3:38:416:1870#0/1  
CCTGTCTTTAATGGTTCCATTGGAATGTTTGTTCATTTAGC  
+HWI-EAS443:3:38:416:1870#0/1  
a¥¥`aba^Laa\_WQH\_]\_P¥[HV`Z[Z[]\_¥^\_Y`Z\_TID  
@HWI-EAS443:3:38:457:906#0/1  
GTCCCAGTCCATCCGTTCCGATCCCAAATCATCTCAAAAC  
+HWI-EAS443:3:38:457:906#0/1  
a`aa\_`^`\_b`a`\_`¥VFYW¥Y¥aa\_VSJW]^ZW^^\_[Z^Q

@HWI-EAS443:3:38:519:1731#0/1  
GAGTTGGAGAAACAATATATTGAGAACACAAGAGTCTGAA  
+HWI-EAS443:3:38:519:1731#0/1  
^b`\_ba`aabbabbbaababaaaabaaba^`^¥\_a\_b^  
@HWI-EAS443:3:38:530:1773#0/1  
GAGGAATTGCCCGCTAATTTACGGAAACCACTGACTGTC  
+HWI-EAS443:3:38:530:1773#0/1  
ZW\_aabbbbaababbaababaaa^¥\_bV^`a`^ZX]U  
@HWI-EAS443:3:38:645:136#0/1  
ATCCGTTGCGATCCCAAATCATCTCAAACCGTTTCTTGA  
+HWI-EAS443:3:38:645:136#0/1  
a`aX`Z\_\_\_\_\_¥SVZa`aPUUZW[XWY\_]ZRQVTUXWXT¥Z  
@HWI-EAS443:3:38:64:1338#0/1  
GAAAGACACCCACGGTCGATTGAGCCATGCCAGTTATCC  
+HWI-EAS443:3:38:64:1338#0/1  
`a\_ba[bbbbba`aaU¥][XUY¥`]^¥QKPVHXP]^¥R  
@HWI-EAS443:3:38:700:1988#0/1  
CAAGAAGAAGGTTCTGCATTCCAAGGGGAGCATGATATG  
+HWI-EAS443:3:38:700:1988#0/1  
abbbb\_abb`]Uaaaaba]ab\_\_][a\_a^Y0\_\_a\_¥`\_^  
@HWI-EAS443:3:38:793:707#0/1  
GAAATTCCAATTGTTAGCCAATTGATGCCATCATGACAAG  
+HWI-EAS443:3:38:793:707#0/1  
`^^¥^bb^SV\_WXY\_bWbbaU\_R^P\_¥`[\_^^`^^¥ZX[  
@HWI-EAS443:3:38:840:971#0/1  
CAGTCGCTTGGTCAGCAAGTGCTTGTTCATGATGGCATCAA  
+HWI-EAS443:3:38:840:971#0/1  
a`a`aaba`a¥\_``\_Y\_^`a^a`\_a\_^WU^[YY]ZUYZ  
@HWI-EAS443:3:38:853:768#0/1  
GATACTGGACCACAACCTGCCTGTCTTATCATTAGGGCGTG  
+HWI-EAS443:3:38:853:768#0/1  
a^``aaaa]`[`¥^]`^]P\_`\_¥]aZ[[^]ZKV^[N  
@HWI-EAS443:3:38:861:894#0/1  
ACCACAACCTGCCTGTCTTATCATTAGGGCGTGGATTGTCT  
+HWI-EAS443:3:38:861:894#0/1  
aaa`a``aa```\_]aa`\_\_a``\_a^X^a]Y^Y]^X]X  
@HWI-EAS443:3:38:905:1654#0/1  
CTAATTATCACTATGAGGAATGCTCCTGTTATCCTGATTC  
+HWI-EAS443:3:38:905:1654#0/1  
a`\_\_aaaa¥]\_]`[\_a`\_aa\_\_b\_¥`\_`[XU^^[]]^W[U  
@HWI-EAS443:3:39:109:865#0/1  
CGCTTGGTCAGCAAGTGCTTGTTCATGATGGCATCAATTGG  
+HWI-EAS443:3:39:109:865#0/1  
aaa\_\_aaH`[]\_P]\_Sa`]^]Y`\_\_^\_T^]`^Y\_¥Y[]YV  
@HWI-EAS443:3:39:1103:1994#0/1  
AAGAGTCTGAATGTGCATGTGTAATGGTTCTTGCTTAC  
+HWI-EAS443:3:39:1103:1994#0/1  
`bba\_U`b`b]a\_abb]^[]`aaaa\_\_YaYX[^aY`^\_N  
@HWI-EAS443:3:39:1114:1595#0/1  
GCCACTCAATTCAACTTGGGAATCAAATCAGATTGAAAC

+HWI-EAS443:3:39:1114:1595#0/1  
\_Z^a`]^\_Xb]]`\_`¥\_XZ`^Z[WY`Y^[]\_^^`\_]^N  
@HWI-EAS443:3:39:1116:40#0/1  
ATTGCCCGCTAATTTACGGAAACCACTGACTGTCCAGCA  
+HWI-EAS443:3:39:1116:40#0/1  
W\_[\_aU\_ba^S¥[ba`¥QY[`a¥IQ\_UXaZUY¥SBBBBBB  
@HWI-EAS443:3:39:1138:1959#0/1  
CACAACTGCCTGTCTTATCATTAGGGCGTGGATTGTCTCC  
+HWI-EAS443:3:39:1138:1959#0/1  
Zabbb`¥a^aa`)][\_^V^`aaa```]RX[\_`^¥QS]]T  
@HWI-EAS443:3:39:1167:65#0/1  
CAGTCAGTGGTTCCGTGAAATTAGCGGGCAATTCCTCTC  
+HWI-EAS443:3:39:1167:65#0/1  
abbbbbbbabbaabaababaa`aaaa`\_aab`Wa`a`\_`\_dW  
@HWI-EAS443:3:39:1186:699#0/1  
GTCAGTCGCTTGGTCAGCAAGTGTGTCATGATGGCATC  
+HWI-EAS443:3:39:1186:699#0/1  
`aa^a]\_¥^^\_¥XD^]\_VY]OW[UW[LO¥OVSZTYWVJXU  
@HWI-EAS443:3:39:1219:338#0/1  
AACTAATGCTTTTAGTTCTCCCTATCCAAACACCATTGCC  
+HWI-EAS443:3:39:1219:338#0/1  
`bab]a`aab`bbab`aa`¥Q^aaab\_a\_a`^```a¥\_`[  
@HWI-EAS443:3:39:1234:937#0/1  
GGGATCCGAACGGATGGACTGGGACAGACAATAACTTCTC  
+HWI-EAS443:3:39:1234:937#0/1  
aYITU]^Z`aU][V]YUV[NNPU¥PH[]ZUTPW\_SLQURV  
@HWI-EAS443:3:39:1245:1476#0/1  
CAGACATATGTTAACATCAGCAACACCAACTTTGCTGCTG  
+HWI-EAS443:3:39:1245:1476#0/1  
aaabaab[ba]bababaa\_^]a\_\_ba[a\_aaV\_^aa^\_^  
@HWI-EAS443:3:39:1264:171#0/1  
CTCGAATCGACCGTGGGTGTCTTTCAACCAGAATCTGGAA  
+HWI-EAS443:3:39:1264:171#0/1  
ab`[^\_babaa^`a¥`b``XL\_a\_Wa`b]baR`\_`aa][W  
@HWI-EAS443:3:39:1286:686#0/1  
AGTGGTTTCCGTGAAATTAGCGGGCAATTCCTCTCTCTGC  
+HWI-EAS443:3:39:1286:686#0/1  
]]Ta^PY¥TV`V`¥0¥]X`]V]XUJT]^`^ZWZ^^Z\_^`H  
@HWI-EAS443:3:39:1302:1276#0/1  
CAACTGCCTGTCTTATCATTAGGGCGTGGATTGTCTCCGA  
+HWI-EAS443:3:39:1302:1276#0/1  
a¥U\_baabaa`abaaaaaa`a\_\_`]Z`a```]]^`\_\_]^Y  
@HWI-EAS443:3:39:1306:76#0/1  
ATTAGACGATACTGGACCACAACCTGCCTGTCTTATCATT  
+HWI-EAS443:3:39:1306:76#0/1  
aaba]T¥`Y\_]LU]^]]a\_¥VWLW[YMVXZR^][USSVVV  
@HWI-EAS443:3:39:1424:1660#0/1  
GGGAACTAAAAGCATTAGTTCAAGAAACGGTTTTGAGAT  
+HWI-EAS443:3:39:1424:1660#0/1  
aSMa]^```¥aaWaa^`a^U`\_\_a`\_\_a\_SS\_]\_¥\_RR

@HWI-EAS443:3:39:1453:1524#0/1  
GTCATGATGGCATCAATTGGCTAACAAATTGGAATTTCTGG  
+HWI-EAS443:3:39:1453:1524#0/1  
aaabbbbbbbbaabaabaa`aba`a^abb\_Zaaaa`\_^  
@HWI-EAS443:3:39:1497:981#0/1  
AGCCCATCCACTAACAGGGCAGAGAGGAATTGCCCGCT  
+HWI-EAS443:3:39:1497:981#0/1  
aaa\_^VT^QS]¥VU\_SLLVRN`RUU\_V\_^UBBBBBBBBBB  
@HWI-EAS443:3:39:1562:110#0/1  
CGAAAATCCCACTGCATATGTATCCTATCTGATATTCCAG  
+HWI-EAS443:3:39:1562:110#0/1  
\_ababbb`\_babbbabbbabbaabab`bb[\_aaaa^a]  
@HWI-EAS443:3:39:1591:491#0/1  
GTCCCAGTCCATCCGTTCCGATCCCAAATCATCTCAAAC  
+HWI-EAS443:3:39:1591:491#0/1  
`¥^aaa`Ubaaa`\_\_^[Waa]][^\_¥^^^VYY\_VP\_]V  
@HWI-EAS443:3:39:1592:1700#0/1  
GTGGGATTTTCGGAGACAATCCACGCCCTAATGATAAGAC  
+HWI-EAS443:3:39:1592:1700#0/1  
aSbb`¥¥bX`ba]a\_^\_W`]V\_\_KW[YRZ^XSZWR]B  
@HWI-EAS443:3:39:15:1082#0/1  
GCCCCGTAATTTACGGAAACCACTGACTGTCCAGCAGCA  
+HWI-EAS443:3:39:15:1082#0/1  
abba^`^ZT^aa`W\_\_Z`a^`^`[QYa[\_YWaXWZ\_VWK  
@HWI-EAS443:3:39:1626:638#0/1  
GAGGAATTGCCCGCTAATTTACGGAAACCACTGACTGTC  
+HWI-EAS443:3:39:1626:638#0/1  
a\_a^][`\_]V¥`[ZaaWQ¥¥P[[V^^^WW[ZXQUSUU  
@HWI-EAS443:3:39:1663:913#0/1  
CAAATCTTGAGTTGTATGGAGAGGGAACCTCACCAATAGG  
+HWI-EAS443:3:39:1663:913#0/1  
a[SYa\_aa^`a\_a]Z^aaa\_[V`¥`\_WZ]UYV]]a]]]\_X  
@HWI-EAS443:3:39:1756:1221#0/1  
CTTTCAACCAGAATCTGGAATATCAGATAGGATACATATG  
+HWI-EAS443:3:39:1756:1221#0/1  
abbb\_`Sababba`bbbabaaa\_ab\_aabaV\_`^`\_`Z  
@HWI-EAS443:3:39:405:1835#0/1  
GACGATACTGGACCACAACCTGCCTGTCTTATCATTAGGGC  
+HWI-EAS443:3:39:405:1835#0/1  
abbabaaa^^a¥X]aa]aT^\_aa\_\_Z`^`aXDOV`aSPSU  
@HWI-EAS443:3:39:439:1593#0/1  
CTTGGGAATCAAATCAGATTGAAACATGCAATCAAAGCG  
+HWI-EAS443:3:39:439:1593#0/1  
a`]YWX^YS`\_WZY\_Y`^`^`a`\_`aa[[`a\_\_a[]]¥\_  
@HWI-EAS443:3:39:440:708#0/1  
CAGACACTATCAAGAGTTGGAGAAACAATATATTGAGAAC  
+HWI-EAS443:3:39:440:708#0/1  
a^`^`\_a`Z\_a`Z`a^aaaa`a]XaZU\_aa\_a\_]``[Y  
@HWI-EAS443:3:39:594:753#0/1  
ACCGTGGGTGTCTTTCAACCAGAATCTGGAATATCAGATA

+HWI-EAS443:3:39:594:753#0/1  
`]ab¥^aa¥a¥aaa\_aa`\_a[¥XY^\_a^TW]^`V^^]X  
@HWI-EAS443:3:39:607:1482#0/1  
ATTTGACTATCTTTCCCTTTTCTATTCTGAAGATCTTGTA  
+HWI-EAS443:3:39:607:1482#0/1  
U^\_`Y¥ab[V\_abaabab`^[WN]V\_]````a\_\_aa]YL[  
@HWI-EAS443:3:39:60:1657#0/1  
CTAAAAGCATTAGTTCAAGAAACGGTTTTGAGATGATTG  
+HWI-EAS443:3:39:60:1657#0/1  
aaab```aaa\_]`Y\_a¥`^\_aa`]N\_¥V¥¥^Z^[U\_\_^U  
@HWI-EAS443:3:39:612:69#0/1  
TGGTAAATGGCAACTCAGCACCGTCTGGCCAAGACCAACC  
+HWI-EAS443:3:39:612:69#0/1  
ab`[`baaaa^a\_V]\_a`a¥a`^`¥`^^Z[UWXZUMVWN  
@HWI-EAS443:3:39:653:555#0/1  
ACCACAACCTGCCTGTCTTATCATTAGGGCGTGGATTGTCT  
+HWI-EAS443:3:39:653:555#0/1  
abaabaaaab`a\_b^a`a^\_¥[````^aa\_YX\_]^\_\_U\_Y  
@HWI-EAS443:3:39:687:1360#0/1  
GGGGGATGTGTTTGTGCATAAGGAACCATTCATATCATGC  
+HWI-EAS443:3:39:687:1360#0/1  
aa^]aaa\_\_aaaaXaaaaaaa]aaaaaaaa\_\_`\_\_`^\_¥  
@HWI-EAS443:3:39:752:805#0/1  
CATGTGTAAATGGTTCTTGCTTTACTGTAATGACCGATGG  
+HWI-EAS443:3:39:752:805#0/1  
aWwJa¥KX`aa`\_aaaa[Xaa^U]^\_\_a^¥\_aaa\_```  
@HWI-EAS443:3:39:756:1154#0/1  
TGTTATTATGCCGTTGTACTTTAACACAGCCACTGCCCA  
+HWI-EAS443:3:39:756:1154#0/1  
aa\_aaaaa`^`\_\_]\_`\_]\_````^¥W`Z`YWY[WU\_]Y  
@HWI-EAS443:3:39:768:255#0/1  
TGGGATTTTCGGAGACAATCCACGCCCTAATGATAAGACA  
+HWI-EAS443:3:39:768:255#0/1  
aabb\_aabbaaa`aaaa`ZZ¥aaa`^^aZ[\_]``^X¥  
@HWI-EAS443:3:39:82:769#0/1  
GGGAGTTTTGTTTCAGCATCCAGAACTAACAGGGCTGGATT  
+HWI-EAS443:3:39:82:769#0/1  
aaaZa\_aaaa`^aaaa`a`aa\_V`aaaa`\_] [a]aYMU`  
@HWI-EAS443:3:39:881:690#0/1  
ACTGGACCACAACCTGCCTGTCTTATCATTAGGGCGTGGAT  
+HWI-EAS443:3:39:881:690#0/1  
`OZ\_\_]\_] [LUWW\_W`U^V]\_\_`^¥`UPZ[YRNX[Q^ZYQ  
@HWI-EAS443:3:39:914:1632#0/1  
CATGACAAGCACTTGCTGACCAAGCGACTGACTCAAATCT  
+HWI-EAS443:3:39:914:1632#0/1  
```bbabbbababbbbab`abb]^`ab`aWZabaa`^^  
@HWI-EAS443:3:39:92:345#0/1  
CAACTGCCTGTCTTATCATTAGGGCGTGGATTGTCTCCGA  
+HWI-EAS443:3:39:92:345#0/1  
a^aa]\_a`^a^aa`V^\_Za\_`` [T`U¥¥]^`ZTY`Y`^R[



@HWI-EAS443:3:3:104:682#0/1  
TGCAGTGGGATTTTCGGAGACAATCCACGCCCTAATGATA  
+HWI-EAS443:3:3:104:682#0/1  
ab`ba\_ab``aaaa[aa`b`¥aa`\_]aWaw¥\_\_^`\_\_¥\_`  
@HWI-EAS443:3:3:112:1256#0/1  
CTTGAGTCAAGAAGAAGTTCTGCATTCCAAGGGGGAGCA  
+HWI-EAS443:3:3:112:1256#0/1  
\_aa\_V^bbbab\_]¥X\_bb¥aaaNb]aa`aa\_]ZSba`a]X  
@HWI-EAS443:3:3:1133:855#0/1  
ATTGTCTCCGAAAATCCCACTGCATATGTATCCTATCTGA  
+HWI-EAS443:3:3:1133:855#0/1  
`bbb\_Ya]aba`aaa0Ya\_]`^\_¥`\_`aV[\_VT¥]^]`a^  
@HWI-EAS443:3:3:1167:1861#0/1  
CAGACACTATCAAGAGTTGGAGAAACAATATATTGAGAAC  
+HWI-EAS443:3:3:1167:1861#0/1  
a`a`abb\_aaab`\_abSbbaba^bbbbb`¥bababbaab]  
@HWI-EAS443:3:3:1169:189#0/1  
ATATGTAAACATCAGCAACACCAACTTTGCTGCTGGACAG  
+HWI-EAS443:3:3:1169:189#0/1  
aaaabaaaa`a`a\_¥aa^a\_\_`\_]\_```Z\_\_YZ`^]Z]]  
@HWI-EAS443:3:3:1172:59#0/1  
GTCAGGATATAGCGGGAGTTTTGTTTCAGCATCCAGAACTA  
+HWI-EAS443:3:3:1172:59#0/1  
aWZ\_a\_\_`\_`\_`W\_a\_YaQ^]\_\_W^UU¥YYWWWYUWYWWB  
@HWI-EAS443:3:3:1173:1027#0/1  
TGGTGTAACAGTGACACTGTGGGTTGGTCTTGCCAGAC  
+HWI-EAS443:3:3:1173:1027#0/1  
\_b`T\_a]\_aXaaVaa^^`]U¥aa`^\_aaTP\_N]aQU\_Z\_B  
@HWI-EAS443:3:3:1199:320#0/1  
GCAAGGCCCTTGAGTCAAGAAGAAGTTCTGCATTCCAA  
+HWI-EAS443:3:3:1199:320#0/1  
ab^abaa]Xa`abY]]`````a[V[aY]S]`P^a`YMYU  
@HWI-EAS443:3:3:1282:102#0/1  
AACTTTGCTGCTGGACAGTCAGTGGTTTCCGTGAAATTAG  
+HWI-EAS443:3:3:1282:102#0/1  
ab\_abab`b]¥aaa\_¥`bY]`a]aaSa`OX¥NHEOZ¥\_XB  
@HWI-EAS443:3:3:128:1888#0/1  
CATTCAAATACGGCAATGGTGTGGATAGGGAGAACTAA  
+HWI-EAS443:3:3:128:1888#0/1  
abaa`¥abbbababWbabaIbabaXaHZ¥b\_Vaa\_\_a\_a^  
@HWI-EAS443:3:3:1303:210#0/1  
CGTTCCGATCCCAAATCATCTCAAACCGTTTCTTGA  
+HWI-EAS443:3:3:1303:210#0/1  
¥bbabbbb`b`\_ba¥bbabababaaa`abaab^a`aa`Ga  
@HWI-EAS443:3:3:1368:1381#0/1  
TGCCTGTCTTATCATTAGGGCGTGGATTGTCTCCGAAAAT  
+HWI-EAS443:3:3:1368:1381#0/1  
]O\_\_UUW\_UUOW]a¥BBBBBBBBBBBBBBBBBBBBBBBB  
@HWI-EAS443:3:3:1396:19#0/1  
TGCAGAACCTTCTTCTTACTCAAGGGCCTTGCTAAATG

+HWI-EAS443:3:3:1396:19#0/1  
`\_S[aa^QU`XZ¥U\_\_a^\_\_¥^`^^`XQ\_`]^`]XWUZ  
@HWI-EAS443:3:3:1474:1141#0/1  
CAAAATCAGATTGAAACATGCAATCAAAGCGTCATTACTT  
+HWI-EAS443:3:3:1474:1141#0/1  
aaaaaaaaababb`a`a\_aaa^a\_a\_a`a^a\_\_^a`a^a\_  
@HWI-EAS443:3:3:1602:1027#0/1  
CCGCTAATTTACGGAAACCACTGACTGTCCAGCAGCAAA  
+HWI-EAS443:3:3:1602:1027#0/1  
a`bababbbaaa^^a\_\_a``\_¥aa\_\_aa[W^`\_¥YXWZB  
@HWI-EAS443:3:3:167:496#0/1  
AGAGTCTGAATGTGCATGTGTAAATGGTTCTTGCTTTACT  
+HWI-EAS443:3:3:167:496#0/1  
ababR[baa`ab`ba^baSa`\_aa`baZa\_aaa]]aa\_Xa  
@HWI-EAS443:3:3:1728:1327#0/1  
CGCTAATTTACGGAAACCACTGACTGTCCAGCAGCAAAG  
+HWI-EAS443:3:3:1728:1327#0/1  
abaa`]]`bab]ba`T^baYX`a`][XPZW¥S\_ZLNW¥]\_  
@HWI-EAS443:3:3:243:1306#0/1  
CCAGATTCTGGTTGAAAGACACCCACGGTCGATTCGAGCC  
+HWI-EAS443:3:3:243:1306#0/1  
abababbbb`\_]^^aaaba^`\_aa]]\_`RXa`Z¥LYZUNQ  
@HWI-EAS443:3:3:356:42#0/1  
CAGTCAGTGGTTTCCGTGAAATTAGCGGGCAATTCCTCTC  
+HWI-EAS443:3:3:356:42#0/1  
`b^T\_`b[bbX][QaaVaa\_``aaaaaaaaV`\_\_`¥¥^¥a\_  
@HWI-EAS443:3:3:421:1612#0/1  
CGCTAGTCCAGATTGTGTTCTTTGGGTCCGCCCTCTGAT  
+HWI-EAS443:3:3:421:1612#0/1  
aba\_^`\_Y\_abaaab\_b`a`\_aaaY`]^]X`X\_[aZaaa`  
@HWI-EAS443:3:3:459:793#0/1  
AGACACCCACGGTCGATTCGAGCCATGCCAGTTATCCCTG  
+HWI-EAS443:3:3:459:793#0/1  
T¥``bb`XTYb]TNaWa`\_^ab`PP¥]`aaRX\_a`^`S]b  
@HWI-EAS443:3:3:507:111#0/1  
CCGAAAATCCCCTGATATGTATCCTATCTGATATCCCA  
+HWI-EAS443:3:3:507:111#0/1  
`babaabaaaa\_aa`\_aaaa\_aa\_\_`a^a`\_\_a\_\_]^  
@HWI-EAS443:3:3:520:1901#0/1  
AATTCAACTTGGGAATCAAATCAGATTGAAACATGCAAT  
+HWI-EAS443:3:3:520:1901#0/1  
a¥aaa`a\_abb`aaaa^b`aa\_]aaa`\_aa`a\_b`aQW¥^  
@HWI-EAS443:3:3:543:1001#0/1  
GGCTCCTGTCTTTAATGGTTCCATTGGAATGTTTGTCTT  
+HWI-EAS443:3:3:543:1001#0/1  
aaaaaaaa`aaaa`aa`\_]a^`]\_a\_\_^a`\_[a\_`^YPZ]  
@HWI-EAS443:3:3:591:1131#0/1  
AGCCCATCCACTAACAGGGCAGAGAGGAATTGCCCGCT  
+HWI-EAS443:3:3:591:1131#0/1  
aaa`a`\_\_a`aaa\_a^aa\_\_a]a\_aWaRU^[^\_WUU\_¥Z

@HWI-EAS443:3:3:711:1879#0/1  
CAAGAAGAAGGTTCTGCATTCCAAGGGGGAGCATGATATG  
+HWI-EAS443:3:3:711:1879#0/1  
J¥¥¥\_VVYaaba\_ab]U¥\_]bbW``]aabba[aaaa]b\_  
@HWI-EAS443:3:3:734:872#0/1  
TTGTGGTGTAAACAGTGACACTGTGGGTTGGTCTTGGCCA  
+HWI-EAS443:3:3:734:872#0/1  
a`R]a\_a`a`ZV^`^^a^a\_^¥] ^¥PZ¥^^BBB  
@HWI-EAS443:3:3:751:476#0/1  
CTCGAATCGACCGTGGGTGTCTTTCAACCAGAATCTGGAA  
+HWI-EAS443:3:3:751:476#0/1  
abb]b\_aU`UT`HZ`XaaNZbb`baa`ba\_bb`bb`a\_  
@HWI-EAS443:3:3:788:79#0/1  
ATCCACTAACAGGGCAGAGAGGAATTGCCCCGTAATTT  
+HWI-EAS443:3:3:788:79#0/1  
`a\_I¥`a`\_\_b`baaZb\_]XaS¥aH^`\_\_¥¥U^^W¥NZBB  
@HWI-EAS443:3:3:799:360#0/1  
ACGGCAATGGTGTGGATAGGGAGAATAAAAGCATTAG  
+HWI-EAS443:3:3:799:360#0/1  
a\_abRZWU`¥`\_aaaa^`\_\_S]aTVZ\_]\_\_\_S[^^\_a  
@HWI-EAS443:3:3:895:289#0/1  
TGCATGTGTAAATGGTTCTTGCTTTACTGTAATGACCGAT  
+HWI-EAS443:3:3:895:289#0/1  
¥^^Z^`\_\_X\_\_`V\_RPaWaa^UZ[^^`a^aW`a¥PPY^B  
@HWI-EAS443:3:3:921:756#0/1  
GGTCCATCGGTCATTACAGTAAAGCAAGAACCATTACAC  
+HWI-EAS443:3:3:921:756#0/1  
ab\_aaaaaba¥\_a\_a`\_aaZ^`a`¥`a`\_Z¥\_\_`a\_Z^V  
@HWI-EAS443:3:3:970:1488#0/1  
TATTGAGAACAAGAGTCTGAATGTGCATGTGTAAATGG  
+HWI-EAS443:3:3:970:1488#0/1  
abaM[`UaWP[`ab`T¥L`ab`aa`SbUY`aLaZ^K\_`¥  
@HWI-EAS443:3:3:981:1669#0/1  
TCTGTCCCAGTCCATCCGTTCCGATCCCAAATCATCTCAA  
+HWI-EAS443:3:3:981:1669#0/1  
``[b¥X¥Q\_a`\_`a`G`QM[^aQUXX\_[Y]XXRVGNUBB  
@HWI-EAS443:3:40:1031:790#0/1  
CACCAACTTTGCTGCTGGACAGTCAGTGGTTTCCGTGAAA  
+HWI-EAS443:3:40:1031:790#0/1  
`[XaZNZbaa\_Y`N¥a\_[]Ta[`V`V]VSURRU]Q[SVQ  
@HWI-EAS443:3:40:1039:1559#0/1  
CGGCAATGGTGTGGATAGGGAGAATAAAAGCATTAGT  
+HWI-EAS443:3:40:1039:1559#0/1  
\_bbb]b`b\_Z`Y`bab`^`\_\_0\_aaaaa]aaaaaa^^aaW  
@HWI-EAS443:3:40:1140:744#0/1  
TATCACTATGAGGAATGCTCCTGTTATCCTGATTCTAGTG  
+HWI-EAS443:3:40:1140:744#0/1  
a`b`aaaaaaaaaaa`\_aa\_\_`a\_a`]aa^\_[`^a\_\_[Y[  
@HWI-EAS443:3:40:1250:1002#0/1  
CTCCATTAGACGATACTGGACCACAACCTGCCTGTCTTATC

+HWI-EAS443:3:40:1250:1002#0/1  
^\_a¥bbb\_[\_aaab`RXXX]¥\_^X`\_`aa`]X]Q^`^Z\_\_  
@HWI-EAS443:3:40:1324:1160#0/1  
CACAACTGCCTGTCTTATCATTAGGGCGTGGATTGTCTCC  
+HWI-EAS443:3:40:1324:1160#0/1  
UbbabbbbZabbbbaba`bbbaab\_]a`abab¥``^G  
@HWI-EAS443:3:40:1442:79#0/1  
TGTAACAGTGACACTGTGGGTTGGTCTTGCCAGACGGT  
+HWI-EAS443:3:40:1442:79#0/1  
\_`VZ^FL\_^P^WY¥^[\_RX]^PUX¥LY[RXBBBBBBBBBB  
@HWI-EAS443:3:40:1468:1916#0/1  
TTGGAATGCAGAACCTTCTTCTTGACTCAAGGGCCTTGC  
+HWI-EAS443:3:40:1468:1916#0/1  
a`a\_aa¥\_`^¥\_\_\_V]]¥]V]¥\_]U]UY`a]ZU^]\_]VZ\_W  
@HWI-EAS443:3:40:1492:1135#0/1  
TCCCAGTCCATCCGTTCCGATCCCAAATCATCTCAAACC  
+HWI-EAS443:3:40:1492:1135#0/1  
a``]aaX[U`¥]SRX\_]X[[]VJQVIV`¥¥WY]ZYPY]S  
@HWI-EAS443:3:40:1590:1848#0/1  
CGGGAGTTTTGTTTCAGCATCCAGAACTAACAGGGCTGGAT  
+HWI-EAS443:3:40:1590:1848#0/1  
Sa¥]¥Z[[¥¥bbbab\_a\_```]\_aaaRab\_\_¥``b\_bbbaa  
@HWI-EAS443:3:40:1594:1167#0/1  
AGCGGGAGTTTTGTTTCAGCATCCAGAACTAACAGGGCTGG  
+HWI-EAS443:3:40:1594:1167#0/1  
`^abb``a\_a`aW0\_X` `[V^a^a]NRV¥a]]Zaa]]`a]  
@HWI-EAS443:3:40:1645:1504#0/1  
AATACGGCAATGGTGTGGATAGGGAGAACTAAAAGCAT  
+HWI-EAS443:3:40:1645:1504#0/1  
^\_IY`aa¥W^^V`¥VX^]]YQ[YYQJG]KS[^TX¥][MUQ  
@HWI-EAS443:3:40:1659:896#0/1  
GAAATTCCAATTGTTAGCCAATTGATGCCATCATGACAAG  
+HWI-EAS443:3:40:1659:896#0/1  
a`aba`a`baaaa\_[\_R\_[a`WU¥Y\_]\_\_¥¥NT[\_ZBBBB  
@HWI-EAS443:3:40:1710:362#0/1  
CGCTAATTTTCACGGAAACCACTGACTGTCCAGCAGCAAAG  
+HWI-EAS443:3:40:1710:362#0/1  
]bbbaabbbbaabbaabaT`a\_bb`Y^Xba^a0TaX]¥Sa  
@HWI-EAS443:3:40:1715:1543#0/1  
GGCTCCTGTCTTTAATGGTTCCATTGGAATGTTTGTCTT  
+HWI-EAS443:3:40:1715:1543#0/1  
`Ybaaa^¥TQZa`Y¥]aa`aa]V¥\_XXTV¥UY\_ZUZR¥\_  
@HWI-EAS443:3:40:1758:306#0/1  
ATCAAGAGTTGGAGAAACAATATATTGAGAACACAAGAGT  
+HWI-EAS443:3:40:1758:306#0/1  
aaa^`b`^^aaaaa]W^a```\_a\_\_^[^]Y^\_a`T¥`aW  
@HWI-EAS443:3:40:1774:261#0/1  
TGGGTGTCTTTCAACCAGAATCTGGAATATCAGATAGGAT  
+HWI-EAS443:3:40:1774:261#0/1  
abba]a]S^a\_¥\_`]¥\_a\_\_\_]a`]]][\_\_^]a^`\_\_\_\_^\_Z

@HWI-EAS443:3:40:211:675#0/1  
ATGACAAGCACTTGCTGACCAAGCGACTGACTCAAATCTT  
+HWI-EAS443:3:40:211:675#0/1  
a\_X]`aaaaa`aa\_`a`SXa\_]`\_]\_^\_^^[^\_UHPX^[]\_  
@HWI-EAS443:3:40:238:404#0/1  
ATCAAAGCGTCATTACTTATGAAAACAACACTTGGGTAAA  
+HWI-EAS443:3:40:238:404#0/1  
abbbY\_ST`XXPP`L\_TM\_``ZSTXROW`a\_Z\_]TTN]¥`  
@HWI-EAS443:3:40:267:2029#0/1  
CAAAACCGTTTCTTGAACATAATGCTTTTAGTTCTCCCTAT  
+HWI-EAS443:3:40:267:2029#0/1  
abaabba\_^aaa``\_a`\_aaa\_`^\_\_ZZDZ]\_``\_`¥\_`]  
@HWI-EAS443:3:40:322:1829#0/1  
AACAGACACTATCAAGAGTTGGAGAAACAATATATTGAGA  
+HWI-EAS443:3:40:322:1829#0/1  
abaa]aaaaaa``aa\_\_`[\_]a`¥K\_X`\_`\_^^\_]`\_\_  
@HWI-EAS443:3:40:37:843#0/1  
CGGCAATGGTGTGGATAGGGAGAACTAAAAGCATTAGT  
+HWI-EAS443:3:40:37:843#0/1  
Y[¥]G[]`ZM^¥¥a¥\_`^Y¥YXXVXV\_¥ZTIVU¥]U¥Z¥RM  
@HWI-EAS443:3:40:409:314#0/1  
CACTGCATATGTATCCTATCTGATATTCCAGATTCTGGTT  
+HWI-EAS443:3:40:409:314#0/1  
V`b]`abbbbaZbbbbbbbaabaYba\_\_^`]^^`a]a  
@HWI-EAS443:3:40:527:310#0/1  
AGCCCATCCACTAACAGGGCAGAGAGGAATTGCCCGCT  
+HWI-EAS443:3:40:527:310#0/1  
`R\_aaa^`a`aaa^a\_a`aa[aV\_¥\_Q\_YY[LFH]\_¥`]U  
@HWI-EAS443:3:40:551:53#0/1  
GGTTGGTCTTGCCAGACGGTGCTGAGTTGCCATTTACCA  
+HWI-EAS443:3:40:551:53#0/1  
`YMQ`^¥\_\_`a\_`UZ\_P^¥WDV]WWWXTYU[TTZWXRYZ  
@HWI-EAS443:3:40:569:747#0/1  
CGTGGGTGTCTTTCAACCAGAATCTGGAATATCAGATAGG  
+HWI-EAS443:3:40:569:747#0/1  
aa\_\_bb\_b`abbbba`babba[`aaa^aa`aaaaaaZ``a  
@HWI-EAS443:3:40:642:967#0/1  
ACTGTTTACACCACAAAAGGATATGCTGCTCCCGCTAGTC  
+HWI-EAS443:3:40:642:967#0/1  
L¥abY\_a¥a^XT[a`\_WZ]]ZZ\_``\_V`\_^]Y][YSUOJZ  
@HWI-EAS443:3:40:645:1640#0/1  
TGCATGTGTAATGGTTCTTGCTTTACTGTAATGACCGAT  
+HWI-EAS443:3:40:645:1640#0/1  
aaaaaa`b^baaaaa]aaa`a`aaa\_a\_\_\_\_aa``aaaa\_\_  
@HWI-EAS443:3:40:661:384#0/1  
CCCCTAATTTACGGAAACCACTGACTGTCCAGCAGCAA  
+HWI-EAS443:3:40:661:384#0/1  
aaaaabbabaaa\_a\_\_`a\_\_\_\_`a\_¥¥`¥^Y\_UW^JW^R  
@HWI-EAS443:3:40:687:82#0/1  
CGCTTGGTCAGCAAGTGCTTGTCATGATGGCATCAATTGG

+HWI-EAS443:3:40:687:82#0/1  
aabbbbbaaaabbaab\_bbaa`aa\_a]GZ^^`aaPZa``  
@HWI-EAS443:3:40:735:1207#0/1  
CTTGAGTCAAGAAGAAGTTCTGCATTCCAAGGGGAGCA  
+HWI-EAS443:3:40:735:1207#0/1  
ab`\_[\_aba`bbba`aaX`babbba\_bbb^`aaa\_bbb  
@HWI-EAS443:3:40:745:337#0/1  
AACAAAACCTCCCGCTATATCCTGACCACTCATTTATTCCT  
+HWI-EAS443:3:40:745:337#0/1  
aaaaaaaa\_a```\_`aa`\_]`\_]QH[Z\_^`^`[]`\_¥  
@HWI-EAS443:3:40:796:1288#0/1  
GTCTGAATGTGCATGTGTAAATGGTTCTTGCTTTACTGTA  
+HWI-EAS443:3:40:796:1288#0/1  
a\_aaaa\_\_^`\_`aY¥aX¥U`\_]`[]^X^Y^X¥^ZZS\_  
@HWI-EAS443:3:40:799:835#0/1  
ATAAGACCTTGCTTCTGGGTTGAACTAATCAGAGGGCGAC  
+HWI-EAS443:3:40:799:835#0/1  
aaa[X\_a``````aab`^][`[G\_U`G`X^^\_V]Va^PV  
@HWI-EAS443:3:40:882:340#0/1  
GGGGCCTTGCTAAATGACAAACATTCCAATGGAACCATTA  
+HWI-EAS443:3:40:882:340#0/1  
a``Z¥¥]`a\_[] [¥]\_`¥T[YSY\_[HV¥\_VU¥¥ZVR[  
@HWI-EAS443:3:40:888:796#0/1  
CAAGAGTCTGAATGTGCATGTGTAAATGGTTCTTGCTTTA  
+HWI-EAS443:3:40:888:796#0/1  
\_V\_aab¥`ab\_^`b]b\_^aa`a]`^`a\_V^`a]\_\_¥¥Y\_  
@HWI-EAS443:3:40:921:315#0/1  
CGCTAATTTACGGAACCCTGACTGTCCAGCAGCAAAG  
+HWI-EAS443:3:40:921:315#0/1  
abbbb]babbaababb^ba\_aaaa^`aaY\_UI¥a``V\_  
@HWI-EAS443:3:42:104:41#0/1  
GACATATGTTAACATCAGCAACACCACTTTGCTGCTGGA  
+HWI-EAS443:3:42:104:41#0/1  
`Ua``\_]\_aaa`^Y[]\_]`^a``a`^¥T¥`\_] [¥]aa]^VW  
@HWI-EAS443:3:42:1108:1516#0/1  
CCCCTAATTATCACTATGAGGAATGCTCCTGTTATCCTGA  
+HWI-EAS443:3:42:1108:1516#0/1  
abbabbbbababaaaaab`]abaaaaaaa`aa`aa`\_  
@HWI-EAS443:3:42:123:300#0/1  
GTCAGCAAGTGCTTGTGCATGATGGCATCAATTGGCTAACA  
+HWI-EAS443:3:42:123:300#0/1  
a^b``aYa\_`aa`aaYa\_\_¥S\_a\_a\_a`]^`^`^`V`^`  
@HWI-EAS443:3:42:1256:1061#0/1  
GACCGTGGGTGTCTTTCAACCAGAATCTGGAATATCAGAT  
+HWI-EAS443:3:42:1256:1061#0/1  
``a``T^`\_[a][`\_^`\_`ZVZ¥[\_`\_]`a^^`^`\_`][¥  
@HWI-EAS443:3:42:1265:567#0/1  
ACCGTTTCTTGAACCTAATGCTTTTAGTTCTCCCTATCCAA  
+HWI-EAS443:3:42:1265:567#0/1  
`[`aX`aaa``\_a]`\_\_\_aZ`aa`\_a^^]\_]`\_`]]`]

@HWI-EAS443:3:42:1277:68#0/1  
TGGGCTCCTGTCTTTAATGGTTCATTGGAATGTTTGTCA  
+HWI-EAS443:3:42:1277:68#0/1  
H\_W¥VV`baTTa^VR¥bbbZ¥WUaU`\_WS¥Zb¥]`aRWP  
@HWI-EAS443:3:42:1333:1124#0/1  
GTTCTGCATTCCAAGGGGAGCATGATATGAATGGTTCCC  
+HWI-EAS443:3:42:1333:1124#0/1  
aZX\_bba\_`\_baabbbbba[a`babbaabaa`aa`[aa`^  
@HWI-EAS443:3:42:1344:1433#0/1  
GAACTTCACCAATAGGACAGCTCATTAGGGTTCGATATGG  
+HWI-EAS443:3:42:1344:1433#0/1  
`a¥YZaaaa`b`aa\_U]¥aa[\_ZTbaaaa]¥``\_a\_a^]Y  
@HWI-EAS443:3:42:1407:728#0/1  
CCCTTTTCTATTCTGAAGATCTTGTATGAGGCCTGTCCAT  
+HWI-EAS443:3:42:1407:728#0/1  
ababbbbbbbbbbbba`bbabbaabbbbbbb]bb`abba  
@HWI-EAS443:3:42:1445:1177#0/1  
TCCAGATTCTGGTTGAAAGACACCCACGGTCGATTCGAGC  
+HWI-EAS443:3:42:1445:1177#0/1  
]bab`b\_bbbabUbbbZa^aaaa\_a^baaU\_aNR]\_¥NXS  
@HWI-EAS443:3:42:1452:977#0/1  
CAGACACTATCAAGAGTTGGAGAAACAATATATTGAGAAC  
+HWI-EAS443:3:42:1452:977#0/1  
¥`ba`^b`Y`\_a^a\_¥X\_bbbbb^MaVbaaa`ab¥bb  
@HWI-EAS443:3:42:1463:1262#0/1  
GACAGGCCTCATACAAGATCTTCAGAATAGAAAAGGGAAA  
+HWI-EAS443:3:42:1463:1262#0/1  
[H]VL]]U¥\_a^WYLRST^TaZ[]TYX]¥BBBBBBBBBBB  
@HWI-EAS443:3:42:1522:645#0/1  
ATGGTGTGGATAGGGAGAACTAAAAGCATTAGTTCAAG  
+HWI-EAS443:3:42:1522:645#0/1  
abbbababbbb`aabba`^`b\_`]]`b\_`aa`]¥`\_`a  
@HWI-EAS443:3:42:1560:504#0/1  
TCCCAGTCCATCCGTTCCGATCCCAAATCATCTCAAAACC  
+HWI-EAS443:3:42:1560:504#0/1  
[aaa\_W`]]`[\_X¥I`NR]^OSST]^YY^a^Y¥Y^][¥`S  
@HWI-EAS443:3:42:1596:945#0/1  
GGGAGCAGCATATCCTTTTGTGGTGTAACAGTGACTG  
+HWI-EAS443:3:42:1596:945#0/1  
a``]]]Waa]aaa\_¥Ya]\_`^aa[`^]V`\_\_`Z¥Y[]¥¥]  
@HWI-EAS443:3:42:1626:1271#0/1  
GAAATTCCAATTGTTAGCCAATTGATGCCATCATGACAAG  
+HWI-EAS443:3:42:1626:1271#0/1  
Y[bba\_bbbbaab¥abaaaba\_aaaaaaaaa^a\_`aWaa\_  
@HWI-EAS443:3:42:1627:702#0/1  
CCCCTAATTTACGGAAACCACTGACTGTCCAGCAGCAA  
+HWI-EAS443:3:42:1627:702#0/1  
a`abaabaa`aa`^`a`a`^`\_\_`\_\_a`\_YUTZU]ZW[X  
@HWI-EAS443:3:42:1678:1534#0/1  
AAAGAGAACAATCTGGACTAGCGGGAGCAGCATATCCT

+HWI-EAS443:3:42:1678:1534#0/1  
abbbbaa`bb`\_\_baaaaa[^``a\_]aXXX[YY]^]QT  
@HWI-EAS443:3:42:1683:1507#0/1  
TCCCGTCCATCCGTTCCGATCCCAAATCATCTCAAACC  
+HWI-EAS443:3:42:1683:1507#0/1  
aaaW\_aaa`ba`\_\_]I]X¥^YYY]a\_\_\_\_[\_^X¥RT`\_\_¥Q  
@HWI-EAS443:3:42:1703:1869#0/1  
GCCCCTAATTATCACTATGAGGAATGCTCCTGTTATCCTG  
+HWI-EAS443:3:42:1703:1869#0/1  
aaa`¥bbaaaaaa[aa`^a`[b`\_Z\_aZa`\_\_`\_¥``\_  
@HWI-EAS443:3:42:1724:1635#0/1  
CCCCTATATCCTGACCACTCATTATTCCTACGATATCT  
+HWI-EAS443:3:42:1724:1635#0/1  
`^YaaUaW]S^YZWYZ^Z[]Y]YZa\_]TOV^Z]X[SZ^V  
@HWI-EAS443:3:42:1728:498#0/1  
ATGGGCTCCTGTCTTTAATGGTTCCATTGGAATGTTTGTC  
+HWI-EAS443:3:42:1728:498#0/1  
aaaaaaa\_`ab``aba\_a`aZU\_¥]`^`\_Y[`\_Za\_QWW  
@HWI-EAS443:3:42:1738:848#0/1  
CAACCAGAATCTGGAATATCAGATAGGATACATATGCAGT  
+HWI-EAS443:3:42:1738:848#0/1  
ab[¥R`aZ\_¥Q`aaa]aaa\_``\_\_¥\_Ua¥FZ`\_`\_T]¥Q  
@HWI-EAS443:3:42:1751:1437#0/1  
CAAATACGGCAATGGTGTGGATAGGGAGAACTAAAAGC  
+HWI-EAS443:3:42:1751:1437#0/1  
]Xba\_ba`aXbXbb`I`aaaY[baaabba\_Waa^\_b\_a]U  
@HWI-EAS443:3:42:1759:654#0/1  
TGCAATCAAAGCGTCATTACTTATGAAAACAACACTTGGG  
+HWI-EAS443:3:42:1759:654#0/1  
XU`V`b¥`LbV0[S[D]aZQ]^P\_a^]ZHGYUQFKY`a\_N  
@HWI-EAS443:3:42:191:70#0/1  
GAATGCTCCTGTTATCCTGATTCTAGTAAATCACATGTG  
+HWI-EAS443:3:42:191:70#0/1  
aaaaZ`a\_\_TX[a`ZT[\_ZT][YYXYZ¥P¥¥ZVSY\_¥]\_  
@HWI-EAS443:3:42:214:813#0/1  
GGTTCGATATGGGCTCCTGTCTTTAATGGTTCCATTGGAA  
+HWI-EAS443:3:42:214:813#0/1  
aaYaab`aaaaaaa\_a\_aa\_\_`aa``\_[a^\_a`\_a\_a]^  
@HWI-EAS443:3:42:242:1694#0/1  
GCCCCTAATTTACGGAAACCACTGACTGTCCAGCAGCA  
+HWI-EAS443:3:42:242:1694#0/1  
^bbbbbbabbbbabbbabbabba`\_a`][aba^ab`¥a]YY  
@HWI-EAS443:3:42:243:1620#0/1  
CAGCCCTGTTAGTTCTGGATGCTGAACAAAACCTCCCGCTA  
+HWI-EAS443:3:42:243:1620#0/1  
ab\_abba\_Z]`^X`¥¥ZTZNT¥\_]\_aaYba`XQaa]^\_^Z  
@HWI-EAS443:3:42:306:1289#0/1  
ATAAGACCTTGCTTCTGGTTGAACTAATCAGAGGGCGAC  
+HWI-EAS443:3:42:306:1289#0/1  
a`aaaaaaa`a`a\_]¥`Q¥`^aS`a`]^a`[\_[aa¥^[



@HWI-EAS443:3:42:397:1023#0/1  
GATATAGCGGGAGTTTTGTTTCAGCATCCAGAACTAACAGG  
+HWI-EAS443:3:42:397:1023#0/1  
\_T\_Zab`Za\_Z]]JT]^OWPT¥]Q`a¥]U[a`[^\_^\_ZZ  
@HWI-EAS443:3:42:397:1088#0/1  
CAAAACCGTTTTCTTGAACCTAATGCTTTTAGTTCTCCCTAT  
+HWI-EAS443:3:42:397:1088#0/1  
aaaa`aaa`a\_aaaa¥a]]`a`\_`\_aa`a]\_a`^aaa`a  
@HWI-EAS443:3:42:425:1785#0/1  
AGCGGGCAATTCCTCTCTCTGCCCTGTTAGTGGATGGGCT  
+HWI-EAS443:3:42:425:1785#0/1  
a\_baaabaaabbb¥Tabaaaaab`abab`a\_\_`aaa^`a[  
@HWI-EAS443:3:42:42:1396#0/1  
CCTCTCCATACTCAAGATTTGAGTCAGTCGCTTGGTC  
+HWI-EAS443:3:42:42:1396#0/1  
abbababba^baaaabaaaaaa]aa\_aaaP`\_`\_¥0[WY  
@HWI-EAS443:3:42:467:704#0/1  
CTTTAACACAGCCACTGCCCATTTGTCTGGGCCAGAAATT  
+HWI-EAS443:3:42:467:704#0/1  
aba`¥`\_`\_bb`^WY^aaXST\_Z^^\_aZN^\_NYUXN¥W[V  
@HWI-EAS443:3:42:46:1663#0/1  
CCCCTGCATATGTATCCTATCTGATATTCCAGATTCTGG  
+HWI-EAS443:3:42:46:1663#0/1  
^a\_\_\_\_\_]\_aa]TM]\_\_^^V]^`^\_] [¥`Y`\_0^¥`¥`^Z[  
@HWI-EAS443:3:42:502:1652#0/1  
GTCCCAGTCCATCCGTTCCGATCCCAAATCATCTCAAAAC  
+HWI-EAS443:3:42:502:1652#0/1  
a^`a^¥YUZ0\_T]U^UZ`V[UD[^\_XR[LWRSYJMLZ[]Z  
@HWI-EAS443:3:42:555:978#0/1  
CAGCAAGTGCTTGTCATGATGGCATCAATTGGCTAACAAAT  
+HWI-EAS443:3:42:555:978#0/1  
]P\_¥YV\_a[^\_HWXTT\_¥`a`[^\_b\_XZS\_\_ [¥Y\_0[¥U  
@HWI-EAS443:3:42:571:216#0/1  
ATCAAAGCGTCATTACTTATGAAAACAACCTTGGGTAAA  
+HWI-EAS443:3:42:571:216#0/1  
`b\_aa`a`aaaabb`aaa\_`^aaaaa` [ ` \_`U\_a^\_GVa`  
@HWI-EAS443:3:42:594:1744#0/1  
ATTCATATCATGCTCCCCCTTGAATGCAGAACCTTCTTC  
+HWI-EAS443:3:42:594:1744#0/1  
aabbaa\_aaab\_aX`\_^0``a]¥\_aaaVb^`a^Ya] [\_VM  
@HWI-EAS443:3:42:647:940#0/1  
GTGTTTGGATAGGGAGAACTAAAAGCATTAGTTCAAGAAA  
+HWI-EAS443:3:42:647:940#0/1  
aR¥L¥XV¥[SVVMQQR¥`PZ\_P\_RWN[RGVTGP]ZLX][S  
@HWI-EAS443:3:42:661:1095#0/1  
CTCAAACCGTTTTCTTGAACCTAATGCTTTTAGTTCTCCCT  
+HWI-EAS443:3:42:661:1095#0/1  
Y` [\_a¥a`baW^`ba]\_`aaaaZa`^^^XZP]\_]Z``¥  
@HWI-EAS443:3:42:673:724#0/1  
TTCGGATCCCAAATCATCTCAAACCGTTTCTTGAACCTAA

+HWI-EAS443:3:42:673:724#0/1  
aaaaaaaaaaaaaa`a`a\_a¥````a^aa``\_`\_`^`\_`\_  
@HWI-EAS443:3:42:690:1756#0/1  
CGGATCCCAAATCATCTCAAACCGTTTCTTGAACATAATG  
+HWI-EAS443:3:42:690:1756#0/1  
a`bbabbbbbbbaab\_b`babbb`b`abaaaaa^abaaa  
@HWI-EAS443:3:42:695:769#0/1  
TAATAACAGACACTATCAAGAGTTGGAGAAACAATATATT  
+HWI-EAS443:3:42:695:769#0/1  
aaaa\_aaaaaa`aa`\_`\_`\_\_^a^aa`\_\_\_\_\_]\_\_`\_`V`\_  
@HWI-EAS443:3:42:82:524#0/1  
GTTTGGATAGGGAGAACTAAAAGCATTAGTTCAAGAAACG  
+HWI-EAS443:3:42:82:524#0/1  
a^a``ZN\_WW[[UXT`\_]`^^[Y`\_`[\_R`\_XZ[TV^Z¥YY[  
@HWI-EAS443:3:42:848:764#0/1  
CAACTGCCTGTCTTATCATTAGGGCGTGGATTGTCTCCGA  
+HWI-EAS443:3:42:848:764#0/1  
aababbbba^b`ababbbbbbbaa`]aaaaa`]aaaaa`  
@HWI-EAS443:3:42:914:398#0/1  
ATTCATATCATGCTCCCCCTTGAATGCAGAACCTTCTTC  
+HWI-EAS443:3:42:914:398#0/1  
aabaabaabb`baaaaZ``\_aaaa\_aa^a`aa\_a\_a\_\_a  
@HWI-EAS443:3:42:953:969#0/1  
CATTATATCATGCTCCCCCTTGAATGCAGAACCTTCTT  
+HWI-EAS443:3:42:953:969#0/1  
^ab\_b¥bba\_a\_a`a[aa¥\_ab\_0[`bba``a\_\_]XaYb  
@HWI-EAS443:3:42:976:266#0/1  
CGACCGTGGGTGTCTTTCAACCAGAATCTGGAATATCAGA  
+HWI-EAS443:3:42:976:266#0/1  
abbabb]baa^b]abbb`aaa¥`a`ab`abb\_\_`aa```a  
@HWI-EAS443:3:43:1043:968#0/1  
CATTTAGCAAGGCCCTTGAGTCAAGAAGAAGTTCTGCA  
+HWI-EAS443:3:43:1043:968#0/1  
abbbbbb`bbaabbbbab^a``baaaaaa\_a\_aa`a  
@HWI-EAS443:3:43:1095:754#0/1  
GGGAACCTCACCAATAGGACAGCTCATTAGGGTTCGATAT  
+HWI-EAS443:3:43:1095:754#0/1  
aaa\_b^aaa\_a^aaaa\_]\_aaa¥\_aa[aa\_]aUa`^[\_  
@HWI-EAS443:3:43:1115:298#0/1  
GGCTCCTGTCTTTAATGGTTCCATTGGAATGTTTGTTCATT  
+HWI-EAS443:3:43:1115:298#0/1  
aa]TUa\_]^^`a``\_¥`R``^[\_`aa\_a`a^aaZZVX``  
@HWI-EAS443:3:43:1128:290#0/1  
AAATGGTTCTTGCTTTACTGTAATGACCGATGGACCAAGT  
+HWI-EAS443:3:43:1128:290#0/1  
aaaaaa`aaaa\_ba`a`aa`aa¥a`^a````\_`^^^aZ  
@HWI-EAS443:3:43:1196:1304#0/1  
CGAAAATCCCCTGCATATGTATCCTATCTGATATTCCAG  
+HWI-EAS443:3:43:1196:1304#0/1  
abaab¥bbaba`\_a¥aaa^]ababab`bYaa¥aaa]^R^a

@HWI-EAS443:3:43:1302:1843#0/1  
TGCATGTGTAATGGTTCTTGCTTTACTGTAATGACCGAT  
+HWI-EAS443:3:43:1302:1843#0/1  
ab^aabab^ba`ab`Z````ZPaaa`aa¥`\_`Z^VUa^\_  
@HWI-EAS443:3:43:1313:1133#0/1  
CGAAAATCCCCTACTGCATATGTATCCTATCTGATATTCCAG  
+HWI-EAS443:3:43:1313:1133#0/1  
`¥V¥U¥`ababaa^Saaba`]aaWW\_`a[aa`a\_`\_aV¥a  
@HWI-EAS443:3:43:1404:1103#0/1  
TGATATTCCAGATTCTGGTTGAAAGACACCCACGGTCGAT  
+HWI-EAS443:3:43:1404:1103#0/1  
``ab^a^[\`^b¥ab`b``aa^`aaaXV¥a]P\_\_a¥RQ¥[]  
@HWI-EAS443:3:43:1453:50#0/1  
CAAATCTTGAGTTGTATGGAGAGGGAATTCACCAATAGG  
+HWI-EAS443:3:43:1453:50#0/1  
^`a^baa`ab\_baa`[ab[b[bbba]\_aaa`\_]ba`]aa  
@HWI-EAS443:3:43:1482:41#0/1  
GCCCATCCACTAACAGGGCAGAGAGGAATTGCCCGCTA  
+HWI-EAS443:3:43:1482:41#0/1  
a^[\`Xaaaa`^a`V[aa\_[\`¥S`\_]S\_`SKRU\_[QFYNOR  
@HWI-EAS443:3:43:1502:211#0/1  
CCGAAAATCCCCTACTGCATATGTATCCTATCTGATATTCCA  
+HWI-EAS443:3:43:1502:211#0/1  
abbbbbbbbababaa`aabbababbaaababbaaab`Y\_  
@HWI-EAS443:3:43:1503:1431#0/1  
TGAAATTAGCGGGCAATTCCTCTCTCTGCCCTGTTAGTGG  
+HWI-EAS443:3:43:1503:1431#0/1  
`ba\_`aa^ba`\_[]]a\_a\_Sa^\_\_`Y`^^]W\_\_WaU\_`^`^  
@HWI-EAS443:3:43:1507:121#0/1  
GTTGTACTTTAACACAGCCACTGCCCCATTGTCTGGGCCA  
+HWI-EAS443:3:43:1507:121#0/1  
aR¥aTZF¥aa\_\_V[^[[WQSU\_]¥YXXX^VTTYPSRVPV  
@HWI-EAS443:3:43:1608:916#0/1  
ATAACTGGCATGGCTCGAATCGACCGTGGGTGTCTTTCAA  
+HWI-EAS443:3:43:1608:916#0/1  
abababbaa^^aaaa]SX`[Z[UPZRKQa^O\_LBBBBBBB  
@HWI-EAS443:3:43:1612:573#0/1  
CTTTAACACAGCCACTGCCCCATTGTCTGGGCCAGAAATT  
+HWI-EAS443:3:43:1612:573#0/1  
a\_¥^T`ab^^`\_Z^V^W¥Z¥]ZX]ZVT¥¥]X]ZXTBBBBB  
@HWI-EAS443:3:43:1631:1080#0/1  
AATCAAAGCGTCATTACTTATGAAAACAACACTTGGGTAA  
+HWI-EAS443:3:43:1631:1080#0/1  
^b[¥V¥baJa¥aaaaab`^^``aaa`aa]^][Ya\_YU``  
@HWI-EAS443:3:43:1633:347#0/1  
GCCCTAATTATCACTATGAGGAATGCTCCTGTTATCCTG  
+HWI-EAS443:3:43:1633:347#0/1  
aaa\_]\_\_\_\_\_^^XZ\_W\_]\_\_^\_U^^^]U^UXZUV\_XXVZZ^  
@HWI-EAS443:3:43:1656:699#0/1  
CTGCCCATTTGTCTGGGCCAGAAATTCCAATTGTTAGCCA

+HWI-EAS443:3:43:1656:699#0/1  
ab`baba`bbaaa`aa]aaa\_\_a^aa\_[a\_a`aa\_]`^`a  
@HWI-EAS443:3:43:1661:528#0/1  
GAAAGACACCCACGGTCGATTTCGAGCCATGCCAGTTATCC  
+HWI-EAS443:3:43:1661:528#0/1  
ab`a]\_a`a^V`Va^RV`K^RRQPYYMQZRFOUOUJNVQP  
@HWI-EAS443:3:43:1713:795#0/1  
GTGGGATTTTCGGAGACAATCCACGCCCTAATGATAAGAC  
+HWI-EAS443:3:43:1713:795#0/1  
a]^`aaa`][Z``XaZO[GVQLVO]VOLYPT[XQJYUWBB  
@HWI-EAS443:3:43:1723:1610#0/1  
ATTAGGGCGTGGATTGTCTCCGAAAATCCCCTGTCATATG  
+HWI-EAS443:3:43:1723:1610#0/1  
\_aYa`aab`¥^\_aaba\_a`a]^`a``¥ZaWa\_a[\_]`\_`¥  
@HWI-EAS443:3:43:1730:157#0/1  
GGGAGTTTTGTTTCAGCATCCAGAACTAACAGGGCTGGATT  
+HWI-EAS443:3:43:1730:157#0/1  
aabab\_baWb\_Y`aa^\_\_`¥\_`\_^^`Y¥Z`^Z^]^`¥Z]Z  
@HWI-EAS443:3:43:1737:802#0/1  
TCTGATTAGTTCAACCCAGAAGCAAGTCTTATACAATCC  
+HWI-EAS443:3:43:1737:802#0/1  
`bbbb]a]bab[bba[`aab`ZWb```HNWZG]aaba\_XK  
@HWI-EAS443:3:43:1759:1716#0/1  
CAACTGCCTGTCTTATCATTAGGGCGTGGATTGTCTCCGA  
+HWI-EAS443:3:43:1759:1716#0/1  
abababbabbaa`b]^`a^bb\_]\_\_aa¥a^aaa^]^a\_^a`  
@HWI-EAS443:3:43:22:1423#0/1  
CTTGAGTCAAGAAGAAGTTCTGCATTCCAAGGGGAGCA  
+HWI-EAS443:3:43:22:1423#0/1  
a`\_\_¥b`a`I\_b[VaV\_aaaaaa\_bb]aY¥\_b`aabab`a  
@HWI-EAS443:3:43:249:245#0/1  
ATAACAGACTATCAAGAGTTGGAGAAACAATATATTGA  
+HWI-EAS443:3:43:249:245#0/1  
aa]]\_]aa`a``\_`\_`\_a¥`X`\_a\_a`^X^PX`\_\_[\_]`\_  
@HWI-EAS443:3:43:269:1932#0/1  
GAAATTCCAATTGTTAGCCAATTGATGCCATCATGACAAG  
+HWI-EAS443:3:43:269:1932#0/1  
Xb]0`XS``Ia[[aba[bba`abY\_a\_HJba`\_]GUU`J^  
@HWI-EAS443:3:43:333:569#0/1  
CAACTGCCTGTCTTATCATTAGGGCGTGGATTGTCTCCGA  
+HWI-EAS443:3:43:333:569#0/1  
abbabbbba`bbabaaab`Z[Z`aa\_a\_a`\_]Z`\_^\_\_[  
@HWI-EAS443:3:43:346:1601#0/1  
GCTGTGTTAAAGTACAACGGCATAATAACAGACTATCA  
+HWI-EAS443:3:43:346:1601#0/1  
``¥¥F¥WST¥]ZQVP[Y¥[MTO[W¥VZRSQXQZYTZYPUX  
@HWI-EAS443:3:43:380:891#0/1  
CGCTTGGTCAGCAAGTGTCTGTCATGATGGCATCAATTGG  
+HWI-EAS443:3:43:380:891#0/1  
aba]^`b`\_aVYtbaaa`ba`]^`U]\_`[^TJW^\_H\_]`bY`[

@HWI-EAS443:3:43:383:1386#0/1  
TTGTGGTGTAAACAGTGACACTGTGGGTTGGTCTTGCCCA  
+HWI-EAS443:3:43:383:1386#0/1  
aa^P\_aXaaa]VYa][aa\_\_aa\_[a\_¥QS`]R¥`Z`\_¥Z¥  
@HWI-EAS443:3:43:384:1272#0/1  
AGGGGCCTTGCTAAATGACAAACATTCCAATGGAACCATT  
+HWI-EAS443:3:43:384:1272#0/1  
SZX^Yaa]`\_]abaaaaabb`¥`aab\_\_]a^aaa]\_ab`  
@HWI-EAS443:3:43:42:1185#0/1  
CTTCACCAATAGGACAGCTCATTAGGGTTCGATATGGGCT  
+HWI-EAS443:3:43:42:1185#0/1  
aa\_aa`a¥XNZYTUYX¥¥[^S¥WOQ[QQSO[^TKTYYYRT  
@HWI-EAS443:3:43:494:289#0/1  
AAGAGTTGGAGAAACAATATATTGAGAACACAAGAGTCTG  
+HWI-EAS443:3:43:494:289#0/1  
abb`abbbbbbbababababbbbaabababab\_aab  
@HWI-EAS443:3:43:524:1712#0/1  
AAATCCCCTGCATATGTATCCTATCTGATATTCCAGATT  
+HWI-EAS443:3:43:524:1712#0/1  
abbb\_VbbbabaaabbW^b`abbab`b``\_b\_\_a¥a¥a`\_  
@HWI-EAS443:3:43:531:1409#0/1  
ATCATTAGGGCGTGGATTGTCTCCGAAAATCCCCTGCAT  
+HWI-EAS443:3:43:531:1409#0/1  
a`]^a`\_aaaa`a``aa¥P]]a`\_[a^a^a\_^YMT[WUW  
@HWI-EAS443:3:43:533:653#0/1  
GTGGGATTTTCGGAGACAATCCACGCCCTAATGATAAGAC  
+HWI-EAS443:3:43:533:653#0/1  
a¥\_\_YR\_baaa`^^`aabaaa`b`aaaa`\_R]a^^XSX]S  
@HWI-EAS443:3:43:579:2044#0/1  
CGCTAGTCCAGATTGTGTTCTCTTTGGGTCGCCCTCTGAT  
+HWI-EAS443:3:43:579:2044#0/1  
abab[\_Zb\_`\_][^`Qaaa¥baa`a]X^UaaY^H]H`a`P  
@HWI-EAS443:3:43:636:327#0/1  
TGGGTGTCTTTCAACCAGAATCTGGAATATCAGATAGGAT  
+HWI-EAS443:3:43:636:327#0/1  
aab\_H[\_aaaa]aaaa`a¥`^]X`[W^`P]\_a^ZZ^a]Y  
@HWI-EAS443:3:43:663:1555#0/1  
CTCCGAAAATCCCCTGCATATGTATCCTATCTGATATTC  
+HWI-EAS443:3:43:663:1555#0/1  
`bbbbba`abbabaaaababbbbabbaabbaabaabaaa  
@HWI-EAS443:3:43:709:395#0/1  
GGGGGATGTGTTTGTGCATAAGGGAACCATTTCATATCATGC  
+HWI-EAS443:3:43:709:395#0/1  
aaaaa`aa`a`aaa`\_`\_`a`\_X¥`^\_\_`\_`[a``]\_`^P  
@HWI-EAS443:3:43:792:120#0/1  
CGTTCGGATCCCAAATCATCTCAAACCGTTTCTTGAAC  
+HWI-EAS443:3:43:792:120#0/1  
abWW]]][bS^[W¥aaaWV]Y`RZY]U^U¥VY^]\_\_^¥YS`  
@HWI-EAS443:3:43:811:266#0/1  
GCATCAATTGGCTAACAATTGGAATTTCTGGCCAGACAA

+HWI-EAS443:3:43:811:266#0/1  
aaa\_T\_`a`XW`]]\_`a]Y[¥`aZ`^[[[]S[N]ZRU\_  
@HWI-EAS443:3:43:850:1567#0/1  
CAGACATATGTTAACATCAGCAACACCAACTTTGCTGCTG  
+HWI-EAS443:3:43:850:1567#0/1  
aabaabbabbbbaabbaa[`ab`a`aa`]babaaa`a`  
@HWI-EAS443:3:43:900:1192#0/1  
GTGCGATTCGAGCCATGCCAGTTATCCCTGCACACACATGT  
+HWI-EAS443:3:43:900:1192#0/1  
a`aT^a¥a\_a]¥`XZ[USV]^`\_\_]VS\_WZV^]^X^`X  
@HWI-EAS443:3:43:943:96#0/1  
CAGACAATAACTTCTCAATAAAGCAAGATATCGTAGGAAT  
+HWI-EAS443:3:43:943:96#0/1  
aabaababbbbbbbaabbaab`ab`b`babab\_b`bbaab  
@HWI-EAS443:3:44:100:1133#0/1  
GTGTAAATGGTTCTTGCTTTACTGTAATGACCGATGGACC  
+HWI-EAS443:3:44:100:1133#0/1  
a[^^`a\_S]^`^a\_aa`a`a[][\_`^[]Z¥`¥YS¥  
@HWI-EAS443:3:44:1016:1556#0/1  
TTCTGGTTGAAAGACACCCACGGTCGATTCGAGCCATGCC  
+HWI-EAS443:3:44:1016:1556#0/1  
aaa`aa¥a`a`^¥\_[a^^)`\_\_XNOUU[ZSPUVYVWUQOJ  
@HWI-EAS443:3:44:1043:1023#0/1  
TGACTGTCCAGCAGCAAAGTTGGTGTGCTGATGTTAACA  
+HWI-EAS443:3:44:1043:1023#0/1  
aaaaab\_abaa]S`a¥\_\_aX`a`Va]\_[^Z\_¥\_\_Z`)\_RZ  
@HWI-EAS443:3:44:1052:70#0/1  
CAAATACGGCAATGGTGTGGATAGGGAGAACTAAAAGC  
+HWI-EAS443:3:44:1052:70#0/1  
`]]aa`bb]U^b\_\_TaX`aaaP\_[^]aZ[OLSY\_]\_¥¥0  
@HWI-EAS443:3:44:1056:1200#0/1  
AGCCACTCAATTCAACTTGGGAATCAAAATCAGATTGAAA  
+HWI-EAS443:3:44:1056:1200#0/1  
aaaaa`^aaabbaaa\_a`aa\_\_\_a\_aa]¥`\_`a`a\_\_\_  
@HWI-EAS443:3:44:1063:1423#0/1  
CGGTCATTACAGTAAAGCAAGAACCATTTACACATGCACA  
+HWI-EAS443:3:44:1063:1423#0/1  
abbabbbbbbabbabbbbaabbbbababbbbabaa  
@HWI-EAS443:3:44:108:1688#0/1  
GCTGGATTGTATAAGACCTTGCTTCTGGGTGAACTAATC  
+HWI-EAS443:3:44:108:1688#0/1  
aaVZZ]a¥0QZW\_\_RZZ¥X^\_W^¥UWR[\_VROX`]^a¥¥N  
@HWI-EAS443:3:44:1096:999#0/1  
ATCATGACAAGCACTTGCTGACCAAGCGACTGACTCAAAT  
+HWI-EAS443:3:44:1096:999#0/1  
aaa`aaa`aab^a`a`a`\_a]\_`^`^`\_Za`\_\_\_\_\_])`\_Z  
@HWI-EAS443:3:44:111:567#0/1  
CCCATATCGAACCTAATGAGCTGTCCTATTGGTGAAGTT  
+HWI-EAS443:3:44:111:567#0/1  
aa\_abZYaaX]^`\_a^U`\_\_VWXYU[Y\_aa¥Q¥\_[TRQ

@HWI-EAS443:3:44:1126:82#0/1  
TCCCTCTCCATACAACACTCAAGATTTGAGTCAGTCGCTTGG  
+HWI-EAS443:3:44:1126:82#0/1  
aa`aa^aa`a`aa`\_\_\_\_`a\_``a^`^]]a]Y`^]`^\_]  
@HWI-EAS443:3:44:1147:754#0/1  
GTGGTTTTCCGTGAAATTAGCGGGCAATTCCTCTCTCTGCC  
+HWI-EAS443:3:44:1147:754#0/1  
a^`a\_\_aa¥aP]\_\_[\_]YZ^`[]¥N]`ZW]]^][ZV`YY  
@HWI-EAS443:3:44:1186:1822#0/1  
CGCTTGGTCAGCAAGTGCTTGCATGATGGCATCAATTGG  
+HWI-EAS443:3:44:1186:1822#0/1  
aa^bbba^b`aaba`aba`\_a\_bba¥```aba`a\_  
@HWI-EAS443:3:44:119:135#0/1  
CCCTTTTCTATTCTGAAGATCTTGTATGAGGCCTGTCCAT  
+HWI-EAS443:3:44:119:135#0/1  
abb^`bbaba`babbaaba`[a`]Zaaaa]\_a\_a`[\_[\_a  
@HWI-EAS443:3:44:11:552#0/1  
GTTCCGATCCCAAATCATCTCAAACCGTTTCTTGAACATA  
+HWI-EAS443:3:44:11:552#0/1  
VJX^a\_OV]¥]Y[VZVWOSPYY[¥RTXZTZRP[TVVVR^V  
@HWI-EAS443:3:44:1270:1651#0/1  
GAATGTGCATGTGTAAATGGTTCTTGCTTTACTGTAATGA  
+HWI-EAS443:3:44:1270:1651#0/1  
a^^`YT\_`Uaa\_[LYa\_\_aa]aWa`a\_a`a`\_`[W\_`\_`\_  
@HWI-EAS443:3:44:1313:828#0/1  
CAAGAGTTGGAGAAACAATATATTGAGAACACAAGAGTCT  
+HWI-EAS443:3:44:1313:828#0/1  
aa^bababbbabaaaaaaaa`a`abbaaaaaaaaaabaa\_¥a  
@HWI-EAS443:3:44:1325:326#0/1  
GACGATACTGGACCACAACACTGCCTGTCTTATCATTAGGGC  
+HWI-EAS443:3:44:1325:326#0/1  
a\_`a\_\_`[[RVVHSNJSUMZXOOZ¥NDVRRRYU¥TBBBBB  
@HWI-EAS443:3:44:1399:857#0/1  
GCATGTGTAAATGGTTCTTGCTTTACTGTAATGACCGATG  
+HWI-EAS443:3:44:1399:857#0/1  
a`aaa\_a\_\_`^aaa`\_a`a^a\_`^^`a^a\_``\_`^a^\_\_  
@HWI-EAS443:3:44:1403:994#0/1  
TGGGTGTCTTTCAACCAGAATCTGGAATATCAGATAGGAT  
+HWI-EAS443:3:44:1403:994#0/1  
`b`Y^b``aba`¥¥`a`^aa`abaaaaa\_`a`aaaa`\_  
@HWI-EAS443:3:44:1408:929#0/1  
TGGAATATCAGATAGGATACATATGCAGTGGGATTTTCGG  
+HWI-EAS443:3:44:1408:929#0/1  
a^a`J]\_a`QSaa^]¥RT\_VU]]\_\_\_\_^\_S^aXRxaPRU  
@HWI-EAS443:3:44:140:1644#0/1  
GTCTGTTATTATGCCGTTGTACTTTAACACAGCCACTGCC  
+HWI-EAS443:3:44:140:1644#0/1  
^a`YYZ\_Y`\_aba]\_\_b`[a^\_`\_aab]T``\_¥\_X^][\_  
@HWI-EAS443:3:44:1462:1026#0/1  
AATTGATGCCATCATGACAAGCACTTGCTGACCAAGCGAC

+HWI-EAS443:3:44:1462:1026#0/1  
aY`Z^QQZZaX¥a`^XQXUQ\_ZPZP[`\_][aTWQXZZW]UZ  
@HWI-EAS443:3:44:1479:45#0/1  
GTCTGTTATTATGCCGTTGTACTTTAACACAGCCACTGCC  
+HWI-EAS443:3:44:1479:45#0/1  
aZa`aUa^^\_`^`^aR^¥ZZZ\_^^YY[VVV]UTYYYY]WV  
@HWI-EAS443:3:44:1502:379#0/1  
CACAGTGTCACTGTTTACACCACAAAAGGATATGCTGCTC  
+HWI-EAS443:3:44:1502:379#0/1  
aababTaa`a]ab]aaa`\_]`a^`\_`^a`^`^`^`^`^`^]X]]]  
@HWI-EAS443:3:44:1560:1510#0/1  
GGCATAATAACAGACACTATCAAGAGTTGGAGAAACAATA  
+HWI-EAS443:3:44:1560:1510#0/1  
a\_]ba`aaaa\_abY\_a^a^^`\_`a^aZb^^[^Y[^XX^`Y  
@HWI-EAS443:3:44:1568:84#0/1  
GCCTGTCTTATCATTAGGGCGTGGATTGTCTCCGAAAATC  
+HWI-EAS443:3:44:1568:84#0/1  
`aaaaRabaaaaab^[\_]T^aR¥\_¥\_`aPU\_¥Z\_ZYWXUS  
@HWI-EAS443:3:44:1600:1531#0/1  
GTCAGCAAGTGCTTGTGCATGATGGCATCAATTGGCTAACA  
+HWI-EAS443:3:44:1600:1531#0/1  
aUaSLOV^PL\_aa¥bXGP¥b^`\_aUFS^U¥aZ[RG¥^\_0]  
@HWI-EAS443:3:44:1659:557#0/1  
AAGTTATTGTCTGTCCCAGTCCATCCGTTCCGATCCCAAA  
+HWI-EAS443:3:44:1659:557#0/1  
`abYbbabba¥abW]\_XOKDS¥XWL[¥P[NV]BBBBBBBB  
@HWI-EAS443:3:44:1665:1216#0/1  
GCCACTCAATTCAACTTGGGAATCAAAATCAGATTGAAAC  
+HWI-EAS443:3:44:1665:1216#0/1  
aaa^U\_a¥0]aX[]\_aa]WZ\_`[[[]¥¥¥]WYa[``a^\_¥]  
@HWI-EAS443:3:44:1703:478#0/1  
AGTTCCTCTCCATACAACCTCAAGATTTGAGTCAGTCGCT  
+HWI-EAS443:3:44:1703:478#0/1  
]¥DZ[S¥]ab[\_`\_QS[\_]^Wa^W[Y\_V\_P\_`[[ZMDVYS  
@HWI-EAS443:3:44:1765:664#0/1  
CTTGTGTTCTCAATATATTGTTTCTCCAACCTTGATAGT  
+HWI-EAS443:3:44:1765:664#0/1  
abbb`babbb`abbabbbababab`ba\_a`baaaaa\_X  
@HWI-EAS443:3:44:1787:993#0/1  
GTTCCGATCCCAAATCATCTCAAACCGTTTCTTGAACCTA  
+HWI-EAS443:3:44:1787:993#0/1  
`^^`\_`\_¥`Q¥V¥Z^]¥^^a^Y¥^a`¥aaaXF[]^¥Y\_`\_  
@HWI-EAS443:3:44:181:985#0/1  
CACAAGAGTCTGAATGTGCATGTGTAAATGGTTCTTGCTT  
+HWI-EAS443:3:44:181:985#0/1  
aabbbbbbbbabbb\_bb\_abaabb`aab`aa`\_abbbbb^bb  
@HWI-EAS443:3:44:189:1441#0/1  
GTTCCCTCTCCATACAACCTCAAGATTTGAGTCAGTCGCTT  
+HWI-EAS443:3:44:189:1441#0/1  
aYO\_^b`^`^\_[aaa\_a\_aaa]UT¥`a`\_`W^ZYWQ[TOVU



@HWI-EAS443:3:44:196:1764#0/1  
ATTTCGAGCCATGCCAGTTATCCCTGCACACACATGTGATT  
+HWI-EAS443:3:44:196:1764#0/1  
\_aa\_a\_aa`a[`¥aWY]a^U[M[a`aaa\_XS^\_a[X¥\_\_  
@HWI-EAS443:3:44:201:422#0/1  
ACGGTTTTGAGATGATTTGGGATCCGAACGGATGGACTGG  
+HWI-EAS443:3:44:201:422#0/1  
aa\_\_Rabb\_\_a\_aaa`aaaT]R]]a¥[`] `]^`]ZX^\_]`  
@HWI-EAS443:3:44:20:1630#0/1  
AGCGGGAGCAGCATATCCTTTTGTGGTGTAAACAGTGACA  
+HWI-EAS443:3:44:20:1630#0/1  
a`ba]`aaaa[a`a^`\_`aba`PV¥\_Y``\_¥aW\_Z[^\_W\_  
@HWI-EAS443:3:44:244:230#0/1  
TAAGAATCGGTTCCAAGGGGATGTGTTTGCATAAGGGA  
+HWI-EAS443:3:44:244:230#0/1  
aaabbaa¥a`UU[]UKXX]\_XHI[OYL¥ZXYQOSSOWXYU  
@HWI-EAS443:3:44:24:783#0/1  
CAAATACGGCAATGGTGGTGGATAGGGAGAACTAAAAGC  
+HWI-EAS443:3:44:24:783#0/1  
aabbbbbbb`a¥R\_`N`]`aTUKV\_aaaI\_GUOW[aaaPT  
@HWI-EAS443:3:44:256:1825#0/1  
GGCTCCTGTCTTTAATGGTCCATTGGAATGTTTGCATT  
+HWI-EAS443:3:44:256:1825#0/1  
a\_``a\_^W\_\_aaaab`QL[\_Ia`]Y0[a[Y\_`aGZ[\_X\_  
@HWI-EAS443:3:44:274:1769#0/1  
TTCAAATACGGCAATGGTGGTGGATAGGGAGAACTAAAA  
+HWI-EAS443:3:44:274:1769#0/1  
a`¥^aaa¥XUT]\_`a^aX¥^aa\_[SX¥NZRV\_S\_W^^\_\_\_\_  
@HWI-EAS443:3:44:318:493#0/1  
GTGTAAATGGTCTTGCTTTACTGTAATGACCGATGGACC  
+HWI-EAS443:3:44:318:493#0/1  
a¥``aZRU]RNRWa\_VQX[¥¥\_¥`X][¥Z[U¥\_^YZ^VYW  
@HWI-EAS443:3:44:32:234#0/1  
TGATTTGGGATCCGAACGGATGGACTGGGACAGACAATAA  
+HWI-EAS443:3:44:32:234#0/1  
aa[aab``¥`^a`a\_\_]\_a\_\_\_\_]ZXX^\_YSTZZUU\_YYUT  
@HWI-EAS443:3:44:332:288#0/1  
CTTGGTCAGCAAGTGCTTGTGCATGATGGCATCAATTGGCT  
+HWI-EAS443:3:44:332:288#0/1  
a]NMYX\_SZ`ONYI[OLSV[\_\_\_\_`\_[¥JOSLZMKFTZ`WT  
@HWI-EAS443:3:44:404:1465#0/1  
CAGTAAAGCAAGAACCATTTACACATGCACATTCAGACTC  
+HWI-EAS443:3:44:404:1465#0/1  
Q]¥^a^a\_```baab``babbbbbb`babbbbaa\_¥\_aaH^W  
@HWI-EAS443:3:44:504:1078#0/1  
ATCGAACCTAATGAGCTGCCTATTGGTGAAGTCCCTC  
+HWI-EAS443:3:44:504:1078#0/1  
aaaaaa\_\_aa`a\_\_`aaaWa`\_[a`a`]`a\_\_X\_\_\_\_]^`  
@HWI-EAS443:3:44:565:1283#0/1  
ATGGCATCAATTGGCTAACAAATTGGAATTTCTGGCCCAGA

+HWI-EAS443:3:44:565:1283#0/1  
^X`WQa\_aTaaaa`^^`\_\_[a`aT^¥`\_Y\_X\_R\_V\_¥[[¥  
@HWI-EAS443:3:44:639:909#0/1  
CAAAATCAGATTGAAACATGCAATCAAAGCGTCATTACTT  
+HWI-EAS443:3:44:639:909#0/1  
¥bZ]`bbbaa¥a\_aZ`^baab\_ab`^b`¥`Jbab` `b`  
@HWI-EAS443:3:44:669:881#0/1  
GCTTGGTCAGCAAGTGCTTGTGCATGATGGCATCAATTGGC  
+HWI-EAS443:3:44:669:881#0/1  
aa`aaaZaa`a`Ya]`\_\_^aW^¥\_\_\_^`\_\_\_\_^R\_]\_^Y  
@HWI-EAS443:3:44:670:1933#0/1  
AACAGGGCAGAGAGGAATTGCCCGCTAATTCACGGAA  
+HWI-EAS443:3:44:670:1933#0/1  
aaaaa\_TY\_a\_b]^T`[`aa\_a`aU[a\_\_\_\_`[SYa^\_\_¥`  
@HWI-EAS443:3:44:692:1038#0/1  
CCGAACGGATGGACTGGGACAGACAATAACTTCTCAATAA  
+HWI-EAS443:3:44:692:1038#0/1  
`\_a`a\_a` `aaa\_Wa`aaa\_^\_Z\_a^`N`V`]`\_\_`¥  
@HWI-EAS443:3:44:697:1268#0/1  
ACTGCCTGTCTTATCATTAGGGCGTGGATTGTCTCCGAAA  
+HWI-EAS443:3:44:697:1268#0/1  
Vab^bbb`X` `bb\_[Z\_YaaU]\_^[]U^a`ULGZ\_\_YXX]  
@HWI-EAS443:3:44:751:1368#0/1  
ATTCAGACTCTTGTGTTCTCAATATATTGTTTCTCCA  
+HWI-EAS443:3:44:751:1368#0/1  
X[^`a`^^\_aaYSS¥YV¥`aab`aa`]^\_a\_VYUXVZ]  
@HWI-EAS443:3:44:782:444#0/1  
CAAGCGACTGACTCAAATCTTGAGTTGTATGGAGAGGGAA  
+HWI-EAS443:3:44:782:444#0/1  
`bb`bbbabb`bb`babbabbbabbbba`bba`babbb`a  
@HWI-EAS443:3:44:785:73#0/1  
AATGGTTCATTGGAATGTTTGTCAATTTAGCAAGGCCCT  
+HWI-EAS443:3:44:785:73#0/1  
aabbbW\_^aP^a`bS\_^`^`\_XXRQT\_^UUTNW\_]WWWRW  
@HWI-EAS443:3:44:793:1065#0/1  
GAACTTCACCAATAGGACAGCTCATTAGGGTTCGATATGG  
+HWI-EAS443:3:44:793:1065#0/1  
`ab`aabaaaabaaa` `aaa\_a^\_aa\_a\_\_V^W¥\_\_a\_^\_  
@HWI-EAS443:3:44:830:1181#0/1  
GTCAGTGGTTTCCGTGAAATTAGCGGGCAATTCCTCTCTC  
+HWI-EAS443:3:44:830:1181#0/1  
a]baa[aaWaaaa`¥a`\_aa` `Y`¥\_\_\_Za`¥U[\_\_\_¥\_¥  
@HWI-EAS443:3:44:897:115#0/1  
GGCTCCTGTCTTTAATGGTTCATTGGAATGTTTGTCAAT  
+HWI-EAS443:3:44:897:115#0/1  
]P`^R[LYS^^a][` ``[N^]ZL¥¥N¥ZGTZ^^[LUBBBB  
@HWI-EAS443:3:44:908:1945#0/1  
CGCTTGGTCAGCAAGTGCTTGTGCATGATGGCATCAATTGG  
+HWI-EAS443:3:44:908:1945#0/1  
aa\_a^^aYaaabbaa\_baaaa`^`bbabaa]aa` `aaaa

@HWI-EAS443:3:44:922:370#0/1  
ATTAGGGCGTGGATTGTCTCCGAAAATCCCACTGCATATG  
+HWI-EAS443:3:44:922:370#0/1  
`bbbaaa\_b`ab`aaa\_a\_a¥a\_a`\_\_^^\_`\_]\_a[\_^  
@HWI-EAS443:3:44:959:487#0/1  
AGCCCATCCACTAACAGGGCAGAGAGGAATTGCCCGCT  
+HWI-EAS443:3:44:959:487#0/1  
`abaa`baa]aaTaaa`^\_aaaa\_a`Z`aa`a\_a^``a\_  
@HWI-EAS443:3:44:972:309#0/1  
CAATGGTGTGGATAGGGAGAACTAAAAGCATTAGTTCA  
+HWI-EAS443:3:44:972:309#0/1  
a\_bb`aUbbabaaaa\_aaa[aa\_\_\_\_aaUaa`a`¥\_Z`  
@HWI-EAS443:3:44:996:506#0/1  
CTCATTATTCTACGATATCTTGCTTTATTGAGAAGTTA  
+HWI-EAS443:3:44:996:506#0/1  
abaabbbababababaaaaababababab`bab\_^`aaa  
@HWI-EAS443:3:45:1070:1354#0/1  
ATCATGACAAGCACTTGCTGACCAAGCGACTGACTCAAAT  
+HWI-EAS443:3:45:1070:1354#0/1  
[baaUa^U^aa\_^a[[aZ\_\_Sa\_`[\_UL[W^a\_a^W]OY  
@HWI-EAS443:3:45:1080:160#0/1  
TGCCCCTAATTACTACTATGAGGAATGCTCCTGTTATCCT  
+HWI-EAS443:3:45:1080:160#0/1  
\_ba\_abaaaaabaa\_aaa`baaa`\_aaa\_a^\_aU^`aYX¥  
@HWI-EAS443:3:45:1126:433#0/1  
TTAAAGTACAACGGCATAATAACAGACACTATCAAGAGTT  
+HWI-EAS443:3:45:1126:433#0/1  
aa]Y[L`\_`^X`\_]`\_\_a\_¥X]U`ZX\_\_[W[R¥V¥¥ZX]  
@HWI-EAS443:3:45:1151:281#0/1  
CAAGAAGAAGGTTCTGCATTCCAAGGGGAGCATGATATG  
+HWI-EAS443:3:45:1151:281#0/1  
X\_]`¥Y`bbX¥abbbbb`¥ab¥bbbbbab]a]\_aa\_baab  
@HWI-EAS443:3:45:1239:17#0/1  
ATCAATTGGCTAACAATTGGAATTTCTGGCCAGACAATG  
+HWI-EAS443:3:45:1239:17#0/1  
U[b[Z`\_W\_\_S^USUL^^]UWZa\_`\_T¥\_]NXP¥VLQX[\_  
@HWI-EAS443:3:45:1286:673#0/1  
CTCCATTAGACGATACTGGACCACAAGTGCCTGTCTTATC  
+HWI-EAS443:3:45:1286:673#0/1  
ab]aa`bba`\_WfYaV`aWIO`QW]bG`\_]\_Wa`\_`aUaQ  
@HWI-EAS443:3:45:1289:1219#0/1  
TGAGTGGTCAGGATATAGCGGGAGTTTTGTTGAGCATCCA  
+HWI-EAS443:3:45:1289:1219#0/1  
abaa^a`\_\_\_\_aa]\_X\_`a`\_a`[\_G[\_^V^Q][SRUG¥W  
@HWI-EAS443:3:45:1305:737#0/1  
TGACTGTCCAGCAGCAAAGTTGGTGTGCTGATGTTAACA  
+HWI-EAS443:3:45:1305:737#0/1  
\_b^¥`¥\_]a`aZX^[XW[^J^`\_KZ\_`]Z`[WXTX^SRTP  
@HWI-EAS443:3:45:131:124#0/1  
GCACCGTCTGGCCAAGACCAACCCACAGTGTCACTGTTTA

+HWI-EAS443:3:45:131:124#0/1  
aabaab\_baa`¥`a\_\_\_\_aaaY````\_`S`^Z\_¥`\_R\_\_X  
@HWI-EAS443:3:45:1343:487#0/1  
CTGGACCACAACCTGCCTGTCTTATCATTAGGGCGTGGATT  
+HWI-EAS443:3:45:1343:487#0/1  
a`bb`ba\_\_\_\_`abaa`aba\_\_bba\_]``a\_[^]a``a\_a`  
@HWI-EAS443:3:45:1394:799#0/1  
ATCGACCGTGGGTGTCTTTCAACCAGAATCTGGAATATCA  
+HWI-EAS443:3:45:1394:799#0/1  
aa```aabWabb[\_MN]aa^`¥V]`a¥\_¥0]aa\_\_\_\_\_¥\_  
@HWI-EAS443:3:45:1405:1546#0/1  
TGTCTGTCCCAGTCCATCCGTTCCGATCCCAAATCATCTC  
+HWI-EAS443:3:45:1405:1546#0/1  
aaaaabWa]\_\_\_\_\_`a^`\_\_]\_]\_Y^^^^ZYGY\_]X^ZZ^  
@HWI-EAS443:3:45:1517:1070#0/1  
CCTCTCCATACAACTCAAGATTTGAGTCAGTCGCTTGGTC  
+HWI-EAS443:3:45:1517:1070#0/1  
aba```abbbaaaa\_`^\_Za]bba`^]¥Y¥`QQ\_[a]¥BBB  
@HWI-EAS443:3:45:1560:782#0/1  
AAATACGGCAATGGTGTGGATAGGGAGAACTAAAAGCA  
+HWI-EAS443:3:45:1560:782#0/1  
\_`^`bX\_aba`````\_S\_abb`^U¥Z````]\_¥¥X\_\_Y\_aa`]  
@HWI-EAS443:3:45:1564:205#0/1  
ACCACTCATTTATTCTACGATATCTTGCTTTATTGAGAA  
+HWI-EAS443:3:45:1564:205#0/1  
aa\_]W\_`ababaaa\_aaaaa]a```\_aaa\_aa^^aa`[a\_a  
@HWI-EAS443:3:45:1604:660#0/1  
GTAAATGGCAACTCAGCACCGTCTGGCCAAGACCAACCCA  
+HWI-EAS443:3:45:1604:660#0/1  
a¥^`[¥\_a`]^a¥ZNU]¥\_¥V[W¥V^^UR[W[SHOUVUWWU  
@HWI-EAS443:3:45:1634:464#0/1  
AATGCTTTTAGTTCTCCCTATCCAAACACCATTGCCGTAT  
+HWI-EAS443:3:45:1634:464#0/1  
\_W\_Y^ba`]\_bZ^aaa\_ab`a`[^\_]\_```^^[Xa[^`  
@HWI-EAS443:3:45:1712:887#0/1  
CATATGTTAACATCAGCAACACCAACTTTGCTGCTGGACA  
+HWI-EAS443:3:45:1712:887#0/1  
]a`a`abaaabb```\_`a`Z\_```aaab```]aa`baa`\_]  
@HWI-EAS443:3:45:1759:294#0/1  
ATTAGACGATACTGGACCACAACCTGCCTGTCTTATCATT  
+HWI-EAS443:3:45:1759:294#0/1  
ababaa`b`\_ZR[^a^\_`¥P\_\_Q\_`^¥^^^VZ\_V]T0[YQ  
@HWI-EAS443:3:45:1781:190#0/1  
ACTTGGTCCATCGGTCATTACAGTAAAGCAAGAACCATTT  
+HWI-EAS443:3:45:1781:190#0/1  
aabbbb`aaaaabb\_`^`a^T]a¥\_\_`^`Z^^a^\_SS¥^\_`^  
@HWI-EAS443:3:45:181:1417#0/1  
AGGGGGATGTGTTTGTGCATAAGGGAACCATTTCATATCATG  
+HWI-EAS443:3:45:181:1417#0/1  
aaaaba^```a```baa^babaa\_]`^b\_[\_aa\_a\_Z`¥a`Y

@HWI-EAS443:3:45:188:709#0/1  
GGGCTCCTGTCTTTAATGGTTCCATTGGAATGTTTGTGCAT  
+HWI-EAS443:3:45:188:709#0/1  
ababa`bbbaabbabbaba`a`ab`a]aab```a`Z¥¥]\_  
@HWI-EAS443:3:45:317:1973#0/1  
CAGGAGCATTCCATAGTGATAATTAGGGGCATTCATTT  
+HWI-EAS443:3:45:317:1973#0/1  
a`aaa¥a¥bba`bVbbaa¥a`bb`bbba``aaabb`aba`  
@HWI-EAS443:3:45:328:1837#0/1  
AGTCTGAATGTGCATGTGTAAATGGTTCTTGCTTTACTGT  
+HWI-EAS443:3:45:328:1837#0/1  
aa\_ab^\_a`WU[Z]a`^[X[`aaaXY`[a`^Z`WXUaZS  
@HWI-EAS443:3:45:340:1255#0/1  
GCCACTCAATTCAACTTGGGAATCAAAATCAGATTGAAAC  
+HWI-EAS443:3:45:340:1255#0/1  
aUR^a¥PaXbXNVSH[^`^OURaWUUVQ[^JYQVW[aY`\_`\_  
@HWI-EAS443:3:45:47:709#0/1  
ATCCCAAATCATCTCAAACCGTTTCTTGAACCTAATGCTT  
+HWI-EAS443:3:45:47:709#0/1  
a\_a`aa^aa`aa``¥`^\_\_a[^\_\_^`\_^[\_]\_¥^\_\_  
@HWI-EAS443:3:45:506:878#0/1  
AGAACACAAGAGTCTGAATGTGCATGTGTAAATGGTTCTT  
+HWI-EAS443:3:45:506:878#0/1  
`Z]aabaab]aQ\_aba\_a\_QQ^`\_a\_a^RZ]\_`SXXW\_^  
@HWI-EAS443:3:45:526:1096#0/1  
GCATTCCAAGGGGAGCATGATATGAATGGTCCCTTATG  
+HWI-EAS443:3:45:526:1096#0/1  
aabbbb`bba\_baa\_aabbaaaaaa`\_`XR\_a\_¥]]S]V  
@HWI-EAS443:3:45:714:790#0/1  
AAGAGTCTGAATGTGCATGTGTAAATGGTTCTTGCTTTAC  
+HWI-EAS443:3:45:714:790#0/1  
`aaaa][\_b]a`b`baaab`aSbaaaba\_aYa`a`aaaQ\_  
@HWI-EAS443:3:45:720:357#0/1  
CTTTTGTGGTGAAACAGTGACACTGTGGGTTGGTCTTGG  
+HWI-EAS443:3:45:720:357#0/1  
abb¥`b`bb]babaa]Zb\_aaaZaaaab`\_\_b`¥¥XR]a  
@HWI-EAS443:3:45:810:851#0/1  
GATTTTCGGAGACAATCCACGCCCTAATGATAAGACAGGC  
+HWI-EAS443:3:45:810:851#0/1  
aaaaaa]baaa]¥a\_¥PXY[^`^`\_W^aY¥¥[TXBBBBB  
@HWI-EAS443:3:45:819:253#0/1  
GAGGAATTGCCCGCTAATTTACGGAAACCACTGACTGTC  
+HWI-EAS443:3:45:819:253#0/1  
a`aa^aa``\_^¥a¥\_¥\_a``\_\_[[`\_¥¥\_¥¥WY^WTW^¥YY  
@HWI-EAS443:3:45:860:1120#0/1  
GCTGACCAAGCGACTGACTCAAATCTTGAGTTGTATGGAG  
+HWI-EAS443:3:45:860:1120#0/1  
a¥`a]Z¥`\_`S\_a]``YZL¥^Z[`]\_\_¥V\_V``X]\_]\_Y]  
@HWI-EAS443:3:45:860:1682#0/1  
CACGGAAACCACTGACTGTCCAGCAGCAAAGTTGGTGTG

+HWI-EAS443:3:45:860:1682#0/1  
a`Q[ `[aa\_aa¥`\_a`aXZ`]TMVX[VZ^T`Y^VPFSGU]  
@HWI-EAS443:3:45:907:1162#0/1  
ATCCACTAACAGGGCAGAGAGGAATTGCCCGCTAATTT  
+HWI-EAS443:3:45:907:1162#0/1  
U`^\_W¥a\_[baa`Z`]¥`\_a\_QZVZa]P]]R[]]a\_`¥a]  
@HWI-EAS443:3:45:957:1074#0/1  
CCACTGCATATGTATCCTATCTGATATTCCAGATTCTGGT  
+HWI-EAS443:3:45:957:1074#0/1  
aa\_`\_aaZ`Z¥b¥aa[\_a\_a`a\_\_[\_^SV\_Y][Y\_^¥L  
@HWI-EAS443:3:46:1038:483#0/1  
GGGACAGACAATAACTTCTCAATAAAGCAAGATATCGTAG  
+HWI-EAS443:3:46:1038:483#0/1  
`\_aa\_aaV^TQY`aV¥]¥\_ZaW]W]aaa^TYZ]]aYaT\_a  
@HWI-EAS443:3:46:1049:1813#0/1  
CAAAGAGAACAATCTGGACTAGCGGGAGCAGCATATCC  
+HWI-EAS443:3:46:1049:1813#0/1  
a`aaa`a`aaa`a\_a`aa`a^^`a\_aa`^^[]^]\_V^]]Y  
@HWI-EAS443:3:46:1068:475#0/1  
CCCCTAATTATCACTATGAGGAATGCTCCTGTTATCCTGA  
+HWI-EAS443:3:46:1068:475#0/1  
aaaaaabbabbb`\_abbba`¥^aaa`a`^^aa¥b[\_a\_  
@HWI-EAS443:3:46:1071:742#0/1  
ATTTGACTATCTTTCCCTTTTCTATTCTGAAGATCTTGTA  
+HWI-EAS443:3:46:1071:742#0/1  
`bbbaabbabbb^aaabbbaabbabbaabaaba`a  
@HWI-EAS443:3:46:1110:1088#0/1  
AAATCATCTCAAAACCGTTTCTTGAATAATGCTTTTAGT  
+HWI-EAS443:3:46:1110:1088#0/1  
SIT\_]`¥Z^]TM¥YY`aa¥W^P\_\_UFT`\_[\_¥]\_\_\_U\_Z  
@HWI-EAS443:3:46:1137:996#0/1  
ATTTGGGATCCGAACGGATGGACTGGGACAGACAATAACT  
+HWI-EAS443:3:46:1137:996#0/1  
[X¥a\_¥^ZTYX\_Z¥`¥W¥ZZ[S[^U]RPYUYPUVNUWTJY  
@HWI-EAS443:3:46:1315:1114#0/1  
GTCGCTTGGTCAGCAAGTGCTTGTCATGATGGCATCAATT  
+HWI-EAS443:3:46:1315:1114#0/1  
aaaaaa]a\_S[XYU[]\_L^`\_AT\_[S[[]`\_a[X¥UT[[[  
@HWI-EAS443:3:46:1324:1831#0/1  
GATTTTCGGAGACAATCCACGCCCTAATGATAAGACAGGC  
+HWI-EAS443:3:46:1324:1831#0/1  
\_V\_b\_aabb`aR`aaW¥`\_Ua`Y\_\_\_\_a`Z¥`V\_XZ\_^]B  
@HWI-EAS443:3:46:133:1534#0/1  
CAACTGCCTGTCTTATCATTAGGGCGTGGATTGTCTCCGA  
+HWI-EAS443:3:46:133:1534#0/1  
aabbaaab`bS^aababbaab`aaaa\_a`\_a`\_`aaa¥  
@HWI-EAS443:3:46:1351:1610#0/1  
TGTTAAAGTACAACGGCATAATAACAGACACTATCAAGAG  
+HWI-EAS443:3:46:1351:1610#0/1  
aa`\_]S[¥0]WQXVQ00VZ`^VU[T[^YR^RYUTPOOQ[]

@HWI-EAS443:3:46:1356:312#0/1  
ATCATGACAAGCACTTGCTGACCAAGCGACTGACTCAAAT  
+HWI-EAS443:3:46:1356:312#0/1  
aba`ab`\_a^`\_\_V`aa]ab^W]````]]Y\_`X]aXV]W`  
@HWI-EAS443:3:46:1514:1093#0/1  
AATCCAAACCAAAAGATAATAACCATTGGTTCGGTCTGT  
+HWI-EAS443:3:46:1514:1093#0/1  
abba`aaaaa`a^b^ba`b\_a`aa\_ab\_\_aaa\_U^aa^\_  
@HWI-EAS443:3:46:1549:371#0/1  
GGAGCAGCATATCCTTTTGTGGTGTAAACAGTGACTGT  
+HWI-EAS443:3:46:1549:371#0/1  
aaX`ZXaU¥ZYPP[[\_`^R`YTXVSN]VRUGVWWW¥OTSS  
@HWI-EAS443:3:46:1660:465#0/1  
AGGGGGATGTGTTTGTGATAAGGGAACCATTTCATATCATG  
+HWI-EAS443:3:46:1660:465#0/1  
```Zb`Zaaaa\_]aVUaaa]aaa`a\_\_a¥\_¥aaa][\_\_T  
@HWI-EAS443:3:46:1663:1660#0/1  
ATTGTCTCCGAAAATCCCACTGCATATGTATCCTATCTGA  
+HWI-EAS443:3:46:1663:1660#0/1  
abbbaaaa`aaa`\_a``aa]`aaaa\_aa`\_a``^aa\_  
@HWI-EAS443:3:46:1705:558#0/1  
GATGATTTGGGATCCGAACGGATGGACTGGGACAGACAAT  
+HWI-EAS443:3:46:1705:558#0/1  
aSX]U]¥Z`aa^TTN`SRWWWYU^ORJXZYVPGTYPRYZP  
@HWI-EAS443:3:46:1737:684#0/1  
TGCCCCGTAATTTACGGAACCACTGACTGTCCAGCAGC  
+HWI-EAS443:3:46:1737:684#0/1  
a\_Z]\_¥T¥OQVaaaa^¥]R[`[S\_Z[XT\_X]MKUVNXZ[B  
@HWI-EAS443:3:46:1738:1295#0/1  
TGCAGAACCTTCTTCTTGACTCAAGGGGCCTTGCTAAATG  
+HWI-EAS443:3:46:1738:1295#0/1  
¥a\_V]PZ^\_Z¥\_^\_]¥\_\_`a¥Y]UZJXR¥]\_V¥V[X^G¥T  
@HWI-EAS443:3:46:1779:1343#0/1  
TGCATGTGTAATGGTTCTTGCTTTACTGTAATGACCGAT  
+HWI-EAS443:3:46:1779:1343#0/1  
```abbab`a`]`baaaaaaaaaaaaa\_aa`a``a`\_\_a`\_  
@HWI-EAS443:3:46:183:1318#0/1  
CCCAGTCCATCCGTTTCGATCCCAAATCATCTCAAACCG  
+HWI-EAS443:3:46:183:1318#0/1  
`]ZQH^aa`a\_]JXWW`TLO¥^MVYT[UNUQVTUWX[TI  
@HWI-EAS443:3:46:194:1414#0/1  
ATAAGACCTTGCTTCTGGGTTGAACATAATCAGAGGGCGAC  
+HWI-EAS443:3:46:194:1414#0/1  
X¥\_¥T]bbabbbabab`¥G]aab`baaaaaa¥\_Y[```  
@HWI-EAS443:3:46:452:106#0/1  
GACCGTGGGTGCTTTCAACCAGAATCTGGAATATCAGAT  
+HWI-EAS443:3:46:452:106#0/1  
\_abbabb`W`R`]a¥Y`X\_\_YY`^U`aaX[^¥]Y]a]\_  
@HWI-EAS443:3:46:493:1927#0/1  
CAAAATCAGATTGAAACATGCAATCAAAGCGTCATTACTT

+HWI-EAS443:3:46:493:1927#0/1  
^`\_#bbaaa`]]`^`a^J[Z^^ba` ``aa`SaVY`a`a[T`  
@HWI-EAS443:3:46:550:1540#0/1  
ATATGCAGTGGGATTTTCGGAGACAATCCACGCCCTAATG  
+HWI-EAS443:3:46:550:1540#0/1  
aaaa`baS)`a^aaa\_aaZ¥aaaaa¥RZaY`[[[\_[^`\_`\_`\_  
@HWI-EAS443:3:46:574:646#0/1  
GTTCCCTCTCCATACTCAAGATTTGAGTCAGTCGCTT  
+HWI-EAS443:3:46:574:646#0/1  
a\_`aaaba`\_Y\_`a¥a\_a`a^T` ``aa`aZ¥V`\_` [ZVQZ\_  
@HWI-EAS443:3:46:702:1417#0/1  
ATCATTAGGGCGTGGATTGTCTCCGAAAATCCCCTGTCAT  
+HWI-EAS443:3:46:702:1417#0/1  
aa\_]aaa\_`aa`^YRS]\_a\_\_\_\_\_^[[\_Z^X]UZXX]]^[[[^  
@HWI-EAS443:3:46:827:733#0/1  
AGATTCTGGTTGAAAGACACCCACGGTCGATTGAGCCAT  
+HWI-EAS443:3:46:827:733#0/1  
aa]aa`bb`a`¥`\_\_a\_`aa` `` `aaUU`O[S`Y\_Y)^]  
@HWI-EAS443:3:46:832:587#0/1  
GCCTGTCTTATCATTAGGGCGTGGATTGTCTCCGAAAATC  
+HWI-EAS443:3:46:832:587#0/1  
aVZV]XYH¥TQ]``YOTZZS\_]\_JHZYY]`¥¥YZRV^VTR  
@HWI-EAS443:3:46:877:1493#0/1  
TGCCCCGTAATTTACGGAACCCTGACTGTCCAGCAGC  
+HWI-EAS443:3:46:877:1493#0/1  
a`abaY^a^SbYa^Q¥`\_\_[aYU`a^[a¥`Q]]¥S¥V]^T  
@HWI-EAS443:3:46:894:748#0/1  
CATGTGTAAATGGTTCTTGCTTTACTGTAATGACCGATGG  
+HWI-EAS443:3:46:894:748#0/1  
abbaababbabbb\_aabababbaa`aa`aaaa^`\_aa`aa  
@HWI-EAS443:3:46:906:315#0/1  
ATCATGCTCCCCCTTGAATGCAGAACCCTTCTTCTTGACT  
+HWI-EAS443:3:46:906:315#0/1  
aaX][a\_]a`a\_\_aa]\_]` `^\_U[]`V]^V\_\_`¥V]  
@HWI-EAS443:3:46:91:611#0/1  
GATAGGGAGAATAAAAGCATTAGTTCAAGAAACGGTTTT  
+HWI-EAS443:3:46:91:611#0/1  
a`a`aaa\_aa`\_` ` `a¥` `` `Ya]`\_`^^`^^]]` `W\_`^`\_  
@HWI-EAS443:3:46:970:550#0/1  
ATCAGATAGGATACATATGCAGTGGGATTTTCGGAGACAA  
+HWI-EAS443:3:46:970:550#0/1  
`^^`a`\_`T\_aa`\_]ZZ^[S]\_Q^`^MY\_```]\_\_H]WU[Q  
@HWI-EAS443:3:47:1000:1869#0/1  
AGATATCGTAGGAATAAATGAGTGGTCAGGATATAGCGGG  
+HWI-EAS443:3:47:1000:1869#0/1  
Y^OFRQXZXW\_UZYS^aZUWUa\_a`MGQaaTHYTQ\_Q^aa  
@HWI-EAS443:3:47:1043:736#0/1  
AAGAATCGGTTCCAAGGGGGATGTGTTTTGTCATAAGGGAA  
+HWI-EAS443:3:47:1043:736#0/1  
aaaba`ab`L^^¥\_a`]aaW`aU`\_]VXS¥[Z[\_]ZY



@HWI-EAS443:3:47:1164:1158#0/1  
GTCCCAGTCCATCCGTTCCGATCCCAAATCATCTCAAAC  
+HWI-EAS443:3:47:1164:1158#0/1  
``babbbaabbbbaa`\_aaa]`W^aaa][``\_^]a`S  
@HWI-EAS443:3:47:1188:1002#0/1  
ATTTTCGGAGACAATCCACGCCCTAATGATAAGACAGGCA  
+HWI-EAS443:3:47:1188:1002#0/1  
abb[[]`^`[^aZYU\_T[SVX]^`^`\_]Z¥¥\_YVBBBB  
@HWI-EAS443:3:47:1211:1502#0/1  
TGCAGTGGGATTTTCGGAGACAATCCACGCCCTAATGATA  
+HWI-EAS443:3:47:1211:1502#0/1  
abab`[`aba`aaaaab`\_a[aa\_\_Y\_Za[QWa^``a¥``  
@HWI-EAS443:3:47:1298:1653#0/1  
ATCAGATTGAAACATGCAATCAAAGCGTCATTACTTATGA  
+HWI-EAS443:3:47:1298:1653#0/1  
\_\_¥¥`a`ZZa`\_W^]\_^\_aaaaaaaaQU`a\_aYaa\_\_\_\_`  
@HWI-EAS443:3:47:1337:1493#0/1  
GTCGCTTGGTCAGCAAGTGCTTGCATGATGGCATCAATT  
+HWI-EAS443:3:47:1337:1493#0/1  
R[a`Z¥`\_¥\_]¥]TY¥a¥YX^U\_WZZ[WYUTT[\_U]`]Y¥  
@HWI-EAS443:3:47:134:1388#0/1  
GTTGGAGAAACAATATATTGAGAACACAAGAGTCTGAATG  
+HWI-EAS443:3:47:134:1388#0/1  
¥`babbab`abbbbbbbb`b\_abababbbbaaaabbbabb  
@HWI-EAS443:3:47:1534:1529#0/1  
TTGGTCAGCAAGTGCTTGCATGATGGCATCAATTGGCTA  
+HWI-EAS443:3:47:1534:1529#0/1  
aba`\_aaa\_aa\_Ya\_^aZ`^]a^^`\_\_^\_\_U\_\_\_\_\_^\_]`  
@HWI-EAS443:3:47:1547:1245#0/1  
GTCTTTAATGGTTCATTGGAATGTTTGCATTTAGCAAG  
+HWI-EAS443:3:47:1547:1245#0/1  
`V¥]aa^`\_]`¥`VTV^`\_]S\_ZM[Z¥`¥X^¥^ZTOXTSQ  
@HWI-EAS443:3:47:1579:774#0/1  
CGCTAATTTACGGAAACCACTGACTGTCCAGCAGCAAAG  
+HWI-EAS443:3:47:1579:774#0/1  
abbbba`bba\_bbbbbbaaab\_bbaaba^aaa``a\_[`\_\_\_\_  
@HWI-EAS443:3:47:1701:546#0/1  
TCAGGATATAGCGGGAGTTTTGTTTCAGCATCCAGAACTAA  
+HWI-EAS443:3:47:1701:546#0/1  
aaabaaaabab`aa`W`[`\_\_ZL]Z`\_V¥^^Y\_\_¥]U]\_^  
@HWI-EAS443:3:47:1786:834#0/1  
CAGACATATGTTAACATCAGCAACACCAACTTTGCTGCTG  
+HWI-EAS443:3:47:1786:834#0/1  
`baa¥\_¥^ababaaaab]``a[L¥`[]\_`^Y^]Z``P[X  
@HWI-EAS443:3:47:232:1531#0/1  
AGCGGGCAATTCTCTCTCTGCCCTGTTAGTGGATGGGCT  
+HWI-EAS443:3:47:232:1531#0/1  
aabaa`a¥^a\_^Vaba`^aa¥¥]Taa\_aaaW\_Ya`QRXDO  
@HWI-EAS443:3:47:248:275#0/1  
TCAGATTGAAACATGCAATCAAAGCGTCATTACTTATGAA

+HWI-EAS443:3:47:248:275#0/1  
^\_Ta\_aY\_aa^^^a¥^\_]X¥[W]P\_WVUZNY\_BBBBBBB  
@HWI-EAS443:3:47:284:630#0/1  
CAACTGCCTGTCTTATCATTAGGGCGTGGATTGTCTCCGA  
+HWI-EAS443:3:47:284:630#0/1  
`ba`b^aaaba`\_abaaaba`a`^a^`a`a¥V^`\_`\_`  
@HWI-EAS443:3:47:288:351#0/1  
GTGTAAACAGTGACACTGTGGGTTGGTCTTGCCAGACGG  
+HWI-EAS443:3:47:288:351#0/1  
aZa\_^^a¥\_a\_a`^^[a\_Z`¥\_QU^\_NW\_¥¥VSU^TU\_B  
@HWI-EAS443:3:47:293:1701#0/1  
GGAACTTCACCAATAGGACAGCTCATTAGGGTTCGATATG  
+HWI-EAS443:3:47:293:1701#0/1  
a\_Ma`aaa^abbU^`aa¥a[]\_YY^`\_`IUR`U`\_Y\_  
@HWI-EAS443:3:47:350:328#0/1  
ATCGGTCATTACAGTAAAGCAAGAACCATTTACACATGCA  
+HWI-EAS443:3:47:350:328#0/1  
a`]`\_NN[]^XSONV]¥YW¥Z[`SXPX^ZQNSRTPV]  
@HWI-EAS443:3:47:361:1700#0/1  
GATATGAATGGTCCCTTATGACAAACACATCCCCCTTGG  
+HWI-EAS443:3:47:361:1700#0/1  
abaa`bbaaba\_\_`aaa`\_\_a\_\_aa^`\_a\_\_\_`\_Z]`]  
@HWI-EAS443:3:47:374:1931#0/1  
AATTGATGCCATCATGACAAGCACTTGCTGACCAAGCGAC  
+HWI-EAS443:3:47:374:1931#0/1  
`a`[b`^aa]\_[a`^`V`\_]IUP\_[[¥`^]\_]WPRZUL  
@HWI-EAS443:3:47:385:1199#0/1  
CGGCATAATAACAGACACTATCAAGAGTTGGAGAAACAAT  
+HWI-EAS443:3:47:385:1199#0/1  
`aaa`bbabbabbabababb`abab[babbb`a\_R`ab\_a  
@HWI-EAS443:3:47:45:1189#0/1  
ATCCTTTTGTGGTGTAAACAGTGACACTGTGGGTTGGTCT  
+HWI-EAS443:3:47:45:1189#0/1  
a`b`]`aaU`¥Q¥aa\_]aa¥b`\_a\_\_¥Ta\_\_¥^`\_NV`  
@HWI-EAS443:3:47:518:1140#0/1  
CGGGAGTTTTGTTTCAGCATCCAGAACTAACAGGGCTGGAT  
+HWI-EAS443:3:47:518:1140#0/1  
`bbba`bbbabbaaba`\_aaabaabbaaaaa\_aaa\_\_  
@HWI-EAS443:3:47:611:151#0/1  
GTTCCCTCTCCATACAACCTCAAGATTTGAGTCAGTCGCTT  
+HWI-EAS443:3:47:611:151#0/1  
aaaaabbaaaaaaaaa`a`\_\_a`aaaa`a^^aaYY`U[\_  
@HWI-EAS443:3:47:637:759#0/1  
TGCCCCTAATTTACGGAAACCACTGACTGTCCAGCAGC  
+HWI-EAS443:3:47:637:759#0/1  
abaaababb`bba¥`aaa`aa\_\_`a`\_`aa¥\_\_[^U¥^V  
@HWI-EAS443:3:47:651:359#0/1  
TGCCAGTTATCCCTGCACACACATGTGATTTCACTAGAAT  
+HWI-EAS443:3:47:651:359#0/1  
abb`bbab]`\_\_ab]aaaa`\_`aa[a`aa\_a\_aaa`\_`\_`

@HWI-EAS443:3:47:673:1800#0/1  
GAATGTGCATGTGTAAATGGTTCTTGCTTTACTGTAATGA  
+HWI-EAS443:3:47:673:1800#0/1  
``]baY\_N#ba#a`Y[^aa^]Ta]\_]#\_^]a^\_``Z`  
@HWI-EAS443:3:47:700:1968#0/1  
TGGTGTGGATAGGGAGAACTAAAAGCATTAGTTCAAGA  
+HWI-EAS443:3:47:700:1968#0/1  
]W]Ia]a`b^\_]\_a[aY^YZYa\_aY[U\_Y#V\_I[Z^V^`  
@HWI-EAS443:3:47:749:697#0/1  
GTAAATGGTTCTTGCTTTACTGTAATGACCGATGGACCAA  
+HWI-EAS443:3:47:749:697#0/1  
a`a\_]\_^FYYaa]```#^ZZM]UX#TUQ\_X#\_X\_XY[P  
@HWI-EAS443:3:47:761:1955#0/1  
ATTTTCGGAGACAATCCACGCCCTAATGATAAGACAGGCA  
+HWI-EAS443:3:47:761:1955#0/1  
`a[MWaaYW[bT^a^`[T#VG\_SU^BBBBBBBBBBBBBB  
@HWI-EAS443:3:47:809:1671#0/1  
GTCCTATTGGTGAAGTCCCTCTCCATACAACCTCAAGATT  
+HWI-EAS443:3:47:809:1671#0/1  
a`a^babbbb\_baaa\_a`VZ\_aaaa`a`\_a\_XaP]`[\_`a  
@HWI-EAS443:3:47:813:46#0/1  
GTGGGATTTTCGGAGACAATCCACGCCCTAATGATAAGAC  
+HWI-EAS443:3:47:813:46#0/1  
a]`b`[a^```\_]#[#]#XVJ[XYRQLZ^[]]YYBBBBB  
@HWI-EAS443:3:47:872:69#0/1  
GAGTCTGAATGTGCATGTGTAAATGGTTCTTGCTTTACTG  
+HWI-EAS443:3:47:872:69#0/1  
a`b#^ba`aa\_a]\_aa\_b^^#a`a]^^a\_\_^`^\_]X\_W  
@HWI-EAS443:3:47:939:1767#0/1  
GAACTAACAGGGCTGGATTGTATAAGACCTTGCTTCTGGG  
+HWI-EAS443:3:47:939:1767#0/1  
^X^aXbba][\_UG[a\_\_```\_]\_]\_]U[[Ma##[V\_[U]  
@HWI-EAS443:3:47:975:434#0/1  
AGGGGCCTTGCTAAATGACAAACATTCCAATGGAACCATT  
+HWI-EAS443:3:47:975:434#0/1  
a]aa]aaa\_a`aaXa`ba]a`\_\_aba^^`^aaaaa]\_\_`  
@HWI-EAS443:3:48:1012:1510#0/1  
ACCTTCTTCTTGACTCAAGGGCCTTGCTAAATGACAAAC  
+HWI-EAS443:3:48:1012:1510#0/1  
aa``baaa\_bbaa\_a`b^#]aaa^#`a\_aa\_^aa^]`a\_#  
@HWI-EAS443:3:48:1020:858#0/1  
TTCCCTCTCCATACAACCTCAAGATTTGAGTCAGTCGCTTG  
+HWI-EAS443:3:48:1020:858#0/1  
aa]XH\_bb`ZYQ\_TN`^XS[]b[]W^`\_a^[\_a\_T\_P\_`^  
@HWI-EAS443:3:48:1086:361#0/1  
CTGATTCTAGTGAAATCACATGTGTGTGCAGGGATAACTG  
+HWI-EAS443:3:48:1086:361#0/1  
`ab`aba\_ababaabbaa`aa^b\_a\_aXaa`a`a`\_aa  
@HWI-EAS443:3:48:1092:67#0/1  
GATGGCATCAATTGGCTAACAATTGGAATTTCTGCCCCAG

+HWI-EAS443:3:48:1092:67#0/1  
aa`XRa\_a\_a]\_a^^aa[a\_^Zaaaa¥XV`a¥¥`^GX]¥\_  
@HWI-EAS443:3:48:1098:723#0/1  
TAACAGGAGCATTCTCATAGTGATAATTAGGGGCATTCA  
+HWI-EAS443:3:48:1098:723#0/1  
abbb^aa`ababba]aUab\_bZb^\_]S^¥`a`\_`[\_a`\_a  
@HWI-EAS443:3:48:1152:373#0/1  
GCAAGAACCATTTACACATGCACATTGACTCTTGTT  
+HWI-EAS443:3:48:1152:373#0/1  
aa`\_a`aZF^aa`\_Ya^\_aa\_\_^\_\_a`\_`^^`]^\_Z\_Z^  
@HWI-EAS443:3:48:1157:1172#0/1  
ATGCCGTTGTACTTTAACACAGCCACTGCCCATTTGTCTG  
+HWI-EAS443:3:48:1157:1172#0/1  
¥aba`a`YY]aaaa`aa`\_`¥[\_XT¥a]\_^RV]\_]VU^Y  
@HWI-EAS443:3:48:1194:1172#0/1  
GACATATGTTAACATCAGCAACACCAACTTTGCTGCTGGA  
+HWI-EAS443:3:48:1194:1172#0/1  
a\_^]\_aaa\_a^`¥a\_\_a^]aaW¥\_^aa¥W\_^a^a^`\_  
@HWI-EAS443:3:48:1283:1162#0/1  
TCTTGAACATAATGCTTTTAGTTCTCCCTATCCAAACACCA  
+HWI-EAS443:3:48:1283:1162#0/1  
`Y^aaa[a]ab[abbb`[¥aa^\_\_a^]`^[\_Z^][^  
@HWI-EAS443:3:48:1300:1210#0/1  
GATTCTGTTGAAAGACACCCACGGTCGATTGAGCCATG  
+HWI-EAS443:3:48:1300:1210#0/1  
a`\_aY[aa`aa\_a\_a`\_`\_WDX^^\_US^[^WUYU¥NQ[WU  
@HWI-EAS443:3:48:1311:772#0/1  
CTGCTCCCGCTAGTCCAGATTGTGTTCTCTTTGGGTCGCC  
+HWI-EAS443:3:48:1311:772#0/1  
ab`abaabbaaXa^\_\_\_aX`a`\_`a\_a\_aW\_a`XaWU^`^\_  
@HWI-EAS443:3:48:132:170#0/1  
CCTAATTATCACTATGAGGAATGCTCCTGTTATCCTGATT  
+HWI-EAS443:3:48:132:170#0/1  
abbabbbbabababbbbabbabbbbaabaaa`]abaab  
@HWI-EAS443:3:48:1376:299#0/1  
AGCGGGAGCAGCATATCCTTTTGTGGTGTAAACAGTGACA  
+HWI-EAS443:3:48:1376:299#0/1  
ZXXXQXT\_ZQVWX\_ZZS¥b¥]TQU]`X`W¥VWL[LY]`TY  
@HWI-EAS443:3:48:1376:91#0/1  
CAAGGGGGATGTGTTTGCATAAGGGAACCATTCATATCA  
+HWI-EAS443:3:48:1376:91#0/1  
a`aba]b^Ua`\_`VU`abR\_\_L\_\_\_\_]^ [WV]Za`¥]\_\_\_\_R]  
@HWI-EAS443:3:48:1390:194#0/1  
AGAATCTGGAATATCAGATAGGATACATATGCAGTGGGAT  
+HWI-EAS443:3:48:1390:194#0/1  
a`L]\_]^^^aaa[\_`¥aXU¥\_Y¥¥^ZSJVTW[YRHMa`ZX  
@HWI-EAS443:3:48:142:533#0/1  
GTGAAATTAGCGGGCAATTCCTCTCTCTGCCCTGTTAGTG  
+HWI-EAS443:3:48:142:533#0/1  
a[ba\_aaa`\_`aaa`\_`aba]¥aaa`a\_\_`[\_`aa]`^\_]a

@HWI-EAS443:3:48:152:1925#0/1  
GGGCCTTGCTAAATGACAAACATTCCAATGGAACCATTAA  
+HWI-EAS443:3:48:152:1925#0/1  
^YX\_aT`a^b^\_aaaa`aa\_aa`aX`\_a`a\_^]YZ\_a\_a\_  
@HWI-EAS443:3:48:1587:1808#0/1  
ATTAGGGCGTGGATTGTCTCCGAAAATCCCCTGTCATATG  
+HWI-EAS443:3:48:1587:1808#0/1  
aa\_ba`bb`\_aaaaa`\_a]¥]\_aaa`¥¥ZY¥^aY¥\_]\_\_  
@HWI-EAS443:3:48:1589:504#0/1  
TTGGGAATCAAAATCAGATTGAAACATGCAATCAAAGCGT  
+HWI-EAS443:3:48:1589:504#0/1  
a]ba¥Z][K`]U`]ZaaJZ`RUT[[`\_a[X¥\_ZY\_UZW`S  
@HWI-EAS443:3:48:1600:1403#0/1  
CGCTTGGTCAGCAAGTGCTTGTTCATGATGGCATCAATTGG  
+HWI-EAS443:3:48:1600:1403#0/1  
\_a^abbb`\_aa\_a`^baabba``abaaa`\_]`a`^Za\_\_^  
@HWI-EAS443:3:48:1710:723#0/1  
GGATAACAGGAGCATTCCCTCATAGTGATAATTAGGGGCAT  
+HWI-EAS443:3:48:1710:723#0/1  
a`aaaa\_^\_aa¥\_\_\_\_\_]`aa^a\_\_]\_\_\_¥\_\_^]`^X]X^^  
@HWI-EAS443:3:48:1730:1258#0/1  
GTGAAATTAGCGGGCAATTCCTCTCTCTGCCCTGTTAGTG  
+HWI-EAS443:3:48:1730:1258#0/1  
aT`¥aa`a\_\_\_aa\_[Xa\_W¥`¥a`U]\_]PHU]V\_\_aY^  
@HWI-EAS443:3:48:1775:1547#0/1  
AATGGTGTGGATAGGGAGAACTAAAAGCATTAGTTCAA  
+HWI-EAS443:3:48:1775:1547#0/1  
\_`\_SLOW\_b\_YUa][ZTS^[`[V¥aY\_aY]`\_\_T^\_[\_]\_  
@HWI-EAS443:3:48:1791:1042#0/1  
CGCTTGGTCAGCAAGTGCTTGTTCATGATGGCATCAATTGG  
+HWI-EAS443:3:48:1791:1042#0/1  
`¥`^RZ¥¥MY¥VZ¥\_] [WZ]]LTXRWO[`[X]]ZTVVYVR  
@HWI-EAS443:3:48:186:1342#0/1  
GTCTGAATGTGCATGTGTAAATGGTTCTTGCTTTACTGTA  
+HWI-EAS443:3:48:186:1342#0/1  
a`\_a`\_`a\_a]a\_\_\_\_\_^`¥`\_Z^`¥X\_^`^^Z^^^\_Z`\_]\_  
@HWI-EAS443:3:48:198:729#0/1  
ATTCCTCTCTGCCCTGTTAGTGGATGGGCTATATACAG  
+HWI-EAS443:3:48:198:729#0/1  
aaaaab`aaba`aa`aab`a]a\_a\_``R\_ZW[\_Z^RW¥V  
@HWI-EAS443:3:48:244:1884#0/1  
TTTGCTGCTGGACAGTCAGTGGTTTCCGTGAAATTAGCGG  
+HWI-EAS443:3:48:244:1884#0/1  
aaa`\_a]`aaa\_[aa^`\_aY¥`¥\_]UZ\_TXW\_^[[\_NX^¥  
@HWI-EAS443:3:48:269:1186#0/1  
GCGGGAGTTTTGTTTCAGCATCCAGAATAACAGGGCTGGA  
+HWI-EAS443:3:48:269:1186#0/1  
`abbTaba`Vbb]aaa\_aaa]L]aaa`aba\_a`a`^\_aaY  
@HWI-EAS443:3:48:27:1085#0/1  
CAAAATCAGATTGAAACATGCAATCAAAGCGTCATTACTT

+HWI-EAS443:3:48:27:1085#0/1  
a`\_``abbba^`Z\_a`aaaaaaaaaa\_aa\_ZY\_`aaaY``  
@HWI-EAS443:3:48:31:1234#0/1  
GGGCGACCCAAAGAGAACAATCTGGACTAGCGGGAGCA  
+HWI-EAS443:3:48:31:1234#0/1  
]\_ba\_bb``\_aaa¥a^ba`a`aaaabaaa`ab]aa\_U\_VW  
@HWI-EAS443:3:48:331:151#0/1  
GTCAGGATATAGCGGGAGTTTTGTTTCAGCATCCAGAACTA  
+HWI-EAS443:3:48:331:151#0/1  
a^XUVP[X]a^`[aa^[ZOX`¥BBBBBBBBBBBBBBBBBBB  
@HWI-EAS443:3:48:370:1596#0/1  
GAAGAAGTTCTGCATTCCAAGGGGGAGCATGATATGAAT  
+HWI-EAS443:3:48:370:1596#0/1  
Y^``\_YX]T\_`\_\_a^^a^`\_]\_]Z]]aaa^a^WY^^SW\_  
@HWI-EAS443:3:48:387:1208#0/1  
GTCCCAGTCCATCCGTTCCGATCCCAAATCATCTCAAAC  
+HWI-EAS443:3:48:387:1208#0/1  
¥ab\_H\_X`bbbaab`]J\_\_`SX][^`NX`¥\_PZ`X\_¥^]R  
@HWI-EAS443:3:48:391:204#0/1  
AAGGGGATGTGTTTGTCTATAAGGGAACCATTCATATCAT  
+HWI-EAS443:3:48:391:204#0/1  
aab`abb\_abUb`aaa\_\_`a\_aa]aa¥\_V\_`]^\_\_\_\_\_¥\_`  
@HWI-EAS443:3:48:39:1265#0/1  
CCAAATCATCTCAAACCGTTTCTTGAACCTAATGCTTTTA  
+HWI-EAS443:3:48:39:1265#0/1  
abbb`\_b\_a^bab^b\_aa]\_a`aa^aaa\_ba[a`a`aba\_  
@HWI-EAS443:3:48:415:1932#0/1  
AGAACTAACAGGGCTGGATTGTATAAGACCTTGCTTCTGG  
+HWI-EAS443:3:48:415:1932#0/1  
^`a`T]baaba[W]a`aaa\_a\_a`a][`P[^\_^\_a]G\_\_]  
@HWI-EAS443:3:48:512:1535#0/1  
GCCCTGTTAGTGGATGGGCTATATACAGTAAAGACAACAG  
+HWI-EAS443:3:48:512:1535#0/1  
¥\_Za[ab\_b`abba\_abb]aa]W\_]X¥¥Y^aaaaZaaX^T  
@HWI-EAS443:3:48:568:441#0/1  
CTTTAACACAGCCACTGCCCATTTGTCTGGGCCAGAAATT  
+HWI-EAS443:3:48:568:441#0/1  
abaaYa`b¥[W[`U^]aYONWV\_\_aQOHYb`PXa¥N\_aRX  
@HWI-EAS443:3:48:606:365#0/1  
CTGGGACAGACAATAACTTCTCAATAAAGCAAGATATCGT  
+HWI-EAS443:3:48:606:365#0/1  
ab^\_a``S]aabaa`baba\_a[`Waa`UTNNa``¥`a[a]  
@HWI-EAS443:3:48:641:323#0/1  
ATCTGATATTCCAGATTCTGGTTGAAAGACACCCACGGTC  
+HWI-EAS443:3:48:641:323#0/1  
abb`aabbbbb^bbabbbbbb`bba`abaaba``aa\_aX]  
@HWI-EAS443:3:48:653:1073#0/1  
GTGGGATTTTCCGAGACAATCCACGCCCTAATGATAAGAC  
+HWI-EAS443:3:48:653:1073#0/1  
aVa`\_[\_^``\_]\_a^\_`U]^`Y`¥¥[[V[Y^Y^¥YYTT

@HWI-EAS443:3:48:655:708#0/1  
GCCAGAAATTCCAATTGTTAGCCAATTGATGCCATCATGA  
+HWI-EAS443:3:48:655:708#0/1  
^`bbaZabab`abbabaabbaaaabaa\_ba\_Y]`V^a`¥  
@HWI-EAS443:3:48:721:394#0/1  
GTTGGAGAAACAATATATTGAGAACAAGAGTCTGAATG  
+HWI-EAS443:3:48:721:394#0/1  
a^baaaa`La\_\_J``aabbay\_a\_]^\_^Z]]aa`Sa`]\_`\_  
@HWI-EAS443:3:48:724:246#0/1  
CTCATTATTCTACGATATCTTGCTTTATTGAGAAGTTA  
+HWI-EAS443:3:48:724:246#0/1  
aaaa\_bbabaaaaaba\_`a\_a\_]ZbaaaaaXb\_]a]``  
@HWI-EAS443:3:48:743:1461#0/1  
TGCAATCAAAGCGTCATTACTTATGAAAACAACACTTGGG  
+HWI-EAS443:3:48:743:1461#0/1  
abaa`b\_baababaaaaaa\_aaaa\_aaaaaa\_]a\_\_a\_X\_  
@HWI-EAS443:3:48:759:1602#0/1  
CCGCTAATTTACGGAAACCACTGACTGTCCAGCAGCAAA  
+HWI-EAS443:3:48:759:1602#0/1  
a```aaaaaab]`a\_`a\_a^a\_``\_¥XZRZX[]SQ^Y  
@HWI-EAS443:3:48:772:389#0/1  
ACGGTCGATTGAGCCATGCCAGTTATCCCTGCACACACA  
+HWI-EAS443:3:48:772:389#0/1  
aabaWY][¥ayax`]^ay`\_]\_`^`\_`R¥\_]¥YRS\_]`^  
@HWI-EAS443:3:48:813:1129#0/1  
GGCTCCTGTCTTTAATGGTTCCATTGGAATGTTTGTTCATT  
+HWI-EAS443:3:48:813:1129#0/1  
`aab`\_a`abbb`¥``Z\_aa`a]aa¥\_aaa``aba\_XZ\_a  
@HWI-EAS443:3:48:818:278#0/1  
TGATATGAATGGTTCCCTTATGACAAACACATCCCCCTTG  
+HWI-EAS443:3:48:818:278#0/1  
`baa`aa`a`abW``XY\_\_`\_] [W\_\_Z\_]\_^]¥XZXUZZ  
@HWI-EAS443:3:48:886:1597#0/1  
AGCCACTCAATTCAACTTGGGAATCAAATCAGATTGAAA  
+HWI-EAS443:3:48:886:1597#0/1  
`[^]]` `aab`\_YZG^]Za]\_ZZR\_[Z]a^[\_]W¥aa]  
@HWI-EAS443:3:48:907:550#0/1  
ATTGTCTGGCCAGAAATTCCAATTGTTAGCCAATTGATG  
+HWI-EAS443:3:48:907:550#0/1  
`ab\_Xa¥ba`¥T\_¥Ra]`a\_^^^`W\_`]aUZ`^WXU^WK  
@HWI-EAS443:3:48:993:1316#0/1  
ATCGGTTCCAAGGGGATGTGTTTGTTCATAAGGGAACCAT  
+HWI-EAS443:3:48:993:1316#0/1  
a\_a[\_]^\_\_[\_^]\_Za]^`Y]Y\_^TXSWU\_]V]SUNNZ]  
@HWI-EAS443:3:49:1006:698#0/1  
CGATACTGGACCACAACACTGCCTGTCTTATCATTAGGGCGT  
+HWI-EAS443:3:49:1006:698#0/1  
ab`a`ab\_¥\_a^aaa`bbaaabaabbab`a`aa]\_a`aa  
@HWI-EAS443:3:49:1254:170#0/1  
CAGAAATTCCAATTGTTAGCCAATTGATGCCATCATGACA

+HWI-EAS443:3:49:1254:170#0/1  
aabbbbbbb`bbbbbbbabab\_babbab\_]\_aS\_`¥^a  
@HWI-EAS443:3:49:1267:42#0/1  
GGCCCCTTGAGTCAAGAAGAAGGTTCTGCATTCCAAGGGG  
+HWI-EAS443:3:49:1267:42#0/1  
`]a^TT\_Xa^^SR\_¥QL]¥]¥¥`V^X]\_X]ZZKZQV\_Y\_^  
@HWI-EAS443:3:49:1268:1045#0/1  
CCCATCCACTAACAGGGCAGAGAGAGGAATTGCCCGCTAA  
+HWI-EAS443:3:49:1268:1045#0/1  
aa\_US\_``\_aa^]¥\_¥Y\_VZ\_^\_[¥\_]Y]¥]LU^\_Y¥¥  
@HWI-EAS443:3:49:1290:200#0/1  
GGGTTGGTCTTGGCCAGACGGTGCTGAGTTGCCATTTACC  
+HWI-EAS443:3:49:1290:200#0/1  
[¥S\_bb]aa]bZU^\_]a`U`]X\_U¥^XWN^HNV`[¥YRXQ  
@HWI-EAS443:3:49:1495:975#0/1  
CGACCGTGGGTGTCTTTCAACCAGAATCTGGAATATCAGA  
+HWI-EAS443:3:49:1495:975#0/1  
ab`a\_babbb`S]\_b`^aaa`[\_^aa\_abaaa`a`YZa^  
@HWI-EAS443:3:49:150:1173#0/1  
GACGATACTGGACCACAACCTGCCTGTCTTATCATTAGGGC  
+HWI-EAS443:3:49:150:1173#0/1  
ab\_`bbbabab\_]b[a`bab`\_\_T¥`aaa`[aaaaa]a\_  
@HWI-EAS443:3:49:1586:748#0/1  
CAGCAACACCAACTTTGCTGCTGGACAGTCAGTGGTTTCC  
+HWI-EAS443:3:49:1586:748#0/1  
``b`bbbbb\_bbabba`abbabb]ba`¥\_a`bZa^Z\_]W^  
@HWI-EAS443:3:49:1632:1575#0/1  
GCTGCTCCCCTAGTCCAGATTGTGTTCTCTTTGGGTCCG  
+HWI-EAS443:3:49:1632:1575#0/1  
\_\_abbbbaabba`\_\_aab]aabab\_]U^¥aa`R`a^^a^  
@HWI-EAS443:3:49:1635:1722#0/1  
TGGTGTGGGATAGGGAGAATAAAAGCATTAGTTCAAGA  
+HWI-EAS443:3:49:1635:1722#0/1  
R¥^¥a]`a\_XR^X\_W^¥bY`]a`\_\_`^N¥\_UZa\_^Z\_\_a]  
@HWI-EAS443:3:49:1653:1973#0/1  
TGCCCCGTAATTTACGGAAACCACTGACTGTCCAGCAGC  
+HWI-EAS443:3:49:1653:1973#0/1  
]ab\_ZW\_bbbY`b^]aba]]`U^`X\_HMR`UT\_Z\_\_\_\_][\_  
@HWI-EAS443:3:49:1759:133#0/1  
GCCAGAAATCCAATTGTTAGCCAATTGATGCCATCATGA  
+HWI-EAS443:3:49:1759:133#0/1  
]a`a`^abb¥]`bbbbaba`\_\_aab`XaaaZ]``[\_aa]  
@HWI-EAS443:3:49:250:1160#0/1  
CTGGGCCAGAAATCCAATTGTTAGCCAATTGATGCCATC  
+HWI-EAS443:3:49:250:1160#0/1  
aUb\_]\_a`aababaaaaabaab]aa\_`a]a``^`\_a`Y  
@HWI-EAS443:3:49:269:1179#0/1  
GACACTATCAAGAGTTGGAGAAACAATATATTGAGAACAC  
+HWI-EAS443:3:49:269:1179#0/1  
ababbbbb^^ab\_^abbaaaaaaaaa`baaababa`\_aa



@HWI-EAS443:3:49:346:1861#0/1  
GCCACTCAATTCAACTTGGGAATCAAAATCAGATTGAAAC  
+HWI-EAS443:3:49:346:1861#0/1  
ababbbbbbabbabbbbbb]bbbaabbbbabbbbab`bba  
@HWI-EAS443:3:49:372:1386#0/1  
ATCTTGAGTTGTATGGAGAGGGAACCTCACCAATAGGACA  
+HWI-EAS443:3:49:372:1386#0/1  
aa¥a` `]¥aa\_Q`aaa\_ba`^`¥ZZ`^Sa\_Va¥^]b¥¥MT  
@HWI-EAS443:3:49:410:1426#0/1  
AACAGACACTATCAAGAGTTGGAGAAACAATATATTGAGA  
+HWI-EAS443:3:49:410:1426#0/1  
aaaababbbba`\_a\_a\_b^\_aa`aaaaaaaaaaa`aaa  
@HWI-EAS443:3:49:452:1888#0/1  
TTCAACTTGGGAATCAAAATCAGATTGAAACATGCAATCA  
+HWI-EAS443:3:49:452:1888#0/1  
abaaa`bb`bbaaaa`aaab\_abaabaaa\_aaba`a` `a  
@HWI-EAS443:3:49:477:1497#0/1  
CAAAATCAGATTGAAACATGCAATCAAAGCGTCATTACTT  
+HWI-EAS443:3:49:477:1497#0/1  
`aabbbbabbbbabbbbaaaababaabaa\_\_ab`a\_aa  
@HWI-EAS443:3:49:601:1298#0/1  
GATGGCATCAATTGGCTAACAATTGGAATTTCTGGCCCAG  
+HWI-EAS443:3:49:601:1298#0/1  
`` `ab`ababa`a`a\_\_aaa\_Saaaaaaaaa\_¥`\_`¥\_``  
@HWI-EAS443:3:49:640:1767#0/1  
AATCGACCGTGGGTGTCTTTCAACCAGAATCTGGAATATC  
+HWI-EAS443:3:49:640:1767#0/1  
abb`\_b\_aa¥aabZaZ^\_a`X\_a\_aaa\_a^F^[a\_a\_[]V  
@HWI-EAS443:3:49:68:405#0/1  
CAAGAGTTGGAGAAACAATATATTGAGAACACAAGAGTCT  
+HWI-EAS443:3:49:68:405#0/1  
abb\_baabbbbbbba`\_baabbbba`baaaabaaabab  
@HWI-EAS443:3:49:754:289#0/1  
ATCCACTAACAGGGCAGAGAGAGGAATTGCCCGCTAATTT  
+HWI-EAS443:3:49:754:289#0/1  
UYW[ab`bbb`bUUZaaa` `aTXMLV`XaaYR^¥V[U]TT  
@HWI-EAS443:3:49:762:365#0/1  
TGCTGAACAAAACCTCCCGCTATATCCTGACCACTCATTTA  
+HWI-EAS443:3:49:762:365#0/1  
ababbbbabbbba`\_baabbbba`baaaabaaabab  
@HWI-EAS443:3:49:782:1808#0/1  
CTCATACAAGATCTTCAGAATAGAAAAGGGAAAGATAGTC  
+HWI-EAS443:3:49:782:1808#0/1  
aaabbbbbbba`\_baabbbbbbbaaaab\_baaaaaba\_a  
@HWI-EAS443:3:49:808:1427#0/1  
GCTTGCTCAGCAAGTCTTGTCTGATGGCATCAATTGGC  
+HWI-EAS443:3:49:808:1427#0/1  
a¥XWYWLX`a\_[¥^MIRZNZ]\_\_YYLST[L[^0\_Q^BBBB  
@HWI-EAS443:3:49:858:179#0/1  
GTCAGGATATAGCGGGAGTTTTGTTTCAGCATCCAGAACTA

+HWI-EAS443:3:49:858:179#0/1  
\_T]¥a^^aaa`Z`aaZaS¥[S]Y^T[¥S][WW[^R]R¥^  
@HWI-EAS443:3:49:897:2004#0/1  
GCCACTCAATTCAACTTGGGAATCAAATCAGATTGAAAC  
+HWI-EAS443:3:49:897:2004#0/1  
aa\_a`aaa¥a`]`a^aa`a`aa\_`^`\_``aaa`aa^`\_  
@HWI-EAS443:3:49:928:1525#0/1  
CACTCAATTCAACTTGGGAATCAAATCAGATTGAAACAT  
+HWI-EAS443:3:49:928:1525#0/1  
Yabb`bbbbbbbbbbbbbbba`b\_bbbbbbbbbbbabbab  
@HWI-EAS443:3:49:968:759#0/1  
GACCACTCATTTATTCCTACGATATCTTGCTTTATTGAGA  
+HWI-EAS443:3:49:968:759#0/1  
aa]aaab`bbbaabaaaaab\_a\_a`aaa`aaa`baa\_a\_  
@HWI-EAS443:3:4:1077:977#0/1  
ATTGGAATGTTTGTCTTTAGCAAGGCCCTTGAGTCAAG  
+HWI-EAS443:3:4:1077:977#0/1  
aabbbabbb`baa^\_abba\_a\_]a`^^]aa`\_`]\_`\_`  
@HWI-EAS443:3:4:1240:364#0/1  
GGGAGCAGCATATCCTTTTGTGGTGTAAACAGTGACACTG  
+HWI-EAS443:3:4:1240:364#0/1  
aZa¥`V¥¥NU`WYUQ\_\_^UNRY¥VWTUYW¥SVVWWWBB  
@HWI-EAS443:3:4:1257:1757#0/1  
GGTTCCTTATGACAAACACATCCCCCTTGAACCGATTC  
+HWI-EAS443:3:4:1257:1757#0/1  
aaYaa`]aa\_aa\_aa\_\_aZ\_^]WZ]Z`\_`^^]aV`^^^S  
@HWI-EAS443:3:4:1278:1310#0/1  
CGTTGTACTTTAACACAGCCACTGCCCCATTGTCTGGGCC  
+HWI-EAS443:3:4:1278:1310#0/1  
aZXOY¥bbbbaa\_R\_[baa`a`]Uaa]\_]``¥VHDWUUB  
@HWI-EAS443:3:4:1281:90#0/1  
TGGTGTGGATAGGGAGAACTAAAAGCATTAGTTCAAGA  
+HWI-EAS443:3:4:1281:90#0/1  
[\_`Hb\_`U`bY`aW\_VQaS¥XYZ[\_SRN^ZRXXP\_TSXaU  
@HWI-EAS443:3:4:1309:128#0/1  
GTTTCCGTGAAATTAGCGGGCAATTCCTCTCTCTGCCCTG  
+HWI-EAS443:3:4:1309:128#0/1  
a\_a`^Za\_a\_`\_\_\_\_]\_Zaa¥^ZZ¥¥¥¥^VZVVV[¥WSXX¥  
@HWI-EAS443:3:4:1324:1703#0/1  
ACATATGTAAACATCAGCAACCAACTTTGCTGCTGGAC  
+HWI-EAS443:3:4:1324:1703#0/1  
aabab`b\_Zaaaa]\_aaaaa\_[\_]a\_\_a\_]\_]¥aQ[^\_\_Z  
@HWI-EAS443:3:4:1346:1568#0/1  
ATCAGGATAACAGGAGCATTCTCATAGTGATAATTAGGG  
+HWI-EAS443:3:4:1346:1568#0/1  
ababbbabbb\_baa\_a\_baa^\_ba`aaa\_b\_a`\_a`\_^a\_  
@HWI-EAS443:3:4:1354:817#0/1  
GTATAAGACCTTGCTTCTGGGTTGAACTAATCAGAGGGCG  
+HWI-EAS443:3:4:1354:817#0/1  
ZTT^TL]W¥S^\_\_V^ZUZ\_\_ZLGZ]`T]ZWVMHZUW]SQB

@HWI-EAS443:3:4:141:42#0/1  
GATGGCATCAATTGGCTAACAATTGGAATTTCTGGCCCAG  
+HWI-EAS443:3:4:141:42#0/1  
`\_I¥¥a[Z]a\_\_\_a\_YUXaQ\_[Z\_a`NSQ`P^T[RMZQUB  
@HWI-EAS443:3:4:1430:1483#0/1  
ATCCGTTTCGGATCCCAAATCATCTCAAAACCGTTTCTTGA  
+HWI-EAS443:3:4:1430:1483#0/1  
a¥\_N\_ZaYT]¥0YNTNZYYI]^UTU^¥¥QXUVW]YV^X]B  
@HWI-EAS443:3:4:1512:742#0/1  
ACAACCTGCCTGTCTTATCATTAGGGCGTGGATTGTCTCCG  
+HWI-EAS443:3:4:1512:742#0/1  
]¥ab`ba][abaaaaa`V\_X`\_`a¥[\_aaX`]a\_U`[V]  
@HWI-EAS443:3:4:1557:1372#0/1  
CTCTGATTAGTTCAACCCAGAAGCAAGTCTTATACAATC  
+HWI-EAS443:3:4:1557:1372#0/1  
`Z^^`bbbba``aW]\_aa^^[`]Ua]0[`a`a]a\_aP  
@HWI-EAS443:3:4:1617:592#0/1  
CCCATATCGAACCCCTAATGAGCTGTCCTATTGGTGAAGTT  
+HWI-EAS443:3:4:1617:592#0/1  
W[\_VT^V[`¥Z¥\_\_`W\_¥[XWWZJZX^]a^Z\_¥WaZU\_BB  
@HWI-EAS443:3:4:161:159#0/1  
CTGGGCCAGAAATTCCAATTGTTAGCCAATTGATGCCATC  
+HWI-EAS443:3:4:161:159#0/1  
`H¥a^\_YP`[\_TRS[Ya]\_aUY\_]TW^]WR[U^ZOL[VY  
@HWI-EAS443:3:4:1685:1787#0/1  
ATACGGCAATGGTGGTTGGATAGGGAGAACTAAAAGCATT  
+HWI-EAS443:3:4:1685:1787#0/1  
\_aaabaa\_aa`a]a\_\_aaaZa¥a\_`]^Z`0]^¥\_¥]X^VB  
@HWI-EAS443:3:4:1709:1380#0/1  
ATGATATGAATGGTCCCTTATGACAAACACATCCCCCTT  
+HWI-EAS443:3:4:1709:1380#0/1  
aaY`aaaaaa]`aY\_S^\_[``]aa]¥\_a[`OV]]PQSO]Z  
@HWI-EAS443:3:4:1709:505#0/1  
GATGATTTGGGATCCGAACGGATGGACTGGGACAGACAAT  
+HWI-EAS443:3:4:1709:505#0/1  
a\_aa`\_b]]`^¥X]^X\_V^VX\_YXXXV]]NGYXXVYBB  
@HWI-EAS443:3:4:1730:452#0/1  
TATGGGCTCCTGTCTTTAATGGTTCCATTGGAATGTTTGT  
+HWI-EAS443:3:4:1730:452#0/1  
aa\_baaa`^`b\_\_aaa`a\_aa]`SY\_``¥`]S`\_]`a^Z  
@HWI-EAS443:3:4:1762:424#0/1  
ATAACAGACACTATCAAGAGTTGGAGAAACAATATATTGA  
+HWI-EAS443:3:4:1762:424#0/1  
`aaaaabZPa]\_`]^\_Za^^Zaaa\_a\_\_\_S^^`Y`[a¥\_\_  
@HWI-EAS443:3:4:1774:556#0/1  
CTGGGACAGACAATAACTTCTCAATAAAGCAAGATATCGT  
+HWI-EAS443:3:4:1774:556#0/1  
a`Ya`Y`\_a]U`\_a][U]\_W^\_\_\_``]]\_T\_]^^]]WS¥[  
@HWI-EAS443:3:4:270:1630#0/1  
CTGCATATGTATCCTATCTGATATTCCAGATTCTGGTTGA

+HWI-EAS443:3:4:270:1630#0/1  
`[R\_[T\_ba[^YN\_SM]¥\_^WH¥X]a\_^\_\_\_\_[^¥^`aYOX  
@HWI-EAS443:3:4:35:348#0/1  
GGGAAC TTCACCAATAGGACAGCTCATTAGGGTTCGATAT  
+HWI-EAS443:3:4:35:348#0/1  
aaa[a\_aaaa`\_a\_aaa`\_\_\_\_[^¥\_^W\_\_U^¥\_¥¥^¥  
@HWI-EAS443:3:4:398:516#0/1  
GCTGCTCCCCTAGTCCAGATTGTGTTCTCTTTGGGTCGC  
+HWI-EAS443:3:4:398:516#0/1  
`\_\_]`X\_W\_aU^WVS¥^\_X¥^\_VUSV¥W¥U^W¥U¥PKKUB  
@HWI-EAS443:3:4:499:1587#0/1  
GTCTGAATGTGCATGTGTAAATGGTTCTTGCTTTACTGTA  
+HWI-EAS443:3:4:499:1587#0/1  
\_¥UY\_a¥Za\_b\_[aa[`Yaba^ba\_\_aaaa`\_a`a\_aa]\_  
@HWI-EAS443:3:4:530:706#0/1  
ATTGTCTCCGAAAATCCCCTGCATATGTATCCTATCTGA  
+HWI-EAS443:3:4:530:706#0/1  
^abbaaa\_\_\_\_`^^]]\_]\_^¥`\_^^Y`[]\_aXFY`\_`Sa\_\_  
@HWI-EAS443:3:4:559:1537#0/1  
ACCACA ACTGCCTGTCTTATCATTAGGGCGTGGATTGTCT  
+HWI-EAS443:3:4:559:1537#0/1  
``\_]a`aaa\_`\_]`\_[`aa`]\_\_Xa¥RR`ZX`\_`^\_ZXX¥  
@HWI-EAS443:3:4:621:943#0/1  
ATTGTCTCCGAAAATCCCCTGCATATGTATCCTATCTGA  
+HWI-EAS443:3:4:621:943#0/1  
aaaa\_aaaaa\_a```^^a`]W\_\_\_\_^\_`W\_\_]U`\_\_^\_a]  
@HWI-EAS443:3:4:690:989#0/1  
GTTTTGTT CAGCATCCAGAACTAACAGGGCTGGATTGTAT  
+HWI-EAS443:3:4:690:989#0/1  
aTaa¥X¥b`aa`a`\_`^a\_^]`\_]\_a]^Z]`\_^]^`X^]  
@HWI-EAS443:3:4:692:428#0/1  
AACAAA ACTCCCGCTATATCCTGACCACTCATTATTCCT  
+HWI-EAS443:3:4:692:428#0/1  
ab`]`aa`a`^Za¥a`\_`a\_]`a\_X[¥^`[\_\_\_\_`\_`^YX^  
@HWI-EAS443:3:4:729:1398#0/1  
CAAGAGTTGGAGAAACAATATATTGAGAACACAAGAGTCT  
+HWI-EAS443:3:4:729:1398#0/1  
aaab¥¥Z\_a^aaaa^\_a]baa`\_a\_aY`a`a``aa^\_Z\_]`  
@HWI-EAS443:3:4:82:888#0/1  
TGA ACTAATGCTTTTAGTTCTCCCTATCCAAACACCATTG  
+HWI-EAS443:3:4:82:888#0/1  
abaaY`[aabbaab^ab^aaa\_^¥`ab\_\_aaa^a\_Paa^\_  
@HWI-EAS443:3:4:882:1173#0/1  
AGCCACTCAATTCAACTTGGGAATCAAATCAGATTGAAA  
+HWI-EAS443:3:4:882:1173#0/1  
a`aaa¥a```aa\_aa^aaaa`\_a```]``^[^`\_`\_a``\_`  
@HWI-EAS443:3:50:1008:1856#0/1  
GCGACTGACTCAAATCTTGAGTTGTATGGAGAGGGAACCTT  
+HWI-EAS443:3:50:1008:1856#0/1  
^^`^`bb`baZ`aaab`a```\_ab^a\_bb¥b`b`^¥\_Y\_]`

@HWI-EAS443:3:50:1043:611#0/1  
CCACAACCTGCCTGTCTTATCATTAGGGCGTGGATTGTCTC  
+HWI-EAS443:3:50:1043:611#0/1  
abbbbbbabb`bbbbbbabaabaa`]^aaaaaabb\_Ya`  
@HWI-EAS443:3:50:1053:36#0/1  
ACCACAACCTGCCTGTCTTATCATTAGGGCGTGGATTGTCTC  
+HWI-EAS443:3:50:1053:36#0/1  
Z\_\_WaaaVXVQZ0[Ub`ZTaS[b]XSaZIQ)`bab`\_WJY  
@HWI-EAS443:3:50:1081:1316#0/1  
AGAGGAATTGCCCGCTAATTTACGGAACCACTGACTGT  
+HWI-EAS443:3:50:1081:1316#0/1  
aa`[^b^abbaa`b]a\_`aabaa]Z`ZSa\_XX\_^XV[aXZ  
@HWI-EAS443:3:50:1127:1793#0/1  
GAAACGGTTTTGAGATGATTTGGGATCCGAACGGATGGAC  
+HWI-EAS443:3:50:1127:1793#0/1  
abbaaaaabb`\_a`b`aabbaaa\_`^baa]^`^aa^\_Z  
@HWI-EAS443:3:50:1145:73#0/1  
ATTGGTTCGGTCTGTATGACAATTGGAATGGCTAACTTAA  
+HWI-EAS443:3:50:1145:73#0/1  
abaabaaabaP[aaabba`\_aaaa`\_a`a`[]^aT`a`\_  
@HWI-EAS443:3:50:1173:1371#0/1  
GTTCTCAATATATTGTTTCTCCAACCTTGATAGTGTCTG  
+HWI-EAS443:3:50:1173:1371#0/1  
a`aa`aaaa`aaa`a`a`^`[^`¥]`¥a`\_\_\_\_`\_]\_^BBB  
@HWI-EAS443:3:50:117:1686#0/1  
GACAGACAATAACTTCTCAATAAAGCAAGATATCGTAGGA  
+HWI-EAS443:3:50:117:1686#0/1  
``a`\_a`aaaaaaaaa\_``aaaaa\_a]``aaaYXYa^[a  
@HWI-EAS443:3:50:1224:312#0/1  
CAGACATATGTTAACATCAGCAACACCAACTTTGCTGCTG  
+HWI-EAS443:3:50:1224:312#0/1  
aaX`^``[``b`]a¥X\_RT\_^^`]TOY\_`QR`\_]aaXaW  
@HWI-EAS443:3:50:1290:1503#0/1  
GATTAGTTCAACCCAGAAGCAAGTCTTATACAATCCAGC  
+HWI-EAS443:3:50:1290:1503#0/1  
a`bbabaaabaaa`aa`a\_X]aaaU[`aaaa\_aaa[[`]  
@HWI-EAS443:3:50:1292:1512#0/1  
ATTGTCTCCGAAAATCCCACTGCATATGTATCCTATCTGA  
+HWI-EAS443:3:50:1292:1512#0/1  
`baa\_aa`\_]aaaa`\_a``¥¥^a\_a`\_aa^^]^`[]  
@HWI-EAS443:3:50:1318:1450#0/1  
CATTATATCATGCTCCCCCTTGAATGCAGAACCTTCTT  
+HWI-EAS443:3:50:1318:1450#0/1  
`bba`abbaaa\_[\_aaaZ\_\_\_\_````\_`RQ\_\_^YF\_`]`U  
@HWI-EAS443:3:50:1323:596#0/1  
GCCACTCAATTCAACTTGGGAATCAAAATCAGATTGAAAC  
+HWI-EAS443:3:50:1323:596#0/1  
`a`bbbaabbbbbbbbaabbaabb\_b`bbbbbbba  
@HWI-EAS443:3:50:1333:289#0/1  
GGCCCCCTTGAGTCAAGAAGAAGTTCTGCATTCCAAGGGG

+HWI-EAS443:3:50:1333:289#0/1  
a]][]`bbb\_`^\_a\_b`\_`^[aaZa\_`\_X¥\_`^^[\_`^¥^  
@HWI-EAS443:3:50:1346:566#0/1  
GTCCCAGTCCATCCGTTCCGATCCCAAATCATCTCAAAAC  
+HWI-EAS443:3:50:1346:566#0/1  
`aaa^`a``aba```a`\_Z\_`]¥\_`\_¥\_a`a`]a`a\_``¥  
@HWI-EAS443:3:50:13:803#0/1  
GTTTGGATAGGGAGAACTAAAAGCATTAGTTCAAGAAACG  
+HWI-EAS443:3:50:13:803#0/1  
aaaaa\_\_a````````baa^aaaa`a`\_a^]\_[]^`Z]  
@HWI-EAS443:3:50:1439:1428#0/1  
CATATGTTAACATCAGCAACACCAACTTTGCTGCTGGACA  
+HWI-EAS443:3:50:1439:1428#0/1  
`bbbabbb^`baWaa`aab\_a`aabb\_XWbaaaba]Z\_  
@HWI-EAS443:3:50:1448:1035#0/1  
GGTTGAAAGACACCCACGGTTCGATTCGAGCCATGCCAGTT  
+HWI-EAS443:3:50:1448:1035#0/1  
a^Y\_\_Y`¥`^\_¥¥XT\_VYZQL¥OQSHUYWQJUUZBBBBBB  
@HWI-EAS443:3:50:1463:776#0/1  
ATTTAGCAAGGCCCTTGAGTCAAGAAGAAGTTCTGCAT  
+HWI-EAS443:3:50:1463:776#0/1  
abaaaab`a`a`\_\_`ba``a]`\_`\_`]a`\_`]¥[\_X``Y^`  
@HWI-EAS443:3:50:1524:1542#0/1  
CAAAGAGAACACAATCTGGACTAGCGGGAGCAGCATATCC  
+HWI-EAS443:3:50:1524:1542#0/1  
`¥Q]\_a`U¥U¥a]^\_abb`aaaaa]``]F`MN^XY`P`TT  
@HWI-EAS443:3:50:1625:1649#0/1  
ATGCCGTTGTACTTTAACACAGCCACTGCCCATTTGTCTG  
+HWI-EAS443:3:50:1625:1649#0/1  
aaaaabab\_HZX`aaa`\_a]`a`\_¥\_`\_`^`\_`¥\_``^¥WW  
@HWI-EAS443:3:50:1706:509#0/1  
ATTCAAATACGGCAATGGTGTGGATAGGGAGAACTAAA  
+HWI-EAS443:3:50:1706:509#0/1  
`b`abbbbbb\_baaaa^ZWa`aa]^Z``¥]aZa¥ZM[^`  
@HWI-EAS443:3:50:239:328#0/1  
GCCTGTCTTATCATTAGGGCGTGGATTGTCTCCGAAAATC  
+HWI-EAS443:3:50:239:328#0/1  
`baaaa`aa`a^¥`a`]a``V[]`\_`\_a``\_\_]Va`a]Z  
@HWI-EAS443:3:50:255:542#0/1  
AAACAATATATTGAGAACACAAGAGTCTGAATGTGCATGT  
+HWI-EAS443:3:50:255:542#0/1  
aaabaab¥`bbbab]bbaa\_\_aaa^`aaaaa]aVL\_a]  
@HWI-EAS443:3:50:272:1097#0/1  
GATGATTTGGGATCCGAACGGATGGACTGGGACAGACAAT  
+HWI-EAS443:3:50:272:1097#0/1  
a\_`aZbbb\_bb\_\_\_\_``^¥\_aS`a^¥Z`^`\_`\_Y]^`\_`^`  
@HWI-EAS443:3:50:276:413#0/1  
GCCCCGTAATTTACGGAAACCACTGACTGTCCAGCAGCA  
+HWI-EAS443:3:50:276:413#0/1  
abbababbbbbbbaaaaaUaabab`bba^aa\_`aa]\_

@HWI-EAS443:3:50:315:832#0/1  
GGCTAACAAATTGGAATTTCTGGCCCAGACAATGGGGCAGT  
+HWI-EAS443:3:50:315:832#0/1  
`a^bab^aababaabbbab````aaaa^aaa`]`\_U[\_N  
@HWI-EAS443:3:50:330:758#0/1  
ATCGAACCTAATGAGCTGTCCTATTGGTGAAGTTCCTC  
+HWI-EAS443:3:50:330:758#0/1  
ababa````aaa`aa`b¥`a^\_]a\_b\_a^a][Y^Z[Y]Z  
@HWI-EAS443:3:50:375:395#0/1  
ATCAATTGGCTAACAAATTGGAATTTCTGGCCCAGACAATG  
+HWI-EAS443:3:50:375:395#0/1  
]bZaa¥`[¥`a`aaaa`aba`aa]TZUa\_\_`aaaa]¥aa  
@HWI-EAS443:3:50:410:767#0/1  
GGTCGATTTCGAGCCATGCCAGTTATCCCTGCACACACATG  
+HWI-EAS443:3:50:410:767#0/1  
ab`a[\_ba^`aa`\_abaa`aaaaa``aaaa\_aaaa]aab  
@HWI-EAS443:3:50:426:826#0/1  
CCGAAAATCCCCTGCATATGTATCCTATCTGATATTCCA  
+HWI-EAS443:3:50:426:826#0/1  
a\_bbbbbbaabababab`bbabba`abaabbaaaba`a  
@HWI-EAS443:3:50:467:1209#0/1  
AGGGCGTGGATTGTCTCCGAAAATCCCCTGCATATGTAT  
+HWI-EAS443:3:50:467:1209#0/1  
aaaa`b`a`Zbb``\_a`T]a\_a`aZ^\_\_a`Z\_\_^a^aa  
@HWI-EAS443:3:50:529:363#0/1  
CAGGGATAACTGGCATGGCTCGAATCGACCGTGGGTGTCT  
+HWI-EAS443:3:50:529:363#0/1  
\_ba\_aabbbabb`babbaab¥Y[\_RVaPGXPIWH]G[JDU  
@HWI-EAS443:3:50:541:657#0/1  
ACTCAATTCAACTTGGGAATCAAAATCAGATTGAAACATG  
+HWI-EAS443:3:50:541:657#0/1  
a\_`aa`aa\_\_`aaaa`^a^\_\_`\_]\_a`\_a\_\_`]\_]\_a  
@HWI-EAS443:3:50:606:480#0/1  
TTGCCCCGTAATTTACGGAAACCACTGACTGTCCAGCAG  
+HWI-EAS443:3:50:606:480#0/1  
Zaa`ba¥a`¥baa[b\_a^aa]Z`abab]\_```][TW\_a  
@HWI-EAS443:3:50:609:1079#0/1  
CTGGACCACAACCTGCCTGTCTTATCATTAGGGCGTGGATT  
+HWI-EAS443:3:50:609:1079#0/1  
H\_¥a¥^¥\_\_\_\_aa\_a`bbaa\_aaa\_[abZ\_I\_V\_\_^b`^^  
@HWI-EAS443:3:50:680:587#0/1  
CCCAGAAGCAAGGTCTTATACAATCCAGCCCTGTTAGTTC  
+HWI-EAS443:3:50:680:587#0/1  
a\_QZ\_WZ]W]¥^^X`\_VZ\_[]^Z[^]¥TNWRZ][a\_XWJ  
@HWI-EAS443:3:50:691:482#0/1  
ATGCCGTTGTACTTTAACACAGCCACTGCCCATTTGTCTG  
+HWI-EAS443:3:50:691:482#0/1  
ababab^aa`babbaba^aaba^\_aaaaa\_\_`aa`^a`  
@HWI-EAS443:3:50:794:414#0/1  
ATTCGAGCCATGCCAGTTATCCCTGCACACACATGTGATT

+HWI-EAS443:3:50:794:414#0/1  
ababbbbaaa`aaa`bb¥aa\_\_\_\_`baZVZ`a`aaa^baa]  
@HWI-EAS443:3:50:810:1270#0/1  
ATGCAATCAAAGCGTCATTACTTATGAAAACAACACTTGG  
+HWI-EAS443:3:50:810:1270#0/1  
^0\_ab`abbaaaa`aaaa¥a`aa\_`a`^aa]a`a\_a\_  
@HWI-EAS443:3:50:847:155#0/1  
AGAACACAATCTGGACTAGCGGGAGCAGCATATCCTTTTG  
+HWI-EAS443:3:50:847:155#0/1  
ab¥b^babba]bbabaaaaabaa\_`V¥aa`a\_a¥\_aa]a]  
@HWI-EAS443:3:50:877:574#0/1  
GTGTAACAGTGACACTGTGGGTTGGTCTTGCCAGACGG  
+HWI-EAS443:3:50:877:574#0/1  
aa]¥`a\_\_aa^^)`aa`[a[X^`^^[\_aa\_]PYZXR]\_  
@HWI-EAS443:3:50:89:1464#0/1  
GTTCCCTCTCCATACTCAAGATTTGAGTCAGTCGCTT  
+HWI-EAS443:3:50:89:1464#0/1  
\_UYU\_¥^U\_WI\_^^TZ¥]P¥]RQX``a¥QXVHWXQBBBBB  
@HWI-EAS443:3:50:929:1244#0/1  
GGAATCAAAATCAGATTGAAACATGCAATCAAAGCGTCAT  
+HWI-EAS443:3:50:929:1244#0/1  
`Z]\_`^a`ZYZa`^`\_aa¥YT`\_aa\_`[\_Y`]]\_`a\_S]^  
@HWI-EAS443:3:50:975:1551#0/1  
CACAACTGCCTGTCTTATCATTAGGGCGTGGATTGTCTCC  
+HWI-EAS443:3:50:975:1551#0/1  
\_baaaba[a\_ba`aabbaa]^`a^aT`a0^^\_baS[^\_X\_  
@HWI-EAS443:3:50:978:1464#0/1  
ATCCGTTCCGATCCCAAATCATCTCAAACCGTTTCTTGA  
+HWI-EAS443:3:50:978:1464#0/1  
aa`aa^a^`aT]YSb`YX^[[P\_]`UaT0[^aa]Y^a\_`  
@HWI-EAS443:3:50:987:1057#0/1  
CTGTCCCAGTCCATCCGTTCCGATCCCAAATCATCTCAA  
+HWI-EAS443:3:50:987:1057#0/1  
`bba\_bb^babaaa[`a`a^ba\_]\_]`aa¥ZU]a^a\_\_a`  
@HWI-EAS443:3:50:989:1258#0/1  
CGTGAAATTAGCGGGCAATTCCTCTCTCTGCCCTGTTAGT  
+HWI-EAS443:3:50:989:1258#0/1  
ababbbbbaba]bb\_b`b`X`b``\_aaaba`b\_^aa]]  
@HWI-EAS443:3:51:1013:633#0/1  
GGTCCATCGGTCATTACAGTAAAGCAAGAACCATTTACAC  
+HWI-EAS443:3:51:1013:633#0/1  
aaHTYaa`a`TQTa]ZW^W[ZRVURZR¥Z]SX\_a`^XMZV  
@HWI-EAS443:3:51:1021:1611#0/1  
GGTGAAGTTCCTCTCCATACTCAAGATTTGAGTCAG  
+HWI-EAS443:3:51:1021:1611#0/1  
aa\_a\_]`a`aaa]\_\_`a^\_\_a\_\_[\_¥aX`\_aZaa\_X^\_  
@HWI-EAS443:3:51:1089:1497#0/1  
CTGTTTACACCACAAAAGGATATGCTGCTCCCGTAGTCC  
+HWI-EAS443:3:51:1089:1497#0/1  
a`¥\_a¥bbbb\_¥¥\_Y¥X]Z]¥aa\_]\_aa¥NX\_`X\_`¥VRU



@HWI-EAS443:3:51:1187:243#0/1  
GAAATTCCAATTGTTAGCCAATTGATGCCATCATGACAAG  
+HWI-EAS443:3:51:1187:243#0/1  
``a`a¥Z]aabaaa\_HZaZ`]\_Y^^XT^aR¥\_`Ya]`¥  
@HWI-EAS443:3:51:1215:1115#0/1  
CTGTCCAGCAGCAAAGTTGGTGTGCTGATGTTAACATAT  
+HWI-EAS443:3:51:1215:1115#0/1  
\_a¥aab``aa^baabab``]`\_bba`^^aa`a]]Y[ZX^  
@HWI-EAS443:3:51:1236:338#0/1  
AACCGTTTCTTGAACATAATGCTTTTAGTTCTCCCTATCCA  
+HWI-EAS443:3:51:1236:338#0/1  
abaababaaaabaa\_baaaa[aa`^ZX`ZX^`\_Y``\_ZR\_  
@HWI-EAS443:3:51:1237:1850#0/1  
CAACTGCCTGTCTTATCATTAGGGCGTGGATTGTCTCCGA  
+HWI-EAS443:3:51:1237:1850#0/1  
abaabababab`bbababaaa`aa`b\_baaaba\_\_a]Y`\_  
@HWI-EAS443:3:51:1336:696#0/1  
AGTGGGATTTTCGGAGACAATCCACGCCCTAATGATAAGA  
+HWI-EAS443:3:51:1336:696#0/1  
abaaaa\_bbabab`abaaaa\_a\_a``\_a`\_a\_\_\_\_\_ [a  
@HWI-EAS443:3:51:1360:902#0/1  
CGCTAATTTTCACGGAAACCACTGACTGTCCAGCAGCAAAG  
+HWI-EAS443:3:51:1360:902#0/1  
`babbbbbb`b`baabb`b`bbaabba\_a^][aa\_aa^a  
@HWI-EAS443:3:51:1363:1714#0/1  
AATCAAAGCGTCATTACTTATGAAAACAACACTTGGGTAA  
+HWI-EAS443:3:51:1363:1714#0/1  
]ba`bb``]NT^`ba^Ya`babaXa`S`\_MY\_Y^a`aT[a  
@HWI-EAS443:3:51:1388:1407#0/1  
GGGACAGACAATAACTTCTCAATAAAGCAAGATATCGTAG  
+HWI-EAS443:3:51:1388:1407#0/1  
aaa`\_\_b``\_aa\_Uaa\_a\_\_`a\_[`aZ`¥a```\_[a]\_`  
@HWI-EAS443:3:51:1549:460#0/1  
GAGGAATTGCCCGCTAATTTACGGAAACCACTGACTGTC  
+HWI-EAS443:3:51:1549:460#0/1  
\_a\_¥]H[aSUP[QSY^¥ZZ`¥]OXDZ^`\_¥Z]BBBBBBBB  
@HWI-EAS443:3:51:1557:1677#0/1  
GAGCTGTCTATTGGTGAAGTTCCCTCTCCATACAACCTCA  
+HWI-EAS443:3:51:1557:1677#0/1  
\_\_bbabab\_bbbaa\_W]b]`aaa\_aaab^aaba`aaaa\_a  
@HWI-EAS443:3:51:1614:428#0/1  
ATCGACCGTGGGTGTCTTTCAACCAGAATCTGGAATATCA  
+HWI-EAS443:3:51:1614:428#0/1  
ab[aa^aa¥\_^^M^[S`a`U^aY¥]\_Ya`Ga\_\_Z`Y¥YJN  
@HWI-EAS443:3:51:1614:807#0/1  
CCAGATTCTGGTTGAAAGACACCCACGGTCGATTGAGCC  
+HWI-EAS443:3:51:1614:807#0/1  
¥G]`\_bbbbSa]aa\_\_a`a\_X`NZ¥WZ\_GXXN\_SR`¥KN[  
@HWI-EAS443:3:51:1641:1339#0/1  
GCTGCTCCCGCTAGTCCAGATTGTGTTCTCTTTGGGTCGC

+HWI-EAS443:3:51:1641:1339#0/1  
Q]TY[Zb`Z]]\_YTT^`¥][^YZUZW]¥ZMO`¥TXZTW¥P  
@HWI-EAS443:3:51:1651:1033#0/1  
CTTGGGAATCAAAATCAGATTGAAACATGCAATCAAAGCG  
+HWI-EAS443:3:51:1651:1033#0/1  
abbbabbbbbbabbabbabbbbababbb`bbbaaa^^a  
@HWI-EAS443:3:51:1682:709#0/1  
CAGACATATGTTAACATCAGCAACACCAACTTTGCTGCTG  
+HWI-EAS443:3:51:1682:709#0/1  
`]GY]Taa]GSa\_[Z`^`¥[a]USY[a^]]\_]V¥QJOMG  
@HWI-EAS443:3:51:16:918#0/1  
CAAATCTTGAGTTGTATGGAGAGGGAACCTCACCAATAGG  
+HWI-EAS443:3:51:16:918#0/1  
abb\_Z`aaa¥abbaabba]b`aabZa\_aa`a\_\_`Y```\_`  
@HWI-EAS443:3:51:1721:858#0/1  
GACACCCACGGTCGATTCGAGCCATGCCAGTTATCCCTGC  
+HWI-EAS443:3:51:1721:858#0/1  
\_aab`a^aaaaIV\_a^`U\_a[[ZaNZ\_¥a^Za^Q`\_]T[  
@HWI-EAS443:3:51:187:1522#0/1  
CTGGACCACAACCTGCCTGTCTTATCATTAGGGCGTGGATT  
+HWI-EAS443:3:51:187:1522#0/1  
a\_ba]a\_a``\_a\_`^[a\_¥^`\_`aaba``]XP\_`\_a^[]a  
@HWI-EAS443:3:51:194:306#0/1  
GGGGGATGTGTTTGTGCATAAGGGAACCATTCATATCATGC  
+HWI-EAS443:3:51:194:306#0/1  
aba\_``ab]baaaa\_\_a^\_Z]`\_a]\_\_a\_U[``UV]\_T  
@HWI-EAS443:3:51:197:296#0/1  
CTCTGATTAGTTCAACCCAGAAGCAAGGTCTTATACAATC  
+HWI-EAS443:3:51:197:296#0/1  
aaabba¥`b`aa`]Z`aa]\_aZ¥X^¥Paa`a\_aaa\_\_]  
@HWI-EAS443:3:51:216:812#0/1  
CCACAACCTGCCTGTCTTATCATTAGGGCGTGGATTGTCTC  
+HWI-EAS443:3:51:216:812#0/1  
a`¥`bbba`abbbabbbb]abaaaaaab\_aa`a\_]¥^`\_  
@HWI-EAS443:3:51:290:932#0/1  
GCTGTGTTAAAGTACAACGGCATAATAACAGACACTATCA  
+HWI-EAS443:3:51:290:932#0/1  
aabb`]F]``]P^a\_aa\_a`\_\_`a````^\_aa\_a^``^[[  
@HWI-EAS443:3:51:354:565#0/1  
AATGCTTTTAGTTCTCCCTATCCAAACACCATTTGCCGTAT  
+HWI-EAS443:3:51:354:565#0/1  
ab\_a^aaa`bb^\_U¥a^aa`aaaaa`ZX``[a\_Z`^``  
@HWI-EAS443:3:51:374:706#0/1  
GTTTCCGTGAAATTAGCGGGCAATTCCTCTCTCTGCCCTG  
+HWI-EAS443:3:51:374:706#0/1  
``bbaabYZOXaa]aa`a`a`[\_`\_\_aa`^a\_`^`WW`a  
@HWI-EAS443:3:51:381:52#0/1  
GGGCTCCTGTCTTTAATGGTTCCATTGGAATGTTTGTCTAT  
+HWI-EAS443:3:51:381:52#0/1  
`a`bb¥a¥¥^bb`aa¥¥a``a\_b`abbb]U\_a^\_\_b^\_X¥

@HWI-EAS443:3:51:444:1452#0/1  
CAACTGCCTGTCTTATCATTAGGGCGTGGATTGTCTCCGA  
+HWI-EAS443:3:51:444:1452#0/1  
abbbbaabbbbbbbbbbbba`abb\_b`abb\_`aaab\_  
@HWI-EAS443:3:51:448:573#0/1  
TCTGATTAGTTCAACCCAGAAGCAAGTCTTATAACAATCC  
+HWI-EAS443:3:51:448:573#0/1  
`W\_\_\_abaaQaaaa\_]ab`\_`b\_a^¥a]```aaa\_a``¥^  
@HWI-EAS443:3:51:474:1314#0/1  
TTCCCTTTTCTATTCTGAAGATCTTGTATGAGGCCTGTCC  
+HWI-EAS443:3:51:474:1314#0/1  
abaa`bbbaabaaa`aaaa`a`a`a`aaa`a`\_`a\_^^¥  
@HWI-EAS443:3:51:491:1006#0/1  
ATTGTCTCCGAAAATCCCACTGCATATGTATCCTATCTGA  
+HWI-EAS443:3:51:491:1006#0/1  
abaa`aaaaaaaa`aaa`\_\_````aaa`\_`\_`aaa`\_```  
@HWI-EAS443:3:51:514:565#0/1  
GTACTTTAACACAGCCACTGCCCATTTGTCTGGGCCAGAA  
+HWI-EAS443:3:51:514:565#0/1  
]HIVZa]\_UYbP`¥[a\_ZYaY\_\_[\_W\_`V`UQ¥UO[\_`YT  
@HWI-EAS443:3:51:52:509#0/1  
GCCCCGTAATTTACGGAAACCACTGACTGTCCAGCAGCA  
+HWI-EAS443:3:51:52:509#0/1  
a[¥¥\_`ZTX]^`¥VXXZQLYURQZR]ZYBBBBBBBBBBBB  
@HWI-EAS443:3:51:572:1483#0/1  
TGCCCCGTAATTTACGGAAACCACTGACTGTCCAGCAGC  
+HWI-EAS443:3:51:572:1483#0/1  
\_a]`a`\_`[bbbZVaa\_WGW\_[I¥^LOY`a^G\_P¥NPDWV  
@HWI-EAS443:3:51:611:1670#0/1  
GCAGAACCTTCTTCTGACTCAAGGGCCTTGCTAAATGA  
+HWI-EAS443:3:51:611:1670#0/1  
\_a`b^a\_a`\_`\_`^`aaaa\_\_a\_a^^]a]\_\_^\_Y`a^`\_`\_`  
@HWI-EAS443:3:51:638:1183#0/1  
GAATATCAGATAGGATACATATGCAGTGGGATTTTCGGAG  
+HWI-EAS443:3:51:638:1183#0/1  
aaaaaa¥a``aa]`Z\_]YYN][QOXXTV]¥ZZUR\_YYXWW  
@HWI-EAS443:3:51:683:1716#0/1  
TTGTATAAGACCTTGCTTCTGGGTTGAACTAATCAGAGGG  
+HWI-EAS443:3:51:683:1716#0/1  
aba\_aaaa`^\_aaaa\_aa`a\_¥[\_aaab]a`aa¥a`\_`\_`  
@HWI-EAS443:3:51:697:1309#0/1  
CAAATCATCTCAAACCGTTTCTTGAACCTAATGCTTTTAG  
+HWI-EAS443:3:51:697:1309#0/1  
a`a¥aab\_bba]abaab`aaXa[a]`[a`]a`P\_ba^[^  
@HWI-EAS443:3:51:768:832#0/1  
CTCCTGTTATCCTGATTCTAGTGAAATCACATGTGTGTGC  
+HWI-EAS443:3:51:768:832#0/1  
]babaaa`ab[Tb`aaa`\_a]U\_aab]ba`[aa[b^`Sa\_  
@HWI-EAS443:3:51:860:1638#0/1  
GATTTTCGGAGACAATCCACGCCCTAATGATAAGACAGGC

+HWI-EAS443:3:51:860:1638#0/1  
aYaaaaabb`b\_baa`aa^a^Ya`^a^`\_\_`V]] [Z  
@HWI-EAS443:3:51:88:576#0/1  
AAGACACCCACGGTCGATTCGAGCCATGCCAGTTATCCCT  
+HWI-EAS443:3:51:88:576#0/1  
`aaaXW`aa]]aaSU`RWY¥]VTSZSNWTZ[¥PQVVTTYO  
@HWI-EAS443:3:51:898:1284#0/1  
TGTGTGTGCAGGGATAACTGGCATGGCTCGAATCGACCGT  
+HWI-EAS443:3:51:898:1284#0/1  
ab`b¥HYba^bbaaaabaaa`\_`a`\_`a][T^GOXUNT[L  
@HWI-EAS443:3:51:923:640#0/1  
ATAACAGACACTATCAAGAGTTGGAGAAACAATATATTGA  
+HWI-EAS443:3:51:923:640#0/1  
aa^`Xa\_¥a`W^WLRX0`^a^^\_Q¥\_`\_`a\_Y`YSX\_X[Z  
@HWI-EAS443:3:51:953:1952#0/1  
GCGGGAGCAGCATATCCTTTTGTGGTGTAAACAGTGACAC  
+HWI-EAS443:3:51:953:1952#0/1  
¥\_\_`^bab[bb`^b^a`bb\_\_]\_`abaaaba`¥Zba¥a\_  
@HWI-EAS443:3:51:981:1226#0/1  
GCCAAGACCAACCCACAGTGTCACTGTTTACACCACAAAA  
+HWI-EAS443:3:51:981:1226#0/1  
]\_\_SaWTW`^a\_bbZZaab`^`bbbb^[ba^aaaa[```¥  
@HWI-EAS443:3:51:993:1232#0/1  
GGAGAAACAATATATTGAGAACACAAGAGTCTGAATGTGC  
+HWI-EAS443:3:51:993:1232#0/1  
aa[Z[[Y]ZP\_a`a^a^\_]\_aXP]a`[N[\_a¥Z^]XXX  
@HWI-EAS443:3:52:1046:564#0/1  
CAACTGCCTGTCTTATCATTAGGGCGTGGATTGTCTCCGA  
+HWI-EAS443:3:52:1046:564#0/1  
Z¥bb\_\_a\_bbaabbbbabbbbbaab`b`^bbabbbbaba  
@HWI-EAS443:3:52:1070:454#0/1  
CCACAACCTGCCTGTCTTATCATTAGGGCGTGGATTGTCTC  
+HWI-EAS443:3:52:1070:454#0/1  
aabababbbbaa]babaaba`a\_aaa[\_[]`\_aaaa^Q`\_  
@HWI-EAS443:3:52:1081:1234#0/1  
GAAACAATATATTGAGAACACAAGAGTCTGAATGTGCATG  
+HWI-EAS443:3:52:1081:1234#0/1  
aaa`\_YYa\_]a`baaa^a]\_]`^\_\_¥^`a]\_a\_\_`X\_\_  
@HWI-EAS443:3:52:1110:1835#0/1  
TTCAAATACGGCAATGGTGTGGATAGGGAGAACTAAAA  
+HWI-EAS443:3:52:1110:1835#0/1  
a`baa`bab¥b]\_`RUWN\_Ra\_VbZ[NVN]W[`]L\_Y]^Y  
@HWI-EAS443:3:52:123:1293#0/1  
GATTCTGGTTGAAAGACACCCACGGTCGATTCGAGCCATG  
+HWI-EAS443:3:52:123:1293#0/1  
`Z]¥`T\_\_X`\_U^0^Z¥`a`\_U[VYDO¥TKT¥OFXSMTR]  
@HWI-EAS443:3:52:1248:585#0/1  
CTCCGAAAATCCCCTGCATATGTATCCTATCTGATATTC  
+HWI-EAS443:3:52:1248:585#0/1  
ababa`abbaaUa``\_`aaa`aa]`a`\_`a`aYb`\_a\_a`\_`

@HWI-EAS443:3:52:1255:955#0/1  
ATAAGACCTTGCTTCTGGGTTGAACTAATCAGAGGGCGAC  
+HWI-EAS443:3:52:1255:955#0/1  
ababaaaabab\_baabaaaaabab\_aa`aSa\_`a`\_^`\_\_  
@HWI-EAS443:3:52:1355:724#0/1  
TTGTCTCCGAAAATCCCCTGCATATGTATCCTATCTGAT  
+HWI-EAS443:3:52:1355:724#0/1  
aba\_\_aa¥a]`\_`\_^a`^^\_^`^^`\_^`\_\_][\_\_\_\_^`^^^  
@HWI-EAS443:3:52:1452:1250#0/1  
CATCAATTGGCTAACAAATTGGAATTTCTGGCCCAGACAAT  
+HWI-EAS443:3:52:1452:1250#0/1  
XY]`¥``aaYb`UQ`^b\_]\_`¥baabb`^[^`ab]\_Y`b  
@HWI-EAS443:3:52:1624:1121#0/1  
TTGTCTCCGAAAATCCCCTGCATATGTATCCTATCTGAT  
+HWI-EAS443:3:52:1624:1121#0/1  
a`aWX^`b[a¥^\_Z^T`NZaU`\_``[Z`TV]JaZ^V¥a  
@HWI-EAS443:3:52:1633:243#0/1  
GTCCCAGTCCATCCGTTCCGATCCCAAATCATCTCAAAAC  
+HWI-EAS443:3:52:1633:243#0/1  
¥`ab`bbaaaba`a\_a`aZ`b^^abab`Saba\_aa^bW  
@HWI-EAS443:3:52:1659:40#0/1  
GAAATTCCAATTGTTAGCCAATTGATGCCATCATGACAAG  
+HWI-EAS443:3:52:1659:40#0/1  
\_`bbaabababba`a[\_Taaa`]^¥\_VU\_`^`a¥QX¥Y  
@HWI-EAS443:3:52:1685:1137#0/1  
GGGCTCCTGTCTTTAATGGTTCATTGGAATGTTTGTCAT  
+HWI-EAS443:3:52:1685:1137#0/1  
aa`baaaabaabbbbaaaba\_aaa\_aa[a\_`a\_abTa]¥`  
@HWI-EAS443:3:52:170:1222#0/1  
GCTCCATTAGACGATACTGGACCACAACCTGCCTGTCTTAT  
+HWI-EAS443:3:52:170:1222#0/1  
a`[`]V\_`SU^^a^¥¥UNNQURRNL PZVTUTZRRRR\_[WU  
@HWI-EAS443:3:52:174:594#0/1  
CATCCGTTCCGATCCCAAATCATCTCAAACCCTTCTTG  
+HWI-EAS443:3:52:174:594#0/1  
¥[^`\_URa]G[`Q¥`¥Z\_\_S¥`\_^`¥¥`¥^\_\_aa\_^][Y  
@HWI-EAS443:3:52:1767:863#0/1  
CTGGACCACAACCTGCCTGTCTTATCATTAGGGCGTGGATT  
+HWI-EAS443:3:52:1767:863#0/1  
\_bbbabababb`bba`bbabbbbabab^`aa[^`¥`ba  
@HWI-EAS443:3:52:1776:1434#0/1  
ATTAGACGATACTGGACCACAACCTGCCTGTCTTATCATT  
+HWI-EAS443:3:52:1776:1434#0/1  
Zab\_Z\_a`\_Y]R¥\_]OZ\_¥T¥UOVSSY^OLV[^`VYMWVQ  
@HWI-EAS443:3:52:184:1807#0/1  
GCCTGTCTTATCATTAGGGCGTGGATTGTCTCCGAAAATC  
+HWI-EAS443:3:52:184:1807#0/1  
^`bbaabbbbabbb`a`ab\_a]aaaa`¥`aaa]aa`a\_]  
@HWI-EAS443:3:52:241:850#0/1  
GGATTGTCTCCGAAAATCCCCTGCATATGTATCCTATCT

+HWI-EAS443:3:52:241:850#0/1  
abbbbaabb`]ZV`aa`a`a`a`\_aa`a`\_a\_aa`a\_a  
@HWI-EAS443:3:52:332:1365#0/1  
CTGGACCACAACCTGCCTGTCTTATCATTAGGGCGTGGATT  
+HWI-EAS443:3:52:332:1365#0/1  
aba]QX^`PXZN]\_Y\_[aVS¥¥UV\_`\_`^UHLSV[^ZP\_S  
@HWI-EAS443:3:52:33:1943#0/1  
CAACTGCCTGTCTTATCATTAGGGCGTGGATTGTCTCCGA  
+HWI-EAS443:3:52:33:1943#0/1  
``\_T\_`a¥`R]R¥a\_\_ZJV¥SZT`[KVVWTRT]^]^]TO  
@HWI-EAS443:3:52:344:146#0/1  
CGCTTGGTCAGCAAGTGCCTGTGCATGATGGCATCAATTGG  
+HWI-EAS443:3:52:344:146#0/1  
abaabab\_a\_aaaab]a\_`ab\_a\_aa^a\_`]]`Z`¥a^`\_  
@HWI-EAS443:3:52:418:1252#0/1  
CAAGTGCCTGTGCATGATGGCATCAATTGGCTAACAAATTGG  
+HWI-EAS443:3:52:418:1252#0/1  
a````\_\_aa`Y]aa[]\_\_¥Z^`\_\_\_\_[^[YVGO[[`^WY  
@HWI-EAS443:3:52:418:597#0/1  
ATTTGAGTCAGTCGCTTGGTCAGCAAGTGCCTGTGCATGAT  
+HWI-EAS443:3:52:418:597#0/1  
abbbbababab`aaaaaaU¥\_`^\_`Z`]]]a`Z^^`\_¥`  
@HWI-EAS443:3:52:458:2019#0/1  
CAGACATATGTTAACATCAGCAACACCAACTTTGCTGCTG  
+HWI-EAS443:3:52:458:2019#0/1  
a`[[[a\_a`a¥Ya¥Y\_`aYTSaZZaXTP`V[]WRWSaW^W  
@HWI-EAS443:3:52:489:1944#0/1  
GGAATGCTCCTGTTATCCTGATTCTAGTAAATCACATGT  
+HWI-EAS443:3:52:489:1944#0/1  
a[]SPZ\_WWZ[a`MOQ\_a]UUY¥¥XP[R\_VZYRRXU^V]T  
@HWI-EAS443:3:52:545:1672#0/1  
GTGGTCCAGTATCGTCTAATGGAGCAAATGGAGTAAAAGG  
+HWI-EAS443:3:52:545:1672#0/1  
a]aaZ\_a``]¥aa]\_\_a\_`^`¥X]^YXZWY\_W`^]a^^  
@HWI-EAS443:3:52:60:1734#0/1  
CAAATACGGCAATGGTGTGGATAGGGAGAACTAAAAGC  
+HWI-EAS443:3:52:60:1734#0/1  
aaa^¥[`^`\_`\_¥ZF¥Xa]]`YZ¥Y]WZ¥WYTTTTY`]Y¥  
@HWI-EAS443:3:52:627:422#0/1  
GGGCGACCCAAAGAGAACACAATCTGGACTAGCGGGAGCA  
+HWI-EAS443:3:52:627:422#0/1  
aaaa\_`Z\_a\_[]`\_\_¥\_\_`Y\_\_¥^\_\_^`¥\_\_`^`U\_WW  
@HWI-EAS443:3:52:628:402#0/1  
GAAATTCCAATTGTTAGCCAATTGATGCCATCATGACAAG  
+HWI-EAS443:3:52:628:402#0/1  
a[]UOXH]a``VW¥¥\_[X¥[UPRZSS]]WWQRX]¥XLS\_B  
@HWI-EAS443:3:52:631:154#0/1  
TTGGTCTTGGCCAGACGGTGCTGAGTTGCCATTTACCATT  
+HWI-EAS443:3:52:631:154#0/1  
^aaaX\_abbbbaab]aa^U\_YX`[a[`^ZZV\_a`[LQV¥^

@HWI-EAS443:3:52:652:1373#0/1  
TCCGAAAATCCCCTGCATATGTATCCTATCTGATATTCC  
+HWI-EAS443:3:52:652:1373#0/1  
aaab\_aaaa\_a`a`aZaaaa\_aa^\_\_\_aaa`\_a`^a\_Z  
@HWI-EAS443:3:52:65:1357#0/1  
GTTCCCTCTCCATACAACCTCAAGATTTGAGTCAGTCGCTT  
+HWI-EAS443:3:52:65:1357#0/1  
aaabaaaaaaaaaaaa\_aaaaa\_aaaa\_\_^a``]^`XZ]  
@HWI-EAS443:3:52:701:65#0/1  
GCGGGCAATTCTCTCTGCCCTGTTAGTGGATGGGCTA  
+HWI-EAS443:3:52:701:65#0/1  
a^bba^[X\_\_`^`\_\_^`\_\_`W¥X^a]aZ\_V^`V]`\_]XRW  
@HWI-EAS443:3:52:720:1482#0/1  
GGATTGTCTCCGAAAATCCCCTGCATATGTATCCTATCT  
+HWI-EAS443:3:52:720:1482#0/1  
a`ba``aaaaa[U]\_a¥YX]W¥`¥\_`a^`\_]a`[Z\_`^¥U  
@HWI-EAS443:3:52:721:443#0/1  
TGGGCTCCTGTCTTTAATGGTTCCATTGGAATGTTGTCA  
+HWI-EAS443:3:52:721:443#0/1  
aaa]`aa`baT[aa\_Y\_ZZYUX¥F¥`W]YR\_[a[\_UaZ¥P  
@HWI-EAS443:3:52:78:110#0/1  
ACAACCTGCCTGTCTTATCATTAGGGCGTGGATTGTCTCCG  
+HWI-EAS443:3:52:78:110#0/1  
aaa`ab\_`a^\_\_a^`\_`aa\_^\_]X]Z]aZ^]\_YZ]ZX^  
@HWI-EAS443:3:52:80:714#0/1  
CACCCACGGTCGATTCGAGCCATGCCAGTTATCCCTGCAC  
+HWI-EAS443:3:52:80:714#0/1  
`\_`baababX\_¥JZa\_QTZ^ZZHV]Y]YNU[\_^PZV`¥X[  
@HWI-EAS443:3:52:815:796#0/1  
CTCCATACAACCTCAAGATTTGAGTCAGTCGCTTGGTCAGC  
+HWI-EAS443:3:52:815:796#0/1  
YY`[\_b\_a`bbbb\_\_b\_bbbbaabaabbbbab\_a[aaa[  
@HWI-EAS443:3:52:821:202#0/1  
ACTGCATATGTATCCTATCTGATATTCCAGATTCTGGTTG  
+HWI-EAS443:3:52:821:202#0/1  
aabb\_aaaaaaaa`\_aaa`aaaaa``^^\_a\_\_`X`aa\_\_a  
@HWI-EAS443:3:52:874:1215#0/1  
AATGCTCCTGTTATCCTGATTCTAGTAAAATCACATGTGT  
+HWI-EAS443:3:52:874:1215#0/1  
ab^U`]`XaU`\_aaZ¥`aZ\_V`U\_¥[¥Y\_\_\_^`WX\_a]\_^  
@HWI-EAS443:3:52:922:1871#0/1  
GATTAGTTCAACCCAGAAGCAAGTCTTATACAATCCAGC  
+HWI-EAS443:3:52:922:1871#0/1  
aa`^Z^F]]^`ZU\_W`X¥PYYXYLFP[\_^^^W\_YUN]WGV  
@HWI-EAS443:3:52:925:748#0/1  
GATATTCCAGATTCTGGTTGAAAGACACCCACGGTCGATT  
+HWI-EAS443:3:52:925:748#0/1  
^bbabbbbabbbbabbbbabbaabb`ababb\_\_a^aa  
@HWI-EAS443:3:52:942:383#0/1  
GTCCCAGTCCATCCGTTCCGATCCCAAATCATCTCAAAAC

+HWI-EAS443:3:52:942:383#0/1  
```aabba`[`aa\_baa¥¥`aaa\_a\_aa[Y\_]]aa`aa]  
@HWI-EAS443:3:52:986:1156#0/1  
GCAGAACCTTCTTCTTGGACTCAAGGGGCCTTGCTAAATGA  
+HWI-EAS443:3:52:986:1156#0/1  
\_aa``W¥Z``^`a`^]a````\_a]TXa`aaa\_`aaa  
@HWI-EAS443:3:52:9:720#0/1  
TCCGTTCCGGATCCCAAATCATCTCAAACCGTTTCTTGAA  
+HWI-EAS443:3:52:9:720#0/1  
aaaa]````Z^[``\_]TV]]][U[[[RY^[``]Y¥YYZ[  
@HWI-EAS443:3:53:100:30#0/1  
TGCCTGTCTTATCATTAGGGCGTGGATTGTCTCCGAAAAT  
+HWI-EAS443:3:53:100:30#0/1  
ab`X`aab`Ya¥ST[Xa`XL[[¥\_Y¥[`YZ\_ZYZPOQ SX  
@HWI-EAS443:3:53:1037:1139#0/1  
TGCACACACATGTGATTTCACTAGAATCAGGATAACAGGA  
+HWI-EAS443:3:53:1037:1139#0/1  
a`a`]a¥^b^XZ`]ba¥]`[Zabbaa\_b`]]\_a`a\_W][  
@HWI-EAS443:3:53:1079:395#0/1  
ATCAGATTGAAACATGCAATCAAAGCGTCATTACTTATGA  
+HWI-EAS443:3:53:1079:395#0/1  
ababbabababa`abb\_baaaa`\_`abaabaaabbabb`  
@HWI-EAS443:3:53:110:654#0/1  
CGCTAATTTACGGAACCACTGACTGTCCAGCAGCAAAG  
+HWI-EAS443:3:53:110:654#0/1  
abbbbbbaaaa`bb¥abaaaaab¥\_bba\_a\_\_`\_\_VYW^a  
@HWI-EAS443:3:53:1113:1569#0/1  
GTTAGCCAATTGATGCCATCATGACAAGCACTTGCTGACC  
+HWI-EAS443:3:53:1113:1569#0/1  
a\_]V¥W[Q]`a`[¥]XX`Z^^`XXX]¥VWNVX[¥X`VBB  
@HWI-EAS443:3:53:1242:1069#0/1  
CAATGGAACCATTAAGACAGGAGCCCATATCGAACCTA  
+HWI-EAS443:3:53:1242:1069#0/1  
[babbbbbbbbbbbbbbb\_aabbb\_babbbb^bbb¥a^ba  
@HWI-EAS443:3:53:1243:949#0/1  
CCCCTAATTTACGGAACCACTGACTGTCCAGCAGCAA  
+HWI-EAS443:3:53:1243:949#0/1  
abaLZ``b\_bbb¥`a\_a`^\_aabaa\_a]a[[`\_Sa\_ZW  
@HWI-EAS443:3:53:1245:117#0/1  
CTCTGATTAGTTCAACCCAGAAGCAAGTCTTATACAATC  
+HWI-EAS443:3:53:1245:117#0/1  
ababbbbbbbbbabb]bababbb\_abbab\_bbbba¥abb`  
@HWI-EAS443:3:53:13:196#0/1  
ACCACAACCTGCCTGTCTTATCATTAGGGCGTGGATTGTCT  
+HWI-EAS443:3:53:13:196#0/1  
\_]YY\_a\_WTXU¥[¥\_\_`[XNXa¥]S¥RVUG\_YVTTYWQY  
@HWI-EAS443:3:53:1400:1105#0/1  
GACAAGCACTTGCTGACCAAGCGACTGACTCAAATCTTGA  
+HWI-EAS443:3:53:1400:1105#0/1  
abZb`aaaaabb^aab[aa\_^\_a`bba]aa\_\_\_a[``a^



@HWI-EAS443:3:53:1404:918#0/1  
CGTGGATTGTCTCCGAAAATCCCCTGCATATGTATCCTA  
+HWI-EAS443:3:53:1404:918#0/1  
\_b`bbbbbaabaabbbababVaabba\_`bbaaabb\_aba  
@HWI-EAS443:3:53:1413:80#0/1  
TGCCTGTCTTATCATTAGGGCGTGGATTGTCTCCGAAAAT  
+HWI-EAS443:3:53:1413:80#0/1  
abYWaa\_aabab]aabaaa]`)]¥]abaa`\_[\_a^^``  
@HWI-EAS443:3:53:1425:785#0/1  
ACCTTGCTTCTGGGTTGAACTAATCAGAGGGCGACCCAAA  
+HWI-EAS443:3:53:1425:785#0/1  
aa\_bbb`ba\_bbaa\_aaab¥aaaaaaaa`aQa`\_a]\_[^  
@HWI-EAS443:3:53:1445:652#0/1  
GAAAGACACCCACGGTCGATTCGAGCCATGCCAGTTATCC  
+HWI-EAS443:3:53:1445:652#0/1  
aabbbZ^ba\_abSaa^¥YPV`¥`aa[Q`ZYaU¥GRa\_\_QQ  
@HWI-EAS443:3:53:1505:1401#0/1  
CAAGAGTTGGAGAAACAATATATTGAGAACACAAGAGTCT  
+HWI-EAS443:3:53:1505:1401#0/1  
aa\_\_P\_Xabb¥bbaaabbb¥aabbaabaabababba\_]b  
@HWI-EAS443:3:53:1633:28#0/1  
CATTTAGCAAGGCCCTTGAGTCAAGAAGAAGTTCTGCA  
+HWI-EAS443:3:53:1633:28#0/1  
a`bbabbab`aaa\_aabab`\_\_aaa\_ba^aa`\_]aa^  
@HWI-EAS443:3:53:185:1080#0/1  
CTGGACCACAACCTGCCTGTCTTATCATTAGGGCGTGGATT  
+HWI-EAS443:3:53:185:1080#0/1  
abaaaaa]\_`aaaa`¥a`a`a``\_a``a[^aaWaa[\_a  
@HWI-EAS443:3:53:258:1203#0/1  
ATGAATGGTTCCCTTATGACAAACACATCCCCCTTGAAC  
+HWI-EAS443:3:53:258:1203#0/1  
aaabbabb\_baa`aaaaa`aaa^a`a`\_`\_Z``\_¥X``X  
@HWI-EAS443:3:53:26:687#0/1  
AGGGGGATGTGTTTGTGCATAAGGGAACCATTCATATCATG  
+HWI-EAS443:3:53:26:687#0/1  
ab\_abaaaa\_baaaa\_aaaXS\_aa``a\_aa`[\_`a`a`a`a`  
@HWI-EAS443:3:53:289:2019#0/1  
ATTCATATCATGCTCCCCCTTGAATGCAGAACCTTCTTC  
+HWI-EAS443:3:53:289:2019#0/1  
abaabbbbbba`bb`a`\_`\_a`a^a\_a\_\_\_\_\_]a^Y  
@HWI-EAS443:3:53:290:449#0/1  
GGTGAAGTTCCTCTCCATACAACCTCAAGATTTGAGTCAG  
+HWI-EAS443:3:53:290:449#0/1  
\_b¥ba]`X`aaa`aaa`^\_a\_]\_aa`aa\_\_a\_a\_b^]\_a  
@HWI-EAS443:3:53:29:151#0/1  
CTTGAATGCAGAACCTTCTTCTTGAAGGGCCTTG  
+HWI-EAS443:3:53:29:151#0/1  
abbbbbbb`bbaabbbbbabbbaaab]`Z\_a`\_``a  
@HWI-EAS443:3:53:306:926#0/1  
CGCTAATTTACGGAAACCACTGACTGTCCAGCAGCAAAG

+HWI-EAS443:3:53:306:926#0/1  
abb`Y^^bbabbY^a`a`¥Yaa\_aaaa[`\_]\_\_KZPX]BB  
@HWI-EAS443:3:53:324:1985#0/1  
GTCTTTCAACCAGAATCTGGAATATCAGATAGGATACATA  
+HWI-EAS443:3:53:324:1985#0/1  
\_S`T`Y`\_\_\_¥\_^aa^`b`¥¥`\_aa\_¥\_[¥`aa^\_ZW^PZ  
@HWI-EAS443:3:53:334:1093#0/1  
GTCAGGATATAGCGGGAGTTTTGTTTCAGCATCCAGAACTA  
+HWI-EAS443:3:53:334:1093#0/1  
a\_`^aaW`^a`^aaaU`Y]\_\_\_¥[UX[]]YU\_]YYYYXY  
@HWI-EAS443:3:53:345:326#0/1  
GTCCCAGTCCATCCGTTCCGATCCCAAATCATCTCAAAC  
+HWI-EAS443:3:53:345:326#0/1  
ab^a^aaa^aa`\_`R]^`^\_]^^W^^]N^]^`¥\_Y^^\_\_Q  
@HWI-EAS443:3:53:348:57#0/1  
GTAGGAATAAATGAGTGGTCAGGATATAGCGGGAGTTTTG  
+HWI-EAS443:3:53:348:57#0/1  
a^`aa\_\_a`\_^`a^aVa`][V`aV]]\_W^X`\_`W\_RYZYY  
@HWI-EAS443:3:53:354:157#0/1  
CTTCCCTTTTCTATTCTGAAGATCTTGTATGAGGCCTGT  
+HWI-EAS443:3:53:354:157#0/1  
abbababbaab]a[baa`aYZa¥a\_baa¥aa``aa\_Ua`Y  
@HWI-EAS443:3:53:358:1110#0/1  
GACATATGTTAACATCAGCAACACCAACTTTGCTGCTGGA  
+HWI-EAS443:3:53:358:1110#0/1  
U[\_¥[¥Z`\_]ab\_aa`Z`a[OY]]\_ZNTa]aa\_\_aY^Y[Z  
@HWI-EAS443:3:53:373:1116#0/1  
GCAGAACCTTCTTCTGACTCAAGGGCCTTGCTAAATGA  
+HWI-EAS443:3:53:373:1116#0/1  
aa]Z]^Z[¥aJ^aaaaX\_U\_``\_\_`U[^Va`0^\_\_PWaWW  
@HWI-EAS443:3:53:440:289#0/1  
CTGGGCCAGAAATTCCAATTGTTAGCCAATTGATGCCATC  
+HWI-EAS443:3:53:440:289#0/1  
aabab\_`W^`b`aaa`aa\_aabaaa¥b^]^`^\_\_aaY`^`^  
@HWI-EAS443:3:53:465:254#0/1  
GTTCCCTCTCCATACAACCTCAAGATTTGAGTCAGTCGCTT  
+HWI-EAS443:3:53:465:254#0/1  
aaaa]M^`a^a\_a^`Y\_a\_\_^a\_a``\_\_a[W^a^`\_V[Y  
@HWI-EAS443:3:53:511:186#0/1  
GGGATGTGTTTGTGATAAGGGAACCATTCATATCATGCTC  
+HWI-EAS443:3:53:511:186#0/1  
`ba`aaaaabb\_`aabaaa\_]`aaa\_aa`aZ`aa`\_`\_  
@HWI-EAS443:3:53:527:1235#0/1  
AGCCACTCAATTCAACTTGGGAATCAAATCAGATTGAAA  
+HWI-EAS443:3:53:527:1235#0/1  
a]^bbbbbaVa]\_a\_\_`Y^^¥¥Sa\_\_HM`T^XY¥a]bVXJ]  
@HWI-EAS443:3:53:539:1213#0/1  
CGATACTGGACCACAACCTGCCTGTCTTATCATTAGGGCGT  
+HWI-EAS443:3:53:539:1213#0/1  
abbbba`baba`baabba`bbb^abbab`abab[`a\_\_¥



+HWI-EAS443:3:54:1051:1506#0/1  
\_ba\_a`\_W^\_aab`aaa\_^\_¥^\_a¥]`^`^`aaaa`^a¥N  
@HWI-EAS443:3:54:105:535#0/1  
GTCTTTACTGTATATAGCCCATCCACTAACAGGGCAGAGA  
+HWI-EAS443:3:54:105:535#0/1  
a`aaaRaWN]¥]Z[\_¥UYV¥UPZX\_ZW[V¥WX\_[NWSR¥T  
@HWI-EAS443:3:54:1117:1214#0/1  
ATTAGGGCGTGGATTGTCTCCGAAAATCCCACTGCATATG  
+HWI-EAS443:3:54:1117:1214#0/1  
¥\_^V\_V\_a[Q`a^aaa`a`^^^a\_Z^¥`a[``\_[]a\_a\_  
@HWI-EAS443:3:54:1233:46#0/1  
GCCACTCAATTCAACTTGGGAATCAAAATCAGATTGAAAC  
+HWI-EAS443:3:54:1233:46#0/1  
aX¥¥P\_\_^^^`^[\_]a^YZ\_\_W[X]^\_X¥Y`]^SF  
@HWI-EAS443:3:54:124:1132#0/1  
TGTCTGTTATTATGCCGTTGTACTTTAACACAGCCACTGC  
+HWI-EAS443:3:54:124:1132#0/1  
aa\_aaa¥a]aa]^\_¥\_a[`S¥\_[`a\_]`^`\_`\_`[^ULZ  
@HWI-EAS443:3:54:1378:1250#0/1  
ATAACAGACACTATCAAGAGTTGGAGAAACAATATATTGA  
+HWI-EAS443:3:54:1378:1250#0/1  
abbbabbbaabbba`aaa[b`ba\_b¥a\_baaaa`bbaaaa  
@HWI-EAS443:3:54:1389:238#0/1  
GATATTCCAGATTCTGGTTGAAAGACACCCACGGTCGATT  
+HWI-EAS443:3:54:1389:238#0/1  
W[`abb¥Z[a]bb[bbbabaaabba¥aU[\_b\_ba\_TXVX`  
@HWI-EAS443:3:54:1426:80#0/1  
CGTGAAATTAGCGGGCAATTCCTCTCTCTGCCCTGTTAGT  
+HWI-EAS443:3:54:1426:80#0/1  
JaZ]`ba`\_`\_U\_ZTZ¥[Yb\_^b\_^[V`\_QX`abba^UaL  
@HWI-EAS443:3:54:1438:1072#0/1  
TGTCTTATCATTAGGGCGTGGATTGTCTCCGAAAATCCCA  
+HWI-EAS443:3:54:1438:1072#0/1  
a]``bbbb\_abaaaaaaaa`[`aaa][\_\_^]¥`[\_PTWZ  
@HWI-EAS443:3:54:1489:568#0/1  
TCCGTTCCGATCCCAAATCATCTCAAACCGTTTCTTGAA  
+HWI-EAS443:3:54:1489:568#0/1  
aba¥¥¥^¥\_Z¥\_^Z^H\_¥\_¥\_]a¥`aaa\_`]Z]¥\_^]]XZ  
@HWI-EAS443:3:54:1492:693#0/1  
CCCAAATCATCTCAAACCGTTTCTTGAACCTAATGCTTTT  
+HWI-EAS443:3:54:1492:693#0/1  
a`bbbb`\_`bba^abbb`\_`abb]b``ababbbb`\_`aba  
@HWI-EAS443:3:54:1507:1010#0/1  
TTCCAAGGGGATGTGTTTGTGCATAAGGGAACCATTTCATA  
+HWI-EAS443:3:54:1507:1010#0/1  
aba`[abb`a`Y`aVa^ab\_\_]`\_^¥Q]\_¥\_VO``a¥\_`\_  
@HWI-EAS443:3:54:1523:1247#0/1  
ACTGCATATGTATCCTATCTGATATTCCAGATTCTGGTTG  
+HWI-EAS443:3:54:1523:1247#0/1  
`YaaZ^bbb`\_`abY^a]`aa`\_aaaa^Xaa`aa`a^aa

@HWI-EAS443:3:54:1549:323#0/1  
CAGAAATTCCAATTGTTAGCCAATTGATGCCATCATGACA  
+HWI-EAS443:3:54:1549:323#0/1  
aa`abbbababbbabab\_H^aabbbbabba[aba\_b^`^b  
@HWI-EAS443:3:54:1659:486#0/1  
GACAGACAATAACTTCTCAATAAAGCAAGATATCGTAGGA  
+HWI-EAS443:3:54:1659:486#0/1  
\_baabaaa`aba` `a\_aaaaa`aa\_aaaaaab^b]aaa\_  
@HWI-EAS443:3:54:1661:228#0/1  
CAAATCTTGAGTTGTATGGAGAGGGAACCTCACCAATAGG  
+HWI-EAS443:3:54:1661:228#0/1  
\_bbbbabbb`a`bbbaaab`aa` [bab`bba`Z¥`babbR  
@HWI-EAS443:3:54:1667:364#0/1  
CTTTAACACAGCCACTGCCCCATTGTCTGGGCCAGAAATT  
+HWI-EAS443:3:54:1667:364#0/1  
S\_abbaaba` `bZbabba^^^bb\_PW\_\_P]H]\_Ubbb\_^\_  
@HWI-EAS443:3:54:1686:217#0/1  
CCTGATTCTAGTGAATCACATGTGTGTGCAGGGATAACT  
+HWI-EAS443:3:54:1686:217#0/1  
\_^` `¥bbb]a\_J\_[b\_b\_\_Z\_b\_ab^W`b^W[^` [baa\_`  
@HWI-EAS443:3:54:1692:153#0/1  
CAGGCCTCATACAAGATCTTCAGAATAGAAAAGGGAAAAGA  
+HWI-EAS443:3:54:1692:153#0/1  
ab` `[Sbaa\_a` `Y\_[\_abba\_a]\_¥\_` `a\_aaaa^aaa  
@HWI-EAS443:3:54:235:462#0/1  
TCGGATCCCAAATCATCTCAAACCGTTTCTTGAACATAAT  
+HWI-EAS443:3:54:235:462#0/1  
aabababbaa\_aabaaaaaaaaaaaa\_b¥`aaa`a\_\_`a\_`a  
@HWI-EAS443:3:54:253:2031#0/1  
AGTGAAATCACATGTGTGTGCAGGGATAACTGGCATGGCT  
+HWI-EAS443:3:54:253:2031#0/1  
aUQbbbaaab`aa`a\_a`^X`a`\_aa` `¥a`][aa^\_\_\_\_  
@HWI-EAS443:3:54:292:19#0/1  
TGGTGTGGATAGGGAGAACTAAAAGCATTAGTTCAAGA  
+HWI-EAS443:3:54:292:19#0/1  
[ `YV`P`a` `URPY\_Y¥baaaVX]U]`^¥aaS\_Y¥\_LD[V  
@HWI-EAS443:3:54:346:177#0/1  
CCCTTTTCTATTCTGAAGATCTTGTATGAGGCCTGTCCAT  
+HWI-EAS443:3:54:346:177#0/1  
abbbbbbbbbbbbabbaaaaaabaa`aaaaa`a\_a\_¥^a\_  
@HWI-EAS443:3:54:453:180#0/1  
AGCCCATCCACTAACAGGGCAGAGAGGAATTGCCCGCT  
+HWI-EAS443:3:54:453:180#0/1  
abbbabbabaaaaaaaaaaaa` `a\_a\_` `\_\_a^` `¥[V\_¥¥  
@HWI-EAS443:3:54:478:940#0/1  
GACTATCTTTCCCTTTTCTATTCTGAAGATCTTGTATGAG  
+HWI-EAS443:3:54:478:940#0/1  
aaaaaaaaaaaa\_a`aa]aabaa`MO[^V¥UO[\_UVO¥SMP[  
@HWI-EAS443:3:54:484:1583#0/1  
GAATTGCCCGCTAATTTACGGAAACCACTGACTGTCCAG

+HWI-EAS443:3:54:484:1583#0/1  
a`ZTRG]a^a[YRUU`\_``[S[^\_¥W[]¥]VRUYSOQBBB  
@HWI-EAS443:3:54:485:1140#0/1  
ATTCATATCATGCTCCCCCTTGGAATGCAGAACCTTCTTC  
+HWI-EAS443:3:54:485:1140#0/1  
aabbabbabaabaaaa`a`aaa`aa\_a¥¥¥`\_aaa`\_\_  
@HWI-EAS443:3:54:513:406#0/1  
CCCTCTCCATACTCAAGATTTGAGTCAGTCGCTTGGT  
+HWI-EAS443:3:54:513:406#0/1  
abbbbbbbba]b]aabaababbbbab`¥bb¥^]V]b``X  
@HWI-EAS443:3:54:538:1122#0/1  
ATTCAAATACGGCAATGGTGTGGATAGGGAGAACTAAA  
+HWI-EAS443:3:54:538:1122#0/1  
]Y\_X¥QV`\_`aZ¥¥a`a¥GZUa`aW[VSHHXFFNVWYU]]  
@HWI-EAS443:3:54:553:184#0/1  
GTGAAATCAGTGTGTGCAGGGATAACTGGCATGGCTC  
+HWI-EAS443:3:54:553:184#0/1  
a\_b`babbaaabaab`b\_a\_\_bba^aaa\_ab`X`\_a\_Y\_[  
@HWI-EAS443:3:54:588:101#0/1  
CTGTCTTATCATTAGGGCGTGGATTGTCTCCGAAAATCCC  
+HWI-EAS443:3:54:588:101#0/1  
abaabbbbabbbbaa`babb^`bba\_aa\_a`\_`a`Y][  
@HWI-EAS443:3:54:607:1042#0/1  
GCCAGAAATTCCAATTGTTAGCCAATTGATGCCATCATGA  
+HWI-EAS443:3:54:607:1042#0/1  
aaaaaaabbbbabYa`a\_a`\_`ab\_aaa\_\_a`\_aa\_a`\_`  
@HWI-EAS443:3:54:623:1308#0/1  
GGGCTCCTGTCTTTAATGGTCCATTGGAATGTTTGTTCAT  
+HWI-EAS443:3:54:623:1308#0/1  
a`aababbb`abaaabaa\_a`\_aaa¥\_\_aaaa`aa\_^\_\_  
@HWI-EAS443:3:54:676:300#0/1  
CTCAATATGGATTAGCCACTCAATTCAACTTGGGAATCAA  
+HWI-EAS443:3:54:676:300#0/1  
`¥aa`b`\_b^`aaabaaa[`aa]`a`aaaaab`]\_^a\_  
@HWI-EAS443:3:54:712:1804#0/1  
AACTGCCTGTCTTATCATTAGGGCGTGGATTGTCTCCGAA  
+HWI-EAS443:3:54:712:1804#0/1  
Ta^a`Z¥^S\_bbbbbbbb¥XY\_ZP`^X¥a\_KQW[PTY¥b  
@HWI-EAS443:3:54:724:1230#0/1  
ATTAGGGCGTGGATTGTCTCCGAAAATCCCACTGCATATG  
+HWI-EAS443:3:54:724:1230#0/1  
aabbab^b`\_a`abbaaa`a\_a`\_`Ya]\_a\_U[¥V`\_`a]  
@HWI-EAS443:3:54:728:1806#0/1  
CGCTATATCCTGACCACTCATTATTCTACGATATCTTG  
+HWI-EAS443:3:54:728:1806#0/1  
abaX^\_^`[]`^\_]\_a`\_`^b^Ya`\_]`R\_Y\_^aT]X]`[^  
@HWI-EAS443:3:54:762:1357#0/1  
TGGGAATCAAAATCAGATTGAAACATGCAATCAAAGCGTC  
+HWI-EAS443:3:54:762:1357#0/1  
aa]b¥a\_a`aba`\_a`\_aa\_a¥Y^a\_a\_a`¥^a`ZaSaYV

@HWI-EAS443:3:54:765:362#0/1  
ATCATGCTCCCCCTTGAATGCAGAACCCTTCTTCTTGACT  
+HWI-EAS443:3:54:765:362#0/1  
a^\_¥`^a^aa^)``\_]X\_Z^[^]X[Z¥[Y`XRX¥VVXS¥  
@HWI-EAS443:3:54:810:667#0/1  
AGGGAGAACTAAAAGCATTAGTTCAAGAAACGGTTTTGAG  
+HWI-EAS443:3:54:810:667#0/1  
abbaabababaaaab^`bbababa`abaaa`ba¥abaa[a  
@HWI-EAS443:3:54:865:1574#0/1  
ATCAAAGCGTCATTACTTATGAAAACAACACTTGGGTAAA  
+HWI-EAS443:3:54:865:1574#0/1  
a`a\_a\_`abY^aaaYa```a\_a`]a`a`\_`¥a^aUTLXa^  
@HWI-EAS443:3:54:953:1801#0/1  
GACCGTGGGTGTCTTTCAACCAGAATCTGGAATATCAGAT  
+HWI-EAS443:3:54:953:1801#0/1  
a]GN\_`]¥¥PaP``b]Y¥^XHq]X\_\_W]Wsa]^\_\_RY\_[]  
@HWI-EAS443:3:54:962:1590#0/1  
ATATGTTAACATCAGCAACACCAACTTTGCTGCTGGACAG  
+HWI-EAS443:3:54:962:1590#0/1  
aabbabab]ba``babb\_aa\_ba[aaaba````aa\_X`a  
@HWI-EAS443:3:54:983:1557#0/1  
TAAGAATCGGTTCCAAGGGGATGTGTTTGCATAAGGGA  
+HWI-EAS443:3:54:983:1557#0/1  
`T^aabWZ\_V[SW]WZ^]S`^YZZH][WURRS^WZ\_V]XP  
@HWI-EAS443:3:54:9:212#0/1  
CTCCTGTTATCCTGATTCTAGTGAAATCACATGTGTGTGC  
+HWI-EAS443:3:54:9:212#0/1  
aU``U¥FZa¥¥LN[MYZ^¥PXYFX\_TVU\_U]\_U^G\_H`N  
@HWI-EAS443:3:55:1044:350#0/1  
CGATACTGGACCACAACACTGCCTGTCTTATCATTAGGGCGT  
+HWI-EAS443:3:55:1044:350#0/1  
ab]]Z`XPYYOV\_RQRU^aWS¥X\_NXNV]Z^\_U]VVaXBB  
@HWI-EAS443:3:55:1098:1576#0/1  
TCAGGATATAGCGGGAGTTTTGTTTCAGCATCCAGAACTAA  
+HWI-EAS443:3:55:1098:1576#0/1  
¥ZW\_¥^¥`¥`b`[a\_U^[^a\_]`^]¥][¥ZZ^¥]R[OX][  
@HWI-EAS443:3:55:1100:147#0/1  
ATTCATATCATGCTCCCCCTTGAATGCAGAACCCTTCTTC  
+HWI-EAS443:3:55:1100:147#0/1  
abbabbababba`aaa^`\_aa`aa`a]`\_\_\_^]`\_\_^^]  
@HWI-EAS443:3:55:1195:149#0/1  
CGCTTGGTCAGCAAGTGCTTGTGCATGATGGCATCAATTGG  
+HWI-EAS443:3:55:1195:149#0/1  
aabbbbbb`abb``abababbbZaabb\_aaaaaaaa\_bab\_  
@HWI-EAS443:3:55:1229:1236#0/1  
TGCCCCTAATTATCACTATGAGGAATGCTCCTGTTATCCT  
+HWI-EAS443:3:55:1229:1236#0/1  
`aaXV`baY[```a^HaV`a[]\_```a`\_^[\_b]a\_a]`\_  
@HWI-EAS443:3:55:1245:935#0/1  
CACGGTCGATTCGAGCCATGCCAGTTATCCCTGCACACAC

+HWI-EAS443:3:55:1245:935#0/1  
a\_]a^Z`ZRSZSOU`W]WTMTRRZQ¥]^Z\_[X¥RSNWPZ]  
@HWI-EAS443:3:55:124:1766#0/1  
ACTCAATTCAACTTGGGAATCAAAATCAGATTGAAACATG  
+HWI-EAS443:3:55:124:1766#0/1  
a^\_`\_\_^^\_]\_]\_^\_]¥\_^\_`^ZX¥^^^^^^]V\_^^^Z^  
@HWI-EAS443:3:55:1288:1106#0/1  
GTCTCCGAAAATCCCCTGCATATGTATCCTATCTGATAT  
+HWI-EAS443:3:55:1288:1106#0/1  
a`\_a]`a\_`aaa`\_\_a\_a`^`a`aa]a`\_^a^`^`\_\_\_\_`  
@HWI-EAS443:3:55:1359:149#0/1  
GGTCATTACAGTAAAGCAAGAACCATTTACACATGCACAT  
+HWI-EAS443:3:55:1359:149#0/1  
aa]Zaaa^^\_a\_\_\_bSaaa\_`X]\_\_`\_a^`^`^a]Y[\_`  
@HWI-EAS443:3:55:1378:1293#0/1  
CCAGATTCTGGTTGAAAGACACCCACGGTCGATTGAGCC  
+HWI-EAS443:3:55:1378:1293#0/1  
]\_bbaba¥abbaa\_a`bb``\_a^`baab\_Y``¥QG`aWWW  
@HWI-EAS443:3:55:1409:1679#0/1  
GGACCACAACCTGCCTGTCTTATCATTAGGGCGTGGATTGT  
+HWI-EAS443:3:55:1409:1679#0/1  
aaaa]babbbXab\_]abaaaaa^aaaa\_a`W¥\_]`\_]aa\_\_  
@HWI-EAS443:3:55:1417:292#0/1  
GACCGTGGGTGTCTTTCAACCAGAATCTGGAATATCAGAT  
+HWI-EAS443:3:55:1417:292#0/1  
aa]\_\_\_]`]b\_ba^aaa`^]N[`a[]`^``¥^U]¥aZ\_^^`  
@HWI-EAS443:3:55:143:1710#0/1  
AAGCAAGAACCATTTACACATGCACATTCAGACTCTTGTG  
+HWI-EAS443:3:55:143:1710#0/1  
aa\_aaa¥aaa`aaa`a`a\_a``\_\_a\_`\_\_`[]^`]`^¥¥^  
@HWI-EAS443:3:55:1479:193#0/1  
CAGCAAGTGCTTGTGCATGATGGCATCAATTGGCTAACAAAT  
+HWI-EAS443:3:55:1479:193#0/1  
`bababaaa[bbaWa`aa\_aab¥ba`\_`ba`X^`aa\_aaa  
@HWI-EAS443:3:55:1494:351#0/1  
CTTGAGTCAAGAAGAAGTTCTGCATTCCAAGGGGGAGCA  
+HWI-EAS443:3:55:1494:351#0/1  
ababbbR¥bbbbbaabbab`baabbbbaabaaabaaaa  
@HWI-EAS443:3:55:159:54#0/1  
GTTATTATGCCGTTGTACTTTAACACAGCCACTGCCCCAT  
+HWI-EAS443:3:55:159:54#0/1  
a^aa`a[aa\_^aZ\_`^\_Z\_`\_\_\_\_]^X^`Z]^XYXYXWU^  
@HWI-EAS443:3:55:1697:1961#0/1  
TGCAGAACCTTCTTCTTACTCAAGGGGCCTTGCTAAATG  
+HWI-EAS443:3:55:1697:1961#0/1  
a\_babaa\_abba]aaabaa`a\_`bbaZa`\_a`aYa`a¥X^  
@HWI-EAS443:3:55:217:1201#0/1  
GAACTAATGCTTTTAGTTCTCCCTATCCAAACACCATTGC  
+HWI-EAS443:3:55:217:1201#0/1  
aa`aaaa^aa`[aaaa`\_a\_aa\_a\_\_b]^`a[^a^S`V`^



@HWI-EAS443:3:55:254:1316#0/1  
CGAAAATCCCCTGCATATGTATCCTATCTGATATTCCAG  
+HWI-EAS443:3:55:254:1316#0/1  
¥YZ^Z`aa`aa[VY\_^^`a`ZX``\_`^```¥Y\_``¥[RV[  
@HWI-EAS443:3:55:272:72#0/1  
GAGCTGTCCTATTGGTGAAGTTCCCTCTCCATACAACTCA  
+HWI-EAS443:3:55:272:72#0/1  
aaaa\_b``^aZaaaa^^\_Z¥Y^[\_U^W]X]VZYV[VUWV]  
@HWI-EAS443:3:55:330:377#0/1  
TGATATTCCAGATTCTGGTTGAAAGACACCCACGGTCGAT  
+HWI-EAS443:3:55:330:377#0/1  
ab\_a`aa`a[[]`b]``\_¥Vab]aQa\_aa`¥\_aaaaNKX¥[  
@HWI-EAS443:3:55:370:850#0/1  
GTCCATCCGTTCCGATCCCAAATCATCTCAAAACCGTTTC  
+HWI-EAS443:3:55:370:850#0/1  
aaa`aaaab`^aaa\_\_¥`\_\_`a`\_`^`^a`\_a`]^\_[]Z  
@HWI-EAS443:3:55:375:1437#0/1  
GATGCCATCATGACAAGCACTTGCTGACCAAGCGACTGAC  
+HWI-EAS443:3:55:375:1437#0/1  
a[Xbabb`^aaa`aa`a^\_`\_]`a¥^\_`WX[``]\_\_aZ[  
@HWI-EAS443:3:55:379:346#0/1  
GTTGAAAGACACCCACGGTCGATTCGAGCCATGCCAGTTA  
+HWI-EAS443:3:55:379:346#0/1  
aaaa`^`\_`\_aa\_\_Z`\_a`UU`¥¥^T^V¥QW[WYWZZ^UVW  
@HWI-EAS443:3:55:418:765#0/1  
TCGGTCATTACAGTAAAGCAAGAACCATTTACACATGCAC  
+HWI-EAS443:3:55:418:765#0/1  
¥`¥WM¥`\_XXSQa¥Z\_^^` `[^TZU]\_abbb`Z\_\_S]TYT  
@HWI-EAS443:3:55:525:1461#0/1  
CTCATTTATTCTACGATATCTTGCTTTATTGAGAAGTTA  
+HWI-EAS443:3:55:525:1461#0/1  
abaabbbbabaaab`a\_a\_a\_aaaaaaaaaaaa`aa^^^aa  
@HWI-EAS443:3:55:529:1323#0/1  
GCTCCCCCTTGAATGCAGAACCTTCTTCTTGAAGTCAAGG  
+HWI-EAS443:3:55:529:1323#0/1  
^babbbbbbbbaa\_[Uaaaaa[bba`a\_baaaaa\_baa`  
@HWI-EAS443:3:55:571:1866#0/1  
AGCCCATATCGAACCTAATGAGCTGTCCTATTGGTGAAG  
+HWI-EAS443:3:55:571:1866#0/1  
aaUQab`aY[OZa\_a\_aa]^LY`\_`\_`X\_\_a\_a¥a0^¥\_W  
@HWI-EAS443:3:55:608:1269#0/1  
ACTCAATTCAACTTGGGAATCAAAATCAGATTGAAACATG  
+HWI-EAS443:3:55:608:1269#0/1  
a^\_\_\_\_`\_^\_[]Z^\_¥[^V^[\_`]]^]W^^\_Y\_]Y]Z]^  
@HWI-EAS443:3:55:612:1415#0/1  
ATTCATATCATGCTCCCCCTTGAATGCAGAACCTTCTTC  
+HWI-EAS443:3:55:612:1415#0/1  
J^¥\_XZ[]U¥bb`a¥XY\_\_a^a^\_¥R]^]Q¥HW\_UR¥W^T  
@HWI-EAS443:3:55:749:570#0/1  
CAACCCAGAAGCAAGTCTTATACAATCCAGCCCTGTTAG

+HWI-EAS443:3:55:749:570#0/1  
a\_[abb]aba`¥¥abb[ab^`^Z`a`aa\_W\_\_a`]^¥`a`  
@HWI-EAS443:3:55:781:1886#0/1  
CAGCACCGTCTGGCCAAGACCAACCCACAGTGTCACTGTT  
+HWI-EAS443:3:55:781:1886#0/1  
a\_abaaa]Z`a\_a0]`a[¥X[`]Y^\_\_``ROYR\_S\_\_W¥  
@HWI-EAS443:3:55:794:279#0/1  
GCTGGATTGTATAAGACCTTGCTTCTGGGTTGAACTAATC  
+HWI-EAS443:3:55:794:279#0/1  
a]a`a`aaa^aa`\_`\_]a\_\_`Zaa^`bbaY`a`bVa`]`Z  
@HWI-EAS443:3:55:860:1014#0/1  
CACAAAAGGATATGCTGCTCCCGCTAGTCCAGATTGTGTT  
+HWI-EAS443:3:55:860:1014#0/1  
abbabaabbaabbbbaabaaaa^aa\_aT[NS]\_aaaGa\_a  
@HWI-EAS443:3:55:884:1468#0/1  
CTGTCTTATCATTAGGGCGTGGATTGTCTCCGAAAATCCC  
+HWI-EAS443:3:55:884:1468#0/1  
X\_b]aaabbb\_bbaaba`bababaababb`^\_\_bb`^`W^  
@HWI-EAS443:3:55:908:1017#0/1  
GTGTTTGTGATAAGGGAACCATTTCATATCATGCTCCCCCT  
+HWI-EAS443:3:55:908:1017#0/1  
a]a]a`a^\_\_`]\_\_`a]\_\_[\_`¥Z^\_\_Z]¥¥X^¥Y^UV¥  
@HWI-EAS443:3:55:938:259#0/1  
TCCGAAAATCCCCTGCATATGTATCCTATCTGATATTCC  
+HWI-EAS443:3:55:938:259#0/1  
aa^a\_aaa`a]`a\_\_a\_aa`aa]`a\_¥a]a^a`]\_\_a\_^Z  
@HWI-EAS443:3:55:947:1419#0/1  
TAGTTCTGGATGCTGAACAAAACCTCCCGCTATATCCTGAC  
+HWI-EAS443:3:55:947:1419#0/1  
``])babaa`a`a\_[aaT]``\_¥a]a[T``\_a[]YX``[Y  
@HWI-EAS443:3:55:966:1356#0/1  
GACCACTCATTTATTCCTACGATATCTTGCTTTATTGAGA  
+HWI-EAS443:3:55:966:1356#0/1  
aa[[^a^\_¥a`]Y`VY]Y]\_^`¥YZ`^YV[`\_^]L¥^  
@HWI-EAS443:3:56:1058:1984#0/1  
GACAAGCACTTGCTGACCAAGCGACTGACTCAAATCTTGA  
+HWI-EAS443:3:56:1058:1984#0/1  
\_\_abbbabbbbaabb\_T^bbbaa``aba[Waabba[abb`  
@HWI-EAS443:3:56:1212:553#0/1  
CCACTGCATATGTATCCTATCTGATATTCCAGATTCTGGT  
+HWI-EAS443:3:56:1212:553#0/1  
abbbbbbabbbbaaba\_bababaabaabaYab`aa\_adWa  
@HWI-EAS443:3:56:1236:1749#0/1  
TAGCCACTCAATTCAACTTGGGAATCAAATCAGATTGAA  
+HWI-EAS443:3:56:1236:1749#0/1  
V]`Q[bT\_`\_ab^ZaKYbaaa\_[^aYVUaS`[ab`\_\_b`\_  
@HWI-EAS443:3:56:1251:1382#0/1  
TGCCCCGTAATTTACGAAACCACTGACTGTCCAGCAGC  
+HWI-EAS443:3:56:1251:1382#0/1  
S\_\_W`a`ba`aaaZa]^a`\_a^]`\_`b`[``\_^\_¥]\_]\_U

@HWI-EAS443:3:56:1260:684#0/1  
AAACAATATATTGAGAACACAAGAGTCTGAATGTGCATGT  
+HWI-EAS443:3:56:1260:684#0/1  
¥`b^¥aa¥b`¥U^a\_a\_R`[Y^ba\_QN\_aU\_a^abYaaa\_  
@HWI-EAS443:3:56:1311:1826#0/1  
ATTCATATCATGCTCCCCCTTGAATGCAGAACCTTCTTC  
+HWI-EAS443:3:56:1311:1826#0/1  
abb¥¥0\_Z]\_abXaaaW[aaaaa[a\_`[\_aa\_`Za`¥\_aT  
@HWI-EAS443:3:56:1369:583#0/1  
CACTCATTATTCTACGATATCTTGCTTTATTGAGAAGT  
+HWI-EAS443:3:56:1369:583#0/1  
ab\_aabbbbbababab\_babaa^aa``abaabaaaba``^  
@HWI-EAS443:3:56:1453:1235#0/1  
GCTTGGTCAGCAAGTGTTCATGATGGCATCAATTGGC  
+HWI-EAS443:3:56:1453:1235#0/1  
``]`aa\_a\_`aaa[b`^¥X^\_a^^¥a¥¥Z\_¥`]`\_a^]  
@HWI-EAS443:3:56:1456:786#0/1  
TGCCTGTCTTATCATTAGGGCGTGGATTGTCTCCGAAAAT  
+HWI-EAS443:3:56:1456:786#0/1  
ab`Z¥aaabaaaRabb\_aa\_]¥YS[`a`^U`\_Za\_\_\_\_`]  
@HWI-EAS443:3:56:1473:341#0/1  
GGATTTTCGGAGACAATCCACGCCCTAATGATAAGACAGG  
+HWI-EAS443:3:56:1473:341#0/1  
ab\_aaba\_ba\_aaQa`\_]`¥`WYT\_¥`\_]¥`¥\_¥W¥¥¥  
@HWI-EAS443:3:56:1514:1111#0/1  
CATTTAGCAAGGCCCTTGAGTCAAGAAGAAGTTCTGCA  
+HWI-EAS443:3:56:1514:1111#0/1  
X^bbbbba\_bbbb`\_`bbb^P^aaa`aa`ba\_`b^ZXbb\_Y  
@HWI-EAS443:3:56:1678:1040#0/1  
AATGCCCTAATTATCACTATGAGGAATGCTCCTGTTATC  
+HWI-EAS443:3:56:1678:1040#0/1  
aab]R`Z`aa`bbaa\_\_\_baa¥[IQ[`aa`aY\_aa^a\_a^  
@HWI-EAS443:3:56:1692:1777#0/1  
GACCACAAGTGCCTGTCTTATCATTAGGGCGTGGATTGTC  
+HWI-EAS443:3:56:1692:1777#0/1  
aU]¥a¥a\_Q\_]FMT\_[Na`U`ZU^XX[¥[[aU\_[RLY\_SS  
@HWI-EAS443:3:56:1705:1684#0/1  
ACTTGGTCCATCGGTCATTACAGTAAAGCAAGAACCATTT  
+HWI-EAS443:3:56:1705:1684#0/1  
a¥ab`]Tabaa¥a`Z¥V[¥¥\_[b^aa¥S¥`^0¥`[a^]\_  
@HWI-EAS443:3:56:1734:1712#0/1  
GCCATCATGACAAGCACTTGCTGACCAAGCGACTGACTCA  
+HWI-EAS443:3:56:1734:1712#0/1  
abaa]`aaa\_`a`WX]\_a\_\_\_Z`^\_\_Y\_¥\_YVY¥\_`X^\_] ]  
@HWI-EAS443:3:56:20:74#0/1  
GATTTTCGGAGACAATCCACGCCCTAATGATAAGACAGGC  
+HWI-EAS443:3:56:20:74#0/1  
a¥^`¥`abb¥a^`\_Y\_T^`¥\_VTU¥PYXTIIZTWXBBBB  
@HWI-EAS443:3:56:256:724#0/1  
GGCGTGGATTGTCTCCGAAAATCCCCTGTCATATGTATCC

+HWI-EAS443:3:56:256:724#0/1  
abbaabb`abaa]aaaaabbaaa`aaaa`aaaa]a\_[\_  
@HWI-EAS443:3:56:25:1408#0/1  
AGCCACTCAATTCAACTTGGGAATCAAATCAGATTGAAA  
+HWI-EAS443:3:56:25:1408#0/1  
aaaa`aa¥`\_a\_¥aaaa^`]^`]a]^a```Y`a\_aa\_a  
@HWI-EAS443:3:56:29:748#0/1  
CTGTCCAGCAGCAAAGTTGGTGTGCTGATGTAAACATAT  
+HWI-EAS443:3:56:29:748#0/1  
abWZaV[¥a[Ua\_T]aX\_ZYGaVOPZ[SGP`Y¥YVQQZUM  
@HWI-EAS443:3:56:300:41#0/1  
ATCAAAGCGTCATTACTTATGAAAACAACACTTGGGTAAA  
+HWI-EAS443:3:56:300:41#0/1  
¥T\_^\_0¥aaa`Z\_`]W`Z[\_a`a[WW\_P]UY)`\_XTT^ZQ  
@HWI-EAS443:3:56:320:104#0/1  
CAGTGTCACTGTTTACACCACAAAAGGATATGCTGCTCCC  
+HWI-EAS443:3:56:320:104#0/1  
aaa\_a`]^`]\_b\_aaaS^^`\_`\_`^P¥^Z^`\_a\_]\_`¥YQU  
@HWI-EAS443:3:56:326:772#0/1  
GTTTGTCAATTTAGCAAGGCCCTTGAGTCAAGAAGAAGGT  
+HWI-EAS443:3:56:326:772#0/1  
a`aa\_V]^aa`aaa\_a¥^`^\_a``a\_\_SYX¥`¥[]UT[\_W  
@HWI-EAS443:3:56:335:93#0/1  
GCTCATTAGGGTTCGATATGGGCTCCTGTCTTTAATGGTT  
+HWI-EAS443:3:56:335:93#0/1  
a\_\_¥W`a^a`^X^^a¥\_]U\_ZU]^`\_a\_X``\_X¥\_a^Y]  
@HWI-EAS443:3:56:346:1274#0/1  
GTAAACAGTGACACTGTGGGTTGGTCTTGCCAGACGGTG  
+HWI-EAS443:3:56:346:1274#0/1  
aX\_YWX`aZ\_`^X]¥[(`^YGV^ZVP]PNUXY¥BBBBBBB  
@HWI-EAS443:3:56:349:977#0/1  
GCCCCGCTAATTTACGGAACCACTGACTGTCCAGCAGCA  
+HWI-EAS443:3:56:349:977#0/1  
`abbbbaabaaaa`a¥`^aaaa`\_a`\_a`^`^`^]]¥^Y[  
@HWI-EAS443:3:56:386:941#0/1  
CTTATACAATCCAGCCCTGTTAGTTCTGGATGCTGAACAA  
+HWI-EAS443:3:56:386:941#0/1  
ab`bbbbbbbabaaaaaaaaab]^aaaa``a^aa`^a`  
@HWI-EAS443:3:56:461:1495#0/1  
ATTCATATCATGCTCCCCCTTGAATGCAGAACCTTCTTC  
+HWI-EAS443:3:56:461:1495#0/1  
aaa¥`a`aabaaaa\_a\_a]^\_Z]^````[\_]\_aZ\_`^`a¥\_  
@HWI-EAS443:3:56:478:1188#0/1  
GAGGAATTGCCCGCTAATTTACGGAACCACTGACTGTC  
+HWI-EAS443:3:56:478:1188#0/1  
a¥aaaaba`a\_\_a`\_\_a``\_\_[\_[\_^[\_`¥\_]\_¥\_\_W¥  
@HWI-EAS443:3:56:546:490#0/1  
TCCCAGTCCATCCGTTCCGATCCCAAATCATCTCAAACC  
+HWI-EAS443:3:56:546:490#0/1  
Z\_ba```abYbbbb`]Sa^W\_a¥Z\_`aa^[`]^\_¥\_aaVX

@HWI-EAS443:3:56:635:1000#0/1  
ATAACAGACTATCAAGAGTTGGAGAAACAATATATTGA  
+HWI-EAS443:3:56:635:1000#0/1  
ab]`aabaaaaab`a`^`a¥a\_\_\_a\_\_aa`¥`\_^a\_\_`  
@HWI-EAS443:3:56:643:431#0/1  
GTCCTGTTTACACCACAAAAGGATATGCTGCTCCCGCTA  
+HWI-EAS443:3:56:643:431#0/1  
\_Y`\_`aSVaabb^X¥T¥]XM[\_`[Y]Z`a¥V]^R[[aVQP  
@HWI-EAS443:3:56:651:661#0/1  
GTACAACGGCATAATAACAGACTATCAAGAGTTGGAGA  
+HWI-EAS443:3:56:651:661#0/1  
aabaaaa`aab`aa`\_aaa\_a\_aa`\_`\_a\_a[a``\_``  
@HWI-EAS443:3:56:669:968#0/1  
GCCCCGTAATTTACGGAAACCACTGACTGTCCAGCAGCA  
+HWI-EAS443:3:56:669:968#0/1  
UbWbb]Uaa`baKYS¥\_Yab`QWWHSS]]aXOR¥aX`aZB  
@HWI-EAS443:3:56:689:963#0/1  
TGTTATTATGCCGTTGTACTTTAACACAGCCACTGCCCA  
+HWI-EAS443:3:56:689:963#0/1  
\_a`aZ^`TRaa`a\_aa]VY\_a\_aa[a^aa\_\_`\_\_`\_]`  
@HWI-EAS443:3:56:730:1387#0/1  
CAAATCTTGAGTTGTATGGAGAGGGAACCTCACCAATAGG  
+HWI-EAS443:3:56:730:1387#0/1  
a¥`aaabb^\_X]`\_`\_a\_Ua]`Za^`\_a\_Z`^Va\_\_\_^X  
@HWI-EAS443:3:56:795:1691#0/1  
AGCCACTCAATTCAACTTGGGAATCAAAATCAGATTGAAA  
+HWI-EAS443:3:56:795:1691#0/1  
aaaabaabb`aaa`a^aba\_a`\_a\_a`\_a\_aa\_a`aaaa  
@HWI-EAS443:3:56:814:1554#0/1  
CAACTGCCTGTCTTATCATTAGGGCGTGGATTGTCTCCGA  
+HWI-EAS443:3:56:814:1554#0/1  
abbabbaaab`^aaa\_P^a`\_^\_a`\_a\_a\_aa`\_`\_aX  
@HWI-EAS443:3:56:815:1285#0/1  
CGAACCTAATGAGCTGTCCTATTGGTGAAGTCCCTCTC  
+HWI-EAS443:3:56:815:1285#0/1  
``\_b`[``abaaY`aa\_\_a\_aaaaa`Za¥`\_`\_^Za`\_]  
@HWI-EAS443:3:56:852:70#0/1  
AGTCGCTTGGTCAGCAAGTGCTTGTTCATGATGGCATCAAT  
+HWI-EAS443:3:56:852:70#0/1  
ababbabbaa[`abT`ab`aZaba`¥[ab\_a]a\_a\_Z`^a  
@HWI-EAS443:3:56:892:1358#0/1  
GAAATTCCAATTGTTAGCCAATTGATGCCATCATGACAAG  
+HWI-EAS443:3:56:892:1358#0/1  
aaaaab\_abaaba\_aa\_aaaa`\_`^\_\_^¥`\_[a`a]]`\_^  
@HWI-EAS443:3:56:8:628#0/1  
CAACCCACAGTGTCACTGTTTACACCACAAAAGGATATGC  
+HWI-EAS443:3:56:8:628#0/1  
]U]baa\_\_`\_`\_X`X\_a`[\_`^\_XZ[]^¥[ZSZ¥¥ZY¥UVP  
@HWI-EAS443:3:56:905:360#0/1  
CCTATCTGATATTCCAGATTCTGGTTGAAAGACACCCACG

+HWI-EAS443:3:56:905:360#0/1  
aaWZa\_`\_\_^`\_`[NY`]Zbb^YXW^baa\_]b¥TU[]  
@HWI-EAS443:3:56:924:412#0/1  
AAGAGTCTGAATGTGCATGTGTAATGGTTCTTGCTTTAC  
+HWI-EAS443:3:56:924:412#0/1  
abaaaabababbb\_b`X`aaa\_ababbaaaaaabaaba`  
@HWI-EAS443:3:56:953:1328#0/1  
CCCAGTCCATCCGTTCCGATCCCAAATCATCTCAAAACCG  
+HWI-EAS443:3:56:953:1328#0/1  
aa^]WZbab`a`a\_Y[\_¥[YL]\_^VRIITROX[\_Z[]QRU  
@HWI-EAS443:3:56:973:1573#0/1  
GTAATGACGCTTTGATTGCATGTTTCAATCTGATTTTGAT  
+HWI-EAS443:3:56:973:1573#0/1  
`\_aaabbaaaabaaaaabaaaa\_a`a`a\_ba\_aaaaa`a  
@HWI-EAS443:3:57:1024:1727#0/1  
ATGAATCCAAACCAAAGATAATAACCATTGGTTCCGGTCT  
+HWI-EAS443:3:57:1024:1727#0/1  
aabaab`aab^^`aaaa`aa`aa`[[`aaaY`]a]\_XW]  
@HWI-EAS443:3:57:1052:1236#0/1  
GCAAGGTCTTATACAATCCAGCCCTGTTAGTTCTGGATGC  
+HWI-EAS443:3:57:1052:1236#0/1  
\_a\_X^Xaaba\_aa`\_ZQS^\_VSXY¥TR^00U[]\_ZY¥¥  
@HWI-EAS443:3:57:1151:905#0/1  
TGCACATTCAGACTCTTGTGTTCTCAATATATTGTTTCTC  
+HWI-EAS443:3:57:1151:905#0/1  
aa\_a\_aaaaa\_\_^a\_a`\_a\_```]\_]\_```a`\_\_`\_Ya^  
@HWI-EAS443:3:57:1189:852#0/1  
GTTCCGATATGGGCTCCTGTCTTTAATGGTTCCATTGGAAT  
+HWI-EAS443:3:57:1189:852#0/1  
]LWJXOW\_[a[[XSP^UUOT\_¥XY¥Y]YYXPRRXTKTBB  
@HWI-EAS443:3:57:1259:1749#0/1  
ATGCAATCAAAGCGTCATTACTTATGAAAACAACACTTGG  
+HWI-EAS443:3:57:1259:1749#0/1  
\_]`¥I^a[`\_ZPO]RT``[]X`^aa^¥^`\_WH[E¥Q`[[B  
@HWI-EAS443:3:57:125:1357#0/1  
ATCCCAAATCATCTCAAAACCGTTTCTTGAACATAATGCTT  
+HWI-EAS443:3:57:125:1357#0/1  
aa`a`^`]]`\_aa`\_T`]]\_[]\_`^`^]Z\_[^]`\_]][]  
@HWI-EAS443:3:57:1281:607#0/1  
GGGATGTGTTTGTGATAAGGGAACCATTCATATCATGCTC  
+HWI-EAS443:3:57:1281:607#0/1  
]a^^bb`^]¥b`^^`ba`baa\_```aaaabbab`bb`]b`  
@HWI-EAS443:3:57:1309:735#0/1  
AATGTGCATGTGTAATGGTTCTTGCTTTACTGTAATGAC  
+HWI-EAS443:3:57:1309:735#0/1  
abab^aabbbaa\_a`aba\_aaaaa\_aaaa^ab\_a`aa\_  
@HWI-EAS443:3:57:1413:514#0/1  
GAAATTCCAATTGTTAGCCAATTGATGCCATCATGACAAG  
+HWI-EAS443:3:57:1413:514#0/1  
\_U]TZW[¥^^aab]]\_^[Z¥QWY\_Ua`\_^\_^W[Z]LSXBB

@HWI-EAS443:3:57:148:638#0/1  
GGTGTAAACAGTGACACTGTGGGTTGGTCTTGGCCAGACG  
+HWI-EAS443:3:57:148:638#0/1  
aaY`aaaa\_aa¥aUaa[`aSaaaTVa`V^]¥`\_TXUUUVB  
@HWI-EAS443:3:57:1495:891#0/1  
AGTTCCCTCTCCATACAACACTCAAGATTTGAGTCAGTCGCT  
+HWI-EAS443:3:57:1495:891#0/1  
aaaYKbbbV[U`bab`a`\_¥]UXbab^¥MXa`a[Za``  
@HWI-EAS443:3:57:1536:1201#0/1  
CAAGAAGAAGGTTCTGCATTCCAAGGGGAGCATGATATG  
+HWI-EAS443:3:57:1536:1201#0/1  
ababbababababbab^\_a`[`babbab]abababaabaa  
@HWI-EAS443:3:57:1565:1460#0/1  
CAAAACCGTTTTCTTGAACATAATGCTTTTAGTTCTCCCTAT  
+HWI-EAS443:3:57:1565:1460#0/1  
aa¥aa`U`a`a`ab^`a\_a\_`a`¥`baa`a\_a`\_\_\_Yaaa  
@HWI-EAS443:3:57:1577:30#0/1  
CAACTCAAGATTTGAGTCAGTCGCTTGGTCAGCAAGTGCT  
+HWI-EAS443:3:57:1577:30#0/1  
`a\_^Y^[D]]baab`a[\_]aVZ`V¥a`^^Z`aVV\_]QYNY  
@HWI-EAS443:3:57:158:1514#0/1  
CATTCAAGACTCTTGTGTTCTCAATATATTGTTTCTCCAAC  
+HWI-EAS443:3:57:158:1514#0/1  
```aaaa\_^aaa[WSaa\_^`\_```a`\_a`a`a`\_`\_`\_¥U  
@HWI-EAS443:3:57:1610:426#0/1  
TGACAAGCACTTGCTGACCAAGCGACTGACTCAAATCTTG  
+HWI-EAS443:3:57:1610:426#0/1  
ab\_^a`a`\_]\_a`^aa\_\_^\_\_\_\_\_]X\_\_^X`X^]\_`V\_``  
@HWI-EAS443:3:57:1610:614#0/1  
GTCTGAATGTGCATGTGTAAATGGTTCTTGCTTTACTGTA  
+HWI-EAS443:3:57:1610:614#0/1  
aa`aaa\_ba]a]^aa`b`\_`\_aa`^a\_a```]aa``X`a\_`  
@HWI-EAS443:3:57:1661:675#0/1  
ATAAGGAACCATTCATATCATGCTCCCCCTTGAATGCA  
+HWI-EAS443:3:57:1661:675#0/1  
abaaabaaaaa[aX^abaa^aa`\_aa\_[\_`^aa`¥^`\_`^a  
@HWI-EAS443:3:57:187:1194#0/1  
CTGGGCCAGAAATTCCAATTGTTAGCCAATTGATGCCATC  
+HWI-EAS443:3:57:187:1194#0/1  
abaa\_bbabbbbbbbabbbabbbbabZ`aabaaa\_aaa  
@HWI-EAS443:3:57:198:217#0/1  
AGCCACTCAATTCAACTTGGGAATCAAAATCAGATTGAAA  
+HWI-EAS443:3:57:198:217#0/1  
aaX``[``PGSaaaHU`a]P]Waa`a\_Y`^]]\_T^a\_W¥[  
@HWI-EAS443:3:57:232:760#0/1  
CAACTGCCTGTCTTATCATTAGGGCGTGGATTGTCTCCGA  
+HWI-EAS443:3:57:232:760#0/1  
]bbb`a``0`aaa^\_baZbbb^W\_^]W[a[a`a^^\_\_\_\_`\_`  
@HWI-EAS443:3:57:255:61#0/1  
ATATGTAAACATCAGCAACACCAACTTTGCTGCTGGACAG

+HWI-EAS443:3:57:255:61#0/1  
`b^ababa\_^aba]aaaa`\_`¥\_Y\_a`ab\_`a\_aaa^WS\_  
@HWI-EAS443:3:57:261:1338#0/1  
GCCAGTTATCCCTGCACACACATGTGATTTCACTAGAATC  
+HWI-EAS443:3:57:261:1338#0/1  
a]`a`\_\_ba¥T\_Zaa\_a^`^aa`a]]\_`\_]\_X^^\_]\_`^  
@HWI-EAS443:3:57:32:438#0/1  
AGCGGGAGTTTTGTTTCAGCATCCAGAACTAACAGGGCTGG  
+HWI-EAS443:3:57:32:438#0/1  
a]aab`Yb]aaaa\_a`]`\_`\_^XaZa\_YU]\_`aZ\_`]`\_`\_  
@HWI-EAS443:3:57:411:1136#0/1  
ATTGTCTCCGAAAATCCCCTGCATATGTATCCTATCTGA  
+HWI-EAS443:3:57:411:1136#0/1  
abaa\_aaaaa\_aa\_a[[\_^\_¥W]`\_`\_a\_¥a\_`]\_]\_\_\_\_  
@HWI-EAS443:3:57:434:1007#0/1  
TCCCTCTCCATACTCAAGATTTGAGTCAGTCGCTTGG  
+HWI-EAS443:3:57:434:1007#0/1  
aabaabbba`a`aaaaaaaa`aaa^aaaaa[X¥\_I\_\_JW  
@HWI-EAS443:3:57:455:1385#0/1  
GCGGGAGTTTTGTTTCAGCATCCAGAACTAACAGGGCTGGA  
+HWI-EAS443:3:57:455:1385#0/1  
aab`Z]a\_aa`X\_¥]a^a^^¥`¥^a]`\_`]`\_`\_YQ[Z\_  
@HWI-EAS443:3:57:473:693#0/1  
TGTTAGTTCTGGATGCTGAACAAAACCTCCCGCTATATCCT  
+HWI-EAS443:3:57:473:693#0/1  
aba`ab\_aa`aaY`aaaaa\_aa`\_]`\_`\_a\_^^^\_`\_]`\_  
@HWI-EAS443:3:57:598:244#0/1  
GGGACAGACAATAACTTCTCAATAAAGCAAGATATCGTAG  
+HWI-EAS443:3:57:598:244#0/1  
aaa`Zaaaa\_\_aa\_aa\_a`\_`\_`\_`\_a^`\_a`\_`\_]\_Y\_`  
@HWI-EAS443:3:57:63:1870#0/1  
AGCCACTGCCCCATTGTCTGGCCAGAAATCCAATTGTT  
+HWI-EAS443:3:57:63:1870#0/1  
a\_[\_a`\_`\_]X^ZVS]\_SMWN]U[UV\_]VNQU]UXYXX  
@HWI-EAS443:3:57:641:1437#0/1  
CCACGGTCGATTTCGAGCCATGCCAGTTATCCCTGCACACA  
+HWI-EAS443:3:57:641:1437#0/1  
ab]`[aZ\_]R\_`[MV`]UYZQTZ[OXaWY^^X^]YPH^  
@HWI-EAS443:3:57:673:860#0/1  
CTCGAATCGACCGTGGGTGTCTTTCAACCAGAATCTGGAA  
+HWI-EAS443:3:57:673:860#0/1  
aabbaaaabbaaT¥^a]X\_HPT\_\_[Z^RZZIZ]RP^V]S^  
@HWI-EAS443:3:57:737:1423#0/1  
CGTGGGTGTCTTTCAACCAGAATCTGGAATATCAGATAGG  
+HWI-EAS443:3:57:737:1423#0/1  
ababbb\_b`bbbabba`aaaabaabbaabbaa`b`bbba  
@HWI-EAS443:3:57:770:751#0/1  
GCAGAACCTTCTTCTTGAAGGGCCTTGCTAAATGA  
+HWI-EAS443:3:57:770:751#0/1  
Ya`ba]abbab`bbY^a¥`bab¥`^`a`\_`ab`¥baa^b`^`^



@HWI-EAS443:3:57:779:165#0/1  
AACACAGCCACTGCCCCATTGTCTGGGCCAGAAATTC  
+HWI-EAS443:3:57:779:165#0/1  
aa`aabaa\_\_^]Z¥[[ZU[ZVWUYUSR  
@HWI-EAS443:3:57:81:956#0/1  
CGCTAATTTACGGAAACCACTGACTGTCCAGCAGCAAAG  
+HWI-EAS443:3:57:81:956#0/1  
a`aYU\_aaaaa`Z`a^aa`\_aaW^`¥V^[U]¥S^XQYM]  
@HWI-EAS443:3:57:828:1678#0/1  
ATTCCAAGGGGAGCATGATATGAATGGTCCCTTATGAC  
+HWI-EAS443:3:57:828:1678#0/1  
\_b``\_`^`]a\_^T[[^Y``\_¥P`aVN]¥Y\_^VVNXUT\_UP  
@HWI-EAS443:3:57:847:1782#0/1  
CCGTTGTACTTTAACACAGCCACTGCCCCATTGTCTGGGC  
+HWI-EAS443:3:57:847:1782#0/1  
aaaaabRaaabba\_bab`Yaa\_a^^`a\_aaa\_¥\_`¥Z^¥  
@HWI-EAS443:3:57:887:1153#0/1  
GGTGTAACAGTGACTGTGGGTTGGTCTTGCCAGACG  
+HWI-EAS443:3:57:887:1153#0/1  
aaYOV`[a[``]a^PX\_aaY^a`T^]XPPX[UU^V[[MBB  
@HWI-EAS443:3:57:896:528#0/1  
GGCCCCTTGAGTCAAGAAGAAGTTCTGCATTCCAAGGGG  
+HWI-EAS443:3:57:896:528#0/1  
\_\_Va\_Ya\_`^aN]\_`aZ¥[\_`XVS\_]\_U\_]\_\_]W]¥Z\_]\_U  
@HWI-EAS443:3:57:931:1341#0/1  
GAGGAATTGCCCCGCTAATTTACGGAAACCACTGACTGTC  
+HWI-EAS443:3:57:931:1341#0/1  
aaaaa`\_\_aaaV\_\_^\_a\_\_¥`^`\_¥`^`\_`^`¥\_\_W¥¥XW  
@HWI-EAS443:3:58:1005:517#0/1  
AAATCATCTCAAACCGTTTCTTGAACCTAATGCTTTTAGT  
+HWI-EAS443:3:58:1005:517#0/1  
aaaaaaaaaaa`aa\_`a`a`aaa\_^^a`aa^a`a`\_`\_`  
@HWI-EAS443:3:58:1015:338#0/1  
CTGGGACAGACAATAACTTCTCAATAAAGCAAGATATCGT  
+HWI-EAS443:3:58:1015:338#0/1  
ababaZW`a`a¥aaRa¥`baaaa]`a`aa`UV¥¥a\_aaa¥  
@HWI-EAS443:3:58:1176:172#0/1  
GGGAGAATAAAAGCATTAGTTCAAGAAACGGTTTTGAGA  
+HWI-EAS443:3:58:1176:172#0/1  
\_V[`a][P]aaX\_[W^[[\_aP¥Z¥UZXX[U][XXZXXXUX  
@HWI-EAS443:3:58:1234:513#0/1  
GGTTGAAAGACACCCACGGTTCGATTCGAGCCATGCCAGTT  
+HWI-EAS443:3:58:1234:513#0/1  
`aX`bab\_b`^]\_Y¥¥`aJJZYQQTY[YBBBBBBBBBB  
@HWI-EAS443:3:58:1279:133#0/1  
TCCCGCTAGTCCAGATTGTGTTCTCTTTGGGTCGCCCTCT  
+HWI-EAS443:3:58:1279:133#0/1  
aa\_aa\_]S]V[^\_a¥\_`¥R`S^T^V¥¥ZZ^\_UU[W¥UW¥^  
@HWI-EAS443:3:58:127:1065#0/1  
GCTCCATTAGACGATACTGGACCACAACCTGCCTGTCTTAT

+HWI-EAS443:3:58:127:1065#0/1  
aaab\_a`aa``a`\_a^XP]X¥\_YXS\_UVRV^^]T]]\_UZ  
@HWI-EAS443:3:58:1292:65#0/1  
CTCCTGTCTTTAATGGTTCCATTGGAATGTTTGTCTTTA  
+HWI-EAS443:3:58:1292:65#0/1  
`baabba`bbb`baa\_a[\_`aaaa`a^aa`^RZ`a[  
@HWI-EAS443:3:58:130:950#0/1  
TGTAACAGTGACACTGTGGGTTGGTCTTGCCAGACGGT  
+HWI-EAS443:3:58:130:950#0/1  
aa`XV\_]aT```aaaVaaaVV^[N[a\_a^]XOZZ]¥Z[  
@HWI-EAS443:3:58:1350:386#0/1  
AGCGGGAGCAGCATATCCTTTTGTGGTGTAACAGTGACA  
+HWI-EAS443:3:58:1350:386#0/1  
abaa`b`b\_\_baaa^aYaaaaba\_aaaa`a^`\_`\_`\_¥a  
@HWI-EAS443:3:58:1404:284#0/1  
GAGGAATTGCCCGCTAATTTACGGAAACCACTGACTGTC  
+HWI-EAS443:3:58:1404:284#0/1  
aaba`aaaa^\_\_b`a\_\_aa`¥a¥a\_Y`Y]^^^U^YW  
@HWI-EAS443:3:58:1426:199#0/1  
CTTCACCAATAGGACAGCTCATTAGGGTTCGATATGGGCT  
+HWI-EAS443:3:58:1426:199#0/1  
\_b`RY]R]aaZL]\_aaaa]P``[ZLLJX]NN^\_aM¥YLMML  
@HWI-EAS443:3:58:1439:208#0/1  
GGGCTCCTGTCTTTAATGGTTCCATTGGAATGTTTGTCT  
+HWI-EAS443:3:58:1439:208#0/1  
aY\_\_`aaa^^`aa^`[]]W\_\_W¥T`\_\_]]`PWYY]  
@HWI-EAS443:3:58:148:126#0/1  
GCATGTGTAATGGTTCTTGCTTTACTGTAATGACCGATG  
+HWI-EAS443:3:58:148:126#0/1  
abbbb\_b]`a`aba^aaaaaaaaaaaa\_a]`aaa\_a]a`\_a  
@HWI-EAS443:3:58:148:1263#0/1  
CTTTAACACAGCCACTGCCCCATTGTCTGGGCCAGAAATT  
+HWI-EAS443:3:58:148:1263#0/1  
`a`bab\_b\_H]a`\_]`abb]`a^Sxa\_aaaXQ[U[^\_Ta  
@HWI-EAS443:3:58:1491:1553#0/1  
AATGGTGTGGATAGGGAGAACTAAAAGCATTAGTTCAA  
+HWI-EAS443:3:58:1491:1553#0/1  
`V\_\_b`bbbab^S¥aZX`¥aa```ba`bba\_a[aZa`  
@HWI-EAS443:3:58:153:363#0/1  
CGATACTGGACCACAACCTGCCTGTCTTATCATTAGGGCGT  
+HWI-EAS443:3:58:153:363#0/1  
aab```aaabbbb]\_baabb\_aabbbabbab`aaaa\_aa  
@HWI-EAS443:3:58:1555:535#0/1  
GTCTCCGAAAATCCCACTGCATATGTATCCTATCTGATAT  
+HWI-EAS443:3:58:1555:535#0/1  
aXa`\_]\_b]a\_aa¥Z^`\_^\_]`^\_0a\_W^X]`\_\_]V\_\_¥U]^  
@HWI-EAS443:3:58:1560:615#0/1  
GTTATCCCTGCACACACATGTGATTTCACTAGAATCAGGA  
+HWI-EAS443:3:58:1560:615#0/1  
a`aabaa`ba\_a`a\_]aaaW^aa`\_a^a`a\_\_\_\_\_^

@HWI-EAS443:3:58:1569:1090#0/1  
GCGGGCAATTCCTCTCTGCCCCTGTTAGTGGATGGGCTA  
+HWI-EAS443:3:58:1569:1090#0/1  
a\_aaa]aaaa\_\_a\_a]a`aa`\_^aaaa\_]`aa\_`a\_¥KWS  
@HWI-EAS443:3:58:1612:897#0/1  
CAAATCAGATTGAAACATGCAATCAAAGCGTCATTACTT  
+HWI-EAS443:3:58:1612:897#0/1  
a^a`ababaababaaaaaa`aaa\_`aa\_`aa\_aa` `[aa  
@HWI-EAS443:3:58:1636:299#0/1  
CATGTGTGTGCAGGGATAACTGGCATGGCTCGAATCGACC  
+HWI-EAS443:3:58:1636:299#0/1  
aZa[Rbab]aaabbaaa]Ua\_a` `` `a[aBBBBBBBBBB  
@HWI-EAS443:3:58:1693:118#0/1  
AACTGCCTGTCTTATCATTAGGGCGTGGATTGTCTCCGAA  
+HWI-EAS443:3:58:1693:118#0/1  
ababb`bbababbbbaabbbbaaa[aabbabbaa¥a\_`^a\_a  
@HWI-EAS443:3:58:1748:1378#0/1  
CGCTAATTTACGGAAACCACTGACTGTCCAGCAGCAAAG  
+HWI-EAS443:3:58:1748:1378#0/1  
`ba\_S\_`a`Y\_]`^VXWa\_XaR\_]`PW`LYRYV¥WNV[BB  
@HWI-EAS443:3:58:1755:350#0/1  
GCAGAACCTTCTTCTTACTCAAGGGGCCTTGCTAAATGA  
+HWI-EAS443:3:58:1755:350#0/1  
a`a`^b¥\_aa\_\_a\_aa[\_a` `` `¥PVZ`^aYP]\_\_`\_`Z\_  
@HWI-EAS443:3:58:17:603#0/1  
GATATGCTGCTCCCGCTAGTCCAGATTGTGTTCTCTTTGG  
+HWI-EAS443:3:58:17:603#0/1  
^^^`a\_ba]`aaa]` `]¥ZY[R\_¥¥ZUMSL¥V¥^[\_ZZ[  
@HWI-EAS443:3:58:189:1224#0/1  
CAGACACTATCAAGAGTTGGAGAAACAATATATTGAGAAC  
+HWI-EAS443:3:58:189:1224#0/1  
a`a^YaaaV^a¥WZ[ZW\_`a[\_TT¥^[\_¥UU`\_]`\_`\_\_^^  
@HWI-EAS443:3:58:252:1775#0/1  
TTTGGGATCCGAACGGATGGACTGGGACAGACAATAACTT  
+HWI-EAS443:3:58:252:1775#0/1  
aa`\_Z]aaa[a\_\_\_\_¥¥a\_a\_`^V\_¥[Z\_[UOVP^VY^^RX]  
@HWI-EAS443:3:58:256:1411#0/1  
CAAATCAGATTGAAACATGCAATCAAAGCGTCATTACTT  
+HWI-EAS443:3:58:256:1411#0/1  
aab` `ab`babbbbbbabb\_baaabaa`bb]aaaab\_aa  
@HWI-EAS443:3:58:311:249#0/1  
CTGTTATTATGCCGTTGTACTTTAACACAGCCACTGCCCC  
+HWI-EAS443:3:58:311:249#0/1  
ab\_\_`abaaaabab\_ba`a`abaaa` `` `a\_a\_`\_]`\_\_[[  
@HWI-EAS443:3:58:341:101#0/1  
CATTATATCATGCTCCCCCTTGAATGCAGAACCTTCTT  
+HWI-EAS443:3:58:341:101#0/1  
¥\_\_bbbabbbbaa`a` `` `aaaZ\_`aa`aW[YVa\_` ``]  
@HWI-EAS443:3:58:400:1071#0/1  
GAACTTACCAATAGGACAGCTCATTAGGGTTTCGATATGG

+HWI-EAS443:3:58:400:1071#0/1  
aZ^a\_aaa`aaaa^`\_^\_\_\_\_^^U`\_\_\_\_ZWS]]\_Y^Z^Y]  
@HWI-EAS443:3:58:416:839#0/1  
CAAAACCGTTTCTTGAACCTAATGCTTTTAGTTCTCCCTAT  
+HWI-EAS443:3:58:416:839#0/1  
a\_aaaa`]^`a^\_aa^\_a¥\_aa^aaa`\_`\_\_\_\_`]¥\_\_\_\_  
@HWI-EAS443:3:58:452:1945#0/1  
TGTTTTGGATAGGGAGAACTAAAAGCATTAGTTCAAGAAAC  
+HWI-EAS443:3:58:452:1945#0/1  
aa`aaaa`abaa`\_\_`a`\_aaa^`X`^^`^X^^^`^^`\_\_`^  
@HWI-EAS443:3:58:474:1969#0/1  
GCAGAACCTTCTTCTTGAAGGGCCTTGCTAAATGA  
+HWI-EAS443:3:58:474:1969#0/1  
a^bbbbabaa`aaabaabaa`a`a`\_`\_^[\_`\_a`\_a\_aa\_a  
@HWI-EAS443:3:58:495:1368#0/1  
CTCGAATCGACCGTGGGTGTCTTTCAACCAGAATCTGGAA  
+HWI-EAS443:3:58:495:1368#0/1  
aa]LS¥XPSTPYWL]V]ZJRWRYPOUOKG^XRTLVL[^QQS  
@HWI-EAS443:3:58:518:430#0/1  
TGGGAATCAAATCAGATTGAAACATGCAATCAAAGCGTC  
+HWI-EAS443:3:58:518:430#0/1  
¥ba]V`^^`^\_a`\_]0]aaaYOXWZVGW¥U¥YLA[^¥`\_`^^  
@HWI-EAS443:3:58:526:542#0/1  
AAGAGTCTGAATGTGCATGTGTAATGGTTCTTGCTTTAC  
+HWI-EAS443:3:58:526:542#0/1  
aba`b`bbbaaab`baaba\_b]aaabaa`aaa`aaaaa\_\_  
@HWI-EAS443:3:58:614:981#0/1  
GTGAAGTTCCCTCTCCATACAACCTCAAGATTTGAGTCAGT  
+HWI-EAS443:3:58:614:981#0/1  
a^a`^aaaa`a```]aa[^[^[\_`\_`V`\_`\_`\_a`\_`V\_\_\_\_]  
@HWI-EAS443:3:58:619:818#0/1  
GGTGTGGATAGGGAGAACTAAAAGCATTAGTTCAAGAA  
+HWI-EAS443:3:58:619:818#0/1  
a`Y`Z\_aa`Wa\_]\_`R]TZYYV]TV`S¥UWXSPSUSTMMU  
@HWI-EAS443:3:58:640:1618#0/1  
CATTAGACGATACTGGACCACAACCTGCCTGTCTTATCATT  
+HWI-EAS443:3:58:640:1618#0/1  
abbbbabbabaaa`[^\_ZYS]aHZZT\_]aa\_aa^[aaa  
@HWI-EAS443:3:58:651:1314#0/1  
GTTCTCAATATATTGTTTCTCCAACCTTGATAGTGTCTG  
+HWI-EAS443:3:58:651:1314#0/1  
`]baabbababaaab`abaaa\_aa\_a\_aa^a`\_]\_`^\_B  
@HWI-EAS443:3:58:653:296#0/1  
ATTCCAGATTCTGGTTGAAAGACACCCACGGTCGATTCTGA  
+HWI-EAS443:3:58:653:296#0/1  
aaaa`^a^aa`aaa^aa`\_`\_`\_`a^^`\_`\_`\_ZZYU[UUY]  
@HWI-EAS443:3:58:786:1063#0/1  
GAAATTCCAATTGTTAGCCAATTGATGCCATCATGACAAG  
+HWI-EAS443:3:58:786:1063#0/1  
aP`[a`]P\_RZaa\_Y^a[S`¥\_S]YZ^`[^¥PV]^WR¥\_`^

@HWI-EAS443:3:58:786:1752#0/1  
CTAGAATCAGGATAACAGGAGCATTCCCTCATAGTGATAAT  
+HWI-EAS443:3:58:786:1752#0/1  
H\_[R`¥[\_a`^`\_^bXb¥`^Z^a\_¥WY^^]b`bR``a`a\_  
@HWI-EAS443:3:58:904:1662#0/1  
ATTTGCTCCATTAGACGATACTGGACCACAACCTGCCTGTC  
+HWI-EAS443:3:58:904:1662#0/1  
a\_a\_^a¥`\_^baP^P[Y¥¥K¥VT\_^SUXa`RFWPR[]ZO  
@HWI-EAS443:3:58:997:1922#0/1  
ATGATATGAATGGTTCCTTATGACAAACACATCCCCCTT  
+HWI-EAS443:3:58:997:1922#0/1  
a]aaaa`Z\_`aa]`[SV\_a\_\_[¥^`aaSa¥a`0\_¥SW\_\_  
@HWI-EAS443:3:59:1022:1453#0/1  
GGAGAATAAAAGCATTAGTTCAAGAAACGGTTTTGAGAT  
+HWI-EAS443:3:59:1022:1453#0/1  
abbabbabbbbbbbaabaabb`bbbaaZaa\_¥X`^^  
@HWI-EAS443:3:59:1044:1543#0/1  
AGCCACTCAATTCAACTTGGGAATCAAAATCAGATTGAAA  
+HWI-EAS443:3:59:1044:1543#0/1  
aaZ]`aaa\_Y\_aaaa`]]`[^`a\_Z`^`\_]`\_^Y]WYW  
@HWI-EAS443:3:59:1066:993#0/1  
CTTTAACACAGCCACTGCCCATTTGTCTGGGCCAGAAATT  
+HWI-EAS443:3:59:1066:993#0/1  
abbbbbbabbbaababababbbbaabbaaNaaaYX`\_\_  
@HWI-EAS443:3:59:1269:847#0/1  
GCTCCATTAGACGATACTGGACCACAACCTGCCTGTCTTAT  
+HWI-EAS443:3:59:1269:847#0/1  
abbbabbbbabbbbaaW\_Z\_[X^[YT`¥ZX`Z\_YSNXa\_X  
@HWI-EAS443:3:59:1312:488#0/1  
GATACTGGACCACAACCTGCCTGTCTTATCATTAGGGCGTG  
+HWI-EAS443:3:59:1312:488#0/1  
a`ab`aaaaaaaa\_\_Z^]`^`\_aa`aa\_a`]a^\_\_]VV^XX  
@HWI-EAS443:3:59:1342:204#0/1  
GCCACTCAATTCAACTTGGGAATCAAAATCAGATTGAAAC  
+HWI-EAS443:3:59:1342:204#0/1  
aabbbaaaabbbbaabbbbaaaaaabaabbbba`aaa]]aaY  
@HWI-EAS443:3:59:1350:802#0/1  
GCTGGATTGTATAAGACCTTGCTTCTGGGTTGAACTAATC  
+HWI-EAS443:3:59:1350:802#0/1  
`Y````Ya]RSa]GOVOZ[`Y[¥\_`XT]^XXTXaYXRQRV  
@HWI-EAS443:3:59:1405:181#0/1  
ATCATTAGGGCGTGGATTGTCTCCGAAAATCCCCTGCAT  
+HWI-EAS443:3:59:1405:181#0/1  
`b`¥`a\_```][a^¥XYa^`X[¥^^\_Z]aa^]P[VJQQYWX  
@HWI-EAS443:3:59:1427:786#0/1  
AGCCACTCAATTCAACTTGGGAATCAAAATCAGATTGAAA  
+HWI-EAS443:3:59:1427:786#0/1  
Y`a]^\_\_XaY``VX¥b`bbb^ZbbbaU^^`]aaa\_TNa\_\_  
@HWI-EAS443:3:59:1448:654#0/1  
TGTCTGTCCCAGTCCATCCGTTCCGATCCCAAATCATCTC

+HWI-EAS443:3:59:1448:654#0/1  
aba`aaYab`\_aY\_aaa^]a`\_^`aZ`\_Z`a`¥`UDMRLVL  
@HWI-EAS443:3:59:1557:1264#0/1  
TGTGTGCAGGGATAACTGGCATGGCTCGAATCGACCGTGG  
+HWI-EAS443:3:59:1557:1264#0/1  
aa\_a\_aa`aa^\_\_a`^a\_\_\_\_`^a^\_aXGR]BBBBBBBBBB  
@HWI-EAS443:3:59:1578:1860#0/1  
GGTCGATTTCGAGCCATGCCAGTTATCCCTGCACACACATG  
+HWI-EAS443:3:59:1578:1860#0/1  
]JQ^`P`Ka\_]¥W]URPUO[ZH`\_TLS`\_\_YX\_VSXYYVX  
@HWI-EAS443:3:59:1588:805#0/1  
GCTTGGTCAGCAAGTGCTTGTTCATGATGGCATCAATTGGC  
+HWI-EAS443:3:59:1588:805#0/1  
aaaa`aRa\_aa`ab]b\_a`a``aabaab[]X¥\_]XY\_]V  
@HWI-EAS443:3:59:1721:2009#0/1  
ATTAAAGACAGGAGCCCATATCGAACCTAATGAGCTGTC  
+HWI-EAS443:3:59:1721:2009#0/1  
^ab`ba\_abbVWL^¥`aaWW\_`\_`a`a`\_VSOXBBBBB  
@HWI-EAS443:3:59:175:1442#0/1  
CACCCACGGTCGATTTCGAGCCATGCCAGTTATCCCTGCAC  
+HWI-EAS443:3:59:175:1442#0/1  
abb`^ba\_PNZ\_a[`^`[RX]UQ[\_Z]ZQ¥\_PY\_XIIKYU  
@HWI-EAS443:3:59:224:376#0/1  
TATTCCTACGATATCTTGCTTTATTGAGAAGTTATTGTCT  
+HWI-EAS443:3:59:224:376#0/1  
abaaaaabaaab\_b\_`aa`a]¥a^Yaa\_Ya^\_\_\_\_]]\_`\_  
@HWI-EAS443:3:59:260:433#0/1  
GGTTTCCGTGAAATTAGCGGGCAATTCCTCTCTGCCCCT  
+HWI-EAS443:3:59:260:433#0/1  
ab\_]aaaa\_aaaaaaaaa`a``\_W^a`a`aU^`\_]V^U^  
@HWI-EAS443:3:59:265:872#0/1  
CAGACAATAACTTCTCAATAAAGCAAGATATCGTAGGAAT  
+HWI-EAS443:3:59:265:872#0/1  
^Zaa]^Z`Y\_\_aaa````aZ`^`¥Z]^a`[`X`[ZZYSWX  
@HWI-EAS443:3:59:278:1567#0/1  
CTCTGATTAGTTCAACCCAGAAGCAAGTCTTATACAATC  
+HWI-EAS443:3:59:278:1567#0/1  
abbaZ``]RXSR\_]J]]]UR]X`NTXL`\_]¥\_W^WUT  
@HWI-EAS443:3:59:295:935#0/1  
CATATGTTAACATCAGCAACACCAACTTTGCTGCTGGACA  
+HWI-EAS443:3:59:295:935#0/1  
aab`^abaaa\_aa]aaaa`a\_aaa\_`\_`a\_[a^\_^ZUUU  
@HWI-EAS443:3:59:302:102#0/1  
CTCCTGTCTTTAATGGTTCCATTGGAATGTTTGTCTTTA  
+HWI-EAS443:3:59:302:102#0/1  
abbabbaabbbbbbbbabbbabbbbaabbabbbbaa]`aa\_  
@HWI-EAS443:3:59:327:1494#0/1  
TAACAGGGCTGGATTGTATAAGACCTTGCTTCTGGGTTGA  
+HWI-EAS443:3:59:327:1494#0/1  
ab^abbaab`a`aa`\_`abab^aaba\_\_`bbTa[XSX^\_]`

@HWI-EAS443:3:59:342:81#0/1  
GCGGGAGTTTTGTTTCAGCATCCAGAACTAACAGGGCTGGA  
+HWI-EAS443:3:59:342:81#0/1  
][\_\_aSXLVTZ`UX^RZUNXPX`Y¥QS]^\_Z^Q^UWa^L  
@HWI-EAS443:3:59:41:1060#0/1  
GCACATTCAGACTCTTGTGTTCTCAATATATTGTTTCTCC  
+HWI-EAS443:3:59:41:1060#0/1  
¥`b`V`b^a`T`ab¥Y\_`\_\_aU`SVZ` `a`ab^\_[T\_\_W  
@HWI-EAS443:3:59:476:1049#0/1  
CAAGGTCTTATACAATCCAGCCCTGTTAGTTCTGGATGCT  
+HWI-EAS443:3:59:476:1049#0/1  
¥W^WQGQ\_ba]\_a`R[bb[¥Yba]b`]QVW`W\_abU]aZa  
@HWI-EAS443:3:59:50:1712#0/1  
CAAGAGTTGGAGAAACAATATATTGAGAACAAGAGTCT  
+HWI-EAS443:3:59:50:1712#0/1  
\_^`X`¥Ra¥^bb¥a\_ab\_bbbabbbbaaMaaSaa^\_]`\_  
@HWI-EAS443:3:59:54:889#0/1  
CTTATACAATCCAGCCCTGTTAGTTCTGGATGCTGAACAA  
+HWI-EAS443:3:59:54:889#0/1  
aaabaaaa`aa\_`a`aa]]aaaZ`\_` ``^\_`Z^TV]]^  
@HWI-EAS443:3:59:571:14#0/1  
CAGACACTATCAAGAGTTGGAGAAACAATATATTGAGAAC  
+HWI-EAS443:3:59:571:14#0/1  
`a¥Z\_^\_a^` `Z\_0`Za`][[[TS¥ZG\_X`R^]¥PX[[[Q  
@HWI-EAS443:3:59:587:194#0/1  
ATTCATATCATGCTCCCCCTTGAATGCAGAACCTTCTTC  
+HWI-EAS443:3:59:587:194#0/1  
abaaabab`aaaaaa`a`\_`\_aa^^^aa`a\_] ]^XU[WU  
@HWI-EAS443:3:59:664:420#0/1  
CAGAGGGCGACCCAAAGAGAACAATCTGGACTAGCGGG  
+HWI-EAS443:3:59:664:420#0/1  
ababaa`bb\_bba`bbbabaaaa^^ababab\_^X¥WW`\_`  
@HWI-EAS443:3:59:700:1204#0/1  
GTCCCAGTCCATCCGTTCCGATCCCAAATCATCTCAAAC  
+HWI-EAS443:3:59:700:1204#0/1  
¥Q\_¥\_¥[M]Y\_^ZZ]QY]ZYZX^WRIWY¥VZSZX[WW`YJ  
@HWI-EAS443:3:59:746:1273#0/1  
ACCACAACCTGCCTGTCTTATCATTAGGGCGTGGATTGTCT  
+HWI-EAS443:3:59:746:1273#0/1  
abaaabaaaaaaaa\_abaaa`aa^¥`\_a`]^\_\_\_YYX]X  
@HWI-EAS443:3:59:779:1270#0/1  
GTTATTATGCCGTTGTACTTTAACACAGCCACTGCCCAT  
+HWI-EAS443:3:59:779:1270#0/1  
]SY\_W]\_]`babW`aSSa`\_a`a`bbaa`a\_`[`YOQJZYR  
@HWI-EAS443:3:59:800:921#0/1  
TTCGGATCCCAAATCATCTCAAACCGTTTCTTGAACATA  
+HWI-EAS443:3:59:800:921#0/1  
^¥`baY¥[XY^]Ya]bbaWYbZHza`^UWaYSGPNQQ^YZ  
@HWI-EAS443:3:59:841:61#0/1  
GCAGTGGGATTTTCGGAGACAATCCACGCCCTAATGATAA

+HWI-EAS443:3:59:841:61#0/1  
aaXaMaa^[X`a]V]aY¥YY`¥YV^YS¥QUUUUPQUUU¥BB  
@HWI-EAS443:3:59:842:364#0/1  
CAGGAGCATTCTCATAGTGATAATTAGGGCATTCAATTT  
+HWI-EAS443:3:59:842:364#0/1  
Q¥bb^bbb`^ab^bbbb^a[ab]\_\_bb^bb`bb^][aba  
@HWI-EAS443:3:59:879:1839#0/1  
GAAATCACATGTGTGTGCAGGGATAACTGGCATGGCTCGA  
+HWI-EAS443:3:59:879:1839#0/1  
``bbbbbbbabababababbabbbbabab\_aaaWS\_^Q  
@HWI-EAS443:3:59:909:128#0/1  
CACAGCCACTGCCCATTTGTCTGGGCCAGAAATCCAATT  
+HWI-EAS443:3:59:909:128#0/1  
abbbbabbb`aaaaab^`bb^a``a]a\_a`[WY\_\_¥  
@HWI-EAS443:3:59:922:1156#0/1  
CTGGACCACAACCTGCCTGTCTTATCATTAGGGCGTGGATT  
+HWI-EAS443:3:59:922:1156#0/1  
`bbba\_b`abbbaba`bbaababb^`baaaa\_`VY¥G[\_^  
@HWI-EAS443:3:59:924:199#0/1  
ATTGTCTCCGAAAATCCCACTGCATATGTATCCTATCTGA  
+HWI-EAS443:3:59:924:199#0/1  
`bbaaababaaaaa`^a\_`aa[`[`bXaaT]`\_]Wa]X  
@HWI-EAS443:3:59:927:1487#0/1  
CAAAACCGTTTCTTGAACCTAATGCTTTTAGTTCTCCCTAT  
+HWI-EAS443:3:59:927:1487#0/1  
abaaaabb`bbaaaaab`aaabbabbaa]a`\_\_a\_UZ`\_`  
@HWI-EAS443:3:59:927:731#0/1  
GTGGTCCAGTATCGTCTAATGGAGCAAATGGAGTAAAAGG  
+HWI-EAS443:3:59:927:731#0/1  
I¥baa\_aa¥baaaabbb¥`bbb¥ab`bX^Y\_ab\_ba^ba\_  
@HWI-EAS443:3:59:975:1202#0/1  
AGCCCATCCACTAACAGGGCAGAGAGGAATTGCCCGCT  
+HWI-EAS443:3:59:975:1202#0/1  
^ab`Ubaab`abaaZ\_aa[\_ab`^a\_`ab`aZaa[VWa\_W  
@HWI-EAS443:3:59:980:1238#0/1  
CACAACCTGCCTGTCTTATCATTAGGGCGTGGATTGTCTCC  
+HWI-EAS443:3:59:980:1238#0/1  
a\_OYW\_\_[YR][R]a^`aWaa^^Z\_T]Y^Z\_Xa^`TV¥WN  
@HWI-EAS443:3:5:1028:962#0/1  
GAAACAATATATTGAGAACACAAGAGTCTGAATGTGCATG  
+HWI-EAS443:3:5:1028:962#0/1  
]\_R¥a`^aab`babaabb]b`\_a]`a]\_bb`bbaZaa`ba  
@HWI-EAS443:3:5:1033:1832#0/1  
CTCAATTCAACTTGGGAATCAAAATCAGATTGAAACATGC  
+HWI-EAS443:3:5:1033:1832#0/1  
abb\_\_bbaabba`\_babbbabba`\_aaabba^`ab`baaa  
@HWI-EAS443:3:5:1060:995#0/1  
GATTAGTTCAACCCAGAAGCAAGGTCTTATACAATCCAGC  
+HWI-EAS443:3:5:1060:995#0/1  
ab`b\_\_bX\_Zaaa¥W`Z^[[a^`ZY¥babaaa`Y]\_\_b\_B



@HWI-EAS443:3:5:1080:376#0/1  
GTGTCTTTCAACCAGAATCTGGAATATCAGATAGGATACA  
+HWI-EAS443:3:5:1080:376#0/1  
aaaa¥bab\_a\_\_^aa\_aaWUJa`\_a¥^`\_a^`\_\_`¥^BBB  
@HWI-EAS443:3:5:1081:275#0/1  
CTTTCAACCAGAATCTGGAATATCAGATAGGATACATATG  
+HWI-EAS443:3:5:1081:275#0/1  
abbba]XZa¥^Za^U`aaa]`W^I`bJYaaa\_] ^P]]^BB  
@HWI-EAS443:3:5:1088:755#0/1  
GGGAACCTCACCAATAGGACAGCTCATTAGGGTTCGATAT  
+HWI-EAS443:3:5:1088:755#0/1  
aba`babb`aT``aaaa`\_a`\_a¥¥`a```aVWUa¥a`B  
@HWI-EAS443:3:5:1166:1512#0/1  
AACAGGGCTGGATTGTATAAGACCTTGCTTCTGGGTTGAA  
+HWI-EAS443:3:5:1166:1512#0/1  
`a``bba\_a\_b^aa\_a\_bbaTa¥P^`]Yaa`a[a\_\_aaaa  
@HWI-EAS443:3:5:1231:1280#0/1  
CAACTGCCTGTCTTATCATTAGGGCGTGGATTGTCTCCGA  
+HWI-EAS443:3:5:1231:1280#0/1  
^\_aa\_`bb\_aaba`bb[`bbba\_^\_Wb`ba\_WPV]aU¥W  
@HWI-EAS443:3:5:1253:194#0/1  
CCTAATTACTACTATGAGGAATGCTCCTGTTATCCTGATT  
+HWI-EAS443:3:5:1253:194#0/1  
aab\_ba^^`ababababaabbabLaaWbaba`b¥aaaaaa  
@HWI-EAS443:3:5:1329:215#0/1  
AATGCTTTTAGTTCTCCCTATCCAAACACCATTGCCGTAT  
+HWI-EAS443:3:5:1329:215#0/1  
ab`[aaabb`\_`aH^T`b]bYYaaa[[]R]Za`a[[]a]`\_  
@HWI-EAS443:3:5:1355:1646#0/1  
AGTGGTTTCCGTGAAATTAGCGGGCAATTCCTCTCTCTGC  
+HWI-EAS443:3:5:1355:1646#0/1  
abaab`baa```aa`\_aa]^a``Yaaa`\_[\_T`Y`\_^aB  
@HWI-EAS443:3:5:1358:906#0/1  
AGGTTCTGCATTCCAAGGGGAGCATGATATGAATGGTTC  
+HWI-EAS443:3:5:1358:906#0/1  
S¥VJ¥Za\_UZ[U`US\_W^`a``\_aX^a`a]a]] [[ab]aB  
@HWI-EAS443:3:5:1435:1282#0/1  
CTTGTCATGGTAAATGGCAACTCAGCACCGTCTGGCCAA  
+HWI-EAS443:3:5:1435:1282#0/1  
[WbbY`b]bbVaaa^aaaY\_\_L\_U[WZ\_\_\_bab\_bZGWb^  
@HWI-EAS443:3:5:157:376#0/1  
CTGGACCACAACCTGCCTGTCTTATCATTAGGGCGTGGATT  
+HWI-EAS443:3:5:157:376#0/1  
a`WZ\_\_Zb`baabbbabb]ba\_\_aba`a]aaaa¥aa`]a  
@HWI-EAS443:3:5:1686:627#0/1  
AGCCACTCAATTCAACTTGGGAATCAAAATCAGATTGAAA  
+HWI-EAS443:3:5:1686:627#0/1  
a]a^b\_aaaaaa]a`^baaaa`aa\_\_\_a``¥`a\_a\_a\_\_`  
@HWI-EAS443:3:5:1690:1629#0/1  
GGTTGAAAGACACCCACGGTTCGATTGAGCCATGCCAGTT

+HWI-EAS443:3:5:1690:1629#0/1  
ab\_\_\_\_\_`]aXG^^U¥^Q¥^UQ¥WSUS^BBBBBBBBBBBBBB  
@HWI-EAS443:3:5:204:1691#0/1  
GAGGAATTGCCCGCTAATTTACGGAACCACTGACTGTC  
+HWI-EAS443:3:5:204:1691#0/1  
`a\_Yab\_\_[Yabbbabaa`aUL`abb\_N[`^`ba\_UYVN  
@HWI-EAS443:3:5:28:841#0/1  
CCTTGAGTCAAGAAGAAGTTCTGCATTCCAAGGGGGAGC  
+HWI-EAS443:3:5:28:841#0/1  
abb\_YFZQ^Z\_b[W^`aaa[]X\_Zaaa]aa`UV^a\_BBBB  
@HWI-EAS443:3:5:300:223#0/1  
ATATCATGCTCCCCCTTGAATGCAGAACCTTCTTCTTGA  
+HWI-EAS443:3:5:300:223#0/1  
`^]R]]`P]U[]\_¥Z`\_YPRaYXFP]RM[`QY`Y\_BBB  
@HWI-EAS443:3:5:310:885#0/1  
ATATCATGCTCCCCCTTGAATGCAGAACCTTCTTCTTGA  
+HWI-EAS443:3:5:310:885#0/1  
aaaaU[U^`\_\_\_\_ZRZ¥¥\_a]\_[[¥WPW]G¥\_`^`XH¥]BBB  
@HWI-EAS443:3:5:320:990#0/1  
GTTTGTGATAAGGGAACCATTTCATATCATGCTCCCCCTTG  
+HWI-EAS443:3:5:320:990#0/1  
aa]\_[TYU\_aaaa]^¥NZ`\_Qaa`VVa]^`¥\_TLZV¥BB  
@HWI-EAS443:3:5:349:1749#0/1  
CAGACACTATCAAGAGTTGGAGAAACAATATATTGAGAAC  
+HWI-EAS443:3:5:349:1749#0/1  
aaabbbbaabb`aaaa\_ba]bbabbabaababbababbaa  
@HWI-EAS443:3:5:377:803#0/1  
GAGTGGTCAGGATATAGCGGGAGTTTTGTTTCAGCATCCAG  
+HWI-EAS443:3:5:377:803#0/1  
`b^baaaab]`a\_abaabb`[\_`a`aUaaXX`Z¥\_\_N`  
@HWI-EAS443:3:5:399:507#0/1  
CAACTGCCTGTCTTATCATTAGGGCGTGGATTGTCTCCGA  
+HWI-EAS443:3:5:399:507#0/1  
`bb\_bba`aaa`aaaba`aab\_\_^\_aWaa`\_`aS\_^`U]`  
@HWI-EAS443:3:5:404:326#0/1  
AGCGGGAGCAGCATATCCTTTTGTGGTGTAAACAGTGACA  
+HWI-EAS443:3:5:404:326#0/1  
ab`bbbab\_`]OYaaaaaaba\_aV[a\_``aa\_W`a¥a^U\_  
@HWI-EAS443:3:5:422:707#0/1  
ATGCCGTTGTACTTTAACACAGCCACTGCCCCATTGTCTG  
+HWI-EAS443:3:5:422:707#0/1  
a¥a^¥a`bb`b`aa\_aaa\_`^\_Y`\_a\_\_\_\_\_XRa`G¥Z]  
@HWI-EAS443:3:5:426:390#0/1  
GGTGTAAACAGTGACACTGTGGGTTGGTCTTGGCCAGACG  
+HWI-EAS443:3:5:426:390#0/1  
a\_M][a]^JaaYXTPWPX¥N`a`¥VVaOFL]VYBBBBBBBB  
@HWI-EAS443:3:5:457:283#0/1  
ATGCAGAACCTTCTTCTTACTCAAGGGGCCTTGCTAAAT  
+HWI-EAS443:3:5:457:283#0/1  
aabY]aaaa`a^YGW\_a¥`\_\_a\_¥`^¥^]U\_UaX]\_^[B

@HWI-EAS443:3:5:470:1588#0/1  
CATTTACACATGCACATTGACTCTTGTGTTCTCAATAT  
+HWI-EAS443:3:5:470:1588#0/1  
\_`\_`RY`a¥TZT]aXWbW^]a^\_a`a^^\_YZH[TZ[YY]  
@HWI-EAS443:3:5:491:576#0/1  
CAGGATATAGCGGGAGTTTTGTTCCAGCATCCAGAACTAAC  
+HWI-EAS443:3:5:491:576#0/1  
abbbbaaab]bbbabaa\_`aa\_aaabXaa]¥`aHaV\_^aB  
@HWI-EAS443:3:5:496:1146#0/1  
CAGTCGCTTGGTCAGCAAGTGCTTGTGCATGATGGCATCAA  
+HWI-EAS443:3:5:496:1146#0/1  
a\_ba\_bbaab]a]IaV`[b\_\_[\_ab`abaa\_^aa`aaGYB  
@HWI-EAS443:3:5:49:640#0/1  
TGACTCAAATCTTGAGTTGTATGGAGAGGGAACCTCACCA  
+HWI-EAS443:3:5:49:640#0/1  
abaaba`[]`a^L]`aa\_aa^\_¥a\_aa]GYV¥[[^][BB  
@HWI-EAS443:3:5:517:1554#0/1  
ACCACAACCTGCCTGTCTTATCATTAGGGCGTGGATTGTCT  
+HWI-EAS443:3:5:517:1554#0/1  
aabaaXVNa\_\_\_ab`a\_a]`^V`¥]\_SSZ]^ ^^]][]\_B  
@HWI-EAS443:3:5:65:1703#0/1  
CACTCATTTATTCTACGATATCTTGCTTTATTGAGAAAGT  
+HWI-EAS443:3:5:65:1703#0/1  
a`^[¥`bb^a`V[\_U^0¥]]L\_^ZQZQ¥^]aaa`^`R^aB  
@HWI-EAS443:3:5:690:209#0/1  
CTCTCCATACAACTCAAGATTTGAGTCAGTCGCTTGGTCA  
+HWI-EAS443:3:5:690:209#0/1  
[\_`Vb\_¥`b`b`baabbaY^aba`¥YWaa``\_] ^UUBBBBB  
@HWI-EAS443:3:5:69:1403#0/1  
CATCAATTGGCTAACAAATTGGAATTTCTGGCCCAGACAAT  
+HWI-EAS443:3:5:69:1403#0/1  
\_bYba\_[[\_]a\_\_`\_\_K\_\_baaa`]X\_[[a`a]aaa`\_  
@HWI-EAS443:3:5:745:519#0/1  
ACAGACAATAACTTCTCAATAAAGCAAGATATCGTAGGAA  
+HWI-EAS443:3:5:745:519#0/1  
^bbb`YaX]`W[aW^a`ba]aaaa`ba`W`PbV`baa`  
@HWI-EAS443:3:5:779:1145#0/1  
GTGTCTTTCAACCAGAATCTGGAATATCAGATAGGATACA  
+HWI-EAS443:3:5:779:1145#0/1  
`Sa]aa`a\_aa]Za`\_`\_\_a`a`a\_R¥a¥a]`]\_\_]\_\_WB  
@HWI-EAS443:3:5:868:664#0/1  
CAGTCGCTTGGTCAGCAAGTGCTTGTGCATGATGGCATCAA  
+HWI-EAS443:3:5:868:664#0/1  
^¥`bab`bba`\_¥abb`b]b`\_a^NXbb`a^bbaaaT a[  
@HWI-EAS443:3:5:912:534#0/1  
ATGGTGTGGATAGGGAGAACTAAAAGCATTAGTTCAAG  
+HWI-EAS443:3:5:912:534#0/1  
abb[Jaab`VYT[\_`baaaabV`Ybbbbabbbab^`¥aab  
@HWI-EAS443:3:5:935:1839#0/1  
AGCGGGAGTTTTGTTCCAGCATCCAGAACTAACAGGGCTGG

+HWI-EAS443:3:5:935:1839#0/1  
aabab][bP^baa\_`a`aQ`a\_\_\_\_a\_a^\_\_^R\_Z\_Z\_NSB  
@HWI-EAS443:3:5:95:625#0/1  
CGGCAATGGTGTGGATAGGGAGAACTAAAAGCATTAGT  
+HWI-EAS443:3:5:95:625#0/1  
abbb]bbba\_b`\_`aba\_`\_`aaa\_ba\_S`aaaa\_a^`^aV  
@HWI-EAS443:3:5:978:1748#0/1  
CTGATTAGTTCAACCCAGAAGCAAGTCTTATACAATCCA  
+HWI-EAS443:3:5:978:1748#0/1  
`bbbb¥¥¥baXabbabb`\_bb^bbbaUbaa¥baababaab  
@HWI-EAS443:3:60:1008:571#0/1  
CTGGACCACAACCTGCCTGTCTTATCATTAGGGCGTGGATT  
+HWI-EAS443:3:60:1008:571#0/1  
abbb^a\_baba¥aa`b`b\_a`bbaa`a\_a`a`\_`¥a`¥\_`  
@HWI-EAS443:3:60:1108:467#0/1  
GGCCCCTTGAGTCAAGAAGAAGTTCTGCATTCCAAGGGG  
+HWI-EAS443:3:60:1108:467#0/1  
aaaaabbab]b\_aa`a`\_aaa`aUaaaa`aaa[Ta\_`\_`a\_  
@HWI-EAS443:3:60:1134:793#0/1  
GGGTGTCTTTCAACCAGAATCTGGAATATCAGATAGGATA  
+HWI-EAS443:3:60:1134:793#0/1  
a^^Ua¥[]`\_`\_\_Y\_`^\_\_^\_\_\_a[\_a\_]^^\_W\_]\_SZ\_S  
@HWI-EAS443:3:60:1140:582#0/1  
TGTAACAGTGACACTGTGGGTTGGTCTTGGCCAGACGGT  
+HWI-EAS443:3:60:1140:582#0/1  
abXU]X][^\_aa\_\_\_\_ab^a`[Y[a[V\_a\_\_\_\_`¥W^[Z``N  
@HWI-EAS443:3:60:1152:1997#0/1  
GTGGTCCAGTATCGTCTAATGGAGCAAATGGAGTAAAAGG  
+HWI-EAS443:3:60:1152:1997#0/1  
`ZaaW[^`^XUa]PY\_[aa`aR`UTQZ\_`[¥^X\_X^`\_\_\_¥  
@HWI-EAS443:3:60:1154:1711#0/1  
GAGAGGAATTGCCCGCTAATTTACCGAAACCACTGACTG  
+HWI-EAS443:3:60:1154:1711#0/1  
`aaaaaaa`bb`a`aaaaa`a]`aaa`[a`^a¥\_`^`\_  
@HWI-EAS443:3:60:1162:1146#0/1  
CGCTTGGTCAGCAAGTGCTTGTGTCATGATGGCATCAATTGG  
+HWI-EAS443:3:60:1162:1146#0/1  
ab\_[a`]Xaba^[`][a]\_a^Z`W`[V\_SYYZ\_]`^V[RV  
@HWI-EAS443:3:60:1170:394#0/1  
CGCTAATTTACCGAAACCACTGACTGTCCAGCAGCAAAG  
+HWI-EAS443:3:60:1170:394#0/1  
aa]`Z]a^`\_a¥aa`aa`a]\_a`^¥aa¥Y][ZQZ^YSVZ\_  
@HWI-EAS443:3:60:122:40#0/1  
AGCCCATCCACTAACAGGGCAGAGAGGAATTGCCCGCT  
+HWI-EAS443:3:60:122:40#0/1  
aaaa\_a\_`]\_a\_aa\_\_`\_¥\_R\_V\_W^V^WV¥¥W¥VUUWWS  
@HWI-EAS443:3:60:1268:991#0/1  
AAAGGATATGCTGCTCCCGCTAGTCCAGATTGTGTTCTCT  
+HWI-EAS443:3:60:1268:991#0/1  
a^aaaababa`\_\_\_\_`\_`\_`\_Y[`¥^¥¥\_¥¥aZY¥S^W^Q^

@HWI-EAS443:3:60:127:961#0/1  
AGAAGTTATTGTCTGTCCCAGTCCATCCGTTCCGGATCCCA  
+HWI-EAS443:3:60:127:961#0/1  
`]Z`¥`aaa`\_]\_]OFZ^PXFQRMSUVWUVUQTPSS¥P  
@HWI-EAS443:3:60:1336:1666#0/1  
CTTATCATTAGGGCGTGGATTGTCTCCGAAAATCCCCTG  
+HWI-EAS443:3:60:1336:1666#0/1  
\_¥YV^aaYY\_[\_a[V¥Z^a¥^`X[¥[\_X\_``[TW[^VXV  
@HWI-EAS443:3:60:133:2018#0/1  
CTTGGAATCAAATCAGATTGAAACATGCAATCAAAGCG  
+HWI-EAS443:3:60:133:2018#0/1  
abaZWGZaN[¥\_Y\_]Z¥P[WQP[`a`^S¥`ZONWYRSTRT  
@HWI-EAS443:3:60:135:656#0/1  
GGGAGTTTTGTTTCAGCATCCAGAACTAACAGGGCTGGATT  
+HWI-EAS443:3:60:135:656#0/1  
a^XYaZ]NS`^a]N\_`\_^`^[\_W`X^UOW\_XRZQV`]X\_]`  
@HWI-EAS443:3:60:1364:1746#0/1  
GACAGACAATAACTTCTCAATAAAGCAAGATATCGTAGGA  
+HWI-EAS443:3:60:1364:1746#0/1  
^Yb]Uab¥^¥\_]abbaaZ^`adW^``abV`\_\_a¥aZabaa  
@HWI-EAS443:3:60:1369:610#0/1  
CGCCCTCTGATTAGTTCAACCCAGAAGCAAGTCTTATAC  
+HWI-EAS443:3:60:1369:610#0/1  
`a^\_aab`\_]abb]\_bbba`ab`\_`abab`baXX^aaaa`  
@HWI-EAS443:3:60:1386:155#0/1  
CACAGCCACTGCCCCATTGTCTGGGCCAGAAATCCAATT  
+HWI-EAS443:3:60:1386:155#0/1  
aba¥R`¥a\_aa\_\_U\_[bba`^`a``Z[`aY``\_^RGS]``  
@HWI-EAS443:3:60:1402:1952#0/1  
AGCGGGCAATTCCTCTCTCTGCCCTGTTAGTGGATGGGCT  
+HWI-EAS443:3:60:1402:1952#0/1  
abab\_ba`aba\_\_aaa`\_a]\_P¥\_\_XZa[aX¥UR\_\_^VFR  
@HWI-EAS443:3:60:1457:139#0/1  
AATGGTGTGGATAGGGAGAATAAAAGCATTAGTTCAA  
+HWI-EAS443:3:60:1457:139#0/1  
aabbbaaabba\_aaaab\_a\_]`\_\_aa\_Y`a\_\_dW\_Y\_^  
@HWI-EAS443:3:60:1481:1076#0/1  
ATGCCGTTGTACTTTAACACAGCCACTGCCCCATTGTCTG  
+HWI-EAS443:3:60:1481:1076#0/1  
aaa\_\_a^ab\_a`a`aaa\_a^\_\_\_U\_U\_UZ\_]\_Z\_]UX]^  
@HWI-EAS443:3:60:1619:54#0/1  
CACACATGTGATTTCACTAGAATCAGGATAACAGGAGCAT  
+HWI-EAS443:3:60:1619:54#0/1  
ababaabbababaaababbbbaaa\_b\_baaa`^`^`a``\_`\_a  
@HWI-EAS443:3:60:164:80#0/1  
ATTCGAGCCATGCCAGTTATCCCTGCACACACATGTGATT  
+HWI-EAS443:3:60:164:80#0/1  
aaa]QXaa[Za\_UT^`¥VWU[VPM]WURP¥\_LMX`O`V]Y  
@HWI-EAS443:3:60:167:392#0/1  
GTTCCGGATCCCAAATCATCTCAAACCGTTTCTTGAACATA

+HWI-EAS443:3:60:167:392#0/1  
a`aaa`[^aa`U````\_`Z\_aa\_\_\_\_]Z^^^]]ZXX]]  
@HWI-EAS443:3:60:181:884#0/1  
GTTATTATGCCGTTGTACTTTAACACAGCCACTGCCCCAT  
+HWI-EAS443:3:60:181:884#0/1  
a``baa``aaabaaaZ`aaaaa\_a\_a\_\_\_\_\_`[^^^\_\_\_\_  
@HWI-EAS443:3:60:189:85#0/1  
AAGGGGGATGTGTTTGTGCATAAGGGAACCATTTCATATCAT  
+HWI-EAS443:3:60:189:85#0/1  
a^bbabb`\_a^a`aab`aaaa\_baaa]aSW\_]Z\_a`[U\_]`  
@HWI-EAS443:3:60:292:1765#0/1  
CAAGCACTTGCTGACCAAGCGACTGACTCAAATCTTGAGT  
+HWI-EAS443:3:60:292:1765#0/1  
]]b\_[`bb\_bY\_Rbbb\_\_b^bb`b^[Ubb`\_\_abb\_`[UV  
@HWI-EAS443:3:60:297:1558#0/1  
GAATGCAGAACCTTCTTCTTGACTCAAGGGGCCTTGCTAA  
+HWI-EAS443:3:60:297:1558#0/1  
a\_SX`Y]YZSTU`[\_KV`[¥SW¥Z\_YYULQW\_ZWV^][[]]  
@HWI-EAS443:3:60:299:1471#0/1  
GTTTGTCAATTTAGCAAGGCCCTTGAGTCAAGAAGAAGGT  
+HWI-EAS443:3:60:299:1471#0/1  
a`abaYabaaaaSaaaa¥a`aa\_\_\_\_\_^^a\_^[^¥UZ\_XX  
@HWI-EAS443:3:60:345:1790#0/1  
CAGACATATGTTAACATCAGCAACACCAACTTTGCTGCTG  
+HWI-EAS443:3:60:345:1790#0/1  
¥\_Va`a`a`[a`ZV`\_a\_bX`a`^aa^aa\_a]ZU\_UN[`T  
@HWI-EAS443:3:60:396:1479#0/1  
ACTGACTGTCCAGCAGCAAAGTTGGTGTGCTGATGTTAA  
+HWI-EAS443:3:60:396:1479#0/1  
^aT^[Y¥¥¥^`VTW\_ZY[SXDRWOWSZUWKXBBBBBBBBBB  
@HWI-EAS443:3:60:440:856#0/1  
TCCAGTCCATCCGTTCCGATCCCAAATCATCTCAAAACC  
+HWI-EAS443:3:60:440:856#0/1  
\_```a`b`^Y^[\_NVX`\_TW\_TW^^¥Z¥^\_]YSLZPVW  
@HWI-EAS443:3:60:46:677#0/1  
CGTGGGTGTCTTTCAACCAGAATCTGGAATATCAGATAGG  
+HWI-EAS443:3:60:46:677#0/1  
aaYa¥aHXY]a`U`PV`a`W[S]\_a]XYVSPWRPWYX]^  
@HWI-EAS443:3:60:479:280#0/1  
TGCATGTGTAATGGTTCTTGCTTTACTGTAATGACCGAT  
+HWI-EAS443:3:60:479:280#0/1  
`a¥[[]^]MVaZ^ZT^]\_ZXY]aZV¥YT]QRYS^\_WQYZZ  
@HWI-EAS443:3:60:598:1816#0/1  
CAGCAGCAAAGTTGGTGTGCTGATGTTAACATATGTCTG  
+HWI-EAS443:3:60:598:1816#0/1  
a`\_aaaa^]a\_`\_\_^]\_````][[^[X`^\_S^][`aZ^^[  
@HWI-EAS443:3:60:605:1169#0/1  
GTGCAGGGATAACTGGCATGGCTCGAATCGACCGTGGGTG  
+HWI-EAS443:3:60:605:1169#0/1  
aaaaabba^aaa`baaaaa\_^aa[YQXXR¥UQVWLS¥^LT

@HWI-EAS443:3:60:615:1060#0/1  
AATGTGCATGTGTAAATGGTTCTTGCTTTACTGTAATGAC  
+HWI-EAS443:3:60:615:1060#0/1  
`]W\_P]a`\_]\_a]``aa`X`\_aZXXa`\_`\_\_`\_X[]\_\_^  
@HWI-EAS443:3:60:618:2040#0/1  
TTCCAATTGTTAGCCAATTGATGCCATCATGACAAGCACT  
+HWI-EAS443:3:60:618:2040#0/1  
¥``ZRW¥^aXa\_Z^\_a\_\_\_ZZZZ[\_¥\_Z]Za[ZVLZFOFX  
@HWI-EAS443:3:60:646:528#0/1  
GTCTGCTTGGTCAGCAAGTGCTTGTGCATGATGGCATCAATT  
+HWI-EAS443:3:60:646:528#0/1  
a\_baaaa`\_]\_a]aa\_\_aXa`Za¥^`^`]¥`]\_\_\_\_\_^\_ZW\_  
@HWI-EAS443:3:60:689:1088#0/1  
GTCCATCCGTTCCGATCCCAAATCATCTCAAACCGTTTC  
+HWI-EAS443:3:60:689:1088#0/1  
aPY]^``¥b`aR[RZSY[aW]a`Z]^\_N\_U\_\_\_^U^V[]]  
@HWI-EAS443:3:60:693:1226#0/1  
CAAATACGGCAATGGTGTGGATAGGGAGAACTAAAAGC  
+HWI-EAS443:3:60:693:1226#0/1  
abaabbbaa\_a`^`¥`ab¥`\_aa`\_]`aaa\_```aa^`  
@HWI-EAS443:3:60:851:97#0/1  
AAAAGCATTAGTTCAAGAAACGGTTTTGAGATGATTTGGG  
+HWI-EAS443:3:60:851:97#0/1  
a\_^Sb^bab]bT`a\_Yb\_\_a\_baYa`\_`M`¥YaU\_\_\_\_`^`  
@HWI-EAS443:3:60:85:269#0/1  
TCTGGCCAGAAATCCAATTGTTAGCCAATTGATGCCAT  
+HWI-EAS443:3:60:85:269#0/1  
abaa`aa^abaaV\_aaaaaaa`\_]\_a`\_W`^\_V]]^SX]  
@HWI-EAS443:3:60:899:619#0/1  
CAAAGAGAACAATCTGGACTAGCGGGAGCAGCATATCC  
+HWI-EAS443:3:60:899:619#0/1  
aa``aabaa`aabaaPbaba`a`aaaa^`\_W¥S]^`\_]`]  
@HWI-EAS443:3:60:902:1974#0/1  
TGCATTCCAAGGGGAGCATGATATGAATGGTTCCCTTAT  
+HWI-EAS443:3:60:902:1974#0/1  
abaaZbab]]a\_aaa\_WVa^V]]`Y`\_a`\_UZWTXPU\_Q  
@HWI-EAS443:3:60:910:431#0/1  
CGATACTGGACCACAACCTGCCTGTCTTATCATTAGGGCGT  
+HWI-EAS443:3:60:910:431#0/1  
aa`a`aba\_aa```aa`a`\_aa¥\_a`^\_\_\_a¥¥^ZZ¥WY  
@HWI-EAS443:3:60:963:1415#0/1  
AGCGACTGACTCAAATCTTGAGTTGTATGGAGAGGGA  
+HWI-EAS443:3:60:963:1415#0/1  
]\_\_\_\_\_b``bba`aa`bbaa`^ab`aaaa^a]]`Z`a]  
@HWI-EAS443:3:60:965:130#0/1  
GCCCGCTAATTTACGGAAACCACTGACTGTCCAGCAGCA  
+HWI-EAS443:3:60:965:130#0/1  
a``\_a`\_[\_]M]S¥`UZV¥W¥YWY\_WW¥YYUYUWWYVUK  
@HWI-EAS443:3:60:996:1327#0/1  
GTTCGATATGGGCTCCTGTCTTTAATGGTTCCATTGGAAT

+HWI-EAS443:3:60:996:1327#0/1  
a\_aaaaaa\_a\_aaaaaa\_`aaa\_a`a\_V^[\_[\_ZLX`\_  
@HWI-EAS443:3:61:1036:1370#0/1  
GATTTTCGGAGACAATCCACGCCCTAATGATAAGACAGGC  
+HWI-EAS443:3:61:1036:1370#0/1  
\_G¥`a\_a[W¥`U]a\_¥[¥^[aaaYJ^PYS^[WU¥UTRUB  
@HWI-EAS443:3:61:1127:827#0/1  
CAGGATATAGCGGGAGTTTTGTTTCAGCATCCAGAACTAAC  
+HWI-EAS443:3:61:1127:827#0/1  
abbbbbbbbbbbbbbbbabbbb\_bbbbaaa`^aaaa\_aaaX  
@HWI-EAS443:3:61:112:2021#0/1  
ACTTTAACACAGCCACTGCCCCATTGTCTGGGCCAGAAAT  
+HWI-EAS443:3:61:112:2021#0/1  
abbbbbbbb\_b]a`aa`^\_aa\_R[^\_]\_Y^0[YX]VXXXV  
@HWI-EAS443:3:61:1140:460#0/1  
GAGAACTAAAAGCATTAGTTCAAGAAACGGTTTTGAGATG  
+HWI-EAS443:3:61:1140:460#0/1  
aa`\_a\_¥``aaa\_\_ZQ]a^]a\_[`\_\_\_^a¥S[[]]YXYYS[  
@HWI-EAS443:3:61:1202:1540#0/1  
AGGTCTTATACAATCCAGCCCTGTTAGTTCTGGATGCTGA  
+HWI-EAS443:3:61:1202:1540#0/1  
`¥\_MP`^bbabbaaYaa¥abaa[Y]QZ\_[]\_[F]RTRVHW  
@HWI-EAS443:3:61:1221:1478#0/1  
ATGCCGTTGTACTTTAACACAGCCACTGCCCCATTGTCTG  
+HWI-EAS443:3:61:1221:1478#0/1  
aa[¥aa[\_aRa\_a\_aaaaa\_b`a`aaaZ`\_ZZ^\_^]V]ZF  
@HWI-EAS443:3:61:1263:444#0/1  
ATCATGCTCCCCCTTGAATGCAGAACCTTCTTCTTACT  
+HWI-EAS443:3:61:1263:444#0/1  
\_b^abbabaaaaaaabaaa\_aaaa]]`V\_`\_`^^^X[G¥  
@HWI-EAS443:3:61:1305:1080#0/1  
CAGACATATGTTAACATCAGCAACACCAACTTTGCTGCTG  
+HWI-EAS443:3:61:1305:1080#0/1  
ababbbbababaaabbbb¥``bababa]ab`aaa\_^`¥  
@HWI-EAS443:3:61:1315:429#0/1  
TGCCGTTGTACTTTAACACAGCCACTGCCCCATTGTCTGG  
+HWI-EAS443:3:61:1315:429#0/1  
aa\_a\_`ab`aaaaaaababbbbaabaaa^`aa^`^Z¥ZUW  
@HWI-EAS443:3:61:1378:1217#0/1  
CAAAACTCCCGCTATATCCTGACCACTCATTATTCTTAC  
+HWI-EAS443:3:61:1378:1217#0/1  
`abbbbbbaabaabaabaababbbbaabaaaa`a\_VW\_`^  
@HWI-EAS443:3:61:1382:1419#0/1  
TGCATGTGTAATGGTTCTTGCTTTACTGTAATGACCGAT  
+HWI-EAS443:3:61:1382:1419#0/1  
]R\_aba[XIaa\_\_b^0`bbbabbb`aM``^H¥[Va\_¥U¥X^  
@HWI-EAS443:3:61:1409:1893#0/1  
CCTCTCCATACAACCTCAAGATTTGAGTCAGTCGCTTGGTC  
+HWI-EAS443:3:61:1409:1893#0/1  
aabbaabbbbaa`ababbaabbbb\_aaaY[^]``Z^VU



@HWI-EAS443:3:61:1462:87#0/1  
ATCCACTAACAGGGCAGAGAGAGGAATTGCCCGCTAATTT  
+HWI-EAS443:3:61:1462:87#0/1  
abaaaabaa\_`baaa\_a`a\_a`aa\_\_`ZZZ[V\_¥U\_YW  
@HWI-EAS443:3:61:146:590#0/1  
CGTTCCGATCCCAAATCATCTCAAACCGTTTCTTGA  
+HWI-EAS443:3:61:146:590#0/1  
ababbbb`abbbaba`aab`aZW`Ya^a]^¥W¥^Z]Y]  
@HWI-EAS443:3:61:1580:945#0/1  
CAACTGCCTGTCTTATCATTAGGGCGTGGATTGTCTCCGA  
+HWI-EAS443:3:61:1580:945#0/1  
`bbbbabbbbabbabbbbbaaa]^ZY`[  
@HWI-EAS443:3:61:1587:1138#0/1  
ATCCGTTCCGATCCCAAATCATCTCAAACCGTTTCTTGA  
+HWI-EAS443:3:61:1587:1138#0/1  
aba`aaa^aa\_a`\_¥a`a\_a`a\_aa`aW]aX^\_Z]^ZZ  
@HWI-EAS443:3:61:1621:903#0/1  
TGTCTTAATGGTTCCATTGGAATGTTTGTCTTAGCAA  
+HWI-EAS443:3:61:1621:903#0/1  
QVa\_b\_a^[\_^`¥^L[[\_`¥¥XU\_a]a¥Z^SUY^]XKFUW  
@HWI-EAS443:3:61:1688:196#0/1  
CAAGCGACTGACTCAAATCTTGAGTTGTATGGAGAGGGAA  
+HWI-EAS443:3:61:1688:196#0/1  
abbaabbbbabbabbbbba`babb`abbb\_a^a\_a\_  
@HWI-EAS443:3:61:1694:1890#0/1  
CTTGAATGCAGAACCTTCTTCTTACTCAAGGGCCTTG  
+HWI-EAS443:3:61:1694:1890#0/1  
\_S^T[^baa\_baa\_]`aZ]abba^X^`a`\_Y\_XRO\_  
@HWI-EAS443:3:61:1729:114#0/1  
GCAGAACCTTCTTCTTACTCAAGGGCCTTGCTAAATGA  
+HWI-EAS443:3:61:1729:114#0/1  
`^`^`\_RVU`Y¥¥0`a\_]^^]Ya`\_XX]YVHTYYXNI  
@HWI-EAS443:3:61:1761:466#0/1  
CAGACATATGTTAACATCAGCAACACCACTTTGCTGCTG  
+HWI-EAS443:3:61:1761:466#0/1  
abbb\_¥bbb]bbb`bbbbba`aT`^`aaa`\_¥¥Z^]]]  
@HWI-EAS443:3:61:1786:1092#0/1  
ATGCAGTGGGATTTTCGGAGACAATCCACGCCCTAATGAT  
+HWI-EAS443:3:61:1786:1092#0/1  
abaaabaaaaaaaa`bbaaa^aaa`a][Y\_UXX¥WWWO  
@HWI-EAS443:3:61:212:200#0/1  
CATTGTCTGGGCCAGAAATCCAATTGTTAGCCAATTGAT  
+HWI-EAS443:3:61:212:200#0/1  
abbbbabbbbaaaaa^`Z\_`\_]\_YOZ\_a`aa`ZTT¥Y¥]UY  
@HWI-EAS443:3:61:245:1224#0/1  
TGCAGAACCTTCTTCTTACTCAAGGGCCTTGCTAAATG  
+HWI-EAS443:3:61:245:1224#0/1  
^^bZ\_bbbbaaaa`a`aa`baaUa`X[\_aa]\_[\_`\_^\_^  
@HWI-EAS443:3:61:276:873#0/1  
AGGGGCCTTGCTAAATGACAAACATTCCAATGGAACCATT

+HWI-EAS443:3:61:276:873#0/1  
`a¥^^a`^aa[bb^aa`Y]Y\_`]]\_`^0^a\_a\_\_Z\_\_]  
@HWI-EAS443:3:61:277:642#0/1  
GGATATAGCGGGAGTTTTGTTTCAGCATCCAGAACTAACAG  
+HWI-EAS443:3:61:277:642#0/1  
aa¥[Y[\_V¥\_`^[^SY]XUWTPSXKP¥TSTUTTWWWRR  
@HWI-EAS443:3:61:286:45#0/1  
ACTGGGACAGACAATAACTTCTCAATAAAGCAAGATATCG  
+HWI-EAS443:3:61:286:45#0/1  
`[bbba]abbaUX^X`a^^`W¥Y]XQL^aXPY\_]¥Z]X\_  
@HWI-EAS443:3:61:333:72#0/1  
TAATAACAGACACTATCAAGAGTTGGAGAAACAATATATT  
+HWI-EAS443:3:61:333:72#0/1  
UY```¥]\_^]VYaaaX¥T`GXRY[Q¥RJPRY\_ZY¥Q]\_  
@HWI-EAS443:3:61:339:368#0/1  
CAAATACGGCAATGGTGTGGATAGGGAGAACTAAAAGC  
+HWI-EAS443:3:61:339:368#0/1  
a^bb`bbbbbb`Wb`bab\_Y\_aa¥``a\_aP^``aaUM  
@HWI-EAS443:3:61:376:871#0/1  
ATCATGACAAGCACTTGCTGACCAAGCGACTGACTCAAAT  
+HWI-EAS443:3:61:376:871#0/1  
aaaba\_]aaaaa`a`^aaaa\_]Y\_\_\_\_\_`Y]\_\_^XYY  
@HWI-EAS443:3:61:418:211#0/1  
CAGACATATGTTAACATCAGCAACACCAACTTTGCTGCTG  
+HWI-EAS443:3:61:418:211#0/1  
aaba`]a^bbabaa`aaaa`^KY¥a\_a\_]\_^]`^\_]YX  
@HWI-EAS443:3:61:514:1430#0/1  
CATGCTCCCCCTTGAATGCAGAACCTTCTTCTTACTCA  
+HWI-EAS443:3:61:514:1430#0/1  
`aaa`aa^\_abbaXR]aabbba^`aaaaaaaa^`\_aQ\_UZ  
@HWI-EAS443:3:61:553:398#0/1  
ATAACAGACACTATCAAGAGTTGGAGAAACAATATATTGA  
+HWI-EAS443:3:61:553:398#0/1  
abaaa^b¥`baaaa`^^`^`\_\_aa¥`^^]\_^Z^`\_^\_^\_  
@HWI-EAS443:3:61:560:1336#0/1  
CAATATATTGAGAACAAGAGTCTGAATGTGCATGTGTA  
+HWI-EAS443:3:61:560:1336#0/1  
aa^b¥baaaabb`aba\_K^Vaa\_baaaa\_]`Z`^\_V¥V[  
@HWI-EAS443:3:61:670:1200#0/1  
ATTTGACTATCTTCCCTTTTCTATTCTGAAGATCTTGTA  
+HWI-EAS443:3:61:670:1200#0/1  
\_\_bb¥`b`¥``aaabb`b`ab^W]bba\_Y^a`aa\_Y\_^a  
@HWI-EAS443:3:61:680:2036#0/1  
CAGACATATGTTAACATCAGCAACACCAACTTTGCTGCTG  
+HWI-EAS443:3:61:680:2036#0/1  
abaaaZ\_^¥¥S\_U¥``a`\_Z¥¥H\_S``[Y]\_Y^]VXYQFQ  
@HWI-EAS443:3:61:696:1147#0/1  
GCATGTGTAATGGTTCTTGCTTTACTGTAATGACCGATG  
+HWI-EAS443:3:61:696:1147#0/1  
aaa\_a^a]\_``aa`^a\_`¥a\_\_`Va^a`\_^\_]X^

@HWI-EAS443:3:61:751:891#0/1  
TGCCTGTCTTATCATTAGGGCGTGGATTGTCTCCGAAAAT  
+HWI-EAS443:3:61:751:891#0/1  
`V`aaaabaaaa\_ab`]aa\_b\_^a`a\_^X#^a][^^Y]YV  
@HWI-EAS443:3:61:783:45#0/1  
CAGACTCTTGTGTTCTCAATATATTGTTTCTCCAACCTCTT  
+HWI-EAS443:3:61:783:45#0/1  
abbaabaaabababaabaaa`Y`ab`aa^]WY\_ZW#]^]  
@HWI-EAS443:3:61:788:1578#0/1  
TGTCCCAGTCCATCCGTTCCGATCCCAAATCATCTCAAAA  
+HWI-EAS443:3:61:788:1578#0/1  
aa`\_`b\_Sa`aa\_\_a\_[^Y\_a\_a`\_a#\_^W\_XUUZ]]^V  
@HWI-EAS443:3:61:849:135#0/1  
CAACTGCCTGTCTTATCATTAGGGCGTGGATTGTCTCCGA  
+HWI-EAS443:3:61:849:135#0/1  
`a`bbabb`a\_ba`\_aaaa\_\_`^aa^`\_W\_^]YR]XXVU  
@HWI-EAS443:3:61:852:1173#0/1  
ATTGTATAAGACCTTGCTTCTGGGTTGAACTAATCAGAGG  
+HWI-EAS443:3:61:852:1173#0/1  
Z^]PYa[^a]\_ab#Y#Y#^\_]`\_POU`bbaa^`aaa\_`[`  
@HWI-EAS443:3:61:862:577#0/1  
CAAGAAGAAGGTTCTGCATTCCAAGGGGAGCATGATATG  
+HWI-EAS443:3:61:862:577#0/1  
aaab\_`a`^ab\_baabbaabb[`a]bababaaaa`\_`\_  
@HWI-EAS443:3:61:898:321#0/1  
AGAACCTTCTTCTTGACTCAAGGGCCTTGCTAAATGACA  
+HWI-EAS443:3:61:898:321#0/1  
abaaaaaaaaaaaaaaaaaa\_aa`aa`^a`\_`\_^\_W\_\_^ZZ]  
@HWI-EAS443:3:61:911:1517#0/1  
AATTGATGCCATCATGACAAGCACTTGCTGACCAAGCGAC  
+HWI-EAS443:3:61:911:1517#0/1  
a`aaaaaaaaaaa\_aaaaa`aaaaa\_\_]`\_]^Z^^^V\_XU  
@HWI-EAS443:3:61:921:147#0/1  
GCTCCATTAGACGATACTGGACCACAACCTGCCTGTCTTAT  
+HWI-EAS443:3:61:921:147#0/1  
a`]\_#^`\_Y]YX`^\_\_S[[ZRX]R#Z[VUQRUTQUUUVW  
@HWI-EAS443:3:61:943:565#0/1  
CGTGGGTGTCTTCAACCAGAATCTGGAATATCAGATAGG  
+HWI-EAS443:3:61:943:565#0/1  
`bVbba[abbbbbbbbbbb`abbbbaaabbb\_]H]aaaa  
@HWI-EAS443:3:61:947:1247#0/1  
ATCATGACAAGCACTTGCTGACCAAGCGACTGACTCAAAT  
+HWI-EAS443:3:61:947:1247#0/1  
\_`\_UWT[b[WU^Tb\_#\_#a^aa`^Wb[^a\_]\_\_\_\_YYTZY  
@HWI-EAS443:3:61:954:1072#0/1  
CAAAGAGAACAATCTGGACTAGCGGGAGCAGCATATCC  
+HWI-EAS443:3:61:954:1072#0/1  
`^aa`\_\_a`abXaaaa`baa[P]aaa\_Z\_[X^LLOVMGS  
@HWI-EAS443:3:61:984:860#0/1  
GACCACAACCTGCCTGTCTTATCATTAGGGCGTGGATTGTC

+HWI-EAS443:3:61:984:860#0/1  
a\_a\_\_`[Q`V]^``\_a`aa``Z\_\_\_¥RZa\_W[SS[UZUW  
@HWI-EAS443:3:62:1007:846#0/1  
TATAGCGGGAGTTTTGTTTCAGCATCCAGAACTAACAGGGC  
+HWI-EAS443:3:62:1007:846#0/1  
aaaaaaba`aY`aa`\_`\_aa\_\_\_\_\_^`a`\_\_\_U[\_\_\_[^  
@HWI-EAS443:3:62:1052:1007#0/1  
CAGGGATAACTGGCATGGCTCGAATCGACCGTGGGTGTCT  
+HWI-EAS443:3:62:1052:1007#0/1  
abba\_\_bZb\_baaaaa`abaXW\_[PSP[X]SR`^BBBBB  
@HWI-EAS443:3:62:1110:1885#0/1  
CAAAATCAGATTGAAACATGCAATCAAAGCGTCATTACTT  
+HWI-EAS443:3:62:1110:1885#0/1  
M^bab¥bb¥a`abbb`bb`b`bb\_aX`a`aaVaabbbbab  
@HWI-EAS443:3:62:1158:125#0/1  
CGCTTGGTCAGCAAGTGCTTGTTCATGATGGCATCAATTGG  
+HWI-EAS443:3:62:1158:125#0/1  
ab[b`b`\_UaabbbUYVaaba`UY]aS`\_a]\_a\_PU`\_\_  
@HWI-EAS443:3:62:1205:611#0/1  
GCATGTGTAATGGTTCTTGCTTTACTGTAATGACCGATG  
+HWI-EAS443:3:62:1205:611#0/1  
a\_abbab`]aaabb`abaaaaa`\_aa\_^[^aa^Za``a  
@HWI-EAS443:3:62:125:1552#0/1  
TTTTCGGAGACAATCCACGCCCTAATGATAAGACAGGCAG  
+HWI-EAS443:3:62:125:1552#0/1  
abaabbaa`^`baaaaaa``aaa`a``\_]Z\_XV[\_BBBBB  
@HWI-EAS443:3:62:125:1733#0/1  
GTCTCCGAAAATCCCCTGTCATATGTATCCTATCTGATAT  
+HWI-EAS443:3:62:125:1733#0/1  
\_Q^a\_[a¥^Y`UWY\_¥Z[]`a`Z]0\_\_\_]^`^W]HXY\_W  
@HWI-EAS443:3:62:1312:1177#0/1  
CAAGAAACGGTTTTGAGATGATTTGGGATCCGAACGGATG  
+HWI-EAS443:3:62:1312:1177#0/1  
^aabb`\_`\_`baba`abbbaabb]aaaaaba`aaa]aa  
@HWI-EAS443:3:62:133:1704#0/1  
CATCAATTGGCTAACAAATTGGAATTTCTGGCCAGACAAT  
+HWI-EAS443:3:62:133:1704#0/1  
aWUZ¥Va[\_`a)`¥`YS^Z[P^\_UQLNPZUY\_¥TQQWBB  
@HWI-EAS443:3:62:1356:2003#0/1  
GCCCCGTAATTTACGGAAACCACTGACTGTCCAGCAGCA  
+HWI-EAS443:3:62:1356:2003#0/1  
aaT[ST[]`^aRY¥S\_]`\_`\_aYaYNTYO\_]VSW[WU[NLS  
@HWI-EAS443:3:62:1371:584#0/1  
CAGCAAGTGCTTGTTCATGATGGCATCAATTGGCTAACAAAT  
+HWI-EAS443:3:62:1371:584#0/1  
abbabababababa`bbaabbabaa\_\_aaaa`aa\_\_`aaa  
@HWI-EAS443:3:62:137:741#0/1  
GCCAGAAATTCCAATTGTTAGCCAATTGATGCCATCATGA  
+HWI-EAS443:3:62:137:741#0/1  
abbbbbbabbabb`ab`abbabb`a`aaaaaa\_aa```

@HWI-EAS443:3:62:1497:512#0/1  
CACGGTTCGATTCGAGCCATGCCAGTTATCCCTGCACACAC  
+HWI-EAS443:3:62:1497:512#0/1  
[`^aaUab`bb`b`aabb]]aabbYbab^aba``a\_``aa  
@HWI-EAS443:3:62:1544:1711#0/1  
AACTTGGGAATCAAAATCAGATTGAAACATGCAATCAAAG  
+HWI-EAS443:3:62:1544:1711#0/1  
RWV]K]U]\_`\_¥Q\_`\_`bYV]I[[^aa`^a\_`\_Y^ST`ba  
@HWI-EAS443:3:62:1552:1048#0/1  
CAAAATCAGATTGAAACATGCAATCAAAGCGTCATTACTT  
+HWI-EAS443:3:62:1552:1048#0/1  
abbbbbbabbbbbab`abbbabaaaa`abab`aabaaabb  
@HWI-EAS443:3:62:1590:619#0/1  
GTCAGGATATAGCGGGAGTTTTGTTTCAGCATCCAGAACTA  
+HWI-EAS443:3:62:1590:619#0/1  
aab`b``aaaa`abb\_b¥aaa`\_a^\_\_``a[]^`^aXaa  
@HWI-EAS443:3:62:159:586#0/1  
CGCTAGTCCAGATTGTGTTCTCTTTGGGTCGCCCTCTGAT  
+HWI-EAS443:3:62:159:586#0/1  
abab`bZbab¥¥\_`^V¥\_bb`baa\_b`aQ``b\_aaaa^a^  
@HWI-EAS443:3:62:1609:229#0/1  
CAGCATCCAGAACTAACAGGGCTGGATTGTATAAGACCTT  
+HWI-EAS443:3:62:1609:229#0/1  
`ababbaaaaabab`baaaaa\_\_aa\_aaaaaa``\_Y^\_\_  
@HWI-EAS443:3:62:1708:1045#0/1  
CCGCTAATTTACGGAAACCACTGACTGTCCAGCAGCAAA  
+HWI-EAS443:3:62:1708:1045#0/1  
abbbbbbbbaabbaaba`a\_aa`^```\_a\_\_]\_\_U¥¥`  
@HWI-EAS443:3:62:1746:1694#0/1  
GGTGTGGATAGGGAGAACTAAAAGCATTAGTTCAAGAA  
+HWI-EAS443:3:62:1746:1694#0/1  
^J^XU]V[U^VTQW]a[Z]]¥`ZXNPXZW]WLO[P^[¥X  
@HWI-EAS443:3:62:1765:1567#0/1  
AAGCGACTGACTCAAATCTTGAGTTGTATGGAGAGGGAAC  
+HWI-EAS443:3:62:1765:1567#0/1  
VSZSZQZ\_^ab[\_WZ¥``WW]H`WP]``\_ZS¥^X\_```a`  
@HWI-EAS443:3:62:210:1698#0/1  
CGACCGTGGGTGTCTTTCAACCAGAATCTGGAATATCAGA  
+HWI-EAS443:3:62:210:1698#0/1  
abaa``]aaa]`^aaa\_baabab`a`\_aaa\_^Y^\_^]`\_\_  
@HWI-EAS443:3:62:241:28#0/1  
GTTCCCTCTCCATACAACCTCAAGATTTGAGTCAGTCGCTT  
+HWI-EAS443:3:62:241:28#0/1  
aX\_^^V[WVZ[Y]T^VR¥YVHR^YX]]X\_VTRZXUSWTU  
@HWI-EAS443:3:62:264:1857#0/1  
GCTTGGTCAGCAAGTGCTTGTCATGATGGCATCAATTGGC  
+HWI-EAS443:3:62:264:1857#0/1  
^aaa[TX`a^a`\_¥V\_\_^^SU^`\_V]YOXV\_V]]YXUVY  
@HWI-EAS443:3:62:332:920#0/1  
TTCTGGATGCTGAACAAAACCTCCCGCTATATCCTGACCAC

+HWI-EAS443:3:62:332:920#0/1  
`X`a^WY\_\_YYSR[aYPNJX[a]aXFXa]TFU\_\_`X`ZS^  
@HWI-EAS443:3:62:346:603#0/1  
CGCTAATTTTCACGAAACCACTGACTGTCCAGCAGCAAAG  
+HWI-EAS443:3:62:346:603#0/1  
a`]^\_S^]^^X^W^`S`^[]a^PZ[QY¥[BBBBBBBBBB  
@HWI-EAS443:3:62:370:1285#0/1  
CTCCTGTCTTTAATGGTTCCATTGGAATGTTTGTCTTTA  
+HWI-EAS443:3:62:370:1285#0/1  
a`aaaa\_aaaaaaaa]\_aa]aa\_WXRU[^aUPRPU^SPR  
@HWI-EAS443:3:62:460:1493#0/1  
GTTATTATGCCGTTGTACTTTAACACAGCCACTGCCCAT  
+HWI-EAS443:3:62:460:1493#0/1  
`U¥^\_]aSZ^`¥]^Ya]a\_\_baa`aa[a^MZ][\_Y[[QY  
@HWI-EAS443:3:62:533:685#0/1  
TTTTGTGGTGTAACAGTGACACTGTGGGTTGGTCTTGGC  
+HWI-EAS443:3:62:533:685#0/1  
`a[abY^W¥Y0a\_J¥\_^SZ`a`¥a0QY¥RY\_^R]Y¥[Y\_  
@HWI-EAS443:3:62:622:196#0/1  
CAGACATATGTTAACATCAGCAACACCACTTTGCTGCTG  
+HWI-EAS443:3:62:622:196#0/1  
\_`b`abb]bb]babbbbaabbbba`a`````aa`Za\_[a  
@HWI-EAS443:3:62:68:476#0/1  
AAATACGCAATGGTGTGGATAGGGAGAACTAAAAGCA  
+HWI-EAS443:3:62:68:476#0/1  
Y`S^aYZ¥Uaa¥X¥S]SZbU\_\_JWT^YVRI¥[]YGS¥MSG  
@HWI-EAS443:3:62:727:566#0/1  
CAGGAGCATTCTCATAGTGATAATTAGGGGCATTCATTT  
+HWI-EAS443:3:62:727:566#0/1  
Yaa¥\_\_a\_[a\_a``\_^¥aUaYa\_a`¥S\_¥aa[Xa\_S\_b]]  
@HWI-EAS443:3:62:772:447#0/1  
CATATGCAGTGGGATTTTCGGAGACAATCCACGCCCTAAT  
+HWI-EAS443:3:62:772:447#0/1  
ab``abaaa`aaa`aaa`a`\_a\_aa\_\_`\_aZ`¥¥Z\_^¥^  
@HWI-EAS443:3:62:799:422#0/1  
AACAGACACTATCAAGAGTTGGAGAAACAATATATTGAGA  
+HWI-EAS443:3:62:799:422#0/1  
a`abaabaaaaaab^bSaaa\_a`^a\_aa`a^\_\_\_\_``[  
@HWI-EAS443:3:62:872:160#0/1  
GTCAGGATATAGCGGGAGTTTTGTTTCAGCATCCAGAACTA  
+HWI-EAS443:3:62:872:160#0/1  
a\_aSaa]\_``]X]aa^Z^J^\_¥^W^RY[^\_WM^[QTVLRY  
@HWI-EAS443:3:62:890:106#0/1  
GCAAGGTCTTATACAATCCAGCCCTGTTAGTTCTGGATGC  
+HWI-EAS443:3:62:890:106#0/1  
a]`\_\_`Z\_\_a\_]^^^\_[X]ZWWZ^^ZZ^Z]X^ZZZZYY  
@HWI-EAS443:3:62:89:1283#0/1  
GTCCAGCAGCAAAGTTGGTGTGCTGATGTTAACATATGT  
+HWI-EAS443:3:62:89:1283#0/1  
aaab^Waa^]Q^T`X`QW]a^a\_aa`¥\_]¥`^`¥]Y\_]^X

@HWI-EAS443:3:62:907:1539#0/1  
TGCTGCTCCCGCTAGTCCAGATTGTGTTCTCTTTGGGTCCG  
+HWI-EAS443:3:62:907:1539#0/1  
aabbbaUZW[bb`WI¥Y]]Z]a`a^aaH`aaZS`]a\_H  
@HWI-EAS443:3:62:927:1491#0/1  
CATGTGTAATGGTTCTTGCTTTACTGTAATGACCGATGG  
+HWI-EAS443:3:62:927:1491#0/1  
aabb\_babbab`b`babbaabbaa`aa\_aaaaa`aaaa`  
@HWI-EAS443:3:62:92:430#0/1  
GTGGTGTAAACAGTGACACTGTGGGTTGGTCTTGCCAGA  
+HWI-EAS443:3:62:92:430#0/1  
aZbbU]]a^X`a\_^aaa`^[aU`X^¥T\_[Q\_\_[\_¥UU]W[  
@HWI-EAS443:3:62:955:82#0/1  
GAAGGTTCTGCATTCCAAGGGGAGCATGATATGAATGGT  
+HWI-EAS443:3:62:955:82#0/1  
aRU^]V^\_V\_WVZ^]VVQ[\_Y^\_W^WX]]WUXW^XYXXXX  
@HWI-EAS443:3:62:965:1586#0/1  
ATTCAGACTCTTGTTCTCAATATATTGTTTCTCCA  
+HWI-EAS443:3:62:965:1586#0/1  
aaaaaaaa\_aaa`X¥`\_`a\_aa`aaa`a`\_`a`\_`\_YU\_\_\_\_  
@HWI-EAS443:3:62:96:1965#0/1  
GGATCCGAACGGATGGACTGGGACAGACAATAACTTCTCA  
+HWI-EAS443:3:62:96:1965#0/1  
^b[abaa[aaaa`a\_X[a]WYa`^ZZT]a`Y[]X]^Y]a`  
@HWI-EAS443:3:62:983:382#0/1  
GAAACATGCAATCAAAGCGTACTTATGAAAACAACA  
+HWI-EAS443:3:62:983:382#0/1  
aaaaaaaaaaaa`\_aaa`\_a^`\_`\_`^`^T\_a`\_`\_`\_Z`^`^`  
@HWI-EAS443:3:63:1012:1584#0/1  
GGTTGAAAGACACCCACGGTCGATTCGAGCCATGCCAGTT  
+HWI-EAS443:3:63:1012:1584#0/1  
a`X`[`aa]]aa`¥Y]aaaQV][S^[[^`\_S^¥[[[^^WVW  
@HWI-EAS443:3:63:1092:1178#0/1  
CGATACTGGACCACAACCTGCCTGTCTTATCATTAGGGCGT  
+HWI-EAS443:3:63:1092:1178#0/1  
aaZX`\_aa^a`\_`\_`a\_aaa\_Ua\_a[\_`a[`V[]¥^aS¥¥\_Z  
@HWI-EAS443:3:63:1123:1225#0/1  
ATCATGACAAGCACTTGCTGACCAAGCGACTGACTCAAAT  
+HWI-EAS443:3:63:1123:1225#0/1  
ab`\_`b`¥]abaa^aaaaa^\_`^`\_`abaaaa\_\_aY¥Ya\_  
@HWI-EAS443:3:63:1138:491#0/1  
GCGGGAGCAGCATATCCTTTTGTGGTGTAAACAGTGACAC  
+HWI-EAS443:3:63:1138:491#0/1  
a\_^¥aZXPV^¥^Xa]Xb\_S]b]aK[aaUaa`ZaQP^XZ¥N  
@HWI-EAS443:3:63:1202:1523#0/1  
GGCGACCCAAAGAGAACAATCTGGACTAGCGGGAGCAG  
+HWI-EAS443:3:63:1202:1523#0/1  
a^a¥`aa\_aaaa]^]a^`\_`aa`a`[\_V\_a[Z`\_`]UQQWX  
@HWI-EAS443:3:63:1298:1263#0/1  
TGCCCCTAATTATCACTATGAGGAATGCTCCTGTTATCCT

+HWI-EAS443:3:63:1298:1263#0/1  
aa^aaaaabaaaa`a``)`\_\_\_aa\_¥\_a\_`a[\_`]W¥[  
@HWI-EAS443:3:63:1373:1684#0/1  
AACTGCCTGTCTTATCATTAGGGCGTGGATTGTCTCCGAA  
+HWI-EAS443:3:63:1373:1684#0/1  
abbb\_TZVba^ab\_b`Kb]a[SYQZ\_]HHV¥V¥a`SY[a`  
@HWI-EAS443:3:63:1451:818#0/1  
ATGCAATCAAAGCGTCATTACTTATGAAAACAACACTTGG  
+HWI-EAS443:3:63:1451:818#0/1  
a¥`\_b^[Xa`b][\_]U]aaa]\_\_a^b`a`aU[aUaaaQ¥\_  
@HWI-EAS443:3:63:1468:92#0/1  
AGAAATTCCAATTGTTAGCCAATTGATGCCATCATGACAA  
+HWI-EAS443:3:63:1468:92#0/1  
^`¥b`aaYW`ab`a]¥`aSaa\_a\_a\_[[W\_Y^]a\_\_RW\_  
@HWI-EAS443:3:63:1484:1167#0/1  
CAAATCTTGAGTTGTATGGAGAGGGAACCTCACCAATAGG  
+HWI-EAS443:3:63:1484:1167#0/1  
aabab^babaa`bb`abbbababab``\_aaaa\_aaa```  
@HWI-EAS443:3:63:1502:756#0/1  
TTTACACCACAAAAGGATATGCTGCTCCCGCTAGTCCAGA  
+HWI-EAS443:3:63:1502:756#0/1  
a`aa\_`a\_`\_`\_\_a^a]`a`a\_a]``\_Y]\_]^Z^\_X[V\_]`  
@HWI-EAS443:3:63:1599:1230#0/1  
GTTCCCTCTCCATACAACCTCAAGATTTGAGTCAGTCGCTT  
+HWI-EAS443:3:63:1599:1230#0/1  
`aaa^\_bT\_`aaZ]\_a```YXYa]`a`aYaYXW`VT\_0^^  
@HWI-EAS443:3:63:1606:1852#0/1  
AAGACACCCACGGTCGATTCGAGCCATGCCAGTTATCCCT  
+HWI-EAS443:3:63:1606:1852#0/1  
aa\_`^aa^`a`\_\_SV\_S`\_WV^VQ¥^]GGVSVG\_\_BBBBB  
@HWI-EAS443:3:63:1622:490#0/1  
GCCACTCAATTCAACTTGGGAATCAAAATCAGATTGAAAC  
+HWI-EAS443:3:63:1622:490#0/1  
a\_abaa``\_aaa\_``aaba\_aaWa\_`a`\_\_aa\_a\_a`  
@HWI-EAS443:3:63:1653:730#0/1  
CAAGAGTCTGAATGTGCATGTGTAAATGGTTCTTGCTTTA  
+HWI-EAS443:3:63:1653:730#0/1  
aaa¥\_``^`^aZ¥S¥Z`\_VV^]`aba`Z[a]`a^]]ab¥  
@HWI-EAS443:3:63:170:1029#0/1  
CGCTAGTCCAGATTGTGTTCTCTTTGGGTCGCCCTCTGAT  
+HWI-EAS443:3:63:170:1029#0/1  
a`ab`Y]abab`aa¥¥a`aaaaaaaa`R\_X^Ya`\_\_`][  
@HWI-EAS443:3:63:1754:46#0/1  
CACTCATTTATTCTACGATATCTTGCTTTATTGAGAAGT  
+HWI-EAS443:3:63:1754:46#0/1  
a``[ZUZZKYQVX`[^T[[VS\_aaOSYRR[RYNXKZBBBB  
@HWI-EAS443:3:63:20:1902#0/1  
CCGTTCCGATCCCAAATCATCTCAAACCGTTTCTTGAAC  
+HWI-EAS443:3:63:20:1902#0/1  
ab^]]b`\_Z]bba^YUVa`^a^`]]aa¥¥YS¥[^[TX^^\_



@HWI-EAS443:3:63:220:570#0/1  
CCCCTAATTACTACTATGAGGAATGCTCCTGTTATCCTGA  
+HWI-EAS443:3:63:220:570#0/1  
\_aaaaaaaaa`a`aaa`\_W][`\_]\_\_a[Z\_a\_\_\_Z]^  
@HWI-EAS443:3:63:235:731#0/1  
GACCAACCCACAGTGTCACTGTTTACACCACAAAAGGATA  
+HWI-EAS443:3:63:235:731#0/1  
Zabaa\_a¥]^`b[\_`\_WW\_a`Ua[``\_]``TX`YYO\_`Z¥  
@HWI-EAS443:3:63:240:819#0/1  
GAACCATTTACACATGCACATTCAGACTCTTGTGTTCTCA  
+HWI-EAS443:3:63:240:819#0/1  
[¥ab```bbbbbbaa`\_Y\_aaaa\_a^baaaaa\_V]^aa[R  
@HWI-EAS443:3:63:250:197#0/1  
CAAATCTTGAGTTGTATGGAGAGGGAACCTCACCAATAGG  
+HWI-EAS443:3:63:250:197#0/1  
a`S\_aaaaa\_baaa\_aaba¥a\_aa`^Y¥`\_]¥`^`\_`Z  
@HWI-EAS443:3:63:250:445#0/1  
AGTTCAACCCAGAAGCAAGGTCTTATACAATCCAGCCCTG  
+HWI-EAS443:3:63:250:445#0/1  
Z\_b`bbabbbZbaa\_`aK\_a\_bbbbbUbbbaabb\_aaaaa  
@HWI-EAS443:3:63:259:1059#0/1  
ACTGACTGTCCAGCAGCAAAGTTGGTGTGCTGATGTTAA  
+HWI-EAS443:3:63:259:1059#0/1  
aaaaaaaaY``]¥]YSYSZV]R[WXT¥[XZNTTY][UO  
@HWI-EAS443:3:63:389:16#0/1  
GTGGGATTTTCGGAGACAATCCACGCCCTAATGATAAGAC  
+HWI-EAS443:3:63:389:16#0/1  
aa```Z\_aaaaba^a^]VY^`]^`^`\_`[¥^[^^Z^[[\_[B  
@HWI-EAS443:3:63:404:480#0/1  
TTCAAATACGGCAATGGTGTGTTGGATAGGGAGAACTAAAA  
+HWI-EAS443:3:63:404:480#0/1  
aaa¥`aaa\_aaa\_\_`a¥HZ]``[`W¥X¥Z^X^^\_LZ^¥\_`  
@HWI-EAS443:3:63:412:1539#0/1  
ATCAAAGCGTCATTACTTATGAAAACAACACTTGGGTAAA  
+HWI-EAS443:3:63:412:1539#0/1  
^aba^aab``aa``[`aaa^`^b¥a^^^a^a`TIVR``[  
@HWI-EAS443:3:63:442:333#0/1  
GGGCCTTGCTAAATGACAAACATTCCAATGGAACCATTAA  
+HWI-EAS443:3:63:442:333#0/1  
a\_aa\_a`a\_aaX\_aa\_\_a`X``\_\_a\_`^`^`^`[^\_]`  
@HWI-EAS443:3:63:445:1622#0/1  
ACTTTAACACAGCCACTGCCCCATTGTCTGGGCCAGAAAT  
+HWI-EAS443:3:63:445:1622#0/1  
`¥b`[ab`aba^babb\_`a\_`][a¥¥Va^YRZYBBBBBBB  
@HWI-EAS443:3:63:470:813#0/1  
CTGGGCCAGAAATTCCAATTGTTAGCCAATTGATGCCATC  
+HWI-EAS443:3:63:470:813#0/1  
aa`^`babb]ab`abbaabaa`aaaaaaaa]a``a\_\_a[`  
@HWI-EAS443:3:63:518:1960#0/1  
CAACTGCCTGTCTTATCATTAGGGCGTGGATTGTCTCCGA



@HWI-EAS443:3:63:863:1767#0/1  
TCCCTGCACACACATGTGATTTCACTAGAATCAGGATAAC  
+HWI-EAS443:3:63:863:1767#0/1  
^bbabbabb\_aabaababbabbbbaabbaabbaba`S]  
@HWI-EAS443:3:63:898:488#0/1  
TGACTGTCCAGCAGCAAAGTTGGTGTGCTGATGTTAACA  
+HWI-EAS443:3:63:898:488#0/1  
aa`ba¥¥^¥X^`]WXaaaa¥WMXR^[Z\_^^QV]QRQ\_\_` [  
@HWI-EAS443:3:63:940:833#0/1  
TTCCAATGGAACCATTAAGACAGGAGCCCATATCGAACC  
+HWI-EAS443:3:63:940:833#0/1  
aaa`aaa]\_\_a\_`a``T]\_X]a`Z^\_ZY\_Z^]]\_ZZUZ  
@HWI-EAS443:3:63:947:1432#0/1  
GGGCTCCTGTCTTTAATGGTTCATTGGAATGTTTGTGCAT  
+HWI-EAS443:3:63:947:1432#0/1  
\_b^bbbbb`abbbaabaa\_aba^abaaaaab\_aaa]Z\_`  
@HWI-EAS443:3:63:952:205#0/1  
ATTTAGCAAGGCCCTTGAGTCAAGAAGAAGTTCTGCAT  
+HWI-EAS443:3:63:952:205#0/1  
Wab`abbaaa`a`aab[\_aV`\_\_Z`aaY^`]X^Z^\_X^\_  
@HWI-EAS443:3:63:995:814#0/1  
GTCGCTTGGTCAGCAAGTGCTTGTGCATGATGGCATCAATT  
+HWI-EAS443:3:63:995:814#0/1  
`U`aa^¥T¥R```¥\_N[TZR\_X\_]VRZ^RZ][^PTNUPVY  
@HWI-EAS443:3:64:1087:628#0/1  
GACGATACTGGACCACAAGTGCCTGTCTTATCATTAGGGC  
+HWI-EAS443:3:64:1087:628#0/1  
a]a[R\_WZ\_bYQ¥a]aaaa[^¥YV]Xaa\_P\_YSYZZSVU^  
@HWI-EAS443:3:64:109:1244#0/1  
GAAATTCCAATTGTTAGCCAATTGATGCCATCATGACAAG  
+HWI-EAS443:3:64:109:1244#0/1  
^`bbbbbbb]bbbaabbbb]aaaaaaaa`aaaa\_aaaa  
@HWI-EAS443:3:64:1121:798#0/1  
TCCCGCTAGTCCAGATTGTGTTCTCTTTGGGTCGCCCTCT  
+HWI-EAS443:3:64:1121:798#0/1  
`baabaaaa^a`¥`[\_aWR`\_aXa^`^AT¥\_Q`\_W`U`^^  
@HWI-EAS443:3:64:1133:1227#0/1  
AATCGACCGTGGTGTCTTTCAACCAGAATCTGGAATATC  
+HWI-EAS443:3:64:1133:1227#0/1  
a`aab\_aaa\_a[aTa^^¥aaa\_a\_`a\_[\_\_]^]\_\_^¥¥[¥  
@HWI-EAS443:3:64:1158:1140#0/1  
ATATCATGCTCCCCCTTGAATGCAGAACCTTCTTCTTGA  
+HWI-EAS443:3:64:1158:1140#0/1  
`bbbababaaba\_a\_aa`b\_\_a`^a`^a`\_\_`a\_]aa^^^  
@HWI-EAS443:3:64:1195:1437#0/1  
ACTATGAGGAATGCTCCTGTTATCCTGATTCTAGTGAAAT  
+HWI-EAS443:3:64:1195:1437#0/1  
aaa``aaaaa\_[]aa\_[aYa\_a]M````\_[aa^¥`a`\_\_  
@HWI-EAS443:3:64:1201:249#0/1  
GCAGAACCTTCTTCTTACTCAAGGGCCTTGCTAAATGA

+HWI-EAS443:3:64:1201:249#0/1  
aab`b\_`aaa`aaaaa`a`aaa`aa]^`aa\_a\_\_\_aa\_  
@HWI-EAS443:3:64:120:723#0/1  
TCATGCTCCCCCTTGAATGCAGAACCTTCTTCTTGACTC  
+HWI-EAS443:3:64:120:723#0/1  
ab`aZ``a^`W¥]^a^ZW]X¥``ZV][S\_]\_Z^\_]`  
@HWI-EAS443:3:64:1230:875#0/1  
TTGGGATCCGAACGGATGGACTGGGACAGACAATAACTTC  
+HWI-EAS443:3:64:1230:875#0/1  
aabb``aaaa^a\_ba`a\_Z¥\_]`XZ[\_WR¥a]`¥U]\_\_  
@HWI-EAS443:3:64:129:1012#0/1  
TTCCCTCTCCATACAACCTCAAGATTTGAGTCAGTCGCTTG  
+HWI-EAS443:3:64:129:1012#0/1  
abaabababbaba`Y`aaaa\_aaaa\_a^aaa]`\_Y^^^  
@HWI-EAS443:3:64:132:230#0/1  
CGACCGTGGGTGTCTTTCAACCAGAATCTGGAATATCAGA  
+HWI-EAS443:3:64:132:230#0/1  
^abbb`abba[\_`a`ba`W\_`bbbaa`aaaa\_QW\_]a`  
@HWI-EAS443:3:64:1440:1918#0/1  
TGCCCCGTAATTTACGGAAACCACTGACTGTCCAGCAGC  
+HWI-EAS443:3:64:1440:1918#0/1  
`aaa]ba\_]a`aaa\_\_`a¥XaRVR¥XP`¥`[\_`¥\_]X^JV  
@HWI-EAS443:3:64:1567:1027#0/1  
CAATTGGCTAACAAATTGGAATTTCTGGCCCAGACAATGGG  
+HWI-EAS443:3:64:1567:1027#0/1  
U\_[]`Y`\_bbabbabb¥^Ubbba`]SZSW[\_UXYaa]YY  
@HWI-EAS443:3:64:1581:234#0/1  
GATTAGTTCAACCCAGAAGCAAGTCTTATACAATCCAGC  
+HWI-EAS443:3:64:1581:234#0/1  
aSIa`ZOV[YW^^UJZSSYHZW^\_WUJ^^[WVTV]WTWSF  
@HWI-EAS443:3:64:1596:399#0/1  
CACCCACGGTTCGATTCGAGCCATGCCAGTTATCCCTGCAC  
+HWI-EAS443:3:64:1596:399#0/1  
aa`aba`a`a`\_aVa`]Taaa`aaaa`]Ya\_Z\_aa`a^  
@HWI-EAS443:3:64:1654:977#0/1  
CAAAATCAGATTGAAACATGCAATCAAAGCGTCATTACTT  
+HWI-EAS443:3:64:1654:977#0/1  
^aabbbbbbbbbbbbabababb`aaa^b^a^baa]aa  
@HWI-EAS443:3:64:1705:1600#0/1  
GTCCAGCAGCAAAGTTGGTGTGCTGATGTAAACATATGT  
+HWI-EAS443:3:64:1705:1600#0/1  
a]Z\_Taa`YX[``aQW[\_G\_¥`\_Y[SGX]W^Z]]QUUUPS  
@HWI-EAS443:3:64:26:1145#0/1  
AGCCCATCCACTAACAGGGCAGAGAGGAATTGCCCGCT  
+HWI-EAS443:3:64:26:1145#0/1  
a\_aaaa¥baaa\_aa\_W\_¥XY``\_`¥\_^`¥J¥^Z[U^¥¥W  
@HWI-EAS443:3:64:302:903#0/1  
GATTTTCGGAGACAATCCACGCCCTAATGATAAGACAGGC  
+HWI-EAS443:3:64:302:903#0/1  
]abaaababaaaaba\_``^[[Ya`\_aa[0]¥]YZ^BBBBB

@HWI-EAS443:3:64:342:1500#0/1  
CAAGAGTCTGAATGTGCATGTGTAAATGGTTCTTGCTTTA  
+HWI-EAS443:3:64:342:1500#0/1  
aaaaa\_`aa`aa^\_aaaa\_a`U¥X¥a\_]\_^`\_^a\_\_\_\_  
@HWI-EAS443:3:64:468:1901#0/1  
ATCAGATTGAAACATGCAATCAAAGCGTCATTACTTATGA  
+HWI-EAS443:3:64:468:1901#0/1  
`ab`a\_X\_ab``Y]\_¥`a`a^ZY`WW\_\_`\_T]\_a[¥]  
@HWI-EAS443:3:64:563:1067#0/1  
CTAAAAGCATTAGTTCAAGAAACGGTTTTGAGATGATTTG  
+HWI-EAS443:3:64:563:1067#0/1  
aaa`ababbba¥^aaaa\_XYY^baa^aab`\_`^]]¥a`\_`  
@HWI-EAS443:3:64:563:474#0/1  
CAAATCTTGAGTTGTATGGAGAGGGAACCTCACCAATAGG  
+HWI-EAS443:3:64:563:474#0/1  
R¥Z^`\_`bb]TZ]\_\_W[\_aab\_^Ia]Jaa`Y\_^QVb\_`[b  
@HWI-EAS443:3:64:615:593#0/1  
GACACCCACGGTCGATTCGAGCCATGCCAGTTATCCCTGC  
+HWI-EAS443:3:64:615:593#0/1  
`a`^\_^aabb]S¥\_PX]a]X^U[]TZU¥]^¥ZW¥]Z]Y\_X  
@HWI-EAS443:3:64:711:1805#0/1  
CATTAGACGATACTGGACCACAACCTGCCTGTCTTATCATT  
+HWI-EAS443:3:64:711:1805#0/1  
abbbbabbab`aQ\_S][¥^Za^^JVNT^ZUZ^^^[]UNU[^  
@HWI-EAS443:3:64:746:1721#0/1  
GCCCCGTAATTTACGGAAACCACTGACTGTCCAGCAGCA  
+HWI-EAS443:3:64:746:1721#0/1  
Zbbbbbbbabbbba`b`b`ba`bZ`a`^`\_  
@HWI-EAS443:3:64:830:333#0/1  
CTCTCCATACACTCAAGATTTGAGTCAGTCGCTTGGTCA  
+HWI-EAS443:3:64:830:333#0/1  
a`bbbbbbbbbbbabbbbaabbbbaaab`aaa\_a`a¥^`  
@HWI-EAS443:3:64:923:1560#0/1  
CTTGAGTCAAGAAGAAGTTCTGCATTCCAAGGGGAGCA  
+HWI-EAS443:3:64:923:1560#0/1  
aab\_bb\_]`bb^a\_b`\_]U`]aaUb]Sabb]L]¥a^S\_a  
@HWI-EAS443:3:64:938:1331#0/1  
GTGAAATCAGTGTGTGCAGGGATAACTGGCATGGCTC  
+HWI-EAS443:3:64:938:1331#0/1  
QI`Z`¥]X^¥Z\_QW]O[JMMWZQO[\_WYTX`]]`YV^a]P  
@HWI-EAS443:3:65:1016:226#0/1  
GCAGAACCTTCTTCTGACTCAAGGGCCTTGCTAAATGA  
+HWI-EAS443:3:65:1016:226#0/1  
\_baaV]U¥ba`a[^Z]]]aaaaa`[aYTZZ¥Y^`TJZ  
@HWI-EAS443:3:65:1046:591#0/1  
GGGGCCTTGCTAAATGACAAACATTCCAATGGAACCATTA  
+HWI-EAS443:3:65:1046:591#0/1  
aaaa\_`aaaaaa\_aaa¥][`^`a\_a^a\_aaa`Z^`\_`a  
@HWI-EAS443:3:65:1053:1512#0/1  
GTATAAGACCTTGCTTCTGGGTTGAACTAATCAGAGGGCG

+HWI-EAS443:3:65:1053:1512#0/1  
aabaa`a`a`\_aaaaaaaa`\_`\_ab`abaa`a\_``[\_`\_`  
@HWI-EAS443:3:65:1068:1536#0/1  
TACTTGTCAATGGTAAATGGCAACTCAGCACCGTCTGGCC  
+HWI-EAS443:3:65:1068:1536#0/1  
aaabaa^bbaaa`¥aaaS``[aa\_aa]\_`a\_]¥a¥\_W¥]  
@HWI-EAS443:3:65:1068:788#0/1  
CAAGATTTGAGTCAGTCGCTTGGTCAGCAAGTGCTTGCA  
+HWI-EAS443:3:65:1068:788#0/1  
a¥ab`bbba^^¥aabaaaa`Z\_\_aaaa\_`^]]Ya]^\_^  
@HWI-EAS443:3:65:1137:526#0/1  
CAAACCGTTTCTTGAACATAATGCTTTTAGTTCTCCCTAT  
+HWI-EAS443:3:65:1137:526#0/1  
abb^babb`aaa`aaaa`a`aab`aaaaa¥aaa\_\_\_`a`  
@HWI-EAS443:3:65:1203:123#0/1  
TGCTTTATTGAGAAGTTATTGTCTGTCCCAGTCCATCCGT  
+HWI-EAS443:3:65:1203:123#0/1  
aa\_aaa\_baa^b\_^a^a`a\_`\_]`\_aGUZZPPVVYXOZVXU  
@HWI-EAS443:3:65:1211:1601#0/1  
CTGTCCCAGTCCATCCGTTCCGATCCCAAATCATCTCAA  
+HWI-EAS443:3:65:1211:1601#0/1  
^aaY`aaZPU`aaaa]]Z`a\_`XUNW^]Y]¥W``XU``WZ  
@HWI-EAS443:3:65:122:1568#0/1  
ATCATGACAAGCACTTGCTGACCAAGCGACTGACTCAAAT  
+HWI-EAS443:3:65:122:1568#0/1  
a]\_baa[````aa\_^S\_^`\_\_\_a\_VTV]^Y^^ZV]X]]UU  
@HWI-EAS443:3:65:122:1912#0/1  
AAGAGTTGGAGAAACAATATATTGAGAACACAAGAGTCTG  
+HWI-EAS443:3:65:122:1912#0/1  
¥WW]aW`[P]^]PY\_a\_a`¥\_`\_]`\_`\_]a[`\_`¥X][  
@HWI-EAS443:3:65:1283:1083#0/1  
GGACCACAACCTGCCTGTCTTATCATTAGGGCGTGGATTGT  
+HWI-EAS443:3:65:1283:1083#0/1  
^¥OW`a^J\_S\_b\_T\_V\_^V\_[ba`]`a[aa^T[V]`]Ua^  
@HWI-EAS443:3:65:1283:1288#0/1  
ACTGTTTACACCACAAAAGGATATGCTGCTCCCGCTAGTC  
+HWI-EAS443:3:65:1283:1288#0/1  
Y¥`Y`bWU[b]``bb\_¥P^]Lb\_Y\_]X^aabbaI¥[OZP  
@HWI-EAS443:3:65:1303:1376#0/1  
GACTCTTGTGTTCTCAATATATTGTTTCTCCAACCTTGA  
+HWI-EAS443:3:65:1303:1376#0/1  
[V^\_bb\_aV`Vb]aa\_aa\_bab]`R`[\_`¥aZaa¥UU]a^\_  
@HWI-EAS443:3:65:1322:1521#0/1  
GGCCCCTTGAGTCAAGAAGAAGGTTCTGCATTCCAAGGGG  
+HWI-EAS443:3:65:1322:1521#0/1  
ab```\_]`[\_b\_aaa`a\_[\_XPbWaZaaRaa¥ZSQa]S[V  
@HWI-EAS443:3:65:1334:552#0/1  
GACAGACAATAACTTCTCAATAAAGCAAGATATCGTAGGA  
+HWI-EAS443:3:65:1334:552#0/1  
a\_XY`aaa^\_ZXZ`aa`\_aa\_]aa\_\_a`^Za\_a\_Y^^^^

@HWI-EAS443:3:65:1450:1298#0/1  
GAGGAATTGCCCGCTAATTTACGGAAACCACTGACTGTC  
+HWI-EAS443:3:65:1450:1298#0/1  
aaa`\_baa`aa\_b\_a^^ba\_Y^a¥Ya`aYa]``W]\_]¥W  
@HWI-EAS443:3:65:1467:314#0/1  
GCTGGATTGTATAAGACCTTGCTTCTGGGTTGAACTAATC  
+HWI-EAS443:3:65:1467:314#0/1  
^^[Z`[\_^WZRU]S[]`\_¥ZD^`Qa]aa[]LZY\_\_[[U  
@HWI-EAS443:3:65:1500:59#0/1  
CCAAGACCAACCCACAGTGTCACTGTTTACACCACAAAAG  
+HWI-EAS443:3:65:1500:59#0/1  
`a\_Y\_\_\_\_]¥`RNW`]\_bab\_^`V\_aX``a^\_\_aVLV¥NXX  
@HWI-EAS443:3:65:1532:791#0/1  
GAACTAAAAGCATTAGTTCAAGAAACGGTTTTGAGATGAT  
+HWI-EAS443:3:65:1532:791#0/1  
^bbabbabbbaabbabab`aabb`a`b¥\_bab¥^¥]aa\_b  
@HWI-EAS443:3:65:1571:268#0/1  
AAACGGTTTTGAGATGATTTGGGATCCGAACGGATGGACT  
+HWI-EAS443:3:65:1571:268#0/1  
`ZRI\_ZQ¥b¥ZXa]`b^aba`\_`\_aaYQSXK^STXYWSOV  
@HWI-EAS443:3:65:1585:911#0/1  
CTGGGACAGACAATAACTTCTCAATAAAGCAAGATATCGT  
+HWI-EAS443:3:65:1585:911#0/1  
abbbb\_abbbba\_bababa`baaabaab`aabaabaa`  
@HWI-EAS443:3:65:1633:659#0/1  
ATTCCAAGGGGAGCATGATATGAATGGTCCCTTATGAC  
+HWI-EAS443:3:65:1633:659#0/1  
]\_ba^^¥T^a^`]a]Y]`W]¥ZZ\_XO\_a]U]`Q¥YJWPWK  
@HWI-EAS443:3:65:1705:116#0/1  
CTGCATTCCAAGGGGAGCATGATATGAATGGTCCCTTA  
+HWI-EAS443:3:65:1705:116#0/1  
^bbbabbb\_bbbbbbbaababbbbaab\_aaba`¥¥^``a\_  
@HWI-EAS443:3:65:1726:1169#0/1  
AGAACACAAGAGTCTGAATGTGCATGTGTAATGGTTCTT  
+HWI-EAS443:3:65:1726:1169#0/1  
\_\_\_\_]`aaa[\_ab\_abbaaba\_¥]aa\_]X]a]L^a\_Z^X\_¥  
@HWI-EAS443:3:65:1783:208#0/1  
AACACAGCCACTGCCCATTTGTCTGGGCCAGAAATCCAA  
+HWI-EAS443:3:65:1783:208#0/1  
]a`aaa`a`\_]aaW^X[[]`^[[¥[ZSMS¥YTZ[[]TLXY  
@HWI-EAS443:3:65:225:756#0/1  
ATGGTGGTTGGATAGGGAGAACTAAAAGCATTAGTTCAAG  
+HWI-EAS443:3:65:225:756#0/1  
`abb`aab`a`^aaaa```a^aaaa^\_```a^L¥^`^aaa  
@HWI-EAS443:3:65:22:1218#0/1  
GTCAGGATATAGCGGGAGTTTTGTTTCAGCATCCAGAACTA  
+HWI-EAS443:3:65:22:1218#0/1  
a`ba`a\_aaaaaba^a^W`\_¥^\_\_^^\_]\_a^^\_]^^  
@HWI-EAS443:3:65:245:1528#0/1  
GACTGGGACAGACAATAACTTCTCAATAAAGCAAGATATC

+HWI-EAS443:3:65:245:1528#0/1  
aaaa`aabaaaaaaaaabaaaaaaaa`aaa\_a`aa\_\_a`\_  
@HWI-EAS443:3:65:302:581#0/1  
AAACGGTTTTGAGATGATTTGGGATCCGAACGGATGGACT  
+HWI-EAS443:3:65:302:581#0/1  
aaaaa`]aaaa`a\_\_a`aaa\_`aZ^aa\_Y\_\_`^]`^¥^^RZ  
@HWI-EAS443:3:65:327:950#0/1  
GGGGGATGTGTTTGTGCATAAGGGAACCATTTCATATCATGC  
+HWI-EAS443:3:65:327:950#0/1  
aaaa`a\_a\_\_\_\_\_`a]aa\_`aZ`W\_aaaa\_`\_\_`a\_\_a^]\_  
@HWI-EAS443:3:65:346:1342#0/1  
GCCCCGTAATTTACGGAAACCACTGACTGTCCAGCAGCA  
+HWI-EAS443:3:65:346:1342#0/1  
abb\_aab`abaaabaa\_\_][`a\_a\_\_[a\_`W``YN]\_`¥]Z  
@HWI-EAS443:3:65:357:205#0/1  
GATTTTCGGAGACAATCCACGCCCTAATGATAAGACAGGC  
+HWI-EAS443:3:65:357:205#0/1  
`Z`\_^`aaaZ`NZ[`^[`¥UUVXRSUXY`¥^`¥VRBBBBBB  
@HWI-EAS443:3:65:382:451#0/1  
CCGCTAATTTACGGAAACCACTGACTGTCCAGCAGCAAA  
+HWI-EAS443:3:65:382:451#0/1  
aa`a\_X¥aaaa`^^`^]`\_\_`\_]`[¥\_\_`\_]`[[¥P^XQVZ  
@HWI-EAS443:3:65:430:539#0/1  
GTGCATGTGTAATGGTTCTTGCTTTACTGTAATGACCGA  
+HWI-EAS443:3:65:430:539#0/1  
¥[¥aa`bYbT`]Q]b`^a`a^]a`^`^`^\_]`\_\_`\_]\_aZZX  
@HWI-EAS443:3:65:554:1821#0/1  
ATAGGATACATATGCAGTGGGATTTTCGGAGACAATCCAC  
+HWI-EAS443:3:65:554:1821#0/1  
aaaZUXaa][UUWNY]SNQ^V[^]\_`[ZYRUUO`\_V\_\_VN  
@HWI-EAS443:3:65:569:174#0/1  
GTCCTATTGGTGAAGTCCCTCTCCATACAACCTCAAGATT  
+HWI-EAS443:3:65:569:174#0/1  
a\_b\_a\_baaa^a`\_\_\_`a]^a\_`\_`\_a\_\_^`]\_\_]a^^]  
@HWI-EAS443:3:65:590:519#0/1  
GTTCCATTGGAATGTTTGCATTTAGCAAGGCCCTTGAG  
+HWI-EAS443:3:65:590:519#0/1  
aUZ\_OTa\_``YL¥a¥\_a`V]GUXTP]aYKZX\_\_\_¥Z^YT\_  
@HWI-EAS443:3:65:600:1480#0/1  
GTTTGGATAGGGAGAACTAAAAGCATTAGTTCAAGAAACG  
+HWI-EAS443:3:65:600:1480#0/1  
\_]^^`^^`]RLY^]b`][`a`\_`^]aa\_¥`\_¥YT]a\_]`  
@HWI-EAS443:3:65:600:780#0/1  
GGTGTAAACAGTGACACTGTGGGTTGGTCTTGGCCAGACG  
+HWI-EAS443:3:65:600:780#0/1  
aa\_a\_ba]aaa^a`^^`^`aZ¥\_`¥¥\_`W\_`\_\_]\_\_\_`\_¥\_  
@HWI-EAS443:3:65:64:1899#0/1  
CAACTGCCTGTCTTATCATTAGGGCGTGGATTGTCTCCGA  
+HWI-EAS443:3:65:64:1899#0/1  
aaaa\_\_aa¥\_\_\_`a\_\_`XZ`]QS\_]Q¥]¥¥¥SVSV^\_W¥



@HWI-EAS443:3:65:683:1800#0/1  
GACCACTCATTTATTCCTACGATATCTTGCTTTATTGAGA  
+HWI-EAS443:3:65:683:1800#0/1  
ababbbbbb`ababa`baaaaaaaaaaaaa`a`a  
@HWI-EAS443:3:65:707:1812#0/1  
GACGATACTGGACCACAACCTGCCTGTCTTATCATTAGGGC  
+HWI-EAS443:3:65:707:1812#0/1  
¥abbbabb\_Y\_\_abbaaaba`ba]]]b`bbaaaaaa]\_`a  
@HWI-EAS443:3:65:712:167#0/1  
GTCTCCGAAAATCCCCTGCATATGTATCCTATCTGATAT  
+HWI-EAS443:3:65:712:167#0/1  
aaYa`aaaaa`\_\_^`]Za\_^\_^`^`^\_Z]^^^\_^\_^]  
@HWI-EAS443:3:65:725:464#0/1  
GGTGTGGATAGGGAGAATAAAAGCATTAGTTCAAGAA  
+HWI-EAS443:3:65:725:464#0/1  
a`Z`[^a`a\_`[^`aWa^\_^\_]Y`\_`\_]`\_\_[\_]^Y]]]  
@HWI-EAS443:3:65:753:1108#0/1  
CTTGGTCAGCAAGTGCTTGTCATGATGGCATCAATTGGCT  
+HWI-EAS443:3:65:753:1108#0/1  
abbbbaabbbbab\_bbba[``bb`aabbbaaba^bb[``\_a  
@HWI-EAS443:3:65:758:1533#0/1  
GATTTTCGGAGACAATCCACGCCCTAATGATAAGACAGGC  
+HWI-EAS443:3:65:758:1533#0/1  
\_\_abaaa\_a`aaaa`aaaa\_[]b\_aaaa]`aaaa\_`aBBB  
@HWI-EAS443:3:65:791:278#0/1  
CTCTGATTAGTTCAACCCAGAAGCAAGTCTTATACAATC  
+HWI-EAS443:3:65:791:278#0/1  
abbbba^abaaabbbb`baab\_ab^a\_ab\_aaaabaaba\_  
@HWI-EAS443:3:65:798:943#0/1  
ACTCAATTCAACTTGGGAATCAAAATCAGATTGAAACATG  
+HWI-EAS443:3:65:798:943#0/1  
aaba¥Q^`a]T^`aa`aa`\_`\_`\_`\_]^`^`¥\_\_\_\_\_`  
@HWI-EAS443:3:65:82:144#0/1  
GTTCGGATCCCAAATCATCTCAAACCGTTTCTTGAACATA  
+HWI-EAS443:3:65:82:144#0/1  
a[\_a`\_`¥¥\_\_\_^]^^\_]^^^[\_^]W]]XZYXWT[XXYYX  
@HWI-EAS443:3:65:877:684#0/1  
GTTTGGATAGGGAGAATAAAAGCATTAGTTCAAGAAACG  
+HWI-EAS443:3:65:877:684#0/1  
]H\_Z\_\_^a`S]]^\_¥a`V¥Y]X^aaaX]a`^^[P]¥VZ¥`  
@HWI-EAS443:3:65:883:875#0/1  
CAAGACCAACCCACAGTGCTACTGTTTACACCACAAAAGG  
+HWI-EAS443:3:65:883:875#0/1  
`\_Ra`a\_Q`X[^ab\_\_H¥G[]T]YN``baba¥aQ[XWP[\_  
@HWI-EAS443:3:65:925:411#0/1  
CCCCTATATCCTGACCACTCATTTATTCCTACGATATCT  
+HWI-EAS443:3:65:925:411#0/1  
a^Q\_P^¥RM]LM`a]P\_YQWW\_TS\_ZZT[ML`RYROUP¥W  
@HWI-EAS443:3:65:952:134#0/1  
GCCTGTCTTATCATTAGGGCGTGGATTGTCTCCGAAAATC

+HWI-EAS443:3:65:952:134#0/1  
aaa`aVaaaaa\_\_aaa\_\_a\_]`\_\_aa`^\_\_X\_X^]X  
@HWI-EAS443:3:66:1099:990#0/1  
AATCGACCGTGGGTGTCTTTCAACCAGAATCTGGAATATC  
+HWI-EAS443:3:66:1099:990#0/1  
aaaaaaa^`[aa]Qa\_`a\_^`a[^\_[¥]YZ^\_^¥]Y\_^U  
@HWI-EAS443:3:66:1183:331#0/1  
CCCTTTTCTATTCTGAAGATCTTGTATGAGGCCTGTCCAT  
+HWI-EAS443:3:66:1183:331#0/1  
Yb`aTb``bbbbbb]`bbb`¥^^b\_b```a]\_a`]R`\_`a  
@HWI-EAS443:3:66:1199:257#0/1  
GCATCAATTGGCTAACAAATTGGAATTTCTGGCCAGACAA  
+HWI-EAS443:3:66:1199:257#0/1  
aaaaaaaaaba`aa`a``bbaa\_aaba\_aa][^V\_a`]\_^  
@HWI-EAS443:3:66:1263:993#0/1  
CAACTGCCTGTCTTATCATTAGGGCGTGGATTGTCTCCGA  
+HWI-EAS443:3:66:1263:993#0/1  
aa^abb\_aa`^abaaaaaaaa[Ya\_]¥¥]Z`aa^Z]YW\_Y  
@HWI-EAS443:3:66:1277:955#0/1  
CCCTCTGATTAGTTCAACCCAGAAGCAAGTCTTATACAA  
+HWI-EAS443:3:66:1277:955#0/1  
abb`^``\_a¥\_bWW\_]ZU\_^Z[]a\_^¥RXWS`a``]]Q\_a  
@HWI-EAS443:3:66:1338:1519#0/1  
CATTAGACGATACTGGACCACAACCTGCCTGTCTTATCATT  
+HWI-EAS443:3:66:1338:1519#0/1  
abbbbbaa\_XY]W\_Z^WFZX^MWFJNY¥FXVU^\_]WJSVT  
@HWI-EAS443:3:66:1343:551#0/1  
GATATCGTAGGAATAAATGAGTGGTCAGGATATAGCGGGA  
+HWI-EAS443:3:66:1343:551#0/1  
\_aaZZ]^]ab``aa``aaa\_¥¥^`MZWX\_XZa^\_X]a`a]  
@HWI-EAS443:3:66:1348:1355#0/1  
AGCGGGAGCAGCATATCCTTTTGTGGTGTAAACAGTGACA  
+HWI-EAS443:3:66:1348:1355#0/1  
ababa`^Z^`aa`]aaa\_aa`aZa^VV\_``]]V¥R^[^\_  
@HWI-EAS443:3:66:1348:166#0/1  
AGGGCGTGGATTGTCTCCGAAAATCCCCTGCATATGTAT  
+HWI-EAS443:3:66:1348:166#0/1  
a^Q]aa`aa`aa\_^`\_`aYW¥`\_^\_]¥]Y\_^\_W]^  
@HWI-EAS443:3:66:135:316#0/1  
CAGACACTATCAAGAGTTGGAGAAACAATATATTGAGAAC  
+HWI-EAS443:3:66:135:316#0/1  
aa`[abbaaaaa\_]a]``a\_`````\_\_`\_aY\_\_`\_^`^X  
@HWI-EAS443:3:66:1376:1973#0/1  
AGAGGAATTGCCCGCTAATTTACGGAAACCACTGACTGT  
+HWI-EAS443:3:66:1376:1973#0/1  
aa`\_^a`\_[ab^aabbbaa`aa\_b][V`aa[\_`\_N`\_\_[\_Q  
@HWI-EAS443:3:66:1442:646#0/1  
GCTGGATTGTATAAGACCTTGCTTCTGGGTTGAACTAATC  
+HWI-EAS443:3:66:1442:646#0/1  
aaaabaaa\_\_a`]a`a``[[[¥LLSa\_]QUG^aSG¥UPF

@HWI-EAS443:3:66:1496:75#0/1  
GCCACTCAATTCAACTTGGGAATCAAAATCAGATTGAAAC  
+HWI-EAS443:3:66:1496:75#0/1  
a\_\_b\_a`a`ba\_\_]abaaa^`a]\_``\_`¥\_`\_\_`\_\_^Y  
@HWI-EAS443:3:66:1517:1681#0/1  
GCCCCGTAATTTACGGAACCACTGACTGTCCAGCAGCA  
+HWI-EAS443:3:66:1517:1681#0/1  
aa````]`aaa`¥Z`^`]``][W[[]^UP[YVSRLYUZ  
@HWI-EAS443:3:66:1585:1633#0/1  
CGCTTGGTCAGCAAGTGCTTGTGCATGATGGCATCAATTGG  
+HWI-EAS443:3:66:1585:1633#0/1  
abbb`\_R]`aZXOX`Paaaa]\_\_]aa^a`\_aa`Sa^¥aX[  
@HWI-EAS443:3:66:1648:487#0/1  
GGTTGAAAGACACCCACGGTCGATTGAGCCATGCCAGTT  
+HWI-EAS443:3:66:1648:487#0/1  
`b[a`\_aab^\_a`¥\_\_¥aa^T^Y^¥^QZ¥RRZ[Q[UWU¥^  
@HWI-EAS443:3:66:169:638#0/1  
CAACTTTGCTGCTGGACAGTCAGTGGTTTCCGTGAAATTA  
+HWI-EAS443:3:66:169:638#0/1  
ab]aabbabaW\_ab^S¥\_]^\_aW`aW\_¥V`\_Z\_R``¥]\_  
@HWI-EAS443:3:66:171:1140#0/1  
CAGACATATGTTAACATCAGCAACACCAACTTTGCTGCTG  
+HWI-EAS443:3:66:171:1140#0/1  
a^QTTVa\_aaYVHSU`\_\_a`a`a]ZMP[XR[UY`YYJ]]Z  
@HWI-EAS443:3:66:172:1269#0/1  
CTCCATTTGCTCCATTAGACGATACTGGACCACAACTGCC  
+HWI-EAS443:3:66:172:1269#0/1  
^\_bbbbbbbbbbbbbbbab\_\_\_Z^`Q`^S]\_¥a\_KZ`\_aa  
@HWI-EAS443:3:66:1757:121#0/1  
CGCTAATTTACGGAACCACTGACTGTCCAGCAGCAAAG  
+HWI-EAS443:3:66:1757:121#0/1  
abZaa\_abaaaXaaZY¥a^a`aa\_\_`[VX\_VQQUWRYBBB  
@HWI-EAS443:3:66:1758:1310#0/1  
CTTCCAAATAGGACAGCTCATTAGGGTTTCGATATGGGCT  
+HWI-EAS443:3:66:1758:1310#0/1  
a``ba\_^``a`Z^XR^\_``WHXaXSRYV[[]\_VZ`¥^TQU  
@HWI-EAS443:3:66:1770:770#0/1  
CGTTCCGATCCCAAATCATCTCAAACCGTTTCTTGA  
+HWI-EAS443:3:66:1770:770#0/1  
ababbbbba`bbbaa^baa\_\_^aab]]a`aa^a`\_]\_¥a  
@HWI-EAS443:3:66:211:1044#0/1  
GATCCCAAATCATCTCAAACCGTTTCTTGA  
+HWI-EAS443:3:66:211:1044#0/1  
aba]aaaa`\_a]`aa¥aa\_a`\_a]\_\_a[[]\_]\_^¥\_^]]\_`^  
@HWI-EAS443:3:66:254:924#0/1  
AATTGATGCCATCATGACAAGCACTTGCTGACCAAGCGAC  
+HWI-EAS443:3:66:254:924#0/1  
aab`aa`aa`aaaaa\_W\_aZ^]R]a\_\_]`aa^a`\_\_\_\_[\_\_\_\_  
@HWI-EAS443:3:66:275:271#0/1  
GCTCCTGTCTTTAATGGTTCATTGGAATGTTTGTCA

+HWI-EAS443:3:66:275:271#0/1  
aa]a\_]`[]^`a\_]\_a`ZY`aZ`YYUY]^VY]\_]VXPXZ¥  
@HWI-EAS443:3:66:284:75#0/1  
GGGGGATGTGTTTGCATAAGGGAACCATTTCATATCATGC  
+HWI-EAS443:3:66:284:75#0/1  
a^[P]^\_XN^UNRPVUTTUXY\_]R^YVVV¥WWWURXXSXY  
@HWI-EAS443:3:66:304:1345#0/1  
GGTAAATGGCAACTCAGCACCGTCTGGCCAAGACCAACCC  
+HWI-EAS443:3:66:304:1345#0/1  
aaabaaa\_`bbbbbaabaaaa\_baaaaaa\_\_][aa^a\_a  
@HWI-EAS443:3:66:315:2009#0/1  
CACAGCCACTGCCCCATTGTCTGGGCCAGAAATCCAATT  
+HWI-EAS443:3:66:315:2009#0/1  
`a\_aW^a^`\_G¥aY\_¥¥W¥Q\_YKHMMV^U¥^¥WWPWWYMK  
@HWI-EAS443:3:66:445:319#0/1  
GCCCCGTAATTTACGGAAACCACTGACTGTCCAGCAGCA  
+HWI-EAS443:3:66:445:319#0/1  
`baaaa`^Z^]`a\_`a`\_]ZU]^^^U^\_UZ¥HTUTTTG  
@HWI-EAS443:3:66:462:1200#0/1  
CTGTGTTAAAGTACAACGGCATAATAACAGACACTATCAA  
+HWI-EAS443:3:66:462:1200#0/1  
a`b`aaaaaaa^baa`aaa`aaa\_a`a\_a`a`a`\_a\_\_\_¥  
@HWI-EAS443:3:66:542:997#0/1  
CGTGGGTGTCTTTCAACCAGAATCTGGAATATCAGATAGG  
+HWI-EAS443:3:66:542:997#0/1  
ab[ab¥[a]a\_\_a^]]\_bb^`Ya^\_a¥¥^a`a^a]^\_]X  
@HWI-EAS443:3:66:552:1458#0/1  
CCGCTATATCCTGACCACTCATTTATTCCTACGATATCTT  
+HWI-EAS443:3:66:552:1458#0/1  
a\_]\_\_W\_]a`^`^\_\_a\_^`\_]a¥]U\_]\_]^^¥Y]]]]][  
@HWI-EAS443:3:66:615:799#0/1  
CTTGGTCAGCAAGTGCTTGTGCATGATGGCATCAATTGGCT  
+HWI-EAS443:3:66:615:799#0/1  
a`aa`]a\_X\_W`aUa``\_]][YX]^]\_\_\_^^ZV¥^[WV[  
@HWI-EAS443:3:66:644:397#0/1  
GTTCCCTCTCCATACAACCTCAAGATTTGAGTCAGTCGCTT  
+HWI-EAS443:3:66:644:397#0/1  
aaaababaaaabaaaaaa`aa\_a\_`aaaa]\_\_\_YVa^^^  
@HWI-EAS443:3:66:679:581#0/1  
TGTAACAGTGACACTGTGGGTTGGTCTTGGCCAGACGGT  
+HWI-EAS443:3:66:679:581#0/1  
^M[aaaa`a¥aR`\_`\_`V\_a\_¥]`]W\_T\_^`\_^`^Z\_]T  
@HWI-EAS443:3:66:725:743#0/1  
TAACAGGGCAGAGAGGAATTGCCCGCTAATTTACGGGA  
+HWI-EAS443:3:66:725:743#0/1  
`\_aa^a^`baaa^`a^]]\_aaaa`aaa^```a\_`aa\_\_\_[  
@HWI-EAS443:3:66:733:1793#0/1  
CAGACATATGTTAACATCAGCAACACCAACTTTGCTGCTG  
+HWI-EAS443:3:66:733:1793#0/1  
a`^a]a\_a\_¥^^a`^a\_a`¥\_`\_]\_`\_]\_\_^]\_]\_^Z]WZZ

@HWI-EAS443:3:66:756:90#0/1  
GCTGCTCCCCTAGTCCAGATTGTGTTCTCTTTGGGTCGC  
+HWI-EAS443:3:66:756:90#0/1  
aaa`a``\_\_a``^^[¥`^\_P]`XW^¥`¥^¥^\_`ZUZVVZ¥  
@HWI-EAS443:3:66:785:1193#0/1  
GAGAAGTTATTGTCTGTCCCAGTCCATCCGTTCCGGATCCC  
+HWI-EAS443:3:66:785:1193#0/1  
a\_aaabaabbba`aaa[\_\_aXSV¥[RWY]WQ]TRZWSYX[  
@HWI-EAS443:3:66:791:1290#0/1  
ATAAGACCTTGCTTCTGGGTTGAACATAATCAGAGGGCGAC  
+HWI-EAS443:3:66:791:1290#0/1  
¥ba`aaab`ab^b¥]aba\_\_`abb`abaa`a\_`a\_`\_`a`  
@HWI-EAS443:3:66:806:1498#0/1  
GAATAAATGAGTGGTCAGGATATAGCGGGAGTTTTGTTCA  
+HWI-EAS443:3:66:806:1498#0/1  
abab`\_`aaaa\_ba¥a`aa`a`a``aaa\_[¥]\_`S]^Z¥  
@HWI-EAS443:3:66:83:658#0/1  
CGATACTGGACCACAACCTGCCTGTCTTATCATTAGGGCGT  
+HWI-EAS443:3:66:83:658#0/1  
aa^abaaaa\_a`aaW```a`a`\_\_`\_`¥[\_\_^`¥V\_\_^¥  
@HWI-EAS443:3:66:907:1368#0/1  
ATTAGGGCGTGGATTGTCTCCGAAAATCCCACTGCATATG  
+HWI-EAS443:3:66:907:1368#0/1  
\_]\_^Z^]\_]^[]]\_Z[``]aaa```a¥Z```]¥a`\_]`  
@HWI-EAS443:3:66:922:694#0/1  
CTTCACCAATAGGACAGCTCATTAGGGTTCGATATGGGCT  
+HWI-EAS443:3:66:922:694#0/1  
abbabbbbbbba`aaabbaaaabbabb`\_abbbaaaaa`a  
@HWI-EAS443:3:66:939:1477#0/1  
CCAGATTCTGGTTGAAAGACACCCACGGTCGATTCGAGCC  
+HWI-EAS443:3:66:939:1477#0/1  
G^¥\_¥\_^\_b^]\_]``a`bbba```b^\_]¥¥]]\_W\_\_X``b  
@HWI-EAS443:3:67:1082:1201#0/1  
AGACACCCACGGTCGATTCGAGCCATGCCAGTTATCCCTG  
+HWI-EAS443:3:67:1082:1201#0/1  
ab]\_abaaa```¥\_`MP[`UU\_¥\_`UMX¥¥¥QY`UX[VT  
@HWI-EAS443:3:67:1103:1052#0/1  
CCCCTAATTTACGAAACCACTGACTGTCCAGCAGCAA  
+HWI-EAS443:3:67:1103:1052#0/1  
a\_\_a\_``T]]\_a\_\_\_`¥^VZ\_\_^]^^Y]]XX\_WWRKKVLZ  
@HWI-EAS443:3:67:1151:195#0/1  
GTAAATGGTTCTTGCTTTACTGTAATGACCGATGGACCAA  
+HWI-EAS443:3:67:1151:195#0/1  
`SYY\_`XSNTKZZ[T]a^U¥¥[\_^Z\_]ZIIYOYZLPQQ[M  
@HWI-EAS443:3:67:1155:787#0/1  
TGCAATCAAAGCGTCATTACTTATGAAAACAACACTTGGG  
+HWI-EAS443:3:67:1155:787#0/1  
ababaaa\_aa]`b`\_abaa`aaabaaa`^¥a\_^\_`\_\_a^\_  
@HWI-EAS443:3:67:1218:777#0/1  
CAGACACTATCAAGAGTTGGAGAAACAATATATTGAGAAC

+HWI-EAS443:3:67:1218:777#0/1  
`bXaaabbaaa\_`aY\_¥bb`aYaa[[]W)`Xb^aa\_]`^¥^[  
@HWI-EAS443:3:67:1232:868#0/1  
GCCCCGCTAATTTACGGAAACCACTGACTGTCCAGCAGCA  
+HWI-EAS443:3:67:1232:868#0/1  
^aa^WXU`a¥`^`^]R^^RVXOS`S]]OQ^¥¥Q[QOXVLYB  
@HWI-EAS443:3:67:1330:1616#0/1  
ATACTGGACCACAACCTGCCTGTCTTATCATTAGGGCGTGG  
+HWI-EAS443:3:67:1330:1616#0/1  
a`[\_`b^`aaaa]aW\_[X]\_`\_`\_T]a`^^a`a¥^]W]VYV  
@HWI-EAS443:3:67:1337:576#0/1  
ATTGCCCGCTAATTTACGGAAACCACTGACTGTCCAGCA  
+HWI-EAS443:3:67:1337:576#0/1  
abbaaaabaaaabaaaa\_baaaa[^`Qaa\_\_a`\_Z\_\_\_\_]^  
@HWI-EAS443:3:67:1394:1737#0/1  
GCTCCTGTCTTTAATGGTTCATTGGAATGTTTGTCTTT  
+HWI-EAS443:3:67:1394:1737#0/1  
aZ^VPaaR¥¥T`[W\_aZPPWGX[¥R¥VWTZZ^^ZZRS\_YB  
@HWI-EAS443:3:67:1426:1257#0/1  
ATCGGTCATTACAGTAAAGCAAGAACCATTTACACATGCA  
+HWI-EAS443:3:67:1426:1257#0/1  
aaaa`Z^^\_\_ZG[QQ¥\_a]X]]\_]\_YTR]W\_¥S¥X\_ZUX^  
@HWI-EAS443:3:67:1460:155#0/1  
TGCCCCGCTAATTTACGGAAACCACTGACTGTCCAGCAGC  
+HWI-EAS443:3:67:1460:155#0/1  
ab`aaa`\_]aabbZ`[````\_]V]Q¥¥VY`aS[UBBBBBB  
@HWI-EAS443:3:67:1519:917#0/1  
AGCCCATCCACTAACAGGGCAGAGAGGAATTGCCCGCT  
+HWI-EAS443:3:67:1519:917#0/1  
ab]W\_bU`S[\_a`R`^abX^aX^Z\_\_b`Z\_V\_aSWUa\_^  
@HWI-EAS443:3:67:1524:1033#0/1  
GAAACGGTTTTGAGATGATTTGGGATCCGAACGGATGGAC  
+HWI-EAS443:3:67:1524:1033#0/1  
¥`^]a`\_YbabaX^Z\_Z]aaa`a[^`^a¥`¥^`\_]¥SJ  
@HWI-EAS443:3:67:1552:770#0/1  
AAGACACCCACGGTCGATTCGAGCCATGCCAGTTATCCCT  
+HWI-EAS443:3:67:1552:770#0/1  
\_`ba`ab^]aab\_QRYZ¥[SSY\_[UOVOSUXRRHKPFZM  
@HWI-EAS443:3:67:1567:1022#0/1  
GTAAATGGCAACTCAGCACCGTCTGGCCAAGACCAACCCA  
+HWI-EAS443:3:67:1567:1022#0/1  
aa`aa`UZX[a`]ZXQZ^[U`^\_[\_[NT^Y^MST[VBBBB  
@HWI-EAS443:3:67:1580:333#0/1  
GCAAGTGCTTGTCATGATGGCATCAATTGGCTAACAATTG  
+HWI-EAS443:3:67:1580:333#0/1  
aa`a]Xa\_aaa`a`\_`a\_\_`a`````^`^a`^`aYY\_`\_`Y  
@HWI-EAS443:3:67:1624:767#0/1  
CTGTCTTTAATGGTTCATTGGAATGTTTGTCTTTAGCA  
+HWI-EAS443:3:67:1624:767#0/1  
abbaabbbbbbbbabbb`bbab`aaaabaUaaaabbaaaa

@HWI-EAS443:3:67:1674:1661#0/1  
TTCCCTTATGACAAACACATCCCCCTTGGAAACCGATTCTT  
+HWI-EAS443:3:67:1674:1661#0/1  
aaa\_\_b`aaaa`aa\_\_a^a\_a\_]`^a^`\_\_XT`\_a\_Za`  
@HWI-EAS443:3:67:1677:245#0/1  
CATCAATTGGCTAACAATTGGAATTTCTGGCCCAGACAAT  
+HWI-EAS443:3:67:1677:245#0/1  
aaaaab\_W`\_`\_`YVY`\_\_a\_[b\_\_`a`a\_\_[Wa¥[U[Z  
@HWI-EAS443:3:67:1679:1797#0/1  
AAATGGTTCTTGCTTTACTGTAATGACCGATGGACCAAGT  
+HWI-EAS443:3:67:1679:1797#0/1  
a`^^^`\_b`ba``baa^X`ZZ`a\_]`^Y^^a\_R\_YT¥¥¥T  
@HWI-EAS443:3:67:1711:487#0/1  
GGTGAAGTTCCTCTCCATACAACCTCAAGATTTGAGTCAG  
+HWI-EAS443:3:67:1711:487#0/1  
aa]baaa`aaa`aaa`)\_a`aa`a`a]a\_aa`\_a[Z\_\_  
@HWI-EAS443:3:67:1729:712#0/1  
GCGGGAGCAGCATATCCTTTTGTGGTGTAAACAGTGACAC  
+HWI-EAS443:3:67:1729:712#0/1  
a]aa`W`^^a`\_`[]VV)``aa[\_V[aZ¥XXX¥¥K][[^W  
@HWI-EAS443:3:67:227:1007#0/1  
CAGTGTCACTGTTTACACCACAAAAGGATATGCTGCTCCC  
+HWI-EAS443:3:67:227:1007#0/1  
abbXS]b)`aZa`ba\_aabVYQQZa`aXU\_N]`ZV\_\_T  
@HWI-EAS443:3:67:262:883#0/1  
GGATAACAGGAGCATTCTCATAGTGATAATTAGGGGCAT  
+HWI-EAS443:3:67:262:883#0/1  
\_abbbb)`baabaaababaaaa`\_baa¥aaaaa`\_\_`a  
@HWI-EAS443:3:67:304:976#0/1  
AAACCGTTTCTTGAACCTAATGCTTTTAGTTCTCCCTATCC  
+HWI-EAS443:3:67:304:976#0/1  
a\_aa`\_\_`U\_WX]`Z\_\_aa\_W\_a`]Z]X`]X]V`\_\_\_\_  
@HWI-EAS443:3:67:310:1300#0/1  
TGTTTGGATAGGGAGAACTAAAAGCATTAGTTCAAGAAAC  
+HWI-EAS443:3:67:310:1300#0/1  
aaabba]a\_aa\_a`)\_a`aaa`\_\_^\_aZ[]^\_\_\_\_`\_`\_`]  
@HWI-EAS443:3:67:341:626#0/1  
GGATGGACTGGGACAGACAATAACTTCTCAATAAAGCAAG  
+HWI-EAS443:3:67:341:626#0/1  
aba¥XZ`\_\_ZW]`YU¥JVP^OVUVUPHYW^[OVHYX[W]B  
@HWI-EAS443:3:67:355:302#0/1  
TCAAAACCGTTTCTTGAACCTAATGCTTTTAGTTCTCCCTA  
+HWI-EAS443:3:67:355:302#0/1  
aa[aZa`aXGV]^Y[^Z[]`¥XTV[¥\_ZVZX¥YLRZ]W  
@HWI-EAS443:3:67:362:1162#0/1  
TCCTGTTATCCTGATTCTAGTGAAATCACATGTGTGTGCA  
+HWI-EAS443:3:67:362:1162#0/1  
aabb`a]\_bbaa`abaaaa\_aba``abaaaa\_¥a\_]\_\_  
@HWI-EAS443:3:67:406:947#0/1  
GAAATTCCAATTGTTAGCCAATTGATGCCATCATGACAAG

+HWI-EAS443:3:67:406:947#0/1  
\_N¥`aa]WQZ^]YYV[\_\_a\_\_]``\_]`Z\_¥\_Z¥]RY][S  
@HWI-EAS443:3:67:452:1753#0/1  
GCGGGCAATTCCTCTCTCTGCCCTGTTAGTGGATGGGCTA  
+HWI-EAS443:3:67:452:1753#0/1  
\_b¥W^bbbabbbbbbaba[bbabaab`aaa^aaaaY\_]  
@HWI-EAS443:3:67:536:223#0/1  
ATTCATATCATGCTCCCCCTTGAATGCAGAACCTTCTTC  
+HWI-EAS443:3:67:536:223#0/1  
\_abbbaabaaa]a^^aa\_\_`a`\_\_`]aZ^\_\_\_\_]]^^S[V[  
@HWI-EAS443:3:67:561:907#0/1  
TATGAATGGTCCCTTATGACAAACACATCCCCCTTGGAA  
+HWI-EAS443:3:67:561:907#0/1  
aaZU\_aP][`aab]\_\_YV`]Zaaaa^]W[a^I\_^]TQ\_`  
@HWI-EAS443:3:67:602:850#0/1  
AAATACGGCAATGGTGTGGATAGGGAGAACTAAAAGCA  
+HWI-EAS443:3:67:602:850#0/1  
]`bbbbabb`X^b\_XaU`abaZ`a\_ZZT[a][]Z`^¥V`  
@HWI-EAS443:3:67:640:773#0/1  
GCCCCGTAATTTACGGAAACCACTGACTGTCCAGCAGCA  
+HWI-EAS443:3:67:640:773#0/1  
abaaaaaaaaababa^a]\_]aba````aa\_\_VX\_`]¥^\_  
@HWI-EAS443:3:67:658:671#0/1  
GTAAACAGTGACACTGTGGGTTGGTCTTGGCCAGACGGTG  
+HWI-EAS443:3:67:658:671#0/1  
]]aba^`a`\_b\_]a`b]¥Ja\_Za\_Xa``a\_\_XWJY\_aaG[  
@HWI-EAS443:3:67:706:1234#0/1  
AGTCGCTTGGTCAGCAAGTGCTTGTGCATGATGGCATCAAT  
+HWI-EAS443:3:67:706:1234#0/1  
aVY]aVRQQ¥[¥GR[OMOVYNI^^P¥TTTT[^HMH[SV00  
@HWI-EAS443:3:67:720:900#0/1  
ATCAAAGCGTCATTACTTATGAAAACAACACTTGGGTAAA  
+HWI-EAS443:3:67:720:900#0/1  
aaaaYT\_`a]`aaa`aa\_aa```\_`a`\_\_\_\_^^^\_]Y``\_  
@HWI-EAS443:3:67:768:138#0/1  
GCCCCGTAATTTACGGAAACCACTGACTGTCCAGCAGCA  
+HWI-EAS443:3:67:768:138#0/1  
\_[[¥a`^`^`]X]Z^^][[VZ¥^YSUYS[[QSUUW[V  
@HWI-EAS443:3:67:785:1034#0/1  
ACCAGAATCTGGAATATCAGATAGGATACATATGCAGTGG  
+HWI-EAS443:3:67:785:1034#0/1  
abbbbaababa]bbbaaab\_aa]\_\_`aY\_\_`\_\_\_\_[MS^\_  
@HWI-EAS443:3:67:801:1906#0/1  
ATCGGTTCCAAGGGGGATGTGTTTGTGCATAAGGGAACCAT  
+HWI-EAS443:3:67:801:1906#0/1  
a\_\_U`UUZ`Z¥^UNRTSZNUOUS[HZTXFZ\_TRNRXXY^X  
@HWI-EAS443:3:67:809:867#0/1  
ATCAAATCAGATTGAAACATGCAATCAAAGCGTCATTAC  
+HWI-EAS443:3:67:809:867#0/1  
aabba¥`aaaa`ababaabaaaaaa\_aa`a`a]a```a`



@HWI-EAS443:3:67:839:982#0/1  
ATTGTATAAGACCTTGCTTCTGGGTTGAACTAATCAGAGG  
+HWI-EAS443:3:67:839:982#0/1  
abbaaaabbaabbaaab`aaa\_^^^aaabaaa\_a`aa`\_\_  
@HWI-EAS443:3:67:855:1595#0/1  
AGACTCTTGTGTTCTCAATATATTGTTTCTCCAACCTCTTG  
+HWI-EAS443:3:67:855:1595#0/1  
a]`a\_a\_^¥Y\_\_`^`a``\_\_\_`a\_]\_a\_^¥\_^^T^]\_YO  
@HWI-EAS443:3:67:857:561#0/1  
TCCGAACGGATGGACTGGGACAGACAATAACTTCTCAATA  
+HWI-EAS443:3:67:857:561#0/1  
abb``bbbbaaba``abab\_a\_a\_]`\_aaa`\_^X`a\_a\_a  
@HWI-EAS443:3:67:870:1670#0/1  
ACGGTTTTGAGATGATTTGGGATCCGAACGGATGGACTGG  
+HWI-EAS443:3:67:870:1670#0/1  
aaa]Oaaa`Ua\_\_ZQ`aa[M¥Y\_\_`[^]`\_\_`^^¥WVX]\_  
@HWI-EAS443:3:67:937:225#0/1  
CCAGAACTAACAGGGCTGGATTGTATAAGACCTTGCTTCT  
+HWI-EAS443:3:67:937:225#0/1  
^YRaP`YaUX]Xa[[aY`\_TNZ\_TXX\_\_^XURZ^RTY]]  
@HWI-EAS443:3:67:949:1249#0/1  
CTTGGGAATCAAAATCAGATTGAAACATGCAATCAAAGCG  
+HWI-EAS443:3:67:949:1249#0/1  
^U^b\_bZNZbbbb`^ba^Z]a`bb^a]bab^`aaaab\_a  
@HWI-EAS443:3:67:998:183#0/1  
CCACTGCCCCATTGTCTGGGCCAGAAATCCAATTGTTAG  
+HWI-EAS443:3:67:998:183#0/1  
aaaaaaaa\_aa^aaa]]\_]NPVTZ\_]^[ZQVX][^YTYYYU  
@HWI-EAS443:3:68:1061:269#0/1  
CGGGCAATTCCTCTCTCTGCCCTGTTAGTGGATGGGCTAT  
+HWI-EAS443:3:68:1061:269#0/1  
abb`abbabb]bababbbbabbbabaa`baabbaaX]`a  
@HWI-EAS443:3:68:1068:840#0/1  
GAAATCCCCTGATATGTATCCTATCTGATATTCCAGA  
+HWI-EAS443:3:68:1068:840#0/1  
IR¥¥`b^¥¥b¥`]PT\_bab\_`¥[¥[b^Y^ab¥^Y`]L[a]  
@HWI-EAS443:3:68:1078:593#0/1  
AGACGATACTGGACCACAACCTGCCTGTCTTATCATTAGGG  
+HWI-EAS443:3:68:1078:593#0/1  
abaaaa`\_Z^`a^V\_``¥¥R¥0[X¥T]`]X]XZ]]V¥^¥  
@HWI-EAS443:3:68:1079:1660#0/1  
GCCCCTAATTATCACTATGAGGAATGCTCCTGTTATCCTG  
+HWI-EAS443:3:68:1079:1660#0/1  
Y`abbb`abbb`bb`babbaaabba\_aab^aa`aaa¥]^a  
@HWI-EAS443:3:68:1142:1672#0/1  
ATGGGCTCCTGTCTTTAATGGTTCCATTGGAATGTTTGTC  
+HWI-EAS443:3:68:1142:1672#0/1  
a`VUF]UP¥ZWSLV¥]T¥RVKKWMMHRY¥[]`BBBBBBBB  
@HWI-EAS443:3:68:115:1323#0/1  
CAATGGTGTGGATAGGGAGAACTAAAAGCATTAGTTCA

+HWI-EAS443:3:68:115:1323#0/1  
aaaa`\_[a^aa`a\_`a\_S`^\_a`\_``a\_\_`\_^\_^[]^X  
@HWI-EAS443:3:68:1177:625#0/1  
AATCAAAGCGTCATTACTTATGAAAACAACACTTGGGTAA  
+HWI-EAS443:3:68:1177:625#0/1  
PTX^`\_^T`^^\_¥[NX^PX]^¥[YZXY^^S]^P]]^)[¥  
@HWI-EAS443:3:68:1188:764#0/1  
AAGATATCGTAGGAATAAATGAGTGGTCAGGATATAGCGG  
+HWI-EAS443:3:68:1188:764#0/1  
abaaaaaa`]aaaaaaaaaaaa]aa]\_]aa]````\_\_a  
@HWI-EAS443:3:68:1206:1281#0/1  
ATTGGCTAACAAATTGGAATTTCTGGCCCAGACAATGGGGC  
+HWI-EAS443:3:68:1206:1281#0/1  
aa]]^]\_]^^^a`aa]^Y]]ZV\_PZ\_Z¥T¥B  
@HWI-EAS443:3:68:1213:160#0/1  
GAAAGACACCCACGGTCGATTCGAGCCATGCCAGTTATCC  
+HWI-EAS443:3:68:1213:160#0/1  
aababaaaaaaaaaa¥[\_WZ¥Y]Z\_^^^[^TU`T^[WRR  
@HWI-EAS443:3:68:1216:729#0/1  
CACCAATAGGACAGCTCATTAGGGTTTCGATATGGGCTCCT  
+HWI-EAS443:3:68:1216:729#0/1  
\_¥bb`V``a``]a`a¥¥`aaaabb¥¥a`[\_[\_]`a¥  
@HWI-EAS443:3:68:1224:855#0/1  
GGGCTCCTGTCTTTAATGGTTCCATTGGAATGTTTGTTCAT  
+HWI-EAS443:3:68:1224:855#0/1  
a]J\_a\_V^bQPUR]Z`P][`SHWJU¥NNLT[`QY^XH]VV  
@HWI-EAS443:3:68:1226:767#0/1  
GTCAGGATATAGCGGGAGTTTTGTTTCAGCATCCAGAACTA  
+HWI-EAS443:3:68:1226:767#0/1  
a\_``aa`aaaa^aa`[`KZa`VUYS]\_¥\_]Z]\_]\_W\_^  
@HWI-EAS443:3:68:1301:1496#0/1  
GCAGAACCTTCTTCTTGAAGGGCCTTGCTAAATGA  
+HWI-EAS443:3:68:1301:1496#0/1  
``ZYFWV¥a^aa[a]a\_^^`aWY][^aV]ZWR[]QV\_\_¥  
@HWI-EAS443:3:68:1302:274#0/1  
CAGGAGCATTCTCATAGTGATAATTAGGGGCATTCATTT  
+HWI-EAS443:3:68:1302:274#0/1  
abbbbb`bbba`bbbbbbababbabbbbaabaaba`abba  
@HWI-EAS443:3:68:1304:121#0/1  
GTTTCGATCCCAAATCATCTCAAACCGTTTCTTGAACCTA  
+HWI-EAS443:3:68:1304:121#0/1  
YY^]]bVaa`^ZaY^a[X\_YWVaWH\_X^M^¥^YN¥[X\_]`  
@HWI-EAS443:3:68:137:851#0/1  
CTCCTGTCTTTAATGGTTCCATTGGAATGTTTGTTCATTTA  
+HWI-EAS443:3:68:137:851#0/1  
abbbbaaYbabbb\_aa]`aab]aa`^]`a``aaa^`X`a`\_  
@HWI-EAS443:3:68:1381:686#0/1  
ATGCAATCAAAGCGTCATTACTTATGAAAACAACACTTGG  
+HWI-EAS443:3:68:1381:686#0/1  
abbababaaaaa`\_`aaaaaa`baaaaa^a`\_a`\_`a`

@HWI-EAS443:3:68:1389:1744#0/1  
GAGGAATTGCCCGCTAATTTACGGAAACCACTGACTGTC  
+HWI-EAS443:3:68:1389:1744#0/1  
aaababa^aa`\_a`\_a\_\_\_\_\_^^`a¥\_\_\_¥\_¥^`^^U]¥  
@HWI-EAS443:3:68:1393:1647#0/1  
CTGGGACAGACAATAACTTCTCAATAAAGCAAGATATCGT  
+HWI-EAS443:3:68:1393:1647#0/1  
abbbabbabaabbbbbabaaaabaabba\_abaaaaba\_a^  
@HWI-EAS443:3:68:1437:378#0/1  
ATCAAATCAGATTGAAACATGCAATCAAAGCGTCATTAC  
+HWI-EAS443:3:68:1437:378#0/1  
ab`abaaba`b`aaaaaaaaaab¥a\_aa`a\_a\_\_\_a\_a\_  
@HWI-EAS443:3:68:1450:528#0/1  
GCGGGAGCAGCATATCCTTTTGTGGTGTAAACAGTGACAC  
+HWI-EAS443:3:68:1450:528#0/1  
a]aaaV^^¥V^[`XWX¥a` `] `[RZVPMZ¥]`W]NKVW  
@HWI-EAS443:3:68:1483:1413#0/1  
ACGATATCTTGCTTTATTGAGAAGTTATTGTCTGTCCCAG  
+HWI-EAS443:3:68:1483:1413#0/1  
a]`\_\_`a`\_``\_aa`a`a^a\_^a^`\_`\_]Z`YBBBBBB  
@HWI-EAS443:3:68:1504:168#0/1  
CGATACTGGACCACAACCTGCCTGTCTTATCATTAGGGCGT  
+HWI-EAS443:3:68:1504:168#0/1  
`babbabaaa^aa]aa`aZ]aaa\_aaaaUa`a`a¥\_Y\_Q  
@HWI-EAS443:3:68:1706:698#0/1  
GTTTGTGCATAAGGGAACCATTTCATATCATGCTCCCCCTTG  
+HWI-EAS443:3:68:1706:698#0/1  
aaabba`babaab\_\_a`^aaa\_aaaa`a`\_a`]`\_]aa`  
@HWI-EAS443:3:68:202:1631#0/1  
CATATGTTAACATCAGCAACACCAACTTTGCTGCTGGACA  
+HWI-EAS443:3:68:202:1631#0/1  
a\_K`Za`\_`V`Xaa¥aWP^a]¥FSQ\_^TW¥\_`U^Y^\_Y  
@HWI-EAS443:3:68:212:124#0/1  
CAGACATATGTTAACATCAGCAACACCAACTTTGCTGCTG  
+HWI-EAS443:3:68:212:124#0/1  
aaaaaYaaaa`aaaa`\_a`\_``[a`\_X^]^^^`\_\_\_Y]^  
@HWI-EAS443:3:68:242:1546#0/1  
CCGCTAATTTACGGAAACCACTGACTGTCCAGCAGCAAA  
+HWI-EAS443:3:68:242:1546#0/1  
abYbaa`aaaaaaaa\_ab`]aaa`a`¥SV`¥\_ZWOROY]H  
@HWI-EAS443:3:68:257:612#0/1  
TGTCTGGCCAGAAATCCAATTGTTAGCCAATTGATGCC  
+HWI-EAS443:3:68:257:612#0/1  
^WYZP]]SV¥Z^U¥W^[V]\_W]^Y\_a]ZW]\_\_\_ZUSU^\_]`  
@HWI-EAS443:3:68:281:2006#0/1  
AGCCACTCAATTCAACTTGGGAATCAAATCAGATTGAAA  
+HWI-EAS443:3:68:281:2006#0/1  
a`abb\_^`a`\_``\_`a`\_`\_`[¥`a^`a`\_`\_`^`\_`^^`\_`\_`  
@HWI-EAS443:3:68:287:1036#0/1  
CATATGTTAACATCAGCAACACCAACTTTGCTGCTGGACA

+HWI-EAS443:3:68:287:1036#0/1  
a¥\_V^aab`bbbaaa``a`S]aab`a¥aaa][Xaa`X`X  
@HWI-EAS443:3:68:332:388#0/1  
AGTGGTTTCCGTGAAATTAGCGGGCAATTCCTCTCTCTGC  
+HWI-EAS443:3:68:332:388#0/1  
``W``^aaaa`Z\_\_\_\_\_`a^^`\_`\_]¥^`\_`\_`¥¥\_\_[¥^`  
@HWI-EAS443:3:68:347:462#0/1  
CGAATCGACCGTGGGTGTCTTTCAACCAGAATCTGGAATA  
+HWI-EAS443:3:68:347:462#0/1  
aab\_a`a`b\_0[\_`PYTXZba^W\_]a\_S`\_¥U\_]T^OQ  
@HWI-EAS443:3:68:375:967#0/1  
CAAGAGTTGGAGAAACAATATATTGAGAACACAAGAGTCT  
+HWI-EAS443:3:68:375:967#0/1  
ab^b]^\_ab\_baabaaaaaaaa\_aaba\_]aaaaaaaa^`a  
@HWI-EAS443:3:68:378:1026#0/1  
GGAATGCTCCTGTTATCCTGATTCTAGTGAAATCACATGT  
+HWI-EAS443:3:68:378:1026#0/1  
aabbaaaaaa\_a`¥`ba`aaaaa\_]^^]Y^a``]`¥U  
@HWI-EAS443:3:68:37:879#0/1  
ATTCCAATTGTTAGCCAATTGATGCCATCATGACAAGCAC  
+HWI-EAS443:3:68:37:879#0/1  
aaaaaaaaaa`aa]a`Y`^`\_]\_a\_a\_]\_\_\_\_]\_`\_\_\_\_]]  
@HWI-EAS443:3:68:423:116#0/1  
TAAGACCTTGCTTCTGGGTTGAACTAATCAGAGGGCGACC  
+HWI-EAS443:3:68:423:116#0/1  
]¥`b]b^`\_\_\_\_`ba^a^VOZ`b`]aaaaa\_Zab[X¥¥WQ  
@HWI-EAS443:3:68:435:1214#0/1  
CTCGAATCGACCGTGGGTGTCTTTCAACCAGAATCTGGAA  
+HWI-EAS443:3:68:435:1214#0/1  
aabaaaaaabT\_aP`a`GYY\_]``\_XVY¥a\_`^W[ZZY]^  
@HWI-EAS443:3:68:452:1781#0/1  
GTCTTTACTGTATATAGCCCATCCACTAACAGGGCAGAGA  
+HWI-EAS443:3:68:452:1781#0/1  
W¥a`bbaaTTbb`\_U`a]`baaba`a`\_a]\_SQ\_aaUaa\_  
@HWI-EAS443:3:68:485:242#0/1  
GTCGCTTGGTCAGCAAGTGCTTGTCATGATGGCATCAATT  
+HWI-EAS443:3:68:485:242#0/1  
aaaaaaaaaa^aaaa]aYa¥`aa```]YW]¥[[^\_Y\_]^\_  
@HWI-EAS443:3:68:560:1042#0/1  
GGAGAGGGAACCTCACCAATAGGACAGCTCATTAGGGTTC  
+HWI-EAS443:3:68:560:1042#0/1  
aa```a\_ZQ^aaaa`a`¥Z`¥`\_`Y`a\_\_\_\_\_a`^]NYW\_\_  
@HWI-EAS443:3:68:627:1709#0/1  
CAGTGGTTTCCGTGAAATTAGCGGGCAATTCCTCTCTCTG  
+HWI-EAS443:3:68:627:1709#0/1  
abb\_]a^bbabZa^ababaa`UX[`T\_RVZaa\_aaa^SY  
@HWI-EAS443:3:68:667:327#0/1  
CATGATGGCATCAATTGGCTAACAATTGGAATTTCTGGCC  
+HWI-EAS443:3:68:667:327#0/1  
\_^^^abaaa`^a^^aba\_^^`^Z`\_a]YY]aaaa`\_`\_`

@HWI-EAS443:3:68:693:515#0/1  
AAGACACCCACGGTCGATTGAGCCATGCCAGTTATCCCT  
+HWI-EAS443:3:68:693:515#0/1  
aa`\_abaa`^^`¥Z\_SSWZ^T\_Z[¥WVSPW^TZ[ZVRZT  
@HWI-EAS443:3:68:712:1159#0/1  
ATTCTGGTTGAAAGACACCCACGGTCGATTGAGCCATGC  
+HWI-EAS443:3:68:712:1159#0/1  
abbbba¥\_Z][TW^]W\_] ^Y`^`U[VTU^[]VRS^WPV¥  
@HWI-EAS443:3:68:738:1894#0/1  
AGAAACAATATATTGAGAACAAGAGTCTGAATGTGCAT  
+HWI-EAS443:3:68:738:1894#0/1  
aXZ^aaaa^^^`] `XaZYZaa^aa`a^¥aY]aaVVNTWa\_  
@HWI-EAS443:3:68:757:256#0/1  
GCAGAACCTTCTTCTGACTCAAGGGCCTTGCTAAATGA  
+HWI-EAS443:3:68:757:256#0/1  
a`] `Z¥`\_]\_]ZQ`\_¥LPN¥`¥W¥V¥`PWXS]RZ^^P^  
@HWI-EAS443:3:68:82:1779#0/1  
GACCGTGGGTGTCTTCAACCAGAATCTGGAATATCAGAT  
+HWI-EAS443:3:68:82:1779#0/1  
ZXb`R\_\_bbb[\_ba]bab`] `Z\_bbbbaa^Zababbaab`a  
@HWI-EAS443:3:68:852:771#0/1  
GCATGTTTCAATCTGATTTTGATTCCCAAGTTGAATTGAG  
+HWI-EAS443:3:68:852:771#0/1  
aa^aaYb\_`[^a\_aaZa\_`Y` `` `aZa^W]Y\_aV^`\_`\_aa  
@HWI-EAS443:3:68:861:423#0/1  
TACGATATCTTGCTTTATTGAGAAGTTATTGTCTGTCCCA  
+HWI-EAS443:3:68:861:423#0/1  
abaa\_aaa`aa]\_aaaa`^^a`\_a¥a`\_`^W¥^\_[FLSZH  
@HWI-EAS443:3:68:871:168#0/1  
GTTCCCTCTCCATACTCAAGATTTGAGTCAGTCGCTT  
+HWI-EAS443:3:68:871:168#0/1  
¥]S]T]ZZ]XW¥UYPYOS]OZ`] `WXZ]aU\_BBBBBBBBBB  
@HWI-EAS443:3:68:925:466#0/1  
CAGAAATTCCAATTGTTAGCCAATTGATGCCATCATGACA  
+HWI-EAS443:3:68:925:466#0/1  
`bbabbbbbbbaaaaaababaaaaaaaaaaa`\_aaa`ab  
@HWI-EAS443:3:68:944:1412#0/1  
GAACTAACAGGGCTGGATTGTATAAGACCTTGCTTCTGGG  
+HWI-EAS443:3:68:944:1412#0/1  
a`ba\_^^baa`T`a\_`X¥^¥`aaU\_]`\_a`a` `[O[]a\_  
@HWI-EAS443:3:68:999:946#0/1  
CTGTCCCAGTCCATCCGTTCCGATCCCAAATCATCTCAAA  
+HWI-EAS443:3:68:999:946#0/1  
abbababbbbaabbaaa\_a`aaa` `aaaaa` `a`a`aa¥a  
@HWI-EAS443:3:69:1003:852#0/1  
CAAATCTTGAGTTGTATGGAGAGGGAACCTCACCAATAGG  
+HWI-EAS443:3:69:1003:852#0/1  
aaaaabaab¥aabb`bbb`aa`[\_`\_]`\_`\_a\_\_a\_aa^\_  
@HWI-EAS443:3:69:1008:1037#0/1  
TGTTATCCTGATTCTAGTGAATCACATGTGTGTGCAGGG

+HWI-EAS443:3:69:1008:1037#0/1  
\_ ^\_ba\_`a`aaa`a\_Za[]`a\_aaaa^a]Y`\_a]a\_Ya\_\_  
@HWI-EAS443:3:69:100:1901#0/1  
CCCCAATCATCTCAAAACCGTTTCTTGAACCTAATGCTTTT  
+HWI-EAS443:3:69:100:1901#0/1  
abb¥U¥^bbababababaaa¥`aa^aa`aaa`\_aaaa`  
@HWI-EAS443:3:69:1011:1675#0/1  
GCGGGAGTTTTGTTTCAGCATCCAGAACTAACAGGGCTGGA  
+HWI-EAS443:3:69:1011:1675#0/1  
aabbaab\_a`abaabaaa`aba¥^abaabbaaa[aY```a  
@HWI-EAS443:3:69:1077:1912#0/1  
GATTCTAGTGAAATCACATGTGTGTGCAGGGATAACTGGC  
+HWI-EAS443:3:69:1077:1912#0/1  
I\_[UW\_\_][\_]`aa\_W\_baa`a]\_\_[a^NWY`aba``[a  
@HWI-EAS443:3:69:1077:999#0/1  
TGCAGAACCTTCTTCTTGAAGGGCCTTGCTAAATG  
+HWI-EAS443:3:69:1077:999#0/1  
\_bbbaZ`abbaabbaabbaab`¥S¥aW^`aaaaZV¥a``  
@HWI-EAS443:3:69:1087:717#0/1  
ACGGTTTTGAGATGATTTGGGATCCGAACGGATGGACTGG  
+HWI-EAS443:3:69:1087:717#0/1  
aaba^abb`aaaa`aab`ab``a`a``]a`\_\_a`VU^aa  
@HWI-EAS443:3:69:1098:523#0/1  
CTCCTGTCTTTAATGGTTCCATTGGAATGTTTGTCTTTA  
+HWI-EAS443:3:69:1098:523#0/1  
]abaa\_0\_bbbbbbbbaab]abba\_aYba`^^^b`^^`aa]  
@HWI-EAS443:3:69:1143:1354#0/1  
CAGACATATGTTAACATCAGCAACACCAACTTTGCTGCTG  
+HWI-EAS443:3:69:1143:1354#0/1  
abaabababaaaaaaaaaaaaaaaa`aa`aaaa`\_aaaa\_\_`  
@HWI-EAS443:3:69:125:1819#0/1  
CTTGAATGCAGAACCTTCTTCTTGAAGGGCCTTG  
+HWI-EAS443:3:69:125:1819#0/1  
aa\_Z`a^ZWa`¥¥]^^^\_]X\_Y^X\_V`^YX0I0]]]YU  
@HWI-EAS443:3:69:1260:1964#0/1  
ACTTTAACACAGCCACTGCCCCATTGTCTGGCCAGAAAT  
+HWI-EAS443:3:69:1260:1964#0/1  
aa`bZb[ab`bZUW]`YT\_baaaVXFPZ^SVUYU¥YV\_\_Y  
@HWI-EAS443:3:69:1280:408#0/1  
CCGTGGGTGTCTTTCAACCAGAATCTGGAATATCAGATAG  
+HWI-EAS443:3:69:1280:408#0/1  
aabbbba`baabbbbbbaaababb`bbaabaaaabaaba  
@HWI-EAS443:3:69:1295:1161#0/1  
CAGACATATGTTAACATCAGCAACACCAACTTTGCTGCTG  
+HWI-EAS443:3:69:1295:1161#0/1  
``aaa\_baa\_^aaaabaaa`\_aa\_aa`X\_a¥\_a\_\_a`\_\_\_\_  
@HWI-EAS443:3:69:131:400#0/1  
GTTTGGATAGGGAGAATAAGCATTAGTTCAAGAAACG  
+HWI-EAS443:3:69:131:400#0/1  
a\_a^Za[]^^a`¥^[a\_\_\_\_]Y^¥\_``^X[XX^\_]¥U¥]^

@HWI-EAS443:3:69:1382:1740#0/1  
ATAACAGACTATCAAGAGTTGGAGAAACAATATATTGA  
+HWI-EAS443:3:69:1382:1740#0/1  
¥YY\_aa[`\_ab`^U`a]`¥XL\_aa\_TZ\_^U]YX]XYTZ[]  
@HWI-EAS443:3:69:1404:1003#0/1  
ATCCTTTTGTGGTGTAAACAGTGACTGTGGGTTGGTCT  
+HWI-EAS443:3:69:1404:1003#0/1  
`[bbababaYabPYY[NbWV]¥a` `[a\_a\_`¥WGV]aHaa  
@HWI-EAS443:3:69:1412:1397#0/1  
GTGCATTGAGCCATGCCAGTTATCCCTGCACACACATGT  
+HWI-EAS443:3:69:1412:1397#0/1  
a[^^^XWTRUPZa` ]\_ [NVYUVXZ[aXX[ULVPU\_aV  
@HWI-EAS443:3:69:1432:1092#0/1  
ACCACAACCTGCCTGTCTTATCATTAGGGCGTGGATTGTCT  
+HWI-EAS443:3:69:1432:1092#0/1  
[baab\_bbbbaabbaabbaaTaa¥aa]a[\_` `` `` `` \_LR[  
@HWI-EAS443:3:69:1521:488#0/1  
TTCAAATACGGCAATGGTGTGGATAGGGAGAACTAAAA  
+HWI-EAS443:3:69:1521:488#0/1  
`aa`aaaa`aa\_\_\_`\_aU`\_a\_]`T[\_\_\_]`\_^\_]\_X\_` ``  
@HWI-EAS443:3:69:154:1084#0/1  
AAGACACCCACGGTCGATTGAGCCATGCCAGTTATCCCT  
+HWI-EAS443:3:69:154:1084#0/1  
`\_Uaaaaaaaa\_^JIZVUH¥UTWWQBbbbbbbbbbbbbbb  
@HWI-EAS443:3:69:1588:1214#0/1  
TGGCTGTGTTAAAGTACAACGGCATAATAACAGACTAT  
+HWI-EAS443:3:69:1588:1214#0/1  
aa` `a\_LYZ\_\_\_a\_W[MW\_Q^\_^]]\_]`^X][QFXTZ^V  
@HWI-EAS443:3:69:1605:1035#0/1  
CTAATTACTACTATGAGGAATGCTCCTGTTATCCTGATTC  
+HWI-EAS443:3:69:1605:1035#0/1  
abXbaXbbbaa^bbb` `ab`a`baaaabaabab` [aa]aa\_  
@HWI-EAS443:3:69:1624:1301#0/1  
GCGGGAGCAGCATATCCTTTTGTGGTGTAAACAGTGACAC  
+HWI-EAS443:3:69:1624:1301#0/1  
aabbaabbbbaababa`bbbbbaa`aa`aaa\_\_aa¥aa¥a¥  
@HWI-EAS443:3:69:1656:745#0/1  
GTGTCTTTCAACCAGAATCTGGAATATCAGATAGGATACA  
+HWI-EAS443:3:69:1656:745#0/1  
aaaa\_aab`aa`aa`\_a^aaaaaa`a]`a]\_` `` `` ^XV  
@HWI-EAS443:3:69:1659:810#0/1  
TCGGTCTGTATGACAATTGGAATGGCTAACTTAATATTAC  
+HWI-EAS443:3:69:1659:810#0/1  
aaaa`a`b\_aaaaSaa`\_a\_\_\_`aa]a\_`P`aaa`\_aaaW  
@HWI-EAS443:3:69:1711:674#0/1  
GTACAACGGCATAATAACAGACTATCAAGAGTTGGAGA  
+HWI-EAS443:3:69:1711:674#0/1  
aa^a\_¥\_WZ]Z\_`^^Y^[[` [S]T\_` [LZZ\_[YQ\_[]W\_S  
@HWI-EAS443:3:69:1730:899#0/1  
ACTCAATTCAACTTGGGAATCAAATCAGATTGAAACATG

+HWI-EAS443:3:69:1730:899#0/1  
a^\_\_`[]`¥^\_\_\_\_^¥^\_]^^]\_^]\_]\_^[]^]¥¥¥Y]  
@HWI-EAS443:3:69:1737:152#0/1  
GCAAGAACCATTTACACATGCACATTCAGACTCTTGTGTT  
+HWI-EAS443:3:69:1737:152#0/1  
aa]aa\_a`\_`a`a\_]\_]\_`[]]\_`\_^¥^X^V¥[WW^YY  
@HWI-EAS443:3:69:247:906#0/1  
TGCCGTTGTACTTTAACACAGCCACTGCCCCATTGTCTGG  
+HWI-EAS443:3:69:247:906#0/1  
`bbb[H^\_\_abb`bbabbb`aaa^`[[aaa\_^PV¥U^^  
@HWI-EAS443:3:69:262:925#0/1  
GGGCCTTGCTAAATGACAAACATTCCAATGGAACCATTAA  
+HWI-EAS443:3:69:262:925#0/1  
ab]b`ab`bba`Yaabbabbab`bbb`a^aaaaaZX\_  
@HWI-EAS443:3:69:270:1306#0/1  
ATCATGCTCCCCCTTGAATGCAGAACCTTCTTCTGACT  
+HWI-EAS443:3:69:270:1306#0/1  
^\_aaaab\_aaa`a^``[VU^^H[UQ[\_\_¥\_YSZZPT¥¥S  
@HWI-EAS443:3:69:307:1231#0/1  
CTCCCCTATATCCTGACCACTCATTATTCTTCTACGATAT  
+HWI-EAS443:3:69:307:1231#0/1  
^¥babbb^\_\_^^bababbaaab^Q¥aab`aaaa¥aaa^¥a  
@HWI-EAS443:3:69:319:26#0/1  
GGGAGCAGCATATCCTTTTGTGGTGTAAACAGTGACACTG  
+HWI-EAS443:3:69:319:26#0/1  
aaaJ¥a`[`XTUa^¥^`aa^][a¥NZP[\_aWaZ¥\_¥\_a  
@HWI-EAS443:3:69:32:261#0/1  
AGAACCTTCTTCTGACTCAAGGGCCTTGCTAAATGACA  
+HWI-EAS443:3:69:32:261#0/1  
Za])abbaaaaaaaaa`aaZH^aaa^X^``\_aa`a\_^\_]\_  
@HWI-EAS443:3:69:363:787#0/1  
GTTCCGATCCCAAATCATCTCAAACCGTTTCTTGAACTA  
+HWI-EAS443:3:69:363:787#0/1  
\_[bbX^b\_babb`Y\_baababbab\_babaaaa\_a`\_aa`a  
@HWI-EAS443:3:69:36:54#0/1  
GGGCTCCTGTCTTTAATGGTTCATTGGAATGTTTGTCTCAT  
+HWI-EAS443:3:69:36:54#0/1  
aaaba\_b\_b^aaba[]aabX`^]H]a]a\_^\_]Va`PZXX\_  
@HWI-EAS443:3:69:446:66#0/1  
GCAAGTGCTTGTCATGATGGCATCAATTGGCTAACAAATTG  
+HWI-EAS443:3:69:446:66#0/1  
\_YFY¥T^\_Z¥aZPX¥]QN]\_ZLTX^UVT^RXGRRURUYUV  
@HWI-EAS443:3:69:518:280#0/1  
ATCAAAGCGTCATTACTTATGAAAACAACACTTGGGTAAA  
+HWI-EAS443:3:69:518:280#0/1  
aa^`]\_`a`\_[^aa]X`aa[`^\_¥]a]aW]¥^¥¥\_YRUSV  
@HWI-EAS443:3:69:519:1195#0/1  
CAGACACTATCAAGAGTTGGAGAAACAATATATTGAGAAC  
+HWI-EAS443:3:69:519:1195#0/1  
aa`abbbbaabb`[\_`aaaa``aYbaaa^\_aba^a\_aaa



@HWI-EAS443:3:69:607:1445#0/1  
GGGGGATGTGTTTGTGCATAAGGGAACCATTTCATATCATGC  
+HWI-EAS443:3:69:607:1445#0/1  
`\_Z\_Za`^`\_Za`^]ab^aa^Y]a\_aaaa`baaa`a`^`  
@HWI-EAS443:3:69:643:646#0/1  
CTTGCTTTATTGAGAAGTTATTGTCTGTCCCAGTCCATCC  
+HWI-EAS443:3:69:643:646#0/1  
aaabaaa`[`ab¥]a\_]aabaaTaa^FV]X\_[OQVSJS]  
@HWI-EAS443:3:69:698:1745#0/1  
CAAGAGTTGGAGAAACAATATATTGAGAACACAAGAGTCT  
+HWI-EAS443:3:69:698:1745#0/1  
aab`ba\_aaaXaa`aabba`\_¥[`Z`aa\_]aaa\_¥aY\_P  
@HWI-EAS443:3:69:837:1264#0/1  
CGCTAATTTACGGAAACCACTGACTGTCCAGCAGCAAAG  
+HWI-EAS443:3:69:837:1264#0/1  
abab``ab^¥``\_a\_Vaa`ab\_]`^`\_[abWV\_\_Z^VUXY  
@HWI-EAS443:3:69:856:1270#0/1  
CTCAAATCTTGAGTTGTATGGAGAGGGAACCTCACCAATA  
+HWI-EAS443:3:69:856:1270#0/1  
a]bbba\_aaaa\_aa`Z`a]X\_a\_\_\_aa`a`\_aaZaaaaW  
@HWI-EAS443:3:69:875:485#0/1  
CACAACTGCCTGTCTTATCATTAGGGCGTGGATTGTCTCC  
+HWI-EAS443:3:69:875:485#0/1  
a\_aabbab``aa^`aaaa`\_\_aa^aaVU\_\_`\_aaX``Z]  
@HWI-EAS443:3:69:904:1564#0/1  
TCATGACAAGCACTTGCTGACCAAGCGACTGACTCAAATC  
+HWI-EAS443:3:69:904:1564#0/1  
abbbbbaaa`a`a`aa`a¥\_]aa^aaa]^¥`[\_]a\_X^\_]`  
@HWI-EAS443:3:69:945:620#0/1  
AGCGGGAGCAGCATATCCTTTTGTGGTGTAAACAGTGACA  
+HWI-EAS443:3:69:945:620#0/1  
aaaaaa¥V\_X`Ua`]a\_`aaa`R¥[^^^`\_\_¥`^`¥\_XUX  
@HWI-EAS443:3:69:970:171#0/1  
GGGGATGTGTTTGTGCATAAGGGAACCATTTCATATCATGCT  
+HWI-EAS443:3:69:970:171#0/1  
`abaaab\_a\_aaa^\_aaa`\_Z``a\_`\_`¥`a`\_`[\_`\_^^\_`  
@HWI-EAS443:3:69:996:1580#0/1  
GGTGTGTTGGATAGGGAGAATAAAAGCATTAGTTCAAGAA  
+HWI-EAS443:3:69:996:1580#0/1  
^\_U`¥`\_]`^`aa`^``a]a\_\_^`\_`[`XZ`\_]`^^\_\_aY  
@HWI-EAS443:3:6:1016:268#0/1  
GGCTCCTGTCTTTAATGGTTCCATTGGAATGTTTGTTCATT  
+HWI-EAS443:3:6:1016:268#0/1  
a]aa\_YI^ZU]aaa\_]Z]\_\_XU[UUHZ]Z]]X¥¥UVXBBB  
@HWI-EAS443:3:6:1056:285#0/1  
AGAAGTTCTGCATTCCAAGGGGAGCATGATATGAATGG  
+HWI-EAS443:3:6:1056:285#0/1  
ab`W[^\_\_\_\_`aX]Z\_a[ ]`\_¥XXZ^Z^\_]X^]]YBBBB  
@HWI-EAS443:3:6:1075:302#0/1  
CTCATTATTCTACGATATCTTGCTTTATTGAGAAGTTA

+HWI-EAS443:3:6:1075:302#0/1  
^`^bbbbbabab\_baba`[a^Yaab`baa`a``aaaa  
@HWI-EAS443:3:6:1101:797#0/1  
ATATGCAGTGGGATTTTCGAGACAATCCACGCCCTAATG  
+HWI-EAS443:3:6:1101:797#0/1  
abbababa\_aZ`aaba`aa^aa]aa`\_\_a]aV]]`\_\_\_\_  
@HWI-EAS443:3:6:110:1101#0/1  
ACAAGTGCCTGTCTTATCATTAGGGCGTGGATTGTCTCCG  
+HWI-EAS443:3:6:110:1101#0/1  
aba`bba`a`N¥aaa]]\_aaa`X]X\_Z^]`^¥]VV\_^T  
@HWI-EAS443:3:6:112:1598#0/1  
AGCCACTCAATTCAACTTGGGAATCAAAATCAGATTGAAA  
+HWI-EAS443:3:6:112:1598#0/1  
aaabbaa`baaa`aa`aaT][aaaaaaaa`aaa``\_aa\_\_  
@HWI-EAS443:3:6:1130:119#0/1  
ATGACAAGCACTTGCTGACCAAGCGACTGACTCAAATCTT  
+HWI-EAS443:3:6:1130:119#0/1  
^aWabaa\_`bVaa[Taaa0^a¥a0a^^aWPH[^ZZUXRaa  
@HWI-EAS443:3:6:1156:343#0/1  
CATTCAAATACGGCAATGGTGTGGATAGGGAGAACTAA  
+HWI-EAS443:3:6:1156:343#0/1  
`ababbabbbaba\_aab^a`¥[aaa`Iaaaa^[a`a]a``  
@HWI-EAS443:3:6:1190:664#0/1  
CCTAATTATCACTATGAGGAATGCTCCTGTTATCCTGATT  
+HWI-EAS443:3:6:1190:664#0/1  
`babbbabb[``aaabab`aaaa`\_\_aa\_aaa^^`a`\_\_  
@HWI-EAS443:3:6:1213:1406#0/1  
GACATATGTTAACATCAGCAACACCAACTTTGCTGCTGGA  
+HWI-EAS443:3:6:1213:1406#0/1  
¥ab\_ab\_a¥a`Za`bMb`a`a`[P]a\_`¥\_b`a\_U^ba  
@HWI-EAS443:3:6:1224:59#0/1  
CACCAACTTTGCTGCTGGACAGTCAGTGGTTTCCGTGAAA  
+HWI-EAS443:3:6:1224:59#0/1  
^ba`baabbababa`bbabbb]\_baGab]ab`WGW\_a]B  
@HWI-EAS443:3:6:1229:1603#0/1  
CAACTGCCTGTCTTATCATTAGGGCGTGGATTGTCTCCGA  
+HWI-EAS443:3:6:1229:1603#0/1  
QW\_`b¥baZ¥^bb^Tab`bbbb\_TaV`[SaZ\_Wa]`bBB  
@HWI-EAS443:3:6:1235:377#0/1  
TAATAACAGACACTATCAAGAGTTGGAGAAACAATATATT  
+HWI-EAS443:3:6:1235:377#0/1  
ababaa`aba`a`a\_a\_a\_a^a^aaa^a^\_][^\_`\_`\_`\_`  
@HWI-EAS443:3:6:1277:846#0/1  
CCTAATTATCACTATGAGGAATGCTCCTGTTATCCTGATT  
+HWI-EAS443:3:6:1277:846#0/1  
]`\_[ab^\_a\_¥¥aaaZ¥`^`bba^a¥^\_`a````abaV`^  
@HWI-EAS443:3:6:1395:1034#0/1  
ATCGGTTCCAAGGGGATGTGTTTGTGCATAAGGGAACCAT  
+HWI-EAS443:3:6:1395:1034#0/1  
a`\_aa```^OW`S\_[UX¥RW^VZ^VVUUU]]\_\_[OYRYBB

@HWI-EAS443:3:6:1410:1848#0/1  
GTGTAAACAGTGACTGTGGGTTGGTCTTGGCCAGACGG  
+HWI-EAS443:3:6:1410:1848#0/1  
`S\_^`\_]\_N^UaZn^¥^]U\_¥\_QUZ¥VWW\_]RUUQ\_¥NWB  
@HWI-EAS443:3:6:1444:1104#0/1  
AAGAAGTTCTGCATTCCAAGGGGAGCATGATATGAATG  
+HWI-EAS443:3:6:1444:1104#0/1  
aaZaabbbaaTa[Yaaa\_Waaaa``\_]YXaaaa``^`^`Y^  
@HWI-EAS443:3:6:1453:843#0/1  
GCTAATTTACGGAAACCACTGACTGTCCAGCAGCAAAGT  
+HWI-EAS443:3:6:1453:843#0/1  
aabbbaabbbaa]ba`aa\_[]^aa\_Va¥\_V\_\_][`\_VW]X]B  
@HWI-EAS443:3:6:1463:1847#0/1  
ATCCTATCTGATATTCCAGATTCTGGTTGAAAGACACCCA  
+HWI-EAS443:3:6:1463:1847#0/1  
a]JYaaU``a^`\_a\_¥ab¥a^]S\_\_\_\_`\_`^`\_¥H]^WO\_  
@HWI-EAS443:3:6:1532:608#0/1  
AAGACACCCACGGTCGATTGAGCCATGCCAGTTATCCCT  
+HWI-EAS443:3:6:1532:608#0/1  
`bbaaa`M\_¥\_ba\_U^XM^¥\_MYQU\_VYSKY¥R^VSVVBB  
@HWI-EAS443:3:6:1607:114#0/1  
GGGCTCCTGTCTTTAATGGTTCATTGGAATGTTTGTCAT  
+HWI-EAS443:3:6:1607:114#0/1  
\_\_`bb\_aaURIabba[aa\_]aNFI`Z^`GTb]\_aaZTB  
@HWI-EAS443:3:6:1617:414#0/1  
GGCGTGGATTGTCTCCGAAAATCCCACTGCATATGTATCC  
+HWI-EAS443:3:6:1617:414#0/1  
ab^a¥^X]aaZYQSY^^]]Z¥YUR]\_MZVP[`\_^U^VDM  
@HWI-EAS443:3:6:1644:954#0/1  
GTCAGCAAGTGCTTGTCATGATGGCATCAATTGGCTAACA  
+HWI-EAS443:3:6:1644:954#0/1  
`W[aa0[^Z]aY]\_ST¥G[aSY[RFWMXKEP``TEM\_UG[  
@HWI-EAS443:3:6:1685:1597#0/1  
GCAGAACCTTCTTCTTACTCAAGGGGCTTGCTAAATGA  
+HWI-EAS443:3:6:1685:1597#0/1  
``aa]^¥`]^Y^\_\_`\_`\_]\_^]^[^\_VTQ]\_V`]XXV^]  
@HWI-EAS443:3:6:1751:1383#0/1  
ATGGTGTGGATAGGGAGAACTAAAAGCATTAGTTCAAG  
+HWI-EAS443:3:6:1751:1383#0/1  
abab\_^aabbba\_aYab`\_a`Y\_\_`\_\_`Z\_`\_`bX\_P^[\_  
@HWI-EAS443:3:6:175:447#0/1  
CTTTAACACAGCCACTGCCCATTTGTCTGGGCCAGAAATT  
+HWI-EAS443:3:6:175:447#0/1  
aabbabbabbbbaaabbbaabbaaaa^`ab`[\_a^ba\_``a  
@HWI-EAS443:3:6:193:797#0/1  
CTGTCCAGCAGCAAAGTTGGTGTGCTGATGTTAACATAT  
+HWI-EAS443:3:6:193:797#0/1  
a\_Z[`[R]aPRZRJT`UaaaWa\_]\_U]\_^a[`U[P¥¥BB  
@HWI-EAS443:3:6:254:1193#0/1  
ATTAGGGCGTGGATTGTCTCCGAAAATCCCACTGCATATG

+HWI-EAS443:3:6:254:1193#0/1  
`babaa` `a` [V`^aZ^a`\_¥a[^\_aZ]¥\_^\_YY\_\_a]B  
@HWI-EAS443:3:6:321:519#0/1  
GGGCGACCCAAAGAGAACAATCTGGACTAGCGGGAGCA  
+HWI-EAS443:3:6:321:519#0/1  
abaa¥¥\_aVa^\_b\_aaaV^VP]a\_a\_aaaRa\_`^¥\_N`UB  
@HWI-EAS443:3:6:35:154#0/1  
GTTCGGATCCCAAATCATCTCAAACCGTTTCTTGAAC TA  
+HWI-EAS443:3:6:35:154#0/1  
`aaaaaaa\_a\_aaa`aaaa`a` ` ` `a`aZ` ` `^^^\_] ^\_  
@HWI-EAS443:3:6:35:1546#0/1  
CGCTAGTCCAGATTGTGTTCTCTTTGGGTCGCCCTCTGAT  
+HWI-EAS443:3:6:35:1546#0/1  
ab`aS`Ha` `a\_aaaa]`aaaa\_aZT¥¥`V\_`` ` \_baaa  
@HWI-EAS443:3:6:416:157#0/1  
TGGACCACAAC TGCCTGTCTTATCATTAGGGCGTGGATTG  
+HWI-EAS443:3:6:416:157#0/1  
`` `U`aX\_aaXaa[P[aNZUPXZY[^Z[SPSR[S¥^BBBB  
@HWI-EAS443:3:6:48:944#0/1  
CATTAGACGATACTGGACCACAAC TGCCTGTCTTATCATT  
+HWI-EAS443:3:6:48:944#0/1  
abababaabaaaZXW^YZXYU\_`V][[[ZOYY\_\_V]OVZ]  
@HWI-EAS443:3:6:513:2044#0/1  
CACAAGAGTCTGAATGTGCATGTGTAAATGGTTCTTGCTT  
+HWI-EAS443:3:6:513:2044#0/1  
`a\_bbaa\_F¥aaaa\_\_\_a^a`a^a\_aaa`aOMZ¥^Y` `a\_  
@HWI-EAS443:3:6:519:413#0/1  
ATTCAAATACGGCAATGGTGTGGATAGGGAGAACTAAA  
+HWI-EAS443:3:6:519:413#0/1  
\_`^`\_ba^^^[bbY^SaaaWY[S[\_a\_a`]\_¥aba^VaaaB  
@HWI-EAS443:3:6:542:315#0/1  
CGCTTGGTCAGCAAGTGTTCATGATGGCATCAATTGG  
+HWI-EAS443:3:6:542:315#0/1  
`abb`aaY[ `b`aaa`bbb`b\_aabb\_\_a`^a\_\_a\_a\_a^  
@HWI-EAS443:3:6:571:1301#0/1  
CCCCTAATTTACGGAAACCACTGACTGTCCAGCAGCAA  
+HWI-EAS443:3:6:571:1301#0/1  
ab[\_a]RZa\_\_XbZaXaa`Xa`^aa^¥`a]Z\_`TXTRRUB  
@HWI-EAS443:3:6:680:955#0/1  
TAAAGACAGGAGCCCATATCGAACCTAATGAGCTGTCCT  
+HWI-EAS443:3:6:680:955#0/1  
aab\_a]]]a`aa\_a\_a\_``]¥`¥a`Q[``^] ^\_V\_] [XV^  
@HWI-EAS443:3:6:72:1700#0/1  
GTTCGATATGGGCTCCTGTCTTTAATGGTTCCATTGGAAT  
+HWI-EAS443:3:6:72:1700#0/1  
`[a`b`Y¥\_`¥Z¥`ab\_] ^[ `bbaaa\_bJ`SJ¥V\_\_`aaR  
@HWI-EAS443:3:6:75:1063#0/1  
ATCCCAAATCATCTCAAACCGTTTCTTGAAC TAATGCTT  
+HWI-EAS443:3:6:75:1063#0/1  
aaaaaaaa`aaa\_aaa\_^aa^aW\_\_ `` `a^\_] ``^a`^\_\_

@HWI-EAS443:3:6:76:1847#0/1  
GAGGAATTGCCCGCTAATTTACGGAAACCACTGACTGTC  
+HWI-EAS443:3:6:76:1847#0/1  
a``bba`bb\_aabb`ababba\_\_`aab\_a\_aaaaa`\_a  
@HWI-EAS443:3:6:788:690#0/1  
ATCAAAATCAGATTGAAACATGCAATCAAAGCGTCATTAC  
+HWI-EAS443:3:6:788:690#0/1  
aaab``baaaaaabbbaaaaa^`[aaa[]a\_`^`a`a]  
@HWI-EAS443:3:6:805:56#0/1  
ATGCAATCAAAGCGTCATTACTTATGAAAACAACACTTGG  
+HWI-EAS443:3:6:805:56#0/1  
aabbaaa\_aaaa`a¥a\_aa`]a\_\_`a\_a^aUa]¥\_b^ZBB  
@HWI-EAS443:3:6:882:641#0/1  
ATTAGGGCGTGGATTGTCTCCGAAAATCCCACTGCATATG  
+HWI-EAS443:3:6:882:641#0/1  
[`aababbbaabb]ba]¥aa]b`aaaa¥`\_\_a`[`a`aa  
@HWI-EAS443:3:6:891:1278#0/1  
CAAGAGTCTGAATGTGCATGTGTAAATGGTTCTTGCTTTA  
+HWI-EAS443:3:6:891:1278#0/1  
aabaa`abb¥`baaaa`bbba\_Ibaaa`YWa\_ab`Z`bb^  
@HWI-EAS443:3:70:1007:674#0/1  
TAAATGGCAACTCAGCACCGTCTGGCCAAGACCAACCCAC  
+HWI-EAS443:3:70:1007:674#0/1  
`ab]]`baaaabaa`bbba¥`ab\_a`X`GZ`\_S]M\_S  
@HWI-EAS443:3:70:1028:437#0/1  
TGTTATTATGCCGTTGTACTTTAACACAGCCACTGCCCA  
+HWI-EAS443:3:70:1028:437#0/1  
aaaaababaaa\_a\_ab`a\_aaa`a`\_a\_\_`\_`\_W\_¥\_^  
@HWI-EAS443:3:70:1048:1692#0/1  
CAAATCTTGAGTTGTATGGAGAGGGAACCTCACCAATAGG  
+HWI-EAS443:3:70:1048:1692#0/1  
a`Y[Z`^RTU`H0a]a\_aa¥a\_\_^QYba`[`\_\_a`U\_]V  
@HWI-EAS443:3:70:1105:1085#0/1  
TCCCTCTCCATACAACCTCAAGATTTGAGTCAGTCGCTTGG  
+HWI-EAS443:3:70:1105:1085#0/1  
aabbababbbbaa`aab`]`aaaaaa^aaa^\_`a`[¥\_  
@HWI-EAS443:3:70:1128:155#0/1  
ATAAGACCTTGCTTCTGGGTTGAACTAATCAGAGGGCGAC  
+HWI-EAS443:3:70:1128:155#0/1  
`aaaaa`abaa`b\_\_aab]ba`b^aa]aaaaa\_\_a\_^R  
@HWI-EAS443:3:70:1173:1185#0/1  
GCCCTGTTAGTGGATGGGCTATATACAGTAAAGACAACAG  
+HWI-EAS443:3:70:1173:1185#0/1  
ab`^abaa`a\_aa¥aa^]]^^\_]ZTW]R[]]WUNY[M¥T  
@HWI-EAS443:3:70:1177:1264#0/1  
ATCTTGCTTTATTGAGAAGTTATTGTCTGTCCCAGTCCAT  
+HWI-EAS443:3:70:1177:1264#0/1  
abb`a`baa¥]`a`b\_b`abb`ZZ`a^TI[]VOS`ZZB  
@HWI-EAS443:3:70:1197:996#0/1  
CCCCTGCATATGTATCCTATCTGATATTCCAGATTCTGG

+HWI-EAS443:3:70:1197:996#0/1  
abaaZ^a`\_a^ab¥aaY¥]`a`aa`\_`aa¥X\_¥[`\_`\_¥X  
@HWI-EAS443:3:70:1276:1964#0/1  
GCCGTTGTACTTTAACACAGCCACTGCCCCATTGTCTGGG  
+HWI-EAS443:3:70:1276:1964#0/1  
abaaaabV`\_aaa`aaaab^\_a\_\_`¥\_^Waa`\_N¥¥¥\_¥]  
@HWI-EAS443:3:70:1310:188#0/1  
CAGACACTATCAAGAGTTGGAGAAACAATATATTGAGAAC  
+HWI-EAS443:3:70:1310:188#0/1  
abbbbabbbbaaaaa`a\_baa`aaaa`\_`aaaaaaaaaZ`\_`  
@HWI-EAS443:3:70:1349:2022#0/1  
GAGAAGTTATTGTCTGTCCCAGTCCATCCGTTCCGGATCCC  
+HWI-EAS443:3:70:1349:2022#0/1  
a\_a\_aa`\_a\_\_\_^a[[PZ¥BBBBBBBBBBBBBBBBBBBBB  
@HWI-EAS443:3:70:1358:1277#0/1  
GGTGTGGATAGGGAGAACTAAAAGCATTAGTTCAAGAA  
+HWI-EAS443:3:70:1358:1277#0/1  
]a[bbbaa\_bb\_bbb\_ba`aab`bbbaaababbbb`bbb  
@HWI-EAS443:3:70:136:50#0/1  
GAGGAATTGCCCGTAATTTACGGAAACCACTGACTGTC  
+HWI-EAS443:3:70:136:50#0/1  
aaZ[aaa\_aa`\_a`\_`\_`¥[^X\_\_\_¥[\_T¥YV¥¥V¥¥VWM  
@HWI-EAS443:3:70:1416:1968#0/1  
GTACAACGGCATAATAACAGACACTATCAAGAGTTGGAGA  
+HWI-EAS443:3:70:1416:1968#0/1  
aa[Uaabab^aa]`b`\_]a]^b^V`\_`\_`\_a\_UW`\_`[\_`\_`^  
@HWI-EAS443:3:70:1429:1401#0/1  
GTCAGGATATAGCGGGAGTTTTGTTTCAGCATCCAGAACTA  
+HWI-EAS443:3:70:1429:1401#0/1  
^aaaa\_P\_aaaa\_aa\_VaW^aaa\_a^a]]\_`^\_]\_a\_\_R`Y  
@HWI-EAS443:3:70:1437:1323#0/1  
CAAGAGTCTGAATGTGCATGTGTAATGGTTCTTGCTTTA  
+HWI-EAS443:3:70:1437:1323#0/1  
abbbbaabbbabbbbabbbbbaabbaabaabbbbabbba  
@HWI-EAS443:3:70:1440:132#0/1  
TGTCTCCGAAAATCCCACTGCATATGTATCCTATCTGATA  
+HWI-EAS443:3:70:1440:132#0/1  
ab¥aa]aa\_aaa\_a`\_]\_\_a`[\_`¥\_\_`X`\_W¥^^`X^`Z^X  
@HWI-EAS443:3:70:1532:2011#0/1  
AGCTGTCCTATTGGTGAAGTTCCCTCTCCATACAACTCAA  
+HWI-EAS443:3:70:1532:2011#0/1  
a]a\_aTbaaaba]aW\_a\_\_\_`aa]aZ[[^aaaS\_\_^^V\_^  
@HWI-EAS443:3:70:1534:763#0/1  
TGCATTCCAAGGGGAGCATGATATGAATGGTTCCCTTAT  
+HWI-EAS443:3:70:1534:763#0/1  
^`\_Y`\_`\_P\_W]\_Z`\_^\_Y[abaZaW[^YU\_QT`Z¥R[W[Q  
@HWI-EAS443:3:70:1536:1364#0/1  
ATCAAAGCGTCATTACTTATGAAAACAACACTTGGGTAAA  
+HWI-EAS443:3:70:1536:1364#0/1  
\_aa`abbabab`abaabbababbbbaaa\_aXaaa`\_Zaaa

@HWI-EAS443:3:70:158:418#0/1  
GCAAGGTCTTATACAATCCAGCCCTGTTAGTTCTGGATGC  
+HWI-EAS443:3:70:158:418#0/1  
ab`¥`a]``abbba`aabbaaaaaa`aaa^aaa````a\_  
@HWI-EAS443:3:70:1590:478#0/1  
GTGTAAACAGTGACACTGTGGGTTGGTCTTGGCCAGACGG  
+HWI-EAS443:3:70:1590:478#0/1  
aX^X\_[ZNWa¥aY^\_\_`a\_a¥\_^^^QYY[^ZW[[^UUYS  
@HWI-EAS443:3:70:1661:1268#0/1  
CCGTTTCGGATCCCAAATCATCTCAAACCGTTTCTTGAAC  
+HWI-EAS443:3:70:1661:1268#0/1  
abbabbbb\_bb`^¥bb`bbbababbbb[^aaba\_aaa\_a\_  
@HWI-EAS443:3:70:1698:1975#0/1  
GGGGGATGTGTTTGTGCATAAGGGAACCATTCATATCATGC  
+HWI-EAS443:3:70:1698:1975#0/1  
H[b]\_bbbUb\_bb[a`[bb\_NX^bbabb\_b`abab`bb^a  
@HWI-EAS443:3:70:1722:251#0/1  
GACGATACTGGACCACAACCTGCCTGTCTTATCATTAGGGC  
+HWI-EAS443:3:70:1722:251#0/1  
aba`a`a`\_X`W[\_Uaa\_\_PVa\_``^aa`^U[^¥[^\_`N  
@HWI-EAS443:3:70:1740:178#0/1  
AAACAATATATTGAGAACACAAGAGTCTGAATGTGCATGT  
+HWI-EAS443:3:70:1740:178#0/1  
`aa``[aabaaababaaaa^aaa`Z¥[a`a^`\_N]Y[[XV  
@HWI-EAS443:3:70:1753:414#0/1  
ATTAGGGCGTGGATTGTCTCCGAAAATCCCACTGCATATG  
+HWI-EAS443:3:70:1753:414#0/1  
abbbaXaaa\_aa`aba^a`^¥¥^a`\_]`\_^Y^M¥`X^]  
@HWI-EAS443:3:70:264:869#0/1  
TCAGACTCTTGTGTTCTCAATATATTGTTTCTCCAACCTCT  
+HWI-EAS443:3:70:264:869#0/1  
abbabbbbaa`\_baaaaa]baa\_aaa[aaa```VIZ`aa  
@HWI-EAS443:3:70:328:1843#0/1  
GAATCGGTTCCAAGGGGGATGTGTTTGTGCATAAGGGAACC  
+HWI-EAS443:3:70:328:1843#0/1  
^bbabaa]Qbbaa\_a`a[[\_U¥R`\_^\_\_\_ZaaT^¥]a\_]`  
@HWI-EAS443:3:70:362:55#0/1  
TACATATGCAGTGGGATTTTCGGAGACAATCCACGCCCTA  
+HWI-EAS443:3:70:362:55#0/1  
aaabaaa\_aa`Z`aa\_\_aa``^a`a`\_`\_^WZ^V^UVR^^  
@HWI-EAS443:3:70:36:137#0/1  
TGTAATGTTCTTGCTTTACTGTAATGACCGATGGACCA  
+HWI-EAS443:3:70:36:137#0/1  
ab\_aX[¥]a^`^a`a`a`a`\_Va\_^\_]`^¥\_\_\_\_\_]]^]QYWW  
@HWI-EAS443:3:70:386:321#0/1  
CAGGCAGTTGTGGTCCAGTATCGTCTAATGGAGCAAATGG  
+HWI-EAS443:3:70:386:321#0/1  
abbabbbb\_aa\_]b\_aaaa]``]`]`a\_X¥][YXFWW^]a\_  
@HWI-EAS443:3:70:394:1896#0/1  
TAAAAGCATTAGTTCAAGAAACGGTTTTGAGATGATTTGG





@HWI-EAS443:3:70:931:968#0/1  
GCCTCATACAAGATCTTCAGAATAGAAAAGGGAAAGATAG  
+HWI-EAS443:3:70:931:968#0/1  
Y`bb`ba`a`aab`bba````¥bbabbaabbbab`\_`abb  
@HWI-EAS443:3:70:979:703#0/1  
CCGAAAATCCCCTGCATATGTATCCTATCTGATATTCCA  
+HWI-EAS443:3:70:979:703#0/1  
ababbabbbbabaaabbbbab`bbaababbbbaaaaa`a  
@HWI-EAS443:3:71:1074:872#0/1  
TGCTCCATTAGACGATACTGGACCACAACCTGCCTGTCTTA  
+HWI-EAS443:3:71:1074:872#0/1  
`^abbbaba^[]baa`¥OYT\_YGXS^`RJYOY^VXTQ^AP  
@HWI-EAS443:3:71:1080:1181#0/1  
ATTCATATCATGCTCCCCCTTGAATGCAGAACCTTCTTC  
+HWI-EAS443:3:71:1080:1181#0/1  
]\_\_ba]\_`bb[b^ZWbV`][a`^`^]¥`]bb`\_\_[^\_aa  
@HWI-EAS443:3:71:1081:1885#0/1  
ATGGGCTCCTGTCTTTAATGGTTCATTGGAATGTTTGTC  
+HWI-EAS443:3:71:1081:1885#0/1  
aaa`^`aba`^Y[S\_`^\_¥T[XW[WMW\_¥X[`^Q¥\_`URX  
@HWI-EAS443:3:71:110:237#0/1  
TGTAACAGTGACTGTGGGTTGGTCTTGGCCAGACGGT  
+HWI-EAS443:3:71:110:237#0/1  
a`W`V]`a^¥a`Z\_aaa¥a`]JW`ONQW[\_XXYX\_YS]]B  
@HWI-EAS443:3:71:112:1453#0/1  
GCTCCCGCTAGTCCAGATTGTGTTCTCTTTGGGTCGCCCT  
+HWI-EAS443:3:71:112:1453#0/1  
`bbbbbbb`Tbaabbbab^aaaabbbbbbaabaabbbb  
@HWI-EAS443:3:71:1138:1472#0/1  
GGAATTGCCCGCTAATTTACGGAAACCACTGACTGTCCA  
+HWI-EAS443:3:71:1138:1472#0/1  
aaaa\_¥\_a¥^[TZ¥`^`ZU[^U[^¥X]\_¥¥VPVXFL[T  
@HWI-EAS443:3:71:1184:829#0/1  
CTGGACCACAACCTGCCTGTCTTATCATTAGGGCGTGGATT  
+HWI-EAS443:3:71:1184:829#0/1  
abb`]]^[bb\_N`W\_Wa\_]aaba\_FZa]ZO[]QUM[a¥^Y  
@HWI-EAS443:3:71:1188:1038#0/1  
CAAATACGGCAATGGTGTGGATAGGGAGAACTAAAAGC  
+HWI-EAS443:3:71:1188:1038#0/1  
abababb`a\_s`V\_I`aaa^ZP`S``\_]`\_`aa\_b]XZ  
@HWI-EAS443:3:71:1209:1214#0/1  
AGCAACACCAACTTTGCTGCTGGACAGTCAGTGGTTCCG  
+HWI-EAS443:3:71:1209:1214#0/1  
`bbaabba`aaaaab`baaaa\_aa`a¥aa\_\_aaW\_`X]a  
@HWI-EAS443:3:71:1217:977#0/1  
CGCTTGGTCAGCAAGTGCTTGTGCATGATGGCATCAATTGG  
+HWI-EAS443:3:71:1217:977#0/1  
a^````aS\_a]a\_a`Sa`\_bb````abaaa`a`]`aaa\_X  
@HWI-EAS443:3:71:1236:1988#0/1  
CACTGCATATGTATCCTATCTGATATTCCAGATTCTGGTT

+HWI-EAS443:3:71:1236:1988#0/1  
`]bbaabbabYaaaaababaaba`abbaabaaaa\_a^`Ua  
@HWI-EAS443:3:71:1309:282#0/1  
CCGCTAATTTACGGAAACCACTGACTGTCCAGCAGCAAA  
+HWI-EAS443:3:71:1309:282#0/1  
abbabbbbab`b`bba`babbabbaa]Z``]^^]  
@HWI-EAS443:3:71:1351:1365#0/1  
ACAATATATTGAGAACACAAGAGTCTGAATGTGCATGTGT  
+HWI-EAS443:3:71:1351:1365#0/1  
aaaaaaabbaaaa\_aaaaaa`a\_^a^aaaaWa^a`\_VVZ  
@HWI-EAS443:3:71:1415:749#0/1  
TTGCATGTTTCAATCTGATTTTGATTCCCAAGTTGAATTG  
+HWI-EAS443:3:71:1415:749#0/1  
^`\_Yab`baaaV`a]bbaaaaabab`^`aaa]a^a\_W^  
@HWI-EAS443:3:71:1448:1359#0/1  
GACTGGGACAGACAATAACTTCTCAATAAAGCAAGATATC  
+HWI-EAS443:3:71:1448:1359#0/1  
^`ZJWY\_`][babZS`YOXV\_SVXVV\_\_UTH^aa¥ZZQX  
@HWI-EAS443:3:71:1457:367#0/1  
GTCAGCAAGTGCTTGTCATGATGGCATCAATTGGCTAACA  
+HWI-EAS443:3:71:1457:367#0/1  
X¥S\_aYa`baSSXR¥QaKa\_Z\_\_`]XZVab``XUO\_JaQZ  
@HWI-EAS443:3:71:1533:737#0/1  
CGATACTGGACCACAACCTGCCTGTCTTATCATTAGGGCGT  
+HWI-EAS443:3:71:1533:737#0/1  
ab[R[Q[^aa\_\_ZVT]\_]\_H\_X^V^\_O[FY`TOH[LMVUQ  
@HWI-EAS443:3:71:1566:811#0/1  
ATCCCAAATCATCTCAAACCGTTTCTTGAACATAATGCTT  
+HWI-EAS443:3:71:1566:811#0/1  
aaa^Xabba]aaabaaab`^`b\_aa]]`[`¥a`\_\_a]\_]`  
@HWI-EAS443:3:71:163:1666#0/1  
GCTAATTTACGGAAACCACTGACTGTCCAGCAGCAAAGT  
+HWI-EAS443:3:71:163:1666#0/1  
abba`baabbbbaa`]abbaa`aaaaYa\_U]a`^`^¥¥ZV  
@HWI-EAS443:3:71:1649:933#0/1  
GGGTGTCTTTCAACCAGAATCTGGAATATCAGATAGGATA  
+HWI-EAS443:3:71:1649:933#0/1  
^¥\_^babbbbaaaaab`aaaaaaY\_\_a\_baabababa\_`a  
@HWI-EAS443:3:71:1669:1508#0/1  
GCAAGGTCTTATACAATCCAGCCCTGTTAGTTCTGGATGC  
+HWI-EAS443:3:71:1669:1508#0/1  
aababb]abbbbaababa`aa`aaaaaba\_aaaa``^S  
@HWI-EAS443:3:71:1705:1002#0/1  
TTCACGGAAACCACTGACTGTCCAGCAGCAAAGTTGGTGT  
+HWI-EAS443:3:71:1705:1002#0/1  
abbbabbaab`^a`aaaaa]aaZ[`W\_\_Y]X]Ya]`RW¥  
@HWI-EAS443:3:71:1716:468#0/1  
GTGTTTGGATAGGGAGAACTAAAAGCATTAGTTCAAGAAA  
+HWI-EAS443:3:71:1716:468#0/1  
a[b\_aa`a]aaa^\_]a\_`[``^^^\_^^^`]`^^Z`][W

@HWI-EAS443:3:71:1726:1757#0/1  
GAAACAATATATTGAGAACACAAGAGTCTGAATGTGCATG  
+HWI-EAS443:3:71:1726:1757#0/1  
``^\_bbbbababbabbab^aab\_``]````aaaXaa]a`  
@HWI-EAS443:3:71:179:501#0/1  
ATGCCCTAATTACTATGAGGAATGCTCCTGTTATCC  
+HWI-EAS443:3:71:179:501#0/1  
a]a]Ya\_a`^W`\_^[\_W\_aS[``^\_UOYO[U¥X]\_^¥\_  
@HWI-EAS443:3:71:181:1017#0/1  
CTTGGGAATCAAATCAGATTGAAACATGCAATCAAAGCG  
+HWI-EAS443:3:71:181:1017#0/1  
ab¥XW\_U`ab`Y`¥[Ya¥]^a]`U`a^HZa\_Xa]a]  
@HWI-EAS443:3:71:19:185#0/1  
CAACTGCCTGTCTTATCATTAGGGCGTGGATTGTCTCCGA  
+HWI-EAS443:3:71:19:185#0/1  
a\_aaaaa`\_W`\_``a\_\_^^[^]^¥]U]U]^V VXXXWXU  
@HWI-EAS443:3:71:211:306#0/1  
GCATATCCTTTTGTGGTGTAAACAGTGACACTGTGGGTTG  
+HWI-EAS443:3:71:211:306#0/1  
\_abb`baaaa`ba`ba`aaaa`aadW`\_`a^adWa`\_U¥a  
@HWI-EAS443:3:71:343:1431#0/1  
GAGTCTGAATGTGCATGTGTAAATGGTTCTTGCTTTACTG  
+HWI-EAS443:3:71:343:1431#0/1  
ab`¥\_a]\_^aaW^\_]b¥\_a]aaaa`R¥a`¥\_^a^\_]\_aa  
@HWI-EAS443:3:71:367:1545#0/1  
CTCCTGTCTTTAATGGTTCCATTGGAATGTTTGTCAATTA  
+HWI-EAS443:3:71:367:1545#0/1  
aabaaa\_aaaa`^ZZX\_a[[^¥XTT0]]ZZVTW¥YW]ZV  
@HWI-EAS443:3:71:45:1354#0/1  
GCAGTGGGATTTTCGGAGACAATCCACGCCCTAATGATAA  
+HWI-EAS443:3:71:45:1354#0/1  
abb\_V`aa`\_aaaa\_a¥K]a\_\_`a]\_¥^```[\_¥]\_\_\_\_  
@HWI-EAS443:3:71:493:402#0/1  
TGGAATGTTTGTCAATTTAGCAAGGCCCTTGAGTCAAGAA  
+HWI-EAS443:3:71:493:402#0/1  
abb\_aab\_aaa]`aaa`\_¥\_\_\_a`\_`\_`[F[¥aZ\_\_\_\_^]^  
@HWI-EAS443:3:71:533:1548#0/1  
CAACTGCCTGTCTTATCATTAGGGCGTGGATTGTCTCCGA  
+HWI-EAS443:3:71:533:1548#0/1  
U¥abb^aaXZXZK`aa`\_`\_`\_`\_YU\_W^VHPa`K[VabbWT  
@HWI-EAS443:3:71:546:805#0/1  
TCTTGTGTTCTCAATATATTGTTTCTCCAATCTTGATAG  
+HWI-EAS443:3:71:546:805#0/1  
abaaa`[I]b`^aa^X\_a`\_`\_`\_`\_V\_baa`aa`Z^aaaYa`a\_  
@HWI-EAS443:3:71:575:1867#0/1  
AGCCCATCCACTAACAGGGCAGAGAGGAATTGCCCGCT  
+HWI-EAS443:3:71:575:1867#0/1  
RY\_ZZ\_X]a¥a\_^`\_X\_XH[VZaXWXQLVR\_]TY\_PVQ`\_  
@HWI-EAS443:3:71:679:611#0/1  
ATCATCTCAAACCGTTTCTTGAACCTAATGCTTTTAGTTC

+HWI-EAS443:3:71:679:611#0/1  
abbbbaababbaaa`aab[aaa`a`aaaaaaa`a  
@HWI-EAS443:3:71:694:142#0/1  
CAAGAAGAAGGTTCTGCATTCCAAGGGGAGCATGATATG  
+HWI-EAS443:3:71:694:142#0/1  
abbb`bb\_bbaabb`b`b\_ababbbab\_b\_bababaaa`a  
@HWI-EAS443:3:71:727:483#0/1  
GTGGTCCAGTATCGTCTAATGGAGCAAATGGAGTAAAAGG  
+HWI-EAS443:3:71:727:483#0/1  
`aaaWaa`^a`aa`aaaaaU`\_[a`aa\_G]Ya`aaa`  
@HWI-EAS443:3:71:768:605#0/1  
TGGGCTCCTGTCTTAATGGTTCCATTGGAATGTTTGTCA  
+HWI-EAS443:3:71:768:605#0/1  
`\_^^[aab\_ba``]]]aab]baU[`ababa\_a``ab]``  
@HWI-EAS443:3:71:83:1925#0/1  
GGATTGTCTCCGAAAATCCCACTGCATATGTATCCTATCT  
+HWI-EAS443:3:71:83:1925#0/1  
a`\_baa`bbbb\_b`baabbaaa^b^aaaa^`aa`aaaa  
@HWI-EAS443:3:71:882:798#0/1  
CGCTTGGTCAGCAAGTGCTTGTGCATGATGGCATCAATTGG  
+HWI-EAS443:3:71:882:798#0/1  
`]ba\_a^`¥Ta¥[¥\_N^a]``¥]`¥YY^Z\_¥¥`aaX`]]``  
@HWI-EAS443:3:71:916:539#0/1  
CATTAGGGCGTGGATTGTCTCCGAAAATCCCACTGCATAT  
+HWI-EAS443:3:71:916:539#0/1  
¥aba^aab\_baa\_¥a]]^Za\_^^`^^^\_aRM\_^a`Z^`¥a  
@HWI-EAS443:3:71:978:18#0/1  
ATTAGACGATACTGGACCACAACCTGCCTGTCTTATCATT  
+HWI-EAS443:3:71:978:18#0/1  
aba\_a]bb`a`¥]\_\_TU]ZNZ\_TY]OW]UP]]`^WLY[^N  
@HWI-EAS443:3:72:1001:259#0/1  
TATATTGAGAACAAGAGTCTGAATGTGCATGTGTAAT  
+HWI-EAS443:3:72:1001:259#0/1  
a^aaaaaaa`Y\_]^^`^^^\_aa\_`]\_W^]^^`Z`[[[]^  
@HWI-EAS443:3:72:1044:978#0/1  
CGCTAATTTTACGGAAACCACTGACTGTCCAGCAGCAAAG  
+HWI-EAS443:3:72:1044:978#0/1  
abbbbaababbb`baaaaaaaaaa\_a]a`a`\_``\_Y\_\_\_\_\_  
@HWI-EAS443:3:72:1048:1919#0/1  
GTTCTGCATTCCAAGGGGAGCATGATATGAATGGTTCCC  
+HWI-EAS443:3:72:1048:1919#0/1  
a[Va][a`YYZTSY\_Ya]XOFWXVPMZ[XKP\_M[YGGFKF  
@HWI-EAS443:3:72:108:476#0/1  
CAAGGGGGATGTGTTTGTGCATAAGGGAACCATTCATATCA  
+HWI-EAS443:3:72:108:476#0/1  
aaaaaa`ZZ` `[aZ\_aaZ¥U]aa[aa\_`]XY¥`ZW\_\_\_a\_  
@HWI-EAS443:3:72:1164:286#0/1  
AGCGGGAGCAGCATATCCTTTTGTGGTGTAAACAGTGACA  
+HWI-EAS443:3:72:1164:286#0/1  
`\_UX\_]^`¥¥¥\_¥¥Z]^a`aa\_ZZ` `^a^^`Z]ZaY]¥X¥

@HWI-EAS443:3:72:1209:620#0/1  
TGCCTGTCTTATCATTAGGGCGTGGATTGTCTCCGAAAAT  
+HWI-EAS443:3:72:1209:620#0/1  
abaabb\_abaabaaaabaaa]a\_aaaa`^`a`¥a^`\_`\_`  
@HWI-EAS443:3:72:1250:384#0/1  
AGCCCATCCACTAACAGGGCAGAGAGGAATTGCCCGCT  
+HWI-EAS443:3:72:1250:384#0/1  
`^¥Y]``Zaaaaa\_a`]WYaaaaa\_`a^Yaa\_\_\_^XaP¥  
@HWI-EAS443:3:72:1262:712#0/1  
GGTGTCTTTCAACCAGAATCTGGAATATCAGATAGGATAC  
+HWI-EAS443:3:72:1262:712#0/1  
aaZa\_Zaa\_aa¥][QZW^^Q`\_W[P]^R¥`V^Y`\_\_^XU  
@HWI-EAS443:3:72:126:1064#0/1  
TAAAGTACAACGGCATAATAACAGACACTATCAAGAGTTG  
+HWI-EAS443:3:72:126:1064#0/1  
a]aaa]aaa[aaaaaa[\_`]aa`\_Ra``\_\_\_]`¥V¥][[\_`\_`  
@HWI-EAS443:3:72:126:537#0/1  
CATCCACTAACAGGGCAGAGAGGAATTGCCCGCTAATT  
+HWI-EAS443:3:72:126:537#0/1  
aa\_b\_[`Z^a\_Z]\_`\_aaT^NWV`Q`V]`ZKS`¥a[U`¥  
@HWI-EAS443:3:72:1276:589#0/1  
TGAGAACACAAGAGTCTGAATGTGCATGTGTAATGGTTC  
+HWI-EAS443:3:72:1276:589#0/1  
HWNNV¥^T`¥QU¥a\_Z\_¥^]MGMO^XVW¥a[QYQ^`\_WWM  
@HWI-EAS443:3:72:1358:47#0/1  
CAATCCAGCCCTGTTAGTTCTGGATGCTGAACAAAACCTCC  
+HWI-EAS443:3:72:1358:47#0/1  
[baa`^bb]baababbb\_aabbaaab`aba`]baa]LaX]  
@HWI-EAS443:3:72:1376:322#0/1  
ATTAGGGCGTGGATTGTCTCCGAAAATCCCACTGCATATG  
+HWI-EAS443:3:72:1376:322#0/1  
`a\_a\_\_^aa¥b`I^]`\_]\_\_Y]^\_\_[]X¥Q\_ZV\_VHW\_R¥  
@HWI-EAS443:3:72:137:447#0/1  
CAGTGGTTTCCGTGAAATTAGCGGGCAATTCCTCTCTCTG  
+HWI-EAS443:3:72:137:447#0/1  
aba`]XHX]\_¥^ZYU^````aZ]U]Z¥U\_Y[^XZNY¥¥^  
@HWI-EAS443:3:72:1382:123#0/1  
CTTTAACACAGCCACTGCCCATTTGTCTGGGCCAGAAATT  
+HWI-EAS443:3:72:1382:123#0/1  
`bbbbbab^bb\_\_a^a¥a\_Ya\_ba`a^`a\_aV^`\_`]`a\_  
@HWI-EAS443:3:72:1473:1787#0/1  
AGGGGGATGTGTTTGTGCATAAGGGAACCATTCATATCATG  
+HWI-EAS443:3:72:1473:1787#0/1  
[a[^R`aa`b\_X`a]aa\_aba\_aaa¥[aa`\_a\_a\_Za]a  
@HWI-EAS443:3:72:1493:1803#0/1  
TCTTTCAACCAGAATCTGGAATATCAGATAGGATACATAT  
+HWI-EAS443:3:72:1493:1803#0/1  
¥¥Y]Waab\_\_a`^a\_\_aaa\_`\_`^`^a\_`Za\_^YYDTWT]  
@HWI-EAS443:3:72:1502:1047#0/1  
GCCTGTCTTATCATTAGGGCGTGGATTGTCTCCGAAAATC

+HWI-EAS443:3:72:1502:1047#0/1  
ababb`ababbZaaaa`aZa`^aa` `a[]\_`^`\_^¥Z`^\_  
@HWI-EAS443:3:72:1516:1058#0/1  
GTCAGGATATAGCGGGAGTTTTGTTTCAGCATCCAGAACTA  
+HWI-EAS443:3:72:1516:1058#0/1  
a]`ba\_aaa]`\_a\_\_[a]\_`a`\_\_]\_¥QV]]X[\_U\_^]  
@HWI-EAS443:3:72:1557:44#0/1  
CAAAATCAGATTGAAACATGCAATCAAAGCGTCATTACTT  
+HWI-EAS443:3:72:1557:44#0/1  
aba`bbaabbbbbbbbbbbabbabaaabb`aaaabbbabb  
@HWI-EAS443:3:72:1611:1868#0/1  
ACAATATATTGAGAACAAGAGTCTGAATGTGCATGTGT  
+HWI-EAS443:3:72:1611:1868#0/1  
a\_\_]aaa`ba¥a^ab`b` `a\_b\_`ab` `a` `^^`aa` `a`  
@HWI-EAS443:3:72:1615:1258#0/1  
TGCCCCGCTAATTTACGGAAACCACTGACTGTCCAGCAGC  
+HWI-EAS443:3:72:1615:1258#0/1  
Taab\_`[abaT` `TT\_]Zaab]a` ^^XbRO¥[ `0^¥FF[Q  
@HWI-EAS443:3:72:1627:658#0/1  
AGAAATCCAATTGTTAGCCAATTGATGCCATCATGACAA  
+HWI-EAS443:3:72:1627:658#0/1  
ab¥\_\_]a`\_¥0¥[^X¥XU[P\_aa]a\_[] ^^ZW\_Z^`Y¥ZY  
@HWI-EAS443:3:72:1674:1637#0/1  
GTGTTTGGATAGGGAGAACTAAAAGCATTAGTTCAAGAAA  
+HWI-EAS443:3:72:1674:1637#0/1  
a[\_L\_aa\_\_`a\_SYX^\_a]\_`^`\_TVZ\_X]\_[WX\_TZ]]Z  
@HWI-EAS443:3:72:1751:657#0/1  
TTCAAATACGGCAATGGTGGTGGATAGGGAGAACTAAAA  
+HWI-EAS443:3:72:1751:657#0/1  
ab\_aaaaa`ba¥]\_[a`S¥YaaTaY[[[[\_P\_\_ZQ¥^\_\_]  
@HWI-EAS443:3:72:1772:1162#0/1  
CTCTCCATACAACCTCAAGATTTGAGTCAGTCGCTTGGTCA  
+HWI-EAS443:3:72:1772:1162#0/1  
a\_bbb\_Y^Y^\_^\_bb[aaZbabba`\_]\_a`]¥\_ZP\_`\_WVJ  
@HWI-EAS443:3:72:1785:49#0/1  
CTGGACCACAACCTGCCTGTCTTATCATTAGGGCGTGGATT  
+HWI-EAS443:3:72:1785:49#0/1  
abbbaaab`ab^baaaabaabbaaaabaaa`aa^\_\_`\_a`  
@HWI-EAS443:3:72:17:1531#0/1  
GGGCTCCTGTCTTTAATGGTTCCATTGGAATGTTTGT CAT  
+HWI-EAS443:3:72:17:1531#0/1  
ab[baaaab\_babaa` `a`]aabaU`W^aa\_\_Xaa[\_`¥\_  
@HWI-EAS443:3:72:231:1347#0/1  
CTCCATTAGACGATACTGGACCACAACCTGCCTGTCTTATC  
+HWI-EAS443:3:72:231:1347#0/1  
`\_]aab[[Z^aaa^^\_Z[\_]Y\_]UL\_VDXa`V^[X`\_`\_XK  
@HWI-EAS443:3:72:254:1025#0/1  
TGCAGGGATAACTGGCATGGCTCGAATCGACCGTGGGTGT  
+HWI-EAS443:3:72:254:1025#0/1  
abbbaabTab\_abbabb\_aabb`SSWSZ]]MYTFP^`GVK

@HWI-EAS443:3:72:294:1473#0/1  
GTCCCAGTCCATCCGTTCCGATCCCAAATCATCTCAAAAC  
+HWI-EAS443:3:72:294:1473#0/1  
aa\_a`\_^\_abba`^ZYa`\_`\_aa`Z]^\_XY^^a^UXa[  
@HWI-EAS443:3:72:311:1728#0/1  
AGCAAGTGCTTGTGCATGATGGCATCAATTGGCTAACCAATT  
+HWI-EAS443:3:72:311:1728#0/1  
``a[[G]\_XY[UaY\_VPRSUXTY^ZPZYLJ[LV]WX]TW  
@HWI-EAS443:3:72:332:162#0/1  
ATCATTAGGGCGTGGATTGTCTCCGAAAATCCCCTGTCAT  
+HWI-EAS443:3:72:332:162#0/1  
`a`aaaaY[`]Y#a`X`\_\_T\_^Z]ZR¥SXWY¥[YVV^]XX  
@HWI-EAS443:3:72:343:1301#0/1  
AAATCATCTCAAAACCGTTTCTTGAACATAATGCTTTTAGT  
+HWI-EAS443:3:72:343:1301#0/1  
aba`aaaa^aaa\_`\_^a]\_\_`\_^^`^`\_`\_^`\_`\_^]`^`^  
@HWI-EAS443:3:72:397:587#0/1  
AGCCACTCAATTCAACTTGGGAATCAAATCAGATTGAAA  
+HWI-EAS443:3:72:397:587#0/1  
`[ `aaaaaQ[J[aa\_`Y`a¥\_`\_aa¥]Y\_\_aa^OQ`a\_a  
@HWI-EAS443:3:72:40:1031#0/1  
AACAGGGCAGAGAGAGGAATTGCCCGCTAATTCACGGAA  
+HWI-EAS443:3:72:40:1031#0/1  
^Ya¥¥^a\_X¥RZ^`R^`WVW[]\_[XZ\_ZY]^Y¥¥ZYRRT  
@HWI-EAS443:3:72:429:769#0/1  
GGGGGATGTGTTTGCATAAGGGAACCATTCATATCATGC  
+HWI-EAS443:3:72:429:769#0/1  
`baaa\_]QaU` [OVS^\_\_ [N\_aW¥V^ [a^S`U[\_]¥V[]  
@HWI-EAS443:3:72:446:469#0/1  
AGCCCATCCACTAACAGGGCAGAGAGGAATTGCCCGCT  
+HWI-EAS443:3:72:446:469#0/1  
aaaaaaaaa`\_`ab\_aa^]\_[a^\_^a]`\_`\_a\_\_^]¥^\_Y^  
@HWI-EAS443:3:72:446:862#0/1  
ATTCCAAGGGGAGCATGATATGAATGGTTCCCTTATGAC  
+HWI-EAS443:3:72:446:862#0/1  
a^X\_]U^]R^]YU]\_`^\_Y¥YY^Y]VYWRX]^]WVWXW]Y  
@HWI-EAS443:3:72:499:529#0/1  
AGAGTCTGAATGTGCATGTGTAAATGGTTCTTGCTTTACT  
+HWI-EAS443:3:72:499:529#0/1  
`]`a[aa```a^WX`\_a`W`]a^Y^a`\_`\_a\_^ [^`¥`a^a  
@HWI-EAS443:3:72:530:599#0/1  
CATATGCAGTGGGATTTTCGGAGACAATCCACGCCCTAAT  
+HWI-EAS443:3:72:530:599#0/1  
aa`^`\_aa`Y`^`\_`\_`\_`^U[\_¥a`^Z^`\_`\_\_\_\_Z[X[[  
@HWI-EAS443:3:72:55:236#0/1  
TCCCAGTCCATCCGTTCCGATCCCAAATCATCTCAAAACC  
+HWI-EAS443:3:72:55:236#0/1  
X`\_`Yaaaa`Y¥b`Z^`a`\_ [aUUZ\_MMPRS\_aPYVS]^  
@HWI-EAS443:3:72:583:102#0/1  
TACACATGCACATTCAACTCTTGTGTTCTCAATATATTG

+HWI-EAS443:3:72:583:102#0/1  
aaaaaabaa` `aaaaa^a`aaa^X¥^\_` \_\_\_`\_a^a\_`  
@HWI-EAS443:3:72:641:1510#0/1  
GCCCCAATTATCACTATGAGGAATGCTCCTGTTATCCTG  
+HWI-EAS443:3:72:641:1510#0/1  
a` ``¥Z¥IZY[Z`Y]V`` [``XWZX`^Z¥XaZOW[VY  
@HWI-EAS443:3:72:711:1395#0/1  
AAAAGCATTAGTTCAAGAAACGGTTTTGAGATGATTTGGG  
+HWI-EAS443:3:72:711:1395#0/1  
ab\_bZbaba` `aaaa`baabb` `aaaa`a`aabaaaa\_a`  
@HWI-EAS443:3:72:72:1195#0/1  
TCCCAGTCCATCCGTTCCGATCCCAAATCATCTCAAAACC  
+HWI-EAS443:3:72:72:1195#0/1  
a` ``b`\_bbbaabaa`a`aa` `aa\_^\_]`a` \_\_` `R`a\_]  
@HWI-EAS443:3:72:76:291#0/1  
CACCCACGGTCGATTCGAGCCATGCCAGTTATCCCTGCAC  
+HWI-EAS443:3:72:76:291#0/1  
a[``b\_]a]X` `¥XPXWZ]ZVY]VJPZZN]\_YZMPRRTWX  
@HWI-EAS443:3:72:778:1973#0/1  
GTTTGGATAGGGAGAACTAAAAGCATTAGTTCAAGAAACG  
+HWI-EAS443:3:72:778:1973#0/1  
aabbbabab`aaaaababaab`baa\_b`\_`\_aaaaaa\_a  
@HWI-EAS443:3:72:875:1186#0/1  
ACTGACTGTCCAGCAGCAAAGTTGGTGTGCTGATGTTAA  
+HWI-EAS443:3:72:875:1186#0/1  
aaa`aaaa\_a\_K[``\_`U\_^[S\_[]V¥]YUZ[PZYPT]X^  
@HWI-EAS443:3:73:1093:532#0/1  
GATGGCATCAATTGGCTAACAATTGGAATTTCTGGCCCAG  
+HWI-EAS443:3:73:1093:532#0/1  
a`aaaaaa¥b`\_bZX¥\_Y]]`aa]\_^^` `^]\_\_^W[Z\_  
@HWI-EAS443:3:73:1097:796#0/1  
ATTGTCTCCGAAAATCCCAGTGCATATGTATCCTATCTGA  
+HWI-EAS443:3:73:1097:796#0/1  
T` ``Yb^bba^` [aH0Zb\_\_W^a`a¥aa`b`^\_^aa]aa`  
@HWI-EAS443:3:73:1102:348#0/1  
GGGCTCCTGTCTTTAATGGTTCCATTGGAATGTTTGTCTCAT  
+HWI-EAS443:3:73:1102:348#0/1  
aba`abbabaabaaaaba`\_`\_a`aaaa`\_`\_a`aa¥^UZ`  
@HWI-EAS443:3:73:1112:1450#0/1  
CATTGTCTGGGCCAGAAATTCCAATTGTTAGCCAATTGAT  
+HWI-EAS443:3:73:1112:1450#0/1  
aa\_Y[X^bbSVa\_VZab`V\_^a\_KY[aQW¥PPaa`VXTQD  
@HWI-EAS443:3:73:1142:624#0/1  
GGGCTCCTGTCTTTAATGGTTCCATTGGAATGTTTGTCTCAT  
+HWI-EAS443:3:73:1142:624#0/1  
\_a^\_b`\_a`aba¥\_U`ab\_H¥b`¥^Ybb\_\_[]`abb[\_^¥  
@HWI-EAS443:3:73:1144:1747#0/1  
GTCCCAGTCCATCCGTTCCGATCCCAAATCATCTCAAAAC  
+HWI-EAS443:3:73:1144:1747#0/1  
a\_aaa`ZYbaaaaa[¥^a]]`\_^¥Ya[^^[``\_\_\_]``^a\_



@HWI-EAS443:3:73:1148:386#0/1  
CACCCACGGTTCGATTTCGAGCCATGCCAGTTATCCCTGCAC  
+HWI-EAS443:3:73:1148:386#0/1  
ab`a\_z`b[WT[DVXXRRZQX]OKPZ¥\_R^PZNOFU\_XRU  
@HWI-EAS443:3:73:114:454#0/1  
GTCTGAATGTGCATGTGTAAATGGTTCTTGCTTTACTGTA  
+HWI-EAS443:3:73:114:454#0/1  
a¥`^]Q0[XYa¥T^a¥\_X^UDX¥^Z\_]¥^\_\_Y\_WT]^U[  
@HWI-EAS443:3:73:116:230#0/1  
ATCCTATCTGATATTCCAGATTCTGGTTGAAAGACACCCA  
+HWI-EAS443:3:73:116:230#0/1  
[\_\_WWW^a[^aa¥¥Ha`XS]PYY[[]QZ\_]\_]T`\_`^aLZ^  
@HWI-EAS443:3:73:1178:788#0/1  
GCCCCGTAATTTACGGAAACCACTGACTGTCCAGCAGCA  
+HWI-EAS443:3:73:1178:788#0/1  
aba`ba^baaa]T`aa¥aa^PY]`¥``YXaX`aV^UGZ¥P  
@HWI-EAS443:3:73:1191:113#0/1  
AGACGATACTGGACCACAACCTGCCTGTCTTATCATTAGGG  
+HWI-EAS443:3:73:1191:113#0/1  
abb\_`a\_`UXWWNQYYS]VR[¥ZSYVRMX]RYXVVRWVY  
@HWI-EAS443:3:73:1201:1801#0/1  
GATTTTCGGAGACAATCCACGCCCTAATGATAAGACAGGC  
+HWI-EAS443:3:73:1201:1801#0/1  
\_babaa`b`aaa^aaaaa]\_a]aa`b`\_\_ZaaZ`X\_¥BB  
@HWI-EAS443:3:73:1207:1800#0/1  
CATTTACACATGCACATTCAGACTCTTGTGTTCTCAATAT  
+HWI-EAS443:3:73:1207:1800#0/1  
a```T\_\_QY^[`a\_aaaa^\_[]a`aaI`Z`]aa\_`^a`^`  
@HWI-EAS443:3:73:1215:57#0/1  
CTCTGATTAGTTCAACCCAGAAGCAAGGTCTTATACAATC  
+HWI-EAS443:3:73:1215:57#0/1  
abbbbbbbbababbbabbbbabbb`baba\_^bbbbYb`a\_  
@HWI-EAS443:3:73:123:34#0/1  
ATCCGTTTCGGATCCCAAATCATCTCAAAACCGTTTCTTGA  
+HWI-EAS443:3:73:123:34#0/1  
a\_aaa```\_`a\_^\_\_\_]V]^]^^^Y]]YX\_[YXUY[[Z  
@HWI-EAS443:3:73:1268:1829#0/1  
CAAAACCGTTTCTTGAACCTAATGCTTTTAGTTCTCCCTAT  
+HWI-EAS443:3:73:1268:1829#0/1  
aa`\_aba`aaa]a\_aab`aa`aa`aaaaaZa¥\_\_\_Y`a`  
@HWI-EAS443:3:73:1306:2017#0/1  
AAGAGTCTGAATGTGCATGTGTAAATGGTTCTTGCTTTAC  
+HWI-EAS443:3:73:1306:2017#0/1  
¥[b¥`YaaabaS]Xaaba``Zabaaa¥a`^a[^^abaa`  
@HWI-EAS443:3:73:1355:420#0/1  
TCTGGATGCTGAACAAAACCTCCCGCTATATCCTGACCACT  
+HWI-EAS443:3:73:1355:420#0/1  
aaabaaabaaaab\_aa`\_a`aa`a`aaa]]a``^\_`^\_  
@HWI-EAS443:3:73:1397:576#0/1  
CAACTGCCTGTCTTATCATTAGGGCGTGGATTGTCTCCGA

+HWI-EAS443:3:73:1397:576#0/1  
aa^S`aaab[VY]^a`[\_a`[\_YP[U^a`\_]\_]RTNNYS  
@HWI-EAS443:3:73:1435:1420#0/1  
CTCCTGTCTTTAATGGTTCCATTGGAATGTTTGTCTTTA  
+HWI-EAS443:3:73:1435:1420#0/1  
a`]¥¥baaba`]`aa]W`aY`]`aX`U[¥`^`aJX^^^aW\_  
@HWI-EAS443:3:73:1435:89#0/1  
GATATGAATGGTCCCTTATGACAAACACATCCCCCTGG  
+HWI-EAS443:3:73:1435:89#0/1  
a`aabbaa`baWaYZLaa]aaa`]`[\_S`^`^W[YYS``¥P  
@HWI-EAS443:3:73:1441:1047#0/1  
CTTGAGTCAAGAAGAAGTTCTGCATTCCAAGGGGAGCA  
+HWI-EAS443:3:73:1441:1047#0/1  
abbbbbbabbbba]aaaba\_aaba^a`a\_aabaa\_\_a`^  
@HWI-EAS443:3:73:1445:334#0/1  
GTGGTCCAGTATCGTCTAATGGAGCAAATGGAGTAAAAGG  
+HWI-EAS443:3:73:1445:334#0/1  
a¥aaR^[X[[¥[Y`¥[^Z[X¥VWYPRQWY`VLYSQZ]Z^Z  
@HWI-EAS443:3:73:1470:410#0/1  
TGCCTGTCTTATCATTAGGGCGTGGATTGTCTCCGAAAAT  
+HWI-EAS443:3:73:1470:410#0/1  
`¥[\_abaabbaa¥aaaa\_a^a\_aaa\_¥YZW^`Y`\_`\_\_`  
@HWI-EAS443:3:73:1482:113#0/1  
TATTGGTGAAGTCCCTCTCCATACAACCTCAAGATTTGAG  
+HWI-EAS443:3:73:1482:113#0/1  
a\_b`a[[¥aaaaX[QW`N]VGZ^\_TZTP]¥[[`X\_[\_ZS¥  
@HWI-EAS443:3:73:1499:308#0/1  
GGGATGTGTTTGTCTATAAGGGAACCATTTCATATCATGCTC  
+HWI-EAS443:3:73:1499:308#0/1  
a\_^[Z\_P¥T]^`¥P]^a\_\_WTU^ZW]]`Y]]^VUV[S]X  
@HWI-EAS443:3:73:1528:245#0/1  
GATTCTAGTGAAATCACATGTGTGTGCAGGGATAACTGGC  
+HWI-EAS443:3:73:1528:245#0/1  
a`a\_]a`[[`\_`^\_]\_`aXa[ZWq]X`]TW`^]X\_]U  
@HWI-EAS443:3:73:153:401#0/1  
AGCCATTCCAATTGTCATACAGACCGAACCAATGGTTATT  
+HWI-EAS443:3:73:153:401#0/1  
a¥b``]`a`TYT`aR^`]Q[VT]a\_a]P[U]P\_]UFV]W[  
@HWI-EAS443:3:73:1688:340#0/1  
CTCAAATCTTGAGTTGTATGGAGAGGGAACCTCACCAATA  
+HWI-EAS443:3:73:1688:340#0/1  
Saabaabbbb]b`abbbabbbbbbbbababbbbaabbbb  
@HWI-EAS443:3:73:17:71#0/1  
CAAGGTCTTATACAATCCAGCCCTGTTAGTTCTGGATGCT  
+HWI-EAS443:3:73:17:71#0/1  
TTZaYF\_baa`b\_aba\_]R¥\_]\_YbYTabOaaU¥aWWZOU  
@HWI-EAS443:3:73:182:975#0/1  
CGCTTGGTCAGCAAGTGTGCTTGTCTGATGGCATCAATTGG  
+HWI-EAS443:3:73:182:975#0/1  
aba\_a\_a^a]a\_¥a^]aaX]U[X]^VU^Z[ZaW\_¥[]WZ[

@HWI-EAS443:3:73:18:346#0/1  
ACTCAATTCAACTTGGGAATCAAAATCAGATTGAAACATG  
+HWI-EAS443:3:73:18:346#0/1  
aa\_`\_^]aXX[^`¥`X\_\_^\_] ^P^^]]^[]^ [Z][^  
@HWI-EAS443:3:73:268:766#0/1  
CAGACACTATCAAGAGTTGGAGAAACAATATATTGAGAAC  
+HWI-EAS443:3:73:268:766#0/1  
abbababbb\_a`b]Yb[a^ [aa¥abaaaaaaaa`a`\_a^  
@HWI-EAS443:3:73:271:222#0/1  
AACATCAGCAACACCAACTTTGCTGCTGGACAGTCAGTGG  
+HWI-EAS443:3:73:271:222#0/1  
`aZXW]aYWHXR][^PYS\_a`SQ`XZ`BBBBBBBBBBBBB  
@HWI-EAS443:3:73:342:1568#0/1  
GTTGAAAGACACCCACGGTCGATTGAGCCATGCCAGTTA  
+HWI-EAS443:3:73:342:1568#0/1  
a^aW]`¥aa\_^`a`\_]UTY[U]^¥^¥W^UUUS`VMMUP  
@HWI-EAS443:3:73:351:786#0/1  
GATTTTCGGAGACAATCCACGCCCTAATGATAAGACAGGC  
+HWI-EAS443:3:73:351:786#0/1  
]¥`^ [a`\_OWa^`ZXaa[a[``]VXGU[]V^`\_`aaBB  
@HWI-EAS443:3:73:356:737#0/1  
GCAAGGTCTTATACAATCCAGCCCTGTTAGTTCTGGATGC  
+HWI-EAS443:3:73:356:737#0/1  
aabaaa]ababaaaa`aa``aaa`a^\_] [^`a``a\_\_`\_  
@HWI-EAS443:3:73:484:367#0/1  
ATTCAAATACGGCAATGGTGTGGATAGGGAGAACTAAA  
+HWI-EAS443:3:73:484:367#0/1  
\_a¥\_T\_V\_^aXV\_Y\_¥]ZHPW]]^¥[RZQ\_N[]P]\_`]¥^  
@HWI-EAS443:3:73:544:712#0/1  
TCCCAGTCCATCCGTTCCGATCCCAAATCATCTCAAACC  
+HWI-EAS443:3:73:544:712#0/1  
[aa`a\_abbb``aZFUX\_VTO^ZU\_\_ZRR¥OXOVNRZ]^]  
@HWI-EAS443:3:73:611:242#0/1  
CCTGTCTTATCATTAGGGCGTGGATTGTCTCCGAAAATCC  
+HWI-EAS443:3:73:611:242#0/1  
`bb`SaaS¥^baaab]a\_aa\_W]¥aVQS¥]^\_YP]HY\_\_ [Y  
@HWI-EAS443:3:73:736:493#0/1  
ACGGAAACCACTGACTGTCCAGCAGCAAAGTTGGTGTTC  
+HWI-EAS443:3:73:736:493#0/1  
\_bbbaabababaaaaaa`\_a\_[aa]Yaa\_Y`Z`Z]][]`R¥  
@HWI-EAS443:3:73:754:1146#0/1  
GGGGGATGTGTTTGTGCATAAGGGAACCATTCATATCATGC  
+HWI-EAS443:3:73:754:1146#0/1  
[ba[[P^aaaaa`Z\_Y`a`\_a`a^`\_\_\_a`a`aWa\_\_\_\_  
@HWI-EAS443:3:73:759:994#0/1  
CTGGACCACAACCTGCCTGTCTTATCATTAGGGCGTGGATT  
+HWI-EAS443:3:73:759:994#0/1  
\_RX]a]aa]]¥a]`XXaaUR`a\_]XX`]¥`\_ZaZ[\_^Z\_Y  
@HWI-EAS443:3:73:793:1268#0/1  
GCCAGAAATTCCAATTGTTAGCCAATTGATGCCATCATGA



@HWI-EAS443:3:74:1358:1464#0/1  
GCGGGAGCAGCATATCCTTTTGTGGTGTAAACAGTGACAC  
+HWI-EAS443:3:74:1358:1464#0/1  
aaabaabaaaaaba`aabbba`aa[``a`a`aa¥aa\_dU  
@HWI-EAS443:3:74:1365:429#0/1  
GAAAGACACCCACGGTCGATTCGAGCCATGCCAGTTATCC  
+HWI-EAS443:3:74:1365:429#0/1  
a`baabab`T^¥\_baQ[a]QaY`^¥N\_^S`]S\_]S¥¥WHM  
@HWI-EAS443:3:74:1391:1502#0/1  
GCCCCGCTAATTTACGGAAACCACTGACTGTCCAGCAGCA  
+HWI-EAS443:3:74:1391:1502#0/1  
aXX¥WHZXaa\_\_\_UNa`VHU]RXVVQ¥Z]\_QWV\_¥WPMMS  
@HWI-EAS443:3:74:1428:1405#0/1  
GCAGAACCTTCTTCTGACTCAAGGGCCTTGCTAAATGA  
+HWI-EAS443:3:74:1428:1405#0/1  
aa¥SZ`^a`^¥a`ZabZaabaY`[\_aX`a¥aSbR`\_`\_]Z  
@HWI-EAS443:3:74:1433:585#0/1  
GGGAGAACTAAAAGCATTAGTTCAAGAAACGGTTTTGAGA  
+HWI-EAS443:3:74:1433:585#0/1  
aaa`abbaaaaaaba^a`aaaa`\_aa\_aaba[aaa`]Z  
@HWI-EAS443:3:74:1486:279#0/1  
TCCCCTGCATATGTATCCTATCTGATATTCCAGATTCTG  
+HWI-EAS443:3:74:1486:279#0/1  
a[\_aaaa`aaabb\_aa\_\_aaa\_aa\_a\_`a^0\_a]``X`\_  
@HWI-EAS443:3:74:1524:504#0/1  
GTCCTATTGGTGAAGTCCCTCTCCATACAACCAAGATT  
+HWI-EAS443:3:74:1524:504#0/1  
a¥`\_Y\_¥TUXV`]VYXST¥Y]WNUYWQ^[FW^[¥\_YMW  
@HWI-EAS443:3:74:1553:363#0/1  
ATTGTATAAGACCTTGCTTCTGGGTTGAACTAATCAGAGG  
+HWI-EAS443:3:74:1553:363#0/1  
]\_a`\_baZbaZW\_\_\_[``b`aa[\_YRb`ba`aMa`a[`  
@HWI-EAS443:3:74:1584:1525#0/1  
CAAAATCAGATTGAAACATGCAATCAAAGCGTCATTACTT  
+HWI-EAS443:3:74:1584:1525#0/1  
aa^`aabab]bbb`ab`aa\_aa`]ab\_abb`^aaa`^aa  
@HWI-EAS443:3:74:1601:716#0/1  
GTTTCGGATCCCAAATCATCTCAAACCGTTTTCTTGAACCTA  
+HWI-EAS443:3:74:1601:716#0/1  
\_RZ[YNU`¥Z\_WW\_a\_a^aY``Z\_aXNNL¥HO^[W`ST¥U  
@HWI-EAS443:3:74:1612:1458#0/1  
CTGCCCCATTGTCTGGGCCAGAAATTCOAATTGTTAGCCA  
+HWI-EAS443:3:74:1612:1458#0/1  
VV^M]¥`abb\_P\_b]V^¥¥¥¥R\_R¥¥\_`b`\_IZa`]X]\_  
@HWI-EAS443:3:74:1647:1807#0/1  
GCTTGTCATGATGGCATCAATTGGCTAACAATTGGAATTT  
+HWI-EAS443:3:74:1647:1807#0/1  
aab[X¥``\_aa``X`\_Z````a¥^[\_aZ^]a`\_\_\_\_\_  
@HWI-EAS443:3:74:1694:1521#0/1  
GTCAAGAAGAAGGTTCTGCATTCCAAGGGGAGCATGATA



@HWI-EAS443:3:74:331:1933#0/1  
GTTAACATCAGCAACACCAACTTTGCTGCTGGACAGTCAG  
+HWI-EAS443:3:74:331:1933#0/1  
`^¥\_SX¥W`aYa\_]\_0^a]`¥`TZWaURa\_QOL]VSQ^BB  
@HWI-EAS443:3:74:36:1540#0/1  
GAATAAATGAGTGGTCAGGATATAGCGGGAGTTTTGTTCA  
+HWI-EAS443:3:74:36:1540#0/1  
abaaaa^aaaa^¥^^aaa`\_\_a`\_`\_^\_]OZVZ^^WZU¥Z  
@HWI-EAS443:3:74:527:1384#0/1  
TGCCTGTCTTATCATTAGGGCGTGGATTGTCTCCGAAAAT  
+HWI-EAS443:3:74:527:1384#0/1  
`baZ\_]V^\_\_^\_a]aa`aa\_^Z`a`aXa\_aaTDV¥]P  
@HWI-EAS443:3:74:583:1230#0/1  
AAATGGTTCTTGCTTTACTGTAATGACCGATGGACCAAGT  
+HWI-EAS443:3:74:583:1230#0/1  
`^\_¥a^]aab`Waaa\_a`aa\_^V`^a`\_`\_`^a\_¥]`][ZV  
@HWI-EAS443:3:74:589:400#0/1  
GGACCACAACCTGCCTGTCTTATCATTAGGGCGTGGATTGT  
+HWI-EAS443:3:74:589:400#0/1  
]ZSSZ^^0^]ZW\_a]aXa\_[S[U]Z[VVY]aTTSR[^XR  
@HWI-EAS443:3:74:660:746#0/1  
TGGGCTCCTGTCTTTAATGGTCCATTGGAATGTTGTCA  
+HWI-EAS443:3:74:660:746#0/1  
`baaa\_^aa[`aa`bbb`b`abaa[a¥aaab`\_aaYa\_  
@HWI-EAS443:3:74:697:542#0/1  
GAGTTGGAGAAACAATATATTGAGAACACAAGAGTCTGAA  
+HWI-EAS443:3:74:697:542#0/1  
aaa`b\_aab\_¥^\_]aa[a^`a`\_`aa`aaaa`a\_aaa\_^  
@HWI-EAS443:3:74:69:842#0/1  
ATCCTTTTGTGGTGTAAACAGTGACACTGTGGGTTGGTCT  
+HWI-EAS443:3:74:69:842#0/1  
aaaaaaaaa^aaZa\_]^\_aa`[\_`\_^\_a`TZV]X¥^[W[[  
@HWI-EAS443:3:74:725:748#0/1  
GTGAAATTAGCGGGCAATTCCTCTCTCTGCCCTGTTAGTG  
+HWI-EAS443:3:74:725:748#0/1  
aZbUa`abaaaaba^`X\_a\_aaaa\_a\_a^a`Xaa`\_`\_`\_`  
@HWI-EAS443:3:74:726:1469#0/1  
AGCACTTGCTGACCAAGCGACTGACTCAAATCTTGAGTTG  
+HWI-EAS443:3:74:726:1469#0/1  
]ZZa`aaaaaaaa\_b^^aaaa\_\_\_\_\_¥]a]\_`\_^\_]U]]aW  
@HWI-EAS443:3:74:73:791#0/1  
AGCCCATCCACTAACAGGGCAGAGAGGAATTGCCCGCT  
+HWI-EAS443:3:74:73:791#0/1  
¥¥`bb\_bababb\_¥aa^]aa]^W[bVaa\_`\_^a]YYS`\_  
@HWI-EAS443:3:74:803:771#0/1  
CGTTCGGATCCCAAATCATCTCAAACCGTTTCTTGAAC  
+HWI-EAS443:3:74:803:771#0/1  
abab`baa\_aabbab`abaaaa`a`aUa`aa`a`\_`\_a  
@HWI-EAS443:3:74:811:1159#0/1  
ATTAGACGATACTGGACCACAACCTGCCTGTCTTATCATTA

+HWI-EAS443:3:74:811:1159#0/1  
¥¥`^^bbb[T[^^a]Ya\_Y`JWX\_YaXXUU\_]`a¥[\_\_\_  
@HWI-EAS443:3:74:916:256#0/1  
GTGGTGTAAACAGTGACACTGTGGGTTGGTCTTGCCAGA  
+HWI-EAS443:3:74:916:256#0/1  
¥U``b\_Z`aaaa^aaaa`ab¥a\_a^b`]^\_`a`¥S\_^¥  
@HWI-EAS443:3:74:986:860#0/1  
GCCTGTCTTATCATTAGGGCGTGGATTGTCTCCGAAAATC  
+HWI-EAS443:3:74:986:860#0/1  
aa[¥]a\_a`V`TR`aULTP]\_`Z\_\_WZ^YU¥]RYV\_^YVG  
@HWI-EAS443:3:75:1002:409#0/1  
TGCAATCAAAGCGTCATTACTTATGAAAACAACACTTGGG  
+HWI-EAS443:3:75:1002:409#0/1  
abbbabaaaab\_Z`abaa`aaa`aaaaa\_aa\_a^``^¥  
@HWI-EAS443:3:75:100:1244#0/1  
GCTGTGTTAAAGTACAACGGCATAATAACAGACACTATCA  
+HWI-EAS443:3:75:100:1244#0/1  
aa\_^`\_\_\_[UX\_U^^T[\_`\_[W[M^\_]JT`^`\_]WVM  
@HWI-EAS443:3:75:1063:843#0/1  
CTGACCACTCATTTATTCCTACGATATCTTGCTTTATTGA  
+HWI-EAS443:3:75:1063:843#0/1  
ababa^b^babbbbab\_\_`^a```[L`aa\_\_\_a\_a^`[a`  
@HWI-EAS443:3:75:1132:332#0/1  
CAAGGTCTTATACAATCCAGCCCTGTTAGTTCTGGATGCT  
+HWI-EAS443:3:75:1132:332#0/1  
\_\_bbbZ¥abbbbaaa]aab`bbbbbbbbbbbabbbb]]  
@HWI-EAS443:3:75:1206:1801#0/1  
GATTAGCCACTCAATTCAACTTGGGAATCAAAATCAGATT  
+HWI-EAS443:3:75:1206:1801#0/1  
^bbbabababbbbaaaaa\_bbbb`aaaabaabaabaaaa  
@HWI-EAS443:3:75:1259:1871#0/1  
ATCAAAGCGTCATTACTTATGAAAACAACACTTGGGTAAA  
+HWI-EAS443:3:75:1259:1871#0/1  
aYY\_b`]\_a¥aaaaaaa`ab\_\_a`\_baWb]X`XUZGbaa  
@HWI-EAS443:3:75:129:1228#0/1  
ATCAAAGCGTCATTACTTATGAAAACAACACTTGGGTAAA  
+HWI-EAS443:3:75:129:1228#0/1  
a`aa\_baaa`aaaaaaaaaaaa\_a``aa``a\_\_\_^¥[\_XT  
@HWI-EAS443:3:75:1302:1629#0/1  
AGCCCATCCACTAACAGGGCAGAGAGGAATTGCCCGCT  
+HWI-EAS443:3:75:1302:1629#0/1  
a^`^]aa]¥\_\_aba\_]Za`X^``a\_aa\_aaa`\_\_S^U\_\_]  
@HWI-EAS443:3:75:133:197#0/1  
GTGTTCTCAATATATTGTTTCTCCAACCTTGATAGTGTC  
+HWI-EAS443:3:75:133:197#0/1  
`¥a`aa`aab^a`aab\_aa`a`a\_`^`\_\_\_\_``]\_\_[]]B  
@HWI-EAS443:3:75:1403:644#0/1  
AGAAATCCAATTGTTAGCCAATTGATGCCATCATGACAA  
+HWI-EAS443:3:75:1403:644#0/1  
abaa`aa^abaaaaa^`\_[a`a`a\_`W[^`[aaa¥M\_a



@HWI-EAS443:3:75:1417:323#0/1  
TGGGAATCAAATCAGATTGAAACATGCAATCAAAGCGTC  
+HWI-EAS443:3:75:1417:323#0/1  
`baa\_`b\_bba`b\_¥abbbbabaZaabP\_`b^aaaa^aZa  
@HWI-EAS443:3:75:1627:1111#0/1  
CAGACATATGTTAACATCAGCAACACCAACTTTGCTGCTG  
+HWI-EAS443:3:75:1627:1111#0/1  
^bbbbbbbbbbabbbaababbaba^babbaabbaaaaa\_bb  
@HWI-EAS443:3:75:180:1049#0/1  
AGAACACAATCTGGACTAGCGGGAGCAGCATATCCTTTTG  
+HWI-EAS443:3:75:180:1049#0/1  
aba¥aaaaaaaaaaaaaaaaa]a`\_]\_^\_\_\_Y\_]\_]\_\_\_YJ  
@HWI-EAS443:3:75:190:1010#0/1  
TTGTCTGGGCCAGAAATCCAATTGTTAGCCAATTGATGC  
+HWI-EAS443:3:75:190:1010#0/1  
YOZQ]aaVW^`TX\_a`a`¥`¥\_]`a]`[``][^X^  
@HWI-EAS443:3:75:197:834#0/1  
CAAATACGGCAATGGTGTGGATAGGGAGAACTAAAAGC  
+HWI-EAS443:3:75:197:834#0/1  
`\_bVa\_abaa[YX[Ua^`a]ZFY[^Z^RWMRS[S^^]\_\_\_  
@HWI-EAS443:3:75:214:758#0/1  
GCGGGAGTTTTGTTCCAGCATCCAGAACTAACAGGGCTGGA  
+HWI-EAS443:3:75:214:758#0/1  
a\_Z^[JYNY¥Y]`^XYX]¥\_a`[^`[VT]^YUVV¥U\_^V  
@HWI-EAS443:3:75:24:1335#0/1  
TGTGTTCTCAATATATTGTTTCTCCAACTCTTGATAGTGT  
+HWI-EAS443:3:75:24:1335#0/1  
abaa`bbbb`bbbbbbb`aaaaba\_`aabbaaba]Z]^`^  
@HWI-EAS443:3:75:250:1380#0/1  
GTGTAACAGTGACACTGTGGGTTGGTCTTGGCCAGACGG  
+HWI-EAS443:3:75:250:1380#0/1  
^\_W\_\_T````\_baabbab[Xaa\_ZU`[a`a¥Xaab`a```  
@HWI-EAS443:3:75:265:357#0/1  
CATTAGGGCGTGGATTGTCTCCGAAAATCCCCTGCATAT  
+HWI-EAS443:3:75:265:357#0/1  
abbab\_abb[ `a`ba\_aab`ba` ``ba][baa`aaaa^a^  
@HWI-EAS443:3:75:281:1007#0/1  
GCCAGAAATCCAATTGTTAGCCAATTGATGCCATCATGA  
+HWI-EAS443:3:75:281:1007#0/1  
`a]L]]XWWGTX[[VPWRPV]aZ\_\_]\_^PPQ]]VRTVQYQ  
@HWI-EAS443:3:75:321:306#0/1  
ATTGTATAAGACCTTGCTTCTGGGTTGAACTAATCAGAGG  
+HWI-EAS443:3:75:321:306#0/1  
\_bbb]aab\_a`Z`aaaa\_aabbaZaab\_aaa`aaa\_a\_  
@HWI-EAS443:3:75:360:218#0/1  
ATTGTCTCCGAAAATCCCCTGCATATGTATCCTATCTGA  
+HWI-EAS443:3:75:360:218#0/1  
`bb`Wa\_a`a\_baaZYa`^^`¥`aa`\_\_\_\_\_`\_]`^`Z\_\_`  
@HWI-EAS443:3:75:390:856#0/1  
CAGACATATGTTAACATCAGCAACACCAACTTTGCTGCTG

+HWI-EAS443:3:75:390:856#0/1  
`\_bbbbbbbaabbaabbbbaabbabaabaaaa`aaaaaaa  
@HWI-EAS443:3:75:39:1378#0/1  
GTGGGTTGGTCTTGCCAGACGGTGCTGAGTTGCCATTTA  
+HWI-EAS443:3:75:39:1378#0/1  
a]aaa`aa\_aaaa`a`a`\_aaaVZ[^[UVW^]\_¥IX¥^[  
@HWI-EAS443:3:75:408:444#0/1  
GGAGCAGCATATCCTTTTGTGGTGTAACAGTGACACTGT  
+HWI-EAS443:3:75:408:444#0/1  
Tb]¥]]`abaX]\_ab`\_a[]PX`[```\_ab^aa^^Za]P  
@HWI-EAS443:3:75:420:25#0/1  
CGGGAGCAGCATATCCTTTTGTGGTGTAACAGTGACACT  
+HWI-EAS443:3:75:420:25#0/1  
^a[Zbbab[0\_bb`ababab\_\_^^[T¥\_]a\_]V`WGZH`  
@HWI-EAS443:3:75:505:1330#0/1  
TGGAATGTTTGTCAATTTAGCAAGGCCCTTGAGTCAAGAA  
+HWI-EAS443:3:75:505:1330#0/1  
`Ub]`\_[abb\_]b`\_aa¥Yb[```bbaaaa`\_[R^`\_`\_a\_  
@HWI-EAS443:3:75:552:1733#0/1  
GGCAATGGTGTGGATAGGGAGAATAAAAGCATTAGTT  
+HWI-EAS443:3:75:552:1733#0/1  
^^a`Xaa^Y[]^aa\_\_aa^UY^`^a^aaaaa\_a\_`\_`^`XX  
@HWI-EAS443:3:75:583:1779#0/1  
GGGCCTTGCTAAATGACAAACATTCCAATGGAACCATTAA  
+HWI-EAS443:3:75:583:1779#0/1  
abbb`]Ma]\_K\_a¥VPV^Saa[bbab\_NaXN]b```\_]a]  
@HWI-EAS443:3:75:616:1460#0/1  
GTGGTTTCCGTGAAATTAGCGGGCAATTCCTCTCTCTGCC  
+HWI-EAS443:3:75:616:1460#0/1  
a\_^[MYaa`a`YL¥a`\_R[]VYVV]]U]aXRX¥\_Va[`ZZ  
@HWI-EAS443:3:75:624:1039#0/1  
GGGTGTCTTTCAACCAGAATCTGGAATATCAGATAGGATA  
+HWI-EAS443:3:75:624:1039#0/1  
abb\_babbbbaX`ababbbbbbbaaaaaaa`aT]ba`a  
@HWI-EAS443:3:75:637:617#0/1  
AGGGATAACTGGCATGGCTCGAATCGACCGTGGGTGTCTT  
+HWI-EAS443:3:75:637:617#0/1  
^aaba]`b`a^]`^`b`baZOWWT¥¥LJYZFUyXR^ODS]  
@HWI-EAS443:3:75:719:1992#0/1  
CGGTCGATTCGAGCCATGCCAGTTATCCCTGCACACACAT  
+HWI-EAS443:3:75:719:1992#0/1  
`^\_[Z[`]V]¥`¥^¥`]RX\_ZTVMT\_[X\_¥`aaa\_\_\_^aT  
@HWI-EAS443:3:75:726:212#0/1  
CAGATTCTGGTTGAAAGACACCCACGGTCGATTCGAGCCA  
+HWI-EAS443:3:75:726:212#0/1  
\_W\_YW`aa¥XXXZa¥TG[`\_Y]XXPO[PG[RVVP]¥¥BBB  
@HWI-EAS443:3:75:770:2002#0/1  
GGGAACCTCACCAATAGGACAGCTCATTAGGGTTCGATAT  
+HWI-EAS443:3:75:770:2002#0/1  
abUUbaa]]XVa\_a\_aWUU`a`\_\_[\_^`\_^]G]^\_^XN¥

@HWI-EAS443:3:75:775:265#0/1  
ATCAGATTGAAACATGCAATCAAAGCGTCATTACTTATGA  
+HWI-EAS443:3:75:775:265#0/1  
aa`U`aabbaaaaab`abb\_aaaa^b\_aabaa^aaaaaa  
@HWI-EAS443:3:75:872:1691#0/1  
TGCCCCGTAATTTACGGAACCACTGACTGTCCAGCAGC  
+HWI-EAS443:3:75:872:1691#0/1  
abb``a`^`¥\_]Sabbba\_`\_baaa`aa^[¥\_W[LZR^  
@HWI-EAS443:3:75:878:854#0/1  
GTCCCAGTCCATCCGTTCCGATCCCAAATCATCTCAAAC  
+HWI-EAS443:3:75:878:854#0/1  
`\_bbbbbabbbbbba`a`aababbbaabbaab[aaba  
@HWI-EAS443:3:75:901:1799#0/1  
CAACTGCCTGTCTTATCATTAGGGCGTGGATTGTCTCCGA  
+HWI-EAS443:3:75:901:1799#0/1  
abba`W`ab[aaaaa`^`^][\_a\_aaUZ[U]\_TUTZ`MZ]X  
@HWI-EAS443:3:75:911:875#0/1  
AGCGGGAGTTTTGTTTCAGCATCCAGAACTAACAGGGCTGG  
+HWI-EAS443:3:75:911:875#0/1  
aabbababZaaa\_¥`a[\_`a\_`a`\_`a\_`aa\_a`\_]\_Y]``  
@HWI-EAS443:3:75:918:436#0/1  
GCGGGAGTTTTGTTTCAGCATCCAGAACTAACAGGGCTGGA  
+HWI-EAS443:3:75:918:436#0/1  
a\_aaa^^Zaaaa\_a^\_a`aaY[``\_\_^`\_aU\_[U^]^^\_V  
@HWI-EAS443:3:75:924:1789#0/1  
ACAATATATTGAGAACAAGAGTCTGAATGTGCATGTGT  
+HWI-EAS443:3:75:924:1789#0/1  
abbbbbbbbbbbbbbbbbbaaaa`aaaaaaa\_baaaa\_a\_  
@HWI-EAS443:3:75:938:434#0/1  
CGGGAGTTTTGTTTCAGCATCCAGAACTAACAGGGCTGGAT  
+HWI-EAS443:3:75:938:434#0/1  
a\_\_b¥`QYabaa^[aaZa\_\_YTY`a^]\_`^`\_bZ]aaa]\_  
@HWI-EAS443:3:75:980:694#0/1  
GGCTCCTGTCTTTAATGGTTCCATTGGAATGTTTGTTCATT  
+HWI-EAS443:3:75:980:694#0/1  
aab``a^WV^`\_aaa\_abX`0`[\_aaa[aaS\_\_[G[]]`a  
@HWI-EAS443:3:76:1032:127#0/1  
TGTAACAGTGACACTGTGGGTTGGTCTTGGCCAGACGGT  
+HWI-EAS443:3:76:1032:127#0/1  
aaaaaa\_aa`a`\_`¥ab^aa\_\_`a\_¥¥a``TW\_`^X¥^W  
@HWI-EAS443:3:76:1032:1999#0/1  
GTGGGATTTTCGGAGACAATCCACGCCCTAATGATAAGAC  
+HWI-EAS443:3:76:1032:1999#0/1  
aIUZUNV\_R]T]^¥W^XZZ[aa\_`VVY\_NSPTSPPQSSWS  
@HWI-EAS443:3:76:1046:2038#0/1  
ATTCATATCATGCTCCCCCTTGAATGCAGAACCTTCTTC  
+HWI-EAS443:3:76:1046:2038#0/1  
\_\_Z]\_\_^W\_ZXYZ]^a]ZS[Z]V\_YS\_[¥XUWJUSPSUVP  
@HWI-EAS443:3:76:1052:1694#0/1  
CACCAACTTTGCTGCTGGACAGTCAGTGGTTTCCGTGAAA



@HWI-EAS443:3:76:1670:612#0/1  
CCTCAATTCAACTGGGAATCAAAATCAGATTGAAACA  
+HWI-EAS443:3:76:1670:612#0/1  
`^WXab\_Z¥a¥^TU¥Vaababa]^0¥]\_Uaa`bbb``PH\_  
@HWI-EAS443:3:76:1671:1541#0/1  
GAGGAATGCTCCTGTTATCCTGATTCTAGTGAATCACAT  
+HWI-EAS443:3:76:1671:1541#0/1  
a\_\_a\_¥^YZ^U[X^^^\_W¥Y\_^`^^\_¥]X\_] ^ZWRTRQ¥  
@HWI-EAS443:3:76:1788:1920#0/1  
ATCGGTTCCAAGGGGATGTGTTTGTGATAAGGGAACCAT  
+HWI-EAS443:3:76:1788:1920#0/1  
a`bba^ab¥Q\_X^aa\_VYL¥`[`¥[[X¥Wa^][QM^SS[Y  
@HWI-EAS443:3:76:271:1854#0/1  
CTCCATTAGACGATACTGGACCACAACCTGCCTGTCTTATC  
+HWI-EAS443:3:76:271:1854#0/1  
`abb`aaa]a\_]ba]^ITV\_[aa\_aa[R[[ZUTZ\_XS`^]  
@HWI-EAS443:3:76:279:995#0/1  
TTCATATCATGCTCCCCCTTGGAAATGCAGAACCTTCTTCT  
+HWI-EAS443:3:76:279:995#0/1  
]TZP¥W^\_T[^\_S¥T`XYVWVJSX¥V\_GYLN[[TPVVRVW  
@HWI-EAS443:3:76:285:1438#0/1  
CGGATGGACTGGGACAGACAATAACTTCTCAATAAAGCAA  
+HWI-EAS443:3:76:285:1438#0/1  
a\_SS][Z¥a`¥VZX]XYY]XWW]]\_T`]^`^^^\_\_IZU  
@HWI-EAS443:3:76:302:109#0/1  
TGCAGAACCTTCTTCTGACTCAAGGGCCTTGCTAAATG  
+HWI-EAS443:3:76:302:109#0/1  
aaY`\_Z¥`]V\_`^[^\_`^Z]¥^XQXW]^WSZPVV]WUW]]  
@HWI-EAS443:3:76:303:1367#0/1  
TGTTATTATGCCGTTGTACTTTAACACAGCCACTGCCCA  
+HWI-EAS443:3:76:303:1367#0/1  
aa\_`a\_```aaaa^]^Z¥aaa]a\_aaa`\_`a\_^N]^\_]K  
@HWI-EAS443:3:76:311:543#0/1  
TATTCCTACGATATCTTGCTTTATTGAGAAGTTATTGTCT  
+HWI-EAS443:3:76:311:543#0/1  
abaaaaabaa\_a\_`\_`\_`aa``aa`^\_\_\_\_]^`]^\_]\_^]]  
@HWI-EAS443:3:76:325:1108#0/1  
CTCCATTAGACGATACTGGACCACAACCTGCCTGTCTTATC  
+HWI-EAS443:3:76:325:1108#0/1  
a]\_b]]`][¥a]SQ\_\_\_\_¥¥VY`H`R¥]V]^0[Ry[YUVO  
@HWI-EAS443:3:76:327:2034#0/1  
AGCCACTCAATTCAACTGGGAATCAAAATCAGATTGAAA  
+HWI-EAS443:3:76:327:2034#0/1  
aabbbaa\_bb]]`a\_]`\_^\_¥^`]^aa¥a`\_a`\_`\_ZF¥\_`^  
@HWI-EAS443:3:76:343:1655#0/1  
CTTGGAAATGCAGAACCTTCTTCTGACTCAAGGGCCTTG  
+HWI-EAS443:3:76:343:1655#0/1  
abb\_ababbbabbbabbbabbaabaab`\_]\_aaaaa`a  
@HWI-EAS443:3:76:496:331#0/1  
AGCGGGAGTTTTGTTTCAGCATCCAGAACTAACAGGGCTGG

+HWI-EAS443:3:76:496:331#0/1  
W\_`^`Ta[Q]\_SV[¥aUZ^V^¥VZT¥V\_`bZ[¥b¥T]]\_V  
@HWI-EAS443:3:76:55:441#0/1  
ATGTGCATGTGTAAATGGTTCTTGCTTTACTGTAATGACC  
+HWI-EAS443:3:76:55:441#0/1  
aaa\_bbabbab\_bbaabaaaaaaaa`aaaa\_aaaaa\_a  
@HWI-EAS443:3:76:636:1945#0/1  
GCTCCATTAGACGATACTGGACCACAACCTGCCTGTCTTAT  
+HWI-EAS443:3:76:636:1945#0/1  
abab`a`ab]aa`\_\_a^`\_a\_abaaa``]]^aa^¥a``aV  
@HWI-EAS443:3:76:639:501#0/1  
GCCAAGACCAACCCACAGTGTCACCTGTTTACACCACAAAA  
+HWI-EAS443:3:76:639:501#0/1  
^\_a\_ab[baaaaa`XX``Ua¥aa¥`a\_\_aaY^`^S``a`  
@HWI-EAS443:3:76:658:833#0/1  
CGTGGGTGTCTTTCAACCAGAATCTGGAATATCAGATAGG  
+HWI-EAS443:3:76:658:833#0/1  
a¥Y[YaZ`]abba^VZ\_`bb^]a]aaa]aWa\_]ab\_Q`aa  
@HWI-EAS443:3:76:738:1797#0/1  
GAGGAATTGCCCGTAATTTACGGAAACCACTGACTGTC  
+HWI-EAS443:3:76:738:1797#0/1  
aba`]baa\_ba[]aaaa\_]bba[`¥aba^aa\_`R[ZV\_  
@HWI-EAS443:3:76:900:850#0/1  
CCCCTAATTTACGGAAACCACTGACTGTCCAGCAGCAA  
+HWI-EAS443:3:76:900:850#0/1  
abbaabbaba\_aa`aa`aaaa\_aa\_`¥V^^[^^^\_V¥^  
@HWI-EAS443:3:76:909:626#0/1  
CCGTAATTTACGGAAACCACTGACTGTCCAGCAGCAAA  
+HWI-EAS443:3:76:909:626#0/1  
abbbbbbbabbabbabbbaab`\_`aaaa\_[]\_`a\_]\_\_  
@HWI-EAS443:3:76:934:1193#0/1  
CTTGGTCCATCGGTCATTACAGTAAAGCAAGAACCATTTA  
+HWI-EAS443:3:76:934:1193#0/1  
`a^bbbbbb`a¥b]babbbb[¥]`ab\_aa``babab``\_a  
@HWI-EAS443:3:76:940:1926#0/1  
TTCCCTCTCCATACAACCTCAAGATTTGAGTCAGTCGCTTG  
+HWI-EAS443:3:76:940:1926#0/1  
]S`\_[\_\_Z\_¥`b`¥¥S]Z^SUZbaW`]W¥]U`^Z\_b¥a`Y  
@HWI-EAS443:3:76:941:768#0/1  
CGATACTGGACCACAACCTGCCTGTCTTATCATTAGGGCGT  
+HWI-EAS443:3:76:941:768#0/1  
ababbbbbbbbbbaabaaaababaaaabaaaa\_aa`a\_a\_  
@HWI-EAS443:3:76:975:1157#0/1  
CAACTGCCTGTCTTATCATTAGGGCGTGGATTGTCTCCGA  
+HWI-EAS443:3:76:975:1157#0/1  
aabbaabbaa`abbaba`aa\_\_aa`a^`\_`a\_^\_\_X\_X  
@HWI-EAS443:3:76:984:565#0/1  
CCCCTAATTTACGGAAACCACTGACTGTCCAGCAGCAA  
+HWI-EAS443:3:76:984:565#0/1  
`bababbbbbbb\_b\_`baaa``aabb``aa]^\_\_¥`^`T\_\_

@HWI-EAS443:3:77:1005:944#0/1  
GAAGAAGTTCTGCATTCCAAGGGGAGCATGATATGAAT  
+HWI-EAS443:3:77:1005:944#0/1  
aa^a¥R`Xaa\_U^^¥`\_\_\_\_`\_`\_\_\_\_Y^\_a]\_a^^\_X  
@HWI-EAS443:3:77:1053:502#0/1  
CAATAAAGCAAGATATCGTAGGAATAAATGAGTGGTCAGG  
+HWI-EAS443:3:77:1053:502#0/1  
aabbbbbbabbabbbbaab```bbbbbbbbbabb[`[b`  
@HWI-EAS443:3:77:1055:676#0/1  
TGGTGTGGATAGGGAGAATAAAAGCATTAGTTCAAGA  
+HWI-EAS443:3:77:1055:676#0/1  
abaX`YbabbXaaa\_`^a```aV]W^a`^a\_`a]^`^]Y\_^  
@HWI-EAS443:3:77:1066:37#0/1  
ATCCCAAATCATCTCAAACCGTTTCTTGAACATAATGCTT  
+HWI-EAS443:3:77:1066:37#0/1  
aa``aab^b^aaaaaa\_`]a]aa^^`^\_]Y`^]``¥\_`  
@HWI-EAS443:3:77:1084:521#0/1  
CCCCGTAATTTACGGAAACCACTGACTGTCCAGCAGCAA  
+HWI-EAS443:3:77:1084:521#0/1  
aa]b`b^^`abaa\_`a^aa`aaa`\_Y]a`Z[TX]\_¥RHWZ  
@HWI-EAS443:3:77:1120:1588#0/1  
GCGGGAGTTTTGTTCCAGCATCCAGAACTAACAGGGCTGGA  
+HWI-EAS443:3:77:1120:1588#0/1  
a[W\_a[[aaaa]Ia\_baaaaa\_`¥\_`aaa]\_a`\_\_\_\_`\_^  
@HWI-EAS443:3:77:1126:1954#0/1  
GAGGAATTGCCCGTAATTTACGGAAACCACTGACTGTC  
+HWI-EAS443:3:77:1126:1954#0/1  
abaaabbaaabababbbbabababbabb`aa\_baa\_aa\_a  
@HWI-EAS443:3:77:1170:486#0/1  
GCAGAACCTTCTTCTTGACTCAAGGGCCTTGCTAAATGA  
+HWI-EAS443:3:77:1170:486#0/1  
a\_aa^a`V]^`YYY[\_^a\_\_\_\_`a\_`Z^`¥Z\_Z[[[\_^]^`^¥  
@HWI-EAS443:3:77:1198:1191#0/1  
CAGAACCTTCTTCTTGACTCAAGGGCCTTGCTAAATGAC  
+HWI-EAS443:3:77:1198:1191#0/1  
a`^^`bb`bba\_\_b\_ab¥¥W[Y`\_aaaab`a]^J¥a¥a`Y  
@HWI-EAS443:3:77:1224:1574#0/1  
CAGACATATGTTAACATCAGCAACACCACTTTGCTGCTG  
+HWI-EAS443:3:77:1224:1574#0/1  
P\_baa^Z^X^^W\_V\_\_b\_VX\_````PH\_\_`QJXS¥bb`¥S  
@HWI-EAS443:3:77:1232:1505#0/1  
TTCTAGTGAAATCACATGTGTGTGCAGGGATAACTGGCAT  
+HWI-EAS443:3:77:1232:1505#0/1  
aa]aab^aa`a\_\_aa\_a`\_`\_a\_aa\_[aa`\_aa]a`aY\_¥  
@HWI-EAS443:3:77:1293:1046#0/1  
TTGTCTCCGAAAATCCCCTGACTGATATGTATCCTATCTGAT  
+HWI-EAS443:3:77:1293:1046#0/1  
a^a^Z`b^\_\_\_\_`aaaaa\_`]aa\_`X````\_`]aa\_a\_^  
@HWI-EAS443:3:77:1355:616#0/1  
GCCCATCCACTAACAGGGCAGAGAGGAATTGCCCGCTA

+HWI-EAS443:3:77:1355:616#0/1  
aa[\_[\_[Z]bab`a]Xa^`aabaa¥`^\_aaa\_Z\_abV`Z  
@HWI-EAS443:3:77:1356:1066#0/1  
CAAATACGGCAATGGTGTGGATAGGGAGAACTAAAAGC  
+HWI-EAS443:3:77:1356:1066#0/1  
a\_^¥UYa\_^bYN`Z¥X¥Pa¥`YWZPX]W\_¥\_]N[``]Y^`  
@HWI-EAS443:3:77:1401:750#0/1  
ATTAGGGCGTGGATTGTCTCCGAAAATCCCACTGCATATG  
+HWI-EAS443:3:77:1401:750#0/1  
aba`[\_[\_\_\_VTaaaa\_`QPba\_aS\_a\_Wa\_^YY¥R^^\_^  
@HWI-EAS443:3:77:1464:885#0/1  
CGTGGGTGTCTTTCAACCAGAATCTGGAATATCAGATAGG  
+HWI-EAS443:3:77:1464:885#0/1  
abYb\_`Ybaabbbb`aab]bbb\_b`babbaaabaa\_ba  
@HWI-EAS443:3:77:1565:1319#0/1  
ATGGTGTGGATAGGGAGAACTAAAAGCATTAGTTCAAG  
+HWI-EAS443:3:77:1565:1319#0/1  
`^\_T]``a`aa`\_\_a\_]bababbaa`ab``a\_bb\_a]a`\_  
@HWI-EAS443:3:77:1586:999#0/1  
GTTGTCTTTACTGTATATAGCCCATCCACTAACAGGGCAG  
+HWI-EAS443:3:77:1586:999#0/1  
aaaa\_aaX^`[\_aP`a```Wa`^^¥N]^[\_W\_a]ZGU^  
@HWI-EAS443:3:77:1595:1106#0/1  
CTGGACCACAACCTGCCTGTCTTATCATTAGGGCGTGGATT  
+HWI-EAS443:3:77:1595:1106#0/1  
]babaaababb\_bba`abaabbabaabbaa^aaa\_aaaab  
@HWI-EAS443:3:77:1635:1858#0/1  
TGGGTGTCTTTCAACCAGAATCTGGAATATCAGATAGGAT  
+HWI-EAS443:3:77:1635:1858#0/1  
``a]`b\_¥babaaa\_aaZ¥aaaaa\_aabaa`]a^aaa^\_\_  
@HWI-EAS443:3:77:1715:697#0/1  
CATTTACACATGCACATTCAGACTCTTGTGTTCTCAATAT  
+HWI-EAS443:3:77:1715:697#0/1  
Q\_aX`bbb`aa[W\_bb^¥^`\_b`Z^VYVYbVb\_\_b\_ba¥]  
@HWI-EAS443:3:77:1748:1191#0/1  
CTCAATTCAACTTGGGAATCAAATCAGATTGAAACATGC  
+HWI-EAS443:3:77:1748:1191#0/1  
abbbbbbbba¥\_bbbabbbbabaaab^a^abaababaaaa]  
@HWI-EAS443:3:77:1750:774#0/1  
CAATATATTGAGAACACAAGAGTCTGAATGTGCATGTGTA  
+HWI-EAS443:3:77:1750:774#0/1  
\_]`bbbbbbbbbb\_aabbVab`\_babbbb[`aaa^aa\_a  
@HWI-EAS443:3:77:1757:88#0/1  
AAGAAGAAGTTCTGCATTCCAAGGGGGAGCATGATATGA  
+HWI-EAS443:3:77:1757:88#0/1  
abaaabaabb`a\_aa]aaa]`a`aa``\_a]`a`\_`^^`¥  
@HWI-EAS443:3:77:1758:712#0/1  
GCTGCTCCCCTAGTCCAGATTGTGTTCTTTGGGTCGC  
+HWI-EAS443:3:77:1758:712#0/1  
^\_`baabb\_¥`¥¥[[\_b^\_ZaaTZ¥Z`\_X]X\_``[`XZ\_Y



@HWI-EAS443:3:77:228:1295#0/1  
CTCTGATTAGTTCAACCCAGAAGCAAGTCTTATACAATC  
+HWI-EAS443:3:77:228:1295#0/1  
a¥a[[`^WZ]FN¥`]\`aa]]`a\_¥¥X¥\_W`¥[a¥UW\_XY[  
@HWI-EAS443:3:77:241:1522#0/1  
ATTATGCCGTTGTACTTTAACACAGCCACTGCCCCATTGT  
+HWI-EAS443:3:77:241:1522#0/1  
aa\_`\_abaa\_\_a]aaa\_`aaaaa^aa``X\_\_`]^Y]]Y  
@HWI-EAS443:3:77:286:1797#0/1  
GGCCTTGCTAAATGACAAACATTCCAATGGAACCATTAAA  
+HWI-EAS443:3:77:286:1797#0/1  
a`bbaaababbaaabab`\_`baabaa\_a\_Ybbaaaa\_bba  
@HWI-EAS443:3:77:290:1238#0/1  
ACTGACTGTCCAGCAGCAAAGTTGGTGTGCTGATGTTAA  
+HWI-EAS443:3:77:290:1238#0/1  
^a`a`a^^`WR[R^^H¥YRN]TUOXXUOVXFHNWS[QY  
@HWI-EAS443:3:77:302:638#0/1  
CTTTTACTCCATTTGCTCCATTAGACGATACTGGACCACA  
+HWI-EAS443:3:77:302:638#0/1  
abbbbbbaaaaabababababab`aa]]^`\_\_^\_^[\_[  
@HWI-EAS443:3:77:354:1942#0/1  
AATCATCTCAAAACCGTTTCTTGAACATAATGCTTTTAGTT  
+HWI-EAS443:3:77:354:1942#0/1  
[a^bb`b`\_`baabaa\_`[b`S¥aaa\_aaa`a\_`^^¥V]S  
@HWI-EAS443:3:77:367:1515#0/1  
AACAGACTATCAAGAGTTGGAGAAACAATATATTGAGA  
+HWI-EAS443:3:77:367:1515#0/1  
a^]¥a^aba`^¥a`a][Y`YG¥UQT]^V^^[^\_\_]\_\_OL  
@HWI-EAS443:3:77:415:251#0/1  
CAGACTATCAAGAGTTGGAGAAACAATATATTGAGAAC  
+HWI-EAS443:3:77:415:251#0/1  
a`bb\_bbb¥YaaX\_`]H]b`b`\_`URZb]aaaa\_aa\_`0  
@HWI-EAS443:3:77:443:552#0/1  
TGCCGTTGTACTTTAACACAGCCACTGCCCCATTGTCTGG  
+HWI-EAS443:3:77:443:552#0/1  
aaaab`\_`^H\_aaaaa^]aa¥\_a¥aaW\_\_\_aa\_\_MV\_^\_Z  
@HWI-EAS443:3:77:457:836#0/1  
GATGATTTGGGATCCGAACGGATGGACTGGGACAGACAAT  
+HWI-EAS443:3:77:457:836#0/1  
\_\_R¥``^`aW`bab`\_]\_]\_Y¥UVV\_\_a]XZ`Va\_][\_U  
@HWI-EAS443:3:77:47:614#0/1  
CATATCCTTTTGTGGTGTAAACAGTGACACTGTGGGTTGG  
+HWI-EAS443:3:77:47:614#0/1  
abaa\_`ab`\_ZVaa\_]ZU^a`a¥a`Z¥[`Y``WQa]  
@HWI-EAS443:3:77:47:631#0/1  
AAGAGTCTGAATGTGCATGTGTAATGGTTCTTGCTTTAC  
+HWI-EAS443:3:77:47:631#0/1  
`aaaW\_abba^Xa\_baaaa]a][^T¥WW\_`a\_X[``\_`[^  
@HWI-EAS443:3:77:490:1232#0/1  
TAAAGACAGGAGCCCATATCGAACCTAATGAGCTGCCT

+HWI-EAS443:3:77:490:1232#0/1  
V\_^VX\_a^ZZ\_X[XVa\_¥U¥aJLY\_]`WY]Z]ZV\_ZOX]  
@HWI-EAS443:3:77:516:1370#0/1  
GGGAGTTTTGTTTCAGCATCCAGAATAACAGGGCTGGATT  
+HWI-EAS443:3:77:516:1370#0/1  
abaaa\_`\_]\_^`b]X\_[¥a`\_¥XQ\_aaa`a`]a\_\_`\_]^\_  
@HWI-EAS443:3:77:546:1406#0/1  
CTTTCAACCAGAATCTGGAATATCAGATAGGATACATATG  
+HWI-EAS443:3:77:546:1406#0/1  
ab^\_aaZ^ba\_]`]aaa]X\_a]aaa`^`a`]`a`a`Z`]V  
@HWI-EAS443:3:77:585:438#0/1  
CGGGCAATTCCTCTCTCTGCCCTGTTAGTGGATGGGCTAT  
+HWI-EAS443:3:77:585:438#0/1  
^\_abbbbb`¥^abbbbaY^\_bbZaT]aZ^b\_¥`¥Z\_[TUS  
@HWI-EAS443:3:77:610:59#0/1  
CAAATACGGCAATGGTGTGGATAGGGAGAATAAAAGC  
+HWI-EAS443:3:77:610:59#0/1  
`ababbbbbbbbbbbbab\_b¥bbabbbbbbbbab`Z  
@HWI-EAS443:3:77:635:888#0/1  
TCTCCATACAACTCAAGATTTGAGTCAGTCGCTTGGTCAG  
+HWI-EAS443:3:77:635:888#0/1  
^abbbba\_`\_]`^UV¥[aaaaba`a\_aa^M`]`a^\_¥TZU]`  
@HWI-EAS443:3:77:638:759#0/1  
CATTTAGCAAGGCCCTTGAGTCAAGAAGAAGTTCTGCA  
+HWI-EAS443:3:77:638:759#0/1  
aa``^aaa`a`\_a\_aaa`a\_aUa`Q`^`\_]¥``Y¥¥]\_]`  
@HWI-EAS443:3:77:645:1076#0/1  
CTGTTGAAAGACACCCACGGTCGATTCGAGCCATGCCAG  
+HWI-EAS443:3:77:645:1076#0/1  
a`baabbabbbbbbbba`W`a```a[```aa^a^a]\_  
@HWI-EAS443:3:77:675:330#0/1  
GAATGTGCATGTGTAATGGTTCTTGCTTTACTGTAATGA  
+HWI-EAS443:3:77:675:330#0/1  
aa`a\_]aaaa]M\_JLS^`RQ\_\_\_^\_]`\_`^[QXQ\_\_\_Y¥  
@HWI-EAS443:3:77:725:1595#0/1  
ATTGTCTGGGCCAGAAATCCAATTGTTAGCCAATTGATG  
+HWI-EAS443:3:77:725:1595#0/1  
aaaa^aa¥\_\_`a^\_\_\_^\_a^aa`a[]`\_`^]`^¥`U`XYVY  
@HWI-EAS443:3:77:72:1547#0/1  
TCCCAAATCATCTCAAACCGTTTCTTGAACATAATGCTTT  
+HWI-EAS443:3:77:72:1547#0/1  
`baaZ^\_Saabbaa]ZM]`a`^\_Y^`Y]aa\_\_^W¥`a^``  
@HWI-EAS443:3:77:739:1135#0/1  
CAGGGATAACTGGCATGGCTCGAATCGACCGTGGGTGTCT  
+HWI-EAS443:3:77:739:1135#0/1  
`¥\_^\_^\_aaaaa`aaa`a]YR¥XTTTW¥TO¥`^J[QVY  
@HWI-EAS443:3:77:747:872#0/1  
ATTCAACTTGGGAATCAAATCAGATTGAAACATGCAATC  
+HWI-EAS443:3:77:747:872#0/1  
a\_bba`aba```aab^a^`¥^bab`S\_^a`\_]`a^aaa]]

@HWI-EAS443:3:77:887:1053#0/1  
CATCAATTGGCTAACAAATTGGAATTTCTGGCCCAGACAAT  
+HWI-EAS443:3:77:887:1053#0/1  
aaaa^^aaa\_aa]`aaUaa\_a`]\_aa`\_^`\_`\_`\_`^`Z\_  
@HWI-EAS443:3:77:920:590#0/1  
GTATCCTATCTGATATTCCAGATTCTGGTTGAAAGACACC  
+HWI-EAS443:3:77:920:590#0/1  
a`aaa`abaabaaaaaaaaaaaaaaa\_aaa^a\_\_\_aa\_  
@HWI-EAS443:3:77:940:1881#0/1  
GGGGGATGTGTTTGTGCATAAGGGAACCATTTCATATCATGC  
+HWI-EAS443:3:77:940:1881#0/1  
a\_T]bbaaI]JVU`]SY`YP^a\_]¥IVaa\_\_\_\_`\_\_JZ\_Ya  
@HWI-EAS443:3:77:947:1282#0/1  
GGGAACCTCACCAATAGGACAGCTCATTAGGGTTCGATAT  
+HWI-EAS443:3:77:947:1282#0/1  
^`[aaab`]a`a`aa^Xa\_a`\_`\_`\_`[\_aaW]\_a\_^aZ  
@HWI-EAS443:3:77:948:1398#0/1  
ATCGAACCTAATGAGCTGTCCTATTGGTGAAGTTCCTC  
+HWI-EAS443:3:77:948:1398#0/1  
aaaa`ababbaa\_aaa`a`\_`aa`a`a`Wa`\_`\_\_^`\_\_a\_  
@HWI-EAS443:3:78:1074:807#0/1  
GTGGTTTCCGTGAAATTAGCGGGCAATTCCTCTCTCTGCC  
+HWI-EAS443:3:78:1074:807#0/1  
a\_a]Za`a\_a[a^`a`\_`\_`[[¥^\_a`¥¥\_\_¥^¥^\_UV  
@HWI-EAS443:3:78:1104:1351#0/1  
AGCATTAGTTCAAGAAACGGTTTTGAGATGATTTGGGATC  
+HWI-EAS443:3:78:1104:1351#0/1  
aaaaaaaa]`\_a`a`\_a\_aa[```\_¥a]`\_`\_`a`]\_\_ZZ¥  
@HWI-EAS443:3:78:1138:262#0/1  
GTCAGGATATAGCGGGAGTTTTGTTCCAGCATCCAGAACTA  
+HWI-EAS443:3:78:1138:262#0/1  
`\_a\_ba\_a\_a\_a[aaa]aWa`\_KZaX\_^T^^¥Z]^]\_N\_\_  
@HWI-EAS443:3:78:1213:1823#0/1  
GCTTGGTCAGCAAGTGCTTGTGCATGATGGCATCAATTGGC  
+HWI-EAS443:3:78:1213:1823#0/1  
a]X`ba^aaa`aaa\_]aaaa^Za`aaaa][aa\_a\_a`]WW  
@HWI-EAS443:3:78:1251:1140#0/1  
GGGCTCCTGTCTTTAATGGTTCCATTGGAATGTTTGTGCAT  
+HWI-EAS443:3:78:1251:1140#0/1  
a]\_aaS\_aa\_\_a\_]`[a¥\_]\_¥Z`]\_\_¥]^\_^^`\_]YXV  
@HWI-EAS443:3:78:1327:1764#0/1  
TGACTGTCCAGCAGCAAAGTTGGTGTGCTGATGTTAACA  
+HWI-EAS443:3:78:1327:1764#0/1  
^WZSS[Va¥`\_^QX\_aU\_]Ua\_R\_`]]]WY[Z[TZ^¥U]  
@HWI-EAS443:3:78:1380:1660#0/1  
ACAACCTGCCTGTCTTATCATTAGGGCGTGGATTGTCTCCG  
+HWI-EAS443:3:78:1380:1660#0/1  
a`aa^aaa\_aaa]aaaa\_\_a\_]\_] ^Y`^`\_a\_`]ZU\_YX\_  
@HWI-EAS443:3:78:1405:424#0/1  
AACACAGCCACTGCCCCATTGTCTGGGCCAGAAATCCAA

+HWI-EAS443:3:78:1405:424#0/1  
`a\_a]a` `[`aa\_[\_a^a[``\_] ^\_a\_UYW¥PaaN\_XU\_`  
@HWI-EAS443:3:78:1419:2035#0/1  
CATTGTCTGGGCCAGAAATTCCAATTGTTAGCCAATTGAT  
+HWI-EAS443:3:78:1419:2035#0/1  
aab[ `S] `aJS` \_\_a\_aaT]^WU\_\_ `a\_\_\_ `VG\_Z]] \_^W  
@HWI-EAS443:3:78:1447:669#0/1  
ATCAAAGCGTCATTACTTATGAAAACAACACTTGGGTAAA  
+HWI-EAS443:3:78:1447:669#0/1  
` `b` ]a\_WaVDWa]VSYaUaa]Y¥XMMWQY` ^\_a[NUVT\_  
@HWI-EAS443:3:78:1504:2044#0/1  
GAGTCTGAATGTGCATGTGTAAATGGTTCTTGCTTTACTG  
+HWI-EAS443:3:78:1504:2044#0/1  
aaa]ab¥aaaa`a\_aba\_baaaa`b]]\_`aaa[a` `a\_a]  
@HWI-EAS443:3:78:1530:878#0/1  
CAGACATATGTTAACATCAGCAACACCAACTTTGCTGCTG  
+HWI-EAS443:3:78:1530:878#0/1  
abbaabbbbabaaabb`a\_\_ba\_a` `aa`bbab\_aa\_aa  
@HWI-EAS443:3:78:1733:1443#0/1  
GTGTGCAGGGATAACTGGCATGGCTCGAATCGACCGTGGG  
+HWI-EAS443:3:78:1733:1443#0/1  
a[ `Ta\_\_a[¥^\_` `^^\_a¥` ¥¥¥¥BBBBBBBBBBBBBBB  
@HWI-EAS443:3:78:19:963#0/1  
TTCAAATACGGCAATGGTGTGGATAGGGAGAACTAAAA  
+HWI-EAS443:3:78:19:963#0/1  
aabbba^baab` ¥S¥\_QXU^aW\_\_^`YZ\_[YY` [^\_\_^\_  
@HWI-EAS443:3:78:215:808#0/1  
AACTGGCATGGCTCGAATCGACCGTGGGTGTCTTTCAACC  
+HWI-EAS443:3:78:215:808#0/1  
Z\_\_ `]bba¥Zaa` `QRZRNULS[]U¥Z\_BBBBBBBBBBBB  
@HWI-EAS443:3:78:224:160#0/1  
TGAAGTCCCTCTCCATACAACACTCAAGATTTGAGTCAGTC  
+HWI-EAS443:3:78:224:160#0/1  
abba` ¥^baaaaaa\_a` \_a\_a` \_\_\_\_]\_\_\_\_ `[aU\_` `]^  
@HWI-EAS443:3:78:24:1896#0/1  
GACCAAGCGACTGACTCAAATCTTGAGTTGTATGGAGAGG  
+HWI-EAS443:3:78:24:1896#0/1  
aabbbaab¥aba]abababaab\_aa` `^aa¥` adWaa\_\_]  
@HWI-EAS443:3:78:266:47#0/1  
ATCGGTTCCAAGGGGATGTGTTTGTGCATAAGGGAACCAT  
+HWI-EAS443:3:78:266:47#0/1  
a` ]aWJWa]]] [\_a^[NZ]Y¥V[[^VTSTZYY]^VPVFUU  
@HWI-EAS443:3:78:269:1638#0/1  
TATTGAGAACAAGAGTCTGAATGTGCATGTGTAAATGG  
+HWI-EAS443:3:78:269:1638#0/1  
T¥`WPZ\_W¥` ¥a` [^abP` [^][^a^a` ]Y\_S^Xaaa¥¥Q  
@HWI-EAS443:3:78:295:1244#0/1  
GCCAGAAATTCCAATTGTTAGCCAATTGATGCCATCATGA  
+HWI-EAS443:3:78:295:1244#0/1  
aa^¥TX\_^aab` ¥] `aa]\_\_ `aaaa^¥Y^\_\_ `a` a` ^^[`

@HWI-EAS443:3:78:330:105#0/1  
CTTTAACACAGCCACTGCCCATTTGTCTGGGCCAGAAATT  
+HWI-EAS443:3:78:330:105#0/1  
`bbbbbababbaaaa`a`a`a\_Vaaa^UY^\_Z^\_^`U^\_]0  
@HWI-EAS443:3:78:338:898#0/1  
TCCCTCTCCATACAACACTCAAGATTTGAGTCAGTCGCTTGG  
+HWI-EAS443:3:78:338:898#0/1  
abbbbaabaaaba^^aaaa^a^aa`Y¥^^\_aa^aa\_\_¥S^  
@HWI-EAS443:3:78:371:682#0/1  
GTAAATGGTTCTTGCTTTACTGTAATGACCGATGGACCAA  
+HWI-EAS443:3:78:371:682#0/1  
\_\_aa[`a¥PV^`XWaa`aaaa`aa]\_a^)``^Y¥Y\_^`]  
@HWI-EAS443:3:78:393:1847#0/1  
ACATAATCTCAATATGGATTAGCCACTCAATTCAACTTGG  
+HWI-EAS443:3:78:393:1847#0/1  
a\_WZ``¥a^`¥[¥\_\_[YXZX]¥^^^X`[[[T`ZTZ¥XUW  
@HWI-EAS443:3:78:44:430#0/1  
CGCTAATTTACGGAAACCACTGACTGTCCAGCAGCAAAG  
+HWI-EAS443:3:78:44:430#0/1  
`babab`b`aa`UZ[`a^a^````\_a`U`[P[¥¥\_XPYMV  
@HWI-EAS443:3:78:454:581#0/1  
CAACTGCCTGTCTTATCATTAGGGCGTGGATTGTCTCCGA  
+HWI-EAS443:3:78:454:581#0/1  
abbabbbaab\_aaa]aaaaaba\_\_aa^\_\_`aa\_\_^Y\_Y  
@HWI-EAS443:3:78:477:2020#0/1  
GAAATTCCAATTGTTAGCCAATTGATGCCATCATGACAAG  
+HWI-EAS443:3:78:477:2020#0/1  
abbbabbbbbbbbaababbbbbaaaaa`ab`aaa[a\_ba^  
@HWI-EAS443:3:78:478:1758#0/1  
CAAGAGTCTGAATGTGCATGTGTAAATGGTTCTTGCTTTA  
+HWI-EAS443:3:78:478:1758#0/1  
^``\_a^U`bb¥]\_[Ya`Zaa[b¥aaaaa]P]aa`\_a\_ba`  
@HWI-EAS443:3:78:568:480#0/1  
CAAAATCAGATTGAAACATGCAATCAAAGCGTCATTACTT  
+HWI-EAS443:3:78:568:480#0/1  
aX¥``ab][U^a``]^`aaa\_\_a`a`a\_a]`^¥``]]\_  
@HWI-EAS443:3:78:574:362#0/1  
GCAATCAAAGCGTCATTACTTATGAAAACAACACTTGGGT  
+HWI-EAS443:3:78:574:362#0/1  
a`aaa\_aa`a`a^\_`a`a^aa\_a`a\_\_`^`^^`\_^`^^V[  
@HWI-EAS443:3:78:580:430#0/1  
CTGGACCACAACACTGCCTGTCTTATCATTAGGGCGTGGATT  
+HWI-EAS443:3:78:580:430#0/1  
ab`^aaaaaaa¥aa`a`a`aaaa`a`aaa\_\_`\_¥``\_\_^  
@HWI-EAS443:3:78:615:1718#0/1  
CAAGAGTCTGAATGTGCATGTGTAAATGGTTCTTGCTTTA  
+HWI-EAS443:3:78:615:1718#0/1  
a`^^]\_Raaa\_aa`Y\_aaa`U\_]a¥[`^^U``a¥Z¥`]^\_  
@HWI-EAS443:3:78:65:718#0/1  
ATCTGATATTCCAGATTCTGGTTGAAAGACACCCACGGTC

+HWI-EAS443:3:78:65:718#0/1  
`^a`\_`¥[TV[^[a\_¥Z¥X[YLXT]^ZWYZSVQX  
@HWI-EAS443:3:78:671:638#0/1  
AGCGACTGACTCAAATCTTGAGTTGTATGGAGAGGGA  
+HWI-EAS443:3:78:671:638#0/1  
ZQ¥aa`aa`\_aa\_\_\_\_\_a`^^^\_a^`[^`X`^\_]`\_`  
@HWI-EAS443:3:78:689:1115#0/1  
ATTGATGCCATCATGACAAGCACTTGCTGACCAAGCGACT  
+HWI-EAS443:3:78:689:1115#0/1  
Z\_b¥bVbb][HRX`[^[SWb\_]¥`X[]aaa¥`¥VI[\_PV  
@HWI-EAS443:3:78:696:1928#0/1  
CGCTTGGTCAGCAAGTGCTTGTATGATGGCATCAATTGG  
+HWI-EAS443:3:78:696:1928#0/1  
`^`TaW\_\_W`J^]aaI`ZVT\_I¥]]¥VWINa]R]UYU`UH  
@HWI-EAS443:3:78:719:1243#0/1  
ATGCAGAACCTTCTTCTTGACTCAAGGGCCTTGCTAAAT  
+HWI-EAS443:3:78:719:1243#0/1  
aba]¥\_`````aa[[]`Z\_Z`a[a^¥Z`````\_a`]XTZ`  
@HWI-EAS443:3:78:724:1852#0/1  
AGAACCTTCTTCTTGACTCAAGGGCCTTGCTAAATGACA  
+HWI-EAS443:3:78:724:1852#0/1  
[a[aY^J``¥[a[aa[aZTbXTLVV\_aRZ^`[a\_`W¥`\_a  
@HWI-EAS443:3:78:751:1051#0/1  
CAACTGCCTGTCTTATCATTAGGGCGTGGATTGTCTCCGA  
+HWI-EAS443:3:78:751:1051#0/1  
abbbbabbaaabbbbabbbba``aaa`]aaaa`^`a`aa  
@HWI-EAS443:3:78:75:1000#0/1  
GGGACAGACAATAACTTCTCAATAAAGCAAGATATCGTAG  
+HWI-EAS443:3:78:75:1000#0/1  
[ababab`aabaabaa\_aabaaaaabbaa`a``aaa¥^a\_  
@HWI-EAS443:3:78:766:1430#0/1  
CGTGGGTGTCTTTCAACCAGAATCTGGAATATCAGATAGG  
+HWI-EAS443:3:78:766:1430#0/1  
aaY\_b\_K¥aaab`aaa`aaa`¥^aaa^aaa`\_`a\_¥\_\_\_\_  
@HWI-EAS443:3:78:803:1295#0/1  
GTCCTATTGGTGAAGTTCCTCTCCATACAACCTCAAGATT  
+HWI-EAS443:3:78:803:1295#0/1  
]`babaab\_][aaa``aaaaaa`^``aa`\_``aa\_a[\_^  
@HWI-EAS443:3:78:833:1401#0/1  
TGCCTGTCTTATCATTAGGGCGTGGATTGTCTCCGAAAAT  
+HWI-EAS443:3:78:833:1401#0/1  
a`aa^]\_b\_aaa¥`aaa`][`^aa`a`[¥a\_\_`^`¥``  
@HWI-EAS443:3:78:882:1772#0/1  
GACAGACAATAACTTCTCAATAAAGCAAGATATCGTAGGA  
+HWI-EAS443:3:78:882:1772#0/1  
\_^^\_^^b]¥ab`Y``¥\_\_`aaaa```^Y``Yaa^aTYa¥a  
@HWI-EAS443:3:78:88:78#0/1  
TGAAGTTCCTCTCCATACAACCTCAAGATTTGAGTCAGTC  
+HWI-EAS443:3:78:88:78#0/1  
abbabaaaaaaaaaaaaa\_\_`Y`\_]Ua\_`\_`a]a]\_\_`X]

@HWI-EAS443:3:78:908:1125#0/1  
CTGGACCACAACCTGCCTGTCTTATCATTAGGGCGTGGATT  
+HWI-EAS443:3:78:908:1125#0/1  
ab`aa[Z¥`\_bbbaX]\_X^bbba^a]`b[]VVaN`a]aU  
@HWI-EAS443:3:78:946:1465#0/1  
GAGCCCATATCGAACCTAATGAGCTGTCCTATTGGTGAA  
+HWI-EAS443:3:78:946:1465#0/1  
]NZaVZ\_Vaab\_`b\_`a`[\_^][Y][VV¥G`¥`\_¥aZDIZ^  
@HWI-EAS443:3:78:977:466#0/1  
GCCCCAATTATCACTATGAGGAATGCTCCTGTTATCCTG  
+HWI-EAS443:3:78:977:466#0/1  
aaa`a`aa\_\_a\_a`a\_\_aaaS\_]\_^`aX`a^`^^¥Z\_`  
@HWI-EAS443:3:79:1049:780#0/1  
GTCAGGATATAGCGGGAGTTTTGTTTCAGCATCCAGAACTA  
+HWI-EAS443:3:79:1049:780#0/1  
a[[\_abZ^`\_¥`Zaaa[`FZ\_`^P¥[T¥VWVY]RYQ^V¥^  
@HWI-EAS443:3:79:1051:390#0/1  
CAAAATCAGATTGAAACATGCAATCAAAGCGTCATTACTT  
+HWI-EAS443:3:79:1051:390#0/1  
abbbbbbabbbbbbbbabbbbbbb`bbbabbabbababa  
@HWI-EAS443:3:79:1107:688#0/1  
TTTAACACAGCCACTGCCCCATTGTCTGGGCCAGAAATTC  
+HWI-EAS443:3:79:1107:688#0/1  
abaabab\_baaa\_aa]`a\_\_aaa\_Y^\_aUOX^\_ZZ\_^^a^  
@HWI-EAS443:3:79:1117:1794#0/1  
CTCCTGTCTTTAATGGTTCCATTGGAATGTTTGTCTTTA  
+HWI-EAS443:3:79:1117:1794#0/1  
aa`abaabba``a`]]aba`]]\_`\_]]\_¥\_`^RaYa\_]\_  
@HWI-EAS443:3:79:111:1535#0/1  
CCTGATTCTAGTGAAATCACATGTGTGTGCAGGGATAACT  
+HWI-EAS443:3:79:111:1535#0/1  
aba`]^b\_aaW`ZT[^aa`\_]R]W¥R^aZ`[ZRSZV]¥  
@HWI-EAS443:3:79:1135:1880#0/1  
TGTCTCCGAAAATCCCACTGCATATGTATCCTATCTGATA  
+HWI-EAS443:3:79:1135:1880#0/1  
`X\_`abba\_aaa`a`baaa`aaaba`\_aa\_]aa``\_`aaa  
@HWI-EAS443:3:79:1164:972#0/1  
GCATTCCAAGGGGAGCATGATATGAATGGTTCCCTTATG  
+HWI-EAS443:3:79:1164:972#0/1  
aababbabaaaa`^a\_baaa`aa``a`\_`\_¥`^`\_`\_`\_`  
@HWI-EAS443:3:79:1182:1680#0/1  
AAATACGGCAATGGTGTGGATAGGGAGAATAAAAGCA  
+HWI-EAS443:3:79:1182:1680#0/1  
abbbbbbabba`W`[Yabb\_\_`b^^[]][aUa```aY\_a  
@HWI-EAS443:3:79:1237:711#0/1  
ATACATATGCAGTGGGATTTTCGGAGACAATCCACGCCCT  
+HWI-EAS443:3:79:1237:711#0/1  
abb`bbaa^aW\_aZ`a\_bb`a]^YaX`aa]]^a\_\_Waa  
@HWI-EAS443:3:79:128:957#0/1  
GTCTCCGAAAATCCCACTGCATATGTATCCTATCTGATAT

+HWI-EAS443:3:79:128:957#0/1  
aba`a^a¥\_aUabZ[^`aaa]`abRaaa]\_L]`\_a`\_a  
@HWI-EAS443:3:79:1359:1766#0/1  
CAAGAGTTGGAGAAACAATATATTGAGAACAAGAGTCT  
+HWI-EAS443:3:79:1359:1766#0/1  
aaaa\_b\_bbb^`]aabbbbbaaa`[`baaaa\_ba`aa¥aa  
@HWI-EAS443:3:79:1410:1318#0/1  
CAACTGCCTGTCTTATCATTAGGGCGTGGATTGTCTCCGA  
+HWI-EAS443:3:79:1410:1318#0/1  
abbabbbabba`bbabbbbbbabbbbbbabbbb\_baaabb  
@HWI-EAS443:3:79:144:1911#0/1  
GTTTCGATATGGGCTCCTGTCTTTAATGGTTCCATTGGAAT  
+HWI-EAS443:3:79:144:1911#0/1  
`ab]a\_`X]]]aabaaaYaa\_aa\_]]]]U`a`a^X¥\_a]  
@HWI-EAS443:3:79:1450:1580#0/1  
CAACTGCCTGTCTTATCATTAGGGCGTGGATTGTCTCCGA  
+HWI-EAS443:3:79:1450:1580#0/1  
\_a^X\_b¥Y\_¥b]bbabaabaUV`a^Uaa`a`^[\_`a`Y  
@HWI-EAS443:3:79:1454:1838#0/1  
GGGAGAACTAAAAGCATTAGTTCAAGAAACGGTTTTGAGA  
+HWI-EAS443:3:79:1454:1838#0/1  
a¥¥V^^W^bbba]aZ\_W¥aZTX[[a]]X[Z\_]`WR`S\_P  
@HWI-EAS443:3:79:1496:180#0/1  
ACAATATATTGAGAACAAGAGTCTGAATGTGCATGTGT  
+HWI-EAS443:3:79:1496:180#0/1  
\_J¥abab^`\_\_Z^YaZ`¥b`¥abb[ab`^b\_`aa^\_]  
@HWI-EAS443:3:79:1530:443#0/1  
TACAACCAAGATTTGAGTCAGTCGCTTGGTCAGCAAGTG  
+HWI-EAS443:3:79:1530:443#0/1  
`\_]baba\_aab`aba`aaa]ab]`a\_aa\_`Z[V[Z^SZ^  
@HWI-EAS443:3:79:1614:1530#0/1  
ATTCCAATTGTCATACAGACCGAACCAATGGTTATTATCT  
+HWI-EAS443:3:79:1614:1530#0/1  
XbZ^\_a`\_]`^`\_`bY`Ja]X`¥VUYXb`^a]¥\_a`^[[IW  
@HWI-EAS443:3:79:1620:1130#0/1  
CCCCTGCATATGTATCCTATCTGATATTCCAGATTCTGG  
+HWI-EAS443:3:79:1620:1130#0/1  
Wbabbaabbbb]bbbbbabbbbabbb`aabb\_b\_aabb  
@HWI-EAS443:3:79:1620:1374#0/1  
CTCAATATGGATTAGCCACTCAATTCAACTGGGAATCAA  
+HWI-EAS443:3:79:1620:1374#0/1  
^^b\_bb`\_bbbbb`\_¥`ba^abb\_bbabbbbaa\_a[`a  
@HWI-EAS443:3:79:1626:1235#0/1  
CAGGAGCCCATATCGAACCTAATGAGCTGCCTATTGGT  
+HWI-EAS443:3:79:1626:1235#0/1  
abbb¥baZZa`a]¥\_V`^^Ybb]b¥a`abb`¥W\_M^b\_Q\_  
@HWI-EAS443:3:79:1638:1396#0/1  
CTGGGCCAGAAATTCCAATTGTTAGCCAATTGATGCCATC  
+HWI-EAS443:3:79:1638:1396#0/1  
`a`a`\_b`a\_`]`aa¥X¥]ab`¥\_¥]^`bX\_aa`\_DDX\_Y



@HWI-EAS443:3:79:165:798#0/1  
GTGTTTGGATAGGGAGAACTAAAAGCATTAGTTCAAGAAA  
+HWI-EAS443:3:79:165:798#0/1  
a`b`aaaa\_a`aa^\_a`\_]a`\_`\_`\_]`\_^\_ZZ\_\_\_\_\_]^]  
@HWI-EAS443:3:79:1660:686#0/1  
TGCTGACCAAGCGACTGACTCAAATCTTGAGTTGTATGGA  
+HWI-EAS443:3:79:1660:686#0/1  
SJ\_bbZGL`bbabU\_]b]Za¥a^^`Y[[a`YU]Va]^`^LW  
@HWI-EAS443:3:79:1692:313#0/1  
ATCAAAATCAGATTGAAACATGCAATCAAAGCGTCATTAC  
+HWI-EAS443:3:79:1692:313#0/1  
aZQ]Z¥¥^SP\_`]U`aaa`a`P]\_aa\_a\_TN^T]YZW^[  
@HWI-EAS443:3:79:1693:933#0/1  
CAATGGTGTGGATAGGGAGAACTAAAAGCATTAGTTCA  
+HWI-EAS443:3:79:1693:933#0/1  
[bbb\_bbbbbbbbabbb`bbaabbbbaabb`aaabbbaaa  
@HWI-EAS443:3:79:1761:1096#0/1  
GATATAGCGGGAGTTTTGTTTCAGCATCCAGAACTAACAGG  
+HWI-EAS443:3:79:1761:1096#0/1  
a`baa^\_Vbaa`\_a`aba\_X]¥Ya`Y\_`]\_]`\_¥\_a  
@HWI-EAS443:3:79:1763:1072#0/1  
CTGGGACAGACAATAACTTCTCAATAAAGCAAGATATCGT  
+HWI-EAS443:3:79:1763:1072#0/1  
aabbbbaa^`¥abbbKbaa^b`a`abbb\_bb\_ba`abXbb  
@HWI-EAS443:3:79:210:145#0/1  
GCGGGAGCAGCATATCCTTTTGTGGTGTAAACAGTGACAC  
+HWI-EAS443:3:79:210:145#0/1  
`bbbb\_aaaaaabaaaaabaa^a`\_`a`]^a`Wa`¥`\_  
@HWI-EAS443:3:79:241:514#0/1  
TGCCCCGTAATTTACGGAAACCACTGACTGTCCAGCAGC  
+HWI-EAS443:3:79:241:514#0/1  
\_`aaabbbbaabaabaaa]aa`a`\_]aaa^`[P[]YZX  
@HWI-EAS443:3:79:315:865#0/1  
CAACTGCCTGTCTTATCATTAGGGCGTGGATTGTCTCCGA  
+HWI-EAS443:3:79:315:865#0/1  
aba\_]bbaU`[a\_]a]^¥XYa¥\_ba\_^¥¥\_¥¥X\_¥`¥`^  
@HWI-EAS443:3:79:32:194#0/1  
CATTATATCATGCTCCCCCTTGAATGCAGAACCCTTCTT  
+HWI-EAS443:3:79:32:194#0/1  
aaa¥aUWWW¥JTX¥^[U[TNNRZSQBBBBBBBBBBBBBB  
@HWI-EAS443:3:79:359:43#0/1  
ATGCAGAACCTTCTTCTTGACTCAAGGGCCTTGCTAAAT  
+HWI-EAS443:3:79:359:43#0/1  
a`a`aaaa^aaa\_a`aaa``````a\_Za\_Y`^`^^`^`^`  
@HWI-EAS443:3:79:389:209#0/1  
CTGCCTGTCTTATCATTAGGGCGTGGATTGTCTCCGAAAA  
+HWI-EAS443:3:79:389:209#0/1  
abbbbbbbaabbbba`aa`aaaaa`aa\_a`[\_Y^  
@HWI-EAS443:3:79:455:322#0/1  
CCTTGAATGCAGAACCCTTCTTCTTGACTCAAGGGCCTT

+HWI-EAS443:3:79:455:322#0/1  
`\_V\_`\_\_\_\_\_a^[aaaa`aa[[]` ``]` `\_\_V[¥\_[[YUY^  
@HWI-EAS443:3:79:461:377#0/1  
TGATTAGTTCAACCCAGAAGCAAGGTCTTATACAATCCAG  
+HWI-EAS443:3:79:461:377#0/1  
`babbbbaa\_bb`\_]\_bbaaaa[a\_[`baaaa\_b`aaT`\_  
@HWI-EAS443:3:79:48:760#0/1  
CCGAAAATCCCCTGCATATGTATCCTATCTGATATTCCA  
+HWI-EAS443:3:79:48:760#0/1  
abWFP[¥X^aZWZP¥`^`¥[¥W\_U`a]^Z^^[ZOOYX\_\_W  
@HWI-EAS443:3:79:494:1254#0/1  
ATTTAGCAAGGCCCTTGAGTCAAGAAGAAGTTCTGCAT  
+HWI-EAS443:3:79:494:1254#0/1  
aa]aabbY^`[baa`aa`a`Xa\_¥\_`\_aaaa^V[a^]^`\_  
@HWI-EAS443:3:79:520:1027#0/1  
GTGGGATTTTCGGAGACAATCCACGCCCTAATGATAAGAC  
+HWI-EAS443:3:79:520:1027#0/1  
a]R]^WI\_[a`]a\_ZTJTH¥\_¥`YZ¥`a]¥]Wa¥W\_WWXa  
@HWI-EAS443:3:79:574:1717#0/1  
AGTCCATCCGTTCCGATCCCAAATCATCTCAAACCGTTT  
+HWI-EAS443:3:79:574:1717#0/1  
\_WF[`b`baa\_\_aXYa`aaZ`^`YX^]]^`\_\_\_\_YQLZ]  
@HWI-EAS443:3:79:577:1094#0/1  
CGGGAGTTTTGTTTCAGCATCCAGAACTAACAGGGCTGGAT  
+HWI-EAS443:3:79:577:1094#0/1  
aa\_^[\_X`]V\_Yb\_[\_a^abb\_RXab\_abb¥]abYaSa\_  
@HWI-EAS443:3:79:598:1765#0/1  
CACTTGCTGACCAAGCGACTGACTCAAATCTTGAGTTGTA  
+HWI-EAS443:3:79:598:1765#0/1  
\_ZYWXY^\_WQZU[SV[VRZOPOZU¥WVOWXVPSQRMRYTV  
@HWI-EAS443:3:79:62:25#0/1  
CAGACATATGTTAACATCAGCAACACCAACTTTGCTGCTG  
+HWI-EAS443:3:79:62:25#0/1  
[`a¥`¥aX¥baababbbbab`^¥`ZaaaYa¥`^aa\_a``a  
@HWI-EAS443:3:79:635:1382#0/1  
TCCAATTGTTAGCCAATTGATGCCATCATGACAAGCACTT  
+HWI-EAS443:3:79:635:1382#0/1  
T\_V¥Z`\_^UHW¥Zabb`Z^¥ZW^b`Uabab¥]aXaK^\_T¥  
@HWI-EAS443:3:79:662:830#0/1  
CACGGAACCCTGACTGTCCAGCAGCAAAGTTGGTGTG  
+HWI-EAS443:3:79:662:830#0/1  
aba^`abbabbaaa`abb[aa[[]`a\_``ZRYU`Y\_V^\_\_^  
@HWI-EAS443:3:79:716:241#0/1  
AGCCACTCAATTCAACTTGGGAATCAAATCAGATTGAAA  
+HWI-EAS443:3:79:716:241#0/1  
aa^^baa`baaa`aaabaa`aaaa``a¥aa\_aa\_a`a``a  
@HWI-EAS443:3:79:788:978#0/1  
AATGAATGCCCTAATTATCACTATGAGGAATGCTCCTGT  
+HWI-EAS443:3:79:788:978#0/1  
a¥¥`¥OW[[]S^]Z\_XX[LXX[WZVTUN]`[SJTWUYLXT]

@HWI-EAS443:3:79:794:1536#0/1  
GTCCGATTCGAGCCATGCCAGTTATCCCTGCACACACATGT  
+HWI-EAS443:3:79:794:1536#0/1  
aaaaa\_0\_WWY\_`K]`\_a\$GZa]\_¥ZQ]]HZKZ]YYU\_U  
@HWI-EAS443:3:79:819:963#0/1  
GTCAGGATATAGCGGGAGTTTTGTTTCAGCATCCAGAACTA  
+HWI-EAS443:3:79:819:963#0/1  
aV[L^PX\_T`aY^V]LM[JXFWXT[QMTZYZ^]U]NWLXK  
@HWI-EAS443:3:79:86:1277#0/1  
GTCAGTGGTTTTCCGTGAAATTAGCGGGCAATTCCTCTCTC  
+HWI-EAS443:3:79:86:1277#0/1  
\_a`a]^aT\_Za`ZN¥`\_]S]]\_¥[`\_TW[]`¥¥^]^][  
@HWI-EAS443:3:79:877:1294#0/1  
ATCAGATTGAAACATGCAATCAAAGCGTCATTACTTATGA  
+HWI-EAS443:3:79:877:1294#0/1  
aaabaaaaabb\_a`aaaaabaa\_aa]a\_`]a¥a`a\_`  
@HWI-EAS443:3:79:961:1449#0/1  
GAAATCACATGTGTGTGCAGGGATAACTGGCATGGCTCGA  
+HWI-EAS443:3:79:961:1449#0/1  
ab`bbbb`aaa`a^][aa`aa¥`aaaaa\_aa\_\_^\_\_^VQ  
@HWI-EAS443:3:79:969:319#0/1  
ATCATCTCAAACCGTTTCTTGAACATAATGCTTTTAGTTC  
+HWI-EAS443:3:79:969:319#0/1  
abaaaaa`aa`a`abaab\_`aa¥a`aaaaabaaa`^a\_  
@HWI-EAS443:3:79:976:1902#0/1  
CTGTTATCCTGATTCTAGTGAAATCACATGTGTGTGCAGG  
+HWI-EAS443:3:79:976:1902#0/1  
SSaS]b]bb\_baaaa\_`a`\_b¥a`aaaa^bYaSa^`aa  
@HWI-EAS443:3:7:1060:411#0/1  
TGAGTGGTCAGGATATAGCGGGAGTTTTGTTTCAGCATCCA  
+HWI-EAS443:3:7:1060:411#0/1  
ab\_`M`b]a^X`^`\_\_aT`\_aU\_URZ\_JQ^XU\_RZRUR]  
@HWI-EAS443:3:7:117:406#0/1  
GATGGCATCAATTGGCTAACAATTGGAATTTCTGGCCCAG  
+HWI-EAS443:3:7:117:406#0/1  
a\_babaaaaa^abaa\_`a`aaaab\_]`aa\_\_`\_`\_aZ`a  
@HWI-EAS443:3:7:1183:227#0/1  
CAAGAGTTGGAGAAACAATATATTGAGAACAAGAGTCT  
+HWI-EAS443:3:7:1183:227#0/1  
UabbaaTabbbbbbb^abababb`ba\_aa``\_a]a\_aL0^  
@HWI-EAS443:3:7:1226:370#0/1  
AGAAATCCAATTGTTAGCCAATTGATGCCATCATGACAA  
+HWI-EAS443:3:7:1226:370#0/1  
^`aaababbaaa`¥]bbbY^baaaaaa[W^\_R^aaaUa\_  
@HWI-EAS443:3:7:1263:327#0/1  
GTTTTGAGATGATTTGGGATCCGAACGGATGGACTGGGAC  
+HWI-EAS443:3:7:1263:327#0/1  
`¥aaa\_\_a]\_a^a\_\_a`\_V^VX\_Y\_V]]YX\_]YUYXVXX  
@HWI-EAS443:3:7:128:726#0/1  
CGGGAGTTTTGTTTCAGCATCCAGAACTAACAGGGCTGGAT

+HWI-EAS443:3:7:128:726#0/1  
`bbbUYaa\_aaYaZ]¥aaaaba`ba`aa`]`a]aaa]Y  
@HWI-EAS443:3:7:129:821#0/1  
GCGGGAGCAGCATATCCTTTTGTGGTGTAACAGTGACAC  
+HWI-EAS443:3:7:129:821#0/1  
a\_] [UYTQVOTYQRZWQYQYWRVJRO¥ [UKETLSDM[YBB  
@HWI-EAS443:3:7:1302:730#0/1  
CCTCTCCATACTCAAGATTTGAGTCAGTCGCTTGGTC  
+HWI-EAS443:3:7:1302:730#0/1  
abba`^`bab¥aa\_a\_aab`abaaaa`a\_¥\_\_U`[^XUW  
@HWI-EAS443:3:7:1519:1417#0/1  
CAGACATATGTTAACATCAGCAACACCAACTTTGCTGCTG  
+HWI-EAS443:3:7:1519:1417#0/1  
ab[\_`\_`baab\_aba¥bbaab¥aa]aTVa`^a^\_\_^`a]\_\_  
@HWI-EAS443:3:7:1672:133#0/1  
GCCCCGTAATTTACGGAAACCACTGACTGTCCAGCAGCA  
+HWI-EAS443:3:7:1672:133#0/1  
a`]¥bUaaabaa`aV`a^Z]¥S]S^¥SSY¥UVVVSUWWBB  
@HWI-EAS443:3:7:1692:1279#0/1  
TCCCAGTCCATCCGTTCCGATCCCAAATCATCTCAAACC  
+HWI-EAS443:3:7:1692:1279#0/1  
a`X\_a`a\_]a`aaTQX`X[^X\_V\_\_Y^X]]Y^V]Q\_]YV  
@HWI-EAS443:3:7:1721:1586#0/1  
GCCCCGTAATTTACGGAAACCACTGACTGTCCAGCAGCA  
+HWI-EAS443:3:7:1721:1586#0/1  
^[\_`aZaa]baXP`Ua\_`a^M]\_S]a^MX^TGNTUUYSSB  
@HWI-EAS443:3:7:241:1679#0/1  
AGGAATTGCCGCTAATTTACGGAAACCACTGACTGTCC  
+HWI-EAS443:3:7:241:1679#0/1  
aaaa`a\_\_a\_a`¥`\_`\_`a`a¥\_X[^\_^\_Q¥¥\_¥Z]YW¥  
@HWI-EAS443:3:7:297:1883#0/1  
CATATGTTAACATCAGCAACACCAACTTTGCTGCTGGACA  
+HWI-EAS443:3:7:297:1883#0/1  
aaaaaa\_aaabb`]aZXba]a]¥aaT`a\_Z¥]R]\_^`^\_  
@HWI-EAS443:3:7:307:136#0/1  
TGCTGCTCCCGCTAGTCCAGATTGTGTTCTCTTTGGGTCG  
+HWI-EAS443:3:7:307:136#0/1  
aba`a[aaaaaaa^\_¥¥^]`^^^]U`¥YP^PW¥¥¥¥¥WW¥  
@HWI-EAS443:3:7:321:1431#0/1  
CGCTTGGTCAGCAAGTGCTTGTTCATGATGGCATCAATTGG  
+HWI-EAS443:3:7:321:1431#0/1  
aba\_bb`Waba`baa`\_ab`a`a\_¥baaabYaa\_aY`ab[  
@HWI-EAS443:3:7:325:71#0/1  
GGCTCCTGTCTTTAATGGTTCCATTGGAATGTTTGTTCATT  
+HWI-EAS443:3:7:325:71#0/1  
aaa]a[RaUVaa\_]\_]`W\_¥X^\_]\_\_R^X^V][TMYR^  
@HWI-EAS443:3:7:400:653#0/1  
TCCCTCTCCATACTCAAGATTTGAGTCAGTCGCTTGG  
+HWI-EAS443:3:7:400:653#0/1  
aaaaaaaaaaaaabaaaa`aa]`\_\_a\_\_^Sa\_FN¥\_X`\_`\_`

@HWI-EAS443:3:7:463:1820#0/1  
ATCAGAGGGCGACCCAAAGAGAACAATCTGGACTAGCG  
+HWI-EAS443:3:7:463:1820#0/1  
a[K\_X^YZa\_``\_X\_R\_Q¥\_\_\_\_\_Za^^ZW\_]\_SU^¥¥[  
@HWI-EAS443:3:7:494:2010#0/1  
AGGGCGTGGATTGTCTCCGAAAATCCCCTGCATATGTAT  
+HWI-EAS443:3:7:494:2010#0/1  
`a[^^¥K[\_aZM¥[]^[\_a\_a^aV]RX`aUWU¥]\_¥WV¥B  
@HWI-EAS443:3:7:514:831#0/1  
GGTGTGGATAGGGAGAACTAAAAGCATTAGTTCAAGAA  
+HWI-EAS443:3:7:514:831#0/1  
`a]b`babbabaa`aabaaaaaaaaaaaa`^\_`aaaaa  
@HWI-EAS443:3:7:524:716#0/1  
CACAACTGGACTAGCGGGAGCAGCATATCCTTTTGTGGT  
+HWI-EAS443:3:7:524:716#0/1  
ababaaaaabb\_aaa`aaa^a[\_\_\_ZRa\_``^`aaaZY\_aS  
@HWI-EAS443:3:7:531:1441#0/1  
CTCCTGTCTTTAATGGTTCCATTGGAATGTTTGTCAATTA  
+HWI-EAS443:3:7:531:1441#0/1  
ab]bb^¥`bbbabbab`aa\_]\_a¥b\_aba\_aaa^``aa^a  
@HWI-EAS443:3:7:539:793#0/1  
AGCCACTCAATTCAACTTGGGAATCAAATCAGATTGAAA  
+HWI-EAS443:3:7:539:793#0/1  
abaabaaabaaaaaaaaaaaaaaaa`a``\_aa\_a\_aaa`  
@HWI-EAS443:3:7:56:416#0/1  
AAATCAGATTGAAACATGCAATCAAAGCGTCATTACTTAT  
+HWI-EAS443:3:7:56:416#0/1  
ababa\_`a```a^[UYa`Za\_\_\_`\_\_¥X¥\_TY^a]VX`Y\_\_\_  
@HWI-EAS443:3:7:594:451#0/1  
CCCATCCACTAACAGGGCAGAGAGGAATTGCCCGCTAA  
+HWI-EAS443:3:7:594:451#0/1  
aabaa``aaaab`baabaaa]a]a````a``aUZX`^`a^  
@HWI-EAS443:3:7:637:679#0/1  
TGCCCCGTAATTTACGGAAACCACTGACTGTCCAGCAGC  
+HWI-EAS443:3:7:637:679#0/1  
abW^^UV¥T][¥`V`[``[`a[HNZZ^`QRJOT\_`BBBBB  
@HWI-EAS443:3:7:661:124#0/1  
CAATATATTGAGAACAAGAGTCTGAATGTGCATGTGTA  
+HWI-EAS443:3:7:661:124#0/1  
aa\_aabaaaaaba`\_\_^\_`a\_a^]aa^^``[a[^``YaZ^  
@HWI-EAS443:3:7:673:1585#0/1  
TGGCTGTGTTAAAGTACAACGGCATAATAACAGACACTAT  
+HWI-EAS443:3:7:673:1585#0/1  
ab`aaaXa`baaa[R]\_aa[`\_V]\_\_a¥`aZ`^\_I\_\_\_]^]  
@HWI-EAS443:3:7:674:1170#0/1  
ACGGCAATGGTGTGGATAGGGAGAACTAAAAGCATTAG  
+HWI-EAS443:3:7:674:1170#0/1  
ab`b`a^baX^baa\_`^N\_`ba^aba¥a`aaa`¥F\_`^\_T  
@HWI-EAS443:3:7:71:1810#0/1  
GACCGTGGGTGTCTTTCAACCAGAATCTGGAATATCAGAT

+HWI-EAS443:3:7:71:1810#0/1  
aaa]XG¥^\_P\_VZaXZT^]`¥`Y`¥V¥]¥aaaV^`[XZX  
@HWI-EAS443:3:7:71:899#0/1  
AAATACGGCAATGGTGTGGATAGGGAGAACTAAAAGCA  
+HWI-EAS443:3:7:71:899#0/1  
J\_\_a`abbaa[^a`]^X^\_¥[YSZaZ¥U`^\_^`aZ\_aXQ\_  
@HWI-EAS443:3:7:724:1124#0/1  
AAGAAACGGTTTTGAGATGATTTGGGATCCGAACGGATGG  
+HWI-EAS443:3:7:724:1124#0/1  
aabaa)`aa]aaaa[\_\_aa\_\_aa[a`^\_\_]^Y`]¥`^]\_Z  
@HWI-EAS443:3:7:745:1136#0/1  
CAAAATCAGATTGAAACATGCAATCAAAGCGTCATTACTT  
+HWI-EAS443:3:7:745:1136#0/1  
abaaaa\_a\_\_ab\_\_`\_aaaS\_\_\_\_]\_\_[\_^\_\_^\_^\_]S^^  
@HWI-EAS443:3:7:745:1152#0/1  
ATCATGACAAGCACTTGCTGACCAAGCGACTGACTCAAAT  
+HWI-EAS443:3:7:745:1152#0/1  
abaa\_a`ba`b`a`aaa\_a`a`a`a`¥`a^^\_0\_\_]\_  
@HWI-EAS443:3:7:787:1991#0/1  
ACCATTTACACATGCACATTCAGACTCTTGTGTTCTCAAT  
+HWI-EAS443:3:7:787:1991#0/1  
aaaaaaaaaaa\_aaa^`aa``Ya```\_^\_\_^[¥]\_¥^\_\_^\_  
@HWI-EAS443:3:7:816:421#0/1  
CATGATATGAATGGTTCCCTTATGACAAACACATCCCCCT  
+HWI-EAS443:3:7:816:421#0/1  
abbbbbbbabbbb`aba`abaaaa`aaaa`^`PYY\_`\_  
@HWI-EAS443:3:7:842:107#0/1  
ATGCCGTTGTACTTTAACACAGCCACTGCCCCATTGTCTG  
+HWI-EAS443:3:7:842:107#0/1  
a¥a[\_aUaa¥¥Z``a\_aY^)``N\_¥U^\_WTNQTXYNUWVB  
@HWI-EAS443:3:7:94:2037#0/1  
AAATGGTTCTTGCTTTACTGTAATGACCGATGGACCAAGT  
+HWI-EAS443:3:7:94:2037#0/1  
Zb\_J\_aa`^[]¥b^W^``J]^aaaa\_aZ¥aa`^^Yb\_`G  
@HWI-EAS443:3:7:990:267#0/1  
ATTAAGACAGGAGCCCATATCGAACCTAATGAGCTGTC  
+HWI-EAS443:3:7:990:267#0/1  
]babaaaa\_bbaaa\_a^aa^^¥[``[``UW\_`\_\_W\_aXB  
@HWI-EAS443:3:80:1051:296#0/1  
CTCCGAAAATCCCCTGATATGTATCCTATCTGATATTC  
+HWI-EAS443:3:80:1051:296#0/1  
a^^bbbbbYab\_^aXab`abbbbaa\_v\_b¥babaabaadW  
@HWI-EAS443:3:80:1069:1696#0/1  
GTTCTCAATATATTGTTTCTCCAACCTTGATAGTGTCTG  
+HWI-EAS443:3:80:1069:1696#0/1  
\_`aaabbbbbbab[a^bb^a``a\_\_a^bb[a\_a`¥^\_BBB  
@HWI-EAS443:3:80:1109:516#0/1  
CAGACATATGTTAACATCAGCAACACCAACTTTGCTGCTG  
+HWI-EAS443:3:80:1109:516#0/1  
Ybbaabbbbbbbba\_ababb\_bb`b`\_aa\_aaaaaabaaa

@HWI-EAS443:3:80:1128:812#0/1  
AAGACACCCACGGTCGATTGAGCCATGCCAGTTATCCCT  
+HWI-EAS443:3:80:1128:812#0/1  
a`bbaba]`a`a`\_[]^S^`\_W¥YXZUT^\_VUa\_^a[\_  
@HWI-EAS443:3:80:1135:1264#0/1  
ATTCATATCATGCTCCCCCTTGAATGCAGAACCTTCTTC  
+HWI-EAS443:3:80:1135:1264#0/1  
aab`bbb`abbba`aaaaa\_a```]a`a`b]^b\_Sba^  
@HWI-EAS443:3:80:1150:1798#0/1  
CAAATCAGATTGAAACATGCAATCAAAGCGTCATTACTT  
+HWI-EAS443:3:80:1150:1798#0/1  
a^^`\_W\_[TT`\_\_`bbaabbaQ]^¥NX[[]WYV\_TX^[U  
@HWI-EAS443:3:80:1170:263#0/1  
CCCCTAATTTACGGAAACCACTGACTGTCCAGCAGCAA  
+HWI-EAS443:3:80:1170:263#0/1  
``aba`a\_bb^Za¥Z\_¥T[XQYXaaaZ\_\_PYXUUO[SQTX  
@HWI-EAS443:3:80:1195:1691#0/1  
GAATAAATGAGTGGTCAGGATATAGCGGGAGTTTTGTTCA  
+HWI-EAS443:3:80:1195:1691#0/1  
\_\_bba]abba`FW¥0a\_ba\_^^\_aaG[aaP[]aaa\_\_YU[  
@HWI-EAS443:3:80:1214:839#0/1  
CGACCGTGGGTGTCTTTCAACCAGAATCTGGAATATCAGA  
+HWI-EAS443:3:80:1214:839#0/1  
[`bbaab]bab^TVabbbab\_]bbabb]bbb`bbbbbbba  
@HWI-EAS443:3:80:1281:1685#0/1  
ATCAAAGCGTCATTACTTATGAAAACAACACTTGGGTAAA  
+HWI-EAS443:3:80:1281:1685#0/1  
¥]`b`^`^^^a]^aa¥babb`\_`bbSaU`\_W[a^^WYbaa  
@HWI-EAS443:3:80:1359:1145#0/1  
ATTAGGGTTCGATATGGGCTCCTGTCTTTAATGGTTCCAT  
+HWI-EAS443:3:80:1359:1145#0/1  
Z^aa`baa¥S\_bba^```a[S[ZU]\_``aZbVW¥`R¥Q]  
@HWI-EAS443:3:80:138:1796#0/1  
TGCTCCCCTAGTCCAGATTGTGTTCTTTGGGTCGCCC  
+HWI-EAS443:3:80:138:1796#0/1  
a^baabbab``¥]ab^]`W`^`^a^a`\_¥\_\_NUZNaV`\_`  
@HWI-EAS443:3:80:1429:818#0/1  
ATTCATATCATGCTCCCCCTTGAATGCAGAACCTTCTTC  
+HWI-EAS443:3:80:1429:818#0/1  
\_bb`abba`bb]`a\_]a\_[a`b\_\_\_\_a\_aa\_^¥Q\_\_[^`T  
@HWI-EAS443:3:80:1487:1749#0/1  
TGGATAGGGAGAACTAAAAGCATTAGTTCAAGAAACGGTT  
+HWI-EAS443:3:80:1487:1749#0/1  
aa\_X¥^`SZ^a\_¥G\_¥¥\_S\_G\_UGZ\_GOZJHN[XBBBBBB  
@HWI-EAS443:3:80:148:847#0/1  
CGGCAATGGTGTGGATAGGGAGAACTAAAAGCATTAGT  
+HWI-EAS443:3:80:148:847#0/1  
aa[^``aaa\_a\_V`a]\_\_`aWQ^\_[`Ra]Za^Y^^\_VX^]  
@HWI-EAS443:3:80:1508:1424#0/1  
ATCCCCTGCATATGTATCCTATCTGATATCCAGATTCT

+HWI-EAS443:3:80:1508:1424#0/1  
\_b¥S`aVabaabaababb^aaa`\_baaaaa\_X¥]a``aYa  
@HWI-EAS443:3:80:1614:1042#0/1  
AATGACGCTTTGATTGCATGTTTCAATCTGATTTTGATTC  
+HWI-EAS443:3:80:1614:1042#0/1  
abbaa\_b\_bbaa\_aa^\_aab`bb`\_`a\_ba\_abaaa\_aa\_  
@HWI-EAS443:3:80:161:1297#0/1  
ATCATTAGGGCGTGGATTGTCTCCGAAAATCCCCTGATC  
+HWI-EAS443:3:80:161:1297#0/1  
a\_]Q\_`a[[Z`\_] ^WT^\_W^]\_\_\_U]\_`Y\_¥U¥ZTXX¥  
@HWI-EAS443:3:80:1640:907#0/1  
GTCTGTTATTATGCCGTTGTACTTTAACACAGCCACTGCC  
+HWI-EAS443:3:80:1640:907#0/1  
ZV`¥b`babaaa`[T]`aaP\_]baa\_\_V`^)`UR¥\_¥^XP  
@HWI-EAS443:3:80:1666:826#0/1  
GAGGAATTGCCCGCTAATTTACGGAAACCACTGACTGTC  
+HWI-EAS443:3:80:1666:826#0/1  
\_`aZ`\_b¥]^¥^TZ\_^^aa`¥^VUaY\_ZVTWa^XXM¥`[N  
@HWI-EAS443:3:80:1709:469#0/1  
GCTCCATTAGACGATACTGGACCACAACCTGCCTGTCTTAT  
+HWI-EAS443:3:80:1709:469#0/1  
a`a[X\_baaaa`a\_]Y0^VZU[[^W[[L[XNV^[TS^`YT  
@HWI-EAS443:3:80:1749:1502#0/1  
CAATCAACTTGGGAATCAAAATCAGATTGAAACATGCAA  
+HWI-EAS443:3:80:1749:1502#0/1  
ab¥^a]Y`abYVaaaaa`^]\_`a`b`])`a[\_aaa¥a\_  
@HWI-EAS443:3:80:1778:464#0/1  
TTGGGAATCAAAATCAGATTGAAACATGCAATCAAAGCGT  
+HWI-EAS443:3:80:1778:464#0/1  
abbaaabababaa`bbaaaaaa\_a`a\_a\_a``a`\_\_\_\_  
@HWI-EAS443:3:80:256:1283#0/1  
ATCAGATTGAAACATGCAATCAAAGCGTCATTACTTATGA  
+HWI-EAS443:3:80:256:1283#0/1  
aaa`aaaa`a`\_¥`aaa\_aa`])`a\_a`a`\_a¥¥`^]  
@HWI-EAS443:3:80:262:979#0/1  
GGGCTCCTGTCTTTAATGGTTCATTGGAATGTTTGTCTAT  
+HWI-EAS443:3:80:262:979#0/1  
aV\_NGY]Z`QUQYYLQOW^MQUSTWPPTL^NJMZP^QNVR  
@HWI-EAS443:3:80:265:1138#0/1  
GAGCAGCATATCCTTTTGTGGTGTAACAGTGACACTGTG  
+HWI-EAS443:3:80:265:1138#0/1  
\_XW`\_]\_UYLZRW]Y]XaRY]VTSWUaba^P]\_K¥G`LR  
@HWI-EAS443:3:80:330:1830#0/1  
CAACTGCCTGTCTTATCATTAGGGCGTGGATTGTCTCCGA  
+HWI-EAS443:3:80:330:1830#0/1  
aba`\_]```\_]a`\_^\_aa\_\_\_^WUaYY¥]^]]¥Q]X^\_ZY  
@HWI-EAS443:3:80:338:827#0/1  
AGACGATACTGGACCACAACCTGCCTGTCTTATCATTAGGG  
+HWI-EAS443:3:80:338:827#0/1  
abaa\_V]a]\_T¥aa`X`\_a`\_`[\_^)`^[\_`\_`^S¥`XTN\_



@HWI-EAS443:3:80:340:1760#0/1  
AGCGGGAGCAGCATATCCTTTTGTGGTGTAAACAGTGACA  
+HWI-EAS443:3:80:340:1760#0/1  
]\_¥FY\_\_T\_T\_\_¥`]a^WZ\_Q`\_M\_UY\_\_aa\_]PTU^¥a  
@HWI-EAS443:3:80:395:1844#0/1  
ATATGTTAACATCAGCAACACCAACTTTGCTGCTGGACAG  
+HWI-EAS443:3:80:395:1844#0/1  
aaa`¥][`a]aW`aI`\_a`\_\_a\_YWU[X¥¥[\_^]X\_]W  
@HWI-EAS443:3:80:407:988#0/1  
ATTTACGGAACCACTGACTGTCCAGCAGCAAAGTTGGT  
+HWI-EAS443:3:80:407:988#0/1  
XZ\_]aaaba¥ba`a\_\_\_\_`\_\_WaVZ^VO\_]YUNNRSL¥[[W  
@HWI-EAS443:3:80:450:1292#0/1  
ATTCCAGATTCTGGTTGAAAGACACCCACGGTCGATTCTGA  
+HWI-EAS443:3:80:450:1292#0/1  
aa`aaaa^aaaaa\_aaaaaa`aa`a``¥[\_\_^[\_`Z^  
@HWI-EAS443:3:80:483:145#0/1  
AAGAAGAAGTTCTGCATTCCAAGGGGAGCATGATATGA  
+HWI-EAS443:3:80:483:145#0/1  
a`a`aa[`a]^`\_`a\_a`\_]`\_¥^]ZW^\_]^^^]  
@HWI-EAS443:3:80:493:1040#0/1  
TGCCCCTAATTACTATGAGGAATGCTCCTGTTATCCT  
+HWI-EAS443:3:80:493:1040#0/1  
aab`bba¥aabbaaaaa\_Z¥^`aaa`a`aa`a`a`^[\_  
@HWI-EAS443:3:80:496:1365#0/1  
ATCAAGAGTTGGAGAAACAATATATTGAGAACACAAGAGT  
+HWI-EAS443:3:80:496:1365#0/1  
^`b^]ZX\_P^aaaa¥KZa¥``aaaa¥\_a``[`a`a]`a`Z  
@HWI-EAS443:3:80:521:1440#0/1  
GCCTTGCTAAATGACAAACATTCCAATGGAACCATTAAAG  
+HWI-EAS443:3:80:521:1440#0/1  
abaaaaaZZ\_aa\_Y^`T¥`a`\_\_aa`\_`\_a\_ZY]aVVVY[  
@HWI-EAS443:3:80:557:1048#0/1  
ATTCATATCATGCTCCCCCTTGAATGCAGAACCTTCTTC  
+HWI-EAS443:3:80:557:1048#0/1  
Q`^V¥a¥\_\_^[`Z]^a^\_UNYaa\_Z\_\_V]a[X^Z\_[ZXW  
@HWI-EAS443:3:80:559:499#0/1  
TAGCGGGCAATTCTCTCTGCCCCTGTTAGTGGATGGGC  
+HWI-EAS443:3:80:559:499#0/1  
aaa`\_`\_`¥baabba`aba\_aaa`\_aaaa`^]aa]`aa[N  
@HWI-EAS443:3:80:582:396#0/1  
ACTGACTGTCCAGCAGCAAAGTTGGTGTGCTGATGTTAA  
+HWI-EAS443:3:80:582:396#0/1  
U`\_a\_a`¥X¥\_I¥¥W¥¥[ST\_XZ`]LUP[a^[OMZPU\_Y`  
@HWI-EAS443:3:80:599:571#0/1  
GCTTGGTCAGCAAGTGTGTCATGATGGCATCAATTGGC  
+HWI-EAS443:3:80:599:571#0/1  
\_]\_^a`Y]¥VQZS\_Y\_VPV]R`X^`WYXY\_\_\_\_\_^[][[\_[N  
@HWI-EAS443:3:80:610:696#0/1  
AGCCCATCCACTAACAGGGCAGAGAGGAATTGCCCGCT

+HWI-EAS443:3:80:610:696#0/1  
a`baaa`\_a``aa\_aa\_¥`\_]`^\_a``\_\_^]Y¥`\_\_  
@HWI-EAS443:3:80:680:561#0/1  
CAGGAGCATTCTCATAGTGATAATTAGGGCATTTCATTT  
+HWI-EAS443:3:80:680:561#0/1  
\_\_^P[aaZ`\_W¥UWS¥W]Y`ZaaUXMYF]X[ZZaa¥ZX]Z  
@HWI-EAS443:3:80:682:1182#0/1  
AACTGCCTGTCTTATCATTAGGGCGTGGATTGTCTCCGAA  
+HWI-EAS443:3:80:682:1182#0/1  
Z`¥`\_`bb`abbbbabbbab[R[`]Yaaa]aa^`a]^`¥  
@HWI-EAS443:3:80:704:691#0/1  
CAACTGCCTGTCTTATCATTAGGGCGTGGATTGTCTCCGA  
+HWI-EAS443:3:80:704:691#0/1  
abbaaaaa`\_`aaa`aaaaaa\_\_a`[\_a\_a`a[\_^¥]¥  
@HWI-EAS443:3:80:707:370#0/1  
TCATGACAAGCACTTGCTGACCAAGCGACTGACTCAAATC  
+HWI-EAS443:3:80:707:370#0/1  
a`bbbabbbbbaabaabbaa`\_baa^a`abaaaabbabaa  
@HWI-EAS443:3:80:730:877#0/1  
GATTAGTTCAACCCAGAAGCAAGTCTTATACAATCCAGC  
+HWI-EAS443:3:80:730:877#0/1  
\_]a`ab¥`aaaa`aa\_`\_]¥``WXa`a\_a¥a\_\_\_Y\_^]  
@HWI-EAS443:3:80:831:651#0/1  
CAAGAGTCTGAATGTGCATGTGTAAATGGTTCTTGCTTTA  
+HWI-EAS443:3:80:831:651#0/1  
YYY\_¥`R¥a^^[`[Z^^[a`¥`^^\_]bb]\_aaaa^aabaa  
@HWI-EAS443:3:80:834:1283#0/1  
ATCTTGCTTTATTGAGAAGTTATTGTCTGTCCCAGTCCAT  
+HWI-EAS443:3:80:834:1283#0/1  
aaabaaaabaabaaaa`a\_aaaa\_\_\_a^GP^[ZXSU]\_^  
@HWI-EAS443:3:80:873:722#0/1  
GTTTGTGCATAAGGGAACCATTTCATATCATGCTCCCCCTTG  
+HWI-EAS443:3:80:873:722#0/1  
a^^aa^`\_]`\_`^`^`\_]`^`¥`[\_]`\_`^`\_`\_]X`\_\_  
@HWI-EAS443:3:80:94:336#0/1  
CTTCTTCTTGACTCAAGGGCCTTGCTAAATGACAAACAT  
+HWI-EAS443:3:80:94:336#0/1  
^a\_YS^\_ab`a^aa^¥ba\_b`])`aaaZZ\_a```¥U]\_a`  
@HWI-EAS443:3:80:961:758#0/1  
CTCTGATTAGTTCAACCCAGAAGCAAGTCTTATACAATC  
+HWI-EAS443:3:80:961:758#0/1  
ababb`a`b`^Y`\_Z\_ZY`a`bbaaba[U`abab[aaa`  
@HWI-EAS443:3:80:963:1243#0/1  
GCGGGAGTTTTGTTTCAGCATCCAGAACTAACAGGGCTGGA  
+HWI-EAS443:3:80:963:1243#0/1  
ZOP¥KN¥P[U[aU[NT^`X[LQU¥R\_ZPLLMYPNWXUZOD  
@HWI-EAS443:3:80:967:1457#0/1  
CAGACTCTTGTTCTCAATATATTGTTTCTCCAACCTCTT  
+HWI-EAS443:3:80:967:1457#0/1  
aZTXY`YVb^¥V¥b\_\_¥¥baXa]\_b0]abY`¥a[a[¥[Pa

@HWI-EAS443:3:81:1023:476#0/1  
GAACCATTTACACATGCACATTCAGACTCTTGTGTTCTCA  
+HWI-EAS443:3:81:1023:476#0/1  
abaaaaabab`aaaabaaaabaaa`\_a`^`a`^`\_a`\_`  
@HWI-EAS443:3:81:1195:526#0/1  
CGAAAATCCCCTGCATATGTATCCTATCTGATATTCCAG  
+HWI-EAS443:3:81:1195:526#0/1  
S\_b`YT¥aYa`U`aVVVba`baaXU¥b\_S¥`^`^`\_a\_HTa  
@HWI-EAS443:3:81:1248:941#0/1  
TGCCTGTCTTATCATTAGGGCGTGGATTGTCTCCGAAAAT  
+HWI-EAS443:3:81:1248:941#0/1  
]Q^[]a`aaa`^`aa`aZ¥\_\_Z^[]\_\_\_\_V\_`]S\_^U^^\_  
@HWI-EAS443:3:81:1251:1421#0/1  
GTTGTACTTTAACACAGCCACTGCCCATTTGTCTGGGCCA  
+HWI-EAS443:3:81:1251:1421#0/1  
¥X^OVW`bbaab`a\_`][]¥[]JWWROS\_V]N]YWH^UV[  
@HWI-EAS443:3:81:126:2033#0/1  
TGCCCCGCTAATTTACGGAACCACTGACTGTCCAGCAGC  
+HWI-EAS443:3:81:126:2033#0/1  
a`aa`\_`a`\_aba`\_[]^a`\_`\_¥]¥ZQW\_XGQZTY  
@HWI-EAS443:3:81:1285:639#0/1  
TGAAAGACACCCACGGTCGATTGAGCCATGCCAGTTATC  
+HWI-EAS443:3:81:1285:639#0/1  
aa]a\_aa\_a¥a`\_`aS^^U\_^¥U[YP[S¥^UUTST¥W^U  
@HWI-EAS443:3:81:1332:1243#0/1  
GACGATACTGGACCACAACTGCCTGTCTTATCATTAGGGC  
+HWI-EAS443:3:81:1332:1243#0/1  
¥¥]¥^^]\_Za\_IV`Z¥\_RX\_aa^X¥X^\_Z]T`aa^^ZUE  
@HWI-EAS443:3:81:1368:470#0/1  
AGATAATAACCATTGGTTCGGTCTGTATGACAATTGGAAT  
+HWI-EAS443:3:81:1368:470#0/1  
ababbbbbbba`bbbbbababa`ba\_baQa`bbaa\_a\_a`  
@HWI-EAS443:3:81:1471:2031#0/1  
CATATGTTAACATCAGCAACACCAACTTTGCTGCTGGACA  
+HWI-EAS443:3:81:1471:2031#0/1  
V¥`ba[aa\_abb\_bbbb]X`b]bbVbb\_a`\_aa`aaa^^  
@HWI-EAS443:3:81:1472:346#0/1  
CAGGGCAGAGAGGAATTGCCCGCTAATTTACGGAAAC  
+HWI-EAS443:3:81:1472:346#0/1  
a[b^a`\_a\_I^\_]abaabab`aab¥a`\_aa[0][aa\_a\_W  
@HWI-EAS443:3:81:1481:1853#0/1  
GAAACAATATATTGAGAACAAGAGTCTGAATGTGCATG  
+HWI-EAS443:3:81:1481:1853#0/1  
ab¥¥F[ba¥¥aa^babbaa`a^]baaaVbaabab`aP`ab  
@HWI-EAS443:3:81:1517:1016#0/1  
ATTCCAGATTCTGGTTGAAAGACACCCACGGTCGATTCTGA  
+HWI-EAS443:3:81:1517:1016#0/1  
`aaa\_aa`\_Xaaa\_aaa\_a\_\_\_a\_N[`T`WZXZU¥WW¥  
@HWI-EAS443:3:81:1525:822#0/1  
GTGTAAACAGTGACACTGTGGTTGGTCTTGCCAGACGG

+HWI-EAS443:3:81:1525:822#0/1  
a\_\_Z[WR`Z]W^\_UY\_\_¥Wa^¥QY`¥TW¥¥¥[SSZWWWQW]  
@HWI-EAS443:3:81:1574:996#0/1  
CCCCTATATCCTGACCACTCATTATTCCCTACGATATCT  
+HWI-EAS443:3:81:1574:996#0/1  
aaaa[babbaabaaba`aaba`aaWabbaaaaa`  
@HWI-EAS443:3:81:1602:288#0/1  
TGTTAGTTCTGGATGCTGAACAAAACCTCCCGCTATATCCT  
+HWI-EAS443:3:81:1602:288#0/1  
`a`ab\_aa]ZS¥\_aP]a`ZX`^X`]YS\_H`Z`\_a`aZZ^  
@HWI-EAS443:3:81:1656:593#0/1  
CACAAAAGGATATGCTGCTCCCGCTAGTCCAGATTGTGTT  
+HWI-EAS443:3:81:1656:593#0/1  
abaaU¥`[\_]ab`^[\_S`a]aZ\_V\_]`^X¥^MZa\_H[IUY  
@HWI-EAS443:3:81:1748:861#0/1  
GTTTTGAGATGATTTGGGATCCGAACGGATGGACTGGGAC  
+HWI-EAS443:3:81:1748:861#0/1  
a^`\_[Y]`¥`YW¥`\_Z]\_^\_W`R¥N[\_]YVUG[ZOLMR  
@HWI-EAS443:3:81:230:1162#0/1  
GTCCAGCAGCAAAGTTGGTGTGCTGATGTTAACATATGT  
+HWI-EAS443:3:81:230:1162#0/1  
aabb^abbaaaaa\_aaa]a`aaaa^\_aa`\_R\_\_a]W^\_]  
@HWI-EAS443:3:81:31:1278#0/1  
TCCATCCGTTTCGGATCCCAAATCATCTCAAACCGTTTCT  
+HWI-EAS443:3:81:31:1278#0/1  
ab``\_bba[a`[]a]a`^`[]`a`\_\_`a]¥¥Y^`\_Z\_U`^  
@HWI-EAS443:3:81:337:1044#0/1  
CACAACTGCCTGTCTTATCATTAGGGCGTGGATTGTCTCC  
+HWI-EAS443:3:81:337:1044#0/1  
aaaa]aaaa`a\_a`aa`\_`\_`^`\_T`\_]X]^\_]ZW^]]V  
@HWI-EAS443:3:81:33:637#0/1  
AGACAGGAGCCCATATCGAACCTAATGAGCTGTCTATT  
+HWI-EAS443:3:81:33:637#0/1  
aaaa^aa`aa`¥`a\_a]P]\_`ZQQ][[Z`^\_W^^^[^¥  
@HWI-EAS443:3:81:350:1433#0/1  
AATGAGTGGTCAGGATATAGCGGGAGTTTTGTTTCAGCATC  
+HWI-EAS443:3:81:350:1433#0/1  
a^aa¥aZaa¥ba`¥]`Y`a^aa`\_GUQ]\_`]^¥^]Y¥X[]  
@HWI-EAS443:3:81:447:197#0/1  
CAATAGGACAGCTCATTAGGGTTCGATATGGGCTCCTGTC  
+HWI-EAS443:3:81:447:197#0/1  
a\_]W`^¥QW`bb^WVZ^ZaZT¥Z]]WWW\_a`^`W^X[`WL  
@HWI-EAS443:3:81:483:845#0/1  
ATCATCTCAAACCGTTTCTTGAACCTAATGCTTTTAGTTC  
+HWI-EAS443:3:81:483:845#0/1  
aVbY^b`^X\_PTa\_V`YXWa`^ZRxaZOZbaaa¥`]^¥`a  
@HWI-EAS443:3:81:510:717#0/1  
TTCGAGCCATGCCAGTTATCCCTGCACACACATGTGATTT  
+HWI-EAS443:3:81:510:717#0/1  
`a¥ZZb¥`babaaaa`a\_aabaabba¥[^\_baaTb\_a[a

@HWI-EAS443:3:81:519:389#0/1  
GTTCCCTTATGACAAACACATCCCCCTTGGAAACCGATTCT  
+HWI-EAS443:3:81:519:389#0/1  
aRaa^`b`^aaaUa\_^\_aZUaa\_`X\_\_\_\_\_^Z^X]a¥` ` ]`  
@HWI-EAS443:3:81:523:289#0/1  
CATTAGGGCGTGGATTGTCTCCGAAAATCCCCTGCATAT  
+HWI-EAS443:3:81:523:289#0/1  
aabbbaaaaa`bbaabb\_aaaba\_`a`aa`aa\_a``a``a  
@HWI-EAS443:3:81:542:238#0/1  
AAGACACCCACGGTCGATTGAGCCATGCCAGTTATCCCT  
+HWI-EAS443:3:81:542:238#0/1  
a`[aaa`a`a]aa¥^a\_¥` `^¥^Y^^W¥¥]\_[V¥^^XW¥W  
@HWI-EAS443:3:81:658:1349#0/1  
CTGGACCACAACCTGCCTGTCTTATCATTAGGGCGTGGATT  
+HWI-EAS443:3:81:658:1349#0/1  
a\_TZ¥¥U`a^`\_SX[XYVaY¥]WS]\_\_^XRUZ[URNGU\_  
@HWI-EAS443:3:81:729:995#0/1  
CTCCTGTCTTTAATGGTTCCATTGGAATGTTTGTCTTTA  
+HWI-EAS443:3:81:729:995#0/1  
aaaaa`\_`aaaaa`aZaa]^`\_¥]^¥\_a\_\_^Q[`[\_`^\_  
@HWI-EAS443:3:81:741:1633#0/1  
CTCCTGTCTTTAATGGTTCCATTGGAATGTTTGTCTTTA  
+HWI-EAS443:3:81:741:1633#0/1  
`¥`^SO^a^[]]\_[SYP[[]YUY\_YTMVTRY]NVOLQRIV  
@HWI-EAS443:3:81:753:1588#0/1  
CATGCACATTCAGACTCTTGTGTTCTCAATATATTGTTTC  
+HWI-EAS443:3:81:753:1588#0/1  
`abaaYba` `bb\_a`aaa` `\_\_]aaaa` `Y` ` ` `W[ ` ^\_  
@HWI-EAS443:3:81:765:1203#0/1  
GGGCTGGATTGTATAAGACCTTGCTTCTGGGTTGAACTAA  
+HWI-EAS443:3:81:765:1203#0/1  
`¥\_\_`\_Z]^`^¥][Q^Z\_` `XX\_`W][^]ZW\_ba¥¥`^  
@HWI-EAS443:3:81:766:1920#0/1  
GAAAGACACCCACGGTCGATTGAGCCATGCCAGTTATCC  
+HWI-EAS443:3:81:766:1920#0/1  
`ab`\_abbbbb`\_aZ`]a` `b¥YNZab]Waaaa¥`a]Z^  
@HWI-EAS443:3:81:816:660#0/1  
GAGAATAAAAGCATTAGTTCAAGAAACGGTTTTGAGATG  
+HWI-EAS443:3:81:816:660#0/1  
` `b^aabaaaa`aba^b\_aaaab\_\_a^`a]a\_aa\_a]aa  
@HWI-EAS443:3:81:825:1674#0/1  
GTTCCCTCTCCATACAACCTCAAGATTTGAGTCAGTCGCTT  
+HWI-EAS443:3:81:825:1674#0/1  
a^\_]\_ababbb` `]b[baaaWa\_aa¥aa` `aaa^aaW]X  
@HWI-EAS443:3:81:863:256#0/1  
CAACTGCCTGTCTTATCATTAGGGCGTGGATTGTCTCCGA  
+HWI-EAS443:3:81:863:256#0/1  
a^\_]\_ab]a` `]aa\_Y\_` `W^a` ` ` `[\_` ` `XVZZYT\_V  
@HWI-EAS443:3:81:928:951#0/1  
CGCTAATTTACGGAAACCACTGACTGTCCAGCAGCAAAG

+HWI-EAS443:3:81:928:951#0/1  
ab`[U]`ab[a\_¥b`aaaXW^a`a`\_]`ZUU][`VV]P]  
@HWI-EAS443:3:81:949:1621#0/1  
CTTTAACACAGCCACTGCCCCATTGTCTGGGCCAGAAATT  
+HWI-EAS443:3:81:949:1621#0/1  
`bbaab\_bababaaaa\_\_a^`a`^^a`\_\_]\_^`\_X¥a\_\_  
@HWI-EAS443:3:82:1154:205#0/1  
ATGAATGGTTCCTTATGACAAACACATCCCCCTTGAAC  
+HWI-EAS443:3:82:1154:205#0/1  
aSVX¥PZ¥XU`S`[JV]`\_]V[NRXSNFX]^RFXZ]]M  
@HWI-EAS443:3:82:1166:1726#0/1  
CGCTTGGTCAGCAAGTGCTTGTATGATGGCATCAATTGG  
+HWI-EAS443:3:82:1166:1726#0/1  
ababaababb`baa]a`aa]`\_abaaaaaaaa`aaa`a¥  
@HWI-EAS443:3:82:1185:825#0/1  
CACAGCCACTGCCCCATTGTCTGGGCCAGAAATCCAATT  
+HWI-EAS443:3:82:1185:825#0/1  
¥`\_`bab]bbbb```abbaaU[b`b`bba\_\_b`\_`Uaabab  
@HWI-EAS443:3:82:1240:205#0/1  
GTCTCCGAAAATCCCACTGCATATGTATCCTATCTGATAT  
+HWI-EAS443:3:82:1240:205#0/1  
a^P`a\_baaaa\_YXaa]ab[\_b`aa`\_`¥]a^a\_a\_¥`a`  
@HWI-EAS443:3:82:1327:1955#0/1  
ACGGTTTTGAGATGATTTGGGATCCGAACGGATGGACTGG  
+HWI-EAS443:3:82:1327:1955#0/1  
ab\_a^a^b`a`^aaaa`^`YR`a`W^Y]YaNUHZY\_  
@HWI-EAS443:3:82:139:1703#0/1  
AGACATATGTTAACATCAGCAACACCAACTTTGCTGCTGG  
+HWI-EAS443:3:82:139:1703#0/1  
aY`a^aaS\_]\_aaaa`a\_\_aa\_a^T[\_[¥¥]^`¥^SXVV  
@HWI-EAS443:3:82:1414:1040#0/1  
ATTCATATCATGCTCCCCCTTGAATGCAGAACCTTCTTC  
+HWI-EAS443:3:82:1414:1040#0/1  
abbbababaabbaaa`T`\_aabaa`ab^aaa`^\_a\_\_a\_  
@HWI-EAS443:3:82:1419:1716#0/1  
AGCCACTCAATTCAACTTGGGAATCAAAATCAGATTGAAA  
+HWI-EAS443:3:82:1419:1716#0/1  
a\_^¥baba`abbaYV]baaa¥bb`Y`¥`aabaa`aa`a`  
@HWI-EAS443:3:82:1447:902#0/1  
CGGGAGCAGCATATCCTTTTGTGGTGTAACAGTGACACT  
+HWI-EAS443:3:82:1447:902#0/1  
X\_]b^[Z\_ax[¥[\_^Tb`bb\_b`ba`bb¥Y`a\_^`aaYSa  
@HWI-EAS443:3:82:1456:1037#0/1  
CTCCTGTCTTTAATGGTTCATTGGAATGTTTGTATTTA  
+HWI-EAS443:3:82:1456:1037#0/1  
L`b¥bbabbbbbbb`aZ`aba\_bbababbbab^a\_\_bb  
@HWI-EAS443:3:82:1481:1119#0/1  
AACTTCACCAATAGGACAGCTCATTAGGGTTCGATATGGG  
+HWI-EAS443:3:82:1481:1119#0/1  
ab`ba\_baabaaba\_aXaaa`aabaa`\_aabSba\_a\_a^a

@HWI-EAS443:3:82:1491:193#0/1  
GTCAGCAAGTGCTTGTGCATGATGGCATCAATTGGCTAACAA  
+HWI-EAS443:3:82:1491:193#0/1  
a`Wa`W`aa\_bXaa`^M¥aa\_ba`Y^aN\_\_aaa\_Y\_^Z]¥  
@HWI-EAS443:3:82:1500:94#0/1  
AACTGCCTGTCTTATCATTAGGGCGTGGATTGTCTCCGAA  
+HWI-EAS443:3:82:1500:94#0/1  
ababa`^bba`bbbbaabbb\_`b¥\_aba`baba¥a`Za``  
@HWI-EAS443:3:82:1505:680#0/1  
GTGGTCCAGTATCGTCTAATGGAGCAAATGGAGTAAAAGG  
+HWI-EAS443:3:82:1505:680#0/1  
aabaZaaabaaa\_a\_\_a```Z`]a]\_^[^Y^\_]T\_a\_`a`  
@HWI-EAS443:3:82:1537:1472#0/1  
GATTTTCCGAGACAATCCACGCCCTAATGATAAGACAGGC  
+HWI-EAS443:3:82:1537:1472#0/1  
aa[baaa`\_ab\_[aaaUab^]aaa```\_`aaa````QaaBB  
@HWI-EAS443:3:82:1586:1574#0/1  
TGTTTGGATAGGGAGAACTAAAAGCATTAGTTCAAGAAAC  
+HWI-EAS443:3:82:1586:1574#0/1  
a\_Labbbabba`aaaa\_babab^^aaaaaab`aaa`\_a¥  
@HWI-EAS443:3:82:162:431#0/1  
CGCTTGGTCAGCAAGTGCTTGTGCATGATGGCATCAATTGG  
+HWI-EAS443:3:82:162:431#0/1  
aa]HYa¥N\_¥[a[V[[a¥X^[TZQ]a]^WQ[[[``URTY^Y  
@HWI-EAS443:3:82:178:1043#0/1  
CTGTGTTAAAGTACAACGGCATAATAACAGACACTATCAA  
+HWI-EAS443:3:82:178:1043#0/1  
a^^I^\_^^^[\`[ab\_Y]`^^`\_aaaOFXa```^a^¥^]]  
@HWI-EAS443:3:82:185:1074#0/1  
TTCATATCATGCTCCCCCTTGAATGCAGAACCTTCTTCT  
+HWI-EAS443:3:82:185:1074#0/1  
`bababbbba`\_aaaaaaaa`a`[a\_`XY\_``¥a\_W\_\_  
@HWI-EAS443:3:82:311:684#0/1  
ATTCCAGATTCTGTTGAAAGACACCCACGGTCGATTTCGA  
+HWI-EAS443:3:82:311:684#0/1  
\_`baXXa\_\_baab]\_baa`]aab[aaaaa`Sa\_VT^][L  
@HWI-EAS443:3:82:312:37#0/1  
ATTAGACGATACTGGACCACAACCTGCCTGTCTTATCATT  
+HWI-EAS443:3:82:312:37#0/1  
abb\_baba^a0Q\_ZaR^^I]X¥a```\_PQ]`[^G¥QF^ZR  
@HWI-EAS443:3:82:340:573#0/1  
GAAGAAGGTTCTGCATTCCAAGGGGAGCATGATATGAAT  
+HWI-EAS443:3:82:340:573#0/1  
aaababaa\_aaa`a`aaaa^aaaa`\_`aa\_a`^\_\_a^a\_  
@HWI-EAS443:3:82:396:700#0/1  
ATTGTCTCCGAAAATCCCCTGCATATGTATCCTATCTGA  
+HWI-EAS443:3:82:396:700#0/1  
`]aaaa^a`WZHY\_]PYa^V¥]Z[\_`]ZL\_ZZa¥Y¥[X^  
@HWI-EAS443:3:82:415:327#0/1  
CAAGGTCTTATACAATCCAGCCCTGTTAGTTCTGGATGCT

+HWI-EAS443:3:82:415:327#0/1  
W^¥¥\_T\_bb¥¥aa¥W`\_W¥[\_bbaaY]X\_NR\_aa`Y¥aX]  
@HWI-EAS443:3:82:447:500#0/1  
CAAAATCAGATTGAAACATGCAATCAAAGCGTCATTACTT  
+HWI-EAS443:3:82:447:500#0/1  
ab^^\_abaaaaab`^aaaaba`\_aaaaaaaa\_aaa`a`aa  
@HWI-EAS443:3:82:452:149#0/1  
CTGGGCCAGAAATTCCAATTGTTAGCCAATTGATGCCATC  
+HWI-EAS443:3:82:452:149#0/1  
a[b[Q`¥baaZaa`aaa\_b^^`aaaU`aW\_\_a`[[M\_]\_U  
@HWI-EAS443:3:82:501:1942#0/1  
GAGCTGTCCTATTGGTGAAGTTCCTCTCCATACAACCTCA  
+HWI-EAS443:3:82:501:1942#0/1  
ab^ba^[bb`\_\_`]VJa^W]aaaa]aa]`baaa\_a`\_a  
@HWI-EAS443:3:82:623:48#0/1  
GATTTTCGAGACAATCCACGCCCTAATGATAAGACAGGC  
+HWI-EAS443:3:82:623:48#0/1  
aUS^^^Va`¥aXV\_QUUWU¥¥¥¥ZVZV\_UW¥¥¥WBBBBB  
@HWI-EAS443:3:82:627:858#0/1  
GCTTGGTCAGCAAGTGCTTGCATGATGGCATCAATTGGC  
+HWI-EAS443:3:82:627:858#0/1  
a\_[^]^[^]a]]S0¥ZP]S¥NW`Z`\_Y\_\_\_X]V[OXN¥\_`  
@HWI-EAS443:3:82:693:1039#0/1  
ACTCAATTCAACTTGGGAATCAAATCAGATTGAAACATG  
+HWI-EAS443:3:82:693:1039#0/1  
a`\_`\_]`\_\_^`]`^^^]]`^^\_]`^^`\_^^\_[^  
@HWI-EAS443:3:82:701:105#0/1  
AGCCAATTGATGCCATCATGACAAGCACTTGCTGACCAAG  
+HWI-EAS443:3:82:701:105#0/1  
aaabaaa`b`aaaaa^aaa`\_a\_a^\_Z^]a^`ZZZ^]a^  
@HWI-EAS443:3:82:712:1581#0/1  
CTGTCCCAGTCCATCCGTTCCGATCCCAAATCATCTCAAA  
+HWI-EAS443:3:82:712:1581#0/1  
abaabbaa\_ababbbbaa]\_aba\_baaaaabbaaaba  
@HWI-EAS443:3:82:746:1905#0/1  
TCCAGATTCTGGTTGAAAGACACCCACGGTCGATTGAGC  
+HWI-EAS443:3:82:746:1905#0/1  
ababYba`ab`\_aabaaba\_bba`baa\_Z¥a`\_`a\_\_\_\_  
@HWI-EAS443:3:82:763:410#0/1  
CCCTAATTACTATGAGGAATGCTCCTGTTATCCTGAT  
+HWI-EAS443:3:82:763:410#0/1  
abb\_\_babba^babbbbbb¥bbabbabbbbababa\_abba  
@HWI-EAS443:3:82:786:466#0/1  
ATCCGTTCCGATCCCAAATCATCTCAAACCGTTTCTTGA  
+HWI-EAS443:3:82:786:466#0/1  
a^YLWZ`UX\_[NXOXX]\_U\_XYWVW`SYRZ\_SWZQRV]]  
@HWI-EAS443:3:83:1036:1221#0/1  
TACAACTCAAGATTTGAGTCAGTCGCTTGGTCAGCAAGTG  
+HWI-EAS443:3:83:1036:1221#0/1  
aaa\_a`a^`U`^aaab`a^aa`][aa]]ZWZ^¥YYP^]LZ



@HWI-EAS443:3:83:1115:531#0/1  
CAGACATATGTTAACATCAGCAACACCAACTTTGCTGCTG  
+HWI-EAS443:3:83:1115:531#0/1  
Z\_a`]`a`a¥`b`\_bb`a`]`^bbbb\_`abUbbbb`  
@HWI-EAS443:3:83:1158:436#0/1  
CAAGAAGAAGTTCTGCATTCCAAGGGGAGCATGATATG  
+HWI-EAS443:3:83:1158:436#0/1  
a`S^abbb]`b¥b\_bbb]aa`aa`aba`babb`aaa^a  
@HWI-EAS443:3:83:1207:327#0/1  
GCAGAACCTTCTTCTTGACTCAAGGGGCCTTGCTAAATGA  
+HWI-EAS443:3:83:1207:327#0/1  
a\_aaaa`^aa\_a^aaa`]\_^`Y\_`¥^XW\_\_`^\_\_¥^`^\_  
@HWI-EAS443:3:83:1249:952#0/1  
GTTTCGATATGGGCTCCTGTCTTTAATGGTCCATTGGAAT  
+HWI-EAS443:3:83:1249:952#0/1  
^Y¥XV^`a]V]`^`][\_JPX^]SUU`UVVZ[]`\_a]]  
@HWI-EAS443:3:83:128:609#0/1  
CAGGATATAGCGGGAGTTTTGTTTCAGCATCCAGAATAAC  
+HWI-EAS443:3:83:128:609#0/1  
aabbab^`aabbba\_a[\_`T`]WTW`\_\_\_`\_\_`\_\_]VG  
@HWI-EAS443:3:83:1342:1125#0/1  
TTCTGGTTGAAAGACACCCACGGTCGATTCGAGCCATGCC  
+HWI-EAS443:3:83:1342:1125#0/1  
a`a\_aa`baaaa`a`\_\_\_U`\_W^`¥\_Z[QW\_TTW^VUU  
@HWI-EAS443:3:83:1344:759#0/1  
ATTTTCGGAGACAATCCACGCCCTAATGATAAGACAGGCA  
+HWI-EAS443:3:83:1344:759#0/1  
aab`aaaaU^a]Y¥a^]aV`[\_`aa\_]`aaa`Za¥]BBB  
@HWI-EAS443:3:83:1434:249#0/1  
GTGGTGTAACAGTGACACTGTGGGTTGGTCTTGCCAGA  
+HWI-EAS443:3:83:1434:249#0/1  
]O]LLb\_`aa`^]Sa]ZWG`Y^[YUQ]\_¥U^^aaSU¥¥S  
@HWI-EAS443:3:83:1474:1250#0/1  
AGCAAGTGCTTGTTCATGATGGCATCAATTGGCTAACAAATT  
+HWI-EAS443:3:83:1474:1250#0/1  
[\_a\_X`b\_Waaaa`a\_\_aaZ][FU\_U`dMRL^`aX\_Ya`  
@HWI-EAS443:3:83:1479:21#0/1  
AACAGACACTATCAAGAGTTGGAGAAACAATATATTGAGA  
+HWI-EAS443:3:83:1479:21#0/1  
a\_XTb^V\_S\_b[PZabaaG\_]ba`]TZ[\_`VY\_^a\_a[[P  
@HWI-EAS443:3:83:1495:963#0/1  
AGCCACTCAATTCAACTTGGGAATCAAAATCAGATTGAAA  
+HWI-EAS443:3:83:1495:963#0/1  
]UW^aabZT`[\_\_NZ^[aa\_UZI`Pa`a\_a]\_a]`U`0[\_  
@HWI-EAS443:3:83:1632:1668#0/1  
CAACTGCCTGTCTTATCATTAGGGCGTGGATTGTCTCCGA  
+HWI-EAS443:3:83:1632:1668#0/1  
abbabbabbbb[bbbbabbaabaaa`abbbba`a^`b]  
@HWI-EAS443:3:83:1641:56#0/1  
AATAACAGACACTATCAAGAGTTGGAGAAACAATATATTG

+HWI-EAS443:3:83:1641:56#0/1  
aa[URaabTHWaa\_[V]TU¥\_0`aaX\_]NLUWM[\_HTKF  
@HWI-EAS443:3:83:181:1763#0/1  
GCTCCCGCTAGTCCAGATTGTGTTCTCTTTGGGTCGCCCT  
+HWI-EAS443:3:83:181:1763#0/1  
abbbbbbb`aabb\_[`ab]\_babbab``Z^a\_babbab  
@HWI-EAS443:3:83:311:1320#0/1  
GCTCATTAGGGTTCGATATGGGCTCCTGTCTTTAATGGTT  
+HWI-EAS443:3:83:311:1320#0/1  
\_`bbaa`U]baXa\_Ya`\_`aaababa¥¥X\_baaX[\_\_UTa  
@HWI-EAS443:3:83:343:499#0/1  
GCCCCGTAATTTACGGAAACCACTGACTGTCCAGCAGCA  
+HWI-EAS443:3:83:343:499#0/1  
ab]\_¥¥abbabbaabba¥]`ab\_`a^Q^W`]W]^UXX¥\_¥  
@HWI-EAS443:3:83:376:776#0/1  
CTCTGATTAGTTCAACCCAGAAGCAAGGTCTTATACAATC  
+HWI-EAS443:3:83:376:776#0/1  
W\_a`abb`b`Z^`V^\_a`¥Z\_aaYT\_^[]`^`a¥KY^VZ^  
@HWI-EAS443:3:83:532:1181#0/1  
CTGGATTGTATAAGACCTTGCTTCTGGGTTGAACTAATCA  
+HWI-EAS443:3:83:532:1181#0/1  
abaa\_bab^aabaabaaaa\_aaaa\_`\_aaab\_aaa\_\_a  
@HWI-EAS443:3:83:564:1062#0/1  
GAAGGTTCTGCATTCCAAGGGGAGCATGATATGAATGGT  
+HWI-EAS443:3:83:564:1062#0/1  
aaa`aZaa`aaaaaa^]`^^`^^\_aa\_`\_\_`^^`[¥\_`X  
@HWI-EAS443:3:83:574:27#0/1  
GAGGAATTGCCCGCTAATTTACGGAAACCACTGACTGTC  
+HWI-EAS443:3:83:574:27#0/1  
Zaaa\_^^¥^aaabaaa`]`a]]T^]YX[X^`\_\_\_\_ZVa\_W¥  
@HWI-EAS443:3:83:581:1312#0/1  
GGGGGATGTGTTTGTGATAAGGGAACCATTCATATCATGC  
+HWI-EAS443:3:83:581:1312#0/1  
abaa^]aa\_\_F\_^`\_]W]]`]a\_`\_]`[\_]aa\_\_^]\_^  
@HWI-EAS443:3:83:584:1786#0/1  
CTTGGAATGCAGAACCTTCTTCTTACTCAAGGGGCCCTTG  
+HWI-EAS443:3:83:584:1786#0/1  
aaaaYa`aabbaaaaa`aa`aa`ba`\_aaaa\_[TYa`aa`  
@HWI-EAS443:3:83:611:1588#0/1  
AGCCCATCCACTAACAGGGCAGAGAGGAATTGCCCGCT  
+HWI-EAS443:3:83:611:1588#0/1  
`Vba`aaaaa\_]a]]]\_U^a`aY^ZaZV^Z¥\_^`X\_]]  
@HWI-EAS443:3:83:611:306#0/1  
CGGCATAATAACAGACACTATCAAGAGTTGGAGAAACAAT  
+HWI-EAS443:3:83:611:306#0/1  
aabaabbba]aaaaabbbaaaaaab^b\_aa^aa¥a\_aa^a  
@HWI-EAS443:3:83:730:1501#0/1  
ATTTGGGATCCGAACGGATGGACTGGGACAGACAATAACT  
+HWI-EAS443:3:83:730:1501#0/1  
aab\_^aba\_bba]ab^`a\_`aa\_a]¥`¥``]\_aaa`a\_N¥

@HWI-EAS443:3:83:774:685#0/1  
GTAAACATCAGCAACACCAACTTTGCTGCTGGACAGTCAG  
+HWI-EAS443:3:83:774:685#0/1  
`SW`a[^\_NSVN\_aa``[¥SL\_^`[^a^WV[^^\_RDU\_a  
@HWI-EAS443:3:83:859:574#0/1  
ATCCGAACGGATGGACTGGGACAGACAATAACTTCTCAAT  
+HWI-EAS443:3:83:859:574#0/1  
abb^]PY`\_]\_R[Y][`]¥\_]\_\_a^^YPWY^\_]^^]\_]\_  
@HWI-EAS443:3:83:90:394#0/1  
GCAAGTGCTTGCATGATGGCATCAATTGGCTAACAAATTG  
+HWI-EAS443:3:83:90:394#0/1  
`a[\_a`aaaa\_\_\_a\_aa\_aaaaa\_a^a`\_]\_]Y``^``  
@HWI-EAS443:3:83:926:745#0/1  
GAGCCATGCCAGTTATCCCTGCACACACATGTGATTTAC  
+HWI-EAS443:3:83:926:745#0/1  
a`aaaa`aaa\_a\_aabaa\_aa````]\_a\_aab^b\_a]a¥aZ  
@HWI-EAS443:3:83:943:1591#0/1  
ATCAGATAGGATACATATGCAGTGGGATTTTCGGAGACAA  
+HWI-EAS443:3:83:943:1591#0/1  
]bbabaaaba¥\_aN¥]`[VL^UNaa`U\_aaaXVaa[WGU\_  
@HWI-EAS443:3:83:995:1430#0/1  
CTCTCCATACAACTCAAGATTTGAGTCAGTCGCTTGGTCA  
+HWI-EAS443:3:83:995:1430#0/1  
abbbabbbbaabab^b`abaaaa`ba\_`a``\_Ta]`a  
@HWI-EAS443:3:84:1082:176#0/1  
ATTCATATCATGCTCCCCCTTGAATGCAGAACCTTCTTC  
+HWI-EAS443:3:84:1082:176#0/1  
aXbabbbaa\_`bb`a\_XVTU`\_aaaa^Z`a^a]]a^\_^  
@HWI-EAS443:3:84:1105:310#0/1  
GTTCCCTTATGACAAACACATCCCCCTTGAACCGATTCT  
+HWI-EAS443:3:84:1105:310#0/1  
a[a\_a`a\_\_aaaa\_`\_`\_\_`\_\_\_`\_\_\_`^\_\_^]aX`\_Z\_  
@HWI-EAS443:3:84:1109:17#0/1  
CATTATATCATGCTCCCCCTTGAATGCAGAACCTTCTT  
+HWI-EAS443:3:84:1109:17#0/1  
`]a^W[`aZR¥\_^RY]XR\_¥aaaZ\_X``[aba`T]`V¥^^  
@HWI-EAS443:3:84:1139:543#0/1  
ACCCACGGTCGATTGAGCCATGCCAGTTATCCCTGCACA  
+HWI-EAS443:3:84:1139:543#0/1  
a`aaa`a¥^^[VYXXWUY¥`^YW[N[Y`]`¥^\_Y^USW^  
@HWI-EAS443:3:84:1189:1089#0/1  
TGTGATTTCACTAGAATCAGGATAACAGGAGCATTCTCA  
+HWI-EAS443:3:84:1189:1089#0/1  
a^¥^Z^aa`UYbba\_\_a\_a[\_`Va^\_`a`aa`\_`Q]]a]]  
@HWI-EAS443:3:84:1278:857#0/1  
CGGCATAATAACAGACACTATCAAGAGTTGGAGAAACAAT  
+HWI-EAS443:3:84:1278:857#0/1  
a`a¥a`T\_\_`baaa^]`\_a\_aa^aY[¥`a`\_a\_^\_\_\_\_`  
@HWI-EAS443:3:84:1407:21#0/1  
CATATGCAGTGGGATTTTCGGAGACAATCCACGCCCTAAT

+HWI-EAS443:3:84:1407:21#0/1  
abbbbbbbbabbb`bba`aaaba`aaa\_a`¥`¥a\_a`\_`  
@HWI-EAS443:3:84:1431:738#0/1  
CGAATCGACCGTGGGTGCTTTCAACCAGAATCTGGAATA  
+HWI-EAS443:3:84:1431:738#0/1  
ab`abbbb\_ab¥aba[aGZZ\_a]¥aaYa\_Wa`V^`a^XQ\_  
@HWI-EAS443:3:84:147:1129#0/1  
GCTTGGTCAGCAAGTGCTTGTGCATGATGGCATCAATTGGC  
+HWI-EAS443:3:84:147:1129#0/1  
aaaa\_[L^¥`\_`ZVYX`a`S¥]¥GY[T\_VH[]^`\_`^X[U  
@HWI-EAS443:3:84:1528:815#0/1  
GAACTAATGCTTTTAGTTCTCCCTATCCAAACACCATTGC  
+HWI-EAS443:3:84:1528:815#0/1  
aababaaba\_abbaaaaa`a`\_`\_aab`\_`aa`b`\_aaaa^  
@HWI-EAS443:3:84:1533:297#0/1  
CTTTAACACAGCCACTGCCCATTTGTCTGGGCCAGAAATT  
+HWI-EAS443:3:84:1533:297#0/1  
\_abbaabbb\_V¥bab[bb\_a]ba]baV`\_`aT`Rab`bb[a  
@HWI-EAS443:3:84:1601:704#0/1  
GTGTCTTTCAACCAGAATCTGGAATATCAGATAGGATACA  
+HWI-EAS443:3:84:1601:704#0/1  
^[V[\_aaa\_]YUY^Y\_]Z]¥`\_`\_`^X¥`]^`^UXU¥^ZZ  
@HWI-EAS443:3:84:1636:1477#0/1  
GGGGGATGTGTTTGTGCATAAGGGAACCATTTCATATCATGC  
+HWI-EAS443:3:84:1636:1477#0/1  
Z\_[\_bbba`\_`a]aaaa`Q¥`aba]abb¥b`aa^bbb]  
@HWI-EAS443:3:84:205:1149#0/1  
CAACTGCCTGTCTTATCATTAGGGCGTGGATTGTCTCCGA  
+HWI-EAS443:3:84:205:1149#0/1  
`ZYa`Yaa\_[Y[`\_`\_`a`^^^R\_]X]]]^Y^][¥VR  
@HWI-EAS443:3:84:218:1645#0/1  
AGATAGGATACATATGCAGTGGGATTTTCGGAGACAATCC  
+HWI-EAS443:3:84:218:1645#0/1  
\_Z]a`\_`\_b\_\_aa`a^TX`^Vaa\_]aa`aYZV¥\_`QYHZW  
@HWI-EAS443:3:84:230:390#0/1  
ATGTGTTTGTGCATAAGGGAACCATTTCATATCATGCTCCCC  
+HWI-EAS443:3:84:230:390#0/1  
aaa\_aZa¥aVZ`\_`a`\_MV\_a]\_¥\_]R[\_]¥\_Y^\_]`^`  
@HWI-EAS443:3:84:339:1915#0/1  
CTGTCCCAGTCCATCCGTTCCGATCCCAAATCATCTCAAA  
+HWI-EAS443:3:84:339:1915#0/1  
`\_ZZ`\_`\_TZ]a\_VZa`W^a\_Y][`]VSMGOY^]XS^][  
@HWI-EAS443:3:84:379:618#0/1  
TTGAAACATGCAATCAAAGCGTCATTACTTATGAAAACAA  
+HWI-EAS443:3:84:379:618#0/1  
¥aba^¥`\_`\_]Y^`a]Iaaa]]\_Y¥¥`¥Q`\_`aT[]\_W`P  
@HWI-EAS443:3:84:491:1546#0/1  
AGACAATAACTTCTCAATAAAGCAAGATATCGTAGGAATA  
+HWI-EAS443:3:84:491:1546#0/1  
^][aaV\_a]aa]`a`aa`aa\_]a^`W`^`^`Y`\_a`]

@HWI-EAS443:3:84:503:253#0/1  
ACTGTATATAGCCCATCCACTAACAGGGCAGAGAGAGGAA  
+HWI-EAS443:3:84:503:253#0/1  
a]R\_]`^¥P¥`aX`ZT¥a^[YaYM[Z]R[]XX¥¥[\_`¥TY  
@HWI-EAS443:3:84:507:1785#0/1  
GAAAGACACCCACGGTCGATTTCGAGCCATGCCAGTTATCC  
+HWI-EAS443:3:84:507:1785#0/1  
¥` `b\_W^ab\_ab\_Q\_¥Z0]ba¥R[ `a^XZYG]a¥KZa]BB  
@HWI-EAS443:3:84:517:33#0/1  
GCCCCGCTAATTTACGGAAACCACTGACTGTCCAGCAGCA  
+HWI-EAS443:3:84:517:33#0/1  
a^\_\_a^aY\_baaaa\_aaWa\_`¥`U` ` \_W]`YWZWZWNWNG  
@HWI-EAS443:3:84:537:575#0/1  
GTTTGGATAGGGAGAATAAAGCATTAGTTCAAGAAACG  
+HWI-EAS443:3:84:537:575#0/1  
a\_aaaa\_a`¥Y[]a\_\_\_\_`\_]a`^\_a[[\_^\_\_\_\_[]X\_^\_U  
@HWI-EAS443:3:84:572:140#0/1  
GATTTTCGGAGACAATCCACGCCCTAATGATAAGACAGGC  
+HWI-EAS443:3:84:572:140#0/1  
a^¥YQ¥]\_XINXPXPPTVPXBBBBBBBBBBBBBBBBBBB  
@HWI-EAS443:3:84:57:670#0/1  
GTTGAAAGACACCCACGGTCGATTTCGAGCCATGCCAGTTA  
+HWI-EAS443:3:84:57:670#0/1  
aP^aa[GR^a^T` \_\_\_\_\_UZ¥NRV¥[M^ZMRPSUSPSGS  
@HWI-EAS443:3:84:604:1471#0/1  
CCGAAAATCCCCTGCATATGTATCCTATCTGATATTCCA  
+HWI-EAS443:3:84:604:1471#0/1  
a`PLOSrvNP^ZXPZSWQUT¥X¥Z\_]IY¥UZ]W]NKRTVY  
@HWI-EAS443:3:84:625:565#0/1  
CTTTCAACCAGAATCTGGAATATCAGATAGGATACATATG  
+HWI-EAS443:3:84:625:565#0/1  
aaaaa[]aaaaa`aaaa^aa`\_a`a` `aa` [\_aaa[a^^  
@HWI-EAS443:3:84:62:554#0/1  
GGCATCAATTGGCTAACAATTGGAATTTCTGGCCCAGACA  
+HWI-EAS443:3:84:62:554#0/1  
a\_bZ¥aa` [\_a\_a`¥a\_Xa`a[ `^\_`\_` ` \_`¥¥\_¥¥X¥^  
@HWI-EAS443:3:84:630:373#0/1  
GTGGTCCAGTATCGTCTAATGGAGCAAATGGAGTAAAAGG  
+HWI-EAS443:3:84:630:373#0/1  
aaaa^aaaa\_aaaa] `a\_\_aaa^`¥^\_\_aaa]aUa\_aaa`  
@HWI-EAS443:3:84:694:897#0/1  
AAACAATATATTGAGAACACAAGAGTCTGAATGTGCATGT  
+HWI-EAS443:3:84:694:897#0/1  
a^^a]XYa`^^abaaaa]a`a\_a] `^\_\_^[\_` `Y]¥^` \_¥  
@HWI-EAS443:3:84:775:1550#0/1  
GAATGTGCATGTGTAAATGGTTCTTGCTTTACTGTAATGA  
+HWI-EAS443:3:84:775:1550#0/1  
aaa\_\_Y[]`ab]Y¥] ` `a] `^aaa`aabaaaaa` ` `]QY  
@HWI-EAS443:3:84:850:700#0/1  
CTCCTGTTATCCTGATTCTAGTGAATCACATGTGTGTGC

+HWI-EAS443:3:84:850:700#0/1  
aa`^^[^X^`^aa]aVa]a\_TUYaYY`\_^T\_\_a` [a]a]aa  
@HWI-EAS443:3:85:1048:1923#0/1  
CATCCGTTCCGGATCCCAAATCATCTCAAAACCGTTTCTTG  
+HWI-EAS443:3:85:1048:1923#0/1  
ab^aaa`]GVaaa[[\_Vaaa\_a\_]`0[`baVKXY¥[R]YV  
@HWI-EAS443:3:85:1103:543#0/1  
AGAGTCTGAATGTGCATGTGTAAATGGTTCTTGCTTTACT  
+HWI-EAS443:3:85:1103:543#0/1  
`\_`aZaba]`ab\_a`aa^]a\_^`aaaa\_a`aaa\_aaa`\_`  
@HWI-EAS443:3:85:1208:946#0/1  
CATGTGTAAATGGTTCTTGCTTTACTGTAATGACCGATGG  
+HWI-EAS443:3:85:1208:946#0/1  
abbbbaababbb]ab`bbbabbbaaab`bbbba`aaaab\_  
@HWI-EAS443:3:85:1349:639#0/1  
CGATACTGGACCACAACCTGCCTGTCTTATCATTAGGGCGT  
+HWI-EAS443:3:85:1349:639#0/1  
ab`bbbb`\_aabaaaaa`ab\_aabab`aaaa\_\_aa`Z  
@HWI-EAS443:3:85:1372:1407#0/1  
ATGCAATCAAAGCGTCATTACTTATGAAAACAACACTTGG  
+HWI-EAS443:3:85:1372:1407#0/1  
abaa`¥b`b]abbb`\_bb¥` [bbabababa\_ba``\_\_aa`  
@HWI-EAS443:3:85:1392:1264#0/1  
GGGGGATGTGTTTGTGCATAAGGGAACCATTTCATATCATGC  
+HWI-EAS443:3:85:1392:1264#0/1  
aabbaabb\_b`bab`^a\_\_aaaa\_aV^`ba\_`a\_a^aa\_V  
@HWI-EAS443:3:85:1477:951#0/1  
CAGACACTATCAAGAGTTGGAGAAACAATATATTGAGAAC  
+HWI-EAS443:3:85:1477:951#0/1  
abbaabab^]NZZ``\_\_aa`¥W`^aY`^a]a`a`b\_aa^\_  
@HWI-EAS443:3:85:1480:1347#0/1  
ACAATATATTGAGAACACAAGAGTCTGAATGTGCATGTGT  
+HWI-EAS443:3:85:1480:1347#0/1  
]V]]]Xba[[]a`a]Yaa\_\_W^aa¥aa]^a]\_\_a`H[V  
@HWI-EAS443:3:85:1557:1410#0/1  
ATTAGACGATACTGGACCACAACCTGCCTGTCTTATCATT  
+HWI-EAS443:3:85:1557:1410#0/1  
]a\_Yaabaa]Y][YQGTX\_L^[LVaaRMV`JY[YRaV  
@HWI-EAS443:3:85:1605:1162#0/1  
AATATATTGAGAACACAAGAGTCTGAATGTGCATGTGTAA  
+HWI-EAS443:3:85:1605:1162#0/1  
^^]bbbbbbbaaaa¥b\_aaa\_a`ab\_a\_bT\_Z\_ab\_^^a\_  
@HWI-EAS443:3:85:168:588#0/1  
TTCAAATACGGCAATGGTGTGGATAGGGAGAACTAAAA  
+HWI-EAS443:3:85:168:588#0/1  
`a`[\_X\_`^aaa]P¥^a¥]V`^`][^``¥XTNZ¥]\_]P]  
@HWI-EAS443:3:85:1716:1320#0/1  
ATTACAGTAAAGCAAGAACCATTTACACATGCACATTACAG  
+HWI-EAS443:3:85:1716:1320#0/1  
a]S[D^a[aa\_`a^Q`^aY^^\_VZ`¥[G^\_[RZ\_a`]L¥]

@HWI-EAS443:3:85:1725:1067#0/1  
GAAATCACATGTGTGTGCAGGGATAACTGGCATGGCTCGA  
+HWI-EAS443:3:85:1725:1067#0/1  
aY]^QW\_\_¥]aP^MaTVOM^Y\_M[]SSW¥[OMWWBBBBBB  
@HWI-EAS443:3:85:1790:521#0/1  
TGTTATTATGCCGTTGTACTTTAACACAGCCACTGCCCCA  
+HWI-EAS443:3:85:1790:521#0/1  
aa\_`^a¥aa``a\_aa\_a]a`aa\_\_^`\_Z[]\_\_\_ZYYX]  
@HWI-EAS443:3:85:181:988#0/1  
CTCAAAACCGTTTCTTGAACATAATGCTTTTAGTTCTCCCT  
+HWI-EAS443:3:85:181:988#0/1  
aaaa`¥a]aa\_a`\_`a`a^aa`a\_\_[\_a\_\_\_X\_\_`\_]\_\_  
@HWI-EAS443:3:85:260:1379#0/1  
CTCCGAAAATCCCCTGCATATGTATCCTATCTGATATTC  
+HWI-EAS443:3:85:260:1379#0/1  
a[^a\_¥VQ^`a`T\_]LX¥¥¥\_SOQ[YYWWYVS^BBBBBBB  
@HWI-EAS443:3:85:292:1110#0/1  
CGCTTGGTCAGCAAGTGCTTGTGCATGATGGCATCAATTGG  
+HWI-EAS443:3:85:292:1110#0/1  
]a`VZVWU\_^^^Y0`\_U]S`WQXX^YJ¥]a`UVYYY¥a¥R  
@HWI-EAS443:3:85:29:1080#0/1  
CAATCAAAGCGTCATTACTTATGAAAACAACACTGGGTA  
+HWI-EAS443:3:85:29:1080#0/1  
abba`^`a`aa[a``^aa`aaa\_aaaaa\_]\_a^^^\_^Xa  
@HWI-EAS443:3:85:318:1667#0/1  
AAACAATATATTGAGAACACAAGAGTCTGAATGTGCATGT  
+HWI-EAS443:3:85:318:1667#0/1  
aWHZTO^`\_aa]^`¥Ua^¥]^`a\_T\_]Za¥^NUX[L^a`\_X[  
@HWI-EAS443:3:85:400:570#0/1  
CGTGGGTGTCTTTCAACCAGAATCTGGAATATCAGATAGG  
+HWI-EAS443:3:85:400:570#0/1  
ab\_bbb\_baabbbba`babbaa`aabaaaaaaa`a``aa  
@HWI-EAS443:3:85:440:759#0/1  
GTTAACATCAGCAACACCAACTTTGCTGCTGGACAGTCAG  
+HWI-EAS443:3:85:440:759#0/1  
`^b`\_bba`b`abbabaaaaaaaaaab^aaaaa`\_a^\_a`  
@HWI-EAS443:3:85:445:1780#0/1  
CAAGAAGAAGGTTCTGCATTCCAAGGGGAGCATGATATG  
+HWI-EAS443:3:85:445:1780#0/1  
aa\_a\_]Z\_`^WVa``]^`\_\_\_`a\_\_\_UPZ\_^\_W^\_¥\_U\_]W  
@HWI-EAS443:3:85:540:585#0/1  
GTCCTATTGGTGAAGTCCCTCTCCATACAACACTCAAGATT  
+HWI-EAS443:3:85:540:585#0/1  
\_`bbbbbbba\_abba\_aaaaaaaaaaaaaa]a\_\_`]````  
@HWI-EAS443:3:85:56:1324#0/1  
GTGTAACAGTGACACTGTGGGTTGGTCTTGCCAGACGG  
+HWI-EAS443:3:85:56:1324#0/1  
a^`^Z¥abaa\_`^W``¥Ya¥\_¥`a`¥`\_``\_``\_Z\_[]  
@HWI-EAS443:3:85:581:1348#0/1  
CTAATTATCACTATGAGGAATGCTCCTGTTATCCTGATTC

+HWI-EAS443:3:85:581:1348#0/1  
]X\_W\_Z\_Z[Z[V[U`QX]X\_]^[^XPS¥SVZ`\_]\_Q¥¥XV]  
@HWI-EAS443:3:85:622:1659#0/1  
AAGACACCCACGGTCGATTGAGCCATGCCAGTTATCCCT  
+HWI-EAS443:3:85:622:1659#0/1  
aa`aaa`b`a`\_`TR^\_SY^VJTMKYVKPRWNUR[¥YTRTB  
@HWI-EAS443:3:85:660:2037#0/1  
CCTTGCTAAATGACAAACATTCCAATGGAACCATTAAAGA  
+HWI-EAS443:3:85:660:2037#0/1  
ab`a[babaaaY`aaaa\_a` ``^aa¥]`a¥X]aa\_]`a¥\_  
@HWI-EAS443:3:85:716:786#0/1  
GTTGAAAGACACCCACGGTCGATTGAGCCATGCCAGTTA  
+HWI-EAS443:3:85:716:786#0/1  
a\_ab` ``a` `a^`\_a`aa[^`\_\_^`\_[Y[¥X¥QYY¥¥Y\_¥  
@HWI-EAS443:3:85:764:852#0/1  
GGCGTGGATTGTCTCCGAAAATCCCCTGCATATGTATCC  
+HWI-EAS443:3:85:764:852#0/1  
]b\_^Vaa[bb`VU]aUb^H\_R`\_aa\_a`aaa\_a`ZSaa`^  
@HWI-EAS443:3:85:882:1795#0/1  
GGCCTTGCTAAATGACAAACATTCCAATGGAACCATTAAA  
+HWI-EAS443:3:85:882:1795#0/1  
`aabaaaaabb`aababaaaaaaa]aba``aaa``\_`\_  
@HWI-EAS443:3:85:948:1526#0/1  
GTCAGGATATAGCGGGAGTTTTGTTTCAGCATCCAGAACTA  
+HWI-EAS443:3:85:948:1526#0/1  
\_S`]ab[^\_aa`aaaa\_aZ``VV`]XX^^\_]``T`Y`^  
@HWI-EAS443:3:85:992:1573#0/1  
TCCAGATTCTGGTTGAAAGACACCCACGGTCGATTGAGC  
+HWI-EAS443:3:85:992:1573#0/1  
aaaUVZaaYa\_[]`a^^a`aZ[aVRP^Q\_SQZOK[^[UUUM  
@HWI-EAS443:3:86:1008:276#0/1  
AAGTGCTTGTCATGATGGCATCAATTGGCTAACAATTGGA  
+HWI-EAS443:3:86:1008:276#0/1  
aaaY]Zaaba`aab`aba^aa\_a`aa\_]aa`\_`^a`\_\_\_\_  
@HWI-EAS443:3:86:1033:562#0/1  
CTTGGGAATCAAAATCAGATTGAAACATGCAATCAAAGCG  
+HWI-EAS443:3:86:1033:562#0/1  
abb`bbbbbbbbbbabbabbbaaaa`b^aaaaba`aa`  
@HWI-EAS443:3:86:1139:834#0/1  
ATTCCAGATTCTGGTTGAAAGACACCCACGGTCGATTGGA  
+HWI-EAS443:3:86:1139:834#0/1  
]ba]aa\_`a`aab]abbaa``Y^^¥]a\_a`GR[MNS[`¥  
@HWI-EAS443:3:86:1193:128#0/1  
CTGTTGAAAGACACCCACGGTCGATTGAGCCATGCCAG  
+HWI-EAS443:3:86:1193:128#0/1  
`b`[b`]TaZaUWT]a]bXbaa]H^WTGX`\_¥GM`aGZ]\_  
@HWI-EAS443:3:86:1469:707#0/1  
ATGCCATCATGACAAGCACTTGCTGACCAAGCGACTGACT  
+HWI-EAS443:3:86:1469:707#0/1  
abbaaab`ab`]`bbaaaSba¥J`aWJT[b`WaaVb`\_0`



@HWI-EAS443:3:86:1552:368#0/1  
TGGGCTCCTGTCTTTAATGGTTCCATTGGAATGTTTGTCA  
+HWI-EAS443:3:86:1552:368#0/1  
]bbb`a\_abbabbbbbbba[b]a`bb\_baa`babb`aGa  
@HWI-EAS443:3:86:159:1105#0/1  
ACGATACTGGACCACAACCTGCCTGTCTTATCATTAGGGCG  
+HWI-EAS443:3:86:159:1105#0/1  
aaaa`^]aaXQ^`]]Z`a`X]]^\_W^^^[^`\_^\_T^]`^]  
@HWI-EAS443:3:86:1604:583#0/1  
CATGTGTGTGCAGGATAACTGGCATGGCTCGAATCGACC  
+HWI-EAS443:3:86:1604:583#0/1  
aabbbbbbabbabbabb`bbbabb\_b[PTbZRYWDL  
@HWI-EAS443:3:86:1621:1526#0/1  
ATATCATGCTCCCCCTTGAATGCAGAACCTTCTTCTTGA  
+HWI-EAS443:3:86:1621:1526#0/1  
aaaaa\_\_`ba^VY`\_a``[a\_a]QZZ`G¥`^\_\_]]][¥¥  
@HWI-EAS443:3:86:1640:391#0/1  
CAACTGCCTGTCTTATCATTAGGGCGTGGATTGTCTCCGA  
+HWI-EAS443:3:86:1640:391#0/1  
`baa`a[Ia¥WQ`]Ub`aVSQM[WWUXa`¥a^X^LFWOVF  
@HWI-EAS443:3:86:1686:261#0/1  
CTTGAATGCAGAACCTTCTTCTTACTCAAGGGGCCTTG  
+HWI-EAS443:3:86:1686:261#0/1  
aba``¥bbbabb\_Y]b\_¥aaX``abSa]aab¥ab^`\_b`  
@HWI-EAS443:3:86:215:1527#0/1  
CTTGTGTTCTCAATATATTGTTTCTCCAACCTTGATAGT  
+HWI-EAS443:3:86:215:1527#0/1  
`U]a]¥Vbbb`QUa^^¥¥\_b`¥\_aUW`P¥a]aVaXHYN  
@HWI-EAS443:3:86:233:341#0/1  
GACCAACCCACAGTGTCACTGTTTACACCACAAAAGGATA  
+HWI-EAS443:3:86:233:341#0/1  
]babbbbbbbaa]b¥a[aaaa`aaaaba`a`a`]aa^`^a  
@HWI-EAS443:3:86:234:218#0/1  
GGCTCGAATCGACCGTGGGTGTCTTTCAACCAGAATCTGG  
+HWI-EAS443:3:86:234:218#0/1  
abbba\_Q\_^\_]ZaaaQbb\_P`SV[aa]¥]¥^``Va`]\_aa  
@HWI-EAS443:3:86:240:191#0/1  
AACCCTAATGAGCTGTCCTATTGGTGAAGTTCCTCTCCA  
+HWI-EAS443:3:86:240:191#0/1  
][Q^][a[a\_U\_`aaUYXaR]`baQ`WV[S`[PV]PUU[U  
@HWI-EAS443:3:86:246:1351#0/1  
GGTGTGGATAGGGAGAACTAAAAGCATTAGTTCAAGAA  
+HWI-EAS443:3:86:246:1351#0/1  
a`Lb\_bbaaaaa^VZaaaa`aaaa\_ab```a]^`a]\_]\_  
@HWI-EAS443:3:86:299:1150#0/1  
AACTGCCTGTCTTATCATTAGGGCGTGGATTGTCTCCGAA  
+HWI-EAS443:3:86:299:1150#0/1  
abYbaZa^WQWa]a]aaY]T]Ya`^[]]a\_]`GVS[\_aY\_  
@HWI-EAS443:3:86:29:1856#0/1  
CAAGAGTTGGAGAAACAATATATTGAGAACAAGAGTCT

+HWI-EAS443:3:86:29:1856#0/1  
aNababababbaaZUaabb¥abbbbbbababbb` `a\_aa  
@HWI-EAS443:3:86:334:351#0/1  
ATCAAGAGTTGGAGAAACAATATATTGAGAACAAGAGT  
+HWI-EAS443:3:86:334:351#0/1  
aa`\_\_aU`^aa`\_\_¥a\_a`\_\_`\_a\_a^aaa`\_¥`^`\_a^\_W  
@HWI-EAS443:3:86:344:1995#0/1  
ACTGCCTGTCTTATCATTAGGGCGTGGATTGTCTCCGAAA  
+HWI-EAS443:3:86:344:1995#0/1  
`b^W\_baa\_baaaaa^aa^XY]a^¥^^^`aYZ`^`\_T¥`a  
@HWI-EAS443:3:86:349:1637#0/1  
TAGCCACTCAATTCAACTTGGGAATCAAAATCAGATTGAA  
+HWI-EAS443:3:86:349:1637#0/1  
a\_a\_W\_aaaa`aa^¥a^aZOXQZ`\_\_]XV[^`\_]`\_\_¥  
@HWI-EAS443:3:86:367:907#0/1  
GGGGGATGTGTTTGTGCATAAGGGAACCATTATCATGC  
+HWI-EAS443:3:86:367:907#0/1  
aaaaX` `aYVa]^`^YVQX0[\_SWZ[^Y[^Z`^XZZ^^^\_  
@HWI-EAS443:3:86:411:1940#0/1  
CGATACTGGACCACAACCTGCCTGTCTTATCATTAGGGCGT  
+HWI-EAS443:3:86:411:1940#0/1  
`\_]`baa`^Vaa`a`a[\_a`^^V¥V¥`[Y^`\_\_¥NW`]W  
@HWI-EAS443:3:86:452:403#0/1  
GTCAGGATATAGCGGGAGTTTTGTTTCAGCATCCAGAACTA  
+HWI-EAS443:3:86:452:403#0/1  
¥Yaabaa]abb` `b¥[P\_Z\_a`UP`^` `¥\_V¥`^XXNY]  
@HWI-EAS443:3:86:458:1977#0/1  
CTTGTCATGATGGCATCAATTGGCTAACAATTGGAATTC  
+HWI-EAS443:3:86:458:1977#0/1  
aaaa^abaaaaa`ba`baaa` `aaaaaaaaaa\_\_a` ` `a  
@HWI-EAS443:3:86:516:1849#0/1  
ATCATGACAAGCACTTGCTGACCAAGCGACTGACTCAAAT  
+HWI-EAS443:3:86:516:1849#0/1  
a\_ababaabba]aaaa`bb` `YZ\_aaa`\_a`aaaa`a`¥\_  
@HWI-EAS443:3:86:527:1468#0/1  
TGCAGAACCTTCTTCTTACTCAAGGGCCTTGCTAAATG  
+HWI-EAS443:3:86:527:1468#0/1  
UZ[^`¥^bZa^`\_Za]]b`Za¥¥\_KZa^¥aXaaa^\_] ^RZ]  
@HWI-EAS443:3:86:563:810#0/1  
CAACTGCCTGTCTTATCATTAGGGCGTGGATTGTCTCCGA  
+HWI-EAS443:3:86:563:810#0/1  
aa`ababaabaaababaaaaa\_a` ` `aa\_a`\_`\_a`^`\_  
@HWI-EAS443:3:86:574:1683#0/1  
AAGACACCCACGGTCGATTCGAGCCATGCCAGTTATCCCT  
+HWI-EAS443:3:86:574:1683#0/1  
aaaaabaa`a\_\_YLM\_[S[^`¥US¥^]UWW\_VVNUUQU¥¥Q  
@HWI-EAS443:3:86:623:588#0/1  
CGCTTGGTCAGCAAGTGCTTGTTCATGATGGCATCAATTGG  
+HWI-EAS443:3:86:623:588#0/1  
a\_aaaba^bbaaa`b`baaab\_a`abaa`\_aaaaa\_a`aY

@HWI-EAS443:3:86:681:1577#0/1  
GTCAGGATATAGCGGGAGTTTTGTTCCAGCATCCAGAACTA  
+HWI-EAS443:3:86:681:1577#0/1  
`XQPN`U]`X\_W]`^WW^KRS\_]X¥]]^FOPLV[NXQGLX  
@HWI-EAS443:3:86:699:1442#0/1  
GGATTTTCGGAGACAATCCACGCCCTAATGATAAGACAGG  
+HWI-EAS443:3:86:699:1442#0/1  
[^\_`babbb\_abbabbbbbbbaa`ba\_[bbaaaa`a\_`  
@HWI-EAS443:3:86:755:1315#0/1  
CACAGTGTACTGTTTACACCACAAAAGGATATGCTGCTC  
+HWI-EAS443:3:86:755:1315#0/1  
aab]aV¥^aa`ab\_aZa[``^[`a\_`^a\_] [^^`¥QYWYU  
@HWI-EAS443:3:86:772:660#0/1  
CTCCCCCTTGAATGCAGAACCTTCTTCTTACTCAAGGG  
+HWI-EAS443:3:86:772:660#0/1  
abbabbbb\_Zaab[`bba]¥bba[babbab\_a`aa\_a`  
@HWI-EAS443:3:86:774:359#0/1  
GGGACAGACAATAACTTCTCAATAAAGCAAGATATCGTAG  
+HWI-EAS443:3:86:774:359#0/1  
a¥ZW]^b`\_T[`] [\_aaa^¥Ua^`Z]Y\_\_T\_ [¥\_^^X^Y  
@HWI-EAS443:3:86:77:1055#0/1  
CTCGAATCGACCGTGGGTGTCTTTCAACCAGAATCTGGAA  
+HWI-EAS443:3:86:77:1055#0/1  
abbbb`aa]b\_\_a`aba[a[[]`aa¥UY`^a`¥`a^\_` [¥Z  
@HWI-EAS443:3:86:812:1340#0/1  
AGTCAGTCGCTTGGTCAGCAAGTGCTTGTGCATGATGGCAT  
+HWI-EAS443:3:86:812:1340#0/1  
\_¥`ba^aba]aab[`^`\_¥`X`aaaa\_¥` ````\_WZaY  
@HWI-EAS443:3:86:829:1077#0/1  
GGTTGGTCTTGGCCAGACGGTGCTGAGTTGCCATTTACCA  
+HWI-EAS443:3:86:829:1077#0/1  
a`^Uab`^`bUUbbaab`ba]\_^Z¥X\_\_XY]]]aaaaV^¥  
@HWI-EAS443:3:86:829:2027#0/1  
CAAAGGATATGCTGCTCCCGCTAGTCCAGATTGTGTTCT  
+HWI-EAS443:3:86:829:2027#0/1  
`UZ¥abb\_Z\_\_P^^VWYaYX^a\_aa[¥a]ZZ]¥[RYXZZ[  
@HWI-EAS443:3:86:844:920#0/1  
GGGCCAGAAATTCCAATTGTTAGCCAATTGATGCCATCAT  
+HWI-EAS443:3:86:844:920#0/1  
aaabb¥^`b`^a^aaabaaaaaaabaa`aaaa]a\_`aa  
@HWI-EAS443:3:86:851:1897#0/1  
CACATGTGTGTGCAGGGATAACTGGCATGGCTCGAATCGA  
+HWI-EAS443:3:86:851:1897#0/1  
abaabbaU]^aa`aa\_`aaaabba¥\_`P`a\_a^U][L0^  
@HWI-EAS443:3:86:861:1868#0/1  
AAATGGCAACTCAGCACCGTCTGGCCAAGACCAACCCACA  
+HWI-EAS443:3:86:861:1868#0/1  
`bW]^Z\_bba^`aab]^V¥`aZYZaa`¥]^ [a[XW`NS\_  
@HWI-EAS443:3:86:884:979#0/1  
GGGAACCATTTCATATCATGCTCCCCCTTGAATGCAGAAC

+HWI-EAS443:3:86:884:979#0/1  
U\_\_X\_a¥S]GMa]¥X\_^[\_^^b`Y`adWUY[\_aa\_[^\_¥S  
@HWI-EAS443:3:86:89:241#0/1  
CATATGCAGTGGGATTTTCGGAGACAATCCACGCCCTAAT  
+HWI-EAS443:3:86:89:241#0/1  
abababbaZW¥]¥X\_aa[^aaZY^`aab`^baaa]]^`a]  
@HWI-EAS443:3:86:904:549#0/1  
GTGGGATTTTCGGAGACAATCCACGCCCTAATGATAAGAC  
+HWI-EAS443:3:86:904:549#0/1  
[[^`\_a^aaaa```aaaa`\_¥]^`VW^`aa``\_a`XY[S  
@HWI-EAS443:3:86:946:291#0/1  
CTGGATGCTGAACAAAACCTCCCGCTATATCCTGACCACTC  
+HWI-EAS443:3:86:946:291#0/1  
ababaababbbbbbba\_bbaa`baaaabba^aab\_aaaa\_  
@HWI-EAS443:3:86:95:801#0/1  
ATCAATTGGCTAACAATTGGAATTTCTGGCCCAGACAATG  
+HWI-EAS443:3:86:95:801#0/1  
aaaaZa`P\_\_`]XXZa^\_V¥aaS]\_aZ\_a\_V][a^¥^¥¥Y  
@HWI-EAS443:3:86:990:1187#0/1  
TGAGAACACAAGAGTCTGAATGTGCATGTGTAATGGTTC  
+HWI-EAS443:3:86:990:1187#0/1  
aaaaaaaaaaaa\_``]]`a`\_aa^a]^a`^a\_\_\_\_\_`^Z^]  
@HWI-EAS443:3:87:1033:735#0/1  
AGAAATTCCAATTGTTAGCCAATTGATGCCATCATGACAA  
+HWI-EAS443:3:87:1033:735#0/1  
abaabaaaaababaabb¥aaaaaa`aa\_aa`\_aaaa`aa  
@HWI-EAS443:3:87:1033:860#0/1  
GGGGGATGTGTTTGTGCATAAGGGAACCATTTCATATCATGC  
+HWI-EAS443:3:87:1033:860#0/1  
a`^baa^aaa]aa¥G]\_]b]a`X¥\_[][\_aX^`[a]\_`X\_  
@HWI-EAS443:3:87:109:933#0/1  
CTTTAACACAGCCACTGCCCCATTGTCTGGCCAGAAATT  
+HWI-EAS443:3:87:109:933#0/1  
abaaabaaabaa`]a]\_aa\_a````]a`^]]\_`^\_[-]Y  
@HWI-EAS443:3:87:1137:305#0/1  
CAACTTTGCTGCTGGACAGTCAGTGGTTTCCGTGAAATTA  
+HWI-EAS443:3:87:1137:305#0/1  
ab``bbb`\_baabbb\_aab\_Z[^\_aZWa^W`¥``^aaaaa  
@HWI-EAS443:3:87:1143:1073#0/1  
GCCCTGTTAGTTCTGGATGCTGAACAAAACCTCCCGCTATA  
+HWI-EAS443:3:87:1143:1073#0/1  
`UaRV`UXORRSYY]`UU¥¥QVQVZYaa]YYVa^^`\_^[^  
@HWI-EAS443:3:87:1194:179#0/1  
CGACCGTGGGTGTCTTTCAACCAGAATCTGGAATATCAGA  
+HWI-EAS443:3:87:1194:179#0/1  
abbb\_bbbababbb]b¥ab`¥^\_a\_bb^bb\_bbbbb`aaa  
@HWI-EAS443:3:87:1297:1116#0/1  
ATTCAAATACGGCAATGGTGTGGATAGGGAGAACTAAA  
+HWI-EAS443:3:87:1297:1116#0/1  
a`aabaaaaY`]Y\_\_aaaU``aa^aY]a^aa[\_\_\_\_]a`\_a

@HWI-EAS443:3:87:1437:1145#0/1  
TGCCCCCTAATTTACGGAAACCACTGACTGTCCAGCAGC  
+HWI-EAS443:3:87:1437:1145#0/1  
^^ZX]bX^^STa]S^\_a\_^^`ab^abaYabLDXUVNO]W  
@HWI-EAS443:3:87:1453:1164#0/1  
AACAGACACTATCAAGAGTTGGAGAAACAATATATTGAGA  
+HWI-EAS443:3:87:1453:1164#0/1  
aa`abaab`ba`aaaa\_a^bbaa``a^``aa\_`aaa`¥\_`  
@HWI-EAS443:3:87:1685:905#0/1  
ATTCCAGATTCTGGTTGAAAGACACCCACGGTCGATTCGA  
+HWI-EAS443:3:87:1685:905#0/1  
a`\_^]`aaba`ab]aaa^`a`^\_aZ[a[a\_R\_ZUY[\_ZN  
@HWI-EAS443:3:87:176:359#0/1  
GGGACAGACAATAACTTCTCAATAAAGCAAGATATCGTAG  
+HWI-EAS443:3:87:176:359#0/1  
`W]S\_^a`aX[`]Q¥[`]W]Y¥^[Z[¥``\_\_][YZPVY  
@HWI-EAS443:3:87:202:1580#0/1  
CAATGGTGTGGATAGGGAGAACTAAAAGCATTAGTTCA  
+HWI-EAS443:3:87:202:1580#0/1  
`aaa`Z[baaaaa\_]Y\_W`^Y^`V^aa`aa`\_\_^^]a  
@HWI-EAS443:3:87:214:1312#0/1  
AGCCCATCCACTAACAGGGCAGAGAGGAATTGCCCGCT  
+HWI-EAS443:3:87:214:1312#0/1  
¥0^aZa`aa]`ZZ]`aZ¥K¥\_ZMY[NV\_ZP]`¥¥¥¥¥WWU  
@HWI-EAS443:3:87:242:100#0/1  
CCTAATTATCACTATGAGGAATGCTCCTGTTATCCTGATT  
+HWI-EAS443:3:87:242:100#0/1  
aaa\_``^aaa\_a¥`a`aa`a``\_\_aa^\_``\_\_^aY\_^  
@HWI-EAS443:3:87:281:467#0/1  
GTTTGGATAGGGAGAACTAAAAGCATTAGTTCAAGAAACG  
+HWI-EAS443:3:87:281:467#0/1  
aabbba\_aa^``aaaaaaa`aaaaaa\_ab]`^\_\_a\_``^\_  
@HWI-EAS443:3:87:308:824#0/1  
TGCAATCAAAGCGTCATTACTTATGAAAACAACACTTGGG  
+HWI-EAS443:3:87:308:824#0/1  
]^abbb`\_baba\_\_aaaab\_a\_]ab\_[aaba^\_aaa\_aa]  
@HWI-EAS443:3:87:33:1404#0/1  
CTCATTAGGGTTTCGATATGGGCTCCTGTCTTTAATGGTTC  
+HWI-EAS443:3:87:33:1404#0/1  
aa`WaaZ\_¥\_X\_WV\_^OY[F0aSOW`Y]\_\_]XHR¥Z^SWa  
@HWI-EAS443:3:87:357:1125#0/1  
ACTGCATATGTATCCTATCTGATATTCCAGATTCTGGTTG  
+HWI-EAS443:3:87:357:1125#0/1  
aaaaaaaaabaa\_aaaaaaaaaaaaaaaa`aaa`a``aa`[`a  
@HWI-EAS443:3:87:374:932#0/1  
TAGGGCGTGGATTGTCTCCGAAAATCCCACTGCATATGTA  
+HWI-EAS443:3:87:374:932#0/1  
Z`baabaabbb`bbWba^aa```aaba`````^a`````T`  
@HWI-EAS443:3:87:391:155#0/1  
GGGTTGGTCTTGGCCAGACGGTGCTGAGTTGCCATTTACC

+HWI-EAS443:3:87:391:155#0/1  
aba\_\_a]R\_a`aaUXT]TH¥\_PSXTQR`RwxMVKY]\_XZ\_  
@HWI-EAS443:3:87:476:1386#0/1  
TCCAGATTCTGGTTGAAAGACACCCACGGTCGATTGAGC  
+HWI-EAS443:3:87:476:1386#0/1  
`\_abba`babab¥a`aaa``baba``\_]P^`\_¥^¥\_^¥\_  
@HWI-EAS443:3:87:488:494#0/1  
ACAATATATTGAGAACACAAGAGTCTGAATGTGCATGTGT  
+HWI-EAS443:3:87:488:494#0/1  
]b]baa^abbb]\_Y]a`a]Ra\_aSa[``\_aaa0a\_\_a^La]  
@HWI-EAS443:3:87:502:1539#0/1  
ATGGTGTGGATAGGGAGAATAAAAGCATTAGTTCAAG  
+HWI-EAS443:3:87:502:1539#0/1  
aaa`Sa\_aa`b[abb\_aa\_\_bba`¥aa\_aa`\_]a[`aa^a  
@HWI-EAS443:3:87:511:688#0/1  
GGGAGAATAAAAGCATTAGTTCAAGAAACGGTTTTGAGA  
+HWI-EAS443:3:87:511:688#0/1  
aaa\_\_a`aaaa`a\_`a\_`a\_`a\_`a`aYa\_`a`[\_`\_aZ\_^  
@HWI-EAS443:3:87:544:1456#0/1  
GCTCCATTAGACGATACTGGACCACAACCTGCCTGTCTTAT  
+HWI-EAS443:3:87:544:1456#0/1  
\_\_`W¥a¥¥Wb¥¥abb\_\_0\_¥W¥`X¥aY]\_^\_U\_¥\_]`\_Y  
@HWI-EAS443:3:87:682:988#0/1  
CACAAAAGGATATGCTGCTCCCGCTAGTCCAGATTGTGTT  
+HWI-EAS443:3:87:682:988#0/1  
abbab]ba\_aab\_aZa]aaX`[\_`\_aaa\_abaa]¥aa\_a¥]  
@HWI-EAS443:3:87:772:57#0/1  
TCGGTCATTACAGTAAAGCAAGAACCATTTACACATGCAC  
+HWI-EAS443:3:87:772:57#0/1  
abbaQMRXbYH^^S\_aa[V``aYa]\_aW`a\_G`\_aa^G^a  
@HWI-EAS443:3:87:820:1233#0/1  
GGCTCCTGTCTTTAATGGTTCCATTGGAATGTTTGTCTATT  
+HWI-EAS443:3:87:820:1233#0/1  
aa\_`ZWO[]]¥a\_VTYZXPX`^SY`W^XYQQU¥\_] [[QF¥  
@HWI-EAS443:3:87:837:1024#0/1  
CTCTTGTGTTCTCAATATATTGTTTCTCCAACCTTGATA  
+HWI-EAS443:3:87:837:1024#0/1  
a\_`\_H¥^ZWa^¥baa`^`a\_aa`aa[a\_aa``^YVa]Yb  
@HWI-EAS443:3:87:84:345#0/1  
AATCAAAGCGTCATTACTTATGAAAACAACACTTGGGTAA  
+HWI-EAS443:3:87:84:345#0/1  
a`\_aaa]`[\_`Y^aaa`Z```\_\_^\_\_\_\_\_[]Z]]Y[[  
@HWI-EAS443:3:87:868:853#0/1  
GGGGGATGTGTTTGTCTATAAGGGAACCATTCATATCATGC  
+HWI-EAS443:3:87:868:853#0/1  
a\_Xa¥¥\_\_L`U^aaS\_`a¥¥\_YPaY[``\_T¥ZUW¥Y\_] ^]  
@HWI-EAS443:3:87:875:636#0/1  
AGCACCGTCTGGCCAAGACCAACCCACAGTGTCACTGTTT  
+HWI-EAS443:3:87:875:636#0/1  
a`aaaab]aabZaaaa\_]```a`a`\_`a`^a¥¥¥¥`aW`\_`

@HWI-EAS443:3:87:912:1557#0/1  
TTCAAATACGGCAATGGTGTGGATAGGGAGAACTAAAA  
+HWI-EAS443:3:87:912:1557#0/1  
a`¥aaaa`aab[`]^\_]U)`baa```]¥`a\_\_\_aWaaa`a  
@HWI-EAS443:3:87:922:763#0/1  
CAACTTTGCTGCTGGACAGTCAGTGGTTTCCGTGAAATTA  
+HWI-EAS443:3:87:922:763#0/1  
abbabb]aaababba\_aaa\_`ab]b]Vaa\_\_¥]a``a\_\_`  
@HWI-EAS443:3:87:94:2039#0/1  
ATTCATATCATGCTCCCCCTTGAATGCAGAACCCTTCTTC  
+HWI-EAS443:3:87:94:2039#0/1  
aa`bb`baaaa\_b`U`VaY\_`\_]`a]Ra\_[]`\_¥XXaU]\_  
@HWI-EAS443:3:87:955:1937#0/1  
GACCGTGGGTGTCTTTCAACCAGAATCTGGAATATCAGAT  
+HWI-EAS443:3:87:955:1937#0/1  
aaQabab]a^`a^bbb`baRabaa``Wbbaa`baa\_a`\_a  
@HWI-EAS443:3:87:963:1977#0/1  
GGGATGTGTTTGTGATAAGGGAACCATTATCATGCTC  
+HWI-EAS443:3:87:963:1977#0/1  
`bbb\_bYbUaaaaabbbbabbaaaabbab\_aba\_bbaaab  
@HWI-EAS443:3:87:968:1246#0/1  
CAAGAGTCTGAATGTGCATGTGTAAATGGTTCTTGCTTTA  
+HWI-EAS443:3:87:968:1246#0/1  
abaaaa`bbbb`ab`babbb`X`aabbaab\_aaa\_abaa  
@HWI-EAS443:3:87:973:803#0/1  
TCCCGTAGTCCAGATTGTGTTCTCTTTGGGTCGCCCTCT  
+HWI-EAS443:3:87:973:803#0/1  
aaaba[aaba`¥`\_aa`aV]aaaaaaa`WT¥¥[`[\_`\_V]  
@HWI-EAS443:3:87:993:1020#0/1  
CAAATCAGATTGAAACATGCAATCAAAGCGTCATTACTT  
+HWI-EAS443:3:87:993:1020#0/1  
\_bababbbbbbaaaaaaaaa`baa^aa`a`a\_aaaaa\_aa  
@HWI-EAS443:3:88:1107:338#0/1  
CTGCTGGACAGTCAGTGGTTTCCGTGAAATTAGCGGGCAA  
+HWI-EAS443:3:88:1107:338#0/1  
abbabbbabb``ab\_bb`bbaa]ab`aaa`X`Vaa^X^a  
@HWI-EAS443:3:88:1148:678#0/1  
TTTTCGGAGACAATCCACGCCCTAATGATAAGACAGGCAG  
+HWI-EAS443:3:88:1148:678#0/1  
\_\_`aaa^a^][\_\_\_¥^`a^^]`]W]¥Z]aa^BBBBBBBBB  
@HWI-EAS443:3:88:1151:878#0/1  
TGCTGCTCCCGTAGTCCAGATTGTGTTCTCTTTGGGTCG  
+HWI-EAS443:3:88:1151:878#0/1  
abaaa`\_a^``aaaa]a`^a¥aa`[^¥\_[\_`¥``Xa\_QYa  
@HWI-EAS443:3:88:1357:1930#0/1  
AGCCACTCAATTCAACTTGGGAATCAAATCAGATTGAAA  
+HWI-EAS443:3:88:1357:1930#0/1  
a`¥bbbaaaaaabaabaaba`a^¥a\_aaaY¥\_aY`aaaa  
@HWI-EAS443:3:88:1372:129#0/1  
CTCCCGCTATATCCTGACCACTCATTTATTCCTACGATAT

+HWI-EAS443:3:88:1372:129#0/1  
a\_abb`babaWbaab¥Vb¥b`a\_bbabbSI\_baa\_a^b  
@HWI-EAS443:3:88:1415:1228#0/1  
CATATGTTAACATCAGCAACACCAACTTTGCTGCTGGACA  
+HWI-EAS443:3:88:1415:1228#0/1  
abab`bbbb`abbaabaa`bbabbaabbbabbaabb`b  
@HWI-EAS443:3:88:1468:1053#0/1  
GACTGGGACAGACAATAACTTCTCAATAAAGCAAGATATC  
+HWI-EAS443:3:88:1468:1053#0/1  
aaabbbba¥babaaababa]aba`\_aa`a`a`Xb[b\_\_aa\_  
@HWI-EAS443:3:88:154:1208#0/1  
GTGAAGTTCCCTCTCCATACAACCTCAAGATTTGAGTCAGT  
+HWI-EAS443:3:88:154:1208#0/1  
a[a]aYU[aaV\_\_a`a`]`R``\_a^V^\_\_a^``\_X[`VW  
@HWI-EAS443:3:88:1631:284#0/1  
TGCCTGTCTTATCATTAGGGCGTGGATTGTCTCCGAAAAT  
+HWI-EAS443:3:88:1631:284#0/1  
KYTQUYUJ¥`aa]`b`bYbaa\_aabY\_[`UP]aa\_\_a\_¥X  
@HWI-EAS443:3:88:1692:1910#0/1  
AAAGACACCCACGTCGATTTCGAGCCATGCCAGTTATCCC  
+HWI-EAS443:3:88:1692:1910#0/1  
aaaa^baaXb`\_b^OI[aZ`^YMRMTaaKHwAN^\_^DLE  
@HWI-EAS443:3:88:1789:668#0/1  
GCCCCAATTATCACTATGAGGAATGCTCCTGTTATCCTG  
+HWI-EAS443:3:88:1789:668#0/1  
¥`abbbbabbbbbbabaaaaabababababbbabbbbaabb  
@HWI-EAS443:3:88:192:706#0/1  
ATCAAAATCAGATTGAAACATGCAATCAAAGCGTCATTAC  
+HWI-EAS443:3:88:192:706#0/1  
^HOUR^]\_S\_X^V\_TUM[P`\_¥a`XFW^QPQTLWWZZ[L  
@HWI-EAS443:3:88:235:1473#0/1  
ATCATGCTCCCCCTTGAATGCAGAACCTTCTTCTGACT  
+HWI-EAS443:3:88:235:1473#0/1  
aa`aaaaaa`\_^`^^^`\_^``[[`\_^`¥`\_¥`\_¥]`^^  
@HWI-EAS443:3:88:249:1488#0/1  
GTCCCAGTCCATCCGTTCCGATCCCAAATCATCTCAAAAC  
+HWI-EAS443:3:88:249:1488#0/1  
a[T]¥``[`a\_\_a¥QXNVa\_K¥¥UH]]^Z¥SP^`\_[[X`  
@HWI-EAS443:3:88:273:1997#0/1  
ATTGTCTCCGAAAATCCCACTGCATATGTATCCTATCTGA  
+HWI-EAS443:3:88:273:1997#0/1  
a`a`W\_abba\_U\_^]Zabaa]]a^\_\_Y¥X`\_a`]]Y\_Y]`  
@HWI-EAS443:3:88:339:494#0/1  
CAGACATATGTTAACATCAGCAACACCAACTTTGCTGCTG  
+HWI-EAS443:3:88:339:494#0/1  
Z\_Z`\_aY`aa[`baab\_\_bbab\_baaaaaab`ab[]aa[`  
@HWI-EAS443:3:88:361:895#0/1  
CAGACATATGTTAACATCAGCAACACCAACTTTGCTGCTG  
+HWI-EAS443:3:88:361:895#0/1  
XJZI\_`^`\_`\_a^¥\_baa]^bbb``a^GH\_QZaaaSaa[`a



@HWI-EAS443:3:88:367:485#0/1  
ATTCATATCATGCTCCCCCTTGAATGCAGAACCTTCTTC  
+HWI-EAS443:3:88:367:485#0/1  
aKb`bab\_PX^aUX`La`a¥\_baQZTa`^]a\_\_\_\_\_][`  
@HWI-EAS443:3:88:369:894#0/1  
TGATATTCCAGATTCTGGTTGAAAGACACCCACGGTCGAT  
+HWI-EAS443:3:88:369:894#0/1  
`aabababbbbaaaaaaa]abaa`aa\_`aa¥`a`^¥\_W]\_  
@HWI-EAS443:3:88:378:616#0/1  
ATGGCATCAATTGGCTAACAATTGGAATTTCTGGCCCAGA  
+HWI-EAS443:3:88:378:616#0/1  
abbbb\_abbbaaaaaa[`aaabaa`X`aaaa`aa]]aa\_`  
@HWI-EAS443:3:88:399:349#0/1  
CAAGAAGAAGGTTCTGCATTCCAAGGGGAGCATGATATG  
+HWI-EAS443:3:88:399:349#0/1  
^]Z`a\_XS¥^PY\_a]]a`\_\_\_\_`X\_]NXWYH]X\_¥¥\_]^^`  
@HWI-EAS443:3:88:408:1123#0/1  
TGCCCCGTAATTTACGGAACCACTGACTGTCCAGCAGC  
+HWI-EAS443:3:88:408:1123#0/1  
XXbbaZbV¥\_bbbbT[`ba`bbbZaaaa`a^^aaS¥ZYZ`  
@HWI-EAS443:3:88:445:242#0/1  
GCAGAACCTTCTTCTTACTCAAGGGCCTTGCTAAATGA  
+HWI-EAS443:3:88:445:242#0/1  
abaaaaaaaa`a`a`a`aa\_\_\_a`\_\_`\_]\_\_\_\_\_a`^`\_^  
@HWI-EAS443:3:88:483:1632#0/1  
CATCATGACAAGCACTTGCTGACCAAGCGACTGACTCAAA  
+HWI-EAS443:3:88:483:1632#0/1  
[bbbabbb`\_\_`\_abbaba`\_babaababa`\_\_`a\_bb[¥  
@HWI-EAS443:3:88:525:1866#0/1  
CTCTGATTAGTTCAACCCAGAAGCAAGTCTTATACAATC  
+HWI-EAS443:3:88:525:1866#0/1  
`bbbbba\_]][ba\_b`W`ba\_b`ab`]]¥b``bbaaa``]  
@HWI-EAS443:3:88:548:1528#0/1  
CGCTTGGTCAGCAAGTGCTTGTTCATGATGGCATCAATTGG  
+HWI-EAS443:3:88:548:1528#0/1  
aa\_^]¥ZSaa`[¥¥SU`\_]\_\_TZ\_¥Y[^^[\_\_\_a\_\_`^WR  
@HWI-EAS443:3:88:54:1247#0/1  
CGCTTGGTCAGCAAGTGCTTGTTCATGATGGCATCAATTGG  
+HWI-EAS443:3:88:54:1247#0/1  
aaa`^]`]aaaa¥¥]Uaa\_\_\_]a`\_\_WZa]`\_Y\_`^]TWZ  
@HWI-EAS443:3:88:554:747#0/1  
CAAAATCAGATTGAAACATGCAATCAAAGCGTCATTACTT  
+HWI-EAS443:3:88:554:747#0/1  
aa`a`baabaaaaababaaaaaa`\_a`¥a\_^^^`a\_\_^aa  
@HWI-EAS443:3:88:559:565#0/1  
CCAGTCCATCCGTTCCGATCCCAAATCATCTCAAAACCGT  
+HWI-EAS443:3:88:559:565#0/1  
aabb^bbbbaba`aaaa`\_`a`aaaaa`\_aaa`aaa`\_`  
@HWI-EAS443:3:88:563:1650#0/1  
CGCTTGGTCAGCAAGTGCTTGTTCATGATGGCATCAATTGG

+HWI-EAS443:3:88:563:1650#0/1  
a^\_a\_`\_Ya`aa[]^M¥a)``Za][U]\_`¥a\_`^a\_]\_^]  
@HWI-EAS443:3:88:575:622#0/1  
TCTGGGCCAGAAATTCCAATTGTTAGCCAATTGATGCCAT  
+HWI-EAS443:3:88:575:622#0/1  
abaa\_aaab`\_`aabaaba`aaaaa^aaa\_a\_\_\_a`^\_a`  
@HWI-EAS443:3:88:583:1821#0/1  
TGTGGGTTGGTCTTGGCCAGACGGTGCTGAGTTGCCATTT  
+HWI-EAS443:3:88:583:1821#0/1  
S\_Y]^XZR[^`[\_a`L\_Z^aaa¥\_\_RWW]\_J`PXSaVZ^  
@HWI-EAS443:3:88:644:1604#0/1  
AAACAATATATTGAGAACACAAGAGTCTGAATGTGCATGT  
+HWI-EAS443:3:88:644:1604#0/1  
abaa`\_`aaaaaaaa`baaaa¥\_\_\_¥\_aaa`aa^a\_\_a`]  
@HWI-EAS443:3:88:645:434#0/1  
TGCATATGTATCCTATCTGATATTCCAGATTCTGGTTGAA  
+HWI-EAS443:3:88:645:434#0/1  
`b`bb\_`babaabb`\_aabab`b`baaaaa\_]abbXab[a  
@HWI-EAS443:3:88:699:1469#0/1  
AGGGATAACTGGCATGGCTCGAATCGACCGTGGGTGCTT  
+HWI-EAS443:3:88:699:1469#0/1  
aaaaabbbaa`aaa]^b^a[T]SV]VXZ[NX\_aG\_GKX\_  
@HWI-EAS443:3:88:741:384#0/1  
CTCCTGTTATCCTGATTCTAGTGAAATCACATGTGTGTGC  
+HWI-EAS443:3:88:741:384#0/1  
`bb`aa]bbbababb`\_`abab`ba`aba`aaab\_b`a]ba  
@HWI-EAS443:3:88:798:1166#0/1  
CAACTGCCTGTCTTATCATTAGGGCGTGGATTGTCTCCGA  
+HWI-EAS443:3:88:798:1166#0/1  
^\_\_\_a`\_`b^¥]ababaaa`]]XQXZ]W[¥Z^`¥^^`[a\_Z  
@HWI-EAS443:3:88:802:544#0/1  
CATATCGAACCTAATGAGCTGCCTATTGGTGAAGTTCC  
+HWI-EAS443:3:88:802:544#0/1  
abbbbbabb^abba^`bbbbaba]`aabaaaZabab\_a`a  
@HWI-EAS443:3:88:805:923#0/1  
ATTAGACGATACTGGACCACAACCTGCCTGTCTTATCATT  
+HWI-EAS443:3:88:805:923#0/1  
TXQ\_bbaaW`aZ\_\_X\_a^\_YZW^FUX^]YW]\_\_Q]]XY`¥  
@HWI-EAS443:3:88:937:59#0/1  
CGGGCAATTCCTCTCTCTGCCCTGTTAGTGGATGGGCTAT  
+HWI-EAS443:3:88:937:59#0/1  
ababaaabbbabaabbbbbbb`bbabababb\_bbbaZ^aa  
@HWI-EAS443:3:89:1084:696#0/1  
AAATGGTTCTTGCTTTACTGTAATGACCGATGGACCAAGT  
+HWI-EAS443:3:89:1084:696#0/1  
U¥a^\_bbb]bZ\_Y\_b\_XT\_b]\_``W`\_ba¥baaa]a`b]  
@HWI-EAS443:3:89:1093:1252#0/1  
GCAGAACCTTCTTCTTGAAGGGCCTTGCTAAATGA  
+HWI-EAS443:3:89:1093:1252#0/1  
aaaa`\_`\_`]`¥Ra¥`\_`^^`Z`aWLX[¥`\_]PYV\_W`WNVVX[

@HWI-EAS443:3:89:1096:837#0/1  
AATGAATGCCCTAATTATCACTATGAGGAATGCTCCTGT  
+HWI-EAS443:3:89:1096:837#0/1  
abbbabbabYNVZ`]abaaa`U`aaa`Xa[^¥]\_\_Y``\_`  
@HWI-EAS443:3:89:1133:1367#0/1  
TTGGAATGTTTGTCAATTTAGCAAGGCCCTTGAGTCAAGA  
+HWI-EAS443:3:89:1133:1367#0/1  
aab^^aa`a`bbaZ\_a\_]¥aaa^aXa¥\_aaaa`a]\_`\_``  
@HWI-EAS443:3:89:113:1851#0/1  
GTCCCAGTCCATCCGTTTCGATCCCAAATCATCTCAAAC  
+HWI-EAS443:3:89:113:1851#0/1  
][`¥b`¥¥\_¥aab`U`¥`aX`\_Y0]Z\_``\_^¥b^]b]ba`  
@HWI-EAS443:3:89:1195:1607#0/1  
CGGGAGTTTTGTTTCAGCATCCAGAACTAACAGGGCTGGAT  
+HWI-EAS443:3:89:1195:1607#0/1  
`abb\_¥\_ab`aab[bbbbbabaaababababa`b\_`bbaa  
@HWI-EAS443:3:89:1249:341#0/1  
ATTCCAATTGTTAGCCAATTGATGCCATCATGACAAGCAC  
+HWI-EAS443:3:89:1249:341#0/1  
ZWW\_YT^`S]K```\_] ^Z¥Z\_¥aaYa\_]FWaa^FY\_aH\_R  
@HWI-EAS443:3:89:1336:219#0/1  
CTCTTGTTCTCAATATATTGTTTCTCCAACCTTGATA  
+HWI-EAS443:3:89:1336:219#0/1  
]b`U```bb^T¥I^abbb\_b`aababaaab]b`b````[  
@HWI-EAS443:3:89:1359:1517#0/1  
CATTCAATCATGCTCCCCCTTGAATGCAGAACCTTCTT  
+HWI-EAS443:3:89:1359:1517#0/1  
^bbbaaU\_WZbba\_U[[J^b]a[aaab`XZUVba[a^[a`  
@HWI-EAS443:3:89:1394:1171#0/1  
GTGCATGTGTAATGGTTCTTGCTTTACTGTAATGACCGA  
+HWI-EAS443:3:89:1394:1171#0/1  
a\_a[aab`b`aa\_aaa\_a\_a\_a]a````````a\_]Sa\_  
@HWI-EAS443:3:89:156:949#0/1  
ACTCAATTCAACTTGGGAATCAAAATCAGATTGAAACATG  
+HWI-EAS443:3:89:156:949#0/1  
a\_\_^\_\_`\_\_^]\_\_^`¥]^`\_^\_Z^U¥^]\_] ]^^¥^^[]  
@HWI-EAS443:3:89:1614:1861#0/1  
ATCACATGTGTGCAGGGATAACTGGCATGGCTCGAATC  
+HWI-EAS443:3:89:1614:1861#0/1  
^¥\_baJZ`V``b[`[\_a]][\_aa\_b¥N]^aST[a[LFZNL  
@HWI-EAS443:3:89:1618:1516#0/1  
CAACTGCCTGTCTTATCATTAGGGCGTGGATTGTCTCCGA  
+HWI-EAS443:3:89:1618:1516#0/1  
^ababbbbaa[a[aaaaabbbbabaa``babaY]]`a`]a`  
@HWI-EAS443:3:89:1654:1249#0/1  
TAGGGCGTGGATTGTCTCCGAAAATCCCACTGCATATGTA  
+HWI-EAS443:3:89:1654:1249#0/1  
abbaYaba`bbbb`aaa`a\_aaa]V\_\_\_\_`\_\_a\_^\_\_aYa  
@HWI-EAS443:3:89:1699:872#0/1  
TGTAATGGTTCTTGCTTTACTGTAATGACCGATGGACCA

+HWI-EAS443:3:89:1699:872#0/1  
abaabbbbaabaabaabbbbabaUbaaaba`a``aaa\_`^`  
@HWI-EAS443:3:89:1760:1354#0/1  
CAGCCACTGCCCCATTGTCTGGGCCAGAAATCCAATTGT  
+HWI-EAS443:3:89:1760:1354#0/1  
abbbbbbbbbb`bb`baaab\_``aaaaabaaaaaaaa`  
@HWI-EAS443:3:89:1769:432#0/1  
GGCTGTGTAAAGTACAACGGCATAATAACAGACTATC  
+HWI-EAS443:3:89:1769:432#0/1  
aa\_abZ``baaaa[a^aa¥a]W\_\_\_\_\_a\_X`\_¥W]LZ¥WV  
@HWI-EAS443:3:89:208:643#0/1  
AGTCGCTTGGTCAGCAAGTGCTTGTGCATGATGGCATCAAT  
+HWI-EAS443:3:89:208:643#0/1  
`b]bbaV^R`0^^L[X]RV[V]\_aVVT\_ZT[Z^XNSGY]  
@HWI-EAS443:3:89:209:301#0/1  
TAGCGGGAGCAGCATATCCTTTTGTGGTGAAACAGTGAC  
+HWI-EAS443:3:89:209:301#0/1  
abbbbbbbab\_T\_^¥`aa\_a`aaa`\_a`¥a^^Ya\_^aY`\_Y  
@HWI-EAS443:3:89:216:1167#0/1  
TGCCCCAATTATCACTATGAGGAATGCTCCTGTTATCCT  
+HWI-EAS443:3:89:216:1167#0/1  
T``^bb¥```¥V\_a`\_`Zabbbab`bb¥b`\_a\_aaaa`a  
@HWI-EAS443:3:89:371:1344#0/1  
CAGAACCTTCTTCTTGAAGGGCCTTGCTAAATGAC  
+HWI-EAS443:3:89:371:1344#0/1  
abbbbabbbbababb`ababbbaa`aaaabaabaaaaaaaa  
@HWI-EAS443:3:89:427:245#0/1  
CCGTGGGTGTCTTTCAACCAGAATCTGGAATATCAGATAG  
+HWI-EAS443:3:89:427:245#0/1  
aababa`\_b``baabb`aabb`aa`bab\_aa`aa]b\_a\_a  
@HWI-EAS443:3:89:532:1292#0/1  
CTCCTGTCTTTAATGGTTCCATTGGAATGTTTGTCAATTA  
+HWI-EAS443:3:89:532:1292#0/1  
aabbbbaabbbbab\_b\_bbaaba`abaababbaa```a`a  
@HWI-EAS443:3:89:611:1669#0/1  
TTATCCTGATTCTAGTAAAATCACATGTGTGTGCAGGGAT  
+HWI-EAS443:3:89:611:1669#0/1  
aXZ[\_¥a\_X\_VOJTGJ`a`aXZ^TY¥\_LYHPXO[]\_O]WU  
@HWI-EAS443:3:89:61:140#0/1  
GACCACAACCTGCCTGTCTTATCATTAGGGCGTGGATTGTC  
+HWI-EAS443:3:89:61:140#0/1  
aaaV¥¥^Z^^\_¥¥^\_X\_W^¥¥]¥^WWWV¥¥WSWYWWWWTYY  
@HWI-EAS443:3:89:64:2018#0/1  
TATATTGAGAACAAGAGTCTGAATGTGCATGTGTAAAT  
+HWI-EAS443:3:89:64:2018#0/1  
[^abb¥aa\_YbbaaaU`]aXaa`aaaa]aaS^aY[Q^\_RY  
@HWI-EAS443:3:89:691:1712#0/1  
GTCATTTAGCAAGGCCCTTGAGTCAAGAAGAAGTTCTG  
+HWI-EAS443:3:89:691:1712#0/1  
aababbaaaaaaaaaaaaa`ba^[X^aa\_Y`aaaaWTVY`\_`

@HWI-EAS443:3:89:695:1532#0/1  
CCCTTGAGTCAAGAAGAAGGTTCTGCATTCCAAGGGGGAG  
+HWI-EAS443:3:89:695:1532#0/1  
``^aa\_a]^`bbab]^aaa][\_ba\_babaa`aaaa\_`a\_  
@HWI-EAS443:3:89:714:1253#0/1  
GAGTCAAGAAGAAGGTTCTGCATTCCAAGGGGGAGCATGA  
+HWI-EAS443:3:89:714:1253#0/1  
abb¥`\_ZV`\_aRa`^^baa\_ba[¥[X`^¥¥aa]a`\_\_aaa  
@HWI-EAS443:3:89:720:1253#0/1  
ATCCGTTTCGGATCCCAAATCATCTCAAACCGTTTCTTGA  
+HWI-EAS443:3:89:720:1253#0/1  
aaY\_Z[`aaY`¥X]aaa]¥\_^\_]^^^\_^^W[ZVQ\_W[\_V  
@HWI-EAS443:3:89:757:16#0/1  
GAGCCCATATCGAACCTAATGAGCTGTCCTATTGGTGAA  
+HWI-EAS443:3:89:757:16#0/1  
aSaWT[]]a\_[¥[\_[\_`aZXVQSUSV`RU¥Z\_[XTW[SV  
@HWI-EAS443:3:89:777:305#0/1  
CTGGGCCAGAAATTCCAATTGTTAGCCAATTGATGCCATC  
+HWI-EAS443:3:89:777:305#0/1  
aaaaYbaabaaaaaaaaaab\_aaa`\_b\_a`````\_]a\_]`  
@HWI-EAS443:3:89:778:935#0/1  
TGCAATCAAAGCGTCATTACTTATGAAAACAACACTTGGG  
+HWI-EAS443:3:89:778:935#0/1  
`aab\_^a\_b`\_`aaaR\_¥]aba]\_a`\_a`\_[MU[\_a\_]Q  
@HWI-EAS443:3:89:822:1443#0/1  
CAACTGCCTGTCTTATCATTAGGGCGTGGATTGTCTCCGA  
+HWI-EAS443:3:89:822:1443#0/1  
abbbabbb\_b`aab`bbaaa`UQ\_ba\_aa]aab``^a`\_`\_  
@HWI-EAS443:3:89:827:933#0/1  
CGATACTGGACCACAACACTGCCTGTCTTATCATTAGGGCGT  
+HWI-EAS443:3:89:827:933#0/1  
abbbabab\_aa`aaa]baa`^`a`\_`baaa]aa`U[ZZ\_^  
@HWI-EAS443:3:89:831:1280#0/1  
GTCCCAGTCCATCCGTTTCGGATCCCAAATCATCTCAAAC  
+HWI-EAS443:3:89:831:1280#0/1  
a`\_0¥Y]```[\_¥aYP]^\_LR]a\_HOVYYY[Wa¥^Z[`^W  
@HWI-EAS443:3:89:852:1513#0/1  
TGCATGTGTAATGGTTCTTGCTTTACTGTAATGACCGAT  
+HWI-EAS443:3:89:852:1513#0/1  
\_Y[L`¥W\_\_¥`¥`^^P`b[`W\_babXQqA`[]YWYa`b`a  
@HWI-EAS443:3:89:868:1335#0/1  
ACTGACTGTCCAGCAGCAAAGTTGGTGTGCTGATGTTAA  
+HWI-EAS443:3:89:868:1335#0/1  
aaaaaaaa`[aa]\_\_a]\_\_U\_\_T^^X¥^`^X]Z^W¥]]]¥  
@HWI-EAS443:3:89:877:528#0/1  
CAGATTGAAACATGCAATCAAAGCGTCATTACTTATGAAA  
+HWI-EAS443:3:89:877:528#0/1  
aabbbbaabbbbbbbaabaabbbbaabbb`babaaaaa  
@HWI-EAS443:3:89:993:1519#0/1  
AGCCCATATCGAACCTAATGAGCTGTCCTATTGGTGAAG

+HWI-EAS443:3:89:993:1519#0/1  
[\_a\_T\_b]bYX]¥]\_N¥a^^S^WSV\_HWV` `` `]]^b`¥a  
@HWI-EAS443:3:8:1123:640#0/1  
AGATTCTGGTTGAAAGACACCCACGGTCGATTCGAGCCAT  
+HWI-EAS443:3:8:1123:640#0/1  
a`^¥a^b`[^[F¥aYbaa^TRZ\_X`¥LNZNFUQX¥WSQVU  
@HWI-EAS443:3:8:1220:1644#0/1  
AATGAATGCCCTAATTATCACTATGAGGAATGCTCCTGT  
+HWI-EAS443:3:8:1220:1644#0/1  
`babaaYaaa\_`^aaaa\_]a^\_\_\_\_\_^^a¥][[[UY]¥  
@HWI-EAS443:3:8:122:1665#0/1  
GACACCCACGGTCGATTCGAGCCATGCCAGTTATCCCTGC  
+HWI-EAS443:3:8:122:1665#0/1  
V[aaa`bbbaU¥`\_`bbbZ\_¥^`XXTbbab\_b`T`bX^b  
@HWI-EAS443:3:8:1231:572#0/1  
GATAGGATACATATGCAGTGGGATTTTCGGAGACAATCCA  
+HWI-EAS443:3:8:1231:572#0/1  
a`¥`^a\_MOX[aT[TZTTR\_`Q[\_J^U\_]\_SPVU[ZYB  
@HWI-EAS443:3:8:1324:742#0/1  
GGGCTCCTGTCTTTAATGGTTCATTGGAATGTTTGTCAT  
+HWI-EAS443:3:8:1324:742#0/1  
^^^a\_]a`]a`^a\_a\_`][¥¥U[``aZU¥YZ\_`\_]V][  
@HWI-EAS443:3:8:1378:211#0/1  
GTTTCCGTGAAATTAGCGGGCAATTCCTCTCTGCCCCTG  
+HWI-EAS443:3:8:1378:211#0/1  
^MMXZYa[`¥VN\_\_¥a`\_¥¥SZV^UUUX^WWWWTWYRLTV  
@HWI-EAS443:3:8:1408:910#0/1  
AAGAGTTGGAGAAACAATATATTGAGAACACAAGAGTCTG  
+HWI-EAS443:3:8:1408:910#0/1  
`W¥`\_SY¥baaba^`aVb]aU`a`ba`aVaW]\_¥Pa`^aa  
@HWI-EAS443:3:8:1430:844#0/1  
GCCCATCCACTAACAGGGCAGAGAGAGGAATTGCCCGCTA  
+HWI-EAS443:3:8:1430:844#0/1  
aa[MUUZMS[aY[\_]YMOZVVNKKSW\_RNUVUXQWU[GWB  
@HWI-EAS443:3:8:1434:1793#0/1  
AGTCCATCCGTTCGGATCCCAAATCATCTCAAACCGTTT  
+HWI-EAS443:3:8:1434:1793#0/1  
aaR¥aaY^\_bUY[``U¥[^[\_^W\_Z]X][ ]\_SLYZWY  
@HWI-EAS443:3:8:146:1760#0/1  
TCCCTTTTCTATTCTGAAGATCTTGATGAGGCCTGTCCA  
+HWI-EAS443:3:8:146:1760#0/1  
``aU^SW[a]aaTaUQWZH¥^aRaY`[TST^^]P\_WTa`¥  
@HWI-EAS443:3:8:1590:284#0/1  
AACAGACTATCAAGAGTTGGAGAAACAATATATTGAGA  
+HWI-EAS443:3:8:1590:284#0/1  
`\_]`aaa^aaa`aa\_a¥a^b\_`a]^N\_\_``\_a``\_U¥  
@HWI-EAS443:3:8:1631:1858#0/1  
GAACTAATGCTTTTAGTTCTCCCTATCCAAACACCATTGC  
+HWI-EAS443:3:8:1631:1858#0/1  
K`¥Xaaabbaaaa\_0¥baa\_baa¥ba``abbbaJababa\_

@HWI-EAS443:3:8:180:1574#0/1  
GGTCAGCAAGTGTTCATGATGGCATCAATTGGCTAAC  
+HWI-EAS443:3:8:180:1574#0/1  
aa\_bb¥bb[]T]aba`aa^a`aaVa`aa`aaa`a`baaa^  
@HWI-EAS443:3:8:210:1350#0/1  
TGCCTGTCTTATCATTAGGGCGTGGATTGTCTCCGAAAAT  
+HWI-EAS443:3:8:210:1350#0/1  
^^\_R]\_\_^[^^aZ]]Z]U0Za]UZOVQ^N^[]V[Z¥OTM  
@HWI-EAS443:3:8:212:1095#0/1  
GGTGAAGTTCCTCTCCATACTCAAGATTTGAGTCAG  
+HWI-EAS443:3:8:212:1095#0/1  
aa\_bbaba¥aaaab``aaabaaaa`aa`a^`aa`a\_\_aa  
@HWI-EAS443:3:8:248:950#0/1  
GTCCCAGTCCATCCGTTCCGATCCCAAATCATCTCAAAC  
+HWI-EAS443:3:8:248:950#0/1  
a¥aaaa¥Xa^a`^U^Z^`[]a¥[[\_¥\_¥¥SUY^UX¥¥¥\_`^  
@HWI-EAS443:3:8:250:2019#0/1  
CATGCTCCCCCTTGAATGCAGAACCTTCTTCTTACTCA  
+HWI-EAS443:3:8:250:2019#0/1  
a)``aab`R`^`¥]aVa[Zb^\_aa]`\_\_\_UU[aZS\_\_NBB  
@HWI-EAS443:3:8:258:1324#0/1  
GTCCCAGTCCATCCGTTCCGATCCCAAATCATCTCAAAC  
+HWI-EAS443:3:8:258:1324#0/1  
a[bbaa`W`]a`aa]URa\_\_\_\_\_`]^`\_\_UN¥^ZZ¥aZ`[[  
@HWI-EAS443:3:8:26:958#0/1  
GTCAGGATATAGCGGGAGTTTTGTTTCAGCATCCAGAACTA  
+HWI-EAS443:3:8:26:958#0/1  
\_¥a)`^X^aa\_]^a\_aRaU^\_\_aZ]¥^\_`^^[^^`¥\_[[  
@HWI-EAS443:3:8:27:1242#0/1  
ACCACAAGTGCCTGTCTTATCATTAGGGCGTGGATTGTCT  
+HWI-EAS443:3:8:27:1242#0/1  
aaaaaaaa`aa\_\_a^a```a```\_`]]\_`^^[\_`\_]W[^  
@HWI-EAS443:3:8:397:1020#0/1  
GGGACAGACAATAACTTCTCAATAAAGCAAGATATCGTAG  
+HWI-EAS443:3:8:397:1020#0/1  
abaaaab``aa\_aa`aaa```a^a`aaaa\_a`\_a\_S¥PZa  
@HWI-EAS443:3:8:40:495#0/1  
GCAAGGTCTTATACAATCCAGCCCTGTTAGTTCTGGATGC  
+HWI-EAS443:3:8:40:495#0/1  
aaXR\_b\_a`a``¥¥aaaPY\_`]\_UZYLXJ`0]RP`Z^[\_R  
@HWI-EAS443:3:8:418:260#0/1  
CAGTCCATCCGTTCCGATCCCAAATCATCTCAAACCGTT  
+HWI-EAS443:3:8:418:260#0/1  
a\_b¥abbbbbbbaabab]`bab\_aabYa\_a```aa`¥Ia\_\_  
@HWI-EAS443:3:8:447:540#0/1  
ATAACAGACTATCAAGAGTTGGAGAAACAATATATTGA  
+HWI-EAS443:3:8:447:540#0/1  
aa^`\_aa\_\_a``a\_a``a\_a]``\_[X\_ZP[\_\_\_\_^\_^`^`^`  
@HWI-EAS443:3:8:484:783#0/1  
CTCGAATCGACCGTGGGTGTCTTTCAACCAGAATCTGGAA

+HWI-EAS443:3:8:484:783#0/1  
a`aaaaba`\_]\_W]¥\_¥D[UU]a]OXZV\_```¥]Z[X`YH  
@HWI-EAS443:3:8:507:1666#0/1  
TTCAAATACGGCAATGGTGTGGATAGGGAGAACTAAAA  
+HWI-EAS443:3:8:507:1666#0/1  
ab\_```aaaaa``aaaNa[`a]a¥U``[\_^\_^\_^]`^a`  
@HWI-EAS443:3:8:514:513#0/1  
CAAATACGGCAATGGTGTGGATAGGGAGAACTAAAAGC  
+HWI-EAS443:3:8:514:513#0/1  
aaa`aa^a]XZ]]`Ua^a`a^^`\_^\_¥^`X¥\_\_^`[M  
@HWI-EAS443:3:8:517:1630#0/1  
GACCAACCCACAGTGTACTGTTTACACCACAAAAGGATA  
+HWI-EAS443:3:8:517:1630#0/1  
aa^Z^a^aba]]Y]`\_b`ba``\_ab]b\_Xb]\_aYaUa\_``  
@HWI-EAS443:3:8:517:330#0/1  
AATCGACCGTGGGTGTCTTTCAACCAGAATCTGGAATATC  
+HWI-EAS443:3:8:517:330#0/1  
^]b`\_¥Yb][aaaGb^\_a`\_a]^\_a^a^`\_U^]^ZW  
@HWI-EAS443:3:8:575:247#0/1  
ACTGATTTGACTATCTTTCCCTTTTCTATTCTGAAGATCT  
+HWI-EAS443:3:8:575:247#0/1  
a`abababa\_]aaa\_aba`\_\_````]a\_`\_]``^\_^^Y]\_  
@HWI-EAS443:3:8:621:771#0/1  
ATCAGATTGAAACATGCAATCAAAGCGTCATTACTTATGA  
+HWI-EAS443:3:8:621:771#0/1  
U^^G[aaaZa[a\_`VaYaaaY`^Xaa`^\_`UH\_I^^`\_`  
@HWI-EAS443:3:8:638:144#0/1  
GCCGTTGTACTTTAACACAGCCACTGCCCCATTGTCTGGG  
+HWI-EAS443:3:8:638:144#0/1  
aa\_a]`b\_\_[\_`aaa\_^^^U¥W\_U\_TYWWWWWTSUYWUYU  
@HWI-EAS443:3:8:647:291#0/1  
AGAGTCTGAATGTGCATGTGTAAATGGTTCTTGCTTTACT  
+HWI-EAS443:3:8:647:291#0/1  
aba`P^X``\_¥\_W^a^aaYYL\_a`\_a[Z]T]\_`\_]`ZV`  
@HWI-EAS443:3:8:722:1369#0/1  
GATGGACTGGGACAGACAATAACTTCTCAATAAAGCAAGA  
+HWI-EAS443:3:8:722:1369#0/1  
^PJ\_b[Z[]Y¥U¥[XRVPN]W¥RP][\_\_^[LR]]OX\_XZZ  
@HWI-EAS443:3:8:728:770#0/1  
GTTCTCAATATATTGTTTCTCCAACCTTGATAGTGTCTG  
+HWI-EAS443:3:8:728:770#0/1  
aabaa¥aaaaa`aa`¥a`\_\_Z\_^¥X¥[\_`a\_^\_]`BBBB  
@HWI-EAS443:3:8:792:493#0/1  
GTCCATCCGTTCCGATCCCAAATCATCTCAAACCGTTTC  
+HWI-EAS443:3:8:792:493#0/1  
\_[Y^aaaaa\_aa`a`\_\_\_\_\_`^\_\_`\_T`¥\_]Y]\_]X  
@HWI-EAS443:3:8:823:1703#0/1  
ACAATATATTGAGAACACAAGAGTCTGAATGTGCATGTGT  
+HWI-EAS443:3:8:823:1703#0/1  
aZY`aa^]aabaYU^]``a^X¥^W¥\_Y`\_H`^P]\_S]U



@HWI-EAS443:3:8:923:1411#0/1  
GCTCATTAGGGTTCGATATGGGCTCCTGTCTTTAATGGTT  
+HWI-EAS443:3:8:923:1411#0/1  
aaaa`baaaaa`aa`aaa`a^`aa^aa^\_aaa`\_`a`V`  
@HWI-EAS443:3:90:1056:2011#0/1  
CAGATTCTGGTTGAAAGACACCCACGGTCGATTGAGCCA  
+HWI-EAS443:3:90:1056:2011#0/1  
\_bbbbba`bb`bbbab\_babb``babaab`b`MbbaZXb  
@HWI-EAS443:3:90:1085:1852#0/1  
CCACAACCTGCCTGTCTTATCATTAGGGCGTGGATTGTCTC  
+HWI-EAS443:3:90:1085:1852#0/1  
Ya^`\_`b¥ZSWbbII\_]bb`]`bZXab]bbaVRQ\_H[X]¥E  
@HWI-EAS443:3:90:110:397#0/1  
CCGTGGGTGTCTTTCAACCAGAATCTGGAATATCAGATAG  
+HWI-EAS443:3:90:110:397#0/1  
abb[abb`b^ababba[babaYaaabbaa`aa`^\_a\_`aa  
@HWI-EAS443:3:90:1151:249#0/1  
CAGACATATGTTAACATCAGCAACACCAACTTTGCTGCTG  
+HWI-EAS443:3:90:1151:249#0/1  
aab`bababbbbab\_bbaa`aba\_b\_\_aa^baba^ab^`b  
@HWI-EAS443:3:90:1248:1111#0/1  
GTGGTTTCCGTGAAATTAGCGGGCAATTCCTCTCTCTGCC  
+HWI-EAS443:3:90:1248:1111#0/1  
a`a`\_aa\_aa\_`a`aaa^]`aa¥\_a`¥`^aS\_^Wa]T  
@HWI-EAS443:3:90:1327:548#0/1  
GATTCTGGTTGAAAGACACCCACGGTCGATTGAGCCATG  
+HWI-EAS443:3:90:1327:548#0/1  
aaab\_baZ¥abaaaaaab`]aaaa`Y¥a¥`^`\_¥¥ZZ^V[  
@HWI-EAS443:3:90:1367:848#0/1  
AGGATATGCTGCTCCCGCTAGTCCAGATTGTGTTCTCTTT  
+HWI-EAS443:3:90:1367:848#0/1  
]`[a\_\_`[[^bX]^RHara`aXYW`^^aa`]`]WP`¥`¥a  
@HWI-EAS443:3:90:158:1145#0/1  
GCTGCTCCCCTAGTCCAGATTGTGTTCTTTGGGTCGC  
+HWI-EAS443:3:90:158:1145#0/1  
aa`Va`a`aT[aSS[\_a\_a`\_`[Ua^\_V^[S\_\_V\_^U\_\_X  
@HWI-EAS443:3:90:1612:268#0/1  
CTGCCCCATTGTCTGGGCCAGAAATTCCAATTGTTAGCCA  
+HWI-EAS443:3:90:1612:268#0/1  
ab\_babbab[[]¥bbba\_Y`W\_Z\_aba][a[aabV¥^aa]a  
@HWI-EAS443:3:90:166:38#0/1  
CATCGGTCATTACAGTAAAGCAAGAACCATTTACACATGC  
+HWI-EAS443:3:90:166:38#0/1  
`\_bbbaX]\_aa]`aaaaaa^a`\_a^`^`^\_\_aa`¥^U\_\_`¥  
@HWI-EAS443:3:90:1672:1456#0/1  
CAGACATATGTTAACATCAGCAACACCAACTTTGCTGCTG  
+HWI-EAS443:3:90:1672:1456#0/1  
aab`abbabaaaUa^a`[a¥\_bb`b\_abb^`aa]0\_aW`a  
@HWI-EAS443:3:90:172:1440#0/1  
CTCCTGTCTTTAATGGTTCCATTGGAATGTTTGTCTTTA



@HWI-EAS443:3:90:44:1953#0/1  
ATAACAGACTATCAAGAGTTGGAGAAACAATATATTGA  
+HWI-EAS443:3:90:44:1953#0/1  
a\_^a`aabaaa`a````[]R[]]U^¥`\_\_\_^\_U\_W`\_^`\_  
@HWI-EAS443:3:90:451:776#0/1  
CATTAGGGTTTCGATATGGGCTCCTGTCTTTAATGGTTCCA  
+HWI-EAS443:3:90:451:776#0/1  
R\_^SWa^QR\_VQV¥\_Z\_\_Q^¥\_T`ab`¥]R]aaba^S\_^  
@HWI-EAS443:3:90:452:1808#0/1  
GAATAAATGAGTGGTCAGGATATAGCGGGAGTTTTGTTCA  
+HWI-EAS443:3:90:452:1808#0/1  
]aabbbbaabb¥]X]b^Y^babbb¥a\_ab¥\_J`Y¥VDVVY  
@HWI-EAS443:3:90:555:796#0/1  
CTCCGAAAATCCCCTGCATATGTATCCTATCTGATATTC  
+HWI-EAS443:3:90:555:796#0/1  
R`SS\_b^[ZWVb\_PN¥VWa\_^[^VbaM^^X¥Va¥b¥bb\_Z  
@HWI-EAS443:3:90:564:839#0/1  
CTGGCATGGCTCGAATCGACCGTGGGTGTCTTCAACCAG  
+HWI-EAS443:3:90:564:839#0/1  
abb`b¥```ba`^[]\_^[Y¥X]Q[a`HXGVZa\_T[YOX\_U  
@HWI-EAS443:3:90:610:897#0/1  
CAATGGTGTGGATAGGGAGAACTAAAAGCATTAGTTCA  
+HWI-EAS443:3:90:610:897#0/1  
a\_abbb]babbbbaaaba`abbb`baabaaba\_bb^`aa  
@HWI-EAS443:3:90:670:322#0/1  
GGTTGAAAGACACCCACGGTCGATTCGAGCCATGCCAGTT  
+HWI-EAS443:3:90:670:322#0/1  
abXaaabaaa`aaXV^]ba¥]a\_]^Z¥\_Q^]¥\_VNSZ`UX  
@HWI-EAS443:3:90:713:1008#0/1  
TGCCCCGTAATTTACGGAAACCACTGACTGTCCAGCAGC  
+HWI-EAS443:3:90:713:1008#0/1  
]\_ab\_`bb`bb``]b[\_Z``bbbab^Z^aa[`¥`ZXW]S  
@HWI-EAS443:3:90:728:1112#0/1  
CGCTAGTCCAGATTGTGTTCTCTTTGGGTCGCCCTCTGAT  
+HWI-EAS443:3:90:728:1112#0/1  
aaaa^baabbbbaaab¥b]aaaaaaaa\_`^]WbZaaaaaa  
@HWI-EAS443:3:90:732:1769#0/1  
AAACAATATATTGAGAACAAGAGTCTGAATGTGCATGT  
+HWI-EAS443:3:90:732:1769#0/1  
T]XRU`]Tbb\_PWaa`a`¥aa^^]Y¥J``a`\_]`VQW]a^T  
@HWI-EAS443:3:90:819:524#0/1  
GTGTTCTCAATATATTGTTTCTCCAACCTTTGATAGTGTC  
+HWI-EAS443:3:90:819:524#0/1  
a¥`\_aaa\_aaa\_a^aa`\_aaaa\_\_``\_]\_a\_\_a\_`\_Y\_ZB  
@HWI-EAS443:3:90:909:1644#0/1  
ATCAAGAGTTGGAGAAACAATATATTGAGAACAAGAGT  
+HWI-EAS443:3:90:909:1644#0/1  
^[[^`aT````[`a`\_a\_ba\_a`baaa^a]a``aZ`a^`\_^  
@HWI-EAS443:3:90:915:105#0/1  
CAATGGTGTGGATAGGGAGAACTAAAAGCATTAGTTCA

+HWI-EAS443:3:90:915:105#0/1  
^babbb`bbbbbbababbaaa`b`baaaabaabaab^a\_a  
@HWI-EAS443:3:90:947:1151#0/1  
ATTCATATCATGCTCCCCCTTGGAATGCAGAACCTTCTTC  
+HWI-EAS443:3:90:947:1151#0/1  
abaaab\_aabaa`a`aa\_aa`aa\_`\_]aaaa^]`\_`a\_Y  
@HWI-EAS443:3:90:958:129#0/1  
TGGACCACAACCTGCCTGTCTTATCATTAGGGCGTGGATTG  
+HWI-EAS443:3:90:958:129#0/1  
aba\_\_a\_\_\_Z^`\_]S\_a^a\_\_`^^`^V]\_X^X^Y]]V  
@HWI-EAS443:3:90:979:308#0/1  
ACGGCAATGGTGTGGATAGGGAGAACTAAAAGCATTAG  
+HWI-EAS443:3:90:979:308#0/1  
aaaa\_`\_aaa^a`aa^\_\_a\_]\_\_]\_Ia\_]``]V\_\_^]W  
@HWI-EAS443:3:90:980:1214#0/1  
CGCTAGTCCAGATTGTGTTCTCTTTGGGTCGCCCTCTGAT  
+HWI-EAS443:3:90:980:1214#0/1  
abK\_WaVWTT[`baba\_Zbba`[`Ua``bV`bbaZ[`bab  
@HWI-EAS443:3:91:1014:1308#0/1  
GTCTGTTATTATGCCGTTGTACTTTAACACAGCCACTGCC  
+HWI-EAS443:3:91:1014:1308#0/1  
aaa\_a`aa\_aaa\_\_\_a`a\_W¥\_aa``]P`[a]\_V\_XZSVZ  
@HWI-EAS443:3:91:107:184#0/1  
TGTGTGCAGGGATAACTGGCATGGCTCGAATCGACCGTGG  
+HWI-EAS443:3:91:107:184#0/1  
aa\_b`aabbab]a¥`a`a^^\_\_YY^^XRQBBBBBBBBBBB  
@HWI-EAS443:3:91:1083:1160#0/1  
CTGTCCAGCAGCAAAGTTGGTGTGCTGATGTTAACATAT  
+HWI-EAS443:3:91:1083:1160#0/1  
`abbbab\_bababbab`bab\_bab\_aab`ababaa`\_a\_  
@HWI-EAS443:3:91:1107:338#0/1  
GGGACAGACAATAACTTCTCAATAAAGCAAGATATCGTAG  
+HWI-EAS443:3:91:1107:338#0/1  
a[\_W]^\_¥ZOWY^¥V^][W¥USZ\_SY\_NX[]W][][¥W[X  
@HWI-EAS443:3:91:1190:171#0/1  
CCGCTAATTTACGGAAACCACTGACTGTCCAGCAGCAAA  
+HWI-EAS443:3:91:1190:171#0/1  
aabab\_bbbbaa^abbbbaabbabbab`aa``b\_\_^a\_¥  
@HWI-EAS443:3:91:1191:1630#0/1  
TGGTTTCCGTGAAATTAGCGGGCAATTCCTCTCTGCCC  
+HWI-EAS443:3:91:1191:1630#0/1  
abaLaaab]Xab^a``a\_W]a\_a[a[\_abaaa]T\_aY`X  
@HWI-EAS443:3:91:1201:990#0/1  
TAACATCAGCAACCAACTTTGCTGCTGGACAGTCAGTG  
+HWI-EAS443:3:91:1201:990#0/1  
`a^[\_`\_¥]\_\_^]`aXX]]Xa¥`a]aa`\_aaZ^a`X^aYGY  
@HWI-EAS443:3:91:1215:894#0/1  
TGTAATGGTTCTTGCTTTACTGTAATGACCGATGGACCA  
+HWI-EAS443:3:91:1215:894#0/1  
aba^a[a`a`b`babb`aaaabb`aa`aa\_abaab\_]Y\_

@HWI-EAS443:3:91:1299:58#0/1  
TGGATTGTATAAGACCTTGCTTCTGGGTTGAACTAATCAG  
+HWI-EAS443:3:91:1299:58#0/1  
\_`b[abba\_baaaa[\_aaa[aa\_aaaaYaa`b^a^\_a]`a  
@HWI-EAS443:3:91:1317:906#0/1  
AGCACTTGCTGACCAAGCGACTGACTCAAATCTTGAGTTG  
+HWI-EAS443:3:91:1317:906#0/1  
abaaabababba`aabbaba`baa`a\_aaaa\_aaa\_b\_aa  
@HWI-EAS443:3:91:1318:639#0/1  
CATGATGGCATCAATTGGCTAACAAATTGGAATTTCTGGCC  
+HWI-EAS443:3:91:1318:639#0/1  
abbabbbbabbabbbb\_bbababbbbaabba`ab^U\_  
@HWI-EAS443:3:91:1376:475#0/1  
TCAAAATCAGATTGAAACATGCAATCAAAGCGTCATTACT  
+HWI-EAS443:3:91:1376:475#0/1  
aaaaaaa\_aba`abaaa^a`aaa\_a`a\_aa^a\_]\_`a`¥`  
@HWI-EAS443:3:91:1386:1323#0/1  
CTGTCTTATCATTAGGGCGTGGATTGTCTCCGAAAATCCC  
+HWI-EAS443:3:91:1386:1323#0/1  
^bababbbbbbbbababaaabbbabbaa\_a\_aaaaa^^`^Y  
@HWI-EAS443:3:91:1387:1848#0/1  
GATGCCATCATGACAAGCACTTGCTGACCAAGCGACTGAC  
+HWI-EAS443:3:91:1387:1848#0/1  
a^`Kb`a\_`[aa^aabaXYDb`aYaYKT`\_aaY¥XE[YBB  
@HWI-EAS443:3:91:138:1629#0/1  
CACCAATAGGACAGCTCATTAGGGTTCGATATGGGCTCCT  
+HWI-EAS443:3:91:138:1629#0/1  
aa\_abb]aZ\_b`]\_Q\_¥\_abbZb``aaOab]\_^]¥¥`]`a  
@HWI-EAS443:3:91:1410:1860#0/1  
CACAGTGTCACTGTTTACACCACAAAAGGATATGCTGCTC  
+HWI-EAS443:3:91:1410:1860#0/1  
aab`a\_bb^b¥`Yaaab\_SX]`Xaaa]WR¥¥a\_a]Y]^TP  
@HWI-EAS443:3:91:1421:1490#0/1  
GTCCCAGTCCATCCGTTCCGATCCCAAATCATCTCAAAC  
+HWI-EAS443:3:91:1421:1490#0/1  
a¥a¥\_a`^`\_`a`[\_`¥`¥\_]`\_R\_\_\_`^`^][][]\_`^\_U  
@HWI-EAS443:3:91:1426:1588#0/1  
AAAGACACCCACGGTCGATTGAGCCATGCCAGTTATCCC  
+HWI-EAS443:3:91:1426:1588#0/1  
aaa\_]`a\_\_`U`aT¥aUY¥W`Z\_]W\_^]VW^aU]\_¥WUW  
@HWI-EAS443:3:91:1437:108#0/1  
CAGACATATGTTAACATCAGCAACACCAACTTTGCTGCTG  
+HWI-EAS443:3:91:1437:108#0/1  
`bbbbbbbbbbbababab`\_abab[bbb^bbbb`bbaab  
@HWI-EAS443:3:91:1531:1902#0/1  
CACCCACGGTCGATTGAGCCATGCCAGTTATCCCTGCAC  
+HWI-EAS443:3:91:1531:1902#0/1  
abbbbaabaQ[O[RQR^aa]]]¥`XX\_]a^¥ZMQM][¥Y  
@HWI-EAS443:3:91:156:787#0/1  
CTTTGCTGCTGGACAGTCAGTGGTTTCCGTGAAATTAGCG

+HWI-EAS443:3:91:156:787#0/1  
abaabb¥babbb`a`\_¥a`a`^]Y`X`]¥[aa^a^\_¥S¥  
@HWI-EAS443:3:91:1729:1655#0/1  
CAAAAGGATATGCTGCTCCCGCTAGTCCAGATTGTGTTCT  
+HWI-EAS443:3:91:1729:1655#0/1  
abbbbbbbbaaba\_^]`baa`b`\_]ab]\_aa`aaa¥]  
@HWI-EAS443:3:91:1769:545#0/1  
GACACCCACGGTCGATTTCGAGCCATGCCAGTTATCCCTGC  
+HWI-EAS443:3:91:1769:545#0/1  
a]X`¥\_^]^^[MX^XNX^^X]¥]XQOSQ^UUX^JQPKNS  
@HWI-EAS443:3:91:196:1349#0/1  
CTGGGCCAGAAATCCAATTGTTAGCCAATTGATGCCATC  
+HWI-EAS443:3:91:196:1349#0/1  
ab\_] ]abb`abbaaaaa`a\_a`a`\_aTa]\_\_\_\_][V\_] ]  
@HWI-EAS443:3:91:303:1134#0/1  
TATTGGTGAAGTTCCTCTCCATACAACCAAGATTTGAG  
+HWI-EAS443:3:91:303:1134#0/1  
`Y`] `XDR]TRLN^X[[a^R`] ]`\_^T^`a`^^\_U^\_a¥`  
@HWI-EAS443:3:91:504:1164#0/1  
AAAAGCATTAGTTCAAGAAACGGTTTTGAGATGATTTGGG  
+HWI-EAS443:3:91:504:1164#0/1  
a`b`aabbaab`\_aaaa`]aaaa`]````\_a\_\_`^`\_^[\_  
@HWI-EAS443:3:91:512:174#0/1  
GTTCTCCCTATCCAAACACCATTGCCGTATTTGAATGAAA  
+HWI-EAS443:3:91:512:174#0/1  
a^\_I¥\_] [XOUSUX]0] [^W[OPMRUSZOVZSWZZXWZVX  
@HWI-EAS443:3:91:594:88#0/1  
CAAAGAGAACAATCTGGACTAGCGGGAGCAGCATATCC  
+HWI-EAS443:3:91:594:88#0/1  
abbbbbbbbaabbababbaaaaaaaa\_aY\_aU\_\_a\_ZG  
@HWI-EAS443:3:91:596:1471#0/1  
CGGGAGCAGCATATCCTTTTGTGGTGTAAACAGTGACACT  
+HWI-EAS443:3:91:596:1471#0/1  
abbbabbbbaWaab`baaaaa`bY`\_a` `aab`¥aaaa¥a  
@HWI-EAS443:3:91:602:1808#0/1  
AAATCTTGAGTTGTATGGAGAGGGAAC TTCACCAATAGGA  
+HWI-EAS443:3:91:602:1808#0/1  
aabaaaaaaaZba[b`a` `a^b^aaa`a` aaaaaaaa\_\_a  
@HWI-EAS443:3:91:640:79#0/1  
CAGACATATGTTAACATCAGCAACACCAACTTTGCTGCTG  
+HWI-EAS443:3:91:640:79#0/1  
abb`bbbbbbbbb\_abaaaabbaa^aaa\_b\_aa]ab\_aa  
@HWI-EAS443:3:91:670:1990#0/1  
CAGGATATAGCGGGAGTTTTGTTTCAGCATCCAGAACTAAC  
+HWI-EAS443:3:91:670:1990#0/1  
a¥RG[Z`bYYa¥S¥]b` [\_^\_Z` `aa` `PZ` a` aaVQaXL  
@HWI-EAS443:3:91:742:1286#0/1  
CAAAATCAGATTGAAACATGCAATCAAAGCGTCATTACTT  
+HWI-EAS443:3:91:742:1286#0/1  
aaa`^baab¥bbbabbb^` `bb^baabbabb` bba` babb

@HWI-EAS443:3:91:750:1174#0/1  
TGGGTGTCTTTCAACCAGAATCTGGAATATCAGATAGGAT  
+HWI-EAS443:3:91:750:1174#0/1  
a` ``Xa¥\_\_aaa^[]`aa` ```aa`\_a`\_a`\_a` `` `^^`  
@HWI-EAS443:3:91:826:237#0/1  
TCCCAGTCCATCCGTTCCGATCCCAAATCATCTCAAAACC  
+HWI-EAS443:3:91:826:237#0/1  
a`\_a\_aa`\_`ba\_\_\_\_[\_` ``\_\_^\_^]```\_¥^U¥`U\_¥\_ZYL  
@HWI-EAS443:3:91:840:949#0/1  
ATTCAAATACGCAATGGTGTGGATAGGGAGAACTAAA  
+HWI-EAS443:3:91:840:949#0/1  
^`\_a\_^bb`\_a\_b`\_]Ya\_aS^`aaba¥\_U`\_a\_\_aX`\_`\_a`  
@HWI-EAS443:3:91:871:725#0/1  
CACTCATTATTCTACGATATCTTGCTTTATTGAGAAGT  
+HWI-EAS443:3:91:871:725#0/1  
abbba\_babaaba`aaSK\_aaaa`\_aUaa`YbaaZa\_¥a]  
@HWI-EAS443:3:91:920:1654#0/1  
AAATGGTTCTTGCTTTACTGTAATGACCGATGGACCAAGT  
+HWI-EAS443:3:91:920:1654#0/1  
a]`\_aVba]Sab`T`Taa^W^`b^¥a¥IV```a\_\_XFNaaal  
@HWI-EAS443:3:91:926:1508#0/1  
CAGAAGCAAGGTCTTATACAATCCAGCCCTGTTAGTTCTG  
+HWI-EAS443:3:91:926:1508#0/1  
abb`babb^¥bZb`ab\_a`bbb`aba\_]aaYaaa\_\_a`  
@HWI-EAS443:3:91:931:1125#0/1  
CTGATATTCCAGATTCTGGTTGAAAGACACCCACGGTCGA  
+HWI-EAS443:3:91:931:1125#0/1  
abbbbabb\_a[bbbbbb\_babbbababab`Xbaaa`\_a]  
@HWI-EAS443:3:92:1025:371#0/1  
GATGATTTGGGATCCGAACGGATGGACTGGGACAGACAAT  
+HWI-EAS443:3:92:1025:371#0/1  
¥\_bb\_bbbbaaZ`\_a\_baaabb`ab` ``]abb¥]`aa^T]a\_  
@HWI-EAS443:3:92:1027:1873#0/1  
AAGAGTCTGAATGTGCATGTGTAAATGGTTCTTGCTTTAC  
+HWI-EAS443:3:92:1027:1873#0/1  
aa[¥`V\_`\_`a[YGTMQa^PYZa`\_`^[\_¥0\_X]W]¥W^^^X  
@HWI-EAS443:3:92:1034:627#0/1  
GGTGAAGTTCCTCTCCATACAACCTCAAGATTTGAGTCAG  
+HWI-EAS443:3:92:1034:627#0/1  
aaUa`\_`X^X^`\_]`\_`\_`Y`\_`\_`XX¥\_]`\_`\_]`\_XU``  
@HWI-EAS443:3:92:1047:1290#0/1  
AGCGGGAGTTTTGTTTCAGCATCCAGAACTAACAGGGCTGG  
+HWI-EAS443:3:92:1047:1290#0/1  
a]aaaaab^``aRKYQ[``]`SY¥\_ZG`]^ba¥^^`\_Z` [[  
@HWI-EAS443:3:92:1098:1144#0/1  
GGGCTGGATTGTATAAGACCTTGCTTCTGGGTTGAACTAA  
+HWI-EAS443:3:92:1098:1144#0/1  
aba\_aba`aaaa`^aaaa\_a\_b^aa\_abaa\_aa\_b\_aa`  
@HWI-EAS443:3:92:1098:498#0/1  
GGGATCCGAACGGATGGACTGGGACAGACAATAACTTCTC

+HWI-EAS443:3:92:1098:498#0/1  
W[¥ab^aZb\_a`]HTaaZYa^ba\_Y¥a\_aaaaa\_¥\_N`X  
@HWI-EAS443:3:92:1106:1480#0/1  
ATTTTCGGAGACAATCCACGCCCTAATGATAAGACAGGCA  
+HWI-EAS443:3:92:1106:1480#0/1  
a]b]b`aX¥Taaba`a^]aa]JMZS¥V`\_`a`^a][¥aNS  
@HWI-EAS443:3:92:1113:572#0/1  
TCCAGATTCTGGTTGAAAGACACCCACGGTCGATTGAGC  
+HWI-EAS443:3:92:1113:572#0/1  
aaaab`aaaabb\_aaaaa\_a`^`\_`a¥aa¥^`\_`a¥`¥`\_`  
@HWI-EAS443:3:92:112:1222#0/1  
CAAGCACTTGCTGACCAAGCGACTGACTCAAATCTTGAGT  
+HWI-EAS443:3:92:112:1222#0/1  
`XUX¥]`\_`\_`^XY^X^`\_`\_`aa^[^`\_`\_`Z`X`\_]  
@HWI-EAS443:3:92:1214:1009#0/1  
CTGTCTTATCATTAGGGCGTGGATTGTCTCCGAAAATCCC  
+HWI-EAS443:3:92:1214:1009#0/1  
abb`bbbbbaabbababa`abaabba`aaa[aaa`a\_[\_\_  
@HWI-EAS443:3:92:1232:1883#0/1  
GGGTTCGATATGGGCTCCTGTCTTTAATGGTTCCATTGGA  
+HWI-EAS443:3:92:1232:1883#0/1  
a]YG]ZV¥]`¥Y0]\_]\_]\_Z`ZSUZ^`a[^]X^\_JFR]]TY  
@HWI-EAS443:3:92:127:989#0/1  
ATTAGACGATACTGGACCACAACCTGCCTGTCTTATCATT  
+HWI-EAS443:3:92:127:989#0/1  
aa`\_`a`^a`\_U`ZT`a`\_a`XS[¥`\_`\_`\_`^`¥[OY\_[\_VV  
@HWI-EAS443:3:92:1412:106#0/1  
CAAGAGTTGGAGAAACAATATATTGAGAACAAGAGTCT  
+HWI-EAS443:3:92:1412:106#0/1  
¥`\_`\_`a`\_`\_`bbaZ`V¥^YVbb¥Ub^aabbbaa`aabaa`^a  
@HWI-EAS443:3:92:1426:330#0/1  
TGCTGCTCCCGCTAGTCCAGATTGTGTTCTCTTTGGGTCG  
+HWI-EAS443:3:92:1426:330#0/1  
abVa\_]`^U]Na^`Za^[¥`b`^a`\_a¥]PaW`\_`\_V^\_WSR  
@HWI-EAS443:3:92:1440:1166#0/1  
TTAGGGTTTCGATATGGGCTCCTGTCTTTAATGGTTCCATT  
+HWI-EAS443:3:92:1440:1166#0/1  
aa\_aaaZa\_a^`\_¥\_]¥\_\_\_Z`¥^^`\_`\_`\_`^]`^XWX\_]`  
@HWI-EAS443:3:92:1655:204#0/1  
CAATTGGCTAACAATTGGAATTTCTGGCCCAGACAATGGG  
+HWI-EAS443:3:92:1655:204#0/1  
\_]\_aU`\_W^abX\_Qaa\_]¥aaaR`]X`]`][XaX]¥]^¥K`B  
@HWI-EAS443:3:92:1675:142#0/1  
ATTGGTGAAGTTCCCTCTCCATACAACCTCAAGATTTGAGT  
+HWI-EAS443:3:92:1675:142#0/1  
\_aab`\_`\_`^X¥aa]]`a`[DOZa[QURUXVXS`[`a`\_Y]R  
@HWI-EAS443:3:92:175:465#0/1  
GGAATGCAGAACCTTCTTCTTGACTCAAGGGCCTTGCTA  
+HWI-EAS443:3:92:175:465#0/1  
`a¥]\_]b]bYbbTa`ba`aaaaYab]a\_]\_`\_`OXa`^a^



@HWI-EAS443:3:92:217:114#0/1  
CTGGATGCTGAACAAAACCTCCCGCTATATCCTGACCACTC  
+HWI-EAS443:3:92:217:114#0/1  
]bbb`bbbbbbabbbbabbbababb[bbabbbbaaab^  
@HWI-EAS443:3:92:305:1698#0/1  
TCCGAAAATCCCACTGCATATGTATCCTATCTGATATTCC  
+HWI-EAS443:3:92:305:1698#0/1  
Xa¥ab`\_aa`a`abaabbbba`baaaaaaaaaa`a`b¥  
@HWI-EAS443:3:92:333:1743#0/1  
GTAAAGCAAGAACCATTTACACATGCACATTCAGACTCTT  
+HWI-EAS443:3:92:333:1743#0/1  
U`b`X`YPRbbab`ba¥abbbbabbbbb\_[^b`a`¥]`a  
@HWI-EAS443:3:92:37:81#0/1  
AAACAATATATTGAGAACAAGAGTCTGAATGTGCATGT  
+HWI-EAS443:3:92:37:81#0/1  
Ybaa[\_¥Rba`a`^aba`YYaYaS`aaI`aaY`\_¥\_\_U  
@HWI-EAS443:3:92:470:347#0/1  
GTGTTCTCAATATATTGTTTCTCCAACCTTGATAGTGTC  
+HWI-EAS443:3:92:470:347#0/1  
aaa^`^Z`¥]a`Y`aaX`\_a]``\_\_]a^`^^ZV^Z[BB  
@HWI-EAS443:3:92:479:1205#0/1  
GCTTGGTCAGCAAGTGCTTGTGCATGATGGCATCAATTGGC  
+HWI-EAS443:3:92:479:1205#0/1  
`bbb\_b\_aa`ba`a\_a^a\_a`^a\_aaaa^aa`\_aaa\_^^^  
@HWI-EAS443:3:92:534:234#0/1  
TCGAGCCATGCCAGTTATCCCTGCACACACATGTGATTTC  
+HWI-EAS443:3:92:534:234#0/1  
aababa`aaa`Xa^a`a`^\_a\_\_^]]`\_^aVa^\_\_\_Z  
@HWI-EAS443:3:92:558:1418#0/1  
ATGTGTGTGCAGGGATAACTGGCATGGCTCGAATCGACCG  
+HWI-EAS443:3:92:558:1418#0/1  
`]]P\_X[T\_QTX`Z\_¥^`\_ZU]¥¥VBBBBBBBBBBBBBB  
@HWI-EAS443:3:92:58:1619#0/1  
ATGGAGTAAAAGGGTTTTTCATTCAAATACGGCAATGGTGT  
+HWI-EAS443:3:92:58:1619#0/1  
aa`]]]P]aaa`V`aaaa\_a`\_a`\_a`\_a^U^^^M^T  
@HWI-EAS443:3:92:629:1967#0/1  
CAGACATATGTTAACATCAGCAACACCAACTTTGCTGCTG  
+HWI-EAS443:3:92:629:1967#0/1  
a`]¥a`^RaYa]aaaba]\_Wa\_YX\_WV\_]`^H`\_a^`\_`\_Y\_  
@HWI-EAS443:3:92:62:509#0/1  
TGTCTTTACTGTATATAGCCCATCCACTAACAGGGCAGAG  
+HWI-EAS443:3:92:62:509#0/1  
abaaabba`bb`ab`aaa`aaa`\_a``````\_`a\_\_\_\_\_]`  
@HWI-EAS443:3:92:657:1702#0/1  
AACACAGCCACTGCCCCATTGTCTGGGCCAGAAATTCCAA  
+HWI-EAS443:3:92:657:1702#0/1  
aaa\_aa`\_a`^\_X^Za``]¥WV^^]RFX^`^TV\_W]U[^\_  
@HWI-EAS443:3:92:668:335#0/1  
TAGCGGGAGTTTTGTTTCAGCATCCAGAACTAACAGGGCTG

+HWI-EAS443:3:92:668:335#0/1  
HZ\_P\_¥¥¥aP^]YY\_YRHX¥VJR]\_`XaY\_\_a[¥a`ZLJ\_  
@HWI-EAS443:3:92:67:116#0/1  
TGCTGCTCCCGCTAGTCCAGATTGTGTTCTCTTTGGGTCG  
+HWI-EAS443:3:92:67:116#0/1  
`baab`a`\_b\_a`aV\_¥¥a\_\_`a^a`[[¥W^\_\_\_\_[aUW¥  
@HWI-EAS443:3:92:688:1944#0/1  
GATTTTCCGAGACAATCCACGCCCTAATGATAAGACAGGC  
+HWI-EAS443:3:92:688:1944#0/1  
abbbabaaababaabaa`ba^\_\_`aaaaa`a`\_`a`\_\_]  
@HWI-EAS443:3:92:750:223#0/1  
ATAAGACCTTGCTTCTGGGTTGAACTAATCAGAGGGCGAC  
+HWI-EAS443:3:92:750:223#0/1  
`SZ¥¥\_]¥Z\_\_^^\_Z\_]\_]YZ]\_¥JY[U\_Z]X]^`W`aV  
@HWI-EAS443:3:92:813:706#0/1  
TAGTTCAACCCAGAAGCAAGGTCTTATACAATCCAGCCCT  
+HWI-EAS443:3:92:813:706#0/1  
abbWa`aaYaaaa\_X]`[aa\_Za`[``\_S``^¥RY`WV\_^  
@HWI-EAS443:3:92:831:1001#0/1  
CCCCTATATCCTGACCACTCATTATTCCCTACGATATCT  
+HWI-EAS443:3:92:831:1001#0/1  
ab`[aaaa``aaaa`aaa`aaa`aa^a`ba`\_aa\_a`\_\_a  
@HWI-EAS443:3:92:841:475#0/1  
GGATTGTCTCCGAAAATCCCACTGCATATGTATCCTATCT  
+HWI-EAS443:3:92:841:475#0/1  
abbaaba`aa`baa`aa`aaa\_bbaaaabb\_aa\_ab`a^a  
@HWI-EAS443:3:92:844:1037#0/1  
TAAGAATCGGTTCCAAGGGGATGTGTTTGTGCATAAGGGA  
+HWI-EAS443:3:92:844:1037#0/1  
aba^^aYT\_¥Z\_^R[LUa\_aa^R]RXMZ]aVUTG^¥T¥^\_  
@HWI-EAS443:3:92:853:917#0/1  
CACTATGAGGAATGCTCCTGTTATCCTGATTCTAGTGAAA  
+HWI-EAS443:3:92:853:917#0/1  
abaaa\_aaa`aaa\_a`a\_aa``aa]\_\_`aa`^a\_\_]\_```  
@HWI-EAS443:3:92:907:1536#0/1  
GTGGTCCAGTATCGTCTAATGGAGCAAATGGAGTAAAAGG  
+HWI-EAS443:3:92:907:1536#0/1  
`^abababb\_babaaabaaba\_aaa`abb`[\_`\_aaabba  
@HWI-EAS443:3:93:1004:1994#0/1  
ACTGGGACAGACAATAACTTCTCAATAAAGCAAGATATCG  
+HWI-EAS443:3:93:1004:1994#0/1  
a`aa``aaaaa¥`aaaaZa`a`\_aaaa`a]\_a`a`\_\_`Qa  
@HWI-EAS443:3:93:102:1399#0/1  
ATAAGACCTTGCTTCTGGGTTGAACTAATCAGAGGGCGAC  
+HWI-EAS443:3:93:102:1399#0/1  
a^a`a\_aa`^aa``\_aaa\_U`a\_aXa\_]^[\_\_]\_\_UY\_\_X  
@HWI-EAS443:3:93:1085:890#0/1  
GCAAGGTCTTATACAATCCAGCCCTGTTAGTTCTGGATGC  
+HWI-EAS443:3:93:1085:890#0/1  
T`Z^^bV]a`bZ[0a\_`ULZa[a`¥\_V[aa\_a\_aa[Pa]U

@HWI-EAS443:3:93:1103:1405#0/1  
GGCCTTGCTAAATGACAAACATTCCAATGGAACCATTAAA  
+HWI-EAS443:3:93:1103:1405#0/1  
aaaaYabaaaaa\_`aaa`X`aaa\_\_\_\_\_a\_]a\_^\_^G[\_\_\_  
@HWI-EAS443:3:93:1112:1976#0/1  
AGGATATGCTGCTCCCGCTAGTCCAGATTGTGTTCTCTTT  
+HWI-EAS443:3:93:1112:1976#0/1  
aaa^abaab¥Q`aW[a]Y^]WKS¥X`\_^aGU`Y`T¥TP]¥  
@HWI-EAS443:3:93:1116:1425#0/1  
AATTGATGCCATCATGACAAGCACTTGCTGACCAAGCGAC  
+HWI-EAS443:3:93:1116:1425#0/1  
\_\_V[LYP[\_X]]UVR¥FX¥[\_`\_]\_^VTS[VZURWXZU[YY  
@HWI-EAS443:3:93:114:440#0/1  
CCGCTATATCCTGACCACTCATTTATTCCTACGATATCTT  
+HWI-EAS443:3:93:114:440#0/1  
a\_a`\_T\_Z`\_\_]^\_^\_][Z]^\_^\_][\_\_\_^]]Y  
@HWI-EAS443:3:93:1263:174#0/1  
GTGAAATCACATGTGTGTGCAGGGATAACTGGCATGGCTC  
+HWI-EAS443:3:93:1263:174#0/1  
a`aa`\_aaaRaa`\_b`b\_\_]`aaaU\_\_^]`^\_\_VV\_BBBBB  
@HWI-EAS443:3:93:1360:186#0/1  
GTTCCCTCTCCATACA ACTCAAGATTTGAGTCAGTCGCTT  
+HWI-EAS443:3:93:1360:186#0/1  
Q`bb]Va\_^OZ`aaVaUGOYW`aaaba\_\_a`\_a^ZVaWQB  
@HWI-EAS443:3:93:154:1891#0/1  
ACAGACACTATCAAGAGTTGGAGAAACAATATATTGAGAA  
+HWI-EAS443:3:93:154:1891#0/1  
`aZZ`^^`a`a^\_\_¥¥¥[¥X[]T\_\_\_UT`\_Z[^[Y\_]\_\_  
@HWI-EAS443:3:93:1552:350#0/1  
GTGAAATCACATGTGTGTGCAGGGATAACTGGCATGGCTC  
+HWI-EAS443:3:93:1552:350#0/1  
¥ababbb^`QZb\_\_b^`abYbaba¥aaa\_]a]G^\_aVBBB  
@HWI-EAS443:3:93:1556:1832#0/1  
CATGATGGCATCAATTGGCTAACAATTGGAATTTCTGGCC  
+HWI-EAS443:3:93:1556:1832#0/1  
a`baaabaab]b\_aaa^`S^^`b^a\_\_\_a`a\_\_\_`]\_ZV  
@HWI-EAS443:3:93:1703:476#0/1  
GTCATTTAGCAAGGCCCTTGAGTCAAGAAGAAGGTTCTG  
+HWI-EAS443:3:93:1703:476#0/1  
a\_aa`aa`\_`\_\_^]]¥¥`\_a\_a¥S\_]¥Y¥a¥¥\_^WWT¥`  
@HWI-EAS443:3:93:1760:1091#0/1  
ACCACA ACTGCCTGTCTTATCATTAGGGCGTGGATTGTCT  
+HWI-EAS443:3:93:1760:1091#0/1  
``\_]`\_]¥aa]a`a\_aaaa`aa`Y`Y¥^^]a\_\_\_VUNX^  
@HWI-EAS443:3:93:179:1726#0/1  
TAAAAGCATTAGTTCAAGAAACGGTTTTGAGATGATTTGG  
+HWI-EAS443:3:93:179:1726#0/1  
X`a^V`\_`\_R]U]ZZ¥``[L¥`]]`XYZ^XVUU[¥U]ZWBB  
@HWI-EAS443:3:93:231:691#0/1  
GAGGAATTGCCCGCTAATTTACGGAAACCACTGACTGTC

+HWI-EAS443:3:93:231:691#0/1  
a`a^PP]]a[[^S[a^`[[\_\_\_\_[^U\_\_T`Y¥YYY¥¥^UW  
@HWI-EAS443:3:93:241:1217#0/1  
CTGTCCCAGTCCATCCGTTCCGATCCCAAATCATCTCAAA  
+HWI-EAS443:3:93:241:1217#0/1  
aKaPXWa¥`MVS0]Pa\_`a¥L¥UUUVYXP]^Z\_]\_TQQVB  
@HWI-EAS443:3:93:267:566#0/1  
GTTCTGCATTCCAAGGGGAGCATGATATGAATGGTCCC  
+HWI-EAS443:3:93:267:566#0/1  
a¥Y`a^Y`^`\_\_\_\_`\_`\_Y`a[¥\_] [X\_UUW\_`^YUX¥  
@HWI-EAS443:3:93:268:435#0/1  
CCGTGAAATTAGCGGGCAATTCCTCTCTCTGCCCTGTTAG  
+HWI-EAS443:3:93:268:435#0/1  
aab`b`a\_]\_a`\_`a`a`\_XT]YY¥\_Z\_^Ta\_V\_¥`W\_¥`  
@HWI-EAS443:3:93:324:409#0/1  
ACTCAATTCAACTTGGGAATCAAAATCAGATTGAAACATG  
+HWI-EAS443:3:93:324:409#0/1  
aU\_[\_Y\_`\_]^[[\_^\_AY]^^[\_\_T¥]Y^\_Y^^^]YZY^^B  
@HWI-EAS443:3:93:361:881#0/1  
GTCTGAATGTGCATGTGTAAATGGTTCTTGCTTTACTGTA  
+HWI-EAS443:3:93:361:881#0/1  
`Kaa`ZY¥a^bYaabZa`]X[X¥`S]P^\_a[a\_[[\_\_\_\_Z\_  
@HWI-EAS443:3:93:389:580#0/1  
TGGACAGTCAGTGGTTTCCGTGAAATTAGCGGGCAATTCC  
+HWI-EAS443:3:93:389:580#0/1  
\_^^`z]abbV^\_S]`TaaZ\_^aa`]`YMP[\_Y]Q^ZS]  
@HWI-EAS443:3:93:404:1699#0/1  
CTTGGCCAGACGGTGCTGAGTTGCCATTTACCATTGACAA  
+HWI-EAS443:3:93:404:1699#0/1  
a]YQ¥`a`]`X\_RUTXYFWWX[[UUSVT]YZ¥\_¥[¥]`]  
@HWI-EAS443:3:93:42:1407#0/1  
GGGCTCCTGTCTTTAATGGTTCCATTGGAATGTTTGTCT  
+HWI-EAS443:3:93:42:1407#0/1  
aa\_b`aaba¥aa`a\_Va`a¥\_aa\_a`\_`^\_\_`^`\_`\_YU]^  
@HWI-EAS443:3:93:439:1988#0/1  
GAATGCAGAACCTTCTTCTTACTCAAGGGGCCTTGCTAA  
+HWI-EAS443:3:93:439:1988#0/1  
abbaaabaabbbaaa`aaaaabbaabaa`W\_`ab``aaaa  
@HWI-EAS443:3:93:454:63#0/1  
ACCACAACCTGCCTGTCTTATCATTAGGGCGTGGATTGTCT  
+HWI-EAS443:3:93:454:63#0/1  
aXaaaaa\_`a`\_]a\_`a`^`aZ^\_UP¥W^\_W^^WUWB  
@HWI-EAS443:3:93:46:342#0/1  
ATCATTAGGGCGTGGATTGTCTCCGAAAATCCCACTGCAT  
+HWI-EAS443:3:93:46:342#0/1  
a][`a]^`a\_aa0\_`\_`\_`R¥[^`\_NZ`XZ¥XYRX^VY  
@HWI-EAS443:3:93:470:372#0/1  
GCATGTGTAATGGTTCTTGCTTTACTGTAATGACCGATG  
+HWI-EAS443:3:93:470:372#0/1  
`¥^¥N¥S¥^V`a`S\_¥]````a`\_`^`a\_`^`a``[]^`\_`

@HWI-EAS443:3:93:661:786#0/1  
GGTGTGGATAGGAGAACTAAAAGCATTAGTTCAAGAA  
+HWI-EAS443:3:93:661:786#0/1  
Ya^TH^`a`X]aa`aaaa]`Y^`]baaa\_\_^J`aTP  
@HWI-EAS443:3:93:678:1154#0/1  
TGCCCCGCTAATTTACGGAAACCACTGACTGTCCAGCAGC  
+HWI-EAS443:3:93:678:1154#0/1  
a\_\_^b`]`\_¥aaaaa]\_]Xa\_^`\_\_^\_\_Z^\_]^^¥^W  
@HWI-EAS443:3:93:68:1954#0/1  
ATCCTATCTGATATTCCAGATTCTGGTTGAAAGACACCCA  
+HWI-EAS443:3:93:68:1954#0/1  
aaaZ[a\_a`]¥U`a^aa¥X^[a]UVU\_^\_U[G\_]V]B  
@HWI-EAS443:3:93:804:1237#0/1  
CCTGTCTTTAATGGTTCCATTGGAATGTTTGTCAATTTAGC  
+HWI-EAS443:3:93:804:1237#0/1  
aaba\_¥a[`aa]aaY[\_]¥[`aaX\_a[]\_\_[^0\_\_^] []  
@HWI-EAS443:3:93:836:2024#0/1  
TGCCCCGCTAATTTACGGAAACCACTGACTGTCCAGCAGC  
+HWI-EAS443:3:93:836:2024#0/1  
aabb]a`abbaaa`\_a`\_aaY^a\_[U` ``¥X]\_`\_¥Z[¥  
@HWI-EAS443:3:93:872:1944#0/1  
ATTGCCCGCTAATTTACGGAAACCACTGACTGTCCAGCA  
+HWI-EAS443:3:93:872:1944#0/1  
aaaaaabbaaba`abb\_a`aaa`aaaa`^aa^VTY[0\_  
@HWI-EAS443:3:93:887:566#0/1  
CACAAGCTGCCTGTCTTATCATTAGGGCGTGGATTGTCTCC  
+HWI-EAS443:3:93:887:566#0/1  
X¥aabVb]bb`bab]b[b[R\_Jbb^`\_Q[`aaa\_bXY¥]^  
@HWI-EAS443:3:93:949:1656#0/1  
CAATTGTTAGCCAATTGATGCCATCATGACAAGCACTTGC  
+HWI-EAS443:3:93:949:1656#0/1  
aUX`[RL^U\_Y`b` ``YHKZ¥T[^P]Y^XW^[aOVSRRPW  
@HWI-EAS443:3:93:981:140#0/1  
TAGGGTTCGATATGGGCTCCTGTCTTTAATGGTTCCATTG  
+HWI-EAS443:3:93:981:140#0/1  
a\_ba`^a]ba\_\_a¥`^`aTU`a^\_\_[a\_¥^`aZ`^VNZ^a  
@HWI-EAS443:3:93:990:723#0/1  
GTGGTTTCCGTGAAATTAGCGGGCAATTCCTCTCTCTGCC  
+HWI-EAS443:3:93:990:723#0/1  
a\_baW`\_a[bS\_\_^`ab\_aaaa^\_]a\_aUaa\_¥\_TW`ZN  
@HWI-EAS443:3:94:1013:1052#0/1  
GACCTTGCTTCTGGGTTGAACTAATCAGAGGGCGACCCAA  
+HWI-EAS443:3:94:1013:1052#0/1  
`P]a]ab``]Z[]\_ZR\_¥[aTaa\_]\_a]`aaa\_`\_]`XU  
@HWI-EAS443:3:94:1038:1654#0/1  
CAAGAAGAAGGTTCTGCATTCCAAGGGGAGCATGATATG  
+HWI-EAS443:3:94:1038:1654#0/1  
aaa`^`a`a`Y\_Ya`aa`\_`Sa\_aa`\_\_\_\_`\_a^a\_^\_]`  
@HWI-EAS443:3:94:1087:466#0/1  
CTGGGACAGACAATAACTTCTCAATAAAGCAAGATATCGT

+HWI-EAS443:3:94:1087:466#0/1  
Z[¥Z[S\_V]VUabaa^¥a^Z^¥Y\_ba¥abZa[¥X`\_\_\_\_b[  
@HWI-EAS443:3:94:1209:618#0/1  
CACTGACTGTCCAGCAGCAAAGTTGGTGTGCTGATGTTA  
+HWI-EAS443:3:94:1209:618#0/1  
abbbbabbaaa`b`[b\_[aab`b[b\_[aa[]a]\_aaaa\_  
@HWI-EAS443:3:94:1235:48#0/1  
ATTCCAATGGAACCATTAAGACAGGAGCCCATATCGAAC  
+HWI-EAS443:3:94:1235:48#0/1  
a``YXT``¥XJ[T\_\_\_\_`ZTZ`\_]YP^^^¥YRX\_`^0^0]L  
@HWI-EAS443:3:94:1254:560#0/1  
TCCCAGTCCATCCGTTCCGATCCCAAATCATCTCAAAACC  
+HWI-EAS443:3:94:1254:560#0/1  
a`ab\_`Z`\_a`UVa^TX^¥`^T]]``\_\_\_\_]]a\_`\_^\_XX  
@HWI-EAS443:3:94:1385:650#0/1  
ACGAAACCAGTGTCCAGCAGCAAAGTTGGTGTGCTG  
+HWI-EAS443:3:94:1385:650#0/1  
a`bb^ab\_\_\_\_`aa\_\_aa^\_\_^Y`^^0]R]¥]WZ¥ZHWWNP  
@HWI-EAS443:3:94:1391:1742#0/1  
GAAAGACACCCACGGTTCGATTCGAGCCATGCCAGTTATCC  
+HWI-EAS443:3:94:1391:1742#0/1  
a`a`aa^a`[^`S^`NN`Q^SG¥VQUHSTYGK\_WN[WVBB  
@HWI-EAS443:3:94:1410:1235#0/1  
GCGACCCAAAGAGAACAATCTGGACTAGCGGGAGCAGC  
+HWI-EAS443:3:94:1410:1235#0/1  
ab`X^`\_0[a\_ZbKWP`NP`¥Qaa]^ZJX^X\_\_\_\_\_]GX¥R  
@HWI-EAS443:3:94:1443:295#0/1  
CAACGGCATAATAACAGACACTATCAAGAGTTGGAGAAAC  
+HWI-EAS443:3:94:1443:295#0/1  
a\_bab`T]\_ZS`\_\_¥aaa`a^aaUZZP`[aZ`]`\_`]¥`P  
@HWI-EAS443:3:94:1456:236#0/1  
GATTAGTTCAACCCAGAAGCAAGTCTTATACAATCCAGC  
+HWI-EAS443:3:94:1456:236#0/1  
[aab\_¥aa`aTV^\_aaaa¥aaba]Yaa`a^J^`X\_`^`^  
@HWI-EAS443:3:94:1573:792#0/1  
TCCTGTTATCCTGATTCTAGTAAATCACATGTGTGTGCA  
+HWI-EAS443:3:94:1573:792#0/1  
a\_aaaaaaa¥`abYaa\_`a`aaa\_\_a\_a`a`aZa]a]^  
@HWI-EAS443:3:94:1590:1308#0/1  
ATGCAGTGGGATTTTCGGAGACAATCCACGCCCTAATGAT  
+HWI-EAS443:3:94:1590:1308#0/1  
aaXL\_a[S\_b¥\_Z]a\_Z]Pa`V\_]RPXZ\_ZP[aUO¥[RZ  
@HWI-EAS443:3:94:1601:748#0/1  
GTCTGTCCCAGTCCATCCGTTCCGATCCCAAATCATCTCA  
+HWI-EAS443:3:94:1601:748#0/1  
a``aa]^`^^aa]\_[a\_]`\_`^UTX^Y]^`a\_^R\_\_V\_Y]  
@HWI-EAS443:3:94:1613:1110#0/1  
CAAAATCAGATTGAAACATGCAATCAAAGCGTCATTACTT  
+HWI-EAS443:3:94:1613:1110#0/1  
a`]¥P\_^aaaabba[]LX^\_G\_a\_Z`¥PaYaWU^``\_^a

@HWI-EAS443:3:94:1613:943#0/1  
TGCATGTGTAATGGTTCTTGCTTTACTGTAATGACCGAT  
+HWI-EAS443:3:94:1613:943#0/1  
aaa\_a`]baY\_a\_Wa]UEU`\_\_aadWY]aW\_a¥]Y\_Z[J\_  
@HWI-EAS443:3:94:1675:1873#0/1  
GGACCACAACCTGCCTGTCTTATCATTAGGGCGTGGATTGT  
+HWI-EAS443:3:94:1675:1873#0/1  
aUa¥^`aabWaaZ\_IaZ\_aaW[VX\_]`[UWSSR`^^YYaR  
@HWI-EAS443:3:94:1711:463#0/1  
ATAACAGGAGCATTCCCTCATAGTGATAATTAGGGGCATTC  
+HWI-EAS443:3:94:1711:463#0/1  
a[aa`aaa`a`\_\_^a\_`a`a]a]aU\_aa^`\_`T^^`U  
@HWI-EAS443:3:94:1753:1707#0/1  
ATATTCCAGATTCTGGTTGAAAGACACCCACGGTCGATTC  
+HWI-EAS443:3:94:1753:1707#0/1  
^aaaaab¥\_R\_a^`\_b`a`]¥[XXYb]\_`\_`a[GR]VNSR  
@HWI-EAS443:3:94:1778:380#0/1  
CTTGGAATGCAGAACCTTCTTCTTGACTCAAGGGGCCTTG  
+HWI-EAS443:3:94:1778:380#0/1  
ab\_b[Q`\_a\_a`aaa\_Xaa]aaKaa\_a\_]^[^aVaX]YGY`  
@HWI-EAS443:3:94:210:270#0/1  
TAGGGCGTGGATTGTCTCCGAAAATCCCACTGCATATGTA  
+HWI-EAS443:3:94:210:270#0/1  
`a`aabb[abaaaa`a`a`W`¥`a\_\_^\_\_`\_^\_]`^`V`  
@HWI-EAS443:3:94:252:801#0/1  
TTGGTCAGCAAGTGCTTGTGCATGATGGCATCAATTGGCTA  
+HWI-EAS443:3:94:252:801#0/1  
aab]GZabaa`aUa`a`a^a`aa^`a\_\_\_\_`\_`Z\_\_a^¥Z`  
@HWI-EAS443:3:94:256:111#0/1  
ACCAACTTTGCTGCTGGACAGTCAGTGGTTTCCGTGAAAT  
+HWI-EAS443:3:94:256:111#0/1  
a^aaaaaaa\_`a^aa`]^^a]^^X`X]X]V^VVT]  
@HWI-EAS443:3:94:290:1205#0/1  
GGAAACCACTGACTGTCCAGCAGCAAAGTTGGTGTGCTG  
+HWI-EAS443:3:94:290:1205#0/1  
ZY¥aa¥aQ^`\_Z`]]`^Z¥\_TX\_ZIZVWZ`ZQMNZ[[[]U  
@HWI-EAS443:3:94:295:389#0/1  
ATCGACCGTGGGTGTCTTTCAACCAGAATCTGGAATATCA  
+HWI-EAS443:3:94:295:389#0/1  
a\_\_aa^aa^aaaZa]^U\_]^\_]\_\_a\_\_^X¥\_^]ZZ^ZZ]  
@HWI-EAS443:3:94:304:653#0/1  
CACAAGAGTCTGAATGTGCATGTGTAATGGTTCTTGCTT  
+HWI-EAS443:3:94:304:653#0/1  
aaaabbaa]aab`aab\_aaba`a`\_a\_aaa^a\_a`\_]a\_  
@HWI-EAS443:3:94:327:620#0/1  
GTGCAGGGATAACTGGCATGGCTCGAATCGACCGTGGGTG  
+HWI-EAS443:3:94:327:620#0/1  
\_QZY[\_b`¥^X]¥`]QYaXYVMSRYRVLKTNKPxJBBBBB  
@HWI-EAS443:3:94:329:440#0/1  
GGCTCCTGTCTTTAATGGTTCCATTGGAATGTTTGCATT

+HWI-EAS443:3:94:329:440#0/1  
abb[\_b\_WZOXbbaa`aaZ\_aW^a`aaU`aa^aa\_`¥Za^  
@HWI-EAS443:3:94:403:1651#0/1  
CGAATCGACCGTGGGTGCTTTCAACCAGAATCTGGAATA  
+HWI-EAS443:3:94:403:1651#0/1  
ab^ab\_a]`aaXab[MDMT`a]Y]YBBBBBBBBBBBBBBB  
@HWI-EAS443:3:94:521:688#0/1  
ATAAGACCTTGCTTCTGGGTGAACTAATCAGAGGCGAC  
+HWI-EAS443:3:94:521:688#0/1  
aZaY\_]aaY\_\_`\_[\_X\_aQa\_T`]S`¥a]UG[^\_MPX\_  
@HWI-EAS443:3:94:544:1667#0/1  
ATCCTATCTGATATTCCAGATTCTGGTTGAAAGACACCCA  
+HWI-EAS443:3:94:544:1667#0/1  
aV```a`\_\_a`a`^`\_`\_\_^`\_]``\_ZXY]\_^0\_]¥^W]]  
@HWI-EAS443:3:94:559:870#0/1  
GTGTAATGGTTCTTGCTTTACTGTAATGACCGATGGACC  
+HWI-EAS443:3:94:559:870#0/1  
a\_aZ`]Z\_aa\_a`aaa]``a]W]a^[\_]^W¥S`]¥\_]XY]  
@HWI-EAS443:3:94:684:803#0/1  
GTAAACAGTGACACTGTGGGTGGTCTTGGCCAGACGGTG  
+HWI-EAS443:3:94:684:803#0/1  
\_]WO[M]ZTX^¥U^`Ra\_VH]ZLMY\_[Q][RWa¥ZP^G\_  
@HWI-EAS443:3:94:713:1170#0/1  
CGACCGTGGGTGCTTTCAACCAGAATCTGGAATATCAGA  
+HWI-EAS443:3:94:713:1170#0/1  
ab`X`a`aa`]a`Xaaa^a¥¥a``Z`a\_`ba`a`\_`aaa`  
@HWI-EAS443:3:94:741:1615#0/1  
GCGGGAGCAGCATATCCTTTTGTGGTGTAAACAGTGACAC  
+HWI-EAS443:3:94:741:1615#0/1  
aa^Z¥U`]VXaaa`^0]Va\_a\_G`^KZ]````ZNa`U^\_  
@HWI-EAS443:3:94:76:610#0/1  
CATTAGGGCGTGGATTGTCTCCGAAAATCCCAGTGCATAT  
+HWI-EAS443:3:94:76:610#0/1  
aaaaaaaaa`aa```a\_a```\_WT][^¥ZWT]]^[ZZ]`  
@HWI-EAS443:3:94:785:880#0/1  
ATTCATATCATGCTCCCCCTTGAATGCAGAACCTTCTTC  
+HWI-EAS443:3:94:785:880#0/1  
^`Z`^¥aa`\_^]T]]aW`^Ya`^]WZ`a¥Ya`V^[^XLZ  
@HWI-EAS443:3:94:803:1438#0/1  
CAGTGGTTTCCGTGAAATTAGCGGGCAATTCCTCTCTCTG  
+HWI-EAS443:3:94:803:1438#0/1  
``^PZ\_\_`a^][Z¥]\_]\_SR^[P^^`\_a\_Q¥ZGV¥¥^W\_  
@HWI-EAS443:3:94:885:1595#0/1  
ATCAAAATCAGATTGAAACATGCAATCAAAGCGTCATTAC  
+HWI-EAS443:3:94:885:1595#0/1  
aabaaaaaaaaa`aaaa`aaaa``aaa`a¥a]``a\_a\_  
@HWI-EAS443:3:94:93:1121#0/1  
CAAAATCAGATTGAAACATGCAATCAAAGCGTCATTACTT  
+HWI-EAS443:3:94:93:1121#0/1  
`abb^babababbbbbbbbbbaabaabab`baa`a^aa



@HWI-EAS443:3:95:1062:892#0/1  
CAACTGCCTGTCTTATCATTAGGGCGTGGATTGTCTCCGA  
+HWI-EAS443:3:95:1062:892#0/1  
abb`b`aabb`abba`abaaa`aa\_`b`baaa``a`\_]`\_`  
@HWI-EAS443:3:95:1105:847#0/1  
TTCATATCATGCTCCCCCTTGAATGCAGAACCTTCTTCT  
+HWI-EAS443:3:95:1105:847#0/1  
a^`baab¥aaa[a]\_aa\_aaaa``\_\_aaa`\_\_aa]\_^Ua  
@HWI-EAS443:3:95:1141:1222#0/1  
AGCGGGAGTTTTGTTTCAGCATCCAGAACTAACAGGGCTGG  
+HWI-EAS443:3:95:1141:1222#0/1  
ababbbbaaab\_bb\_aaa[^aaaYaa^a`a\_a\_aaa\_\_`\_a  
@HWI-EAS443:3:95:1156:1176#0/1  
ATACGGCAATGGTGTGGATAGGGGAACTAAAAGCATT  
+HWI-EAS443:3:95:1156:1176#0/1  
aba\_]¥ab\_abbW\_]a]aba]\_¥`aKaaa`\_\_]^a¥^`¥  
@HWI-EAS443:3:95:115:635#0/1  
AATGCAGAACCTTCTTCTTGACTCAAGGGCCTTGCTAAA  
+HWI-EAS443:3:95:115:635#0/1  
¥bab`b^`a```a\_^\_a`a^^^`X^YZ^`^^`¥LXW¥]  
@HWI-EAS443:3:95:1184:662#0/1  
CAGCATCCAGAACTAACAGGGCTGGATTGTATAAGACCTT  
+HWI-EAS443:3:95:1184:662#0/1  
ZTZ[SLSU`\_a`ZVb`VbaZT\_Zb[aa^D¥baYU\_bZHQ  
@HWI-EAS443:3:95:1232:573#0/1  
TCCCAGTCCATCCGTTCCGATCCCAAATCATCTCAAAACC  
+HWI-EAS443:3:95:1232:573#0/1  
aaaa`\_a[\_aaaa]U`\_`\_Ua[[La\_`aSa¥¥a`\_^\_V]  
@HWI-EAS443:3:95:1312:1239#0/1  
GCAATCAAAGCGTCATTACTTATGAAAACAACACTTGGGT  
+HWI-EAS443:3:95:1312:1239#0/1  
abaXa¥^aab`b[a`b`\_aa[aabb]aa]aa`\_]a`aYP  
@HWI-EAS443:3:95:1360:1195#0/1  
CCTCTCCATACAACCTCAAGATTTGAGTCAGTCGCTTGGTC  
+HWI-EAS443:3:95:1360:1195#0/1  
abbbbabbbbabbabbbbbaabbbbabbbaaaa`bbab]V  
@HWI-EAS443:3:95:1401:159#0/1  
ATACTGGACCACAACCTGCCTGTCTTATCATTAGGGCGTGG  
+HWI-EAS443:3:95:1401:159#0/1  
abbaabab¥ab[aaWaaUJZa[\_ab`a`aa\_a`aaU]X\_^  
@HWI-EAS443:3:95:1407:1015#0/1  
CAGACTCTTGTGTTCTCAATATATTGTTTCTCCAACCTCTT  
+HWI-EAS443:3:95:1407:1015#0/1  
^aba¥aaa\_b¥bbb\_bXaaaab\_bbaaba\_aW\_aaWa]aa  
@HWI-EAS443:3:95:1423:912#0/1  
CGGGAGTTTTGTTTCAGCATCCAGAACTAACAGGGCTGGAT  
+HWI-EAS443:3:95:1423:912#0/1  
a\_`babYb`]b`aLS^J]]]aab`aaaa`aa`aa\_Yb`[¥  
@HWI-EAS443:3:95:1426:1380#0/1  
CTTTAACACAGCCACTGCCCCATTGTCTGGGCCAGAAATT

+HWI-EAS443:3:95:1426:1380#0/1  
W`ababbb` `` `bbabb\_[b` `bbaSK¥bb\_a` ababb[[  
@HWI-EAS443:3:95:145:1167#0/1  
CAGGATATAGCGGGAGTTTTGTTTCAGCATCCAGAACTAAC  
+HWI-EAS443:3:95:145:1167#0/1  
`¥abbb\_bbaaa[babXaa\_ZYa`^`¥L\_baa\_a\_[^`\_F  
@HWI-EAS443:3:95:1530:1226#0/1  
CAAGAAGAAGGTTCTGCATTCCAAGGGGAGCATGATATG  
+HWI-EAS443:3:95:1530:1226#0/1  
abbbabb`aba[aabb`baa^aab]`¥aaa\_abb\_aaaa  
@HWI-EAS443:3:95:1583:192#0/1  
AGATTCTGGTTGAAAGACACCCACGGTCGATTCGAGCCAT  
+HWI-EAS443:3:95:1583:192#0/1  
` `Z`^`^a[bb`b^a]\_X[RGUaXbaRZ]UaaY^^TVR^T  
@HWI-EAS443:3:95:1623:1540#0/1  
ATCGAACCTAATGAGCTGTCCTATTGGTGAAGTTCCTC  
+HWI-EAS443:3:95:1623:1540#0/1  
ab[ab` `` `aab\_aa^aY`a\_\_\_\_\_a`aa\_^aa]\_\_aVO\_XI  
@HWI-EAS443:3:95:1624:756#0/1  
CGCTAATTTACGGAAACCACTGACTGTCCAGCAGCAAAG  
+HWI-EAS443:3:95:1624:756#0/1  
\_ab\_[ba\_b]Va^]Ya`Q]a\_^aa`\_aWN`YSY\_aa[BBB  
@HWI-EAS443:3:95:201:1535#0/1  
GGTTGAAAGACACCCACGGTCGATTCGAGCCATGCCAGTT  
+HWI-EAS443:3:95:201:1535#0/1  
^^aab¥K\_]aabba^a¥Q¥TVWVZ[ ]\_Z]]NP^W]ZPT  
@HWI-EAS443:3:95:245:1459#0/1  
CACAACTGCCTGTCTTATCATTAGGGCGTGGATTGTCTCC  
+HWI-EAS443:3:95:245:1459#0/1  
aaabbb\_bbaab\_\_aabb\_aba`a\_aa^\_\_a`\_`^^^\_]Z  
@HWI-EAS443:3:95:286:1880#0/1  
ATCGGTTCCAAGGGGATGTGTTTGTGCATAAGGGAACCAT  
+HWI-EAS443:3:95:286:1880#0/1  
\_T^\_ZVV` ]Z[ ]^a` `TORNRPX¥]MW]TWWPZ[\_XXWUT  
@HWI-EAS443:3:95:290:190#0/1  
ATTTATTCCTACGATATCTTGCTTTATTGAGAAGTTATTG  
+HWI-EAS443:3:95:290:190#0/1  
abb\_baba`ab¥` `aa`Zaa`\_`aaabaa`a]\_a\_`a` `\_  
@HWI-EAS443:3:95:362:1809#0/1  
ATCAAAGCGTCATTACTTATGAAAACAACACTTGGGTAAA  
+HWI-EAS443:3:95:362:1809#0/1  
¥Q^`aa\_\_YJ]^V¥a\_b]Xa^¥]aab`a^a]^\_a[NO`I`  
@HWI-EAS443:3:95:401:813#0/1  
TGGAGAAACAATATATTGAGAACACAAGAGTCTGAATGTG  
+HWI-EAS443:3:95:401:813#0/1  
aababa^\_`TQ]aaaaa` `` `a`a\_a]]L^¥`\_`H¥¥`P\_  
@HWI-EAS443:3:95:495:1935#0/1  
GAACCATTTACACATGCACATTCAGACTCTTGTGTTCTCA  
+HWI-EAS443:3:95:495:1935#0/1  
]ZbaaUab`b\_ba` `^¥\_Xa`b`a` `b\_V\_¥¥¥¥\_baabb

@HWI-EAS443:3:95:512:1233#0/1  
GGACCACAACCTGCCTGTCTTATCATTAGGGCGTGGATTGT  
+HWI-EAS443:3:95:512:1233#0/1  
abbbbbbbabbabbabbbbbabbbbaa`a` `aabbab\_aa  
@HWI-EAS443:3:95:558:138#0/1  
TCCAGATTCTGGTTGAAAGACACCCACGGTCGATTTCGAGC  
+HWI-EAS443:3:95:558:138#0/1  
aaaab^aaaaab`a^¥aa\_]\_aa\_`\_\_a`YY\_¥^¥W]W¥U  
@HWI-EAS443:3:95:572:1435#0/1  
CGCCCTCTGATTAGTTCAACCCAGAAGCAAGGTCTTATAC  
+HWI-EAS443:3:95:572:1435#0/1  
abb`bbbabbabb^abbb`aabb^bbbbbbaaTababaa¥  
@HWI-EAS443:3:95:590:439#0/1  
CATTATATCATGCTCCCCCTTGAATGCAGAACCTTCTT  
+HWI-EAS443:3:95:590:439#0/1  
W[[` `¥[\_b`a¥`^a¥MaZaYa¥X[\_Ya`Y]NZZ\_`]]\_  
@HWI-EAS443:3:95:76:623#0/1  
CAAATACGGCAATGGTGTGGATAGGGAGAACTAAAAGC  
+HWI-EAS443:3:95:76:623#0/1  
ab^Vb^abaa\_aab`\_b\_abaaaa^aa[]R¥`a\_^]a` `\_  
@HWI-EAS443:3:95:883:1860#0/1  
ATGCAGTGGGATTTTCGGAGACAATCCACGCCCTAATGAT  
+HWI-EAS443:3:95:883:1860#0/1  
aa`ab[ `a` `bbbaaa`aa\_aabaa\_\_aaaX]\_a`^a` `\_  
@HWI-EAS443:3:95:985:1795#0/1  
ATGGGCTCCTGTCTTTAATGGTTCATTGGAATGTTTGTC  
+HWI-EAS443:3:95:985:1795#0/1  
aZ^ab`¥^]]X¥¥Y^b]`^W`TXVGSZTa\_PWSIW^^`R[  
@HWI-EAS443:3:96:1107:1585#0/1  
CAAATACGGCAATGGTGTGGATAGGGAGAACTAAAAGC  
+HWI-EAS443:3:96:1107:1585#0/1  
a^aab[aaaa`]^\_b\_aaabZb\_\_YUXa\_aa` `aaa¥baU  
@HWI-EAS443:3:96:1124:1670#0/1  
TGTCTTTCAACCAGAATCTGGAATATCAGATAGGATACAT  
+HWI-EAS443:3:96:1124:1670#0/1  
\_`¥Z^`aaaaaaaaaaaaaaaa`aaa^Vaa\_\_\_a`\_\_¥P`Z  
@HWI-EAS443:3:96:112:1166#0/1  
GGTCAGCAAGTGTGTCATGATGGCATCAATTGGCTAAC  
+HWI-EAS443:3:96:112:1166#0/1  
J\_[ `abaYaaR`Ta¥WZ[Y^`S\_baW^IV\_L^¥P\_Z\_`¥`  
@HWI-EAS443:3:96:1136:248#0/1  
ATTAGTTCAACCCAGAAGCAAGGTCTTATACAATCCAGCC  
+HWI-EAS443:3:96:1136:248#0/1  
a`]^M\_aaa[ `a\_[ `]^RaaYLYa^`]Y\_a`GU]YYR  
@HWI-EAS443:3:96:1219:1559#0/1  
ATTTACACATGCACATTCAGACTCTTGTGTTCTCAATATA  
+HWI-EAS443:3:96:1219:1559#0/1  
\_bb^b`babbbbaa`ba`baa`b^aa^^aVa\_ba]aaa[a  
@HWI-EAS443:3:96:1240:1173#0/1  
GCCCCGTAATTTACGGAAACCACTGACTGTCCAGCAGCA

+HWI-EAS443:3:96:1240:1173#0/1  
a[0`¥S`¥S¥]¥Ma\_Z[YUZU¥^PZ¥WU¥¥WUBBBBBBBB  
@HWI-EAS443:3:96:1278:659#0/1  
GTGCATGTGTAATGGTTCTTGCTTTACTGTAATGACCGA  
+HWI-EAS443:3:96:1278:659#0/1  
\_P`[XTXN]PXR[\_\_\_Y]YYZ[VXZUNLX^R]^]]YXRBB  
@HWI-EAS443:3:96:1303:1386#0/1  
GTCTTTAATGGTTCCATTGGAATGTTTGCATTTAGCAAG  
+HWI-EAS443:3:96:1303:1386#0/1  
a`Za`\_b\_aaaY]Z^^`¥SjWa¥\_\_[]¥XRXX^Z¥]WYBB  
@HWI-EAS443:3:96:1347:683#0/1  
GTTCAAGAAACGGTTTTGAGATGATTTGGGATCCGAACGG  
+HWI-EAS443:3:96:1347:683#0/1  
a`baaaaaa[ab\_bbba^a]a]V`aa`aZ]\_^\_\_\_Y\_a  
@HWI-EAS443:3:96:1379:606#0/1  
GGTGAAGTTCCTCTCCATACAACCTCAAGATTTGAGTCAG  
+HWI-EAS443:3:96:1379:606#0/1  
a]Zaba[aba\_Sa\_aOU`a\_Y]\_\_\_T\_^a`[Waa]\_]U]B  
@HWI-EAS443:3:96:1398:599#0/1  
CGCTAGTCCAGATTGTGTTCTTTGGGTCGCCCTCTGAT  
+HWI-EAS443:3:96:1398:599#0/1  
ababa]\_`a\_a\_abba[abUb^a`bQ``\_Z\_^`a^aaaa  
@HWI-EAS443:3:96:1500:1005#0/1  
AGCAGCATATCCTTTTGTGGTGTAAACAGTGACACTGTGG  
+HWI-EAS443:3:96:1500:1005#0/1  
`¥ab`\_abbaa\_aabba\_a\_¥a\_aa\_\_`a^```a¥\_XNY\_  
@HWI-EAS443:3:96:1503:1009#0/1  
CAGTGACACTGTGGGTTGGTCTTGCCAGACGGTGCTGAG  
+HWI-EAS443:3:96:1503:1009#0/1  
abb¥Y¥`babbabbaabb]^a]ab¥`\_a]¥aaU\_N\_TU^  
@HWI-EAS443:3:96:1560:1700#0/1  
GGGATTTTCGGAGACAATCCACGCCCTAATGATAAGACAG  
+HWI-EAS443:3:96:1560:1700#0/1  
abbaabbbaaa^ab]]abaM`Gb^XS`^a\_aa\_aaa\_MaB  
@HWI-EAS443:3:96:1578:1023#0/1  
CTGGGCCAGAAATCCAATTGTTAGCCAATTGATGCCATC  
+HWI-EAS443:3:96:1578:1023#0/1  
aaaa\_Z`ab`babb\_Za]a`a`ba`[¥`^``aaa]SY\_Y  
@HWI-EAS443:3:96:1674:1716#0/1  
ATCAAAGCGTCATTACTTATGAAAACAACACTTGGGTAAA  
+HWI-EAS443:3:96:1674:1716#0/1  
¥¥`bb`a\_b¥`aaa`aaaaabaabb^[[DNWba`a¥HW`B  
@HWI-EAS443:3:96:196:1722#0/1  
CAAGAGTCTGAATGTGCATGTGTAATGGTTCTTGCTTTA  
+HWI-EAS443:3:96:196:1722#0/1  
aa`U^^`aaaa\_`[Z\_a`^a]aY^a\_\_\_a^^``\_a  
@HWI-EAS443:3:96:235:1053#0/1  
GACACCCACGGTCGATTCGAGCCATGCCAGTTATCCCTGC  
+HWI-EAS443:3:96:235:1053#0/1  
``babb^aaaaP]aS``\_X]a]Ua\_SSWS\_Y]`¥M\_¥]B

@HWI-EAS443:3:96:245:1863#0/1  
AGAACCTTCTTCTTGACTCAAGGGCCTTGCTAAATGACA  
+HWI-EAS443:3:96:245:1863#0/1  
aaab]aaaa\_]a`a\_```aaa\_]`^a¥^^\_^^a\_\_\_\_\_^Y\_  
@HWI-EAS443:3:96:275:752#0/1  
GGGAGTTTTGTTTCAGCATCCAGAACTAACAGGGCTGGATT  
+HWI-EAS443:3:96:275:752#0/1  
^b`I\_¥`Za\_]aaaYaVW\_X\_a`\_\_`^[^\_ZUWa^aaXUV  
@HWI-EAS443:3:96:283:605#0/1  
AACAGGGCAGAGAGAGGAATTGCCCGCTAATTTACGGAA  
+HWI-EAS443:3:96:283:605#0/1  
`[\_a\_^Zaaab`b\_b]``XU\_Z[S¥MX^\_^ZZ¥ZVXZU]  
@HWI-EAS443:3:96:305:117#0/1  
CAAAGAGAACAATCTGGACTAGCGGGAGCAGCATATCC  
+HWI-EAS443:3:96:305:117#0/1  
`a\_b]`bISaK\_a`a¥aaZ][U]\_[]VWR[GNT00]UBBB  
@HWI-EAS443:3:96:327:1769#0/1  
ATCAAAATCAGATTGAAACATGCAATCAAAGCGTCATTAC  
+HWI-EAS443:3:96:327:1769#0/1  
^\_a`^`X\_a`a\_T]aa]Y]a^``¥^]X\_[WZZ^W\_a]]`^  
@HWI-EAS443:3:96:38:1353#0/1  
ATCGAACCTAATGAGCTGTCCTATTGGTGAAGTTCCTC  
+HWI-EAS443:3:96:38:1353#0/1  
aa\_[a\_\_a^`a\_^`\_`^\_U]``^a``XR\_`[]XU\_XOZY  
@HWI-EAS443:3:96:433:387#0/1  
ATTAGACGATACTGGACCACAACTGCCTGTCTTATCATT  
+HWI-EAS443:3:96:433:387#0/1  
aaa`¥T^a\_X\_U\_\_a]S[RN[^N[TPT]\_]S]`]MQVUZB  
@HWI-EAS443:3:96:437:1835#0/1  
GAACTAAAAGCATTAGTTCAAGAAACGGTTTTGAGATGAT  
+HWI-EAS443:3:96:437:1835#0/1  
aa`a^\_ab``\_^[[b^VY^aaaa\_a`aaR^a\_WR¥Z[\_a  
@HWI-EAS443:3:96:477:1167#0/1  
ATCAAAATCAGATTGAAACATGCAATCAAAGCGTCATTAC  
+HWI-EAS443:3:96:477:1167#0/1  
Uaa`Y\_¥]`a^aba^\_\_^^[aa`[a`b`^^^a`¥aWW]\_  
@HWI-EAS443:3:96:610:249#0/1  
GAAGAAGTTCTGCATTCCAAGGGGGAGCATGATATGAAT  
+HWI-EAS443:3:96:610:249#0/1  
a¥aa^a`\_S^\_``]aa[X\_\_\_aa`a\_Z^[\_\_\_\_[Z^`]BB  
@HWI-EAS443:3:96:614:1321#0/1  
GAAAGACACCCACGGTCGATTGAGCCATGCCAGTTATCC  
+HWI-EAS443:3:96:614:1321#0/1  
`a^a```baa`a\_`V``]X¥ZZ[`¥]`]VUH\_a¥Y[]RY  
@HWI-EAS443:3:96:631:1671#0/1  
GGTTGAAAGACACCCACGGTCGATTGAGCCATGCCAGTT  
+HWI-EAS443:3:96:631:1671#0/1  
X`XRR¥a`bbab¥a`\_aa^U¥`XaaYXaV[¥aOUF\_^SQ`  
@HWI-EAS443:3:96:780:1839#0/1  
AAAAGCATTAGTTCAAGAAACGGTTTTGAGATGATTTGGG

+HWI-EAS443:3:96:780:1839#0/1  
`b]``aaaa^^VaaaYY\_a¥ab^F]a`^G^XYb`LL[]H`  
@HWI-EAS443:3:96:788:1472#0/1  
CAGACACTATCAAGAGTTGGAGAAACAATATATTGAGAAC  
+HWI-EAS443:3:96:788:1472#0/1  
a\_a\_\_a^aba` ``^a^aa`\_\_^^^` `]a^aa`\_\_^^^  
@HWI-EAS443:3:96:841:934#0/1  
TAAACAGTGACACTGTGGGTTGGTCTTGGCCAGACGGTGC  
+HWI-EAS443:3:96:841:934#0/1  
a\_¥^aa^Z`a\_\_SaWFG]TZS`aVQ\_VL[\_¥]`RGXB BBB  
@HWI-EAS443:3:96:85:382#0/1  
GCGGGCAATTCCTCTCTGCCCTGTTAGTGGATGGGCTA  
+HWI-EAS443:3:96:85:382#0/1  
aa`T¥ZXMZLRV\_[]\_YX[¥KXV`XU¥YVP\_]V¥BBBBBB  
@HWI-EAS443:3:96:940:732#0/1  
GTTTGTGATAAGGGAACCATTCATATCATGCTCCCCCTTG  
+HWI-EAS443:3:96:940:732#0/1  
a\_`a`][Zaa`a^[QVNU`a`\_\_\_\_\_X\_` `]a`\_X[Z]^a  
@HWI-EAS443:3:96:945:1164#0/1  
AATGGTGTGGATAGGGAGAACTAAAAGCATTAGTTCAA  
+HWI-EAS443:3:96:945:1164#0/1  
]V`ababaXb¥ab^bbb`Q¥T]\_`\_¥^bXJ]`a]aSaXRU  
@HWI-EAS443:3:96:966:1589#0/1  
ATTCAACTTGGGAATCAAAATCAGATTGAAACATGCAATC  
+HWI-EAS443:3:96:966:1589#0/1  
abba[`Za]abbaba`b^ab`U`aba\_ba`a\_aabaa\_aa  
@HWI-EAS443:3:96:997:62#0/1  
AAGACACCCACGGTCGATTCGAGCCATGCCAGTTATCCCT  
+HWI-EAS443:3:96:997:62#0/1  
aab`^b¥Z]\_^a\_US^U¥aSSVWTWUSSSPWWW¥BBBBBB  
@HWI-EAS443:3:97:1018:312#0/1  
ATCGGTCATTACAGTAAAGCAAGAACCATTTACACATGCA  
+HWI-EAS443:3:97:1018:312#0/1  
^`Za\_]Z\_`R\_^LZa]WGYaaaaV¥Z\_[a\_Y]TW^]UY  
@HWI-EAS443:3:97:1048:528#0/1  
ATCCGTTCCGATCCCAAATCATCTCAAACCGTTTCTTGA  
+HWI-EAS443:3:97:1048:528#0/1  
aa]` `YX`b\_`\_Xab]a[\_\_V][aaa\_\_Xa^a`Wa\_\_^  
@HWI-EAS443:3:97:1049:1064#0/1  
ATTGAGAACACAAGAGTCTGAATGTGCATGTGTAATGGT  
+HWI-EAS443:3:97:1049:1064#0/1  
aaaaabbabaaaabaa\_abbababP`\_aaa`aa^aabaa\_  
@HWI-EAS443:3:97:1062:751#0/1  
CACCAATAGGACAGCTCATTAGGGTTCGATATGGGCTCCT  
+HWI-EAS443:3:97:1062:751#0/1  
` `b]aabbbbbbaa\_Pa`]bbaaba[aa`\_aab\_a\_a]S\_  
@HWI-EAS443:3:97:1142:529#0/1  
GGGATTTTCGAGACAATCCACGCCCTAATGATAAGACAG  
+HWI-EAS443:3:97:1142:529#0/1  
abbabbbbabb`bbab`a\_ab^a`[^aa\_aa\_a\_\_a\_¥\_B

@HWI-EAS443:3:97:1165:1788#0/1  
GCGGGAGTTTTGTTCCAGCATCCAGAACTAACAGGGCTGGA  
+HWI-EAS443:3:97:1165:1788#0/1  
aaa`a\_b\_a\_aba`]`a[aa]U\_a\_aUa\_\_U]`\_]\_Xa\_`^  
@HWI-EAS443:3:97:1166:36#0/1  
GAGGAATGCTCCTGTTATCCTGATTCTAGTGAAATCACAT  
+HWI-EAS443:3:97:1166:36#0/1  
a\_a\_OZ\_]\_\_VY¥]Y\_\_XXX^^Y\_]OVVVYXMMVRYXR  
@HWI-EAS443:3:97:1258:425#0/1  
TTCTCCCTATCCAAACACCATTGCCGATTTGAATGAAAA  
+HWI-EAS443:3:97:1258:425#0/1  
a\_a¥N\_]`ba^`Z\_a\_a\_Saa\_aa\_b]^aaa`\_\_\_b^]\_\_  
@HWI-EAS443:3:97:1300:1467#0/1  
ATGGTGTGGATAGGGAGAACTAAAAGCATTAGTTCAAG  
+HWI-EAS443:3:97:1300:1467#0/1  
¥b\_b`ba`aa`bbabbaaab^baab^aY`ab`b\_aaa^b  
@HWI-EAS443:3:97:1311:1325#0/1  
CAAATCTTGAGTTGTATGGAGAGGAACTTACCAATAGG  
+HWI-EAS443:3:97:1311:1325#0/1  
R]babaa^`abaabbbbaabb^`bbab\_baH`ba`bbb\_b  
@HWI-EAS443:3:97:1344:392#0/1  
CAAGAAGAAGTTCTGCATTCCAAGGGGAGCATGATATG  
+HWI-EAS443:3:97:1344:392#0/1  
abbb\_aabbbb`baab\_abbbUbaba`aaabY^bbbaa\_a  
@HWI-EAS443:3:97:1344:549#0/1  
ATCCGTTCCGATCCCAAATCATCTCAAACCGTTTCTTGA  
+HWI-EAS443:3:97:1344:549#0/1  
aaZV`aa\_ba¥¥W]aabaa^aa\_a\_]\_aaZW^`^`¥`\_`\_`  
@HWI-EAS443:3:97:1394:522#0/1  
AGGTTCTGCATTCCAAGGGGAGCATGATATGAATGGTTC  
+HWI-EAS443:3:97:1394:522#0/1  
`\_]\_[aaa`\_]\_[aa^P]a\_a[\_ab^a0a`a`¥a\_a\_\_¥aa¥¥X  
@HWI-EAS443:3:97:1433:527#0/1  
GAGAACTAAAAGCATTAGTTCAAGAAACGGTTTTGAGATG  
+HWI-EAS443:3:97:1433:527#0/1  
\_ababKbbab¥babaYaaL`Ja¥`[ZT]aaabbaU]W]]  
@HWI-EAS443:3:97:1439:1884#0/1  
ATAACAGACACTATCAAGAGTTGGAGAAACAATATATTGA  
+HWI-EAS443:3:97:1439:1884#0/1  
`b\_aY]`aa\_Paa`^^\_a\_a¥K\_a\_\_`a¥`\_`Y\_Y¥a\_]a  
@HWI-EAS443:3:97:146:1839#0/1  
CCTCTCCATACAACTCAAGATTTGAGTCAGTCGCTTGGTC  
+HWI-EAS443:3:97:146:1839#0/1  
aba^`bb]`a`Z¥`aa¥`\_a``aa`]`\_`\_X\_]^[^^[PW[  
@HWI-EAS443:3:97:1520:53#0/1  
GATGATTTGGGATCCGAACGGATGGACTGGGACAGACAAT  
+HWI-EAS443:3:97:1520:53#0/1  
a¥``]aaaaa\_XYVV\_^]GS]Y\_¥BBBBBBBBBBBBBBBB  
@HWI-EAS443:3:97:1536:959#0/1  
ATCTTTCCCTTTTCTATTCTGAAGATCTTGTATGAGGCCT

+HWI-EAS443:3:97:1536:959#0/1  
abbbabbabbbb\_b`bb`a`a¥a`b`a`ab`aaa`Wa  
@HWI-EAS443:3:97:1596:645#0/1  
ATGAGTGGTCAGGATATAGCGGGAGTTTTGTTTCAGCATCC  
+HWI-EAS443:3:97:1596:645#0/1  
ababaYbb]Y`aaaa`a\_Y]bba^^TU\_[``\_0`\_`a\_00  
@HWI-EAS443:3:97:1660:100#0/1  
CCCAAATCATCTCAAACCGTTTCTTGAACCTAATGCTTTT  
+HWI-EAS443:3:97:1660:100#0/1  
`b\_¥aUaa\_\_a`J`KU`^`^`U^``]WXSfVa\_U\_QZVQB  
@HWI-EAS443:3:97:261:457#0/1  
CGATACTGGACCACAACCTGCCTGTCTTATCATTAGGGCGT  
+HWI-EAS443:3:97:261:457#0/1  
ababbababaaaaababbaaaba`ababaaaaaSa[\_\_\_\_  
@HWI-EAS443:3:97:277:187#0/1  
GATGGCATCAATTGGCTAACAATTGGAATTTCTGGCCCAG  
+HWI-EAS443:3:97:277:187#0/1  
a[aaaX[\_ZV`a¥`P¥\_]R\_UY^`^[X^[ZU]^\_UUVXT  
@HWI-EAS443:3:97:310:1479#0/1  
ATTTAGCAAGGCCCTTGAGTCAAGAAGAAGTTCTGCAT  
+HWI-EAS443:3:97:310:1479#0/1  
a^baa\_ba\_a]`\_`aa`^`aNa`^]`\_`^`\_TQNZWV¥¥  
@HWI-EAS443:3:97:351:688#0/1  
TAAGGGAACCATTTCATATCATGCTCCCCCTTGAATGCAG  
+HWI-EAS443:3:97:351:688#0/1  
\_]a\_aaaVP`aa\_a`]¥aaabaaa\_a\_````^`^^`^`a  
@HWI-EAS443:3:97:400:1765#0/1  
AGCGGGAGCAGCATATCCTTTTGTGGTGTAAACAGTGACA  
+HWI-EAS443:3:97:400:1765#0/1  
a`\_^`^aaa`Sa`\_aaaa\_a[a\_¥[Y`^`\_`^`a\_Q`\_U\_  
@HWI-EAS443:3:97:432:435#0/1  
CTCATTTATTCCTACGATATCTTGCTTTATTGAGAAGTTA  
+HWI-EAS443:3:97:432:435#0/1  
`b]T\_aba^¥[U`W\_baa```Y`^`aaa``XaW`\_\_aZ`¥  
@HWI-EAS443:3:97:438:2018#0/1  
AATTGTTAGCCAATTGATGCCATCATGACAAGCACTTGCT  
+HWI-EAS443:3:97:438:2018#0/1  
abaaa\_¥aa¥aba`\_`a\_a\_aa^`a`\_`^`aa^`\_`¥`^]¥\_  
@HWI-EAS443:3:97:530:1559#0/1  
GTTATTATGCCGTTGTACTTTAACACAGCCACTGCCCCAT  
+HWI-EAS443:3:97:530:1559#0/1  
aaaaaa`¥a`^b`aaYaaa`a`^b`a¥``a¥`\_T`\_¥`\_  
@HWI-EAS443:3:97:566:997#0/1  
CTCATTTATTCCTACGATATCTTGCTTTATTGAGAAGTTA  
+HWI-EAS443:3:97:566:997#0/1  
ababbbbbbbaaaababa`Z`abbaaaaaaa````\_`a`a`  
@HWI-EAS443:3:97:570:759#0/1  
ATGGAACCATTAAAGACAGGAGCCCATATCGAACCCCTAAT  
+HWI-EAS443:3:97:570:759#0/1  
aaabaaaa]a`^`¥U^a`]¥\_aa\_]a`a`\_X[ZZ¥a[\_]





+HWI-EAS443:3:98:1259:556#0/1  
aabbaaRbb````baa`a`aaaab`\_aTaaba\_a^a%0\_V\_  
@HWI-EAS443:3:98:1315:349#0/1  
CTGACTGTCCAGCAGCAAAGTTGGTGTGCTGATGTTAAC  
+HWI-EAS443:3:98:1315:349#0/1  
abbaabaVaa`ba^a\_aaV\_\_X]\_R^Va`^aY[\_YIYS]U  
@HWI-EAS443:3:98:1445:76#0/1  
AGACGATACTGGACCACAACCTGCCTGTCTTATCATTAGGG  
+HWI-EAS443:3:98:1445:76#0/1  
aa``ba``SaPaVLN`S^`G\_`QV[a%V^a%V^%V^`%]VW  
@HWI-EAS443:3:98:1473:237#0/1  
GCCCCTAATTACTACTATGAGGAATGCTCCTGTTATCCTG  
+HWI-EAS443:3:98:1473:237#0/1  
a`TX`aaaaa\_a[\_^aa[a\_\_X\_\_\_^^]`%S\_^\_W^XWVZ\_  
@HWI-EAS443:3:98:157:1809#0/1  
ATTCATATCATGCTCCCCCTTGAATGCAGAACCTTCTTC  
+HWI-EAS443:3:98:157:1809#0/1  
V^abbaabVbb%Y[b%bab\_`abZa[I]^`^]V[\_YINT`S  
@HWI-EAS443:3:98:1778:1269#0/1  
TACTTGTCAATGGTAAATGGCAACTCAGCACCGTCTGGCC  
+HWI-EAS443:3:98:1778:1269#0/1  
ab%bbb\_\_aaaba]aaaZ`UPaaZ`Z`\_Wa\_YU[\_V%[\_W  
@HWI-EAS443:3:98:1782:992#0/1  
ATCAGAGGGCGACCCAAAGAGAACACAATCTGGACTAGCG  
+HWI-EAS443:3:98:1782:992#0/1  
^a]a\_a]aaaaaa`aaaaaaaaa^b]aaaY\_\_^a%`a%]]  
@HWI-EAS443:3:98:186:296#0/1  
ATTCGAGCCATGCCAGTTATCCCTGCACACACATGTGATT  
+HWI-EAS443:3:98:186:296#0/1  
\_]ZaaVaa`a``]Z^a[\_``^W[\_^^]^^\_Z\_````\_]^\_  
@HWI-EAS443:3:98:229:383#0/1  
CTCCATTAGACGATACTGGACCACAACCTGCCTGTCTTATC  
+HWI-EAS443:3:98:229:383#0/1  
ababa`UU^NF[`S\_NT\_YOX`[P]LHT\_[URTRN%[[^Z  
@HWI-EAS443:3:98:31:403#0/1  
GACCACAACCTGCCTGTCTTATCATTAGGGCGTGGATTGTC  
+HWI-EAS443:3:98:31:403#0/1  
\_]J^ZXX[%`\_]UUVa[Z^^\_X%Z[W[[ZUNUVJVUVU^RB  
@HWI-EAS443:3:98:328:117#0/1  
CAGTCGCTTGGTCAGCAAGTGCTTGTTCATGATGGCATCAA  
+HWI-EAS443:3:98:328:117#0/1  
abbaabbbabb^Tbb`Z\_a]b)`aaU[``b0aaa\_\_`S\_`%  
@HWI-EAS443:3:98:33:1634#0/1  
AGCCCATCCACTAACAGGGCAGAGAGGAATTGCCCGCT  
+HWI-EAS443:3:98:33:1634#0/1  
`)]`aaaaaaaaaab\_a\_[a`a\_`a\_a\_\_\_%]`\_%]W%\_U%  
@HWI-EAS443:3:98:376:1829#0/1  
TCCGTTCCGATCCCAAATCATCTCAAACCGTTTCTTGAA  
+HWI-EAS443:3:98:376:1829#0/1  
ab%[H\_%]X\_aaaa`ba`abaaa\_baaaSb%^^\_aa^aaa

@HWI-EAS443:3:98:390:1674#0/1  
AGACATATGTAAACATCAGCAACACCAACTTTGCTGCTGG  
+HWI-EAS443:3:98:390:1674#0/1  
^aa\_\_\_aabTYb[aaaZ\_`\_b`\_dW^a`H`S\_¥aQa^]^¥  
@HWI-EAS443:3:98:410:663#0/1  
CAACTGCCTGTCTTATCATTAGGGCGTGGATTGTCTCCGA  
+HWI-EAS443:3:98:410:663#0/1  
a¥\_a`ababb`abbab`abb[``aaaaa`aa¥a`\_\_b]  
@HWI-EAS443:3:98:536:376#0/1  
GTGAAATCACATGTGTGTGCAGGGATAACTGGCATGGCTC  
+HWI-EAS443:3:98:536:376#0/1  
aabbba``a`aa]¥aVa\_a^Tba`^^`Vaa\_\_`]\_\_S\_Y  
@HWI-EAS443:3:98:658:1100#0/1  
GCGGGCAATTCTCTCTGCCCTGTTAGTGGATGGGCTA  
+HWI-EAS443:3:98:658:1100#0/1  
aa`aa``]a`\_`U\_\_][`R]XQTX¥ZZX]V^BBBBBBBBB  
@HWI-EAS443:3:98:672:1937#0/1  
GGGATCCGAACGGATGGACTGGGACAGACAATAACTTCTC  
+HWI-EAS443:3:98:672:1937#0/1  
a\_a`abaabZFR¥]\_aa\_] [WZ[[]VS^b\_¥aa¥Y]\_^  
@HWI-EAS443:3:98:678:1349#0/1  
TGTCTCCGAAAATCCCACTGCATATGTATCCTATCTGATA  
+HWI-EAS443:3:98:678:1349#0/1  
¥¥a`a`ZSXaWa^X`\_baba\_aa`Y^Xb¥\_a\_a\_aXR¥a^  
@HWI-EAS443:3:98:700:621#0/1  
AATTGATGCCATCATGACAAGCACTTGCTGACCAAGCGAC  
+HWI-EAS443:3:98:700:621#0/1  
¥aaaaa\_XV``ba`^b`aaab\_aaa\_a`a^YXaaaZ]`\_  
@HWI-EAS443:3:98:739:1705#0/1  
AGCCACTCAATTCAACTTGGGAATCAAAATCAGATTGAAA  
+HWI-EAS443:3:98:739:1705#0/1  
aaabbababaaa`\_\_TV\_a]Ybb\_`ba¥aaab^\_baa`ba  
@HWI-EAS443:3:98:825:1579#0/1  
CGAATCGACCGTGGGTGTCTTTCAACCAGAATCTGGAATA  
+HWI-EAS443:3:98:825:1579#0/1  
abbabbbb\_baaaa^aWabbaaaa`bbab\_\_`babbbbaa  
@HWI-EAS443:3:98:831:1494#0/1  
CAGCAGCAAAGTTGGTGTGCTGATGTTAACATATGTCTG  
+HWI-EAS443:3:98:831:1494#0/1  
VXS`¥[``[^X`\_`aPaX^a\_S[K\_]YZU^`]b\_SZDGP^  
@HWI-EAS443:3:98:887:563#0/1  
AGCCACTCAATTCAACTTGGGAATCAAAATCAGATTGAAA  
+HWI-EAS443:3:98:887:563#0/1  
``a````\_\_`ba¥YV¥a^aa^aaaa\_¥]`dW``^``aa`^  
@HWI-EAS443:3:98:915:871#0/1  
AGGCCTCATACAAGATCTTCAGAATAGAAAAGGGAAAGAT  
+HWI-EAS443:3:98:915:871#0/1  
`¥Zaaaabbbabaaa`ba\_abaaa`aaaa\_````\_a\_a`\_  
@HWI-EAS443:3:98:977:389#0/1  
GCCGTTGACTTTAACACAGCCACTGCCCCATTGTCTGGG



@HWI-EAS443:3:99:230:1894#0/1  
AAAGGATATGCTGCTCCCGCTAGTCCAGATTGTGTTCTCT  
+HWI-EAS443:3:99:230:1894#0/1  
abaa\_a`a``aaYa\_a\_a\_\_`\_`XY\_¥\_U\_`\_¥^Q^¥¥¥Y  
@HWI-EAS443:3:99:230:614#0/1  
GCCAAGACCAACCCACAGTGTCACTGTTTACACCACAAAA  
+HWI-EAS443:3:99:230:614#0/1  
a`aaaa`aa\_```\_^XaU`R\_\_^^aXU]`\_]\_¥]^R\_\_]¥  
@HWI-EAS443:3:99:236:1666#0/1  
TACTGGACCACAACCTGCCTGTCTTATCATTAGGGCGTGGA  
+HWI-EAS443:3:99:236:1666#0/1  
ZSJ^¥URaa` [TTUW^XRaba`^\_b^F][a^F^VRZQJM\_  
@HWI-EAS443:3:99:268:178#0/1  
CAGAACCTTCTTCTTACTCAAGGGCCTTGCTAAATGAC  
+HWI-EAS443:3:99:268:178#0/1  
S\_`SYR\_a`Y¥I\_baa`W`XZRR[``]`\_aa`[X\_Z]ZVPY  
@HWI-EAS443:3:99:300:1791#0/1  
CAGGATATAGCGGGAGTTTTGTTTCAGCATCCAGAATAAC  
+HWI-EAS443:3:99:300:1791#0/1  
\_b]a\_bb\_aZ`bbbabK`ab\_aaY^aa\_W^^`a]\_aa]  
@HWI-EAS443:3:99:328:882#0/1  
GTGCATGTGTAATGGTTCTTGCTTTACTGTAATGACCGA  
+HWI-EAS443:3:99:328:882#0/1  
aab`]`b\_baa`Q¥abaaa`b`aaa\_`a\_a`a\_a`Za\_  
@HWI-EAS443:3:99:379:707#0/1  
TGATATTCCAGATTCTGGTTGAAAGACACCCACGGTCGAT  
+HWI-EAS443:3:99:379:707#0/1  
abaaaba^\_\_Wtaa`aaZ`aaaa`aa`^Y^`Ta[WW`] ^  
@HWI-EAS443:3:99:394:781#0/1  
CAACTGCCTGTCTTATCATTAGGGCGTGGATTGTCTCCGA  
+HWI-EAS443:3:99:394:781#0/1  
aab`]baabb^abb`\_^`ba`aa`a[Xa^aa^`\_Y`Z  
@HWI-EAS443:3:99:479:1320#0/1  
CGAGCCATGCCAGTTATCCCTGCACACACATGTGATTTCA  
+HWI-EAS443:3:99:479:1320#0/1  
abbaa\_[V\_bb[``bbbbbaaaba\_¥\_abb`¥aaaa\_T\_  
@HWI-EAS443:3:99:552:1077#0/1  
GGTCCATCGGTCATTACAGTAAAGCAAGAACCATTTACAC  
+HWI-EAS443:3:99:552:1077#0/1  
aa]a\_aa`a\_]a`\_a¥]\_a]`Y`\_\_]T]¥^^Y`^\_\_`^]\_  
@HWI-EAS443:3:99:598:368#0/1  
GCTCCCGCTAGTCCAGATTGTGTTCTTTGGGTCGCCCT  
+HWI-EAS443:3:99:598:368#0/1  
aXYV` [NUNN]VZaT`PHUZV^LLZQUV¥QYL [VVVUBBB  
@HWI-EAS443:3:99:626:778#0/1  
CGTTTCTTGAACCTAATGCTTTTAGTTCTCCCTATCCAAAC  
+HWI-EAS443:3:99:626:778#0/1  
ababbbab]bb`J\_ab`ababaaaaabaa`b`a`a^a\_  
@HWI-EAS443:3:99:674:942#0/1  
CGGGAGTTTTGTTTCAGCATCCAGAATAACAGGGCTGGAT

+HWI-EAS443:3:99:674:942#0/1  
`aSaaQ`\_b\_\_\_\_`\_bVbaaabba¥aaaa`]aaaaa`\_^  
@HWI-EAS443:3:99:753:1316#0/1  
GACATATGTTAACATCAGCAACACCAACTTTGCTGCTGGA  
+HWI-EAS443:3:99:753:1316#0/1  
aaababba`abbbabaaaaba`a`aaa\_aa`a`aa\_a\_aa  
@HWI-EAS443:3:99:787:1805#0/1  
CAAAGAGAACAATCTGGACTAGCGGGAGCAGCATATCC  
+HWI-EAS443:3:99:787:1805#0/1  
\_bbabbaab]abbbb\_bbaaabbaabbbb[ba`bb^HX  
@HWI-EAS443:3:99:800:375#0/1  
ATTCATATCATGCTCCCCCTTGAATGCAGAACCTTCTTC  
+HWI-EAS443:3:99:800:375#0/1  
Xa^a`bbbabbbba`^^^`b`b^`a`\_`abba[[`^X^[a  
@HWI-EAS443:3:99:812:1751#0/1  
CAAACCGTTTTCTTGAACATAATGCTTTTAGTTCTCCCTAT  
+HWI-EAS443:3:99:812:1751#0/1  
W\_bbaZ^\_S\_b^[Y¥bba¥a^b\_J\_P\_a`ba\_HXV^V[b`  
@HWI-EAS443:3:99:842:1748#0/1  
ATTCAAATACGGCAATGGTGTGGATAGGGAGAACTAAA  
+HWI-EAS443:3:99:842:1748#0/1  
aa\_a`a`^a]]`\_`aaabU`\_\_a^\_YU\_\_`\_¥^a`Y[]\_a  
@HWI-EAS443:3:99:844:1436#0/1  
CAGTGGGATTTTCGGAGACAATCCACGCCCTAATGATAAG  
+HWI-EAS443:3:99:844:1436#0/1  
abbQ`bb\_[abaabbababa\_^aaba`a`aaaabaaa`\_`  
@HWI-EAS443:3:99:954:1627#0/1  
AATGTGCATGTGTAAATGGTCTTGCTTTACTGTAATGAC  
+HWI-EAS443:3:99:954:1627#0/1  
a`abaa`aaaaaaaaabba\_a`aaa]aaba¥ab`baaa`  
@HWI-EAS443:3:9:1002:729#0/1  
GTCCCAGTCCATCCGTTCCGATCCCAAATCATCTCAAAAC  
+HWI-EAS443:3:9:1002:729#0/1  
a\_[SY\_XQ]WSOT[^\_¥U\_a\_]UZR[[U[T¥XR¥TXYWYW  
@HWI-EAS443:3:9:1003:895#0/1  
AGCGGGAGTTTTGTTTCAGCATCCAGAACTAACAGGGCTGG  
+HWI-EAS443:3:9:1003:895#0/1  
aaabaa]aH^\_aa\_\_Y`\_\_\_\_]^\_\_\_\_V^`\_¥\_\_Y\_W]^\_  
@HWI-EAS443:3:9:1032:1227#0/1  
AATATATTGAGAACAAGAGTCTGAATGTGCATGTGTAA  
+HWI-EAS443:3:9:1032:1227#0/1  
a^bababbbbababababab`abaaaabaaaaba`a`aa  
@HWI-EAS443:3:9:1057:875#0/1  
AGCGGGAGCAGCATATCCTTTTGTGGTGTAAACAGTGACA  
+HWI-EAS443:3:9:1057:875#0/1  
aaaaYRR¥RVa\_Z\_X`[KQa`a`\_UUP]NV\_[NW\_P¥U¥¥  
@HWI-EAS443:3:9:1059:1147#0/1  
GGGATTTTCGGAGACAATCCACGCCCTAATGATAAGACAG  
+HWI-EAS443:3:9:1059:1147#0/1  
¥a\_\_bbb`ba`abbbbZbaW`^`aVaa`Uaa`abaaaaa

@HWI-EAS443:3:9:1204:376#0/1  
CAAATCAGATTGAAACATGCAATCAAAGCGTCATTACTT  
+HWI-EAS443:3:9:1204:376#0/1  
aaaaababbabbbbaaabab\_aaa\_a`ab\_a\_]aba`^b`  
@HWI-EAS443:3:9:1273:81#0/1  
TGTTAACATCAGCAACACCAACTTTGCTGCTGGACAGTCA  
+HWI-EAS443:3:9:1273:81#0/1  
\_Q\_^R]XVaXQ]aa]aaU¥¥`Y[\_\_\_L]]H]aaQTNZM^B  
@HWI-EAS443:3:9:131:982#0/1  
TGCCCCGTAATTTACGGAAACCACTGACTGTCCAGCAGC  
+HWI-EAS443:3:9:131:982#0/1  
a\_bbbabbL]R]\_abbaa`a`[¥]aXX]\_a\_H]NQS^U¥B  
@HWI-EAS443:3:9:1410:1275#0/1  
GAAATTCCAATTGTTAGCCAATTGATGCCATCATGACAAG  
+HWI-EAS443:3:9:1410:1275#0/1  
`V`X]]V`aa¥aaa¥0\_I¥Q\_]YW\_[X]^TPY`\_WG[\_[  
@HWI-EAS443:3:9:1411:1975#0/1  
GTCAGGATATAGCGGGAGTTTTGTTGATCCAGAACTA  
+HWI-EAS443:3:9:1411:1975#0/1  
a^¥aa`^`\_`a\_a`aYaU\_\_[[W^S]]S¥UNSX]X]UXY  
@HWI-EAS443:3:9:1429:1239#0/1  
CATCAATTGGCTAACAAATTGGAATTTCTGGCCAGACAAT  
+HWI-EAS443:3:9:1429:1239#0/1  
`¥`a\_\_a\_\_Zaba^^aaa`T\_a^[]`aa]`aaZ\_\_YZ  
@HWI-EAS443:3:9:1461:908#0/1  
GACACCCACGGTCGATTCGAGCCATGCCAGTTATCCCTGC  
+HWI-EAS443:3:9:1461:908#0/1  
abaa¥`aaSYZ[Za\_\_a[Y]`YW`\_^M^^[Y^^aMS^^`W  
@HWI-EAS443:3:9:1507:308#0/1  
TCTGGCCAGAAATCCAATTGTTAGCCAATTGATGCCAT  
+HWI-EAS443:3:9:1507:308#0/1  
a\_Z]b¥R]b`aaa`aa\_\_V`a^V\_^ON¥`]][\_¥^\_VU^Z  
@HWI-EAS443:3:9:1536:104#0/1  
TGCTGCTCCCGCTAGTCCAGATTGTGTTCTCTTTGGGTCCG  
+HWI-EAS443:3:9:1536:104#0/1  
aa`aa^`^]Z\_Z^U¥W¥WU^WWWPWUW¥WWWUWWWSSUSU  
@HWI-EAS443:3:9:1564:1942#0/1  
AACAGACACTATCAAGAGTTGGAGAAACAATATATTGAGA  
+HWI-EAS443:3:9:1564:1942#0/1  
aaa`^\_\_a\_a`^¥\_\_XWZ^a\_]^^^[\_^\_\_\_\_\_[¥`¥  
@HWI-EAS443:3:9:1615:1531#0/1  
AATGCAGAACCTTCTTCTTACTCAAGGGCCTTGCTAAA  
+HWI-EAS443:3:9:1615:1531#0/1  
`b`b`a`bYXab`aaW`babSa\_\_\_\_UaWaG^aab^a^a\_  
@HWI-EAS443:3:9:1622:166#0/1  
TTCAAATACGGCAATGGTGTGGATAGGGAGAACTAAAA  
+HWI-EAS443:3:9:1622:166#0/1  
^b]`a\_bbaba\_a]^b[`¥a``¥X^[\_]V\_] [T]]^¥\_  
@HWI-EAS443:3:9:1657:1755#0/1  
CACCAACTTTGCTGCTGGACAGTCAGTGGTTCCGTGAAA

+HWI-EAS443:3:9:1657:1755#0/1  
aba^aaaaab`aab`abaaXaa`¥a^NY`U`\_Y\_¥TTTT[  
@HWI-EAS443:3:9:1723:1219#0/1  
TTCATATCATGCTCCCCCTTGAATGCAGAACCTTCTTCT  
+HWI-EAS443:3:9:1723:1219#0/1  
a¥]\_aaaZ`aa¥\_H¥^[\_`\_\_WY^XRN^a\_\_^QY]Q]^¥^  
@HWI-EAS443:3:9:1776:638#0/1  
GTCAGTCGCTTGGTCAGCAAGTGCCTTGCATGATGGCATC  
+HWI-EAS443:3:9:1776:638#0/1  
a]\_^\_WLZU][\_XS¥ZVS[¥^P[UROOSVVVFQZVYBBBB  
@HWI-EAS443:3:9:234:246#0/1  
ACCAACTTTGCTGCTGGACAGTCAGTGGTTTCCGTGAAAT  
+HWI-EAS443:3:9:234:246#0/1  
aaaaa```aa\_`a`a`a`\_\_^`X`\_`U`\_Y]^^^X]X^^X  
@HWI-EAS443:3:9:294:835#0/1  
ATGTGTTTGTGATAAGGGAACCATTCATATCATGCTCCCC  
+HWI-EAS443:3:9:294:835#0/1  
aa`a^aaa^aa`b`\_aa`aa`aaa[`a`a¥a`\_\_\_\_]\_]\_  
@HWI-EAS443:3:9:308:1364#0/1  
GATTAGTTCAACCCAGAAGCAAGTCTTATACAATCCAGC  
+HWI-EAS443:3:9:308:1364#0/1  
a`aaaa[``abaa\_aa`a\_\_Z`X¥`\_a`a\_a\_\_Z``]^  
@HWI-EAS443:3:9:314:1347#0/1  
TGCATGTGTAATGGTTCTTGCTTTACTGTAATGACCGAT  
+HWI-EAS443:3:9:314:1347#0/1  
\_`a¥Xa\_UGTbbbbbaR^baaa]aabbba`a¥a^^`a¥aa\_  
@HWI-EAS443:3:9:323:429#0/1  
CTTGGGAATCAAAATCAGATTGAAACATGCAATCAAAGCG  
+HWI-EAS443:3:9:323:429#0/1  
aaaa`aaa`aaa`aaaa`aa```\_`\_a\_\_\_a\_\_\_]`¥a  
@HWI-EAS443:3:9:422:785#0/1  
GAAGTTCCCTCTCCATACAACCTCAAGATTTGAGTCAGTCG  
+HWI-EAS443:3:9:422:785#0/1  
Zabbabaabbbaabbbaabbbb[b`a\_b]`bb\_^abb¥a\_  
@HWI-EAS443:3:9:454:531#0/1  
GAGGAATTGCCCGCTAATTTACGGAACCACTGACTGTC  
+HWI-EAS443:3:9:454:531#0/1  
aa`aaaaaaaa`a`aaaaa`a¥aa`]`W]a\_\_\_]\_T]  
@HWI-EAS443:3:9:481:410#0/1  
GGCTGTGTTAAAGTACAACGGCATAATAACAGACACTATC  
+HWI-EAS443:3:9:481:410#0/1  
aa[\_aW`\_]a¥`V¥ZW\_^]WYWV^\_X]^\_\_\_]SZWSZ]SZ  
@HWI-EAS443:3:9:493:2027#0/1  
CAACTTTGCTGCTGGACAGTCAGTGGTTTCCGTGAAATTA  
+HWI-EAS443:3:9:493:2027#0/1  
[`ba^a\_`^abaab]\_[T^I¥\_] [a`Z¥UZ^WNT]`aa`\_  
@HWI-EAS443:3:9:548:1093#0/1  
GCAGCATATCCTTTTGTGGTGTAAACAGTGACACTGTGGG  
+HWI-EAS443:3:9:548:1093#0/1  
aa`^aaaa`^`aaa\_]Y^]¥a\_aa]``^Ua\_[\_`\_W\_¥\_



@HWI-EAS443:3:9:54:1342#0/1  
AACTTGGGAATCAAATCAGATTGAAACATGCAATCAAAG  
+HWI-EAS443:3:9:54:1342#0/1  
aa`Z\_\_Z```aaa`[^`aaa]M¥a\_aaabaaaaaaaa`a\_  
@HWI-EAS443:3:9:566:348#0/1  
GGCTGTGTAAAGTACAACGGCATAATAACAGACACTATC  
+HWI-EAS443:3:9:566:348#0/1  
aa^`bS][^Ta`0Sa^S\_I\_\_Z^\_X\_S]\_^ZNZXW]^YTG  
@HWI-EAS443:3:9:591:28#0/1  
TGAGAACACAAGAGTCTGAATGTGCATGTGTAATGGTTC  
+HWI-EAS443:3:9:591:28#0/1  
`babb^aaaaabab]aaba`aa¥b[\_aaZa^``^]aa]^  
@HWI-EAS443:3:9:624:1965#0/1  
ACAGCCACTGCCCCATTGTCTGGGCCAGAAATCCAATTG  
+HWI-EAS443:3:9:624:1965#0/1  
aYa]a^^¥WV\_Z`[\_Y]YXYXX]UUQ]Z¥\_^XUUU^UBBB  
@HWI-EAS443:3:9:627:1448#0/1  
ATCCACTAACAGGGCAGAGAGGAATTGCCCGCTAATTT  
+HWI-EAS443:3:9:627:1448#0/1  
`a^baaab``U¥S^aa\_a\_aZxaU\_VX[WEL¥\_\_\_¥\_X\_  
@HWI-EAS443:3:9:670:595#0/1  
AGCATCCAGAACTAACAGGGCTGGATTGTATAAGACCTTG  
+HWI-EAS443:3:9:670:595#0/1  
ab\_^aa\_baZaaaba``^^`\_QSQ[U\_¥T[aYXW\_VHPPa  
@HWI-EAS443:3:9:72:436#0/1  
TGCAGAACCTTCTTCTTACTCAAGGGCCTTGCTAAATG  
+HWI-EAS443:3:9:72:436#0/1  
abbaaabaa\_aaaaaaaaa`a\_aa`aaa\_\_``a``]aa`  
@HWI-EAS443:3:9:752:1762#0/1  
CAGACATATGTTAACATCAGCAACACCACTTTGCTGCTG  
+HWI-EAS443:3:9:752:1762#0/1  
a\_]S]^`X^`^]Ubaa`[aaa\_a\_XaU]XaNX]]Y\_^\_Y][  
@HWI-EAS443:3:9:777:1452#0/1  
ATGCCCTAATTATCACTATGAGGAATGCTCCTGTTATCC  
+HWI-EAS443:3:9:777:1452#0/1  
aYL[YW`\_a\_aaa^Z`]a```]SY`^^`WU]SSaZ^[XX[  
@HWI-EAS443:3:9:869:72#0/1  
ACAACCTGCCTGTCTTATCATTAGGGCGTGGATTGTCTCCG  
+HWI-EAS443:3:9:869:72#0/1  
aaa`ab```aaaaba^aa`a\_]^[```]Z¥XX^X^^  
@HWI-EAS443:3:9:923:271#0/1  
GGTGTAAACAGTGACACTGTGGGTTGGTCTTGGCCAGACG  
+HWI-EAS443:3:9:923:271#0/1  
aaW`^a^\_aa`Wa\_U¥¥`aW^¥]W¥^¥W¥Z^¥^WUU¥UUW  
@HWI-EAS443:3:9:990:1843#0/1  
GCCCCGTAATTTACGGAAACCACTGACTGTCCAGCAGCA  
+HWI-EAS443:3:9:990:1843#0/1  
]b¥F^Z]baZaa`aa\_bX]aa\_`K¥aa\_\_aG`]X]G¥`\_\_  
@HWI-EAS443:3:32:1084:573#0/1  
GCCGGAATAGCAATAAGACCCAAAGGGAGGGTCAAGAG

+HWI-EAS443:3:32:1084:573#0/1  
aaaab¥^\_aaa[ar`a\_^¥]\_aQT¥aGXR[W^[W\_TYVRJ  
@HWI-EAS443:3:43:101:1096#0/1  
GTTCTTCTCCCTTCTTGACCCCTCACTTTGGGTCTTATTG  
+HWI-EAS443:3:43:101:1096#0/1  
a^a`aaaaaaaaaaaa\_a` ]`\_`aaaa`Z[\_X`\_\_\_a^Z  
@HWI-EAS443:3:66:1117:415#0/1  
AATGGTTCATTCTCCCTTCTTGACCCCTCACTTTGGGTCT  
+HWI-EAS443:3:66:1117:415#0/1  
]b\_GX0Zba`ba[a[bbb`aYSY]\_ZX]aV`ZZ`baaHY]  
@HWI-EAS443:3:12:702:1318#0/1  
CAGTAATAGTTCATACTCCCTTCTTGACCCCTCACTTTGG  
+HWI-EAS443:3:12:702:1318#0/1  
aaa^bbbbbaa¥ab`bbab\_bbbab`aaaaaba`^`babV  
@HWI-EAS443:3:16:349:1629#0/1  
CAGTAATAGATCATTCTCCCTTCTTGACCCCTCACTTTGG  
+HWI-EAS443:3:16:349:1629#0/1  
a`Za]a`V^DS¥]Q¥[[]`^aaa^ZPR\_\_a`U[aUW¥¥RX  
@HWI-EAS443:3:1:428:1298#0/1  
CCCCTCACTTTGGGTATTATTGCTATTTCCGGCTTGA  
+HWI-EAS443:3:1:428:1298#0/1  
aa¥ObRTU]Z`a]WGFT\_\_`MZYK\_PX¥XSaORWZBBBBB  
@HWI-EAS443:3:29:914:1679#0/1  
CTCCCTTCTTGACCCCTCACTTTGGGACTTATTGCTATTT  
+HWI-EAS443:3:29:914:1679#0/1  
V]bZ]b\_JR]`aP¥a`b[]WbWX`aaFFG\_NUI\_a\_a\_BB  
@HWI-EAS443:3:35:1677:773#0/1  
GACCCCTCACTTTGGGTCTTATTCTTATTTCCGGCTTGAA  
+HWI-EAS443:3:35:1677:773#0/1  
`b`\_abaab`[bbaba][bbbb[H]bbabbbaba`a\_ZXG  
@HWI-EAS443:3:43:778:1180#0/1  
GTAATAGTTCATTCTCCCTTCTTGACCCCTCTCTTTGGGT  
+HWI-EAS443:3:43:778:1180#0/1  
`\_abaaaaa`ba\_a`aab`a`aaa`\_`\_]a\_aaa`^aZ  
@HWI-EAS443:3:48:67:143#0/1  
GTAATAGTTCATTCTCCCTTCTTGACCGCTCACTTTGGGT  
+HWI-EAS443:3:48:67:143#0/1  
aa^JMWZWWRWQNSPWR[Q^]`VBBBBBBBBBBBBBBBBB  
@HWI-EAS443:3:52:577:972#0/1  
CAAGCCGGCAATAGCAATAAGACCCAAAGTGAGGGGTCAA  
+HWI-EAS443:3:52:577:972#0/1  
ab\_```[^D0a]^¥[Z¥`a[aa^`\_\_`]aYa\_a`aaR[U¥  
@HWI-EAS443:3:52:645:202#0/1  
GCCGGAATAGCAATAAGACCCAAAGAGAGGGGTCAAGAA  
+HWI-EAS443:3:52:645:202#0/1  
a`\_aa¥aI`^`\_aaSSS[VWNT¥PXXDRYWZ\_]YZMSS\_  
@HWI-EAS443:3:52:757:1337#0/1  
TAATAGTTCATTCTCCCTTCTTGACCCCTCACTTAGGGTC  
+HWI-EAS443:3:52:757:1337#0/1  
aaaa¥a\_aa\_ab`a\_a\_baa`aaa\_\_^`a\_\_^a`````\_X\_

@HWI-EAS443:3:76:1579:284#0/1  
CAGTAATAGTTTATTCTCCCTTCTTGACCCCTCACTTTGG  
+HWI-EAS443:3:76:1579:284#0/1  
a]bbXbbba\_FX`bJ^X`bbb`]aaaaZSL^`\_]ba\_^  
@HWI-EAS443:3:17:770:1786#0/1  
CTCCCTNCTTGACCCCTCACTTTGGGTCTTATTGCTATTT  
+HWI-EAS443:3:17:770:1786#0/1  
`aaaa[DYa\_Z`aa\_a``\_[``^\_[Sa^``¥¥¥¥`\_¥\_  
@HWI-EAS443:3:19:967:522#0/1  
GCCGAAATAGCAATNAGACCCAAAGTGAGGGTCAAGAA  
+HWI-EAS443:3:19:967:522#0/1  
aa```[[U```\_`XDZ`a\_ZY\_]\_W\_]a¥\_\_X]]\_XU  
@HWI-EAS443:3:78:828:1554#0/1  
CAGTNATAGTTCATTCTCCCTTCTTGACCCCTCACTTTGG  
+HWI-EAS443:3:78:828:1554#0/1  
a`^D]a`S`bbabaabaaaa\_`aaa\_¥¥`aa\_`a\_a\_]`  
@HWI-EAS443:3:8:1396:1269#0/1  
GTAATAGTTCATTCTCCCTTCTTGACCCCTCANTTTGGGT  
+HWI-EAS443:3:8:1396:1269#0/1  
aYa\_a^[]a^a\_Z^\_]`aX`^^\_V0¥]\_^SEW]\_\_XVZ  
@HWI-EAS443:3:49:684:349#0/1  
GGCCAGTAATAGTTCATTCTCCCTTCTTGACCCCTCACTT  
+HWI-EAS443:3:49:684:349#0/1  
]MWLVbPZZVLRGVNNVTX^ZXNZWL VVRNTMLS^URRR¥  
@HWI-EAS443:3:27:1131:907#0/1  
CCCTTCTTGACCCCTCACTTTGGGTCTTATTGCTATTTCN  
+HWI-EAS443:3:27:1131:907#0/1  
[ `[Zbaa`a\_a\_a^UW[X`a\_aWWWXYVYY¥K[[¥BBBB  
@HWI-EAS443:3:58:345:303#0/1  
CCTCCCTTCTTGACCCCTCACTTTGGGTCTTATTGCTATT  
+HWI-EAS443:3:58:345:303#0/1  
abba`aa`^`\_`a\_aZ¥]^SZ`][a`aSQ\_\_]]\_^]]U^\_  
@HWI-EAS443:3:65:1253:335#0/1  
GTAATAGTTCATTCTCCCTTCTTGACCCCTCACTTTGGGG  
+HWI-EAS443:3:65:1253:335#0/1  
aaa\_aGaV^Saa¥`aaa`]\_\_]¥]^\_\_`\_]\_Y\_X\_\_¥WF  
@HWI-EAS443:3:66:1098:131#0/1  
ACTCCCTTCTTGACCCCTCACTTTGGGTCTTATTGCTATT  
+HWI-EAS443:3:66:1098:131#0/1  
\_]abbabba`aba^\_aaaa^abb`a]]abaa`aa]a\_a`  
@HWI-EAS443:3:69:1116:1139#0/1  
GTAATAGTTCATTCTCCCTTCTTGACCCCTCACTTTGGGG  
+HWI-EAS443:3:69:1116:1139#0/1  
\_T\_a^]VFYZaZ]X`^]aZ[aZRZ[``NNUF[S^``TaHG  
@HWI-EAS443:3:100:56:738#0/1  
TAATAGTTCATTCTCCCTTCTTGACCCCTCACTTTGGGTC  
+HWI-EAS443:3:100:56:738#0/1  
Y00]Xa]]`¥a^]a]aaa`^¥\_\_][ZPW¥]\_]a`\_aa[L[  
@HWI-EAS443:3:10:1168:1053#0/1  
TCCAGTAATAGTTCATTCTCCCTTCTTGACCCCTCACTTT

+HWI-EAS443:3:10:1168:1053#0/1  
\_Y^aa[\_Raa]0^X]aa[[XUX[\_]Z]`ZVOTT^]WW]\_\_  
@HWI-EAS443:3:11:93:1389#0/1  
AGTAATAGTTCATTCTCCCTTCTTGACCCCTCACTTTGGG  
+HWI-EAS443:3:11:93:1389#0/1  
a`\_a^a^a]abaaaaaaaaaaaa`aaa`^aa\_`a]YVa  
@HWI-EAS443:3:12:52:904#0/1  
TCTTGACCCCTCACTTTGGGTCTTATTGCTATTTCCGGCT  
+HWI-EAS443:3:12:52:904#0/1  
a`ZU`[\_`bb¥aZGxa`a`^Vsa\_`^U¥\_QY\_[a`\_`\_¥B  
@HWI-EAS443:3:12:69:1176#0/1  
ATTCTCCCTTCTTGACCCCTCACTTTGGGTCTTATTGCTA  
+HWI-EAS443:3:12:69:1176#0/1  
R¥\_a]¥¥¥^a`^aZ¥```Z\_J\_b`b`¥\_`bb\_Waba¥aa  
@HWI-EAS443:3:13:1470:115#0/1  
GTCCAGTAATAGTTCATTCTCCCTTCTTGACCCCTCACTT  
+HWI-EAS443:3:13:1470:115#0/1  
]]a^ab\_aba\_ba`¥¥bbaa¥^\_aaaa\_aa^^\_a\_a\_a^  
@HWI-EAS443:3:13:881:1201#0/1  
GTAATAGTTCATTCTCCCTTCTTGACCCCTCACTTTGGGT  
+HWI-EAS443:3:13:881:1201#0/1  
``TaZRYaa``X^ZS]\_Z^Y]\_^Z^\_R]]ZZ\_W¥^^XW  
@HWI-EAS443:3:14:1118:291#0/1  
TGACCCCTCACTTTGGGTCTTATTGCTATTTCCGGCTTGA  
+HWI-EAS443:3:14:1118:291#0/1  
`b[YYZaaaa`bbbbbaY]aa¥a\_]aabaY¥Va`X[a`Z  
@HWI-EAS443:3:15:1313:15#0/1  
GTTCATTCTCCCTTCTTGACCCCTCACTTTGGGTCTTATT  
+HWI-EAS443:3:15:1313:15#0/1  
`]^Z^\_]\_\_Y\_a`\_`\_Z[UZ^`]\_]\_\_a`aWUZ\_\_^]  
@HWI-EAS443:3:16:1604:338#0/1  
CATTCTCCCTTCTTGACCCCTCACTTTGGGTCTTATTGCT  
+HWI-EAS443:3:16:1604:338#0/1  
aabbVba`Z]`Zaa`V]\_`^]a\_aa`\_Q\_aa^a\_¥P¥  
@HWI-EAS443:3:16:857:594#0/1  
AGTAATAGTTCATTCTCCCTTCTTGACCCCTCACTTTGGG  
+HWI-EAS443:3:16:857:594#0/1  
Xaabb]babbabaaba¥baaaaaaaaaa`aa`aaaa  
@HWI-EAS443:3:17:1021:498#0/1  
CCAGTAATAGTTCATTCTCCCTTCTTGACCCCTCACTTTG  
+HWI-EAS443:3:17:1021:498#0/1  
aaab`baaa^^aaaaaa`^`aa\_aaaa`^\_a¥``a\_a\_  
@HWI-EAS443:3:17:1065:1420#0/1  
GTAATAGTTCATTCTCCCTTCTTGACCCCTCACTTTGGGT  
+HWI-EAS443:3:17:1065:1420#0/1  
`^a^aYS[aaaa\_a`\_X\_aaaaa`a]``aa`a]ZYaZ  
@HWI-EAS443:3:17:604:1419#0/1  
GTAATAGTTCATTCTCCCTTCTTGACCCCTCACTTTGGGT  
+HWI-EAS443:3:17:604:1419#0/1  
aP]XX0`MS^KU]^S^]ZP[aS[S^X\_\_\_^\_O\_¥\_]¥HVG

@HWI-EAS443:3:18:86:1142#0/1  
CAGTAATAGTTCATTCTCCCTTCTTGACCCCTCACTTTGG  
+HWI-EAS443:3:18:86:1142#0/1  
aS[\_][`\_aKaY`]\_\_\_\_\_`a\_\_`^^W`W``\_\_^]`\_`WXO  
@HWI-EAS443:3:19:1507:1935#0/1  
CAGTAATAGTTCATTCTCCCTTCTTGACCCCTCACTTTGG  
+HWI-EAS443:3:19:1507:1935#0/1  
^a`a]N]b\_ba`Z`\_b\_a\_^]baa\_b``[``a\_a[aa]\_  
@HWI-EAS443:3:19:1519:1138#0/1  
GTAATAGTTCATTCTCCCTTCTTGACCCCTCACTTTGGGT  
+HWI-EAS443:3:19:1519:1138#0/1  
a[]TYG`Z`U[^ZY`[Z^`\_^`^^\_ZZZW\_XXZ\_\_`W¥YX  
@HWI-EAS443:3:19:1612:1138#0/1  
AGTAATAGTTCATTCTCCCTTCTTGACCCCTCACTTTGGG  
+HWI-EAS443:3:19:1612:1138#0/1  
a\_Xa^`Z¥Zbaabbaa``]aa`a```][ZZaZ\_Zaa\_a`a  
@HWI-EAS443:3:19:320:1134#0/1  
GTAATAGTTCATTCTCCCTTCTTGACCCCTCACTTTGGGT  
+HWI-EAS443:3:19:320:1134#0/1  
aa\_`a[a^a^]aa\_a`a`aa`a``aa^```a\_\_\_\_`\_\_`PN  
@HWI-EAS443:3:19:430:291#0/1  
CTCCCTTCTTGACCCCTCACTTTGGGTCTTATTGCTATTT  
+HWI-EAS443:3:19:430:291#0/1  
abbb\_`bbbbaba`aabaaaaaba`b^abbbbaa`aaaaa  
@HWI-EAS443:3:1:173:727#0/1  
CAATAAGACCCAAAGTGAGGGTCAAGAAGGGAGAATGAA  
+HWI-EAS443:3:1:173:727#0/1  
Vabbbabbb\_bbbbaSa\_ba]bTbbbbaaabab` `bbaab  
@HWI-EAS443:3:1:993:1377#0/1  
AGTTCATTCTCCCTTCTTGACCCCTCACTTTGGGTCTTAT  
+HWI-EAS443:3:1:993:1377#0/1  
aba`]bba\_a^TM\_\_H]aa`\_¥LZa\_\_\_a\_\_\_a¥W]a\_aB  
@HWI-EAS443:3:20:866:557#0/1  
CAGTAATAGTTCATTCTCCCTTCTTGACCCCTCACTTTGG  
+HWI-EAS443:3:20:866:557#0/1  
abbabbbabababbbabababbaabbaaaaaabaaabba  
@HWI-EAS443:3:21:988:1313#0/1  
GTAATAGTTCATTCTCCCTTCTTGACCCCTCACTTTGGGT  
+HWI-EAS443:3:21:988:1313#0/1  
a\_aa`\_aWa\_^aaY\_\_\_aa`^]\_^]\_^`^^`^^^`\_]XX  
@HWI-EAS443:3:24:1715:493#0/1  
GTAATAGTTCATTCTCCCTTCTTGACCCCTCACTTTGGGT  
+HWI-EAS443:3:24:1715:493#0/1  
\_baaa`b\_bY\_bbaa\_]\_aa^a\_aa^¥\_0`^\_Ua^ba\_`Z  
@HWI-EAS443:3:25:1333:1014#0/1  
CCAGTAATAGTTCATTCTCCCTTCTTGACCCCTCACTTTG  
+HWI-EAS443:3:25:1333:1014#0/1  
Z\_aa[abbbbbbbbbbbbbbbbbba\_aabbaababba  
@HWI-EAS443:3:25:1677:256#0/1  
AGTTCATTCTCCCTTCTTGACCCCTCACTTTGGGTCTTAT

+HWI-EAS443:3:25:1677:256#0/1  
abbbbabbbabbabb\_bbbbbbaab\_bbbbbbbbaabbbb  
@HWI-EAS443:3:25:562:1382#0/1  
AGTAATAGTTCATTCTCCCTTCTTGACCCCTCACTTTGGG  
+HWI-EAS443:3:25:562:1382#0/1  
ab\_bba`aaabaaaaaaaa`aaaaaa`aaaa`adW\_  
@HWI-EAS443:3:25:896:16#0/1  
AGTTCATTCTCCCTTCTTGACCCCTCACTTTGGGTCTTAT  
+HWI-EAS443:3:25:896:16#0/1  
M\_¥`abababbbba\_\_`bb`a^a¥a`abb`ab`¥¥aab  
@HWI-EAS443:3:25:978:1464#0/1  
TAATAGTTCATTCTCCCTTCTTGACCCCTCACTTTGGGTC  
+HWI-EAS443:3:25:978:1464#0/1  
]U`[OF]\_¥`a]bba¥\_\_¥\_S`a`aaaa¥`^\_aYb\_]NG  
@HWI-EAS443:3:26:653:1891#0/1  
GTAATAGTTCATTCTCCCTTCTTGACCCCTCACTTTGGGT  
+HWI-EAS443:3:26:653:1891#0/1  
aQ]a`bQLXaYa`S]`YI\_`]IZ\_]YU]W\_\_]Y^`\_SUK  
@HWI-EAS443:3:27:681:824#0/1  
CTCCCTTCTTGACCCCTCACTTTGGGTCTTATTGCTATTT  
+HWI-EAS443:3:27:681:824#0/1  
a\_`a¥¥\_\_V\_¥Q][R^`^`\_X`a]ZVa¥YUZ`][UR^[Z  
@HWI-EAS443:3:28:455:439#0/1  
GTAATAGTTCATTCTCCCTTCTTGACCCCTCACTTTGGGT  
+HWI-EAS443:3:28:455:439#0/1  
aZY¥a]YV`\_aa^`\_\_\_\_`a]\_`\_\_\_\_]\_\_^W^Y[^\_\_X  
@HWI-EAS443:3:29:122:29#0/1  
GTTCATTCTCCCTTCTTGACCCCTCACTTTGGGTCTTATT  
+HWI-EAS443:3:29:122:29#0/1  
a\_aa`a`aaa`a\_\_\_\_a`^¥)`\_[^`^`)\_`\_Y¥\_[[[^  
@HWI-EAS443:3:29:1708:1017#0/1  
TGACCCCTCACTTTGGGTCTTATTGCTATTTCCGGCTTGA  
+HWI-EAS443:3:29:1708:1017#0/1  
```\_[]bbaa`aaYb\_[¥\_a\_aa]R```aa¥[]]U`YBB  
@HWI-EAS443:3:2:151:1948#0/1  
GTTCATTCTCCCTTCTTGACCCCTCACTTTGGGTCTTATT  
+HWI-EAS443:3:2:151:1948#0/1  
`\_aa`aa\_aT]P\_a[\_`aa¥NX¥a\_\_^a\_\_VKTTU\_\_`\_`\_  
@HWI-EAS443:3:30:601:1584#0/1  
CAAGCCGAAATAGCAATAAGACCCAAAGTGAGGGTCAA  
+HWI-EAS443:3:30:601:1584#0/1  
abb`aa\_aaaba][`aa^aa\_aaaa]W`T\_\_\_\_^\_]X^\_^  
@HWI-EAS443:3:30:655:130#0/1  
CAGTAATAGTTCATTCTCCCTTCTTGACCCCTCACTTTGG  
+HWI-EAS443:3:30:655:130#0/1  
aaba\_baaaT`bbbbabaabaa`\_`aaa\_\_`\_`^]``a\_`  
@HWI-EAS443:3:31:165:1533#0/1  
CAGTAATAGTTCATTCTCCCTTCTTGACCCCTCACTTTGG  
+HWI-EAS443:3:31:165:1533#0/1  
T\_\_UQQ`^]Z``\_ba\_b`baa\_QTI^``¥``aab^a^X]

@HWI-EAS443:3:31:181:1064#0/1  
TGACCCCTCACTTTGGGTCTTATTGCTATTTCCGGCTTGA  
+HWI-EAS443:3:31:181:1064#0/1  
abbbbbbbbaababbaa]babbb\_abab[R[bbaaa`a[`  
@HWI-EAS443:3:31:679:134#0/1  
GCAATAAGACCCAAAGTGAGGGTCAAGAAGGGAGAATGA  
+HWI-EAS443:3:31:679:134#0/1  
aa]^\_U^`W]¥]\_Y`W^\_^]`YW]]Y^YW¥VXZ^ZXW^O  
@HWI-EAS443:3:34:1063:1045#0/1  
GACCCCTCACTTTGGGTCTTATTGCTATTTCCGGCTTGA  
+HWI-EAS443:3:34:1063:1045#0/1  
abb`bababaaabbbb[aaaabaaaaabaa`\_]\_`Y[]  
@HWI-EAS443:3:34:1187:797#0/1  
TGACCCCTCACTTTGGGTCTTATTGCTATTTCCGGCTTGA  
+HWI-EAS443:3:34:1187:797#0/1  
abaaa`aba`\_bab\_`ZZbaaaa]]a`aaa^]\_V]^\_XN  
@HWI-EAS443:3:35:1175:772#0/1  
CAGTAATAGTTCATTCTCCCTTCTTGACCCCTCACTTTGG  
+HWI-EAS443:3:35:1175:772#0/1  
abbabbbabab\_]abbbaaabbab`ab`bbbaab`a\_aa`  
@HWI-EAS443:3:35:1461:732#0/1  
GTAATAGTTCATTCTCCCTTCTTGACCCCTCACTTTGGGT  
+HWI-EAS443:3:35:1461:732#0/1  
aaaab\_a`a`\_aa`a\_a`aa\_a`aa^aVbaaa\_a`aIa^]  
@HWI-EAS443:3:35:1497:1192#0/1  
CTCCCTTCTTGACCCCTCACTTTGGGTCTTATTGCTATTT  
+HWI-EAS443:3:35:1497:1192#0/1  
abaa\_bbabaaba```baaaabb`^]\_^bbbbabaaab`b  
@HWI-EAS443:3:35:186:667#0/1  
GTAATAGTTCATTCTCCCTTCTTGACCCCTCACTTTGGGT  
+HWI-EAS443:3:35:186:667#0/1  
a`^T`\_a^`aaaa`aaaaaa`aaaa`a\_aY^`a`^aV  
@HWI-EAS443:3:35:822:1040#0/1  
TTGACCCCTCACTTTGGGTCTTATTGCTATTTCCGGCTTG  
+HWI-EAS443:3:35:822:1040#0/1  
aabbbbababbbbaaaaaa[a`aaaa\_a`aaa`ba\_\_`^\_]`  
@HWI-EAS443:3:36:1285:775#0/1  
GCCGAAATAGCAATAAGACCCAAAGTGAGGGTCAAGAA  
+HWI-EAS443:3:36:1285:775#0/1  
aa`abaa`^`a`a`^a\_a`^]\_XG0^RYX^\_UXY[YU^YX  
@HWI-EAS443:3:36:1501:442#0/1  
GTCCAGTAATAGTTCATTCTCCCTTCTTGACCCCTCACTT  
+HWI-EAS443:3:36:1501:442#0/1  
aX¥RG[T¥`¥P¥YZ¥V\_]UYT\_aX][QS[]LRN]Z¥K[Y  
@HWI-EAS443:3:37:375:589#0/1  
GTCCAGTAATAGTTCATTCTCCCTTCTTGACCCCTCACTT  
+HWI-EAS443:3:37:375:589#0/1  
aabaaba`\_b\_aa`aabaaaaab`a^\_`^`aa`a\_aa`  
@HWI-EAS443:3:39:55:1626#0/1  
GTCCAGTAATAGTTCATTCTCCCTTCTTGACCCCTCACTT

+HWI-EAS443:3:39:55:1626#0/1  
aJba\_X\_aa\_¥\_Y\_]\_UT]¥Y\_`Y[[\_\_SMWZSO¥]]LXWU  
@HWI-EAS443:3:39:641:1763#0/1  
ATAGTTCATTCTCCCTTCTTGACCCCTCACTTTGGGTCTT  
+HWI-EAS443:3:39:641:1763#0/1  
`\_\_`]a`¥`ababab^`[U`\_^WQ¥b]a\_bZ\_\_a`VTaaX  
@HWI-EAS443:3:39:857:475#0/1  
GTCCAGTAATAGTTCATTCTCCCTTCTTGACCCCTCACTT  
+HWI-EAS443:3:39:857:475#0/1  
a\_a\_R\_abaa`a\_aa\_a\_`a[a[a`\_``[[ZY[`]\_\_a\_  
@HWI-EAS443:3:3:1094:1964#0/1  
TGACCCCTCACTTTGGGTCTTATTGCTATTTCCGGCTTGA  
+HWI-EAS443:3:3:1094:1964#0/1  
`bYU\_\_S\_Oa`^Z`\_L^aa[^\_^\_aa\_`]GR^VNN`^X  
@HWI-EAS443:3:40:328:209#0/1  
CAATAAGACCCAAAGTGAGGGTCAAGAAGGGAGAATGAA  
+HWI-EAS443:3:40:328:209#0/1  
a`^^¥Z\_^a^^^\_U\_]\_Q\_aabZaOQG[Ja]]NaSST[[a  
@HWI-EAS443:3:40:939:1986#0/1  
ATAGTTCATTCTCCCTTCTTGACCCCTCACTTTGGGTCTT  
+HWI-EAS443:3:40:939:1986#0/1  
a]\_`Z``aaaa`aa^aaa`aaaaa]LF^S[\_\_\_`Y\_YN]\_]  
@HWI-EAS443:3:42:1042:1306#0/1  
GCCGAAATAGCAATAAGACCCAAAGTGAGGGTCAAGAA  
+HWI-EAS443:3:42:1042:1306#0/1  
aba`^b[\_baaa`¥`abaaa]`\_`bQa\_aaaaW``[`]\_  
@HWI-EAS443:3:43:544:1964#0/1  
CAATAAGACCCAAAGTGAGGGTCAAGAAGGGAGAATGAA  
+HWI-EAS443:3:43:544:1964#0/1  
ab`a`^Wbaaab\_aa^aaaabWPY^aa\_\_a\_`\_```a\_\_^  
@HWI-EAS443:3:44:112:673#0/1  
CTCCCTTCTTGACCCCTCACTTTGGGTCTTATTGCTATTT  
+HWI-EAS443:3:44:112:673#0/1  
abbba`aa`aabaaaa`\_`aa`aaaX`aa\_\_`\_\_a`a`a  
@HWI-EAS443:3:44:517:1079#0/1  
CAGTAATAGTTCATTCTCCCTTCTTGACCCCTCACTTTGG  
+HWI-EAS443:3:44:517:1079#0/1  
]P¥XWW^R^\_aaa^WVXZ\_[XZJYRKX]aXVS`SZN[RZ]  
@HWI-EAS443:3:44:552:1863#0/1  
CAAGCCGAAATAGCAATAAGACCCAAAGTGAGGGTCAA  
+HWI-EAS443:3:44:552:1863#0/1  
`bbbaaaaaabbbabbbb\_b\_]`^bbaaZbaba`\_^`\_`\_  
@HWI-EAS443:3:45:1752:878#0/1  
GTAATAGTTCATTCTCCCTTCTTGACCCCTCACTTTGGGT  
+HWI-EAS443:3:45:1752:878#0/1  
aW`ba\_bHb`\_a`\_`a`\_aa`\_a\_\_^a\_\_Z¥]X]a`\_T  
@HWI-EAS443:3:45:231:1049#0/1  
AGTAATAGTTCATTCTCCCTTCTTGACCCCTCACTTTGGG  
+HWI-EAS443:3:45:231:1049#0/1  
aaabaa[a\_baaba^a\_aa`a\_`aaa`\_\_a`\_^b``][[



@HWI-EAS443:3:45:257:1361#0/1  
GTTCAAGCCGAAATAGCAATAAGACCCAAAGTGAGGGGT  
+HWI-EAS443:3:45:257:1361#0/1  
^`abaaa^\_\_`aaa]\_]\_a`a`[\_`\_[aaa\_aX#^\_\_Z\_U  
@HWI-EAS443:3:45:973:1369#0/1  
TAATAGTTCATTCTCCCTTCTTGACCCCTCACTTTGGGTC  
+HWI-EAS443:3:45:973:1369#0/1  
aaaa]`^aa\_aa`\_^a\_a`\_]\_^\_S^]\_\_^]`\_`\_\_YUU  
@HWI-EAS443:3:47:616:916#0/1  
GTTCATTCTCCCTTCTTGACCCCTCACTTTGGGTCTTATT  
+HWI-EAS443:3:47:616:916#0/1  
a\_a#^aaQ\_V^`\_YZ]^YUUYZ\_YT]\_\_#W`VV[]Y]#  
@HWI-EAS443:3:48:1018:1213#0/1  
GCCGAAATAGCAATAAGACCCAAAGTGAGGGGTCAAGAA  
+HWI-EAS443:3:48:1018:1213#0/1  
Za`\_a#Z^\_aZ`\_]baW`\_]X`^#ab#W#^#S[#`^`W  
@HWI-EAS443:3:48:1144:349#0/1  
CAGTAATAGTTCATTCTCCCTTCTTGACCCCTCACTTTGG  
+HWI-EAS443:3:48:1144:349#0/1  
aaa#abbaabba\_bbabbabbaabbaa`ab`a\_babbb  
@HWI-EAS443:3:49:1094:966#0/1  
CCAGTAATAGTTCATTCTCCCTTCTTGACCCCTCACTTTG  
+HWI-EAS443:3:49:1094:966#0/1  
`X]aY^Q[U]^]L[\_X]aa^]Y]YZ`YV[Z`]WF^Ua#  
@HWI-EAS443:3:49:1469:1118#0/1  
GTCCAGTAATAGTTCATTCTCCCTTCTTGACCCCTCACTT  
+HWI-EAS443:3:49:1469:1118#0/1  
aaa^baaaba\_a[a^abaab^bb`\_baaa`\_^`a#\_Uab  
@HWI-EAS443:3:49:496:794#0/1  
GTCCAGTAATAGTTCATTCTCCCTTCTTGACCCCTCACTT  
+HWI-EAS443:3:49:496:794#0/1  
`baaab\_abb^b\_aa\_bbaa`aaaa`a`baa[\_aa`\_aa  
@HWI-EAS443:3:4:1198:391#0/1  
CAGTAATAGTTCATTCTCCCTTCTTGACCCCTCACTTTGG  
+HWI-EAS443:3:4:1198:391#0/1  
`[\_`[X]^U`aa#aa#L^]#X\_ZY#W`#TQXU`U]W\_\_\_[M  
@HWI-EAS443:3:50:652:1546#0/1  
GCCGAAATAGCAATAAGACCCAAAGTGAGGGGTCAAGAA  
+HWI-EAS443:3:50:652:1546#0/1  
a\_Qa#VVabbY`bb`b#R^a\_a[\_PVY]]XRZa`ab^]`a  
@HWI-EAS443:3:51:729:1112#0/1  
AAGACCCAAAGTGAGGGGTCAAGAAGGGAGAATGAACAT  
+HWI-EAS443:3:51:729:1112#0/1  
a\_\_X[TW\_a]^V#YU\_[]a#YOZ^RL#a]ZLWZWR]NZ``  
@HWI-EAS443:3:51:824:1796#0/1  
AATAAGACCCAAAGTGAGGGGTCAAGAAGGGAGAATGAAC  
+HWI-EAS443:3:51:824:1796#0/1  
abaaaa```aa\_bVa`\_]`aR`^^^`a``[\_^a`^`\_  
@HWI-EAS443:3:51:909:298#0/1  
GCCGAAATAGCAATAAGACCCAAAGTGAGGGGTCAAGAA

+HWI-EAS443:3:51:909:298#0/1  
aa`ba\_bbbabaaaabba\_`^\_a\_`]b\_`a[a]^\_^`X^  
@HWI-EAS443:3:52:1127:838#0/1  
CTCCCTTCTTGACCCCTCACTTTGGGTCTTATTGCTATTT  
+HWI-EAS443:3:52:1127:838#0/1  
abbbabbbbbbaaa]abbbabbbab`^`babbba`bbbab  
@HWI-EAS443:3:52:1648:1009#0/1  
AGTTCATTCTCCCTTCTTGACCCCTCACTTTGGGTCTTAT  
+HWI-EAS443:3:52:1648:1009#0/1  
a`^`[\_bba\_\_`^bbba`^`]WU]b\_aaabb` `aW\_`a^b  
@HWI-EAS443:3:52:665:308#0/1  
CAGTAATAGTTCATTCTCCCTTCTTGACCCCTCACTTTGG  
+HWI-EAS443:3:52:665:308#0/1  
a`abbbabbbbbbbbb`bbbababbaa`aaaaabbbab  
@HWI-EAS443:3:52:906:423#0/1  
CAGTAATAGTTCATTCTCCCTTCTTGACCCCTCACTTTGG  
+HWI-EAS443:3:52:906:423#0/1  
aaaababababaaba`aa`abaaa`aa\_`\_a``\_b`aaa  
@HWI-EAS443:3:53:1617:1119#0/1  
GTTCATTCTCCCTTCTTGACCCCTCACTTTGGGTCTTATT  
+HWI-EAS443:3:53:1617:1119#0/1  
a`a[\_ab[ba[a`aaa`ba^`\_aa`\_\_abbbW\_VSba\_a[  
@HWI-EAS443:3:53:86:1310#0/1  
AGTAATAGTTCATTCTCCCTTCTTGACCCCTCACTTTGGG  
+HWI-EAS443:3:53:86:1310#0/1  
\_bb^\_[0\_]abaaab\_```aab`abb]ZQa`\_`aaa`a``  
@HWI-EAS443:3:55:79:1869#0/1  
TGACCCCTCACTTTGGGTCTTATTGCTATTTCCGGCTTGA  
+HWI-EAS443:3:55:79:1869#0/1  
Za`¥bbb\_b¥`b^Jab\_]\_]ab`\_a`^b[¥a` `aU¥YZ`J  
@HWI-EAS443:3:55:807:699#0/1  
GTAATAGTTCATTCTCCCTTCTTGACCCCTCACTTTGGGT  
+HWI-EAS443:3:55:807:699#0/1  
a]``a\_a]^)`a`]\_``aaa\_a`^\_W]^\_\_\_\_\_``\_\_X  
@HWI-EAS443:3:57:1334:505#0/1  
GTCCAGTAATAGTTCATTCTCCCTTCTTGACCCCTCACTT  
+HWI-EAS443:3:57:1334:505#0/1  
¥]`` `b`RN¥\_[OZ^V^[]ZWIX[ZVX^]QOL¥XS[P` `V  
@HWI-EAS443:3:57:1535:1529#0/1  
CTCCCTTCTTGACCCCTCACTTTGGGTCTTATTGCTATTT  
+HWI-EAS443:3:57:1535:1529#0/1  
abaaaababa`a[ba]bba\_bbb`]W¥`bbbbbb`b`bbb  
@HWI-EAS443:3:57:469:1486#0/1  
GTTCATTCTCCCTTCTTGACCCCTCACTTTGGGTCTTATT  
+HWI-EAS443:3:57:469:1486#0/1  
a]]][R]ZS^`^IYXN¥UGXY\_`^X^V^]TX\_T[R\_Y¥NZB  
@HWI-EAS443:3:58:1434:128#0/1  
GCCGAAATAGCAATAAGACCCAAAGTGAGGGTCAAGAA  
+HWI-EAS443:3:58:1434:128#0/1  
aa`bbabaa\_a\_baaaaba]\_\_\_\_\_`a^a\_\_aaaZ^]\_`X^

@HWI-EAS443:3:58:923:629#0/1  
GTCCAGTAATAGTTCATTCTCCCTTCTTGACCCCTCACTT  
+HWI-EAS443:3:58:923:629#0/1  
a\_a`Y`aa]`W\_\_aa^`^a\_\_\_a\_^\_ZY]`Y\_`]^Z`a  
@HWI-EAS443:3:59:1104:910#0/1  
CTCCCTTCTTGACCCCTCACTTTGGGTCTTATTGCTATTT  
+HWI-EAS443:3:59:1104:910#0/1  
abbabbbbbbbbabbbba`babbba\_abbaaaa\_^]aaa  
@HWI-EAS443:3:63:314:272#0/1  
GTTTCATTCTCCCTTCTTGACCCCTCACTTTGGGTCTTATT  
+HWI-EAS443:3:63:314:272#0/1  
a¥`X SX[ZOVUVa`a`SX`a^[^`\_[YQ¥UJJOT^BBBBB  
@HWI-EAS443:3:64:1432:1177#0/1  
GCCGAAATAGCAATAAGACCCAAAGTGAGGGGTCAAGAA  
+HWI-EAS443:3:64:1432:1177#0/1  
^ZW[YZ00]QZQW¥^Y`ZNR0M]`S¥Ma\_Y^Za]^W[[PV  
@HWI-EAS443:3:64:815:762#0/1  
GTAATAGTTCATTCTCCCTTCTTGACCCCTCACTTTGGGT  
+HWI-EAS443:3:64:815:762#0/1  
aZ^`a^YX\_\_\_\_\_`\_`^aa\_a^`^]]\_\_\_\_\_`^\_\_\_Z  
@HWI-EAS443:3:65:1117:1755#0/1  
GCCGAAATAGCAATAAGACCCAAAGTGAGGGGTCAAGAA  
+HWI-EAS443:3:65:1117:1755#0/1  
`aXUR]Q]]VPP]aa¥a`PW¥^[XZYOV`aZQ[LQYUU]V  
@HWI-EAS443:3:65:431:1973#0/1  
GCCGAAATAGCAATAAGACCCAAAGTGAGGGGTCAAGAA  
+HWI-EAS443:3:65:431:1973#0/1  
abb`\_^\_T[¥Z\_aa\_¥X]a\_\_aa]]SS`^^Z0]X`^TZU¥  
@HWI-EAS443:3:65:622:1404#0/1  
GCCGAAATAGCAATAAGACCCAAAGTGAGGGGTCAAGAA  
+HWI-EAS443:3:65:622:1404#0/1  
]bb^Y]bbb\_`abb`b\_aaaabaaWb¥[ab`a`0\_[aaa`  
@HWI-EAS443:3:65:872:1734#0/1  
AGTAATAGTTCATTCTCCCTTCTTGACCCCTCACTTTGGG  
+HWI-EAS443:3:65:872:1734#0/1  
a¥]`bb`¥V\_`ab`^bbaaaa]Xa¥0[[`a`\_]`XWP  
@HWI-EAS443:3:66:1744:1167#0/1  
GTCCAGTAATAGTTCATTCTCCCTTCTTGACCCCTCACTT  
+HWI-EAS443:3:66:1744:1167#0/1  
aa¥VY`\_[K\_Xa\_]NZaa¥\_]¥]\_\_¥]Q[^V^YXXUWY\_V  
@HWI-EAS443:3:66:180:1302#0/1  
GTTTCATTCTCCCTTCTTGACCCCTCACTTTGGGTCTTATT  
+HWI-EAS443:3:66:180:1302#0/1  
a\_a`^`baabbaaaaaa\_ab`abaaaaaaa\_]a]``aaa^  
@HWI-EAS443:3:67:178:1287#0/1  
GCCGAAATAGCAATAAGACCCAAAGTGAGGGGTCAAGAA  
+HWI-EAS443:3:67:178:1287#0/1  
\_bb\_aa`^`bab`^a`babba```\_]L[^`\_]Q]\_a``a  
@HWI-EAS443:3:67:737:1508#0/1  
AGACCCAAAGTGAGGGGTCAAGAAGGGAGAATGAAC TATT



@HWI-EAS443:3:76:1247:777#0/1  
GTAATAGTTCATTCTCCCTTCTTGACCCCTCACTTTGGGT  
+HWI-EAS443:3:76:1247:777#0/1  
aZ^`YZ[DU¥QW¥V`[R[¥`Y[\_Y¥^SQP\_^ZOS¥YZZ¥V  
@HWI-EAS443:3:77:240:973#0/1  
GTAATAGTTCATTCTCCCTTCTTGACCCCTCACTTTGGGT  
+HWI-EAS443:3:77:240:973#0/1  
aUN``SZaaa]a\_\_Za\_a\_]\_SY¥Ra`\_`\_\_\_^^[¥XZX  
@HWI-EAS443:3:79:1204:476#0/1  
CTCCCTTCTTGACCCCTCACTTTGGGTCTTATTGCTATTT  
+HWI-EAS443:3:79:1204:476#0/1  
¥aa^abbab\_bbbbUabbbabbba`aabbaabbabaaab  
@HWI-EAS443:3:79:266:235#0/1  
CTCCCTTCTTGACCCCTCACTTTGGGTCTTATTGCTATTT  
+HWI-EAS443:3:79:266:235#0/1  
aaabb]b``abbaa`baa^\_`aab`^Y`][[\_a]`Xa`]  
@HWI-EAS443:3:81:153:1024#0/1  
TAATAGTTCATTCTCCCTTCTTGACCCCTCACTTTGGGT  
+HWI-EAS443:3:81:153:1024#0/1  
aa]a``\_bbabaaaaabaaaaaaba`aaa\_aaaaPWY`  
@HWI-EAS443:3:82:704:1144#0/1  
TAATAGTTCATTCTCCCTTCTTGACCCCTCACTTTGGGT  
+HWI-EAS443:3:82:704:1144#0/1  
a`aba]R`aaaa\_Xa[]`a\_a\_a]I]\_``\_``\_``\_`S\_  
@HWI-EAS443:3:83:1069:268#0/1  
GTCCAGTAATAGTTCATTCTCCCTTCTTGACCCCTCACTT  
+HWI-EAS443:3:83:1069:268#0/1  
`RVKZ[TWU¥`[[WYW[¥Z[VNNY`\_VOULJQJ\_QJO]]  
@HWI-EAS443:3:83:158:674#0/1  
GTTCACTTCTCCCTTCTTGACCCCTCACTTTGGGTCTTATT  
+HWI-EAS443:3:83:158:674#0/1  
a^a\_¥a\_``aaa^`a`^a\_a\_`\_\_\_]\_\_]``^\_X^]\_a]^  
@HWI-EAS443:3:83:846:367#0/1  
TAATAGTTCATTCTCCCTTCTTGACCCCTCACTTTGGGT  
+HWI-EAS443:3:83:846:367#0/1  
aaba`b]Q¥[ba`a`aaaaaY]\_a\_^¥`^Z]`a\_^\_`W]  
@HWI-EAS443:3:83:903:2030#0/1  
GTAATAGTTCATTCTCCCTTCTTGACCCCTCACTTTGGGT  
+HWI-EAS443:3:83:903:2030#0/1  
`[\_X^ZN]^W][TY¥^\_TQWS^a¥WRW`XXV¥`RPPVWU  
@HWI-EAS443:3:84:138:1892#0/1  
GTTCACTTCTCCCTTCTTGACCCCTCACTTTGGGTCTTATT  
+HWI-EAS443:3:84:138:1892#0/1  
Z\_aa[^Ub[b¥b¥S`]aX¥bbb¥`\_N¥]a`a[I`]abVZ  
@HWI-EAS443:3:85:1000:1389#0/1  
CTCCCTTCTTGACCCCTCACTTTGGGTCTTATTGCTATTT  
+HWI-EAS443:3:85:1000:1389#0/1  
a`\_babbba\_aa]]`aaa``\_`^``[\_aaa``aaaaa`  
@HWI-EAS443:3:85:497:1159#0/1  
CTTGACCCCTCACTTTGGGTCTTATTGCTATTTCCGGCTT

+HWI-EAS443:3:85:497:1159#0/1  
aa]X\_¥aaa`[\_aaaaaaU]^`\_\_`^\_\_a`a]`]]Z^\_\_  
@HWI-EAS443:3:85:800:1159#0/1  
GTTTCATTCTCCCTTCTTGACCCCTCACTTTGGGTCTTATT  
+HWI-EAS443:3:85:800:1159#0/1  
`a`\_`aaaaaaaa`aa`\_a\_aa`\_aaaa`]a\_a`^\_  
@HWI-EAS443:3:86:1153:85#0/1  
AATAGTTCATTCTCCCTTCTTGACCCCTCACTTTGGGTCT  
+HWI-EAS443:3:86:1153:85#0/1  
abaaZ`aaa`bSaa`[ba\_aaaa^`Z\_a^a]aaabaaX]a  
@HWI-EAS443:3:86:151:759#0/1  
AGCAATAAGACCCAAAGTGAGGGTCAAGAAGGGAGAATG  
+HWI-EAS443:3:86:151:759#0/1  
abab`[\_b^¥aaaX^YaT`[\_X`aOb]Va]U^aa\_aZ`a\_  
@HWI-EAS443:3:86:460:208#0/1  
GTCCAGTAATAGTTCATTCTCCCTTCTTGACCCCTCACTT  
+HWI-EAS443:3:86:460:208#0/1  
a¥aaaaZaa\_0\_¥^YYaa`\_a\_\_`\_\_\_a\_[T\_]\_^¥V^  
@HWI-EAS443:3:87:1027:1069#0/1  
TAATAGTTCATTCTCCCTTCTTGACCCCTCACTTTGGGTCT  
+HWI-EAS443:3:87:1027:1069#0/1  
aZ]]L\_ZaaWZa[\_`[\_¥^a`\_`\_\_\_¥Y]\_\_[\_^`\_`\_RX  
@HWI-EAS443:3:87:1368:148#0/1  
AGTTCATTCTCCCTTCTTGACCCCTCACTTTGGGTCTTAT  
+HWI-EAS443:3:87:1368:148#0/1  
\_babbbbabbb\_bbbbbbbaba^aXbaaababbbY]bbbb  
@HWI-EAS443:3:87:1662:149#0/1  
CAGTAATAGTTCATTCTCCCTTCTTGACCCCTCACTTTGG  
+HWI-EAS443:3:87:1662:149#0/1  
a[\_`bbbabababbbabaYbbbbba[a\_^aaa^^baba]  
@HWI-EAS443:3:87:1669:460#0/1  
TGACCCCTCACTTTGGGTCTTATTGCTATTTCCGGCTTGA  
+HWI-EAS443:3:87:1669:460#0/1  
aabaaa¥a[a\_\_bbaT^U]bbaaaa\_aaaba0^`[\_`^\_  
@HWI-EAS443:3:88:1116:460#0/1  
AATAGTTCATTCTCCCTTCTTGACCCCTCACTTTGGGTCT  
+HWI-EAS443:3:88:1116:460#0/1  
aa^ababaaba\_aaa\_aaaaab`aa`aaa\_aba\_`^Z`\_  
@HWI-EAS443:3:88:455:667#0/1  
TTGACCCCTCACTTTGGGTCTTATTGCTATTTCCGGCTTG  
+HWI-EAS443:3:88:455:667#0/1  
aaabbbbaaba`abaaa\_a\_aaaaaaaaaaaa`a^]`aa  
@HWI-EAS443:3:88:508:697#0/1  
GCCGAAATAGCAATAAGACCCAAAGTGAGGGTCAAGAA  
+HWI-EAS443:3:88:508:697#0/1  
aaa`YQ\_Y\_W\_¥`¥`a¥]]Z\_[¥0W^Sa[]X[\_U^¥^\_0J  
@HWI-EAS443:3:88:647:66#0/1  
CTCCCTTCTTGACCCCTCACTTTGGGTCTTATTGCTATTT  
+HWI-EAS443:3:88:647:66#0/1  
¥ab`bababaababb`a`aabbabbaabbbbbbbbbb`

@HWI-EAS443:3:8:891:1333#0/1  
TGACCCCTCACTTTGGGTCTTATTGCTATTTCCGGCTTGA  
+HWI-EAS443:3:8:891:1333#0/1  
abbQ]aa`^`Yb\_a]`[G]^`aN]\_X`\_][ZX\_`U^¥[Z  
@HWI-EAS443:3:91:1396:1474#0/1  
AAGTGAGGGGTCAAGAAGGGAGAATGAACCTATTACTGGAC  
+HWI-EAS443:3:91:1396:1474#0/1  
aaa^b`aaaaa]aaaaa\_`aaaaaaa`^aaaaa\_aa\_`\_  
@HWI-EAS443:3:91:426:440#0/1  
CAGTAATAGTTCATTCTCCCTTCTTGACCCCTCACTTTGG  
+HWI-EAS443:3:91:426:440#0/1  
Vb]UP`bbb^`^ababa`\_`][¥\_]`a`aabaaa^`ab  
@HWI-EAS443:3:93:1205:858#0/1  
CTCCCTTCTTGACCCCTCACTTTGGGTCTTATTGCTATTT  
+HWI-EAS443:3:93:1205:858#0/1  
abaaYabaaaba`VXabZRTaaaa`¥WYa`aa`a\_a\_```  
@HWI-EAS443:3:93:715:303#0/1  
CAGTAATAGTTCATTCTCCCTTCTTGACCCCTCACTTTGG  
+HWI-EAS443:3:93:715:303#0/1  
aba^b\_[`ba`T`bb`ba\_aa`baba`a¥\_`aa^a\_baa  
@HWI-EAS443:3:94:55:617#0/1  
ATAGCAATAAGACCCAAAGTGAGGGGTCAAGAAGGGAGAA  
+HWI-EAS443:3:94:55:617#0/1  
a¥aXR`^]SaZVa[¥`aa]WaSHZ¥`GXYRa``\_V]Z`XX  
@HWI-EAS443:3:95:294:135#0/1  
CAGTAATAGTTCATTCTCCCTTCTTGACCCCTCACTTTGG  
+HWI-EAS443:3:95:294:135#0/1  
`\_a\_`aUaYbaa\_a\_aaaaaaaaa`\_^VW`\_R\_^`\_`\_  
@HWI-EAS443:3:97:559:742#0/1  
CTCCCTTCTTGACCCCTCACTTTGGGTCTTATTGCTATTT  
+HWI-EAS443:3:97:559:742#0/1  
K`\_V[Z`¥[bbS[\_aT¥VbUb\_a¥\_\_GPbYY`b[0¥K`ba  
@HWI-EAS443:3:98:145:809#0/1  
GCCGGAATAGCAATAAGACCCAAAGTGAGGGGTCAAGAA  
+HWI-EAS443:3:98:145:809#0/1  
^Q[\_[UTW^T\_aa`a\_¥]`[\_`]QTaR¥V^^ZZRVVN[MP  
@HWI-EAS443:3:98:370:1614#0/1  
AGCAATAAGACCCAAAGTGAGGGGTCAAGAAGGGAGAATG  
+HWI-EAS443:3:98:370:1614#0/1  
ababb`abab\_aaaa\_a¥a`a\_aVHQ^`\_\_^a`a^YUX\_¥  
@HWI-EAS443:3:98:680:1444#0/1  
GTCCAGTAATAGTTCATTCTCCCTTCTTGACCCCTCACTT  
+HWI-EAS443:3:98:680:1444#0/1  
aYbbZ\_WX`¥Zb0\_`\_[aa]\_```aaSY\_\_a]0]ZY¥^\_^  
@HWI-EAS443:3:98:839:1868#0/1  
CAGTAATAGTTCATTCTCCCTTCTTGACCCCTCACTTTGG  
+HWI-EAS443:3:98:839:1868#0/1  
`\_^`¥aa`a```]X^b[]U[aU[Y¥[ZNY\_\_S¥S]aab^  
@HWI-EAS443:3:98:851:214#0/1  
AAAGTGAGGGGTCAAGAAGGGAGAATGAACCTATTACTGGA

+HWI-EAS443:3:98:851:214#0/1  
aaab¥aaaaaa\_\_\_\_\_`]ba\_^a^\_aaaY]a\_`^aZ^\_`^  
@HWI-EAS443:3:99:1064:1752#0/1  
CAGTAATAGTTCATTCTCCCTTCTTGACCCCTCACTTTGG  
+HWI-EAS443:3:99:1064:1752#0/1  
aa`\_a`bYb\_^Maba`a¥`]aa¥^`aba`a\_^U`¥a`\_`\_`  
@HWI-EAS443:3:99:353:738#0/1  
CTCCCTTCTTGACCCCTCACTTTGGGTCTTATTGCTATTT  
+HWI-EAS443:3:99:353:738#0/1  
abaaabbaaabbaZ\_aaa^`\_`aaaa\_]a`a`aa`\_aaa`\_`  
@HWI-EAS443:3:9:1337:537#0/1  
GTAATAGTTCATTCTCCCTTCTTGACCCCTCACTTTGGGT  
+HWI-EAS443:3:9:1337:537#0/1  
T^Z\_VZa[YDWY`RYV`\_`aaWZQ\_XYM^ZULXP\_^Xa[`W  
@HWI-EAS443:3:9:40:1870#0/1  
CAGTAATAGTTCATTCTCCCTTCTTGACCCCTCACTTTGG  
+HWI-EAS443:3:9:40:1870#0/1  
^H[OW¥`WULT^`^Y`[Z]^YU¥W\_\_X\_^X]^XW]XUL  
@HWI-EAS443:3:58:1713:1560#0/1  
CTAGTGTCCAGTAATAGTTCATTCTCCCTTCTTGACACCT  
+HWI-EAS443:3:58:1713:1560#0/1  
`a¥aYU\_b\_b\_Y[^`ZX``JZZbYPWGZ^`ZaaaXLGV\_a  
@HWI-EAS443:3:15:77:978#0/1  
CTAGTGTCCAGTAATAGTTCATTCTCCCTTCTTGCCCCCT  
+HWI-EAS443:3:15:77:978#0/1  
aa\_^`\_aa`aZa`aaa`a`\_`aaaaaaaa`\_a\_^`\_aa\_  
@HWI-EAS443:3:76:992:1576#0/1  
CTAGTGTCCANTAATAGTTCATTCTCCCTTCTTGACCCCT  
+HWI-EAS443:3:76:992:1576#0/1  
`bbbWbaa`[DVb\_a`a`aaaba`aaaaaa`\_aa`\_`^\_`a  
@HWI-EAS443:3:43:1370:1882#0/1  
GGAGGGGTCAAGAAGGGAGAATGA ACTATTACTGGACACT  
+HWI-EAS443:3:43:1370:1882#0/1  
aZZ]\_Y^FY^¥XZX¥\_ZUXZ^T^^\_UW¥[Z\_Z[\_¥YZ^X]  
@HWI-EAS443:3:100:833:713#0/1  
CTAGTGTCCAGTAATAGTTCATTCTCCCTTCTTGACCCCT  
+HWI-EAS443:3:100:833:713#0/1  
a`\_a\_¥GZYaaN\_]X]Na^`\_a\_aX00`\_aa\_T\_UZLW]  
@HWI-EAS443:3:10:167:1243#0/1  
CTAGTGTCCAGTAATAGTTCATTCTCCCTTCTTGACCCCT  
+HWI-EAS443:3:10:167:1243#0/1  
abbabbababbaabb`b`bbabbaaaaaaaaa`\_aaa\_aaa  
@HWI-EAS443:3:10:549:1272#0/1  
CTAGTGTCCAGTAATAGTTCATTCTCCCTTCTTGACCCCT  
+HWI-EAS443:3:10:549:1272#0/1  
aabb`bbbbbb`]bb]bX`aaab¥b¥baa`\_\_^aa[R\_R^  
@HWI-EAS443:3:10:718:510#0/1  
CTAGTGTCCAGTAATAGTTCATTCTCCCTTCTTGACCCCT  
+HWI-EAS443:3:10:718:510#0/1  
¥`bbabb\_b\_\_[bba```ab`bbaba^a`b`bbba\_UV]a



@HWI-EAS443:3:16:1597:827#0/1  
CTAGTGTCCAGTAATAGTTCATTCTCCCTTCTTGACCCCT  
+HWI-EAS443:3:16:1597:827#0/1  
^`baa\_¥\_baba`ba`baa`Zab[b`a¥aaaa]¥^^X[N\_  
@HWI-EAS443:3:16:950:1067#0/1  
TACTAGTGTCCAGTAATAGTTCATTCTCCCTTCTTGACCC  
+HWI-EAS443:3:16:950:1067#0/1  
aa`]P^\_aaa]\_a^\_¥aU¥\_\_¥^a`Za\_ZZ`\_^\_\_^X[\_  
@HWI-EAS443:3:17:172:168#0/1  
CTAGTGTCCAGTAATAGTTCATTCTCCCTTCTTGACCCCT  
+HWI-EAS443:3:17:172:168#0/1  
aaaa`a`baaa\_aa\_\_`^`\_`aa\_a\_``\_a\_\_\_\_\_^^\_Y  
@HWI-EAS443:3:17:340:234#0/1  
CTAGTGTCCAGTAATAGTTCATTCTCCCTTCTTGACCCCT  
+HWI-EAS443:3:17:340:234#0/1  
aa]`QU¥ZV\_a¥TZTR[NN`UTVZ\_]UYRUQLL]GQ^V[N  
@HWI-EAS443:3:19:1420:1094#0/1  
GTGTCCAGTAATAGTTCATTCTCCCTTCTTGACCCCTCAC  
+HWI-EAS443:3:19:1420:1094#0/1  
a)`][a[a\_\_a[][[[Z[`Y[VWX^X^`^\_]YPV^]YYX  
@HWI-EAS443:3:19:210:1230#0/1  
GTGAGGGGTCAAGAAGGGAGAATGAATTAATGACTGGACAC  
+HWI-EAS443:3:19:210:1230#0/1  
aZaaaaaa]aaaa[aa\_\_`\_`\_`^a`\_a`a\_a\_`a```a`  
@HWI-EAS443:3:19:235:500#0/1  
CTAGTGTCCAGTAATAGTTCATTCTCCCTTCTTGACCCCT  
+HWI-EAS443:3:19:235:500#0/1  
aaab\_a[`aaa\_[X]\_`Z`a\_¥[^`^`\_a`^^`^`^`^UZT]  
@HWI-EAS443:3:19:299:1050#0/1  
CTAGTGTCCAGTAATAGTTCATTCTCCCTTCTTGACCCCT  
+HWI-EAS443:3:19:299:1050#0/1  
a`aa]aW^aaaX``\_] [N[\_W\_^`\_`\_`\_`^^Z^`¥^Z]Z]  
@HWI-EAS443:3:21:1233:100#0/1  
CTAGTGTCCAGTAATAGTTCATTCTCCCTTCTTGACCCCT  
+HWI-EAS443:3:21:1233:100#0/1  
aaaa\_a]aaaaZa\_a`baa\_aaa\_a^YU^\_\_a\_\_a][V\_`  
@HWI-EAS443:3:23:1486:1816#0/1  
CTAGTGTCCAGTAATAGTTCATTCTCCCTTCTTGACCCCT  
+HWI-EAS443:3:23:1486:1816#0/1  
\_`bb`\_babbbbab]bbb`bbbababaaa`abba\_`¥\_a  
@HWI-EAS443:3:23:1679:967#0/1  
CTAGTGTCCAGTAATAGTTCATTCTCCCTTCTTGACCCCT  
+HWI-EAS443:3:23:1679:967#0/1  
ab`X`a\_¥Zbaaab`aba]ab\_a`¥`aa`X\_`¥[[^Y\_  
@HWI-EAS443:3:23:651:1757#0/1  
CTACTAGTGTCCAGTAATAGTTCATTCTCCCTTCTTGACC  
+HWI-EAS443:3:23:651:1757#0/1  
abbbba^a\_baaa\_aabaa\_aaaaaaaaaa``a`^``\_\_  
@HWI-EAS443:3:25:819:1505#0/1  
CTAGTGTCCAGTAATAGTTCATTCTCCCTTCTTGACCCCT

+HWI-EAS443:3:25:819:1505#0/1  
Ya`^L^Z¥a`Z`a¥¥¥aUab^a``\_[ZXaba]bb^ab^ab  
@HWI-EAS443:3:30:47:45#0/1  
CTAGTGTCCAGTAATAGTTCATTCTCCCTTCTTGACCCCT  
+HWI-EAS443:3:30:47:45#0/1  
aaaa\_a`ba]`\_`¥[\_\_¥\_^P]¥`^^^a^`^`^\_\_\_\_[[^^  
@HWI-EAS443:3:32:501:1748#0/1  
CTAGTGTCCAGTAATAGTTCATTCTCCCTTCTTGACCCCT  
+HWI-EAS443:3:32:501:1748#0/1  
a¥\_^Za^baa\_T]R`]\_]\_^¥Y[`[\_\_a\_^\_[WPX[^\_ZU  
@HWI-EAS443:3:32:798:489#0/1  
GTGTCCAGTAATAGTTCATTCTCCCTTCTTGACCCCTCAC  
+HWI-EAS443:3:32:798:489#0/1  
\_\_])a`^`aa`^[`[XXW``[N\_`Z`^``\_a\_]R^`\_`a  
@HWI-EAS443:3:35:947:474#0/1  
CTAGTGTCCAGTAATAGTTCATTCTCCCTTCTTGACCCCT  
+HWI-EAS443:3:35:947:474#0/1  
aa^`ab\_baaaaaaU`\_`a\_a^`^`aaa`a`\_\_¥\_\_aXT  
@HWI-EAS443:3:36:378:772#0/1  
CTAGTGTCCAGTAATAGTTCATTCTCCCTTCTTGACCCCT  
+HWI-EAS443:3:36:378:772#0/1  
aaab\_aaabaa\_aaa^a]aa`aa`aa`\_a`aa`a]aa`a\_  
@HWI-EAS443:3:38:748:1637#0/1  
CTAGTGTCCAGTAATAGTTCATTCTCCCTTCTTGACCCCT  
+HWI-EAS443:3:38:748:1637#0/1  
aa`] `] `abaaa^aaa^`^a\_]` `a`aa^\_\_T[S^`]\_]a^  
@HWI-EAS443:3:39:351:110#0/1  
CTAGTGTCCAGTAATAGTTCATTCTCCCTTCTTGACCCCT  
+HWI-EAS443:3:39:351:110#0/1  
ab]b\_aaa`TaUTT]YSX^aHN\_aY¥^Y\_S\_WT[NXTN^^  
@HWI-EAS443:3:3:510:415#0/1  
CTAGTGTCCAGTAATAGTTCATTCTCCCTTCTTGACCCCT  
+HWI-EAS443:3:3:510:415#0/1  
\_[aaaU`[\_Z¥PZ¥`WUH]]¥`¥`^ZV]QR[[a[^GZRV  
@HWI-EAS443:3:42:1218:337#0/1  
CTACTAGTGTCCAGTAATAGTTCATTCTCCCTTCTTGACC  
+HWI-EAS443:3:42:1218:337#0/1  
` `aaa`aabaababab]b\_b^a` `baaabaaaaaa`^` `^`  
@HWI-EAS443:3:42:456:1249#0/1  
GTGTCCAGTAATAGTTCATTCTCCCTTCTTGACCCCTCAC  
+HWI-EAS443:3:42:456:1249#0/1  
aZR]]`Z^Va`[`] [aa`aaaa\_]T\_]XZ`a¥W\_[a\_\_  
@HWI-EAS443:3:45:1188:1690#0/1  
CTAGTGTCCAGTAATAGTTCATTCTCCCTTCTTGACCCCT  
+HWI-EAS443:3:45:1188:1690#0/1  
`abb]`\_] ^a^L`\_a[a]a`\_\_a¥W]¥`\_`a`\_`\_`a]\_]`\_`  
@HWI-EAS443:3:47:1618:264#0/1  
CTAGTGTCCAGTAATAGTTCATTCTCCCTTCTTGACCCCT  
+HWI-EAS443:3:47:1618:264#0/1  
abbb`babbaaaaabababa`ba¥b\_a^ab`aaaa]\_\_Ra

@HWI-EAS443:3:47:706:405#0/1  
CTAGTGCCAGTAATAGTTCATTCTCCCTTCTTGACCCCT  
+HWI-EAS443:3:47:706:405#0/1  
ab`b`bbaabbabab\_babaabb\_baaabbababbb]^aa  
@HWI-EAS443:3:50:1135:1379#0/1  
CTAGTGCCAGTAATAGTTCATTCTCCCTTCTTGACCCCT  
+HWI-EAS443:3:50:1135:1379#0/1  
¥Zb`T`X`XH\_X^a¥` `a^aa`\_I\_RFSW\_]Q\_U¥^WZSJ  
@HWI-EAS443:3:51:1209:1275#0/1  
CTAGTGCCAGTAATAGTTCATTCTCCCTTCTTGACCCCT  
+HWI-EAS443:3:51:1209:1275#0/1  
`bb` `aaaa\_baabb]babbabbaba\_abb`aba]GW^`b  
@HWI-EAS443:3:51:942:539#0/1  
CTACTAGTGCCAGTAATAGTTCATTCTCCCTTCTTGACC  
+HWI-EAS443:3:51:942:539#0/1  
abbabbb`baabababab^a`b\_aba\_ba`\_ba^bbaaaa  
@HWI-EAS443:3:51:976:72#0/1  
CTAGTGCCAGTAATAGTTCATTCTCCCTTCTTGACCCCT  
+HWI-EAS443:3:51:976:72#0/1  
abbbabaabbbbabbbbbb\_bbb[abb`bbbbaa^ab  
@HWI-EAS443:3:52:584:237#0/1  
CTAGTGCCAGTAATAGTTCATTCTCCCTTCTTGACCCCT  
+HWI-EAS443:3:52:584:237#0/1  
]^`aa`a\_` ` `^¥\_b]^`[\_^b` ` `aaa^aaaaaaY]^`a  
@HWI-EAS443:3:55:1116:1148#0/1  
CTAGTGCCAGTAATAGTTCATTCTCCCTTCTTGACCCCT  
+HWI-EAS443:3:55:1116:1148#0/1  
M^a¥\_U[T^a¥UX`[\_`aa^bbTZ`aVT^a\_aaa`a^`aa  
@HWI-EAS443:3:57:544:474#0/1  
CTAGTGCCAGTAATAGTTCATTCTCCCTTCTTGACCCCT  
+HWI-EAS443:3:57:544:474#0/1  
ab]aX[^a\_^\_aZb\_Q\_abZ¥`Y¥a[\_Z^a]a^^¥][YZ`  
@HWI-EAS443:3:57:764:1345#0/1  
CTAGTGCCAGTAATAGTTCATTCTCCCTTCTTGACCCCT  
+HWI-EAS443:3:57:764:1345#0/1  
abbb` `abbabaabb`aaa`aaa¥aa\_aaa`aaaa\_Y]\_a  
@HWI-EAS443:3:58:1404:578#0/1  
CTAGTGCCAGTAATAGTTCATTCTCCCTTCTTGACCCCT  
+HWI-EAS443:3:58:1404:578#0/1  
abbbbbbbbabbbbbbabbabbbbbbabbabb`bb`a`b  
@HWI-EAS443:3:59:1102:854#0/1  
CTAGTGCCAGTAATAGTTCATTCTCCCTTCTTGACCCCT  
+HWI-EAS443:3:59:1102:854#0/1  
aa]Y]YaH` ` \_a` \_]V`\_]YR^`U^` ` ` ` ` \_ZZ` \_\_TGVZU  
@HWI-EAS443:3:5:1704:1369#0/1  
GTGTCCAGTAATAGTTCATTCTCCCTTCTTGACCCCTCAC  
+HWI-EAS443:3:5:1704:1369#0/1  
aabaa`aaa^]a¥VFZ]]^^P`SWTV^\_XZ[[YZTT[U]Y  
@HWI-EAS443:3:60:479:1592#0/1  
CTACTAGTGCCAGTAATAGTTCATTCTCCCTTCTTGACC

+HWI-EAS443:3:60:479:1592#0/1  
`\_\_TZ`ZZ^Qa`^`WW[aX¥[¥\_¥^Z]P^\_0¥WHRa^^[R  
@HWI-EAS443:3:60:741:409#0/1  
CTACTAGTGTCCAGTAATAGTTCATTCTCCCTTCTTGACC  
+HWI-EAS443:3:60:741:409#0/1  
aab\_a\_b`b\_ba`a`aa`¥ZaX\_aa\_a\_aa`a\_aaa\_^\_  
@HWI-EAS443:3:60:839:1032#0/1  
TACTAGTGTCCAGTAATAGTTCATTCTCCCTTCTTGACCC  
+HWI-EAS443:3:60:839:1032#0/1  
]P]]Z]a)`¥[\_Z^aaa[U\_`¥aa[Waa[Y`a\_`\_\_\_¥W`  
@HWI-EAS443:3:61:910:1226#0/1  
CTAGTGTCCAGTAATAGTTCATTCTCCCTTCTTGACCCCT  
+HWI-EAS443:3:61:910:1226#0/1  
abb\_\_\_`b`]]\_aababU`a`b``Ybbbbbaa\_T[bUU]\_  
@HWI-EAS443:3:64:1205:1238#0/1  
CTAGTGTCCAGTAATAGTTCATTCTCCCTTCTTGACCCCT  
+HWI-EAS443:3:64:1205:1238#0/1  
a`T`^aX^aaaYUX[U\_U\_ZUa]¥ZW^`TT]^a]\_]TW][  
@HWI-EAS443:3:65:778:1300#0/1  
CTAGTGTCCAGTAATAGTTCATTCTCCCTTCTTGACCCCT  
+HWI-EAS443:3:65:778:1300#0/1  
a\_`]]VPa]]`]\_\_a`IYa]]^\_X]`Z`]\_\_^]]XZ\_Z]\_  
@HWI-EAS443:3:67:1266:117#0/1  
AGTGTCCAGTAATAGTTCATTCTCCCTTCTTGACCCCTCA  
+HWI-EAS443:3:67:1266:117#0/1  
ab¥a\_aa\_a\_a`a\_`Wa`a`a]^aW\_`a\_a\_`\_Z]\_^]ZW  
@HWI-EAS443:3:67:743:1023#0/1  
GTGTCCAGTAATAGTTCATTCTCCCTTCTTGACCCCTCAC  
+HWI-EAS443:3:67:743:1023#0/1  
a```bb\_\_\_aa`Y`^aaaaaaaaaaaaaaaa\_aa`\_a`\_```  
@HWI-EAS443:3:69:197:585#0/1  
CTAGTGTCCAGTAATAGTTCATTCTCCCTTCTTGACCCCT  
+HWI-EAS443:3:69:197:585#0/1  
aaaa]``a`\_a^aaa\_`Z`a^\_`\_```\_`]]``^\_\_\_\_\_^  
@HWI-EAS443:3:6:641:1035#0/1  
GTGTCCAGTAATAGTTCATTCTCCCTTCTTGACCCCTCAC  
+HWI-EAS443:3:6:641:1035#0/1  
a`aab]baaaaa]]`a]abb[a`a\_aaaaaa``Ua\_`a^  
@HWI-EAS443:3:71:1052:1062#0/1  
CTAGTGTCCAGTAATAGTTCATTCTCCCTTCTTGACCCCT  
+HWI-EAS443:3:71:1052:1062#0/1  
abbbababaab\_aaa\_a\_ba`aa`aba\_`aaa\_aa\_\_[\_`  
@HWI-EAS443:3:72:110:1854#0/1  
CTAGTGTCCAGTAATAGTTCATTCTCCCTTCTTGACCCCT  
+HWI-EAS443:3:72:110:1854#0/1  
R```TW¥^a^TY^ZS\_QXK¥a][[`Uaa]\_a]VRS][```¥  
@HWI-EAS443:3:72:1454:1935#0/1  
CTAGTGTCCAGTAATAGTTCATTCTCCCTTCTTGACCCCT  
+HWI-EAS443:3:72:1454:1935#0/1  
aaa\_V^W[b`aV\_bba]ab]bba\_]``P\_bbab]ba`b\_a

@HWI-EAS443:3:73:1183:617#0/1  
TAGTGTCCAGTAATAGTTCATTCTCCCTTCTTGACCCCTC  
+HWI-EAS443:3:73:1183:617#0/1  
aba\_b`aaaa\_a^ba`aa^aa\_a`\_¥aa\_\_aaa`^¥]a\_  
@HWI-EAS443:3:74:1079:1044#0/1  
TACTAGTGTCCAGTAATAGTTCATTCTCCCTTCTTGACCC  
+HWI-EAS443:3:74:1079:1044#0/1  
aabb^^Ya0aba^Paa`]a\_bb]a\_\_a\_a\_BBBBBBBBBB  
@HWI-EAS443:3:78:128:633#0/1  
CTAGTGTCCAGTAATAGTTCATTCTCCCTTCTTGACCCCT  
+HWI-EAS443:3:78:128:633#0/1  
a`\_a\_\_`baaa\_aaaY\_\_``a`a\_\_\_\_`\_`\_\_\_\_`[^[^  
@HWI-EAS443:3:78:260:1365#0/1  
GTGTCCAGTAATAGTTCATTCTCCCTTCTTGACCCCTCAC  
+HWI-EAS443:3:78:260:1365#0/1  
aa`bbba^a^a\_]\_aaaaaaaaabaaaaaaaaaba\_\_aa`a\_  
@HWI-EAS443:3:7:1289:473#0/1  
CTAGTGTCCAGTAATAGTTCATTCTCCCTTCTTGACCCCT  
+HWI-EAS443:3:7:1289:473#0/1  
¥abbbba\_abbabbbab`a`bb`ba`bb`abba`^SX`  
@HWI-EAS443:3:80:542:480#0/1  
CTAGTGTCCAGTAATAGTTCATTCTCCCTTCTTGACCCCT  
+HWI-EAS443:3:80:542:480#0/1  
abbb^`abaabaaab]a`Y`aa^baa`aaaaa\_a\_^\_a  
@HWI-EAS443:3:81:1074:1159#0/1  
TAGTGTCCAGTAATAGTTCATTCTCCCTTCTTGACCCCTC  
+HWI-EAS443:3:81:1074:1159#0/1  
^[URV¥`ZX`[[a]\_aY^ZU^^]a¥MJ^a^[W]]\_V^N\_  
@HWI-EAS443:3:82:99:1145#0/1  
CTAGTGTCCAGTAATAGTTCATTCTCCCTTCTTGACCCCT  
+HWI-EAS443:3:82:99:1145#0/1  
abbababbbababbba`abbbbabbbababbaabb\_bba  
@HWI-EAS443:3:84:1135:1247#0/1  
CTAGTGTCCAGTAATAGTTCATTCTCCCTTCTTGACCCCT  
+HWI-EAS443:3:84:1135:1247#0/1  
ababab`ababY`abPb\_\_`aba`aa^a]a`\_``\_`\_\_a  
@HWI-EAS443:3:87:62:378#0/1  
CTACTAGTGTCCAGTAATAGTTCATTCTCCCTTCTTGACC  
+HWI-EAS443:3:87:62:378#0/1  
aaaaaaaaZ\_^`aZa\_\_`\_]\_`\_```\_^\_^\_^\_^^\_\_^^  
@HWI-EAS443:3:90:1077:62#0/1  
CTAGTGTCCAGTAATAGTTCATTCTCCCTTCTTGACCCCT  
+HWI-EAS443:3:90:1077:62#0/1  
abbbbbbbbbbbabb`babaabbaba`bbabbba\_\_a`a  
@HWI-EAS443:3:90:203:1860#0/1  
CTAGTGTCCAGTAATAGTTCATTCTCCCTTCTTGACCCCT  
+HWI-EAS443:3:90:203:1860#0/1  
ab`Z^a`aab`a`a[a\_aaaaaaaa\_\_`a\_\_`aa\_\_^\_  
@HWI-EAS443:3:90:372:595#0/1  
AGTGTCCAGTAATAGTTCATTCTCCCTTCTTGACCCCTCA

+HWI-EAS443:3:90:372:595#0/1  
abaaabaab`a\_b^a`a`aaa`\_]\_`aa``]aa]a^a\_`  
@HWI-EAS443:3:93:448:790#0/1  
CTAGTGCCAGTAATAGTTCATTCTCCCTTCTTGACCCCT  
+HWI-EAS443:3:93:448:790#0/1  
aa¥a`bb\_[`b¥a^aV``^]bbaa`aaa`]b\_a\_0JY`a  
@HWI-EAS443:3:96:1071:1880#0/1  
CTAGTGCCAGTAATAGTTCATTCTCCCTTCTTGACCCCT  
+HWI-EAS443:3:96:1071:1880#0/1  
Z¥```\_U\_b`aaabb\_Z¥aP]bbb[P[N\_bZabba]bQ`b  
@HWI-EAS443:3:96:690:1483#0/1  
GTGTCCAGTAATAGTTCATTCTCCCTTCTTGACCCCTCAC  
+HWI-EAS443:3:96:690:1483#0/1  
\_Xa\_bbaa\_`a¥`aa`bbaa`b\_¥a\_aaaaa\_a\_aaS\_\_  
@HWI-EAS443:3:97:139:1197#0/1  
CTACTAGTGCCAGTAATAGTTCATTCTCCCTTCTTGACC  
+HWI-EAS443:3:97:139:1197#0/1  
abaabab\_`a]\_a`aa\_]^`a`Za]\_\_^`Z\_^`^U  
@HWI-EAS443:3:34:1601:597#0/1  
AGCCGGTTTCATTGAAGGGGGTGGACAGGGATGGTGGAG  
+HWI-EAS443:3:34:1601:597#0/1  
Z]N][`a\_baa\_¥Z`aa¥\_\_a\_M¥\_HY`¥\_\_`X\_IRBBBB  
@HWI-EAS443:3:75:907:408#0/1  
GCCGGTTTCATTGAAGGGGGTGGACAGGGATGGTGGATG  
+HWI-EAS443:3:75:907:408#0/1  
^abbb]bb`abbbb\_¥abba^ab``abbaabb`ba`¥b  
@HWI-EAS443:3:40:471:1158#0/1  
AATCAAGAAGGGAGAATGAATTAATGACTACTGGACACAGAGGC  
+HWI-EAS443:3:40:471:1158#0/1  
aaaaaaba`aaa\_a[`aa[a^\_aaa\_\_\_^a`\_\_aa[[]¥\_  
@HWI-EAS443:3:3:1183:1454#0/1  
GAATAAGAGCCAAAGTGAGGAATCAAGAAGGGAGAATGAA  
+HWI-EAS443:3:3:1183:1454#0/1  
¥`Vb`\_¥`J``a^baNXa¥baa¥Z¥\_b¥b¥bbbbUVb¥^  
@HWI-EAS443:3:84:439:1216#0/1  
CAGCAATAGTTCATTCTCCCTTCTTGATTCTCACTTTGG  
+HWI-EAS443:3:84:439:1216#0/1  
`[XGX]YYY^X]\_]\_`\_XP^U[`YS]WP]P]^ZY\_SQOQ  
@HWI-EAS443:3:13:1034:413#0/1  
CTTCTTGATTCTCACCTTGGGTCTTATTGCTATTTCGG  
+HWI-EAS443:3:13:1034:413#0/1  
abbaabbaabaabaaZI]aaa\_¥`\_aa`\_a^\_]`^]U[[\_  
@HWI-EAS443:3:39:1723:199#0/1  
GTAATAGTTCATTCTCCCTTCTTGATTCTCACTTTGGGT  
+HWI-EAS443:3:39:1723:199#0/1  
aa\_aa]a\_a^baRa\_]``]`a\_]aZXaaYV[ ]`\_]UUN  
@HWI-EAS443:3:72:174:1811#0/1  
GTCCAGTAATAGTACATTCTCCCTTCTTGATTCTCACTT  
+HWI-EAS443:3:72:174:1811#0/1  
YUb`\_TZ``¥¥S¥F^bZXZ``a[aT`^]LO\_^`aaaYaa[

@HWI-EAS443:3:78:123:787#0/1  
TGATTCCTCACTTTGGGTCTTATTGTTATTTCCGGCTTGA  
+HWI-EAS443:3:78:123:787#0/1  
abaaaabbbbaabbaba^aaaaaa0`aaaaaa¥^`a`\_  
@HWI-EAS443:3:51:1699:1545#0/1  
GTTCATTCTCCNTTCTTGATTCCTCACTTTGGGTCTTATT  
+HWI-EAS443:3:51:1699:1545#0/1  
a¥¥`\_`bb¥`\_¥D[aS`]ZYaS\_a^Z¥Iaa\_ZN\_NPHGWY\_  
@HWI-EAS443:3:61:1106:1510#0/1  
CTAGTGTNCAGTAATAGTTCATTCTCCCTTCTTGATTCCT  
+HWI-EAS443:3:61:1106:1510#0/1  
aabb\_WD[baabbaabaababbbbbbabbababa\_aa  
@HWI-EAS443:3:68:703:728#0/1  
CTAGTGTNCAGTAATAGTTCATTCTCCCTTCTTGATTCCT  
+HWI-EAS443:3:68:703:728#0/1  
abba¥`[D^b\_]bbab\_`aaabbbaaa`aaaab`aaa`aa  
@HWI-EAS443:3:10:152:1676#0/1  
TTCTCCCTTCTTGATTCCTCACTTTGGGTCTTATTGCTAT  
+HWI-EAS443:3:10:152:1676#0/1  
`abba\_aaaaaaa`\_`aaaa`aa`\_`[X\_a`a`^`\_`\_`a  
@HWI-EAS443:3:15:895:495#0/1  
AATAGTTCATTCTCCCTTCTTGATTCCTCACTTTGGGTCT  
+HWI-EAS443:3:15:895:495#0/1  
]\_aZ`\_bbba\_aa]aba`b`a\_aaaaaaa^¥^aaaaa^¥`  
@HWI-EAS443:3:17:382:1770#0/1  
GTCCAGTAATAGTTCATTCTCCCTTCTTGATTCCTCACTT  
+HWI-EAS443:3:17:382:1770#0/1  
`abbbba]`bbbb\_a`bb\_bbbaabbabb\_]aabaabab\_b  
@HWI-EAS443:3:17:416:236#0/1  
GTCCAGTAATAGTTCATTCTCCCTTCTTGATTCCTCACTT  
+HWI-EAS443:3:17:416:236#0/1  
aaba¥Z¥\_V^aZV^a\_aT\_Y\_VVXaa\_\_[[a`X`¥]\_^[W  
@HWI-EAS443:3:17:927:259#0/1  
CTAGTGTCCAGTAATAGTTCATTCTCCCTTCTTGATTCCT  
+HWI-EAS443:3:17:927:259#0/1  
abbbababaaaaaaa^\_\_aaaaa`\_aaa^aa`a\_^`\_`  
@HWI-EAS443:3:18:1310:1926#0/1  
CTACTAGTGTCCAGTAATAGTTCATTCTCCCTTCTTGATT  
+HWI-EAS443:3:18:1310:1926#0/1  
^`baabb]`]abbbZaaaaa\_abba`aa`aXa`ab\_a`a`  
@HWI-EAS443:3:18:1691:871#0/1  
CAGTAATAGTTCATTCTCCCTTCTTGATTCCTCACTTTGG  
+HWI-EAS443:3:18:1691:871#0/1  
¥\_S[J\_`[``a`[TQI`V`\_aYTW^JW\_`J]¥b\_]aZ]  
@HWI-EAS443:3:18:359:976#0/1  
CTAGTGTCCAGTAATAGTTCATTCTCCCTTCTTGATTCCT  
+HWI-EAS443:3:18:359:976#0/1  
abbaab\_b`ba[aba`b^ababba\_aa`aaaa`aa][a  
@HWI-EAS443:3:19:1076:624#0/1  
AGTGTCCAGTAATAGTTCATTCTCCCTTCTTGATTCCTCA





@HWI-EAS443:3:35:1522:1635#0/1  
GTCCAGTAATAGTTCATTCTCCCTTCTTGATTCCCTCACTT  
+HWI-EAS443:3:35:1522:1635#0/1  
aa`[a\_0Yaaaa]``aa`a\_a\_\_`]VaY``a\_\_\_\_`X^U¥^  
@HWI-EAS443:3:36:487:400#0/1  
GCCGAAATAGCAATAAGACCCAAAGTGAGGAATCAAGAA  
+HWI-EAS443:3:36:487:400#0/1  
`^\_TPNV\_`^X^YW]Z¥\_[[Y^[X]aX[``\_[Y\_YaXW\_XN  
@HWI-EAS443:3:38:1785:65#0/1  
CTACTAGTGTCCAGTAATAGTTCATTCTCCCTTCTTGATT  
+HWI-EAS443:3:38:1785:65#0/1  
abbbbababaaaab`baaab\_aaaabaaa[XY\_^a\_a[``]  
@HWI-EAS443:3:39:366:1775#0/1  
CTAGTGTCCAGTAATAGTTCATTCTCCCTTCTTGATTCCCT  
+HWI-EAS443:3:39:366:1775#0/1  
`V\_Z]aX`^`\_]¥``]XZOTWZR^ZYQXY[WY^Z[¥\_XPX  
@HWI-EAS443:3:39:723:1186#0/1  
AGTGTCCAGTAATAGTTCATTCTCCCTTCTTGATTCCCTCA  
+HWI-EAS443:3:39:723:1186#0/1  
a^]aabbaa\_abaaa^a\_\_`^a\_aaaaaaaaa\_\_a``\_`a]  
@HWI-EAS443:3:40:1028:1811#0/1  
AGCAATAAGACCCAAAGTGAGGAATCAAGAAGGGAGAATG  
+HWI-EAS443:3:40:1028:1811#0/1  
^STT\_a¥XZ\_V¥\_`^``S¥b]U\_aZJL^\_a^\_Z^^YVTU\_  
@HWI-EAS443:3:40:1371:109#0/1  
CTAGTGTCCAGTAATAGTTCATTCTCCCTTCTTGATTCCCT  
+HWI-EAS443:3:40:1371:109#0/1  
ab`bba^¥`abaabbbb`ba`bbab\_aaaa^aba\_aa`\_`  
@HWI-EAS443:3:42:1143:923#0/1  
AAGCCGAAATAGCAATAAGACCCAAAGTGAGGAATCAAG  
+HWI-EAS443:3:42:1143:923#0/1  
aaa]a\_\_Ya`a\_a`]]aa]``[aXXOW`W\_aa\_^V\_`[\_\_  
@HWI-EAS443:3:43:1575:1285#0/1  
CTTCTTGATTCCCTCACTTTGGGTCTTATTGCTATTTCCGG  
+HWI-EAS443:3:43:1575:1285#0/1  
abbbbb\_\_bb`¥bbbaababaXb\_bbb\_bTb`babb^VY  
@HWI-EAS443:3:43:654:435#0/1  
TCCTCACTTTGGGTCTTATTGCTATTTCCGGCTTGAACCT  
+HWI-EAS443:3:43:654:435#0/1  
aab]`aabbbb^aR`aaaa`\_`\_aaa]a`]aaa]\_X`\_  
@HWI-EAS443:3:45:1267:1583#0/1  
CTAGTGTCCAGTAATAGTTCATTCTCCCTTCTTGATTCCCT  
+HWI-EAS443:3:45:1267:1583#0/1  
abba\_b`babb\_aabaa`baaaaaa``aaa`bba`a`\_\_a  
@HWI-EAS443:3:47:724:419#0/1  
CTAGTGTCCAGTAATAGTTCATTCTCCCTTCTTGATTCCCT  
+HWI-EAS443:3:47:724:419#0/1  
abbbabbbbbbbbbbbbaabbabaaabbabbbabba`a  
@HWI-EAS443:3:47:905:260#0/1  
GTTCACTTCTCCCTTCTTGATTCCCTCACTTTGGGTCTTATT

+HWI-EAS443:3:47:905:260#0/1  
a`XU`)[^TJOV\_0QZ¥a]\_ZS[\_^WSX¥[Y]\_NOTZW^T  
@HWI-EAS443:3:48:1448:1711#0/1  
AGTGTCCAGTAATAGTTCATTCTCCCTTCTTGATTCCTCA  
+HWI-EAS443:3:48:1448:1711#0/1  
aba[¥\_aaYHYb^aU]ZL]a`a^Z\_¥a\_`\_\_\_\_^[KEM]UT  
@HWI-EAS443:3:48:1579:552#0/1  
TAGCAATAAGACCCAAAGTGAGGAATCAAGAAGGGAGAAT  
+HWI-EAS443:3:48:1579:552#0/1  
aab`abbaabba^aaaab\_b`aa`a^a\_a\_[\_aU¥\_`\_\_  
@HWI-EAS443:3:49:1654:1457#0/1  
GTTTCATTCTCCCTTCTTGATTCCTCACTTTGGGTCTTATT  
+HWI-EAS443:3:49:1654:1457#0/1  
aaa`aa]F\_\_^`a\_]abb\_aa]\_`ZWS\_aa\_\_ZRY``\_`\_  
@HWI-EAS443:3:4:538:1485#0/1  
GTTTCATTCTCCCTTCTTGATTCCTCACTTTGGGTCTTATT  
+HWI-EAS443:3:4:538:1485#0/1  
a[[Ya]`]Z[\_]¥ZUa^aUW\_0`\_]I]`\_`QU]OV^]`\_Z  
@HWI-EAS443:3:4:639:1936#0/1  
CAGTAATAGTTCATTCTCCCTTCTTGATTCCTCACTTTGG  
+HWI-EAS443:3:4:639:1936#0/1  
abbaaabbb\_babbbbbbbaaba`bbaabba\_abbababaa  
@HWI-EAS443:3:54:1195:1017#0/1  
TAATAGTTCATTCTCCCTTCTTGATTCCTCACTTTGGGTCT  
+HWI-EAS443:3:54:1195:1017#0/1  
aaabaaaba`baaaX]`aa]aaa\_b`\_`b\_`\_baaa[a]¥  
@HWI-EAS443:3:55:1289:740#0/1  
GTCCAGTAATAGTTCATTCTCCCTTCTTGATTCCTCACTT  
+HWI-EAS443:3:55:1289:740#0/1  
aba`]b`aabbaaa``abaa¥\_\_ba\_aaa`aa¥S`]`^aa  
@HWI-EAS443:3:56:1069:882#0/1  
GTGTCCAGTAATAGTTCATTCTCCCTTCTTGATTCCTCAC  
+HWI-EAS443:3:56:1069:882#0/1  
aa`a^ab\_a^aaa\_a^abaaa`^^aa`aa`\_aa^^a\_\_]  
@HWI-EAS443:3:56:155:266#0/1  
CTAGTGTCCAGTAATAGTTCATTCTCCCTTCTTGATTCCT  
+HWI-EAS443:3:56:155:266#0/1  
VaZ`Ta\_babbV`b\_\_^a`Z\_aaaaYV^\_aa`aa\_]¥\_a`  
@HWI-EAS443:3:57:75:1038#0/1  
CTAGTGTCCAGTAATAGTTCATTCTCCCTTCTTGATTCCT  
+HWI-EAS443:3:57:75:1038#0/1  
abaaaaaabaa\_ab`X`\_a\_aaaaaaaaaaaaa``aaa\_`  
@HWI-EAS443:3:58:1426:575#0/1  
GTTTCATTCTCCCTTCTTGATTCCTCACTTTGGGTCTTATT  
+HWI-EAS443:3:58:1426:575#0/1  
a^a¥aaa`a]¥[aa\_aaa```¥[`]\_Za`aa`XX]`\_`a\_  
@HWI-EAS443:3:61:450:1027#0/1  
CTACTAGTGTCCAGTAATAGTTCATTCTCCCTTCTTGATT  
+HWI-EAS443:3:61:450:1027#0/1  
aaba\_^ba`abbab[bb\_bb\_aaaaababaaa\_aaa`a``

@HWI-EAS443:3:61:987:1421#0/1  
CTAGTGTCCAGTAATAGTTCATTCTCCCTTCTTGATTCCT  
+HWI-EAS443:3:61:987:1421#0/1  
abbbbabbbbbaababbbbabbbbababa\_^a  
@HWI-EAS443:3:62:1293:1170#0/1  
AATAGTTCATTCTCCCTTCTTGATTCCTCACTTTGGGTCT  
+HWI-EAS443:3:62:1293:1170#0/1  
a]aS^Taa]\_`aa\_P\_`a^]U\_R]`][^a`Ya\_\_WXaRY^  
@HWI-EAS443:3:62:1775:117#0/1  
CCCTTCTTGATTCCTCACTTTGGGTCTTATTGCTATTCC  
+HWI-EAS443:3:62:1775:117#0/1  
\_abbbbbaabaaba\_abbbbb\_\_bbbabababab^`  
@HWI-EAS443:3:63:1007:1276#0/1  
CTAGTGTCCAGTAATAGTTCATTCTCCCTTCTTGATTCCT  
+HWI-EAS443:3:63:1007:1276#0/1  
\_V¥^\_`H¥aZ\_V\_a`[^[Za`a^aaa`^a`\_`¥TZ¥^¥a`  
@HWI-EAS443:3:64:696:1454#0/1  
GTCCAGTAATAGTTCATTCTCCCTTCTTGATTCCTCACTT  
+HWI-EAS443:3:64:696:1454#0/1  
]S`bbbU`aZ^`ab]¥`a`a\_aa^aa¥`^^X\_[^Zaa  
@HWI-EAS443:3:64:878:1030#0/1  
CTAGTGTCCAGTAATAGTTCATTCTCCCTTCTTGATTCCT  
+HWI-EAS443:3:64:878:1030#0/1  
ab`aaa\_abbaababa`\_aaaaaaaaaaaaa`aaa`a  
@HWI-EAS443:3:66:1284:1468#0/1  
TAGTTCATTCTCCCTTCTTGATTCCTCACTTTGGGTCTTA  
+HWI-EAS443:3:66:1284:1468#0/1  
a`aaabbababab^aabaa`aaa`abaa`baaa`aVa`aa  
@HWI-EAS443:3:67:1382:1283#0/1  
CAATAAGACCCAAAGTGAGGAATCAAGAAGGGAGAATGAA  
+HWI-EAS443:3:67:1382:1283#0/1  
`bbb`abb`aaa`Xbbaaaaaa`¥]a\_\_`\_b^aaaaa  
@HWI-EAS443:3:68:144:302#0/1  
CTAGTGTCCAGTAATAGTTCATTCTCCCTTCTTGATTCCT  
+HWI-EAS443:3:68:144:302#0/1  
aaa`R]W\_aa\_X\_a\_YY[`[]]\_^a]Y[^\_\_`\_^\_[¥\_\_  
@HWI-EAS443:3:68:598:400#0/1  
AGCAATAAGACCCAAAGTGAGGAATCAAGAAGGGAGAATG  
+HWI-EAS443:3:68:598:400#0/1  
\_]aaaa`aaaa^^^aaW`aa`\_`]]`a^\_a\_\_a^`a  
@HWI-EAS443:3:70:637:160#0/1  
CTAGTGTCCAGTAATAGTTCATTCTCCCTTCTTGATTCCT  
+HWI-EAS443:3:70:637:160#0/1  
abb`Sb\_aaa\_\_aabaaZb`baaaaa\_\_`aaaa`\_a`\_\_a  
@HWI-EAS443:3:71:1718:1572#0/1  
GTCCAGTAATAGTTCATTCTCCCTTCTTGATTCCTCACTT  
+HWI-EAS443:3:71:1718:1572#0/1  
`abaabababa`b`abbaa\_aabaaabbaaaaaZa]aa  
@HWI-EAS443:3:71:62:123#0/1  
GTTCACTTCTCCCTTCTTGATTCCTCACTTTGGGTCTTATT

+HWI-EAS443:3:71:62:123#0/1  
a`aabaaaa^`a\_^`\_]aa\_a^`\_\_\_\_`\_aZZ^WX]\_\_^V  
@HWI-EAS443:3:73:311:182#0/1  
CTAGTGTCCAGTAATAGTTCATTCTCCCTTCTTGATTCCT  
+HWI-EAS443:3:73:311:182#0/1  
abaaab`a`ab\_a`a\_`]a\_aaa`a\_^\_\_\_\_a`^^^\_^^B  
@HWI-EAS443:3:75:1668:1849#0/1  
CTAGTGTCCAGTAATAGTTCATTCTCCCTTCTTGATTCCT  
+HWI-EAS443:3:75:1668:1849#0/1  
abbbaaa```aababbbab`abbabaa[bbbbbbaba\_ab  
@HWI-EAS443:3:75:534:614#0/1  
CTACTAGTGTCCAGTAATAGTTCATTCTCCCTTCTTGATT  
+HWI-EAS443:3:75:534:614#0/1  
abbba[aababbababaabb`bbabababa`aabaaaaa  
@HWI-EAS443:3:79:141:1447#0/1  
GTAATAGTTCATTCTCCCTTCTTGATTCCTCACTTTGGGT  
+HWI-EAS443:3:79:141:1447#0/1  
`aab`^[aaaaababaaaaaaa`¥a\_aaa`aaaaa[UTV  
@HWI-EAS443:3:80:636:159#0/1  
GTAATAGTTCATTCTCCCTTCTTGATTCCTCACTTTGGGT  
+HWI-EAS443:3:80:636:159#0/1  
aabbbba\_abbbb^a`aaa`abaaaa\_\_a^`\_aaaa^`X  
@HWI-EAS443:3:81:542:619#0/1  
GTCCAGTAATAGTTCATTCTCCCTTCTTGATTCCTCACTT  
+HWI-EAS443:3:81:542:619#0/1  
a`aaaa]aaa\_a\_`\_aaaaa\_`aa\_aaa^`\_`Z`a`^`a  
@HWI-EAS443:3:83:219:1499#0/1  
GTCCAGTAATAGTTCATTCTCCCTTCTTGATTCCTCACTT  
+HWI-EAS443:3:83:219:1499#0/1  
`]`bbb`ZSZ]YW]b`Y]ZXW`]\_WY\_YT]^^a]¥][`\_]`  
@HWI-EAS443:3:84:530:1427#0/1  
CTTGATTCCTCACTTTGGGTCTTATTGCTATTTCCGGCTT  
+HWI-EAS443:3:84:530:1427#0/1  
abba`bbbbabaabba`aa]aaaa`aba`aaaaa]aaa  
@HWI-EAS443:3:87:1138:608#0/1  
GTAATAGTTCATTCTCCCTTCTTGATTCCTCACTTTGGGT  
+HWI-EAS443:3:87:1138:608#0/1  
a\_a`babaa`aaaab\_\_aab^abaab\_^\_a^`\_a`a`\_Z  
@HWI-EAS443:3:88:875:332#0/1  
AGCAATAAGACCCAAAGTGAGGAATCAAGAAGGGAGAATG  
+HWI-EAS443:3:88:875:332#0/1  
aa`aabaabaaaa`\_a\_aaaaa\_\_\_\_```\_a``\_a^a`a  
@HWI-EAS443:3:89:1011:28#0/1  
CTAGTGTCCAGTAATAGTTCATTCTCCCTTCTTGATTCCT  
+HWI-EAS443:3:89:1011:28#0/1  
aaY[[NXa\_¥\_UX`b\_WZ`[`b`]]]]ZY\_aaa]¥aZSY  
@HWI-EAS443:3:8:80:1818#0/1  
GATTCCTCACTTTGGGTCTTATTGCTATTTCCGGCTTGAA  
+HWI-EAS443:3:8:80:1818#0/1  
]aaWaba¥aba`b¥TST\_bbb\_aa\_\_a```\_]\_[X^\_]\_]a

@HWI-EAS443:3:97:801:557#0/1  
CTAGTGTCCAGTAATAGTTCATTCTCCCTTCTTGATTCCT  
+HWI-EAS443:3:97:801:557#0/1  
`^T\_Xa^Y[]abbaT¥¥]a`babb`a\_]\_Y\_bbbaa`¥[^  
@HWI-EAS443:3:98:1270:540#0/1  
GTTTCATTCTCCCTTCTTGATTCCTCACTTTGGGTCTTATT  
+HWI-EAS443:3:98:1270:540#0/1  
``a``bbab]¥abbaaabaaa][a`a\_aaba]a\_Yaaaa`  
@HWI-EAS443:3:98:574:1115#0/1  
GCCGAAATAGCAATAAGACCCAAAGTGAGGAATCAAGAA  
+HWI-EAS443:3:98:574:1115#0/1  
aaaba`a\_b`baaababa`\_`aa`ZT[abaaaaaaa`  
@HWI-EAS443:3:98:667:1170#0/1  
CTAGTGTCCAGTAATAGTTCATTCTCCCTTCTTGATTCCT  
+HWI-EAS443:3:98:667:1170#0/1  
a`KaZ¥J[aba``Tabbbbb\_b^Z`^¥VbbaZbZbbZQHa  
@HWI-EAS443:3:51:1048:1200#0/1  
TAGGCCATGAACCTGTCTTGGGAATATCTCAAACCTTTC  
+HWI-EAS443:3:51:1048:1200#0/1  
a]^baa\_abZ`aaaa\_aaba^[¥\_a\_a\_``aa\_]a`\_\_  
@HWI-EAS443:3:40:43:1074#0/1  
GAAAGAAATGCTGGATCTGGTATTATCATTTTCAGATCCAC  
+HWI-EAS443:3:40:43:1074#0/1  
`^^]\_V^\_ZP`\_]\_0^X[[WYTLV^ZXyTXU^YWY]XHR\_]`  
@HWI-EAS443:3:45:286:318#0/1  
TGCATTGCAATGGAAAGAAATGCTGGATCTGGTATCATC  
+HWI-EAS443:3:45:286:318#0/1  
aabaaaab`baabaaaaaaaaaWa\_aaa``]¥\_]aa^aa\_  
@HWI-EAS443:3:49:980:686#0/1  
ACCGAGATATGCATTGCAATGGAAAGAAATGCTGGTTCT  
+HWI-EAS443:3:49:980:686#0/1  
a`ab\_aaba`b`abaa`\_a\_a`a`^^`\_`aa`^aa`^a^a  
@HWI-EAS443:3:15:342:320#0/1  
CTGACATGATAATACCAGATCCAGCATTTCTTTCCATTGC  
+HWI-EAS443:3:15:342:320#0/1  
aa\_^L\_a[\_b`b`a^^aaabababbba]bbbb\_bba`ab  
@HWI-EAS443:3:19:1519:1342#0/1  
TGTATCTGAACTGATAATACCAGATCCAGCATTTCTTTCC  
+HWI-EAS443:3:19:1519:1342#0/1  
Y`^^TT[\_NWIS]T`[WQ]S[aa`SOS¥`XW]`WPZ¥^`[  
@HWI-EAS443:3:22:967:842#0/1  
AAAGAAATCCTGGATCTGGTATTATCATTTTCAGATACACC  
+HWI-EAS443:3:22:967:842#0/1  
a```^`a¥G¥a)`a`a``\_¥aa\_\_TX\_a`````\_\_`a¥\_VP  
@HWI-EAS443:3:46:1232:1714#0/1  
GCATTTCTTTTCATTGCGAATGCATATCTCGGTACCACTA  
+HWI-EAS443:3:46:1232:1714#0/1  
a``aaa\_aaa`¥aa`\_aa`\_`S^aa`¥\_\_^^Za]0\_X\_\_  
@HWI-EAS443:3:51:1207:1158#0/1  
TAGTGGTACCGAGATATGCATCCGCAATGGAAAGAAATGC

+HWI-EAS443:3:51:1207:1158#0/1  
aab¥aaT`a`^b\_\_abaW`\_]Yaa`\_b`Z]a``a`\_\_]`  
@HWI-EAS443:3:5:825:1199#0/1  
CTGAAATGATAATACCAGATCCAGCTTTTCTTCCATTGC  
+HWI-EAS443:3:5:825:1199#0/1  
a^b[ZHaa`\_`aaT`Q]bY`IS\_bYFXaa^a`ZNZaaZa]  
@HWI-EAS443:3:69:1455:132#0/1  
TGGAAATATAGTGGTACCGAGATATGCATTGCAATGGAA  
+HWI-EAS443:3:69:1455:132#0/1  
\_Z\_ZV0\_I\_aaT]¥\_\_¥Qa[[\_Y\_W^Y\_ZZ\_X^ZZ^ZWX  
@HWI-EAS443:3:72:907:1233#0/1  
ACCAGATCCAGCATTTCTTCCATTCCGAATGCATATCTC  
+HWI-EAS443:3:72:907:1233#0/1  
aaZ[[Y]babV[P¥RN\_a\_\_]P[WS\_FW^I\_]ZOYY]\_XR  
@HWI-EAS443:3:96:1738:1528#0/1  
AGCATTTCTCTCCATTGCGAATGCATATCTCGGTACCACT  
+HWI-EAS443:3:96:1738:1528#0/1  
aaa`^a]a^a\_\_a\_\_\_[`\_]`\_Y\_Z^\_V]X`Z`]^Z`  
@HWI-EAS443:3:11:1440:1758#0/1  
CATTTCTTCCATTGCGAATGCATATCTCNGTACCACTAG  
+HWI-EAS443:3:11:1440:1758#0/1  
¥`\_b`bbb`abbbbba`abbaa`babaX]DY`bb\_aWbbb  
@HWI-EAS443:3:53:1174:1798#0/1  
ATGATAATACCAGATCCAGCATTTCTTCCATTNCGAATG  
+HWI-EAS443:3:53:1174:1798#0/1  
ababaabbbb`]b\_aaaa`\_`ba`a`a\_\_a`UDK]`\_aa  
@HWI-EAS443:3:56:753:1059#0/1  
GGAAATCTAGTGGTACCGAGATATGCATTGNAATGGAAA  
+HWI-EAS443:3:56:753:1059#0/1  
aa¥R\_a`a`^`]^R¥a[a]^a`¥`^^aa`a[DY`\_`\_`¥\_  
@HWI-EAS443:3:67:997:657#0/1  
ACCGAGATATGCATTGCAATGGAAAGAAATGNTGGATCT  
+HWI-EAS443:3:67:997:657#0/1  
aaaaaaaa¥```aa`a`\_`^`a``````\_¥`aTDV`\_`\_\_\_\_  
@HWI-EAS443:3:21:759:908#0/1  
GTCCAGCATTTCTTCCATTGCGAATGCATATCTCGGTAC  
+HWI-EAS443:3:21:759:908#0/1  
aaaabaabaabaaaaa\_aaaa`a`]`a\_aa`\_`^`\_aT]^  
@HWI-EAS443:3:40:406:788#0/1  
TGTGGTACCGAGATATGCATTGCAATGGAAAGAAATGCT  
+HWI-EAS443:3:40:406:788#0/1  
`aWa]]aaaaaa`\_aa]YY]aaa`\_YYRU]aXJZUXU`\_  
@HWI-EAS443:3:93:857:1761#0/1  
NTTCGCAATGGAAAGAAATGCTGGATCTGGTATTATCATT  
+HWI-EAS443:3:93:857:1761#0/1  
DMY[WU[ZXXYY[[[[[Y[P[[YYY[WW[ZZ[[[[[[[[Z[Y  
@HWI-EAS443:3:100:397:710#0/1  
GATAATACCAGATCCAGCATTTCTTCCATTGCGAATGCA  
+HWI-EAS443:3:100:397:710#0/1  
aa`aa`\_a`\_b`\_^^aa`\_`a`\_a`\_a`\_^^aW\_\_]^\_V\_



+HWI-EAS443:3:17:910:1464#0/1  
VV^bab\_\_`a\_YaY^]`baa]^ [YYY^YY[^^`Sa  
@HWI-EAS443:3:18:1109:1577#0/1  
TGCATTGCAATGGAAAGAAATGCTGGATCTGGTATTATC  
+HWI-EAS443:3:18:1109:1577#0/1  
¥Y¥bXH¥¥^P\_^Z]aZ\_a]H[Ya^¥aaaSJaa0]a]^aY  
@HWI-EAS443:3:18:437:1440#0/1  
GGCTCTACTAGTGTCCAGTAATAGTTCATTCTCCCTTCTT  
+HWI-EAS443:3:18:437:1440#0/1  
^`U`¥\_ZZa`T[¥aaaaZ`aZ``Iaaa\_a[`a\_a`^Zaa  
@HWI-EAS443:3:19:1338:186#0/1  
GTGTATCTGAAATGATAATACCAGATCCAGCATTCTTTC  
+HWI-EAS443:3:19:1338:186#0/1  
\_aYNWV`¥\_MFY`aaU^`^^PLZZTOYV`]XP[XY]YUZG  
@HWI-EAS443:3:1:1411:1322#0/1  
GAAAGAAATGCTGGATCTGGTATTATCATTTCAGATACAC  
+HWI-EAS443:3:1:1411:1322#0/1  
]XU^`]aaaaaaaa]aa\_`b]Wa`a`aW\_aaaZ]`\_aBBB  
@HWI-EAS443:3:20:1355:466#0/1  
ATGGAAGAAATGCTGGATCTGGTATTATCATTTCAGATA  
+HWI-EAS443:3:20:1355:466#0/1  
aaaaaaaaaaaaa\_`a`a`aaaaZ\_aaaa\_\_a``\_``\_``\_`  
@HWI-EAS443:3:20:903:1385#0/1  
TGGAAATCTAGTGGTACCGAGATATGCATTGCAATGGAA  
+HWI-EAS443:3:20:903:1385#0/1  
U```\_V[ [YWOWML\_X\_ZSabV]aba]¥V\_^\_bb[Z`\_¥  
@HWI-EAS443:3:21:1068:634#0/1  
ACCGAGATATGCATTGCAATGGAAAGAAATGCTGGATCT  
+HWI-EAS443:3:21:1068:634#0/1  
a^Y`^`^`\_`\_` [Z\_\_ [OY`\_V\_^YFV`^^WZ^^ [S\_^\_^]\_  
@HWI-EAS443:3:21:722:350#0/1  
GAGATATGCATTGCAATGGAAAGAAATGCTGGATCTGGT  
+HWI-EAS443:3:21:722:350#0/1  
aaaaaaaaaaaa^a\_\_`aa``a``\_`\_`U`^`^`\_`\_`^`\_`\_`T  
@HWI-EAS443:3:22:1366:1305#0/1  
GTGTATCTGAAATGATAATACCAGATCCAGCATTCTTTC  
+HWI-EAS443:3:22:1366:1305#0/1  
a]`X`babba\_`a\_aaaaa`a`a`^a`a^Y\_\_aa]a\_`\_  
@HWI-EAS443:3:22:998:1537#0/1  
GCATTTCTTTCCATTGCGAATGCATATCTCGGTACCACTA  
+HWI-EAS443:3:22:998:1537#0/1  
\_YLRXXFL]Y]¥Q]TZ^UJ\_]PPZ\_]TTNUZ[X¥VTY]  
@HWI-EAS443:3:23:1616:135#0/1  
GTATCTGAAATGATAATACCAGATCCAGCATTCTTTCCA  
+HWI-EAS443:3:23:1616:135#0/1  
aaab\_ab`]abaaaa`aa`\_^`]^^`^`Z^`\_^`[^`\_`SX[  
@HWI-EAS443:3:23:255:1601#0/1  
ATTCGCAATGGAAAGAAATGCTGGATCTGGTATTATCATT  
+HWI-EAS443:3:23:255:1601#0/1  
aa`aaaaaaaa`aaa\_\_aa` [a^\_Ya\_\_\_\_`\_` [``^a\_\_\_\_^]



@HWI-EAS443:3:23:328:120#0/1  
CATTTCGCAATGGAAAGAAATGCTGGATCTGGTATTATCAT  
+HWI-EAS443:3:23:328:120#0/1  
\_ababbabbabbbaaab`aaa`aaa\_aa^`a``aaa`aaaa  
@HWI-EAS443:3:24:675:866#0/1  
GAAATCTAGTGGTACCGAGATATGCATTTCGCAATGGAAAG  
+HWI-EAS443:3:24:675:866#0/1  
abaaaa`a`^b]Ya\_aaaa\_]`^`a\_a`a```aa\_^`\_`  
@HWI-EAS443:3:24:747:929#0/1  
ATCTGAAATGATAATACCAGATCCAGCATTTCTTTCCATT  
+HWI-EAS443:3:24:747:929#0/1  
aabba`]¥ab^a``a\_aaa``aaaa[`abbaaaaa\_aa]  
@HWI-EAS443:3:25:1614:1554#0/1  
CCGAGATATGCATTTCGCAATGGAAAGAAATGCTGGATCTG  
+HWI-EAS443:3:25:1614:1554#0/1  
Xbaabbbbbbabbba\_bbbaba`babaabb`b\_b[bbabb  
@HWI-EAS443:3:27:881:813#0/1  
TGCATTTCGCAATGGAAAGAAATGCTGGATCTGGTATTATC  
+HWI-EAS443:3:27:881:813#0/1  
Z^``a¥¥¥ZY`\_`Y`¥\_Y¥¥ZHV¥ZW^^`]a^Ya\_Va[F  
@HWI-EAS443:3:28:52:378#0/1  
ACCGAGATATGCATTTCGCAATGGAAAGAAATGCTGGATCT  
+HWI-EAS443:3:28:52:378#0/1  
\_¥```a`¥aSZ[`a`] ^ZP\_`aYWQ[U\_`XTF¥GXQ¥YYW  
@HWI-EAS443:3:29:1088:1614#0/1  
CAAGAAGGGAGAATGAACTATTACTGGACACTAGTAGAGC  
+HWI-EAS443:3:29:1088:1614#0/1  
aaba]¥aa`aa\_aba``aa\_a`aaaaa`a\_aa`^aa``¥  
@HWI-EAS443:3:29:1202:840#0/1  
ACCGAGATATGCATTTCGCAATGGAAAGAAATGCTGGATCT  
+HWI-EAS443:3:29:1202:840#0/1  
aaababbb`aaabaaa\_aaaa`a``¥a\_a\_]`\_\_`a^[\_  
@HWI-EAS443:3:29:1306:934#0/1  
GGAAAGAAATGCTGGATCTGGTATTATCATTTCAGATACA  
+HWI-EAS443:3:29:1306:934#0/1  
abaaaaaaaaUb^a`aa\_`¥^Z\_a`\_a^Wa`\_\_\_\_\_`^a  
@HWI-EAS443:3:29:838:1428#0/1  
TGCATTTCGCAATGGAAAGAAATGCTGGATCTGGTATTATC  
+HWI-EAS443:3:29:838:1428#0/1  
¥`aaa`aba\_\_]^Z[¥[`^a\_¥0\_[`\_`\_^`^0a]]`\_\_  
@HWI-EAS443:3:2:37:651#0/1  
TGGAAATCTAGTGGTACCGAGATATGCATTTCGCAATGGAA  
+HWI-EAS443:3:2:37:651#0/1  
aab^IO\_]`\_b[b0H\_a`aTa`\_\_[a`Y\_Y^`\_a^\_``^`  
@HWI-EAS443:3:2:711:1914#0/1  
ACCGAGATATGCATTTCGCAATGGAAAGAAATGCTGGATCT  
+HWI-EAS443:3:2:711:1914#0/1  
a\_L]a^a\_a^\_¥a`^WV^\_aZ]^aa\_] ^\_]YGSX]^ZWW  
@HWI-EAS443:3:30:1082:663#0/1  
CGAGATATGCATTTCGCAATGGAAAGAAATGCTGGATCTGG

+HWI-EAS443:3:30:1082:663#0/1  
\_abba^Y`aaaa`^aab^ab\_PZ[^Ya`U^`V]\_^¥\_\_X  
@HWI-EAS443:3:30:648:1504#0/1  
AGCATTCTTTCCATTGCGAATGCATATCTCGGTACCACT  
+HWI-EAS443:3:30:648:1504#0/1  
aaaa\_`a`\_a`a^a\_a\_]\_\_a`\_`]\_^]Z\_\_Z\_Z]  
@HWI-EAS443:3:30:947:1273#0/1  
CCGAGATATGCATTGCGAATGGAAAGAAATGCTGGATCTG  
+HWI-EAS443:3:30:947:1273#0/1  
aaa`]Yaa`Uaa`aaa^]a`a\_Ya`U\_WZU`Z]]\_Y\_Z\_  
@HWI-EAS443:3:31:1421:902#0/1  
ACCGAGATATGCATTGCGAATGGAAAGAAATGCTGGATCT  
+HWI-EAS443:3:31:1421:902#0/1  
ab\_``baaaa\_\_aaa`¥```aaaa\_a``aa`W^Z]]`T]\_  
@HWI-EAS443:3:31:616:808#0/1  
GAGATATGCATTGCGAATGGAAAGAAATGCTGGATCTGGT  
+HWI-EAS443:3:31:616:808#0/1  
abb^`ababa]aa`ababa\_\_a]^aa`\_Rb^\_`]``adW  
@HWI-EAS443:3:32:268:1294#0/1  
TGAAATGATAATACCAGATCCAGCATTCTTTCCATTGCG  
+HWI-EAS443:3:32:268:1294#0/1  
V`¥W¥`a``bba\_bbb\_ZXab^^baaaa```a]\_`\_WYa\_  
@HWI-EAS443:3:32:458:1324#0/1  
ACCGAGATATGCATTGCGAATGGAAAGAAATGCTGGATCT  
+HWI-EAS443:3:32:458:1324#0/1  
aaaa^[Y`aa\_aa`\_`\_a[Q^]^a^`[\_a^¥XaX]TY[`Z  
@HWI-EAS443:3:33:1766:1965#0/1  
GGCTCTACTAGTGTCCAGTAATAGTTCATTCTCCCTTCTT  
+HWI-EAS443:3:33:1766:1965#0/1  
a^a`]aaaa\_a\_Y]^LZ\_W`\_^[VR`RZ\_^XKDKW^]X^¥  
@HWI-EAS443:3:33:363:264#0/1  
GCATTTCTTTCCATTGCGAATGCATATCTCGGTACCACTA  
+HWI-EAS443:3:33:363:264#0/1  
aaaabaa`aaaaaaaaa\_\_`aa```\_```aa\_Wa^``]^  
@HWI-EAS443:3:34:1392:1557#0/1  
CCGAGATATGCATTGCGAATGGAAAGAAATGCTGGATCTG  
+HWI-EAS443:3:34:1392:1557#0/1  
`b¥]`a¥¥a]Q^]W\_\_M^V¥`\_`a¥¥a\_ZZMZZ\_X]PLSP  
@HWI-EAS443:3:34:1435:262#0/1  
CTGAAATGATAATACCAGATCCAGCATTCTTTCCATTGC  
+HWI-EAS443:3:34:1435:262#0/1  
abbbbbbb`bbab\_aabbaaabba`aab`aaa^Y`^`\_Y  
@HWI-EAS443:3:35:351:968#0/1  
CTGAAATGATAATACCAGATCCAGCATTCTTTCCATTGC  
+HWI-EAS443:3:35:351:968#0/1  
aa`^Zaaaaaaaaa¥]U]aaa`\_\_^`]`\_`\_a``\_Y¥`  
@HWI-EAS443:3:35:456:761#0/1  
GTGGTACCGAGATATGCATTGCGAATGGAAAGAAATGCTG  
+HWI-EAS443:3:35:456:761#0/1  
]N]]S¥aaaa¥R\_]¥]\_``[^\_`a^^¥S][Z¥¥T^WX][[]

@HWI-EAS443:3:36:1292:768#0/1  
CCGAGATATGCATTGCAATGGAAAGAAATGCTGGATCTG  
+HWI-EAS443:3:36:1292:768#0/1  
aa\_¥`b`a^aaa`\_aaaaaa`a`a]a^\_\_`¥aaa\_a  
@HWI-EAS443:3:36:584:1413#0/1  
GATATGCATTGCAATGGAAAGAAATGCTGGATCTGGTAT  
+HWI-EAS443:3:36:584:1413#0/1  
\_b\_b^abbabbabbbbabb`bbba\_aY^^a\_\_aa\_]a\_  
@HWI-EAS443:3:37:1776:431#0/1  
ACCAGATCCAGCATTTCTTTCCATTGCGAATGCATATCTC  
+HWI-EAS443:3:37:1776:431#0/1  
aaPZ]Wa`a`^W¥abb\_b^`^aa\_ab¥`[E[^baa\_aa`U  
@HWI-EAS443:3:37:681:816#0/1  
TGGAAATCTAGTGGTACCGAGATATGCATTGCAATGGAA  
+HWI-EAS443:3:37:681:816#0/1  
WQV`¥¥\_bab¥Q]¥\_bbaaa`b`a^`\_]WT\_aba\_ba\_¥^  
@HWI-EAS443:3:37:845:45#0/1  
CATTGCAATGGAAAGAAATGCTGGATCTGGTATTATCAT  
+HWI-EAS443:3:37:845:45#0/1  
aaaa\_baabbaaba`T\_a`\_a]a¥^\_^XY]Y`\_\_a\_a``  
@HWI-EAS443:3:39:1029:263#0/1  
ACCGAGATATGCATTGCAATGGAAAGAAATGCTGGATCT  
+HWI-EAS443:3:39:1029:263#0/1  
abbaZa`a\_]\_`^`a`^`a`¥[a]^¥T¥\_X¥¥¥¥ZY  
@HWI-EAS443:3:3:1365:1791#0/1  
ATTCGCAATGGAAAGAAATGCTGGATCTGGTATTATCATT  
+HWI-EAS443:3:3:1365:1791#0/1  
`b`SZU[aa[`ab\_Vaab¥PR^aVX[XbbM``\_ba^JXaa  
@HWI-EAS443:3:3:1522:1709#0/1  
ATATGCATTGCAATGGAAAGAAATGCTGGATCTGGTATT  
+HWI-EAS443:3:3:1522:1709#0/1  
\_`Va`aYVbKb[\_bbb¥bba\_V``YWHabPY\_aI^UHaa\_  
@HWI-EAS443:3:3:725:1308#0/1  
ATTCGCAATGGAAAGAAATGCTGGATCTGGTATTATCATT  
+HWI-EAS443:3:3:725:1308#0/1  
a\_a]baa\_bb`aaa`¥]`[OVaa`\_\_a]]T``[\_aP`^]  
@HWI-EAS443:3:42:1447:1314#0/1  
GTGGTACCGAGATATGCATTGCAATGGAAAGAAATGCTG  
+HWI-EAS443:3:42:1447:1314#0/1  
a[`X]\_`abab\_aYa`]aa[P`\_a``aa\_XSa\_\_aa]`\_`  
@HWI-EAS443:3:42:1614:1617#0/1  
CAGATCCAGCATTTCTTTCCATTGCGAATGCATATCTCGG  
+HWI-EAS443:3:42:1614:1617#0/1  
abbbbbabbbbbbababbabbaabaabbaabbaaaaa`  
@HWI-EAS443:3:42:927:1214#0/1  
TGCATTGCAATGGAAAGAAATGCTGGATCTGGTATTATC  
+HWI-EAS443:3:42:927:1214#0/1  
aaabb```a`abaaabbaaaaa^a`\_\_a`a`a`]\_\_aaa\_  
@HWI-EAS443:3:43:1147:457#0/1  
CAAGAAGGGAGAATGAAC TACTACTGGACACTAGTAGAGC

+HWI-EAS443:3:43:1147:457#0/1  
a`\_\_Ybbb^W\_a^abaaaabbbba]]aa^``\_aaaZba¥`Z  
@HWI-EAS443:3:43:163:1234#0/1  
CTGAAATGATAATACCAGATCCAGATTTCTTTCCATTGC  
+HWI-EAS443:3:43:163:1234#0/1  
a\_YQ`^a[a`bba]a`ab`\_a\_aaaaa`abaaa`¥`[]\_  
@HWI-EAS443:3:43:541:1612#0/1  
AGATATGCATTGCAATGGAAAGAAATGCTGGATCTGGTA  
+HWI-EAS443:3:43:541:1612#0/1  
`T`[b]ZY¥`\_^\_M\_U¥`\_U^\_HZ`¥T`^`^]N¥^W\_aYH[  
@HWI-EAS443:3:43:934:375#0/1  
GGTGTATCTGAAATGATAATACCAGATCCAGATTTCTTT  
+HWI-EAS443:3:43:934:375#0/1  
^b]b`ababb\_aaabaaaaaaaa`b```\_aa^`aa`\_aa`  
@HWI-EAS443:3:44:553:1635#0/1  
ATAATACCAGATCCAGATTTCTTTCCATTGCGAATGCAT  
+HWI-EAS443:3:44:553:1635#0/1  
\_aaaba```\_\_\_\_\_Xaa\_aaY`a`a`a]\_Q^\_¥`W^\_a```  
@HWI-EAS443:3:44:89:1360#0/1  
GGCTCTACTAGTGTCCAGTAATAGTTCATTCTCCCTTCTT  
+HWI-EAS443:3:44:89:1360#0/1  
aaa`a]aaa]a\_a`a`\_aaaaa[^Va\_a\_`^`Za^`\_`  
@HWI-EAS443:3:44:938:164#0/1  
CAAGAAGGGAGAATGAACTATTACTGGACACTAGTAGAGC  
+HWI-EAS443:3:44:938:164#0/1  
`aaba``bb`b`\_abaa\_aaaaa^aaa`aa^a`a]ba\_`W  
@HWI-EAS443:3:45:444:261#0/1  
ATGCATTGCAATGGAAAGAAATGCTGGATCTGGTATTAT  
+HWI-EAS443:3:45:444:261#0/1  
abbaabbabaaa`bbaa`VaaZ`0a\_a`^`X^aaXa`aa`  
@HWI-EAS443:3:46:1623:937#0/1  
CCGAGATATGCATTGCAATGGAAAGAAATGCTGGATCTG  
+HWI-EAS443:3:46:1623:937#0/1  
aabbbaaaaaaaaa\_baaaaaa`a`a`a\_`^`^a\_\_\_\_\_^`  
@HWI-EAS443:3:46:489:817#0/1  
GTGGTACCGAGATATGCATTGCAATGGAAAGAAATGCTG  
+HWI-EAS443:3:46:489:817#0/1  
a\_b¥Raba`baa`\_\_a\_a`a`aaa\_``aa``a`\_`\_W\_^\_  
@HWI-EAS443:3:46:961:501#0/1  
CTGAAATCTAGTGGTACCGAGATATGCATTGCAATGGA  
+HWI-EAS443:3:46:961:501#0/1  
abbbbb`babb`abbabbbbbbbbbbb`bbbbbbbbbb  
@HWI-EAS443:3:47:1562:601#0/1  
CCGAGATATGCATTGCAATGGAAAGAAATGCTGGATCTG  
+HWI-EAS443:3:47:1562:601#0/1  
abbbbbbaba^ab`abaa\_bba`aaaaaa^\_a`a\_\_^aa  
@HWI-EAS443:3:47:543:1660#0/1  
GAAATCTAGTGGTACCGAGATATGCATTGCAATGGAAAG  
+HWI-EAS443:3:47:543:1660#0/1  
aaababba`Yb¥^aa[baa\_aaaaW^[`Y[^abaa`a\_\_\_\_



+HWI-EAS443:3:55:1163:1324#0/1  
aX\_aZba]`b¥]a`RbVa`Ya]aa\_aaab]Q\_`a¥`b\_`a  
@HWI-EAS443:3:55:373:142#0/1  
ACCCCACAAAAACATATGCATCTGCATTCTGATAGAGACT  
+HWI-EAS443:3:55:373:142#0/1  
a``\_`a]`\_]\_\_^\_]`a`^\_^`W^\_`¥`^]`\_`¥`]Y]  
@HWI-EAS443:3:56:1286:1780#0/1  
ACCAGATCCAGCATTTCTTTCCATTGCGAATGCATATCTC  
+HWI-EAS443:3:56:1286:1780#0/1  
YL¥U`aa^Tb]T\_baa\_baa\_a¥^aa\_a`^`\_]`\_`\_`^  
@HWI-EAS443:3:56:746:232#0/1  
CTGAAATGATAATACCAGATCCAGCATTTCTTTCCATTGC  
+HWI-EAS443:3:56:746:232#0/1  
`\_baabbb`bab`a`aaaaa\_baa``ba¥a`a¥X`a\_a¥  
@HWI-EAS443:3:57:1634:881#0/1  
GGGTCATCAAGATACAGCAAGAAGTTCAAGCCGGAAATAG  
+HWI-EAS443:3:57:1634:881#0/1  
aaaR\_ba`K^bb^baa\_Xbbb`abZ`Yb\_bZ\_`aaa`\_`b  
@HWI-EAS443:3:58:127:352#0/1  
TATGCATTGCGAATGGAAAGAAATGCTGGATCTGGTATTA  
+HWI-EAS443:3:58:127:352#0/1  
a`aaaa`a`W\_S^YP]^^^^[W]^ZX^GY]X\_[VPX]^  
@HWI-EAS443:3:58:1748:1753#0/1  
CTGGAAATCTAGTGGTACCGAGATATGCATTGCGAATGGA  
+HWI-EAS443:3:58:1748:1753#0/1  
ZMXaabbbbaa`¥Ya]]`\_]\_a`aaa\_a\_\_aaaaaa]\_`^Ya  
@HWI-EAS443:3:58:541:1189#0/1  
AGTGGTACCGAGATATGCATTGCGAATGGAAAGAAATGCT  
+HWI-EAS443:3:58:541:1189#0/1  
\_YUaa¥a\_aaaaaaa^a^aa\_\_`a`a`a`\_`\_`a\_\_\_\_]W\_\_  
@HWI-EAS443:3:59:905:1867#0/1  
ACCGAGATATGCATTGCGAATGGAAAGAAATGCTGGATCT  
+HWI-EAS443:3:59:905:1867#0/1  
]a]a\_^\_aaa^aa`\_]`\_aaaaaaaaaaaa\_0`WZGUSPG  
@HWI-EAS443:3:5:151:153#0/1  
CATTGCGAATGGAAAGAAATGCTGGATCTGGTATTATCAT  
+HWI-EAS443:3:5:151:153#0/1  
abb\_`abXbbbbabbaaa`a¥aaaa^a\_a`Xa]Y\_a^a^  
@HWI-EAS443:3:5:232:816#0/1  
GGTGTATCTGAAATGATAATACCAGATCCAGCATTTCTTT  
+HWI-EAS443:3:5:232:816#0/1  
a\_I^L^`aaa\_a]a^Y^aZYaY[]][XOG]aaWR\_\_`\_\_a`  
@HWI-EAS443:3:60:1427:444#0/1  
GTGGTACCGAGATATGCATTGCGAATGGAAAGAAATGCTG  
+HWI-EAS443:3:60:1427:444#0/1  
aVaaXaa¥^]aaa^aa[aa\_`a\_```ba^a\_`\_\_`^WU]]  
@HWI-EAS443:3:60:450:756#0/1  
TGCATTGCGAATGGAAAGAAATGCTGGATCTGGTATTATC  
+HWI-EAS443:3:60:450:756#0/1  
`b`]^\_ab\_aaaa`\_a]¥¥`\_Z^[X[`\_`¥[\_aZ^\_]]

@HWI-EAS443:3:61:1420:1425#0/1  
TGCATTGCAATGGAAAGAAATGCTGGATCTGGTATTATC  
+HWI-EAS443:3:61:1420:1425#0/1  
aaaaaaaa`aaaa\_aaaaaaa]a`a`aa\_\_`\_Z^a]\_]W  
@HWI-EAS443:3:61:1679:2015#0/1  
ATCTGAAATGATAATACCAGATCCAGCATTTCTTTCCATT  
+HWI-EAS443:3:61:1679:2015#0/1  
ab\_a`abaaaaaaaaaaaaababbaaaa`\_a`aWN]^V  
@HWI-EAS443:3:61:303:650#0/1  
AAAGAAATGCTGGATCTGGTATTATCATTTTCAGATACACC  
+HWI-EAS443:3:61:303:650#0/1  
abaa`\_[a]a`a^a`a\_aa]a^^Y^aa\_\_\_`\_]^]\_Y^Y[  
@HWI-EAS443:3:61:409:1850#0/1  
AAGAAGGGAGAATGAATGACTATTACTGGACACTAGTAGAGCC  
+HWI-EAS443:3:61:409:1850#0/1  
abaaabaaaaaaaaaaaaaaaaabaa\_aaaaaa¥Za^\_^X¥  
@HWI-EAS443:3:61:882:114#0/1  
CGAGATATGCATTGCAATGGAAAGAAATGCTGGATCTGG  
+HWI-EAS443:3:61:882:114#0/1  
\_babba¥`b`bb`abb^abb¥`^b`b^``aaaa`aT^\_a  
@HWI-EAS443:3:63:1057:1123#0/1  
ACCGAGATATGCATTGCAATGGAAAGAAATGCTGGATCT  
+HWI-EAS443:3:63:1057:1123#0/1  
aU¥`\_b\_aa`[`a`¥\_ab\_¥]a`Z`^W`[^\_P¥¥WMS]a`  
@HWI-EAS443:3:63:41:1433#0/1  
ATCTGAAATGATAATACCAGATCCAGCATTTCTTTCCATT  
+HWI-EAS443:3:63:41:1433#0/1  
R]aZ`[Y^a`¥`ba[J\_b``^a`bb\_[V¥a`¥a^aaX\_¥T  
@HWI-EAS443:3:63:867:1230#0/1  
GTGTATCTGAAATGATAATACCAGATCCAGCATTTCTTTC  
+HWI-EAS443:3:63:867:1230#0/1  
aabaabab^`abbaaba\_a`abaaaa\_ba\_aaaa\_aa`a  
@HWI-EAS443:3:64:1618:1834#0/1  
ACCGAGATATGCATTGCAATGGAAAGAAATGCTGGATCT  
+HWI-EAS443:3:64:1618:1834#0/1  
aa`a``aaaa`^a^Yaa\_Za\_a`\_\_\_\_\_¥\_X\_\_[X\_\_W]  
@HWI-EAS443:3:64:843:1784#0/1  
CCAGCATTTCTTTCCATTGCGAATGCATATCTCGGTACCA  
+HWI-EAS443:3:64:843:1784#0/1  
ab\_TZ`bba]^babaaaa\_W]^aa`\_^aaaa\_b`a]bZ]a  
@HWI-EAS443:3:64:864:1065#0/1  
GAAAGAAATGCTGGATCTGGTATTATCATTTTCAGATACAC  
+HWI-EAS443:3:64:864:1065#0/1  
^¥`bbb^Ta¥b^`ab]aa``X^`a\_aaaabaaa``])`\_aa  
@HWI-EAS443:3:65:1214:2045#0/1  
AGTGGTACCGAGATATGCATTGCAATGGAAAGAAATGCT  
+HWI-EAS443:3:65:1214:2045#0/1  
aa]`aXaa`aaa\_\_\_`a`a`\_\_`W]a`a]a`a\_`\_`\_W]]  
@HWI-EAS443:3:65:12:1708#0/1  
ACCGAGATATGCATTGCAATGGAAAGAAATGCTGGATCT

+HWI-EAS443:3:65:12:1708#0/1  
`aa^¥V¥^` []]a][V\_¥U[[PVZ[U[IMRTWNWUZZ\_^  
@HWI-EAS443:3:65:326:2000#0/1  
CTGAAATGATAATACCAGATCCAGCATTTCTTTCCATTGC  
+HWI-EAS443:3:65:326:2000#0/1  
aY\_ZXZ]¥\_`a^`ZY\_]YZVZ`^LWRR[S\_[FS¥\_YYLU[  
@HWI-EAS443:3:65:815:292#0/1  
CCGAGATATGCATTGCAATGGAAAGAAATGCTGGATCTG  
+HWI-EAS443:3:65:815:292#0/1  
abbbbaabbaabbbabababbaabbaabaab`bb\_baa^aa`b  
@HWI-EAS443:3:66:1158:1955#0/1  
GGTGTATCTGAAATGATAATACCAGATCCAGCATTTCTTT  
+HWI-EAS443:3:66:1158:1955#0/1  
Y`¥¥SQZ\_L[[¥``ZSaa^b¥VbbXa\_a¥Xb`Z\_a¥VVa¥  
@HWI-EAS443:3:67:1296:825#0/1  
TGAAATGATAATACCAGATCCAGCATTTCTTTCCATTGCG  
+HWI-EAS443:3:67:1296:825#0/1  
`b`Z`¥b]a^][VTY`aa`a`aa¥^]a`aaa]`V\_^\_Z\_  
@HWI-EAS443:3:67:58:1471#0/1  
GGCTCTACTAGTGTCCAGTAATAGTTCATTCTCCCTTCTT  
+HWI-EAS443:3:67:58:1471#0/1  
[abbb`bba]¥aa\_bbb]¥T`^`¥\_baaaaaa`[``\_`  
@HWI-EAS443:3:68:1509:1591#0/1  
TGAAATCTAGTGGTACCGAGATATGCATTGCAATGGAA  
+HWI-EAS443:3:68:1509:1591#0/1  
a`]`aaaaa`^a`Vaa\_\_`a^`\_\_\_`\_\_`\_¥\_^`\_]`\_  
@HWI-EAS443:3:68:241:1294#0/1  
TGAAATCTAGTGGTACCGAGATATGCATTGCAATGGAA  
+HWI-EAS443:3:68:241:1294#0/1  
a¥`^b`aa^`[[Z`]aab\_`a¥¥\_\_a\_aa^`aa\_`a`\_`X  
@HWI-EAS443:3:68:300:1477#0/1  
CTGAAATGATAATACCAGATCCAGCATTTCTTTCCATTGC  
+HWI-EAS443:3:68:300:1477#0/1  
aaaaaaaaaaaaaaaaabaXY[``b[a``\_\_`\_\_`\_\_][`  
@HWI-EAS443:3:6:1133:1588#0/1  
ACCGAGATATGCATTGCAATGGAAAGAAATGCTGGATCT  
+HWI-EAS443:3:6:1133:1588#0/1  
¥bbabbbbabbbX\_¥aaa`bbabbaabaaa`aaaa`a\_a  
@HWI-EAS443:3:6:525:1121#0/1  
CTCTACTAGTGTCCAGTAATAGTTCATTCTCCCTTCTTGA  
+HWI-EAS443:3:6:525:1121#0/1  
aaabbb`bbaaaba`babbbbaa`aaaaaba\_`aa`aa`a  
@HWI-EAS443:3:70:1336:1478#0/1  
ATTCGCAATGGAAAGAAATGCTGGATCTGGTATTATCATT  
+HWI-EAS443:3:70:1336:1478#0/1  
aa```baaaaaa```[`Xa``\_a`\_a`\_]`a````\_\_\_\_  
@HWI-EAS443:3:71:1360:573#0/1  
GTGGTACCGAGATATGCATTGCAATGGAAAGAAATGCTG  
+HWI-EAS443:3:71:1360:573#0/1  
][bb\_babbab`a^¥a]\_^¥aaa[I^Va`a^LZaa\_\_`[^



@HWI-EAS443:3:72:1133:1409#0/1  
GGCTCTACTAGTGTCCAGTAATAGTTCATTCTCCCTTCTT  
+HWI-EAS443:3:72:1133:1409#0/1  
`abba`a\_[^`ZZ`aUaXN]a\_a^a^¥aaa\_a]``a]\_  
@HWI-EAS443:3:72:242:1454#0/1  
TGCATTGCAATGGAAAGAAATGCTGGATCTGGTATTATC  
+HWI-EAS443:3:72:242:1454#0/1  
abbbbbbbbabbbababab\_\_b\_aaYba`\_aaba`]aaaaaa  
@HWI-EAS443:3:72:243:1413#0/1  
GAGATATGCATTGCAATGGAAAGAAATGCTGGATCTGGT  
+HWI-EAS443:3:72:243:1413#0/1  
a\_¥QZba[ba`^aYb[\_Ya\_¥I[a`b\_`[[Z¥][WXMM  
@HWI-EAS443:3:72:750:1939#0/1  
GTGTATCTGAAATGATAATACCAGATCCAGCATTTCTTTC  
+HWI-EAS443:3:72:750:1939#0/1  
]\_aabbb`aabbaaab`abbb`]\_aababaaa]aa``\_  
@HWI-EAS443:3:73:120:139#0/1  
GGTGTATCTGAAATGATAATACCAGATCCAGCATTTCTTT  
+HWI-EAS443:3:73:120:139#0/1  
ab]b``a]G)`aaaaaaaa[aaaa```\_a\_\_`\_^a`^\_  
@HWI-EAS443:3:74:1786:1409#0/1  
CATTGCAATGGAAAGAAATGCTGGATCTGGTATTATCAT  
+HWI-EAS443:3:74:1786:1409#0/1  
^HRZU]XZ^a\_\_a`\_ba^X[^Z]^)^`^¥]\_V`Y\_]\_ZS  
@HWI-EAS443:3:74:216:350#0/1  
CTCTACTAGTGTCCAGTAATAGTTCATTCTCCCTTCTTGA  
+HWI-EAS443:3:74:216:350#0/1  
abbabbbbabbbbbbabaa`a\_baabaaaaa\_aaaaaaa  
@HWI-EAS443:3:74:430:1630#0/1  
ACCGAGATATGCATTGCAATGGAAAGAAATGCTGGATCT  
+HWI-EAS443:3:74:430:1630#0/1  
`aaa\_\_a`^`aa`aaaa\_a\_^\_^\_a`a\_V`]^Z\_^\_Y  
@HWI-EAS443:3:75:1265:1417#0/1  
ATGCATTGCAATGGAAAGAAATGCTGGATCTGGTATTAT  
+HWI-EAS443:3:75:1265:1417#0/1  
`SL\_ba\_]babbbXaabb^ab`^Y^\_aba^`aabV`a`ba  
@HWI-EAS443:3:76:1232:297#0/1  
ATCTGAAATGATAATACCAGATCCAGCATTTCTTTCCATT  
+HWI-EAS443:3:76:1232:297#0/1  
`b`b`\_aabbaaaaaaaaab``\_\_aa\_^\_aa\_aa`YW`^\_  
@HWI-EAS443:3:76:1693:957#0/1  
GGCTCTACTAGTGTCCAGTAATAGTTCATTCTCCCTTCTT  
+HWI-EAS443:3:76:1693:957#0/1  
a`aaY\_]T`ZWY[¥UX[\_]^a][ZU^X]W\_X^PUZ\_^V[`  
@HWI-EAS443:3:76:330:1511#0/1  
ACCAGATCCAGCATTTCTTTCCATTGCGAATGCATATCTC  
+HWI-EAS443:3:76:330:1511#0/1  
abab\_\_`abb^a]aaaa`abaa\_\_\_\_a``\_¥\_aaa^^\_  
@HWI-EAS443:3:77:1323:192#0/1  
TATGCATTGCAATGGAAAGAAATGCTGGATCTGGTATTA

+HWI-EAS443:3:77:1323:192#0/1  
a`ab`abaaba`aaa`a`\_`a^]``\_`Y\_a\_]\_a\_\_  
@HWI-EAS443:3:77:374:64#0/1  
CGAGATATGCATTGCAATGGAAAGAAATGCTGGATCTGG  
+HWI-EAS443:3:77:374:64#0/1  
abbbb`bbbbabbbbbabbb`ab`bba`ab\_aa`ab]  
@HWI-EAS443:3:77:742:873#0/1  
GATATGCATTGCAATGGAAAGAAATGCTGGATCTGGTAT  
+HWI-EAS443:3:77:742:873#0/1  
aaaaaaaa`baaaabbaaa^\_a^a\_Xa`a\_aaa\_`aT\_a  
@HWI-EAS443:3:77:99:1374#0/1  
TGAAATCTAGTGGTACCGAGATATGCATTGCAATGGAA  
+HWI-EAS443:3:77:99:1374#0/1  
ab`[¥aabaaa^aa\_bba`aaNa`aaaa`a`abaaa^aa  
@HWI-EAS443:3:79:211:849#0/1  
GGAAATCTAGTGGTACCGAGATATGCATTGCAATGGAAA  
+HWI-EAS443:3:79:211:849#0/1  
ab\_\_\_aaaa]b`\_abaa\_aa`aaaa`\_\_aaY¥`a\_X\_W  
@HWI-EAS443:3:79:892:1608#0/1  
GTGTATCTGAAATGATAATACCAGATCCAGCATTTCTTTC  
+HWI-EAS443:3:79:892:1608#0/1  
aaa`\_aaaa`aa`aaaaaaaa`a`\_a`baa`a`a\_a\_aa  
@HWI-EAS443:3:7:1330:1144#0/1  
TATGCATTGCAATGGAAAGAAATGCTGGATCTGGTATTA  
+HWI-EAS443:3:7:1330:1144#0/1  
aaaaa[\_a\_bY\_aaab\_a\_a\_\_\_\_\_]¥^\_]``W^`^[^`^\_  
@HWI-EAS443:3:7:436:1193#0/1  
GAGATATGCATTGCAATGGAAAGAAATGCTGGATCTGGT  
+HWI-EAS443:3:7:436:1193#0/1  
a`a]] [OYXWV[]^`\_\_a]Y[\_a`X¥XYMR[\_ZSL¥\_BB  
@HWI-EAS443:3:80:1132:470#0/1  
CAGATCCAGCATTTCTTTCCATTGCGAATGCATATCTCGG  
+HWI-EAS443:3:80:1132:470#0/1  
abaababbbaabbb`bbbaabaab`\_aaaa`bbab\_aaaa  
@HWI-EAS443:3:80:597:1620#0/1  
TGAAATGATAATACCAGATCCAGCATTTCTTTCCATTGCG  
+HWI-EAS443:3:80:597:1620#0/1  
ab\_¥\_bababbbbaabaaa`a]^`abababa]^aaa^a  
@HWI-EAS443:3:80:66:1960#0/1  
TAGTGGTACCGAGATATGCATTGCAATGGAAAGAAATGC  
+HWI-EAS443:3:80:66:1960#0/1  
aba]]a`abab`baba`bba`baba[\_a\_aba`aaa`Za  
@HWI-EAS443:3:81:1007:800#0/1  
CCGAGATATGCATTGCAATGGAAAGAAATGCTGGATCTG  
+HWI-EAS443:3:81:1007:800#0/1  
aaaaaababbaab`baaaabbaaaaaaaaaa^a``aa`a  
@HWI-EAS443:3:81:1084:1597#0/1  
TGAAATCTAGTGGTACCGAGATATGCATTGCAATGGAA  
+HWI-EAS443:3:81:1084:1597#0/1  
aa]aa`a`a`\_Yaa¥aa`a\_aa`\_\_a\_aa`Z[\_a`Z`\_





@HWI-EAS443:3:93:1377:553#0/1  
GTATCTGAAATGATAATACCAGATCCAGCATTCTTTCCA  
+HWI-EAS443:3:93:1377:553#0/1  
\_R`aZV`SOYYW^`Za¥^I¥^W¥WUa`V\_^Z^[VUUUO`  
@HWI-EAS443:3:93:554:1495#0/1  
TCGCAATGAAAGAAATGCTGGATCTGGTATTATCATTTTC  
+HWI-EAS443:3:93:554:1495#0/1  
aaaaabaa`baa¥ba\_a\_`a`a\_aaa[````aa`aaaa\_  
@HWI-EAS443:3:95:1181:192#0/1  
GTGTATCTGAAATGATAATACCAGATCCAGCATTCTTTTC  
+HWI-EAS443:3:95:1181:192#0/1  
a^b^bbabaaabbbbbaaba^^baaa\_`ba¥`aabZaaa\_  
@HWI-EAS443:3:96:283:292#0/1  
GAAAGAAATGCTGGATCTGGTATTATCATTTTCAGATACAC  
+HWI-EAS443:3:96:283:292#0/1  
a^`YVRTU]PSXPQNP[N[SPUZYVL[YU\_^YJVZ^YUHRB  
@HWI-EAS443:3:96:669:618#0/1  
CTGAAATGATAATACCAGATCCAGCATTCTTTCCATTGC  
+HWI-EAS443:3:96:669:618#0/1  
[``\_baa^`abb`ba\_`babaaa\_``\_a`aab`\_Taa^aa  
@HWI-EAS443:3:97:57:1893#0/1  
CTAGTGGTACCGAGATATGCATTTCGCAATGAAAGAAATG  
+HWI-EAS443:3:97:57:1893#0/1  
abb\_^baaab^abaaaaa\_abaaaaaabaaa`aa`aa`\_^  
@HWI-EAS443:3:98:1321:124#0/1  
GGTACCGAGATATGCATTTCGCAATGAAAGAAATGCTGGA  
+HWI-EAS443:3:98:1321:124#0/1  
a¥0a\_Wa^a\_`aa`U¥aa]\_W[\_^^^\_]^^`XRX`]  
@HWI-EAS443:3:9:1086:1739#0/1  
CATTTCTTTCCATTGCGAATGCATATCTCGGTACCACTAG  
+HWI-EAS443:3:9:1086:1739#0/1  
aabba^)]bb\_a\_ab`a`abb^`aaa¥aXa`^¥¥aa\_`b^  
@HWI-EAS443:3:9:1293:1370#0/1  
GGAAATCTAGTGGTACCGAGATATGCATTTCGCAATGGAAA  
+HWI-EAS443:3:9:1293:1370#0/1  
ababbaabaa\_bbWba`b\_baaabb\_bba\_a\_aaaa\_`aa  
@HWI-EAS443:3:9:1376:1034#0/1  
ACCAGATCCAGCATTCTTTCCATTGCGAATGCATATCTC  
+HWI-EAS443:3:9:1376:1034#0/1  
]XUW^Z\_¥``XX¥\_^Y]``ZVY``\_]\_`Y[Y[Z^^PYU  
@HWI-EAS443:3:9:289:200#0/1  
TGGAAATCTAGTGGTACCGAGATATGCATTTCGCAATGGAA  
+HWI-EAS443:3:9:289:200#0/1  
abaaaaaaba]ba^aaaaa````aa`a`\_\_a``[\_````\_  
@HWI-EAS443:3:9:74:999#0/1  
AGCATTTCTTTCCATTGCGAATGCATATCTCGGTACCACT  
+HWI-EAS443:3:9:74:999#0/1  
a\_`\_]¥`aY[Wa^]XT]¥\_[HY\_ZPZ]^XPYSYWZZY]ZZ  
@HWI-EAS443:3:2:1661:1252#0/1  
TCGGTCTGTTGAATTGTTTCGCATGATAACCTATACNTAAT

+HWI-EAS443:3:2:1661:1252#0/1  
a\_bb`]^\_`a`^]aa\_^aQ]\_\_\_\_`[¥Z[\_]\_\_\_\_RDR]\_]`  
@HWI-EAS443:3:23:942:968#0/1  
CATTGCAACCGCATATGCAGACACATTATGTATAGGTTA  
+HWI-EAS443:3:23:942:968#0/1  
¥Yaaaabab`¥`bbababaaabbbbbbbbbb^bbbbbabbb  
@HWI-EAS443:3:98:1006:654#0/1  
TTTGCAACCGCAAATGCAGACACATTATGTATAGGTTGCG  
+HWI-EAS443:3:98:1006:654#0/1  
abaa^^a\_¥a¥aaaaaab`aa]aaaaaa\_aa\_a`^a`Za  
@HWI-EAS443:3:25:834:1030#0/1  
ATACTAGTAGTTCTGCTATATACATTTNCAACCGCAAATG  
+HWI-EAS443:3:25:834:1030#0/1  
`aaaabb\_ba\_ab`aaaa`aaa`aaa[DZaa]\_`Y`^`^`\_  
@HWI-EAS443:3:15:1428:155#0/1  
CGTCTGTTGAATTGTTTCGCATGATAACCTATACATAATGT  
+HWI-EAS443:3:15:1428:155#0/1  
a`Z`b`\_b`[`aaV]`Z¥¥\_]SZ``aY^a\_a`Y`a`\_\_IX  
@HWI-EAS443:3:61:848:822#0/1  
CGGCAATACTAGTAGTTCTGCTATATACATTTGCAACCGC  
+HWI-EAS443:3:61:848:822#0/1  
ababbbbbabab`abbabbbbaa``Y\_abb`a\_W]aaX[^U  
@HWI-EAS443:3:62:84:666#0/1  
CGTTTCGCATGATAACCTATACATAATGTGTCTGCATTTGC  
+HWI-EAS443:3:62:84:666#0/1  
abaabbbbaab\_```ba\_Z`aaaaR\_a`XaXa`a¥T`]\_¥`  
@HWI-EAS443:3:73:406:673#0/1  
GGTTTCGCATGATAACCTATACATAATGTGTCTGCATTTGC  
+HWI-EAS443:3:73:406:673#0/1  
]^abababbbbaababbbab]babaaab\_`aa`a\_a\_V]  
@HWI-EAS443:3:12:917:358#0/1  
GAAGGCAATACTAGTAGTTCTGCTATATACATTTGCAACC  
+HWI-EAS443:3:12:917:358#0/1  
aaaa\_baaaa`aaaXaa\_a`aa¥aaa\_aa\_a`\_`a^`aXU  
@HWI-EAS443:3:13:1720:676#0/1  
CTGCTATATACATTTGCAACCGCAAATGCAGACACATTAT  
+HWI-EAS443:3:13:1720:676#0/1  
abbabbbbbbbbbbba`bb`[babbaba\_`b\_¥a^`abaa  
@HWI-EAS443:3:15:1181:43#0/1  
GTTGAATTGTTTCGCATGATAACCTATACATAATGTGTCTG  
+HWI-EAS443:3:15:1181:43#0/1  
a\_aaX^`aa\_a\_a^a`a`\_\_^X\_\_`\_]\_\_[-`[-]Y]^  
@HWI-EAS443:3:15:1375:225#0/1  
GCAACCGCAAATGCAGACACATTATGTATAGGTTATCATG  
+HWI-EAS443:3:15:1375:225#0/1  
aabbbbbbbbabababbbbaabbbabbababbb\_ba^[`\_Y  
@HWI-EAS443:3:15:1751:1304#0/1  
CGCATGATAACCTATACATAATGTGTCTGCATTTGCGGTT  
+HWI-EAS443:3:15:1751:1304#0/1  
¥``Z^^¥X\_`¥JT`\_¥^^`^`a\_\_b]H\_Xa\_W¥U\_Y¥\_HY

@HWI-EAS443:3:21:1394:761#0/1  
TGTCTGTTGAATTGTTTCGCATGATAACCTATACATAATGT  
+HWI-EAS443:3:21:1394:761#0/1  
a\_U^a`¥^[ZYY` [[]¥\_S]]aZ[^\_ZV^U]^YY\_T]TNR  
@HWI-EAS443:3:21:708:1312#0/1  
GCGGTTGCAAATGTATATAGCAGAACTACTAGTATTGCCT  
+HWI-EAS443:3:21:708:1312#0/1  
aa¥¥Ua¥VOZ\_[US`]YR[Y\_WVPU[YZ\_XKDS¥\_ZW][  
@HWI-EAS443:3:26:892:75#0/1  
GTTCTGCTATATACATTTGCAACCGCAAATGCAGACACAT  
+HWI-EAS443:3:26:892:75#0/1  
`Q\_¥\_¥\_`\_\_a^UU\_\_a`V`]PP`X]]]X^Y[^[Y][ZT  
@HWI-EAS443:3:27:1524:391#0/1  
CGCATGATAACCTATACATAATGTGTCTGCATTTGCGGTT  
+HWI-EAS443:3:27:1524:391#0/1  
ab^b[^ba^`^a\_XU]a¥aaa¥aZ\_a[QZ¥¥a[EX^GW  
@HWI-EAS443:3:27:629:182#0/1  
CGCAAATGCAGACACATTATGTATAGGTTATCATGCGAAC  
+HWI-EAS443:3:27:629:182#0/1  
aba`bbb`bbbababbaaab`bbbab^adW\_`[\_\_`aaZ  
@HWI-EAS443:3:27:970:357#0/1  
TGTTTCGCATGATAACCTATACATAATGTGTCTGCATTTGC  
+HWI-EAS443:3:27:970:357#0/1  
ab`babaaab``a[¥^aaaaaaaaabYa\_\_`a\_\_\_\_\_a]  
@HWI-EAS443:3:29:1317:1446#0/1  
GCATGATAACCTATACATAATGTGTCTGCATTTGCGGTTG  
+HWI-EAS443:3:29:1317:1446#0/1  
aaaaaaaaabaaaaaaaaaaaaa\_a\_`aa^\_a\_`\_``W^¥  
@HWI-EAS443:3:33:210:423#0/1  
TTCGCATGATAACCTATACATAATGTGTCTGCATTTGCGG  
+HWI-EAS443:3:33:210:423#0/1  
^Waaa`]aaaa^`aaa`\_a\_]`[]`Y`^`¥X[[¥VVZB  
@HWI-EAS443:3:33:712:523#0/1  
GTAGTTCTGCTATATACATTTGCAACCGCAAATGCAGACA  
+HWI-EAS443:3:33:712:523#0/1  
`Y^a`bb¥`bb`bbbb``ba`^^b¥aaaaa^a^aaaa``a  
@HWI-EAS443:3:34:1279:324#0/1  
ATTTGCAACCGCAAATGCAGACACATTATGTATAGGTTAT  
+HWI-EAS443:3:34:1279:324#0/1  
`a\_a\_\_Y\_`]^a^^]`ba^`]a\_aa``aa[]]][\_BBBB  
@HWI-EAS443:3:36:1601:1321#0/1  
TTCGCATGATAACCTATACATAATGTGTCTGCATTTGCGG  
+HWI-EAS443:3:36:1601:1321#0/1  
a^^VP`abT[P[QHTSVS`]`aQWXIaW][[GZSYBBBBB  
@HWI-EAS443:3:36:512:448#0/1  
GCATGATAACCTATACATAATGTGTCTGCATTTGCGGTTG  
+HWI-EAS443:3:36:512:448#0/1  
Za`ab^TXZ¥`]U[YY^a^LR^b][b¥aV¥^a`XXZOLOS  
@HWI-EAS443:3:37:1416:1779#0/1  
ATGATAACCTATACATAATGTGTCTGCATTTGCGGTTGCA

+HWI-EAS443:3:37:1416:1779#0/1  
\_`^]aabaabbaaaba`Xa\_aaaYaaTa\_a^[UG[S  
@HWI-EAS443:3:38:941:1682#0/1  
GTTGAATTGTTTCGCATGATAACCTATACATAATGTGTCTG  
+HWI-EAS443:3:38:941:1682#0/1  
a^[PRPTYPM[SMVaYLWYVS]\_Z]TRXTVPXXV[[[[VW  
@HWI-EAS443:3:39:270:557#0/1  
CGCAAATGCAGACACATTATGTATAGGTTATCATGCGAAC  
+HWI-EAS443:3:39:270:557#0/1  
abbb\_bbbba`baabababaababaa\_aaaTa\_XJ¥aaI  
@HWI-EAS443:3:43:323:127#0/1  
ATTGTTTCGCATGATAACCTATACATAATGTGTCTGCATTT  
+HWI-EAS443:3:43:323:127#0/1  
a^`VH¥`ba\_W\_ababa`a`b`a`a\_aa^a`\_aa[S[^]  
@HWI-EAS443:3:44:429:332#0/1  
TACATAATGTGTCTGCATTTGCGGTTGCAAATGTATATAG  
+HWI-EAS443:3:44:429:332#0/1  
a^a^aY`ab^a^aaa^`\_`a^a`Z]]XTUXMVGTYZUVI  
@HWI-EAS443:3:47:1617:1214#0/1  
TGTCTGTTGAATTGTTTCGCATGATAACCTATACATAATGT  
+HWI-EAS443:3:47:1617:1214#0/1  
abaab^^ba\_aaa]\_a`a]`\_a`\_`¥[\_^a^ZZ`\_^`\_\_  
@HWI-EAS443:3:4:199:483#0/1  
CATTATGTATAGGTTATCATGCGAACAAATCAACAGACAC  
+HWI-EAS443:3:4:199:483#0/1  
abbbbbbbabaabb^aa`aaaa`aaa]aaaa\_\_`aa\_]aW  
@HWI-EAS443:3:52:1097:1327#0/1  
TATACATTTGCAACCGCAAATGCAGACACATTATGTATAG  
+HWI-EAS443:3:52:1097:1327#0/1  
aa```abaa`][aa\_a]aaaa`\_a`^¥Zaaaaa\_a`\_a  
@HWI-EAS443:3:55:1162:64#0/1  
GTTGAATTGTTTCGCATGATAACCTATACATAATGTGTCTG  
+HWI-EAS443:3:55:1162:64#0/1  
a]a`X]a`a^\_]\_[^]\_[^][Y`^^¥XX^YZ^\_[XZ^\_  
@HWI-EAS443:3:55:395:433#0/1  
CTGTTGAATTGTTTCGCATGATAACCTATACATAATGTGTC  
+HWI-EAS443:3:55:395:433#0/1  
abbaaa`^abb]bab\_abbbaba^`aaaa`aaaab¥a\_a  
@HWI-EAS443:3:56:1361:702#0/1  
CTGTTGAATTGTTTCGCATGATAACCTATACATAATGTGTC  
+HWI-EAS443:3:56:1361:702#0/1  
a\_Z`^`b`abba][`bb\_a`\_[Paaa`\_^aa]`\_Z]^  
@HWI-EAS443:3:56:533:1199#0/1  
GCATGATAACCTATACATAATGTGTCTGCATTTGCGGTTG  
+HWI-EAS443:3:56:533:1199#0/1  
\_a\_ababba`[\_abb\_\_ba`bb`a\_aaa`\_abb`^`\_S¥]  
@HWI-EAS443:3:59:10:143#0/1  
GCAAATGCAGACACATTATGTATAGGTTATCATGCGAACAA  
+HWI-EAS443:3:59:10:143#0/1  
`¥^aQO¥RI¥\_Y¥`U`S\_a¥YJQ[\_ULUS[UWTRTOPJZ



@HWI-EAS443:3:60:1248:1189#0/1  
ATTTGCAACCGCAAATGCAGACACATTATGTATAGGTTAT  
+HWI-EAS443:3:60:1248:1189#0/1  
Y`b\_Vaab][\_PY[`a`b]aXa\_aa]\_aaaa]a`¥P^aV  
@HWI-EAS443:3:61:1785:1019#0/1  
TACATTTGCAACCGCAAATGCAGACACATTATGTATAGGT  
+HWI-EAS443:3:61:1785:1019#0/1  
a\_aaaaa``aba^```^`\_a``aaa]^Za`\_¥XR¥¥¥[TR  
@HWI-EAS443:3:62:1529:169#0/1  
TGTTGAATTGTTTCGCATGATAACCTATACATAATGTGTCT  
+HWI-EAS443:3:62:1529:169#0/1  
abVPT]\_a\_Z`\_PFP^]a\_aXYT\_U`[VW]ZWUVV`ZWY  
@HWI-EAS443:3:62:1699:100#0/1  
GTTGAATTGTTTCGCATGATAACCTATACATAATGTGTCTG  
+HWI-EAS443:3:62:1699:100#0/1  
aaaaQ]aa`ZVK]GUa\_^`YX`\_^^[U]\_^Y]^[\_]\_]  
@HWI-EAS443:3:63:551:552#0/1  
GTTGAATTGTTTCGCATGATAACCTATACATAATGTGTCTG  
+HWI-EAS443:3:63:551:552#0/1  
a\_aa`aa`a\_a`a`^aa`a\_a`aaaa]\_`aa\_aa]\_Y]\_a  
@HWI-EAS443:3:63:842:1400#0/1  
CGCAAATGCAGACACATTATGTATAGGTTATCATGCGAAC  
+HWI-EAS443:3:63:842:1400#0/1  
a^`b¥[¥]¥aaa^\_a`X`aaaa\_a\_V`\_P[¥XOT[Z]SZ][  
@HWI-EAS443:3:67:518:250#0/1  
ACATTTGCAACCGCAAATGCAGACACATTATGTATAGGTT  
+HWI-EAS443:3:67:518:250#0/1  
aaaa\_\_`aa`\_\_a^\_Y\_\_\_\_`\_a\_¥\_[`\_^^]aX]¥UZ¥X]  
@HWI-EAS443:3:69:1327:1629#0/1  
GTTGAATTGTTTCGCATGATAACCTATACATAATGTGTCTG  
+HWI-EAS443:3:69:1327:1629#0/1  
aaa```bba`a`a`aaaaaa\_`aaaa\_aa`^aa¥`\_^\_a  
@HWI-EAS443:3:69:348:1332#0/1  
GGCAATACTAGTAGTTCTGCTATATACATTTGCAACCGCA  
+HWI-EAS443:3:69:348:1332#0/1  
`bbaabbbaba¥baabbb`aaab\_a\_aab`a\_abbaaaa`  
@HWI-EAS443:3:71:733:975#0/1  
TACATTTGCAACCGCAAATGCAGACACATTATGTATAGGT  
+HWI-EAS443:3:71:733:975#0/1  
abbaaa\_V]bb`^^Yab\_]a`a``^ab]aa\_`^YZ\_a`QS  
@HWI-EAS443:3:75:611:97#0/1  
ACATTATGTATAGGTTATCATGCGAACCAATTCAACAGACA  
+HWI-EAS443:3:75:611:97#0/1  
a``aa`aa`aaaaa[``Z[\_X`W]^`UYR]\_\_[\_]\_¥ZHW  
@HWI-EAS443:3:81:437:123#0/1  
CGCATGATAACCTATACATAATGTGTCTGCATTTGCGGTT  
+HWI-EAS443:3:81:437:123#0/1  
abaabbbbaaaaaabaaaa`ab^a`\_`aW``a``\_a`^\_  
@HWI-EAS443:3:82:1718:1195#0/1  
CGCATGATAACCTATACATAATGTGTCTGCATTTGCGGTT



@HWI-EAS443:3:98:48:610#0/1  
GTTCGCATGATAACCTATAACATAATGTGTCTGCATTTGCG  
+HWI-EAS443:3:98:48:610#0/1  
^SWTPTX[U\_Y]]YF0`¥¥` ]`a0\_ZRSFYX\_]ZKUFQRB  
@HWI-EAS443:3:99:133:1369#0/1  
CTGTTGAATTGTTCGCATGATAACCTATAACATAATGTGTC  
+HWI-EAS443:3:99:133:1369#0/1  
`bbaabaaabbabbbab\_bbbbbabaabbabbbbb`b\_b  
@HWI-EAS443:3:100:1773:986#0/1  
AAAAACAATGCCAAGGAAATTGGAAACGGCTGCGTTTAAT  
+HWI-EAS443:3:100:1773:986#0/1  
abaaab`a^a`R^\_\_aSUa`QI\_¥ba\_aQ\_[UGJ]BBBBB  
@HWI-EAS443:3:13:1059:646#0/1  
CACGTGCATGGAAAGTGTCAAAAATGGGACTTACTACCCA  
+HWI-EAS443:3:13:1059:646#0/1  
\_\_]a\_aa\_aaa^\_]\_X`\_^`\_]XV`\_\_^\_a^\_^\_YQT\_  
@HWI-EAS443:3:3:178:447#0/1  
AGTTACCACAGGGATGGTAGATGGATGGTACGGTTATCAC  
+HWI-EAS443:3:3:178:447#0/1  
aa]aa`bab`bbb]\_[SHbV^`b`\_^`aR^¥aZ`a^WW]L  
@HWI-EAS443:3:54:647:1004#0/1  
TAGTTGTTTCCACAATGTAGGACCATGAGCTTGCTGTNGA  
+HWI-EAS443:3:54:647:1004#0/1  
a\_a\_aba`\_^`[\_`a^T[``^]\_\_\_`\_]a]\_\_a^\_UIDYV  
@HWI-EAS443:3:57:1121:1896#0/1  
TGTCACCAAAAACATATGCATCTGCATTCTGTCCATTA  
+HWI-EAS443:3:57:1121:1896#0/1  
aa^PRZQ]X`YX¥[U\_\_[RU^ZS^VV]VOFLYa]XDHSZZ  
@HWI-EAS443:3:58:1100:1119#0/1  
AAACAGGGGGGGTGGACAGGGATGGTAGATGGATGGTAC  
+HWI-EAS443:3:58:1100:1119#0/1  
aab^abbaaaaa`a`\_[Y]a\_\_\_aW\_]`Ra\_ZO`\_V[^  
@HWI-EAS443:3:70:1299:271#0/1  
GGAAATTGGAAACGGCTGCTTTGAATTTTACCAAAAAGC  
+HWI-EAS443:3:70:1299:271#0/1  
aa\_QW`[\_aZ\_\_U]UW\_Z]Q^THLVKUX\_XRVVGSXYOXU  
@HWI-EAS443:3:71:67:605#0/1  
AAAAACAATGCCAAGGAAATTGGAAACGGCTGGCTTGAA  
+HWI-EAS443:3:71:67:605#0/1  
ab[[[aaa\_\_`aa]\_aa`\_\_^^]\_]^^[^XR\_SSQPQ  
@HWI-EAS443:3:78:999:185#0/1  
GCTGGCTGATCCTGGAAATCCAGAGTGTGAATCACTCTC  
+HWI-EAS443:3:78:999:185#0/1  
a\_b\_a`abaaaa`^bb`baa`V``aaV`\_\_`aa`]`¥a¥\_\_  
@HWI-EAS443:3:88:1276:108#0/1  
GGATATGCAGCCGACCTGAAGAGCACACAGAATTTTCCAA  
+HWI-EAS443:3:88:1276:108#0/1  
aba`a\_^X]X[\_ZZZ\_U`YY\_a^P[U[]aa`Z``a`^^\_\_  
@HWI-EAS443:3:92:374:600#0/1  
CACCCCCGAATTTCTTTTTTAACTAGCCATATTAATTT

+HWI-EAS443:3:92:374:600#0/1  
S[bbWXa`LXabb`abbbbbbba¥a^bbab¥¥b\_b¥TWab^  
@HWI-EAS443:3:93:1295:515#0/1  
GAATTTACTTTGTTAGTAATCTCGTCAATGGCACAATCTT  
+HWI-EAS443:3:93:1295:515#0/1  
\_aa^`a`\_aabbZaaa\_\_aa`b`b`^a\_]\_aXa^```\_[\_\_  
@HWI-EAS443:3:11:462:1152#0/1  
AATCTCCTGGGTAANACGTTCCATTGTCTGAACTAGTTGT  
+HWI-EAS443:3:11:462:1152#0/1  
a`baaa\_`aa^LDUa`\_\_`\_a[ZZaa`\_`]\_a\_X\_`]  
@HWI-EAS443:3:4:1602:512#0/1  
AATCTCCTGGNTAACACGTTCCATTGTCTGAACTAGTTGT  
+HWI-EAS443:3:4:1602:512#0/1  
a`X`XKTR`[DMW\_]UG\_]Z^[I¥WN]\_\_QYY^ZZBBBB  
@HWI-EAS443:3:100:1268:1511#0/1  
TGGCTGGGGTTTATAGCACCTTGGGTGTCTGACAAGTGG  
+HWI-EAS443:3:100:1268:1511#0/1  
```Pbba`¥ZJ`aa`aa`^V^`abaLRRQ[aNVYWBBBB  
@HWI-EAS443:3:1:1409:573#0/1  
ACACCAGTCCACGATTGCAATAGAATTGTGACACACAAA  
+HWI-EAS443:3:1:1409:573#0/1  
WbbNXY\_Z`a[b\_]`^`\_b]Y]FTaBBBBBBBBBBBBBBB  
@HWI-EAS443:3:1:963:1789#0/1  
TTAATGATAAAGGGAAAGAAGTCGTCGTGCTATGGGGGAT  
+HWI-EAS443:3:1:963:1789#0/1  
\_aa[]P`Y`I[\_Yaa`a[\_aaWVLTQ\_^b\_]aIRBBBBBB  
@HWI-EAS443:3:28:1774:612#0/1  
GCCGGGAGACAAAATAACATTGCAAGCAATTGGAAATTTA  
+HWI-EAS443:3:28:1774:612#0/1  
aaabaaXb\_Xba`a\_[G^]ba`bTM\_Y``G^¥^`W^N\_R  
@HWI-EAS443:3:32:82:1921#0/1  
GGAAATTGGAAACGGCTGCTTTTAATTTTACCACAAAAAC  
+HWI-EAS443:3:32:82:1921#0/1  
\_Zbbaba`]`bb`^]a\_V]R[]K¥¥P\_]aW^\_BBBBBBBB  
@HWI-EAS443:3:35:856:1119#0/1  
TCGACTGTTATTTTGTCTCCCGGCTCTACTAGTGTCCCGT  
+HWI-EAS443:3:35:856:1119#0/1  
aba[H¥bTY)`aa`ZXY]a\_VRZaZ`HQXXMVQBBBBBBB  
@HWI-EAS443:3:38:1110:954#0/1  
CACCCCCCTTCAATGAAACCGCAATGGCCACAAATATGC  
+HWI-EAS443:3:38:1110:954#0/1  
VMZb\_¥aba^\_`¥b`\_]`¥a[aa]aGFMXa`Y\_FTD  
@HWI-EAS443:3:47:1563:1239#0/1  
ATGTCCTGGGTAACACGTTCCATTGTCTGAACTAGTTGTT  
+HWI-EAS443:3:47:1563:1239#0/1  
aba^`aaaba\_aa`\_`\_aa\_]`^`a]W^`\_`]`\_`^a`\_^  
@HWI-EAS443:3:49:904:1407#0/1  
AAAAACAATGCCAAGGTAATTGGAAACGGCTGCTTTGGGT  
+HWI-EAS443:3:49:904:1407#0/1  
^UQVVY`a`a^^^bZHX`bVa\_]aa`\_V`a^K¥`BBBBB

@HWI-EAS443:3:71:366:1011#0/1  
ACACGTTCCATTGTCTGAACTAGTTGTTTCCACAATGGAG  
+HWI-EAS443:3:71:366:1011#0/1  
abbb¥T¥abaU^`Z\_a¥^^a`UaYa¥Y\_``[Q]\_``¥H`Y  
@HWI-EAS443:3:72:1503:446#0/1  
CGNGTCTTATTGCTATTTCCGGCTTGAACCTTCTTGTGTA  
+HWI-EAS443:3:72:1503:446#0/1  
X^DOWab]`baUZb\_\_aUaVYU[bab¥`K\_b^a^XF\_V]a  
@HWI-EAS443:3:85:1368:1912#0/1  
AAACAATGCCAAGGAAATTGGAAACGGCTGTTTTGAAATT  
+HWI-EAS443:3:85:1368:1912#0/1  
aJbaab^aa`bZ\_\_¥¥b[\_aW`^`SRaaaG\_aaSIJGU[  
@HWI-EAS443:3:100:1373:1330#0/1  
GGGGACATCAAGATACAGCAAGAAGTTCAAGCGNGAAATA  
+HWI-EAS443:3:100:1373:1330#0/1  
abaaXaa[¥Ya`aXa]aaa`abYYX[M]aaWDD[W0a¥`  
@HWI-EAS443:3:100:564:134#0/1  
CACGTTCCATTGTCTGAACTAGTTGTTNCCACAATGTAGG  
+HWI-EAS443:3:100:564:134#0/1  
aa`Wab\_aba]aaaba\_^Ga`a^aa\_YDV]aa[aaa^aa\_  
@HWI-EAS443:3:20:547:386#0/1  
CTCATGGTCCTACATTGTGGNAACAACCTAGTTCAGACAAT  
+HWI-EAS443:3:20:547:386#0/1  
a\_\_UYa\_Ma\_a^`Ya\_a]a[D¥]LY]V¥\_aY\_N[^^^\_^  
@HWI-EAS443:3:22:1152:348#0/1  
AACACGTTCCATTGTCTGAACNAGTTGTTTCCACAATGTA  
+HWI-EAS443:3:22:1152:348#0/1  
``¥aab`aaaaaab]`aaaaUDV`XX`\_a[`¥\_X]\_\_aY`  
@HWI-EAS443:3:2:1378:1866#0/1  
ACGTTCNATTGTCTGAACTAGTTGTTTCCACAATGTAGGA  
+HWI-EAS443:3:2:1378:1866#0/1  
a\_]`UDX`aa\_^`\_^`\_\_\_a\_^a¥\_]Y\_V\_W]\_UZ¥^¥  
@HWI-EAS443:3:2:1439:321#0/1  
GGCCCGTCTCAATTTTGTGCTTTTTACATANTTTGGACAT  
+HWI-EAS443:3:2:1439:321#0/1  
aa\_^\_a`[a^`\_aa\_a\_\_`Z`aaaa\_¥\_\_ND¥a\_\_^ZZ\_\_  
@HWI-EAS443:3:38:160:226#0/1  
GAAACTGATTGGCCCCAGGGNGACTACCAGTACCAATGAA  
+HWI-EAS443:3:38:160:226#0/1  
aaU`bbbaaa\_PaabbbaaTD[\_a\_Uaa`]T`¥aa\_\_`\_]  
@HWI-EAS443:3:3:1200:978#0/1  
CACGTTCCATTGTNTGAACTAGTTGTTTCCACAATGTAGG  
+HWI-EAS443:3:3:1200:978#0/1  
`bY¥X]`[¥`abVD]`aa]\_YaU`a\_V]]VWZ[``a¥``X  
@HWI-EAS443:3:40:1039:1377#0/1  
AGCAAGCTCATGGTCCTACATNGTGGAAACAACCTAGTTCA  
+HWI-EAS443:3:40:1039:1377#0/1  
¥``a\_``aaaa`\_]\_\_Z¥`^XDUV][GVY\_\_\_\_`ZR[Y]\_\_  
@HWI-EAS443:3:48:255:1620#0/1  
TCATNGTCCTACATTGTGGAAACAACCTAGTTCAGACAATG

+HWI-EAS443:3:48:255:1620#0/1  
aaa[D[Na]a¥U`\_\_a^aa^a\_aa\_^]UV\_] [\_\_\_\_\_]U`  
@HWI-EAS443:3:57:1753:1950#0/1  
ATTCAATCTAGAGGCATATTTGGGGCCATTGCCGNTTCA  
+HWI-EAS443:3:57:1753:1950#0/1  
]ba¥a^^¥bbY`RZQF¥^[\_\_]WUW^\_`]YZ][YDX]YR  
@HWI-EAS443:3:59:1377:943#0/1  
CTGGGTAACACGTTCCATTGTCTGAANTAGTTGTTCCAC  
+HWI-EAS443:3:59:1377:943#0/1  
aVT[OVVX`\_]\_]U]¥X\_[^`ZEUDPP\_PU[]XVSYQU  
@HWI-EAS443:3:5:1134:1278#0/1  
ACGTTCCATTGTCTGAACTANTTGTTCACAAATGTAGGA  
+HWI-EAS443:3:5:1134:1278#0/1  
\_X^YXa`^`XW]XY]XWYQRDR\_`\_`X¥TZG¥[^]BBBBB  
@HWI-EAS443:3:70:1545:1041#0/1  
GCTTTCTCTGAGTATTTGGGNAGTCATAAGTCCCATTTT  
+HWI-EAS443:3:70:1545:1041#0/1  
abbbbbbbbbbb\_bababba^D]b^abbbbaa^`^`aaabb  
@HWI-EAS443:3:70:887:724#0/1  
CTCCTGNGTAACACGTTCCATTGTCTGAACTAGTTGTTTC  
+HWI-EAS443:3:70:887:724#0/1  
abaaa^D^¥`^`a`a`aaaa`a]aaaY]]a\_]\_`a\_`\_]  
@HWI-EAS443:3:76:1461:1208#0/1  
AAACAATGCCAAGGNAATTGGAAACGGCTGTTTGAATTT  
+HWI-EAS443:3:76:1461:1208#0/1  
^Z^a^abb`\_¥^^]D]a^a\_[]aaY]^`^]LOY\_WYXFW^  
@HWI-EAS443:3:82:1764:246#0/1  
TCTTCAGGGCGGCTGCATATCCTGACCCNTGCTCATTTTG  
+HWI-EAS443:3:82:1764:246#0/1  
T^\_S\_aS\_I¥`^`bb[a`^^`R]¥ZYVQDU]ab^^Z`aaX  
@HWI-EAS443:3:8:1370:1459#0/1  
GCCAGTTCATTGGTACTGGTAGGCTCNCTGGGGGCAATCA  
+HWI-EAS443:3:8:1370:1459#0/1  
a\_P¥`^`¥V[aZa^R¥[[BBBBBBBBBBBBBBBBBBBB  
@HWI-EAS443:3:92:143:962#0/1  
GGAAAGAAGTCCTCGTGCTATGGGGCTTTCACNATCCATC  
+HWI-EAS443:3:92:143:962#0/1  
`\_YaaYa][aX\_^aI\_\_¥¥\_Ra]^`^VG]Y`^`VDOUaQ¥\_¥  
@HWI-EAS443:3:95:646:959#0/1  
GGGGACAGCAAGATACAGCAAGAAGTNCAAGCCGAAATA  
+HWI-EAS443:3:95:646:959#0/1  
a`Z^X¥]HSa\_T[]`^`aaX[Z¥^^`aODVUGVQY\_\_TW[¥¥  
@HWI-EAS443:3:16:27:1740#0/1  
AAGCCAGTTAAAAACAATGCCAAGGAAATTGGAAACGGCT  
+HWI-EAS443:3:16:27:1740#0/1  
a\_`aaab\_aaaa^`\_aaaa]ZY]^`^`S`^`Y\_`^`\_Y\_V\_  
@HWI-EAS443:3:10:1387:606#0/1  
TGAATACACAGTTCACAGCAGTAGGTAAAGAGTAAAAAA  
+HWI-EAS443:3:10:1387:606#0/1  
aaaaaa`\_`^`a[\_\_\_aY`^`¥\_`Y]a\_[\_\_^^]\_[^^^^^\_\_

@HWI-EAS443:3:22:130:12#0/1  
AGTGGGGACATCAAGATACAGCAAGAAGTTCAAGCNGGAA  
+HWI-EAS443:3:22:130:12#0/1  
ab\_aaa]¥`^`a[^`^`[]`aaa\_aa\_\_\_UZ\_ZY^ZDDTYZ  
@HWI-EAS443:3:24:1498:696#0/1  
GCCAGTTAAAAACAATGCCAAGGAAATTGGAAAGGACGG  
+HWI-EAS443:3:24:1498:696#0/1  
aab^^\_VZ`\_NW\_`[Z]a[Z]][^]WX\_aaBBBBBBBBBB  
@HWI-EAS443:3:30:747:1148#0/1  
AGACAAGTTCAGACAATGGAACGTGTTACCCAGGAGA  
+HWI-EAS443:3:30:747:1148#0/1  
aaaaaa`\_a¥W^`^`\_aa\_\_^]a^\_U^W\_^Z`\_Y¥Z¥ZY  
@HWI-EAS443:3:42:1769:1352#0/1  
AAGTCCTCGTGCTATGGGGCATTACCATCCATCGTCTCA  
+HWI-EAS443:3:42:1769:1352#0/1  
a`^`^`[aa[a`a^aaaaa[^U¥a`[a`Z\_aZN¥^VX¥Y\_¥¥  
@HWI-EAS443:3:44:62:1271#0/1  
GTTACCCAGGAGATTTTCATCGATTATGAGGAGCTGTGAGG  
+HWI-EAS443:3:44:62:1271#0/1  
\_abbabaabaa`Zaaaa\_a\_a\_ba`a`aa\_¥a^a`]aW^]  
@HWI-EAS443:3:54:590:1800#0/1  
GGAAATCCAGAGTGTGAATCACTCTCCACAGCAAAAAGCAA  
+HWI-EAS443:3:54:590:1800#0/1  
abbbba`abaaa]aWabba\_baa\_a\_aaaaa\_aaaaaa`^`  
@HWI-EAS443:3:55:1005:1651#0/1  
ATTGCATTTGGGTAAATGTAACATTGCTGGCTGGGTCAAA  
+HWI-EAS443:3:55:1005:1651#0/1  
aa`b`abbaaba]aaaa`^`a¥aaaa`\_a`\_a\_a`Z]^a\_  
@HWI-EAS443:3:67:558:1895#0/1  
TAGTGCTGACCAACAAAGTCTCTATCAGAATGCATGCATA  
+HWI-EAS443:3:67:558:1895#0/1  
a¥`\_abaaaaa`^`a`\_aa`aaab`\_`a^^`a\_a¥`^`^`  
@HWI-EAS443:3:68:567:358#0/1  
TGGAAAATGTCCAAAATATGTA AAAAGCACAAAAGGTCAG  
+HWI-EAS443:3:68:567:358#0/1  
aa`\_a`^]ab\_aaaaaaaaa\_aabb`aa\_aa`[^`aa[^`^`a  
@HWI-EAS443:3:69:1656:894#0/1  
ATTTATTTCTTCTCTGTTTAATTTTGCTTCCTCTGAGCAT  
+HWI-EAS443:3:69:1656:894#0/1  
aa\_\_ab]VUZ[V`^`¥Y¥`¥Y^a`¥aaS[aWFWT¥a^ZFUX  
@HWI-EAS443:3:75:1259:1247#0/1  
ATTGAGCTCAGTGCATCATTTGAAAGTTTGAGCTTTGA  
+HWI-EAS443:3:75:1259:1247#0/1  
abababb`^\_Z]a\_Xbb`\_aaa`b`T`ZM`aaWaa`^aa  
@HWI-EAS443:3:7:995:492#0/1  
TCAGAATGCAGATGCATATGTTTTTGTGGGGACACAGGTG  
+HWI-EAS443:3:7:995:492#0/1  
a]aa\_aaa^\_\_^`[^`[aaaaa^`a`\_W¥\_\_^Z^X`XXa^Xa  
@HWI-EAS443:3:81:1780:980#0/1  
CAGAATGCCATTGCCGTTTCATTGAAGGGGGGTGGACAG

+HWI-EAS443:3:81:1780:980#0/1  
aaa`U`[]XT`\_WQX^bS\_¥XYa^SYY]¥aaX[DURJN¥¥  
@HWI-EAS443:3:88:1131:1976#0/1  
GGTTGCCAGCACTAGTAGATGGATGGTGAATGCCCCATAG  
+HWI-EAS443:3:88:1131:1976#0/1  
\_R]S\_N^`¥T^Xa^a[`]X]aaXY`YQa`a¥TDQ[VY^Z¥  
@HWI-EAS443:3:95:310:1251#0/1  
CGGCTGATGAACCTGTCTTGGGGAATATCTCAAACCTTTC  
+HWI-EAS443:3:95:310:1251#0/1  
abaabY^\_]`baabaaaa`^`Y^a```a`]b``a\_aa]]  
@HWI-EAS443:3:97:221:63#0/1  
GGATATGCAGCCGACCTGAAGAGCACACAGAATGGGGGCA  
+HWI-EAS443:3:97:221:63#0/1  
aaa`\_^`¥]\_VV\_U¥V^\_¥¥aU\_WSVWWU\_UWU¥UUUUQW  
@HWI-EAS443:3:98:1468:888#0/1  
CGAATGTATTTTGTCTCCCGGCTCTACTAGTGTCCAGTAA  
+HWI-EAS443:3:98:1468:888#0/1  
abaaabYb¥abbbR]¥¥aaab`\_]W]0`SOTa^`a\_\_S``  
@HWI-EAS443:3:98:752:1483#0/1  
AGAGGTAAGAAGCCAGTTAAAAACAATGCCAAGGAGATT  
+HWI-EAS443:3:98:752:1483#0/1  
`a`a^abbbbaaab`bbbabaaa^b`a]b]aabba[a`\_  
@HWI-EAS443:3:39:1195:504#0/1  
TTTTGCTTCTCTGAGTATTTTGGGTAGTNATAAGTCAGT  
+HWI-EAS443:3:39:1195:504#0/1  
aaa`^`\_`a^a\_a^^V¥0Taa\_a`a^X\_aXDUU[[]Q[V]V  
@HWI-EAS443:3:65:1743:877#0/1  
GCTGGTTTNTTGAAGGGGGTGGACAGGGATGGTAGATG  
+HWI-EAS443:3:65:1743:877#0/1  
a`aa`¥a`YD[`aZYaaa^`V``¥\_\_a^^P`U^a¥W^  
@HWI-EAS443:3:100:185:324#0/1  
GCATTCTGTGTGTTCTTCAGGTCGGCTGCATATCCTGAAC  
+HWI-EAS443:3:100:185:324#0/1  
a`a`\_`aaaXZVXFU`\_^`a\_UV`\_[N[\_]X``NWW[BBB  
@HWI-EAS443:3:15:366:1142#0/1  
CACGGCTGCTTTGAATTTTACCACCAATGCGATAACACGC  
+HWI-EAS443:3:15:366:1142#0/1  
aa¥W¥`¥]ZZba]Y^S```PHWUZRY\_BBBBBBBBBBBBB  
@HWI-EAS443:3:18:983:508#0/1  
CGGTGGGGACATCATGATACAGCAAGAAGTTCAAGCCGGA  
+HWI-EAS443:3:18:983:508#0/1  
abbYbbaaabaab`aa\_bb^abbaab`\_`aaaa^b`\_  
@HWI-EAS443:3:1:1262:1783#0/1  
GAAATCTCTGGGTAACACGTTCCATGGTCTGAACTAGTT  
+HWI-EAS443:3:1:1262:1783#0/1  
aab`¥XZX\_aa`bXa`\_^W\_\_XXa`aa]0`a^\_]`^\_aBB  
@HWI-EAS443:3:22:29:1979#0/1  
ACGTTCCATTGTCTGAACTAGTTGTTTCCACAATGTAGTA  
+HWI-EAS443:3:22:29:1979#0/1  
aa`\_UaaRIToy^00T`¥MXTNVXNZYVOJWWXVOJWQG[



@HWI-EAS443:3:22:847:616#0/1  
GCGGGGCGGACAGGGATGGTAGATGGATGGTACGGTTAT  
+HWI-EAS443:3:22:847:616#0/1  
\_¥`M^[\`U]`MNP`VYTa`^UY\_¥W[KT¥`UGPWJTG^¥B  
@HWI-EAS443:3:23:1318:2035#0/1  
GCGGGGACATCAAGATACAGCAAGAAGTTGAAGCCGGAAA  
+HWI-EAS443:3:23:1318:2035#0/1  
¥Faa[\`[aa^aa\_Ua]H\_b`0abPFJYGMD[YUQGaa\_YZ  
@HWI-EAS443:3:25:1346:1522#0/1  
GAAATCTCCTGGGTAACACGTTCCATTGTGTGAACTAGTT  
+HWI-EAS443:3:25:1346:1522#0/1  
a`X^aaXM]\_``\_G`ZTRZ\_¥a`a\_a]]PEX`^`HWU¥X]  
@HWI-EAS443:3:25:816:326#0/1  
TCTCTACAGTGTAGAGACCCATTAGAGCACATCCAGAAAC  
+HWI-EAS443:3:25:816:326#0/1  
aaaaaaaa`^a¥aa`\_`\_]^\_W`¥\_¥^`¥\_¥Y¥\_^^¥W  
@HWI-EAS443:3:34:1138:1027#0/1  
GGGAGGCTGGTGCTTATAGCACCCCTGGGTGTCTGACAGG  
+HWI-EAS443:3:34:1138:1027#0/1  
`a[[b`ab\_\_WTH\_ZT0[aaa`\_VbRaXU]aXFRT[BBBB  
@HWI-EAS443:3:34:1431:236#0/1  
GGGGGACATCAAGATACAGCAAGAAGTTCAAGCGGGAAA  
+HWI-EAS443:3:34:1431:236#0/1  
ZFYZRZ`QXYOU\_a`^VX` `[ \_`^UW`Z]NPUYNGYYTBB  
@HWI-EAS443:3:40:641:1944#0/1  
CTGCTCTGCTAGTGTCCAGTAATAGTTCATTCTCCCTTCT  
+HWI-EAS443:3:40:641:1944#0/1  
``aZQ``a]TR]XWNYO[[W^][[XOO[HJTZUa^^Z^a`  
@HWI-EAS443:3:4:1372:845#0/1  
CGGTAACACACTCTGTAAAGCTTCTAGAAGACAAGCATAA  
+HWI-EAS443:3:4:1372:845#0/1  
^baWb\_aa` `Waa\_Z¥a` `GS\_aa` ¥\_] [a\_a`a\_]`a\_`  
@HWI-EAS443:3:4:474:2044#0/1  
ATTTACTTCGTTAGTAATCTCGTCAATGGCATTCTGTGCG  
+HWI-EAS443:3:4:474:2044#0/1  
aabWaZN]TV[[]aa]bUZFUJ[JI\_¥I`\_[I\_IXM`HXBB  
@HWI-EAS443:3:60:1651:873#0/1  
GAGCCGGTTTCACTGAAGGGGGTGGACAGGGATGGTAGA  
+HWI-EAS443:3:60:1651:873#0/1  
a]``ab\_Xaa`UG]]U`b]WbbYKKZ¥aX[\_^U^`\_PP^]  
@HWI-EAS443:3:68:774:948#0/1  
TTGGGTAAATGTAACATTCCTGGCTGGATCCTGGGAAACC  
+HWI-EAS443:3:68:774:948#0/1  
a\_baS\_U[TaZ\_T\_SZY`\_BBBBBBBBBBBBBBBBBBBB  
@HWI-EAS443:3:6:717:1801#0/1  
GAAATCTCCTGGCTAACACGTTCCATTGTCTGAACTAGTT  
+HWI-EAS443:3:6:717:1801#0/1  
U¥`^abbbbV\_UFVaabbbaaaRa\_ab`] `baaa^\_`a`  
@HWI-EAS443:3:7:389:623#0/1  
GGCCTACATTGTGGAAACAACACTAGTTCAGACAATGGAACG

+HWI-EAS443:3:7:389:623#0/1  
YH^aKaa]Y`X]b`a¥W\_a`adWa¥[VW[`M[PS[]BBBB  
@HWI-EAS443:3:84:1170:1356#0/1  
CTCTGAGTATTTTGGGAAGTCATAAGTCCCATTTTGTATA  
+HWI-EAS443:3:84:1170:1356#0/1  
`^W]ab]\_Y]\_\_`aZ[QQYY\_¥ZR^DDD[^aaa\_]\_VGP  
@HWI-EAS443:3:8:1231:1329#0/1  
GAAATCTCCTGGGTAACACGTTCCACTGTCTGAACTAGTT  
+HWI-EAS443:3:8:1231:1329#0/1  
\_bbbbabaababbabbbbbbbabaabRabbab\_aaaaabab  
@HWI-EAS443:3:92:1114:1798#0/1  
TTGCTCCTCATAATCGATGAAATCTCCTTGGTAAACACGTT  
+HWI-EAS443:3:92:1114:1798#0/1  
`ba`baaa[b[b\_aZM\_^^aa`¥S`\_X^DWTP[^\_aU\_IY  
@HWI-EAS443:3:93:1099:820#0/1  
GAAATTTCTCCTGGGTAACACGTTCCATTGTCTGAACTAGTT  
+HWI-EAS443:3:93:1099:820#0/1  
a\_ZZZ\_^]X\_aa¥FZaaaVU\_a]XJ]W\_`W`Z]\_X¥T]YS  
@HWI-EAS443:3:93:460:544#0/1  
GGAACGTGATACCCAGGAGATTTTCATCGATTATGAGGACC  
+HWI-EAS443:3:93:460:544#0/1  
a^¥^\_TQ[DSQ]P]\_^R]¥aVV[]¥^\_U\_^S`¥Z]TWW`  
@HWI-EAS443:3:36:878:11#0/1  
CTGGTGTATCTGAAATGATAATACCAGANCCAGNATTTCT  
+HWI-EAS443:3:36:878:11#0/1  
abba\_babaabbaaaaaX]aaaa`\_aSDYaaXD[`]`\_a  
@HWI-EAS443:3:16:644:1453#0/1  
ATGAAATCTCCTGGGTAACACGTTCCATTGTCTGACGTAG  
+HWI-EAS443:3:16:644:1453#0/1  
`¥Q\_VOO\_UT[OTGSJUJ¥]YRWRMMXBBBBBBBBBBBBBB  
@HWI-EAS443:3:25:1570:235#0/1  
GGGGGGTGGACAGGGATGGTAGATGGATGGTACGGGTATA  
+HWI-EAS443:3:25:1570:235#0/1  
a`]]]PEY¥ON[^^BBBBBBBBBBBBBBBBBBBBBBBBBB  
@HWI-EAS443:3:34:647:1922#0/1  
CTAGTGTCCAGTAATAGTTCATTCTCCCTTCTCGACGCCT  
+HWI-EAS443:3:34:647:1922#0/1  
\_aZQYX]baa\_`baZb`U\_b`T`aa]a\_aaXJU^bGRPb  
@HWI-EAS443:3:34:780:1753#0/1  
GAAATTGGAAACGGCTGCTTTGAATTTTACCACAANATAG  
+HWI-EAS443:3:34:780:1753#0/1  
Q\_^¥Y\_X`¥^¥b```a`\_Q`bUV[\_Z`^^XBBBBBBBBBB  
@HWI-EAS443:3:37:859:816#0/1  
AAATGGGACTTATGACTACCCAAAATACTCAGAGGGAGAA  
+HWI-EAS443:3:37:859:816#0/1  
^`¥]a^^]``a`baa`^[`\_`aaZ^\_XTT\_X`^X\_^^  
@HWI-EAS443:3:3:337:373#0/1  
GACCTCAAAGTCTCTATCAGAATGCAGATGCATATGTTTT  
+HWI-EAS443:3:3:337:373#0/1  
`[\_`\_\_a¥]]¥^aa\_]\_\_a[¥\_SYGZ\_^[QJXZ`^`S^^`

@HWI-EAS443:3:40:475:110#0/1  
GCGGGGACATCAAGATACAGCAAGAAGTTCAAGCCGGCAA  
+HWI-EAS443:3:40:475:110#0/1  
`NZDO`^ZXLVKNRJJVZN]RZ^NNRHRU^BBBBBBBBB  
@HWI-EAS443:3:44:353:256#0/1  
CACGTGTATCGCATTTGTGGTAAAATTCAAAGCATGCTT  
+HWI-EAS443:3:44:353:256#0/1  
a`bbaababbab`abaababb\_\_aaaaaaaa\_a]aaa`a\_  
@HWI-EAS443:3:51:1275:1378#0/1  
ACCGTACCATCCATCTACCATCCCTGTCCACCCCGTTCT  
+HWI-EAS443:3:51:1275:1378#0/1  
a\_\_PTW¥Xa\_¥[N][S\_UZZNH¥QZaQ`ZPSMHSRPHDHZ  
@HWI-EAS443:3:55:156:1550#0/1  
ACCCCTTACCTTTTCATATAAGTTCTTCACATTTGAATC  
+HWI-EAS443:3:55:156:1550#0/1  
a`ab`\_¥¥\_[`b`U`\_VaadWMR]YX`a\_a``]]^Y`  
@HWI-EAS443:3:60:73:1194#0/1  
CAAGGAAATTGGAACGGCTGCTTTGAATTTACCCCCCA  
+HWI-EAS443:3:60:73:1194#0/1  
^RN^[Xa\_^PV][BBBBBBBBBBBBBBBBBBBBBBBBB  
@HWI-EAS443:3:81:1155:1453#0/1  
CAAAATATGTA AAAAGCACAAAATTGAGACTGGCCNCGGG  
+HWI-EAS443:3:81:1155:1453#0/1  
Na`[^babb]^]XXTaZ^]\_b`[¥QZ]YaabbBBBBBBB  
@HWI-EAS443:3:89:1343:80#0/1  
GGGTGCTTTGAATTTTACCACAAATGCGATAACACGTGGA  
+HWI-EAS443:3:89:1343:80#0/1  
a\_G[\_MYZ`X[`]^baYN[SVWTYOZFZ[TIPV]J^S\_LW  
@HWI-EAS443:3:8:1082:774#0/1  
ATTGGAACGGCTGCTTTGAATTTTACCACAAATGGGGAA  
+HWI-EAS443:3:8:1082:774#0/1  
abb\_b`aaaaS]\_aR¥Y¥FT\_QQ^BBBBBBBBBBBBBBB  
@HWI-EAS443:3:90:1332:1850#0/1  
AGCTACTGTGAAGTGTATTTCATCTTTTCAATAACAGAA  
+HWI-EAS443:3:90:1332:1850#0/1  
aabba\_ba]Y¥a\_ba`baabb`ab]bbabababb`baab  
@HWI-EAS443:3:96:1325:1524#0/1  
GCTGTATCTTGATGTCCCCACAAAACATATGCATGTGGA  
+HWI-EAS443:3:96:1325:1524#0/1  
^NZ¥DXYY[RZUUXOTLQSRGYXUKOTNQZV[KZBBBBBB  
@HWI-EAS443:3:9:1551:102#0/1  
TGCTGGCTGGATCCTGGGAAATCCAGAGTGTGAATAAGTC  
+HWI-EAS443:3:9:1551:102#0/1  
XbSa`[¥Vba`VXJSYWYU\_\_PRNRTR¥W[U^BBBBBBB  
@HWI-EAS443:3:99:1129:1441#0/1  
CAATGGCATTCTGTGTGCTCTTCAGGTCGGCNGCATATGC  
+HWI-EAS443:3:99:1129:1441#0/1  
aaabaXa^bZFZ^`W`abbab^`U\_[P¥bXODOWaU\_BBB  
@HWI-EAS443:3:13:1271:306#0/1  
AGCCGGTTTCATTGAAGGGGGTGGAGAGGGATGGTAGAT

+HWI-EAS443:3:13:1271:306#0/1  
]ba\_]VRI\_X^aaa\_abb^XRa[^\^IHU`^TNKa\_YH` [W  
@HWI-EAS443:3:14:1742:119#0/1  
CGTGGGGACATCAAGATACAGCAAGAAGTTCAAGCGGGAA  
+HWI-EAS443:3:14:1742:119#0/1  
]S`^a]LYaa`Y¥WUVLY\_VSV^¥`U^VLOPW]\_UGS\_WR  
@HWI-EAS443:3:14:1779:1442#0/1  
ATCCGGCTTGAACCTTCTTGCTGTATATTGATGTCCCCACA  
+HWI-EAS443:3:14:1779:1442#0/1  
a\_WW`^L]aa`\_[[¥M[TWP]\_SZTG[S^\_Z¥^PEHX[GP  
@HWI-EAS443:3:17:59:1275#0/1  
TAACACGTTCCATTGTCTGAACTAGTTGTTCCACAATGC  
+HWI-EAS443:3:17:59:1275#0/1  
`X`\_baaaX^`^`¥JJS¥\_T`U\_XaRL¥]Y\_W[^Ya]RBB  
@HWI-EAS443:3:24:662:311#0/1  
CATTGAAGGGGGTGGACAGGGATGGTAGATGGAGGGTAG  
+HWI-EAS443:3:24:662:311#0/1  
abbbabbba`^ababbabaabaabQFY]^IbZUG^]GRE  
@HWI-EAS443:3:28:1397:1286#0/1  
CTCCTCTGAGTATTTTGGGTAGTCATTAGTCCCATTTTTG  
+HWI-EAS443:3:28:1397:1286#0/1  
aa`Zb¥bbaaWa]a\_aWX\_TU¥Z\_\_`\_a^`]]\_`^aa¥¥  
@HWI-EAS443:3:35:208:599#0/1  
TGTGGGGACATCAAGATACAGCAAGAAGTTCACGCCGGAC  
+HWI-EAS443:3:35:208:599#0/1  
\_aU¥X¥]X[ba`S¥`^Z`^Z`^`\_OS^WUa¥H¥¥a^MXF  
@HWI-EAS443:3:36:1046:767#0/1  
CTTCGACTGTTATTTTGTCTCCCGCTCTACTAGTGTCGG  
+HWI-EAS443:3:36:1046:767#0/1  
`X¥`b\_HZV^\_ZZ\_a`ZW]\_a`aY`BBBBBBBBBBBBBB  
@HWI-EAS443:3:38:1367:488#0/1  
GGTGGGGACATCAAGATACAGCAAGAAGTTGAAGCCGGAA  
+HWI-EAS443:3:38:1367:488#0/1  
aa^aa`^b^aW\_a[¥Z\_\_`^aQ`a`aaYHHL]S\_GT`¥V]  
@HWI-EAS443:3:44:727:1145#0/1  
ACCGGTTTCATTGAAGGGGGTGGTCAGGGATGGTAGATG  
+HWI-EAS443:3:44:727:1145#0/1  
a`^aa]aaa\_aaa^`aa\_a`\_T`^UW[^^aWZ`\_W^^[U^  
@HWI-EAS443:3:49:949:136#0/1  
AGCCGGTTTCATTGAAGGGGGTGGACAAGGATGGTAGAT  
+HWI-EAS443:3:49:949:136#0/1  
aba^baaabaabaabaabbabba¥aVZR`aaa`\_aa¥\_aZ¥  
@HWI-EAS443:3:52:80:1858#0/1  
CATGACTCGAACAAAGGTGTAACGGCAGCATGGCCTCATT  
+HWI-EAS443:3:52:80:1858#0/1  
a`a`ab\_aaZ\_Y`Z^`ZW\_T\_[RTL[M^BBBBBBBBBBBB  
@HWI-EAS443:3:54:1123:1785#0/1  
CGGGGACATCAAGATACAGAAAGAAGTTCAAGCCGGAAAT  
+HWI-EAS443:3:54:1123:1785#0/1  
aa¥`ZZTaJ`a[a¥¥RZ`bTZXaaKbMvb][b]Vbbbaa`

@HWI-EAS443:3:55:1612:1068#0/1  
CGCCAGTTCATTGGTACTGGTAGTATCCCTGGGGGCAATA  
+HWI-EAS443:3:55:1612:1068#0/1  
abbZb]J\_bV[bab`b``baab]ZH\_VUWZU`aaYBBBBB  
@HWI-EAS443:3:5:909:1336#0/1  
CGGGGGTGGACAGGGATGGTAGACGGATGGTACGGTTATC  
+HWI-EAS443:3:5:909:1336#0/1  
ab``YPUTOVXX^]]TWOWHY\_\_PTV]J^\_BBBBBBBBBB  
@HWI-EAS443:3:61:1106:600#0/1  
GTTCCATTGTCTGAACTAGTTGTTTCCACAATGTAGGACT  
+HWI-EAS443:3:61:1106:600#0/1  
a^^M¥W\_a]X¥URXRZ\_]^^Y][[VTRSV^XUY^WVHO  
@HWI-EAS443:3:61:804:647#0/1  
TTGGGGACATCAAGATACAGCCAGAAGTTCAAGCCGAAA  
+HWI-EAS443:3:61:804:647#0/1  
a)`abRP^¥]ZT\_X0Zaaa\_RH[`¥J`^]^ZZQZX\_¥ZXV  
@HWI-EAS443:3:62:52:824#0/1  
NTGGGTAACACGTTCCATTGTCTGAACTAGTTGTTTCCAC  
+HWI-EAS443:3:62:52:824#0/1  
DNVVVVLUXVRVYYYYWXYUXRUVWMRRRXXVXRXYVW  
@HWI-EAS443:3:69:566:741#0/1  
TTGGAAACGGCTGCTTTTAAATTTTACCACAAATGCGATAG  
+HWI-EAS443:3:69:566:741#0/1  
aaW^[`^\_VX``¥TY`¥HY]]Z`a[QQMOZ\_ROJMUURTX  
@HWI-EAS443:3:73:413:1175#0/1  
CGGCTGGTGTTTATAACACCCTTGGGTGTCTGACAAGTTG  
+HWI-EAS443:3:73:413:1175#0/1  
abab\_b¥LWZb\_aab`\_abbSaS^aU\_T\_\_ZRVQ`^\_aY  
@HWI-EAS443:3:76:1032:689#0/1  
GTGGTGTTTATAGCACCTTGGGTGTCTGACCAGTTGTAT  
+HWI-EAS443:3:76:1032:689#0/1  
L`\_ZZb^]Z\_ba¥F^^b¥T`abSXXaa\_T¥aYbU]QO\_N  
@HWI-EAS443:3:79:1475:1694#0/1  
GGTGGGGACATCAAGATACAGCATGAAGTTCAAGCCGGAA  
+HWI-EAS443:3:79:1475:1694#0/1  
aa]b\_]`aaaa¥aaaa`\_]`\_`aaaZ``Y\_Za\_\_YT`¥^^  
@HWI-EAS443:3:94:321:2033#0/1  
CGCTTCTCTGAGCATTTTGGGTAGTCATAAGTCCCATTT  
+HWI-EAS443:3:94:321:2033#0/1  
aaaabbbbbbb`aabb`aaaa^a]aa^aaaa`a^\_`aaa`^  
@HWI-EAS443:3:95:712:509#0/1  
CAATGCCAAGGAAATTGGAAACGGCTGATTTGAATTTTAA  
+HWI-EAS443:3:95:712:509#0/1  
ab^`a[TbabbX\_ab`\_¥Xbbbbbaa]F]¥[K\_\_RU]aJ]  
@HWI-EAS443:3:96:1366:744#0/1  
ACGTTCCATTGTCTGAACTAGTTGTTTCCACAATGTAGGG  
+HWI-EAS443:3:96:1366:744#0/1  
^]`^`^`¥]aUaW¥ab`\_]RbPaS`\_`ZR¥ZZV`\_^Y`^U  
@HWI-EAS443:3:98:1664:1697#0/1  
GGAAATTGGAAACGGCTGCTTTGAATTTTACCAAAAATGA

+HWI-EAS443:3:98:1664:1697#0/1  
`b\_a`bbba\_b\_a^ab`NWaaNWaYab`YGN\_J\_`^H¥B  
@HWI-EAS443:3:100:596:1680#0/1  
AATCTCCTGGGTAACACGTTCCATTGTCTGAACTAGTTGT  
+HWI-EAS443:3:100:596:1680#0/1  
aa\_]W]ZW\_\_UOW^F]ZaNZa\_T¥]]T[Ya\_PM¥aWXBBB  
@HWI-EAS443:3:10:1400:500#0/1  
TCCGAGGATCCAGCCAGCAATGTTACATTTACCCAAATGC  
+HWI-EAS443:3:10:1400:500#0/1  
[¥PEW¥ST[¥¥TUVYJL[`V\_[[\_SSRSVPVVR[VSBBB  
@HWI-EAS443:3:10:528:55#0/1  
GTACTGGTAGTCTCCCTGGGGGCAATCAGTTTCTGGGTGT  
+HWI-EAS443:3:10:528:55#0/1  
`W]UPOXPQ\_TROOZSKHS\_WTRNWUPNRGNBBBBBBBBB  
@HWI-EAS443:3:10:918:1528#0/1  
GGCCCAATCATGACTCGAACAAAGGTGTAACGGCAGGATG  
+HWI-EAS443:3:10:918:1528#0/1  
a`^\_`a`a`aa\_¥¥`^\_Y\_]\_`VKMMO^VBBBBBBBBB  
@HWI-EAS443:3:13:1379:1108#0/1  
AATCTCCTGGGTAACACGTTCCATTGTCTGAACTAGTTGG  
+HWI-EAS443:3:13:1379:1108#0/1  
aa`XZ]TQ[^X\_X]G^Sa\_XZVX\_TZLLWa^]SZW]TBBB  
@HWI-EAS443:3:13:1584:1609#0/1  
AATCTCCTGGGTAACACGTTCCATTGTCTGAACTAGTTGT  
+HWI-EAS443:3:13:1584:1609#0/1  
Va^Z^\_`a[a\_a^]]b`[UUU^]a^T`Z^\_NXN\_Z]^  
@HWI-EAS443:3:13:695:1256#0/1  
GCTCTTTACATATTTTGGACATTTTCCAATTGTGATCGGA  
+HWI-EAS443:3:13:695:1256#0/1  
\_a^F¥]P¥\_WSW^aaX[]QXaYb`\_¥\_`^ [ZGV]`SWUZQ  
@HWI-EAS443:3:16:1253:212#0/1  
AATCTCCTGGGTAACACGTTCCATTGTCTGAACTAGTTGT  
+HWI-EAS443:3:16:1253:212#0/1  
\_^\_^[\_¥a¥Y]¥`\_N\_Z\_^ [Z]X]\_¥S^\_Y¥^T^]YX^\_X  
@HWI-EAS443:3:17:674:1229#0/1  
ACACGTTGTATTGCAATCGTGGACTGGTGTATCTGAAATG  
+HWI-EAS443:3:17:674:1229#0/1  
¥¥UVT[``YT^W\_a`^`ZPX`S`[Ua^aY^QZXa`YT[`  
@HWI-EAS443:3:19:1298:1874#0/1  
CCGACTGCTTTGAATTTTACCACAAATGCGATAACACGTG  
+HWI-EAS443:3:19:1298:1874#0/1  
a`aa`aa\_aa``aaaa`\_G`a`aaaa`]aa`a`\_a\_aV]  
@HWI-EAS443:3:1:428:1233#0/1  
AATCTCCTGGGTAACACGTTCCATTGTCTGAACTAGTTGT  
+HWI-EAS443:3:1:428:1233#0/1  
aabZ`aaaa\_]\_ba]aaa]a\_^a`^a\_Waa`\_W\_]XRBBB  
@HWI-EAS443:3:1:735:1147#0/1  
AATCTCCTGGGTAACACGTTCCATTGTCTGAACTAGTTGT  
+HWI-EAS443:3:1:735:1147#0/1  
``aab`Yaa^\_a]\_^a]`\_\_\_a\_aU]a¥]^^^\_\_WBBB

@HWI-EAS443:3:1:818:362#0/1  
AATCGATGAAATCTCCTGGGTAACACGTTCCATTGTATGA  
+HWI-EAS443:3:1:818:362#0/1  
][X\_a`WX¥aT\_VYWJ\_\_Z[P\_]``S¥XTGQU`a^VJ]BB  
@HWI-EAS443:3:20:1026:1473#0/1  
AATCTCCTGGGTAACACGTTCCATTGTCTGAACTAGTTGT  
+HWI-EAS443:3:20:1026:1473#0/1  
a\_^\_¥^^Z¥¥^MW`]¥^\_Z\_]X^]U^ZZZ^X]ZZZZWWWWW  
@HWI-EAS443:3:20:1342:792#0/1  
AATCTCCTGGGTAACACGTTCCATTGTCTGAACTAGTTGT  
+HWI-EAS443:3:20:1342:792#0/1  
`\_\_]^SU]Z]^LV^]a][[^\_^SZVVTNX]PZW^^WSPZU  
@HWI-EAS443:3:20:1417:1275#0/1  
AATCTCCTGGGTAACACGTTCCATTGTCTGAACTAGTTGT  
+HWI-EAS443:3:20:1417:1275#0/1  
`aa\_a`\_a`X^X`\_¥`\_a^^]U[\_\_\_`]]^US^Y^Y\_YY]Y  
@HWI-EAS443:3:20:277:42#0/1  
AATCTCCTGGGTAACACGTTCCATTGTCTGAACTAGTTGT  
+HWI-EAS443:3:20:277:42#0/1  
Zaab^a`Wbb\_abTabbb[aYX`bZa¥]aa^^¥a[b]a^¥  
@HWI-EAS443:3:21:1282:1578#0/1  
AATCTCCTGGGTAACACGTTCCATTGTCTGAACTAGTTGT  
+HWI-EAS443:3:21:1282:1578#0/1  
aRZab``]VSWO`\_Y\_``^]`Y\_`^\_N\_]Y]ZWW¥\_U\_\_¥  
@HWI-EAS443:3:22:207:302#0/1  
AATCTCCTGGGTAACACGTTCCATTGTCTGAACTAGTTGT  
+HWI-EAS443:3:22:207:302#0/1  
abaaa`a\_`]`W\_\_\_\_`\_\_^\_a\_\_^^¥V]\_\_^^]^X]X^\_]`  
@HWI-EAS443:3:26:117:1934#0/1  
AATCTCCTGGGTAACACGTTCCATTGTCTGAACTAGTTGT  
+HWI-EAS443:3:26:117:1934#0/1  
aa`a[aa¥\_TXVa`^`^`VWVaa\_^SRJZ]^ [YS¥]YSSMO  
@HWI-EAS443:3:28:1596:678#0/1  
TTCTTTTTTCCAGGTGGTTGAACTCTTTACCTACTGTTGT  
+HWI-EAS443:3:28:1596:678#0/1  
ababbbbbbb`aaab\_\_\_\_[a^W\_L\_Z``aa[^`]Uaa`aaY  
@HWI-EAS443:3:28:520:147#0/1  
AATCTCCTGGGTAACACGTTCCATTGTCTGAACTAGTTGT  
+HWI-EAS443:3:28:520:147#0/1  
a^[¥PZ^MD[aI\_\_Y^[ [ZY^Z¥XXMV^^XTRPUU¥HP[M  
@HWI-EAS443:3:29:151:1010#0/1  
AATCTCCTGGGTAACACGTTCCATTGTCTGAACTAGTTGT  
+HWI-EAS443:3:29:151:1010#0/1  
`a`b\_aa`a]¥F``Y\_]\_\_^`\_PZ\_[Q¥\_WQW^¥Z¥XZZB  
@HWI-EAS443:3:29:60:1969#0/1  
CGCTGCTGGATCCTGGGAAATCCAGAGTGTGAATCACTCT  
+HWI-EAS443:3:29:60:1969#0/1  
aWa\_]`WYS^¥^aUUSU¥`^¥W`VUWSMSUS^WUW¥UW¥B  
@HWI-EAS443:3:2:1677:299#0/1  
CATATCCTGACCCCTGCTCATTGATGGTGATAACAGTA

+HWI-EAS443:3:2:1677:299#0/1  
Xbabaa`\_`aKOTZ[0a`\_aaaa\_WFW`0`\_`¥^VG^BB  
@HWI-EAS443:3:30:1274:40#0/1  
AATCTCCTGGGTAACACGTTCCATTGTCTGAACTAGTTGT  
+HWI-EAS443:3:30:1274:40#0/1  
aabbbb^¥b`bZaaaa`b\_a`a\_aa\_\_aa\_^`^`^`[\_`\_`  
@HWI-EAS443:3:30:753:1981#0/1  
AATCTCCTGGGTAACACGTTCCATTGTCTGAACTAGTTGT  
+HWI-EAS443:3:30:753:1981#0/1  
¥S\_a^bb`a^SF\_¥\_b`[\_¥b`\_]`aYNVXU]^`[^]^Z[^]  
@HWI-EAS443:3:32:1024:60#0/1  
AATCTCCTGGGTAACACGTTCCATTGTCTGAACTAGTTGT  
+HWI-EAS443:3:32:1024:60#0/1  
abaaa\_]`aaaX`\_^`\_\_^^\_^]^^\_^]\_^]X]V]Z\_dW  
@HWI-EAS443:3:32:279:408#0/1  
ACGCGTTATCGCATTTGTGGTAAAATCAAAGCAGCCGTT  
+HWI-EAS443:3:32:279:408#0/1  
\_TXR[HR[Y[]]RWX\_YIY¥T[TX]]P[O[OUXSKEZOKM  
@HWI-EAS443:3:33:134:1650#0/1  
AATCTCCTGGGTAACACGTTCCATTGTCTGAACTAGTTGT  
+HWI-EAS443:3:33:134:1650#0/1  
`][aYaaUV¥XN]]¥[`^W[a¥ZNTWQ[XQX¥TZ[ZWY[W  
@HWI-EAS443:3:33:1499:373#0/1  
ATTGAAAATGAAAGAACTTTGGACTACCACGATTCTCCT  
+HWI-EAS443:3:33:1499:373#0/1  
a`]abaaaaaa`\_\_a\_a`aa^aZ^aa``\_a¥[V`YU\_VZ[  
@HWI-EAS443:3:33:237:725#0/1  
GGTCGTTACATTCTTTTCTAGTACTGTGTCTACAGTGTCT  
+HWI-EAS443:3:33:237:725#0/1  
aaabaaabbababbbb`babaaaab`\_b\_aaa]`\_R[]aB  
@HWI-EAS443:3:34:360:1270#0/1  
TGTGCTCTTCAGGTCGGCTGCATATCCTGACCCCTGATCA  
+HWI-EAS443:3:34:360:1270#0/1  
`THT``aSX]\_UVPXZZTZ¥^T\_Y[\_PTX^`a\_BBBBBB  
@HWI-EAS443:3:34:606:1259#0/1  
AATCTCCTGGGTAACACGTTCCATTGTCTGAACTAGTTGT  
+HWI-EAS443:3:34:606:1259#0/1  
`\_`aaaaZ``\_[\_V\_[a\_Z`^^`]UX^\_Y^^UWRVMVYT  
@HWI-EAS443:3:36:414:1036#0/1  
AGCCGGGAGACAAAATAACATTCCAAGCAACTGGAECTCT  
+HWI-EAS443:3:36:414:1036#0/1  
\_Xabaa`X`aaaaaaaa^aaa`a``¥`\_\_aa`¥^^ZG¥\_^  
@HWI-EAS443:3:37:202:1649#0/1  
CAGCCGGGAGACAAAATAACATTCCAAGCAACTGGAECTC  
+HWI-EAS443:3:37:202:1649#0/1  
aRH¥``\_[VNNYZJ`\_`YVRQWPP¥\_[^I¥TJTNTTXWGNU  
@HWI-EAS443:3:37:826:1795#0/1  
TAAGACTCTGTAACTTCTAGAAGACAAGCATAACGG  
+HWI-EAS443:3:37:826:1795#0/1  
K\_aV¥a^ba^aaLaab\_aa\_Y\_[OYa[`bRTZba\_aa\_LX



@HWI-EAS443:3:38:1360:906#0/1  
GGCCCAATCATGACTCGAACAAAGGTGTAACGGCAGGATG  
+HWI-EAS443:3:38:1360:906#0/1  
aa]`a\_]a`ab\_a^a\_aa`Ya¥`a`Va¥^UVWZUXBBBBB  
@HWI-EAS443:3:38:386:1099#0/1  
TTTGATGGTGATAACCGTACCATCCATCTACCATCCAAAT  
+HWI-EAS443:3:38:386:1099#0/1  
`^` [ ]\_ ^U] ] ^M^ ] a] V\_VV\_ ^ ` ` ] ^¥^\_ VWXYP¥\_ ¥YP  
@HWI-EAS443:3:39:1493:531#0/1  
AAACGAGCAGGGGTCAGGATATGCAGCCGACCTGAAGAGC  
+HWI-EAS443:3:39:1493:531#0/1  
VOWHZ^b]R]ZW`^^\_¥¥Tb\_] ` ] abH¥\_RFQ[ZP]WMVD  
@HWI-EAS443:3:39:247:90#0/1  
CAGGGAGACTACCAGTACCAATGAACTGGCGACAGTCGAA  
+HWI-EAS443:3:39:247:90#0/1  
`¥¥bb`b\_XR\_abaZUa`\_XUV`YFMZ\_]¥aTRTNJFYU^  
@HWI-EAS443:3:39:558:269#0/1  
AATCTCCTGGGTAACACGTTCCATTGTCTGAACTAGTTGT  
+HWI-EAS443:3:39:558:269#0/1  
a` [^^\_X¥\_[UL¥¥ZX[WWYYUXTUTXYWTWXUTUXXYX  
@HWI-EAS443:3:39:777:622#0/1  
AATCTCCTGGGTAACACGTTCCATTGTCTGAACTAGTTGT  
+HWI-EAS443:3:39:777:622#0/1  
aaaaaaaa`aaaZ``aa` `¥\_\_`\_¥¥\_XZ\_¥UUXYYYYW^\_V  
@HWI-EAS443:3:39:791:1834#0/1  
AGCCAGTTAAAAACAATGCCAAGGAAATTGGAAACAGCT  
+HWI-EAS443:3:39:791:1834#0/1  
RYa¥[ [V\_aZ`U` [T\_b]\_Z¥\_ba`\_Ra[a` [ ]\_b\_SF[Y  
@HWI-EAS443:3:3:402:1103#0/1  
AATCTCCTGGGTAACACGTTCCATTGTCTGAACTAGTTGT  
+HWI-EAS443:3:3:402:1103#0/1  
aaa`aa¥\_ba`^a`aa^`\_\_\_\_]\_ ` `a^Z\_]\_ `X\_] ^Z^\_Z  
@HWI-EAS443:3:3:487:1971#0/1  
TGGCCCGGAGACAAAATAACATTCCAAGCAACTGGAAAT  
+HWI-EAS443:3:3:487:1971#0/1  
a\_^\_aaa`\_UY\_\_^`\_^\_a¥V^Z\_U\_ ^¥\_R^\_R\_\_WJVUS  
@HWI-EAS443:3:3:547:779#0/1  
GTAAAAACAATGCCAAGGAAATTGGAAACGGCTGGGTT  
+HWI-EAS443:3:3:547:779#0/1  
\_Z`\_]ONW`ZZQ]^]Z`\_`PU]^][PSQWZ^[ [BBBBBB  
@HWI-EAS443:3:40:214:1735#0/1  
CTTCCTCTGAGTATTTTGGGTAGTCATAAGTCCCATCTTT  
+HWI-EAS443:3:40:214:1735#0/1  
ababbbbb`aaXa`aaa` ``]bb]aa\_¥Y\_^bbb\_a\_aa`  
@HWI-EAS443:3:42:262:1016#0/1  
TTTCCTTCCTCTGAGTATTTTGGGTAGTCATAAGTCCCAT  
+HWI-EAS443:3:42:262:1016#0/1  
]b`ba\_abb`ab`b\_XX]aab` [ `Z^bTbaaa\_Z[]aab^  
@HWI-EAS443:3:45:556:61#0/1  
AATCTCCTGGGTAACACGTTCCATTGTCTGAACTAGTTGT

+HWI-EAS443:3:45:556:61#0/1  
a\_\_YXYX¥`^]SX^W\_]\_X^ZR^ZY]XX¥]VWWTXZZ^U  
@HWI-EAS443:3:47:653:685#0/1  
AATCTCCTGGGTAACACGTTCCATTGTCTGAACTAGTTGT  
+HWI-EAS443:3:47:653:685#0/1  
`b]Q^^^aa]aT¥a\_`b]\_aPX\_W\_]\_aa`T[^Z[]W  
@HWI-EAS443:3:47:863:1920#0/1  
TAGTTGTTTCCACAATGTAGGACCATGAGCTTGCTGTGGA  
+HWI-EAS443:3:47:863:1920#0/1  
Y^^[\_`^^^aa]`\_X`a\_`TZ¥Y`]YYa]W[\_X[`¥a`  
@HWI-EAS443:3:49:744:51#0/1  
AATCTCCTGGGTAACACGTTCCATTGTCTGAACTAGTTGT  
+HWI-EAS443:3:49:744:51#0/1  
aab`b\_``bbbUaa\_aab^a¥^a^`a^\_a\_\_\_W^\_aZ\_\_Z  
@HWI-EAS443:3:51:1385:536#0/1  
CAGTGCTAGTTAAAAAAGGAAATTCATACCCAAAGCTCAG  
+HWI-EAS443:3:51:1385:536#0/1  
][[¥Ua[[aKa`\_Z¥b^a`\_aN¥a`bbb`VR\_bb`bb^]a  
@HWI-EAS443:3:52:643:502#0/1  
GAGCAATTGAGCTCAGTGTCATCATTGAAAGGTTTCTGG  
+HWI-EAS443:3:52:643:502#0/1  
aabaaabbb\_babaaa\_b`abaaaaaa`\_`aa^aaaa`  
@HWI-EAS443:3:53:1121:777#0/1  
AATTAACAGAGAAGAAATAGATGGGGTAAAGCTGGGATC  
+HWI-EAS443:3:53:1121:777#0/1  
aabbaaaaababaabaaaaab\_abbabWaa`a^aaa\_`^`  
@HWI-EAS443:3:53:550:603#0/1  
CAATGTAGGACCATGAGCTTGCTGTGGAGAGTGATTGACA  
+HWI-EAS443:3:53:550:603#0/1  
aW\_ba]]\_bbba[\_b]b\_a]¥\_aY`bb[aaaVb[X\_G[aa  
@HWI-EAS443:3:54:1337:100#0/1  
GCTGGCTGGATCCTGGGAAATCCAGAGTGTGAATCAGTCT  
+HWI-EAS443:3:54:1337:100#0/1  
aab``\_\_a\_U`UX[^^H\_\_\_XR]]]QU\_U¥N]NVTLUUY  
@HWI-EAS443:3:54:512:1519#0/1  
AACGGTAACACACTCTGTTAACCTTCTAGAAGACAAGCAT  
+HWI-EAS443:3:54:512:1519#0/1  
`b\_\_\_[\_`]`¥YX^\_]\_XW]]UW^\_]`¥¥^Q^`^` [[]V  
@HWI-EAS443:3:55:1442:812#0/1  
AATCTCCTGGGTAACACGTTCCATTGTCTGAACTAGTTGT  
+HWI-EAS443:3:55:1442:812#0/1  
aa`]Zaa\_\_`aV]a¥`]`a¥\_[\_]`^^`^WYX\_]a[\_a]  
@HWI-EAS443:3:56:803:659#0/1  
GGGGCATCAAGATACAGCAAGAAGTTCAAGCCGAAATAG  
+HWI-EAS443:3:56:803:659#0/1  
aa`aaaa\_`a`aa\_aa\_aaa\_\_a¥\_\_a\_`\_^aa^ZTa`a  
@HWI-EAS443:3:58:1040:948#0/1  
GCCCCTTTCATTGAAGGGGGTGGACAGGGATGGTAGATG  
+HWI-EAS443:3:58:1040:948#0/1  
a`¥FVa\_bR]a`Y\_\_a\_MTTYFYXQZR\_WU]YG[R\_\_^^^

@HWI-EAS443:3:58:1398:687#0/1  
AATCTCCTGGGTAACACGTTCCATTGTCTGAACTAGTTGT  
+HWI-EAS443:3:58:1398:687#0/1  
abbaaabbbabb\_ba`a\_aaa``a`a\_\_aa\_`\_]YR\_] ]  
@HWI-EAS443:3:58:23:583#0/1  
TCCGGCTTGAACCTTCTTGCTGTATCTTGATGTCCCCCAA  
+HWI-EAS443:3:58:23:583#0/1  
aba``[ `XUOTX\_^^OQZ\_WWMWZY[UNHMHVHW¥UPDXHX  
@HWI-EAS443:3:59:1665:610#0/1  
AATCTCCTGGGTAACACGTTCCATTGTCTGAACTAGTTGT  
+HWI-EAS443:3:59:1665:610#0/1  
a\_`\_]\_^]¥U¥[Q^^Z]]\_^^YY^^\_\_[Z^`VXZ]VSUXGT  
@HWI-EAS443:3:59:282:1385#0/1  
ATTCTGTGTGCTCTTCAGGTCGGCTGCATATCCTGAGCCC  
+HWI-EAS443:3:59:282:1385#0/1  
``aaaaaa`aaaaaaa`^Z`aaaaaa`b¥R\_YVMDUPS  
@HWI-EAS443:3:5:1053:1617#0/1  
GGGTCAGTCTCAATTTTGTGCTTTTTACATATTTTGGACA  
+HWI-EAS443:3:5:1053:1617#0/1  
a\_`S\_aa\_\_aX\_[\_`¥aa[a\_¥`\_aa`\_^`a\_aa\_[\_\_`  
@HWI-EAS443:3:5:220:1477#0/1  
CGTCGGCATTCTGTGTGCTCTTCAGGTCGGCTGCATATCC  
+HWI-EAS443:3:5:220:1477#0/1  
aa\_aa\_`^aR`\_YX]T\_`^`^`\_US¥^U[^UR^^aBBB  
@HWI-EAS443:3:5:343:494#0/1  
TAGTTGTTTCCACAATGTAGGACCATGAGCTTGCTGTGGA  
+HWI-EAS443:3:5:343:494#0/1  
\_aa\_[a\_baZ\_]U\_K`¥`baaZ]W\_\_aaa\_^^bY^`VY[Y  
@HWI-EAS443:3:60:339:578#0/1  
AATCTCCTGGGTAACACGTTCCATTGTCTGAACTAGTTGT  
+HWI-EAS443:3:60:339:578#0/1  
`^`aaabaaa]a\_`aaa\_a`````\_`Z\_a`^`\_`[^aZ]\_`^  
@HWI-EAS443:3:60:441:546#0/1  
AATCTCCTGGGTAACACGTTCCATTGTCTGAACTAGTTGT  
+HWI-EAS443:3:60:441:546#0/1  
\_`S\_¥¥`b`]¥XYVR\_^]RaYYZUVRNYVTGUQUTYLYVS  
@HWI-EAS443:3:61:1279:1880#0/1  
AATCTCCTGGGTAACACGTTCCATTGTCTGAACTAGTTGT  
+HWI-EAS443:3:61:1279:1880#0/1  
aaa\_`\_aa\_a\_Zaa]a`a]aaaaa``^`\_`\_`OX^^ZZWZ  
@HWI-EAS443:3:62:814:1777#0/1  
AATCTCCTGGGTAACACGTTCCATTGTCTGAACTAGTTGT  
+HWI-EAS443:3:62:814:1777#0/1  
a`]]V]a][ ]YV^aaa][ ]Xa^`Y¥[T\_`\_¥^\_Y^^WSYU  
@HWI-EAS443:3:64:897:1406#0/1  
GGGGACATCAAGATACAGCAAGAAGTTCAAGCCGGAGATA  
+HWI-EAS443:3:64:897:1406#0/1  
\_`^`¥`aaa]`V``\_a`aaa`aaa`a]X]`¥`\_`\_`TQLJY[  
@HWI-EAS443:3:65:1097:609#0/1  
AATCTCCTGGGTAACACGTTCCATTGTCTGAACTAGTTGT

+HWI-EAS443:3:65:1097:609#0/1  
a\_babb`bbba\_`\_abababaabaaa`aaa\_a``\_a\_`[`  
@HWI-EAS443:3:65:1287:1226#0/1  
GATAGATGGTACGGTTATCACCATCAAAATGAGCAGGGGT  
+HWI-EAS443:3:65:1287:1226#0/1  
ab`U`aaa\_\_baba^aa^]^Zaa\_]aabaaaa]a`a`V¥V  
@HWI-EAS443:3:68:1581:188#0/1  
AATCTCCTGGGTAACACGTTCCATTGTCTGAACTAGTTGT  
+HWI-EAS443:3:68:1581:188#0/1  
abbaaaaa^`a^aa\_a\_a\_`]^a`\_a^]``\_]\_Z\_^\_Y^\_Y  
@HWI-EAS443:3:68:1613:1758#0/1  
AGCCGTTACACCTTTGTTTCGAGTCATGATTGGGCCATNAA  
+HWI-EAS443:3:68:1613:1758#0/1  
`Q`a\_ab^a`W`aba^\_YMP^\_a\_aaY\_^¥a\_Z¥]KDW^  
@HWI-EAS443:3:69:856:884#0/1  
AATCTCCTGGGTAACACGTTCCATTGTCTGAACTAGTTGT  
+HWI-EAS443:3:69:856:884#0/1  
ababaaa`aa]Ya\_\_a`\_\_\_a```aa^\_aaU\_]^\_\_Y\_\_]  
@HWI-EAS443:3:70:20:594#0/1  
GCCGGTTTCATTGAAGGGGGTGGACAGGGATGGTAAATG  
+HWI-EAS443:3:70:20:594#0/1  
aaab`]aa`Xaaa^\_aa`a`^S\_`\_\_\_`\_]\_]W^U^W^  
@HWI-EAS443:3:72:98:148#0/1  
GGAAAGAAGTCCTCGTGCTATGGGGCATTACCATCATCT  
+HWI-EAS443:3:72:98:148#0/1  
a\_R]^`¥¥`Z\_\_^\_aQ\_¥¥¥\_[T^¥SWSW¥YWTXUU[UTY  
@HWI-EAS443:3:73:275:1418#0/1  
AATCTCCTGGGTAACACGTTCCATTGTCTGAACTAGTTGT  
+HWI-EAS443:3:73:275:1418#0/1  
`^`aYa^R¥¥\_N^^[\_a\_\_ZPSZR^\_Q]^X^^[ZUQNNX  
@HWI-EAS443:3:74:1645:1642#0/1  
CTGGGCTCTTCAGGTCGGCTGCATATCCTGACCCCTGCTC  
+HWI-EAS443:3:74:1645:1642#0/1  
ab¥F¥a¥`baa`bba\_`abb\_^\_aa¥Y¥\_¥VV¥¥^aa¥`¥  
@HWI-EAS443:3:75:1768:1584#0/1  
AATCTCCTGGGTAACACGTTCCATTGTCTGAACTAGTTGT  
+HWI-EAS443:3:75:1768:1584#0/1  
Za¥TYaPI\_a]P]][aabaVTTX]XV]J\_]¥X]]OGL]Wa  
@HWI-EAS443:3:77:860:32#0/1  
AATCTCCTGGGTAACACGTTCCATTGTCTGAACTAGTTGT  
+HWI-EAS443:3:77:860:32#0/1  
aaaaaaaa`aa]V`aa`a^`\_``\_\_\_Z^``]]]¥R`XX\_^  
@HWI-EAS443:3:7:1520:1176#0/1  
AATCTCCTGGGTAACACGTTCCATTGTCTGAACTAGTTGT  
+HWI-EAS443:3:7:1520:1176#0/1  
aaa\_a]Y^\_a[Ya\_X\_[\_\_^]^]^^XXX^`WZV¥Z^X^\_Z  
@HWI-EAS443:3:80:888:1590#0/1  
AATCTCCTGGGTAACACGTTCCATTGTCTGAACTAGTTGT  
+HWI-EAS443:3:80:888:1590#0/1  
abb]aaa]a`^¥aa\_a\_]`^aa``\_X¥Maaa^``\_\_Y\_``¥

@HWI-EAS443:3:80:962:35#0/1  
ATTGAAGGGGGTGGACAGGGATGGTAGATGGATGGGACG  
+HWI-EAS443:3:80:962:35#0/1  
¥b^aY``b\_bb`Q`b\_SabbaX`bbWUaa`ba\_ab\_F^H`  
@HWI-EAS443:3:81:1663:853#0/1  
TGGGGAGTGATTCACTCTGGATTTCCCAGGATCCAGCC  
+HWI-EAS443:3:81:1663:853#0/1  
`bb\_X]a[bZabZ\_[aaa`aab`a¥`U^]\_X¥`\_\_]a]UU  
@HWI-EAS443:3:81:215:1675#0/1  
GGCTGATCCTGGGAAATCCAGAGTGTGAATCACTCTCCAC  
+HWI-EAS443:3:81:215:1675#0/1  
``aaZab`ba\_``\_`aaa``aa`¥a\_a`a\_a\_a\_a\_a``  
@HWI-EAS443:3:82:821:737#0/1  
AATCTCCTGGGTAACACGTTCCATTGTCTGAACTAGTTGT  
+HWI-EAS443:3:82:821:737#0/1  
ababaaaaaaaaYaa`aaa`\_`aaaa`\_`adW^^\_]\_^]a\_  
@HWI-EAS443:3:84:409:117#0/1  
AATCTCCTGGGTAACACGTTCCATTGTCTGAACTAGTTGT  
+HWI-EAS443:3:84:409:117#0/1  
`ba````\_`aaa]\_`¥a^`^`\_`^`\_]V¥^Z¥V^W[WW^X  
@HWI-EAS443:3:88:1696:15#0/1  
CAACTTGTCAGACACCCAAGGGTGCTATAAACACCATGCC  
+HWI-EAS443:3:88:1696:15#0/1  
a¥bbbbbabbbbbbababab`¥Zb`aabbabObU¥babUa  
@HWI-EAS443:3:88:86:1907#0/1  
AATCTCCTGGGTAACACGTTCCATTGTCTGAACTAGTTGT  
+HWI-EAS443:3:88:86:1907#0/1  
abaa\_ba]X]XJa``^ZSW^¥a]Z]Z\_^\_^\_]W]YYZUP  
@HWI-EAS443:3:89:1245:246#0/1  
TTTCGGGACATCAAGATACAGCAAGAAGTTCAAGCCGGAA  
+HWI-EAS443:3:89:1245:246#0/1  
aaa``aaa`a^U^`ba`aZ\_a`]aa]X`V\_Z\_^\_]W\_^ZW  
@HWI-EAS443:3:8:1324:766#0/1  
AATCTCCTGGGTAACACGTTCCATTGTCTGAACTAGTTGT  
+HWI-EAS443:3:8:1324:766#0/1  
abaXaaa\_aaaWa`¥aVa`\_a`\_`\_`^¥a^`\_X\_\_a]]`Z  
@HWI-EAS443:3:8:1792:1142#0/1  
NTTCTCTATTCTTTTTTCCAGGTGGTTGAACTCTTTAACT  
+HWI-EAS443:3:8:1792:1142#0/1  
DMWQV[[[[[Y[[[[[XWZYZZZZ[W[[YUVPVY[XNN[  
@HWI-EAS443:3:90:283:223#0/1  
AATCTCCTGGGTAACACGTTCCATTGTCTGAACTAGTTGT  
+HWI-EAS443:3:90:283:223#0/1  
\_UbZaab`a`a[``]bbb]a[Ra`\_[U`a`\_¥`\_`^`S^]]  
@HWI-EAS443:3:90:415:1011#0/1  
GTTTCCCAGGAGATTTTCATCGATTATGAGGAGCTAAGAGA  
+HWI-EAS443:3:90:415:1011#0/1  
aaaaabba`aaa`a``aaaaa\_\_```\_\_\_\_\_^\_Y\_`]\_  
@HWI-EAS443:3:91:1050:594#0/1  
GTGGGAGAGCAATTGAGCTCAGTGCATCATTGAAAGGT

+HWI-EAS443:3:91:1050:594#0/1  
]bZ`¥NP[\_¥\_YXW]W^XXQV]H\_RSVY` `]^`^[\_VH¥YH  
@HWI-EAS443:3:91:1438:714#0/1  
AATCTCCTGGGTAACACGTTCCATTGTCTGAACTAGTTGT  
+HWI-EAS443:3:91:1438:714#0/1  
`ba```a^`\_¥aaa`[\_`aba\_aaab\_`ab[^Y\_ab\_aaa  
@HWI-EAS443:3:92:1542:182#0/1  
ACGTGTTACCCAGGAGATTTTCATCGATTATGAGGAGGTAA  
+HWI-EAS443:3:92:1542:182#0/1  
aabY¥^bab`\_a\_[YbaaZ[\_`a^^¥`\_`b`\_aRHxKT]]  
@HWI-EAS443:3:92:28:1367#0/1  
CATCGCCGGTTTCATTGAAGGGGGTGGACAGGGATGGTA  
+HWI-EAS443:3:92:28:1367#0/1  
`aaa`aaaWXZa¥aaa`W\_a`Y`Z[NX¥\_WZ\_V¥WBBBBB  
@HWI-EAS443:3:92:418:1482#0/1  
AATCTCCTGGGTAACACGTTCCATTGTCTGAACTAGTTGT  
+HWI-EAS443:3:92:418:1482#0/1  
`S¥`\_`\_`Z\_a`S^]]a]\_YV¥\_^X]\_W]^UZ\_V]^W]]W  
@HWI-EAS443:3:93:1074:959#0/1  
TCCCGCTTGAACTTCTTGCTGTATCTTGATGTCCCCACAA  
+HWI-EAS443:3:93:1074:959#0/1  
YYYFXS]]GR^SYYUS]SSU¥VZTXPPLQY\_L]UFYZPPY  
@HWI-EAS443:3:93:232:1546#0/1  
AATCTCCTGGGTAACACGTTCCATTGTCTGAACTAGTTGT  
+HWI-EAS443:3:93:232:1546#0/1  
W^^`Wa^SLLIT`]]`a]YXZZ^U]V`PUX`[¥W^\_YU[¥B  
@HWI-EAS443:3:93:74:681#0/1  
GGGGCATCAAGATACAGCAAGAAGTTCAAGCCGAAATAG  
+HWI-EAS443:3:93:74:681#0/1  
aZaa````a`a`\_`\_`\_a^`aaa\_aU\_aa`\_`^`\_]]\_]]¥  
@HWI-EAS443:3:94:249:1808#0/1  
AATCTCCTGGGTAACACGTTCCATTGTCTGAACTAGTTGT  
+HWI-EAS443:3:94:249:1808#0/1  
`a\_a]`\_`\_`[^Y`¥a`^`^`W`^^ZW^^Y]^WX^XR]]]  
@HWI-EAS443:3:95:1196:928#0/1  
AATCTCCTGGGTAACACGTTCCATTGTCTGAACTAGTTGT  
+HWI-EAS443:3:95:1196:928#0/1  
aaa[Ta\_aa\_Q]a\_\_Ua]\_¥^¥\_\_¥Z^aYQQ^^`W\_^Z  
@HWI-EAS443:3:95:82:255#0/1  
TACCGTTACATTCTTTTCTAGTACTGTGTCTACAGTGTCT  
+HWI-EAS443:3:95:82:255#0/1  
abb`baaaaabbbbabaaa^a`\_`aa]a\_aaa¥Za]a]]B  
@HWI-EAS443:3:96:737:662#0/1  
AATCTCCTGGGTAACACGTTCCATTGTCTGAACTAGTTGT  
+HWI-EAS443:3:96:737:662#0/1  
aaaa`\_`\_`baaX`a`a\_a]\_`^`\_`\_]]`a]\_^`\_`Z`^^  
@HWI-EAS443:3:96:745:1175#0/1  
AATCTCCTGGGTAACACGTTCCATTGTCTGAACTAGTTGT  
+HWI-EAS443:3:96:745:1175#0/1  
aaaaaaaaa\_Z¥¥Y]]a\_\_a`\_a`\_ZRa\_]\_^[]a^^YZ

@HWI-EAS443:3:97:190:1197#0/1  
AATCTCCTGGGTAACACGTTCCATTGTCTGAACTAGTTGT  
+HWI-EAS443:3:97:190:1197#0/1  
ab`a`a`a`a`Y`a`W]`\_\_`¥`\_\_\_]¥W¥`\_\_^X^`][\_X  
@HWI-EAS443:3:98:795:1718#0/1  
CATTACCATCCATCTACTAGTGCTGACCAACAAAGGCTC  
+HWI-EAS443:3:98:795:1718#0/1  
X`[[Sa^ba\_ZaVbababZSY]ab^b`Yaa\_a``aI¥aT  
@HWI-EAS443:3:99:1204:51#0/1  
AGAGTGTGAATCACTCTCCACAGCAAGCTCATGGTCGTAC  
+HWI-EAS443:3:99:1204:51#0/1  
ab\_\_Ga[a`]a[aZa\_`[TaR\_a\_aZaT^]Z\_`\_TQGV]B  
@HWI-EAS443:3:99:1718:777#0/1  
AATCTCCTGGGTAACACGTTCCATTGTCTGAACTAGTTGT  
+HWI-EAS443:3:99:1718:777#0/1  
a^^]]Z]abb[\_a`\_]aa`\_¥\_a`aa]RXa[UW``]¥W[]  
@HWI-EAS443:3:99:1787:1159#0/1  
AATCTCCTGGGTAACACGTTCCATTGTCTGAACTAGTTGT  
+HWI-EAS443:3:99:1787:1159#0/1  
ab]WZ¥V¥Ya\_K[\_[\_`VaW\_]\_]aaa\_]``]ZHW^¥SVY¥  
@HWI-EAS443:3:99:498:129#0/1  
AATCTCCTGGGTAACACGTTCCATTGTCTGAACTAGTTGT  
+HWI-EAS443:3:99:498:129#0/1  
aaa``\_\_\_a`^X\_\_\_a\_aZ^]]^^\_]\_]\_\_^X]]\_XY\_Y  
@HWI-EAS443:3:9:1701:1229#0/1  
AATCTCCTGGGTAACACGTTCCATTGTCTGAACTAGTTGT  
+HWI-EAS443:3:9:1701:1229#0/1  
aaaS\_\_FXabaX\_a\_\_^\_^\_SXU\_ZWWV\_¥¥]G\_]aX\_\_^  
@HWI-EAS443:3:70:1689:1367#0/1  
AGGGGACATCAAGATACAGCAAGNAGTTCAAGCCGGAAAT  
+HWI-EAS443:3:70:1689:1367#0/1  
a\_\_aa\_aaa\_a\_aaaa\_ba^^b^DYaX`]b\_a[Za]\_\_\_`  
@HWI-EAS443:3:100:1036:494#0/1  
GCTGGCTGGATCTTGGGAAATCCAGAGTGTGAATCACTCT  
+HWI-EAS443:3:100:1036:494#0/1  
abbaaa\_Xa]`[^^Q`ZZ\_\_`Z]a\_ZaU\_Z^¥[¥¥ZN^\_B  
@HWI-EAS443:3:100:1335:1141#0/1  
CACGTTCCATTGTCTGAACTAGTTGTTTCCACAATGTAGG  
+HWI-EAS443:3:100:1335:1141#0/1  
ababbba\_abaababbbaabbbbabbbbaYb¥bbbaaaaa  
@HWI-EAS443:3:100:1337:1334#0/1  
AATCGATGAAATTTCTGGGTAACACGTTCCATTGTCTGA  
+HWI-EAS443:3:100:1337:1334#0/1  
`\_Z[\_`^F¥`a\_]V\_aa\_Q¥[\_`Wa\_Y`aV\_]`]^LZ^BB  
@HWI-EAS443:3:100:138:1225#0/1  
ATTTTGTCTCCCGCTCTACTAGTGTGCAGTAATAGTTCA  
+HWI-EAS443:3:100:138:1225#0/1  
]`\_a`[S`aaa`\_[XN```V^ZWUaFFS¥\_0]^aV¥BBBB  
@HWI-EAS443:3:100:1653:733#0/1  
CAAGATACAGCAAGAAGTTGAAGCCGGAAATAGCAATAAG

+HWI-EAS443:3:100:1653:733#0/1  
ab[HWa\_Q[baabb\_ZVY\_G^a\_]^^^`\_\_\_\_a\_aU\_\_BB  
@HWI-EAS443:3:100:327:921#0/1  
ACGTTCCATTGTCTGAACTAGTTGTTTCCACAATGTAGGA  
+HWI-EAS443:3:100:327:921#0/1  
aZQ¥a^]aa\_aZI^]Y````aW`b`aa`UY\_`^X`X][]B  
@HWI-EAS443:3:100:359:1832#0/1  
ATTTACTTTGTTAGTAATCTCGTGAATGGCATTCTGTGTG  
+HWI-EAS443:3:100:359:1832#0/1  
¥¥`UXY[X^Y^aa]\_a\_Z]R\_WVG¥\_VbWaL¥RBBBBBBB  
@HWI-EAS443:3:100:609:704#0/1  
ACTAGTTGTTTCCACAATGTAGGACCATGAGCTTGCTGTG  
+HWI-EAS443:3:100:609:704#0/1  
aaaaa\_babaaa^`^aaa`\_^`\_^`^¥`a`\_a[a\_\_Va\_]`  
@HWI-EAS443:3:100:705:271#0/1  
ACACGTTCCATTGTCTGAACTAGTTGTTTCCACAATGTAG  
+HWI-EAS443:3:100:705:271#0/1  
aSSRNZZ`¥a¥a¥RH[a]^`a^]¥a^]`\_\_YWSY^^\_]TL]B  
@HWI-EAS443:3:100:767:143#0/1  
CAAGGGGGCTATAAACACCAGCCTCCCATTTCAGAATATA  
+HWI-EAS443:3:100:767:143#0/1  
```¥¥ZF]\_]Zbbaa]abZba^X`SXY`a¥X^\_aaS\_\_¥B  
@HWI-EAS443:3:100:833:315#0/1  
CTAGATTTCCAGTCGCTTCGAATGTTATTTTGTCTCCCGG  
+HWI-EAS443:3:100:833:315#0/1  
abaa`a`\_`\_a]\_aaab`\_`^ab¥`^aaaa\_\_^\_Z\_Z`B  
@HWI-EAS443:3:100:919:996#0/1  
AAGTCCTCGTGATATGGGGCATTACCATCCATCTACTAG  
+HWI-EAS443:3:100:919:996#0/1  
][¥]]abaaa^PUb]a]]I[¥b]aa]S]aZNSa]Y]Y\_aa  
@HWI-EAS443:3:10:1014:560#0/1  
CTTCCTCTGAGTATTTTGGGTAGTCATAAGTCCAATTTTT  
+HWI-EAS443:3:10:1014:560#0/1  
T¥aV^a\_Wabbb^]^a¥aZ^\_Z[PXabYXS`TOGO]ZWZR  
@HWI-EAS443:3:10:1119:1922#0/1  
CACGTTCCATTGTCTGAACTAGTTGTTTCCACAATGTAGG  
+HWI-EAS443:3:10:1119:1922#0/1  
aba\_OV\_ZV\_b¥00Va\_b^`a¥U^^[^PHLODVWZZU\_YX  
@HWI-EAS443:3:10:1218:1581#0/1  
CACGTTCCATTGTCTGAACTAGTTGTTTCCACAATGTAGG  
+HWI-EAS443:3:10:1218:1581#0/1  
\_ab¥U¥b^`bbaa`b\_ab\_b`a`\_`^bb\_\_b\_]`a`\_`\_a  
@HWI-EAS443:3:10:1230:1974#0/1  
ATCTCCTGGGTAACACGTTCCATTGTCTGAACTAGTTGTT  
+HWI-EAS443:3:10:1230:1974#0/1  
aa\_\_\_\_`aa\_`^aaZa^\_^\_W]\_\_^\_U]\_^\_W^Z\_Z]]^^  
@HWI-EAS443:3:10:1319:1936#0/1  
ATCTCCTGGGTAACACGTTCCATTGTCTGAACTAGTTGTT  
+HWI-EAS443:3:10:1319:1936#0/1  
aba^`H`\_`\_[]aa\_]a`a`HT`\_Wa^¥\_\_^\_TQa]OXR[`



@HWI-EAS443:3:10:151:1589#0/1  
ATCTCCTGGGTAACACGTTCCATTGTCTGAACTAGTTGTT  
+HWI-EAS443:3:10:151:1589#0/1  
a`a\_ba\_\_^]Za`\_a`\_^`\_\_^^]Z\_\_Y]^Z]]ZX]Z]  
@HWI-EAS443:3:10:1572:1359#0/1  
GTCTGAACTAGTTGTTTCCACAATGTAGGACCATGAGCTT  
+HWI-EAS443:3:10:1572:1359#0/1  
aSXT[MUX¥¥[WX\_0]]WGWVVXZG¥ZZXR XUWVSWSOX  
@HWI-EAS443:3:10:210:1210#0/1  
AGGAAATTGGAAACGGCTGCTTTGAATTTTACCAAAAATG  
+HWI-EAS443:3:10:210:1210#0/1  
]]¥[[^Q\_U¥W\_aa`LX]SXVT^^YBBBBBBBBBBBBBB  
@HWI-EAS443:3:10:55:1081#0/1  
TCCGGCTTGAACCTCTGCTGTATCTTGATGTCCCCACAA  
+HWI-EAS443:3:10:55:1081#0/1  
abaaaaa`^[a`\_\_`\_\_`\_\_`\_\_`^^Z^[¥X[¥\_\_\_\_]\_`  
@HWI-EAS443:3:10:684:381#0/1  
TGGGTAACACGTTCCATTGTCTGAACTAGTTGTTTCCACA  
+HWI-EAS443:3:10:684:381#0/1  
\_ba`IaV`b[]^M¥bbba[]b[]`aabV`aaU^\_[[\_Y]  
@HWI-EAS443:3:10:808:1937#0/1  
TGCCGGTTTCATTGAATGGGGGTGGACAGGGATGGTAGAT  
+HWI-EAS443:3:10:808:1937#0/1  
aabY\_`\_`\_b\_baaaa¥bba]`[IZ`]0]\_aa]X`TNa`a\_  
@HWI-EAS443:3:10:925:196#0/1  
ATCTCCTGGGTAACACGTTCCATTGTCTGAACTAGTTGTT  
+HWI-EAS443:3:10:925:196#0/1  
`bbab`baa`^a\_\_`U`\_\_^^`[^YZ`Z\_X^]R]\_Z^  
@HWI-EAS443:3:10:952:816#0/1  
CACGTTCCATTGTCTGAACTAGTTGTTTCCACAATGTAGG  
+HWI-EAS443:3:10:952:816#0/1  
ababbbbabbbbaabbab^abbabababa`a``aa[^a`a  
@HWI-EAS443:3:11:1092:788#0/1  
GAACTAGTTGTTTCCACAATGTAGGACCATGAGCTTGCTG  
+HWI-EAS443:3:11:1092:788#0/1  
^aba\_T\_]`aaaa^aZ`¥Z]`^`]]]¥^W\_a\_a`\_a`^\_\_  
@HWI-EAS443:3:11:1605:555#0/1  
CACGTTCCATTGTCTGAACTAGTTGTTTCCACAATGTAGG  
+HWI-EAS443:3:11:1605:555#0/1  
`a`[]W^a\_\_`V^W^\_¥XYR[Z\_ZZX\_RXZGZ]XZBBBB  
@HWI-EAS443:3:11:1664:716#0/1  
CACGTTCCATTGTCTGAACTAGTTGTTTCCACAATGTAGG  
+HWI-EAS443:3:11:1664:716#0/1  
[`bbbb`\_ba`baabbbbaabb]aba[^\_T[]`]PZHaa\_  
@HWI-EAS443:3:11:271:1683#0/1  
AGACTACCAGTACCAATGAACTGGCGACAGTTGAAAAGAT  
+HWI-EAS443:3:11:271:1683#0/1  
Xb`baa`aW¥[aPZ^ba[¥[]IRWaTa]¥\_]UVZaG¥BBB  
@HWI-EAS443:3:11:399:1620#0/1  
GTTGCTTCGAATGTTATTTTGTCTCCCGCTCTAATAGTG

+HWI-EAS443:3:11:399:1620#0/1  
`RUVVaSVaSTPYGYPa\_\_\_\_^`MPBBBBBBBBBBBBBBB  
@HWI-EAS443:3:11:515:79#0/1  
ACACGTTCCATTGTCTGAACTAGTTGTTCCACAATGTAG  
+HWI-EAS443:3:11:515:79#0/1  
aabab^``^`\_`^aa`\_]a^Ya\_^\_ZX]Z\_]^\_Z]\_  
@HWI-EAS443:3:11:62:1650#0/1  
TCTGAGTATTTTGGGTAGTCATAGTCCCATTTTTGACAC  
+HWI-EAS443:3:11:62:1650#0/1  
aaaaa\_[`aaa^aaXaa¥a`¥FT^`a`a`\_`Y^`\_  
@HWI-EAS443:3:11:726:1846#0/1  
ACGTTCCATTGTCTGAACTAGTTGTTCCACAATGTAGGA  
+HWI-EAS443:3:11:726:1846#0/1  
^[UHY^Y\_\_\_RTa`¥Xa`VVQ``\_\_`TO]I`a^¥S`^BB  
@HWI-EAS443:3:11:822:1459#0/1  
CTCCTGGGTAACACGTTCCATTGTCTGAACTAGTTGTTTC  
+HWI-EAS443:3:11:822:1459#0/1  
aa`\_`[`a^a^`aaaZ\_¥a`\_`a`\_`a`\_`Z`\_`Y`a[\_`X  
@HWI-EAS443:3:11:883:173#0/1  
CTCCTGGGTAACACGTTCCATTGTCTGAACTAGTTGTTTC  
+HWI-EAS443:3:11:883:173#0/1  
abaaabaaQbaaa\_```a`\_`\_]\_\_^VUR[\_\_\_X^]^[^]]  
@HWI-EAS443:3:11:886:1881#0/1  
ATTAATTTTTGTAGAAGCTTTTTGCTCCAGCAGGAGGAC  
+HWI-EAS443:3:11:886:1881#0/1  
ZR`abV\_ZZba\_UXbbab][X^[`]XWOF[XP`GZUKZBB  
@HWI-EAS443:3:12:1347:963#0/1  
GAACTAGTTGTTCCACAATGTAGGACCATGAGCTTGCTG  
+HWI-EAS443:3:12:1347:963#0/1  
\_aaaabbU]b\_bb\_b`baba¥]b`Ya`b\_aaaUa^aSab  
@HWI-EAS443:3:12:1712:1219#0/1  
GGGGGCATCAAGATACAGCAAGAAGTTCAAGCCGAAATA  
+HWI-EAS443:3:12:1712:1219#0/1  
a\_X\_] [V[HV^U[^YP`Y[`a`^^aSSL\_]LDW[YYV]Y  
@HWI-EAS443:3:12:362:297#0/1  
ACGTTCCATTGTCTGAACTAGTTGTTCCACAATGTAGGA  
+HWI-EAS443:3:12:362:297#0/1  
`V\_X`]^`aZ`\_^`[]\_\_aWa`\_`\_`\_SX¥^\_Z\_]W]  
@HWI-EAS443:3:12:426:666#0/1  
CTGGGTAACACGTTCCATTGTCTGAACTAGTTGTTCCAC  
+HWI-EAS443:3:12:426:666#0/1  
^^^U\_]`T^¥Y[HXI^Vbbb¥VYbX`SUZ`\_a`SQH\_Z`X  
@HWI-EAS443:3:12:474:1653#0/1  
CATCATTTGAAAGGTTGAGATATTTCCCAAGACAAGTTC  
+HWI-EAS443:3:12:474:1653#0/1  
[`UU`b\_YVa`Zb\_F[`^^`¥aa\_ab]QOR``aaabaa¥`U  
@HWI-EAS443:3:12:69:747#0/1  
CCAGGAGATTTTCATCGATTATGAGGAGATAAGAGAGCAAT  
+HWI-EAS443:3:12:69:747#0/1  
`ba\_ww]XFXSa\_\_aZ[aa¥\_\_^`L]¥H\_¥OUX\_^``PG¥

@HWI-EAS443:3:12:864:1373#0/1  
CACGTTCCATTGTCTGAACTAGTTGTTTCCACAATGTAGG  
+HWI-EAS443:3:12:864:1373#0/1  
ab`aW`a[L[\_a^Z`^[\`¥`b`X¥]aZZ\_`aa\_aVR[\_  
@HWI-EAS443:3:12:985:105#0/1  
ACGTTCCATTGTCTGAACTAGTTGTTTCCACAATGTAGGA  
+HWI-EAS443:3:12:985:105#0/1  
aab\_aaa`bab`\_b`¥aZa¥a^aaaa`\_]\_R\_`^`]^a^]  
@HWI-EAS443:3:13:100:995#0/1  
ATTGTGGAACAACACTAGTTCAGACAATGGAACGTGTTACC  
+HWI-EAS443:3:13:100:995#0/1  
aa`¥aaa[^a`[a\_a^^`a\_aa`a\_`\_^[R\_Y\_Y^[XZ  
@HWI-EAS443:3:13:1128:1791#0/1  
GAACTAGTTGTTTCCACAATGTAGGACCATGAGCTTGCTG  
+HWI-EAS443:3:13:1128:1791#0/1  
a`b¥bbb[bbba\_\_\_a\_babZ\_baaaaZaaa^aa`\_`\_\_a  
@HWI-EAS443:3:13:260:941#0/1  
GGGGACATCAAGATACAGCAAGAAGTTCAAGCCGAAAATA  
+HWI-EAS443:3:13:260:941#0/1  
aba`a`Z]ab\_Ya`¥^`Z[\_aa]\_`MRUaa`X]]^ZZZ\_[  
@HWI-EAS443:3:13:633:1325#0/1  
GCCGGTTTCATTGAAGGGTGGTGGACAGGGATGGTAGATG  
+HWI-EAS443:3:13:633:1325#0/1  
aa\_]QZ¥]aaaXWYF`¥`ZR]`S\_aYRP^^\_Z\_a^NZ`SP\_  
@HWI-EAS443:3:13:683:397#0/1  
GAACTAGTTGTTTCCACAATGTAGGACCATGAGCTTGCTG  
+HWI-EAS443:3:13:683:397#0/1  
aabab`b`baaabaaaababa\_aaaaa`ba`a`aaaa`a  
@HWI-EAS443:3:13:765:78#0/1  
ACACGTTCCATTGTCTGAACTAGTTGTTTCCACAATGTAG  
+HWI-EAS443:3:13:765:78#0/1  
aaa\_a\_\_¥`\_^\_^]\_`^^Z\_^\_X\_]\_\_^X^W\_Z^^XZ^  
@HWI-EAS443:3:13:892:46#0/1  
GGGACATCAAGATACAGCAAGAAGTTCACGCCGAAATAG  
+HWI-EAS443:3:13:892:46#0/1  
abbaaaa\_aaaaa`aaaaa¥^a]`^]bUUY\_]YYYYY^  
@HWI-EAS443:3:14:1307:492#0/1  
ATTCTGTGTCTCTTCAGGTGGCTGCATACCCTGACCCC  
+HWI-EAS443:3:14:1307:492#0/1  
aabaaa¥¥¥a`b]a]RW]`¥¥`a¥a[DKRWQRRX]QMVPP  
@HWI-EAS443:3:14:1474:1793#0/1  
AATCGATGAAATCTCCTGGGAAACACGTTCCATTGTCTGA  
+HWI-EAS443:3:14:1474:1793#0/1  
V\_TTZ^SXY]¥SWQXZ\_Z¥aG[Qa^OHO\_`S]Y^]FJ]a]]  
@HWI-EAS443:3:14:216:1472#0/1  
TAAAAACAATGCCAAGGAAATTGGAACGGCTGCCTTGA  
+HWI-EAS443:3:14:216:1472#0/1  
ab`Xaabba]aaa`abaYabY[Z`aa`a`\_baaLDU\_SH  
@HWI-EAS443:3:14:233:1091#0/1  
TGCATATGTTTTTGTGGGGACACCAAGATACAGCAAGAAG

+HWI-EAS443:3:14:233:1091#0/1  
¥bbb`>`bab¥aab\_a\_bbaabJ`abaa\_aab\_\_abaa\_a  
@HWI-EAS443:3:14:334:1130#0/1  
CTCCTCATAATCGATGAAATCTCCTGGGTAATACGTTCCA  
+HWI-EAS443:3:14:334:1130#0/1  
abaaa`aaa`Z`aa`\_\_aaa\_`aa¥`a\_S\_[F\_a\_\_]\_\_`  
@HWI-EAS443:3:14:758:733#0/1  
GCTTCCTTTGAGTATTTTGGGTAGTCATAAGTCCCATTTT  
+HWI-EAS443:3:14:758:733#0/1  
aabaaaaab\_aa]\_a\_aaaaa]\_aY\_\_`^a\_Y]X\_\_a\_aa  
@HWI-EAS443:3:14:867:1868#0/1  
CCTGACCCCTGCTCATATTGATGGTGATAACCGTACCATC  
+HWI-EAS443:3:14:867:1868#0/1  
aaaaaaaaaaaa`a\_aaaZZ]b`aSMU\_^`aQ[[]]NU¥NN  
@HWI-EAS443:3:14:900:1826#0/1  
CCC GTTATGCTTGTCTTCTAGAAGGTTAACAGAGAGTGTT  
+HWI-EAS443:3:14:900:1826#0/1  
```^[bV¥\_V^^]aV]Zaab\_]baa]V``Saa]VG^]`^aU  
@HWI-EAS443:3:15:1145:313#0/1  
CCCGGCTCTACTAGTGTCCAGTAATAGATCATTCTCCCTT  
+HWI-EAS443:3:15:1145:313#0/1  
a`WS\_`¥`a`UN][DR¥[OTW\_Q0]I[FQ]\_\_Z`^W\_YST  
@HWI-EAS443:3:15:1525:525#0/1  
CGTTCCATTGTCTGAACTAGTTGTTTCCACAATGTAGGAC  
+HWI-EAS443:3:15:1525:525#0/1  
]``ab\_baaa^`ba`[aaa^`b]\_a\_a`a[\_¥WPaa`\_]`  
@HWI-EAS443:3:15:1536:1514#0/1  
AACAAAGGCTCTATCAGAATGCAGATGCATATGTTTTTGT  
+HWI-EAS443:3:15:1536:1514#0/1  
aaa¥^¥TG`ba¥aa`bbb``aaXV]aaaaa^`aaa\_`aa^  
@HWI-EAS443:3:15:177:211#0/1  
CACGTTCCATTGTCTGAACTAGTTGTTTCCACAATGTAGG  
+HWI-EAS443:3:15:177:211#0/1  
a`Y`\_aa^ZU]aXS`^[aZ`\_¥][Z^`\_U\_^W\_UY]W¥\_`^  
@HWI-EAS443:3:15:179:781#0/1  
GCTCATGGTCTACATTGTGGAAACAACTAGTTCAGACAA  
+HWI-EAS443:3:15:179:781#0/1  
]`bbbU`^``¥Vaabba^`^`\_`a¥baY¥a¥^\_babbbba  
@HWI-EAS443:3:15:300:1722#0/1  
AATTTACTTTGTTAGTAATCTCGGCAATGGCATTCTGTGT  
+HWI-EAS443:3:15:300:1722#0/1  
]XXa]a]`Y][V]`P¥S¥`¥\_`G]^ZU¥Z[^]Z`]\_0]Z  
@HWI-EAS443:3:15:727:1896#0/1  
CACGTTCCATTGTCTGAACTAGTTGTTTCCACAATGTAGG  
+HWI-EAS443:3:15:727:1896#0/1  
aa````b`b`ab]]Jaaa^aaa`^`Paaaa\_aaa`]a^^  
@HWI-EAS443:3:15:908:1202#0/1  
ACACGTTCCATTGTCTGAACTAGTTGTTTCCACAATGTAG  
+HWI-EAS443:3:15:908:1202#0/1  
aabaa\_`aa``aa\_aaa\_a\_\_^aX\_`^``]\_aW[^`^¥]X

@HWI-EAS443:3:15:954:535#0/1  
ACGTTCCATTGTCTGAACTAGTTGTTTCCACAATGTAGGA  
+HWI-EAS443:3:15:954:535#0/1  
]T]RZZ\_ZaWa\_WU^V`QYSWQY\_O^WVQ[TVVQ^HT` [W  
@HWI-EAS443:3:16:1463:1209#0/1  
ATTCATCTTTTCAATAACAGAATTTACTTCGTTAGTAATC  
+HWI-EAS443:3:16:1463:1209#0/1  
abbbbaababbabbaabababaaabaaaab`^`^[\_a\_]\_^N  
@HWI-EAS443:3:16:1557:1872#0/1  
CACGTTCCATTGTCTGAACTAGTTGTTTCCACAATGTAGG  
+HWI-EAS443:3:16:1557:1872#0/1  
U¥ba\_a]aa`b¥HW]`\_]^a\_a¥aaab\_TX\_aYa^`^¥a`  
@HWI-EAS443:3:16:1619:1846#0/1  
GTGGGGACATCAAGATACAGCAAGAGGTTCAAGCCGAAA  
+HWI-EAS443:3:16:1619:1846#0/1  
XJ])bbb`b[bb[bb\_`V]^`^a¥a[H[J][baaVUVa` [b  
@HWI-EAS443:3:16:1768:1494#0/1  
GTTCCATTGTCTGAACTAGTTGTTTCCACAATGTAGGACC  
+HWI-EAS443:3:16:1768:1494#0/1  
^T`TaX^Ybaaaba`J^ab]aaa``Z\_aYaa^a\_\_aa¥FV  
@HWI-EAS443:3:16:367:1509#0/1  
CTTGAACCTCTTGCTGTATCTTGATATCCCCACAAAAACA  
+HWI-EAS443:3:16:367:1509#0/1  
aaYVO[¥¥W[`\_`\_\_aW]YZPW¥TPDW[^\_a` [ZZXSR[W  
@HWI-EAS443:3:16:496:1700#0/1  
AGAAGTTCAAGCCGAAATATCAATAAGACCCAAAGTGAG  
+HWI-EAS443:3:16:496:1700#0/1  
a`a[\_V¥aa`Y])\_Z\_\_a[ZG^`a[a\_]\_\_\_0]S])X\_WY  
@HWI-EAS443:3:16:62:1016#0/1  
ATTGTCTGAACTAGTTGTTTCCACAATGTAGGACCATGAG  
+HWI-EAS443:3:16:62:1016#0/1  
\_ZV\_^\_\_\_SZ\_aYZPZ^Waaaa^YV[\_\_\_V\_]WLVXPPZRV  
@HWI-EAS443:3:16:786:1282#0/1  
TTTTGCTTCTCTGAGCATTGTTGGGTAGTCATAAGTCCCA  
+HWI-EAS443:3:16:786:1282#0/1  
]^`^¥ab`Sabbba^a^`K^aU]Raa`aa`VYa\_^\_aXa^\_V  
@HWI-EAS443:3:16:897:1513#0/1  
TGGGTAACACGTTCCATTGTCTGAACTAGTTGTTTCCACA  
+HWI-EAS443:3:16:897:1513#0/1  
ab\_\_F[[b\_bXaaababb\_\_bbaa\_\_baaaaba`abaa`\_  
@HWI-EAS443:3:16:902:603#0/1  
ACGTTCCATTGTCTGAACTAGTTGTTTCCACAATGTAGGA  
+HWI-EAS443:3:16:902:603#0/1  
aaaaa[`aaaa\_\_a\_`a^aaa\_``]aa\_^\_]`\_\_\_Y\_`\_\_  
@HWI-EAS443:3:17:1031:693#0/1  
CACTAGTAGACGGATGGTGAATGCCCCATAGCACGAGGAC  
+HWI-EAS443:3:17:1031:693#0/1  
^X\_]\_U\_a])\_`^S\_\_U\_[BBBBBBBBBBBBBBBBBBBB  
@HWI-EAS443:3:17:1217:2025#0/1  
GTAACACGTTCCATTGTCTGAACTAGTTGTTTCCACAATG

+HWI-EAS443:3:17:1217:2025#0/1  
^MWW]YX[U[S]0^`RR]ZY^\_X¥PTQYZPYTU¥ZZ]WV  
@HWI-EAS443:3:17:123:977#0/1  
ACCAGCCTCCCATTTCAGAACATACATCCGATCACAATTG  
+HWI-EAS443:3:17:123:977#0/1  
ab\_JZ\_Q\_`baaa`aa]QUR`UZY\_¥¥^ZKFWZ]RXM[XB  
@HWI-EAS443:3:17:127:1591#0/1  
CAAGGAAATTGGAAACGGCTGCTTTGAATTTTAACACAAA  
+HWI-EAS443:3:17:127:1591#0/1  
`[VSXWY^^[GU]¥\_^XT]]ROOVZFFVMW\_¥OGORP]BB  
@HWI-EAS443:3:17:1284:1595#0/1  
CTCCTGGGTAACACGTTCCATTGTCTGAACTAGTTGTTTC  
+HWI-EAS443:3:17:1284:1595#0/1  
aaaa[Z^^VQ\_`aaaX\_\_aa`PZX^]`L\_`YNYZ¥\_]U][  
@HWI-EAS443:3:17:1401:816#0/1  
TACGGTTATAACCATCAAAATGAGCAGGGGTCAGGATATG  
+HWI-EAS443:3:17:1401:816#0/1  
`¥¥ab^`\_MFXSQ\_aWZ`aa`aZYQT`a`\_P`¥a`¥UV]B  
@HWI-EAS443:3:17:1694:1099#0/1  
ACGTTCCATTGTCTGAACTAGTTGTTTCCACAATGTAGGA  
+HWI-EAS443:3:17:1694:1099#0/1  
aaaaaa\_abaa\_^aa[\_Va\_\_^aa``a[L[W`Y\_Y]¥^ZT  
@HWI-EAS443:3:17:1748:69#0/1  
GTGTTATCGCATTTGTGGTAAAATTCAAGGCAGCCGTTTC  
+HWI-EAS443:3:17:1748:69#0/1  
`^\_G^]ZY\_`X^b`a]\_\_S\_\_]XW]Q¥SU^W¥\_TT[TYUQ  
@HWI-EAS443:3:17:176:266#0/1  
AAACGGCTGGTTTGAATTTTACCACAAATGCGATAACACG  
+HWI-EAS443:3:17:176:266#0/1  
Z\_\_Q¥XaZULF\_Z\_\_PX^aZOY¥V¥]WYXZXTUMQTR¥NV  
@HWI-EAS443:3:17:227:378#0/1  
CCTCTGAGCATTTTGGGTAGTCATAAGTCCCATTTTGGAC  
+HWI-EAS443:3:17:227:378#0/1  
abaaZZZ^FZbaaa\_]L[a`Xaa]¥^`Za\_R``a\_a]a\_\_  
@HWI-EAS443:3:17:371:2020#0/1  
CACGTTCCATTGTCTGAACTAGTTGTTTCCACAATGTAGG  
+HWI-EAS443:3:17:371:2020#0/1  
abaa\_\_aba`]¥]a]]\_aa\_a¥S`¥]\_`aaaa`SXR`¥^  
@HWI-EAS443:3:17:383:158#0/1  
AACACGTTCCATTGTCTGAACTAGTTGTTTCCACAATGTA  
+HWI-EAS443:3:17:383:158#0/1  
abaaaa\_aa`aaaa]aaa¥^\_`\_`X^a^`^\_^]\_^\_\_Z^  
@HWI-EAS443:3:17:447:1802#0/1  
ATTTACTTTGTTAGTAATCTCGTCAATGTCATTCTGTGTG  
+HWI-EAS443:3:17:447:1802#0/1  
`aaY¥¥\_``[ab`[H^`a`\_`\_`Za\_aPGQ`\_]\_^¥ZPPYM  
@HWI-EAS443:3:17:967:814#0/1  
GAACTAGTTGTTTCCACAATGTAGGACCATGAGCTTGCTG  
+HWI-EAS443:3:17:967:814#0/1  
^^]\_`]]YR\_Z¥¥]¥`a`]T]RUY\_]^^¥OX¥ZTYW]RW^

@HWI-EAS443:3:18:1392:1104#0/1  
GAACTAGTTGTTTCCACAATGTAGGACCATGAGCTTGCTG  
+HWI-EAS443:3:18:1392:1104#0/1  
a¥a`a\_a`]b][WM]\_Y^VJ0^[WVU]Z\_V¥YRV^^Z^]  
@HWI-EAS443:3:18:1601:669#0/1  
GGTAGTCATAAGTCCATTTTTGACACTTTCCACGCACGT  
+HWI-EAS443:3:18:1601:669#0/1  
aa`aba\_ba`ba[aa\_``aaaaa`^\_^`aa]]a]`\_\_]aU  
@HWI-EAS443:3:18:1770:1117#0/1  
GCCATGAACTTGTCTTGGGAATATCTCAAACCTCTCAAA  
+HWI-EAS443:3:18:1770:1117#0/1  
]SZ`\_Z0[VZa[VXa[a]`OKX\_`[Q¥Z¥ZU^V[bBBBBB  
@HWI-EAS443:3:18:295:168#0/1  
GCTTTTTGCTCCAGCATGAGGACATGCTGCCGCTACACCT  
+HWI-EAS443:3:18:295:168#0/1  
aaaaaaaa`a\_aaa\_a\_\_a\_\_```^U\_X`UTZZTWNVNYQ  
@HWI-EAS443:3:18:30:1352#0/1  
CTCCTGGGTAACACGTTCCATTGTCTGAACTAGTTGTTTC  
+HWI-EAS443:3:18:30:1352#0/1  
aa\_b\_aa`^aXa`\_^\_\_aa`]\_\_S\_^\_\_a\_\_`aV\_¥X^[\`  
@HWI-EAS443:3:18:372:1265#0/1  
TAACACGTTCCATTGTCTGAACTAGTTGTTTCCACAATGT  
+HWI-EAS443:3:18:372:1265#0/1  
^]aa`¥SY`b^aa^VMa`]`\_\_WN]^\_^]^^^]VZLP[^^S  
@HWI-EAS443:3:18:387:1315#0/1  
CCTGGGTAACACGTTCCATTGTCTGAACTAGTTGTTTCCA  
+HWI-EAS443:3:18:387:1315#0/1  
aaa\_``Z¥aa`a\_^`\_^`^`\_X]\_\_]a][V[U^X^]]X  
@HWI-EAS443:3:18:412:723#0/1  
GTGAAACAACACTAGTTCAGACAATGGAACGTGTTACCCAG  
+HWI-EAS443:3:18:412:723#0/1  
aaaaab[bbaaabb\_`aabab`aa``a\_aZa]\_\_aa¥a`  
@HWI-EAS443:3:18:44:726#0/1  
CAGAATTTACTTTGTCTAGTAATCTCGTCAATGGCATTCTG  
+HWI-EAS443:3:18:44:726#0/1  
abb`aabbbX`bb^T^ababaa\_`\_bZZa\_] [a\_\_a\_\_S[  
@HWI-EAS443:3:18:511:1566#0/1  
TCCTGGGTAACACGTTCCATTGTCTGAACTAGTTGTTTCC  
+HWI-EAS443:3:18:511:1566#0/1  
aa\_`^`¥V`aa\_aaZ[`a]a\_¥Y]aI`aa\_[]^\_\_Q\_W\_`  
@HWI-EAS443:3:18:67:1865#0/1  
GTTATCGCATTTGTGGTAAAATTCAAAGCAGCAGTTTCCA  
+HWI-EAS443:3:18:67:1865#0/1  
a```USW\_aX\_`\_XWWGaa\_UWZTX[ZGU¥ZYGYWXX¥P[  
@HWI-EAS443:3:18:895:157#0/1  
GTGCTTTTTACATATTTTGGACATTTTCCAACGTGATCG  
+HWI-EAS443:3:18:895:157#0/1  
a\_R`aab`\_`¥¥a\_`\_]a¥^[^¥\_`^]U[UK[]VY[Y  
@HWI-EAS443:3:18:962:22#0/1  
GAACTAGTTGTTTCCACAATGTAGGACCATGAGCTTGCTG

+HWI-EAS443:3:18:962:22#0/1  
aa`>`aa`aa`a`\_a\_a\_aa^\_[^]^^^\_\_\_\_`Z^\_  
@HWI-EAS443:3:19:1151:160#0/1  
GCCAGCAATGTTACATTTACCCAAATGCAATTGGGCTACC  
+HWI-EAS443:3:19:1151:160#0/1  
aaaYa^`a¥JJ¥aUW\_S`X[WQ]\_TWZ^S^[VM[^R][WO  
@HWI-EAS443:3:19:1550:270#0/1  
ATCTCCTGGGTAACACGTTCCATTGTCTGAACTAGTTGTT  
+HWI-EAS443:3:19:1550:270#0/1  
a]\_aaa¥\_aUU\_]aa^aT\_S¥a]PVNX[a\_WY[```PUZGY  
@HWI-EAS443:3:19:1607:763#0/1  
GTCAGGATATGCAGCCTACCTGAAGAGCACACAGAATGCC  
+HWI-EAS443:3:19:1607:763#0/1  
a``baaa`aa¥`aa]`aa^]aa`\_a]a\_aZ\_¥`\_^^\_UU  
@HWI-EAS443:3:19:305:1260#0/1  
ACGTTCCATTGTCTGAACTAGTTGTTTCCACAATGTAGGA  
+HWI-EAS443:3:19:305:1260#0/1  
aba¥`^a[`aa]aa[VaaaaaX^¥M`\_aa¥Uaa``]\_^\_^  
@HWI-EAS443:3:19:728:1269#0/1  
ATGAAATCTCCTGGGTAACACGTTCCATTGACTGAACTAG  
+HWI-EAS443:3:19:728:1269#0/1  
a^Z\_^¥\_^`aaXX^aQ\_FHZa^ZZaUHYQ^GY`]RQUXXB  
@HWI-EAS443:3:19:800:874#0/1  
ATGGCATTGTTGTGTGCTCTTCAGGTCGGCTGCATATCCTG  
+HWI-EAS443:3:19:800:874#0/1  
RW\_a^b[``\_\_b[`^bbbb\_`W`a]a`Wq]Xaa]aaVZTZ  
@HWI-EAS443:3:19:918:206#0/1  
TGTGGAAACAACACTAGTTCAGACAATGGAACGTGTTACCCA  
+HWI-EAS443:3:19:918:206#0/1  
Yb¥`bZ]`a¥^Xa`]0\_PU```Qa````Z`\_\_Y\_X[^\_^]Z  
@HWI-EAS443:3:19:930:1237#0/1  
AACACGTTCCATTGTCTGAACTAGTTGTTTCCACAATGTA  
+HWI-EAS443:3:19:930:1237#0/1  
Va`¥aa`aa]baaa]¥a`QY`^^`\_aa`a]X]^Y`¥\_ZT[  
@HWI-EAS443:3:1:1470:2026#0/1  
GGGGTGGACAGGGATGGAAGATGGATGGTACGGTTATCAC  
+HWI-EAS443:3:1:1470:2026#0/1  
ababR\_`aXab\_^a\_a[HY\_^^`a¥^`KLUP\_SBBBBBBB  
@HWI-EAS443:3:1:681:276#0/1  
GCCGGGAGACAAAATAACATTAGAAGCAACTGGAAATCTA  
+HWI-EAS443:3:1:681:276#0/1  
]QY]aa^^VU]\_^\_TRTNZXGX¥\_aQONXZ[PHOUUBBB  
@HWI-EAS443:3:1:938:1058#0/1  
CGTTCCATTGTCTGAACTAGTTGTTTCCACAATGTAGGAC  
+HWI-EAS443:3:1:938:1058#0/1  
aba`b]a`^¥HJWZTZV\_UUU``[^UP^`STUY`U[D¥BB  
@HWI-EAS443:3:1:972:1026#0/1  
CAACTTGTGACACACCCAAGGGGGCTATAAACACCAGCCT  
+HWI-EAS443:3:1:972:1026#0/1  
a\_`aaba^Ubaa[b`][b]ZaaIa\_Za`ba^\_aPPaBBBB



@HWI-EAS443:3:20:1146:588#0/1  
ACTAGTTGTTTCCACAATGTAGGACCATGAGCTTGCTGTG  
+HWI-EAS443:3:20:1146:588#0/1  
[WZa``]babb``a[``]a`\_a¥M¥]¥¥]a]a[\_`a\_^¥^Y  
@HWI-EAS443:3:20:1153:1792#0/1  
CTCCTGGGTAACACGTTCCATTGTCTGAACTAGTTGTTTC  
+HWI-EAS443:3:20:1153:1792#0/1  
aa]a^WZ`U]`Z\_a\_[0`]Xa[a[a``XZY\_`¥[``U[]V  
@HWI-EAS443:3:20:1518:246#0/1  
ACGTTCCATTGTCTGAACTAGTTGTTTCCACAATGTAGGA  
+HWI-EAS443:3:20:1518:246#0/1  
`P\_\_]]^aaa\_VVaa]`V]R`[Z\_]Z`Z^YV]ZV^WY`^Q  
@HWI-EAS443:3:20:1551:1501#0/1  
TTTTCCAATTGTGCTCGGATGTATATTCTGAAATGGGAGG  
+HWI-EAS443:3:20:1551:1501#0/1  
abaaba\_\_````\_MZ]``U]`RU]]\_`T¥VM]^Z^\_]X]X  
@HWI-EAS443:3:20:1645:883#0/1  
GGGGACATCAAGATACAGCAAGAAGTTCAGGCCGAAATA  
+HWI-EAS443:3:20:1645:883#0/1  
`aQ^a[[aaa[aH[HXa`JQ]P`UX]N^YFLLGU`RURU^  
@HWI-EAS443:3:20:167:1033#0/1  
GTGCTCTTCAGGCCGGCTGCATATCCTGACCCCTGCTCAT  
+HWI-EAS443:3:20:167:1033#0/1  
a¥X`X]T^``\_SFY\_[\_SV¥ZPNV`\_SX¥V¥^\_WUWWWRW  
@HWI-EAS443:3:20:1680:451#0/1  
CTGGTGTATCTGAACTGATAATACCAGATCCAGCATTCT  
+HWI-EAS443:3:20:1680:451#0/1  
a``````^^``^`T¥``\_R¥UVUWUNT[QLNNSYSV[VPOY  
@HWI-EAS443:3:20:185:872#0/1  
CACGTTCCATTGTCTGAACTAGTTGTTTCCACAATGTAGG  
+HWI-EAS443:3:20:185:872#0/1  
``b]abbbb`bb¥^¥\_aZ]babaabaaaaaaaa\_H¥^X^  
@HWI-EAS443:3:20:208:1316#0/1  
CACGTTCCATTGTCTGAACTAGTTGTTTCCACAATGTAGG  
+HWI-EAS443:3:20:208:1316#0/1  
a]ba^aabaaa^]abaaaa\_`a^``\_`bab\_a\_abaa\_aV]  
@HWI-EAS443:3:20:432:943#0/1  
CTCTTTACCTACTGCTGTGAACTGCGTATTCATCTTTTCA  
+HWI-EAS443:3:20:432:943#0/1  
aa`U`]a``aaaaaaa\_\_YW^`\_F]J`a^^a¥U\_\_a\_`¥  
@HWI-EAS443:3:20:946:1300#0/1  
AACACGTTCCATTGTCTGAACTAGTTGTTTCCACAATGTA  
+HWI-EAS443:3:20:946:1300#0/1  
aa`aa\_\_[]`a``a¥Z^]U]ZZ\_\_LU\_\_a\_\_^\_ZY^^\_V^  
@HWI-EAS443:3:21:1075:701#0/1  
CCTCTGAGTATTTTGGGCAGTCATAAGTCCCATTTTGGAC  
+HWI-EAS443:3:21:1075:701#0/1  
^a^``\_¥\_Z`\_Z\_¥U\_]L¥^^``\_][S¥Y]]T[^V]``aUG  
@HWI-EAS443:3:21:1154:1344#0/1  
GAACTCTTTACCTACTGCTGTGAACTGTGGATTCATCTTT

+HWI-EAS443:3:21:1154:1344#0/1  
[S^[[[aabaWTY\_W`RYS\_\_ZZYYYYXG^H\_]TFZWW`R\_  
@HWI-EAS443:3:21:1319:502#0/1  
CCAGTTGCTTCGAATGTTATGTTGTCTCCCGCTCTACTA  
+HWI-EAS443:3:21:1319:502#0/1  
`]W\_]aaTaaUa^T¥ZZ]UXOWW[YY[TX]^BBBBBBBBB  
@HWI-EAS443:3:21:1532:1285#0/1  
GTCCTACATTGTGGAAACAACACTAGTTCAGACAATGGAACG  
+HWI-EAS443:3:21:1532:1285#0/1  
aaa`a\_aaa`a¥b^aaa\_a^^\_a\_W`^]\_]\_^\_PT[0\_  
@HWI-EAS443:3:21:1783:1591#0/1  
CAGCAAGCTCATGGTCCTACATTGTGGAAACAACACTAGTTC  
+HWI-EAS443:3:21:1783:1591#0/1  
``aZa¥b`]Q[]\_T[[Z¥\_\_`[J]S^U[^^[VY^X^SZU  
@HWI-EAS443:3:21:182:2033#0/1  
TTCCTGGACATTTGGACTTACAACGCCGAACACTGTTGGTTC  
+HWI-EAS443:3:21:182:2033#0/1  
U^baZb¥Z\_baX¥Xba\_GM]\_a¥I\_^a`M]ZF[IWFQJPR  
@HWI-EAS443:3:21:869:821#0/1  
CTGGCGTATCTGAAATGATAATACCAGATCCAGCATTCT  
+HWI-EAS443:3:21:869:821#0/1  
abbYDY`¥^b``]S]abaV\_TaYSL[Z\_a\_W\_aPP]\_`PP  
@HWI-EAS443:3:22:1353:686#0/1  
CTCCTGGGTAACACGTTCCATTGTCTGAACTAGTTGTTTC  
+HWI-EAS443:3:22:1353:686#0/1  
`a\_\_bbbbX`a`aaa```\_a`aa\_\_aa\_`^`\_\_]aa\_`\_Z  
@HWI-EAS443:3:22:1629:227#0/1  
GCTTCCTCTGAGTATTTGGGTAGTCATAAGTCGCATTTT  
+HWI-EAS443:3:22:1629:227#0/1  
aY]W[U^P\_]``P^Y¥`a¥a]SH]X][[RU\_TDDTX\_`\_\_  
@HWI-EAS443:3:22:1728:1344#0/1  
CACGTTCCATTGTCTGAACTAGTTGTTCCACAATGTAGG  
+HWI-EAS443:3:22:1728:1344#0/1  
abb`ab`a¥baS`]\_aab`baaabaabb\_Ra\_aa`a]a^Y  
@HWI-EAS443:3:22:377:1988#0/1  
TACATATTCTACACTGTAGAGACCCATTAGAGCGCATCCA  
+HWI-EAS443:3:22:377:1988#0/1  
ZXW¥I[`ab¥¥aX^0^W¥ZZLWaba]\_0^abZZa`bPa¥¥  
@HWI-EAS443:3:22:497:1847#0/1  
CTAGTTGTTTCCACAATGTAGGACCATGAGCTTGCTGTGG  
+HWI-EAS443:3:22:497:1847#0/1  
aaba`\_]Uaa[Y^T^b\_]VbY[[]`\_aSN\_U]]RSZWZR^  
@HWI-EAS443:3:22:508:681#0/1  
GTCTGAACTAGTTGTTTCCACAATGTAGGACCATGAGCTT  
+HWI-EAS443:3:22:508:681#0/1  
a`aaaaaaa]`\_aaaaaaaaaaaaaZ`Y\_\_\_\_\_a`\_\_`\_  
@HWI-EAS443:3:22:682:832#0/1  
CACGTTCCATTGTCTGAACTAGTTGTTTCCACAATGTAGG  
+HWI-EAS443:3:22:682:832#0/1  
U`]P[WYTZ\_Z¥F0aZU¥bZ\_¥TUZOU¥NIYKFHLWOZ[`

@HWI-EAS443:3:22:749:1668#0/1  
ACCCCCTCTATTTCTTCTCTGTTTAATTTTGCTTCCCTCTG  
+HWI-EAS443:3:22:749:1668#0/1  
LS[aaR`PaWabbbb¥bbba`abbabbbb¥^bbabbabb  
@HWI-EAS443:3:23:1194:1184#0/1  
ATTGTGGAACAACACTAGTTCCAGACAATGGAACGTGTTACC  
+HWI-EAS443:3:23:1194:1184#0/1  
aaaaWabaa^aba`aa`aa\_aa]a\_`[a`^UYW^]^XKR  
@HWI-EAS443:3:23:1309:2012#0/1  
CAGTGTGCATCATTTGAAAGTTTGAGATATTCCTCGAAGAC  
+HWI-EAS443:3:23:1309:2012#0/1  
H¥bS`X\_\_\_TT\_`ZZab\_ab^\_abbabaaXabb]L`babb  
@HWI-EAS443:3:23:1626:1681#0/1  
CACGTTCCATTGTCTGAACTAGTTGTTTCCACAATGTAGG  
+HWI-EAS443:3:23:1626:1681#0/1  
\_Z¥ZZ[\_Y\_Y¥`aa`^¥`WZ]Z\_aa\_Z\_`aYI[^T[Z^]¥  
@HWI-EAS443:3:23:187:1443#0/1  
CACGTTCCATTGTCTGAACTAGTTGTTTCCACAATGTAGG  
+HWI-EAS443:3:23:187:1443#0/1  
abba]\_bb`aa`¥a`\_aba¥TV\_]Y]\_\_aa`]Pa\_\_W^^^  
@HWI-EAS443:3:23:261:1178#0/1  
AACACGTTCCATTGTCTGAACTAGTTGTTTCCACAATGTA  
+HWI-EAS443:3:23:261:1178#0/1  
aaaaa¥\_aaaa\_`]aaa`a\_]`Y`a\_a\_¥\_`¥`¥^¥]`  
@HWI-EAS443:3:23:443:774#0/1  
GTTCCATTGTCTGAACTAGTTGTTTCCACAATGTAGGACC  
+HWI-EAS443:3:23:443:774#0/1  
GY````b\_S¥bb`aabbbaabab\_b\_bbbaabaa]b[aTb  
@HWI-EAS443:3:23:873:244#0/1  
GGGGCATTACCATCCATCTACTAGTGCTGACCAGCAAAG  
+HWI-EAS443:3:23:873:244#0/1  
UHO[`\_^`^baab`aZaa]aa`a\_aYa`¥aaT\_\_`^W``\_  
@HWI-EAS443:3:24:141:916#0/1  
GCTGCTTTGAATTTTACCACCAATGCGATAACACGTGCAT  
+HWI-EAS443:3:24:141:916#0/1  
]b`ab]a`^VUY`]aa`^]¥I¥aYY^¥\_]aaaM`aZa[^]  
@HWI-EAS443:3:24:1443:1549#0/1  
GGAGGCTGGGGTTTATAGCACCTTGGGTGTCTGACAAGT  
+HWI-EAS443:3:24:1443:1549#0/1  
aaab`aaabH\_H^aZXV^MZVRUZ\_\_^\_S\_S[¥[UQUQ^G  
@HWI-EAS443:3:24:1497:1748#0/1  
GGAACGTGTCACCCAGGAGATTTTCATCGATTATGAGGAGC  
+HWI-EAS443:3:24:1497:1748#0/1  
aaaYYa\_\_SUaaaRa`a`a]V`aX`a`b`\_]`a\_a\_Z]N  
@HWI-EAS443:3:24:1555:1868#0/1  
GAGACTTTGTTGGTCAGCACTAGTAGATGGATGGGGAATG  
+HWI-EAS443:3:24:1555:1868#0/1  
a\_ba`abb\_]^[XW¥b`¥aS]ZXH\_b^`¥Xa\_`\_Ga``a\_  
@HWI-EAS443:3:24:18:1422#0/1  
TTCTGATAGAGACTTCGTTGGTCAGCACTAGTAGATGGAT

+HWI-EAS443:3:24:18:1422#0/1  
[\_¥\_\_S¥QU¥]abbabU\_X]SSUYY]aXL[JL^]ZY[FO  
@HWI-EAS443:3:24:193:1391#0/1  
ACGTTCCATTGTCTGAACTAGTTGTTTCCACAATGTAGGA  
+HWI-EAS443:3:24:193:1391#0/1  
aa`\_aaa)`\_U\_a`\_`\_a`\_`\_]\_V`a`\_`\_`\_W]TT]W[  
@HWI-EAS443:3:24:327:1601#0/1  
ACGTTCCATTGTCTGAACTAGTTGTTTCCACAATGTAGGA  
+HWI-EAS443:3:24:327:1601#0/1  
\_\_J¥\_b`Wa]]Sb^VR[¥`¥]]¥SUTP¥^a`Z^[ZGNTT`  
@HWI-EAS443:3:24:626:1363#0/1  
GCTGTGAAGTGTGATACATCTTTTCAATAACAGAATTTA  
+HWI-EAS443:3:24:626:1363#0/1  
abbaabbbabb\_babbbbbbbababbababaaaaabaaa  
@HWI-EAS443:3:24:756:712#0/1  
GTTCCATTGTCTGAACTAGTTGTTTCCACAATGTAGGACC  
+HWI-EAS443:3:24:756:712#0/1  
aYaa`aa`\_`\_]abP\_\_a`Y[\_a\_`a`\_a][a`\_]\_YS[Y^  
@HWI-EAS443:3:24:921:80#0/1  
GCTGGCTGGATCCTGGGGAATCCAGAGTGTGAATCACTCT  
+HWI-EAS443:3:24:921:80#0/1  
aZa\_^RUYaMSSVNV`]GX]¥W¥¥^W¥TZUUSUSMUGUBB  
@HWI-EAS443:3:25:1011:176#0/1  
ATCTGCATTCTGATAGAGTCTTTGTTGGTCAGCACTAGTA  
+HWI-EAS443:3:25:1011:176#0/1  
`aaaa\_Ubbaaaaa`a\_aZ`aa`a\_aa]Z¥Y`Y¥V^U[Y[  
@HWI-EAS443:3:25:1066:1745#0/1  
GAACTAGTTGTTTCCACAATGTAGGACCATGAGCTTGCTG  
+HWI-EAS443:3:25:1066:1745#0/1  
a[aZ][^URYVZ]YP[\_^[U^V^UM[UT]¥]]XYUWVWW[  
@HWI-EAS443:3:25:1075:1548#0/1  
GCCAGTTCATTGGTACTGGTAGGCTCCCTGGGGCAATCA  
+HWI-EAS443:3:25:1075:1548#0/1  
a^[`aQ^X^\_a^\_U^UU\_MMV]GS¥V]XKKT[V¥USBBBB  
@HWI-EAS443:3:25:120:922#0/1  
GTCCTACATTGTGGAAACAAGTTCAGACAATGGAACG  
+HWI-EAS443:3:25:120:922#0/1  
`T`\_aY\_ZVUa\_^\_aa`a]¥^`\_Ra\_] [U`a[U]UX`¥Y  
@HWI-EAS443:3:25:126:1207#0/1  
CTACATTGTGGAAACAAGTTCAGACAATGGAACGTGT  
+HWI-EAS443:3:25:126:1207#0/1  
a¥b```[a[``Z¥\_aab^^b\_a^a]W\_^aaa^\_aa\_ZPUY  
@HWI-EAS443:3:25:1407:411#0/1  
CACGTTCCATTGTCTGAACTAGTTGTTTCCACAATGTAGG  
+HWI-EAS443:3:25:1407:411#0/1  
`b[babb[abbbba]bbbabbbbaabbb`\_Yaaa`bbb  
@HWI-EAS443:3:25:1487:499#0/1  
TAAAAACAATGCCAAGGAAATTGGAAACGGCTGGTTTGA  
+HWI-EAS443:3:25:1487:499#0/1  
`abbaaaaaaba[`]aYaa`aa¥`\_]a`\_`MPUWIM

@HWI-EAS443:3:25:223:711#0/1  
CACGTTCCATTGTCTGAACTAGTTGTTCCACAATGTAGG  
+HWI-EAS443:3:25:223:711#0/1  
abbb`bb`¥aba`bbbbbbbab`aaaba\_aba``[``a  
@HWI-EAS443:3:25:282:1444#0/1  
CACGTTCCATTGTCTGAACTAGTTGTTCCACAATGTAGG  
+HWI-EAS443:3:25:282:1444#0/1  
\_\_\_¥\_¥\_¥Z`¥]aa¥]YQ^ZV\_¥^[`VZZ]^``W\_a¥Z¥Y  
@HWI-EAS443:3:25:591:193#0/1  
TTCCATTGTCTGAACTAGTTGTTCCACAATGTAGGACCA  
+HWI-EAS443:3:25:591:193#0/1  
[bbbbaaa\_¥ab[abaaaaa]`a^\_¥a\_aa[\_a¥\_^]\_  
@HWI-EAS443:3:25:979:1204#0/1  
CAAAATATGTAAAAAGCACAAAATTGAGACCGGCCACAGG  
+HWI-EAS443:3:25:979:1204#0/1  
ababbabbab`¥abbbbbbabaaababbaaba`^b`\_aa  
@HWI-EAS443:3:26:1423:336#0/1  
CACGTTCCATTGTCTGAACTAGTTGTTCCACAATGTAGG  
+HWI-EAS443:3:26:1423:336#0/1  
`b`bbbb`abbbbbbab\_b^^`^ba`baaa`baaa`VZ  
@HWI-EAS443:3:26:1586:14#0/1  
GAACTAGTTGTTCCACAATGTAGGACCATGAGCTTGCTG  
+HWI-EAS443:3:26:1586:14#0/1  
a\_a^aaa^aaaa^S`W`\_aa^`¥\_Y]\_\_¥^^R^^\_X\_\_  
@HWI-EAS443:3:26:1746:1387#0/1  
GTAACACGTTCCATTGTCTGAACTAGTTGTTCCACAATG  
+HWI-EAS443:3:26:1746:1387#0/1  
a\_aa\_b`aa`\_`aaaa\_\_a¥^\_\_`]Z`a`\_`^^^Z^`^^  
@HWI-EAS443:3:26:288:982#0/1  
TGGGGGCATCAAGATACAGCAAGAAGTTCAAGCCGAAAT  
+HWI-EAS443:3:26:288:982#0/1  
abaaaabbaababaaaaaaaab¥Z`aV\_abaa^aa\_aa`\_  
@HWI-EAS443:3:26:304:803#0/1  
CTCCTGGGTAACACGTTCCATTGTCTGAACTAGTTGTTTC  
+HWI-EAS443:3:26:304:803#0/1  
aTOWN\_NPG`a`NWVUMYYaPO^W\_aZUKYTX^G[¥GL¥P  
@HWI-EAS443:3:26:322:2010#0/1  
ATTCTGCGTGCTTTCAGGTCGGCTGCATATCCTGACCCC  
+HWI-EAS443:3:26:322:2010#0/1  
]X]a\_XR\_RW\_\_a`W\_a\_HKV]N\_U]^aWBBBBBBBBBBB  
@HWI-EAS443:3:26:812:1749#0/1  
CAGCAAGCTCATGGTCCTACATTGTGGAAACAACTAGTTC  
+HWI-EAS443:3:26:812:1749#0/1  
V^abb`baaa`Y^\_\_bbbbba`\_\_`[bb`]`ba\_b`\_a]  
@HWI-EAS443:3:26:836:386#0/1  
ATCTCCTGGGTAACACGTTCCATTGTCTGAACTAGTTGTT  
+HWI-EAS443:3:26:836:386#0/1  
aaaa```a`aV\_a^`^a][\_¥]Y]\_Z]`\_^XW\_Y¥Z\_^W^  
@HWI-EAS443:3:27:1275:1088#0/1  
TGCTATTTCCGGCTTGAACCTTCTGCTGTATCTTGGTGTC

+HWI-EAS443:3:27:1275:1088#0/1  
`aabaabaaa`a`ba\_]a`aa]\_a`aa^`aa¥X^]]  
@HWI-EAS443:3:27:1367:985#0/1  
CTCCTGGGTAACACGTTCCATTGTCTGAACTAGTTGTTTC  
+HWI-EAS443:3:27:1367:985#0/1  
abababbb`bb\_b`aaaa\_aaaa\_\_aaaa\_a\_a`aa\_aa]  
@HWI-EAS443:3:27:1416:1704#0/1  
ACACGTTCCATTGTCTGAACTAGTTGTTTCCACAATGTAG  
+HWI-EAS443:3:27:1416:1704#0/1  
X`]XaU`^a``[[P¥b\_W^U[¥0^`¥¥aXOX^0^`V\_Z` [  
@HWI-EAS443:3:27:1650:1306#0/1  
GATGACACTGAGCTCAATTGCTCTCTTAACTCCTCATAAT  
+HWI-EAS443:3:27:1650:1306#0/1  
aaa`aaaaaa`a^`\_\_aa¥a\_a^\_\_\_`a^]\_^¥\_`^¥^^`\_  
@HWI-EAS443:3:27:1688:610#0/1  
GGGGGAGGACAGGGATGGTAGATGGATGGTACGGTTATCA  
+HWI-EAS443:3:27:1688:610#0/1  
\_aabZD[]aaaabbaa[UWaaaYabZZaaG\_QaZZaZXG¥  
@HWI-EAS443:3:27:190:1198#0/1  
GTCCCCACAAAACATATGCGTCTGCATTCTGATAGAGAC  
+HWI-EAS443:3:27:190:1198#0/1  
a]bbbbabaaaa\_a[a`a`aaaaaa^aaaaaa^`aaaa  
@HWI-EAS443:3:27:242:1475#0/1  
ACGTTCCATTGTCTGAACTAGTTGTTTCCACAATGTAGGA  
+HWI-EAS443:3:27:242:1475#0/1  
]¥\_Z¥`YVX¥¥\_\_YXY^\_XR][W\_\_Z¥[\_a`KZ¥VO[Q^ [  
@HWI-EAS443:3:27:292:546#0/1  
GGCTGGACCCTGGGAAATCCAGAGTGTGAATCACTCTCCA  
+HWI-EAS443:3:27:292:546#0/1  
`b`\_^a\_I\_a``]]a[\_aa`X`a`P][^a^]N\_^^[aWK\_  
@HWI-EAS443:3:27:299:279#0/1  
CACGTTCCATTGTCTGAACTAGTTGTTTCCACAATGTAGG  
+HWI-EAS443:3:27:299:279#0/1  
abbaaababaaaa`bbaaaaab\_abaaaaaa\_a```Xa]`  
@HWI-EAS443:3:27:446:1588#0/1  
TGTGGGACATCAAGATACAGCAAGAAGATCAAGCCGGAA  
+HWI-EAS443:3:27:446:1588#0/1  
[`] [URH] []XZ]`]^H]\_a]aaaaa¥HXaUZU^\_HV`W  
@HWI-EAS443:3:27:629:1157#0/1  
TGGGTAACACGTTCCATTGTCTGAACTAGTTGTTTCCACA  
+HWI-EAS443:3:27:629:1157#0/1  
]b\_Y]]U`\_¥`KU`\_W\_]¥W[^`a¥Q\_[ZS[]a[aYXNU[  
@HWI-EAS443:3:27:796:81#0/1  
ATTAATGTAGGATTTGCTGAGCTTTGGGCATGAATTCCT  
+HWI-EAS443:3:27:796:81#0/1  
¥aSV¥a]aXbba]aa\_`\_^Pba``\_X`¥FQUVHRZ\_XRTa  
@HWI-EAS443:3:27:798:71#0/1  
AAAAACAATGCCAAGGAAATTGGAAACGGCTGGTTTGAA  
+HWI-EAS443:3:27:798:71#0/1  
a^^]]a]`b`b`\_XZaaW\_\_aa\_`\_\_`\_¥][`BBBBBBB

@HWI-EAS443:3:28:1109:1997#0/1  
CACGTTCCATTGTCTGAACTAGTTGTTTCCACAATGTAGG  
+HWI-EAS443:3:28:1109:1997#0/1  
`bba\_ab\_b^`\_Z\_]ba\_`a\_\_aa^Y`^\_a\_a`\_YXa¥X  
@HWI-EAS443:3:28:1198:1271#0/1  
AACAAATGCCAAGGAAATTGGAAACGGCTGTTTGAATTTT  
+HWI-EAS443:3:28:1198:1271#0/1  
\_]¥aY^b]^Z0Ya¥a\_a^`]NT`aaaZX¥MFSTRXPZXXZ  
@HWI-EAS443:3:28:1459:1093#0/1  
TGGCTGGATCCTGGGAAATCCAGAGGGTGAATCACTCTCC  
+HWI-EAS443:3:28:1459:1093#0/1  
aa`abaaa[¥]aa]¥^\_a¥¥]U]VN\_¥\_V\_^U`VU^XXS  
@HWI-EAS443:3:28:161:183#0/1  
CTCCTGGGTAACACGTTCCATTGTCTGAACTAGTTGTTTC  
+HWI-EAS443:3:28:161:183#0/1  
aaaaaaaa¥aa\_aaaa`aaa\_`\_^`\_`YX¥`\_\_Z\_\_^\_] [  
@HWI-EAS443:3:28:277:233#0/1  
CTCCTGGGTAACACGTTCCATTGTCTGAACTAGTTGTTTC  
+HWI-EAS443:3:28:277:233#0/1  
]T^]ZY^TVYZ\_V^SSY[USSPOFXYXOQWTRXNQ¥BBBB  
@HWI-EAS443:3:28:278:1724#0/1  
CAGAATGCAGATGCATATGTTTTTGTGAGGACATCAAGAT  
+HWI-EAS443:3:28:278:1724#0/1  
\_WYS\_WP]TaUVQ^XPXTZP¥TJNZRYGXQ`\_ZPP¥[W]]  
@HWI-EAS443:3:28:290:1508#0/1  
CCTACATTGTGGAAACAAGTTCAGACAATGGAACGTG  
+HWI-EAS443:3:28:290:1508#0/1  
ab`baZ`¥G¥¥¥`\_S\_\_a\_¥TV`aa^a`\_TZX^OY[XHK  
@HWI-EAS443:3:28:297:912#0/1  
CACGTTCCATTGTCTGAACTAGTTGTTTCCACAATGTAGG  
+HWI-EAS443:3:28:297:912#0/1  
abba]aaaa````a`a]\_````]`a\_````aa^`\_^`Y\_XV  
@HWI-EAS443:3:28:303:520#0/1  
CTCCTGGGTAACACGTTCCATTGTCTGAACTAGTTGTTTC  
+HWI-EAS443:3:28:303:520#0/1  
abaaabaaZbaabaa\_abaaaa\_aaaaa`\_a`\_a\_¥^\_  
@HWI-EAS443:3:28:410:950#0/1  
AACACGTTCCATTGTCTGAACTAGTTGTTTCCACAATGTA  
+HWI-EAS443:3:28:410:950#0/1  
abab^]]][a\_b`]^`^````a[¥Q`[\_\_\_]^`\_\_[U¥Z]ZZ\_  
@HWI-EAS443:3:28:555:1035#0/1  
CTACATTGTGGAAACAAGTTCAGACAATGGAACGTGT  
+HWI-EAS443:3:28:555:1035#0/1  
a`YR\_aZXLZ`Wa\_[^a\_XVXR][ZZ^`\_VY\_RR]T¥R[S  
@HWI-EAS443:3:28:619:327#0/1  
ACGTTCCATTGTCTGAACTAGTTGTTTCCACAATGTAGGA  
+HWI-EAS443:3:28:619:327#0/1  
a\_a\_^\_]Y\_]`\_\_^[[[\_[V^\_]^\_]`]]]]^^VYVY^  
@HWI-EAS443:3:28:64:1441#0/1  
CTCCTGGGTAACACGTTCCATTGTCTGAACTAGTTGTTTC

+HWI-EAS443:3:28:64:1441#0/1  
a`aa¥¥¥^Vaaa\_`\_^a``\_\_[S[^Z¥]`¥ZV[ZV[]¥W  
@HWI-EAS443:3:28:934:1975#0/1  
GAACTAGTTGTTTCCACAATGTAGGACCATGAGCTTGCTG  
+HWI-EAS443:3:28:934:1975#0/1  
¥aT^a\_W\_`aa]bbbaab\_\_Za]`a\_aa`\_aYa`^`]`a  
@HWI-EAS443:3:28:942:947#0/1  
GCAAGCTCATGGTCCTACATTGTGGAAACAACTAGTTCAG  
+HWI-EAS443:3:28:942:947#0/1  
aabaaaa\_aaaa[`aa\_^\_a^^a\_\_\_\_`]aa^^`\_Y\_[^]  
@HWI-EAS443:3:29:1657:1736#0/1  
TTTTGCTTCCTCTGAGTATTTTGGGTAGTCATAAGCCCCA  
+HWI-EAS443:3:29:1657:1736#0/1  
]X]```aaa\_]¥VKXR¥[^`SUUYQSYMZ]aWOXHT]VU  
@HWI-EAS443:3:29:316:131#0/1  
GCCCAATCATGACTCGAACAAAGGTGTAACGGCAGGATGT  
+HWI-EAS443:3:29:316:131#0/1  
¥abb]bbbbbbbaa`b\_a`aaaabSb\_aaaaa`BBBBBBB  
@HWI-EAS443:3:29:64:1928#0/1  
CTCCTGGGTAACACGTTCCATTGTCTGAACTAGTTGTTTC  
+HWI-EAS443:3:29:64:1928#0/1  
a\_ab]^[XVaaaaa]]\_aa`^\_¥Y\_\_ZP`\_[VWVY]V]Y\_  
@HWI-EAS443:3:29:698:535#0/1  
ATTTTGGGTGGTCATAAGTCCCATTTTTGACACTTTCCAT  
+HWI-EAS443:3:29:698:535#0/1  
aaaa`aaaRPa]^^`\_`a`\_\_aa`]a`a^^`\_a`\_\_^]`  
@HWI-EAS443:3:29:749:1307#0/1  
ACGTTCCATTGTCTGAACTAGTTGTTTCCACAATGTAGGA  
+HWI-EAS443:3:29:749:1307#0/1  
a\_\_\_\_`aa^WQ\_G\_\_aa\_\_^^aV¥[^]^XYI¥\_]V]0¥]]B  
@HWI-EAS443:3:29:776:1763#0/1  
GGCTGGTGATTATAGCACCCCTGGGTGTCTGACAAGTTGT  
+HWI-EAS443:3:29:776:1763#0/1  
a[b`WZY^`aa`b\_aa^V`[a][\_V]Va\_N]\_aaWR]¥V  
@HWI-EAS443:3:29:918:105#0/1  
GCAAGCTCATGGTCCTACATTGTGGAAACAACTAGTTCAG  
+HWI-EAS443:3:29:918:105#0/1  
aaabb\_[I[baa]`\_a`Xaaa`aa`a`¥`\_X\_aa^\_^\_  
@HWI-EAS443:3:2:123:419#0/1  
CTCCTGGGTAACACGTTCCATTGTCTGAACTAGTTGTTTC  
+HWI-EAS443:3:2:123:419#0/1  
aaababbb\_baaaZa^\_\_aaaaa\_aaaa^`aaW`a[`a\_  
@HWI-EAS443:3:2:1252:434#0/1  
AAAGTCTCTATCAGAATGCAGCTGCATATGTTTTTGTGGG  
+HWI-EAS443:3:2:1252:434#0/1  
`P]]L]a]¥Q\_KZ^V^¥aXP`bN^Y]W¥[SX]]\_] ^G[\_\_\_  
@HWI-EAS443:3:2:489:1526#0/1  
AATCACTCTCCACAGCAAGCTCATGGGCCTACATTGTGGA  
+HWI-EAS443:3:2:489:1526#0/1  
aa\_Y\_^\_^\_WF`XaaPaa^¥]]SY`\_G`]\_\_X]^O\_LSS]



@HWI-EAS443:3:2:975:296#0/1  
CACGTTCCATTGTCTGAACTAGTTGTTCCACAATGTAGG  
+HWI-EAS443:3:2:975:296#0/1  
aa`\_`ba^aaaa\_\_`a[X^aaa\_`aaabRT\_V^\_^\_V]\_¥  
@HWI-EAS443:3:30:1047:2007#0/1  
ATCTCCTGGGTAACACGTTCCATTGTCTGAACTAGTTGTT  
+HWI-EAS443:3:30:1047:2007#0/1  
aaa\_a\_\_a`Z`aaa]\_^\_^`^^]`^]\_^]\_^\_Z]]X^  
@HWI-EAS443:3:30:108:1134#0/1  
AACACGTTCCATTGTCTGAACTAGTTGTTCCACAATGTA  
+HWI-EAS443:3:30:108:1134#0/1  
]aaZaa\_aaa]`a\_Za`^[aW\_]a^\_[Z\_`a\_\_\_\_\_[-^X\_  
@HWI-EAS443:3:30:1250:1125#0/1  
TGGGTAACACGTTCCATTGTCTGAACTAGTTGTTCCACA  
+HWI-EAS443:3:30:1250:1125#0/1  
aa^aW^^abab`aaaaa]\_`aaaY]\_\_[¥W`aZa``¥^^\_  
@HWI-EAS443:3:30:1261:1853#0/1  
CGTGGTAGTCCAAAGTTCTTTTCATTTTACAATAGAACCAA  
+HWI-EAS443:3:30:1261:1853#0/1  
U\_WV\_J^X¥a\_PXY`a¥WUZ`baVR\_\_FL[¥MXY¥]STPM  
@HWI-EAS443:3:30:1469:1024#0/1  
CACGTTCCATTGTCTGAACTAGTTGTTCCACAATGTAGG  
+HWI-EAS443:3:30:1469:1024#0/1  
aaabbb]bbbbbbbbbbbabababbbba\_babaa[]aXa  
@HWI-EAS443:3:30:1525:558#0/1  
CACGTTCCATTGTCTGAACTAGTTGTTCCACAATGTAGG  
+HWI-EAS443:3:30:1525:558#0/1  
abbb]babbbbaabaaaababaababba\_aabaaa`a`Y  
@HWI-EAS443:3:30:908:477#0/1  
ACGTTCCATTGTCTGAACTAGTTGTTCCACAATGTAGGA  
+HWI-EAS443:3:30:908:477#0/1  
a`a```aa\_`a\_X^^^a\_[WZ^]\_^]]^`\_`\_ZUU^[LY  
@HWI-EAS443:3:30:961:86#0/1  
TAACACGTTCCATTGTCTGAACTAGTTGTTCCACAATGT  
+HWI-EAS443:3:30:961:86#0/1  
aa¥R\_] ^PYY]Y^ab¥V¥a^`¥[]`\_`\_W^^V]W¥XUZ  
@HWI-EAS443:3:31:1143:1042#0/1  
GGTAAATGTAACATTGCTGGCTGGATACTGGGAAATCCAG  
+HWI-EAS443:3:31:1143:1042#0/1  
ab\_babZRR`X^TY\_bUb[`YJ¥`\_`FZ¥Y`]MZWQBBBB  
@HWI-EAS443:3:31:1431:308#0/1  
TCCTGGGTAACACGTTCCATTGTCTGAACTAGTTGTTCC  
+HWI-EAS443:3:31:1431:308#0/1  
`aabbb\_bab]baabaXS`b\_^`\_b\_]L`]X]Xa`aaaQ  
@HWI-EAS443:3:31:1492:255#0/1  
CTCCTGGGTAACACGTTCCATTGTCTGAACTAGTTGTTCC  
+HWI-EAS443:3:31:1492:255#0/1  
abaaa[`a\_\_`b^aaaa\_a`a`Xaa`a]a\_a^\_a^a`X  
@HWI-EAS443:3:31:1515:1951#0/1  
CTACATTGTGGAAACAACACTAGTTCAGACAATGGAACGTGT

+HWI-EAS443:3:31:1515:1951#0/1  
` ` `¥babab[babaa`bbaWaaZTY\_baaaaaaa`T\_H]\_  
@HWI-EAS443:3:31:1700:985#0/1  
TGCTGACCAACAAAGTCTCTATCAGAATGCAGATGAATAT  
+HWI-EAS443:3:31:1700:985#0/1  
\_abbU\_aaaa]`aaU`Raababab`a\_\_^]` `Z¥V`ab`  
@HWI-EAS443:3:31:456:273#0/1  
CACGTTCCATTGTCTGAACTAGTTGTTTCCACAATGTAGG  
+HWI-EAS443:3:31:456:273#0/1  
aba` [P[^aV^UX\_\_[^W¥[\_SUTT[TYS¥VV^]]Y^YX  
@HWI-EAS443:3:31:480:92#0/1  
CACGTTCCATTGTCTGAACTAGTTGTTTCCACAATGTAGG  
+HWI-EAS443:3:31:480:92#0/1  
aa¥X`Y`bYFWaa\_^\_a^OM]ULZYNX^\_]NNSTYBBBBB  
@HWI-EAS443:3:31:522:941#0/1  
GAAATTGGAACGGCTGCTTTGAATTTTACCAAAAATGCG  
+HWI-EAS443:3:31:522:941#0/1  
^` ` `b\_b^` `abbbaaZXP\_ZRWPW¥¥ZWR\_\_IPQWDDUW  
@HWI-EAS443:3:31:895:1222#0/1  
CTGAACTAGTTGTTTCCACAATGTAGGACCATGAGCTTGC  
+HWI-EAS443:3:31:895:1222#0/1  
ab` \_\_ `a]a]baaaaaaabaa^¥a`^ `a\_¥a\_\_aaa` \_\_  
@HWI-EAS443:3:32:1025:1294#0/1  
CGGCTCTACTAGTGTCCAGTAATAGTTCCTTCTCCCTTCT  
+HWI-EAS443:3:32:1025:1294#0/1  
a][aaa[a\_VV]S¥\_\_^Y^G^[MJ¥VPLFZaT^T\_XLT\_W  
@HWI-EAS443:3:32:1521:1450#0/1  
CACGTTCCATTGTCTGAACTAGTTGTTTCCACAATGTAGG  
+HWI-EAS443:3:32:1521:1450#0/1  
ab`bbbabbbb\_\_ba^\_aabaa`b`bab[Y`^[\_ `S`aaa  
@HWI-EAS443:3:32:1536:496#0/1  
AACACGTTCCATTGTCTGAACTAGTTGTTTCCACAATGTA  
+HWI-EAS443:3:32:1536:496#0/1  
a\_` \_ `a¥a`\_]Z^]XTYSV^^\_XYU^^^`^ZXWJQP` `V`  
@HWI-EAS443:3:32:1634:594#0/1  
AGGAGATTTTCATCGATTATGAGGAGCTAAGAGAGCGATTG  
+HWI-EAS443:3:32:1634:594#0/1  
[QZ\_b¥bba`\_bab[ `b` \_ `¥bb\_aY¥a]aaaa¥][aaaa  
@HWI-EAS443:3:32:267:1134#0/1  
GAGCAATTGAGCTCAGTGTCTGTCATTTGAAAGTTTGAGA  
+HWI-EAS443:3:32:267:1134#0/1  
a^H\_\_\_\_\_XOW]` ` \_WIXG^` [^^\_Wa\_`ZPTYW[^X`¥]  
@HWI-EAS443:3:32:304:1243#0/1  
CGGTTTCATTGAAGGGGGTGGACAGGGATGGCAGATGGA  
+HWI-EAS443:3:32:304:1243#0/1  
`¥KXR]a^THTRTZ` `[aM^]X]ZNBBBBBBBBBBBBBB  
@HWI-EAS443:3:32:323:335#0/1  
CACGTTCCATTGTCTGAACTAGTTGTTTCCACAATGTAGG  
+HWI-EAS443:3:32:323:335#0/1  
aa\_a¥a`a` ` `aZ\_a]`aX\_\_YV]\_Y\_^\_]^^^X[Y^^[

@HWI-EAS443:3:32:623:1853#0/1  
GAACTAGTTGTTTCCACAATGTAGGACCATGAGCTTGCTG  
+HWI-EAS443:3:32:623:1853#0/1  
a`ba`\_]`a^`aaaaa\_`Z]\_]aaaFXa`^\_]aa]  
@HWI-EAS443:3:32:858:1392#0/1  
CAGAACTGATTGCCTCCAGGGAGACTACCAAGTACCAATG  
+HWI-EAS443:3:32:858:1392#0/1  
aaabb`bbaba`]^aaaabaa`aa`a\_aa¥aa¥`aT^b`Y  
@HWI-EAS443:3:33:1039:106#0/1  
AACACGTTCCATTGTCTGAACTAGTTGTTTCCACAATGTA  
+HWI-EAS443:3:33:1039:106#0/1  
aa`Z¥a`ba\_\_aaa`]aZxa]a`[```\_\_`\_[U¥UX\_X]]  
@HWI-EAS443:3:33:1131:1406#0/1  
AAAATGAGCAGGGTCAGGATATGCAGCCGACGTGAAGAG  
+HWI-EAS443:3:33:1131:1406#0/1  
aabb``babaaa\_YIXaaa`a\_aa\_a¥U^\_[LDX\_¥¥TVV  
@HWI-EAS443:3:33:1225:1145#0/1  
AAACAATGCCAAGGAAATTGGAAACGGCTGCTTTAATTT  
+HWI-EAS443:3:33:1225:1145#0/1  
abaaaa`aba``aa\_]a\_a\_^`a¥^X]\_UEKXQGQTQ[^  
@HWI-EAS443:3:33:1291:324#0/1  
CTGCTTTGAATTTTACCACAAATGCGATAACAGGTGCATG  
+HWI-EAS443:3:33:1291:324#0/1  
Y^¥¥Y^¥T`bb`a`\_b`abbb¥bba^0\_a`^SJJ]¥^^ZY\_  
@HWI-EAS443:3:33:1308:310#0/1  
CCGGCTTGAACCTTCTGCTGTATCTTGATGTCACCACAAA  
+HWI-EAS443:3:33:1308:310#0/1  
`\_aaaabaaaVab\_aaa`aa\_¥a]aa\_\_\_^\_LIOX`^^`\_  
@HWI-EAS443:3:33:1458:533#0/1  
CACGTTCCATTGTCTGAACTAGTTGTTTCCACAATGTAGG  
+HWI-EAS443:3:33:1458:533#0/1  
ab`b`b`abaaaaaaa`aaa\_aa`aa]^aONS^\_V^W]  
@HWI-EAS443:3:33:1545:174#0/1  
GCCAGTAAAAACAATGCTAAGGAAATTGGAAACGGCTG  
+HWI-EAS443:3:33:1545:174#0/1  
a^`RVQZVY`YXS`\_PQNIDMVY[UUPYSTZZBBBBBBBB  
@HWI-EAS443:3:33:1598:1133#0/1  
ACTAGTTGTTTCCACAATGTAGGACCATGAGCTTGCTGTG  
+HWI-EAS443:3:33:1598:1133#0/1  
a`^^`bb`aa``aa`]]]¥^]a\_]\_U\_`SVVYX\_\_^`  
@HWI-EAS443:3:33:1601:823#0/1  
GCTGGCTGGATCCTGGGAAATCCAGAGGGTGAATCACTCT  
+HWI-EAS443:3:33:1601:823#0/1  
aaa\_a`\_X^^^X`P¥aa`¥XYVTZ^P[MLJV[STG¥YURP  
@HWI-EAS443:3:33:1782:388#0/1  
AACGTGTTACCCAGGAAATTTTCATCGATTATGAGGAGCTA  
+HWI-EAS443:3:33:1782:388#0/1  
NY\_]HY\_V\_Y¥aaSa¥\_^`\_`\_Y^[baab`M[PP[HY¥  
@HWI-EAS443:3:33:658:1246#0/1  
AAACAACCTAGTTCAGACAATGGAACGTGTTACCCAGGAGA

+HWI-EAS443:3:33:658:1246#0/1  
¥¥]aa\_a\_\_\_\_¥`a`aaaa\_^][aa[TZTZ^YTWZUXZX^  
@HWI-EAS443:3:33:828:150#0/1  
GCCCAATCATGACTCGAACAAAGGTGTAACGGCAGGATGT  
+HWI-EAS443:3:33:828:150#0/1  
a^¥Z[`]aa\_a`^\_[`\_VX]\_]W^XZ^BBBBBBBBBBB  
@HWI-EAS443:3:33:953:1313#0/1  
CATACCCAAAGCTCAGCAAATCCTACATTAATTATAAAGG  
+HWI-EAS443:3:33:953:1313#0/1  
R^bb[W^bababbXbbbab\_abb]aXbbaV^bJ\_¥baJ]^  
@HWI-EAS443:3:33:978:1470#0/1  
GGGGCATTACCATCCATCTACTAGTGCTGACAAACAAAG  
+HWI-EAS443:3:33:978:1470#0/1  
aa\_¥U`a`]a`b`aa`aa[ba[`\_Za```^MET`a\_]\_W  
@HWI-EAS443:3:34:1481:1400#0/1  
CTCCTGGGTAACACGTTCCATTGTCTGAACTAGTTGTTTC  
+HWI-EAS443:3:34:1481:1400#0/1  
]Ya^XZ¥¥UV[aa`\_0¥^R¥X^J]Y¥U]YBBBBBBBBBBB  
@HWI-EAS443:3:34:1578:1642#0/1  
CACGTTCCATTGTCTGAACTAGTTGTTTCCACAATGTAGG  
+HWI-EAS443:3:34:1578:1642#0/1  
abbbbbbbbbbbbabab\_bb\_baa`b`aba``a]aa`\_V\_¥K  
@HWI-EAS443:3:34:1660:195#0/1  
TCTTTATCTACTGCTGTGAACTGTGTATTCATCTTTTCAA  
+HWI-EAS443:3:34:1660:195#0/1  
aR^^^ZDH[\_¥`aa\_]\_¥T[LY`RaVL]`\_S]NTW^WSUY  
@HWI-EAS443:3:34:175:1392#0/1  
GTGGGGACATTAAGATACAGCAAGAAGTTCAAGCCGGAAA  
+HWI-EAS443:3:34:175:1392#0/1  
`¥ba`a[ab^NN^a]^]aaaaaba\_VaU]a\_TT\_a\_^W\_\_  
@HWI-EAS443:3:34:513:1352#0/1  
ACACGTTCCATTGTCTGAACTAGTTGTTTCCACAATGTAG  
+HWI-EAS443:3:34:513:1352#0/1  
abaa\_\_\_\_aa`^`^]```\_\_[\_]\_Y]^\_a\_X¥^]WYVL  
@HWI-EAS443:3:34:702:1536#0/1  
TAACACGTTCCATTGTCTGAACTAGTTGTTTCCACAATGT  
+HWI-EAS443:3:34:702:1536#0/1  
YXT`\_`¥HW`\_YXPPUU]UZ¥\_F^PF¥]ZW^WXLUUBBB  
@HWI-EAS443:3:34:717:1467#0/1  
CTCCTGGGTAACACGTTCCATTGTCTGAACTAGTTGTTTC  
+HWI-EAS443:3:34:717:1467#0/1  
abbbaaa¥Uaba`aa\_aba`\_\_YX```\_¥U¥^USU^¥]¥V  
@HWI-EAS443:3:35:1009:92#0/1  
CTAGATTTTCGAGTTGCTTTCGAATGTTATTTTGTCTCCCGG  
+HWI-EAS443:3:35:1009:92#0/1  
a\_``¥`aa]G[b\_aa`ba\_a]`aa^]^\_a`aa^\_[¥V\_]`^  
@HWI-EAS443:3:35:1294:1648#0/1  
ATTGTCTGAACTAGTTGTTTCCACAATGTAGGACCATGAG  
+HWI-EAS443:3:35:1294:1648#0/1  
aa`a\_abaaa^a`aR`a[`]`]X[\_]`]¥Z[^\_^¥[QY

@HWI-EAS443:3:35:1368:1625#0/1  
CTTTGTTAGTAATCTCGTCAATGGAATTCTGTGTGCTCTT  
+HWI-EAS443:3:35:1368:1625#0/1  
abbbbbbbbbbbbabaaa\_b````\_Ga^R]ab\_[`a`aaa^  
@HWI-EAS443:3:35:1720:92#0/1  
GCAGATGCATATGTTTTGTGGTGACATCAAGATACAGCA  
+HWI-EAS443:3:35:1720:92#0/1  
`R``\_Z\_S[W]aa]\_\_a\_\_WaTG]XXYXSNU]]UTYY[QW  
@HWI-EAS443:3:35:1724:1978#0/1  
GCCCAATCATGACTCGAACAAAGGTGTAACGGCAGGATGT  
+HWI-EAS443:3:35:1724:1978#0/1  
`a\_Uaa\_N`a`aW\_¥¥\_[TZ^\_¥VDPWYaBBBBBBBBBBB  
@HWI-EAS443:3:35:1776:321#0/1  
CAATCCTGTGGCCAGTCTCAATCTTGTGCTTTTTACATAT  
+HWI-EAS443:3:35:1776:321#0/1  
a`UYa¥^`abb`aUQVP\_Q[`YFU^ZYZZ\_^^`¥SLV[S\_  
@HWI-EAS443:3:35:277:587#0/1  
ATTTGGGTAATGTAACATTGCTGGCTCGATCCTGGGAAA  
+HWI-EAS443:3:35:277:587#0/1  
aababaa]Zaaaa`\_aaaa`aa`\_aRGR]Y]^UTZVWV¥  
@HWI-EAS443:3:35:292:1575#0/1  
CCTACATTGTGGAAACAAGTAGTTCCAGACAATGGAACGTG  
+HWI-EAS443:3:35:292:1575#0/1  
abbbb``\_a\_aa^b[bb]b`aa\_aa`^`baa\_X]\_dWYN\_  
@HWI-EAS443:3:35:29:2017#0/1  
CTCGTCAATGGCATTCTGTGTGCTCCTCAGGTCGGCTGCA  
+HWI-EAS443:3:35:29:2017#0/1  
aaa\_\_`TT¥a¥aa`aa^¥Y¥[^\_^\_ZfV^]^U`^[\_^UQX  
@HWI-EAS443:3:35:352:1389#0/1  
GTTCCATTGTCTGAACTAGTTGTTTCCACAATGTAGGACC  
+HWI-EAS443:3:35:352:1389#0/1  
a`bbbab`abbaaaaaa]aa`aaab`ba`a`¥a[^a^\_  
@HWI-EAS443:3:35:369:2009#0/1  
CACGTTCCATTGTCTGAACTAGTTGTTTCCACAATGTAGG  
+HWI-EAS443:3:35:369:2009#0/1  
aaa[^\_a`^]]¥P`^[^`[]TVY][Z^Za`¥`^SXVQ\_TT  
@HWI-EAS443:3:35:423:322#0/1  
ACGTTCCATTGTCTGAACTAGTTGTTTCCACAATGTAGGA  
+HWI-EAS443:3:35:423:322#0/1  
a\_a`a`a`\_`^`SaPLQZYPW^R]]YXXY^YRFKQTTXXYV  
@HWI-EAS443:3:35:613:1014#0/1  
CTTCCTCTGAGTATTTTGGGTAGTCATAAGTCCCGTTTTT  
+HWI-EAS443:3:35:613:1014#0/1  
aaab]aa]^a]Kbbbab^\_¥¥a]TbaYH[¥aa^0[`Wa\_  
@HWI-EAS443:3:35:858:595#0/1  
CTGTAGAGACCCATTAGAGCACATCCAGCAACTGATTGCC  
+HWI-EAS443:3:35:858:595#0/1  
abbbbbbabbbbaabaaaabaaa`aaZJ]aa`aa\_[]Sa  
@HWI-EAS443:3:35:926:584#0/1  
ATCTCCTGGGTAACACGTTCCATTGTCTGAACTAGTTGTT

+HWI-EAS443:3:35:926:584#0/1  
aaaaaaaaaV^`a^a^`Z[\_`\_`Z`^^[[[^[ZX^^^]  
@HWI-EAS443:3:36:1024:438#0/1  
CTGGGTAACACGTTCCATTGTCTGAACTAGTTGTTCCAC  
+HWI-EAS443:3:36:1024:438#0/1  
abbb```Zabab]aaaabab`a]b`aaY¥`\_\_`\_aaa``a  
@HWI-EAS443:3:36:117:1145#0/1  
CCATTGTCTGAACTAGTTGTTCCACAATGTAGGACCATG  
+HWI-EAS443:3:36:117:1145#0/1  
aZTR\_VG]^[]V¥¥[Z¥a]Y[X[UOWTZYYUV]S[¥`X¥R  
@HWI-EAS443:3:36:1240:784#0/1  
ACACGTTCCATTGTCTGAACTAGTTGTTCCACAATGTAG  
+HWI-EAS443:3:36:1240:784#0/1  
]a¥ba`bbbba`[Z`aZR\_a`````\_a`aaa`\_`aa\_X^\_  
@HWI-EAS443:3:36:169:1856#0/1  
CAGAGTGAAATCACTCTCCACAGCAAGCTCATGGTCCTA  
+HWI-EAS443:3:36:169:1856#0/1  
a`[\_`a\_a[bbaabbaabaabZb```aaS[\_`aaa`^Uba^¥  
@HWI-EAS443:3:36:1711:489#0/1  
ACGTTCCATTGTCTGAACTAGTTGTTCCACAATGTAGGA  
+HWI-EAS443:3:36:1711:489#0/1  
`abaaabaaaZ\_\_a`Z`Z`\_a^`\_]aaUZ\_`]V[aX`\_U^  
@HWI-EAS443:3:36:184:1737#0/1  
AAGATACAGCAAGAAGTTCAAGCCGAAATAGCACTAAGA  
+HWI-EAS443:3:36:184:1737#0/1  
a`Z\_\_ba^W]ab^a]`W\_aaZ¥a¥UYS\_]¥ZYZ[HVH¥WZ  
@HWI-EAS443:3:36:295:840#0/1  
GGGACATCAAGATACAGCAAGAAGTTCAAGCCGGCAATAG  
+HWI-EAS443:3:36:295:840#0/1  
\_SO¥`^`URVYOLU]^ZT]¥X\_V`P\_]YR[UY]GRXVLX  
@HWI-EAS443:3:36:704:1057#0/1  
GTTCCATTGTCTGAACTAGTTGTTCCACAATGTAGGACC  
+HWI-EAS443:3:36:704:1057#0/1  
a^¥aVIS[\_TYZ]VWVTZV[ZYVXQ\_WV[ZQ]^JLSTQV]  
@HWI-EAS443:3:36:844:1487#0/1  
TGTGGGGCATCAAGATACAGCAAGAAGTTCAAGCCGGAA  
+HWI-EAS443:3:36:844:1487#0/1  
a`\_aa`]X```aaa``[\_`a```aba`\_`R`a[\_Z\_\_`^[\_  
@HWI-EAS443:3:36:999:1610#0/1  
ATCTCCTGGGTAACACGTTCCATTGTCTGAACTAGTTGTT  
+HWI-EAS443:3:36:999:1610#0/1  
aaaa`a\_a`^^a]\_¥]Z\_USV]S]XP^^Z\_\_WVYPV]WWZ  
@HWI-EAS443:3:37:1115:1748#0/1  
ATTTACTTTGTTAGTAATCTCGTCAATGGAATTCTGTGTG  
+HWI-EAS443:3:37:1115:1748#0/1  
aba^aabbab`[\_]\_aaaa\_a\_b\_\_W`QFR[X\_[MS^]Z  
@HWI-EAS443:3:37:1122:1312#0/1  
ATCTCCTGGGTAACACGTTCCATTGTCTGAACTAGTTGTT  
+HWI-EAS443:3:37:1122:1312#0/1  
aa`\_`a`[\_`Vaa¥aa`\_\_^`a\_\_^\_V^¥0`Z\_]`X`^^X

@HWI-EAS443:3:37:1212:1393#0/1  
ACGTTCCATTGTCTGAACTAGTTGTTTCCACAATGTAGGA  
+HWI-EAS443:3:37:1212:1393#0/1  
a`\_\_a`¥a`a`\_]Tq]aZ[]W][\_¥^ZaZa\_\_]\_N\_]Y  
@HWI-EAS443:3:37:1324:1614#0/1  
ACGTTCCATTGTCTGAACTAGTTGTTTCCACAATGTAGGA  
+HWI-EAS443:3:37:1324:1614#0/1  
`\_^a`]Z\_UNW¥\_V¥V¥V¥\_\_X\_a`\_bTazY\_aW]¥UY  
@HWI-EAS443:3:37:136:694#0/1  
GTCATCATTTGAAAGTTTGGAGATGTTCCCAAGACAAGT  
+HWI-EAS443:3:37:136:694#0/1  
a\_b`aaaabaaaa`a]a`[X^]Y^`\_]^[¥[^`^ZZ  
@HWI-EAS443:3:37:1398:1342#0/1  
CTCTGAGTATTTTGGGTAGTCATAAGTCCGATTTTGGACA  
+HWI-EAS443:3:37:1398:1342#0/1  
abbabba]bbbaa`Yb]aZ]]b`\_aYSTZG[aaa``aaa\_  
@HWI-EAS443:3:37:1518:1091#0/1  
TAGTAATCTCGTCAATGGCATTCTGTGTGGTCTTCAGGTC  
+HWI-EAS443:3:37:1518:1091#0/1  
¥X[[\_]S¥DY[UT[RRY`¥\_X\_¥Y[]QXQ\_] [V[VLO  
@HWI-EAS443:3:37:152:1748#0/1  
GAACTAGTTGTTTCCACAATGTAGGACCATGAGCTTGCTG  
+HWI-EAS443:3:37:152:1748#0/1  
aba\_YU` [¥`]]`a`\_J¥YNRYXGTa]HFVS\_a]OY]Z]  
@HWI-EAS443:3:37:1754:1526#0/1  
AAACAATGCCAAGGAAATTGGAAACGGCTGCTTGCATTT  
+HWI-EAS443:3:37:1754:1526#0/1  
a`¥^aa[aa\_aUaaI^`a`R`]a[\_]`¥WNaWS¥EDTWTB  
@HWI-EAS443:3:37:211:811#0/1  
ACACGTTCCATTGTCTGAACTAGTTGTTTCCACAATGTAG  
+HWI-EAS443:3:37:211:811#0/1  
]baaaaaaba`aaa`\_aZaaa\_Y`^`\_`^^`S^LZYYS¥[  
@HWI-EAS443:3:37:309:1341#0/1  
GTGGGGACATCAAGATACAGCAAGAAGTTCCAGCCGGAAA  
+HWI-EAS443:3:37:309:1341#0/1  
`XZR^PZ^0]aa`a^^baaaaa\_X¥QTWZRG]\_aa^RW^a  
@HWI-EAS443:3:37:354:1083#0/1  
CTCCTGGGTAACACGTTCCATTGTCTGAACTAGTTGTTTC  
+HWI-EAS443:3:37:354:1083#0/1  
aabaaaa`\_]YaaaaZabaaaa\_b``]YS^a\_]\_`¥]\_¥  
@HWI-EAS443:3:37:40:816#0/1  
GTTCCATTGTCTGAACTAGTTGTTTCCACAATGTAGGACC  
+HWI-EAS443:3:37:40:816#0/1  
aaaa`a¥ab\_aaa^Za\_V```a\_aaaaaaXGV¥T`aa^V0  
@HWI-EAS443:3:37:522:46#0/1  
ACCTTTGTTTCGAGTCATGATTGGGCCATGACCTTGTCTTG  
+HWI-EAS443:3:37:522:46#0/1  
`baababaaa¥`a^`a`^]\_a`aa`\_a\_KEX^\_ZW^\_^\_  
@HWI-EAS443:3:37:59:581#0/1  
CAAAAACATATGCATCTGCATTCTGATAGAGCCTTTGTTG

+HWI-EAS443:3:37:59:581#0/1  
^TXU^aaVJYZZ\_YY\_V^VVO]]`P^HFUUFV` `aaSTX  
@HWI-EAS443:3:37:731:143#0/1  
GTTCCATTGTCTGAACTAGTTGTTCCACAATGTAGGACC  
+HWI-EAS443:3:37:731:143#0/1  
aabaaa\_aaaaaaa`aaa]`a^\_`a]`aPP]^Z\_`\_¥¥V  
@HWI-EAS443:3:37:89:299#0/1  
GTCAGCACTAGTAGATGGATGGTGAATGCCCCCTAGCACG  
+HWI-EAS443:3:37:89:299#0/1  
aYaa`aa`aUaU`a\_\_\_\_`V^`[U]^QY^[U^[GP^\_WEYX  
@HWI-EAS443:3:37:979:25#0/1  
ACGTTCCATTGTCTGAACTAGTTGTTCCACAATGTAGGA  
+HWI-EAS443:3:37:979:25#0/1  
aabaaabaaaa\_\_a^\_a^\_X`\_aa\_a\_[^T`[W[¥¥¥]YY  
@HWI-EAS443:3:38:1025:1476#0/1  
AAATGCGATAAAACGTGCATGGAAAGTGTCAAAAATGGGA  
+HWI-EAS443:3:38:1025:1476#0/1  
abbaabaa¥`aU`U`\_aYaa`\_\_a\_[T\_ZS]^Z\_`^IXM  
@HWI-EAS443:3:38:1138:628#0/1  
ATCTCCTGGTAACACGTTCCATTGTCTGAACTAGTTGTT  
+HWI-EAS443:3:38:1138:628#0/1  
a\_`aaa\_aa\_Ya\_`a^a\_^^`^a`¥YY\_`RVR]U]Y^`\_X  
@HWI-EAS443:3:38:1437:1650#0/1  
ATCTCCTGGTAACACGTTCCATTGTCTGAACTAGTTGTT  
+HWI-EAS443:3:38:1437:1650#0/1  
a`bb\_abaXb`\_aGba^a^`\_[^^a\_a^HRMW\_UW\_`\_W  
@HWI-EAS443:3:38:157:690#0/1  
CACGTTCCATTGTCTGAACTAGTTGTTCCACAATGTAGG  
+HWI-EAS443:3:38:157:690#0/1  
abbbabaa`bb\_aa^aaaaaXaa^\_\_¥¥¥^`a\_\_V¥[[  
@HWI-EAS443:3:38:246:1426#0/1  
CCCATTTTTGACACTTCCATGCACGTGTTACCGCATTG  
+HWI-EAS443:3:38:246:1426#0/1  
abaaaaaaaaa\_\_`a`aaa`^aa`]Y\_X^^]\_]`]¥Z  
@HWI-EAS443:3:38:414:657#0/1  
TTTGTAGTAATCTCGTCAATGGCATTCTGGGTGCTCTTC  
+HWI-EAS443:3:38:414:657#0/1  
a]¥US]]a]baa¥¥\_`RUZ`UWN`^`YQY¥FTUY¥Y\_`¥N  
@HWI-EAS443:3:38:493:868#0/1  
CCGGCTCTACTAGAGTCCAGTAATAGTTCATTCTCCCTTC  
+HWI-EAS443:3:38:493:868#0/1  
ab^bba[PU`\_N\_QZaabX]L\_UO^aZ\_a¥[ZT^T\_ZU¥Y  
@HWI-EAS443:3:38:619:1474#0/1  
GAAACAACACTAGTTCAGACAATGGAACGTGTTACCCAGGAG  
+HWI-EAS443:3:38:619:1474#0/1  
ababaaaa\_abUbWbaab`b`aa`a`a`a``\_\_]aaa]^U  
@HWI-EAS443:3:39:1022:103#0/1  
CACGTTCCATTGTCTGAACTAGTTGTTCCACAATGTAGG  
+HWI-EAS443:3:39:1022:103#0/1  
aaba\_`ba]aaa\_ab[YTa`YbSa`aa\_¥aMFS\_\_\_V]aW



@HWI-EAS443:3:39:1199:1383#0/1  
AAGGAAATTGGAAACGGCTGATTTGAATTTTACCACAAAT  
+HWI-EAS443:3:39:1199:1383#0/1  
]`a``\_[\_bbbbZYaa]S[QS]¥MLUZIV[BBBBBBBBBB  
@HWI-EAS443:3:39:1347:112#0/1  
AACGTGTTACCCAGGAAATTTTCATCGATTATGAGGAGCTA  
+HWI-EAS443:3:39:1347:112#0/1  
abab[aaV^ZiYW]ZQXaaa]^`aa^a\_`[SP^`XaY\_S  
@HWI-EAS443:3:39:1468:1690#0/1  
ACGTTCCATTGTCTGAACTAGTTGTTTCCACAATGTAGGA  
+HWI-EAS443:3:39:1468:1690#0/1  
aa]\_\_a`\_`a\_]^a\_\_a[]YV^MZ`^]`^\_YYY]]U]QYY  
@HWI-EAS443:3:39:1515:1376#0/1  
CATCCATCTCCTAGTGCTGACCAACAAAGTCTCTATCAGA  
+HWI-EAS443:3:39:1515:1376#0/1  
a¥aa\_\_ZT^`R\_]`[\_P[`]U¥\_U`^TT]NWKHRaZ]aXX  
@HWI-EAS443:3:39:1578:1934#0/1  
CTCCTGGGTAACACGTTCCATTGTCTGAACTAGTTGTTTC  
+HWI-EAS443:3:39:1578:1934#0/1  
aba`abaa\_a\_]aVa¥`¥]a¥]aW\_`]\_a[VY[V`^YWYY  
@HWI-EAS443:3:39:182:833#0/1  
GTGAAACAACACTAGTTCAGACAATGGAACGTGTACCCAG  
+HWI-EAS443:3:39:182:833#0/1  
a]aaaaZaaa`\_¥Xa\_\_`\_`\_`a\_\_a`\_`^aX\_W]]\_\_^TX  
@HWI-EAS443:3:39:429:1888#0/1  
ACATTGTGGAACAACACTAGTTCAGACAATGGAACGTGTTA  
+HWI-EAS443:3:39:429:1888#0/1  
aa`a\_a]``\_aaaaa\_a\_]`a`]aaa]]Z[X]]^Z^]]Z  
@HWI-EAS443:3:39:479:1560#0/1  
GATGGGTTCTGGACATTTGGACTTACAATGCCGAACGT  
+HWI-EAS443:3:39:479:1560#0/1  
a]a]a`aabb`a[ab]`aa\_\_baa\_X\_aaaa]]aaa`a\_¥  
@HWI-EAS443:3:39:500:1407#0/1  
CACGTTCCATTGTCTGAACTAGTTGTTTCCACAATGTAGG  
+HWI-EAS443:3:39:500:1407#0/1  
a¥b\_a\_baY[]I^T]aabX\_X^\_aa\_a`\_`\_aR]]]a]^N]  
@HWI-EAS443:3:39:570:12#0/1  
AAAACAATGCCAAGGAAATTGGAAACGGCTGGTTTGAATT  
+HWI-EAS443:3:39:570:12#0/1  
abbbabaab``aaaa`a```a`\_a`aa\_^]NT[VIJPVS  
@HWI-EAS443:3:39:96:1416#0/1  
ACATTGTGGAACAACACTAGTTCAGACAATGGAACGTGTTA  
+HWI-EAS443:3:39:96:1416#0/1  
a``[MYXRTSS\_`[```]XQ\_aa]aaaUO[LS¥SRTUTV[  
@HWI-EAS443:3:3:1197:1380#0/1  
TGCCGGTTTCATTGAAGGGGGTGGACAGGGATGGAAGAT  
+HWI-EAS443:3:3:1197:1380#0/1  
a`^RaaMUbaaabaUZ\_RbaU\_Ga]¥YZaa\_]Q`BBBBBB  
@HWI-EAS443:3:3:1263:1691#0/1  
CACGTTCCATTGTCTGAACTAGTTGTTTCCACAATGTAGG

+HWI-EAS443:3:3:1263:1691#0/1  
W¥abbRW[bbVb^^U^`^`abbbba]aa\_UYaV`aTYNZZ^  
@HWI-EAS443:3:3:134:1657#0/1  
GAAATTGGAAACGGCTGCGTTGAATTTTACCACAAATGCG  
+HWI-EAS443:3:3:134:1657#0/1  
a`N[[[Y^aWa`]```\_QQG[Y[ZPXaaZ[Q^PZ`BBBB  
@HWI-EAS443:3:3:1458:1505#0/1  
CACGTTCCATTGTCTGAACTAGTTGTTTCCACAATGTAGG  
+HWI-EAS443:3:3:1458:1505#0/1  
¥ab\_abaabbbbbb`bab\_a`b\_ababab^`^`\_abI[aa  
@HWI-EAS443:3:3:1587:1570#0/1  
CACGTTCCATTGTCTGAACTAGTTGTTTCCACAATGTAGG  
+HWI-EAS443:3:3:1587:1570#0/1  
aaab]aaRaaaaPP¥a¥YZU]`\_]a]Z`U[]YZ\_YPPBBB  
@HWI-EAS443:3:3:251:586#0/1  
GCTGGCTGGATCCTGGGAAATCCAGAGTGTCAATCACTCT  
+HWI-EAS443:3:3:251:586#0/1  
aa¥abaaa\_VRW[LVYX¥\_aa`\_`\_TW]SXFkZTVJSDPRY  
@HWI-EAS443:3:3:294:815#0/1  
CACGTTCCATTGTCTGAACTAGTTGTTTCCACAATGTAGG  
+HWI-EAS443:3:3:294:815#0/1  
abbbbaa`babbbb^a[[`\_bbb`baa`a]¥aW]aa`aa`\_  
@HWI-EAS443:3:3:373:387#0/1  
CAACAAAGGCTCTATCAGAATGCAGATGCATATGTTTTTG  
+HWI-EAS443:3:3:373:387#0/1  
]`\_^`\_¥SHPaZ]bbZ\_¥¥S]TOW\_XUYDYbaaaZ^W[UJ  
@HWI-EAS443:3:3:498:1684#0/1  
ACTTCTTGCTGTATCTTGATGGCCCCACAAAAACATATGC  
+HWI-EAS443:3:3:498:1684#0/1  
ZLWQ^`\_Raab¥^Z[aaaaZUGa`Ya\_\_¥`a[a`\_^````\_  
@HWI-EAS443:3:3:562:1323#0/1  
CACGTTCCATTGTCTGAACTAGTTGTTTCCACAATGTAGG  
+HWI-EAS443:3:3:562:1323#0/1  
ab]aa[]aa\_a`HX`¥Y`]^`^[Ka]W]\_YY¥U^a\_]W]^B  
@HWI-EAS443:3:3:946:918#0/1  
GACAAGTTGTATTGCAATCGTGGAGTGGTGTATCTGAAAT  
+HWI-EAS443:3:3:946:918#0/1  
]N\_Y¥[^S[GWP¥X¥W\_¥T[Uaa^RZa`RHF[UFMVU^BB  
@HWI-EAS443:3:3:992:638#0/1  
CTCCTGGGTAACACGTTCCATTGTCTGAACTAGTTGTTTC  
+HWI-EAS443:3:3:992:638#0/1  
^ab[abbba^V\_b]`T\_^]^V`ba`baa`G`ab\_bb¥\_XO  
@HWI-EAS443:3:40:1034:1453#0/1  
GAACTAGTTGTTTCCACAATGTAGGACCATGAGCTTGCTG  
+HWI-EAS443:3:40:1034:1453#0/1  
a\_[\_\_\_\_`ZRZN`¥^YaYZ\_]PIZ\_^Va^UYQ\_S[WSWWQ¥  
@HWI-EAS443:3:40:1047:274#0/1  
CACGTTCCATTGTCTGAACTAGTTGTTTCCACAATGTAGG  
+HWI-EAS443:3:40:1047:274#0/1  
abZT]ab`LXa[`a\_a\_aaaa`]S`HU\_\_`a``LSUDX\_]`

@HWI-EAS443:3:40:1124:964#0/1  
ATTTGAAAAGTTTGGATATTTCCCAAGACAAGTTCATGG  
+HWI-EAS443:3:40:1124:964#0/1  
ab]]YXRYQ]NWVZW^¥OWXY^^]T¥G¥WRWTFRO` [PVP  
@HWI-EAS443:3:40:1431:813#0/1  
ACGTTCCATTGTCTGAACTAGTTGTTTCCACAATGTAGGA  
+HWI-EAS443:3:40:1431:813#0/1  
aZ`a^]¥\_\_` `[[`W¥Y\_\_\_Y\_`]^W[`V]Y^\_SU¥[]  
@HWI-EAS443:3:40:145:1788#0/1  
CAAGAAGTTCAAGCCGAAATAGCAATACGACCCAAAGTG  
+HWI-EAS443:3:40:145:1788#0/1  
a\_bab¥baabba\_bb` ]\_bbbbb\_\_IZbbba\_L]]Va  
@HWI-EAS443:3:40:1496:479#0/1  
CACGTTCCATTGTCTGAACTAGTTGTTTCCACAATGTAGG  
+HWI-EAS443:3:40:1496:479#0/1  
ab\_ba[`bb\_[\_NZ`aP^`^W\_Saba\_a\_XVXMM[ZMZV  
@HWI-EAS443:3:40:1727:962#0/1  
ACTTCTTGCTGTATCTTGATGTCCCCACAAAACATATGC  
+HWI-EAS443:3:40:1727:962#0/1  
aa^]YV^aZX`¥¥]X¥` `][^¥` [WPLYJ][UU[ZYYXP^X  
@HWI-EAS443:3:40:1786:620#0/1  
CACGTTCCATTGTCTGAACTAGTTGTTTCCACAATGTAGG  
+HWI-EAS443:3:40:1786:620#0/1  
Wa\_\_\_\_`Y`aa¥`aa`a`a]aUY\_bb^^LV^abZa`a  
@HWI-EAS443:3:40:180:761#0/1  
CTTCCTCTGAGTATTTTGGGTAGTCATACGTCCCATTTTT  
+HWI-EAS443:3:40:180:761#0/1  
aabababb\_^bb¥bbaabab[aa`bbU\_H`bb]R]abaa  
@HWI-EAS443:3:40:407:1527#0/1  
AGCCAGTTAAAAACAATGCCAAGGACATTGGAACGGCT  
+HWI-EAS443:3:40:407:1527#0/1  
^aba` `[aba\_Z\_aaa`aba`^a\_]NZ[SOW`Sa`]\_Y  
@HWI-EAS443:3:40:633:1709#0/1  
CTACATTGTGGAACAACACTAGTTCAGACAATGGAACGTGT  
+HWI-EAS443:3:40:633:1709#0/1  
\_\_¥YSX]^`^VQ]]\_`ab` [[XFQ\_[¥M`IS]Z]JQ[GQSV  
@HWI-EAS443:3:40:822:1227#0/1  
CTCGTCAATGGCATTCTGGGTGCTTTCAGGTCGGCTGCA  
+HWI-EAS443:3:40:822:1227#0/1  
aW`bQX[^`aabb]^`^a¥DU]^`\_`W^X]\_W\_[VaW\_XN  
@HWI-EAS443:3:40:846:1047#0/1  
CAGGGATGGTAGATGGATGGTACGGTTATCACCCCTAAAA  
+HWI-EAS443:3:40:846:1047#0/1  
¥¥¥[`¥\_RMLZZ[YZ^ZZa^`aX¥^QJVYP\_¥FFRROSYX  
@HWI-EAS443:3:42:1248:1539#0/1  
GTGTTACCCAGGAGATTTTCATCGATTATGAGGAGGTAAGA  
+HWI-EAS443:3:42:1248:1539#0/1  
aXZO[TZN[V[YTXUJZSSNW¥ZQOYVVOX^ZSXGSZZUW  
@HWI-EAS443:3:42:1320:732#0/1  
AAAAACAATGCCAAGGAAATTGGAACGGCTGGTTTGAA

+HWI-EAS443:3:42:1320:732#0/1  
a\_Z^`baabaa][abab`aaaaba^aa\_\_^]¥XDP]^NJR  
@HWI-EAS443:3:42:136:145#0/1  
GCCGGTTTCATTGAAGGGGGGGGACAGGGATGGTAGATG  
+HWI-EAS443:3:42:136:145#0/1  
`b^aT^`¥T]^PQS\_]^^SNQVSWP^SXSS¥WSU¥UG[  
@HWI-EAS443:3:42:1472:46#0/1  
CACGTTCCATTGTCTGAACTAGTTGTTCCACAATGTAGG  
+HWI-EAS443:3:42:1472:46#0/1  
\_abb`^^ZV\_bb\_abb^^abababb¥b^\_[¥aa`a`W\_\_a  
@HWI-EAS443:3:42:1604:170#0/1  
GCCGGGAGACAATATAACATTTCGAAGCAACTGGAAATCTA  
+HWI-EAS443:3:42:1604:170#0/1  
aaaaaab\_\_aaa\_a`\_`a`\_]a\_^`\_^]\_\_^]^[\_^]  
@HWI-EAS443:3:42:1736:321#0/1  
AAATTGGAACGGCTGCCTTGAATTTTACCACAAATGCGA  
+HWI-EAS443:3:42:1736:321#0/1  
abbabbbabbb`\_`\_bbSFWaUNUR]a`MFU^HZ]\_RQLSV  
@HWI-EAS443:3:42:1758:499#0/1  
GTCCTCGTGCTATGGGTCATTCACCATCCATCTACTAGTG  
+HWI-EAS443:3:42:1758:499#0/1  
\_P\_]`^]^^a``¥`YK[[]^S\_U^\_[^Z^[\_^RZRZZ  
@HWI-EAS443:3:42:234:1364#0/1  
ACGTTCCATTGTCTGAACTAGTTGTTCCACAATGTAGGA  
+HWI-EAS443:3:42:234:1364#0/1  
`\_\_[\_]¥\_^YS\_¥][`Z]¥U]ZQ]^UO¥]XQTTYXV¥  
@HWI-EAS443:3:42:374:1093#0/1  
GCTTCCTCTGAGTATTTTGGGTAGTCTTAAGTCCCATTTT  
+HWI-EAS443:3:42:374:1093#0/1  
aaaaaaa]^Z^`^aaaa`a`R`]Z`aaa\_\_^a¥[Z[\_^a  
@HWI-EAS443:3:42:510:1983#0/1  
AACAACTAGTTCAGACAATGGAACGTGTTACCCAGGAGAT  
+HWI-EAS443:3:42:510:1983#0/1  
[\_`^^¥VW\_`¥^MW\_aa`\_TFZQQZWXFY¥YIN[[]¥[YYU  
@HWI-EAS443:3:42:728:655#0/1  
ACACGTTCCATTGTCTGAACTAGTTGTTCCACAATGTAG  
+HWI-EAS443:3:42:728:655#0/1  
aaaaa`]aZ^aaa^\_a`\_\_^^a^`a`\_`\_]UWU]\_T[[  
@HWI-EAS443:3:42:783:1698#0/1  
CTAGTTGTTCCACAATGTAGGACCATGAGCTTGCTGTGG  
+HWI-EAS443:3:42:783:1698#0/1  
aaa^Waa\_aaabaaa`ab\_b]U`\_\_aa`aa`\_`^^`\_^\_Y  
@HWI-EAS443:3:42:787:73#0/1  
AACACGTTCCATTGTCTGAACTAGTTGTTCCACAATGTA  
+HWI-EAS443:3:42:787:73#0/1  
a`^^^baa`]aaa`XX`b`a``aa`\_a``\_`[¥^V¥`[\_V^  
@HWI-EAS443:3:43:1004:198#0/1  
ATGTTTTTGTGGGACATCAAGCTACAGCAAGAAGTTCAA  
+HWI-EAS443:3:43:1004:198#0/1  
`bbbbbbbbb`baba`aaaa`aa`aa\_ba^aaa`\_a]a\_\_\_\_



+HWI-EAS443:3:44:21:1713#0/1  
abaabaa^aaaaa¥Z¥a\_]a^]XV^Y\_\_`\_[Z[a\_[ZS  
@HWI-EAS443:3:44:453:13#0/1  
ATTGTGGAAACAAGTTCAGACAATGGAACGTGTTACC  
+HWI-EAS443:3:44:453:13#0/1  
`VQaWN\_0^¥YOTZZX]¥][OUUYY[Z\_¥YV]O[PKPOQ  
@HWI-EAS443:3:44:488:912#0/1  
ACGTTCCATTGTCTGAACTAGTTGTTTCCACAATGTAGGA  
+HWI-EAS443:3:44:488:912#0/1  
a^\_`aaaa]\_a^`aa\_`[`aa¥\_a\_`a`a\_\_a`^[P¥X[Y  
@HWI-EAS443:3:44:657:26#0/1  
GGGTGGACAGGGAGGGTAGATGGATGGTACGGTTATCACC  
+HWI-EAS443:3:44:657:26#0/1  
abaQa[FWR`\_YK]NZXKS]¥WK[MG[¥¥SVSWRWUO  
@HWI-EAS443:3:45:1083:2013#0/1  
AAGTCCTCGTGCTATGGGGAATTCACCATCCATCTACTAG  
+HWI-EAS443:3:45:1083:2013#0/1  
aaa^YV]aa`\_ZVaQ\_`a[DU\_]\_`^W\_]`Z`\_]\_\_V¥^\_  
@HWI-EAS443:3:45:1129:273#0/1  
ATCTCGCCAATGGCATTCTGTGTGCTCTTCAGGTGGCTG  
+HWI-EAS443:3:45:1129:273#0/1  
ZS^``[DRUaZN]aXX^XaVPOPXMZSZa\_Z`BBBBBBBB  
@HWI-EAS443:3:45:127:1783#0/1  
CCTGGGTAACACGTTCCATTGTCTGAACTAGTTGTTCCA  
+HWI-EAS443:3:45:127:1783#0/1  
aa]`¥[SW[Z`SaY]`ULWZWZ[[US¥V\_[]U]]X][MZ\_  
@HWI-EAS443:3:45:129:442#0/1  
ATTCATCGATTATGAGGAGCTAAGAGAGCAATTGGGCTC  
+HWI-EAS443:3:45:129:442#0/1  
abba¥ZX\_XZbb[b`a¥\_Za[b¥S``X\_`P`\_[]XDY[a\_  
@HWI-EAS443:3:45:1571:569#0/1  
CAAGCTCATGGTCCTACATTGTGGAAACAAGTTCAGA  
+HWI-EAS443:3:45:1571:569#0/1  
aaaaaa¥aaba^`aaaa`a`a]a```a]a[[\_\_`]X\_a\_  
@HWI-EAS443:3:45:1667:1316#0/1  
GAAACAAGTTCAGACAATGGAACGTGTTACCCAGGAG  
+HWI-EAS443:3:45:1667:1316#0/1  
aaaa\_ba`¥aa^\_\_aaa\_``\_`^R\_]\_YXW^^]]W]^TQX  
@HWI-EAS443:3:45:1710:897#0/1  
CTCCTGGGTAACACGTTCCATTGTCTGAACTAGTTGTTTC  
+HWI-EAS443:3:45:1710:897#0/1  
a\_ab`\_Y\_T\_a`a¥ZYW]¥¥]ZWUX``a\_¥TL¥][[N[[R  
@HWI-EAS443:3:45:310:1346#0/1  
AAACAAGTTCAGACAATGGAACGTGTTACCCAGGAGA  
+HWI-EAS443:3:45:310:1346#0/1  
^\_Z``]Y\_U¥¥\_a`^a`\_`a`\_]`[¥]\_\_]YS^^`^`]  
@HWI-EAS443:3:45:321:662#0/1  
GCCCAATCATGACTCGAACAAAGGTGTAACGGCAGGATGT  
+HWI-EAS443:3:45:321:662#0/1  
ab`^``\_aa^aZ]``a\_¥LZ^`aaWq]\_\_\_\_`BBBBBBBB

@HWI-EAS443:3:45:455:1219#0/1  
CACGTTCCATTGTCTGAACTAGTTGTTTCCACAATGTAGG  
+HWI-EAS443:3:45:455:1219#0/1  
aabbabb\_bbbbababbbbabab`baabb`aaTbaaa\_`\_a  
@HWI-EAS443:3:45:675:1867#0/1  
ATCTTTTCAATAACAGAATTTACTTTGTTAGGAATCTCGT  
+HWI-EAS443:3:45:675:1867#0/1  
Y[`R[W]aaa^a¥Q¥```ZP\_a\_`ZW\_WY^SFZ]aUYXXW  
@HWI-EAS443:3:45:829:1282#0/1  
ATCTCCTGGGTAACACGTTCCATTGTCTGAACTAGTTGTT  
+HWI-EAS443:3:45:829:1282#0/1  
aaa\_UZ¥`aX0^a\_aa\_]`^U^\_YWQPS]]]Q^]\_VZXU]  
@HWI-EAS443:3:45:844:1244#0/1  
GTTCCATTGTCTGAACTAGTTGTTTCCACAATGTAGGACC  
+HWI-EAS443:3:45:844:1244#0/1  
abbaabbbbaabb`aab`aaaaaaaaab]a\_a`\_aaaa\_W  
@HWI-EAS443:3:46:1102:274#0/1  
CTGACAAGTTGTAAGTCAATCGTGGACTGGTGTATCTGAA  
+HWI-EAS443:3:46:1102:274#0/1  
]abba`V`a\_``aabb\_bb``aWaa\_abb^b`aaZ\_b`\_  
@HWI-EAS443:3:46:1245:1146#0/1  
GAACGTGTTACCCAGGGATTTTCATCGATTATGAGGAGCT  
+HWI-EAS443:3:46:1245:1146#0/1  
`RPX[UYNVSY][Z[SEUVYQQ]]XRZRZLT][V^]VVRU  
@HWI-EAS443:3:46:1399:480#0/1  
TTTGGGTCTTATTGCTATTTCCGGCCTGAACCTCTTGCTG  
+HWI-EAS443:3:46:1399:480#0/1  
a^`\_WY^][\_]\_XY`XVY\_]¥[[XX^T]Y]^X¥ZX^^  
@HWI-EAS443:3:46:1667:268#0/1  
GGATATGCAGCCGACCTGAAGATCACACAGAATGCCATTG  
+HWI-EAS443:3:46:1667:268#0/1  
ab\_^`[^`^`aU`]^\_\_\_\_]U]XXTZUZRX¥]XXTSQ]XW  
@HWI-EAS443:3:46:235:1925#0/1  
GTCTGAACTAGTTGTTTCCACAATGTAGGACCATGAGCTT  
+HWI-EAS443:3:46:235:1925#0/1  
aXa¥ZWaZYU`S`[V[^Z]NYTY[YUYNVYTX[BBBBBBB  
@HWI-EAS443:3:46:447:1213#0/1  
AACACGTTCCATTGTCTGAACTAGTTGTTTCCACAATGTA  
+HWI-EAS443:3:46:447:1213#0/1  
aXaa\_\_G]aaa\_ZVRZ\_a^`^aa^M^^]\_\_^\_`[^`^WNV^  
@HWI-EAS443:3:46:557:785#0/1  
CGGGGACAAAATAACATTCGAAGCAACTGGAAATCTAGT  
+HWI-EAS443:3:46:557:785#0/1  
abbabbbab\_\_baababbba`bbbabbabbaaaababab^  
@HWI-EAS443:3:46:599:932#0/1  
GAAATTGGAAACGCCTGCTTTGAATTTTACCACAAATGCG  
+HWI-EAS443:3:46:599:932#0/1  
\_a`bbbbbbbaaa`aba\_abbaabaaaa\_aa`aaaa`^a  
@HWI-EAS443:3:46:614:1241#0/1  
CGTTCCATTGTCTGAACTAGTTGTTTCCACAATGTAGGAC

+HWI-EAS443:3:46:614:1241#0/1  
T\_`b`bb`¥`^YPYWaab¥a`Zaab]`aRF^¥` ]\_  
@HWI-EAS443:3:47:1647:414#0/1  
CACGTTCCATTGTCTGAACTAGTTGTTCCACAATGTAGG  
+HWI-EAS443:3:47:1647:414#0/1  
abaa^bbaaaa\_]`a`^Va]`Q`a`aa\_]Z\_^YVUY¥^  
@HWI-EAS443:3:47:1691:1500#0/1  
ACACGTTCCATTGTCTGAACTAGTTGTTCCACAATGTAG  
+HWI-EAS443:3:47:1691:1500#0/1  
aab^`aaa`aaa^Y]aa\_\_[]ZVRa`\_]\_^]\_^\_\_^YV]Y  
@HWI-EAS443:3:47:620:877#0/1  
CTCCTGGGTAACACGTTCCATTGTCTGAACTAGTTGTTTC  
+HWI-EAS443:3:47:620:877#0/1  
Zaaaa\_aa[ZT¥aaa\_a`\_a^ZW\_\_]\_\_Z`¥¥S`\_O\_YV  
@HWI-EAS443:3:47:723:850#0/1  
ACACGTTCCATTGTCTGAACTAGTTGTTCCACAATGTAG  
+HWI-EAS443:3:47:723:850#0/1  
`bb^b\_`bbbaX^]Y\_bZX]\_¥¥]`\_^]QWY¥a`\_¥X]a  
@HWI-EAS443:3:47:814:741#0/1  
CACGTTCCATTGTCTGAACTAGTTGTTCCACAATGTAGG  
+HWI-EAS443:3:47:814:741#0/1  
ababaa¥abaaa`\_b`\_a\_a\_a[aZ]a`[\_^¥]\_\_¥^[]\_  
@HWI-EAS443:3:47:898:1359#0/1  
AACACGTTCCATTGTCTGAACTAGTTGTTCCACAATGTA  
+HWI-EAS443:3:47:898:1359#0/1  
aaaaab`abaa\_a¥`\_a`\_`[\_`\_¥aa`aa\_^]\_\_\_]\_[-  
@HWI-EAS443:3:48:1223:672#0/1  
ACGTTCCATTGTCTGAACTAGTTGTTCCACAATGTAGGA  
+HWI-EAS443:3:48:1223:672#0/1  
a```^]¥TZa\_[X^Y^^[XXYX\_^]a]U¥ZS\_[¥^RXVVU  
@HWI-EAS443:3:48:1642:186#0/1  
AAAATTCAAAGCAGCCGTTTCCAATTCCCTTGGCATTGTT  
+HWI-EAS443:3:48:1642:186#0/1  
`[]\_VVa`\_\_a\_^¥^]a\_\_\_\_]a]^VFRQYTQQMIMX^V  
@HWI-EAS443:3:48:432:593#0/1  
TTCTGATAGAGACTTTGTTGGTCAGCACTGGTAGATGGAT  
+HWI-EAS443:3:48:432:593#0/1  
aa````b`a^]`aaaaZaa`W[^]^¥PXEX[YaY`a[]\_  
@HWI-EAS443:3:48:763:1558#0/1  
CACTGAGCTCAATTGCTCTGTTAGCTCCTCATAATCGATG  
+HWI-EAS443:3:48:763:1558#0/1  
aaaaaaaaaababaaaa`Raaa`\_``\_\_`aa`Yaa^a  
@HWI-EAS443:3:48:989:1635#0/1  
AGGAAATTTTCATCGATTATGAGGAGCTAAGAGAGCAATTG  
+HWI-EAS443:3:48:989:1635#0/1  
Y]\_a`^`b]^`^b\_aba]aaVba¥`\_aa`^aa]aU\_a`\_a  
@HWI-EAS443:3:49:1173:637#0/1  
CGTTCCATTGTCTGAACTAGTTGTTCCACAATGTAGGAC  
+HWI-EAS443:3:49:1173:637#0/1  
Taa\_U]bbY`^Wa[^TW^bb`[^]^Z[SJFa\_T]X[a\_ZG



@HWI-EAS443:3:49:1185:1979#0/1  
CACGTTCCATTGTCTGAACTAGTTGTTTCCACAATGTAGG  
+HWI-EAS443:3:49:1185:1979#0/1  
abbbabaaabbaaaa\_aaaaa`aab\_`a¥` `]aaa\_]a\_`  
@HWI-EAS443:3:49:1242:1023#0/1  
ACACGTTCCATTGTCTGAACTAGTTGTTTCCACAATGTAG  
+HWI-EAS443:3:49:1242:1023#0/1  
^aa`aba`a`ab`aaaa\_X[ `\_aaa` `a`^Y[0¥¥^XYZ\_  
@HWI-EAS443:3:49:128:1296#0/1  
AAGTCCTCGTGCTATGGGGCATTAAACCATCCATCTACTAG  
+HWI-EAS443:3:49:128:1296#0/1  
TX` [¥ba`¥`SaUYa^¥b]^]aYGR`aaaa^a`U`a[ `aa  
@HWI-EAS443:3:49:1312:1311#0/1  
TCCGGCTTGAACCTTCTGCTGTATCCTGATGTCCCCACAA  
+HWI-EAS443:3:49:1312:1311#0/1  
aa`a^b`a\_0Y`]ba`ab\_ab`\_aYaaa\_aa¥^a]QY¥a`  
@HWI-EAS443:3:49:1378:1168#0/1  
CACGTTCCATTGTCTGAACTAGTTGTTTCCACAATGTAGG  
+HWI-EAS443:3:49:1378:1168#0/1  
^`baabaabbab]`abaa\_a`a\_abaaaaX¥[a\_`a]\_a\_  
@HWI-EAS443:3:49:1512:340#0/1  
CTCCTGGGTAACACGTTCCATTGTCTGAACTAGTTGTTTC  
+HWI-EAS443:3:49:1512:340#0/1  
aaababababb\_aaabbaaba\_a^\_ba`a[\_S¥¥aa`aa`  
@HWI-EAS443:3:49:1572:866#0/1  
CTCCTGGGTAACACGTTCCATTGTCTGAACTAGTTGTTTC  
+HWI-EAS443:3:49:1572:866#0/1  
aaaab\_aaabbaa]\_aaaa`aab[\_ab`aaa^baaa\_a`^  
@HWI-EAS443:3:49:1583:516#0/1  
GTTCCATTGTCTGAACTAGTTGTTTCCACAATGTAGGACC  
+HWI-EAS443:3:49:1583:516#0/1  
aaXVYaaa\_ZUa^\_] ^a¥`\_a^a`b[ `\_^`^a`UU[\_^SL  
@HWI-EAS443:3:49:1608:1631#0/1  
CTTTTTTCCAGGTGGGTGAACTCTTTACCTACTGCTGTGA  
+HWI-EAS443:3:49:1608:1631#0/1  
V` `bbbbbb\_abQbRO[\_Mb]aV`\_a[HYb`[a`]\_b`UH  
@HWI-EAS443:3:49:523:1159#0/1  
CTGGCTGGATCCTGGGAAATCCAGAGTGTGAACCACTCTC  
+HWI-EAS443:3:49:523:1159#0/1  
abbaabababaaab`babbb[aaaab]baaaaXZ`Zaaa\_  
@HWI-EAS443:3:49:583:521#0/1  
CACGTTCCATTGTCTGAACTAGTTGTTTCCACAATGTAGG  
+HWI-EAS443:3:49:583:521#0/1  
Y`bb¥YQ`\_X¥[]VaaUaJ^`\_b`b`bY\_T\_aa]ZS[bb`  
@HWI-EAS443:3:49:787:1276#0/1  
GCTTGAACCTTCTGCTGTATCTTGATGTCCCGACAAAAAC  
+HWI-EAS443:3:49:787:1276#0/1  
S^ZT^VVa\_Y\_aY^` `a^\_Y\_aaaa]ba¥I¥H[¥¥I^`b^  
@HWI-EAS443:3:4:1087:69#0/1  
TGGGGACATCAAGATACAGCAAGAAGTTGAAGCCGAAAT

+HWI-EAS443:3:4:1087:69#0/1  
]b\_R¥`RM]XZaaa[P`aWH\_\_[ ]MWG[``SVa^RNRB  
@HWI-EAS443:3:4:1405:712#0/1  
GGGGGGTGGACAGGGATGGTAGATGGATGGTAAGGTTATC  
+HWI-EAS443:3:4:1405:712#0/1  
\_`b^`aY]VRU\_U[\_¥¥aaQG¥^¥\_¥NU\_WTBTTTTTTTT  
@HWI-EAS443:3:4:206:1077#0/1  
CACGTTCCATTGTCTGAACTAGTTGTTTCCACAATGTAGG  
+HWI-EAS443:3:4:206:1077#0/1  
aba\_aa\_aaaba^\_ab`aaa`\_`a`a`¥^aZ]Y]a\_`\_^  
@HWI-EAS443:3:4:445:501#0/1  
ACGTTCCATTGTCTGAACTAGTTGTTTCCACAATGTAGGA  
+HWI-EAS443:3:4:445:501#0/1  
]baa`aaaaaaaaW`ZU`a]a`a^\_aUR\_TaYZSW\_a\_^  
@HWI-EAS443:3:4:78:1526#0/1  
TGGCTGGATCCTGGGAAATCCAGAGTGTGAATAACTCTCC  
+HWI-EAS443:3:4:78:1526#0/1  
Z\_XV\_`\_\_W\_a^^^Z¥^]¥TZ`a[ZZU`]a[D^W]^\_YZ  
@HWI-EAS443:3:4:823:1443#0/1  
ATCTCCTGGGTAACACGTTCCATTGTCTGAACTAGTTGTT  
+HWI-EAS443:3:4:823:1443#0/1  
a¥[\_^R[[VYQWXT\_^`V¥WU\_]TXXYZYSVPQXRMURBB  
@HWI-EAS443:3:4:881:967#0/1  
ACGTTCCATTGTCTGAACTAGTTGTTTCCACAATGTAGGA  
+HWI-EAS443:3:4:881:967#0/1  
ZS\_PY`a\_\_\_^`aa]L¥a\_W^\_^]Ua`X][GYW\_YSY\_BB  
@HWI-EAS443:3:50:1218:635#0/1  
CACGTTCCATTGTCTGAACTAGTTGTTTCCACAATGTAGG  
+HWI-EAS443:3:50:1218:635#0/1  
R\_aaa\_baa`bbb[ba\_X\_bbaa`bbbb`babbbba`a\_a  
@HWI-EAS443:3:50:315:1832#0/1  
AGCTCATGGTCCTACATTGTGGAAACAAGTTCAGACA  
+HWI-EAS443:3:50:315:1832#0/1  
a\_PU¥KVXOV`a¥ZSZ``YV]aR\_`M`a¥N\_GRKS^\_Z0]  
@HWI-EAS443:3:50:541:46#0/1  
TGCATATGTTTTTATGGGACATCAAGATACAGCAAGAAG  
+HWI-EAS443:3:50:541:46#0/1  
\_[I[a\_abaabbbabbb`¥bTX[a¥[aZYaaaa]S^b¥ab  
@HWI-EAS443:3:50:705:1756#0/1  
ATCTCCTGGGTAACACGTTCCATTGTCTGAACTAGTTGTT  
+HWI-EAS443:3:50:705:1756#0/1  
a^`a`aaabYZ```ba`]\_]\_U\_^\_]\_YX\_ZSZ¥`Y\_\_Q\_  
@HWI-EAS443:3:50:813:350#0/1  
TGGAAAATGTCCAAAATATGTAAGAAGCACAAAATTGAGA  
+HWI-EAS443:3:50:813:350#0/1  
ab\_`b^YU\_^Ia¥bVTZabaSaRF^`THP[^]SuaYa\_V\_  
@HWI-EAS443:3:50:951:2044#0/1  
TACGGTTATCACCATCAAAATGAGCAGGGGGCAGGATATG  
+HWI-EAS443:3:50:951:2044#0/1  
Tabab]bYPGTW^VYT¥VW][Z^aV\_]`^b\_H\_]`^]U^``

@HWI-EAS443:3:50:975:210#0/1  
GGGGGCATCAAGATACAGCAAGAAGTTCAAGCCGGAAATA  
+HWI-EAS443:3:50:975:210#0/1  
Maab\_\_`ababbabaaab`babbbbX`aba\_Zaa`ab\_aa  
@HWI-EAS443:3:51:104:1354#0/1  
ATCTCCTGGGTAACACGTTCCATTGTCTGAACTAGTTGTT  
+HWI-EAS443:3:51:104:1354#0/1  
ZXT^WWZa¥RM`\_YXZWY\_WWR\_`[^GZbXWH^Y¥GS[Y`  
@HWI-EAS443:3:51:1336:800#0/1  
CGTTCCATTGTCTGAACTAGTTGTTTCCACAATGTAGGAC  
+HWI-EAS443:3:51:1336:800#0/1  
`\_`b`bbbabba```ab\_]`bbabb\_ab`bbbaaaaZ]a  
@HWI-EAS443:3:51:187:274#0/1  
GATACAGCAAGAAGGTCAAGCCGGAAATAGCAATAAGACC  
+HWI-EAS443:3:51:187:274#0/1  
Q^[\_`baa\_b`aa\_H¥a`ba`aa\_ab\_ab`baaa`aaS[  
@HWI-EAS443:3:52:125:711#0/1  
CGTTCCATTGTCTGAACTAGTTGTTTCCACAATGTAGGAC  
+HWI-EAS443:3:52:125:711#0/1  
abaaa`aa`a`aa`a`a`a[a`a]`\_^`[^¥^`¥¥\_V][  
@HWI-EAS443:3:52:1260:1243#0/1  
GCTGGCTGGATCCTGGGAAATCCAGAGTGTGAATAACTCT  
+HWI-EAS443:3:52:1260:1243#0/1  
a`]ZN¥`QSYaVL¥¥]BBBBBBBBBBBBBBBBBBBBBBB  
@HWI-EAS443:3:52:184:664#0/1  
ATTTTTGACACTTTCCATGCACGTGTTGTCGCATTTGTGG  
+HWI-EAS443:3:52:184:664#0/1  
abbab``\_`aaaaa^`aaa^a\_aZ^V^aa`\_aa\_\_Y`a  
@HWI-EAS443:3:52:276:604#0/1  
GTTCCATTGTCTGAACTAGTTGTTTCCACAATGTAGGACC  
+HWI-EAS443:3:52:276:604#0/1  
a¥Yaa\_a]aV[¥`¥\_W`[aW^aW\_\_¥Y[T^]]`V^[¥¥NS  
@HWI-EAS443:3:52:371:360#0/1  
ATCTCCTGGGTAACACGTTCCATTGTCTGAACTAGTTGTT  
+HWI-EAS443:3:52:371:360#0/1  
ababaaaaaa\_\_aaa\_a[aa¥`a\_a]`a\_]\_Za]\_Y\_¥^a  
@HWI-EAS443:3:52:538:465#0/1  
GGGGCGTTCACCATCCATCTACTAGTGCTGACCAACAAAG  
+HWI-EAS443:3:52:538:465#0/1  
aOV]UO¥[S[^UPZX[[U^\_\_\_UITYMMMMNYVZVFOT  
@HWI-EAS443:3:52:57:1999#0/1  
ACACGTTCCATTGTCTGAACTAGTTGTTTCCACAATGTAG  
+HWI-EAS443:3:52:57:1999#0/1  
aaa`a\_\_\_`\_^\_]`^\_\_\_\_]¥]^^^Y^W]^\_VY^V[]YYU]O  
@HWI-EAS443:3:52:667:367#0/1  
CCTGGGTAACACGTTCCATTGTCTGAACTAGTTGTTTCCA  
+HWI-EAS443:3:52:667:367#0/1  
a`ababRa^\_a\_b¥a\_^aa][Q\_`\_U[]]W`]¥`]a\_[Z]  
@HWI-EAS443:3:52:764:1469#0/1  
GATGTCACCTGAGCTCAATTGCTCTTAGCTCCTCATAAT

+HWI-EAS443:3:52:764:1469#0/1  
a`Y\_a`\_b\_¥`aZ]abaYW\_S]^[\_]Ra```a\_\_\_\_\_ [R  
@HWI-EAS443:3:52:76:491#0/1  
CACGTTCCATTGTCTGAACTAGTTGTTCCACAATGTAGG  
+HWI-EAS443:3:52:76:491#0/1  
ab`¥]aaY]aa]X]aa\_`RZ\_a\_abX`]XX\_XK[aaY`X^  
@HWI-EAS443:3:53:1105:1811#0/1  
CATTGTGGAAACAACACTAGTTCAGACAATGGAACGTGTAC  
+HWI-EAS443:3:53:1105:1811#0/1  
aaZ[U¥abbaaV\_baababa¥`b`bbb¥a`aa[b\_bXH`¥  
@HWI-EAS443:3:53:1132:1750#0/1  
GCTCATGGTCCTACATTGTGGAAACAACACTAGTTCAGACAA  
+HWI-EAS443:3:53:1132:1750#0/1  
`abaab`b`a`ba]bbaa`aa`baabbVaaaZa`ab`Z\_\_  
@HWI-EAS443:3:53:1170:398#0/1  
GGGGCCATCAAGATACAGCAAGAAGTTCAAGCCGGAAATA  
+HWI-EAS443:3:53:1170:398#0/1  
`bbb\_`bbTaababbaab^abbabb`a¥aaa^[ba``\_a\_  
@HWI-EAS443:3:53:1731:872#0/1  
AGGAGATTTTCATCGATTATTAGGAGCTAAGAGAGCAATTG  
+HWI-EAS443:3:53:1731:872#0/1  
[`ab`bbbbb\_b]T^a`a^FYZ``^]`aab¥H¥^\_\_aa\_]`  
@HWI-EAS443:3:53:28:448#0/1  
AACACGTTCCATTGTCTGAACTAGTTGTTCCACAATGTA  
+HWI-EAS443:3:53:28:448#0/1  
aaaa`baaaaaa`a]aaa\_\_\_\_\_]a`\_a\_aaaV^^¥\_``WZ  
@HWI-EAS443:3:53:299:1848#0/1  
ACGTTCCATTGTCTGAACTAGTTGTTCCACAATGTAGGA  
+HWI-EAS443:3:53:299:1848#0/1  
a`U\_a[a[^\_Y¥a`^ZY]S¥W`\_¥\_]`[\_``TNRNU^TUT  
@HWI-EAS443:3:53:40:25#0/1  
AAAGTCTCAATCAGAATGCAGATGCATATGTTTTTGTGGG  
+HWI-EAS443:3:53:40:25#0/1  
¥b^`T\_b\_Y¥`b^`a^a¥SaU\_`]\_^\_ab]a^`ab]a`a  
@HWI-EAS443:3:53:762:730#0/1  
GAACTAGTTGTTCCACAATGTAGGACCATGAGCTTGCTG  
+HWI-EAS443:3:53:762:730#0/1  
aaaY¥`b¥`¥]a¥aa\_^\_Zb\_``aa\_Raa`ZaY`]a\_]`  
@HWI-EAS443:3:54:101:1311#0/1  
GGGACATTCGCAATCCTGTGGCCAGTCTCAATTTTGTGC  
+HWI-EAS443:3:54:101:1311#0/1  
^baaa]Za\_]Xabaaaaa\_aa^WYSNFS\_\_^[``\_XTO  
@HWI-EAS443:3:54:1023:1460#0/1  
GCCGGTTTCATTGAAGTGGGGTGGACAGGGATGGTAGATG  
+HWI-EAS443:3:54:1023:1460#0/1  
W\_b`aab`]^Z\_bab\_IU^TXWa\_[G[\_ROMYV]`aabaa  
@HWI-EAS443:3:54:114:301#0/1  
GTTCCATTGTCTGAACTAGTTGTTCCACAATGTAGGACC  
+HWI-EAS443:3:54:114:301#0/1  
aa]aaaa````a]W\_¥\_T\_]aa^\_\_\_\_\_]SNY\_X¥^[]^

@HWI-EAS443:3:54:1314:1777#0/1  
GCCGGTTTCATTGAAGGGGGTGGACAGGGATGGTCGATG  
+HWI-EAS443:3:54:1314:1777#0/1  
a]\_`XZ\_]P^ZUZU¥SZ¥a]W]¥WVN^V]WU^UGG¥HNW  
@HWI-EAS443:3:54:1603:226#0/1  
AAGCAAGTTAAAAACAATGCCAAGGAAATTGGAAACGGC  
+HWI-EAS443:3:54:1603:226#0/1  
abaIXbaaV\_Na[RLNa^Y[PP\_`a^SZP]Q¥\_VYYSWWN  
@HWI-EAS443:3:54:454:835#0/1  
CAGAATTTACTTTGTTAGTCATCTCGTCAATGGCATTCTG  
+HWI-EAS443:3:54:454:835#0/1  
]¥a\_R\_b`X^bb`b¥XZ`XG]babb\_WZ\_]`^ab]]]\_\_Ya  
@HWI-EAS443:3:54:606:1741#0/1  
ATTGTGGAAACAACACTAGTTCAGACAATGGAACGTGTTACC  
+HWI-EAS443:3:54:606:1741#0/1  
aaaa\_aabb`aba\_a`^^]ZaaaS\_]a\_\_]WWZU^M`¥^  
@HWI-EAS443:3:54:648:497#0/1  
CACGTTCCATTGTCTGAACTAGTTGTTCCACAATGTAGG  
+HWI-EAS443:3:54:648:497#0/1  
aabb]a^^^`ba¥`Za\_ZV\_Ua]]bX`]¥a`]XZZ¥LY`  
@HWI-EAS443:3:54:704:1221#0/1  
AACACGTTCCATTGTCTGAACTAGTTGTTCCACAATGTA  
+HWI-EAS443:3:54:704:1221#0/1  
W\_b\_`\_Wabaaa¥^Tb`b``[aaa]aaa]a\_a]I¥U\_`XN  
@HWI-EAS443:3:54:706:291#0/1  
ACACGTTCCATTGTCTGAACTAGTTGTTCCACAATGTAG  
+HWI-EAS443:3:54:706:291#0/1  
`abaa`a]aabaa\_`a\_`a]aaa^a`^aa[[`^\_\_aYZ\_a  
@HWI-EAS443:3:54:813:1504#0/1  
TTCCATTGTCTGAACTAGTTGTTCCACAATGTAGGACCA  
+HWI-EAS443:3:54:813:1504#0/1  
a^M¥[aabW`]a\_`¥Tb\_\_Xa`aa]PYZ¥WZa]NL¥a]\_\_  
@HWI-EAS443:3:55:1441:343#0/1  
CACGTTCCATTGTCTGAACTAGTTGTTCCACAATGTAGG  
+HWI-EAS443:3:55:1441:343#0/1  
`bbbababa`bbb]a\_bb¥b^bab`b\_`ba`\_aSaaa`\_]ba  
@HWI-EAS443:3:55:1455:836#0/1  
GTCCTACATTGTGGAAACAACACTAGTTCAGACAATGGAACG  
+HWI-EAS443:3:55:1455:836#0/1  
a\_\_V\_Z^`RY]S^^N]YY\_\_]\_]`QXS[\_¥]\_^Z^\_]Y`  
@HWI-EAS443:3:55:197:1223#0/1  
GTTCCATTGTCTGAACTAGTTGTTCCACAATGTAGGACC  
+HWI-EAS443:3:55:197:1223#0/1  
VZV^QYVaU```b`R`\_I\_JY`UTa]Haaaa`\_]VQQOa]  
@HWI-EAS443:3:55:207:1209#0/1  
CACGTTCCATTGTCTGAACTAGTTGTTCCACAATGTAGG  
+HWI-EAS443:3:55:207:1209#0/1  
`baaa`abTaa\_U\_aX¥b`^aa^][\_a`\_[a^^a^^V\_] [  
@HWI-EAS443:3:55:342:1858#0/1  
CATGAACTTGTCTAGGGGAATATCTCAAACCTTTCAAATG

+HWI-EAS443:3:55:342:1858#0/1  
¥b^baaUaaaaaa`aa`\_`aaa`a`aa`\_]`[\_aa`\_`\_  
@HWI-EAS443:3:55:718:434#0/1  
GCTGCTTTGAATTTTACCACAAATGCGATAACACGGGCAT  
+HWI-EAS443:3:55:718:434#0/1  
¥\_V¥Z`¥bbK¥^Z^¥aXU]`¥PYYaXa`RaY^\_a\_F]LMP  
@HWI-EAS443:3:55:720:418#0/1  
ATGGTCCTACATTGTGGAAACAAGTTCAGACAATGGA  
+HWI-EAS443:3:55:720:418#0/1  
\_`^`Pa]baaaba^L`aS]a\_adW]]a]aaa]a]\_W`¥]^  
@HWI-EAS443:3:55:746:1505#0/1  
CCGGCTTGGACTTCTTGCTGTATCTTGATGTCACAAAA  
+HWI-EAS443:3:55:746:1505#0/1  
X`\_`\_a¥aXHS¥aa¥¥\_b`^Z`^`¥X^`YWYV¥^aZWX]^  
@HWI-EAS443:3:55:824:1692#0/1  
ATCTCCTGGTAACACGTTCCATTGTCTGAACTAGTTGTT  
+HWI-EAS443:3:55:824:1692#0/1  
a]\_aaa`a[\_W[\_¥^`\_\_\_\_`^\_]\_ZZ^\_]\_`^Z`^`Z^]^\_`  
@HWI-EAS443:3:55:939:2035#0/1  
ATCAAATCAGCAGGGGTCAGGATATGCAGCCGACCTGAA  
+HWI-EAS443:3:55:939:2035#0/1  
Tbb]aa[MKVM\_\_S\_ZSHabaa`^UZbbbU]ZaWKM[a^b  
@HWI-EAS443:3:55:982:1189#0/1  
CACGTTCCATTGTCTGAACTAGTTGTTTCCACAATGTAGG  
+HWI-EAS443:3:55:982:1189#0/1  
aaaaabaa\_aaaa`\_`b`a`b\_aa\_aa`\_a`\_a`\_`[^a`  
@HWI-EAS443:3:56:1022:1237#0/1  
GTTACCGTTACATTCTTTTCTAGTACTGTGTCTACAGTGT  
+HWI-EAS443:3:56:1022:1237#0/1  
abaaa`¥`\_WY`aa[aaa`\_a]a`^^aa]a\_\_`]U¥`V`B  
@HWI-EAS443:3:56:1044:1959#0/1  
CACGTTCCATTGTCTGAACTAGTTGTTTCCACAATGTAGG  
+HWI-EAS443:3:56:1044:1959#0/1  
`aaaaabbaabba`\_`baaUaabYaa`^\_V^a0aa`^S`\_`¥  
@HWI-EAS443:3:56:1297:1259#0/1  
GGGGGGTGGACAGGGATGGTAGATGGATGGCACGGTTATC  
+HWI-EAS443:3:56:1297:1259#0/1  
\_b¥P`aUT`\_`Va\_b]^VaaG[TMP`a¥^SODK¥`^HU^BB  
@HWI-EAS443:3:56:1359:311#0/1  
CTCATGGTCCTACATTGTGGAAACAAGTTCAGACAAT  
+HWI-EAS443:3:56:1359:311#0/1  
[a`aaa\_Z¥Taa]b]baa`[YI¥]aa¥¥Z^V\_[R`\_Y[`R  
@HWI-EAS443:3:56:1438:285#0/1  
GTCCTACATTGTGGAAACAAGTTCAGACAATGGAACG  
+HWI-EAS443:3:56:1438:285#0/1  
a\_\_`^`\_\_a`\_`]a`\_XWa^X]^\_`^SW[WZ`^Z^^SZX]  
@HWI-EAS443:3:56:1622:1089#0/1  
TGTGCTCTTCAGGTCGGCTGCATATCCTGACTCCTGCTCA  
+HWI-EAS443:3:56:1622:1089#0/1  
aa`\_`^a\_aaYaaa¥`\_Y`aa¥\_\_a`¥Ya\_\_YG[W\_Y¥\_¥]

@HWI-EAS443:3:56:27:676#0/1  
AGGAGATTCATCGATTATGAGGAGCTACGAGAGCAATTG  
+HWI-EAS443:3:56:27:676#0/1  
ab^TaP]OY¥P\_Xa^QVV][W^YJ^[¥]IVFVH^]OQPUY  
@HWI-EAS443:3:56:487:724#0/1  
AAACAAC TAGTTCAGACAATGGAACGTGTACCCAGGAGA  
+HWI-EAS443:3:56:487:724#0/1  
a\_a`^bb]\_]aaaaZ[^Z`aa]`^bP¥L\_]X\_\_a`[[^]  
@HWI-EAS443:3:56:624:809#0/1  
GGAAATTGGAACGGCTGCTTTTAATTTTACCACAAATGC  
+HWI-EAS443:3:56:624:809#0/1  
`aaa`aa\_\_[a\_^`^^aa]X¥[HTY[^\_a]MOPHM`UVOV  
@HWI-EAS443:3:56:720:1535#0/1  
TTCCGGCTTGAAC TCTTGCTGTATCTTGATATCCCCACA  
+HWI-EAS443:3:56:720:1535#0/1  
aabaaaaba\_aaX` `` `]^`aZO¥a\_aa^aa`]T^X`ZY[  
@HWI-EAS443:3:56:815:598#0/1  
ACACGTTCCATTGTCTGAACTAGTTGTTCCACAATGTAG  
+HWI-EAS443:3:56:815:598#0/1  
\_]b`Vab^Ya]a¥\_a[^\_a`ZWaa[a`\_VZZ\_]\_`W[P  
@HWI-EAS443:3:56:973:545#0/1  
TGCTGGCTGGATCCTGGGAAATCCAGAGGGTGAATCACTC  
+HWI-EAS443:3:56:973:545#0/1  
]ba`ZZ^bb\_\_¥\_`UYF¥Z]a`]Y]FXP\_U\_a]ZY`V  
@HWI-EAS443:3:56:977:244#0/1  
CTGGGTAACACGTTCCATTGTCTGAACTAGTTGTTCCAC  
+HWI-EAS443:3:56:977:244#0/1  
aab`aaababbbYaa`aaa`a`ab\_a]a`Yab[a`]¥]Y  
@HWI-EAS443:3:57:1223:1428#0/1  
CAAATCCTACATTAATGATAAAGGGAAAGAAGACCTCGTG  
+HWI-EAS443:3:57:1223:1428#0/1  
]Y\_`¥¥`\_`aaa]N\_`W¥`X^`^a\_]WZ^`^a\_]¥NZX`  
@HWI-EAS443:3:57:1373:359#0/1  
CACGTTCCATTGTCTGAACTAGTTGTTCCACAATGTAGG  
+HWI-EAS443:3:57:1373:359#0/1  
ababbbbaabb`abbbbaabab`bbbbbaabaa\_bb\_abb  
@HWI-EAS443:3:57:1407:1198#0/1  
AAACTGATTGCCCAAGGGAGACTACCAGTACCAATGAAC  
+HWI-EAS443:3:57:1407:1198#0/1  
WW[\_\_PPa[[[]H[MT^aW`\_]aa¥VXH\_a[XU]b¥]]Z^  
@HWI-EAS443:3:57:1427:71#0/1  
TGCTTCTCTGAGTATTTTGGGCAGTCATAAGTCCCATTT  
+HWI-EAS443:3:57:1427:71#0/1  
aa\_baa\_babbab\_abaaaa^W¥`^]]a\_]\_^X¥WZ\_\_^  
@HWI-EAS443:3:57:1534:952#0/1  
ACACGTTCCATTGTCTGAACTAGTTGTTCCACAATGTAG  
+HWI-EAS443:3:57:1534:952#0/1  
abb`^abaabaaaa`baaaXa]aaa^\_ab`¥^P]aa`]\_R  
@HWI-EAS443:3:57:156:398#0/1  
GGGGGCATCAAGATACAGCAAGAAGTTCAAGCCGAAATA

+HWI-EAS443:3:57:156:398#0/1  
aaa` `` `aK\_WQ\_] ^Za]] ¥] ` ] ^\_XZUZ[KY\_aaZVT]R  
@HWI-EAS443:3:57:1681:1395#0/1  
GCTTGAACCTTCTGCTGCATCTTGATGTCCCCACAAAAAC  
+HWI-EAS443:3:57:1681:1395#0/1  
¥] ` ¥^^a`aaX\_\_VZab¥^a]bba`aa\_Y\_\_WaW] [-] \_ `   
@HWI-EAS443:3:57:1721:835#0/1  
CTCCTGGGTAACACGTTCCATTGTCTGAACTAGTTGTTTC  
+HWI-EAS443:3:57:1721:835#0/1  
a`U\_` `a`T`^WaV\_`\_¥XZ\_`^SZ`^]\_\_b\_¥T\_`V¥b]  
@HWI-EAS443:3:57:198:289#0/1  
ACGTTCCATTGTCTGAACTAGTTGTTTCCACAATGTAGGA  
+HWI-EAS443:3:57:198:289#0/1  
aaa`\_`ZN[ ` ]\_\_][Z`^`\_aX`\_] ` `¥Z`^`^]YV¥\_T  
@HWI-EAS443:3:57:31:1380#0/1  
GAGGACATGCTGCCGTTACTCCTTTGTTTCGAGTCATGATT  
+HWI-EAS443:3:57:31:1380#0/1  
[b`\_] ` \_VWaXX`b`b^baaaZJY\_`aX`XZ¥a] ` ]\_\_\_\_[  
@HWI-EAS443:3:57:562:1264#0/1  
GTTACCGTTACATTCTTTTCTAGTACTGTGTCTACAGTGT  
+HWI-EAS443:3:57:562:1264#0/1  
aaaa\_aa]a]^ [ ` ` \_aaaa\_a^\_] \_^\_\_Y`\_\_`^^[BBBB  
@HWI-EAS443:3:57:856:736#0/1  
CACGTTCCATTGTCTGAACTAGTTGTTTCCACAATGTAGG  
+HWI-EAS443:3:57:856:736#0/1  
a\_aba`a`abb`abbZ]b\_aababa\_a`¥]a[ `Zaa]]aa  
@HWI-EAS443:3:57:90:155#0/1  
ATCTCCTGGGTAACACGTTCCATTGTCTGAACTAGTTGTT  
+HWI-EAS443:3:57:90:155#0/1  
Xaa]Zaa¥` `V`Z^a`aRU]ZP\_^^¥\_] ]TUTSFZUZ^X^  
@HWI-EAS443:3:57:91:355#0/1  
ACGTTCCATTGTCTGAACTAGTTGTTTCCACAATGTAGGA  
+HWI-EAS443:3:57:91:355#0/1  
aaa^aa`\_`^`a`\_`^aZZU\_Y^¥¥\_¥T^\_ZZZ\_[XXKITWP  
@HWI-EAS443:3:57:967:164#0/1  
GTGGGGACATCAAGATACAGCAAGAAGTCCAAGCCGAAAA  
+HWI-EAS443:3:57:967:164#0/1  
a`aaaa\_`a`^^`b\_`\_`aa^\_aa\_YaR`UW^\_YY`\_Z[W  
@HWI-EAS443:3:58:1148:1317#0/1  
ACGTTCCATTGTCTGAACTAGTTGTTTCCACAATGTAGGA  
+HWI-EAS443:3:58:1148:1317#0/1  
a\_WWY^`a`a`\_] ^aT¥YX[T`a^¥`XMS`a\_\_a][ `Z`  
@HWI-EAS443:3:58:1263:1295#0/1  
CGTTCCATTGTCTGAACTAGTTGTTTCCACAATGTAGGAC  
+HWI-EAS443:3:58:1263:1295#0/1  
ab` `X\_baaa^Xab`a] `ab\_ab`aa[ \_ ` [ `aaaY` ` [^^  
@HWI-EAS443:3:58:1366:662#0/1  
GCCGGTTTCATTGAAGGGGGTGGACAGGGAAGGTAGATG  
+HWI-EAS443:3:58:1366:662#0/1  
a`abb^baaabbb` `b`bb[aTa\_`W[a^`^Ua\_W` ``]a



@HWI-EAS443:3:58:146:904#0/1  
AACACGTTCCATTGTCTGAACTAGTTGTTTCCACAATGTA  
+HWI-EAS443:3:58:146:904#0/1  
a[`aaa`¥``]Z^`\_Ya`¥¥Va\_aY``]`a\_\_YZ`Y\_WYZ  
@HWI-EAS443:3:58:1537:1035#0/1  
ACGTTCCATTGTCTGAACTAGTTGTTTCCACAATGTAGGA  
+HWI-EAS443:3:58:1537:1035#0/1  
aYa]a]\_\_a`]^[^]bY\_a¥`^a\_a]^aa¥FZP\_Z\_`X\_]][  
@HWI-EAS443:3:58:1537:1919#0/1  
AGCAAGCTCATGGTCCTACATTGTGGAAACAACACTAGTTCA  
+HWI-EAS443:3:58:1537:1919#0/1  
aa]^aa`^^WZ]XN][\_a^]YX\_`[\_\_\_]V^^SR¥[  
@HWI-EAS443:3:58:1585:350#0/1  
GGGTAACACGTTCCATTGTCTGAACTAGTTGTTTCCACAA  
+HWI-EAS443:3:58:1585:350#0/1  
abb`abababaa`a\_a^]V\_`¥¥aZ\_aa`aaa``¥X]S]a  
@HWI-EAS443:3:58:1658:438#0/1  
CGTCAATGGCATTCTGTGCCTCTTCAGGTCGGCTGCATA  
+HWI-EAS443:3:58:1658:438#0/1  
ab`bbbbbb`bbbaababb]\_b`aaabb`VW`aXba¥^ab  
@HWI-EAS443:3:58:1730:302#0/1  
CACGTTCCATTGTCTGAACTAGTTGTTTCCACAATGTAGG  
+HWI-EAS443:3:58:1730:302#0/1  
aba^`bbaba`a`aa`a`]` ` `abbaba^]a]aaaa]\_`a  
@HWI-EAS443:3:58:1755:1679#0/1  
CACGTTCCATTGTCTGAACTAGTTGTTTCCACAATGTAGG  
+HWI-EAS443:3:58:1755:1679#0/1  
^\_Y`U]Z¥aab\_]a\_\_H\_a]¥\_\_\_^aa]LX^XY`^[a`a`  
@HWI-EAS443:3:58:335:500#0/1  
AACAAATGCCAAGGAAATTGGAAACGGCTGGTTTGAATTTT  
+HWI-EAS443:3:58:335:500#0/1  
]`\_` `abbaaaa`^`aa^¥]^]X]`aa[[BBBBBBBBBBBB  
@HWI-EAS443:3:58:347:1363#0/1  
CACAGCAAGCTCATGGTCCTACATTGTGGAAACAACACTAGT  
+HWI-EAS443:3:58:347:1363#0/1  
aabbba]ba`a`a` ` `VS[`a\_\_a\_a\_^a`aaYaa\_\_^\_]`  
@HWI-EAS443:3:58:439:219#0/1  
GTCTGAACTAGTTGTTTCCACAATGTAGGACCATGAGCTT  
+HWI-EAS443:3:58:439:219#0/1  
a\_`abXaaa[a]`a\_a\_a^`^`^a`]^a\_[S[¥\_^]^]^]  
@HWI-EAS443:3:58:481:1354#0/1  
GTAACACGTTCCATTGTCTGAACTAGTTGTTTCCACAATG  
+HWI-EAS443:3:58:481:1354#0/1  
a\_`aaaaa]`\_]a\_\_[]` `^^` \_\_\_\_\_`\_\_`\_`\_]^^\_]^\_  
@HWI-EAS443:3:58:519:1926#0/1  
CTCCTGGGTAACACGTTCCATTGTCTGAACTAGTTGTTTC  
+HWI-EAS443:3:58:519:1926#0/1  
aaa`abba\_abb\_Z\_`a`aa`a\_\_^R^`]]`\_]`\_`^`\_`^  
@HWI-EAS443:3:58:625:978#0/1  
CTCCTGGGTAACACGTTCCATTGTCTGAACTAGTTGTTTC

+HWI-EAS443:3:58:625:978#0/1  
abbaabba]aabbba`aa\_aaaaX`aa\_a\_`¥Z[aa``aa  
@HWI-EAS443:3:58:634:99#0/1  
GAACTAGTTGTTTCCACAATGTAGGACCATGAGCTTGCTG  
+HWI-EAS443:3:58:634:99#0/1  
\_Y\_Y¥ab`aa`\_aaa¥\_`[a^[^`[^¥¥`^[\_SY[`]\_\_  
@HWI-EAS443:3:58:663:683#0/1  
ACACGTTCCATTGTCTGAACTAGTTGTTTCCACAATGTAG  
+HWI-EAS443:3:58:663:683#0/1  
aaW^b^XY```aHLYXSUTSYYZ\_]ZX¥[YYTZ^W]RMOX  
@HWI-EAS443:3:58:66:615#0/1  
CTCCTGGGTAACACGTTCCATTGTCTGAACTAGTTGTTTC  
+HWI-EAS443:3:58:66:615#0/1  
`X\_]Uaa\_LPZ^[^^ZUYVV^RV¥\_VWQNLON[QQUUQSZ  
@HWI-EAS443:3:58:682:1757#0/1  
CTCCTGGGTAACACGTTCCATTGTCTGAACTAGTTGTTTC  
+HWI-EAS443:3:58:682:1757#0/1  
aab````[ZWQ[\_\_\_a\_\_Y^`^^a^\_^\_[H¥ZPPXZ[]^R  
@HWI-EAS443:3:58:945:215#0/1  
ACGTTCCATTGTCTGAACTAGTTGTTTCCACAATGTAGGA  
+HWI-EAS443:3:58:945:215#0/1  
a`baa`\_aa`a\_\_`a\_]`\_a^aa```^¥^Z\_^^^X^Z¥¥  
@HWI-EAS443:3:59:164:926#0/1  
ATCTCCTGGGTAACACGTTCCATTGTCTGAACTAGTTGTT  
+HWI-EAS443:3:59:164:926#0/1  
a\_aaab`\_a\_RUaaZaa\_[^]a\_\_`Za\_[RZW^Y[QY¥WR  
@HWI-EAS443:3:59:324:1940#0/1  
GAACTAGTTGTTTCCACAATGTAGGACCATGAGCTTGCTG  
+HWI-EAS443:3:59:324:1940#0/1  
]\_baaab`\_\_\_\_bbbbbbba¥]abbbbbbb```\_^Za[aa]^  
@HWI-EAS443:3:59:432:1426#0/1  
CTCCTGGGTAACACGTTCCATTGTCTGAACTAGTTGTTTC  
+HWI-EAS443:3:59:432:1426#0/1  
a`\_\_`^U^^^YabaL]S\_aa]SZWbb\_a[^a]WV\_RV``Y  
@HWI-EAS443:3:59:458:2009#0/1  
GAACTAGTTGTTTCCACAATGTAGGACCATGAGCTTGCTG  
+HWI-EAS443:3:59:458:2009#0/1  
\_aa]]¥¥Z\_Z]b^¥UZ]ab`YS\_Z]W\_ab]URNN]ZRS^[  
@HWI-EAS443:3:59:590:178#0/1  
AAAAACAATGCCAAGGAAATTGGAAACGGCTGGTTTGAA  
+HWI-EAS443:3:59:590:178#0/1  
TX[`aZ\_¥Z`b``¥X`bY`^\_¥\_\_WU\_X`V\_]TDPYQFU  
@HWI-EAS443:3:59:77:1568#0/1  
CGTTCCATTGTCTGAACTAGTTGTTTCCACAATGTAGGAC  
+HWI-EAS443:3:59:77:1568#0/1  
ab\_baaa\_a``aaaaabab]^¥a\_^¥ab`\_aT`\_]^YRYX  
@HWI-EAS443:3:5:1009:1921#0/1  
CGGCTCTACTAGTGTCCAGGAATAGTTCATTCTCCCTTCT  
+HWI-EAS443:3:5:1009:1921#0/1  
ababb¥\_\_WIZ\_]a0`abaJ^b[¥KZ]\_`a^S^\_SIX`V`

@HWI-EAS443:3:5:1203:1084#0/1  
CTCCTGGGTAACACGTTCCATTGTCTGAACTAGTTGTTTC  
+HWI-EAS443:3:5:1203:1084#0/1  
a`b[bbbbbbabba`aab`Uaaaba\_abaa¥bbb`bbaaaa  
@HWI-EAS443:3:5:1371:349#0/1  
CACGTTCCATTGTCTGAACTAGTTGTTTCCACAATGTAGG  
+HWI-EAS443:3:5:1371:349#0/1  
`babbba\_MbbbIbab\_b^\_^`\_[a`bb]Z\_\_\_\_^a\_R^bB  
@HWI-EAS443:3:5:1376:126#0/1  
ACGTTCCATTGTCTGAACTAGTTGTTTCCACAATGTAGGA  
+HWI-EAS443:3:5:1376:126#0/1  
abbab``\_aaaZVa\_^\_\_a\_b^a\_\_``[X^X^^\_WKT\_XB  
@HWI-EAS443:3:5:1388:1272#0/1  
TGCAGATGCATATGTTTTGTGGGGACATCACGATACAGC  
+HWI-EAS443:3:5:1388:1272#0/1  
ababbaba^abaaa]abaab`\_]aaa^aaSS]H\_\_`]a^B  
@HWI-EAS443:3:5:1509:703#0/1  
TAACACGTTCCATTGTCTGAACTAGTTGTTTCCACAATGT  
+HWI-EAS443:3:5:1509:703#0/1  
aaa\_b[babbabba^\_ab¥aa^b\_b\_aaa`^\_\_\_\_][a`aB  
@HWI-EAS443:3:5:1588:793#0/1  
CACGTTCCATTGTCTGAACTAGTTGTTTCCACAATGTAGG  
+HWI-EAS443:3:5:1588:793#0/1  
aab`ab\_abbba¥ba`b`bbbabbabb^ab^aaaa\_aaa  
@HWI-EAS443:3:5:428:1893#0/1  
ACGTTCCATTGTCTGAACTAGTTGTTTCCACAATGTAGGA  
+HWI-EAS443:3:5:428:1893#0/1  
`ZP]a`aaa]¥¥^]0[`\_a`[`¥`a\_a]Y`aa]`VG]`BB  
@HWI-EAS443:3:5:49:1064#0/1  
TCTTGCTGCATCTTGATGTCCCCACAAAACATATGCATC  
+HWI-EAS443:3:5:49:1064#0/1  
aba]bb\_]D[aaaaaab`aba`aaaa¥\_a\_aaa\_a`a`^  
@HWI-EAS443:3:5:51:679#0/1  
CTCCTGGGTAACACGTTCCATTGTCTGAACTAGTTGTTTC  
+HWI-EAS443:3:5:51:679#0/1  
aababaXa`aa]b`aVaa\_aaaa`\_a]`aYaa`V``^aa]  
@HWI-EAS443:3:60:1168:146#0/1  
ACTAGTTGTTTCCACAATGTAGGACCATGAGCTTGCTGTG  
+HWI-EAS443:3:60:1168:146#0/1  
aa\_]bYab\_bbS¥aZ[Xa`[]b`¥`\_\_aY\_T¥¥`Za`\_\_  
@HWI-EAS443:3:60:1263:219#0/1  
CTCCTGGGTAACACGTTCCATTGTCTGAACTAGTTGTTTC  
+HWI-EAS443:3:60:1263:219#0/1  
a`]\_\_ba\_P¥]`[]Z`ba`Y\_]aZ^aaY`\_```Q`aP^]]  
@HWI-EAS443:3:60:1440:2002#0/1  
GTTTAATTTTGCTTCCTCTGAGTATTTTGGGAAGTCATAA  
+HWI-EAS443:3:60:1440:2002#0/1  
aQ[`TSY`JY^UPX^^]S\_`]XUY^PP¥[UZN[[SP[YUP  
@HWI-EAS443:3:60:1478:1168#0/1  
CTGGGTAACACGTTCCATTGTCTGAACTAGTTGTTTCCAC

+HWI-EAS443:3:60:1478:1168#0/1  
ab`a\_\_aa`baa`\_]`¥Y`aa^Za\_a^]Y¥a^Q[\_¥  
@HWI-EAS443:3:60:1576:756#0/1  
CAGGGATGGTAGATGGATGGTACGGCTATCACCATCAAAA  
+HWI-EAS443:3:60:1576:756#0/1  
aaabbabbb\_bba`aaaaa[a^a[SaXNZ\_U¥VUQY\_`\_  
@HWI-EAS443:3:60:165:1424#0/1  
CTCCTGGGTAACACGTTCCATTGTCTGAACTAGTTGTTTC  
+HWI-EAS443:3:60:165:1424#0/1  
]¥bbbb`bUbY\_abaYababaaa¥`ZXY^Z]UZaQXa^^  
@HWI-EAS443:3:60:1714:628#0/1  
CACGTTCCATTGTCTGAACTAGTTGTTTCCACAATGTAGG  
+HWI-EAS443:3:60:1714:628#0/1  
]baaab[``bb\_X]\_bab]aaa¥`a`ba[aa`aaab[aaa  
@HWI-EAS443:3:60:30:1522#0/1  
AACAACTAGTTCAGACAATGGAACGTGTTACCCAGGAGAT  
+HWI-EAS443:3:60:30:1522#0/1  
aa`a\_\_Z\_[X]aYM]V^]X]V^`UXPNLQ^ZY¥ZTQTVVT  
@HWI-EAS443:3:60:363:1571#0/1  
GGGGACATCAAGATACAGCAAGAAGTTCGAGCCGGAAATA  
+HWI-EAS443:3:60:363:1571#0/1  
`\_0[b\_Zab`XabXWN\_aUba\_^ZaU^YG^a\_`a]N[¥¥V  
@HWI-EAS443:3:60:436:606#0/1  
ACGTTCCATTGTCTGAACTAGTTGTTTCCACAATGTAGGA  
+HWI-EAS443:3:60:436:606#0/1  
\_baaaaaX[VX\_`aaa``\_aa]`Y\_^\_T`W`\_X\_V^`]  
@HWI-EAS443:3:60:537:712#0/1  
GTGGGGGCATCAAGATACAGCAAGAAGTTCAGCCGGAAA  
+HWI-EAS443:3:60:537:712#0/1  
¥U^U¥[Y[¥]\_ZXY¥¥S¥`^WW\_]VNYT[\_]W[UYU^RQT  
@HWI-EAS443:3:60:758:1010#0/1  
CACGTTCCATTGTCTGAACTAGTTGTTTCCACAATGTAGG  
+HWI-EAS443:3:60:758:1010#0/1  
aaab[\_bbab`ba`\_ababa`Z\_]a\_a``¥[````Y\_Z¥  
@HWI-EAS443:3:60:913:1219#0/1  
AAACAACCTAGTTCAGACAATGGAACGTGTTACCCAGGAGA  
+HWI-EAS443:3:60:913:1219#0/1  
abbaaa\_`aa`aaaaaa^\_a`\_\_Xa]a^`\_\_^W\_\_Z^\_a  
@HWI-EAS443:3:61:333:1339#0/1  
GCTGCATATCCTGACCCCTGCACATTTTGATGGTGATAAC  
+HWI-EAS443:3:61:333:1339#0/1  
^bababbaaabababbbbaab[b]`aaaa`aZU^^\_a\_T  
@HWI-EAS443:3:61:610:409#0/1  
CACGTTCCATTGTCTGAACTAGTTGTTTCCACAATGTAGG  
+HWI-EAS443:3:61:610:409#0/1  
abb`Ybabbaab\_bab`bbb]b\_abaabaaaa`a`¥X\_^  
@HWI-EAS443:3:61:69:152#0/1  
CGTTCCATTGTCTGAACTAGTTGTTTCCACAATGTAGGAC  
+HWI-EAS443:3:61:69:152#0/1  
abbbbbbbbabbbbbb`a\_a`\_aaaa\_\_aa\_a^^a\_`^]

@HWI-EAS443:3:61:740:645#0/1  
TAACACGTTCCATTGTCTGAACTAGTTGTTTCCACAATGT  
+HWI-EAS443:3:61:740:645#0/1  
aaaabaa^aa`aa\_\_aaa\_W]]a^aa`aa\_]\_]\_¥YOV  
@HWI-EAS443:3:61:957:630#0/1  
ATCTCCTGGGTAACACGTTCCATTGTCTGAACTAGTTGTT  
+HWI-EAS443:3:61:957:630#0/1  
aa`a^]\_aaaZa`^a`^`^`\_\_`Z`^`^^^][YU[\_VY  
@HWI-EAS443:3:62:1194:1824#0/1  
GCCTTCCATTTCAGAATATACATCCGATCACAATTGGAAA  
+HWI-EAS443:3:62:1194:1824#0/1  
\_\_`^a\_\_¥U`^a````^b\_bbbZSTabaaba¥\_aaaaaa`  
@HWI-EAS443:3:62:123:1985#0/1  
TGTGGAAACAACACTAGTTCAGACAATGGAACGTGTTACCCA  
+HWI-EAS443:3:62:123:1985#0/1  
\_`]\_H^`\_]Zb\_]`^`Ub¥[Z`a]]N]]\_`RZQWW\_a`V  
@HWI-EAS443:3:62:1417:1252#0/1  
CCATTGTCTGAACTAGTTGTTTCCACAATGTAGGACCATG  
+HWI-EAS443:3:62:1417:1252#0/1  
TY[¥Y\_Z`^\_Y¥SYa\_N¥¥Z\_¥\_¥Z^Z¥\_ZY]¥`]¥\_¥\_a  
@HWI-EAS443:3:62:199:1257#0/1  
GGAAATTGGAAACGGCTGCTTTGAATTTTCCACAAATGC  
+HWI-EAS443:3:62:199:1257#0/1  
^Y``\_SW[R^Y\_ZW¥aY`WGUXTYXQ]\_BBBBBBBBBBBB  
@HWI-EAS443:3:62:327:2041#0/1  
CACGTTCCATTGTCTGAACTAGTTGTTTCCACAATGTAGG  
+HWI-EAS443:3:62:327:2041#0/1  
\_\_bUQ\_a`¥¥U\_VQ]VZZ\_XFRW[\_Y``[U]YWZWHN\_PZ  
@HWI-EAS443:3:62:361:339#0/1  
AACTAGTTGTTTCCACAATGTAGGACCATGAGCTTGCTGT  
+HWI-EAS443:3:62:361:339#0/1  
abbb\_babbaaaa`\_`a`aa[a]a`a```\_\_^`\_`\_\_^  
@HWI-EAS443:3:62:396:1283#0/1  
CCTACATTGTGGAAACAACACTAGTTCAGACAATGGAACGTG  
+HWI-EAS443:3:62:396:1283#0/1  
a`ba`[LYZ]\_Z]]\_ab\_a^^¥Y`a`\_`aaa\_aYVTXYX^  
@HWI-EAS443:3:62:627:866#0/1  
ACGTTCCATTGTCTGAACTAGTTGTTTCCACAATGTAGGA  
+HWI-EAS443:3:62:627:866#0/1  
aab\_aaaaaa`\_aa``aaa`a`\_]`\_a\_a``\_\_a]\_U]\_  
@HWI-EAS443:3:62:673:811#0/1  
ATTCTCTGTGCTCTTCAGGTCGGCTGCATATCCTGACCCC  
+HWI-EAS443:3:62:673:811#0/1  
`Z]ZZGL`QZ`^aaabaZVVXWV``\_YZ^`^YaZ][^``[  
@HWI-EAS443:3:62:703:1160#0/1  
CATTGTGGAAACAACACTAGTTCAGACAATGGAACGTGTTAC  
+HWI-EAS443:3:62:703:1160#0/1  
a`Z¥`[\_]`\_`\_a^VRZ[ZW¥\_\_¥a`\_\_\_ZW\_ZXWY]TS]  
@HWI-EAS443:3:62:868:651#0/1  
CGTGGTAGTCCAAAGTTCTTTTCTTTTCCACTAGAACCAA

+HWI-EAS443:3:62:868:651#0/1  
ab]aTJW]NS`VTL]RXW\_\_\_\_^^^\_a^[ZRFVUWSYS¥XZ  
@HWI-EAS443:3:63:1123:805#0/1  
CACGTTCCATTGTCTGAACTAGTTGTTTCCACAATGTAGG  
+HWI-EAS443:3:63:1123:805#0/1  
abbbbbbabba`¥bbbbbbbaabbabb`\_\_JabbaaaBB  
@HWI-EAS443:3:63:1146:61#0/1  
GGGGACATCAAGATACAGCAAGAAGCTCAAGCCGGAAATA  
+HWI-EAS443:3:63:1146:61#0/1  
aaaa\_\_`a`\_a^\_\_^aa\_\_a`[^`UX[YPZRU[¥WWWWW  
@HWI-EAS443:3:63:1197:609#0/1  
GAACTAGTTGTTTCCACAATGTAGGACCATGAGCTTGCTG  
+HWI-EAS443:3:63:1197:609#0/1  
¥abaa[^`abaaa`Zbaaaa\_V\_bbT^`aW`a^aab¥ab  
@HWI-EAS443:3:63:1234:1626#0/1  
CTCCTGGGTAACACGTTCCATTGTCTGAACTAGTTGTTTC  
+HWI-EAS443:3:63:1234:1626#0/1  
\_[W^SYXXZ`\_V^Xa^^aa]XRYNSYXZVVTYYSVWZZ[Z  
@HWI-EAS443:3:63:1532:584#0/1  
ACACGTTCCATTGTCTGAACTAGTTGTTTCCACAATGTAG  
+HWI-EAS443:3:63:1532:584#0/1  
]aaa`a]aa^^^`\_[]`aaa`X^SZ¥\_Z]T[`]YS^]  
@HWI-EAS443:3:63:236:1660#0/1  
AGTATTTTGGGTAGTCATAAGTCTCATTITTTGACACTTTC  
+HWI-EAS443:3:63:236:1660#0/1  
aa`abaaaba`¥a\_\_`]\_]QY\_aaababaaaa\_aa\_\_`\_a  
@HWI-EAS443:3:63:247:1159#0/1  
TTCGAATGTTATTTTGTCTCCCGCTCTGCTAGTGTCCAG  
+HWI-EAS443:3:63:247:1159#0/1  
^X`\_RHX¥\_\_0]a^a[Ya]``]XX¥ZBBBBBBBBBBBBB  
@HWI-EAS443:3:63:250:38#0/1  
ACACGTTCCATTGTCTGAACTAGTTGTTTCCACAATGTAG  
+HWI-EAS443:3:63:250:38#0/1  
]a]bb\_\_\_\_Za`a`abb^¥Z^0]V\_^W`a^ZX]\_¥`¥OX^  
@HWI-EAS443:3:63:348:496#0/1  
GGGACATCAAGATACAGCAAGACGTTCAAGCCGGAAATAG  
+HWI-EAS443:3:63:348:496#0/1  
aa`bVa\_a]\_a[^`]aa\_aba[G\_W`\_aY^W[\_`\_¥^RP[  
@HWI-EAS443:3:63:416:2015#0/1  
GAACTAGTTGTTTCCACAATGTAGGACCATGAGCTTGCTG  
+HWI-EAS443:3:63:416:2015#0/1  
abba`¥FU]U^aaaa`aa`UUW\_]\_[`¥W¥^`^\_\_[^`  
@HWI-EAS443:3:63:488:710#0/1  
CACGTTCCATTGTCTGAACTAGTTGTTTCCACAATGTAGG  
+HWI-EAS443:3:63:488:710#0/1  
a`aa`aaa`aaa`aaa`aaaZaa`aaa`\_]\_[H¥\_`[^`  
@HWI-EAS443:3:63:527:242#0/1  
GTTCCATTGTCTGAACTAGTTGTTTCCACAATGTAGGACC  
+HWI-EAS443:3:63:527:242#0/1  
a`^`^`a\_\_^`a`^`a]\_[W\_\_^\_\_^^^Y\_Y]\_W[¥W]WW

@HWI-EAS443:3:63:536:842#0/1  
CAGTTAAAAACAATGCCAAGGAAATTGGAAGCGGCTGCT  
+HWI-EAS443:3:63:536:842#0/1  
abbaabbabaaaaabaa`aa`]^a\_a`a^F^]`\_^NR  
@HWI-EAS443:3:63:814:964#0/1  
GTTCCATTGTCTGAAGTAGTTGTTTCCACAATGTAGGACC  
+HWI-EAS443:3:63:814:964#0/1  
`W`bba`a]XWRaP^aabbZaa\_Qa`aa]XLZ]]\_]¥]  
@HWI-EAS443:3:63:88:1893#0/1  
AATCGATGAAATCTCCTGGGGAACACGTTCCATTGTCTGA  
+HWI-EAS443:3:63:88:1893#0/1  
aaU[``RIWa`]S\_U^XTL[G[]T\_]\_TS[BBBBBBBBBB  
@HWI-EAS443:3:64:1141:1146#0/1  
CTCCTGGGTAACACGTTCCATTGTCTGAAGTAGTTGTTTC  
+HWI-EAS443:3:64:1141:1146#0/1  
aaaba`b`bb`a]bb]abbaaaa¥^aU`b`[``^`b`\_^]  
@HWI-EAS443:3:64:1195:143#0/1  
AAACAATGCCAAGGAAATTGGAACGGCTGCTTTGGATTT  
+HWI-EAS443:3:64:1195:143#0/1  
aba]a`baaaaaaba\_`abaa`Y\_aW¥`\_]\_[HKTTGFXRZ\_  
@HWI-EAS443:3:64:1280:1656#0/1  
GCTGCCGTTACACCTTTGTTTCGAGTCATGATTGAGCCATG  
+HWI-EAS443:3:64:1280:1656#0/1  
aa`a^^`Q\_a`[XYaaZUVMQVXUX\_W[JWZTTUZWZ¥  
@HWI-EAS443:3:64:1281:195#0/1  
ATTGTCTGAAGTAGTTGTTTCCACAATGTAGGACCATGAG  
+HWI-EAS443:3:64:1281:195#0/1  
ababa[bbab]aaa]aaaa`Ya\_\_^aa^`\_¥`W^`\_]\_\_  
@HWI-EAS443:3:64:1421:1445#0/1  
ACACGTTCCATTGTCTGAAGTAGTTGTTTCCACAATGTAG  
+HWI-EAS443:3:64:1421:1445#0/1  
aa\_HW`]\_]\_a`^U¥PX```U`^`ZX\_H]^`TYZ][OYTW\_  
@HWI-EAS443:3:64:1478:1105#0/1  
GGGGAATTCACCATCCATCTACTAGTGCTGACCAACAAAG  
+HWI-EAS443:3:64:1478:1105#0/1  
aa`NH`]Ub[]^VOV]OOVGTQNY^VYGV\_XWYUVXYUG^  
@HWI-EAS443:3:64:149:2008#0/1  
AATCATGACTCGAACAAAGGTGTAACGGCAGGATGTCCCTC  
+HWI-EAS443:3:64:149:2008#0/1  
abb\_aa\_a`^\_W¥a¥aaa`\_PWXa`aBBBBBBBBBBBBBB  
@HWI-EAS443:3:64:1525:1607#0/1  
TAACACGTTCCATTGTCTGAAGTAGTTGTTTCCACAATGT  
+HWI-EAS443:3:64:1525:1607#0/1  
aba^baaaab\_baba]^aa\_a\_aaa\_baaaa\_``[\_a\_¥R  
@HWI-EAS443:3:64:1657:204#0/1  
CACGTTCCATTGTCTGAAGTAGTTGTTTCCACAATGTAGG  
+HWI-EAS443:3:64:1657:204#0/1  
aa`bbbabb`ba`aaaab`aaba`^ba`a^aa``\_aX¥aa  
@HWI-EAS443:3:64:312:473#0/1  
CACGTTCCATTGTCTGAAGTAGTTGTTTCCACAATGTAGG





@HWI-EAS443:3:65:370:346#0/1  
TATAGCACCTTGGGTGCCTGACAAGTTGTATTGCAATCG  
+HWI-EAS443:3:65:370:346#0/1  
aZSWSa`aaa]Z¥XXJWDW`\_UTR^]OX]R[Y¥VTXZULV  
@HWI-EAS443:3:65:582:949#0/1  
GTAACACGTTCCATTGTCTGAACTAGTTGTTTCCACAATG  
+HWI-EAS443:3:65:582:949#0/1  
a``[a`aa[aa\_ZY\_aUa\_TX¥aLMJF¥a]\_XS^[^\_]V  
@HWI-EAS443:3:65:598:1333#0/1  
GTTATTTTGCCTCCCGGCTCTACTAGTGTCCAGTAATAGT  
+HWI-EAS443:3:65:598:1333#0/1  
^Z¥[\_¥Q\_MG\_\_aY`a`\_V¥UMUY[BBBBBBBBBBBBBBB  
@HWI-EAS443:3:65:704:837#0/1  
TAAAAAACGAAATTCATACCCAAAGCTCAGCAAATCCTAC  
+HWI-EAS443:3:65:704:837#0/1  
^bbaa^\_S\_\_^`baababbaabbaaaaaaaaa`^Z]aa`a\_  
@HWI-EAS443:3:65:843:365#0/1  
ATGGATGGTCCGGTTATCACCATCAAAATGAGCAGGGGTC  
+HWI-EAS443:3:65:843:365#0/1  
aaaa`¥a`UFV¥`V^Ya^\_N\_U^QZ`]\_a^¥^P[\_a``GY  
@HWI-EAS443:3:65:857:1274#0/1  
CTCCTGGGTAACACGTTCCATTGTCTGAACTAGTTGTTTC  
+HWI-EAS443:3:65:857:1274#0/1  
aaba`\_\_\_[baaa`\_\_a`````^\_aa\_[Z`]]X\_]\_\_\_^  
@HWI-EAS443:3:66:1243:694#0/1  
GGGACATCAAGATACATCAAGAAGTTCAAGCCGAAATAG  
+HWI-EAS443:3:66:1243:694#0/1  
aaaaabaabaaaabababbbbaab`\_abaa\_abaaa``aa  
@HWI-EAS443:3:66:1299:116#0/1  
CAGCAAGCTCATGGTCTACATTGTGGAAACAACTAGTTC  
+HWI-EAS443:3:66:1299:116#0/1  
aabaa^^`[\_aa`Z\_^a\_^`aa\_]a\_UFYSZ`ZR^]Y¥V  
@HWI-EAS443:3:66:1529:261#0/1  
GGGGACATCAAGATACAGCAAGGAGTTCAAGCCGAAATA  
+HWI-EAS443:3:66:1529:261#0/1  
aaaa[VX]Z^^Y`\_^[a`^P^^FY`UUU\_Z`VU`\_QWTTW  
@HWI-EAS443:3:66:663:1588#0/1  
CACGTTCCATTGTCTGAACTAGTTGTTTCCACAATGTAGG  
+HWI-EAS443:3:66:663:1588#0/1  
`baY`\_aaaa\_\_\_\_\_`\_`a]`a`X\_\_`\_a^^\_`a`^WV`ZY  
@HWI-EAS443:3:66:980:370#0/1  
CTTCTCTGAGTATTTTGGGCAGTCATAAGTCCCATTTTT  
+HWI-EAS443:3:66:980:370#0/1  
aaY]baab]Z`PYUVX^a`¥FY`S][\_a\_WU¥T]\_a\_W`\_  
@HWI-EAS443:3:67:1094:985#0/1  
CGTTCCATTGTCTGAACTAGTTGTTTCCACAATGTAGGAC  
+HWI-EAS443:3:67:1094:985#0/1  
^X]bbabbaaa`aaaababaab`aaa\_¥baaa`^^a`  
@HWI-EAS443:3:67:1144:1174#0/1  
GTGGAAACAACTAGTTCAGACAATGGAACGTGTACCCAG

+HWI-EAS443:3:67:1144:1174#0/1  
`Y\_Z^a]]aaa`Za[]\_]\_aaba\_a`]XXaTa^\_^YYZ  
@HWI-EAS443:3:67:1154:134#0/1  
GTGGGGACATCGAGATACAGCAAGAAGTTCAAGCCGGAAA  
+HWI-EAS443:3:67:1154:134#0/1  
`VXU\_a]TNQ¥MYRUYNK[S¥\_]SR¥LYU[WXQQX^UQR  
@HWI-EAS443:3:67:1417:527#0/1  
CACGTTCCATTGTCTGAACTAGTTGTTCCACAATGTAGG  
+HWI-EAS443:3:67:1417:527#0/1  
^\_bab^¥\_¥UU¥^Ub]a[T^bRa`U^`\_`aa`aa`\_`^`  
@HWI-EAS443:3:67:1638:1887#0/1  
CACGTTCCATTGTCTGAACTAGTTGTTCCACAATGTAGG  
+HWI-EAS443:3:67:1638:1887#0/1  
aa^`^aa`aa\_a¥\_¥aaa`[¥]¥¥][\_a\_^]U^\_^XN[[Y  
@HWI-EAS443:3:67:1746:1807#0/1  
GGGGACATCAAGATAGAGCAAGAAGTTCAAGCCGGAAAATA  
+HWI-EAS443:3:67:1746:1807#0/1  
ab]^a¥P\_N\_aa]U[DXGXK\_a0JRG`\_[Ga\_\_a^VP\_\_^  
@HWI-EAS443:3:67:57:278#0/1  
CAAGGAAATTGGAGACGGCTGCTTTGAATTTTACCACAAA  
+HWI-EAS443:3:67:57:278#0/1  
a\_\_ba\_a^aaabZX^aba``RVZ]SYW¥`\_`[YWTWU^  
@HWI-EAS443:3:68:1061:384#0/1  
CTGAACTAGTTGTTCCACAATGTAGGACCATGAGCTTGCTG  
+HWI-EAS443:3:68:1061:384#0/1  
abbbbabababbaa`abbabaab\_ba`a\_aaaaaa\_\_a`  
@HWI-EAS443:3:68:1241:1152#0/1  
CCCAAGACAAGTTCCTGGCCCAATCATGACTCGAACAAAG  
+HWI-EAS443:3:68:1241:1152#0/1  
a]Q\_`b``[a¥UYHYa]aa^VTX]TZ^`^T]ZHOT¥aX\_  
@HWI-EAS443:3:68:1565:1310#0/1  
GAACTAGTTGTTCCACAATGTAGGACCATGAGCTTGCTG  
+HWI-EAS443:3:68:1565:1310#0/1  
^\_¥`bb]\_\_\_]b`XYaaSaaa\_bbabUL^]a\_UVa\_\_Sa`  
@HWI-EAS443:3:68:172:1619#0/1  
CACGTTCCATTGTCTGAACTAGTTGTTCCACAATGTAGG  
+HWI-EAS443:3:68:172:1619#0/1  
`]\_]`aaa`\_WYa\_]\_aa\_]`^`]Z`\_aa`\_\_a^ZWaSY  
@HWI-EAS443:3:68:199:217#0/1  
GTTCCATTGTCTGAACTAGTTGTTCCACAATGTAGGACC  
+HWI-EAS443:3:68:199:217#0/1  
`¥TZRPYT[[\_[PKXOWXYIRVRYLYXU[]]QMXQOQVTUN  
@HWI-EAS443:3:68:452:1813#0/1  
AAATTGGAAACGGCTGCTTTGAATTTTACCACAAAAGCGA  
+HWI-EAS443:3:68:452:1813#0/1  
Z^T`\_\_Ua``WY¥Yaaa\_T¥L^a]Z^aX¥TJ`\_T`aJ¥QXD  
@HWI-EAS443:3:68:598:121#0/1  
CCTACATTGTGGAAACAACTAGTTCCAGACAATGGAACGTG  
+HWI-EAS443:3:68:598:121#0/1  
abbbbabbbbabbbaabb`\_aYaaa]]baaaaaX\_\_L\_¥a

@HWI-EAS443:3:68:69:1842#0/1  
GTCATAAGTCCCCTTTTTGACACTTTCCATGCACGTGTTA  
+HWI-EAS443:3:68:69:1842#0/1  
`P\_P^¥¥XSW\_\_I¥a[]\_^Z\_Z\_[W]\_`WWT\_XTXM\_UYN  
@HWI-EAS443:3:68:936:515#0/1  
CACGTTCCATTGTCTGAACTAGTTGTTTCCACAATGTAGG  
+HWI-EAS443:3:68:936:515#0/1  
abab\_`aabab`^ab\_ab\_a^a\_`a`aa\_aa`aaa`Za\_\_  
@HWI-EAS443:3:69:1105:1041#0/1  
CACGTTCCATTGTCTGAACTAGTTGTTTCCACAATGTAGG  
+HWI-EAS443:3:69:1105:1041#0/1  
\_`a`ab`U`RUUa\_\_R\_Z\_Z\_Y[`[]]\_¥RYRTVV^[]  
@HWI-EAS443:3:69:135:1718#0/1  
CTCCTGGGTAACACGTTCCATTGTCTGAACTAGTTGTTTC  
+HWI-EAS443:3:69:135:1718#0/1  
aaba\_]K¥bbaaa\_]aa`aY`a`]ZPZ`a\_a[X\_\_^]]`  
@HWI-EAS443:3:69:1404:1115#0/1  
TCTTGCTGTGCTTGATGTCCCCACAAAAACATATGCATC  
+HWI-EAS443:3:69:1404:1115#0/1  
^aXT`bbaSHNZYY¥[XSM[`]UQVW^GS\_YZ[DUHWZR  
@HWI-EAS443:3:69:1617:917#0/1  
CAAGGAAATTGGAAACGGCTGGTTTGAATTTTACCACAAA  
+HWI-EAS443:3:69:1617:917#0/1  
`bb`^bbabbbabababb\_`S^]]FDZV]abMDY¥`aa\_  
@HWI-EAS443:3:69:1716:1074#0/1  
CTAGTTGTTTCCACAATGTAGGACCATGAGCTTGCTGTGG  
+HWI-EAS443:3:69:1716:1074#0/1  
a`[\_bbbbbbaba`bbba\_\_b`\_W]`bbb`bbbba\_Z`ba  
@HWI-EAS443:3:69:206:1557#0/1  
CACGTTCCATTGTCTGAACTAGTTGTTTCCACAATGTAGG  
+HWI-EAS443:3:69:206:1557#0/1  
aa`¥^U\_\_ZTTXQXQQV[TYV[WVTRRW¥^ZZ[WVVWUTT  
@HWI-EAS443:3:69:301:1111#0/1  
GGAAATTGGAAACGGCTGCTTTGAATTTTACCACCAATGC  
+HWI-EAS443:3:69:301:1111#0/1  
a`a`aaa[[aaaa]¥a\_XMW`^MLQX`¥RT¥QUJ]YMNS  
@HWI-EAS443:3:69:538:503#0/1  
AAGCCAGTTAAAAACAATGCCAAGGACATTGGAAACGGC  
+HWI-EAS443:3:69:538:503#0/1  
ab\_T`S]\_¥QX\_MUZ\_UO\_^`Z\_NM¥ZJSUYRXUSRS]BB  
@HWI-EAS443:3:69:829:1192#0/1  
GTTCCATTGTCTGAACTAGTTGTTTCCACAATGTAGGACC  
+HWI-EAS443:3:69:829:1192#0/1  
```baaaaa[``a\_aaa```aa`aaaa¥\_a\_`^ZW\_¥[^`  
@HWI-EAS443:3:69:897:703#0/1  
AATCGATGAAATTTCTGGGTAACACGTTCCATTGTCTGA  
+HWI-EAS443:3:69:897:703#0/1  
a\_bbabbbbabbb`bbbba`baabbbbaaaaaaabab`\_  
@HWI-EAS443:3:69:919:277#0/1  
CACGTTCCATTGTCTGAACTAGTTGTTTCCACAATGTAGG

+HWI-EAS443:3:69:919:277#0/1  
T¥¥`XQWaNUN^^QX`WX¥a[Y]X`a\_\_]\_Y¥S¥a]ZR^a]  
@HWI-EAS443:3:6:1004:1288#0/1  
GTAATCTCGTCAATGGCATTCTGGGTGCTCTTCAGGTCGG  
+HWI-EAS443:3:6:1004:1288#0/1  
aW\_\_X`\_X\_X¥a¥RNNZ\_\_U^\_GXV\_U\_N\_^QVQSUU\_¥  
@HWI-EAS443:3:6:1240:1104#0/1  
CTGTGTGCTCTTCAGGTCGGCTGCATATCCTGAACCCTGC  
+HWI-EAS443:3:6:1240:1104#0/1  
a^`abaaZ\_abb\_R\_ZR¥\_Tba]]aba^M^T\_G]X`]a`  
@HWI-EAS443:3:6:1395:333#0/1  
GTGCTCTTCAGGTCGGCTGCATATCCTGAGCCCTGCTCAT  
+HWI-EAS443:3:6:1395:333#0/1  
aT`][Ra^baab¥U`b\_`\_]\_¥a]XKLZa[JNSQa[TaRQ`  
@HWI-EAS443:3:6:1599:1358#0/1  
TCTTGCTGTATCTTGATGTCCCCACAAAAAATATGCATC  
+HWI-EAS443:3:6:1599:1358#0/1  
VTT^bK`¥¥`ababb]^\_`JX\_aLQW\_\_ZHGJaT¥]\_JY]  
@HWI-EAS443:3:6:389:856#0/1  
CACCAGTCCACGATTGCAATACAACCTTGTCAGACAACCAA  
+HWI-EAS443:3:6:389:856#0/1  
[bb\_ZZ¥`\_`a\_b\_VR^abTaaa\_]Ua`aLN\_]\_]\_\_HPZa\_  
@HWI-EAS443:3:6:572:446#0/1  
CACGTTCCATTGTCTGAACTAGTTGTTTCCACAATGTAGG  
+HWI-EAS443:3:6:572:446#0/1  
Wbbba`ab`YababbbWb[bbbabbbabIKa[a`bb]bba  
@HWI-EAS443:3:6:590:1423#0/1  
CATTGTGGAAACAACCTAGTTCAGACAATGGAACGTGTTAC  
+HWI-EAS443:3:6:590:1423#0/1  
UU`\_]Y]^bba\_b\_Yb`Y`XG[ababb`\_V[`¥`\_\_\_Y`B  
@HWI-EAS443:3:6:643:1650#0/1  
CAGAGTGTGAATCACTCTCCACAGCAAGTCATGGGCCTA  
+HWI-EAS443:3:6:643:1650#0/1  
aZ`baababbb]b\_baa[bbbbaVaaaa\_abbZDPZ\_a  
@HWI-EAS443:3:6:660:1636#0/1  
ATCCTGACCCGTGCTCATTTTGTGATGGTGATAACCGTACCA  
+HWI-EAS443:3:6:660:1636#0/1  
`P`^`^`\_`UGVLQ][\_`]X^]Y]^XOV]Y^\_YU¥V]OBB  
@HWI-EAS443:3:6:775:508#0/1  
GATGAAATCTCCTGGGTAACACGTTCCATTGTATGAACTA  
+HWI-EAS443:3:6:775:508#0/1  
Y\_aaa^^`bbVaVY\_\_ZbbY`Ta^^XF]`]PLGZQS\_UZB  
@HWI-EAS443:3:70:100:1524#0/1  
GTGTGTTACCGTTACATTCTTTTCTAGTACTGTGTCTACA  
+HWI-EAS443:3:70:100:1524#0/1  
aaa`\_`aabab`aaaaaaaaaaaaab\_]abaa^a^aaa\_^  
@HWI-EAS443:3:70:1069:1577#0/1  
TCCGGCTTGAACCTTCTTGCTGTATCTTGTGTTGTCCCCACAA  
+HWI-EAS443:3:70:1069:1577#0/1  
Zbbbbb`Z^aa]a^X¥`bb`\_`ba^`a^¥aaaaa\_`aaa

@HWI-EAS443:3:70:1370:1317#0/1  
CACGTTCCATTGTCTGAACTAGTTGTTCCACAATGTAGG  
+HWI-EAS443:3:70:1370:1317#0/1  
abbbabbabaaa\_a`aaaa`\_b`aaa`ba\_a`a^`^  
@HWI-EAS443:3:70:1585:1225#0/1  
CACGTTCCATTGTCTGAACTAGTTGTTCCACAATGTAGG  
+HWI-EAS443:3:70:1585:1225#0/1  
aba]babaaabaaab`babab`b\_aaa]¥`aa`¥]`\_\_  
@HWI-EAS443:3:70:1637:199#0/1  
ACGTTCCATTGTCTGAACTAGTTGTTCCACAATGTAGGA  
+HWI-EAS443:3:70:1637:199#0/1  
`a\_\_\_\_\_a]\_a`]a\_¥`Q`\_`Xa`\_a`V\$XZ^^Z[P^]¥T  
@HWI-EAS443:3:70:1645:1517#0/1  
CTTCATCTGAGTATTTTGGGTAGTCATAAGTCCCATTTTT  
+HWI-EAS443:3:70:1645:1517#0/1  
¥a`RI[VabaX^bb`Z^`bbZV`\_ZQ\_abba`babba`b\_  
@HWI-EAS443:3:70:1776:1431#0/1  
ACATTGTGGAAACAACACTAGTTCAGACAATGGAACGTGTTA  
+HWI-EAS443:3:70:1776:1431#0/1  
ab\_aaa\_aa`ab]aa\_\_`X\_\_\_\_\_¥¥`\_\_\_\_^`Z\_X\_W]]  
@HWI-EAS443:3:70:287:1542#0/1  
CTGAACTAGTTGTTCCACAATGTAGGACCATGAGCTTGC  
+HWI-EAS443:3:70:287:1542#0/1  
aa]YS\_\_JVT\_Y]Z[a]¥aX]UVU[Y]\_^[^VU[TYYWR[  
@HWI-EAS443:3:70:466:1255#0/1  
CATTGTGGAAACAACACTAGTTCAGACAATGGAACGTGTTAC  
+HWI-EAS443:3:70:466:1255#0/1  
aaaaaT\_]`^abbbaa\_\_\_\_]aaa\_aaaa\_¥^\_]`^Y[X^\_\_  
@HWI-EAS443:3:70:494:1589#0/1  
ATTGTCTGAACTAGTTGTTCCACAATGTAGGACCATGAG  
+HWI-EAS443:3:70:494:1589#0/1  
YXZ`U¥\_]Va]LUTZT¥Z\_aa\_Y^[VGXHXU[Y`XYS[¥B  
@HWI-EAS443:3:71:1206:146#0/1  
TGGGGACATCAAGATACAGCAAGAAGCTCAAGCCGAAAT  
+HWI-EAS443:3:71:1206:146#0/1  
abbaa^`a`¥^a\_\_`\_aa^\_aa][`R\_\_a]\_[T\_^Y]X]  
@HWI-EAS443:3:71:1329:959#0/1  
ACGTTCCATTGTCTGAACTAGTTGTTCCACAATGTAGGA  
+HWI-EAS443:3:71:1329:959#0/1  
``^0]¥¥S]\_`Za]`UZVUa`V`b\_ab\_\_[EX[X]\_XY¥Y  
@HWI-EAS443:3:71:1570:1822#0/1  
GCTTCCTCTGAGGATTTTGGGTAGTCATAAGTCCCATTTT  
+HWI-EAS443:3:71:1570:1822#0/1  
a\_V\_Q\_a]`L[[G[[\_aZa\_aXQSLQ]X]`\_S[\_^XV¥^Y  
@HWI-EAS443:3:71:1589:976#0/1  
CACGTTCCATTGTCTGAACTAGTTGTTCCACAATGTAGG  
+HWI-EAS443:3:71:1589:976#0/1  
a`aa`abbbabba`b\_baab`aaa\_abbba`\_a`aa`a`]  
@HWI-EAS443:3:71:209:107#0/1  
CCTACATTGTGGAAACAACACTAGTTCAGACAATGGAACGTG

+HWI-EAS443:3:71:209:107#0/1  
abaaa`aab\_aa\_baab`\_aa`]\_^`^`\_Z^Z^X\_  
@HWI-EAS443:3:71:219:1097#0/1  
GAACTAGTTGTTTCCACAATGTAGGACCATGAGCTTGCTG  
+HWI-EAS443:3:71:219:1097#0/1  
a\_^`aaaWab`aabbba^`]S[^`aa^^`X` `aZZXaa\_  
@HWI-EAS443:3:71:745:194#0/1  
GTTCCATTGTCTGAACTAGTTGTTTCCACAATGTAGGACC  
+HWI-EAS443:3:71:745:194#0/1  
aaab`aabb\_aabab`aaa`aa\_aabaa]a`aa\_`] [\_^]  
@HWI-EAS443:3:71:858:26#0/1  
CTAGTTGTTTCCACAATGTAGGACCATGAGCTTGCTGTGG  
+HWI-EAS443:3:71:858:26#0/1  
ab\_b]`\_]bKbMa[aaa^aTUaa^baa`XHYRT\_\_\_R]W^Q  
@HWI-EAS443:3:71:886:560#0/1  
CTCCTGGGTAACACGTTCCATTGTCTGAACTAGTTGTTTC  
+HWI-EAS443:3:71:886:560#0/1  
aabaabaaVaa`a\_a\_a`aaaaa[^aaaaaa\_a\_aa\_a\_^  
@HWI-EAS443:3:71:946:1409#0/1  
GAAAGAAGTCCTCGTGCTATGGGGCATTACCCTATCT  
+HWI-EAS443:3:71:946:1409#0/1  
`ba]aa\_a`ab`aa\_a`aa`a\_^Z]aa`aa\_\_a\_a\_a\_] ^  
@HWI-EAS443:3:72:1392:1333#0/1  
AAACAATGCCAAGGAAATTGGAAACGGCTGGTTTGAATTT  
+HWI-EAS443:3:72:1392:1333#0/1  
abaaa\_`^^aa\_WX`\_ab\_a]`\_`\_a\_Za^FO\_[JOXU\_^  
@HWI-EAS443:3:72:1486:1636#0/1  
ATTGTCTGAACTAGTTGTTTCCACAATGTAGGACCATGAG  
+HWI-EAS443:3:72:1486:1636#0/1  
`a^bY` ``]aaaa\_Z^ba]aa\_aZ^`]Y¥aa]`R\_\_a^a`  
@HWI-EAS443:3:72:392:453#0/1  
CTCCTGGGTAACACGTTCCATTGTCTGAACTAGTTGTTTC  
+HWI-EAS443:3:72:392:453#0/1  
abbabbab^bbbbbbab`abaa` `aaaabaaaa` `\_]aaa  
@HWI-EAS443:3:72:443:1495#0/1  
GGCTACCCCCCTTAGTTTGCATAGTTTCCCGTTATGCTTG  
+HWI-EAS443:3:72:443:1495#0/1  
¥U`a` `bb[F]` [P]¥WZ]ZWUZYHX\_]Z^PMXMX¥¥[UD  
@HWI-EAS443:3:72:50:2041#0/1  
GGGGACATCAAGATACAGCAAGAAGCTCAAGCCGGAAATA  
+HWI-EAS443:3:72:50:2041#0/1  
ZK\_R`\_^]\_\_W^\_baS\_ab\_^`\_a^HS\_\_\_^a`]\_TWa\_^  
@HWI-EAS443:3:72:765:1211#0/1  
GGAAACAACCTAGTTCCAGACAATGGAACGTGTTACCCAGGA  
+HWI-EAS443:3:72:765:1211#0/1  
`b\_bbabbba^` `abba` bbaabaaaa` aabaa\_aa\_a  
@HWI-EAS443:3:72:912:1712#0/1  
CACGTTCCATTGTCTGAACTAGTTGTTTCCACAATGTAGG  
+HWI-EAS443:3:72:912:1712#0/1  
ab` \_\_bbbb` \_[\_aa^]`a`aa` `a\_a` ``a`a` \_`U` \_¥

@HWI-EAS443:3:72:976:736#0/1  
TTGGAAACGGCTGCTTTGAATTTTAAACACAAATGCGATAA  
+HWI-EAS443:3:72:976:736#0/1  
abba`a`bbba`aVV^ZJ0[aaa`XDPSF]\_\_Z`^^VYRY  
@HWI-EAS443:3:73:1152:1831#0/1  
GCGAACAATTCAACAGACACTGTAGACACAGTAGTAGAAA  
+HWI-EAS443:3:73:1152:1831#0/1  
`bZ\_^a`¥\_aaaa¥baaa`\_a¥Y]`[^^]QZUFXXSZ\_Q  
@HWI-EAS443:3:73:1474:1963#0/1  
AAACAATGCCAAGGAAATTGGAAACGGCTGCTTTTAATTT  
+HWI-EAS443:3:73:1474:1963#0/1  
a`a\_¥```a`^`aaaYZ`Y^`^``\_¥[[]\_PT¥WDISYZ[  
@HWI-EAS443:3:73:1494:341#0/1  
TAAGAAGCCAGTTAAAAACAATGCGAAGGAAATTGGAAA  
+HWI-EAS443:3:73:1494:341#0/1  
]L]SVYb^\_^\_¥[a`Y^ZHWba^SET[¥UNR\_^`\_¥QR¥  
@HWI-EAS443:3:73:155:1437#0/1  
GTAACACGTTCCATTGTCTGAACTAGTTGTTCCACAATG  
+HWI-EAS443:3:73:155:1437#0/1  
`a^Za]b\_¥abba\_aa\_ba`^a`a^Z^``aa`aa\_aaa\_\_  
@HWI-EAS443:3:73:170:774#0/1  
GCATATCTCGCTACCACTAGATTTCCAGTTGCTTCCAATG  
+HWI-EAS443:3:73:170:774#0/1  
`b]^]¥`GZ]R\_NS^\_SZ¥a]MRV]NFZWW]XX]V`OUW[  
@HWI-EAS443:3:73:332:376#0/1  
CTGGCGTATCTGAAATGATAATACCAGATCCAGCATTCT  
+HWI-EAS443:3:73:332:376#0/1  
Y\_]\_R\_PYY¥ZX¥`\_``[a]TX^OTZX]S^\_[\_\_][W]a  
@HWI-EAS443:3:73:361:1186#0/1  
GTCTGAACTAGTTGTTTCCACAATGTAGGACCATGAGCTT  
+HWI-EAS443:3:73:361:1186#0/1  
a^aa```a\_aa^`a\_``aa`]``\_P`\_\_`¥YSY^\_Z^]]  
@HWI-EAS443:3:73:381:1561#0/1  
ACACGTTCCATTGTCTGAACTAGTTGTTTCCACAATGTAG  
+HWI-EAS443:3:73:381:1561#0/1  
¥\_Y^^\_aaa[[¥QU\_\_IY`][^`[VIYW\_Z[BBBBBBBBB  
@HWI-EAS443:3:74:1592:1924#0/1  
GAAGTTCAAGCCGAAATAGCAATAAGACCCAAAGGGAGG  
+HWI-EAS443:3:74:1592:1924#0/1  
`[[`[[aaZ\_]Xba]¥a``aaa¥KSRLXPTGW[ZVSYZY  
@HWI-EAS443:3:74:1650:926#0/1  
CACGTTCCATTGTCTGAACTAGTTGTTTCCACAATGTAGG  
+HWI-EAS443:3:74:1650:926#0/1  
aba\_] ]bab`aa\_bbbbaa\_``[a`\_b\_]aaVa\_aaU\_\_^  
@HWI-EAS443:3:74:1663:17#0/1  
ATTCATCTTTTCAATAACAGAATTTACTTTGCTAGTAATC  
+HWI-EAS443:3:74:1663:17#0/1  
`bb``aab]bb\_baaa`Xaba`aaa`TaabaWa``^`\_\_W  
@HWI-EAS443:3:74:1790:455#0/1  
CAATCATGACTCGAACAAAGGTGTAACGGCATCATGTCCT

+HWI-EAS443:3:74:1790:455#0/1  
W\_^Y`^a`a^`¥` `b[ `aa\_^G\_[\_]¥¥¥`^YM¥XPWYOR  
@HWI-EAS443:3:74:377:1008#0/1  
AAGTTCTTCACATTTGAATCGTGGTAGTCCAAAGGTCTTT  
+HWI-EAS443:3:74:377:1008#0/1  
`` `[W[\_a^\_^\_]]`\_PPX` `L¥RQZXUFZYSLOGLRZZW  
@HWI-EAS443:3:74:625:1214#0/1  
GGAACGTGTAACCCAGGAGATTTTCATCGATTATGAGGAGC  
+HWI-EAS443:3:74:625:1214#0/1  
\_`aVaba^GH\_ba`baX]ab\_aW^babaIabaa`a[a]aR  
@HWI-EAS443:3:74:679:499#0/1  
GAACTCTTTATCTACTGCTGTGAACGTGTATTTCATCTTT  
+HWI-EAS443:3:74:679:499#0/1  
XXb`bbbabZLaabab`b\_aVbba`bb\_a¥aabbaa^bab  
@HWI-EAS443:3:74:728:1942#0/1  
GTTCCATTGTCTGAACTAGTTGTTTCCACAATGTAGGACC  
+HWI-EAS443:3:74:728:1942#0/1  
a]`bab^`¥Uaaaa\_`XZWP¥aXQ]`a\_aa`Y\_[ZP^` [¥  
@HWI-EAS443:3:74:753:979#0/1  
ACGTTCCATTGTCTGAACTAGTTGTTTCCACAATGTAGGA  
+HWI-EAS443:3:74:753:979#0/1  
a`^`\_aa`aa\_\_\_\_`¥^`\_][YZ\_]\_]YH[^`\_\_RXQ[X  
@HWI-EAS443:3:74:85:1748#0/1  
AAGAAATGCTGGATCTGGTATTATCATTCCAGATACACCA  
+HWI-EAS443:3:74:85:1748#0/1  
^VRX¥^¥M`YRYTWb\_]`P]`U¥]\_X\_P¥¥LXRU^^X[]  
@HWI-EAS443:3:75:1125:1992#0/1  
ACGTTCCATTGTCTGAACTAGTTGTTTCCACAATGTAGGA  
+HWI-EAS443:3:75:1125:1992#0/1  
aa]aaaaa\_a\_\_`]\_`aa¥\_aY\_\_\_\_aa\_`a\_` `^^R\_^\_\_  
@HWI-EAS443:3:75:1163:1668#0/1  
CACGTTCCATTGTCTGAACTAGTTGTTTCCACAATGTAGG  
+HWI-EAS443:3:75:1163:1668#0/1  
ab`abbbabba^¥bb`babbbbbbbaabbbbbbbaa\_ba\_  
@HWI-EAS443:3:75:1174:1215#0/1  
GGGGACATCAAGATACAGCAAGAAGATCAAGCCGGAAATA  
+HWI-EAS443:3:75:1174:1215#0/1  
aa`TROHWT]\_aUa^XaQX\_[baUJGWUaaPUNa^^XU`¥  
@HWI-EAS443:3:75:1216:1496#0/1  
GATAACCGCACCATCCATCTACCATCCCTGTCCACCCCC  
+HWI-EAS443:3:75:1216:1496#0/1  
HObbbab^GR\_\_¥I\_Z]bT]a\_ZR¥]]Z\_GK^V]` `YFXW  
@HWI-EAS443:3:75:1500:425#0/1  
ATCTCCTGGGTAACACGTTCCATTGTCTGAACTAGTTGTT  
+HWI-EAS443:3:75:1500:425#0/1  
QZY\_Y^S\_aYR\_a]`ab`]QZ\_]bPPY\_`\_]\_`a`¥Va]`  
@HWI-EAS443:3:75:1553:767#0/1  
TGCTCGCTGGATCCTGGGAAATCCAGAGTGTGAATCACTC  
+HWI-EAS443:3:75:1553:767#0/1  
abb[D^aaabZU\_aY`aaaaaYX`^ab`bUb]aa¥ZaaV



@HWI-EAS443:3:75:338:1004#0/1  
GTTTCATTGAAGGGGGTGGACAGGGATGGGAGATGGATG  
+HWI-EAS443:3:75:338:1004#0/1  
OUba\_Q[Z[\_baV]`bU^T\_Pa^aXWbbHUSa]V¥\_a\_  
@HWI-EAS443:3:75:345:1709#0/1  
GAACTAGTTGTTCCACAATGTAGGACCATGAGCTTGCTG  
+HWI-EAS443:3:75:345:1709#0/1  
[bb`a`b`babab]baba\_a\_]b^`aaaa\_a`\_\_a\_\_`\_  
@HWI-EAS443:3:75:363:871#0/1  
ATTGAGCTCAGTGCATCATTGAAAAGTTTGAGATATTC  
+HWI-EAS443:3:75:363:871#0/1  
ababaa`b`]VR^aaaab¥¥a`aa\_[P[a¥^XOVHT¥B  
@HWI-EAS443:3:75:552:964#0/1  
TGGTCCTACATTGTGGAAACAACTAGTTCAGACAATGGAA  
+HWI-EAS443:3:75:552:964#0/1  
abaab`aaba`aYaa]a[``\_\_`a^¥^aa\_a\_\_QZ`\_XY  
@HWI-EAS443:3:75:734:880#0/1  
CACGTTCCATTGTCTGAACTAGTTGTTCCACAATGTAGG  
+HWI-EAS443:3:75:734:880#0/1  
`bVa]\_¥\_abbaa`b]ab]`M]]bababaa]aR^aaXYV  
@HWI-EAS443:3:75:914:1476#0/1  
TGTGGAAACAACTAGTTCAGACAATGGAACGTGTTACCCA  
+HWI-EAS443:3:75:914:1476#0/1  
]aaa`bbbbb^^`bba`a¥`abbbb`abab]aaabab]a  
@HWI-EAS443:3:76:1284:785#0/1  
GAACTAGTTGTTCCACAATGTAGGACCATGAGCTTGCTG  
+HWI-EAS443:3:76:1284:785#0/1  
¥[]`\_WY\_\_ZVa]¥^Z\_\_XWU^TNTV]X¥^RYTXXSZWW]  
@HWI-EAS443:3:76:1328:1967#0/1  
TGGGTAACACGTTCCATTGTCTGAACTAGTTGTTCCACA  
+HWI-EAS443:3:76:1328:1967#0/1  
^Y]\_ZaaaaW^\_]Q[`¥`a`a\_]aY\_a\_TSJW\_\_[S¥V¥  
@HWI-EAS443:3:76:1567:1883#0/1  
ACGTTCCATTGTCTGAACTAGTTGTTCCACAATGTAGGA  
+HWI-EAS443:3:76:1567:1883#0/1  
a`]a`\_]``\_Y^¥^^a\_\_\_aU\_\_YZZOT]Z¥^W\_0[^UW  
@HWI-EAS443:3:76:179:1032#0/1  
GGGACATCAAGATACAGCAAGAAGGTCAAGCCGGAAATA  
+HWI-EAS443:3:76:179:1032#0/1  
`bSX]]VNU\_QG[\_\_\_\_^`N[[RDL]RUNUUVTWXWRU  
@HWI-EAS443:3:76:249:435#0/1  
CTCCTGGGTAACACGTTCCATTGTCTGAACTAGTTGTTTC  
+HWI-EAS443:3:76:249:435#0/1  
aabbaabb\_`a`aaa^aa`aa\_`^`a\_`^`^`\_`\_]\_Y]  
@HWI-EAS443:3:76:339:1372#0/1  
CTCCTGGGTAACACGTTCCATTGTCTGAACTAGTTGTTTC  
+HWI-EAS443:3:76:339:1372#0/1  
ababba`Waaab\_aY``]b\_¥\_\_\_a`\_a\_^a[^^X]]]  
@HWI-EAS443:3:76:431:942#0/1  
GTGGGGGCATCAAGATACAGCAAGAAGTTCAGCCGGAAA

+HWI-EAS443:3:76:431:942#0/1  
a`a`ZD[a`a`[^]\_^[\_a`a`\_[VR]\_\_^\_^^[^^^  
@HWI-EAS443:3:76:730:887#0/1  
ACGTTCCATTGTCTGAACTAGTTGTTTCCACAATGTAGGA  
+HWI-EAS443:3:76:730:887#0/1  
aa\_]\_`^`¥U`a`ZT[\_a^`a\_a`]`\_]`\_]VT[^  
@HWI-EAS443:3:77:1173:1474#0/1  
GGAAATTGGAAACGGCTGCTTTGAATTTTACCAAAAATGC  
+HWI-EAS443:3:77:1173:1474#0/1  
abbbbbbbbabbaabab^0\_b`LY`Y\_bb¥RSUG^aaITG  
@HWI-EAS443:3:77:179:1309#0/1  
ACGTTCCATTGTCTGAACTAGTTGTTTCCACAATGTAGGA  
+HWI-EAS443:3:77:179:1309#0/1  
a^]P^`^Z¥[P¥Z[\_`][QQ[QV^W\_^\_]`WZW]SXLWW  
@HWI-EAS443:3:77:277:1759#0/1  
CACGTTCCATTGTCTGAACTAGTTGTTTCCACAATGTAGG  
+HWI-EAS443:3:77:277:1759#0/1  
a)`XYWbbaT¥NN¥[\_a\_^\_[QQ\_NS^Z^X`P¥^TTJF  
@HWI-EAS443:3:77:609:1845#0/1  
GGGAGAGTACCAGTACCAATGAACTGGCGACAGTTGAATA  
+HWI-EAS443:3:77:609:1845#0/1  
aa`bbb[¥Ybaba^aababbbaaaa^b^a`aX`U\_a`a  
@HWI-EAS443:3:77:885:1495#0/1  
CACGTTCCATTGTCTGAACTAGTTGTTTCCACAATGTAGG  
+HWI-EAS443:3:77:885:1495#0/1  
abbbaaaaba`\_J0\_bbbbabab\_aaaaa\_aa]aaa\_a`U  
@HWI-EAS443:3:78:1119:1453#0/1  
TGCTCATTGATGCTGATAACCGTACCATCCATCTACCA  
+HWI-EAS443:3:78:1119:1453#0/1  
^aabZ]a`^aa^YXUaa`baG]ZMaZH¥[\_]a\_U\_a]M`  
@HWI-EAS443:3:78:1120:1577#0/1  
CTTTGGACTACCACGATTGATGTTGAAGAATTATATGA  
+HWI-EAS443:3:78:1120:1577#0/1  
\_bYHNWYOF[`a]ZZX\_V[¥X^\_¥X¥PIXQ¥`aY`\_a¥BB  
@HWI-EAS443:3:78:1401:596#0/1  
CACGTTCCATTGTCTGAACTAGTTGTTTCCACAATGTAGG  
+HWI-EAS443:3:78:1401:596#0/1  
^¥bbY¥¥`^`T¥SV\_bYba]aaabbWR¥S`b``aaba^Za  
@HWI-EAS443:3:78:312:506#0/1  
CTCCTGGGTAACACGTTCCATTGTCTGAACTAGTTGTTTC  
+HWI-EAS443:3:78:312:506#0/1  
aaaaa`YaG^`aa`][`\_`a`\_W`\_^][U[K\_NTWW\_Z^  
@HWI-EAS443:3:78:344:1439#0/1  
ACACGTTCCATTGTCTGAACTAGTTGTTTCCACAATGTAG  
+HWI-EAS443:3:78:344:1439#0/1  
aaa```\_a\_`^Y]\_`\_`a`^`aZ`\_]a\_¥\_`^`\_`\_W]W  
@HWI-EAS443:3:78:380:1803#0/1  
CGGGAGACAAAATAACATTCGAAGCAACCGGAAATCTAGT  
+HWI-EAS443:3:78:380:1803#0/1  
`ZZU¥¥^a^`][ZQ\_a)`Z\_][^Z\_`ZTV^`]^`^]S

@HWI-EAS443:3:78:483:1150#0/1  
TTCATCTTTTCAATTACAGAATTTACTTTGTTAGTAATCT  
+HWI-EAS443:3:78:483:1150#0/1  
aaaYaaaaaaaa` ]`aaaX`a`a[aa\_]`^a`a`\_`\_`\_`^`  
@HWI-EAS443:3:78:787:895#0/1  
GAACTAGTTGTTTCCACAATGTAGGACCATGAGCTTGCTG  
+HWI-EAS443:3:78:787:895#0/1  
¥\_b`\_`\_]`b^b\_]`^aa`bb`[^¥`a]^a`a`\_`a`\_`a`a`  
@HWI-EAS443:3:79:1117:510#0/1  
CTTGGGTGTCTGACAAGTTATATTGCAATCGTGGACTGGT  
+HWI-EAS443:3:79:1117:510#0/1  
aa`U`^R\_[a]U^ZZX\_W`a]]baY\_OW]W^¥R^\_¥¥`Y`  
@HWI-EAS443:3:79:1125:1496#0/1  
GAACTAGTTGTTTCCACAATGTAGGACCATGAGCTTGCTG  
+HWI-EAS443:3:79:1125:1496#0/1  
aaaa`a]N\_aZaaa[a`aa][a[\_]` ]`¥^]YYa\_¥L¥\_  
@HWI-EAS443:3:79:1249:801#0/1  
CACTAGTAGATGGATGGTGAATGCCCCATAGCAGGAGGAC  
+HWI-EAS443:3:79:1249:801#0/1  
S\_W^\_¥a^\_^[^X^aaaba¥^a^\_0]ab\_YX]G]VXRVP  
@HWI-EAS443:3:79:1283:1231#0/1  
CACGTTCCATTGTCTGAACTAGTTGTTTCCACAATGTAGG  
+HWI-EAS443:3:79:1283:1231#0/1  
abbabbbabbab`ababb`a`baab`b`aaaaa`a`\_`\_`aa  
@HWI-EAS443:3:79:1317:171#0/1  
CAATGCAGGACCATGAGCTTGCTGTGGAGAGTGATTCACA  
+HWI-EAS443:3:79:1317:171#0/1  
ab]`a`\_`\_`b^U]aab`^`\_`aabb`\_`\_`a\_¥TbZZUU^Y`  
@HWI-EAS443:3:79:1347:592#0/1  
GCCGGGTGACAAAATAACATTCCAAGCAACTGGAATCTA  
+HWI-EAS443:3:79:1347:592#0/1  
¥F[¥a\_\_YUR\_\_ORO¥WZ^UZNYTX[XY\_[^` ]^`\_a]aJ  
@HWI-EAS443:3:79:1437:1249#0/1  
ATCGATGAAATCTCCTGGGTGACACGTTCCATTGTCTGAA  
+HWI-EAS443:3:79:1437:1249#0/1  
ab`^^`\_`baaaa\_\_aaa[Kaa[a`aa`]¥\_`aYa\_¥V^a  
@HWI-EAS443:3:79:1451:676#0/1  
CACGTTCCATTGTCTGAACTAGTTGTTTCCACAATGTAGG  
+HWI-EAS443:3:79:1451:676#0/1  
Z\_aa^a\_Z\_a]a¥[\_^ZaW\_\_\_\_\_R`\_¥LM^R\_\_¥P¥`¥[  
@HWI-EAS443:3:79:1702:1252#0/1  
ACACGTTCCATTGTCTGAACTAGTTGTTTCCACAATGTAG  
+HWI-EAS443:3:79:1702:1252#0/1  
```ab`b\_aaabS`R`¥V¥[a`a`aa`a\_[Y\_\_^\_]\_Y\_Z  
@HWI-EAS443:3:79:1704:764#0/1  
CTCCCCGCTCTACTAGTGTCCAGTAATAGGTCATTCTCCC  
+HWI-EAS443:3:79:1704:764#0/1  
`\_^b\_[ZZ¥¥WXRQS`¥X¥]`Z]]a\_RRPFXY¥Q\_U]STX  
@HWI-EAS443:3:79:36:1675#0/1  
CTGCTGTTAACTGTGTATTTCATCTTTTCAATAACAGAATT

+HWI-EAS443:3:79:36:1675#0/1  
a\_\_^T]QFL]^WTR\_U[V[^YW]\_^]Y`ZOS^S\$UWM[]]  
@HWI-EAS443:3:79:436:1646#0/1  
CACGTTCCATTGTCTGAACTAGTTGTTTCCACAATGTAGG  
+HWI-EAS443:3:79:436:1646#0/1  
aba\_]\_abab`a\_^\_aa\_aa`\_\_^`a^`\_a` `^\$`\_US\_VX  
@HWI-EAS443:3:79:618:1209#0/1  
CATTGTCTGAACTAGTTGTTTCCACAATGTAGGACCATGA  
+HWI-EAS443:3:79:618:1209#0/1  
ababb^baa\_\_b\_bb^b`\_aaaaabZaa]a`a\_aYa\_[a  
@HWI-EAS443:3:79:758:1005#0/1  
ACGTTCCATTGTCTGAACTAGTTGTTTCCACAATGTAGGA  
+HWI-EAS443:3:79:758:1005#0/1  
ab[¥\_b`\_`aZ`aa¥Zaa[ZX]]\_]`\_a`aa^]``[ `[PX  
@HWI-EAS443:3:79:776:1899#0/1  
CATCCATCTACTAGCGCTGACCAACAAAGTCTCTATCAGA  
+HWI-EAS443:3:79:776:1899#0/1  
ab`b`baa\_bbX¥bIbabaa`\_`aabab^`abbWb]Tbab  
@HWI-EAS443:3:79:953:26#0/1  
AAGTCATGGTCTACATTGTGGAAACAAGTTCAGAC  
+HWI-EAS443:3:79:953:26#0/1  
aabbbb\_bbb\_]`\_aaaabbabba`a\_aa¥\_abaa^\_a`\_  
@HWI-EAS443:3:7:1469:776#0/1  
AAACAATGCCAAGGAAATTGGAAACGGCTGGTTTGAATTT  
+HWI-EAS443:3:7:1469:776#0/1  
abb`aaba\_]Z¥ba\_\_`aaaa¥^\_\_`a^a]MQ^^FOVZ\_B  
@HWI-EAS443:3:7:1688:608#0/1  
GGGACATCAAGATACAGCAAGAAGTTCAAGCCGGGAATA  
+HWI-EAS443:3:7:1688:608#0/1  
^]¥]`VaaR`\_a^a\_\_`aV`\_]^[aX]\_¥^VOG\_]V¥V]X  
@HWI-EAS443:3:7:1782:1624#0/1  
GCAGGGGTCAGGATATGCAGCCGACGTGAAGAGCACACAG  
+HWI-EAS443:3:7:1782:1624#0/1  
`SR]XZYKVX\_\_XY[XIS^VPSRWGFS^SNNSRUUM[BBB  
@HWI-EAS443:3:7:38:1046#0/1  
CGTTCCATTGTCTGAACTAGTTGTTTCCACAATGTAGGAC  
+HWI-EAS443:3:7:38:1046#0/1  
aa\_b\_abba^[\_]\_JaabaaY\_]aaaa\_aaa^]¥aa`aa  
@HWI-EAS443:3:7:491:1608#0/1  
AGAACTTTGGACTACCACGATTCAAATGTGAAGAAGTTAT  
+HWI-EAS443:3:7:491:1608#0/1  
ab`^U[GY\_[¥^Xab]a`a^]J^a^YIa^Y[WR]]GV¥R[  
@HWI-EAS443:3:7:513:1147#0/1  
ATGCCAAGGAAATTGGAAACGGCTGGTTTGAATTTTACCA  
+HWI-EAS443:3:7:513:1147#0/1  
\_bb`baabb\_\_RZ\_b[Y` ` \_baaabIaaaVVZ\_\_a\_UFMZ  
@HWI-EAS443:3:7:547:789#0/1  
TGCATATGTTTTGTGAGGACATCAAGATACAGCAAGAAG  
+HWI-EAS443:3:7:547:789#0/1  
abaaaaabb^aaaaa^a`aa`\_a`^a\_aa` `]a`^aa\_\_^`

@HWI-EAS443:3:7:634:581#0/1  
ACACGTTCCATTGTCTGAACTAGTTGTTTCCACAATGTAG  
+HWI-EAS443:3:7:634:581#0/1  
aVba\_Yab¥V¥I`\_Ta]¥XS\_0\_U]`^^^\_W^]\_aX\_`  
@HWI-EAS443:3:7:691:1347#0/1  
ATTAGAGCACATCCAGAAAATGATTGCCCCAGGGAGACT  
+HWI-EAS443:3:7:691:1347#0/1  
[a[[aab]]a[ab[^X`[QH[]^¥\_a¥^QWX]]XYZV^BB  
@HWI-EAS443:3:80:1654:1395#0/1  
GTCATCATTTGAAAGTTTGAGATATCCCGAAGACAAGT  
+HWI-EAS443:3:80:1654:1395#0/1  
`Y`a`^[b^ba`aY]Z^aaa]WX\_\_¥\_NZSDXa^]\_^Y`U  
@HWI-EAS443:3:80:1769:1241#0/1  
GGGGACATCAAGATACAGCAAGGAGTTCAAGCCGAAATA  
+HWI-EAS443:3:80:1769:1241#0/1  
a\_[[UVTXTHXP^]Z¥YLY\_] [L[VVR\_UZTT¥\_VMPPY  
@HWI-EAS443:3:80:253:750#0/1  
CTCCTGGGTAACACGTTCCATTGTCTGAACTAGTTGTTTC  
+HWI-EAS443:3:80:253:750#0/1  
aabaaaaY^Zaa`a^aa\_V\_] [\_aa[\_\_\_\_[^\_]]^^  
@HWI-EAS443:3:80:559:351#0/1  
CTCCTGGGTAACACGTTCCATTGTCTGAACTAGTTGTTTC  
+HWI-EAS443:3:80:559:351#0/1  
aa\_a\_[X`UQ\_aaOPZ`PP]S]RRXUKN[HWFKHZ^^U\_U  
@HWI-EAS443:3:80:710:249#0/1  
GATGAAATCTCCTGGGAAACACGTTCCATTGTCTGAACTA  
+HWI-EAS443:3:80:710:249#0/1  
abbaaababaa^`aa\_a`^`a`a]a\_^`aaa^\_\_a\_\_Z`^  
@HWI-EAS443:3:81:118:698#0/1  
CACGTTCCATTGTCTGAACTAGTTGTTTCCACAATGTAGG  
+HWI-EAS443:3:81:118:698#0/1  
abbb`a\_]Z\_aZZaa]H^`aa^ab^`\_`aSaa[¥`]`\_`  
@HWI-EAS443:3:81:127:1492#0/1  
CTCCTGGGTAACACGTTCCATTGTCTGAACTAGTTGTTTC  
+HWI-EAS443:3:81:127:1492#0/1  
aaa`RWOXY[W`P`\_L^]a]ZXRS\_ZWSN[Y^\_UYVTTS^  
@HWI-EAS443:3:81:1421:1858#0/1  
AGAAGTTTGGACTACCACGATTAATAATGTGAAGAACTTAT  
+HWI-EAS443:3:81:1421:1858#0/1  
`T\_]\_¥R\_b]]`W[LababW\_\_XLJab]I]`ab`]P[[S`  
@HWI-EAS443:3:81:1665:474#0/1  
AACACGTTCCATTGTCTGAACTAGTTGTTTCCACAATGTA  
+HWI-EAS443:3:81:1665:474#0/1  
ab`bababaa\_baa\_aaaaa¥`^`a\_aa`^^`\_aZa\_a\_^]  
@HWI-EAS443:3:81:1757:1661#0/1  
GCCGGTTTCATTGAAGGGGGCGGACAGGGATGGTAGATG  
+HWI-EAS443:3:81:1757:1661#0/1  
^[ZaXOUS[¥TTbPL[G]¥¥UJRSBBBBBBBBBBBBBBBB  
@HWI-EAS443:3:81:220:1927#0/1  
GCTGGCTGGATCCTGGGAAATCCATAGTGTGAATCACTCT

+HWI-EAS443:3:81:220:1927#0/1  
W`\_]X`WXXa`b¥Z^`ab¥]Z]b¥GZ¥IWaWabT^¥Tbba  
@HWI-EAS443:3:81:292:158#0/1  
ACGTTCCATTGTCTGAACTAGTTGTTTCCACAATGTAGGA  
+HWI-EAS443:3:81:292:158#0/1  
¥Z¥a^`QZXWWTV`b`YYZN`[\_b[^WO[W]P¥[\_\_\_`]X[  
@HWI-EAS443:3:81:521:910#0/1  
CGTTCCATTGTCTGAACTAGTTGTTTCCACAATGTAGGAC  
+HWI-EAS443:3:81:521:910#0/1  
aaaaaa`\_\_a]aa`a\_`V`^`a]`\_`^`\_\_\_\_\_¥]\_\_`^`^`  
@HWI-EAS443:3:81:639:1477#0/1  
GTTCCATTGTCTGAACTAGTTGTTTCCACAATGTAGGACC  
+HWI-EAS443:3:81:639:1477#0/1  
```^abaaa`]aa¥a^\_U`[``][`\_a\_W\_Y`a^U[ZV]V¥  
@HWI-EAS443:3:81:884:1324#0/1  
CTCCTGGGTAACACGTTCCATTGTCTGAACTAGTTGTTTC  
+HWI-EAS443:3:81:884:1324#0/1  
a]a`\_bbbU¥\_`^`[`Z```\_\_`a`U\_aa`a¥``a^^a`Z^`  
@HWI-EAS443:3:82:113:1810#0/1  
CACGTTCCATTGTCTGAACTAGTTGTTTCCACAATGTAGG  
+HWI-EAS443:3:82:113:1810#0/1  
aaaa^P`XYMXaU[¥V]a^\_USH^\_Y[]`^Y^WRVRYVWV  
@HWI-EAS443:3:82:1308:1645#0/1  
ACACGTTCCATTGTCTGAACTAGTTGTTTCCACAATGTAG  
+HWI-EAS443:3:82:1308:1645#0/1  
abba`ababaaaaQaba`0`Z`Sa[`aaZ^a^`aa\_X`]  
@HWI-EAS443:3:82:1393:771#0/1  
GGGTGGGCAGGGATGGTAGATGGATGGTACGGTTATCACC  
+HWI-EAS443:3:82:1393:771#0/1  
]^WV\_Y`\_`a^a^]^a^D[`Z]abaW`]V`]^W¥\_TLYUQ  
@HWI-EAS443:3:82:384:1432#0/1  
ACGTTCCATTGTCTGAACTAGTTGTTTCCACAATGTAGGA  
+HWI-EAS443:3:82:384:1432#0/1  
a`^OTVX¥b[P¥¥a]a`TaVH^b]Taa^SZ\_b``HG¥`M¥  
@HWI-EAS443:3:82:730:1905#0/1  
GCAGGGGGCAGGATATGCAGCCGACCTGAAGAGCACACAG  
+HWI-EAS443:3:82:730:1905#0/1  
aa¥[`ZWDMZZT^`\_`X¥KU`S¥]VY[RVY[[R^¥GZV^  
@HWI-EAS443:3:82:891:1071#0/1  
CTAGTTGTTTCCACAATGTAGGACCATGAGCTTGCTGTGG  
+HWI-EAS443:3:82:891:1071#0/1  
a`Y```bbbbbabbbbbb[]b]a`aabbabbbbbb`bbbba  
@HWI-EAS443:3:83:1001:2026#0/1  
CAGGGGGCAGGATATGCAGCCGACCTGAAGAGCACACAGA  
+HWI-EAS443:3:83:1001:2026#0/1  
T`aab\_H`bbaba`Zb¥`aQP`[^]^ab^bba\_]\_`baa^  
@HWI-EAS443:3:83:1217:910#0/1  
ACACGTTCCATTGTCTGAACTAGTTGTTTCCACAATGTAG  
+HWI-EAS443:3:83:1217:910#0/1  
a`ba\_V\_a`aaaa`abb`\_`^aaa``^\_a\_\_YY¥Ya``U¥`

@HWI-EAS443:3:83:1270:1168#0/1  
CAGAATTTACTTTGGTAGTAATCTCGTCAATGGCATTCTG  
+HWI-EAS443:3:83:1270:1168#0/1  
a¥YXa`aSb[[[aVD¥a^M^\_X\_\_XaQ\_`¥UPPM\_TWS\_Y  
@HWI-EAS443:3:83:1437:771#0/1  
GCCAGTTAAAAACAATGCCAGGGAAATTGGAAACGGCTG  
+HWI-EAS443:3:83:1437:771#0/1  
`YUQWY¥a`ZWWa[YWU`FQXHP]] [Z¥¥]]YYZBBBBBB  
@HWI-EAS443:3:83:1471:617#0/1  
GCCAGTTAAAAACAATGCCAAGCAAATTGGAAACGGCTG  
+HWI-EAS443:3:83:1471:617#0/1  
`W[^a`aa``aa]S`a\_aMRU\_POV\_¥\_Y\_¥¥^YSVVU^R  
@HWI-EAS443:3:83:1515:1146#0/1  
CTCTTTACTACTGCTGAGAACTGTGTATTTCATCTTTTCA  
+HWI-EAS443:3:83:1515:1146#0/1  
aabbby`\_\_`b^\_bb\_a]D]RWY`b`b\_aaaaabXaba` [ `  
@HWI-EAS443:3:83:20:150#0/1  
CGGCTCTACTAGTGTCCAGTAACAGTTCATTCTCCCTTCT  
+HWI-EAS443:3:83:20:150#0/1  
aaa`\_\_Y]aZZ¥L[Z^\_HXNTX`RYLTUXU[[WTZBBBBBB  
@HWI-EAS443:3:83:400:1854#0/1  
AACACGTTCCATTGTCTGAACTAGTTGTTTCCACAATGTA  
+HWI-EAS443:3:83:400:1854#0/1  
aaaYRY^^ab^\_]H]`S]`\_]`\_YS^\_]^^\_]X[U[]00Z  
@HWI-EAS443:3:83:652:1221#0/1  
AAAACAATGCCAAGGAAATTGGAAACGGCTGCCTTGAATT  
+HWI-EAS443:3:83:652:1221#0/1  
a^Obaaaa`]aV]a\_¥Y\_`\_`^Y[\_`aW]XSOIX]MIDJ¥  
@HWI-EAS443:3:83:841:1351#0/1  
TCCGGCTTGACTTCTTGCTGTATCTTGATGTCCCCACAA  
+HWI-EAS443:3:83:841:1351#0/1  
aaa`\_baaaZa\_\_a\_a` [Y]WY^`\_\_` [XXH[\_`¥`¥]\_  
@HWI-EAS443:3:84:1184:465#0/1  
CTCCTGGGTAACACGTTCCATTGTCTGAACTAGTTGTTTC  
+HWI-EAS443:3:84:1184:465#0/1  
a`a`bb`\_Uaabaaa`aa^aab`\_aaaa^aaa]aaaa^Z  
@HWI-EAS443:3:84:1528:659#0/1  
GGCATTCTGTGTGCTCTTCAGGTCGGCTGCATATACTGAC  
+HWI-EAS443:3:84:1528:659#0/1  
a`a`ab`\_b[`abIaaaaa[aa\_U^TT`a\_a`bUUQaPMK  
@HWI-EAS443:3:84:1676:523#0/1  
ACGTTCCATTGTCTGAACTAGTTGTTTCCACAATGTAGGA  
+HWI-EAS443:3:84:1676:523#0/1  
a]W``ZY`\_aa`Y^\_N¥V^U`^a[[[a[0]]U` [¥[V^\_[L  
@HWI-EAS443:3:84:200:674#0/1  
AATGGAACGTGTTACCCGGGAGATTTTCATCGATTATGAGG  
+HWI-EAS443:3:84:200:674#0/1  
`]R^PNZ\_aYYY]^^a^M^[Z`WV^[VUV\_¥MVVV]]Y]Y  
@HWI-EAS443:3:84:40:852#0/1  
GCTTCCTCTGAGTATTTTGGGTAGTCATAAGTCCCCTTTT

+HWI-EAS443:3:84:40:852#0/1  
^¥UXbb\_[^^aa0¥]``T\_`ZMXHOJTH]¥Y\_`YG¥U¥[  
@HWI-EAS443:3:84:551:1607#0/1  
ACACGTTCCATTGTCTGAACTAGTTGTTTCCACAATGTAG  
+HWI-EAS443:3:84:551:1607#0/1  
aabaaaabaa`a\_`aa`aaa]a^aa`a`\_\_`a`^]\_\_  
@HWI-EAS443:3:84:794:818#0/1  
GCTCCTCATAATCGATGACATCTCCTGGGTAACACGTTCC  
+HWI-EAS443:3:84:794:818#0/1  
aa`a`aaaa`aaa`aa\_S]aa`a\_`a\_]\_¥`a\_\_^^\_[  
@HWI-EAS443:3:85:1028:666#0/1  
CTTCGTCTGAGTATTTGGGTAGTCATAAGTCCCATTTTT  
+HWI-EAS443:3:85:1028:666#0/1  
ab`WIRZbb]b]QWX^a\_TaR`¥PaTba^]G[Y`a^aaa\_  
@HWI-EAS443:3:85:1036:915#0/1  
CTCCTGGGTAACACGTTCCATTGTCTGAACTAGTTGTTTC  
+HWI-EAS443:3:85:1036:915#0/1  
aaa`a^X^^aaaa`aa\_X^`\_aa`T`a^a^\_aaV`a\_a` [  
@HWI-EAS443:3:85:1075:1327#0/1  
ACATTGCTGGCTGGATCCTCGAAATCCAGAGTGTGAATC  
+HWI-EAS443:3:85:1075:1327#0/1  
aaWZ\_`aa\_Y¥aa^V¥]^WDV\_[[]\_\_Za`^`¥\_¥^¥\_^¥  
@HWI-EAS443:3:85:1149:282#0/1  
ACGTTCCATTGTCTGAACTAGTTGTTTCCACAATGTAGGA  
+HWI-EAS443:3:85:1149:282#0/1  
a¥baa[OUaTOQ^aa`^aW[\_^`\_`\_`¥UY]V\_\_X]]`^R  
@HWI-EAS443:3:85:116:1086#0/1  
CACGTTCCATTGTCTGAACTAGTTGTTTCCACAATGTAGG  
+HWI-EAS443:3:85:116:1086#0/1  
abaaaa`aaaa\_\_aaaa\_`\_`^`a\_\_\_\_`\_]\_\_`\_\_Y\_] ]  
@HWI-EAS443:3:85:162:943#0/1  
ATCTCCTGGGTAACACGTTCCATTGTCTGAACTAGTTGTT  
+HWI-EAS443:3:85:162:943#0/1  
aaa`a`a`\_W`a\_a\_\_^]`]`¥\_^Y\_\_^¥\_]¥Z^Y\_]W^  
@HWI-EAS443:3:85:299:977#0/1  
ACGTTCCATTGTCTGAACTAGTTGTTTCCACAATGTAGGA  
+HWI-EAS443:3:85:299:977#0/1  
aaaZSaa\_`a^` `[X\_`a]`U\_^]\_\_`[`\_] ]^]]  
@HWI-EAS443:3:85:320:338#0/1  
ACGTTCCATTGTCTGAACTAGTTGTTTCCACAATGTAGGA  
+HWI-EAS443:3:85:320:338#0/1  
]aaTURQU¥¥RRZTZV]\_W[\_[^`SXVYTZXLU]]T[]BB  
@HWI-EAS443:3:85:414:1536#0/1  
ACGTTCCATTGTCTGAACTAGTTGTTTCCACAATGTAGGA  
+HWI-EAS443:3:85:414:1536#0/1  
ab`U]aaWQUYD[XRY¥RXY¥YTMQ]^V^VTX]VZTTYSMX  
@HWI-EAS443:3:85:545:1989#0/1  
ATCTCCTGGGTAACACGTTCCATTGTCTGAACTAGTTGTT  
+HWI-EAS443:3:85:545:1989#0/1  
a`a`aa^^]a]aa]Z`\_Y\_`[`[VTR`[PW^\_Z\_\_Z]^WZ



@HWI-EAS443:3:85:620:1295#0/1  
GTTCCATTGTCTGAACTAGTTGTTTCCACAATGTAGGACC  
+HWI-EAS443:3:85:620:1295#0/1  
aab`^aa]b\_aab[aab]a^\_a`aaa`^aaaa`^a^]\_\_`  
@HWI-EAS443:3:86:1022:1352#0/1  
ACGTTCCATTGTCTGAACTAGTTGTTTCCACAATGTAGGA  
+HWI-EAS443:3:86:1022:1352#0/1  
abaaa`\_`aa\_`^`aaaa`\_``^`¥`aa\_]`[]``Y\_[VY  
@HWI-EAS443:3:86:1185:1241#0/1  
ACGGTTATCACCATCAAATGAGCAGGGGGCAGGATATGC  
+HWI-EAS443:3:86:1185:1241#0/1  
XT\_b`¥`^W`Ra`b]\_aa`X`a`U`b`a`Gaaab^a`\_`G  
@HWI-EAS443:3:86:1286:546#0/1  
GCCGGGAGACAAAATAACATTCGTAGCAACTGGAAATCTA  
+HWI-EAS443:3:86:1286:546#0/1  
`\_ababbbbababbbbbb`bbbb\_N¥`a`a^baaabaa\_`b  
@HWI-EAS443:3:86:1288:1593#0/1  
ATTTCTTCTCTGTTTAATTTTGCTTCTTCTGAGTATTTTG  
+HWI-EAS443:3:86:1288:1593#0/1  
[T^X^bb^bb\_\_H\_`aZU¥¥\_`bba[F]a^^a`P¥b^¥^`  
@HWI-EAS443:3:86:1470:258#0/1  
ACGTTCCATTGTCTGAACTAGTTGTTTCCACAATGTAGGA  
+HWI-EAS443:3:86:1470:258#0/1  
aa`\_a^aaaa\_[]b`]a\_a]``]]]aaZR\_[\_`^]SY\_\_X  
@HWI-EAS443:3:86:1488:1229#0/1  
CTCCTGGGTAACACGTTCCATTGTCTGAACTAGTTGTTTC  
+HWI-EAS443:3:86:1488:1229#0/1  
a`\_`¥`bbbY`baaa\_bb\_]ab`KYabba`a^S\_^^a[aa`  
@HWI-EAS443:3:86:301:1974#0/1  
ACGTTCCATTGTCTGAACTAGTTGTTTCCACAATGTAGGA  
+HWI-EAS443:3:86:301:1974#0/1  
`\_] [aaaa`a`\_a`\_``aa`\_`]¥a\_`^`a\_```\_\_ [U`]]^  
@HWI-EAS443:3:86:376:1848#0/1  
TGACAAGTAGTATTGCAATCGTGGACTGGTGTATCTGAAA  
+HWI-EAS443:3:86:376:1848#0/1  
abb\_¥ab\_ba\_b\_a\_]b^aa`]a]aa\_aa^a]aa[a\_Y^\_  
@HWI-EAS443:3:86:379:1464#0/1  
GGGGACATCAAGATACAGCAAGAAGTTCACGCCGGAATA  
+HWI-EAS443:3:86:379:1464#0/1  
aa[\_T]]Y^a] []X[`a¥`^]RV]GN\_NH¥\_^^\_NVPYM  
@HWI-EAS443:3:86:565:1755#0/1  
TGTGGGGACATCAAGATAAAGCAAGAAGTTCAAGCCGGAA  
+HWI-EAS443:3:86:565:1755#0/1  
aa\_baa\_baaaa`aaaabaa¥abb`\_Za^¥]ba`\_¥]`^]  
@HWI-EAS443:3:86:665:817#0/1  
TCCTGGGTAACACGTTCCATTGTCTGAACTAGTTGTTTCC  
+HWI-EAS443:3:86:665:817#0/1  
aa`a]RON\_`aa\_\_S```X[] [Xaa`P^P`¥[QZ]\_a^\_`  
@HWI-EAS443:3:86:770:57#0/1  
CTCCTGGGTAACACGTTCCATTGTCTGAACTAGTTGTTTC

+HWI-EAS443:3:86:770:57#0/1  
`baaaaaa\_]Y\_YZYa]\_\_\_\_]\_¥^`aY\_^`SaZ¥[Z\_^]  
@HWI-EAS443:3:86:800:411#0/1  
GTTCCATTGTCTGAACTAGTTGTTCCACAATGTAGGACC  
+HWI-EAS443:3:86:800:411#0/1  
aMa¥]^[\_UXa^`a^Z\_\_`S]aYa\_\_`\_]^^aVY`^W^]  
@HWI-EAS443:3:86:886:568#0/1  
ACGTTCCATTGTCTGAACTAGTTGTTCCACAATGTAGGA  
+HWI-EAS443:3:86:886:568#0/1  
aT]abaaYL[`ZQ]X\_]a`¥`^ab\_a\_S`\_]U[aZ\_W¥¥  
@HWI-EAS443:3:86:951:691#0/1  
GAAACAACACTAGTTCAGACAATGGAACGTGTACCCAGGAG  
+HWI-EAS443:3:86:951:691#0/1  
ab\_^ba^][a[Va^W\_\_\_^ab`^a\_\_aY`[a`Y\_Ya`P`\_  
@HWI-EAS443:3:87:1002:1693#0/1  
CACGTTCCATTGTCTGAACTAGTTGTTCCACAATGTAGG  
+HWI-EAS443:3:87:1002:1693#0/1  
aba[\_bb¥¥b^^]abaab`aab\_`ZRaKa\_bGa\_Ta[Ua\_  
@HWI-EAS443:3:87:1152:29#0/1  
GGGGACATCAAGATACAGCAAGAAGTTCGAGCCGGAAATA  
+HWI-EAS443:3:87:1152:29#0/1  
aa\_a\_\_YaSa^^^`\_]`U]]aX^`V]¥\_W\_VYa]UV]YY  
@HWI-EAS443:3:87:1297:1130#0/1  
CACTGTAGACACAGTACTAGAAAAGAATGTAACGGTAACA  
+HWI-EAS443:3:87:1297:1130#0/1  
R`a¥aX^b^UYWa`La¥¥R¥aa¥a^^[^^`a\_a\_¥T]YF\_  
@HWI-EAS443:3:87:1653:562#0/1  
ACACGTTCCATTGTCTGAACTAGTTGTTCCACAATGTAG  
+HWI-EAS443:3:87:1653:562#0/1  
aa^`bbb\_Xbaaaa\_a`aaTbaa`aY]^aa\_^`\_\_\_aQ`\_  
@HWI-EAS443:3:87:184:1350#0/1  
AATAAGATTCTGAAGCAACTGGAAATCTAGTGGTACCGAGA  
+HWI-EAS443:3:87:184:1350#0/1  
\_X`WXDR]VWW¥``\_UWZVJJJSTY^ZRPR¥LS¥^\_]T\_X  
@HWI-EAS443:3:88:1179:1315#0/1  
CGGGAAACCATGCAAACCTAAGAGGGGTAGCCCCATTGCAT  
+HWI-EAS443:3:88:1179:1315#0/1  
\_a`bbaa[HZaaYYaa¥R\_\_b`aR`^`\_bba^a^aX^Z^^  
@HWI-EAS443:3:88:1231:532#0/1  
GTTCCATTGTCTGAACTAGTTGTTCCACAATGTAGGACC  
+HWI-EAS443:3:88:1231:532#0/1  
`¥]]][Y`^]^\_\_a^¥S`YT\_\_a]\_aXM\_[a¥`a\_¥a¥\_S\_  
@HWI-EAS443:3:88:1382:595#0/1  
CACGTTCCATTGTCTGAACTAGTTGTTCCACAATGTAGG  
+HWI-EAS443:3:88:1382:595#0/1  
aaabbb]aa]Vab\_bbaaab`¥Q\_a[b[H[LL¥`S`[]aa  
@HWI-EAS443:3:88:1412:1164#0/1  
CACGTTCCATTGTCTGAACTAGTTGTTCCACAATGTAGG  
+HWI-EAS443:3:88:1412:1164#0/1  
^`^bU¥¥Q`]^`^][`¥0\_\_b`\_a`\_Za\_[¥WG\_]`^a\_aba



+HWI-EAS443:3:89:794:1131#0/1  
a\_Z\_b^T¥bZ\_\_MT`bb]b`aW¥`J`0`bX¥aa]PZZa`  
@HWI-EAS443:3:8:1161:474#0/1  
TGTGGGGACATCAAGATACAGCAAGAAGTTAAAGCCGGAA  
+HWI-EAS443:3:8:1161:474#0/1  
aa¥a^a\_]U\_[[\_a^\_a\_\_a]\_aa`[\_]YGY]^]Wa]]\_`  
@HWI-EAS443:3:8:1223:1335#0/1  
GTCTGAACTAGTTGTTTCCACAATGTAGGACCATGAGCTT  
+HWI-EAS443:3:8:1223:1335#0/1  
`W`¥`]S]``Paa`bb^SbWa`]`R^`¥¥OMV^X`[Sa\_  
@HWI-EAS443:3:8:1448:1562#0/1  
GAACTAGTTGTTTCCACAATGTAGGACCATGAGCTTGCTG  
+HWI-EAS443:3:8:1448:1562#0/1  
aT]]R`]aJ]YaT`YX\_a\_`^S\_RV¥RP\_VPYTG`VFN\_¥  
@HWI-EAS443:3:8:1484:832#0/1  
CCTGGGTAACACGTTCCATTGTCTGAACTAGTTGTTTCCA  
+HWI-EAS443:3:8:1484:832#0/1  
^`ab\_\_`[[`baVUW\_`bba`ba\_^N\_`TUbaaa^FQW  
@HWI-EAS443:3:8:1609:498#0/1  
GGGACATCAAGATACAGCAAGAAGTTCAGGCCGGAAATAG  
+HWI-EAS443:3:8:1609:498#0/1  
``ZUSY]\_WHU^\_¥LQ[\_J VX\_QW[TUBBBBBBBBBBBBBB  
@HWI-EAS443:3:8:1639:65#0/1  
AACAAATGCCAAGGAAATTGGAAACGGCTGTTTGAATTTT  
+HWI-EAS443:3:8:1639:65#0/1  
aa\_aaab\_[\_ba^\_\_a\_aa]¥]Xa^WZVDKU¥GKTUXBB  
@HWI-EAS443:3:8:205:290#0/1  
CTCCTGGGTAACACGTTCCATTGTCTGAACTAGTTGTTTC  
+HWI-EAS443:3:8:205:290#0/1  
aa\_`^`Z`R]\_aa\_a\_\_`a\_^Y¥]a][\_]\_\_^`XZVX¥\_¥  
@HWI-EAS443:3:8:329:1736#0/1  
GTTGCTTCGAATGTTATTTTGTCTCCCGCTCTAATAGTG  
+HWI-EAS443:3:8:329:1736#0/1  
\_\_X`]a`a¥N\_aIY`[\_FNa0][XXaaNPGT[¥GX]QBB  
@HWI-EAS443:3:8:446:741#0/1  
GGGGACATCAAGATACAGCAAGAAGTCAAGCCGGAAATA  
+HWI-EAS443:3:8:446:741#0/1  
aWXaR¥XVYT]\_SR^V¥`¥SUY¥NYFFR`SVRSZ]YY^]]  
@HWI-EAS443:3:8:454:1654#0/1  
GGGGACATCAAGATACAGCAAGAAGCTCAAGCCGGAAATA  
+HWI-EAS443:3:8:454:1654#0/1  
Z\_[bbbbab`Ya\_]`^bbbbbbbaM\_NGaaa[a[b\_\_`a`  
@HWI-EAS443:3:8:581:1391#0/1  
CACGTTCCATTGTCTGAACTAGTTGTTTCCACAATGTAGG  
+HWI-EAS443:3:8:581:1391#0/1  
aba\_\_aabba`baaba\_a`^aa]a\_\_aa\_aaaaa\_`Xa\_V  
@HWI-EAS443:3:8:720:1695#0/1  
CACGTTCCATTGTCTGAACTAGTTGTTTCCACAATGTAGG  
+HWI-EAS443:3:8:720:1695#0/1  
abaaaaabbbbaabb`bbbbbbbaaaaaababbaYW[ba

@HWI-EAS443:3:8:764:1232#0/1  
GACTACCAGTACCAATGAACTGGGGACAGTTGAATAGATC  
+HWI-EAS443:3:8:764:1232#0/1  
^T^bZaa^VYYZ[W#bZaVOF]V^[Paaw]Z#`RHRJ[\_  
@HWI-EAS443:3:8:821:1827#0/1  
GCTGGTGGTTATAGCACCTTGGGTGTCTGACAAGTTGTA  
+HWI-EAS443:3:8:821:1827#0/1  
aa`[aYZI]aaSaa]]aX[NUU\_\_U]VNZ\_`N\_\_\_PY\_VB  
@HWI-EAS443:3:8:842:379#0/1  
CTCCTGGGTAACACGTTCCATTGTCTGAACTAGTTGTTTC  
+HWI-EAS443:3:8:842:379#0/1  
`aa`^^a^aa`a]a^a`#`a^a`\_#`\_a^\_\_\_W\_\_\_\_\_]  
@HWI-EAS443:3:8:899:754#0/1  
CTTGATGTCCCCACAAAACCATATGCATCTGCATTCTGAT  
+HWI-EAS443:3:8:899:754#0/1  
#W^\_^[aZ^Za^a^^^\_#YZ^bWX]#aaaab`Z^a\_\_  
@HWI-EAS443:3:90:1090:23#0/1  
TGTGGAAACAAGTTCAGACAATGGAACGTGTTACCCA  
+HWI-EAS443:3:90:1090:23#0/1  
ababbaaaaa[aaa`a\_^``]a`aa`W#a^a^\_\_Z]UZ  
@HWI-EAS443:3:90:1189:1778#0/1  
GCTGGCTGGATCCTGGGAAATCCAGAGGGTGAATCACTCT  
+HWI-EAS443:3:90:1189:1778#0/1  
aaaa`aa`[^]R#V]X]H\_]XXX^[Y^G]QXT`MW]YPP^  
@HWI-EAS443:3:90:1281:149#0/1  
CTGATTGCCCCAGGGAGACTACAAGTACCAATGAACTGG  
+HWI-EAS443:3:90:1281:149#0/1  
[\_[\_U\_#\_\_WUT]^ZZT[W##\_WFZZUTWQZRZ#X]SM\_`  
@HWI-EAS443:3:90:1665:1866#0/1  
TCCGGCTTGAACCTTCTTGCTGTATCTTGCTGTCCCCACAA  
+HWI-EAS443:3:90:1665:1866#0/1  
a#Y\_]X`#]#]H]U#[^aVNWTJ#T#T#SQ]Y#[]NW`U[QX  
@HWI-EAS443:3:90:1682:1147#0/1  
CCTGGGTAACACGTTCCATTGTCTGAACTAGTTGTTTCCA  
+HWI-EAS443:3:90:1682:1147#0/1  
H^a\_b]]`b`bb#bU\_#bbbYba`\_a`[b]bZaaabb#`b  
@HWI-EAS443:3:90:25:1392#0/1  
TCCTCGTGCTATGGGGCATCCACCATCCATCTACTAGTGC  
+HWI-EAS443:3:90:25:1392#0/1  
abb)`aX`a]a`aaV]\_X`TU\_\_aUSXXKYZ#UXZ[N\_W  
@HWI-EAS443:3:90:385:1565#0/1  
GAACTAGTTGTTTCCACAATGTAGGACCATGAGCTTGCTG  
+HWI-EAS443:3:90:385:1565#0/1  
abab]S]\_aa#abaabaa\_YUaaSP#``\_[V]S\_]\_\_\_\_  
@HWI-EAS443:3:90:463:1297#0/1  
CAGCAAGCTCATGGTCCTACATTGTGGAAACAAGTTC  
+HWI-EAS443:3:90:463:1297#0/1  
aaaba`baa#`^`Zaaa`b#^[`Z`^`[a]b\_TU^`Y\_a  
@HWI-EAS443:3:90:567:500#0/1  
AACTAGTTGTTTCCACAATGTAGGACCATGAGCTTGCTGT

+HWI-EAS443:3:90:567:500#0/1  
a^`abaaaaa\_a`aaaa`aa`\_\_]aaa\_a\_``]`aV  
@HWI-EAS443:3:90:690:796#0/1  
ATCTCCTGGTAACACGTTCCATTGTCTGAACTAGTTGTT  
+HWI-EAS443:3:90:690:796#0/1  
]a`Y``\_\_^bWRZ\_¥\_YX\_¥Y\_aZ]LZ`a][ ]`ZWM[[¥Y  
@HWI-EAS443:3:90:803:853#0/1  
CAATGTAGGACCAAGAGCTTGCTGTGGAGAGTGATTCACA  
+HWI-EAS443:3:90:803:853#0/1  
aa`bb\_aZTY`JX`aa`b[T\_baaab\_]`\_aYbJ\_a\_a\_b  
@HWI-EAS443:3:90:819:304#0/1  
AAGATACAGCAAGAAGTTCAAGCCGGAAGTAGCAATAAGA  
+HWI-EAS443:3:90:819:304#0/1  
\_abb^Yaba\_a\_^]`b^Uab^a```]`WGU^aa^X\_`^`  
@HWI-EAS443:3:90:829:1035#0/1  
GTGAAACAAGTAGTTCCAGACAATGGAACGTGTTACCCAG  
+HWI-EAS443:3:90:829:1035#0/1  
ZYab\_aa`a\_\_abbabbbbaaabaab`aa`aa`aa[`aaa  
@HWI-EAS443:3:90:830:1709#0/1  
CATCCATCTACTAGCGCTGACCAACAAAGTCTCTATCAGA  
+HWI-EAS443:3:90:830:1709#0/1  
aabbaba\_^\_bba[IY`Xaba\_bX\_aaaaS^aa\_a``aa`  
@HWI-EAS443:3:91:1087:876#0/1  
TAACACGTTCCATTGTCTGAACTAGTTGTTTCCACAATGT  
+HWI-EAS443:3:91:1087:876#0/1  
`¥\_U`^V]OWN[ZX`¥X]P\_WP`^][WZRXL[XSS^Z  
@HWI-EAS443:3:91:1095:698#0/1  
CACGTTCCATTGTCTGAACTAGTTGTTTCCACAATGTAGG  
+HWI-EAS443:3:91:1095:698#0/1  
\_`aa\_baa\_a\_b`a¥ba`Z\_[]^bYZa`aa`S`X\_a^aaa  
@HWI-EAS443:3:91:1356:772#0/1  
ACGTTCCATTGTCTGAACTAGTTGTTTCCACAATGTAGGA  
+HWI-EAS443:3:91:1356:772#0/1  
aaaU¥¥a[[a``\_b\_\_a`^\_a\_aa\_\_`^]\_[[\_TTN^^Z\_  
@HWI-EAS443:3:91:1458:2015#0/1  
CACGTTCCATTGTCTGAACTAGTTGTTTCCACAATGTAGG  
+HWI-EAS443:3:91:1458:2015#0/1  
abab`b\_abbbaI\_bbba\_bba`ab\_ba`\_`¥aaa`]\_\_\_\_  
@HWI-EAS443:3:91:1772:471#0/1  
CTGGGTAACACGTTCCATTGTCTGAACTAGTTGTTTCCAC  
+HWI-EAS443:3:91:1772:471#0/1  
Ub`\_\_Vbbbbaba\_]bbbabaabbb\_P¥b`abaa`b][a  
@HWI-EAS443:3:91:190:1630#0/1  
CTCCTGGGTAACACGTTCCATTGTCTGAACTAGTTGTTTCC  
+HWI-EAS443:3:91:190:1630#0/1  
abbbb\_bb\_ababa`abaaaa^\_aaa`a`aaa[\_`^^`[  
@HWI-EAS443:3:91:242:942#0/1  
ATCGATTATGAGGAGCCAAGAGAGCAATTGAGCTCAGTGT  
+HWI-EAS443:3:91:242:942#0/1  
abbbabbaab\_ba`aaaaaaa`S`aaa\_^Y^``\_aaaZa^

@HWI-EAS443:3:91:443:898#0/1  
CACGTTCCATTGTCTGAACTAGTTGTTTCCACAATGTAGG  
+HWI-EAS443:3:91:443:898#0/1  
\_`a\_¥aa`[aba^bbb¥`^¥X¥abb`^abbZT]]a^Q¥[X  
@HWI-EAS443:3:91:623:1191#0/1  
AACACGTTCCATTGTCTGAACTAGTTGTTTCCACAATGTA  
+HWI-EAS443:3:91:623:1191#0/1  
abbaaaY`baaaaaZaaa```a\_a\_`a\_`aa`aY]Y\_\_W`  
@HWI-EAS443:3:91:925:1950#0/1  
AAAAACAATGCCAAGGAAATTGGAAACGGCTGGTTTGAA  
+HWI-EAS443:3:91:925:1950#0/1  
a`^X]^aaa]b`ab`aM^\_`Y`a\_a]G`aa]\_FNOYFVN  
@HWI-EAS443:3:91:937:1218#0/1  
TACATTGTGGAAACAACACTAGTTCAGACAATGGAACGTGTT  
+HWI-EAS443:3:91:937:1218#0/1  
abbaabb\_baaababbaaa`\_abaaaaaaa`a\_`]a]\_  
@HWI-EAS443:3:92:1102:103#0/1  
CAAGGAAATTGGAAACGGCTGGTTTGAATTTTACCACAAA  
+HWI-EAS443:3:92:1102:103#0/1  
\_bbbbbbbbbbbbbbabb\_bbR`bb`Y^\_babHGW]GZaa  
@HWI-EAS443:3:92:1151:1586#0/1  
CCTGGGTAACACGTTCCATTGTCTGAACTAGTTGTTTCCA  
+HWI-EAS443:3:92:1151:1586#0/1  
aaaaab^`a\_abaaaa\_`aa^\_`aaa\_a\_`]aa^`\_^^`  
@HWI-EAS443:3:92:1330:1149#0/1  
CTGAACTAGTTGTTTCCACAATGTAGGACCATGAGCTTGC  
+HWI-EAS443:3:92:1330:1149#0/1  
aaa`aaaab¥bb`a`aaa`baaaXabaa```]a`bZ[\_b\_  
@HWI-EAS443:3:92:1449:526#0/1  
TTCCGGCTTGAATTTCTTGCTGTATCTTGATGTCCCCACA  
+HWI-EAS443:3:92:1449:526#0/1  
V¥\_Sa`X`b^^[F[a¥a`NN\_TT[`]``a\_\_a\_OS][^]]  
@HWI-EAS443:3:92:1465:1832#0/1  
AGGAAATTGGAAACGGCTGGTTTGAATTTTACCACAAATG  
+HWI-EAS443:3:92:1465:1832#0/1  
abaabbaabaaa`]bbaa\_JFY\_\_a¥[T^`¥GZaZ¥`aYF  
@HWI-EAS443:3:92:1648:458#0/1  
CACGTTCCATTGTCTGAACTAGTTGTTTCCACAATGTAGG  
+HWI-EAS443:3:92:1648:458#0/1  
`a`bab\_aa^b]aabbbaYbbb`aa`aaaa¥H]`aaS^a\_  
@HWI-EAS443:3:92:1660:749#0/1  
ACACGTTCCATTGTCTGAACTAGTTGTTTCCACAATGTAG  
+HWI-EAS443:3:92:1660:749#0/1  
aaaabb`aaaaba`\_a\_`Sa`R¥aa\_`a`SW]\_\_`\_]\_  
@HWI-EAS443:3:92:234:417#0/1  
ACACGTTCCATTGTCTGAACTAGTTGTTTCCACAATGTAG  
+HWI-EAS443:3:92:234:417#0/1  
\_aabaaaab^R^`Sa^aY^^XW^)`[XZ¥aa^¥[Z[`GY\_  
@HWI-EAS443:3:92:237:31#0/1  
CACGTTCCATTGTCTGAACTAGTTGTTTCCACAATGTAGG

+HWI-EAS443:3:92:237:31#0/1  
ab^a]a\_\_aXabW`aaaaW¥`a][a^Y]]Y]PWN]`PU]^  
@HWI-EAS443:3:92:385:47#0/1  
TGGGGACATCAAGATACAGCAAGAAGTACAAGCCGGAAAT  
+HWI-EAS443:3:92:385:47#0/1  
abaaaaaaaa`aa`\_`\_aa`\_]a^^`Z`^^]\_^]`\_Z]^  
@HWI-EAS443:3:92:782:755#0/1  
ACGTTCCATTGTCTGAACTAGTTGTTTCCACAATGTAGGA  
+HWI-EAS443:3:92:782:755#0/1  
a`a`\_]\_SXZX¥¥¥abaR[\_T\_^a\_\_\_\_\_])\_]U[a]\_\_\_\_^  
@HWI-EAS443:3:92:820:823#0/1  
CACGTTCCATTGTCTGAACTAGTTGTTTCCACAATGTAGG  
+HWI-EAS443:3:92:820:823#0/1  
X¥babbbbaUabbabbbba\_abb`bb`\_b`¥W^a]`a0aba  
@HWI-EAS443:3:92:853:656#0/1  
CATAATCGATGAAATATCCTGGGTAACACGTTCCATTGTC  
+HWI-EAS443:3:92:853:656#0/1  
`bbZS\_WaaV[^a`VHXaabbaxP^R\_^\_aI\_YYJSWZGM  
@HWI-EAS443:3:92:895:115#0/1  
GCTTCCTCTGAGTATTTTGGGTAGTCATAAGTACCATTTT  
+HWI-EAS443:3:92:895:115#0/1  
a\_\_`]^^L^\_`0\_\_\_\_`\_[\_]WVZTFNXYX\_LLHRX]¥]^  
@HWI-EAS443:3:92:977:962#0/1  
ACACGTTCCATTGTCTGAACTAGTTGTTTCCACAATGTAG  
+HWI-EAS443:3:92:977:962#0/1  
ab]SbV^`b]]^``[[`RQJ\_]`aZW[\_`NI^a\_`]aHYY  
@HWI-EAS443:3:93:1209:1858#0/1  
TTCATACCCAAAGCTCAGCAAATCATACATTAATGATAAA  
+HWI-EAS443:3:93:1209:1858#0/1  
a\_aaV[\_VN¥Y¥X^]UW`aZPSLGPFERS`\_UTXYUX[Q  
@HWI-EAS443:3:93:1309:1089#0/1  
GCCGGTTTCATTGAAGGGGGTGGACAGGGATGGGAGATG  
+HWI-EAS443:3:93:1309:1089#0/1  
a¥]S¥S]\_P[`QUS^\_KT¥[YKaSGPRJ[USU[UGUSBBB  
@HWI-EAS443:3:93:1332:1588#0/1  
ACGTTCCATTGTCTGAACTAGTTGTTTCCACAATGTAGGA  
+HWI-EAS443:3:93:1332:1588#0/1  
U`VZ^[YQ]`RJ^aabTa¥\_`aaa¥aPYW[[¥XPTF]\_]`  
@HWI-EAS443:3:93:1370:1129#0/1  
AACTAGTTGTTTCCACAATGTAGGACCATGAGCTTGCTGT  
+HWI-EAS443:3:93:1370:1129#0/1  
a`\_b`b`abaaaa\_a`a`\_a^aaa¥Z^aa^\_aZ`\_aZ``\_`  
@HWI-EAS443:3:93:1499:751#0/1  
CACGTTCCATTGTCTGAACTAGTTGTTTCCACAATGTAGG  
+HWI-EAS443:3:93:1499:751#0/1  
a`\_YZbb`bbbbb\_bbba`aab¥ba\_bb^\_\_aaaaa\_\_\_\_a  
@HWI-EAS443:3:93:173:1808#0/1  
GAAGCCACTTAAAAACAATGCCAAGGAAATTGGAAACGG  
+HWI-EAS443:3:93:173:1808#0/1  
a¥[[W]¥GYaY`aa`\_]`Z\_a`aZ]Y¥^\_Z]aX^]\_\_BB



@HWI-EAS443:3:93:1790:419#0/1  
GTCTGAACTAGTTGTTTCCACAATGTAGGACCATGAGCTT  
+HWI-EAS443:3:93:1790:419#0/1  
a[¥[P^[\`aU\_\_YZVQN[Q]]\_YMYUXUWV[V^R\_XVS  
@HWI-EAS443:3:93:437:1970#0/1  
ATCTCCTGGGTAACACGTTCCATTGTCTGAACTAGTTGTT  
+HWI-EAS443:3:93:437:1970#0/1  
\_W]^\_aXNSXORZ[\_`XX]\_\_aW[]O\_\_XW^MZZXQ¥^ZB  
@HWI-EAS443:3:93:817:1697#0/1  
GAAGTTCAAGCCGAAATAGCAATAAGACACAAAGTGAGG  
+HWI-EAS443:3:93:817:1697#0/1  
^a`U)`aa^W^T[Z`\_a]\_S)`[\_Y\_`\_]YFQ[[\_`Z\_\_VB  
@HWI-EAS443:3:93:855:525#0/1  
GGGTAACACGTTCCATTGTCTGAACTAGTTGTTTCCACAA  
+HWI-EAS443:3:93:855:525#0/1  
`a`\_\_`aa`\_\_\_\_\_¥\_¥YX^`a\_[W\_\_[]]\_^]X]X]Z  
@HWI-EAS443:3:93:941:435#0/1  
CACGTTCCATTGTCTGAACTAGTTGTTTCCACAATGTAGG  
+HWI-EAS443:3:93:941:435#0/1  
a`ababaaabaaaabaaa`aab`aa\_aa\_^a)`]]X\_\_\_\_  
@HWI-EAS443:3:94:100:926#0/1  
CATTGTGGAAACAACACTAGTTCAGACAATGGAACGTGTAC  
+HWI-EAS443:3:94:100:926#0/1  
abaab`aab]abaa`aa^aaaa`a`\_aa\_`]a]\_Z\_`^  
@HWI-EAS443:3:94:1139:1166#0/1  
CAGCAAGCTCATGGTCCTACATTGTGGAAACAACACTAGTTC  
+HWI-EAS443:3:94:1139:1166#0/1  
]¥[\_Q[\_¥X\_\_TP]\_X]N^``\_¥[\_aR¥`^WVRV`Y^\_  
@HWI-EAS443:3:94:1434:1709#0/1  
ATCTCCTGGGTAACACGTTCCATTGTCTGAACTAGTTGTT  
+HWI-EAS443:3:94:1434:1709#0/1  
a]`a\_Xaaa`]aaXb\_a^\_\_aa``a]\_\_a]aW\_¥\_¥`\_^\_  
@HWI-EAS443:3:94:1513:79#0/1  
AAGTCCTCGTGCTATGGGGCATTCCACATCGATCTACTAG  
+HWI-EAS443:3:94:1513:79#0/1  
a[YPPP`]^bY[¥a]V]\_XNX^\_\_JGU\_UFZ^W]UYUXU  
@HWI-EAS443:3:94:1636:1577#0/1  
GGCATTACCATCAATCTACTAGTGCTGACCAACAAAGTC  
+HWI-EAS443:3:94:1636:1577#0/1  
UU`baaa[RZba`G^b¥`\_b\_b¥]Waa`Y`[\_a]¥`\_Z¥\_^  
@HWI-EAS443:3:94:866:84#0/1  
TGGGGCCATTGCCGTTTCATTGGAGGGGGGTGGACAGGG  
+HWI-EAS443:3:94:866:84#0/1  
\_X¥`aX`^¥\_KR¥Y`G^aX¥PaVKN^`XUZYZR^XFNSRBB  
@HWI-EAS443:3:95:1202:1574#0/1  
CACGTTCCATTGTCTGAACTAGTTGTTTCCACAATGTAGG  
+HWI-EAS443:3:95:1202:1574#0/1  
a\_aaaaaab`a[\_\_\_a\_\_a]`\_aa\_`]aaRa]\_\_\_`a`Z¥\_H  
@HWI-EAS443:3:95:1667:1734#0/1  
ATTAGAGCACATCCAGAACTGATTGCCACCAGGGAGACT

+HWI-EAS443:3:95:1667:1734#0/1  
`b`TQ\_\_`aaabb^a\_aa`Vbbaa]bRbGPU^a``Z]R]B  
@HWI-EAS443:3:95:1740:1302#0/1  
ATCTCCTGGGTAACACGTTCCATTGTCTGAACTAGTTGTT  
+HWI-EAS443:3:95:1740:1302#0/1  
]bab^Z`Zbbab^QZ`\_Q^aaa\_a]N\_b`[aV`baW\_b¥U  
@HWI-EAS443:3:95:1767:310#0/1  
TGGCTGGATCCTGGGAAATGCAGAGTGTGAATCACTCTCC  
+HWI-EAS443:3:95:1767:310#0/1  
``aaaaa`W]Z]^a\_P\_aYDH¥a`\_S`Ua^¥[Q\_R[[[NL  
@HWI-EAS443:3:95:194:606#0/1  
ATTGCTATTTCCGGCTTGAACCTTCTTGCTCTATCTTGATG  
+HWI-EAS443:3:95:194:606#0/1  
`aabX^bbbaaWaaaYa`\_R`PU\_a^`\_[aZ`\_^¥[¥\_\_Y\_  
@HWI-EAS443:3:95:205:247#0/1  
GTTCCATTGTCTGAACTAGTTGTTTCCACAATGTAGGACC  
+HWI-EAS443:3:95:205:247#0/1  
aaaaabaaa[aaaa`aaaa\_\_`aaa\_\_a^a\_a`¥`\_]\_Z]  
@HWI-EAS443:3:95:607:295#0/1  
ACGTTCCATTGTCTGAACTAGTTGTTTCCACAATGTAGGA  
+HWI-EAS443:3:95:607:295#0/1  
a`a\_a¥`\_`a`\_a`[]`\_`¥^a\_\_\_a^aW`Y`\_U]\_¥Y  
@HWI-EAS443:3:95:796:1370#0/1  
GTTCCATTGTCTGAACTAGTTGTTTCCACAATGTAGGACC  
+HWI-EAS443:3:95:796:1370#0/1  
`Za```b`aa`aaa```ab[a`¥a`^aa\_¥\_a`¥`\_`YYJ  
@HWI-EAS443:3:95:813:801#0/1  
CTTGTGTGTCTGACAAGTTGTATTGCAATCGTGGACTGGT  
+HWI-EAS443:3:95:813:801#0/1  
abbb`\_`bbbbbbbababbbbbbbbaabbbbabaaabbbba  
@HWI-EAS443:3:96:1071:1252#0/1  
GAAGTCCTCGTGCTATGGGGCATTCCACAATCCATCTACTA  
+HWI-EAS443:3:96:1071:1252#0/1  
aaaa^`\_`aa\_\_UY]aa[XSWLZ\_¥¥MFM\_SN`^W^aWY¥  
@HWI-EAS443:3:96:339:1058#0/1  
GAAGCCAGTTAAAAAATAATGCCAAGGAAATTGGAAACGG  
+HWI-EAS443:3:96:339:1058#0/1  
aab`¥`Yaaa`]UVV[F]aaa¥[`YY``\_\_a^`\_]\_aUBB  
@HWI-EAS443:3:96:562:712#0/1  
ATAATCGATGAAATCTCCTGGGTAACACGTTCCATCGTCT  
+HWI-EAS443:3:96:562:712#0/1  
abbbb`baabaaaaa`aaa`a\_\_^Ya`a^`]]`^`[a^¥\_  
@HWI-EAS443:3:96:775:1114#0/1  
CGTTCCATTGTCTGAACTAGTTGTTTCCACAATGTAGGAC  
+HWI-EAS443:3:96:775:1114#0/1  
`WMWR]NXN\_V¥W`^W]¥^aQZ\_¥X]YJQ¥UYQTXFU]TB  
@HWI-EAS443:3:97:1082:266#0/1  
GAGTATTTTGGGGAGTCATAAGTCCCATTTTTGACACTTT  
+HWI-EAS443:3:97:1082:266#0/1  
Z\_\_RZaa^```TF¥aTX\_aV^`a]TN\_b```¥a\_N\_Ua\_a

@HWI-EAS443:3:97:1549:369#0/1  
CTTCTTGCTGTATCTTGATGTCACCACAAAAACATATGCA  
+HWI-EAS443:3:97:1549:369#0/1  
`bb[bab`ba[\_aJabbb`UaIPS^H^aaba\_aab`]S¥  
@HWI-EAS443:3:97:423:1903#0/1  
ACGTTCCATTGTCTGAACTAGTTGTTTCCACAATGTAGGA  
+HWI-EAS443:3:97:423:1903#0/1  
a\_^\_\_`^a^^SZ]`[\_W\_`UY^`^^\_N¥0\_XRYW]]0^  
@HWI-EAS443:3:97:902:2007#0/1  
CTGGCTGGATCCTGGGAAATCCAGAGTGTGAATCAGTCTC  
+HWI-EAS443:3:97:902:2007#0/1  
L^a]Z¥Z`\_¥Z\_\_\_\_\_bab\_ab]ZabbaaTbb\_aT\_HU¥ba  
@HWI-EAS443:3:98:1296:1710#0/1  
ACACGTTCCATTGTCTGAACTAGTTGTTTCCACAATGTAG  
+HWI-EAS443:3:98:1296:1710#0/1  
aaa`a[bWJ[aaaV\_abWaG\_\_`]aaZ`][0^]a\_\_`X`\_  
@HWI-EAS443:3:98:1676:1113#0/1  
CGGATGGATATTCTGAAATGGGAGGCTGGTGTATAGCA  
+HWI-EAS443:3:98:1676:1113#0/1  
abb][¥\$[\_bK¥QL¥^b`bZabbVbJHK]]ZYUb[[Y\_a  
@HWI-EAS443:3:98:284:1231#0/1  
CTCCTGGGTAACACGTTCCATTGTCTGAACTAGTTGTTTC  
+HWI-EAS443:3:98:284:1231#0/1  
abZUT\_\_]RTa^Z]^H\_`^`a\_^]a`a^\_\_R`¥Q]a]\_ZZ  
@HWI-EAS443:3:98:294:1126#0/1  
ACACGTTCCATTGTCTGAACTAGTTGTTTCCACAATGTAG  
+HWI-EAS443:3:98:294:1126#0/1  
aabb]^X`]^`\_\_¥YZaa]^`\_`TaZ\_a`\_`a\_`]^`\_`\_Z`]  
@HWI-EAS443:3:98:638:614#0/1  
CTCCTGGGTAACACGTTCCATTGTCTGAACTAGTTGTTTC  
+HWI-EAS443:3:98:638:614#0/1  
`^]ZGa`aZ`\_T`^aZW\_[][\_\_W\_¥a^^aU]aZS\_¥[YR  
@HWI-EAS443:3:98:836:1954#0/1  
TTTGTCTCCCGCTCTACTAGAGTCCAGTAATAGTTCATT  
+HWI-EAS443:3:98:836:1954#0/1  
abaZ`a^^`T`^`^[\_aYY¥¥]N\_[T^U¥VW\_SRNZXQLPP  
@HWI-EAS443:3:98:884:197#0/1  
CAGCACTAGTAGATGGATGGTGAATGCCCGATAGCACGAG  
+HWI-EAS443:3:98:884:197#0/1  
¥\_Z\_^U\_Uba\_\_SVa]Ja^QH^[Xbb¥WDFUMZZHYFY`a  
@HWI-EAS443:3:98:959:771#0/1  
GTTCCATTGTCTGAACTAGTTGTTTCCACAATGTAGGACC  
+HWI-EAS443:3:98:959:771#0/1  
aa`V`a][ZHV[a[KL^a^]¥W`[a¥VKTPU\_Y[¥ZZX\_MW  
@HWI-EAS443:3:99:112:1520#0/1  
CACGTTCCATTGTCTGAACTAGTTGTTTCCACAATGTAGG  
+HWI-EAS443:3:99:112:1520#0/1  
`\_`baaba`aa`]^`baaa`a^^`Z`\_aa`]a\_`aZ\_[^  
@HWI-EAS443:3:99:114:1640#0/1  
GGCCATGAACCTGTCTTGGCGAATATCTCAAACCTTCAA

+HWI-EAS443:3:99:114:1640#0/1  
^`S^aZaT¥¥¥`ab\_b[F¥Z^`VV¥Q\_]aW]X\_S¥aa  
@HWI-EAS443:3:99:1194:1570#0/1  
ATTTGAATCGTGGTAGTCCAAAGTTCTTTTACATTTACAAT  
+HWI-EAS443:3:99:1194:1570#0/1  
`¥`a\_\_0ZaaZ\_a¥`aSYW\_]abJa[a`NV^`aa\_FI`b\_  
@HWI-EAS443:3:99:1206:694#0/1  
CCCCCTTCAATGAAACCGCAATGGGCCCAAATAGGCCTC  
+HWI-EAS443:3:99:1206:694#0/1  
[[\_[^¥W[`ab`bVSI Sab[bbaaUQ¥`aaa[\_aabL^] ^  
@HWI-EAS443:3:99:1222:1887#0/1  
CATCAAGATACAGCAAGAAGTACAAGCCGAAATAGCAAT  
+HWI-EAS443:3:99:1222:1887#0/1  
aaXK\_`ab\_bbab\_baba[] [FZaaaX`\_ababL` `aab`  
@HWI-EAS443:3:99:1369:1269#0/1  
AGCTCCTCATAATCGATGAAATCTCTTGGGTAACACGTTC  
+HWI-EAS443:3:99:1369:1269#0/1  
^TL\_NQ]NP^\_a\_^`¥`a\_` `¥UVZG¥bSa¥¥¥OSG]O\_S  
@HWI-EAS443:3:99:1457:722#0/1  
GAAGGGGGGTGGACAGGGATGGTAGATGGATGGAACGGTT  
+HWI-EAS443:3:99:1457:722#0/1  
\_aOX[S^`]FYa^S\_]a\_U]QMYVUR[X]SZ[FO[\_BBB  
@HWI-EAS443:3:99:1484:2024#0/1  
AGAGACTTTGTTGGTCAGCACTAGTAGATGGATGGGGAAT  
+HWI-EAS443:3:99:1484:2024#0/1  
ab^aa^abaU\_a`aYRa`S`Yaaa] [\_^ZaaQ`aaHZ[ `B  
@HWI-EAS443:3:99:181:272#0/1  
CACGTTCCATTGTCTGAACTAGTTGTTTCCACAATGTAGG  
+HWI-EAS443:3:99:181:272#0/1  
\_` `¥WZ\_ababa\_\_^[]ZX0^]Y^aa] `^aaa`\_`R`^^  
@HWI-EAS443:3:99:198:1964#0/1  
ATCATGACTCGAACAAGGTGTAACGGCAGGATGTCCTCA  
+HWI-EAS443:3:99:198:1964#0/1  
a]\_a]aa\_`U`\_\_a`aJZVV`Xa`] ^XBBBBBBBBBBBBB  
@HWI-EAS443:3:99:319:1757#0/1  
CACGTTCCATTGTCTGAACTAGTTGTTTCCACAATGTAGG  
+HWI-EAS443:3:99:319:1757#0/1  
a\_` `ababb[bb]ab` ` `a` `aba¥abaaa\_aa]]U`aa  
@HWI-EAS443:3:99:518:395#0/1  
CACGTTCCATTGTCTGAACTAGTTGTTTCCACAATGTAGG  
+HWI-EAS443:3:99:518:395#0/1  
ab` `aa` `a`aaa[aba\_¥a`b\_\_` `aa¥^aaa\_\_`Y\_aa  
@HWI-EAS443:3:99:557:521#0/1  
ACGTTCCATTGTCTGAACTAGTTGTTTCCACAATGTAGGA  
+HWI-EAS443:3:99:557:521#0/1  
^WaWa^^aa`b]Z^[Y\_` `^¥XUa`T`] ^^¥]¥SXWZaa[  
@HWI-EAS443:3:99:562:377#0/1  
AAACAAGTTCAGACAATGGAACGTGTTACCCAGGAGA  
+HWI-EAS443:3:99:562:377#0/1  
a`aY]a^^`aH\_^a\_TZ¥0[\_`YaUaY¥XY] []^^UTWZM

@HWI-EAS443:3:99:58:399#0/1  
ACGTTCCATTGTCTGAACTAGTTGTTTCCACAATGTAGGA  
+HWI-EAS443:3:99:58:399#0/1  
`a^a`^a`N^\_Y`XH`\_]S\_¥aa[\_\_\_X`]R[Y¥X^\_]X  
@HWI-EAS443:3:99:881:1782#0/1  
ATGCAAATAAGAGGGGTAGCCCCATTGAATTTGGGTAAA  
+HWI-EAS443:3:99:881:1782#0/1  
aa¥RQaST^b`ababaaI¥aSOVZa`J\_F]]X]bb]GZ]X  
@HWI-EAS443:3:9:1062:907#0/1  
AACACGTTCCATTGTCTGAACTAGTTGTTTCCACAATGTA  
+HWI-EAS443:3:9:1062:907#0/1  
aa`aaaaab\_aabb`aa^a`a\_a^ab¥aa\_\_`\_\_a`Q^  
@HWI-EAS443:3:9:1091:1524#0/1  
CACGTTCCATTGTCTGAACTAGTTGTTTCCACAATGTAGG  
+HWI-EAS443:3:9:1091:1524#0/1  
`a`Y`\_Z^abb`ba\_^\_bbaaa`Y^a[[\_\_aaaa^\_N\_  
@HWI-EAS443:3:9:1296:946#0/1  
CCGGCGTGAACCTCTTGCTGTATCTTGATGTCCCCACAAA  
+HWI-EAS443:3:9:1296:946#0/1  
aa^TS\_\_aX0J¥U¥VTWX`¥UW¥]UTTW\_[PJO¥ZXJJQZ  
@HWI-EAS443:3:9:270:1228#0/1  
TAAAAACAATGCCAAGGAAATTGGAAACGGCTGGTTTGA  
+HWI-EAS443:3:9:270:1228#0/1  
abbaaaaa`aaa`\_`aaa`\_a]a\_a`\_`a¥`^`H[B BBB  
@HWI-EAS443:3:9:30:1102#0/1  
GGGGACATCAAGATACAGCAAGAAGATCAAGCCGGAAATA  
+HWI-EAS443:3:9:30:1102#0/1  
Waab[abba[b`a[babbba`a\_T[HYab`a¥`^`aX`]  
@HWI-EAS443:3:9:336:1596#0/1  
GGGGACACCAAGATACAGCAAGAAGTTCAAGCCGGAAATA  
+HWI-EAS443:3:9:336:1596#0/1  
\_OX^M[¥P[JLR]`a`aZa`YQVZUVLW\_QYF]¥Z\_\_]^  
@HWI-EAS443:3:9:340:259#0/1  
GTAACACGTTCCATTGTCTGAACTAGTTGTTTCCACAATG  
+HWI-EAS443:3:9:340:259#0/1  
`RZ^^\_\_^¥\_ZX^\_YX0\_^ZZ^R^RZ¥XWZWRXXZZWV  
@HWI-EAS443:3:9:387:790#0/1  
ATGGGGCATAACCATCCATCTACTAGTGCTGACCAACAA  
+HWI-EAS443:3:9:387:790#0/1  
\_]¥a¥aaaXM]a[]aaaa`aa\_a`\_]a^`^`\_`\_[] [Na\_  
@HWI-EAS443:3:9:475:1180#0/1  
GCTGCTTTGAATTCTACCACAAATGCGATAACACGTGCAT  
+HWI-EAS443:3:9:475:1180#0/1  
aaZUTZWUV[QW`\_]\_a`YLV]T[Z]NG[LXIZ]`NLFXZ  
@HWI-EAS443:3:9:549:960#0/1  
GTCTGAACTAGTTGTTTCCACAATGTAGGACCATGAGCTT  
+HWI-EAS443:3:9:549:960#0/1  
a`aaaa`aab\_bbaaaaa\_a]`aXa`\_`^`^`^`X`^  
@HWI-EAS443:3:100:413:377#0/1  
AGTTGTTTCCACAATGTAGGACCATGAGCTTGCTGTGGAG

+HWI-EAS443:3:100:413:377#0/1  
a¥`aa[a\_a`a¥`\_aa\_aa\_a]\_`\_\_\_aU\_`\_Ua\_^`X¥B  
@HWI-EAS443:3:10:1618:120#0/1  
GGGGTGGACAGGGATGGTAGATGGATGGTACGGTTATAAA  
+HWI-EAS443:3:10:1618:120#0/1  
aSBBBBBBBBBBBBBBBBBBBBBBBBBBBBBBBBBBBBB  
@HWI-EAS443:3:12:850:1689#0/1  
GGAGACATCAAGATACAGCAAGAAGTTCAAGCCGAAATA  
+HWI-EAS443:3:12:850:1689#0/1  
a]F[¥aV`aXPYa\_a\_[`[aWab\_^JP\_]b\_ZR``U¥`Q\_`  
@HWI-EAS443:3:15:442:1907#0/1  
GGGGTCTGACAAGTTGTATTGCAATCGTGGACTGGTGTAT  
+HWI-EAS443:3:15:442:1907#0/1  
aVaaY`a`\_`ba\_UabT\_a¥SaabXa`MaQ]U]\_RVZTbZ  
@HWI-EAS443:3:16:826:974#0/1  
ATTGCCGGTTTCATTGAAGGGGGTGGACAGGGATGGGAG  
+HWI-EAS443:3:16:826:974#0/1  
WUW¥\_S\_`V¥\_`X`\_ZV^bba]^^Naa]```bUNWa^EM[  
@HWI-EAS443:3:20:417:1354#0/1  
ACGGTTATCACCATCAAATGAGCAGGGGTCAGGATAGCC  
+HWI-EAS443:3:20:417:1354#0/1  
aa]a¥\_`\_Xa\_YPZ\_¥T[]R]\_¥¥\_RY\_]WU^[Z[U\_SQW  
@HWI-EAS443:3:21:213:690#0/1  
GAGCCCCTGCTCATTGATGGTGATAACCGTACCATCCA  
+HWI-EAS443:3:21:213:690#0/1  
abab^bb`ababbaaaaa`aa\_[aaa`b```Za`aa`a\_`  
@HWI-EAS443:3:21:628:1142#0/1  
AGCTGCATATGTTTTGTGGGACATCAAGATACAGCAAG  
+HWI-EAS443:3:21:628:1142#0/1  
``^Ua^`^U]a^X^\_Z^RXNW^0^]VXZ^V^W]Z]ZZ^^  
@HWI-EAS443:3:25:195:312#0/1  
TGCTGGCTGGATCCTGGGAAATCCAGAGTGAATCAATC  
+HWI-EAS443:3:25:195:312#0/1  
[\_S\_[[\_[b`[`ab]a[G\_ba]Xa`^a^V[```ab^XYF¥]  
@HWI-EAS443:3:25:799:907#0/1  
ATCTCGTCAATGGCATTCTGTGTGCTCTCAGGTCGGNTG  
+HWI-EAS443:3:25:799:907#0/1  
\_] [X^^H¥V¥XXZ\_ZZ\_¥\_UZZ]a\_Z\_¥]U\_ZSFOWXBBB  
@HWI-EAS443:3:26:975:1135#0/1  
AGNTTCCAGTTGCTTCGAATGTTATTTTGTCTCCCGGCT  
+HWI-EAS443:3:26:975:1135#0/1  
a¥D[aaaaa^\_a\_baaba\_`aa\_\_\_a\_aa`\_]\_\_\_a]\_¥W  
@HWI-EAS443:3:28:1401:376#0/1  
ACGGTAACACACTCTGTTAACCTTCTAGAAGACAAGCATA  
+HWI-EAS443:3:28:1401:376#0/1  
^Y^¥XaaaaX\_P]Waa\_aaa[TN]^\_`\_]`\_ZW]\_X]\_^  
@HWI-EAS443:3:28:501:86#0/1  
CTGGGGAGACTACCAGTACCAATGAACTGGCGACAGTTGA  
+HWI-EAS443:3:28:501:86#0/1  
abbbbabbbbaa\_aaa\_``\_aabbbaa^^a`\_a^NZZX^\_^

@HWI-EAS443:3:29:1198:576#0/1  
GGGGACATCAAGATACAGCAAGAAGTTCAAGCCGGAAGTA  
+HWI-EAS443:3:29:1198:576#0/1  
`bbbb\_b`aa^bab`aa^[abba```\_aa`aaaba``a0\_  
@HWI-EAS443:3:2:1777:2005#0/1  
GAGAATGGAACGTGTTACCCAGGAGATTTTCATCGATTATG  
+HWI-EAS443:3:2:1777:2005#0/1  
aSP^^`[]\_aGXJXRYTZYO¥\_^PWHVFQW[MJ[U^X]BB  
@HWI-EAS443:3:31:1781:417#0/1  
TGNATATGTTTTTGTGGGGACATCAAGATACAGCAAGAAG  
+HWI-EAS443:3:31:1781:417#0/1  
`^DQ^\_ab¥VabaaUY]YY`Pa\_WZ^¥Y\_^¥\_`X\_[[[^R  
@HWI-EAS443:3:31:624:121#0/1  
GGCGTGGACAGGGATGGTAGATGGATGGTACGGTTATCAC  
+HWI-EAS443:3:31:624:121#0/1  
ababNbbb`aaab0]baV`aa¥aa`^b\_W[\_a\_GX^XSYJ  
@HWI-EAS443:3:32:1662:402#0/1  
CAGACACTGTAGACACAGTACTAGAAAAGAATGTAACGGT  
+HWI-EAS443:3:32:1662:402#0/1  
`bbbababbbbb`a\_ab[a`ba`Zaaaa\_a`aNaaaabI  
@HWI-EAS443:3:32:72:1886#0/1  
GCGGGGGTCAGGATATGCAGCCGACCTGAAGAGCACACAG  
+HWI-EAS443:3:32:72:1886#0/1  
a`ZRYWW¥a]^UTW¥V``]Va\_¥\_a\_X]^¥XZM¥ZUG]SL  
@HWI-EAS443:3:33:1184:164#0/1  
AGTTGTTTCCACAATGTAGGACCATGAGCTTGCTGTGGAG  
+HWI-EAS443:3:33:1184:164#0/1  
aa\_baaaba\_a\_aaaa\_a```]\_]a]\_\_\_V^¥^\_¥X^  
@HWI-EAS443:3:33:303:1194#0/1  
TGCAAAGTGTCAAAAATGGGACTTATGACTACCCAAAATA  
+HWI-EAS443:3:33:303:1194#0/1  
a`a[]^\_Z¥I`aX``\_^a\_S]\_`\_^]Y]YY\_[UYW\_[]Y]  
@HWI-EAS443:3:34:715:1526#0/1  
AACTTGTCAGACACCCAAGGGTGCTATAAACACCAGCATA  
+HWI-EAS443:3:34:715:1526#0/1  
\_^Ya[XPa]Y`aaaa]¥XJX^G^a]aa\_aa`aXS¥YRBBB  
@HWI-EAS443:3:35:376:625#0/1  
CAACTAGTTCAGACAATGGAACGTGTTACCCAGGAGATTT  
+HWI-EAS443:3:35:376:625#0/1  
a^I\_SZ^U]¥VWa]^QUX`[Z\_¥M[VVO[```SLORLQSN  
@HWI-EAS443:3:36:1042:1548#0/1  
ATCGATTATGAGGAGCTAAGAGAGCAATTGAGCTCAGAGT  
+HWI-EAS443:3:36:1042:1548#0/1  
V¥aa^`\_L\_YY[a^¥QR¥a\_Z]VYN^ST¥¥]YW[[`XISX  
@HWI-EAS443:3:37:484:146#0/1  
CCCGGCTTGAACCTTCTGCTGTATCTTGATGTCCCCACCA  
+HWI-EAS443:3:37:484:146#0/1  
ab````ab]``¥```[\_^^`ZZT[]I¥QGFU[\_a`[LWG¥  
@HWI-EAS443:3:39:1742:789#0/1  
AGAGACTTTGTTGGTCAGCACTAGTAGATGGATGGTGGAG

+HWI-EAS443:3:39:1742:789#0/1  
TW¥aba]]`^Ua]b`]Ua\_^RU]W\_[\_[VVLOP^aR\_Y¥F  
@HWI-EAS443:3:39:192:1720#0/1  
ACGGTAACACACTCTGTAACTTCTAGAAGACAAGCATA  
+HWI-EAS443:3:39:192:1720#0/1  
aa[^Va`aa`Y\_^\_^Z[Z`Z\_]^^¥PU]RTZV\_\_S]XYZ  
@HWI-EAS443:3:3:1185:1670#0/1  
GAGGAAGCAAAATTAACAGAGAAGAAATAGATGGGGCAA  
+HWI-EAS443:3:3:1185:1670#0/1  
a\_aa`aa`aaba`a`a`aa]`^`\_]\_\_\_^`^^\_]X^W]X  
@HWI-EAS443:3:3:334:1473#0/1  
AGTTGTTTCCACAATGTAGGACCATGAGCTTGCTGTGGAG  
+HWI-EAS443:3:3:334:1473#0/1  
aaSWa¥aaaWa\_aaaG¥a\_\_^UYa[\_\_\_`^^\_[^a\_]\_]UW  
@HWI-EAS443:3:44:1178:1536#0/1  
CTCTCTTAGCTCCTCATAATCGATGAAATCTCCTGGGCAA  
+HWI-EAS443:3:44:1178:1536#0/1  
aaaaaa`aa^aa\_a\_]Z`¥`ZbY]a`a\_\_¥]W\_^\_\_^^\_]`  
@HWI-EAS443:3:45:1392:1482#0/1  
GGCTGCTTTGAATTTTACCACAAATGCGATAACACGTNCA  
+HWI-EAS443:3:45:1392:1482#0/1  
aa`^`\_]a`^¥aaaa¥T]aT\_[T][PaUH¥^`\_`X\_PDH[  
@HWI-EAS443:3:46:1443:329#0/1  
AAATGTCCAAAATATGTAAAAAGCACAAAATTGAGACCGG  
+HWI-EAS443:3:46:1443:329#0/1  
YYba\_T`\_T\_\_a\_aa\_`a\_\_¥\_\_\_\_\_Y`^a`^]YH`a  
@HWI-EAS443:3:48:33:1113#0/1  
TCNGTGTGCTCTTCAGGTGCGCTGCATATCCTGACCCCTG  
+HWI-EAS443:3:48:33:1113#0/1  
^[DWaab`aa\_bbabba\_\_]a`V`[\_Z¥]W\_NYYU\_a^NN  
@HWI-EAS443:3:48:54:109#0/1  
CAACTAGTTCAGACAATGGAACGTGTTACCCAGGAGATTT  
+HWI-EAS443:3:48:54:109#0/1  
`ba^abbaaa`baaaaab`a`\_b\_a\_a^\_\_`^^`Za``  
@HWI-EAS443:3:49:640:728#0/1  
GCCTCCTCTGAGTATTTTGGGTAGTCATAAGTCCCATTTT  
+HWI-EAS443:3:49:640:728#0/1  
abab^a\_\_bbbb[`a`bab^`\_aa\_``aa\_a]\_^\_Zaaa\_  
@HWI-EAS443:3:49:660:2005#0/1  
CCAGTTGCTTCGAATGTTATTTTGTCTCCCGCTCTAATA  
+HWI-EAS443:3:49:660:2005#0/1  
aa``Vab`Z\_0`aaaaS¥I¥aa¥¥Ya]W`V[OT\_YW[GWW  
@HWI-EAS443:3:4:1449:1525#0/1  
AAATCTCCTGGGTAACACGTTCCATTGTCTGAACTAGTTG  
+HWI-EAS443:3:4:1449:1525#0/1  
aaba^Y]aaabb\_``\_a\_a\_`\_]^[`\_OWT^^\_X\_^aX]]  
@HWI-EAS443:3:4:1756:1843#0/1  
ACCTTCCATGCACGTGTTATCGCATTGTGGTAAAATTCA  
+HWI-EAS443:3:4:1756:1843#0/1  
aa^`a\_`a^a^a^\_Ya\_]\_^S\_]\_\_[^Y[]]Y\_^\_WBBBB



@HWI-EAS443:3:4:579:503#0/1  
GATTGGGCCATGAACTTGTCTTGGGGAATATCTCAAANCT  
+HWI-EAS443:3:4:579:503#0/1  
aa`\_`a`\_aab[`¥`\_T]^a`aa`I^`¥a\_aa`RDV^  
@HWI-EAS443:3:51:101:864#0/1  
GGNGGGTGGACAGGGATGGTAGATGGATGGTACGGTTATC  
+HWI-EAS443:3:51:101:864#0/1  
a[D¥aaXa\_a`a`^W`\_XWa^W`\_Z^`¥V¥U\_`¥]]¥U  
@HWI-EAS443:3:52:968:893#0/1  
CACGCCAGCAATGTTACATTTACCCAAATGCAATGGGGCT  
+HWI-EAS443:3:52:968:893#0/1  
^\_ba\_\_bb]Xabbabbbbabbb\_\_abaaabbbbaabba¥b  
@HWI-EAS443:3:54:1332:1757#0/1  
TCCGGGCCATGAACTTGTCTTGGGGAATATCTCAAACCTT  
+HWI-EAS443:3:54:1332:1757#0/1  
XSXa^\_Z^YY^ZJabZPVba\_^XW`\_`a`][[`a^0¥a^  
@HWI-EAS443:3:54:322:1717#0/1  
CTTTGGGTCTTATTGCTATTTCCGGCTTGAACCTCTTTCT  
+HWI-EAS443:3:54:322:1717#0/1  
`ab¥\_[F\_b\_^¥^`bbbbb\_ab^SRbVP¥SZUS`\_I\_`  
@HWI-EAS443:3:56:1142:1066#0/1  
ATCTACTAGTGCTGACCAACAAAGTCTCTATCAGAATACA  
+HWI-EAS443:3:56:1142:1066#0/1  
]b\_b`bababbaV]a\_\_b]\_b\_a\_\_`\_a```aa\_^GWa  
@HWI-EAS443:3:56:1499:428#0/1  
GTAGTGGTAAAATTCAAAGCAGCCGTTTCCAATTCCTTG  
+HWI-EAS443:3:56:1499:428#0/1  
a[Y[SaaS]aa\_a\_¥W¥^`U¥a¥P[WW¥XTQW^]^QLY]\_  
@HWI-EAS443:3:57:1703:1368#0/1  
TATGCTTGTCTTCTAGAAGTTAACAGAGTGTGTTACCGT  
+HWI-EAS443:3:57:1703:1368#0/1  
aaYRYabaaaa\_b^Z^a`][`^X^`a\_Y]]V]a\_[UX]  
@HWI-EAS443:3:5:1233:865#0/1  
AGAGTCATCATTTGAAAGTTTGAGATATTCCTCAAGACA  
+HWI-EAS443:3:5:1233:865#0/1  
UYS`Z\_\_V`\_\_\_a^^`^Sbb^`b\_a`\_\_¥]T[b]`b[B  
@HWI-EAS443:3:5:439:1380#0/1  
GGCCATCAAGATACAGCAAGAAGTTCAAGCCGGAATAGC  
+HWI-EAS443:3:5:439:1380#0/1  
\_TFHXUYWFWNQJONY^`¥QUTU00Z\_X\_SVLVS^VB BBB  
@HWI-EAS443:3:5:92:902#0/1  
TCCTGAAAAGGTAAGAAGCCAGTTAAAAACAATGCCAAG  
+HWI-EAS443:3:5:92:902#0/1  
aaab`aaaX`WaaZUa`^`aa\_aa\_aaaa\_a`aa[^\_a  
@HWI-EAS443:3:60:1645:1261#0/1  
CACTTCCATGCACGTGTTATCGCATTTGTGGTAAAANTC  
+HWI-EAS443:3:60:1645:1261#0/1  
abbbbbbabbabbbabbbbaabbbbab]ZbabYD^J  
@HWI-EAS443:3:60:67:1165#0/1  
GTATCTGACAAGTTGATTGCAATCGTGGACTGGTGTATC

+HWI-EAS443:3:60:67:1165#0/1  
a\_aa`aaa\_`¥a\_aaXa\_\_` `` `` \_ZF[] ^^ ` ` ¥Z\_Z\_\_^  
@HWI-EAS443:3:60:701:512#0/1  
CTGGCTGGATCCTGGGAAATCCAGAGTGTGAATCACTNTC  
+HWI-EAS443:3:60:701:512#0/1  
]¥¥` ` \_`W]`R\_R])\_¥W\_aZX\_a^a`^H\_`]¥]^`¥D[X  
@HWI-EAS443:3:62:268:1272#0/1  
CCGGCTTGAACCTTCTTGCTGTATCTTGATGTCCCCACCAA  
+HWI-EAS443:3:62:268:1272#0/1  
`\_]\_\_a\_\_W])YLY^[RVJV`OOQS[] [VX`PW¥^^^QFZS  
@HWI-EAS443:3:63:403:269#0/1  
AATGTAGGACCATGAGCTTGCTGTGGAGAGTGATTCAGAC  
+HWI-EAS443:3:63:403:269#0/1  
aUabY\_ZQ]Y[a[ZTZ[Z]WP`\_`aba`¥a\_`YX\_[¥F¥W  
@HWI-EAS443:3:64:1240:1291#0/1  
ATTGTGATCGGATGTATATTCTGAAATGGGAGGCTGGGGT  
+HWI-EAS443:3:64:1240:1291#0/1  
aabb\_bbabbb\_aa¥a` [ `a¥a[Y\_a`aaaUa` ] ` \_]GQ]  
@HWI-EAS443:3:65:907:2007#0/1  
CTTAGCTCAATTGCTCTCTTAGCTCCTCATAATCGATGAA  
+HWI-EAS443:3:65:907:2007#0/1  
¥YIV`\_`bb`a\_R\_\_a\_\_b^QaZZRWVPVa^aaY]QYX[ `a  
@HWI-EAS443:3:68:1485:791#0/1  
ACGGTAACACACTCTGTAACTTCTAGAAGACAAGCATA  
+HWI-EAS443:3:68:1485:791#0/1  
aab^P[a`a\_^aa\_¥a]\_^`^\_aa]a]a^aa\_\_Z``]^`^\_\_  
@HWI-EAS443:3:6:228:973#0/1  
GGAGGGGTGGACAGGGATGGTAGATGGATGGTACGGTTAT  
+HWI-EAS443:3:6:228:973#0/1  
aa¥a^`\_H\_`¥^]`\_\_`¥¥TPY\_¥¥\_RV¥ZSH^WZ\_VS[B  
@HWI-EAS443:3:70:897:1690#0/1  
CAACTAGTTCAGACAATGGAACGTGTTACCCAGGAGATTT  
+HWI-EAS443:3:70:897:1690#0/1  
aa`a^Z¥LQ`\_` [aaa\_` `^a\_SL[PQPUa]W¥LWY^\_TN  
@HWI-EAS443:3:72:1431:354#0/1  
GCCTCCTCTGAGTATTTTGGGTAGTCATAAGTCCCATTTT  
+HWI-EAS443:3:72:1431:354#0/1  
aa¥b\_`babba¥`ababba\_a^`ba^aa\_^aZ¥Z^\_aaaa  
@HWI-EAS443:3:72:1451:646#0/1  
TCTGGGGTCAGGATATGCAGCCGACCTGAAGAGCACACAG  
+HWI-EAS443:3:72:1451:646#0/1  
a`aaba` `a`baaa` `aaaa\_` ` \_Vaa\_\_Va[ `P¥^` \_  
@HWI-EAS443:3:72:812:989#0/1  
GCTTTTTGCTCCAGCATGAGGACATGCTGCCGTTACAGCT  
+HWI-EAS443:3:72:812:989#0/1  
aaa]\_baaa\_a^Y^^]VJ¥\_\_RW\_R]^[]^`YL¥GZBBB  
@HWI-EAS443:3:73:579:220#0/1  
GCCAGTAAAAACAATGCCAAGGAAATTGGAACGGATG  
+HWI-EAS443:3:73:579:220#0/1  
a`]¥SJ¥`a\_ZWQPYV]^NXNQBBBBBBBBBBBBBBBB

@HWI-EAS443:3:74:1509:1752#0/1  
CAACTAGTTCAGACAATGGAACGTGTTACCCAGGAGATTT  
+HWI-EAS443:3:74:1509:1752#0/1  
`aaaabaaa\_bbb\_aaa`baa`\_a\_aa\_a\_a\_\_Sa[a\_S  
@HWI-EAS443:3:75:1340:522#0/1  
GCTGGCTGGATCCTGGGAAATCCAGAGTGTGAATCACACT  
+HWI-EAS443:3:75:1340:522#0/1  
aa\_^\_aaa`a]]^]]\_][`a]V^^WXUaP^[Y]YWTZSV  
@HWI-EAS443:3:76:1710:1494#0/1  
ATCCTGACCCCTGCTCATTTTGTGGTATAACCGTAGCA  
+HWI-EAS443:3:76:1710:1494#0/1  
]ZT\_]Y`YTQYQQ^PW^\_Z]\_¥`]X`O`WBBBBBBBBB  
@HWI-EAS443:3:76:659:16#0/1  
GTCGCCAGTTCATTGGTACTGGTAGTCTCCCTGGGGGAA  
+HWI-EAS443:3:76:659:16#0/1  
a^]^W[X`^¥W0[``]PSR]^^[NRWJVBBBBBBBBBBBBB  
@HWI-EAS443:3:77:1576:1295#0/1  
GCCAGTAAAAACAATGCCAAGGAAATTGGAAACGGGTG  
+HWI-EAS443:3:77:1576:1295#0/1  
¥`^`bb¥`¥YU[[V]W]SS`ZL]]V]V^Xb^R`BBBBBBB  
@HWI-EAS443:3:78:1381:141#0/1  
GCTGGATCCTGGGAAATCCAGAGTGTGAATCACTCTCAAC  
+HWI-EAS443:3:78:1381:141#0/1  
^^`Z`][X[Z`X^T[]YJ[[YXG]W`[RPPWPYBBBBBBB  
@HWI-EAS443:3:79:668:1269#0/1  
CACAATGTAGGACCATGAGCTTGCTGTGGAGAGTGATACA  
+HWI-EAS443:3:79:668:1269#0/1  
aabab^a[a¥]]Z\_\_¥RR`Z^V`\_^ZSZRT[LZ¥XJQa  
@HWI-EAS443:3:81:1122:345#0/1  
GCATATCCTGACCCCTGCTCATTTTGTGGTATAACAGT  
+HWI-EAS443:3:81:1122:345#0/1  
a\_^\_\_TTa\_P^\_JTZZ^^\_AG[^\_VV]GY`H`]O^^OGYO  
@HWI-EAS443:3:83:606:351#0/1  
GGCCAGCACTAGTAGATGGATGGTGAATGCCCCATAGCAC  
+HWI-EAS443:3:83:606:351#0/1  
a¥U0aaXZQS[]XY\_TD¥ZOUaWK]]ZZ\_RT¥UZYOMRZ^  
@HWI-EAS443:3:83:898:1067#0/1  
CGCGTTCGAGTCATGATTGGGCCATGAACTTGTCTTGGGG  
+HWI-EAS443:3:83:898:1067#0/1  
aa`\_[aaaab^`aa`aaa\_aa]^aa`a\_aaa¥[`aa\_a`  
@HWI-EAS443:3:85:1090:608#0/1  
CCGGGCTTCTTACCTTTTCATATAAGTTCTTCACATTTGA  
+HWI-EAS443:3:85:1090:608#0/1  
abaabbbbbabbbabbbbaabaaaabaa`aa\_baaaaab^  
@HWI-EAS443:3:86:418:249#0/1  
CAGACACTGTAGACACAGTACTAGAAAAGAATGTAACGAT  
+HWI-EAS443:3:86:418:249#0/1  
Y```aaaaa]U¥^a`¥^aZ^¥¥]]¥¥[Z\_¥^Y\_R\_YDZ[R  
@HWI-EAS443:3:87:571:1435#0/1  
GGTCCATGAACTTGTCTTGGGGAATATCTCAAACCTTTCA

+HWI-EAS443:3:87:571:1435#0/1  
YRIa`¥`\_ZZab[OXZV¥]Z]a[Y]]Z\_`ababa^a¥U\_W  
@HWI-EAS443:3:87:581:1498#0/1  
CCCATTCTCTCTGTTTAATTTTGCTTCCTCTGAGTATT  
+HWI-EAS443:3:87:581:1498#0/1  
aabb`abbbba`baaba^abababbbba`bbbbbb\_ba`  
@HWI-EAS443:3:8:877:506#0/1  
CAACTAGTTCAGACAATGGAACGTGTTACCCAGGAGATTT  
+HWI-EAS443:3:8:877:506#0/1  
abb`aab¥b[baaaaa`a`a¥\_aXa^`aWQ[\_`\_\_^¥^\_  
@HWI-EAS443:3:93:1525:1950#0/1  
TTTTGCTTCCTCTGAGTATTTGGGTAGTCATAAGTCGCA  
+HWI-EAS443:3:93:1525:1950#0/1  
ab`\_]aba]¥^]a`\_Z\_W[aa``aP`^]YX¥^`^GLVU\_  
@HWI-EAS443:3:93:80:1766#0/1  
GAAGTCCTCGTGTATGGGGCATTACCATCCATCTATCT  
+HWI-EAS443:3:93:80:1766#0/1  
a¥Q\_\_ba[aZZ\_`aa`[¥^a`a`\_[a`^`¥\_a`V`¥[^^[  
@HWI-EAS443:3:94:1458:2047#0/1  
NAACTTTTTTATTTAAATTCTCTATTCTTTTTTCCAGGAG  
+HWI-EAS443:3:94:1458:2047#0/1  
DKXXZSSXYU[YYZ[YY[YY[[ZYXVPYY[[XVPWM[YHX  
@HWI-EAS443:3:94:407:1017#0/1  
GTGGGGACATCAAGATACAGCAAGAAGTTCAAGCCGGNAA  
+HWI-EAS443:3:94:407:1017#0/1  
a0`^`]a```\_aaaa`aaaa\_abaa[a]\_\_aaa]^\_[DZ[  
@HWI-EAS443:3:94:497:304#0/1  
GGCGGGGACATCAAGATACAGCAAGAAGTTCAAGCCGGAA  
+HWI-EAS443:3:94:497:304#0/1  
aa`a`aa`\_a`[^`````\_Sa\_\_aaa`¥aW\_[a`\_[U^^YY  
@HWI-EAS443:3:94:787:1889#0/1  
ATGCCAAGGAAATTGGAACGGCTGCTTTGAATTTTAAACA  
+HWI-EAS443:3:94:787:1889#0/1  
a^`^[\_aaa[`]¥ZTU¥`\_`¥`\_ZXLS`RLTYXVB BBB  
@HWI-EAS443:3:94:869:1877#0/1  
TTCGAATGTTATTTGTCTCCCGCTCTACTAGTGTGCGAG  
+HWI-EAS443:3:94:869:1877#0/1  
a\_^¥aab]aW`aaaaY¥¥`[Z[\_a^`P]U[\_[FZO[G^¥  
@HWI-EAS443:3:95:157:826#0/1  
CAGACACTGTAGACACAGTACTAGAAAAGAATGTAACGGT  
+HWI-EAS443:3:95:157:826#0/1  
aaba`\_]`baa]ba[aa``W`\_`XaaaaYaU^`\_Yb`G`\_W  
@HWI-EAS443:3:97:1334:718#0/1  
AAATCTCCTGGGTAACACGTTCCATTGTCTGAACTAGTTG  
+HWI-EAS443:3:97:1334:718#0/1  
a¥^Y]`a^^`\_YTZaaa]aW^[Y[]a^VYaa\_^R^\_aU]`  
@HWI-EAS443:3:97:871:1516#0/1  
GTGCTCTCAGGTCGGCTGCATATCCTGACCCCTGCTGAT  
+HWI-EAS443:3:97:871:1516#0/1  
`X¥W¥TRYU^)`¥WW`][XaaPT]`WHOPVOEPYBBBBBB

@HWI-EAS443:3:98:1004:1367#0/1  
CCGGTTTCATTGAAGGGGGTGGACAGGGATGGTAGAGGG  
+HWI-EAS443:3:98:1004:1367#0/1  
a``aa````b]¥VT¥`^\_bb0aUXP]abU¥]¥UK¥aZF[M  
@HWI-EAS443:3:98:112:1597#0/1  
CTGCCTCTGAGTATTTTGGGTAGTCATAAGTCCCATTTTT  
+HWI-EAS443:3:98:112:1597#0/1  
ab\_baaaaaaa]aaa\_aaa\_¥\_`^]aa`\_`Xa\_\_a^a^\_\_  
@HWI-EAS443:3:98:1163:1443#0/1  
CAACTAGTTCAGACAATGGAACGTGTACCCAGGAGATTT  
+HWI-EAS443:3:98:1163:1443#0/1  
`abaabb\_bY¥bb^baaa^\_aWb`````a[V]a^``^\_`a\_  
@HWI-EAS443:3:98:791:1505#0/1  
TGTGGGGACATCAAGATACAGCAAGAAGTTCAAGCCGNAA  
+HWI-EAS443:3:98:791:1505#0/1  
ab\_bab`a\_a^a`ab]\_a`ab\_aaaaZb[``\_aaa`V[DOZ  
@HWI-EAS443:3:11:1449:1013#0/1  
GCTCAATTGCTCTCTTAGCTCCTNATAATCGATGAAATCT  
+HWI-EAS443:3:11:1449:1013#0/1  
a¥``a`a^\_Va[a\_aa`\_]a^]ZDX\_\_a\_Y]X^^`^`]^\_`  
@HWI-EAS443:3:11:974:1400#0/1  
GAAGCCAGTTAAAAACAATGCCAANGAAATTGGAAACGG  
+HWI-EAS443:3:11:974:1400#0/1  
abbbbbbbbabbbabb`babb\_aaWD]a\_aaaaa`\_\_aa  
@HWI-EAS443:3:14:1764:987#0/1  
CCGGCTTGAACCTNTTGCTGTATCTTGATGTCCCCACAAA  
+HWI-EAS443:3:14:1764:987#0/1  
aabbabb`bb\_b^D^baaba`aaaabb`aa\_`¥W^a]aa¥  
@HWI-EAS443:3:15:822:13#0/1  
ACCCCATCTATTTCTTCTCTGTTTAATTTTGCTCCNCTG  
+HWI-EAS443:3:15:822:13#0/1  
Y\_`\_a`a^a`ab\_T\_a^```a^\_a`\_bbaba\_ba[RD[`¥  
@HWI-EAS443:3:17:1009:711#0/1  
CACATCCAGAACTGATTGCCCCAGGGANACTACCAGTA  
+HWI-EAS443:3:17:1009:711#0/1  
`ab``]b`aabZX^b`\_aaa[aaa\_aaaVDW\_\_\_ZYaaZ\_  
@HWI-EAS443:3:17:1028:237#0/1  
GAAGTCCTCGTGTNTGGGGCATTACCATCCATCTACTA  
+HWI-EAS443:3:17:1028:237#0/1  
aaaa\_\_aaaa[a\_ZDX`\_^^¥`\_^R^`¥`WY[[ZU[\_VZ¥  
@HWI-EAS443:3:19:983:1987#0/1  
GGAGGCTGGTGTATAGCANCCTTGGGTGTCTGACAAGT  
+HWI-EAS443:3:19:983:1987#0/1  
aa]`\_aaa\_]aZaaaa]`a[DN`\_`[\_]WaVX\_[YP`]TT  
@HWI-EAS443:3:20:883:937#0/1  
ATANTCCCCAAGACAAGTTCATGGCCCAATCATGACTCGA  
+HWI-EAS443:3:20:883:937#0/1  
\_a[D]`[`aa\_\_aab\_`\_`\_\_UZa\_`\_`[YG\_]^[RUUZX  
@HWI-EAS443:3:22:1074:207#0/1  
GCATATCCTGACCNTGCTCATTTTGATGGTGATAACCGT

+HWI-EAS443:3:22:1074:207#0/1  
aaaaba\_[aaa^XDYa`Y]\_`\_^`\_\_`Y\_X^^XV[X  
@HWI-EAS443:3:22:373:1337#0/1  
ATGCGAACAAATTCAACAGACACTGTAGACACAGTACNAGA  
+HWI-EAS443:3:22:373:1337#0/1  
aa`a`a`a`a`a\_a^`a^`a`\_Z^^W^[LV]RDVY]  
@HWI-EAS443:3:25:1465:1808#0/1  
TCCTCGTGCTATGGGGCATTACCATCCATCTANTAGTGC  
+HWI-EAS443:3:25:1465:1808#0/1  
]``\_bbabbababba\_Sa`])ab`b`Q[T^T¥¥D[\_\_¥`\_  
@HWI-EAS443:3:26:1051:1804#0/1  
CGGATGTATATTCTGAAATNGGAGGCTGGTGGTTTATAGCA  
+HWI-EAS443:3:26:1051:1804#0/1  
`a\_bbbXbbbaaaabaaaZD[\_\_aa`]ab]\_^aa`aaY]\_  
@HWI-EAS443:3:26:1494:1977#0/1  
TGCTNGCTGGATCCTGGGAAATCCAGAGTGTGAATCACTC  
+HWI-EAS443:3:26:1494:1977#0/1  
`aa^DZabbaaaaa\_aaa\_ab`\_Yaaa]¥^¥\_aa`ZaS\_W  
@HWI-EAS443:3:26:928:1217#0/1  
AGCCAGTTAAAAACAATGCCAAGGAAATTGGNAACGGCT  
+HWI-EAS443:3:26:928:1217#0/1  
aTa\_]\_R^aaa^`^^aaaaa¥\_\_\_\_])`a\_\_YDXZZ`^ZY  
@HWI-EAS443:3:28:1171:1489#0/1  
GTTTTTGTGGGACATCAAGATACNGCAAGAAGTTCAAGC  
+HWI-EAS443:3:28:1171:1489#0/1  
^ababb\_b\_bbbbbba¥bbbabbb]D^abb`babababaa`  
@HWI-EAS443:3:29:1490:600#0/1  
TGGATCCTGGGAAATCCAGAGTGTGNATCACTCTCCACAG  
+HWI-EAS443:3:29:1490:600#0/1  
a`````\_aW`baa`a\_\_aa^¥Z^[[DR[UZ\_\_\_\_\_U[\_V\_]  
@HWI-EAS443:3:29:219:1148#0/1  
GCTGCTTTGAATTTTACCACAAANGCGATAACACGTGCAT  
+HWI-EAS443:3:29:219:1148#0/1  
abbababbab]bbbbbabbaaa[D¥baaabaa[aa^a\_X`  
@HWI-EAS443:3:30:1224:562#0/1  
GGTGGTTGAACTCTTTACCTACTGCTGTGAACTGNGTATT  
+HWI-EAS443:3:30:1224:562#0/1  
a^Za]O[Z^ZZ¥`\_\_¥`VW¥WW[VO[UYZ[QDPPT[^  
@HWI-EAS443:3:31:1161:484#0/1  
GAAACTNATTGCCCCAGGGAGACTACCAGTACCAATGAA  
+HWI-EAS443:3:31:1161:484#0/1  
aaa¥^¥D[a`a]a\_\_a`¥XX\_YU]\_`^^\_W¥¥¥¥¥\_\_[W  
@HWI-EAS443:3:31:363:1458#0/1  
TATGAATTTTNTTTTTTAACTAGCCATATTAATTTTTGT  
+HWI-EAS443:3:31:363:1458#0/1  
aa`^a\_aa¥WD[aaaa`aaa`a`a`a`\_RX`a\_a^^\_  
@HWI-EAS443:3:33:1638:1373#0/1  
GTCATCATTTGAAANGTTTGAGATATTTCCCAAGACAAGT  
+HWI-EAS443:3:33:1638:1373#0/1  
a\_aaaaabbaaaaaXD¥]aaaa`aa\_]YW^U\_]Z^\_Z

@HWI-EAS443:3:34:439:357#0/1  
GTTACACCTTTGTTTCGAGTCNTGATTGGGCCATGAACTTG  
+HWI-EAS443:3:34:439:357#0/1  
aa`b`aaa^aab`\_aabSSDZa\_\_aa\_\_]\_aa`^^Y\_\_\_\_  
@HWI-EAS443:3:35:1103:844#0/1  
GTCAGCACTAGTAGATGGATNGTGAATGCCCCATAGCACG  
+HWI-EAS443:3:35:1103:844#0/1  
``aba^aaaabaa^aa`a\_¥D^Xa`X]]`baaX^``]¥S¥  
@HWI-EAS443:3:36:1324:1057#0/1  
GCTTCCTCTGAGTATTTTGGGTAGTCATAAGTCCCANTTT  
+HWI-EAS443:3:36:1324:1057#0/1  
YabV``bbYQYLaa^aba^M`a]`U\_aba[HSTaOD]\_`  
@HWI-EAS443:3:36:1691:1605#0/1  
AAACAATGCCAAGGAAATTGGNAACGGCTGCTTTGAATTT  
+HWI-EAS443:3:36:1691:1605#0/1  
\_`a\_`YW¥`Z`^]¥OZ`]aUDP[[a[BBBBBBBBBBBBB  
@HWI-EAS443:3:37:892:981#0/1  
ATTTTGGGTAGTCATAAGTCCCATTTTTGACACNTTCCAT  
+HWI-EAS443:3:37:892:981#0/1  
`abbaaba]aa^a`a\_R]^Raa`aaaaaUaa¥D]aV^a`  
@HWI-EAS443:3:38:1485:970#0/1  
TGCTATGGGGCATTACCATCCATCTACTAGTGNTGACCA  
+HWI-EAS443:3:38:1485:970#0/1  
aaaaaabaaaa`a`baab`aaaa\_\_b]b]ZYKDX[\_ZZV  
@HWI-EAS443:3:39:1090:1779#0/1  
CACTGTNGAGACCCATTAGAGCACATCCAGAACTGATTG  
+HWI-EAS443:3:39:1090:1779#0/1  
aaba`YDVbaa`aabaaa`aZa`\_aa\_\_a\_aW`\_`\_a`W  
@HWI-EAS443:3:39:1246:549#0/1  
AGCCAGTTAAAAACAATGCCAAGGAAATTNGAAACGGCT  
+HWI-EAS443:3:39:1246:549#0/1  
a`aaa^Yaaaaaaaaa`a\_a`\_Z^\_\_WDK[\_¥S`^\_P  
@HWI-EAS443:3:39:646:1465#0/1  
TCCNGCTTGAACCTTCTTGCTGTATCTTGATGTCCCCACAA  
+HWI-EAS443:3:39:646:1465#0/1  
ab]D¥bab^¥a\_SaaaaX¥\_\_\_\_]\_a`a\_[QMM]¥a\_\_W`]  
@HWI-EAS443:3:3:1628:139#0/1  
TCCGGCTTGAACCTTCTTGCTGTATCTTGNTGTCCCCACAA  
+HWI-EAS443:3:3:1628:139#0/1  
aa]]``aaa\_a]aa]\_\_a\_a]]`aZ`\_TDU^\_XZ]XVZ]Z  
@HWI-EAS443:3:40:81:1198#0/1  
CACANCCAGAACTGATTGCCCCAGGGAGACTACCAGTA  
+HWI-EAS443:3:40:81:1198#0/1  
abb[D^```a]baab]baabaabbab\_a\_\_W``Taa]aYa  
@HWI-EAS443:3:42:1498:494#0/1  
GGTGTANAGCACCTTGGGTGTCTGACAAGTTGTATTG  
+HWI-EAS443:3:42:1498:494#0/1  
ab\_aYba^D[a\_\_\_\_`XXa]`\_MZW^V^^`\_¥¥VY[YYY¥¥  
@HWI-EAS443:3:43:1166:62#0/1  
GGTTTCCTGNACATTTGGACTTACAATGCCGAACGTGG

+HWI-EAS443:3:43:1166:62#0/1  
abS\_]Q]\_YDRY\_\_^^[^¥]]]XX[Z\_TU¥U[PU\_Z]^Z  
@HWI-EAS443:3:44:1037:305#0/1  
ACAGAATTTACTTTGTTAGTAATCTCGTCAATNGCATTCT  
+HWI-EAS443:3:44:1037:305#0/1  
`bbaabaaa\_baaaa\_a\_aa\_]`ab\_a`aWD¥]\_`\_\_\_\_  
@HWI-EAS443:3:44:456:419#0/1  
GAAGTTCAAGCCGAAATAGCAATAAGACCCAAANTGAGG  
+HWI-EAS443:3:44:456:419#0/1  
a\_\_YRQ]`X^PYa\_V¥Z]YYY¥\_\_Y`X¥VT]¥KDIZ^[S  
@HWI-EAS443:3:46:159:1077#0/1  
ACTTCTTGCTGTATCTTGATNTCCCCACAAAACATATGC  
+HWI-EAS443:3:46:159:1077#0/1  
`R\_\_S]`Y^a`V[`a\_a^XUDV^¥Y]]Z[[¥QQY[¥¥X^]  
@HWI-EAS443:3:46:264:596#0/1  
GTGGGGACATCAAGATACANCAAGAAGTTCAAGCCGGAAA  
+HWI-EAS443:3:46:264:596#0/1  
`T]YWWSX¥WZXT[TTZ[TDR¥\_`VW]SVT[U[YS][WSU  
@HWI-EAS443:3:47:1258:1301#0/1  
GCCAGTTAAAAACAATGCCAAGGAAATTGGANACGGCTG  
+HWI-EAS443:3:47:1258:1301#0/1  
`aa\_a`a`Y¥]]]Za``a][ZZ\_a^]]\_Z\_[WD[^\_\_^^]  
@HWI-EAS443:3:47:1328:1304#0/1  
CAAACCTTTCAAATGNTGACACTGAGCTCAATTGCTCTCT  
+HWI-EAS443:3:47:1328:1304#0/1  
abaaa^bbaX\_V[Z]DQ`^TaYZa\_^`[\_\_\_\_`]]]`^]  
@HWI-EAS443:3:47:634:732#0/1  
TGTGGGGACATCAAGATACAGCAAGAAGTTNAAGCCGGAA  
+HWI-EAS443:3:47:634:732#0/1  
abaaaaa\_aaa¥\_`aa\_```a[aaa¥[`¥TDW^[^X`^X¥  
@HWI-EAS443:3:4:235:415#0/1  
CTTCTTGCTGTNTCTTGATGTCCCCACAAAACATATGCA  
+HWI-EAS443:3:4:235:415#0/1  
abbaabaabbZD¥aaaaaa`a```aaa`]a`^````\_a\_`  
@HWI-EAS443:3:50:1325:1674#0/1  
ACTTCNTGCTGTATCTTGATGTCCCCACAAAACATATGC  
+HWI-EAS443:3:50:1325:1674#0/1  
aaab^D]bbbbaba^bb¥aaaaZ¥]T\_\_aaaa`aaaa\_  
@HWI-EAS443:3:50:1514:839#0/1  
CAAAAACATATGCATCTGCNTTCTGATAGAGACTTTGTTG  
+HWI-EAS443:3:50:1514:839#0/1  
abbbbbbbbabbbbaabbYD^babbbabababaabaaZ]bb  
@HWI-EAS443:3:51:615:1605#0/1  
CAAGGAAATTGGAAACGGCTGCTTTGAATNTTACCACAAA  
+HWI-EAS443:3:51:615:1605#0/1  
aa`ba^babaaaaba`^TXa]FX\_`NFZ[D^aGFMVY\_`  
@HWI-EAS443:3:52:1101:1119#0/1  
GGGGACATCAAGATACAGCAAGAAGTTCAANCCGGAAATA  
+HWI-EAS443:3:52:1101:1119#0/1  
abaaa\_`a\_X]\_a^aab\_aaa[Q¥Q\_\_\_WDX\_baX\_\_a`



@HWI-EAS443:3:53:1097:2023#0/1  
AAGCCAGTTAAAAACAATNCCAAGGAAATTGGAAACGGC  
+HWI-EAS443:3:53:1097:2023#0/1  
aaaaaaaa[] [a`aUaaaaRDLU`^`^¥Y^^aWXX^^aW^]S  
@HWI-EAS443:3:53:652:716#0/1  
AAGAAATGCTGGATCTGGTATTATCATTTCAGNTACACCA  
+HWI-EAS443:3:53:652:716#0/1  
ab\_Z¥Z]] [¥`Y``\_[aYJ`\_`bb`Zaaa¥W[D[YWa¥aa  
@HWI-EAS443:3:54:1036:1149#0/1  
TTAANGATAAAGGGAAAGAAGTCCTCGTGCTATGGGGCAT  
+HWI-EAS443:3:54:1036:1149#0/1  
aaa[DV\_a`aaba`\_]```\_\_\_\_`aa]a¥`\_a`^\_^]\_^\_  
@HWI-EAS443:3:57:1741:1115#0/1  
TGCCGGTTTCNTTGAAGGGGGTGGACAGGGATGGTAGAT  
+HWI-EAS443:3:57:1741:1115#0/1  
abbbba¥b]ZD^\_]ab[X`¥[YYV`¥¥^\_WWa[XY]^a^  
@HWI-EAS443:3:58:1789:1110#0/1  
TGTGGGGACATCAAGATACAGCAAGANGTTCAAGCCGGAA  
+HWI-EAS443:3:58:1789:1110#0/1  
^WS^[WSY`¥[T`\_]`\_^]Y]Y¥`]]YD¥UXZ¥YLNQVQ  
@HWI-EAS443:3:5:1560:1889#0/1  
AGCCAGTTAAAAANAATGCCAAGGAAATTGGAAACGGCT  
+HWI-EAS443:3:5:1560:1889#0/1  
`\_VR][L]`XbaWD^ba`a^WP`[RROGFN¥¥^aZBBBB  
@HWI-EAS443:3:60:1207:587#0/1  
GGGGACATCAAGATACAGCAAGAAGTTCNAGCCGGAAATA  
+HWI-EAS443:3:60:1207:587#0/1  
aaa\_X[`^]aaa]\_a[aa\_\_aaa\_aY`UD[`¥S\_a^]\_\_\_\_  
@HWI-EAS443:3:61:1069:1693#0/1  
GCTGGCTGGATCCTGGGAAATCCAGAGTNTGAATCACTCT  
+HWI-EAS443:3:61:1069:1693#0/1  
^\_bb`a`aaaaa[abbabbab\_`bbTDVbb\_`a\_ZaQV  
@HWI-EAS443:3:61:1357:1496#0/1  
CTTGTCTTGGNGAATATCTCAAACCTTTCAAATGATGACA  
+HWI-EAS443:3:61:1357:1496#0/1  
\_abbbbbbb[D]bbbbbb`¥`abbbbbbbbaaaaa\_`  
@HWI-EAS443:3:61:567:554#0/1  
CCGGGAGACAAAATAACATTNGAAGCAACTGGAAATCTAG  
+HWI-EAS443:3:61:567:554#0/1  
aabb\_aaabaabbaabb`^D[aaab`\_Yaaaa\_`¥`a\_  
@HWI-EAS443:3:62:288:1619#0/1  
CATGATTGGCCATGAACCTTGTCTTGGGGAATNTCTCAA  
+HWI-EAS443:3:62:288:1619#0/1  
a`aaa``\_¥`aaa\_`^aa^`\_Z\_^¥[]\_Z]]TDW^]X`\_\_  
@HWI-EAS443:3:63:693:1210#0/1  
AGCTTTTTGCTCCAGCATGAGGACATGNTGCCGTTACACC  
+HWI-EAS443:3:63:693:1210#0/1  
aa`^aaa`^`a\_[Pab\_`aU]Ya\_`QDU^]]SOJT[]]`  
@HWI-EAS443:3:64:1778:641#0/1  
TCGANTGTTATTTTGTCTCCCGGCTCTACTAGTGCCAGT

+HWI-EAS443:3:64:1778:641#0/1  
aabXD]baa]babaaaa` `]`Xa¥TUTRQTWYZP¥YVYYT  
@HWI-EAS443:3:64:292:165#0/1  
GCACTAGTAGATGGATGGTGAATGCCNCATAGCACGAGGA  
+HWI-EAS443:3:64:292:165#0/1  
aa`Y`V¥S¥b]^aaXa]aS`baXaVWDW\_]][ZUW]RWOJ  
@HWI-EAS443:3:64:781:2023#0/1  
TCTTGCTGTATCTTGATGTCCCCACANAAACATATGCATC  
+HWI-EAS443:3:64:781:2023#0/1  
\_b` `ababaab\_abaaab` `b`aa]]D^bbabaa` `^aaa  
@HWI-EAS443:3:65:1525:1615#0/1  
GCTGCTTTGAATTTTACCACAAATGCGATANCACGTGCAT  
+HWI-EAS443:3:65:1525:1615#0/1  
aa[ZLY¥]ZWSX]WTWXVZRV^^^]WZ^¥WDMW[XT¥VSW  
@HWI-EAS443:3:65:1731:256#0/1  
TCACCATCCATCTACTAGTGCTGACCAACNAAGTCTCTAT  
+HWI-EAS443:3:65:1731:256#0/1  
aba`¥a`a`aa\_aa^a` `a¥`a`\_Wa\_JD[aa¥X`^`^`\_`  
@HWI-EAS443:3:65:85:96#0/1  
TGAAAAGGTAAGAAGCCAGTTAAAAACAATGCCNAGGAA  
+HWI-EAS443:3:65:85:96#0/1  
aa\_[\_\_a[Waa\_XY]¥X^`\_]\_^ZUYV¥¥Z¥^`\_TND0^WYY  
@HWI-EAS443:3:66:877:1712#0/1  
GCCAGTTAAAAACAATGCCAAGGAAATTGGAAACNGCTG  
+HWI-EAS443:3:66:877:1712#0/1  
^]E¥X¥abba^^¥`Q¥aYa[SXXQaV¥`YX^`BBBBBBBB  
@HWI-EAS443:3:67:1270:513#0/1  
GAAGCCAGTTNAAAAACAATGCCAAGGAAATTGGAAACGG  
+HWI-EAS443:3:67:1270:513#0/1  
I`bbbab¥^]D[¥¥abb\_]Vbbbb¥ab^^Nbbaaa` `^bb  
@HWI-EAS443:3:68:1003:1265#0/1  
CAAGTTGTATNGCAATCGTGGACTGGTGTATCTGAAATGA  
+HWI-EAS443:3:68:1003:1265#0/1  
a`\_abbbaa]D]bb` `WTaaaaabb\_Tbabbabaaabab\_  
@HWI-EAS443:3:69:727:195#0/1  
CCACGATTCANATGTGAAGAACTTATATGAAAAGGTAAGA  
+HWI-EAS443:3:69:727:195#0/1  
¥`¥Z\_]bbUDLW¥YV]`a^[M]a¥]JYa^W¥]\_\_Y` `\_]`  
@HWI-EAS443:3:6:771:1155#0/1  
TAGCACCCCTGGGTGTCTGACAAGTTGTATTGCAANCGTG  
+HWI-EAS443:3:6:771:1155#0/1  
aaaa]aa]` `^^a`VaR` ` `][ZZ`¥X[T`\_¥TN\_XDR^BB  
@HWI-EAS443:3:6:807:1811#0/1  
GTTTTGTGGNGACATCAAGATACAGCAAGAAGTTCAAGC  
+HWI-EAS443:3:6:807:1811#0/1  
aTXa`Ya^aXD^\_Z` ` `a\_]W¥Ma\_]\_a^¥^]V]Oa` `^B  
@HWI-EAS443:3:70:1459:863#0/1  
GCTGGATCCTGGGAAATCCAGAGTGTGAATCACTNTCCAC  
+HWI-EAS443:3:70:1459:863#0/1  
aabbaaaaaaaaa` `aaaaaaaa^a\_\_a`a`\_]ZDX\_]` ` \_`

@HWI-EAS443:3:71:1581:898#0/1  
GTGCTCTTCAGGTCGGCTNCATATCCTGACCCCTGCTCAT  
+HWI-EAS443:3:71:1581:898#0/1  
aab^^[]¥WZbaZV\_baRDL]a\_YNV¥XVZH¥¥LV^W¥¥  
@HWI-EAS443:3:71:698:1144#0/1  
CTCCTCATAATCGATGAAATCTCCTGGGTAACACNTTCCA  
+HWI-EAS443:3:71:698:1144#0/1  
abbbbbbbbbbbba]abZbbbbbabaaa\_^b`ab^DXaa]a  
@HWI-EAS443:3:74:1629:1155#0/1  
GCTGGCTGGATCCTGGGAAATCCAGANTGTGAATCACTCT  
+HWI-EAS443:3:74:1629:1155#0/1  
aQ`a`aaaa`]YY]SZ\_V`\_] [Z[`RDDZ^XLXZQXN^XY  
@HWI-EAS443:3:75:1121:1754#0/1  
AGCCNGTTAAAAACAATGCCAAGGAAATTGGAAACGGCT  
+HWI-EAS443:3:75:1121:1754#0/1  
a\_] [D]^YO¥` `a`b`ab`0`a`a^a`\_¥aaaa`a¥\_a  
@HWI-EAS443:3:75:1614:1630#0/1  
CTACATTAATGATAANGGAAAGAAGTCCTCGTGCTATGG  
+HWI-EAS443:3:75:1614:1630#0/1  
0¥ba¥`aaZ\_aabaPD[[]`b`bab`^[RV^`Yaa[ba¥`  
@HWI-EAS443:3:77:1031:1563#0/1  
TCTTGCTGNATCTTGATGTCCCCACAAAACATATGCATC  
+HWI-EAS443:3:77:1031:1563#0/1  
`ab^aa]DU`abbb\_Uaa`Waa`a\_]¥aaaa\_Vaa\_^`\_  
@HWI-EAS443:3:77:1522:596#0/1  
ATTTTGTGCTTTTTNCATATTTTGGACATTTTCCAATTGT  
+HWI-EAS443:3:77:1522:596#0/1  
abbbbbbababbbb^D^ba`bbbb` `aabba` [aabb`\_  
@HWI-EAS443:3:78:967:1037#0/1  
CGATTGCAATACAACNTGTCAGACACCCAAGGGTGCTATA  
+HWI-EAS443:3:78:967:1037#0/1  
abba` `bbaabba[D[b`aab`\_`baa]aaa`a^a\_aaaa  
@HWI-EAS443:3:79:127:1575#0/1  
GTGTTACCCAGGAGATTTTCATCGATTATGAGNAGCTAAGA  
+HWI-EAS443:3:79:127:1575#0/1  
a\_a\_aabba]ZW]S^a`a` `a[] ` ` ` ` \_YDPY\_[[WW¥  
@HWI-EAS443:3:79:1749:1664#0/1  
TCCGGCTTGAACTTCTTGCTGTATCTTGATGTCNCCACAA  
+HWI-EAS443:3:79:1749:1664#0/1  
aaKZ`^aa] ` ` [\_ba^ab\_aa`a` `aaa¥\_TW[DP`SP\_\_  
@HWI-EAS443:3:79:579:1738#0/1  
CTCCTCTGAGTATTTTGGGTAGTCATAAGTCCCNTTTTT  
+HWI-EAS443:3:79:579:1738#0/1  
ababaaabaa`VbbbbbaZS[aXabb`baaTab^D[aaaa  
@HWI-EAS443:3:7:920:1136#0/1  
GAAGTCCTCGTGCTATGGGCATTACCATNCATCTACTA  
+HWI-EAS443:3:7:920:1136#0/1  
\_bb]aabbababbaabb`aaababaa\_b¥DWaaa`b\_aa  
@HWI-EAS443:3:81:1768:1076#0/1  
ATGACACTGAGCTCAATTGNTCTCTTAGCTCCTCATAATC

+HWI-EAS443:3:81:1768:1076#0/1  
]aSYQb\_bb]b^^Vaba\_TDSUV^aa\_\_\_Z\_a`a][`X]`  
@HWI-EAS443:3:81:454:1699#0/1  
CAATTGGAAAATGTCCNAAATATGTAAAAAGCACAAAATT  
+HWI-EAS443:3:81:454:1699#0/1  
a\_¥QZ]LZb]a\_a]aVDY¥¥^\_aaYaU]Ya¥^a\_`X\_]Z  
@HWI-EAS443:3:83:830:1171#0/1  
CTTCTTGCTGTATCTTGATGTCCCNCAAAAACATATGCA  
+HWI-EAS443:3:83:830:1171#0/1  
abbabaaabbabbaabbbbbaaaa]D[bab]bbaaaa`a  
@HWI-EAS443:3:84:1615:1314#0/1  
AATCGATNAAATCTCCTGGTAACACGTTCCATTGTCTGA  
+HWI-EAS443:3:84:1615:1314#0/1  
Xba`¥b]DZX]UZb^a¥]`¥`a]`]]`^a`UabQ`G`aa\_  
@HWI-EAS443:3:85:470:100#0/1  
GGTGGACAGGGATGGTAGATGGATGGTACNGTTATCACCA  
+HWI-EAS443:3:85:470:100#0/1  
aaUaa\_]`^`a¥\_\_\_Y¥aZW\_Z¥¥\_`^V¥LDVY¥WUWUSU  
@HWI-EAS443:3:85:783:241#0/1  
TGCTCTTAGCTCCTCATAATCGATGAAATCTCNTGGGT  
+HWI-EAS443:3:85:783:241#0/1  
ab`aaaabaa`a`^^`aaa`a`\_\_\_a^a\_a\_aXDUa^`Z  
@HWI-EAS443:3:86:776:547#0/1  
CATCCATCTACTAGTGCTGACCAACAAAGTCTCNATCAGA  
+HWI-EAS443:3:86:776:547#0/1  
aba¥`baaaaaaa\_G^aaaa\_aaa`aaa`aXD[aXaa\_  
@HWI-EAS443:3:87:1186:1153#0/1  
TGCTGGCTGGATCCTNGGAAATCCAGAGTGTGAATCACTC  
+HWI-EAS443:3:87:1186:1153#0/1  
QW\_aabZa`]]XW^NDW^]bbbababZ`XaV[a`b\_a]aa  
@HWI-EAS443:3:89:623:1522#0/1  
GCTTCCTCTNAGTATTTTGGGTAGTCATAAGTCCCATTTT  
+HWI-EAS443:3:89:623:1522#0/1  
abababba¥D^a^baaaaaaa\_a`\_aaabaa]aaaaaaa  
@HWI-EAS443:3:90:1661:341#0/1  
GAAATGCTGNATCTGGTATTATCATTTTCAGATACACCAGT  
+HWI-EAS443:3:90:1661:341#0/1  
\_b\_a]aaaZD]`ababVaab\_aZ`baa`\_baab^a\_\_a`I  
@HWI-EAS443:3:90:526:1364#0/1  
GGGGACATCAAGNTACAGCAAGAAGTTCAAGCCGGAAATA  
+HWI-EAS443:3:90:526:1364#0/1  
a¥QYUab`\_baTD[bab\_`bba[`[Y`aba`^^Zba`aaa  
@HWI-EAS443:3:90:65:1121#0/1  
GGCTAGTTAAAAAAGGAANTTCATACCCAAAGCTCAGCAA  
+HWI-EAS443:3:90:65:1121#0/1  
aabaaa\_ababbaa`]YZDY`ba\_[a\_\_a[Q\_`^`\_`[\_]  
@HWI-EAS443:3:91:1419:180#0/1  
ATCANAATGCAGATGCATATGTTTTTGTGGGGACATCAAG  
+HWI-EAS443:3:91:1419:180#0/1  
^`a^DY\_bb\_¥baY^\_bba^b¥aba^\_X`]\_`Ya`^\_\_a

@HWI-EAS443:3:91:1723:917#0/1  
AGAAATAGATGGGGTNAAGCTGGAATCAACAAGGATTTAC  
+HWI-EAS443:3:91:1723:917#0/1  
abaaabababbaaaYD]baabbaaaaaa`a`aa\_aa``W  
@HWI-EAS443:3:93:153:1359#0/1  
TGCTGNCTGGATCCTGGGAAATCCAGAGTGTGAATCACTC  
+HWI-EAS443:3:93:153:1359#0/1  
aaba¥D^UZa[Q[a[^X`]]R[]^Z\_V`VZ\_\_[U]TZ[  
@HWI-EAS443:3:94:1263:1818#0/1  
ATCGATGAAATCTCCTGGGTAANACGTTCCATTGTCTGAA  
+HWI-EAS443:3:94:1263:1818#0/1  
a`WZ]\_a`YU]YYS^\_b`R\_UDU\_`S`SGY\_`^`RG\_XU¥  
@HWI-EAS443:3:94:309:1343#0/1  
GGGTCNTATTGCTATTTCCGGCTTGAACCTTCTTGCTGTAT  
+HWI-EAS443:3:94:309:1343#0/1  
abb]WD^bbaa`aaabaaa`^\_aa\_\_\_\_]`\_Xaa`Z`aU\_]`  
@HWI-EAS443:3:95:987:867#0/1  
TGCAGCCGACCTGAAGAGCACACAGAATGCCATTGNCGAG  
+HWI-EAS443:3:95:987:867#0/1  
a`WV¥S¥b[^Xab^\_bababaaSab\_IXa¥Y\_aa^DU\_]b  
@HWI-EAS443:3:96:1765:1195#0/1  
TGGGGCATTACCATCCATCTNCTAGTGCTGACCAACAAA  
+HWI-EAS443:3:96:1765:1195#0/1  
`]]`b`aa\_S]b`IWa\_RWDT\_`]W`K^X]\_\_\_\_`Z\_`  
@HWI-EAS443:3:98:933:1102#0/1  
CATCATTTGAAANGTTTGAGATATTTCCCAAGACAAGTTC  
+HWI-EAS443:3:98:933:1102#0/1  
a\_bbabbb\_`a[D^]abbbbaaaaaW]\_]aaaa`¥b\_`\_  
@HWI-EAS443:3:99:1760:965#0/1  
CAAGNTCATGGCCAATCATGACTCGAACAAAGGTGTAAC  
+HWI-EAS443:3:99:1760:965#0/1  
abT[D[b`ZU¥^¥^a][^aaaa¥\_UU[ZDUa`[^UZZ]\_B  
@HWI-EAS443:3:10:1238:644#0/1  
CGAGGGGGGTGGACAGGGATGGTAGATGGATGGTACGGTT  
+HWI-EAS443:3:10:1238:644#0/1  
`babbbbabQbaa\_YI¥baab¥EXXOUaaP\_a^P`^]¥U^  
@HWI-EAS443:3:11:1359:440#0/1  
TCGCCCCATTGCATTTGGGTAAATGTAACATTGCTGGCTG  
+HWI-EAS443:3:11:1359:440#0/1  
``^`]]`a[a`Z]b\_a`QXY]VU\_\_¥Z^]W¥NY]`UYB  
@HWI-EAS443:3:12:1312:1837#0/1  
TGGCTCCTCATAATCGATGAAATCTCCTGGGTAACACGTT  
+HWI-EAS443:3:12:1312:1837#0/1  
aaaaaaaaa`aba\_ab`aaaa]¥^\_`^`\_\_Z``\_\_[^Z]  
@HWI-EAS443:3:14:1489:805#0/1  
AAATGCGATAACACGTGCATGGAAAGTGTCAAAAATGGTC  
+HWI-EAS443:3:14:1489:805#0/1  
abaaa\_aaaaa^a\_b^a\_`aaa\_\_\_\_`]a]]^\_\_\_\_`\_\_^ZU  
@HWI-EAS443:3:15:358:1386#0/1  
CCCCAGGGGAGACTACCAGTACCAATGAACTGGCGACAGCT

+HWI-EAS443:3:15:358:1386#0/1  
abb`]aa^\_`\_ZaZ`a^U^W\_`Q`¥\_Z¥^]¥Y\_]¥BBBB  
@HWI-EAS443:3:16:453:1892#0/1  
TGCTTCGAATGTTATTTGTCTCCCGGCTCTACTAGTGCC  
+HWI-EAS443:3:16:453:1892#0/1  
Vb¥Z¥bWl¥b[a`aa^a`\_Z^`ba`\_]`¥PZ`J^QJU  
@HWI-EAS443:3:18:1376:503#0/1  
AGCCTTTGTTTCGAGTCATGATTGGGCCATGAACTTGTCTT  
+HWI-EAS443:3:18:1376:503#0/1  
aa`a`aaa`Y^Pa[^`\_`\_`a`\_`^Z^`\_W\_Z`a\_]Va`  
@HWI-EAS443:3:18:419:747#0/1  
TCTGGGCCATGAACTTGTCTTGGGGAATATCTCAAACCTT  
+HWI-EAS443:3:18:419:747#0/1  
abaa`baaaaaaaaaa^aaaa]`YZa`[a[aaaa]]^a`  
@HWI-EAS443:3:19:191:330#0/1  
GGGTCAGGATATGCAGCCGACCTGAAGAGCACACAGAANG  
+HWI-EAS443:3:19:191:330#0/1  
a\_SN\_Zaa¥Z`NZ`aaa`a\_a`T`]X]N`Z¥]a`\_XQXDU  
@HWI-EAS443:3:1:1661:482#0/1  
GGCAGTTAAAAACAATGCCAAGGAAATTGGAAACGGCTG  
+HWI-EAS443:3:1:1661:482#0/1  
aIZX¥V¥`^IR^a]¥^P[NLP[Q`X]\_YR`^UZ^BBBBBB  
@HWI-EAS443:3:20:1579:647#0/1  
TTCTGTGTGCTCTTCAGGTCGGCTGCATATCCTGACCCAT  
+HWI-EAS443:3:20:1579:647#0/1  
ab]a`ab]^aa[ba]]`XM]^SVYHNMW`aFH[RBBBBBB  
@HWI-EAS443:3:21:578:322#0/1  
ACGTGGTTGAACTCTTTACCTACTGCTGTGAACTGTGTAT  
+HWI-EAS443:3:21:578:322#0/1  
]bbNL^Z^`\_a`¥UYa`a`^¥]a`]ZYa\_a]^]\_aX`[`X  
@HWI-EAS443:3:22:1234:1033#0/1  
CGTGGGGACATCAAGATACAGCAAGAAGTTCAAGCCGGAG  
+HWI-EAS443:3:22:1234:1033#0/1  
abTaaaaabaa`\_aa\_]aaaaYaaa\_aaYU[]`a`Ra`]`  
@HWI-EAS443:3:22:168:859#0/1  
GATCTATTCAACTGTCGCCAGTTCATTGGTACTGGTAGGC  
+HWI-EAS443:3:22:168:859#0/1  
`\_a`\_a\_babaaa\_a`\_`\_aV\_aa`aadW`\_]`^`Q`\_G¥  
@HWI-EAS443:3:22:774:1060#0/1  
CTCTTTACCTACTGCTGTGAACTGTGTATTTCATCTTTTAA  
+HWI-EAS443:3:22:774:1060#0/1  
abbbbbbb^¥^aa`aaaa]`[a^Za\_\_aaaa`\_`aa`P\_  
@HWI-EAS443:3:22:868:782#0/1  
CCGCCGTTTCATTGAAGGGGGTGGACAGGGATGGTAGA  
+HWI-EAS443:3:22:868:782#0/1  
aaa`aaaWa`] [aaa^[\_a\_aa\_Pa¥UX\_\_aaQM`]UY^X  
@HWI-EAS443:3:23:405:1823#0/1  
AAATGCTGGATCTGGTATTATCATTTTCAGATACACCAGGC  
+HWI-EAS443:3:23:405:1823#0/1  
`a^^L\_Y¥Y\_]SXUH^\_\_aQ^W¥ZOV^[`\_]`\_YXY\_NG^

@HWI-EAS443:3:24:76:1548#0/1  
CTCTGGCTGGATCCTGGGAAATCCAGAGTGTGAATCACTC  
+HWI-EAS443:3:24:76:1548#0/1  
aaba`ab``````aa\_``\_aaa\_aaa¥`[Y][¥a`¥`a^¥^  
@HWI-EAS443:3:26:933:272#0/1  
GCGGGGGTGGACAGGGATGGTAGATGGATGGTACGGTTAT  
+HWI-EAS443:3:26:933:272#0/1  
a\_bbabaZaaa`a`a\_\_a\_W]VZZ\_\_¥^\_\_Q\_¥¥¥SW¥N  
@HWI-EAS443:3:29:396:1734#0/1  
CCTTACCCCATCTATTTCTTCTCTGTTTAATTTTGCTTCC  
+HWI-EAS443:3:29:396:1734#0/1  
¥GUWW[Q]aZKWQ[]`^^LP¥Q\_]\_SJFZJZ¥VTMNLRBB  
@HWI-EAS443:3:2:1520:330#0/1  
CAACTTGTGACACACCCAAGGGTCTATAAACACCAGCAT  
+HWI-EAS443:3:2:1520:330#0/1  
a`Ia`\_UXa[ba^SYZQY[\_\_QN\_[BBBBBBBBBBBBBBB  
@HWI-EAS443:3:31:1406:606#0/1  
GGAAACGGCTGCTTTGAATTTTACCACAAATGCGATAAAA  
+HWI-EAS443:3:31:1406:606#0/1  
\_\_bba`^`aa]LU¥bXZZW`^aWUM¥RI]^QMRZXOVZFT  
@HWI-EAS443:3:33:1305:415#0/1  
GAAATCTCCTGGGTAACACGTTCCATTGTCTGAACTAGTT  
+HWI-EAS443:3:33:1305:415#0/1  
aaaaaabbaaba^aaaaa`\_^`a\_]`[\_a`X\_Z^\_\_Z\_  
@HWI-EAS443:3:33:1753:726#0/1  
CTCCCCTTCAATGAAACCGCAATGGCCCCAAATAGGCCT  
+HWI-EAS443:3:33:1753:726#0/1  
X\_Za\_bbab\_bbabbb`\_R`a\_T¥¥a]`a^]¥X^SFFW  
@HWI-EAS443:3:34:459:301#0/1  
GCGGGGACATCAAGATACAGCAAGAAGTTCAAGCCGGAAA  
+HWI-EAS443:3:34:459:301#0/1  
abaa`b`a\_^aa¥aaa`\_baaaaa[aX]\_\_^Y\_]`^^XY  
@HWI-EAS443:3:34:58:688#0/1  
GTTGTTTCCACAATGTAGGACCATGAGCTTGCTGTGGAGA  
+HWI-EAS443:3:34:58:688#0/1  
a\_aa\_]\_\_\_\_a`URYPVQTU]^`\_ZS[]Y]`¥\_^\_SVVB  
@HWI-EAS443:3:34:821:1792#0/1  
GCTCCTCATAATCGATGAAATCTCCTGGGTAACACGTTGC  
+HWI-EAS443:3:34:821:1792#0/1  
a\_¥baabaa]a`aa\_[``ba\_a\_``^a\_`Za^]`^\_XYBB  
@HWI-EAS443:3:35:519:1441#0/1  
GCTGGCTGGATCCTGGGAAATCCAGAGTGTGAATCACTAC  
+HWI-EAS443:3:35:519:1441#0/1  
``[\_U\_``ZVOX\_0^UT\_TTVT\_\_^RBBBBBBBBBBBBBBB  
@HWI-EAS443:3:36:669:677#0/1  
GTTGTTTCCACAATGTAGGACCATGAGCTTGCTGTGGAGA  
+HWI-EAS443:3:36:669:677#0/1  
a`aa\_aabaaa`aaZ^a`a\_\_a\_`\_\_[\_]\_\_V`]^¥\_  
@HWI-EAS443:3:36:771:1024#0/1  
GAAATCTCCTGGGTAACACGTTCCATTGTCTGAACTAGTT





@HWI-EAS443:3:45:738:795#0/1  
GGCTGCTTTGAATTTTACCACAAATGCGATAACACGTGNA  
+HWI-EAS443:3:45:738:795#0/1  
ab\_`\_¥\_a¥\_T[`a`\_][YX]Y```a]]XZ]]]]¥]ZXDW  
@HWI-EAS443:3:47:1014:691#0/1  
CAGGCATTCTGTGTGCTCTTCAGGTCGGCTGCATATCCTG  
+HWI-EAS443:3:47:1014:691#0/1  
a\_bUbbaabbaaZbbbabbaX``[Z^aa`aaX`\_`^[\_W]  
@HWI-EAS443:3:47:143:1940#0/1  
TTGCTCCTCATAATCGATGAAATCTCCTGGGTAACACGTT  
+HWI-EAS443:3:47:143:1940#0/1  
[aUR`b^^\_bba\_bbbbaa^abaaWaaaa^]`aT0]W``a  
@HWI-EAS443:3:4:1311:1090#0/1  
GTCCGGGAGACAAAATAACATTCTGAAGCAACTGGAAATCTA  
+HWI-EAS443:3:4:1311:1090#0/1  
a[`aaaX\_Z¥Y¥[\_[[[\_```^[\_^\_\_\_\_Z`[a``\_\_]]]^  
@HWI-EAS443:3:4:88:1496#0/1  
GCGGGGACATCAAGATACAGCAAGAAGTTCAAGCCGGAAA  
+HWI-EAS443:3:4:88:1496#0/1  
^H¥[VSQU0[aQ¥XTV]]X[YXV^TN¥W^^\_P[WS]QQ]B  
@HWI-EAS443:3:50:1754:1205#0/1  
CGCGTGTATTATCGCATTTGTGGTAAAATTCAAAGCAGCCGT  
+HWI-EAS443:3:50:1754:1205#0/1  
a\_Sa^aa^^^Z`ab\_ba^^¥X¥bbbabbaba`a[\_bVV\_¥  
@HWI-EAS443:3:50:931:1245#0/1  
CGCCGGTTTCATTGAAGGGGGTGGACAGGGATGGTAGAG  
+HWI-EAS443:3:50:931:1245#0/1  
aZX^bb`]]OY^`^VZW¥QZ[``\_ZTKF¥^\_W¥^BBBBBB  
@HWI-EAS443:3:51:1011:793#0/1  
AGCCCCTCTTAGTTTGCATAGTTTCCCGTTATGCTTGTCT  
+HWI-EAS443:3:51:1011:793#0/1  
\_Y[VY\_b`bY[UVY¥ZZSZJYNY\_RGMR]Z^PMXa^HFM¥  
@HWI-EAS443:3:51:970:1071#0/1  
CCGCTGAGCTTTGGGTATGAATTTCTTTTTTAACTAGCC  
+HWI-EAS443:3:51:970:1071#0/1  
abaab`X``^]\_bba\_\_ab\_\_aaa^]a^\_aaaa\_¥a\_a^\_  
@HWI-EAS443:3:52:1554:1378#0/1  
GCTGGGGACATCAAGATACAGCAAGAAGTTCAAGCCGGAA  
+HWI-EAS443:3:52:1554:1378#0/1  
a\_aa\_\_a`]\_]\_]a^\_]``R`\_a\_]`V]¥\_`\_RW\_XX[  
@HWI-EAS443:3:53:1081:263#0/1  
ATGAACTTGTCTTGGGAATATCTCAAACCTTCAAATAA  
+HWI-EAS443:3:53:1081:263#0/1  
a¥\_\_XZ``aa\_b`\_`ba]^abaa\_Yba\_a\_`aa`^`\_a`\_  
@HWI-EAS443:3:54:7:1107#0/1  
GATTCACACTCTGGATTTCCAGGATCCAGCCAGCAATNT  
+HWI-EAS443:3:54:7:1107#0/1  
`a`aaa`a`a`a\_\_`\_]\_a^^\_]^\_]\_¥\_]\_] ^NTDN  
@HWI-EAS443:3:56:1010:495#0/1  
GAGCTGGCTGGATCCTGGGAAATCCAGAGTGTGAATCACT

+HWI-EAS443:3:56:1010:495#0/1  
aWZ]]aS``\_]UKTV[^Z¥ZR`\_UZU\_U\_Q^NVZ^\_\_YPS  
@HWI-EAS443:3:56:1697:144#0/1  
ATATTGGAAACGGCTGCTTTGAATTTTACCACAAATGCGA  
+HWI-EAS443:3:56:1697:144#0/1  
\_]aaa^`aa^`\_¥a]0[a¥GQ[Z\_aaLDN[0¥^]BBBBB  
@HWI-EAS443:3:58:184:505#0/1  
CGGGCTTCTTACCTTTTCATATAAGTTCTTCACATTTGAA  
+HWI-EAS443:3:58:184:505#0/1  
abba\_abababaabbaabaaaaa\_`aaaa```aaaa`  
@HWI-EAS443:3:61:683:921#0/1  
CACCCAGGATCCAGCCAGCAATGTTACATTTACCCAAATG  
+HWI-EAS443:3:61:683:921#0/1  
abbabbabaaaaaaaaab`aaaa]Zaa```\_W^\_a^`^^  
@HWI-EAS443:3:63:1252:116#0/1  
GGCGGCTGCTTTGAATTTTACCACAAATGCGATAACACGT  
+HWI-EAS443:3:63:1252:116#0/1  
aa\_aa]\_bZ[aaMFZ\_aaaVM¥VMUaaU[S[R¥UFZR^X  
@HWI-EAS443:3:64:1390:394#0/1  
ANAAGTTGTATTGCAATCGTGGACTGGTGTATCTGAAATG  
+HWI-EAS443:3:64:1390:394#0/1  
¥D[`a[]`[aaaaaa¥a¥ZM``[\_]\_[U\_Z\_\_\_\_\_`Y¥X`\_  
@HWI-EAS443:3:65:388:488#0/1  
CATATCCTGACCCCTGCTCATTTTGATGGTGATAACCGCA  
+HWI-EAS443:3:65:388:488#0/1  
\_`\_`aVT^¥a^`VPZa]aa]QXPP]Z[XPJZ^[WYTNODV  
@HWI-EAS443:3:65:807:608#0/1  
CTTGGGAAATCCAGAGTGTGAATCACTCTCCACAGCAAGC  
+HWI-EAS443:3:65:807:608#0/1  
¥\_]UGY^Z^U¥\_[H[Y\_\_XWW\_\_aa`^T^¥a¥\_`\_R\_X  
@HWI-EAS443:3:66:1293:164#0/1  
AACTAGTTCAGACAATGGAACGTGTTACCCAGGAGATTTC  
+HWI-EAS443:3:66:1293:164#0/1  
aaaa^]]a^aaaaa`a¥[\_Y]X¥¥\_\_\_\_\_`\_¥\_X\_\_^]  
@HWI-EAS443:3:6:1099:1304#0/1  
ACGGGGGTGGACAGGGATGGTAGATGGATGGTACGGTTAT  
+HWI-EAS443:3:6:1099:1304#0/1  
^`^a^¥X``b]bb[]¥U[a`a`\_U\_\_\_a[F^[^aQ]BB  
@HWI-EAS443:3:72:1075:1851#0/1  
AACTGATTGCCCCAGGGAGACTACCAGTACCAATGAAGT  
+HWI-EAS443:3:72:1075:1851#0/1  
¥`\_`^^W[V\_b\_\_V\_U]P¥X\_X¥a[T^Y]U[VSa]UX¥FV  
@HWI-EAS443:3:73:1064:1193#0/1  
GCAGATTTTCATCGATTATGAGGAGCTAAGAGAGCAATTGA  
+HWI-EAS443:3:73:1064:1193#0/1  
[IXa]`bSZ]Z`ZMaaaYLL[`]`¥WYYRU[UWXS¥N\_Z  
@HWI-EAS443:3:73:360:934#0/1  
GAGAGTGATTCACACTCTGGATTTCCCAGGATCCAGCCGG  
+HWI-EAS443:3:73:360:934#0/1  
^¥]]Zabaa]bab[`babaaa`]a\_baa^[`aaa`a`ZFY

@HWI-EAS443:3:74:845:505#0/1  
GGAAACGGCTGCTTTGAATTTTACCACAAATGCGATAAAA  
+HWI-EAS443:3:74:845:505#0/1  
ab\_aaabbaa\_L]aa¥` `]`a]GL[^\_]a` []Z]¥Y^WFZ  
@HWI-EAS443:3:74:898:159#0/1  
ATCCTGACCCCTGCTCATTTTGATGGTGATAACCGTACTA  
+HWI-EAS443:3:74:898:159#0/1  
OTYWa`SWXVP^0\_[]` `]Z]\_WF[FM`LJR\_BBBBBBBB  
@HWI-EAS443:3:75:27:1316#0/1  
CAGAATGCAGATGCATATGTTTTGTGGGGACATCAAGNT  
+HWI-EAS443:3:75:27:1316#0/1  
ab`TX`aba^a`aa\_\_a]a¥`a` [XT`\_`][``]`^¥ZDR  
@HWI-EAS443:3:75:378:237#0/1  
AACTAGTTCAGACAATGGAACGTGTACCCAGGAGATTTC  
+HWI-EAS443:3:75:378:237#0/1  
aa\_a[^X\_\_YZ\_`¥^\_aXTKR^U^SXY^ZW\_]SV\_X]\_¥X  
@HWI-EAS443:3:75:860:1824#0/1  
GAGCCGGTTTCATTGAAGGGGGTGGACAGGGATGGTAGA  
+HWI-EAS443:3:75:860:1824#0/1  
^^¥`X`WT¥Z^aaa`aa`a] []S]X^a\_a` `[[\_U]b`^  
@HWI-EAS443:3:76:818:322#0/1  
ACGGGTATGAATTTCCTTTTTAACTAGCCATATTAAT  
+HWI-EAS443:3:76:818:322#0/1  
aabaa]aba`aaaa`aaaaaaaa`\_aa`a` `aaaa`^aa  
@HWI-EAS443:3:77:906:1886#0/1  
GAAATCTCCTGGGTAACACGTTCCATTGTCTGAACTAGTT  
+HWI-EAS443:3:77:906:1886#0/1  
aa` `^¥abaYb]Z¥b\_baba^¥aaaa`[^a` `aa`\_aa^^  
@HWI-EAS443:3:78:95:514#0/1  
GCGTGGGGACATCAAGATACAGCAAGAAGTTCAAGCCGGA  
+HWI-EAS443:3:78:95:514#0/1  
a`\_P¥aaa` `` `a][a^\_aaa[aaaa\_`V^\_\_Z`]Wa^^  
@HWI-EAS443:3:80:348:1104#0/1  
AACTAGTTCAGACAATGGAACGTGTACCCAGGAGATTTC  
+HWI-EAS443:3:80:348:1104#0/1  
`aba]]^`aZ]`a]aaa^¥]a]a\_\_\_\_\_][[[Z^]Y¥^W^  
@HWI-EAS443:3:80:586:1390#0/1  
TGTGGGGACATCAAGATACAGCAAGAAGTTCAAGCCGGCA  
+HWI-EAS443:3:80:586:1390#0/1  
WZ\_aaa¥\_a¥]^^`^^R`MSS\_b`Y]ZPG^a]QW\_ZSHX  
@HWI-EAS443:3:81:1726:1477#0/1  
GCTGGGGACATCAAGATACAGCAAGAAGTTCAAGCCGGAA  
+HWI-EAS443:3:81:1726:1477#0/1  
abbbabab` `aab`abaa`a`\_bbaa^a¥\_\_aaZa][a^¥  
@HWI-EAS443:3:81:907:492#0/1  
GGGAGAATGAACTATTACTGGACACTAGTAGAGCCGGGGA  
+HWI-EAS443:3:81:907:492#0/1  
abb`b^aaaaaaaaaaaaaaaaaaaaa\_aa`\_aa\_\_ ``\_\_¥` ``  
@HWI-EAS443:3:82:195:137#0/1  
GCCATCCATCTACCATCCCTGTCCACCCCTTCAATGAC

+HWI-EAS443:3:82:195:137#0/1  
V¥\_NZ¥TZTHZ¥\_a`\_P¥\_Z]MQ[ZXQU\_ZYKDYaRSXXH  
@HWI-EAS443:3:82:391:152#0/1  
GCTGCTCTTCAGGTCGGCTGCATATCCTGACCCCTGCTCA  
+HWI-EAS443:3:82:391:152#0/1  
a`[]^`\_`\_][W[`Y^]SUPZKNV¥[UULLEIS[SPYNTQU  
@HWI-EAS443:3:84:1574:1621#0/1  
GTTATTATCATTTCAGATACACCAGTCCACGATTGCAATA  
+HWI-EAS443:3:84:1574:1621#0/1  
aNbaa`Y]\_\_\_a`Sa\_a`¥`V\_a\_SV\_\_`U\_XaXa]^ [  
@HWI-EAS443:3:84:558:509#0/1  
GCTGGGGACATCAAGATACAGCAAGAAGTTCAAGCCGGAA  
+HWI-EAS443:3:84:558:509#0/1  
^]W^)`SS\_a\_a[\_a[[\_T`[X\_`a`\_`T[\_aZ`aU\_^NR  
@HWI-EAS443:3:86:140:813#0/1  
GTAGGGGTCAGGATATGCAGCCGACCTGAAGAGCACACAG  
+HWI-EAS443:3:86:140:813#0/1  
[DZa]Z`Raa^a`^`aa\_a\_Y`a\_\_[]\_VY]\_\_\_`^`¥\_\_  
@HWI-EAS443:3:87:1193:1586#0/1  
GGAGGGGTCAGGATATGCAGCCGACCTGAAGAGCACACAG  
+HWI-EAS443:3:87:1193:1586#0/1  
`bHR`a\_R[aaaSXaUaS]SRWa]^`aVVX]ZYPRXSUZa  
@HWI-EAS443:3:88:347:685#0/1  
GAAATCTCCTGGGTAACACGTTCCATTGTCTGAACTAGTT  
+HWI-EAS443:3:88:347:685#0/1  
aXRWPZ\_X]Z]ZVG\_¥]XS[]^[] [SNXYP¥]ZPZ\_¥[PL  
@HWI-EAS443:3:88:482:1768#0/1  
GTCCACGATTGCAATACAACCTTGTGAGACACCCAAGGGGG  
+HWI-EAS443:3:88:482:1768#0/1  
¥IN^`¥^¥MGXb`Ya]a\_Y\_a\_[ZNXXX`VM¥UX¥RDQ  
@HWI-EAS443:3:88:832:1504#0/1  
GTCCTCGTGCTATGGGGCATTACCATCCATCTACTAGCG  
+HWI-EAS443:3:88:832:1504#0/1  
a)`a]aaaaabX^a[\_`a`a\_ab[^]\_a\_a]\_Z`^^¥G^  
@HWI-EAS443:3:89:1714:1458#0/1  
GAAATCTCCTGGGTAACACGTTCCATTGTCTGAACTAGTT  
+HWI-EAS443:3:89:1714:1458#0/1  
``a`U¥baaaab][b``aaaaaa[aa`a\_\_`a`N¥]`\_Z  
@HWI-EAS443:3:8:1568:1285#0/1  
GCTGGCTGGATCCTGGGAAATCCAGAGTGTGAATCACTAT  
+HWI-EAS443:3:8:1568:1285#0/1  
aYF¥a]aa¥]WWSa]S]\_\_VPHNP^SBBBBBBBBBBBBBB  
@HWI-EAS443:3:90:117:1041#0/1  
GAAATCTCCTGGGTAACACGTTCCATTGTCTGAACTAGTT  
+HWI-EAS443:3:90:117:1041#0/1  
a\_baaaa\_aab\_aX`a^a`Z^a\_^Y\_]Va\_a^¥^¥\_aU]  
@HWI-EAS443:3:91:1563:1178#0/1  
ATTTTGTCTCCCGCTCTACTAGTGTCCAGTAATAGTTGA  
+HWI-EAS443:3:91:1563:1178#0/1  
Kba[¥Z[`bb\_`aU[\_\_\_a][a`bbb`PYaaXabVRYG¥DU

@HWI-EAS443:3:92:142:1630#0/1  
CAGGGATGGTAGATGGATGGTACGGTTATCACCATCAACA  
+HWI-EAS443:3:92:142:1630#0/1  
¥\_Q¥X[\_[RU]]Z\_\_`^UK[Y\_JQSW]\_RZPZZ]aBBB  
@HWI-EAS443:3:92:1565:478#0/1  
GGGTGGACAGGGATGGTAGATGGATGGTACGGTTATCANC  
+HWI-EAS443:3:92:1565:478#0/1  
]¥b`bbbabbbbabbaab\_aabbab\_YUa^][bbb]G[DS  
@HWI-EAS443:3:92:1604:1736#0/1  
GAAATCTCCTGGGTAACACGTTCCATTGTCTGAACTAGTT  
+HWI-EAS443:3:92:1604:1736#0/1  
abbaa`b¥`abb\_0^a\_aY`[YaWaa^^^`a`aW^`]]\_  
@HWI-EAS443:3:94:1633:426#0/1  
CGGCTCCTCATAATCGATGAAATCTCCTGGGTAACACGTT  
+HWI-EAS443:3:94:1633:426#0/1  
`abab^`aaab\_a`[\_aabaaaa^\_\_aa`aXa`S\_]`X`  
@HWI-EAS443:3:95:1683:1602#0/1  
AATGCTGTGAACTGTGTATTCATCTTTTCAATAACAGAAT  
+HWI-EAS443:3:95:1683:1602#0/1  
YNabaXTabXVS\_[Y¥[\_aVba]]Xa]]T\_`[^`aabba  
@HWI-EAS443:3:96:153:258#0/1  
CAGCCGGTTTCATTGAAGGGGGTGGACAGGGATGGTAGA  
+HWI-EAS443:3:96:153:258#0/1  
aa^Y[XTR¥XOWa]]^a`a¥Y[RV¥Y]W\_^YMW`¥PW¥¥  
@HWI-EAS443:3:96:534:1894#0/1  
GAAATCTCCTGGGTAACACGTTCCATTGTCTGAACTAGTT  
+HWI-EAS443:3:96:534:1894#0/1  
a^^`[bba[a^Z`Yaa]b\_abbaabaa¥a¥aabb^aa[\_`  
@HWI-EAS443:3:97:752:820#0/1  
GGAGGGGTCAGGATATGCAGCCGACCTGAAGAGCACACAG  
+HWI-EAS443:3:97:752:820#0/1  
a`[`bZ^]aaaaaaaaa¥[\_a]¥U`a`aaX`^][`aa`  
@HWI-EAS443:3:99:1561:363#0/1  
CTTCTTGCTGTATCTTGATGTCCCCACAAAAACATATGAA  
+HWI-EAS443:3:99:1561:363#0/1  
ab^^aababbabb]bbb¥abbY^\_bbab¥a`a\_abbbbHb  
@HWI-EAS443:3:99:745:2007#0/1  
AACTAGTTCAGACAATGGAACGTGTTACCCAGGAGATTTTC  
+HWI-EAS443:3:99:745:2007#0/1  
a\_a¥aaRaabaaaa`a\_a`a`\_\_`\_\_^Z`\_aa\_^Z`V\_  
@HWI-EAS443:3:100:411:549#0/1  
CGTGGGACATCAAGATACAGCAAGAAGTTCAAGCCGGAA  
+HWI-EAS443:3:100:411:549#0/1  
ababbbbaabbabbbbaa`abbbbabbaaYbbbaabbab  
@HWI-EAS443:3:10:1312:171#0/1  
CGTTACCCAGGAGATTTTCATCGATTATGAGGAGCTAAGAG  
+HWI-EAS443:3:10:1312:171#0/1  
abbbba`bbbbb`bab^baabaaaabb`baYa[ab`^aa  
@HWI-EAS443:3:10:1736:1147#0/1  
ATGCTTCTCTGAGTATTTTGGGTAGTCATAAGTCCCATT

+HWI-EAS443:3:10:1736:1147#0/1  
a`Z¥a\_\_b\_aa`a]\_aaa`^[U\_a^R[\_^]^[RUXZ\_\_  
@HWI-EAS443:3:11:1050:1222#0/1  
AGCTGGCTGGATCCTGGGAAATCCAGAGTGTGAATCACTC  
+HWI-EAS443:3:11:1050:1222#0/1  
aa]X`aa)`a`^`\_¥[``U¥^SVOZ¥[XRZPX[^ZRXPVB  
@HWI-EAS443:3:11:1171:1656#0/1  
CCCAGGAGATTTTCATCGATTATGAGGAGCTAAGAGAGCAG  
+HWI-EAS443:3:11:1171:1656#0/1  
¥0]U`\_Ub]^YUXSZXaa`YX`Z\_a\_a[\_]Y[V[]B  
@HWI-EAS443:3:11:158:837#0/1  
TGGGGGGTGGACAGGGATGGTAGATGGATGGTACGGTTAT  
+HWI-EAS443:3:11:158:837#0/1  
aaa`babNa]Z\_\_aaa^`aaWWa`Za\_[a^U`\_`XS\_[U  
@HWI-EAS443:3:11:30:643#0/1  
CGGGGCATTCACCATCCATCTACTAGTGCTGACCAACAAA  
+HWI-EAS443:3:11:30:643#0/1  
a`babb`aaa`aaaa`a`\_`\_`a\_a`^`a`a]```\_^\_Y\_[\_`  
@HWI-EAS443:3:11:441:261#0/1  
AGCCGGTTTCATTGAAGGGGGTGGACAGGGATGGTAGAT  
+HWI-EAS443:3:11:441:261#0/1  
aaaabbXaaaZaaa`aa`a\_Wa\_\_¥\_\_\_\_\_V\_\_^U¥¥WV  
@HWI-EAS443:3:12:306:422#0/1  
CACGTGTACCAGGAGATTTTCATCGATTATGAGGAGCTA  
+HWI-EAS443:3:12:306:422#0/1  
I¥b`Yaaaabbbb]WYaaa]`aaaaa`aaaa`a`a\_aa`]  
@HWI-EAS443:3:12:326:1212#0/1  
AGTGGGGACATCAAGATACAGCAAGAAGTTCAAGCCGGAA  
+HWI-EAS443:3:12:326:1212#0/1  
abWa^a^Va`^`a¥`^Yaaa`^`a\_\_a0^`a`^`^`^ZS  
@HWI-EAS443:3:12:478:1706#0/1  
CGTGGGGACATCAAGATACAGCAAGAAGTTCAAGCCGGAA  
+HWI-EAS443:3:12:478:1706#0/1  
\_\_0[LP]¥¥¥W¥\_Waa]`ab¥Xa\_]\_GRU]¥XXXaV[\_`  
@HWI-EAS443:3:12:990:884#0/1  
CGGGACATCAAGATACAGCAAGAAGTTCAAGCCGGAAATA  
+HWI-EAS443:3:12:990:884#0/1  
aaaaa`aaaaa`a`\_aaaaa`\_\_aX`\_a^^\_]`Y^^`\_  
@HWI-EAS443:3:13:1191:371#0/1  
CGCTGGCTGGATCCTGGGAAATCCAGAGTGTGAATCACTC  
+HWI-EAS443:3:13:1191:371#0/1  
abaa\_W]`b`\_aZa`aaX`\_¥[\_`a`^`¥\_S[^\_\_U^U¥¥`  
@HWI-EAS443:3:13:1340:1234#0/1  
CGCACGTGTTATCGCATTGTGGTAAAATTCAAAGCAGCC  
+HWI-EAS443:3:13:1340:1234#0/1  
abaaaa`abaa\_aa\_ab`a^aa^ab``aaWa\_\_`¥`\_UX  
@HWI-EAS443:3:13:1344:758#0/1  
AGCTGGCTGGATCCTGGGAAATCCAGAGTGTGAATCACTC  
+HWI-EAS443:3:13:1344:758#0/1  
a[^\_\_^aZa\_]\_\_\_\_^Y\_N\_\_RP^WUTYRVTBBBBBBBBBB

@HWI-EAS443:3:13:350:1038#0/1  
GTCCGGCTTGAACCTTCTTGCTGTATCTTGATGTCCCCACA  
+HWI-EAS443:3:13:350:1038#0/1  
\_^bb`¥aa`bbaaaaaababaa`a\_aaaaa\_`b`\_aa\_a  
@HWI-EAS443:3:13:517:416#0/1  
GCGGCTGCTTTGAATTTTACCACAAATGCGATAACACGTG  
+HWI-EAS443:3:13:517:416#0/1  
ababaa`TW^a]X\_`aaaR]XVXaX^HWW]ZX¥^^`X\_RU  
@HWI-EAS443:3:14:1065:660#0/1  
CGGGGACATCAAGATACAGCAAGAAGTTCAAGCCGGAAAT  
+HWI-EAS443:3:14:1065:660#0/1  
abaaba^^`X^`a\_\_a`aUaaa]\_`R]^`\_Y\_a[VNW\_  
@HWI-EAS443:3:14:936:1219#0/1  
TTCGATGAAATCTCCTGGGTAACACGTTCCATTGTCTGAA  
+HWI-EAS443:3:14:936:1219#0/1  
aaabaZY\_Y^aaaa`[aa`¥aa``\_a\_aa\_``\_`\_a\_^`  
@HWI-EAS443:3:15:301:714#0/1  
ATCCGGCTTGAACCTTCTTGCTGTATCTTGATGTCCCCACA  
+HWI-EAS443:3:15:301:714#0/1  
aaaaa`]aaa`a`aaaa``a^aa`aa\_`a^``\_\_`Z\_  
@HWI-EAS443:3:15:507:331#0/1  
CGGCTGGATCCTGGGAAATCCAGAGTGTGAATCACTCTCC  
+HWI-EAS443:3:15:507:331#0/1  
ababba`bba]bb[]baba`bL`S``\_P\_`aZ[^`]'`aa  
@HWI-EAS443:3:15:932:479#0/1  
CCCGGCTTGAACCTTCTTGCTGTATCTTGATGTCCCCACAA  
+HWI-EAS443:3:15:932:479#0/1  
abbbbaaa[aa^abaabb`baabbaab``]``^aaaaaaa  
@HWI-EAS443:3:15:994:198#0/1  
CGTGGGGACATCAAGATACAGCAAGAAGTTCAAGCCGGAA  
+HWI-EAS443:3:15:994:198#0/1  
ab`bbbaa]Z`a]ba\_\_aaaaaaa`^a^`\_]`[\_aa\_\_  
@HWI-EAS443:3:16:1077:341#0/1  
ATGCTTCCTCTGAGTATTTTGGGTAGTCATAAGTCCCATT  
+HWI-EAS443:3:16:1077:341#0/1  
\_TaZ``^`^abb\_`Yaa^aaZYVKaXRH\_`\_O\_ZHVW¥Y^  
@HWI-EAS443:3:16:111:199#0/1  
AGAGCACACAGAATGCCATTGACGAGATTACTAACAAAGC  
+HWI-EAS443:3:16:111:199#0/1  
`Y¥```aYZ]\_YZ\_\_¥Z^\_\_aZza`a]W^Q[^ZWHH]¥XD  
@HWI-EAS443:3:16:1397:604#0/1  
CGTGGGGACATCAAGATACAGCAAGAAGTTCAAGCCGGAA  
+HWI-EAS443:3:16:1397:604#0/1  
``\_a`a`aba\_\_aba`^`aaabaa^¥\_]`^``\_`N¥^a\_Z  
@HWI-EAS443:3:16:1659:1857#0/1  
GCTCGTCAATGGCATTCTGTGTGCTCTTCAGGTCGGCTGC  
+HWI-EAS443:3:16:1659:1857#0/1  
aaa^aX^aa^[`0`]Z\_Q^T[YYP¥U¥]NX^YFNOVB BBB  
@HWI-EAS443:3:16:175:283#0/1  
TAGGGGTCAGGATATGCAGCCGACCTGAAGAGCACACAGA

+HWI-EAS443:3:16:175:283#0/1  
aaaa\_aU\_aaaa\_a\_\_aa^Za`a`a` `¥KZ\_Z\_\_^T]¥¥  
@HWI-EAS443:3:16:845:1491#0/1  
GGGGGACATCAAGATACAGCAAGAAGTTCAAGCCGGAAAT  
+HWI-EAS443:3:16:845:1491#0/1  
a]]aaaa\_\_a`aaaa\_`]a\_aa`\_T`]]\_a]\_^]X^^^\_\_  
@HWI-EAS443:3:16:951:1658#0/1  
CGTGGGGACATCAAGATACAGCAAGAAGTTCAAGCCGGAA  
+HWI-EAS443:3:16:951:1658#0/1  
a`Ua`^a\_aaaaaaa`aaa` `aaa[\_`^]ab\_a\_]`^]`\_  
@HWI-EAS443:3:17:1793:244#0/1  
NGGGCCATGAACTTGTCTTGGGGAATATCTCAAACCTTTC  
+HWI-EAS443:3:17:1793:244#0/1  
DMVXZZZZZZWZZZWZZZZZZWVUZZZXWZZZVYXZXU  
@HWI-EAS443:3:17:678:467#0/1  
CGGGGACATCAAGATACAGCAAGAAGTTCAAGCCGGAAAT  
+HWI-EAS443:3:17:678:467#0/1  
abaaaaa\_a`ab` `a\_` ` `aa\_Ya]^aa`^^Za`\_]\_^  
@HWI-EAS443:3:18:1742:1210#0/1  
ATCCGGCTTGAACCTTCTTGCTGTATCTTGATGTCCCCACA  
+HWI-EAS443:3:18:1742:1210#0/1  
aa`\_\_a\_aaa`aWaa]baa^aa\_\_a^aaa^`a\_]Z]^]^  
@HWI-EAS443:3:18:319:1061#0/1  
CGCTGGCTGGATCCTGGGAAATCCAGAGTGTGAATCACTC  
+HWI-EAS443:3:18:319:1061#0/1  
^\_`Xa]baXY`X`aaW[]^]XY^W¥RX[N]GU[GRb^Y`^  
@HWI-EAS443:3:18:41:1157#0/1  
GGCTTCTCTGAGTATTTTGGGTAGTCATAAGTCCCATTT  
+HWI-EAS443:3:18:41:1157#0/1  
aaba]abaa\_\_\_\_^Va` ` `[\_`W^]Q]^\_[W[[`]]^^`\_  
@HWI-EAS443:3:18:440:640#0/1  
CGTGGGGACATCAAGATACAGCAAGAAGTTCAAGCCGGAA  
+HWI-EAS443:3:18:440:640#0/1  
aa¥a^]]`ZW¥Z]]`Y`\_a`a]¥¥V[G[FNYaa\_W¥TXYS  
@HWI-EAS443:3:18:913:358#0/1  
CGTGGGGACATCAAGATACAGCAAGAAGTTCAAGCCGGAA  
+HWI-EAS443:3:18:913:358#0/1  
aa[`aa` `[a\_`a\_` `^a^`^]\_aa^]`Y^X^V^VV\_]\_]\_  
@HWI-EAS443:3:19:1201:1340#0/1  
GGCTGGCTGGATCCTGGGAAATCCAGAGTGTGAATCACTC  
+HWI-EAS443:3:19:1201:1340#0/1  
aXW\_b¥X¥]^XXUF^`aaaaa¥]a^` [][a]` ` `Y^¥  
@HWI-EAS443:3:19:864:512#0/1  
AGCCGGTTTCATTGAAGGGGGTGGACAGGGATGGTAGAT  
+HWI-EAS443:3:19:864:512#0/1  
aaaaba\_aa`¥`aa^\_a`¥aaa¥`V¥¥`\_^` `¥W\_ZV^\_ZU  
@HWI-EAS443:3:1:764:559#0/1  
TGGGGTCAGGATATGCAGCCGACCTGAAGAGCACACAGAA  
+HWI-EAS443:3:1:764:559#0/1  
T`bab^¥abbZ\_`¥¥X¥]QX]UXaaaS\_a¥b¥` [\_X\_BBB



@HWI-EAS443:3:20:1243:256#0/1  
TGGGAAATCCAGAGTGTGAATCACTCTCCACAGCAAGCTG  
+HWI-EAS443:3:20:1243:256#0/1  
[aVXN[Y[]`[`a]a\_\_W¥ba``aba^\_V`U^W]aX`[H  
@HWI-EAS443:3:21:842:544#0/1  
CGCACGTGTTATCGCATTGTGGTAAAATTCAAAGCAGCC  
+HWI-EAS443:3:21:842:544#0/1  
aaaa]a[]aaba`a^`baaa\_`\_]aaa`a`\_\_\_`VZ`U^  
@HWI-EAS443:3:22:721:1318#0/1  
GTTATTTTGTCTCCCGGCTCTACTAGTGTCCAGTAATAGG  
+HWI-EAS443:3:22:721:1318#0/1  
a`]Y¥XS^]0a`a[`YRP[VSBBBBBBBBBBBBBBBBBB  
@HWI-EAS443:3:23:1504:319#0/1  
GGTGCTTTTTACATATTTTGGACATTTTCCAATTGTGATC  
+HWI-EAS443:3:23:1504:319#0/1  
^\_Yb`abbbaa^aaaabbab]^\_`baba^`^`a\_a\_a\_^]  
@HWI-EAS443:3:23:501:517#0/1  
GATTCCCAAGACAAGTTCATGGCCAATCATGACTCGAA  
+HWI-EAS443:3:23:501:517#0/1  
a`aaXb]aa\_`\_]`NYU^XYV`\_\_VY\_[W\_Z]\_¥]X]WWX  
@HWI-EAS443:3:23:64:1601#0/1  
GGGGGACATCAAGATACAGCAAGAAGTTCAAGCCGAAAT  
+HWI-EAS443:3:23:64:1601#0/1  
`abbababaa\_^bbabbabb\_ba\_aa\_\_`\_]aaa\_^\_a`  
@HWI-EAS443:3:24:1269:169#0/1  
ATAAATTTTTGTAGAAGCTTTTTGCTCCAGCATGAGGACA  
+HWI-EAS443:3:24:1269:169#0/1  
`baaabaaaa`aa`a`a`\_]`\_W^^]\_]\_ZZY\_]W]V]  
@HWI-EAS443:3:24:1305:419#0/1  
CGCTTCTCTGAGTATTTTGGGTAGTCATAAGTCCCATTT  
+HWI-EAS443:3:24:1305:419#0/1  
Ma````ab]^`a^[\_bbbba``]bbabb\_abbY`\_babbb  
@HWI-EAS443:3:24:1456:1655#0/1  
AAAGATACAGCAAGAAGTTCAAGCCGAAATAGCAATAAG  
+HWI-EAS443:3:24:1456:1655#0/1  
H\_babK\_\_\_\_]]]ba`bba¥X\_bb\_U^aaaabbX`a]b`a¥  
@HWI-EAS443:3:24:1480:555#0/1  
AGCTGGCTGGATCCTGGGAAATCCAGAGTGTGAATCACTC  
+HWI-EAS443:3:24:1480:555#0/1  
aaa[[]`ZV]aa]^`aaba]aX^]X\_Y^`¥^YaaZPY^G]^  
@HWI-EAS443:3:24:1586:1206#0/1  
GGGGTCTTATTGCTATTTCCGGCTTGAACCTTCTTGCTGTA  
+HWI-EAS443:3:24:1586:1206#0/1  
ab¥]]YW¥^aab\_bZ\_ba`H^VY\_¥QLXN`XL^¥S]U]M]  
@HWI-EAS443:3:24:1701:406#0/1  
AGGCTGCATATCCTGACCCCTGCTCATTGATGGTGATA  
+HWI-EAS443:3:24:1701:406#0/1  
aab][aaabaaaa\_a]``\_]X\_[``\_^\_a\_^^`U`]V]  
@HWI-EAS443:3:24:246:265#0/1  
ACTTGTGACACACCAAGGGTGTATAAACACCAGCCTCA

+HWI-EAS443:3:24:246:265#0/1  
ZRYV\_]^[V`]``T`0Q0JNW¥`ZaZ`^^RN\_LZOWZF  
@HWI-EAS443:3:25:1007:1746#0/1  
ACCTCGTGCTATGGGGCATTACCATCCATCTACTAGTGC  
+HWI-EAS443:3:25:1007:1746#0/1  
aa¥a`\_] ][]`\_`\_^^^\_a\_\_a\_Z`^`\_\_\_\_`^^^]\_\_YUO  
@HWI-EAS443:3:25:1010:1308#0/1  
CGGGGTGGACAGGGATGGTAGATGGATGGTACGGTTATCA  
+HWI-EAS443:3:25:1010:1308#0/1  
`abba`bbbbbbabbbba^bbbbbbba`baZbbbbbaYaY^a  
@HWI-EAS443:3:25:1320:1334#0/1  
GTCCCGGCTCTACTAGTGTCCAGTAATAGTTCATTCTCCC  
+HWI-EAS443:3:25:1320:1334#0/1  
H[`\_\_¥W\_` `V\_¥\_\_W\_[[U\_¥^¥\_¥¥RY\_ZP[a[¥YZVH  
@HWI-EAS443:3:25:485:2047#0/1  
NGGTAGTCCAAAGTTCTTTTCATTTTCCAATAGAACCAACA  
+HWI-EAS443:3:25:485:2047#0/1  
DMRNTUXXSMSURORXTRWYUXXXVYZSZXXMTZSXZ  
@HWI-EAS443:3:25:633:944#0/1  
CGTGGGGACATCAAGATACAGCAAGAAGTTCAAGCCGGAA  
+HWI-EAS443:3:25:633:944#0/1  
a¥Pa^abb\_Z¥aaZ\_U^X`]ZU\_a[\_]`VFZ¥KUXVaQ\_\_  
@HWI-EAS443:3:25:709:496#0/1  
ACTAGTTCAGACAATGGAACGTGTTACCCAGGAGATTTCA  
+HWI-EAS443:3:25:709:496#0/1  
abbbb`abbbbbbbbaabbaa`\_baa`aa`ba\_aa\_aa`¥`  
@HWI-EAS443:3:25:972:200#0/1  
TGCCGGGAGACAAAATAACATTCGAAGCAACTGGAAATCT  
+HWI-EAS443:3:25:972:200#0/1  
`]L[a]OXa]VURZ`PaaS`a]¥aa[XK¥TGLQ[I]UVGV  
@HWI-EAS443:3:26:129:147#0/1  
AGCCGGTTTCATTGAAGGGGGTGGACAGGGATGGTAGAT  
+HWI-EAS443:3:26:129:147#0/1  
\_a`abaaaaabaaS`aaSa`\_W`]X`aY`¥]\_\_U\_VUT  
@HWI-EAS443:3:26:27:1367#0/1  
ACTAGTTCAGACAATGGAACGTGTTACCCAGGAGATTTCA  
+HWI-EAS443:3:26:27:1367#0/1  
aaa`[`aaa`baba`a`a`^¥^^^`a^\_a\_Z``[Y`\_`]  
@HWI-EAS443:3:26:477:712#0/1  
TGTAATCTCGTCAATGGCATTCTGTGTGCTCTTCAGGTCG  
+HWI-EAS443:3:26:477:712#0/1  
a^JaZbaa\_¥Ub¥U[\_X``aa][`\_] ]^a\_aaa¥aX`\_`\_`  
@HWI-EAS443:3:27:113:190#0/1  
CTGCCGGTTTCATTGAAGGGGGTGGACAGGGATGGTAGA  
+HWI-EAS443:3:27:113:190#0/1  
aa`baba^]aaaa`a[[`^aa`W^[^[\_^VUY`\_UZ^¥  
@HWI-EAS443:3:27:1577:2022#0/1  
TCCGGTTTCATTGAAGGGGGTGGACAGGGATGGTAGATG  
+HWI-EAS443:3:27:1577:2022#0/1  
K`\_\_aa^`abb`J\_b`\_`baYS\_]MX\_bbaaZWY\_aa`b

@HWI-EAS443:3:27:161:19#0/1  
AGCTGCTTTGAATTTTACCACAAATGCGATAACACGTGCA  
+HWI-EAS443:3:27:161:19#0/1  
YW`^`\_^`]T^abab`aa`a^¥aaaa`]T```¥`\_``a  
@HWI-EAS443:3:28:1793:1952#0/1  
NGGTAGTCCAAAGTTCTTTTCATTTTCCAATAGAACCAACA  
+HWI-EAS443:3:28:1793:1952#0/1  
DOZZYTNRXUSWVYXYZZWZZZZWYWZZZWZVZZZZWW  
@HWI-EAS443:3:28:355:1510#0/1  
CAGGGGGGTGGACAGGGATGGTAGATGGATGGTACGGTTA  
+HWI-EAS443:3:28:355:1510#0/1  
a\_a`¥aa^Z`\_aaa\_[^`\_a\_Wa\_\_¥`\_^`\_Wa\_\_UVU\_  
@HWI-EAS443:3:28:872:511#0/1  
GGCTTCTCTGAGTATTTTGGGTAGTCATAAGTCCCATTT  
+HWI-EAS443:3:28:872:511#0/1  
aaaaaabaab`\_[aaaa]aUaa\_[aaa^¥^``[\_aaa  
@HWI-EAS443:3:29:1157:283#0/1  
CGCACGTGTTATCGCATTTGTGGTAAAATTCAAAGCAGCC  
+HWI-EAS443:3:29:1157:283#0/1  
abbaa\_babbbabaabaa\_bb^babaaaaba`a`aa¥\_  
@HWI-EAS443:3:29:1256:130#0/1  
TCGGCTGCTTTGAATTTTACCACAAATGCGATAACACGTG  
+HWI-EAS443:3:29:1256:130#0/1  
\_```¥\_[N]aaP[\_]`aaTHSSQZ^\_XYQZXT¥[N[MWBB  
@HWI-EAS443:3:29:1611:74#0/1  
ACCCAGGATCCAGCCAGCAATGTTACATTTACCCAAATGC  
+HWI-EAS443:3:29:1611:74#0/1  
a`aZa`baa`¥`\_SZ¥]N\_Z\_¥`]W¥¥¥W^WWU`^TW`B  
@HWI-EAS443:3:29:173:1254#0/1  
CGGGTAAATGTAACATTGCTGGCTGGATCCTGGGAAATCC  
+HWI-EAS443:3:29:173:1254#0/1  
abbaYb\_\_`\_]b`a`a`ba]0]\_`Va`]X\_NTYV\_a\_aB  
@HWI-EAS443:3:29:20:989#0/1  
GTACCCCATCTATTTCTTCTCTGTTAATTTTGCTTCCTC  
+HWI-EAS443:3:29:20:989#0/1  
a\_aaaaaaaaa`aaaaaaaa`aa`\_a`a`a\_\_`````\_a`\_`  
@HWI-EAS443:3:29:509:1404#0/1  
ATCCGGCTTGAACCTTCTTGCTGTATCTTGATGTCCCCACA  
+HWI-EAS443:3:29:509:1404#0/1  
`Za````aaaWZ\_]\_Z]\_Z[¥Y]YX```¥Z^\_WX```¥^X^B  
@HWI-EAS443:3:30:1687:586#0/1  
CGTGGGGACATCAAGATACAGCAAGAAGTTCAAGCCGGAA  
+HWI-EAS443:3:30:1687:586#0/1  
[aaXaabb]bbbbbbabbaab`bbbbba`bVbb`R[aZUa  
@HWI-EAS443:3:30:253:839#0/1  
TGGGTGGACAGGGATGGTAGATGGATGGTACGGTTATCAC  
+HWI-EAS443:3:30:253:839#0/1  
[bbbYbbaa]^`^aaa`a[aa`^aa]Ua`Ta\_aaX\_[Z^]]  
@HWI-EAS443:3:30:267:362#0/1  
CGGGGTGGACAGGGATGGTAGATGGATGGTACGGTTATCA

+HWI-EAS443:3:30:267:362#0/1  
a]aa`U`aaa\_\_aa^ZaaUaa`¥¥^a\_a[Ya`]\_W¥¥WSY  
@HWI-EAS443:3:31:1290:1160#0/1  
ACCGGTTTCATTGAAGGGGGTGGACAGGGATGGTAGATG  
+HWI-EAS443:3:31:1290:1160#0/1  
W`ba`abb`abbbbbb`abaZ``ab`baaaaa`bXbaaZ`  
@HWI-EAS443:3:31:1499:1550#0/1  
GGCTCCTCATAATCGATGAAATCTCCTGGGTAACACGTTC  
+HWI-EAS443:3:31:1499:1550#0/1  
abaZ`a`b\_^R[^]^^`aabb`R]aa[``P¥a]`ab[^S  
@HWI-EAS443:3:31:238:520#0/1  
CGCACGTGTTATCGCATTGTGGTAAAATCAAAGCAGCC  
+HWI-EAS443:3:31:238:520#0/1  
`\_`a¥Xa\_[¥Z\_Z¥Y][`^`Y[X¥N]`^V¥a\_RVY^Y¥]  
@HWI-EAS443:3:31:636:1211#0/1  
AGCCGTTTCATTGAAGGGGGTGGACAGGGATGGTAGAT  
+HWI-EAS443:3:31:636:1211#0/1  
^`ba``\_b]baabb^aa\_a]^aG^`a`a^a`a^Za`^X  
@HWI-EAS443:3:32:110:1257#0/1  
AGGGCCATGAACCTGTCTTGGGAATATCTCAAACCTTTC  
+HWI-EAS443:3:32:110:1257#0/1  
[[R`b`````\_a`a\_a```a`¥¥\_]¥]^¥[¥`¥`a`ZVZ¥^  
@HWI-EAS443:3:32:473:1751#0/1  
GGGCTGCTTTGAATTTTACCACAAATGCGATAACACGTGC  
+HWI-EAS443:3:32:473:1751#0/1  
H\_baabaabbb\_b\_Xbbbbabbbbaababbaa^\_bba`bb  
@HWI-EAS443:3:32:568:1681#0/1  
CTGTTATCGCATTGTGGTAAAATCAAAGCAGCCGTTTC  
+HWI-EAS443:3:32:568:1681#0/1  
aaa```\_a`````\_aaa]a`\_bb`^`]```¥^a`W¥a\_X\_\_a  
@HWI-EAS443:3:32:76:1653#0/1  
CGCACGTGTTATCGCATTGTGGTAAAATCAAAGCAGCC  
+HWI-EAS443:3:32:76:1653#0/1  
a[`a`\_]\_\_\_\_a```\_]`\_]X\_^Xa`Y^^]a\_STU`^X\_¥  
@HWI-EAS443:3:33:1242:1364#0/1  
CTCCTCTGAGTATTTTGGGTAGTCATAAGTCCCATTTTGTG  
+HWI-EAS443:3:33:1242:1364#0/1  
aaa`aababa\_abbba``a^baababaaa`a]Waaaaaaa  
@HWI-EAS443:3:33:1792:1381#0/1  
NAGCAATTGAGCTCAGTGTCATCATTGAAAGTTTGAGA  
+HWI-EAS443:3:33:1792:1381#0/1  
DOXXYZZYZZYZZXYVXXVWWZZZXYUZTXXZXZZUZXX  
@HWI-EAS443:3:34:1295:224#0/1  
AAGCCGACCTGAAGAGCACACAGAATGCCATTGACGAGAT  
+HWI-EAS443:3:34:1295:224#0/1  
abbbbaaabbbbaabaaaaa`aa`\_a```\_`aa]Y`Z\_W^  
@HWI-EAS443:3:35:1151:648#0/1  
GGCTGGCTGGATCCTGGGAAATCCAGAGTGTGAATCACTC  
+HWI-EAS443:3:35:1151:648#0/1  
]X\_^`\_\_\_\_b]NX]¥PQQ]V\_[¥]^Y¥\_WEUOX¥WWWZ`^`

@HWI-EAS443:3:35:1218:1671#0/1  
GGGGACATCAAGATACAGCAAGAAGTTCAAGCCGGAAAT  
+HWI-EAS443:3:35:1218:1671#0/1  
ab`Q\_]S¥\_^[W\_a^a`WUbaaaa`T`ba]^WaaW^Z^  
@HWI-EAS443:3:35:358:1286#0/1  
CTGGGCCATGAACCTGTCTTGGGGAATATCTCAAACCTTT  
+HWI-EAS443:3:35:358:1286#0/1  
a`^`aa\_T\_S`a`\_¥\_Ua\_\_^¥\_ZY\_\_^¥XYa\_VW[`YZV  
@HWI-EAS443:3:35:46:759#0/1  
TTCCGGCTTGAACCTTGTCTTGTATCTTGATGTCCCCACC  
+HWI-EAS443:3:35:46:759#0/1  
aaba\_a`aX[]\_Ya\_WX\_ZNXXYY^^`^^[\_]\_a`[FRJ  
@HWI-EAS443:3:36:1420:1799#0/1  
CGGGCCATGAACCTGTCTTGGGGAATATCTCAAACCTTTC  
+HWI-EAS443:3:36:1420:1799#0/1  
aabababbbbaabbb`bababb`aabbaabaaaaabbab  
@HWI-EAS443:3:36:576:618#0/1  
ATGGCATTCTGTGTGCTCTTCAGGTCGGCTGCATATCCTC  
+HWI-EAS443:3:36:576:618#0/1  
a]XG]TZ]a\_HZTaaU¥`^H^\_aUR]BBBBBBBBBBBBBB  
@HWI-EAS443:3:36:805:282#0/1  
CCCAGGAGATTCATCGATTATGAGGAGCTAAGAGAGCAC  
+HWI-EAS443:3:36:805:282#0/1  
`b^ZZ¥RX[PX]T[NSYV[\_\_\_`RIX]R`NT¥^U\_]Q\_XSG  
@HWI-EAS443:3:36:853:1392#0/1  
CCCCGGCTCTACTAGTGTCCAGTAATAGTTCATTCTCCCT  
+HWI-EAS443:3:36:853:1392#0/1  
abbbbbbbbaa[aaaVaaaaa\_aba^U[aaaa\_a^aa\_\_  
@HWI-EAS443:3:37:1121:1483#0/1  
AGCACGTGTATCGCATTTGTGGTAAAATTCAAAGCAGCC  
+HWI-EAS443:3:37:1121:1483#0/1  
¥b\_aURUUR`¥aP\_W\_[¥baTMO\_b¥a\_bG\_^S)`]`\_I  
@HWI-EAS443:3:37:1172:704#0/1  
AGCCGGTTTCATTGAAGGGGGTGGACAGGGATGGTAGAT  
+HWI-EAS443:3:37:1172:704#0/1  
aab\_bb`bbaabab`baaaaaa]bab\_\_aW\_\_`abUaa\_Y  
@HWI-EAS443:3:37:469:187#0/1  
CGTGGGGACATCAAGATACAGCAAGAAGTTCAAGCCGGAA  
+HWI-EAS443:3:37:469:187#0/1  
ab\_baaaaaaaaa\_\_Zaaa`a^Z`¥``VRb\_N]`P`\_]\_^  
@HWI-EAS443:3:37:733:601#0/1  
CGCCGTTACACCTTTGTTGAGTCATGATTGGGCCATGAA  
+HWI-EAS443:3:37:733:601#0/1  
abba¥`a`abaa]aa]aa`aaa\_abaa`\_\_\_\_aaaa\_a`aa  
@HWI-EAS443:3:38:362:390#0/1  
CGGGTGGACAGGGATGGTAGATGGATGGTACGGTTATCAC  
+HWI-EAS443:3:38:362:390#0/1  
a\_ZWE]aa\_Z]^a^`aK`]WY``¥Y`]V\_VY¥X\_¥YKVU  
@HWI-EAS443:3:38:530:168#0/1  
TGGGGGGTGGACAGGGATGGTAGATGGATGGTACGGTTAT

+HWI-EAS443:3:38:530:168#0/1  
`bbaaaNbaaa\_\_aa\_`^¥\_a\_¥a\_¥¥\_UQ¥N][SY¥V  
@HWI-EAS443:3:39:1159:260#0/1  
CGTGGGGACATCAAGATACAGCAAGAAGTTCAAGCCGGAA  
+HWI-EAS443:3:39:1159:260#0/1  
aa¥`a`WRV[baaa^X`]bbababa`b\_`[Z\_a^[aa\_W  
@HWI-EAS443:3:39:1368:1121#0/1  
GCCTCGTGCTATGGGGCATTACCATCCATCTACTAGTGC  
+HWI-EAS443:3:39:1368:1121#0/1  
abaaabaabbabb[aa[\_aaTba[aa\_aaa\_YaTaaa^aU  
@HWI-EAS443:3:39:1529:1149#0/1  
ATATGTTTTTGTGGGGACATCAAGATACAGCAAGAAGTTA  
+HWI-EAS443:3:39:1529:1149#0/1  
]`[aW`babba\_aaaZX¥WY`\_aa\_`[aaZM^`a`USF  
@HWI-EAS443:3:39:1539:796#0/1  
CATCATTTGAAAGTTTGAGATATCCCCAAGACAAGTTG  
+HWI-EAS443:3:39:1539:796#0/1  
`¥b`bb\_bb\_^[ba`bb[ab\_bbab]]\_a]S`aaaa`\_F  
@HWI-EAS443:3:39:671:80#0/1  
CGGGCATTACCATCCATCTACTAGTGCTGACCAACAAAG  
+HWI-EAS443:3:39:671:80#0/1  
abbaY```[W[aa]``]`aaaa¥\_[a\_`¥¥^`a[``\_a  
@HWI-EAS443:3:39:695:1345#0/1  
CGGGACATCAAGATACAGCAAGAAGTTCAAGCCGGAAATA  
+HWI-EAS443:3:39:695:1345#0/1  
GZ^[^\_ZN^`\_[X\_a^`aY`¥¥R¥b¥[a`¥ZDRZW\_bbbZ  
@HWI-EAS443:3:3:1539:1161#0/1  
ATCCGGCTTGAACCTTCTTGCTGTATCTTGATGTCCCCACA  
+HWI-EAS443:3:3:1539:1161#0/1  
a`a^X`a`a\_[LU]aZ^a``\_^`][a``][MKP]XV\_  
@HWI-EAS443:3:3:1682:2037#0/1  
CGCTGGCTGGATCCTGGGAAATCCAGAGTGTGAATCACTC  
+HWI-EAS443:3:3:1682:2037#0/1  
Zbabab`bbba]^aaab`ab```abaa]b]baa`[P]W  
@HWI-EAS443:3:42:144:1050#0/1  
CAGGGGGGTGGACAGGGATGGTAGATGGATGGTACGGTTA  
+HWI-EAS443:3:42:144:1050#0/1  
aaXbabaaQbaa`aaaa`a`aUaaa\_aa`aXWaSXW[^  
@HWI-EAS443:3:42:160:1698#0/1  
CGGCCATGAACCTGTCTTGGGGAATATCTCAAACCTTTC  
+HWI-EAS443:3:42:160:1698#0/1  
K\_b\_abaaWaab[bbaabbbbaabaab\_[baa\_b[aabb  
@HWI-EAS443:3:42:505:520#0/1  
GGGGCCATGAACCTGTCTTGGGGAATATCTCAAACCTTTC  
+HWI-EAS443:3:42:505:520#0/1  
VaaU`\_aaJ[[]aab]`bbbb^`ba[aaabab]^b`[`a  
@HWI-EAS443:3:42:863:1356#0/1  
CGGGGACATCAAGATACAGCAAGAAGTTCAAGCCGGAAAT  
+HWI-EAS443:3:42:863:1356#0/1  
aba`babb^abab\_aabbabab`a^\_abaaa`aa`]a`

@HWI-EAS443:3:43:1552:890#0/1  
CGCCGGGAGACAAAATAACATTCTGAAGCAACTGGAAATCT  
+HWI-EAS443:3:43:1552:890#0/1  
a\_bbbbaaabbbaabbbb\_bbab[bb`\_a^bb`babb`b  
@HWI-EAS443:3:43:1732:308#0/1  
CGCCGGGAGACAAAATAACATTCTGAAGCAACTGGAAATCT  
+HWI-EAS443:3:43:1732:308#0/1  
a`¥J\_Q\_U]PT`]b\_a[Ybb¥[V`aab[`[Y`bb\_]¥ZG[  
@HWI-EAS443:3:44:1193:1048#0/1  
ATCCGGCTTGAACCTTCTTGCTGTATCTTGATGTCCCCACA  
+HWI-EAS443:3:44:1193:1048#0/1  
\_a\_`^¥U`aSVa]a]X`bbabaY]Zaaaa]]^[LO]SY\_a  
@HWI-EAS443:3:44:1193:1916#0/1  
CGCCGGGAGACAAAATAACATTCTGAAGCAACTGGAAATCT  
+HWI-EAS443:3:44:1193:1916#0/1  
`Z``aaaYa]Saa`aaaa\_aa`[``\_\_\_\_^N`^WZ`\_]V\_  
@HWI-EAS443:3:44:1465:317#0/1  
AGCCCAATCATGACTCGAACAAAGGTGTAACGGCAGCATG  
+HWI-EAS443:3:44:1465:317#0/1  
aaa`\_a]aaaba`\_a\_\_Z\_]`\_^`\_U\_Z]\_W\_\_QU[RWBB  
@HWI-EAS443:3:44:1567:779#0/1  
AGCTGGCTGGATCCTGGGAAATCCAGAGTGTGAATCACTC  
+HWI-EAS443:3:44:1567:779#0/1  
abbaab\_G[¥QVa]P¥abXaaa^¥¥XBBBBBBBBBBBBBBB  
@HWI-EAS443:3:44:1770:1603#0/1  
CGTCATCATTGAAAGTTTGAGATATCCCCAAGACAAG  
+HWI-EAS443:3:44:1770:1603#0/1  
```aaab^ababaaa\_\_baaaa`aaaa[[UY^\_^a^`\_\_  
@HWI-EAS443:3:45:1124:647#0/1  
GGTGGGACATCAAGATACAGCAAGAAGTTCAAGCCGGAA  
+HWI-EAS443:3:45:1124:647#0/1  
aaTaaaa`a`\_`\_\_a```a^\_aaa^a]^a\_\_[U`^`^]  
@HWI-EAS443:3:45:1254:1292#0/1  
GGCTGGCTGGATCCTGGGAAATCCAGAGTGTGAATCACTC  
+HWI-EAS443:3:45:1254:1292#0/1  
^aab]]Z`\_^¥a^¥`\_aaa]^a`\_^`\_a`^aaaaO\_T`^  
@HWI-EAS443:3:45:1401:1661#0/1  
CGTGGGACATCAAGATACAGCAAGAAGTTCAAGCCGGAA  
+HWI-EAS443:3:45:1401:1661#0/1  
aa]bbb`abaababbababbaabbbab^a`aab`Sa`a\_  
@HWI-EAS443:3:46:1268:983#0/1  
GGCTGTGGAGAGTGATTCACACTCTGGATTTCCAGGATC  
+HWI-EAS443:3:46:1268:983#0/1  
`bbbaQaa`b^¥L]X¥`X`V`Y`[aa`HXaaUY\_VX`UXX  
@HWI-EAS443:3:46:938:340#0/1  
TGGGGTGGACAGGGATGGTAGATGGATGGTACGGTTATCA  
+HWI-EAS443:3:46:938:340#0/1  
abbaa¥baa`aba^\_aa¥a\_\_aa^`\_aY`\_a`¥\_\_QNX  
@HWI-EAS443:3:46:9:13#0/1  
CGTGGGACATCAAGATACAGCAAGAAGTTCAAGCCGGAA

+HWI-EAS443:3:46:9:13#0/1  
aaabbbbaa^ab\_b`\_`ba]a`\_bbbbaaN\_^aab¥`aaaa  
@HWI-EAS443:3:47:1145:506#0/1  
GCCGGCTTGAACCTTCTTGCTGTATCTTGATGTCCCCACAA  
+HWI-EAS443:3:47:1145:506#0/1  
aaabbab`V¥]T\_`\_]a[[`a^[[X[^SZVVU¥¥Y[XU[^  
@HWI-EAS443:3:47:1297:1862#0/1  
GGTGGGGACATCAAGATACAGCAAGAAGTTCAAGCCGGAA  
+HWI-EAS443:3:47:1297:1862#0/1  
\_]Zbb`a`aaa`aaa`aa]a`\_aaaa[^XUXa`a^X\_`]]  
@HWI-EAS443:3:47:1344:416#0/1  
AGCTTCCTCTGAGTATTTTGGGTAGTCATAAGTCCCATTT  
+HWI-EAS443:3:47:1344:416#0/1  
abba\_^]abbb¥¥]\_aabbbba``¥]Y]a\_X]Y¥UaY`a`  
@HWI-EAS443:3:47:912:1902#0/1  
TGCCGGGAGACAAAATAACATTCTGAAGCAACTGGAAATCT  
+HWI-EAS443:3:47:912:1902#0/1  
`[\_a`^aa\_`aaaaaa`\_aa`\_aa\_`[^aX`a¥^\_a\_Sa  
@HWI-EAS443:3:48:198:1038#0/1  
CTCCCCTTATGCTTGTCTTCTAGAAGGTTAACAGAGTGTG  
+HWI-EAS443:3:48:198:1038#0/1  
abbbbaababababbXa`bbaba`babaaaaaa`aa`b`\_  
@HWI-EAS443:3:4:1646:281#0/1  
CTCCTCTGAGTATTTTGGGTAGTCATAAGTCCCATTTTTTG  
+HWI-EAS443:3:4:1646:281#0/1  
Y[a`aabaaaabaab`aab`K`V[baZ`]HXZZa`[^a\_  
@HWI-EAS443:3:4:789:920#0/1  
CGCCGGTTTCATTGAAGGGGGTGGACAGGGATGGTAGAT  
+HWI-EAS443:3:4:789:920#0/1  
\_`bbbbbababbbababbbIbba`ba^0¥`bb¥aaaW  
@HWI-EAS443:3:4:87:1360#0/1  
GACTCTGTAACTTCTAGAAGACAAGCATAACGGGAAAC  
+HWI-EAS443:3:4:87:1360#0/1  
Vb¥^bbb`b``abba`bba¥¥a\_babbabba^R¥Y\_abb\_  
@HWI-EAS443:3:50:1184:1787#0/1  
GGTGGGGACATCAAGATACAGCAAGAAGTTCAAGCCGGAA  
+HWI-EAS443:3:50:1184:1787#0/1  
`aURX^aa]b`a¥aaabaab¥^¥b`aaa\_^[[a^`[^¥]a  
@HWI-EAS443:3:50:1598:1855#0/1  
CGGGGCATTACCATCCATCTACTAGTGCTGACCAACAAA  
+HWI-EAS443:3:50:1598:1855#0/1  
aaZ`^bbbbabba`a]Y`babaabaaaaaba]X`a```a\_  
@HWI-EAS443:3:50:1643:1902#0/1  
CGTGGGGACATCAAGATACAGCAAGAAGTTCAAGCCGGAA  
+HWI-EAS443:3:50:1643:1902#0/1  
ab]abbaaaaaaa\_aaaa\_aa^ab`aaa^aYa\_`^Xa\_`^`  
@HWI-EAS443:3:50:612:475#0/1  
CTGGGTGTCTGACAAGTTGTATTGCAATCGTGGACTGGTG  
+HWI-EAS443:3:50:612:475#0/1  
\_`b\_`^a¥b`\_aSSa`a``]\_YaU`S]Z\_aa`UR`^XWa



@HWI-EAS443:3:51:365:1835#0/1  
ACTAGTTCAGACAATGGAACGTGTTACCCAGGAGATTTCA  
+HWI-EAS443:3:51:365:1835#0/1  
\_Y[\_]Q`aaaaa\_a^T[]a[a]¥\_`\_\_`a¥W]U`^¥Y  
@HWI-EAS443:3:51:643:161#0/1  
CGCTGGCTGGATCCTGGGAAATCCAGAGTGTGAATCACTC  
+HWI-EAS443:3:51:643:161#0/1  
`\_`J\_\_aaa\_I]``\_aa\_QU`XTR¥\_¥\_VZLT`¥YQ\_UW^  
@HWI-EAS443:3:52:1663:163#0/1  
CGTGGGGACATCAAGATACAGCAAGAAGTTCAAGCCGGAA  
+HWI-EAS443:3:52:1663:163#0/1  
aa¥U`bbab\_abb`aa`aZa`abb]baa\_[]aaaaab\_aa  
@HWI-EAS443:3:52:595:1743#0/1  
CGGGGGGTGGACAGGGATGGTAGATGGATGGTACGGTTAT  
+HWI-EAS443:3:52:595:1743#0/1  
abaaa\_bX`aa``aaa\_aaaG`a^Wa]]¥a\_¥a^a]S^U¥  
@HWI-EAS443:3:52:773:764#0/1  
GGTGGGGACATCAAGATACAGCAAGAAGTTCAAGCCGGAA  
+HWI-EAS443:3:52:773:764#0/1  
a]T\_\_\_\_`\_^\_aZ^]]^]XY^V^^\_YV^RYV`V]XY^XXY  
@HWI-EAS443:3:53:1020:1725#0/1  
CGTGGGGACATCAAGATACAGCAAGAAGTTCAAGCCGGAA  
+HWI-EAS443:3:53:1020:1725#0/1  
¥babaa`abbb`bb`bbba`a\_bbbba]abbbb`Z^aaa`  
@HWI-EAS443:3:53:371:1629#0/1  
AGCTGGCTGGATCCTGGGAAATCCAGAGTGTGAATCACTC  
+HWI-EAS443:3:53:371:1629#0/1  
a]`]]aa`a^`^Za¥Z]^a`^Z``a\_Z`¥\_\_]¥`\_Z]S  
@HWI-EAS443:3:53:610:563#0/1  
CGGGGGGTGGACAGGGATGGTAGATGGATGGTACGGTTAT  
+HWI-EAS443:3:53:610:563#0/1  
`bbbbbbbaaababa\_U\_baSbbaabb`ab`^aaba`a`  
@HWI-EAS443:3:54:1308:992#0/1  
ATCCGGCTTGAACCTTCTTGCTGTATCTTGATGTCCCCACA  
+HWI-EAS443:3:54:1308:992#0/1  
abaV`b[abVJRaaa`aa[a\_`\_b\_`a`¥``Y¥`VMX^  
@HWI-EAS443:3:54:327:355#0/1  
TTGCAGCCGACCTGAAGAGCACACAGAATGCCATTGACGA  
+HWI-EAS443:3:54:327:355#0/1  
abb\_Z]a`]¥[]aa\_\_TY``a\_a¥a^`a\_a]R\_\_aa\_W`Z  
@HWI-EAS443:3:54:370:1777#0/1  
ATTCTCTGAGTATTTTGGGTAGTCATAAGTCCCATTTTT  
+HWI-EAS443:3:54:370:1777#0/1  
aababaaaaba\_aaaaa\_aa[aa\_a\_aa`a\_^\_^`aaaa`  
@HWI-EAS443:3:55:1251:1001#0/1  
CGTGGGGACATCAAGATACAGCAAGAAGTTCAAGCCGGAA  
+HWI-EAS443:3:55:1251:1001#0/1  
ab\_`]^^V]aa````a`a`aaaaba]`aN\_aba`^]a`\_`  
@HWI-EAS443:3:55:598:916#0/1  
CCCCGCTTGAACCTTCTTGCTGTATCTTGATGTCCCCACAA



@HWI-EAS443:3:59:396:241#0/1  
AGTACCCTCTTAGTTTGCATAGTTTCCCGTTATGCTTG  
+HWI-EAS443:3:59:396:241#0/1  
abaaa]\_ba`a^`aYaaa]Y][a\_a`a`\_aY^)`WS¥\_\_  
@HWI-EAS443:3:59:813:791#0/1  
CGGCTGCTTTGAATTTTACCACAAATGCGATAACACGTGG  
+HWI-EAS443:3:59:813:791#0/1  
abbaaaVZaaWOZa]^baY`a`^aM]a`^LWUa¥[SWPVD  
@HWI-EAS443:3:59:961:849#0/1  
CCTCGTCAATGGCATTCTGTGTGCTCTTCAGGTCGGCTGC  
+HWI-EAS443:3:59:961:849#0/1  
ab\_a^`ZZ]^\_a\_\_bb]b]\_XW[aTba\_T`\_ZNY^FRXPV  
@HWI-EAS443:3:59:97:404#0/1  
CGCCGTTACACCTTTGTTTCGAGTCATGATTGGGCCATGAA  
+HWI-EAS443:3:59:97:404#0/1  
^`abbaa¥ababaaaaababab\_baaaY\_a\_aa\_XY]a]V  
@HWI-EAS443:3:59:991:1221#0/1  
CGGGGACATCAAGATACAGCAAGAAGTTCAAGCCGAAAT  
+HWI-EAS443:3:59:991:1221#0/1  
ab`aTa\_baaa\_b]aabbabbbba\_b`bba\_\_\_\_TR^YV  
@HWI-EAS443:3:5:1259:1839#0/1  
TAGAATGCAGATGCATATGTTTTTGTGGGGACATCAAGAT  
+HWI-EAS443:3:5:1259:1839#0/1  
a`b]Y`a`[^]W]R^a^aaX\_\_`a^Yaaaa^``]Yaa`\_Z  
@HWI-EAS443:3:5:577:1276#0/1  
ATCCGGCTTGAACCTTCTTGCTGTATCTTGATGTCCCCACA  
+HWI-EAS443:3:5:577:1276#0/1  
`^a\_a`\_bbaaa0a`[aaaaaT`^`[aa]R\_a^^`\_U`  
@HWI-EAS443:3:61:1637:189#0/1  
CGGAGCTAAGAGAGCAATTGAGCTCAGTGTCATCATTTGA  
+HWI-EAS443:3:61:1637:189#0/1  
Xbabbab¥a\_babb`abbabbbX`ba]aaaabaY¥baa``  
@HWI-EAS443:3:61:53:711#0/1  
CGCCGGGAGACAAAATAACATTCTGAAGCAACTGGAAATCT  
+HWI-EAS443:3:61:53:711#0/1  
abab\_¥\_abbbbaabbaaba]a`IZ`)]`^a\_\_\_\_a\_^]\_  
@HWI-EAS443:3:62:1146:1369#0/1  
CGCCGGGAGACAAAATAACATTCTGAAGCAACTGGAAATCT  
+HWI-EAS443:3:62:1146:1369#0/1  
Wabbbbbb`Ua^`a`a^]aaY^[aUU]\_^a\_^a\_YLY¥^X  
@HWI-EAS443:3:62:1376:1228#0/1  
TGCCGGGAGACAAAATAACATTCTGAAGCAACTGGAAATCT  
+HWI-EAS443:3:62:1376:1228#0/1  
a\_aa`aa[``\_`\_a`a`aa`aaa\_a\_\_a``a`^a\_\_[``\_`  
@HWI-EAS443:3:62:1734:647#0/1  
GTCCTCTGAGTATTTTGGGTAGTCATAAGTCCCATTTTTG  
+HWI-EAS443:3:62:1734:647#0/1  
^aaaaXY\_]`\_[X^YVbbbWaba\_XK]ZZX\_a`Vbaaaaa  
@HWI-EAS443:3:62:351:682#0/1  
GCCTCTGAGTATTTTGGGTAGTCATAAGTCCCATTTTTGA

+HWI-EAS443:3:62:351:682#0/1  
^0^`\_`baXUUa`aa\_W^N^U`\_\_¥RJM\_``W\_`\_^^[L  
@HWI-EAS443:3:62:572:43#0/1  
TCCGGCTCTACTAGTGTCCAGTAATAGTTCATTCTCCCTT  
+HWI-EAS443:3:62:572:43#0/1  
]¥a\_^\_[^UVZY]]RZH]YUYLV¥BBBBBBBBBBBBBBB  
@HWI-EAS443:3:62:639:558#0/1  
GGTGGGGACATCAAGATACAGCAAGAAGTTCAAGCCGGAA  
+HWI-EAS443:3:62:639:558#0/1  
X]\_a¥Z\_¥[\_¥\_YWa^Z\_\_b`\_ab`]XZF[a]aY[XZ]W]  
@HWI-EAS443:3:62:928:1610#0/1  
TGGGGGGTGGACAGGGATGGTAGATGGATGGTACGGTTAT  
+HWI-EAS443:3:62:928:1610#0/1  
abaaa]ZR]^aaaa`a^`\_Zaa]S]¥\_\_aXUa`¥\_V]¥[  
@HWI-EAS443:3:63:725:2046#0/1  
NAGCTTTTTGCTCCAGCATGAGGACATGCTGCCGTTACAC  
+HWI-EAS443:3:63:725:2046#0/1  
DNSUWYYTTWYWWUYTVWYXYWNTTBBBBBBBBB  
@HWI-EAS443:3:63:932:1172#0/1  
AGCCCCAGGGAGACTACCAATGAAGTGGCGACA  
+HWI-EAS443:3:63:932:1172#0/1  
``aba`]``\_`a\_¥S^^``Xa^^`[]\_\_^\_\_¥¥ZXSQ¥S[  
@HWI-EAS443:3:65:1057:1821#0/1  
CGTGGGGACATCAAGATACAGCAAGAAGTTCAAGCCGGAA  
+HWI-EAS443:3:65:1057:1821#0/1  
abY\_aa\_aaaaaa`aaaab\_`baaaaaS\_`a`\_^a¥\_`  
@HWI-EAS443:3:65:161:430#0/1  
CGCACGTGTATCGCATTGTGGTAAAATCAAAGCAGCC  
+HWI-EAS443:3:65:161:430#0/1  
a`ba^\_YaT\_`aa`aaa`aaY\_`^a^\_\_\_\_\_``]a\_\_\_\_`\_`[  
@HWI-EAS443:3:65:432:1965#0/1  
GTGCCGGTTTCATTGAAGGGGGTGGACAGGGATGGTAGA  
+HWI-EAS443:3:65:432:1965#0/1  
`P¥aa\_`S\_^aa`^]\_aaZZ][[R`X]PX``Y[Z¥RP¥\_`  
@HWI-EAS443:3:66:1155:324#0/1  
CGCCGTTTCATTGAAGGGGGTGGACAGGGATGGTAGAT  
+HWI-EAS443:3:66:1155:324#0/1  
aabaaa\_a]`abbbY\_baab\_aVaaUTaa\_aZ\_a`Ua¥\_¥  
@HWI-EAS443:3:66:1510:370#0/1  
AATCCGATCACAATTGAAAAATGTCCAAAATATGTAAAAA  
+HWI-EAS443:3:66:1510:370#0/1  
aaaaa`aa`a\_a\_a\_aa`aa``aY\_\_a^\_a`aaa\_\_a```  
@HWI-EAS443:3:66:1583:360#0/1  
CCCGGCTTGAACCTTCTTGCTGTATCTTGATGTCCCCACAA  
+HWI-EAS443:3:66:1583:360#0/1  
aabababb``a`[baaba`ab[aa`bbaabba\_`aaa`aa  
@HWI-EAS443:3:66:638:1082#0/1  
GGTGGGGACATCAAGATACAGCAAGAAGTTCAAGCCGGAA  
+HWI-EAS443:3:66:638:1082#0/1  
aa]aa``aaa\_aa`aa\_aaaa`a`aaQ\_]`^aaa\_a`\_^`

@HWI-EAS443:3:66:708:792#0/1  
CGTGGGGACATCAAGATACAGCAAGAAGTTCAAGCCGGAA  
+HWI-EAS443:3:66:708:792#0/1  
ab\_aaa\_aaaaaab\_aabbaa`baa\_b\_aa\_W\_a\_`a\_U  
@HWI-EAS443:3:68:1004:599#0/1  
CGCCGGGAGACAAAATAACATTCTGAAGCAACTGGAAATCT  
+HWI-EAS443:3:68:1004:599#0/1  
abaabbaabaaaabaaaa`aa`aaaa`aaaaa¥`aa`  
@HWI-EAS443:3:68:1073:570#0/1  
AGTGGGGACATCAAGATACAGCAAGAAGTTCAAGCCGGAA  
+HWI-EAS443:3:68:1073:570#0/1  
aaa[a^`aabbababaab`ababbaaba[aaaa`aaaa`a  
@HWI-EAS443:3:68:1110:1268#0/1  
GCCTCGTGCTATGGGGCATTACCATCCATCTACTAGTGC  
+HWI-EAS443:3:68:1110:1268#0/1  
[^[YaVUF^¥]]\_PZ]U]Z\_]ZVaa\_]NT[VU`[``TR[X  
@HWI-EAS443:3:68:1201:1002#0/1  
TACTACCACGATTCAAATGTGAAGAACTTATATGAAAAGG  
+HWI-EAS443:3:68:1201:1002#0/1  
ababbaaaaba`aaaaaa]a`a\_aaaaaaaaaaaa\_`a\_  
@HWI-EAS443:3:68:1243:842#0/1  
TGCTCCTCATAATCGATGAAATCTCCTGGGTAACACGTTC  
+HWI-EAS443:3:68:1243:842#0/1  
\_]aaa¥^\_]Y¥\_^]]^a]]a\_¥U^Z`Y`X[[\_`^aX[Y  
@HWI-EAS443:3:68:1492:1561#0/1  
TTTGAATTTTACCACAAATGCGATAACACGTGCATGGAAG  
+HWI-EAS443:3:68:1492:1561#0/1  
V¥\_¥]ZP¥VV¥ZXV`RTN]\_I^¥Y`\_TZ0¥aa¥aVbaRZG  
@HWI-EAS443:3:68:548:1832#0/1  
CGCAGGGGTCAGGATATGCAGCCGACCTGAAGAGCACACA  
+HWI-EAS443:3:68:548:1832#0/1  
a`a`\_¥X^Ua`a`aaa^\_aa]aa\_\_`[``````¥\_`\_\_`\_  
@HWI-EAS443:3:69:984:122#0/1  
CGCTTCTCTGAGTATTTTGGGTAGTCATAAGTCCCATTT  
+HWI-EAS443:3:69:984:122#0/1  
aba`b`aabb`aa^baba]\_ba\_aa\_`\_a¥]a¥¥XX\_aa`  
@HWI-EAS443:3:6:1741:510#0/1  
CGTGGGGACATCAAGATACAGCAAGAAGTTCAAGCCGGAA  
+HWI-EAS443:3:6:1741:510#0/1  
``YZ`a\_]X¥ZU]R]]WWL[PPU\_RU]]W][^\_\_PLW[BB  
@HWI-EAS443:3:6:347:471#0/1  
CGGACTACCACGATTCAAATGTGAAGAACTTATATGAAAA  
+HWI-EAS443:3:6:347:471#0/1  
abababbaab`b`bb`aaabb^a\_aaaaZbaaaabb`\_aa  
@HWI-EAS443:3:6:586:230#0/1  
TAGATTTCCAGTTGCTTGAATGTTATTTTGTCTCCCGGG  
+HWI-EAS443:3:6:586:230#0/1  
ab`]^a`\_[ab^]a^aa]a^`ab[[\_`a]a`\_X\_^Z^\_¥B  
@HWI-EAS443:3:70:295:1667#0/1  
CAATGCCAAGGAAATTGGAAACGGCTGCTTTGAATTTTAA

+HWI-EAS443:3:70:295:1667#0/1  
abaa]baa\_Z]aaaa`aZZ]`a`\_``]ORY^P]YK#BBBB  
@HWI-EAS443:3:70:696:629#0/1  
CCCTCGTGCTATGGGGCATTACCATCCATCTACTAGTGC  
+HWI-EAS443:3:70:696:629#0/1  
aba``a`aaaa\_aaaa`aaaaaaaa`aaa`a`a``a\_¥a\_  
@HWI-EAS443:3:70:87:407#0/1  
CGGTGTTTATAGCACCTTGGGTGTCTGACAAGTTGTATT  
+HWI-EAS443:3:70:87:407#0/1  
aaa^a^aaaa`aaa`a\_aa\_^`W`^a``¥`^T`W^`¥\_\_V  
@HWI-EAS443:3:71:1044:239#0/1  
CGTGGGGACATCAAGATACAGCAAGAAGTTCAAGCCGGAA  
+HWI-EAS443:3:71:1044:239#0/1  
aaK^`aa`aa]W¥`baa^V]aYZaa`abU`T`a`K0aa\_\_  
@HWI-EAS443:3:71:1468:618#0/1  
GCGCCAGTTCATTGGTACTGGTAGTCTCCCTGGGGGCAAT  
+HWI-EAS443:3:71:1468:618#0/1  
aY`TT\_a^a`a\_]R\_Va¥¥aaH[^MY¥U\_ZLLV¥\_^P^RS  
@HWI-EAS443:3:71:161:1727#0/1  
TGCTCCTCATAATCGATGAAATCTCCTGGGTAACACGTTC  
+HWI-EAS443:3:71:161:1727#0/1  
aabaababa`ab\_aaa`a`aaaa\_a\_\_]\_ZT\_ab`\_^\_a  
@HWI-EAS443:3:71:232:2047#0/1  
NTTACTAACAAAGTAAATTCTGTTATTGAAAAGATGAATA  
+HWI-EAS443:3:71:232:2047#0/1  
DM[[[[ZVZ[YYYZYV[[[Z[[[[[[[W[Z[[Y[Z[[[[[[  
@HWI-EAS443:3:71:47:1672#0/1  
CGGGGACATCAAGATACAGCAAGAAGTTCAAGCCGGAAAT  
+HWI-EAS443:3:71:47:1672#0/1  
a¥]\_LMXZTa`¥F¥aa`a\_^\_a`\_\_U]aa\_]^[ZWWO^V  
@HWI-EAS443:3:72:1140:2047#0/1  
NGCATATCTCGGTACCACTAGATTTCCAGTTGCTTCGAAT  
+HWI-EAS443:3:72:1140:2047#0/1  
DNXZZZZZZXZZZWVZZXZZZZZZXZZZZZZZZZW  
@HWI-EAS443:3:72:969:827#0/1  
CTTCCTCTGAGTATTTTGGGTAGTCATAAGTCCCATTTTC  
+HWI-EAS443:3:72:969:827#0/1  
a^bba¥U\_^bbY\_ab\_abaa`b`\_^`a]bbPY^X¥`a`XJ  
@HWI-EAS443:3:73:1442:25#0/1  
ACCTCGTGCTATGGGGCATTACCATCCATCTACTAGTGC  
+HWI-EAS443:3:73:1442:25#0/1  
¥Z^bb¥`^^`RW¥^`^VU\_\_R\_^LY\_X^aa]`UFZZ]GZL  
@HWI-EAS443:3:73:277:218#0/1  
ATCCGGCTTGAACCTTCTTGCTGTATCTTGATGTCCCCACA  
+HWI-EAS443:3:73:277:218#0/1  
aaa¥a\_\_aa\_[\_Y`^`^\_\_^a\_^`\_\_`^]BBB BBBB  
@HWI-EAS443:3:74:1246:691#0/1  
ACCTCGTGCTATGGGGCATTACCATCCATCTACTAGTGC  
+HWI-EAS443:3:74:1246:691#0/1  
aaaWZb^[^abaa^aaabbabb¥^`aa\_abaaaaaaaa\_a]

@HWI-EAS443:3:74:1659:1435#0/1  
TGGGGGGTGGACAGGGATGGTAGATGGATGGTACGGTTAT  
+HWI-EAS443:3:74:1659:1435#0/1  
`\_Ubab`]b^a^[a\_`^`ba¥\_[Z0¥aX^b^¥`]aa¥¥XS  
@HWI-EAS443:3:75:1313:390#0/1  
GGGGGCCATTGCCGTTTCATTGAAGGGGGTGGACAGGG  
+HWI-EAS443:3:75:1313:390#0/1  
`[^`^aa¥`\_`¥[\_`]a`T[^`\_NY`^a```Ka\_NPS]``  
@HWI-EAS443:3:76:149:1375#0/1  
CCCCGCTTGAACCTTCTTGCTGTATCTTGATGTCCCCACAA  
+HWI-EAS443:3:76:149:1375#0/1  
abbbbb`Z]aaaa]aWU¥\_]X`]a\_a[X[Z\_\_a^a][]P  
@HWI-EAS443:3:76:854:1668#0/1  
GGGGGACATCAAGATACAGCAAGAAGTTCAAGCCGAAAT  
+HWI-EAS443:3:76:854:1668#0/1  
abaaababWaaaa`U`aba`aba\_^aX^aa``^a^]\_`aR  
@HWI-EAS443:3:76:92:700#0/1  
CGGGCCATGAACCTTGTCTTGGGAATATCTCAAACCTTTC  
+HWI-EAS443:3:76:92:700#0/1  
aabb\_bb\_abbaabb]abbbb`baaaaaaaaaa\_`^\_`aa  
@HWI-EAS443:3:77:1304:863#0/1  
AATTTTTGTAGAAGCTTTTTGCTCCAGCATGAGGACATGA  
+HWI-EAS443:3:77:1304:863#0/1  
`\_a^`b`¥Y\_a\_````b`^¥OVT\_WW\_``Z]`ba`[ZYSH  
@HWI-EAS443:3:77:149:211#0/1  
CGCTGCTTTGAATTTTACCACAAATGCGATAACACGTGCA  
+HWI-EAS443:3:77:149:211#0/1  
abbbbbbb`bbba`aabbbbb`^^^bb`baa\_]ab\_aX^Va  
@HWI-EAS443:3:77:1724:1151#0/1  
TCCCAGGAGATTTTCATCGATTATGAGGAGCTAAGAGAGCA  
+HWI-EAS443:3:77:1724:1151#0/1  
ab\_Yabb`b^````]`\_^Za^a`\_\_a]Q¥`a¥`aa`^^U¥  
@HWI-EAS443:3:77:912:96#0/1  
AGCCGTTTCATTGAAGGGGGTGGACAGGGATGGTAGAT  
+HWI-EAS443:3:77:912:96#0/1  
aa`abbabbaabbba[bbabba]ba`U`aaZXZabU\_a\_\_  
@HWI-EAS443:3:78:521:717#0/1  
GGGGGGTGGACAGGGATGGTAGATGGATGGTACGGTTAT  
+HWI-EAS443:3:78:521:717#0/1  
\_`\_^[]WG[\_T¥¥WQWWS[^M[]WRZ[LWZTDSQZBBBBB  
@HWI-EAS443:3:78:718:1644#0/1  
CGCCGGGAGACAAAATAACATTGAAGCAACTGGAAATCT  
+HWI-EAS443:3:78:718:1644#0/1  
aa\_WJSNYMSP]Xaa`^\_\_YVVPT[`SUVUWUVP\_]R¥OW  
@HWI-EAS443:3:79:888:701#0/1  
GCCCCAGGGAGACTACCAGTACCAATGAAGTGGCGACAGT  
+HWI-EAS443:3:79:888:701#0/1  
aa`aabbaaaaaaaaaa[]a\_aa\_a]aaaa\_\_`a¥a¥^\_`¥  
@HWI-EAS443:3:7:1178:977#0/1  
CGTGGGGACATCAAGATACAGCAAGAAGTTCAAGCCGAA

+HWI-EAS443:3:7:1178:977#0/1  
abP\_Ya^U^abb`^`b\_aa`a`abaaT^H\_]a[[RH` `\_\_  
@HWI-EAS443:3:7:281:1543#0/1  
AGCTGGCTGGATCCTGGGAAATCCAGAGTGTGAATCACTC  
+HWI-EAS443:3:7:281:1543#0/1  
`ab\_Z^bU`\_\_`aaXaaa\_^aZ`aYLTa\_ZQRaXaGZUQS  
@HWI-EAS443:3:80:1447:610#0/1  
GGGGCCATGAACCTTGTCTTGGGGAATATCTCAAACCTTTC  
+HWI-EAS443:3:80:1447:610#0/1  
aaaa^V]¥` `a^aa`¥\_a`a\_aa]^`\_]`Y`a\_ZS^^\_T  
@HWI-EAS443:3:80:318:1129#0/1  
TGGGGGTGGACAGGGATGGTAGATGGATGGTACGGTTAT  
+HWI-EAS443:3:80:318:1129#0/1  
a`[aa`aS¥`X`[aaaa\_¥`¥`\_`\_`\_V[`^Na¥^]G[[P  
@HWI-EAS443:3:80:798:525#0/1  
CGTGTGAATCACTCTCCACAGCAAGCTCATGGTCCTACAT  
+HWI-EAS443:3:80:798:525#0/1  
a]XX\_`b\_aabba\_aabb`babaa`[XabZaa\_a`\_\_a^]  
@HWI-EAS443:3:80:916:753#0/1  
AGCCGTTTCATTGAAGGGGGTGGACAGGGATGGTAGAT  
+HWI-EAS443:3:80:916:753#0/1  
` `aabb^ba`abaaa^baaaa^¥aa`a`ba\_^\_aa[``^S  
@HWI-EAS443:3:81:22:1094#0/1  
GGCTGGCTGGATCCTGGGAAATCCAGAGTGTGAATCACTC  
+HWI-EAS443:3:81:22:1094#0/1  
¥Rb¥OT]VFXTTV¥POW^^`Z`^\_RGYKSGSNPUWU¥VS  
@HWI-EAS443:3:81:244:785#0/1  
CGCTGGCTGGATCCTGGGAAATCCAGAGTGTGAATCACTC  
+HWI-EAS443:3:81:244:785#0/1  
\_^` `a]aWaaaY¥¥X^aVQTZVa`¥¥TXKZP\_Y^VY[[V]  
@HWI-EAS443:3:82:971:549#0/1  
CGTGTGCTCTTCAGGTCGGCTGCATATCCTGACCCCTGCT  
+HWI-EAS443:3:82:971:549#0/1  
\_¥`^a\_`babb`bbbZ^a^^aba]aaa]^`^X` `a`a^`  
@HWI-EAS443:3:83:1046:344#0/1  
TCCCAGGAGATTTTCATCGATTATGAGGAGCTAAGAGAGCA  
+HWI-EAS443:3:83:1046:344#0/1  
aaa`bbbab`bba]^`a\_a` `aaaa` ` `R\_\_\_\_\_ `^^\_¥\_  
@HWI-EAS443:3:83:763:308#0/1  
CCCCCTGCTCATTTTGATGGTGATAACCGTACCATCCATC  
+HWI-EAS443:3:83:763:308#0/1  
a\_aaaabaaabaaaaaa[a\_aaa^\_a\_a` `aa\_\_` `\_  
@HWI-EAS443:3:84:452:1594#0/1  
NTGAGCTCAATTGCTCTCTTAGCTCCTCATAATCGATGAA  
+HWI-EAS443:3:84:452:1594#0/1  
DMUYZZXWVYVWVYZZZZZXZZZZWSYWYWWYVZWUW  
@HWI-EAS443:3:84:968:1152#0/1  
TGGGCTACCCCTCTTAGTTTGCATAGTTTCCCGTTATGCT  
+HWI-EAS443:3:84:968:1152#0/1  
aaaaabbbb`¥^bbbbbbbaabbb\_\_bababb`a`bbaa



@HWI-EAS443:3:84:99:1541#0/1  
ATCCGGCTTGAACCTTCTTGCTGTATCTTGATGTCCCCACA  
+HWI-EAS443:3:84:99:1541#0/1  
a`a^JW`^Z[[a^^\_aX^N\_\_^R]RZ]^¥¥WWW`^\_\_\_\_]  
@HWI-EAS443:3:85:1133:767#0/1  
AGAACGTGTTACCCAGGAGATTTTCATCGATTATGAGGAGC  
+HWI-EAS443:3:85:1133:767#0/1  
`aabababaababaabaa``abaaaaab\_aaabbaba\_a`  
@HWI-EAS443:3:85:120:1539#0/1  
CCCCATTGCATTTGGGTAAATGTAACATTGCTGGCTGGAA  
+HWI-EAS443:3:85:120:1539#0/1  
abb`X¥VL¥TY`aZS]Ra]N]¥V\_]ROY^H[]]X^UTQRD  
@HWI-EAS443:3:85:1301:1283#0/1  
CACGGGAACTATGCAAATAAGAGGGGTAGCCCCATTGC  
+HWI-EAS443:3:85:1301:1283#0/1  
aaaa^``aa`baaaa````aaa`]a^]]][aa`\_\_^a]\_`]  
@HWI-EAS443:3:86:887:1093#0/1  
TGCCGGGAGACAAAATAACATTCTGAAGCAACTGGAAATCT  
+HWI-EAS443:3:86:887:1093#0/1  
aaaa^a^Zaaa`aaaa`\_aaaab`\_`a`a`\_aaa\_a\_a\_\_  
@HWI-EAS443:3:86:932:338#0/1  
AGCCGGTTTCATTGAAGGGGGTGGACAGGGATGGTAGAT  
+HWI-EAS443:3:86:932:338#0/1  
aaabbbbb`\_abbabbba`b`\_bbaaabbaab`¥aaaa  
@HWI-EAS443:3:87:859:142#0/1  
CGCTGGCTGGATCCTGGGAAATCCAGAGTGTGAATCACTC  
+HWI-EAS443:3:87:859:142#0/1  
aaa\_\_`bbbbbb`\_S`bbb`abbbbaba`b`\_b`bbab¥a[a\_  
@HWI-EAS443:3:87:990:894#0/1  
AGCCGGTTTCATTGAAGGGGGTGGACAGGGATGGTAGAT  
+HWI-EAS443:3:87:990:894#0/1  
YW^a``[aa^aaaa`a[aaba`Uaa`¥`aa`¥`aaWa``^  
@HWI-EAS443:3:88:157:427#0/1  
TTCGTGGTAGTCCAAAGTTCTTTTCATTTTCCAATAGAACC  
+HWI-EAS443:3:88:157:427#0/1  
JWY`[]XXaUVU`PZUT0aa``aVX\_aV¥VXJ[[^a^a``  
@HWI-EAS443:3:88:1616:1553#0/1  
GCGAACAATTCAACAGACACTGTAGACACAGTACTAGAAG  
+HWI-EAS443:3:88:1616:1553#0/1  
aSQV]¥`\_JRMXOX^^^X[O[^GLTWUVUW\_^^SUXUNBB  
@HWI-EAS443:3:88:439:1142#0/1  
AGCCGGTTTCATTGAAGGGGGTGGACAGGGATGGTAGAT  
+HWI-EAS443:3:88:439:1142#0/1  
\_V¥abb^aababab`[`¥^a``Ya\_a`\_`^`^Za`¥\_\_Z¥  
@HWI-EAS443:3:88:81:931#0/1  
CGCTGGCTGGATCCTGGGAAATCCAGAGTGTGAATCACTC  
+HWI-EAS443:3:88:81:931#0/1  
aaa`\_V^TK``SP]P^Q]TZXMY¥U[M^MPGSP¥MWW¥SS  
@HWI-EAS443:3:89:1558:137#0/1  
ACGGCTGCATATCCTGACCCCTGCTCATTTTGTGGTGGT



@HWI-EAS443:3:93:113:1213#0/1  
GGGGTCTTATTGCTATTTCCGGCTTGAACCTTCTTGCTGTA  
+HWI-EAS443:3:93:113:1213#0/1  
`a\_b\_bbabbbb`bbbabababaa\_aa`aaaaa\_\_¥\_\_a  
@HWI-EAS443:3:93:1237:1236#0/1  
GTTTCTTCTCTGTTTAATTTTGCTTCTCTGAGTATTTTG  
+HWI-EAS443:3:93:1237:1236#0/1  
a^^[[^```Z\_a^\_\_XX\_a`Z^^Z`V¥]S[`^YR\_\_]\_] ]  
@HWI-EAS443:3:94:117:378#0/1  
ACATTTTTGACACTTCCATGCACGTGTTATCGCATTTGT  
+HWI-EAS443:3:94:117:378#0/1  
aab`babb\_aaaaaa`aaaa`ab\_b\_aa`^`\_\_aa\_a[  
@HWI-EAS443:3:94:777:1175#0/1  
CGGGTCTTATTGCTATTTCCGGCTTGAACCTTCTTGCTGTA  
+HWI-EAS443:3:94:777:1175#0/1  
abba\_abbbbababababaaaaaaZ\_]aa`ba[Yb\_\_a  
@HWI-EAS443:3:95:1092:776#0/1  
GGTGGGGACATCAAGATACAGCAAGAAGTTCAAGCCGGAA  
+HWI-EAS443:3:95:1092:776#0/1  
`a^baabb`ba\_a\_abaa`ab\_abbaab\_a^aa`a^a^\_¥  
@HWI-EAS443:3:96:1215:186#0/1  
CCTGGCTTCTTACCTTTTCATATAAGTTCTTCACATTTGA  
+HWI-EAS443:3:96:1215:186#0/1  
`\_aab\_bbabaaS`a\_aba`\_W\_aaaSa\_a`Qa]\_a`^]a  
@HWI-EAS443:3:97:1618:352#0/1  
GGGGGACATCAAGATACAGCAAGAAGTTCAAGCCGGAAAT  
+HWI-EAS443:3:97:1618:352#0/1  
\_\_Z\_Ybbb`aabaaaa\_bY`bb`ab\_b¥b`UGVa^aaaa  
@HWI-EAS443:3:97:61:631#0/1  
ACTTGCTGTATCTTGATGTCCCCACAAAACATATGCATC  
+HWI-EAS443:3:97:61:631#0/1  
aYa`a\_`a\_a]a^V^aaa^\_\_^`X^\_RFS]U^^^]Y^^W  
@HWI-EAS443:3:97:807:1385#0/1  
GGTCAGGATATGCAGCCGACCTGAAGAGCACACAGAATGG  
+HWI-EAS443:3:97:807:1385#0/1  
ab\_`aabbaaaaaaaa\_aa`aaaaaaaa`a[a\_aaa^aa\_  
@HWI-EAS443:3:98:1026:1086#0/1  
AGCTGGCTGGATCCTGGGAAATCCAGAGTGTGAATCACTC  
+HWI-EAS443:3:98:1026:1086#0/1  
aaaa`a`aaWV`\_R]\_a`¥]X\_\_``\_PY`Z`\_`^ZaS\_W  
@HWI-EAS443:3:98:708:212#0/1  
TGCCGACCTGAAGAGCACACAGAATGCCATTGACGAGATT  
+HWI-EAS443:3:98:708:212#0/1  
aa¥Q\_bY`^`a]a\_aaa[^PZaZaaa\_\_^```]Nb`a]0\_  
@HWI-EAS443:3:98:969:806#0/1  
CGTGGGGACATCAAGATACAGCAAGAAGTTCAAGCCGGAA  
+HWI-EAS443:3:98:969:806#0/1  
]`^b`Zaa^¥ba`U\_baa\_^aYZb\_a`X`aa¥ZQ]`baa  
@HWI-EAS443:3:99:1038:119#0/1  
CAGGATATGCAGCCGACCTGAAGAGCACACAGAATGCCAC

+HWI-EAS443:3:99:1038:119#0/1  
]bab\_ba`Xb`ba¥¥¥X]bbaaaab``aZO\_a`aa`ZKUW  
@HWI-EAS443:3:99:389:554#0/1  
TGCTGCTTTGAATTTTACCACAAATGCGATAACACGTGCA  
+HWI-EAS443:3:99:389:554#0/1  
abaabaaab^aabbaaaaaaaaa`a\_b`aaa\_a^`^`\_`  
@HWI-EAS443:3:9:1131:177#0/1  
CGCTGGCTGGATCCTGGGAAATCCAGAGTGTGAATCACTC  
+HWI-EAS443:3:9:1131:177#0/1  
`baabbabbb`abaabbbaab^]]``a^aXaa``S`M¥S  
@HWI-EAS443:3:9:1363:726#0/1  
GGAAATTGGAAACGGCTGCTTTGAATTTTACCACAAATGG  
+HWI-EAS443:3:9:1363:726#0/1  
\_`VXZX[\_]P]X[\_]ZTTTQMQ[WLRO[WBBBBBBBBBBBB  
@HWI-EAS443:3:9:742:1196#0/1  
ACCGGCTTGAACTTCTTGCTGTATCTTGATGTCCCCACAA  
+HWI-EAS443:3:9:742:1196#0/1  
a`]a`a\_aRZ^WZ\_]\_^HN[^XSYT[XGNTPMVWX¥MPXZ  
@HWI-EAS443:3:9:885:888#0/1  
CGGGTCAGGATATGCAGCCGACCTGAAGAGCACACAGAAT  
+HWI-EAS443:3:9:885:888#0/1  
aa\_a[\_a\_a`aa`]\_`\_\_^]¥^\_YUU]¥`S\_X¥¥¥¥W^W  
@HWI-EAS443:3:100:1056:1454#0/1  
ATGGAAAGTGTCAAAAATGGGACTTATGACTACCCAAAAT  
+HWI-EAS443:3:100:1056:1454#0/1  
aabababa^aa^abba`aaaaaaaa`aa\_aaa`\_``a\_a  
@HWI-EAS443:3:100:1066:301#0/1  
GTCATGATTGGCCATGAACCTGTCTTGGGGAATATCTCA  
+HWI-EAS443:3:100:1066:301#0/1  
a`XZba¥UYLXX¥Z[]aXTR\_aaWY^`WV^a]]]¥^RBBB  
@HWI-EAS443:3:100:1072:604#0/1  
ATCTCGTCAATGGCATTCTGTGTGCTCTTCAGGTCGGCTG  
+HWI-EAS443:3:100:1072:604#0/1  
Ybbabb`]S0aU[`]a]^`[^[\_a`\_Na`Q`ZUV¥`\_BBB  
@HWI-EAS443:3:100:1080:1142#0/1  
CGAATGCATATCTCGGTACCACTAGATTTCCAGTTGCTTC  
+HWI-EAS443:3:100:1080:1142#0/1  
aaaTbbbbbaab[X`ba]a\_ZWa\_aa\_aZa`Wb¥aa\_]aB  
@HWI-EAS443:3:100:1096:1661#0/1  
ATTGGAAAATGAAAGAACCTTGGACTACCACGATTCAAAT  
+HWI-EAS443:3:100:1096:1661#0/1  
aaaba`aaaab¥a\_^`a¥aa`\_]a^`\_UP`P\_\_\_\_W\_\_¥\_  
@HWI-EAS443:3:100:1207:490#0/1  
GGGTGGACAGGGATGGTAGATGGATGGTACGGTTATCACC  
+HWI-EAS443:3:100:1207:490#0/1  
^WXNb¥PIVR¥PWaX`KKU^¥[ `[RVaY[P¥\_NYUTTBBB  
@HWI-EAS443:3:100:1252:320#0/1  
CTCTATCAGAATGCAGATGCATATGTTTTTGTGGGGACAT  
+HWI-EAS443:3:100:1252:320#0/1  
``Vbabb\_babbbabababV\_babbbabbaababbbbbb

@HWI-EAS443:3:100:1265:330#0/1  
TGCTCTTCAGGTCGGCTGCATATCCTGACCCCTGCTCATT  
+HWI-EAS443:3:100:1265:330#0/1  
¥P¥RX¥bI][[Taa^aaX`VNYPNGOZQG\_]BBBBBB  
@HWI-EAS443:3:100:1282:302#0/1  
ATCGATGAAATCTCCTGGGTAACACGTTCCATTGTCTGAA  
+HWI-EAS443:3:100:1282:302#0/1  
aaab`^^`aaa]a`aa`X````a^a[\_\_\_\_``]X]^X^  
@HWI-EAS443:3:100:1323:351#0/1  
AACACGTGCATGGAAAGTGTCAAAAATGGGACTTATGACT  
+HWI-EAS443:3:100:1323:351#0/1  
abaaab`aaababaab\_ab\_\_aaabaa`¥`Xaaaba`^a  
@HWI-EAS443:3:100:1328:1252#0/1  
TGCTTCTCTGAGTATTTTGGGTAGTCATAAGTCCCATTT  
+HWI-EAS443:3:100:1328:1252#0/1  
aaa`aaab\_bbaa\_ababaaaa`aa^Y[a`\_`X[WZ`a`a  
@HWI-EAS443:3:100:1339:1821#0/1  
CAGTCCACGATTGCAATACAACCTTGTGACACCCCAAGGG  
+HWI-EAS443:3:100:1339:1821#0/1  
I¥b\_Nabaabbbb\_]bbb[][[abb[HYba\_a\_UN]a]bB  
@HWI-EAS443:3:100:136:913#0/1  
GCTGGCTGGATCCTGGGAAATCCAGAGTGTGAATCACTCT  
+HWI-EAS443:3:100:136:913#0/1  
aa\_X^a`aY[Z`U[¥^[`^OZYZZRZSMNNVVBBBBBBB  
@HWI-EAS443:3:100:1458:810#0/1  
ATTTTGTCTCCCGCTCTACTAGTGTCCAGTAATAGTTCA  
+HWI-EAS443:3:100:1458:810#0/1  
S^a`bb^SaaaabYSb\_¥[H\_0]\_a]UP`YUV`a\_VHaBB  
@HWI-EAS443:3:100:1513:1176#0/1  
GGGACATCAAGATACAGCAAGAAGTTCAAGCCGAAATAG  
+HWI-EAS443:3:100:1513:1176#0/1  
^`S[`]\_^aa¥\_X\_X\_^0aaXGWSO]X`\_\_DDX\_BBBBBB  
@HWI-EAS443:3:100:1519:723#0/1  
ATTTACTTTGTTAGTAATCTCGTCAATGGCATTCTGTGTG  
+HWI-EAS443:3:100:1519:723#0/1  
abb\_baaaaa\_bba\_bba`a`^^ba[```aa`\_a\_]RPX  
@HWI-EAS443:3:100:1551:973#0/1  
AACATTGCTGGCTGGATCCTGGGAAATCCAGAGTGTGAAT  
+HWI-EAS443:3:100:1551:973#0/1  
^Sa[`NWXZR`M[b`aSZ\_Q¥^\_M\_`QYNaxRPNYFYBBB  
@HWI-EAS443:3:100:1569:108#0/1  
AGCTCCTCATAATCGATGAAATCTCCTGGGTAACACGTTC  
+HWI-EAS443:3:100:1569:108#0/1  
a^GQ])`a`ba[a[``]bX`a\_Za\_0`¥\_]ZW^U\_W]¥¥B  
@HWI-EAS443:3:100:1669:789#0/1  
GCCAGTTAAAAACAATGCCAAGGAAATTGGAAACGGCTG  
+HWI-EAS443:3:100:1669:789#0/1  
YY^\_\_`a]¥¥a`^QVR]¥\_Ya`¥XYXMba^WI\_\_TYBBB  
@HWI-EAS443:3:100:171:776#0/1  
CATCATTTGAAAGTTTGGAGATATCCCCCAAGACAAGTTC

+HWI-EAS443:3:100:171:776#0/1  
\_aab\_bbabaa\_bb`bbab\_aa\_ba[U`aabbaabaa``\_@  
@HWI-EAS443:3:100:1748:1489#0/1  
ATTGAGCTCAGTGCATCATTTGAAAGTTTGAGATATTC  
+HWI-EAS443:3:100:1748:1489#0/1  
`aa^abU\_``aI\_a`baTXU^aba[W^\_]]YaWZ^]BB  
@HWI-EAS443:3:100:282:1168#0/1  
GGGGTGGACAGGGATGGTAGATGGATGGTACGGTTATCAC  
+HWI-EAS443:3:100:282:1168#0/1  
`\_aaG``abb`aba\_]bPR[^aa`\_aa`Qa\_Ya¥`\_]\_Z]B  
@HWI-EAS443:3:100:287:542#0/1  
GGGGACATCAAGATACAGCAAGAAGTTCAAGCCGAAATA  
+HWI-EAS443:3:100:287:542#0/1  
``aa\_\_aa`a[Y`\_```a^`a`]aX]X`¥\_]Z\_^W¥^^^  
@HWI-EAS443:3:100:29:766#0/1  
GAACGTGTTACCCAGGAGATTTTCATCGATTATGAGGAGCT  
+HWI-EAS443:3:100:29:766#0/1  
]aTaa\_`Z^\_W¥`^a`S\_KTT[^]\_VPV]¥^W`\_]\_^[XBB  
@HWI-EAS443:3:100:302:553#0/1  
TCCTTTTTTAAGTAGCCATATTAATTTTTGTAGAAGCTT  
+HWI-EAS443:3:100:302:553#0/1  
`ZVZ]^^Y`XHRa[YX]`Z[\_aRaX¥`\_^^`\_a^YVW]B  
@HWI-EAS443:3:100:336:97#0/1  
ATGAATTTTCTTTTTTAAGTAGCCATATTAATTTTTGT  
+HWI-EAS443:3:100:336:97#0/1  
a^b`abbbaab`bbba]a`aab\_a\_a`a``^`aa`aaa^a  
@HWI-EAS443:3:100:341:1361#0/1  
GCTGGCTGGATCCTGGGAAATCCAGAGTGTGAATCACTCT  
+HWI-EAS443:3:100:341:1361#0/1  
\_\_babbbbaaaaaaababbb^aba`a¥a^aaa`Z`^`a  
@HWI-EAS443:3:100:361:1315#0/1  
GGGGACATCAAGATACAGCAAGAAGTTCAAGCCGAAATA  
+HWI-EAS443:3:100:361:1315#0/1  
T¥UI\_aab]]Z]\_\_baaaaa`baZ`\_\_[aaaYaa]``]^a  
@HWI-EAS443:3:100:381:1982#0/1  
GGCTGCTTTGAATTTTACCACAAATGCGATAACACGTGCA  
+HWI-EAS443:3:100:381:1982#0/1  
a)`\_aTSU`TXQ^]\_\_\_PZ]\_a`Y[PW]^]]HYUZUBBB  
@HWI-EAS443:3:100:403:385#0/1  
GCTGGCTGGATCCTGGGAAATCCAGAGTGTGAATCACTCT  
+HWI-EAS443:3:100:403:385#0/1  
aU^aY]aaaUZNPYR]Y¥\_X¥¥V^]SKGTP¥GTSBBBBBB  
@HWI-EAS443:3:100:448:523#0/1  
ATTAATTTTTGTAGAAGCTTTTTGCTCCAGCATGAGGAC  
+HWI-EAS443:3:100:448:523#0/1  
abaa\_Vabaaa`^aa`baaa`\_aa]]\_aaS\_\_`a[V^  
@HWI-EAS443:3:100:528:1004#0/1  
CGATGAAATCTCCTGGGTAACACGTTCCATTGTCTGAACT  
+HWI-EAS443:3:100:528:1004#0/1  
abbababb`aa\_[aab¥G`aaa\_a`aa\_a`\_\_`a\_\_^Za

@HWI-EAS443:3:100:590:455#0/1  
CTTTGTTAGTAATCTCGTCAATGGCATTCTGTGTGCTCTT  
+HWI-EAS443:3:100:590:455#0/1  
a¥¥YaQ\_Y\_a]aaa]b`\_aV[^aZUUa`^aaW]WZHUS\_B  
@HWI-EAS443:3:100:642:728#0/1  
GTAAAAAACAATGCCAAGGAAATTGGAAACGGCTGCTTT  
+HWI-EAS443:3:100:642:728#0/1  
aaaaa\_a`a¥`aaaY`a[``]\_`a``\_\_\_^[a\_Y`^BBBB  
@HWI-EAS443:3:100:643:142#0/1  
GGGGACATCAAGATACAGCAAGAAGTTCAAGCCGAAATA  
+HWI-EAS443:3:100:643:142#0/1  
aaaaa\_a``aaaa`a^aa\_`aa\_\_a\_`[a\_a]0a^]\_\_W^  
@HWI-EAS443:3:100:649:243#0/1  
GCTATTTCCGGCTTGAACCTTCTGCTGTATCTTGATGTCC  
+HWI-EAS443:3:100:649:243#0/1  
aaaaaaaa```\_`aX]XX`\_a]^\_][`^`\_WZ\_]TB  
@HWI-EAS443:3:100:740:1927#0/1  
AAGCCAGTTAAAAACAATGCCAAGGAAATTGGAAACGGC  
+HWI-EAS443:3:100:740:1927#0/1  
aaYUTa[Gab`\_a\_a¥^aa[¥a0\_\_a\_¥a`NY`G[`BBBBB  
@HWI-EAS443:3:100:798:165#0/1  
GCCGTTACACCTTTGTTTCGAGTCATGATTGGCCATGAAC  
+HWI-EAS443:3:100:798:165#0/1  
a`bb`baabaaabababaaaa``abbaaaab^`\_`a^`^  
@HWI-EAS443:3:100:822:325#0/1  
GAGCAATTGAGCTCAGTGTCATCATTGAAAGTTTGAGA  
+HWI-EAS443:3:100:822:325#0/1  
]Y`¥Z^\_YZ`\_¥Z\_bWOYR]SO\_W\_ZUZR¥V`XGQSa]BB  
@HWI-EAS443:3:100:83:500#0/1  
TTTTGCTTCTCTGAGTATTTTGGGTAGTCATAAGTCCCA  
+HWI-EAS443:3:100:83:500#0/1  
aaaaaaaaaaaa\_bbab^aaaaaaaaa]`a^[^`^`\_]XW^\_  
@HWI-EAS443:3:100:84:359#0/1  
GCTGCTTTGAATTTTACCACAAATGCGATAACACGTGCAT  
+HWI-EAS443:3:100:84:359#0/1  
aaaa`aaaa^Sa\_a`a`a^a\_```]`^^\_\_\_`^`S`\_\_\_]  
@HWI-EAS443:3:100:883:833#0/1  
CGGCTGCTTTGAATTTTACCACAAATGCGATAACACGTGC  
+HWI-EAS443:3:100:883:833#0/1  
aaa]a`]`a\_PY\_\_aaaaYY]\_\_`^¥0\_ZLZ\_\_]\_R^Z`]  
@HWI-EAS443:3:100:891:503#0/1  
CTTTTTGCTCCAGCATGAGGACATGCTGCCGTTACACCTT  
+HWI-EAS443:3:100:891:503#0/1  
^bbbbb`bbbababb`baa`abbaaba`a\_`aV`^Ga\_  
@HWI-EAS443:3:10:1011:978#0/1  
ATGGGCATTACCATCCATCTACTAGTGCTGACCAACAA  
+HWI-EAS443:3:10:1011:978#0/1  
W¥bb`b\_Vabb¥\_aaa]]U00¥Z¥[aN`^aa`]W^a``^  
@HWI-EAS443:3:10:103:518#0/1  
GCCAGTTAAAAACAATGCCAAGGAAATTGGAAACGGCTG





@HWI-EAS443:3:10:1527:1380#0/1  
AGCCAGTTAAAAACAATGCCAAGGAAATTGGAAACGGCT  
+HWI-EAS443:3:10:1527:1380#0/1  
a`^^^\_b\_ab\_aa^[`T\_NS`]`X[a\_]Y\_^¥XQYZR[  
@HWI-EAS443:3:10:1542:588#0/1  
TGTCTGACAAGTTGTATTGCAATCGTGGACTGGTGTATCT  
+HWI-EAS443:3:10:1542:588#0/1  
a``\_aa`¥`ab\_aa^^a`aT`\_`W\_]`\_YY\_\_^W\_Y]^XW  
@HWI-EAS443:3:10:1624:366#0/1  
CCTCTGAGTATTTTGGGTAGTCATAAGTCCCATTTTTGAC  
+HWI-EAS443:3:10:1624:366#0/1  
QZb\_```abbabbbb\_b\_bb`¥`bbbb^b\_bbbbbbb\_ba  
@HWI-EAS443:3:10:164:435#0/1  
TGCTTCGAATGTTATTTGTCTCCCGCTCTACTAGTGTC  
+HWI-EAS443:3:10:164:435#0/1  
abaaaab^aaa`aaaaaa\_\_`\_[^\_a\_\_^\_[^][¥U\_]\_  
@HWI-EAS443:3:10:1711:1010#0/1  
CTGAGTATTTTGGGTAGTCATAAGTCCCATTTTTGACACT  
+HWI-EAS443:3:10:1711:1010#0/1  
WX`Z`V¥abbba[Z`a`a\_¥``\_\_S¥]FZa`abb^[Y]\_b  
@HWI-EAS443:3:10:1715:160#0/1  
AAAACATATGCATCTGCATTCTGATAGAGACTTTGTTGGT  
+HWI-EAS443:3:10:1715:160#0/1  
a`\_a\_abaab\_\_a^X`]]`\_]`]]X]]W]]Y[RUX  
@HWI-EAS443:3:10:174:1654#0/1  
TAGAGCACATCCAGAACTGATTGCCCCAGGGAGACTAC  
+HWI-EAS443:3:10:174:1654#0/1  
aabbbbbbbbbbaaab`bbbaaba^b^abbaaab\_aa`  
@HWI-EAS443:3:10:1756:194#0/1  
CTATTTCTTCTCTGTTTAATTTTGCTTCCTCTGAGTATTT  
+HWI-EAS443:3:10:1756:194#0/1  
aabbbbbbb`b`bbbbbbbbbbbabba\_babbbb\_abb  
@HWI-EAS443:3:10:1761:926#0/1  
ATGGCATTCTGTGTGCTCTTCAGGTCGGCTGCATATCCTG  
+HWI-EAS443:3:10:1761:926#0/1  
aYa`YZ\_``a`R]LYLWT\_^P[[VR^[YTT^UWUUTSSUW  
@HWI-EAS443:3:10:184:241#0/1  
ATCATTTAGATACACCAGTCCACGATTGCAATACAACCTT  
+HWI-EAS443:3:10:184:241#0/1  
aaaaaa`a`aa\_aaaa\_a`^aa`^^^^\_\_bU]\_]^^W^Z  
@HWI-EAS443:3:10:228:1354#0/1  
TCTGACAAGTTGTATTGCAATCGTGGACTGGTGTATCTGA  
+HWI-EAS443:3:10:228:1354#0/1  
\_aaa^[^`a\_aaYa`\_\_`a`][^¥a]\_a\_\_]X`[\_\_\_``\_\_  
@HWI-EAS443:3:10:240:245#0/1  
AGAAGCTTTTTGCTCCAGCATGAGGACATGCTGCCGTTAC  
+HWI-EAS443:3:10:240:245#0/1  
^aa`\_aaaa]aaa\_a¥`a[`V`\_\_¥V^a^V[]VV\_V]YH  
@HWI-EAS443:3:10:26:740#0/1  
GCTGTGAAGTGTATTTCATCTTTTCAATAACAGAATTTA

+HWI-EAS443:3:10:26:740#0/1  
`a^SZZ\_^`\_M[¥\_]`]^`^]\_\_\_\_\_`a`\_[T`YW]a\_\_  
@HWI-EAS443:3:10:315:1252#0/1  
ATTTCTTCTCTGTTTAATTTTGCTTCCTCTGAGTATTTTG  
+HWI-EAS443:3:10:315:1252#0/1  
abbbbababbbbbbbbbbbbbbaabbbbb¥bbbabbb  
@HWI-EAS443:3:10:363:101#0/1  
AACAAAGTCTCTATCAGAATGCAGATGCATATGTTTTGT  
+HWI-EAS443:3:10:363:101#0/1  
abaabab`abaa`a\_ab`aa`a\_aa\_\_a`a]aa`a^  
@HWI-EAS443:3:10:396:1608#0/1  
ATGAACTTGTCTTGGGAATATCTCAAACCTTCAAATGA  
+HWI-EAS443:3:10:396:1608#0/1  
`¥`a`a`\_ZR`a`aaYa]][\_aaa^¥\_Z]\_\_`\_`]  
@HWI-EAS443:3:10:427:82#0/1  
GTGGGGACATCAAGATACAGCAAGAAGTTCAAGCCGGAAA  
+HWI-EAS443:3:10:427:82#0/1  
aQ[\_a]^UUWRPUU¥PURWWSMV^UVNUZZVOXGRVSMZZ  
@HWI-EAS443:3:10:447:991#0/1  
CACTCTGTAACTTCTAGAAGACAAGCATAACGGGAAAC  
+HWI-EAS443:3:10:447:991#0/1  
`\_bbbbbbbaab`\_bbaa`\_b\_abbaaa^aaa`aabb`  
@HWI-EAS443:3:10:451:373#0/1  
CATCATTTGAAAGTTTGAGATATTCCTCAAGACAAGTTC  
+HWI-EAS443:3:10:451:373#0/1  
abbbabba`\_aabb`ababaaaa`]a`aba`\_\_\_\_\_  
@HWI-EAS443:3:10:462:688#0/1  
CAATTGCTCTTAGCTCCTCATAATCGATGAAATCTCCT  
+HWI-EAS443:3:10:462:688#0/1  
abbababbabababaaaaa`aaaa\_a`\_a`aaa¥`]V\_  
@HWI-EAS443:3:10:48:1245#0/1  
GCCGGTTTCATTGAAGGGGGTGGACAGGGATGGTAGATG  
+HWI-EAS443:3:10:48:1245#0/1  
\_Ra^TLa^Xaa`X`¥`]a\_aW`aV^XY`\_VU\_[PZ^¥NY  
@HWI-EAS443:3:10:490:1491#0/1  
AAAGAAGTCTCGTGCTATGGGCATTACCATCCATCTA  
+HWI-EAS443:3:10:490:1491#0/1  
\_Y`]^\_a`^aa`a\_\_adWU[[`\_]Y`\_Xa\_\_\_\_\_]^a  
@HWI-EAS443:3:10:498:338#0/1  
CAGTTAAAAACAATGCCAAGGAAATTGAAACGGCTGCT  
+HWI-EAS443:3:10:498:338#0/1  
abbabababbbabbbbaab`\_aababa`a^a\_[a\_LV  
@HWI-EAS443:3:10:543:1343#0/1  
GTATCTTGATGTCCCCACAAAACATATGCATCTGCATTC  
+HWI-EAS443:3:10:543:1343#0/1  
`ZaXZ]]\_TTZUXY\_[S[¥ZY]XY[¥SWWY]PNQN]NKH  
@HWI-EAS443:3:10:55:754#0/1  
CTAGAGGCCTATTTGGGGCCATTGCCGTTTCATTGAAGG  
+HWI-EAS443:3:10:55:754#0/1  
aab\_bbbbbbbabba\_a`aba`^^Ybb\_¥a`U^aa¥TWaa

@HWI-EAS443:3:10:567:1587#0/1  
GAAGCCAGTTAAAAACAATGCCAAGGAAATTGGAAACGG  
+HWI-EAS443:3:10:567:1587#0/1  
`ba]¥Xbb`bbaab\_a^a¥RUHQ]\_a]W\_\_\_\_\_a``X^]¥X  
@HWI-EAS443:3:10:572:1643#0/1  
ACTTCTTGCTGTATCTTGATGTCCCCACAAAAACATATGC  
+HWI-EAS443:3:10:572:1643#0/1  
XZ\_a`aa]`ba^aa`]¥\_^[YVa`] [abb`a\_baa\_\_`a]  
@HWI-EAS443:3:10:621:910#0/1  
TGGGGACATCAAGATACAGCAAGAAGTTCAAGCCGGAAAT  
+HWI-EAS443:3:10:621:910#0/1  
ab\_[]`aaRV]ZQ`a\_a\_Y^a` [¥Z¥WV\_^¥\_W^PZ[`^]  
@HWI-EAS443:3:10:634:889#0/1  
TGAACTATTACTGGACACTAGTAGAGCCGGGAGACAAAAT  
+HWI-EAS443:3:10:634:889#0/1  
XWIUZQ]¥TVQRU`\_^Q][X`RX^¥]\_[[a¥UUWU\_[XRQ  
@HWI-EAS443:3:10:639:234#0/1  
CTTCCTCTGAGTATTTTGGGTAGTCATAAGTCCCATTTTT  
+HWI-EAS443:3:10:639:234#0/1  
\_bbbabbbbbbabbabbbba[baabbbbaaa\_aaaaaa  
@HWI-EAS443:3:10:643:614#0/1  
AAGATACAGCAAGAAGTTCAAGCCGGAAATAGCAATAAGA  
+HWI-EAS443:3:10:643:614#0/1  
aabaaa`ab]bbbab\_^aaa\_a\_Ybaaaaaa\_\_a]`aa`a  
@HWI-EAS443:3:10:673:303#0/1  
TGGAAACGGCTGCTTTGAATTTTACCACAAATGCGATAAC  
+HWI-EAS443:3:10:673:303#0/1  
aaa`a`Xaa¥^¥LVT^XZZX`a]RRRUJ\_`XDMNQRLY¥N  
@HWI-EAS443:3:10:674:443#0/1  
TGGGGCATTACCATCCATCTACTAGTGCTGACCAACAAA  
+HWI-EAS443:3:10:674:443#0/1  
ab``bb]bbaabaaa`^aa\_aa`a`aXaaa`a\_\_`a^aa`  
@HWI-EAS443:3:10:746:1721#0/1  
CAATTCAACAGACACTGTAGACACAGTACTAGAAAAGAAT  
+HWI-EAS443:3:10:746:1721#0/1  
a`b```babbbbaa¥abb`ba`TabUZG]`\_baaa``a\_  
@HWI-EAS443:3:10:768:1291#0/1  
CATACCCAAAGCTCAGCAAATCCTACATTAATGATAAAGG  
+HWI-EAS443:3:10:768:1291#0/1  
`SS¥[]abYbX]a\_¥H^0Qb`ZRVIU^^\_W\_aV^``T`V  
@HWI-EAS443:3:10:801:729#0/1  
AAAAAGCACAAAATTGAGACTGGCCACAGGATTGAGGAAT  
+HWI-EAS443:3:10:801:729#0/1  
a``aaaaaaa`a`a`\_a^^`\_\_^\_^\_\_\_\_X^^ZX[\_X\_Y  
@HWI-EAS443:3:10:812:1364#0/1  
AGAACTTTGGACTACCACGATTCAAATGTGAAGAACTTAT  
+HWI-EAS443:3:10:812:1364#0/1  
aabaabbabababa`aaaaaaa\_aaa]ba`aa`aaaaa  
@HWI-EAS443:3:10:890:323#0/1  
TGCCGGTTTTCATTGAAGGGGGGTGGACAGGGATGGTAGAT

+HWI-EAS443:3:10:890:323#0/1  
aaa^ba^aa`aaa[\_baaa]YU\_`¥¥^`Z[[\_a\_W^\_Z¥  
@HWI-EAS443:3:10:929:1312#0/1  
AATCGATGAAATCTCCTGGGTAACACGTTCCATTGTCTGA  
+HWI-EAS443:3:10:929:1312#0/1  
abaaaa`a`aa\_`^`\_Za\_¥`^`^^]]\_\_^^Z[^]^  
@HWI-EAS443:3:10:938:1358#0/1  
TCATTTTCAGATACACCAGTCCACGATTGCAATACAACCTG  
+HWI-EAS443:3:10:938:1358#0/1  
V)`a`[a`K`¥`\_]\_\_\_\_\_¥`]^`^`aWPYYR]XOYYY  
@HWI-EAS443:3:10:980:1593#0/1  
CCGGGAGACAAAATAACATTCCAAGCAACTGGAAATCTAG  
+HWI-EAS443:3:10:980:1593#0/1  
abbabaaab`bbbbbbabaa\_aaa`\_`aTaa^]aX\_N`\_  
@HWI-EAS443:3:11:1016:648#0/1  
TTTGGGTAGTCATAAGTCCCATTTTTGACACTTCCATGC  
+HWI-EAS443:3:11:1016:648#0/1  
\_`abaaaa]a`a`aa[¥a\_]baaaaaVZ`¥\_a`^`\_`^`  
@HWI-EAS443:3:11:1072:29#0/1  
AGAAGTTCAAGCCGAAATAGCAATAAGACCCAAAGTGAG  
+HWI-EAS443:3:11:1072:29#0/1  
aa`^a^\_aaTa\_[aa]Y`^`\_a^]\_^^^\_]WV^VV^V^]^  
@HWI-EAS443:3:11:1079:1496#0/1  
CTAGATTTCCAGTTGCTTCCAATGTTATTTTTGTCTCCCGG  
+HWI-EAS443:3:11:1079:1496#0/1  
aba\_^aba`^`ba[`^\_aaa\_]aa\_aaaaa\_`\_aY[Q^\_  
@HWI-EAS443:3:11:1082:1364#0/1  
TCCGGCTTGAACCTTCTGCTGTATCTTGATGTCCCCACAA  
+HWI-EAS443:3:11:1082:1364#0/1  
aa\_]\_`aaaaa[\_a\_`a`^`aa^\_aY`\_`^`¥\_\_\_\_\_`\_\_[\_  
@HWI-EAS443:3:11:1091:523#0/1  
CAAGGAAATTGAAACGGCTGCTTTGAATTTTACCACAAA  
+HWI-EAS443:3:11:1091:523#0/1  
`bbabaaabbba\_\_`aaaaaaL\_`aLLZ^`aaHO[¥H^\_[  
@HWI-EAS443:3:11:119:17#0/1  
GAAGCCAGTTAAAAACAATGCCAAGGAAATTGGAAACGG  
+HWI-EAS443:3:11:119:17#0/1  
aabaa`aa\_aaaaaa¥aa`\_aa]U[`^`¥`\_]\_\_]\_`[Za\_  
@HWI-EAS443:3:11:1303:421#0/1  
CTGGTGTATCTGAAATGATAATACCAGATCCAGCATTCT  
+HWI-EAS443:3:11:1303:421#0/1  
^`a\_H\_0]a`\_¥^¥V\_b`a`V^b^SW`VSUQXa]]Z^^J¥  
@HWI-EAS443:3:11:1359:822#0/1  
ACTGATTGCCCCAGGGAGACTACCAGTACCAATGAACTG  
+HWI-EAS443:3:11:1359:822#0/1  
aXb\_Z`aa`ZX`Y\_`Va\_aa\_\_`ZU^aW\_S¥W¥\_`^`\_ZNBB  
@HWI-EAS443:3:11:1370:914#0/1  
GGGTGTCTGACAAGTTGTATTGCAATCGTGGACTGGTGTA  
+HWI-EAS443:3:11:1370:914#0/1  
`[\_`SaRZaa^M^\_]\_W\_^Z`X^UZZ^^^]ZZ^Z]Z^ZW

@HWI-EAS443:3:11:1403:1184#0/1  
CTGGACATTTGGACTTACAATGCCGAAGTGTGGTTCTAT  
+HWI-EAS443:3:11:1403:1184#0/1  
a]a[XS\_\_`Y^ab`UW]a`aaa\_0¥X\_Lbbaaa\_LSL\_]b  
@HWI-EAS443:3:11:1409:1807#0/1  
GGCTAGTTAAAAAAGGAAATTCATACCCAAAGCTCAGCAA  
+HWI-EAS443:3:11:1409:1807#0/1  
a\_\_b^Vbaa\_aaa\_\_```a[`^\_^S`\_\_¥Y[V]ZP\_^  
@HWI-EAS443:3:11:1414:1731#0/1  
TGGGCCATGAACCTGTCTTGGGGAATATCTCAAACCTTTC  
+HWI-EAS443:3:11:1414:1731#0/1  
aZaa^¥VY`[]Y\_YaLGS\_¥^aZ0]^R^UOW]^YUUZ^^¥  
@HWI-EAS443:3:11:1436:390#0/1  
ATGAAAAGGTAAGAAGCCAGTTAAAAACAATGCCAAGGA  
+HWI-EAS443:3:11:1436:390#0/1  
R\_a^IW¥\_[U[`bWT¥abb¥TZ`b¥^][JZ^a]aY\_V¥ba  
@HWI-EAS443:3:11:1492:631#0/1  
TTTTCTTGGCATTGTTTTTAACTGGCTTCTTACCTTTTC  
+HWI-EAS443:3:11:1492:631#0/1  
aaaa\_aabbaaab^`a`aa\_\_^`\_]`^`\_S`\_`AY[^]^\_W  
@HWI-EAS443:3:11:1539:1872#0/1  
AGGAGATTTTCATCGATTATGAGGAGCTAAGAGAGCAATTG  
+HWI-EAS443:3:11:1539:1872#0/1  
Y\_¥`\_X`bbNba`S]^`¥^``[]Z]Ra]aTV[F\_BBBB  
@HWI-EAS443:3:11:1554:1144#0/1  
GCACGTGTTATCGCATTGTGGTAAAATCAAAGCAGCCG  
+HWI-EAS443:3:11:1554:1144#0/1  
a[`P\_]a\_a`a`]^`^`\_aZ^AY\_]\_\_S`]Z\_QX]X]¥  
@HWI-EAS443:3:11:1668:1603#0/1  
CCATGAGCTTGCTGTGGAGAGTGATTCACACTCTGGATTT  
+HWI-EAS443:3:11:1668:1603#0/1  
a]a`a\_VY[`XZSbbZaXZPQGWXQTMZ\_]a``XGURMTX  
@HWI-EAS443:3:11:1716:914#0/1  
GGTGTATATAGCACCTTGGGTGTCTGACAAGTTGTATTG  
+HWI-EAS443:3:11:1716:914#0/1  
ab¥baabaaa]``¥Z`\_a`W`UZ`^^Z`¥\_Z`¥¥]^]B  
@HWI-EAS443:3:11:183:206#0/1  
AATTTTGCTTCTGAGTATTTTGGGTAGTCATAAGTCC  
+HWI-EAS443:3:11:183:206#0/1  
aaaaaa`a`aaaaaaaaY\_``^`a`\_[\_a]^Z^\_\_\_W¥\_  
@HWI-EAS443:3:11:209:1685#0/1  
AAGATACAGCAAGAAGTTCAAGCCGAAATAGCAATAAGA  
+HWI-EAS443:3:11:209:1685#0/1  
¥^\_\_Vabb\_``ba`Y[FTbb`[`X^¥`aa^`[\_¥\_a\_`a  
@HWI-EAS443:3:11:252:227#0/1  
GGTGGACAGGGATGGTAGATGGATGGTACGGTTATCACCA  
+HWI-EAS443:3:11:252:227#0/1  
abXaa\_`¥¥¥\_¥\_\_\_UR^[¥\_\_V¥\_\_WYZ[\_SWWRORUUB  
@HWI-EAS443:3:11:254:272#0/1  
ATCATTGAAAGGTTTGGAGATATTTCCCAAGACAAGTTCA

+HWI-EAS443:3:11:254:272#0/1  
`ba]`^a\_M0]aaZ^baV]YVa¥a^QsaaY\_LL]\_`PVBB  
@HWI-EAS443:3:11:260:1906#0/1  
TACGGTTATCACCATCAAAATGAGCAGGGGTCAGGATATG  
+HWI-EAS443:3:11:260:1906#0/1  
ab\_TZ]\_aaaba`a]`¥a`aWWYV¥VL[^]X\_`R¥`\_`W[  
@HWI-EAS443:3:11:270:1365#0/1  
GCTGGCTGGATCCTGGGAAATCCAGAGTGTGAATCACTCT  
+HWI-EAS443:3:11:270:1365#0/1  
aa`aab\_XZM[Qa`VW^]aZ^^VGP[ZY]S\_YaOSWZU¥Y  
@HWI-EAS443:3:11:304:1143#0/1  
AGAGGAAGCAAAATTAACAGAGAAGAAATAGATGGGGTA  
+HWI-EAS443:3:11:304:1143#0/1  
¥YIVT^UYa¥Y\_SH\_`¥`T`YZP]^`a\_T¥WX`YST^[V  
@HWI-EAS443:3:11:311:1397#0/1  
ATCAGAATGCAGATGCATATGTTTTGTGGGGACATCAAG  
+HWI-EAS443:3:11:311:1397#0/1  
`\_`bbaaaabaaa\_aaaaa^^¥`\_`a`\_a`¥G`¥a]¥]\_`  
@HWI-EAS443:3:11:323:1535#0/1  
TTCGAATGTTATTTTGTCTCCCGCTCTACTAGTGTCCAG  
+HWI-EAS443:3:11:323:1535#0/1  
aab`a`bb\_[]`aaa\_¥\_\_`\_\_`\_`^W]\_]XZZYS¥ZZ]WW  
@HWI-EAS443:3:11:329:607#0/1  
AATTTACTTTGTTAGTAATCTCGTCAATGGCATTCTGTGT  
+HWI-EAS443:3:11:329:607#0/1  
Xbbbbabbbbbaabaaa`baaab`baa\_a\_aa\_aa`a`[U  
@HWI-EAS443:3:11:362:1113#0/1  
GGGGTGGACAGGGATGGTAGATGGATGGTACGGTTATCAC  
+HWI-EAS443:3:11:362:1113#0/1  
`ba`Saaa^^^\_\_\_\_\_a^P\_`\_YPU¥[¥\_XXQ`\_WW¥¥W¥¥  
@HWI-EAS443:3:11:392:1030#0/1  
GAAGAACTTATATGAAAAGGTAAGAAGCCAGTAAAAAAC  
+HWI-EAS443:3:11:392:1030#0/1  
^¥W\_^`\_`aaV]^Z[Y\_a\_OZ\_]XY^a`V`aaULYGR`\_  
@HWI-EAS443:3:11:440:1069#0/1  
AATCGATGAAATCTCCTGGGTAACACGTTCCATTGTCTGA  
+HWI-EAS443:3:11:440:1069#0/1  
aaaaa`\_\_`aa^\_\_`^`\_`X¥[\_`^\_]`^`\_`Z^^\_U  
@HWI-EAS443:3:11:440:668#0/1  
TAGGACCATGAGCTTGCTGTGGAGAGTGATTCACACTCTG  
+HWI-EAS443:3:11:440:668#0/1  
a`[ba^W\_a\_¥`V]baabbabbR]aaS`aa[U]`a\_]P]a  
@HWI-EAS443:3:11:462:1866#0/1  
TGTGGGGACATCAAGATACAGCAAGAAGTTCAAGCCGGAA  
+HWI-EAS443:3:11:462:1866#0/1  
abXaabbW\_baabaaaabaaaabbaaaa`\_`aa^a[[]]\_\_  
@HWI-EAS443:3:11:472:749#0/1  
TCGTGGTAGTCCAAAGTTCTTTTCATTTTCCAATAGAACCA  
+HWI-EAS443:3:11:472:749#0/1  
^\_¥Ra`Y^^^0¥X\_YZ\_]\_`]V]^OW\_WU]aa`Y\_a\_\_I[a

@HWI-EAS443:3:11:524:34#0/1  
GTTACCCAGGAGATTTTCATCGATTATGAGGAGCTAAGAGA  
+HWI-EAS443:3:11:524:34#0/1  
a\_`a`\_\_\_a`a`^`^`]^`XZ`X^`Y`\_]`^XZRZZZZ^Z  
@HWI-EAS443:3:11:563:367#0/1  
GATGAAATCTCCTGGGTAACACGTTCCATTGTCTGAACTA  
+HWI-EAS443:3:11:563:367#0/1  
aaaaaa`aaa`\_`a\_\_^a`a^`\_`\_\_\_a^`^`\_]^^\_\_  
@HWI-EAS443:3:11:581:1820#0/1  
TGTGGGGACATCAAGATACAGCAAGAAGTTCAAGCCGGAA  
+HWI-EAS443:3:11:581:1820#0/1  
^]¥QUZ^abbaaaa]aaba\_\_baba`\_`^`Wb`\_]`\_YW`\_  
@HWI-EAS443:3:11:584:298#0/1  
CTGGCTGGATCCTGGGAAATCCAGAGTGTGAATCACTCTC  
+HWI-EAS443:3:11:584:298#0/1  
`baaababT]baU`a`\_`^W`[¥b`a^`^a`^`\_`aRX`^¥  
@HWI-EAS443:3:11:599:723#0/1  
CTTTTTTCCAGGTGGTTGAACTCTTTACCTACTGCTGTGA  
+HWI-EAS443:3:11:599:723#0/1  
aaa`a`^`^`[aaR`a^`[\_ZOY\_US¥[a]`ZXZ¥`UZVM^W  
@HWI-EAS443:3:11:610:1589#0/1  
ATAAGTCCCATTTTTGACACTTTCCATGCACGTGTATCG  
+HWI-EAS443:3:11:610:1589#0/1  
aaa\_aYab`ba`\_aaaaa`a`^`\_¥`\_\_\_\_`Z`^`¥`^]S]  
@HWI-EAS443:3:11:611:1710#0/1  
CACTAGTAGAGCCGGGAGACAAAATAACATTCGAAGCAAC  
+HWI-EAS443:3:11:611:1710#0/1  
a`a^WawTW][Wa\_[[N]Ub]H]]`^Za[\_XNX\_PYV`aU  
@HWI-EAS443:3:11:646:1217#0/1  
TTCCAATTGTGATCGGATGTATATTCTGAAATGGGAGGCT  
+HWI-EAS443:3:11:646:1217#0/1  
aX\_[Ta\_baa`\_Waaa\_RYNUZP]]NXTG`\_]QU]\_YBBB  
@HWI-EAS443:3:11:652:1538#0/1  
TGGAAAGTGTCAAAAATGGGACTTATGACTACCCAAAATA  
+HWI-EAS443:3:11:652:1538#0/1  
aba^]`\_¥`\_ba`ba\_aa`aaa`\_`aaaa`a`W\_X`\_`\_\_\_\_`  
@HWI-EAS443:3:11:665:1702#0/1  
CTTTGTTAGTAATCTCGTCAATGGCATTCTGTGTGCTCTT  
+HWI-EAS443:3:11:665:1702#0/1  
abbbb[bbb\_bbaaaaa\_a¥[^`a`aa^Y`aaWS\_aa`a`  
@HWI-EAS443:3:11:676:987#0/1  
AATCGATGAAATCTCCTGGGTAACACGTTCCATTGTCTGA  
+HWI-EAS443:3:11:676:987#0/1  
^`\_Za\_\_\_\_`\_]`\_`^`\_¥`\_]V[¥`\_`[`Z]Y\_[[\_TU[[\_[  
@HWI-EAS443:3:11:730:1435#0/1  
AAGAACTTTGGACTACCACGATTCAAATGTGAAGAACTTA  
+HWI-EAS443:3:11:730:1435#0/1  
¥`\_`XZ`a`^T`^`\_]aN^aa`\_`\_¥`\_P`\_]`^X[^`\_¥`\_  
@HWI-EAS443:3:11:758:1558#0/1  
CTTCCTCTGAGTATTTTTGGGTAGTCATAAGTCCCATTTTT

+HWI-EAS443:3:11:758:1558#0/1  
ab\_abba\_b`UX\_`a]baab\_aa` ``ba\_a`\_Y]aaaaa`  
@HWI-EAS443:3:11:788:273#0/1  
GCCAGTCTCAATTTTGTGCTTTTTACATATTTTGGACATT  
+HWI-EAS443:3:11:788:273#0/1  
`aaaa\_`aa` `aaa`a^a^a`aaa`\_\_`^a\_a^\_^]V^\_^  
@HWI-EAS443:3:11:800:114#0/1  
CAATGGCATTCTGTGTGCTCTTCAGGTCGGCTGCATATCC  
+HWI-EAS443:3:11:800:114#0/1  
aZW\_`bbbbbbbb]b`abb`ba`bWa\_ab`]aaZXX`]¥X  
@HWI-EAS443:3:11:806:755#0/1  
CTAGTTCAGACAATGGAACGTGTTACCCAGGAGATTTTCAT  
+HWI-EAS443:3:11:806:755#0/1  
\_Ybbaa\_SV`]`\_Z]]`P]WaX`YW`]`a¥aaV`YS`Y\_[]`  
@HWI-EAS443:3:11:826:1412#0/1  
TTCAATGAAACCGCAATGGCCCCAAATAGGCCTCTAGAT  
+HWI-EAS443:3:11:826:1412#0/1  
V¥\_Z\_]`HX\_b\_]`^`Ta`]`\_`aa\_]`a[YUXPYY` [JV  
@HWI-EAS443:3:11:856:1177#0/1  
ATTTGAAAGTTTGAGATATTTCCCAAGACAAGTTCATGG  
+HWI-EAS443:3:11:856:1177#0/1  
aV\_]`]]S`b[\_aaaaaa[a\_`^[]`\_a\_TYT\_]`^XXZ^S  
@HWI-EAS443:3:11:861:702#0/1  
ATTTTGTCTCCCGCTCTACTAGTGTCCAGTAATAGTTCA  
+HWI-EAS443:3:11:861:702#0/1  
``bb`¥UZ¥¥`ZH¥]aWa`aa\_`P¥`ZHW^WM¥\_RXQXXY  
@HWI-EAS443:3:11:924:737#0/1  
GGGATGGTAGATGGATGGTACGGTTATCACCATCAAAATG  
+HWI-EAS443:3:11:924:737#0/1  
aaa]abaT`a`^`U`aa^` `a`¥a¥¥SVTN¥^XZ[] [UV  
@HWI-EAS443:3:11:928:455#0/1  
AGAACTTATATGAAAAGGTAAGAAGCCAGTTAAAAAACAA  
+HWI-EAS443:3:11:928:455#0/1  
```a`^`SWZ`ZG]\_aaaVa¥^]a`U\_aa`^a\_` ``\_¥`^  
@HWI-EAS443:3:11:931:1652#0/1  
TGGGGACATCAAGATACAGCAAGAAGTTCAAGCCGGAAAT  
+HWI-EAS443:3:11:931:1652#0/1  
abaaa`aaaa`aUb¥a^aa\_`aaa\_`Z`\_a\_^[]`\_W\_[]`  
@HWI-EAS443:3:11:994:544#0/1  
CGGGAGACAAAATAACATTCGAAGCAACTGGAAATCTAGT  
+HWI-EAS443:3:11:994:544#0/1  
abbbabaabaaaaba\_abbaa\_ab]aa\_aaa` ``a`a`a]  
@HWI-EAS443:3:12:100:117#0/1  
GCAAGAAGTTCAAGCCGAAATAGCAATAAGACCCAAAGT  
+HWI-EAS443:3:12:100:117#0/1  
a` `ba¥^bW^aba\_\_Za]^`a\_`\_\_`^` ` `\_]Z\_Z^\_0  
@HWI-EAS443:3:12:1073:859#0/1  
TCTGAGTATTTTGGGTAGTCATAAGTCCCATTTTGGACAC  
+HWI-EAS443:3:12:1073:859#0/1  
ZZaaZ¥UXY\_\_Z`^]J`]¥SSY[R\_XZ¥`^aZ``^]TU¥M



@HWI-EAS443:3:12:1076:1548#0/1  
GCCATGAACCTTGCTTGGGGAATATCTCAAACCTTTCAAA  
+HWI-EAS443:3:12:1076:1548#0/1  
aaaaa`aa\_aaa\_^\_aaa`b^`\_`a^a^a`a^]a\_`^`¥a  
@HWI-EAS443:3:12:1121:79#0/1  
GCTGGCTGGATCCTGGGAAATCCAGAGTGTGAATCACTCT  
+HWI-EAS443:3:12:1121:79#0/1  
a\_aba\_\_bb[\_\_\_\_`\_]a^\_\_\_VZ^`U\_S[V^¥U[VWQ¥WB  
@HWI-EAS443:3:12:1153:485#0/1  
GAGACTACCAGTACCAATGAACTGGCGACAGTTGAATAGA  
+HWI-EAS443:3:12:1153:485#0/1  
abbaabb`aab\_aa\_\_ba`aa`aa`^`]S`a]\_`\_]a\_`^`  
@HWI-EAS443:3:12:1157:1582#0/1  
CCCGGCTCTACTAGTGTCCAGTAATAGTTCATTCTCCCTT  
+HWI-EAS443:3:12:1157:1582#0/1  
aaabbaaa\_aa`aa\_`aaaa\_aaa\_`]aTaaa\_a^`¥aa  
@HWI-EAS443:3:12:1208:1644#0/1  
GGGACATCAAGATACAGCAAGAAGTTCAAGCCGAAATAG  
+HWI-EAS443:3:12:1208:1644#0/1  
`b^Y\_bbaS^S]XOVaIZa\_\_SIUS]\_]WHR`\_Y^`^PXU  
@HWI-EAS443:3:12:1209:879#0/1  
GGGGACATCAAGATACAGCAAGAAGTTCAAGCCGAAATA  
+HWI-EAS443:3:12:1209:879#0/1  
a\_T[``\_`b\_a`]U]^`NTaaaa\_]aS^`a]]OGa`WI^¥]  
@HWI-EAS443:3:12:1287:1728#0/1  
GAAGTCCTCGTGTCTATGGGGCATTACCATCCATCTACTA  
+HWI-EAS443:3:12:1287:1728#0/1  
`b\_]QTZb\_a`MWbabZ`UU¥b`S\_WJ`^RF]a\_[b¥\_X  
@HWI-EAS443:3:12:1331:725#0/1  
ATGTAACATTGCTGGCTGGATCCTGGGAAATCCAGAGTGT  
+HWI-EAS443:3:12:1331:725#0/1  
^]]]aa\_]`aba]¥^^]a`XV¥\_ZZ[^`^`\_]\_]\_`\_W`V  
@HWI-EAS443:3:12:1366:990#0/1  
GATAACCGTACCATCCATCTACCATCCCTGTCCACCCCC  
+HWI-EAS443:3:12:1366:990#0/1  
\_Wba`a`aaaa\_¥U¥\_]a]TU[``\_`^T\_\_YKV¥¥RKNS^  
@HWI-EAS443:3:12:1403:644#0/1  
CGATGAAATCTCCTGGGTAACACGTTCCATTGTCTGAACT  
+HWI-EAS443:3:12:1403:644#0/1  
¥\_bbbbbbba`aa\_`bb\_aababababbaa`\_baaab`^Z`  
@HWI-EAS443:3:12:1409:1544#0/1  
GAAATCCAGAGTGTGAATCACTCTCCACAGCAAGCTCATG  
+HWI-EAS443:3:12:1409:1544#0/1  
a`aaa`aaa`^U`\_a`a\_\_\_\_`^a][[]ZaN¥\_]UURBB  
@HWI-EAS443:3:12:1461:251#0/1  
ACTAGTAGATGGATGGTGAATGCCCCATAGCACGAGGACT  
+HWI-EAS443:3:12:1461:251#0/1  
`bbaa¥ababbbbaaaUab`ba\_]^\_a^aVSR]\_`\_`[T¥  
@HWI-EAS443:3:12:1563:193#0/1  
GCTCAGCAAATCCTACATTAATGATAAAGGGAAAGAAGTC

+HWI-EAS443:3:12:1563:193#0/1  
aaa^`\_a\_a`]S^]X^aa^^aa\_`Z^\_]¥Z\_`^^^BB  
@HWI-EAS443:3:12:1649:610#0/1  
AAATGAGCAGGGGTCAGGATATGCAGCCGACCTGAAGAGC  
+HWI-EAS443:3:12:1649:610#0/1  
aa`\_`abaa`^`aZY\_baS\_`\_`[\_`SQ^WRR¥^^Z\_[-¥  
@HWI-EAS443:3:12:1746:740#0/1  
TGGAAACGGCTGCTTTGAATTTTACCACAAATGCGATAAC  
+HWI-EAS443:3:12:1746:740#0/1  
ab`Iab`bb`b\_0¥`^S````aaZS¥\_P]^\_PTRWBBBBB  
@HWI-EAS443:3:12:179:1121#0/1  
TGGGGACATCAAGATACAGCAAGAAGTTCAAGCCGGAAAT  
+HWI-EAS443:3:12:179:1121#0/1  
abb\_]aUZQX^W]YT\_]b\_¥]a\_`S¥ZX`a\_`a]\_Y¥a^]  
@HWI-EAS443:3:12:198:764#0/1  
GCTGGCTGGATCCTGGGAAATCCAGAGTGTGAATCACTCT  
+HWI-EAS443:3:12:198:764#0/1  
Q`Q¥RXR\_\_QWZWPZ^\_XV]Z\_b¥\_OXZ¥GIO`XX``¥aB  
@HWI-EAS443:3:12:219:820#0/1  
GGTCAGCACTAGTAGATGGATGGTGAATGCCCATAGCAC  
+HWI-EAS443:3:12:219:820#0/1  
abUb`^`\_ab`b]`]`abaaaaa^a`X`a\_`\_aaaa^`a^  
@HWI-EAS443:3:12:236:704#0/1  
CATATCCTGACCCCTGCTCATTGATGGTGATAACCGTA  
+HWI-EAS443:3:12:236:704#0/1  
a`]a`\_]K]\_`]WGYTV\_a]\_X]\_VU[`VNYM^\_\_\_TRLU  
@HWI-EAS443:3:12:268:183#0/1  
GGGAGGCTGGTGTATAGCACCCCTGGGTGTCTGACAAG  
+HWI-EAS443:3:12:268:183#0/1  
abb¥aaaaab^\_a\_aaaaaa`\_a^a¥a\_`Q`W\_\_\_\_]¥^¥¥  
@HWI-EAS443:3:12:279:1375#0/1  
CACGATTCAAATGTGAAGAACTTATATGAAAAGGTAAGAA  
+HWI-EAS443:3:12:279:1375#0/1  
XabbX`baabb^^`\_a¥`^a`\_abbbba\_aa¥Y]aa`bb  
@HWI-EAS443:3:12:302:1137#0/1  
AAAAGCACAAAATTGAGACTGGCCACAGGATTGAGGAATG  
+HWI-EAS443:3:12:302:1137#0/1  
\_Ua\_X`Za`¥aaaa`a¥aa\_\_[a``¥R[]Y^YUVO¥P¥^B  
@HWI-EAS443:3:12:32:121#0/1  
GGGGTGGACAGGGATGGTAGATGGATGGTACGGTTATCAC  
+HWI-EAS443:3:12:32:121#0/1  
`\_baQa]^ [SY`aWZaaQ\_X¥W\_ZWU^^R[¥Y\_QTUVUBB  
@HWI-EAS443:3:12:330:375#0/1  
GCACGTGTTATCGCATTTGTGGTAAAATTCAAAGCAGCCG  
+HWI-EAS443:3:12:330:375#0/1  
¥bbbaPYa]a```aa]`\_]`P]^R`aa\_a[Taa`\_b`a]S[  
@HWI-EAS443:3:12:350:1623#0/1  
CCTGGGAAATCCAGAGTGTGAATCACTCTCCACAGCAAGC  
+HWI-EAS443:3:12:350:1623#0/1  
abbaaZ^`W\_^^aaaRR\_U¥^WVbRJY`[^]R]ZaaWBB

@HWI-EAS443:3:12:384:1051#0/1  
GCTCCTCATAATCGATGAAATCTCCTGGGTAACACGTTCC  
+HWI-EAS443:3:12:384:1051#0/1  
ab[X]Y]M¥N^X[\_\_aVOXa\_Y\_[aVa]XU\_R[\_¥^][\_R  
@HWI-EAS443:3:12:424:1764#0/1  
GGCTTGAACCTTCTTGCTGTATCTTGATGTCCCCACAAAA  
+HWI-EAS443:3:12:424:1764#0/1  
a^bba]abbaa`aaa\_a`aaaaabTaa^aaa`\_a\_aaaa\_  
@HWI-EAS443:3:12:469:63#0/1  
GGATCCTGGGAAATCCAGAGTGTGAATCACTCTCCACAGC  
+HWI-EAS443:3:12:469:63#0/1  
ab¥\_abaa`\_a`aa]Xaaa`[`Z`Z^`Z^¥\_¥\_^U^S^\_T  
@HWI-EAS443:3:12:499:556#0/1  
AGCCAGTTAAAAACAATGCCAAGGAAATTGGAAACGGCT  
+HWI-EAS443:3:12:499:556#0/1  
aa\_a`a`\_`\_`^]\_\_a`\_`\_\_Ya\_Z^¥\_^^\_Z^]Z^^¥Z  
@HWI-EAS443:3:12:515:1630#0/1  
GCTGCTTTGAATTTTACCACAAATGCGATAACACGTGCAT  
+HWI-EAS443:3:12:515:1630#0/1  
a`][a]\_\_[`\_`^]W]^¥\_]¥]^¥]^¥X^^Z^^^0^X^G  
@HWI-EAS443:3:12:580:1431#0/1  
GATGACACTGAGCTCAATTGCTCTTAGCTCCTCATAAT  
+HWI-EAS443:3:12:580:1431#0/1  
`^bbbbbb`bb\_abbbbbbbbaabbbbbbbba[^bbaaaa  
@HWI-EAS443:3:12:59:888#0/1  
GTTGCTTCGAATGTTATTTTGTCTCCCGGCTCTACTAGTG  
+HWI-EAS443:3:12:59:888#0/1  
a\_a\_aa`\_a`[aa]a`\_a`\_]\_^a`\_]ZX\_]][XXZX\_  
@HWI-EAS443:3:12:600:1137#0/1  
GGGGACATCAAGATACAGCAAGAAGTTCAAGCCGAAATA  
+HWI-EAS443:3:12:600:1137#0/1  
¥`\_\_¥a\_Za¥S[Q^^aaaa`b`WQ\_UXab[aZZ`]S¥¥`\_  
@HWI-EAS443:3:12:64:667#0/1  
CACGATTCAAATGTGAAGAACTTATATGAAAAGGTAAGAA  
+HWI-EAS443:3:12:64:667#0/1  
`^`aaaaaaa`a^Xa\_aa^[`a\_aa``aaaXP``X[[\_a]  
@HWI-EAS443:3:12:659:1741#0/1  
GGAAACCATCATCAACTTTTTTATTTAAATTCTCTATTCT  
+HWI-EAS443:3:12:659:1741#0/1  
abaaaaaaabaaaaZaabaaaa\_baba`\_b`\_aaaaaa]a  
@HWI-EAS443:3:12:671:1147#0/1  
AATCATGACTCGAACAAAGGTGTAACGGCAGCATGTCCTC  
+HWI-EAS443:3:12:671:1147#0/1  
HQ\_X`b`^`^abb^]O\_RR^aP\_N¥ZGUSHBBBBBBBBBB  
@HWI-EAS443:3:12:735:1506#0/1  
GGAAATTGGAAACGGCTGCTTTGAATTTTACCACAAATGC  
+HWI-EAS443:3:12:735:1506#0/1  
YYXZaVaaab`\_bb\_ba`QGU\_OUJFVQ]YUW^`W]a[``  
@HWI-EAS443:3:12:748:1575#0/1  
TACCCCTCTTAGTTTGCATAGTTTCCCGTTATGCTTGCT

+HWI-EAS443:3:12:748:1575#0/1  
abaaa`aa`a[``a`a\_a^^a`¥`\_^\_][¥Z\_`XYS[  
@HWI-EAS443:3:12:74:1495#0/1  
AACATATGCATCTGCATTCTGATAGAGACTTTGTTGGTCA  
+HWI-EAS443:3:12:74:1495#0/1  
a`aIV^YY`〕`¥aa[\_aadW]\_`[¥PZ^\_a]GLXSLOST  
@HWI-EAS443:3:12:812:1724#0/1  
GGCATTACCATCCATCTACTAGTGCTGACCAACAAAGTC  
+HWI-EAS443:3:12:812:1724#0/1  
abbbabbbabb\_[baabaabaa\_[bbaa`aaababbX^  
@HWI-EAS443:3:12:845:525#0/1  
ATGAAATCTCCTGGTAACACGTTCCATTGTCTGAACTAG  
+HWI-EAS443:3:12:845:525#0/1  
abbaabaaa\_a`aa`\_aaaaa\_a`a`\_`\_\_aa^`V^\_a  
@HWI-EAS443:3:12:872:969#0/1  
CAACTGGAAATCTAGTGGTACCGAGATATGCATTCGCAAT  
+HWI-EAS443:3:12:872:969#0/1  
abb`abbabaaaab^Zba^ababbbaabbb`baaa`\_a`b  
@HWI-EAS443:3:12:874:1451#0/1  
TGTCTGACAAGTTGTATTGCAATCGTGGACTGGTGTATCT  
+HWI-EAS443:3:12:874:1451#0/1  
Y\_Z^¥^\_bVb`〕`^\_\_¥b`bbbba`bab`aa`\_aaabaa  
@HWI-EAS443:3:12:877:1493#0/1  
GCTGCTTTGAATTTTACCACAAATGCGATAACACGTGCAT  
+HWI-EAS443:3:12:877:1493#0/1  
aa^]]WHZR〕`〕a`a^\_a`ZZ¥〕`¥[¥Z`\_\_a¥^¥¥^¥Z  
@HWI-EAS443:3:12:883:1769#0/1  
GAGCTCAATTGCTCTTTAGCTCCTCATAATCGATGAAAT  
+HWI-EAS443:3:12:883:1769#0/1  
¥`^`JU¥`YY`¥`^YW\_\_YY\_[YPVG``¥Za^\_¥ZBBBBB  
@HWI-EAS443:3:12:892:1253#0/1  
TGATTGGCCATGAACCTGTCTTGGGGAATATCTCAAACC  
+HWI-EAS443:3:12:892:1253#0/1  
]b`bbbab`abbab]bba`aabaaa¥]`\_a``aaaa]\_  
@HWI-EAS443:3:12:935:224#0/1  
GTGTATTCATCTTTTCAATAACAGAATTTACTTTGTTAGT  
+HWI-EAS443:3:12:935:224#0/1  
¥Z^\_Z]YY\_\_aabb`¥Z¥]^L0Sa\_a^]\_SZ\_\_¥Z¥W]Y  
@HWI-EAS443:3:12:983:1772#0/1  
ACATTTTCCAATTGTGATCGGATGTATATTCTGAAATGGG  
+HWI-EAS443:3:12:983:1772#0/1  
abbaaa\_aa`aaa`WaVaaa¥X¥aS^\_a\_Za[RR^]YBB  
@HWI-EAS443:3:13:1018:99#0/1  
GCAGGGGTCAGGATATGCAGCCGACCTGAAGAGCACACAG  
+HWI-EAS443:3:13:1018:99#0/1  
a¥a\_MM\_VLQ`\_ZaZ\_VZ^ZUX^RS〕`^LMRM^YVWQKZ^  
@HWI-EAS443:3:13:1170:1510#0/1  
GAAAAGGTAAGAAGCCAGTTAAAAACAATGCCAAGGAAA  
+HWI-EAS443:3:13:1170:1510#0/1  
Y]SY^¥Y`\_^b\_aLWQUBTa[aaaVaa\_a\_[XF^\_a\_a[

@HWI-EAS443:3:13:1184:294#0/1  
GGGGACATCAAGATACAGCAAGAAGTTCAAGCCGGAAATA  
+HWI-EAS443:3:13:1184:294#0/1  
R¥a^[\`ZZ`¥^a`\_¥X`^`ab\_Yb\_¥Y]\_^PZab``aaa  
@HWI-EAS443:3:13:1196:1490#0/1  
ATCAAGATACAGCAAGAAGTTCAAGCCGGAAATAGCAATA  
+HWI-EAS443:3:13:1196:1490#0/1  
aaaa^ba`a^aaaabaa\_a0`\_a`\_\_a\_\_`aa`a\_¥`\_`  
@HWI-EAS443:3:13:1285:1607#0/1  
TCCTCTGAGTATTTTGGGTAGTCATAAGTCCCATTTTTGA  
+HWI-EAS443:3:13:1285:1607#0/1  
^MZ`\_a`SOKXa\_[^]W\_H^aNR\_\_\_^XS\_WXZ\_^`\_`\_X  
@HWI-EAS443:3:13:1293:1843#0/1  
AATCACTCTCCACAGCAAGCTCATGGTCCTACATTGTGGA  
+HWI-EAS443:3:13:1293:1843#0/1  
aaa[ar^\_\_a\_aYaa]\_\_\_Z]¥^^^`^]VX^^Z]ZU^ZXXZ  
@HWI-EAS443:3:13:1357:697#0/1  
CCCATTTTTGACACTTCCATGCACGTGTTATCGCATTTG  
+HWI-EAS443:3:13:1357:697#0/1  
abbbbaababbbab`a````b`abaY`^a\_aba\_b`\_aaaa  
@HWI-EAS443:3:13:1417:355#0/1  
CTTTGTTAGTAATCTCGTCAATGGCATTCTGTGTGCTCTT  
+HWI-EAS443:3:13:1417:355#0/1  
abbbbaaabaab`b`baaaa`aa^aba\_ba`a^a]`\_a`  
@HWI-EAS443:3:13:1434:1013#0/1  
GATGGATGGTACGGTATCACCATCAAATGAGCAGGGGT  
+HWI-EAS443:3:13:1434:1013#0/1  
^\_]a`\_¥XZwa`\_^T]`\_TPZZPUHX`a]X]STEV¥Y`YJ  
@HWI-EAS443:3:13:1444:1206#0/1  
GGTGGACAGGGATGGTAGATGGATGGTACGGTTATCACCA  
+HWI-EAS443:3:13:1444:1206#0/1  
aa]aa`\_\_`a`\_\_`X\_\_^Y\_\_]X]ZY`]`U^][V[RXX  
@HWI-EAS443:3:13:1469:595#0/1  
GCTTTACCCCATCTATTTCTTCTCTGTTTAATTTTGCTTC  
+HWI-EAS443:3:13:1469:595#0/1  
aaaaa\_TR[\`\_aY`\_aaaZaa]a\_aa\_aa`\_a`\_a`X`\_Z  
@HWI-EAS443:3:13:1472:1732#0/1  
GCTGGCTGGATCCTGGGAAATCCAGAGTGTGAATCACTCT  
+HWI-EAS443:3:13:1472:1732#0/1  
aabaaaa¥a\_aa^aaaaaaaa^\_aa`¥aS^a``V`S`\_]`  
@HWI-EAS443:3:13:1486:1448#0/1  
CAGGGATGGTAGATGGATGGTACGGTATCACCATCAAAA  
+HWI-EAS443:3:13:1486:1448#0/1  
`Q¥QR¥`¥WW[¥ZGQW¥aaYK\_U`\_¥¥VZ^PKK¥[Z[\_`K  
@HWI-EAS443:3:13:1589:1223#0/1  
GGGGACATCAAGATACAGCAAGAAGTTCAAGCCGGAAATA  
+HWI-EAS443:3:13:1589:1223#0/1  
\_bbbaaaaaab`ba\_bb]aaaa\_aV\_]b`a[Ra^^^`\_\_  
@HWI-EAS443:3:13:1610:641#0/1  
ATCGATTATGAGGAGCTAAGAGAGCAATTGAGCTCAGTGT

+HWI-EAS443:3:13:1610:641#0/1  
aa`aab^bbaab^`¥¥aaa`\_aWa`X]aZ`[S[\_aQ]V  
@HWI-EAS443:3:13:1620:1117#0/1  
ATTTACTTTGTTAGTAATCTCGTCAATGGCATTCTGTGTG  
+HWI-EAS443:3:13:1620:1117#0/1  
abbaa^aab`aaa`\_a^a^a`\_`\_a`\_`\_a`\_a`\_a`\_`\_`  
@HWI-EAS443:3:13:1660:164#0/1  
GACTACCAGTACCAATGAACTGGCGACAGTTGAATAGATC  
+HWI-EAS443:3:13:1660:164#0/1  
ababaabab¥a`\_aabaaa`a][`\_`^^^`\_Z¥^`\_`XR  
@HWI-EAS443:3:13:1685:825#0/1  
CTCCCGGCTCTACTAGTGTCCAGTAATAGTTCATTCTCCC  
+HWI-EAS443:3:13:1685:825#0/1  
Y`^VI^¥M`\_]b\_v\_¥XU`^S^`[\_aZ]¥[^GW¥^MSLGR  
@HWI-EAS443:3:13:1693:630#0/1  
CACATCCAGAACTGATTGCCCCAGGGAGACTACCAGTA  
+HWI-EAS443:3:13:1693:630#0/1  
V[\_`a\_bbabbbbabbaa`\_`[[bb`b`\_`\_`^^^a^ab\_a  
@HWI-EAS443:3:13:1696:630#0/1  
CAGTTAAAAACAATGCCAAGGAAATTGGAAACGGCTGCT  
+HWI-EAS443:3:13:1696:630#0/1  
[Yababa\_aaaaa`aa]\_]aba\_¥`ba\_a`\_`^aa[ZXJQ  
@HWI-EAS443:3:13:1722:254#0/1  
GGGACATCAAGATACAGCAAGAAGTTCAAGCCGGAAATAG  
+HWI-EAS443:3:13:1722:254#0/1  
]aaUN`\_V`[\_`\_]R\_aa`a`a]aX`\_`^YaZZ`\_ZXX]]^  
@HWI-EAS443:3:13:1736:1135#0/1  
CCTCTGAGTATTTTGGGTAGTCATAAGTCCCATTTTGTGAC  
+HWI-EAS443:3:13:1736:1135#0/1  
a\_a`[¥a^aab`^a]aaZaa\_W]a`\_`^¥`\_]`\_`\_aYNTS  
@HWI-EAS443:3:13:194:698#0/1  
GGGCCATGAACTTGTCTTGGGAATATCTCAAACCTTTCA  
+HWI-EAS443:3:13:194:698#0/1  
[aKabbbb`b`a`baabbbabaaY\_baa\_ab^baa]aaab  
@HWI-EAS443:3:13:196:153#0/1  
GGGAGGCTGGTGTATAGCACCTTGGGTGTCTGACAAG  
+HWI-EAS443:3:13:196:153#0/1  
aababbbabb]b[a`aa`aaa`\_`\_`^a`\_`[LV^`\_`[^¥`\_`\_`  
@HWI-EAS443:3:13:254:503#0/1  
GAAGCTTTTTGCTCCAGCATGAGGACATGCTGCCGTTACA  
+HWI-EAS443:3:13:254:503#0/1  
aa[aaaba`a`¥[ ]\_aaa]\_`\_`a`\_`[^a^`\_`\_`^`\_`¥YWTTQY¥  
@HWI-EAS443:3:13:339:1113#0/1  
CCCGGCTCTACTAGTGTCCAGTAATAGTTCATTCTCCCTT  
+HWI-EAS443:3:13:339:1113#0/1  
aaa^aa`[^[XPYNG[ ]\_a`\_`R`\_]\_YU^Z`\_`UUU`\_`UZ  
@HWI-EAS443:3:13:34:1015#0/1  
CGGTTTCATTGAAGGGGGTGGACAGGGATGGTAGATGGA  
+HWI-EAS443:3:13:34:1015#0/1  
abbZaabaab^]aa\_aa\_¥a`¥`\_`\_`aaa^`\_`\_`V`\_`^Wa]]

@HWI-EAS443:3:13:371:362#0/1  
GGCTGGTGTATAGCACCTTGGGTGTCTGACAAGTTGT  
+HWI-EAS443:3:13:371:362#0/1  
\_\_bab`Z`^bbbabba]`]baaab\_a^\_aba]abb¥XaX  
@HWI-EAS443:3:13:404:619#0/1  
CATATGTTTTGTGGGACATCAAGATACAGCAAGAAGTT  
+HWI-EAS443:3:13:404:619#0/1  
aa\_\_\_baaabaa^b`]`aaaaaaaa`aaaa`aba``^TX  
@HWI-EAS443:3:13:46:1336#0/1  
GCTATGGGCATTACCATCCATCTACTAGTGCTGACCAA  
+HWI-EAS443:3:13:46:1336#0/1  
a\_`¥\_V[^^^Y¥^``^a\_\_\_`]\_]`^^\_^T\_¥^VWZ^^  
@HWI-EAS443:3:13:474:1850#0/1  
AATTTTGCTTCTCTGAGTATTTTGGGTAGTCATAAGTCC  
+HWI-EAS443:3:13:474:1850#0/1  
aa`aaa\_a`a`[\_aaY``]^``^\_W`¥Z^\_`^`^WZ`  
@HWI-EAS443:3:13:483:430#0/1  
AGCCAGTTAAAAACAATGCCAAGGAAATTGGAAACGGCT  
+HWI-EAS443:3:13:483:430#0/1  
aaaabb`abaaaa`aaaa\_a^\_a\_a\_aaa\_\_\_`]a\_¥^  
@HWI-EAS443:3:13:633:1184#0/1  
TCCGGCTTGAACCTTCTGCTGTATCTTGATGTCCCCACAA  
+HWI-EAS443:3:13:633:1184#0/1  
`Zaaa]]ZY^ZV\_WRS[ZP]`V\_¥YW]UFQ`VRKV^\_]UY  
@HWI-EAS443:3:13:667:954#0/1  
ATTGCATTTGGGTAAATGTAACATTGCTGGCTGGATCCTG  
+HWI-EAS443:3:13:667:954#0/1  
aaab\_aaa\_\_\_`\_Xbaaa`]\_a\_`a\_\_\_`a\_]¥`a^\_¥¥^  
@HWI-EAS443:3:13:675:480#0/1  
AAAGAAGTCCTCGTGCTATGGGCATTACCATCCATCTA  
+HWI-EAS443:3:13:675:480#0/1  
a[Y`¥a`HYQ^^`PYG[XZaUUOT\_\_^\_\_Z[XRYN[\_Y]\_  
@HWI-EAS443:3:13:678:1072#0/1  
ATACTCAGAGGAAGCAAAATTAACAGAGAAGAAATAGAT  
+HWI-EAS443:3:13:678:1072#0/1  
aa¥\_^\_\_\_`aaa^aa`]^`]aa\_`a\_\_\_`^\_\_a\_`U\_`Za^\_  
@HWI-EAS443:3:13:682:2044#0/1  
GGGACATCAAGATACAGCAAGAAGTTCAAGCCGGAATA  
+HWI-EAS443:3:13:682:2044#0/1  
aXXa`[aVaa¥aW\_aS[^a\_]W^]]O¥P`\_]YN]\_]\_^[W  
@HWI-EAS443:3:13:695:1166#0/1  
TCTTTACCTACTGCTGTGAAGTGTATTTCATCTTTCAA  
+HWI-EAS443:3:13:695:1166#0/1  
^``\_\_b`]a`a\_`^`aY^baaUaaX[ ]\_\_`\_aa]a`a\_]`^  
@HWI-EAS443:3:13:703:159#0/1  
CTGAAGAGCACACAGAATGCCATTGACGAGATTACTAACA  
+HWI-EAS443:3:13:703:159#0/1  
X`\_I^abbabbbb^ba`bbaa]bababaaa\_aaaa^a^`  
@HWI-EAS443:3:13:765:277#0/1  
CAGGTCGGCTGCATATCCTGACCCCTGCTCATTTTGATGG

+HWI-EAS443:3:13:765:277#0/1  
aaTHH]XaKZ[UT]\_P[aa`\_]LLQUJVQGTQZPM[Q[B  
@HWI-EAS443:3:13:783:780#0/1  
ATTGCTGGCTGGATCCTGGGAAATCCAGAGTGTGAATCAC  
+HWI-EAS443:3:13:783:780#0/1  
^V\_^\_Z[\_\_\_Z]\_\_\_]\_W\_X`ZZ^`^^]^X`RZZb`^aX`^  
@HWI-EAS443:3:13:785:580#0/1  
CTTAGCTCCTCATAATCGATGAAATCTCCTGGGTAACACG  
+HWI-EAS443:3:13:785:580#0/1  
\_bbabaa\_bbb``abaabaabaab`aa`a`aa`¥`^\_a`\_  
@HWI-EAS443:3:13:799:666#0/1  
CTGGGAAATCCAGAGTGTGAATCACTCTCCACAGCAAGCT  
+HWI-EAS443:3:13:799:666#0/1  
a`babaaababaaaa\_aaaa`a¥`\_\_``¥a```aZ\_\_\_V^  
@HWI-EAS443:3:13:803:547#0/1  
GTGGGGACATCAAGATACAGCAAGAAGTTCAAGCCGGAAA  
+HWI-EAS443:3:13:803:547#0/1  
`W\_^a]^`aa^^`a^`a\_aaaaa``a]``a\_`\_\_a\_]\_`  
@HWI-EAS443:3:13:816:1235#0/1  
AATCGATGAAATCTCCTGGGTAACACGTTCCATTGTCTGA  
+HWI-EAS443:3:13:816:1235#0/1  
YS]a¥a^\_UZZVP`ZT[ZUS¥Sa`X]`]IaHX[XTTU^aB  
@HWI-EAS443:3:13:864:332#0/1  
CTATTTCTTCTCTGTTTAATTTTGCTTCCTCTGAGTATTT  
+HWI-EAS443:3:13:864:332#0/1  
aa\_abbabaa]\_P]^a]¥\_\_a``aZa\_^\_aW\_``^W^`¥Z  
@HWI-EAS443:3:13:872:575#0/1  
ATCCTGACCCCTGCTCATTTTGATGGTGATAACCGTACCA  
+HWI-EAS443:3:13:872:575#0/1  
aYYPN\_Y^\_ZWWQ]R]Y^\_U¥URYXUIMXRYXTHXXRBBB  
@HWI-EAS443:3:13:893:1380#0/1  
GGGGACATCAAGATACAGCAAGAAGTTCAAGCCGGAAATA  
+HWI-EAS443:3:13:893:1380#0/1  
aa```aa`baa`a^a`a`aaaaY^W^aa`\_U]Z^``````  
@HWI-EAS443:3:13:903:404#0/1  
TGCTGTATCTTGATGTCCCCACAAAACATATGCATCTGC  
+HWI-EAS443:3:13:903:404#0/1  
[WQRUW\_SQab^J`a[aa`PZaWYaaa\_WS¥¥]`\_¥0[YM  
@HWI-EAS443:3:14:1006:1871#0/1  
TGTGGGGACATCAAGATACAGCAAGAAGTTCAAGCCGGAA  
+HWI-EAS443:3:14:1006:1871#0/1  
\_a[a]a^]aaa`aa`\_^\_Y`Y]aba¥W]XZ[a\_\_¥U\_\_^^  
@HWI-EAS443:3:14:1090:698#0/1  
GGACAGGGATGGTAGATGGATGGTACGGTTATCACCATCA  
+HWI-EAS443:3:14:1090:698#0/1  
a`X`aaa\_\_abaMV`\_^\_a`a]U^^`\_[^\_S¥¥UZZWU  
@HWI-EAS443:3:14:1106:1167#0/1  
CGATTATGAGGAGCTAAGAGAGCAATTGAGCTCAGTGTCA  
+HWI-EAS443:3:14:1106:1167#0/1  
ab`aaR`bbb\_\_\_\_\_ba`aabaa`a\_a\_^^`¥a\_aaYa¥U¥



@HWI-EAS443:3:14:1115:789#0/1  
ACATATTCTACTGTAGAGACCCATTAGAGCACATCCAG  
+HWI-EAS443:3:14:1115:789#0/1  
aaaa\_aaabaaaaaa^aa`\_^`\_^`\_\_`\_]`^`\_\_`\_^]\_a  
@HWI-EAS443:3:14:1126:713#0/1  
GGGGACATCAAGATACAGCAAGAAGTTCAAGCCGGAAATA  
+HWI-EAS443:3:14:1126:713#0/1  
aaL[NU]V#a^S[[bY^b]¥[b\_Y\_\_\_\_\_ [aX]]UGXG]a\_  
@HWI-EAS443:3:14:1162:105#0/1  
TTCAACTGTCGCCAGTTCATTGGTACTGGTAGTCTCCCTG  
+HWI-EAS443:3:14:1162:105#0/1  
aabaaaababb\_\_Za`a`^a^¥aV^\_`a`¥\_ZKRYUVZZX  
@HWI-EAS443:3:14:1179:1064#0/1  
GTGCTCTTCAGGTCGGCTGCATATCCTGACCCCTGCTCAT  
+HWI-EAS443:3:14:1179:1064#0/1  
aZT\_[T]` `WNTXRVR]P]`X`YKSRRXKPWSRUU[¥WV  
@HWI-EAS443:3:14:1202:623#0/1  
AATTTACTTTGTTAGTAATCTCGTCAATGGCATTCTGTGT  
+HWI-EAS443:3:14:1202:623#0/1  
aaabbaabbab`aab`aaa`a`b\_\_aa`aa\_aa\_\_`a\_a]  
@HWI-EAS443:3:14:1334:813#0/1  
ATGGCATTCTGTGTGCTCTTCAGGTCGGCTGCATATCCTG  
+HWI-EAS443:3:14:1334:813#0/1  
^`X¥¥¥¥][UZPWKV` `Z\_^\_¥^]RU[[^\_\_SUNVZUSUB  
@HWI-EAS443:3:14:1336:750#0/1  
ACTTCTTGCTGTATCTTGATGTCCCCACAAAAACATATGC  
+HWI-EAS443:3:14:1336:750#0/1  
aab\_X\_V¥^abZa^\_\_]\_V`a\_`[G]a]\_` `^a[a\_\_U^Z  
@HWI-EAS443:3:14:1343:513#0/1  
GCTGGATCCTGGGAAATCCAGAGTGTGAATCACTCTCCAC  
+HWI-EAS443:3:14:1343:513#0/1  
a` `a\_¥\_^]^[\_\_\_\_^\_X`aUZ[\_¥a^¥¥S\_W¥¥^W¥¥W  
@HWI-EAS443:3:14:1370:525#0/1  
TGACACTTTCCATGCACGTGTTATCGCATTGTGGTAAAA  
+HWI-EAS443:3:14:1370:525#0/1  
aY`^`^`a`\_]Z]\_ZYa]a0`^aaa\_aa\_aaa^T\_]Z\_a\_]`  
@HWI-EAS443:3:14:1419:1376#0/1  
GCTATGGGGCATTACCATCCATCTACTAGTGCTGACCAA  
+HWI-EAS443:3:14:1419:1376#0/1  
^`^WI]\_YbYYW[aP¥]\_\_U^Y`\_a[H` `YVJYaY`a]TU  
@HWI-EAS443:3:14:141:1535#0/1  
ATTTTGATGGTGATAACCGTACCATCCATCTACCATCCCT  
+HWI-EAS443:3:14:141:1535#0/1  
aaa`a` `X[a[[\_¥\_\_¥^\_¥WQWY¥Y^\_¥\_¥¥¥XW^\_UW^  
@HWI-EAS443:3:14:1450:683#0/1  
TACTGGACACTAGTAGAGCCGGGAGACAAAATAACATTCG  
+HWI-EAS443:3:14:1450:683#0/1  
^`X¥`ZZ¥aY^Q`]¥^]T[I¥\_ZT^JORLY^` `SW¥V\_[b  
@HWI-EAS443:3:14:1464:1518#0/1  
ACTGTAGAGACCCATTAGAGCACATCCAGAAACTGATTGC

+HWI-EAS443:3:14:1464:1518#0/1  
a]`a\_a]YZ`\_V\_\_`\_X\_^`QZS\_VR^^`¥XU]\_^^¥QQ  
@HWI-EAS443:3:14:146:2019#0/1  
AGACAATGGAACGTGTACCCAGGAGATTTCATCGATTAT  
+HWI-EAS443:3:14:146:2019#0/1  
aabbaa`a`a\_\_XaW^aa`\_a\_]``^`^`X^\_]X^^^]  
@HWI-EAS443:3:14:1475:28#0/1  
TCCAGAAACTGATTGCCCCAGGGAGACTACCAGTACCAA  
+HWI-EAS443:3:14:1475:28#0/1  
`\_\_a`a\_a\_aa\_aaa`SZRX^`\_\_U\_\_W^¥WWW¥`W¥SQ[¥  
@HWI-EAS443:3:14:1476:1102#0/1  
GGAAACTATGCAAACCTAAGAGGGGTAGCCCCATTGCATTT  
+HWI-EAS443:3:14:1476:1102#0/1  
¥\_[^^aba^`aaa]Zb`aabaaa]`bW]aY¥`aaY[\_^`  
@HWI-EAS443:3:14:1498:1398#0/1  
TGCCGGTTTCATTGAAGGGGGGTGGACAGGGATGGTAGAT  
+HWI-EAS443:3:14:1498:1398#0/1  
^]bbbbba\_^bbbbbabbbb`^]b[ba`baaZ]bbPa`aa  
@HWI-EAS443:3:14:1532:864#0/1  
CATCATTTGAAAGTTTGAGATATTCCTCAAGACAAGTTC  
+HWI-EAS443:3:14:1532:864#0/1  
ab[^`aabaaa`b`W`^a`a`a`a`\_¥][\_`^U^\_\_]]\_WO  
@HWI-EAS443:3:14:1575:379#0/1  
CCGGGAGACAAAATAACATTGCAAGCAACTGGAAATCTAG  
+HWI-EAS443:3:14:1575:379#0/1  
YR\_a`\_`aa¥\_aba^WY\_b`H`\_X¥[V]J]`^[[[]\_0^`  
@HWI-EAS443:3:14:1611:1372#0/1  
AATTTTGCTTCTCTGAGTATTTTGGGTAGTCATAAGTCC  
+HWI-EAS443:3:14:1611:1372#0/1  
a\_Za^[a]Y`ZF\_L\_`Ya[a`a^`\_H\_^WOLTR\_`^^¥RF  
@HWI-EAS443:3:14:1629:278#0/1  
GGGCATTACCATCCATCTACTAGTGCTGACCAACAAAG  
+HWI-EAS443:3:14:1629:278#0/1  
Z\_bbaababb`^aa`aab\_b\_a\_aa\_] [ab\_\_U`aR\_aaa  
@HWI-EAS443:3:14:1667:110#0/1  
TCCGGCTTGAACCTTCTGCTGTATCTTGATGTCCCCACAA  
+HWI-EAS443:3:14:1667:110#0/1  
`^Y\_a[\_RXVaR\_\_ZX`QX\_aU]¥N¥a¥Y[MXZVXPXRZ^  
@HWI-EAS443:3:14:1752:1503#0/1  
ATTGCATTTGGGTAAATGTAACATTGCTGGCTGGATCCTG  
+HWI-EAS443:3:14:1752:1503#0/1  
\_bbbaaaaaab`\_aba`b\_aa[\_a`\_aa`^aaZZ\_X`[\_  
@HWI-EAS443:3:14:205:1970#0/1  
CACGTGTATCGCATTTGTGGTAAAATTCAAAGCAGCCGT  
+HWI-EAS443:3:14:205:1970#0/1  
Xb^^LZV\_Z`SS\_b\_baa[`VMab[aaaaa^\_R`^aUZ[  
@HWI-EAS443:3:14:221:657#0/1  
ATTTTGCTTCTCTGAGTATTTTGGGTAGTCATAAGTCCC  
+HWI-EAS443:3:14:221:657#0/1  
`bbaabaabaaaaabab^aaa`\_a\_aZaa\_`\_a\_\_a^\_\_`

@HWI-EAS443:3:14:24:637#0/1  
GCCAGTTAAAAACAATGCCAAGGAAATTGGAAACGGCTG  
+HWI-EAS443:3:14:24:637#0/1  
a` `[a` ^^a^]`\_^a\_a\_a^T`Z]]X[^\_¥¥\_\_\_\_¥\_B  
@HWI-EAS443:3:14:254:1145#0/1  
TCTAGAGGCCTATTTGGGGCCATTGCCGGTTTCATTGAAG  
+HWI-EAS443:3:14:254:1145#0/1  
abab`^^`aaaaa`a^U^abb^^^`a` [ `R\_`V` `` `^` `^`  
@HWI-EAS443:3:14:266:1581#0/1  
CAAGATACAGCAAGAAGTTCAAGCCGAAATAGCAATAAG  
+HWI-EAS443:3:14:266:1581#0/1  
`RW[TO^`^a\_ZX¥YY\_SJY^V[]¥`a[U]^U]\_a\_¥¥[  
@HWI-EAS443:3:14:314:1320#0/1  
CTGACAAGTTGTATTGCAATCGTGGACTGGTGTATCTGAA  
+HWI-EAS443:3:14:314:1320#0/1  
aaaa`]]`[aa\_aa]`abaa`\_[\_\_^^`a[W\_^a`^^a\_  
@HWI-EAS443:3:14:322:1036#0/1  
CTGGTGTATCTGAAATGATAATACCAGATCCAGCATTCT  
+HWI-EAS443:3:14:322:1036#0/1  
abbb[ `a\_abbbbaabbbbbbabbaabaaa\_abb`aaa`ab  
@HWI-EAS443:3:14:341:230#0/1  
CACCATCCATCTACTAGTGCTGACCAACAAAGTCTCTATC  
+HWI-EAS443:3:14:341:230#0/1  
abbaaa`abbaabb`\_b[ `aaaa¥`a`a`U`\_W`\_¥`\_^\_  
@HWI-EAS443:3:14:359:1783#0/1  
ATTCTACACTGTAGAGACCCATTAGAGCACATCCAGAAAC  
+HWI-EAS443:3:14:359:1783#0/1  
^^¥aaaaaa`aX`aaa`a\_a`\_Y]T]]aa\_\_\_\_`Z^` []  
@HWI-EAS443:3:14:359:1810#0/1  
GAAGTCCTCGTGCTATGGGGCATTACCATCCATCTACTA  
+HWI-EAS443:3:14:359:1810#0/1  
[]WZ^b]SabZV`ZTW]aZ`GPT[]a`\_U¥SN`¥aXaZ^  
@HWI-EAS443:3:14:370:669#0/1  
CAATGGAACGTGTTACCCAGGAGATTTTCATCGATTATGAG  
+HWI-EAS443:3:14:370:669#0/1  
a`\_`a]WXYULTWa[\_`Z^`^`^`]]`¥¥R`X\_^[SY`[U¥  
@HWI-EAS443:3:14:399:261#0/1  
GTGGGGACATCAAGATACAGCAAGAAGTTCAAGCCGGAAA  
+HWI-EAS443:3:14:399:261#0/1  
a^`a`a^[¥^ZZ\_\_\_\_`\_Z` `^^`\_¥]`XYY\_^\_WZ\_\_ZWY  
@HWI-EAS443:3:14:436:1679#0/1  
GCCGGTTTCATTGAAGGGGGTGGACAGGGATGGTAGATG  
+HWI-EAS443:3:14:436:1679#0/1  
aaaaaW¥a]SS]QSQVS^`MaSPKZ¥`Z¥VGP¥\_MZ`¥BB  
@HWI-EAS443:3:14:43:795#0/1  
CTCGTCAATGGCATTCTGTGTGCTCTTCAGGTCGGCTGCA  
+HWI-EAS443:3:14:43:795#0/1  
aabb\_aaa`aaaaa`aaa`a¥aaa^a\_a`^X[\_a`\_^a^\_  
@HWI-EAS443:3:14:445:1368#0/1  
GCCGGTTTCATTGAAGGGGGTGGACAGGGATGGTAGATG



@HWI-EAS443:3:14:874:18#0/1  
ATACATCCGATCACAATTGGAAAATGTCCAAAATATGTAA  
+HWI-EAS443:3:14:874:18#0/1  
]abaaa`aa`\_]aa`\_`\_a^\_\_\_[[]]^\_^\_^\_[^^  
@HWI-EAS443:3:14:897:1084#0/1  
TGAAAAGGTAAGAAGCCAGTTAAAAACAATGCCAAGGAA  
+HWI-EAS443:3:14:897:1084#0/1  
abb\_babaIaba\_aaaaba\_aaaaaaaaa`a^¥a\_aa\_\_  
@HWI-EAS443:3:14:924:812#0/1  
GGTAAATGTAACATTGCTGGCTGGATCCTGGGAAATCCAG  
+HWI-EAS443:3:14:924:812#0/1  
aaaaabbb^bbb`baaabbaa\_a`a\_a`\_`aVYXa``\_aa  
@HWI-EAS443:3:14:949:1605#0/1  
GGGGACATCAAGATACAGCAAGAAGTTCAAGCCGAAATA  
+HWI-EAS443:3:14:949:1605#0/1  
`bbaa[X]`\_X\_Y¥b`[]^ab`Y`]U`\_]`UY`\_aaa\_\_  
@HWI-EAS443:3:15:101:1647#0/1  
GCTTCGAATGTTATTTTGTCTCCCGCTCTACTAGTGTCC  
+HWI-EAS443:3:15:101:1647#0/1  
ab[^abbba^^`abbaba¥`W`ba^]]a^^V`¥`[X]`aa  
@HWI-EAS443:3:15:1023:1859#0/1  
GGGACATTCCTCAATCCTGTGGCCAGTCTCAATTTTGTGC  
+HWI-EAS443:3:15:1023:1859#0/1  
`Y]0a\_OZ\_]R\_^[]`¥`Z¥XS^\_RRWSY[H^\_X^¥SYT  
@HWI-EAS443:3:15:1032:461#0/1  
CCGGCTTGAACCTTCTTGCTGTATCTTGATGTCCCCACAAA  
+HWI-EAS443:3:15:1032:461#0/1  
a\_QOX`[`Z`ba^`a`baa`aa^W`\_a]GQ¥FT`\_Y[  
@HWI-EAS443:3:15:1054:396#0/1  
AATTTACTTTGTTAGTAATCTCGTCAATGGCATTCTGTGT  
+HWI-EAS443:3:15:1054:396#0/1  
aabbbbaa]baa\_aaaaaaaaa`b\_aaa`\_a^aaaa``\_]`^  
@HWI-EAS443:3:15:1088:479#0/1  
GGCTAGTTAAAAAAGGAAATTCATACCCAAAGCTCAGCAA  
+HWI-EAS443:3:15:1088:479#0/1  
TV^RRWTY^ROUOX^ZTYOYZVPNNKPXRO]`[P]\_YUQF  
@HWI-EAS443:3:15:1117:1448#0/1  
TGGGCCATGAACCTTGTCTTGGGAATATCTCAAACCTTTC  
+HWI-EAS443:3:15:1117:1448#0/1  
abaa\_aaab[aaa`a`\_`a\_]`XXZ[]aYaa`U`ZT^^`\_  
@HWI-EAS443:3:15:1142:1865#0/1  
TTCCGGCTTGAACCTTCTTGCTGTATCTTGATGTCCCCACA  
+HWI-EAS443:3:15:1142:1865#0/1  
HP]¥R^^^TYZ]UOV\_XVW]Y\_SaWVI`[GLP]XXW^VR`  
@HWI-EAS443:3:15:1159:1080#0/1  
GCATATCCTGACCCCTGCTCATTTTGTGATGGTGATAACCGT  
+HWI-EAS443:3:15:1159:1080#0/1  
aa[a`QTXP\_X\_S\_]XUL^]NLNRQXZVVXY\_ZLTQYTWN  
@HWI-EAS443:3:15:1168:1515#0/1  
GGGGCCATTGCCGGTTTCATTGAAGGGGGTGGACAGGGA

+HWI-EAS443:3:15:1168:1515#0/1  
a`Y[[aa`aaa^`R^a]aXZaX]]`aY`aP][UX^``UO  
@HWI-EAS443:3:15:1173:838#0/1  
ATTTCCCAGGATCCAGCCAGCAATGTTACATTTACCCAAA  
+HWI-EAS443:3:15:1173:838#0/1  
]`Y[`Z¥`b]]^Z]\_¥Y]`UZ]Pb`]a`\_`aa[a`Z¥`TY  
@HWI-EAS443:3:15:1386:1705#0/1  
GGGGACATCAAGATACAGCAAGAAGTTCAAGCCGGAAATA  
+HWI-EAS443:3:15:1386:1705#0/1  
^bbabaabaaaaaaa`bbaaaaa`aXaaaaaTR¥\_\_a`aa  
@HWI-EAS443:3:15:1421:1406#0/1  
AGCATGAGGACATGCTGCCGTTACACCTTTGTTGAGTCA  
+HWI-EAS443:3:15:1421:1406#0/1  
aabaab`aaZ[aaa`aaa`\_]a`\_\_OX\_\_a]`X\_\_\_^Y^  
@HWI-EAS443:3:15:1426:1629#0/1  
ATGAAATCTCCTGGGTAACACGTTCCATTGTCTGAACTAG  
+HWI-EAS443:3:15:1426:1629#0/1  
abbaabbb]a^aba\_0\_\_`a^a]\_\_^\_I¥WL]a\_^`W^X¥  
@HWI-EAS443:3:15:1537:1904#0/1  
GCTGGCTGGATCCTGGGAAATCCAGAGTGTGAATCACTCT  
+HWI-EAS443:3:15:1537:1904#0/1  
aaX[\_\_\_IZ^ab\_b]ZT¥QWSQVMMUSaSUP`\_`HVBBBBB  
@HWI-EAS443:3:15:1594:376#0/1  
TCCGGCTTGAACCTTCTTGCTGTATCTTGATGTCCCCACAA  
+HWI-EAS443:3:15:1594:376#0/1  
]abbb]ab\_GZXVZQaa\_] [YZ^0^``aYZ[LR]¥^``a  
@HWI-EAS443:3:15:1609:518#0/1  
ATGCGATAACACGTGCATGGAAAGTGTCAAAAATGGGACT  
+HWI-EAS443:3:15:1609:518#0/1  
aab`]¥a\_\_STa^Taab\_US\_Y``GbY\_a^Vba]b^Z`]\_  
@HWI-EAS443:3:15:1617:697#0/1  
TGAACCTTTTACCTACTGCTGTGAACCTGTATTTCATCTT  
+HWI-EAS443:3:15:1617:697#0/1  
abaa\_¥V¥`a]G]]YP]a¥[]U]WNFW\_QYSZaXTX\_Y^\_  
@HWI-EAS443:3:15:1637:900#0/1  
AATTTACTTTGTTAGTAATCTCGTCAATGGCATTCTGTGT  
+HWI-EAS443:3:15:1637:900#0/1  
abbbba`bba`ababaaab¥bab¥`\_`\_`aa\_abaaaa\_a\_  
@HWI-EAS443:3:15:1651:1694#0/1  
GAGCTTTGGGTATGAATTTCTTTTTTAACTAGCCATATT  
+HWI-EAS443:3:15:1651:1694#0/1  
¥¥Z`aaba\_a¥Zb\_b\_¥¥QGYba`aaab\_[[[W]aaabb`  
@HWI-EAS443:3:15:1717:1278#0/1  
ACTGTGTATTTCATCTTTTCAATAACAGAATTTACTTTGTT  
+HWI-EAS443:3:15:1717:1278#0/1  
a\_a^aaZ\_a`\_`\_`[`bb`[^`aab\_^`a`b`^`\_bab`^a  
@HWI-EAS443:3:15:1757:287#0/1  
CTTCTTGCTGTATCTTGATGTCCCCACAAAAACATATGCA  
+HWI-EAS443:3:15:1757:287#0/1  
abbbbbb¥bbaXababaaabbbbaWTababaaabab`babSa

@HWI-EAS443:3:15:210:567#0/1  
GGGACATCAAGATACAGCAAGAAGTTCAAGCCGGAAATAG  
+HWI-EAS443:3:15:210:567#0/1  
aabaaaa`Y``a`aaaaaa\_aZ\_\_a¥\_^\_a`^^`\_`\_  
@HWI-EAS443:3:15:231:161#0/1  
AAAAACAATGCCAAGGAAATTGGAAACGGCTGCTTTGAA  
+HWI-EAS443:3:15:231:161#0/1  
aa`aaaaaa\_aa`a`a\_a\_[\_[ZaY^X^XV\_¥FX¥ZFSR  
@HWI-EAS443:3:15:271:429#0/1  
CTGGTGTATCTGAAATGATAATACCAGATCCAGCATTTCT  
+HWI-EAS443:3:15:271:429#0/1  
aaa^^a^a^`a`\_\_`]^\_^^`a```\_[^]`\_^^^`YX\_  
@HWI-EAS443:3:15:294:69#0/1  
AGCAATTGAGCTCAGTGTGCATCATTTGAAAGTTTGAGAT  
+HWI-EAS443:3:15:294:69#0/1  
[a^aa^¥V]aMSYbbT¥HX¥bYa\_a]baK\_b^\_^¥¥]`LY  
@HWI-EAS443:3:15:299:1432#0/1  
GCCAGTCTCAATTTTGTGCTTTTTACATATTTTGGACATT  
+HWI-EAS443:3:15:299:1432#0/1  
\_ba]XU`]^\_a\_]¥¥X¥X`¥a\_a`a]aaaaXb\_aa`aa`^`  
@HWI-EAS443:3:15:341:1546#0/1  
CACTCTGTAACTTCTAGAAGACAAGCATAACGGGAAAC  
+HWI-EAS443:3:15:341:1546#0/1  
abbbb`babbbbaabaabbaaabba^aaabbaaa^a`aa  
@HWI-EAS443:3:15:373:369#0/1  
CCGGGAGACAAAATAACATTCTGAAGCAACTGGAAATCTAG  
+HWI-EAS443:3:15:373:369#0/1  
abba`]abaa`aaa^``aa\_baSaa]\_Zbaa`a`\_\_a\_\_  
@HWI-EAS443:3:15:379:433#0/1  
CCCGGCTCTACTAGTGTCCAGTAATAGTTCATTCTCCCTT  
+HWI-EAS443:3:15:379:433#0/1  
abbbbabbaa\_aaa[a`\_a\_a]aaa^a]a``aa\_a]a`\_  
@HWI-EAS443:3:15:397:1916#0/1  
CGCCAGTTCATTGGTACTGGTAGTCTCCCTGGGGGCAATC  
+HWI-EAS443:3:15:397:1916#0/1  
aaba^bT¥aa]X`XV¥`^`aM]ZNXR[]U[Y¥^Y]G¥[YQ  
@HWI-EAS443:3:15:400:374#0/1  
TTCAGTCTCGCTGCATATCCTGACCCCTGCTCATTTTGAT  
+HWI-EAS443:3:15:400:374#0/1  
aaaabbP[\_\_Xa`R¥aa\_a^\_a\_]\_a\_a`\_\_^Z]\_^\_\_[\_  
@HWI-EAS443:3:15:432:484#0/1  
GGGACATCAAGATACAGCAAGAAGTTCAAGCCGGAAATAG  
+HWI-EAS443:3:15:432:484#0/1  
^¥`]aa\_¥V\_X\_]aaa]]a]]]aX^``[\_]\_]\_\_^^`\_^\_  
@HWI-EAS443:3:15:437:1892#0/1  
GCTAAGAGAGCAATTGAGCTCAGTGTGCATCATTTGAAAGG  
+HWI-EAS443:3:15:437:1892#0/1  
aaaba]]`[a¥aba`a\_a^`aa^`Ua\_\_\_\_\_aa`a`a`a\_  
@HWI-EAS443:3:15:486:625#0/1  
TTTTGCTTCTCTGAGTATTTTGGGTAGTCATAAGTCCCA

+HWI-EAS443:3:15:486:625#0/1  
aabbbaa^baab`baba\_`bbb`aaaOS`Xa]``\_a%U\_X\_  
@HWI-EAS443:3:15:503:401#0/1  
GAGCAATTGAGCTCAGTGCATCATTGAAAGTTTGAGA  
+HWI-EAS443:3:15:503:401#0/1  
aXa[V]a`\_T%\_]R`aZTL^aa\_\_Y][a]SS`\_Q]``]`\_  
@HWI-EAS443:3:15:514:852#0/1  
TGCATATGTTTTGTGGGGACATCAAGATACAGCAAGAAG  
+HWI-EAS443:3:15:514:852#0/1  
[aT[Y]T%ZbaaS%[XU^aY^\_bbaaaa]\_`ba[aa^[]b  
@HWI-EAS443:3:15:548:224#0/1  
GGGGCATTACCATCCATCTACTAGTGCTGACCAACAAAG  
+HWI-EAS443:3:15:548:224#0/1  
a`[aa%Z]\_Z%a^Q%MT^```\_] ^V`[[a\_WU%[QWV[a  
@HWI-EAS443:3:15:54:647#0/1  
CATTACCATCCATCTACTAGTGCTGACCAACAAAGTCTC  
+HWI-EAS443:3:15:54:647#0/1  
abbbbbbaa``abbbab`bab\_aa`a`a^a\_¥a`a`[a`a  
@HWI-EAS443:3:15:563:1275#0/1  
AGAAGTCCTCGTGCTATGGGGCATTACCATCCATCTACT  
+HWI-EAS443:3:15:563:1275#0/1  
aaZXYFWY]aXKT^W%\_`^USPTU%Z\_¥\_]YLRU%¥VTRV  
@HWI-EAS443:3:15:583:758#0/1  
ATTTTGTCTCCCGCTCTACTAGTGCCAGTAATAGTTCA  
+HWI-EAS443:3:15:583:758#0/1  
\_bbabbab`aa\_] ^`a`]a```a%¥H^\_\_`U\_a\_]YS\_^\_  
@HWI-EAS443:3:15:591:1682#0/1  
GGGGACATCAAGATACAGCAAGAAGTTCAAGCCGAAATA  
+HWI-EAS443:3:15:591:1682#0/1  
`abbabbbbbbbabbbababbb`bab\_^ab`bbabaabbab  
@HWI-EAS443:3:15:614:418#0/1  
CTTCTCTGAGTATTTTGGGTAGTCATAAGTCCCATTTTT  
+HWI-EAS443:3:15:614:418#0/1  
aab`^\_aabab\_aaa\_¥b`^`]a\_aaa`aa]`¥\_Q]^Zaa  
@HWI-EAS443:3:15:661:1246#0/1  
TGAGTATTTTGGGTAGTCATAAGTCCCATTTTTGACACTT  
+HWI-EAS443:3:15:661:1246#0/1  
aaba\_aa``aaaa^aa^a`aaa\_^`\_\_a`\_aaa^\_^`a`\_  
@HWI-EAS443:3:15:759:1908#0/1  
CATCTATTTCTTCTCTGTTTAATTTTGCTTCTCTGAGTA  
+HWI-EAS443:3:15:759:1908#0/1  
abbbabbbbbabbaaab\_babaaaaa`\_aaa\_aaaaa`^a  
@HWI-EAS443:3:15:762:506#0/1  
GGGGCATTACCATCCATCTACTAGTGCTGACCAACAAAG  
+HWI-EAS443:3:15:762:506#0/1  
`aPa]^\_`Qa%a^a^Tab\_ba\_aaaaZ`aa%a`\_a]\_[[]a  
@HWI-EAS443:3:15:76:281#0/1  
AAAAAGCACAAAATTGAGACTGGCCACAGGATTGAGGAAT  
+HWI-EAS443:3:15:76:281#0/1  
abba]aaaaa^a`aaaaaaaaaaa\_W\_^` [W`]R]]W%Y



@HWI-EAS443:3:15:807:189#0/1  
GCTGGCTGGATCCTGGGAAATCCAGAGTGTGAATCACTCT  
+HWI-EAS443:3:15:807:189#0/1  
aaa````\_`\_`[¥UYPX`ZPTWTS[¥¥VYH[Q¥¥¥STPPSMQ  
@HWI-EAS443:3:15:80:1068#0/1  
AACCGTACCATCCATCTACCATCCCTGTCCACCCCTTC  
+HWI-EAS443:3:15:80:1068#0/1  
\_`ba¥ZZb`¥a`^aa`aaaa\_^^¥¥¥`¥¥^a^¥ZZ\_a\_¥\_  
@HWI-EAS443:3:15:810:465#0/1  
GCTGCTTTGAATTTTACCACAAATGCGATAACACGTGCAT  
+HWI-EAS443:3:15:810:465#0/1  
^\_¥aZV\_a`UJW``TWTaa`[VYWUa^^^]¥`\_aS^[W\_  
@HWI-EAS443:3:15:835:672#0/1  
CAATGGCATTCTGTGTGCTTTCAGGTCGGCTGCATATCC  
+HWI-EAS443:3:15:835:672#0/1  
abbbbbbbbabbbbabbaabb`bbb]baababababa^`  
@HWI-EAS443:3:15:880:1630#0/1  
TAAAAAAGGAAATTCATACCCAAAGCTCAGCAAATCCTAC  
+HWI-EAS443:3:15:880:1630#0/1  
Ya¥Y[QWQ\_]T¥¥Y^¥^U^X)`a`W]`\_^]PUN¥`W\_\_  
@HWI-EAS443:3:15:908:221#0/1  
GACCAACAAAGTCTCTATCAGAATGCAGATGCATATGTTT  
+HWI-EAS443:3:15:908:221#0/1  
¥^`Z]\_Y^`¥`[a[aaS^^a``¥Za¥¥Z[P`aa]S]^Z^a  
@HWI-EAS443:3:15:939:161#0/1  
ATCGATGAAATCCTCCTGGGTAACACGTTCCATTGTCTGAA  
+HWI-EAS443:3:15:939:161#0/1  
aa`aa`aaaa```]Z^`^[X`\_]L[Y¥YTTY]^WUYVTY  
@HWI-EAS443:3:15:956:355#0/1  
ATTGCATTTGGGTAAATGTAACATTGCTGGCTGGATCCTG  
+HWI-EAS443:3:15:956:355#0/1  
aaab`bba[aaa^aa```\_aaaaa```\_a`\_`a[\_Z]\_XW  
@HWI-EAS443:3:15:976:1108#0/1  
AGGGGTCAGGATATGCAGCCGACCTGAAGAGCACACAGAA  
+HWI-EAS443:3:15:976:1108#0/1  
````bb^aa`aaaa^^`]^a^aa`aaa`aaaaa\_`¥\_a`\_  
@HWI-EAS443:3:15:989:907#0/1  
GAGTATTTTGGGTAGTCATAAGTCCCATTTTTGACACTTT  
+HWI-EAS443:3:15:989:907#0/1  
a`bW^^\_aaaab^aaZ`X^aabWaaaa`baaaa`Qa\_\_a  
@HWI-EAS443:3:15:991:1111#0/1  
TGTATCTTGATGTCCCCACAAAAACATATGCATCTGCATT  
+HWI-EAS443:3:15:991:1111#0/1  
[^X¥YJ^`a`Wa`TaXa\_W^¥aXaT\_Za\_a\_P]b\_X¥`  
@HWI-EAS443:3:15:993:912#0/1  
GGAGATTTTCATCGATTATGAGGAGCTAAGAGAGCAATTGA  
+HWI-EAS443:3:15:993:912#0/1  
aZ^b^`\_a\_VOM[¥`aa\_b\_aY\_aW¥WaZZ¥`WR\_U]LTT  
@HWI-EAS443:3:16:1065:678#0/1  
CGTGCATGGAAAGTGTCAAAAATGGGACTTATGACTACCC

+HWI-EAS443:3:16:1065:678#0/1  
S\_Y^\_a\_[[\_¥ab^¥U\_\_`¥Z`]Z\_S]ba¥`a^`^Y]  
@HWI-EAS443:3:16:1188:1463#0/1  
ATCAAGATACAGCAAGAAGTTCAAGCCGAAATAGCAATA  
+HWI-EAS443:3:16:1188:1463#0/1  
Z0^\_V\_aaa^Z[HT`\_S^\_¥UNYaaNQSSRT\_[T[¥¥\_\_B  
@HWI-EAS443:3:16:1236:1464#0/1  
CAGGGATGGTAGATGGATGGTACGGTTATCACCATCAAAA  
+HWI-EAS443:3:16:1236:1464#0/1  
a\_R`[Waaa[aa^LVF0a`Z\_¥^^\_a`XX`SX\_]aY[  
@HWI-EAS443:3:16:1289:45#0/1  
GTGGGGACATCAAGATACAGCAAGAAGTTCAAGCCGGAAA  
+HWI-EAS443:3:16:1289:45#0/1  
\_[^a`]^[\_T^\_a^\_YY\_\_X]\_^)`TYPTY]ZW¥]XYX  
@HWI-EAS443:3:16:1321:1432#0/1  
GTTACCCAGGAGATTTTCATCGATTATGAGGAGCTAAGAGA  
+HWI-EAS443:3:16:1321:1432#0/1  
a]Y\_¥\_a`\_^\_aV\_^`\_X]`^Za`Y`a^]a]`Z\_[^^[`Z  
@HWI-EAS443:3:16:1343:949#0/1  
TGGTGTTTATAGCACCCCTTGGGTGTCTGACAAGTTGTATT  
+HWI-EAS443:3:16:1343:949#0/1  
aba\_b\_babaaaaa`a\_aaa]Ua^¥Ya\_]a]`Y]`\_]\_^R  
@HWI-EAS443:3:16:1411:1499#0/1  
GGTCAGGATATGCAGCCGACCTGAAGAGCACACAGAATGC  
+HWI-EAS443:3:16:1411:1499#0/1  
abZb\_^\_Saa\_b¥[YWaa\_FZaa^\_Yaa\_`Z[¥`^`ZP[  
@HWI-EAS443:3:16:1620:788#0/1  
GGAAATTGGAAACGGCTGCTTTGAATTTTACCACAAATGC  
+HWI-EAS443:3:16:1620:788#0/1  
abaaaabbbbaaZbaVba0[`aRSLVaaaSPM]^Z]\_NLT  
@HWI-EAS443:3:16:1621:219#0/1  
CAACAAAGTCTCTATCAGAATGCAGATGCATATGTTTTTG  
+HWI-EAS443:3:16:1621:219#0/1  
abbabbab\_bbabaaYbba\_aa\_aa`aa^aa`ab\_abaa\_  
@HWI-EAS443:3:16:1653:1498#0/1  
ATTTCCAGTTGCTTCGAATGTTATTTTGTCTCCCGCTCT  
+HWI-EAS443:3:16:1653:1498#0/1  
[bb`¥\_]aab\_H]`U^`\_aa\_a]^aaa^YK\_\_PY¥YG¥]B  
@HWI-EAS443:3:16:165:1969#0/1  
ACGGTTATCACCATCAAAATGAGCAGGGGTCAGGATATGC  
+HWI-EAS443:3:16:165:1969#0/1  
aaaZ^`a`\_a\_a`\_\_\_a¥`\_[^[\_[¥¥^T\_\_X^¥W¥¥¥^  
@HWI-EAS443:3:16:1690:935#0/1  
TTTCCGGCTTGAACCTTCTTGCTGTATCTTGATGTCCCCAC  
+HWI-EAS443:3:16:1690:935#0/1  
a^a¥Y[[[^`[VZZ^YLYZ^XZOMUQRW¥X¥QZYTQUZUQ  
@HWI-EAS443:3:16:1726:330#0/1  
CTGCATATCCTGACCCCTGCTCATTTTGTGGTGATAACC  
+HWI-EAS443:3:16:1726:330#0/1  
a`a`aaaa^aaaa`\_`a^]``\_```a`\_\_aZVaZ\_\_`WN

@HWI-EAS443:3:16:1740:496#0/1  
ATCCTACATTAATGATAAAGGGAAAGAAGTCCTCGTGCTA  
+HWI-EAS443:3:16:1740:496#0/1  
aa\_aa`aaaba`ab`aa`a`a`\_aa`\_aV¥]\_]\_]aW]^  
@HWI-EAS443:3:16:1772:1118#0/1  
GCTGGATCCTGGGAAATCCAGAGTGTGAATCACTCTCCAC  
+HWI-EAS443:3:16:1772:1118#0/1  
aa`\_a^\_\_Za\_\_`\_^`¥¥¥\_¥aU`W`W^¥\_¥¥VWWN¥¥  
@HWI-EAS443:3:16:1784:126#0/1  
GCTTCCTCTGAGTATTTTGGGTAGTCATAAGTCCCATTTT  
+HWI-EAS443:3:16:1784:126#0/1  
aaaa`Za\_aa`b]a`aa\_aa]U^a^Z`^Xa^WZV^`\_^\_  
@HWI-EAS443:3:16:197:1069#0/1  
GGGGTGGACAGGGATGGTAGATGGATGGTACGGTTATCAC  
+HWI-EAS443:3:16:197:1069#0/1  
^aZShXY\_a\_aaS^^U`YT`\_a\_Z\_]Na¥\_XM^VXT\_^  
@HWI-EAS443:3:16:223:1566#0/1  
GTGATTCACACTCTGGATTTCCAGGATCCAGCCAGCAAT  
+HWI-EAS443:3:16:223:1566#0/1  
`Yaa``abbba`aa``¥\_]`\_`a`\_`^¥aaa`\_a```\_^\_  
@HWI-EAS443:3:16:246:466#0/1  
GCTGGCTGGATCCTGGGAAATCCAGAGTGTGAATCACTCT  
+HWI-EAS443:3:16:246:466#0/1  
aaaaa`aa\_¥[ ]\_^`][X\_^\_a^^U\_UZS¥¥^¥U\_¥¥^¥  
@HWI-EAS443:3:16:264:1902#0/1  
GGCTTGAACCTTCTTGCTGTATCTTGATGTCCCCACAAAAA  
+HWI-EAS443:3:16:264:1902#0/1  
[¥`¥a]N^a`]ab\_Z\_abTaaY\_aaaaa\_aa^`aa[aa`\_  
@HWI-EAS443:3:16:271:1467#0/1  
ATTGAGCTCAGTGCATCATTTGAAAGTTTGAGATATTC  
+HWI-EAS443:3:16:271:1467#0/1  
`a`[aYa`a^^R\_^^`^a`a\_\_\_\_\_]¥\_\_V^\_\_\_\_^\_\_\_\_^¥\_  
@HWI-EAS443:3:16:277:1148#0/1  
TTCAGATACACCAGTCCACGATTGCAATACAACCTTGTCAG  
+HWI-EAS443:3:16:277:1148#0/1  
`bbbaaabbabaaaaaaabaa\_aaabaaa]\_a¥aaa\_aaa  
@HWI-EAS443:3:16:309:960#0/1  
CTGGGAAATCCAGAGTGTGAATCACTCTCCACAGCAAGCT  
+HWI-EAS443:3:16:309:960#0/1  
a`^`ZU```a`b`W]Y\_Z^T^]`¥a`a\_]\_a`a]N¥¥^ZU  
@HWI-EAS443:3:16:338:849#0/1  
AGCATGAGGACATGCTGCCGTTACACCTTTGTTTCGAGTCA  
+HWI-EAS443:3:16:338:849#0/1  
a\_OLQRb`SP\_aa``Z`\_H\_PZ[NYU[¥]aUPTaNSLS\_U  
@HWI-EAS443:3:16:350:1252#0/1  
GAGAATTTAAATAAAAAAGTTGATGATGGTTTCCTGGACA  
+HWI-EAS443:3:16:350:1252#0/1  
Y`WU^a\_X[\_bbb\_`XYZa^^`a`baaabX`aa\_\_^`^a`  
@HWI-EAS443:3:16:364:877#0/1  
AAATTTTTGTAGAAGCTTTTTGCTCCAGCATGAGGACATG

+HWI-EAS443:3:16:364:877#0/1  
`Y^^ZYP^\_a[ZZTaa]`\_\_\_\_aRaaa¥NT`PZQ\_Y`a¥]  
@HWI-EAS443:3:16:366:453#0/1  
GCTGCTTTGAATTTTACCACAAATGCGATAACACGTGCAT  
+HWI-EAS443:3:16:366:453#0/1  
ab]]T`\_aa^X^a^^aa`a\_\_aa`\_[aa^\_¥[``^X`¥\_`^  
@HWI-EAS443:3:16:414:1531#0/1  
GGGAAAGAAGTCCTCGTGCTATGGGGCATTACCATCCAT  
+HWI-EAS443:3:16:414:1531#0/1  
a¥^bbbabbbbaa^aaa`aaaa\_a`a\_\_aa`aa`\_a\_a\_a\_  
@HWI-EAS443:3:16:555:1550#0/1  
AATTTACTTTGTTAGTAATCTCGTCAATGGCATTCTGTGT  
+HWI-EAS443:3:16:555:1550#0/1  
aaa`aaaa`\_`\_`aY`aaaaa`\_]`a`\_`\_`\_`a^Z\_]^^Z  
@HWI-EAS443:3:16:57:82#0/1  
CATCATTTGAAAGTTTGAGATATTCACCAAGACAAGTTC  
+HWI-EAS443:3:16:57:82#0/1  
aa^¥¥\_`^aY]]aa^]\_^abbaaabaaba]U]Xaa]a¥^a  
@HWI-EAS443:3:16:605:1331#0/1  
ACTTCTTGCTGTATCTTGATGTCCCCACAAAACATATGC  
+HWI-EAS443:3:16:605:1331#0/1  
a\_\_`b`````Z][UW]aaZa[YG\_]¥Ra]Ja[Q`b`PY\_]\_  
@HWI-EAS443:3:16:627:1742#0/1  
ATTTTGTCTCCCGCTCTACTAGTGTCCAGTAATAGTTCA  
+HWI-EAS443:3:16:627:1742#0/1  
a\_aaaa\_baaaa`\_\_\_\_aV`\_]`^¥¥ZYa\_]`^R^`U¥UX¥Z\_  
@HWI-EAS443:3:16:644:817#0/1  
TGCTGGCTGGATCCTGGGAAATCCAGAGTGTGAATCACTC  
+HWI-EAS443:3:16:644:817#0/1  
`aa¥`ab^aaXRYZX]V]``\_Z]`\_`\_`^Z`WZX\_XV\_^¥\_  
@HWI-EAS443:3:16:692:458#0/1  
TGCCGGTTTCATTGAAGGGGGTGGACAGGGATGGTAGAT  
+HWI-EAS443:3:16:692:458#0/1  
aaaaabXa`aaaa``bbaaa`Uba]S`a`````aZU`\_^]  
@HWI-EAS443:3:16:702:1661#0/1  
CTCAATTGCTCTTAGCTCCTCATAATCGATGAAATCTC  
+HWI-EAS443:3:16:702:1661#0/1  
a`b`baab^``aabb¥`a`aa`aaaa`ZXTV¥aaa\_0^a  
@HWI-EAS443:3:16:705:628#0/1  
GCTGGCTGGATCCTGGGAAATCCAGAGTGTGAATCACTCT  
+HWI-EAS443:3:16:705:628#0/1  
aY0]`a\_^`^¥SYNYXSDXaVBBBBBBBBBBBBBBBBBBB  
@HWI-EAS443:3:16:711:1243#0/1  
CAAATGATGACTGAGCTCAATTGCTCTCTTAGCTCCTC  
+HWI-EAS443:3:16:711:1243#0/1  
abaaa`a\_ab\_a\_`a`a`aaa`\_`^a`\_\_`\_a\_\_^^¥\_`^  
@HWI-EAS443:3:16:72:1724#0/1  
ATTGAGCTCAGTGTATCATTTTGAAGGTTTGAGATATTC  
+HWI-EAS443:3:16:72:1724#0/1  
a\_`^¥[a\_a`\_]`\_^\_\_\_\_a¥a```\_`]]`X^`^`^`\_`^W`

@HWI-EAS443:3:16:738:506#0/1  
CATTACCATCCATCTACTAGTGCTGACCAACAAAGTCTC  
+HWI-EAS443:3:16:738:506#0/1  
\_Sabab¥¥Vb`bbbabbabbab`bbba`bb\_aXab]`aa  
@HWI-EAS443:3:16:762:2037#0/1  
TCAAGATACAGCAAGAAGTTCAAGCCGAAATAGCAATAA  
+HWI-EAS443:3:16:762:2037#0/1  
¥ba¥VSS¥`a¥X^b^`a¥QSYba`VR`¥aa^Z`a^`\_`aa\_  
@HWI-EAS443:3:16:831:1641#0/1  
GTTCAGACAATGGAACGTGTTACCCAGGAGATTTTCATCGA  
+HWI-EAS443:3:16:831:1641#0/1  
aaab`]`babbaaaaT\_]WZaaabaa]]aab`aaSX¥]^`  
@HWI-EAS443:3:16:854:1763#0/1  
CAAAGGTGTAACGGCAGCATGTCCTCATGCTGGAGCAAAA  
+HWI-EAS443:3:16:854:1763#0/1  
abbbbb^babbb`[baa[\_UZR\_[`][^SXX[a[^]\_```  
@HWI-EAS443:3:16:880:1217#0/1  
ACAGAATTTACTTTGTTAGTAATCTCGTCAATGGCATTCT  
+HWI-EAS443:3:16:880:1217#0/1  
abaa`^aaaaaaaa\_aaa^`\_a\_\_`\_`\_aa^\_a\_a`\_]`  
@HWI-EAS443:3:16:889:319#0/1  
TGTGTATTCATCTTTTCAATAACAGAATTTACTTTGTTAG  
+HWI-EAS443:3:16:889:319#0/1  
[`bb\_\_Yaba`\_X`M^Z\_\_aX^a¥¥NV\_a`aVa`ba]\_]¥  
@HWI-EAS443:3:16:907:1218#0/1  
CGCCAGTTCATTGGTACTGGTAGTCTCCCTGGGGGCAATC  
+HWI-EAS443:3:16:907:1218#0/1  
a¥¥a^b`\_aZbaa`Vaaa`\_Va¥R\_[¥`aXRZX^a]]^Q^  
@HWI-EAS443:3:16:910:571#0/1  
TCTATTTCTTCTCTGTTTAATTTTGCTTCCTCTGAGTATT  
+HWI-EAS443:3:16:910:571#0/1  
abbaabbaaaaa`aaaaaa^aaaaaa\_a`]a`aaaa]aa`  
@HWI-EAS443:3:16:918:1444#0/1  
GATCCTGGGAAATCCAGAGTGTGAATCACTCTCCACAGCA  
+HWI-EAS443:3:16:918:1444#0/1  
aa\_ab`bbaabaaa\_bbaa¥a\_aa`\_`ab^aa`\_a\_`a\_X`  
@HWI-EAS443:3:16:924:1588#0/1  
GCCAGTTAAAAACAATGCCAAGGAAATTGGAAACGGCTG  
+HWI-EAS443:3:16:924:1588#0/1  
]b¥]^D¥a^a\_VZ`aaab]]Y¥^RY]\_\_`a`WHTYZO¥]\_  
@HWI-EAS443:3:16:950:507#0/1  
GGGGACATCAAGATACAGCAAGAAGTTCAAGCCGAAATA  
+HWI-EAS443:3:16:950:507#0/1  
abaaaaaa\_aa]¥aa\_aaaa\_a`\_aUZ^\_Y`L^^^`\_\_^\_  
@HWI-EAS443:3:16:964:468#0/1  
ACATTTTCCAATTGTGATCGGATGTATATTCTGAAATGGG  
+HWI-EAS443:3:16:964:468#0/1  
a`]baaaaa\_\_a\_a\_bSa\_aYWW\_ORU[^¥[^^MRTX]`a  
@HWI-EAS443:3:16:980:1419#0/1  
TGCCGGTTTTATTGAAGGGGGTGGACAGGGATGGTAGAT

+HWI-EAS443:3:16:980:1419#0/1  
K¥`¥R\_TZ\_aa`bXQVW\_bb\_^`\_T]]\_bb]`bbR]bXa  
@HWI-EAS443:3:17:1006:1200#0/1  
ATTTTGTCTCCCGCTCTACTAGTGTCCAGTAATAGTTCA  
+HWI-EAS443:3:17:1006:1200#0/1  
a\_aaa`\_a\_a`^^^`[¥a`XT`ZHP`J`UXYQ¥a`]TUW[Z  
@HWI-EAS443:3:17:103:1446#0/1  
ATAAACACCAGCCTCCCATTTTCAGAATATACATCCGATCA  
+HWI-EAS443:3:17:103:1446#0/1  
a^Y^a\_Z]\_SG[Y[``[^¥WV]\_\_[NXQXTS[YYY[]ZZ¥  
@HWI-EAS443:3:17:1040:1916#0/1  
GGGGACATCAAGATACAGCAAGAAGTTCAAGCCGGAAATA  
+HWI-EAS443:3:17:1040:1916#0/1  
ab¥Ya`XKR`\_][W\_¥aaaabaa[`OV\_\_aa\_\_a\_]P¥^\_  
@HWI-EAS443:3:17:105:1520#0/1  
GGATGGTAGATGGATGGTACGGTTATCACCATCAAAATGA  
+HWI-EAS443:3:17:105:1520#0/1  
Z\_V^¥\_Y¥¥¥`[[Z^[X[aa]¥Z¥XY^`\_] []XMZVYS¥  
@HWI-EAS443:3:17:106:683#0/1  
GATGAAATCTCCTGGGTAACACGTTCCATTGTCTGAACTA  
+HWI-EAS443:3:17:106:683#0/1  
]a\_ab\_K`abaabbbb0V]]b^aYa¥a]Zb^0\_aa]LH`Z  
@HWI-EAS443:3:17:109:666#0/1  
GGGCCATGAACTTGTCTTGGGAATATCTCAAACCTTTCA  
+HWI-EAS443:3:17:109:666#0/1  
abaa^\_¥¥\_a\_aaa\_a[N¥aaa[``[\_\_a^`aa\_aa¥\_\_\_\_  
@HWI-EAS443:3:17:1139:280#0/1  
CTTTTTTAAGCTAGCCATATTAATTTTTGTAGAAGCTTTT  
+HWI-EAS443:3:17:1139:280#0/1  
`bbbbbb`babaaa`aabaaa\_aaaaab`aaa`aaa`^^`  
@HWI-EAS443:3:17:1153:541#0/1  
ATCCTGACCCCTGCTCATTGATGGTGATAACCGTACCA  
+HWI-EAS443:3:17:1153:541#0/1  
a]\_]V`\_YYU^^^] ^VXY]YX]YU[WUVXXYYUT[YVYVX  
@HWI-EAS443:3:17:1196:641#0/1  
CGGCTGCTTTGAATTTTACCACAAATGCGATAACACGTGC  
+HWI-EAS443:3:17:1196:641#0/1  
abaa\_\_VX`ZZ[]a`aV[¥YQY`^^^`^^^¥UYQ^YWX  
@HWI-EAS443:3:17:1213:1949#0/1  
GCCGGTTTCATTGAAGGGGGTGGACAGGGATGGTAGATG  
+HWI-EAS443:3:17:1213:1949#0/1  
abab`V\_aaaaa^`\_baabaaX`^¥^a`\_\_^\_aUG\_aYS`  
@HWI-EAS443:3:17:1248:1578#0/1  
CATTCTGTGTGCTCTTCAGGTCGGCTGCATATCCTGACCC  
+HWI-EAS443:3:17:1248:1578#0/1  
W\_\_WZQJ\_\_Q\_a`¥Zbbb\_\_N^`T]\_\_`T^^¥VZZa^JQ^  
@HWI-EAS443:3:17:1249:1980#0/1  
GCTAAGAGAGCAATTGAGCTCAGTGTGCATCATTGAAAGG  
+HWI-EAS443:3:17:1249:1980#0/1  
a^aab`aa]aYJ[X^X\_\_a^¥^\_ZOXX\_\_W]``a^¥ZW\_V

@HWI-EAS443:3:17:125:1863#0/1  
GGGATGGTAGATGGATGGTACGGTTATCACCATCAAAATG  
+HWI-EAS443:3:17:125:1863#0/1  
Z¥bb¥ZZ`b]aaaaaa[¥M^a\_^G^a``\_¥`^OW^H[aTP  
@HWI-EAS443:3:17:1293:582#0/1  
GAAGTCCTCGTGCTATGGGGCATTACCATCCATCTACTA  
+HWI-EAS443:3:17:1293:582#0/1  
aa`]Y]aa^a`a^`\_Za\_aaZ`\_^¥\_V[\_¥Z^`\_U]\_W[S  
@HWI-EAS443:3:17:1297:1908#0/1  
TCCTCGTGCTATGGGGCATTACCATCCATCTACTAGTGC  
+HWI-EAS443:3:17:1297:1908#0/1  
abRa`\_¥a\_aa`aa\_\_[aa\_Za\_Xa\_aXaa\_\_YMX``Y\_^  
@HWI-EAS443:3:17:1317:937#0/1  
CAATGCCAAGGAAATTGGAAACGGCTGCTTTGAATTTTAC  
+HWI-EAS443:3:17:1317:937#0/1  
a^^aaaaaa`a`\_aa`a`\_\_[\_]\_X\_\_JJS`XLWLZ^^FM  
@HWI-EAS443:3:17:1337:166#0/1  
GGACATCAAGATACAGCAAGAAGTTCAAGCCGAAATAGC  
+HWI-EAS443:3:17:1337:166#0/1  
`a\_]VW\_W^\_N\_[^aa\_Y`aYL¥V[VaVZLW``UW¥PZZW  
@HWI-EAS443:3:17:1405:1579#0/1  
AGGAAATTGGAAACGGCTGCTTTGAATTTTACCACAAATG  
+HWI-EAS443:3:17:1405:1579#0/1  
a`b\_bbaabaa\_aaba`a`TU¥\_NFVR\_a\_PY]]YW[[HY  
@HWI-EAS443:3:17:1437:1791#0/1  
ATGGCATTCTGTGTGCTCTTCAGGTCCGGCTGCATATCCTG  
+HWI-EAS443:3:17:1437:1791#0/1  
\_```\_abba`a`^X]^aaabUaa^G\_a[\_``aa]aaXR]N  
@HWI-EAS443:3:17:1473:723#0/1  
ATTTTACCACAAATGCGATAACACGTGCATGGAAAGTGTC  
+HWI-EAS443:3:17:1473:723#0/1  
¥b`bbb``baaX^^aUaaaaaaa¥aWa]aaaaaa\_W¥¥¥  
@HWI-EAS443:3:17:1493:2016#0/1  
AAATACTCAGAGGAAGCAAAATTAACAGAGAAGAAATAG  
+HWI-EAS443:3:17:1493:2016#0/1  
ab\_aaabaabaa\_\_aa^aabaaa`^a``X¥M¥\_¥^a¥`\_U  
@HWI-EAS443:3:17:155:1738#0/1  
TCTTTACCTACTGCTGTGAAGTGTGTATTCATCTTTTCAA  
+HWI-EAS443:3:17:155:1738#0/1  
ab`aaaaaaa¥aa\_aY¥``a[\_a^][aa\_\_a`^`\_\_\_\_```  
@HWI-EAS443:3:17:1563:816#0/1  
GTCTGACAAGTTGTATTGCAATCGTGGACTGGTGTATCTG  
+HWI-EAS443:3:17:1563:816#0/1  
aaabaaaaab\_aa`aaaa`aaa\_a^aa\_\_a\_aXaZ\_\_X`  
@HWI-EAS443:3:17:1631:351#0/1  
CTACATTAATGATAAAGGGAAAGAAGTCCTCGTGCTATGG  
+HWI-EAS443:3:17:1631:351#0/1  
aba\_]`]aa^a]a```]T^]Q¥¥^¥\_^U]^]a\_`W`]Z^W  
@HWI-EAS443:3:17:1696:1762#0/1  
AAATTTTTGTAGAAGCTTTTTGCTCCAGCATGAGGACATG

+HWI-EAS443:3:17:1696:1762#0/1  
SWabb`bbb\_^abb[¥[`\_baaaaRTaa\_]aaa\_YYW`W^  
@HWI-EAS443:3:17:1712:768#0/1  
AAATTGGAAACGGCTGCTTTGAATTTTACCACAAATGCCA  
+HWI-EAS443:3:17:1712:768#0/1  
abaaaa^aaa`a`\_XGT`SV\_]\_`JDL¥T[^^ROSS[  
@HWI-EAS443:3:17:181:809#0/1  
GTGAATCACTCTCCACAGCAAGCTCATGGTCCTACATTGT  
+HWI-EAS443:3:17:181:809#0/1  
a`a]aaaaaaaaabaaaa\_a`aaa`a^`\_`¥\_\_\_\_Y  
@HWI-EAS443:3:17:201:1251#0/1  
ACATATTCTACTGTAGAGACCCATTAGAGCACATCCAG  
+HWI-EAS443:3:17:201:1251#0/1  
aba`baba^abaaa\_aa\_[^`\_aa\_a`aY\_a\_a`W`\_  
@HWI-EAS443:3:17:204:1676#0/1  
AGAATTTACTTTGTTAGTAATCTCGTCAATGGCATTCTGT  
+HWI-EAS443:3:17:204:1676#0/1  
a\_\_a\_\_`Y`[a\_X\_\_0\_`aa]\_`^a\_[UURZ]UY\_V[Q  
@HWI-EAS443:3:17:207:1693#0/1  
TCCGGCTTGAACCTTCTGCTGTATCTTGATGTCCCCACAA  
+HWI-EAS443:3:17:207:1693#0/1  
abaVZbV`W¥^\_\_S]Z`a`¥``aYa^aXa`Q`b^a¥QQYT  
@HWI-EAS443:3:17:210:1336#0/1  
GAAGCCAGTTAAAAACAATGCCAAGGAAATTGGAAACGG  
+HWI-EAS443:3:17:210:1336#0/1  
^Z`a\_abb\_b`bbbaab¥J¥b\_\_X\_]Z``aU]N^aVHYa  
@HWI-EAS443:3:17:212:823#0/1  
TTCGAATGTTATTTTGTCTCCCGCTCTACTAGTGTCCAG  
+HWI-EAS443:3:17:212:823#0/1  
ababaabb^b`babaa`aaa[aa`^\_a\_\_V[\_`]\_X^\_^`  
@HWI-EAS443:3:17:266:183#0/1  
CTCCCGCTCTACTAGTGTCCAGTAATAGTTCATTCTCCC  
+HWI-EAS443:3:17:266:183#0/1  
a^\_a[aba\_a`]W\_\_a]^S[ ]`\_N[W]NZ^]VY[ ]]¥TR¥  
@HWI-EAS443:3:17:305:1558#0/1  
TGGGCCATGAACCTTGTCTTGGGGAATATCTCAAACCTTTC  
+HWI-EAS443:3:17:305:1558#0/1  
a]^`aaaa¥ab`]\_aaaa\_a`\_aaa`\_ab`a`a\_a\_a  
@HWI-EAS443:3:17:341:237#0/1  
CACCAGTCCACGATTGCAATACAACCTTGTCCAGACACCCAA  
+HWI-EAS443:3:17:341:237#0/1  
abba]SS)`]`a¥]Z]a^] ^YWa`aa`¥YXY\_YV`UTR]¥  
@HWI-EAS443:3:17:343:1884#0/1  
GAAGTCCTCGTGTATGGGGCATTACCATCCATCTACTA  
+HWI-EAS443:3:17:343:1884#0/1  
ab\_b`bbaba`a`^a\_a`a`a`^Yaa\_a`aa\_\_b¥Z`  
@HWI-EAS443:3:17:343:550#0/1  
GCTGGCTGGATCCTGGGAAATCCAGAGTGTGAATCACTCT  
+HWI-EAS443:3:17:343:550#0/1  
abbbb`ab\_a`aa\_Za`\_aaa^baaWaS`\_a`aa¥a`\_`\_`





+HWI-EAS443:3:17:611:624#0/1  
aI]\_^[\ [Z¥\_^YYZ`MZ[\_U¥P^XVVXZ\_^]]Z^]XWXX  
@HWI-EAS443:3:17:634:398#0/1  
GTGTATTCATCTTTTCAATAACAGAATTTACTTTGTTAGT  
+HWI-EAS443:3:17:634:398#0/1  
aU\_¥WbaaMaaa`\_\_\_\_`a`a^`\_\_^\_^\_¥\_\_`\_]^\_aV  
@HWI-EAS443:3:17:642:343#0/1  
GGGGACATCAAGATACAGCAAGAAGTTCAAGCCGGAAATA  
+HWI-EAS443:3:17:642:343#0/1  
abX\_¥XRU`a`¥aZPL¥]V[\_\_\_]a\_G[\_\_\_WYY``GVQ\_`]  
@HWI-EAS443:3:17:654:1497#0/1  
TTCCGGCTTGAACCTTGCTGTATCTTGATGTCACCA  
+HWI-EAS443:3:17:654:1497#0/1  
a^^^[^`\_XTL[TYVZV\_]ZVYT¥WUT\_[RQYQOVR]¥WR  
@HWI-EAS443:3:17:664:1161#0/1  
TCTGTGTCTTTCAGGTCGGCTGCATATCCTGACCCCTG  
+HWI-EAS443:3:17:664:1161#0/1  
a`aa¥a`\_]X`aa]Y`]Saa^a\_X\_]`b]Y^^[`X\_ZNUG  
@HWI-EAS443:3:17:71:1248#0/1  
CTTGAACCTTCTTGCTGTATCTTGATGTCCCCACAAAAACA  
+HWI-EAS443:3:17:71:1248#0/1  
`\_^a\_`baab`Y`^a\_aaaaa`¥[b`````aaaaa\_OZ``  
@HWI-EAS443:3:17:833:1921#0/1  
AAAGAACCTTGGACTACCACGATTCAAATGTGAAGAACTT  
+HWI-EAS443:3:17:833:1921#0/1  
a`ba`aaa`a\_¥bbaa`aa`a\_``\_aaa`\_]``a\_\_`Z\_^  
@HWI-EAS443:3:17:841:345#0/1  
GGAAATTGGAAACGGCTGCTTTGAATTTTACCACAAATGC  
+HWI-EAS443:3:17:841:345#0/1  
aa`aaaaaa`aa\_a\_^`PV^aPRV¥]\_^SXU^Z\_\_\_MUU  
@HWI-EAS443:3:17:867:497#0/1  
ATCTACTAGTGCTGACCAACAAAGTCTCTATCAGAATGCA  
+HWI-EAS443:3:17:867:497#0/1  
ZY\_0a]\_Y`Uaa¥`PZU\_Y^`]`KTVUU¥RX¥XRW^`X\_  
@HWI-EAS443:3:17:871:1351#0/1  
AGCCAGTTAAAAACAATGCCAAGGAAATTGGAAACGGCT  
+HWI-EAS443:3:17:871:1351#0/1  
a\_aaa`\_a\_aa`\_`\_\_a`\_]\_^a\_]a`\_]`\_^]\_^]\_^VS  
@HWI-EAS443:3:17:882:679#0/1  
TCGATGAAATCTCCTGGGTAACACGTTCCATTGTCTGAAC  
+HWI-EAS443:3:17:882:679#0/1  
`YZa[`b]WY`PMVZ`Z]]YJ]]ZXV[SSWWY`[V]QOV  
@HWI-EAS443:3:17:929:315#0/1  
ATTGTGATCGGATGTATATTCTGAAATGGGAGGCTGGTGT  
+HWI-EAS443:3:17:929:315#0/1  
abbbabbbaba\_a^FWa\_aa[aa\_[`aa^\_Ua`TVaaO\_[  
@HWI-EAS443:3:17:941:1332#0/1  
TGCCGGTTTCATTGAAGGGGGTGGACAGGGATGGTAGAT  
+HWI-EAS443:3:17:941:1332#0/1  
Za`^a¥\_¥aba`a¥aa[^b]GPZY[^[\`\_^`\_U¥WNY

@HWI-EAS443:3:17:951:166#0/1  
GCCGGTTTCATTGAAGGGGGTGGACAGGGATGGTAGATG  
+HWI-EAS443:3:17:951:166#0/1  
^^`W]T\_a\_aaa`a`¥`\_``ZSb]S\_]`^a`RSa\_RQ]HQa  
@HWI-EAS443:3:18:1023:1096#0/1  
ATTGCATTTGGGTAATGTAACATTGCTGGCTGGATCCTG  
+HWI-EAS443:3:18:1023:1096#0/1  
aaaa`[a^`\_a`VaZ\_\_`^a]\_`a[`\_a`\_\_`^ZX¥ZZZZ  
@HWI-EAS443:3:18:1075:157#0/1  
GTCCTCGTGCTATGGGGCATTACCATCCATCTACTAGTG  
+HWI-EAS443:3:18:1075:157#0/1  
aaaaa\_aZ`¥aa`^R`¥``[\_\_\_\_[\_\_\_\_V[V¥\_\_¥¥¥YW[  
@HWI-EAS443:3:18:1109:1477#0/1  
TTCGAATGTTATTTTGTCTCCCGCTCTACTAGTGTCCAG  
+HWI-EAS443:3:18:1109:1477#0/1  
aabb\_aab¥aababaaaaa\_a`a`\_`¥\_T]ZYUJJPZZ^]  
@HWI-EAS443:3:18:1140:1183#0/1  
ATGGGACTTATGACTACCCAAAATACTCAGAGGAAGCAAA  
+HWI-EAS443:3:18:1140:1183#0/1  
aaba\_\_aaaaa`aaa\_`^`\_`\_`a`a^`\_`a^`\_\_`^^`\_]`\_`\_`  
@HWI-EAS443:3:18:1149:152#0/1  
GCTGGCTGGATCCTGGGAAATCCAGAGTGTGAATCACTCT  
+HWI-EAS443:3:18:1149:152#0/1  
`^`a`^aaa¥^^[YXRU[^`Y¥P¥^U^V^V[Y^MTXOPOT  
@HWI-EAS443:3:18:1152:182#0/1  
AGTTGCTTTCGAATGTTATTTTGTCTCCCGCTCTACTAGT  
+HWI-EAS443:3:18:1152:182#0/1  
abaa\_0^aaa^aa`X\_Y]aaaaYWa`a^[^^^^^[UXOZN  
@HWI-EAS443:3:18:1153:595#0/1  
GTTAGTAATCTCGTCAATGGCATTCTGTGTGCTCTTCAGG  
+HWI-EAS443:3:18:1153:595#0/1  
aY`aa\_aaa^a`\_``\_`\_\_^]\_\_\_^`\_]`^^]`^Y^]UZ]V  
@HWI-EAS443:3:18:1174:1511#0/1  
GGGGCATTACCATCCATCTACTAGTGCTGACCAACAAAG  
+HWI-EAS443:3:18:1174:1511#0/1  
^P]a\_a[a]aaYa`]X]^\_\_a`W^[`\_]`^`\_]`W``\_`\_`  
@HWI-EAS443:3:18:1230:2021#0/1  
AAGAAATGCTGGATCTGGTATTATCATTTTCAGATACACCA  
+HWI-EAS443:3:18:1230:2021#0/1  
`b¥`aba`\_```\_aaPY`^Na`\_a¥R¥^^^Y`\_``]`\_SaS^\_  
@HWI-EAS443:3:18:1234:989#0/1  
GCCGGTTTCATTGAAGGGGGTGGACAGGGATGGTAGATG  
+HWI-EAS443:3:18:1234:989#0/1  
aZW^aZ`\_]`]aaaST¥`\_`\_`\_`^W\_SUTT¥[ZUZ`VJV^SST  
@HWI-EAS443:3:18:1295:1440#0/1  
AAGTCTTCACATTTGAATCGTGGTAGTCCAAAGTTCTTT  
+HWI-EAS443:3:18:1295:1440#0/1  
a]aYXX^YMZZ\_aaaa^^\_GUVa[NVUHMF¥YRXVJTWX  
@HWI-EAS443:3:18:1309:799#0/1  
GGAAACCATCATCAACTTTTTTTATTTAAATTCTCTATTCT

+HWI-EAS443:3:18:1309:799#0/1  
`R^[]`^`a\_\_^^\_aa`a\_^^^[]Y^\_]^^]^^]  
@HWI-EAS443:3:18:1321:303#0/1  
GGGACATCAAGATACAGCAAGAAGTTCAAGCCGGAAATAG  
+HWI-EAS443:3:18:1321:303#0/1  
^`a]Taa`¥bbaa\_]aa\_aaZ]^\_Za``] `L[[` []]\_\_a  
@HWI-EAS443:3:18:1322:1093#0/1  
GTTTCATGGCCCAATCATGACTCGAACAAAGGTGTAACGGC  
+HWI-EAS443:3:18:1322:1093#0/1  
aaaa`^`aaaaba` ``ba\_\_\_`\_Y\_Y` `a¥]R\_Y\_\_S[\_W  
@HWI-EAS443:3:18:132:2022#0/1  
TCCTCTGAGTATTTTGGGTAGTCATAAGTCCCATTTTTGA  
+HWI-EAS443:3:18:132:2022#0/1  
a`baaabaar]b^¥a^V`]¥Z\_aaaa`\_Y[ `a^^a\_` `^a  
@HWI-EAS443:3:18:1350:707#0/1  
CTCTTTACTACTGCTGTGAAGTGTGTATTTCATCTTTTCA  
+HWI-EAS443:3:18:1350:707#0/1  
abbbabbbabbab`bababaa`bbab\_bbbbaaababaa  
@HWI-EAS443:3:18:1380:1196#0/1  
GCTGGCTGGATCCTGGGAAATCCAGAGTGTGAATCACTCT  
+HWI-EAS443:3:18:1380:1196#0/1  
aaa\_aaaa\_\_`^^^TYX\_aaYYY[^Z\_W\_RS]\_¥W]UWWU  
@HWI-EAS443:3:18:140:1004#0/1  
TGTGGGACATCAAGATACAGCAAGAAGTTCAAGCCGGAA  
+HWI-EAS443:3:18:140:1004#0/1  
ab¥` [a` `baaa`Y` `Yaaa]`aaZaaa]^a\_a` \_\_`a\_\_  
@HWI-EAS443:3:18:1420:134#0/1  
GAATTTACTTTGTTAGTAATCTCGTCAATGGCATTCTGTG  
+HWI-EAS443:3:18:1420:134#0/1  
][[XY]Z\_T¥a^Y`YV¥`Z^T]Xa^XW[^YTSX\_^XZ]VS  
@HWI-EAS443:3:18:1450:153#0/1  
CTCCCGGCTCTACTAGTGTCCAGTAATAGTTCATTCTCCC  
+HWI-EAS443:3:18:1450:153#0/1  
aaaa¥a`\_a`a^P\_\_¥^aY\_]\_VY^a\_]\_V¥FT\_`^]LYW  
@HWI-EAS443:3:18:1500:1176#0/1  
CAAGCATAACGGGAAACTATGCAAATAAGAGGGGTAGCC  
+HWI-EAS443:3:18:1500:1176#0/1  
ab\_\_^abbbabb` `ab\_aaa\_a`Y\_R^` `aaaaa[^` []  
@HWI-EAS443:3:18:1520:938#0/1  
TGTGGGACATCAAGATACAGCAAGAAGTTCAAGCCGGAA  
+HWI-EAS443:3:18:1520:938#0/1  
^VN` `\_[aaZa¥\_Sa\_a\_R`a\_\_a\_¥Y]^\_\_a\_`SW]¥\_`^  
@HWI-EAS443:3:18:154:210#0/1  
AGAGCACATCCAGAACTGATTGCCCCCAGGGAGACTACC  
+HWI-EAS443:3:18:154:210#0/1  
a`aaaaab\_`a`¥aa^^`] `a\_`^`\_] `Z^[[X\_\_U  
@HWI-EAS443:3:18:1574:1663#0/1  
GTTGCTTCGAATGTTATTTTGTCTCCCGGCTCTACTAGTG  
+HWI-EAS443:3:18:1574:1663#0/1  
Z^baabbbb`abbababbba` `aa]X`^a\_a` `[G]]XZ[

@HWI-EAS443:3:18:159:400#0/1  
AGACTACCAGTACCAATGAACTGGCGACAGTTGAATAGAT  
+HWI-EAS443:3:18:159:400#0/1  
aaaaaaaa`a\_`aaaa\_aa\_aa\_aa\_\_\_\_\_Z^\_VY[^¥^[  
@HWI-EAS443:3:18:1625:606#0/1  
GGGACATCAAGATACAGCAAGAAGTTCAAGCCGGAAATAG  
+HWI-EAS443:3:18:1625:606#0/1  
Z\_¥`aa`a^SW`Z\_bb\_aa\_^ZF^aa\_aY``ZY\_¥Z\_  
@HWI-EAS443:3:18:1629:513#0/1  
ATTGCTATTTCCGGCTTGAACCTTCTTGCTGTATCTTGATG  
+HWI-EAS443:3:18:1629:513#0/1  
a`aa\_aaaa\_aaa^\_aUV]Wa\_W[]]`\_[]\_W`]¥X^^  
@HWI-EAS443:3:18:1636:440#0/1  
CTCGGTACCACTAGATTTCCAGTTGCTTCAATGTTATTT  
+HWI-EAS443:3:18:1636:440#0/1  
\_aaa¥[\_SK`S`abbab\_]`\_baa]a\_aa\_¥aba\_SXaa  
@HWI-EAS443:3:18:1647:293#0/1  
GGGACATCAAGATACAGCAAGAAGTTCAAGCCGGAAATAG  
+HWI-EAS443:3:18:1647:293#0/1  
a`]`^`b¥aabaaa\_ab\_aa`aaa^\_\_a`R^a\_^^`\_\_  
@HWI-EAS443:3:18:1738:336#0/1  
GAAAGAAGTCCTCGTGCTATGGGGCATTACCATCCATCT  
+HWI-EAS443:3:18:1738:336#0/1  
^`]`^X^YQ\_H`PVL`V¥RQ`Z[XXDS][QS\_QFRYU]  
@HWI-EAS443:3:18:1749:654#0/1  
ATTGCTATTTCCGGCTTGAACCTTCTTGCTGTATCTTGATG  
+HWI-EAS443:3:18:1749:654#0/1  
a^^S0]a`]\_[[\_`\_aaa\_\_NW\_P]\_`\_\_a^W\_]\_Z[WZZ  
@HWI-EAS443:3:18:1752:484#0/1  
GGGACATCAAGATACAGCAAGAAGTTCAAGCCGGAAATAG  
+HWI-EAS443:3:18:1752:484#0/1  
``bb]a`aa`aabaaa`a`aa`b^\_\_a`\_]`^aa^\_^]]\_  
@HWI-EAS443:3:18:1778:250#0/1  
GGTGTATTATAGCACCTTGGGTGTCTGACAAGTTGTATTG  
+HWI-EAS443:3:18:1778:250#0/1  
^a¥ba`baa\_]`^a^PUa`\_¥U^a]¥\_`^]`^a^T[ZZ\_[X  
@HWI-EAS443:3:18:19:1658#0/1  
CTGGTATTATCATTTCAGATACACCAGTCCACGATTGCAA  
+HWI-EAS443:3:18:19:1658#0/1  
aa\_ZV^`aaaa`ba`ab`]Ya\_`\_[\_`¥\_\_`a\_`[]^)`\_  
@HWI-EAS443:3:18:213:106#0/1  
GCTCAATTGCTCTTAGCTCCTCATAATCGATGAAATCT  
+HWI-EAS443:3:18:213:106#0/1  
aaaaabbbaa`aaaaaa`a\_\_`\_¥`\_`\_`a\_^\_]¥`^\_^  
@HWI-EAS443:3:18:223:1018#0/1  
GATGAAATCTCCTGGGTAACACGTTCCATTGTCTGAACTA  
+HWI-EAS443:3:18:223:1018#0/1  
]Y\_a`\_W\_baaaaaaaa¥\_Y\_aa]``a\_]`\_aY^aa\_a^`\_  
@HWI-EAS443:3:18:226:1702#0/1  
ATCGATGAAATCTCCTGGGTAACACGTTCCATTGTCTGAA

+HWI-EAS443:3:18:226:1702#0/1  
a^`^X^]\_`[b`^a^Z¥ZS]]\_a\_`^]a[\_]\_`^T\_`^Z^Y  
@HWI-EAS443:3:18:254:74#0/1  
GGGTGGACAGGGATGGTAGATGGATGGTACGGTTATCACC  
+HWI-EAS443:3:18:254:74#0/1  
aab¥ba\_]aaa\_\_a\_U`a^R``¥\_¥]S]W[\_W¥¥VVUUP  
@HWI-EAS443:3:18:258:189#0/1  
CGAGTCATGATTGGGCCATGAACTTGTCTTGGGGAATATC  
+HWI-EAS443:3:18:258:189#0/1  
ab¥`^a\_^baaaaa\_`[^a[`]\_\_a^¥``aZY[¥\_^^\_]`  
@HWI-EAS443:3:18:310:1623#0/1  
AAGCCAGTTAAAAACAATGCCAAGGAAATTGGAAACGGC  
+HWI-EAS443:3:18:310:1623#0/1  
[]L)`[`]aaY`V``\_a`¥¥W]XR¥\_U]YXY]TU¥\_W[[Y  
@HWI-EAS443:3:18:333:727#0/1  
CGGTTTCATTGAAGGGGGTGGACAGGGATGGTAGATGGA  
+HWI-EAS443:3:18:333:727#0/1  
aaaZaa`Waaa]aa][aUNaa^[UaX`V]`XDX\_]Y^^^  
@HWI-EAS443:3:18:398:1801#0/1  
GCTGGCTGGATCCTGGGAAATCCAGAGTGTGAATCACTCT  
+HWI-EAS443:3:18:398:1801#0/1  
abaaaaaa¥\_V`a]a^ZW`a`aba`\_]M¥M]a`]]a]Y¥¥  
@HWI-EAS443:3:18:425:785#0/1  
GCTGCTTTGAATTTTACCACAAATGCGATAACACGTGCAT  
+HWI-EAS443:3:18:425:785#0/1  
aaaaaa^aaaaaa\_aa¥a\_`Za`\_aa\_\_^Y`a`aP`]]`  
@HWI-EAS443:3:18:445:1133#0/1  
GAGCTCAATTGCTCTCTTAGCTCCTCATAATCGATGAAAT  
+HWI-EAS443:3:18:445:1133#0/1  
^S[^`^`[]VH[a¥TYXQZY\_a¥Z[^]Z`X\_XX¥^]OW^[  
@HWI-EAS443:3:18:460:1596#0/1  
GTCCTCGTGCTATGGGCATTACCATCCATCTACTAGTG  
+HWI-EAS443:3:18:460:1596#0/1  
\_ab`aVb\_Xbab[aabaabaabba\_a\_b]aa`\_`a`aaN\_  
@HWI-EAS443:3:18:462:945#0/1  
GCTGGCTGGATCCTGGGAAATCCAGAGTGTGAATCACTCT  
+HWI-EAS443:3:18:462:945#0/1  
a`\_]ab¥aaa`aaVa]`H\_a¥aaYV^¥S`U\_Y]Y\_aVUOU  
@HWI-EAS443:3:18:538:258#0/1  
GTCTCTATCAGAATGCAGATGCATATGTTTTTGTGGGGAC  
+HWI-EAS443:3:18:538:258#0/1  
a[aaaaaaabaaa`aaaa\_\_a]`\_`aa\_\_a`aa]```\_\_]  
@HWI-EAS443:3:18:569:435#0/1  
AGCCAGTTAAAAACAATGCCAAGGAAATTGGAAACGGCT  
+HWI-EAS443:3:18:569:435#0/1  
ab`a\_b``aaaaaY[Z```¥Y]¥\_a]a`\_aaa`\_\_Z`S[\_  
@HWI-EAS443:3:18:629:64#0/1  
CGGGAAACTATGCAAATAAGAGGGGTAGCCCCATTGCAT  
+HWI-EAS443:3:18:629:64#0/1  
abaaaaaa`aaa^```\_aa``\_\_\_^X`a\_]X^^]Y\_WY]

@HWI-EAS443:3:18:636:1318#0/1  
TGACACTTCCATGCACGTGTTATCGCATTGTGGTAAAA  
+HWI-EAS443:3:18:636:1318#0/1  
ab`ba`WU`\_a`UR]a\_^[\_R¥`\_a]a¥`]XRGaTK\_[^^  
@HWI-EAS443:3:18:654:751#0/1  
GGGACATTCTCAATCCTGTGGCCAGTCTCAATTTTGTGC  
+HWI-EAS443:3:18:654:751#0/1  
aab`aabababbabaaaa\_aV`^a`V^¥UW^`\_`\_^][N  
@HWI-EAS443:3:18:69:192#0/1  
GCAGCCGACCTGAAGAGCACACAGAATGCCATTGACGAGA  
+HWI-EAS443:3:18:69:192#0/1  
a\_`X]\_Y\_^a^a0`\_\_¥R]Z]\_[NFY¥^PNMJL¥WT^XXG  
@HWI-EAS443:3:18:709:345#0/1  
GCACGTGTTATCGCATTGTGGTAAAATCAAAGCAGCCG  
+HWI-EAS443:3:18:709:345#0/1  
a`\_a[[b`aa]W^¥0¥aZY]aaWaa]V`UH¥^``¥\_`^Y\_  
@HWI-EAS443:3:18:715:796#0/1  
AGCAAGAAGTTCAAGCCGAAATAGCAATAAGACCCAAAG  
+HWI-EAS443:3:18:715:796#0/1  
aaaabaa\_a]\_`b`aa]aa^Yaa]a^`\_\_a\_`\_^\_^\_¥\_X  
@HWI-EAS443:3:18:783:827#0/1  
AAGAACTTATATGAAAAGGTAAGAAGCCAGTAAAAACA  
+HWI-EAS443:3:18:783:827#0/1  
a\_ba\_bbbab`aa¥]aaZ`^`\_a\_]a``aa`\_]\_Za\_\_``  
@HWI-EAS443:3:18:839:1105#0/1  
GGTGGACAGGGATGGTAGATGGATGGTACGGTTATCACCA  
+HWI-EAS443:3:18:839:1105#0/1  
^aQZa`\_^\_¥T^`Z\_N¥a`\_a[\_L``\_`[[S]`a\_\_S^QX\_  
@HWI-EAS443:3:18:941:204#0/1  
CAGCCGACCTGAAGAGCACACAGAATGCCATTGACGAGAT  
+HWI-EAS443:3:18:941:204#0/1  
abaa`baa\_ab^`b`a^a^`\_aa^\_\_¥\_\_]a`^¥`^\_]\_  
@HWI-EAS443:3:18:942:231#0/1  
GTGGGGACATCAAGATACAGCAAGAAGTTCAAGCCGAAA  
+HWI-EAS443:3:18:942:231#0/1  
\_R[TPUURUSMZV`]\_\_]^X]]\_\_PRU[VYV]RHYQVVV  
@HWI-EAS443:3:18:965:663#0/1  
CTGCTTTGAATTTTACCACAAATGCGATAACACGTGCATG  
+HWI-EAS443:3:18:965:663#0/1  
abbbbbbababbbbbbaabaa\_aaaaabaa^^b\_`\_aaa`a  
@HWI-EAS443:3:18:978:160#0/1  
CAGGATATGCAGCCGACCTGAAGAGCACACAGAATGCCAT  
+HWI-EAS443:3:18:978:160#0/1  
ab`UK``W]bbaa`P¥X`Raaaa^aYa¥a]^`\_]\_\_^RV\_V  
@HWI-EAS443:3:18:996:267#0/1  
GCCCCATTGCATTTGGGTAAATGTAACATTGCTGGCTGGA  
+HWI-EAS443:3:18:996:267#0/1  
aa\_`^]S\_\_\_\_^\_\_¥\_``U^¥\_¥`Y¥¥U¥^Y^W¥^¥T¥¥WT  
@HWI-EAS443:3:19:1014:1426#0/1  
GGAACGTGTTACCCAGGAGATTTTCATCGATTATGAGGAGC

+HWI-EAS443:3:19:1014:1426#0/1  
`ba`abaaa\_baa`aaa]aaaaa\_`\_a``a`a\_`^\_aa\_  
@HWI-EAS443:3:19:1016:72#0/1  
GTTGGTCAGCACTAGTAGATGGATGGTGAATGCCCCATAG  
+HWI-EAS443:3:19:1016:72#0/1  
aZ]a\_Z[[[a[`¥`M^W[a¥]a\_W\_a\_V`\_V¥]SWVVVYV¥  
@HWI-EAS443:3:19:1047:489#0/1  
GATGAAATCTCCTGGGTAACACGTTCCATTGTCTGAACTA  
+HWI-EAS443:3:19:1047:489#0/1  
^Z\_^`YVSX^`¥Rba\_XaaNV¥ZZ\_```a`a][^R]^^^  
@HWI-EAS443:3:19:1066:1704#0/1  
TACTTTGTTAGTAATCTCGTCAATGGCATTCTGTGTGCTC  
+HWI-EAS443:3:19:1066:1704#0/1  
Y^K^Zab`ba[]abbabab[`aa`][baaVaa^[\_`¥aS  
@HWI-EAS443:3:19:1083:387#0/1  
GTGGGGACATCAAGATACAGCAAGAAGTTCAAGCCGGAAA  
+HWI-EAS443:3:19:1083:387#0/1  
a]aa\_\_`^\_\_`a```\_\_^a`\_`a`\_\_aW^]`^^V¥`]]^\_  
@HWI-EAS443:3:19:1094:1245#0/1  
GATAACCGTACCATCCATCTACCATCCCTGTCCACCCCC  
+HWI-EAS443:3:19:1094:1245#0/1  
a]a``ba]aabbbaa`a]aaaS\_\_[a\_¥`\_ZU`[Y\_a\_\_S\_  
@HWI-EAS443:3:19:1139:1152#0/1  
CGGCTGCTTTGAATTTTACCACAAATGCGATAACACGTGC  
+HWI-EAS443:3:19:1139:1152#0/1  
aba`ba]^baVva`abb\_¥`aaVb\_aa]a[bba`a`a^b`  
@HWI-EAS443:3:19:1246:1134#0/1  
GCCAGTTAAAAACAATGCCAAGGAAATTGAAACGGCTG  
+HWI-EAS443:3:19:1246:1134#0/1  
\_abbaabbbb\_abbabbbbbbabbabbbbabbaaaa\_  
@HWI-EAS443:3:19:1247:1474#0/1  
GAAATTGAAACGGCTGCTTTGAATTTTACCACAAATGCG  
+HWI-EAS443:3:19:1247:1474#0/1  
aaX^aaaa¥aa`aa`\_^VZ¥TRL[QTW^TNQJO[\_]BBBB  
@HWI-EAS443:3:19:1250:287#0/1  
CACGATTGCAATACAAC TTGTCAGACACCCAAGGGTGCTA  
+HWI-EAS443:3:19:1250:287#0/1  
abaabbbbbbbbaabbabbbb¥baaaaa\_\_a`baa]`\_a\_  
@HWI-EAS443:3:19:1275:1102#0/1  
CGGCTGCATATCCTGACCCCTGCTCATT TTTGATGGTGATA  
+HWI-EAS443:3:19:1275:1102#0/1  
`b]bab[\_bba\_bab[\_Sb]]]`[\_aa`aa^a\_\_a]aa¥Y  
@HWI-EAS443:3:19:1319:1235#0/1  
TCAAGATACAGCAAGAAGTTCAAGCCGGAAATAGCAATAA  
+HWI-EAS443:3:19:1319:1235#0/1  
aaaabbaaba^abba^b\_`]baa]\_a`\_\_Z\_``]`\_a\_\_  
@HWI-EAS443:3:19:1343:88#0/1  
CCGTTACACCTTTGTTTCGAGTCATGATTGGGCCATGAACT  
+HWI-EAS443:3:19:1343:88#0/1  
YWa\_bbbaaa\_`abWabaaa`¥¥aa]aaa^^`T```U\_]]



@HWI-EAS443:3:19:1406:605#0/1  
CACGTGTTATCGCATTTGTGGTAAAATTCAAAGCAGCCGT  
+HWI-EAS443:3:19:1406:605#0/1  
^Z\_^[\_Z¥`S¥V^baY``\_I`Ya[\_^UYL]]T¥\_ZEYR  
@HWI-EAS443:3:19:1456:1007#0/1  
CTTCCTCTGAGTATTTTGGGTAGTCATAAGTCCCATTTTT  
+HWI-EAS443:3:19:1456:1007#0/1  
[a[]X\_]``a`Z`bb]]`^aW[\_Z\_Ya\_¥[^YYX``[a``  
@HWI-EAS443:3:19:1494:1342#0/1  
CAGCCGTTTCCAATTTCTTGGCATTGTTTTTAACTGGC  
+HWI-EAS443:3:19:1494:1342#0/1  
XV\_`U^PH\_¥`T\_]W\_VT\_aaVSW^`bb]a^^b]HY`UHM  
@HWI-EAS443:3:19:1613:1254#0/1  
AGCCAGTTAAAAACAATGCCAAGGAAATTGGAAACGGCT  
+HWI-EAS443:3:19:1613:1254#0/1  
`a\_aabaaaa\_a``\_aa`a¥¥¥\_a`\_^aa¥YW[\_\_\_]N`V`  
@HWI-EAS443:3:19:1661:1210#0/1  
GCCAGTTAAAAACAATGCCAAGGAAATTGGAAACGGCTG  
+HWI-EAS443:3:19:1661:1210#0/1  
aaaaa```aaaab\_a\_baaa`aba`````a\_\_\_\_\_]a\_X`\_  
@HWI-EAS443:3:19:1685:557#0/1  
GCTGCTTTGAATTTTACCACAAATGCGATAACACGTGCAT  
+HWI-EAS443:3:19:1685:557#0/1  
`XSYP]^ZY¥V\_\_WTQOTRWOUWZQXQZQRYUX[BBBBB  
@HWI-EAS443:3:19:216:284#0/1  
GCTCCTCATAATCGATGAAATCTCCTGGGTAACACGTTCC  
+HWI-EAS443:3:19:216:284#0/1  
aab`abaaaaaa\_aa`aaaaaa\_aa`a[``^`\_aa`^X\_\_`  
@HWI-EAS443:3:19:230:1025#0/1  
GGGACATCAAGATACAGCAAGAAGTTCAAGCCGAAATAG  
+HWI-EAS443:3:19:230:1025#0/1  
`a[W``aa^a]bTaabaaaa\_\_aaG^^aa`\_a\_a`a]V\_a  
@HWI-EAS443:3:19:287:1910#0/1  
ATGGCATTCTGTGTGCTCTTCAGGTCGGCTGCATATCCTG  
+HWI-EAS443:3:19:287:1910#0/1  
aaXabbT``¥]^]TIYaY[T`\_TOS`^N^¥¥`aX`]G¥¥B  
@HWI-EAS443:3:19:305:1865#0/1  
GACACCAAGGGTGTATAAACACCAGCCTCCCATTTTCAG  
+HWI-EAS443:3:19:305:1865#0/1  
\_baabbbbb`aaY]abaabaaaaaaaaa\_\_\_^aaa`aa`  
@HWI-EAS443:3:19:305:531#0/1  
AAATTTTTGTAGAAGCTTTTTGCTCCAGCATGAGGACATG  
+HWI-EAS443:3:19:305:531#0/1  
¥\_abbbbbbbabb]0]\_aabaa`Y]aaa````]\_\_aaSVa[[  
@HWI-EAS443:3:19:312:469#0/1  
AGAAGTTCAAGCCGAAATAGCAATAAGACCCAAAGTGAG  
+HWI-EAS443:3:19:312:469#0/1  
`\_QHZ]¥`b\_\_`aa\_^^S`^`X`^\_^UWUVV[X^]UO^Z  
@HWI-EAS443:3:19:314:1606#0/1  
AGCCAGTTAAAAACAATGCCAAGGAAATTGGAAACGGCT



@HWI-EAS443:3:19:506:575#0/1  
GGGACATCAAGATACAGCAAGAAGTTCAAGCCGGAAATAG  
+HWI-EAS443:3:19:506:575#0/1  
aaabaaa`\_`bb^ababa`b`a]b`Zab\_abab\_PU`aa\_  
@HWI-EAS443:3:19:508:86#0/1  
TGTTAGTAATCTCGTCAATGGCATTCTGTGTGCTCTTCAG  
+HWI-EAS443:3:19:508:86#0/1  
ab`aaa\_a`a\_a]b¥[a^¥^\_Z\_\_\_^^\_¥¥W`UY¥^YV¥]  
@HWI-EAS443:3:19:50:172#0/1  
GCATATCCTGACCCCTGCTCATTTTTGATGGTGATAACCGT  
+HWI-EAS443:3:19:50:172#0/1  
¥`bbbbbaabaa\_\_Z\_baaa]a```aa^aaSaa^[aa\_VW  
@HWI-EAS443:3:19:524:1119#0/1  
TGGGGACATCAAGATACAGCAAGAAGTTCAAGCCGGAAAT  
+HWI-EAS443:3:19:524:1119#0/1  
aaabaaaaaaaa`]a^aaaaa\_\_aX^`a\_\_`^\_W\_]\_^  
@HWI-EAS443:3:19:532:1935#0/1  
GCTGGCTGGATCCTGGGAAATCCAGAGTGTGAATCACTCT  
+HWI-EAS443:3:19:532:1935#0/1  
`bbbbbb`aaba\_^a]abb\_\_`b`a^Z\_N^aaa\_ZQ\_¥`  
@HWI-EAS443:3:19:562:968#0/1  
GGGACATCAAGATACAGCAAGAAGTTCAAGCCGGAAATAG  
+HWI-EAS443:3:19:562:968#0/1  
]L[\_X¥TV^`a`^^a]`¥`a][YYQX``X¥TN¥UX¥VV``  
@HWI-EAS443:3:19:577:1338#0/1  
AGGGGTCAGGATATGCAGCCGACCTGAAGAGCACACAGAA  
+HWI-EAS443:3:19:577:1338#0/1  
a`a]Naaaa`a\_\_`a`[````ZZX\_\_`^\_\_`^^`\_\_\_\_`\_  
@HWI-EAS443:3:19:611:1569#0/1  
GCTGCTTTGAATTTTACCACAAATGCGATAACACGTGCAT  
+HWI-EAS443:3:19:611:1569#0/1  
¥]¥WJY[R^X\_Za]a]]Taaaa`\_`\_a^\_]\_]YXL]TaU  
@HWI-EAS443:3:19:642:716#0/1  
GCAGCCGACCTGAAGAGCACACAGAATGCCATTGACGAGA  
+HWI-EAS443:3:19:642:716#0/1  
a\_K`^Y[M\_]ab`¥W¥aTa]`^ba¥``^\_H^XW`¥`a\_a\_  
@HWI-EAS443:3:19:661:252#0/1  
TCGAGTCATGATTGGCCATGAACTTGTCTTGGGGAATAT  
+HWI-EAS443:3:19:661:252#0/1  
`\_``a\_b`aZJ^a`aa`¥\_`a\_]\_a]a^`^`a``^U]]^\_  
@HWI-EAS443:3:19:671:1715#0/1  
GGGGCATTACCATCCATCTACTAGTGCTGACCAACAAAG  
+HWI-EAS443:3:19:671:1715#0/1  
\_XZ`^````abbbb¥a]b^a`aa`a`Z`a¥Z`¥\_aa\_aaa\_  
@HWI-EAS443:3:19:673:255#0/1  
GCCGGTTTCATTGAAGGGGGTGGACAGGGATGGTAGATG  
+HWI-EAS443:3:19:673:255#0/1  
a\_bab]aZ]RbbZWUbaa`\_WNa¥aY[^a]G\_aaPVM¥P\_  
@HWI-EAS443:3:19:692:99#0/1  
TGTCACCAAAAAACATATGCATCTGCATTCTGATAGAGA

+HWI-EAS443:3:19:692:99#0/1  
Xbb\_aaaaaaab\_aa`\_`[a^aaYaa[\_aa\_`a\_\_`[^\_¥  
@HWI-EAS443:3:19:696:567#0/1  
ATTTGGGGCCATTGCCGTTTCATTGAAGGGGGTGGACA  
+HWI-EAS443:3:19:696:567#0/1  
\_a\_[Z]``aa`a`a`a\_V\_X`ZHNZ^OD¥^¥`]b\_H]bKDK  
@HWI-EAS443:3:19:69:999#0/1  
CATCCATCTACTAGTGCTGACCAACAAAGTCTCTATCAGA  
+HWI-EAS443:3:19:69:999#0/1  
¥QT`]\_\_`a`XTGWZ^OZX\_]a[\_[Z¥RUV¥T[RHSLY  
@HWI-EAS443:3:19:725:1186#0/1  
GCCAGTTAAAAACAATGCCAAGGAAATTGGAACGGCTG  
+HWI-EAS443:3:19:725:1186#0/1  
abb^a`bbaa`ab]baaa]aaaa`aaaaaa`aa\_aa\_Z  
@HWI-EAS443:3:19:748:550#0/1  
CTGTGTATTCATCTTTTCAATAACAGAATTTACTTTGTTA  
+HWI-EAS443:3:19:748:550#0/1  
abb\_^P`baaaaabbbaab`ba\_\_b`V`abaaaabaa\_aa  
@HWI-EAS443:3:19:762:1095#0/1  
TATCAGAATGCAGATGCATATGTTTTGTGGGGACATCAA  
+HWI-EAS443:3:19:762:1095#0/1  
`b`a]a^W^^^`^`^W]a`^a[`a\_^a]a`a`aV¥\_\_[  
@HWI-EAS443:3:19:774:110#0/1  
AAAGAAGTCCTCGTGCTATGGGGCATTACCATCCATCTA  
+HWI-EAS443:3:19:774:110#0/1  
a`\_]\_]\_YOTWX]UKLZ[^Y¥]¥X^RUUNNK^BBBBBBBB  
@HWI-EAS443:3:19:816:759#0/1  
AATTGGAAACGGCTGCTTTGAATTTTACCACAAATGCGAT  
+HWI-EAS443:3:19:816:759#0/1  
a``\_aa[aa`ba`aaX]\_[MV^`\_a^MV\_TP[\_BBBBBBB  
@HWI-EAS443:3:19:850:834#0/1  
TAGATTTCCAGTTGCTTCGAATGTTATTTTGTCTCCCGGC  
+HWI-EAS443:3:19:850:834#0/1  
Vb\_L]]S¥aYY^^][^]aa^VaVa\_]\_HW]^]^aa[\_`\_  
@HWI-EAS443:3:19:872:1128#0/1  
AGCCAGTTAAAAACAATGCCAAGGAAATTGGAACGGCT  
+HWI-EAS443:3:19:872:1128#0/1  
¥Ya`][N^WYW¥aa]T[PaX`aZ`\_\_ZPS^P`S[[X]^BB  
@HWI-EAS443:3:19:879:856#0/1  
GCCGTTTCATTGAAGGGGGTGGACAGGGATGGTAGATG  
+HWI-EAS443:3:19:879:856#0/1  
abbbba^abaabbaabaaba¥aab\_aaaa^\_aaSa^`]^  
@HWI-EAS443:3:19:891:1095#0/1  
TACCCCATCTATTTCTTCTCTGTTTAATTTTGCTTCCTCT  
+HWI-EAS443:3:19:891:1095#0/1  
¥``¥abaabaa^ab`^]`baaaaaa`aaaa`aa\_\_a`a  
@HWI-EAS443:3:19:901:1224#0/1  
AAATTGGAACGGCTGCTTTGAATTTTACCACAAATGCGA  
+HWI-EAS443:3:19:901:1224#0/1  
`a¥\_[`^]US`\_baaWY^aXP]WN]a]IHS[^`a^BBBB

@HWI-EAS443:3:19:906:1808#0/1  
CATCATTTGAAAGTTTGGAGATATTCCTCCCAAGACAAGTTC  
+HWI-EAS443:3:19:906:1808#0/1  
ababbababaaaZZLa^abaa\_baYaaa`aa\_aaa`a]\_^  
@HWI-EAS443:3:19:961:55#0/1  
CCCCAGGGAGACTACCAATGAAGTGGCGACAGTT  
+HWI-EAS443:3:19:961:55#0/1  
abbbbbbbbab`baa^aaa`aaaaaaaa\_aaa\_a^UTa¥`  
@HWI-EAS443:3:1:1023:702#0/1  
GGGACATCAAGATACAGCAAGAAGTTCAAGCCGGAAATA  
+HWI-EAS443:3:1:1023:702#0/1  
^`[[a`abaa]N¥^Saab`a`Y¥aPGX¥Xb[Y`aU`¥BB  
@HWI-EAS443:3:1:1042:118#0/1  
GAGCTTGCTGTGGAGAGTGATTCACACTCTGGATTTCCCA  
+HWI-EAS443:3:1:1042:118#0/1  
\_aUba¥`bb[bbUbabababbYa`[`b`bbabab^YaB  
@HWI-EAS443:3:1:1105:1983#0/1  
AAGTTCATGGCCCAATCATGACTCGAACAAAGGTGTAACG  
+HWI-EAS443:3:1:1105:1983#0/1  
`aa\_]`PX]UUM^a`\_^Yav^`aUa`\_`SGVBBBBB  
@HWI-EAS443:3:1:1134:1193#0/1  
TAGAGACCCATTAGAGCACATCCAGAACTGATTGCCCCC  
+HWI-EAS443:3:1:1134:1193#0/1  
a\_aaaa`^a`H`\_]`a`V^aaa^[\_`\_]YSBB  
@HWI-EAS443:3:1:1161:1332#0/1  
TATCTCGGTACCACTAGATTTCCAGTTGCTTCGAATGTTA  
+HWI-EAS443:3:1:1161:1332#0/1  
¥ba`a`baabL\_bXaab\_aa`\_S`bX^aWa\_[a\_Waa¥BB  
@HWI-EAS443:3:1:1217:1093#0/1  
CTGGCTGGATCCTGGGAAATCCAGAGTGTGAATCACTCTC  
+HWI-EAS443:3:1:1217:1093#0/1  
\_bbbab`\_b\_Z`baa`a¥Z\_bbabV`\_aa^R\_V^B  
@HWI-EAS443:3:1:1244:1015#0/1  
ACCCCTCTTAGTTTGCATAGTTTCCCGTTATGCTTGCTT  
+HWI-EAS443:3:1:1244:1015#0/1  
]XY][a]aa`\_ZX^\_Z^[\_¥`a¥H`\_0]^\_\_RV¥^]BBB  
@HWI-EAS443:3:1:1262:1739#0/1  
CACCATCCATCTACTAGTGCTGACCAACAAAGTCTCTATC  
+HWI-EAS443:3:1:1262:1739#0/1  
abUYbb`Xb`QabW`a`\_aGaaaa¥ba[b`aa^YaGaabB  
@HWI-EAS443:3:1:1297:1966#0/1  
GACAATGGAACGTGTTACCCAGGAGATTCATCGATTATG  
+HWI-EAS443:3:1:1297:1966#0/1  
a`a`ba`bbWa\_ba^bRTVabaab`b`]aYb`a`^bB  
@HWI-EAS443:3:1:1299:1251#0/1  
GAATTTACTTTGTTAGTAATCTCGTCAATGGCATTCTGTG  
+HWI-EAS443:3:1:1299:1251#0/1  
`Ya]^aa`Va\_U[aVbTbX[P¥UbZ`\_a`aa^YGYR]`BB  
@HWI-EAS443:3:1:1314:776#0/1  
GTGTATTCATCTTTTCAATAACAGAATTTACTTTGTTAGT

+HWI-EAS443:3:1:1314:776#0/1  
aYa]aaa¥a`Saa\_a¥\_`^`\_¥¥`a\_\_a\_a\_[a\_aa^^\_BB  
@HWI-EAS443:3:1:1338:1330#0/1  
ATCTCGTCAATGGCATTCTGTGTGCTCTCAGGTCGGCTG  
+HWI-EAS443:3:1:1338:1330#0/1  
a``^]b[Xa\_\_`Sa\_\_`\_V^[aT`Y\_]WUT\_WBBBBBB  
@HWI-EAS443:3:1:1394:984#0/1  
GTAACATTGCTGGCTGGATCCTGGGAAATCCAGAGTGTGA  
+HWI-EAS443:3:1:1394:984#0/1  
a``WXaab^GZZXM¥\_`W[UX\_aYY¥ZYS¥VY`^`TBBBB  
@HWI-EAS443:3:1:1410:289#0/1  
TGAACCTCTTGCTGTATCTTGATGTCCCCACAAAACATA  
+HWI-EAS443:3:1:1410:289#0/1  
aaaa^aa¥`\_a¥aa^\_a¥a\_\_^aa^\_\_ZX\_Z^^\_\_XZBBB  
@HWI-EAS443:3:1:1413:454#0/1  
CAAGAAGTTCAAGCCGAAATAGCAATAAGACCCAAAGTG  
+HWI-EAS443:3:1:1413:454#0/1  
abaababab`babaa]a`^aa\_aa``bba^a¥Z^`\_`a]B  
@HWI-EAS443:3:1:1440:1361#0/1  
ACCCCATCTATTTCTTCTGTTTAAATTTTGCTTCTCTG  
+HWI-EAS443:3:1:1440:1361#0/1  
aIVZaba^bbaabWbbaaaabbabaaaab[`aab¥I^\_b`  
@HWI-EAS443:3:1:1443:483#0/1  
GGGACATCAAGATACAGCAAGAAGTTCAAGCCGAAATA  
+HWI-EAS443:3:1:1443:483#0/1  
a[QZPY\_a]\_`\_\_`W\_a]¥`a\_\_^MZ^^^VTW`YXZ]BB  
@HWI-EAS443:3:1:1477:1469#0/1  
GAATTTCTTTTTTAACTAGCCATATTAATTTTTGTAGA  
+HWI-EAS443:3:1:1477:1469#0/1  
a\_\_aaa^a`aaba`\_\_`a\_\_]¥`aaa`\_\_^a`\_``\_\_\_\_]B  
@HWI-EAS443:3:1:1491:541#0/1  
TAGATTTCCAGTTGCTTCGAATGTTATTTTGTCTCCCGGC  
+HWI-EAS443:3:1:1491:541#0/1  
^aZP¥`TV¥JUa^SZa]V[Y`\_`UP`YaZ[OTBBBBBBBB  
@HWI-EAS443:3:1:1724:964#0/1  
CAAAGTCTCTATCAGAATGCAGATGCATATGTTTTGTGG  
+HWI-EAS443:3:1:1724:964#0/1  
ababb`\_b¥babaaaaabbIa`abb¥aaabb`\_aaaa^bB  
@HWI-EAS443:3:1:1741:652#0/1  
CAACAGACACTGTAGACACAGTACTAGAAAAGAATGTAAC  
+HWI-EAS443:3:1:1741:652#0/1  
`bb\_ba¥I`]^`^`^aaS\_^XY\_\_G\_a[\_aa^[Q¥`PBBBB  
@HWI-EAS443:3:1:203:50#0/1  
GCTGCTTTGAATTTTACCACAAATGCGATAACACGTGCAT  
+HWI-EAS443:3:1:203:50#0/1  
a\_aa\_a`\_b`\_`aaa\_]^[`\_\_\_\_a^\_^\_[]^]`Z`BBB  
@HWI-EAS443:3:1:213:2010#0/1  
AAAGGTTTGAGATATTTCCCAAGACAAGTTCATGGCCCAA  
+HWI-EAS443:3:1:213:2010#0/1  
aaaaaX\_aaY`aa\_\_TRDZSa`a\_¥^\_aZ[Z^G]aLNBBB

@HWI-EAS443:3:1:221:1025#0/1  
AATGATGACTGAGCTCAATTGCTCTCTTAGCTCCTCAT  
+HWI-EAS443:3:1:221:1025#0/1  
aaa`a`aa\_a^\_U]a^`\_\_\_^\_^\_\_\_`]^`^\_`Z`\_U`\_`BB  
@HWI-EAS443:3:1:273:372#0/1  
TGAATTTCTTTTTTAACTAGCCATATTAATTTTTGTAG  
+HWI-EAS443:3:1:273:372#0/1  
aa\_`aa`[^`aaaaa`^`\_`[P^`\_`\_`a`\_`\_`a`\_`^`B  
@HWI-EAS443:3:1:313:377#0/1  
TCACCATCCATCTACTAGTGCTGACCAACAAAGTCTCTAT  
+HWI-EAS443:3:1:313:377#0/1  
a\_a[FY¥T¥a`]Z^]^`XV[X^`^^]LT]Q`^^^GZ[\_BBB  
@HWI-EAS443:3:1:375:478#0/1  
GCCAGCAATGTTACATTTACCCAAATGCAATGGGGCTACC  
+HWI-EAS443:3:1:375:478#0/1  
aa]aaa`aa`aV`\_\_\_aa^]a`\_\_\_\_\_`^^]^`\_`[V^BBB  
@HWI-EAS443:3:1:400:623#0/1  
GCCAGTTAAAAACAATGCCAAGGAAATTGGAAACGGCTG  
+HWI-EAS443:3:1:400:623#0/1  
aTL]a`\_a`\_]W^^`\_]a^X¥[^`X`^^`^^]]ZBBBBB  
@HWI-EAS443:3:1:422:554#0/1  
GGGGACATCAAGATACAGCAAGAAGTTCAAGCCGAAATA  
+HWI-EAS443:3:1:422:554#0/1  
aa`aa`a`\_aaa`a`\_aaaabba`b¥^`\_`a`^b`a`\_aaB  
@HWI-EAS443:3:1:42:670#0/1  
CTGAAATGGGAGGCTGGTGTATAGCACCCCTGGGTGTC  
+HWI-EAS443:3:1:42:670#0/1  
`bba`aaba¥]b`\_aaN`R`\_`\_ZIVa[\_`^[\_`aBBBB  
@HWI-EAS443:3:1:430:1288#0/1  
ATCAGAATGCAGATGCATATGTTTTGTGGGACATCAAG  
+HWI-EAS443:3:1:430:1288#0/1  
aa`babb`\_`\_¥`aabaab`a`\_ab`aaa`\_aaaQa`a`\_Oa`\_B  
@HWI-EAS443:3:1:463:1328#0/1  
ACTTGTGACACACCAAGGGTGCTATAAACACCAGCCTCC  
+HWI-EAS443:3:1:463:1328#0/1  
aYI^]aYUYQX`\_aaaIaa`0a^^aa`\_]`\_`[a[G[YGG`\_BB  
@HWI-EAS443:3:1:496:392#0/1  
GGGACATCAAGATACAGCAAGAAGTTCAAGCCGAAATAG  
+HWI-EAS443:3:1:496:392#0/1  
aaa`\_`\_Z`\_`\_`\_`]^`a^`a`\_`[¥NOX`\_`\_ZZ`\_`\_`]Z`\_BB  
@HWI-EAS443:3:1:49:1404#0/1  
ATTGGAACGGCTGCTTTGAATTTTACCACAAATGCGATA  
+HWI-EAS443:3:1:49:1404#0/1  
aaaaaaaaaaaa`aYLQaaKT`\_M^aaQPV¥I`a`\_]UBBBBB  
@HWI-EAS443:3:1:562:631#0/1  
GTGGGACATCAAGATACAGCAAGAAGTTCAAGCCGAAA  
+HWI-EAS443:3:1:562:631#0/1  
a`baaa`^`\_`^`\_`\_`\_`\_`a`Uaaa`\_`aW^Ra¥`\_ZV`]]^B  
@HWI-EAS443:3:1:608:888#0/1  
GGGGTGGACAGGGATGGTAGATGGATGGTACGGTTATCAC

+HWI-EAS443:3:1:608:888#0/1  
a\_a[aa`\_\_\_\_`\_¥`\_W`\_`^¥^\_^\_Y^W\_VW¥BBBBB  
@HWI-EAS443:3:1:662:432#0/1  
TGAGCTCAATTGCTCTCTTAGCTCCTCATAATCGATGAAA  
+HWI-EAS443:3:1:662:432#0/1  
ab\_aaa\_aaa`baa`\_`aa`\_a]aa^aaaa\_Sa\_a\_``B  
@HWI-EAS443:3:1:695:369#0/1  
AGCCAGTTAAAAACAATGCCAAGGAAATTGGAAACGGCT  
+HWI-EAS443:3:1:695:369#0/1  
aaZ]bb]a\_a`]Za`\_`a\_aS[a\_b`^\_]\_`a`\_`]WBBBB  
@HWI-EAS443:3:1:818:1314#0/1  
ATTAGAGCACATCCAGAACTGATTGCCCCAGGGAGACT  
+HWI-EAS443:3:1:818:1314#0/1  
aabaaa`\_`aZaa[Vaaa`a¥a`aaaa]UYYZ]\_\_\_\_¥\_¥BB  
@HWI-EAS443:3:1:908:1868#0/1  
AATGGAACGTGTTACCCAGGAGATTTTCATCGATTATGAGG  
+HWI-EAS443:3:1:908:1868#0/1  
aa\_\_`¥a]aG^^a`]OG\_\_^\_]\_¥^\_R¥^0^VZ]]V]BBB  
@HWI-EAS443:3:1:961:372#0/1  
CCTCTGAGTATTTTGGGTAGTCATAAGTCCCATTTTTGAC  
+HWI-EAS443:3:1:961:372#0/1  
^^`]bbbb`bbbbbbbb\_bbaabbaaaa\_[`baababbbB  
@HWI-EAS443:3:1:962:495#0/1  
CACGTGTATCGCATTGTGGTAAAATTCAAAGCAGCCGT  
+HWI-EAS443:3:1:962:495#0/1  
abbb`b\_aab\_baabaab\_aaY]Vaaba\_`aaaa`a\_^aB  
@HWI-EAS443:3:20:1027:929#0/1  
GCAGGGGTCAGGATATGCAGCCGACCTGAAGAGCACACAG  
+HWI-EAS443:3:20:1027:929#0/1  
aaaaaabQaaaaaabaaaaa\_a`Z^a`a\_a\_a\_a¥a¥`\_`  
@HWI-EAS443:3:20:1064:550#0/1  
GCCATGAACCTGTCTTGGGAATATCTCAAACCTTTCAA  
+HWI-EAS443:3:20:1064:550#0/1  
a\_Z¥\_W]]RU`a¥\_a]Z\_] [ZT¥R^H^Z^^^XY\_]Y] []  
@HWI-EAS443:3:20:1098:1241#0/1  
CAATGTAGGACCATGAGCTTGCTGTGGAGAGTGATTCACA  
+HWI-EAS443:3:20:1098:1241#0/1  
aaaaTJY¥\_aa`baa¥\_aa`\_^a^^aaZ`\_aW`\_\_ZQ\_W]  
@HWI-EAS443:3:20:1149:1287#0/1  
CATGATTGGCCATGAACCTGTCTTGGGAATATCTCAA  
+HWI-EAS443:3:20:1149:1287#0/1  
ab¥Z¥Z[¥^\_¥WT^\_HS[`Y`XUZa``ZZLW]^`¥`X` [0  
@HWI-EAS443:3:20:1208:363#0/1  
ATCCTGGGAAATCCAGAGTGTGAATCACTCTCCACAGCAA  
+HWI-EAS443:3:20:1208:363#0/1  
aa`aaaa`\_\_`aa`\_\_a\_a¥a]aaa\_V\_¥`U[¥¥\_¥¥¥Y¥¥  
@HWI-EAS443:3:20:1210:607#0/1  
CCAGTACCAATGAACCTGGCGACAGTTGAATAGATCGCCAA  
+HWI-EAS443:3:20:1210:607#0/1  
^^bbZbbabbbbaabbab^\_]`\_bb`aaaZ\_]Y\_V¥aa



@HWI-EAS443:3:20:1234:1376#0/1  
GCCGTTACACCTTTGTTTCGAGTCATGATTGGGCCATGAAC  
+HWI-EAS443:3:20:1234:1376#0/1  
`^XQXUHR]PWXVOZW^WSQ[NPLYNJVYYZX¥RUSNYST  
@HWI-EAS443:3:20:1235:1084#0/1  
GTGTTACCCAGGAGATTTTCATCGATTATGAGGAGCTAAGA  
+HWI-EAS443:3:20:1235:1084#0/1  
^`QVX`^]Y`[^U\_\_Q]]H¥¥Y]¥\_\_Y¥YNW\_VXR^[UQR  
@HWI-EAS443:3:20:1300:902#0/1  
GGGAGACAAAATAACATTCTGAAGCAACTGGAAATCTAGTG  
+HWI-EAS443:3:20:1300:902#0/1  
``bbaaa`[^`b`aZbaabba`aaaa\_aaaa\_aa`a\_[b  
@HWI-EAS443:3:20:1335:1070#0/1  
GCCGGTTTCATTGAAGGGGGTGGACAGGGATGGTAGATG  
+HWI-EAS443:3:20:1335:1070#0/1  
a¥]a]YW¥XZ`^¥NS]\_¥]RYTYYPSSYY[WW[WKR[WS[  
@HWI-EAS443:3:20:1371:1808#0/1  
CAAGAAGTTCAAGCCGAAATAGCAATAAGACCCAAAGTG  
+HWI-EAS443:3:20:1371:1808#0/1  
\_babVZaZ`V`a`Xb`aaYaZ\_[[^`a\_aaYNW[\_Z\_\_Z  
@HWI-EAS443:3:20:1403:1432#0/1  
GAAGGGAGAATGAAGTACTTACTGGACTAGTAGAGCCGG  
+HWI-EAS443:3:20:1403:1432#0/1  
a`aaaa`a]\_ba`a\_aWaaa\_]`\_]\_¥^aaZ`^^^]]\_\_  
@HWI-EAS443:3:20:1412:725#0/1  
CATATTCTACTGTAGAGACCCATTAGAGCACATCCAGA  
+HWI-EAS443:3:20:1412:725#0/1  
aa\_abb]abababbabbaa`\_aa`\_`\_aa\_a`a`W\_a`\_`  
@HWI-EAS443:3:20:1419:581#0/1  
AAGAAATAGATGGGGTAAAGCTGGAATCAACAAGGATTTA  
+HWI-EAS443:3:20:1419:581#0/1  
\_¥`ZRP^MSQY`¥YUKVZZWQ^XW]ZRNUSDPPQU[UR]B  
@HWI-EAS443:3:20:1467:329#0/1  
ACTGTGTATTTCATCTTTTCAATAACAGAATTTACTTTGTT  
+HWI-EAS443:3:20:1467:329#0/1  
T\_`\_]WFO`a`aa`a¥[aSW`aabb]`ZZaa\_V]bba\_``  
@HWI-EAS443:3:20:1510:1492#0/1  
AAGAGAGCAATTGAGCTCAGTGTCATCATTGAAAGGTTT  
+HWI-EAS443:3:20:1510:1492#0/1  
`baa`aa`^aa\_\_aa]`\_aaYa]]`aZa\_\_`a\_\_]a`X\_\_  
@HWI-EAS443:3:20:1548:556#0/1  
AGCCAGTTAAAAACAATGCCAAGGAAATTGGAAACGGCT  
+HWI-EAS443:3:20:1548:556#0/1  
`WO[^]V\_aYaa\_¥¥\_¥`XWGO\_\_]^`^]S¥\_Y]^S¥QQQ  
@HWI-EAS443:3:20:239:1337#0/1  
TGCTTCCTCTGAGTATTTTGGGTAGTCATAAGTCCCATTT  
+HWI-EAS443:3:20:239:1337#0/1  
aYaaaaabbb`¥`\_¥ab\_ab\_aSaa]ababaaSb\_```aa  
@HWI-EAS443:3:20:243:336#0/1  
CTCCTCATAATCGATGAAATCTCCTGGGTAACACGTTCCA

+HWI-EAS443:3:20:243:336#0/1  
aa`aaaaab``aa\_a^Z`\_a`\_\_\_\_^Z\_\_]]Y`^^`^^  
@HWI-EAS443:3:20:24:155#0/1  
GGGTCAGGATATGCAGCCGACCTGAAGAGCACACAGAATG  
+HWI-EAS443:3:20:24:155#0/1  
a`]S^U\_]\_^Q`]`[¥PZTUXZVLV[^S[QVTPUS  
@HWI-EAS443:3:20:258:1917#0/1  
CTGGTGTATAGCACCTTGGGTGTCTGACAAGTTGTAT  
+HWI-EAS443:3:20:258:1917#0/1  
aa[XJYR\_]aU¥[`]X0[Z\_Z\_VNaT[[[]]TPWKR[T]O  
@HWI-EAS443:3:20:275:193#0/1  
GGGGACATCAAGATACAGCAAGAAGTTCAAGCCGGAAATA  
+HWI-EAS443:3:20:275:193#0/1  
abaa[¥L\_]aaaaaa\_ab\_aa`¥b`]\_a\_a0Ya`^Z^^\_  
@HWI-EAS443:3:20:297:1119#0/1  
GGAACGTGTTACCCAGGAGATTTTCATCGATTATGAGGAGC  
+HWI-EAS443:3:20:297:1119#0/1  
aa]]\_aWaQ`a`aaaa^]]`aa\_\_a^`]a^\_\_Z^O  
@HWI-EAS443:3:20:302:1902#0/1  
GAACTTCTTGCTGTATCTTGATGTCCCCACAAAACATAT  
+HWI-EAS443:3:20:302:1902#0/1  
\_S[¥bUa]abb^b]ba^[aaa]a`aa[MaYWZaaa^a]a¥  
@HWI-EAS443:3:20:336:1259#0/1  
CATATGCATCTGCATTCTGATAGAGACTTTGTTGGTCAGC  
+HWI-EAS443:3:20:336:1259#0/1  
aaaa`aa`aa^aaaa\_\_a`^`a^`Q]\_\_\_\_`¥\_¥\_ZV\_]¥  
@HWI-EAS443:3:20:341:57#0/1  
AGCAACTGGAAATCTAGTGGTACCGAGATATGCATTGCA  
+HWI-EAS443:3:20:341:57#0/1  
`ba^^\_aa]XZ\_aT]a¥S`ZW`¥a\_b`\_Ya\_\_a`ZaU[  
@HWI-EAS443:3:20:346:1053#0/1  
GAGCAATTGAGCTCAGTGCATCATTGAAAGTTTGAGA  
+HWI-EAS443:3:20:346:1053#0/1  
abaaab\_Z¥abbab\_aTa`aaaa`aaaa`a`a[aaaaa`  
@HWI-EAS443:3:20:351:1022#0/1  
CTGAGCTCAATTGCTCTTAGCTCCTCATAATCGATGAA  
+HWI-EAS443:3:20:351:1022#0/1  
aa[\_ab]\_U\_\_^`aaaba`aa\_aa`V[]V\_`VHY[aa^a  
@HWI-EAS443:3:20:372:1150#0/1  
AACAAAGTCTCTATCAGAATGCAGATGCATATGTTTTGT  
+HWI-EAS443:3:20:372:1150#0/1  
aba]YUa\_aaaa^`\_ba\_\_a``````a\_a\_\_^]\_\_`\_V  
@HWI-EAS443:3:20:376:1006#0/1  
GCTGCTTTGAATTTTACCACAAATGCGATAACACGTGCAT  
+HWI-EAS443:3:20:376:1006#0/1  
a`^aa`^aaa^`]a`¥UZ]QW^\_[XYP UW`¥VYTYOXSTN  
@HWI-EAS443:3:20:378:1035#0/1  
ATATCCTGACCCCTGCTCATTGATGGTGATAACCGTAC  
+HWI-EAS443:3:20:378:1035#0/1  
¥¥b\_`V¥``\_bbaa¥aab¥a`\_] [a\_[LUaa\_Za^\_WJYV

@HWI-EAS443:3:20:419:1215#0/1  
AAAACATATGCATCTGCATTCTGATAGAGACTTTGTTGGT  
+HWI-EAS443:3:20:419:1215#0/1  
\_Y\_V\_`WWY\_aab^aZ\_X\_aR\_]`aaY`\_Y`TUQ][OM  
@HWI-EAS443:3:20:443:1513#0/1  
GTTCTATTGGAAAATGAAAGAACTTTGGACTACCACGATT  
+HWI-EAS443:3:20:443:1513#0/1  
^\_\_bY`\_]\_\_^\_Y\_]`ZYaYVZ`^]PZYJ\_``a[^``ZYXT  
@HWI-EAS443:3:20:472:588#0/1  
CATGAGCTTGCTGTGGAGAGTGATTCACACTCTGGATTTC  
+HWI-EAS443:3:20:472:588#0/1  
abaUabbbbabbb`bbaba`YaaaaYa`baaa`ab`Y``Y`  
@HWI-EAS443:3:20:47:1198#0/1  
TGGGGACATCAAGATACAGCAAGAAGTTCAAGCCGAAAT  
+HWI-EAS443:3:20:47:1198#0/1  
aaaaaa`aa\_a`^``aaa`^aa`a\_\_X^aa\_`\_`\_\_\_W^\_  
@HWI-EAS443:3:20:575:1504#0/1  
ATGGTGATAACCGTACCATCCATCTACCATCCCTGTCCAC  
+HWI-EAS443:3:20:575:1504#0/1  
a`]`U^^\_a]\_Y]Saa^]^^``Y`^^YX]Y\$`Y\$TWW^^^S  
@HWI-EAS443:3:20:583:191#0/1  
GGGACATCAAGATACAGCAAGAAGTTCAAGCCGAAATAG  
+HWI-EAS443:3:20:583:191#0/1  
Sa`YKZTT`Y`U[UQYa^`\_aLXULPWaXSJN`ZFNR[P^  
@HWI-EAS443:3:20:596:554#0/1  
ATCTGCATTCTGATAGAGACTTTGTTGGTCAGCACTAGTA  
+HWI-EAS443:3:20:596:554#0/1  
aaa`a`aaa]aa\_a\_a\_a]^`^`a\_a\_\_X\_\_\_\_]\_]`^`\_Y\_  
@HWI-EAS443:3:20:638:1985#0/1  
GACAATGGAACGTGTTACCCAGGAGATTTTCATCGATTATG  
+HWI-EAS443:3:20:638:1985#0/1  
ababa\_`]aaa`Xa``ab`\_a^Za\_\_]`[^`\_`^`^^^]  
@HWI-EAS443:3:20:664:1660#0/1  
ATTCTGTGTGCTCTTCAGGTCGGCTGCATATCCTGACCCC  
+HWI-EAS443:3:20:664:1660#0/1  
`XOUTRINFVUP`[OW[]NVZQPYNPL\_R]\_\_\_[YRFVFS  
@HWI-EAS443:3:20:665:1303#0/1  
GGCTGCTTTGAATTTTACCACAAATGCGATAACACGTGCA  
+HWI-EAS443:3:20:665:1303#0/1  
aa^`[PXZ¥[\_\_a¥WYWZ¥]Y¥^aY¥T¥VIP]¥¥YTET[O  
@HWI-EAS443:3:20:704:1352#0/1  
GAATTTCTTTTTTAACTAGCCATATTAATTTTTGTAGA  
+HWI-EAS443:3:20:704:1352#0/1  
]¥a¥\_aaa^`aa\_a\_aaaa\_aa`aab¥`aaa\_aab\_WaaZ  
@HWI-EAS443:3:20:709:1373#0/1  
GCTGGCTGGATCCTGGGAAATCCAGAGTGTGAATCACTCT  
+HWI-EAS443:3:20:709:1373#0/1  
abXaaY]^VGYT¥¥XJ[U`¥VKX[aSaTZFKUZ¥P[YVQS  
@HWI-EAS443:3:20:714:1357#0/1  
ATCGATGAAATCTCCTGGGTAACACGTTCCATTGTCTGAA

+HWI-EAS443:3:20:714:1357#0/1  
[]`^a¥TQ`V`]^a\_^`^^[a]`[`\_]\_\_¥a¥\_\_X\_`\_Z^  
@HWI-EAS443:3:20:735:100#0/1  
GTGCTCTTCAGGTCGGCTGCATATCCTGACCCCTGCTCAT  
+HWI-EAS443:3:20:735:100#0/1  
\_N\_a\_¥N¥[a\_W]Y[]¥UVZ`VLNSSYSSQNRJRSSUW  
@HWI-EAS443:3:20:776:741#0/1  
AACTGATTGCCCCAGGGAGACTACCAGTACCAATGAACT  
+HWI-EAS443:3:20:776:741#0/1  
`]XI[SX¥aP`PPNYSWa]a\_`XU¥P\_TX]]ZZVWaZ][U  
@HWI-EAS443:3:20:781:965#0/1  
CCGGCTTGAACCTTCTTGCTGTATCTTGATGTCACCAAAA  
+HWI-EAS443:3:20:781:965#0/1  
a`a]`\_`[\_¥]``WTZ]][\_X¥]WXMVURZ]TYRWL[^  
@HWI-EAS443:3:20:790:1875#0/1  
AGCATGAGGACATGCTGCCGTTACACCTTTGTTGAGTCA  
+HWI-EAS443:3:20:790:1875#0/1  
a^aa]aa\_`\_`\_\_`^^`^^Z^^¥]YX^Z^UZ^Z¥WWUW]  
@HWI-EAS443:3:20:80:1644#0/1  
CATGAGCTTGCTGTGGAGAGTGATTCACACTCTGGATTTC  
+HWI-EAS443:3:20:80:1644#0/1  
aa\_]`Z`ba\_[U¥NVX¥Y`a^`^]\_a^^`\_`^SZ[S  
@HWI-EAS443:3:20:829:1012#0/1  
GTCAATGGCATTCTGTGTGCTCTTCAGGTCGGCTGCATAT  
+HWI-EAS443:3:20:829:1012#0/1  
a\_\_aaW]^`\_\_V`¥W\_U[Z¥Y\_`¥`W¥V^WTWZ¥V¥¥`V  
@HWI-EAS443:3:20:850:1997#0/1  
CAGGGATGGTAGATGGATGGTACGGTTATCACCATCAAAA  
+HWI-EAS443:3:20:850:1997#0/1  
a\_bba\_ab`Zbbba`abab`Xb\_aa\_\_a^^\_U^a]X`aaa  
@HWI-EAS443:3:20:885:85#0/1  
GATGCATATGTTTTTGTGGGACATCAAGATACAGCAAGA  
+HWI-EAS443:3:20:885:85#0/1  
aa]RFJL[¥^)`YZ\_[Qa^^aYYW¥TZX^]`^YT¥YTWZ]]  
@HWI-EAS443:3:20:895:648#0/1  
AGAAGACAAGCATAACGGGAACTATGCAAATAAGAGGG  
+HWI-EAS443:3:20:895:648#0/1  
aaYaa\_aaa`\_`aaa\_a\_\_\_`a\_`\_\_\_\_\_]^U^\_^][\_S]  
@HWI-EAS443:3:20:897:1109#0/1  
GGGGACATCAAGATACAGCAAGAAGTTCAAGCCGAAATA  
+HWI-EAS443:3:20:897:1109#0/1  
\_bbaaa]babbaaba\_bbba]a¥M\_]a`b^\_\_`^`^`[aaa\_  
@HWI-EAS443:3:20:908:1363#0/1  
AGCCAGTTAAAAACAATGCCAAGGAAATTGGAAACGGCT  
+HWI-EAS443:3:20:908:1363#0/1  
aNabaaQ``]ab^`ba`\_a^\_a¥^^a^^\_]¥Z\_^[XZ\_]`  
@HWI-EAS443:3:20:908:1963#0/1  
ACCTTTTCATATAAGTTCTTCACATTTGAATCGTGGTAGT  
+HWI-EAS443:3:20:908:1963#0/1  
a^\_]`a`Y`\_\_¥¥¥]VY^\_\_`W\_\_\_V[¥\_]\_S`XWWSY

@HWI-EAS443:3:20:909:46#0/1  
CTAGATTTCCAGTTGCTTGAATGTTATTTTGTCTCCCGG  
+HWI-EAS443:3:20:909:46#0/1  
abbbababaabbaba`baaa`aab`a`aaaa`^^^`\_] [a\_  
@HWI-EAS443:3:20:930:1191#0/1  
TCCCGTTATGCTTGTCTTCTAGAAGTTAACAGAGTGTGT  
+HWI-EAS443:3:20:930:1191#0/1  
aaaaa\_aa\_]\_a`Y[^`a]`a]^^[W#a]`Xa\_^^X[PSR  
@HWI-EAS443:3:20:931:1020#0/1  
TCAGAATGCAGATGCATATGTTTTTGTGGGGACATCAAGA  
+HWI-EAS443:3:20:931:1020#0/1  
a\_baa#`#a\_RTY\_S\_`#^`#`Xa\_X]W``\_] [^#\_X\_]`  
@HWI-EAS443:3:20:931:1113#0/1  
CATATCCTGACCCCTGCTCATTGATGGTGATAACCGTA  
+HWI-EAS443:3:20:931:1113#0/1  
abb`bbaabaabbaaa\_aa#] [ `aaa\_a[Taa\_aa\_\_aT\_  
@HWI-EAS443:3:20:947:780#0/1  
GCAAAATTAACAGAGAAGAAATAGATGGGGTAAAGCTGG  
+HWI-EAS443:3:20:947:780#0/1  
a\_\_Z[V`a^abaaa\_a#^`^`a`]a`a]^a\_] [¥XaPZ¥#  
@HWI-EAS443:3:20:978:1527#0/1  
GGGACATCAAGATACAGCAAGAAGTTCAAGCCGGAAATAG  
+HWI-EAS443:3:20:978:1527#0/1  
a#U[WQX[[¥ZX#a]#]\_\_Z\_#PZYZZ`MYFQ]]\_^[XYU  
@HWI-EAS443:3:21:1016:1512#0/1  
GTGTTTATAGCACCTTGGGTGTCTGACAAGTTGTATTGC  
+HWI-EAS443:3:21:1016:1512#0/1  
a#aaa`\_`a\_aa`a\_a`XZ\_V#[^`^`\_#UY]`Y\_V]]Z  
@HWI-EAS443:3:21:1018:1349#0/1  
CAGAGTGTGAATCACTCTCCACAGCAAGCTCATGGTCCTA  
+HWI-EAS443:3:21:1018:1349#0/1  
aabaa\_aaab]a\_b`aaaa`a[aaa\_\_Z\_\_X]^]]^]\_`^  
@HWI-EAS443:3:21:1052:543#0/1  
AGGAGATTTTCATCGATTATGAGGAGCTAAGAGAGCAATTG  
+HWI-EAS443:3:21:1052:543#0/1  
]`a\_#X`#`\_`a`\_`\_b`\_a\_X\_a^`\_#aa[a\_a^\_\_\_\_\_`X#  
@HWI-EAS443:3:21:1081:637#0/1  
GGGACATCAAGATACAGCAAGAAGTTCAAGCCGGAAATAG  
+HWI-EAS443:3:21:1081:637#0/1  
`Uaaa`bb]XQW[a`abaabaa[a\_`aa\_a`\_`aZY\_Z\_]`  
@HWI-EAS443:3:21:1136:404#0/1  
GTGGGGACATCAAGATACAGCAAGAAGTTCAAGCCGGAAA  
+HWI-EAS443:3:21:1136:404#0/1  
a\_aa]a`\_a`\_`\_a`\_`\_`\_aa`\_`\_`Z]]\_] ^XWa]]^^  
@HWI-EAS443:3:21:1159:767#0/1  
CTTCCTCTGAGTATTTTGGGTAGTCATAAGTCCCATTTTT  
+HWI-EAS443:3:21:1159:767#0/1  
a`aa\_VZaaY[F[]V`WR`\_QZYWWTZ#RQ#^VMY`]\_\_#  
@HWI-EAS443:3:21:1182:1300#0/1  
CACTTTGGGTCTTATTGCTATTTCCGGCTTGAACCTCTTG

+HWI-EAS443:3:21:1182:1300#0/1  
aa`]]`^aSabaaYZ`a`aa\_\_[]\_[\_\_Z]`Z^^]\_\_\_\_  
@HWI-EAS443:3:21:1201:955#0/1  
AATTTTGCTTCCTCTGAGTATTTGGGTAGTCATAAGTCC  
+HWI-EAS443:3:21:1201:955#0/1  
aYa`a`YaaWa^`N\_aa`^\_aa\_a\_`a[`[WS[WX\_aLRP  
@HWI-EAS443:3:21:1224:251#0/1  
CTCATTGATGGTGATAACCGTACCATCCATCTACCATC  
+HWI-EAS443:3:21:1224:251#0/1  
\_a[^\_\_b[b[¥^¥\_babaaa]a`a¥Xaa\_V`[JT]FJ]aB  
@HWI-EAS443:3:21:1235:203#0/1  
GCTGGCTGGATCCTGGGAAATCCAGAGTGTGAATCACTCT  
+HWI-EAS443:3:21:1235:203#0/1  
a`a\_]\_¥aaaW¥¥Z¥\_a^^ZVSZ^¥UWVVX¥¥XVS¥UWQW  
@HWI-EAS443:3:21:1272:657#0/1  
TGGAAAGTGTCAAAAATGGGACTTATGACTACCCAAAATA  
+HWI-EAS443:3:21:1272:657#0/1  
abaaba`^b\_\_`aaa`ab`a\_\_a``aaa^aa^Y`a\_a\_`  
@HWI-EAS443:3:21:1294:340#0/1  
CATGAGCTTGCTGTGGAGAGTGATTCACACTCTGGATTTC  
+HWI-EAS443:3:21:1294:340#0/1  
abb]bbbbbb`bbbaaabbaZbaba\_aa^a`abaaaaabV  
@HWI-EAS443:3:21:1303:186#0/1  
GTAATCTCGTCAATGGCATTCTGTGTGCTCTTCAGGTCCG  
+HWI-EAS443:3:21:1303:186#0/1  
^P]aa\_aaa¥X`\_\_\_\_ZaaV^`\_[^[]Q[R^\_ZZ¥VRUSY  
@HWI-EAS443:3:21:1306:1069#0/1  
ATCCTGGGAAATCCAGAGTGTGAATCACTCTCCACAGCAA  
+HWI-EAS443:3:21:1306:1069#0/1  
\_`baZT¥NN¥a]^`T^]V\_TaaS\_NW`¥^\_QZX¥^^W^Z  
@HWI-EAS443:3:21:1397:891#0/1  
ATGAAATCTCCTGGGTAACACGTTCCATTGTCTGAACTAG  
+HWI-EAS443:3:21:1397:891#0/1  
abaa\_abaaa¥^aaXW`\_a\_a`¥\_aX\_\_\_\_`]a\_\_\_\_P¥¥]  
@HWI-EAS443:3:21:1404:1361#0/1  
GGAGCTAAGAGAGCAATTGAGCTCAGTGTGCATCATTGAA  
+HWI-EAS443:3:21:1404:1361#0/1  
`a]\_X[[\_YJ]RZW[]Y\_Z]\_]\_^X]S\_ZX\_]WU]\_QKZU  
@HWI-EAS443:3:21:1414:1258#0/1  
GCTGGCTGGATCCTGGGAAATCCAGAGTGTGAATCACTCT  
+HWI-EAS443:3:21:1414:1258#0/1  
aaQX`a`a]LLRXPX]^JY^R^MV\_SZQNOZVYQVU[TVQ  
@HWI-EAS443:3:21:1438:1740#0/1  
TGCTGGCTGGATCCTGGGAAATCCAGAGTGTGAATCACTC  
+HWI-EAS443:3:21:1438:1740#0/1  
Zb`^bYRYbaaZOSQXaa[aa¥XZa]JaS`¥`\_S``[¥BB  
@HWI-EAS443:3:21:1485:989#0/1  
GGGATGGTAGATGGATGGTACGGTTATCACCATCAAAAATG  
+HWI-EAS443:3:21:1485:989#0/1  
a```\_a`Yaa````\_``]U`^aZV\_\_\_\_¥¥VQ[^W^\_^^Z[

@HWI-EAS443:3:21:1495:247#0/1  
GCTGGATCCTGGGAAATCCAGAGTGTGAATCACTCTCCAC  
+HWI-EAS443:3:21:1495:247#0/1  
a\_^aa\_a\_\_^¥¥]^\_\_\_\_^X\_\_[\_W^W[Z¥[Q^V[WVRGTW  
@HWI-EAS443:3:21:1518:1593#0/1  
CTTCCTCTGAGTATTTTGGGTAGTCATAAGTCCCATTTTT  
+HWI-EAS443:3:21:1518:1593#0/1  
abbaba`bbbb\_bb`bbabb^ba\_^aaa\_aU`\_^abaaaa  
@HWI-EAS443:3:21:1555:931#0/1  
GCTCCTCATAATCGATGAAATCTCCTGGGTAACACGTTCC  
+HWI-EAS443:3:21:1555:931#0/1  
``]¥]`¥]\_T^¥Ta^[]XZ\_\_WYWXQT[G^YNZU^VXQQ  
@HWI-EAS443:3:21:159:978#0/1  
AGTCATGATTGGGCCATGAACCTTGTCTTGGGGAATATCTC  
+HWI-EAS443:3:21:159:978#0/1  
]a\_aa`a`\_`S^aa\_a^`¥NR`\_aU[```aW]R^]¥a\_\_[  
@HWI-EAS443:3:21:1603:173#0/1  
GGACAGGGATGGTAGATGGATGGTACGGTTATCACCATCA  
+HWI-EAS443:3:21:1603:173#0/1  
a¥¥SY¥`^W\_aSWRYUU¥WPLWTVWTUJWWRWPRVSSVWW  
@HWI-EAS443:3:21:1715:1401#0/1  
TATGAATTTCTTTTTTAACTAGCCATATTAATTTTTGT  
+HWI-EAS443:3:21:1715:1401#0/1  
a^\_ZWYa^a\_aa`X¥a\_]\_^Y¥X¥W^\_\_\_\_\_`\_\_`^]XY  
@HWI-EAS443:3:21:1790:1881#0/1  
GCTGTATCTTGATGTCCCCACAAAACATATGCATCTGCA  
+HWI-EAS443:3:21:1790:1881#0/1  
aa`\_[YZ^]Wa\_^aZY\_Z^[^W\_¥^[U]^[[a]^]XWZPS  
@HWI-EAS443:3:21:21:1270#0/1  
TCTGAGTATTTTGGGTAGTCATAAGTCCCATTTTTTGACAC  
+HWI-EAS443:3:21:21:1270#0/1  
aa]\_]\_Yaa`a``\_[¥\_aU^^\_a`\_[¥^^^Z`^a¥X[[^^  
@HWI-EAS443:3:21:229:1337#0/1  
GATGGATGGTGAATGCCCCATAGCACGAGGACTTCTTTCC  
+HWI-EAS443:3:21:229:1337#0/1  
aaa^`\_a\_WDX^``\_¥X\_[WLY^QYYWLSOV\_UNVTVJW[  
@HWI-EAS443:3:21:238:1217#0/1  
CTAGTGCTGACCAACAAAGTCTCTATCAGAATGCAGATGC  
+HWI-EAS443:3:21:238:1217#0/1  
a¥XRJY`Ra`aa¥¥S`Y]\_W`PaYNX¥`\_]YYY¥^\_]Z^\_  
@HWI-EAS443:3:21:248:488#0/1  
GATTGCCCCAGGGAGACTACCAATGAACCTGGCG  
+HWI-EAS443:3:21:248:488#0/1  
\_`a``baabaa^[a`\_¥b`a`aaa[¥a\_]T`aaa[¥Z\_¥`  
@HWI-EAS443:3:21:258:247#0/1  
GCTGCTTTGAATTTTACCACAAATGCGATAACACGTGCAT  
+HWI-EAS443:3:21:258:247#0/1  
\_`aa``aa`a^^]\_a]\_]a`]^`aa\_a]^aa^a\_aXa[`[  
@HWI-EAS443:3:21:267:1842#0/1  
GGGACATTCCTCAATCCTGTGGCCAGTCTCAATTTTGTGC

+HWI-EAS443:3:21:267:1842#0/1  
S\_^bbb\_abbbaabbbaa`bab]M]^\_aaaaaS[\_  
@HWI-EAS443:3:21:269:1771#0/1  
GTTCTATTGGAAAATGAAAGAACTTTGGACTACCACGATT  
+HWI-EAS443:3:21:269:1771#0/1  
a¥\_aaaaa\_aa`a`a`\_]`\_^¥¥]aa\_a`\_^\_a`\_]  
@HWI-EAS443:3:21:28:1150#0/1  
GGGGACATCAAGATACAGCAAGAAGTTCAAGCCGAAATA  
+HWI-EAS443:3:21:28:1150#0/1  
aaaaa`aaaaa`\_`aa\_abaa`a]`b`a¥aa`\_\_`  
@HWI-EAS443:3:21:320:975#0/1  
GCTTCCTCTGAGTATTTGGGTAGTCATAAGTCCCATTTT  
+HWI-EAS443:3:21:320:975#0/1  
aba^a`aaaaa]aaaaa^Xaa^Z``\_\_X```a`\_a  
@HWI-EAS443:3:21:377:1939#0/1  
TAAGAGAGCAATTGAGCTCAGTGCATCATTGAAAGGTT  
+HWI-EAS443:3:21:377:1939#0/1  
aXaaaaXabXa\_\_¥`aaaa\_^a^aa`]a\_\_`Waa`\_ZKZ  
@HWI-EAS443:3:21:380:376#0/1  
ATCTTGATGTCCCCACAAAACATATGCATCTGCATTCTG  
+HWI-EAS443:3:21:380:376#0/1  
]aY\_U\_aa¥PaS]\_a`aXLG`a\_\_[^¥]W[Z`UN]]Y[  
@HWI-EAS443:3:21:387:495#0/1  
TGCCGGTTTCATTGAAGGGGGTGGACAGGGATGGTAGAT  
+HWI-EAS443:3:21:387:495#0/1  
Tbba^b`ab\_a\_baaa]`]`¥\_P\_a]`aaa^`X`Sa`\_Q  
@HWI-EAS443:3:21:393:1666#0/1  
GATGGATGGTACGGTTATCACCATCAAATGAGCAGGGGT  
+HWI-EAS443:3:21:393:1666#0/1  
^¥ZQUX`ab^bZ0]TYXYVa¥^RY]\_a]^Za\_aP][^TPG  
@HWI-EAS443:3:21:394:837#0/1  
GGGGACATCAAGATACAGCAAGAAGTTCAAGCCGAAATA  
+HWI-EAS443:3:21:394:837#0/1  
aaaZab`a`baa^bbbaaaba`aaV\_abXa`\_aa`[a`\_  
@HWI-EAS443:3:21:455:1038#0/1  
GCTGGTGTATATAGCACCTTGGGTGTCTGACAAGTTGTA  
+HWI-EAS443:3:21:455:1038#0/1  
abbab^abbbbabV`b``aba[RVNa`a\_\_aZ\_^\_SZa  
@HWI-EAS443:3:21:463:1096#0/1  
ATTAATGATAAAGGGAAAGAAGTCCTCGTCTATGGGGCA  
+HWI-EAS443:3:21:463:1096#0/1  
a`a`baaaabbb`aa^baabb¥]a`]`a`\_a`Y^YaW\_a  
@HWI-EAS443:3:21:463:293#0/1  
GTTACCCAGGAGATTTTCATCGATTATGAGGAGCTAAGAGA  
+HWI-EAS443:3:21:463:293#0/1  
aab`aXabab[WNX`XVa`\_a\_a]\_a¥`X`\_]\_\_aZ^Y^  
@HWI-EAS443:3:21:495:606#0/1  
CTGGCTGGATCCTGGGAAATCCAGAGTGTGAATCACTCTC  
+HWI-EAS443:3:21:495:606#0/1  
abba`aaaaaa`\_aa\_aaaa`a`a¥\_\_aa\_[`a\_]¥^\_



@HWI-EAS443:3:21:50:1166#0/1  
CCCCCTTCAATGAAACCGCAATGGCCCCAAATAGGCCT  
+HWI-EAS443:3:21:50:1166#0/1  
aaaaaaaaabaaaa`a`a`aaa`\_`\_`Z`\_`\_`Y`\_`\_`^`  
@HWI-EAS443:3:21:526:1414#0/1  
AAAACATATGCATCTGCATTCTGATAGAGACTTTGTTGGT  
+HWI-EAS443:3:21:526:1414#0/1  
a]^H`^WS^T`\_]`\_RL`^`\_]`^Y`^YPTVY[S[Z\_NNX  
@HWI-EAS443:3:21:572:222#0/1  
CAGGGATGGTAGATGGATGGTACGGTTATCACCATCAAAA  
+HWI-EAS443:3:21:572:222#0/1  
a`ba^`\_`ba[aaa\_aa`\_a^Ua^`\_`Y`\_]X`\_N[¥V¥¥]`\_`  
@HWI-EAS443:3:21:577:627#0/1  
AGCAAATCCTACATTAATGATAAAGGAAAGAAGTCCTCG  
+HWI-EAS443:3:21:577:627#0/1  
ababb`abaaaa\_aa`aa\_aa`[a\_aaa`a\_a`^`\_]`\_`  
@HWI-EAS443:3:21:58:352#0/1  
CAAAGTCTATCAGAATGCAGATGCATATGTTTTTGTGG  
+HWI-EAS443:3:21:58:352#0/1  
aa¥`aTbbb^aababb]^ab^¥aab^^^\_ab\_aaaaa^U¥  
@HWI-EAS443:3:21:622:661#0/1  
AGGAAATTCATACCCAAAGCTCAGCAAATCCTACATTAAT  
+HWI-EAS443:3:21:622:661#0/1  
abaaaababaaa]^aaaaa`\_`aa^aX`^`\_`\_`aa^`\_`¥a  
@HWI-EAS443:3:21:624:488#0/1  
GCTCCTCATAATCGATGAAATCTCCTGGGTAACACGTTCC  
+HWI-EAS443:3:21:624:488#0/1  
aaabb`bb]aaaTbYWYY^L[a`aa\_a`\_G]^`^¥VS\_]¥^`  
@HWI-EAS443:3:21:62:1239#0/1  
GGAGATTTTCATCGATTATGAGGAGCTAAGAGAGCAATTGA  
+HWI-EAS443:3:21:62:1239#0/1  
^^aa]^aaaa\_a`\_]`\_]X`]Za\_U¥TZ¥]U]Z^^¥^`]VPV  
@HWI-EAS443:3:21:644:1070#0/1  
ATGGCATTCTGTGTGCTTTCAGGTCGGCTGCATATCCTG  
+HWI-EAS443:3:21:644:1070#0/1  
[¥]^]aaab¥\_V][]^`\_Y`\_`^]VUaZ`\_`\_`^`[`[^Z^YQ  
@HWI-EAS443:3:21:664:385#0/1  
GAAACTGATTGCCCCAGGGAGACTACCAGTACCAATGAA  
+HWI-EAS443:3:21:664:385#0/1  
a\_aa`aaa`\_`aaaa`\_`aaa^^`a^a`\_`\_`a¥`\_`Z`\_`\_`a`\_`\_`  
@HWI-EAS443:3:21:706:1731#0/1  
AGCCCCATTGCATTTGGGTAATGTAACATTGCTGGCTGG  
+HWI-EAS443:3:21:706:1731#0/1  
`¥¥`\_`\_`a`\_`bT`\_`\_VZ`aVa`]UYWa`\_`^¥[YV`\_]X^[]V  
@HWI-EAS443:3:21:742:1322#0/1  
CAGAACTGATTGCCCCAGGGAGACTACCAGTACCAATG  
+HWI-EAS443:3:21:742:1322#0/1  
ababa`Z`a]Zaaa`\_]`\_`^`[^`a`\_XS`\_`\_`S`\_`¥S¥`\_`\_`Z  
@HWI-EAS443:3:21:747:531#0/1  
GGGGCATTACCATCCATCTACTAGTGCTGACCAACAAAG

+HWI-EAS443:3:21:747:531#0/1  
ababbbbbbbaabaaabaabbabab`baaab`aaaab` `a  
@HWI-EAS443:3:21:761:523#0/1  
GCTTTTTGCTCCAGCATGAGGACATGCTGCCGTTACACCT  
+HWI-EAS443:3:21:761:523#0/1  
a\_P`\_][a`a\_U¥^\_¥N¥ZZHY[UZ^XS[VVBVVVVVVVV  
@HWI-EAS443:3:21:765:648#0/1  
GCCATGAACCTGTCTTGGGAATATCTCAAACCTTTCAAA  
+HWI-EAS443:3:21:765:648#0/1  
Z^aXYUKSZ[¥aVbbba]H\_YJ`\_a]]`¥a^WGX^`FJQY  
@HWI-EAS443:3:21:786:1605#0/1  
ACAAGTTCATGGCCAATCATGACTCGAACAAAGGTGTAA  
+HWI-EAS443:3:21:786:1605#0/1  
a\_\_a\_Va`a[[]\_\_ZZ^^]]^\_YX]¥]XX¥YZU^RXX]B  
@HWI-EAS443:3:21:793:765#0/1  
TTTCTTCTCTGTTAATTTTGCTTCCTCTGAGTATTTTGG  
+HWI-EAS443:3:21:793:765#0/1  
abaaaaaaaaab\_ab`aaaaab\_aa\_aa`aaaa[ `a`^`a`  
@HWI-EAS443:3:21:813:1171#0/1  
CAGCCGACCTGAAGAGCACACAGAATGCCATTGACGAGAT  
+HWI-EAS443:3:21:813:1171#0/1  
^ZZ`TV¥X]\_b][\_N]RY[]T\_a\_W\_\_a]\_Z```U`X\_\_[  
@HWI-EAS443:3:21:820:1116#0/1  
CTGGTGTATCTGAAATGATAATACCAGATCCAGCATTTCT  
+HWI-EAS443:3:21:820:1116#0/1  
aaaa]aXa` `aa]¥aa`\_aa\_`\_\_^a\_^]]\_a\_\_`\_] ^Z\_  
@HWI-EAS443:3:21:83:1408#0/1  
TGAATTCCTTTTTTAACTAGCCATATTAATTTTTGTAG  
+HWI-EAS443:3:21:83:1408#0/1  
`¥¥aab`aabaaaa`a`^\_\_ab\_`aaaVa\_a`a`a`\_`^a  
@HWI-EAS443:3:21:858:1059#0/1  
CACGTGTATCGCATTGTGGTAAAATTCAAAGCAGCCGT  
+HWI-EAS443:3:21:858:1059#0/1  
abb\_\_a`aa]`a\_\_`aaa^aaWbaa`b^P^` `a]`]^]\_W  
@HWI-EAS443:3:21:860:1322#0/1  
GAGAGCAATTGAGCTCAGTGTCATCATTTGAAAGGTTTGA  
+HWI-EAS443:3:21:860:1322#0/1  
a\_OS¥aa\_aaY]^`aa`a^]]]\_`\_]\_XY\_\_P[]0^Va\_  
@HWI-EAS443:3:21:881:166#0/1  
GCCGTTACACCTTTGTTGAGTCATGATTGGGCCATGAAC  
+HWI-EAS443:3:21:881:166#0/1  
a^^a` [MUJ0¥\_]WXTL¥BBBBBBBBBBBBBBBBBBBB  
@HWI-EAS443:3:21:886:2007#0/1  
GCTGGATCCTGGGAAATCCAGAGTGTGAATCACTCTCCAC  
+HWI-EAS443:3:21:886:2007#0/1  
¥`a`ab\_`baaaaaa`a]]`aa\_a`^aaaZa^\_^` [[a¥  
@HWI-EAS443:3:21:907:1498#0/1  
GCTTCCTCTGAGTATTTGGGTAGTCATAAGTCCCATTTT  
+HWI-EAS443:3:21:907:1498#0/1  
\_\_]Z`S\_\_^aa\_[¥Y^\_`a^aW`¥OV[¥[`]WXYZZZ^`

@HWI-EAS443:3:21:908:102#0/1  
GCTGGCTGGATCCTGGGAAATCCAGAGTGTGAATCACTCT  
+HWI-EAS443:3:21:908:102#0/1  
aaaaa^aaa¥¥[¥^¥a^PZ[\_¥^[\_V\_S[X`¥¥ZV[N[WX  
@HWI-EAS443:3:21:939:404#0/1  
CCATCATCAACTTTTTTATTTAAATTCTCTATTCTTTTTT  
+HWI-EAS443:3:21:939:404#0/1  
^^`bbbbba`bbbabbabbabaaaab^bbbbbb`abbaab  
@HWI-EAS443:3:21:940:290#0/1  
GGGACATCAAGATACAGCAAGAAGTTCAAGCCGGAAATA  
+HWI-EAS443:3:21:940:290#0/1  
W\_bb]b\_bbbbbbaba`\_^abaaSaab`aabT¥[Z``aaa  
@HWI-EAS443:3:21:987:121#0/1  
TGAGCTCAATTGCTCTTTAGCTCCTCATAATCGATGAAA  
+HWI-EAS443:3:21:987:121#0/1  
aaaa`babaaaa`b]a^aa`a`a`]a^```^`^`\_\_\_\_```^  
@HWI-EAS443:3:21:987:1254#0/1  
ATCCAGAACTGATTGCCCCAGGGAGACTACCAGTACCA  
+HWI-EAS443:3:21:987:1254#0/1  
aaaaa\_a^W`\_aa`^a`\_]`\_`\_^]\_¥`^W^^\_W^WW^  
@HWI-EAS443:3:22:1023:1044#0/1  
CATCTTTTCAATAACAGAATTTACTTTGTTAGTAATCTCG  
+HWI-EAS443:3:22:1023:1044#0/1  
aabaabbb^¥bbaaaaabaaaaa`b`ba\_aaa\_aaaaa\_a  
@HWI-EAS443:3:22:1029:490#0/1  
CCAGTACCAATGAACTGGCGACAGTTGAATAGATCGCCAA  
+HWI-EAS443:3:22:1029:490#0/1  
a`\_a^^Za]abbbbaa]a^a`\_`aYaa`\_`a^YZSZY`a^  
@HWI-EAS443:3:22:1051:775#0/1  
CAGAACTGATTGCCCCAGGGAGACTACCAGTACCAATG  
+HWI-EAS443:3:22:1051:775#0/1  
ababaabbbab`ba\_\_aa`bab``a]ba[Saa[\_Ua\_aa`  
@HWI-EAS443:3:22:1063:1081#0/1  
AAAAACAATGCCAAGGAAATTGGAAACGGCTGCTTTGAA  
+HWI-EAS443:3:22:1063:1081#0/1  
a`a`aa`aaaa\_\_`a\_\_`a`\_\_\_\_\_`^`\_]`^[FSZ[MPW  
@HWI-EAS443:3:22:1080:1101#0/1  
GTTATTTTGTCTCCCGCTCTACTAGTGTCCAGTAATAGT  
+HWI-EAS443:3:22:1080:1101#0/1  
a\_aNa\_]`TN[[]\_^] []V¥¥]TXOUQVZW]XXRWXXXYX  
@HWI-EAS443:3:22:1087:980#0/1  
CTGGTGTATCTGAAATGATAATACCAGATCCAGCATTCT  
+HWI-EAS443:3:22:1087:980#0/1  
aU]HM`b^Z]a¥]^[\_]a^`^a^`^]]`ab¥YaY[a[`  
@HWI-EAS443:3:22:1095:622#0/1  
AGTCTCAATTTTGTGCTTTTTACATATTTTGGACATTTTC  
+HWI-EAS443:3:22:1095:622#0/1  
``^¥Z\_XV]^ab`^^W\_bba^aaaa`a`aaU][[`aa^W  
@HWI-EAS443:3:22:1128:1234#0/1  
CTTCACATTTGAATCGTGGTAGTCCAAAGTTCTTTCATTT

+HWI-EAS443:3:22:1128:1234#0/1  
abbbbbbbbaabbbaba[a\_\_^a`a`T\_^T^a[0Zaaa  
@HWI-EAS443:3:22:1137:1120#0/1  
AAACGGCTGCTTTGAATTTTACCACAAATGCGATAACACG  
+HWI-EAS443:3:22:1137:1120#0/1  
\_^\_aba`aa\_\_aaZ^Z`aa]Z]a\_```YYYYV\_^aU\_¥¥  
@HWI-EAS443:3:22:1140:1972#0/1  
GGACTACCACGATTCAAATGTGAAGAACTTATATGAAAAG  
+HWI-EAS443:3:22:1140:1972#0/1  
abbbbbbbbabbaabbbbb`aaaaa`abaaaaaaa`  
@HWI-EAS443:3:22:116:826#0/1  
TGAATACACAGTTCACAGCAGTAGGTAAAGAGTTCAACCA  
+HWI-EAS443:3:22:116:826#0/1  
ababa`ababb\_aaa`aaa]a^`a¥]aaaa\_a[\_```\_\_\_\_  
@HWI-EAS443:3:22:1195:66#0/1  
TTCGAATGTTATTTTGTCTCCCGCTCTACTAGTGTCCAG  
+HWI-EAS443:3:22:1195:66#0/1  
a[P`[]\_`Z\_V`\_\_\_\_`¥¥\_Z]]X^] ^XXZRRRUSXXRSV^  
@HWI-EAS443:3:22:120:1751#0/1  
CAAAATTAACAGAGAAGAAATAGATGGGGTAAAGCTGGA  
+HWI-EAS443:3:22:120:1751#0/1  
aa]\_VTO\_a`ZYX[HW[¥HQTTYTXWRNOMPWHT¥^MRS^  
@HWI-EAS443:3:22:1224:295#0/1  
ATCACTCTCCACAGCAAGCTCATGGTCCTACATTGTGGAA  
+HWI-EAS443:3:22:1224:295#0/1  
aaabba^baa`\_a`^a`b\_a¥`a]a^^\_\_X\_^`\_U\_^\_`^\_  
@HWI-EAS443:3:22:1272:1595#0/1  
GCAAAATTAACAGAGAAGAAATAGATGGGGTAAAGCTGG  
+HWI-EAS443:3:22:1272:1595#0/1  
aa`Y^`\_¥WSXQ[PFW]ZYOLJMSPJ^SELWZ`[¥\_BBBB  
@HWI-EAS443:3:22:1289:1897#0/1  
ATCTTGATGTCCCCACAAAAACATATGCATCTGCATTCTG  
+HWI-EAS443:3:22:1289:1897#0/1  
`]M[¥\_`X^`\_\_a]aa^`^a`a¥`^UHKXWTIV\_YNOT\_\_  
@HWI-EAS443:3:22:128:675#0/1  
GCCGTTACACCTTTGTTGAGTCATGATTGGGCCATGAAC  
+HWI-EAS443:3:22:128:675#0/1  
aaa`^`aba`^aaaaU\_aa\_bU`^a`^`a\_a`\_\_^\_a`^`^\_  
@HWI-EAS443:3:22:130:1796#0/1  
GCACGTGTTATCGCATTTGTGGTAAAATTCAAAGCAGCCG  
+HWI-EAS443:3:22:130:1796#0/1  
aabba^a\_abaaaaaaaXaa¥`Y\_aa¥¥aa¥¥aa\_a\_a  
@HWI-EAS443:3:22:1381:137#0/1  
GTGGGGACATCAAGATACAGCAAGAAGTTCAAGCCGAAA  
+HWI-EAS443:3:22:1381:137#0/1  
a]bZZ¥VRV¥¥\_YUV]\_Z]`¥Y^WSPREN[]UZWVZMVRY  
@HWI-EAS443:3:22:1394:1752#0/1  
AAAAACAATGCCAAGGAAATTGGAAACGGCTGCTTTGAAT  
+HWI-EAS443:3:22:1394:1752#0/1  
abba`bbaba\_aaaaa`aaaa`^`a`^`^\_]PXZ`RQTS

@HWI-EAS443:3:22:1415:435#0/1  
GCTGGATCCTGGGAAATCCAGAGTGTGAATCACTCTCCAC  
+HWI-EAS443:3:22:1415:435#0/1  
a`]]^a]]\_aa]`^`aX¥\_a`^a[`[¥]VVSZW^YYTSZR  
@HWI-EAS443:3:22:1467:685#0/1  
TGCCGTTACACCTTTGTTTCGAGTCATGATTGGGCCATGAA  
+HWI-EAS443:3:22:1467:685#0/1  
]a^^\_`Z[W\_¥0Zaa\_V^aTZa[W^\_`\_[W¥OPY[YWa\_^  
@HWI-EAS443:3:22:1483:1431#0/1  
CAGGGGTACAGATATGCAGCCGACCTGAAGAGCACACAGA  
+HWI-EAS443:3:22:1483:1431#0/1  
^`aa`\_0\_bbabab\_`]]`\_\_`aa`bb`aaa`V`]a`aa`  
@HWI-EAS443:3:22:1563:267#0/1  
GCTTCCTCTGAGTATTTGGGTAGTCATAAGTCCCATTTT  
+HWI-EAS443:3:22:1563:267#0/1  
]\_`\_`a`babb`\_[¥baab`aa]X`R`Zb¥Zb\_W][Yaaa\_  
@HWI-EAS443:3:22:1571:561#0/1  
GGGGCATTACCATCCATCTACTAGTGCTGACCAACAAAG  
+HWI-EAS443:3:22:1571:561#0/1  
`\_`a`]`aaaa^¥^]`b`a^X[^RX[a`ZZT][T]a¥]  
@HWI-EAS443:3:22:1573:1811#0/1  
AAGATACAGCAAGAAGTTCAAGCCGAAATAGCAATAAGA  
+HWI-EAS443:3:22:1573:1811#0/1  
a`bU^\_`YKba`bab\_`T[a]UT[\_`a]^Y`L[ZJ^\_`^a  
@HWI-EAS443:3:22:1646:1679#0/1  
CAAAAACATATGCATCTGCATTCTGATAGAGACTTTGTTG  
+HWI-EAS443:3:22:1646:1679#0/1  
`aaX[\_`^a`\_baaaa`bUa`b\_a`¥a¥a`a]S`a^YY[S  
@HWI-EAS443:3:22:1652:649#0/1  
CTAGATTTCCAGTTGCTTCAATGTTATTTTGTCTCCCGG  
+HWI-EAS443:3:22:1652:649#0/1  
`aZ]\_]b`X]a\_bbbV`a\_b]bab[\_`[a^`Q`]\_¥^R^aa  
@HWI-EAS443:3:22:1664:624#0/1  
ATTAATTTTTGTAGAAGCTTTTTGCTCCAGCATGAGGAC  
+HWI-EAS443:3:22:1664:624#0/1  
aba¥aabaabb^aa`a\_[a`a]a`[\_`[¥`\_HZ^^¥\_\_ZW  
@HWI-EAS443:3:22:1686:1720#0/1  
TTTGTGGGACATCAAGATACAGCAAGAAGTTCAAGCCGG  
+HWI-EAS443:3:22:1686:1720#0/1  
^]ba\_aa[^aaa]SZa`aab^a`Yaaa`\_a^\_Za\_YMU[Z  
@HWI-EAS443:3:22:170:517#0/1  
TGAATTTTACCACAAATGCGATAACACGTGCATGGAAAGT  
+HWI-EAS443:3:22:170:517#0/1  
aa`\_aaaaa`aa`a\_\_a`\_\_aa`aa`aYa`\_aaZ\_`\_`]  
@HWI-EAS443:3:22:1769:241#0/1  
GGCCATTGCCGTTTCATTGAAGGGGGTGGACAGGGATG  
+HWI-EAS443:3:22:1769:241#0/1  
a\_[[U`Z^a`bb]abaabbaQ`baababP^]ZMS`b`UQa  
@HWI-EAS443:3:22:178:863#0/1  
CAGGGATGGTAGATGGATGGTACGGTTATCACCATCAAAA

+HWI-EAS443:3:22:178:863#0/1  
a`abba`bbZbb\_`aaa\_`ba\_bab[^aa¥[a\_`\_`\_`X`\_  
@HWI-EAS443:3:22:242:234#0/1  
GCTGGATCTGGTATTATCATTTCAGATACACCAGTCCACG  
+HWI-EAS443:3:22:242:234#0/1  
abbbaabbbb`bbbbbbabbabbbbabbabbaabbb  
@HWI-EAS443:3:22:281:138#0/1  
TGAACCTCTTGCTGTATCTTGATGTCCCCACAAAAACATA  
+HWI-EAS443:3:22:281:138#0/1  
XU^aV`a`]`¥`a`\_aa]`^`^TRNP\_V[¥^^YYTU¥\_¥]Z  
@HWI-EAS443:3:22:283:668#0/1  
GACTACCAGTACCAATGAACTGGCGACAGTTGAATAGATC  
+HWI-EAS443:3:22:283:668#0/1  
aaa\_`baaa¥baaaaa`\_`^^aaaa`\_]`^^`X^`aV^  
@HWI-EAS443:3:22:290:1924#0/1  
CATCATTTGAAAGTTTGAGATATCCCCAAGACAAGTTC  
+HWI-EAS443:3:22:290:1924#0/1  
aaaaabbbbaa`\_`^aaabaaaaaaaaaaaaa`a`XRUa  
@HWI-EAS443:3:22:311:440#0/1  
ATGTTTTTGTGGGACATCAAGATACAGCAAGAAGTTCAA  
+HWI-EAS443:3:22:311:440#0/1  
^aa`a`aaaXaaaaaa\_aa\_a`\_aaaa`T`a`]aZ¥\_`¥  
@HWI-EAS443:3:22:313:1281#0/1  
CATCCATCTACTAGTGCTGACCAACAAAGTCTCTATCAGA  
+HWI-EAS443:3:22:313:1281#0/1  
^`ba]``bbbbbab]ba^^¥b]\_\_aaV^bX``bbbbabab  
@HWI-EAS443:3:22:322:1407#0/1  
GTCTGACAAGTTGTATTGCAATCGTGGACTGGTGTATCTG  
+HWI-EAS443:3:22:322:1407#0/1  
RX\_¥^ba\_^^^`^^abZbbbb\_aYaW0¥\_`^^Zb\_baa`a  
@HWI-EAS443:3:22:350:394#0/1  
CAGAACTGATTGCCCCAGGGAGACTACCAGTACCAATG  
+HWI-EAS443:3:22:350:394#0/1  
abbaabbbabaab^ababaaab^aa`aZ``aa¥\_^`\_`aa  
@HWI-EAS443:3:22:36:578#0/1  
TGCCGGTTTTATTGAAGGGGGTGGACAGGGATGGTAGAT  
+HWI-EAS443:3:22:36:578#0/1  
\_abbbb`baaab`a\_¥\_a\_\_\_\_U`\_Z\_]`\_`a```ZQ]\_Y]  
@HWI-EAS443:3:22:466:602#0/1  
GTAGGATTTGCTGAGCTTTGGGTATGAATTCCTTTTTTA  
+HWI-EAS443:3:22:466:602#0/1  
aRM[aOUZ]RS[`]\_]`[^`\_`\_`[Z¥VLO^^T¥P]¥\_\_\_\_¥Z  
@HWI-EAS443:3:22:509:266#0/1  
CGGGAACTATGCAAATAAGAGGGGTAGCCCCATTGCAT  
+HWI-EAS443:3:22:509:266#0/1  
\_aaa^`babaab`\_aaVQW]a`aXRY\_\_]GWRa\_NVG^X  
@HWI-EAS443:3:22:525:769#0/1  
AAATGAGCAGGGTCAGGATATGCAGCCGACCTGAAGAGC  
+HWI-EAS443:3:22:525:769#0/1  
aXaabaaaa^aaS`a````a\_\_aa\_¥]\_S^¥¥`^^\_]`^W

@HWI-EAS443:3:22:529:998#0/1  
TCCAGAACTGATTGCCCCAGGGAGACTACCAGTACCAA  
+HWI-EAS443:3:22:529:998#0/1  
`bb]ZaIZ^b¥]aLaaa]`aaS]V]\_\_\_^Za\_a¥aG^Za  
@HWI-EAS443:3:22:533:1797#0/1  
TAGCCCCATTGCATTTGGGTAAATGTAACATTGCTGGCTG  
+HWI-EAS443:3:22:533:1797#0/1  
abaaaa\_a`aaaaaa]aaa`^aa`aa`^``]\_\_[\_  
@HWI-EAS443:3:22:54:335#0/1  
GATTTCCAGTTGCTTCGAATGTTATTTTGTCTCCCGGCTC  
+HWI-EAS443:3:22:54:335#0/1  
aaababaaaaab\_`^S^\_aYYXX[a]¥[[Y`¥`VYSVT  
@HWI-EAS443:3:22:589:1316#0/1  
ATTGAAAATGAAAGAAGTTTGGACTACCACGATTCAAAT  
+HWI-EAS443:3:22:589:1316#0/1  
aaaa`a¥a`\_a````a`\_]``\_]\_a\_]``\_]`^\_]`\_`  
@HWI-EAS443:3:22:592:314#0/1  
GGGACATCAAGATACAGCAAGAAGTTCAAGCCGAAATAG  
+HWI-EAS443:3:22:592:314#0/1  
¥¥ZUYbZ¥\_^baZ\_¥\_a^`b`Y^aUX`\_R\_¥XYaaba`ab  
@HWI-EAS443:3:22:654:988#0/1  
CAAAGTCTCTATCAGAATGCAGATGCATATGTTTTTGTGG  
+HWI-EAS443:3:22:654:988#0/1  
aaaa\_U^aaaaabbbaa`aa`\_aa\_a`^`Xaaa`YX\_Y  
@HWI-EAS443:3:22:734:1654#0/1  
GAAATGCTGGATCTGGTATTATCATTTCAGATACACCAGT  
+HWI-EAS443:3:22:734:1654#0/1  
aabab`b]YY`]a\_]a\_baaa]aaaa`aY`Z`aa¥S\_\_X  
@HWI-EAS443:3:22:747:1888#0/1  
GCTTCCTCTGAGTATTTTGGGTAGTCATAAGTCCCATTTT  
+HWI-EAS443:3:22:747:1888#0/1  
aV`a`Va\_UUaLHL^\_\_\_U`MV]Z]WYP¥`GZX\_^VZRU  
@HWI-EAS443:3:22:751:374#0/1  
ATTGAGCTCAGTGTCATCATTGAAAGTTTGAGATATTC  
+HWI-EAS443:3:22:751:374#0/1  
aaaWab`aaaRaP]`aa`a`\_aa^a^Y\_\_a^a`^`a^\_  
@HWI-EAS443:3:22:760:1425#0/1  
CTTTACCTACTGCTGTGAAGTGTGTATTTCATCTTTTCAAT  
+HWI-EAS443:3:22:760:1425#0/1  
\_`b\_S\_b\_V^\_\_`^Wa`UY\_¥YYY[`YV]\_S^WZV^a^]  
@HWI-EAS443:3:22:769:916#0/1  
GAGCAATTGAGCTCAGTGTCATCATTGAAAGTTTGAGA  
+HWI-EAS443:3:22:769:916#0/1  
a`a`\_`aa`a^aaaaR^\_\_\_a\_\_`a\_a`^`^YZ\_\_aa`\_`  
@HWI-EAS443:3:22:778:142#0/1  
CTCCCGGCTCTACTAGTGTCCAGTAATAGTTCATTCTCCC  
+HWI-EAS443:3:22:778:142#0/1  
ab`a`]aaa`YV[ZZ`G\_]Z]X`UX]WW]Y^NNR^UUBBB  
@HWI-EAS443:3:22:789:1664#0/1  
ACTGAGCTCAATTGCTCTCTTAGCTCCTCATAATCGATGA





@HWI-EAS443:3:23:1047:1980#0/1  
TTCATCGATTATGAGGAGCTAAGAGAGCAATTGAGCTCAG  
+HWI-EAS443:3:23:1047:1980#0/1  
Yb\_\_QZbabbVPS[\_\_\_PaaZ¥[^ZZ¥`Q`b[Waa[`] \_a¥  
@HWI-EAS443:3:23:1123:658#0/1  
TTTACTTTGTTAGTAATCTCGTCAATGGCATTCTGTGTGC  
+HWI-EAS443:3:23:1123:658#0/1  
ab`a^abab\_b\_b\_\_\_a\_a`^^^\_\_\_\_X\_a``\_aX`Y`]  
@HWI-EAS443:3:23:1134:1964#0/1  
TCCTCTGAGTATTTTGGGTAGTCATAAGTCCCATTTTGA  
+HWI-EAS443:3:23:1134:1964#0/1  
aa[Z^^^\_]WTR¥WVU¥RW`¥R\_ZWVXWLHR¥XWZ]ZWRX  
@HWI-EAS443:3:23:1140:1906#0/1  
GGGGACATCAAGATACAGCAAGAAGTTCAAGCCGAAATA  
+HWI-EAS443:3:23:1140:1906#0/1  
[]aa[aa`\_bb\_\_abbbabbbbaa\_b]aaaa\_Nbaa\_T¥a]  
@HWI-EAS443:3:23:1162:1020#0/1  
GGTCAGGATATGCAGCCGACCTGAAGAGCACACAGAATGC  
+HWI-EAS443:3:23:1162:1020#0/1  
`¥TX`U`X`a]aa^a\_a`ZS\_RY]\_VUL`V`\_`^]V[UW  
@HWI-EAS443:3:23:1176:1384#0/1  
GACAATGGAACGTGTTACCCAGGAGATTTTCATCGATTATG  
+HWI-EAS443:3:23:1176:1384#0/1  
X`ba^[aa[`]ZPW[]a\_QRZa`Xa^`aaaa`\_a`\_`\_`]  
@HWI-EAS443:3:23:1182:1322#0/1  
GAAGGGGGGTGGACAGGGATGGTAGATGGATGGTACGGTT  
+HWI-EAS443:3:23:1182:1322#0/1  
aa\_baa`a`aaaZ`^TK`aaa`S[`\_]Z\_QZ¥SX`\_`¥Z  
@HWI-EAS443:3:23:124:1250#0/1  
AGATGGATGGTACGGTTATCACCATCAAAATGAGCAGGGG  
+HWI-EAS443:3:23:124:1250#0/1  
aaa\_aa\_aaaYaaa\_¥\_`a^`aX\_``[]`^`^`^]¥\_  
@HWI-EAS443:3:23:1258:1161#0/1  
GCTTCTCTGAGTATTTTGGGTAGTCATAAGTCCCATTTT  
+HWI-EAS443:3:23:1258:1161#0/1  
]¥`ba`a`aaaSZ\_Za`a`¥ZYUQ]a^VF¥Y]Z]\_`aaa  
@HWI-EAS443:3:23:1310:1374#0/1  
GAGTGATTCACACTCTGGATTTCCCAGGATCCAGCCAGCA  
+HWI-EAS443:3:23:1310:1374#0/1  
XI^Q¥Tab`^Z`¥[ZUX\_QU¥^¥a]S^HRRXa\_`]aW[Z]  
@HWI-EAS443:3:23:1334:1602#0/1  
CTTCTCTGAGTATTTTGGGTAGTCATAAGTCCCATTTT  
+HWI-EAS443:3:23:1334:1602#0/1  
`Y¥]RXZ¥\_T\_^\_XVY]`¥XS0[PV^QYOLVUXQQ¥` [VT  
@HWI-EAS443:3:23:1397:202#0/1  
GGGGGGTGGACAGGGATGGTAGATGGATGGTACGGTTATC  
+HWI-EAS443:3:23:1397:202#0/1  
ababaaX^`^a`a]^[[`]S¥\_\_V\_\_[Q` [RYWZUW¥ZTP  
@HWI-EAS443:3:23:139:1781#0/1  
CAGGATATGCAGCCGACCTGAAGAGCACACAGAATGCCAT

+HWI-EAS443:3:23:139:1781#0/1  
aa]]aaaaa` `[aa\_aaa`aaa\_a¥` [``a`X`^Z`^`\_\_  
@HWI-EAS443:3:23:1404:1086#0/1  
TGTGGGGACATCAAGATACAGCAAGAAGTTCAAGCCGGAA  
+HWI-EAS443:3:23:1404:1086#0/1  
`ba`a\_YK`]^\_[aa^`ab]a]a¥Z¥VY]YG\_\_\_¥OX^  
@HWI-EAS443:3:23:1415:517#0/1  
GGGGACATCAAGATACAGCAAGAAGTTCAAGCCGGAAATA  
+HWI-EAS443:3:23:1415:517#0/1  
a`aaabba\_aaaaaa]aaYaaaa\_aW`b\_a[Z^a\_^`^`^  
@HWI-EAS443:3:23:1429:1758#0/1  
ATCACTCTCCACAGCAAGCTCATGGTCCTACATTGTGGAA  
+HWI-EAS443:3:23:1429:1758#0/1  
ababZ\_a\_Y]baaa\_aaaaYa^`\_X]\_\_\_^`\_X\_W`S¥]  
@HWI-EAS443:3:23:143:1778#0/1  
ATGCAAATAAGAGGGGTAGCCCCATTGCATTTGGGTAAA  
+HWI-EAS443:3:23:143:1778#0/1  
`a^a¥D[`aab`a``[\_b\_`a`\_b\_]a`aa\_\_^[X\_Z`  
@HWI-EAS443:3:23:1517:628#0/1  
CTCGTCAATGGCATTCTGTGTGCTCTTCAGGTCCGGCTGCA  
+HWI-EAS443:3:23:1517:628#0/1  
a`\_`baa`a`aa\_bb`ba\_a¥ba`aba\_abaWaa\_\_a`S\_  
@HWI-EAS443:3:23:1577:1409#0/1  
GATGAAATCTCCTGGGTAACACGTTCCATTGTCTGAACTA  
+HWI-EAS443:3:23:1577:1409#0/1  
]a^b¥bbab)`a\_WT]b]^a`baabaa^`]Z¥XaaZ[\_a  
@HWI-EAS443:3:23:1655:35#0/1  
ATTGCTATTTCCGGCTTGAACCTTCTTGCTGTATCTTGATG  
+HWI-EAS443:3:23:1655:35#0/1  
a\_abW)`[^a`Z]]Yaaa\_\_LX]Y`^[RZ[^U¥IX]^ZY[  
@HWI-EAS443:3:23:1657:758#0/1  
CGATGAAATCTCCTGGGTAACACGTTCCATTGTCTGAACT  
+HWI-EAS443:3:23:1657:758#0/1  
^`^bab^`]^\_a]]ZSV`[Sbaaaa`^a¥]Y`]]aa`[a  
@HWI-EAS443:3:23:1668:422#0/1  
ACCCTTGGGTGTCTGACAAGTTGTATTGCAATCGTGGACT  
+HWI-EAS443:3:23:1668:422#0/1  
aaa`bbb]FZZ`aa[Ua`]S`b^`\_`]Q¥``Z^R\_[RR`  
@HWI-EAS443:3:23:173:1017#0/1  
GCTGGCTGGATCCTGGGAAATCCAGAGTGTGAATCACTCT  
+HWI-EAS443:3:23:173:1017#0/1  
aaababab^VZ`b\_\_\_`VXa`aa`aU\_XZ`a`\_\_a\_ZR  
@HWI-EAS443:3:23:176:1491#0/1  
CAGGGAGACTACCAGTACCAATGAACTGGCGACAGTTGAA  
+HWI-EAS443:3:23:176:1491#0/1  
aa^abaa\_bbbaa`\_Zaaaaa`[\_a`\_a`\_`\_`^`\_N^RU`  
@HWI-EAS443:3:23:198:1330#0/1  
GTGGGGACATCAAGATACAGCAAGAAGTTCAAGCCGGAAA  
+HWI-EAS443:3:23:198:1330#0/1  
]N][aWK^aVaYMXaY\_Z]V\_^][YHWJL]\_X¥\_X\_[WZ¥

@HWI-EAS443:3:23:224:817#0/1  
GGGGACATCAAGATACAGCAAGAAGTTCAAGCCGGAAATA  
+HWI-EAS443:3:23:224:817#0/1  
abab`a\_``^a^]^^aa`a\_\_^aZ\_`a\_\_\_\_]a]\_\_-\_-]  
@HWI-EAS443:3:23:226:1950#0/1  
CAGGGATGGTAGATGGATGGTACGGTTATCACCATCAAAA  
+HWI-EAS443:3:23:226:1950#0/1  
aa\_a^a`a^Q\_\_a\_\_^T`[ZWb`^XW\_]¥¥`U\_WQ\_a¥^\_  
@HWI-EAS443:3:23:237:570#0/1  
GAAGCCAGTTAAAAACAATGCCAAGGAAATTGGAAACGG  
+HWI-EAS443:3:23:237:570#0/1  
a`baab]a\_abaaaaa``]aaa`a[`a\_\_a`\_a\_`a\_\_`\_  
@HWI-EAS443:3:23:237:755#0/1  
ATTGGAACGGCTGCTTTGAATTTTACCACAAATGCGATA  
+HWI-EAS443:3:23:237:755#0/1  
`abbaa\_abaaaa\_[]]J[ZN\_a\_TN\_RXaa¥GS]]UV¥  
@HWI-EAS443:3:23:247:1617#0/1  
ATCAAAATGAGCAGGGTCAGGATATGCAGCCGACCTGAA  
+HWI-EAS443:3:23:247:1617#0/1  
a¥a¥UWSZ]¥\_aa^RV`Uaa¥XaPa]\_Yb\_``Y\_\_\_ZJWU  
@HWI-EAS443:3:23:259:1656#0/1  
AAAATGTCCAAAATATGTAAAAAGCACAAAATTGAGACTG  
+HWI-EAS443:3:23:259:1656#0/1  
V]U\_\_`S¥\_¥^UQ`\_`a^a\_a]Y]aa^^W¥]Z\_`¥\_\_`H\_  
@HWI-EAS443:3:23:309:641#0/1  
CATGATTGGCCATGAACTTGTCTTGGGGAATATCTCAAA  
+HWI-EAS443:3:23:309:641#0/1  
P¥Y```ab\_Wa\_Yabb^a`\_`Q`bbbb\_`\_\_aab\_aaba  
@HWI-EAS443:3:23:33:1604#0/1  
CGATTGCAATACAACCTGTCAGACACCCAAGGGTGCTATA  
+HWI-EAS443:3:23:33:1604#0/1  
``aaaabb]`[^aaaa`¥aaa\_aa\_aaa]a\_^S^¥^`^Q  
@HWI-EAS443:3:23:384:156#0/1  
AAGTCCTCGTGCTATGGGGCATTACCATCCATCTACTAG  
+HWI-EAS443:3:23:384:156#0/1  
`^`ababbaaa`aaaa\_¥X]aaa\_a\_U][^Z\_\_VZ\_¥[\_\_\_  
@HWI-EAS443:3:23:388:190#0/1  
GACACTTCCATGCACGTGTTATCGCATTGTGGTAAAAT  
+HWI-EAS443:3:23:388:190#0/1  
aaa¥\_aa`aaa`]`aaa\_^W[`a\_aa`a`\_`VaWH[\_\_\_^^  
@HWI-EAS443:3:23:414:813#0/1  
GAAGCTTTTTGCTCCAGCATGAGGACATGCTGCCGTTACA  
+HWI-EAS443:3:23:414:813#0/1  
aa]aaabaaaaaaaaa^^a\_`aa\_`a\_``\_\_\_\_¥\_VU\_¥\_  
@HWI-EAS443:3:23:449:1234#0/1  
ACCGTACCATCCATCTACCATCCCTGTCCACCCCTTCA  
+HWI-EAS443:3:23:449:1234#0/1  
aa`a]`aab``aa`]`]a\_a^\_^\_^]¥\_^^`¥¥^]^^W¥W^  
@HWI-EAS443:3:23:498:930#0/1  
AGCAAATCCTACATTAATGATAAAGGAAAGAAGTCCTCG

+HWI-EAS443:3:23:498:930#0/1  
aaaaaaaaaba`aaaaa\_aa`^a`^` `aab` `a`]\_\_\_\_U  
@HWI-EAS443:3:23:514:122#0/1  
GAGATATCCCCAAGACAAGTTCATGGCCCAATCATGACT  
+HWI-EAS443:3:23:514:122#0/1  
a`\_`PSSQ¥^HJ¥\_a¥Y\_\_^XNVRTF[]TUQJQQVU^YXX  
@HWI-EAS443:3:23:551:471#0/1  
TTCAGGTCGGCTGCATATCCTGACCCCTGCTCATTTTGAT  
+HWI-EAS443:3:23:551:471#0/1  
VX[b\_a¥` `UON`aaa\_XUU]YWJSLZ\_]R^X` `^[\_`\_0  
@HWI-EAS443:3:23:564:1365#0/1  
TGAACCTTTTACCTACTGCTGTGAACGTGTATTTCATCTT  
+HWI-EAS443:3:23:564:1365#0/1  
^b^abaa¥bbba\_bba^a]b^Xb`a¥aaR`\_¥aa`baaa`  
@HWI-EAS443:3:23:580:54#0/1  
CTGGTGTATCTGAAATGATAATACCAGATCCAGCATTCT  
+HWI-EAS443:3:23:580:54#0/1  
aa`]D[¥b^¥a^^^¥[a`¥]WaVaYYZ\_\_UR[ `^` [ `]M]  
@HWI-EAS443:3:23:589:72#0/1  
GGACAGGGATGGTAGATGGATGGTACGGTTATCACCATCA  
+HWI-EAS443:3:23:589:72#0/1  
abbaabbb`abbXaa]P¥aaabaGa\_a[V^`[[[\_VQSN¥  
@HWI-EAS443:3:23:594:841#0/1  
TGGGAAATCCAGAGTGTGAATCACTCTCCACAGCAAGCTC  
+HWI-EAS443:3:23:594:841#0/1  
aaabab\_bb`bbabVaabbabbbaaaaaababb[aa\_\_`a  
@HWI-EAS443:3:23:639:1982#0/1  
TGCGATAACACGTGCATGGAAAGTGTCAAAAATGGGACTT  
+HWI-EAS443:3:23:639:1982#0/1  
aababaZ`abba\_aaaa\_\_`\_a`X`]\_a`aa`\_Y\_``]a\_  
@HWI-EAS443:3:23:69:399#0/1  
CTTAGCTCCTCATAATCGATGAAATCTCCTGGGTAACACG  
+HWI-EAS443:3:23:69:399#0/1  
aa`a^`\_`a`^`^`^`\_\_a`\_`\_`^]`^\_]\_\_]Z`Y\_\_^]  
@HWI-EAS443:3:23:702:1241#0/1  
GAACGTGTTACCCAGGAGATTTTCATCGATTATGAGGAGCT  
+HWI-EAS443:3:23:702:1241#0/1  
¥Sabb^0^`^`baa\_]a\_X`a]a`aaaaa` `a`Z`^^Z^  
@HWI-EAS443:3:23:734:1164#0/1  
AAGCCAGTTAAAAACAATGCCAAGGAAATTGGAAACGGC  
+HWI-EAS443:3:23:734:1164#0/1  
a`aa¥aa]¥`aaaa\_\_a\_\_aUaW`]`^VaW\_N¥`^^`¥[  
@HWI-EAS443:3:23:758:1840#0/1  
TTTGAATTTTACCACAAATGCGATAACACGTGCATGGAAA  
+HWI-EAS443:3:23:758:1840#0/1  
a]aaa^^S]aababaa`] `a`a` `aa`aaa]aR` [ ` \_` \_` \_`  
@HWI-EAS443:3:23:760:56#0/1  
CACCATCCATCTACTAGTGCTGACCAACAAAGTCTCTATC  
+HWI-EAS443:3:23:760:56#0/1  
ab\_]\_a\_]ba]^b`a[aV^a\_bW[\_aaaaaaaYVSY` \_\_\_\_

@HWI-EAS443:3:23:836:1225#0/1  
CACGTGTTATCGCATTGTGGTAAAATTCAAAGCAGCCGT  
+HWI-EAS443:3:23:836:1225#0/1  
abaaPaZ`baba^]\_a`a\_bWTaaa^aaaa`\_\_\_\_\_X¥]^  
@HWI-EAS443:3:23:838:984#0/1  
TTTACCTACTGCTGTGAAGTGTGATTTCATCTTTTCAATA  
+HWI-EAS443:3:23:838:984#0/1  
a\_\_bRXb`XaX[\_^LZHRZ]^U`WW[aYa^XW^aWUX][Y  
@HWI-EAS443:3:23:839:1434#0/1  
ACCATCCATCTACTAGTGCTGACCAACAAAGTCTCTATCA  
+HWI-EAS443:3:23:839:1434#0/1  
aa`b\_aba``\_b^`^Z`^`\_\_\_\_\_`^aa^YW\_^`^]U\_  
@HWI-EAS443:3:23:83:912#0/1  
AGGAAACCATCATCAACTTTTTTATTTAAATTCTCTATTC  
+HWI-EAS443:3:23:83:912#0/1  
a\_aS\_\_^`][\_`aaa\_]`aa[`aUaa\_NZS`\_`a\_a`a`\_  
@HWI-EAS443:3:23:851:154#0/1  
CCAGGATCCAGCCAGCAATGTTACATTTACCCAAATGCAA  
+HWI-EAS443:3:23:851:154#0/1  
abbbba`abba\_\_aa]a`a]\_a`^a`a`\_[\_]`a^`W]\_  
@HWI-EAS443:3:23:851:396#0/1  
TCCTTGGCATTGTTTTTAACTGGCTTCTTACCTTTTCAT  
+HWI-EAS443:3:23:851:396#0/1  
abbaaab^ba`V`a^aaa```aa`\_a\_aa\_X\_\_`a`]a¥  
@HWI-EAS443:3:23:863:1531#0/1  
ATGGCTAGTTAAAAAAGGAAATTCATACCCAAAGCTCAGC  
+HWI-EAS443:3:23:863:1531#0/1  
`a`\_]\_]TNZN\_aaa`U¥W`]G[UUP`X[^`\_`OVTVYSS  
@HWI-EAS443:3:23:864:1333#0/1  
CTTTTCAATAACAGAATTTACTTTGTTAGTAATCTCGTCA  
+HWI-EAS443:3:23:864:1333#0/1  
abaaaaab\_]bba`\_`aaaabba`bbb`baaaaba\_aa  
@HWI-EAS443:3:23:900:422#0/1  
CATCAAGATACAGCAAGAAGTTCAAGCCGAAATAGCAAT  
+HWI-EAS443:3:23:900:422#0/1  
aa\_¥]^`ab\_\_Xb\_¥bb^aaa\_aa^^¥¥b^^`]a¥Y\_\_\_\_  
@HWI-EAS443:3:23:903:1166#0/1  
GAGCAATTGAGCTCAGTGTCATCATTTGAAAGTTTGAGA  
+HWI-EAS443:3:23:903:1166#0/1  
aabbbbabababbbbababbbbaabbbbaaaaa]aaabbb  
@HWI-EAS443:3:23:962:833#0/1  
GCTGCTTTGAATTTTACCACAAATGCGATAACACGTGCAT  
+HWI-EAS443:3:23:962:833#0/1  
aa^[¥`^^a^[\_^^\_[¥^]ZPV^[T^^^Z[\_Y\_ZaWZX  
@HWI-EAS443:3:23:975:824#0/1  
GAAACTGATTGCCCCAGGGAGACTACCAGTACCAATGAA  
+HWI-EAS443:3:23:975:824#0/1  
\_¥V0]bb^a`\_U]¥VZ]a``]^`XYJWS]ZZY^WKXY¥¥Z]  
@HWI-EAS443:3:23:989:1447#0/1  
GCTGGCTGGATCCTGGGAAATCCAGAGTGTGAATCACTCT



@HWI-EAS443:3:24:1383:1057#0/1  
GGGGACATCAAGATACAGCAAGAAGTTCAAGCCGGAAATA  
+HWI-EAS443:3:24:1383:1057#0/1  
aY`a\_\_a^a\_]\_[`Z\_]U`a\_]X`UZUV]]WL]\_]R VX  
@HWI-EAS443:3:24:1404:646#0/1  
TGTGGGGACATCAAGATACAGCAAGAAGTTCAAGCCGGAA  
+HWI-EAS443:3:24:1404:646#0/1  
ababababaa^¥abaaaa\_aaUabaa`aX`\_a`\_[\_a^\_¥  
@HWI-EAS443:3:24:1417:350#0/1  
TTCCGGCTTGAACCTTCTTGCTGTATCTTGATGTCCCCACA  
+HWI-EAS443:3:24:1417:350#0/1  
ab`aababaa`a¥aaU[`a]a`]`a¥aa^a`a`[\_W\_]`  
@HWI-EAS443:3:24:1418:612#0/1  
ATCGATTATGAGGAGCTAAGAGAGCAATTGAGCTCAGTGT  
+HWI-EAS443:3:24:1418:612#0/1  
T``a]\_a\_^bb`^a¥Z^```a]U]^YT¥T[ba^]ba\_`W  
@HWI-EAS443:3:24:1418:793#0/1  
AGCACTAGTAGATGGATGGTGAATGCCCCATAGCACGAGG  
+HWI-EAS443:3:24:1418:793#0/1  
aba\_^\_\_b^`b`Ybbaa\_V]`a[¥\_\_`a[aaaaTXabaaa  
@HWI-EAS443:3:24:1488:1524#0/1  
AACTTGTCAGACACCCAAGGGTGCTATAAACACCAGCCTC  
+HWI-EAS443:3:24:1488:1524#0/1  
ab¥aaa\_abbaab`^\_aaaaVa`a``aaa\_a^¥\_`\_\_\_\_  
@HWI-EAS443:3:24:1538:207#0/1  
GAAGCAACTGGAAATCTAGTGGTACCGAGATATGCATTTCG  
+HWI-EAS443:3:24:1538:207#0/1  
aa¥YN^^Xaa^^`\_^XS^¥M¥^X\_ZX^^\_Z][X]T\_XXQY  
@HWI-EAS443:3:24:1555:1248#0/1  
CTAGTGCTGACCAACAAAGTCTCTATCAGAATGCAGATGC  
+HWI-EAS443:3:24:1555:1248#0/1  
Y\_`YP^YT`\_T¥T\_U```a^^]L]a\_Z¥[\_\_\_]\_aVa\_X]\_  
@HWI-EAS443:3:24:1589:979#0/1  
ATTTTGGGTAGTCATAAGTCCCATTTTTGACACTTTCCAT  
+HWI-EAS443:3:24:1589:979#0/1  
``baababaab`\_a`a^`[aU^aa`aaa¥]``ab\_a`^`^  
@HWI-EAS443:3:24:1594:1402#0/1  
GGGTGGACAGGGATGGTAGATGGATGGTACGGTTATCACC  
+HWI-EAS443:3:24:1594:1402#0/1  
abaTab[U`aabaaa`¥aa^aaX``TXZ`¥U`\_`¥YVF  
@HWI-EAS443:3:24:161:1406#0/1  
GGTGTATAGCACCTTGGGTGTCTGACAAGTTGTATTG  
+HWI-EAS443:3:24:161:1406#0/1  
ab\_aabbZ^a`b`aba`a[\_\_\_Z``ab\_V^]aa\_a``aa`a  
@HWI-EAS443:3:24:1622:1807#0/1  
TACGGTTATCACCATCAAAATGAGCAGGGGTCAGGATATG  
+HWI-EAS443:3:24:1622:1807#0/1  
ab^bbabb``bb``aabaaaaaaa`aaaaYaaaa]a``  
@HWI-EAS443:3:24:1664:1596#0/1  
ATTCTGTGTCTCTTCAGGTCGGCTGCATATCCTGACCCC

+HWI-EAS443:3:24:1664:1596#0/1  
\_aaVaaNaa^Na`aa`a[N[^`Wa¥Sa^b`SWYBBBBBB  
@HWI-EAS443:3:24:1675:151#0/1  
CTTCCTCTGAGTATTTTGGGTAGTCATAAGTCCCATTTTT  
+HWI-EAS443:3:24:1675:151#0/1  
Ybbbbbbbbbabbbbbbbbabbbbaabbabb\_```bbbb  
@HWI-EAS443:3:24:1696:1852#0/1  
AGCCAGTTAAAAACAATGCCAAGGAAATTGGAAACGGCT  
+HWI-EAS443:3:24:1696:1852#0/1  
`^PSaYS\_bbabb\_\_b^U^a^`¥aa`^a\_\_aZa\_`^`\_S`  
@HWI-EAS443:3:24:1697:1192#0/1  
CGGTTTCATTGAAGGGGGTGGACAGGGATGGTAGATGGA  
+HWI-EAS443:3:24:1697:1192#0/1  
a¥\_Wba`abb\_Zabbbba[¥b]a`aaaa[abbTa]` `bX  
@HWI-EAS443:3:24:1709:1998#0/1  
GAGCTCAATTGCTCTCTTAGCTCCTCATAATCGATGAAAT  
+HWI-EAS443:3:24:1709:1998#0/1  
aaa]X]\_\_T`[[a\_`X¥YX`R¥GYVN]U\_`UP``^`^`\_]`  
@HWI-EAS443:3:24:195:1181#0/1  
CAGGGAGACTACCAGTACCAATGAACTGGCGACAGTTGAA  
+HWI-EAS443:3:24:195:1181#0/1  
`\_^a\_W\_[M^`^RSYU\_`Y`aY`IU^[bUWZ\_][¥[FX[]U  
@HWI-EAS443:3:24:212:955#0/1  
TGCCGGTTTCATTGAAGGGGGTGGACAGGGATGGTAGAT  
+HWI-EAS443:3:24:212:955#0/1  
ababba^aaaaaaaa\_H^`Y[¥`WZ¥¥¥Y^[UU^YXRURYS  
@HWI-EAS443:3:24:232:1332#0/1  
CTCCCGGCTCTACTAGTGTCCAGTAATAGTTCATTCTCCC  
+HWI-EAS443:3:24:232:1332#0/1  
\_`bba[ba[`] `Yab`RKS` `XXZX0¥\_YS]]a]¥]] `a`  
@HWI-EAS443:3:24:308:1791#0/1  
AAATTTTTGTAGAAGCTTTTTGCTCCAGCATGAGGACATG  
+HWI-EAS443:3:24:308:1791#0/1  
^ZaXZ`aaV]aab` `a\_a^[¥\_a[baa` `aPV`]] `a¥]  
@HWI-EAS443:3:24:335:374#0/1  
CTTTGTTAGTAATCTCGTCAATGGCATTCTGTGTGCTCTT  
+HWI-EAS443:3:24:335:374#0/1  
`abaaabab`bbaaabb\_`a` `a`aa` `aa`\_a\_aaa\_a`  
@HWI-EAS443:3:24:342:184#0/1  
GGGGACATCAAGATACAGCAAGAAGTTCAAGCCGAAATA  
+HWI-EAS443:3:24:342:184#0/1  
aab]aa`aa`aa` [a\_`a^`aa`^aY`^a`\_¥¥a\_W^^^  
@HWI-EAS443:3:24:448:1916#0/1  
GCTGGCTGGATCCTGGGAAATCCAGAGTGTGAATCACTCT  
+HWI-EAS443:3:24:448:1916#0/1  
abbb`bab]`]ab\_\_`^aaba^aa`a\_YSXZaa]^a` `\_\_  
@HWI-EAS443:3:24:540:1453#0/1  
CTTTGTTGGTCAGCACTAGTAGATGGATGGTGAATGCCCC  
+HWI-EAS443:3:24:540:1453#0/1  
a]TY\_VW¥\_PW]`^`[a`\_NWaX]\_`P¥X[U[`\_¥¥] `S]



@HWI-EAS443:3:24:553:725#0/1  
CCAGGAGATTTTCATCGATTATGAGGAGCTAAGAGAGCAAT  
+HWI-EAS443:3:24:553:725#0/1  
`¥^`b\_aSYU`VOXa^`^`a`a]T¥ZZ]aV`b]]N\_`]X  
@HWI-EAS443:3:24:583:193#0/1  
ATCCTGACCCCTGCTCATTGATGGTGATAACCGTACCA  
+HWI-EAS443:3:24:583:193#0/1  
YaaaZXU]^UQ`]^`^NXWZaR]LV\_]`H¥`[ZWJF[]`^`  
@HWI-EAS443:3:24:592:510#0/1  
GGGGACATCAAGATACAGCAAGAAGTTCAAGCCGGAAATA  
+HWI-EAS443:3:24:592:510#0/1  
`[\_b`aaa^aaab\_a]aa\_aaaa`aX^`^^a]\_\_a¥Z^`  
@HWI-EAS443:3:24:623:209#0/1  
GGGGCATTACCATCCATCTACTAGTGCTGACCAACAAAG  
+HWI-EAS443:3:24:623:209#0/1  
abab[FNZaa\_Z[U\_aa]^a```Xa```aa\_¥VW^`¥¥\_a  
@HWI-EAS443:3:24:629:1236#0/1  
CATTTTGTGGTGATAACCGTACCATCCATCTACCATCCC  
+HWI-EAS443:3:24:629:1236#0/1  
\_U¥aa`\_a\_aaYa`\_aab`a\_a`\_`a\_\_\_`[a\_\_aa]¥\_\_  
@HWI-EAS443:3:24:653:746#0/1  
CTTCTCTGAGTATTTTGGGTAGTCATAAGTCCCATTTTT  
+HWI-EAS443:3:24:653:746#0/1  
ab^b^V\_¥a``SX\_\_V[aZ¥F\_]ZU^a^`\_¥^a```aa`a  
@HWI-EAS443:3:24:661:518#0/1  
GCCAGTAAAAAACAATGCCAAGGAAATTGGAACGGCTG  
+HWI-EAS443:3:24:661:518#0/1  
``^`aW`baaaa¥W\_baaaa`\_`a¥Y`\_a\_\_`a\_a`\_Sa  
@HWI-EAS443:3:24:731:1310#0/1  
CATGATTGGCCATGAACCTGTCTTGGGGAATATCTCAA  
+HWI-EAS443:3:24:731:1310#0/1  
aZaYVbbab`babb\_Va^aba]a`baaaa\_baabXaaa]b  
@HWI-EAS443:3:24:732:892#0/1  
ATTGCATTTGGGTAAATGTAACATTGCTGGCTGGATCCTG  
+HWI-EAS443:3:24:732:892#0/1  
X`¥``abbabaaabb¥`bSbaaa\_b`aabb`ba`Z`]aa`  
@HWI-EAS443:3:24:743:567#0/1  
CGCATTTGTGGTAAAATTCAAAGCAGCCGTTTCCAATTT  
+HWI-EAS443:3:24:743:567#0/1  
abbbbbbbbaa`\_`bbabbaaXaaba`abb`aaaa^V^a`]  
@HWI-EAS443:3:24:760:1947#0/1  
AAATGCTGGATCTGGTATTATCATTTTCAGATACACCAGTC  
+HWI-EAS443:3:24:760:1947#0/1  
\_ab\_Ua\_`^`a\_a`^S]^`^a^^\_a^\_]\_^`Za\_\_]OZ]W`  
@HWI-EAS443:3:24:776:1935#0/1  
GGTGTAAACGGCAGCATGTCCTCATGCTGGAGCAAAAAGCT  
+HWI-EAS443:3:24:776:1935#0/1  
``Ta\_bbaaaaa\_NZZRMTWUXYSRYTY]X^UX`\_`ZLJM  
@HWI-EAS443:3:24:785:963#0/1  
ATTCTGTGTCTTTCAGGTCGGCTGCATATCCTGACCCC

+HWI-EAS443:3:24:785:963#0/1  
aaabbb\_b\_b`ba`aaa\_\_`a\_a]J`V^\_\_aaZ\_Z\_  
@HWI-EAS443:3:24:833:1487#0/1  
CTGGCTGGATCCTGGGAAATCCAGAGTGTGAATCACTCTC  
+HWI-EAS443:3:24:833:1487#0/1  
`b`Ubbaaaa\_\_R`^Ua`^aa\_a`W`¥`^a`\_`W[\_  
@HWI-EAS443:3:24:872:1646#0/1  
CATGAACCTTGTCTTGGGGAATATCTCAAACCTTCAAATG  
+HWI-EAS443:3:24:872:1646#0/1  
[`¥Xabbbb[bb[VZ^^Y¥`a^a]baa^`aaab\_babaa  
@HWI-EAS443:3:24:881:1005#0/1  
CTCTTCAGGTCGGCTGCATATCCTGACCCCTGCTCATTTT  
+HWI-EAS443:3:24:881:1005#0/1  
ab¥b¥a\_[Z]]ba`aaaa`b\_Y]NN]\_`¥`Q`^¥^`^S^\_  
@HWI-EAS443:3:24:956:1295#0/1  
CCTCGTGCTATGGGGCATTACCATCCATCTACTAGTGCT  
+HWI-EAS443:3:24:956:1295#0/1  
`b`aYSaaU^^S[``\_`\_`¥^`V[YVaV[S\_UZ`][Y¥¥S  
@HWI-EAS443:3:24:960:106#0/1  
GTGGGGACATCAAGATACAGCAAGAAGTTCAAGCCGGAAA  
+HWI-EAS443:3:24:960:106#0/1  
a\_baa`^]``[a`a`^^[``V\_a`^]`RXUa]\_VY`]XY]  
@HWI-EAS443:3:24:970:294#0/1  
ACCATCCCTGTCCACCCCTTCAATGAAACCGGCAATGG  
+HWI-EAS443:3:24:970:294#0/1  
aa`aaaaaaaa`aba^`]a`Y^]\_a^`\_`aUX]`Sa^S]S  
@HWI-EAS443:3:24:984:1891#0/1  
ATTCTGTGTCTTTCAGGTCGGCTGCATATCCTGACCCC  
+HWI-EAS443:3:24:984:1891#0/1  
`bba`aWba`\_\_ba``aaVR[^`Waa\_\_abaUHZ\_aGZYW  
@HWI-EAS443:3:25:1032:98#0/1  
AGCCAGTTAAAAACAATGCCAAGGAAATTGGAAACGGCT  
+HWI-EAS443:3:25:1032:98#0/1  
aa]abbaa`abaa\_aa`b\_\_\_\_`ba`\_\_a`a\_\_\_\_\_]\_\_]^  
@HWI-EAS443:3:25:1050:947#0/1  
CTGGCTGGATCCTGGGAAATCCAGAGTGTGAATCACTCTC  
+HWI-EAS443:3:25:1050:947#0/1  
a\_\_\_\_abbbbbbb`aa^`bbbaaab`b`bbaa`aa`\_\_\_\_  
@HWI-EAS443:3:25:1057:1485#0/1  
ACAGAATTTACTTTGTTAGTAATCTCGTCAATGGCATTCT  
+HWI-EAS443:3:25:1057:1485#0/1  
abbbbbabbbbbbbbabbbabbbbbbaaba`a\_abaaaa  
@HWI-EAS443:3:25:1112:1507#0/1  
CTTCTCTGAGTATTTTGGGTAGTCATAAGTCCCATTTTT  
+HWI-EAS443:3:25:1112:1507#0/1  
^¥Z\_WXY`[`aY[Y^ZZ`\_Qa\_UZab¥QUSOTZV¥ZWZa  
@HWI-EAS443:3:25:1140:739#0/1  
TGTTTTTGTGGGACATCAAGATACAGCAAGAAGTTCAAG  
+HWI-EAS443:3:25:1140:739#0/1  
`b]abbba\_`^aaaaaa\_a\_a``¥aaaabaa^^Z^^`\_a

@HWI-EAS443:3:25:1147:1290#0/1  
CTGGCTGGATCCTGGGAAATCCAGAGTGTGAATCACTCTC  
+HWI-EAS443:3:25:1147:1290#0/1  
abbbb`^]\_^ba`^a`a\_a\_\_\_\_`XaY\_ba``\_a\_U]¥  
@HWI-EAS443:3:25:1148:1752#0/1  
ATTTGGGTAAATGTAACATTGCTGGCTGGATCCTGGGAAA  
+HWI-EAS443:3:25:1148:1752#0/1  
Z\_\_¥\_^WO\_a`aaXa¥^b\_a`^`¥X¥Ya^a¥TXVXaN`\_  
@HWI-EAS443:3:25:1238:2014#0/1  
AAAATATGTAAAAAGCACAAAATTGAGACTGGCCACAGGA  
+HWI-EAS443:3:25:1238:2014#0/1  
Z^¥[aa\_V\_a`baa`[a`aZT[^aba]Vaa`aYa]]\_W  
@HWI-EAS443:3:25:126:977#0/1  
TTTTGCTCCAGCATGAGGACATGCTGCCGTTACACCTTTG  
+HWI-EAS443:3:25:126:977#0/1  
^]bQHV\_]\_[a^ZX]]Uba¥aXaTTUNYYKT]YXBBBBBB  
@HWI-EAS443:3:25:1306:353#0/1  
GCCGGTTTCATTGAAGGGGGTGGACAGGGATGGTAGATG  
+HWI-EAS443:3:25:1306:353#0/1  
aaa^b\_a`TZbaaZX\_aa\_aYF^aZS[a\_`T¥[\_QY\_VN\_  
@HWI-EAS443:3:25:1350:377#0/1  
TGGGCCATGAACCTGTCTTGGGGAATATCTCAAACCTTTC  
+HWI-EAS443:3:25:1350:377#0/1  
abbbba]abb`a`aaa^`baaaaa\_\_a\_a^a]a\_`Y]aa`]  
@HWI-EAS443:3:25:1408:26#0/1  
GGGACATCAAGATACAGCAAGAAGTTCAAGCCGAAATAG  
+HWI-EAS443:3:25:1408:26#0/1  
\_N`\_Z^]UYQ^\_^`^]WT^\_\_XSVVXQZYYSO]]WZVZWT  
@HWI-EAS443:3:25:1408:728#0/1  
CACGTGTTATCGCATTGTGGTAAAATTCAAAGCAGCCGT  
+HWI-EAS443:3:25:1408:728#0/1  
aZb`bbbbbbbbbabababb`bbabbbabbbb\_bbZY]a  
@HWI-EAS443:3:25:1409:1025#0/1  
ATTCTGTGTCTTTCAGGTCTGGCTGCATATCCTGACCCC  
+HWI-EAS443:3:25:1409:1025#0/1  
V\_`R[\_\_\_VT\_¥¥`¥¥W\_a^H\_a¥U\_aa]Q\_ZUHZZ`]YOR  
@HWI-EAS443:3:25:1410:102#0/1  
GCACGTGTTATCGCATTGTGGTAAAATTCAAAGCAGCCG  
+HWI-EAS443:3:25:1410:102#0/1  
aG\_P``¥FW][P]S`\_[\_[VPX]¥Z^]OOYW]OQYXP¥  
@HWI-EAS443:3:25:143:1295#0/1  
ATCCTGACCCCTGCTCATTTTGTGGTATAACCGTACCA  
+HWI-EAS443:3:25:143:1295#0/1  
a\_a\_\_\_\_\_^[\_\_\_¥^\_¥^\_¥W^¥¥¥W¥¥W¥¥W^^VUWWYYWW  
@HWI-EAS443:3:25:1443:906#0/1  
ATCTTTTCAATAACAGAATTTACTTTGTTAGTAATCTCGT  
+HWI-EAS443:3:25:1443:906#0/1  
abababbaaaaa`aabaaba\_a]aaaaaaaa\_`a`\_`^a]  
@HWI-EAS443:3:25:1469:633#0/1  
ATGACACTGAGCTCAATTGCTCTCTTAGCTCCTCATAATC

+HWI-EAS443:3:25:1469:633#0/1  
aabaaaaabab`b`aabba`aaa`baaa^a\_\_`^\_aa\_`V  
@HWI-EAS443:3:25:1524:1235#0/1  
CACCATCCATCTACTAGTGCTGACCAACAAAGTCTCTATC  
+HWI-EAS443:3:25:1524:1235#0/1  
Ob\_bbbaabbaba`abb\_bbabbaababbbbaababbba  
@HWI-EAS443:3:25:1526:2034#0/1  
CGTGTATCGCATTGTGGTAAAATTCAAAGCAGCCGTTT  
+HWI-EAS443:3:25:1526:2034#0/1  
a\_\_bbabb`ababb\_bVbb[bbb\_`a\_bb`babb`ba^ab  
@HWI-EAS443:3:25:1571:94#0/1  
AGCCAGTTAAAAACAATGCCAAGGAAATTGGAAACGGCT  
+HWI-EAS443:3:25:1571:94#0/1  
`bbabba^K`Ybaaaba]\_LZaaaVLFsa¥UQ^¥UZ\_\_Z^  
@HWI-EAS443:3:25:1611:251#0/1  
TGAATTCCTTTTTTAACTAGCCATATTAATTTTTGTAG  
+HWI-EAS443:3:25:1611:251#0/1  
aa^`aaYW\_\_a`\_`\_\_^`\_]\_Y[[\_^`\_^][\_]`^`^`^`  
@HWI-EAS443:3:25:1624:1811#0/1  
TGCACGTGTATCGCATTGTGGTAAAATTCAAAGCAGCC  
+HWI-EAS443:3:25:1624:1811#0/1  
aaX¥[b\_baaaa`a[[Za\_\_U`\_Va\_\_R\_\_^`^^`^`\_ZX  
@HWI-EAS443:3:25:167:400#0/1  
TGCCGGTTTCATTGAAGGGGGTGGACAGGGATGGTAGAT  
+HWI-EAS443:3:25:167:400#0/1  
``bbbbabbbbaa`aabbbbbbYaba\_a`aaa`baZa]a^  
@HWI-EAS443:3:25:1699:219#0/1  
CTCTGTTAATTTGCTTCCTCTGAGTATTTGGGTAGTC  
+HWI-EAS443:3:25:1699:219#0/1  
^bbbbbbbbbbbbbbbabba\_bbbbbbb`bbbbbaab\_bbaa  
@HWI-EAS443:3:25:1721:1077#0/1  
CATATTCTACACTGTAGAGACCCATTAGAGCACATCCAGA  
+HWI-EAS443:3:25:1721:1077#0/1  
`bbbbbbbabbbbbbabbabbbbabababbaaabb  
@HWI-EAS443:3:25:1740:453#0/1  
CTTTGTTGGTCAGCACTAGTAGATGGATGGTGAATGCCCC  
+HWI-EAS443:3:25:1740:453#0/1  
abab¥bbb`bW¥[abVa`bbba\_abaab`abbaba[G[W  
@HWI-EAS443:3:25:1757:1111#0/1  
CTCTTTACCTACTGCTGTGAAGTGTATTTCATCTTTTCA  
+HWI-EAS443:3:25:1757:1111#0/1  
a]^]ba`¥`aXX`\_0\_\_Z`\_`\_Yaa]\_R^aa`a\_R\_aaa[^  
@HWI-EAS443:3:25:1779:1254#0/1  
CTTTGTTAGTAATCTCGTCAATGGCATTCTGTGTGCTCTT  
+HWI-EAS443:3:25:1779:1254#0/1  
abbbbbbbbbbbbababb\_abbabb`bbbbbbbababb`bb  
@HWI-EAS443:3:25:235:338#0/1  
CATGAGGACATGCTGCCGTTACACCTTTGTTTCGAGTCATG  
+HWI-EAS443:3:25:235:338#0/1  
Yb\_b`bbbb^abaaaaYa¥RT¥`PaS\_`\_`Z\_R]`aNY\_YV

@HWI-EAS443:3:25:264:1313#0/1  
AGAAGTCCTCGTGCTATGGGGCATTACCATCCATCTACT  
+HWI-EAS443:3:25:264:1313#0/1  
¥\_a\_] [a\_`aWV`a]V[a^¥] ]\_Y¥aa\_` `` ` \_XaXa\_]  
@HWI-EAS443:3:25:270:307#0/1  
CTTCCTCTGAGTATTTTGGGTAGTCATAAGTCCCATTTTT  
+HWI-EAS443:3:25:270:307#0/1  
a`baabbbbbbaaaaabbbbb\_ababababa`abbbbbbbba  
@HWI-EAS443:3:25:368:1629#0/1  
CAACAAAGTCTCTATCAGAATGCAGATGCATATGTTTTTG  
+HWI-EAS443:3:25:368:1629#0/1  
aabaZ`\_b]bbbaab`a^aa¥`aa^\_a\_aa`a\_¥\_`aa`  
@HWI-EAS443:3:25:372:1247#0/1  
AGATTTTCATCGATTATGAGGAGCTAAGAGAGCAATTGAGC  
+HWI-EAS443:3:25:372:1247#0/1  
aaaaaabaaaaaaaaa`\_`aaa\_` `` ` \_a\_`a\_\_`^\_\_  
@HWI-EAS443:3:25:378:307#0/1  
CAAAATGAGCAGGGGTCAGGATATGCAGCCGACCTGAAGA  
+HWI-EAS443:3:25:378:307#0/1  
Saa\_b`bbbb`aa^Xbbbb` `` ` babb\_abb`abba`^a  
@HWI-EAS443:3:25:440:488#0/1  
CTTGGGTGTCTGACAAGTTGTATTGCAATCGTGGACTGGT  
+HWI-EAS443:3:25:440:488#0/1  
abb`bbabbba` `bbbbabbabbbbbbb`\_aa`\_aaaZ  
@HWI-EAS443:3:25:474:1894#0/1  
GGGCCATGAACTTGTCTTGGGAATATCTCAAACCTTTCA  
+HWI-EAS443:3:25:474:1894#0/1  
`aU]aXJFQZaVv`W\_`Z`XOSUNTSYZNG[Z^^YY]]¥^  
@HWI-EAS443:3:25:510:1139#0/1  
CTGGCTGGATCCTGGGAAATCCAGAGTGTGAATCACTCTC  
+HWI-EAS443:3:25:510:1139#0/1  
ababbaaba[ `` `^Wa\_\_aaabYXbX[[^`a`\_\_aZ\_[¥\_  
@HWI-EAS443:3:25:550:130#0/1  
GAAACTGATTGCCCCAGGGAGACTACCAAGTACCAATGAA  
+HWI-EAS443:3:25:550:130#0/1  
a`aa`aaaaaba` `` `^a¥`^`\_¥Y^^¥`\_W\_¥[\_W¥¥^¥  
@HWI-EAS443:3:25:555:159#0/1  
TGAACCTCTTGCTGTATCTTGATGTCCCCACAAAAACATA  
+HWI-EAS443:3:25:555:159#0/1  
`QUaY^aaaaWTY^G^Y^Y]SXY\_\_ [Z^SQUITPUZW\_^¥  
@HWI-EAS443:3:25:566:1661#0/1  
GGGGACATCAAGATACAGCAAGAAGTTCAAGCCGAAATA  
+HWI-EAS443:3:25:566:1661#0/1  
aaa[aaaaa` `Z` [ `aa`a`b\_`a\_OW`b\_^^[]¥\_` `` `\_\_  
@HWI-EAS443:3:25:571:1035#0/1  
TCACTCTCCACAGCAAGCTCATGGTCCTACATTGTGGAAA  
+HWI-EAS443:3:25:571:1035#0/1  
`b` `b]abbb`¥\_aZ\_aaa`aa`ZP\_aaa]¥¥\_` `a`aa^  
@HWI-EAS443:3:25:608:1639#0/1  
TGCTGGCTGGATCCTGGGAAATCCAGAGTGTGAATCACTC

+HWI-EAS443:3:25:608:1639#0/1  
a`aaaaaaaa`aa`P^)`a`\_\_`\_\_`[S`¥\_a`\_\_\_\_]\_\_  
@HWI-EAS443:3:25:619:1161#0/1  
GCACGTGTTATCGCATTTGTGGTAAAATCAAAGCAGCCG  
+HWI-EAS443:3:25:619:1161#0/1  
ab¥`baa\_\_bbba`aabb`\_a^^b`b`aaZaa`¥a\_\_X`  
@HWI-EAS443:3:25:622:827#0/1  
ACTTCTTGCTGTATCTTGATGTCCCCACAAAAACATATGC  
+HWI-EAS443:3:25:622:827#0/1  
]`^^\_ZY`baV`aa`bbbb^`b`\_\_Laa\_baaaa]a  
@HWI-EAS443:3:25:751:615#0/1  
CTGGCTGGATCCTGGGAAATCCAGAGTGTGAATCACTCTC  
+HWI-EAS443:3:25:751:615#0/1  
R\_\_V¥[YVPV¥V\_V`\_[\_\_ZX^T^ZUZ\_V]Z^`]Z^¥X  
@HWI-EAS443:3:25:851:1387#0/1  
TGTATCTTGATGTCCCCACAAAAACATATGCATCTGCATT  
+HWI-EAS443:3:25:851:1387#0/1  
aba\_bbbabbbbabb`^a`aabbbaaaaaaaaa\_aaaaa  
@HWI-EAS443:3:25:852:1269#0/1  
AGAGACTTTGTTGGTCAGCACTAGTAGATGGATGGTGAAT  
+HWI-EAS443:3:25:852:1269#0/1  
abbabbbb`bab\_aaaaY`aaa[```aaa`a\_¥abaa  
@HWI-EAS443:3:25:863:459#0/1  
AGCCAGTAAAAACAATGCCAAGGAAATTGGAAACGGCT  
+HWI-EAS443:3:25:863:459#0/1  
^)``baaabaa]Zaaaa`ba]a`aa`\_\_`b`\_`[a\_\_\_\_  
@HWI-EAS443:3:25:898:935#0/1  
GGCCATGAACCTTGTCTTGGGAATATCTCAAACCTTCA  
+HWI-EAS443:3:25:898:935#0/1  
a\_^aa\_\_^\_aWa`\_¥`a^¥Z\_Z^`\_\_Xa`\_`\_]Y`\_\_V`  
@HWI-EAS443:3:25:954:515#0/1  
GAAATGCTGGATCTGGTATTATCATTTCAGATACACCAGT  
+HWI-EAS443:3:25:954:515#0/1  
aYaa`\_^¥\_aY^\_\_aYDPa¥Xa\_0^^^WS\_¥¥[\_`W]VBB  
@HWI-EAS443:3:25:961:1652#0/1  
AGGAGCTAAGAGAGCAATTGAGCTCAGTGCATCATTGA  
+HWI-EAS443:3:25:961:1652#0/1  
V\_¥\_\_b^`a¥]`b`bbabbabbb^abaaa]^bbbaa\_  
@HWI-EAS443:3:25:974:214#0/1  
CAGATGCATATGTTTTGTGGGACATCAAGATACAGCAA  
+HWI-EAS443:3:25:974:214#0/1  
abbbbbbbbbbbbbbbabbbbbbbabbbbbbbabbabb  
@HWI-EAS443:3:25:992:125#0/1  
GCTCCTCATAATCGATGAAATCTCCTGGGTAACACGTTCC  
+HWI-EAS443:3:25:992:125#0/1  
a\_aab`aTaaaZOSS`[Y`¥^G\_TX[^T\_Z`WV\_Z[¥WZZ  
@HWI-EAS443:3:25:999:602#0/1  
CCTCTGAGTATTTGGGTAGTCATAAGTCCCATTTTTGAC  
+HWI-EAS443:3:25:999:602#0/1  
`bZ`¥`bXZ\_bbabbbZ`a\_aY\_bb¥Z]¥[`baaabaa



+HWI-EAS443:3:26:130:1084#0/1  
aaa\_aaaa`aaaa`aa\_[a`\_````aaa\_\_a`R¥`\_a  
@HWI-EAS443:3:26:1346:1550#0/1  
TACGGTTATCACCATCAAAATGAGCAGGGGTCAGGATATG  
+HWI-EAS443:3:26:1346:1550#0/1  
a\_v\_WLM^[00\_VROX]W^[MY\_YUDY]`Ta][DRT\_T`  
@HWI-EAS443:3:26:1361:1214#0/1  
CACCATCCATCTACTAGTGCTGACCAACAAAGTCTCTATC  
+HWI-EAS443:3:26:1361:1214#0/1  
ab\_ababbbbbbbbbbbab`b\_bbabbbbbbb`babbba  
@HWI-EAS443:3:26:1364:1029#0/1  
GGTAAATGTAACATTGCTGGCTGGATCCTGGGAAATCCAG  
+HWI-EAS443:3:26:1364:1029#0/1  
W\_H\_bb^a^ba`^bbab\_Ya`^\_]`QU[`\_aS]\_][NV\_  
@HWI-EAS443:3:26:1368:66#0/1  
AGCCAGTTAAAAACAATGCCAAGGAAATTGGAAACGGCT  
+HWI-EAS443:3:26:1368:66#0/1  
aaaa\_a`\_a`aa`\_aab¥^X^a`^\_a\_a`W[[Y\_]UZ  
@HWI-EAS443:3:26:1369:1711#0/1  
TGAGTATTTGGGTAGTCATAAGTCCCATTTTTGACACTT  
+HWI-EAS443:3:26:1369:1711#0/1  
abaYD[`[]aabaTN[¥Y^[a`\_Za\_W`]``\_`a\_Ga^\_W  
@HWI-EAS443:3:26:140:472#0/1  
GGCTGCTTTGAATTTTACCACAAATGCGATAACACGTGCA  
+HWI-EAS443:3:26:140:472#0/1  
aaaabbbaba^baababab\_a^bb`aaaa\_aaaaaa^aa\_  
@HWI-EAS443:3:26:1416:84#0/1  
GGGACATCAAGATACAGCAAGAAGTTCAAGCCGAAATAG  
+HWI-EAS443:3:26:1416:84#0/1  
aZa`¥a[[^[\_]`^\_a]]\_]Y¥UPUZRYLR¥YUQZWZ]  
@HWI-EAS443:3:26:1437:858#0/1  
CAATTTTGTGCTTTTTACATATTTTGGACATTTTCCAATT  
+HWI-EAS443:3:26:1437:858#0/1  
aZba\_bba`aaZ\_aa\_bbabaaa\_aaZb`bbaaaaa\_abb  
@HWI-EAS443:3:26:1452:521#0/1  
ATTCTGTGTGCTCTTCAGGTCGGCTGCATATCCTGACCCC  
+HWI-EAS443:3:26:1452:521#0/1  
aab`aba¥P]¥aZ^a\_aba[]aa`\_`UZ`\_aYM[ZRNRNT  
@HWI-EAS443:3:26:146:795#0/1  
CCCATCTATTTCTTCTCTGTTTAATTTTGCTTCTCTGAG  
+HWI-EAS443:3:26:146:795#0/1  
]baWZV¥]aXX\_ZVV\_\_V[QOV``]aYRZW¥SXaZZ`]X^  
@HWI-EAS443:3:26:1487:1463#0/1  
TCCGGCTTGAACCTTCTTGCTGTATCTTGATGTCCCCACAA  
+HWI-EAS443:3:26:1487:1463#0/1  
[bbbaaabaa\_[`ba]ZZQX``\_b]ZVa\_\_ZN]`Y`0``  
@HWI-EAS443:3:26:1489:453#0/1  
TAACATTGCTGGCTGGATCCTGGGAAATCCAGAGTGTGAA  
+HWI-EAS443:3:26:1489:453#0/1  
aba^[``\_Y^a\_[\_`a]Z[Y^a`\_W^]SY]`Za[^Ta\_V



@HWI-EAS443:3:26:1502:1285#0/1  
ATTTAAATAAAAAAGTTGATGATGGTTTCCTGGACATTTG  
+HWI-EAS443:3:26:1502:1285#0/1  
`bbbbba`a`bba^`abbab`aabW]a^[\`ba`\_`\_`\_`a  
@HWI-EAS443:3:26:1519:1986#0/1  
AATCGATGAAATCTCCTGGGTAACACGTTCCATTGTCTGA  
+HWI-EAS443:3:26:1519:1986#0/1  
`aabaaa\_\_`\_a[ZY]aW^X]^`^\_]GS[]OX^WOSWWX\_  
@HWI-EAS443:3:26:1546:779#0/1  
ATTCATCTTTTCAATAACAGAATTTACTTTGTTAGTAATC  
+HWI-EAS443:3:26:1546:779#0/1  
`^abbba`aababaaba\_bababb`aabbbb`aab]baaa  
@HWI-EAS443:3:26:1547:90#0/1  
GAGCAGGGGTCAGGATATGCAGCCGACCTGAAGAGCACAC  
+HWI-EAS443:3:26:1547:90#0/1  
aZb`aa`W^a^`V^aaUV\_¥U`]ST^^]¥¥W\_T¥TWU  
@HWI-EAS443:3:26:1601:395#0/1  
ATCGATTATGAGGAGCTAAGAGAGCAATTGAGCTCAGTGT  
+HWI-EAS443:3:26:1601:395#0/1  
a]Q]bbb¥ba`\_\_UKU¥b`\_`baZ^b¥bb^b]LYVaaS`Q  
@HWI-EAS443:3:26:1642:667#0/1  
GCTCCTCATAATCGATGAAATCTCCTGGGTAACACGTTCC  
+HWI-EAS443:3:26:1642:667#0/1  
^VRaUZ`W]W\_aW\_]aa¥¥a`U`WU\_] ]QRVUVPOQWJL  
@HWI-EAS443:3:26:171:1231#0/1  
AAAACAATGCCAAGGAAATTGGAAACGGCTGCTTTGAATT  
+HWI-EAS443:3:26:171:1231#0/1  
aa¥ab`a`Z^`V^VPX]Y`a`SX¥T\_]P^^^RFZ]FTXXF  
@HWI-EAS443:3:26:1757:1787#0/1  
ATTAATTTTTGTAGAAGCTTTTTGCTCCAGCATGAGGAC  
+HWI-EAS443:3:26:1757:1787#0/1  
``bba`aabab¥a`\_^IQ]a`\_O\_S0aBBBBBBBBBB  
@HWI-EAS443:3:26:1758:494#0/1  
TGGGGACATCAAGATACAGCAAGAAGTTCAAGCCGAAAT  
+HWI-EAS443:3:26:1758:494#0/1  
\_bb`W`^`\_V]^`^¥Xa`\_`\_`ab`WaM¥Sa]b]V`a``a`  
@HWI-EAS443:3:26:1762:1366#0/1  
TAACGGGAAACTATGCAAATAAGAGGGGTAGCCCCATTG  
+HWI-EAS443:3:26:1762:1366#0/1  
aabab`^aa`\_a[ZWP`aZFaaabS[a`\_`NXYFLQ]\_QR]  
@HWI-EAS443:3:26:1776:849#0/1  
AGAAGTTCAAGCCGAAATAGCAATAAGACCCAAAGTGAG  
+HWI-EAS443:3:26:1776:849#0/1  
[a[\_]DOX[a\_a\_\_a`^`YZZU`^`a0]`PSYSYX\_WY]B  
@HWI-EAS443:3:26:1782:1508#0/1  
CATATCCTGACCCCTGCTCATTTTGTGGTGATAACCGTA  
+HWI-EAS443:3:26:1782:1508#0/1  
a[\_]\_U`Yb\_\_\_YY[SZ\_JWR`a`a[]\_a0`¥W`\_`RR`V¥  
@HWI-EAS443:3:26:1791:1663#0/1  
TAAAGGGAAAGAAGTCCTCGTGCTATGGGGCATTACCAT

+HWI-EAS443:3:26:1791:1663#0/1  
a\_a`bab\_`^`a`aZa`]`\_^LN\_XaY\_^\_]`\_NN\_]X]B  
@HWI-EAS443:3:26:181:553#0/1  
TGGGCCATGAACTTGTCTTGGGGAATATCTCAAACCTTTC  
+HWI-EAS443:3:26:181:553#0/1  
aa\_W\_b`bbbb`bbbabbbb`bbabbababb\_bab]baaa  
@HWI-EAS443:3:26:186:881#0/1  
ATTCTACACTGTAGAGACCCATTAGAGCACATCCAGAAAC  
+HWI-EAS443:3:26:186:881#0/1  
^]ba`]bb`UTX^Z^`aZ¥]\_\_¥Y^a]a\_aa\_aa]]^Ra  
@HWI-EAS443:3:26:240:1585#0/1  
GAAGCCAGTTAAAAACAATGCCAAGGAAATTGGAAACGG  
+HWI-EAS443:3:26:240:1585#0/1  
¥`aaba^\_\_bb```¥abba`aaaX¥`a`Y`aaa```Za`a  
@HWI-EAS443:3:26:256:1612#0/1  
ATCCTGACCCCTGCTCATTGATGGTGATAACCGTACCA  
+HWI-EAS443:3:26:256:1612#0/1  
a¥a`¥Y^¥^]¥YY¥SVNWNWYT¥STWGYYTWTBBBBBBB  
@HWI-EAS443:3:26:274:484#0/1  
AAACAATGCCAAGGAAATTGGAAACGGCTGCTTTGAATTT  
+HWI-EAS443:3:26:274:484#0/1  
^\_babaa`ba`aaaV\_a``aa\_``\_aaa\_]UYX¥XP¥U]B  
@HWI-EAS443:3:26:288:280#0/1  
TGGGTCTTATTGCTATTTCCGGCTTGAACCTTCTTGCTGTA  
+HWI-EAS443:3:26:288:280#0/1  
\_bba\_a`aaa`¥¥`aU\_`\_[\_`\_T^ZU\_``¥\_]`^¥[X]W\_  
@HWI-EAS443:3:26:420:1509#0/1  
CGTGTATCGCATTGTTGGTAAAATTCAAAGCAGCCGTTT  
+HWI-EAS443:3:26:420:1509#0/1  
ab^``aaa^^aaaaa^\_]ba`aa`\_aa`\_``]\_\_\_^^^  
@HWI-EAS443:3:26:423:796#0/1  
GGACACTAGTAGAGCCGGGAGACAAAATAACATTCTGAAGC  
+HWI-EAS443:3:26:423:796#0/1  
aabababbbabababbaa`ab`ba`aaaaabaaa`aaa\_  
@HWI-EAS443:3:26:458:997#0/1  
AGCTCCTCATAATCGATGAAATCTCCTGGGTAACACGTTC  
+HWI-EAS443:3:26:458:997#0/1  
`\_aaaaaaaa\_aa`\_aa`aa`]^a\_^`^`\_[WT\_]`]XR¥\_  
@HWI-EAS443:3:26:464:1487#0/1  
GCCGGGAGACAAAATAACATTCTGAAGCAACTGGAAATCTA  
+HWI-EAS443:3:26:464:1487#0/1  
^^a\_\_VZ\_b\_Z`aaX`abb\_aa^`]X]\_Q¥aaa`¥aaaXZ  
@HWI-EAS443:3:26:464:507#0/1  
TGGCTGGATCCTGGGAAATCCAGAGTGTGAATCACTCTCC  
+HWI-EAS443:3:26:464:507#0/1  
\_ZX\_aaa`[aa`^^`Xaa^^^aa\_aZ\_Z\_]U\_\_a\_Z\_[¥^  
@HWI-EAS443:3:26:47:125#0/1  
GTGTGCTCTTCAGTTCGGCTGCATATCCTGACCCCTGCTC  
+HWI-EAS443:3:26:47:125#0/1  
a\_b`baaaa``aaaWa]X\_`a\_\_\_b^\_aZ[\_^^`^]XVZ

@HWI-EAS443:3:26:486:1604#0/1  
GCTGGATCCTGGGAAATCCAGAGTGTGAATCACTCTCCAC  
+HWI-EAS443:3:26:486:1604#0/1  
\_`\_]\_ZVa\_b`\_Z\_\_bbbabbTb]`a\_b^aaZabaaaaab\_  
@HWI-EAS443:3:26:517:368#0/1  
GCCGGTTTCATTGAAGGGGGTGGACAGGGATGGTAGATG  
+HWI-EAS443:3:26:517:368#0/1  
a`aa^[aa¥L¥`\_RW`aa`[aU\_aTPZ`X`[Ua[UY`XG`  
@HWI-EAS443:3:26:527:1235#0/1  
GTGTGCTCTTCAGGTCGGCTGCATATCCTGACCCCTGCTC  
+HWI-EAS443:3:26:527:1235#0/1  
Z\_`^\_aa`a`^`PTPZ[\_\_\_a\_\_\_b`¥a`Q`[^RQMUNTB  
@HWI-EAS443:3:26:546:220#0/1  
TACAATTGTCAGACACCCAAGGGTCTATAAACACCAGC  
+HWI-EAS443:3:26:546:220#0/1  
aa`aaaa¥a`W`a`^`¥X¥U]^\_¥a`^`^V]^[[[R  
@HWI-EAS443:3:26:550:644#0/1  
ACTGATTGCCCCAGGGAGACTACCAGTACCAATGAACTG  
+HWI-EAS443:3:26:550:644#0/1  
`YN\_b^a`]W^]T¥XYZG^TZ]^[\_VG¥F\_P]TPT^PR  
@HWI-EAS443:3:26:600:1222#0/1  
TCTGTGTGCTCTTCAGGTCGGCTGCATATCCTGACCCCTG  
+HWI-EAS443:3:26:600:1222#0/1  
\_bab\_]RU\_aaa¥ZaZ\_Ka`^`^`\_X`\_V¥X]aa`0^P  
@HWI-EAS443:3:26:609:1074#0/1  
GGACATGCTGCCGTTACACCTTTGTTTCGAGTCATGATTGG  
+HWI-EAS443:3:26:609:1074#0/1  
abbbbaaabababa```]aaa`a`aaa`¥`a`^`^`\_`\_  
@HWI-EAS443:3:26:619:654#0/1  
GGCTAGTTAAAAAAGGAAATTCATACCCAAAGCTCAGCAA  
+HWI-EAS443:3:26:619:654#0/1  
aY`VVaYaZVSS`]Y[WW`VJLW`\_a`\_XOTY`]WW[TXV  
@HWI-EAS443:3:26:651:538#0/1  
CTGTGTGCTCTTCAGGTCGGCTGCATATCCTGACCCCTGC  
+HWI-EAS443:3:26:651:538#0/1  
Q¥[[\_bb¥bb``baa]`bbbbbb]ba`aZ\_X^ba``\_P]\_  
@HWI-EAS443:3:26:69:900#0/1  
GGCTGGTGTATAGCACCCCTGGGTGTCTGACAAGTTGT  
+HWI-EAS443:3:26:69:900#0/1  
aababaTaabb`[\_`bbbbaab\_]\_a\_aa`RYYY`¥^  
@HWI-EAS443:3:26:702:726#0/1  
CCGGCTTGAACCTTCTGCTGTATCTTGATGTCCCCACAAA  
+HWI-EAS443:3:26:702:726#0/1  
\_ab¥\_a\_U\_\_T\_\_^a]G^\_¥¥b`\_a^S]\_`\_\_Z\_\_V\_a[\_  
@HWI-EAS443:3:26:748:518#0/1  
GGGACATCAAGATACAGCAAGAAGTTCAAGCCGAAATAG  
+HWI-EAS443:3:26:748:518#0/1  
]JZYPH\_P]aY[Ra`\_aaW`a[LZSWX^^]Z[]TFROX]^  
@HWI-EAS443:3:26:762:644#0/1  
TGCCGGTTTCATTGAAGGGGGTGGACAGGGATGGTAGAT

+HWI-EAS443:3:26:762:644#0/1  
abbabbabbbabbb`aabaab¥baa]ab]baabbbP` `aZ  
@HWI-EAS443:3:26:769:251#0/1  
GGGGCATTACCCATCCATCTACTAGTGCTGACCAACAAAG  
+HWI-EAS443:3:26:769:251#0/1  
ababaabaababba\_`aaa`]`¥`aSaa\_a\_a^¥`0`\_^^  
@HWI-EAS443:3:26:830:1821#0/1  
TTTTGGGTAGTCATAAGTCCCATTTTTGACACTTCCATG  
+HWI-EAS443:3:26:830:1821#0/1  
aaaa`bVb` `aaaaa\_U`baaaaaabaa^a`a\_\_aa`\_\_  
@HWI-EAS443:3:26:837:420#0/1  
AAACGGCTGCTTTGAATTTACCACAAATGCGATAACACG  
+HWI-EAS443:3:26:837:420#0/1  
¥^VV]Q^YYa¥^ZYS]^¥a\_]M[ `aa¥\_RRGWTV]WYMZ  
@HWI-EAS443:3:26:858:1053#0/1  
GACAATGGAACGTGTTACCCAGGAGATTTTCATCGATTATG  
+HWI-EAS443:3:26:858:1053#0/1  
abbbaaaaaba`b`aa\_\_aa`a` `a\_aa\_\_aaa\_aa]`\_`  
@HWI-EAS443:3:26:89:594#0/1  
ATTGCTATTTCCGGCTTGAACCTTCTTGCTGTATCTTGATG  
+HWI-EAS443:3:26:89:594#0/1  
aWX` `¥a^aY^a^Ra^¥\_ZYY`Z¥H[T^\_^\_X¥`XWV`¥  
@HWI-EAS443:3:26:942:1517#0/1  
GGGGACATCAAGATACAGCAAGAAGTTCAAGCCGGAATA  
+HWI-EAS443:3:26:942:1517#0/1  
abaabbbbaab\_aababaabbbbaabV\_baaa\_^a`a\_b\_a  
@HWI-EAS443:3:27:1022:932#0/1  
GACAGGGATGGTAGATGGATGGTACGGTTATCACCATCAA  
+HWI-EAS443:3:27:1022:932#0/1  
ab^\_bba]aba^\_aa`aaa`aYa\_\_aY\_a`Z\_[Y^\_RY\_  
@HWI-EAS443:3:27:1123:1007#0/1  
TTGCTATTTCCGGCTTGAACCTTCTTGCTGTATCTTGATGT  
+HWI-EAS443:3:27:1123:1007#0/1  
abaaabbbbaa`aaaa`aa`\_a`]\_aa\_a`\_`aa`\_^  
@HWI-EAS443:3:27:1133:1097#0/1  
TGGGAAATCCAGAGTGTGAATCACTCTCCACAGCAAGCTC  
+HWI-EAS443:3:27:1133:1097#0/1  
aaaaabbb^bbba\_S\_\_baaaaaa`aa\_a\_\_`\_aaa`][  
@HWI-EAS443:3:27:1151:684#0/1  
AGCCAGTTAAAAACAATGCCAAGGAAATTGGAAACGGCT  
+HWI-EAS443:3:27:1151:684#0/1  
aaaaabaaaaaaa`aaaa`\_`aa`\_`a\_aa`\_`Ya`Y\_  
@HWI-EAS443:3:27:1152:969#0/1  
GTCATGATTGGCCATGAACTTGTCTTGGGGAATATCTCA  
+HWI-EAS443:3:27:1152:969#0/1  
a\_[a`\_Vaa\_a`a`\_`[\_\_\_a`\_`a`\_]Y`\_`[\_`\_`\_`]  
@HWI-EAS443:3:27:1199:1278#0/1  
AAATTGGAACGGCTGCTTTGAATTTTACCACAAATGCGA  
+HWI-EAS443:3:27:1199:1278#0/1  
aabaabbaaaaaaa`Z\_aaIPXU` `a\_^`\_`\_`aaM^UT¥

@HWI-EAS443:3:27:1208:1789#0/1  
TGCATATGTTTTGTGGGACATCAAGATACAGCAAGAAG  
+HWI-EAS443:3:27:1208:1789#0/1  
ababaaababaaaa`aa\_XaaaaWaaaaaaaaa\_aaaaaa  
@HWI-EAS443:3:27:1226:433#0/1  
GGGTGGACAGGGATGGTAGATGGATGGTACGGTTATCACC  
+HWI-EAS443:3:27:1226:433#0/1  
^bbbaa\_baab`aabbZQbaaaaa\_abaQb\_`[\_aaa\_\_X¥  
@HWI-EAS443:3:27:1242:132#0/1  
GAGTATTTTGGGTAGTCATAAGTCCCATTTTTGACACTTT  
+HWI-EAS443:3:27:1242:132#0/1  
abb\_abbba^`a[`a]\_\_a\_\_`^S^X\_a`aa\_\_\_¥]\_\_]`  
@HWI-EAS443:3:27:124:268#0/1  
GAAATTCATACCCAAAGCTCAGCAAATCCTACATTAATGA  
+HWI-EAS443:3:27:124:268#0/1  
aaZ\_\_¥aba`baba`]]\_W]V]]W]¥[X`YOW`¥` `a`a^  
@HWI-EAS443:3:27:1284:1318#0/1  
TGGGCCATGAACCTGTCTTGGGGAATATCTCAAACCTTTC  
+HWI-EAS443:3:27:1284:1318#0/1  
abaaaababaaabab\_ababa` `aa`aaaaaa\_\_aaa`  
@HWI-EAS443:3:27:1348:684#0/1  
CAGGGGTCAGGATATGCAGCCGACCTGAAGAGCACACAGA  
+HWI-EAS443:3:27:1348:684#0/1  
abbb`b`bbabaabaaabaaaa]\_abaa`a`a\_aa\_`\_a\_  
@HWI-EAS443:3:27:1402:552#0/1  
TGATGACACTGAGCTCAATTGCTCTTAGCTCCTCATAA  
+HWI-EAS443:3:27:1402:552#0/1  
aaaaa`]a`aa\_a`a\_`a`aa^\_]a¥` `a`V¥]^\_V\_\_\_[  
@HWI-EAS443:3:27:1406:919#0/1  
TTTGCTTCTCTGAGTATTTTGGGTAGTCATAAGTCCCAT  
+HWI-EAS443:3:27:1406:919#0/1  
abba\_b`]aa¥a`^a\_^aaa\_` `VX¥¥Y\_^`Y¥\_^S\_[[`  
@HWI-EAS443:3:27:141:525#0/1  
AATTTCTTTTTTAACTAGCCATATTAATTTTTGTAGAA  
+HWI-EAS443:3:27:141:525#0/1  
`]baabbb`aaaa\_b^a[`aa\_aYa`\_a`aaaa`]`aa`  
@HWI-EAS443:3:27:1427:1403#0/1  
TAAAAACAATGCCAAGGAAATTGGAAACGGCTGCTTTGA  
+HWI-EAS443:3:27:1427:1403#0/1  
^\_ab\_aaZ`abaaa`ba\_a\_a\_aa` `Pa`[^`OZOYWV  
@HWI-EAS443:3:27:1430:1922#0/1  
ATTTCCAGTTGCTTGAATGTTATTTTGTCTCCCGGCTCT  
+HWI-EAS443:3:27:1430:1922#0/1  
aa`a`aaa¥a]\_`aaa\_a` `T`a\_a\_a\_U¥¥\_Z`Z]Z]¥]  
@HWI-EAS443:3:27:1460:370#0/1  
AAGTCCTCGTGCTATGGGCATTACCATCCATCTACTAG  
+HWI-EAS443:3:27:1460:370#0/1  
aaba[ababab\_aaaa`ba\_abaNa\_Vaa\_^` `a`¥a`\_  
@HWI-EAS443:3:27:1462:761#0/1  
GCTTCTCTGAGTATTTTGGGTAGTCATAAGTCCCATTTT

+HWI-EAS443:3:27:1462:761#0/1  
`S^XV]N\_a[XQ[`a`\_`a`S[¥SOWU^]\_VV]]]\_^^\_  
@HWI-EAS443:3:27:1494:567#0/1  
GAAAGAACTTTGGACTACCACGATTCAAATGTGAAGAACT  
+HWI-EAS443:3:27:1494:567#0/1  
aa`\_aaa^aaa^`\_]`^]]`¥aY`¥P\_``a`]\_\_^a¥\_U\_  
@HWI-EAS443:3:27:1498:613#0/1  
TGGCTGGATCCTGGGAAATCCAGAGTGTGAATCACTCTCC  
+HWI-EAS443:3:27:1498:613#0/1  
abaaabbabaa`¥a¥`ba\_\_a`\_aXa\_aa`\_Z`\_]S]ZZ  
@HWI-EAS443:3:27:1506:1107#0/1  
TGCTCTTCAGGTCGGCTGCATATCCTGACCCCTGCTCATT  
+HWI-EAS443:3:27:1506:1107#0/1  
ababaab`^^]]]Z]aaT``aVMY^`^¥U[¥T`\_a[^\_\_  
@HWI-EAS443:3:27:1513:1660#0/1  
TTTTGCTTCTCTGAGTATTTTGGGTAGTCATAAGTCCCA  
+HWI-EAS443:3:27:1513:1660#0/1  
aaaabbbbaa`b\_bbaa]`aaaa\_`a]a`]]`\_\_`\_X^]`\_  
@HWI-EAS443:3:27:1529:251#0/1  
CCGGGAGACAAAATAACATTCCAAGCAACTGGAAATCTAG  
+HWI-EAS443:3:27:1529:251#0/1  
aaabbbbbbbbbbb^abbabaabaaa\_bbaaaaa`aaa  
@HWI-EAS443:3:27:1594:1048#0/1  
CTTTGGGTCTTATTGCTATTTCCGGCTTGAACCTCTTGCT  
+HWI-EAS443:3:27:1594:1048#0/1  
abbb`b`\_abbbaabaaaabaa\_ab]aaaa]P\_a\_``\_V\_  
@HWI-EAS443:3:27:1610:138#0/1  
TTTGTTAGTAATCTCGTCAATGGCATTCTGTGTGCTCTTC  
+HWI-EAS443:3:27:1610:138#0/1  
W`a\_a\_aa]\_a\_¥a\_a[\_Y¥Y\_YU^\_\_V^WPVVZW^U]]¥  
@HWI-EAS443:3:27:1613:1787#0/1  
CTTCTTGCTGTATCTTGATGTCCCACAAAAACATATGCA  
+HWI-EAS443:3:27:1613:1787#0/1  
aaabaaaabbaaa\_aaaa`a`a\_]\_aaaaa`\_a`a`\_`\_`  
@HWI-EAS443:3:27:162:200#0/1  
AAAGAACTTTGGACTACCACGATTCAAATGTGAAGAACTT  
+HWI-EAS443:3:27:162:200#0/1  
a`Z\_Z^a\_a`\_\_aa\_aaa`^a`^^[Y¥X[\_X`]\_`Y¥^^]  
@HWI-EAS443:3:27:1634:2027#0/1  
CGGGGAGACAAAATAACATTCCAAGCAACTGGAAATCTAGT  
+HWI-EAS443:3:27:1634:2027#0/1  
a^^WZabaW^`Z`^W]ZaQN\_\_`WXTYWZ]]^N[]Z^YM  
@HWI-EAS443:3:27:1659:827#0/1  
ATGCTGGATCTGGTATTATCATTTTCAGATACACCAGTCCA  
+HWI-EAS443:3:27:1659:827#0/1  
¥HL\_TX]¥KJYKa^`aa`a\_`YY]VT\_`Wa[WGL[^]]P[  
@HWI-EAS443:3:27:1789:1585#0/1  
GTGGGGACATCAAGATACAGCAAGAAGTTCAAGCCGGAAA  
+HWI-EAS443:3:27:1789:1585#0/1  
aT``]aaWa^^\_\_`]\_\_``aS\_`a`^aZ^^`]¥¥R^]ZZ^

@HWI-EAS443:3:27:184:947#0/1  
CAAAGTCTCTATCAGAATGCAGATGCATATGTTTTTGTGG  
+HWI-EAS443:3:27:184:947#0/1  
abaaa\_aaa^Z]abaZ`\_\_a``]\_aaa¥U¥^Xa\_aa\_Wa\_  
@HWI-EAS443:3:27:233:1408#0/1  
GAAAGAAGTCCTCGTGCTATGGGGCATTACCATCCATCT  
+HWI-EAS443:3:27:233:1408#0/1  
abbYbb\_aZbbaba\_]b`b]]^aaaaa`abaaaaa`aa^  
@HWI-EAS443:3:27:243:1449#0/1  
CAAAGGTGTAACGGCAGCATGTCCTCATGCTGGAGCAAAA  
+HWI-EAS443:3:27:243:1449#0/1  
a^[\_a]a`baa][aa`WTTU^`Ya]WfY¥VYUY^`\_\_Y  
@HWI-EAS443:3:27:250:906#0/1  
AAGGGAAAGAAGTCCTCGTGCTATGGGGCATTACCATCC  
+HWI-EAS443:3:27:250:906#0/1  
\_bababbab\_U\_\_baaba\_aba`aaaa[\_a`\_abaaa]`a  
@HWI-EAS443:3:27:269:683#0/1  
TTCGAATGTTATTTTGTCTCCCGCTCTACTAGTGTCCAG  
+HWI-EAS443:3:27:269:683#0/1  
abbZ\_ba`]b`bbbab`baba\_aaaa][X]]S[`V[]¥¥  
@HWI-EAS443:3:27:338:1406#0/1  
CATTCTGTGTGCTCTTCAGGTCGGCTGCATATCCTGACCC  
+HWI-EAS443:3:27:338:1406#0/1  
]`V¥\_\_Vab^RWVbb^\_b00^b^]N¥`a]a]Q¥a[^]`\_¥  
@HWI-EAS443:3:27:349:22#0/1  
GGAAATTGGAAACGGCTGCTTTGAATTTTACCACAAATGC  
+HWI-EAS443:3:27:349:22#0/1  
abaaabaab`\_a\_aa`a^FX¥\_TQYW\_\_]NRZU¥`BBBB  
@HWI-EAS443:3:27:34:1730#0/1  
CCGGCTTGAACCTTCTTGCTGTATCTTGATGTCACCAAAA  
+HWI-EAS443:3:27:34:1730#0/1  
ab]Ya]^Q¥ZZ`V¥T\_[YZS]\_]\_XZXPX\_^aa`a^`¥  
@HWI-EAS443:3:27:368:1572#0/1  
GCTGGCTGGATCCTGGGAAATCCAGAGTGTGAATCACTCT  
+HWI-EAS443:3:27:368:1572#0/1  
`bbaabbaba\_ab]aaa¥ababaa``W`]aaaaaba`aa  
@HWI-EAS443:3:27:404:689#0/1  
TTTTTGACACTTTCATGCACGTGTTATCGCATTGTGGT  
+HWI-EAS443:3:27:404:689#0/1  
abbbaabaaaaaa`Z``aaaa^a\_aaa``a`a`[^a\_S  
@HWI-EAS443:3:27:404:75#0/1  
GGGGACATCAAGATACAGCAAGAAGTTCAAGCCGGAATA  
+HWI-EAS443:3:27:404:75#0/1  
abb`PXX\_]aaaaY^aa`Taa`\_\_G]T\_[aRV`\_W^^W[  
@HWI-EAS443:3:27:411:1897#0/1  
GCTTCCTCTGAGTATTTTGGGTAGTCATAAGTCCCATTTT  
+HWI-EAS443:3:27:411:1897#0/1  
abaabbaaba]R^`aa`aa]a\_^ab`aaW\_`aa`a\_\_  
@HWI-EAS443:3:27:435:1331#0/1  
CATGAACCTTGTCTTGGGAATATCTCAAACCTTCAAATG

+HWI-EAS443:3:27:435:1331#0/1  
abab`ab^aa^b`b\_aa\_`\_]aaaaaaa\_``\_`aa^¥  
@HWI-EAS443:3:27:435:1644#0/1  
GATAACCGTACCATCCATCTACCATCCCTGTCCACCCCC  
+HWI-EAS443:3:27:435:1644#0/1  
abbbabaa`ab`baaaG`aaba`a`aaa`]^a\_a``\_\_\_\_`  
@HWI-EAS443:3:27:470:91#0/1  
CAATTGAGCTCAGTGTCATCATTTGAAAGTTTGAGATAT  
+HWI-EAS443:3:27:470:91#0/1  
aabbabbbbaaab^baaaa^abaaa`aaaa^aaaaaa`a`  
@HWI-EAS443:3:27:493:984#0/1  
TGTGGGGACATCAAGATACAGCAAGAAGTTCAAGCCGGAA  
+HWI-EAS443:3:27:493:984#0/1  
]ZR[^XTRZ]RZUNZ\_^]¥YZL\_UY`ZN]]^`aXO[XU]  
@HWI-EAS443:3:27:503:385#0/1  
CATTCTGTGTGCTCTTCAGGTCGGCTGCATATCCTGACCC  
+HWI-EAS443:3:27:503:385#0/1  
a¥^^aa\_[a`]aaaa`X^]R]\_a`[^[a^ZY^a\_`^WZ^  
@HWI-EAS443:3:27:538:1342#0/1  
CAGGAGATTTTCATCGATTATGAGGAGCTAAGAGAGCAATT  
+HWI-EAS443:3:27:538:1342#0/1  
Z`UWSNP`QW^XZYRSJXV`YXV¥]TQHUIT¥^aTS[[¥Y  
@HWI-EAS443:3:27:552:345#0/1  
GGGGCATTACCATCCATCTACTAGTGCTGACCAACAAAG  
+HWI-EAS443:3:27:552:345#0/1  
aa\_aa\_aaaaa`a\_a\_\_a^aa\_`a]`\_^a\_`^`X\_^Z`  
@HWI-EAS443:3:27:553:1730#0/1  
GTCATGATTGGGCCATGAACCTGTCTTGGGGAATATCTCA  
+HWI-EAS443:3:27:553:1730#0/1  
a^\_]`^a\_]^[U[\_`WSZ`a\_\_XX^[^^^`^U^^^Z\_U]Y  
@HWI-EAS443:3:27:556:1028#0/1  
GGGGCATTACCATCCATCTACTAGTGCTGACCAACAAAG  
+HWI-EAS443:3:27:556:1028#0/1  
aaaa^a`U`¥abaaa\_\_Z^a`aaaZ\_aa`a\_^\_a]a``\_  
@HWI-EAS443:3:27:570:1049#0/1  
CTAGTGCTGACCAACAAAGTCTCTATCAGAATGCAGATGC  
+HWI-EAS443:3:27:570:1049#0/1  
abb\_`aa`Z]bbbbbaaba`aaaa¥`aa`a`¥a]K¥^`\_`a  
@HWI-EAS443:3:27:620:146#0/1  
TTCATCGATTATGAGGAGCTAAGAGAGCAATTGAGCTCAG  
+HWI-EAS443:3:27:620:146#0/1  
abbb^a`abbaab`b^`a\_aaa`\_aYa\_\_`\_]\_\_`\_]`^`  
@HWI-EAS443:3:27:632:694#0/1  
CTTCAGGTCGGCTGCATATCCTGACCCCTGCTCATTTTGA  
+HWI-EAS443:3:27:632:694#0/1  
`S]^X\_[V]^a]¥aZVYb^)`[S[^P`¥P^T^a¥PXP]UZ  
@HWI-EAS443:3:27:636:1376#0/1  
CCC GTTATGCTTGTCTTCTAGAAGGTTAACAGAGTGTGTT  
+HWI-EAS443:3:27:636:1376#0/1  
aa``a`^\_\_aa[aaa\_^aXa`]YZ`aaaa\_\_aW\_\_\_^`



@HWI-EAS443:3:27:643:1064#0/1  
TGAAGAACTTATATGAAAAGGTAAGAAGCCAGTTAAAAAA  
+HWI-EAS443:3:27:643:1064#0/1  
\_b`U`W]NY¥T¥¥^ba``\_a¥]U¥`Y`^^bbaa[`a]W]  
@HWI-EAS443:3:27:645:516#0/1  
TACTGCTGTGAAGTGTATTTCATCTTTTCAATAACAGAA  
+HWI-EAS443:3:27:645:516#0/1  
``a`¥^Y`W]\_a\_]bH\_ba\_a\_]^\_¥\_¥`]a`^V][]¥  
@HWI-EAS443:3:27:668:1965#0/1  
GGGAAACTATGCAAATAAGAGGGGTAGCCCCATTGCATT  
+HWI-EAS443:3:27:668:1965#0/1  
^^^W¥abab\_U\_a`\_`¥`^X]LLZNa`ab`\_]UWY]a^X  
@HWI-EAS443:3:27:669:44#0/1  
TCCGGCTTGAAGTCTTGCTGTATCTTGATGTCCCCACAA  
+HWI-EAS443:3:27:669:44#0/1  
abaabaaaba\_]\_^Z^a\_]aY]^\_\_a]^\_`YU]W^Z^\_  
@HWI-EAS443:3:27:673:1180#0/1  
ATGAAATCTCCTGGGTAACACGTTCCATTGTCTGAACTAG  
+HWI-EAS443:3:27:673:1180#0/1  
aaa]]a`a\_aa\_\_[^Yaa`aa\_Z^\_^`\_]\_^\_\_W]]^]]  
@HWI-EAS443:3:27:709:1056#0/1  
AGGGAGACTACCAGTACCAATGAAGTGGCGACAGTTGAAT  
+HWI-EAS443:3:27:709:1056#0/1  
a`\_X^\_b`aaaa¥`\_]`[^]a`^`\_a`\_]\_`P^ZZ^Q  
@HWI-EAS443:3:27:738:1739#0/1  
GGGGACATCAAGATACAGCAAGAAGTTCAAGCCGGAAATA  
+HWI-EAS443:3:27:738:1739#0/1  
a¥babaaabba\_babab``ababaYTU`aba`aa[aba`b  
@HWI-EAS443:3:27:744:440#0/1  
GCTGGATCCTGGGAAATCCAGAGTGTGAATCACTCTCCAC  
+HWI-EAS443:3:27:744:440#0/1  
aa`]a`\_`¥`aa`a`¥]Za\_]\_PXY]aa\_[`KWV^O[[`  
@HWI-EAS443:3:27:745:984#0/1  
GGTCAGGATATGCAGCCGACCTGAAGAGCACACAGAATGC  
+HWI-EAS443:3:27:745:984#0/1  
^¥G\_\_Y`¥`aZ\_]WT]`\_]`¥¥ZVNY``ZPTV[[VZYU  
@HWI-EAS443:3:27:746:1991#0/1  
AATTTTGCTTCTCTGAGTATTTTGGGTAGTCATAAGTCC  
+HWI-EAS443:3:27:746:1991#0/1  
aaa`\_]Xa\_Q]^\_aaa]NG¥^XY^^XZG`\_Y[\_¥\_]PX¥^  
@HWI-EAS443:3:27:770:923#0/1  
AAGTCCTCGTGCTATGGGGCATTCCACATCCATCTACTAG  
+HWI-EAS443:3:27:770:923#0/1  
]Z\_]W¥]UOX``SaXU[[T\_^U`]aa^VU`X¥\_X[[^a`  
@HWI-EAS443:3:27:77:577#0/1  
GGGAAATCCAGAGTGTGAATCACTCTCCACAGCAAGCTCA  
+HWI-EAS443:3:27:77:577#0/1  
aaaabbabbbaab\_aaaabaabaaaaaaaaa`[`]^\_  
@HWI-EAS443:3:27:790:1133#0/1  
TGTGGGGACATCAAGATACAGCAAGAAGTTCAAGCCGGAA

+HWI-EAS443:3:27:790:1133#0/1  
aaY`]^aab]aa`a\_a`a`baVaaa`YPW`a``^``^X^  
@HWI-EAS443:3:27:795:299#0/1  
TCTTTACCTACTGCTGTGAAGTGTATTTCATCTTTTCAA  
+HWI-EAS443:3:27:795:299#0/1  
aabbabbabaaaaaa`a\_a\_aa^a^aaaaa`aaaa\_aa  
@HWI-EAS443:3:27:819:374#0/1  
GTGGGGACATCAAGATACAGCAAGAAGTTCAAGCCGGAAA  
+HWI-EAS443:3:27:819:374#0/1  
a]a¥WYR[`PWPZ¥]\_NX^]P^\_ZWR]MWU[X]SSW]YYY  
@HWI-EAS443:3:27:880:371#0/1  
CGTGTTACCCAGGAGATTTTCATCGATTATGAGGAGCTAAG  
+HWI-EAS443:3:27:880:371#0/1  
abaa`bbbbaabbab`aa``aa`aYaaaa``a`^\_Ya^a\_  
@HWI-EAS443:3:27:951:1184#0/1  
GCTTCCTCTGAGTATTTTGGGTAGTCATAAGTCCCATTTT  
+HWI-EAS443:3:27:951:1184#0/1  
\_baaabbbbabZ¥\_a`aaaaV^]W`aaa]^\_aZaaa``a  
@HWI-EAS443:3:27:96:573#0/1  
ACAGAATTTACTTTGTTAGTAATCTCGTCAATGGCATTCT  
+HWI-EAS443:3:27:96:573#0/1  
^[U]Z^XaaT`[aZ^^a[¥Y¥¥NM[b^U^FLY\_Z]S[`b\_  
@HWI-EAS443:3:27:974:120#0/1  
CGGCTGCTTTGAATTTTACCACAAATGCGATAACACGTGC  
+HWI-EAS443:3:27:974:120#0/1  
a`\_]\_]PYa`^^baaaa^W¥UY`aa]]H^ZQ¥`O¥L\_MQR  
@HWI-EAS443:3:28:1009:1158#0/1  
GGTACGGTTATCACCATCAAAATGAGCAGGGGTCAGGATA  
+HWI-EAS443:3:28:1009:1158#0/1  
abV]abaI]\_ZPZ\_RLQ`aa^TV`]SPW[\_aaUT`ZXRSW  
@HWI-EAS443:3:28:1085:1970#0/1  
ATGGTTTCCTGGACATTTGGACTTACAATGCCGAAGTGT  
+HWI-EAS443:3:28:1085:1970#0/1  
`bbb`bab[`\_`a[aaa\_¥]¥`]aaba[`¥`\_\_a\_^¥Z^  
@HWI-EAS443:3:28:1087:358#0/1  
GAACGTGTTACCCAGGAGATTTTCATCGATTATGAGGAGCT  
+HWI-EAS443:3:28:1087:358#0/1  
aaaaa`\_Saa`\_U^^^\_\_^a\_¥`]]]]`\_¥^]\_^Z]Z¥  
@HWI-EAS443:3:28:1095:1412#0/1  
ATCCTGACCCCTGCTCATTTTGGTGGATAACCGTACCA  
+HWI-EAS443:3:28:1095:1412#0/1  
W\_WZ[^V]Z]^\_RQYRTXNZWSUPDHPTL]\_[JJJVZOB  
@HWI-EAS443:3:28:110:432#0/1  
GCTGCTTTGAATTTTACCACAAATGCGATAACACGTGCAT  
+HWI-EAS443:3:28:110:432#0/1  
aaa^\_]Y^aa^\_X\_¥\_¥\_a^`a]¥]^a]GX\_]U[`¥\_]¥X  
@HWI-EAS443:3:28:1111:414#0/1  
CAGAATGCAGATGCATATGTTTTTGTGGGGACATCAAGAT  
+HWI-EAS443:3:28:1111:414#0/1  
`[UO\_T[]ab`a]TU\_`U¥SY\_a`\_S`\_\_`\_\_\_`Z\_\_`\_Z

@HWI-EAS443:3:28:1116:35#0/1  
GCTGGCTGGATCCTGGGAAATCCAGAGTGTGAATCACTCT  
+HWI-EAS443:3:28:1116:35#0/1  
a\_aaaa`aa\_`Z]NZaZ¥``\_¥\_]\_X\_NXW]¥¥QV[GYRY  
@HWI-EAS443:3:28:1144:657#0/1  
CTTGAACCTTCTTGCTGTATCTTGATGTCCCCACAAAACA  
+HWI-EAS443:3:28:1144:657#0/1  
a`bbbabbbbabbabbabbabbabbabbabbabbabb`b  
@HWI-EAS443:3:28:1151:1116#0/1  
GCATTCTGTGTCTTTCAGGTCGGCTGCATATCCTGACC  
+HWI-EAS443:3:28:1151:1116#0/1  
aaa`][^][`XST`¥X`\_\_`¥P^\_\_[W\_VZ^\_ZP[^[YTQ  
@HWI-EAS443:3:28:1151:277#0/1  
CAATGGCATTCTGTGTGCTTTCAGGTCGGCTGCATATCC  
+HWI-EAS443:3:28:1151:277#0/1  
\_¥ba\_^`aaaabaa\_aXb`aa`a\_a^`aaX`R`V^aY¥  
@HWI-EAS443:3:28:1156:1133#0/1  
TGCCGGTTTCATTGAAGGGGGTGGACAGGGATGGTAGAT  
+HWI-EAS443:3:28:1156:1133#0/1  
abaabbabbaabb`W^bbab`a[aaaXa`aa\_aZ\_Y¥X\_Z  
@HWI-EAS443:3:28:1162:143#0/1  
GATGGTTTCCTGGACATTTGGACTTACAATGCCGAACGT  
+HWI-EAS443:3:28:1162:143#0/1  
abbababbbabbbb`abbbbaabababbbba]]a`a\_a`a  
@HWI-EAS443:3:28:1169:2004#0/1  
GAAGCCAGTTAAAAACAATGCCAAGGAAATTGGAAACGG  
+HWI-EAS443:3:28:1169:2004#0/1  
\_`babbaabbbbbbbbbbb`bbaaabbaaaaaab\_a]  
@HWI-EAS443:3:28:1197:910#0/1  
GGGAGAATGAACTATTACTGGACACTAGTAGAGCCGGGAG  
+HWI-EAS443:3:28:1197:910#0/1  
\_Y[]`X¥]`\_^J^Y¥`¥V`a¥XWaZXW^U[WHXPSZ[[LY  
@HWI-EAS443:3:28:1231:1030#0/1  
CAGAACTGATTGCCCCAGGGAGACTACCAATG  
+HWI-EAS443:3:28:1231:1030#0/1  
a`b`]UaS[X\_X0]ZZ[``XZ\_¥\_YX\_a¥ZY]LV\_Q\_a\_¥  
@HWI-EAS443:3:28:1257:1817#0/1  
CAGAACTGATTGCCCCAGGGAGACTACCAATG  
+HWI-EAS443:3:28:1257:1817#0/1  
abaab\_aabaaaaa^^Z¥baX\_a^¥a[a\_X¥`F¥\_V`\_`^  
@HWI-EAS443:3:28:1301:800#0/1  
GAAGCCAGTTAAAAACAATGCCAAGGAAATTGGAAACGG  
+HWI-EAS443:3:28:1301:800#0/1  
a`¥aYWSWG[`^XUX[RU¥Z`\_\_a\_a^UW\_]Z`X[\_\_\_]\_\_  
@HWI-EAS443:3:28:1316:1857#0/1  
GACAGGGATGGTAGATGGATGGTACGGTTATCACCATCAA  
+HWI-EAS443:3:28:1316:1857#0/1  
^\_bbbb\_SabaV`aa^aaaaaN]]^a]aa`\_¥VV¥]S¥^  
@HWI-EAS443:3:28:1371:2040#0/1  
TGCTGGCTGGATCCTGGGAAATCCAGAGTGTGAATCACTC

+HWI-EAS443:3:28:1371:2040#0/1  
aa`aa[a\_a`^\_¥^R[`aS`\_ZNRUYZ\_SVS]UWVSZR XU  
@HWI-EAS443:3:28:1372:703#0/1  
GAAGTCCTCGTGCTATGGGGCATTACCATCCATCTACTA  
+HWI-EAS443:3:28:1372:703#0/1  
aab`a`aa\_a`b`]X[`aaa^`aXX\_¥[a^RR\_\_\_¥a¥\_`^  
@HWI-EAS443:3:28:1383:12#0/1  
CAACAAAGTCTCTATCAGAATGCAGATGCATATGTTTTTG  
+HWI-EAS443:3:28:1383:12#0/1  
abbabbbabababababb`abb`bbaa\_\_bbbab]bbab\_  
@HWI-EAS443:3:28:1392:1501#0/1  
GTGCTGACCAACAAAGTCTCTATCAGAATGCAGATGCATA  
+HWI-EAS443:3:28:1392:1501#0/1  
aYaX¥V\_WV¥a^\_WY[V[aX^Y[[`a\_]VZU]NY\_VJX]]  
@HWI-EAS443:3:28:1403:1373#0/1  
CATCTTTTCAATAACAGAATTTACTTTGTTAGTAATCTCG  
+HWI-EAS443:3:28:1403:1373#0/1  
abb\_bbbbbababa^ababaa\_b\_`a^a]`a¥R¥a^¥a\_]`  
@HWI-EAS443:3:28:1453:1679#0/1  
ATTCTGTGTCTTTCAGGTCGGCTGCATATCCTGACCCC  
+HWI-EAS443:3:28:1453:1679#0/1  
ab\_aY`bb\_babbb[\_bba¥a`a`a[X`\_b`a`\_a`\_T\_N  
@HWI-EAS443:3:28:147:1498#0/1  
CTCATAATCGATGAAATCTCCTGGGTAACACGTTCCATTG  
+HWI-EAS443:3:28:147:1498#0/1  
abbbb]`baabbabbaababba`a]]aa`\_b]`aba`\_a\_  
@HWI-EAS443:3:28:1504:569#0/1  
GGAAAGTGTCAAAAATGGGACTTATGACTACCCAAAATAC  
+HWI-EAS443:3:28:1504:569#0/1  
abaaba`b\_¥aa[`\_aa^^a^`aa`aa^\_a\_[Z\_`\_`^`Y  
@HWI-EAS443:3:28:150:1216#0/1  
GGGGACATCAAGATACAGCAAGAAGTTCAAGCCGGAAATA  
+HWI-EAS443:3:28:150:1216#0/1  
aaZ`a^Y]baZ\_TXW\_ba`b^]`^`a^`^`^`^`aV`  
@HWI-EAS443:3:28:1531:1734#0/1  
GAAGAAGTTATATGAAAAGGTAAGAAGCCAGTAAAAAAC  
+HWI-EAS443:3:28:1531:1734#0/1  
^`^`a`aabaabaaa^^a`a`Ya`]a^LVT^aXS¥\_¥[``V  
@HWI-EAS443:3:28:1609:1042#0/1  
GAACTCTTTACCTACTGCTGTGAAGTGTATTTCATCTTT  
+HWI-EAS443:3:28:1609:1042#0/1  
``\_]`^^`^aaYFWaYaaSa]]a[`Paa\_a\_\_a\_^aaSaaa  
@HWI-EAS443:3:28:1632:668#0/1  
CCTGACCCCTGCTCATTGATGGTGATAACCGTACCATC  
+HWI-EAS443:3:28:1632:668#0/1  
abbbbbaa`bbbaaX`babbbbaab[b\_aaa\_\_b\_\_Z\_\_aU  
@HWI-EAS443:3:28:1633:723#0/1  
ATGATTGGGCCATGAACTTGTCTTGGGGAATATCTCAAAC  
+HWI-EAS443:3:28:1633:723#0/1  
abbabbbbbb`aab\_a\_baa\_\_\_aaaa`^`\_`aa^a\_a``X

@HWI-EAS443:3:28:1693:1641#0/1  
GTCATGATTGGCCATGAACTTGTCTTGGGGAATATCTCA  
+HWI-EAS443:3:28:1693:1641#0/1  
`aababbab\_\_b`aa[¥a[aa]a\_aa]aaaSZ]aa\_a[a  
@HWI-EAS443:3:28:1736:1447#0/1  
CAGGATATGCAGCCGACCTGAAGAGCACACAGAATGCCAT  
+HWI-EAS443:3:28:1736:1447#0/1  
abbbbbbbabb\_\_^bb\_aa`aaaaaa\_a`aaaaaa`Uaa  
@HWI-EAS443:3:28:1758:764#0/1  
AAGTCCTCGTGCTATGGGGCATTACCATCCATCTACTAG  
+HWI-EAS443:3:28:1758:764#0/1  
a^b^W[]\_^^`Q\_`\_\_`Y[\_aaa¥¥NZ[]Z^]S\_a¥\_[]`  
@HWI-EAS443:3:28:191:448#0/1  
AGAAGCTTTTTGCTCCAGCATGAGGACATGCTGCCGTTAC  
+HWI-EAS443:3:28:191:448#0/1  
a\_`¥W\_\_aa\_`a`a\_aaaYa`a`a¥a\_[a\_YUQ\_`[TRLS]  
@HWI-EAS443:3:28:194:1360#0/1  
ATTCAAATGTGAAGAATTATATGAAAAGTAAGAAGCCA  
+HWI-EAS443:3:28:194:1360#0/1  
aaaba[0¥^Y]¥a^J`\_`Z``\_a`aa\_\_UXUaa)`a\_a]¥  
@HWI-EAS443:3:28:207:1741#0/1  
TTGCCGGTTTCATTGAAGGGGGTGGACAGGGATGGTAGA  
+HWI-EAS443:3:28:207:1741#0/1  
aababbb`abbabb]¥`[ababaZaabbbaT[U`a\_ZaXa  
@HWI-EAS443:3:28:213:326#0/1  
GGATGGTGAATGCCCCATAGCACGAGGACTTCTTCCCTT  
+HWI-EAS443:3:28:213:326#0/1  
abaaaa^aabaaa\_`a`^a\_```a`\_`\_``^^\_\_]\_`^^  
@HWI-EAS443:3:28:266:1878#0/1  
GCTCCTCATAATCGATGAAATCTCCTGGGTAACACGTTCC  
+HWI-EAS443:3:28:266:1878#0/1  
aaY`]V^ZL]a]aa\_WVNN\_W]¥YZLFGaO\_aaa`¥UT\_a  
@HWI-EAS443:3:28:268:282#0/1  
AGTTCAGACAATGGAACGTGTACCAGGAGATTCATCG  
+HWI-EAS443:3:28:268:282#0/1  
¥]GYTRT^b``\_`^YaaaY¥LWU\_V¥^SZa`SL^¥[¥¥\_\_  
@HWI-EAS443:3:28:280:1191#0/1  
ATGCAGCCGACCTGAAGAGCACACAGAATGCCATTGACGA  
+HWI-EAS443:3:28:280:1191#0/1  
¥Z\_^aZ\_`QZbb¥WWZW[Y]\_Z`]V`N]MM¥]P^L^OZV[  
@HWI-EAS443:3:28:323:539#0/1  
TTTCCAATTTCTTGGCATTGTTTTTAAGTGGCTTCTTA  
+HWI-EAS443:3:28:323:539#0/1  
aaabaaa`aab\_aaaaa`\_\_b¥\_a\_a\_^`\_a\_^\_`]`^]  
@HWI-EAS443:3:28:336:470#0/1  
TCCTGGACATTTGGACTTACAATGCCGAAGTGTGGTTCT  
+HWI-EAS443:3:28:336:470#0/1  
a`aaaa]aaaa`aa`a`aaa`\_`a\_`\_¥X\_\_^^a\_V^Y¥  
@HWI-EAS443:3:28:363:1022#0/1  
GTTATCATGCGAACAATTCAACAGACTGTAGACACAGT

+HWI-EAS443:3:28:363:1022#0/1  
a[P\_\_b` ``\_¥b`^baa[¥Va`¥\_RW\_a`SZR]a^aZ\_T  
@HWI-EAS443:3:28:365:109#0/1  
AAACTGATTGCCCCAGGGAGACTACCAGTACCAATGAAC  
+HWI-EAS443:3:28:365:109#0/1  
aaa`ba` ``\_a[a`aa`¥`\_\_a¥^]aT\_¥TZ\_\_^¥W  
@HWI-EAS443:3:28:374:186#0/1  
TTTGGACATTTTCCAATTGTGATCGGATGTATATTCTGAA  
+HWI-EAS443:3:28:374:186#0/1  
a\_a\_^`^0]a` ]`X`aaa]a[[]]^¥¥¥QXPTRVKVPTB  
@HWI-EAS443:3:28:378:1050#0/1  
CATGATTGGCCATGAACTTGTCTTGGGGAATATCTCAAA  
+HWI-EAS443:3:28:378:1050#0/1  
a` ``^aa\_¥¥aaa` [aaa[¥a`a[¥a^\_\_` `aa\_  
@HWI-EAS443:3:28:393:837#0/1  
TGGACAGGGATGGTAGATGGATGGTACGGTTATCACCATC  
+HWI-EAS443:3:28:393:837#0/1  
`aa`\_aa]Za`]Ya¥a`^`\_\_Wa` ¥VW`Z^^¥\_XVQ  
@HWI-EAS443:3:28:415:1353#0/1  
ATTCACCATCCATCTACTAGTGCTGACCAACAAAGTCTCT  
+HWI-EAS443:3:28:415:1353#0/1  
aaaabaab\_a\_a\_aaba`a\_^a`^^\_\_^a\_\_a[^0` `\_  
@HWI-EAS443:3:28:446:1916#0/1  
CTTTGTTAGTAATCTCGTCAATGGCATTCTGTGTGCTCTT  
+HWI-EAS443:3:28:446:1916#0/1  
a]a]a`[^T`^`]`a]Yaba\_YZ^aaVaa\_\_QZYZa\_YQ  
@HWI-EAS443:3:28:450:468#0/1  
ATTGGAAAATGTCCAAAATATGTAAAAAGCACAAAATTGA  
+HWI-EAS443:3:28:450:468#0/1  
ababa`¥V[aa`ba^a`\_b^aa`a`aYa^a` ``\_a`]\_a  
@HWI-EAS443:3:28:456:628#0/1  
GGGCCATGAACTTGTCTTGGGGAATATCTCAAACCTTCA  
+HWI-EAS443:3:28:456:628#0/1  
\_a^abaababbbb^`aa\_\_aab`aaa`\_¥` `aaa`\_a  
@HWI-EAS443:3:28:502:1210#0/1  
GGTTTCCTGGACATTTGGACTTACAATGCCGAAGTGTGG  
+HWI-EAS443:3:28:502:1210#0/1  
Y`^ZS[a`^]a`[b`X^\_Xaa^[\_\_X¥Z\_^]a` ``NYYZ  
@HWI-EAS443:3:28:658:1566#0/1  
AGTCCTCGTGCTATGGGGCATTACCATCCATCTACTAGT  
+HWI-EAS443:3:28:658:1566#0/1  
a\_Yaa[a`X` ``\_]`\_V^` `\_\_aa\_\_aXa^\_]a\_^\_]X  
@HWI-EAS443:3:28:65:1174#0/1  
GGGACATCAAGATACAGCAAGAAGTTCAAGCCGAAATAG  
+HWI-EAS443:3:28:65:1174#0/1  
aaaa\_S`b`Y^aabaabaa`aaaa\_\_bbaaa` ``^^`a`a`  
@HWI-EAS443:3:28:674:835#0/1  
GCATTCTGTGTGCTCTTCAGGTCCGGCTGCATATCCTGACC  
+HWI-EAS443:3:28:674:835#0/1  
a`K\_Vab`S`S`Uba`a` `bb[^]ba\_\_aOUL\_GHaRHNVG

@HWI-EAS443:3:28:696:1423#0/1  
GTTCTATTGGAAAATGAAAGAAGCTTTGGACTACCACGATT  
+HWI-EAS443:3:28:696:1423#0/1  
aaa\_a¥abaa^abaaa\_aa\_\_]\_`¥Z^aa`a\_aa\_a\_\_^  
@HWI-EAS443:3:28:730:2000#0/1  
AAAGATGAATACACAGTTCACAGCAGTAGGTTAAAGAGTTC  
+HWI-EAS443:3:28:730:2000#0/1  
]¥YLUJb\_¥]ba`Z`L]`aZTY[\_`Sa]\_G][XV^^ZZW  
@HWI-EAS443:3:28:748:1672#0/1  
TAGCTCCTCATAATCGATGAAATCTCCTGGGTAACACGTT  
+HWI-EAS443:3:28:748:1672#0/1  
aYNY¥aa^ba`aa\_``RZ`\_\_RaWWV\_\_^\_V\_``a[¥^^  
@HWI-EAS443:3:28:748:48#0/1  
ATGCGATAACACGTGCATGGAAAGTGCAAAAATGGGACT  
+HWI-EAS443:3:28:748:48#0/1  
a\_aaaabaa\_`\_aX`\_]`a\_[\_\_\_G`Z`^^^Z\_`S[ZZ^  
@HWI-EAS443:3:28:783:1695#0/1  
CAAGATACAGCAAGAAGTTCAAGCCGAAATAGCAATAAG  
+HWI-EAS443:3:28:783:1695#0/1  
ab```aab`aba`aaUaaba`a`\_\_`\_```a]aa\_a`\_  
@HWI-EAS443:3:28:822:1024#0/1  
GCTGCTTTGAATTTTACCACAAATGCGATAACACGTGCAT  
+HWI-EAS443:3:28:822:1024#0/1  
a\_abaa`\_aa`a\_]``^`aa`\_\_\_\_\_`^^a^¥¥XaS\_`\_\_  
@HWI-EAS443:3:28:859:275#0/1  
CATCTTTTCAATAACAGAATTTACTTTGTTAGTAATCTCG  
+HWI-EAS443:3:28:859:275#0/1  
abbabbbbbbbbaaaabbbbababbbb`bbbaaaaa\_a  
@HWI-EAS443:3:28:895:1341#0/1  
TCCCAGGATCCAGCCAGCAATGTTACATTTACCCAAATGC  
+HWI-EAS443:3:28:895:1341#0/1  
`abaU``[`aab`aaaab]X`a````aa^`aa`^aXa`]Y  
@HWI-EAS443:3:28:912:1442#0/1  
GGGGTGGACAGGGATGGTAGATGGATGGTACGGTTATCAC  
+HWI-EAS443:3:28:912:1442#0/1  
\_bbaZ``^aaaa``aaa¥a\_a`aaZa`^UaR`a¥\_``[`V  
@HWI-EAS443:3:28:918:1256#0/1  
GTGCTCTCAGGTCGGCTGCATATCCTGACCCCTGCTCAT  
+HWI-EAS443:3:28:918:1256#0/1  
a¥aaa`aa^aa¥¥a]`a]VZ[Va]]`¥¥Z^¥a¥X^^¥^^Y  
@HWI-EAS443:3:28:921:996#0/1  
CTTTGTTAGTAATCTCGTCAATGGCATTCTGTGTGCTCTT  
+HWI-EAS443:3:28:921:996#0/1  
abbbbabba\_bbaaaba\_abaaa\_¥b\_aa`b\_a^a`aa`\_  
@HWI-EAS443:3:28:934:912#0/1  
TTCTTGCTGTATCTTGATGTCCCCACAAAACATATGCAT  
+HWI-EAS443:3:28:934:912#0/1  
abaaaaabbabaaaaaaaaaaaaaaaa`aa\_a`a`a^a\_`\_  
@HWI-EAS443:3:28:99:1153#0/1  
TTGAACTCTTTACCTACTGCTGTGAAGTGTGATTATCATCT

+HWI-EAS443:3:28:99:1153#0/1  
a\_Y\_b`bbaa\_b`bbaa\_ba`b]a\_a[XUZb¥^b`¥SZ`a  
@HWI-EAS443:3:29:1060:1392#0/1  
TTTTGCTCCTCTGAGTATTTTGGGTAGTCATAAGTCCCA  
+HWI-EAS443:3:29:1060:1392#0/1  
[ab¥]\_bbbabaaabb\_aaba\_^`ZWa^WaaaaaUa¥¥a  
@HWI-EAS443:3:29:107:266#0/1  
CGGCTCTACTAGTGTCCAGTAATAGTTCATTCTCCCTTCT  
+HWI-EAS443:3:29:107:266#0/1  
aaY`aa\_bba`aR^\_a`aa\_aa`XYZ^[`aaa^\_\_aU`BB  
@HWI-EAS443:3:29:1087:1601#0/1  
ATTTTGGGTAGTCATAAGTCCCATTTTGGACTTTCCAT  
+HWI-EAS443:3:29:1087:1601#0/1  
¥`K^ba^\_]\_\_ba\_Y¥\_WU`[aabY^a\_a\_ba`^\_a[aP  
@HWI-EAS443:3:29:1095:749#0/1  
GGCTGGTGTATAGCACCTTGGGTGTCTGACAAGTTGT  
+HWI-EAS443:3:29:1095:749#0/1  
`aaaab[babbaaaba\_`^`^Ya`a]^¥[\_`[¥\_V^U\_aY  
@HWI-EAS443:3:29:1121:1065#0/1  
CATAATCGATGAAATCTCCTGGGTAACACGTTCCATTGTC  
+HWI-EAS443:3:29:1121:1065#0/1  
abbbbbbbbbbbabbaaaba\_aaba`aaaa\_a^\_  
@HWI-EAS443:3:29:1126:1413#0/1  
GCCATGAACCTTGTCTTGGGAATATCTCAAACCTTTCAA  
+HWI-EAS443:3:29:1126:1413#0/1  
ab`a`\_aabb`Zaaa¥Y\_UUQ¥Z]`]UYaa\_W\_`]\_`a[  
@HWI-EAS443:3:29:1161:1235#0/1  
GCTGGCTGGATCCTGGGAAATCCAGAGTGTGAATCACTCT  
+HWI-EAS443:3:29:1161:1235#0/1  
aaba`^¥aa\_a^]`aa`\_a^a]]^aS]Wa\_\_¥`\_`^¥S¥  
@HWI-EAS443:3:29:1218:1824#0/1  
CATCTGCATTCTGATAGAGACTTTGTTGGTCAGCACTAGT  
+HWI-EAS443:3:29:1218:1824#0/1  
a^`aS^¥¥Z`a\_P]b¥`b`VU`^\_YZLWaY^Z¥b]bVX[  
@HWI-EAS443:3:29:1241:1497#0/1  
GGGCCATGAACCTTGTCTTGGGAATATCTCAAACCTTTCA  
+HWI-EAS443:3:29:1241:1497#0/1  
a\_bbbbaaaa`bababbab]baa`b\_aab\_baa^^a`aa`  
@HWI-EAS443:3:29:1251:1229#0/1  
GAAGTCCTCGTGCTATGGGCATTCACCATCCATCTACTA  
+HWI-EAS443:3:29:1251:1229#0/1  
a`^`a`][¥][aU¥]X^V]^a\_UaWKXU\_Y]\_\_]\_S][  
@HWI-EAS443:3:29:1308:1239#0/1  
AGATTTTCATCGATTATGAGGAGCTAAGAGAGCAATTGAGC  
+HWI-EAS443:3:29:1308:1239#0/1  
abaabaaabbb`ab`aa`a]^a`a`\_`\_a`\_`\_]`^\_Y  
@HWI-EAS443:3:29:1354:64#0/1  
GTCTCAATTTTGTGCTTTTACATATTTTGGACATTTTCC  
+HWI-EAS443:3:29:1354:64#0/1  
aS[`]ZUV`\_Xa[\_S\_[UV^^YZ\_^\_]`^Y\_]ZS\_Y]ZBB



@HWI-EAS443:3:29:1383:1410#0/1  
ATCAGAATGCAGATGCATATGTTTTGTGGGGACATCAAG  
+HWI-EAS443:3:29:1383:1410#0/1  
aa`aaab`aaaa^`a`\_\_`a^aa`^^]¥^a\_`^]\_\_^  
@HWI-EAS443:3:29:1393:302#0/1  
GGACATTTTCCAATTGTGATCGGATGTATATTCTGAAATG  
+HWI-EAS443:3:29:1393:302#0/1  
aaRa[Vaaa^a\_XTGZOUm^NZ\_UZYJPXJSWGYZT[]BB  
@HWI-EAS443:3:29:1400:177#0/1  
ATTTTGTCTCCCGCTCTACTAGTGTCCAGTAATAGTTCA  
+HWI-EAS443:3:29:1400:177#0/1  
aabb]^aaba`\_\_`]ZWOS]SSVW]W]R[\_ZVLVX^]  
@HWI-EAS443:3:29:1445:397#0/1  
TTGCTCTCTTAGCTCCTCATAATCGATGAAATCTCCTGGG  
+HWI-EAS443:3:29:1445:397#0/1  
aa`\_aWb]aaaaY\_\_\_\_\_¥`a`\_]\_^\_\_[\_`\_X^^]\_^]Y  
@HWI-EAS443:3:29:1485:1810#0/1  
ACAGAATTTACTTTGTTAGTAATCTCGTCAATGGCATTCT  
+HWI-EAS443:3:29:1485:1810#0/1  
`\_V\_a^aba`aaaa\_aa^`S``a[\_ZaVZa\_\_`\_\_\_\_`U`  
@HWI-EAS443:3:29:1493:1221#0/1  
AAGTCCTCGTGCTATGGGGCATTACCATCCATCTACTAG  
+HWI-EAS443:3:29:1493:1221#0/1  
a\_]YZ]\_`b`\_`a\_^a][\_^^a\_V\_^]`\_Z^`]V\_a¥`\_`B  
@HWI-EAS443:3:29:1545:539#0/1  
ATGGTTTCTGGACATTTGGACTTACAATGCCGAAGTGT  
+HWI-EAS443:3:29:1545:539#0/1  
abbaaabaabbbaWababba`aaaa^aab]^`a`b\_aa\_\_  
@HWI-EAS443:3:29:1602:883#0/1  
CTTCCTCTGAGTATTTTGGGTAGTCATAAGTCCCATTTTT  
+HWI-EAS443:3:29:1602:883#0/1  
``Y`\_`bbbbaZ`abbaaa`ab```ba\_^a[\_`\_``aba  
@HWI-EAS443:3:29:1636:665#0/1  
GACACTGAGCTCAATTGCTCTCTTAGCTCCTCATAATCGA  
+HWI-EAS443:3:29:1636:665#0/1  
`bababbabab`a`abaab[a`bbaa`a]^`a`aba^aYa`  
@HWI-EAS443:3:29:1736:839#0/1  
GCTTCCTCTGAGTATTTTGGGTAGTCATAAGTCCCATTTTT  
+HWI-EAS443:3:29:1736:839#0/1  
`¥\_\_XU`^b`\_\_Z`aa`]^[¥PY]R]]\_Y^^XXWWWZZ¥B  
@HWI-EAS443:3:29:1756:610#0/1  
AAAGAAGTTTGGACTACCACGATTCAAATGTGAAGAACTT  
+HWI-EAS443:3:29:1756:610#0/1  
abbbaa`bba`a`\_a\_WUa]a\_`^`\_a`\_\_a]a\_\_a\_\_Ya\_  
@HWI-EAS443:3:29:1782:711#0/1  
AAGCCAGTTAAAAACAATGCCAAGGAAATTGGAAACGGC  
+HWI-EAS443:3:29:1782:711#0/1  
abaIX¥b]^`Rab¥¥S`a\_aaa]a¥aa]a]aTZ`^Z\_`^`BB  
@HWI-EAS443:3:29:230:723#0/1  
TAGATTTCCAGTTGCTTCGAATGTTATTTTGTCTCCCGGC

+HWI-EAS443:3:29:230:723#0/1  
aa[^aaaba^a`aa`aaa`Y`aa^\_a\_`a\_]a^aa`^SZ  
@HWI-EAS443:3:29:231:136#0/1  
GAGAATTTAAATAAAAAAGTTGATGATGGTTTCCTGGACA  
+HWI-EAS443:3:29:231:136#0/1  
abaa`a`aabaaaa\_\_\_¥aZ``\_\_a\_^aSLV^\_¥^\_]^[^W  
@HWI-EAS443:3:29:270:585#0/1  
GTCAGCACTAGTAGATGGATGGTGAATGCCCCATAGCACG  
+HWI-EAS443:3:29:270:585#0/1  
a[a`]^[^V]a[`[\_aY\_``¥\_\_\_U\_a`¥\_Z[\_[Z^¥`^\_B  
@HWI-EAS443:3:29:274:630#0/1  
ATTCACCATCCATCTACTAGTGCTGACCAACAAAGTCTCT  
+HWI-EAS443:3:29:274:630#0/1  
`aab`a]b```aX\_]a\_`\_aXaa[\_Y`aYa```[^X^^^]  
@HWI-EAS443:3:29:306:1962#0/1  
TAACCGTACCATCCATCTACCATCCCTGTCCACCCCTT  
+HWI-EAS443:3:29:306:1962#0/1  
U¥\_a^¥¥¥b\_X0\_ZHU[\_YabVWVbUEYH\_[U\_`^`bb`B  
@HWI-EAS443:3:29:313:608#0/1  
TGAGTATTTTGGGTAGTCATAAGTCCCATTTTTGACACTT  
+HWI-EAS443:3:29:313:608#0/1  
`¥^\_X\_`aaabaa]^a\_aZa`b^P``a]aaa\_a`\_\_a\_\_\_  
@HWI-EAS443:3:29:346:721#0/1  
CCGGGAGACAAAATAACATTGAAGCAACTGGAAATCTAG  
+HWI-EAS443:3:29:346:721#0/1  
]X\_^PM¥¥Z`S``X]X\_\_^\_``[Z\_VR\_[\_^^]^ZZZU[\_  
@HWI-EAS443:3:29:372:1924#0/1  
ATCGATGAAATCTCCTGGGTAACACGTTCCATTGTCTGAA  
+HWI-EAS443:3:29:372:1924#0/1  
a\_b\_bX[Z``Va[\_\_\_NT[¥S^\_aa^^WV^aa^YPL]^S^\_  
@HWI-EAS443:3:29:394:663#0/1  
GACAAGTTGTATTGCAATCGTGGACTGGTGTATCTGAAAT  
+HWI-EAS443:3:29:394:663#0/1  
aabb`a`\_ba`b\_bbb]aba`b^[abab¥a`aaaaTaa\_  
@HWI-EAS443:3:29:418:915#0/1  
ATGGCATTCTGTGTGCTCTTCAGGTCGGCTGCATATCCTG  
+HWI-EAS443:3:29:418:915#0/1  
\_U`^`a`aa]QTXZ\_T]`[^X^[Xa^¥]^`aX[`[`YBB  
@HWI-EAS443:3:29:468:116#0/1  
AACTCTTTACCTACTGCTGTGAAGTGTATTTCATCTTTT  
+HWI-EAS443:3:29:468:116#0/1  
XUU`XaaWWRZ\_bb[¥]a]HV¥\_aX]^¥ZZYaYP¥Saa`Y  
@HWI-EAS443:3:29:536:262#0/1  
CACTGAGCTCAATTGCTCTCTTAGCTCCTCATAATCGATG  
+HWI-EAS443:3:29:536:262#0/1  
abbababb`ba]abbaaaaXa```a\_\_aaa`\_\_]\_]a\_`\_  
@HWI-EAS443:3:29:558:115#0/1  
ACACTTTCCATGCACGTGTTATCGCATTGTGGTAAAATT  
+HWI-EAS443:3:29:558:115#0/1  
^¥^`\_aaa^`a¥^]`¥`[a\_aa`[]``aa\_b^¥a\_`[\_¥



+HWI-EAS443:3:29:861:1043#0/1  
aba^W^\_aba`aaaaaaaaa^^¥`aa^aaaaa\_a\_a^aY  
@HWI-EAS443:3:29:872:648#0/1  
GTGGGGACATCAAGATACAGCAAGAAGTTCAAGCCGGAAA  
+HWI-EAS443:3:29:872:648#0/1  
aUaaaYV[`aa`a\_\_a`\_a`\_]\_`a\_[aX^^a]\_^`a`[Y\_  
@HWI-EAS443:3:29:941:1155#0/1  
GCCCCATTGCATTTGGGTAAATGTAACATTGCTGGCTGGA  
+HWI-EAS443:3:29:941:1155#0/1  
\_bb`¥R[^a\_^ab`^Y[¥^\_Q\_[Pa`[aa\_XZ]a^`Y\_`^  
@HWI-EAS443:3:29:948:312#0/1  
GAAGTCCTCGTGCTATGGGGCATTACCATCCATCTACTA  
+HWI-EAS443:3:29:948:312#0/1  
aaba\_a`aab\_a\_`Za[a\_`VW\_`\_`\_ZR`[\_`Q\_`\_ZaW^]  
@HWI-EAS443:3:29:968:1166#0/1  
ATGAGGACATGCTGCCGTTACACCTTTGTTTCGAGTCATGA  
+HWI-EAS443:3:29:968:1166#0/1  
aa`a]aaabaaaa\_\_a]^\_Z\_[[^\_\_UY`[ZZ]¥^\_^VU  
@HWI-EAS443:3:29:973:1250#0/1  
ACTGAGCTCAATTGCTCTTAGCTCCTCATAATCGATGA  
+HWI-EAS443:3:29:973:1250#0/1  
aa^aaaba`aa\_a\_`\_a]\_aaaa\_\_a`\_^^\_\_\_\_^\_^[\_  
@HWI-EAS443:3:2:1002:1985#0/1  
GATCCTGGGAAATCCAGAGTGTGAATCACTCTCCACAGCA  
+HWI-EAS443:3:2:1002:1985#0/1  
abba\_abbabbaaYa`bab`b`baba`aZ`\_^[\_aW`bZa  
@HWI-EAS443:3:2:1008:248#0/1  
ATTTGTGGTAAAATTCAAAGCAGCCGTTTCCAATTCCTT  
+HWI-EAS443:3:2:1008:248#0/1  
`a`ab\_b\_Laa`^aa`a`^`\_\_\_\_a^^a\_\_\_\_]]\_\_`\_]Z]^  
@HWI-EAS443:3:2:1014:1593#0/1  
AGCTTTTTGCTCCAGCATGAGGACATGCTGCCGTTACACC  
+HWI-EAS443:3:2:1014:1593#0/1  
YYQYV^a]\_R[[IUVK[^aZW]a`aZREW¥QQ]aV`VBBB  
@HWI-EAS443:3:2:1052:1085#0/1  
ATTTCTTTTTTTAACTAGCCATATTAATTTTTGTAGAAG  
+HWI-EAS443:3:2:1052:1085#0/1  
Yaba^Ma\_]abbaa\_`ab¥[bbb`abbaababbaaaa`b  
@HWI-EAS443:3:2:1063:624#0/1  
ATTCTGATAGAGACTTTGTTGGTCAGCACTAGTAGATGGA  
+HWI-EAS443:3:2:1063:624#0/1  
^aaS\_^F]^`b`¥`b]]V`bb]]`^^Z`X`]`^Y`]`aX  
@HWI-EAS443:3:2:1069:819#0/1  
GATCGGATGTATATTCTGAAATGGGAGGCTGGTGTTTATA  
+HWI-EAS443:3:2:1069:819#0/1  
a\_\_Za`\_\_^SM^Y¥]RYZZ[U^[aXNVWDKX¥FVBBBBBBB  
@HWI-EAS443:3:2:1076:1676#0/1  
CACGTGCATGGAAAGTGTCAAAAATGGGACTTATGACTAC  
+HWI-EAS443:3:2:1076:1676#0/1  
ab`ba`bbbbbab`a^aa`aababbb`a]baaba`\_`aY



+HWI-EAS443:3:2:1485:1553#0/1  
a`]a][`aX¥Za`\_PV`aV`a]Y]^Y\_V]\_^PR^]UV`BB  
@HWI-EAS443:3:2:1526:130#0/1  
GGGACATCAAGATACAGCAAGAAGTTCAAGCCGAAATAG  
+HWI-EAS443:3:2:1526:130#0/1  
Yab`aab\_\_aa\_a`aaa`aaa^^aU^^a\_\_SU\_\_\_^[^^]  
@HWI-EAS443:3:2:1535:1085#0/1  
CCAGGATCCAGCCAGCAATGTTACATTTACCCAAATGCAA  
+HWI-EAS443:3:2:1535:1085#0/1  
a`bbbbaaaab\_]`aSabbaaa`^ababaW]Xa`aaaY\_a  
@HWI-EAS443:3:2:1536:1429#0/1  
ACGGTTATCACCATCAAATGAGCAGGGTCAGGATATGC  
+HWI-EAS443:3:2:1536:1429#0/1  
Z¥a`[b^\_ZUH``[OZ]aa`Z\_V\_Y\_\_ZPLLruz[BBBB  
@HWI-EAS443:3:2:1756:1053#0/1  
ATGAACTTGTCTTGGGAATATCTCAAACCTTTCAAATGA  
+HWI-EAS443:3:2:1756:1053#0/1  
`ab`b\_bab\_Xaaaaaa\_a`aaZa[aaaXS`\_a`¥\_a``  
@HWI-EAS443:3:2:1774:1233#0/1  
ATTTTGTCTCCCGCTCTACTAGTGTCCAGTAATAGTTCA  
+HWI-EAS443:3:2:1774:1233#0/1  
a\_[[Z^^^STVXTP]LT[[[YYY]GNZZUXOVV]VTFX  
@HWI-EAS443:3:2:177:583#0/1  
TTTCAGAATATACATCCGATCACAATTGGAAAATGTCCAA  
+HWI-EAS443:3:2:177:583#0/1  
^b¥Q`^RVaaZS¥\_a¥F^a`¥]H[^ZVX^RY\_XX\_YS`WB  
@HWI-EAS443:3:2:192:369#0/1  
CCAGTACCAATGAACTGGCGACAGTTGAATAGATCGCCAA  
+HWI-EAS443:3:2:192:369#0/1  
aaaa`a`\_abbaa```a\_\_a^`^a]\_\_W\_\_\_`\_¥Y`^^^^  
@HWI-EAS443:3:2:248:210#0/1  
GATGGTTTCTGGACATTTGGACTTACAATGCCGAACTGT  
+HWI-EAS443:3:2:248:210#0/1  
aaaaa^a]a\_a]¥]^aY`aa\_^a]`]^`\_^Z]Y\_]R^¥Z  
@HWI-EAS443:3:2:287:725#0/1  
AAGAGAGCAATTGAGCTCAGTGTTCATCATTGAAAGGTTT  
+HWI-EAS443:3:2:287:725#0/1  
`[\_]`Y\_bbb^Z[\_a`a[Z\_ab^TW`Y^aa`b\_VN\_ZF\_\_\_  
@HWI-EAS443:3:2:365:114#0/1  
GAGCAATTGAGCTCAGTGTTCATCATTGAAAGGTTTGGAGA  
+HWI-EAS443:3:2:365:114#0/1  
aa]J]ZUN]YW][XZRU\_VM^¥PY]]`]YX\_[U^¥]XBB  
@HWI-EAS443:3:2:398:1474#0/1  
CAGTTCGGCATTGTAAGTCCAAATGTCCAGGAAACCATCA  
+HWI-EAS443:3:2:398:1474#0/1  
^a`b`b^bbbbbabb`aaabbbba]a`baa^aa\_\_a`Wa  
@HWI-EAS443:3:2:400:841#0/1  
CATTCTGTGTGCTCTTCAGGTCGGCTGCATATCCTGACCC  
+HWI-EAS443:3:2:400:841#0/1  
Lab`[\_]Zb]babab`bbbb^Zb`SZba``abZ`aaaSXY

@HWI-EAS443:3:2:412:409#0/1  
GGGGACATCAAGATACAGCAAGAAGTTCAAGCCGGAAATA  
+HWI-EAS443:3:2:412:409#0/1  
ab``aaaa`a`baab\_abaabba^a^`\_a`a\_Rba\_\_\_\_``  
@HWI-EAS443:3:2:444:1033#0/1  
AATGAAACCGCAATGGCCCCAAATAGGCCTCTAGATTGA  
+HWI-EAS443:3:2:444:1033#0/1  
aUX^a\_^^UZ]\_`\_Z\_GQ\_] ^a^]ZVWVSGXWUXZX]OZB  
@HWI-EAS443:3:2:47:1732#0/1  
CATATCCTGACCCCTGCTCATTTTTGATGGTGATAACCGTA  
+HWI-EAS443:3:2:47:1732#0/1  
ababY#a\_a]aSWJ\_WW[G`T`\_`\_YaYaYHLS\_\_a]GaBB  
@HWI-EAS443:3:2:490:832#0/1  
TTTGGGTAGTCATAAGTCCCATTTTTGACACTTCCATGC  
+HWI-EAS443:3:2:490:832#0/1  
`aaa\_aZ\_aR]Y^^^]\_\_YYaa\_\_\_\_\_V\_]\_\_^U^] ^WV  
@HWI-EAS443:3:2:499:1137#0/1  
GGGGACATCAAGATACAGCAAGAAGTTCAAGCCGGAAATA  
+HWI-EAS443:3:2:499:1137#0/1  
aba\_aaaaa`\_a\_aa]abaaaa`\_aZ^`\_`\_Xa`^\_]a\_  
@HWI-EAS443:3:2:556:1056#0/1  
GAGCAATTGAGCTCAGTGTCATCATTTGAAAGGTTTGAGA  
+HWI-EAS443:3:2:556:1056#0/1  
a`\_¥^`\_`aa\_aY`]\_\_\_a]]`\_^\_\_^`a]¥\_\_UW\_^^`\_^  
@HWI-EAS443:3:2:589:1159#0/1  
AATCGATGAAATCTCCTGGGTAACACGTTCCATTGTCTGA  
+HWI-EAS443:3:2:589:1159#0/1  
aaa`ba`a`]a`a[]`a¥W¥`^W`X^\_XRW^`\_]X^]X  
@HWI-EAS443:3:2:653:621#0/1  
GAGCTCAATTGCTCTCTTAGCTCCTCATAATCGATGAAAT  
+HWI-EAS443:3:2:653:621#0/1  
a\_\_a`\_`aa\_a`a\_a\_aaa\_\_a^\_a```a`a^\_\_\_\_`^`^  
@HWI-EAS443:3:2:666:307#0/1  
AGCCAGTTAAAAACAATGCCAAGGAAATTGGAAACGGCT  
+HWI-EAS443:3:2:666:307#0/1  
^[¥XH\_Z]XaaXX]]\_[\_a]X\_]a]RP]\_Y^YQOS[\_]UY  
@HWI-EAS443:3:2:743:539#0/1  
TCTTTACCTACTGCTGTGAACTGTGTATTCATCTTTTCAA  
+HWI-EAS443:3:2:743:539#0/1  
aaaabaaaaa\_aa\_aa\_a^\_[aa^`]`aa]aa[aaaa\_``  
@HWI-EAS443:3:2:749:1285#0/1  
CAAATGTGAAGAACTTATATGAAAAGGTAAGAAGCCAGTT  
+HWI-EAS443:3:2:749:1285#0/1  
aaabbb^bab\_\_a`aaab\_aba`a`a`[a^aaaa¥]\_\_\_\_  
@HWI-EAS443:3:2:769:180#0/1  
GTGGGGACATCAAGATACAGCAAGAAGTTCAAGCCGGAAA  
+HWI-EAS443:3:2:769:180#0/1  
aO^`a`]V\_`^]X]]][X¥^^^] ^] ^UV[UYV^Y^OVYOVYY  
@HWI-EAS443:3:2:783:53#0/1  
CCCCCTTCAATGAAACCGCAATGGCCCCAAATAGGCCTC

+HWI-EAS443:3:2:783:53#0/1  
^`ZK¥¥XR¥bbaa`TPZa`¥`¥bZLZTQV\_`^V\_`]K SUR  
@HWI-EAS443:3:2:88:1422#0/1  
GTGGGGACATCAAGATACAGCAAGAAGTTCAAGCCGGAAA  
+HWI-EAS443:3:2:88:1422#0/1  
`Y`¥``]aa\_```a`\_a`a[a\_XU[a¥]]`^aYV\_`^\_`^0  
@HWI-EAS443:3:2:94:47#0/1  
TTTGCTTCCTCTGAGTATTTTGGGTAGTCATAAGTCCCAT  
+HWI-EAS443:3:2:94:47#0/1  
a`^W^]a^[P[Y^][XW[[[aXJVP\_[PVY[¥WUQXY¥XB  
@HWI-EAS443:3:2:966:364#0/1  
TGCAGATGCATATGTTTTGTGGGGACATCAAGATACAGC  
+HWI-EAS443:3:2:966:364#0/1  
ab\_`bbabbbb^ab\_aaaa`ba^^a¥\_aXa\_\_`aaXa^Y  
@HWI-EAS443:3:2:985:1571#0/1  
TGATGATGGTTTCCTGGACATTTGGACTTACAATGCCGAA  
+HWI-EAS443:3:2:985:1571#0/1  
aa[Z¥¥Va`J]OGFLQ\_Y¥`^\_\_`XVRV`SPZ¥\_WRK¥]B  
@HWI-EAS443:3:30:1110:266#0/1  
ACAAAGTCTCTATCAGAATGCAGATGCATATGTTTTGTG  
+HWI-EAS443:3:30:1110:266#0/1  
a^abaaU`a`a`a`b``aaa]```adWaa^aa`aa``¥Za  
@HWI-EAS443:3:30:1121:1147#0/1  
GCTTCCTCTGAGTATTTTGGGTAGTCATAAGTCCCATTTT  
+HWI-EAS443:3:30:1121:1147#0/1  
a`\_[VKW`WT¥^L[]Za\_[]YWY`\_]YQS¥]^]\_a  
@HWI-EAS443:3:30:1146:1865#0/1  
GAGATTTTCATCGATTATGAGGAGCTAAGAGAGCAATTGAG  
+HWI-EAS443:3:30:1146:1865#0/1  
``b`abbabbbb]abb`^a^]\_aaaaaaaa[```aaa`W]aT  
@HWI-EAS443:3:30:1152:1216#0/1  
AGCCAGTTAAAAACAATGCCAAGGAAATTGGAAACGGCT  
+HWI-EAS443:3:30:1152:1216#0/1  
a]¥Ya\_\_\_\_a¥\_`\_`aNaa\_Ta`a`]\_\_\_\_]^`X[\_`^\_aP]  
@HWI-EAS443:3:30:1161:426#0/1  
GAATTTTCCTTTTTTAACTAGCCATATTAATTTTTGTAGA  
+HWI-EAS443:3:30:1161:426#0/1  
^L[\_]SZO¥]V[^`^aZR¥]0[^`aa¥a\_\_RVY\_a^Z^YGV  
@HWI-EAS443:3:30:1217:26#0/1  
GATGGTGAATGCCCCATAGCACGAGGACTTCTTCCCTTT  
+HWI-EAS443:3:30:1217:26#0/1  
a^aaZS[[\_`\_¥^\_X]]]ZWWWWW]XYYZXT¥]]ZVW^XV  
@HWI-EAS443:3:30:1239:1172#0/1  
CAGCAGTAGGTAAAGAGTTCAACCACCTGGAAAAAGAAT  
+HWI-EAS443:3:30:1239:1172#0/1  
abab`aQabb]aaaa\_b^^`aaaaaa`abaa]`a\_``^\_a  
@HWI-EAS443:3:30:1276:620#0/1  
GGACATCAAGATACAGCAAGAAGTTCAAGCCGGAAATAGC  
+HWI-EAS443:3:30:1276:620#0/1  
Yb]b\_a]¥bab`a]bVbVbXI]\_ZaJ^aNyaaaVSa^\_Ua



@HWI-EAS443:3:30:1384:1365#0/1  
CTGCTTTGAATTTTACCACAAATGCGATAACACGTGCATG  
+HWI-EAS443:3:30:1384:1365#0/1  
a^bb\_aa`babaab\_`abba`]aaaa`aaaa^a]`aa  
@HWI-EAS443:3:30:141:670#0/1  
ATCTTTTCAATAACAGAATTTACTTTGTTAGTAATCTCGT  
+HWI-EAS443:3:30:141:670#0/1  
aa\_aabaa]^abbbba^`aaa\_aaa`aZ`a`]`a\_^`]  
@HWI-EAS443:3:30:1424:1198#0/1  
GCTGCTTTGAATTTTACCACAAATGCGATAACACGTGCAT  
+HWI-EAS443:3:30:1424:1198#0/1  
aa`a\_¥\_]^[a\_^^`]\_\_^[Y¥W^^[U]^T^P[Z¥]  
@HWI-EAS443:3:30:1431:53#0/1  
AGTCCTCGTGCTATGGGCATTACCATCCATCTACTAGT  
+HWI-EAS443:3:30:1431:53#0/1  
aa\_]P¥\_a\_a`[`a`^^`U`^`¥¥WW\_\_TLX`U^]W¥SUW  
@HWI-EAS443:3:30:1449:480#0/1  
GGGGCATTACCATCCATCTACTAGTGCTGACCAACAAAG  
+HWI-EAS443:3:30:1449:480#0/1  
abab`abbaba`bbaabbaababaa`b\_b`aa`a^a`\_a  
@HWI-EAS443:3:30:1464:341#0/1  
GCCAGTTAAAAACAATGCCAAGGAAATTGGAAACGGCTG  
+HWI-EAS443:3:30:1464:341#0/1  
aaabaabbabbbaaaabba`aabb`abaaaaa^a\_[]  
@HWI-EAS443:3:30:147:1568#0/1  
CTGATAGAGACTTTGTTGGTCAGCACTAGTAGATGGATGG  
+HWI-EAS443:3:30:147:1568#0/1  
aa[b`aaa`bbbaaa\_a^aXaa^aR]aaa^\_Y`]^\_^\_Z  
@HWI-EAS443:3:30:1490:1844#0/1  
CAGTCTCAATTTTGTGCTTTTTACATATTTTGGACATTTT  
+HWI-EAS443:3:30:1490:1844#0/1  
U`\_\_ba^]babbb[bbbbbbba\_bb`bbba\_\_baaaaab  
@HWI-EAS443:3:30:1520:1510#0/1  
CATCAAGATACAGCAAGAAGTTCAAGCCGAAATAGCAAT  
+HWI-EAS443:3:30:1520:1510#0/1  
a`bababaabbb^abbbabb`a\_ba`Wa`aaaa[a]a  
@HWI-EAS443:3:30:1522:198#0/1  
GTTGGTCAGCACTAGTAGATGGATGGTGAATGCCCCATAG  
+HWI-EAS443:3:30:1522:198#0/1  
ZW\_ZZ`bXZWWbba¥Z\_a`^^`bab^GaV\_\_aaZHG`ZQ`  
@HWI-EAS443:3:30:1533:1981#0/1  
CTTCCTCTGAGTATTTTGGGTAGTCATAAGTCCCATTTT  
+HWI-EAS443:3:30:1533:1981#0/1  
]``^a¥TTb[F]Z\_TT`\_]T¥ZXW`ab^QNY¥\_a`a]\_a  
@HWI-EAS443:3:30:1537:1487#0/1  
GGTGTATATAGCACCTTGGGTGTCTGACAAGTTGTATTG  
+HWI-EAS443:3:30:1537:1487#0/1  
aa\_b\_aabba`aaa`aa\_aZZ\_] [aZ\_\_\_\_^`\_`[Y\_]^\_  
@HWI-EAS443:3:30:156:1743#0/1  
CGGGAAACTATGCAAATAAGAGGGGTAGCCCCATTGCAT

+HWI-EAS443:3:30:156:1743#0/1  
aa`^ZW¥`XUWY`RVX`\_T\_^aRVX\_X`^`^aYVWV^^^U  
@HWI-EAS443:3:30:1571:545#0/1  
CGTCAATGGCATTCTGTGTGCTCTTCAGGTCGGCTGCATA  
+HWI-EAS443:3:30:1571:545#0/1  
^bZK\_¥\_\_[[W[aa\_\_I¥U¥ba]bab^``ZS\_aT`^`^]Z  
@HWI-EAS443:3:30:1575:1658#0/1  
CTGGCTTCTTACCTTTTCATATAAGTTCTTCACATTTGAA  
+HWI-EAS443:3:30:1575:1658#0/1  
X[a\_\_a¥aZ`b^\_U\_aab[aaaa`¥P[WaaaaZZ`b^Za  
@HWI-EAS443:3:30:1599:1979#0/1  
CGTCAATGGCATTCTGTGTGCTCTTCAGGTCGGCTGCATA  
+HWI-EAS443:3:30:1599:1979#0/1  
aa`^b`^`^abbbabaab]a`a¥`aaa^`[Zaa]^RV`b  
@HWI-EAS443:3:30:1604:48#0/1  
ATTTGAAAGTTTGGAGATATTCACCAAGACAAGTTCATGG  
+HWI-EAS443:3:30:1604:48#0/1  
^`bbbababa\_bbbbabbabba[[\_aab`^aab`a]^`^V  
@HWI-EAS443:3:30:1623:1402#0/1  
CTCTGTAACTTCTAGAAGACAAGCATAACGGGAAACTA  
+HWI-EAS443:3:30:1623:1402#0/1  
aaaababbbbbbbbabbbbaabaaaabaababaa`\_aa  
@HWI-EAS443:3:30:1656:1064#0/1  
TGGCTGGATCCTGGGAAATCCAGAGTGTGAATCACTCTCC  
+HWI-EAS443:3:30:1656:1064#0/1  
a``bb`aaa`]a`aa`aaa]\_aa\_a\_a\_\_`aa]`W^V]S[  
@HWI-EAS443:3:30:1672:1458#0/1  
GGGACATCAAGATACAGCAAGAAGTTCAAGCCGAAATA  
+HWI-EAS443:3:30:1672:1458#0/1  
`aaa[J[aaabbaa`bbUbbba`ab^`Vaa[¥\_aa^\_]\_a  
@HWI-EAS443:3:30:1679:1742#0/1  
ATGGTTTCTGACATTTGGACTTACAATGCCGAAGTGT  
+HWI-EAS443:3:30:1679:1742#0/1  
a¥S[G^^^YQ^^W]]]\_\_OR]X^ZX^]VZW]Z^RW[Z]  
@HWI-EAS443:3:30:169:1143#0/1  
GGACATGCTGCCGTTACACCTTTGTTGAGTCATGATTGG  
+HWI-EAS443:3:30:169:1143#0/1  
aX[ab]]aabbaWiaX¥]\_aYaaa`a`[a`Uaa``R¥VRP  
@HWI-EAS443:3:30:16:1827#0/1  
GCTGGCTGGATCCTGGGAAATCCAGAGTGTGAATCACTCT  
+HWI-EAS443:3:30:16:1827#0/1  
aba^Za^a^aZbaXa]a`baZaaa^``UXUY`W`\_``^^W  
@HWI-EAS443:3:30:1702:718#0/1  
CTTGAACCTTCTTGCTGTATCTTGATGTCCCCACAAAAACA  
+HWI-EAS443:3:30:1702:718#0/1  
abbbbbbbbabbbbbbbbabbb`aabb\_\_aba\_ba\_W`  
@HWI-EAS443:3:30:1714:1270#0/1  
GGGGCATTACCATCCATCTACTAGTGCTGACCAACAAAG  
+HWI-EAS443:3:30:1714:1270#0/1  
aaQaaS`aabaaa`a``\_a\_aaXa`\_]`\_Y\_]`\_]Q^`^`

@HWI-EAS443:3:30:1736:209#0/1  
GCCAGTTAAAAACAATGCCAAGGAAATTGGAAACGGCTG  
+HWI-EAS443:3:30:1736:209#0/1  
a`XW¥FTSIST\_\_\_¥VZNLTYQ^XOFS]\_W\_YUYSLVSBB  
@HWI-EAS443:3:30:1743:211#0/1  
GGACTGGTGTATCTGAAATGATAATACCAGATCCAGCATT  
+HWI-EAS443:3:30:1743:211#0/1  
aa`^]^\_YbY`a¥aa``aaa\_a\_Z``ZZ]\_T\_SP\_^WW¥¥  
@HWI-EAS443:3:30:185:1206#0/1  
GTCATGATTGGCCATGAACTTGTCTTGGGGAATATCTCA  
+HWI-EAS443:3:30:185:1206#0/1  
`\_a`aa`a`abbaaaa`[aaaa¥baaaaa\_]`a`a`[T  
@HWI-EAS443:3:30:193:1619#0/1  
GGGACATCAAGATACAGCAAGAAGTTCAAGCCGAAATAG  
+HWI-EAS443:3:30:193:1619#0/1  
`bbbbbab\_baba]bbababa`¥^[^`baabaaa\_Waaa\_  
@HWI-EAS443:3:30:212:288#0/1  
GTTGCTTCGAATGTTATTTTGTCTCCCGCTCTACTAGTG  
+HWI-EAS443:3:30:212:288#0/1  
`^babaa\_]aaaa\_aaa`a`Y`\_]`\_WY^¥[PFPJVVUB  
@HWI-EAS443:3:30:237:582#0/1  
AATTTACTTTGTTAGTAATCTCGTCAATGGCATTCTGTGT  
+HWI-EAS443:3:30:237:582#0/1  
^R^aa`aaa`a`aa[Xa\_``^aa]\_\_\_X^^\_\_\_^]^\_`ZZ  
@HWI-EAS443:3:30:245:397#0/1  
TATCCTGACCCCTGCTCATTGATGGTGATAACCGTACC  
+HWI-EAS443:3:30:245:397#0/1  
ab`baabbbba\_\_abbb[``aa\_\_a^a^aaa[`Z`TN  
@HWI-EAS443:3:30:256:1711#0/1  
GTTTTGTGGGACATCAAGATACAGCAAGAAGTTCAAGC  
+HWI-EAS443:3:30:256:1711#0/1  
H^baS\_¥]bb`Z^Z\_SX\_¥[P^ba`Yaab¥\_IWX[F^^``  
@HWI-EAS443:3:30:259:244#0/1  
CAAGGAAATTGGAAACGGCTGCTTTGAATTTTACCACAAA  
+HWI-EAS443:3:30:259:244#0/1  
aa^aaYaa`aaa\_a`]aYaaa^Z¥\_YY]Y]\_`^I\_RS]\_Y  
@HWI-EAS443:3:30:299:19#0/1  
GCTGCTTTGAATTTTACCACAAATGCGATAACACGTGCAT  
+HWI-EAS443:3:30:299:19#0/1  
a``aWZ]\_[¥^[\_[SX¥ZXXTOVX¥YYZUPMWWYUYW  
@HWI-EAS443:3:30:342:817#0/1  
GTGCTATGGGCATTACCATCCATCTACTAGTGCTGACC  
+HWI-EAS443:3:30:342:817#0/1  
aY\_aX¥OGU[\_`]`\_aaa\_a````\_^\_a`\_\_^X\_[W]^W]  
@HWI-EAS443:3:30:372:594#0/1  
CAGAACTGATTGCCCCAGGGAGACTACCAGTACCAATG  
+HWI-EAS443:3:30:372:594#0/1  
a\_\_V``bW^^aa^\_ababa`[XV[`a^`aa]\_¥\_\_a\_X[\_  
@HWI-EAS443:3:30:408:263#0/1  
AGAAGTCCTCGTGCTATGGGCATTACCATCCATCTACT



@HWI-EAS443:3:30:698:401#0/1  
AATCGATGAAATCTCCTGGGTAACACGTTCCATTGTCTGA  
+HWI-EAS443:3:30:698:401#0/1  
¥aabb[bbbabbabb]bb^aaa]^`^¥`\_]aa^M]^`YY  
@HWI-EAS443:3:30:699:1442#0/1  
GAGCAATTGAGCTCAGTGCATCATTGAAAGGTTTGAGA  
+HWI-EAS443:3:30:699:1442#0/1  
\_aabba```aaaab`Y¥a^aaaaaaaa^Za]a\_Uaaaa`a  
@HWI-EAS443:3:30:735:1200#0/1  
CAGTTAAAAACAATGCCAAGGAAATTGGAAACGGCTGCT  
+HWI-EAS443:3:30:735:1200#0/1  
aa\_]b\_Ya^]a`\_]aa]^`b\_a`\_TT[Xa^¥^^]^\_TB  
@HWI-EAS443:3:30:745:1551#0/1  
ATCTTGATGTCCCCACAAAAACATATGCATCTGCATTCTG  
+HWI-EAS443:3:30:745:1551#0/1  
a`\_aaaa`a^baaaa`[[^a^\_`\_aZ¥```\_`\_]\_U\_\_  
@HWI-EAS443:3:30:803:770#0/1  
GCTGAGCTTTGGGTATGAATTTCTTTTTTAACTAGCCAT  
+HWI-EAS443:3:30:803:770#0/1  
a`V`VYZ][Y\_\_^MW^^[LZ``YaX[\_]a\_V\_``[RMS^\_  
@HWI-EAS443:3:30:816:174#0/1  
TCCCGGCTCTACTAGTGTCCAGTAATAGTTCATTCTCCCT  
+HWI-EAS443:3:30:816:174#0/1  
aaa]UXZ[SYa[¥¥N¥^`\_[WET\_[YURXUY^]RRRTMP  
@HWI-EAS443:3:30:81:2000#0/1  
CGTTACACCTTTGTTGAGTCATGATTGGGCCATGAACTT  
+HWI-EAS443:3:30:81:2000#0/1  
aa]\_^b`\_Z\_VQ]^¥]^`¥^X\_]`\_^Y]]R¥^]XQX]UV]V  
@HWI-EAS443:3:30:843:1994#0/1  
CTCCCGGCTCTACTAGTGTCCAGTAATAGTTCATTCTCCC  
+HWI-EAS443:3:30:843:1994#0/1  
a\_abb`^a`a`a`¥^\_UTT```\_V\_`^ZPU[SXX^V¥W¥[  
@HWI-EAS443:3:30:866:39#0/1  
AGCAAATCCTACATTAATGATAAAGGGAAAGAAGTCCTCG  
+HWI-EAS443:3:30:866:39#0/1  
^baa`a`a`¥Y`abaa\_^]]a\_\_```^^¥¥]\_``]VGYP`  
@HWI-EAS443:3:30:897:1154#0/1  
TACCACGATTCAAATGTGAAGAACTTATATGAAAAGGTAA  
+HWI-EAS443:3:30:897:1154#0/1  
abbbbabaaabb^a`a^bbba]aaaaa`aaaaa`\_Taa  
@HWI-EAS443:3:30:925:1758#0/1  
CAGTCTCAATTTTGTGCTTTTTACATATTTTGGACATTTT  
+HWI-EAS443:3:30:925:1758#0/1  
a`^\_aaba^aaba`\_aaaa`\_N¥aa\_aaa`\_\_aaa``a\_  
@HWI-EAS443:3:30:933:1397#0/1  
CTGACAAGTTGTATTGCAATCGTGGACTGGTGTATCTGAA  
+HWI-EAS443:3:30:933:1397#0/1  
a`b\_[\_a^X[a^```\_`ab\_^aa`\_aaa]\_\_X\_`^aQ`\_^^  
@HWI-EAS443:3:30:950:131#0/1  
GGGGTCAGGATATGCAGCCGACCTGAAGAGCACACAGAAT

+HWI-EAS443:3:30:950:131#0/1  
\_¥\_b`aabbabbab]aaa]aaa\_aa^aa`aa`¥`^]Y  
@HWI-EAS443:3:30:969:1021#0/1  
CAGCAAATCCTACATTAATGATAAAGGGAAAGAAGTCCTC  
+HWI-EAS443:3:30:969:1021#0/1  
abaa`^aa`]T)```]`\_a`a`aa`\_\_\_Y`\_\_^\_]YW  
@HWI-EAS443:3:30:977:1759#0/1  
CATAATCGATGAAATCTCCTGGGTAACACGTTCCATTGTC  
+HWI-EAS443:3:30:977:1759#0/1  
[abbbaaaaabbbbaabaaa`\_Gaaaba`\_aba`a`]`]a  
@HWI-EAS443:3:30:978:140#0/1  
ATCATTAATGTAGGATTTGCTGAGCTTTGGGTATGAATTT  
+HWI-EAS443:3:30:978:140#0/1  
`a`bbbabb`]abbaababaa`¥\_\_aaaabaYaaa\_\_a`  
@HWI-EAS443:3:30:97:961#0/1  
GTGGGGACATCAAGATACAGCAAGAAGTTCAAGCCGGAAA  
+HWI-EAS443:3:30:97:961#0/1  
a¥[a[[aaZ^baaba\_\_a`aaab`\_\_aWZ`aa`\_aX\_]a  
@HWI-EAS443:3:30:986:673#0/1  
GATAACCGTACCATCCATCTACCATCCCTGTCCACCCCC  
+HWI-EAS443:3:30:986:673#0/1  
aa`a`a`a`\_`\_`\_a`^`\_]\_\_WV`¥Q¥U^`¥^¥\_UUWUVW  
@HWI-EAS443:3:31:1023:938#0/1  
CAGAATTTACTTTGTTAGTAATCTCGTCAATGGCATTCTG  
+HWI-EAS443:3:31:1023:938#0/1  
a]]aabbbaaaaaaaaa`\_aa`^`\_a`^`a`\_`^]\_\_``[`Y  
@HWI-EAS443:3:31:1034:87#0/1  
TCGTGCTATGGGGCATTACCATCCATCTACTAGTGCTGA  
+HWI-EAS443:3:31:1034:87#0/1  
aabaabaaaba`¥Zabb`aa[aa`[aa\_aaXX`b`\_`\_`a`  
@HWI-EAS443:3:31:1117:98#0/1  
GCTGCATATCCTGACCCCTGCTCATTTTGATGGTGATAAC  
+HWI-EAS443:3:31:1117:98#0/1  
abbbbbbababbbbaaabb^babbbabb`abb\_ba`aaZ  
@HWI-EAS443:3:31:1121:169#0/1  
AGGAAATTGGAAACGGCTGCTTTGAATTTTACCACAAATG  
+HWI-EAS443:3:31:1121:169#0/1  
`bba`abbbbaaaabaaa¥^a`HQ[\_\_\_`aSNY^GX`aQS  
@HWI-EAS443:3:31:1143:1433#0/1  
CTTTATCATTAATGTAGGATTTGCTGAGCTTTGGGTATGA  
+HWI-EAS443:3:31:1143:1433#0/1  
[``Z\_a\_[\_a\_YJ^Laa`]¥babbabaabbaaaa`Kb\_ba  
@HWI-EAS443:3:31:1155:494#0/1  
GCTGGCTGGATCCTGGGAAATCCAGAGTGTGAATCACTCT  
+HWI-EAS443:3:31:1155:494#0/1  
\_R\_aba`aZQOW\_RY]VRW^PMVUN^ZRYQZWYPNUTTZN  
@HWI-EAS443:3:31:116:1680#0/1  
GCTGCTTTGAATTTTACCACAAATGCGATAACACGTGCAT  
+HWI-EAS443:3:31:116:1680#0/1  
abbabbbbV`N^aa```]¥`b^ZUaaRY^aY^aa`Xaab^

@HWI-EAS443:3:31:1172:2024#0/1  
GTTGCTTCGAATGTTATTTTGTCTCCCGGCTCTACTAGTG  
+HWI-EAS443:3:31:1172:2024#0/1  
^U¥\_\_`\_bb`Y\_[U^X`¥X[^\_`¥]aa^[V[YOYZVYPMN  
@HWI-EAS443:3:31:1185:478#0/1  
GCTTCGAATGTTATTTTGTCTCCCGGCTCTACTAGTGTCC  
+HWI-EAS443:3:31:1185:478#0/1  
aaaa`a^a^a[a¥aaaa`^`\_\_]^)^\_^^¥]\_¥ZRTTZV  
@HWI-EAS443:3:31:1210:1251#0/1  
GGTAGATGGATGGTACGGTTATCACCATCAAAATGAGCAG  
+HWI-EAS443:3:31:1210:1251#0/1  
[`[b¥[¥][b\_V]RbZ`¥Va\_V`a]Zbb]aUaaXVaR[[a  
@HWI-EAS443:3:31:1437:543#0/1  
AAGCCAGTTAAAAACAATGCCAAGGAAATTGGAAACGGC  
+HWI-EAS443:3:31:1437:543#0/1  
abaa\_aa\_aaa\_\_a`\_`a`a`¥\_\_WX\_\_\_\_\_`\_¥^^^a\_W  
@HWI-EAS443:3:31:1499:496#0/1  
CACCATCCATCTACTAGTGCTGACCAACAAAGTCTCTATC  
+HWI-EAS443:3:31:1499:496#0/1  
a\_^]WQY^\_[`a[a]YX]`\_aa¥V`a^a^aaYGYPX\_\_V  
@HWI-EAS443:3:31:1545:469#0/1  
GTTTCCCGTTATGCTTGTCTTCTAGAAGGTTAACAGAGTG  
+HWI-EAS443:3:31:1545:469#0/1  
`[^ba^P\_a\_`a`X`¥`\_`a\_\_aa^QN^`X]¥`ZVU¥¥MZ  
@HWI-EAS443:3:31:1600:992#0/1  
GAGCAATTGAGCTCAGTGTCATCATTGAAAGTTTGAGA  
+HWI-EAS443:3:31:1600:992#0/1  
a`^`bbbabbaab\_aaabaaaaababba[`a`\_aaaa`  
@HWI-EAS443:3:31:1681:1573#0/1  
CATTTTCCAATTGTGATCGGATGTATATTCTGAAATGGGA  
+HWI-EAS443:3:31:1681:1573#0/1  
abbbabba\_`b\_KW`\_a]aaPbaPR¥T[a`[LHZS¥P]`X  
@HWI-EAS443:3:31:1690:1080#0/1  
GGGGACATCAAGATACAGCAAGAAGTTCAAGCCGGAAATA  
+HWI-EAS443:3:31:1690:1080#0/1  
\_ZG¥]YHYZQR\_[ZIZNaNPZ`]Y]MW¥]WVHDXZYY]\_N  
@HWI-EAS443:3:31:1720:747#0/1  
CAGGTCGGCTGCATATCCTGACCCCTGCTCATTTTGATGG  
+HWI-EAS443:3:31:1720:747#0/1  
a\_ab[bbX`bb\_T\_\_]`aaa^`RMH\_ab\_¥Ybb`bbaaZU  
@HWI-EAS443:3:31:1726:1540#0/1  
CATTCTGTGTGCTCTTCAGGTCGGCTGCATATCCTGACCC  
+HWI-EAS443:3:31:1726:1540#0/1  
aabbaba[b^aUa`a`bbb^bbaabba\_abbbaIbaabaSR  
@HWI-EAS443:3:31:180:111#0/1  
GCTTCCTCTGAGTATTTTGGGTAGTCATAAGTCCCATTTT  
+HWI-EAS443:3:31:180:111#0/1  
`aaa`baabba`]aaaa`aa`Zaa^\_\_a`\_`Za\_`aa`aa  
@HWI-EAS443:3:31:198:889#0/1  
GGATGGTACGGTTATCACCATCAAAATGAGCAGGGGTCAG

+HWI-EAS443:3:31:198:889#0/1  
aaT^a`K¥bab¥abaZP`TM^aadW^`\_a\_X]\_\_[W\_[[  
@HWI-EAS443:3:31:248:660#0/1  
GCTGTATCTTGATGTCCCCACAAAAACATATGCATCTGCA  
+HWI-EAS443:3:31:248:660#0/1  
[bb`]^ba\_[a`Wbba]S\_aabaaS]R`aa`V][`a`  
@HWI-EAS443:3:31:250:1073#0/1  
GAATTTACTTTGTTAGTAATCTCGTCAATGGCATTCTGTG  
+HWI-EAS443:3:31:250:1073#0/1  
^S`][`a^a]`aX`^`¥]^Y]Zba[a\_W¥YQaa\_US^\_QN  
@HWI-EAS443:3:31:337:172#0/1  
GGGGACATCAAGATACAGCAAGAAGTTCAAGCCGGAAATA  
+HWI-EAS443:3:31:337:172#0/1  
aaaaaaaa\_a`aa``aaa`a`aaZ¥`Y]^a\_\_ZY\_^]^^^  
@HWI-EAS443:3:31:439:1346#0/1  
ACTTTGGGTCTTATTGCTATTTCCGGCTTGAACCTTCTTGC  
+HWI-EAS443:3:31:439:1346#0/1  
aaaaaaaa¥X`aaa]`\_aabaaaa`\_```OT\_`^^¥][\_\_  
@HWI-EAS443:3:31:492:680#0/1  
GTTTTTGTGGGGACATCAAGATACAGCAAGAAGTTCAAGC  
+HWI-EAS443:3:31:492:680#0/1  
`¥\_]``0^^[¥VX\_\_```\_`\_\_\_¥a]¥]a`]V^X¥[^¥Q  
@HWI-EAS443:3:31:52:1919#0/1  
CACCTTTGTTTCGAGTCATGATTGGGCCATGAACTTGTCTT  
+HWI-EAS443:3:31:52:1919#0/1  
abba`^``]\_a¥¥ZYaa\_\_a\_^]\_Wa`^¥Z¥Y^^^[\_Y\_YV  
@HWI-EAS443:3:31:536:857#0/1  
GCCAGTTAAAAACAATGCCAAGGAAATTGGAAACGGCTG  
+HWI-EAS443:3:31:536:857#0/1  
abbX[U``aa\_S^`a^aa]^SX\_WZ`[\_aYGL]a\_\_^X]Z  
@HWI-EAS443:3:31:543:692#0/1  
CATTGAAGGGGGTGGACAGGGATGGTAGATGGATGGTAC  
+HWI-EAS443:3:31:543:692#0/1  
aabbba\_ab`ab]a^aaa`a`aaaUaaa^aa^aaTaZ  
@HWI-EAS443:3:31:561:1881#0/1  
ATGAAATCTCCTGGGTAACACGTTCCATTGTCTGAACTAG  
+HWI-EAS443:3:31:561:1881#0/1  
aY[^`¥]`\_ba¥ZX[W]\_aa`\_]a]ZZXZU¥YY¥\_^]a`  
@HWI-EAS443:3:31:566:452#0/1  
GGGACATTCCTCAATCCTGTGGCCAGTCTCAATTTTGTGC  
+HWI-EAS443:3:31:566:452#0/1  
a`X^TPRV`\_`aba[YTMSRVUZaXLFVH¥N^TLRLXFXW  
@HWI-EAS443:3:31:592:1036#0/1  
AAATTTTTGTAGAAGCTTTTTGCTCCAGCATGAGGACATG  
+HWI-EAS443:3:31:592:1036#0/1  
aZ^]aaaab`\_`[`aaa`aa`\_\_a`a\_a\_]\_]a\_^`\_`^^  
@HWI-EAS443:3:31:668:1834#0/1  
GGCCATTGCCGTTTCATTGAAGGGGGTGGACAGGGATG  
+HWI-EAS443:3:31:668:1834#0/1  
\_abb]abaa`]Mbabab`U\_U]Xab\_ZIT`a^a`\_`W\_a





+HWI-EAS443:3:31:909:1304#0/1  
^Ua[S`bY^R0^\_a\_a`SaW`a`XVUG`]\_]¥]ZVU\_\_\_\_  
@HWI-EAS443:3:31:915:966#0/1  
GAGCAATTGAGCTCAGTGCATCATTGAAAGGTTTGAGA  
+HWI-EAS443:3:31:915:966#0/1  
abbbabbbb^bbbbbbabaaaaababab`aba]aabbaa  
@HWI-EAS443:3:31:939:723#0/1  
TGCTTTGAATTTTACCACAAATGCGATAACACGTGCATGG  
+HWI-EAS443:3:31:939:723#0/1  
¥\_Y[``a```abab\_Z`aZ^a^\_¥ba^\_¥`^^`N\_]¥b`  
@HWI-EAS443:3:31:942:1560#0/1  
AAAGTGTCAAAAATGGGACTTATGACTACCCAAAATACTC  
+HWI-EAS443:3:31:942:1560#0/1  
aaa¥U]V``a````aa\_a\_\_\_\_\_`aa\_aX¥¥``\_]]]\_¥  
@HWI-EAS443:3:31:962:245#0/1  
ACTACCACGATTCAAATGTGAAGAACTTATATGAAAAGGT  
+HWI-EAS443:3:31:962:245#0/1  
`aaba^aab\_aaaaa`ab\_b\_aaa\_\_aaaaaaaa`\_a\_W  
@HWI-EAS443:3:31:973:1093#0/1  
GAATGCCCATAGCACGAGGACTTCTTCCCTTATCATT  
+HWI-EAS443:3:31:973:1093#0/1  
aba^`]0^SRZ\_X¥Z0\_W\_Z^Y¥]¥][W[^¥WU¥0\_Y]X  
@HWI-EAS443:3:31:981:498#0/1  
GGATATGCAGCCGACCTGAAGAGCACACAGAATGCCATTG  
+HWI-EAS443:3:31:981:498#0/1  
^MY^`\_P\_[SS^]U\_]W^[^`^^TNZYX[]Z[Z[]Y[]  
@HWI-EAS443:3:32:1025:607#0/1  
GCTATTTCCGGCTTGAACCTTCTTGCTGTATCTTGATGTCC  
+HWI-EAS443:3:32:1025:607#0/1  
aaa\_bbbba]``\_b`[^\_a`¥\_a^Z\_aY\_]¥`a``^^[aa  
@HWI-EAS443:3:32:1039:449#0/1  
GGTTGAACTCTTACCTACTGCTGTGAACTGTGTATTCAT  
+HWI-EAS443:3:32:1039:449#0/1  
ab¥a`aa\_aabbbba\_aaaabb\_\_W¥^`S\_`X`Y\_a\_\_`\_  
@HWI-EAS443:3:32:1047:538#0/1  
AAGTCCTCGTGCTATGGGCATTACCATCCATCTACTAG  
+HWI-EAS443:3:32:1047:538#0/1  
abaY`aaaa\_`[^\_a`^^`¥a\_\_a¥\_\_¥W¥\_\_WW`\_¥\_\_  
@HWI-EAS443:3:32:1050:751#0/1  
TGAGTATTTTGGGTAGTCATAAGTCCCATTTTGGACACTT  
+HWI-EAS443:3:32:1050:751#0/1  
\_bbb\_aY^ab^aaIa`\_UZaR]aWZ\_]SYababa¥¥aa`a  
@HWI-EAS443:3:32:1055:1378#0/1  
ATCTCGTCAATGGCATTCTGTGTGCTCTCAGGTCGGCTG  
+HWI-EAS443:3:32:1055:1378#0/1  
aa`\_\_a`^¥b`^[]`aa[\_YY¥¥\_\_\_^a\_[^VLN`^¥\_Y^  
@HWI-EAS443:3:32:1082:264#0/1  
AATTTACTTTGTTAGTAATCTCGTCAATGGCATTCTGTGT  
+HWI-EAS443:3:32:1082:264#0/1  
aaaaa``baabaaaaYaaa]a\_`S\_``^a[]\_a\_\_\_a^a^

@HWI-EAS443:3:32:1127:431#0/1  
GGGGACATCAAGATACAGCAAGAAGTTCAAGCCGGAAATA  
+HWI-EAS443:3:32:1127:431#0/1  
aaa`b``aaaabaaa`aa``aa``a]]\_a]aZa\_a^aaaa  
@HWI-EAS443:3:32:1140:1737#0/1  
GCCAGTTAAAAACAATGCCAAGGAAATTGGAAACGGCTG  
+HWI-EAS443:3:32:1140:1737#0/1  
`abbaabbbabbbaaaaaaaba\_¥`aaa`a\_\_a`\_¥^a`^  
@HWI-EAS443:3:32:1142:1997#0/1  
CCCATTTTTGACACTTTCCATGCACGTGTTATCGCATTTG  
+HWI-EAS443:3:32:1142:1997#0/1  
¥abababba\_\_bbbaba`^ba\_abaa^b`bba\_X`ababa  
@HWI-EAS443:3:32:1163:1599#0/1  
GACCAACAAAGTCTCTATCAGAATGCAGATGCATATGTTT  
+HWI-EAS443:3:32:1163:1599#0/1  
abbabbbba\_aaaaaaab\_aa``\_a`\_\_a\_aaaaa\_aa  
@HWI-EAS443:3:32:1200:1211#0/1  
TGCATATGTTTTTGTGGGACATCAAGATACAGCAAGAAG  
+HWI-EAS443:3:32:1200:1211#0/1  
^baab`baaabbbb`\_aa`a^abaaa`^^`aaa^abaa`\_`  
@HWI-EAS443:3:32:1204:1074#0/1  
TGCTATTTCCGGCTTGAACCTTCTTGCTGTATCTTGATGTC  
+HWI-EAS443:3:32:1204:1074#0/1  
¥T``\_`^`^bb`]^`^\_¥FX0\_`^`[[OYa[^``\_`WWYN¥Q^  
@HWI-EAS443:3:32:1211:1596#0/1  
GGGTGGACAGGGATGGTAGATGGATGGTACGGTTATCACC  
+HWI-EAS443:3:32:1211:1596#0/1  
``YPab^]W^Z[[[aXL]W]HVRU[U¥W\_^WNLUJLZ[Y[  
@HWI-EAS443:3:32:1218:1010#0/1  
ATCGATTATGAGGAGCTAAGAGAGCAATTGAGCTCAGTGT  
+HWI-EAS443:3:32:1218:1010#0/1  
\_`\_¥]^`b``abaY`¥XZZ\_\_[\_Q`¥¥Y]Z\_N\_]``^^^]  
@HWI-EAS443:3:32:1270:1103#0/1  
GGGGGGTGGACAGGGATGGTAGATGGATGGTACGGTTATC  
+HWI-EAS443:3:32:1270:1103#0/1  
W\_Z]U\_UZ\_PPWab^W¥aYFQYJLZX¥¥a\_Z^`aBBBBBB  
@HWI-EAS443:3:32:1301:1943#0/1  
TGCAGATGCATATGTTTTTGTGGGACATCAAGATACAGC  
+HWI-EAS443:3:32:1301:1943#0/1  
`ababa`baaaaab\_aa`b`^aa```X``]aaa^\_`ba`a  
@HWI-EAS443:3:32:1362:20#0/1  
TGTTATTTTTGTCTCCCGCTCTACTAGTGTCCAGTAATAG  
+HWI-EAS443:3:32:1362:20#0/1  
ab`aaabbaa`\_`a\_Z`^\_\_]\_^R]X\_VXX^X^ZVU\_]QT  
@HWI-EAS443:3:32:1373:1962#0/1  
GGGCCATGAACTTGTCTTGGGAATATCTCAAACCTTTCA  
+HWI-EAS443:3:32:1373:1962#0/1  
``YY\_`^aa^a^`¥R`baa\_ZUY]^\_a\_a0`\_aG[[aa`a  
@HWI-EAS443:3:32:1558:584#0/1  
TCTTGCTGTATCTTGATGTCCCCACAAAAACATATGCATC

+HWI-EAS443:3:32:1558:584#0/1  
^^`aYab\_a¥W\_^\_RZ][[\_RMW]^¥]¥YX\_`X`\_Za¥¥  
@HWI-EAS443:3:32:1588:1523#0/1  
GGCTGCTTTGAATTTTACCACAAATGCGATAACACGTGCA  
+HWI-EAS443:3:32:1588:1523#0/1  
a`QXWM\_^`R[]\_a``\_]^S\_\_¥NZ]WS^`XOZ^S[]¥W  
@HWI-EAS443:3:32:158:1461#0/1  
AGAGGCCTATTTGGGGCCATTGCCGTTTCATTGAAGGGG  
+HWI-EAS443:3:32:158:1461#0/1  
aZS]]aa`\_]\_^¥¥¥]aa¥[UY[UYYM¥^¥U^0ORUUUWS  
@HWI-EAS443:3:32:1593:1570#0/1  
GCTTCCTCTGAGTATTTGGGTAGTCATAAGTCCCATTTT  
+HWI-EAS443:3:32:1593:1570#0/1  
aaaaaabababb]aaaaaa`W`a]^`a\_^\_]`X\_^a`aa  
@HWI-EAS443:3:32:1653:921#0/1  
AAGCCAGTTAAAAACAATGCCAAGGAAATTGGAAACGGC  
+HWI-EAS443:3:32:1653:921#0/1  
X`aU`\_`L^]TZ^aYP`[ab]R]¥aa``\_\_\_aa`\_Z\_aaW  
@HWI-EAS443:3:32:226:518#0/1  
GGGGCATTACCATCCATCTACTAGTGCTGACCAACAAAG  
+HWI-EAS443:3:32:226:518#0/1  
TUF¥``\_\_bbabb^^[b`bZ``a]^Paaaaaba^YXNHR  
@HWI-EAS443:3:32:294:729#0/1  
AGGTCGGCTGCATATCCTGACCCCTGCTCATTTTGATGGT  
+HWI-EAS443:3:32:294:729#0/1  
a^\_Xa`aaaa[[[b^V[^XZ]U`WPZY[¥UUUU\_¥¥RTXX  
@HWI-EAS443:3:32:297:225#0/1  
GCCGGTTTCATTGAAGGGGGGTGGACAGGGATGGTAGATG  
+HWI-EAS443:3:32:297:225#0/1  
a`\_^a\_aabaaa]^`a`a`]`SY[TTZ[X¥U¥^¥U¥¥¥U^  
@HWI-EAS443:3:32:316:1701#0/1  
CTGAAAAAAGAATAGAGAATTTAAATAAAAAAGTTGATG  
+HWI-EAS443:3:32:316:1701#0/1  
a``^WabbX^`a\_aabb]aaaa`aab]ba^^a[aa`aa  
@HWI-EAS443:3:32:322:268#0/1  
GTCAGGATATGCAGCCGACCTGAAGAGCACACAGAATGCC  
+HWI-EAS443:3:32:322:268#0/1  
aS\_`]^`^]VXUUI¥[\_ZPN^UUYZ][^¥ZUZ¥TWUWVUP  
@HWI-EAS443:3:32:365:567#0/1  
CATGATTGGCCATGAAC TTGTCTTGGGGAATATCTCAAA  
+HWI-EAS443:3:32:365:567#0/1  
aaaa\_aaaaaa\_`\_¥a]\_\_a]^````\_YX¥^]\_^\_\_\_\_  
@HWI-EAS443:3:32:410:1174#0/1  
CTGATTGCCCCAGGGAGACTACCAGTACCAATGAACTGG  
+HWI-EAS443:3:32:410:1174#0/1  
aU^]RZ]a\_aab[OY¥[HT\_K\_[`\_[G^XU\_a]UZ\_a¥¥V  
@HWI-EAS443:3:32:435:201#0/1  
TCCGGCTTGAAC TTCTTGCTGTATCTTGATGTCCCCACAA  
+HWI-EAS443:3:32:435:201#0/1  
`aa`a\_a\_T^ba^^^^\_UZ^[Y\_¥Y^¥M[¥^W\_^]VRSPU

@HWI-EAS443:3:32:444:1412#0/1  
ATGGAAAGTGTCAAAAATGGGACTTATGACTACCCAAAAT  
+HWI-EAS443:3:32:444:1412#0/1  
`a[S\_]^X`\_bbb]aaa\_a\_\_aa\_aa\_a`]``\_a`T]W^  
@HWI-EAS443:3:32:450:435#0/1  
GAGCAATTGAGCTCAGTGCATCATTGAAAGGTTTGAGA  
+HWI-EAS443:3:32:450:435#0/1  
aa\_aaaaabaa`aa\_`\_\_\_a``\_`^aa``^^`\_U`^^`^  
@HWI-EAS443:3:32:511:895#0/1  
CAATTGCTCTTAGCTCCTCATAATCGATGAAATCTCCT  
+HWI-EAS443:3:32:511:895#0/1  
^T^a\_Z¥a^MS]YZ\_a\_\_b`a¥[^YWaa\_\_]¥^¥TV]``]  
@HWI-EAS443:3:32:587:394#0/1  
CATGAGCTTGCTGTGGAGAGTGATTCACACTCTGGATTTC  
+HWI-EAS443:3:32:587:394#0/1  
¥[] [Z\_]Q\_bbb^¥\_YH¥\_L^]a^Z^\_TW``b\_XTVXU]  
@HWI-EAS443:3:32:600:1407#0/1  
TCCCGGCTCTACTAGTGTCCAGTAATAGTTCATTCTCCCT  
+HWI-EAS443:3:32:600:1407#0/1  
`bbaaababab`^`^`aa]\_]aaa^^T`a\_\_`\_``\_a\_  
@HWI-EAS443:3:32:615:1834#0/1  
TGAAGAATTATATGAAAAGGTAAGAAGCCAGTAAAAAA  
+HWI-EAS443:3:32:615:1834#0/1  
aa```¥`a`bbbb`aba`a¥ba]ab\_^X`Wa\_b`\_`aa  
@HWI-EAS443:3:32:633:1542#0/1  
CAGAATGCAGATGCATATGTTTTGTGGGGACATCAAGAT  
+HWI-EAS443:3:32:633:1542#0/1  
aba¥baa`¥`a\_aaaaa\_XR`\_]Z]X^[]\_\_a`LZTQXa¥  
@HWI-EAS443:3:32:664:1505#0/1  
GTTGCTTCGAATGTTATTTTGTCTCCCGGCTCTACTAGTG  
+HWI-EAS443:3:32:664:1505#0/1  
¥T]V\_`^a\_UMS^[]]W]Z]XPa\_a`^QVTBBBBBBBBBB  
@HWI-EAS443:3:32:67:770#0/1  
GCCATGAATTGTCTTGGGAATATCTCAAACCTTTCAA  
+HWI-EAS443:3:32:67:770#0/1  
abbbabZW`bbb]aaab]ba\_`aaa\_aaaaZ`]a\_a`]UW  
@HWI-EAS443:3:32:731:1297#0/1  
GTTAGTAATCTCGTCAATGGCATTCTGTGTGCTCTTCAGG  
+HWI-EAS443:3:32:731:1297#0/1  
^]`a¥[a¥aabb^aa`Z¥\_\_a\_`¥¥^YYZ\_`^^[]`\_YV  
@HWI-EAS443:3:32:767:1329#0/1  
ATGGAAAGTGTCAAAAATGGGACTTATGACTACCCAAAAT  
+HWI-EAS443:3:32:767:1329#0/1  
aaaab]b\_]a^bbbaaaaaa]`\_a\_aaaa````\_``\_a\_  
@HWI-EAS443:3:32:772:484#0/1  
ACTAGATTTCCAGTTGCTTCGAATGTTATTTTGTCTCCCG  
+HWI-EAS443:3:32:772:484#0/1  
aba`b\_abaa``aSaaaaa][\_`a^a¥aaaa\_`^`\_aaa[  
@HWI-EAS443:3:32:823:1316#0/1  
AGGAAATTGGAAACGGCTGCTTTGAATTTTACCACAAATG

+HWI-EAS443:3:32:823:1316#0/1  
aaaaaaa\_¥aaaa^`a^WT\_¥FMUO¥a]TLXT\_[PXD  
@HWI-EAS443:3:32:83:1360#0/1  
GGCCATGAACCTTGCTTGGGAATATCTCAAACCTTCAA  
+HWI-EAS443:3:32:83:1360#0/1  
¥Yab¥RWP¥` `]YS]¥\_Z\_abaa\_V\_ba`a]\_aX`^` `]U  
@HWI-EAS443:3:32:867:1446#0/1  
CAAAAACATATGCATCTGCATTCTGATAGAGACTTTGTTG  
+HWI-EAS443:3:32:867:1446#0/1  
aa`X¥a\_a`ba`\_[aaa`¥Ya\_aa^^aa\_\_Ua`\_^`Z]U  
@HWI-EAS443:3:32:893:908#0/1  
GATGGTGAATGCCCCATAGCACGAGGACTTCTTCCCTTT  
+HWI-EAS443:3:32:893:908#0/1  
^]`` `]a`\_`aa`` `]a`\_`¥\_] `\_^]]^^^a`\_`  
@HWI-EAS443:3:32:916:1173#0/1  
GCAGGGGTCAGGATATGCAGCCGACCTGAAGAGCACACAG  
+HWI-EAS443:3:32:916:1173#0/1  
aaa^]\_XNa]aa`^a]a`aa^\_`Y^^`YPaYXS]KW[]Z  
@HWI-EAS443:3:32:916:2002#0/1  
TTTCTTCTCTGTTAATTTTGCTTCTGAGTATTTTGG  
+HWI-EAS443:3:32:916:2002#0/1  
aabaababa][aaaaaa^\_`aa`Zabaaa`YaaW` `` \_  
@HWI-EAS443:3:32:944:459#0/1  
GGGACATCAAGATACAGCAAGAAGTTCAAGCCGGAAATA  
+HWI-EAS443:3:32:944:459#0/1  
abaaaaaaaaaba`a`aaaabb`\_a[^\_a\_a\_aa^^\_a`\_`  
@HWI-EAS443:3:32:957:1929#0/1  
TTCCTCTGAGTATTTTGGGTAGTCATAAGTCCCATTTTTG  
+HWI-EAS443:3:32:957:1929#0/1  
aab`aba`bb¥aaa`aaaaWaa`\_`a`aa^`` `a` ` ` ` \_  
@HWI-EAS443:3:33:1039:559#0/1  
GGCCAGTCTCAATTTTGCTTTTTACATATTTTGGACAT  
+HWI-EAS443:3:33:1039:559#0/1  
W]¥\_aa\_[\_HYa` ` ¥`^¥\_\_Z\_¥X^ `[]SuaZa`^^` ` [  
@HWI-EAS443:3:33:1044:1611#0/1  
GCTGCTTTGAATTTTACCACAAATGCGATAACACGTGCAT  
+HWI-EAS443:3:33:1044:1611#0/1  
a¥UX` ` `]a`\_]YR^[a¥JW\_\_^Z^\_XW]^^]U^^X\_Z¥X  
@HWI-EAS443:3:33:1048:1632#0/1  
AGAAGTCCTCGTGCTATGGGCATTACCATCCATCTACT  
+HWI-EAS443:3:33:1048:1632#0/1  
\_aaaaZaaa[\_[aa[\_a`\_`]V` \_\_a\_\_\_ZaY\_V\_¥\_YQ  
@HWI-EAS443:3:33:1052:412#0/1  
GGGACATCAAGATACAGCAAGAAGTTCAAGCCGGAAATA  
+HWI-EAS443:3:33:1052:412#0/1  
¥X`a`aa`aa\_a`\_`^]`^`\_` \_\_`VSYH¥SR[[VZ^^^  
@HWI-EAS443:3:33:1059:982#0/1  
CTCTTTACCTACTGCTGTGAAGTGTGATTCATCTTTTCA  
+HWI-EAS443:3:33:1059:982#0/1  
abbbabbaabbbbbaabbbababaZb`aa`aa`\_` `abaaa

@HWI-EAS443:3:33:1146:139#0/1  
GCAAATCCTACATTAATGATAAAGGGAAAGAAGTCCTCGT  
+HWI-EAS443:3:33:1146:139#0/1  
`¥^aa`aa\_a\_\_Y\_Z^`a`Y\_]Z[U`U[Z\_\_WVUPUWSWV  
@HWI-EAS443:3:33:1174:1036#0/1  
GCTGGCTGGATCCTGGGAAATCCAGAGTGTGAATCACTCT  
+HWI-EAS443:3:33:1174:1036#0/1  
[aa`a\_aaabaaa`\_^\_W`\_`\_]`\_^T¥RWZTYS\_¥^Z[  
@HWI-EAS443:3:33:1208:279#0/1  
AAATATGTAAAAAGCACAAAATTGAGACTGGCCACAGGAT  
+HWI-EAS443:3:33:1208:279#0/1  
``\_aa\_aVaaaaV^Zaab`\_\_baaaa\_\_\_`\_¥G^SG¥]O\_  
@HWI-EAS443:3:33:1227:415#0/1  
AAGATACAGCAAGAAGTTCAAGCCGAAATAGCAATAAGA  
+HWI-EAS443:3:33:1227:415#0/1  
^a`^`aZ^b`b`a`ab`aXb`a\_X\_`^aaa^XDX]\_a^^^  
@HWI-EAS443:3:33:1229:347#0/1  
TTCCCGTTATGCTTGCTTCTAGAAGGTTAACAGAGTGTG  
+HWI-EAS443:3:33:1229:347#0/1  
abba`a]abab^bba]a`aaaaa`\_^Z`\_]X\_\_\_X\_X^  
@HWI-EAS443:3:33:1282:1464#0/1  
GCTAGTTAAAAAAGGAAATTCATACCCAAAGCTCAGCAAA  
+HWI-EAS443:3:33:1282:1464#0/1  
QXTXaa\_b^¥ZaYXU``aaaabb]`\_abb\_NaIZ^Sbbb  
@HWI-EAS443:3:33:1329:1201#0/1  
CTTTACTACTGCTGTGAAGTGTATTTCATCTTTTCAAT  
+HWI-EAS443:3:33:1329:1201#0/1  
ab^^aa` `baaa\_a`ZaYZ]aa\_a^¥Y`[^`Y]^`^RY\_\_  
@HWI-EAS443:3:33:136:1130#0/1  
CAGAATTTACTTTGTTAGTAATCTCGTCAATGGCATTCTG  
+HWI-EAS443:3:33:136:1130#0/1  
aaaX[W[Y\_^XHIYQ]]V¥RJOYWa`G[GGYOGSZ]^NRV  
@HWI-EAS443:3:33:1464:1106#0/1  
ATTGCCCCCAGGGAGACTACCAATGAAGTGGCGA  
+HWI-EAS443:3:33:1464:1106#0/1  
aaaa`aaaa`a`[^\_\_`a`^`\_`W`\_T`^`\_ZUW¥WZV¥¥  
@HWI-EAS443:3:33:1563:410#0/1  
GAAATGCTGGATCTGGTATTATCATTTTCAGATACACCAAGT  
+HWI-EAS443:3:33:1563:410#0/1  
^Za`¥Z]aba]aa^ba¥aaaaaY¥aaZ^^`][QQ[YP[\_^  
@HWI-EAS443:3:33:1616:1413#0/1  
CTTTGTTAGTAATCTCGTCAATGGCATTCTGTGTGCTCTT  
+HWI-EAS443:3:33:1616:1413#0/1  
abbbabbbbaabababababaaabaaa\_bababa`W`\_^`^a`  
@HWI-EAS443:3:33:1624:1619#0/1  
CTGATTGCCCCAGGGAGACTACCAATGAAGTGG  
+HWI-EAS443:3:33:1624:1619#0/1  
a\_\_T`\_`\_`aaa[^¥[aaV\_a\_ZP^bQaZTJJ]S[\_¥ZX\_N  
@HWI-EAS443:3:33:1708:1667#0/1  
CACGTGCATGGAAAGTGTCAAAAATGGGACTTATGACTAC

+HWI-EAS443:3:33:1708:1667#0/1  
ababRaabaa``a`aaaaab`baab^`^a\_Ua\_^\_¥`G  
@HWI-EAS443:3:33:1753:260#0/1  
GGGACATCAAGATACAGCAAGAAGTTCAAGCCGAAATAG  
+HWI-EAS443:3:33:1753:260#0/1  
abaa[¥`\_\_aa\_`^`b^`\_\_]aW^Za^`PTU]OWW^W[  
@HWI-EAS443:3:33:178:1640#0/1  
TCAAGATACAGCAAGAAGTTCAAGCCGAAATAGCAATAA  
+HWI-EAS443:3:33:178:1640#0/1  
`ba^^baabbbbbbb`^`a¥b`a`W\_aa\_]JPaaYZa`  
@HWI-EAS443:3:33:17:1284#0/1  
ACAGCAAGAAGTTCAAGCCGAAATAGCAATAAGACCCAA  
+HWI-EAS443:3:33:17:1284#0/1  
aab``aaaaX`Y^\_\_\_\_]a\_]Y]\_^\_R]\_\_¥]VV^Y^V^V  
@HWI-EAS443:3:33:192:763#0/1  
CCGGCTTGAACCTTCTTGCTGTATCTTGATGTCCCCACAAA  
+HWI-EAS443:3:33:192:763#0/1  
ab`abaa`a\_\_aa\_`a`a^`aa`\_a\_^\_]^\_\_\_\_`  
@HWI-EAS443:3:33:211:995#0/1  
TCTCTGTTAATTTTGCTTCTGAGTATTTTGGGTAGT  
+HWI-EAS443:3:33:211:995#0/1  
^baa[aLa\_a¥]a¥^a`V\_b\_^^a[^\_ZZ^`]]`¥¥QZVS  
@HWI-EAS443:3:33:222:1836#0/1  
GGGCATTACCATCCATCTACTAGTGCTGACCAACAAAGT  
+HWI-EAS443:3:33:222:1836#0/1  
\_]\_aYaa`bb]bbbbbb`bbb\_T\_`aaaaba\_aaa]b`]  
@HWI-EAS443:3:33:266:1226#0/1  
GCGATAACACGTGCATGGAAAGTGTCAAAAATGGGACTTA  
+HWI-EAS443:3:33:266:1226#0/1  
Y``\_V\_aaab\_a\_V]`SZabaXa^aabb^^`a]a`a`\_a  
@HWI-EAS443:3:33:291:735#0/1  
CACGTGTATCGCATTGTGGTAAAATTCAAAGCAGCCGT  
+HWI-EAS443:3:33:291:735#0/1  
abab`babbab`ababb`b[^bab]bb`\_\_a^`a\_`Z\_]`  
@HWI-EAS443:3:33:32:912#0/1  
TGCATATCTCGGTACCACTAGATTTCCAGTTGCTTCGAAT  
+HWI-EAS443:3:33:32:912#0/1  
aa`¥^babaaba[aa`W^]V¥Q¥X\_`^`¥`R\_`^V[^a  
@HWI-EAS443:3:33:335:823#0/1  
GCTGGATCTGGTATTATCATTTCAGATACACCAGTCCACG  
+HWI-EAS443:3:33:335:823#0/1  
[babbbbbbaaabbbbbbbbbbbbabababbbbb`ba  
@HWI-EAS443:3:33:362:1648#0/1  
GAGCTCAATTGCTCTTTAGCTCCTCATAATCGATGAAAT  
+HWI-EAS443:3:33:362:1648#0/1  
ab\_b`ba`ba^b[b\_bba]aaaabaa\_`b`aa\_\_¥``a¥  
@HWI-EAS443:3:33:390:372#0/1  
GAACGTGTTACCCAGGAGATTTTCATCGATTATGAGGAGCT  
+HWI-EAS443:3:33:390:372#0/1  
aaaaa`a^a``\_aaaYaaa\_a`^\_\_\_\_]\_^\_]\_\_[]^X¥



@HWI-EAS443:3:33:479:1196#0/1  
ATCTTGATGTCCCCACAAAAACATATGCATCTGCATTCTG  
+HWI-EAS443:3:33:479:1196#0/1  
aa`¥`a^aa\_abaaaa\_J\_a]`a`Y¥\_\_a\_\_^UU\_`\_[\_\_  
@HWI-EAS443:3:33:491:627#0/1  
CCTGACCCCTGCTCATTTTGTGGTATAACCGTACCATC  
+HWI-EAS443:3:33:491:627#0/1  
aba¥ba\_\_\_\_\_]a¥]`¥TX¥Q¥UU]UY\_VR¥T\_NLRRT¥UU  
@HWI-EAS443:3:33:498:898#0/1  
GGGACATCAAGATACAGCAAGAAGTTCAAGCCGGAAATA  
+HWI-EAS443:3:33:498:898#0/1  
¥`babbbab`aaba`bbabbbab¥b^\_bbbaaG`\_`aa`  
@HWI-EAS443:3:33:506:979#0/1  
GTCCCCACAAAAACATATGCATCTGCATTCTGATAGAGAC  
+HWI-EAS443:3:33:506:979#0/1  
aabbabaa[aababaaaaaaaa``aaaa``\_a\_]`\_a`]]  
@HWI-EAS443:3:33:517:1312#0/1  
GCTGGCTGGATCCTGGGAAATCCAGAGTGTGAATCACTCT  
+HWI-EAS443:3:33:517:1312#0/1  
abb`aba\_aaaaa`a`X\_a¥aba\_¥Y[\_¥\_`\_]X`¥W¥U  
@HWI-EAS443:3:33:539:1312#0/1  
GAGGACATGCTGCCGTTACACTTTTGTTGAGTCATGATT  
+HWI-EAS443:3:33:539:1312#0/1  
ab\_abbbaa`aa`aba\_\_aa\_`a`Z\_^\_a¥`¥\_W\_`ZY\_]W  
@HWI-EAS443:3:33:53:783#0/1  
ATTCTGTGTCTTTCAGGTCGGCTGCATATCCTGACCCC  
+HWI-EAS443:3:33:53:783#0/1  
``ab`a\_a^`a`\_\_¥]aaWaa\_a\_\_\_\_\_`a`\_`YJY\_`^`  
@HWI-EAS443:3:33:615:551#0/1  
GCTGGCTGGATCCTGGGAAATCCAGAGTGTGAATCACTCT  
+HWI-EAS443:3:33:615:551#0/1  
a`WV\_a`bbX`a^Q`aZaab\_a]WTWHN\_¥\_TJINRM^V¥  
@HWI-EAS443:3:33:617:1690#0/1  
AAATTTTTGTAGAAGCTTTTTGCTCCAGCATGAGGACATG  
+HWI-EAS443:3:33:617:1690#0/1  
a^aa¥aa`PW[\_a]\_`^\_^`¥\_`^aa\_`^\_]ZUTT]]\_ZZ  
@HWI-EAS443:3:33:62:158#0/1  
TTCGAATGTTATTTTGTCTCCCGCTCTACTAGTGTCCAG  
+HWI-EAS443:3:33:62:158#0/1  
a`abaaabaa^abaaa\_a^aa`]]\_`^XVUXYOTWUYQOI  
@HWI-EAS443:3:33:640:591#0/1  
GTTCTTACATTTGAATCGTGGTAGTCCAAAGTTCTTTCA  
+HWI-EAS443:3:33:640:591#0/1  
\_V\_aabbbbbaaa\_aaaaab[aaXa`YZ``^XXM^Z\_`^^\_  
@HWI-EAS443:3:33:665:122#0/1  
TGAGGAGCTAAGAGAGCAATTGAGCTCAGTGCATCATTT  
+HWI-EAS443:3:33:665:122#0/1  
\_]a¥aaa¥aaaaaa\_aaaa`U`X]][^`]aVDU\_ZW``\_  
@HWI-EAS443:3:33:730:385#0/1  
TGCAGATGCATATGTTTTTGTGGGACATCAAGATACAGC



@HWI-EAS443:3:34:1052:68#0/1  
TGGATGGTGAATGCCCATAGCACGAGGACTTCTTTCCCT  
+HWI-EAS443:3:34:1052:68#0/1  
`\_SS]^ZTaa`aa¥RRRTNVTZ[[¥T^\_RYWPV[BBBBBB  
@HWI-EAS443:3:34:1069:1549#0/1  
CTTCCTCTGAGTATTTTGGGTAGTCATAAGTCCCATTTTT  
+HWI-EAS443:3:34:1069:1549#0/1  
abbbbabb^`aV`bbbaSaa\_baaa`ab``Y`a`aaaa\_\_  
@HWI-EAS443:3:34:1082:499#0/1  
GCAATTGAGCTCAGTGCATCATTGAAAGTTTGAGATA  
+HWI-EAS443:3:34:1082:499#0/1  
Z¥Z\_QVUYa\_XaYaUYU\_ZY]XY`^YWZP]YDY[[[`aaa  
@HWI-EAS443:3:34:1124:294#0/1  
GGGGACATCAAGATACAGCAAGAAGTTCAAGCCGAAATA  
+HWI-EAS443:3:34:1124:294#0/1  
S^``^¥^a\_V¥`a^T]^a`a¥KYM]^\_][Z^ZGMYZMZ  
@HWI-EAS443:3:34:1126:1231#0/1  
GTGATTCACACTCTGGATTTCCAGGATCCAGCCAGCAAT  
+HWI-EAS443:3:34:1126:1231#0/1  
a`aababbbba`a`a^aaaa`a]]`\_\_aa`V`]\_VX]\_  
@HWI-EAS443:3:34:1148:154#0/1  
CATTTTGGTGGTATAACCGTACCATCCATCTACCATCCC  
+HWI-EAS443:3:34:1148:154#0/1  
abbbabaaaba\_abaaa`\_`S][Z]^Z`¥Z^^SLVB BBB  
@HWI-EAS443:3:34:1247:750#0/1  
GTGGGGACATCAAGATACAGCAAGAAGTTCAAGCCGAAA  
+HWI-EAS443:3:34:1247:750#0/1  
a`baZ¥Z`\_`a]^````a^`a`]baXaa¥\_aa`X[`¥^\_^  
@HWI-EAS443:3:34:1252:1757#0/1  
CAATTGGAAAATGTCCAAAATATGTAAAAAGCACAAAATT  
+HWI-EAS443:3:34:1252:1757#0/1  
^¥bbb¥Y\_bbbbbbaa[ababba`\_`aabbb`¥\_Ta`Y\_a\_  
@HWI-EAS443:3:34:1252:816#0/1  
CAAAAACATATGCATCTGCATTCTGATAGAGACTTTGTTG  
+HWI-EAS443:3:34:1252:816#0/1  
]aa`a\_a^aaaa^^`¥\_\_^^`\_`^\_\_aaba]a[¥a[BB  
@HWI-EAS443:3:34:1276:142#0/1  
CACCCAAGGGTGTATAAACACCAGCCTCCCATTTCCAGAA  
+HWI-EAS443:3:34:1276:142#0/1  
`aa`bbVaab¥aW`b\_bbbab[aa[aRaab``bQTMHXUB  
@HWI-EAS443:3:34:1276:916#0/1  
CATTGAAGGGGGTGGACAGGGATGGTAGATGGATGGTAC  
+HWI-EAS443:3:34:1276:916#0/1  
a^`\_aUaaaa\_\_V`\_TT¥^`\_`\_VX`W^ZU¥ORNVS S¥B  
@HWI-EAS443:3:34:1282:1750#0/1  
CACCTTTGTTCCGAGTCATGATTGGCCATGAACTTGTCTT  
+HWI-EAS443:3:34:1282:1750#0/1  
abaabbababbbba]aabaaa`\_`\_\_aaa^\_Va^`X[\_]  
@HWI-EAS443:3:34:1286:938#0/1  
ATTTTGTCTCCCGCTCTACTAGTGTCCAGTAATAGTTCA

+HWI-EAS443:3:34:1286:938#0/1  
\_\_`\_\_\_`Z¥a\_aaa\_¥^ZX^¥^[WUWX¥RXWUZVR¥BBBB  
@HWI-EAS443:3:34:1287:1196#0/1  
GTGGGGACATCAAGATACAGCAAGAAGTTCAAGCCGGAAA  
+HWI-EAS443:3:34:1287:1196#0/1  
a\_a`[¥ZZaa`a`a^`a`^¥```]V`V¥\_a\_^WTLTZ]Z  
@HWI-EAS443:3:34:129:1287#0/1  
ATTCTGTGTGCTCTTCAGGTCGGCTGCATATCCTGACCCC  
+HWI-EAS443:3:34:129:1287#0/1  
aaabaa^X¥aa```\_Z]\_Va¥]`^`\_S[[^\_] [YRSUU^  
@HWI-EAS443:3:34:1320:1516#0/1  
TAGAGACTTTGTTGGTCAGCACTAGTAGATGGATGGTGAA  
+HWI-EAS443:3:34:1320:1516#0/1  
ab`[YT`ba¥`\_\_`¥`^`]^`\_`a¥F[U\_aVX[X]¥S\_QY  
@HWI-EAS443:3:34:1347:1114#0/1  
GCCGACCTGAAGAGCACACAGAATGCCATTGACGAGATTA  
+HWI-EAS443:3:34:1347:1114#0/1  
a``]QV[WZ\_RUY`\_\_OOQPZSOOQUQOVL¥NNVUBBBBB  
@HWI-EAS443:3:34:1361:1765#0/1  
GCCGGTTTCATTGAAGGGGGTGGACAGGGATGGTAGATG  
+HWI-EAS443:3:34:1361:1765#0/1  
abbb`M`Z¥^aabWta`U]aaS\_]QUTa`XYBBBBBBBBB  
@HWI-EAS443:3:34:1372:1770#0/1  
CACTGAGCTCAATTGCTCTCTTAGCTCCTCATAATCGATG  
+HWI-EAS443:3:34:1372:1770#0/1  
Yab\_babaa\_bbbb[bbbababbaabb`[b[`b\_\_Uabab  
@HWI-EAS443:3:34:1388:34#0/1  
GATGCATATGTTTTGTGGGGACATCAAGATACAGCAAGA  
+HWI-EAS443:3:34:1388:34#0/1  
aaaaaab`bb`a`aaaZZP\_¥¥Z¥^ZZ[]a`^¥a[QZ]\_^  
@HWI-EAS443:3:34:1464:826#0/1  
CTGATTGCCCCAGGGAGACTACCAGTACCAATGAACTGG  
+HWI-EAS443:3:34:1464:826#0/1  
aba\_`baabbabbbbabaaab\_aaaaaaaaaaaaXUBBB  
@HWI-EAS443:3:34:1468:1481#0/1  
AAAAAAGGAAATTCATACCCAAAGCTCAGCAAATCCTACA  
+HWI-EAS443:3:34:1468:1481#0/1  
ababbbbaababa¥`ab``aaaa^a``a\_\_a^`^N^Y¥SV  
@HWI-EAS443:3:34:1482:1202#0/1  
CTCTTTACCTACTGCTGTGAACTGTGTATTTCATCTTTTCA  
+HWI-EAS443:3:34:1482:1202#0/1  
ab`b]``¥a¥US¥¥JU`^¥V\_`V\_^YZ¥Z`aa^]\_^`U\_  
@HWI-EAS443:3:34:148:982#0/1  
CTAGATTTCCAGTTGCTTCCAATGTTATTTTGTCTCCCGG  
+HWI-EAS443:3:34:148:982#0/1  
aaaa¥aaaa`a^\_\_a``aa\_a\_dW^\_\_a\_^VW`^\_] [SW  
@HWI-EAS443:3:34:1608:1075#0/1  
TTGCTGTATCTTGATGTCCCCACAAAAACATATGCATCTG  
+HWI-EAS443:3:34:1608:1075#0/1  
a^`\_a`0\_a]`aaa\_b\_`[\_]\_¥`\_`a`a`^ [PU` [PWPZB

@HWI-EAS443:3:34:1649:866#0/1  
CGCATTGTGGTAAAATTCAAAGCAGCCGTTTCCAATTTTC  
+HWI-EAS443:3:34:1649:866#0/1  
Xabbbbbb`bbb\_bbaaab`babbab`\_¥bbabba\_\_bbaW  
@HWI-EAS443:3:34:1663:1763#0/1  
GCAGGGGTCAGGATATGCAGCCGACCTGAAGAGCACACAG  
+HWI-EAS443:3:34:1663:1763#0/1  
a`aa\_\_X]aa^Y\_aaaa\_a^^^a`WQ\_\_\_\_\_^¥¥\_OWBBB  
@HWI-EAS443:3:34:1680:845#0/1  
CGGAAACTATGCAAACCTAAGAGGGGTAGCCCCATTGCAT  
+HWI-EAS443:3:34:1680:845#0/1  
a`bbbbbb`bbbbabaa\_ba^`^aa\_^Yab`VVZ¥^][YZ]  
@HWI-EAS443:3:34:1707:1954#0/1  
GTTATTTTGTCTCCCGGCTCTACTAGTGTCCAGTAATAGT  
+HWI-EAS443:3:34:1707:1954#0/1  
abbabbbbaaa^aa`a^`a\_]a\_]\_\_YV[]\_Z¥[W[BB  
@HWI-EAS443:3:34:1716:1325#0/1  
GAGAGCAATTGAGCTCAGTGCATCATTGAAAGTTTGA  
+HWI-EAS443:3:34:1716:1325#0/1  
a`aabbaab\_bbabb[b\_^baabbabaabba`a``\_aaPZ  
@HWI-EAS443:3:34:1742:504#0/1  
CACCATCCATCTACTAGTGCTGACCAACAAAGTCTCTATC  
+HWI-EAS443:3:34:1742:504#0/1  
[b[\_a[\_aaaaab^Yb¥`aaaba^`aa[^aa`\_0a\_]^^B  
@HWI-EAS443:3:34:175:714#0/1  
AAGCCAGTTAAAAACAATGCCAAGGAAATTGGAAACGGC  
+HWI-EAS443:3:34:175:714#0/1  
\_Z\_ba`aaaaa]R\_aa`X\_abaaa]`[^¥^`^``\_\_¥^¥  
@HWI-EAS443:3:34:177:731#0/1  
GGCCATGAACCTGTCTTGGGGAATATCTCAAACCTTTCAA  
+HWI-EAS443:3:34:177:731#0/1  
`abbaaaY`R\_\_[]abaaaa\_a`\_a`\_Z`a\_\_a`aa`  
@HWI-EAS443:3:34:201:647#0/1  
GCCAGTTAAAAACAATGCCAAGGAAATTGGAAACGGCTG  
+HWI-EAS443:3:34:201:647#0/1  
abbbb\_bbaaa^Tabb`abba`\_aa\_a`\_aa[^\_a\_a\_^`X  
@HWI-EAS443:3:34:214:1562#0/1  
AACAAAGTCTCTATCAGAATGCAGATGCATATGTTTTTGT  
+HWI-EAS443:3:34:214:1562#0/1  
\_Z\_a[^aWb\_aaa^ab\_aa^Za`¥a]Xaa\_[\_\_]\_\_a`¥B  
@HWI-EAS443:3:34:225:946#0/1  
CATCAAGATACAGCAAGAAGTTCAAGCCGAAATAGCAAT  
+HWI-EAS443:3:34:225:946#0/1  
a\_X\_\_\_VUDYRXH`X]^^`WX`\_\_¥NZRSXJ[GWBBBB  
@HWI-EAS443:3:34:22:146#0/1  
CCAGAAACTGATTGCCCCAGGGAGACTACCAGTACCAAT  
+HWI-EAS443:3:34:22:146#0/1  
aa`]¥ZZ]^`^a^\_aa\_\_a^Z`\_^¥^Z[¥Y¥UPUVWXVWVB  
@HWI-EAS443:3:34:279:908#0/1  
GCTCTCTTAGCTCCTCATAATCGATGAAATCTCCTGGGTA

+HWI-EAS443:3:34:279:908#0/1  
abbbabba\_\_babbab\_aa\_`aaaaaa`U^a`a`\_`\_\_0`  
@HWI-EAS443:3:34:296:1515#0/1  
GGGGACATCAAGATACAGCAAGAAGTTCAAGCCGGAAATA  
+HWI-EAS443:3:34:296:1515#0/1  
S¥W`b\_R\_\_a^^¥R\_^¥aabbbSI\_UVba¥WZZXVVa]P]  
@HWI-EAS443:3:34:298:954#0/1  
CCCCGGCTCTACTAGTGTCCAGTAATAGTTCATTCTCCCTT  
+HWI-EAS443:3:34:298:954#0/1  
aa`¥MXa\_OX]YMUVSLXTKWLV\_TIMUR[NRPRRTRBBB  
@HWI-EAS443:3:34:32:1435#0/1  
TTCTATTGGAAAATGAAAGAACTTTGGACTACCACGATTC  
+HWI-EAS443:3:34:32:1435#0/1  
aabbbbbb`abbbbbb`aababaaaa\_abaaaa`\_a\_a  
@HWI-EAS443:3:34:357:799#0/1  
CCTCGTGCTATGGGGCATTACCATCCATCTACTAGTGCT  
+HWI-EAS443:3:34:357:799#0/1  
a`aaUVZ``aZ`]¥T[]Y^`¥`aa`[`X¥UMPYQXNZNR  
@HWI-EAS443:3:34:35:1570#0/1  
GGGGCATTACCATCCATCTACTAGTGCTGACCAACAAAG  
+HWI-EAS443:3:34:35:1570#0/1  
`]abbbbbbbba`abbbababba`aaabbabbbabaaaa  
@HWI-EAS443:3:34:504:812#0/1  
GTGCTCTTCAGGTCGGCTGCATATCCTGACCCCTGCTCAT  
+HWI-EAS443:3:34:504:812#0/1  
aaaba`U\_baZ\_N`V\_`a^V[^¥¥WPZV[Z[¥XP[^[BBB  
@HWI-EAS443:3:34:518:806#0/1  
AAAGGTTTGAGATATCCCCAAGACAAGTTCATGGCCCAA  
+HWI-EAS443:3:34:518:806#0/1  
a]aba^aaaa`aabaaaa`aaa`\_a`\_`[^`VZ^^\_Z^]^  
@HWI-EAS443:3:34:581:476#0/1  
GGAACGTGTTACCCAGGAGATTTTCATCGATTATGAGGAGC  
+HWI-EAS443:3:34:581:476#0/1  
T¥Maa¥]aa\_0\_ba\_`aababaa]R^bbZa```a]\_[^aX  
@HWI-EAS443:3:34:609:1071#0/1  
TAGATTTCCAGTTGCTTCGAATGTTATTTTGTCTCCCGGC  
+HWI-EAS443:3:34:609:1071#0/1  
aba^a\_aaa`\_`^aa\_\_a\_\_a`W\_\_a`^`^R\_]`^]WYV  
@HWI-EAS443:3:34:621:364#0/1  
AAATCCTTGTTGATTCCAGCTTTACCCCATCTATTTCTTC  
+HWI-EAS443:3:34:621:364#0/1  
aa\_aaaaa`aa`\_`^a`a`a````[[`\_`\_`^^^\_V]]  
@HWI-EAS443:3:34:692:849#0/1  
CAGGGTCAGGATATGCAGCCGACCTGAAGAGCACACAGA  
+HWI-EAS443:3:34:692:849#0/1  
^`\_`Ta^`\_`b]TZZR\_b]b^Z]X[`UZZ¥^¥]`ZF]PGY^  
@HWI-EAS443:3:34:705:410#0/1  
AGCTCCTCATAATCGATGAAATCTCCTGGGTAACACGTTC  
+HWI-EAS443:3:34:705:410#0/1  
aab`a`aabaaaaa\_aaaaa```a`\_`a\_aZ`\_`^aZUZ¥R

@HWI-EAS443:3:34:712:889#0/1  
TCCGATCACAATTGGAAAATGTCCAAAATATGTAAAAAGC  
+HWI-EAS443:3:34:712:889#0/1  
a`aWQ\_\_SZS¥]\_TWQ^¥OVNS]VRQWPX]ZWP¥X`^ULB  
@HWI-EAS443:3:34:736:1773#0/1  
GAAGCCAGTTAAAAACAATGCCAAGGAAATTGGAAACGG  
+HWI-EAS443:3:34:736:1773#0/1  
Q\_a\_\_\_\_\_¥]X¥¥`\_aWQ\_\_\_Z`\_\_^\_^\_b`^]`a]U]BBB  
@HWI-EAS443:3:34:745:328#0/1  
GAACTCTTTACTACTGCTGTGAAGTGTGATTTCATCTTT  
+HWI-EAS443:3:34:745:328#0/1  
aa]b^`aaaaaa¥aaaaa\_a[`[^`a^`]\_`\_^\_V]^^  
@HWI-EAS443:3:34:779:1507#0/1  
GAAAGAAGTCCTCGTGCTATGGGGCATTACCATCCATCT  
+HWI-EAS443:3:34:779:1507#0/1  
`bbb]¥URa[X\_^b`¥Y]aW0¥YSa^aa`^[``\_¥`]aW]  
@HWI-EAS443:3:34:790:1234#0/1  
GTGAAGAAGTTATATGAAAAGTAAGAAGCCAGTTAAAAA  
+HWI-EAS443:3:34:790:1234#0/1  
a\_aa^aa\_aaa[a¥aaaa]aaaWa`\_`a\_a\_\_\_\_]\_`^^]  
@HWI-EAS443:3:34:80:925#0/1  
CATCCATCTACTAGTGCTGACCAACAAAGTCTCTATCAGA  
+HWI-EAS443:3:34:80:925#0/1  
ababbbabaaaaaa¥`a``\_a]aaa`a\_Z```\_\_^¥`¥]  
@HWI-EAS443:3:34:824:1718#0/1  
ATTAGAGCACATCCAGAACTGATTGCCCCAGGGAGACT  
+HWI-EAS443:3:34:824:1718#0/1  
a[¥aZa^\_aaa\_\_\_\_a¥`a\_a`[\_¥Y\_¥¥]^U^WYBBBBBB  
@HWI-EAS443:3:34:826:1329#0/1  
TGGCTGGATCCTGGGAAATCCAGAGTGTGAATCACTCTCC  
+HWI-EAS443:3:34:826:1329#0/1  
a`b\_\_a]\_aa¥\_\_\_\_\_`aa\_aa\_[^UZ^`a`ZS`Q\_X¥W]  
@HWI-EAS443:3:34:870:436#0/1  
AGGAAATTCATACCCAAAGCTCAGCAAATCCTACATTAAT  
+HWI-EAS443:3:34:870:436#0/1  
\_]aV¥[\_Y\_¥Wa[\_aa^ZXaaT^]ZWXHX`\_[PY]\_^]V^  
@HWI-EAS443:3:34:892:385#0/1  
TCTTGCTGTATCTTGATGTCCCCACAAAAACATATGCATC  
+HWI-EAS443:3:34:892:385#0/1  
aaa]\_aaa\_aaaaaaaaa`aaaaaaaaaa`\_a\_\_^`V\_]Z  
@HWI-EAS443:3:34:897:581#0/1  
GCTGGCTGGATCCTGGGAAATCCAGAGTGTGAATCACTCT  
+HWI-EAS443:3:34:897:581#0/1  
ababaaaaa^`a\_W¥a`a]`¥`a]]¥`Z\_Z\_^¥\$WWUVV  
@HWI-EAS443:3:34:904:1496#0/1  
AAAGAGTTCAACCACCTGGAAAAAGAATAGAGAATTTAA  
+HWI-EAS443:3:34:904:1496#0/1  
aaZX¥\_\_abbbba\_b`a^[]a^^`\_aa`aa`a`^¥0¥\_]`  
@HWI-EAS443:3:34:921:978#0/1  
TGTGGGGACATCAAGATACAGCAAGAAGTTCAAGCCGGAA

+HWI-EAS443:3:34:921:978#0/1  
ab\_baaabaaaabaaa`abaaabaaa]a`aa\_]^\_^]\_  
@HWI-EAS443:3:34:925:517#0/1  
TGCCGTTACACCTTTGTTTCGAGTCATGATTGGGCCATGAA  
+HWI-EAS443:3:34:925:517#0/1  
aa\_baa\_\_aa`aba`aaaa^aXa\_`\_]`\_\_^\_YX`S]YW  
@HWI-EAS443:3:34:966:1024#0/1  
CATGAACCTTGTCTTGGGAATATCTCAAACCTTTCAAATG  
+HWI-EAS443:3:34:966:1024#0/1  
^`a]`¥^\_Z\_]\_aaa]`¥a`^`a`aa^aa\_`^]YYX]\_]\_  
@HWI-EAS443:3:34:986:128#0/1  
CGTGCATGGAAAGTGTCAAAAATGGGACTTATGACTACCC  
+HWI-EAS443:3:34:986:128#0/1  
abab`bbbbbabababbbaabaaa`baaaa`]`^TS]  
@HWI-EAS443:3:35:1037:1834#0/1  
ACTTCTTGCTGTATCTTGATGTCCCCACAAAACATATGC  
+HWI-EAS443:3:35:1037:1834#0/1  
YXW]a`aa^`aa`^Ua\_]\_]YTX\_b[[Yba]`a`\_[N\_  
@HWI-EAS443:3:35:1037:404#0/1  
GCTGGCTGGATCCTGGGAAATCCAGAGTGTGAATCACTCT  
+HWI-EAS443:3:35:1037:404#0/1  
abbaba\_\_`¥`aa]aa`\_`a\_`U¥^Z\_G]U`a\_¥[`S¥VZ  
@HWI-EAS443:3:35:1083:1909#0/1  
CCGGGAGACAAAATAACATTCCAAGCAACTGGAAATCTAG  
+HWI-EAS443:3:35:1083:1909#0/1  
aZSZR¥N`baUQa\_a]]]XSa`]TZ¥U¥aV]\_Y\_]SSRY^  
@HWI-EAS443:3:35:1141:1723#0/1  
TGACAAGTTGTATTGCAATCGTGGACTGGTGTATCTGAAA  
+HWI-EAS443:3:35:1141:1723#0/1  
aaa`^`]aX^`^`aa[]`ba`^Y\_a]Za^^]a[^^^aaSa  
@HWI-EAS443:3:35:1145:1096#0/1  
TTTTACCACAAATGCGATAACACGTGCATGGAAAGTGTCA  
+HWI-EAS443:3:35:1145:1096#0/1  
abaab^aaaba`YT]a`\_\_`^`]`¥\_a`[\_^\_Y¥[Z\_]Y\_  
@HWI-EAS443:3:35:1194:1200#0/1  
GCCGGTTTCATTGAAGGGGGTGGACAGGGATGGTAGATG  
+HWI-EAS443:3:35:1194:1200#0/1  
`^\_Z¥]a^a\_a\_]Z\_`a`[Ta]SS`^\_aV`ZK][^R^  
@HWI-EAS443:3:35:1199:221#0/1  
CTGGTGTATAGCACCTTGGGTGTCTGACAAGTTGTAT  
+HWI-EAS443:3:35:1199:221#0/1  
a\_b`a^a`P¥SbU^\_MZTZ\_\_W]LN¥BBBBBBBBBBBBBBB  
@HWI-EAS443:3:35:1204:1605#0/1  
CTGGATCCTGGGAAATCCAGAGTGTGAATCACTCTCCACA  
+HWI-EAS443:3:35:1204:1605#0/1  
^^\_aZ¥^b`^b`a^ab\_`^`^[a]a\_0\_bbbabaa`^¥a  
@HWI-EAS443:3:35:1217:474#0/1  
CTTGCTGTATCTTGATGTCCCCACAAAACATATGCATCT  
+HWI-EAS443:3:35:1217:474#0/1  
abbbbbbbabbbbbbbbbbbbabaaaa\_a\_baababaaa\_a



@HWI-EAS443:3:35:1246:348#0/1  
GGCTGCTTTGAATTTTACCACAAATGCGATAACACGTGCA  
+HWI-EAS443:3:35:1246:348#0/1  
`^`ba\_Q\_Ka¥`¥`bb¥b` `[a`aX`\_X`¥\_aa`]]DWLa  
@HWI-EAS443:3:35:1275:1124#0/1  
GGAAACGGCTGCTTTGAATTTTACCACAAATGCGATAACA  
+HWI-EAS443:3:35:1275:1124#0/1  
\_aaa````bb\_T]a\_IX]aaa\_VUW[UYQ]XY\_`Z¥\_^U`  
@HWI-EAS443:3:35:1316:1145#0/1  
CTTCCTCTGAGTATTTTGGGTAGTCATAAGTCCCATTTTT  
+HWI-EAS443:3:35:1316:1145#0/1  
abbabbbbbbabbabbbbbb`bba`bbabb`bb`¥abbbb  
@HWI-EAS443:3:35:136:16#0/1  
CATGAACCTGTCTTGGGAATATCTCAAACCTTCAAATG  
+HWI-EAS443:3:35:136:16#0/1  
a]``]^`aaa\_baaa``a]\_aa`aaa^^S]a^`^a`¥U]^  
@HWI-EAS443:3:35:1386:1069#0/1  
GACAAGTTGTATTGCAATCGTGGACTGGTGTATCTGAAAT  
+HWI-EAS443:3:35:1386:1069#0/1  
ab\_ZS¥ab`abba]aaaa^a[Z]`a]^`]aaa`a^a^`  
@HWI-EAS443:3:35:1396:1864#0/1  
GCTTCCTCTGAGTATTTTGGGTAGTCATAAGTCCCATTTT  
+HWI-EAS443:3:35:1396:1864#0/1  
aaa]PSXVxb\_b0`Y\_\_\_`a\_G^`XU]^`[R]R¥V]¥]\_Y^  
@HWI-EAS443:3:35:1410:1461#0/1  
CGGTTTCATTGAAGGGGGTGGACAGGGATGGTAGATGGA  
+HWI-EAS443:3:35:1410:1461#0/1  
a^MP¥R¥Z`]RQ[^XVPVYJFUUY]S[NUUY[BBBBBBBB  
@HWI-EAS443:3:35:1411:939#0/1  
GATGGTGATAACCGTACCATCCATCTACCATCCCTGTCCA  
+HWI-EAS443:3:35:1411:939#0/1  
abab`Zbabbbaaa[aa`aa\_`\_a^aaWbaaaa\_a`¥`W`  
@HWI-EAS443:3:35:1458:1048#0/1  
GCTTCCTCTGAGTATTTTGGGTAGTCATAAGTCCCATTTT  
+HWI-EAS443:3:35:1458:1048#0/1  
abbbbabba`ab`abbbaaa^aa\_¥]`a\_^]aa[]aaaa  
@HWI-EAS443:3:35:1494:2042#0/1  
GAAGTCCTCGTGTATGGGGCATTACCATCCATCTACTA  
+HWI-EAS443:3:35:1494:2042#0/1  
`baaaaVabaaaa`aaa``\_aaaWaaNbaa\_b`]\_aa[a  
@HWI-EAS443:3:35:1540:1112#0/1  
CGATAACACGTGCATGGAAAGTGTCAAAAATGGGACTTAT  
+HWI-EAS443:3:35:1540:1112#0/1  
¥ab\_Q\_\_\_`aa]aab`^^`\_`UUa`]]`^^Xbbb^`^a`\_  
@HWI-EAS443:3:35:1589:553#0/1  
GATTCATCGATTATGAGGAGCTAAGAGAGCAATTGAGCT  
+HWI-EAS443:3:35:1589:553#0/1  
a]aa`a]\_a\_U\_`a`\_a`\_a¥`]^UZ¥`a`[W\_V\_^]SV  
@HWI-EAS443:3:35:1627:164#0/1  
ATGAGGACATGCTGCCGTTACACCTTTGTTTCGAGTCATGA

+HWI-EAS443:3:35:1627:164#0/1  
aa`abaa`[abaa^V]a]XT]WY[^Y[^^^^VZ\_QWL[V¥  
@HWI-EAS443:3:35:1628:290#0/1  
ATGTTATTTTGTCTCCCGGCTCTACTAGTGCCAGTAATA  
+HWI-EAS443:3:35:1628:290#0/1  
\_b`ZX]ZS\_¥XVT]^]V\_b^a`\_¥MY^UU[XORUO[UTQU  
@HWI-EAS443:3:35:1638:391#0/1  
GGCTTCTTACCTTTTCATATAAGTTCTTCACATTTGAATC  
+HWI-EAS443:3:35:1638:391#0/1  
`baababa\_]^bbb^¥\_ba`abb\_a^\_ba`^baaa\_a`a  
@HWI-EAS443:3:35:1676:1535#0/1  
AAATTTTTGTAGAAGCTTTTTGCTCCAGCATGAGGACATG  
+HWI-EAS443:3:35:1676:1535#0/1  
aaba`babbUaa]aWZbbbaaa`^[aX\_a`b`^YUaWa  
@HWI-EAS443:3:35:1682:1992#0/1  
GTGGGGACATCAAGATACAGCAAGAAGTTCAAGCCGGAAA  
+HWI-EAS443:3:35:1682:1992#0/1  
]\_Z¥bb`bab\_baa\_[aaa\_aaa¥\_aV]aa`\_^a`\_¥\_  
@HWI-EAS443:3:35:1714:426#0/1  
TCTTGCTGTATCTTGATGTCCCAAAAAACATATGCATC  
+HWI-EAS443:3:35:1714:426#0/1  
]a¥^ZU[Y¥Y`\_\_`[]\_X[YQTYT\_\_N`^`a\_^Q]Y\_  
@HWI-EAS443:3:35:1715:264#0/1  
GCCGGTTTCATTGAAGGGGGTGGACAGGGATGGTAGATG  
+HWI-EAS443:3:35:1715:264#0/1  
a`W]bV\_[^^Z¥¥Z¥`a^\_aaY`\_WW`U^`^\_aaW\_¥\_V`  
@HWI-EAS443:3:35:1739:415#0/1  
GAAATTGGAAACGGCTGCTTTGAATTTTACCACAAATGCG  
+HWI-EAS443:3:35:1739:415#0/1  
aa\_aaaab`b`aa^\_aR[aaPV¥]^a[TFU`X`\_U[FY  
@HWI-EAS443:3:35:1758:838#0/1  
GGGGACATCAAGATACAGCAAGAAGTTCAAGCCGGAAATA  
+HWI-EAS443:3:35:1758:838#0/1  
a`]\_\_YZ¥a`¥`VY¥MU[¥T]Y[Y¥Waa\_QL]^M`Y\_  
@HWI-EAS443:3:35:1788:1265#0/1  
GGGCCATTGCCGGTTTCATTGAAGGGGGTGGACAGGGAT  
+HWI-EAS443:3:35:1788:1265#0/1  
\_U\_]\_]\_]W\_\_PX][PY\_[LV^]RV[ZN[`V^UXXZSO  
@HWI-EAS443:3:35:203:658#0/1  
CCGGGAGACAAAATAACATTCCAAGCAACTGGAAATCTAG  
+HWI-EAS443:3:35:203:658#0/1  
aaa`a`SaZ`aaa\_I^a`aa]Y]^\_^\_ZXX¥\_\_¥¥]  
@HWI-EAS443:3:35:232:525#0/1  
CCTGACCCCTGCTCATTGATGGTGATAACCGTACCATC  
+HWI-EAS443:3:35:232:525#0/1  
ab\_aaabab]W]^a`^`[YX^^U¥^\_P[a[MMPS¥PW^  
@HWI-EAS443:3:35:241:903#0/1  
GATGGTTTCTGGACATTTGGACTTACAATGCCGAACTGT  
+HWI-EAS443:3:35:241:903#0/1  
```\_aY[aaa`\_a`a`\_`\_`^a\_UU`^¥]\_^b\_Z^UZ^]

@HWI-EAS443:3:35:251:1950#0/1  
GCTTCCTCTGAGTATTTTGGGTAGTCATAAGTCCCATT  
+HWI-EAS443:3:35:251:1950#0/1  
[b[\_ababa`a\_`a\_a`a¥^]Raa^ba`¥\_]aa`aa^a^  
@HWI-EAS443:3:35:283:38#0/1  
GGGGACATCAAGATACAGCAAGAAGTTCAAGCCGAAATA  
+HWI-EAS443:3:35:283:38#0/1  
abaaV``aaaabaaaa`aaaba`Tq]]W\_]`^`\_\_`T`]]`Z  
@HWI-EAS443:3:35:326:1066#0/1  
ATTTCCAGTTGCTTGAATGTTATTTTGTCTCCCGGCTCT  
+HWI-EAS443:3:35:326:1066#0/1  
^aaaaaaa\_aabaaaa`a`a\_a¥`a\_`]]`\_aa\_^^`¥XW  
@HWI-EAS443:3:35:32:80#0/1  
ACCATCCATCTACTAGTGCTGACCAACAAAGTCTCTATCA  
+HWI-EAS443:3:35:32:80#0/1  
aaaaaa`a\_`Y^`\_Y`Z\_]\_`\_YZ^[I[^W¥¥^]ZSSQ  
@HWI-EAS443:3:35:358:1355#0/1  
CGATTGCAATACAACCTTGTGACACACCAAGGGTGCTATA  
+HWI-EAS443:3:35:358:1355#0/1  
aa`aaabb]a]baaaaa`^aa\_aa\_a\_`a[a¥V`a\_``a  
@HWI-EAS443:3:35:36:608#0/1  
GCCGGTTTCATTGAAGGGGGTGGACAGGGATGGTAGATG  
+HWI-EAS443:3:35:36:608#0/1  
aaaaa^`aa`aaa[^`^`]]`aaUa`¥[^^^]XT`YS\_`XV[  
@HWI-EAS443:3:35:412:1592#0/1  
TGGAAAGTGCAAAAATGGGACTTATGACTACCAAAAATA  
+HWI-EAS443:3:35:412:1592#0/1  
`a`a`\_YRa]b`babaab`[YaaW\_`aab[\_aa``VZa]`  
@HWI-EAS443:3:35:432:1363#0/1  
TCTCTGTTTAATTTTGTCTCCTCTGAGTATTTTGGGTAGT  
+HWI-EAS443:3:35:432:1363#0/1  
ababab]aababaaa`baaaaaaaaaaU¥^``aaZ`S¥]]  
@HWI-EAS443:3:35:432:1828#0/1  
TGCATATCCTGACCCCTGCTCATTGATGGTGATAACCG  
+HWI-EAS443:3:35:432:1828#0/1  
`\_baab[ab\_¥aaba\_aaaa`a\_RWSa^^ONR^¥a^^¥R  
@HWI-EAS443:3:35:47:1160#0/1  
GCCGTTTCCAATTTTCTTGGCATTGTTTTTTAACTGGCTT  
+HWI-EAS443:3:35:47:1160#0/1  
abb^Zaab^RZaaaaaa`Z][a]aZ^a^`[WUZZ`^]`^]  
@HWI-EAS443:3:35:480:1208#0/1  
GGGGACATCAAGATACAGCAAGAAGTTCAAGCCGAAATA  
+HWI-EAS443:3:35:480:1208#0/1  
\_b^\_`^`^`bbbbbaabbbbbbbabba`a\_bbabaa`aabab  
@HWI-EAS443:3:35:489:1457#0/1  
CATCAAGATACAGCAAGAAGTTCAAGCCGAAATAGCAAT  
+HWI-EAS443:3:35:489:1457#0/1  
ab``¥aZa`babbaab`Y\_¥P]``aTa`]XY]a\_\_\_\_aa`Z  
@HWI-EAS443:3:35:494:1061#0/1  
GTCCCATTTTTGACACTTCCATGCACGTGTTATCGCATT

+HWI-EAS443:3:35:494:1061#0/1  
`\_bbbabbabba\_bb`a`aaba\_aaaa\_X^\_\_a\_a\_a\_a]  
@HWI-EAS443:3:35:496:1755#0/1  
ATTGAGCTCAGTGCATCATTGAAAGGTTGAGATATTC  
+HWI-EAS443:3:35:496:1755#0/1  
aY¥`a¥]¥`^XTXY\_\_^\_^\_\_Z[Z\_U]NS]Y^\_^`X\_] ]\_  
@HWI-EAS443:3:35:535:1061#0/1  
AACAAAGTCTCTATCAGAATGCAGATGCATATGTTTTGT  
+HWI-EAS443:3:35:535:1061#0/1  
WI\_aYYW^\_Q\_¥\_VZ^RRT^`\_V\_¥JLLUS¥`]FYZXOYT  
@HWI-EAS443:3:35:559:76#0/1  
GTTCAGACAATGGAACGTGTTACCCAGGAGATTCATCGA  
+HWI-EAS443:3:35:559:76#0/1  
a`aa^a\_^a\_\_aa]`\_]`Y^]\_\_]Y^\_] ]^S[ZZ]X]]]Y  
@HWI-EAS443:3:35:568:1134#0/1  
GTTAAAAAAGGAAATTCATACCCAAAGCTCAGCAAATCCT  
+HWI-EAS443:3:35:568:1134#0/1  
a`ababbbbaaaaaaaaaabaaaaaaaa`\_\_aaaaaa`\_`^¥  
@HWI-EAS443:3:35:592:1219#0/1  
ATAAGTCCCATTTTTGACACTTTCCATGCACGTGTTATCG  
+HWI-EAS443:3:35:592:1219#0/1  
aaaaaYbabYba`baaaaaaaaa\_aa`\_`\_¥`a]\_`[`a\_] ]  
@HWI-EAS443:3:35:619:130#0/1  
ATAAGTCCCATTTTTGACACTTTCCATGCACGTGTTATCG  
+HWI-EAS443:3:35:619:130#0/1  
aa`JXWbbaL¥b`b\_baaa`a``ZZ`Ua[¥^a]a^¥^¥Xa  
@HWI-EAS443:3:35:654:349#0/1  
GGGCCATGAACCTGTCTTGGGAATATCTCAAACCTTCA  
+HWI-EAS443:3:35:654:349#0/1  
a``aaZWaPa`a`YDZ\_`\_`UZZ^\_\_`ZX\_a\_`W`^¥YPVU  
@HWI-EAS443:3:35:687:1401#0/1  
AGCCAGTTAAAAACAATGCCAAGGAAATTGAAACGGCT  
+HWI-EAS443:3:35:687:1401#0/1  
^Y]\_]\_]aaa]]]`\_^a`\_]`a]\_[XWHY]]][I]^WTRZ  
@HWI-EAS443:3:35:720:1060#0/1  
AGAAGTTCAGCCGAAATAGCAATAAGACCCAAAGTGAG  
+HWI-EAS443:3:35:720:1060#0/1  
aZ[S`TY]`ZTa\_[XS^¥Z\_\_\_[\_Y[UZ]\_]\_]NT]PTWX  
@HWI-EAS443:3:35:731:874#0/1  
CTTCTCTGAGTATTTGGGTAGTCATAAGTCCCATTTTT  
+HWI-EAS443:3:35:731:874#0/1  
^b\_aabb`¥abR^`\_babaa]b¥]aba\_¥`\_bb`Z¥`aa`  
@HWI-EAS443:3:35:743:72#0/1  
GCTGGCTGGATCCTGGGAAATCCAGAGTGTGAATCACTCT  
+HWI-EAS443:3:35:743:72#0/1  
^bbbbbbba\_\_aaaaaa`aaaaa^a\_`T`Z``^^]`Z[U[  
@HWI-EAS443:3:35:774:997#0/1  
CTTCTCTGTTAATTTTGCTTCTCTGAGTATTTGGGTA  
+HWI-EAS443:3:35:774:997#0/1  
J\_ab^^b]a`a[W`aabbbbb``bbbbab^^`abba`YH`

@HWI-EAS443:3:35:78:1778#0/1  
ATTAGAGCACATCCAGAACTGATTGCCCCAGGGAGACT  
+HWI-EAS443:3:35:78:1778#0/1  
aUU[R`\_a`¥M]V[Z\_a\_\_^[UP^Z^[VPOMRTUUUU  
@HWI-EAS443:3:35:793:309#0/1  
TATCCTGACCCCTGCTCATTTTGTGGTGATAACCGTACC  
+HWI-EAS443:3:35:793:309#0/1  
`b]abaaaa`\_a\_a\_aa`\_[\_\_Y\_¥^\_U\_\_UQ]^Z\_0¥Y¥  
@HWI-EAS443:3:35:81:426#0/1  
CAGCACTAGTAGATGGATGGTGAATGCCCATAGCACGAG  
+HWI-EAS443:3:35:81:426#0/1  
`K[aabXZ\_]Za^]\_Z`aaU\_aaa`¥Y\_\_Q][XP]^`\_  
@HWI-EAS443:3:35:885:1999#0/1  
GCTGGCTGGATCCTGGGAAATCCAGAGTGTGAATCACTCT  
+HWI-EAS443:3:35:885:1999#0/1  
`bba`a`¥`\_b\_\_¥a\_bbb`^^aaZK^[\_baZT¥¥^KT  
@HWI-EAS443:3:35:891:1977#0/1  
GGAAATTGGAAACGGCTGCTTTGAATTTTACCACAAATGC  
+HWI-EAS443:3:35:891:1977#0/1  
a\_baa\_a¥aaba[`aTZGL`[LFUZ\_¥VMW`]^a\_HGY  
@HWI-EAS443:3:35:917:426#0/1  
CAAGATACAGCAAGAAGTTCAAGCCGAAATAGCAATAAG  
+HWI-EAS443:3:35:917:426#0/1  
abaa¥Z^`R`baa\_0H]XZR¥X\_`¥aaXNZ¥¥a¥¥\_U\_T^  
@HWI-EAS443:3:35:942:1104#0/1  
GCTGGCTGGATCCTGGGAAATCCAGAGTGTGAATCACTCT  
+HWI-EAS443:3:35:942:1104#0/1  
aabbbbaaaabaa`aa¥a`[aaa\_¥`Za[`aa]Y]\_\_¥\_  
@HWI-EAS443:3:35:950:578#0/1  
GCTCAATTGCTCTTAGCTCCTCATAATCGATGAAATCT  
+HWI-EAS443:3:35:950:578#0/1  
aababbbbaabaaaabb\_aa`aabaabaabaa¥^a`a[a  
@HWI-EAS443:3:35:993:856#0/1  
CCTCGTGCTATGGGGCATTACCATCCATCTACTAGTGCT  
+HWI-EAS443:3:35:993:856#0/1  
aaaa`X`[```aa`^^`]^Xa^W¥¥[¥]aa[`^¥¥]¥`SW  
@HWI-EAS443:3:36:1042:1486#0/1  
CTGGCTGGATCCTGGGAAATCCAGAGTGTGAATCACTCTC  
+HWI-EAS443:3:36:1042:1486#0/1  
\_[W^[\_`\_¥^`\_YZ^^`]\_^\_[W^Z]P`¥YV^]]^^Va  
@HWI-EAS443:3:36:104:2015#0/1  
TCGATTATGAGGAGCTAAGAGAGCAATTGAGCTCAGTGTC  
+HWI-EAS443:3:36:104:2015#0/1  
abaa`baaYaa\_a`aaab\_\_\_a\_aaaXTP`^\_\_\_`UX\_]a  
@HWI-EAS443:3:36:1062:913#0/1  
AGCCGGGAGACAAAATAACATTGAAGCAACTGGAAATCT  
+HWI-EAS443:3:36:1062:913#0/1  
^^`bb`ba]]aaaa]aa]aaa`aa`\_\_`aa`\_`\_aa```  
@HWI-EAS443:3:36:1117:1301#0/1  
ATTTGAATCGTGGTAGTCCAAAGTTCTTTTCAATTTTCCAAT

+HWI-EAS443:3:36:1117:1301#0/1  
abaaabbab\_Waa^`¥V\_```][[\_`\_a\_\_Y``````\_b^^X  
@HWI-EAS443:3:36:111:993#0/1  
CTGACAAGTTGTATTGCAATCGTGGACTGGTGTATCTGAA  
+HWI-EAS443:3:36:111:993#0/1  
aaaaa`[\_]``^^`\_`^S\_\_a`\_]\_[^`\_]\_YQYX^[\_`¥^ZW  
@HWI-EAS443:3:36:1131:177#0/1  
GAACTATTACTGGACACTAGTAGAGCCGGGAGACAAAATA  
+HWI-EAS443:3:36:1131:177#0/1  
a¥a`abbaa\_aaaa`\_`a[\_]a\_^`\_¥U^^Z¥VZ^^[\_]\_  
@HWI-EAS443:3:36:1133:1024#0/1  
TTCGAATGTTATTTTGTCTCCCGCTCTACTAGTGTCCAG  
+HWI-EAS443:3:36:1133:1024#0/1  
aabb`\_`a¥babbbaaaaaa`¥]¥`a\_XVZUOP]W`]^\_  
@HWI-EAS443:3:36:1134:555#0/1  
ACCAGTACCAATGAACTGGCGACAGTTGAATAGATCGCCA  
+HWI-EAS443:3:36:1134:555#0/1  
aab¥b```aaaaaa`\_a`^b`[P]T¥KY¥VQSSUWX[XG  
@HWI-EAS443:3:36:1145:140#0/1  
GCTGGCTGGATCCTGGGAAATCCAGAGTGTGAATCACTCT  
+HWI-EAS443:3:36:1145:140#0/1  
a]X\_aabaa]X\_``ZTYP]\_XPY¥¥[^S¥P^UPUY^WJN  
@HWI-EAS443:3:36:1155:1426#0/1  
ATAATCGATGAAATCTCCTGGGTAACACGTTCCATTGTCT  
+HWI-EAS443:3:36:1155:1426#0/1  
aa\_\_abaaaaa`a`a`\_a`\_^\_[a``aY`^^XZ]\_¥YY]^\_  
@HWI-EAS443:3:36:1221:1246#0/1  
CTTTTCAATAACAGAATTTACTTTGTTAGTAATCTCGTCA  
+HWI-EAS443:3:36:1221:1246#0/1  
Y¥`^```a`a¥aZ`UY\_`aa\_a\_\_¥`^ababb^YaZ`TYZ  
@HWI-EAS443:3:36:1221:59#0/1  
GGGGACATCAAGATACAGCAAGAAGTTCAAGCCGGAAATA  
+HWI-EAS443:3:36:1221:59#0/1  
a^`a]aWQ¥`aa`Z\_Ya`[[abYR\_PYLZVXNPZ[LYZ^^  
@HWI-EAS443:3:36:1290:1951#0/1  
AACTGATTGCCCCAGGGAGACTACCAGTACCAATGAACT  
+HWI-EAS443:3:36:1290:1951#0/1  
aa\_`ab\_\_aaa`\_\_\_Z^X^`\_`¥`S^`¥W`\_QYW^¥`^WR  
@HWI-EAS443:3:36:1312:768#0/1  
GCTGGATCCTGGGAAATCCAGAGTGTGAATCACTCTCCAC  
+HWI-EAS443:3:36:1312:768#0/1  
ababba`baaaaaa¥aab\_aa\_a\_a`a\_\_aaa^`\_`a\_`a  
@HWI-EAS443:3:36:1407:1285#0/1  
GGGGACATCAAGATACAGCAAGAAGTTCAAGCCGGAAATA  
+HWI-EAS443:3:36:1407:1285#0/1  
aa]aZaaab`]aa]QXb[\_aaa¥[[DVR\_]a]Q\_]aW][  
@HWI-EAS443:3:36:1424:488#0/1  
GTACGGTTATCACCATCAAAATGAGCAGGGGTCAGGATAT  
+HWI-EAS443:3:36:1424:488#0/1  
a\_a\_a`¥`a`\_`XS¥````\_`\_`^^^]\_\_\_\_`\_VWW`\_`^¥¥Y



+HWI-EAS443:3:36:195:1895#0/1  
aa`a`a`aa\_Z^a`\_a`^\_[QaSa]\_Z^YZ\_\_\_WJY^`  
@HWI-EAS443:3:36:226:1313#0/1  
GTGGGGACATCAAGATACAGCAAGAAGTTCAAGCCGGAAA  
+HWI-EAS443:3:36:226:1313#0/1  
a^Z]^]La]]a]¥\_\_X^a]U^¥`^¥[ZIV][S]ZWZZYZU  
@HWI-EAS443:3:36:324:318#0/1  
ATCGATTATGAGGAGCTAAGAGAGCAATTGAGCTCAGTGT  
+HWI-EAS443:3:36:324:318#0/1  
abbaaabaaaaaa\_aa`\_\_\_^\_\_\_X`aaa\_]a]  
@HWI-EAS443:3:36:33:1330#0/1  
GCCGGTTTCATTGAAGGGGGTGGACAGGGATGGTAGATG  
+HWI-EAS443:3:36:33:1330#0/1  
aab`a`¥`ab`aa`HYV^a``\_N\_[Yaa[^\_¥^\_\_V^\_VW  
@HWI-EAS443:3:36:350:505#0/1  
AGAAGTTCAAGCCGAAATAGCAATAAGACCCAAAGTGAG  
+HWI-EAS443:3:36:350:505#0/1  
\_Y]aaQY]a\_``a[T¥\_[\_a\_`R^Y\_[\_]X`WWVP[G[`W  
@HWI-EAS443:3:36:384:1139#0/1  
AAGTCCTCGTGCTATGGGGCATTCCACATCCATCTACTAG  
+HWI-EAS443:3:36:384:1139#0/1  
aU`Na`Zb¥X\_^\_TN\_M¥Q`\_\_\_ZNS[[V\_a\_¥WTU[]`U  
@HWI-EAS443:3:36:428:1719#0/1  
GCTGGCTGGATCCTGGGAAATCCAGAGTGTGAATCACTCT  
+HWI-EAS443:3:36:428:1719#0/1  
abb`\_baabb`bb`^^^WabbaabaaaU]Qaa`Sb]b`a¥  
@HWI-EAS443:3:36:447:2027#0/1  
ATACAACCTGTGACACCCCAAGGGTGCTATAAACACCAG  
+HWI-EAS443:3:36:447:2027#0/1  
a[¥b\_Z`aa]W]]P[aa`aa\_a\_]RKR```^`\_`\_a`a\_\_]  
@HWI-EAS443:3:36:509:517#0/1  
GCCGGTTTCATTGAAGGGGGTGGACAGGGATGGTAGATG  
+HWI-EAS443:3:36:509:517#0/1  
aab\_WYaa\_aab^PZaa`a]aR```\_a`]aa\_\_aaU^`[T\_  
@HWI-EAS443:3:36:534:1542#0/1  
AAAAACAATGCCAAGGAAATTGGAAACGGCTGCTTTGAA  
+HWI-EAS443:3:36:534:1542#0/1  
aaa]aaaa¥^aaa`\_] ^a]\_\_^^^\_Y\_]\_YYOJ[WISX  
@HWI-EAS443:3:36:589:122#0/1  
TTTGTAGTAATCTCGTCAATGGCATTCTGTGTGCTCTTC  
+HWI-EAS443:3:36:589:122#0/1  
aa\_b]aab^aa`\_a\_aXa`\_]\_^\_\_\_^Y\_\_Y^Y^]^\_X^\_  
@HWI-EAS443:3:36:589:47#0/1  
TGAAGGGGGTGGACAGGGATGGTAGATGGATGGTACGGT  
+HWI-EAS443:3:36:589:47#0/1  
a`ZUa\_`aab\_aa^Z^aa[TZa\_T`]ZU``ZUY¥R]^`^UW  
@HWI-EAS443:3:36:591:824#0/1  
CCTCTGAGTATTTTGGGTAGTCATAAGTCCCATTTTGGAC  
+HWI-EAS443:3:36:591:824#0/1  
aaaaaa``¥aaaa`aaaUW\_Xa\_aZ``Ya\_\_[\_a\_]`^¥`



@HWI-EAS443:3:36:595:478#0/1  
CCATGAACCTGTCTTGGGGAATATCTCAAACCTTTCAAAT  
+HWI-EAS443:3:36:595:478#0/1  
aa¥bb\_K^aa`aaa`aa`ZV\_``a`b\_VZa^aa\_]Z]^`^  
@HWI-EAS443:3:36:598:483#0/1  
AATCGATGAAATCTCCTGGGTAACACGTTCCATTGTCTGA  
+HWI-EAS443:3:36:598:483#0/1  
abaabaaa\_aaaaaaaaaa¥^aaa`\_\_aa\_a`\_]a\_\_\_\_  
@HWI-EAS443:3:36:598:869#0/1  
ATTCATCTTTTCAATAACAGAATTTACTTTGTTAGTAATC  
+HWI-EAS443:3:36:598:869#0/1  
]^`[¥Yaa¥^`bZMSbaab\_VYZa]¥a`a\_a`]\_`^]]^a  
@HWI-EAS443:3:36:59:1713#0/1  
GCTGGCTGGATCCTGGGAAATCCAGAGTGTGAATCACTCT  
+HWI-EAS443:3:36:59:1713#0/1  
a`aa\_`¥`\_]T\_`WVXR^W^G^a\_OXXP\_Qa\_WU^^]FXN  
@HWI-EAS443:3:36:629:1997#0/1  
GGGGACATCAAGATACAGCAAGAAGTTCAAGCCGGAAATA  
+HWI-EAS443:3:36:629:1997#0/1  
^\_Z¥ba`\_b`Z^`W^\_aaa`]T0^Ga]ab`Q^aa```^L  
@HWI-EAS443:3:36:62:1475#0/1  
GGTGGACAGGGATGGTAGATGGATGGTACGGTTATCACCA  
+HWI-EAS443:3:36:62:1475#0/1  
a`R```\_¥]a`]^a`JVR``\_Z]¥\_¥L]]\_XN[¥^ZT\_[0  
@HWI-EAS443:3:36:635:676#0/1  
GGACATCAAGATACAGCAAGAAGTTCAAGCCGGAAATAGC  
+HWI-EAS443:3:36:635:676#0/1  
^OX`a\_a¥G[Y`[^a]^`a\_W[\_V^`^^^UX^¥WVSY^X\_  
@HWI-EAS443:3:36:637:944#0/1  
AAGAAATGCTGGATCTGGTATTATCATTTCAGATACACCA  
+HWI-EAS443:3:36:637:944#0/1  
aaa`^^Q\_`a`]^a\_]\_T[[aa\_]a\_\_^]¥W^^`^^^`  
@HWI-EAS443:3:36:642:552#0/1  
GATACACCAGTCCACGATTGCAATACAACCTTGTGACACAC  
+HWI-EAS443:3:36:642:552#0/1  
a[abbabbbaT\_`^aaa\_\_a`b\_\_`\_a]\_\_\_]TZ[\_WQ`\_a  
@HWI-EAS443:3:36:656:799#0/1  
CACGTGCATGGAAAGTGTCAAAAATGGGACTTATGACTAC  
+HWI-EAS443:3:36:656:799#0/1  
a\_b\_\_bbbaaaaaba\_b`bbbbbbbaa\_a`aa\_aaa]aa\_a  
@HWI-EAS443:3:36:662:227#0/1  
CTGGCTGGATCCTGGGAAATCCAGAGTGTGAATCACTCTC  
+HWI-EAS443:3:36:662:227#0/1  
a]]J\_`\_SWT`T`RJUPa[V]VY`¥XS^K]YOXKR]Q[UU  
@HWI-EAS443:3:36:693:1633#0/1  
TGCCGGTTTCATTGAAGGGGGTGGACAGGGATGGTAGAT  
+HWI-EAS443:3:36:693:1633#0/1  
`bbbab\_bba``a`[\_a`aa`Saaa]`a`^\_^\_PZR\_¥  
@HWI-EAS443:3:36:748:2029#0/1  
AGCCAGTTAAAAACAATGCCAAGGAAATTGGAAACGGCT



@HWI-EAS443:3:37:1018:1772#0/1  
GAATTTACTTTGTTAGTAATCTCGTCAATGGCATTCTGTG  
+HWI-EAS443:3:37:1018:1772#0/1  
`a]^W\_baaabaYaaaWba\_aaba`aaa`W^^aa\_[`\_]X  
@HWI-EAS443:3:37:1061:1651#0/1  
CATCCATCTACTAGTGCTGACCAACAAAGTCTCTATCAGA  
+HWI-EAS443:3:37:1061:1651#0/1  
^¥Y¥\_[Vabbbbb^Z¥\_`aabbaba^^`aLaabba\_]^[^`  
@HWI-EAS443:3:37:1062:1401#0/1  
CTCTTAGCTCCTCATAATCGATGAAATCTCCTGGGTAACA  
+HWI-EAS443:3:37:1062:1401#0/1  
Ybbb\_baba]\_`a\_aaXab`V^aabb¥X\_Wbaaa`\_a^`  
@HWI-EAS443:3:37:1062:1634#0/1  
GGGAAATCCAGAGTGTGAATCACTCTCCACAGCAAGCTCA  
+HWI-EAS443:3:37:1062:1634#0/1  
aa`abbbbbbaaa```babaabaaa^a][PY¥aaaa\_```  
@HWI-EAS443:3:37:1066:1960#0/1  
CACTGTAGAGACCCATTAGAGCACATCCAGAACTGATTG  
+HWI-EAS443:3:37:1066:1960#0/1  
ab`[WH`a\_VZ]P]YQP`X`aa^^a\_]S]Z][XW[Y[^UU  
@HWI-EAS443:3:37:1082:389#0/1  
GTGTCTGACAAGTTGTATTGCAATCGTGGACTGGTGTATC  
+HWI-EAS443:3:37:1082:389#0/1  
``^`a`aa]¥X`\_`aaa]``a```^`^Ma`\_][`YW\_V  
@HWI-EAS443:3:37:1104:1148#0/1  
CTCCCGGCTCTACTAGTGCCAGTAATAGTTCATTCTCCC  
+HWI-EAS443:3:37:1104:1148#0/1  
]bb`¥[b`bba\_\_a]WQZaab^aaaa^`G`ZHYa¥aa\_a  
@HWI-EAS443:3:37:1128:226#0/1  
GGGACATCAAGATACAGCAAGAAGTTCAAGCCGAAATAG  
+HWI-EAS443:3:37:1128:226#0/1  
abaaaaaaaaabaab`ba^aaaaab^a`b`Ua\_`a^\_]a`\_  
@HWI-EAS443:3:37:1153:218#0/1  
TGCCGGTTTCATTGAAGGGGGTGGACAGGGATGGTAGAT  
+HWI-EAS443:3:37:1153:218#0/1  
`ba`bb^bab^abbaaaaaabWbaa^\_ZJ¥``a`¥]a^¥  
@HWI-EAS443:3:37:1214:808#0/1  
ATTCTGTGTCTTTCAGGTCGGCTGCATATCCTGACCCC  
+HWI-EAS443:3:37:1214:808#0/1  
a``aa^SYQba`a¥Waa`[Paa```^`QX\_N[Y`X\_][^ZQ  
@HWI-EAS443:3:37:1234:375#0/1  
CAGGGATGGTAGATGGATGGTACGGTTATCACCATCAAAA  
+HWI-EAS443:3:37:1234:375#0/1  
aba\_a^\_`a^bbW^`ba\_bb`b```^aaa[M[Tbaa¥aZ`¥  
@HWI-EAS443:3:37:1237:1263#0/1  
AGATACACCAGTCCACGATTGCAATACAACCTGTCAGACA  
+HWI-EAS443:3:37:1237:1263#0/1  
aa\_`bb`Z`\_]V^aa`\_aa]babaaa[aUTaaa\_\_]]\_aa  
@HWI-EAS443:3:37:1243:784#0/1  
ATTTTGTCTCCCGCTCTACTAGTGCCAGTAATAGTTCA

+HWI-EAS443:3:37:1243:784#0/1  
abbabbaaaaa`^^`a`\_X]a`¥[[[\_YOJQ[`ZZ]S`^U  
@HWI-EAS443:3:37:1260:869#0/1  
GTCCCATTTTTGACACTTTCATGCACGTGTTATCGCATT  
+HWI-EAS443:3:37:1260:869#0/1  
a\_aaaaabbbbaaa`aaaa`aaa`a`a\_a]VW`\_`\_a]`a\_  
@HWI-EAS443:3:37:1279:1649#0/1  
CATTTTCCAATTGTGATCGGATGTATATTCTGAAATGGGA  
+HWI-EAS443:3:37:1279:1649#0/1  
]aaT\_bb`^^]b`bbaa`\_aa`^^a^ZYLZ¥]SX]a`¥0  
@HWI-EAS443:3:37:127:663#0/1  
GGGGGGTGGACAGGGATGGTAGATGGATGGTACGGTTATC  
+HWI-EAS443:3:37:127:663#0/1  
^`b`baYbaabbaa`S`a`Y`^`a^aa`W[aLW^a`]WZ¥W  
@HWI-EAS443:3:37:1325:1807#0/1  
TACTTTGTAGTAATCTCGTCAATGGCATTCTGTGTGCTC  
+HWI-EAS443:3:37:1325:1807#0/1  
aa^aaab`bbbaaa`^`aaa^`aa`aa^aaVbaa\_a^`aa[  
@HWI-EAS443:3:37:1358:384#0/1  
CACGTGTTATCGCATTGTGGTAAAATTCAAAGCAGCCGT  
+HWI-EAS443:3:37:1358:384#0/1  
J\_Y`¥bbbbbbb`aabb`b`\_b\_b`^`abGbb\_`^`aZbbb  
@HWI-EAS443:3:37:1369:919#0/1  
GCCGTTTCCAATTTCCCTTGGCATTGTTTTTTAACTGGCTT  
+HWI-EAS443:3:37:1369:919#0/1  
aaaa\_b`a`Z\_aaa\_`aaaaaaaaab\_aa`[a\_X^aa`^^`  
@HWI-EAS443:3:37:1373:1267#0/1  
GCTGGCTGGATCCTGGGAAATCCAGAGTGTGAATCACTCT  
+HWI-EAS443:3:37:1373:1267#0/1  
`aa]a`\_]aa]Z¥WZa`Q`^X^\_XW`UYH[SaVZ¥¥¥US  
@HWI-EAS443:3:37:1378:600#0/1  
GCTGGCTGGATCCTGGGAAATCCAGAGTGTGAATCACTCT  
+HWI-EAS443:3:37:1378:600#0/1  
ab¥¥]¥`^`OYVVGZY`\_ZW]¥Y¥SZ¥XPULa]HTW\_LO[S  
@HWI-EAS443:3:37:138:243#0/1  
CTGCCGTTACACCTTTGTTGAGTCATGATTGGCCATGA  
+HWI-EAS443:3:37:138:243#0/1  
a^bbb¥X^]a^a`^^`a`\_`¥P[Za\_]aZVNXVZ`\_[ZX¥  
@HWI-EAS443:3:37:1426:40#0/1  
GGATCCTGGGAAATCCAGAGTGTGAATCACTCTCCACAGC  
+HWI-EAS443:3:37:1426:40#0/1  
a^^SY]]^`a`\_\_[[[\_UZU^V`V`¥[^^ODORUXMZSS[L  
@HWI-EAS443:3:37:1467:709#0/1  
AACTGATTGCCCCAGGGAGACTACCAGTACCAATGAACT  
+HWI-EAS443:3:37:1467:709#0/1  
\_`^`XZ`U`[^aa`ab`a`^^`\_V`\_`^][WbX`]a`]]^  
@HWI-EAS443:3:37:147:213#0/1  
AAAACATATGCATCTGCATTCTGATAGAGACTTTGTTGGT  
+HWI-EAS443:3:37:147:213#0/1  
UL`bbbbaaaaa`^`aaaaaaba\_`[\_`a`\_`aX`a^`\_`\_W

@HWI-EAS443:3:37:1534:150#0/1  
GCTGGCTGGATCCTGGGAAATCCAGAGTGTGAATCACTCT  
+HWI-EAS443:3:37:1534:150#0/1  
aaa`a`aaa¥YZ\_VVa^Z`\_Y[ZP]^V\_G¥[^^[SSTV  
@HWI-EAS443:3:37:1540:443#0/1  
CAAGATACAGCAAGAAGTTCAAGCCGAAATAGCAATAAG  
+HWI-EAS443:3:37:1540:443#0/1  
a`aXV`ZWU^0]a¥Zba\_^Vab[OZaaW\_M]Z]\_Y]SZ\_P  
@HWI-EAS443:3:37:1584:1569#0/1  
AAAAGAATAGAGAATTTAAATAAAAAAGTTGATGATGGTT  
+HWI-EAS443:3:37:1584:1569#0/1  
abaabaabbbbaaabaabb`aaaa\_Zbaaba\_a\_Y\_  
@HWI-EAS443:3:37:1609:99#0/1  
GAAGAGCACACAGAATGCCATTGACGAGATTACTAACAAA  
+HWI-EAS443:3:37:1609:99#0/1  
a^)]^a^\_\_a]\_a`YaaXX[[¥`[R`]YMIx¥][^XUY[X  
@HWI-EAS443:3:37:1687:1097#0/1  
CGAATGTTATTTTGTCTCCCGCTCTACTAGTGTCCAGTA  
+HWI-EAS443:3:37:1687:1097#0/1  
`baabbababbbb\_abbba^baaab`^aMb¥a\_a\_XaUZ  
@HWI-EAS443:3:37:1716:1074#0/1  
CTTTGTTAGTAATCTCGTCAATGGCATTCTGTGTGCTCTT  
+HWI-EAS443:3:37:1716:1074#0/1  
`bbbaabbbbaaabaabaaaa`ba`aaaaXa^a`a\_aaaa  
@HWI-EAS443:3:37:1747:956#0/1  
GGGGACATCAAGATACAGCAAGAAGTTCAAGCCGAAATA  
+HWI-EAS443:3:37:1747:956#0/1  
[b`aXG]aa\_aba[aaa\_\_Vaa¥`aYZNbXa]][]Z\_aR]  
@HWI-EAS443:3:37:1750:691#0/1  
CCATCCATCTACTAGTGCTGACCAACAAAGTCTCTATCAG  
+HWI-EAS443:3:37:1750:691#0/1  
`aa]bbbbabb`baaabaaba`bb`aaaG^ababaa`ba  
@HWI-EAS443:3:37:19:1187#0/1  
TCAGAATGCAGATGCATATGTTTTTGTGGGGACATCAAGA  
+HWI-EAS443:3:37:19:1187#0/1  
ab`¥`^^^ba^aab`b\_V\_a^`aa\_aSY\_¥Y]`[`aa`a`  
@HWI-EAS443:3:37:204:205#0/1  
GGCCAGTCTCAATTTTGTGCTTTTACATATTTTGGACAT  
+HWI-EAS443:3:37:204:205#0/1  
aaaa^^Va\_`P`\_a¥a\_U]a]\_^a¥\_`[^VV^[^\_Y\_¥\_  
@HWI-EAS443:3:37:215:231#0/1  
CTGGGAAATCCAGAGTGTGAATCACTCTCCACAGCAAGCT  
+HWI-EAS443:3:37:215:231#0/1  
aaa``abbaaa\_aaa^a^aa`aab```\_aRR\_\_^aaV^a^  
@HWI-EAS443:3:37:218:1885#0/1  
CACTGAGCTCAATTGCTCTCTTAGCTCCTCATAATCGATG  
+HWI-EAS443:3:37:218:1885#0/1  
]bb[Z`ab\_baaa`X``bbaa\_b\_b\_ba`\_``Ub`a^UWa  
@HWI-EAS443:3:37:287:1171#0/1  
GGGGCATTACCATCCATCTACTAGTGCTGACCAACAAAG

+HWI-EAS443:3:37:287:1171#0/1  
[b`\_b\_bbbbbabbabbbbbbbbaabbaaNabY\_baM¥a  
@HWI-EAS443:3:37:289:472#0/1  
AAATACTCAGAGGAAGCAAATTAACAGAGAAGAAATAG  
+HWI-EAS443:3:37:289:472#0/1  
aabaaaaaaaa`aaa`aaa[aaaa``\_]`^`Y`\_\_\_`\_\_`  
@HWI-EAS443:3:37:306:104#0/1  
ATCGATTATGAGGAGCTAAGAGAGCAATTGAGCTCAGTGT  
+HWI-EAS443:3:37:306:104#0/1  
^bbbbbbaababaa`aa`aaK\_\_aaa``ZKIV\_Z`^XNRK  
@HWI-EAS443:3:37:320:116#0/1  
CACTCTGTAACTTCTAGAAGACAAGCATAACGGGAAAC  
+HWI-EAS443:3:37:320:116#0/1  
`a`¥`a`]aaaa\_aaa^``]`a`aaT^POVF[\_`\_aZFTX  
@HWI-EAS443:3:37:326:1416#0/1  
TGAACCTGTCTGGGAATATCTCAAACCTTCAAATGAT  
+HWI-EAS443:3:37:326:1416#0/1  
^[]`a]\_bYbaa\_^`a¥aaaaaa^aa`b¥Uab`¥```a]  
@HWI-EAS443:3:37:338:382#0/1  
GGGACATCAAGATACAGCAAGAAGTTCAAGCCGAAATAG  
+HWI-EAS443:3:37:338:382#0/1  
aaa`\_a`a`aaa`a`baaaba`[^X^`YHQ\_\_`^X\_\_^\_\_  
@HWI-EAS443:3:37:449:151#0/1  
ATCCTGACCCCTGCTCATTTTGATGGTGATAACCGTACCA  
+HWI-EAS443:3:37:449:151#0/1  
]S][[JSZ[X`XSYW[RXTN XRQLQBBBBBBBBBBBBB  
@HWI-EAS443:3:37:453:1318#0/1  
TTTGCTTCTCTGAGTATTTTGGGTAGTCATAAGTCCCAT  
+HWI-EAS443:3:37:453:1318#0/1  
aa\_]\_aaaaaaaaaba]\_aaa\_aZ`W^`]a0¥`T¥[aaaaa  
@HWI-EAS443:3:37:504:1159#0/1  
CTGGCTGGATCCTGGAAATCCAGAGTGTGAATCACTCTC  
+HWI-EAS443:3:37:504:1159#0/1  
aa`]a`a\_]`\_]\_X\_]`^X¥a]\_Y]R^UKJYV`aU^a^`  
@HWI-EAS443:3:37:504:721#0/1  
TCTTCAGGTCGGCTGCATATCCTGACCCCTGCTCATTTTG  
+HWI-EAS443:3:37:504:721#0/1  
\_ba`aaYZ¥a``aa`a\_\_a\_\_``^\_¥`^^Q¥\_WZ\_\_W\_  
@HWI-EAS443:3:37:520:1008#0/1  
CACGTGTTATCGCATTTGTGGTAAAATCAAAGCAGCCGT  
+HWI-EAS443:3:37:520:1008#0/1  
aaaaY^Z`^`^`a^^\_\_aaUaYXa]^[]^aPDZ]^XY^`^X  
@HWI-EAS443:3:37:555:1622#0/1  
GGGTCAGGATATGCAGCCGACCTGAAGAGCACACAGAATG  
+HWI-EAS443:3:37:555:1622#0/1  
`b[\_abbabba`bbabb\_a\_aa]aa]aaGUYU\_a`aaa`  
@HWI-EAS443:3:37:566:522#0/1  
TCGGATGTATATTCTGAAATGGGAGGCTGGTGTATTATAGC  
+HWI-EAS443:3:37:566:522#0/1  
aaa`\_a`\_\_a\_aaa`a````¥```]a`\_Z\_UH\_W^\_YR]]Z

@HWI-EAS443:3:37:580:380#0/1  
GGTCAGGATATGCAGCCGACCTGAAGAGCACACAGAATGC  
+HWI-EAS443:3:37:580:380#0/1  
aaRV`aabaaUW]`a\_ab]GY`a\_^aQaaW`^\_a]XR[^Y  
@HWI-EAS443:3:37:62:1252#0/1  
TTGGAAACGGCTGCTTTGAATTTTACCACAAATGCGATAA  
+HWI-EAS443:3:37:62:1252#0/1  
``\_T\_USbaTb\_¥UG^XFWXZ^\_R`a¥`NHUUHVZTQ]\_  
@HWI-EAS443:3:37:630:1292#0/1  
GGGAGACTACCAGTACCAATGAACTGGCGACAGTTGAATA  
+HWI-EAS443:3:37:630:1292#0/1  
]aaaaabaaaa\_abaaaa[aaa\_a`\_aXa\_\_Y\_]\_U[a  
@HWI-EAS443:3:37:645:249#0/1  
ATGATTGGGCCATGAACTTGTCTTGGGAATATCTCAAAC  
+HWI-EAS443:3:37:645:249#0/1  
aaaa^Q\_Ua^````YQR`aa[^`a¥a\_aUMM\_U\_^^¥H¥V  
@HWI-EAS443:3:37:676:1250#0/1  
AGCCAGTTAAAAACAATGCCAAGGAAATTGGAAACGGCT  
+HWI-EAS443:3:37:676:1250#0/1  
``aaaaW`\_]Z\_a\_aaa`\_] ^YZ^[U]ZNSY^XT[X  
@HWI-EAS443:3:37:677:1523#0/1  
CGGGAAACTATGCAAATAAGAGGGGTAGCCCCATTGCAT  
+HWI-EAS443:3:37:677:1523#0/1  
ab[`abbaab][\_a`aaaa`\_``Y\_\_^baWa^ba\_\_`a`¥  
@HWI-EAS443:3:37:688:426#0/1  
GGGCCATGAACTTGTCTTGGGAATATCTCAAACCTTTCA  
+HWI-EAS443:3:37:688:426#0/1  
`abaa`aa[aabb`]\_bbbbbaab^baaQVa\_aba\_a`  
@HWI-EAS443:3:37:766:141#0/1  
GAATTTTACCACAAATGCGATAACACGTGCATGGAAAGTG  
+HWI-EAS443:3:37:766:141#0/1  
aa`\_\_a`^a`\_``^¥^a^¥\_SW`^¥XWV]^][[]ZZ\_  
@HWI-EAS443:3:37:843:1705#0/1  
TTTTCAATAACAGAATTTACTTTGTTAGTAATCTCGTCAA  
+HWI-EAS443:3:37:843:1705#0/1  
^\_OUS^`YS`a`WS`^0\_Za^Z\_M0a\_SUQ0aVbbIba`  
@HWI-EAS443:3:37:869:2041#0/1  
ATGGCATTCTGTGTGCTCTTCAGGTCGGCTGCATATCCTG  
+HWI-EAS443:3:37:869:2041#0/1  
aabX\_b^aaaa[a\_a``aa`aa`[Na`^bNXYL]b[N]PL  
@HWI-EAS443:3:37:882:1448#0/1  
AGCCAGTTAAAAACAATGCCAAGGAAATTGGAAACGGCT  
+HWI-EAS443:3:37:882:1448#0/1  
a`a\_aaababaa`a\_baa\_[\_`\_`[a`¥ZY[]\_`^`\_]\_¥  
@HWI-EAS443:3:37:884:1245#0/1  
CGTCAATGGCATTCTGTGTGCTCTTCAGGTCGGCTGCATA  
+HWI-EAS443:3:37:884:1245#0/1  
ab]W\_LZ`Q[]\_Z¥`]`aPTa^bZ]¥SZPGbZT^\_V[]T¥  
@HWI-EAS443:3:37:896:1978#0/1  
GCCTAGTAGATGGATGGTGAATGCCCCATAGCACGAGGA

+HWI-EAS443:3:37:896:1978#0/1  
aba\_UaaZaa`\_`\_]`a\_]`b^^aaaXLLDG[``a[^\_V\_  
@HWI-EAS443:3:37:911:95#0/1  
GGGACATCAAGATACAGCAAGAAGTTCAAGCCGAAATAG  
+HWI-EAS443:3:37:911:95#0/1  
aaa`a`^`aa`\_]a`]\_aa`\_aP[]^NL`^`\_R¥Z^^^  
@HWI-EAS443:3:37:914:524#0/1  
ACTGATTGCCCCAGGGAGACTACCAGTACCAATGAACTG  
+HWI-EAS443:3:37:914:524#0/1  
aaa`aaaaaaaa]Z\_X`^X]`^]X¥SWSa`Y\_]T]¥^  
@HWI-EAS443:3:37:917:87#0/1  
TTGTGGGGACATCAAGATACAGCAAGAAGTTCAAGCCGGA  
+HWI-EAS443:3:37:917:87#0/1  
aaa^aaaa¥Z¥a\_\_^aaa\_]aa]]`a\_]aGYWaZ\_]^`\_]  
@HWI-EAS443:3:37:927:998#0/1  
AAATAACATTGAAGCAACTGGAAATCTAGTGGTACCGAG  
+HWI-EAS443:3:37:927:998#0/1  
a¥baa¥abaaaa¥\_baa`aa`\_`aa`^`aKRXaYaa\_a`a  
@HWI-EAS443:3:37:941:1267#0/1  
AGGAGATTCATCGATTATGAGGAGCTAAGAGAGCAATTG  
+HWI-EAS443:3:37:941:1267#0/1  
`ab`\_`[bba^aa\_a¥ab^aaa`aaaa`ITR`^`aaaZ^X  
@HWI-EAS443:3:37:970:741#0/1  
TGCGAATGCATATCTCGGTACCACTAGATTTCCAGTTGCT  
+HWI-EAS443:3:37:970:741#0/1  
`Z`\_SU`baa`\_aa`\_`\_W\_\_\_[[\_aa[TTW\_aZ\_VOJS¥  
@HWI-EAS443:3:37:990:525#0/1  
AAAGAATAGAGAATTTAAATAAAAAAGTTGATGATGGTTT  
+HWI-EAS443:3:37:990:525#0/1  
aaababbbbbbbbabbb`bbab`b`bb^a\_aabaabaaab  
@HWI-EAS443:3:38:1031:1279#0/1  
GACCATGAGCTTGCTGTGGAGAGTGATTACACTCTGGAT  
+HWI-EAS443:3:38:1031:1279#0/1  
a`]aa^aYZ\_]aa¥`]`a\_M\_P]Pa[]^][U`WX¥`^R^W  
@HWI-EAS443:3:38:1092:993#0/1  
TCCGGCTTGAACTTCTTGCTGTATCTTGATGTCCCACAA  
+HWI-EAS443:3:38:1092:993#0/1  
`abaa`^a]^\_Y\_aa\_a`[\_`Y`]X]a^¥RYXV]`TNR\_^  
@HWI-EAS443:3:38:1118:1272#0/1  
TGACAAGTTGTATTGCAATCGTGGACTGGTGTATCTGAAA  
+HWI-EAS443:3:38:1118:1272#0/1  
[`V`a`aTZ\_Rb^Y`^Z`^aa¥V^^T`^¥^M[R`Z^a¥\_O  
@HWI-EAS443:3:38:1124:1805#0/1  
GTTACCCAGGAGATTCATCGATTATGAGGAGCTAAGAGA  
+HWI-EAS443:3:38:1124:1805#0/1  
aUR^WZ¥`ON^]`[]\_Z¥^M]W¥]H[Y^XTZRXXYYW]XU  
@HWI-EAS443:3:38:1215:91#0/1  
CATTGCATTTGGGTAAATGTAACATTGCTGGCTGGATCCT  
+HWI-EAS443:3:38:1215:91#0/1  
ababab`abaaab`abaaaabbbabababa\_]^aa]^`W



@HWI-EAS443:3:38:1239:26#0/1  
GTGGGGACATCAAGATACAGCAAGAAGTTCAAGCCGGAAA  
+HWI-EAS443:3:38:1239:26#0/1  
a\_aa`a`^^\_¥^`^a^[\_`^^`[U^VYTX]VW]]VPR  
@HWI-EAS443:3:38:1299:394#0/1  
ATTAATTTTTGTAGAAGCTTTTTGCTCCAGCATGAGGAC  
+HWI-EAS443:3:38:1299:394#0/1  
`a`a^abba`R]b^^¥\_baa`^Y^¥QT[Y\_¥W`UYG  
@HWI-EAS443:3:38:12:348#0/1  
GGGACATCAAGATACAGCAAGAAGTTCAAGCCGGAAATA  
+HWI-EAS443:3:38:12:348#0/1  
aa\_aaaa`b`aaYaa\_aa\_aaaZR^[\_Y\_VS]\_\_Y¥\_^^  
@HWI-EAS443:3:38:1316:1382#0/1  
ACAATGTAGGACCATGAGCTTGCTGTGGAGAGTGATTCAC  
+HWI-EAS443:3:38:1316:1382#0/1  
]¥`U`SX^X^T¥^`a¥a¥Ta`V]YMQPNRTRVKT[R  
@HWI-EAS443:3:38:1325:1312#0/1  
AATTTCTTGGCATTGTTTTTAACTGGCTTCTTACCTTT  
+HWI-EAS443:3:38:1325:1312#0/1  
aa\_`a``\_aYXZ\_ab`aaa^a^\_X^\_Z^\_SVX\_YQZ^`]  
@HWI-EAS443:3:38:1340:435#0/1  
CAAAGTCTCTATCAGAATGCAGATGCATATGTTTTGTGG  
+HWI-EAS443:3:38:1340:435#0/1  
aaaab]ab^ba]¥]\_V¥aaX\_]^a`aaTS[\_a`\_`Z¥Y  
@HWI-EAS443:3:38:1347:1613#0/1  
ATTTTGTCTCCTCTGAGTATTTTGGGTAGTCATAAGTCCC  
+HWI-EAS443:3:38:1347:1613#0/1  
¥[\_][X`^`¥ZZY`^¥a¥\_a\_ZaX\_PV¥FJ[[¥WSONWH  
@HWI-EAS443:3:38:1351:107#0/1  
TGCAATACTTGTGACACCCAAGGGTGTATAAACA  
+HWI-EAS443:3:38:1351:107#0/1  
abaaaabaa\_`a`\_\_a\_V`^`^a^aUXWXY]Y]]VU  
@HWI-EAS443:3:38:1389:812#0/1  
GATTTCCAGTTGCTTCGAATGTTATTTGTCTCCCGGCTC  
+HWI-EAS443:3:38:1389:812#0/1  
\_Y¥`aa`W¥^^]Z^`\_aX]]aZ`````\_]UUXT[U[ZTYU  
@HWI-EAS443:3:38:142:389#0/1  
GCCGGTTTCATTGAAGGGGGTGGACAGGGATGGTAGATG  
+HWI-EAS443:3:38:142:389#0/1  
ab``Z`a`^]ab]Z\_\_a``W``UQZ[^UVa\_S`\_^Y[  
@HWI-EAS443:3:38:1438:1879#0/1  
CAGAACTGATTGCCCCAGGGAGACTACCAGTACCAATG  
+HWI-EAS443:3:38:1438:1879#0/1  
Q\_^`b`U\_\_TZ]XR\_\_`M\_\_I¥U][TWW\_NGFFWXXaaVY  
@HWI-EAS443:3:38:1488:1437#0/1  
ATACAATTTGTGACACCCAAGGGTGTATAAACACCAG  
+HWI-EAS443:3:38:1488:1437#0/1  
`bbaaaaba^\_\_a`a`a`Va`aa\_Ua]`Y^^^U^\_X^Y  
@HWI-EAS443:3:38:1488:952#0/1  
CTCTTTACCTACTGCTGTGAAGTGTGATTTCATCTTTCA

+HWI-EAS443:3:38:1488:952#0/1  
aa\_\_ba``aba\_ababbbb\_a`bb`b[ab\_Z\_]YaabaXT  
@HWI-EAS443:3:38:1535:1450#0/1  
CTGAAATGGGAGGCTGGTGTATTATAGCACCTTGGGTGTC  
+HWI-EAS443:3:38:1535:1450#0/1  
a`ba^`b`a¥Vaabb`^[bZbbb\_WW\_ZKSY^[aa]R`\_T  
@HWI-EAS443:3:38:1536:1486#0/1  
GGGACATCAAGATACAGCAAGAAGTTCAAGCCGGAAATAG  
+HWI-EAS443:3:38:1536:1486#0/1  
\_[\_aaa\_\_baa``\_aaa]``a`aaYZ\_aaYRT¥\_]Z¥]\_Y  
@HWI-EAS443:3:38:1659:692#0/1  
CTGGCTGGATCCTGGGAAATCCAGAGTGTGAATCACTCTC  
+HWI-EAS443:3:38:1659:692#0/1  
ab\_]`\_\_\_ba\_K][¥a\_a\_[Z\_a¥U`S^¥¥WV¥V¥U^RUS  
@HWI-EAS443:3:38:1668:640#0/1  
GCCATGAACCTTGTCTTGGGAATATCTCAAACCTTTCAA  
+HWI-EAS443:3:38:1668:640#0/1  
^Y`a`aaaab`aXVbbabab`aaaaabaUWROa\_````Z  
@HWI-EAS443:3:38:1702:65#0/1  
GACAAGTTGTATTGCAATCGTGGACTGGTGTATCTGAAAT  
+HWI-EAS443:3:38:1702:65#0/1  
a`^`a^ab\_`\_\_\_[a\_a^X\_`\_W\_]ZZZZXZZZZZ  
@HWI-EAS443:3:38:1746:1144#0/1  
CATCGATTATGAGGAGCTAAGAGAGCAATTGAGCTCAGTG  
+HWI-EAS443:3:38:1746:1144#0/1  
a\_bbb^^^aab\_`^Xbaaaa````]a`a^aUOTYS[UZYXX  
@HWI-EAS443:3:38:1774:850#0/1  
GCTCTCTTAGCTCCTCATAATCGATGAAATCTCCTGGGTA  
+HWI-EAS443:3:38:1774:850#0/1  
aaa\_a\_aaaaZ]VY`¥\_a`]`¥a\_^ZXZ`WGYWYZW^WZW  
@HWI-EAS443:3:38:192:925#0/1  
GTCAATGGCATTCTGTGTGCTCTTCAGGTCGGCTGCATAT  
+HWI-EAS443:3:38:192:925#0/1  
a[a\_[^]`aa^`ZU]\_`QaZ\_\_\_\_\_Z`PXQZ^RTZVSU^\_Z  
@HWI-EAS443:3:38:204:476#0/1  
ACGTGTTATCGCATTTGTGGTAAAATCAAAGCAGCCGTT  
+HWI-EAS443:3:38:204:476#0/1  
]^VZ\_[ ]`bb]`[aYa^bVUab`^¥TW`VRa¥]\_YG`¥[  
@HWI-EAS443:3:38:211:617#0/1  
CTCCTCATAATCGATGAAATCTCCTGGGTAACACGTTCCA  
+HWI-EAS443:3:38:211:617#0/1  
a]SH\_\_^YU]`\_\_\_`UURY`aSZa`a]]X`^Z\_]`0aZW`  
@HWI-EAS443:3:38:370:840#0/1  
CCTCTGAGTATTTGGGTAGTCATAAGTCCCATTTTGGAC  
+HWI-EAS443:3:38:370:840#0/1  
abbabbbbaVaaa`aaaaYaa`ba`a`aXa\_^a`aaaa[aW  
@HWI-EAS443:3:38:377:93#0/1  
CAGAACTGATTGCCCCAGGGAGACTACCAAGTACCAATG  
+HWI-EAS443:3:38:377:93#0/1  
a¥X]\_VaZ\_¥^V\_\_\_\_\_aaX``[MZZ^^VUWRVSVLNWTYQ

@HWI-EAS443:3:38:385:54#0/1  
GCTGGCTGGATCCTGGGAAATCCAGAGTGTGAATCACTCT  
+HWI-EAS443:3:38:385:54#0/1  
aa]\_aa]a\_UQ¥]X¥Y\_NTWS\_]UYVZKVUUSYT[YUUUU  
@HWI-EAS443:3:38:400:764#0/1  
CTCGTCAATGGCATTCTGTGTGCTCTTCAGGTCGGCTGCA  
+HWI-EAS443:3:38:400:764#0/1  
^b\_\_¥bb]S`b`^\_aa]^¥`Vabaa¥0[ZZNWP\_\_aX]^G  
@HWI-EAS443:3:38:427:53#0/1  
GCTGGCTGGATCCTGGGAAATCCAGAGTGTGAATCACTCT  
+HWI-EAS443:3:38:427:53#0/1  
aabaaaa\_[Y``[¥`\_a]Y¥SYVZULXM[URPQTYZZYSS  
@HWI-EAS443:3:38:434:306#0/1  
CACTAGTAGATGGATGGTGAATGCCCCATAGCACGAGGAC  
+HWI-EAS443:3:38:434:306#0/1  
\_``aab\_abaaaa\_aa`Yaaa`aa`a`\_]Y]\_\_\_\_\_][S  
@HWI-EAS443:3:38:461:420#0/1  
TGACACTGAGCTCAATTGCTCTCTTAGCTCCTCATAATCG  
+HWI-EAS443:3:38:461:420#0/1  
a\_aa]aaSY]\_``\_`^V^a`\_a¥`\_a\_Z\_0^U^][0¥]\_  
@HWI-EAS443:3:38:474:1898#0/1  
AAAAAGCACAAAATTGAGACTGGCCACAGGATTGAGGAAT  
+HWI-EAS443:3:38:474:1898#0/1  
a`a\_a\_baaaa\_a````Z\_`\_]a]\_]UZUWZ[SS]Z\_S  
@HWI-EAS443:3:38:542:1832#0/1  
GGGGACATCAAGATACAGCAAGAAGTTCAAGCCGAAATA  
+HWI-EAS443:3:38:542:1832#0/1  
\_UG\_[Y^P`a`R\_a]]`\_]aaZU\_KSQ]ZFZLURP\_YZ¥  
@HWI-EAS443:3:38:546:1114#0/1  
CAACTTGTGACACCCCAAGGGTGTATAAACACCAGCCT  
+HWI-EAS443:3:38:546:1114#0/1  
a^^aaaa\_aa`\_`aaaaa\_\_TY^`¥a\_^V\_^]ZV  
@HWI-EAS443:3:38:550:693#0/1  
ACCATCCATCTACTAGTGCTGACCAACAAAGTCTCTATCA  
+HWI-EAS443:3:38:550:693#0/1  
aaa`0]ZU\_RMWJOUTOVSLWLW]Y^]WPSLQZMXUUTQ  
@HWI-EAS443:3:38:586:556#0/1  
ATTCTGTGTGCTCTTCAGGTCGGCTGCATATCCTGACCCC  
+HWI-EAS443:3:38:586:556#0/1  
`abbbbab\_`aaaaabaaa[baaa`^\_``^\_\_\_\_]V]Y[Q  
@HWI-EAS443:3:38:628:1372#0/1  
GGAGGCTGGTGTATATAGCACCCCTTGGGTGTCTGACAAGT  
+HWI-EAS443:3:38:628:1372#0/1  
aaa`aaaba[`¥aaaa`\_``aa`\_¥[]`W[QV\_[¥Y\_YUS  
@HWI-EAS443:3:38:63:1795#0/1  
GCCGGTTTCATTGAAGGGGGTGGACAGGGATGGTAGATG  
+HWI-EAS443:3:38:63:1795#0/1  
a`¥¥]T``[`a\_W`\_]UQ^VJVYU^¥ZRPV]VLLYL¥ST  
@HWI-EAS443:3:38:681:1298#0/1  
ACCCAGGAGATTCATCGATTATGAGGAGCTAAGAGAGCA

+HWI-EAS443:3:38:681:1298#0/1  
aaa\_Z\_aaa`aa`\_Xa`^¥```a\_^]\_^\_W][^X\_X^SWZ  
@HWI-EAS443:3:38:698:870#0/1  
CTTTACTACTGCTGTGAAGTGTATTTCATCTTTTCAAT  
+HWI-EAS443:3:38:698:870#0/1  
abaab`ba`aaa\_a`\_a`]¥ab`a]aaaa`]aaa```\_`  
@HWI-EAS443:3:38:713:1036#0/1  
CTTTTCAATAACAGAATTTACTTTGTTAGTAATCTCGTCA  
+HWI-EAS443:3:38:713:1036#0/1  
aa^aab\_[`b^aaaaaaaa`aa`\_a^aaa]^\_`]`^a]\_^  
@HWI-EAS443:3:38:781:752#0/1  
AGTCATAAGTCCCATTTTTGACACTTTCCATGCACGTGTT  
+HWI-EAS443:3:38:781:752#0/1  
ab^`]Y¥T]¥¥^Y¥`^aaa`[Z¥`\_\_[\_`¥\_`¥YQLW]]Y  
@HWI-EAS443:3:38:798:1192#0/1  
CAGCCGTTTCCAATTTCTTGGCATTGTTTTTAACTGGC  
+HWI-EAS443:3:38:798:1192#0/1  
ab`\_``[X^`aaaabY^aaa\_[aZ^^a^\_a[\_[¥]W`¥`W  
@HWI-EAS443:3:38:799:207#0/1  
AGAAGACAAGCATAACGGGAACTATGCAAATAAGAGGG  
+HWI-EAS443:3:38:799:207#0/1  
aa`aaaa```^`a\_a\_¥][^a\_\_^`XVUWVW¥¥^]¥WV  
@HWI-EAS443:3:38:818:1697#0/1  
ATCTATTTCTTCTCTGTTTAATTTTGCTTCCTCTGAGTAT  
+HWI-EAS443:3:38:818:1697#0/1  
^baa`S\_aa]a]aWabaa`baaaaa`aaa]X`\_]aaYX`]  
@HWI-EAS443:3:38:84:582#0/1  
ACTGATTGCCCCAGGGAGACTACCAGTACCAATGAACTG  
+HWI-EAS443:3:38:84:582#0/1  
abab`\_`bbbaa```\_`[^^^a¥^a]¥`[\_`Y]`WXN[\_`  
@HWI-EAS443:3:38:866:1372#0/1  
AAGGGAGAATGAACTATTACTGGACACTAGTAGAGCCGGG  
+HWI-EAS443:3:38:866:1372#0/1  
¥\_¥SV``abb¥``\_[b`^^[a¥ZZ`\_`^`^SY`WTWR\_]`^  
@HWI-EAS443:3:38:880:726#0/1  
CGATTATGAGGAGCTAAGAGAGCAATTGAGCTCAGTGTCA  
+HWI-EAS443:3:38:880:726#0/1  
abbb\_¥bbbb`U]aababbb`abbaba¥¥aXa`\_b\_a\_^  
@HWI-EAS443:3:38:914:812#0/1  
AAAGTGTCAAAAATGGGACTTATGACTACCCAAAATACTC  
+HWI-EAS443:3:38:914:812#0/1  
aaaa\_b\_abbabaa`[^aaaaaaaa`aaa[U^\_Z^\_]`^M  
@HWI-EAS443:3:38:926:1858#0/1  
GAGCAGGGGTCAGGATATGCAGCCGACCTGAAGAGCACAC  
+HWI-EAS443:3:38:926:1858#0/1  
aababa\_aba\_a]Xbbbb\_b`aaaaSa¥S¥VaVUa¥XT  
@HWI-EAS443:3:38:962:1086#0/1  
CAGCCGACCTGAAGAGCACACAGAATGCCATTGACGAGAT  
+HWI-EAS443:3:38:962:1086#0/1  
aaabbaaaba`a`^a`a`aaa`\_`a\_a^Z\_\_\_\_\_`^`\_^

@HWI-EAS443:3:38:994:214#0/1  
AGGAAATTGGAAACGGCTGCTTTGAATTTTACCACAAATG  
+HWI-EAS443:3:38:994:214#0/1  
Xb`]aab`bb`baaaba^bZR`aWMZVW^^OWQOL\_\_]LV  
@HWI-EAS443:3:39:1013:968#0/1  
GTCATGATTGGCCATGAACTTGTCTTGGGAATATCTCA  
+HWI-EAS443:3:39:1013:968#0/1  
a`aaa`\_aaa\_a`[R]\_^]\_a`^^`\_a\_]Y]\_`a]\_`X  
@HWI-EAS443:3:39:1024:737#0/1  
GGGACATCAAGATACAGCAAGAAGTTCAAGCCGAAATAG  
+HWI-EAS443:3:39:1024:737#0/1  
^abbbbbbbbab\_bbabbbbabab\_aab`aa]ba``aa`a  
@HWI-EAS443:3:39:1025:954#0/1  
CTGCTGTGAAGTGTATTTCATCTTTTCAATAACAGAATT  
+HWI-EAS443:3:39:1025:954#0/1  
abbabb^b^b`bb^bZaaaaaab\_aabaa`\_`[a\_`aa\_  
@HWI-EAS443:3:39:1076:707#0/1  
CATGAACTTGTCTTGGGAATATCTCAAACCTTCAAATG  
+HWI-EAS443:3:39:1076:707#0/1  
a¥`bX`bbbaaabba`U\_b\_b`ababaa`^a\_ba```\_  
@HWI-EAS443:3:39:1130:1288#0/1  
GGGGACATCAAGATACAGCAAGAAGTTCAAGCCGAAATA  
+HWI-EAS443:3:39:1130:1288#0/1  
aa`^a```\_]\_^]aa`a^[`aa\_aUY`\_RIMY[¥VX]W^  
@HWI-EAS443:3:39:1219:982#0/1  
AACGTGTTACCCAGGAGATTTTCATCGATTATGAGGAGCTA  
+HWI-EAS443:3:39:1219:982#0/1  
`a`\_Wa`a]aa^Y][aa¥a\_]a\_`a`^a`\_aW^\_\_Z\_U^X  
@HWI-EAS443:3:39:1222:1280#0/1  
CCAGAACTGATTGCCCCAGGGAGACTACCAGTACCAAT  
+HWI-EAS443:3:39:1222:1280#0/1  
abbabbbbbbbbbbbabbba`bbaaaa`aaaa^^Za¥```\_  
@HWI-EAS443:3:39:1222:86#0/1  
CCCCCTTCAATGAAACCGCAATGGCCCCAAATAGGCCTC  
+HWI-EAS443:3:39:1222:86#0/1  
a]ababbbbbbbbaabaaa`a`\_a\_aQa```\_¥\_\_\_\_\_¥^N  
@HWI-EAS443:3:39:1224:655#0/1  
GATGAAATCTCCTGGGTAACACGTTCCATTGTCTGAACTA  
+HWI-EAS443:3:39:1224:655#0/1  
aaaa`^\_aaaa`aaaU^`\_\_\_a\_Za^`^^\_ZU^ZX]W]X  
@HWI-EAS443:3:39:1276:307#0/1  
TGATGATGGTTTCTGGACATTTGGACTTACAATGCCGAA  
+HWI-EAS443:3:39:1276:307#0/1  
`[Y^`a`bb\_\_a`¥`aaTP[\_`a\_[VXa¥ZYXW]\_S¥UUU  
@HWI-EAS443:3:39:1330:141#0/1  
TCATAAGTCCCATTTTTGACACTTCCATGCACGTGTTAT  
+HWI-EAS443:3:39:1330:141#0/1  
aaaaaaaa`^`aaaaa^\_\_a```^`X\_\_\_[[X`Y^\_]\_^  
@HWI-EAS443:3:39:1339:222#0/1  
TGTGGGGACATCAAGATACAGCAAGAAGTTCAAGCCGAA



@HWI-EAS443:3:39:1645:1028#0/1  
TTTACCACAAATGCGATAACACGTGCATGGAAAGTGTC  
+HWI-EAS443:3:39:1645:1028#0/1  
^Z]bb\_baaaYTaXa\_Z]]Y]^\_]UNJZ¥¥XSWX]^SY]Y  
@HWI-EAS443:3:39:1656:1197#0/1  
GAGCAATTGAGCTCAGTGCATCATTTGAAAGGTTTGAGA  
+HWI-EAS443:3:39:1656:1197#0/1  
aa^[^abbbaaaaR^\_W¥Ya^¥`^`bbV]\_a`M[[a\_a`a]  
@HWI-EAS443:3:39:1662:190#0/1  
TTCATCTTTTCAATAACAGAATTTACTTTGTTAGTAATCT  
+HWI-EAS443:3:39:1662:190#0/1  
``^Z¥S\_a`^W¥`a\_\_`T¥W^a`^Z\_`^`aZ[]^]\_ZROU  
@HWI-EAS443:3:39:1663:526#0/1  
GCCGGTTTCATTGAAGGGGGTGGACAGGGATGGTAGATG  
+HWI-EAS443:3:39:1663:526#0/1  
aaa`^Y]aa`aaaRQ¥aa\_a\_U`VSZU\_`^¥UV^^RUYYVV  
@HWI-EAS443:3:39:1710:1656#0/1  
GTTGCTTCGAATGTTATTTGTCTCCCGGCTCTACTAGTG  
+HWI-EAS443:3:39:1710:1656#0/1  
a\_aaaaa\_a\_\_a`[aaaa`^¥\_Y^]\_T]Y^YXZSTUPUMT  
@HWI-EAS443:3:39:186:1693#0/1  
GCCGGTTTCATTGAAGGGGGTGGACAGGGATGGTAGATG  
+HWI-EAS443:3:39:186:1693#0/1  
Z`R\_]J^ab]a¥QaXWRaa]^Na[aa^R]UXV]PKaX[YX  
@HWI-EAS443:3:39:232:753#0/1  
ACAGTACCAATGAACTGGCGACAGTTGAATAGATCGCCA  
+HWI-EAS443:3:39:232:753#0/1  
aaa`XY`aa[`aa`aa^^[\_`^^]X^]¥WSX]\_TXUXXY  
@HWI-EAS443:3:39:282:139#0/1  
ATGCATATGTTTTGTGGGGACATCAAGATACAGCAAGAA  
+HWI-EAS443:3:39:282:139#0/1  
aaabaaY`^]aaaaYaa`^`^]¥Y¥\_\_Y^V^\_\_\_\_^Z¥  
@HWI-EAS443:3:39:289:1530#0/1  
TGGGGACATCAAGATACAGCAAGAAGTTCAAGCCGAAAT  
+HWI-EAS443:3:39:289:1530#0/1  
aaa^QZ\_]\_[`^`\_`a`^Za`b]^Y`^aa\_R[\_^^Va`]  
@HWI-EAS443:3:39:384:176#0/1  
GCTGCTTTGAATTTTACCACAAATGCGATAACACGTGCAT  
+HWI-EAS443:3:39:384:176#0/1  
aa¥[\_^\_`^¥Y¥\_]\_]X^ZWZ]ZX^YXY^XSZWZZWSWX  
@HWI-EAS443:3:39:390:1217#0/1  
TCTCCCGGCTCTACTAGTGTCCAGTAATAGTTCATTCTCC  
+HWI-EAS443:3:39:390:1217#0/1  
a\_H\_\_[aab`a]]0]OTUa[¥\_WWLUZZ[UQYZ\_YX][YM  
@HWI-EAS443:3:39:409:223#0/1  
AACAGAATTTACTTTGTTAGTAATCTCGTCAATGGCATT  
+HWI-EAS443:3:39:409:223#0/1  
a]abb]Xbbb]aabbab\_b]a`aaaa`a`Z``\_```\_`^  
@HWI-EAS443:3:39:465:356#0/1  
GGCATTACCATCCATCTACTAGTGCTGACCAACAAAGTC

+HWI-EAS443:3:39:465:356#0/1  
aaaaa`a`aaaa\_a`\_\_aa`aa]`\_\_\_\_`\_\_Xa]a^^\_VV  
@HWI-EAS443:3:39:49:518#0/1  
CCAAAGCTCAGCAAATCCTACATTAATGATAAAGGGAAAG  
+HWI-EAS443:3:39:49:518#0/1  
abbaaabaa^aaba`\_aa`La`aa^Q\_aa[\_`\_a]`Y\_``  
@HWI-EAS443:3:39:507:1598#0/1  
GGCTGGTGTATAGCACCTTGGGTGTCTGACAAGTTGT  
+HWI-EAS443:3:39:507:1598#0/1  
\_X`bbaX¥WX^aab`b]^a[\_`\_a^Ra^[FRMQV[\_T][Z  
@HWI-EAS443:3:39:520:1726#0/1  
TAGTTCAGACAATGGAACGTGTTACCCAGGAGATTCATC  
+HWI-EAS443:3:39:520:1726#0/1  
`[ZQab¥XabaaabbaaYbZa``\_a`Za[`¥\_\_a`\_a``R  
@HWI-EAS443:3:39:535:1150#0/1  
TCCCATTTTTGACACTTCCATGCACGTGTTATCGCATTT  
+HWI-EAS443:3:39:535:1150#0/1  
[aba]R\_\_[^PY\_`XZ[ZM^Z^UZS`¥TVYQV]Z[^a`a¥  
@HWI-EAS443:3:39:567:397#0/1  
CTTTTTTATTTAAATTCTCTATTCTTTTTTCCAGGTGGTT  
+HWI-EAS443:3:39:567:397#0/1  
aaabbaaaaa\_^^\_aaa\_a`aa`a^``a`\_W\_a]]a`W^  
@HWI-EAS443:3:39:573:1661#0/1  
ATTGAGCTCAGTGCATCATTTGAAAGTTTGAGATATTC  
+HWI-EAS443:3:39:573:1661#0/1  
aa````\_aaaa\_¥`]aa`\_\_`\_\_^\_\_^Y`^]``\_a^\_\_^Z  
@HWI-EAS443:3:39:596:313#0/1  
GCTGGCTGGATCCTGGGAAATCCAGAGTGTGAATCACTCT  
+HWI-EAS443:3:39:596:313#0/1  
aaaa^a`]¥][^^T[SSVMPV^^VYYUVURS^UPYPV¥V  
@HWI-EAS443:3:39:61:977#0/1  
CTCCCGGCTCTACTAGTGTCCAGTAATAGTTCATTCTCCC  
+HWI-EAS443:3:39:61:977#0/1  
aabbaaa`aa\_\_`[\_`\_¥`¥`\_¥``\_\_¥¥^PZ\_^Z^\_\_¥  
@HWI-EAS443:3:39:629:626#0/1  
TGTGTGCTCTTCAGGTCGGCTGCATATCCTGACCCCTGCT  
+HWI-EAS443:3:39:629:626#0/1  
`\_\_baaabbbabba`\_aaaaaaaaabaaa\_\_^\_aaaa¥^`  
@HWI-EAS443:3:39:62:274#0/1  
CCGTTTTATTGAAGGGGGTGGACAGGGATGGTAGATGG  
+HWI-EAS443:3:39:62:274#0/1  
abbaTaaa`aaa[^aa^^a]T\_a¥^T^Y]U^¥^V[\_^W^^  
@HWI-EAS443:3:39:630:325#0/1  
TGCATATCTCGGTACCACTAGATTTCCAGTTGCTTCGAAT  
+HWI-EAS443:3:39:630:325#0/1  
a````\_a^bab\_aWY\_``````]\_¥a`Ya`^`\_¥\_[W\_¥[\_`^  
@HWI-EAS443:3:39:64:395#0/1  
GCCATGAACCTTGTCTTGGGGAATATCTCAAACCTTTCAA  
+HWI-EAS443:3:39:64:395#0/1  
aaaa^¥Y`][^\_L]a^\_X[\_QLSVX[\_YJ][^¥X\_^\_^^]^



@HWI-EAS443:3:39:655:1228#0/1  
GGGACATTCCTCAATCCTGTGGCCAGTCTCAATTTTGTGC  
+HWI-EAS443:3:39:655:1228#0/1  
a\_`Z`a\_YT\_]`a\_`a\_`UGU]]P\_[POYZUQ\_a][[TZL  
@HWI-EAS443:3:39:663:1894#0/1  
AAGCCAGTTAAAAACAATGCCAAGGAAATTGGAAACGGC  
+HWI-EAS443:3:39:663:1894#0/1  
a^[\`aaa^a`aa`aaaa^^]\_\_¥^^]]\_]]VX]]]]^YU  
@HWI-EAS443:3:39:674:1879#0/1  
ATATCCTGACCCCTGCTCATTTTGTGGTATAACCGTAC  
+HWI-EAS443:3:39:674:1879#0/1  
a]baba\_\_`aa`Ya`^ZZ\_\_^a^`^Y`Y\_`^]]^0  
@HWI-EAS443:3:39:707:1416#0/1  
GCCAGTTAAAAACAATGCCAAGGAAATTGGAAACGGCTG  
+HWI-EAS443:3:39:707:1416#0/1  
abaZ¥ababbb`a¥abbba\_Z\_aaa]a```\_aaaa`a\_¥  
@HWI-EAS443:3:39:709:1127#0/1  
CACGTGTTATCGCATTTGTGGTAAAATCAAAGCAGCCGT  
+HWI-EAS443:3:39:709:1127#0/1  
aabaV`a`^^aaaa`V`a]a\_V[\`\_aa`][\_`¥^]]  
@HWI-EAS443:3:39:72:525#0/1  
TTGGGTAGTCATAAGTCCCATTTTGGACACTTCCATGCA  
+HWI-EAS443:3:39:72:525#0/1  
aabbbVQ`\_aabaaa¥aa\_Z`aaaa\_Waaa`\_`aa`aa\_  
@HWI-EAS443:3:39:739:665#0/1  
ATGGTTTCCTGGACATTTGGACTTACAATGCCGAAGTGT  
+HWI-EAS443:3:39:739:665#0/1  
aaba\_aabbabaaaa`aaa\_a``aaa\_aaaX`TT¥`\_^^  
@HWI-EAS443:3:39:791:493#0/1  
CCGGCTTGAACCTTCTTGCTGTATCTTGATGTCCCCACAAA  
+HWI-EAS443:3:39:791:493#0/1  
aba`aab\_baaaaaaaa`aa\_`a`aa`aa\_`^`\_a``^`\_  
@HWI-EAS443:3:39:833:54#0/1  
TTCAGGTCGGCTGCATATCCTGACCCCTGCTCATTTTGT  
+HWI-EAS443:3:39:833:54#0/1  
aaba^X^aaXaZa¥¥XaUN¥Sa]NQ`TVUVSU¥^¥QYSPU  
@HWI-EAS443:3:39:852:1387#0/1  
GTAGTCCAAAGTTCTTTTCATTTTCCAATAGAACCAACAGT  
+HWI-EAS443:3:39:852:1387#0/1  
^`Ua]bb`¥a`aaabbb]abaababaab`a`a`¥`aa\_^  
@HWI-EAS443:3:39:852:273#0/1  
AGGGAGACTACCAGTACCAATGAACTGGCGACAGTTGAAT  
+HWI-EAS443:3:39:852:273#0/1  
^a`\_U`ba\_ba`\_`\_Y``^`\_]]U`XV[\`aa`HTRN\_TZ]P  
@HWI-EAS443:3:39:954:552#0/1  
AGAAGTTTGGACTACCAGATTCAAATGTGAAGAACTTAT  
+HWI-EAS443:3:39:954:552#0/1  
aaaaaaabaaabaa^b`ab`aaa^[[`a^a`^a^^^a`\_\_  
@HWI-EAS443:3:39:962:1336#0/1  
TAGTAATCTCGTCAATGGCATTCTGTGTGCTCTTCAGGTC

+HWI-EAS443:3:39:962:1336#0/1  
\_]aW^]\_b`\_^Z]a\_a\_\_aaaa`¥¥\_`a\_N\_`aaZNSN  
@HWI-EAS443:3:39:977:1060#0/1  
TACATATTCTACTGTAGAGACCCATTAGAGCACATCCA  
+HWI-EAS443:3:39:977:1060#0/1  
aa\_^`b`\_]Za[¥a[SWYRNU\_`^`¥X\_^UXR¥`¥¥Y^V  
@HWI-EAS443:3:39:97:576#0/1  
TGCATATGTTTTGTGGGACATCAAGATACAGCAAGAAG  
+HWI-EAS443:3:39:97:576#0/1  
V[a[UZ\_\_M\_`\_`\_`\_YTOW]¥a`]]S\_Z]^aa`a\_a^]Z\_  
@HWI-EAS443:3:39:983:703#0/1  
GGGACATCAAGATACAGCAAGAAGTTCAAGCCGAAATA  
+HWI-EAS443:3:39:983:703#0/1  
aaaaa¥^`baa`^ZZaa\_\_a`a^[\_Y\_aa[\_UZ\_a]]^V  
@HWI-EAS443:3:3:1050:457#0/1  
GAAATCCAGAGTGTGAATCACTCTCCACAGCAAGCTCATG  
+HWI-EAS443:3:3:1050:457#0/1  
aRTPX\_a]bab]aYKR\_`]\_\_aG]U]WZ\_\_VSU\_Y]YQ]¥  
@HWI-EAS443:3:3:1084:114#0/1  
GCTAGTTAAAAAAGGAAATTCATACCCAAAGCTCAGCAA  
+HWI-EAS443:3:3:1084:114#0/1  
a\_`b\_^`a`\_aaa^^]`\_\_^[]^\_^]`\_[Y[]P[WZ  
@HWI-EAS443:3:3:1098:1518#0/1  
GCTATTTCCGGCTTGAACCTTCTGCTGTATCTTGATGTCC  
+HWI-EAS443:3:3:1098:1518#0/1  
aaaaaaaa\_a[X`a`\_^\_[\_\_Y]`\_Z\_^Z^]]`\_X¥]XYX  
@HWI-EAS443:3:3:1115:1814#0/1  
CTTCTCTGAGTATTTTGGGTAGTCATAAGTCCCATTTTT  
+HWI-EAS443:3:3:1115:1814#0/1  
abbaaababababbaa`aY[^ab\_`baaba\_`[\_aa`a`  
@HWI-EAS443:3:3:111:613#0/1  
AGAATTTACTTTGTTAGTAATCTCGTCAATGGCATTCTGT  
+HWI-EAS443:3:3:111:613#0/1  
aaaaaaaa\_aaaa^aab\_`a`\_aab^Za`\_\_^\_`^`\_aZ  
@HWI-EAS443:3:3:1150:173#0/1  
TGTTACCCAGGAGATTTTCATCGATTATGAGGAGCTAAGAG  
+HWI-EAS443:3:3:1150:173#0/1  
`[aba`aabab\_b\_`a\_aaa\_a\_a`aaa\_a^\_Z^\_\_^^  
@HWI-EAS443:3:3:1158:192#0/1  
GTGTGCTCTTCAGGTCGGCTGCATATCCTGACCCCTGCTC  
+HWI-EAS443:3:3:1158:192#0/1  
aU`]a¥a\_a`\_\_a\_W¥\_`^^^ZU^¥\_Z[X¥TWVWV¥^WWU  
@HWI-EAS443:3:3:1177:1247#0/1  
GTTTAATTTTGCTTCTCTGAGTATTTTGGGTAGTCATAA  
+HWI-EAS443:3:3:1177:1247#0/1  
a\_abaaaaaabaa`¥]`\_aaa`Y`aaa`\_`Y^a]¥Y`^  
@HWI-EAS443:3:3:1230:375#0/1  
AGTAATCTCGTCAATGGCATTCTGTGTGCTCTTCAGGTCG  
+HWI-EAS443:3:3:1230:375#0/1  
aaaba]ab]aY`Ua\_a\_`^aa^^a¥`X`]`\_]\_\_^^^NKO^

@HWI-EAS443:3:3:1280:1790#0/1  
ACCCCATCTATTTCTTCTCTGTTTAATTTTGCTTCCTCTG  
+HWI-EAS443:3:3:1280:1790#0/1  
aa[¥^¥b\_aaaab`a\_P\_\_^VT\_a\_Y`\_aI[]a[X]`I\_a  
@HWI-EAS443:3:3:1283:412#0/1  
GCTGAGCTTTGGGTATGAATTTCTTTTTTAACTAGCCAT  
+HWI-EAS443:3:3:1283:412#0/1  
]QS]¥ZTYX`a¥QU\_\_]]¥Z^XX¥\_X]]ZYS]T\_UNVZ  
@HWI-EAS443:3:3:1315:464#0/1  
GATTGCAATACAACCTGTCAGACACCCAAGGGTGCTATAA  
+HWI-EAS443:3:3:1315:464#0/1  
aa]]bW\_ab¥]]`Na\_baaaa\_``^ZWaY\_]a]`Z\_\_`\_]`  
@HWI-EAS443:3:3:1364:50#0/1  
TTTTGCTTCCTCTGAGTATTTTGGGTAGTCATAAGTCCCA  
+HWI-EAS443:3:3:1364:50#0/1  
abaaaYa`\_Za^aa\_\_Y`a\_\_^`\_Z\_\_ZU]`Z]^XUUZ^  
@HWI-EAS443:3:3:1392:420#0/1  
CTTCTCTGAGTATTTTGGGTAGTCATAAGTCCCATTTTT  
+HWI-EAS443:3:3:1392:420#0/1  
]`b``aa`b`aba^YaY\_b^]¥bb`^bbaa`a]Jb\_abBB  
@HWI-EAS443:3:3:1408:1925#0/1  
GGGCCATGAACCTGTCTTGGGAATATCTCAAACCTTCA  
+HWI-EAS443:3:3:1408:1925#0/1  
a]a```a¥]\_J`^b]0a^^^¥^Z[``]\_U\_W`[``VLV\_\_^^  
@HWI-EAS443:3:3:1424:198#0/1  
AGCCAGTTAAAAACAATGCCAAGGAAATTGGAAACGGCT  
+HWI-EAS443:3:3:1424:198#0/1  
ZG0]aa\_b`\_^][\_`^\_\_\_\_¥]\_P\_^Z[\_]UW^¥]]\_UBBB  
@HWI-EAS443:3:3:1443:1116#0/1  
ATTTGTGGTAAAATTCAAAGCAGCCGTTTCCAATTTCTT  
+HWI-EAS443:3:3:1443:1116#0/1  
`baaa\_ba\_bbaa`b^aaaa[\_a[Ua\_\_`Y¥\_`^aa^]Ya`  
@HWI-EAS443:3:3:1462:817#0/1  
GACACTTTCATGCACGTGTTATCGCATTGTGGTAAAAT  
+HWI-EAS443:3:3:1462:817#0/1  
^\_]VaaZb`Tb¥0S^Ya^`¥V`\_\_a`¥a]\_bZb\_Sa\_\_¥¥  
@HWI-EAS443:3:3:1485:220#0/1  
GTCAATGGCATTCTGTGTGCTTTCAGGTCGGCTGCATAT  
+HWI-EAS443:3:3:1485:220#0/1  
a[P[\_S]ZP^X]VNPSZP^S¥TVSVUWSSU¥UWUVSBBBB  
@HWI-EAS443:3:3:1491:1414#0/1  
CGTGCATGGAAAGTGTCAAAAATGGGACTTATGACTACCC  
+HWI-EAS443:3:3:1491:1414#0/1  
Y`ba`^bbZb^[[L]aWa`a`^`aa\_a^a`Y`a`¥aa[VW  
@HWI-EAS443:3:3:1533:525#0/1  
TTGAAAATGTCCAAAATATGTAAAAAGCACAAAATTGAG  
+HWI-EAS443:3:3:1533:525#0/1  
\_`bbb\_¥]\_^[X`a`aa]]a[]aaaaa]¥U^a`\_`a^\_\_  
@HWI-EAS443:3:3:1588:150#0/1  
ATGAATTTCTTTTTTAACTAGCCATATTAATTTTTGTA



@HWI-EAS443:3:3:325:316#0/1  
ACTAGATTTCCAGTTGCTTCGAATGTTATTTTGTCTCCCG  
+HWI-EAS443:3:3:325:316#0/1  
abbbaabab]^abYaa\_\_a\_a\_\_a`Z\_`\_`aaa]]\_X\_XB  
@HWI-EAS443:3:3:395:1499#0/1  
GTCTCCCGGCTCTACTAGTGTCCAGTAATAGTTCATTCTC  
+HWI-EAS443:3:3:395:1499#0/1  
a]Z[aaaa`STSTVZRY^]WMMXPUVL^[LNR]MUXUX]U  
@HWI-EAS443:3:3:400:1118#0/1  
TGCATATGTTTTGTGGGACATCAAGATACAGCAAGAAG  
+HWI-EAS443:3:3:400:1118#0/1  
ab¥I\_b\_a`\_bba\_\_ba^\_a¥aabb]^¥`b` `a`bba[aB  
@HWI-EAS443:3:3:457:297#0/1  
AATCGATGAAATCTCCTGGGTAACACGTTCCATTGTCTGA  
+HWI-EAS443:3:3:457:297#0/1  
^ababaaab`baaa^S\_aa`\_a¥\_a\_a]`[X\_a\_a]X`a\_  
@HWI-EAS443:3:3:468:281#0/1  
CCGGCTTGAACCTTGCTGTATCTTGATGTCCCCACAAA  
+HWI-EAS443:3:3:468:281#0/1  
aaba`aaa`a]`aY\_a^`aa]aa\_aa` `^^UXU\_`]\_\_\_\_  
@HWI-EAS443:3:3:473:1534#0/1  
GGGGACATCAAGATACAGCAAGAAGTTCAAGCCGGAAATA  
+HWI-EAS443:3:3:473:1534#0/1  
` `aWb\_VSbaM`\_[a]a\_^`a\_Z]\_G\_Wa^\_[^`]]^I\_]`  
@HWI-EAS443:3:3:502:225#0/1  
TAGATTTCCAGTTGCTTCGAATGTTATTTTGTCTCCCGGC  
+HWI-EAS443:3:3:502:225#0/1  
aba\_\_aaaaaba\_]`a`a\_\_aa`\_\_`a\_aX\_^`W\_Z`X  
@HWI-EAS443:3:3:530:1704#0/1  
CATCATTTGAAAGTTTGAGATATTTCCCAAGACAAGTTC  
+HWI-EAS443:3:3:530:1704#0/1  
ab\_bbb¥`aabaa`a¥abb`b]ab`aaYP\_bb`\_`\_aZa^  
@HWI-EAS443:3:3:553:1723#0/1  
GTGGGGACATCAAGATACAGCAAGAAGTTCAAGCCGGAAA  
+HWI-EAS443:3:3:553:1723#0/1  
a¥\_\_¥[ZVJQT`X\_\_Z\_a^^`¥^^¥VPGU]\_OZ]OWW^  
@HWI-EAS443:3:3:57:1067#0/1  
ACAATGCCAAGGAAATTGGAAACGGCTGCTTTGAATTTTA  
+HWI-EAS443:3:3:57:1067#0/1  
ab^aab`U¥a^Za]^Z\_\_Y\_]¥aNW`UMI[^GYXZBBBB  
@HWI-EAS443:3:3:61:448#0/1  
CACCCAAGGGTGTATAAACACCAGCCTCCCATTTCAGAA  
+HWI-EAS443:3:3:61:448#0/1  
ab`\_`b`^bUG\_aaba\_^ab\_^]a^GXUaVT\_ab`bYa`  
@HWI-EAS443:3:3:641:729#0/1  
ATGAAATCTCCTGGGTAACACGTTCCATTGTCTGAACTAG  
+HWI-EAS443:3:3:641:729#0/1  
aba¥Xababb\_bbbaaaaaaaaa]a^abaaa\_\_aa^`\_aaa  
@HWI-EAS443:3:3:648:1678#0/1  
ACTTGTGACACCCCAAGGGTGTATAAACACCAGCCTCC

+HWI-EAS443:3:3:648:1678#0/1  
`aa`U\_a[a\_ZbX`aZ`Y^]a^a\_\_\_\_aHaUW\_`aG]]X  
@HWI-EAS443:3:3:697:175#0/1  
GAAGTCCTCGTGCTATGGGGCATTACCATCCATCTACTA  
+HWI-EAS443:3:3:697:175#0/1  
abb`^Qb\_^b`\_]aaaaaaZ]\_\_`¥\_¥XTRS\_BBBBBBB  
@HWI-EAS443:3:3:774:1340#0/1  
CATTACCATCCATCTACTAGTGCTGACCAACAAAGTCTC  
+HWI-EAS443:3:3:774:1340#0/1  
abbbab[bbbaa\_bbbaabab`babb`]G^b\_bb`aY\_aU  
@HWI-EAS443:3:3:77:1439#0/1  
GCCGGTTTCATTGAAGGGGGTGGACAGGGATGGTAGATG  
+HWI-EAS443:3:3:77:1439#0/1  
aZFZ¥HRVTW¥V^LVa]W¥^]SxLM¥Y`^]SY^^UBBBBB  
@HWI-EAS443:3:3:782:1760#0/1  
ACAAGTTGTATTGCAATCGTGGACTGGTGTATCTGAAATG  
+HWI-EAS443:3:3:782:1760#0/1  
a^`a\_W\_^]aaaaaaaaaX]a\_aaa`]\_Xa\_W^`\_^]a^  
@HWI-EAS443:3:3:78:1049#0/1  
AGAAGACAAGCATAACGGGAAACTATGCAAACCTAAGAGGG  
+HWI-EAS443:3:3:78:1049#0/1  
abbV`ab\_]ba```YQabWaab[]\_aaa\_``b[```aaaa\_  
@HWI-EAS443:3:3:851:848#0/1  
GGGGTCAGGATATGCAGCCGACCTGAAGAGCACACAGAAT  
+HWI-EAS443:3:3:851:848#0/1  
]GY]LUT\_Y]]¥V\_]\_JSSYQWVX^S\_[WYKVQ[P^BBBB  
@HWI-EAS443:3:3:865:422#0/1  
GGGGTCAGGATATGCAGCCGACCTGAAGAGCACACAGAAT  
+HWI-EAS443:3:3:865:422#0/1  
X^b\_ZRa`aa`^T]]]X¥Y\_¥[V\_aYSa`]N\_WUR[\_¥¥^  
@HWI-EAS443:3:3:868:1218#0/1  
TAAATTTTTGTAGAAGCTTTTTGCTCCAGCATGAGGACAT  
+HWI-EAS443:3:3:868:1218#0/1  
abb^ba]`bbaba]^¥`aaa`a\_aa]aaXa`\_YaaaX`^  
@HWI-EAS443:3:3:887:46#0/1  
AATCGATGAAATCTCCTGGGTAACACGTTCCATTGTCTGA  
+HWI-EAS443:3:3:887:46#0/1  
aabbbaab`¥^`I`\_aab^[P`RLa0``¥GW`\_ZaSQ`¥]  
@HWI-EAS443:3:3:88:1127#0/1  
GGGGACATCAAGATACAGCAAGAAGTTCAAGCCGAAATA  
+HWI-EAS443:3:3:88:1127#0/1  
`a`bab`abba`\_baa`ba¥aba`\_Z`abaa`abWaa¥X`  
@HWI-EAS443:3:3:896:1363#0/1  
CATCGATTATGAGGAGCTAAGAGAGCAATTGAGCTCAGTG  
+HWI-EAS443:3:3:896:1363#0/1  
aWJ\_`Z``bab]`^WaT¥YYaZR^a\_S[IZ`¥^¥MP\_^Ga  
@HWI-EAS443:3:3:904:744#0/1  
GTGGGGACATCAAGATACAGCAAGAAGTTCAAGCCGGAAA  
+HWI-EAS443:3:3:904:744#0/1  
a^a`a`a\_aa^``a`\_\_^`a¥`aa`^aZ^]]Y\_SZ`ZW]Z

@HWI-EAS443:3:3:910:129#0/1  
GATAAAGGGAAAGAAGTCCTCGTGCTATGGGGCATTACACC  
+HWI-EAS443:3:3:910:129#0/1  
\_Ya\_`XaX\_[aX`¥^ZU\_R\_V\_]¥\_¥\_¥V[\_OX]XVYBB  
@HWI-EAS443:3:3:910:500#0/1  
GGGTGGACAGGGATGGTAGATGGATGGTACGGTTATCACC  
+HWI-EAS443:3:3:910:500#0/1  
aa^SaU`\_[`\_\_^^WHX^TRR]WX¥NPSUU\_N[PBBBBB  
@HWI-EAS443:3:3:918:200#0/1  
GCTGCTTTGAATTTTACCACAAATGCGATAACACGTGCAT  
+HWI-EAS443:3:3:918:200#0/1  
a\_aa\_a`aa`aaa`a\_Y\_a]`^^^X\_]Z]^^^Z]V\_Z^]  
@HWI-EAS443:3:3:92:1368#0/1  
CTGGCTGGATCCTGGGAAATCCAGAGTGTGAATCACTCTC  
+HWI-EAS443:3:3:92:1368#0/1  
aba\_]XY]JZ]aUa`¥PU`````\_Y¥Y[TL\_\_`\_T\_]VUB  
@HWI-EAS443:3:40:1017:794#0/1  
TGGCATTCTGTGTGCTCTTCAGGTCGGCTGCATATCCTGA  
+HWI-EAS443:3:40:1017:794#0/1  
\_\_VWbbbabab\_bbb^abb\_a\_aa\_a^a\_aaa^aa]\_\_  
@HWI-EAS443:3:40:1022:67#0/1  
GGGGGGTGGACAGGGATGGTAGATGGATGGTACGGTTATC  
+HWI-EAS443:3:40:1022:67#0/1  
a`WFU`SZa¥MUa¥YMU¥]UPQUW¥¥SSTQSWUWPTTOU  
@HWI-EAS443:3:40:1046:414#0/1  
ATCATTGAAAGTTTGAGATATCCCCAAGACAAGTTCA  
+HWI-EAS443:3:40:1046:414#0/1  
a`\_aabba`XXab]aabbaaaaa`a\_W^aa^`]`^a\_  
@HWI-EAS443:3:40:1056:615#0/1  
CTGACAAGTTGTATTGCAATCGTGGACTGGTGTATCTGAA  
+HWI-EAS443:3:40:1056:615#0/1  
a¥\_TWQV\_T]`¥V¥\_]`¥^^ZaWaa]\_RMYJ]VUY`]`R^  
@HWI-EAS443:3:40:1103:1386#0/1  
AATTTTTGTAGAAGCTTTTTGCTCCAGCATGAGGACATGC  
+HWI-EAS443:3:40:1103:1386#0/1  
¥aababbaaaaa`baab\_aaaa\_b]`\_a\_]`a`]\_a\_\_Y`  
@HWI-EAS443:3:40:1136:1008#0/1  
AACTGATTGCCCCAGGGAGACTACCAGTACCAATGAACT  
+HWI-EAS443:3:40:1136:1008#0/1  
aaaaaaaaabaa\_ba`aaa[[Z`\_a\_VH\_WaW`^¥``a\_`^  
@HWI-EAS443:3:40:1171:166#0/1  
CATCGATTATGAGGAGCTAAGAGAGCAATTGAGCTCAGTG  
+HWI-EAS443:3:40:1171:166#0/1  
Y\_¥aW^¥YT`\_Y``S[a^`Ya`\_ZYWGTYWY[^``\_RYY\_  
@HWI-EAS443:3:40:1194:1152#0/1  
TCCATCTACTAGTGCTGACCAACAAAGTCTCTATCAGAAT  
+HWI-EAS443:3:40:1194:1152#0/1  
a`\_aaTaaa]a]a```a]a`a\_`^^Za\_[\_]`^\_a\_Y[V  
@HWI-EAS443:3:40:1209:948#0/1  
CAGAAACTGATTGCCCCAGGGAGACTACCAGTACCAATG

+HWI-EAS443:3:40:1209:948#0/1  
`bababbbaabbb\_b\_bbbbab\_a`abbbab]]\_b[ba`  
@HWI-EAS443:3:40:1224:1496#0/1  
GGGGCATTACCATCCATCTACTAGTGCTGACCAACAAAG  
+HWI-EAS443:3:40:1224:1496#0/1  
a\_]a^abb^baabaa^aa`ab^`aaU^\_b`\_a[b]abab`  
@HWI-EAS443:3:40:1263:657#0/1  
AAGCCAGTTAAAAACAATGCCAAGGAAATTGGAAACGGC  
+HWI-EAS443:3:40:1263:657#0/1  
abaaaab`aaaa`a\_aaaaaa`a`XaY`^\_aa^aa]X  
@HWI-EAS443:3:40:1279:675#0/1  
GCTTCCTCTGAGTATTTGGGTAGTCATAAGTCCCATTTT  
+HWI-EAS443:3:40:1279:675#0/1  
\_`aa`a`a`a`LY\_\_\_\_\_`¥U\_\_XQNWYZYX]]^X¥Y]^  
@HWI-EAS443:3:40:1285:1845#0/1  
CATATCCTGACCCCTGCTCATTGATGGTGATAACCGTA  
+HWI-EAS443:3:40:1285:1845#0/1  
Vaa]bbaM¥b\_V\_baa[a^`a`\_]\_b[b\_0\_aZbaabXXa  
@HWI-EAS443:3:40:1296:388#0/1  
GGGGCATTACCATCCATCTACTAGTGCTGACCAACAAAG  
+HWI-EAS443:3:40:1296:388#0/1  
\_S\_a\_\_aUTYZ[¥X`Z`\_QZU\_[S^RU\_YYY[P[^TWPU  
@HWI-EAS443:3:40:1387:1338#0/1  
AGCAGTAGGTAAAGAGTTCAACCACCTGGAAAAAAGAATA  
+HWI-EAS443:3:40:1387:1338#0/1  
aX^aa]aba\_a`aa`^F^aa`\_a\_\_Z\_aa\_\_¥\_V^`a^`^  
@HWI-EAS443:3:40:1444:1642#0/1  
TTGCTATTTCCGGCTTGAACCTTCTTGCTGTATCTTGATGT  
+HWI-EAS443:3:40:1444:1642#0/1  
`\_babbbbb`Ya\_]Z[¥aa\_aaaa\_[baaa`^`^\_a^a^a[  
@HWI-EAS443:3:40:1476:1148#0/1  
AAATGTAACATTGCTGGCTGGATCCTGGGAAATCCAGAGT  
+HWI-EAS443:3:40:1476:1148#0/1  
`ab`bT`[\_[\_a¥Za]`bab`[\_`aST¥ZaX`\_aa`U]a\_U  
@HWI-EAS443:3:40:1569:1607#0/1  
CTTATATGAAAAGGTAAGAAGCCAGTTAAAAACAATGCC  
+HWI-EAS443:3:40:1569:1607#0/1  
abb`bb`a\_b`\_`bYbbbb`abbb^aUaa\_\_`\_T^aa]  
@HWI-EAS443:3:40:1598:1161#0/1  
CTTCCTCTGAGTATTTGGGTAGTCATAAGTCCCATTTT  
+HWI-EAS443:3:40:1598:1161#0/1  
a`abbbbbbbaabbbba^`abba`^Z]`¥Vaa`Y\_abbb  
@HWI-EAS443:3:40:1612:1937#0/1  
TGTCCCCACAAAACATATGCATCTGCATTCTGATAGAGA  
+HWI-EAS443:3:40:1612:1937#0/1  
a`\_]`\_``aaaa`aa`a^aaZ^^aaa`X\_^``¥XaX  
@HWI-EAS443:3:40:161:1644#0/1  
TGCCGGTTTCATTGAAGGGGGTGGACAGGGATGGTAGAT  
+HWI-EAS443:3:40:161:1644#0/1  
^[\_`a`aabbbabbaaa`a`aa^T[\_a]aa`a`\_T``\_Z



@HWI-EAS443:3:40:1634:503#0/1  
GGGGACATCAAGATACAGCAAGAAGTTCAAGCCGGAAATA  
+HWI-EAS443:3:40:1634:503#0/1  
a^^^]Y\_RO\_Y^WY]V^^IV]^XYVRRYUVOVYUUUXYY  
@HWI-EAS443:3:40:1647:1109#0/1  
CGATGAAATCTCCTGGGTAACACGTTCCATTGTCTGAACT  
+HWI-EAS443:3:40:1647:1109#0/1  
`¥¥\_\_R]^a`aVZ\_aYXQ^aa^`^]ab]^a]a\_abaa[a\_  
@HWI-EAS443:3:40:1649:458#0/1  
AAAAAAGTTGATGATGGTTTCCTGGACATTTGGACTTACA  
+HWI-EAS443:3:40:1649:458#0/1  
aabaabVbaababab\_`a^`aaa]a`aa`a`^\_a``a\_  
@HWI-EAS443:3:40:1664:120#0/1  
CTCCTCATAATCGATGAAATCTCCTGGGTAACACGTTCCA  
+HWI-EAS443:3:40:1664:120#0/1  
ababbbbbbbbabbbbbbbbbbbbab\_baaaaaaaa`a  
@HWI-EAS443:3:40:1687:1601#0/1  
TGTGTATTCATCTTTTCAATAACAGAATTTACTTTGTTAG  
+HWI-EAS443:3:40:1687:1601#0/1  
¥Y`^^a^`]\_]a``\_]\_[\_]Z]\_TV]^YZ]\_\_`¥\_\_Z  
@HWI-EAS443:3:40:1717:1265#0/1  
ATTTGAAAGTTTGGATATTTCCCAAGACAAGTTCATGG  
+HWI-EAS443:3:40:1717:1265#0/1  
abbbaba^^\_Vaababababaa`a[¥¥\_b`aa`\_ab`\_a]  
@HWI-EAS443:3:40:1718:2033#0/1  
CCCAAGGGTGTATAAACACCAGCCTCCCATTTCAGAATA  
+HWI-EAS443:3:40:1718:2033#0/1  
aabb\_aa`0\_[N[bbbb`babbb`b`b`aa\_\_`aaaa`a\_  
@HWI-EAS443:3:40:1729:1267#0/1  
TCGAATGTTATTTGTCTCCCGGCTCTACTAGTGTCCAGT  
+HWI-EAS443:3:40:1729:1267#0/1  
`]\_MY`a\_`]a]^aa\_aa`]\_ab\_^MPX^VNTY]SQSS]V  
@HWI-EAS443:3:40:1744:916#0/1  
GAATGTTATTTGTCTCCCGGCTCTACTAGTGTCCAGTAA  
+HWI-EAS443:3:40:1744:916#0/1  
a^^¥[Q\_N]^Z]RRPSRRVMUSTHU^UOWOSFS[BBBBB  
@HWI-EAS443:3:40:1757:378#0/1  
GCTGGCTGGATCCTGGGAAATCCAGAGTGTGAATCACTCT  
+HWI-EAS443:3:40:1757:378#0/1  
a\_^]YT\_[aURRQLY¥\_SZZTLRUURWU[SV¥ZRWUZRRS  
@HWI-EAS443:3:40:1757:570#0/1  
GCTGGCTGGATCCTGGGAAATCCAGAGTGTGAATCACTCT  
+HWI-EAS443:3:40:1757:570#0/1  
aZ^`]^`^`\_RXRRU¥\_PDWUXYZ[ZPSFZUUTUSRXTTY  
@HWI-EAS443:3:40:1765:987#0/1  
GCCAGTTAAAAACAATGCCAAGGAAATTGGAAACGGCTG  
+HWI-EAS443:3:40:1765:987#0/1  
aaaa\_\_a`aa`a\_\_aaa``]Ra`^^¥^\_]V\_^`]\_`XZT  
@HWI-EAS443:3:40:243:1596#0/1  
ATGGAAAGTGTCAAAAATGGGACTTATGACTACCCAAAAT

+HWI-EAS443:3:40:243:1596#0/1  
aa]a\_ba¥Sa[\_\_\_^Z[]\_]\_^`\_\_\_][^Ya^a`^^^\_]\_W  
@HWI-EAS443:3:40:260:848#0/1  
GCTTTTTGCTCCAGCATGAGGACATGCTGCCGTTACACCT  
+HWI-EAS443:3:40:260:848#0/1  
`aa`a`aaa`aaaa\_\_\_`a¥S^`a`¥YY]¥\_ZY[ZFLY¥  
@HWI-EAS443:3:40:272:1243#0/1  
CGGGAAACTATGCAAATAAGAGGGGTAGCCCCATTGCAT  
+HWI-EAS443:3:40:272:1243#0/1  
aba`a`aaaV^aaa]a`a`bY^U`YU][\_N[\_TQ]YZ^^  
@HWI-EAS443:3:40:354:696#0/1  
GTTGCTTCGAATGTTATTTGTCTCCCGCTCTACTAGTG  
+HWI-EAS443:3:40:354:696#0/1  
a^`¥\_\_\_^Z^¥[\_`ZWZ`\_]\_\_X]\_]\_ZXRZXXZRVXXYVRM  
@HWI-EAS443:3:40:356:1504#0/1  
CTCGGTACCACTAGATTTCCAGTTGCTTCGAATGTTATTT  
+HWI-EAS443:3:40:356:1504#0/1  
``bbb^babbabb`aaabbbba`aYa^aba\_aaa^[U^`a  
@HWI-EAS443:3:40:403:311#0/1  
CTCTTCAGGTCGGCTGCATATCCTGACCCCTGCTCATTTT  
+HWI-EAS443:3:40:403:311#0/1  
aabaaaT`[Xb\_\_\_`aaa]`bY`a^SDMa\_\_W^`V[MJXWS  
@HWI-EAS443:3:40:43:628#0/1  
CTGCCGTTACACCTTTGTTGAGTCATGATTGGGCCATGA  
+HWI-EAS443:3:40:43:628#0/1  
abbbbbbabb]babbbbbb`abbaa\_a]V`P]\_baaa`S\_a\_  
@HWI-EAS443:3:40:468:1282#0/1  
CTAGATTTCCAGTTGCTTCGAATGTTATTTTGTCTCCCGG  
+HWI-EAS443:3:40:468:1282#0/1  
aa``¥Z[`^\_]\_^\_ZWa¥^Y`]Z``^TF[`ZY]S\_Zaa\_HZ  
@HWI-EAS443:3:40:468:505#0/1  
TGGGCCATGAACCTTGTCTTGGGGAATATCTCAAACCTTTC  
+HWI-EAS443:3:40:468:505#0/1  
`babababba`aab`aaaa`aa`a`W`aa\_a]a`^^^a  
@HWI-EAS443:3:40:489:270#0/1  
TACATATTCTACACTGTAGAGACCCATTAGAGCACATCCA  
+HWI-EAS443:3:40:489:270#0/1  
a`\_`````aaaa`\_`a]`\_`¥][T[WSUZZ[V[Z¥VU^WU  
@HWI-EAS443:3:40:493:1646#0/1  
TGGGGACATCAAGATACAGCAAGAAGTTCAAGCCGAAAT  
+HWI-EAS443:3:40:493:1646#0/1  
`a`a\_\_\_aaaa`\_]\_aaaa]`abaa^WU¥ab\_[]b^^`]Z]  
@HWI-EAS443:3:40:499:263#0/1  
CCTCTGAGTATTTGGGTAGTCATAAGTCCCATTTTGTGAC  
+HWI-EAS443:3:40:499:263#0/1  
abbbbbb]abbaaab`ab\_aaaaa]a`\_]`^^^a^\_  
@HWI-EAS443:3:40:533:59#0/1  
GGCTGCTTTGAATTTTACCACAAATGCGATAACACGTGCA  
+HWI-EAS443:3:40:533:59#0/1  
a\_]a[^]\_]¥]\_`\_]^[^]W]]X^Z¥RYXZZZWVZXT

@HWI-EAS443:3:40:575:1622#0/1  
ATTTGGACTTACAATGCCGAAGTGGTTCTATTGGAAA  
+HWI-EAS443:3:40:575:1622#0/1  
\_`bbbbbababbaab`bbaaa`bb`^`\_a]\_\_aaa`Y`^aa  
@HWI-EAS443:3:40:57:612#0/1  
TAGATTTCCAGTTGCTTCGAATGTTATTTTGTCTCCCGGC  
+HWI-EAS443:3:40:57:612#0/1  
a\_`a`aaaaa^`\_`aaa`a`X]`a\_[TTaX\_VV`[\_`\_`[¥[  
@HWI-EAS443:3:40:59:1887#0/1  
AAAAGGTAAGAAGCCAGTTAAAAACAATGCCAAGGAAAT  
+HWI-EAS443:3:40:59:1887#0/1  
aaaa^^Ua^YaaX`a`V¥Q\_`^I^`ZG¥[\_]a\_V[[X]W[  
@HWI-EAS443:3:40:603:1248#0/1  
CAACAAAGTCTCTATCAGAATGCAGATGCATATGTTTTTG  
+HWI-EAS443:3:40:603:1248#0/1  
abba^a^abbabab`babbbbb¥\_a^aaaabb`¥baba`  
@HWI-EAS443:3:40:631:366#0/1  
ATCGCATTTGTGGTAAAATTCAAAGCAGCCGTTTCCAATT  
+HWI-EAS443:3:40:631:366#0/1  
ab¥`J¥b^aa^abXb¥Z[]]WW\_¥¥RV\_`^`]L[]\_\_WNZZ  
@HWI-EAS443:3:40:67:171#0/1  
GCTTCCTCTGAGTATTTTGGGTAGTCATAAGTCCCATTTT  
+HWI-EAS443:3:40:67:171#0/1  
a\_^[]\_^[]^]¥aTZ¥\_\_\_\_\_SV[SVLVLVWRX[YJQVW¥  
@HWI-EAS443:3:40:706:1205#0/1  
TGGAAAATGAAAGAAGTGGACTACCACGATTCAAATGT  
+HWI-EAS443:3:40:706:1205#0/1  
a^¥FV[]\_V\_a¥^¥ZX[\_`a[aY`¥0¥^`¥YYVaYUZa` [  
@HWI-EAS443:3:40:706:621#0/1  
ATATCCCAAGACAAGTTCATGGCCCAATCATGACTCGA  
+HWI-EAS443:3:40:706:621#0/1  
^`aaabababaa\_`a`[^^a`\_`\_\_\_\_[LQZ^Z^YQ¥^aZZ  
@HWI-EAS443:3:40:719:665#0/1  
TTCCAATTGTGATCGGATGTATATTCTGAAATGGGAGGCT  
+HWI-EAS443:3:40:719:665#0/1  
aaabaaaaa^a\_`aaa`aa]\_UX[¥KNXLZ^^`\_WJX\_[R  
@HWI-EAS443:3:40:761:1657#0/1  
GCTGGATCCTGGGAAATCCAGAGTGTGAATCACTCTCCAC  
+HWI-EAS443:3:40:761:1657#0/1  
\_bR]PUa`\_`^X[\_¥XJ]\_[\_`aNau¥a\_YGXV\_a¥aUVR  
@HWI-EAS443:3:40:768:1089#0/1  
ATTAATGTAGGATTTGCTGAGCTTTGGGTATGAATTCCT  
+HWI-EAS443:3:40:768:1089#0/1  
aababbbaabaaaaabaaa\_babaaa`a[aab\_S\_aaa`a  
@HWI-EAS443:3:40:768:198#0/1  
AATTTACTTTGTTAGTAATCTCGTCAATGGCATTCTGTGT  
+HWI-EAS443:3:40:768:198#0/1  
a\_babaababbabb\_`\_`abaab\_a\_S\_\_`T`X¥^a]\_V  
@HWI-EAS443:3:40:806:1128#0/1  
TCCTCGTGCTATGGGGCATTACCATCCATCTACTAGTGC

+HWI-EAS443:3:40:806:1128#0/1  
abaaaa\_aaa\_\_aa`^¥aa\_]\_aa\_`¥`\_Ya\_]P]¥\_\_  
@HWI-EAS443:3:40:814:1114#0/1  
CCCAGGGAGACTACCAGTACCAATGAACTGGCGACAGTTG  
+HWI-EAS443:3:40:814:1114#0/1  
aba\_\_bb\_aa`aaU\_aaV`a]J^[\_]WZV`\_`a\_\_`^]ZV  
@HWI-EAS443:3:40:819:1007#0/1  
ATCCTGACCCCTGCTCATTGATGGTGATAACCGTACCA  
+HWI-EAS443:3:40:819:1007#0/1  
aX^`¥ZZ^¥¥¥^WWW¥YYWVWSUVSWRGRVVXWWWQWYY  
@HWI-EAS443:3:40:843:1929#0/1  
GCTTTTTGCTCCAGCATGAGGACATGCTGCCGTTACACCT  
+HWI-EAS443:3:40:843:1929#0/1  
`\_`aaaaRa\_\_Ya^\_a\_`\_`^¥aZMMa\_ZWYVLY\_`BBBB  
@HWI-EAS443:3:40:882:1650#0/1  
TTTGTAGTAATCTCGTCAATGGCATTCTGTGTGCTCTTC  
+HWI-EAS443:3:40:882:1650#0/1  
ab```ba\_\_aaaa`aa[aaX[\_\_\_\_`U`^\_]SZ[\_[\_`¥\_  
@HWI-EAS443:3:40:979:989#0/1  
GGGGTGGACAGGGATGGTAGATGGATGGTACGGTTATCA  
+HWI-EAS443:3:40:979:989#0/1  
``ZN]U^`^\_YWGUJY`¥MX[QZ\_\_YN¥WQZT¥WYUQSSF  
@HWI-EAS443:3:40:98:1858#0/1  
AATTGGAAACGGCTGCTTTGAATTTTACCACAAATGCGAT  
+HWI-EAS443:3:40:98:1858#0/1  
aa]`aaaaaa]X`\_YWJS¥PYWTXXXFY`JY[YSFP]SOS  
@HWI-EAS443:3:40:996:921#0/1  
ATGGTGAATGCCCCATAGCACGAGGACTTCTTCCCTTTA  
+HWI-EAS443:3:40:996:921#0/1  
`a`^\_baaaaaaa^U\_```aa\_abaa^`^`\_`Z^`a\_`\_W  
@HWI-EAS443:3:42:1007:1617#0/1  
GTTACCCAGGAGATTTTCATCGATTATGAGGAGCTAAGAGA  
+HWI-EAS443:3:42:1007:1617#0/1  
aaaaaa`aaaa`aa\_`^Z\_]a\_`\_\_a`^^¥]^YZ`\_]`  
@HWI-EAS443:3:42:1008:960#0/1  
CGTCAATGGCATTCTGTGTGCTCTTCAGGTCGGCTGCATA  
+HWI-EAS443:3:42:1008:960#0/1  
aaaaaa[X`\_abaa\_aPa¥``aa[PUY¥\_GX`ZM^]\_VUa  
@HWI-EAS443:3:42:1017:125#0/1  
GACACTAGTAGAGCCGGGAGACAAAATAACATTCTGAAGCA  
+HWI-EAS443:3:42:1017:125#0/1  
aaababaa\_ab`b\_\_baa]^`^````\_`\_]\_a\_¥a^\_a\_`^  
@HWI-EAS443:3:42:1026:956#0/1  
GGGACATCAAGATACAGCAAGAAGTTCAAGCCGGAAATAG  
+HWI-EAS443:3:42:1026:956#0/1  
`^\_PU\_^]XZ\_`\_]`[^a`\_`a]ZS][[\_TV]XUYT]WZ]  
@HWI-EAS443:3:42:1033:949#0/1  
GCTGCTTTGAATTTTACCACAAATGCGATAACACGTGCAT  
+HWI-EAS443:3:42:1033:949#0/1  
aaa`aababa\_aaaaaa\_a\_aa`a\_a`a`aa`a^`Z`aaa

@HWI-EAS443:3:42:1125:1154#0/1  
TGTTTTTAACTGGCTTCTTACCTTTTCATATAAGTTCTT  
+HWI-EAS443:3:42:1125:1154#0/1  
aa¥`abbbbbaaa`aba\_\_a\_¥aa`a`Z]\_`a`[]a[a`  
@HWI-EAS443:3:42:1174:167#0/1  
GCCCAATCATGACTCGAACAAAGGTGTAACGGCAGCATGT  
+HWI-EAS443:3:42:1174:167#0/1  
aabaaba`abaaa`aaaa`aaaaTa¥`\_\_``[BBBBBBB  
@HWI-EAS443:3:42:1212:554#0/1  
CTCTGTTTAAATTTTGCTTCTGAGTATTTTGGGTAGTC  
+HWI-EAS443:3:42:1212:554#0/1  
abba`^bbbbbaabaab`ababbbaa`]aaaaaba]`\_`  
@HWI-EAS443:3:42:1221:380#0/1  
GGCCATTGCCGGTTTCATTGAAGGGGGTGGACAGGGATG  
+HWI-EAS443:3:42:1221:380#0/1  
aaaaaaaa`^`^a¥a`\_Zaa]YQ`a`\_aaMaa^¥¥\_a`M[^  
@HWI-EAS443:3:42:131:584#0/1  
GGTCTTATTGCTATTTCCGGCTTGAACCTTGTGTATC  
+HWI-EAS443:3:42:131:584#0/1  
a¥M[a`¥][QYYaa`¥X[¥U]XXX[YZQ[VTXQ[QRVNBB  
@HWI-EAS443:3:42:1341:395#0/1  
GCTTCTGAGTATTTTGGGTAGTCATAAGTCCCATTTT  
+HWI-EAS443:3:42:1341:395#0/1  
aaab]`]Xba\_a\_\_a`Z`a`T\_`]X\_a\_\_aQ^^^`\_a`  
@HWI-EAS443:3:42:1350:745#0/1  
AGAACTTTGGACTACCACGATTCAAATGTGAAGAACTTAT  
+HWI-EAS443:3:42:1350:745#0/1  
PRUY`\_`a¥S¥0^`¥T^^aaa`X^aaa\_Z`Y¥Z[Yaaaa\_  
@HWI-EAS443:3:42:1370:1538#0/1  
GGGGACATCAAGATACAGCAAGAAGTTCAAGCCGGAAATA  
+HWI-EAS443:3:42:1370:1538#0/1  
aaaaaa`a`b`baaaabaaba\_aa\_a`aaaa]\_\_\_\_\_`\_]  
@HWI-EAS443:3:42:137:913#0/1  
AAAAACAATGCCAAGGAAATTGGAAACGGCTGCTTTGAA  
+HWI-EAS443:3:42:137:913#0/1  
`Y`¥aaba\_baaa\_a`a^`\_a\_`a`a`\_`^]`^RR`^`RKM  
@HWI-EAS443:3:42:1384:929#0/1  
GTGGGACATCAAGATACAGCAAGAAGTTCAAGCCGGAAA  
+HWI-EAS443:3:42:1384:929#0/1  
]N`\_a^Z`\_¥T^`^`\_`^]aXU`]U^`Wa`¥OWSI¥]U¥[  
@HWI-EAS443:3:42:1488:997#0/1  
ATTTGTGGTAAAATTCAAAGCAGCCGTTTCCAATTTCTT  
+HWI-EAS443:3:42:1488:997#0/1  
aababab`¥bbb``¥babab`aba[Zaa`a^aYaaa\_aa\_  
@HWI-EAS443:3:42:1511:48#0/1  
GAAGCCAGTTAAAAACAATGCCAAGGAAATTGGAAACGG  
+HWI-EAS443:3:42:1511:48#0/1  
abbaaababaaaaaa`aab`\_`\_\_aa\_\_a\_a\_^`\_`\_a`  
@HWI-EAS443:3:42:1518:1189#0/1  
GAAGTCTCGTGTATGGGGCATTACCATCCATCTACTA

+HWI-EAS443:3:42:1518:1189#0/1  
]¥\_^\_aababab`a^`Yaaa\_Yaa`aa[D[[\_^a\_aa[`Y  
@HWI-EAS443:3:42:151:131#0/1  
AATTTTGCTTCCTCTGAGTATTTGGGTAGTCATAAGTCC  
+HWI-EAS443:3:42:151:131#0/1  
aaaaaaaa`aaaa`a\_aa]a`a\_`a\_\_]\_a]^^`\_`Z\_]`  
@HWI-EAS443:3:42:1546:261#0/1  
GGGGACATCAAGATACAGCAAGAAGTTCAAGCCGAAAATA  
+HWI-EAS443:3:42:1546:261#0/1  
`a\_\_\_]\_]Y]¥`¥[¥¥\_\_Y\_]`^¥RX[]]¥TU[YYZ¥[[  
@HWI-EAS443:3:42:1596:831#0/1  
AACGTGTTACCCAGGAGATTTTCATCGATTATGAGGAGCTA  
+HWI-EAS443:3:42:1596:831#0/1  
abbbab\_bbaaaabbabaabbaba\_b`bbabbaaa`b`\_a  
@HWI-EAS443:3:42:1645:1485#0/1  
GTTAAAAAAGGAAATTCATACCCAAAGCTCAGCAAATCCT  
+HWI-EAS443:3:42:1645:1485#0/1  
aaaaab`ZZbbbaaabababb¥`abU`a]a`a`aaa^a\_¥  
@HWI-EAS443:3:42:1679:159#0/1  
GGTAGCCCCATTGCATTTGGGTAAATGTAACATTGCTGGC  
+HWI-EAS443:3:42:1679:159#0/1  
ababbabaaabbaaabb`ba¥`a`ba\_aaXaa\_[\_a``¥  
@HWI-EAS443:3:42:1701:711#0/1  
TGTGGGGACATCAAGATACAGCAAGAAGTTCAAGCCGGAA  
+HWI-EAS443:3:42:1701:711#0/1  
a`X``aa`[]\_V\_[X^\_Z`]UZ`T`^`VYG^^aRZaMDU  
@HWI-EAS443:3:42:1707:1750#0/1  
CACCATCCATCTACTAGTGCTGACCAACAAAGTCTCTATC  
+HWI-EAS443:3:42:1707:1750#0/1  
aa`]¥]]OYZQ]aZ[]aXa^\_]UQ]\_HZ\_XUQLW¥^]]S  
@HWI-EAS443:3:42:1718:1558#0/1  
TTGCTGTATCTTGATGTCCCCACAAAAACATATGCATCTG  
+HWI-EAS443:3:42:1718:1558#0/1  
aaab\_Y\_a`X`aa\_]\_`a]]\_aa`aaa\_a\_\_^U¥]¥]\_^  
@HWI-EAS443:3:42:194:1747#0/1  
CAATAACAGAATTTACTTTGTTAGTAATCTCGTCAATGGC  
+HWI-EAS443:3:42:194:1747#0/1  
\_abb^RY\_Y]bbb¥H\_aa\_b^bb\_Y`X¥abbbVZ\_ZI]W\_  
@HWI-EAS443:3:42:194:604#0/1  
GCAGGGGTCAGGATATGCAGCCGACCTGAAGAGCACACAG  
+HWI-EAS443:3:42:194:604#0/1  
¥¥^Ya^^T`Y\_W`]`V¥^]]Z`]X`]``aa`aa^`^[a¥  
@HWI-EAS443:3:42:19:341#0/1  
ATGAGCTTGCTGTGGAGAGTGATTCACACTCTGGATTTCC  
+HWI-EAS443:3:42:19:341#0/1  
aaa]aa`VX\_`a^``Z[R[LYZ^YYY^\_ZZ[RY¥TTWWZ\_  
@HWI-EAS443:3:42:208:405#0/1  
GCTTCCTCTGAGTATTTGGGTAGTCATAAGTCCCATTTT  
+HWI-EAS443:3:42:208:405#0/1  
abbbbbbaaabb`aaaa\_aaaYaa\_aaaaaa¥\_a\_aaaaa

@HWI-EAS443:3:42:283:82#0/1  
GAAATGCTGGATCTGGTATTATCATTTTCAGATACACCAGT  
+HWI-EAS443:3:42:283:82#0/1  
aabaaUa`aaa]a`aaU¥a\_``aaaa]\_\_aa[PU`¥VZ[S  
@HWI-EAS443:3:42:299:1034#0/1  
GTTGGTCAGCACTAGTAGATGGATGGTGAATGCCCCATAG  
+HWI-EAS443:3:42:299:1034#0/1  
a\_`^^Pa\_`aR^a[`[¥VZ\_a\_ZQ\_[V`a\_`\_\_^P\_\_\_¥[  
@HWI-EAS443:3:42:311:467#0/1  
CTGCCGTTACACCTTTGTTTCGAGTCATGATTGGGCCATGA  
+HWI-EAS443:3:42:311:467#0/1  
a\_`aa\_\_^baaaaaaaaa\_aa`aa]aaab\_``\_a\_`a^\_a\_  
@HWI-EAS443:3:42:331:1408#0/1  
GTTTCATTGGTACTGGTAGTCTCCCTGGGGCAATCAGTTT  
+HWI-EAS443:3:42:331:1408#0/1  
aabb`baba`bbaaaWb`U`a]a¥]V\_^`[`X]\_¥ROZQ\_^  
@HWI-EAS443:3:42:378:913#0/1  
GAACTCTTTACCTACTGCTGTGAAGTGTGATTTCATCTTT  
+HWI-EAS443:3:42:378:913#0/1  
\_`[`a``]a``aaa`\_\_`¥Z\_LZW)`XRF¥RV]WZ]¥^[\_]  
@HWI-EAS443:3:42:389:164#0/1  
GTGCTGACCAACAAAGTCTCTATCAGAATGCAGATGCATA  
+HWI-EAS443:3:42:389:164#0/1  
aabaaaaaaaa``aaaa]aaaa`\_ba```\_a\_`^`a\_\_\_\_  
@HWI-EAS443:3:42:428:1925#0/1  
CAGTTAAAAACAATGCCAAGGAAATTGGAACGGCTGCT  
+HWI-EAS443:3:42:428:1925#0/1  
\_¥babbabb`babaaaa`aaaa¥aa`^`aa\_`]\_b¥^QU  
@HWI-EAS443:3:42:434:707#0/1  
AGACTTTGTTGGTCAGCACTAGTAGATGGATGGTGAATGC  
+HWI-EAS443:3:42:434:707#0/1  
ab]abaab`abb[^aa``¥aaaU\_a`a]^`a\_`[`a\_¥`\_  
@HWI-EAS443:3:42:440:1997#0/1  
CTTCTTGCTGTATCTTGATGTCCCCACAAAAACATATGCA  
+HWI-EAS443:3:42:440:1997#0/1  
aba\_a`\_bab``a`Zaaa\_`a^b^`a``aaaa`aRHX^aa  
@HWI-EAS443:3:42:442:730#0/1  
CGGGAGACAAAATAACATTCGAAGCAACTGGAAATCTAGT  
+HWI-EAS443:3:42:442:730#0/1  
a``Z]abbbbbbb]aabbaabbabaaaabaI]^ababaa]  
@HWI-EAS443:3:42:468:682#0/1  
GAACTGTGATTTCATCTTTTCAATAACAGAATTTACTTTG  
+HWI-EAS443:3:42:468:682#0/1  
V\_^`bb`b`bbabbabbbbbbbbabbbb\_abbabbbabb  
@HWI-EAS443:3:42:483:1146#0/1  
AGGGAGACTACCAGTACCAATGAACTGGCGACAGTTGAAT  
+HWI-EAS443:3:42:483:1146#0/1  
^`b`bbbbbbbabZbbbbbbba[Y`aa\_bb`aa]^a`aa[  
@HWI-EAS443:3:42:494:254#0/1  
ACGGTTATCACCATCAAATGAGCAGGGGTCAGGATATGC

+HWI-EAS443:3:42:494:254#0/1  
aabb\_\_`aaa\_a`\_`\_]V`\_`\_a^aZZ`\_`^`ZZ^`\_`\_`BBBBB  
@HWI-EAS443:3:42:496:829#0/1  
CGAGTCATGATTGGGCCATGAACTTGTCTTGGGGAATATC  
+HWI-EAS443:3:42:496:829#0/1  
abbbaa]aaaa\_aaaabaaaaaaaa\_aaaaa`V``aa\_  
@HWI-EAS443:3:42:55:1613#0/1  
GGGGTGGACAGGGATGGTAGATGGATGGTACGGTTATCAC  
+HWI-EAS443:3:42:55:1613#0/1  
]bab]babbb\_aaab`^[bbbaa`abb`¥bab\_aab\_S\_S  
@HWI-EAS443:3:42:560:1240#0/1  
GGGCCATGAACTTGTCTTGGGGAATATCTCAAACCTTTCA  
+HWI-EAS443:3:42:560:1240#0/1  
aaaWSZbaaa¥¥X`Y]Z]a\_]Y`^\_aa¥]aa```¥]`\_`^  
@HWI-EAS443:3:42:566:897#0/1  
GCTTCCTCTGAGTATTTGGGTAGTCATAAGTCCCATTTT  
+HWI-EAS443:3:42:566:897#0/1  
`]Yaa[^aa`aa^L`^¥\_aaaV[[G¥\_]`^\_]T¥\_]\_]Z[  
@HWI-EAS443:3:42:614:508#0/1  
GGGACATCAAGATACAGCAAGAAGTTCAAGCCGAAATAG  
+HWI-EAS443:3:42:614:508#0/1  
abba\_aa`^abaaaab`\_aba\_^a^`ba`a\_a\_\_\_\_`````  
@HWI-EAS443:3:42:614:688#0/1  
AAATGATGACACTGAGCTCAATTGCTCTCTTAGCTCCTCA  
+HWI-EAS443:3:42:614:688#0/1  
YQJ[Z[]¥VSY`S¥X\_aa¥¥bbb\_bZOYK]b]aJIYS\_TT  
@HWI-EAS443:3:42:61:548#0/1  
CCTGCTCATTGATGGTGATAACCGTACCATCCATCTAC  
+HWI-EAS443:3:42:61:548#0/1  
aaaaa``aaaa^`^^``¥\_`^¥aa\_Z¥SLY^¥YY[¥\_`[\_^  
@HWI-EAS443:3:42:630:56#0/1  
GGGGCATTACCATCCATCTACTAGTGCTGACCAACAAAG  
+HWI-EAS443:3:42:630:56#0/1  
a\_\_UV¥VPT[^\_ZR\_ROPZRT]WV¥Y]VU]RXXXPWUXX]  
@HWI-EAS443:3:42:647:1196#0/1  
ACAGAGAAGAAATAGATGGGGTAAAGCTGGAATCAACAAG  
+HWI-EAS443:3:42:647:1196#0/1  
ab\_babbbbbbbaa]babbaaa]aaS`aaaa\_a`a\_aaaa  
@HWI-EAS443:3:42:672:360#0/1  
GCTGGATCCTGGGAAATCCAGAGTGTGAATCACTCTCCAC  
+HWI-EAS443:3:42:672:360#0/1  
ababaa`aa]baa¥aaaa^`aZ`Z`^`\_`¥`\_`\_`\_`^`[aa]  
@HWI-EAS443:3:42:690:671#0/1  
GTGTATTCATCTTTTCAATAACAGAATTTACTTTGTTAGT  
+HWI-EAS443:3:42:690:671#0/1  
^¥`W¥aa^Z`aa^aaaa`a¥[¥^`aaaa`\_`¥\_a\_a\_aa]S  
@HWI-EAS443:3:42:721:76#0/1  
CTTCAATGAAACCGCAATGGCCCCAAATAGGCCTCTAGA  
+HWI-EAS443:3:42:721:76#0/1  
a`a`babba\_`bb`b`Y[a`a`\_aabZa]a\_a```aa`



@HWI-EAS443:3:42:782:391#0/1  
ATGGGAGGCTGGTGTATAGCACCCCTGGGTGTCTGACA  
+HWI-EAS443:3:42:782:391#0/1  
]abaSa`a]UFUa^\_ab`aba[[Q`aa^aS[¥U[a\_R¥  
@HWI-EAS443:3:42:80:184#0/1  
CATTCTGTGTCTTCAGGTCGGCTGCATATCCTGACCC  
+HWI-EAS443:3:42:80:184#0/1  
¥SZaa\_]\_^ZXbaaa]abaaa[aaab`a`W^a\_`\_X]^`\_  
@HWI-EAS443:3:42:814:472#0/1  
GAGACAAAATAACATTCTGAAGCAACTGGAAATCTAGTGGT  
+HWI-EAS443:3:42:814:472#0/1  
aaa\_a\_aaaab\_\_^a`aa\_\_a\_\_a\_\_aa\_`\_\_¥a^aZa`Z  
@HWI-EAS443:3:42:856:1064#0/1  
GCTGGCTGGATCCTGGGAAATCCAGAGTGTGAATCACTCT  
+HWI-EAS443:3:42:856:1064#0/1  
aab\_¥]aa`]^aa\_\_`^aa\_\_a\_`\_^S\_U^\_^[Z`^Z\_¥  
@HWI-EAS443:3:42:882:507#0/1  
ACATATTCTACTGTAGAGACCCATTAGAGCACATCCAG  
+HWI-EAS443:3:42:882:507#0/1  
a^RX`b\_T\_^[\`YYS[] [IZSL[[¥¥]V`WWW¥Z^SZXQU  
@HWI-EAS443:3:42:916:544#0/1  
GCTGGCTGGATCCTGGGAAATCCAGAGTGTGAATCACTCT  
+HWI-EAS443:3:42:916:544#0/1  
a]a]aa`aa¥^a\_\_Y\_^T\_^R]^`Z`^\_Y\_¥`ZZZV\_U^[U  
@HWI-EAS443:3:42:98:903#0/1  
GTGGGGACATCAAGATACAGCAAGAAGTTCAAGCCGGAAA  
+HWI-EAS443:3:42:98:903#0/1  
a[\`a^X\_\_\_a`[\`^\_\_aa`][X]][]Z¥a`¥^¥`¥XI[  
@HWI-EAS443:3:42:992:1705#0/1  
TGAGCTTGCTGTGGAGAGTGATTCACACTCTGGATTCCC  
+HWI-EAS443:3:42:992:1705#0/1  
]bb`]bbaabaabb]ZZ`\_aaaa\_aab`aa¥YZa\_``¥  
@HWI-EAS443:3:42:993:323#0/1  
GTGGGGACATCAAGATACAGCAAGAAGTTCAAGCCGGAAA  
+HWI-EAS443:3:42:993:323#0/1  
a^a`^^^]\_``\_\_a\_a\_a`\_\_a`\_\_aX]\_`^`Y^\_^]]  
@HWI-EAS443:3:42:997:985#0/1  
GGGTAGTCATAAGTCCCATTTTTGACACTTTCCATGCACG  
+HWI-EAS443:3:42:997:985#0/1  
a``]aaZa\_a\_``^`]\_\_a`^aaS^`¥^\_^]]\_^X]\_`\_  
@HWI-EAS443:3:43:1000:1096#0/1  
TCCGGCTTGAACCTTCTGCTGTATCTTGATGTCCCCACAA  
+HWI-EAS443:3:43:1000:1096#0/1  
`Z)`aaa`]a¥\_]\_^\_ZW]\_[]`\_ [W[]]¥]X[W[Y[]  
@HWI-EAS443:3:43:1008:543#0/1  
CACTAGTAGATGGATGGTGAATGCCCCATAGCACGAGGAC  
+HWI-EAS443:3:43:1008:543#0/1  
ab\_b`b]abaabb\_aab`bbaabaaa^aaaa^aaa\_aa\_Z  
@HWI-EAS443:3:43:1011:596#0/1  
ACTAGATTTCCAGTTGCTTCTGAATGTTATTTTGTCTCCCG

+HWI-EAS443:3:43:1011:596#0/1  
aab`babbab`abaaa[aZ]^Zabaa¥aaba\_[W]W]¥\_  
@HWI-EAS443:3:43:1015:1328#0/1  
GCATATCTCGGTACCACTAGATTTCCAGTTGCTTCAATG  
+HWI-EAS443:3:43:1015:1328#0/1  
a`Xa\_^\_]¥[\_X`^][YUU`\_\_^^VZ^OV]ZNV¥V\_VVX^  
@HWI-EAS443:3:43:1053:622#0/1  
CACCAGTCCACGATTGCAATACAACCTGTCAGACACCCAA  
+HWI-EAS443:3:43:1053:622#0/1  
`^\_bbba``bab`baabbabbbbabab\_bbba`b`^Uaa  
@HWI-EAS443:3:43:1061:1034#0/1  
CTCTGTTTAATTTTGCTTCCTCTGAGTATTTTGGGTAGTC  
+HWI-EAS443:3:43:1061:1034#0/1  
\_aa`\_^`[^`abaaaaZ¥[^bbbaaY\_abb^\_¥\_PZTbZ  
@HWI-EAS443:3:43:1128:450#0/1  
GGCATTCTGTGTGCTTTCAGGTCGGCTGCATATCCTGAC  
+HWI-EAS443:3:43:1128:450#0/1  
ababbbaab[a\_aaa`aa`aa[]aaa\_aa\_`a`Z\_`\_`S  
@HWI-EAS443:3:43:1130:635#0/1  
CAACAAAGTCTCTATCAGAATGCAGATGCATATGTTTTTG  
+HWI-EAS443:3:43:1130:635#0/1  
^bbbaabbbbbbbaabbbbabbbbbbabb  
@HWI-EAS443:3:43:1141:1182#0/1  
ATTCTGTGTGCTTTCAGGTCGGCTGCATATCCTGACCCC  
+HWI-EAS443:3:43:1141:1182#0/1  
abaaZa\_aY`aa[aa\_]^\_Y[aa\_\_a\_U¥a\_[V]V¥^Z[¥  
@HWI-EAS443:3:43:1150:1765#0/1  
AATTAACAGAGAAGAAATAGATGGGGTAAAGCTGGAATC  
+HWI-EAS443:3:43:1150:1765#0/1  
Y`ba¥a^Yaa^abba¥YY^ababbZT\_^[[PMTa[T\_¥XS  
@HWI-EAS443:3:43:1183:341#0/1  
CCTCATAATCGATGAAATCTCCTGGGTAACACGTTCCATT  
+HWI-EAS443:3:43:1183:341#0/1  
aabbbbabbbbaabaaabaa`aaaa`\_aaaa\_a\_a\_^`a`  
@HWI-EAS443:3:43:1186:962#0/1  
GGGCCATGAACCTTGTCTTGGGAATATCTCAAACCTTTCA  
+HWI-EAS443:3:43:1186:962#0/1  
\_a\_V\_¥QYR^T`¥GUYV^¥ZYQ00V[S¥S¥T¥¥T]UY^Z  
@HWI-EAS443:3:43:1239:1179#0/1  
CAAGATACAGCAAGAAGTTCAAGCCGAAATAGCAATAAG  
+HWI-EAS443:3:43:1239:1179#0/1  
`a[\_abbababbbab\_b`aabaaa\_aaaa`aa`^aaaa`  
@HWI-EAS443:3:43:1252:2001#0/1  
ATTCTGTGTGCTTTCAGGTCGGCTGCATATCCTGACCCC  
+HWI-EAS443:3:43:1252:2001#0/1  
aaaa^\_M^]`\_\_a`a`XUU[`Y`a`¥`\_`ZNY[YR[YX  
@HWI-EAS443:3:43:1256:1138#0/1  
GGGGACATCAAGATACAGCAAGAAGTTCAAGCCGAAATA  
+HWI-EAS443:3:43:1256:1138#0/1  
`baaa[`PV\_`a^aaaa\_aaaa\_a\_`\_`[a\_U`W^\_¥`\_`

@HWI-EAS443:3:43:1256:217#0/1  
TGGGGCATTACCATCCATCTACTAGTGCTGACCAACAAA  
+HWI-EAS443:3:43:1256:217#0/1  
\_Za`aaababaaaa]\_aa\_aa]aaa]a\_\_`^ZMZx¥^^^  
@HWI-EAS443:3:43:1282:486#0/1  
AGCTCCTCATAATCGATGAAATCTCCTGGGTAACACGTTC  
+HWI-EAS443:3:43:1282:486#0/1  
`\_bbaabaa`aaab`aa\_aaa```\_`aaa]a`\_a\_a¥^\_  
@HWI-EAS443:3:43:1289:265#0/1  
GAGACTTTGTTGGTCAGCACTAGTAGATGGATGGTGAATG  
+HWI-EAS443:3:43:1289:265#0/1  
a\_b`\_bbbb`aba\_a`a\_\_^a\_a^\_a`aa[\_aaU`]X^a  
@HWI-EAS443:3:43:1294:1034#0/1  
ATAAAGGGAAAGAAGTCCTCGTGCTATGGGGCATTACCA  
+HWI-EAS443:3:43:1294:1034#0/1  
G[TP[Y`\_V\_bZa\_UYbb`\_\_X\_X`¥b\_]Z]UbTTXX0`b  
@HWI-EAS443:3:43:1297:770#0/1  
GAAAAGGTAAGAAGCCAGTTAAAAACAATGCCAAGGAAA  
+HWI-EAS443:3:43:1297:770#0/1  
````\_]`a`\_\_\_\_W]aaX`a¥`¥]`^```a^Z]¥`]ZQX  
@HWI-EAS443:3:43:1308:1067#0/1  
TAACCGTACCATCCATCTACCATCCCTGTCCACCCCTT  
+HWI-EAS443:3:43:1308:1067#0/1  
aaaa\_a¥a\_\_aa^\_a\_aa\_\_a\_\_\_\_`¥\_¥U¥UW^W^W  
@HWI-EAS443:3:43:1311:564#0/1  
GGGGACATCAAGATACAGCAAGAAGTTCAAGCCGAAATA  
+HWI-EAS443:3:43:1311:564#0/1  
abaa`\_aaaaab`aaaa`aa`\_a]`]a`TVa`^^^\_  
@HWI-EAS443:3:43:1321:465#0/1  
GGAGGCTGGTGTATAGCACCTTGGGTGTCTGACAAGT  
+HWI-EAS443:3:43:1321:465#0/1  
aa^a\_\_^aaNaU\_] [¥\_¥¥¥¥\_^[^^^`S^Z¥W`TVXW¥Y  
@HWI-EAS443:3:43:1377:2025#0/1  
TAAGAAGCCAGTTAAAAACAATGCCAAGGAAATTGGAAA  
+HWI-EAS443:3:43:1377:2025#0/1  
a\_P¥bb`ZZabYaZ`aaaa[a\_]\_]0]\_`^\_]`^\_U\_\_`\_V  
@HWI-EAS443:3:43:1485:642#0/1  
GGGACATCAAGATACAGCAAGAAGTTCAAGCCGAAATAG  
+HWI-EAS443:3:43:1485:642#0/1  
a]b]abb`abaa\_a`baaabb`Za\_aabaa]Va```\_`aaa  
@HWI-EAS443:3:43:1547:646#0/1  
GCCAGTTCATTGGTACTGGTAGTCTCCCTGGGGGCAATCA  
+HWI-EAS443:3:43:1547:646#0/1  
`b```^b```bba\_S\_\_aa^Za`^^X]]YUXVT]VOM¥SSB  
@HWI-EAS443:3:43:1565:926#0/1  
GCTGGCTGGATCCTGGGAAATCCAGAGTGTGAATCACTCT  
+HWI-EAS443:3:43:1565:926#0/1  
aaabaabba]\_]```\_aa]`aa\_Y^`\_aW`Za¥\_`S^¥^W^  
@HWI-EAS443:3:43:1715:1726#0/1  
GGGACATCAAGATACAGCAAGAAGTTCAAGCCGAAATAG

+HWI-EAS443:3:43:1715:1726#0/1  
aa\_b`ab^aaaaa`[\_aUabaa`a^`\_\_`a^^`^`^`^^`^^  
@HWI-EAS443:3:43:171:601#0/1  
TGCCGGTTTCATTGAAGGGGGTGGACAGGGATGGTAGAT  
+HWI-EAS443:3:43:171:601#0/1  
abaab`^`aaba^^aZ\_a]ZXa^Va`S]\_¥VXR]`W¥`[\_`  
@HWI-EAS443:3:43:172:1234#0/1  
GTCCCCACAAAAACATATGCATCTGCATTCTGATAGAGAC  
+HWI-EAS443:3:43:172:1234#0/1  
`abbaaab]]baabbaaa`bbaba^aab\_aa`aaaa\_^\_  
@HWI-EAS443:3:43:1743:717#0/1  
ATCTACTAGTGCTGACCAACAAAGTCTCTATCAGAATGCA  
+HWI-EAS443:3:43:1743:717#0/1  
ab^aa`aa`^`a`^^`^[\_a^\_a`X`^a^YU]`[\_`¥a¥\_  
@HWI-EAS443:3:43:1757:202#0/1  
GGAAAATGAAAGAACTTTGGACTACCACGATTCAAATGTG  
+HWI-EAS443:3:43:1757:202#0/1  
aYW\_RX\_YTVX¥[\_Yaaa\_VFQ^`ZGZ^`W][YUSWW]V`  
@HWI-EAS443:3:43:193:884#0/1  
GAAGTCCTCGTGCTATGGGGCATTACCATCCATCTACTA  
+HWI-EAS443:3:43:193:884#0/1  
abbb\_bb\_bbababbaa`baaaa\_bbb^[\_aaaa\_a`b^a\_  
@HWI-EAS443:3:43:196:1355#0/1  
CCGGGAGACAAAATAACATTGAAGCAACTGGAAATCTAG  
+HWI-EAS443:3:43:196:1355#0/1  
`bb]bab]abba]¥][\_`\_`[\_`¥aaP]^a^aa`\_`\_`\_`\_`\_  
@HWI-EAS443:3:43:209:447#0/1  
GACAAGTTGTATTGCAATCGTGGACTGGTGTATCTGAAAT  
+HWI-EAS443:3:43:209:447#0/1  
a`abbbabbabbabaabbababb^`ab¥¥¥aaa\_aab]aa  
@HWI-EAS443:3:43:213:929#0/1  
CACCCAAGGGTGTATAAACACCAGCCTCCCATTTTCAGAA  
+HWI-EAS443:3:43:213:929#0/1  
ababab`^`aa]aab`aaaaaa`^`aa`\_`aaa`\_`a\_aaa  
@HWI-EAS443:3:43:230:1441#0/1  
AAGAGTTCAACCACCTGGAAAAAGAATAGAGAATTTAAA  
+HWI-EAS443:3:43:230:1441#0/1  
aaaaa`aaba`^`a`^`aba`aa`a\_a`^`aaaaa`^`aa`a`\_`  
@HWI-EAS443:3:43:247:801#0/1  
GCCAAGGAAATTGGAAACGGCTGCTTTGAATTTTACCACA  
+HWI-EAS443:3:43:247:801#0/1  
`bb`\_`bbaaaaaa`^`a`aa`\_]JS`¥GQ][\_a]LMWXX\_  
@HWI-EAS443:3:43:330:650#0/1  
CATGACTCGAACAAAGGTGTAACGGCAGCATGTCCTCATG  
+HWI-EAS443:3:43:330:650#0/1  
ababbbbbbbbaabb]a`aaaaa\_a[[X`^`a`]UXY  
@HWI-EAS443:3:43:372:235#0/1  
CCAGGAGATTTTCATCGATTATGAGGAGCTAAGAGAGCAAT  
+HWI-EAS443:3:43:372:235#0/1  
Ya`^bb¥¥a\_b`\_`bJaXYaaa`T]\_H¥a^aXXXWV¥]aaV

@HWI-EAS443:3:43:431:1109#0/1  
GTTTTTGTGGGACATCAAGATACAGCAAGAAGTTCAAGC  
+HWI-EAS443:3:43:431:1109#0/1  
aQ]ZSSUDYW[`VP\_\_^\_\_aZRY¥¥PZ]`ZY[[NOFXU\_]`  
@HWI-EAS443:3:43:442:1297#0/1  
GCCGGGAGACAAAATAACATTCCGAAGCAACTGGAAATCTA  
+HWI-EAS443:3:43:442:1297#0/1  
aba\_babb\_b`Waaa\_b`baa`aaa\_aababaa`aaa\_`a  
@HWI-EAS443:3:43:534:332#0/1  
TGGCTGGATCCTGGGAAATCCAGAGTGTGAATCACTCTCC  
+HWI-EAS443:3:43:534:332#0/1  
abb\_^a[FU]\_ST\_[[`\_[Xa¥a^]R¥\_[YYZ¥`^X[VVV  
@HWI-EAS443:3:43:536:1854#0/1  
CTTTGGGTCTTATTGCTATTTCCGGCTTGAACCTCTTGCT  
+HWI-EAS443:3:43:536:1854#0/1  
\_bbbb¥¥0]``ab`\_bbbbbb`\_W[^a^aaaV`YH\_`S\_b  
@HWI-EAS443:3:43:54:1547#0/1  
CTAGTTCAGACAATGGAACGTGTTACCCAGGAGATTTTCAT  
+HWI-EAS443:3:43:54:1547#0/1  
Z[\_¥X]aaaa````aa\_Y\_^\_\_¥¥¥\_¥`]``¥\_`\_\_^\_\_  
@HWI-EAS443:3:43:551:497#0/1  
GCCGGTTTCATTGAAGGGGGTGGACAGGGATGGTAGATG  
+HWI-EAS443:3:43:551:497#0/1  
aa`\_a]`b\_aaba^\_aabaUa^^^`aaa^`a`V^¥[V^  
@HWI-EAS443:3:43:578:1007#0/1  
TGGCTGGATCCTGGGAAATCCAGAGTGTGAATCACTCTCC  
+HWI-EAS443:3:43:578:1007#0/1  
XHX`]b]\_`aa]^\_¥[^aaaa\_ZZ^NZZP^aa`aW¥^`\_`]  
@HWI-EAS443:3:43:587:203#0/1  
ATTAATTTTTGTAGAAGCTTTTTGCTCCAGCATGAGGAC  
+HWI-EAS443:3:43:587:203#0/1  
``]aa]a\_ab``W¥\_[J¥Zaa`a`\_^\_]\_¥ZW]]T^^XX  
@HWI-EAS443:3:43:595:837#0/1  
CACGTGCATGGAAAGTGTCAAAAATGGGACTTATGACTAC  
+HWI-EAS443:3:43:595:837#0/1  
ab^bYaaaaaa^`aaYa\_\_a¥X\_Y\_aY[^a\_a`aa\_^^`]  
@HWI-EAS443:3:43:609:45#0/1  
GGGACATCAAGATACAGCAAGAAGTTCAAGCCGGAAATA  
+HWI-EAS443:3:43:609:45#0/1  
abaa`^aa\_Z\_a`aa`a`aa[YaX]^`V`]X`\_][V[^  
@HWI-EAS443:3:43:67:165#0/1  
TCCGGCTTGAACCTTCTGCTGTATCTTGATGTCCCCACAA  
+HWI-EAS443:3:43:67:165#0/1  
ababbbab`^\_Za`^\_aaa^]\_`a`a`W^`^^]`¥aa\_PZ  
@HWI-EAS443:3:43:682:738#0/1  
TGCTGGCTGGATCCTGGGAAATCCAGAGTGTGAATCACTC  
+HWI-EAS443:3:43:682:738#0/1  
abababb\_bS]aU`aZH]X`a^\_\_`^]a`a[^aaY^VX`  
@HWI-EAS443:3:43:69:1737#0/1  
AAAATTCAAAGCAGCCGTTTCCAATTTCTTGGCATTGTT

+HWI-EAS443:3:43:69:1737#0/1  
a¥^Y`aa[\_XZ\_W\_`\_S`[a^]Y\_`W\_`^¥YYY]Z]¥`  
@HWI-EAS443:3:43:782:829#0/1  
GCCAGTTAAAAACAATGCCAAGGAAATTGGAAACGGCTG  
+HWI-EAS443:3:43:782:829#0/1  
\_T[aa^aaaa\_\_^\_a`a\_]¥\_a`^`\_`\_`¥\_\_^`]¥^¥  
@HWI-EAS443:3:43:814:1226#0/1  
GGAACGTGTTACCCAGGAGATTCATCGATTATGAGGAGC  
+HWI-EAS443:3:43:814:1226#0/1  
`\_]Z]Z`a^\_]VU\_\_`abaaa^a`U`a`a`X\_][\_F  
@HWI-EAS443:3:43:814:454#0/1  
ATTCTGTGTCTTTCAGGTCGGCTGCATATCCTGACCCC  
+HWI-EAS443:3:43:814:454#0/1  
]a\_\_Zaa`X[`b`bbbaa][`aaaa\_\_a\_\_^`\_\_Z]¥  
@HWI-EAS443:3:43:843:1706#0/1  
GATTTCCAGTTGCTTCGAATGTTATTTTGTCTCCCGGCTC  
+HWI-EAS443:3:43:843:1706#0/1  
aWa\_V\_^^[J]a\_]`][`[^`¥N]Y¥\_I^P^]X¥H¥BBBB  
@HWI-EAS443:3:43:854:2001#0/1  
AAGTGTCAAAAATGGGACTTATGACTACCCAAAATACTCA  
+HWI-EAS443:3:43:854:2001#0/1  
ab`a`\_baabba`\_`ab`b`baab^abYIaa`a\_a`aSV  
@HWI-EAS443:3:43:857:1244#0/1  
TTGTGGGACATCAAGATACAGCAAGAAGTTCAAGCCGGA  
+HWI-EAS443:3:43:857:1244#0/1  
abbabbbb`aaa\_babba`a`aaab\_abU¥Xaaa\_^aa\_  
@HWI-EAS443:3:43:899:1349#0/1  
GAGGACATGCTGCCGTTACACCTTTGTTTCGAGTCATGATT  
+HWI-EAS443:3:43:899:1349#0/1  
abaaaabbabaabbb\_aaa`[\_aaaa\_aa`\_aV`a`a[\_\_\_  
@HWI-EAS443:3:43:94:1210#0/1  
CAGGTCGGCTGCATATCCTGACCCCTGCTCATTGATGG  
+HWI-EAS443:3:43:94:1210#0/1  
aa[`WaaX`^aaaa\_a`\_`V`\_\_`\_\_[\_a\_Z`a`\_\_^\_  
@HWI-EAS443:3:43:959:1389#0/1  
ACAAATGCGATAACACGTGCATGGAAAGTGCAAAAATGG  
+HWI-EAS443:3:43:959:1389#0/1  
a^SZLHXGX[YUT`YaU[PS`\_`aP¥\_\_UGZRUZaWROV[[  
@HWI-EAS443:3:43:963:1007#0/1  
GCAAGAAGTTCAAGCCGAAATAGCAATAAGACCCAAAAGT  
+HWI-EAS443:3:43:963:1007#0/1  
aaabaaab]`aa\_\_^`\_Z\_]`a\_a\_\_\_\_\_][V^^`V`  
@HWI-EAS443:3:43:970:188#0/1  
CTTTGTTAGTAATCTCGTCAATGGCATTCTGTGTGCTCTT  
+HWI-EAS443:3:43:970:188#0/1  
abbbbabaa`a¥`aab`^\_\_aaa`aaaa\_aaUaXa^`  
@HWI-EAS443:3:43:970:736#0/1  
GGGGACATCAAGATACAGCAAGAAGTTCAAGCCGAAATA  
+HWI-EAS443:3:43:970:736#0/1  
abbbbaa]baabaaa`bb`bbaab\_a\_b\_aT^aaaaaa^

@HWI-EAS443:3:43:975:1812#0/1  
TGCAAATAAGAGGGTAGCCCCATTGCATTTGGGTAAAT  
+HWI-EAS443:3:43:975:1812#0/1  
a\_aaabababba\_`a\_¥aa\_\_`aaaaP`a``\_]PP``\_a  
@HWI-EAS443:3:44:1012:1002#0/1  
ATTCTGTGTGCTCTTCAGGTCGGCTGCATATCCTGACCCC  
+HWI-EAS443:3:44:1012:1002#0/1  
^a`a``[aYba^a`a`aa`Tq]TUT¥PV\_`U¥]¥¥`VXTV  
@HWI-EAS443:3:44:1018:560#0/1  
AGCCAGTAAAAACAATGCCAAGGAAATTGGAAACGGCT  
+HWI-EAS443:3:44:1018:560#0/1  
aaaa\_a`aaa\_a`aaa`aaa^[]a\_^Wa\_`\_\_^`]\_\_Z[  
@HWI-EAS443:3:44:104:532#0/1  
GGGGCATTACCATCCATCTACTAGTGCTGACCAACAAAG  
+HWI-EAS443:3:44:104:532#0/1  
abbb\_abb\_baba\_a^aaaaa\_aaaWaa\_aaa`¥a]Ia`a  
@HWI-EAS443:3:44:1065:767#0/1  
GTACCATCCATCTACCATCCCTGTCCACCCCCTTCAATG  
+HWI-EAS443:3:44:1065:767#0/1  
a]aababaaaaa\_`^`abaa\_a¥]^`a`\_]\_\_^`\_^`  
@HWI-EAS443:3:44:1066:1535#0/1  
CTGGGAAATCCAGAGTGTGAATCACTCTCCACAGCAAGCT  
+HWI-EAS443:3:44:1066:1535#0/1  
`bba^Zaaa`a`a^\_b`\_]Z`\_a``\_`\_[]`aPX¥\_UZ  
@HWI-EAS443:3:44:1108:498#0/1  
ATGAAACCGCAATGGCCCCAAATAGGCCTCTAGATTGAA  
+HWI-EAS443:3:44:1108:498#0/1  
`aa¥`a`aa\_\_a`\_`a`\_ab`¥\_¥\_\_\_\_]ZS^`¥\_`\_¥¥  
@HWI-EAS443:3:44:1141:471#0/1  
CCCCACAAAACATATGCATCTGCATTCTGATAGAGACTT  
+HWI-EAS443:3:44:1141:471#0/1  
^W]PZ]Y^S\_S]`¥]```\_RRZ`Wa]\_`Z]Y\_WaQ\_[Z\_¥  
@HWI-EAS443:3:44:1145:111#0/1  
CCGGGAGACAAAATAACATTGAAGCAACTGGAAATCTAG  
+HWI-EAS443:3:44:1145:111#0/1  
aabbbab`aaaabbab^aba`baaaaab\_bba`a`a`aaa  
@HWI-EAS443:3:44:1180:35#0/1  
GGGGACATCAAGATACAGCAAGAAGTTCAAGCCGGAAATA  
+HWI-EAS443:3:44:1180:35#0/1  
aa`a\_^`\_^`\_a`\_\_YHa^^`a]UaY^]`^^]V^]YXXXY  
@HWI-EAS443:3:44:1181:1860#0/1  
CTAGATTTCCAGTTGCTTGAATGTTATTTTGTCTCCCGG  
+HWI-EAS443:3:44:1181:1860#0/1  
`a]TWUb`]W[ZH[`\_\_aaa\_¥\_aRZZ]]¥^`W]]WZ]]  
@HWI-EAS443:3:44:1215:200#0/1  
CAATGGCATTCTGTGTGCTCTTCAGGTCGGCTGCATATCC  
+HWI-EAS443:3:44:1215:200#0/1  
R\_[J```abb\_[[bbaababbbbWbaaXa`baa`XabbaRT  
@HWI-EAS443:3:44:1231:1633#0/1  
GGGGACATCAAGATACAGCAAGAAGTTCAAGCCGGAAATA





@HWI-EAS443:3:44:1476:305#0/1  
GCCGGTTTCATTGAAGGGGGTGGACAGGGATGGTAGATG  
+HWI-EAS443:3:44:1476:305#0/1  
a\_aab\_aa`^aba[`aa`a\_`Y``¥¥¥\_\_\_U¥`^V^^¥V¥  
@HWI-EAS443:3:44:1525:199#0/1  
CGGCTGCTTTGAATTTTACCACAAATGCGATAACACGTGC  
+HWI-EAS443:3:44:1525:199#0/1  
abbabbU]abaZa``aaa¥^aV]¥`\_`¥`[[^L[Y¥R[T  
@HWI-EAS443:3:44:1561:830#0/1  
GGGCATTACCATCCATCTACTAGTGCTGACCAACAAAG  
+HWI-EAS443:3:44:1561:830#0/1  
ab``abbbb\_aabbaaab^b\_a`aa`aa`^aaaa`a  
@HWI-EAS443:3:44:1565:1235#0/1  
GTGGGGACATCAAGATACAGCAAGAAGTTCAAGCCGAAA  
+HWI-EAS443:3:44:1565:1235#0/1  
a^]a^]TV]^RZ¥[]^a^]`^`Z]a^]aZ\_XQ^UTWW  
@HWI-EAS443:3:44:1566:590#0/1  
GAATTTTACCACAAATGCGATAACACGTGCATGGAAAGTG  
+HWI-EAS443:3:44:1566:590#0/1  
`XH][[]]U[U\_^¥Za\_Ta\_\_]P][^aW\_T[WaXRYQZL]  
@HWI-EAS443:3:44:1571:1522#0/1  
AAAGAAGTCCTCGTGCTATGGGCATTACCATCCATCTA  
+HWI-EAS443:3:44:1571:1522#0/1  
\_a`aabaab\_aaba\_aaa`a`a[`[a^aa^aa\_\_a`^\_a  
@HWI-EAS443:3:44:1590:407#0/1  
GCCAGTAAAAACAATGCCAAGGAAATTGGAACGGCTG  
+HWI-EAS443:3:44:1590:407#0/1  
a^[\_a\_bab`\_baYa\_aba\_a`aa]\_^a\_\_\_\_^\_\_`^]aW  
@HWI-EAS443:3:44:1602:678#0/1  
GCCGGTTTCATTGAAGGGGGTGGACAGGGATGGTAGATG  
+HWI-EAS443:3:44:1602:678#0/1  
a\_abb\_aba^aab\_abaa`aaWaa¥^\_aaa^\_aaQ\_]V\_  
@HWI-EAS443:3:44:1620:587#0/1  
GTGGACAGGGATGGTAGATGGATGGTACGGTTATCACCAT  
+HWI-EAS443:3:44:1620:587#0/1  
a¥\_^][Z\_\_aUT]^V¥^ZU^\_TW¥[NWV[¥LTPNNOPTTT  
@HWI-EAS443:3:44:1623:657#0/1  
CTTTACCTACTGCTGTGAAGTGTATTTCATCTTTTCAAT  
+HWI-EAS443:3:44:1623:657#0/1  
abbbba^bbbbbbbabababbababbabbbb\_aab  
@HWI-EAS443:3:44:1631:186#0/1  
CAAGAAGTTCAAGCCGAAATAGCAATAAGACCCAAAGTG  
+HWI-EAS443:3:44:1631:186#0/1  
abbbbaab\_aabbb^a]a`\_aaaa`\_aa`a`\_`Y¥`Z\_U`  
@HWI-EAS443:3:44:1683:1444#0/1  
TGGCCATGAACCTGTCTTGGGAATATCTCAAACCTTTC  
+HWI-EAS443:3:44:1683:1444#0/1  
`b\_aa\_aaZa\_aa\_\_Zaaa^`^`^`\_`[\_a`\_VW^\_\_¥  
@HWI-EAS443:3:44:1690:1844#0/1  
GAAGCCAGTAAAAACAATGCCAAGGAAATTGGAACGG



@HWI-EAS443:3:44:389:1245#0/1  
GCTGGCTGGATCCTGGGAAATCCAGAGTGTGAATCACTCT  
+HWI-EAS443:3:44:389:1245#0/1  
aaaaXaba`¥Y`[^Z\_S^aa`X\_`a[\_V0`[\_`\_XXP]PU  
@HWI-EAS443:3:44:42:866#0/1  
CAGATGCATATGTTTTTGTGGGACATCAAGATACAGCAA  
+HWI-EAS443:3:44:42:866#0/1  
a``\_abbbbbbaaabbbaY^[``aaaaaaaaa]^aa`a\_  
@HWI-EAS443:3:44:493:1029#0/1  
TGGCATTCTGTGTCTTTCAGGTCGGCTGCATATCCTGA  
+HWI-EAS443:3:44:493:1029#0/1  
Z[\_]\_ab\_¥L]\_a`[^a`[\_^V^^Z\_Y`YL[\_a\_XX]`[  
@HWI-EAS443:3:44:576:1398#0/1  
CCTTGGCATTGTTTTTAACTGGCTTCTTACCTTTTCATA  
+HWI-EAS443:3:44:576:1398#0/1  
aabbaababababbabb\_aa^^aaa[\_a[Z^aaaa]a`X  
@HWI-EAS443:3:44:609:1145#0/1  
CAGGGATGGTAGATGGATGGTACGGTTATCACCATCAAAA  
+HWI-EAS443:3:44:609:1145#0/1  
Z]\_`\_¥b\_¥Q``^babbbaZX\_G[b`abZ]Z]]RZ`¥^]]  
@HWI-EAS443:3:44:617:44#0/1  
GGGGACATCAAGATACAGCAAGAAGTTCAAGCCGGAAATA  
+HWI-EAS443:3:44:617:44#0/1  
aaa\_R]U[[\_XYRV¥`\_] [Z[[V]NRT[R¥UWU[WVP[X  
@HWI-EAS443:3:44:631:1359#0/1  
GGGACATCAAGATACAGCAAGAAGTTCAAGCCGGAAATAG  
+HWI-EAS443:3:44:631:1359#0/1  
aa\_]\_``Xaa`\_^\_aa`aab`X]^I^[baa]\_a`]a\_\_\_^  
@HWI-EAS443:3:44:694:1806#0/1  
GAATTTCTTTTTTAACTAGCCATATTAATTTTTGTAGA  
+HWI-EAS443:3:44:694:1806#0/1  
`aabba\_`abbbbbbaa¥aaa`aaaabaabaaba`ab`aaa  
@HWI-EAS443:3:44:715:1300#0/1  
TGACTACCCAAAATACTCAGAGGAAGCAAAATTAACAGA  
+HWI-EAS443:3:44:715:1300#0/1  
aabaaaaababaaaaa`ababa``a[aaaaa`aaQaa\_  
@HWI-EAS443:3:44:71:519#0/1  
CGGGAGACAAAATAACATTCTGAAGCAACTGGAAATCTAGT  
+HWI-EAS443:3:44:71:519#0/1  
abba¥babaa\_babbbbaab``a\_b¥\_a\_aaaaaa\_``a\_  
@HWI-EAS443:3:44:769:173#0/1  
TCTGTGTCTTTCAGGTCGGCTGCATATCCTGACCCCTG  
+HWI-EAS443:3:44:769:173#0/1  
aaa`][a^aX¥]^`\_\_Y`\_^a]^RY^^\_¥^^\_WZRUX¥[  
@HWI-EAS443:3:44:77:1158#0/1  
AAAGTCTCTATCAGAATGCAGATGCATATGTTTTTGTGGG  
+HWI-EAS443:3:44:77:1158#0/1  
aaa`\_aa`a``aa[^ZY]Z]Y]a\_\_^¥`a^`a\_`¥T\_\_^  
@HWI-EAS443:3:44:831:389#0/1  
TGGGTATGAATTTCTTTTTTAACTAGCCATATTAATTT

+HWI-EAS443:3:44:831:389#0/1  
aaaa\_aabaaaa`aa`aaaaa\_aa`a`aa\_aaaaYaaa  
@HWI-EAS443:3:44:834:1118#0/1  
ATGAACTTGTCTTGGGAATATCTCAAACCTTCAAATGA  
+HWI-EAS443:3:44:834:1118#0/1  
a^\_]\_Uabb`[a`^a^R\_¥`^`Z]Y]¥UV^`aa¥]aaaa\_  
@HWI-EAS443:3:44:856:208#0/1  
AGAGCAATTGAGCTCAGTGTCATCATTTGAAAGTTTGAG  
+HWI-EAS443:3:44:856:208#0/1  
aaXa`aaa\_a\_a\_a\_\_a[`^`\_a]^`a``]]Y`\_Y\_^\_]`  
@HWI-EAS443:3:44:938:199#0/1  
TTCTTGCTGTATCTTGATGTCCCCACAAAACATATGCAT  
+HWI-EAS443:3:44:938:199#0/1  
]bbb\_b\_ab`a^a`bb^¥b¥`^^`\_`\_`\_\_\_\_\_¥^\_a^]\_  
@HWI-EAS443:3:44:952:1273#0/1  
GAACTGTGTATTTCATCTTTTCAATAACAGAATTTACTTTG  
+HWI-EAS443:3:44:952:1273#0/1  
¥U^abbbb`bab^[aabbb\_ba``aaabbababa\_abb`b  
@HWI-EAS443:3:44:996:791#0/1  
TTGGGTATGAATTTCTTTTTTAACTAGCCATATTAATT  
+HWI-EAS443:3:44:996:791#0/1  
aaa\_¥]]`a``aaa\_^aaabaa`^¥`[a]\_```a]a\_\_a\_  
@HWI-EAS443:3:45:1067:1991#0/1  
ACTTTCCATGCACGTGTTATCGCATTGTGGTAAAATTCA  
+HWI-EAS443:3:45:1067:1991#0/1  
a`b`aa\_baaWaWa]a]\_aaY[¥`\_aa\_]a\_^aaa`\_`^a  
@HWI-EAS443:3:45:107:708#0/1  
GAAAAGGTAAGAAGCCAGTTAAAAACAATGCCAAGGAAA  
+HWI-EAS443:3:45:107:708#0/1  
aaaaabbX\_a`aa`Uabaaa`\_`aaaa`aa\_a^a`\_]`^  
@HWI-EAS443:3:45:1099:1511#0/1  
ATAATCGATGAAATCTCCTGGGTAACACGTTCCATTGTCT  
+HWI-EAS443:3:45:1099:1511#0/1  
aaabbabaaaaa`]a`\_a`a\_Zb`¥\_]`¥a`\_\_`^^¥]`  
@HWI-EAS443:3:45:1102:1660#0/1  
GTCAAAAATGGGACTTATGACTACCCAAAATACTCAGAGG  
+HWI-EAS443:3:45:1102:1660#0/1  
a``aba\_aaaa`a[a^aaaVfy]`\_aaa`a`\_UaV[a^`\_  
@HWI-EAS443:3:45:1116:1065#0/1  
CGGGAGACAAAATAACATTCTGAAGCAACTGGAAATCTAGT  
+HWI-EAS443:3:45:1116:1065#0/1  
abbbababbbbabbaaabababaa`^bbaaa`aaaaa^  
@HWI-EAS443:3:45:117:1504#0/1  
ATCCATCTACTAGTGCTGACCAACAAAGTCTCTATCAGAA  
+HWI-EAS443:3:45:117:1504#0/1  
aab\_ab¥\_a`a\_\_`a`a`a`^`\_\_aa]PJ[\_`a\_aS`S\_\_  
@HWI-EAS443:3:45:1184:1260#0/1  
GGAACGTGTTACCCAGGAGATTTTCATCGATTATGAGGAGC  
+HWI-EAS443:3:45:1184:1260#0/1  
`aababababaaa^ab^`aaaaa`aaa``a^\_aaa^`\_¥

@HWI-EAS443:3:45:1255:194#0/1  
GTTACCCAGGAGATTTTCATCGATTATGAGGAGCTAAGAGA  
+HWI-EAS443:3:45:1255:194#0/1  
a`aaaaaba\_b`a\_a\_``\_a\_a\_`a^aaX\_]]^]]\_X  
@HWI-EAS443:3:45:1295:1017#0/1  
CAACAAAGTCTCTATCAGAATGCAGATGCATATGTTTTTG  
+HWI-EAS443:3:45:1295:1017#0/1  
aabbbaa¥b^abab`aaaa\_a\_a`\_a`aa\_aaaaa\_aa`aa  
@HWI-EAS443:3:45:1322:132#0/1  
GTGGGGACATCAAGATACAGCAAGAAGTTCAAGCCGGAAA  
+HWI-EAS443:3:45:1322:132#0/1  
a^`aa`\_aa^\_\_¥¥\_a^a`[\_aa]^`^U\_]`^Y`\_^Y  
@HWI-EAS443:3:45:1376:713#0/1  
CAGAAACTGATTGCCCCAGGGAGACTACCAAGTACCAATG  
+HWI-EAS443:3:45:1376:713#0/1  
abbba^\_bbbbbaba`aaaabaa`\_a\_aa\_\_`b\_a^Y^`aa  
@HWI-EAS443:3:45:1397:1849#0/1  
CCTCTGAGTATTTTGGGTAGTCATAAGTCCCATTTTTGAC  
+HWI-EAS443:3:45:1397:1849#0/1  
`aa`b`bb`bbbaabb`aba`aaa\_aTW`^aaaaaa`^  
@HWI-EAS443:3:45:1404:1899#0/1  
GAAGAACTTATATGAAAAGGTAAGAAGCCAGTAAAAAAC  
+HWI-EAS443:3:45:1404:1899#0/1  
^a`^aa\_b¥baaaaa`ab\_L]a`aa`^a`\_`aaa^\_\_^  
@HWI-EAS443:3:45:1421:1634#0/1  
GGGACATCAAGATACAGCAAGAAGTTCAAGCCGGAAATAG  
+HWI-EAS443:3:45:1421:1634#0/1  
aa]a`a]G]aa`a`^\_[`aa[`¥W\_Y[OTVP``^]`^]\_¥  
@HWI-EAS443:3:45:1471:1134#0/1  
CTCCTCATAATCGATGAAATCTCCTGGGTAACACGTTCCA  
+HWI-EAS443:3:45:1471:1134#0/1  
a¥XMV]a`Y0]\_aZYZ]a`T¥a]RWa]aV]\_`¥M\_X^¥VV  
@HWI-EAS443:3:45:1477:1834#0/1  
GTTATTTTGTCTCCCGGCTCTACTAGTGTCCAGTAATAGT  
+HWI-EAS443:3:45:1477:1834#0/1  
a\_aaaaaa\_]a^X[`\_]\_]\_YU\_YYV^Y¥W]]W\_]ZQY  
@HWI-EAS443:3:45:1510:1845#0/1  
GTCAAAAATGGGACTTATGACTACCCAAAATACTCAGAGG  
+HWI-EAS443:3:45:1510:1845#0/1  
a^aaaaa\_¥aaa\_Za^a^W¥^\_aOMT``\_`\_]Y]X[W^^  
@HWI-EAS443:3:45:1514:142#0/1  
GACTACCAGTACCAATGAACTGGCGACAGTTGAATAGATC  
+HWI-EAS443:3:45:1514:142#0/1  
aabaaaabaaaaaaaaaaaaa`\_aaaaXQS`]]\_]\_[Y\_\_NU  
@HWI-EAS443:3:45:1544:1291#0/1  
GCTTTTTGCTCCAGCATGAGGACATGCTGCCGTTACACCT  
+HWI-EAS443:3:45:1544:1291#0/1  
aaaaaa]]`¥¥`[X]^`¥T[¥\_\_Z^^TX[WVXRZWZU  
@HWI-EAS443:3:45:1553:251#0/1  
GGGGCATTACCATCCATCTACTAGTGCTGACCAACAAAG

+HWI-EAS443:3:45:1553:251#0/1  
W\_ROXRaSJvU\_¥USXSU`^`\_aa¥¥a`\_a\_a\_\_\_\_\_YLZ`  
@HWI-EAS443:3:45:1566:981#0/1  
TCACCATCCATCTACTAGTGCTGACCAACAAAGTCTCTAT  
+HWI-EAS443:3:45:1566:981#0/1  
aaaa^aa^aa\_\_aa\_a\_]a\_\_`\_\_\_\_^]¥[``\_`Y\_^\_`^^  
@HWI-EAS443:3:45:1576:265#0/1  
CCACGATTCAAATGTGAAGAACTTATATGAAAAGGTAAGA  
+HWI-EAS443:3:45:1576:265#0/1  
aaV¥aYSa]VbV]b\_`P^aVa\_\_]]abba][aVYZSaa`\_  
@HWI-EAS443:3:45:1586:1567#0/1  
CAGTGTcATcATTTGAAAGTTTGAGATATCCCCAAGAC  
+HWI-EAS443:3:45:1586:1567#0/1  
aab\_baabbbabbbb`aab`[aababaaab`[\_Y^`a`a\_  
@HWI-EAS443:3:45:1604:387#0/1  
ACTTATATGAAAAGGTAAGAAGCCAGTTAAAAACAATGC  
+HWI-EAS443:3:45:1604:387#0/1  
abbbababbaaaabb\_aabaaaaaab`aa\_aaaa`a\_`b^  
@HWI-EAS443:3:45:1636:1400#0/1  
CTCGGTACCCTAGATTTCCAGTTGCTTCGAATGTTATTT  
+HWI-EAS443:3:45:1636:1400#0/1  
aaabb`aa¥b`babaabaU^[^Zaa^a`]`\_aa`X`]¥a`  
@HWI-EAS443:3:45:1638:308#0/1  
TTGGGCCATGAACCTGTCTTGGGGAATATCTCAAACCTTT  
+HWI-EAS443:3:45:1638:308#0/1  
a`b\_^¥`abb\_aaaa]¥]aaaaba]\_aaa]a\_`a\_]W`a`  
@HWI-EAS443:3:45:1668:1180#0/1  
GTGTGCTCTTCAGGTCGGCTGCATATCCTGACCCCTGCTC  
+HWI-EAS443:3:45:1668:1180#0/1  
a¥bGa[V\_aY`\_^W]\_RZ]\_TTXYNVN[\_Y¥¥XSTVW¥¥  
@HWI-EAS443:3:45:167:323#0/1  
CAGCCGACCTGAAGAGCACACAGAATGCCATTGACGAGAT  
+HWI-EAS443:3:45:167:323#0/1  
a\_abb`^RU\_^`^\_\_^]`X¥b```\_Z\_Laa^\_SWaaa`\_[  
@HWI-EAS443:3:45:1680:722#0/1  
TCCCGTTATGCTTGTCTTCTAGAAGGTTAACAGAGTGTGT  
+HWI-EAS443:3:45:1680:722#0/1  
^\_ZX`]U^^^[S\_WWxaa]aa]QW\_¥VZa[Q¥Y][VaT]X  
@HWI-EAS443:3:45:1689:1403#0/1  
GGACATTTGGACTTACAATGCCGAAGTGTGGTTCTATTG  
+HWI-EAS443:3:45:1689:1403#0/1  
aa`\_aaaaba`\_``\_\_`aaa\_^`^\_]``]`\_`X`^^^`\_\_  
@HWI-EAS443:3:45:1693:1484#0/1  
AGCCAGTTAAAAACAATGCCAAGGAAATTGGAAACGGCT  
+HWI-EAS443:3:45:1693:1484#0/1  
a``]\_XF\_XY]TQ^P]Y[^S[XUYMQSV]TZXXHZUZWWY  
@HWI-EAS443:3:45:1710:685#0/1  
CATCTACCATCCCTGTCCACCCCTTCAATGAAACCGGC  
+HWI-EAS443:3:45:1710:685#0/1  
^WTRYP[VS]UbbYR^TaXaZOZ^V`XZ¥TWa]\_[JiWZK

@HWI-EAS443:3:45:1732:343#0/1  
CAAATCCTACATTAATGATAAAGGGAAAGAAGTCCTCGTG  
+HWI-EAS443:3:45:1732:343#0/1  
`bbab\_aab\_abbaaabaaaa\_aaaaabaaa\_a^a`a\_a  
@HWI-EAS443:3:45:1732:877#0/1  
AATTTACTTTGTTAGTAATCTCGTCAATGGCATTCTGTGT  
+HWI-EAS443:3:45:1732:877#0/1  
a`abaa`babaa`aa^a\_a\_a\_a]^a````¥^a\_^^\_X]Z  
@HWI-EAS443:3:45:187:195#0/1  
ATCCTGACCCCTGCTCATTGATGGTGATAACCGTACCA  
+HWI-EAS443:3:45:187:195#0/1  
aa`a`a```a]\_\_`a¥]aa`````\_a¥P^`\_a[ZX`V]XZa  
@HWI-EAS443:3:45:215:213#0/1  
AGCAAATCCTACATTAATGATAAAGGGAAAGAAGTCCTCG  
+HWI-EAS443:3:45:215:213#0/1  
a`abW`^baaa`aaa^b`a```\_¥a`\_`\_`\_¥U]]^U`UR  
@HWI-EAS443:3:45:276:401#0/1  
GGCATTCTGTGTGCTCTTCAGGTCGGCTGCATATCCTGAC  
+HWI-EAS443:3:45:276:401#0/1  
a^^^`WXW]U]0¥][`aa``¥Xaa^[Q¥PXZS]\_XY[\_\_\_  
@HWI-EAS443:3:45:278:1002#0/1  
CCGGCTTGAACCTTCTTGCTGTATCTTGATGTCCCACAAA  
+HWI-EAS443:3:45:278:1002#0/1  
aabbabbaab````aaa\_^Y]aa`aaa\_aaY`a`\_`\_`\_`aa  
@HWI-EAS443:3:45:286:1343#0/1  
ATAACAGAATTTACTTTGTTAGTAATCTCGTCAATGGCAT  
+HWI-EAS443:3:45:286:1343#0/1  
aaba\_¥Z\_bbabaaaa\_a\_b`R\_aU^\_aZbU[a[UXa0\_\_\_  
@HWI-EAS443:3:45:348:74#0/1  
ACAGAATTTACTTTGTTAGTAATCTCGTCAATGGCATTCT  
+HWI-EAS443:3:45:348:74#0/1  
`NTZ^]`[aaIaZ]¥aaT`\_]N^¥\_0^RZSUZ^\_T]\_^]Y  
@HWI-EAS443:3:45:388:905#0/1  
GTTTATAGCACCTTGGGTGTCTGACAAGTTGTATTGCAA  
+HWI-EAS443:3:45:388:905#0/1  
aTaa\_`[[^`\_W^`^`[WX\_X^UUX]W^XQRX]^Z^W  
@HWI-EAS443:3:45:418:1719#0/1  
TGAACCTTTACTACTGCTGTGAACCTGTGTATTTCATCTT  
+HWI-EAS443:3:45:418:1719#0/1  
]\_aa`babbb`aa`a`bb`aa\_a`\_\_aa`\_`aa`\_`aaGaa  
@HWI-EAS443:3:45:421:747#0/1  
CCCGGCTCTACTAGTGTCCAGTAATAGTTCATTCTCCCTT  
+HWI-EAS443:3:45:421:747#0/1  
aaaaabaaa`a`]Q]a\_aaa\_\_`\_WX[a\_`^`a`\_`\_`\_`a  
@HWI-EAS443:3:45:449:942#0/1  
GAAAGAAGTCCTCGTGCTATGGGGCATTACCATCCATCT  
+HWI-EAS443:3:45:449:942#0/1  
`^\_aa``[a]`¥\_K0`¥\_bR]¥^`]UaaSaUL^TWN\_[V[  
@HWI-EAS443:3:45:474:988#0/1  
CTGGTGTATCTGAAATGATAATACCAGATCCAGCATTCT

+HWI-EAS443:3:45:474:988#0/1  
a[a`[aY\_\_¥`[Y^]`aa`a\_a][Y^]a¥W[M[]\_a\_^]  
@HWI-EAS443:3:45:491:1970#0/1  
GGTGTATTATAGCACCCCTGGGTGTCTGACAAGTTGTATTG  
+HWI-EAS443:3:45:491:1970#0/1  
ab\_\_`a`bab`^a]X\_^]a\_\_V¥]VaaW`\_\_^`URX\_\_\_\_  
@HWI-EAS443:3:45:558:420#0/1  
GCTGGCTGGATCCTGGGAAATCCAGAGTGTGAATCACTCT  
+HWI-EAS443:3:45:558:420#0/1  
a`aba`aaUYT¥YT\_]`[\_`\_\_^Y\_[`S\_Z`\_Z[^U^¥\_  
@HWI-EAS443:3:45:598:1400#0/1  
TGCCGGTTTCATTGAAGGGGGTGGACAGGGATGGTAGAT  
+HWI-EAS443:3:45:598:1400#0/1  
aa]aaa`baa\_bb`U`ba\_`Xa\_]Ua`a\_\_`a[Xa¥\_\_  
@HWI-EAS443:3:45:608:1204#0/1  
ATCAGAATGCAGATGCATATGTTTTTGTGGGGACATCAAG  
+HWI-EAS443:3:45:608:1204#0/1  
aa\_aaaaaba`a`aaaaab\_aa`aa^aa\_\_`\_`\_]\_\_`  
@HWI-EAS443:3:45:613:62#0/1  
GAACGTGTTACCCAGGAGATTTTCATCGATTATGAGGAGCT  
+HWI-EAS443:3:45:613:62#0/1  
aaW]bVa`aV\_a]V\_XNb\_a¥P\_¥^M`]`aX`a^]aYaY\_  
@HWI-EAS443:3:45:667:444#0/1  
CTCGAACAAAGGTGTAACGGCAGCATGTCCTCATGCTGGA  
+HWI-EAS443:3:45:667:444#0/1  
abab`a^^¥babZa\_aaaaaa\_ZDIVOLS[NKYXLONXXF  
@HWI-EAS443:3:45:674:861#0/1  
ATTTGAAAGTTTGAGATATCCCCAAGACAAGTTCATGG  
+HWI-EAS443:3:45:674:861#0/1  
abb`aa¥¥ab`bbba]`aaaa\_aa`\_`a`aaa`\_\_`\_a^  
@HWI-EAS443:3:45:700:1562#0/1  
AATTCAACAGACACTGTAGACACAGTACTAGAAAAGAATG  
+HWI-EAS443:3:45:700:1562#0/1  
`aLaa^`aa[a`aS^^^X]X^ZTZPWXP\_\_`XU[]  
@HWI-EAS443:3:45:736:810#0/1  
GGAGGCTGGTGTATTATAGCACCCCTGGGTGTCTGACAAGT  
+HWI-EAS443:3:45:736:810#0/1  
aa^aaabbb^`aa`a`aa`R^\_\_aa\_\_[^X^\_[YW^^\_V  
@HWI-EAS443:3:45:740:1044#0/1  
TGTGGGGACATCAAGATACAGCAAGAAGTTCAAGCCGGAA  
+HWI-EAS443:3:45:740:1044#0/1  
abUTZaa]\_\_\_\_`Y¥¥``[a`\_`\_`^aU`^`^ZW`^]\_  
@HWI-EAS443:3:45:74:1220#0/1  
GAACTTATATGAAAAGGTAAGAAGCCAGTTAAAAACAAT  
+HWI-EAS443:3:45:74:1220#0/1  
`ab`babaa`^^bbaaa\_`Y`\_a[]Q]a[``¥a`a\_aaa`  
@HWI-EAS443:3:45:752:712#0/1  
GGGGACATCAAGATACAGCAAGAAGTTCAAGCCGGAAATA  
+HWI-EAS443:3:45:752:712#0/1  
abbaaaaaaab\_a`\_aa`\_aa\_aa]\_aa`a]^a\_]`a`a



@HWI-EAS443:3:45:754:1021#0/1  
CTTTGGGTATGAATTTCTTTTTTAACTAGCCATATTTAAA  
+HWI-EAS443:3:45:754:1021#0/1  
S^aab`a[^`\_bbba\_```bbbbbbabbbaabbbab`]]  
@HWI-EAS443:3:45:756:879#0/1  
GAAATGCTGGATCTGGTATTATCATTTCAGATACACCAGT  
+HWI-EAS443:3:45:756:879#0/1  
Q\_^\_YKY``¥¥\_b^`baaabb\_a`abbbb`\_bb¥b^bbaa  
@HWI-EAS443:3:45:767:47#0/1  
TAACCGTACCATCCATCTACCATCCCTGTCCACCCCTT  
+HWI-EAS443:3:45:767:47#0/1  
T^bba\_Q\_[[`b\_\_ba^^YP]Ya¥]W¥b[^`[^]XNNN¥[  
@HWI-EAS443:3:45:794:912#0/1  
ATTGCTGGCTGGATCCTGGGAAATCCAGAGTGTGAATCAC  
+HWI-EAS443:3:45:794:912#0/1  
aa]aaaaa\_aaa`Z^a^`\_¥¥\_\_``aaa^`Z\_Wa\_^¥W]^  
@HWI-EAS443:3:45:801:1748#0/1  
ATCATTTGAAAGGTTTGAGATATTCCCCAAGACAAGTTCA  
+HWI-EAS443:3:45:801:1748#0/1  
a`Wabbaa`ba¥[Yabaa]a^aba`¥^aaaaaaaa\_a`\_[a  
@HWI-EAS443:3:45:859:1214#0/1  
CTCTTAGTTTGCATAGTTTCCCGTTATGCTTGTCTTCTAG  
+HWI-EAS443:3:45:859:1214#0/1  
aaaaa]aaaaaaaaa^`aa`a^^`^`\_\_a`¥a\_a`````\_`  
@HWI-EAS443:3:45:863:874#0/1  
CTTCTTGCTGTATCTTGATGTCCCCACAAAAACATATGCA  
+HWI-EAS443:3:45:863:874#0/1  
aa`````a`^a\_a\_W``WRZ`ZP\_]`]^]X¥^^]^ ^^Z^X^  
@HWI-EAS443:3:45:867:1017#0/1  
CTCTTTACCTACTGCTGTGAAGTGTGATTTCATCTTTTCA  
+HWI-EAS443:3:45:867:1017#0/1  
aa`aaaa`a`a`a`\_aa¥a^]]`a[a\_]`\_\_`^`\_\_`\_`  
@HWI-EAS443:3:45:873:529#0/1  
GTGTGCTCTTCAGGTCGGCTGCATATCCTGACCCCTGCTC  
+HWI-EAS443:3:45:873:529#0/1  
a\_aab`a\_bbaaaaSaaa\_aa^\_abaV`\_^`\_\_`^`\_\_`YVZ  
@HWI-EAS443:3:45:899:1159#0/1  
AAATGAGCAGGGGTCAGGATATGCAGCCGACCTGAAGAGC  
+HWI-EAS443:3:45:899:1159#0/1  
T¥Xab\_`bWWZZa\_HUUb`aa]]]bYIRb\_IWb\_`aba`X  
@HWI-EAS443:3:45:945:1655#0/1  
GCTGGCTGGATCCTGGGAAATCCAGAGTGTGAATCACTCT  
+HWI-EAS443:3:45:945:1655#0/1  
`\_\_\_\_X\_\_\_\_RM¥^¥Xa`a¥WSQY¥[ZZZLYa^V\_`^]ZY  
@HWI-EAS443:3:45:948:734#0/1  
ATATGTTTTTGTGGGACATCAAGATACAGCAAGAAGTTC  
+HWI-EAS443:3:45:948:734#0/1  
ababaabbbbbbabbba\_\_a`aaa^^``\_a^]aaa\_^a\_a^  
@HWI-EAS443:3:46:1006:1412#0/1  
GGTTGAACTCTTACCTACTGCTGTGAAGTGTGATTTCAT

+HWI-EAS443:3:46:1006:1412#0/1  
`\_]^a`baaab`\_\_XZ`aaa`]\_[Za\_`[`]aYaaa]aa  
@HWI-EAS443:3:46:1102:272#0/1  
GCTCCTCATAATCGATGAAATCTCCTGGGTAACACGTTCC  
+HWI-EAS443:3:46:1102:272#0/1  
a`\_^]Z\_SY`^aaa]aaZa^[]^\_YaaaP^[[`Y`^Z^R  
@HWI-EAS443:3:46:1106:1156#0/1  
TATGAATTTCTTTTTTAACTAGCCATATTAATTTTTGT  
+HWI-EAS443:3:46:1106:1156#0/1  
\_`a`YW\_Y\_]\_a`a`a^^¥L^^]¥[^aa]YQ^`aa¥TZ  
@HWI-EAS443:3:46:1111:1522#0/1  
GGCTGGTGTATAGCACCCCTGGGTGTCTGACAAGTTGT  
+HWI-EAS443:3:46:1111:1522#0/1  
`baabaQa\_ba\_a`]`¥\_`^\_a`]\_T`Z`]`Z[¥^\_V`VZ  
@HWI-EAS443:3:46:121:1177#0/1  
AGCCAGTTAAAAACAATGCCAAGGAAATTGGAAACGGCT  
+HWI-EAS443:3:46:121:1177#0/1  
`Za\_`aa`a¥\_`W[¥`W]]`Z^[]`^WZ\_\_R]¥]WUW[Z\_  
@HWI-EAS443:3:46:1256:950#0/1  
ATCTCGTCAATGGCATTCTGTGTGCTCTTCAGGTCGGCTG  
+HWI-EAS443:3:46:1256:950#0/1  
]\_\_\_^S`^OZY^[]RTU`\_ZT[ZW\_\_¥ZZ\_ZVTPPa]^X^\_  
@HWI-EAS443:3:46:1272:116#0/1  
GAAAAGGTAAGAAGCCAGTTAAAAACAATGCCAAGGAAA  
+HWI-EAS443:3:46:1272:116#0/1  
a`¥UZ\_\_L]H]QP]^XQ¥X`]UV]¥MXWS¥\_XXXTZ]SPS  
@HWI-EAS443:3:46:1286:1188#0/1  
GCTGGCTGGATCCTGGGAAATCCAGAGTGTGAATCACTCT  
+HWI-EAS443:3:46:1286:1188#0/1  
aa`a^aa`^\_¥a`¥¥ZU^U`V[X[[V\_T¥UZWWW¥¥¥¥¥¥  
@HWI-EAS443:3:46:1293:874#0/1  
GGGACATCAAGATACAGCAAGAAGTTCAAGCCGAAATAG  
+HWI-EAS443:3:46:1293:874#0/1  
T\_`\_\_bbabbbbabbb`bbabbb[aabbb\_abb`abbbb  
@HWI-EAS443:3:46:1305:381#0/1  
GGACTTATGACTACCCAAAATACTCAGAGGAAGCAAAATT  
+HWI-EAS443:3:46:1305:381#0/1  
a¥`]aa`a\_\_`[RZ]\_\_^\_^\_Wa¥\_a^`a]]`U]]^^]Z  
@HWI-EAS443:3:46:1321:942#0/1  
ATTCTGTGTGCTCTTCAGGTCGGCTGCATATCCTGACCCC  
+HWI-EAS443:3:46:1321:942#0/1  
`ab`b`]ab\_^b``][a\_¥R`\_¥a`b[^Ua^Q\_`^YV^¥  
@HWI-EAS443:3:46:1359:1293#0/1  
CTGATTGCCCCAGGGAGACTACCAGTACCAATGAACTGG  
+HWI-EAS443:3:46:1359:1293#0/1  
`bb]baaaab\_^S[ab\_baaa\_a``]\_\_aa``aaa`]^aa  
@HWI-EAS443:3:46:1360:1879#0/1  
GGAAAGAAGTCCTCGTGCTATGGGGCATTACCATCCATC  
+HWI-EAS443:3:46:1360:1879#0/1  
\_]NVaaV]a\_[¥`a`]¥[RbaXWb``aQG¥¥aY`R]V\_aW

@HWI-EAS443:3:46:1381:1061#0/1  
GGGGCATTACCATCCATCTACTAGTGCTGACCAACAAAG  
+HWI-EAS443:3:46:1381:1061#0/1  
aa`\_aaaaa\_\_`a]a\_\_\_a\_a`aRa`\_`^[\_V\_\_\_\_]  
@HWI-EAS443:3:46:1384:960#0/1  
GGGACATCAAGATACAGCAAGAAGTTCAAGCCGAAATAG  
+HWI-EAS443:3:46:1384:960#0/1  
VXWZKa`V`W[^aT`¥¥`ba^[^T`¥UNZ`Z`aZRRX`^  
@HWI-EAS443:3:46:1408:1218#0/1  
ATGACACTGAGCTCAATTGCTCTCTTAGCTCCTCATAATC  
+HWI-EAS443:3:46:1408:1218#0/1  
aaaaaaaaaa`aa\_aaa`a`\_a^aa`\_\_`\_\_a\_\_`\_\_\_\_^  
@HWI-EAS443:3:46:1409:1100#0/1  
AGAGAATTTAAATAAAAAAGTTGATGATGGTTTCCTGGAC  
+HWI-EAS443:3:46:1409:1100#0/1  
ababWY^abaaa`a` `[a]ba^`b^a`a` ` \_]` ` `[^  
@HWI-EAS443:3:46:1441:106#0/1  
GTGGGGACATCAAGATACAGCAAGAAGTTCAAGCCGAAA  
+HWI-EAS443:3:46:1441:106#0/1  
a]aaaa`a`a`\_a\_\_\_^\_aZaaa\_Z`Y]¥\_\_\_VU^^Y^Y  
@HWI-EAS443:3:46:1467:984#0/1  
GAGCAATTGAGCTCAGTGTCATCATTGAAAGTTTGAGA  
+HWI-EAS443:3:46:1467:984#0/1  
aaaaaaaaabaa\_\_\_^`Xa`\_a`\_aa`\_`¥¥`\_Z`\_a^\_Z  
@HWI-EAS443:3:46:1486:859#0/1  
CAGAACTGATTGCCCCAGGGAGACTACCAGTACCAATG  
+HWI-EAS443:3:46:1486:859#0/1  
abbbbaabbbabba`aaabb`^a`a`a`a`bZaa\_a\_aa  
@HWI-EAS443:3:46:1537:1875#0/1  
TCTCTGTTTAAATTTTGCTTCCTCTGAGTATTTGGGTAGT  
+HWI-EAS443:3:46:1537:1875#0/1  
abbbba`abbabaa`a`b`\_\_b`a`aa^aa`a` ` `^a`^  
@HWI-EAS443:3:46:1558:423#0/1  
CTGGCTGGATCCTGGGAAATCCAGAGTGTGAATCACTCTC  
+HWI-EAS443:3:46:1558:423#0/1  
ab`bbab`\_bb`\_abb]\_^aaaab`\_Y\_\_a` ` `^`\_aXa`  
@HWI-EAS443:3:46:1572:472#0/1  
CAGGAGATTTTCATCGATTATGAGGAGCTAAGAGAGCAATT  
+HWI-EAS443:3:46:1572:472#0/1  
aabbbb^`bbaabab`baaababa`b\_aaa`\_a`a\_aaa\_  
@HWI-EAS443:3:46:1579:1562#0/1  
TTTTGCTTCCTCTGAGTATTTGGGTAGTCATAAGTCCCA  
+HWI-EAS443:3:46:1579:1562#0/1  
aa`R]¥`a\_\_a\_aa`\_Wa`[[[]^Z]aZ^U\_^[RR¥]]]  
@HWI-EAS443:3:46:1590:120#0/1  
GCTGGTGTATATAGCACCTTGGGTGTCTGACAAGTTGTA  
+HWI-EAS443:3:46:1590:120#0/1  
a\_a^aV`[[` `P]\_VV¥V^]\_`^0]WUZ]YWSQVWVWV  
@HWI-EAS443:3:46:1604:1584#0/1  
GCTGGCTGGATCCTGGGAAATCCAGAGTGTGAATCACTCT

+HWI-EAS443:3:46:1604:1584#0/1  
aaa`aa`a`a`ZZ^^`^aa[PW\_]RZN¥Z^VV¥YU[[¥  
@HWI-EAS443:3:46:1659:578#0/1  
CCGGCTTGAACCTTCTGCTGTATCTTGATGTCCCCACAAA  
+HWI-EAS443:3:46:1659:578#0/1  
YX^\_T]\_RXY^VYJ[^Z¥aWWY[SZ¥T^]WZOZIJUY\_  
@HWI-EAS443:3:46:1686:1258#0/1  
ACAGAATTTACTTTGTTAGTAATCTCGTCAATGGCATTCT  
+HWI-EAS443:3:46:1686:1258#0/1  
a`aa\_a\_baa^¥Yaa`abV\_^]\_Za^^^UU\_X`^¥]Z^  
@HWI-EAS443:3:46:1691:1629#0/1  
ATTTCTTTTTTAACTAGCCATATTAATTTTTGTAGAAG  
+HWI-EAS443:3:46:1691:1629#0/1  
V]^`a^Xaa^ab\_[\_\_`a\_Z^bbbbba\_abbbbb`\_```\_  
@HWI-EAS443:3:46:1754:146#0/1  
CCATGAACCTGTCTTGGGAATATCTCAAACCTTCAAAT  
+HWI-EAS443:3:46:1754:146#0/1  
\_\_a¥XYZU^`[WSY]^aaa]XXWS[]X[V¥WZYZ[YYQSS  
@HWI-EAS443:3:46:1778:341#0/1  
GGATGGTGAATGCCCCATAGCACGAGGACTTCTTCCCTT  
+HWI-EAS443:3:46:1778:341#0/1  
a`¥[^`¥R]ZVUSVRS]VXNOSTQ]WZSRW[ZWVYWQUVWV  
@HWI-EAS443:3:46:1780:1837#0/1  
GCTTCCTCTGAGTATTTTGGGTAGTCATAAGTCCCATTTT  
+HWI-EAS443:3:46:1780:1837#0/1  
Za¥\_¥b`abb]XT\_a``[aZG¥OYWbR`XQMaX^]a`[\_  
@HWI-EAS443:3:46:221:809#0/1  
AGCTCCTCATAATCGATGAAATCTCCTGGGTAACACGTTC  
+HWI-EAS443:3:46:221:809#0/1  
a`aa`aa`aY``\_aaaa`aa\_a\_\_a`a`Ua\_]`Xa\_a^  
@HWI-EAS443:3:46:223:1496#0/1  
TCAAGATACAGCAAGAAGTTCAAGCCGAAATAGCAATAA  
+HWI-EAS443:3:46:223:1496#0/1  
aUba]babaaaaaab^b^a`aM`^aaaa`Uaa[^`^\_ba  
@HWI-EAS443:3:46:237:675#0/1  
ACTTCTTGTGTATCTTGATGTCCCCACAAAAACATATGC  
+HWI-EAS443:3:46:237:675#0/1  
a\_baabbbbb`abaabaaaaaa`a`aaaaaaa\_\_a\_  
@HWI-EAS443:3:46:32:1329#0/1  
CAATGTAGGACCATGAGCTTGCTGTGGAGAGTGATTCACA  
+HWI-EAS443:3:46:32:1329#0/1  
Y\_bU\_\_aab``[[ORabbbb]bbbbaa^J^a\_Z¥a¥]XJ\_  
@HWI-EAS443:3:46:381:630#0/1  
AGTAGATGGATGGTGAATGCCCCATAGCACGAGGACTTCT  
+HWI-EAS443:3:46:381:630#0/1  
`babbabbbbbb`babbbbaaaaaaa]aaaaaa`aaaa  
@HWI-EAS443:3:46:395:1663#0/1  
GCTGGCTGGATCCTGGGAAATCCAGAGTGTGAATCACTCT  
+HWI-EAS443:3:46:395:1663#0/1  
^^aK[^`b\_^^`¥S]a^a[^ba`\_[Ra\_S`aQZa`a\_

@HWI-EAS443:3:46:406:1933#0/1  
GAGATTTTCATCGATTATGAGGAGCTAAGAGAGCAATTGAG  
+HWI-EAS443:3:46:406:1933#0/1  
\_a^\_aa\_Vbb\_^¥`Yaa`\_a]\_]\_\_a`S`W^¥^`a]ZW`\_  
@HWI-EAS443:3:46:436:1504#0/1  
TGGCCAGTCTCAATTTTGTGCTTTTTACATATTTTGGACA  
+HWI-EAS443:3:46:436:1504#0/1  
abbaaabZ^aa`\_a`aa\_]\_\_aba``]\_`a`abaa``X\_  
@HWI-EAS443:3:46:449:1986#0/1  
AGTCCTCGTGTATGGGGCATTACCATCCATCTACTAGT  
+HWI-EAS443:3:46:449:1986#0/1  
a]]`^^aa`Z[]aZY¥]]¥\_`[]a\_]a`^^`\_¥`aY\_\_WW  
@HWI-EAS443:3:46:463:248#0/1  
CTTCCTCTGAGTATTTTGGGTAGTCATAAGTCCCATTTTT  
+HWI-EAS443:3:46:463:248#0/1  
abbbabbb`bba¥bababba^abaaaabb\_[aaaabbaaa  
@HWI-EAS443:3:46:505:590#0/1  
GCTTCCTCTGAGTATTTTGGGTAGTCATAAGTCCCATTTT  
+HWI-EAS443:3:46:505:590#0/1  
aaaaa`a```^aY\_a`a`aaaU`aYTY\_^``UXZ\_^\_\_`]  
@HWI-EAS443:3:46:509:2039#0/1  
AGATGCATATGTTTTGTGGGGACATCAAGATACAGCAAG  
+HWI-EAS443:3:46:509:2039#0/1  
]Z]T]ab`aa`^^`a]Z\_\_\_`Z¥\_\_`^`a[`a^aa^a¥X  
@HWI-EAS443:3:46:553:730#0/1  
CATGAGGACATGCTGCCGTTACACCTTTGTTTCGAGTCATG  
+HWI-EAS443:3:46:553:730#0/1  
aabbabbaabbaaabaabaa^aUX]aaa^aa\_\_U^¥¥^\_^  
@HWI-EAS443:3:46:560:321#0/1  
ATCCCCAAGACAAGTTCATGGCCCAATCATGACTCGAAC  
+HWI-EAS443:3:46:560:321#0/1  
\_\_b¥Z\_\_bbbaab`bYb^^a`b\_\_a\_]\_`aVba[aaa^[S  
@HWI-EAS443:3:46:574:273#0/1  
GTTATTTTGTCTCCCGCTCTACTAGTGTCCAGTAATAGT  
+HWI-EAS443:3:46:574:273#0/1  
aa\_aba`a````aa`a\_\_¥\_\_¥Z^X]Y]QUUUUVVZ^[YSS  
@HWI-EAS443:3:46:632:1846#0/1  
ATCCTGACCCCTGCTCATTTTGTGATGGTGATAACCGTACCA  
+HWI-EAS443:3:46:632:1846#0/1  
a`\_\_[UZURa^M^VSVWQ[^[V¥¥¥SQYSW¥¥SVVWNWWW  
@HWI-EAS443:3:46:660:684#0/1  
GGCAGCATGTCTCATGCTGGAGCAAAAAGCTTCTACAAA  
+HWI-EAS443:3:46:660:684#0/1  
abbbbabbb`aaaa`abaaa^aaaaaaaab`aaaaabaa  
@HWI-EAS443:3:46:683:966#0/1  
GCCGGTTTCATTGAAGGGGGTGGACAGGGATGGTAGATG  
+HWI-EAS443:3:46:683:966#0/1  
aabb`Paa^YS^`X`]W]`WUa¥^`[]]\_\_^¥WR¥a^Y[  
@HWI-EAS443:3:46:684:1156#0/1  
TTGCTATTTCCGGCTTGAACCTTCTGCTGTATCTTGATGT

+HWI-EAS443:3:46:684:1156#0/1  
a`b\_aaaa\_^\_\_a`a\_X¥[a^YaZXU`^\_W`U`a¥¥¥¥W  
@HWI-EAS443:3:46:709:1138#0/1  
TGGGGACATCAAGATACAGCAAGAAGTTCAAGCCGGAAAT  
+HWI-EAS443:3:46:709:1138#0/1  
VRX\_aa`\_a`Z``V\_^a`Zaba]¥`]MY\_a`\_\_a`\_a\_¥  
@HWI-EAS443:3:46:70:512#0/1  
AGATTTCCAGTTGCTTCAATGTTATTTTGTCTCCCGGCT  
+HWI-EAS443:3:46:70:512#0/1  
aaaaab``¥^`a`aaa`b``aa`a]aaaa\_\_^`\_^]\_Y¥Z  
@HWI-EAS443:3:46:722:1749#0/1  
TTTTTGTGGGACATCAAGATACAGCAAGAAGTTCAAGCC  
+HWI-EAS443:3:46:722:1749#0/1  
X]]T^Xa]¥U`^`\_][TY¥``a`][N[^b`UNF¥GX`WL  
@HWI-EAS443:3:46:763:981#0/1  
GGCTGGTGTATAGCACCTTGGGTGTCTGACAAGTTGT  
+HWI-EAS443:3:46:763:981#0/1  
aaaabb[baabaa]`aa\_a^aaa`aW`Z^`]¥Y^\_a^`\_Z  
@HWI-EAS443:3:46:784:349#0/1  
GGGACATCAAGATACAGCAAGAAGTTCAAGCCGGAAATAG  
+HWI-EAS443:3:46:784:349#0/1  
]bbaa`^`^aaa`a]`a\_aaa]WaU\_\_a`\_\_Z`aZZ\_\_a  
@HWI-EAS443:3:46:786:124#0/1  
CCTCTGAGTATTTTGGGTAGTCATAAGTCCCATTTTGTGAC  
+HWI-EAS443:3:46:786:124#0/1  
^]b]ba`b]aWaababaQPakR[\_\_\_aY^Y¥\_\_a\_\_``XW  
@HWI-EAS443:3:46:849:1046#0/1  
CGGATGTATATTCTGAAATGGGAGGCTGGTGTATAGCA  
+HWI-EAS443:3:46:849:1046#0/1  
`a\_aab\_`baabaaaa\_abaaaWba\_b`\_^`Z`a`\_ZYY`  
@HWI-EAS443:3:46:879:41#0/1  
GTTTTTGTGGGACATCAAGATACAGCAAGAAGTTCAAGC  
+HWI-EAS443:3:46:879:41#0/1  
aSaaZWYF``\_XSMOWNNUa[T¥X^]L]\_]PV`XZX^UZN  
@HWI-EAS443:3:46:904:235#0/1  
GCTGGCTGGATCCTGGGAAATCCAGAGTGTGAATCACTCT  
+HWI-EAS443:3:46:904:235#0/1  
aXaX¥\_X`\_UY¥U[^a`¥^[VQ[¥\_W¥FZS`¥^U¥¥WSQW  
@HWI-EAS443:3:46:990:1093#0/1  
AACAAAGTAAATTCTGTTATTGAAAAGATGAATACACAGT  
+HWI-EAS443:3:46:990:1093#0/1  
\_`a`^`aa`bbb]]\_b```abbabaabaabaab`aaaa\_  
@HWI-EAS443:3:46:995:710#0/1  
ATCGATTATGAGGAGCTAAGAGAGCAATTGAGCTCAGTGT  
+HWI-EAS443:3:46:995:710#0/1  
abbbabbYab\_aaU^^aaa`^baa`aYaaaY``\_`\_a^Za]  
@HWI-EAS443:3:46:996:1378#0/1  
GGGGACATCAAGATACAGCAAGAAGTTCAAGCCGGAAATA  
+HWI-EAS443:3:46:996:1378#0/1  
^abbabbbbbb`baabb`bbba\_b\_aaabb]aba`aaaa

@HWI-EAS443:3:47:1007:1114#0/1  
CAGGTGGTTGAACCTTTACCTACTGCTGTGAACCTGTGTA  
+HWI-EAS443:3:47:1007:1114#0/1  
^`bbaabXaXabaababab`aaa`ab`bbWa\_a[b`a\_``  
@HWI-EAS443:3:47:1009:1870#0/1  
ATTCTGTGTGCTCTTCAGGTGCGCTGCATATCCTGACCCC  
+HWI-EAS443:3:47:1009:1870#0/1  
aab]a``ZS`aaZaaaa`aWZ\_`V\_\_YUU\_ZT¥[¥VTU¥Q  
@HWI-EAS443:3:47:1069:1943#0/1  
ATTTGAAAGTTTTGAGATATTCCTCAAGACAAGTTCATGG  
+HWI-EAS443:3:47:1069:1943#0/1  
aabbbba]`[Iba]\_Zaaa¥`^Y]Qa]L]^`WaZ`R`]\_Y  
@HWI-EAS443:3:47:1084:570#0/1  
GACCCCTGCTCATTTTTGATGGTGATAACCGTACCATCCAT  
+HWI-EAS443:3:47:1084:570#0/1  
\_b`Z\_ababbaababa`a\_baZa`aaUPa^^`R\_`[X`^  
@HWI-EAS443:3:47:1085:1836#0/1  
AGGTGCGCTGCATATCCTGACCCCTGCTCATTTTTGATGGT  
+HWI-EAS443:3:47:1085:1836#0/1  
¥\_^T][^\_`]^Z^`WEU¥T¥^Z¥T]VV]G]¥UXKU\_Q\_^G  
@HWI-EAS443:3:47:108:241#0/1  
CTGCTCATTTTTGATGGTGATAACCGTACCATCCATCTACC  
+HWI-EAS443:3:47:108:241#0/1  
aa`]abaabaa`a\_\_\_Zaa`\_¥ZY\_YUSZ^Y\_^`[U\_^¥\_  
@HWI-EAS443:3:47:1101:292#0/1  
CTTCTTGCTGTATCTTGATGTCCCCACAAAACATATGCA  
+HWI-EAS443:3:47:1101:292#0/1  
ababbbbabbb`ababbbbaaa\_aa`a`aaaaaa```a]`  
@HWI-EAS443:3:47:1134:1146#0/1  
GATGGTTTCCTGGACATTTGGACTTACAATGCCGAACTGT  
+HWI-EAS443:3:47:1134:1146#0/1  
`]abb\_aaa^a`a``aaaaa``\_aaa^`aa`]\_^Z\_]^^Z  
@HWI-EAS443:3:47:1166:1422#0/1  
CACAAATGCGATAACACGTGCATGGAAAGTGTCAAAAATG  
+HWI-EAS443:3:47:1166:1422#0/1  
]a¥^Wa``a`¥X\_bba^`Z^X\_^[S^a`¥]\_\_aa\_X\_ZZa  
@HWI-EAS443:3:47:1177:1116#0/1  
CGTCAATGGCATTCTGTGTGCTCTTCAGGTGCGCTGCATA  
+HWI-EAS443:3:47:1177:1116#0/1  
`bab\_[\_bbbbbaabab¥bababaabba``baaab^aab  
@HWI-EAS443:3:47:1212:131#0/1  
AGCATGAGGACATGCTGCCGTTACACCTTTGTTGAGTCA  
+HWI-EAS443:3:47:1212:131#0/1  
abaaaaa`a\_\_aa[]\_`¥[``^`¥GXUZ]\_\_YW\_T^W`UPU  
@HWI-EAS443:3:47:1215:862#0/1  
GTTACCCAGGAGATTTTCATCGATTATGAGGAGCTAAGAGA  
+HWI-EAS443:3:47:1215:862#0/1  
aa`Z`a\_aaa\_\_\_\_a`\_\_`¥a]`\_^\_\_Z`\_]^X¥\_^`]^Z  
@HWI-EAS443:3:47:1247:1403#0/1  
GAAAGAACTTTGGACTACCACGATTCAAATGTGAAGAACT

+HWI-EAS443:3:47:1247:1403#0/1  
aaaaa`a\_aaaaa`a`aa]a^a^`\_`\_^^a\_Pa^`\_]¥Y`  
@HWI-EAS443:3:47:1272:1337#0/1  
GGGGACATCAAGATACAGCAAGAAGTTCAAGCCGGAAATA  
+HWI-EAS443:3:47:1272:1337#0/1  
a]^Y¥aaaaaa\_a[`¥]]Z\_`a\_¥]T^^`X^R[¥\_]¥¥^]  
@HWI-EAS443:3:47:1302:232#0/1  
TGCGAACAAATTCAACAGACACTGTAGACACAGTACTAGAA  
+HWI-EAS443:3:47:1302:232#0/1  
abaabaaaabba` ``a`a¥`¥aa]\_a^^^U]` [TSRPSMU  
@HWI-EAS443:3:47:1311:149#0/1  
AGCTCAATTGCTCTCTTAGCTCCTCATAATCGATGAAATC  
+HWI-EAS443:3:47:1311:149#0/1  
aba`XZ]baa`^¥[`a¥XW]^]¥Y[[\_^][S[ZU¥YRXWS  
@HWI-EAS443:3:47:1312:865#0/1  
TCAAGATACAGCAAGAAGTTCAAGCCGGAAATAGCAATAA  
+HWI-EAS443:3:47:1312:865#0/1  
ababbababbbabbbbaab^`aaaaa`^a\_aaa`a\_a¥aa`  
@HWI-EAS443:3:47:1315:198#0/1  
GCTAGTTAAAAAAGGAAATTCATACCCAAAGCTCAGCAAA  
+HWI-EAS443:3:47:1315:198#0/1  
a`aaa]b`aa` `a\_a^`\_`a]a\_\_]\_X^X\_T\_U[^]^\_]  
@HWI-EAS443:3:47:1330:1872#0/1  
GGAAAATGTCCAAAATATGTAAAAAGCACAAAATTGAGAC  
+HWI-EAS443:3:47:1330:1872#0/1  
aa]XX`TaWQN\_\_U¥` [ `a]`XT[[]\_\_^\_ZQ\_^U^a^Y^  
@HWI-EAS443:3:47:1349:1614#0/1  
GATCCTGGGAAATCCAGAGTGTGAATCACTCTCCACAGCA  
+HWI-EAS443:3:47:1349:1614#0/1  
\_b\_]b`¥Y\_\_bbaaa`^^b`\_Zb^` `a^b`aaa\_a\_]Z\_  
@HWI-EAS443:3:47:1391:1202#0/1  
ATTTACTTTGTTAGTAATCTCGTCAATGGCATTCTGTGTG  
+HWI-EAS443:3:47:1391:1202#0/1  
abaaa`aaaa`\_a^\_a\_a\_`\_aZ¥\_\_^^¥^^a^^a]]\_Z^  
@HWI-EAS443:3:47:1396:266#0/1  
AGAAACTGATTGCCCCAGGGAGACTACCAGTACCAATGA  
+HWI-EAS443:3:47:1396:266#0/1  
abbaaabababaaa` \_\_\_aaaa\_aaZ`\_¥\_\_\_V`¥W\_\_\_\_\_  
@HWI-EAS443:3:47:1406:1791#0/1  
GAGCAATTGAGCTCAGTGTCATCATTGAAAGTTTGAGA  
+HWI-EAS443:3:47:1406:1791#0/1  
aaa^aa` `aa` [\_¥aaY`^\_\_\_\_]^\_^^]ZZQ[[]WYV]^\_]  
@HWI-EAS443:3:47:142:1249#0/1  
GATTCACACTCTGGATTTCCCAGGATCCAGCCAGCAATGT  
+HWI-EAS443:3:47:142:1249#0/1  
a[Ta]b\_VSGU]a]] [a^V]YWa`]QLT[\_YNYWL]QO^G  
@HWI-EAS443:3:47:1468:291#0/1  
TGGCATTCTGTGTGCTCTTCAGGTCGGCTGCATATCCTGA  
+HWI-EAS443:3:47:1468:291#0/1  
abbbbbbbbababbbbaabab`a¥aa]\_a`V` `a`^` `\_\_



@HWI-EAS443:3:47:1540:153#0/1  
GGGTGGACAGGGATGGTAGATGGATGGTACGGTTATCACC  
+HWI-EAS443:3:47:1540:153#0/1  
^^\_N]aT^V]U[LSXWIP¥WT^^UU^OKTQUUSWTPNRMJ  
@HWI-EAS443:3:47:1586:1152#0/1  
GCCATGAACCTTGCTTGGGGAATATCTCAAACCTTTCAAA  
+HWI-EAS443:3:47:1586:1152#0/1  
aba`a`a`aab^a`¥aa¥[\_`^`a^]`\_]\_a``^\_^^  
@HWI-EAS443:3:47:1634:1963#0/1  
TAGTAATCTCGTCAATGGCATTCTGTGTGCTCTTCAGGTC  
+HWI-EAS443:3:47:1634:1963#0/1  
aa^Xaba\_b\_b\_Y\_`a]V[``X`a¥a]`]XD¥\_Y¥Z¥S¥  
@HWI-EAS443:3:47:1680:1086#0/1  
GAAGGGGGGTGGACAGGGATGGTAGATGGATGGTACGGTT  
+HWI-EAS443:3:47:1680:1086#0/1  
a^`a`a`a`[aa^[``^`aZ\_a\_V\_`\_\_\_\_[Z^]R¥U^[W[  
@HWI-EAS443:3:47:1705:1837#0/1  
GAAAGAAGTCCTCGTGCTATGGGGCATTACCATCCATCT  
+HWI-EAS443:3:47:1705:1837#0/1  
`\_\_`aab`^aXZ\_[M¥]^[\_ULY`Z¥\_VY`¥¥SWVU]  
@HWI-EAS443:3:47:1737:626#0/1  
TGACCAACAAAGTCTCTATCAGAATGCAGATGCATATGTT  
+HWI-EAS443:3:47:1737:626#0/1  
aaa\_ab\_aabab^aaaa\_a\_a`a`aa`aa`a`\_a\_\_a`^\_  
@HWI-EAS443:3:47:1741:1842#0/1  
CAGGGATGGTAGATGGATGGTACGGTTATCACCATCAAAA  
+HWI-EAS443:3:47:1741:1842#0/1  
aa\_aZ]a^b]aa\_Z^]]\_X\_T\_ZXLOLYNTY[RVQTX[¥U  
@HWI-EAS443:3:47:1742:997#0/1  
CAGCACTAGTAGATGGATGGTGAATGCCCCATAGCACGAG  
+HWI-EAS443:3:47:1742:997#0/1  
abaabab`baabaabb`aba^bbaab¥\_]V`\_aa[\_[\_`  
@HWI-EAS443:3:47:1780:177#0/1  
CAGAACTGATTGCCCCAGGGAGACTACCAGTACCAATG  
+HWI-EAS443:3:47:1780:177#0/1  
]bbbababbbbaa\_\_\_\_baa`a\_Z`^¥]\_a¥]¥¥`\_\_\_\_  
@HWI-EAS443:3:47:201:697#0/1  
AGCTTTTTGCTCCAGCATGAGGACATGCTGCCGTTACACC  
+HWI-EAS443:3:47:201:697#0/1  
a\_aaba`^Ma`\_`aZ^aa`a\_ZTa\_Y¥`\_WY¥[\_¥W¥UW  
@HWI-EAS443:3:47:233:1303#0/1  
CACAGTTCACAGCAGTAGGTAAAGAGTTCAACCACCTGGA  
+HWI-EAS443:3:47:233:1303#0/1  
abaabbbabbbbaababba]aabbab`aaa`\_aa^aba`  
@HWI-EAS443:3:47:239:1054#0/1  
CGTTATGCTTGTCTTCTAGAAGGTTAACAGAGTGTGTTAC  
+HWI-EAS443:3:47:239:1054#0/1  
aaba`bbbabaaabb`bbbb`baabbab\_ababababaa  
@HWI-EAS443:3:47:253:222#0/1  
GGGACATCAAGATACAGCAAGAAGTTCAAGCCGAAATAG

+HWI-EAS443:3:47:253:222#0/1  
a`a`baaabbaa\_abba\_bba\_a]`aaaaXaa]\_\_a^T  
@HWI-EAS443:3:47:258:104#0/1  
GTCTTATTGCTATTTCCGGCTTGAACCTTGCTGTATCT  
+HWI-EAS443:3:47:258:104#0/1  
a`a^baSaaYaaaab^`b\_a`YXVP[^Q`^J^aY]\_[U`  
@HWI-EAS443:3:47:26:1561#0/1  
AGGGAGACTACCAGTACCAATGAACTGGCGACAGTTGAAT  
+HWI-EAS443:3:47:26:1561#0/1  
`[aa`\_aaba^[``^[\_```\_¥a`^^^\_0`YG[]SUMP`V  
@HWI-EAS443:3:47:295:856#0/1  
AGAAGTTCAAGCCGAAATAGCAATAAGACCCAAAGTGAG  
+HWI-EAS443:3:47:295:856#0/1  
a\_]`]^\_a``¥]\_]TU]^]\_Z^^^YY]YTYT]XV  
@HWI-EAS443:3:47:298:839#0/1  
CTTGTTGATTCCAGCTTTACCCCATCTATTTCTTCTCTGT  
+HWI-EAS443:3:47:298:839#0/1  
ab^`^b]\_ba\_aa`aba\_¥]^a\_a\_aV`aa`aa¥a`a^  
@HWI-EAS443:3:47:348:755#0/1  
AAAAAAGTTGATGATGGTTTCCTGGACATTTGGACTTACA  
+HWI-EAS443:3:47:348:755#0/1  
aaaa`b]abaab\_a`a\_a`\_¥a`a`\_\_a`aaa`Z`\_]`  
@HWI-EAS443:3:47:354:711#0/1  
AATCGATGAAATCTCCTGGGTAACACGTTCCATTGTCTGA  
+HWI-EAS443:3:47:354:711#0/1  
aa\_aaaaaaaaa`^\_\_^`a``Wa`]`]a]]`W[\_]\_Z]\_`^X  
@HWI-EAS443:3:47:357:1095#0/1  
GACAGGGATGGTAGATGGATGGTACGGTTATCACCATCAA  
+HWI-EAS443:3:47:357:1095#0/1  
aaaa`aa`aaaU[\_\_[aa¥`\_[V`U``T\_\_^T\_UUWURU¥  
@HWI-EAS443:3:47:402:968#0/1  
GAGGAGCTAAGAGAGCAATTGAGCTCAGTGTCATCATTG  
+HWI-EAS443:3:47:402:968#0/1  
a`^`UbaaaaaVa[`aaaa[^\_¥\_a`a[YaTTa`¥\_a^\_a  
@HWI-EAS443:3:47:438:265#0/1  
GAATTTACTTTGTTAGTAATCTCGTCAATGGCATTCTGTG  
+HWI-EAS443:3:47:438:265#0/1  
aaabbba^babb\_aaa^aaa]a`a^]\_\_^\_]`a\_¥\_¥]  
@HWI-EAS443:3:47:480:1146#0/1  
CTGGTGTATATAGCACCCCTTGGGTGTCTGACAAGTTGTAT  
+HWI-EAS443:3:47:480:1146#0/1  
aaba`bbab\_bbaaaaa]bbaba¥b\_¥aaa``]aaaa\_aa  
@HWI-EAS443:3:47:495:1793#0/1  
TGGCTTCTTACCTTTTCATATAAGTTCTTCACATTTGAAT  
+HWI-EAS443:3:47:495:1793#0/1  
a][Z]¥Q¥a`Y^SaYZV[]UX¥YOFZ]`ZGUVZZ[Z\_X^Y  
@HWI-EAS443:3:47:588:1718#0/1  
GCCGTTACACCTTTGTTGAGTCATGATTGGGCCATGAAC  
+HWI-EAS443:3:47:588:1718#0/1  
^`abbab\_aabbbbabbabaa^Z\_bbaZb```]\_a[]aZL

@HWI-EAS443:3:47:617:667#0/1  
GAAGCCAGTTAAAAACAATGCCAAGGAAATTGGAAACGG  
+HWI-EAS443:3:47:617:667#0/1  
aa^baa\_bab`aa¥M^`aa`]`aa¥`aaaa`Y^aa`\_U  
@HWI-EAS443:3:47:618:945#0/1  
GCCTCCCATTTCAGAATATACATCCGATCACAATTGGAAA  
+HWI-EAS443:3:47:618:945#0/1  
``bab\_`bbbaa`aabaaa`a`[aa[W\_\_aa\_a\_\_[a`  
@HWI-EAS443:3:47:644:1174#0/1  
GGGGACATCAAGATACAGCAAGAAGTTCAAGCCGGAAATA  
+HWI-EAS443:3:47:644:1174#0/1  
Za`bbabaZa[¥TSSa\_`ab]N\_aYaabIabbW]`\_^  
@HWI-EAS443:3:47:672:315#0/1  
TGCCGGTTTCATTGAAGGGGGTGGACAGGGATGGTAGAT  
+HWI-EAS443:3:47:672:315#0/1  
ab`X`b\_baa`bab[`bbbabaUaa\_`a\_`¥\_aaQ``\_]  
@HWI-EAS443:3:47:676:813#0/1  
CTTCCTCTGAGTATTTTGGGTAGTCATAAGTCCCATTTTT  
+HWI-EAS443:3:47:676:813#0/1  
abb`bb]bbbaabba^`b``\_aaaa`¥GZ`a`aaaa  
@HWI-EAS443:3:47:690:1178#0/1  
ATCCTGACCCCTGCTCATTTTGGTGGATAACCGTACCA  
+HWI-EAS443:3:47:690:1178#0/1  
a`a`W]^`baaaaa¥a^`a\_`\_[`aW```]R¥SVU`RZ^  
@HWI-EAS443:3:47:70:1538#0/1  
CACTGAGCTCAATTGCTCTCTTAGCTCCTCATAATCGATG  
+HWI-EAS443:3:47:70:1538#0/1  
]aba`Z¥Xbbaa`Y``a`^a^a]N]`[aa¥a^a]`W]]Z`  
@HWI-EAS443:3:47:754:707#0/1  
AATGATGACTGAGCTCAATTGCTCTCTTAGCTCCTCAT  
+HWI-EAS443:3:47:754:707#0/1  
X`bbbbb^aa^`^b¥a`^a^a]a]a\_]VO[`[Ua¥QY  
@HWI-EAS443:3:47:781:315#0/1  
GGGAAATCCAGAGTGTGAATCACTCTCCACAGCAAGCTCA  
+HWI-EAS443:3:47:781:315#0/1  
ab`\_abbabaaab¥a\_abYa^a`\_[aUQ`¥a\_]`\_¥Z]W¥  
@HWI-EAS443:3:47:808:1576#0/1  
AAAACATATGCATCTGCATTCTGATAGAGACTTTGTTGGT  
+HWI-EAS443:3:47:808:1576#0/1  
``^X¥]W¥a`^]`bb`^`\_X\_aXa[ZV]QR[XZ[J¥V\_J  
@HWI-EAS443:3:47:80:1868#0/1  
CTTCTAGAAGACAAGCATAACGGGAACTATGCAAATAA  
+HWI-EAS443:3:47:80:1868#0/1  
`ababb\_b[aabaa^abbabababaababb````\_aa`aaa  
@HWI-EAS443:3:47:81:1767#0/1  
CTTGCTGTATCTTGATGTCCCCACAAAAACATATGCATCT  
+HWI-EAS443:3:47:81:1767#0/1  
`a^a`\_a[a\_Z]aZ\_^a\_¥aZUZ```[QTZLZL]V\_ZL]  
@HWI-EAS443:3:47:901:1976#0/1  
GGGACATCAAGATACAGCAAGAAGTTCAAGCCGGAAATAG

+HWI-EAS443:3:47:901:1976#0/1  
[a¥a[abZbbab\_a`\_baab]aab^aa]aba`ba^aaaa`  
@HWI-EAS443:3:47:910:711#0/1  
CTCTGAGTATTTTGGGTAGTCATAAGTCCCATTTTGGACA  
+HWI-EAS443:3:47:910:711#0/1  
aabbbbbbbbbbbba`aa`babaaa`aaX\_bbbbbbbbaa  
@HWI-EAS443:3:47:935:957#0/1  
GCTGGCTGGATCCTGGGAAATCCAGAGTGTGAATCACTCT  
+HWI-EAS443:3:47:935:957#0/1  
a`aaaaaa`Y^^\_¥\_`][`^^¥¥\_^¥SU^¥^¥\_¥U¥WWU^  
@HWI-EAS443:3:47:96:1288#0/1  
GACAAGTTGTATTGCAATCGTGGACTGGTGTATCTGAAAT  
+HWI-EAS443:3:47:96:1288#0/1  
¥abbbbabbbbbb\_abbaabbbabbaabbbbabbbbbb  
@HWI-EAS443:3:47:96:375#0/1  
GGGGACATCAAGATACAGCAAGAAGTTCAAGCCGGAAATA  
+HWI-EAS443:3:47:96:375#0/1  
ab]aabbaaaaa`aaba`bbba`a`aaba`^aaa\_\_`aa  
@HWI-EAS443:3:48:1042:824#0/1  
AGGAAATTGGAACGGCTGCTTTGAATTTTACCACAAATG  
+HWI-EAS443:3:48:1042:824#0/1  
a\_ba]bbba`aabbbbaa]MX\_\_PTWZaa\_GHSZFU]]PR  
@HWI-EAS443:3:48:1061:662#0/1  
GGGGACATCAAGATACAGCAAGAAGTTCAAGCCGGAAATA  
+HWI-EAS443:3:48:1061:662#0/1  
abab¥\_aa\_a]\_RaaSaa]aaa¥`bW\_^^\_aR]a`Z^^[^  
@HWI-EAS443:3:48:1074:1978#0/1  
ATTTCTTCTCTGTTTAATTTTGCTTCTCTGAGTATTTTG  
+HWI-EAS443:3:48:1074:1978#0/1  
abba]a`SYab`]`\_`babbaa^bb```]abb`b\_bbaaa^  
@HWI-EAS443:3:48:1077:572#0/1  
TGTGGGGACATCAAGATACAGCAAGAAGTTCAAGCCGGAA  
+HWI-EAS443:3:48:1077:572#0/1  
abaaaba\_\_aaa`aaaa\_aaZaaa`\_a]`Za\_a]Xa\_]`^  
@HWI-EAS443:3:48:1081:1817#0/1  
TGCCGGTTTCATTGAAGGGGGTGGACAGGGATGGTAGAT  
+HWI-EAS443:3:48:1081:1817#0/1  
ab^\_aa^a`aabaa\_abaa^a\_U```aa``^¥\_]TNW`]¥  
@HWI-EAS443:3:48:10:761#0/1  
GCCGGTTTCATTGAAGGGGGTGGACAGGGATGGTAGATG  
+HWI-EAS443:3:48:10:761#0/1  
aaaba\_aa\_\_baa``aa\_¥]\_Va`\_^\_aaa¥`\_XW^¥^V\_  
@HWI-EAS443:3:48:1305:1513#0/1  
CCAGTCCACGATTGCAATACAACCTTGTGACACCCCAAGG  
+HWI-EAS443:3:48:1305:1513#0/1  
aa`\_`a`ba`b`ab`bbbabbaaaa``aa`\_ba`Za`\_\_  
@HWI-EAS443:3:48:1310:1083#0/1  
GGACATCAAGATACAGCAAGAAGTTCAAGCCGGAAATAGC  
+HWI-EAS443:3:48:1310:1083#0/1  
aaaZ[ `[T]^R[ `aa\_a`a]^`UZ[a\_`^]][^]ZVW[Q

@HWI-EAS443:3:48:1318:1486#0/1  
TCGAATGTTATTTGTCTCCCGGCTCTACTAGTGCCAGT  
+HWI-EAS443:3:48:1318:1486#0/1  
a`\_\_ab`a]aaaaa`a`[^\_¥\_\_[[W\_Z[U¥R¥UW^Y  
@HWI-EAS443:3:48:1354:27#0/1  
TTTTGCTTCTGAGTATTTGGGTAGTCATAAGTCCCA  
+HWI-EAS443:3:48:1354:27#0/1  
¥¥¥¥^Wa[SU^a^]Zb¥Z`Z¥aaa\_R\_aLSYX]^¥RPYO[  
@HWI-EAS443:3:48:1359:1335#0/1  
GGGACATCAAGATACAGCAAGAAGTTCAAGCCGAAATAG  
+HWI-EAS443:3:48:1359:1335#0/1  
^¥`Z]a\_R^`\_\_YQZ\_T]ZU`RX`aX][aVN\_^RUV\_^\_  
@HWI-EAS443:3:48:1371:318#0/1  
GGCATTACCATCCATCTACTAGTGCTGACCAACAAAGTC  
+HWI-EAS443:3:48:1371:318#0/1  
aaaaa`a`aa\_¥a`\_`a]`\_a^a]\_a^\_\_\_\_X]\_Z\_Z]  
@HWI-EAS443:3:48:1433:203#0/1  
GCTTTTACATATTTGGACATTTCCAATTGTGATCGGA  
+HWI-EAS443:3:48:1433:203#0/1  
`KVQSaWPJXXXVV^\_[VWYNXMY]^VGT[^YR^RXUZ[Z  
@HWI-EAS443:3:48:144:827#0/1  
TGAACCTGTCTGGGAATATCTCAAACCTTCAAATGAT  
+HWI-EAS443:3:48:144:827#0/1  
]UY^`bba]a`aaa`]]^`]]`][a\_^\_Y\_a\_VT\_`aa[[  
@HWI-EAS443:3:48:1452:467#0/1  
CAGTTGCTTCGAATGTTATTTGTCTCCCGGCTCTACTAG  
+HWI-EAS443:3:48:1452:467#0/1  
aba]bbbba\_b]abb\_a`bbabb`aaaa`a]]`\_`Z^\_X[  
@HWI-EAS443:3:48:1567:1041#0/1  
AAAACAATGCCAAGGAAATTGGAAACGGCTGCTTTGAATT  
+HWI-EAS443:3:48:1567:1041#0/1  
abb]\_ba`\_`\_`aaba`aa`aba`aa`aa`aZFV]\_VYV¥Z  
@HWI-EAS443:3:48:1588:1687#0/1  
ACCATCCATCTACTAGTGCTGACCAACAAAGTCTCTATCA  
+HWI-EAS443:3:48:1588:1687#0/1  
a\_\_a\_]aa\_]\_a]a``¥a`\_Z`^X\_]`¥^^]X\_S\_\_\_\_^\_  
@HWI-EAS443:3:48:1616:894#0/1  
TATGCATCTGCATTCTGATAGAGACTTTGTTGGTCAGCAC  
+HWI-EAS443:3:48:1616:894#0/1  
W[[babba`V`aaWX`a]X\_]```a`aaa\_U\_VSQYQUO  
@HWI-EAS443:3:48:161:1218#0/1  
GATCCAGCCAGCAATGTTACATTTACCCAAATGCAATGGG  
+HWI-EAS443:3:48:161:1218#0/1  
aa^ZT¥`[]a]aaaab¥a^T]`a[a\_^`aaa]a^\_¥`\_Y  
@HWI-EAS443:3:48:1627:975#0/1  
GGGACATCAAGATACAGCAAGAAGTTCAAGCCGAAATAG  
+HWI-EAS443:3:48:1627:975#0/1  
a\_\_a¥¥¥`\_aa\_\_\_\_]`a`\_aaRV`YTR\_ZXUR^\_WURVZV  
@HWI-EAS443:3:48:1655:462#0/1  
TGTTTTTGTGGGACATCAAGATACAGCAAGAAGTTCAAG

+HWI-EAS443:3:48:1655:462#0/1  
aa[a`T`b]aaaa^`[¥QZ`\_\_\_\_\_`¥]`\_\_]aZXQ¥^]  
@HWI-EAS443:3:48:1670:1782#0/1  
GGAACGTGTTACCCAGGAGATTTTCATCGATTATGAGGAGC  
+HWI-EAS443:3:48:1670:1782#0/1  
`\_]\_[FORa^\_^Z^]aXZ\_¥R^ZWU]`X^Z^^¥^^Z^]WZZ  
@HWI-EAS443:3:48:1691:497#0/1  
CTTTGTTGGTCAGCACTAGTAGATGGATGGTGAATGCCCC  
+HWI-EAS443:3:48:1691:497#0/1  
`\_ba\_a\_a[a[Q¥\_bab]a`[^^^bbX\_\_aabZRY\_Z]¥T  
@HWI-EAS443:3:48:1737:445#0/1  
CTGGATCCTGGGAAATCCAGAGTGTGAATCACTCTCCACA  
+HWI-EAS443:3:48:1737:445#0/1  
abbaabaaabbbbaabbaabb^a\_aYba``^a^a\_a[\_aZ\_  
@HWI-EAS443:3:48:231:1271#0/1  
AAAATTCAAAGCAGCCGTTTCCAATTTCTTGGCATTGTT  
+HWI-EAS443:3:48:231:1271#0/1  
ab`aa`^`aaa`aaa`]^^QRS]\_] [S^ZZR¥P\_\_^VV  
@HWI-EAS443:3:48:236:880#0/1  
ATAAAGGGAAAGAAGTCCTCGTGCTATGGGGCATTACCA  
+HWI-EAS443:3:48:236:880#0/1  
aabbaba\_abbbbabaaba`aaa`a`a`]ba¥`bb\_\_a[a  
@HWI-EAS443:3:48:251:88#0/1  
GTTTATAGCACCTTGGGTGTCTGACAAGTTGTATTGCAA  
+HWI-EAS443:3:48:251:88#0/1  
a¥aa\_aa`a`a[WWaaa\_]`WY^\_T^WY]]^[Y^^^VPWZ  
@HWI-EAS443:3:48:252:1805#0/1  
GTTGGTTCTATTGGAAAATGAAAGAACTTTGGACTACCAC  
+HWI-EAS443:3:48:252:1805#0/1  
a¥ZU[VTX¥QZNSMUXJJ[ZNU¥`V^ZXRO¥\_]¥]\_YY¥T  
@HWI-EAS443:3:48:372:700#0/1  
GCTGGCTGGATCCTGGGAAATCCAGAGTGTGAATCACTCT  
+HWI-EAS443:3:48:372:700#0/1  
a^`aVPT`a¥U`\_MVR¥TX[SPYG]^TK¥H^QRRUVKQWR  
@HWI-EAS443:3:48:375:34#0/1  
GGAAATTGGAAACGGCTGCTTTGAATTTTACCACAAATGC  
+HWI-EAS443:3:48:375:34#0/1  
`\_]\_[VX^aaVSYY]]X¥\_RQ]XOLTP\_\_^BBBBBBBBBBBB  
@HWI-EAS443:3:48:389:908#0/1  
AAAACAATGCCAAGGAAATTGGAAACGGCTGCTTTGAATT  
+HWI-EAS443:3:48:389:908#0/1  
aaabaa\_aaaab`bbaaaaa`aa\_`^a\_\_a`LX^]GFU\_\_  
@HWI-EAS443:3:48:38:989#0/1  
GGCTGGATCCTGGGAAATCCAGAGTGTGAATCACTCTCCA  
+HWI-EAS443:3:48:38:989#0/1  
a\_`a^`aa`\_aS[^`^a\_aV`\_`WRLZP^\_ZU^\_WZUa¥VQ  
@HWI-EAS443:3:48:406:704#0/1  
GTCCTCGTGCTATGGGGCATTACCATCCATCTACTAGTG  
+HWI-EAS443:3:48:406:704#0/1  
a][\_`^`a\_a]a\_\_a\_\_\_a^a[R^QV\_^^S\_\_\_]\_X\_]\_U¥

@HWI-EAS443:3:48:408:235#0/1  
ATGAAATCTCCTGGGTAACACGTTCCATTGTCTGAACTAG  
+HWI-EAS443:3:48:408:235#0/1  
\_aa\_¥S¥aYXY^b`^ZYZ\_b\_]T`WZ[]a^[^]R^Q^T]  
@HWI-EAS443:3:48:426:314#0/1  
TCACCATCCATCTACTAGTGCTGACCAACAAAGTCTCTAT  
+HWI-EAS443:3:48:426:314#0/1  
a`a]W`baaabaaa\_a`a^Z]a\_`\_`Z`\_`]]\_¥a\_¥  
@HWI-EAS443:3:48:431:1089#0/1  
AAGCCAGTTAAAAACAATGCCAAGGAAATTGGAAACGGC  
+HWI-EAS443:3:48:431:1089#0/1  
\_`^RVY]baaVVS`aaaaba[\_`bab\_a`¥aa\_\_Y]aaW  
@HWI-EAS443:3:48:448:1076#0/1  
GGGGACATCAAGATACAGCAAGAAGTTCAAGCCGAAATA  
+HWI-EAS443:3:48:448:1076#0/1  
`T`[TX¥ZWZa[LW^YXa`]]NTTTVQ[\_¥LV\_`][[\_]  
@HWI-EAS443:3:48:467:1921#0/1  
AGCCAGTTAAAAACAATGCCAAGGAAATTGGAAACGGCT  
+HWI-EAS443:3:48:467:1921#0/1  
aY`V`[S`aaa`]]`\_^^[FOQaTFT\_SY^]SBBBBBBB  
@HWI-EAS443:3:48:565:1611#0/1  
TGGGAGGCTGGTGTATAGCACCTTGGGTGTCTGACAA  
+HWI-EAS443:3:48:565:1611#0/1  
`ZZZa]]babZ]abaa`]X\_]\_aa\_¥\_T\_\_^ZNZ\_Y^  
@HWI-EAS443:3:48:579:592#0/1  
GTTTTTGTGGGACATCAAGATACAGCAAGAAGTTCAAGC  
+HWI-EAS443:3:48:579:592#0/1  
a]aaaaYa\_a`]S`\_`\_`a`^]`^`a\_`\_^PYY\_^[X  
@HWI-EAS443:3:48:591:526#0/1  
GTCCAAAATATGTA AAAAGCACAAAATTGAGACTGGCCAC  
+HWI-EAS443:3:48:591:526#0/1  
a\_`\_^X`a\_a`aXaa`a^b`YZ\_¥\_\_aa\_\_T^\_\_^\_]0  
@HWI-EAS443:3:48:592:171#0/1  
ACACCTTTGTTGAGTCATGATTGGGCCATGAACTTGTCT  
+HWI-EAS443:3:48:592:171#0/1  
a`aa\_babb`aaaa``abb\_aaa`\_\_¥``a\_^^`^a]]`  
@HWI-EAS443:3:48:658:1908#0/1  
CGATTGCAATACAACCTTGTGACACCCCAAGGGTGCTATA  
+HWI-EAS443:3:48:658:1908#0/1  
abbbabbabb`bbaaaa^ab`aba\_abaa``R`^aaaa  
@HWI-EAS443:3:48:716:1485#0/1  
ATAATCGATGAAATCTCCTGGGTAACACGTTCCATTGTCT  
+HWI-EAS443:3:48:716:1485#0/1  
aba`a``ba\_`baabaabaaaa\_aaba]aaa^aaa\_^^a  
@HWI-EAS443:3:48:716:466#0/1  
ATTGGAAACGGCTGCTTTGAATTTTACCACAAATGCGATA  
+HWI-EAS443:3:48:716:466#0/1  
ab`a^`ababbab^HP\_aY`]aa`PTY^Y`a\_ZY[\_\_\_^  
@HWI-EAS443:3:48:717:532#0/1  
GTCCTCGTGCTATGGGGCATTACCATCCATCTACTAGTG

+HWI-EAS443:3:48:717:532#0/1  
a\_X\_a\_UZSWa^[¥YX`¥]BBBBBBBBBBBBBBBBBBB  
@HWI-EAS443:3:48:738:614#0/1  
ACACTCTGTTAACCTTCTAGAAGACAAGCATAACGGGAAA  
+HWI-EAS443:3:48:738:614#0/1  
aaaababaa`^`aa`aaaa¥aaW]aaa[``aa]a\_b]\_a  
@HWI-EAS443:3:48:760:346#0/1  
CAGGAGATTTTCATCGATTATGAGGAGCTAAGAGAGCAATT  
+HWI-EAS443:3:48:760:346#0/1  
abbbabbbbbbabbbabbbbabbaabaaaaaaa`aa`  
@HWI-EAS443:3:48:768:1954#0/1  
GAATTTACTTTGTTAGTAATCTCGTCAATGGCATTCTGTG  
+HWI-EAS443:3:48:768:1954#0/1  
aa¥a\_aaaaaa` `[a¥abaU\_UaZ\_a^^\_US``^R`]]S  
@HWI-EAS443:3:48:794:530#0/1  
ATCGATGAAATCTCCTGGGTAACACGTTCCATTGTCTGAA  
+HWI-EAS443:3:48:794:530#0/1  
\_SZaa`Y\_VLF^a\_^abYTX\_X¥^^T]WQWXNZNJ[WMM  
@HWI-EAS443:3:48:821:1452#0/1  
CCTCTGAGTATTTGGGTAGTCATAAGTCCCATTTTGGAC  
+HWI-EAS443:3:48:821:1452#0/1  
`Xaaba^b]aX`aa`\_]abZ^]`a\_a]]`\_`aaaa]a^  
@HWI-EAS443:3:48:849:1127#0/1  
GCTGGTGTTTATAGCACCTTGGGTGTCTGACAAGTTGTA  
+HWI-EAS443:3:48:849:1127#0/1  
a```\_[a\_`a``\_`^[\_]WZ^[Y\_UV^^]V]]`YX^V^  
@HWI-EAS443:3:48:84:665#0/1  
CGTCAATGGCATTCTGTGTGCTTTCAGGTCGGCTGCATA  
+HWI-EAS443:3:48:84:665#0/1  
WY]`aabbbbZa[OWaTbaaabT`bX`baSa```b\_\_¥ab  
@HWI-EAS443:3:48:858:1458#0/1  
CATCTTTTCAATAACAGAATTTACTTTGTTAGTAATCTCG  
+HWI-EAS443:3:48:858:1458#0/1  
`aaa`bbb[`¥^^`ab`abaa``aa`aaa\_[a``^a\_\_  
@HWI-EAS443:3:48:88:148#0/1  
GAAATTGGAAACGGCTGCTTTGAATTTTACCACAAATGCG  
+HWI-EAS443:3:48:88:148#0/1  
`^`\_aaaa]aa^][`¥VV¥ZOLSQ¥^^NMSMERYBBBBB  
@HWI-EAS443:3:48:904:268#0/1  
AATTGGAAACGGCTGCTTTGAATTTTACCACAAATGCGAT  
+HWI-EAS443:3:48:904:268#0/1  
ababa`aaa```aaaQ]`a\_[[]aaaHIMRN`a\_VXW^\_W  
@HWI-EAS443:3:48:950:1109#0/1  
CTCCTCATAATCGATGAAATCTCCTGGGTAACACGTTCCA  
+HWI-EAS443:3:48:950:1109#0/1  
a`b\_X`bY[^\_Zb^aX\_\_```baabab\_J][a`aa`a\_¥  
@HWI-EAS443:3:48:952:1019#0/1  
AACGTGTTACCCAGGAGATTTTCATCGATTATGAGGAGCTA  
+HWI-EAS443:3:48:952:1019#0/1  
aaabYaaaaaaaa^]\_b^aa`\_^a\_b^aa\_ba\_aa\_`^`\_`



@HWI-EAS443:3:48:963:1031#0/1  
AGTCCTCGTGCTATGGGGCATTACCATCCATCTACTAGT  
+HWI-EAS443:3:48:963:1031#0/1  
`b`aaaaa\_a`^a\_b`\_a`aa\_a\_a`\_a\_\_\_¥\_a`H`U  
@HWI-EAS443:3:48:981:1321#0/1  
AGCACATCCAGAACTGATTGCCCCAGGGAGACTACCAG  
+HWI-EAS443:3:48:981:1321#0/1  
a`aa\_aaa]a`aaaaaa`\_]^^^`\_`a`Z^^^`WY^\_  
@HWI-EAS443:3:49:1007:1648#0/1  
TGGGGACATCAAGATACAGCAAGAAGTTCAAGCCGAAAT  
+HWI-EAS443:3:49:1007:1648#0/1  
abaaaaUa`Y[]a`]a`bba\_a`\_aaG[``\_aW^a]^]\_`  
@HWI-EAS443:3:49:1018:1495#0/1  
TCCTCGTGCTATGGGGCATTACCATCCATCTACTAGTGC  
+HWI-EAS443:3:49:1018:1495#0/1  
`aab[a`X^a\_aaab]`aa\_\_ZZ¥^]`^`RaaYa\_a\_aS  
@HWI-EAS443:3:49:1043:1529#0/1  
TTGTGGGGACATCAAGATACAGCAAGAAGTTCAAGCCGGA  
+HWI-EAS443:3:49:1043:1529#0/1  
aba`abbaaaaaaabaab`aaaaabaaa[``ba`]a`a`a  
@HWI-EAS443:3:49:1092:421#0/1  
GTTTAATTTTGCTTCTCTGAGTATTTTGGGTAGTCATAA  
+HWI-EAS443:3:49:1092:421#0/1  
^\_X¥^Z\_b`Y\_W`¥T]LZ`\_`T[``WX`W\_U]a¥¥T`\_Y  
@HWI-EAS443:3:49:1156:378#0/1  
GACAAGTTGTATTGCAATCGTGGACTGGTGTATCTGAAAT  
+HWI-EAS443:3:49:1156:378#0/1  
a`\_aab`bb`abaa\_baa`a`aa\_aaa`^b\_aa^aa\_\_]a  
@HWI-EAS443:3:49:1163:230#0/1  
GGGGACATCAAGATACAGCAAGAAGTTCAAGCCGAAATA  
+HWI-EAS443:3:49:1163:230#0/1  
`\_X\_\_RU^\_TZ[Vaaaababb`\_`[R¥\_T\_b\_[aaNW\_] [  
@HWI-EAS443:3:49:1250:1907#0/1  
GGGTCTTATTGCTATTTCCGGCTTGAACCTTGCTGTAT  
+HWI-EAS443:3:49:1250:1907#0/1  
aa^LZaaa^`a`a`a`\_`\_]¥W¥\_Z`^]\_`^YUU\_\_  
@HWI-EAS443:3:49:1352:272#0/1  
TTGCTCTCTTAGCTCCTCATAATCGATGAAATCTCCTGGG  
+HWI-EAS443:3:49:1352:272#0/1  
abaaa]a`baaa\_a\_\_a\_aa`\_a]a`\_`\_`a^`]]]\_[¥  
@HWI-EAS443:3:49:1367:1496#0/1  
CTCAATTGCTCTTAGCTCCTCATAATCGATGAAATCTC  
+HWI-EAS443:3:49:1367:1496#0/1  
`aabbbbbbbbabbbbbbbbaaaaabaab¥aaaaaaaa\_ba  
@HWI-EAS443:3:49:1371:1081#0/1  
GGCTGGTGTATAGCACCTTGGGTGTCTGACAAGTTGT  
+HWI-EAS443:3:49:1371:1081#0/1  
abaaa[TYJ`b`RR[XXaWZ^OVXb\_aWYZ]V[VVWaaU¥  
@HWI-EAS443:3:49:1372:407#0/1  
ACATTAATGATAAAGGGAAAGAAGTCCTCGTGCTATGGGG

+HWI-EAS443:3:49:1372:407#0/1  
[Uba`^Y`aVZa`¥^`baba\_Y^Z]Z¥\_¥`baWa`a`^PS  
@HWI-EAS443:3:49:1373:1694#0/1  
ACTTCTTGCTGTATCTTGATGTCCCCACAAAACATATGC  
+HWI-EAS443:3:49:1373:1694#0/1  
a\_aaabbaaab`aaaaa`aa\_a\_a\_`^\_``aa^`\_`\_`]  
@HWI-EAS443:3:49:1380:437#0/1  
GTTATTTTGTCTCCCGGCTCTACTAGTGCCAGTAATAGT  
+HWI-EAS443:3:49:1380:437#0/1  
¥`aabbbba^ba¥a\_Vb[`]Y[N[UWNL]SQLOMU¥QU\_Z  
@HWI-EAS443:3:49:1407:1186#0/1  
GTTGGTTCTATTGGAAAATGAAAGAACTTTGGACTACCAC  
+HWI-EAS443:3:49:1407:1186#0/1  
aaab^¥aaaaa]X¥`a\_a^^\_\_[\_]\_`a^^]\_\_\_\_  
@HWI-EAS443:3:49:1464:860#0/1  
CAAAATATGTAAAAAGCACAAAATTGAGACTGGCCACAGG  
+HWI-EAS443:3:49:1464:860#0/1  
S¥¥`W[Wa^^¥a\_UUXU[b\_YI\_``¥XP`N^ZaV]\_OV^^  
@HWI-EAS443:3:49:1466:2012#0/1  
GGGACATCAAGATACAGCAAGAAGTTCAAGCCGGAAATAG  
+HWI-EAS443:3:49:1466:2012#0/1  
`a]Y\_U\_\_]`Vaa^ZL][YTa`\_UGSWa\_0\_[TaX]^S\_^  
@HWI-EAS443:3:49:1469:1963#0/1  
GGGGGTGGACAGGGATGGTAGATGGATGGTACGGTTATCA  
+HWI-EAS443:3:49:1469:1963#0/1  
ababa`\_\_`abba`bbbb\_aba`aUZ```a[a^a[G`aWDX  
@HWI-EAS443:3:49:1511:1360#0/1  
GGCCATGAACCTGTCTTGGGAATATCTCAAACCTTCAA  
+HWI-EAS443:3:49:1511:1360#0/1  
aWO¥¥^]O[ZTOTNJa\_`U]WLPWYNFTF¥LWFPT`XY`]  
@HWI-EAS443:3:49:1599:729#0/1  
GTCCCCACAAAACATATGCATCTGCATTCTGATAGAGAC  
+HWI-EAS443:3:49:1599:729#0/1  
aaa`a`bbba\_aaabaaa`aa^aa`aaa^aa\_`a``a\_Z  
@HWI-EAS443:3:49:1613:1078#0/1  
GGGGCATTACCATCCATCTACTAGTGCTGACCAACAAAG  
+HWI-EAS443:3:49:1613:1078#0/1  
\_]bbabbbabaabbbZbbbababbbabaab`aaba\_bbab  
@HWI-EAS443:3:49:1618:1798#0/1  
AGCCAGTTAAAAACAATGCCAAGGAAATTGGAAACGGCT  
+HWI-EAS443:3:49:1618:1798#0/1  
aaXaabY]¥^[`a[a`^aa]\_`^`WX¥X]^\_`^PXU`^PV  
@HWI-EAS443:3:49:1700:450#0/1  
GAAGTCCTCGTGTATGGGGCATTACCATCCATCTACTA  
+HWI-EAS443:3:49:1700:450#0/1  
abab]Y¥R¥b\_b`a]abaaaX`b\_U\_a\_\_`Vaaa\_`^LZ^  
@HWI-EAS443:3:49:170:1127#0/1  
GGAACGTGTTACCCAGGAGATTTTCATCGATTATGAGGAGC  
+HWI-EAS443:3:49:170:1127#0/1  
\_bbb`b\_b`bb`babbbaaabbaabaaaabaaa\_a\_a\_a^

@HWI-EAS443:3:49:174:1747#0/1  
AAAGAAGTCCTCGTGCTATGGGGCATTACCATCCATCTA  
+HWI-EAS443:3:49:174:1747#0/1  
ab``a\_[^aa`\_a`aaaa^]\_``X`\_¥a``]``\_`a  
@HWI-EAS443:3:49:1771:2009#0/1  
GGCCAGTCTCAATTTTGTGCTTTTACATATTTTGGACAT  
+HWI-EAS443:3:49:1771:2009#0/1  
aaaa^Xa\_WGX`\_]V[V`]]aa¥a[\_\_\_\_aaaaaZ^]\_[  
@HWI-EAS443:3:49:19:918#0/1  
ATTCATCTTTTCAATAACAGAATTTACTTTGTTAGTAATC  
+HWI-EAS443:3:49:19:918#0/1  
abaabbabbbb`bbabaabaabaaaaaaaaaaaa`a\_aa  
@HWI-EAS443:3:49:203:1574#0/1  
GGAACGTGTTACCCAGGAGATTTTCATCGATTATGAGGAGC  
+HWI-EAS443:3:49:203:1574#0/1  
abaa^¥^[\_P¥TPa]]PT`PR[aMS[R`ZaaX`\_^Y^U^P  
@HWI-EAS443:3:49:289:1819#0/1  
TGAACCTCTTGCTGTATCTTGATGTCCCAAAAAACATA  
+HWI-EAS443:3:49:289:1819#0/1  
[``a``^bbba\_]W]`a`^`\_W]`\_¥T`^`\_aa^aa`^Y\_  
@HWI-EAS443:3:49:351:50#0/1  
AATCGATGAAATCTCCTGGGTAACACGTTCCATTGTCTGA  
+HWI-EAS443:3:49:351:50#0/1  
`a]Xb`aa]^^\_[^\_S`\_`aaV\_\_W\_UTR`\_`[\_¥\_]\_Z0¥\_Z  
@HWI-EAS443:3:49:373:842#0/1  
CGGCTGCTTTGAATTTTACCACAAATGCGATAACACGTGC  
+HWI-EAS443:3:49:373:842#0/1  
]b`¥ZbbbaUF^`a`b^W^W[^]aZYaXHU\_`]aTYT\_]`  
@HWI-EAS443:3:49:376:1871#0/1  
TACGGTTATCACCATCAAATGAGCAGGGGTCAGGATATG  
+HWI-EAS443:3:49:376:1871#0/1  
abaa`Oa^`]Z¥Z`P]a``]¥`\_Paaa^]NQ¥a\_\_`^`¥V  
@HWI-EAS443:3:49:421:1158#0/1  
CTGGCTGGATCCTGGGAAATCCAGAGTGTGAATCACTCTC  
+HWI-EAS443:3:49:421:1158#0/1  
abbbbab`^a`aUbbUa^babba`b`b`aa`\_`abab\_b[  
@HWI-EAS443:3:49:429:1233#0/1  
ATCTCGTCAATGGCATTCTGTGTGCTCTTCAGGTCGGCTG  
+HWI-EAS443:3:49:429:1233#0/1  
[``a\_a]^\_¥`\_`ZW`\_]`\_¥SX\_UMZX¥ZZOZV]X\_U]^  
@HWI-EAS443:3:49:518:1908#0/1  
CATGATTGGCCATGAACCTGTCTTGGGGAATATCTCAA  
+HWI-EAS443:3:49:518:1908#0/1  
abbbbaabba`baaaaab`aab]\_aaaaa````a`\_````aa\_  
@HWI-EAS443:3:49:580:625#0/1  
GCTGGCTGGATCCTGGGAAATCCAGAGTGTGAATCACTCT  
+HWI-EAS443:3:49:580:625#0/1  
a`Yb`^a¥a\_NWJTL^K``X^XU^^PVJYU¥¥`ZP\_SUU[  
@HWI-EAS443:3:49:583:781#0/1  
ATCTCGTCAATGGCATTCTGTGTGCTCTTCAGGTCGGCTG

+HWI-EAS443:3:49:583:781#0/1  
abab`b\_\_ba`aa`abb`ab\_aa^`b]aa¥a¥a¥X]WN]`  
@HWI-EAS443:3:49:589:1094#0/1  
CAATGTAGGACCATGAGCTTGCTGTGGAGAGTGATTCACA  
+HWI-EAS443:3:49:589:1094#0/1  
abbbbbbbbaabababbabaa\_a^`a``aaa[baaa`aYb  
@HWI-EAS443:3:49:590:287#0/1  
ATTGAGCTCAGTGCATCATTTGAAAGTTTGAGATATTC  
+HWI-EAS443:3:49:590:287#0/1  
^\_a\_^\_]b]\_a^a\_aa`a`aab\_\_`a¥P[`a\_`^`^`^`X  
@HWI-EAS443:3:49:634:950#0/1  
CATTCTGTGTCTTTCAGGTCGGCTGCATATCCTGACCC  
+HWI-EAS443:3:49:634:950#0/1  
`bbbbba\_`baaababbaaa\_]`abaaa\_a`aa¥^a\_aXUa  
@HWI-EAS443:3:49:66:89#0/1  
GAACGTGTTACCCAGGAGATTTTCATCGATTATGAGGAGCT  
+HWI-EAS443:3:49:66:89#0/1  
abbab```bbbabbbabbbbaaaa`a^baabb`baaa[a  
@HWI-EAS443:3:49:671:1270#0/1  
GAAGTCCTCGTCTATGGGGCATTACCATCCATCTACTA  
+HWI-EAS443:3:49:671:1270#0/1  
a`a^P[a`aa\_a^`aaa`\_a\_\_ba\_a`\_`\_^P^`^\_a\_a`  
@HWI-EAS443:3:49:69:1226#0/1  
AGTTCATGGCCCAATCATGACTCGAACAAAGGTGTAACGG  
+HWI-EAS443:3:49:69:1226#0/1  
``QW¥RORTW\_]`XWZWaZ`Z`U]V\_WZ\_Z¥W^X¥^]`XX  
@HWI-EAS443:3:49:714:1315#0/1  
GGGACATCAAGATACAGCAAGAAGTTCAAGCCGAAATAG  
+HWI-EAS443:3:49:714:1315#0/1  
a`URG\_^\_a`Z[\_aabY``[a^PNN]Y\_\_aGU\_\_\_^^a]X  
@HWI-EAS443:3:49:735:853#0/1  
ACAAGTTGTATTGCAATCGTGGACTGGTGTATCTGAAATG  
+HWI-EAS443:3:49:735:853#0/1  
aabbbabbabbbbaaabab\_bbaaba`\_a\_ba^aa```aa  
@HWI-EAS443:3:49:739:1133#0/1  
ATGGTTTCTGGACATTTGGACTTACAATGCCGAAGTGT  
+HWI-EAS443:3:49:739:1133#0/1  
abbbabababbaa^aaaaa`^baa`\_aab]\_a`aYaa]`  
@HWI-EAS443:3:49:782:426#0/1  
GCTTCCTCTGAGTATTTGGGTAGTCATAAGTCCCATTTT  
+HWI-EAS443:3:49:782:426#0/1  
YaZab\_b^`bb`Sabbabb^Pabaaab`^a^aa\_a\_baa  
@HWI-EAS443:3:49:799:406#0/1  
GAGTATTTTGGGTAGTCATAAGTCCCATTTTGGACTTT  
+HWI-EAS443:3:49:799:406#0/1  
`bb\_abaaa\_ab]`b\_aaaa\_a^\_^`\_aaaaa\_\_a^a`a  
@HWI-EAS443:3:49:806:1539#0/1  
CACGTGTATCGCATTTGTGGTAAAATTCAAAGCAGCCGT  
+HWI-EAS443:3:49:806:1539#0/1  
ab^b```aaabaaYabbbb`a\_baaab`[a`aaSa¥¥\_a`

@HWI-EAS443:3:49:829:270#0/1  
GCTGGCTGGATCCTGGGAAATCCAGAGTGTGAATCACTCT  
+HWI-EAS443:3:49:829:270#0/1  
aabbbaaaabaaa^Saaa`ba`0`aa\_a¥]^`^]a^Q[Y^Y]  
@HWI-EAS443:3:49:845:398#0/1  
CTGATTGCCCCAGGGAGACTACCAATGAAGTGG  
+HWI-EAS443:3:49:845:398#0/1  
ababbbbbbabbbbbbbaabbaba\_aab`^`a\_aaaaa`N^ab  
@HWI-EAS443:3:49:862:840#0/1  
ATGAACTATTACTGGACACTAGTAGAGCCGGGAGACAAAA  
+HWI-EAS443:3:49:862:840#0/1  
a`¥SYa\_b\_\_\_\_\_]]`^`b^`\_`]^`^`\_Z`^W\_]`^\_  
@HWI-EAS443:3:49:869:502#0/1  
GGGGACATCAAGATACAGCAAGAAGTTCAAGCCGAAATA  
+HWI-EAS443:3:49:869:502#0/1  
ZW]¥`\_\_`X^`bb]baZbbbaaba`bb`b¥Z¥baabab  
@HWI-EAS443:3:49:910:966#0/1  
CAAGATACAGCAAGAAGTTCAAGCCGAAATAGCAATAAG  
+HWI-EAS443:3:49:910:966#0/1  
Vb^a`¥XXXSaK\_ZY¥\_LZa\_0^¥aa\_`a¥`VXT`bb^U[  
@HWI-EAS443:3:49:963:147#0/1  
GTGGTTGAACTCTTTACCTACTGCTGTGAAGTGTGTATTC  
+HWI-EAS443:3:49:963:147#0/1  
a^^^¥^aT^V`[`a]aYaYV\_a^`a\_\_T[X`aX`]^`]X  
@HWI-EAS443:3:49:972:244#0/1  
CGTCAATGGCATTCTGTGTGCTCTTCAGGTCGGCTGCATA  
+HWI-EAS443:3:49:972:244#0/1  
]b¥¥W\_`a¥Sa\_`Yaa^bZ\_I\_Ubbab`]^`a^`a\_N^a[  
@HWI-EAS443:3:49:972:855#0/1  
ACCAGTACCAATGAAGTGGCGACAGTTGAATAGATCGCCA  
+HWI-EAS443:3:49:972:855#0/1  
a\_aaba¥V]a`a\_\_^aaY`a]YXWa¥ZQW]\_`^`\_TWVVZ  
@HWI-EAS443:3:49:990:1460#0/1  
AATCGATGAAATCTCCTGGGTAACACGTTCCATTGTCTGA  
+HWI-EAS443:3:49:990:1460#0/1  
a¥^`\_a]^a`a\_`¥\_H`\_a`a^a`]a`\_\_\_\_\_]Y^`X[¥V^`\_  
@HWI-EAS443:3:4:100:376#0/1  
GCTGCTTTGAATTTTACCACAAATGCGATAACACGTGCAT  
+HWI-EAS443:3:4:100:376#0/1  
`¥¥a`]^]\_Z[a¥[WY[`]\_¥¥ZX]Y¥^TV\_Z\_^YUW¥BB  
@HWI-EAS443:3:4:1025:1105#0/1  
AACGTGTTACCCAGGAGATTTTCATCGATTATGAGGAGCTA  
+HWI-EAS443:3:4:1025:1105#0/1  
aaaa[baa]^aa^b[[aaa\_a^^a\_a¥a^^`a^\_\_Za^\_¥  
@HWI-EAS443:3:4:103:1262#0/1  
CAGAATTTACTTTGTTAGTAATCTCGTCAATGGCATTCTG  
+HWI-EAS443:3:4:103:1262#0/1  
abbbabbbbaabbbaaba`b`aaa`b\_aa\_`^`aaa`aaaa  
@HWI-EAS443:3:4:1056:856#0/1  
CCCAGGAGATTTTCATCGATTATGAGGAGCTAAGAGAGCAA

+HWI-EAS443:3:4:1056:856#0/1  
\_aX`b^¥`aba\_]\_`]a\_aa\_aa]aZ\_]N\_a]`a]XaU^a  
@HWI-EAS443:3:4:1080:206#0/1  
GCACCCTTGGGTGTCTGACAAGTTGTATTGCAATCGTGGA  
+HWI-EAS443:3:4:1080:206#0/1  
a`a]\_\_aa\_`^W\_¥U\_\_^¥¥V¥¥^^¥¥^^¥V[W\_Y^W^WY  
@HWI-EAS443:3:4:1194:341#0/1  
CAATGGCATTCTGTGTGCTCTTCAGGTCGGCTGCATATCC  
+HWI-EAS443:3:4:1194:341#0/1  
aaaa`][^R^^\_¥QYZa]Va\_Z``a¥Qa]TTZOV`¥^BB  
@HWI-EAS443:3:4:1198:1815#0/1  
CAATGTAGGACCATGAGCTTGCTGTGGAGAGTGATTCACA  
+HWI-EAS443:3:4:1198:1815#0/1  
Z\_b`ba]a`]Xab` `b` `[ZUab`ba`a[bWbab\_\_\_H^  
@HWI-EAS443:3:4:1224:1640#0/1  
GGTAGATGGATGGTACGGTTATCACCATCAAATGAGCAG  
+HWI-EAS443:3:4:1224:1640#0/1  
aaYbb\_P¥ba[ba`aa`]a\_a\_[aa`aaa`aaa\_\_`a\_\_\_\_  
@HWI-EAS443:3:4:1226:1449#0/1  
CATCTACCATCCCTGTCCACCCCTTCAATGAAACCGGC  
+HWI-EAS443:3:4:1226:1449#0/1  
abb`a`aa]b][aa]Ybb]¥`abXaa\_aaa]aaa`]^aW  
@HWI-EAS443:3:4:1357:323#0/1  
AATGGAACGTGTTACCCAGGAGATTTTCATCGATTATGAGG  
+HWI-EAS443:3:4:1357:323#0/1  
`\_\_¥a]a[Z[^`^[]ZXR^a` `a^^` `^Z^Za^^a\_`a^`]  
@HWI-EAS443:3:4:1377:1052#0/1  
CTCGGTACCACTAGATTTCCAGTTGCTTCAATGTTATTT  
+HWI-EAS443:3:4:1377:1052#0/1  
`baaa`b\_a]aa`\_aaaa`^\_a\_ab`a\_\_a]\_aaY^]`a\_  
@HWI-EAS443:3:4:1386:1686#0/1  
GAATTTACTTTGTTAGTAATCTCGTCAATGGCATTCTGTG  
+HWI-EAS443:3:4:1386:1686#0/1  
]GYXX`\_RU[a\_\_\_\_Y` `W^[VSW`^^^ [BBBBBBBBB  
@HWI-EAS443:3:4:1441:1221#0/1  
TGTCGCCAGTTCATTGGTACTGGTAGTCTCCCTGGGGGCA  
+HWI-EAS443:3:4:1441:1221#0/1  
abaaaa`b[`` ` `aa\_^R`aa^\_\_JUSX^]S]` [ `YFQ  
@HWI-EAS443:3:4:1459:1708#0/1  
ATTTACTTTGTTAGTAATCTCGTCAATGGCATTCTGTGTG  
+HWI-EAS443:3:4:1459:1708#0/1  
aba\_b\_b`baaabb\_baaaa\_bZa\_a\_a\_Waa¥a\_\_Va]a  
@HWI-EAS443:3:4:1464:456#0/1  
CCTCTGAGTATTTTGGGTAGTCATAAGTCCCATTTTTGAC  
+HWI-EAS443:3:4:1464:456#0/1  
aaaZ\_a¥WPXbaW¥]\_\_OI][[\_YV]RWLLT[aa` [ `VM  
@HWI-EAS443:3:4:149:906#0/1  
ATTCTGTGTGCTCTTCAGGTCGGCTGCATATCCTGACCCC  
+HWI-EAS443:3:4:149:906#0/1  
aabb` `]HU¥ZY[a\_aaaa\_a`b^\_a[\_^¥QJSRN\_XUZB

@HWI-EAS443:3:4:1510:1077#0/1  
GAACTTCTTGCTGTATCTTGATGTCCCCACAAAAACATAT  
+HWI-EAS443:3:4:1510:1077#0/1  
aaba`baaab`ab`aa`baaa\_aa`\_\_`\_`\_`\_a`\_a`\_\_`  
@HWI-EAS443:3:4:1533:889#0/1  
GTGGGGACATCAAGATACAGCAAGAAGTTCAAGCCGGAAA  
+HWI-EAS443:3:4:1533:889#0/1  
aVa\_a\_¥Y¥YSZY]V^\_Y\_\_U[`\_[]^VXV^Y]RRXVUVS  
@HWI-EAS443:3:4:1535:96#0/1  
GAAGTCCTCGTGTATGGGGCATTACCATCCATCTACTA  
+HWI-EAS443:3:4:1535:96#0/1  
aaaa¥`]a`\_\_¥a\_\_\_a`^¥¥a\_W\_WS¥¥QV¥¥WV^U^X  
@HWI-EAS443:3:4:154:1008#0/1  
GGGACATCAAGATACAGCAAGAAGTTCAAGCCGGAAATA  
+HWI-EAS443:3:4:154:1008#0/1  
a`b\_\_\_\_\_a\_\_aa¥\_a`a^`aa`\_`X\_\_`^\_V\_\_VX^`]  
@HWI-EAS443:3:4:1615:1868#0/1  
GGGACATCAAGATACAGCAAGAAGTTCAAGCCGGAAATA  
+HWI-EAS443:3:4:1615:1868#0/1  
¥NRaUYaXZaaTaR`Ta¥Pa\_\_`]]HZNY^VVQWPYQBBB  
@HWI-EAS443:3:4:1620:653#0/1  
GAACTTATATGAAAAGGTAAGAAGCCAGTTAAAAACAAT  
+HWI-EAS443:3:4:1620:653#0/1  
`T\_[ba^a`b^Z\_bZZZ]a\_aaaa\_\_[aZ[`¥\_\_^^[a\_`  
@HWI-EAS443:3:4:164:1482#0/1  
AAGTCCTCGTGTATGGGGCATTACCATCCATCTACTAG  
+HWI-EAS443:3:4:164:1482#0/1  
aba[a`a`\_`\_`\_a`\_]`X\_^[]\_\_]`Z]]RX`[U^\_X\_\_Y  
@HWI-EAS443:3:4:1668:194#0/1  
GGGACATCAAGATACAGCAAGAAGTTCAAGCCGGAAATAG  
+HWI-EAS443:3:4:1668:194#0/1  
ab]`¥abXaaba`\_]a\_a\_a`a]a^a`aPT¥`\_^`a\_X  
@HWI-EAS443:3:4:166:1980#0/1  
CATAAGTCCATTTTTGACACTTTCCATGCACGTGTTATC  
+HWI-EAS443:3:4:166:1980#0/1  
abbbba`b\_b`ab\_b`^aaY]FZ`Laa\_^`^DXa`[  
@HWI-EAS443:3:4:1712:1082#0/1  
TGAATTCCTTTTTTAACTAGCCATATTAATTTTTGTAG  
+HWI-EAS443:3:4:1712:1082#0/1  
aa`\_]^a`^aa\_a`^]]\_\_aUW\_a`a`\_\_^`\_`\_`^]]\_  
@HWI-EAS443:3:4:176:339#0/1  
CGTGCATGGAAAGTGTCAAAAATGGGACTTATGACTACCC  
+HWI-EAS443:3:4:176:339#0/1  
ab^bbba\_babba[a`aababaabaaa`\_\_`aaa`\_a\_¥a  
@HWI-EAS443:3:4:184:292#0/1  
CGGCTGCTTTGAATTTTACCACAAATGCGATAACACGTGC  
+HWI-EAS443:3:4:184:292#0/1  
aba`[W¥\_bbVZZbbbbbbYa\_Zabaab]ba][`b`bYaW  
@HWI-EAS443:3:4:193:2041#0/1  
TGCAGATGCATATGTTTTGTGGGGACATCAAGATACAGC

+HWI-EAS443:3:4:193:2041#0/1  
abbbb`^^`abaaa\_baaa`^aaaaaaaaaaaaa\_`aba`  
@HWI-EAS443:3:4:193:750#0/1  
GTGGGGACATCAAGATACAGCAAGAAGTTCAAGCCGGAAA  
+HWI-EAS443:3:4:193:750#0/1  
`Gaaa`[¥a]U]a\_[Z\_\_a\_\_a`a]^MVU¥\_`^VZ`\_][  
@HWI-EAS443:3:4:204:905#0/1  
GCCGGTTTCATTGAAGGGGGTGGACAGGGATGGTAGATG  
+HWI-EAS443:3:4:204:905#0/1  
a\_KY^LTYa\_T\_`SJ\_` `a^aWa]RT¥\_aVXTWaGV`XW`  
@HWI-EAS443:3:4:204:970#0/1  
GATGGATGGTACGGTTATCACCATCAAATGAGCAGGGGT  
+HWI-EAS443:3:4:204:970#0/1  
aaabbaabb]b`bbZ^a\_SP]SaWGWXZa\_[\_X\_PTZPPB  
@HWI-EAS443:3:4:234:277#0/1  
CGTCAATGGCATTCTGTGTGCTCTTCAGGTCGGCTGCATA  
+HWI-EAS443:3:4:234:277#0/1  
\_b`^ba\_aa]bab]aa^aZbZa^aa^`^`Wa`\_]`a[^a  
@HWI-EAS443:3:4:248:600#0/1  
AGAATTTACTTTGTTAGTAATCTCGTCAATGGCATTCTGT  
+HWI-EAS443:3:4:248:600#0/1  
aaL[¥aYU[TUVZY]YZN\_TQS^`a]VPOUWJMXQOYWBB  
@HWI-EAS443:3:4:266:131#0/1  
CAAAGTCTCTATCAGAATGCAGATGCATATGTTTTTGTGG  
+HWI-EAS443:3:4:266:131#0/1  
`b`abUaba`aa`ab]\_a` `a^\_a\_\_\_\_\_a`^^a\_aaXa¥  
@HWI-EAS443:3:4:291:1408#0/1  
TGGTAGTCCAAAGTTCTTTTCATTTTCCAATAGAACCAACA  
+HWI-EAS443:3:4:291:1408#0/1  
`aa[baTa¥aY^a\_` `baa[[aa`baaba]aaab^Ia\_[^  
@HWI-EAS443:3:4:361:435#0/1  
AAGCCAGTTAAAAACAATGCCAAGGAAATTGGAAACGGC  
+HWI-EAS443:3:4:361:435#0/1  
ab[W¥0Za`baY`¥T\_b`\_]VRXX^aTU]aaa\_\_^\_`^BB  
@HWI-EAS443:3:4:368:1324#0/1  
GCTGGCTGGATCCTGGGAAATCCAGAGTGTGAATCACTCT  
+HWI-EAS443:3:4:368:1324#0/1  
abab`U\_\_^^]RZ`\_W^]` `XT0^\_`¥GaJVXZ]aXZZBB  
@HWI-EAS443:3:4:374:800#0/1  
CTAGATTTCCAGTTGCTTCAATGTTATTTTGTCTCCCGG  
+HWI-EAS443:3:4:374:800#0/1  
aaba\_aa`aaaa\_aa`aaabaabb\_`aaaa¥\_``]\_V]a  
@HWI-EAS443:3:4:385:248#0/1  
ATTGCTATTTCCGGCTTGAACCTTCTTGCTGTATCTTGATG  
+HWI-EAS443:3:4:385:248#0/1  
^^^b\_````RQS`UVXY¥`U¥ZX[\_a\_XZaZ\_\_Y]¥aS`¥  
@HWI-EAS443:3:4:402:1100#0/1  
CAGAACTGATTGCCCCAGGGAGACTACCAAGTACCAATG  
+HWI-EAS443:3:4:402:1100#0/1  
`aba^`Ta]babb\_aUa`\_]`a]aaa`a`\_`Za¥`^`a\_\_a



@HWI-EAS443:3:4:412:1580#0/1  
CAGGTCGGCTGCATATCCTGACCCCTGCTCATTTTGATGG  
+HWI-EAS443:3:4:412:1580#0/1  
abba`ababbaaaaabLbbaaS`a\_aa\_b`abaaba[VZ`  
@HWI-EAS443:3:4:416:1300#0/1  
TGTGTATTCATCTTTTCAATAACAGAATTTACTTTGTAG  
+HWI-EAS443:3:4:416:1300#0/1  
`b\_[WSTZbaaa¥`aa^aaa`a\_`^Z]^\_¥Z`aa\_\_\_\_``a  
@HWI-EAS443:3:4:45:735#0/1  
TGGGCCATGAACCTTGTCTTGGGGAATATCTCAAACCTTTC  
+HWI-EAS443:3:4:45:735#0/1  
abbaaaaaaaaa`aaa]`aaa]\_a]\_a\_a\_a\_`aa]\_`\_\_\_\_  
@HWI-EAS443:3:4:503:702#0/1  
CTGACCCCTGCTCATTTTGATGGTGATAACCGTACCATCC  
+HWI-EAS443:3:4:503:702#0/1  
abbaaaa[bb\_aZ`aaaab\_aaa^aaaaa¥¥a¥¥WT``[V  
@HWI-EAS443:3:4:538:1759#0/1  
TGAGCTTTGGGTATGAATTTCTTTTTTAACTAGCCATAT  
+HWI-EAS443:3:4:538:1759#0/1  
abW[\_ab¥ba^VV`^^`\_`a\_K¥`^`\_\_`^Pa^aH^\_a^`  
@HWI-EAS443:3:4:556:1290#0/1  
CTAGAAGACAAGCATAACGGGAACTATGCAAACCTAAGAG  
+HWI-EAS443:3:4:556:1290#0/1  
abbbbbbbbbbbabbbaabaaaabab`baaaaa\_baaaa  
@HWI-EAS443:3:4:561:899#0/1  
CTTCAGGTCGGCTGCATATCCTGACCCCTGCTCATTTTGA  
+HWI-EAS443:3:4:561:899#0/1  
aababa\_Taaaaa`]]`b`Za\_]S\_ZP[[[\_S\_\_¥¥¥\_¥  
@HWI-EAS443:3:4:571:1506#0/1  
ATTGAGCTCAGTGCATCATTTGAAAGTTTGAGATATTC  
+HWI-EAS443:3:4:571:1506#0/1  
a`aa\_`T0]SaS^]I]Y`\_a^\_a\_aY\_a¥\_``a\_]\_a`WU  
@HWI-EAS443:3:4:582:2037#0/1  
ACAAAGTCTCTATCAGAATGCAGATGCATATGTTTTGTG  
+HWI-EAS443:3:4:582:2037#0/1  
a`bba]VRVYaa\_Yaaa`^WXWRYTq]`\_\_`¥M¥`¥`¥UB  
@HWI-EAS443:3:4:602:283#0/1  
TGAACCTGTCTTGGGGAATATCTCAAACCTTTCAAATGAT  
+HWI-EAS443:3:4:602:283#0/1  
``a`YU\_`VZ^S\_[PRJYZS¥]Ra`^QW\_XVI[\_`[^aZ  
@HWI-EAS443:3:4:629:521#0/1  
GTGGGGACATCAAGATACAGCAAGAAGTTCAAGCCGAAAA  
+HWI-EAS443:3:4:629:521#0/1  
a]bb`\_`\_¥\_\_`\_a\_\_`aaaZ`aa^aX\_V\_\_aZM`a]^\_  
@HWI-EAS443:3:4:638:1492#0/1  
AAAAACATATGCATCTGCATTCTGATAGAGACTTTGTTGG  
+HWI-EAS443:3:4:638:1492#0/1  
¥abaaaab`abaaa\_`aa¥aaaaaaaab`aaU^aaa\_`X\_  
@HWI-EAS443:3:4:639:1283#0/1  
GCCGGTTTCATTGAAGGGGGTGGACAGGGATGGTAGATG



@HWI-EAS443:3:4:882:132#0/1  
ATCTTTTCAATAACAGAATTTACTTTGTTAGTAATCTCGT  
+HWI-EAS443:3:4:882:132#0/1  
aaaabbaaa\_a^]\_aZP^a\_\_Z`\_b^]¥aZ\_\_`S\_PbV  
@HWI-EAS443:3:4:912:38#0/1  
ATCCTGACCCCTGCTCATTTTGATGGTGATAACCGTACCA  
+HWI-EAS443:3:4:912:38#0/1  
a`\_^\_^^^X[V^RXRO[X^^XYX^YVVXXVXXNMMY  
@HWI-EAS443:3:4:920:1311#0/1  
GGGACATCAAGATACAGCAAGAAGTTCAAGCCGAAATA  
+HWI-EAS443:3:4:920:1311#0/1  
aabaaaa`a`aa\_\_aaaaaaaa`\_aX\_]a`\_SV`^^]\_\_  
@HWI-EAS443:3:4:941:1088#0/1  
GAGGACATGCTGCCGTTACACCTTTGTTGAGTCATGATT  
+HWI-EAS443:3:4:941:1088#0/1  
a`baa\_ba\_\_aa]\_a\_¥\_]\_W]Z\_a[U¥]\_X\_YXU\_^]Y]  
@HWI-EAS443:3:4:956:681#0/1  
ATTATCATTTTCAGATACACCAGTCCACGATTGCAATACAA  
+HWI-EAS443:3:4:956:681#0/1  
aaaaa``baaW`aa`a`\_`\_a^]\_¥\_Za^\_`Wb\_`\_a`\_`  
@HWI-EAS443:3:4:962:353#0/1  
CTTATATGAAAAGGTAAGAAGCCAGTTAAAAACAATGCC  
+HWI-EAS443:3:4:962:353#0/1  
abaabbbbbba]ba\_aabbaa`aa``aaaa`aaaa\_aa[Y  
@HWI-EAS443:3:4:986:1350#0/1  
GAAACCGCAATGGCCCAAATAGGCCTCTAGATTGAATA  
+HWI-EAS443:3:4:986:1350#0/1  
a`a[X¥^ZLa\_Y\_UU\_Q`bb[VaW[WU¥QX]\_\_\_\_\_X[V  
@HWI-EAS443:3:50:101:146#0/1  
ATTGCTCTTAGCTCCTCATAATCGATGAAATCTCCTGG  
+HWI-EAS443:3:50:101:146#0/1  
abbb`babaabbaabab`aaabaXaa\_ababaaa\_\_[aa  
@HWI-EAS443:3:50:101:540#0/1  
CTTGGGTGTCTGACAAGTTGTATTGCAATCGTGGACTGGT  
+HWI-EAS443:3:50:101:540#0/1  
abbbab¥bbabbbabbaabaaabab\_bbbba`baaaaa`\_  
@HWI-EAS443:3:50:1064:1110#0/1  
CCATTTTTGACACTTTCCATGCACGTGTTATCGCATTTGT  
+HWI-EAS443:3:50:1064:1110#0/1  
a`abbbbabbb`aabbbb`aa`a``b\_a\_aa``a\_aba`a^  
@HWI-EAS443:3:50:108:837#0/1  
CGTCAATGGCATTCTGTGTGCTTTCAGGTCGGCTGCATA  
+HWI-EAS443:3:50:108:837#0/1  
abaabbbbb`bbbabbbbabababbababaabb\_aa\_\_aa  
@HWI-EAS443:3:50:1139:1337#0/1  
GGGACATCAAGATACAGCAAGAAGTTCAAGCCGAAATAG  
+HWI-EAS443:3:50:1139:1337#0/1  
`U]RZTYUQ\_`YW[^`V\_\_WPN¥[TN\_ZZOQ]XXT[VYV  
@HWI-EAS443:3:50:1166:230#0/1  
ACTGGTAGTCTCCCTGGGGCAATCAGTTTCTGGATGTGC

+HWI-EAS443:3:50:1166:230#0/1  
abba^\_a\_UUa¥aaS¥¥`a\_T`]`^`]`P`]`N]U[X`aU]V  
@HWI-EAS443:3:50:1191:324#0/1  
GGGCCATGAACCTGTCTTGGGAATATCTCAAACCTTCA  
+HWI-EAS443:3:50:1191:324#0/1  
]`^\_Va\_^]`¥`¥ba\_\_^`Z^``aaa¥a^a^Paa`X^  
@HWI-EAS443:3:50:1196:983#0/1  
CGGCTCTACTAGTGTCCAGTAATAGTTCATTCTCCCTTCT  
+HWI-EAS443:3:50:1196:983#0/1  
W\_babba`¥TR\_0¥aXa[¥^babbV\_aaaaba`^^ab`P^  
@HWI-EAS443:3:50:119:150#0/1  
CTGGCTGGATCCTGGGAAATCCAGAGTGTGAATCACTCTC  
+HWI-EAS443:3:50:119:150#0/1  
ab\_[`bbbaaab]baaab`]^a`a`¥a\_``ab``aa]`a  
@HWI-EAS443:3:50:1249:1270#0/1  
TACGGTTATCACCATCAAATGAGCAGGGGTCAGGATATG  
+HWI-EAS443:3:50:1249:1270#0/1  
ababb\_P¥`YVZTYRO^^`R¥\_H\_ZP^[\_aPHP[¥HPFTR  
@HWI-EAS443:3:50:128:1254#0/1  
GCTGGCTGGATCCTGGGAAATCCAGAGTGTGAATCACTCT  
+HWI-EAS443:3:50:128:1254#0/1  
aabaabbbaa`a``baa\_a`]^`aa^Vb`a`a^Va^\_T\_  
@HWI-EAS443:3:50:1294:362#0/1  
TGAGTATTTTGGGTAGTCATAAGTCCCATTTTTGACACTT  
+HWI-EAS443:3:50:1294:362#0/1  
`baa\_abbab`¥\_`baT`ba\_aW\_\_\_`bbba^]`¥aa  
@HWI-EAS443:3:50:1311:195#0/1  
GTGCTGACCAACAAAGTCTCTATCAGAATGCAGATGCATA  
+HWI-EAS443:3:50:1311:195#0/1  
¥bb`abba^`aabaaba\_aaba\_Waaa`bbZ[a`ab¥^aa  
@HWI-EAS443:3:50:1327:773#0/1  
AGCCAGTTAAAAACAATGCCAAGGAAATTGGAAACGGCT  
+HWI-EAS443:3:50:1327:773#0/1  
aa`aabaabaaaaababaa`a`aa\_`aaa]`\_a\_`^^a  
@HWI-EAS443:3:50:1348:115#0/1  
GGGGACATCAAGATACAGCAAGAAGTTCAAGCCGAAAATA  
+HWI-EAS443:3:50:1348:115#0/1  
aba^`abaaa`baaab`baabaa]aVaaa[b[aaa`\_`a`  
@HWI-EAS443:3:50:1408:477#0/1  
CATTGCTGGCTGGATCCTGGGAAATCCAGAGTGTGAATCA  
+HWI-EAS443:3:50:1408:477#0/1  
abbbbbbbba`abaUaaQbaabb[^a`\_aZbYaaV`\_  
@HWI-EAS443:3:50:1436:853#0/1  
AAGTCCTCGTGCTATGGGGCATTACCATCCATCTACTAG  
+HWI-EAS443:3:50:1436:853#0/1  
aY^Y]aa`WY^\_Za¥[LYP`aaSa`SRPTXV]ZMY`HaP`  
@HWI-EAS443:3:50:1440:923#0/1  
TTCTTGCTGTATCTTGATGTCCCCACAAAACATATGCAT  
+HWI-EAS443:3:50:1440:923#0/1  
ab\_abaabbabaabbbbaaa`^^^a\_`aaa^aa`aaaW^a

@HWI-EAS443:3:50:1445:1735#0/1  
TTAGTAATCTCGTCAATGGCATTCTGTGTGCTCTTCAGGT  
+HWI-EAS443:3:50:1445:1735#0/1  
`^a\_Ua^S``\_XRZa]\_ZP]XWY\_\_T\_¥ZOYZ`\_TR¥OL  
@HWI-EAS443:3:50:1462:1466#0/1  
GCTTCCTCTGAGTATTTGGGTAGTCATAAGTCCCATTTT  
+HWI-EAS443:3:50:1462:1466#0/1  
aa^a]`WaaaZWWaaa`^¥\_KT\_UX^`^XX[Z[L[a[a\_`  
@HWI-EAS443:3:50:1469:472#0/1  
GAATTTACTTTGTTAGTAATCTCGTCAATGGCATTCTGTG  
+HWI-EAS443:3:50:1469:472#0/1  
`\_abbaaab``baa``]aa\_[ZS\_\_aa\_\_aa]aaaV]a]a  
@HWI-EAS443:3:50:1488:1518#0/1  
CTTCCTCTGAGTATTTGGGTAGTCATAAGTCCCATTTT  
+HWI-EAS443:3:50:1488:1518#0/1  
ab]b`^¥\_bba¥]\_]`bb¥a\_abY\_ab`SS``\_Q]abab`  
@HWI-EAS443:3:50:1508:835#0/1  
CCAGCATGAGGACATGCTGCCGTTACACCTTTGTTGAGT  
+HWI-EAS443:3:50:1508:835#0/1  
aa\_^b\_ba`aaa^aab`\_\_[[P]QX[IY\_]V[\_\_XSRZ]X  
@HWI-EAS443:3:50:151:939#0/1  
ATTGGAACGGCTGCTTTGAATTTTACCACAAATGCGATA  
+HWI-EAS443:3:50:151:939#0/1  
abaaaaabaabaaWFXa\_TT]Vaa\_SRZ\_IO¥^OGQ¥WY¥  
@HWI-EAS443:3:50:1546:734#0/1  
ATTTGAAAGGTTTGAGATATTTCCCAAGACAAGTTCATGG  
+HWI-EAS443:3:50:1546:734#0/1  
`babbaY``¥\_bb\_aa\_abaa\_`][aaaa\_a\_a^aa``^Y  
@HWI-EAS443:3:50:1550:830#0/1  
AGCCAGTTAAAAACAATGCCAAGGAAATTGGAAACGGCT  
+HWI-EAS443:3:50:1550:830#0/1  
a]`aa`aaaa`aa\_aaaa\_`aa`\_¥`a``\_\_\_\_`^¥`  
@HWI-EAS443:3:50:1551:1121#0/1  
ATTCTGTGTGCTCTTCAGGTGCGCTGCATATCCTGACCCC  
+HWI-EAS443:3:50:1551:1121#0/1  
]b[Y\_babbb`¥Y¥TX]a¥HRa^X[TZ]a^XYQQV[FZLN  
@HWI-EAS443:3:50:1611:1472#0/1  
ACAGAATTTACTTTGTTAGTAATCTCGTCAATGGCATTCT  
+HWI-EAS443:3:50:1611:1472#0/1  
Z`\_`\_\_a`\_b`aaabba]¥ZX^a]`[¥X^TSY¥QZS\_`^W  
@HWI-EAS443:3:50:1646:642#0/1  
CATATCCTGACCCCTGCTCATTTTGTGTTGATAACCGTA  
+HWI-EAS443:3:50:1646:642#0/1  
aababaaaaa`baabbbbaba\_baa`abbaaabbb\_`a^a  
@HWI-EAS443:3:50:1650:44#0/1  
CCCAGGAGATTTTCATCGATTATGAGGAGCTAAGAGAGCAA  
+HWI-EAS443:3:50:1650:44#0/1  
^`[ababaaabbbbbbaababaZbbaabbbbaaa`babb  
@HWI-EAS443:3:50:1727:774#0/1  
GTCAGGATATGCAGCCGACCTGAAGAGCACACAGAATGCC

+HWI-EAS443:3:50:1727:774#0/1  
`a\_bbaa`aabaaa`aa`\_aaa\_`a\_`a`\_`^a\_]\_`a\_`  
@HWI-EAS443:3:50:1748:1683#0/1  
TGCAATCGTGGACTGGTGTATCTGAAATGATAATACCAGA  
+HWI-EAS443:3:50:1748:1683#0/1  
`]\_XGTaaX`a]YP`\_Ga0^`X[\_Q]\_`\_\_^^]]WU]]\_Y  
@HWI-EAS443:3:50:1776:1119#0/1  
ATGCAGATGCATATGTTTTTGTGGGGACATCAAGATACAG  
+HWI-EAS443:3:50:1776:1119#0/1  
abaaa`]bb`aaabbbababa\_aaaa`aa`S^\_a\_``¥aa  
@HWI-EAS443:3:50:18:1754#0/1  
GCTGGCTGGATCCTGGGAAATCCAGAGTGTGAATCACTCT  
+HWI-EAS443:3:50:18:1754#0/1  
aaa\_M`aa¥a[V^¥Y]\_K]^YSYSVT\_QaS\_Z\_Z[^Q^R^  
@HWI-EAS443:3:50:214:1993#0/1  
GCTCCTCATAATCGATGAAATCTCCTGGGTAACACGTTCC  
+HWI-EAS443:3:50:214:1993#0/1  
a¥RUJ`\_aa\_aXJX[^JY¥[^]\_K¥OHP IPT\_N[[[GLMT  
@HWI-EAS443:3:50:217:737#0/1  
TGCTTCCTCTGAGTATTTTGGGTAGTCATAAGTCCCATTT  
+HWI-EAS443:3:50:217:737#0/1  
M` `ab¥aX`SZb^Rb^^^X[XaSavabY]]H\_\_UKYZ¥R^  
@HWI-EAS443:3:50:222:741#0/1  
AGCCATATTAATTTTTGTAGAAGCTTTTTGCTCCAGCAT  
+HWI-EAS443:3:50:222:741#0/1  
abaabbbabbbbbbbaaaaabaababbaaaaa`\_a`  
@HWI-EAS443:3:50:23:1442#0/1  
AAATAACATTGGAAGCAACTGGAAATCTAGTGGTACCGAG  
+HWI-EAS443:3:50:23:1442#0/1  
TH¥b\_QZb¥Q¥`^`a^b`UY`bbb`bba\_YS[]T\_Y`[^  
@HWI-EAS443:3:50:242:280#0/1  
GCCAGTTAAAAACAATGCCAAGGAAATTGGAAACGGCTG  
+HWI-EAS443:3:50:242:280#0/1  
abbbbbbbaabbbabbbbaabab` `abaaa^aaa`aa\_a^  
@HWI-EAS443:3:50:276:1704#0/1  
AGAAATGCTGGATCTGGTATTATCATTTTACAGATACACCAG  
+HWI-EAS443:3:50:276:1704#0/1  
a`aaba]aaaaba`\_baW\_aaa`S`a\_[]a`aa`^a\_Va\_  
@HWI-EAS443:3:50:376:1415#0/1  
ATCGATTATGAGGAGCTAAGAGAGCAATTGAGCTCAGTGT  
+HWI-EAS443:3:50:376:1415#0/1  
aba`bbbababaaabbbba\_aaaa`aabaa`\_aab^`]  
@HWI-EAS443:3:50:425:673#0/1  
GGGGACATCAAGATACAGCAAGAAGTTCAAGCCGAAATA  
+HWI-EAS443:3:50:425:673#0/1  
aabaaaaaaaabaaaaba]aaaa`a¥`aaaa\_[a` `^`a`  
@HWI-EAS443:3:50:437:1453#0/1  
CAGGGATGGTAGATGGATGGTACGGTTATCACCATCAAAA  
+HWI-EAS443:3:50:437:1453#0/1  
aa[^aabbbG\_]baabb\_a[L`^ba¥\_a\_H¥aUa^`aa]a

@HWI-EAS443:3:50:441:274#0/1  
CCACAATGTAGGACCATGAGCTTGCTGTGGAGAGTGATTC  
+HWI-EAS443:3:50:441:274#0/1  
aaaabbba\_bbab\_^baaaaaba]Zbaa` `¥aa]Z` \_\_a\_  
@HWI-EAS443:3:50:47:334#0/1  
CTCGTCAATGGCATTCTGTGTGCTCTTCAGGTCGGCTGCA  
+HWI-EAS443:3:50:47:334#0/1  
abbbabbbbbbbbabbb[ `a`Y`aabbbb\_]\_]\_V]\_aaaa  
@HWI-EAS443:3:50:502:866#0/1  
TGCTATTTCCGGCTTGAACCTTCTTGCTGTATCTTGATGTC  
+HWI-EAS443:3:50:502:866#0/1  
`S]]\_bb`¥a`]Xbb`^^]a^^`ba`^ZWZaYa`T]^OY  
@HWI-EAS443:3:50:564:833#0/1  
GCTGCTTTGAATTTTACCACAAATGCGATAACACGTGCAT  
+HWI-EAS443:3:50:564:833#0/1  
`bab]aa^aY¥Y`¥ababa]TL\_`a`\_PQ¥`\_Z`aR`]`\_  
@HWI-EAS443:3:50:56:1365#0/1  
GGGGTGGACAGGGATGGTAGATGGATGGTACGGTTATCAC  
+HWI-EAS443:3:50:56:1365#0/1  
aba]^abaabaaa`abaVaa\_¥\_\_^\_aaZa[^¥U\_\_ [ZZZ  
@HWI-EAS443:3:50:597:183#0/1  
TCGAATGTTATTTTGTCTCCCGCTCTACTAGTGTCCAGT  
+HWI-EAS443:3:50:597:183#0/1  
aabaa` `aa\_bbbabaab\_\_`aa\_aa]¥X^^`^TZ^^[YF  
@HWI-EAS443:3:50:649:1405#0/1  
GAACTCTTTACCTACTGCTGTGAACCTGTGATTTCATCTTT  
+HWI-EAS443:3:50:649:1405#0/1  
¥Z`^a\_bbb\_abbaaba]] [ ] aaaaab`baaaaU\_aaaba  
@HWI-EAS443:3:50:686:518#0/1  
CAACTGTGCAGACACCCAAGGGTGCTATAAACACCAGCCT  
+HWI-EAS443:3:50:686:518#0/1  
`bb[abbb\_abbab\_bbaab` `Yb\_ababbaa` `aab\_`a  
@HWI-EAS443:3:50:706:1459#0/1  
CAGGGAGACTACCAGTACCAATGAACTGGCGACAGTTGAA  
+HWI-EAS443:3:50:706:1459#0/1  
abbbbabbbbbbbbaabbabbb`bbaaba`\_a\_a\_]a  
@HWI-EAS443:3:50:720:134#0/1  
ATCGTGGTAGTCCAAAGTTCTTTCAATTTTCCAATAGAACC  
+HWI-EAS443:3:50:720:134#0/1  
\_bab`b`SZZHY\_] ^SaP`a^b\_YUUbaY]\_]ba¥aY`¥Z  
@HWI-EAS443:3:50:738:399#0/1  
GGAGATTTTCATCGATTATGAGGAGCTAAGAGAGCAATTGA  
+HWI-EAS443:3:50:738:399#0/1  
\_` `b^bbb^a\_Za^ab` `a[aa]a\_a`[^]¥[]]a^][¥Z  
@HWI-EAS443:3:50:755:1773#0/1  
GAGCAATTGAGCTCAGTGTCATCATTTGAAAGGTTTGAGA  
+HWI-EAS443:3:50:755:1773#0/1  
]^` `^`^ [babaa\_Tb]b^\_a\_`Y]] [ `^^a]\_Saaa`aa  
@HWI-EAS443:3:50:766:1428#0/1  
GAAGCCAGTTAAAAACAATGCCAAGGAAATTGAAAACGG

+HWI-EAS443:3:50:766:1428#0/1  
abbbbaababbbbbbabbabb`\_aabaab`bbbbbaaaaa  
@HWI-EAS443:3:50:796:524#0/1  
GGGGACATCAAGATACAGCAAGAAGTTCAAGCCGGAAATA  
+HWI-EAS443:3:50:796:524#0/1  
`a\_ba\_ba\_`[]b`a^ab\_`baa`aY\_\_aaa\_\_`a``[a\_  
@HWI-EAS443:3:50:866:1760#0/1  
CTGGTGTATAGCACCTTGGGTGTCTGACAAGTTGTAT  
+HWI-EAS443:3:50:866:1760#0/1  
Z\_b¥[^Zab\_a```b`T\_¥Y\_\_RV`R`\_YR\_`a¥X^Ra]  
@HWI-EAS443:3:50:869:568#0/1  
AGCCAGTTAAAAACAATGCCAAGGAAATTGGAAACGGCT  
+HWI-EAS443:3:50:869:568#0/1  
\_W\_`aba`X^a^^a\_baaaa\_XFWa\_a`aaaa`a`a`]Z  
@HWI-EAS443:3:50:875:1200#0/1  
GCAGGGGTCAGGATATGCAGCCGACCTGAAGAGCACACAG  
+HWI-EAS443:3:50:875:1200#0/1  
`\_X¥Ya`T\_`Zaa]\_bba^a```\_TX]¥YQ`¥`V¥OVRX]  
@HWI-EAS443:3:50:913:705#0/1  
GCATTCTGTGTCTTTCAGGTCGGCTGCATATCCTGACC  
+HWI-EAS443:3:50:913:705#0/1  
aabbabbba\_a^\_babbbaaa\_]Y[abbaaaba\_aa^``\_  
@HWI-EAS443:3:50:920:781#0/1  
CGAATGTTATTTTGTCTCCCGCTCTACTAGTGTCCAGTA  
+HWI-EAS443:3:50:920:781#0/1  
``bbbab`^`bbbbb`a`¥bbbbb\_YV\_X]XHVR]V]V\_  
@HWI-EAS443:3:50:943:384#0/1  
CAGGTCGGCTGCATATCCTGACCCCTGCTCATTTTGATGG  
+HWI-EAS443:3:50:943:384#0/1  
ab`WUaaaU^¥HT\_`UV`XP]U^ZY]F¥``a`a^BBBBB  
@HWI-EAS443:3:51:1062:1929#0/1  
TGGGGACATCAAGATACAGCAAGAAGTTCAAGCCGGAAAT  
+HWI-EAS443:3:51:1062:1929#0/1  
^\_\_T¥aa]¥Pa`a][aaaa^`aa[^a]][a`\_TG]\_]S^Z  
@HWI-EAS443:3:51:1063:1193#0/1  
ACGGCTGCTTTGAATTTTACCACAAATGCGATAACACGTG  
+HWI-EAS443:3:51:1063:1193#0/1  
aaaaaa\_OR[^OYYZ]baNHTYS]a¥TXT¥WQYXGZNQQ[  
@HWI-EAS443:3:51:1068:1412#0/1  
GAACTTATATGAAAAGGTAAGAAGCCAGTTAAAAACAAT  
+HWI-EAS443:3:51:1068:1412#0/1  
¥`b\_`¥U¥XaUS\_bb^MP¥a\_U¥SWa[b]aa]aZUVPQ\_a  
@HWI-EAS443:3:51:1076:1676#0/1  
GTAAAAAGCACAAAATTGAGACTGGCCACAGGATTGAGGA  
+HWI-EAS443:3:51:1076:1676#0/1  
aa`aaaabaaaa`ZaaaaY]a`a`[FY\_Z]`\_X[^\_X^\_U  
@HWI-EAS443:3:51:1084:1966#0/1  
ATTAGAGCACATCCAGAACTGATTGCCCCCAGGGAGACT  
+HWI-EAS443:3:51:1084:1966#0/1  
aa^abba``aa\_]aab`]YYa`a\_`\_\_\_Z[Za\_a\_^¥^`



@HWI-EAS443:3:51:108:1188#0/1  
GGTCAGGATATGCAGCCGACCTGAAGAGCACACAGAATGC  
+HWI-EAS443:3:51:108:1188#0/1  
VX#b`bbbbbbbbb\_bbbbaabb`^b\_b\_a`aaaa`aaa  
@HWI-EAS443:3:51:1177:1452#0/1  
AAACTATGCAAATAAGAGGGGTAGCCCCATTGCATTTGG  
+HWI-EAS443:3:51:1177:1452#0/1  
aaaaaabYa`]QN[Zbaa\_\_aU#0YY\_\_UYZ[NZa#^[W  
@HWI-EAS443:3:51:1185:407#0/1  
TTTTGCTTCTCTGAGTATTTGGGTAGTCATAAGTCCCA  
+HWI-EAS443:3:51:1185:407#0/1  
abbba`baa\_babbaa\_aaaaaaa`^b\_\_\_ba\_a\_\_X]\_  
@HWI-EAS443:3:51:1190:916#0/1  
GTTATTTTGTCTCCCGGCTCTACTAGTGTCCAGTAATAGT  
+HWI-EAS443:3:51:1190:916#0/1  
aaa\_aa`^Y^`\_`T[aZ^X^YV[WRV]YWTUXT[[TULQ  
@HWI-EAS443:3:51:1191:510#0/1  
GATTTCCAGTTGCTTCGAATGTTATTTTGTCTCCCGGCTC  
+HWI-EAS443:3:51:1191:510#0/1  
aaaabaaaa`baaaa\_ba\_aaaa\_aaaa`\_a\_\_]\_]X^Y  
@HWI-EAS443:3:51:1200:1142#0/1  
AGCCGGGAGACAAAATAACATTCCAAGCAACTGGAAATCT  
+HWI-EAS443:3:51:1200:1142#0/1  
ZKa\_aaSZaaUUYa#`^]UQ\_`T]W]^]NYL[a^][RHZUZ  
@HWI-EAS443:3:51:1308:166#0/1  
GGCATTACCATCCATCTACTAGTGTGACCAACAAAGTC  
+HWI-EAS443:3:51:1308:166#0/1  
#ML#baa`\_\_aab]`aa\_`]\_`b\_`Za#\_FZ`[X`a[#[\_  
@HWI-EAS443:3:51:1316:1555#0/1  
GAGCAATTGAGCTCAGTGTGCATCATTGAAAGTTTGAGA  
+HWI-EAS443:3:51:1316:1555#0/1  
]S\_W[b]#TZ\_T\_OS\_TR#]bYO^J#^\_YNWaaSZ^aX\_U  
@HWI-EAS443:3:51:1331:1742#0/1  
GCCGAACAATTCAACAGACACTGTAGACACAGTACTAGAAA  
+HWI-EAS443:3:51:1331:1742#0/1  
`abbbbbbbbabbb`abba\_]ab^^aa^\_aaa]\_N\_aa]aa  
@HWI-EAS443:3:51:1358:1215#0/1  
CATATTCTACACTGTAGAGACCCATTAGAGCACATCCAGA  
+HWI-EAS443:3:51:1358:1215#0/1  
`abbab\_aaab\_ababb^a\_`b[bbaaabaabbbbaa[``b  
@HWI-EAS443:3:51:1370:862#0/1  
AAGCCAGTTAAAAACAATGCCAAGGAAATTGGAAACGGC  
+HWI-EAS443:3:51:1370:862#0/1  
aa`^`abaaaa\_aa]aaa`[^a^\_`^`a^\_\_`^a\_^]^]  
@HWI-EAS443:3:51:1393:1912#0/1  
GCCATGAACCTTGTCTTGGGAATATCTCAAACCTTTCAA  
+HWI-EAS443:3:51:1393:1912#0/1  
aa^aabaa\_aab\_\_aabaaa^\_a`bZa\_a\_`XW]aa\_]``  
@HWI-EAS443:3:51:1405:908#0/1  
GGGGACATCAAGATACAGCAAGAAGTTCAAGCCGAAAATA

+HWI-EAS443:3:51:1405:908#0/1  
`ba¥¥¥\_^]a`^a\_]\_aYa^b[]^X\_]``UZ\_]YX¥``  
@HWI-EAS443:3:51:1417:1643#0/1  
AGCCAGTTAAAAACAATGCCAAGGAAATTGGAAACGGCT  
+HWI-EAS443:3:51:1417:1643#0/1  
a¥aaaa`a`^`aa^`aaa\_S`a]`^`\_`a\_\_`^`^aWT]  
@HWI-EAS443:3:51:147:1352#0/1  
GGATCCTGGGAAATCCAGAGTGTGAATCACTCTCCACAGC  
+HWI-EAS443:3:51:147:1352#0/1  
aUuaz]bb\_R\_QLaX`¥UVb\_^S^]XXUQT[XWTT`U^YS  
@HWI-EAS443:3:51:1500:584#0/1  
TGAAGAACTTATATGAAAAGGTAAGAAGCCAGTTAAAAAA  
+HWI-EAS443:3:51:1500:584#0/1  
TUPS\_`Ya[\_¥\_`aa]URS\_[JPOQO`¥OXW^Z]^UX¥`]  
@HWI-EAS443:3:51:1565:779#0/1  
ATCTCGTCAATGGCATTCTGTGTGCTCTTCAGGTCGGCTG  
+HWI-EAS443:3:51:1565:779#0/1  
ab`b\_`a]aaaa^¥aaaaa]\_\_[]`[aa¥\_S\_¥\_aa¥``  
@HWI-EAS443:3:51:1574:1082#0/1  
ACTTCTTGCTGTATCTTGATGTCCCCACAAAACATATGC  
+HWI-EAS443:3:51:1574:1082#0/1  
a]¥babba`bb`bbabababaa`\_aa`\_^a`¥bYa`aa[W  
@HWI-EAS443:3:51:1576:48#0/1  
CAACAAAGTCTCTATCAGAATGCAGATGCATATGTTTTTG  
+HWI-EAS443:3:51:1576:48#0/1  
`bbbbbbbababbbbbbbbbbaabbbabbbbbbaabbbab  
@HWI-EAS443:3:51:1580:1369#0/1  
CAATTGGAAAATGTCCAAAATATGAAAAAGCACAAAATT  
+HWI-EAS443:3:51:1580:1369#0/1  
a`bbaa^aabab\_a^a`aaabbaaaaaa`a^b¥bb`aba  
@HWI-EAS443:3:51:1609:978#0/1  
GGGACATCAAGATACAGCAAGAAGTTCAAGCCGAAATA  
+HWI-EAS443:3:51:1609:978#0/1  
¥a¥XWZZT^a\_\_Wb]RU`]^\_^]RZS^^]U]OWQ`X]\_^Y  
@HWI-EAS443:3:51:1620:1686#0/1  
CCTCTGAGTATTTTGGGTAGTCATAAGTCCCATTTTGGAC  
+HWI-EAS443:3:51:1620:1686#0/1  
aabababaaabba`[`aaa\_aaaa[a`ZW]abbabb^`U  
@HWI-EAS443:3:51:1682:582#0/1  
CCCCCTTCAATGAAACCGCAATGGCCCCAAATAGGCCT  
+HWI-EAS443:3:51:1682:582#0/1  
aabba\_babba¥\_b`a¥XS]ba[GP\_`a`b`a¥S\_P^`  
@HWI-EAS443:3:51:1698:688#0/1  
CGGATGTATATTCTGAAATGGGAGGCTGGTGTATTATAGCA  
+HWI-EAS443:3:51:1698:688#0/1  
Y¥`babb\_abb\_baHaa\_`abab\_S``UVVXbaaa]]Z[  
@HWI-EAS443:3:51:1704:1879#0/1  
CCTCTGAGTATTTTGGGTAGTCATAAGTCCCATTTTGGAC  
+HWI-EAS443:3:51:1704:1879#0/1  
ab\_abbba^`bbbbbb^aba¥`baa``]Y]aababaa`Y

@HWI-EAS443:3:51:1719:1570#0/1  
ATTAGAGCACATCCAGAACTGATTGCCCCAGGGAGACT  
+HWI-EAS443:3:51:1719:1570#0/1  
[``b^aaa\_a[\_]\_a\_U]Z]U]\_a[[Q^[^XZXY^Y¥X  
@HWI-EAS443:3:51:1722:361#0/1  
CTTGCTGTATCTTGATGTCCCCACAAAACATATGCATCT  
+HWI-EAS443:3:51:1722:361#0/1  
ab^`abaabb\_bbabaa`^\_T^`bbbbaa\_bbaaUa```  
@HWI-EAS443:3:51:1738:608#0/1  
CTTGAACCTCTTGCTGTATCTTGATGTCCCCACAAAACA  
+HWI-EAS443:3:51:1738:608#0/1  
¥bbabbbbbb`bbbabbbb\_babbb`bab`bbabbbbbb  
@HWI-EAS443:3:51:1781:955#0/1  
AATCGATGAAATCTCCTGGGTAACACGTTCCATTGTCTGA  
+HWI-EAS443:3:51:1781:955#0/1  
``ab`aabaaaa\_`]XV^R\_YU``a`\_ZSZWWNX`PIM  
@HWI-EAS443:3:51:178:610#0/1  
GGCTGCTTTGAATTTTACCACAAATGCGATAACACGTGCA  
+HWI-EAS443:3:51:178:610#0/1  
a`aaa^`aa\_a[aaaa^^`Xaa`\_^Xa^)`\_[\_X`]^`^  
@HWI-EAS443:3:51:20:84#0/1  
CTTCTCTGTTTAAATTTTGCTTCCTCTGAGTATTTGGGTA  
+HWI-EAS443:3:51:20:84#0/1  
\_`b¥abbabbbbbb\_bbaabbbb¥b`bbbbbba\_b  
@HWI-EAS443:3:51:218:1391#0/1  
CAAGGAAATTGGAAACGGCTGCTTTGAATTTTACCACAAA  
+HWI-EAS443:3:51:218:1391#0/1  
abbbbV\_abbbaaaabb]`¥JZa`WV\_U^`a¥F[XNN\_  
@HWI-EAS443:3:51:232:1911#0/1  
ACTCTTTACCTACTGCTGTGAAGTGTGATTCATCTTTTC  
+HWI-EAS443:3:51:232:1911#0/1  
aWa[]\_`aY^^a0]^¥]F[`WQLY\_PHMW\_\_¥\_¥V[\_[¥S  
@HWI-EAS443:3:51:266:526#0/1  
GGGGACATCAAGATACAGCAAGAAGTTCAAGCCGGAAATA  
+HWI-EAS443:3:51:266:526#0/1  
abbaabbaaaabaaa`bb\_abaab\_a`aaa[aba[\_aaa  
@HWI-EAS443:3:51:283:1320#0/1  
GACAATGGAACGTGTTACCCAGGAGATTTTCATCGATTATG  
+HWI-EAS443:3:51:283:1320#0/1  
a`aaaaaaaa`S\_\_`a\_\_^\_a\_^a[\_a``\_Y\_a]`^^Z[  
@HWI-EAS443:3:51:322:1231#0/1  
CCCCGCTCTACTAGTGTCCAGTAATAGTTCATTCTCCCTT  
+HWI-EAS443:3:51:322:1231#0/1  
aaab``\_a`ZP¥`a^Z¥`\_[W\_[\_\_[[Z\_V^\_U^\_Z[[`  
@HWI-EAS443:3:51:322:477#0/1  
GGGAGAATGAACTATTACTGGACACTAGTAGAGCCGGGAG  
+HWI-EAS443:3:51:322:477#0/1  
aaa\_a[]`])`a¥a[a]a\_`a``][T¥^`Y\_`^aZ¥`¥WZ[  
@HWI-EAS443:3:51:351:1935#0/1  
GTTGGTCAGCACTAGTAGATGGATGGTGAATGCCCATAG

+HWI-EAS443:3:51:351:1935#0/1  
aaaba^aab¥aa^aa0baX`\_a\_\_¥[VYa\_[]`S]`a\_\_[]  
@HWI-EAS443:3:51:37:75#0/1  
AATTTTGCTTCCTCTGAGTATTTGGGTAGTCATAAGTCC  
+HWI-EAS443:3:51:37:75#0/1  
a`bbbbabaaab`bbb]abbbaabbXaa`^a\_`a\_`^  
@HWI-EAS443:3:51:385:1307#0/1  
CTGGCTGGATCCTGGGAAATCCAGAGTGTGAATCACTCTC  
+HWI-EAS443:3:51:385:1307#0/1  
abbbbaZ¥^babb\_`^`b^baabaaa^baaabaab\_a^]a  
@HWI-EAS443:3:51:410:1278#0/1  
TGCTTCCTCTGAGTATTTGGGTAGTCATAAGTCCCATTT  
+HWI-EAS443:3:51:410:1278#0/1  
abaaaabbaaaa\_\_aaa`aa¥UZ]UU`a`a][[]`[aaaa  
@HWI-EAS443:3:51:415:1440#0/1  
CATCTTTTCAATAACAGAATTTACTTTGTTAGTAATCTCG  
+HWI-EAS443:3:51:415:1440#0/1  
X¥babab^^`baa\_a`U``¥a\_bYabbbabaa^\_bb\_b\_a  
@HWI-EAS443:3:51:445:1827#0/1  
TCTGTGTCTTTCAGGTCGGCTGCATATCCTGACCCCTG  
+HWI-EAS443:3:51:445:1827#0/1  
abaa`a\_`a`aaa\_a^]`a¥aXYaaba¥U]\_XHY[V\_[]  
@HWI-EAS443:3:51:487:666#0/1  
TTCTTGCTGTATCTTGATGTCCCCACAAAAACATATGCAT  
+HWI-EAS443:3:51:487:666#0/1  
aaaaababb`aa`baaaaa\_`a[aa^]a\_[]`a`V`]  
@HWI-EAS443:3:51:523:572#0/1  
GTGGGGACATCAAGATACAGCAAGAAGTTCAAGCCGAAAA  
+HWI-EAS443:3:51:523:572#0/1  
a`bbbabbabababababa^bbbaab\_aaaaa]`baaaa  
@HWI-EAS443:3:51:575:611#0/1  
GGGGACATCAAGATACAGCAAGAAGTTCAAGCCGAAATA  
+HWI-EAS443:3:51:575:611#0/1  
aaaa`aaa``]a`\_`\_aa`aa`^^a]\_`b^`WWa`^\_`^`  
@HWI-EAS443:3:51:60:801#0/1  
GTCAATGGCATTCTGTGTGCTTTCAGGTCGGCTGCATAT  
+HWI-EAS443:3:51:60:801#0/1  
\_¥aT][baaaa`\_aa^\_a\_a`a\_`\_¥[UVaXY\_a]\_UaY  
@HWI-EAS443:3:51:616:1818#0/1  
ATCCTGACCCCTGCTCATTTTGATGGTGATAACCGTACCA  
+HWI-EAS443:3:51:616:1818#0/1  
a\_]YV^\_[]ZZ¥^TWS^^WWZUZVWU^¥¥¥[WSTWVRNR  
@HWI-EAS443:3:51:627:292#0/1  
CGGCTCTACTAGTGTCCAGTAATAGTTCATTCTCCCTTCT  
+HWI-EAS443:3:51:627:292#0/1  
aba\_aaa\_aaab[a]UY`a`aa`XaZaU]aa\_a^\_]`^`W\_  
@HWI-EAS443:3:51:65:364#0/1  
GCCGGTTTCATTGAAGGGGGTGGACAGGGATGGTAGATG  
+HWI-EAS443:3:51:65:364#0/1  
a`]^`X\_`\_]`]UT^`a]a^N^[[[]`a^`[^aYSZRY[^

@HWI-EAS443:3:51:666:1985#0/1  
CAAAGTCTCTATCAGAATGCAGATGCATATGTTTTTGTGG  
+HWI-EAS443:3:51:666:1985#0/1  
aba]`[\_aaaa\_]abaaaa^aa\_a^]`aa`a\_aaaa\_`^`  
@HWI-EAS443:3:51:76:1305#0/1  
TGGGGACATCAAGATACAGCAAGAAGTTCAAGCCGAAAT  
+HWI-EAS443:3:51:76:1305#0/1  
abb^X\_]bab``^aa¥aa`a`b\_\_aV`aa```W\_¥^W^[  
@HWI-EAS443:3:51:773:1069#0/1  
TCAGAATGCAGATGCATATGTTTTTGTGGGGACATCAAGA  
+HWI-EAS443:3:51:773:1069#0/1  
aaaba\_\_`a\_ba`a\_aa`ab]aaaa\_ba`a`]`\_\_\_\_\_  
@HWI-EAS443:3:51:789:686#0/1  
TGTTATTGAAAAGATGAATACACAGTTCACAGCAGTAGGT  
+HWI-EAS443:3:51:789:686#0/1  
abaa^baa]a`ab`aaaaaa`aXU`]`aaY`a\_^a]`a`Y  
@HWI-EAS443:3:51:798:1488#0/1  
CGTCAATGGCATTCTGTGTGCTCTTCAGGTCGGCTGCATA  
+HWI-EAS443:3:51:798:1488#0/1  
ab\_aa]abaaba¥D¥b\_b[Za\_V\_ZV`VXH]XIXY^[a``  
@HWI-EAS443:3:51:831:598#0/1  
TGAAGAGCACACAGAATGCCATTGACGAGATTACTAACAA  
+HWI-EAS443:3:51:831:598#0/1  
^ba]b^aaa]aa`b]ab``\_aaaa`ba\_^`ba^a\_`¥aa  
@HWI-EAS443:3:51:862:164#0/1  
CAGAATTTACTTTGTTAGTAATCTCGTCAATGGCATTCTG  
+HWI-EAS443:3:51:862:164#0/1  
a\_b^babbbabbabbbb`\_bbbaabbbbbaabbabbb¥bb  
@HWI-EAS443:3:51:910:333#0/1  
ATTAATTTTTGTAGAAGCTTTTTGCTCCAGCATGAGGAC  
+HWI-EAS443:3:51:910:333#0/1  
ab\_WXVa^a]abX`a`bb[YY`]a[UVVYY`Qa\_`]``]\_  
@HWI-EAS443:3:51:911:1930#0/1  
TGCAGATGCATATGTTTTTGTGGGGACATCAAGATACAGC  
+HWI-EAS443:3:51:911:1930#0/1  
^^\_ZX^]a]abbb\_b`^`¥U`Z]aIb\_]a^a^aa[aa`  
@HWI-EAS443:3:51:955:1545#0/1  
TGCATCTGCATTCTGATAGAGACTTTGTTGGTCAGCACTA  
+HWI-EAS443:3:51:955:1545#0/1  
a\_a``aZZY[¥YV]XI[Y\_XZVVZ\_[YXBBBBBBBBBBBB  
@HWI-EAS443:3:51:999:1062#0/1  
CAATGTAGGACCATGAGCTTGCTGTGGAGAGTGATTCACA  
+HWI-EAS443:3:51:999:1062#0/1  
abbb`bba`a`a`a\_]\_]abaab`aaaa\_a[``^a``]\_  
@HWI-EAS443:3:52:1057:1046#0/1  
ATTTACTTTGTTAGTAATCTCGTCAATGGCATTCTGTGTG  
+HWI-EAS443:3:52:1057:1046#0/1  
¥`b\_V]`^a`X`\_¥Z^]aP¥Vb¥`a]Zaaa`baYbaa\_¥]  
@HWI-EAS443:3:52:108:1274#0/1  
CTATTTCTTCTCTGTTTAATTTTGCTTCTCTGAGTATTT

+HWI-EAS443:3:52:108:1274#0/1  
a`S\_\_¥b`bbb\_bb\_\_a^^[`a\_a`a`a`a`b\_a`aaa`  
@HWI-EAS443:3:52:1099:1343#0/1  
ATGAAATCTCCTGGGTAACACGTTCCATTGTCTGAACTAG  
+HWI-EAS443:3:52:1099:1343#0/1  
\_abbbbaa`bbbbbba`\_Y`\_b`[``abaa`¥baaa^\_\_\_\_  
@HWI-EAS443:3:52:1109:1213#0/1  
TAGTAATCTCGTCAATGGCATTCTGTGTGCTCTTCAGGTC  
+HWI-EAS443:3:52:1109:1213#0/1  
aaaPZabab^aa\_\_a\_\_a\_\_\_\_`Z`[[`[a]a[a\_¥]\_ZTW  
@HWI-EAS443:3:52:1131:1611#0/1  
GCTCCTCATAATCGATGAAATCTCCTGGGTAACACGTTCC  
+HWI-EAS443:3:52:1131:1611#0/1  
a``\_]\_aaba¥aa`aabaaaab^`¥Y\_aa\_^S\_] [Saa¥QU  
@HWI-EAS443:3:52:1147:1074#0/1  
TGGTAGTCCAAAGTTCTTTTCATTTTCCAATAGAACCAACA  
+HWI-EAS443:3:52:1147:1074#0/1  
aaa\_aba^a`a`a\_a\_aaaY^aaaa^¥\_\_\_\_`^^`]^\_^^`  
@HWI-EAS443:3:52:1193:695#0/1  
TTTACCTACTGCTGTGAAGTGTGATTTCATCTTTTCAATA  
+HWI-EAS443:3:52:1193:695#0/1  
``a]]\_aa`\_a^`[^a^\_[aa`a^`aaT`a`a`\_`\_] [\_\_\_\_  
@HWI-EAS443:3:52:1243:43#0/1  
TGGCTGGATCCTGGGAAATCCAGAGTGTGAATCACTCTCC  
+HWI-EAS443:3:52:1243:43#0/1  
abbaa\_]\_U]Z\_]Wa\_`¥aa^U^¥¥[S\_S¥\_X^R[SVQXTN  
@HWI-EAS443:3:52:1267:141#0/1  
CGTGCATGGAAAGTGTCAAAAATGGGACTTATGACTACCC  
+HWI-EAS443:3:52:1267:141#0/1  
ab`baaabbaaab]aa`aaaaaaaaa\_bb`bba\_aaZZ\_  
@HWI-EAS443:3:52:1267:728#0/1  
GACACCCAAGGGTGTATAAACACCAGCCTCCCATTTCAG  
+HWI-EAS443:3:52:1267:728#0/1  
abab``aaaaa`\_a`a`aaa`\_a¥¥`\_]a\_]`\_a`aZ\_]`  
@HWI-EAS443:3:52:1283:761#0/1  
CCCCCTTCAATGAAACCGCAATGGCCCAAATAGGCCT  
+HWI-EAS443:3:52:1283:761#0/1  
abbb`abbbba`abaaaabaaa`〕``^abaa]\_aa[[a  
@HWI-EAS443:3:52:1346:1293#0/1  
GGCTAGTTAAAAAAGGAAATTCATACCCAAAGCTCAGCAA  
+HWI-EAS443:3:52:1346:1293#0/1  
aabb]babb`abaaaaaaa`a]\_\_aaaa]\_¥``T`\_  
@HWI-EAS443:3:52:1348:650#0/1  
CCGGCTTGAAGTCTTGCTGTATCTTGATGTCCCAAAA  
+HWI-EAS443:3:52:1348:650#0/1  
``bb`aab`aab^aa`a\_^\_aWa\_a`\_\_^¥^Y^\_^]\_`  
@HWI-EAS443:3:52:1442:1138#0/1  
GCCGGTTTCATTGAAGGGGGTGGACAGGGATGGTAGATG  
+HWI-EAS443:3:52:1442:1138#0/1  
a[^a]ZWW¥Y^`]¥Va^¥¥RFO^[XPT\_XVQV^ZWS¥UW\_

@HWI-EAS443:3:52:1472:1166#0/1  
TGATGACACTGAGCTCAATTGCTCTCTTAGCTCCTCATAA  
+HWI-EAS443:3:52:1472:1166#0/1  
abbaaa`ba\_b`a`a\_aaaa\_`a^a^aa^aZ]\_^a^\_`]]  
@HWI-EAS443:3:52:1493:1158#0/1  
GAGACTTTGTTGGTCAGCACTAGTAGATGGATGGTGAATG  
+HWI-EAS443:3:52:1493:1158#0/1  
a`^[¥aaaa¥a\_aRU\_]\_XX^X[V]\_W^\_\_]¥a\_Y\_`UU^  
@HWI-EAS443:3:52:1518:1674#0/1  
GCTGGATCCTGGGAAATCCAGAGTGTGAATCACTCTCCAC  
+HWI-EAS443:3:52:1518:1674#0/1  
]Q]`ba]¥]¥`V]¥\_¥^a`aaXZN`V`^RHKUXU^^ZN^T  
@HWI-EAS443:3:52:1524:647#0/1  
GGTGGACAGGGATGGTAGATGGATGGTACGGTTATCACCA  
+HWI-EAS443:3:52:1524:647#0/1  
\_]S[OW[ab¥¥Zaa¥U\_a[[^^UW[ZW\_W[\_V`\_ZSYRLU  
@HWI-EAS443:3:52:153:855#0/1  
GTAAAGAGTTCAACCACCTGGAAAAAAGAATAGAGAATTT  
+HWI-EAS443:3:52:153:855#0/1  
aabbaaaa^aaa\_```aaba^\_\_\_\_a\_`a\_a`b¥`````  
@HWI-EAS443:3:52:154:805#0/1  
CTTTGGACTACCACGATTCAAATGTGAAGAACTTATATGA  
+HWI-EAS443:3:52:154:805#0/1  
a¥b`babbbb\_Xabb^^\_bb`abbV`¥Q\_[\_^bbabbaaa  
@HWI-EAS443:3:52:1589:1724#0/1  
AGGAAATTGGAAACGGCTGCTTTGAATTTTACCACAAATG  
+HWI-EAS443:3:52:1589:1724#0/1  
abba\_aabaa`b`ba¥aaQYa^FSYOa\_\_OG¥UOW`^VS  
@HWI-EAS443:3:52:1591:1929#0/1  
TGCATATGTTTTGTGGGACATCAAGATACAGCAAGAAG  
+HWI-EAS443:3:52:1591:1929#0/1  
ab\_`aaabaabaaa^aaa^Q]a\_S^\_`]\_^aaZaaa^]a  
@HWI-EAS443:3:52:1642:925#0/1  
AAGCCAGTTAAAAACAATGCCAAGGAAATTGGAAACGGC  
+HWI-EAS443:3:52:1642:925#0/1  
aaa`\_\_`¥a\_a```]`\_]a^]WZ\_]\_WTW\_Y`[\_¥\_^VZ¥Z  
@HWI-EAS443:3:52:1643:143#0/1  
GCTGGCTGGATCCTGGGAAATCCAGAGTGTGAATCACTCT  
+HWI-EAS443:3:52:1643:143#0/1  
a\_aaZX\_aa¥[T[YPQZR\_]LKRYOJYYYYWS[YS¥KWBB  
@HWI-EAS443:3:52:164:950#0/1  
CAGAATTTACTTTGTTAGTAATCTCGTCAATGGCATTCTG  
+HWI-EAS443:3:52:164:950#0/1  
Za[M`b\_\_Y`bbbb`a\_aabaa¥\_Y\_\_[STa^S\_a\_`[aa  
@HWI-EAS443:3:52:1658:509#0/1  
CTGAGTATTTTGGGTAGTCATAAGTCCCATTTTGGACT  
+HWI-EAS443:3:52:1658:509#0/1  
aba`[]bb`Ybbb`a^RYa^b\_aRY¥`\_`^`aa\_RG¥^^  
@HWI-EAS443:3:52:1673:1182#0/1  
GGGTCAGGATATGCAGCCGACCTGAAGAGCACACAGAATG

+HWI-EAS443:3:52:1673:1182#0/1  
W\_bbabbbbabbbbabba[`bbabbbaaa\_ba\_baaab  
@HWI-EAS443:3:52:1715:226#0/1  
TCACTTTGGGTCTTATTGCTATTTCCGGCTTGAACCTTCTT  
+HWI-EAS443:3:52:1715:226#0/1  
aaa`abbab\_[0aaaa\_b\_aaaa\_Y`\_]\_]R]^`¥\_  
@HWI-EAS443:3:52:1735:324#0/1  
CAGTCCACGATTGCAATACAACCTGTCAGACACCCAAGGG  
+HWI-EAS443:3:52:1735:324#0/1  
`\_^Z^ZUZaZ^a`\_ba\_^Z\_¥^]¥¥]^`^W[\_^T\_ZUUV  
@HWI-EAS443:3:52:174:1897#0/1  
ATTTTCCAATTGTGATCGGATGTATATTCTGAAATGGGAG  
+HWI-EAS443:3:52:174:1897#0/1  
`aa`a`a`\_aaaX[\_`aa]Y`RU]WT][FV]^¥¥VM[^W\_  
@HWI-EAS443:3:52:1767:1030#0/1  
CGGCTTGAACCTTCTGCTGTATCTTGATGTCCCCACAAAA  
+HWI-EAS443:3:52:1767:1030#0/1  
\_aaZ¥a¥¥^UYWWY]WW¥Z¥¥¥¥\_]UZ[MXY\_a^T[\_]a\_  
@HWI-EAS443:3:52:1769:336#0/1  
CCTCTGAGTATTTTGGGTAGTCATAAGTCCCATTTTGGAC  
+HWI-EAS443:3:52:1769:336#0/1  
`\_bb[`bb\_^baba`Y`^`ab\_aabaa^^`[^`babbaa`¥  
@HWI-EAS443:3:52:182:453#0/1  
AAATTTTTGTAGAAGCTTTTTGCTCCAGCATGAGGACATG  
+HWI-EAS443:3:52:182:453#0/1  
aa]baaaaa`]a\_\_a]aaa\_a`^^\_U\_\_¥]\_`^\_\_Z^^^\_  
@HWI-EAS443:3:52:238:799#0/1  
GAGCAATTGAGCTCAGTGCATCATTGAAAGGTTTGAGA  
+HWI-EAS443:3:52:238:799#0/1  
aabb\_bb`^`ab`abbb`b`aabaaaabaaa`^`Waaaab`  
@HWI-EAS443:3:52:246:608#0/1  
GCTGAGCTTTGGGTATGAATTTCTTTTTTAACTAGCCAT  
+HWI-EAS443:3:52:246:608#0/1  
aaa`ZaaaaabaaZ^aaX^a`\_`^`\_`^`^`Y^^`Xa¥]^`\_  
@HWI-EAS443:3:52:290:304#0/1  
GGACATCAAGATACAGCAAGAAGTTCAAGCCGAAATAGC  
+HWI-EAS443:3:52:290:304#0/1  
`ba^`aaaa`\_aaaa]aa`^`\_aW]^`^`U]^`a^^W^^\_W  
@HWI-EAS443:3:52:306:1072#0/1  
GCCCCATTGCATTTGGGTAAATGTAACATTGCTGGCTGGA  
+HWI-EAS443:3:52:306:1072#0/1  
`Z`\_QHYXaPa`XV`X^`RSTNRTQJO¥JU\_aRLNPM¥B  
@HWI-EAS443:3:52:309:939#0/1  
ATGAAAAGGTAAGAAGCCAGTTAAAAACAATGCCAAGGA  
+HWI-EAS443:3:52:309:939#0/1  
abbaaaa`a]ba`aaaaab`^`\_a`aa\_a`aaa^a\_aS[  
@HWI-EAS443:3:52:320:1512#0/1  
GCTGGCTGGATCCTGGGAAATCCAGAGTGTGAATCACTCT  
+HWI-EAS443:3:52:320:1512#0/1  
aa`\_Y]^`a^^Z[¥SZ[XR[][\_ZZXQTR\_V\_¥^YU[ZUTK



@HWI-EAS443:3:52:341:724#0/1  
GAAACTGATTGCCCCAGGGAGACTACCAGTACCAATGAA  
+HWI-EAS443:3:52:341:724#0/1  
`]QXYU\_[Y¥a[]¥Y\_``^PX^JY[YJWZV¥]TTW]^ZZ  
@HWI-EAS443:3:52:346:792#0/1  
GGGGACATCAAGATACAGCAAGAAGTTCAAGCCGAAATA  
+HWI-EAS443:3:52:346:792#0/1  
abbaa\_aaaaaa`aaaaa\_[R\_R\_aa\_a¥\_a\_[[Z`\_  
@HWI-EAS443:3:52:383:791#0/1  
AATACACAGTTCACAGCAGTAGGTAAAGAGTTCAACCACC  
+HWI-EAS443:3:52:383:791#0/1  
a[ababaab\_aaaa`a\_b\_\_bbV`aaa`a]^a\_a`a\_`  
@HWI-EAS443:3:52:397:1535#0/1  
ATGAGGACATGCTGCCGTTACACCTTTGTTTCGAGTCATGA  
+HWI-EAS443:3:52:397:1535#0/1  
a\_`aa¥T\_`[ZT]W^W¥^[SVYWZRZGLNRRTLLUUPPZQ  
@HWI-EAS443:3:52:420:1288#0/1  
AACAAAGTCTCTATCAGAATGCAGATGCATATGTTTTGT  
+HWI-EAS443:3:52:420:1288#0/1  
^Y]X\_RaXa\_aaaaa\_W^`a`a\_¥Z^[U]\_`Z]Y\_\_^\_^Y  
@HWI-EAS443:3:52:427:1012#0/1  
CTTTGTTAGTAATCTCGTCAATGGCATTCTGTGTGCTCTT  
+HWI-EAS443:3:52:427:1012#0/1  
J]\_S[\_\_\_]\_V`Z\_^b[aa]XZX`aa[\_`b]a`\_[\_WWab\_  
@HWI-EAS443:3:52:427:633#0/1  
ACCCCTCTTAGTTTGCATAGTTTCCCCTTATGCTTGTCTT  
+HWI-EAS443:3:52:427:633#0/1  
\_[]aY¥Z`a^WYa^\_[a^[\_T]aX¥^¥0¥Y]Q[^^[¥PY]  
@HWI-EAS443:3:52:444:786#0/1  
GTAGTCCAAAGTTCTTTTCATTTTCCAATAGAACCAACAGT  
+HWI-EAS443:3:52:444:786#0/1  
PSSTUY`U¥U¥aba^TX¥Za\_Za\_a^ZaVa\_YZSX]P\_b`  
@HWI-EAS443:3:52:460:1276#0/1  
AAGCTTTTTGCTCCAGCATGAGGACATGCTGCCGTTACAC  
+HWI-EAS443:3:52:460:1276#0/1  
[`]ba`ba`\_]a[S]aaZa\_UX\_aaa`]TS]]\_\_UTZ  
@HWI-EAS443:3:52:467:470#0/1  
CGGGAACTATGCAAATAAGAGGGGTAGCCCCATTGCAT  
+HWI-EAS443:3:52:467:470#0/1  
ababU\_]abV]b\_]UP\_]NWVX[NZH\_\_RXSP^`\_`SWa  
@HWI-EAS443:3:52:481:1046#0/1  
GCTGGCTGGATCCTGGGAAATCCAGAGTGTGAATCACTCT  
+HWI-EAS443:3:52:481:1046#0/1  
aaaa\_Zaa\_]UNa\_^Q\_ZUa\_[Y[ZVYU[¥aWZX¥V¥¥Y^  
@HWI-EAS443:3:52:503:910#0/1  
CTCTGAGTATTTTGGGTAGTCATAAGTCCCATTTTGGACA  
+HWI-EAS443:3:52:503:910#0/1  
abbbabaV]bbabaaba¥b`bbb\_ab`\_`aabbbbbbba\_a  
@HWI-EAS443:3:52:526:1240#0/1  
CCATGAACCTGTCTTGGGGAATATCTCAAACCTTCAAAT

+HWI-EAS443:3:52:526:1240#0/1  
abbbbaaabababbbabab`ab`a`a`aa`\_baa\_a`aa  
@HWI-EAS443:3:52:539:571#0/1  
GGTTGAACTCTTTACCTACTGCTGTGAACTGTGATTTCAT  
+HWI-EAS443:3:52:539:571#0/1  
aa[a`a`a`\_aaaa[\_a]`[\_`Y`^\_X\_a[^X^a`W¥]  
@HWI-EAS443:3:52:547:895#0/1  
TGCATATCTCGGTACCACTAGATTTCCAGTTGCTTCGAAT  
+HWI-EAS443:3:52:547:895#0/1  
aba`\_[WWW`TPQN^^R`RW¥0\_^XS]TH]\_U\_Z^ZROW  
@HWI-EAS443:3:52:559:1812#0/1  
CCCCCTTCAATGAAACCGCAATGGCCCAAATAGGCCT  
+HWI-EAS443:3:52:559:1812#0/1  
aaabba`aa`b\_aa`^^^][a`\_a\_\_\_^\_aaa¥\_W¥UQ\_  
@HWI-EAS443:3:52:565:513#0/1  
GTGCTCTTCAGGTCGGCTGCATATCCTGACCCCTGCTCAT  
+HWI-EAS443:3:52:565:513#0/1  
`]aaa\_baa`a`U\_a[Zaa]\_^aaa\_\_[\_]Y`¥\_\_^YW`  
@HWI-EAS443:3:52:570:312#0/1  
GGCCAGTCTCAATTTTGTGCTTTTACATATTTTGGACAT  
+HWI-EAS443:3:52:570:312#0/1  
^bab^^bXZ[\_S[bb¥YR[]`baW`¥^[[Zabbaa[ZYX^  
@HWI-EAS443:3:52:629:1674#0/1  
CTAGATTTCCAGTTGCTTCGAATGTTATTTTGTCTCCCGG  
+HWI-EAS443:3:52:629:1674#0/1  
¥[^aW\_\_bWYY^R[``\_]XUXW\_]^]\_a`a`YT\_S[VP^  
@HWI-EAS443:3:52:718:821#0/1  
CATATCCTGACCCCTGCTCATTGTGATGGTGATAACCGTA  
+HWI-EAS443:3:52:718:821#0/1  
abbbb¥bbbbba`bbb`baabbaabaaab\_baaba]V^Z`  
@HWI-EAS443:3:52:794:453#0/1  
CACAAATGCGATAACACGTGCATGGAAAGTGCAAAAATG  
+HWI-EAS443:3:52:794:453#0/1  
abbabbbababbbababaaababaaaa\_babaabbaa  
@HWI-EAS443:3:52:809:560#0/1  
GCTCCTCATAATCGATGAAATCTCCTGGGTAACACGTTCC  
+HWI-EAS443:3:52:809:560#0/1  
aaa^aaa]aaa`\_a¥]`a^¥`\_`]\_\_[[`Za\_\_`^a`]]^  
@HWI-EAS443:3:52:812:396#0/1  
GCAGCATGTCCTCATGCTGGAGCAAAAAGCTTCTACAAAA  
+HWI-EAS443:3:52:812:396#0/1  
aa^`Y`ab]W¥a\_aa\_]\_a\_Xa\_aaY[]\_Naa[a`Z``]\_  
@HWI-EAS443:3:52:823:795#0/1  
GCTTCTCTGAGTATTTTGGGTAGTCATAAGTCCCATTTT  
+HWI-EAS443:3:52:823:795#0/1  
aabb\_^a`baab^aaa\_aaa`OU]XTZ\_]¥T^^ZX``\_`  
@HWI-EAS443:3:52:830:842#0/1  
GGGAAATCCAGAGTGTGAATCACTCTCCACAGCAAGCTCA  
+HWI-EAS443:3:52:830:842#0/1  
\_aaaabaaaaaab`b\_aaaaaaaaa`a\_a`aaa``a\_a```

@HWI-EAS443:3:52:880:715#0/1  
GCTTCCTCTGAGTATTTTGGGTAGTCATAAGTCCCATTTT  
+HWI-EAS443:3:52:880:715#0/1  
a\_abaab\_baab`abaaaa\_`aa`\_`aa`a[a¥`¥aaaa  
@HWI-EAS443:3:52:896:1691#0/1  
TGGCATTCTGTGTGCTCTTCAGGTCGGCTGCATATCCTGA  
+HWI-EAS443:3:52:896:1691#0/1  
aaaabbbbaaa]Z]ab]b^`^\_XR]aba`aZ`bbaaaaaZ  
@HWI-EAS443:3:52:903:943#0/1  
AGTCCACGATTGCAATACAACCTTGTCAGACACCCAAGGGT  
+HWI-EAS443:3:52:903:943#0/1  
ab]aaaabaabbabaaaa`\_aaa`\_aa`\_`^`[^aaa``V  
@HWI-EAS443:3:52:932:19#0/1  
GACAATGGAACGTGTTACCCAGGAGATTTTCATCGATTATG  
+HWI-EAS443:3:52:932:19#0/1  
aaa`^`\_`\_¥¥Q^¥a]XSNJNS`^U^Pa^Z[U][`SZUT¥`  
@HWI-EAS443:3:52:993:859#0/1  
GTTATTTTGTCTCCCGGCTCTACTAGTGTCCAGTAATAGT  
+HWI-EAS443:3:52:993:859#0/1  
a```a`]^[VR]`SJ[^`^X¥P¥TUL[WVQF¥UYSZSFK  
@HWI-EAS443:3:53:1010:863#0/1  
CATACCCAAAGCTCAGCAAATCCTACATTAATGATAAAGG  
+HWI-EAS443:3:53:1010:863#0/1  
SabbKbbbb`babbbbabbbbabbbaabbabb`baab`b  
@HWI-EAS443:3:53:1011:238#0/1  
ATGAAATCTCCTGGGTAACACGTTCCATTGTCTGAACTAG  
+HWI-EAS443:3:53:1011:238#0/1  
abbbbbbbabaabaab`aa`]`a``YRXaaaWaa\_`¥```  
@HWI-EAS443:3:53:1017:1628#0/1  
ATGAAATCTCCTGGGTAACACGTTCCATTGTCTGAACTAG  
+HWI-EAS443:3:53:1017:1628#0/1  
a`ab`[^`ba``\_]\_Z¥¥a\_`^T^a]Zaa`^`\_b\_X]^a^^  
@HWI-EAS443:3:53:1036:1992#0/1  
CTGAGTATTTTGGGTAGTCATAAGTCCCATTTTGGACACT  
+HWI-EAS443:3:53:1036:1992#0/1  
^a^^aabba`aaX\_G¥¥ST`\_\_`]0\_b`[^`b\_]baab\_a  
@HWI-EAS443:3:53:1056:302#0/1  
TGCATATCCTGACCCCTGCTCATTTTGGATGGTGATAACCG  
+HWI-EAS443:3:53:1056:302#0/1  
aba\_bbba\_]aba`\_aa^Xaaababb`aba^b^`a]YU[  
@HWI-EAS443:3:53:1061:1146#0/1  
GGGGCCATTGCCGTTTCATTGAAGGGGGTGGACAGGGA  
+HWI-EAS443:3:53:1061:1146#0/1  
aaTba^aWZ[^]a`Ya``¥`]YPU^`]aaaPY¥MSW¥^aP  
@HWI-EAS443:3:53:1076:641#0/1  
GCTTCGAATGTTATTTTGTCTCCCGGCTCTACTAGTGTCC  
+HWI-EAS443:3:53:1076:641#0/1  
\_\_^X`b^`a^Z[]^`bbaa``]¥Q\_a``Y^ML[¥`YVRQQ  
@HWI-EAS443:3:53:107:1068#0/1  
CAGGGGTCAGGATATGCAGCCGACCTGAAGAGCACACAGA

+HWI-EAS443:3:53:107:1068#0/1  
aabb\_G\_¥¥abaY`b¥bb]a^aaaa\_U^¥a`aa]X^aa  
@HWI-EAS443:3:53:1100:835#0/1  
CATCCATCTACTAGTGCTGACCAACAAAGTCTCTATCAGA  
+HWI-EAS443:3:53:1100:835#0/1  
aaaabbbbabbb\_abbab`ba`aaaa`a`aab`a`a  
@HWI-EAS443:3:53:1104:433#0/1  
GCTTCCTCTGAGTATTTGGGTAGTCATAAGTCCCATTT  
+HWI-EAS443:3:53:1104:433#0/1  
aaab¥]aabaW\_\_aa¥[Z]\_aX^Y\_`\_`\_aaT\_¥L[a`\_\_  
@HWI-EAS443:3:53:1111:301#0/1  
ATTTCCAGTTGCTTCGAATGTTATTTGTCTCCCGCTCT  
+HWI-EAS443:3:53:1111:301#0/1  
Y`aabb\_b^bbab¥I\_aaba^^abbbaaYZ]ZZ¥S¥Y\_^X  
@HWI-EAS443:3:53:1119:1038#0/1  
GCTGGCTGGATCCTGGGAAATCCAGAGTGTGAATCACTCT  
+HWI-EAS443:3:53:1119:1038#0/1  
^]\_`^`\_a`W¥^U^\_L^][X\_RYV\_ZaXaU\_XPXLUIW  
@HWI-EAS443:3:53:1120:194#0/1  
CAATAACAGAATTTACTTTGTTAGTAATCTCGTCAATGGC  
+HWI-EAS443:3:53:1120:194#0/1  
T\_S`¥aabV[]S[Y`^[KP¥bVV`[]aaVaV^aV¥XP[  
@HWI-EAS443:3:53:1209:1241#0/1  
GAACTTGTCTTGGGAATATCTCAAACCTTTCAAATGATG  
+HWI-EAS443:3:53:1209:1241#0/1  
a`\_]aabV`aa`]\_^aa\_a`^a\_`\_`^`aaaZaaaa`]a  
@HWI-EAS443:3:53:1231:1212#0/1  
CAGAATTTACTTTGTTAGTAATCTCGTCAATGGCATTCTG  
+HWI-EAS443:3:53:1231:1212#0/1  
`b`b\_aa]VbbXa[a`V]baaabNbb\_aaa]aRYX`  
@HWI-EAS443:3:53:1244:289#0/1  
ACTTCTTGCTGTATCTTGATGTCCCCACAAAAACATATGC  
+HWI-EAS443:3:53:1244:289#0/1  
abbbababaa`ab`babaab`\_aaa\_ab^`aaaaaa]  
@HWI-EAS443:3:53:1244:620#0/1  
GGGGACATCAAGATACAGCAAGAAGTTCAAGCCGAAAATA  
+HWI-EAS443:3:53:1244:620#0/1  
W\_¥\_aba\_GP[aa`\_WaS\_`b]^a\_a\_babX`b`]]¥aa  
@HWI-EAS443:3:53:1274:1775#0/1  
GCTTCCTCTGAGTATTTGGGTAGTCATAAGTCCCATTT  
+HWI-EAS443:3:53:1274:1775#0/1  
^\_\_`YZ`a`\_Y\_aa`^a¥`Z`a\_X\_^¥aaKHPTX]`\_]  
@HWI-EAS443:3:53:1359:466#0/1  
CTTCCTCTGAGTATTTGGGTAGTCATAAGTCCCATTT  
+HWI-EAS443:3:53:1359:466#0/1  
abbb`abbb`\_`¥bbbb`b^V^Y¥b\_aa]baV^ababbbb  
@HWI-EAS443:3:53:1379:1452#0/1  
GCTGGCTGGATCCTGGGAAATCCAGAGTGTGAATCACTCT  
+HWI-EAS443:3:53:1379:1452#0/1  
a\_`YQYa`[[ZRNU\_a[Z`^UZ`U^W`V¥UaS^^¥\_OUMW

@HWI-EAS443:3:53:137:380#0/1  
GGGGCATTACCATCCATCTACTAGTGCTGACCAACAAAG  
+HWI-EAS443:3:53:137:380#0/1  
aba`babbba\_^abb]abaaab`]ab]a\_`ba\_`[aaaa[a  
@HWI-EAS443:3:53:1396:1663#0/1  
CTGCATTCTGATAGAGACTTTGTTGGTCAGCACTAGTAGA  
+HWI-EAS443:3:53:1396:1663#0/1  
ab]Ybbbabbbbababbababbabab`]aa`^\_aab\_aa\_  
@HWI-EAS443:3:53:1400:1774#0/1  
ACATATTCTACTGTAGAGACCCATTAGAGCACATCCAG  
+HWI-EAS443:3:53:1400:1774#0/1  
aTZ]bbb[bVRYJV[a\_H\_]SQSQU`Z[[[aRWZY[HSUZ  
@HWI-EAS443:3:53:1440:504#0/1  
AGCCAGTTAAAAACAATGCCAAGGAAATTGGAAACGGCT  
+HWI-EAS443:3:53:1440:504#0/1  
aa[\_`babaaaaa`aab\_a^\_a`\_`\_a`aZ^^^`\_\_^^  
@HWI-EAS443:3:53:1447:2040#0/1  
GCTTCCTCTGAGTATTTTGGGTAGTCATAAGTCCCATTTT  
+HWI-EAS443:3:53:1447:2040#0/1  
a¥`a\_^aa```a]\_`a`\_a`¥U`\_]`]^^^Z^]Z\_]`^`^  
@HWI-EAS443:3:53:1485:273#0/1  
CATCTTTTCAATAACAGAATTTACTTTGTTAGTAATCTCG  
+HWI-EAS443:3:53:1485:273#0/1  
abbbbbbbbaabbbbaabbbbabbb`bbbbabb]abab^ba^  
@HWI-EAS443:3:53:1531:713#0/1  
GCTGGCTGGATCCTGGGAAATCCAGAGTGTGAATCACTCT  
+HWI-EAS443:3:53:1531:713#0/1  
\_abab`bb`]ababbab\_bba^abbba^bababbRb^a`X  
@HWI-EAS443:3:53:1533:1151#0/1  
GACAAGTTGTATTGCAATCGTGGACTGGTGTATCTGAAAT  
+HWI-EAS443:3:53:1533:1151#0/1  
a`\_\_\_\_`baaaaa`]aaa`a\_aa\_\_abaYba``^aa\_^\_`  
@HWI-EAS443:3:53:155:739#0/1  
TTCAGGTCGGCTGCATATCCTGACCCCTGCTCATTTTGAT  
+HWI-EAS443:3:53:155:739#0/1  
]aabaaTaaaa```aaa^aa`a`\_`\_\_[\_]\_[\_a^a\_`]  
@HWI-EAS443:3:53:1716:691#0/1  
CAAGTTGTATTGCAATCGTGGACTGGTGTATCTGAAATGA  
+HWI-EAS443:3:53:1716:691#0/1  
aaaa`a``bb`]¥a`a\_\_¥Pa^]a`U¥\_``]ababaa``  
@HWI-EAS443:3:53:1738:1322#0/1  
ATTCTGTGTCTTTCAGGTCGGCTGCATATCCTGACCCC  
+HWI-EAS443:3:53:1738:1322#0/1  
`ba]aa^baa`aZaa^a\_[V]UZ^`\_\_[Wa]R¥[U]WXQN  
@HWI-EAS443:3:53:1782:1464#0/1  
GTCAGGATATGCAGCCGACCTGAAGAGCACACAGAATGCC  
+HWI-EAS443:3:53:1782:1464#0/1  
a\_]aaaabaaba`a\_\_`\_]Z`¥^^^Z¥NZ]ZRY\_]`SVWS  
@HWI-EAS443:3:53:187:36#0/1  
AGATGGATGGTGAATGCCCCATAGCACGAGGACTTCTTTC

+HWI-EAS443:3:53:187:36#0/1  
aaabbaUabaabb\_bbaa\_]ababaa\_a`b\_\_^aa`aaa\_  
@HWI-EAS443:3:53:204:637#0/1  
CCTCTGAGTATTTTGGGTAGTCATAAGTCCCATTTTGGAC  
+HWI-EAS443:3:53:204:637#0/1  
abaa`babXZaa`baXU[a``\_`aa\_V`\_\_`\_\_aaaa\_^  
@HWI-EAS443:3:53:228:439#0/1  
GGCTGCTTTGAATTTTACCACAAATGCGATAACACGTGCA  
+HWI-EAS443:3:53:228:439#0/1  
¥[`^aaaa`a]aaab\_\_ba`U``aa¥\_V^¥]X\_X\_¥a\_¥  
@HWI-EAS443:3:53:254:1009#0/1  
AGCCAGTTAAAAACAATGCCAAGGAAATTGGAAACGGCT  
+HWI-EAS443:3:53:254:1009#0/1  
a]ab`\_`b`\_]a^a`aa`TT¥^ba\_^U]aa^¥`\_``¥^Y  
@HWI-EAS443:3:53:265:81#0/1  
GAAAAGGTAAGAAGCCAGTTAAAAACAATGCCAAGGAAA  
+HWI-EAS443:3:53:265:81#0/1  
aa`ZX`]X[¥a^a`[``a]`\_\_^XZZ\_X`¥XYS¥a¥X¥  
@HWI-EAS443:3:53:277:1189#0/1  
CATTCTGTGTGCTCTTCAGGTCGGCTGCATATCCTGACCC  
+HWI-EAS443:3:53:277:1189#0/1  
aab\_aaaZJUZY¥^aa¥\_]^^a`aab\_aaa`b\_[\_\_XVT¥R  
@HWI-EAS443:3:53:317:549#0/1  
AAGCTTTTTGCTCCAGCATGAGGACATGCTGCCGTTACAC  
+HWI-EAS443:3:53:317:549#0/1  
aab^bbaaabaab`aaaaa^\_aa`aa`\_`T[a¥\_^^^U  
@HWI-EAS443:3:53:397:687#0/1  
GGGACATCAAGATACAGCAAGAAGTTCAAGCCGAAATAG  
+HWI-EAS443:3:53:397:687#0/1  
a`][\_\_aaaa]aaa\_aaaaaa\_\_aYa^a¥a\_^a`Y^^\_`^`  
@HWI-EAS443:3:53:399:654#0/1  
AGGAAATTCATACCCAAAGCTCAGCAAATCCTACATTAAT  
+HWI-EAS443:3:53:399:654#0/1  
aaa`^bbb\_\_a^aabab^¥aV¥[\_P[\_\_]X]¥\_\_a¥^]  
@HWI-EAS443:3:53:440:279#0/1  
ATGCAAATAAGAGGGGTAGCCCCATTGCATTTGGGTAAA  
+HWI-EAS443:3:53:440:279#0/1  
aabaa\_aaaaaaab`\_\_a\_\_Za[\_^ZYU]^\_\_a`]]]]  
@HWI-EAS443:3:53:495:1006#0/1  
TTTTACCACAAATGCGATAACACGTGCATGGAAAGTGTCA  
+HWI-EAS443:3:53:495:1006#0/1  
aaaabaababaaaaaa`aa`^\_]aaa``aa]]\_\_a`  
@HWI-EAS443:3:53:506:1068#0/1  
GAATCACTCTCCACAGCAAGCTCATGGTCCTACATTGTGG  
+HWI-EAS443:3:53:506:1068#0/1  
aa[a\_aaV`a^¥aaZ\_^`aa]^b\_a\_[Tbaa]^`aa`[\_`X  
@HWI-EAS443:3:53:517:759#0/1  
ATTTACTTTGTTAGTAATCTCGTCAATGGCATTCTGTGTG  
+HWI-EAS443:3:53:517:759#0/1  
\_\_abbabbbb`\_\_```^`aabaaa`a\_\_]aaaaa¥`]`

@HWI-EAS443:3:53:550:1386#0/1  
TCGCATTTGTGGTAAAATTCAAAGCAGCCGTTTCCAATTT  
+HWI-EAS443:3:53:550:1386#0/1  
aab[a`ba`\_b\_Ua\_^`]`a`aa[W]¥^a^`]]V\_\_¥\_  
@HWI-EAS443:3:53:550:265#0/1  
CTAGTTCAGACAATGGAACGTGTACCCAGGAGATTTTCAT  
+HWI-EAS443:3:53:550:265#0/1  
abbbababbbabaabaaa`bZbaaaa`\_aa`\_b`\_a`\_\_a  
@HWI-EAS443:3:53:559:147#0/1  
CATCTTTTCAATAACAGAATTTACTTTGTTAGTAATCTCG  
+HWI-EAS443:3:53:559:147#0/1  
`b¥aabbbbb`\_aabbbbabbb^abbababbb`\_abb`b^`  
@HWI-EAS443:3:53:587:904#0/1  
CTGCCGTTACACCTTTGTTTCGAGTCATGATTGGGCCATGA  
+HWI-EAS443:3:53:587:904#0/1  
abb\_Z`a`[a`aWYa^\_Waaaa`Y]\_aa^U`\_`T`a\_aaU  
@HWI-EAS443:3:53:591:849#0/1  
ATCGATGAAATCTCCTGGGTAACACGTTCCATTGTCTGAA  
+HWI-EAS443:3:53:591:849#0/1  
ab`b`abaabaab`aaa]XWa\_aaa`a`\_aa]a`\_\_`^\_  
@HWI-EAS443:3:53:593:1123#0/1  
CCGATCACAATTGGAAAATGTCCAAAATATGTAAAAAGCA  
+HWI-EAS443:3:53:593:1123#0/1  
aaab\_\_b^b`b^Na[aVbb`aa`aabbba\_UXbbabbb``  
@HWI-EAS443:3:53:605:546#0/1  
AAAATAACATTGCAAGCAACTGGAAATCTAGTGGTACCGA  
+HWI-EAS443:3:53:605:546#0/1  
ababbbba`abbabaabaaa^baaaaaaaaa]aa\_a\_ab\_  
@HWI-EAS443:3:53:614:1217#0/1  
CACCTTTGTTTCGAGTCATGATTGGGCCATGAACTTGTCTT  
+HWI-EAS443:3:53:614:1217#0/1  
\_Z`aba`\_`bbbb`babbbba`abbab`^baba^abbbbaaaa  
@HWI-EAS443:3:53:645:342#0/1  
AAAAAAGTTGATGATGTTTCTGGACATTTGGACTTACA  
+HWI-EAS443:3:53:645:342#0/1  
aaabaab`bbbbbabbbabaa¥baba`aabaaaa^baaaa  
@HWI-EAS443:3:53:712:112#0/1  
GAGCAATTGAGCTCAGTGTTCATCATTGAAAGGTTTGAGA  
+HWI-EAS443:3:53:712:112#0/1  
aaa`bbbbbaa`\_`ab^a`^aa`aaaa```aa]aa`aa\_  
@HWI-EAS443:3:53:726:723#0/1  
AAGTCCTCGTGCTATGGGGCATTACCATCCATCTACTAG  
+HWI-EAS443:3:53:726:723#0/1  
`baa`^bbbabaaabbaba\_aaaabaXaa¥]^a\_a`Zaaa  
@HWI-EAS443:3:53:733:320#0/1  
AAAACATATGCATCTGCATTCTGATAGAGACTTTGTTGGT  
+HWI-EAS443:3:53:733:320#0/1  
abbbbab`aaa`bbababba`bbabab^aaaaaa`aa]S  
@HWI-EAS443:3:53:742:1141#0/1  
ATCTTTTCAATAACAGAATTTACTTTGTTAGTAATCTCGT

+HWI-EAS443:3:53:742:1141#0/1  
a`^\_bb^T\_b` `]Ra^]a\_^[QQbZW^T]^a[SQb^a\_aN  
@HWI-EAS443:3:53:742:813#0/1  
AGCACATCCAGAACTGATTGCCCCAGGGAGACTACCAG  
+HWI-EAS443:3:53:742:813#0/1  
abaa`bbbaba` `a[bbaaaba`¥^ab\_¥\_`aa`a`W`\_a  
@HWI-EAS443:3:53:751:2032#0/1  
GGGGACATCAAGATACAGCAAGAAGTTCAAGCCGAAATA  
+HWI-EAS443:3:53:751:2032#0/1  
ab^Z` `a`^^]a\_\_aaaa`ab` ``aW]\_` `aT[aaZ^\_^]  
@HWI-EAS443:3:53:768:915#0/1  
GGGGTGGACAGGGATGGTAGATGGATGGTACGGTTATCAC  
+HWI-EAS443:3:53:768:915#0/1  
aba\_]b`\_X` `\_ZX]a[W`\_XZ]ZP\_aaU`U]^S]\_\_VZY  
@HWI-EAS443:3:53:783:1075#0/1  
AACGTGTTACCCAGGAGATTTTCATCGATTATGAGGAGCTA  
+HWI-EAS443:3:53:783:1075#0/1  
aa] [\_baba` `` `ababa`\_baabab\_baabaaba`\_aa  
@HWI-EAS443:3:53:853:403#0/1  
CAAGATACAGCAAGAAGTTCAAGCCGAAATAGCAATAAG  
+HWI-EAS443:3:53:853:403#0/1  
`\_ab` `babbaabb`b`X\_Z`ab\_aabaa\_aabaaaa`\_`  
@HWI-EAS443:3:53:888:570#0/1  
TTGGGTATGAATTTCTTTTTTAACTAGCCATATTAAT  
+HWI-EAS443:3:53:888:570#0/1  
aab]\_I\_aa¥¥[\_\_\_\_][aa]a\_V\_\_`]^\_\_¥\_\_aa^¥T\_a  
@HWI-EAS443:3:53:922:1906#0/1  
CTTCAGGTGGCTGCATATCCTGACCCCTGCTCATTTTGA  
+HWI-EAS443:3:53:922:1906#0/1  
ab]\_ba`][H` `bbbbbbWbbbbba[ ` `abbaababab^  
@HWI-EAS443:3:53:970:137#0/1  
GCTGGCTGGATCCTGGGAAATCCAGAGTGTGAATCACTCT  
+HWI-EAS443:3:53:970:137#0/1  
a^]Z¥SX\_^T]RNVaaYKW^ZTY¥\_V^U^U\_V[[RWSUUU  
@HWI-EAS443:3:54:102:1354#0/1  
GGAGGCTGGTGTATAGCACCCCTGGGTGTCTGACAAGT  
+HWI-EAS443:3:54:102:1354#0/1  
aa`aaaaaN` `aaa\_[`\_Y^` `Q\_¥a\_T^W¥^ZU\_¥N\_¥  
@HWI-EAS443:3:54:1030:1648#0/1  
CAGGGTCAGGATATGCAGCCGACCTGAAGAGCACACAGA  
+HWI-EAS443:3:54:1030:1648#0/1  
abbbab^bba`bbbbbaab` `^ba`bbabbababaaabba  
@HWI-EAS443:3:54:1030:487#0/1  
AGAAATGCTGGATCTGGTATTATCATTTCAGATACACCAG  
+HWI-EAS443:3:54:1030:487#0/1  
aaaaaa`aaabaaabba^abaaa]aaaa\_aaaaa^a`^a`  
@HWI-EAS443:3:54:1035:366#0/1  
TGGGGACATCAAGATACAGCAAGAAGTTCAAGCCGAAAT  
+HWI-EAS443:3:54:1035:366#0/1  
^^^a^]S\_\_PU[\_] `b` ``XZ¥WQZ]FRYSSaXNVXSX¥R



@HWI-EAS443:3:54:1054:421#0/1  
AAGCCAGTTAAAAACAATGCCAAGGAAATTGGAAACGGC  
+HWI-EAS443:3:54:1054:421#0/1  
abaYba^\_`aaa`Zaaaa\_a¥]`aa`a\_aa`\_\_R\_X\_`T  
@HWI-EAS443:3:54:105:224#0/1  
CTGGCTGGATCCTGGGAAATCCAGAGTGTGAATCACTCTC  
+HWI-EAS443:3:54:105:224#0/1  
abbbbaabb^aaa`ba`^aa`^X`a¥a^a[aa`^¥^Z`[¥X  
@HWI-EAS443:3:54:1070:1425#0/1  
TAGCTCCTCATAATCGATGAAATCTCCTGGGTAACACGTT  
+HWI-EAS443:3:54:1070:1425#0/1  
`ba`ba]baab`aa\_aaa^T]\_aYb`a\_a`aPaaQbUa\_`  
@HWI-EAS443:3:54:1078:425#0/1  
CTTCCTCTGAGTATTTTGGGTAGTCATAAGTCCCATTTTT  
+HWI-EAS443:3:54:1078:425#0/1  
``\_¥\_bab\_bYZ`bb]]X]U`b\_aaa`]aY¥W^^baaaa  
@HWI-EAS443:3:54:107:857#0/1  
GGGGACATCAAGATACAGCAAGAAGTTCAAGCCGAAATA  
+HWI-EAS443:3:54:107:857#0/1  
aaaaaaaaaaaaaaaa`aa\_aaZ\_^`\_\_\_\_`^\_U^\_  
@HWI-EAS443:3:54:1081:1368#0/1  
GCCATGAACCTGTCTTGGGAATATCTCAAACCTTTCAAA  
+HWI-EAS443:3:54:1081:1368#0/1  
a\_\_\_a][^J[aa^aa]Z]¥`\_a`Y`^\_\_\_\_]]`\_][^^  
@HWI-EAS443:3:54:1103:1311#0/1  
AAGAAGCCAGTTAAAAACAATGCCAAGGAAATTGGAAAC  
+HWI-EAS443:3:54:1103:1311#0/1  
ab``babaabaaa\_aaa`a[a`a¥`a[a\_`¥[a]^`\_`\_¥  
@HWI-EAS443:3:54:1112:1018#0/1  
AGCAACTGGAAATCTAGTGGTACCGAGATATGCATTCGCA  
+HWI-EAS443:3:54:1112:1018#0/1  
aaa]aabbba`aaaaab`aa`a\_Zaaaaaaaa\_aaa\_]`\_  
@HWI-EAS443:3:54:1155:635#0/1  
GCTGGCTGGATCCTGGGAAATCCAGAGTGTGAATCACTCT  
+HWI-EAS443:3:54:1155:635#0/1  
\_Paa]^`\_`RX\_aVab\_aa`\_\_`\_YTXP`R`\_a\_UR¥^R^  
@HWI-EAS443:3:54:1157:741#0/1  
AATTTACTTTGTTAGTAATCTCGTCAATGGCATTCTGTGT  
+HWI-EAS443:3:54:1157:741#0/1  
abbbbaabbbbaaaa`aaa^aab\_\_a`aZaaaa\_a\_^\_]`  
@HWI-EAS443:3:54:1167:408#0/1  
CGGCTGCTTTGAATTTTACCACAAATGCGATAACACGTGC  
+HWI-EAS443:3:54:1167:408#0/1  
`abaab¥a`aa\_\_\_aba]\_Ra`aa\_ZY¥Y[]`VZ\_ZXa^  
@HWI-EAS443:3:54:1171:1423#0/1  
AAAATTCAAAGCAGCCGTTTCCAATTTCCCTTGGCATTGTT  
+HWI-EAS443:3:54:1171:1423#0/1  
a`a`bb\_\_Z]aXaaWZ[U`\_]X\_^a\_`U^]`^^^Wa\_a^`  
@HWI-EAS443:3:54:1179:893#0/1  
TTCTGTGTGCTCTTCAGGTCGGCTGCATATCCTGACCCCT

+HWI-EAS443:3:54:1179:893#0/1  
a]Ta[X\_\_ba]^baSa^a[P[TV]a\_¥Wa`[\`¥aZNNUR]  
@HWI-EAS443:3:54:1194:282#0/1  
GATGAAATCTCCTGGGTAACACGTTCCATTGTCTGAACTA  
+HWI-EAS443:3:54:1194:282#0/1  
a\_aaZS\_a\_aZL¥X¥`Pa\_Z`YY]\_RU¥Z¥¥WT]ZZVQVS  
@HWI-EAS443:3:54:1238:1869#0/1  
GATGAAATCTCCTGGGTAACACGTTCCATTGTCTGAACTA  
+HWI-EAS443:3:54:1238:1869#0/1  
\_\_aa[b¥[¥]]a]aa]Ua]L`RbZT][a]abYSVa`KGYS  
@HWI-EAS443:3:54:124:1510#0/1  
TACATATTCTACTGTAGAGACCCATTAGAGCACATCCA  
+HWI-EAS443:3:54:124:1510#0/1  
`babb¥]^`a`aa`[[`a^`a[¥``[Z^\_]\_\_a`¥W¥\_`  
@HWI-EAS443:3:54:1252:1526#0/1  
GCAAATCCTACATTAATGATAAAGGGAAAGAAGTCCTCGT  
+HWI-EAS443:3:54:1252:1526#0/1  
a\_`a\_a\_abaaaba\_`bbaaaa`\_`a^Ja]\_\_a^WS`^`\_]  
@HWI-EAS443:3:54:1290:1514#0/1  
ATCAGAATGCAGATGCATATGTTTTGTGGGGACATCAAG  
+HWI-EAS443:3:54:1290:1514#0/1  
`\_Z\_^]bb`aZ\_a¥^[Ua\_aaa``aSP`a`^`\_a\_Z\_`L]  
@HWI-EAS443:3:54:1369:1950#0/1  
GAAATGCTGGATCTGGTATTATCATTTCAGATACACCAGT  
+HWI-EAS443:3:54:1369:1950#0/1  
aaaab`aaabba^a````a^aaaaaaU]aaa`^aaU`a^  
@HWI-EAS443:3:54:1427:1307#0/1  
GAACTCTTTACTACTGCTGTGAAGTGTATTTCATCTTT  
+HWI-EAS443:3:54:1427:1307#0/1  
^bbXb¥baba^\_aZJaa`\_`X[\_Xa\_a¥Ybb]J¥aa``a  
@HWI-EAS443:3:54:1483:783#0/1  
CTGGCTGGATCCTGGGAAATCCAGAGTGTGAATCACTCTC  
+HWI-EAS443:3:54:1483:783#0/1  
a\_^a^```]a`]babbabaa\_ZXU^`Vb\_`\_`OW^]S]U  
@HWI-EAS443:3:54:1493:1158#0/1  
AACATTGCTGGCTGGATCCTGGGAAATCCAGAGTGTGAAT  
+HWI-EAS443:3:54:1493:1158#0/1  
aaaaba^^b`[[ba\_¥\_[]^a\_aX`aa][`a\_a¥a\_\_\_\_¥  
@HWI-EAS443:3:54:1536:457#0/1  
GAAGTCCTCGTGCTATGGGGCATTACCATCCATCTACTA  
+HWI-EAS443:3:54:1536:457#0/1  
a^Z^a^)`^^[U`a\_a^aa^H^a\_\_\_\_WS\_\_\_\_][`\_Q\_\_\_\_\_]`  
@HWI-EAS443:3:54:1542:1393#0/1  
GTGGGGACATCAAGATACAGCAAGAAGTTCAAGCCGGAAA  
+HWI-EAS443:3:54:1542:1393#0/1  
aab`\_ba`^a]\_`a¥a`^`a¥`aa`\_a]`\_a\_a^Ua\_¥¥¥  
@HWI-EAS443:3:54:1547:860#0/1  
TGAATTTCTTTTTTAACTAGCCATATTAATTTTTGTAG  
+HWI-EAS443:3:54:1547:860#0/1  
aaaabbbba\_abbbaaa\_a\_a\_\_`aaaaaa`baaaa\_\_a]

@HWI-EAS443:3:54:1565:501#0/1  
CCGGGAGACAAAATAACATTCTGAAGCAACTGGAAATCTAG  
+HWI-EAS443:3:54:1565:501#0/1  
`\_a`abaaababbbb`abaaa`aa[aa\_a`W\_]YaWaa\_  
@HWI-EAS443:3:54:1569:930#0/1  
CACGTGCATGGAAAGTGTCAAAAATGGGACTTATGACTAC  
+HWI-EAS443:3:54:1569:930#0/1  
ab``a``bbbbabbbababbbbab\_X¥aabbbbbbabb`  
@HWI-EAS443:3:54:156:1805#0/1  
CTGGATCCTGGGAAATCCAGAGTGTGAATCACTCTCCACA  
+HWI-EAS443:3:54:156:1805#0/1  
aaba^ZabaaaaZ`a`abaaa]RUTZ\_[¥¥`]X^X`[^\_a  
@HWI-EAS443:3:54:1577:92#0/1  
ATTGCTGGCTGGATCCTGGGAAATCCAGAGTGTGAATCAC  
+HWI-EAS443:3:54:1577:92#0/1  
abbb[aba^bbaaaa^H][\_aa`Y[aa]aX`\_`[\_[\_`Z  
@HWI-EAS443:3:54:159:1570#0/1  
CAAATGCGATAACACGTGCATGGAAAGTGTCAAAAATGGG  
+HWI-EAS443:3:54:159:1570#0/1  
abaa\_Y`\_^\_a`ba\_\_bb`^Y[aaa^b^`]`````^¥  
@HWI-EAS443:3:54:1612:956#0/1  
ATTTACTTTGTTAGTAATCTCGTCAATGGCATTCTGTGTG  
+HWI-EAS443:3:54:1612:956#0/1  
abbbbaabbbbaaab`a`b\_aab\_^a`a\_\_`aa¥aa\_a`a  
@HWI-EAS443:3:54:1622:154#0/1  
TACCCCTCTTAGTTTGCATAGTTTCCCGTTATGCTTGTCT  
+HWI-EAS443:3:54:1622:154#0/1  
ab^]¥\_\_^`\_`Y¥Z]a[`a[aYa`\_^`\_\_^`\_]\_Z[Y`  
@HWI-EAS443:3:54:1627:1908#0/1  
CCTCTGAGTATTTTGGGTAGTCATAAGTCCCATTTTTGAC  
+HWI-EAS443:3:54:1627:1908#0/1  
aabbbbbb[abba`aa]``]`aa`\_L]`Y`b`abaa`¥  
@HWI-EAS443:3:54:165:1112#0/1  
ATTTTGATGGTGATAACCGTACCATCCATCTACCATCCCT  
+HWI-EAS443:3:54:165:1112#0/1  
aba`aba[`NX`a`aaaa¥WTY`\_^\_Z`^¥[W¥Y`UW¥¥YT  
@HWI-EAS443:3:54:1662:1106#0/1  
CAAATCCTACATTAATGATAAAGGGAAAGAAGTCCTCGTG  
+HWI-EAS443:3:54:1662:1106#0/1  
V^¥[\_`ba`^`bbbbbbabbbba^`\_`a\_aa¥\_\_]a¥Z`b  
@HWI-EAS443:3:54:1671:463#0/1  
CTCGTCAATGGCATTCTGTGTGCTCTTCAGGTGGGCTGCA  
+HWI-EAS443:3:54:1671:463#0/1  
aaab¥`VQUa^Z]¥ZXU¥Q`[VVP[\_[NUa]¥¥aW^¥\_U¥  
@HWI-EAS443:3:54:1716:295#0/1  
GAAGTCCTCGTGCTATGGGGCATTACCATCCATCTACTA  
+HWI-EAS443:3:54:1716:295#0/1  
]bbbbabb\_a`a\_bba^Y[^]`bb¥ba`baaZ^bZba[b\_  
@HWI-EAS443:3:54:19:1211#0/1  
TCCTCGTGCTATGGGGCATTACCATCCATCTACTAGTGC

+HWI-EAS443:3:54:19:1211#0/1  
\_N¥\_ZYDP\_]¥P^`aa\_aaa]^aa\_aSaTS[^^\_\_ZQ\_Y  
@HWI-EAS443:3:54:210:591#0/1  
AAGGAAATTGGAAACGGCTGCTTTGAATTTTACCACAAAT  
+HWI-EAS443:3:54:210:591#0/1  
aabab)`aabbaa^\_b```\_GN[\_QKSN¥\_\_BBBBBBBBB  
@HWI-EAS443:3:54:243:607#0/1  
GGCATTACCATCCATCTACTAGTGCTGACCAACAAAGTC  
+HWI-EAS443:3:54:243:607#0/1  
aaaabbabaaaaaaaa`aa\_a\_a^a`a`\_`a\_a`\_aU^  
@HWI-EAS443:3:54:252:173#0/1  
TGCCGTTACACCTTTGTTTCGAGTCATGATTGGGCCATGAA  
+HWI-EAS443:3:54:252:173#0/1  
a``b^aa`]W^`a]a^`]\_\_aVV^`[^Y``\_WWS[]XV  
@HWI-EAS443:3:54:259:1402#0/1  
GCTGGCTGGATCCTGGGAAATCCAGAGTGTGAATCACTCT  
+HWI-EAS443:3:54:259:1402#0/1  
abb\_babbbba]Y\_Xbbbaaaa\_a`a`bS`Ya`a\_[a```\_  
@HWI-EAS443:3:54:262:1366#0/1  
GAAAGAACTTTGGACTACCACGATTCAAATGTGAAGAACT  
+HWI-EAS443:3:54:262:1366#0/1  
a`aaaaaaaaaaaa`aaaaaaaa`^`a`\_`a[a\_]\_\_\_\_\_  
@HWI-EAS443:3:54:267:989#0/1  
TGCTGGCTGGATCCTGGGAAATCCAGAGTGTGAATCACTC  
+HWI-EAS443:3:54:267:989#0/1  
a`¥[RW\_P\_TZ[YUQQSWMV]¥RVX¥[URYR¥UTR[BBBB  
@HWI-EAS443:3:54:274:783#0/1  
GTCCCATTTTTGACACTTTCCATGCACGTGTTATCGCATT  
+HWI-EAS443:3:54:274:783#0/1  
a)````\_`aaaa\_]¥OWa`^`X¥[]YY\_Z]¥^ZYP\_[¥Y^  
@HWI-EAS443:3:54:293:1195#0/1  
GTGGGGACATCAAGATACAGCAAGAAGTTCAAGCCGGAAA  
+HWI-EAS443:3:54:293:1195#0/1  
[D[\_W\_\_Xa^XZ^Y^a\_¥aaa\_]ZZ`[[Xa^`^¥^^[V]  
@HWI-EAS443:3:54:307:1316#0/1  
GCTCATTTTTGATGGTGATAACCGTACCATCCATCTACCAT  
+HWI-EAS443:3:54:307:1316#0/1  
aaa]SYa¥^]XM^[H\_T[\_Z\_Z¥S[\_`a\_\_\_\_]¥¥R^UZ^\_^  
@HWI-EAS443:3:54:314:991#0/1  
GGGGACATCAAGATACAGCAAGAAGTTCAAGCCGGAAATA  
+HWI-EAS443:3:54:314:991#0/1  
\_aab`ab`\_abaaab^bbb`bba\_b`\_aaba\_aaa\_``a`  
@HWI-EAS443:3:54:329:15#0/1  
GGCATTCTGTGTGCTCTTCAGGTCGGCTGCATATCCTGAC  
+HWI-EAS443:3:54:329:15#0/1  
a`\_^[\_ab`P\_]aabaaaa``\_KZ\_]`^Y¥TT]XVQ^UR  
@HWI-EAS443:3:54:368:915#0/1  
CGGGAGACAAAATAACATTTCGAAGCAACTGGAAATCTAGT  
+HWI-EAS443:3:54:368:915#0/1  
aa¥a[aa`\_a]\_a\_¥aba`a]aP]S]\_TX`^R\_¥aYY[\_Z

@HWI-EAS443:3:54:387:115#0/1  
TCCGGCTTGAACCTTCTTGCTGTATCTTGATGTCCCCACAA  
+HWI-EAS443:3:54:387:115#0/1  
aa`bb\_baa[\U]\T`\a\_a\_]\`Y\_`^]\\_[\X]^W^]  
@HWI-EAS443:3:54:418:154#0/1  
GCCGGTTTCATTGAAGGGGGTGGACAGGGATGGTAGATG  
+HWI-EAS443:3:54:418:154#0/1  
aaaab`baa\_bb\_Z\_bbb`\bWa`^^\_`\\_¥`a\_U\_`\_Z\_  
@HWI-EAS443:3:54:46:1703#0/1  
CAGGGATGGTAGATGGATGGTACGGTTATCACCATCAAAA  
+HWI-EAS443:3:54:46:1703#0/1  
aabb^ba^U^bbba`baa\_aaba\_a\_aabbU¥bbaab\_  
@HWI-EAS443:3:54:471:1592#0/1  
TGCATATCTCGGTACCACTAGATTTCCAGTTGCTTCAAT  
+HWI-EAS443:3:54:471:1592#0/1  
`b]bbbb`aab`]aaaa`a\_`\`aa`aa^^a¥a`\`a\_\_a  
@HWI-EAS443:3:54:486:1963#0/1  
CTCAGAGGAAGCAAAATTAACAGAGAAGAAATAGATGGG  
+HWI-EAS443:3:54:486:1963#0/1  
aa`¥MXU\_P¥]TMQVU[TYU`\_aYFW[X]^]]\_UR[¥NY  
@HWI-EAS443:3:54:505:396#0/1  
CACAAATGCGATAACACGTGCATGGAAAGTGTCAAAAATG  
+HWI-EAS443:3:54:505:396#0/1  
`\`bab`b^bab`\`baa`abb`abbbbaab`baabaaaaab  
@HWI-EAS443:3:54:514:137#0/1  
GCCGGTTTCATTGAAGGGGGTGGACAGGGATGGTAGATG  
+HWI-EAS443:3:54:514:137#0/1  
aaaba\_aaa`\`abY^a[\`aaaUaa¥¥a`\`\_a¥¥aYS[[UV^  
@HWI-EAS443:3:54:518:1184#0/1  
TGCCGTTACACCTTTGTTGAGTCATGATTGGGCCATGAA  
+HWI-EAS443:3:54:518:1184#0/1  
a`\`ab`\`\_`¥`¥¥]\`abaa`aa^\_]\`¥a`¥a\_]Z`^`\_`\_Z]\`¥  
@HWI-EAS443:3:54:546:1448#0/1  
GATTCACACTCTGGATTTCCAGGATCCAGCCAGCAATGT  
+HWI-EAS443:3:54:546:1448#0/1  
a]ab^^UWYI\_[^MNJX[[Y[\_Y^QYLSXTUTTV[\_R]]X  
@HWI-EAS443:3:54:547:1235#0/1  
GCTGTATCTTGATGTCCCCACAAAACATATGCATCTGCA  
+HWI-EAS443:3:54:547:1235#0/1  
a`ab`aaaaaaaaa^a¥¥`\`Z]\_a]a]\`\_\_`\`a\_`]Z  
@HWI-EAS443:3:54:575:1923#0/1  
AAACACCAGCCTCCCATTTCAGAATATACATCCGATCACA  
+HWI-EAS443:3:54:575:1923#0/1  
YYUT]\`^a^GW`\`a`UW\_`^`^bXU^T¥a]\_`J¥`RNNZP[  
@HWI-EAS443:3:54:593:997#0/1  
CTCAAACCTTTCAAATGATGACACTGAGCTCAATTGCTCT  
+HWI-EAS443:3:54:593:997#0/1  
abbaaZabbaaba^`bbbbbbababbbbababababaaaa  
@HWI-EAS443:3:54:605:264#0/1  
GACAATGGAACGTGTACCCAGGAGATTTTCATCGATTATG

+HWI-EAS443:3:54:605:264#0/1  
abab¥baZ^\_U^^a]\_a`^Y[a[[bVY]]\_]aUa]`\_\_`]  
@HWI-EAS443:3:54:649:548#0/1  
GATGGTTTCCTGGACATTTGGACTTACAATGCCGAAGTGT  
+HWI-EAS443:3:54:649:548#0/1  
^babbabaaabba`aabbbabaaaaaaba^VaabS`a\_  
@HWI-EAS443:3:54:683:1107#0/1  
TGAAAAGGTAAGAAGCCAGTTAAAAACAATGCCAAGGAA  
+HWI-EAS443:3:54:683:1107#0/1  
abaa`\_`b\_aaaa`^\_aabaaa``aaY¥aaab^` `a`Ya\_  
@HWI-EAS443:3:54:68:212#0/1  
AGCCAGTTAAAAACAATGCCAAGGAAATTGGAAACGGCT  
+HWI-EAS443:3:54:68:212#0/1  
aaa\_P`^Z^\_X`^]`^aZURUU`\_[U^¥^VUU]^X\_WVZ  
@HWI-EAS443:3:54:692:969#0/1  
CTGCCGTTACACCTTTGTTTCGAGTCATGATTGGGCCATGA  
+HWI-EAS443:3:54:692:969#0/1  
abbbbbbb\_bbaababaaaba^`baa\_b\_Yaaabb`\_a\_aa  
@HWI-EAS443:3:54:694:509#0/1  
TGGGGACATCAAGATACAGCAAGAAGTTCAAGCCGAAAT  
+HWI-EAS443:3:54:694:509#0/1  
abbaaaaaa\_aaaaa\_aa`aaa`aa]`\_`a\_\_Ya`Z`\_a  
@HWI-EAS443:3:54:698:1090#0/1  
GGTACCACTAGATTTCCAGTTGCTTCGAATGTTATTTTGT  
+HWI-EAS443:3:54:698:1090#0/1  
aa`baabababababbaabaaaaabaa` `aa`aabaaaa¥  
@HWI-EAS443:3:54:698:854#0/1  
ATTTACTTTGTTAGTAATCTCGTCAATGGCATTCTGTGTG  
+HWI-EAS443:3:54:698:854#0/1  
aaabaYa`T`[\_`¥a][[ZNa\_]Q¥S]`^UTV\_YQ\_YX\_MP  
@HWI-EAS443:3:54:702:21#0/1  
GGCTAGTTAAAAAAGGAAATTCATACCCAAAGCTCAGCAA  
+HWI-EAS443:3:54:702:21#0/1  
a` `ZZ[^Y]U¥^¥¥UUPU\_\_YT]STRR¥`^Y]^TT¥TZS  
@HWI-EAS443:3:54:706:948#0/1  
TGCTGGCTGGATCCTGGGAAATCCAGAGTGTGAATCACTC  
+HWI-EAS443:3:54:706:948#0/1  
Zbbbabbaabaaa\_]aaaaZ\_aV`]Wa^a\_^`\_]Z\_  
@HWI-EAS443:3:54:790:489#0/1  
GATTTCCAGTTGCTTCGAATGTTATTTTGTCTCCCGGCTC  
+HWI-EAS443:3:54:790:489#0/1  
aaabaaaYa\_b`a`a^aa` `a[\_aaaa`\_^X[\_`^`¥  
@HWI-EAS443:3:54:843:1222#0/1  
CAGGGATGGTAGATGGATGGTACGGTTATCACCATCAAAA  
+HWI-EAS443:3:54:843:1222#0/1  
abab`a\_^\_SZbbabbaa`WT` `ba\_\_aaaa`\_^¥¥^aa^  
@HWI-EAS443:3:54:84:1175#0/1  
ATCTATTTCTTCTCTGTTTAATTTTGCTTCCTCTGAGTAT  
+HWI-EAS443:3:54:84:1175#0/1  
a`¥\_ababb^^Xa^a`W` `aa\_aaa\_a`\_aa`aa][¥Y`

@HWI-EAS443:3:54:853:448#0/1  
AAGAACTTTGGACTACCACGATTCAAATGTGAAGAACTTA  
+HWI-EAS443:3:54:853:448#0/1  
a¥^^\_[bbaabaaaa[`aaaaab^b¥`ab`b`aaaa\_ba\_  
@HWI-EAS443:3:54:885:959#0/1  
AGCCAGTTAAAAACAATGCCAAGGAAATTGGAAACGGCT  
+HWI-EAS443:3:54:885:959#0/1  
a]¥`]^`b`aa^¥b][G]Z¥¥``]]`R`aa[TV`Z¥XW\_  
@HWI-EAS443:3:54:928:1953#0/1  
AGAAGTCCTCGTGCTATGGGGCATTACCATCCATCTACT  
+HWI-EAS443:3:54:928:1953#0/1  
ab^^`KZ\_SV`[]YZ¥\_WR][P\_[-`^IL``\_Z\_UY[\_Z^  
@HWI-EAS443:3:54:959:456#0/1  
GCTGGCTGGATCCTGGGAAATCCAGAGTGTGAATCACTCT  
+HWI-EAS443:3:54:959:456#0/1  
a`^^`aa\_aTa^[[`^VX\_¥ZS[[a]^P`TaX¥\_V^P^[¥  
@HWI-EAS443:3:54:98:1057#0/1  
TGGCATTCTGTGTGCTCTTCAGGTCGGCTGCATATCCTGA  
+HWI-EAS443:3:54:98:1057#0/1  
[bba¥\_\_abbT^``abbaabbbba\_\_ZaaaaZZ\_baa]^`  
@HWI-EAS443:3:55:1003:73#0/1  
TGCCGGTTTTATTGAAGGGGGTGGACAGGGATGGTAGAT  
+HWI-EAS443:3:55:1003:73#0/1  
abaabbZabaabbb`\_abb`baWbb`\_aZ\_^`baX¥`\_\_  
@HWI-EAS443:3:55:1009:1544#0/1  
ATTAATGATAAAGGAAAGAAGTCCTCGTGCTATGGGGCA  
+HWI-EAS443:3:55:1009:1544#0/1  
abbaabbaabb`\_[-`aaaaba`Wa`a`a`aa`a`\_\_S`  
@HWI-EAS443:3:55:1032:1522#0/1  
GCTCCTCATAATCGATGAAATCTCCTGGGTAACACGTTCC  
+HWI-EAS443:3:55:1032:1522#0/1  
^`Ya^¥`]U\_U¥``\_]¥`¥aXZaYVTaYG¥^WRYV\_^XN  
@HWI-EAS443:3:55:104:935#0/1  
GGGGCTACCCCTTTAGTTTGCATAGTTTCCCGTTATGCT  
+HWI-EAS443:3:55:104:935#0/1  
a\_\_S\_Y`XV\_aYVUYUUS]U`PTTNXU`¥S¥[XVSYMYW[  
@HWI-EAS443:3:55:10:1350#0/1  
GTCCCATTTTTGACACTTTCCATGCACGTGTTATCGCATT  
+HWI-EAS443:3:55:10:1350#0/1  
\_Y¥W¥`^`W[\_TUW]\_^U^Z\_VQ¥]\_Y`W][][UZU^  
@HWI-EAS443:3:55:1103:536#0/1  
GGTAAAATTCAAAGCAGCCGTTTCCAATTTCCCTTGGCATT  
+HWI-EAS443:3:55:1103:536#0/1  
a^Yabb`baaaa[aaaaa`a`a\_]\_\_]a\_a^P`\_b\_Z]\_`  
@HWI-EAS443:3:55:1110:957#0/1  
GCATATCCTGACCCCTGCTCATTTTGGATGGTGATAACCGT  
+HWI-EAS443:3:55:1110:957#0/1  
aa`]ba]\_aa]``[-^Z`^^`]^aa\_^`[Sa^^¥¥VOVR  
@HWI-EAS443:3:55:11:194#0/1  
AATCTCGTCAATGGCATTCTGTGTGCTCTTCAGGTCGGCT

+HWI-EAS443:3:55:11:194#0/1  
\_\_]^abb\_b`^]ba\_U`^]aa\_a[``aY]a`]^`\_T¥a`P  
@HWI-EAS443:3:55:1233:1095#0/1  
AAAAGGTAAGAAGCCAGTTAAAAACAATGCCAAGGAAAT  
+HWI-EAS443:3:55:1233:1095#0/1  
Y¥S¥\_`0`X^bZ`^]XU[Z`b\_]``a¥TWZVP\_Y^UZ\_\_a  
@HWI-EAS443:3:55:1259:201#0/1  
GCTGGCTGGATCCTGGGAAATCCAGAGTGTGAATCACTCT  
+HWI-EAS443:3:55:1259:201#0/1  
aaaa]Y```\_aU¥\_¥a¥[^a\_[[Y[a¥\_U¥V¥\_S¥U^V^  
@HWI-EAS443:3:55:1309:1093#0/1  
AAGAAATGCTGGATCTGGTATTATCATTTCAGATACACCA  
+HWI-EAS443:3:55:1309:1093#0/1  
aaaaa`a^`ZY\_SZXY`Zaa`[^TW]^W[```\_aY`^U^  
@HWI-EAS443:3:55:1332:1787#0/1  
TCAAGATACAGCAAGAAGTTCAAGCCGAAATAGCAATAA  
+HWI-EAS443:3:55:1332:1787#0/1  
a\_aaaaaa`aa[`aa\_\_aV¥Xa\_`TT\_\_^]`^`\_U\_\_^`\_  
@HWI-EAS443:3:55:1360:1330#0/1  
GCCCCATTGCATTTGGGTAAATGTAACATTGCTGGCTGGA  
+HWI-EAS443:3:55:1360:1330#0/1  
aa^\_X```\_`^`\_`a^[V\_a\_[X\_^`a\_\_\_a[[XNU^^  
@HWI-EAS443:3:55:1399:413#0/1  
CCTCTGAGTATTTTGGGTAGTCATAAGTCCCATTTTTGAC  
+HWI-EAS443:3:55:1399:413#0/1  
ab¥\_¥``¥^`bb\_aV\_aQ[SGYYSSL]G¥¥W]\_¥a[YYZ\_  
@HWI-EAS443:3:55:1405:1834#0/1  
ATCGATTATGAGGAGCTAAGAGAGCAATTGAGCTCAGTGT  
+HWI-EAS443:3:55:1405:1834#0/1  
ab\_`\_baaab`ba\_aaaaabaa`aSaaa`]aa][^aaVa0  
@HWI-EAS443:3:55:1447:1283#0/1  
TGACACTTCCATGCACGTGTATCGCATTGTGGTAAAA  
+HWI-EAS443:3:55:1447:1283#0/1  
`^aX`aaaaa[a`¥^`¥\_R\_\_aa]^`[X`aa``a`X¥X\_\_  
@HWI-EAS443:3:55:1524:646#0/1  
GGAACGTGTTACCCAGGAGATTTTCATCGATTATGAGGAGC  
+HWI-EAS443:3:55:1524:646#0/1  
\_b]¥Za\_X^`\_]¥NZ^ZaaS]\_^W]XX\_¥^`^aZ][QXZU  
@HWI-EAS443:3:55:1545:357#0/1  
TGTCTCCCGCTCTACTAGTGTCCAGTAATAGTTCATTCT  
+HWI-EAS443:3:55:1545:357#0/1  
ab^aa^`^``]¥][PT]RV^XUXX[^aWZWS¥RX`YJX  
@HWI-EAS443:3:55:1572:962#0/1  
CAAAGCAGCCGTTTCCAATTTCTTGGCATTGTTTTTAA  
+HWI-EAS443:3:55:1572:962#0/1  
`abbabbb`baP\_baaababb`abbabaabbbbaabbbbaa  
@HWI-EAS443:3:55:1581:215#0/1  
CAATGGCATTCTGTGTGCTCTTCAGGTCGGCTGCATATCC  
+HWI-EAS443:3:55:1581:215#0/1  
\_`bXW\_[bbb]]b[a]b[b`bbababbZ^WZa^]aaa`S[



@HWI-EAS443:3:55:1597:1524#0/1  
CTGGCTGGATCCTGGGAAATCCAGAGTGTGAATCACTCTC  
+HWI-EAS443:3:55:1597:1524#0/1  
abbbab` `aaaaa^`aabba]aab`b\_aZa`\_a^a\_a^a^  
@HWI-EAS443:3:55:159:1694#0/1  
CAAGATACAGCAAGAAGTTCAAGCCGAAATAGCAATAAG  
+HWI-EAS443:3:55:159:1694#0/1  
aba`aaaabaaaba\_]`\_]`b`aa\_a^^`\_`\_]`a`a`\_  
@HWI-EAS443:3:55:1731:1272#0/1  
AGATTTCCAGTTGCTTCAATGTTATTTTGTCTCCCGGCT  
+HWI-EAS443:3:55:1731:1272#0/1  
abababaaa`ba`V`a`ba¥b`[aaaab`W¥X`ZYWa]P\_  
@HWI-EAS443:3:55:1739:449#0/1  
AAATGTCCAAAATATGTAAAAAGCACAAAATTGAGACTGG  
+HWI-EAS443:3:55:1739:449#0/1  
ab`aaa`\_`aaaaaab^ba\_aa¥^a¥aaaabaaa`a`\_a^  
@HWI-EAS443:3:55:1789:1083#0/1  
CTTTACCTACTGCTGTGAAGTGTATTTCATCTTTTCAAT  
+HWI-EAS443:3:55:1789:1083#0/1  
\_U]Y]X^[[ab\_¥J\_T\_ba^ab]]SZ\_\_ZWH[``^X`ab  
@HWI-EAS443:3:55:240:889#0/1  
CAACTTGTCCAGACACCCAAGGGTGTATAAACACCAGCCT  
+HWI-EAS443:3:55:240:889#0/1  
ab```bbba`aaabbbbaab`ab^b^aaabaa[```aaaa`  
@HWI-EAS443:3:55:269:405#0/1  
GGGGACATCAAGATACAGCAAGAAGTTCAAGCCGAAATA  
+HWI-EAS443:3:55:269:405#0/1  
aabaaaa`a`aa`a`aaa`ba`^^Y\_\_^[^^`\_a\_\_^\_^  
@HWI-EAS443:3:55:281:1456#0/1  
GAATTTACTTTGTTAGTAATCTCGTCAATGGCATTCTGTG  
+HWI-EAS443:3:55:281:1456#0/1  
`WYa^UMMW\_^`MW^ZS]PLP\_`YXQLTWXSLR\_`^]`^RZ  
@HWI-EAS443:3:55:345:525#0/1  
GTTATTTTGTCTCCCGGCTCTACTAGTGTCCAGTAATAGT  
+HWI-EAS443:3:55:345:525#0/1  
a```]`bbaa`a`\_`^a`\_`^¥]R[[YS[UU]Q]W[[YWWT  
@HWI-EAS443:3:55:348:1392#0/1  
ATCACTCTCCACAGCAAGCTCATGGTCCTACATTGTGGAA  
+HWI-EAS443:3:55:348:1392#0/1  
a[a`a^`^`\_`aaa`[\_a\_aa[V[R¥`^V^[V]^`Y]\_  
@HWI-EAS443:3:55:400:683#0/1  
CCGGCTTGAAGTCTTGTGTATCTTGATGTCCCCACAAA  
+HWI-EAS443:3:55:400:683#0/1  
aa` `[`ZR^U]\_a]`U]aaa`\_`aaaa^GSa\_aa\_a`aaa\_  
@HWI-EAS443:3:55:457:15#0/1  
GGTTTCCTGGACATTTGGACTTACAATGCCGAAGTGTGG  
+HWI-EAS443:3:55:457:15#0/1  
]a]bbabbabaa\_bbbbb`Xaaaa`aab`aa\_a`aa`aa`aa  
@HWI-EAS443:3:55:468:1077#0/1  
CAGCCGTTTCCAATTTCTTGGCATTGTTTTTTAACTGGC

+HWI-EAS443:3:55:468:1077#0/1  
aa^aaaaa^aa^`]Ya`a¥aa]HZ]aZ^aYW]`\_\_UVLO  
@HWI-EAS443:3:55:472:474#0/1  
GGGGTGGACAGGGATGGTAGATGGATGGTACGGTTATCAC  
+HWI-EAS443:3:55:472:474#0/1  
abaaWaba`aaa\_]`¥\_a\_aa\_¥]a\_G]¥aa¥\_[OKXN  
@HWI-EAS443:3:55:49:1224#0/1  
CATAAGTCCCATTTTTGACACTTTCCATGCACGTGTTATC  
+HWI-EAS443:3:55:49:1224#0/1  
aaaaaa\_a\_aaaaaaaa`aaaa`a^`^a\_[\_\_`[a^^a\_]  
@HWI-EAS443:3:55:588:1467#0/1  
GGTCAGGATATGCAGCCGACCTGAAGAGCACACAGAATGC  
+HWI-EAS443:3:55:588:1467#0/1  
aaV`^^^\_aaaa]aa]^a[R¥^\_^]`^\_^Z¥a`\_\_a\_\_Y  
@HWI-EAS443:3:55:604:1810#0/1  
GCCATGAACCTGTCTTGGGAATATCTCAAACCTTTCAAA  
+HWI-EAS443:3:55:604:1810#0/1  
aa]\_a`a`[`aa^a`b`\_a\_Y[``aa[aaa\_\_`\_\_`a`  
@HWI-EAS443:3:55:648:1747#0/1  
CAGAACTGATTGCCCCAGGGAGACTACCAAGTACCAATG  
+HWI-EAS443:3:55:648:1747#0/1  
ab^baabaabbaa\_aa]aa]aa\_¥N`a\_aaaaa^aa`\_a  
@HWI-EAS443:3:55:651:284#0/1  
CGGCTCTACTAGTGTCCAGTAATAGTTCATTCTCCCTTCT  
+HWI-EAS443:3:55:651:284#0/1  
aaabYba`]TYYSUSZZX`QM^\_VaZZKL^`VWRX]]WNY  
@HWI-EAS443:3:55:685:341#0/1  
AACATTGCTGGCTGGATCCTGGGAAATCCAGAGTGTGAAT  
+HWI-EAS443:3:55:685:341#0/1  
abaabaaaa`ba\_aa`Za``\_aaZ\_`^`[\_a^\_Sa¥a\_\_\_  
@HWI-EAS443:3:55:69:1193#0/1  
AAACGGCTGCTTTGAATTTTACCACAAATGCGATAACACG  
+HWI-EAS443:3:55:69:1193#0/1  
`bbaZXZ][`ZPH`Q`P]]WOOT¥H[\_YV]TTUSTYXYM  
@HWI-EAS443:3:55:754:170#0/1  
ACTAGATTTCCAGTTGCTTCGAATGTTATTTTGTCTCCCG  
+HWI-EAS443:3:55:754:170#0/1  
aa¥a``baaa`aa`aa\_aa\_a^aaa`\_\_a\_a`a``Z\_]`  
@HWI-EAS443:3:55:788:1631#0/1  
GTAGGATTTGCTGAGCTTTGGGTATGAATTCCTTTTTTA  
+HWI-EAS443:3:55:788:1631#0/1  
\_X]aaaa^\_\_aaa[ ]`\_a]``Y`a`]U^a\_`¥\_a\_a`\_  
@HWI-EAS443:3:55:857:1037#0/1  
GGCTGGTGTATAGCACCTTGGGTGTCTGACAAGTTGT  
+HWI-EAS443:3:55:857:1037#0/1  
abaabb\_a\_bbaaa`aaa\_\_aaaaa]a`\_]¥^\_]a^`]]  
@HWI-EAS443:3:55:859:506#0/1  
GTCAGCACTAGTAGATGGATGGTGAATGCCCCATAGCACG  
+HWI-EAS443:3:55:859:506#0/1  
a`aaaa¥aaaaXaaaa]a`\_aaZa[\_`a`\_^Z¥`\_\_\_\_]`

@HWI-EAS443:3:55:868:1044#0/1  
GACAAGTTGTATTGCAATCGTGGACTGGTGTATCTGAAAT  
+HWI-EAS443:3:55:868:1044#0/1  
aaa\_`a]ab^^^`VZ\_\_a`a\_a\_^^`]XV`^\_a^`a^^^^  
@HWI-EAS443:3:55:879:1213#0/1  
GTTGCTTCGAATGTTATTTTGTCTCCCGGCTCTACTAGTG  
+HWI-EAS443:3:55:879:1213#0/1  
JQRW[\_SS\_T^Y^aVW¥a^[\`RU¥b\_BBBBBBBBBBBBBB  
@HWI-EAS443:3:55:921:1558#0/1  
AATCGATGAAATCTCCTGGGTAACACGTTCCATTGTCTGA  
+HWI-EAS443:3:55:921:1558#0/1  
¥S\_^¥W^Y^Q\_XTY`¥TZ\_\_LWa¥\_U]Z[XL¥V]]VLVTZ  
@HWI-EAS443:3:55:937:590#0/1  
ACTGATTGCCCCAGGGAGACTACCAAGTACCAATGAACTG  
+HWI-EAS443:3:55:937:590#0/1  
```a`a`a\_a\_\_X¥`\_\_\_\_Z^^`VUY\_]\_WT^]^^]]XVV  
@HWI-EAS443:3:55:963:483#0/1  
GGGACATCAAGATACAGCAAGAAGTTCAAGCCGAAATAG  
+HWI-EAS443:3:55:963:483#0/1  
abbaaba\_aabaa`aabaabb\_aa]aab`aa`a\_W\_aa\_a  
@HWI-EAS443:3:55:964:168#0/1  
GTTGCTTCGAATGTTATTTTGTCTCCCGGCTCTACTAGTG  
+HWI-EAS443:3:55:964:168#0/1  
aaba`baab`abb\_``abba`\_`a\_]`^a\_]`[]\_RQY¥TS]  
@HWI-EAS443:3:56:1008:558#0/1  
CGGGAGACAAAATAACATTTCGAAGCAACTGGAATCTAGT  
+HWI-EAS443:3:56:1008:558#0/1  
abba`baabaaabaaabb`ba`a`aa\_aaaa]aa\_aaa[  
@HWI-EAS443:3:56:1057:1178#0/1  
GGAAATTGGAACGGCTGCTTTGAATTTTACCACAAATGC  
+HWI-EAS443:3:56:1057:1178#0/1  
\_V]aaaaaa`baaa`a]¥X[a[HYJ¥a`RJVPL]aVRPP  
@HWI-EAS443:3:56:1087:1966#0/1  
ATCCTGACCCCTGCTCATTGATGGTGATAACCGTACCA  
+HWI-EAS443:3:56:1087:1966#0/1  
a`ZP^`\_YWUY]YRU¥S\_^Z[Z¥W¥^W\_WT¥¥RNXW[QTV  
@HWI-EAS443:3:56:1131:1243#0/1  
GAAGTCTCGTGTATGGGGCATTACCATCCATCTACTA  
+HWI-EAS443:3:56:1131:1243#0/1  
a``a[\_`bbb^a`b`a`]]¥\_`a`\_`Z^a\_YV\_`Z`aZa\_  
@HWI-EAS443:3:56:1151:686#0/1  
AAATATGTA AAAAGCACAAAATTGAGACTGGCCACAGGAT  
+HWI-EAS443:3:56:1151:686#0/1  
^QZ¥\_bb¥b\_`Y¥V]`V^¥P]bab[baa]aaX\_baS\_[NW  
@HWI-EAS443:3:56:1192:336#0/1  
TGTTACCCAGGAGATTTTCATCGATTATGAGGAGCTAAGAG  
+HWI-EAS443:3:56:1192:336#0/1  
aa``a``aaaa`a\_`a\_```\_a]a`\_aa^`TZ`Z`\_]`^`^  
@HWI-EAS443:3:56:11:684#0/1  
TCATAATCGATGAAATCTCCTGGGTAACACGTTCCATTGT

+HWI-EAS443:3:56:11:684#0/1  
aaaa`aaaba`a[]`\_`\_]``\_`\_`aZ^¥W¥\_]^X^]Z]\_Z  
@HWI-EAS443:3:56:1237:1450#0/1  
GTTCTTCACATTTGAATCGTGGTAGTCCAAAGTTCTTCA  
+HWI-EAS443:3:56:1237:1450#0/1  
a`a``a`a`aaaa``\_a^\_a]``PUYV]\_¥`]^`^^UU  
@HWI-EAS443:3:56:1246:742#0/1  
TAGATTTCCAGTTGCTTCGAATGTTATTTTGTCTCCCGGC  
+HWI-EAS443:3:56:1246:742#0/1  
^a\_aa`ba`b`abbaa`]a[aab^aabaa`\_]a`R`aa¥^  
@HWI-EAS443:3:56:1284:1919#0/1  
GAAGCCAGTTAAAAACAATGCCAAGGAAATTGGAAACGG  
+HWI-EAS443:3:56:1284:1919#0/1  
aaaaWW`\_`Ya`\_`\_]\_V`a]`YYXW^\_ZX^^]X`\_^`W\_]  
@HWI-EAS443:3:56:1293:345#0/1  
ATTGAAGGGGGTGGACAGGGATGGTAGATGGATGGTACG  
+HWI-EAS443:3:56:1293:345#0/1  
\_abb`bbb`aaa\_a^``abbb\_aa]^aa`\_aa``a]Y\_V\_  
@HWI-EAS443:3:56:1306:190#0/1  
AAATTGGAACGGCTGCTTTGAATTTTACCACAAATGCCGA  
+HWI-EAS443:3:56:1306:190#0/1  
aa`aba[aaaa\_] [ML[^HSXV`\_]NKXYGZ]BBBBBB  
@HWI-EAS443:3:56:1377:1850#0/1  
CAAAGTCTCTATCAGAATGCAGATGCATATGTTTTTGTGG  
+HWI-EAS443:3:56:1377:1850#0/1  
ababbbbbaabb`a\_bbbb`b¥abba\_bbbbabbbababa  
@HWI-EAS443:3:56:1424:158#0/1  
GACCAACAAAGTCTCTATCAGAATGCAGATGCATATGTTT  
+HWI-EAS443:3:56:1424:158#0/1  
^Qaaaa`¥¥b^^`YbVbab^ZV`XWYb^bWR^bb\_^Pba  
@HWI-EAS443:3:56:1432:212#0/1  
GTTGAACTCTTTACCTACTGCTGTGAAGTGTGATTTCATC  
+HWI-EAS443:3:56:1432:212#0/1  
a\_a]^`\_\_aaaa]^`¥^`\_W\_a]`\_]Vaa]^`^^]\_\_Z  
@HWI-EAS443:3:56:144:1228#0/1  
TCGAATGTTATTTTGTCTCCCGGCTCTACTAGTGTCCAGT  
+HWI-EAS443:3:56:144:1228#0/1  
aaa^`\_b`\_]aaaa`\_aa`\_¥]Y[¥¥¥TXNSTZQS¥VZT  
@HWI-EAS443:3:56:1552:855#0/1  
GTGGGGACATCAAGATACAGCAAGAAGTTCAAGCCGGAAA  
+HWI-EAS443:3:56:1552:855#0/1  
a]``aZa`\_a\_a`a`\_Ya\_Yaaa`\_`^`^a^aYY^`^^^  
@HWI-EAS443:3:56:1559:957#0/1  
GCCGGTTTCATTGAAGGGGGTGGACAGGGATGGTAGATG  
+HWI-EAS443:3:56:1559:957#0/1  
a`^`[^`^\_aX`\_`a`WY]T]¥Z\_U[ZSW[^^W¥a¥WP]ZW\_  
@HWI-EAS443:3:56:156:369#0/1  
CATAAGTCCCATTTTTGACACTTTCCATGCACGTGTTATC  
+HWI-EAS443:3:56:156:369#0/1  
aab`\_`aaa`\_`bbaaabb^`a\_a`aa\_aa`\_`^`^a`a`a`a`\_`a`\_`

@HWI-EAS443:3:56:1593:1525#0/1  
GAAAAGGTAAGAAGCCAGTTAAAAACAATGCCAAGGAAA  
+HWI-EAS443:3:56:1593:1525#0/1  
a`\_^ba¥`a\_aaZ\_[R\_aaaa\_]`^`\_^`\_[a\_\_^^  
@HWI-EAS443:3:56:1622:662#0/1  
GGGGCATTACCATCCATCTACTAGTGCTGACCAACAAAG  
+HWI-EAS443:3:56:1622:662#0/1  
\_^T^abbbabbbab¥`aabbaabb`aa]bbb`abaabaa`  
@HWI-EAS443:3:56:1676:1464#0/1  
GAAGCCAGTTAAAAACAATGCCAAGGAAATTGGAAACGG  
+HWI-EAS443:3:56:1676:1464#0/1  
]`¥ZY¥b`ab\_b^aYY\_aaY\_YZW^Z[`Ya¥aa`XaP^\_  
@HWI-EAS443:3:56:1680:812#0/1  
CACCATCCATCTACTAGTGCTGACCAACAAAGTCTCTATC  
+HWI-EAS443:3:56:1680:812#0/1  
X`aab`^abbbba`Z¥\_a¥aa`\_Z]aU`\_^]S[aaba\_]`  
@HWI-EAS443:3:56:168:1765#0/1  
GTGCTCTTCAGGTCGGCTGCATATCCTGACCCCTGCTCAT  
+HWI-EAS443:3:56:168:1765#0/1  
a`aaaaaab\_YX]`^`a`]WZZ[aa0]OZ^`YPXNR]¥Z  
@HWI-EAS443:3:56:168:477#0/1  
GCTTCCTCTGAGTATTTGGGTAGTCATAAGTCCCATTTT  
+HWI-EAS443:3:56:168:477#0/1  
aaababaaab]aa`aaaaY\_b`\_`a`^a^b]\_\_`^a^`  
@HWI-EAS443:3:56:1701:596#0/1  
GTGTGCTCTTCAGGTCGGCTGCATATCCTGACCCCTGCTC  
+HWI-EAS443:3:56:1701:596#0/1  
a[(`W\_a\_aaVa[ZW¥Z^\_[TX`a`\_[Z¥W[T[¥SSSQWR  
@HWI-EAS443:3:56:1783:1108#0/1  
GAAGCCAGTTAAAAACAATGCCAAGGAAATTGGAAACGG  
+HWI-EAS443:3:56:1783:1108#0/1  
a`baa`bbaabaa`a`aa\_a`\_a`a]`^`aa`\_[]^a^¥W  
@HWI-EAS443:3:56:189:1686#0/1  
GGGGACATCAAGATACAGCAAGAAGTTCAAGCCGGAAATA  
+HWI-EAS443:3:56:189:1686#0/1  
]\_a`]baaba`^`baba^`a`¥`aa]^]abab`YH¥b]`b  
@HWI-EAS443:3:56:20:919#0/1  
GGGGACATCAAGATACAGCAAGAAGTTCAAGCCGGAAATA  
+HWI-EAS443:3:56:20:919#0/1  
abbbba]ab`aaa`abbaabaaab]`abaa\_aa¥\_H\_``  
@HWI-EAS443:3:56:255:600#0/1  
CCCCTGCTCATTTTGATGGTGATAACCGTACCATCCATCT  
+HWI-EAS443:3:56:255:600#0/1  
abbaaabbbabaaabaabaWaaaaa\_a^aa\_a`\_]W\_``  
@HWI-EAS443:3:56:256:1561#0/1  
GGGACATCAAGATACAGCAAGAAGTTCAAGCCGGAAATAG  
+HWI-EAS443:3:56:256:1561#0/1  
^\_\_`\_^`a`^aaaaaaa]T\_W\_\_^]Y[Y]]`^a``¥  
@HWI-EAS443:3:56:269:1530#0/1  
GGGGACATCAAGATACAGCAAGAAGTTCAAGCCGGAAATA

+HWI-EAS443:3:56:269:1530#0/1  
aa`a\_aaaaaaba\_aaaa`aa\_\_\_]^\_a\_a\_]\_\_\_``]`  
@HWI-EAS443:3:56:276:419#0/1  
TTTTCCAATTGTGATCGGATGTATATTCTGAAATGGGAGG  
+HWI-EAS443:3:56:276:419#0/1  
aaaaa`\_`aaa]a`\_`a^`a0]¥V¥`^\_YVY]^]\_\_W\_V  
@HWI-EAS443:3:56:280:1996#0/1  
TGCATATCTCGGTACCACTAGATTTCCAGTTGCTTCAAT  
+HWI-EAS443:3:56:280:1996#0/1  
¥[\_^ZIbaaab\_Yaab^ZO`Y\_V[LX`a`Z`Y[[RW¥ZGT  
@HWI-EAS443:3:56:303:408#0/1  
CTCCCGGCTCTACTAGTGTCCAGTAATAGTTCATTCTCCC  
+HWI-EAS443:3:56:303:408#0/1  
aa`abbaaaa`\_[a\_aW`\_`\_`a¥aY`\_`¥`\_\_`a\_^\_[^  
@HWI-EAS443:3:56:308:1614#0/1  
GGGGACATCAAGATACAGCAAGAAGTTCAAGCCGGAAATA  
+HWI-EAS443:3:56:308:1614#0/1  
`[a^aaaaaaaaaaa`a\_aab\_a`a^\_\_``]`\_a`0`\_a\_  
@HWI-EAS443:3:56:323:184#0/1  
TCCACGATTGCAATACAACCTTGTCCAGACACCCAAGGGTGC  
+HWI-EAS443:3:56:323:184#0/1  
aba^`T\_ababaaaab\_a`ab`\_aa`\_aa`\_a`a^U\_\_  
@HWI-EAS443:3:56:354:1571#0/1  
TGCTGGCTGGATCCTGGGAAATCCAGAGTGTGAATCACTC  
+HWI-EAS443:3:56:354:1571#0/1  
ab\_R\_aa\_]\_\_¥aa]WVa`\_\_\_\_\_`¥^W^W`\_`^`\_`R[X  
@HWI-EAS443:3:56:373:274#0/1  
AGACTTTGTTGGTCAGCACTAGTAGATGGATGGTGAATGC  
+HWI-EAS443:3:56:373:274#0/1  
aa\_aabab\_aaa^\_ab`[aa`b^^a\_\_baZaa\_Yaaa¥`¥  
@HWI-EAS443:3:56:382:792#0/1  
TTGGACATTTTCCAATTGTGATCGGATGTATATTCTGAAA  
+HWI-EAS443:3:56:382:792#0/1  
ababaa`aaaa`¥^`\_`\_Xa^][`¥[``ZT]P¥`P¥PW¥Y  
@HWI-EAS443:3:56:384:170#0/1  
TAATCGATGAAATCTCCTGGGTAACACGTTCCATTGTCTG  
+HWI-EAS443:3:56:384:170#0/1  
aaaaabaaaaaa`a`\_U`baaZ`\_^^\_a\_V[W\_\_\_\_\_^^\_`  
@HWI-EAS443:3:56:387:791#0/1  
GGGGACATCAAGATACAGCAAGAAGTTCAAGCCGGAAATA  
+HWI-EAS443:3:56:387:791#0/1  
a]]a`a`\_`^\_W`\_¥¥\_a`\_`a`\_`\_`^OWV^a`^^[^U  
@HWI-EAS443:3:56:402:1699#0/1  
GATGAAATCTCCTGGGTAACACGTTCCATTGTCTGAACTA  
+HWI-EAS443:3:56:402:1699#0/1  
`bbabbbaaaaaaaaaaRaa\_aa`\_aa`\_`a\_]`\_a`^`\_`\_`  
@HWI-EAS443:3:56:406:2007#0/1  
ATGGTTTCTCCTGGACATTTGGACTTACAATGCCGAAGTGT  
+HWI-EAS443:3:56:406:2007#0/1  
`abaa`baabaa^[aaa]YZa\_aR[a\_aaaXV`a^P`\_`^U

@HWI-EAS443:3:56:417:644#0/1  
GCCGGTTTCATTGAAGGGGGTGGACAGGGATGGTAGATG  
+HWI-EAS443:3:56:417:644#0/1  
`aaa\_`a\_YX`[a[[`Z`aaV]]U]V]a^U[`VV]^S`  
@HWI-EAS443:3:56:424:1316#0/1  
GAAATGCTGGATCTGGTATTATCATTTCAGATACACCAGT  
+HWI-EAS443:3:56:424:1316#0/1  
^`b`[D]aa\_`aaabaT`aab`\_baaaaaab\_X¥aaa`aY  
@HWI-EAS443:3:56:435:1275#0/1  
GAATCACTCTCCACAGCAAGCTCATGGTCCTACATTGTGG  
+HWI-EAS443:3:56:435:1275#0/1  
abbbVbbZP]a^`\_\_aa`¥`^`\_\_]]\_\_\_\_]]^W¥\_Z`^  
@HWI-EAS443:3:56:513:1573#0/1  
CAAAAACATATGCATCTGCATTCTGATAGAGACTTTGTTG  
+HWI-EAS443:3:56:513:1573#0/1  
a`\_b`bbbaa]aabb`¥ba\_aaY¥``aa¥¥^Z[\_aI\_]`  
@HWI-EAS443:3:56:515:1177#0/1  
GCTGGCTGGATCCTGGGAAATCCAGAGTGTGAATCACTCT  
+HWI-EAS443:3:56:515:1177#0/1  
^a¥\_\_\_\_`^\_QN`]¥W\_`^`aaaZWXRVTEMX\_]`[\_WQVOT  
@HWI-EAS443:3:56:615:172#0/1  
ATTGAAGGGGGTGGACAGGGATGGTAGATGGATGGTACG  
+HWI-EAS443:3:56:615:172#0/1  
Vb^`¥ab`b^ab]baXX]VXa`aaa\_`^V`aXXaaZ`Xa  
@HWI-EAS443:3:56:634:633#0/1  
CCGGCTTGAACCTTGCTGTATCTTGATGTCCCCACAAA  
+HWI-EAS443:3:56:634:633#0/1  
\_abaab`aX^]`b\_]\_`^^`\_aa`a`\_]`\_]`a`^  
@HWI-EAS443:3:56:658:981#0/1  
GTATCTTGATGTCCCCACAAAACATATGCATCTGCATTC  
+HWI-EAS443:3:56:658:981#0/1  
aaabaaaabaaa\_a`a`\_aaaa`aaaa`\_a``\_aa\_`a`\_  
@HWI-EAS443:3:56:66:1592#0/1  
GCTTCCTCTGAGTATTTGGGTAGTCATAAGTCCCATTTT  
+HWI-EAS443:3:56:66:1592#0/1  
aaa¥[Xa¥W¥^Ua\_\_a\_¥Y\_Y[YO¥Y\_^^^[]NZa]U\_  
@HWI-EAS443:3:56:679:188#0/1  
TGTGGGACATCAAGATACAGCAAGAAGTTCAAGCCGGAA  
+HWI-EAS443:3:56:679:188#0/1  
^aTb`Y`a^`]aY\_abHZ[¥``¥Y`]P`[¥Waaa^\_a^`\_  
@HWI-EAS443:3:56:680:339#0/1  
GGGAAATCCAGAGTGTGAATCACTCTCCACAGCAAGCTCA  
+HWI-EAS443:3:56:680:339#0/1  
a`^`^Xabab`ab\_bZaaaaa``\_aa`a\_aa^\_\_`^YRV  
@HWI-EAS443:3:56:691:1187#0/1  
CTAGATTTCCAGTTGCTTGAATGTTATTTTGTCTCCCGG  
+HWI-EAS443:3:56:691:1187#0/1  
abbbabaab`b¥]bb``b]aaa^X[bbbaa[¥aaaaaa  
@HWI-EAS443:3:56:711:1167#0/1  
AAATCCTACATTAATGATAAAGGGAAAGAAGTCCCTCGTGC

+HWI-EAS443:3:56:711:1167#0/1  
R`¥]Xaa`YR`a¥Q`a`X`¥Z¥\_]Paaa]\_bYZHWY\_] ]]  
@HWI-EAS443:3:56:722:1499#0/1  
ACTTTCCATGCACGTGTTATCGCATTGTGGTAAAATTCA  
+HWI-EAS443:3:56:722:1499#0/1  
a[^aaabb^¥`\_X\_X[[V`aZV`^^\_]ZXZVF\_\_a\_`[T\_  
@HWI-EAS443:3:56:758:1526#0/1  
TTCATCGATTATGAGGAGCTAAGAGAGCAATTGAGCTCAG  
+HWI-EAS443:3:56:758:1526#0/1  
a`aa`a`XabZa`\_¥RW^`aZ[^]¥OWX]X\_^a\_[T]]]\_  
@HWI-EAS443:3:56:780:1004#0/1  
CGTCAATGGCATTCTGTGTGCTCTTCAGGTCGGCTGCATA  
+HWI-EAS443:3:56:780:1004#0/1  
`X^\_YU¥[F[a`T[`W^¥XTURR]VYRYXYaa\_MH¥LORa  
@HWI-EAS443:3:56:782:1592#0/1  
GATATTCCCAAGACAAGTTCATGGCCCAATCATGACTCG  
+HWI-EAS443:3:56:782:1592#0/1  
¥¥bY^b¥baab`ba``ab]^¥^VYY]VZaWTV¥¥``][S[  
@HWI-EAS443:3:56:801:234#0/1  
GACAAGTTGTATTGCAATCGTGGACTGGTGTATCTGAAAT  
+HWI-EAS443:3:56:801:234#0/1  
a`\_`Za`aa^`\_\_\_\_]a]a\_`\_] ]]X^`\_X`Y¥` ] ]\_YZ]\_  
@HWI-EAS443:3:56:871:1031#0/1  
GCACGTGTTATCGCATTGTGGTAAAATTCAAAGCAGCCG  
+HWI-EAS443:3:56:871:1031#0/1  
abaaba`]aaabb`abab`[`aZbaaaaaaaaaa¥`aY[`  
@HWI-EAS443:3:56:900:237#0/1  
GCTGGCTGGATCCTGGGAAATCCAGAGTGTGAATCACTCT  
+HWI-EAS443:3:56:900:237#0/1  
abaaa\_aa\_FWaa\_]a\_[aaa¥[``U`QaUa¥`^U[[[WZ  
@HWI-EAS443:3:56:921:245#0/1  
CAGGATATGCAGCCGACCTGAAGAGCACACAGAATGCCAT  
+HWI-EAS443:3:56:921:245#0/1  
aa¥`abbbbaab[abbTab¥`aa\_b\_a^aaaa\_b\_a\_`aa  
@HWI-EAS443:3:56:957:1254#0/1  
AAGTCCTCGTGCTATGGGGCATTACCATCCATCTACTAG  
+HWI-EAS443:3:56:957:1254#0/1  
aba`aaa\_b`aaa`aa`aa[aa`a`Ya`\_Z]a^aa\_\_`\_  
@HWI-EAS443:3:56:977:1926#0/1  
AGCACATCCAGAACTGATTGCCCCAGGGAGACTACCAG  
+HWI-EAS443:3:56:977:1926#0/1  
\_[\_aab``aaaaa`][aa¥¥a]P¥\_\_[ZMP]¥\_¥¥\_\_T`\_  
@HWI-EAS443:3:56:98:1254#0/1  
AGCTTTTTGCTCCAGCATGAGGACATGCTGCCGTTACACC  
+HWI-EAS443:3:56:98:1254#0/1  
Z]¥W\_bYbU`Z¥0\_OHTR¥M¥SWa]a¥OT`\_aUHXGX`¥P  
@HWI-EAS443:3:57:1034:128#0/1  
GCCAAGGAAATTGGAAACGGCTGCTTTGAATTTTACCACA  
+HWI-EAS443:3:57:1034:128#0/1  
abaa\_bba`b`aaa\_aa\_aa¥`aPX\_aUNNX]aaNNO]OB



@HWI-EAS443:3:57:1115:505#0/1  
TAACATTGCTGGCTGGATCCTGGGAAATCCAGAGTGTGAA  
+HWI-EAS443:3:57:1115:505#0/1  
aa^USWb^`abaSbbbV`ZPX^\_YZWa\_ML[a[\_N`LXV]  
@HWI-EAS443:3:57:1120:1737#0/1  
ATCAGAATGCAGATGCATATGTTTTGTGGGGACATCAAG  
+HWI-EAS443:3:57:1120:1737#0/1  
^^b^UOXR`Y¥\_Y[¥Z\_^X[^ [RS^ZVUV^[Y[QZ]VZW[  
@HWI-EAS443:3:57:112:1112#0/1  
GTGGGGACATCAAGATACAGCAAGAAGTTCAAGCCGGAAA  
+HWI-EAS443:3:57:112:1112#0/1  
\_N¥W¥¥X\_V[]YQa[R\_a`SP\_¥\_^¥XXU^aWQQMUW]VQ  
@HWI-EAS443:3:57:1140:1089#0/1  
AAATACATATTCTACACTGTAGAGACCCATTAGAGCACAT  
+HWI-EAS443:3:57:1140:1089#0/1  
abbbbbbbbbbbabb`babbabaa`b`\_`aaaa`a\_`a]aa  
@HWI-EAS443:3:57:1152:1072#0/1  
GAATGCATATCTCGGTACCACTAGATTTCCAGTTGCTTCG  
+HWI-EAS443:3:57:1152:1072#0/1  
U`bWV\_Vb¥^¥^¥ba\_\_\_\_]YP`^a]¥baWY^ab¥`Yab`b  
@HWI-EAS443:3:57:1166:1864#0/1  
AGCTCCTCATAATCGATGAAATCTCCTGGGTAACACGTTC  
+HWI-EAS443:3:57:1166:1864#0/1  
a\_`VY^aa\_baaJ`\_^a`^a\_\_`QT\_\_X\_G\_^Z\_0]\_`W  
@HWI-EAS443:3:57:1173:352#0/1  
CTCGTCAATGGCATTCTGTGTGCTCTCAGGTCGGCTGCA  
+HWI-EAS443:3:57:1173:352#0/1  
`babbbb``bb``bbabbaaab]baaa\_babUZbb^[b\_\_  
@HWI-EAS443:3:57:118:1971#0/1  
TTCTGTGTGCTCTCAGGTCGGCTGCATATCCTGACCCCT  
+HWI-EAS443:3:57:118:1971#0/1  
aUHVRLUS``¥¥QaYa\_^Q\_VH¥ZW]^T\_PZZUVPiZ¥BB  
@HWI-EAS443:3:57:1358:571#0/1  
CTCCTCATAATCGATGAAATCTCCTGGGTAACACGTTC  
+HWI-EAS443:3:57:1358:571#0/1  
aaKZabb]aV\_ba[]ZZaa[]]V`ba]Z]UYb\_b\_\_KG¥  
@HWI-EAS443:3:57:1359:492#0/1  
GGCTAGTTAAAAAAGGAAATTCATACCCAAAGCTCAGCAA  
+HWI-EAS443:3:57:1359:492#0/1  
^\_U\_baW^a`[¥baaaaba]``a``¥X\_aaa]NW¥``^aa  
@HWI-EAS443:3:57:1370:748#0/1  
AAAAAGCACAAAATTGAGACTGGCCACAGGATTGAGGAAT  
+HWI-EAS443:3:57:1370:748#0/1  
`aaa\_\_`a\_a\_^`aaaa``\_a`\_V¥]ZMW\_GVaRTX¥N^Y  
@HWI-EAS443:3:57:1488:270#0/1  
ATATCCCCAAGACAAGTTCATGGCCCAATCATGACTCGA  
+HWI-EAS443:3:57:1488:270#0/1  
`babaaaaX`aa`a\_\_Q^]¥YWV[ZZT]]VaaaaGSTaZ  
@HWI-EAS443:3:57:1495:192#0/1  
GACACCCAAGGGTGCTATAAACACCAGCCTCCCATTTCAG

+HWI-EAS443:3:57:1495:192#0/1  
Z\_^^\_ZaR¥b`Pb]]\_\_X^X]]TPV^PR]¥LXYVWVRSW  
@HWI-EAS443:3:57:1497:505#0/1  
CTCAAACCTTTCAAATGATGACACTGAGCTCAATTGCTCT  
+HWI-EAS443:3:57:1497:505#0/1  
aaaaaaaa\_aa\_ab]ba]\_aaaa`a`]]`Vaa¥`]Y\_]a  
@HWI-EAS443:3:57:1507:1582#0/1  
ATCTGCATTCTGATAGAGACTTTGTTGGTCAGCACTAGTA  
+HWI-EAS443:3:57:1507:1582#0/1  
ab\_a`aaa^aba\_a\_a\_a^Xa`aaY`YaVZ^\_U[]a\_]V\_  
@HWI-EAS443:3:57:1556:144#0/1  
AGCCGGGAGACAAAATAACATTCTGAAGCAACTGGAAATCT  
+HWI-EAS443:3:57:1556:144#0/1  
^^\_Q]b\_V\_XV¥Z¥¥\_NUZQ[````\_aa^[]YYPX[]ZYB  
@HWI-EAS443:3:57:1561:1111#0/1  
ATTCTGTGTGCTCTTCAGGTCGGCTGCATATCCTGACCCC  
+HWI-EAS443:3:57:1561:1111#0/1  
a]\_La``bWU\_b`a`¥`\_`[``a\_a]NP]\_aa\_Wa\_]¥]  
@HWI-EAS443:3:57:1615:855#0/1  
GAGCTCAATTGCTCTCTTAGCTCCTCATAATCGATGAAAT  
+HWI-EAS443:3:57:1615:855#0/1  
¥V[VRI¥Z[````Y^M[`XW]`OZ\_NS¥]]]OQV][SBBB  
@HWI-EAS443:3:57:1615:997#0/1  
TGCTGAGCTTTGGGTATGAATTCCTTTTTTAACTAGCCA  
+HWI-EAS443:3:57:1615:997#0/1  
ab\_b¥Q\_abbabab^abaaabaa\_\_aaaaba`a^a``\_¥a  
@HWI-EAS443:3:57:1660:111#0/1  
GGCTGGATCCTGGGAAATCCAGAGTGTGAATCACTCTCCA  
+HWI-EAS443:3:57:1660:111#0/1  
`\_bbbbbaaaaZ\_b\_bbb\_^aaaa\_b`a^ab\_\_^a^``U¥  
@HWI-EAS443:3:57:1680:715#0/1  
GAAATTCATACCCAAAGCTCAGCAAATCCTACATTAATGA  
+HWI-EAS443:3:57:1680:715#0/1  
^aZ^aaaba``abaa`〕`\_WVbYZVaVZ[^][a`a\_]\_X\_  
@HWI-EAS443:3:57:171:582#0/1  
CTGGCTGGATCCTGGGAAATCCAGAGTGTGAATCACTCTC  
+HWI-EAS443:3:57:171:582#0/1  
abaaa`aaa`a`¥\_aa\_]\_\_\_\_\_^\_W\_W`\_`\_^^^Z¥¥¥  
@HWI-EAS443:3:57:1721:1604#0/1  
GCTGGCTGGATCCTGGGAAATCCAGAGTGTGAATCACTCT  
+HWI-EAS443:3:57:1721:1604#0/1  
a`aaaaaa]U[¥\_¥a]^X^^`VT]`¥¥NW¥\_\_^VU]W¥UW  
@HWI-EAS443:3:57:207:1502#0/1  
ATTTTGTCTCCCGCTCTACTAGTGTCCAGTAATAGTTCA  
+HWI-EAS443:3:57:207:1502#0/1  
^a`]^b`bab^^`Z\_a]]WWNLRJWNY¥P]Y[YYYRETBB  
@HWI-EAS443:3:57:241:219#0/1  
GCCGGTTTCATTGAAGGGGGTGGACAGGGATGGTAGATG  
+HWI-EAS443:3:57:241:219#0/1  
a]aaa¥a`aW`aaU¥aa`¥`\_S\_¥¥¥Wa¥^W¥`PLL¥WW^

@HWI-EAS443:3:57:259:1386#0/1  
GAATTTACTTTGTTAGTAATCTCGTCAATGGCATTCTGTG  
+HWI-EAS443:3:57:259:1386#0/1  
R]bbbabbbb`\_^b`bbbbbabX`^a`baba\_bba\_`a  
@HWI-EAS443:3:57:266:1700#0/1  
TTGGCATTGTTTTTAACTGGCTTCTTACCTTTTCATATA  
+HWI-EAS443:3:57:266:1700#0/1  
a¥a\_V[ZOUT[Y`XT][S^^]LWR¥a¥BBBBBBBBBBBB  
@HWI-EAS443:3:57:270:1693#0/1  
AAACACCAGCCTCCATTTCAGAATATACATCCGATCACA  
+HWI-EAS443:3:57:270:1693#0/1  
a``a`aa^`\_`\_\_\_`aa`]``a^`\_`^\_a\_^`\_\_^W\_U\_  
@HWI-EAS443:3:57:299:159#0/1  
AATCGATGAAATCTCCTGGGTAACACGTTCCATTGTCTGA  
+HWI-EAS443:3:57:299:159#0/1  
abaabaaa\_a\_`aa\_\_^aa\_`¥XZ¥^]`^]\_\_¥]\_\_W  
@HWI-EAS443:3:57:31:305#0/1  
TGCATATCTCGGTACCACTAGATTTCCAGTTGCTTCGAAT  
+HWI-EAS443:3:57:31:305#0/1  
abbbb]bbabaa\_baaaa`aba`aa\_]aZaa\_\_`^\_`\_`  
@HWI-EAS443:3:57:328:380#0/1  
ATTAGAGCACATCCAGAACTGATTGCCCCAGGGAGACT  
+HWI-EAS443:3:57:328:380#0/1  
[aaab`a`Uaaaabaaaa`aaaa`\_aa[a`a[\_a¥V``\_¥  
@HWI-EAS443:3:57:330:1742#0/1  
CTAGTGCTGACCAACAAAGTCTCTATCAGAATGCAGATGC  
+HWI-EAS443:3:57:330:1742#0/1  
abb]`bbbabbbb`ababbb`bbbbaaZa`\_aba  
@HWI-EAS443:3:57:39:821#0/1  
GCTGGATCTGGTATTATCATTTCAGATACACCAGTCCACG  
+HWI-EAS443:3:57:39:821#0/1  
abba\_V`b`bb`X`aaab\_bbaabbababa¥^a`aaa`b  
@HWI-EAS443:3:57:415:136#0/1  
GGGGTGGACAGGGATGGTAGATGGATGGTACGGTTATCAC  
+HWI-EAS443:3:57:415:136#0/1  
aabbYaa\_Z^``U^¥`G^`¥W][WZaUW¥W[^WZTNBBB  
@HWI-EAS443:3:57:444:52#0/1  
CTCCCGCTCTACTAGTGTCCAGTAATAGTTCATTCTCCC  
+HWI-EAS443:3:57:444:52#0/1  
S^]W\_\_\_\_\_^aUPY¥^Z[\_^WOY^00]\_NZU^[[Z¥ZYBBB  
@HWI-EAS443:3:57:461:168#0/1  
CACCATCAAAATGAGCAGGGGTCAGGATATGCAGCCGACC  
+HWI-EAS443:3:57:461:168#0/1  
^a\_abb`\_Wabbb\_aaabab¥¥`baa]a]`XT¥^¥]Xa^  
@HWI-EAS443:3:57:506:1440#0/1  
ATCAGAATGCAGATGCATATGTTTTTGTGGGACATCAAG  
+HWI-EAS443:3:57:506:1440#0/1  
abbbaa``babaaa`aaaab]aaaa]a\_]`^a\_aa^aaa  
@HWI-EAS443:3:57:514:78#0/1  
CTTCTCTGAGTATTTTGGGTAGTCATAAGTCCCATTTTT

+HWI-EAS443:3:57:514:78#0/1  
abbabbbabbaa¥bbbbbbab\_aaaaabaab\_b` `abbbab  
@HWI-EAS443:3:57:520:1944#0/1  
CTTGATGTCCCCACAAAAACATATGCATCTGCATTCTGAT  
+HWI-EAS443:3:57:520:1944#0/1  
a\_a` ]YZN]aaaa^^ab[ `aaZRZ^][¥` `][Y` a]\_  
@HWI-EAS443:3:57:520:842#0/1  
GGCTGCTTTGAATTTTACCACAAATGCGATAACACGTGCA  
+HWI-EAS443:3:57:520:842#0/1  
`aabba` ab]aaaba` aaba\_]a` Z` ]Z^\_\_\_\_ `]a]\_YX  
@HWI-EAS443:3:57:548:813#0/1  
GGTGTCTGACAAGTTGTATTGCAATCGTGGACTGGTGTAT  
+HWI-EAS443:3:57:548:813#0/1  
a\_N]S[SOS¥SVYYW]` [[[\_] `¥[^J¥OQTS]WGYLW]  
@HWI-EAS443:3:57:553:380#0/1  
ATTCTGTGTCTTTCAGGTCGGCTGCATATCCTGACCCC  
+HWI-EAS443:3:57:553:380#0/1  
abbaaa\_abaabaaaaa\_\_Z`aa\_`a]a^b][Y¥^Z^^\_\_  
@HWI-EAS443:3:57:577:627#0/1  
CTTTGGGTCTTATTGCTATTTCCGGCTTGAACCTTCTTGCT  
+HWI-EAS443:3:57:577:627#0/1  
]bbbbbb`\_bbbb^`^abbbab` ``aaaba` `a`\_]`aaaa  
@HWI-EAS443:3:57:600:26#0/1  
GCTGGCTGGATCCTGGGAAATCCAGAGTGTGAATCACTCT  
+HWI-EAS443:3:57:600:26#0/1  
aaaaa^aaaQZU`Y^\_`U^¥^[YXZS]U\_W^UVVTUUUVU  
@HWI-EAS443:3:57:613:582#0/1  
CATCTTTTCAATAACAGAATTTACTTTGTTAGTAATCTCG  
+HWI-EAS443:3:57:613:582#0/1  
a`aaaabaa^aaaa`aa`aaa`a`a` `a`\_`aa]` ``^`\_a  
@HWI-EAS443:3:57:643:1499#0/1  
CAGAATTTACTTTGTTAGTAATCTCGTCAATGGCATTCTG  
+HWI-EAS443:3:57:643:1499#0/1  
`ab\_aaaa^\_aaa\_\_a` `Y\_\_\_\_ ` `^`¥^]\_`^`¥^\_\_^]^^  
@HWI-EAS443:3:57:702:519#0/1  
GCTTCCTCTGAGTATTTTGGGTAGTCATAAGTCCCATTTT  
+HWI-EAS443:3:57:702:519#0/1  
aaa`] ^a` ababSaaaaaaaaZ\_aZ` `]aaaUaZaaaa` a  
@HWI-EAS443:3:57:703:876#0/1  
GTGAAGAACTTATATGAAAAGTAAGAAGCCAGTTAAAAA  
+HWI-EAS443:3:57:703:876#0/1  
aWa\_ab\_\_\_\_ `a\_aabaYaa¥a` ^a`\_a` `a\_aa` \_\_\_\_]Y]  
@HWI-EAS443:3:57:759:790#0/1  
TAGAGACTTTGTTGGTCAGCACTAGTAGATGGATGGTGAA  
+HWI-EAS443:3:57:759:790#0/1  
^a\_W[SU\_¥`\_0[V\_]SZZ` `U` ¥ZH^\_[X\_YU\_]XX` ^]  
@HWI-EAS443:3:57:765:726#0/1  
TTGCTATTTCCGGCTTGAACCTTCTTGCTGTATCTTGATGT  
+HWI-EAS443:3:57:765:726#0/1  
ab`aabbbbabbaaab]GYaY\_aa[aaaaa[] ` \_aa^[[ ` \_

@HWI-EAS443:3:57:772:674#0/1  
AGGAAATTCATACCCAAAGCTCAGCAAATCCTACATTAAT  
+HWI-EAS443:3:57:772:674#0/1  
aaaa¥aaaaaaaa`baa\_\_`\_`a\_\_`a`\_`\_`\_`^`a\_^\_a  
@HWI-EAS443:3:57:797:208#0/1  
TGGGGCATTACCATCCATCTACTAGTGCTGACCAACAAA  
+HWI-EAS443:3:57:797:208#0/1  
aaaaaaaaaaaa`\_aa`\_`a]aa\_a\_a^a`\_a`^Z`\_X\_\_^  
@HWI-EAS443:3:57:820:190#0/1  
AGGGGTCAGGATATGCAGCCGACCTGAAGAGCACACAGAA  
+HWI-EAS443:3:57:820:190#0/1  
abbaa]babaaaaababaa`ba^Zaa`aa\_a^a^a`\_aa`  
@HWI-EAS443:3:57:854:201#0/1  
TCACCATCCATCTACTAGTGCTGACCAACAAAGTCTCTAT  
+HWI-EAS443:3:57:854:201#0/1  
abb`¥`Wa]aaa^aZQ]b^a`aa`¥`]`Q^`aaXT¥R\_`]  
@HWI-EAS443:3:57:861:1400#0/1  
ATTTCTTCTCTGTTTAAATTTTGCCTCCTCTGAGTATTTTG  
+HWI-EAS443:3:57:861:1400#0/1  
`ba`^aba^aa`Z\_a`ab^aaaaaa^aaabaa\_\_aa`\_a  
@HWI-EAS443:3:57:871:990#0/1  
GATCGGATGTATATTCTGAAATGGGAGGCTGGTGTTTATA  
+HWI-EAS443:3:57:871:990#0/1  
^^bb\_WX\_aWLW[V^Y\_Z]VOZWZZJ¥Y^`\_\_TOR¥\_aBB  
@HWI-EAS443:3:57:874:1257#0/1  
GGGTCTTATTGCTATTTCCGGCTTGAACCTTGCTGTAT  
+HWI-EAS443:3:57:874:1257#0/1  
a][W`aaa\_aa\_a`aaa`\_]¥\_ZSZ^Ga`U\_aXX`\_^\_\_  
@HWI-EAS443:3:57:930:568#0/1  
ATCCCCCAAGACAAGTTCATGGCCCAATCATGACTCGAAC  
+HWI-EAS443:3:57:930:568#0/1  
N]]SSSS`Wa¥VWa`aa\_V¥V\_G\_Xaa[Y]YGFUW[aBB  
@HWI-EAS443:3:57:962:938#0/1  
GAAGCCAGTTAAAAACAATGCCAAGGAAATTGGAAACGG  
+HWI-EAS443:3:57:962:938#0/1  
aba¥`\_`aa`a\_a^a^^)`aa`\_`\_\_aa^][\_\_`]\_\_]]\_B  
@HWI-EAS443:3:57:966:1389#0/1  
AGGAGATTTTCATCGATTATGAGGAGCTAAGAGAGCAATTG  
+HWI-EAS443:3:57:966:1389#0/1  
]`aaabbbbbaaaa^`aaa`\_aa]a^`\_a\_a`\_]`\_`a\_\_  
@HWI-EAS443:3:57:988:148#0/1  
CGGCTCTACTAGTGCCAGTAATAGTTCATTCTCCCTTCT  
+HWI-EAS443:3:57:988:148#0/1  
a\_N¥baaaaa]aaa)`a\_aZ¥`\_TaT`\_^`a\_`]\_\_\_\_\_T\_  
@HWI-EAS443:3:58:1019:340#0/1  
CGGCTCTACTAGTGCCAGTAATAGTTCATTCTCCCTTCT  
+HWI-EAS443:3:58:1019:340#0/1  
]\_¥`\_¥ZS[¥`a]aW\_¥U\_WSWRVaJZ¥^`aaaWZaa`]U  
@HWI-EAS443:3:58:1035:888#0/1  
TGATTCCAGCTTTACCCCATCTATTTCTTCTCTGTTTAAAT

+HWI-EAS443:3:58:1035:888#0/1  
aaUbaaaa]aaaa\_`\_a^a\_a^aaa\_a\_a\_\_`a\_`a`\_a  
@HWI-EAS443:3:58:1124:1641#0/1  
GCTGGCTGGATCCTGGGAAATCCAGAGTGTGAATCACTCT  
+HWI-EAS443:3:58:1124:1641#0/1  
a\_`W`¥R^TJV¥PZ¥[RNY[LLL[YQXW^U^YUSPQRUUQ  
@HWI-EAS443:3:58:1154:1070#0/1  
ATGACACTGAGCTCAATTGCTCTCTTAGCTCCTCATAATC  
+HWI-EAS443:3:58:1154:1070#0/1  
`\_`^^^Ya`\_P¥ZY`^W`\_Q]]X`^a\_XVLW``¥^^T]R  
@HWI-EAS443:3:58:1173:382#0/1  
CGTGGTAGTCCAAAGTTCTTTTCATTTTCCAATAGAACCAA  
+HWI-EAS443:3:58:1173:382#0/1  
`b`\_¥¥bb`^a`a\_a]ba`ab[`bbbaaaaa`aaaa[a`  
@HWI-EAS443:3:58:1203:1225#0/1  
AGCTTGCTGTGGAGAGTGATTCACTCTGGATTTCCCAG  
+HWI-EAS443:3:58:1203:1225#0/1  
W`UKa^a\_]bbb`]a\_aa]`U`Saaaa^aaa][`^Q`a  
@HWI-EAS443:3:58:1222:1623#0/1  
GCTGGCTGGATCCTGGGAAATCCAGAGTGTGAATCACTCT  
+HWI-EAS443:3:58:1222:1623#0/1  
aaa\_`\_`a`[VW`¥V]`\_`\_¥U^^^¥\_S\_W\_\_¥WR[¥¥QV  
@HWI-EAS443:3:58:1274:771#0/1  
ATCATTTGAAAGTTTGGAGATATCCCCAAGACAAGTTCA  
+HWI-EAS443:3:58:1274:771#0/1  
aababab`\_b`bb^baabaaaaba`aa`a^baaaaa``aa  
@HWI-EAS443:3:58:1279:1759#0/1  
GTCAGACACCCAAGGGTGCTATAAACACCAGCCTCCCATT  
+HWI-EAS443:3:58:1279:1759#0/1  
aaaaa\_ab]Sa`aa\_XX\_a`\_`^\_V`a¥^`WVa[]]a¥\_  
@HWI-EAS443:3:58:132:1026#0/1  
GTAGTCATAAGTCCCATTTTTGACACTTTCCATGCACGTG  
+HWI-EAS443:3:58:132:1026#0/1  
[XaaN\_aT[YX]`[Z`S¥aY`SWPTR[¥`WP]\_\_GK¥RGX  
@HWI-EAS443:3:58:1376:615#0/1  
AGGGATGGTAGATGGATGGTACGGTTATCACCATCAAAAT  
+HWI-EAS443:3:58:1376:615#0/1  
Za]b[b¥ZZaaaab`\_a]aYb\_a^¥aa`Q]`V]aZ\_Y```  
@HWI-EAS443:3:58:1402:1758#0/1  
GCTGCTTTGAATTTTACCACAAATGCGATAACACGTGCAT  
+HWI-EAS443:3:58:1402:1758#0/1  
^\_b`\_aaabaaababa]Ua^``aaa[]a`a`\_]Va\_aTaa  
@HWI-EAS443:3:58:1408:666#0/1  
CAAAGGTGTAACGGCAGCATGTCCTCATGCTGGAGCAAAA  
+HWI-EAS443:3:58:1408:666#0/1  
`bbbab^bbabbba`b`Q¥aS¥^\_a`[^`\_a^aZ]Q^aab  
@HWI-EAS443:3:58:1440:1358#0/1  
AAGCCAGTTAAAAACAATGCCAAGGAAATTGGAAACGGC  
+HWI-EAS443:3:58:1440:1358#0/1  
[\_`XZa\_HWZ\_S`\_UO\_Z]XOTUTT¥\_`\_]a]`VNXW`SYH

@HWI-EAS443:3:58:14:890#0/1  
AAATTGGAACGGCTGCTTTGAATTTTACCACAAATGCGA  
+HWI-EAS443:3:58:14:890#0/1  
ababbbbaa\_a`baaa`GT`\_¥ZX[\_aaQMY¥KGXXHXQWZ  
@HWI-EAS443:3:58:1525:294#0/1  
TTCTGTGTGCTCTTCAGGTCGGCTGCATATCCTGACCCCT  
+HWI-EAS443:3:58:1525:294#0/1  
a[[Y[Sa[¥NaUaUQ\_[[TW[X¥[¥UY]NZQZ[UWWWWQU  
@HWI-EAS443:3:58:1548:1650#0/1  
GCTACCCCTCTTAGTTTGCATAGTTTCCCGTTATGCTTGT  
+HWI-EAS443:3:58:1548:1650#0/1  
aWba¥]a\_YDUYZZQY\_TX\_¥[^OXVYLTX\_Y¥ZTY\_YLW  
@HWI-EAS443:3:58:1564:243#0/1  
CTCTGAGTATTTTGGGTAGTCATAAGTCCCATTTTGGACA  
+HWI-EAS443:3:58:1564:243#0/1  
ababbbb`abbabbba\_aa`aa`\_a`^\_aaaaaba\_Z`  
@HWI-EAS443:3:58:1572:810#0/1  
GGGGCATTACCATCCATCTACTAGTGCTGACCAACAAAG  
+HWI-EAS443:3:58:1572:810#0/1  
]abaababab`aba`aaaaab`bX]`aaaa]`aa`aa¥a  
@HWI-EAS443:3:58:1587:888#0/1  
AGATTTCCAGTTGCTTTCGAATGTTATTTTGTCTCCCGGCT  
+HWI-EAS443:3:58:1587:888#0/1  
aaaa`baaaaaab\_aaaa`aa^a`aaaa\_\_a^\_\_`M^  
@HWI-EAS443:3:58:1643:628#0/1  
CTTTGTTTCGAGTCATGATTGGGCCATGAACCTGTCTTGGG  
+HWI-EAS443:3:58:1643:628#0/1  
abbbbbbbbbbbbbbbbabbb\_````bba`abba````abbb  
@HWI-EAS443:3:58:1713:1985#0/1  
AGAAGTCCTCGTGCTATGGGGCATTACCATCCATCTACT  
+HWI-EAS443:3:58:1713:1985#0/1  
aaa\_Z¥]Y¥T]\_`R^\_^\_[[]]\_`ZX\_\_U`]][\_TZ^`Y]  
@HWI-EAS443:3:58:171:1137#0/1  
ATCATTGAAAGTTTGGAGATTTCCCAAGACAAGTTCA  
+HWI-EAS443:3:58:171:1137#0/1  
^Y\_a^[a\_X^`Z\_Xaaabaaaab`^[\_aa`]T^\_Y[Z[\_\_\_  
@HWI-EAS443:3:58:1735:347#0/1  
GAACGTGTTACCCAGGAGATTTTCATCGATTATGAGGAGCT  
+HWI-EAS443:3:58:1735:347#0/1  
a¥`Ya¥`¥¥TRVY\_S¥]aWZ`\_`¥^W[YYZUa\_]`][XOV  
@HWI-EAS443:3:58:1745:631#0/1  
GCTTCCTCTGAGTATTTTGGGTAGTCATAAGTCCCATTTT  
+HWI-EAS443:3:58:1745:631#0/1  
aabbaababbab`aaabaaaa¥\_`^\_aaaaa]\_¥\_¥aaa`  
@HWI-EAS443:3:58:1750:873#0/1  
TGGGCCATGAACCTGTCTTGGGGAATATCTCAAACCTTTC  
+HWI-EAS443:3:58:1750:873#0/1  
\_Y`b]`bbbaba^Ua]SZ¥]`a[X`ZN¥ZYX^a][\_¥W`\_  
@HWI-EAS443:3:58:1757:1882#0/1  
CCATTTTGGACACTTTCATGCACGTGTTATCGCATTTGT

+HWI-EAS443:3:58:1757:1882#0/1  
`b^bbababaaaaaba`a`aaa\_\_a`a\_aa^a^^a]^\_^  
@HWI-EAS443:3:58:1771:675#0/1  
TAGCTCCTCATAATCGATGAAATCTCCTGGGTAACACGTT  
+HWI-EAS443:3:58:1771:675#0/1  
aa`aaaaa`^aaaaa\_[\_`\_`aa^^\_\_\_`aaX`^Z\_]\_^  
@HWI-EAS443:3:58:1776:139#0/1  
GATTGCCCCAGGGAGACTACCAGTACCAATGAACTGGCG  
+HWI-EAS443:3:58:1776:139#0/1  
abb`a`\_aa[`a`^`a]V¥a^\_\_`\_¥YW`\_Y`¥¥LY^WZa  
@HWI-EAS443:3:58:184:575#0/1  
GAACTCTTTACTACTGCTGTGAACTGTGTATTTCATCTTT  
+HWI-EAS443:3:58:184:575#0/1  
aaaab`bbabaaab`aaaaa`P^\_a`\_a\_\_aa^X`aa\_a  
@HWI-EAS443:3:58:189:889#0/1  
GGGGACATCAAGATACAGCAAGAAGTTCAAGCCGGAAATA  
+HWI-EAS443:3:58:189:889#0/1  
`baaabba\_]`^aaababbaabaaab^aabaaa\_aa^a``\_`  
@HWI-EAS443:3:58:229:413#0/1  
GCCAGTTAAAAACAATGCCAAGGAAATTGGAAACGGCTG  
+HWI-EAS443:3:58:229:413#0/1  
aaabb`abV¥```b`\_a`\_a\_]ab`])`a\_aa`^`[X`\_`X  
@HWI-EAS443:3:58:277:986#0/1  
GGAAATTCATACCCAAAGCTCAGCAAATCCTACATTAATG  
+HWI-EAS443:3:58:277:986#0/1  
`YZa`aaaba``aaaaa^a`\_[W[a\_\_`\_`\_`\_`a^^\_\_`  
@HWI-EAS443:3:58:281:1250#0/1  
CTTCCTCTGAGTATTTTGGGTAGTCATAAGTCCCATTTTT  
+HWI-EAS443:3:58:281:1250#0/1  
aabaabbbbab`abaaaaa^aa\_\_aaa`a]`^]aaa`a  
@HWI-EAS443:3:58:297:921#0/1  
GGAGATTTTCATCGATTATGAGGAGCTAAGAGAGCAATTGA  
+HWI-EAS443:3:58:297:921#0/1  
^]Y\_PZUZ^W^YSOXZRY[QWRW\_XZ^SRM[W[]YXWYY¥  
@HWI-EAS443:3:58:308:766#0/1  
TGCTTCCTCTGAGTATTTTGGGTAGTCATAAGTCCCATTT  
+HWI-EAS443:3:58:308:766#0/1  
abb`abbab`aaa]aaaa\_baa\_a`\_^\_adV]Z^^`\_a`\_`  
@HWI-EAS443:3:58:318:660#0/1  
GGGAGGCTGGTGTATAGCACCCCTTGGGTGTCTGACAAG  
+HWI-EAS443:3:58:318:660#0/1  
`ab[bbabaa^bababaa`a`Z¥a^`Y`¥Z```X¥`\_[`  
@HWI-EAS443:3:58:326:665#0/1  
CACCATCCATCTACTAGTGCTGACCAACAAAGTCTCTATC  
+HWI-EAS443:3:58:326:665#0/1  
aabaa`a`aababba``^b``¥``a^a[¥``a¥^````\_`\_`  
@HWI-EAS443:3:58:361:1210#0/1  
GCCGGTTTCATTGAAGGGGGGTGGACAGGGATGGTAGATG  
+HWI-EAS443:3:58:361:1210#0/1  
^]\_`aPa]ZY`YY^N\_aaa\_\_RV]PO`\_[RV¥\_[WZZPSN



@HWI-EAS443:3:58:411:1321#0/1  
GCTTCCTCTGAGTATTTTGGGTAGTCATAAGTCCCATTTT  
+HWI-EAS443:3:58:411:1321#0/1  
aa¥Z^`a``\_ZYVY[W`U¥\_ZO^OVWNSLU[JVUOM]\_U¥  
@HWI-EAS443:3:58:439:171#0/1  
GTTTAATTTTCTTCCTCTGAGTATTTTGGGTAGTCATAA  
+HWI-EAS443:3:58:439:171#0/1  
a]a`\_\_a```\_^\_\_¥]`^`a^`Z^]`^`\_a\_\_YY\_YY[[[]Y  
@HWI-EAS443:3:58:468:916#0/1  
TCACCATCCATCTACTAGTGCTGACCAACAAAGTCTCTAT  
+HWI-EAS443:3:58:468:916#0/1  
aba`aa`abaabaaaa^a\_a`aaaa¥`a`aa¥^Y\_aa`a`  
@HWI-EAS443:3:58:497:736#0/1  
GAGCAGGGGTCAGGATATGCAGCCGACCTGAAGAGCACAC  
+HWI-EAS443:3:58:497:736#0/1  
aaaaaa\_]\_]aabaaaaa`]aa`a`\_a\_b`\_a`a``\_\_¥  
@HWI-EAS443:3:58:511:942#0/1  
GCCGGTTTCATTGAAGGGGGTGGACAGGGATGGTAGATG  
+HWI-EAS443:3:58:511:942#0/1  
aaaa``baaabba\_abaa```V`\_`¥`a^`\_aa`Wa\_\_\_a  
@HWI-EAS443:3:58:522:899#0/1  
GCCATGAACCTGTCTTGGGAATATCTCAAACCTTTCAAA  
+HWI-EAS443:3:58:522:899#0/1  
aaa\_aaY[¥``aX]aa\_\_\_^V^`^^X^]\_]T^]^^][^]Y  
@HWI-EAS443:3:58:52:182#0/1  
TTGGCGATCTATTCAACTGTCGCCAGTTCATTGGTACTGG  
+HWI-EAS443:3:58:52:182#0/1  
a`aabba\_`^¥a``Y[F[]UVa¥\_R[TVURR^VPTWWW[N  
@HWI-EAS443:3:58:595:781#0/1  
AATCGATGAAATCTCCTGGGTAACACGTTCCATTGTCTGA  
+HWI-EAS443:3:58:595:781#0/1  
^X``aaaa``\_a\_a]Yaaa¥a\_]Y¥[]\_a`\_`\_]`\_\_\_\_\_`  
@HWI-EAS443:3:58:666:803#0/1  
GTAGAGCCGGGAGACAAAATAACATTCAAGCAACTGGAA  
+HWI-EAS443:3:58:666:803#0/1  
a^aa`^baaa`]\_\_^\_aaa`\_a`\_`\_`\_`\_]\_]\_^\_\_\_\_^\_  
@HWI-EAS443:3:58:706:1103#0/1  
GTGGGGACATCAAGATACAGCAAGAAGTTCAAGCCGGAAA  
+HWI-EAS443:3:58:706:1103#0/1  
a\_\_\_`aa\_aa\_\_\_aa\_\_\_aa\_\_\_a\_\_^a]^\_a``Z\_a\_\_\_a  
@HWI-EAS443:3:58:717:663#0/1  
GACAATGGAACGTGTTACCCAGGAGATTTTCATCGATTATG  
+HWI-EAS443:3:58:717:663#0/1  
]¥\_XZa`aa`Z`\_¥S\_Y`^^VZNX\_]Q]a`¥\_VS^ZYX]]  
@HWI-EAS443:3:58:740:974#0/1  
GCTGTATCTTGATGTCCCCACAAAACATATGCATCTGCA  
+HWI-EAS443:3:58:740:974#0/1  
a`\_bWa[[a`\_V^\_S]]VWU\_\_\_Z¥WU]U^^¥^^X\_¥¥Y  
@HWI-EAS443:3:58:753:234#0/1  
ACACCAGTCCACGATTGCAATACAACCTGTCAGACACCCA

+HWI-EAS443:3:58:753:234#0/1  
a\_]\_aa^U]V\_`^X¥^W^aW^\_`]^V^`[W\_``ZV[UMS\_  
@HWI-EAS443:3:58:757:1453#0/1  
ATGAGCAGGGGTCAGGATATGCAGCCGACCTGAAGAGCAC  
+HWI-EAS443:3:58:757:1453#0/1  
aba\_a\_ab`aa\_\_aa`aaa\_`aa\_]\_a\_^`a\_^`a¥aY`¥  
@HWI-EAS443:3:58:763:1042#0/1  
CAAAAACATATGCATCTGCATTCTGATAGAGACTTTGTTG  
+HWI-EAS443:3:58:763:1042#0/1  
`¥]^`[^`^a\_`\_`\_a\_`\_]W]^`^U]^ZV``¥X^WT  
@HWI-EAS443:3:58:794:565#0/1  
ATTCACACTCTGGATTTCCAGGATCCAGCCAGCAATGTT  
+HWI-EAS443:3:58:794:565#0/1  
aaaaaa^]aaaaa`a`a\_a``aa\_\_`\_\_\_`Z`\_[Z¥]\_[W  
@HWI-EAS443:3:58:796:1409#0/1  
ACAGTTCACAGCAGTAGGTAAAGAGTTCAACCACCTGGAA  
+HWI-EAS443:3:58:796:1409#0/1  
]bbbR¥^a\_¥X^Y\_Z`ba¥^`\_\_aW\_a^^a``¥]]`U[  
@HWI-EAS443:3:58:835:412#0/1  
GGGACATCAAGATACAGCAAGAAGTTCAAGCCGGAAATAG  
+HWI-EAS443:3:58:835:412#0/1  
aa`[M^VVaa[`¥`\_`\_aZ\_aaZ^^X\_X]\_^QGa\_OVSZ\_\_  
@HWI-EAS443:3:58:887:1041#0/1  
CTACATTAATGATAAAGGGAAAGAAGTCCTCGTGCTATGG  
+HWI-EAS443:3:58:887:1041#0/1  
aaa`abbaabbabaaaaaa`aaaa`a`a`a`a\_a``aaa\_  
@HWI-EAS443:3:58:8:317#0/1  
GTGGGGACATCAAGATACAGCAAGAAGTTCAAGCCGGAAA  
+HWI-EAS443:3:58:8:317#0/1  
a\_aabb`aa\_a]aaa\_a`aaaaa``aX^Wa`aST``\_]\_  
@HWI-EAS443:3:58:901:692#0/1  
GATGGATGGTACGGTTATCACCATCAAAATGAGCAGGGGT  
+HWI-EAS443:3:58:901:692#0/1  
aaaa\_\_`aaSaX``¥a^[\_V[ZZVL^`\_^]X[U[\_\_\_^¥  
@HWI-EAS443:3:58:906:79#0/1  
AGAATGCAGATGCATATGTTTTTGTGGGGACATCAAGATA  
+HWI-EAS443:3:58:906:79#0/1  
abaaaa`\_b\_aa^\_a\_ab^aaa`aZaa`\_]\_^\_X^]\_^  
@HWI-EAS443:3:58:917:1272#0/1  
GCACGTGTTATCGCATTGTGGTAAAATTCAAAGCAGCCG  
+HWI-EAS443:3:58:917:1272#0/1  
a\_aSa]a`aaa¥aaZ\_aaa]\_aZ`\_a`U`\_`^`S\_\_ZWa  
@HWI-EAS443:3:58:91:1000#0/1  
GCAGCCGACCTGAAGAGCACACAGAATGCCATTGACGAGA  
+HWI-EAS443:3:58:91:1000#0/1  
aabaaabb`aaba`Z]abb¥`aaa\_a`a`a\_\_a[\_]a`\_\_  
@HWI-EAS443:3:58:947:1455#0/1  
CTTCCTCTGAGTATTTTGGGTAGTCATAAGTCCCATTTTT  
+HWI-EAS443:3:58:947:1455#0/1  
aa^aaaabbbbV^b`Y`a`a`\_]aa\_aaba`a^`aaaaaa

@HWI-EAS443:3:58:976:1226#0/1  
GTGGGGACATCAAGATACAGCAAGAAGTTCAAGCCGGAAA  
+HWI-EAS443:3:58:976:1226#0/1  
a\_¥T[`\_\_¥\_]a]]\_`^````]\_aa`X¥VW\_a\_ZZT`\_]\_\_  
@HWI-EAS443:3:59:1025:423#0/1  
AAAATAACATTCGAAGCAACTGGAAATCTAGTGGTACCGA  
+HWI-EAS443:3:59:1025:423#0/1  
aabbbbbbababbaabbbbaabba`aaaaa¥aa\_XZ\_a^  
@HWI-EAS443:3:59:1053:1098#0/1  
GGGCATTACCATCCATCTACTAGTGCTGACCAACAAAG  
+HWI-EAS443:3:59:1053:1098#0/1  
a^¥SSabaSa]0ZVP\_b^P^R\_^\_TS`aQSQGU^\_TT\_¥N  
@HWI-EAS443:3:59:1073:768#0/1  
GGAAATTGGAAACGGCTGCTTTGAATTTTACCACAAATGC  
+HWI-EAS443:3:59:1073:768#0/1  
abaaabba`aabaaaa\_HV¥[OY^¥aabMLOVGWZSGQP  
@HWI-EAS443:3:59:1152:1457#0/1  
CAGAATTTACTTTGTTAGTAATCTCGTCAATGGCATTCTG  
+HWI-EAS443:3:59:1152:1457#0/1  
`aaa\_bb`bababaabbbbaabbbbabaaa\_a```0\_a]  
@HWI-EAS443:3:59:1172:946#0/1  
TGCTTCCTCTGAGTATTTTGGGTAGTCATAAGTCCCATTT  
+HWI-EAS443:3:59:1172:946#0/1  
^^`Za]aaa`\_¥LW``a^aaaZa[X¥\_]ZXZUWRRS```]  
@HWI-EAS443:3:59:1187:199#0/1  
GGGGCATTACCATCCATCTACTAGTGCTGACCAACAAAG  
+HWI-EAS443:3:59:1187:199#0/1  
abbbb`bb`ba\_bbaaba`abababZa\_abaW^^`NN\_^^  
@HWI-EAS443:3:59:1210:1240#0/1  
GGGACATCAAGATACAGCAAGAAGTTCAAGCCGGAAATAG  
+HWI-EAS443:3:59:1210:1240#0/1  
^a\_\_`bbba\_aababb\_bb^^^aY`]bab^T`\_^Ra\_a  
@HWI-EAS443:3:59:1227:1797#0/1  
GACACTAGTAGAGCCGGGAGACAAAATAACATTCGAAGCA  
+HWI-EAS443:3:59:1227:1797#0/1  
aa\_aabababb`bb`^b`bbbbbbaabSa`\_]Y]PU  
@HWI-EAS443:3:59:1384:1716#0/1  
ATATCTCGGTACCACTAGATTTCCAGTTGCTTCGAATGTT  
+HWI-EAS443:3:59:1384:1716#0/1  
\_]`U\_a```\_¥¥]\_a\_\_\_a``\_aab`\_aaaW]aVY^aX^  
@HWI-EAS443:3:59:1418:1432#0/1  
AGAATTTGGACTACCACGATTCAAATGTGAAGAACTTAT  
+HWI-EAS443:3:59:1418:1432#0/1  
^bba^bba`aaaba`baaaa^`a\_bba\_b`¥^`aP^a\_\_  
@HWI-EAS443:3:59:1478:989#0/1  
GAGTGATTCACACTCTGGATTTCCAGGATCCAGCCAGCA  
+HWI-EAS443:3:59:1478:989#0/1  
^WMEUGYNR[[VNYT]```SLQQVY[H^\_N]\_PUYQLTLNQ  
@HWI-EAS443:3:59:1492:1165#0/1  
GCTGCTTTGAATTTTACCACAAATGCGATAACACGTGCAT

+HWI-EAS443:3:59:1492:1165#0/1  
`b¥a\_bbb`aXabbaa^\_a]aaabaaaa\_\_PQ`]PKK^\_U  
@HWI-EAS443:3:59:1537:1918#0/1  
AGCACGAGGACTTCTTTCCCTTATCATTAAATGTAGGATT  
+HWI-EAS443:3:59:1537:1918#0/1  
¥bb¥a\_^¥^`ab\_aabaXXa`a`aa`b`]a\_a^\_\_0\_\_K  
@HWI-EAS443:3:59:1553:1110#0/1  
GGCATTACCATCCATCTACTAGTGCTGACCAACAAAGTC  
+HWI-EAS443:3:59:1553:1110#0/1  
\_a\_[^```\_\_SXSa`¥a\_^Q]\_aUa]aaa\_VP\_WPHV^QS  
@HWI-EAS443:3:59:161:993#0/1  
ATTTTGATGGTGATAACCGTACCATCCATCTACCATCCCT  
+HWI-EAS443:3:59:161:993#0/1  
`aaa`aaaaR` `\_baaaaOY]`aa\_\_a\_\_Y^\_\_YRM\_^Z  
@HWI-EAS443:3:59:1651:842#0/1  
CTTCAGGTGGCTGCATATCCTGACCCCTGCTCATTTTGA  
+HWI-EAS443:3:59:1651:842#0/1  
abbab`bbbaabaabbbb`babaa`\_abbb\_aSbZZb]^  
@HWI-EAS443:3:59:1677:1213#0/1  
GCTTCCTCTGAGTATTTGGGTAGTCATAAGTCCCATTTT  
+HWI-EAS443:3:59:1677:1213#0/1  
a`baa\_b¥baab`abbbbaa\_W`ba`aaa`aZ\_^ZXXa\_]`  
@HWI-EAS443:3:59:171:1394#0/1  
GCTGGCTGGATCCTGGGAAATCCAGAGTGTGAATCACTCT  
+HWI-EAS443:3:59:171:1394#0/1  
ab`[P¥`[]a```¥P¥a\_a`T¥`^^ZZZ¥Y[^]TSLKSUR  
@HWI-EAS443:3:59:1734:344#0/1  
CGCCAGTTCATTGGTACTGGTAGTCTCCCTGGGGCAATC  
+HWI-EAS443:3:59:1734:344#0/1  
abababbbbabbb` `babab`bb¥`^\_ab` `HaaaUU¥^R  
@HWI-EAS443:3:59:1748:1417#0/1  
ATCGATTATGAGGAGCTAAGAGAGCAATTGAGCTCAGTGT  
+HWI-EAS443:3:59:1748:1417#0/1  
a`bb`abb` `^ba`U\_b` `a`a`ab¥`bbbaaa^aS]XaT  
@HWI-EAS443:3:59:1752:1205#0/1  
GCCTCCCATTTCAGAATATACATCCGATCACAATTGAAAA  
+HWI-EAS443:3:59:1752:1205#0/1  
a`^`aa[^` `a`\_^\_\_a`aa^aa\_\_a][YTXRYUSQQQTS  
@HWI-EAS443:3:59:1766:689#0/1  
CCCCATTGCATTTGGGTAAATGTAACATTGCTGGCTGGAT  
+HWI-EAS443:3:59:1766:689#0/1  
aa` `b\_\_babab`\_Y^T`\_aaaaaaaa^]`\_\_a^`\_SWOR  
@HWI-EAS443:3:59:1767:959#0/1  
CATTCTGTGTGCTCTTCAGGTCGGCTGCATATCCTGACCC  
+HWI-EAS443:3:59:1767:959#0/1  
abbb]bbaa`bbbbbbbabab`bba`b`bbbbZa[¥FT]\_\_  
@HWI-EAS443:3:59:191:1747#0/1  
TGAGTATTTGGGTAGTCATAAGTCCCATTTTGGACACTT  
+HWI-EAS443:3:59:191:1747#0/1  
\_\_a`T^bbb`aSZZ]a]a`aab`WbaabaaaaaaaaWX^`\_`

@HWI-EAS443:3:59:198:16#0/1  
GGGTAGTCATAAGTCCCATTTTTGACACTTCCATGCACG  
+HWI-EAS443:3:59:198:16#0/1  
abaYab\_aaa`aa\_\_`\_\_a\_aa\_]¥^[^\_¥X¥]^URZX\_  
@HWI-EAS443:3:59:204:683#0/1  
TGCCGGTTTCATTGAAGGGGGTGGACAGGGATGGTAGAT  
+HWI-EAS443:3:59:204:683#0/1  
\_\_a\_b\_`bbabba\_X\_babaaaR^`^¥aaaa^^a`UR[^S  
@HWI-EAS443:3:59:210:162#0/1  
ACCAGTACCAATGAACTGGCGACAGTTGAATAGATCGCCA  
+HWI-EAS443:3:59:210:162#0/1  
Ua]GYXY^\_OW`aS`VaYPZ[OVR¥]X]W]BBBBBBBBBB  
@HWI-EAS443:3:59:213:868#0/1  
TGACAAGTTGTATTGCAATCGTGGACTGGTGTATCTGAAA  
+HWI-EAS443:3:59:213:868#0/1  
X\_ISRR\_UX^X`a¥`\_ab¥XaQYUPGYGL¥TYY\_YYa]W  
@HWI-EAS443:3:59:22:95#0/1  
GGTGGACAGGGATGGTAGATGGATGGTACGGTTATCACCA  
+HWI-EAS443:3:59:22:95#0/1  
aaUaa[`¥aaa¥`aaY\_`¥¥^\_W¥`¥U¥Y\_¥WYWWUYWVW  
@HWI-EAS443:3:59:248:1249#0/1  
GCATTCTGTGTGCTCTTCAGGTCGGCTGCATATCCTGACC  
+HWI-EAS443:3:59:248:1249#0/1  
a^[]`aUY`RPU[\_[\_Z[VS]QV\_XX¥NZLQNSNMRRJ  
@HWI-EAS443:3:59:268:894#0/1  
AAGCCAGTTAAAAACAATGCCAAGGAAATTGGAAACGGC  
+HWI-EAS443:3:59:268:894#0/1  
aaaaTa\_Qaa`¥[[]`U`\_]a[`\_VPZ]ZPDPZYV\_\_R  
@HWI-EAS443:3:59:275:877#0/1  
GAAAGAAGTCCTCGTGCTATGGGGCATTACCATCCATCT  
+HWI-EAS443:3:59:275:877#0/1  
¥a`a¥Xaab`bab^baaababb^aba`a`H\_aaZ\_ZV[  
@HWI-EAS443:3:59:292:989#0/1  
CTCGTCAATGGCATTCTGTGTGCTCTTCAGGTCGGCTGCA  
+HWI-EAS443:3:59:292:989#0/1  
ababbbbaa^aababab\_aXa`aabaU^XUaa\_W^\_¥^  
@HWI-EAS443:3:59:29:1054#0/1  
TGGGGCATTACCATCCATCTACTAGTGCTGACCAACAAA  
+HWI-EAS443:3:59:29:1054#0/1  
abaabb`babbaaaabbaaabaaZ\_^aa```\_a^\_Y`\_^  
@HWI-EAS443:3:59:326:1629#0/1  
CGAATGTTATTTTGTCTCCCGCTCTACTAGTGTCCAGTA  
+HWI-EAS443:3:59:326:1629#0/1  
ab`abba^bab¥bb[bbbaaZzb]^`¥UZ[Z¥PV[GWWYZ  
@HWI-EAS443:3:59:332:1901#0/1  
GGGACATCAAGATACAGCAAGAAGTTCAAGCCGAAATAG  
+HWI-EAS443:3:59:332:1901#0/1  
\_XIV^\_V\_a^ZVP\_]aaa]b^`\_aW¥^\_X¥YDR\_XXN\_[N  
@HWI-EAS443:3:59:334:642#0/1  
TACGGTTATCACCATCAAATGAGCAGGGGTCAGGATATG

+HWI-EAS443:3:59:334:642#0/1  
a`abb\_aaaaaa\_`aaaaaaaaa\_a`\_`U^\_aaYWa\_^  
@HWI-EAS443:3:59:370:1159#0/1  
GTATTATCATTTCAGATACACCAGTCCACGATTGCAATAC  
+HWI-EAS443:3:59:370:1159#0/1  
a[]`\_ba`¥]]`aaba\_`a¥\_`\_¥Za`¥`^[S]\_¥\_W]ZT  
@HWI-EAS443:3:59:375:179#0/1  
GGCCTATTTGGGGCCATTGCCGGTTTCATTGAAGGGGGGT  
+HWI-EAS443:3:59:375:179#0/1  
aaa`aa`aaaa`aaaa`aaS]]`¥^\_¥¥]^¥W¥¥U  
@HWI-EAS443:3:59:394:283#0/1  
AATCGATGAAATCTCCTGGGTAACACGTTCCATTGTCTGA  
+HWI-EAS443:3:59:394:283#0/1  
^`babaababaaaa`aaaa\_a¥aaaa\_aa\_\_`\_aVP``Y  
@HWI-EAS443:3:59:39:139#0/1  
GCTGCTTTGAATTTTACCACAAATGCGATAACACGTGCAT  
+HWI-EAS443:3:59:39:139#0/1  
aaaa^`aaa\_`aa`]a`a\_[Y[Y\_\_[`WY^]X]^\_N]U]Z  
@HWI-EAS443:3:59:451:2006#0/1  
CGGGAGACAAAATAACATTTCGAAGCAACTGGAAATCTAGT  
+HWI-EAS443:3:59:451:2006#0/1  
\_`aaZ[[]WT^ab`b`SKVT`^Y\_[]TWSUOH\_`aYGS\_NR  
@HWI-EAS443:3:59:48:380#0/1  
CGGCTCTACTAGTGTCCAGTAATAGTTCATTCTCCCTTCT  
+HWI-EAS443:3:59:48:380#0/1  
R^[\_¥¥\_Z[VXZXZ]\_^FZY`¥YU¥H¥¥Z]UWLT¥OLXa[  
@HWI-EAS443:3:59:501:220#0/1  
GTGGGGACATCAAGATACAGCAAGAAGTCAAGCCGAAAA  
+HWI-EAS443:3:59:501:220#0/1  
aZ^`\_a][\_^^^WWS^\_`^Za^\_QaXZ]^ZXRXZZZW  
@HWI-EAS443:3:59:526:1112#0/1  
TGCTATTTCCGGCTTGAACCTTCTTGCTGTATCTTGATGTC  
+HWI-EAS443:3:59:526:1112#0/1  
]a[`]bbab^``]abZ`\_Xa¥aaaa]aa\_\_XN]^`\_VYa[^  
@HWI-EAS443:3:59:543:416#0/1  
AAAAACAATGCCAAGGAAATTGGAAACGGCTGCTTTGAAT  
+HWI-EAS443:3:59:543:416#0/1  
abaaaaabaaaaabaaaaaa```[``\_aa`^GS¥ZGTXS  
@HWI-EAS443:3:59:566:1741#0/1  
GGAACGTGTTACCCAGGAGATTCATCGATTATGAGGAGC  
+HWI-EAS443:3:59:566:1741#0/1  
\_baaabaaaabba`aaaa\_aaabaababaaa]aaa]^`\_Z  
@HWI-EAS443:3:59:594:910#0/1  
GCCAGTTAAAAACAATGCCAAGGAAATTGGAAACGGCTG  
+HWI-EAS443:3:59:594:910#0/1  
[`bba[ab`Xbba\_ba`a^¥`LRba[a^`aX]bb¥`S\_BB  
@HWI-EAS443:3:59:651:207#0/1  
CTTCCTCTGAGTATTTTGGGTAGTCATAAGTCCCATTTTT  
+HWI-EAS443:3:59:651:207#0/1  
aa`^`abbbb`¥ababab`b^bbaaaa^ab`T``\_¥`aa`

@HWI-EAS443:3:59:729:223#0/1  
ATCGCATTTGTGGTAAAATTCAAAGCAGCCGTTTCCAATT  
+HWI-EAS443:3:59:729:223#0/1  
aa`Z]aaaaa^a`[aaa`aa^a```¥a\_``aX^^ZUUW][  
@HWI-EAS443:3:59:747:282#0/1  
AGGGGGGTGGACAGGGATGGTAGATGGATGGTACGGTTAT  
+HWI-EAS443:3:59:747:282#0/1  
`bbbabbb[ab`bbbababab¥abbabb```aaVa\_aQS```¥  
@HWI-EAS443:3:59:760:195#0/1  
TCTGAGTATTTTGGGTAGTCATAAGTCCCATTTTGGACAC  
+HWI-EAS443:3:59:760:195#0/1  
a```aa^b^aa`aaa`a[````aaa[X[Z¥W^W^¥XX\_^W  
@HWI-EAS443:3:59:780:164#0/1  
AAACCGGCAATGGCCCCAAATAGGCCTCTAGATTGAATAG  
+HWI-EAS443:3:59:780:164#0/1  
abba]ababa]^a`aaabba\_a\_aaa^^^`])`\_\_QV\_^[  
@HWI-EAS443:3:59:781:908#0/1  
CACAAATGCGATAACACGTGCATGGAAAGTGCAAAAATG  
+HWI-EAS443:3:59:781:908#0/1  
abba^`bbbbbb``bbbbabababa`bba\_b^abb\_[]]a  
@HWI-EAS443:3:59:794:1133#0/1  
TTCCGGCTTGAACCTTCTTGCTGTATCTTGATGTCCCCACA  
+HWI-EAS443:3:59:794:1133#0/1  
aa`a\_`aaaY```\_aa\_a`X¥[`^\_a\_`][^\_U^\_XV]WZ  
@HWI-EAS443:3:59:794:362#0/1  
ATGCATCTGCATTCTGATAGAGACTTTGTTGGTCAGCACT  
+HWI-EAS443:3:59:794:362#0/1  
`^a```a```\_bb`ab`]aabaaZ\_aa`¥W\_XZQ¥]ZM\_UY  
@HWI-EAS443:3:59:805:1266#0/1  
CGGCTGCTTTGAATTTTACCACAAATGCGATAACACGTGC  
+HWI-EAS443:3:59:805:1266#0/1  
abaaab^]aa¥Z\_`aab^[]¥XTaa\_¥][`Z[\_N[TURZQ  
@HWI-EAS443:3:59:827:1907#0/1  
ATTACTGGACACTAGTAGAGCCGGGAGACAAAATAACATT  
+HWI-EAS443:3:59:827:1907#0/1  
ababa`Z¥`\_ababaa\_ab^`a`a`Yaaa`aaR`[`]G`XZ  
@HWI-EAS443:3:59:875:1860#0/1  
CTTAGCTCCTCATAATCGATGAAATCTCCTGGGTAACACG  
+HWI-EAS443:3:59:875:1860#0/1  
abab]ab\_`babbbbbbbaa\_aaabba```aaaa]aWaOHZWZ  
@HWI-EAS443:3:59:910:1288#0/1  
GCTTCGAATGTTATTTTGTCTCCCGGCTCTACTAGTGTCC  
+HWI-EAS443:3:59:910:1288#0/1  
abbbbab`bbabbbbbbabaaa`baa^`b^]W^a`VO]\_G  
@HWI-EAS443:3:59:930:1789#0/1  
AGAGTGTGAATCACTCTCCACAGCAAGCTCATGGTCCTAC  
+HWI-EAS443:3:59:930:1789#0/1  
aa\_`X```aaaaaa]a`aaaa`aa`\_a\_b^`¥PZ^XXZ\_WO  
@HWI-EAS443:3:59:986:944#0/1  
GCCAGTTAAAAACAATGCCAAGGAAATTGGAACGGCTG

+HWI-EAS443:3:59:986:944#0/1  
aaaaaYaaY[Waaa]Z`^`\_\_a`^`¥aaaVNV[]WYZV  
@HWI-EAS443:3:59:997:743#0/1  
CGGGAGACAAAATAACATTTCGAAGCAACTGGAAATCTAGT  
+HWI-EAS443:3:59:997:743#0/1  
aabbab`bbba`aabbba^Ybaababb^aaaU^a`\_  
@HWI-EAS443:3:5:1037:1036#0/1  
CATCTTTTCAATAACAGAATTTACTTTGTTAGTAATCTCG  
+HWI-EAS443:3:5:1037:1036#0/1  
`bb\_bbbbabaaaa\_b`\_abbaa\_abab`abb¥aaa`a¥b  
@HWI-EAS443:3:5:1115:136#0/1  
CCCAAAGCTCAGCAAATCCTACATTAATGATAAAGGGAAA  
+HWI-EAS443:3:5:1115:136#0/1  
aaabbbabbaa[abbaaab`a\_aaab]X^aaaaaaaa\_  
@HWI-EAS443:3:5:111:1159#0/1  
CAGGATATGCAGCCGACCTGAAGAGCACACAGAATGCCAT  
+HWI-EAS443:3:5:111:1159#0/1  
\_b`Ybaab^abab[Y\_b`baa]abb[ba\_Z``a\_baUb^U  
@HWI-EAS443:3:5:1175:798#0/1  
CGGCTTGAACTTCTTGCTGTATCTTGATGTCCCCACAAAA  
+HWI-EAS443:3:5:1175:798#0/1  
`bbabba¥a^bb^bbVab¥`\_b\_bb`^a][^aaaa\_\_aaa  
@HWI-EAS443:3:5:1185:488#0/1  
AGAAGACAAGCATAACGGGAACTATGCAAACCTAAGAGGG  
+HWI-EAS443:3:5:1185:488#0/1  
aa[a`][\_`^a]`\_\_^`¥H`aI`a^\_a]¥\_]\_\_\_a^BBB  
@HWI-EAS443:3:5:1328:1361#0/1  
TAGATTTCCAGTTGCTTCGAATGTTATTTTGTCTCCCGGC  
+HWI-EAS443:3:5:1328:1361#0/1  
`aaaaaaaa¥Z`\_\_a\_aa\_a`aa[\_\_\_a```\_]\_]BBB  
@HWI-EAS443:3:5:1349:866#0/1  
TGGGCCATGAACTTGTCTTGGGGAATATCTCAAACCTTTC  
+HWI-EAS443:3:5:1349:866#0/1  
\_`S¥]¥Yb`[¥[`¥^Pab`a¥Z^]`^^`\_`aba`[D[\_aB  
@HWI-EAS443:3:5:1379:868#0/1  
CTCCTCATAATCGATGAAATCTCCTGGGTAACACGTTCCA  
+HWI-EAS443:3:5:1379:868#0/1  
Yaba\_bbb\_`¥Xa]bbbaXab^b\_bbbabb`bX^aa]J]  
@HWI-EAS443:3:5:1411:69#0/1  
TAAGAAGCCAGTTAAAAACAATGCCAAGGAAATTGGAAA  
+HWI-EAS443:3:5:1411:69#0/1  
aaaaaaaa]Xa\_^a\_]\_\_\_\_^`Y\_\_¥Y]^a^[YZ\_^`^BB  
@HWI-EAS443:3:5:1448:155#0/1  
ATTGCAATCGTGGACTGGTGTATCTGAAATGATAATACCA  
+HWI-EAS443:3:5:1448:155#0/1  
a`RY\_aZ[RN\_¥UZV`ZVVV`a\_T`¥H`YaYa`]ZX^BBB  
@HWI-EAS443:3:5:1489:475#0/1  
CAGCATGAGGACATGCTGCCGTTACACCTTTGTTTCGAGTC  
+HWI-EAS443:3:5:1489:475#0/1  
Za[Ua`b```\_b`bY`baX]b^baa^]U\_a^aaba``b`\_



@HWI-EAS443:3:5:1507:749#0/1  
GTCCAAAGTTCTTTCATTTTCCAATAGAACCAACAGTTTCG  
+HWI-EAS443:3:5:1507:749#0/1  
`^`abba\_abaaba\_abbab`\_a\_aaaa`\_`\_^`a\_`^`\_  
@HWI-EAS443:3:5:1530:1678#0/1  
GACAATGGAACGTGTACCAGGAGATTTTCATCGATTATG  
+HWI-EAS443:3:5:1530:1678#0/1  
abbb[bba]a[bNaZ`a\_Yaa`\_a`\_`^^aVa\_Ya\_\_B  
@HWI-EAS443:3:5:155:510#0/1  
GCCAGTTAAAAACAATGCCAAGGAAATTGGAAACGGCTG  
+HWI-EAS443:3:5:155:510#0/1  
aabbbaaaaaaaaaabaaaabaaa`aaa\_aaa`ba`BB  
@HWI-EAS443:3:5:1617:1123#0/1  
ATTGAGCTCAGTGTTCATTTTCAAAGTTTGGAGATATTC  
+HWI-EAS443:3:5:1617:1123#0/1  
abaS`LSbUaV\_aWabbaYaabb\_^¥a`a^aaba\_aa\_B  
@HWI-EAS443:3:5:1640:1258#0/1  
AGCATGTCCTCATGCTGGAGCAAAAAGCTTCTACAAAAAT  
+HWI-EAS443:3:5:1640:1258#0/1  
\_baab`Z[`a^`]`Xbba]a^a`a`\_a`aa^`\_`aaa`a  
@HWI-EAS443:3:5:1697:1364#0/1  
AAGAAGTTCAAGCCGAAATAGCAATAAGACCCAAAGTGA  
+HWI-EAS443:3:5:1697:1364#0/1  
`aU\_^\_W]a\_a]UY¥[[\_a`^Q`]]`^^WfNZWWaNPp  
@HWI-EAS443:3:5:1768:830#0/1  
AAGCTTTTGTCCAGCATGAGGACATGCTGCCGTTACAC  
+HWI-EAS443:3:5:1768:830#0/1  
aZU^aabb`]^[TVZ]\_\_]\_`YZYS]\_\_VBBBBBBBBBB  
@HWI-EAS443:3:5:192:224#0/1  
GGGAAAGAAGTCCTCGTGTATGGGGCATTACCATCCAT  
+HWI-EAS443:3:5:192:224#0/1  
^bbab\_aaaa`aaaa]aa`XY\_a^a`\_¥X^¥]a\_]`B  
@HWI-EAS443:3:5:199:387#0/1  
CTAGATTTCCAGTTGCTTGAATGTTATTTTGTCTCCCGG  
+HWI-EAS443:3:5:199:387#0/1  
`a\_aabbb\_Z\_b]aY\_ab^bab`^Ya]a\_`KQZ]\_aBBB  
@HWI-EAS443:3:5:211:1352#0/1  
AGCCAGTTAAAAACAATGCCAAGGAAATTGGAAACGGCT  
+HWI-EAS443:3:5:211:1352#0/1  
¥^b^[Waaab\_^YVbaab^¥aaa`Vba`Y]\_aZb¥^^BB  
@HWI-EAS443:3:5:229:338#0/1  
TTCTTGCTGTATCTTGATGTCCCCACAAAAACATATGCAT  
+HWI-EAS443:3:5:229:338#0/1  
aa`a]aaa¥Y`\_Z`^^^aa\_a]`^^]\_\_^^¥`[]\_^\_W\_^  
@HWI-EAS443:3:5:240:1263#0/1  
GCCGGTTTCATTGAAGGGGGTGGACAGGGATGGTAGATG  
+HWI-EAS443:3:5:240:1263#0/1  
aZa`]Ga^aVaYV]W`[O]^`GVT[UVV^\_XWa¥PYBBBB  
@HWI-EAS443:3:5:287:1340#0/1  
GAAGTCCTCGTGTATGGGGCATTACCATCCATCTACTA

+HWI-EAS443:3:5:287:1340#0/1  
a\_X]a`¥a[a\_^Z]\_aa\_\_`Q`[^\_^`\_a\_`^\_\_T\_a`\_B  
@HWI-EAS443:3:5:299:936#0/1  
GCTGGCTGGATCCTGGGAAATCCAGAGTGTGAATCACTCT  
+HWI-EAS443:3:5:299:936#0/1  
a]baaa`RY^\_X`a`^aaaa\_^Z^ZY]H`V]aRV¥ZXXBB  
@HWI-EAS443:3:5:339:1808#0/1  
AATCGATGAAATCTCCTGGGTAACACGTTCCATTGTCTGA  
+HWI-EAS443:3:5:339:1808#0/1  
aa\_T¥`[^`abaa`\_\_aa\_T`\_¥X¥^S^^RM¥`S`W¥\_¥B  
@HWI-EAS443:3:5:355:752#0/1  
CCGTTACACCTTTGTTTCGAGTCATGATTGGGCCATGAACT  
+HWI-EAS443:3:5:355:752#0/1  
aa`Uaa`a`L^Uaa¥`^]`^VPU]\_NHUWG^Z[RV\_VRQV  
@HWI-EAS443:3:5:367:125#0/1  
AGCCAGTTAAAAACAATGCCAAGGAAATTGGAAACGGCT  
+HWI-EAS443:3:5:367:125#0/1  
aWFSaXP`]^[\_`Y^\_W^`UIOX\_\_UUWW^OWZBBBBBBB  
@HWI-EAS443:3:5:367:571#0/1  
GCTGCTTTGAATTTTACCACAAATGCGATAACACGTGCAT  
+HWI-EAS443:3:5:367:571#0/1  
^U`bbbaVZfVbY^aXVX^\_\_[\_`ab^aaaRFY`IaQa^`B  
@HWI-EAS443:3:5:512:571#0/1  
AAAATAACATTCGAAGCAACTGGAAATCTAGTGGTACCGA  
+HWI-EAS443:3:5:512:571#0/1  
\_babbba^abaYbaab\_a``abaaaaaaaa`\_a\_^a`]aa  
@HWI-EAS443:3:5:516:1121#0/1  
GGCCAGTCTCAATTTTGTGCTTTTACATATTTTGGACAT  
+HWI-EAS443:3:5:516:1121#0/1  
aba`Za]a[] [G`aa`^QWL`^\_\_`^]`[^`^`¥[]QT^aB  
@HWI-EAS443:3:5:519:627#0/1  
GTTGCTTCGAATGTTATTTTGTCTCCCGCTCTACTAGTG  
+HWI-EAS443:3:5:519:627#0/1  
aabb\_ab\_b`abb`\_aba`aa`\_`^a\_a\_Z\_]Z^^\_BB  
@HWI-EAS443:3:5:533:203#0/1  
CGGCTCTACTAGTGTCCAGTAATAGTTCATTCTCCCTTCT  
+HWI-EAS443:3:5:533:203#0/1  
abaa\_KZa¥a[TT\_]Ta```]aaa[`Z`V`^XKV^[UW\_BB  
@HWI-EAS443:3:5:537:1543#0/1  
ATTTTGTCTCCCGCTCTACTAGTGTCCAGTAATAGTTCA  
+HWI-EAS443:3:5:537:1543#0/1  
aY^¥```]aaa\_U[[`a]LZ`\_a`Y`S^¥^aY`IX`Z^\_B  
@HWI-EAS443:3:5:569:951#0/1  
GAGGCTGGTGTATATAGCACCTTGGGTGTCTGACAAGTT  
+HWI-EAS443:3:5:569:951#0/1  
aaa\_aaaa^a\_aa`]¥Z`¥aa[\_aa\_\_IXGU`\_`¥S¥]BB  
@HWI-EAS443:3:5:628:591#0/1  
GGGGTGGACAGGGATGGTAGATGGATGGTACGGTTATCAC  
+HWI-EAS443:3:5:628:591#0/1  
a[QWU\_a`\_`^¥0¥VYaaU\_aOR`[N`\_SR^¥`¥V^BBBBB

@HWI-EAS443:3:5:645:1998#0/1  
TTGAATTTTACCACAAATGCGATAACACGTGCATGGAAAG  
+HWI-EAS443:3:5:645:1998#0/1  
a¥bVV`ba¥JUbb[abbb`aaaaaa[V\_aG\_IZ\_aa^a`^  
@HWI-EAS443:3:5:658:737#0/1  
GCTGGATCTGGTATTATCATTTCAGATACACCAGTCCACG  
+HWI-EAS443:3:5:658:737#0/1  
ab\_bba\_bbab]abbaabbbbab`babbaba\_ab`aaaab  
@HWI-EAS443:3:5:671:1181#0/1  
CGATTCAAATGTGAAGAACTTATATGAAAAGGTAAGAAGC  
+HWI-EAS443:3:5:671:1181#0/1  
¥abbbba^babbb\_bbbaababbbbaa`bbabb]aaaabaa  
@HWI-EAS443:3:5:675:731#0/1  
GTGGAGAGTGATTACACTCTGGATTTCCCAGGATCCACG  
+HWI-EAS443:3:5:675:731#0/1  
aabb`bab``aaa¥aabaaaaab`a¥ZZZa\_\_\_`\_V\_\_\_`B  
@HWI-EAS443:3:5:685:944#0/1  
GCTAGTTAAAAAGGAAATTCATACCCAAAGCTCAGCAAA  
+HWI-EAS443:3:5:685:944#0/1  
aababaaaaba```\_aaaa\_aa\_a\_\_\_aa`\_\_\_]a`\_``\_`  
@HWI-EAS443:3:5:722:19#0/1  
GAGTATTTTGGGTAGTCATAAGTCCCATTTTGGACTTT  
+HWI-EAS443:3:5:722:19#0/1  
aab`a`baabab^ab`ab`^aX^]UZba``aa]\_\_Z`a^  
@HWI-EAS443:3:5:805:800#0/1  
GAGTATTTTGGGTAGTCATAAGTCCCATTTTGGACTTT  
+HWI-EAS443:3:5:805:800#0/1  
aaa^abaa`^^][T]`[^aW[^[Yaa]`aaUQ]ZU`\_  
@HWI-EAS443:3:5:855:1118#0/1  
GGGGCATTACCATCCATCTACTAGTGCTGACCAACAAAG  
+HWI-EAS443:3:5:855:1118#0/1  
]W`WT]`aT`PY\_\_\_^ZRY[a]\_M]M[\_`\_Y^`YLN`]]  
@HWI-EAS443:3:5:879:120#0/1  
ATCCTGGGAAATCCAGAGTGTGAATCACTCTCCACAGCAA  
+HWI-EAS443:3:5:879:120#0/1  
^bZQ]aaa¥\_aa^\_X\_Ya\_\_\_\_\_`\_`V`Y^^[WGZR]BBBB  
@HWI-EAS443:3:5:907:457#0/1  
CACGTGTATCGCATTGTGGTAAAATTCAAAGCAGCCGT  
+HWI-EAS443:3:5:907:457#0/1  
`b`b¥babbabbUQ^^`M`X`aabbZ`\_a`\_a^Yb]baW  
@HWI-EAS443:3:5:909:1352#0/1  
ATTGGAATGTCCAAAATATGTAAGAACACAAAATTGA  
+HWI-EAS443:3:5:909:1352#0/1  
`abaa\_aba^ZZ`Y^a^aaaa\_a\_\_aaa\_a\_a\_[Y`\_`a  
@HWI-EAS443:3:5:921:250#0/1  
AGAAGTTCAAGCCGAAATAGCAATAAGACCCAAAGTGAG  
+HWI-EAS443:3:5:921:250#0/1  
ab`aaYa`aa\_QQ[ZUU\_`¥\_S¥\_`\_\_a^^RV[]]`Y\_aB  
@HWI-EAS443:3:5:961:741#0/1  
GTTACCCAGGAGATTTTCATCGATTATGAGGAGCTAAGAGA



@HWI-EAS443:3:60:1136:27#0/1  
AGCTTTTTGCTCCAGCATGAGGACATGCTGCCGTTACACC  
+HWI-EAS443:3:60:1136:27#0/1  
ababbbbbb]\_aaaaaa\_¥a`aa]¥aa`\_\_a\_V^XV^WWWU  
@HWI-EAS443:3:60:1141:762#0/1  
GGGGACATCAAGATACAGCAAGAAGTTCAAGCCGAAATA  
+HWI-EAS443:3:60:1141:762#0/1  
a`aa^¥`Y]Y`a^^[\_`Zaaa¥UaU^^`[^]S^`^]¥ZY  
@HWI-EAS443:3:60:1158:1080#0/1  
TGCCGGTTTCATTGAAGGGGGTGGACAGGGATGGTAGAT  
+HWI-EAS443:3:60:1158:1080#0/1  
`bbaba`abbbbbb^`bbbaa^aaa```aa`aaa[aaa\_  
@HWI-EAS443:3:60:1161:73#0/1  
CACCTGGAAAAAGAATAGAGAATTTAAATAAAAAAGTTG  
+HWI-EAS443:3:60:1161:73#0/1  
^aababbbbaaa^bbabbbbaabbbbaabaaa`\_\_a^ab  
@HWI-EAS443:3:60:1163:1731#0/1  
ATATGCATCTGCATTCTGATAGAGACTTTGTTGGTCAGCA  
+HWI-EAS443:3:60:1163:1731#0/1  
aa`a\_aaaa`a\_\_aaa`a]\_`^`\_\_a`Z`]RR]^]¥^  
@HWI-EAS443:3:60:1165:609#0/1  
AGACTTTGTTGGTCAGCACTAGTAGATGGATGGTGAATGC  
+HWI-EAS443:3:60:1165:609#0/1  
]b[b`]\_aababaa\_b`aaabb\_\_a^bb`¥aba\_bb\_aaa  
@HWI-EAS443:3:60:1208:1997#0/1  
CTGGCTGGATCCTGGGAAATCCAGAGTGTGAATCACTCTC  
+HWI-EAS443:3:60:1208:1997#0/1  
ab`]``¥aa¥X\_Z\_a`V\_ab[TT[``I\_Ib`\_a^\_N¥\_\_[  
@HWI-EAS443:3:60:1208:430#0/1  
GCTGGCTGGATCCTGGGAAATCCAGAGTGTGAATCACTCT  
+HWI-EAS443:3:60:1208:430#0/1  
abab\_\_aa```aaXaab`a\_\_\_\_a]a```a\_¥\_]\_¥a^`  
@HWI-EAS443:3:60:125:239#0/1  
GGGGACATCAAGATACAGCAAGAAGTTCAAGCCGAAATA  
+HWI-EAS443:3:60:125:239#0/1  
abaa\_]¥``\_\_```a\_aaa]S`]\_`\_Z^X]\_YWXX]^  
@HWI-EAS443:3:60:1294:895#0/1  
GCTGGCTGGATCCTGGGAAATCCAGAGTGTGAATCACTCT  
+HWI-EAS443:3:60:1294:895#0/1  
abb\_\_bZb¥Y`a\_b^a`Zba\_aaa`ZYDYaaZVRZ]R[`\_  
@HWI-EAS443:3:60:1295:1514#0/1  
GACCCCTGCTCATTTTGTGATGGTGATAACCGTACCATCCAT  
+HWI-EAS443:3:60:1295:1514#0/1  
`baabZ`ab`aaaa]a^a`]a`a`a`QSU\_UM`\_SU`^  
@HWI-EAS443:3:60:1325:282#0/1  
ATCTACTAGTGCTGACCAACAAAGTCTCTATCAGAATGCA  
+HWI-EAS443:3:60:1325:282#0/1  
aaZ]aa`a\_aW¥\_\_]\_]`Y]¥`\_YY\_Z\_]W^\_]Y^^X]  
@HWI-EAS443:3:60:1371:1238#0/1  
TTCCAATTGTGATCGGATGTATATTCTGAAATGGGAGGCT

+HWI-EAS443:3:60:1371:1238#0/1  
aaaa\_aaab\_a\_`\_aa\_adW^\_R]\_]\_\_V^ZZ[^T^][JS  
@HWI-EAS443:3:60:1406:2013#0/1  
TGTGGGGACATCAAGATACAGCAAGAAGTTCAAGCCGGAA  
+HWI-EAS443:3:60:1406:2013#0/1  
aa[]aaa\_a`¥`^`^`^]\_\_a\_[^^`S]¥`]WU[]]^]  
@HWI-EAS443:3:60:1475:1304#0/1  
CGTCAATGGCATTCTGTGTGCTCTTCAGGTCGGCTGCATA  
+HWI-EAS443:3:60:1475:1304#0/1  
]b]a`\_]Q]aaab\_abb`aP`¥^a`^]ZVa¥^aXKT]LV`\_  
@HWI-EAS443:3:60:1481:1386#0/1  
AAGAAGTCCTCGTGCTATGGGGCATTACCATCCATCTAC  
+HWI-EAS443:3:60:1481:1386#0/1  
aaaaa^[\`^`^`\_¥^`\_a]\_]\_[UaZ¥`¥N\_\_¥U^¥WW\_W  
@HWI-EAS443:3:60:1485:629#0/1  
GGGGACATCAAGATACAGCAAGAAGTTCAAGCCGGAAATA  
+HWI-EAS443:3:60:1485:629#0/1  
aa\_a`^`aa^aaa`aa\_aaZaaa\_\_aZ\_\_a^\_]Y\_\_\_\_]\_`\_  
@HWI-EAS443:3:60:1487:541#0/1  
GCTGGCTGGATCCTGGGAAATCCAGAGTGTGAATCACTCT  
+HWI-EAS443:3:60:1487:541#0/1  
a`bbaabba`^`^`^`aaa\_aa]VZ^`^a\_a^]Y]^ZaW`^\_  
@HWI-EAS443:3:60:1491:275#0/1  
ATGACACTGAGCTCAATTGCTCTCTTAGCTCCTCATAATC  
+HWI-EAS443:3:60:1491:275#0/1  
aaba\_b`aaaa`a\_aaaaa\_a^`Za\_`]\_\_^¥^Z^`^^\_X  
@HWI-EAS443:3:60:1548:1353#0/1  
GGGGACATCAAGATACAGCAAGAAGTTCAAGCCGGAAATA  
+HWI-EAS443:3:60:1548:1353#0/1  
ab`^`aaaababbbbabbaab^\_aa\_`a`a`^`Zaa\_\_aaa  
@HWI-EAS443:3:60:1559:1086#0/1  
GCTGGCTGGATCCTGGGAAATCCAGAGTGTGAATCACTCT  
+HWI-EAS443:3:60:1559:1086#0/1  
aaaaa`aaYJ[Q\_\_`Y^[Z`^]¥^\_[aW¥Y\_\_¥UX^T^SV  
@HWI-EAS443:3:60:1576:1321#0/1  
CGTGGTAGTCCAAAGTTCTTTTCAATTTTCCAATAGAACCAA  
+HWI-EAS443:3:60:1576:1321#0/1  
aaY\_[]aaaaa^¥Y^Z`[aa^Y`]aaa]R]Y]]ZY`WZ\_`  
@HWI-EAS443:3:60:1592:1588#0/1  
CCCGGCTCTACTAGTGTCCAGTAATAGTTCATTCTCCCTT  
+HWI-EAS443:3:60:1592:1588#0/1  
a`^`^`aa¥INaYX[Y^Z`XXUO^[`S[U^]PQa\_L]VTY][  
@HWI-EAS443:3:60:1606:630#0/1  
GTGCTCTAATGGGTCTCTACAGTGTAGAATATGTATTTAA  
+HWI-EAS443:3:60:1606:630#0/1  
`\_b\_a`b\_^ab¥[S^a`aaW[b[Y\_\_aa\_a^a`Z¥a\_\_][Z  
@HWI-EAS443:3:60:1661:1760#0/1  
CTGAGCTCAATTGCTCTCTTAGCTCCTCATAATCGATGAA  
+HWI-EAS443:3:60:1661:1760#0/1  
abb`aabaabbbba^bababba\_aa\_\_a`aaaaaZ\_`\_\_`^`

@HWI-EAS443:3:60:1666:227#0/1  
GGGACATCAAGATACAGCAAGAAGTTCAAGCCGGAAATAG  
+HWI-EAS443:3:60:1666:227#0/1  
abbaaaba`aaaaaabaaba`b¥`\_a`X\_a`\_^a\_\_  
@HWI-EAS443:3:60:1688:587#0/1  
GTGGACAGGGATGGTAGATGGATGGTACGGTTATCACCAT  
+HWI-EAS443:3:60:1688:587#0/1  
a\_a`\_¥`\_aaZ`\_aY\_a^U[\_V[\_\_\_W]WY`W^UMMVPRRR  
@HWI-EAS443:3:60:168:1010#0/1  
CAAGATACAGCAAGAAGTTCAAGCCGGAAATAGCAATAAG  
+HWI-EAS443:3:60:168:1010#0/1  
a`bbaabbbbababaab\_aabaaa`aba`a``a`\_a\_a`\_`  
@HWI-EAS443:3:60:1697:638#0/1  
GAAAGAAGTCCTCGTGCTATGGGGCATTACCATCCATCT  
+HWI-EAS443:3:60:1697:638#0/1  
aa``aa\_a\_aXa\_a`a\_a^aa`Z^Z`a]a`\_\_^Y]]\_]`^  
@HWI-EAS443:3:60:175:1045#0/1  
AGTAGATGGATGGTGAATGCCCCATAGCACGAGGACTTCT  
+HWI-EAS443:3:60:175:1045#0/1  
abWabaaa\_aaaaYa`a`a\_aa`^^`^^`^\_`[S¥Z]]^\_`  
@HWI-EAS443:3:60:1771:1389#0/1  
CAGGTCGGCTGCATATCCTGACCCCTGCTCATTTTGATGG  
+HWI-EAS443:3:60:1771:1389#0/1  
`\_]`^`]^`aaaaab`aa\_a`[^^^a¥Z[]```\_`\_`[P¥  
@HWI-EAS443:3:60:1771:427#0/1  
GCCGGTTTCATTGAAGGGGGTGGACAGGGATGGTAGATG  
+HWI-EAS443:3:60:1771:427#0/1  
WT]ba`aa]U]a]M[]^a`[]KWLJ0`Z]Z¥\_`^P]UPWT  
@HWI-EAS443:3:60:1788:353#0/1  
CAAGATACAGCAAGAAGTTCAAGCCGGAAATAGCAATAAG  
+HWI-EAS443:3:60:1788:353#0/1  
abbbb`bbbbbbbaaaa^aabbaZaaa`]^`a``Yaa\_aa`  
@HWI-EAS443:3:60:181:1303#0/1  
GCTGGCTGGATCCTGGGAAATCCAGAGTGTGAATCACTCT  
+HWI-EAS443:3:60:181:1303#0/1  
abbb\_b`]^`X]aa]U]]aba]^`^aa\_aHXWS¥]]U`XP¥^  
@HWI-EAS443:3:60:211:1235#0/1  
GAAGTCCTCGTGCTATGGGGCATTACCATCCATCTACTA  
+HWI-EAS443:3:60:211:1235#0/1  
aaaaa``\_\_\_`a`````\_`\_`^`^`\_\_\_\_]]]^]V^^`]\_\_  
@HWI-EAS443:3:60:211:835#0/1  
TGCCGGTTTCATTGAAGGGGGTGGACAGGGATGGTAGAT  
+HWI-EAS443:3:60:211:835#0/1  
XR`\_¥`\_Z`\_ab`¥b\_Y]abXLT¥`\_bb]^`¥a\_UQ\_ZYMO\_UY  
@HWI-EAS443:3:60:256:476#0/1  
CTTGAACCTCTTGCTGTATCTTGATGTCCCCACAAAAACA  
+HWI-EAS443:3:60:256:476#0/1  
U\_]\_\_¥`^abZ`aaaY¥aa`aaa\_aaa`\_a`\_¥R¥`a`  
@HWI-EAS443:3:60:262:509#0/1  
GGGACATCAAGATACAGCAAGAAGTTCAAGCCGGAAATAG

+HWI-EAS443:3:60:262:509#0/1  
XabbZbaa\_]V\_```abaaT[H[b\_^Z^¥`a`aVJ][T]  
@HWI-EAS443:3:60:299:820#0/1  
GCTGGCTGGATCCTGGGAAATCCAGAGTGTGAATCACTCT  
+HWI-EAS443:3:60:299:820#0/1  
aQ[X^b`]VMM^a^`[^R^aa`aaYQJLYXY¥PYV]G¥TU  
@HWI-EAS443:3:60:309:1511#0/1  
GTTTCCAATTTTCCTTGGCATTGTTTTTTAACTGGCTTCTT  
+HWI-EAS443:3:60:309:1511#0/1  
^P]¥`a`\_a^`¥a\_]\_\_ZZ^`¥`\_`\_]^^`\_VQZ\_^]W  
@HWI-EAS443:3:60:331:530#0/1  
ATTCATCTAGAGGCCTATTTGGGGCCATTGCCGTTTCA  
+HWI-EAS443:3:60:331:530#0/1  
a][\_`Z^`]ZX^aaa¥a`^aa\_aZY```V^][JQ]VL  
@HWI-EAS443:3:60:334:1295#0/1  
TTGAACTCTTTACCTACTGCTGTGAAGTGTATTTCATCT  
+HWI-EAS443:3:60:334:1295#0/1  
aa``aaaa`b`a`\_`\_`a`\_]`^Z^``[^`[^]\_\_\_\_^]  
@HWI-EAS443:3:60:336:1064#0/1  
GCCATGAAGTGTCTTGGGGAATATCTCAAACCTTTCAA  
+HWI-EAS443:3:60:336:1064#0/1  
a`a^a````\_aab¥```aaa\_\_Y\_```\_````[^`]^\_\_]`\_^`  
@HWI-EAS443:3:60:387:1152#0/1  
GCTGGCTGGATCCTGGGAAATCCAGAGTGTGAATCACTCT  
+HWI-EAS443:3:60:387:1152#0/1  
a\_\_aZ^R[VRSa[YG^\_¥\_][¥\_\_¥^Q[WUS^\_¥¥WVNUXV  
@HWI-EAS443:3:60:442:1481#0/1  
CTCCTCATAATCGATGAAATCTCCTGGGTAACACGTTCCA  
+HWI-EAS443:3:60:442:1481#0/1  
^MZUTaWZV]T```[P`]TR^\_XNZL¥TYNTXa^XVOQT^Y  
@HWI-EAS443:3:60:450:470#0/1  
GGGACATCAAGATACAGCAAGAAGTTCAAGCCGGAAATA  
+HWI-EAS443:3:60:450:470#0/1  
ab\_a^a^`a`\_`^\_aa\_`a`\_\_`Y^X`^\_^¥\_`Y]X^¥  
@HWI-EAS443:3:60:459:527#0/1  
ACCTTTCAAATGATGACTGAGCTCAATTGCTCTCTTAG  
+HWI-EAS443:3:60:459:527#0/1  
a``aaaaa\_a`a`\_`a`aa^`^`^`\_\_\_\_^]^^¥\_`^`  
@HWI-EAS443:3:60:46:978#0/1  
GATGCATATGTTTTTGTGGGACATCAAGATACAGCAAGA  
+HWI-EAS443:3:60:46:978#0/1  
\_Yabbb¥¥`babab`b\_b^ay]X^`a\_Wa`^a^`\_¥`aa]  
@HWI-EAS443:3:60:55:461#0/1  
CACAAATGCGATAACACGTGCATGGAAAGTGTCAAAAATG  
+HWI-EAS443:3:60:55:461#0/1  
aaabaaabababaabaa``a\_aaaaaa`Za^\_`aa^]^a  
@HWI-EAS443:3:60:617:436#0/1  
AATTTTGCTTCTCTGAGTATTTTGGGTAGTCATAAGTCC  
+HWI-EAS443:3:60:617:436#0/1  
a`aaabb\_a`\_`\_a\_baaa]\_a`\_`\_`a`Saa^\_X\_]\_`^Y\_]`



@HWI-EAS443:3:60:62:706#0/1  
GTTGCTTCGAATGTTATTTTGTCTCCCGGCTCTACTAGTG  
+HWI-EAS443:3:60:62:706#0/1  
aYYQ^VV\_TWXXZMLP]\_\_]UH][^Z^ZWBBBBBBBBBBB  
@HWI-EAS443:3:60:632:1979#0/1  
GGAGGCTGGTGTATAGCACCTTGGGTGTCTGACAAGT  
+HWI-EAS443:3:60:632:1979#0/1  
a`Xaa`^\_XWZ[````^X]^PZ^X]]WP`LUZ]LJVY[P  
@HWI-EAS443:3:60:638:393#0/1  
TTTTGCTTCTCTGAGTATTTTGGGTAGTCATAAGTCCCA  
+HWI-EAS443:3:60:638:393#0/1  
abab`aaba`babaaa]aaaaa`a^\_a\_`aa`^`]^\_^^  
@HWI-EAS443:3:60:664:1186#0/1  
GGGGACATCAAGATACAGCAAGAAGTTCAAGCCGAAATA  
+HWI-EAS443:3:60:664:1186#0/1  
`a\_[\_aP\_aa\_aaa`aaa`a`\_]`X`\_aaZ]YX]]]\_\_^  
@HWI-EAS443:3:60:671:726#0/1  
CCCATTTTTGACACTTCCATGCACGTGTATCGCATTTG  
+HWI-EAS443:3:60:671:726#0/1  
aaabbbbbbbbaaaabaaaaaaaaa\_b\_aaa`^Yaaaaa  
@HWI-EAS443:3:60:73:434#0/1  
GACTACCAGTACCAATGAAGTGGCGACAGTTGAATAGATC  
+HWI-EAS443:3:60:73:434#0/1  
^b`bb`^aa¥abbabaZ¥a^Z]aaa¥^YF[YY\_\_^V[Z[  
@HWI-EAS443:3:60:741:1838#0/1  
CTTATATGAAAAGGTAAGAAGCCAGTTAAAAACAATGCC  
+HWI-EAS443:3:60:741:1838#0/1  
^`\_`abbabbaabbbWbaabbaabbaabbaabb`baaba\_  
@HWI-EAS443:3:60:746:659#0/1  
GGGGACATCAAGATACAGCAAGAAGTTCAAGCCGAAATA  
+HWI-EAS443:3:60:746:659#0/1  
abaaa`aa\_aba\_`a`a````aa[`]¥^`[aXZ\_`]^``\_  
@HWI-EAS443:3:60:778:1726#0/1  
GAGACAAAATAACATTGAAGCAACTGGAAATCTAGTGGT  
+HWI-EAS443:3:60:778:1726#0/1  
a`Z`T^YZ^``[aa`Z]`a`^aaaa`aa\_Y\_XOY``Y[J[  
@HWI-EAS443:3:60:794:1135#0/1  
GGGCATTACCATCCATCTACTAGTGCTGACCAACAAAGT  
+HWI-EAS443:3:60:794:1135#0/1  
abbbbbbbbaabbbabbabbabaaabaab`aaa\_aaaa^  
@HWI-EAS443:3:60:806:610#0/1  
CACTAGTAGATGGATGGTGAATGCCCATAGCACGAGGAC  
+HWI-EAS443:3:60:806:610#0/1  
\_`\_`aab\_aaabba\_aba\_abaaaaaa`a`aaaa\_aa`\_a`  
@HWI-EAS443:3:60:815:1770#0/1  
CCGTTACACCTTTGTTGAGTCATGATTGGGCCATGAACT  
+HWI-EAS443:3:60:815:1770#0/1  
aa\_RW]YP\_¥`¥L¥Y`\_Y]]NZY¥^V][\_TTRP]¥^V[WS  
@HWI-EAS443:3:60:828:495#0/1  
TTGGAAACGGCTGCTTTGAATTTTACCACAAATGCGATAA

+HWI-EAS443:3:60:828:495#0/1  
abbb`bbabbaaZST``RS]Xab\_UNZ¥XX`ZGU][OJW^  
@HWI-EAS443:3:60:831:466#0/1  
CAAGAAGTTCAAGCCGAAATAGCAATAAGACCCAAAGTG  
+HWI-EAS443:3:60:831:466#0/1  
abbbbab`abbbba`baa`aab`aaaa`aa[a\_a`\_aZ^  
@HWI-EAS443:3:60:847:424#0/1  
AAACAATGCCAAGGAAATTGGAAACGGCTGCTTTGAATTT  
+HWI-EAS443:3:60:847:424#0/1  
aaa\_abab`aaaaaaa`aaa`aa\_aaaaabJLX^SSTL[]  
@HWI-EAS443:3:60:856:205#0/1  
AATGGAACGTGTTACCCAGGAGATTTTCATCGATTATGAGG  
+HWI-EAS443:3:60:856:205#0/1  
a`a`a`a`\_aZ`^]\_\_\_\_^Z`^]]Z`^\_W]^Z`ZZ]X  
@HWI-EAS443:3:60:888:985#0/1  
TCCGGCTTGAACCTTCTTGCTGTATCTTGATGTCCCCACAA  
+HWI-EAS443:3:60:888:985#0/1  
abababb```I``]a\_aa`W¥`\_`]]][Q[\_WT]\_^\_JGY  
@HWI-EAS443:3:60:895:713#0/1  
AATTGGAACGGCTGCTTTGAATTTTACCACAAATGCGAT  
+HWI-EAS443:3:60:895:713#0/1  
U¥`^¥a`b`b`baa^\_Y]^ZU[[Y`^RU^YZWZYN[ZLLT  
@HWI-EAS443:3:60:896:203#0/1  
CTCTGAGTATTTTGGGTAGTCATAAGTCCCATTTTTGACA  
+HWI-EAS443:3:60:896:203#0/1  
abbbbbbbabbbbbabb^bbaaab````aa`aaabaaaaa  
@HWI-EAS443:3:60:89:1567#0/1  
AAGCTTTTTGCTCCAGCATGAGGACATGCTGCCGTTACAC  
+HWI-EAS443:3:60:89:1567#0/1  
a^`b`^¥aa^aaaa`W`ba\_a`Ia`\_^`\_¥T^¥`^^]]S  
@HWI-EAS443:3:60:910:1189#0/1  
GACAAGTTGTATTGCAATCGTGGACTGGTGTATCTGAAAT  
+HWI-EAS443:3:60:910:1189#0/1  
`bbaaa`aa^`bbabaab`a¥a`Qaaa`\_a\_aa^aa`\_`a  
@HWI-EAS443:3:60:932:1214#0/1  
GAAGCCAGTTAAAAACAATGCCAAGGAAATTGGAAACGG  
+HWI-EAS443:3:60:932:1214#0/1  
\_aaa`a^aab\_aaa`\_`aaa][F[\_\_\_\_a`^`S¥`\_]ZZ  
@HWI-EAS443:3:60:978:1522#0/1  
CATCTATTTCTTCTCTGTTTAAATTTTGCTTCTCTGAGTA  
+HWI-EAS443:3:60:978:1522#0/1  
a`^]`\_a^aab`R`aa\_Vba\_Z]]`a^`a^\_[Uaa``UU  
@HWI-EAS443:3:60:996:943#0/1  
ATCTCGTCAATGGCATTCTGTGTGCTCTTCAGGTCGGCTG  
+HWI-EAS443:3:60:996:943#0/1  
aUba`baXb^¥]ZZ)`aY)`[YYaS`S`[Za^XGT\_¥¥BB  
@HWI-EAS443:3:61:1026:515#0/1  
CAATGGAACGTGTTACCCAGGAGATTTTCATCGATTATGAG  
+HWI-EAS443:3:61:1026:515#0/1  
T\_bbbb^\_\_abb\_aa`¥[\_[X\_R`\_\_`aa`\_V\_aaaa^a

@HWI-EAS443:3:61:1058:532#0/1  
CTGCCGTTACACCTTTGTTTCGAGTCATGATTGGGCCATGA  
+HWI-EAS443:3:61:1058:532#0/1  
abbbbabababbbbbbbabbbbababbbbabbba\_aaa\_  
@HWI-EAS443:3:61:1111:1092#0/1  
CTGCTGTGAAGTGTATTTCATCTTTTCAATAACAGAATT  
+HWI-EAS443:3:61:1111:1092#0/1  
[a\_^\V\^V[ZS\_ab]UU`¥b`Y[\`^\_aa`XX\_^[^`^Z\_\_^  
@HWI-EAS443:3:61:1115:620#0/1  
TCCAGCTTTACCCCATCTATTTCTTCTCTGTTTAATTTTG  
+HWI-EAS443:3:61:1115:620#0/1  
aaaaaaaba`\_\_^`aaaa\_aaaab`aaaab^a`^]```a\_  
@HWI-EAS443:3:61:1119:2011#0/1  
ATTAGAGCACATCCAGAACTGATTGCCCCAGGGAGACT  
+HWI-EAS443:3:61:1119:2011#0/1  
aaaa^aa`a\_aaZ\_aaaaaa`b``\_aa¥¥¥`\_¥WY¥Y\_WW  
@HWI-EAS443:3:61:1144:473#0/1  
GGGGACATCAAGATACAGCAAGAAGTTCAAGCCGGAAATA  
+HWI-EAS443:3:61:1144:473#0/1  
a^Y[¥NPLQVUUWQ[]][YZ^]^[\_]TUZYVZSLWVXPRVV  
@HWI-EAS443:3:61:1167:1073#0/1  
AAGGAAATTCATACCCAAAGCTCAGCAAATCCTACATTA  
+HWI-EAS443:3:61:1167:1073#0/1  
abaaaaaaaaaaaaa\_aaaaaa\_baU\_\_^\_\_^^[W[[^]Z[  
@HWI-EAS443:3:61:1182:1667#0/1  
ATTCTGTGTGCTCTTCAGGTCGGCTGCATATCCTGACCCC  
+HWI-EAS443:3:61:1182:1667#0/1  
¥\_¥¥\_\_QQVZXIXVV^``¥ZZUaa``ZW^XLVWHTLVIP  
@HWI-EAS443:3:61:119:1684#0/1  
CATCATTTGAAAGTTTGAGATATCCCAAGACAAGTTC  
+HWI-EAS443:3:61:119:1684#0/1  
abbbbabbbb`a`b[bbbbab\_X\_abbbab]\_a\_``YU^¥  
@HWI-EAS443:3:61:1222:100#0/1  
TCGTGGTAGTCCAAAGTTCTTTTCATTTTCCAATAGAACCA  
+HWI-EAS443:3:61:1222:100#0/1  
aaa^aaP[^JT`Z`Z`\_a\_`aL`[WZ`]SW]]WTVSVXYO  
@HWI-EAS443:3:61:1252:590#0/1  
GCTTCGAATGTTATTTTGTCTCCCGGCTCTACTAGTGTC  
+HWI-EAS443:3:61:1252:590#0/1  
aa\_`\_a^\_aa^\_Z`\_`aa^`\_`a`\_`\_\_^^WWYQUWWZXZ  
@HWI-EAS443:3:61:125:1562#0/1  
CTGTGTGCTCTTCAGGTCGGCTGCATATCCTGACCCCTGC  
+HWI-EAS443:3:61:125:1562#0/1  
ab\_abbabbbbab`aabbbaababbbabaaa¥]]W\_NV  
@HWI-EAS443:3:61:1272:1168#0/1  
CCTCTGAGTATTTGGGTAGTCATAAGTCCCATTTTGGAC  
+HWI-EAS443:3:61:1272:1168#0/1  
`abbbbaN`ab`aaaa\_U`^babbZ¥baaa]ba\_bb`Z]\_  
@HWI-EAS443:3:61:1295:101#0/1  
TATCTCAAACCTTTCAAATGATGACACTGAGCTCAATTGC

+HWI-EAS443:3:61:1295:101#0/1  
aabababbbaaaaaabaa\_aa\_ba\_a\_`a\_a^^^[\_]]Z  
@HWI-EAS443:3:61:1305:31#0/1  
ATCCGATCACAATTGGAAAATGTCCAAAATATGTAAAAAG  
+HWI-EAS443:3:61:1305:31#0/1  
^b`^ba\_YZUY^U[`a[OZa``[a^[TW\_a\_`¥YaX^`WX  
@HWI-EAS443:3:61:1361:1479#0/1  
AGCCAGTTAAAAACAATGCCAAGGAAATTGGAAACGGCT  
+HWI-EAS443:3:61:1361:1479#0/1  
a`a`ab`aaaaaaaaabaaa`aaa````a\_]^^V`[YU  
@HWI-EAS443:3:61:1389:1912#0/1  
CTCGTGCTATGGGGCATTACCATCCATCTACTAGTGCTG  
+HWI-EAS443:3:61:1389:1912#0/1  
Z\_^XV`aa\_`aa`Zb\_`¥\_bbbb````babbaaaaaZPW^  
@HWI-EAS443:3:61:1400:1440#0/1  
AATTGGAAACGGCTGCTTTGAATTTTACCACAAATGCGAT  
+HWI-EAS443:3:61:1400:1440#0/1  
``baaabaaaa]\_`V¥aaZRQT\_a\_XOXUH[[]YFTDPJU  
@HWI-EAS443:3:61:1409:2041#0/1  
TAATCGATGAAATCTCCTGGGTAACACGTTCCATTGTCTG  
+HWI-EAS443:3:61:1409:2041#0/1  
aaaa^]a\_aaaa\_`aabaa\_baaaa]`XLQ]]]ZSWV  
@HWI-EAS443:3:61:1424:935#0/1  
GCTCATTTTGATGGTGATAACCGTACCATCCATCTACCAT  
+HWI-EAS443:3:61:1424:935#0/1  
`W]¥PV`]HQN¥\_\_KTQ[NZS]^UQOROZMPWNNYUUUTQ  
@HWI-EAS443:3:61:1437:915#0/1  
GATGAAATCTCCTGGGTAACACGTTCCATTGTCTGAACTA  
+HWI-EAS443:3:61:1437:915#0/1  
`^Ubaa]baa^[aab^]`YZaaW^bR]]X`X]\_¥RU^WO  
@HWI-EAS443:3:61:1446:1681#0/1  
TCTGAGTATTTTGGGTAGTCATAAGTCCCATTTTGGACAC  
+HWI-EAS443:3:61:1446:1681#0/1  
a`bbab\_aaaa]a`]aa\_aaaaa^a`^`aa\_\_\_\_ZXY  
@HWI-EAS443:3:61:1478:151#0/1  
CTCAATTGCTCTTTAGCTCCTCATAATCGATGAAATCTC  
+HWI-EAS443:3:61:1478:151#0/1  
`bbbbbbbabababbbbabbaaaaaaaa``aaa\_\_`\_V\_V  
@HWI-EAS443:3:61:1504:297#0/1  
GGCATTCTGTGTGCTCTTCAGGTCGGCTGCATATCCTGAC  
+HWI-EAS443:3:61:1504:297#0/1  
aa``aa`a`¥a`a`\_aaa\_aaaVaaa`aW^\_\_¥U\_VWWM  
@HWI-EAS443:3:61:1539:1180#0/1  
CTTCTCTGTTTAATTTTGGTTCCTCTGAGTATTTTGGGTA  
+HWI-EAS443:3:61:1539:1180#0/1  
ababbbbababababbbabbbabbaab¥]\_SY  
@HWI-EAS443:3:61:155:710#0/1  
GGTTATCATGCGAACAATTCAACAGACACTGTAGACACAG  
+HWI-EAS443:3:61:155:710#0/1  
ab¥aa\_\_`[\_`\_\_\_\_U`^\_W]Z]^\_YUU]]]]ZZZZXXUZ

@HWI-EAS443:3:61:1574:487#0/1  
TGTAACATTGCTGGCTGGATCCTGGGAAATCCAGAGTGTG  
+HWI-EAS443:3:61:1574:487#0/1  
\_b¥XR]]a^a\_]Iaa`[^[aX\_¥NVV\_\_¥PGWN¥KXGV  
@HWI-EAS443:3:61:1623:1893#0/1  
CAACTTGTCAGACACCCAAGGGTGCTATAAACACCAGCCT  
+HWI-EAS443:3:61:1623:1893#0/1  
abbabbbabbba`baabbbaaa^aaaaaaaa`¥[\_\_OFS  
@HWI-EAS443:3:61:1637:2034#0/1  
CTGACCCCTGCTCATTTTGATGGTGATAACCGTACCATCC  
+HWI-EAS443:3:61:1637:2034#0/1  
]baabb`\_]Z`\_aa\_aa`[a]\_Zaaaaa[VRJVURY[LD  
@HWI-EAS443:3:61:1644:1506#0/1  
GGGACATCAAGATACAGCAAGAAGTTCAAGCCGAAATAG  
+HWI-EAS443:3:61:1644:1506#0/1  
\_a0\_a^^¥`\_\_`^Y^`a`[a]\_\_^IT`\_[XY\_]V00^XVY  
@HWI-EAS443:3:61:1662:388#0/1  
TGGTAGTCCAAAGTTCTTTTCATTTTCCAATAGAACCAACA  
+HWI-EAS443:3:61:1662:388#0/1  
aaaZ]^a``Z][\_\_aaa^Z^aaaaa\_\_\_\_`\_¥XX¥\_YS  
@HWI-EAS443:3:61:1715:1126#0/1  
ATTTTGGGTAGTCATAAGTCCCATTTTGGACTTTCCAT  
+HWI-EAS443:3:61:1715:1126#0/1  
\_\_a¥a`\_^`^[[[MvVaba]\_aZaabbaa¥UvL]]]NNX^  
@HWI-EAS443:3:61:1747:264#0/1  
TCAAATGTGAAGAACTTATATGAAAAGGTAAGAAGCCAGT  
+HWI-EAS443:3:61:1747:264#0/1  
a`a`abZb`a`\_`aa\_aaaa¥aa`^W`a^^^YV]^X  
@HWI-EAS443:3:61:1749:1563#0/1  
GCCCAATCATGACTCGAACAAAGGTGTAACGGCAGCATGT  
+HWI-EAS443:3:61:1749:1563#0/1  
aaZORYa¥SYV\_FTP^X`\_^]`][UaBBBBBBBBBBBBBB  
@HWI-EAS443:3:61:185:152#0/1  
GCCGGTTTCATTGAAGGGGGGTGGACAGGGATGGTAGATG  
+HWI-EAS443:3:61:185:152#0/1  
a\_aa`S^^ZPW^`UU\_^\_^`\_N¥[SUUW^WWUYRQRWTQV  
@HWI-EAS443:3:61:189:739#0/1  
CTAGTTCAGACAATGGAACGTGTTACCCAGGAGATTTTCAT  
+HWI-EAS443:3:61:189:739#0/1  
abbabbbbabababb¥baa^`]^`abba`^]^`¥^^\_]`  
@HWI-EAS443:3:61:190:987#0/1  
TGGATGGTGAATGCCCCATAGCACGAGGACTTCTTTCCCT  
+HWI-EAS443:3:61:190:987#0/1  
a`ZV[aaW^a`\_`Z`¥Z[TT]HRNHTXZ^^^R\_]\_X[VU  
@HWI-EAS443:3:61:205:75#0/1  
GTGGGGACATCAAGATACAGCAAGAAGTTCAAGCCGAAA  
+HWI-EAS443:3:61:205:75#0/1  
a\_\_aZ`X\_S^V¥Q^]^Z^X\_^XXYRHVKOR\_W¥RHZXZWX  
@HWI-EAS443:3:61:207:674#0/1  
TGCTTCCTCTGAGTATTTTGGGTAGTCATAAGTCCCATTT

+HWI-EAS443:3:61:207:674#0/1  
`aaaa`a`ababb\_aaa`aaa`VY¥¥aa``\_`Z\_]\_\_\_\_\_

@HWI-EAS443:3:61:246:992#0/1  
CTGCATTCTGATAGAGACTTTGTTGGTCAGCACTAGTAGA

+HWI-EAS443:3:61:246:992#0/1  
abbbbbbbbabbbbbbbbaab`a\_a]^aY^aaa]``a

@HWI-EAS443:3:61:277:1022#0/1  
TGTGGGACATCAAGATACAGCAAGAAGTTCAAGCCGGAA

+HWI-EAS443:3:61:277:1022#0/1  
^a\_¥^¥¥b`¥¥¥aZ^\_a`a``[Q¥R[\_aUZ^a]IZW^[U[

@HWI-EAS443:3:61:282:1288#0/1  
ATGTTTTTGTGGGACATCAAGATACAGCAAGAAGTTCAA

+HWI-EAS443:3:61:282:1288#0/1  
ab\_abbb`^P^`¥]`[^aaa`\_U¥Z¥baa``¥`T`UWZ^]

@HWI-EAS443:3:61:297:1624#0/1  
AGCCAGTTAAAAACAATGCCAAGGAAATTGGAAACGGCT

+HWI-EAS443:3:61:297:1624#0/1  
``¥^¥ZbaaL\_\_``YY\_a]PZ[ `[ZX`SLYYP\_aBBBB

@HWI-EAS443:3:61:327:1594#0/1  
ACTGAGCTCAATTGCTCTTAGCTCCTCATAATCGATGA

+HWI-EAS443:3:61:327:1594#0/1  
aa\_VYaaaa]aa][`aaaa`¥¥a\_aa\_]`[\_[Z^YY]S

@HWI-EAS443:3:61:37:79#0/1  
CTAGATTTCCAGTTGCTTCAATGTTATTTTGTCTCCCGG

+HWI-EAS443:3:61:37:79#0/1  
abbb`bbbab]b^aba[\_abZ0^aWZX]aaaa^\_^\_]\_]\_

@HWI-EAS443:3:61:392:1459#0/1  
ATTCTGTGTCTTTCAGGTCGGCTGCATATCCTGACCCC

+HWI-EAS443:3:61:392:1459#0/1  
abaaaa`aa`aaaaaaaa¥b¥\_a\_\_aa\_b\_`S¥¥^UZ¥¥

@HWI-EAS443:3:61:424:32#0/1  
ACTTCTTGCTGTATCTTGATGTCCCCACAAAAACATATGC

+HWI-EAS443:3:61:424:32#0/1  
]VY¥a\_X`\_a¥Jabb\_L``[b^aaa¥^`¥^ZHVS0]^¥VH

@HWI-EAS443:3:61:447:748#0/1  
CATCAAGATACAGCAAGAAGTTCAAGCCGGAAATAGCAAT

+HWI-EAS443:3:61:447:748#0/1  
aaaabbabbbbbbbbaab``bbbababbabaaaa`aaa

@HWI-EAS443:3:61:476:137#0/1  
ACAGAATTTACTTTGTTAGTAATCTCGTCAATGGCATTCT

+HWI-EAS443:3:61:476:137#0/1  
ababaabba]`aaaa\_baa¥\_[]a]aa````^\_Z¥Y\_]X^

@HWI-EAS443:3:61:516:719#0/1  
GAGACTTTGTTGGTCAGCACTAGTAGATGGATGGTGAATG

+HWI-EAS443:3:61:516:719#0/1  
aaa^^aaa\_¥a\_^U¥^`^`QHVY^\_W\_`^W¥^PW^^YYW

@HWI-EAS443:3:61:538:736#0/1  
TGCTTCTCTGAGTATTTTGGGTAGTCATAAGTCCCATTT

+HWI-EAS443:3:61:538:736#0/1  
a`aaaaaa\_aaaa^\_aa`\_aaaW]^]a`\_a]\_^\_^^^\_

@HWI-EAS443:3:61:571:1980#0/1  
GCTTTTTGCTCCAGCATGAGGACATGCTGCCGTTACACCT  
+HWI-EAS443:3:61:571:1980#0/1  
`a`aaa`Z``aaa^`^^a]WL¥a[Z[XYLTL[UZTNRQRS  
@HWI-EAS443:3:61:695:1025#0/1  
GAACGTGTTACCCAGGAGATTTTCATCGATTATGAGGAGCT  
+HWI-EAS443:3:61:695:1025#0/1  
aZaY^VYLQ\_Z]^\_PX\_]\_]aYYX[]^Z¥^ZZWRWRZ  
@HWI-EAS443:3:61:742:764#0/1  
GAATTTCTTTTTTAACTAGCCATATTAATTTTTGTAGA  
+HWI-EAS443:3:61:742:764#0/1  
a]]aaaa`aaaaaa]¥]\_^aaaY`\_a``\_\_a\_\_\_\_^][^]  
@HWI-EAS443:3:61:770:467#0/1  
GGGGACATCAAGATACAGCAAGAAGTTCAAGCCGAAATA  
+HWI-EAS443:3:61:770:467#0/1  
]X]^a^`\_\_[Z`¥X^\_\_`[X[¥KPVVY[¥]]VU]XPQVVV  
@HWI-EAS443:3:61:779:559#0/1  
GATGAAATCTCCTGGGTAACACGTTCCATTGTCTGAACTA  
+HWI-EAS443:3:61:779:559#0/1  
aaa`aaa\_a^a\_\_\_¥^¥Wa```\_^]\_\_\_^]\_YZ\_\_Z^ZZZ  
@HWI-EAS443:3:61:786:523#0/1  
GGGACATCAAGATACAGCAAGAAGTTCAAGCCGAAATAG  
+HWI-EAS443:3:61:786:523#0/1  
aaaa]]a```\_`\_`a^aa`a^aZJ`0¥a`a\_^^\_a¥\_W]^  
@HWI-EAS443:3:61:791:791#0/1  
TGGCTGGATCCTGGGAAATCCAGAGTGTGAATCACTCTCC  
+HWI-EAS443:3:61:791:791#0/1  
abaababaa`aaaaa]`]ba¥L\_aa\_b`baaaZa\_\_¥¥U¥  
@HWI-EAS443:3:61:804:956#0/1  
TGCCGTTTTATTGAAGGGGGTGGACAGGGATGGTAGAT  
+HWI-EAS443:3:61:804:956#0/1  
abaab``baaabaa`aaaaaaa¥a```\_aaa^¥\_\_W¥[¥S  
@HWI-EAS443:3:61:807:698#0/1  
GTTATTTTGTCTCCCGCTCTACTAGTGTCCAGTAATAGT  
+HWI-EAS443:3:61:807:698#0/1  
aa\_aaaaaa\_a`\_]^[\_\_\_\_]OHX¥¥XTZY¥VYTTW]WXTT  
@HWI-EAS443:3:61:848:463#0/1  
GCTGGCTGGATCCTGGGAAATCCAGAGTGTGAATCACTCT  
+HWI-EAS443:3:61:848:463#0/1  
aaa`a`P]S[TSZTX¥WOX[VY^ORJZSSLWKXRVTSRO  
@HWI-EAS443:3:61:857:879#0/1  
GCTGGCTGGATCCTGGGAAATCCAGAGTGTGAATCACTCT  
+HWI-EAS443:3:61:857:879#0/1  
a`^a`a¥`a^Z^\_¥V`[\_\_\_\_][^`Q[Z^S^S[^VVV[XWWW  
@HWI-EAS443:3:61:864:1221#0/1  
AGTTCAAGCCGAAATAGCAATAAGACCCAAAGTGAGGGA  
+HWI-EAS443:3:61:864:1221#0/1  
¥\_^\_b`bb^^\_^^aaba`\_VZS¥`aaa`a^^aW`\_`^YN  
@HWI-EAS443:3:61:883:1101#0/1  
CTTGATGTCCCCACAAAAACATATGCATCTGCATTCTGAT

+HWI-EAS443:3:61:883:1101#0/1  
aa`aZ¥\_R\_R[a`P[`\_W^Z¥SVX^\_ZW\_a\_WX]UQ]`^P  
@HWI-EAS443:3:61:902:346#0/1  
CCTCTGAGTATTTTGGGTAGTCATAAGTCCCATTTTGGAC  
+HWI-EAS443:3:61:902:346#0/1  
abbbba^`\_bbbbbbb`W\_`[bb\_RQ\_]aa`aaaaa`^^  
@HWI-EAS443:3:61:926:2034#0/1  
GAAATCCAGAGTGTGAATCACTCTCCACAGCAAGCTCATG  
+HWI-EAS443:3:61:926:2034#0/1  
a[^]UIX\_][aY\_]¥[`a^\_a]a\_`Y[^\_^]`UVUNRXVV  
@HWI-EAS443:3:61:949:179#0/1  
CAAAGTCTCTATCAGAATGCAGATGCATATGTTTTTGTGG  
+HWI-EAS443:3:61:949:179#0/1  
aabbbabbbbab`bbbbaba^aaaaaaaaab\_aaaa`]a\_  
@HWI-EAS443:3:61:957:1777#0/1  
AACAAAGTCTCTATCAGAATGCAGATGCATATGTTTTTGT  
+HWI-EAS443:3:61:957:1777#0/1  
aaXbb^UR[aaaa`^a``a¥]a[]ZNYa^)`\_YW]V]]WY  
@HWI-EAS443:3:61:988:661#0/1  
TCCGGCTTGAACCTTCTTGCTGTATCTTGATGTCCCCACAA  
+HWI-EAS443:3:61:988:661#0/1  
aa\_`a`aaZX¥[\_`^]\_[[]aY[]\_]a\_`¥YSRZZXXUXY  
@HWI-EAS443:3:62:1006:40#0/1  
GGGGCATTACCATCCATCTACTAGTGCTGACCAACAAAG  
+HWI-EAS443:3:62:1006:40#0/1  
aba]\_\_a[^b¥¥b\_^a^`Z`aY^`a]a]K¥`V\_^\_ZX[LW  
@HWI-EAS443:3:62:1057:413#0/1  
AAAAACATATGCATCTGCATTCTGATAGAGACTTTGTTGG  
+HWI-EAS443:3:62:1057:413#0/1  
a]abab\_bbbbbbaabababaaa\_baaa\_aaaa`a`aaX`\_a  
@HWI-EAS443:3:62:1064:998#0/1  
CTGGTGTATCTGAAATGATAATACCAGATCCAGCATTCT  
+HWI-EAS443:3:62:1064:998#0/1  
a`^`\_]a¥`aa\_]S`baaba`[]]`a^`\_`a]UZ\_¥^\_^  
@HWI-EAS443:3:62:1075:71#0/1  
AACGTGTTACCCAGGAGATTTTCATCGATTATGAGGAGCTA  
+HWI-EAS443:3:62:1075:71#0/1  
aa¥`a^Ya`]aTJ\_]T^S[b¥`N\_XaUa`S[`Za^U\_H\_U  
@HWI-EAS443:3:62:1098:1108#0/1  
CATGCGAACAATTCAACAGACACTGTAGACACAGTACTAG  
+HWI-EAS443:3:62:1098:1108#0/1  
abbbbaa¥ababbaababababab\_aa]aaa\_aY]YS\_\_  
@HWI-EAS443:3:62:1098:1186#0/1  
CGTCAATGGCATTCTGTGTGCTCTTCAGGTCGGCTGCATA  
+HWI-EAS443:3:62:1098:1186#0/1  
^[I^UTa^Qb¥YX\_]Za\_\_aS`L]U\_N^H`XUU^aS[SHS]  
@HWI-EAS443:3:62:109:391#0/1  
GGGACATCAAGATACAGCAAGAAGTTCAAGCCGAAATAG  
+HWI-EAS443:3:62:109:391#0/1  
``babaab\_bbbba¥`bbba``aZ^^]a\_Q[``]`]a\_\_¥[



@HWI-EAS443:3:62:1106:74#0/1  
GAGCAATTGAGCTCAGTGCATCATTTGAAAGGTTTGAGA  
+HWI-EAS443:3:62:1106:74#0/1  
a`a`aa`[a`\_\_a\_a``]a¥[\_aaa¥[[``]``\_\_a]  
@HWI-EAS443:3:62:1156:106#0/1  
GCTGGTGTATTATAGCACCTTGGGTGTCTGACAAGTTGTA  
+HWI-EAS443:3:62:1156:106#0/1  
a`aaUaZ[\_]`^WWV[\_]\_\_\_X]UXQ[NRSPSU]]VR  
@HWI-EAS443:3:62:1182:1362#0/1  
CTGGCTGGATCCTGGGAAATCCAGAGTGTGAATCACTCTC  
+HWI-EAS443:3:62:1182:1362#0/1  
aaaaaab\_aaaa^`\_`ba`^^^`¥\_S\_\_\_a`]¥aZ\_`]  
@HWI-EAS443:3:62:1222:1742#0/1  
ACTTCTTGCTGTATCTTGATGTCCCCACAAAAACATATGC  
+HWI-EAS443:3:62:1222:1742#0/1  
a]aa]aaaa`\_\_`\_aaaa`a^[\_]`\_a\_a`X`^`\_\_^  
@HWI-EAS443:3:62:1267:1990#0/1  
CTTCCTCTGAGTATTTTGGGTAGTCATAAGTCCCATTTTT  
+HWI-EAS443:3:62:1267:1990#0/1  
¥abbaabbabbbbbbbaabb]bb\_Saabbba`a]b`bbbb  
@HWI-EAS443:3:62:1290:204#0/1  
TAGATTTCCAGTTGCTTCGAATGTTATTTTGTCTCCCGGC  
+HWI-EAS443:3:62:1290:204#0/1  
`ba\_\_bababbaaabaab`aab`a\_aaaaa`a`\_¥aaa  
@HWI-EAS443:3:62:1334:1255#0/1  
GCCGGTTTCATTGAAGGGGGTGGACAGGGATGGTAGATG  
+HWI-EAS443:3:62:1334:1255#0/1  
aa]a`]V`\_V\_MQTZU^T]TZ^\_aa`\_a]`baTYU]Ta  
@HWI-EAS443:3:62:1343:476#0/1  
TGCTGGCTGGATCCTGGGAAATCCAGAGTGTGAATCACTC  
+HWI-EAS443:3:62:1343:476#0/1  
¥Za\_WY[aa\_\_\_]Z^\_^`aa]X]¥a^^\_aaa^Z`]]`  
@HWI-EAS443:3:62:1377:1339#0/1  
ACTTCTTGCTGTATCTTGATGTCCCCACAAAAACATATGC  
+HWI-EAS443:3:62:1377:1339#0/1  
¥b^]Raa^aaaYa]\_a\_a\_\_a\_\_^\_^YR¥\_\_a\_\_OS]\_^  
@HWI-EAS443:3:62:1396:559#0/1  
GAAGTCCTCGTGTATGGGGCATTACCATCCATCTACTA  
+HWI-EAS443:3:62:1396:559#0/1  
X`[bH]\_ab\_aa\_aabbbab`V`U[aaab^b`\_]U`\_a\_T  
@HWI-EAS443:3:62:1411:1442#0/1  
AGTAATCTCGTCAATGGCATTCTGTGTGCTCTCAGGTCG  
+HWI-EAS443:3:62:1411:1442#0/1  
a`YbbU`^R^U`Y[Xba[ZaaIab[¥[]¥¥^XUN]\_L[a`  
@HWI-EAS443:3:62:1414:1613#0/1  
CATTCTGTGTGCTCTTCAGGTCGGCTGCATATCCTGACCC  
+HWI-EAS443:3:62:1414:1613#0/1  
aabbabbaa\_\_]aabb`a`]]\_`[aaa`aaba[Y`^aa]a  
@HWI-EAS443:3:62:1491:76#0/1  
CTTCTTGCTGTATCTTGATGTCCCCACAAAAACATATGCA



@HWI-EAS443:3:62:198:264#0/1  
GGGCCATGAACCTTGTCTTGGGGAATATCTCAAACCTTTCA  
+HWI-EAS443:3:62:198:264#0/1  
aaZ\_a]YRH<sup>a</sup>Y<sup>a</sup>`GWY<sup>a</sup>[<sup>]</sup>¥`NS[WP\_<sup>]</sup>[RHT]TYUT`W  
@HWI-EAS443:3:62:227:1457#0/1  
CAAGAAGTTCAAGCCGAAATAGCAATAAGACCCAAAGTG  
+HWI-EAS443:3:62:227:1457#0/1  
abbabb\_\_bbbb`b`^^]baa\_aaaaabaaaa`a\_`Y`  
@HWI-EAS443:3:62:247:1541#0/1  
ATGTTTTTGTGGGACATCAAGATACAGCAAGAAGTTCAA  
+HWI-EAS443:3:62:247:1541#0/1  
[[^S\_aa\_aab`aaaaa\_aaaa`baa`aa`^a`aW¥a\_a  
@HWI-EAS443:3:62:328:374#0/1  
CACCATCCATCTACTAGTGCTGACCAACAAAGTCTCTATC  
+HWI-EAS443:3:62:328:374#0/1  
abbaaaaabaabaa`a]a`\_aaa`aba\_a\_`^a`\_`\_`\_`  
@HWI-EAS443:3:62:329:1398#0/1  
CACGTGCATGGAAAGTGTCAAAAATGGGACTTATGACTAC  
+HWI-EAS443:3:62:329:1398#0/1  
ab\_]S]¥a]SN[a`[XaWaa`\_aX`[PY\_`^`[`]Z\_`¥[^  
@HWI-EAS443:3:62:330:916#0/1  
GCCGGTTTCATTGAAGGGGGTGGACAGGGATGGTAGATG  
+HWI-EAS443:3:62:330:916#0/1  
aaaba^a`a]aa`[^aZ`^`\_W`^`^¥¥\_`¥W¥^U[XYNY  
@HWI-EAS443:3:62:334:407#0/1  
AAGTTGTATTGCAATCGTGGACTGGTGTATCTGAAATGAT  
+HWI-EAS443:3:62:334:407#0/1  
aaaT\_a`^`ab`]\_a`YVa]PX^¥^Va]`a^`ZXU¥`\_`\_`  
@HWI-EAS443:3:62:365:327#0/1  
TGCAGATGCATATGTTTTTGTGGGACATCAAGATACAGC  
+HWI-EAS443:3:62:365:327#0/1  
ab`\_a[ab\_baabb`bbaab\_aabaaaa`aa\_aa]a[a\_]`  
@HWI-EAS443:3:62:378:1063#0/1  
ACCCCATCTATTTCTTCTCTGTTTAATTTTGCTTCCCTCTG  
+HWI-EAS443:3:62:378:1063#0/1  
ababaabbbbbbbbbbbbbbbbabH^a\_a\_`aa``aaaa  
@HWI-EAS443:3:62:390:1843#0/1  
ATGGGACTTATGACTACCCAAAATACTCAGAGGAAGCAAA  
+HWI-EAS443:3:62:390:1843#0/1  
a`¥a`````a`^aa`````aa^`]^`¥^`a`\_`W[YUR]`^  
@HWI-EAS443:3:62:469:1193#0/1  
TCATAATCGATGAAATCTCCTGGGTAACACGTTCCATTGT  
+HWI-EAS443:3:62:469:1193#0/1  
`\_`[`[]]a\_VPbaSSUY[aVP¥^S]HGFH¥^]X][BBBBB  
@HWI-EAS443:3:62:495:1141#0/1  
CACTTCCATGCACGTGTTATCGCATTGTGGTAAAATTC  
+HWI-EAS443:3:62:495:1141#0/1  
]PO`\_¥`a`¥Y[ ]`^]a`Z\_[XNY\_`aY[X`¥L][^XZ]¥  
@HWI-EAS443:3:62:525:221#0/1  
AAACAATGCCAAGGAAATTGGAAACGGCTGCTTTGAATTT



@HWI-EAS443:3:62:869:824#0/1  
CTCGTCAATGGCATTCTGTGTGCTCTTCAGGTCGGCTGCA  
+HWI-EAS443:3:62:869:824#0/1  
ababaabaaababbbbaaU`aa`aaaaa`YVa`¥X¥`a`  
@HWI-EAS443:3:62:899:1683#0/1  
ATCTCGTCAATGGCATTCTGTGTGCTCTTCAGGTCGGCTG  
+HWI-EAS443:3:62:899:1683#0/1  
`b^a[^a^aaa]a`^aaaaa[VYQ`\_`a`aaa`\_Sa\_\_a¥`  
@HWI-EAS443:3:62:941:91#0/1  
GTGGGGACATCAAGATACAGCAAGAAGTTCAAGCCGGAAA  
+HWI-EAS443:3:62:941:91#0/1  
a\_a\_aRYR^a]WY`W¥]X\_`Y\_\_`]QYUXR]V^RO\_]XXX  
@HWI-EAS443:3:62:944:538#0/1  
GGGGGGTGGACAGGGATGGTAGATGGATGGTACGGTTATC  
+HWI-EAS443:3:62:944:538#0/1  
aa\_a`X^VWQ\_Q\_aZP]ZaU¥a\_\_\_\_\_^`]U¥^XXBBBBB  
@HWI-EAS443:3:62:945:685#0/1  
GATTGGGCCATGAACCTGTCTTGGGGAATATCTCAAACCT  
+HWI-EAS443:3:62:945:685#0/1  
a\_[a\_\_ZXVJT[P[Z^\_\_X^Za[^Z\_YXWOQV VX]]W[WV  
@HWI-EAS443:3:63:1018:809#0/1  
GAAGCTTTTTGCTCCAGCATGAGGACATGCTGCCGTTACA  
+HWI-EAS443:3:63:1018:809#0/1  
¥\_X¥V\_[aUQU^SZ¥ZZ]HYab]UUO\_W`RZ¥[OXN`XTU  
@HWI-EAS443:3:63:1038:1550#0/1  
CTTTGTTTCGAGTCATGATTGGGCCATGAACCTGTCTTGGG  
+HWI-EAS443:3:63:1038:1550#0/1  
aaaaa`a`aaa`\_aaaa\_a\_a`a`aa`^\_Z`\_a¥]``\_]\_  
@HWI-EAS443:3:63:1050:1165#0/1  
GCCATGAACCTGTCTTGGGGAATATCTCAAACCTTTCAA  
+HWI-EAS443:3:63:1050:1165#0/1  
ababbaab`bbbaabaaab\_abaaaabab^`abbaa`baa  
@HWI-EAS443:3:63:1066:936#0/1  
GTCATGATTGGGCCATGAACCTGTCTTGGGGAATATCTCA  
+HWI-EAS443:3:63:1066:936#0/1  
a^aaabaaaaa``aaa]^aaa``aa``aa]`a``\_a`a  
@HWI-EAS443:3:63:1081:352#0/1  
TGGCATTCTGTGTGCTCTTCAGGTCGGCTGCATATCCTGA  
+HWI-EAS443:3:63:1081:352#0/1  
`ba\_\_¥\_\_a^Za\_aabab]ZaaaU[]``]\_JWY`US¥VR]  
@HWI-EAS443:3:63:1083:1145#0/1  
GAAAGAACCTTTGGACTACCACGATTCAAATGTGAAGAACT  
+HWI-EAS443:3:63:1083:1145#0/1  
^``bbbabbbb`bbaababba`]aa`aaaa]aa`a\_`aa  
@HWI-EAS443:3:63:1142:1218#0/1  
CCCGGCTCTACTAGTGTCCAGTAATAGTTCATTCTCCCTT  
+HWI-EAS443:3:63:1142:1218#0/1  
abb`bbbab]\_a]`X]aaa\_]``^¥`Za][a`^`````]a  
@HWI-EAS443:3:63:1149:574#0/1  
ATGGCATTCTGTGTGCTCTTCAGGTCGGCTGCATATCCTG

+HWI-EAS443:3:63:1149:574#0/1  
^Zab¥ba\_U\_bW[`¥a^Z\_aW`]a\_b`XV¥\_[]`a`¥¥[]  
@HWI-EAS443:3:63:1180:1045#0/1  
GCTTTTTGCTCCAGCATGAGGACATGCTGCCGTTACACCT  
+HWI-EAS443:3:63:1180:1045#0/1  
a`a`aa`U[`\_UZ]]FL[\_X¥`\_W\_[XXY[ZKRYNRHVS  
@HWI-EAS443:3:63:1192:365#0/1  
TGAGGACATGCTGCCGTTACACCTTTGTTTCGAGTCATGAT  
+HWI-EAS443:3:63:1192:365#0/1  
abbb\_]aa\_Z^a]aaXY]Ya]a]]\_][]X]YSQ]\_`\_[]  
@HWI-EAS443:3:63:1231:1508#0/1  
TCTGTGTGCTCTTCAGGTCGGCTGCATATCCTGACCCCTG  
+HWI-EAS443:3:63:1231:1508#0/1  
a`ba`\_`aabaaa\_aaa^a`aa]\_]^a`\_Z\_\_`¥W`^`\_  
@HWI-EAS443:3:63:1233:578#0/1  
GGGAAATCCAGAGTGTGAATCACTCTCCACAGCAAGCTCA  
+HWI-EAS443:3:63:1233:578#0/1  
^¥`[bbaa`\_T^\_Sb\_aaa`aa\_abaa\_\_\_\_\_aa] []a^^`  
@HWI-EAS443:3:63:1234:1736#0/1  
CCCCTGCTCATTGATGGTGATAACCGTACCATCCATCT  
+HWI-EAS443:3:63:1234:1736#0/1  
aaSWV\_aa[L`bUaaa¥aaY`\_¥]^`[ZGaVURW]\_YN¥¥  
@HWI-EAS443:3:63:1292:1088#0/1  
GTCGGCTGCATATCCTGACCCCTGCTCATTGATGGTGA  
+HWI-EAS443:3:63:1292:1088#0/1  
`baa`aa`UW\_\_Yba^`X`b`^¥`\_W^aa\_]YW\_aV\_\_  
@HWI-EAS443:3:63:1294:276#0/1  
GTGCTTTTTACATATTTTGGACATTTTCCAATTGTGATCG  
+HWI-EAS443:3:63:1294:276#0/1  
a\_aa`aaaa`aaa\_aaaaa`]]\_baa\_^\_a^aa^a\_]^`  
@HWI-EAS443:3:63:1349:1400#0/1  
GCCAGTTAAAAACAATGCCAAGGAAATTGGAAACGGCTG  
+HWI-EAS443:3:63:1349:1400#0/1  
aaa\_^Vbabbaba\_bbbaabaaabababba`a`aaaa\_a[  
@HWI-EAS443:3:63:1394:1784#0/1  
CCGGGAGACAAAATAACATTGCAAGCAACTGGAAATCTAG  
+HWI-EAS443:3:63:1394:1784#0/1  
`Y]a`Ta¥]a¥H¥¥aa^[a\_]Y¥a\_\_\_Z\_\_\_`WLZPU[`a  
@HWI-EAS443:3:63:142:624#0/1  
ATTCAATCTAGAGGCCTATTTGGGGCCATTGCCGTTTCA  
+HWI-EAS443:3:63:142:624#0/1  
aaaa`aaaab`aa`a`a\_\_¥[\_[\_Za`\_`^¥^^¥\_\_TW\_WV  
@HWI-EAS443:3:63:1430:901#0/1  
GGGCCATGAACTTGTCTTGGGAATATCTCAAACCTTTCA  
+HWI-EAS443:3:63:1430:901#0/1  
abbaaabbaa^baa`bbbbaaaaaab\_aaaaa`aa`a  
@HWI-EAS443:3:63:1441:102#0/1  
TTTTGCTTCTCTGAGTATTTTGGGTAGTCATAAGTCCCA  
+HWI-EAS443:3:63:1441:102#0/1  
abab\_]aa`\_a\_abab`abaaba^NVa^]\_``\_a[][\_`

@HWI-EAS443:3:63:1460:1924#0/1  
GTGTGCTCTTCAGGTCGGCTGCATATCCTGACCCCTGCTC  
+HWI-EAS443:3:63:1460:1924#0/1  
a^H¥ZU`a[\_X^]TP\_aa]ZYM\_a^YUJX`ZSSPYZ]P¥a  
@HWI-EAS443:3:63:1489:140#0/1  
CCGGCTTGAACCTTCTTGCTGTATCTTGATGTCCCCACAAA  
+HWI-EAS443:3:63:1489:140#0/1  
a^\_``\_Z¥]\_\_`\_Y\_aaa]ZZ][X[^¥YYZPRVZWA`\_]\_Y  
@HWI-EAS443:3:63:1544:305#0/1  
CAAGGGTGTATAAACACCAGCCTCCCATTTCAGAATATA  
+HWI-EAS443:3:63:1544:305#0/1  
aaaab`Ya]aa\_`\_aa``\_\_a`¥\_`\_^^^YNZ^][a\_  
@HWI-EAS443:3:63:1590:1555#0/1  
CTCTTTACTACTGCTGTGAACCTGTGTATTCATCTTTTCA  
+HWI-EAS443:3:63:1590:1555#0/1  
`babbbb`abbaba`ababaaabbabaabb\_ab\_bbbbaab  
@HWI-EAS443:3:63:1590:322#0/1  
GACTGGTGTATCTGAAATGATAATACCAGATCCAGCATTT  
+HWI-EAS443:3:63:1590:322#0/1  
aPOUZ¥P\_[`U]\_V]^aaaa^[U[\_UP¥\_]WU¥U`^RYBB  
@HWI-EAS443:3:63:1596:98#0/1  
ATTAATTTTTGTAGAAGCTTTTTGCTCCAGCATGAGGAC  
+HWI-EAS443:3:63:1596:98#0/1  
aaaaa\_abba\_a\_\_b\_ab^aaaa`\_]¥W^`Y^`\_Y\_YZY  
@HWI-EAS443:3:63:1616:1079#0/1  
TTCAAATGTGAAGAACTTATATGAAAAGGTAAGAAGCCAG  
+HWI-EAS443:3:63:1616:1079#0/1  
aaa\_aaaa\_b\_``\_a^bbaaabba`]a`[X\_`aaaa[T`^  
@HWI-EAS443:3:63:163:1131#0/1  
ATTTTGCTTCTCTGAGTATTTTGGGTAGTCATAAGTCCC  
+HWI-EAS443:3:63:163:1131#0/1  
a`a`V¥aaa]ab`aa^Wa`a`\_]`V\_`^`\_`\_`[\_`\_  
@HWI-EAS443:3:63:1711:384#0/1  
TGGTATTATCATTTAGATACACCAGTCCACGATTGCAAT  
+HWI-EAS443:3:63:1711:384#0/1  
aa`Vaaaba`abaa`abbaa\_aaY`¥\_`\_`^aaaa^Z\_``  
@HWI-EAS443:3:63:1730:890#0/1  
CGTCAATGGCATTCTGTGTGCTCTTCAGGTCGGCTGCATA  
+HWI-EAS443:3:63:1730:890#0/1  
[`aW]ZY]U]`[a\_``[]0]\_]`^]a`ZZS[]^Za\_TTV  
@HWI-EAS443:3:63:1767:1613#0/1  
AAAGGGAAAGAAGTCTCGTGCTATGGGGCATTACCCATC  
+HWI-EAS443:3:63:1767:1613#0/1  
aaaa`aa\_abba[`a\_aa\_`a\_`a\_W^X`aaa¥\_\_`^  
@HWI-EAS443:3:63:198:109#0/1  
CAGGGATGGTAGATGGATGGTACGGTTATCACCATCAAAA  
+HWI-EAS443:3:63:198:109#0/1  
a^aaaaaba¥``][`\_\_Ya\_S\_\_`^W¥\_WW¥WW¥U¥VWSZ  
@HWI-EAS443:3:63:23:1374#0/1  
GCTGGCTGGATCCTGGGAAATCCAGAGTGTGAATCACTCT

+HWI-EAS443:3:63:23:1374#0/1  
\_`bbbbbbba^abbZ]a`^Taabb`aaa\_bY`a^`a]]`Z  
@HWI-EAS443:3:63:363:882#0/1  
AGCCAGTTAAAAACAATGCCAAGGAAATTGGAAACGGCT  
+HWI-EAS443:3:63:363:882#0/1  
aabb¥`ZWaaaa`aa\_ba`\_LY`\_Z[`\_¥¥^`\_W`ZXY  
@HWI-EAS443:3:63:369:147#0/1  
ATTAATTTTTGTAGAAGCTTTTTGCTCCAGCATGAGGAC  
+HWI-EAS443:3:63:369:147#0/1  
abb^YZabaaaaaaaa\_aaaaa\_a`^^^`\_¥W¥¥^Y[W]  
@HWI-EAS443:3:63:384:1885#0/1  
CCCACAAAACATATGCATCTGCATTCTGATAGAGACTTT  
+HWI-EAS443:3:63:384:1885#0/1  
a¥a`a]`¥`^`a`Z\_a`\_a\_\_a\_\_¥`\_^]]P[YP\_¥XX  
@HWI-EAS443:3:63:443:1344#0/1  
AGGAGATTTTCATCGATTATGAGGAGCTAAGAGAGCAATTG  
+HWI-EAS443:3:63:443:1344#0/1  
Z]G]Y[\_b`baa`aa]`aba]`]ab\_a\_ba\_aZaaaY`\_]\_  
@HWI-EAS443:3:63:491:427#0/1  
GGGACATCAAGATACAGCAAGAAGTTCAAGCCGAAATAG  
+HWI-EAS443:3:63:491:427#0/1  
ab`]^KabUb¥¥aW[`aabbaYT\_QNP\_\_UTPaWUa`a[V  
@HWI-EAS443:3:63:49:642#0/1  
CATCTACCATCCCTGTCCACCCCTTCAATGAAACCGGC  
+HWI-EAS443:3:63:49:642#0/1  
^FV\_]R]\_Z\_`a¥T\_HZ]\_¥Z\_a]]TVYTX¥MBBBBBBBB  
@HWI-EAS443:3:63:529:1030#0/1  
TGGTGAATGCCCCATAGCACGAGGACTTCTTCCCTTAT  
+HWI-EAS443:3:63:529:1030#0/1  
a^`\_abbabba`\_aaa\_aaaaaaZaaa^\_\_`\_aaa\_a```  
@HWI-EAS443:3:63:53:1552#0/1  
CAGCACTAGTAGATGGATGGTGAATGCCCCATAGCACGAG  
+HWI-EAS443:3:63:53:1552#0/1  
a\_R`]^aYZF`U[[a\_`XXa]`\_]\_`a\_Y]a\_¥[V\_`R[]  
@HWI-EAS443:3:63:545:1647#0/1  
TTCCAATTGTGATCGGATGTATATTCTGAAATGGGAGGCT  
+HWI-EAS443:3:63:545:1647#0/1  
abbba`aba`aaa`a`a`Z[\_U]`X]RYXV^^a`ZZ[X¥  
@HWI-EAS443:3:63:586:849#0/1  
CGAATGTTATTTTGTCTCCCGGCTCTACTAGTGTCCAGTA  
+HWI-EAS443:3:63:586:849#0/1  
abaaaaaaaaabbbb\_]abbab\_ba`a]ZR]a]LHU`SRZYR  
@HWI-EAS443:3:63:592:234#0/1  
GGTAAATGTAACATTGCTGGCTGGATCCTGGGAAATCCAG  
+HWI-EAS443:3:63:592:234#0/1  
ab^aaaaa`aa`a`aa`a`\_\_\_^]\_^]`^`^V[]TTWWZ  
@HWI-EAS443:3:63:608:779#0/1  
CACAAATGCGATAACACGTGCATGGAAAGTGTCAAAAATG  
+HWI-EAS443:3:63:608:779#0/1  
[V]UX]]`¥YMN\_Z\_JVVLQVZWTZaa¥ZFVO]^BBBBBB



@HWI-EAS443:3:63:60:1253#0/1  
GACCAACAAAGTCTCTATCAGAATGCAGATGCATATGTTT  
+HWI-EAS443:3:63:60:1253#0/1  
aaabab`bb`]`baa^a¥]X¥aZRY]Y\_WU^S^¥`ZZR¥U  
@HWI-EAS443:3:63:610:1601#0/1  
CAAAATATGTAAAAAGCACAAAATTGAGACTGGCCACAGG  
+HWI-EAS443:3:63:610:1601#0/1  
\_U[Q]IJaaL]\_Z\_ZU]]a\_]\_YZ[^`S]^]SY\_BBBBBB  
@HWI-EAS443:3:63:618:676#0/1  
GGGGCATTACCATCCATCTACTAGTGCTGACCAACAAAG  
+HWI-EAS443:3:63:618:676#0/1  
`a[abba]Z`]`baa`a`Y]]b`a^aba\_V`aa]\_`^aa  
@HWI-EAS443:3:63:643:1940#0/1  
CTCTGTAACTTCTAGAAGACAAGCATAACGGGAAACTA  
+HWI-EAS443:3:63:643:1940#0/1  
`\_b¥^Zab`X`\_`¥b¥]ab`\_[Y`a^^a`aa`a^\_X]a  
@HWI-EAS443:3:63:644:569#0/1  
AATCGATGAAATCTCCTGGGTAACACGTTCCATTGTCTGA  
+HWI-EAS443:3:63:644:569#0/1  
aa`aaa`aaaa`a`\_`aaa\_a^aaaa`\_^¥X^`\_`]`^`¥Z  
@HWI-EAS443:3:63:702:1059#0/1  
TAAATTTTTGTAGAAGCTTTTTGCTCCAGCATGAGGACAT  
+HWI-EAS443:3:63:702:1059#0/1  
aaaaaaaa`a\_Va^\_a^`aa`aaa`a\_]¥^\_\_Z^]]\_[Y[  
@HWI-EAS443:3:63:721:1322#0/1  
GGACTACCACGATTCAAATGTGAAGAACTTATATGAAAAG  
+HWI-EAS443:3:63:721:1322#0/1  
S]U\_R]Z¥¥UWPY^^^[QR]^ZXY¥OW`XSTNYN\_TOXTZ  
@HWI-EAS443:3:63:722:46#0/1  
GCTTCCTCTGAGTATTTTGGGTAGTCATAAGTCCCATTTT  
+HWI-EAS443:3:63:722:46#0/1  
a`aa`¥`abb`b^`aaaabaaZaa^aaa\_\_aZ`T¥\_aaa^  
@HWI-EAS443:3:63:763:502#0/1  
AAATGCGATAACACGTGCATGGAAAGTGTCAAAAATGGGA  
+HWI-EAS443:3:63:763:502#0/1  
¥\_]ZPY¥Ya^`\_`a[[`aa¥XW\_Y[\_Z¥]^]a¥WT]]`Z  
@HWI-EAS443:3:63:767:397#0/1  
CTTGAACCTTCTTGCTGTATCTTGATGTCCCCACAAAACA  
+HWI-EAS443:3:63:767:397#0/1  
]^abb`b`a^^`bbbb`bbabbba^aa`\_]¥`YZ\_aba  
@HWI-EAS443:3:63:784:2027#0/1  
GCTGGCTGGATCCTGGGAAATCCAGAGTGTGAATCACTCT  
+HWI-EAS443:3:63:784:2027#0/1  
ab`\_`aa`\_`¥aaZ¥\_a]\_^]]`^^S]Z`Y``]]\_\_Z`^  
@HWI-EAS443:3:63:835:227#0/1  
GAAGCCAGTTAAAAACAATGCCAAGGAAATTGGAAACGG  
+HWI-EAS443:3:63:835:227#0/1  
abaa]aba`aaaa`\_aaaa`a\_\_aa\_\_`^`\_]\_[Wa\_  
@HWI-EAS443:3:63:86:2034#0/1  
TAGATTTCCAGTTGCTTCGAATGTTATTTTGTCTCCCGGC

+HWI-EAS443:3:63:86:2034#0/1  
`bbZ^a¥bba\_\_aWbaabaVX\_] [`aa\_`a] `a\_BBBBBB  
@HWI-EAS443:3:63:878:1740#0/1  
GCTGGTGTTTATAGCACCCCTTGGGTGTCTGACAAGTTGTA  
+HWI-EAS443:3:63:878:1740#0/1  
^\_HYbZW\_bbY`aYY^`bbWP¥\_` [Z`\_\_P\_J¥TaP\_¥F]  
@HWI-EAS443:3:63:890:620#0/1  
GCTGGCTGGATCCTGGGAAATCCAGAGTGTGAATCACTCT  
+HWI-EAS443:3:63:890:620#0/1  
`¥abb`bba`\_^Qa]XS¥a\_]aW[]`KW¥a^`U]`\_^BB  
@HWI-EAS443:3:63:911:93#0/1  
CGGCTCTACTAGTGTCCAGTAATAGTTCATTCTCCCTTCT  
+HWI-EAS443:3:63:911:93#0/1  
abbbbaa` [a] `ab^a`Za`aaaabaa\_`bb¥a`a`aa\_`  
@HWI-EAS443:3:63:947:434#0/1  
GAATTTACTTTGTTAGTAATCTCGTCAATGGCATTCTGTG  
+HWI-EAS443:3:63:947:434#0/1  
aabbbb`abbbbabaa`aWa`bbb`ab``baa`a``aa^a  
@HWI-EAS443:3:63:966:1849#0/1  
ACCTTCTAGAAGACAAGCATAACGGGAAACTATGCAAAC  
+HWI-EAS443:3:63:966:1849#0/1  
^][[\_W^\_aaa`\_^aa¥a^`\_a\_aa^W`\_^\_\_\_\_]\_XVZ\_\_  
@HWI-EAS443:3:63:999:1175#0/1  
TGCCGGTTTCATTGAAGGGGGGTGGACAGGGATGGTAGAT  
+HWI-EAS443:3:63:999:1175#0/1  
Y^abb\_Xaa\_Y\_^XZ\_\_^^^D¥]\_¥]`aa[]a]TZ\_\_^  
@HWI-EAS443:3:64:1014:1456#0/1  
TAAAAAAGGAAATTCATACCCAAAGCTCAGCAAATCCTAC  
+HWI-EAS443:3:64:1014:1456#0/1  
a`^¥]`\_`baaYY[\_¥b`a^]ab`a\_\_^`^[[aaa`]\_\_\_\_  
@HWI-EAS443:3:64:1064:1116#0/1  
CAGAATGCAGATGCATATGTTTTTGTGGGACATCAAGAT  
+HWI-EAS443:3:64:1064:1116#0/1  
abaabaabaaaabababaa`aaaa\_aa\_\_a^a``a`aa\_  
@HWI-EAS443:3:64:1082:1033#0/1  
GCTGGTGTTTATAGCACCCCTTGGGTGTCTGACAAGTTGTA  
+HWI-EAS443:3:64:1082:1033#0/1  
a`\_¥\_¥ba^`^^aa[`]\_\_a]aaVaT]TZ[Y`\_a]`¥Y`  
@HWI-EAS443:3:64:1083:890#0/1  
CTGGGAAATCCAGAGTGTGAATCACTCTCCACAGCAAGCT  
+HWI-EAS443:3:64:1083:890#0/1  
aaa^]`aaaa^aa`a]a\_a\_aaaa\_`\_`\_`a\_a\_`\_\_\_\_]  
@HWI-EAS443:3:64:1091:1006#0/1  
CGATTGCAATACAACCTTGTGACACCCAAAGGGTGTCTATA  
+HWI-EAS443:3:64:1091:1006#0/1  
abbbbbbbbbbbabaabbaab` `\_baaabaaaa]aaaaaa  
@HWI-EAS443:3:64:113:106#0/1  
ATCTCGGTACCACTAGATTTCCAGTTGCTTGAATGTTAT  
+HWI-EAS443:3:64:113:106#0/1  
aa``aaa¥]\_a\_\_a¥a¥\_a\_^\_\_aZ^\_\_^^]\_R]\_\_Z]Z\_

@HWI-EAS443:3:64:1140:1358#0/1  
ATTTTGTCTCCCGCTCTACTAGTGTCCAGTAATAGTTCA  
+HWI-EAS443:3:64:1140:1358#0/1  
aaaaaa`aaa`a\_\_[\_\_\_\_[Y\_^\_UUZ]^ZU^\_]VX]Y]  
@HWI-EAS443:3:64:1158:232#0/1  
GAACTGTGTATTTCATCTTTTCAATAACAGAATTTACTTTG  
+HWI-EAS443:3:64:1158:232#0/1  
aaa`ab\_b`abb\_aa`baaaaa`aaa^aa``aaa`]aaaa  
@HWI-EAS443:3:64:1166:1397#0/1  
CTGGTGTATAGCACCTTGGGTGTCTGACAAGTTGTAT  
+HWI-EAS443:3:64:1166:1397#0/1  
abbbababbabbabaaa`ba^ba¥b\_a\_a`\_\_]a\_`a^`a  
@HWI-EAS443:3:64:1196:936#0/1  
AAAACAATGCCAAGGAAATTGGAAACGGCTGCTTTGAATT  
+HWI-EAS443:3:64:1196:936#0/1  
¥bb¥\_ba\_b`U`[]¥[a\_aaa\_¥aaaa\_ZIZ`^a¥JRLW¥  
@HWI-EAS443:3:64:1240:842#0/1  
ATTCATCTTTTCAATAACAGAATTTACTTTGTTAGTAATC  
+HWI-EAS443:3:64:1240:842#0/1  
^`\_abb^bbbab`ab¥b`b^baab\_W^`\_bb]bbbbaaa]  
@HWI-EAS443:3:64:1253:1929#0/1  
GCAGCCGACCTGAAGAGCACACAGAATGCCATTGACGAGA  
+HWI-EAS443:3:64:1253:1929#0/1  
\_X¥\_ZYT00X]Z]a[[X0THVL[V]]]RVY^]XNVPFSNO  
@HWI-EAS443:3:64:1262:128#0/1  
GGAACGTGTTACCCAGGAGATTTTCATCGATTATGAGGAGC  
+HWI-EAS443:3:64:1262:128#0/1  
abaaab`babaa`aabaab^aaa``a\_b\_a``ba`a`]`^  
@HWI-EAS443:3:64:1307:1146#0/1  
TCCTCGTGCTATGGGGCATTACCATCCATCTACTAGTGC  
+HWI-EAS443:3:64:1307:1146#0/1  
aaaa```¥Q\_`X^a\_YQRa¥\_\_aP`PPX\_TX[\_XaSSXVW  
@HWI-EAS443:3:64:1312:1408#0/1  
ATCGATGAAATCTCCTGGGTAACACGTTCCATTGTCTGAA  
+HWI-EAS443:3:64:1312:1408#0/1  
¥VO\_SY`ZR¥Z¥]`¥`a[`M¥J]^`VZ^\_PTVaa[]¥^WY  
@HWI-EAS443:3:64:1321:1614#0/1  
GTGGGGACATCAAGATACAGCAAGAAGTTCAAGCCGGAAA  
+HWI-EAS443:3:64:1321:1614#0/1  
aT\_^]aVYY\_[]a\_ZZY]a\_SJ`\_PS]VPP\_^^WO]^]R]  
@HWI-EAS443:3:64:1344:672#0/1  
AAGTCCTCGTGCTATGGGGCATTACCATCCATCTACTAG  
+HWI-EAS443:3:64:1344:672#0/1  
a¥GZ`aaaa\_`]aa``Z`aX^`^`\_X\_\_]^`X^a]\_\_\_\_  
@HWI-EAS443:3:64:1364:1696#0/1  
ACAGAATTTACTTTGTTAGTAATCTCGTCAATGGCATTCT  
+HWI-EAS443:3:64:1364:1696#0/1  
aa\_S^\_abaa\_b\_aYW\_`JX^]`U``T^aaaUK^¥TYRT¥  
@HWI-EAS443:3:64:137:91#0/1  
GCCGGTTTCATTGAAGGGGGTGGACAGGGATGGTAGATG



@HWI-EAS443:3:64:1745:957#0/1  
GCTGCTTTGAATTTTACCACAAATGCGATAACACGTGCAT  
+HWI-EAS443:3:64:1745:957#0/1  
a`aa`aaaa`aaa`ZY^`Z`^aa`\_\_`^`\_]¥X\_X[¥^X^\_  
@HWI-EAS443:3:64:1756:843#0/1  
ACTTCTTGCTGTATCTTGATGTCCCCACAAAACATATGC  
+HWI-EAS443:3:64:1756:843#0/1  
aabb\_bababa`a`abaa^`^^`\_]`a^a^`a`\_\_`\_  
@HWI-EAS443:3:64:1766:901#0/1  
GCTGGCTGGATCCTGGGAAATCCAGAGTGTGAATCACTCT  
+HWI-EAS443:3:64:1766:901#0/1  
a`^baaa]a]X`¥]W\_^]`^^`¥YNWU`P][`YTWYYV[  
@HWI-EAS443:3:64:197:1682#0/1  
ATTTCTTTTTTAACTAGCCATATTAATTTTTGTAGAAG  
+HWI-EAS443:3:64:197:1682#0/1  
abbaba\_aaaaaaaaa`a`aaa`aa]\_aa\_aa^`aY`\_¥  
@HWI-EAS443:3:64:222:464#0/1  
GGGCATTACCATCCATCTACTAGTGCTGACCAACAAAG  
+HWI-EAS443:3:64:222:464#0/1  
aZ\_aa`]`a]a¥a\_`]\_Q\_\_`U¥V[TaYY¥WY`VYV\_^Z  
@HWI-EAS443:3:64:272:73#0/1  
CTCCCGGCTCTACTAGTGCCAGTAATAGTTCATTCTCCC  
+HWI-EAS443:3:64:272:73#0/1  
aaaaba`a`a]¥Z`¥^V¥[\_`[aZ`^`\_\_][SX^¥[¥]V[  
@HWI-EAS443:3:64:292:2011#0/1  
GAAGTCCTCGTGCTATGGGCATTACCATCCATCTACTA  
+HWI-EAS443:3:64:292:2011#0/1  
a\_\_]bbaa`^^`¥\_XYYSW¥]\_^`^Z`V^[]]W`WWY  
@HWI-EAS443:3:64:333:1381#0/1  
CTGGTGTATCTGAAATGATAATACCAGATCCAGCATTCT  
+HWI-EAS443:3:64:333:1381#0/1  
aa\_PX¥^[]`aaa``\_aaaa\_aa\_\_a`a\_a\_a\_^]`\_\_a  
@HWI-EAS443:3:64:350:1099#0/1  
CGATGAAATCTCCTGGGTAACACGTTCCATTGTCTGAACT  
+HWI-EAS443:3:64:350:1099#0/1  
a`^`^\_]`VXZ\_a\_[¥[QQYY\_[YQQZYPSWWYWXVSZVYW  
@HWI-EAS443:3:64:361:227#0/1  
GAAATTGAAACGGCTGCTTTGAATTTTACCACAAATGCG  
+HWI-EAS443:3:64:361:227#0/1  
YYYYbaaY¥^^`aaaa^00[\_FKS[\_`\_STWG[`BBBBBB  
@HWI-EAS443:3:64:368:1086#0/1  
CTTTGGGTCTTATTGCTATTTCCGGCTTGAACCTTCTGCT  
+HWI-EAS443:3:64:368:1086#0/1  
aRS`VaUTa]RIYMPNLPQTWZ`ZRPNYOOSWBBBBBBBB  
@HWI-EAS443:3:64:372:980#0/1  
AAAGAGTTCAACCACCTGGAAAAAGAATAGAGAATTTAA  
+HWI-EAS443:3:64:372:980#0/1  
a\_\_V\_ZZ\_a^a\_\_ba\_]aa¥SWU]a¥SZ`\_Y`R[OTXW]]  
@HWI-EAS443:3:64:379:528#0/1  
GCTGGATCCTGGGAAATCCAGAGTGTGAATCACTCTCCAC

+HWI-EAS443:3:64:379:528#0/1  
aba`Y[[abaaaaaaaa\_a^a`^aW\_[U^`\_XX\_^¥\_\_\_\_^¥  
@HWI-EAS443:3:64:383:1695#0/1  
CTGGTGTATTATAGCACCTTGGGTGTCTGACAAGTTGTAT  
+HWI-EAS443:3:64:383:1695#0/1  
a^aaRa\_bbba`\_aaaa`a`\_\_]\_^^^a`\_¥]`¥]\_¥  
@HWI-EAS443:3:64:386:443#0/1  
AGCCGACCTGAAGAGCACACAGAATGCCATTGACGAGATT  
+HWI-EAS443:3:64:386:443#0/1  
aabbbabbbb`aaaabbaa]^^`aaa\_aaaa`aaa\_a^  
@HWI-EAS443:3:64:392:319#0/1  
GTTGTATTGCAATCGTGGACTGGTGTATCTGAAATGATAA  
+HWI-EAS443:3:64:392:319#0/1  
a]WZMWOZ]U]UWZ¥Q[WSSV]XNYOVTVSY[VLV]YYWZ  
@HWI-EAS443:3:64:407:206#0/1  
GCTCAATTGCTCTTAGCTCCTCATAATCGATGAAATCT  
+HWI-EAS443:3:64:407:206#0/1  
aaaaaaaaa\_a\_\_`\_\_`^\_^\_^^^\_\_¥XV]^VZ¥  
@HWI-EAS443:3:64:417:1904#0/1  
CATGAACCTTGTCTTGGGAATATCTCAAACCTTCAAATG  
+HWI-EAS443:3:64:417:1904#0/1  
\_aab`Za`bbabb``^`abaabbaaaaa\_aaabbaa`  
@HWI-EAS443:3:64:439:144#0/1  
GCTGGCTGGATCCTGGGAAATCCAGAGTGTGAATCACTCT  
+HWI-EAS443:3:64:439:144#0/1  
aaaaaaaa`]Z`\_\_`¥\_YYXTTQ[UYPYZYUUYUUS  
@HWI-EAS443:3:64:43:225#0/1  
CTGTGTGCTCTCAGGTCGGCTGCATATCCTGACCCCTGC  
+HWI-EAS443:3:64:43:225#0/1  
a`^a`aa\_a`]aa\_\_T]¥`X¥¥Z^a^VVQZVSY[TSTS  
@HWI-EAS443:3:64:440:2036#0/1  
GGGACATCAAGATACAGCAAGAAGTTCAAGCCGAAATAG  
+HWI-EAS443:3:64:440:2036#0/1  
\_b`bababbbababbaaab]IY`a`Ma\_babab\_b[  
@HWI-EAS443:3:64:474:1392#0/1  
TGCATATGTTTTTGTGGGACATCAAGATACAGCAAGAAG  
+HWI-EAS443:3:64:474:1392#0/1  
a^baa^aaZ`\_bbaTa`\_ZXaa\_aa`aZ^aaba\_aa¥a\_a  
@HWI-EAS443:3:64:49:1015#0/1  
ATGTTTTTGTGGGACATCAAGATACAGCAAGAAGTTCAA  
+HWI-EAS443:3:64:49:1015#0/1  
¥^`Z^Y\_]V^b`ZQa\_\_\_\_]^WF[R\_Z`\_¥\_[SXN^WVUW[  
@HWI-EAS443:3:64:509:1113#0/1  
ATCCGATCACAATTGGAAAATGTCCAAAATATGTAAAAAG  
+HWI-EAS443:3:64:509:1113#0/1  
]P]]`]^VYX[TYW^]YPYQZ`YZPFIYJUWYWDUZZBBB  
@HWI-EAS443:3:64:549:795#0/1  
GTCCCCACAAAACATATGCATCTGCATTCTGATAGAGAC  
+HWI-EAS443:3:64:549:795#0/1  
¥U¥^`\_`\_a\_¥S\_\_a[] [Y[X[`\_aX¥^a\_]a]R`Z]\_\_Z

@HWI-EAS443:3:64:583:424#0/1  
CCCCAGGGAGACTACCAGTACCAATGAACTGGCGACAGTT  
+HWI-EAS443:3:64:583:424#0/1  
abbb\_]ba]a`aa\_aa^\_Y`Xa][][]^X]^[]aaXZ[`YU  
@HWI-EAS443:3:64:605:708#0/1  
AAAAAGTTGATGATGGTTTCCTGGACATTTGGACTTACAA  
+HWI-EAS443:3:64:605:708#0/1  
¥U\_HP\_TW\_\_¥`Y`^\_TYZX\_X\_XZ[\_a^¥VWRZ]]VYV]  
@HWI-EAS443:3:64:60:1013#0/1  
GGGGTGGACAGGGATGGTAGATGGATGGTACGGTTATCAC  
+HWI-EAS443:3:64:60:1013#0/1  
a[Za[ba\_\_R\_aa`]aa¥aV^[XZ^Z\_\_W\_[W\_S\_\_[Y^Y  
@HWI-EAS443:3:64:680:623#0/1  
TGCTGGCTGGATCCTGGGAAATCCAGAGTGTGAATCACTC  
+HWI-EAS443:3:64:680:623#0/1  
aba`baa`aaa\_\_b)``Z\_aaaaaa`a`¥a[aaaa`a¥¥Z  
@HWI-EAS443:3:64:729:1059#0/1  
GTCCTCGTGCTATGGGGCATTACCATCCATCTACTAGTG  
+HWI-EAS443:3:64:729:1059#0/1  
WWb````¥bbbb`^aa\_\_a`^`a\_\_b`a\_bY^^a`a^aV`  
@HWI-EAS443:3:64:734:1847#0/1  
GGGGACATCAAGATACAGCAAGAAGTTCAAGCCGGAAATA  
+HWI-EAS443:3:64:734:1847#0/1  
a\_a]aaa]aaa`\_`aa\_`a\_a]\_V^\_a\_]`^\_^\_`\_`  
@HWI-EAS443:3:64:769:732#0/1  
GGCATTCTGTGTGCTCTTCAGGTCCGGCTGCATATCCTGAC  
+HWI-EAS443:3:64:769:732#0/1  
a\_bbbb`b`aa\_a\_a`bbaaba¥a)`aaaaaab````\_`  
@HWI-EAS443:3:64:776:603#0/1  
CAACAAAGTCTCTATCAGAATGCAGATGCATATGTTTTTG  
+HWI-EAS443:3:64:776:603#0/1  
a\_a\_aaaa]aa`a\_^\_aa\_`]X```XTa^)]\_`Y^^`a\_^  
@HWI-EAS443:3:64:828:1806#0/1  
CGGTACCCTAGATTTCCAGTTGCTTCCGAATGTTATTTTG  
+HWI-EAS443:3:64:828:1806#0/1  
aba\_baabaaa`aaaaaa^\_a`b`\_`a\_`aa]^\_\_a`a\_  
@HWI-EAS443:3:64:832:1563#0/1  
GGTAAATGTAACATTGCTGGCTGGATCCTGGGAAATCCAG  
+HWI-EAS443:3:64:832:1563#0/1  
^aR^a¥^babbbbaabba]Xaaa\_```^^]a\_^\_a[U\_aa  
@HWI-EAS443:3:64:880:1809#0/1  
GCCAGTTAAAAACAATGCCAAGGAAATTGGAAACGGCTG  
+HWI-EAS443:3:64:880:1809#0/1  
aabb]bbabbb``¥a^Z`]a`]W`b`ba\_^`a`[a^]\_  
@HWI-EAS443:3:64:896:79#0/1  
GAAGACAAGCATAACGGGAACTATGCCAACTAAGAGGGG  
+HWI-EAS443:3:64:896:79#0/1  
a[^\_WG][aZM¥W`^a^\_UY]Z^]YUQSQXX¥UZ¥UY^ZZ  
@HWI-EAS443:3:64:898:1820#0/1  
GCACGTGTTATCGCATTTGTGGTAAAATTCAAAGCAGCCG

+HWI-EAS443:3:64:898:1820#0/1  
aab`\_UX\_abVXH\_[\_aa¥X\_¥U^`aa^H[`]\_T`\_0]U  
@HWI-EAS443:3:64:899:357#0/1  
GCCGGTTTCATTGAAGGGGGTGGACAGGGATGGTAGATG  
+HWI-EAS443:3:64:899:357#0/1  
aabbb\_baa\_baaa`aa]aUa`\_\_\_`¥^^\_a^U```Ua  
@HWI-EAS443:3:64:906:767#0/1  
CATCATTTGAAAGTTTGAGATATCCCCAAGACAAGTTC  
+HWI-EAS443:3:64:906:767#0/1  
`[a`ab`aaaa`YG\_^`Y]`\_`\_a`[¥aaaa`^Y\_\_`  
@HWI-EAS443:3:64:90:1543#0/1  
GGCTGCTTTGAATTTTACCACAAATGCGATAACACGTGCA  
+HWI-EAS443:3:64:90:1543#0/1  
abb\_Z¥^a¥Z\_]aaaaa``^\_[R[\_\_\_¥Y\_]a][YU\_]`  
@HWI-EAS443:3:64:959:304#0/1  
AAAAAAGTTGATGATGGTTTCCTGGACATTTGGACTTACA  
+HWI-EAS443:3:64:959:304#0/1  
\_YV`aba\_¥ab\_b\_abbYYaW^b`ba[^`\_]\_^Z¥\_]\_Z\_  
@HWI-EAS443:3:64:985:722#0/1  
GTGATAACCGTACCATCCATCTACCATCCCTGTCCACCCC  
+HWI-EAS443:3:64:985:722#0/1  
aVRZW^W]QRH¥P[[PHZ\_OJOVKYa^^S^BBBBBBBBBB  
@HWI-EAS443:3:64:993:339#0/1  
TGGGAGGCTGGTGTATAGCACCCCTGGGTGTCTGACAA  
+HWI-EAS443:3:64:993:339#0/1  
abbbbaabba\_baabbbb\_baa``\_aaa`]a\_\_a``\_a\_  
@HWI-EAS443:3:64:995:1409#0/1  
CAGAATTTACTTTGTTAGTAATCTCGTCAATGGCATTCTG  
+HWI-EAS443:3:64:995:1409#0/1  
`bbbb\_b\_¥ab`a\_bbb¥abba`Q^ZabaaY\_U\_aaa\_`  
@HWI-EAS443:3:65:1051:373#0/1  
GGAAATTGAAAACGGCTGCTTTGAATTTTACCACAAATGC  
+HWI-EAS443:3:65:1051:373#0/1  
aa\_aaaaa`\_\_Za^\_a\_KY\_a[X\_S`\_`WTHYQ]BBBBB  
@HWI-EAS443:3:65:1075:979#0/1  
GAACTGTGTATTCATCTTTTCAATAACAGAATTTACTTTG  
+HWI-EAS443:3:65:1075:979#0/1  
\_SV^\_YP^`baaaaa`a`¥]UVZa\_¥XY\_a[a`]S][^]  
@HWI-EAS443:3:65:1083:1605#0/1  
GAAAGAAGTCCTCGTGCTATGGGGCATTACCATCCATCT  
+HWI-EAS443:3:65:1083:1605#0/1  
aaaaa]`W`baaaa`aaa`\_a]\_aa`aaa`\_b\_\_\_a\_]`  
@HWI-EAS443:3:65:1095:866#0/1  
CAAAGTCTCTATCAGAATGCAGATGCATATGTTTTTGTGG  
+HWI-EAS443:3:65:1095:866#0/1  
aaaaaT]a`W^bab`Z`aaa\_aXP\_VZ`]aa`]`a¥ZYaa  
@HWI-EAS443:3:65:110:1274#0/1  
GGAGATTTTCATCGATTATGAGGAGCTAAGAGAGCAATTGA  
+HWI-EAS443:3:65:110:1274#0/1  
``a^R\_aabaaaaaaabaaaaa`aa]\_a\_\_`X`]][^



@HWI-EAS443:3:65:1114:700#0/1  
TGCTGGCTGGATCCTGGGAAATCCAGAGTGTGAATCACTC  
+HWI-EAS443:3:65:1114:700#0/1  
`\_\_\_\_\_Z¥¥b]W\_^\_\_Z^YWY¥a` ]^Y[]YYQX]\_¥]\_XZT  
@HWI-EAS443:3:65:1138:821#0/1  
CCGTTACACCTTTGTTTCGAGTCATGATTGGGCCATGAACT  
+HWI-EAS443:3:65:1138:821#0/1  
abbabbaba\_a`aa\_aaaa]\_aaaaaa`\_``Z^` [[ZV¥  
@HWI-EAS443:3:65:126:719#0/1  
GTGGGGACATCAAGATACAGCAAGAAGTTCAAGCCGGAAA  
+HWI-EAS443:3:65:126:719#0/1  
a`` [WRZZPZaYZ`aYaaaa^baZ¥U[NZ]a`` ]]\_¥Q[^  
@HWI-EAS443:3:65:1372:857#0/1  
TTCCTCTGAGTATTTTGGGTAGTCATAAGTCCCATTTTGT  
+HWI-EAS443:3:65:1372:857#0/1  
a`a`X^aa]a\_a[\_\_\_aa`TZ` `W\_\_Z]R\_U\_a^Ya` \_\_^a  
@HWI-EAS443:3:65:1373:588#0/1  
GATAACCGTACCATCCATCTACCATCCCTGTCCACCCCC  
+HWI-EAS443:3:65:1373:588#0/1  
aWP`aa\_\_VR[P^TYJ[\_^\_a\_^\_[[\_`YX^RMV\_\_\_¥B  
@HWI-EAS443:3:65:1454:572#0/1  
GCTGGCTGGATCCTGGGAAATCCAGAGTGTGAATCACTCT  
+HWI-EAS443:3:65:1454:572#0/1  
K\_aaabbbb[bbba\_abbbaab`b\_^a[[Ubbbaababab  
@HWI-EAS443:3:65:1458:1216#0/1  
CCGGCTTGAACCTTCTTGCTGTATCTTGATGTCCCCACAAA  
+HWI-EAS443:3:65:1458:1216#0/1  
aabbbbab^bb]ab^abaZbb`bbaaa\_a`aa]`aaaa  
@HWI-EAS443:3:65:146:2027#0/1  
AAGAAATAGATGGGGTAAAGCTGGAATCAACAAGGATTTA  
+HWI-EAS443:3:65:146:2027#0/1  
a^] ^V¥¥YX\_a`SYa^aYZY¥PKT\_Y¥^\_^ [^[XXYYWS^  
@HWI-EAS443:3:65:1480:599#0/1  
TACACCTTTGTTTCGAGTCATGATTGGGCCATGAACTTGTC  
+HWI-EAS443:3:65:1480:599#0/1  
abbbaababbaaba\_b`\_aa\_]aaaaa` ``a`\_^aaa^^  
@HWI-EAS443:3:65:1561:1256#0/1  
ATCGATTATGAGGAGCTAAGAGAGCAATTGAGCTCAGTGT  
+HWI-EAS443:3:65:1561:1256#0/1  
abaaabbab`aab\_a\_aaaaa`aa`aaa¥a`aWa]\_a[a]  
@HWI-EAS443:3:65:1612:170#0/1  
CCAGGAGATTTTCATCGATTATGAGGAGCTAAGAGAGCAAT  
+HWI-EAS443:3:65:1612:170#0/1  
¥bbbbbaYY¥a]b`Vbbaabbbb`¥\_[UQZZ\_` ]a]a`aa  
@HWI-EAS443:3:65:1688:1138#0/1  
GTGGTTGAACTCTTTACCTACTGCTGTGAACTGTGTATTC  
+HWI-EAS443:3:65:1688:1138#0/1  
a\_baZabaa\_a[^aaaa`a\_\_a^Z^^Zb^]]aaW]^[a`X  
@HWI-EAS443:3:65:1713:85#0/1  
AATTTTTGTAGAAGCTTTTTGCTCCAGCATGAGGACATGC

+HWI-EAS443:3:65:1713:85#0/1  
^abaaaX\_b[][\_bVa`baab`]a^`a^^XWJ\_¥PRW\_aU  
@HWI-EAS443:3:65:1770:93#0/1  
ATGAAATCTCCTGGGTAACACGTTCCATTGTCTGAACTAG  
+HWI-EAS443:3:65:1770:93#0/1  
\_¥`YY^abaV]X\_b\_RXUVZW]I¥¥YVYYa^YZ[WVXUTL  
@HWI-EAS443:3:65:177:258#0/1  
GCTCTTCAGGTCGGCTGCATATCCTGACCCCTGCTCATTT  
+HWI-EAS443:3:65:177:258#0/1  
ab¥`a`aVTZUY[``XN[a\_a^WWQQU`¥^\_SSWZRUSNS  
@HWI-EAS443:3:65:229:1668#0/1  
GACAAGTTGTATTGCAATCGTGGACTGGTGTATCTGAAAT  
+HWI-EAS443:3:65:229:1668#0/1  
a^bb\_babbabbbabbbbab`abbbba`ababbabba`  
@HWI-EAS443:3:65:240:1041#0/1  
AGCCAGTTAAAAACAATGCCAAGGAAATTGGAAACGGCT  
+HWI-EAS443:3:65:240:1041#0/1  
\_abb^a`aa\_¥\_\_`a\_] ]\_¥^Y]`aYX]¥W^^]Z]^¥Z^\_  
@HWI-EAS443:3:65:26:239#0/1  
CCCCCTTCAATGAAACCGGCAATGGCCCCAAATAGGCCTC  
+HWI-EAS443:3:65:26:239#0/1  
aaaaab^b`aaa^aa`\_``aaaZ\_^][¥\_a`\_¥^WWZUW  
@HWI-EAS443:3:65:277:1143#0/1  
ATTTGCTGAGCTTTGGGTATGAATTTCTTTTTTAACTAG  
+HWI-EAS443:3:65:277:1143#0/1  
ZTQOQUTQ¥V`Y`YaWTYNQaYOV^V``WYWW^T¥OPYGS  
@HWI-EAS443:3:65:303:625#0/1  
GGGGGTGGACAGGGATGGTAGATGGATGGTACGGTTATCA  
+HWI-EAS443:3:65:303:625#0/1  
aaaaWJYX`\_] [^`V¥`]SZW¥Y¥ZRU¥^[\_\_XT0¥ZLRQ  
@HWI-EAS443:3:65:316:560#0/1  
GCTGGCTGGATCCTGGGAAATCCAGAGTGTGAATCACTCT  
+HWI-EAS443:3:65:316:560#0/1  
aaa``aZbaa¥^a¥abaZ\_]YYaaXT^QaUa¥¥U^\_H[[T  
@HWI-EAS443:3:65:320:701#0/1  
ATATGTTTTTGTGGGACATCAAGATACAGCAAGAAGTTC  
+HWI-EAS443:3:65:320:701#0/1  
aaaab\_aaaaa\_a`^]a`\_\_aa`a\_aaaa`aba`\_aZ\_\_  
@HWI-EAS443:3:65:34:23#0/1  
CTAGATTTCCAGTTGCTTCAATGTTATTTTGTCTCCCGG  
+HWI-EAS443:3:65:34:23#0/1  
a]0¥``aa`¥`a\_```\_a\_a^¥\_` [¥Y^\_\_\_\_]]^¥¥¥^X  
@HWI-EAS443:3:65:384:178#0/1  
GACATCAAGATACAGCAAGAAGTTCAAGCCGGAAATAGCA  
+HWI-EAS443:3:65:384:178#0/1  
ababaaaabaaaabaaba`aa]\_`aaa^`a\_\_\_\_`\_`^^`  
@HWI-EAS443:3:65:402:40#0/1  
TTGCTTCTCTGAGTATTTTGGGTAGTCATAAGTCCCATT  
+HWI-EAS443:3:65:402:40#0/1  
^a¥¥`baaaZ\_`\_aZ¥^aaa`a`TY` [\_\_\_\_^Z[R`^`¥\_`

@HWI-EAS443:3:65:462:1319#0/1  
GGGTAGTCATAAGTCCCATTTTTGACACTTCCATGCACG  
+HWI-EAS443:3:65:462:1319#0/1  
`a^^`babbb\_``\_baa`aaabaaaa\_aaa`aaaa¥aa`^  
@HWI-EAS443:3:65:465:357#0/1  
GAAGCCAGTTAAAAACAATGCCAAGGAAATTGGAAACGG  
+HWI-EAS443:3:65:465:357#0/1  
abb`b`ba`aba`aaaaaaa`\_aaa`\_]\_``\_`a\_`\_  
@HWI-EAS443:3:65:557:985#0/1  
CTTCTTGCTGTATCTTGATGTCCCCACAAAAACATATGCA  
+HWI-EAS443:3:65:557:985#0/1  
a`]aa]\_\_a^[\_`^`^`^`])[]``^JY[[R^Q¥a^^^¥]`  
@HWI-EAS443:3:65:566:1034#0/1  
GATGGTGAATGCCCCATAGCACGAGGACTTCTTCCCTTT  
+HWI-EAS443:3:65:566:1034#0/1  
`¥QTWH``^`\_\_abbZ]a``J[`]P[PQX[ZV¥NXYaaZV  
@HWI-EAS443:3:65:594:146#0/1  
GGGGACATCAAGATACAGCAAGAAGTTCAAGCCGGAAATA  
+HWI-EAS443:3:65:594:146#0/1  
a`\_b`aaa\_\_aa`a``aaaaaa^aY^\_a\_\_^\_``^]\_] ]  
@HWI-EAS443:3:65:598:222#0/1  
ATCATTTCAGATACACCAGTCCACGATTGCAATACAACCT  
+HWI-EAS443:3:65:598:222#0/1  
aaaaaaaaaaaa`aaaaa`\_]aZ[\_X^a`\_b[\_`¥^^X^^  
@HWI-EAS443:3:65:705:183#0/1  
GCTGCTTTGAATTTTACCACAAATGCGATAACACGTGCAT  
+HWI-EAS443:3:65:705:183#0/1  
`bb`GXa`aaa^^aa¥[\_]J¥]\_[YLUTT]VW¥XUVYJYR  
@HWI-EAS443:3:65:705:864#0/1  
GCCGGTTTCATTGAAGGGGGTGGACAGGGATGGTAGATG  
+HWI-EAS443:3:65:705:864#0/1  
aaaa\_W`aa[`ab\_\_aaa\_\_`U`a`\_aaaa]\_a`U\_a¥¥\_  
@HWI-EAS443:3:65:715:1336#0/1  
GCTTCCTCTGAGTATTTGGGTAGTCATAAGTCCCATTTT  
+HWI-EAS443:3:65:715:1336#0/1  
\_\_V\_`aZ```a`XPYZV\_\_X[R]PVZ\_] [PRM]VWV\_Y^¥  
@HWI-EAS443:3:65:733:1702#0/1  
GCTATTTCCGGCTTGAACCTTCTTGCTGTATCTTGATGTCC  
+HWI-EAS443:3:65:733:1702#0/1  
a`¥\_\_UP\_^[\_Wa`¥Y\_S^a¥]YY^``[a[Y]`ZYaaYa]  
@HWI-EAS443:3:65:737:915#0/1  
CATCATTTGAAAGTTTGGAGATATTTCCCAAGACAAGTTC  
+HWI-EAS443:3:65:737:915#0/1  
`\_]Y^\_]`¥W]\_Z^V^\_]WY¥\_]\_WZ\_V¥[HYWZTMUQYO  
@HWI-EAS443:3:65:75:1325#0/1  
CCTCTGAGTATTTGGGTAGTCATAAGTCCCATTTTTGAC  
+HWI-EAS443:3:65:75:1325#0/1  
ababaaa`[aba`a`^Za^X]aa`aa\_aa^R``aaa`]`  
@HWI-EAS443:3:65:771:1101#0/1  
CAGGTCGGCTGCATATCCTGACCCCTGCTCATTTTGATGG

+HWI-EAS443:3:65:771:1101#0/1  
a`a`¥a`Y`¥aa`aaa`a^[¥`\_`\_a^[^``\_\_¥\_\_¥WZZ  
@HWI-EAS443:3:65:776:142#0/1  
CTGGCTGGATCCTGGGAAATCCAGAGTGTGAATCACTCTC  
+HWI-EAS443:3:65:776:142#0/1  
`abb`aaaa¥\_]ba\_X`^`¥a`^]\_¥a¥a```]\_Q\_[-  
@HWI-EAS443:3:65:813:772#0/1  
CAATGTAGGACCATGAGCTTGCTGTGGAGAGTGATTCACA  
+HWI-EAS443:3:65:813:772#0/1  
aabab[b^abaaba`aaabbaabaaaV^`^]a\_ab`a\_a  
@HWI-EAS443:3:65:823:77#0/1  
TGTATCTTGATGTCCCCACAAAACATATGCATCTGCATT  
+HWI-EAS443:3:65:823:77#0/1  
ab`ababaaaaa````a`aaaa``aaa`a\_aa\_\_a[\_a\_  
@HWI-EAS443:3:65:824:392#0/1  
CAAAAACATATGCATCTGCATTCTGATAGAGACTTTGTTG  
+HWI-EAS443:3:65:824:392#0/1  
aababbb\_bbbbbaaaaaabbaaab\_aabaa`ab`aa]aa  
@HWI-EAS443:3:65:828:1672#0/1  
CATGAACCTGTCTTGGGGAATATCTCAAACCTTTCAAATG  
+HWI-EAS443:3:65:828:1672#0/1  
ab[N^`a[U\_T¥^T\_R`\_]ZRX]a`aaa^]a``\_^a^¥Y  
@HWI-EAS443:3:65:834:2013#0/1  
AACCGTACCATCCATCTACCATCCCTGTCCACCCCTTC  
+HWI-EAS443:3:65:834:2013#0/1  
W\_TVOSW[aaa[[TZ]P\_H`[[\_HR]UaaT^]¥PO^a¥\_¥  
@HWI-EAS443:3:65:843:83#0/1  
GATGCATATGTTTTTGTGGGACATCAAGATACAGCAAGA  
+HWI-EAS443:3:65:843:83#0/1  
aaaba\_aaab``aaaa^aaaa\_]`\_``aa\_`a^``Z`````  
@HWI-EAS443:3:65:860:977#0/1  
CATGAACCTGTCTTGGGGAATATCTCAAACCTTTCAAATG  
+HWI-EAS443:3:65:860:977#0/1  
abaa]¥`aaa`aaa`aa]^a`a`aaa\_a`aaaaa``aa  
@HWI-EAS443:3:65:903:1519#0/1  
TAATTTTGTCTCCTCTGAGTATTTTGGGTAGTCATAAGTC  
+HWI-EAS443:3:65:903:1519#0/1  
aa\_aaaaa`aaaab`abaa^^a`a`aa\_W`a^``\_``a^\_  
@HWI-EAS443:3:65:976:82#0/1  
ATCAAGATACAGCAAGAAGTTCAAGCCGAAATAGCAATA  
+HWI-EAS443:3:65:976:82#0/1  
`a`aa````\_[`a`aa^^`a\_\_]a`\_]\_\_]^\_Z\_^\_^\_\_  
@HWI-EAS443:3:65:978:1170#0/1  
ATTGAGCTCAGTGCATCATTGAAAGTTTGGAGATATTC  
+HWI-EAS443:3:65:978:1170#0/1  
aaaaaaaa`a`^a¥\_`^`aabaaa`\_`aa^aaaaaaaaaaa\_  
@HWI-EAS443:3:65:986:219#0/1  
TGCCGTTACACCTTTGTTTCGAGTCATGATTGGGCCATGAA  
+HWI-EAS443:3:65:986:219#0/1  
abaa[¥Ia`aaXaa`\_]`a`a\_bIPUaa`[]`RWNTPaUNG



+HWI-EAS443:3:66:1309:1000#0/1  
abbbbbbbabbabbaabaaaa`^aaabab` `aaaaa^`a\_a  
@HWI-EAS443:3:66:130:1112#0/1  
CTCGTCAATGGCATTCTGTGTGCTCTTCAGGTCGGCTGCA  
+HWI-EAS443:3:66:130:1112#0/1  
aaa^Y\_NMEVZ`¥UT`ZVQ`PLXPTN\_ZZLPPYZNZKUU¥  
@HWI-EAS443:3:66:1395:1480#0/1  
GCCATGAACCTGTCTTGGGGAATATCTCAAACCTTTCAAA  
+HWI-EAS443:3:66:1395:1480#0/1  
¥T[[T`ZZ`aa[L]aZ`]]YY^`\_]\_a^]aYQZa`^P`Q  
@HWI-EAS443:3:66:1397:182#0/1  
GAACTCTTTACCTACTGCTGTGAACTGTGTATTCATCTTT  
+HWI-EAS443:3:66:1397:182#0/1  
a^a`a`bbbb]aab\_aba`a\_aa\_\_ab^a\_`aa`a`^`\_`  
@HWI-EAS443:3:66:139:1209#0/1  
GTTAAAAAAGGAAATTCATACCCAAAGCTCAGCAAATCCT  
+HWI-EAS443:3:66:139:1209#0/1  
\_W`Z¥¥a`\_¥^aaaZI\_\_`Taaa¥ZQ\_a]a^^a`]¥U¥^M  
@HWI-EAS443:3:66:1463:811#0/1  
GGGGTGGACAGGGATGGTAGATGGATGGTACGGTTATCAC  
+HWI-EAS443:3:66:1463:811#0/1  
aaaaWa` `¥`a`^`a`U\_`^Z\_`¥\_\_\_W\_¥` [W^SWM[[  
@HWI-EAS443:3:66:1497:448#0/1  
GGCTGGATCCTGGGAAATCCAGAGTGTGAATCACTCTCCA  
+HWI-EAS443:3:66:1497:448#0/1  
aaabb`aaba\_aa\_aaba`aaa`a¥a¥aaa\_\_a¥\_`^`\_Y`  
@HWI-EAS443:3:66:1516:1620#0/1  
GTGGGGACATCAAGATACAGCAAGAAGTTCAAGCCGAAA  
+HWI-EAS443:3:66:1516:1620#0/1  
a`abbaa^a`aaaaaaa`b\_0abaaab\_` ` `a\_Z0aZVX\_  
@HWI-EAS443:3:66:1518:1844#0/1  
ATGCAAATAAGAGGGGTAGCCCCATTGCATTTGGGTAAA  
+HWI-EAS443:3:66:1518:1844#0/1  
a^aa¥`\_\_aaa\_aa`aXQa¥ZUX\_[[ZW`^]\_`Z^MUX`\_  
@HWI-EAS443:3:66:1528:1017#0/1  
GTTTCCCCTTATGCTTGTCTTCTAGAAGGTTAACAGAGTG  
+HWI-EAS443:3:66:1528:1017#0/1  
aa\_a`^a^P`^a¥X` `]]\_]X[^\_[\_]W\_`\_U¥XY[V¥  
@HWI-EAS443:3:66:1528:258#0/1  
CTCTTTACCTACTGCTGTGAACTGTGTATTCATCTTTTCA  
+HWI-EAS443:3:66:1528:258#0/1  
abbbbabbbabbbbabaaaaab`bb`a\_abbabb`bbbaaa  
@HWI-EAS443:3:66:1532:1444#0/1  
GACTACCAGTACCAATGAACTGGCGACAGTTGAATAGATC  
+HWI-EAS443:3:66:1532:1444#0/1  
a\_`aaaa¥bV]ab]Sbb]a]]ORHXaa^]W^¥URVTX]GF  
@HWI-EAS443:3:66:1553:1216#0/1  
GCTGGCTGGATCCTGGGAAATCCAGAGTGTGAATCACTCT  
+HWI-EAS443:3:66:1553:1216#0/1  
aaa`a`a`\_]Z[[Z]¥Z\_] [¥`^ZQ^W]W] []¥Q¥S¥W¥

@HWI-EAS443:3:66:157:1179#0/1  
AGCAGGGGTCAGGATATGCAGCCGACCTGAAGAGCACACA  
+HWI-EAS443:3:66:157:1179#0/1  
a]abaaaa^aa]Z\_aa`aa``a[``¥`a`^]a`X]\_`a`  
@HWI-EAS443:3:66:1615:310#0/1  
AGGGGAGACTACCAGTACCAATGAACTGGCGACAGTTGAAT  
+HWI-EAS443:3:66:1615:310#0/1  
abbaaba`aa^`aa^a\_]``aa`\_Z`a]``^^^]`^WY]Z  
@HWI-EAS443:3:66:1624:845#0/1  
GAACTCTTTACTACTGCTGTGAACTGTGTATTCATCTTT  
+HWI-EAS443:3:66:1624:845#0/1  
a]a^a`aaaa\_`a`]aa\_`a^`\_\_^`a]a[\_`^`\_]`^V\_`\_  
@HWI-EAS443:3:66:1647:1399#0/1  
GGACCATGAGCTTGCTGTGGAGAGTGATTCACACTCTGGA  
+HWI-EAS443:3:66:1647:1399#0/1  
ab`aaaaaa`aa`\_bb\_ba]a`a¥````a^```\_`¥`\_`W  
@HWI-EAS443:3:66:1652:705#0/1  
CAAGGAAATTGGAAACGGCTGCTTTGAATTTTACCACAAA  
+HWI-EAS443:3:66:1652:705#0/1  
[abbb`bbbbbbbb`abab\_J¥\_\_QV¥`^`aYG]`UZ`]  
@HWI-EAS443:3:66:1653:1324#0/1  
CCCCATCTATTTCTTCTCTGTTTAATTTTGCTTCCTCTGA  
+HWI-EAS443:3:66:1653:1324#0/1  
aaabbbbbbbbbbbbbabbabbbabbbbabbaababba  
@HWI-EAS443:3:66:1654:325#0/1  
ATTTTGGGTAGTCATAAGTCCCATTTTTGACACTTTCCAT  
+HWI-EAS443:3:66:1654:325#0/1  
aba^a`a`V[a]^`^`\_`^`[X\_¥]``aaaa\_`^`Z`\_]`[^`\_`  
@HWI-EAS443:3:66:1658:727#0/1  
GCCGTTACACCTTTGTTTCGAGTCATGATTGGGCCATGAAC  
+HWI-EAS443:3:66:1658:727#0/1  
aaab`aa`a`\_`aaa^`\_`a`a^`\_`^`^`[\_`\_`\_]YS[\_`Y¥V  
@HWI-EAS443:3:66:1681:860#0/1  
CCCAAGGGTGTATAAACACCAGCCTCCCATTTCAGAATA  
+HWI-EAS443:3:66:1681:860#0/1  
abba\_`a`Wa`aaa```\_`\_]¥`\_`ZaX¥ZZaaa\_\_`\_`\_`\_  
@HWI-EAS443:3:66:1788:93#0/1  
GAACGTGTTACCCAGGAGATTTTCATCGATTATGAGGAGCT  
+HWI-EAS443:3:66:1788:93#0/1  
aaa\_b\_a`aa`^`\_`aaaaXaa\_]`^`\_`a[\_`^`a\_]`\_`X]V]  
@HWI-EAS443:3:66:181:1559#0/1  
CCGGCTTGAACCTTCTGCTGTATCTTGATGTCCCCACAAA  
+HWI-EAS443:3:66:181:1559#0/1  
ab]Wa`aa`aa`a`\_`\_`\_`a[]a`^`a¥`]Z^aa\_`[^`\_`a\_  
@HWI-EAS443:3:66:183:705#0/1  
ATTTTGTCTCCCGCTCTACTAGTGTCCAGTAATAGTTCA  
+HWI-EAS443:3:66:183:705#0/1  
\_`aa\_\_Va\_```\_`a¥`^`LTSP¥ZWZUV[GZTNMYTUR]WW  
@HWI-EAS443:3:66:218:1545#0/1  
TGCTGGCTGGATCCTGGGAAATCCAGAGTGTGAATCACTC

+HWI-EAS443:3:66:218:1545#0/1  
a\_aa\_\_ba`\_`\_aaZ]^`¥aa\_a\_X\_X^W\_¥^¥\_U\_`VSU  
@HWI-EAS443:3:66:239:52#0/1  
AGCACATCCAGAAACTGATTGCCCCAGGGAGACTACCAG  
+HWI-EAS443:3:66:239:52#0/1  
V`Z¥a`\_`¥¥Z¥\_^\_\_a^XR¥Z¥F[VT`XXM[[XSTUYPY  
@HWI-EAS443:3:66:271:330#0/1  
CGTCAATGGCATTCTGTGTGCTCTTCAGGTCGGCTGCATA  
+HWI-EAS443:3:66:271:330#0/1  
ababbbaaa\_abaaaa\_\_[aba`a`aa]`S``````a¥]``  
@HWI-EAS443:3:66:305:621#0/1  
GCCCCATTGCATTTGGGTAAATGTAACATTGCTGGCTGGA  
+HWI-EAS443:3:66:305:621#0/1  
abbbbaaaaaaaaaaaaaa^aa`aa\_aa`^`\_`\_a\_^]\_[Z  
@HWI-EAS443:3:66:373:1804#0/1  
GGATTTCCAGGATCCAGCCAGCAATGTTACATTTACCCA  
+HWI-EAS443:3:66:373:1804#0/1  
\_U`Y`]`aa^T[[\_aa\_\_aaXU^\_Y¥PP\_\_\_¥WYa[QS[  
@HWI-EAS443:3:66:401:922#0/1  
CACTTTCCATGCACGTGTTATCGCATTGTGGTAAAATTC  
+HWI-EAS443:3:66:401:922#0/1  
aaaaaabbaa¥aba`\_a\_b]ba`aabbaa\_ba^babaaa`  
@HWI-EAS443:3:66:406:169#0/1  
GGGGACATCAAGATACAGCAAGAAGTTCAAGCCGGAAATA  
+HWI-EAS443:3:66:406:169#0/1  
ZQ^UNGWQ^OQ\_QT\_S`a`ZZWRZYVUZP¥[N]\_R^[TU  
@HWI-EAS443:3:66:410:773#0/1  
GAAGCCAGTTAAAAACAATGCCAAGGAAATTGGAACGG  
+HWI-EAS443:3:66:410:773#0/1  
¥R`^a\_\_¥¥`\_V]X]\_`¥¥\_]`aSZ\_SH]^`¥YX[X]^a  
@HWI-EAS443:3:66:433:266#0/1  
GGGGACATCAAGATACAGCAAGAAGTTCAAGCCGGAAATA  
+HWI-EAS443:3:66:433:266#0/1  
aa\_aa[bba`\_`^[]abaa`ba`W`P]¥a`Z^`¥^¥Y^`¥  
@HWI-EAS443:3:66:475:631#0/1  
AGGGGGGTGGACAGGGATGGTAGATGGATGGTACGGTTAT  
+HWI-EAS443:3:66:475:631#0/1  
[T¥]\_W\_V`ba^]\_]a`a`U¥]`\_¥a[[b`Ua¥][P``\_  
@HWI-EAS443:3:66:47:706#0/1  
GCTGGCTGGATCCTGGGAAATCCAGAGTGTGAATCACTCT  
+HWI-EAS443:3:66:47:706#0/1  
aaa]OY`a¥`^]]RXZLJY]TWa^]ZZN^PVQXQQNQQP  
@HWI-EAS443:3:66:486:1445#0/1  
GCCCCATTGCATTTGGGTAAATGTAACATTGCTGGCTGGA  
+HWI-EAS443:3:66:486:1445#0/1  
aabab\_\_^\_X^`a`^]Z^aaa\_\_^\_Z\_^]Y]^\_X^[]Y[  
@HWI-EAS443:3:66:536:1427#0/1  
GGGACATCAAGATACAGCAAGAAGTTCAAGCCGGAAATAG  
+HWI-EAS443:3:66:536:1427#0/1  
a`Z^bbabba^baabbaaba`a^^Yabbaaa\_a````a\_`a



@HWI-EAS443:3:66:548:375#0/1  
GTTGCTTCGAATGTTATTTGTCTCCCGCTCTACTAGTG  
+HWI-EAS443:3:66:548:375#0/1  
aa]YUY]]ZY[a`^RYa`a¥TYXY\_]R]^[[OU[TSPJU  
@HWI-EAS443:3:66:567:524#0/1  
GTGTATTCATCTTTTCAATAACAGAATTTACTTTGTTAGT  
+HWI-EAS443:3:66:567:524#0/1  
a]`\_aaaa`^aa^\_aa¥a]a`a]\_\_a``\_\_\_`\_a^\_]\_Y  
@HWI-EAS443:3:66:587:147#0/1  
ATTCAATCTAGAGCCTATTTGGGGCCATTGCCGTTTCA  
+HWI-EAS443:3:66:587:147#0/1  
ab`b`R`a`a^Raaaa`a]a`a`\_\_^ZZ\_^a\_WFR^¥W  
@HWI-EAS443:3:66:627:895#0/1  
CTGCTCATTTTGATGGTGATAACCGTACCATCCATCTACC  
+HWI-EAS443:3:66:627:895#0/1  
aYX\_Wa]]a`a[ZHa^W[aaaba[^P[aaX¥aa^Q`SV\_a  
@HWI-EAS443:3:66:629:2001#0/1  
GTTACCCAGGAGATTTTCATCGATTATGAGGAGCTAAGAGA  
+HWI-EAS443:3:66:629:2001#0/1  
ZY¥aabb\_W`ba`a\_aaX]a^\_a``aaa¥a]aa`\_Z\_\_`  
@HWI-EAS443:3:66:645:142#0/1  
GATGAAATCTCCTGGGTAACACGTTCCATTGTCTGAACTA  
+HWI-EAS443:3:66:645:142#0/1  
aaaaaa`a`aaa`aa`^a\_]`^a^[\_^`^\_^^^VRV]]  
@HWI-EAS443:3:66:690:1789#0/1  
ATTCTGTGTCTCTTCAGGTCGGCTGCATATCCTGACCCC  
+HWI-EAS443:3:66:690:1789#0/1  
Y`\_aa]NZ¥Xa`a`\_aa\_\_SaRN[[SXZ]a[`\_QUYYRX^  
@HWI-EAS443:3:66:739:1950#0/1  
ACTTTGGGTCTTATTGCTATTTCCGGCTTGAACCTCTTGC  
+HWI-EAS443:3:66:739:1950#0/1  
aaaaaa\_\_Zaaaa`aaaa`\_`aa^\_a``]\_a¥\_Z\_]^^\_  
@HWI-EAS443:3:66:76:872#0/1  
CAAATAACATTCTGAAGCAACTGGAAATCTAGTGGTACCG  
+HWI-EAS443:3:66:76:872#0/1  
]¥ZTaVWa`^aaba`\_ba¥abab``aS]a]a[[ba¥aaY]  
@HWI-EAS443:3:66:774:570#0/1  
GCCGGTTTCATTGAAGGGGGTGGACAGGGATGGTAGATG  
+HWI-EAS443:3:66:774:570#0/1  
ababa`bbbabbb`abab`aa^`ba`aaa`^aaa]```\_a  
@HWI-EAS443:3:66:806:993#0/1  
CGGGAGACAAAATAACATTCTGAAGCAACTGGAAATCTAGT  
+HWI-EAS443:3:66:806:993#0/1  
aa\_]VaZaa]Va\_aa`V¥\_aW[\_\_\_\_\_[\_\_\_\_\_]`^]][\_Z  
@HWI-EAS443:3:66:848:269#0/1  
CTCTTCAGGTCGGCTGCATATCCTGACCCCTGCTCATTTT  
+HWI-EAS443:3:66:848:269#0/1  
`]aYaaa]a^bb`aaaa¥Zaa]]]X`[\_\_\_\_\_[\_\_\_\_\_]`^`^\_  
@HWI-EAS443:3:66:85:352#0/1  
GGGGACATCAAGATACAGCAAGAAGTTCAAGCCGAAATA

+HWI-EAS443:3:66:85:352#0/1  
a]aUa[b`baaaaaaaaaabaa\_aaN\_`^a]]`aZ¥Pa\_a  
@HWI-EAS443:3:66:860:1533#0/1  
GGCTAGTTAAAAAAGGAAATTCATACCCAAAGCTCAGCAA  
+HWI-EAS443:3:66:860:1533#0/1  
a]\_V[a^`aaaaa]¥\_aa`^ab\_aaa`aaa`a^]Z]WY[  
@HWI-EAS443:3:66:860:774#0/1  
GGGAAATCCAGAGTGTGAATCACTCTCCACAGCAAGCTCA  
+HWI-EAS443:3:66:860:774#0/1  
aaaYababaa][ ]\_¥^P\_a]a`a`\_`¥^^\_aaa]\_\_^\_[  
@HWI-EAS443:3:66:865:1070#0/1  
AGCCAGTTAAAAACAATGCCAAGGAAATTGGAAACGGCT  
+HWI-EAS443:3:66:865:1070#0/1  
]J¥a^a\_`]]]Y¥W]Y¥`\_a`V[\_¥`^^]`^`]NTUS¥TXQ  
@HWI-EAS443:3:66:866:1054#0/1  
AACTGGCTTCTTACCTTTTCATATAAGTTCTTCACATTTG  
+HWI-EAS443:3:66:866:1054#0/1  
^aaaa`aa```a^``aaa````aa`^W¥a^`a\_`W`\_a¥  
@HWI-EAS443:3:66:883:633#0/1  
GTCCTCGTGCTATGGGGCATTCCACATCCATCTACTAGTG  
+HWI-EAS443:3:66:883:633#0/1  
aQaa\_¥aS]^V^Ua`¥¥[YUZ[YXXXP[\_VS^¥[ZU¥[T[  
@HWI-EAS443:3:66:911:381#0/1  
AGAAGACAAGCATAACGGGAAACTATGCAAATAAGAGGG  
+HWI-EAS443:3:66:911:381#0/1  
`Y]aaaaaaaa¥Z^`\_a`\_`\_\_^a^`\_`[\_^\_`\_`^`^`]  
@HWI-EAS443:3:66:935:1986#0/1  
AACGTGTTACCCAGGAGATTTTCATCGATTATGAGGAGCTA  
+HWI-EAS443:3:66:935:1986#0/1  
^`\_TY¥\_\_¥`^^a\_N`a`^`N[`S\_\_`WZZ`S¥`\_ZSV0a  
@HWI-EAS443:3:66:943:420#0/1  
GTTACCCAGGAGATTTTCATCGATTATGAGGAGCTAAGAGA  
+HWI-EAS443:3:66:943:420#0/1  
aaabaaaaaaaa`aaaaa`b`a`aaa\_aa^\_`\_aa\_```  
@HWI-EAS443:3:66:962:1373#0/1  
ATTTTGTCTCCCGCTCTACTAGTGTCCAGTAATAGTTCA  
+HWI-EAS443:3:66:962:1373#0/1  
^abbbaabbbaa\_^\_\_\_\_\_V[W^NQT¥[O^¥¥`R^`V¥[V  
@HWI-EAS443:3:66:983:1389#0/1  
GGCTAGTTAAAAAAGGAAATTCATACCCAAAGCTCAGCAA  
+HWI-EAS443:3:66:983:1389#0/1  
^b\_T]^J`^\_a` `[a^a^[R^TbX`¥T¥`baUW\_\_WOX`^  
@HWI-EAS443:3:66:985:100#0/1  
ATGAAATCTCCTGGTAACACGTTCCATTGTCTGAACTAG  
+HWI-EAS443:3:66:985:100#0/1  
aaaa\_^baa`abaa¥aa^a^`a]` `a`a\_\_a\_^Y\_^`  
@HWI-EAS443:3:66:992:1734#0/1  
GGACCATGAGCTTGCTGTGGAGAGTGATTCCACTCTGGA  
+HWI-EAS443:3:66:992:1734#0/1  
aaa`PT\_\_abb]a^]aa`ZXZ\_TWF[^ZZJZ`\_N\_VUERP



+HWI-EAS443:3:67:1186:1722#0/1  
abaaaaa^bbabbY¥`aaaaa]`b\_`ba`ab]¥`\_[aV[S  
@HWI-EAS443:3:67:1237:929#0/1  
AAGCCAGTTAAAAACAATGCCAAGGAAATTGGAAACGGC  
+HWI-EAS443:3:67:1237:929#0/1  
aa``aaaaa\_]aa\_aa\_aaa^\_[a`\_[``\_a\_\_\_\_\_^\_^^  
@HWI-EAS443:3:67:1298:906#0/1  
AGATTTCCAGTTGCTTCCAATGTTATTTTGTCTCCCGGCT  
+HWI-EAS443:3:67:1298:906#0/1  
ab^`bbaaaa]aa\_abaa\_\_aa`a\_aaaaa^`a^`]\_\_\_\_]  
@HWI-EAS443:3:67:1436:1055#0/1  
TGCTGGCTGGATCCTGGGAAATCCAGAGTGTGAATCACTC  
+HWI-EAS443:3:67:1436:1055#0/1  
^¥]\_ba`]aaR[aU^\_aW¥¥¥\_\_X`¥`]W\_¥`\_YSNWZ\_V  
@HWI-EAS443:3:67:1439:734#0/1  
GGAACGTGTTACCCAGGAGATTTTCATCGATTATGAGGAGC  
+HWI-EAS443:3:67:1439:734#0/1  
aaaa\_b\_a\_aa````a\_`a]aa`^\_`^\_]aa^a`^a\_]^W  
@HWI-EAS443:3:67:1442:1445#0/1  
CTGGCTTCTTACCTTTTCATATAAGTTCTTCCATTTGAA  
+HWI-EAS443:3:67:1442:1445#0/1  
abbaaaa`bbbabbbba\_ab```baaaaabaa`aaabaa\_a  
@HWI-EAS443:3:67:1445:1443#0/1  
GGTAGATGGATGGTACGGTTATCACCATCAAAATGAGCAG  
+HWI-EAS443:3:67:1445:1443#0/1  
¥WUaa¥SUZ]X]^GZ¥\_VPTWN¥YX`]]^\_YZ\_`X^[[\_  
@HWI-EAS443:3:67:1504:64#0/1  
CTGGTGTATCTGAAATGATAATACCAGATCCAGCATTCT  
+HWI-EAS443:3:67:1504:64#0/1  
aa\_`Xb\_U`aaabbXXab¥¥b\_a[YabbaaabGabaaab  
@HWI-EAS443:3:67:1504:806#0/1  
GGGGCATTACCATCCATCTACTAGTGCTGACCAACAAAG  
+HWI-EAS443:3:67:1504:806#0/1  
^ababbbbababbb`abbbbabab`babbbbaabaaabb  
@HWI-EAS443:3:67:1523:1803#0/1  
AAAACATATGCATCTGCATTCTGATAGAGACTTTGTTGGT  
+HWI-EAS443:3:67:1523:1803#0/1  
¥[X[XY```a¥]a]\_b\_b`^Y\_]N]a`a\_PL^aW]SM^XG  
@HWI-EAS443:3:67:15:402#0/1  
GGGGACATCAAGATACAGCAAGAAGTTCAAGCCGAAATA  
+HWI-EAS443:3:67:15:402#0/1  
[aab\_¥W¥]^¥X]^`aabab\_`b\_aaZQaaT\_`^¥¥`Y`\_a]  
@HWI-EAS443:3:67:1672:1561#0/1  
GCTGGATCCTGGGAAATCCAGAGTGTGAATCACTCTCCAC  
+HWI-EAS443:3:67:1672:1561#0/1  
ab]PPVaa\_^^a\_\_`aa[``\_YUaU\_W\_a\_\_¥`\_`^V[^V`^  
@HWI-EAS443:3:67:1691:1104#0/1  
TCCGGCTTGAACCTTCTTGCTGTATCTTGATGTCCCCACAA  
+HWI-EAS443:3:67:1691:1104#0/1  
a^`a^abba```[aa[aaa[``]]aa\_ba\_aa^`\_\_\_\_^W`\_`

@HWI-EAS443:3:67:1692:1595#0/1  
CAGAATGCAGATGCATATGTTTTGTGGGGACATCAAGAT  
+HWI-EAS443:3:67:1692:1595#0/1  
ab`bbbbabbbbbbbbaabbbb`bbaabaaaa`abb  
@HWI-EAS443:3:67:1703:725#0/1  
GCTCCTCATAATCGATGAAATCTCCTGGGTAACACGTTCC  
+HWI-EAS443:3:67:1703:725#0/1  
a^`a]¥]a`[]`\_a`X[^`\_¥\_\_^\_VY\_Y\_^]V]U]ZV  
@HWI-EAS443:3:67:1721:1844#0/1  
ATCTCGTCAATGGCATTCTGTGTGCTCTTCAGGTCGGCTG  
+HWI-EAS443:3:67:1721:1844#0/1  
`aaaabX`aa`aa`\_]a``[Z\_\_\_Z````\_`[SS\_\_Y¥\_\_  
@HWI-EAS443:3:67:1723:1371#0/1  
GGGGACATCAAGATACAGCAAGAAGTTCAAGCCGAAATA  
+HWI-EAS443:3:67:1723:1371#0/1  
aaaa]aba`baaaaaaaaa\_abaa`b^a\_a^`Z^aa\_``a\_  
@HWI-EAS443:3:67:1772:1373#0/1  
ATGGTTTCTGGACATTTGGACTTACAATGCCGAAGTGT  
+HWI-EAS443:3:67:1772:1373#0/1  
`baa[ab\_aaaa`aaa\_Q[\_`a\_`aaaa`aa\_\_\_\_\_^]  
@HWI-EAS443:3:67:183:848#0/1  
CGTCAATGGCATTCTGTGTGCTCTTCAGGTCGGCTGCATA  
+HWI-EAS443:3:67:183:848#0/1  
ab\_aaRTa`^`aa`a[`\_^`\_`¥\_\_ZZ¥\_\_RUZ\_W[¥a  
@HWI-EAS443:3:67:202:893#0/1  
CGATGAAATCTCCTGGGTAACACGTTCCATTGTCTGAACT  
+HWI-EAS443:3:67:202:893#0/1  
aaaaaaaa`aaaa`QX]`Z\_\_`\_a`\_a\_`¥\_\_\_\_\_^T  
@HWI-EAS443:3:67:22:586#0/1  
GAGTGATTCACACTCTGGATTTCCCAGGATCCAGCCAGCA  
+HWI-EAS443:3:67:22:586#0/1  
¥U`[`0`a`[¥a`\_Waaa\_Ta`\_aYaX[]\_`\_\_\_a\_OJT^  
@HWI-EAS443:3:67:230:888#0/1  
CGGCTCTACTAGTGTCCAGTAATAGTTCATTCTCCCTTCT  
+HWI-EAS443:3:67:230:888#0/1  
aaaaa`X[`\_\_\_SXS0^`aYZ^^YYT``Y^\_\_\_\_\_]  
@HWI-EAS443:3:67:329:265#0/1  
GATTTCCAGTTGCTTCGAATGTTATTTTGTCTCCCGGCTC  
+HWI-EAS443:3:67:329:265#0/1  
a`baabb``]a`baa`a[Taa^\_`aa`¥Z^[]`\_`\_`[]`[]`  
@HWI-EAS443:3:67:394:1043#0/1  
CAATTGCTCTTAGCTCCTCATAATCGATGAAATCTCCT  
+HWI-EAS443:3:67:394:1043#0/1  
a]\_VXW\_^`] []G¥KWRW]NVQWTN¥UKNTOGUX\_\_ZSXQ  
@HWI-EAS443:3:67:395:1756#0/1  
ATAAGTTCTTCACATTTGAATCGTGGTAGTCCAAAGTTCT  
+HWI-EAS443:3:67:395:1756#0/1  
aa``\_N\_a`¥^`aaa\_[X¥Z`aaU]¥G¥\_K¥¥SVNMNVWZ  
@HWI-EAS443:3:67:397:499#0/1  
GACAAGTTGTATTGCAATCGTGGACTGGTGTATCTGAAAT

+HWI-EAS443:3:67:397:499#0/1  
]abbabab`bb`W¥aab`\_]aaaaa\_X^aaaaa`^a  
@HWI-EAS443:3:67:407:1705#0/1  
TCCGGCTTGAACCTTCTTGCTGTATCTTGATGTCCCCACAA  
+HWI-EAS443:3:67:407:1705#0/1  
`aaXZ^`]Uab\_abb]S^baVY`^`aZ^`[\_baa`TU]`  
@HWI-EAS443:3:67:415:1616#0/1  
CTGATTGCCCCAGGGAGACTACCAGTACCAATGAACTGG  
+HWI-EAS443:3:67:415:1616#0/1  
a¥VY`\_W\_aaa\_a]ZWaX¥aZV`\_¥YR\_ZXXVUZZ[^S[Q  
@HWI-EAS443:3:67:420:298#0/1  
ATTCTGTGTGCTCTTCAGGTCGGCTGCATATCCTGACCCC  
+HWI-EAS443:3:67:420:298#0/1  
[\_\_`¥¥\_\_¥\_YX^^aa]aYQ]W`[W]¥`][^^^]SNX[  
@HWI-EAS443:3:67:422:412#0/1  
GGCTGGATCCTGGGAAATCCAGAGTGTGAATCACTCTCCA  
+HWI-EAS443:3:67:422:412#0/1  
aaa\_\_`aYaa\_aa`Y]a`^^`\_¥\_Ua^`\_\_a\_¥\_^^BB  
@HWI-EAS443:3:67:444:1682#0/1  
GAAGCCAGTTAAAAACAATGCCAAGGAAATTGGAAACGG  
+HWI-EAS443:3:67:444:1682#0/1  
^a`K`ab^K¥ab`¥baba\_a`bbUW`I\_^M`V`[aaaba]  
@HWI-EAS443:3:67:497:1560#0/1  
GTCCTCGTGCTATGGGGCATTACCATCCATCTACTAGTG  
+HWI-EAS443:3:67:497:1560#0/1  
[abb`aN]]bbbbV]aZb\_\_`b`baaJaM\_^Xaaa[`]a`  
@HWI-EAS443:3:67:516:785#0/1  
GTGTTACCCAGGAGATTTTCATCGATTATGAGGAGCTAAGA  
+HWI-EAS443:3:67:516:785#0/1  
UWa]YX^b^W`^^`ZU\_]¥\_a`V\_]aZ]aaa^[S^a`\_[Y\_  
@HWI-EAS443:3:67:51:43#0/1  
CATGGAAAGTGTCAAAAATGGGACTTATGACTACCCAAAA  
+HWI-EAS443:3:67:51:43#0/1  
aaaab`\_^a^a\_aa`^`a`aa`[`a`^^`\_\_\_\_`^¥^\_\_^\_  
@HWI-EAS443:3:67:52:1814#0/1  
CAAAGTCTCTATCAGAATGCAGATGCATATGTTTTTGTGG  
+HWI-EAS443:3:67:52:1814#0/1  
Y`bY¥Y`\_bbbb`X`a`a`\_YZ\_[`Z¥MZV[\_^aYQF¥M  
@HWI-EAS443:3:67:540:231#0/1  
ACCCCATCTATTTCTTCTGTTTAATTTTGCTTCCTCTG  
+HWI-EAS443:3:67:540:231#0/1  
`aaaaabababbbbbbababbbbabbbbaabaabbabb  
@HWI-EAS443:3:67:573:1327#0/1  
GAGCTTTGGGTATGAATTCCTTTTTTAAGTAGCCATATT  
+HWI-EAS443:3:67:573:1327#0/1  
^ZX`\_^aZK¥RV\_SQ^]aa`^^`]\_b\_^\_XZ\_L^\_Z`\_baW  
@HWI-EAS443:3:67:593:1609#0/1  
ATTCTGTGTGCTCTTCAGGTCGGCTGCATATCCTGACCCC  
+HWI-EAS443:3:67:593:1609#0/1  
ababb^\_\_¥S`aa`\_`^^`^Ta`\_\_¥U`\_ZUFZ¥¥`]^\_\_



+HWI-EAS443:3:67:986:1983#0/1  
aa[FW^^¥0]`^aZ¥PWP^\_\_SSL]aZGXTJWFF¥YBBBB  
@HWI-EAS443:3:67:998:227#0/1  
CTCGTGCTATGGGGCATTACCATCCATCTACTAGTGCTG  
+HWI-EAS443:3:67:998:227#0/1  
abbbba\_a\_aba`^^aaaaba\_baaabaaaa\_a\_a`a]`a  
@HWI-EAS443:3:68:1045:1444#0/1  
AATTTACTTTGTTAGTAATCTCGTCAATGGCATTCTGTGT  
+HWI-EAS443:3:68:1045:1444#0/1  
a`baaabaaba^a`\_]a\_a`aaa]aa^\_\_\_\_\_a`\_]\_X  
@HWI-EAS443:3:68:1080:1255#0/1  
GCTGCTTTGAATTTTACCACAAATGCGATAACACGTGCAT  
+HWI-EAS443:3:68:1080:1255#0/1  
aaa^`\_a]b¥T`baaaaaaaaaaaaaa\_\_aaaa\_a\_a`a\_  
@HWI-EAS443:3:68:1151:27#0/1  
GTCTTATTGCTATTTCCGGCTTGAACCTTGCTGTATCT  
+HWI-EAS443:3:68:1151:27#0/1  
aa`bb`aab`aaaa\_\_a\_X``a\_\_¥``\_\_a\_]`^^^\_]\_  
@HWI-EAS443:3:68:1152:1267#0/1  
AAATTGGAACGGCTGCTTTGAATTTTACCACAAATGCGA  
+HWI-EAS443:3:68:1152:1267#0/1  
\_[Za\_\_\_\_^[W[]]a\_¥RQ¥\_00YH^X^00¥^¥Y]\_OPOFR  
@HWI-EAS443:3:68:1168:958#0/1  
GTTCAGACAATGGAACGTGTTACCCAGGAGATTTTCATCGA  
+HWI-EAS443:3:68:1168:958#0/1  
a\_aa\_aa`a`a`\_]\_X]]`\_\_^¥\_\_\_\_\_^a^]]]]`X  
@HWI-EAS443:3:68:1202:801#0/1  
TCACCATCCATCTACTAGTGCTGACCAACAAAGTCTCTAT  
+HWI-EAS443:3:68:1202:801#0/1  
aaaaaa`aa``\_`a\_b`a]^`^`W]\_\_\_\_Z\_]R]]]\_¥\_`^`  
@HWI-EAS443:3:68:1248:1683#0/1  
ATTAGAGCACATCCAGAACTGATTGCCCCAGGGAGACT  
+HWI-EAS443:3:68:1248:1683#0/1  
aaaaab`^aaaa¥aa¥a\_a\_aa``\_aa``\_¥`\_\_^^a`^]  
@HWI-EAS443:3:68:1261:26#0/1  
CAAGATACAGCAAGAAGTTCAAGCCGAAATAGCAATAAG  
+HWI-EAS443:3:68:1261:26#0/1  
abaa`aa`abaabb`ab\_\_\_\_`^a¥\_bb^\_a^a¥`\_`^a`a  
@HWI-EAS443:3:68:1333:1632#0/1  
GACATCAAGATACAGCAAGAAGTTCAAGCCGAAATAGCA  
+HWI-EAS443:3:68:1333:1632#0/1  
ababbabbbbbbaabbbbaab\_a^baa\_\_a\_\_`aa`a`a`  
@HWI-EAS443:3:68:1333:1902#0/1  
CTGATTGCCCCAGGGAGACTACCAGTACCAATGAACTGG  
+HWI-EAS443:3:68:1333:1902#0/1  
T\_]¥WXab\_\_\_\_W`a\_¥\_Z`Z¥\_^^\_b\_\_\_\_V`a^T]^`a`^`  
@HWI-EAS443:3:68:1382:1963#0/1  
CTTTGTTAGTAATCTCGTCAATGGCATTCTGTGTGCTCTT  
+HWI-EAS443:3:68:1382:1963#0/1  
abbbbbbbbabbbbabab\_abaababbaaba\_a\_aaaZaa



@HWI-EAS443:3:68:143:376#0/1  
CATTGGGTAAATGTAACATTGCTGGCTGGATCCTGGGAA  
+HWI-EAS443:3:68:143:376#0/1  
abXV\_\_aaNT\_bX[aab\_`ba¥aaa\_b[\_]LY]]Y\_^\_X  
@HWI-EAS443:3:68:1456:1164#0/1  
GAACTCTTTACCTACTGCTGTGAAGTGTATTTCATCTTT  
+HWI-EAS443:3:68:1456:1164#0/1  
aXT`\_]aa\_Y`X^Z\_\_a\_\_a[aXX]\_T¥aW^\_]^\_VX^\_  
@HWI-EAS443:3:68:1477:1782#0/1  
AAAGGTTTGAGATATTCCCAAGACAAGTTCATGGCCCAA  
+HWI-EAS443:3:68:1477:1782#0/1  
ab^Y`\_b\_baaab`aa\_P\_aaaa]aa]][``\_]`S¥`^  
@HWI-EAS443:3:68:1540:1090#0/1  
AAAGGTAAGAAGCCAGTTAAAAACAATGCCAAGGAAATT  
+HWI-EAS443:3:68:1540:1090#0/1  
^^`^aabX`bb`\_`bbaaabab^ababb\_aa^bb[baba  
@HWI-EAS443:3:68:1560:875#0/1  
GTGGGGACATCAAGATACAGCAAGAAGTTCAAGCCGGAAA  
+HWI-EAS443:3:68:1560:875#0/1  
\_L\_\_NW^^`\_]\_^ZWS^\_P`\_Z^`\_ZH^Y[VVWWWU[VYX[  
@HWI-EAS443:3:68:1642:262#0/1  
GTTTGAGATATTCCCAAGACAAGTTCATGGCCCAATCAT  
+HWI-EAS443:3:68:1642:262#0/1  
a`¥`X`a`]W`ZJIR\_\_\_\_\_]T]^VSSLKKT000SOVUXS  
@HWI-EAS443:3:68:169:1065#0/1  
TGAACCTGTCTTGGGAATATCTCAAACCTTTCAAATGAT  
+HWI-EAS443:3:68:169:1065#0/1  
ab^a]\_RYaaa`baa[Y¥babb`babb`aaaabaYa`¥¥`  
@HWI-EAS443:3:68:1700:322#0/1  
TGCTGGCTGGATCCTGGGAAATCCAGAGTGTGAATCACTC  
+HWI-EAS443:3:68:1700:322#0/1  
ZaUU`a^\_¥```^a]H\_a^a¥OV]Y^^]S\_P`HM]]YT\_]`  
@HWI-EAS443:3:68:1727:1432#0/1  
GCTGGCTGGATCCTGGGAAATCCAGAGTGTGAATCACTCT  
+HWI-EAS443:3:68:1727:1432#0/1  
abbaabbb^]a`a\_`b^aaa]aabaa¥aZa`a`\_\_M`^`  
@HWI-EAS443:3:68:1791:264#0/1  
GTTCTATTGAAAATGAAAGAACTTTGGACTACCACGATT  
+HWI-EAS443:3:68:1791:264#0/1  
`aababba^babbababb``aaaaaa`aa[a``a\_\_`a`  
@HWI-EAS443:3:68:225:709#0/1  
ATAAGTCCCATTTTTGACACTTTCCATGCACGTGTTATCG  
+HWI-EAS443:3:68:225:709#0/1  
aaaY^\_aa\_Q]b`aaa\_\_a]aa^\_`[]a\_\_IX[a^`\_\_`]  
@HWI-EAS443:3:68:241:1994#0/1  
GCTTCCTCTGAGTATTTGGGTAGTCATAAGTCCCATTTT  
+HWI-EAS443:3:68:241:1994#0/1  
]a]Xbaaab^]RM\_]^aa\_]\_]a]R^`aaaaYbbbbaaa`]  
@HWI-EAS443:3:68:263:964#0/1  
GCCCAATCATGACTCGAACAAAGGTGTAACGGCAGCATGT

+HWI-EAS443:3:68:263:964#0/1  
aabaaaaaaaa`^`a`a`\_Z`^`U`U`Z`V¥Z^BBBBBB  
@HWI-EAS443:3:68:278:131#0/1  
CCACGATTCAAATGTGAAGAACTTATATGAAAAGGTAAGA  
+HWI-EAS443:3:68:278:131#0/1  
abbbb`abaaaaab\_baaa[]\_aaaaaaaa`^aa]\_[\_a  
@HWI-EAS443:3:68:286:101#0/1  
GATCCAGCCAGCAATGTTACATTTACCCAAATGCAATGGG  
+HWI-EAS443:3:68:286:101#0/1  
aab^Z¥aaa^JT¥¥`Yaa\_\_`\_\_a]\_`V¥\_UX[][[S  
@HWI-EAS443:3:68:322:1531#0/1  
GGATCCTGGGAAATCCAGAGTGAATCACTCTCCACAGC  
+HWI-EAS443:3:68:322:1531#0/1  
\_`bbabbbbbbbbabbb\_`b`bbbaa`baaabbaabaa  
@HWI-EAS443:3:68:325:1338#0/1  
ATCATTTAGATACACCAGTCCACGATTGCAATACAACCT  
+HWI-EAS443:3:68:325:1338#0/1  
aTaaa\_aaa`\_`b`aaaa\_\_a]U][^\_]^[^aZU`^T[[V  
@HWI-EAS443:3:68:327:1021#0/1  
ATCAAGATACAGCAAGAAGTTCAAGCCGAAATAGCAATA  
+HWI-EAS443:3:68:327:1021#0/1  
V^`\_]\_aaaTaba`a]\_]\_`^¥`a`a\_[T]\_aaa`\_[a  
@HWI-EAS443:3:68:330:58#0/1  
GGGAAAGAAGTCCTCGTGCTATGGGGCATTACCATCCAT  
+HWI-EAS443:3:68:330:58#0/1  
ab`]aa`Y`[a\_aaa\_`X`^^\_a\_]Y[\_\_\_\_¥W[\_WWY^  
@HWI-EAS443:3:68:380:75#0/1  
GGAAAGAAGTCCTCGTGCTATGGGGCATTACCATCCATC  
+HWI-EAS443:3:68:380:75#0/1  
aa¥a\_`\_`¥\_[\_¥aW\_Z\_¥¥]\_¥^\_]`^WU¥WU¥YWWYWU  
@HWI-EAS443:3:68:387:1002#0/1  
CTCCTCATAATCGATGAAATCTCCTGGGTAACACGTTCCA  
+HWI-EAS443:3:68:387:1002#0/1  
a^aa`b^bb`b\_¥¥baa]`aab¥`^^]X\_`aaaa\_]Z]a  
@HWI-EAS443:3:68:467:1532#0/1  
TTACCCAGGAGATTTTCATCGATTATGAGGAGCTAAGAGAG  
+HWI-EAS443:3:68:467:1532#0/1  
a\_abba`]¥W]a`^a`a`\_`^`\_`\_\_\_\_\_^\_]`^  
@HWI-EAS443:3:68:46:108#0/1  
CTCCTCATAATCGATGAAATCTCCTGGGTAACACGTTCCA  
+HWI-EAS443:3:68:46:108#0/1  
a¥bab\_a`aaa`]YZYW^`\_aaaa`a]LUZ\_``\_W`]]  
@HWI-EAS443:3:68:51:869#0/1  
AGTAATCTCGTCAATGGCATTCTGTGTGCTCTTCAGGTCG  
+HWI-EAS443:3:68:51:869#0/1  
aa]U`ab`a`Zaa`\_¥XP^^`\_\_`VX[U`^`\_\_`\_\_\_\_[V\_X  
@HWI-EAS443:3:68:530:19#0/1  
GGACAGGGATGGTAGATGGATGGTACGGTTATCACCATCA  
+HWI-EAS443:3:68:530:19#0/1  
abaaabaa`aaa[aa`\_aa^]aaZ\_\_a^U[\_XYY¥\_ZV¥Z



+HWI-EAS443:3:68:796:1030#0/1  
ab\_V\_]\_\_aab^baba[ba]aaaaaa`a\_VZNZaa`\_a  
@HWI-EAS443:3:68:799:101#0/1  
GAACTTCTTGCTGTATCTTGATGTCCCCACAAAAACATAT  
+HWI-EAS443:3:68:799:101#0/1  
¥bXS\_baa`Yaa[a`a\_^\_adW`\_\_a^^ZaZ[XX]\_  
@HWI-EAS443:3:68:801:767#0/1  
CCTGGGAAATCCAGAGTGTGAATCACTCTCCACAGCAAGC  
+HWI-EAS443:3:68:801:767#0/1  
aba`bb`a`abbV\_bHb¥a\_[aaaa\_aabbaaa\_\_b\_  
@HWI-EAS443:3:68:823:41#0/1  
TCCCAGGATCCAGCCAGCAATGTTACATTTACCCAAATGC  
+HWI-EAS443:3:68:823:41#0/1  
aaaaabaaaa`a\_\_`^`a`^^`\_\_`^`^^aZ^\_\_^  
@HWI-EAS443:3:68:82:1974#0/1  
GGGGACATCAAGATACAGCAAGAAGTTCAAGCCGGAAATA  
+HWI-EAS443:3:68:82:1974#0/1  
aaa¥aab\_aaa]aabab^bab]]a\_X\_\_ba\_^`\_¥W`U`  
@HWI-EAS443:3:68:840:928#0/1  
CTCGTCAATGGCATTCTGTGTGCTCTTCAGGTCGGCTGCA  
+HWI-EAS443:3:68:840:928#0/1  
^YtQb`T`]^X¥bb]b`X¥\_UaZ`a`X^ba¥[b]Z[Z^]^  
@HWI-EAS443:3:68:865:317#0/1  
CTCTTCAGGTCGGCTGCATATCCTGACCCCTGCTCATTTT  
+HWI-EAS443:3:68:865:317#0/1  
aaaaabbbb`baaaaaaaaa`a`V^`a`\_`Ya\_\_`\_a  
@HWI-EAS443:3:68:887:259#0/1  
CAAGTTGTATTGCAATCGTGGACTGGTGTATCTGAAATGA  
+HWI-EAS443:3:68:887:259#0/1  
`bababbJ\_aaaa`aa\_a¥a`^aa]Za^\_a`\_Z]]`\_`  
@HWI-EAS443:3:68:916:1810#0/1  
GAGCAATTGAGCTCAGTGCATCATTGAAAGTTTGAGA  
+HWI-EAS443:3:68:916:1810#0/1  
ab\_bb`^`TZ\_aaa`\_JaW^`aaa`\_a`^`\_]a]`aaa  
@HWI-EAS443:3:68:936:1357#0/1  
TTTTGCTTCTCTGAGTATTTTGGGTAGTCATAAGTCCCA  
+HWI-EAS443:3:68:936:1357#0/1  
a`a^]aaY][\_\_][ZaYM[`\_]aNP0`a\_\_\_\_`^Z]]^Z[]  
@HWI-EAS443:3:68:953:1472#0/1  
ATGGCATTCTGTGTGCTCTTCAGGTCGGCTGCATATCCTG  
+HWI-EAS443:3:68:953:1472#0/1  
`\_ZOVb`bb]LX`aa]abaab^WUa\_]RXX¥]]aZY^[L  
@HWI-EAS443:3:68:959:1064#0/1  
ATTGGTACTGGTAGTCTCCCTGGGGCAATCAGTTTCTGG  
+HWI-EAS443:3:68:959:1064#0/1  
Z\_bb`U\_bba\_Q\_[Q[`aba^Y^^W¥Z[LU]OYQ\_[OZT¥  
@HWI-EAS443:3:68:973:971#0/1  
GTCATGATTGGCCATGAACTTGTCTTGGGAATATCTCA  
+HWI-EAS443:3:68:973:971#0/1  
a¥\_R¥a`aaa`aaaaaa`a\_aZ`aa\_a^^^]\_\_\_\_\_]a

@HWI-EAS443:3:68:978:467#0/1  
CTCCTCATAATCGATGAAATCTCCTGGGTAACACGTTCCA  
+HWI-EAS443:3:68:978:467#0/1  
`bbbbbabbbabbababaaaaabaabab\_aaaaa\_R`^a  
@HWI-EAS443:3:69:1003:516#0/1  
GGGCCATGAACCTTGTCTTGGGGAATATCTCAAACCTTCA  
+HWI-EAS443:3:69:1003:516#0/1  
`babaaZa^a\_^`\_abaab]a`a`]\_aTJ]`a\_`a\_¥a  
@HWI-EAS443:3:69:1065:1205#0/1  
AATCGATGAAATCTCCTGGGTAACACGTTCCATTGTCTGA  
+HWI-EAS443:3:69:1065:1205#0/1  
]¥U¥¥b`b`bQX\_V¥¥`¥b]]YSOSS^]YHYQ]S]R^R]^  
@HWI-EAS443:3:69:1069:1816#0/1  
GGGGGGTGGACAGGGATGGTAGATGGATGGTACGGTTATC  
+HWI-EAS443:3:69:1069:1816#0/1  
aba`abUaaaa`a`abZL¥aa^a`aZNY]\_XNZa^^  
@HWI-EAS443:3:69:1071:1432#0/1  
CAATTGGAAAATGTCCAAAATATGTAAAAAGCACAAAATT  
+HWI-EAS443:3:69:1071:1432#0/1  
a¥UYV\_] [W\_ZYZ¥^`aa\_Y\_\_T`Z^]`Y^`^`XZ[  
@HWI-EAS443:3:69:1084:137#0/1  
ACAGAATTTACTTTGTTAGTAATCTCGTCAATGGCATTCT  
+HWI-EAS443:3:69:1084:137#0/1  
aabbbbabbaababa`aaa¥aaa\_aaaY`a¥^a`[\_a`^^  
@HWI-EAS443:3:69:1109:272#0/1  
GGGACATCAAGATACAGCAAGAAGTTCAAGCCGAAATAG  
+HWI-EAS443:3:69:1109:272#0/1  
aabaaa\_baaaaaaa`abaa`a¥¥a`\_aZ¥aa`\_\_`  
@HWI-EAS443:3:69:1139:416#0/1  
CAGTTGCTTCGAATGTTATTTTGTCTCCCGGCTCTACTAG  
+HWI-EAS443:3:69:1139:416#0/1  
aba`bbbbbababba\_bbbbbbaaba\_]a`a`aZW\_^Y  
@HWI-EAS443:3:69:1153:1128#0/1  
CTGTATCTTGATGTCCCCACAAAACATATGCATCTGCAT  
+HWI-EAS443:3:69:1153:1128#0/1  
¥bbaaaa\_bba`babaaa`aabaaaaa^aa`ba`aa  
@HWI-EAS443:3:69:1249:693#0/1  
TTTTTGTGGGACATCAAGATACAGCAAGAAGTTCAAGCC  
+HWI-EAS443:3:69:1249:693#0/1  
abaaab^baa`aaaa`aaa^a`aaa\_\_aa[\_a]\_\_a`a[]  
@HWI-EAS443:3:69:1264:18#0/1  
ACAAAGTCTCTATCAGAATGCAGATGCATATGTTTTTGTG  
+HWI-EAS443:3:69:1264:18#0/1  
aa`Z^abbb`^Y¥aa\_YZ][GS¥W\_ZVYU\_`aT[ZWT]]a  
@HWI-EAS443:3:69:1285:1083#0/1  
CAAAGTCTCTATCAGAATGCAGATGCATATGTTTTTGTGG  
+HWI-EAS443:3:69:1285:1083#0/1  
a^\_Z^Ra]]aX`aa`aaPSIR\_`Ya\_\_a\_a[X\_\_TRYN¥U  
@HWI-EAS443:3:69:1305:625#0/1  
TGCTGGCTGGATCCTGGGAAATCCAGAGTGTGAATCACTC

+HWI-EAS443:3:69:1305:625#0/1  
abababaab\_Y^aa`Z``\_aaaaaa\_a¥aUa\_]\_\_a^`\_  
@HWI-EAS443:3:69:1332:1680#0/1  
AGGATATGCAGCCGACCTGAAGAGCACACAGAATGCCATT  
+HWI-EAS443:3:69:1332:1680#0/1  
\_^`aabaaaa^``]aaaa`\_`^```a`\_`^^\_a`^^Za`\_  
@HWI-EAS443:3:69:1353:1038#0/1  
ATGCAATGGGGCTACCCCTCTTAGTTTGCATAGTTTCCCG  
+HWI-EAS443:3:69:1353:1038#0/1  
aaaaaa`\_`\_^aaa^^a^`^a`\_`Z^``¥````Z\_^]]^  
@HWI-EAS443:3:69:1496:1010#0/1  
TGGCATTCTGTGTGCTCTTCAGGTCGGCTGCATATCCTGA  
+HWI-EAS443:3:69:1496:1010#0/1  
¥]\_[`[Ub]b\_¥`\_X^X\_``\_]`[`YY\_Y\_V]Zaa\_PW¥X^  
@HWI-EAS443:3:69:1508:1783#0/1  
CTGGCTTCTTACCTTTTCATATAAGTTCTTCACATTTGAA  
+HWI-EAS443:3:69:1508:1783#0/1  
abaaaababaaa`abaa``aaaa\_a^a\_```````a``a\_\_  
@HWI-EAS443:3:69:1523:1839#0/1  
ACAAGTTGTATTGCAATCGTGGACTGGTGTATCTGAAATG  
+HWI-EAS443:3:69:1523:1839#0/1  
a^`¥^abb\_aa`a^baaaa[¥````aa^[a]aa\_aa\_``aa  
@HWI-EAS443:3:69:1640:248#0/1  
CGTCAATGGCATTCTGTGTGCTCTTCAGGTCGGCTGCATA  
+HWI-EAS443:3:69:1640:248#0/1  
`bba`baa`^bbbbbaa`b]aabbba]bS`ab`aa¥aa`  
@HWI-EAS443:3:69:1723:1050#0/1  
GCTGCTTTGAATTTTACCACAAATGCGATAACACGTGCAT  
+HWI-EAS443:3:69:1723:1050#0/1  
aa`^OOP\_`aaaU]]`UNVY[`aT`[a`X[HR[Z\_SXWW`  
@HWI-EAS443:3:69:1729:127#0/1  
TGGGTCTTATTGCTATTTCCGGCTTGAACCTTCTTGCTGTA  
+HWI-EAS443:3:69:1729:127#0/1  
aaaaZ`aaaa`]aaaa`[W\_\_Z^^LU^O`^Z\_]\_R^^YZ  
@HWI-EAS443:3:69:173:1256#0/1  
GCTGCTTTGAATTTTACCACAAATGCGATAACACGTGCAT  
+HWI-EAS443:3:69:173:1256#0/1  
abba``aZ]Zaaaaabaaa`Za`aaaa^aaa``¥^^`\_  
@HWI-EAS443:3:69:190:1197#0/1  
GCTGTATCTTGATGTCCCCACAAAACATATGCATCTGCA  
+HWI-EAS443:3:69:190:1197#0/1  
¥bb^O`\_^\_¥^`[\_`Wa`¥ZWY`\_^\_[V¥aOX¥Z[]][aS`\_^]  
@HWI-EAS443:3:69:212:528#0/1  
CATTCTGTGTGCTCTTCAGGTCGGCTGCATATCCTGACCC  
+HWI-EAS443:3:69:212:528#0/1  
abaR[^OR`ZZa\_^O¥aa]RN``a`[\_`PS]\_YU^[YKY¥^  
@HWI-EAS443:3:69:246:641#0/1  
AGAAGTCCTCGTGCTATGGGGCATTCCACATCCATCTACT  
+HWI-EAS443:3:69:246:641#0/1  
aa]¥^]aa`a¥¥\_\_\_\_[¥\_[]\_\_`\_\_`\_XV¥]\_\_¥Z¥`^W

@HWI-EAS443:3:69:258:206#0/1  
TAGTAATCTCGTCAATGGCATTCTGTGTGCTCTTCAGGTC  
+HWI-EAS443:3:69:258:206#0/1  
a^a\_aa`aaab^aa^\_aT^\_\_¥\_¥`W\_W¥]\_¥¥^¥\_^YTW  
@HWI-EAS443:3:69:267:113#0/1  
GAAGTCCTCGTGTATGGGGCATTACCATCCATCTACTA  
+HWI-EAS443:3:69:267:113#0/1  
a\_¥ZUWaa]\_[Z^^P¥aXTY`^^`[^GNW\_¥F¥a¥UU]]  
@HWI-EAS443:3:69:296:711#0/1  
GCTGCTTTGAATTTTACCACAAATGCGATAACACGTGCAT  
+HWI-EAS443:3:69:296:711#0/1  
a[^[\`\_\_abYP]aaZ`]\_[¥RJXVZa]U\_YZa`¥[`PQP  
@HWI-EAS443:3:69:366:792#0/1  
TCCGGCTTGAACTTCTTGCTGTATCTTGATGTCCCCACAA  
+HWI-EAS443:3:69:366:792#0/1  
aaba^``\_TU`Y``X`X¥]^Sa\_a\_`]\_\_[]\_\_aa[`XX  
@HWI-EAS443:3:69:431:1549#0/1  
CAGAAACTGATTGCCCCAGGGAGACTACCAGTACCAATG  
+HWI-EAS443:3:69:431:1549#0/1  
a^YZ`aa`^U[^[^a\_a¥[V¥RSV^¥\_\_\_\_ZLY¥[MZZW  
@HWI-EAS443:3:69:442:1069#0/1  
GGAACGTGTTACCCAGGAGATTTTCATCGATTATGAGGAGC  
+HWI-EAS443:3:69:442:1069#0/1  
a^R^^b¥¥¥a`aaaa\_aa¥\_`a^a]a\_XT[^`a¥]\_¥\_  
@HWI-EAS443:3:69:527:549#0/1  
ATGGCTAGTTAAAAAAGGAAATTCATACCCAAAGCTCAGC  
+HWI-EAS443:3:69:527:549#0/1  
aa`aba^^Y¥TWaaa^Z]T\_ZDWW\_XQG^^[a^PPYLVMO  
@HWI-EAS443:3:69:530:1242#0/1  
TCTACACTGTAGAGACCCATTAGAGCACATCCAGAACTG  
+HWI-EAS443:3:69:530:1242#0/1  
ababaaaa\_aa`\_\_aa`^``Z\_\_`a\_a\_]¥]`a\_\_a\_  
@HWI-EAS443:3:69:538:347#0/1  
CAGAATTTACTTTGTTAGTAATCTCGTCAATGGCATTCTG  
+HWI-EAS443:3:69:538:347#0/1  
abbabaaabaaaab`aba\_baaaabba\_aa\_a\_aaa\_aaa  
@HWI-EAS443:3:69:542:224#0/1  
GCTTCCTCTGAGTATTTTGGGTAGTCATAAGTCCCATTTT  
+HWI-EAS443:3:69:542:224#0/1  
]a`aba^``¥]^X``aaa\_T¥^``ZYT]¥R]WSQ^`]^`\_^  
@HWI-EAS443:3:69:553:1630#0/1  
GAACTCTTTACCTACTGCTGTGAAGTGTATTTCATCTTT  
+HWI-EAS443:3:69:553:1630#0/1  
Y[^a¥aa`\_V\_b\_]baaa^^¥Z^[ab^R`Zaa]ba`aa`a  
@HWI-EAS443:3:69:566:1276#0/1  
CAGACACCCAAGGGTGTATAAACACCAGCCTCCCATTTC  
+HWI-EAS443:3:69:566:1276#0/1  
aaaabaabaaa^UTX\_\_\_\_aaaaYaaa\_\_\_\_\_`]NU``\_  
@HWI-EAS443:3:69:58:840#0/1  
CCTCTGAGTATTTTGGGTAGTCATAAGTCCCATTTTGGAC







+HWI-EAS443:3:6:1495:372#0/1  
[\_`bba[a^]a\_aaba\_\_[aa]`[\_Za\_aXaa\_aa]R)`  
@HWI-EAS443:3:6:1532:1050#0/1  
AGACTTTGTTGGTCAGCACTAGTAGATGGATGGTGAATGC  
+HWI-EAS443:3:6:1532:1050#0/1  
`a^bab`aX]¥bTYO]WWYazWXa^`a`]P`\_TKTX\_\_BB  
@HWI-EAS443:3:6:1596:348#0/1  
GAAGTCCTCGTGCTATGGGGCATTACCATCCATCTACTA  
+HWI-EAS443:3:6:1596:348#0/1  
a]a\_^ZST\_a\_\_^a`[\_UZ`TX\_VRZQMY\_ZTZ^U¥a^¥B  
@HWI-EAS443:3:6:1597:443#0/1  
ATCATTGAAAGTTTGAGATATCCCCAAGACAAGTTCA  
+HWI-EAS443:3:6:1597:443#0/1  
aaY\_aaaba\_\_ba`aaaaa```XWU[W`a`Za\_\_V^BB  
@HWI-EAS443:3:6:1631:1617#0/1  
CGGCTCTACTAGTGTCCAGTAATAGTTCATTCTCCCTTCT  
+HWI-EAS443:3:6:1631:1617#0/1  
`aba\_^^[a`\_^b`[\_a\_aaa[H\_`^YX]babaQXZaWB  
@HWI-EAS443:3:6:1721:659#0/1  
GCTTCCTCTGAGTATTTGGGTAGTCATAAGTCCCATTTT  
+HWI-EAS443:3:6:1721:659#0/1  
aabaa\_aYba\_b\_a\_a`W[\_a^`a]^\_`^`^[\_YY\_a``^  
@HWI-EAS443:3:6:172:766#0/1  
GAACTCTTACCTACTGCTGTGAAGTGTGATTTCATCTTT  
+HWI-EAS443:3:6:172:766#0/1  
a`[V`]aa`bV``]\_a`Xab[aT[[\_b[a\_^\_WL¥`W`\_T  
@HWI-EAS443:3:6:183:2036#0/1  
TTTGCTTCTCTGAGTATTTGGGTAGTCATAAGTCCCAT  
+HWI-EAS443:3:6:183:2036#0/1  
`a^Z`aaaaaYaaa`]\_a`\_\_\_Z^X\_^Z`a`a\_\_S\_^]`B  
@HWI-EAS443:3:6:211:1413#0/1  
CTTCCTCTGAGTATTTGGGTAGTCATAAGTCCCATTTT  
+HWI-EAS443:3:6:211:1413#0/1  
abbbbbbbba`aaabba¥Tbb\_aaaaaaWa`aaaba\_b  
@HWI-EAS443:3:6:225:970#0/1  
GTGATTCACACTCTGGATTTCCAGGATCCAGCCAGCAAT  
+HWI-EAS443:3:6:225:970#0/1  
H\_babbbb\_bbaba\_a¥aaab\_^S]a\_ab`ba`V^a`\_^a  
@HWI-EAS443:3:6:27:401#0/1  
GTAGGACCATGAGCTTGCTGTGGAGAGTGATTCACACTCT  
+HWI-EAS443:3:6:27:401#0/1  
a\_aaa]a¥`a\_\_`\_Y``\_\_a`\_a¥[Y\_QaZ^^Z\_XXW¥Q\_  
@HWI-EAS443:3:6:299:1967#0/1  
GGCTAGTTAAAAAAGGAAATTCATACCCAAAGCTCAGCAA  
+HWI-EAS443:3:6:299:1967#0/1  
ab[[a]R`WUKa]]VYW^`\_TR`Z\_U¥\_]ba[\_PYP`\_]B  
@HWI-EAS443:3:6:304:1297#0/1  
ACAATGGAACGTGTTACCCAGGAGATTTTCATCGATTATGA  
+HWI-EAS443:3:6:304:1297#0/1  
aaa\_aaaT`[a^a\_\_\_¥\_Z\_]^[\_^^^`^Y\_^\_V\_^^^^[

@HWI-EAS443:3:6:349:1040#0/1  
TGCGAATGCATATCTCGGTACCACTAGATTTCCAGTTGCT  
+HWI-EAS443:3:6:349:1040#0/1  
a`aa\_aaaaaaaaa\_a\_a`Ua\_^`Ua[a`\_`\_\_\_\_^`\_]\_  
@HWI-EAS443:3:6:364:1049#0/1  
GCTTCCTCTGAGTATTTGGGTAGTCATAAGTCCCATTTT  
+HWI-EAS443:3:6:364:1049#0/1  
aa¥a[a¥^`Z`a^\_aa\_\_`a`X`aXZ`a``\_X\_]W\_`^\_\_  
@HWI-EAS443:3:6:372:1602#0/1  
ATCGATTATGAGGAGCTAAGAGAGCAATTGAGCTCAGTGT  
+HWI-EAS443:3:6:372:1602#0/1  
abababbabaaXWRYbaaa^¥aaa\_aaa^`a]^`\_a`\_[^  
@HWI-EAS443:3:6:402:232#0/1  
GGCTAGTTAAAAAAGGAAATTCATACCCAAAGCTCAGCAA  
+HWI-EAS443:3:6:402:232#0/1  
U^ba`bab]baba¥Vaab\_`VaW\_`\_Ra\_a[Y]]QXa^\_\_  
@HWI-EAS443:3:6:403:1297#0/1  
GTGCTTTTTACATATTTTGGACATTTTCCAATTGTGATCG  
+HWI-EAS443:3:6:403:1297#0/1  
]^bbbbbbab`baabababaaaa¥a\_`aa`aaaYaa`Sa  
@HWI-EAS443:3:6:411:341#0/1  
CCATGAGCTTGCTGTGGAGAGTGATTCACACTCTGGATTT  
+HWI-EAS443:3:6:411:341#0/1  
a`RU]Q¥Z]\_]¥¥`X][X]^XP\_`^^TTNVX`V]YYBBBB  
@HWI-EAS443:3:6:414:391#0/1  
CTTTGTTAGTAATCTCGTCAATGGCATTCTGTGTGCTCTT  
+HWI-EAS443:3:6:414:391#0/1  
abbbb]a^`bYXR^\_\_Y¥`aaZ]^abb¥`ZaaabYa^a`  
@HWI-EAS443:3:6:426:1336#0/1  
ATGGATGGTACGGTTATCACCATCAAAATGAGCAGGGGTC  
+HWI-EAS443:3:6:426:1336#0/1  
`La`aa`TaX`a\_V^^SYS^Q\_]UY^a\_¥V\_Q[Q`H`GV  
@HWI-EAS443:3:6:439:837#0/1  
GGGTGCTATAAACACCAGCCTCCCATTTTCCAGAAATATACAT  
+HWI-EAS443:3:6:439:837#0/1  
Y^ababbbbbbbbaabbb`babbbbaabbbabbbbbb  
@HWI-EAS443:3:6:471:644#0/1  
GGGGTGGACAGGGATGGTAGATGGATGGTACGGTTATCAC  
+HWI-EAS443:3:6:471:644#0/1  
aa^aX` `[Zbaaa[VabQ`^Y¥a`Kta¥Q`Xaa]ZaZX\_\_  
@HWI-EAS443:3:6:502:1752#0/1  
GAGCAATTGAGCTCAGTGCATCATTGAAAGGTTTGAGA  
+HWI-EAS443:3:6:502:1752#0/1  
ab¥bbababaabW` `a\_bKa`Sb\_b¥V^ab\_[P]baaaa  
@HWI-EAS443:3:6:595:1760#0/1  
ATGGCATTCTGTGTGCTCTTCAGGTCGGCTGCATATCCTG  
+HWI-EAS443:3:6:595:1760#0/1  
aS`Xaa` `aaa`aZa\_aXa\_aa`¥X` `a[¥]Z\_\_bHZBBB  
@HWI-EAS443:3:6:609:1936#0/1  
CTTCCTCTGAGTATTTTGGGTAGTCATAAGTCCCATTTT

+HWI-EAS443:3:6:609:1936#0/1  
\_a¥`b¥`X\_a`U`TUS^¥\_SZ]\_Z¥¥a]a`VX\_`aa\_[\_a  
@HWI-EAS443:3:6:625:645#0/1  
ATGACACTGAGCTCAATTGCTCTCTTAGCTCCTCATAATC  
+HWI-EAS443:3:6:625:645#0/1  
aaaaabaabaaYYPaab`\_`aaa\_aaaa[aa`a]`aa\_\_0  
@HWI-EAS443:3:6:62:336#0/1  
GAGGAGCTAAGAGAGCAATTGAGCTCAGTGTCATCATTG  
+HWI-EAS443:3:6:62:336#0/1  
Z\_a```R¥bba`^¥a`¥`Ybb\_abaa^a]a¥`bab]b[\_b  
@HWI-EAS443:3:6:640:1599#0/1  
ATGAACTTGTCTTGGGAATATCTCAAACCTTCAAATGA  
+HWI-EAS443:3:6:640:1599#0/1  
aa`^V]a`bY\_a`baa\_]aa`aaa^`^`a`^a`¥aVa`\_^  
@HWI-EAS443:3:6:663:308#0/1  
AGCTCCTCATAATCGATGAAATCTCCTGGGTAACACGTTC  
+HWI-EAS443:3:6:663:308#0/1  
abaa]aa\_aaaab`\_a`^¥a[^Z^WWY\_]U[¥MZGW^]B  
@HWI-EAS443:3:6:669:1397#0/1  
AAAATTCAAAGCAGCCGTTTCCAATTTCCCTTGGCATTGTT  
+HWI-EAS443:3:6:669:1397#0/1  
`b¥¥^aaaa]aaaGXRWaa\_V\_¥a\_ZPDX`^^a\_a\_a^Z  
@HWI-EAS443:3:6:717:528#0/1  
ATTTTCATCGATTATGAGGAGCTAAGAGAGCAATTGAGCTC  
+HWI-EAS443:3:6:717:528#0/1  
`bbaaab`aabb^bb\_aa\_a\_aa\_a`a``\_^`\_¥a\_\_[^  
@HWI-EAS443:3:6:796:823#0/1  
TTTTGCTTCTGAGTATTTGGGTAGTCATAAGTCCCA  
+HWI-EAS443:3:6:796:823#0/1  
\_baa`[\_b]aaabbaa\_abaa`a\_aU^^[]`\_\_\_\_`U[PV\_  
@HWI-EAS443:3:6:896:2014#0/1  
GGGACATCAAGATACAGCAAGAAGTTCAAGCCGAAATAG  
+HWI-EAS443:3:6:896:2014#0/1  
aa]\_Z\_¥aa]aa^a`a\_\_aa`\_[`VSF]\_\_VP¥\_[\_[[\_^  
@HWI-EAS443:3:6:919:880#0/1  
ACTGTGTATTCATCTTTTCAATAACAGAATTTACTTTGTT  
+HWI-EAS443:3:6:919:880#0/1  
¥aa¥[\_\_\_`baaab`^`aa]aXaaaab`^`^`baa\_b`b¥`  
@HWI-EAS443:3:6:920:1373#0/1  
AGAAGCCAGTTAAAAACAATGCCAAGGAAATTGGAAACG  
+HWI-EAS443:3:6:920:1373#0/1  
^HXa\_U`\_\_RY¥^S`\_Z\_0[\_[V^X`^X^Z^¥\_ZZZBBB  
@HWI-EAS443:3:6:935:1117#0/1  
CATGAACTTGTCTTGGGAATATCTCAAACCTTCAAATG  
+HWI-EAS443:3:6:935:1117#0/1  
aa\_baabbbbaab`baab`abaa\_a\_bba¥^aaa^a\_aaa  
@HWI-EAS443:3:6:941:1021#0/1  
GGACAGGGATGGTAGATGGATGGTACGGTTATCACCATCA  
+HWI-EAS443:3:6:941:1021#0/1  
abababbaaabZaababa`aaa]a\_aaXa`\_R`RQ]\_U\_

@HWI-EAS443:3:6:97:848#0/1  
CAAGGAAATTGGAAACGGCTGCTTTGAATTTTACCACAAA  
+HWI-EAS443:3:6:97:848#0/1  
abba\_bbbbbbaabaabaaaaKR^`JT`aaaaJV`a`Waa  
@HWI-EAS443:3:6:990:1443#0/1  
GAGATTTTCATCGATTATGAGGAGCTAAGAGAGCAATTGAG  
+HWI-EAS443:3:6:990:1443#0/1  
a][YV^`¥\_SWa\_YP]`aYRY`WX`[T][a`Xa\_W\_XWa  
@HWI-EAS443:3:6:999:452#0/1  
GGGGACATCAAGATACAGCAAGAAGTTCAAGCCGGAAATA  
+HWI-EAS443:3:6:999:452#0/1  
`S\_\_SN]T¥Raa\_a^\_UWWa\_\_]WYP^G\_Z¥UG¥VN¥]\_\_  
@HWI-EAS443:3:70:1018:583#0/1  
GAGTGATTCACACTCTGGATTTCCCAGGATCCAGCCAGCA  
+HWI-EAS443:3:70:1018:583#0/1  
`ab^baaaababa`\_abaa`a`aaa`a`Y^`\_`a`^`\_`¥\_  
@HWI-EAS443:3:70:1024:1157#0/1  
GCTGGCTGGATCCTGGGAAATCCAGAGTGTGAATCACTCT  
+HWI-EAS443:3:70:1024:1157#0/1  
aaa)`a`a^^`ZY[^`\_`]Z^`\_`[U[R[VWY\_ZW^Y[¥X  
@HWI-EAS443:3:70:1068:396#0/1  
ACATATTCTACACTGTAGAGACCCATTAGAGCACATCCAG  
+HWI-EAS443:3:70:1068:396#0/1  
a^Z^abba`aaaaba^aaaba`aa^a`\_`ba`a]aaa[aa  
@HWI-EAS443:3:70:1072:1374#0/1  
CTCATAATCGATGAAATCTCCTGGGTAACACGTTCCATTG  
+HWI-EAS443:3:70:1072:1374#0/1  
`aa^abaaa]aaaaabaa\_aa`\_a`Xaa\_^a\_\_[\_Q¥a`\_`  
@HWI-EAS443:3:70:1073:1643#0/1  
CATTGAAGGGGGTGGACAGGGATGGTAGATGGATGGTAC  
+HWI-EAS443:3:70:1073:1643#0/1  
a]bba^\_\_¥`\_b`ab`\_bbaabab]P^Q[SaWYab\_Ub`  
@HWI-EAS443:3:70:1076:335#0/1  
CCTCTGAGTATTTTGGGTAGTCATAAGTCCCATTTTGGAC  
+HWI-EAS443:3:70:1076:335#0/1  
abb`babbYU]bbbab`UT¥^aaa\_U^\_\_a\_aaaaaa`^  
@HWI-EAS443:3:70:1090:1514#0/1  
GGGGCATTACCATCCATCTACTAGTGCTGACCAACAAAG  
+HWI-EAS443:3:70:1090:1514#0/1  
O[QNPa`QZYbba^X\_¥Z¥b`a^`WH\_^`Ybb]X`a^¥WQ  
@HWI-EAS443:3:70:1161:452#0/1  
CAGGATATGCAGCCGACCTGAAGAGCACACAGAATGCCAT  
+HWI-EAS443:3:70:1161:452#0/1  
aaaabb^`a`bbabbb`\_ab`a\_Z]a`a\_a]a\_a`a`^a\_  
@HWI-EAS443:3:70:1163:2021#0/1  
ATCTGCATTCTGATAGAGACTTTGTTGGTCAGCACTAGTA  
+HWI-EAS443:3:70:1163:2021#0/1  
`]MP`X¥U`^]aYZ\_a\_¥OY]]`aPYW\_MLWY\_[QW]]]^  
@HWI-EAS443:3:70:1180:259#0/1  
TCGAATGTTATTTTGTCTCCCGGCTCTACTAGTGCCAGT

+HWI-EAS443:3:70:1180:259#0/1  
¥[bWUY`Yaababbaaa^a\_W¥aW`XY\_H\_`a^VUPWT[Y  
@HWI-EAS443:3:70:1188:234#0/1  
AACAAATGCCAAGGAAATTGGAAACGGCTGCTTTGAATTTT  
+HWI-EAS443:3:70:1188:234#0/1  
abaaaa\_`aaaaaaaaaba\_a`aa`]a]LS`\_MMSZ]``  
@HWI-EAS443:3:70:1204:1523#0/1  
GGGGCATTACCATCCATCTACTAGTGCTGACCAACAAAG  
+HWI-EAS443:3:70:1204:1523#0/1  
\_\_MZaabaU^`Z\_a^]a`S\_Y```VMaa]]aa\_a`H``\_a  
@HWI-EAS443:3:70:1253:1139#0/1  
GGATATGCAGCCGACCTGAAGAGCACACAGAATGCCATTG  
+HWI-EAS443:3:70:1253:1139#0/1  
aaa\_a\_b\_a`\_ZU\_¥`]a¥[PS[\_SGYUU^^]ZLYZUZG  
@HWI-EAS443:3:70:1273:136#0/1  
TGTTTTTGTGGGACATCAAGATACAGCAAGAAGTTCAAG  
+HWI-EAS443:3:70:1273:136#0/1  
a`\_`a`abPabaa^^aaa`]aa`Y\_a`\_`a`]^[X]^V]  
@HWI-EAS443:3:70:1294:2023#0/1  
CAGCCTCCATTTCAGAATATACATCCGATCACAATTGGA  
+HWI-EAS443:3:70:1294:2023#0/1  
[\_a`^a`b`bbababbb`aba`bba`\_\_bababb`aa\_\_a  
@HWI-EAS443:3:70:1386:1508#0/1  
CAGGTCGGCTGCATATCCTGACCCCTGCTCATTTTGATGG  
+HWI-EAS443:3:70:1386:1508#0/1  
\_[ZWO\_a^b^[`¥`aa\_\_\_\_\_````abaaa`ab]`a``aaV  
@HWI-EAS443:3:70:1390:1506#0/1  
CTGGCTGGATCCTGGGAAATCCAGAGTGTGAATCACTCTC  
+HWI-EAS443:3:70:1390:1506#0/1  
ab\_Y\_]^[^XYW^\_aaa]ab]Q`aYaaXaU\_\_`TKXU`[^W  
@HWI-EAS443:3:70:1427:107#0/1  
ATTCTGTGTGCTCTTCAGGTCGGCTGCATATCCTGACCCC  
+HWI-EAS443:3:70:1427:107#0/1  
aaaUb]bb\_`a^Q`a\_¥aa\_QVa¥\_aTY\_^\_FFUWUMDMS  
@HWI-EAS443:3:70:1457:145#0/1  
CGGCTGCTTTGAATTTTACCACAAATGCGATAACACGTGC  
+HWI-EAS443:3:70:1457:145#0/1  
ab`aaKabbba`^`baa`a\_\_`bbRST¥a`aa^a]aSaZ  
@HWI-EAS443:3:70:1464:743#0/1  
GATGAAATCTCCTGGGTAACACGTTCCATTGTCTGAACTA  
+HWI-EAS443:3:70:1464:743#0/1  
\_ZbXH\_T^aaba^YQ\_V]aa`Vb\_`a[a`aa[T\_a\_^]aG  
@HWI-EAS443:3:70:1525:1555#0/1  
GGGGACATCAAGATACAGCAAGAAGTTCAAGCCGAAATA  
+HWI-EAS443:3:70:1525:1555#0/1  
`ba`aaaa`aa`aa\_aaaaba`aa^]\_`aa\_¥Y\_\_]\_`\_  
@HWI-EAS443:3:70:1586:362#0/1  
GGGGGTGGACAGGGATGGTAGATGGATGGTACGGTTATCA  
+HWI-EAS443:3:70:1586:362#0/1  
abbaaXb``\_abaa`ab^a`\_`aa\_\_a\_T`Za\_¥\_\_WUU



+HWI-EAS443:3:70:264:1261#0/1  
abaaaaab`aaa^)`a`a^\_a`a`\_[^Y`a`\_aa`Z`[\_\_\_\_  
@HWI-EAS443:3:70:30:1470#0/1  
ATGGCATTCTGTGTGCTCTTCAGGTCGGCTGCATATCCTG  
+HWI-EAS443:3:70:30:1470#0/1  
^```b`^aba^Xa]Y\_aa``^[`Za¥]`^^`[Y¥Y^`WW  
@HWI-EAS443:3:70:318:1785#0/1  
GAACGTGTTACCCAGGAGATTTTCATCGATTATGAGGAGCT  
+HWI-EAS443:3:70:318:1785#0/1  
\_]U`¥ZUZV[a\_WZRTX`\_a]\_aaa\_a^¥\_¥`\_YQ[[U[`  
@HWI-EAS443:3:70:385:86#0/1  
GACAGGGATGGTAGATGGATGGTACGGTTATCACCATCAA  
+HWI-EAS443:3:70:385:86#0/1  
aaa\_baa`aabUb]\_abaaa\_a¥a\_a\_N\_\_\_¥`W¥UZQ¥¥  
@HWI-EAS443:3:70:397:1787#0/1  
AGAAGTTCAAGCCGAAATAGCAATAAGACCCAAAGTGAG  
+HWI-EAS443:3:70:397:1787#0/1  
aaa^\_]`^abaYa`XSV¥\_]`]a^W^\_\_^`\_^\_`^¥Z]WX^Z  
@HWI-EAS443:3:70:444:1763#0/1  
GCTGGCTGGATCCTGGGAAATCCAGAGTGTGAATCACTCT  
+HWI-EAS443:3:70:444:1763#0/1  
ab^]]a]``YP]¥N[`]XX]ZaZO^¥ZLYTX\_ZS]``[^[  
@HWI-EAS443:3:70:458:689#0/1  
CTTATATGAAAAGGTAAGAAGCCAGTTAAAAACAATGCC  
+HWI-EAS443:3:70:458:689#0/1  
aaa\_a`abYa``a`U``aa`\_a`¥`^\_a````\_¥a\_\_\_\_[^  
@HWI-EAS443:3:70:49:87#0/1  
CGGTTTCATTGAAGGGGGTGGACAGGGATGGTAGATGGA  
+HWI-EAS443:3:70:49:87#0/1  
abb\_baaaabb¥`b``aa\_HbaZa`a``\_\_a`Y¥`]\_\_`¥  
@HWI-EAS443:3:70:553:851#0/1  
ATGTTTTTGTGGGACATCAAGATACAGCAAGAAGTTCAA  
+HWI-EAS443:3:70:553:851#0/1  
Uab`a`^OZQ``a^]aZab]Z¥a``aaa^`[^WF[GNY[\_  
@HWI-EAS443:3:70:594:108#0/1  
GGGACATCAAGATACAGCAAGAAGTTCAAGCCGAAATAG  
+HWI-EAS443:3:70:594:108#0/1  
aaaa\_aaaaaa`\_a\_aa`aa`\_aaW^¥\_\_^]Y`\_X`]\_^\_  
@HWI-EAS443:3:70:609:2031#0/1  
GGGGACATCAAGATACAGCAAGAAGTTCAAGCCGAAATA  
+HWI-EAS443:3:70:609:2031#0/1  
NZaa]YXP`WSa¥SWaba¥\_Y¥\_YX^Ra¥K^¥\_\_¥[```b  
@HWI-EAS443:3:70:655:1399#0/1  
GGGGACATCAAGATACAGCAAGAAGTTCAAGCCGAAATA  
+HWI-EAS443:3:70:655:1399#0/1  
]\_[\_¥a`b`XKI¥Wbba``b¥W]^`RX`aZbb\_¥a\_K¥ab  
@HWI-EAS443:3:70:664:265#0/1  
ATTCTGTGTGCTCTTCAGGTCGGCTGCATATCCTGACCCC  
+HWI-EAS443:3:70:664:265#0/1  
`aa\_\_b]aaaba]bb`a\_aXab\_\_\_aZ\_aa\_Ya`\_^\_W[V



@HWI-EAS443:3:70:669:1772#0/1  
GCAGGGGTCAGGATATGCAGCCGACCTGAAGAGCACACAG  
+HWI-EAS443:3:70:669:1772#0/1  
`b\_]N]aT^]YW[aa¥0ZaWb]H¥T¥YaV`XZR\_[UXU\_^  
@HWI-EAS443:3:70:673:204#0/1  
GTTAGTAATCTCGTCAATGGCATTCTGTGTGCTCTTCAGG  
+HWI-EAS443:3:70:673:204#0/1  
a``a^aV`aa`aX`]Y¥][\_\_\_\_`ZZ\_¥\_Y\_¥¥¥\_Y¥^TZ  
@HWI-EAS443:3:70:690:1434#0/1  
GTGCTCTTCAGGTCGGCTGCATATCCTGACCCCTGCTCAT  
+HWI-EAS443:3:70:690:1434#0/1  
a`^\_[Z`^]¥a¥\_]`^QX`````UVRSZ`[a]YQTV`^a  
@HWI-EAS443:3:70:70:145#0/1  
GGGTGCTATAAACACCAGCCTCCCATTTCAGAATATACAT  
+HWI-EAS443:3:70:70:145#0/1  
aaa\_baabbbbababa`aaaa`aaa\_````aa^a`a`a\_a^  
@HWI-EAS443:3:70:780:1869#0/1  
GCTAGTTAAAAAAGGAAATTCATACCCAAAGCTCAGCAAA  
+HWI-EAS443:3:70:780:1869#0/1  
ab\_]a\_aaaa]\_aWOX]¥^\_a^¥a\_aaaYK]\_`ZL]U]`  
@HWI-EAS443:3:70:848:705#0/1  
GGTTGAACTCTTTACCTACTGCTGTGAACTGTGTATTCAT  
+HWI-EAS443:3:70:848:705#0/1  
aaW^\_[X\_aa`]``b`¥aaaabb\_a`\_^baa`Z`aa\_a`  
@HWI-EAS443:3:70:889:649#0/1  
GGCTACCCCTCTTAGTTTGCATAGTTTCCCGTTATGCTTG  
+HWI-EAS443:3:70:889:649#0/1  
abbaaabb`aaaaV\_\_`^aaa`aa¥`aa\_a````\_aa`^  
@HWI-EAS443:3:70:911:1098#0/1  
TCTTTACCTACTGCTGTGAACTGTGTATTCATCTTTTCAA  
+HWI-EAS443:3:70:911:1098#0/1  
`aaaaaa`aa]``a`a]SR]]aa[]Jaaaa``[aaa]`a¥  
@HWI-EAS443:3:70:924:14#0/1  
AGGGAGACTACCAGTACCAATGAACTGGCGACAGTTGAAT  
+HWI-EAS443:3:70:924:14#0/1  
abbaaba`Z`aaaa^a`abaaba`\_\_aa\_a`XYYS`Q^\_  
@HWI-EAS443:3:70:935:1174#0/1  
GGGACATTCTCAATCCTGTGGCCAGTCTCAATTTTGTGC  
+HWI-EAS443:3:70:935:1174#0/1  
aa`aaaaaaaaabbaaa\_aa^`\_aaa]]\_\_]HV\_a`a^^\_^  
@HWI-EAS443:3:70:967:860#0/1  
AGCACATCCAGAAACTGATTGCCCCAGGGAGACTACCAG  
+HWI-EAS443:3:70:967:860#0/1  
aa^`\_aa\_\_aaa`\_`aaa¥[``\_a\_Z\_a\_\_W\_^S^`\_[S`  
@HWI-EAS443:3:70:984:1428#0/1  
TTCTTGCTGTATCTTGATGTCCCCACAAAACATATGCAT  
+HWI-EAS443:3:70:984:1428#0/1  
S¥``SX\_[YZ`¥b\_^[[`VR¥a[\_Z\_`W]^aSZ]aXaY  
@HWI-EAS443:3:71:1005:1451#0/1  
GAAGCTTTTTGCTCCAGCATGAGGACATGCTGCCGTTACA

+HWI-EAS443:3:71:1005:1451#0/1  
aabbbbbbbb\_abbababaa`aa`aabbaaa\_a`a\_`a^a  
@HWI-EAS443:3:71:1032:1381#0/1  
ATCCTGACCCCTGCTCATTGATGGTGATAACCGTACCA  
+HWI-EAS443:3:71:1032:1381#0/1  
^a`Y\_XXZ`X\_^`S\_]¥XU`baZ``WR`aZXZ[PN\_[X\_  
@HWI-EAS443:3:71:1039:602#0/1  
CACCTTTGTTTCGAGTCATGATTGGGCCATGAACTTGTCTT  
+HWI-EAS443:3:71:1039:602#0/1  
abbabbbbbbbbababbbbbbbab`bbaabbaa`abb\_\_ba  
@HWI-EAS443:3:71:103:1252#0/1  
GCTGGCTGGATCCTGGGAAATCCAGAGTGTGAATCACTCT  
+HWI-EAS443:3:71:103:1252#0/1  
aa`]aaa`]X^`\_`¥\_\_¥aa\_```[YZW¥WUZ^^WZ`¥^¥  
@HWI-EAS443:3:71:1040:780#0/1  
AGCCAGTTAAAAACAATGCCAAGGAAATTGGAAACGGCT  
+HWI-EAS443:3:71:1040:780#0/1  
[V\_][\_a^`a`¥S]S\_U¥Za`]a]¥]\_XX[]T^`¥^ZWQ  
@HWI-EAS443:3:71:1051:507#0/1  
GTGTGCTCTTCAGGTCGGCTGCATATCCTGACCCCTGCTC  
+HWI-EAS443:3:71:1051:507#0/1  
a]a\_aa\_Z\_a^`a`¥Xa\_`¥`S¥¥aZ¥^X¥¥WQWZ¥SUWS  
@HWI-EAS443:3:71:1053:1659#0/1  
ATTTGAAAGTTTGGAGATATCCCAAGACAAGTTCATGG  
+HWI-EAS443:3:71:1053:1659#0/1  
abb`abb^\_a\_aa^bbaaaaa`¥\_`aaaa`]aZ`a\_^W\_  
@HWI-EAS443:3:71:1112:1878#0/1  
CATCCATCTACTAGTGCTGACCAACAAAGTCTCTATCAGA  
+HWI-EAS443:3:71:1112:1878#0/1  
abMbababaaa]aa[\_bZ`a`aaa\_ba`^Waaaa`^aR\_  
@HWI-EAS443:3:71:1125:1938#0/1  
CAGAATTTACTTTGTTAGTAATCTCGTCAATGGCATTCTG  
+HWI-EAS443:3:71:1125:1938#0/1  
aaabbabba`bbbaab`^bbbaaa¥aaaYaaaa`\_`^  
@HWI-EAS443:3:71:1136:769#0/1  
TGGGCCATGAACTTGTCTTGGGGAATATCTCAAACCTTTC  
+HWI-EAS443:3:71:1136:769#0/1  
[¥b`^abaYWY¥\_]`b\_I^U`aaWY\_S]a^Y^b^T¥S]a\_  
@HWI-EAS443:3:71:1139:1814#0/1  
TGGCTGGATCCTGGGAAATCCAGAGTGTGAATCACTCTCC  
+HWI-EAS443:3:71:1139:1814#0/1  
a\_¥a]aX\_aaZa[Raaaaaaa`^]S]X`aa``aa\_`¥\_H  
@HWI-EAS443:3:71:1174:311#0/1  
GGGCCATGAACTTGTCTTGGGGAATATCTCAAACCTTTC  
+HWI-EAS443:3:71:1174:311#0/1  
`bba^a`aaa`abb\_abb\_I\_b\_\_`\_a\_b`aa`]\_`aa\_\_  
@HWI-EAS443:3:71:1181:104#0/1  
TTCACCATCCATCTACTAGTGCTGACCAACAAAGTCTCTA  
+HWI-EAS443:3:71:1181:104#0/1  
aa¥a[^bbSWaaY¥\_]a^a]a^]\_\_^`^`S^``\_X¥\_0]^

@HWI-EAS443:3:71:1228:1846#0/1  
CAGAAACTGATTGCCCCAGGGAGACTACCAAGTACCAATG  
+HWI-EAS443:3:71:1228:1846#0/1  
abZ`\_`baaba]`\_a`]a`Z]\_]aa^¥^a]a\_SX\_\_`\_^\_  
@HWI-EAS443:3:71:1273:15#0/1  
ATCGATGAAATCTCCTGGGTAACACGTTCCATTGTCTGAA  
+HWI-EAS443:3:71:1273:15#0/1  
Z\_a`]\_\_`aa\_H^SZabbbY`¥`YabaWZ[W`aa`\_a]Y\_  
@HWI-EAS443:3:71:1289:1038#0/1  
ACCCCTCTTAGTTTGCATAGTTTCCCGTTATGCTTGTCTT  
+HWI-EAS443:3:71:1289:1038#0/1  
abaa^babbaa`baa`aaab\_aaa¥^a^`\_aa`\_a`W`a  
@HWI-EAS443:3:71:1289:1443#0/1  
CACTTCCATGCACGTGTTATCGCATTGTGGTAAAATTC  
+HWI-EAS443:3:71:1289:1443#0/1  
a]baaaabaa`¥`\_a\_baaaaa]\_baaa`aa\_b`¥`\_¥Y  
@HWI-EAS443:3:71:1303:1297#0/1  
GGGTCAGGATATGCAGCCGACCTGAAGAGCACACAGAATG  
+HWI-EAS443:3:71:1303:1297#0/1  
abb\_a¥b\_bbaab`bbaaaa\_bbaa`bab\_\_ab`baaaaa  
@HWI-EAS443:3:71:132:356#0/1  
GCGAACAATTCAACAGACACTGTAGACACAGTACTAGAAA  
+HWI-EAS443:3:71:132:356#0/1  
```a`\_^Y¥``]W¥`¥V]aaa]W]``YO[U`QVZ]YY[WO  
@HWI-EAS443:3:71:1363:1198#0/1  
GCCGGTTTCATTGAAGGGGGTGGACAGGGATGGTAGATG  
+HWI-EAS443:3:71:1363:1198#0/1  
]`a`\_aaba`bab`]baab`a[a```aa`\_`abaS`a[Wa  
@HWI-EAS443:3:71:1391:889#0/1  
CAGATGCATATGTTTTTGTGGGACATCAAGATACAGCAA  
+HWI-EAS443:3:71:1391:889#0/1  
\_bbbbbbba^^^babaa\_ab`abTb]¥aabaabbaa^bb  
@HWI-EAS443:3:71:1406:443#0/1  
TGGCATTCTGTGTCTTTCAGGTCGGCTGCATATCCTGA  
+HWI-EAS443:3:71:1406:443#0/1  
aa`\_`abbbba\_aSa\_a`bbab`[[^a`\_`abQaaba¥\_\_¥^  
@HWI-EAS443:3:71:1411:1936#0/1  
GGGACATCAAGATACAGCAAGAAGTTCAAGCCGAAATA  
+HWI-EAS443:3:71:1411:1936#0/1  
\_bababaaaabb\_bbbbbbaabbbb`aaaba\_ab^b`aaa  
@HWI-EAS443:3:71:1441:1859#0/1  
GGGAAATCCAGAGTGTGAATCACTCTCCACAGCAAGCTCA  
+HWI-EAS443:3:71:1441:1859#0/1  
`bb`\_`^¥]\_`\_`^aVa[aa[a\_\_\_\_a]`a]aa`a\_`\_`\_]]]  
@HWI-EAS443:3:71:1472:611#0/1  
CACAGTTCACAGCAGTAGGTAAGAGTTCAACCACCTGGA  
+HWI-EAS443:3:71:1472:611#0/1  
abbbbbbbbbb^^`abaa`a`abab`a^aa^]^^]\_b^^  
@HWI-EAS443:3:71:1481:512#0/1  
GGGACATCAAGATACAGCAAGAAGTTCAAGCCGAAATA

+HWI-EAS443:3:71:1481:512#0/1  
aa¥Y]^X\_Z]Z^aaZ\_¥\_N`b`QSRUF]^SVS^]ZWUa\_  
@HWI-EAS443:3:71:1507:748#0/1  
CATAAGTCCCATTTTTGACACTTTCCATGCACGTGTTATC  
+HWI-EAS443:3:71:1507:748#0/1  
aabaa\_¥¥X[`aa]^`\_]YSaaZ]^U`^X\_aab```a]]U  
@HWI-EAS443:3:71:1523:553#0/1  
TTTGGGGCCATTGCCGGTTTCATTGAAGGGGGGTGGACAG  
+HWI-EAS443:3:71:1523:553#0/1  
ab`b`ba`b^\_aV[`b^^a¥`b`Z^\_aa`^]^Saa¥U^^  
@HWI-EAS443:3:71:1535:1491#0/1  
TGTTATTTTGTCTCCCGCTCTACTAGTGTCCAGTAATAG  
+HWI-EAS443:3:71:1535:1491#0/1  
aa^a`baaaba\_`Z`a^R^]\_YS^a`^\_Z\_Y[W[[^^\_]^[^  
@HWI-EAS443:3:71:154:75#0/1  
TAGATTTCCAGTTGCTTCGAATGTTATTTTGTCTCCCGGC  
+HWI-EAS443:3:71:154:75#0/1  
aaa`a\_a`a\_a\_¥^`\_`\_¥X`X^W\_\_\_\_\_^]X\_ZZ]]ZW  
@HWI-EAS443:3:71:1574:439#0/1  
GAAGCCAGTTAAAAACAATGCCAAGGAAATTGGAAACGG  
+HWI-EAS443:3:71:1574:439#0/1  
aaaa]Za^aaa[aaaabaaab^¥a^aa`\_V^aaaa\_`T`^  
@HWI-EAS443:3:71:1621:1636#0/1  
GGGGCATTACCATCCATCTACTAGTGCTGACCAACAAAG  
+HWI-EAS443:3:71:1621:1636#0/1  
XSV¥LTN¥¥^\_NUQ¥``Y[\_PY\_[U[Y[Y[[T`]U[¥^`  
@HWI-EAS443:3:71:1624:627#0/1  
TGCTGGCTGGATCCTGGGAAATCCAGAGTGTGAATCACTC  
+HWI-EAS443:3:71:1624:627#0/1  
ababbbabaaaa^¥abbaaba\_`aaaa¥a^a`a`Sa]^¥  
@HWI-EAS443:3:71:1661:1559#0/1  
GCCGGTTTCATTGAAGGGGGGTGGACAGGGATGGTAGATG  
+HWI-EAS443:3:71:1661:1559#0/1  
a``]^`U\_a]^`^`aNWa]\_\_Z\_G\_¥W^^\_]VW`\_NV\_SW¥  
@HWI-EAS443:3:71:1675:786#0/1  
AGCAAATCCTACATTAATGATAAAGGAAAGAAGTCCTCG  
+HWI-EAS443:3:71:1675:786#0/1  
^``bbbbbbba\_bbbbbbbbaabbabbbba^``\_]\_aa  
@HWI-EAS443:3:71:1696:1755#0/1  
GCCAGTTAAAAACAATGCCAAGGAAATTGGAAACGGCTG  
+HWI-EAS443:3:71:1696:1755#0/1  
aa]\_a`bba`aaa\_aaaa\_\_\_\_`aaX`\_\_``\_\_\_\_`\_]\_Y  
@HWI-EAS443:3:71:1716:1279#0/1  
TTCTTGCTGTATCTTGATGTCCCCACAAAAACATATGCAT  
+HWI-EAS443:3:71:1716:1279#0/1  
aaaaab`bbaa\_``aaaa`\_``]\_^`^`\_`^`^`V]^  
@HWI-EAS443:3:71:1728:1820#0/1  
GTAATCTCGTCAATGGCATTCTGTGTGCTCTTCAGGTCGG  
+HWI-EAS443:3:71:1728:1820#0/1  
`^a\_aaaaa`¥^X[\_`]^a\_]a^QVS`]^`^\_\_a\_\_QZ¥

@HWI-EAS443:3:71:1773:487#0/1  
CTTTTCAATAACAGAATTTACTTTGTTAGTAATCTCGTCA  
+HWI-EAS443:3:71:1773:487#0/1  
abbbbbbbbbbbabbbbbbbbabababab]b^¥\_  
@HWI-EAS443:3:71:199:145#0/1  
AAAAACAATGCCAAGGAAATTGGAAACGGCTGCTTTGAAT  
+HWI-EAS443:3:71:199:145#0/1  
aaa^`a[`a\_\_\_[a\_]`\_`a`\_\_^\_\_\_]]¥KOY^OLPV  
@HWI-EAS443:3:71:223:1522#0/1  
CTTATATGAAAAGGTAAGAAGCCAGTTAAAAACAATGCC  
+HWI-EAS443:3:71:223:1522#0/1  
\_a`W^a]a¥^a^XW]VS`a\_a\_b^\_\_a`aa\_\_\_a^Z\_^X  
@HWI-EAS443:3:71:270:87#0/1  
CAGACAATGGAACGTGTACCCAGGAGATTCATCGATTA  
+HWI-EAS443:3:71:270:87#0/1  
ababbbabaabb¥aabaaaaaaaaaaaaaaaaa\_`a``]a\_  
@HWI-EAS443:3:71:343:1312#0/1  
CTGGTATTATCATTTCAGATACACCAGTCCACGATTGCAA  
+HWI-EAS443:3:71:343:1312#0/1  
^a`¥Ha\_Q^^a\_\_a]aYW\_^a]¥^b`[¥b^aZX]\_\_ab\_  
@HWI-EAS443:3:71:354:106#0/1  
ATCTCGGTACCACTAGATTTCCAGTTGCTTGAATGTTAT  
+HWI-EAS443:3:71:354:106#0/1  
ab`aaa`^b\_a`a`aa\_aa`\_\_aZ```aa\_\_UU]aW^Z^  
@HWI-EAS443:3:71:399:1588#0/1  
CAGAATTTACTTTGTTAGTAATCTCGTCAATGGCATTCTG  
+HWI-EAS443:3:71:399:1588#0/1  
^^¥X^a\_[Va]VPVX[`Y[Y^^YY]YV¥QOUGXWP¥F[SZ  
@HWI-EAS443:3:71:413:739#0/1  
AGCTTTTTGCTCCAGCATGAGGACATGCTGCCGTTACACC  
+HWI-EAS443:3:71:413:739#0/1  
H\_¥`W\_abb^TQ[¥\_]¥^^a\_[[`bYP]a)`¥\_[¥OHWMY  
@HWI-EAS443:3:71:440:132#0/1  
GGGGACATCAAGATACAGCAAGAAGTTCAAGCCGGAATA  
+HWI-EAS443:3:71:440:132#0/1  
abbbbbba^abaaa`bbbbbbbaa\_\_\_baa`aaW\_\_\_\_  
@HWI-EAS443:3:71:456:1832#0/1  
ACATATTCTACTGTAGAGACCCATTAGAGCACATCCAG  
+HWI-EAS443:3:71:456:1832#0/1  
``Z`[]¥\_\_^a¥\_SWUQXZOYa]^YSQXV\_Z\_UW]R¥YSQ  
@HWI-EAS443:3:71:467:500#0/1  
ATGGTTTCTGACATTTGGACTTACAATGCCGAACTGTT  
+HWI-EAS443:3:71:467:500#0/1  
abbb¥aaaaabb^`Z`aaa`^a`\_`a`\_\_a`\_`¥`ZW  
@HWI-EAS443:3:71:517:197#0/1  
TGTTATTTTGTCTCCCGCTCTACTAGTGTCCAGTAATAG  
+HWI-EAS443:3:71:517:197#0/1  
ab``aabbaaa\_a`aaa```\_[]^XXUURW¥T\_X\_XXVX  
@HWI-EAS443:3:71:530:1478#0/1  
ATGGTTTCTGACATTTGGACTTACAATGCCGAACTGTT

+HWI-EAS443:3:71:530:1478#0/1  
aaaaWaabba¥¥aaaa\_a[\_`a\_aabZa``\_a\_\_\_\_\_`]X^  
@HWI-EAS443:3:71:534:2021#0/1  
CACCGTCCACGATTGCAATACAACCTGTCAGACACCCAA  
+HWI-EAS443:3:71:534:2021#0/1  
`[ba]\_G¥a\_a^\_V]bbYP¥\_a\_[VYYYV^`U[`a^^V\_U  
@HWI-EAS443:3:71:629:695#0/1  
TGGAAAATGTCCAAAATATGTAAAAAGCACAAAATTGAGA  
+HWI-EAS443:3:71:629:695#0/1  
¥ba```aababbaaaa`^aa\_abb^¥```baaW^abaa^\_a  
@HWI-EAS443:3:71:656:1822#0/1  
AGATACACCAGTCCACGATTGCAATACAACCTGTCAGACA  
+HWI-EAS443:3:71:656:1822#0/1  
MZ`aaabb\_aS^abab\_a\_a`aaa[aba`a\_] [Z[aa`\_\_  
@HWI-EAS443:3:71:677:705#0/1  
CAGGGGTGAGGATATGCAGCCGACCTGAAGAGCACACAGA  
+HWI-EAS443:3:71:677:705#0/1  
abb```a\_ba`b\_`a¥a`a`a`a```aaaa^]`aaa\_\_\_\_\_  
@HWI-EAS443:3:71:726:77#0/1  
GTATCTTGATGTCCCCACAAAACATATGCATCTGCATTC  
+HWI-EAS443:3:71:726:77#0/1  
aabbabbbbaaaaa`aaaaaabbaaaaa`a\_aa\_aa]```¥  
@HWI-EAS443:3:71:728:1881#0/1  
GGGGGGTGGACAGGGATGGTAGATGGATGGTACGGTTATC  
+HWI-EAS443:3:71:728:1881#0/1  
aaa]aaVa^`bb`Zaaa^aSaaaV]a```\_Qa`\_Z¥]aMV  
@HWI-EAS443:3:71:763:1466#0/1  
GAGCTCAATTGCTCTCTTAGCTCCTCATAATCGATGAAAT  
+HWI-EAS443:3:71:763:1466#0/1  
a`[aabb`baabb`abaab`baababa`aaa`a\_a`\_aa\_  
@HWI-EAS443:3:71:776:860#0/1  
TCATAATCGATGAAATCTCCTGGGTAACACGTTCCATTGT  
+HWI-EAS443:3:71:776:860#0/1  
`a[ZYRV\_aaSY\_Z]]`\_aTa^JGV`[\_`RZa¥Z^Y\_Y  
@HWI-EAS443:3:71:790:347#0/1  
TCACCATCCATCTACTAGTGCTGACCAACAAAGTCTCTAT  
+HWI-EAS443:3:71:790:347#0/1  
]S]T^TMWUaY\_aa]aZ[U[Qaa\_[QW`XV¥¥[LY``V¥^  
@HWI-EAS443:3:71:793:195#0/1  
GGAAAGTGTCAAAAATGGGACTTATGACTACCCAAAATAC  
+HWI-EAS443:3:71:793:195#0/1  
a^aaaa^b\_a```aaaab\_a^```a`a```\_aYT\_\_^```\_U  
@HWI-EAS443:3:71:859:1661#0/1  
CACGTGTTATCGCATTTGTGGTAAAATTCAAAGCAGCCGT  
+HWI-EAS443:3:71:859:1661#0/1  
abaa]\_\_aaaa]^aaaa\_a¥¥baaaa`a```[^]W`^[Z  
@HWI-EAS443:3:71:899:1693#0/1  
ATGTTTTTGTGGGACATCAAGATACAGCAAGAAGTTCAA  
+HWI-EAS443:3:71:899:1693#0/1  
^aa`aabaa\_aaa^```aa\_aa\_]aaaaabb\_a`X^¥b`

@HWI-EAS443:3:71:939:1928#0/1  
TGGGGACATCAAGATACAGCAAGAAGTTCAAGCCGGAAAT  
+HWI-EAS443:3:71:939:1928#0/1  
ab`IOaab`aaX^`aabbabb`\_a`0\_aaa\_ba`S`aa\_  
@HWI-EAS443:3:71:972:114#0/1  
TACCAGTACCAATGAACTGGCGACAGTTGAATAGATCGCC  
+HWI-EAS443:3:71:972:114#0/1  
aba`aa\_aa\_^abbaa`aaa\_a\_\_\_\_\_Za\_^`\_\_a\_ZZ\_ZV  
@HWI-EAS443:3:71:976:1919#0/1  
AATTTACTTTGTTAGTAATCTCGTCAATGGCATTCTGTGT  
+HWI-EAS443:3:71:976:1919#0/1  
abaaabbabb\_\_aa``baaaaaa]\_aa``[¥`a`a`\_\_\_Z  
@HWI-EAS443:3:71:980:954#0/1  
GTGTATTCATCTTTTCAATAACAGAATTTACTTTGTTAGT  
+HWI-EAS443:3:71:980:954#0/1  
a¥Q¥OZW\_UYaWW)`aXQXWSUZ\_^[¥[RPY]]aaW¥\_\_T  
@HWI-EAS443:3:71:995:1740#0/1  
GCTTGAACCTTCTTGCTGTATCTTGATGTCCCCACAAAAAC  
+HWI-EAS443:3:71:995:1740#0/1  
\_bZaV`¥\_aab[Ya``b[a\_aa^\_R]a^b`\_aa]L^`S^`  
@HWI-EAS443:3:72:1008:1300#0/1  
GCACGTGTTATCGCATTTGTGGTAAAATTCAAAGCAGCCG  
+HWI-EAS443:3:72:1008:1300#0/1  
[`a\_a\_babbba`ababb^baa\_bbba]bbbbabaabaa  
@HWI-EAS443:3:72:1020:578#0/1  
CTTCCTCTGAGTATTTTGGGTAGTCATAAGTCCCATTTTT  
+HWI-EAS443:3:72:1020:578#0/1  
a`bbbbbbbbbabbbbabbbabba\_bbbabaaaabbbbb  
@HWI-EAS443:3:72:1020:804#0/1  
CGTGCATGGAAAGTGCAAAAATGGGACTTATGACTACCC  
+HWI-EAS443:3:72:1020:804#0/1  
ab`aabaa\_abaaTb`bb```aabbba`baaaa`a\_aaa[  
@HWI-EAS443:3:72:1022:856#0/1  
GTGGGGACATCAAGATACAGCAAGAAGTTCAAGCCGGAAA  
+HWI-EAS443:3:72:1022:856#0/1  
`ZWWXHW[LV\_UWRQZ[[`\_]\_^WZXWQFV¥SQXISSXV]X  
@HWI-EAS443:3:72:1023:1380#0/1  
AAAAAAGGAAATTCATACCCAAAGCTCAGCAAATCCTACA  
+HWI-EAS443:3:72:1023:1380#0/1  
aaaa\_``\_\_`a`\_``\_\_aY^\_\_\_Y¥^X¥Y^`]\_\_^Z^^^\_  
@HWI-EAS443:3:72:1024:940#0/1  
CGGCTCTACTAGTGTCCAGTAATAGTTCATTCTCCCTTCT  
+HWI-EAS443:3:72:1024:940#0/1  
abaabb^babb`JWWbbW¥Xba`T\_[aa`K\_V]aaaa`a  
@HWI-EAS443:3:72:1028:1784#0/1  
CTTCTTGCTGTATCTTGATGTCCCCACAAAAACATATGCA  
+HWI-EAS443:3:72:1028:1784#0/1  
`aabaabbba^aaaa`aa`a`baaa^a^U^aaa`\_\_\_^^a  
@HWI-EAS443:3:72:1066:340#0/1  
GAAATTGGAAACGGCTGCTTTGAATTTTACCACAAATGCG

+HWI-EAS443:3:72:1066:340#0/1  
aaaaaaaaaba`aa\_a\_RW`HJY^aaaXX]]]]\_`TVR[  
@HWI-EAS443:3:72:1075:492#0/1  
GACAAGTTGTATTGCAATCGTGGACTGGTGTATCTGAAAT  
+HWI-EAS443:3:72:1075:492#0/1  
`S`[U\_Z]][]ZTZZ`aa^a[Z¥YY]YNNaY`WS]`YYW¥  
@HWI-EAS443:3:72:1123:278#0/1  
CTTCAGGTCGGCTGCATATCCTGACCCCTGCTCATTTTGA  
+HWI-EAS443:3:72:1123:278#0/1  
abbbaba¥[baabb`abbbaba`b``\_a]`a^]b^`a^`  
@HWI-EAS443:3:72:1127:910#0/1  
CAGAATTTACTTTGTTAGTAATCTCGTCAATGGCATTCTG  
+HWI-EAS443:3:72:1127:910#0/1  
`bbbbabbbbbbbba`bbbbbbb]baabba\_a^bbb`ab  
@HWI-EAS443:3:72:1141:1283#0/1  
GTGGGGACATCAAGATACAGCAAGAAGTTCAAGCCGAAA  
+HWI-EAS443:3:72:1141:1283#0/1  
a[\_````¥¥¥¥\_`]]`\_]]a`^TW\_LX]^Z\_¥^]¥\_^^  
@HWI-EAS443:3:72:1165:413#0/1  
CGGTTTCATTGAAGGGGGTGGACAGGGATGGTAGATGGA  
+HWI-EAS443:3:72:1165:413#0/1  
aaaabbabbbbaabbbbb`abaabbbbabbb`ba`bb\_  
@HWI-EAS443:3:72:1171:834#0/1  
CTCGTGCTATGGGCATTACCATCCATCTACTAGTGCTG  
+HWI-EAS443:3:72:1171:834#0/1  
abababababbaaaaaabaabaaaa`aa`]aa`bab\_aaaa  
@HWI-EAS443:3:72:118:1698#0/1  
CAACAAAGTCTCTATCAGAATGCAGATGCATATGTTTTTG  
+HWI-EAS443:3:72:118:1698#0/1  
a^`^`SMTF\_Z¥W¥¥¥¥^SO\_VY^\_XTW\_`^XTS[SZSRLT  
@HWI-EAS443:3:72:1194:937#0/1  
GCCATGAACCTGTCTTGGGAATATCTCAAACCTTTCAA  
+HWI-EAS443:3:72:1194:937#0/1  
aa\_aaaa\_aa`\_`aaaa\_a^\_a`a^a\_`^a\_`\_^`^\_`a  
@HWI-EAS443:3:72:1203:348#0/1  
GTCCATTTTTGACACTTCCATGCACGTGTATCGCATT  
+HWI-EAS443:3:72:1203:348#0/1  
aa`a`abaaba`^`a`bb¥^]`a`Z]]aaaaa^`]]`  
@HWI-EAS443:3:72:1235:507#0/1  
TGCACGTGTTATCGCATTGTGGTAAAATCAAAGCAGCC  
+HWI-EAS443:3:72:1235:507#0/1  
[`^`aababbab[[Uabba`b\_Ua`Kabaabb]b\_a`¥N  
@HWI-EAS443:3:72:1238:1947#0/1  
GATTTGCTGAGCTTTGGGTATGAATTCCTTTTTTAACTA  
+HWI-EAS443:3:72:1238:1947#0/1  
a\_a`a`bba\_abaaaaa[baaaaa`a\_\_aaaa```aa`a  
@HWI-EAS443:3:72:1242:1128#0/1  
AATCGATGAAATCTCCTGGTAACACGTTCCATTGTCTGA  
+HWI-EAS443:3:72:1242:1128#0/1  
`ab^aab¥abaaa`[\_ba\_a¥a\_Sa^a¥`a]\_\_`a]^`a^`



@HWI-EAS443:3:72:1299:1060#0/1  
GTCTTATTGCTATTTCCGGCTTGAACCTTCTTGCTGTATCT  
+HWI-EAS443:3:72:1299:1060#0/1  
a\_a\_aaaaaa`aaa`a\_\_\_a`\_``\_^^^`\_^^^`X[\_\_\_\_  
@HWI-EAS443:3:72:1377:1366#0/1  
GCAGTAGGTAAGAGTTCAACCACCTGGAAAAAGAATAG  
+HWI-EAS443:3:72:1377:1366#0/1  
abaaY`aa`a`a\_^a]^`¥\_\_[X\_]\_^aa]]\_\_\_\_]WY\_\_^\_  
@HWI-EAS443:3:72:1385:1367#0/1  
GTTCAGACAATGGAACGTGTTACCCAGGAGATTTTCATCGA  
+HWI-EAS443:3:72:1385:1367#0/1  
aaaaa]^`ab]^`\_`\_a]^`\_\_`\_`\_a\_\_\_`\_^`]\_\_\_\_\_]  
@HWI-EAS443:3:72:1393:724#0/1  
CAACTGGAATCTAGTGGTACCGAGATATGCATTCGCAAT  
+HWI-EAS443:3:72:1393:724#0/1  
`a]^`\_][V\_¥V¥b^aa\_b]I`^b]^`\_aa][aaaa\_a`\_  
@HWI-EAS443:3:72:1415:626#0/1  
AAGAGAGCAATTGAGCTCAGTGCATCATTGAAAGGTTT  
+HWI-EAS443:3:72:1415:626#0/1  
aa`aa`U^ba^[\_][\_]a`\_Na\_^\_a]^`\_]a^X]a]X\_\_  
@HWI-EAS443:3:72:1490:254#0/1  
GTGGGGACATCAAGATACAGCAAGAAGTTCAAGCCGAAAA  
+HWI-EAS443:3:72:1490:254#0/1  
`RY`aa`a\_a\_\_`\_a\_aaa\_\_\_`a\_^aY]V\_\_`R[^]]]]  
@HWI-EAS443:3:72:1538:1891#0/1  
CGGTACCACTAGATTTCCAGTTGCTTCCAATGTTATTTTG  
+HWI-EAS443:3:72:1538:1891#0/1  
aba]a`abVaba¥`aaaa`\_`\_`aaa^a^aaa^\_`a]a]^`  
@HWI-EAS443:3:72:1548:206#0/1  
CACAAATGCGATAACACGTGCATGGAAAGTGCAAAAATG  
+HWI-EAS443:3:72:1548:206#0/1  
ab]babbbbbbaa`b^baa¥`bbaaa`\_Yb\_\_aaaa`aa  
@HWI-EAS443:3:72:1562:825#0/1  
CCCGGCTCTACTAGTGTCCAGTAATAGTTCATTCTCCCTT  
+HWI-EAS443:3:72:1562:825#0/1  
]^`\_`]HPa\_]`YUY]G]^`SSaS\_\_`\_^OXQ]Y]Z\_VU\_W^  
@HWI-EAS443:3:72:1596:1367#0/1  
CTCTCTTAGCTCCTCATAATCGATGAAATCTCCTGGGTAA  
+HWI-EAS443:3:72:1596:1367#0/1  
ababbbbaXZba`\_[ab\_bb\_baabaaaaa`a`a`\_]a`  
@HWI-EAS443:3:72:1598:1540#0/1  
TGCTGGCTGGATCCTGGGAAATCCAGAGTGTGAATCACTC  
+HWI-EAS443:3:72:1598:1540#0/1  
^^`ababbab^TbaZ]aaXaaa^aaa^aSaXaaa[Uaa`Z  
@HWI-EAS443:3:72:1638:68#0/1  
CAACAAAGTCTCTATCAGAATGCAGATGCATATGTTTTTG  
+HWI-EAS443:3:72:1638:68#0/1  
aV^U¥^\_`Z`aYb\_`K`\_NWbb¥VaYN¥HYaY`R^WG^[G  
@HWI-EAS443:3:72:1665:1365#0/1  
TGTTTTCCACAATGTAGGACCATGAGCTTGCTGTGGAGAGT

+HWI-EAS443:3:72:1665:1365#0/1  
`aYa``ba`aba\_aaab^[aaa^aa`\_\_aa`aaY\_\_^U  
@HWI-EAS443:3:72:1667:976#0/1  
GCTCCTCATAATCGATGAAATCTCCTGGGTAACACGTTCC  
+HWI-EAS443:3:72:1667:976#0/1  
a\_a\_¥X`\_`aa\_]W[a[T^\_]\_¥XP\_V\_R`UVV]\_Y^XR  
@HWI-EAS443:3:72:1749:262#0/1  
GACAATGGAACGTGTTACCCAGGAGATTTTCATCGATTATG  
+HWI-EAS443:3:72:1749:262#0/1  
ab`baaaaa[a^a\_`aa]^\_a\_``\_`^^\_`^^V\_^]\_\_  
@HWI-EAS443:3:72:189:196#0/1  
GGGGTCAGGATATGCAGCCGACCTGAAGAGCACACAGAAT  
+HWI-EAS443:3:72:189:196#0/1  
aX^aHaaaa]\_a\_``\_`\_`¥\_^¥\_\_WV`¥\_T^¥^¥^\_`^¥Y  
@HWI-EAS443:3:72:224:756#0/1  
TGCTTCCTCTGAGTATTTTGGGTAGTCATAAGTCCCATTT  
+HWI-EAS443:3:72:224:756#0/1  
aabaaaaaaaa`b]aaaaa`\_]aa\_``\_`[`a[\_Y]\_`a`  
@HWI-EAS443:3:72:225:267#0/1  
CACTAGTAGATGGATGGTGAATGCCCATAGCACGAGGAC  
+HWI-EAS443:3:72:225:267#0/1  
\_]\_bab\_baaab`]bb^^aaba``^`\_`\_a``[^`\_a\_``  
@HWI-EAS443:3:72:233:1604#0/1  
AGCCAGTTAAAAACAATGCCAAGGAAATTGGAAACGGCT  
+HWI-EAS443:3:72:233:1604#0/1  
a^aa^Z]``aa^\_]a^]a^\_``\_`\_`^]¥^^]]]Y]]\_`^ZY[[  
@HWI-EAS443:3:72:268:896#0/1  
TGACACTGAGCTCAATTGCTCTTAGCTCCTCATAATCG  
+HWI-EAS443:3:72:268:896#0/1  
[`]b[aaW¥baI^WVaaababaab\_W\_ba`]]`b`b`b¥^aa  
@HWI-EAS443:3:72:282:1392#0/1  
CAACTTGTGACACACCCCAAGGGTGCTATAAACACCAGCCT  
+HWI-EAS443:3:72:282:1392#0/1  
`]]````YS\_Y\_]a^`\_`\_`][[[]T¥^U^Y¥^^¥^U¥RUYQV  
@HWI-EAS443:3:72:287:646#0/1  
CGTGTATCGCATTTGTGGTAAAATTCAAAGCAGCCGTTT  
+HWI-EAS443:3:72:287:646#0/1  
a\_T\_a\_]]]]]X`a^]W`]Q^[XV]^`\_`a[SOZWX[UMQT  
@HWI-EAS443:3:72:294:1219#0/1  
AAGCCAGTTAAAAACAATGCCAAGGAAATTGGAAACGGC  
+HWI-EAS443:3:72:294:1219#0/1  
TYVba\_¥GW^YSSQ¥aaaWaba`PVQQT]a[aZVZOLXY\_  
@HWI-EAS443:3:72:294:783#0/1  
CAAAGTCTCTATCAGAATGCAGATGCATATGTTTTTGTGG  
+HWI-EAS443:3:72:294:783#0/1  
`aa\_aZabbbbaaX\_a[P``abaab\_aabab¥aaaaa^ab  
@HWI-EAS443:3:72:399:463#0/1  
GGGGACATCAAGATACAGCAAGAAGTTCAAGCCGGAATA  
+HWI-EAS443:3:72:399:463#0/1  
]b``aaaabb\_aaaaabbaaba`W^]\_`aaa¥`aaa`X\_\_

@HWI-EAS443:3:72:403:43#0/1  
GTGTCTGACAAGTTGTATTGCAATCGTGGACTGGTGTATC  
+HWI-EAS443:3:72:403:43#0/1  
aaaYaaa¥[\_V]^`Za\_`a]^`^^`[]YRZ\_\_¥S^X[[¥  
@HWI-EAS443:3:72:441:1145#0/1  
GTGGGGACATCAAGATACAGCAAGAAGTTCAAGCCGGAAA  
+HWI-EAS443:3:72:441:1145#0/1  
aW]aa^\_ab`][aaa\_\_aaa`\_a\_ZRWY]a^P^\_PZVU[]  
@HWI-EAS443:3:72:477:40#0/1  
CAAGTTCATGGCCCAATCATGACTCGAACAAAGGTGTAAC  
+HWI-EAS443:3:72:477:40#0/1  
aaS]TWa\_W]YZPT^\_\_\_\_\_¥Z^]ZYPYRRNP[TTSSUUU  
@HWI-EAS443:3:72:49:978#0/1  
TGAACTCTTTACCTACTGCTGTGAACTGTGTATTCATCTT  
+HWI-EAS443:3:72:49:978#0/1  
[[a¥a\_aba¥Z\_a`a`\_¥XVLUT\_a\_bYZ]T`TXQSZ\_\_  
@HWI-EAS443:3:72:503:360#0/1  
GGTAAATGTAACATTGCTGGCTGGATCCTGGGAAATCCAG  
+HWI-EAS443:3:72:503:360#0/1  
aaU`a^abZa]aa```a\_X]^`\_¥ZZ\_\_^`Ya[^^\_W^`U  
@HWI-EAS443:3:72:511:1349#0/1  
AATCTCGTCAATGGCATTCTGTGTGCTCTTCAGGTCGGCT  
+HWI-EAS443:3:72:511:1349#0/1  
`aaaaa[\_`[Y^¥^`\_`\_¥LL]]¥[\_\_^`]^`\_X^RZ\_¥¥V  
@HWI-EAS443:3:72:518:1477#0/1  
GCCGGTTTCATTGAAGGGGGTGGACAGGGATGGTAGATG  
+HWI-EAS443:3:72:518:1477#0/1  
`bbbbabbbaab`]¥^aabaa^]aa`aa`aaaa`¥b`a\_[  
@HWI-EAS443:3:72:579:1314#0/1  
CGATTATGAGGAGCTAAGAGAGCAATTGAGCTCAGTGTCA  
+HWI-EAS443:3:72:579:1314#0/1  
a``aaaaa^\_a`\_aaaa\_a\_aa`\_aa\_\_a¥a``\_\_^\_^[Z  
@HWI-EAS443:3:72:580:514#0/1  
CAATGGCATTCTGTGTGCTCTTCAGGTCGGCTGCATATCC  
+HWI-EAS443:3:72:580:514#0/1  
abb]]\_ZZb\_0\_bababbbaaa`]]bUab]^`^R[]``¥]  
@HWI-EAS443:3:72:590:1392#0/1  
TATATTCTGAAATGGGAGGCTGGTGTATATAGCACCCCTTG  
+HWI-EAS443:3:72:590:1392#0/1  
^`\_\_aaba`\_a`ba[a^`\_\_\_^\_Za\_aaa`````aa`¥W[a  
@HWI-EAS443:3:72:608:2023#0/1  
GCTGGCTGGATCCTGGGAAATCCAGAGTGTGAATCACTCT  
+HWI-EAS443:3:72:608:2023#0/1  
abb]aaaa``¥]a\_^`a^`\_S]aSX¥]W[UP``NSZW¥¥U  
@HWI-EAS443:3:72:617:1783#0/1  
CATAAGTCCCATTTTTGACACTTCCATGCACGTGTTATC  
+HWI-EAS443:3:72:617:1783#0/1  
``]``XU[¥^`]^`^PWJS¥`^aR[]ZY0^^^ZSSOW¥ZN  
@HWI-EAS443:3:72:623:2014#0/1  
GAGTATTTTGGGTAGTCATAAGTCCCATTTTTGACACTT

+HWI-EAS443:3:72:623:2014#0/1  
`aa]aa``\_aa¥]\_Ya`aa`\_Xa`aa`````\_`^`^^\_\_  
@HWI-EAS443:3:72:636:1489#0/1  
CTGGCTGGATCCTGGGAAATCCAGAGTGTGAATCACTCTC  
+HWI-EAS443:3:72:636:1489#0/1  
a\_]W]a]U^^aa`\_]¥^¥\_aaaa^T[P\_T`a]¥]a`\_a¥a  
@HWI-EAS443:3:72:64:1868#0/1  
TCTTGATGTCCCCACAAAAACATATGCATCTGCATTCTGA  
+HWI-EAS443:3:72:64:1868#0/1  
aba¥b^a]\_babbbaS^VZ^aa[ZYa`\_b^`baY^a]\_\_  
@HWI-EAS443:3:72:654:883#0/1  
GGAAAATGAAAGAACTTTGGACTACCACGATTCAAATGTG  
+HWI-EAS443:3:72:654:883#0/1  
`^^a\_¥^^V^a\_aaa¥YZ]a^aaaaa\_W]\_`\_]`¥]a0a  
@HWI-EAS443:3:72:668:1372#0/1  
GCTGGCTGGATCCTGGGAAATCCAGAGTGTGAATCACTCT  
+HWI-EAS443:3:72:668:1372#0/1  
X``]baa]aabbXUa`T\_aa`ab\_U]]XYa\_aY]FQR¥H  
@HWI-EAS443:3:72:66:1540#0/1  
TTCACCATCCATCTACTAGTGCTGACCAACAAAGTCTCTA  
+HWI-EAS443:3:72:66:1540#0/1  
aab`bb^U\_```b¥baaaa\_abaababaabaa]a]aaa\_a  
@HWI-EAS443:3:72:671:1827#0/1  
GCTGCTTTGAATTTTACCACAAATGCGATAACACGTGCAT  
+HWI-EAS443:3:72:671:1827#0/1  
abaaa`a\_W`aaa`aaaaaaaa`\_`a\_a`a`aaa\_^\_``^  
@HWI-EAS443:3:72:684:1613#0/1  
CGATAACACGTGCATGGAAAGTGTCAAAAATGGGACTTAT  
+HWI-EAS443:3:72:684:1613#0/1  
a`baabb\_baX`ba`a^\_ba\_Wa^aaa\_baa`\_Y\_\_a`aa  
@HWI-EAS443:3:72:71:1545#0/1  
TTGCTATTTCCGGCTTGAACCTTCTTGCTGTATCTTGATGT  
+HWI-EAS443:3:72:71:1545#0/1  
a\_V``b`a`b\_[Q`abZ^a`^`ba[Z¥\_TYa`aa^PXYW]  
@HWI-EAS443:3:72:729:1852#0/1  
GGTTATCATGCGAACAATTCAACAGACACTGTAGACACAG  
+HWI-EAS443:3:72:729:1852#0/1  
\_OP]^\_aaY^`Ya\_Z[P[Z^^^\_WU[Y\_]XLNQX^\_\_[U  
@HWI-EAS443:3:72:73:1518#0/1  
AGGGAAAGAAGTCCTCGTGCTATGGGGCATTACCATCCA  
+HWI-EAS443:3:72:73:1518#0/1  
aaX]X`\_¥`¥][aa`\_Z^\_`^`¥[WY^]Y`\_a^U^Z`Z`  
@HWI-EAS443:3:72:748:306#0/1  
GGGAAATCCAGAGTGTGAATCACTCTCCACAGCAAGCTCA  
+HWI-EAS443:3:72:748:306#0/1  
\_Zbbbbbaa\_\_\_^]\_]b\_ZX]]\_aa\_\_\_aa`[\_`^`P^[^  
@HWI-EAS443:3:72:787:1227#0/1  
ATTAATTTTTGTAGAAGCTTTTTGCTCCAGCATGAGGAC  
+HWI-EAS443:3:72:787:1227#0/1  
aaabaaaaaaaaXa\_\_G¥\_`^a\_\_\_]\_`^\_\_\_`\_]\_¥]Z^



+HWI-EAS443:3:73:1018:412#0/1  
aaabaabbaabbbbbbabbbaabbbbbbabbaabaabbbba  
@HWI-EAS443:3:73:1067:620#0/1  
ATTTGGGTAAATGTAACATTGCTGGCTGGATCCTGGGAAA  
+HWI-EAS443:3:73:1067:620#0/1  
\_\_a\_]\_a^`a^` `]`a^aa]\_¥` `a` ^^\_\_W]W0¥]^¥a^  
@HWI-EAS443:3:73:1071:1424#0/1  
CATCCATCTACTAGTGCTGACCAACAAAGTCTCTATCAGA  
+HWI-EAS443:3:73:1071:1424#0/1  
abbaaabababaa\_bbaaaa`aaa\_aa`V[^a`a` `aaa  
@HWI-EAS443:3:73:1102:1920#0/1  
GCGAACAAATTCAACAGACACTGTAGACACAGTACTAGAAA  
+HWI-EAS443:3:73:1102:1920#0/1  
aabbababaaabbaababaa`aaaa\_aaaaa\_¥aVa`¥¥a`  
@HWI-EAS443:3:73:112:303#0/1  
GCATTCACCATCCATCTACTAGTGCTGACCAACAAAGTCT  
+HWI-EAS443:3:73:112:303#0/1  
`aaaaaa` `aW` `a`a\_ba\_\_\_U` ^^\_]\_\_\_]` \_\_T^^W^]  
@HWI-EAS443:3:73:1130:1356#0/1  
GCTGCATATCCTGACCCCTGCTCATTGATGGTGATAAC  
+HWI-EAS443:3:73:1130:1356#0/1  
aaaab^bbbaaaabb`ab\_a`aaaa`a`aa\_a`X` ^` `a^  
@HWI-EAS443:3:73:1197:1381#0/1  
CTCTGTTTAATTTTGCTTCCTCTGAGTATTTTGGGTAGTC  
+HWI-EAS443:3:73:1197:1381#0/1  
abaabab`baba`a`aaaaaaba\_]MPaaa`aa¥PX[TX  
@HWI-EAS443:3:73:1203:1952#0/1  
AATGGAACGTGTTACCCAGGAGATTTTCATCGATTATGAGG  
+HWI-EAS443:3:73:1203:1952#0/1  
a^¥aX[ ` \_b[b]¥SX]X[^[WaY]^Z]I]X][[^]a\_]Y]  
@HWI-EAS443:3:73:1239:774#0/1  
CACGATTGCAATACAACCTGTCAGACACCCAAGGGTGCTA  
+HWI-EAS443:3:73:1239:774#0/1  
RT[ \_`U` ^^\_Z` Zab¥Ua\_XSWZX\_aabb\_¥W\_ababI¥R  
@HWI-EAS443:3:73:126:1963#0/1  
AGACTTTGTTGGTCAGCACTAGTAGATGGATGGTGAATGC  
+HWI-EAS443:3:73:126:1963#0/1  
aT[b\_\_ [a\_[NPH][[Q\_¥`TZaN`Z`RXX¥¥\_GTZ\_\_URU  
@HWI-EAS443:3:73:1284:1540#0/1  
GTCCTCGTGCTATGGGCATTACCATCCATCTACTAGTG  
+HWI-EAS443:3:73:1284:1540#0/1  
aabbbbbbaaaaaabaaaaaa¥¥ba^aaaa`a[a  
@HWI-EAS443:3:73:1299:1250#0/1  
GAATTTCTTTTTTAACTAGCCATATTAATTTTTGTAGA  
+HWI-EAS443:3:73:1299:1250#0/1  
aZ^NZ\_V[QM^X^]ZTS[T\_OPW]\_\_\_TTT` ]Z][XS]\_^  
@HWI-EAS443:3:73:134:2009#0/1  
GGCTAGTTAAAAAAGGAAATTCATACCCAAAGCTCAGCAA  
+HWI-EAS443:3:73:134:2009#0/1  
Tabb\_[^`¥VQ¥` \_W]\_`UZ]b\_¥^abbbbaP` `b]Xa^H

@HWI-EAS443:3:73:1369:1308#0/1  
GCTCATTTTTGATGGTGATAACCGTACCATCCATCTACCAT  
+HWI-EAS443:3:73:1369:1308#0/1  
a^]a`a``]bXX``\_``X[\_R¥[FULUXU]UX^J[SFM^^  
@HWI-EAS443:3:73:1378:346#0/1  
CTTCCTCTGAGTATTTTTGGGTAGTCATAAGTCCCATTTTT  
+HWI-EAS443:3:73:1378:346#0/1  
a`b`^`abbbb\_abaab^a^^ab`¥`ba\_a^^^[]bbaaa  
@HWI-EAS443:3:73:1393:23#0/1  
CATTTGAGATACACCAGTCCACGATTGCAATACAACCTTGT  
+HWI-EAS443:3:73:1393:23#0/1  
a^[\_a[b\_aaX`WV^]Y`STY`P¥VU\_a`T¥^¥¥0a[[X  
@HWI-EAS443:3:73:1411:1502#0/1  
GATGCATATGTTTTTGTGGGGACATCAAGATACAGCAAGA  
+HWI-EAS443:3:73:1411:1502#0/1  
a^¥a`aaaaa^aaaaa^a\_`\_\_`V[\_]\_\_\_\_`\_a`^`aa^  
@HWI-EAS443:3:73:1421:1467#0/1  
CAGAATGCAGATGCATATGTTTTTGTGGGGACATCAAGAT  
+HWI-EAS443:3:73:1421:1467#0/1  
Z\_\_Y\_``¥V\_`^a]¥]]^\_`^\_X``b`U¥\_Q¥X¥\_Z^a`  
@HWI-EAS443:3:73:1436:1321#0/1  
TCCGGCTTGAACCTTCTTGCTGTATCTTGATGTCCCCACAA  
+HWI-EAS443:3:73:1436:1321#0/1  
```^W`\_¥[]^X\_W^a`N¥`L^[S^`WSSL)`\_SKZaaR  
@HWI-EAS443:3:73:1453:1320#0/1  
GCTAAGAGAGCAATTGAGCTCAGTGCATCATTTGAAAGG  
+HWI-EAS443:3:73:1453:1320#0/1  
X`bbabbb¥aabaa`aba`a]b\_a\_aa`b\_abbb]Y[a]a  
@HWI-EAS443:3:73:1463:436#0/1  
TGGTTTCTGGACATTTGGACTTACAATGCCGAACCTGTTG  
+HWI-EAS443:3:73:1463:436#0/1  
aa\_U\_`\_]\_aa`QW`aZ`^[WQa`\_`^\_\_aU\_`PTT)`^\_\_  
@HWI-EAS443:3:73:1466:1768#0/1  
CGATGAAATCTCCTGGGTAACACGTTCCATTGTCTGAACT  
+HWI-EAS443:3:73:1466:1768#0/1  
a`bbba`\_R^aaabaaaaaba\_``ZZaa`aa`baaa¥a  
@HWI-EAS443:3:73:148:734#0/1  
AAAATGGGACTTATGACTACCCAAAATACTCAGAGGAAGC  
+HWI-EAS443:3:73:148:734#0/1  
a`a`a]¥S¥a]a\_``a\_`^\_]U]`\_\_\_\_^¥^^U¥¥T^\_]  
@HWI-EAS443:3:73:1605:1249#0/1  
CAATGTAGGACCATGAGCTTGCTGTGGAGAGTGATTCACA  
+HWI-EAS443:3:73:1605:1249#0/1  
aaaabaa\_aaZ``aaaaa`^]ba]`^[]`W``^]S][^  
@HWI-EAS443:3:73:168:1381#0/1  
GCTGTATCTTGATGTCCCCACAAAAACATATGCATCTGCA  
+HWI-EAS443:3:73:168:1381#0/1  
`ba¥U^`b`][VT``a`a^Y^]W[¥]\_SPUHXa[Y¥U]OS  
@HWI-EAS443:3:73:1705:1603#0/1  
CCCTTCAATGAAACCGGCAATGGCCCCAAATAGGCCTCTA

+HWI-EAS443:3:73:1705:1603#0/1  
`aaabba`aba\_a\_a]\_]a\_\_`^`\_`aa`\_\_\_\_][[`]\_^  
@HWI-EAS443:3:73:1706:1309#0/1  
GCTTCCTCTGAGTATTTTGGGTAGTCATAAGTCCCATTTT  
+HWI-EAS443:3:73:1706:1309#0/1  
a\_aa[abaaaa^`aa`\_^`\_]`X\_\_\_\_^`\_]\_[Z^`\_`\_  
@HWI-EAS443:3:73:1718:2019#0/1  
TTTGGGTCTTATTGCTATTTCCGGCTTGAACCTCTTGCTG  
+HWI-EAS443:3:73:1718:2019#0/1  
`babb\_¥abbaaaa\_aaaa^\_a\_aa]`\_X`^W``[Y^a  
@HWI-EAS443:3:73:173:1850#0/1  
CACGTGTTATCGCATTGTGGTAAAATTCAAAGCAGCCGT  
+HWI-EAS443:3:73:173:1850#0/1  
aa`^^^0[b\_`Xa`\_`^^QYYWT`[OV¥^][[^`\_¥`¥YW  
@HWI-EAS443:3:73:1743:734#0/1  
CGGATGTATATTCTGAAATGGGAGGCTGGTGTATAGCA  
+HWI-EAS443:3:73:1743:734#0/1  
abbab`[`b]\_\_\_a`aa\_¥\_U`\_]PY[`Ya\_a\_\_^Z`  
@HWI-EAS443:3:73:1755:882#0/1  
CTGAGTATTTTGGGTAGTCATAAGTCCCATTTTGGACACT  
+HWI-EAS443:3:73:1755:882#0/1  
¥aaN¥U\_Z¥`a`V\_U`^T`XWSS^QSSQ¥\_]`[Z^VRKJ  
@HWI-EAS443:3:73:175:115#0/1  
CATTTGAAAGGTTTGAGATATTTCCCAAGACAAGTTCATG  
+HWI-EAS443:3:73:175:115#0/1  
aabbbbbWQ¥a\_a[`aaYaaaa^a[\_\_\_`^S`W^]VZ[U]  
@HWI-EAS443:3:73:193:1772#0/1  
ACTTTGGGTCTTATTGCTATTTCCGGCTTGAACCTCTTGC  
+HWI-EAS443:3:73:193:1772#0/1  
aaaaba`[SY]`a\_\_\_a`a`\_a\_X`]\_\_W^a¥¥\_\_\_\_]X^  
@HWI-EAS443:3:73:213:638#0/1  
AGGACATGCTGCCGTTACACCTTTGTTTCGAGTCATGATTG  
+HWI-EAS443:3:73:213:638#0/1  
aa^`a`^`aY`[S^NY^UMVSPV[ZT\_YVV[NYV][PPSU  
@HWI-EAS443:3:73:225:76#0/1  
TGCCGTTTTCATTGAAGGGGGGTGGACAGGGATGGTAGAT  
+HWI-EAS443:3:73:225:76#0/1  
WX^bbbaabaab^Xaaaa`aYa`]^^[aS¥a¥U¥^P  
@HWI-EAS443:3:73:267:1680#0/1  
CATGCGAACAATTCAACAGACACTGTAGACACAGTACTAG  
+HWI-EAS443:3:73:267:1680#0/1  
aaa`babbbbbbbaUabaa`abbaa^a\_a\_\_a\_[X\_[\_XX  
@HWI-EAS443:3:73:268:511#0/1  
GCTGCTTTGAATTTTACCACAAATGCGATAACACGTGCAT  
+HWI-EAS443:3:73:268:511#0/1  
aaaaaaabaa^aaaaaa\_a\_aaa`a`a\_\_`\_\_`X`\_`\_\_  
@HWI-EAS443:3:73:289:493#0/1  
GCTGAGCTTTGGGTATGAATTTCTTTTTTAACTAGCCAT  
+HWI-EAS443:3:73:289:493#0/1  
aa`a\_aa`aaaZ`P`a`Y`\_`a`\_`\_\_^`]a`\_`\_`^U]\_\_



@HWI-EAS443:3:73:291:1739#0/1  
GAGCAATTGAGCTCAGTGTCATCATTTGAAAGTTTGAGA  
+HWI-EAS443:3:73:291:1739#0/1  
ab^b\_b^¥Zaaba`[`]Ya`aabaa\_aa\_^baa[`aaa\_\_\_  
@HWI-EAS443:3:73:292:669#0/1  
GGCTGGTGTATAGCACCTTGGGTGTCTGACAAGTTGT  
+HWI-EAS443:3:73:292:669#0/1  
`\_a^aZVa¥]aaaaa^\_]\_`a]¥\_R]V\_\_\_]R\_¥¥aV^ZW  
@HWI-EAS443:3:73:311:279#0/1  
GGGACATCAAGATACAGCAAGAAGTTCAAGCCGGAAATA  
+HWI-EAS443:3:73:311:279#0/1  
abaa\_a^`¥\_aaa`aa`^aaa``a]ZXY[^\_`^]\_^`  
@HWI-EAS443:3:73:342:1044#0/1  
CAAAGGTGTAACGGCAGCATGTCCTCATGCTGGAGCAAAA  
+HWI-EAS443:3:73:342:1044#0/1  
aba`ba]b\_aabaaaa]YV[W\_\_Z[PYP^XT\_Q]\_\_\_\_a\_  
@HWI-EAS443:3:73:362:815#0/1  
ACTTCTTGTGTATCTTGATGTCCCCACAAAACATATGC  
+HWI-EAS443:3:73:362:815#0/1  
`\_V¥]]`W`^X`\_`^T[a\_X[]\_]\_a`¥0[L]\_¥\_`]  
@HWI-EAS443:3:73:377:442#0/1  
GTGGGACATCAAGATACAGCAAGAAGTTCAAGCCGGAAA  
+HWI-EAS443:3:73:377:442#0/1  
`Z]]a` `[`\_Yaaa`]a`^]\_aa\_\_YaX\_]a\_\_\_]]`\_]]^  
@HWI-EAS443:3:73:385:487#0/1  
TACCACTAGATTTCCAGTTGCTTGAATGTTATTTTGTCT  
+HWI-EAS443:3:73:385:487#0/1  
abbaaaaa`¥aaa`\_aa\_aaaa¥¥a]S^a]^`^`^`^`^`^`U^¥  
@HWI-EAS443:3:73:426:260#0/1  
GCCGGTTTCATTGAAGGGGGTGGACAGGGATGGTAGATG  
+HWI-EAS443:3:73:426:260#0/1  
abbbbUab\_abb`^ba]aab¥bb[X]aaaV\_a`RZ`\_Za  
@HWI-EAS443:3:73:430:411#0/1  
CCCCCTTCAATGAAACCGCAATGGCCCCAAATAGGCCTC  
+HWI-EAS443:3:73:430:411#0/1  
Yaa]`Tabb\_\_aab^^[0[bZ`QU¥QOZ^^\_\_RV\_]a¥Z  
@HWI-EAS443:3:73:478:737#0/1  
CGGCTCTACTAGTGTCCAGTAATAGTTCATTCTCCCTTCT  
+HWI-EAS443:3:73:478:737#0/1  
aabbab`baa``\_a[\_a[\_\_\_`aZ[R\_^\_\_a^¥Ya[[\_\_\_\_  
@HWI-EAS443:3:73:501:993#0/1  
ATGAGGACATGCTGCCGTTACACCTTGTTCGAGTCATGA  
+HWI-EAS443:3:73:501:993#0/1  
`\_]```aaaaa\_a``a^WJRV\_a¥\_\_^Z```Z^Q[\_\_\_[U  
@HWI-EAS443:3:73:511:101#0/1  
GGGAAATCCAGAGTGTGAATCACTCTCCACAGCAAGCTCA  
+HWI-EAS443:3:73:511:101#0/1  
ababbbbaaabab\_a`baaa`a^a\_a\_]a]`a\_^\_]\_Y\_  
@HWI-EAS443:3:73:559:1966#0/1  
CCAGGAGATTTTCATCGATTATGAGGAGCTAAGAGAGCAAT

+HWI-EAS443:3:73:559:1966#0/1  
abaa[``T\_\_aa`[\_aW^)`\_]Y^\_^]a^`\_V\_^\_Y\_\_\_V  
@HWI-EAS443:3:73:560:207#0/1  
TTTCCAGTTGCTTCGAATGTTATTTTGTCTCCCGGCTCTA  
+HWI-EAS443:3:73:560:207#0/1  
`a^aa`\_W^aY`Z¥`][`]Y¥Z^`^]¥W¥¥Z]YZ]BBBBB  
@HWI-EAS443:3:73:58:1277#0/1  
TTAGAGCACATCCAGAACTGATTGCCCCAGGGAGACTA  
+HWI-EAS443:3:73:58:1277#0/1  
aaaab¥bbabaaaa\_]a^a`\_aa``aaaa`\_`^`\_\_\_`ZV  
@HWI-EAS443:3:73:622:1974#0/1  
GGGACATCAAGATACAGCAAGAAGTTCAAGCCGGAAATAG  
+HWI-EAS443:3:73:622:1974#0/1  
a`abb`abbbbaabbbbaabbaaaaa]^bba`a\_\_aaa`\_`\_`  
@HWI-EAS443:3:73:636:1147#0/1  
CTCGTGCTATGGGGCATTACCATCCATCTACTAGTGCTG  
+HWI-EAS443:3:73:636:1147#0/1  
\_\_¥M[ba]\_]\_]\_]`a^Z`a`]`\_]`a^aaa\_¥]]Xa]]\_`  
@HWI-EAS443:3:73:697:825#0/1  
AATCGATGAAATCTCCTGGGTAACACGTTCCATTGTCTGA  
+HWI-EAS443:3:73:697:825#0/1  
a`aaaaaaaaaaaa\_aa`\_a`X¥Z\_a]\_^`a^`\_\_`^a`^]  
@HWI-EAS443:3:73:805:1240#0/1  
AGCCAGTTAAAAACAATGCCAAGGAAATTGGAAACGGCT  
+HWI-EAS443:3:73:805:1240#0/1  
]Zab^^\_abaa```aaaa\_aa``Z^`aa`a\_aaa]\_^`\_`  
@HWI-EAS443:3:73:826:205#0/1  
GGGGTCAGGATATGCAGCCGACCTGAAGAGCACACAGAAT  
+HWI-EAS443:3:73:826:205#0/1  
```¥Z]aaX`\_]H^^`\_\_S`^RU\_]R[X[\_TX¥¥^VZWTW  
@HWI-EAS443:3:73:844:1195#0/1  
CAGGATATGCAGCCGACCTGAAGAGCACACAGAATGCCAT  
+HWI-EAS443:3:73:844:1195#0/1  
aab`bbababbaba`babaa\_aaaabb`ababa`a`aaaa  
@HWI-EAS443:3:73:853:2031#0/1  
AGCCAGTTAAAAACAATGCCAAGGAAATTGGAAACGGCT  
+HWI-EAS443:3:73:853:2031#0/1  
aZ^^aa]`a`\_`¥a`\_\_^[aX^Z\_^\_^]]]X^Y^^]Z\_V  
@HWI-EAS443:3:73:857:370#0/1  
GAACGTGTTACCCAGGAGATTTTCATCGATTATGAGGAGCT  
+HWI-EAS443:3:73:857:370#0/1  
aaa`b`aaaaaaaaabaaa\_aaaa\_b`a`aaaab\_a``\_¥a  
@HWI-EAS443:3:73:85:44#0/1  
GGGCCATGAACTTGTCTTGGGAATATCTCAAACCTTTCA  
+HWI-EAS443:3:73:85:44#0/1  
a^a`^^^`^\_Y\_\_\_Y^\_^\_^\_YYX^]X\_]X]Z]ZZ]  
@HWI-EAS443:3:73:866:1485#0/1  
GGGGACATCAAGATACAGCAAGAAGTTCAAGCCGGAAATA  
+HWI-EAS443:3:73:866:1485#0/1  
I\_[RTa^\_baabbaabbb\_bba^`aab^baabb\_\_bbbaa

@HWI-EAS443:3:73:903:626#0/1  
GCCGGTTTCATTGAAGGGGGTGGACAGGGATGGTAGATG  
+HWI-EAS443:3:73:903:626#0/1  
aaaa\_aba`aaa\_]`][Z^Taa\_`^X``[\_`¥ER`X¥\_  
@HWI-EAS443:3:73:921:203#0/1  
CAAAGTCTCTATCAGAATGCAGATGCATATGTTTTTGTGG  
+HWI-EAS443:3:73:921:203#0/1  
abbaaaaaabaa`baaaa\_\_\_a`aaa\_aaaa``aaaa\_a`  
@HWI-EAS443:3:73:960:1654#0/1  
CAGAGTGTGAATCACTCTCCACAGCAAGCTCATGGTCCTA  
+HWI-EAS443:3:73:960:1654#0/1  
aU^`^Xb]¥]¥Sbba\_a\_X`ba`]baa^Za`]`\_ZIYQU^  
@HWI-EAS443:3:73:97:50#0/1  
CCCCTCTTAGTTTGCATAGTTTCCCGTTATGCTTGTCTTC  
+HWI-EAS443:3:73:97:50#0/1  
ababaaa``\_]`aaaaaa^^Zaa`^^a]\_\_\_^]^^W[]\_`^\_  
@HWI-EAS443:3:73:99:758#0/1  
AATTTACTTTGTTAGTAATCTCGTCAATGGCATTCTGTGT  
+HWI-EAS443:3:73:99:758#0/1  
YP]^`¥aa^`\_]a\_\_\_]K`a^]b[^S¥`aa]\_aaa]]¥]U  
@HWI-EAS443:3:74:1109:704#0/1  
TTTGTTAGTAATCTCGTCAATGGCATTCTGTGTGCTCTTC  
+HWI-EAS443:3:74:1109:704#0/1  
abb¥OUPR^\_b]`^Y`[^`aXa\_aabaX]aTY`\_QVY]UF  
@HWI-EAS443:3:74:1111:236#0/1  
CTGGCTGGATCCTGGGAAATCCAGAGTGTGAATCACTCTC  
+HWI-EAS443:3:74:1111:236#0/1  
I\_bbbbb``a`\_`\_Z\_]bb\_W¥[aa\_aaabb]ab]bbab]  
@HWI-EAS443:3:74:1127:1083#0/1  
GCCGGTTTCATTGAAGGGGGTGGACAGGGATGGTAGATG  
+HWI-EAS443:3:74:1127:1083#0/1  
M^\_¥Z¥\_Y^\_a`aT¥¥ba\_^\_U`\_YWZW¥XZ¥\_WRZ\_ZU]  
@HWI-EAS443:3:74:1144:1690#0/1  
GGGGCATTACCATCCATCTACTAGTGCTGACCAACAAAG  
+HWI-EAS443:3:74:1144:1690#0/1  
`^ [YTWY]]a[T` [V\_a]`X[¥¥¥VHR[V[XM`^YZ[T¥Z  
@HWI-EAS443:3:74:1180:770#0/1  
AAATGCGATAACACGTGCATGGAAAGTGTCAAAAATGGGA  
+HWI-EAS443:3:74:1180:770#0/1  
aa¥aa\_\_V\_^M]aa`X¥[aa\_Y\_a`ZX]]aa^[^^aaa\_`  
@HWI-EAS443:3:74:1214:1481#0/1  
GATTCACACTCTGGATTTCCAGGATCCAGCCAGCAATGT  
+HWI-EAS443:3:74:1214:1481#0/1  
`VbZ^^^bY`^a\_a[aaaXaVYbb¥X\_O\_QU\_RXH]S]Va  
@HWI-EAS443:3:74:1251:210#0/1  
CTGTGTATTTCATCTTTTCAATAACAGAATTTACTTTGTTA  
+HWI-EAS443:3:74:1251:210#0/1  
abaabbbba`ab\_bbbbbbbbaabababbba`babbaaa  
@HWI-EAS443:3:74:1283:1016#0/1  
GTGATTCACACTCTGGATTTCCAGGATCCAGCCAGCAAT

+HWI-EAS443:3:74:1283:1016#0/1  
`\_aaaaaaabaaabb\_Zaaaaaaa\_a`\_aa\_aa``\_a`\_  
@HWI-EAS443:3:74:1284:273#0/1  
GGGAGGCTGGTGTATAGCACCTTGGGTGTCTGACAAG  
+HWI-EAS443:3:74:1284:273#0/1  
aabXababbb\_babaaa`a`a¥ZZaaa\_a\_a\_Wa\_¥¥W[[  
@HWI-EAS443:3:74:1360:1588#0/1  
CTCTGAGTATTTTGGGTAGTCATAAGTCCCATTTTGGACA  
+HWI-EAS443:3:74:1360:1588#0/1  
ab`bbab`bbbb`bab\_aaa`bbbaa`a]bbaabaaaa\_a  
@HWI-EAS443:3:74:1393:953#0/1  
GGCTGCATATCCTGACCCCTGCTCATTTTGATGGTGATAA  
+HWI-EAS443:3:74:1393:953#0/1  
V]b]baZ]bab[bVbaW\_[\_]VKaU`Yaa[``bX[Wb[b`\_  
@HWI-EAS443:3:74:1402:745#0/1  
AACTGATTGCCCCAGGGAGACTACCAGTACCAATGAACT  
+HWI-EAS443:3:74:1402:745#0/1  
aa^a`S]ab]`ba`aab`aaa]`a`a`]a]W\_``]aaN\_  
@HWI-EAS443:3:74:1436:214#0/1  
GAAGTCCTCGTCTATGGGGCATTACCATCCATCTACTA  
+HWI-EAS443:3:74:1436:214#0/1  
`^\_\_Q\_a\_OVbaT\_ba`^Z`a[aaIaa[a^LS^aUV]T` [  
@HWI-EAS443:3:74:1446:183#0/1  
CTCGGTACCCTAGATTTCCAGTTGCTTCCAATGTTATTT  
+HWI-EAS443:3:74:1446:183#0/1  
a`T\_a[^SWW`XYaZVa\_ROY\_a`[R`QFPIa`aX]`aW^  
@HWI-EAS443:3:74:147:1550#0/1  
GCTGGCTGGATCCTGGGAAATCCAGAGTGTGAATCACTCT  
+HWI-EAS443:3:74:147:1550#0/1  
abbbbbbb`¥`bbaaa`¥\_aaaaba``ZaZ`]a^aa``]^  
@HWI-EAS443:3:74:153:17#0/1  
AAAACAATGCCAAGGAAATTGGAAACGGCTGCTTTGAATT  
+HWI-EAS443:3:74:153:17#0/1  
aaa`\_a\_aa`\_\_a`¥Z\_\_\_\_``]^]\_[ZW[GTZ^MPWSY  
@HWI-EAS443:3:74:1544:377#0/1  
AGTTCTTTCACATTTGAATCGTGGTAGTCCAAAGTTCTTTC  
+HWI-EAS443:3:74:1544:377#0/1  
aaababbababbabbaaaababb¥ab[ZVa``[[a\_aaa]  
@HWI-EAS443:3:74:1607:147#0/1  
GTCTCTATCAGAATGCAGATGCATATGTTTTTGTGGGGAC  
+HWI-EAS443:3:74:1607:147#0/1  
aV`a^`a`\_aa]a\_\_X`\_a\_a\_\_\_¥\_aY`aa^]X`[ZZYY  
@HWI-EAS443:3:74:1628:1021#0/1  
GTAGTCCAAAGTTCTTTTCATTTTCCAATAGAACCAACAGT  
+HWI-EAS443:3:74:1628:1021#0/1  
a¥`^^bba\_ab¥aaaabZZ^ba`^Yaaaab``\_a``\_^YS  
@HWI-EAS443:3:74:1674:237#0/1  
AATCTCGTCAATGGCATTCTGTGTGCTCTTCAGGTCGGCT  
+HWI-EAS443:3:74:1674:237#0/1  
aab\_a\_WZa]X`R`\_Z]a\_[R¥a^\_Ub[Z]S\_\_`P¥WBBB

@HWI-EAS443:3:74:232:1704#0/1  
ATGCAGATGCATATGTTTTGTGGGGACATCAAGATACAG  
+HWI-EAS443:3:74:232:1704#0/1  
X^`bVOZV]`b]VYaTaa\_`^LZFYJX\_Y]`aV¥a^^Z^^  
@HWI-EAS443:3:74:234:23#0/1  
GTGGGGACATCAAGATACAGCAAGAAGTTCAAGCCGGAAA  
+HWI-EAS443:3:74:234:23#0/1  
aaaaa\_\_Z^X¥`^a^[\_`a^\_aa^]aU]]Y]^ [Ya]ZZ^  
@HWI-EAS443:3:74:235:1160#0/1  
CAATGCCAAGGAAATTGGAAACGGCTGCTTTGAATTTTAC  
+HWI-EAS443:3:74:235:1160#0/1  
aba` ``b^a^¥^a\_aa`a\_aa`\_^\_\_GQXWGSLLW][LL  
@HWI-EAS443:3:74:248:535#0/1  
TTCCGGCTTGAACCTCTTGCTGTATCTTGATGTCCCCACA  
+HWI-EAS443:3:74:248:535#0/1  
aba` ``\_ba\_KXY\_aa\_\_^\_\_Z[\_[]a¥\_\_aZ\_\_¥` ]Z]  
@HWI-EAS443:3:74:264:743#0/1  
TGGGGACATCAAGATACAGCAAGAAGTTCAAGCCGGAAAT  
+HWI-EAS443:3:74:264:743#0/1  
^RO]a\_T^SYU\_`VPX[aa¥ab\_QIX^H]UWSRWTDX\_]S  
@HWI-EAS443:3:74:292:345#0/1  
GCCAAGGAAATTGGAAACGGCTGCTTTGAATTTTACCACA  
+HWI-EAS443:3:74:292:345#0/1  
`a\_¥¥b\_ZWa`aaa`^^ba^\_\_NNZ\_]Y\_Y^a[QF[\_P[  
@HWI-EAS443:3:74:304:192#0/1  
CTGGCTGGATCCTGGGAAATCCAGAGTGTGAATCACTCTC  
+HWI-EAS443:3:74:304:192#0/1  
`` `V]`aaVUW`TT^OZWaU[TNZ^\_G^V¥N]HVBBBBBB  
@HWI-EAS443:3:74:30:591#0/1  
TGGGGCTACCCCTCTTAGTTTGCATAGTTTCCCGTTATGC  
+HWI-EAS443:3:74:30:591#0/1  
aab`]aaa]`baaaaa]WYa` ``a`\_`^`]]]`\_]`\_^¥[  
@HWI-EAS443:3:74:367:1421#0/1  
ATTTTGGACATTTTCCAATTGTGATCGGATGTATATTCTG  
+HWI-EAS443:3:74:367:1421#0/1  
aaaaaaaaa`aaa\_a^a\_aaXR[ `[ `a¥[¥aWWU^USS[S  
@HWI-EAS443:3:74:36:1399#0/1  
GGACATTTGGACTTACAATGCCGAAGTGTGGTTCTATTG  
+HWI-EAS443:3:74:36:1399#0/1  
SXR^¥\_`^\_J¥¥P]b^[V[¥` `Z` [Z¥SX¥\_TPP[YGG[ `  
@HWI-EAS443:3:74:371:644#0/1  
GCTGGCTGGATCCTGGGAAATCCAGAGTGTGAATCACTCT  
+HWI-EAS443:3:74:371:644#0/1  
aa`X`a^Z\_`[\_a[¥^W`aaZ`\_ [UZ]V¥U`\_`¥VMWUW  
@HWI-EAS443:3:74:402:1103#0/1  
GCTGCTTTGAATTTTACCACAAATGCGATAACACGTGCAT  
+HWI-EAS443:3:74:402:1103#0/1  
abaaa`\_aZ\_aabaabababba]`a`a^¥a`\_aa`W` ``^  
@HWI-EAS443:3:74:41:2006#0/1  
GCTTCCTCTGAGTATTTTGGGTAGTCATAAGTCCCATTTT

+HWI-EAS443:3:74:41:2006#0/1  
Za`]'`a`aU]Z[V[a\_\_\_\_\_][^`Z\_Y\_]H#Z``\_X`\_[]  
@HWI-EAS443:3:74:440:712#0/1  
GTGTATTCATCTTTTCAATAACAGAATTTACTTTGTTAGT  
+HWI-EAS443:3:74:440:712#0/1  
aabX#``a]aaaaaaaa[aaa\_aaWaa``]`a\_`a`\_\_a]  
@HWI-EAS443:3:74:448:36#0/1  
GCCAGTTAAAAACAATGCCAAGGAAATTGGAAACGGCTG  
+HWI-EAS443:3:74:448:36#0/1  
a`a^aaa]`````aaaab^`\_#``#\_][Wa\_X^[]  
@HWI-EAS443:3:74:467:696#0/1  
TGGCTGGATCCTGGGAAATCCAGAGTGTGAATCACTCTCC  
+HWI-EAS443:3:74:467:696#0/1  
a\_\_]a]\_\_^\_\_^[]Z[\_`\_Z^^^SZW\_W[ZZ#U^ZVW#T  
@HWI-EAS443:3:74:478:800#0/1  
GACCATGAGCTTGCTGTGGAGAGTGATTCACACTCTGGAT  
+HWI-EAS443:3:74:478:800#0/1  
abbbbbabaaabbbbbbab`aaaaabaaaaaaaa\_`^  
@HWI-EAS443:3:74:504:1009#0/1  
CATTTGAAAGGTTTGAGATATCCCCAAGACAAGTTCATG  
+HWI-EAS443:3:74:504:1009#0/1  
aaaaaaaaa#X`\_abaa`\_a`aaa`a\_\_`a``^]Sa\_XZ  
@HWI-EAS443:3:74:570:93#0/1  
CTAGTGCTGACCAACAAAGTCTCTATCAGAATGCAGATGC  
+HWI-EAS443:3:74:570:93#0/1  
a`[a]bYZTaabaab`^`a][#aZaaYWRS\_YaSa`][X  
@HWI-EAS443:3:74:573:1038#0/1  
AACAAAGTCTCTATCAGAATGCAGATGCATATGTTTTGT  
+HWI-EAS443:3:74:573:1038#0/1  
#`b^`#a#aY`b]aa`]\_aZY`^\_[````]V]`^^``aYM  
@HWI-EAS443:3:74:621:1691#0/1  
GTATTTTGGGTAGTCATAAGTCCCATTTTGGACTTTCC  
+HWI-EAS443:3:74:621:1691#0/1  
a\_abba`\_aa]aa`aaaab\_\_aaaaaaaaaaaaaaaa\_a`  
@HWI-EAS443:3:74:626:507#0/1  
AATTTACTTTGTTAGTAATCTCGTCAATGGCATTCTGTGT  
+HWI-EAS443:3:74:626:507#0/1  
a`baaabbaaa`abb`aaa`aab\_\_a]`aaa`aa`a`\_\_^  
@HWI-EAS443:3:74:626:594#0/1  
GCAGGGGTCAGGATATGCAGCCGACCTGAAGAGCACACAG  
+HWI-EAS443:3:74:626:594#0/1  
ZZ\_W]X^H]b\_\_a[^X```Z`^`^\_Z`^^`aaa`\_aa]]aa  
@HWI-EAS443:3:74:659:220#0/1  
GCTGGCTGGATCCTGGGAAATCCAGAGTGTGAATCACTCT  
+HWI-EAS443:3:74:659:220#0/1  
ab]]`b`a]P[X\_[^R]\_aa^ZX[^`^#GYY`#Y]UYPQRW  
@HWI-EAS443:3:74:666:1924#0/1  
AGCCAGTTAAAAACAATGCCAAGGAAATTGGAAACGGCT  
+HWI-EAS443:3:74:666:1924#0/1  
`Wa`aa`\_`aaaa`\_`aaa`\_aa`^#X^^[]^^`\_`#^`\_`^`

@HWI-EAS443:3:74:677:300#0/1  
AAGCCAGTTAAAAACAATGCCAAGGAAATTGGAAACGGC  
+HWI-EAS443:3:74:677:300#0/1  
aba]`ab\_aaaaaa`aa`aa`\_\_``¥¥T\_\_\_^`\_\_][Z¥  
@HWI-EAS443:3:74:701:238#0/1  
CCGGCTTGAACCTTCTTGCTGTATCTTGATGTCCCCACAAA  
+HWI-EAS443:3:74:701:238#0/1  
abababbbbababababba`baaaaa`abba^aa\_a`a\_a  
@HWI-EAS443:3:74:713:372#0/1  
GGCCAGTCTCAATTTTGTGCTTTTTACATATTTTGGACAT  
+HWI-EAS443:3:74:713:372#0/1  
a¥bba¥F\_]`[``aaa`Uaaaaaaaabaaaaaba^\_\_``  
@HWI-EAS443:3:74:728:567#0/1  
CTCATAATCGATGAAATCTCCTGGGTAACACGTTCCATTG  
+HWI-EAS443:3:74:728:567#0/1  
a`bababbbbbbabb`bbb[bb\_bbbbaabba\_a  
@HWI-EAS443:3:74:769:484#0/1  
GCCGGTTTCATTGAAGGGGGTGGACAGGGATGGTAGATG  
+HWI-EAS443:3:74:769:484#0/1  
aaabb^bbb]bbbaaba\_baa0baaaaaaaba]aa^^^  
@HWI-EAS443:3:74:791:1329#0/1  
AACTTATATGAAAAGGTAAGAAGCCAGTTAAAAACAATG  
+HWI-EAS443:3:74:791:1329#0/1  
]aaaaaaa]b`\_`]baaaaaaaa\_aa``aaab```  
@HWI-EAS443:3:74:816:203#0/1  
CTTGAACCTTCTTGCTGTATCTTGATGTCCCCACAAAAACA  
+HWI-EAS443:3:74:816:203#0/1  
aabbbbbbbbbbbbaababbbabba`bbaaaa`aa^aa  
@HWI-EAS443:3:74:839:1539#0/1  
CTTATATGAAAAGGTAAGAAGCCAGTTAAAAACAATGCC  
+HWI-EAS443:3:74:839:1539#0/1  
``b`^`ba`a`UY[L\_b[¥\_`aa^[SK`a\_a]abaa]`\_X  
@HWI-EAS443:3:74:840:1034#0/1  
TGGACAGGGATGGTAGATGGATGGTACGGTTATCACCATC  
+HWI-EAS443:3:74:840:1034#0/1  
abaa`aaaaaba^aba^baaaa\_`aa\_]`^`a^[^¥V^`Z  
@HWI-EAS443:3:74:844:628#0/1  
GCCATATTAATTTTTGTAGAAGCTTTTTGCTCCAGCATG  
+HWI-EAS443:3:74:844:628#0/1  
aabbbabbbbbbbbaabaababbabbbbaaaaaaba\_aa  
@HWI-EAS443:3:74:857:585#0/1  
GCTGTATCTTGATGTCCCCACAAAAACATATGCATCTGCA  
+HWI-EAS443:3:74:857:585#0/1  
aabaabaabb`aaaa`a^aaaa\_aaaa`aaa\_aa``\_]`  
@HWI-EAS443:3:74:894:1425#0/1  
GCTGGCTGGATCCTGGGAAATCCAGAGTGTGAATCACTCT  
+HWI-EAS443:3:74:894:1425#0/1  
¥\_b`\_`\_b`[\_b\_J\_a]X\_``¥`\_^¥PX\_]W\_`[\_][YX]  
@HWI-EAS443:3:74:903:174#0/1  
GGGGACATCAAGATACAGCAAGAAGTTCAAGCCGAAATA

+HWI-EAS443:3:74:903:174#0/1  
ababaa`babba`aaUbb`abbaabZa\_a\_aW^aa\_]\_``  
@HWI-EAS443:3:74:968:1896#0/1  
GCTGCTTTGAATTTTACCACAAATGCGATAACACGTGCAT  
+HWI-EAS443:3:74:968:1896#0/1  
aaT0]]]\_a\_PQQWZZ\_OZ^XZ`ZSFSW^N]aa`X]XPG  
@HWI-EAS443:3:74:96:1573#0/1  
ATCCTGACCCCTGCTCATTGATGGTGATAACCGTACCA  
+HWI-EAS443:3:74:96:1573#0/1  
aWa^[T¥[[^^QR[WU¥UUTUWWWUUVUUYVWVWWWU  
@HWI-EAS443:3:75:101:501#0/1  
GTTGATTCCAGCTTTACCCCATCTATTTCTTCTCTGTTTA  
+HWI-EAS443:3:75:101:501#0/1  
aaa]¥aaaa¥aaaaaa]^`\_aaa\_aaa`a`\_a\_`a```^  
@HWI-EAS443:3:75:1041:1832#0/1  
GAACTTGTCTTGGGAATATCTCAAACCTTTCAAATGATG  
+HWI-EAS443:3:75:1041:1832#0/1  
U¥b¥bY¥`bUb`a^aZ\_a`\_aaab`aV`\_aabbaXaba\_b  
@HWI-EAS443:3:75:1046:541#0/1  
CATCATTTGAAAGTTTGAGATATCCCCAAGACAAGTTC  
+HWI-EAS443:3:75:1046:541#0/1  
[b\_bb\_bb``¥¥`V\_bbbbbbb\_ab¥¥Y¥b`b\_a^^`]a`  
@HWI-EAS443:3:75:1080:2030#0/1  
TGCATATGTTTTGTGGGGACATCAAGATACAGCAAGAAG  
+HWI-EAS443:3:75:1080:2030#0/1  
`abb`bbaaababZaaaaaaaaaaaaaba\_aa\_abba`aa  
@HWI-EAS443:3:75:1083:1708#0/1  
ATTTACTTTGTTAGTAATCTCGTCAATGGCATTCTGTGTG  
+HWI-EAS443:3:75:1083:1708#0/1  
aba`^W^aa```a`^aaa```a\_aaa`\_``^a`\_`a]aZ\_  
@HWI-EAS443:3:75:1093:1907#0/1  
AAGTCCTCGTGCTATGGGGCATTACCATCCATCTACTAG  
+HWI-EAS443:3:75:1093:1907#0/1  
aa`V¥]ZaaWUO\_\_Y\_`Y``\_a¥W\_\_aaYaTa]¥[aV\_`\_  
@HWI-EAS443:3:75:1094:1164#0/1  
GAGTATTTTGGGTAGTCATAAGTCCCATTTTGGACTTT  
+HWI-EAS443:3:75:1094:1164#0/1  
aa^Tbbaaabab]a\_]`^`a\_a\_[PY^a`abaaa\_\_a^a`\_  
@HWI-EAS443:3:75:1135:889#0/1  
ATTGCTGGCTGGATCCTGGGAAATCCAGAGTGTGAATCAC  
+HWI-EAS443:3:75:1135:889#0/1  
^bbaaa]a`bbbaa`b\_aaa``aa`\_ab\_aHa^aa`\_Naa  
@HWI-EAS443:3:75:1146:317#0/1  
AAGTCCTCGTGCTATGGGGCATTACCATCCATCTACTAG  
+HWI-EAS443:3:75:1146:317#0/1  
a`]SRVa\_]`^`P`V\_a¥`ZGU[`¥`^W`^\_G\_ZN\_¥¥`^a  
@HWI-EAS443:3:75:1159:1317#0/1  
AATCGATGAAATCTCCTGGGTAACACGTTCCATTGTCTGA  
+HWI-EAS443:3:75:1159:1317#0/1  
abbbbaaaaaabaaaaaa\_aVaa`aa\_\_aa`ab```[`a\_a



@HWI-EAS443:3:75:115:1732#0/1  
TGAGGACATGCTGCCGTTACACCTTTGTTTCGAGTCATGAT  
+HWI-EAS443:3:75:115:1732#0/1  
aaba\_bbbaaa\_[b`a`X`\_b`a`\_]T[\_[V[UU]a\_\_`]  
@HWI-EAS443:3:75:1161:1946#0/1  
CATGAACCTTGTCTTGGGAATATCTCAAACCTTTCAAATG  
+HWI-EAS443:3:75:1161:1946#0/1  
abbbbbbbbaaaabaaabaaaaaaaa\_bbaa\_aaaaa`a`\_  
@HWI-EAS443:3:75:1168:1872#0/1  
ATGGCATTCTGTGTGCTCTTCAGGTCGGCTGCATATCCTG  
+HWI-EAS443:3:75:1168:1872#0/1  
^Za\_U\_]ab\_]UbaaaaX``ba[Y]U`\_aZ^[]b`]GNP  
@HWI-EAS443:3:75:1272:1212#0/1  
CCTCTGAGTATTTTGGGTAGTCATAAGTCCCATTTTGTGAC  
+HWI-EAS443:3:75:1272:1212#0/1  
\_]`^X`¥aTZ`^V``\_U]^YT¥\_]¥]Z\_WZ¥UO^`^`^a  
@HWI-EAS443:3:75:1307:1834#0/1  
GGAAATCCAGAGTGTGAATCACTCTCCACAGCAAGCTCAT  
+HWI-EAS443:3:75:1307:1834#0/1  
a`]a\_ZT\_bb`aZ`P`aa[¥a\_aaV¥\_aZa¥aaaaZRY\_]`  
@HWI-EAS443:3:75:130:1508#0/1  
GACTACCCAAAATACTCAGAGGAAGCAAAATTAACAGAG  
+HWI-EAS443:3:75:130:1508#0/1  
aba\_X^ab^[]``b\_S^aaaaa`\_`a`\_`R¥]a`\_]\_\_\_\_  
@HWI-EAS443:3:75:1335:632#0/1  
GTTATCACCATCAAATGAGCAGGGGTCAGGATATGCAGC  
+HWI-EAS443:3:75:1335:632#0/1  
a[a\_a¥a\_aaa]aa`aaa\_[[`a^\_a]W\_aa``\_`^a¥^¥`  
@HWI-EAS443:3:75:1416:840#0/1  
TCACCATCCATCTACTAGTGCTGACCAACAAAGTCTCTAT  
+HWI-EAS443:3:75:1416:840#0/1  
[``^]abbabbbbabab\_babba¥^^^[\_baa`[a]aaa  
@HWI-EAS443:3:75:1422:504#0/1  
GGGGACATCAAGATACAGCAAGAAGTTCAAGCCGAAATA  
+HWI-EAS443:3:75:1422:504#0/1  
aaaaa]ba\_aaaS``aab`aaa`aa^a`a`a^Zaa`^\_a`  
@HWI-EAS443:3:75:1425:2018#0/1  
ACGTGTTACCCAGGAGATTTTCATCGATTATGAGGAGCTAA  
+HWI-EAS443:3:75:1425:2018#0/1  
¥X]RMW`[[QW\_b`^`¥QZPN\_[W`a¥[U¥aY`[]YH[`a  
@HWI-EAS443:3:75:1503:1258#0/1  
CAAGAAGTTCAAGCCGAAATAGCAATAAGACCCAAAGTG  
+HWI-EAS443:3:75:1503:1258#0/1  
ababbbbbbbaabb`abbbb`bbbaababbaba`^baY`Qb  
@HWI-EAS443:3:75:1542:129#0/1  
CGGCTGCTTTGAATTTTACCACAAATGCGATAACACGTGC  
+HWI-EAS443:3:75:1542:129#0/1  
abbab`Jbbbaabbbb`\_\_a^abaUaSa\_\_^`HaS]R`¥  
@HWI-EAS443:3:75:1564:1063#0/1  
AATGAAACCGGCAATGGCCCCAAATAGGCCTCTAGATTGA

+HWI-EAS443:3:75:1564:1063#0/1  
^bbbaUa^`bbabaab` `a\_\_[ba]aaa\_aaVaaa\_aa\_a  
@HWI-EAS443:3:75:1586:1050#0/1  
ATGGCATTCTGTGTGCTCTTCAGGTCGGCTGCATATCCTG  
+HWI-EAS443:3:75:1586:1050#0/1  
abababba[b`ab\_bX` `ba`ab\_W]aa[a`L`ab`Q\_Y`  
@HWI-EAS443:3:75:1603:143#0/1  
GAAATGCTGGATCTGGTATTATCATTTTCAGATACACCAGT  
+HWI-EAS443:3:75:1603:143#0/1  
`P]aa`YWZW` `Z`aZ¥W¥]Z¥P¥\_\_b¥VY\_Z^^QSQ^R  
@HWI-EAS443:3:75:1702:1556#0/1  
ATTGCTATTTCCGGCTTGAACCTTCTTGCTGTATCTTGATG  
+HWI-EAS443:3:75:1702:1556#0/1  
^`ab`aaab`][aa^`aW[¥FW`X\_`\_^\_a]^`Y`]Q[`U  
@HWI-EAS443:3:75:1710:1469#0/1  
TCCGGCTTGAACCTTCTTGCTGTATCTTGATGTCCCCACAA  
+HWI-EAS443:3:75:1710:1469#0/1  
a¥Y\_b`¥Z^a`R`a[^aa^\_V\_`b^abaXa[]][Z`W¥]\_a  
@HWI-EAS443:3:75:1720:1462#0/1  
GGGTAAATGTAACATTGCTGGCTGGATCCTGGGAAATCCA  
+HWI-EAS443:3:75:1720:1462#0/1  
^aaabbabbaababbbbaabaaaaabaa\_\_aba\_^aa`YV`  
@HWI-EAS443:3:75:1731:1420#0/1  
GAAATGCTGGATCTGGTATTATCATTTTCAGATACACCAGT  
+HWI-EAS443:3:75:1731:1420#0/1  
abbbbab`abaaaaab\_abaaaaaaaaaaba`a\_\_^`]  
@HWI-EAS443:3:75:1742:1485#0/1  
TGGGGACATCAAGATACAGCAAGAAGTTCAAGCCGAAAT  
+HWI-EAS443:3:75:1742:1485#0/1  
¥W[a\_Z[\_a`\_`aZZVTab^aba\_WaWQ\_\_[\_`Z`^a^V`a`  
@HWI-EAS443:3:75:1746:195#0/1  
CACCAGTCCACGATTGCAATACAACCTTGTCAGACACCCAA  
+HWI-EAS443:3:75:1746:195#0/1  
^`Z`\_aa\_a\_\_¥a`\_baabaa¥¥[H^` `RXb`\_a\_]\_¥a  
@HWI-EAS443:3:75:194:720#0/1  
AGTTGCTTCAATGTTATTTTGTCTCCCGCTCTACTAGT  
+HWI-EAS443:3:75:194:720#0/1  
aa`abbbba\_N^ab` `abbaa`aaabaaa`\_a]ZXX]^T  
@HWI-EAS443:3:75:282:515#0/1  
CTTCTTGCTGTATCTTGATGTCCCCACAAAAACATATGCA  
+HWI-EAS443:3:75:282:515#0/1  
abaaa`baaaSaaa\_abaaaUa¥aaaaaaaVS\_\_\_\_\_]`\_`  
@HWI-EAS443:3:75:291:124#0/1  
CTTTGTTAGTAATCTCGTCAATGGCATTCTGTGTGCTCTT  
+HWI-EAS443:3:75:291:124#0/1  
`b\_abU`Ya`abaaaab\_¥a]Vb`a[baaaa\_\_F`N¥\_a\_  
@HWI-EAS443:3:75:298:1734#0/1  
CGTGTTACCCAGGAGATTTTCATCGATTATGAGGAGCTAAG  
+HWI-EAS443:3:75:298:1734#0/1  
^a^[[` `babab`a`\_`aaaa`aa]\_]\_a\_`]Waa\_\_a\_U

@HWI-EAS443:3:75:29:542#0/1  
AGTTCAGACAATGGAACGTGTTACCCAGGAGATTTTCATCG  
+HWI-EAS443:3:75:29:542#0/1  
`aaaaaaaaabaaba[V^`a\_`\_\_[[Z\_W^\_\_^[^\_\_  
@HWI-EAS443:3:75:313:1958#0/1  
ATCTTGATGTCCCCACAAAACATATGCATCTGCATTCTG  
+HWI-EAS443:3:75:313:1958#0/1  
[`baaaaZ][aab\_`aaaYaY]^¥a^\_aa`a¥¥]``]\_\_[  
@HWI-EAS443:3:75:420:1340#0/1  
GAATTTCTTTTTTAACTAGCCATATTAATTTTTGTAGA  
+HWI-EAS443:3:75:420:1340#0/1  
a`\_`a`\_```aa\_`aa`Y^a\_``\_a`\_Y]\_\_\_\_^^]\_\_`  
@HWI-EAS443:3:75:432:827#0/1  
GCTGGCTGGATCCTGGGAAATCCAGAGTGTGAATCACTCT  
+HWI-EAS443:3:75:432:827#0/1  
abab`ba¥aa\_\_b^`a`ab`a`a`a\_\_a^`ba`XZ¥a\_  
@HWI-EAS443:3:75:435:1068#0/1  
ATTGGAAAATGTCCAAAATATGTAAAAAGCACAAAATTGA  
+HWI-EAS443:3:75:435:1068#0/1  
aaaaaaaaa`V`aa]a¥a^aa]aaa^`\_¥[aaU`aa`\_¥  
@HWI-EAS443:3:75:43:1645#0/1  
AAAACATATGCATCTGCATTCTGATAGAGACTTTGTTGGT  
+HWI-EAS443:3:75:43:1645#0/1  
]b¥Z`aaY`ab[]a\_a\_Yaaaa\_UR`\_`\_\_^`\_^`\_]\_W  
@HWI-EAS443:3:75:443:453#0/1  
CTGCTCATTTTGATGGTGATAACCGTACCATCCATCTACC  
+HWI-EAS443:3:75:443:453#0/1  
aaaa\_Y[¥a[a\_TR\_ZX[\_`^a^\_¥^¥W]^a`aaYY[Y`b  
@HWI-EAS443:3:75:489:1342#0/1  
CCCGGCTCTACTAGTGTCCAGTAATAGTTCATTCTCCCTT  
+HWI-EAS443:3:75:489:1342#0/1  
aba```^\_Zaa`]]`X`a¥¥XYZXQ]Q````YZ[]a[¥  
@HWI-EAS443:3:75:518:1469#0/1  
AGCCAGTTAAAAACAATGCCAAGGAAATTGGAAACGGCT  
+HWI-EAS443:3:75:518:1469#0/1  
a\_aaaa`Y¥\_a`Yaaa\_aaa\_\_aa^`\_^`\_`W]\_^][¥]^  
@HWI-EAS443:3:75:544:414#0/1  
GGGCCATGAACCTGTCTTGGGAATATCTCAAACCTTTCA  
+HWI-EAS443:3:75:544:414#0/1  
abbabbbbab`baba\_baab\_ba]aba`aaaaabaaa`\_  
@HWI-EAS443:3:75:559:1795#0/1  
TTCCCCTTATGCTTGTCTTCTAGAAGGTTAACAGAGTGTG  
+HWI-EAS443:3:75:559:1795#0/1  
aabbbba]`ab\_ba\_`\_aa`\_ab`aa`W]`aa```\_aa^`]`  
@HWI-EAS443:3:75:598:1042#0/1  
TGTGTGCTCTTCAGGTCGGCTGCATATCCTGACCCCTGCT  
+HWI-EAS443:3:75:598:1042#0/1  
ababab`bbba\_]WYb`aa`a^`abaaa`a`^`aa\_\_^a  
@HWI-EAS443:3:75:610:1053#0/1  
CCGGCTTGAACCTTCTTGCTGTATCTTGATGTCCCCACAAA

+HWI-EAS443:3:75:610:1053#0/1  
aabaaab`abaaaaaba` `[aaa\_VY\_`¥^`aaaaa[WU  
@HWI-EAS443:3:75:617:93#0/1  
ACCATCCATCTACTAGTGCTGACCAACAAAGTCTCTATCA  
+HWI-EAS443:3:75:617:93#0/1  
aZY`Ya\_a\_^^a^` `aZa^aW]W^^\_`\_]`Z¥\_`^`]^R`  
@HWI-EAS443:3:75:623:1370#0/1  
ATAAGTCCCATTTTTGACACTTTCCATGCACGTGTTATCG  
+HWI-EAS443:3:75:623:1370#0/1  
`b`¥\_X¥a\_¥Za`aaa\_aaaaa\_`¥\_`^]a`T`¥` ``aa  
@HWI-EAS443:3:75:701:1480#0/1  
GTATTTTGGGTAGTCATAAGTCCCATTTTTGACACTTTCC  
+HWI-EAS443:3:75:701:1480#0/1  
YTabbba^^a` `` `aab^U[bbabaaaabaab`ba^aa  
@HWI-EAS443:3:75:710:138#0/1  
GTTTAATTTTGCTTCCTCTGAGTATTTTGGGTAGTCATAA  
+HWI-EAS443:3:75:710:138#0/1  
aabb` `` `aaa^ab\_`aaaaa¥\_aa` `a` `[`a\_`\_` `^  
@HWI-EAS443:3:75:728:144#0/1  
TCCCGGCTCTACTAGTGCCAGTAATAGTTCATTCTCCCT  
+HWI-EAS443:3:75:728:144#0/1  
aabaaaaa\_`\_` ` `V`Y\_`\_]a]^`\_`\_`Y^`^^aV\_VRV^  
@HWI-EAS443:3:75:767:792#0/1  
GGGGCATTACCATCCATCTACTAGTGCTGACCAACAAAG  
+HWI-EAS443:3:75:767:792#0/1  
`I^U¥\_`a^TVUZRZ\_X]\_Q^ [`Z\_YOZ¥`R]a¥S\_` `X  
@HWI-EAS443:3:75:781:129#0/1  
ATCTTTTCAATAACAGAATTTACTTTGTTAGTAATCTCGT  
+HWI-EAS443:3:75:781:129#0/1  
^¥Z\_Z]ab\_` [`a^^b]Vb`^b^aa`bQ`]a]^][R\_V\_L  
@HWI-EAS443:3:75:787:523#0/1  
GAAGAACTTATATGAAAAGGTAAGAAGCCAGTTAAAAAAC  
+HWI-EAS443:3:75:787:523#0/1  
Y¥` [ [`¥Y\_a` ` `b\_]\_aa¥R\_a`V`b¥\_bb\_b\_K\_a¥V\_  
@HWI-EAS443:3:75:819:1269#0/1  
CATTTTGGTGGTATAACCGTACCATCCATCTACCATCCC  
+HWI-EAS443:3:75:819:1269#0/1  
aab]R\_X¥`¥TFUaaa\_`aaV^`\_[]\_ [`\_`0`\_` `¥\_¥\_ZZ  
@HWI-EAS443:3:75:840:1074#0/1  
AGGAAATTGGAAACGGCTGCTTTGAATTTTACCACAAATG  
+HWI-EAS443:3:75:840:1074#0/1  
aa]baabaaaa`aaa`a\_^JYa^UT^P^aaYYZ^]Pa`PM  
@HWI-EAS443:3:75:842:452#0/1  
CCAGAACTGATTGCCCCAGGGAGACTACCAGTACCAAT  
+HWI-EAS443:3:75:842:452#0/1  
abbbbbbbbbbbab`babbab\_bb]baab] `bb`a\_Zaab  
@HWI-EAS443:3:75:843:1821#0/1  
GCCGGTTTCATTGAAGGGGGTGGACAGGGATGGTAGATG  
+HWI-EAS443:3:75:843:1821#0/1  
]a`baX^ba]aa\_VOY]Ya^YS`WTV`a^a\_¥a^UW^ZX^

@HWI-EAS443:3:75:874:953#0/1  
ATTGCCCCAGGGAGACTACCAGTACCAATGAACTGGCGA  
+HWI-EAS443:3:75:874:953#0/1  
^¥X[\_]baaa]\_`U¥abaaaaa`aaaa^[aaa\_]aa`  
@HWI-EAS443:3:75:879:768#0/1  
CTTCCTCTGAGTATTTTGGGTAGTCATAAGTCCCATTTTT  
+HWI-EAS443:3:75:879:768#0/1  
abbbbbbbbabababbbba[bbaabbbabababbbbbb  
@HWI-EAS443:3:75:893:397#0/1  
GCTGGCTGGATCCTGGGAAATCCAGAGTGTGAATCACTCT  
+HWI-EAS443:3:75:893:397#0/1  
aa]ab`aaa^`^`^X]\_Y^a\_Y[``\_]U`R]a\_^\_^[^  
@HWI-EAS443:3:75:895:1429#0/1  
GAAACTGATTGCCCCAGGGAGACTACCAGTACCAATGAA  
+HWI-EAS443:3:75:895:1429#0/1  
]ba`bbbbabb`bb\_aab\_aaa\_aa^aaYaa\_baaaaa  
@HWI-EAS443:3:75:906:766#0/1  
GCTTCCTCTGAGTATTTTGGGTAGTCATAAGTCCCATTTT  
+HWI-EAS443:3:75:906:766#0/1  
abbbbabab`aaaabbbabaa\_aaaaaaab\_aaaaaaa  
@HWI-EAS443:3:75:937:1180#0/1  
GCTGGATCCTGGGAAATCCAGAGTGTGAATCACTCTCCAC  
+HWI-EAS443:3:75:937:1180#0/1  
abbbababaaaaaaa`aaabaaa¥b`baaaaaa```\_aa  
@HWI-EAS443:3:75:940:170#0/1  
GTAACATTGCTGGCTGGATCCTGGGAAATCCAGAGTGTGA  
+HWI-EAS443:3:75:940:170#0/1  
aabbaabbbababaaaaaa\_\_`aaa`aa`\_`\_`\_a¥a¥a`  
@HWI-EAS443:3:75:945:551#0/1  
TCCACGATTGCAATACAATTGTCAGACACCCAAGGGTGC  
+HWI-EAS443:3:75:945:551#0/1  
aaab`b\_aaaaba`\_\_\_\_\_aaa`\_`a\_^a`\_]`\_`^U\_¥  
@HWI-EAS443:3:75:99:664#0/1  
GCCGTTACACCTTTGTTGAGTCATGATTGGGCCATGAAC  
+HWI-EAS443:3:75:99:664#0/1  
a`a\_\_\_\_`X`a]\_a`\_`[[V¥S[G¥V[`WZ\_VNR¥YSVZR^V  
@HWI-EAS443:3:76:1025:1019#0/1  
AGAACTTATATGAAAAGGTAAGAAGCCAGTTAAAAAACAA  
+HWI-EAS443:3:76:1025:1019#0/1  
a]baYbbbbbbba`ab\_^Ybab^bb`abba`b`aabbab\_  
@HWI-EAS443:3:76:1039:85#0/1  
TTTACTTTGTTAGTAATCTCGTCAATGGCATTCTGTGTGC  
+HWI-EAS443:3:76:1039:85#0/1  
aa`^a`aaR\_]a`\_]a]^Ra\_[]XYZXN]]XS\_]XWY^U  
@HWI-EAS443:3:76:1058:76#0/1  
TACTAGTGCTGACCAACAAAGTCTCTATCAGAATGCAGAT  
+HWI-EAS443:3:76:1058:76#0/1  
abWaa^Q\_a^a`WS`aZZ\_]YS^`\_aaa]`aa`[[[]a  
@HWI-EAS443:3:76:107:1578#0/1  
TGCATATGTTTTTGTGGGGACATCAAGATACAGCAAGAAG

+HWI-EAS443:3:76:107:1578#0/1  
aabbabaa^aaaaYaaa`aa`baaaaaa¥a\_\_Zaaa[^  
@HWI-EAS443:3:76:1087:1457#0/1  
CACGTGCATGGAAAGTGCAAAAATGGGACTTATGACTAC  
+HWI-EAS443:3:76:1087:1457#0/1  
a`ba\_`^abbaaaaa`a`abaaaa`]aaabaaaa\_ab`  
@HWI-EAS443:3:76:1093:261#0/1  
CCGTTACACCTTTGTTTCGAGTCATGATTGGGCCATGAACT  
+HWI-EAS443:3:76:1093:261#0/1  
aababbbb`abbaa`aabaa\_aaba`aaaaaZ[^aa\_\_Y^  
@HWI-EAS443:3:76:1116:1389#0/1  
ATTCTGTGTGCTCTTCAGGTCGGCTGCATATCCTGACCCC  
+HWI-EAS443:3:76:1116:1389#0/1  
aaaaa`\_a\_a``\_aaaa`\_\_aa`\_`\_\_b^Y]\_^¥XXUY  
@HWI-EAS443:3:76:1141:1922#0/1  
ATTAATTTTTGTAGAAGCTTTTTGCTCCAGCATGAGGAC  
+HWI-EAS443:3:76:1141:1922#0/1  
abbbbabbbbababbaaaba`aa`b\_\_aaaa\_`a`  
@HWI-EAS443:3:76:1150:169#0/1  
CTCGTCAATGGCATTCTGTGTGCTCTTCAGGTCGGCTGCA  
+HWI-EAS443:3:76:1150:169#0/1  
Z`\_`Zbbaabb^bbbabbaa\_`a`Zba`aaa[S¥\_Z^YGY  
@HWI-EAS443:3:76:1168:1191#0/1  
TGCTGGCTGGATCCTGGGAAATCCAGAGTGTGAATCACTC  
+HWI-EAS443:3:76:1168:1191#0/1  
a`aa`^`a^XR^YV¥¥`VX^XX[TJLZM]WVS¥UP[KFO  
@HWI-EAS443:3:76:1168:816#0/1  
CTGGATCCTGGGAAATCCAGAGTGTGAATCACTCTCCACA  
+HWI-EAS443:3:76:1168:816#0/1  
ab`bbbbbaa\_bbbba`bb]`a\_a\_]`a\_aaaa^a^`  
@HWI-EAS443:3:76:1169:62#0/1  
GGGGACATCAAGATACAGCAAGAAGTTCAAGCCGGAAATA  
+HWI-EAS443:3:76:1169:62#0/1  
a\_a`^[^]X]\_Z^^X\_\_V^\_\_^Y]VXW^^XVXVXYVYYY  
@HWI-EAS443:3:76:1238:281#0/1  
GCACTAGTAGATGGATGGTGAATGCCCCATAGCACGAGGA  
+HWI-EAS443:3:76:1238:281#0/1  
a\_^Y`[Y\_]`^\_X^\_W\_\_\_\_\_UTVXY]XVYYYUV^RY  
@HWI-EAS443:3:76:1269:1512#0/1  
TACGGTTATCACCATCAAATGAGCAGGGGTCAGGATATG  
+HWI-EAS443:3:76:1269:1512#0/1  
aa\_bbY¥a`a\_aa`a`\_`aa\_a\_\_aaaaY¥a`^\_\_a[\_  
@HWI-EAS443:3:76:1274:879#0/1  
GGGACATCAAGATACAGCAAGAAGTTCAAGCCGGAAATAG  
+HWI-EAS443:3:76:1274:879#0/1  
^[\_`Z¥YYQR¥]Q\_YZ`T`aXZY[XTS`]XNN¥QVZYXZ¥  
@HWI-EAS443:3:76:1276:1277#0/1  
ATGAAATCTCCTGGGTAACACGTTCCATTGTCTGAACTAG  
+HWI-EAS443:3:76:1276:1277#0/1  
Zab`aaabbabb]`UabbbbbaaaaZ`baaba^aaaa]a\_a

@HWI-EAS443:3:76:1296:1936#0/1  
AAAAGAATAGAGAATTTAAATAAAAAAGTTGATGATGGTT  
+HWI-EAS443:3:76:1296:1936#0/1  
ab`aaababbb\_aaaaabaabaaaa`a¥a`aa`aa\_]`  
@HWI-EAS443:3:76:1367:1575#0/1  
GGGGACATCAAGATACAGCAAGAAGTTCAAGCCGAAATA  
+HWI-EAS443:3:76:1367:1575#0/1  
ababa^`aa\_aaaaaaaabbbaaaX`\_aa\_G\_a]\_]`\_a  
@HWI-EAS443:3:76:1405:480#0/1  
TGCTGGCTGGATCCTGGGAAATCCAGAGTGTGAATCACTC  
+HWI-EAS443:3:76:1405:480#0/1  
aa`aa`\_aa]`^¥¥^`a¥aa`[Y^^]`W`W`^^T^W\_U  
@HWI-EAS443:3:76:1416:531#0/1  
AGCTTTACCCCATCTATTTCTTCTCTGTTAATTTTGCTT  
+HWI-EAS443:3:76:1416:531#0/1  
¥bbbbbbba^aa¥bab`baaaaa\_a`aaaaa^babaa]aa  
@HWI-EAS443:3:76:1441:206#0/1  
CAACAAAGTCTCTATCAGAATGCAGATGCATATGTTTTTG  
+HWI-EAS443:3:76:1441:206#0/1  
R`babb\_\_S¥bVbb\_a\_^¥`U\_]`^b]abab¥`ba[baaa^  
@HWI-EAS443:3:76:1458:120#0/1  
ATTAGAGCACATCCAGAACTGATTGCCCCAGGGAGACT  
+HWI-EAS443:3:76:1458:120#0/1  
`aaab]bab[aba\_abbaZaab`\_aa[¥[T^\_a``¥]WT^  
@HWI-EAS443:3:76:1465:1151#0/1  
TTTTCAATTTCTTGGCATTGTTTTTAACTGGCTTCTTA  
+HWI-EAS443:3:76:1465:1151#0/1  
aaa^^¥^aa`¥YY\_^a¥^aaa]`\_a^\_^][^]ZX^`X]^Q  
@HWI-EAS443:3:76:1470:296#0/1  
CTGGTGTATAGCACCTTGGGTGTCTGACAAGTTGTAT  
+HWI-EAS443:3:76:1470:296#0/1  
ab`aabbbbbbbbbbaabb`a]¥a`[aba[`\_b^ab``a  
@HWI-EAS443:3:76:148:1073#0/1  
TGGAGAGTGATTCACACTCTGGATTTCCAGGATCCAGCC  
+HWI-EAS443:3:76:148:1073#0/1  
aa\_XaYaZaa`aaaaa\_aaa`P[\_\_aaZ]UV¥^]\_\_]V]  
@HWI-EAS443:3:76:1521:1373#0/1  
GCTTTTTGCTCCAGCATGAGGACATGCTGCCGTTACACCT  
+HWI-EAS443:3:76:1521:1373#0/1  
\_]`ba`\_\_Z`aaa]V¥Z[[TOWYTPTRRZRY¥RT¥WBBBB  
@HWI-EAS443:3:76:1537:1170#0/1  
ATTCTGAAATGGGAGGCTGGTGTATAGCACCTTGGGT  
+HWI-EAS443:3:76:1537:1170#0/1  
abbbbbUbabbbbaXbaaaba[aaa\_`a`X]LNYaa]X]^  
@HWI-EAS443:3:76:1540:1486#0/1  
GGGAAATCCAGAGTGTGAATCACTCTCCACAGCAAGCTCA  
+HWI-EAS443:3:76:1540:1486#0/1  
`¥\_\_¥aaYa`X][^^`a\_aY`]^X\_\_[\_X0[U\_\_aV[U]  
@HWI-EAS443:3:76:1562:1273#0/1  
AAATTTTTGTAGAAGCTTTTTGCTCCAGCATGAGGACATG





@HWI-EAS443:3:76:449:1789#0/1  
GCACGTGTTATCGCATTTGTGGTAAAATTCAAAGCAGCCG  
+HWI-EAS443:3:76:449:1789#0/1  
aaaaaW`]Wa\_a`\_\_^^`Z^^W\_`T^\_\_`^]Y]Y[[]]\_  
@HWI-EAS443:3:76:467:916#0/1  
TTTGTTAGTAATCTCGTCAATGGCATTCTGTGTGCTCTTC  
+HWI-EAS443:3:76:467:916#0/1  
aaaba[a]]]\_aa`aa`a\_\_`^^^^`^a¥^¥\_\_``\_\_\_^\_  
@HWI-EAS443:3:76:46:1528#0/1  
CAACAAAGTCTCTATCAGAATGCAGATGCATATGTTTTTG  
+HWI-EAS443:3:76:46:1528#0/1  
abbb\_^^`^b`b^^abba]MYQ¥a]\_^\_\_\_\_`Y]aQX`^^S  
@HWI-EAS443:3:76:476:1652#0/1  
AGAAGTCCTCGTGCTATGGGGCATTACCATCCATCTACT  
+HWI-EAS443:3:76:476:1652#0/1  
aaab\_^abaaa^`aa^`\_^\_aaa^\_aa`a^^^\_]\_\_`\_\_  
@HWI-EAS443:3:76:495:996#0/1  
CGGCTGCATATCCTGACCCCTGCTCATTTTGATGGTGATA  
+HWI-EAS443:3:76:495:996#0/1  
a``bbba]ababbabbba[Zaaa^a``a^^`aaU`\_]a  
@HWI-EAS443:3:76:512:1544#0/1  
CTCTTTACCTACTGCTGTGAAGTGTGATTTCATCTTTTCA  
+HWI-EAS443:3:76:512:1544#0/1  
a`^Z\_\_Z`\_X¥V]P[Y¥]^QRTYXL^LY^RP[[]Q[¥XZ^Y  
@HWI-EAS443:3:76:554:877#0/1  
TGGACAGGGATGGTAGATGGATGGTACGGTTATCACCATC  
+HWI-EAS443:3:76:554:877#0/1  
aaaa`\_aaa`a`¥``\_¥[[]\_\_\_V\_W`\_U^¥Z\_ZXYWW¥  
@HWI-EAS443:3:76:562:1037#0/1  
CGGATGTATATTCTGAAATGGGAGGCTGGTGTATAGCA  
+HWI-EAS443:3:76:562:1037#0/1  
\_^\_¥¥[\_¥¥a`a\_aabaV\_WU^^^`bH\_V\_\_Z¥]U][  
@HWI-EAS443:3:76:612:305#0/1  
CAGGTCGGCTGCATATCCTGACCCCTGCTCATTTTGATGG  
+HWI-EAS443:3:76:612:305#0/1  
\_]`aTaaaa]aab`\_V\_¥QOWP]\_F[\_[ZVRORMPPYUOQ  
@HWI-EAS443:3:76:613:1498#0/1  
ATCCATCTACTAGTGCTGACCAACAAAGTCTCTATCAGAA  
+HWI-EAS443:3:76:613:1498#0/1  
aaabaaaabaaaa]\_a`aaaa`a¥\_\_Xa`\_\_`\_\_a\_\_`  
@HWI-EAS443:3:76:619:1329#0/1  
CCGGGAGACAAAATAACATTGAAGCAACTGGAAATCTAG  
+HWI-EAS443:3:76:619:1329#0/1  
a\_\_`aaaaaZa]U`¥¥`[¥XZ]]XSXYWZWYX^X\_XXZ\_^  
@HWI-EAS443:3:76:629:1333#0/1  
ATCGATGAAATCTCCTGGGTAACACGTTCCATTGTCTGAA  
+HWI-EAS443:3:76:629:1333#0/1  
a`aaa`a]baa`aa`a^[[aaaa`a^aa`\_^`\_]\_^\_\_  
@HWI-EAS443:3:76:648:359#0/1  
CAAAGCTCAGCAAATCCTACATTAATGATAAAGGGAAAAGA

+HWI-EAS443:3:76:648:359#0/1  
¥bbba`abbaabab`aaaaaaaa\_aa\_a`\_\_a`\_`a\_\_`  
@HWI-EAS443:3:76:657:1595#0/1  
AGCCAGTTAAAAACAATGCCAAGGAAATTGGAAACGGCT  
+HWI-EAS443:3:76:657:1595#0/1  
]S¥WZT\_RU\_Z¥]RY¥^aa^baTFOX^GTxNRSN[[X\_Z  
@HWI-EAS443:3:76:673:1286#0/1  
TGCCGGTTTCATTGAAGGGGGTGGACAGGGATGGTAGAT  
+HWI-EAS443:3:76:673:1286#0/1  
aabbbb\_abb\_aaa\_a`aaaa`Wa^\_\_a`\_\_^\_aV\_Z\_Z  
@HWI-EAS443:3:76:693:330#0/1  
CTCCCGCTCTACTAGTGTCCAGTAATAGTTCATTCTCCC  
+HWI-EAS443:3:76:693:330#0/1  
V]abaa[a\_U[YQR]a¥a]\_aZ^V^^ZU]¥\_¥[`[^NR[  
@HWI-EAS443:3:76:695:20#0/1  
ATTCTGTGTCTTTCAGGTCGGCTGCATATCCTGACCCC  
+HWI-EAS443:3:76:695:20#0/1  
aaaaaa`b`Za`a`aa`a`\_\_`X\_\_a\_U^^^UXX]  
@HWI-EAS443:3:76:698:1965#0/1  
CACTGAGCTCAATTGCTCTTAGCTCCTCATAATCGATG  
+HWI-EAS443:3:76:698:1965#0/1  
a\_\_`Y]a`a`aa]X\_\_aaa\_\_aX\_[\_\_\_\_]Y^\_Z¥\_Z^UV  
@HWI-EAS443:3:76:702:1046#0/1  
CATCAAGATACAGCAAGAAGTTCAAGCCGAAATAGCAAT  
+HWI-EAS443:3:76:702:1046#0/1  
ababaabaaabbbabbaa`a¥`bba`\_aa`\_a\_a\_\_`aa^  
@HWI-EAS443:3:76:751:1922#0/1  
CTGCTTTGAATTTTACCACAAATGCGATAACACGTGCATG  
+HWI-EAS443:3:76:751:1922#0/1  
aa\_baaaaabaaaaababaaa\_a\_a\_aa`a\_]`Sa`\_  
@HWI-EAS443:3:76:754:337#0/1  
CATGAACCTGTCTTGGGAATATCTCAAACCTTCAAATG  
+HWI-EAS443:3:76:754:337#0/1  
abb`aabbbbaabbbbbb`bbbababb`\_aabaabaaaa  
@HWI-EAS443:3:76:766:194#0/1  
CACGTGTTATCGCATTTGTGGTAAAATTCAAAGCAGCCGT  
+HWI-EAS443:3:76:766:194#0/1  
aaab]babbb`baababbaba^aabaaa[aa\_a`aa]Wa]  
@HWI-EAS443:3:76:796:1256#0/1  
TGCCGGTTTCATTGAAGGGGGTGGACAGGGATGGTAGAT  
+HWI-EAS443:3:76:796:1256#0/1  
abbbbabababbbbaabbbbbb¥bbaaaaaaab¥bab`  
@HWI-EAS443:3:76:80:1251#0/1  
GGGTGGACAGGGATGGTAGATGGATGGTACGGTTATCACC  
+HWI-EAS443:3:76:80:1251#0/1  
\_\_]UY00[S^\_]X¥]VMXQR]RORXRPS[BBBBBBBBBB  
@HWI-EAS443:3:76:81:753#0/1  
CGCCAGTTCATTGGTACTGGTAGTCTCCCTGGGGCAATC  
+HWI-EAS443:3:76:81:753#0/1  
abb\_X`]abbbaa`^aa]¥0\_bMY¥¥¥]UVYa`N]BBB

@HWI-EAS443:3:76:859:243#0/1  
ACAGAATTTACTTTGTTAGTAATCTCGTCAATGGCATTCT  
+HWI-EAS443:3:76:859:243#0/1  
]¥Y\_ZZ` ]`T\_a`aa` ]^]V\_a¥H]YaZX`WU`a\_YV]\_¥  
@HWI-EAS443:3:76:871:1163#0/1  
ATTTTGCTTCCTCTGAGTATTTTGGGTAGTCATAAGTCCC  
+HWI-EAS443:3:76:871:1163#0/1  
aa\_a`a^`baa^^aaaa¥` ` [ `aa`U^] ` \_ `a` `W\_[Q]  
@HWI-EAS443:3:76:899:510#0/1  
GAATGTTATTTTGTCTCCCGCTCTACTAGTGTCCAGTAA  
+HWI-EAS443:3:76:899:510#0/1  
aa^`a\_aaaaaa`^\_a\_a\_a`\_^\_[TW^¥^Q]ZZ^]]X^^  
@HWI-EAS443:3:76:916:1196#0/1  
CCATTGACGAGATTACTAACAAAGTAAATTCTGTTATTGA  
+HWI-EAS443:3:76:916:1196#0/1  
abbb¥bbbbbb`]aa` `a`aa^]¥`¥` `aaa\_` ` `a\_a¥^\_  
@HWI-EAS443:3:76:919:992#0/1  
GTGTTATCGCATTTGTGGTAAAATTCAAAGCAGCCGTTTC  
+HWI-EAS443:3:76:919:992#0/1  
aW^Z] ` [¥WYR¥]]^X^^W\_\_ [VV]X^^X¥VY]WU[XUTU  
@HWI-EAS443:3:76:934:227#0/1  
GCTTCCTCTGAGTATTTTGGGTAGTCATAAGTCCCATTTT  
+HWI-EAS443:3:76:934:227#0/1  
a[¥¥Z[\_a\_a^`UUW\_Y\_\_\_¥FR[YTXYWY]WTXXX]]]]  
@HWI-EAS443:3:76:937:1432#0/1  
CTTCGAATGTTATTTTGTCTCCCGCTCTACTAGTGTCCA  
+HWI-EAS443:3:76:937:1432#0/1  
abbbbabbbbababbbbaabbbbaaaaaa\_[W` \_\_X^Y]W]  
@HWI-EAS443:3:76:981:1034#0/1  
CAGGTCGGCTGCATATCCTGACCCCTGCTCATTTTGATGG  
+HWI-EAS443:3:76:981:1034#0/1  
abab¥abaaaa[ `aaa^aa\_aa] [ ] \_]\_a^` \_\_\_\_\_ `^^\_  
@HWI-EAS443:3:76:983:130#0/1  
GAAGTCCTCGTCTATGGGGCATTACCATCCATCTACTA  
+HWI-EAS443:3:76:983:130#0/1  
a^]RX[ `0^U¥[\_VZ^^\_AY¥\_UUUQJV[QRW¥VV[WRW  
@HWI-EAS443:3:76:987:1457#0/1  
AGCCAGTTAAAAACAATGCCAAGGAAATTGGAAACGGCT  
+HWI-EAS443:3:76:987:1457#0/1  
a\_aaaa] `aaaa`^\_a`a`aa` \_\_\_\_\_]\_^\_]\_^\_Y[]  
@HWI-EAS443:3:77:1001:81#0/1  
CACAAATGCGATAACACGTGCATGGAAAGTGCAAAAATG  
+HWI-EAS443:3:77:1001:81#0/1  
ababbbba`abbbb`babab\_bbbbabab[baaababaab  
@HWI-EAS443:3:77:1004:234#0/1  
CTGGTGTATAGCACCCCTGGGTGTCTGACAAGTTGTAT  
+HWI-EAS443:3:77:1004:234#0/1  
abba` `bbbbba\_\_ba\_\_b\_bb\_\_a] `^`^X`a`¥`\_^`a  
@HWI-EAS443:3:77:1034:321#0/1  
ATTTGGACTTACAATGCCGAAGTGTGGTTCTATTGGAAA

+HWI-EAS443:3:77:1034:321#0/1  
abbbba`abbaabbabaabab\_aba\_^b\_`Z^^aa^a][`  
@HWI-EAS443:3:77:1035:631#0/1  
GGCTAGTTAAAAAAGGAAATTCATACCCAAAGCTCAGCAA  
+HWI-EAS443:3:77:1035:631#0/1  
ababbb`babbabbabbaaaaaab`aabbaa`a`aa\_aa  
@HWI-EAS443:3:77:1070:791#0/1  
GGTATTATCATTTTCAGATACACCAGTCCACGATTGCAATA  
+HWI-EAS443:3:77:1070:791#0/1  
ab^`aabbbaaaa`bbaab`bbaabSaaaaa``abab`a\_  
@HWI-EAS443:3:77:1079:926#0/1  
ATTCATCTTTTCAATAACAGAATTTACTTTGTTAGTAATC  
+HWI-EAS443:3:77:1079:926#0/1  
¥bb`b`Z``Xaaa\_a`a¥R\_babY^[aYaaa\_b\_aY]J\_\_  
@HWI-EAS443:3:77:1189:775#0/1  
AGCAATTGAGCTCAGTGTCATCATTTGAAAGTTTGAGAT  
+HWI-EAS443:3:77:1189:775#0/1  
aa¥^b`b`a`]]U]a`bZWX^[`aa``¥[aa¥¥a``a\_`a  
@HWI-EAS443:3:77:1196:751#0/1  
GGGGGGTGGACAGGGATGGTAGATGGATGGTACGGTTATC  
+HWI-EAS443:3:77:1196:751#0/1  
ab`b`\_ab\_baab\_aa`ab¥bbaab\_aab`[a^aa`aaaT  
@HWI-EAS443:3:77:1208:24#0/1  
ATCCTGACCCCTGCTCATTTTGATGGTGATAACCGTACCA  
+HWI-EAS443:3:77:1208:24#0/1  
a]a\_a^a[UUT`]WaZ^]Z]\_a\_Y`¥Wq]^W^TU\_XZTNZ  
@HWI-EAS443:3:77:120:1159#0/1  
CAAAAACATATGCATCTGCATTCTGATAGAGACTTTGTTG  
+HWI-EAS443:3:77:120:1159#0/1  
`QV¥Y¥aa[^`a^`\_\_aa`]X^\_a\_^]^^\_]^\_\_]\_T¥]  
@HWI-EAS443:3:77:1214:360#0/1  
GTCAAAAATGGGACTTATGACTACCCAAAATACTCAGAGG  
+HWI-EAS443:3:77:1214:360#0/1  
a\_a`\_\_\_\_a^^Y\_]`¥`^a]^`\_]`[]`\_^]\_]Z]^^\_\_  
@HWI-EAS443:3:77:1220:1844#0/1  
TCCGGCTTGAACCTTCTTGCTGTATCTTGATGTCCCCACAA  
+HWI-EAS443:3:77:1220:1844#0/1  
`a\_ba`aaaa\_Ya\_`a¥a\_\_\_`a\_a\_¥``YX```^\_U^a  
@HWI-EAS443:3:77:1227:373#0/1  
TGCTTCGAATGTTATTTTGTCTCCCGGCTCTACTAGTGTC  
+HWI-EAS443:3:77:1227:373#0/1  
a`a`a`b\_aab`a`aaa\_a^¥`\_J\_\_`]\_ZU[H\_^\_XUSO  
@HWI-EAS443:3:77:1260:232#0/1  
TCCGGCTTGAACCTTCTTGCTGTATCTTGATGTCCCCACAA  
+HWI-EAS443:3:77:1260:232#0/1  
``[baaaaaa\_\_aa\_aa`^aa`\_SGYa¥T\_\_\_^]]XUG]\_  
@HWI-EAS443:3:77:1261:1384#0/1  
GCTAGTTAAAAAAGGAAATTCATACCCAAAGCTCAGCAAA  
+HWI-EAS443:3:77:1261:1384#0/1  
aaaabbb^^baabbbababaabaaaa\_aaaa¥a\_aa\_a\_a

@HWI-EAS443:3:77:1270:1876#0/1  
ATGCTGCCGTTACACCTTTGTTTCGAGTCATGATTGGGCCA  
+HWI-EAS443:3:77:1270:1876#0/1  
ab\_ab`aa[a`STW^`^aXP\_aa^`G`QU¥UaZ^\_aT]\_  
@HWI-EAS443:3:77:1323:479#0/1  
GCCATGAACCTGTCTTGGGGAATATCTCAAACCTTTCAAA  
+HWI-EAS443:3:77:1323:479#0/1  
[``^Za`T^YZ\_\_JS¥a\_a^P¥```YS\_aa[\_a^U\_Z\_^\_  
@HWI-EAS443:3:77:1344:470#0/1  
CCTCTGAGTATTTTGGGTAGTCATAAGTCCCATTTTTGAC  
+HWI-EAS443:3:77:1344:470#0/1  
`ba\_`bab^ab^ba`Y]ZabW^Wb¥Z]¥YV¥\_aab\_a``^  
@HWI-EAS443:3:77:136:2001#0/1  
ATCCCCAAGACAAGTTCATGGCCCAATCATGACTCGAAC  
+HWI-EAS443:3:77:136:2001#0/1  
a^`abaaaa^\_baa\_V^a\_]Y]a\_\_^\_X^\_\_¥^YY^Y]^]  
@HWI-EAS443:3:77:1443:838#0/1  
GACAAGTTGTATTGCAATCGTGGACTGGTGTATCTGAAAT  
+HWI-EAS443:3:77:1443:838#0/1  
abababbbbabbbaabbbabaa`\_aaba\_``aa^bbaaaa  
@HWI-EAS443:3:77:1462:374#0/1  
ATTTGAAAGTTTTCAGATATTTCCCAAGACAAGTTCATGG  
+HWI-EAS443:3:77:1462:374#0/1  
```a`ab\_bbaa\_baabaabbbaaa`baaa`\_b0\_`\_X` [  
@HWI-EAS443:3:77:1463:485#0/1  
TGTGTGCTCTTCAGGTCGGCTGCATATCCTGACCCCTGCT  
+HWI-EAS443:3:77:1463:485#0/1  
aa\_a]b`aabb^baa\_abaaaa^`bbaa]a^]a¥^N\_¥F^  
@HWI-EAS443:3:77:146:1937#0/1  
TTCCAGTTGCTTCGAATGTTATTTTGTCTCCCGGCTCTAC  
+HWI-EAS443:3:77:146:1937#0/1  
a`bbb`I\_`ba`\_WZZ`XSaa`\_a`SY\_Jaaa^U[]YQZZ  
@HWI-EAS443:3:77:1476:257#0/1  
ATTCTGTGTGCTCTTCAGGTCGGCTGCATATCCTGACCCC  
+HWI-EAS443:3:77:1476:257#0/1  
]abbab[a\_aaa`bb\_b`a¥aaaY`a\_\_`b`U¥¥\_aTSVT  
@HWI-EAS443:3:77:1503:688#0/1  
GCTGGATCCTGGGAAATCCAGAGTGTGAATCACTCTCCAC  
+HWI-EAS443:3:77:1503:688#0/1  
a[a`]XaZ\_U^^```aZ]a^^^XZ`W^a^[[\_^V]ZPU¥N  
@HWI-EAS443:3:77:1519:1096#0/1  
CCTCTGAGTATTTTGGGTAGTCATAAGTCCCATTTTTGAC  
+HWI-EAS443:3:77:1519:1096#0/1  
`aaYaa¥`V^bbbbbb`^`bb`^b``b`^a^]bbbaba[a  
@HWI-EAS443:3:77:1530:1291#0/1  
ATGGTTTCCTGGACATTTGGACTTACAATGCCGAAGTGT  
+HWI-EAS443:3:77:1530:1291#0/1  
abaa\_abaabaaa`abbb`aaaaa^aaaa\_\_a\_a\_a``a  
@HWI-EAS443:3:77:1562:1235#0/1  
GGGGACATCAAGATACAGCAAGAAGTTCAGCCGAAATA

+HWI-EAS443:3:77:1562:1235#0/1  
ababaabbbbbaabaabbbbbaaab\_aabaa`[aa```aa  
@HWI-EAS443:3:77:1564:1295#0/1  
TTTTGCTTCCTCTGAGTATTTTGGGTAGTCATAAGTCCCA  
+HWI-EAS443:3:77:1564:1295#0/1  
¥b[Y]`aa\_X`^`b```ab¥a`^`[OZ\_Raaaa`VUMZ`  
@HWI-EAS443:3:77:1627:1262#0/1  
GAACTCTTTACCTACTGCTGTGAAGTGTATTTCATCTTT  
+HWI-EAS443:3:77:1627:1262#0/1  
a`^Y^b^`a]\_a\_\_`a\_aaYa^\_Y\_a]\_Y^```\_aI`\_a  
@HWI-EAS443:3:77:1661:843#0/1  
GCTGGCTGGATCCTGGGAAATCCAGAGTGTGAATCACTCT  
+HWI-EAS443:3:77:1661:843#0/1  
`bb]aaabbaa]]R^abaa\_a^¥]baa¥a^`aa\_XXP^^]  
@HWI-EAS443:3:77:1671:982#0/1  
GATCCTGGGAAATCCAGAGTGTGAATCACTCTCCACAGCA  
+HWI-EAS443:3:77:1671:982#0/1  
aab`aaaaaaaa`aab\_a^b`b`\_aXa¥a]\_a]`¥`\_Y\_  
@HWI-EAS443:3:77:1695:1442#0/1  
GCTGGCTGGATCCTGGGAAATCCAGAGTGTGAATCACTCT  
+HWI-EAS443:3:77:1695:1442#0/1  
aabbbbbbb`a```baaba^^aaaa\_aaaaa^a\_a¥a  
@HWI-EAS443:3:77:1697:718#0/1  
AAGCCAGTTAAAAACAATGCCAAGGAAATTGGAAACGGC  
+HWI-EAS443:3:77:1697:718#0/1  
aba\_\_ab\_ba```aaaaaaaaa]a\_aa`\_`a^]a\_a\_]`\_W  
@HWI-EAS443:3:77:16:313#0/1  
CGATTATGAGGAGCTAAGAGAGCAATTGAGCTCAGTGTCA  
+HWI-EAS443:3:77:16:313#0/1  
ababbUb^bb¥`aa`0\_aaa^`a`a`\_aaa`\_a`aXaX¥^  
@HWI-EAS443:3:77:1730:579#0/1  
CTTTGGACTACCAGATTCAAATGTGAAGAACTTATATGA  
+HWI-EAS443:3:77:1730:579#0/1  
[^\_\_S\_¥`[`b`bb¥baa^S^a`a¥¥`bVb[M\_`a`ab^^  
@HWI-EAS443:3:77:1784:1658#0/1  
GAGCAATTGAGCTCAGTGTGCATCATTGAAAGTTTGAGA  
+HWI-EAS443:3:77:1784:1658#0/1  
aaaaababaa```a`aa\_a`^aba\_a`a```\_`^Taaaa`a  
@HWI-EAS443:3:77:190:1099#0/1  
GGCATTCTGTGTGCTCTTCAGGTCGGCTGCATATCCTGAC  
+HWI-EAS443:3:77:190:1099#0/1  
aabb``bb`a`X`bbba`a\_]^H`\_¥bab¥\_aba`aaH\_Z  
@HWI-EAS443:3:77:19:1641#0/1  
TCTTGCTGTATCTTGATGTCCCCACAAAAACATATGCATC  
+HWI-EAS443:3:77:19:1641#0/1  
`ba¥VZZ\_abY`abYY`¥Y^^R`^aVZ^\_U`ZU``^aa[^  
@HWI-EAS443:3:77:244:52#0/1  
ATGAAATCTCCTGGGTAACACGTTCCATTGTCTGAACTAG  
+HWI-EAS443:3:77:244:52#0/1  
ababbabab`aba`a`aaa\_b\_a`\_\_``a^\_``\_\_^`\_a

@HWI-EAS443:3:77:285:860#0/1  
CTCTTCAGGTTCGGCTGCATATCCTGACCCCTGCTCATT  
+HWI-EAS443:3:77:285:860#0/1  
Z[``bb`¥[``\_\_ba]\_¥a[^[a\_a¥\_\_a^aaV]¥WXU\_  
@HWI-EAS443:3:77:286:1775#0/1  
TGGCTAGTTAAAAAGGAAATTCATACCCAAAGCTCAGCA  
+HWI-EAS443:3:77:286:1775#0/1  
ab\_a¥[T[\_aa`aY¥][\_aabaa^VaZaa`[[Y^^`¥R`¥  
@HWI-EAS443:3:77:308:2013#0/1  
TGCATATGTTTTGTGGGGACATCAAGATACAGCAAGAAG  
+HWI-EAS443:3:77:308:2013#0/1  
aaabaaa^`aaaa`]aa[\_aba`aaa\_a`baaV^aa\_aa\_  
@HWI-EAS443:3:77:315:1095#0/1  
CTTTGTTTCGAGTCATGATTGGGCCATGAACTTGTCTTGGG  
+HWI-EAS443:3:77:315:1095#0/1  
a`^aZaa`^`^T\_]bab[OWJY\_`S`]aZUWa]XTPY¥`V  
@HWI-EAS443:3:77:426:949#0/1  
ATGGATGGTACGGTTATCACCATCAAAATGAGCAGGGGTC  
+HWI-EAS443:3:77:426:949#0/1  
`b\_\_Za]aT\_^X\_T¥]Y¥ITUZVXZ]X]S^^YVX[a¥KT  
@HWI-EAS443:3:77:427:1532#0/1  
ATTTGGGGCCATTGCCGTTTCATTGAAGGGGGGTGGACA  
+HWI-EAS443:3:77:427:1532#0/1  
aa^`a¥^WY\_\_a\_¥P^^`Q[\_¥¥U]SW`^`^`a\_K]ZXa^  
@HWI-EAS443:3:77:441:1645#0/1  
GCTTTTTGCTCCAGCATGAGGACATGCTGCCGTTACACCT  
+HWI-EAS443:3:77:441:1645#0/1  
ababbbaabaabbabbaaaaaaaaaa`a\_a\_`Z]``\_a  
@HWI-EAS443:3:77:455:414#0/1  
CTTTACCTACTGCTGTGAAGTGTGATTTCATCTTTTCAAT  
+HWI-EAS443:3:77:455:414#0/1  
aabba`^a`a]a]a\_NYaU]^a[aaa```[[^^a\_ba\_XV  
@HWI-EAS443:3:77:460:1509#0/1  
TCGAATGTTATTTTGTCTCCCGGCTCTACTAGTGTCCAGT  
+HWI-EAS443:3:77:460:1509#0/1  
ab``a`a\_aaaaa\_\_a`a`a`^`^¥]Q[YVTY`\_[[P  
@HWI-EAS443:3:77:527:817#0/1  
GTGTTACCCAGGAGATTTTCATCGATTATGAGGAGCTAAGA  
+HWI-EAS443:3:77:527:817#0/1  
a\_aWa`aaaa^^YNR`]^^^`\_\_`ZY\_\_[[ZY]]\_`^¥Y  
@HWI-EAS443:3:77:530:412#0/1  
GGGGTCAGGATATGCAGCCGACCTGAAGAGCACACAGAAT  
+HWI-EAS443:3:77:530:412#0/1  
T\_]ZUH[W\_babb]bUb`bT]b`TQ`TTb]\_0^¥Zbba\_  
@HWI-EAS443:3:77:546:897#0/1  
CAGGGAGACTACCAGTACCAATGAACTGGCGACAGTTGAA  
+HWI-EAS443:3:77:546:897#0/1  
aaba`U]aa\_\_`\_\_Rbaa`X`a\_K]\_`^`\_]`W^[]\_  
@HWI-EAS443:3:77:555:1682#0/1  
CCGGCTTGAAGTCTTGCTGTATCTTGATGTCCCCACAAA

+HWI-EAS443:3:77:555:1682#0/1  
aa]]\_\_[TS[]]\_a[]U`XZUZ¥\_ZSYTZWU¥\_Z[[VWVY  
@HWI-EAS443:3:77:565:64#0/1  
CTGACAAGTTGTATTGCAATCGTGGACTGGTGTATCTGAA  
+HWI-EAS443:3:77:565:64#0/1  
abb`b\_^\_bbbbabbbbbbbbaa^[aabaWb\_a`a]a]]  
@HWI-EAS443:3:77:568:112#0/1  
ACCAGTACCAATGAACTGGCGACAGTTGAATAGATCGCCA  
+HWI-EAS443:3:77:568:112#0/1  
aa\_aa]]\_\_a`aaaa\_\_\_aaa¥Z\_X^\_¥[Y\_^\_^^\_YX¥  
@HWI-EAS443:3:77:568:1778#0/1  
GCTGGCTGGATCCTGGGAAATCCAGAGTGTGAATCACTCT  
+HWI-EAS443:3:77:568:1778#0/1  
abaZab\_a`]X`aSK\_\_Y`aZ^a^X^^P\_U]]Y^^Z[^  
@HWI-EAS443:3:77:572:1325#0/1  
ATTTTGGGTAGTCATAAGTCCCATTTTTGACACTTTCCAT  
+HWI-EAS443:3:77:572:1325#0/1  
aaK^`a^LXMY]aa`^L¥aa^Z`V`\_a¥VW]a\_\_UMWZ]  
@HWI-EAS443:3:77:57:321#0/1  
GGAACGTGTTACCCAGGAGATTTTCATCGATTATGAGGAGC  
+HWI-EAS443:3:77:57:321#0/1  
a`\_a^aS`^`^W]\_`\_]`V^]\_^[\_^^^]XY]\_^]  
@HWI-EAS443:3:77:589:949#0/1  
TAAGAAGCCAGTTAAAAACAATGCCAAGGAAATTGGAAA  
+HWI-EAS443:3:77:589:949#0/1  
`¥Z¥aY`\_\_¥¥Yab\_\_[X\_\_]\_^`^^YZ¥]\_aY]\_a^`]  
@HWI-EAS443:3:77:601:186#0/1  
TGGGGACATCAAGATACAGCAAGAAGTTCAAGCCGAAAT  
+HWI-EAS443:3:77:601:186#0/1  
abaaaaabaaa`aaaaa`aa^aa`\_\_a^^\_a^\_\_\_a]\_\_``  
@HWI-EAS443:3:77:602:753#0/1  
TGCTGACCAACAAAGTCTCTATCAGAATGCAGATGCATAT  
+HWI-EAS443:3:77:602:753#0/1  
abbababba¥]\_\_b`\_^`¥Y`\_`W`a`^][`]Y]`\_a  
@HWI-EAS443:3:77:611:146#0/1  
TTCCGGCTTGAACCTTCTTGCTGTATCTTGATGTCCCCACA  
+HWI-EAS443:3:77:611:146#0/1  
Sa`a\_¥¥`¥X`Zab^]\_[ZOR]N][K[a^¥¥RLV¥LZYSZ  
@HWI-EAS443:3:77:686:358#0/1  
ATGGAACGTGTTACCCAGGAGATTTTCATCGATTATGAGGA  
+HWI-EAS443:3:77:686:358#0/1  
abbbbaaab`aaaaaaaaa`a`aa^¥`a\_b\_aa`aa\_\_\_^  
@HWI-EAS443:3:77:69:1626#0/1  
CAGTCCACGATTGCAATACAACCTTGTGACACCCCAAGGG  
+HWI-EAS443:3:77:69:1626#0/1  
a]\_\_aa`a`a`\_ab\_aaaa`\_`¥]a¥]]^a\_\_\_\_\_ZXYY  
@HWI-EAS443:3:77:708:230#0/1  
TGGGAAATCCAGAGTGTGAATCACTCTCCACAGCAAGCTC  
+HWI-EAS443:3:77:708:230#0/1  
abaaabbaaaba`a]a\_aaaaab`a`a`aa]`a\_a`R]\_



@HWI-EAS443:3:77:714:1765#0/1  
CCCATCTATTTCTTCTCTGTTTAATTTTGCTTCCTCTGAG  
+HWI-EAS443:3:77:714:1765#0/1  
aab`^babbabbbbaab\_babbb^bbbb^`\_^aabbabb  
@HWI-EAS443:3:77:727:1618#0/1  
TAAAAACAATGCCAAGGAAATTGGAAACGGCTGCTTTGA  
+HWI-EAS443:3:77:727:1618#0/1  
a`¥babbabbaabaaaa`abaa\_^\_aa`\_^\_`¥GK¥\_GV  
@HWI-EAS443:3:77:748:1214#0/1  
CTTCTCTGAGTATTTTGGGTAGTCATAAGTCCCATTTTT  
+HWI-EAS443:3:77:748:1214#0/1  
ab`^bbbbbZ`[a^a`a`a\_\_\_aaa`aaaa^¥aaaa`a`  
@HWI-EAS443:3:77:765:48#0/1  
GCATATCCTGACCCCTGCTCATTTTGATGGTGATAACCGT  
+HWI-EAS443:3:77:765:48#0/1  
a\_¥YY]¥\_`a\_UYZ]\_\_\_¥YYWU\_XRXY]]V]]^]SFVV  
@HWI-EAS443:3:77:790:1470#0/1  
GCAGGGGTCAGGATATGCAGCCGACCTGAAGAGCACACAG  
+HWI-EAS443:3:77:790:1470#0/1  
abbaaab¥ba`aaaaaaaaaaaa`^\_aa^aa^a^a`^`a\_\_\_  
@HWI-EAS443:3:77:813:569#0/1  
CCATGAACCTGTCTTGGGAATATCTCAAACCTTCAAAT  
+HWI-EAS443:3:77:813:569#0/1  
`bbbbbabbabbbbaaababbbbbb`^`^`bbbbbbaab  
@HWI-EAS443:3:77:831:982#0/1  
GGGGACATCAAGATACAGCAAGAAGTTCAAGCCGAAATA  
+HWI-EAS443:3:77:831:982#0/1  
\_ZZ)`aaaa¥Y^`^`a[`aaa\_]aW¥]^`^Xa\_V^^`\_`  
@HWI-EAS443:3:77:856:841#0/1  
GTGGTAGTCCAAAGTTCTTTTCAATAGAACCAAC  
+HWI-EAS443:3:77:856:841#0/1  
aa`^Uba¥aaZ0]ZV]aaa`]a\_aab^[`^`^`^`¥aa]a\_\_\_  
@HWI-EAS443:3:77:866:789#0/1  
TGTGTATTTCATTTTTCAATAACAGAATTTACTTTGTTAG  
+HWI-EAS443:3:77:866:789#0/1  
`a`\_a\_^X\_b^^^b\_a`^^`^`a]X\_V[^`\_`aaa\_b\_^¥^  
@HWI-EAS443:3:77:874:657#0/1  
GAAGCCAGTTAAAAACAATGCCAAGGAAATTGGAAACGG  
+HWI-EAS443:3:77:874:657#0/1  
`abbbabaZ^\_abbbabbaabaa`a`^bbaaba\_babaab  
@HWI-EAS443:3:77:920:1315#0/1  
GGGGACATCAAGATACAGCAAGAAGTTCAAGCCGAAATA  
+HWI-EAS443:3:77:920:1315#0/1  
\_^aa`¥S\_\_Za`¥X\_a\_\_W\_aX^Z]IW)`[YY^ZXNY`^\_  
@HWI-EAS443:3:77:939:1435#0/1  
GCTGGCTGGATCCTGGGAAATCCAGAGTGTGAATCACTCT  
+HWI-EAS443:3:77:939:1435#0/1  
aaabaa[Z]\_aaa`^aa^aa][X`\_]¥V\_Z`Z`¥¥^^^`\_`  
@HWI-EAS443:3:77:949:1442#0/1  
TCGTGGTAGTCCAAAGTTCTTTTCAATAGAACCA

+HWI-EAS443:3:77:949:1442#0/1  
a`\_Z\_]G]aX]¥L`¥\_]`aZ]]aa`¥¥Q[^WWT]LU]  
@HWI-EAS443:3:77:952:1711#0/1  
ATTCCCCAAGACAAGTTCATGGCCCAATCATGACTCGAAC  
+HWI-EAS443:3:77:952:1711#0/1  
Z`^^¥a\_]W`\_]ORZX`W`]JZ¥ZX`aYT[VV][[TT  
@HWI-EAS443:3:77:957:305#0/1  
CTTTGTTAGTAATCTCGTCAATGGCATTCTGTGTGCTCTT  
+HWI-EAS443:3:77:957:305#0/1  
abbbbbbbbbbbbbbbbabababbbbabababab\_ba  
@HWI-EAS443:3:78:100:759#0/1  
GTGCTCTTCAGGTCGGCTGCATATCCTGACCCCTGCTCAT  
+HWI-EAS443:3:78:100:759#0/1  
¥V`\_`^^a^\_^]LPSY¥^aZ0Q¥Z`X[HR^\_\_TV]SYXSY  
@HWI-EAS443:3:78:102:1170#0/1  
CACTCTGTAACTTCTAGAAGACAAGCATAACGGGAAAC  
+HWI-EAS443:3:78:102:1170#0/1  
a]bbaaa[aaaaaa`baaaaaa[`a`aa`aXaa\_`^``\_`  
@HWI-EAS443:3:78:1033:424#0/1  
GAAAGAAGTCCTCGTGTATGGGGCATTACCATCCATCT  
+HWI-EAS443:3:78:1033:424#0/1  
aaaaa`a^\_\_`[a\_`\_`]aa[\_\_\_]`\_\_\_]``^`\_]X\_^U]  
@HWI-EAS443:3:78:1052:1211#0/1  
AACTGATTGCCCCAGGGAGACTACCAGTACCAATGAACT  
+HWI-EAS443:3:78:1052:1211#0/1  
aaaa`aba`]FY\_`a`\_aa¥`]\_\_\_]`WZa`\_\_\_\_`^`¥  
@HWI-EAS443:3:78:106:643#0/1  
GCTTTTTGCTCCAGCATGAGGACATGCTGCCGTTACACCT  
+HWI-EAS443:3:78:106:643#0/1  
a`a`aaa`babbaa\_\_\_a`\_\_[\_^`\_]¥Z`Y[Z^U¥¥W  
@HWI-EAS443:3:78:1108:400#0/1  
GCTATTTCCGGCTTGAACCTTCTGCTGTATCTTGATGTCC  
+HWI-EAS443:3:78:1108:400#0/1  
^JX[`QL^WR¥QNOVJU\_RUPNS^JV]\_^]^UW¥LG¥KMF  
@HWI-EAS443:3:78:1112:1870#0/1  
AATTTTGCTTCTCTGAGTATTTGGGTAGTCATAAGTCC  
+HWI-EAS443:3:78:1112:1870#0/1  
`^^a`aaaa`Waa`Z`a[`a`\_¥a`]X`\_]\_\_a^`\_Y`\_  
@HWI-EAS443:3:78:1211:37#0/1  
TTGGCCCATGAACTTGTCTTGGGGAATATCTCAAACCTTT  
+HWI-EAS443:3:78:1211:37#0/1  
^^\_aa\_TW`b[¥``SX]aa`a`P[a][N¥V][WSO[^X  
@HWI-EAS443:3:78:1249:1291#0/1  
GAAGCCAGTTAAAAACAATGCCAAGGAAATTGGAAACGG  
+HWI-EAS443:3:78:1249:1291#0/1  
PR^¥`V\_b`bbab[X[a^[¥b\_YZ]aa`a^U¥\_\_^]]Waa  
@HWI-EAS443:3:78:1326:1840#0/1  
GGGGACATCAAGATACAGCAAGAAGTTCAAGCCGGAAATA  
+HWI-EAS443:3:78:1326:1840#0/1  
a`[`a]aV`aa`\_]ZP`^aa`]¥`T\_Va]\_]a¥]]^^\_`

@HWI-EAS443:3:78:1342:650#0/1  
GGCCAGTCTCAATTTTGTGCTTTTACATATTTTGGACAT  
+HWI-EAS443:3:78:1342:650#0/1  
`ba]aa#` ` \_]\_^`^`a]\_a\_a\_a`aY]\_\_\_a`a` `^[\_]  
@HWI-EAS443:3:78:1369:429#0/1  
GGGACATCAAGATACAGCAAGAAGTTCAAGCCGGAAATAG  
+HWI-EAS443:3:78:1369:429#0/1  
\_aa\_\_a\_aaaba^a^aa^abaa`a^\_]a\_^\_a^`^`\_a^\_  
@HWI-EAS443:3:78:1370:911#0/1  
ATCCTTGTTGATTCCAGCTTACCCTATCTATTTCTTCTC  
+HWI-EAS443:3:78:1370:911#0/1  
aaY`a^aabbaa`ZN\_baY^a[QXYSXZN\_aaaaS\_`[a]  
@HWI-EAS443:3:78:1459:227#0/1  
TGTTACCCAGGAGATTTTCATCGATTATGAGGAGCTAAGAG  
+HWI-EAS443:3:78:1459:227#0/1  
`baa`\_Waaaa\_a^\_\_a\_aG\_Z^\_aa]\_`Z\_Y\_^`^`]  
@HWI-EAS443:3:78:1499:120#0/1  
ATCAAGATACAGCAAGAAGTTCAAGCCGGAAATAGCAATA  
+HWI-EAS443:3:78:1499:120#0/1  
a\_`\_[a#\_] ]SM\_`\_Y\_]OZV[X]Z]\_RZ]\_Z]OZX]X  
@HWI-EAS443:3:78:1529:1214#0/1  
ATGAACCTGTCCTGGGAATATCTCAAACCTTTCAAATGA  
+HWI-EAS443:3:78:1529:1214#0/1  
^aa`\_a^a`aaabbaa]Pa]aRa^a`\_]Uaa\_`^\_`\_`  
@HWI-EAS443:3:78:1591:814#0/1  
ACCCCATCTATTTCTTCTGTTTAAATTTTGCTTCTCTG  
+HWI-EAS443:3:78:1591:814#0/1  
\_a\_0\_abababba\_aabbabb^bbb#b`bbbabb#`b\_`b  
@HWI-EAS443:3:78:1595:473#0/1  
TGTGGGGACATCAAGATACAGCAAGAAGTTCAAGCCGGAA  
+HWI-EAS443:3:78:1595:473#0/1  
ab`aabaa^aaa^aa`aa^aa#`aa\_`aU`\_a\_aWZa\_^\_  
@HWI-EAS443:3:78:1726:1010#0/1  
GCTGGCTGGATCCTGGGAAATCCAGAGTGTGAATCACTCT  
+HWI-EAS443:3:78:1726:1010#0/1  
^R]TI^bb`\_]aZ\_\_a`Raa^[Ua\_V]FTK\_\_\_\_\_^XWNV  
@HWI-EAS443:3:78:1754:1126#0/1  
GTGGGGACATCAAGATACAGCAAGAAGTTCAAGCCGGAAA  
+HWI-EAS443:3:78:1754:1126#0/1  
^PVWN\_` `^\_[XOR^a]\_a#`\_\_^#\_Y]]`\_]RR#^]]  
@HWI-EAS443:3:78:1765:1487#0/1  
GCCAGTTAAAAACAATGCCAAGGAAATTGGAAACGGCTG  
+HWI-EAS443:3:78:1765:1487#0/1  
H]`#a\_aa^\_R\_#a` `Va[aZaba\_`bba\_]\_`^a\_X[a^  
@HWI-EAS443:3:78:186:1422#0/1  
GGAGATTTTCATCGATTATGAGGAGCTAAGAGAGCAATTGA  
+HWI-EAS443:3:78:186:1422#0/1  
ZZ#`\_abab\_#b`Z`a#]Z\_]\_`a`^#^aa`\_T`\_]\_]`  
@HWI-EAS443:3:78:193:331#0/1  
ACCCAAGGGTGCTATAAACACCAGCCTCCCATTTCAGAAT

+HWI-EAS443:3:78:193:331#0/1  
a`aa`aaaV``\_\_aX\_]\_]\_Z[^X]]]]]]]YVSZ]  
@HWI-EAS443:3:78:269:177#0/1  
CTGTGTATTCATCTTTTCAATAACAGAATTTACTTTGTTA  
+HWI-EAS443:3:78:269:177#0/1  
aab\_a\_a`a\_a[Y¥aa`\_\_L````aa\_\_`\_\_[[``]-]]]  
@HWI-EAS443:3:78:325:553#0/1  
TGAATTTTACCACAAATGCGATAACACGTGCATGGAAAAGT  
+HWI-EAS443:3:78:325:553#0/1  
a`Yaaa`aaa]\_aa`aaa`aa`a`aZ`\_\_aa^`\_\_W  
@HWI-EAS443:3:78:331:188#0/1  
CTTTGTTAGTAATCTCGTCAATGGCATTCTGTGTGCTCTT  
+HWI-EAS443:3:78:331:188#0/1  
aa`a`a`\_\_X`\_]`bV[Y^^\_]\_^]\_^\_W\_W\_^]X]X  
@HWI-EAS443:3:78:335:1875#0/1  
GCTGGTGTATATAGCACCCCTTGGGTGTCTGACAAGTTGTA  
+HWI-EAS443:3:78:335:1875#0/1  
aa^U[UYUTT`T¥V¥0]VXTBBBBBBBBBBBBBBBBBBB  
@HWI-EAS443:3:78:355:1615#0/1  
ATAAGTCCCATTTTGGACACTTTCCATGCACGTGTTATCG  
+HWI-EAS443:3:78:355:1615#0/1  
VZ¥Z[S\_bbaabb^[[`\_V¥aa]`abZ]aa`YJ\_UZ\_[^a  
@HWI-EAS443:3:78:415:192#0/1  
GCTGCTTTGAATTTTACCACAAATGCGATAACACGTGCAT  
+HWI-EAS443:3:78:415:192#0/1  
aaZaaaVUP`¥PZGT¥TUTWLWLGMRSM\_RVPFRNWTMS  
@HWI-EAS443:3:78:425:279#0/1  
GGGGACATCAAGATACAGCAAGAAGTTCAAGCCGAAATA  
+HWI-EAS443:3:78:425:279#0/1  
abaa`Xaa\_aaa`a`aaaaa`\_aX]^a\_\_¥¥[``^^^\_^  
@HWI-EAS443:3:78:438:188#0/1  
ATAAACACCAGCCTCCCATTTTCAAGTATACATCCGATCA  
+HWI-EAS443:3:78:438:188#0/1  
a`aaa```^`\_\_[[\_\_]]]]]]^^[[]^]^]^`^]Z^][Y]  
@HWI-EAS443:3:78:463:399#0/1  
TTTGTAGTAATCTCGTCAATGGCATTCTGTGTGCTCTTC  
+HWI-EAS443:3:78:463:399#0/1  
ab`\_``[`abaaT]aa\_aa`a`a`a¥¥]ULT`^[\_]  
@HWI-EAS443:3:78:488:1995#0/1  
AAACCTTTCAAATGATGACTGAGCTCAATTGCTCTCTT  
+HWI-EAS443:3:78:488:1995#0/1  
aa\_\_`\_\_S\_aaaaP`ZY^a\_[^Z[¥¥X\_\_UZ`^¥]^\_Y  
@HWI-EAS443:3:78:50:688#0/1  
CGGCTTGAACCTTCTGCTGTATCTTGATGTCCCCACAAAA  
+HWI-EAS443:3:78:50:688#0/1  
aaZZZ]UMP¥LVZ¥¥SYV]QNWVZZMOPXRZX[XPZYU  
@HWI-EAS443:3:78:571:1256#0/1  
CTTTGTTAGTAATCTCGTCAATGGCATTCTGTGTGCTCTT  
+HWI-EAS443:3:78:571:1256#0/1  
aba\_¥Na¥WPZ¥aa`a`FW¥^Y^`Y]a`\_`[\_]\_[a\_^\_^^

@HWI-EAS443:3:78:591:631#0/1  
GGGACATCAAGATACAGCAAGAAGTTCAAGCCGGAAATAG  
+HWI-EAS443:3:78:591:631#0/1  
`¥\_a¥aaa\_\_`\_^]`aaa^a`^a]Y`a`^]`a\_Y]\_``  
@HWI-EAS443:3:78:615:1506#0/1  
TTGTGCTTTTTACATATTTTGGACATTTTCCAATTGTGAT  
+HWI-EAS443:3:78:615:1506#0/1  
aaa\_\_abaaaaba`aaaaaa\_`\_`a`aaaa^a^aY\_\_\_\_  
@HWI-EAS443:3:78:615:1693#0/1  
CAGGTCGGCTGCATATCCTGACCCCTGCTCATTTTGATGG  
+HWI-EAS443:3:78:615:1693#0/1  
ab`a^ba^aa\_aa`baaba^ab\_`^a\_a`aaa¥¥`\_a^\_\_  
@HWI-EAS443:3:78:631:1885#0/1  
GTTATTTTGTCTCCCGGCTCTACTAGTGTCCAGTAATAGT  
+HWI-EAS443:3:78:631:1885#0/1  
^V\_a`a\_aPb`a¥a\_\_\_\_`\_[^QPXVLXWTWZ^N[¥LZ\_0  
@HWI-EAS443:3:78:63:472#0/1  
CTGGTATTATCATTTTCAGATACACCAGTCCACGATTGCAA  
+HWI-EAS443:3:78:63:472#0/1  
\_\_bXbbaa`bbaaa\_aa`b\_aaaa`]`\_a`aY^\_a\_b\_  
@HWI-EAS443:3:78:667:1184#0/1  
TGCATATCCTGACCCCTGCTCATTTTGATGGTGATAACCG  
+HWI-EAS443:3:78:667:1184#0/1  
ab\_S`baba`W\_`^a]aaaa```aa]a]\_`aaaa`]^  
@HWI-EAS443:3:78:751:647#0/1  
GGAACGTGTTACCCAGGAGATTTTCATCGATTATGAGGAGC  
+HWI-EAS443:3:78:751:647#0/1  
aaaaWa`a`aa`[a````aaaaa`\_\_a^]`\_aa`a`^`^  
@HWI-EAS443:3:78:786:186#0/1  
CTGGCTTCTTACCTTTTTCATATAAGTTCTTCCACATTTGAA  
+HWI-EAS443:3:78:786:186#0/1  
\_Za\_0¥bbV^baT0\_a\_0\_\_R¥`\_]IILP¥a^TSV¥T]WI  
@HWI-EAS443:3:78:795:1984#0/1  
ATTTCTTCTCTGTTAATTTTGCTTCTCTGAGTATTTTG  
+HWI-EAS443:3:78:795:1984#0/1  
^[baba`aaa[aYaaba^]a^S^]aY`]^[aa\_\_\_\_`^[W[  
@HWI-EAS443:3:78:832:1522#0/1  
TTTTGCTTCTCTGAGTATTTTGGGTAGTCATAAGTCCCA  
+HWI-EAS443:3:78:832:1522#0/1  
\_\_]X^]\_^[¥Y^a`aXJX`^]TOY\_]\_[VPZUXWZT^[TT  
@HWI-EAS443:3:78:850:1193#0/1  
CGGCTCTACTAGTGTCCAGTAATAGTTCATTCTCCCTTCT  
+HWI-EAS443:3:78:850:1193#0/1  
aa\_aaaX^Z]QQHP^¥`VSQS\_]RZVZQTZYU[RR`\_]UX  
@HWI-EAS443:3:78:855:755#0/1  
GGGACATCAAGATACAGCAAGAAGTTCAAGCCGGAAATA  
+HWI-EAS443:3:78:855:755#0/1  
aabaaaaaaaaaaaaaaba`abbaaa\_aaa``a[a`^^`a`  
@HWI-EAS443:3:78:862:1290#0/1  
AGGGAGACTACCAGTACCAATGAACTGGCGACAGTTGAAT

+HWI-EAS443:3:78:862:1290#0/1  
^ab` [¥baaaaa`]aa]a`aaaa]aa^¥`aaa`\_\_^Za\_  
@HWI-EAS443:3:78:867:408#0/1  
ACATATTCTACTGTAGAGACCCATTAGAGCACATCCAG  
+HWI-EAS443:3:78:867:408#0/1  
a]bbaaaaa\_a\_aa\_aaU]]\_`]a\_¥¥a``a``a^`^`\_`\_  
@HWI-EAS443:3:78:884:216#0/1  
ATCTCGGTACCACTAGATTTCCAGTTGCTTCAATGTTAT  
+HWI-EAS443:3:78:884:216#0/1  
aa^`W\_^¥aZWZaaaa```a¥^^`\_\_\_\_Y\_\_W\_^`^`U[[^  
@HWI-EAS443:3:78:904:1706#0/1  
TCGAATGTTATTTGTCTCCCGCTCTACTAGTGTCCAGT  
+HWI-EAS443:3:78:904:1706#0/1  
abaaaaa\_abaaaa`aa`b`a]`\_[G¥X\_\_\_\_Y\_X¥\_`^¥X  
@HWI-EAS443:3:78:909:520#0/1  
CCGGCTTGAACCTTGTGTGTATCTTGATGTCACCAAAA  
+HWI-EAS443:3:78:909:520#0/1  
``bbabbbbabbaaaabbaab\_aababbaaaaaa\_aa  
@HWI-EAS443:3:78:923:57#0/1  
GTCATGATGGGCCATGAACCTGTCTTGGGAATATCTCA  
+HWI-EAS443:3:78:923:57#0/1  
a`a\_abWabaUa¥\_\_`a]\_T[¥`^¥aaa`^`TLX¥\_`^WZ`  
@HWI-EAS443:3:79:1021:1025#0/1  
ATTTTGTCTCCCGCTCTACTAGTGTCCAGTAATAGTTCA  
+HWI-EAS443:3:79:1021:1025#0/1  
abbbbaaabb````Uaa``¥\_^\_Y]\_aaY\_Z`a^``^¥^^  
@HWI-EAS443:3:79:1032:793#0/1  
CGAATGTTATTTTGTCTCCCGCTCTACTAGTGTCCAGTA  
+HWI-EAS443:3:79:1032:793#0/1  
ab\_¥\_ba\_Yabba]¥a``^`a`aa^WTR\_^\_]ZX\_VR[V]  
@HWI-EAS443:3:79:1032:799#0/1  
TTCTTGCTGTATCTTGATGTCCCCACAAAACATATGCAT  
+HWI-EAS443:3:79:1032:799#0/1  
aV\_VZX^[bMT^XX\_a¥P`PPYaa¥PGTQSQ^a`V`R]W  
@HWI-EAS443:3:79:1089:489#0/1  
TGCTCTTCAGGTCCGCTGCATATCCTGACCCCTGCTCATT  
+HWI-EAS443:3:79:1089:489#0/1  
aaab^\_a`\_`a`\_^`aaa`\_`ab\_]¥`\_\_^[]\_a^^^YP``  
@HWI-EAS443:3:79:1110:465#0/1  
GAAAGAAGTCCTCGTGCTATGGGGCATTACCATCCATCT  
+HWI-EAS443:3:79:1110:465#0/1  
¥¥\_^]b]b¥^a^`baaabaab`]``a`aab]R\_¥^¥`aPa  
@HWI-EAS443:3:79:1116:59#0/1  
CAGACAATGGAACGTGTTACCCAGGAGATTTTCATCGATTA  
+HWI-EAS443:3:79:1116:59#0/1  
`abb`bbababb\_bbb^]bTa`a\_¥Yb\_a\_^\_baY\_Xaa`  
@HWI-EAS443:3:79:1122:1837#0/1  
GGTTTCTGACATTTGGACTTACAATGCCGAACGTGTTGG  
+HWI-EAS443:3:79:1122:1837#0/1  
¥Z`bbba```abY``b^V¥b`b]bbb`\_``\_Sbab`]Zaa

@HWI-EAS443:3:79:1143:111#0/1  
CATTCTGTGTGCTCTTCAGGTCGGCTGCATATCCTGACCC  
+HWI-EAS443:3:79:1143:111#0/1  
``bbaabbbaaa`bbbabbbabababb`^bbbaYYaa[^a  
@HWI-EAS443:3:79:1217:559#0/1  
CTTGATGTCCCCACAAAACATATGCATCTGCATTCTGAT  
+HWI-EAS443:3:79:1217:559#0/1  
H]X`b`¥S[aabbbb`bZbbabb\_Kabab`a\_\_¥abbb  
@HWI-EAS443:3:79:1225:396#0/1  
GGGACATCAAGATACAGCAAGAAGTTCAAGCCGAAATAG  
+HWI-EAS443:3:79:1225:396#0/1  
abaaaabaaaa`aaYab`aaa^Xa[aaa\_aVZ`a\_^\_\_aa  
@HWI-EAS443:3:79:1273:1244#0/1  
CTCCTCATAATCGATGAAATCTCCTGGGTAACACGTTCCA  
+HWI-EAS443:3:79:1273:1244#0/1  
SVW¥`b`¥\_\_Z`aa¥ZGYaYa`a`\_\_¥X\_WR\_[`ZZQP]  
@HWI-EAS443:3:79:1296:651#0/1  
CTTTGGGTCTTATTGCTATTTCCGGCTTGAACCTCTTGCT  
+HWI-EAS443:3:79:1296:651#0/1  
aaaabb]Vabaaaab[abbbba\_`aaa`Sa\_Xa`¥aaUZa  
@HWI-EAS443:3:79:1319:1648#0/1  
ATTTTGGGTAGTCATAAGTCCCATTTTTGACACTTTCCAT  
+HWI-EAS443:3:79:1319:1648#0/1  
ab\_\_\_\_\_¥Naba`baabaM]a`ababbaaaaa`¥\_Sa]  
@HWI-EAS443:3:79:1339:961#0/1  
TGCTCATTTTGATGGTGATAACCGTACCATCCATCTACCA  
+HWI-EAS443:3:79:1339:961#0/1  
abb\_[Z`¥`WYZT\_\_¥\_aaaaXQ^U\_YLYaXN\_^XNRSY\_  
@HWI-EAS443:3:79:1351:27#0/1  
CGATTGCAATACAACCTTGTCAGACACCCAAGGGTGCTATA  
+HWI-EAS443:3:79:1351:27#0/1  
`bbbabbabbbbbb^bb`aa`baab^`abbbb\_bSa]aa  
@HWI-EAS443:3:79:1382:364#0/1  
GGACATTTGGACTTACAATGCCGAAGTGTGGTTCTATTG  
+HWI-EAS443:3:79:1382:364#0/1  
Taabb\_bbaa[V`ba`baa`aWa[aPabba^Z\_aYa\_abb  
@HWI-EAS443:3:79:1382:570#0/1  
AAAAAAGGAAATTCATACCCAAAGCTCAGCAAATCCTACA  
+HWI-EAS443:3:79:1382:570#0/1  
abb\_``ab`a^\_b¥\_aa\_a^abaaaa^Ua`a\_`S`\_``  
@HWI-EAS443:3:79:1434:623#0/1  
GCTGGCTGGATCCTGGGAAATCCAGAGTGTGAATCACTCT  
+HWI-EAS443:3:79:1434:623#0/1  
abbbabbbbbb`\_`b^abbbabaaaa\_`]\_a`b`¥K[]a  
@HWI-EAS443:3:79:147:151#0/1  
CCGGTTTCATTGAAGGGGGTGGACAGGGATGGTAGATGG  
+HWI-EAS443:3:79:147:151#0/1  
ab]bXbb`Vabb]]a^Z¥\_\_F]a\_TT\_\_^J[[[G\_YVGR`  
@HWI-EAS443:3:79:1483:1183#0/1  
ATCAGAATGCAGATGCATATGTTTTTGTGGGGACATCAAG

+HWI-EAS443:3:79:1483:1183#0/1  
]bb`^bbaabb\_bababb`b¥`bbbbbabb`a`b`a`b  
@HWI-EAS443:3:79:1514:641#0/1  
CATACCCAAAGCTCAGCAAATCCTACATTAATGATAAAGG  
+HWI-EAS443:3:79:1514:641#0/1  
aabbbbbbbbaabbaababaa`bbbbbbbabbbabaa\_bb  
@HWI-EAS443:3:79:1520:529#0/1  
GCTTGAACCTTCTGCTGTATCTTGATGTCCCCACAAAAAC  
+HWI-EAS443:3:79:1520:529#0/1  
aabbbab\_bbabab^bbaababbaaaaa`[Z¥a]a\_`a`  
@HWI-EAS443:3:79:1520:798#0/1  
CTTCTAGAAGACAAGCATAACGGGAACTATGCAAATAA  
+HWI-EAS443:3:79:1520:798#0/1  
abbbbbbbbaababbbb`ababbbababba\_bbabab  
@HWI-EAS443:3:79:1537:602#0/1  
GGACATCAAGATACAGCAAGAAGTTCAAGCCGAAATAGC  
+HWI-EAS443:3:79:1537:602#0/1  
aba\_aaaabbaaa`ab\_bbaaab\_a`aaaZ]aa]a^a\_a]  
@HWI-EAS443:3:79:1550:1175#0/1  
CATGAACCTGTCTTGGGGAATATCTCAAACCTTTCAAATG  
+HWI-EAS443:3:79:1550:1175#0/1  
]a`aT`bbbbbbbbbb`bbbbaa`a\_\_^[ababbbabb  
@HWI-EAS443:3:79:1556:499#0/1  
GAGCACATCCAGAACTGATTGCCCCAGGGAGACTACCA  
+HWI-EAS443:3:79:1556:499#0/1  
RT\_RU`Z\_^`¥¥`\_T]\_\_Z]\_RW[D^Z^^U¥b`[ORKX¥  
@HWI-EAS443:3:79:1647:976#0/1  
ATTCATCTTTTCAATAACAGAATTTACTTTGTTAGTAATC  
+HWI-EAS443:3:79:1647:976#0/1  
ab`\_a^aa`b^TZb`b\_a`aaababa`abba`b`b`a\_ba  
@HWI-EAS443:3:79:1666:1738#0/1  
CTAGATTTCCAGTTGCTTGAATGTTATTTTGTCTCCCGG  
+HWI-EAS443:3:79:1666:1738#0/1  
abb^]bbbababa`a`aaaaababb`bbba\_a`a^`a`a  
@HWI-EAS443:3:79:1706:1240#0/1  
AAACAATGCCAAGGAAATTGGAAACGGCTGCTTTGAATTT  
+HWI-EAS443:3:79:1706:1240#0/1  
`baaa`a\_b`])^`aabaaaa`^aa`b]DMa]YP^\_aa  
@HWI-EAS443:3:79:1723:366#0/1  
GTTGCTTCGAATGTTATTTTGTCTCCCGGCTCTACTAGTG  
+HWI-EAS443:3:79:1723:366#0/1  
\_[aaaab`b¥`aaaa`aaa]\_\_X[NH[Z]XUF^MVYVQQJ  
@HWI-EAS443:3:79:17:1408#0/1  
CCTCTGAGTATTTGGGTAGTCATAAGTCCCATTTTGGAC  
+HWI-EAS443:3:79:17:1408#0/1  
ab`aaa`W[aa`^aa]W^YN`\_[XGWHZ^\_Y¥^`\_VR\_  
@HWI-EAS443:3:79:186:506#0/1  
GGGGTGGACAGGGATGGTAGATGGATGGTACGGTTATCAC  
+HWI-EAS443:3:79:186:506#0/1  
abaaUb^aaa`\_a]\_a\_W`\_¥¥\_¥¥\_]V`¥\_]V\_\_ZR[¥



@HWI-EAS443:3:79:191:1872#0/1  
CAATTGGAAAATGTCCAAAATATGTAAAAAGCACAAAATT  
+HWI-EAS443:3:79:191:1872#0/1  
aaY`a`¥[`a`aZZbb\_X^a`aaa\_aaaa```aaaa]]\_\_  
@HWI-EAS443:3:79:218:714#0/1  
GCCGGTTTCATTGAAGGGGGTGGACAGGGATGGTAGATG  
+HWI-EAS443:3:79:218:714#0/1  
`^`\_\_Taa`baZFNyZ¥^a`^]]\_YTY[ZU]^WN\_]VQ[  
@HWI-EAS443:3:79:21:1014#0/1  
CTCACTTTGGGTCTTATTGCTATTTCCGGCTTGAACCTCT  
+HWI-EAS443:3:79:21:1014#0/1  
^T`R\_[ba¥ZZ`b]a^^]]^aa`¥\_Y\_]a``ZRW¥X¥]¥  
@HWI-EAS443:3:79:234:588#0/1  
GGGGACATCAAGATACAGCAAGAAGTTCAAGCCGAAAATA  
+HWI-EAS443:3:79:234:588#0/1  
aaaa\_a`aa]aaa^aaaaaa^^`\_Y\_aa`\_\_\_a\_aa^Z]  
@HWI-EAS443:3:79:251:1352#0/1  
ATCTCGGTACCACTAGATTTCCAGTTGCTTCAATGTTAT  
+HWI-EAS443:3:79:251:1352#0/1  
aaa\_a[`Yaaaa\_\_a]^`\_aa`\_Z\_]a\_\_\_ZZ^^\_Y]\_^  
@HWI-EAS443:3:79:388:1188#0/1  
CACATCCAGAACTGATTGCCCCAGGGAGACTACCAGTA  
+HWI-EAS443:3:79:388:1188#0/1  
`XZ`S]UWXZVU]]U`Y]\_`¥`Z[]V`YR¥]W\_YVLXWUZ  
@HWI-EAS443:3:79:484:214#0/1  
ATTTTGTCTCCCGCTCTACTAGTGTCCAGTAATAGTTCA  
+HWI-EAS443:3:79:484:214#0/1  
ababaa\_aaa\_aaa``^ZU]\_^R][[]\_ZZ¥\_]VT]Y]  
@HWI-EAS443:3:79:527:670#0/1  
GTCCTCGTGTATGGGGCATTACCATCCATCTACTAGTG  
+HWI-EAS443:3:79:527:670#0/1  
a¥\_aYaa\_aa^\_\_\_`Z`a``a\_a\_aa\_]¥\_`¥aa\_] [TZ  
@HWI-EAS443:3:79:528:890#0/1  
AGAGCACATCCAGAACTGATTGCCCCAGGGAGACTACC  
+HWI-EAS443:3:79:528:890#0/1  
aaa¥a\_a]aba`a`\_aaaaaaa`aaa`X`\_\_^^`\_`^`a^  
@HWI-EAS443:3:79:538:643#0/1  
ATTAAATTTTTGTAGAAGCTTTTTGCTCCAGCATGAGGAC  
+HWI-EAS443:3:79:538:643#0/1  
Y\_ZZ`]S^SVY^¥¥bZUUaOQ]S\_S]Z¥a\_]\_[X`OQWNY  
@HWI-EAS443:3:79:551:958#0/1  
TGCGATAACACGTGCATGGAAAGTGTCAAAAATGGGACTT  
+HWI-EAS443:3:79:551:958#0/1  
ab`b`bbba``abb``baaba[b`bbbaYaaaaaaaa  
@HWI-EAS443:3:79:558:793#0/1  
AAGCCAGTTAAAAACAATGCCAAGGAAATTGGAAACGGC  
+HWI-EAS443:3:79:558:793#0/1  
aaabb¥`a^a`aaaaY\_aaa^`\_\_\_\_\_a^`\_\_\_\_\_]\_¥¥  
@HWI-EAS443:3:79:572:676#0/1  
GAATGCAGATGCATATGTTTTTGTGGGGACATCAAGATAC

+HWI-EAS443:3:79:572:676#0/1  
aY`\_]^^¥X¥aU]a\_``[\_^^`aX`X¥^\_Z^^^Z¥a`^V\_  
@HWI-EAS443:3:79:589:1001#0/1  
ATGAAATCTCCTGGGTAACACGTTCCATTGTCTGAACTAG  
+HWI-EAS443:3:79:589:1001#0/1  
aa`bab`aaaa]baTS¥aa`a`^`^`a\_\_\_\_[`a^[\_^\_^W  
@HWI-EAS443:3:79:593:93#0/1  
ATCCTGACCCCTGCTCATTTTTGATGGTGATAACCGTACCA  
+HWI-EAS443:3:79:593:93#0/1  
a`UWU^V\_VVV^YY\_[YVW^T[TLLWWXPS\_XLN]BBBBB  
@HWI-EAS443:3:79:597:1888#0/1  
CTAGTTAAAAAAGGAAATTCATACCCAAAGCTCAGCAAAT  
+HWI-EAS443:3:79:597:1888#0/1  
`W\_¥S`a\_]\_SZ]N¥][¥RU`X^^^`\_`¥TMZ^XXYTTUU  
@HWI-EAS443:3:79:636:1589#0/1  
CCTGACCCCTGCTCATTTTTGATGGTGATAACCGTACCATC  
+HWI-EAS443:3:79:636:1589#0/1  
aba^bbbababbbabbaaba¥¥¥bbaabaa`\_aaaaaa  
@HWI-EAS443:3:79:637:916#0/1  
ATCCTGACCCCTGCTCATTTTTGATGGTGATAACCGTACCA  
+HWI-EAS443:3:79:637:916#0/1  
`V]a`\_\_¥Y¥[X^`[\_`[^¥¥^^^\_[Y\_Z[^¥^U^WZ]T^  
@HWI-EAS443:3:79:652:15#0/1  
ACTTCTTGCTGTATCTTGATGTCCCCACAAAAACATATGC  
+HWI-EAS443:3:79:652:15#0/1  
]Y^```ba`]`WT^TP]XW0\_^`a`]`P[]aa^Y^a`[YS  
@HWI-EAS443:3:79:668:1267#0/1  
GCTGGCTGGATCCTGGGAAATCCAGAGTGTGAATCACTCT  
+HWI-EAS443:3:79:668:1267#0/1  
aaaa`aaaa`\_`a\_`aYL¥a\_`a`\_`¥V\_PS]¥U`¥XW[¥  
@HWI-EAS443:3:79:711:1950#0/1  
TTCCGGCTTGAACCTTCTTGCTGTATCTTGATGTCCCCACA  
+HWI-EAS443:3:79:711:1950#0/1  
`U¥a`¥baXHW\_XU]^¥¥U¥Y[N``Y`]ZaZ[PV\_`V¥`X  
@HWI-EAS443:3:79:722:1001#0/1  
GTGGGGACATCAAGATACAGCAAGAAGTTCAAGCCGAAAA  
+HWI-EAS443:3:79:722:1001#0/1  
]Ya]`WS\_a`ZaY`^^^aa]`ab^\_Z`SZZa]]^¥a^U]`  
@HWI-EAS443:3:79:799:786#0/1  
GGAAAATGAAAGAACCTTGGACTACCACGATTCAAATGTG  
+HWI-EAS443:3:79:799:786#0/1  
ab\_ababbab¥\_aa\_bbaa^aaa`a``abaaaa^Y^aa\_a  
@HWI-EAS443:3:79:810:832#0/1  
CCGGCTTGAACCTTCTTGCTGTATCTTGATGTCCCCACAAA  
+HWI-EAS443:3:79:810:832#0/1  
aa`aaaaaaaaaba`aa`aaa\_aa`aa\_`a]aa`a`a`aa  
@HWI-EAS443:3:79:820:62#0/1  
GGGACATCAAGATACAGCAAGAAGTTCAAGCCGAAATAG  
+HWI-EAS443:3:79:820:62#0/1  
¥`\_`ZW\_\_`^\_a`^]\_aZO¥b`ab\_VZ]V`VV`a^V]a¥`

@HWI-EAS443:3:79:86:293#0/1  
GGTGTTTATAGCACCTTGGGTGTCTGACAAGTTGTATTG  
+HWI-EAS443:3:79:86:293#0/1  
abJaUZ\_bZH\_b`Ub]¥¥a^b`a[[Ua\_V\_Y[Q`a]¥  
@HWI-EAS443:3:79:86:431#0/1  
AAGCCAGTTAAAAACAATGCCAAGGAAATTGGAAACGGC  
+HWI-EAS443:3:79:86:431#0/1  
ObbbaZ^T]aa`abaa`a[aaTa`a^X¥\_\_^`Z]aYS]  
@HWI-EAS443:3:79:896:435#0/1  
CGTCAATGGCATTCTGTGTGCTCTTCAGGTCGGCTGCATA  
+HWI-EAS443:3:79:896:435#0/1  
`babbbababa`]`bb`a\_bababaaba\_Y\_aa\_a¥W`ab  
@HWI-EAS443:3:79:908:487#0/1  
AAAAACAATGCCAAGGAAATTGGAAACGGCTGCTTTGAA  
+HWI-EAS443:3:79:908:487#0/1  
a[aa`\_aaa\_a\_\_a\_a\_[¥^a[a^`\_\_aa\_\_\_aQOPMSKX  
@HWI-EAS443:3:79:939:179#0/1  
CCTCTGAGTATTTTGGGTAGTCATAAGTCCCATTTTGGAC  
+HWI-EAS443:3:79:939:179#0/1  
aaba`¥`a¥^a`aaaba^a[\_Xa\_]`^]]]\_baa`aa¥\_  
@HWI-EAS443:3:79:940:128#0/1  
GACCAACAAAGTCTCTATCAGAATGCAGATGCATATGTTT  
+HWI-EAS443:3:79:940:128#0/1  
aa`\_aa\_aaaa^\_a^a`^aa``a^\_a\_\_\_Z\_\_`^aX``  
@HWI-EAS443:3:79:944:642#0/1  
GTTTCAGACAATGGAACGTGTTACCCAGGAGATTTTCATCGA  
+HWI-EAS443:3:79:944:642#0/1  
a]\_WSZWR]TT\_G[VZ¥R¥TONXY]\_WfV\_¥X¥WVGX0^]  
@HWI-EAS443:3:79:954:891#0/1  
GCCGGTTTCATTGAAGGGGGGTGGACAGGGATGGTAGATG  
+HWI-EAS443:3:79:954:891#0/1  
ab\_¥X^ab]\_\_ba`ab`aa^Nab]^`aa^abTJY^a`^  
@HWI-EAS443:3:79:955:1854#0/1  
CATCCATCTACTAGTGTGACCAACAAAGTCTCTATCAGA  
+HWI-EAS443:3:79:955:1854#0/1  
abaabbbaabaaaa^a\_Ya\_aaaa\_aaa\_\_\_\_\_a`XT\_¥a  
@HWI-EAS443:3:79:974:143#0/1  
TAGATTTCCAGTTGCTTTCGAATGTTATTTTGTCTCCCGGC  
+HWI-EAS443:3:79:974:143#0/1  
a\_b`ZVa\_^YaW^^`b¥S¥]]]b^Yaaa`^Y]^XZ]]]T  
@HWI-EAS443:3:79:977:1667#0/1  
AGAAACTGATTGCCCCAGGGAGACTACCAGTACCAATGA  
+HWI-EAS443:3:79:977:1667#0/1  
aabaaaaa^a\_a`a\_aYaaa`^a``aa`aa`WaU\_\_`\_`\_  
@HWI-EAS443:3:79:977:449#0/1  
TGGGGACATCAAGATACAGCAAGAAGTTCAAGCCGAAAT  
+HWI-EAS443:3:79:977:449#0/1  
abbaaaaaabaaabbababb\_bbb`aaZ`abaa`^ba``aa  
@HWI-EAS443:3:7:1044:479#0/1  
ATCTCGGTACCACTAGATTTCCAGTTGCTTCCAATGTTAT

+HWI-EAS443:3:7:1044:479#0/1  
`a`\_\_a`Wa^\_\_]a`aaa\_`¥^]a`\_a^a\_0a^^^\_]Z^\_  
@HWI-EAS443:3:7:1054:2045#0/1  
ACAATGGAACGTGTTACCCAGGAGATTTTCATCGATTATGA  
+HWI-EAS443:3:7:1054:2045#0/1  
a]a¥^\_\_¥`Xa]`U¥\_]\_]^^]]^ZXXX]]XXYZZZ]BB  
@HWI-EAS443:3:7:1055:656#0/1  
ATTTACTTTGTTAGTAATCTCGTCAATGGCATTCTGTGTG  
+HWI-EAS443:3:7:1055:656#0/1  
abb`\_`babbaaaa`a\_a`a\_b`aa`aa`\_aaa\_aa\_a]a  
@HWI-EAS443:3:7:1099:538#0/1  
GCTTCCTCTGAGTATTTTGGGTAGTCATAAGTCCCATTTT  
+HWI-EAS443:3:7:1099:538#0/1  
aabba^aabaaa^ab`aaa`a]a\_\_^`a\_`aZ^]X`\_aaa  
@HWI-EAS443:3:7:1114:1467#0/1  
GATGACACTGAGCTCAATTGCTCTCTTAGCTCCTCATAAT  
+HWI-EAS443:3:7:1114:1467#0/1  
]Zbbbabbb¥abbbbabbbabab`baaa\_`S^b\_abaaa  
@HWI-EAS443:3:7:1143:1155#0/1  
GAGGAAGCAAATTAACAGAGAAGAAATAGATGGGGTAA  
+HWI-EAS443:3:7:1143:1155#0/1  
aY`Ra`aa]VZa\_[]a[\_a]bSZaSHNaUa]aaZX`]a\_  
@HWI-EAS443:3:7:1184:782#0/1  
GGGGACATCAAGATACAGCAAGAAGTTCAAGCCGGAAATA  
+HWI-EAS443:3:7:1184:782#0/1  
aba`a^aa\_aaaaa`\_aa\_aaa\_^a]\_\_a``[]`\_^\_\_`]  
@HWI-EAS443:3:7:1190:66#0/1  
ATGACACTGAGCTCAATTGCTCTCTTAGCTCCTCATAATC  
+HWI-EAS443:3:7:1190:66#0/1  
^abaaaabb¥aa¥`Y`a][¥\_¥\_Waa`a^\_OS\_Z^`\_^\_O  
@HWI-EAS443:3:7:1208:1845#0/1  
CTAGATTTCCAGTTGCTTCGAATGTTATTTTGTCTCCCGG  
+HWI-EAS443:3:7:1208:1845#0/1  
a\_¥^YXaaa`^^[Z`]^S^a^Uaa[XR[a]YHJMYLPBBB  
@HWI-EAS443:3:7:1220:1022#0/1  
TGTGGGGACATCAAGATACAGCAAGAAGTTCAAGCCGGAA  
+HWI-EAS443:3:7:1220:1022#0/1  
]¥0Z`\_\_\_YbbabVb^aa[bbababa\_^Z`aa]`UXbaaa  
@HWI-EAS443:3:7:1231:149#0/1  
CAAATGTGAAGAACTTATATGAAAAGGTAAGAAGCCAGTT  
+HWI-EAS443:3:7:1231:149#0/1  
abbabbabbbbbbabbabbbbaaabbbabaaaa`¥abaa  
@HWI-EAS443:3:7:1245:863#0/1  
TTTGTAGTAATCTCGTCAATGGCATTCTGTGTGCTCTTC  
+HWI-EAS443:3:7:1245:863#0/1  
aaaa\_\_aa^\_a`Y``aUWZ¥]XDR[\_]H[\_¥[T¥Y]XWUV  
@HWI-EAS443:3:7:1257:512#0/1  
GGAACGTGTTACCCAGGAGATTTTCATCGATTATGAGGAGC  
+HWI-EAS443:3:7:1257:512#0/1  
a`aaaaUa\_Z`a`\_`aa`a][`\_^\_a¥a\_``\_\_a^\_a^aW

@HWI-EAS443:3:7:1267:301#0/1  
GGGGACATCAAGATACAGCAAGAAGTTCAAGCCGGAAATA  
+HWI-EAS443:3:7:1267:301#0/1  
abaa`\_aa\_a`aa\_`ab`\_aa\_\_aZ^\_a\_`]Z`^]]^\_`  
@HWI-EAS443:3:7:1279:1354#0/1  
GAATTTCTTTTTTAACTAGCCATATTAATTTTTGTAGA  
+HWI-EAS443:3:7:1279:1354#0/1  
]Wb]b]`W]b\_\_bbaabba\_ab\_aabbb`abbbbaaaaba  
@HWI-EAS443:3:7:1292:537#0/1  
GTAGTCCAAAGTTCTTTTCATTTTCCAATAGAACCAACAGT  
+HWI-EAS443:3:7:1292:537#0/1  
a¥T`WQVMVXZP\_¥SWaZNXU\_`PNWPWO]XVVLTSY\_BB  
@HWI-EAS443:3:7:1310:1343#0/1  
AAGGTAAGAAGCCAGTTAAAAACAATGCCAAGGAAATTG  
+HWI-EAS443:3:7:1310:1343#0/1  
aaaaVa`¥a`YYUZbYbbaab`\_]b`aa¥\_`\_a\_Y[[[Y`  
@HWI-EAS443:3:7:1382:377#0/1  
TCATCTTTTCAATAACAGAATTTACTTTGTTAGTAATCTC  
+HWI-EAS443:3:7:1382:377#0/1  
¥a\_aa^Wb[YWaa`\_\_bb\_`aaa^\_\_abb`aYUW\_¥aY`^  
@HWI-EAS443:3:7:1391:223#0/1  
GGGACATCAAGATACAGCAAGAAGTTCAAGCCGGAAATAG  
+HWI-EAS443:3:7:1391:223#0/1  
aa`a`aa\_`aa`a\_S\_a¥\_aa\_U`ZWY\_]YT]]]Y\_^]\_  
@HWI-EAS443:3:7:1409:757#0/1  
TTCGAATGTTATTTTGTCTCCCGCTCTACTAGTGCCAG  
+HWI-EAS443:3:7:1409:757#0/1  
aa^a\_\_ab`a\_aa\_\_\_\_\_^a] [[]¥¥]]^XZ]RTYSZ]UZ^  
@HWI-EAS443:3:7:1422:775#0/1  
CAAATAACATTGAAGCAACTGGAAATCTAGTGGTACCG  
+HWI-EAS443:3:7:1422:775#0/1  
a¥`b¥^b\_W`XbVbaVba]¥]aabaa`V`bb]¥RZa`Q`  
@HWI-EAS443:3:7:1470:260#0/1  
CAGATGCATATGTTTTGTGGGACATCAAGATACAGCAA  
+HWI-EAS443:3:7:1470:260#0/1  
¥Ra¥aYR]^^[`bbaaa]^ab^YabaaS^baX¥^`XVb  
@HWI-EAS443:3:7:1471:104#0/1  
CAATGTAGGACCATGAGCTTGCTGTGGAGAGTGATTCACA  
+HWI-EAS443:3:7:1471:104#0/1  
ab`bbbabababbbbbbbbbb`bbbb`abaa\_b^aaa^Za  
@HWI-EAS443:3:7:1489:787#0/1  
GGAAAGAAGTCCTCGTGCTATGGGGCATTACCATCCATC  
+HWI-EAS443:3:7:1489:787#0/1  
a`\_`aa`\_a]\_\_a\_a¥\_¥`¥\_`\_¥W¥`^¥¥¥T¥WQY¥¥U  
@HWI-EAS443:3:7:1537:435#0/1  
GGGAAAGAAGTCCTCGTGCTATGGGGCATTACCATCCAT  
+HWI-EAS443:3:7:1537:435#0/1  
abaaa`aa`aX\_\_`[a\_a¥\_\_VPV\_^S\_`¥Q^WV¥WNU\_V  
@HWI-EAS443:3:7:1555:1065#0/1  
ATTGCTATTTCCGGCTTGAACCTTCTTGCTGTATCTTGATG

+HWI-EAS443:3:7:1555:1065#0/1  
`aaaabbabb\_aaa\_aa`\_`Q`a\_a`a¥aa\_`aRa\_¥X]`  
@HWI-EAS443:3:7:1560:1280#0/1  
ATCAAGATACAGCAAGAAGTTCAAGCCGAAATAGCAATA  
+HWI-EAS443:3:7:1560:1280#0/1  
^ZO]^aTS[aSJ\_[ZL\_]a]^Pb\_OLMO`^\_\_K][[\_NLB  
@HWI-EAS443:3:7:1565:1055#0/1  
GCAGGGGTCAGGATATGCAGCCGACCTGAAGAGCACACAG  
+HWI-EAS443:3:7:1565:1055#0/1  
\_a^W\_aaP]\_a[``\_a`\_]¥¥¥¥UU\_\_SS^MXU¥W¥U^B  
@HWI-EAS443:3:7:1600:1731#0/1  
ATTTACTTTGTTAGTAATCTCGTCAATGGCATTCTGTGTG  
+HWI-EAS443:3:7:1600:1731#0/1  
a`^]aGa^ba^b`a¥`a^GaYaZ]\_XZYFMVX0¥V`O\_XZ  
@HWI-EAS443:3:7:1606:1237#0/1  
TGGTAGTCCAAAGTTCTTTTCATTTTCCAATAGAACCAACA  
+HWI-EAS443:3:7:1606:1237#0/1  
]a\_Q^^X¥a\_aW¥¥a`aaaZ¥a`aa^U`aa]a¥]FTY\_X[  
@HWI-EAS443:3:7:161:1146#0/1  
GAAGAACTTATATGAAAAGGTAAGAAGCCAGTTAAAAAAC  
+HWI-EAS443:3:7:161:1146#0/1  
\_aaa¥Z^`a\_aaaaYG^`a^[a^aaa`\_`aa`a\_\_\_a\_a\_  
@HWI-EAS443:3:7:1713:724#0/1  
ATCCTGACCCCTGCTCATTTTGATGGTGATAACCGTACCA  
+HWI-EAS443:3:7:1713:724#0/1  
`\_ZU[Z^XR]X^aWXXU^^^BBBBBBBBBBBBBBBBBB  
@HWI-EAS443:3:7:207:1320#0/1  
GCAGCCGACCTGAAGAGCACACAGAATGCCATTGACGAGA  
+HWI-EAS443:3:7:207:1320#0/1  
aab`^`^ZRYaa^^\_¥T^`]]X`VU¥\_X^\_XURNO`Z\_]YL  
@HWI-EAS443:3:7:231:1166#0/1  
CATCCATCTACTAGTGCTGACCAACAAAGTCTCTATCAGA  
+HWI-EAS443:3:7:231:1166#0/1  
abbabbbabbab`a\_aabbabaabbbbbb¥ab`aaa`baa  
@HWI-EAS443:3:7:246:638#0/1  
AAAAACAATGCCAAGGAAATTGGAAACGGCTGCTTTGAA  
+HWI-EAS443:3:7:246:638#0/1  
a\_bbbb\_^`\_`a\_abab¥b\_]aaa^`a\_\_ba\_aZDTP`QP]  
@HWI-EAS443:3:7:272:942#0/1  
ATTTACTTTGTTAGTAATCTCGTCAATGGCATTCTGTGTG  
+HWI-EAS443:3:7:272:942#0/1  
¥\_b\_aa¥\_L¥[b]]`abaZW^a``¥]]`aaYXSYPSU¥[  
@HWI-EAS443:3:7:278:1469#0/1  
GGGAGACAAAATAACATTCGAAGCAACTGGAAATCTAGTG  
+HWI-EAS443:3:7:278:1469#0/1  
aaa`b\_a\_\_aaa]a\_aaa\_a``Z[\_`X`\_]`\_`^``Z`  
@HWI-EAS443:3:7:366:1879#0/1  
CCCGGCTCTACTAGTGTCAGTAATAGTTCATTCTCCCTT  
+HWI-EAS443:3:7:366:1879#0/1  
^^[babba`b]bbaabT][a`T`bWba]]aaaa^a[\_\_a[

@HWI-EAS443:3:7:393:837#0/1  
GTTGGTTCTATTGGAAAATGAAAGAACTTTGGACTACCAC  
+HWI-EAS443:3:7:393:837#0/1  
aY¥a`\_¥^\_aaaa\_S`\_\_\_\_\_a^]]U^^RT]U\_]`][][  
@HWI-EAS443:3:7:403:477#0/1  
ATTCTGTGTGCTCTTCAGGTCGGCTGCATATCCTGACCCC  
+HWI-EAS443:3:7:403:477#0/1  
\_bba`\_X\_aa^aZ`aaa`]¥aaa`¥Z]`[a][X[V]¥LS¥  
@HWI-EAS443:3:7:404:24#0/1  
GCTGGCTGGATCCTGGGAAATCCAGAGTGTGAATCACTCT  
+HWI-EAS443:3:7:404:24#0/1  
a\_\_aaTV[¥GY¥YTNZ]¥\_`[TQU`¥^T¥FV¥^PRTTBBB  
@HWI-EAS443:3:7:442:158#0/1  
CTGGTGTATAGCACCTTGGGTGTCTGACAAGTTGTAT  
+HWI-EAS443:3:7:442:158#0/1  
abb`[\_^bbaba`¥aaYa`\_aaXUa\_[`a``¥^aX\_a^\_\_  
@HWI-EAS443:3:7:483:121#0/1  
TGCAGATGCATATGTTTTTGTGGGGACATCAAGATACAGC  
+HWI-EAS443:3:7:483:121#0/1  
a\_a`\_a`a`baa`bIaaa[b\_`aa`]¥a\_Z\_Ua\_YaR`aK  
@HWI-EAS443:3:7:52:373#0/1  
AGAAATGCTGGATCTGGTATTATCATTTTCAGATACACCAG  
+HWI-EAS443:3:7:52:373#0/1  
a^¥\_V^K\_^[Q^[U\_a[LW\_W[¥][¥¥¥¥¥UY\_[^`R^B  
@HWI-EAS443:3:7:569:144#0/1  
AAAAAAGTTGATGATGTTTCTGGACATTTGGACTTACA  
+HWI-EAS443:3:7:569:144#0/1  
YV`I^¥Y^¥Za`[SaYHP]SW\_\_aT[P]]]\_aYJWZ¥NZ  
@HWI-EAS443:3:7:572:1454#0/1  
GCTGCTTTGAATTTTACCACAAATGCGATAACACGTGCAT  
+HWI-EAS443:3:7:572:1454#0/1  
`\_^Xa]`ba`aa`][a\_aaaa\_a\_`]]`W\_a^a^`]a¥\_a^  
@HWI-EAS443:3:7:727:1159#0/1  
AACAAAGTCTCTATCAGAATGCAGATGCATATGTTTTTGT  
+HWI-EAS443:3:7:727:1159#0/1  
aaaaaab^aaa`a`\_aaa\_aa`\_a^\_a^`ab]`\_`\_`]  
@HWI-EAS443:3:7:802:1896#0/1  
CGTGGTAGTCCAAAGTTCTTTTCATTTTCCAATAGAACCAA  
+HWI-EAS443:3:7:802:1896#0/1  
ab^ba`\_b\_\_\_bb\_\_\_`S^aa^Wa\_abS\_b^aa`aba¥a`  
@HWI-EAS443:3:7:869:390#0/1  
CCGGGAGACAAAATAACATTGAAGCAACTGGAAATCTAG  
+HWI-EAS443:3:7:869:390#0/1  
^¥[ZaV^TZ]OMWLW][`WJZa\_TRNUVYVY^O]QVVBBB  
@HWI-EAS443:3:7:882:333#0/1  
CTCGTCAATGGCATTCTGTGTGCTCTTCAGGTCGGCTGCA  
+HWI-EAS443:3:7:882:333#0/1  
ababaaaa`baabbb`bbaaaa`a`aa\_aa^¥Zaa¥aaQ[  
@HWI-EAS443:3:7:903:1067#0/1  
TGGCATTCTGTGTGCTCTTCAGGTCGGCTGCATATCCTGA

+HWI-EAS443:3:7:903:1067#0/1  
a^a`\_Z\_aa\_a\_XaaZ¥a`aa\_X\_]a^\_U\_]a]PMU¥¥  
@HWI-EAS443:3:7:903:175#0/1  
TGCTCTTCAGGTCGGCTGCATATCCTGACCCCTGCTCATT  
+HWI-EAS443:3:7:903:175#0/1  
ababababbaaGaaa\_bb^aaa`SYP]\_VX[G]ZV¥¥¥^B  
@HWI-EAS443:3:7:910:113#0/1  
AGAAGTTCAAGCCGAAATAGCAATAAGACCCAAAGTGAG  
+HWI-EAS443:3:7:910:113#0/1  
ab\_^a0`\_aX\_\_Z`X[]ZZ^XXZ^]XX^ZVWZXWBBBB  
@HWI-EAS443:3:7:932:551#0/1  
ATCTACTAGTGCTGACCAACAAAGTCTCTATCAGAATGCA  
+HWI-EAS443:3:7:932:551#0/1  
aa\_\_a\_a`a[a]a\_\_^\_\_\_[`\_`\_]`^a^`[aa\_^\_\_Y\_  
@HWI-EAS443:3:7:949:1332#0/1  
CTCGTCAATGGCATTCTGTGTGCTCTTCAGGTCGGCTGCA  
+HWI-EAS443:3:7:949:1332#0/1  
abbb\_PZ¥EYa``PZZaUbXa\_WUXVMU^UG¥`]PG`YB  
@HWI-EAS443:3:7:992:585#0/1  
AACGTGTTACCCAGGAGATTTTCATCGATTATGAGGAGCTA  
+HWI-EAS443:3:7:992:585#0/1  
a\_\_a\_]`^aaa\_\_`a`a`aa^^\_¥a^`a^`a^a\_YaV^\_  
@HWI-EAS443:3:80:1060:1912#0/1  
CCGGCTTGAACCTTCTTGCTGTATCTTGATGTCCCCACAAA  
+HWI-EAS443:3:80:1060:1912#0/1  
^b`¥FW^RURVW[\_I¥[S¥QP¥YY[]OTRZWRSa\_VP^\_X  
@HWI-EAS443:3:80:1069:649#0/1  
CATGAGCTTGCTGTGGAGAGTGATTCACACTCTGGATTTC  
+HWI-EAS443:3:80:1069:649#0/1  
aZZTU```[\_\_\_\_[W¥Z[N]T`aa`Z\_aXaX]H^Y]¥N¥OF  
@HWI-EAS443:3:80:1100:85#0/1  
AGGAAATTGGAAACGGCTGCTTTGAATTTTACCACAAATG  
+HWI-EAS443:3:80:1100:85#0/1  
\_bb`[`bbbb\_b^\_b¥`aH\_]¥SX\_OUYVPKRVSa`a\_F  
@HWI-EAS443:3:80:1105:1038#0/1  
GGCCATGAACCTTGTCTTGGGGAATATCTCAAACCTTTCAA  
+HWI-EAS443:3:80:1105:1038#0/1  
^^aa`baabbba\_abbba\_b`baaaaaaa`aa`aaa  
@HWI-EAS443:3:80:1169:1473#0/1  
TGCATATGTTTTGTGGGACATCAAGATACAGCAAGAAG  
+HWI-EAS443:3:80:1169:1473#0/1  
aa[a`aa]\_`baaa\_a\_aaa\_a\_\_`a`a\_a`Saa`aZa  
@HWI-EAS443:3:80:1169:972#0/1  
CTTCTCTGAGTATTTTGGGTAGTCATAAGTCCCATTTTT  
+HWI-EAS443:3:80:1169:972#0/1  
abb]abbb```bbb`a^aaa`bbaabb\_bYaav`baaaa  
@HWI-EAS443:3:80:1217:1018#0/1  
GGGGCATTACCATCCATCTACTAGTGCTGACCAACAAAG  
+HWI-EAS443:3:80:1217:1018#0/1  
abbbabbbbbbabb\_abbabbabaa`aaaa¥P\_b`aa`a



@HWI-EAS443:3:80:1231:1078#0/1  
GATGACACTGAGCTCAATTGCTCTCTTAGCTCCTCATAAT  
+HWI-EAS443:3:80:1231:1078#0/1  
aaYaa^aaYa^aV]YYaVUa`R^]\_`¥VW`VSW[]aa]Y  
@HWI-EAS443:3:80:1241:1925#0/1  
TTTCCAGTTGCTTCGAATGTTATTTTGTCTCCCGGCTCTA  
+HWI-EAS443:3:80:1241:1925#0/1  
`aaaaa`aa]aa[aaa\_a]^a\_a\_Y\_\_\_^\_]\_^Z^]^]  
@HWI-EAS443:3:80:1263:1473#0/1  
ATTCTGTGTGCTCTTCAGGTCGGCTGCATATCCTGACCCC  
+HWI-EAS443:3:80:1263:1473#0/1  
aa`][`Y]\_a^Wbabaa¥`ZY]\_[Y¥aVb`U]\_Z¥F¥NN  
@HWI-EAS443:3:80:1271:1760#0/1  
GTGGGGACATCAAGATACAGCAAGAAGTTCAAGCCGGAAA  
+HWI-EAS443:3:80:1271:1760#0/1  
]LO^^][`SZ]X]`¥NUQV]H¥¥RZU[OVQ\_U\_QQUSY¥W  
@HWI-EAS443:3:80:1290:188#0/1  
GTTACCCAGGAGATTTTCATCGATTATGAGGAGCTAAGAGA  
+HWI-EAS443:3:80:1290:188#0/1  
a`aa`a\_a\_a`aaa\_a`a¥``\_`\_]a^^\_Y\_^^^\_] ]  
@HWI-EAS443:3:80:1293:216#0/1  
TGCCGGTTTCATTGAAGGGGGTGGACAGGGATGGTAGAT  
+HWI-EAS443:3:80:1293:216#0/1  
`U]Y^^aba`XbZ\_GJbbX`bb``Y\_QI[``a`Q``UW  
@HWI-EAS443:3:80:1306:1639#0/1  
CACTAGATTTCCAGTTGCTTCGAATGTTATTTTGTCTCCC  
+HWI-EAS443:3:80:1306:1639#0/1  
a`¥U]ZQ[RM[aa\_Q[YMOYQ\_[WOXG¥`a`\_¥ZZ[^[LR  
@HWI-EAS443:3:80:1329:964#0/1  
GGCATTACCATCCATCTACTAGTGCTGACCAACAAAGTC  
+HWI-EAS443:3:80:1329:964#0/1  
a\_`abbabba`aa¥a`\_a``aaaSa\_\_`a`^`a\_a[aaVS  
@HWI-EAS443:3:80:1355:349#0/1  
CTCCCATTTCCAGAATATACATCCGATCACAATTGGAAAAT  
+HWI-EAS443:3:80:1355:349#0/1  
\_[YZ`aa`^`^^`baab`bX¥`\_]ba\_aba^`a`a`]  
@HWI-EAS443:3:80:1373:657#0/1  
TTTTGCTTCTCTGAGTATTTTGGGTAGTCATAAGTCCCA  
+HWI-EAS443:3:80:1373:657#0/1  
Z^`^UX\_`][][0^[`\_P]aa`Z[ET`\_ZY[``[Y¥VQGT  
@HWI-EAS443:3:80:1403:1684#0/1  
TGTGGGGACATCAAGATACAGCAAGAAGTTCAAGCCGGAA  
+HWI-EAS443:3:80:1403:1684#0/1  
ab^a¥b`a\_¥b][`a\_a`Yb`\_`a\_\_`XOZ\_`\_¥]\_]`^  
@HWI-EAS443:3:80:1410:298#0/1  
GGCTAGTTAAAAAAGGAAATTCATACCCAAAGCTCAGCAA  
+HWI-EAS443:3:80:1410:298#0/1  
abbbabaabbaab\_ba`a`aa\_aaa[P\_a`\_aZ`W\_a]`\_  
@HWI-EAS443:3:80:143:1566#0/1  
GCATATCCTGACCCCTGCTCATTTTGGTGGTATAACCGT

+HWI-EAS443:3:80:143:1566#0/1  
`bb`\_P¥aa\_Yaaaa\_\_a`^a`\_a]a[Y\_\_[a\_\_]U[[[  
@HWI-EAS443:3:80:1487:88#0/1  
CTTGAACCTCTTGCTGTATCTTGATGTCCCCACAAAAACA  
+HWI-EAS443:3:80:1487:88#0/1  
]bbbabbbbbbabbbbbabbbbbbaY``\_aaabaaa\_a  
@HWI-EAS443:3:80:151:1075#0/1  
GCACTAGTAGATGGATGGTGAATGCCCATAGCACGAGGA  
+HWI-EAS443:3:80:151:1075#0/1  
a[FV^ZXVUZ\_[R^NZXV^Z[V[^ZZ\_OFMXSVXKM[Z  
@HWI-EAS443:3:80:1536:1507#0/1  
GACAAGCATAACGGGAACTATGCAAATAAGAGGGGTAG  
+HWI-EAS443:3:80:1536:1507#0/1  
a[aa\_]`Y\_a`aa¥`\_]V`[W]GVUTL¥\_V\_\_^G¥¥\_]  
@HWI-EAS443:3:80:1648:597#0/1  
GATGGTTTCTGGACATTTGGACTTACAATGCCGAAGTGT  
+HWI-EAS443:3:80:1648:597#0/1  
VZbbb`\_aZ¥^^VSR¥b\_bb¥¥U\_[\_G\_baaN[aa¥Ma[\_  
@HWI-EAS443:3:80:1674:463#0/1  
AAAAAAGGAAATTCATACCCAAAGCTCAGCAAATCCTACA  
+HWI-EAS443:3:80:1674:463#0/1  
abb¥baa]a`Xaa^aa`\_Y\_\_`TX\_¥aa]a\_a\_]V^]Y  
@HWI-EAS443:3:80:1719:1139#0/1  
CTTGGGTGTCTGACAAGTTGTATTGCAATCGTGGACTGGT  
+HWI-EAS443:3:80:1719:1139#0/1  
`bbbbbabbbaaaa`bbbbbbb\_abbbaabbaaab^Y`  
@HWI-EAS443:3:80:1776:483#0/1  
GATCGGATGTATATTCTGAAATGGGAGGCTGGTGTATA  
+HWI-EAS443:3:80:1776:483#0/1  
¥a`^Xb`¥\_IZaPZ\_]aa[]\_`¥Z[LX¥S¥`]HZL\_a¥SL  
@HWI-EAS443:3:80:1782:1648#0/1  
CCCATCTATTTCTTCTCTGTTAATTTTGCTTCCTCTGAG  
+HWI-EAS443:3:80:1782:1648#0/1  
\_N\_Q¥W¥[]^G[`^`]]`]¥YXT``aWX]WYPSX`[]P`  
@HWI-EAS443:3:80:232:1253#0/1  
CACTAGTAGATGGATGGTGAATGCCCATAGCACGAGGAC  
+HWI-EAS443:3:80:232:1253#0/1  
abb`a`abbabbaabb\_\_bbb``]^aba^ba`aa`aaa  
@HWI-EAS443:3:80:240:272#0/1  
GGGGTCAGGATATGCAGCCGACCTGAAGAGCACACAGAAT  
+HWI-EAS443:3:80:240:272#0/1  
a¥JOPUNWZ]V]Y¥RX¥VS¥LRTZTYZZYNXBBBBBBBBB  
@HWI-EAS443:3:80:241:430#0/1  
GGCATTACCATCCATCTACTAGTGCTGACCAACAAAGTC  
+HWI-EAS443:3:80:241:430#0/1  
aba]`abba`baaabaaaaaaa^aa`aa`aaaaa]`a^\_  
@HWI-EAS443:3:80:252:740#0/1  
CTAGATTTCCAGTTGCTTCGAATGTTATTTTGTCTCCCGG  
+HWI-EAS443:3:80:252:740#0/1  
aab`aaaaaa`a\_aaaaaaWX`a¥\_[\_aa\_\_\_\_\_^W

@HWI-EAS443:3:80:285:642#0/1  
AATGGAACGTGTTACCCAGGAGATTTTCATCGATTATGAGG  
+HWI-EAS443:3:80:285:642#0/1  
a]W^`\_a\_a[a]\_\_\_Z^¥^¥`\_[^^X]]¥XXS]]]]X]Y  
@HWI-EAS443:3:80:304:183#0/1  
CCGGCTTGAACCTTCTTGCTGTATCTTGATGTCCCCACAAA  
+HWI-EAS443:3:80:304:183#0/1  
aST\_V]T]^¥¥^0`W[XW]]ZZ^U^XTTZXQUVZXPYUW  
@HWI-EAS443:3:80:307:1913#0/1  
ATATACATCCGATCACAATTGGAAAATGTCCAAAATATGT  
+HWI-EAS443:3:80:307:1913#0/1  
U¥aWbba\_a\_[`]\_\_[SSWZ^Z^aa]OZWa^^[`¥[``^0  
@HWI-EAS443:3:80:308:195#0/1  
GAACTCTTTACCTACTGCTGTGAACGTGTATTTCATCTTT  
+HWI-EAS443:3:80:308:195#0/1  
aaa`aaaaaaa````a`a`a\_a\_\_^aa]`^\_``^^`]]``\_  
@HWI-EAS443:3:80:319:252#0/1  
GTAGTCATAAGTCCCATTTTTGACACTTTCCATGCACGTG  
+HWI-EAS443:3:80:319:252#0/1  
aYU`\_\_V\_^``^`\_¥`aaa`aa`^\_[a`[``]`\_Y^¥`Y`  
@HWI-EAS443:3:80:330:1279#0/1  
CTTGCTGTATCTTGATGTCCCCACAAAACATATGCATCT  
+HWI-EAS443:3:80:330:1279#0/1  
abbbbb``abbaab\_a`aa`a``a`]aa^a\_aa\_^a\_  
@HWI-EAS443:3:80:347:881#0/1  
GCTGGCTGGATCCTGGGAAATCCAGAGTGTGAATCACTCT  
+HWI-EAS443:3:80:347:881#0/1  
`b¥ab`H]^R`a`VYXXW[a^^`^XU^GaWYUXX]Q¥S^¥  
@HWI-EAS443:3:80:355:1957#0/1  
TGCTATTTCCGGCTTGAACCTTCTTGCTGTATCTTGATGTC  
+HWI-EAS443:3:80:355:1957#0/1  
abbbbbbbabbbabaaWab`aaaa\_M[a\_^aaaa\_a\_]\_a  
@HWI-EAS443:3:80:35:1965#0/1  
ATGAAATCTCCTGGGTAACACGTTCCATTGTCTGAACTAG  
+HWI-EAS443:3:80:35:1965#0/1  
¥X[``SV\_R]\_U`^^J0[aa\_NPPS^\_]W`X`\_^¥\_UWZL  
@HWI-EAS443:3:80:378:767#0/1  
CAAAGTCTCTATCAGAATGCAGATGCATATGTTTTTGTGG  
+HWI-EAS443:3:80:378:767#0/1  
a¥``b`abab¥b`bbbb\_\_b¥aaaa^`aabaaaaa\_ba  
@HWI-EAS443:3:80:399:72#0/1  
GTGGGGACATCAAGATACAGCAAGAAGTTCAAGCCGGAAA  
+HWI-EAS443:3:80:399:72#0/1  
a\_aaa^\_[\_\_\_\_\_a\_]\_Z\_`^`\_]`X[W^W\_VY]^T^SW  
@HWI-EAS443:3:80:416:425#0/1  
CCCCATTGCATTTGGGTAAATGTAACATTGCTGGCTGGAT  
+HWI-EAS443:3:80:416:425#0/1  
abbbabbba[aaabab^bbabb`baabaaaa`a``\_]V  
@HWI-EAS443:3:80:430:1674#0/1  
GGGACATCAAGATACAGCAAGAAGTTCAAGCCGGAAATAG

+HWI-EAS443:3:80:430:1674#0/1  
aa\_abbbaa\_ababb`abb`ba`^`aba\_a\_a`````\_`^  
@HWI-EAS443:3:80:453:666#0/1  
CACATCCAGAACTGATTGCCCCAGGGAGACTACCAGTA  
+HWI-EAS443:3:80:453:666#0/1  
aaa\_baaba`aaaaaa^b\_\_a`a```\_`aV\_aa`\_`a¥`  
@HWI-EAS443:3:80:471:327#0/1  
CTTTTCAATAACAGAATTTACTTTGTTAGTAATCTCGTCA  
+HWI-EAS443:3:80:471:327#0/1  
abbabbbbbbbaabbaabaaa`aab\_aab`a`aaab`\_`a  
@HWI-EAS443:3:80:488:901#0/1  
GGGACATCAAGATACAGCAAGAAGTTCAAGCCGAAATAG  
+HWI-EAS443:3:80:488:901#0/1  
aaaa`Yaabaaaa`abaaaaaa^`ab`a```a¥`\_\_\_\_^  
@HWI-EAS443:3:80:501:1325#0/1  
CTGGTGTATAGCACCTTGGGTGTCTGACAAGTTGTAT  
+HWI-EAS443:3:80:501:1325#0/1  
aba]Za\_aaaaa]aa`\_\_`\_\_`N\_U`\_`\_`[^`¥X^^U\_^  
@HWI-EAS443:3:80:567:525#0/1  
CATTAATGATAAAGGGAAAGAAGTCCTCGTGCTATGGGGC  
+HWI-EAS443:3:80:567:525#0/1  
a`bababbbbaaaaaaaaaaaaaaaaa^a`aaa\_a`aa`a`a\_P  
@HWI-EAS443:3:80:579:546#0/1  
ATCTTTTCAATAACAGAATTTACTTTGTTAGTAATCTCGT  
+HWI-EAS443:3:80:579:546#0/1  
aaaTaaa^]aaaaa`a`aaa`^a``ab^`^a]`\_``^Z^^  
@HWI-EAS443:3:80:584:1253#0/1  
GAAGTCCTCGTGCTATGGGGCATTACCATCCATCTACTA  
+HWI-EAS443:3:80:584:1253#0/1  
a\_ZUO\_XR¥\_QZ^]^^XV]]`\_]\_RURX¥`[]YZV]Q¥PX]  
@HWI-EAS443:3:80:592:1733#0/1  
AAGCCAGTTAAAAACAATGCCAAGGAAATTGGAAACGGC  
+HWI-EAS443:3:80:592:1733#0/1  
]]H]^a\_\_`[WaY\_\_^[`\_`a¥[TXT^\_\_¥\_U[\_]^W\_B  
@HWI-EAS443:3:80:604:1735#0/1  
CAGGATATGCAGCCGACCTGAAGAGCACACAGAATGCCAT  
+HWI-EAS443:3:80:604:1735#0/1  
aa]]aa]a`aa]ba`a\_aaaaa^aaa\_aaaa`a\_a`\_] [  
@HWI-EAS443:3:80:650:1116#0/1  
CAATGGCATTCTGTGTGCTCTTCAGGTCGGCTGCATATCC  
+HWI-EAS443:3:80:650:1116#0/1  
^WZJ[aab]\_ab^]UZa[]ba]\_ba`V]aab[a\_]aa`aa  
@HWI-EAS443:3:80:663:1104#0/1  
AGCCAGTTAAAAACAATGCCAAGGAAATTGGAAACGGCT  
+HWI-EAS443:3:80:663:1104#0/1  
a¥a\_aa\_a]G^a\_`a`\_`^\_\_`^`^^¥a`]¥]\_^\_W\_S^^  
@HWI-EAS443:3:80:667:1717#0/1  
TAGATTTCCAGTTGCTTCGAATGTTATTTTGTCTCCCGGC  
+HWI-EAS443:3:80:667:1717#0/1  
aa`P\_babaaa\_aaaaaba`\_aa^aaa]aa\_]a\_\_]\_]\_]

@HWI-EAS443:3:80:66:136#0/1  
AGCAAATCCTACATTAATGATAAAGGGAAAGAAGTCCTCG  
+HWI-EAS443:3:80:66:136#0/1  
¥ab\_aaT\_\_][a]`a^W`aa[^¥T¥a`^^`\_]R\_VUYSV\_  
@HWI-EAS443:3:80:677:1236#0/1  
GGCCCAATCATGACTCGAACAAAGGTGTAACGGCAGCATG  
+HWI-EAS443:3:80:677:1236#0/1  
`abbbbaabbbbaababababababba¥a¥aa`aa\_a`GTPK  
@HWI-EAS443:3:80:755:567#0/1  
GCTTTTTGCTCCAGCATGAGGACATGCTGCCGTTACACCT  
+HWI-EAS443:3:80:755:567#0/1  
\_aaaa\_\_baaaaaaabbaaa\_a\_aa\_``a\_\_U\_YY\_\_`\_  
@HWI-EAS443:3:80:764:649#0/1  
ATTCCCAAGACAAGTTCATGGCCCAATCATGACTCGAAC  
+HWI-EAS443:3:80:764:649#0/1  
\_`\_``a\_aaaaaa^aV\_^^^a]\_\_\_\_\_¥]``aa\_^\_``XZQ  
@HWI-EAS443:3:80:849:1510#0/1  
AGAAGTCCTCGTGCTATGGGGCATTACCATCCATCTACT  
+HWI-EAS443:3:80:849:1510#0/1  
^\_]ba\_\_a\_RW[]a\_LUZ]U\_b\_bUa\_bb`aaaa¥a^GX  
@HWI-EAS443:3:80:857:1481#0/1  
AGAGCACATCCAGAACTGATTGCCCCAGGGAGACTACC  
+HWI-EAS443:3:80:857:1481#0/1  
Z\_b]b`^^^[\_`\_\_`aaaaa`^^\_W[]`a`Y\_a]``^X  
@HWI-EAS443:3:80:866:52#0/1  
GGAGGCTGGTGTATAGCACCCCTTGGGTGTCTGACAAGT  
+HWI-EAS443:3:80:866:52#0/1  
aa\_bb\_aab¥b\_aa\_\_`a¥`\_\_¥¥``\_\_TaVW`\_¥W¥¥¥U  
@HWI-EAS443:3:80:870:131#0/1  
GCTGGTGTATAGCACCCCTTGGGTGTCTGACAAGTTGTA  
+HWI-EAS443:3:80:870:131#0/1  
`Z^XXN`¥]`Za\_a\_T¥NWZ¥Q\_^S\_WUWUSWYGYNQVUH  
@HWI-EAS443:3:80:879:318#0/1  
CGAATGTTATTTTGTCTCCCGCTCTACTAGTGTCCAGTA  
+HWI-EAS443:3:80:879:318#0/1  
aa`a`^`a\_aaaaa`^`a`^a\_\_\_\_^]Z]^]Y]W]YQ^X^  
@HWI-EAS443:3:80:909:1040#0/1  
GAAATTCATACCCAAAGCTCAGCAAATCCTACATTAATGA  
+HWI-EAS443:3:80:909:1040#0/1  
`¥¥]ZZZ^aaaa`YO\_`^a`a\_\_a]W[^]^][^\_^]\_`\_^  
@HWI-EAS443:3:80:954:1302#0/1  
AATTTACTTTGTTAGTAATCTCGTCAATGGCATTCTGTGT  
+HWI-EAS443:3:80:954:1302#0/1  
aa`]]`\_`[]aZQWa¥aa^¥aaaZY¥a\_^aW[a]``\_¥\_[]  
@HWI-EAS443:3:80:962:89#0/1  
GCTTCCTCTGAGTATTTTGGGTAGTCATAAGTCCCATTTT  
+HWI-EAS443:3:80:962:89#0/1  
a`aa\_\_a\_bb`a``aaaaaa]^a]^¥`\_Y`^]X¥^\_\_\_\_`  
@HWI-EAS443:3:81:1016:585#0/1  
ATTTGGACTTACAATGCCGAAGTGTGGTTCTATTGGAAA

+HWI-EAS443:3:81:1016:585#0/1  
aa\_bb`a\_aa`\_`bab]aa\_]b`a\_a]X`Xb\_a\_¥`[\_`  
@HWI-EAS443:3:81:1053:509#0/1  
CAATTGCTCTTAGCTCCTCATAATCGATGAAATCTCCT  
+HWI-EAS443:3:81:1053:509#0/1  
abVQN`ba^STY]`b^ZPW\_[`[^\_\_`aYF¥UX\_`\_^^^\_  
@HWI-EAS443:3:81:1063:448#0/1  
CTCGTGCTATGGGGCATTACCATCCATCTACTAGTGCTG  
+HWI-EAS443:3:81:1063:448#0/1  
HTbb^bTT^Tb```Zbb```aY^a`R[bbb\_¥`aaaba\_`  
@HWI-EAS443:3:81:1087:367#0/1  
TGGTAGATGGATGGTACGGTTATCACCATCAAAATGAGCA  
+HWI-EAS443:3:81:1087:367#0/1  
aaa)`a`a`^Wa\_]\_aa\_Z\_a^Z^]]][YR]\_\_]\_^Z^]  
@HWI-EAS443:3:81:1096:233#0/1  
GTGTTTATAGCACCTTGGGTGTCTGACAAGTTGTATTGC  
+HWI-EAS443:3:81:1096:233#0/1  
aXaaaa`WW^\_aZQ¥U[`a\_Y\_[Y]\_VFOYUSY^[]YY[S  
@HWI-EAS443:3:81:1154:1153#0/1  
GCTTCCTCTGAGTATTTTGGGTAGTCATAAGTCCCATTTT  
+HWI-EAS443:3:81:1154:1153#0/1  
a`ab^^`]aba```abbbbb`\_ba`¥`a`]a`a^```baba  
@HWI-EAS443:3:81:1156:96#0/1  
GAGGACATGCTGCCGTTACACCTTTGTTTCGAGTCATGATT  
+HWI-EAS443:3:81:1156:96#0/1  
[`baaabbbab\_[b]ba^^[\_aaaa`¥`]\_]\_^a\_¥]\_  
@HWI-EAS443:3:81:1186:1898#0/1  
CTGGACACTAGTAGAGCCGGGAGACAAAATAACATTCGAA  
+HWI-EAS443:3:81:1186:1898#0/1  
ab\_\_^aa`aaa\_a\_a``\_a\_W[``\_TU^`a^a\_a\_Z¥R¥\_W  
@HWI-EAS443:3:81:1265:1408#0/1  
ATAAGTCCCATTTTGGACTTTCCATGCACGTGTATCG  
+HWI-EAS443:3:81:1265:1408#0/1  
`babb`[\_¥a]a`^`a`baa`a`aa\_aaaa\_a\_aa^^\_  
@HWI-EAS443:3:81:1283:139#0/1  
GCTGGCTGGATCCTGGGAAATCCAGAGTGTGAATCACTCT  
+HWI-EAS443:3:81:1283:139#0/1  
`S]XYV]^`^YPSYSY[EVYVKQXYUVSYUQNTTSTMWUU  
@HWI-EAS443:3:81:1305:829#0/1  
GAAGTCCTCGTGCTATGGGGCATTACCATCCATCTACTA  
+HWI-EAS443:3:81:1305:829#0/1  
\_Z[[\_¥\_a\_[^]``\_]`\_]`¥a[OZ`\_R¥a^aaS]]  
@HWI-EAS443:3:81:1330:100#0/1  
TAAGAAGCCAGTTAAAAACAATGCCAAGGAAATTGGAAA  
+HWI-EAS443:3:81:1330:100#0/1  
aa`a`aaa`\_a\_a`\_aa`^Sa¥\_a]H]Ya\_\_[]`¥`]]][  
@HWI-EAS443:3:81:1453:135#0/1  
ATGACACTGAGCTCAATTGCTCTCTTAGCTCCTCATAATC  
+HWI-EAS443:3:81:1453:135#0/1  
I^`\_S\_`\_Z¥[^]W]``b[``^Z\_¥a`a`Y`L[a¥aaWY`V

@HWI-EAS443:3:81:1498:1162#0/1  
CACGTGTTATCGCATTGTGGTAAAATTCAAAGCAGCCGT  
+HWI-EAS443:3:81:1498:1162#0/1  
^`\_^\_SX]babb¥abbbT`¥[ababbaabb` `aab`0aI  
@HWI-EAS443:3:81:1511:119#0/1  
TTTTGCTTCCTCTGAGTATTTGGGTAGTCATAAGTCCCA  
+HWI-EAS443:3:81:1511:119#0/1  
ababaaab\_]a^aba`]aa\_aaa` `[\_^¥\_a`]aX\_SW^  
@HWI-EAS443:3:81:1534:1116#0/1  
AGCAAATCCTACATTAATGATAAAGGGAAAGAAGTCCTCG  
+HWI-EAS443:3:81:1534:1116#0/1  
aaRb`ab\_aaaa`\_a\_aaZ^`\_aZ\_a`\_Z\_a`\_`¥\_W\_\_`  
@HWI-EAS443:3:81:153:1788#0/1  
CAGAAACTGATTGCCCCAGGGAGACTACCAAGTACCAATG  
+HWI-EAS443:3:81:153:1788#0/1  
`b¥ab]aaa`a[[^aa\_a`\_`\_\_\_\_\_[Z`a\_N\_\_¥\_\_X  
@HWI-EAS443:3:81:1543:963#0/1  
CAGGAGATTTTCATCGATTATGAGGAGCTAAGAGAGCAATT  
+HWI-EAS443:3:81:1543:963#0/1  
`aa\_Sb¥bab^bbW]abbabaaba]aba`aa`aa[a`aa  
@HWI-EAS443:3:81:1567:1459#0/1  
CTTGCTGTGGAGAGTGATTCACACTCTGGATTTCCAGGA  
+HWI-EAS443:3:81:1567:1459#0/1  
\_a`\_H[a`Zb`b` `Pbaab¥R\_aYaabb\_a^b¥a¥\_ab`  
@HWI-EAS443:3:81:1604:512#0/1  
CTCGTGCTATGGGGCATTACCATCCATCTACTAGTGCTG  
+HWI-EAS443:3:81:1604:512#0/1  
ab`bbbabbbb`baabb[bbabbaababbabbbb\_ba  
@HWI-EAS443:3:81:1606:509#0/1  
CTCCCATTTCAGAATATACATCCGATCACAATTGAAAAAT  
+HWI-EAS443:3:81:1606:509#0/1  
\_a`^KbbY`Y`bbb\_bbb[abb`b^a¥\_]\_aa\_IXYb^bb  
@HWI-EAS443:3:81:215:1236#0/1  
GAAGTTCAAGCCGAAATAGCAATAAGACCCAAAGTGAGG  
+HWI-EAS443:3:81:215:1236#0/1  
¥Z^b`aabb`a`ba\_aa`\_\_a¥[`aaa` `a` `\_\_aZ\_a^a  
@HWI-EAS443:3:81:250:439#0/1  
GAGAGCAATTGAGCTCAGTGTCATCATTGAAAGGTTTGA  
+HWI-EAS443:3:81:250:439#0/1  
aaZ]`bYb`baaaba`a`[a^aaa]S` `a`Y¥[`aU\_]a`  
@HWI-EAS443:3:81:262:1211#0/1  
GGCATTACCATCCATCTACTAGTGCTGACCAACAAAGTC  
+HWI-EAS443:3:81:262:1211#0/1  
a`a\_U\_b\_b`aabb\_aaX`aaa\_Za¥` `aaaabaV`G¥Za  
@HWI-EAS443:3:81:263:1824#0/1  
AAAAAAGGAAATTCATACCCAAAGCTCAGCAAATCCTACA  
+HWI-EAS443:3:81:263:1824#0/1  
]]¥UYV[MX^aa]^\_aaaaaaaZa]aZZ^]`XY^`VIY\_  
@HWI-EAS443:3:81:265:1063#0/1  
GCCGGTTTCATTGAAGGGGGTGGACAGGGATGGTAGATG

+HWI-EAS443:3:81:265:1063#0/1  
abbb`^aaa\_aaa\_\_aaaaaNaa``\_\_\_\_\_^\_a\_V\_\_^S`  
@HWI-EAS443:3:81:357:836#0/1  
AAAATATGTAAAAAGCACAAAATTGAGACTGGCCACAGGA  
+HWI-EAS443:3:81:357:836#0/1  
\_]P\_¥baS`[RZ\_¥^`aa¥UZ]b\_] [YV\_Wa^YFGQQVH  
@HWI-EAS443:3:81:365:982#0/1  
CAGCAAGAAGTTCAAGCCGAAATAGCAATAAGACCCAAA  
+HWI-EAS443:3:81:365:982#0/1  
a]baab\_\_Y^LX\_a`\_¥`baLX¥`[aaX`^^T`a\_Z[HN  
@HWI-EAS443:3:81:379:1705#0/1  
CAGAAACTGATTGCCCCAGGGAGACTACCAGTACCAATG  
+HWI-EAS443:3:81:379:1705#0/1  
``[b```a`a`\_aa`aaa`[XR¥^X¥\_\_^¥ZYU\_`SX^^Z  
@HWI-EAS443:3:81:438:949#0/1  
CCGATCACAATTGGAAAATGTCCAAAATATGTAAAAAGCA  
+HWI-EAS443:3:81:438:949#0/1  
\_`[^ZZaaY`^ZPS[¥`bWaqYPR^\_`aaa\_a]RU```a  
@HWI-EAS443:3:81:451:692#0/1  
CACAAAAACATATGCATCTGCATTCTGATAGAGACTTTGT  
+HWI-EAS443:3:81:451:692#0/1  
aaabaaZaaaaaaaaaaaaaaaa```aa``\_\_a`a\_\_\_a]  
@HWI-EAS443:3:81:469:514#0/1  
TTTTGCTTCTCTGAGTATTTTGGGTAGTCATAAGTCCCA  
+HWI-EAS443:3:81:469:514#0/1  
ab\_U\_`bb`XYbba]bP``\_aa`W¥W\_aaaaaaaa`\_\_]  
@HWI-EAS443:3:81:47:415#0/1  
TGCCGGTTTCATTGAAGGGGGTGGACAGGGATGGTAGAT  
+HWI-EAS443:3:81:47:415#0/1  
abbbbbbaab`babaaaabaaWaaQa]aa\_KZ]`YY¥^]  
@HWI-EAS443:3:81:480:632#0/1  
TCACCATCCATCTACTAGTGCTGACCAACAAAGTCTCTAT  
+HWI-EAS443:3:81:480:632#0/1  
aaaaabaaaaa`baaaa\_a``\_a`aa`\_aa\_`W\_\_\_\_a\_  
@HWI-EAS443:3:81:506:448#0/1  
ATCAGAATGCAGATGCATATGTTTTTGTGGGACATCAAG  
+HWI-EAS443:3:81:506:448#0/1  
a`^a`^`\_``a\_NP^V`a\_\_ba\_aX^bXa`a\_\_^`a`\_]\_a  
@HWI-EAS443:3:81:537:2011#0/1  
GTCAATGGCATTCTGTGTGCTTTCAGGTCGGCTGCATAT  
+HWI-EAS443:3:81:537:2011#0/1  
]GV`^\_a`ab\_`a¥`YYM0[\_a\_XW\_RPW^[``H¥PWG\_Q  
@HWI-EAS443:3:81:566:811#0/1  
GGGACATCAAGATACAGCAAGAAGTTCAAGCCGAAATAG  
+HWI-EAS443:3:81:566:811#0/1  
a\_TYaaa\_a`¥\_a¥^`Y^a\_aMIYV\_aaW^[ZTXTFU\_^]  
@HWI-EAS443:3:81:589:1505#0/1  
GGCCATTGCCGTTTCATTGAAGGGGGTGGACAGGGATG  
+HWI-EAS443:3:81:589:1505#0/1  
aabb]X]]`aa`U\_`a`]a\_^^`^a^aUa[V^a\_`\_\_^\_



@HWI-EAS443:3:81:629:1859#0/1  
TTTTTGTAGAAGCTTTTTGCTCCAGCATGAGGACATGCTG  
+HWI-EAS443:3:81:629:1859#0/1  
`^baab¥¥]\_^`aaZab¥T`aa[ZaT`\_aYR`R`Wa][Y  
@HWI-EAS443:3:81:643:331#0/1  
GCTTCTTACCTTTTCATATAAGTTCTTCACATTTGAATCG  
+HWI-EAS443:3:81:643:331#0/1  
aa][Z\_]R\_\_`¥^ab[X`^\_[XZ[^\_¥\_Y\_]\_]S\_[Z\_PS  
@HWI-EAS443:3:81:656:663#0/1  
CCGGTTTCATTGAAGGGGGTGGACAGGGATGGTAGATGG  
+HWI-EAS443:3:81:656:663#0/1  
a`[\_aabbaba^XXbaa`aaIaaaa\_a``Raa^Q^\_`Naa  
@HWI-EAS443:3:81:658:1168#0/1  
TTCTTGCTGTATCTTGATGTCCCCACAAAAACATATGCAT  
+HWI-EAS443:3:81:658:1168#0/1  
aa\_aaaaa\_a`a`\_a`\_\_\_aaa`\_^`a``\_]`^Y\_\_^\_^  
@HWI-EAS443:3:81:668:1631#0/1  
GCTGCCGTTACACCTTTGTTTCGAGTCATGATTGGGCCATG  
+HWI-EAS443:3:81:668:1631#0/1  
¥\_]Q\_TX\_a^]RZ]\_`XXZZTQZLZa^[Ta`]]`aa^SZU  
@HWI-EAS443:3:81:690:425#0/1  
GAGGAGCTAAGAGAGCAATTGAGCTCAGTGTCATCATTG  
+HWI-EAS443:3:81:690:425#0/1  
a^ba]aaa`aa`VL]a\_Ta`[X`\_a```]a]LZ`a^`Z^`  
@HWI-EAS443:3:81:701:454#0/1  
GTCCCATTTTTGACACTTTCATGCACGTGTTATCGCATT  
+HWI-EAS443:3:81:701:454#0/1  
aZ`aYJ[WZaYTW[W]aU``\_¥`V\_]][\_`M]YZTUTSYQ  
@HWI-EAS443:3:81:711:175#0/1  
GGACAGGGATGGTAGATGGATGGTACGGTTATCACCATCA  
+HWI-EAS443:3:81:711:175#0/1  
abab`bbb\_aab¥aaa]`a[aaaWa¥`aW\_a[N]WY\_¥W\_  
@HWI-EAS443:3:81:733:77#0/1  
CACAATGTAGGACCATGAGCTTGCTGTGGAGAGTGATTCA  
+HWI-EAS443:3:81:733:77#0/1  
a^ba`b\_Yaa`aJaaa\_^a^\_aaZaa\_a`R\_¥aU`]R`W[  
@HWI-EAS443:3:81:735:512#0/1  
CAGGTCGGCTGCATATCCTGACCCCTGCTCATTTTGATGG  
+HWI-EAS443:3:81:735:512#0/1  
aaQIRWY\_Z^ZVLOX`[PVWYIX^S¥XKY^U^\_\_VJRSZ\_  
@HWI-EAS443:3:81:745:1053#0/1  
GCCGTTACACCTTTGTTTCGAGTCATGATTGGGCCATGAAC  
+HWI-EAS443:3:81:745:1053#0/1  
aaa][aaabaaaaa`aaa`a]aaa````a]a\_a`]]`\_V\_^  
@HWI-EAS443:3:81:785:818#0/1  
CATATCCTGACCCCTGCTCATTTTGATGGTGATAACCGTA  
+HWI-EAS443:3:81:785:818#0/1  
abbbbaabaaaaba\_abaaa`aa\_\_a`\_a`^a``a\_]\_\_Z`  
@HWI-EAS443:3:81:798:1125#0/1  
CATCTACCATCCCTGTCCACCCCTTCAATGAAACCGGC

+HWI-EAS443:3:81:798:1125#0/1  
`aa\_aa\_aa\_a\_aa^^[`a`a\_R]aaaa`¥X`\_]a`Q  
@HWI-EAS443:3:81:804:185#0/1  
GTGGGGACATCAAGATACAGCAAGAAGTTCAAGCCGGAAA  
+HWI-EAS443:3:81:804:185#0/1  
aU]]W\_VPZ]WXX]^Y^Z]¥]^\_Z]^WXY]UYXX^XUXU  
@HWI-EAS443:3:81:811:1006#0/1  
GGCTAGTTAAAAAAGGAAATTCATACCCAAAGCTCAGCAA  
+HWI-EAS443:3:81:811:1006#0/1  
abbYbababbbbbb^`abbabababaabbabaaabaaaab  
@HWI-EAS443:3:81:815:591#0/1  
AACTGATTGCCCCAGGGAGACTACCAGTACCAATGAACT  
+HWI-EAS443:3:81:815:591#0/1  
a`a^\_a\_a\_]\_a^]aaa`\_`^`^`Za`Wa`^`^`X^^[  
@HWI-EAS443:3:81:817:1424#0/1  
AGCCAGTTAAAAACAATGCCAAGGAAATGGAAACGGCT  
+HWI-EAS443:3:81:817:1424#0/1  
a^a\_`^X^a`¥]Z^\_a]]`\_\_`\_`^\_\_X^^`\_]\_Z\_]X  
@HWI-EAS443:3:81:831:139#0/1  
CCCCGCTCTACTAGTGTCCAGTAATAGTTCATTCTCCCTT  
+HWI-EAS443:3:81:831:139#0/1  
a^Y^aa`X`W]Z`Z`[¥]X^S¥\_\_\_\_\_]\_Z\_a[U¥^[V\_Y  
@HWI-EAS443:3:81:869:853#0/1  
GCTGGCTGGATCCTGGGAAATCCAGAGTGTGAATCACTCT  
+HWI-EAS443:3:81:869:853#0/1  
a^WTT^`0\_¥Q\_a¥QRV[a\_WZYZYL]Q¥LOQSUZ`\_KNG  
@HWI-EAS443:3:81:896:840#0/1  
ACAGAATTTACTTTGTTAGTAATCTCGTCAATGGCATTCT  
+HWI-EAS443:3:81:896:840#0/1  
a`\_\_YY\_aaa\_aa`aYZ]`Z`]`\_`\_`aX^`¥^`a\_`a]`  
@HWI-EAS443:3:81:906:1453#0/1  
ATGAAATCTCCTGGGTAACACGTTCCATTGTCTGAACTAG  
+HWI-EAS443:3:81:906:1453#0/1  
^[a¥\_Y¥ba\_\_Z\_Z¥[ZYY^b¥VT\_S\_SZaZ^Z`] ^PT]¥  
@HWI-EAS443:3:81:922:682#0/1  
GCATATCCTGACCCCTGCTCATTTTGTGATGGTGATAACCGT  
+HWI-EAS443:3:81:922:682#0/1  
aa`\_aaaa\_aa\_a^\_\_aa`^aa\_\_Y\_\_`\_Xa^``]WV`^  
@HWI-EAS443:3:81:922:930#0/1  
GCTGGCTGGATCCTGGGAAATCCAGAGTGTGAATCACTCT  
+HWI-EAS443:3:81:922:930#0/1  
ab`]Z\_\_a¥T\_aaTQ^a\_aaaaa`a^aX¥0`\_\_`^]`^\_¥  
@HWI-EAS443:3:82:1031:1928#0/1  
GGGGACATCAAGATACAGCAAGAAGTTCAAGCCGGAAATA  
+HWI-EAS443:3:82:1031:1928#0/1  
^`[R]U\_U\_`¥\_\_Wa¥aaaa[a\_U¥Y¥]a`aX]Za\_\_a\_Z  
@HWI-EAS443:3:82:1043:507#0/1  
AACGTGTTACCCAGGAGATTTTCATCGATTATGAGGAGCTA  
+HWI-EAS443:3:82:1043:507#0/1  
abab\_babaaa\_baaaa`aaaaaab`aaabaaa`\_a^a\_

@HWI-EAS443:3:82:1047:618#0/1  
ATTTCTTCTCTGTTTAATTTTGCTTCCTCTGAGTATTTTG  
+HWI-EAS443:3:82:1047:618#0/1  
[``bbbabb`babb` ``b`ababbaababb`b[abaaa`  
@HWI-EAS443:3:82:1059:735#0/1  
CCGGGAGACAAAATAACATTCTGAAGCAACTGGAAATCTAG  
+HWI-EAS443:3:82:1059:735#0/1  
aaaa\_abbab`abbb` `aabab\_\_abaa\_baaI^ab[baa  
@HWI-EAS443:3:82:105:194#0/1  
GGTGATAACCGTACCATCCATCTACCATCCCTGTCCACCC  
+HWI-EAS443:3:82:105:194#0/1  
`^E¥aabb`aaaaa`^aaa`a\_`^`^`¥¥` [[¥\$^¥Ua  
@HWI-EAS443:3:82:1071:1937#0/1  
CACTGAGCTCAATTGCTCTTAGCTCCTCATAATCGATG  
+HWI-EAS443:3:82:1071:1937#0/1  
UY\_R\_]b¥`¥]bbbbbabU[`aaUb[\_¥bbbb\_a\_^]`¥  
@HWI-EAS443:3:82:1088:58#0/1  
AGAAGTCCTCGTGCTATGGGGCATTACCATCCATCTACT  
+HWI-EAS443:3:82:1088:58#0/1  
aaaa\_Y]aab]^RNV^a`a[``a^`\_`\_a`\_\_\_\_][^X[  
@HWI-EAS443:3:82:1157:1999#0/1  
GGGGACATCAAGATACAGCAAGAAGTTCAAGCCGGAAATA  
+HWI-EAS443:3:82:1157:1999#0/1  
aa[`aZaa\_bb`aZ`Z^aaaaaaa`U\_Ra`aWZaW\_]¥\_`  
@HWI-EAS443:3:82:1158:1309#0/1  
AAGTCCTCGTGCTATGGGGCATTACCATCCATCTACTAG  
+HWI-EAS443:3:82:1158:1309#0/1  
\_`Z`baab`V`^`^aa`]]aaba`a]`b\_a\_b`\_a```aa  
@HWI-EAS443:3:82:1165:1295#0/1  
TGGTACGGTTATCACCATCAAAATGAGCAGGGGTCAGGAT  
+HWI-EAS443:3:82:1165:1295#0/1  
aabTa¥YWXOX]\_PTY]¥\_\_¥Q[YVaXWJV^G[S][^Z  
@HWI-EAS443:3:82:1169:510#0/1  
CATCAAGATACAGCAAGAAGTTCAAGCCGGAAATAGCAAT  
+HWI-EAS443:3:82:1169:510#0/1  
`ZTJbbb^^Zabb`Vbb]bb```¥abb`^b`b``YbJbb¥  
@HWI-EAS443:3:82:1203:698#0/1  
ATATGTTTTTGTGGGGACATCAAGATACAGCAAGAAGTTC  
+HWI-EAS443:3:82:1203:698#0/1  
aa¥aba\_bb^aSbbaba`aa]bb\_aaa[a\_\_ab`b` `aa^  
@HWI-EAS443:3:82:1281:253#0/1  
GATGACTGAGCTCAATTGCTCTTAGCTCCTCATAAT  
+HWI-EAS443:3:82:1281:253#0/1  
]bbabaab\_babbaabbbbaabb`bbb` `b^aa\_aaaaa  
@HWI-EAS443:3:82:1302:1197#0/1  
GCTTCCTCTGAGTATTTTGGGTAGTCATAAGTCCCATTTT  
+HWI-EAS443:3:82:1302:1197#0/1  
a[¥aY^a\_` `Z\_L^`PW`ZXM\_\_PU`\_¥W¥Y^¥WUX\_] ]  
@HWI-EAS443:3:82:1324:1616#0/1  
ATTTCCAGTTGCTTCGAATGTTATTTTGTCTCCCGCTCT

+HWI-EAS443:3:82:1324:1616#0/1  
abba]`¥\_V¥aJabbbTbba^Vab`b`\_OR¥baa]a]aaa  
@HWI-EAS443:3:82:132:125#0/1  
ATCTCGTCAATGGCATTCTGTGTGCTCTTCAGGTCGGCTG  
+HWI-EAS443:3:82:132:125#0/1  
a)`Wab^ZU^^^V¥]aaa]a^]^^^]\_^]Z`\_S`O[YU^  
@HWI-EAS443:3:82:1343:803#0/1  
TCTACTAGTGCTGACCAACAAAGTCTCTATCAGAATGCAG  
+HWI-EAS443:3:82:1343:803#0/1  
a`¥baba\_^`\_]ba\_Zabab\_\_\_\_\_]bababa\_b\_^a^Yaa  
@HWI-EAS443:3:82:1371:639#0/1  
TTCAGGTCGGCTGCATATCCTGACCCCTGCTCATTTTGAT  
+HWI-EAS443:3:82:1371:639#0/1  
ab\_b\_a\_ba`^`a`aba`\_`aa\_¥\_Y``¥a¥``a\_^\_\_\_\_  
@HWI-EAS443:3:82:1394:1762#0/1  
TGGGGACATCAAGATACAGCAAGAAGTTCAAGCCGGAAAT  
+HWI-EAS443:3:82:1394:1762#0/1  
abaaaa\_ba\_a[aa^b\_ba^aa`a\_a¥`\_aa``\_aa\_`a`  
@HWI-EAS443:3:82:1398:947#0/1  
GCTTCCTCTGAGTATTTGGGTAGTCATAAGTCCCATTTT  
+HWI-EAS443:3:82:1398:947#0/1  
``bba\_b`bbb`\_aababbb^`ab\_Y`]aabaaaX`abaa  
@HWI-EAS443:3:82:1446:1901#0/1  
ACCTTTTCATATAAGTTCTTCACATTTGAATCGTGGTAGT  
+HWI-EAS443:3:82:1446:1901#0/1  
aaaaba\_aaabbbbaaa\_baa\_\_aa`a`a\_a\_aVb\_Ya`Y  
@HWI-EAS443:3:82:1480:175#0/1  
GCCGGTTTCATTGAAGGGGGTGGACAGGGATGGTAGATG  
+HWI-EAS443:3:82:1480:175#0/1  
]UO`¥T¥a]¥a¥\_a\_a[aaa^Y``UY\_[`a[\_a\_VZTZQ\_  
@HWI-EAS443:3:82:1571:839#0/1  
ATTAATGTAGGATTTGCTGAGCTTTGGGTATGAATTCCT  
+HWI-EAS443:3:82:1571:839#0/1  
Y``\_\_bb^[¥\_^`¥a¥a^SYZb`^\_a¥VWaba\_\_]L[¥  
@HWI-EAS443:3:82:1579:1481#0/1  
AGCACATCCAGAACTGATTGCCCCAGGGAGACTACCAG  
+HWI-EAS443:3:82:1579:1481#0/1  
aa^a\_aba`abaaaaaaaaa``\_\_\_\_```aa]a\_¥a`  
@HWI-EAS443:3:82:1607:1006#0/1  
GTGCTCTTCAGGTCGGCTGCATATCCTGACCCCTGCTCAT  
+HWI-EAS443:3:82:1607:1006#0/1  
T`]T\_b^bZbbJ`\_ababa\_^b]aTQ\_\_^X`abbaaaHX]  
@HWI-EAS443:3:82:1651:802#0/1  
ACCCCATCTATTTCTTCTCTGTTTAATTTTGCTTCCTCTG  
+HWI-EAS443:3:82:1651:802#0/1  
aaUabab`bbbbb\_bbabbaabbabbbbbbba`bb`\_babb  
@HWI-EAS443:3:82:1689:225#0/1  
ATTAGAGCACATCCAGAACTGATTGCCCCAGGGAGACT  
+HWI-EAS443:3:82:1689:225#0/1  
VRFYbb]\_bab`aT`bbaU\_\_a[a`a`N][\_``^\_UZ\_YY

@HWI-EAS443:3:82:1713:847#0/1  
GACCAACAAAGTCTCTATCAGAATGCAGATGCATATGTTT  
+HWI-EAS443:3:82:1713:847#0/1  
aaT`b\_¥bbab^aa]a\_baa^aa^`¥`¥\_a\_U\_a\_aa`aa  
@HWI-EAS443:3:82:1758:1152#0/1  
GAATCACTCTCCACAGCAAGCTCATGGTCCTACATTGTGG  
+HWI-EAS443:3:82:1758:1152#0/1  
`babab\_baba\_baaaaaabUa[aa]a\_]\_aa^``a^[`Z  
@HWI-EAS443:3:82:187:1744#0/1  
TGTGTATTCATCTTTTCAATAACAGAATTTACTTTGTTAG  
+HWI-EAS443:3:82:187:1744#0/1  
ab\_\_Ia¥¥ZW¥`\_aaaaY`aa\_aa\_a]aa`aa\_`aa`]a`  
@HWI-EAS443:3:82:201:212#0/1  
CCAGCCAGCAATGTTACATTTACCCAAATGCAATGGGGCT  
+HWI-EAS443:3:82:201:212#0/1  
abaaaaaaaa\_R]][[[^[Y`\_\_]\_\_\_\_`[U^`\_¥VS^]`^\_]`  
@HWI-EAS443:3:82:208:1493#0/1  
ATTTGCTGAGCTTTGGGTATGAATTTCCTTTTTAACTAG  
+HWI-EAS443:3:82:208:1493#0/1  
aaaa`a^G]aaaaa[Xaaaaa`a`aa`\_\_\_\_`^\_\_]  
@HWI-EAS443:3:82:227:488#0/1  
GGGGACATCAAGATACAGCAAGAAGTTCAAGCCGAAATA  
+HWI-EAS443:3:82:227:488#0/1  
abbb\_^^a`\_b`aaa\_babab\_aa\_^baaXT`a\_K\_`a  
@HWI-EAS443:3:82:243:1106#0/1  
GCTGCATATCCTGACCCCTGCTCATTGATGGTGATAAC  
+HWI-EAS443:3:82:243:1106#0/1  
a]\_a`\_H¥Ub`^\_XV`V]U¥`a¥`\_RRGU\_WZRZ¥¥\_\_SG  
@HWI-EAS443:3:82:281:1164#0/1  
TTGGGTAAATGTAACATTGCTGGCTGGATCCTGGGAAATC  
+HWI-EAS443:3:82:281:1164#0/1  
Y`\_Z][X¥¥`a]\_a^^a\_¥\_^T^a`\_VX`\_^`X^]ZQ`TZ  
@HWI-EAS443:3:82:300:1816#0/1  
GGGACATCAAGATACAGCAAGAAGTTCAAGCCGAAATAG  
+HWI-EAS443:3:82:300:1816#0/1  
a`SS¥¥X¥Y¥¥aa`ababbb\_RYX[Z`b]```][X]^]a\_  
@HWI-EAS443:3:82:313:867#0/1  
AAAAGGTAAGAAGCCAGTTAAAAACAATGCCAAGGAAAT  
+HWI-EAS443:3:82:313:867#0/1  
\_Z``^Z`R¥Z¥baa`bZ\_K\_a\_aa\_¥\_aaa`aaa[a``\_  
@HWI-EAS443:3:82:343:112#0/1  
GCTTCCTCTGAGTATTTGGGTAGTCATAAGTCCCATTTT  
+HWI-EAS443:3:82:343:112#0/1  
aaba\_\_aaabaa^\_aaa`a`aZaa^]``\_\_a^`\_^\_``\_a  
@HWI-EAS443:3:82:371:1857#0/1  
GAGCAATTGAGCTCAGTGCATCATTGAAAGTTTGAGA  
+HWI-EAS443:3:82:371:1857#0/1  
X```aaJ```aabb`bVbVbbabba]bab`UaaSaaabab  
@HWI-EAS443:3:82:412:829#0/1  
ATGTTTTTGTGGGGACATCAAGATACAGCAAGAAGTTCAA

+HWI-EAS443:3:82:412:829#0/1  
Xa`a\_aaaabab`\_aaaaaaaaaab]^^`Z^`^¥\_b[  
@HWI-EAS443:3:82:415:88#0/1  
CTGGTGTATCTGAAATGATAATACCAGATCCAGCATTCT  
+HWI-EAS443:3:82:415:88#0/1  
abbb[`Xaabbbb`abba]aaaa`\_a`\_¥aaba`a`^a  
@HWI-EAS443:3:82:432:1639#0/1  
GCTGGCTGGATCCTGGGAAATCCAGAGTGTGAATCACTCT  
+HWI-EAS443:3:82:432:1639#0/1  
ab\_¥^aZQ^¥aa¥WX[]Za\_]W¥^^N\_SS`]Z\_[KVYT  
@HWI-EAS443:3:82:455:1128#0/1  
ATTGCTATTTCCGGCTTGAACCTTCTTGCTGTATCTTGATG  
+HWI-EAS443:3:82:455:1128#0/1  
aaaaa`aaaa\_]a`\_][OU\_a\_\_`^^`^^`\_\_`^^`\_]\_  
@HWI-EAS443:3:82:499:1915#0/1  
CAATTGCTCTTAGCTCCTCATAATCGATGAAATCTCCT  
+HWI-EAS443:3:82:499:1915#0/1  
\_K\_ba\_`Z]Xb]aaP[N¥]a\_b\_aa\_a]\_`PS¥]`¥Y^\_\_  
@HWI-EAS443:3:82:508:490#0/1  
CAGTGTATCATTTGAAAGTTTGAGATATCCCCAAGAC  
+HWI-EAS443:3:82:508:490#0/1  
aba\_aa`^^`bbabbb`\_aa[bbaaababbaaaa`aaaa  
@HWI-EAS443:3:82:50:1218#0/1  
ACCACGATTCAAATGTGAAGAACTTATATGAAAAGGTAAG  
+HWI-EAS443:3:82:50:1218#0/1  
aaba^`Z\_aaaa][\_W`a`]`a\_\_Z`\_\_`\_Z[Y][S¥`\_  
@HWI-EAS443:3:82:535:934#0/1  
TGGGGCATTACCATCCATCTACTAGTGTGACCAACAAA  
+HWI-EAS443:3:82:535:934#0/1  
abb`aabbbba`abbabbaaaaaaaaa\_a`a`a`aaa\_aaa  
@HWI-EAS443:3:82:565:1101#0/1  
GGTAGTCATAAGTCCCATTTTTGACACTTTCCATGCACGT  
+HWI-EAS443:3:82:565:1101#0/1  
a]TX¥Yaa`aa^¥aa`]aaa`^`\_a`\_aX^a^\_VU``\_]`  
@HWI-EAS443:3:82:565:1403#0/1  
TCAGAATGCAGATGCATATGTTTTGTGGGGACATCAAGA  
+HWI-EAS443:3:82:565:1403#0/1  
\_`\_a\_\_\_`a^\_Z^aa`]Y`][`\_a\_Y¥\_¥Y¥^aa`a^R^]  
@HWI-EAS443:3:82:588:1883#0/1  
AAACGGCTGCTTTGAATTTTACCACAAATGCGATAACACG  
+HWI-EAS443:3:82:588:1883#0/1  
`Z\_a]ZZaZ[Q`]WZ\_V]^`^\_ZQY`¥X[[[]R¥]H[¥\_  
@HWI-EAS443:3:82:604:1602#0/1  
GCACTAGTAGATGGATGGTGAATGCCCCATAGCACGAGGA  
+HWI-EAS443:3:82:604:1602#0/1  
a`Y\_W^00]Y\_YXRW[a]VT]Y¥¥BBBBBBBBBBBBBBBB  
@HWI-EAS443:3:82:604:1812#0/1  
ATGGTTTCTGACATTTGGACTTACAATGCCGAACGTGT  
+HWI-EAS443:3:82:604:1812#0/1  
a\_W`ZZQaaV`T¥b\_]a[N\_a`Vaa^LS^Yb[\_`a^`aYa

@HWI-EAS443:3:82:605:473#0/1  
GTCCCATTTTTGACACTTCCATGCACGTGTTATCGCATT  
+HWI-EAS443:3:82:605:473#0/1  
^Zaaa\_aba¥[\_\_a^W^baba\_aa\_]]^a\_\_V]a]¥Xa]  
@HWI-EAS443:3:82:614:838#0/1  
GGAAACGGCTGCTTTGAATTTTACCACAAATGCGATAACA  
+HWI-EAS443:3:82:614:838#0/1  
aa]b`aaabbbT\_`bY^`]aa`XOYV^^abW`a\_WY]aSa  
@HWI-EAS443:3:82:623:1541#0/1  
ATTTACTTTGTTAGTAATCTCGTCAATGGCATTCTGTGTG  
+HWI-EAS443:3:82:623:1541#0/1  
a```a[a\_ZZaa^U\_Va`b`a`\_a^ZVXRaaa[``a]\_^\_  
@HWI-EAS443:3:82:664:793#0/1  
GGGACATCAAGATACAGCAAGAAGTTCAAGCCGAAATAG  
+HWI-EAS443:3:82:664:793#0/1  
aaa^^a\_``a`^X`aaa\_aaa\_[a[``aa]\_\_aa\_`\_\_\_\_  
@HWI-EAS443:3:82:698:20#0/1  
GATGCATATGTTTTGTGGGACATCAAGATACAGCAAGA  
+HWI-EAS443:3:82:698:20#0/1  
aaab`aaaab`aaa`a^ba^a\_``^``\_a`\_`\_a\_\_\_\_aa[  
@HWI-EAS443:3:82:703:885#0/1  
AATTTACTTTGTTAGTAATCTCGTCAATGGCATTCTGTGT  
+HWI-EAS443:3:82:703:885#0/1  
]]¥X¥XXV^a]OUR¥WL^ZV`aWQY^]VWV[```aY]W  
@HWI-EAS443:3:82:717:754#0/1  
GATCCTGGGAAATCCAGAGTGTGAATCACTCTCCACAGCA  
+HWI-EAS443:3:82:717:754#0/1  
^¥Za`a\_aaaaa``````aUb`ba]aaa¥]Y`]^`^aa`]  
@HWI-EAS443:3:82:746:111#0/1  
GCTGCTTTGAATTTTACCACAAATGCGATAACACGTGCAT  
+HWI-EAS443:3:82:746:111#0/1  
ab`b`aaba`^baaba[``````aa\_a]`\_a]^\_\_Y\_X\_a  
@HWI-EAS443:3:82:751:1088#0/1  
AGAATATACATCCGATCACAATTGGAAAATGTCCAAAATA  
+HWI-EAS443:3:82:751:1088#0/1  
ab]``\_ab\_`b`baaa`\_aa\_aa`Y]V`\_aa\_aaa`\_`\_a  
@HWI-EAS443:3:82:765:1943#0/1  
CAAGATACAGCAAGAAGTTCAAGCCGAAATAGCAATAAG  
+HWI-EAS443:3:82:765:1943#0/1  
ababbabbbbabba`b]abbbaaaaaba`babbaaba`  
@HWI-EAS443:3:82:787:971#0/1  
ATGAAATCTCCTGGTAACACGTTCCATTGTCTGAACTAG  
+HWI-EAS443:3:82:787:971#0/1  
abbbbbbbbaaaabaW`\_aa\_aaaaaaaaaaaa\_aaa\_\_\_\_a`a  
@HWI-EAS443:3:82:804:807#0/1  
CAAAGTCTCTATCAGAATGCAGATGCATATGTTTTGTGG  
+HWI-EAS443:3:82:804:807#0/1  
`bbU`^`a`aaaabbbbaaaaaaaaaaaa`VD^aaaa`a]aa  
@HWI-EAS443:3:82:840:1518#0/1  
GGCTGCTTTGAATTTTACCACAAATGCGATAACACGTGCA

+HWI-EAS443:3:82:840:1518#0/1  
^Xab]X\_]YS[S`¥`^\_W\_W[a[XY^\_Z]aZ`¥YUP]\_U  
@HWI-EAS443:3:82:853:912#0/1  
GGGGCCATTGCCGGTTTCATTGAAGGGGGGTGGACAGGGA  
+HWI-EAS443:3:82:853:912#0/1  
abbaabaaaXaaba\_baaabba^aaabbaaZaa`¥\_a`\_`  
@HWI-EAS443:3:82:871:1561#0/1  
GGGGACATCAAGATACAGCAAGAAGTTCAAGCCGGAAATA  
+HWI-EAS443:3:82:871:1561#0/1  
ab\_aa`¥Va]¥]HJ[^aaWb]^XVXL¥W\_aU`W\_\_\_\_[^\_`  
@HWI-EAS443:3:82:891:500#0/1  
GTGTGCTCTTCAGGTCGGCTGCATATCCTGACCCCTGCTC  
+HWI-EAS443:3:82:891:500#0/1  
`X¥WT]baT]^bUQ^]S]aa^X\_a¥Y^`aa`\_aa`Za`\_]  
@HWI-EAS443:3:82:956:849#0/1  
CCCTGTCCACCCCTTCAATGAAACCGGCAATGGCCCCA  
+HWI-EAS443:3:82:956:849#0/1  
ab\_NFT``]a¥X\_babbb\_TV`aa\_aa`a^YFWa¥`]XZQ  
@HWI-EAS443:3:82:96:733#0/1  
CTCGTCAATGGCATTCTGTGTGCTCTTCAGGTCGGCTGCA  
+HWI-EAS443:3:82:96:733#0/1  
aZ`\_X\_XRF¥]abaabaa\_b`aaaa`T^L^NX]XZa^a]]  
@HWI-EAS443:3:82:97:1938#0/1  
GCCAGTTAAAAACAATGCCAAGGAAATTGGAAACGGCTG  
+HWI-EAS443:3:82:97:1938#0/1  
ab\_R¥Z\_Yaa^a`bbbaabbb``aaba\_a]^a``aZV\_\_^  
@HWI-EAS443:3:83:1030:822#0/1  
CTCTTTACTACTGCTGTGAAGTGTGTATTTCATCTTTTCA  
+HWI-EAS443:3:83:1030:822#0/1  
``aaba^`ba\_aa`\_`\_]\_^P`WL]^][Z\_a[\_W\_^¥`  
@HWI-EAS443:3:83:1031:596#0/1  
CTCTGAGTATTTTGGGTAGTCATAAGTCCCATTTTGGACA  
+HWI-EAS443:3:83:1031:596#0/1  
abbabbb`bbbbabbabbbabbbba`abbaabbbbbbbbaa  
@HWI-EAS443:3:83:1035:1293#0/1  
AGCCGGGAGACAAAATAACATTGCAAGCAACTGGAAATCT  
+HWI-EAS443:3:83:1035:1293#0/1  
a¥`a`a`\_`V`a`aaa`\_a`a`\_`a`^`\_`[\_``a^^`\_`¥`  
@HWI-EAS443:3:83:1040:300#0/1  
CAATGTAGGACCATGAGCTTGCTGTGGAGAGTGATTCACA  
+HWI-EAS443:3:83:1040:300#0/1  
aa^`ZU`\_¥X[W[R]X\_U\_]`YU^^aaa\_a\_G]HSSR]M]  
@HWI-EAS443:3:83:1069:429#0/1  
CTTGAACCTTCTTGCTGTATCTTGATGTCCCCACAAAAACA  
+HWI-EAS443:3:83:1069:429#0/1  
abb`bbbbabaaabbbbbabbaababbaabaabaabab  
@HWI-EAS443:3:83:1070:71#0/1  
ATATCCCCCAAGACAAGTTCATGGCCCAATCATGACTCGA  
+HWI-EAS443:3:83:1070:71#0/1  
a`bbbaa`abbb[\_a`aaa\_\_a][ZUQa``\_\_aa`RZO^V



@HWI-EAS443:3:83:1102:1052#0/1  
AATTTACTTTGTTAGTAATCTCGTCAATGGCATTCTGTGT  
+HWI-EAS443:3:83:1102:1052#0/1  
aaabbabaH\_baba`b`b`a`b\_aa`\_a`X\_a`^`\_^\_]  
@HWI-EAS443:3:83:1150:464#0/1  
GCTTTGAATTTTACCACAAATGCGATAACACGTGCATGGA  
+HWI-EAS443:3:83:1150:464#0/1  
a^SY^X`\_aa`[aaaa\_a`\_`a^\_\_\_\_\_a`¥`¥]\_\_Q¥  
@HWI-EAS443:3:83:1162:1050#0/1  
CTGGGAAATCCAGAGTGTGAATCACTCTCCACAGCAAGCT  
+HWI-EAS443:3:83:1162:1050#0/1  
a[^\_U\_\_bbaba]\_bYaUba[b`\_ba]`\_\_aaa`aaaaUW  
@HWI-EAS443:3:83:1164:752#0/1  
GTGGTAGTCCAAAGTTCTTTTCATTTTCCAATAGAACCAAC  
+HWI-EAS443:3:83:1164:752#0/1  
a^aa]bb]^`¥a\_\_UaU¥a`\_]`aa^\_\_`\_\_`]a0`\_\_V  
@HWI-EAS443:3:83:1278:1505#0/1  
GAACTTATATGAAAAGGTAAGAAGCCAGTTAAAAACAAT  
+HWI-EAS443:3:83:1278:1505#0/1  
a\_aT`¥T¥ab[¥]QZa]\_aaa^Za]Y]a`\_]¥Y`XLS\_Q  
@HWI-EAS443:3:83:1301:1085#0/1  
GTTATTTTGTCTCCCGGCTCTACTAGTGTCCAGTAATAGT  
+HWI-EAS443:3:83:1301:1085#0/1  
aab\_bbba[aaaZVS^\_^\_]^^GX^\_Y\_PW[R[V¥Y^ORO  
@HWI-EAS443:3:83:1340:1005#0/1  
CTGGTGTATCTGAAATGATAATACCAGATCCAGCATTCT  
+HWI-EAS443:3:83:1340:1005#0/1  
`aa`\_a\_abbbb`^`bbbbbb`a`bbbb`ab¥bbbaaa  
@HWI-EAS443:3:83:1382:311#0/1  
AAGCCAGTTAAAAACAATGCCAAGGAAATTGGAAACGGC  
+HWI-EAS443:3:83:1382:311#0/1  
`aa^aaa¥aaaa\_a`\_`ZY¥\_W]a[[`S\_R`\_]`]^`^PZ  
@HWI-EAS443:3:83:1416:183#0/1  
AACAAAGTCTCTATCAGAATGCAGATGCATATGTTTTTGT  
+HWI-EAS443:3:83:1416:183#0/1  
Xa]aaab][^X`a`Ybba]```\_^ZQYaaaa^b]aa¥P  
@HWI-EAS443:3:83:1442:855#0/1  
GGGACATCAAGATACAGCAAGAAGTTCAAGCCGAAATAG  
+HWI-EAS443:3:83:1442:855#0/1  
aab[abb\_abbaaa\_bb\_aba`aa^`b`a\_^b`\_\_`a\_^  
@HWI-EAS443:3:83:144:1369#0/1  
ATTGAAGGGGGTGGACAGGGATGGTAGATGGATGGTACG  
+HWI-EAS443:3:83:144:1369#0/1  
¥aZa[^^[XZVPXUY]a¥ZW\_`^UYKU]]TMR[`XLDX`]  
@HWI-EAS443:3:83:1452:1046#0/1  
AACAAAGTCTCTATCAGAATGCAGATGCATATGTTTTTGT  
+HWI-EAS443:3:83:1452:1046#0/1  
V\_aYaabbba¥aXbbVabbb^b`\_YU¥]Ja]\_`]^ba^WG  
@HWI-EAS443:3:83:145:991#0/1  
CTCGTGCTATGGGGCATTACCATCCATCTACTAGTGCTG

+HWI-EAS443:3:83:145:991#0/1  
aaba^aaa]`a¥\_`]a`\_]aaa\_a]¥Y\_\_\_\_[\_^W^\_Z[  
@HWI-EAS443:3:83:1478:1150#0/1  
TACCCAGGAGATTTTCATCGATTATGAGGAGCTAAGAGAGC  
+HWI-EAS443:3:83:1478:1150#0/1  
aaa`\_`baabaaaa`aa`^aa]aa\_\_\_\_]\_U``\_\_^^^`U  
@HWI-EAS443:3:83:1480:1403#0/1  
CATTTTTGACACTTTCCATGCACGTGTATCGCATTGTG  
+HWI-EAS443:3:83:1480:1403#0/1  
a`Y\_a\_bba`a\_a`^\_[TWUU\_S\_\_bXaX\_Xa]^a`aaXa  
@HWI-EAS443:3:83:1509:980#0/1  
TTGCTGAGCTTTGGGTATGAATTTCTTTTTTAACTAGCC  
+HWI-EAS443:3:83:1509:980#0/1  
aaa\_a`¥aaabaaa`[aa`\_^aa`^^aaa`^^`^]\_`\_YY  
@HWI-EAS443:3:83:1523:1106#0/1  
GCTTTTTGCTCCAGCATGAGGACATGCTGCCGTTACACCT  
+HWI-EAS443:3:83:1523:1106#0/1  
a\_baabbb\_¥aa\_aa\_b^b`a\_`]`aaUaaZU^[\_R`XXY  
@HWI-EAS443:3:83:161:1987#0/1  
TTGGAAACGGCTGCTTTGAATTTTACCACAAATGCGATAA  
+HWI-EAS443:3:83:161:1987#0/1  
ab`^^^`b`aa`ZV`^Z]¥LXaZXX\_X^]WUF¥[YYZ\_a  
@HWI-EAS443:3:83:205:1552#0/1  
ATGGTTTCTGACATTTGGACTTACAATGCCGAAGTGT  
+HWI-EAS443:3:83:205:1552#0/1  
ZZ`Xaabb`^aX^`^`a\_aaba\_aaaW\_]\_`[^`\_`]]  
@HWI-EAS443:3:83:247:1234#0/1  
GGGGACATCAAGATACAGCAAGAAGTTCAAGCCGAAATA  
+HWI-EAS443:3:83:247:1234#0/1  
\_bb\_ab]abaY¥aabbbaaab^a^`X`a`aaaaaaaa`a  
@HWI-EAS443:3:83:255:1106#0/1  
GATAACCGTACCATCCATCTACCATCCCTGTCCACCCCC  
+HWI-EAS443:3:83:255:1106#0/1  
]XZT^ZaT^Y^`V\_a``]H]]`]aaa\_]\_a`aba`^Uaa\_  
@HWI-EAS443:3:83:285:1704#0/1  
CACTCTCCACAGCAAGCTCATGGTCCTACATTGTGGAAAC  
+HWI-EAS443:3:83:285:1704#0/1  
a]a\_Y`b[aYaYU[YU`\_\_\_\_U¥V^a\_] ^JT^W]R[S\_^]  
@HWI-EAS443:3:83:324:1478#0/1  
GCTCCTCATAATCGATGAAATCTCCTGGGTAACACGTTCC  
+HWI-EAS443:3:83:324:1478#0/1  
aa\_aa\_aV`\_\_^aa`\_R\_a`]\_^a¥^¥YXX`^a\_X]a^  
@HWI-EAS443:3:83:338:1311#0/1  
AAAAGTTGATGATGGTTTCTGGACATTTGGACTTACAAT  
+HWI-EAS443:3:83:338:1311#0/1  
a`^\_]`a`a\_\_Y\_]\_^]\_\_`^W]]\_^]\_^]]\_`Z]]^Z^  
@HWI-EAS443:3:83:362:1841#0/1  
GGGGACATCAAGATACAGCAAGAAGTTCAAGCCGAAATA  
+HWI-EAS443:3:83:362:1841#0/1  
abaaabbabbbbaaabbaabbaaaaa¥\_aba`ab\_\_a\_a`a

@HWI-EAS443:3:83:385:160#0/1  
TTCGAATGTTATTTTGTCTCCCGCTCTACTAGTGCCAG  
+HWI-EAS443:3:83:385:160#0/1  
aaabaabb``\_bbaa\_aa``^[\_`\_¥¥NY[ZUYPWUNV  
@HWI-EAS443:3:83:431:1624#0/1  
TGGCTTCTTACCTTTTCATATAAGTTCTTCACATTTGAAT  
+HWI-EAS443:3:83:431:1624#0/1  
VH\_a`U`\_^^`aaaaaa`YUY`XY\_aa`aZ¥[\_U]``a\_  
@HWI-EAS443:3:83:459:1894#0/1  
TGGCTGGATCCTGGGAAATCCAGAGTGTGAATCACTCTCC  
+HWI-EAS443:3:83:459:1894#0/1  
a``a``a`baa\_a\_aa¥^\_\_a``\_V\_] [aa¥\_\_\_\_\_Z`\_  
@HWI-EAS443:3:83:471:1910#0/1  
CTCTATTCTTTTTTCCAGGTGGTTGAACTCTTTACCTACT  
+HWI-EAS443:3:83:471:1910#0/1  
aab]aaaaaaaa`aa`a\_]a\_Z`VY^^¥T\_`\_\_`UYZ]^  
@HWI-EAS443:3:83:493:699#0/1  
GAAGCTTTTTGCTCCAGCATGAGGACATGCTGCCGTTACA  
+HWI-EAS443:3:83:493:699#0/1  
a`\_`a\_a[[]\_]Y`\_a`^X^YR\_] [\_\_^[\_^]¥U^PGVXX  
@HWI-EAS443:3:83:523:1162#0/1  
GGGACATCAAGATACAGCAAGAAGTTCAAGCCGGAAATAG  
+HWI-EAS443:3:83:523:1162#0/1  
aa\_P\_\_``\_ZX`\_Q¥aaa`^^U`aT¥Y[¥V`\_[U[Y]T^]  
@HWI-EAS443:3:83:529:688#0/1  
GCTTCCTCTGAGTATTTTGGGTAGTCATAAGTCCCATTTT  
+HWI-EAS443:3:83:529:688#0/1  
aaaa`\_aaaaaa\_aa]\_aaaaWaa^a`a`a\_]`^YTa\_\_`  
@HWI-EAS443:3:83:542:1380#0/1  
AGAGAGCAATTGAGCTCAGTGCATCATTTGAAAGTTTG  
+HWI-EAS443:3:83:542:1380#0/1  
a[ba¥\_b`baa^[a\_Ya\_YM¥X\_\_`\_aaaa\_a\_[]YZ`\_`^  
@HWI-EAS443:3:83:611:782#0/1  
CAAAGTCTCTATCAGAATGCAGATGCATATGTTTTTGTGG  
+HWI-EAS443:3:83:611:782#0/1  
aX\_XH\_b`bb¥b¥Z`\_U]¥b^babbaX¥bbbSbaabbSaa  
@HWI-EAS443:3:83:618:1540#0/1  
GGGACATCAAGATACAGCAAGAAGTTCAAGCCGGAAATA  
+HWI-EAS443:3:83:618:1540#0/1  
]aa^\_a``bbb`aaabbabbbbaZa\_abbaabaaaaaaaa  
@HWI-EAS443:3:83:668:1377#0/1  
GCTCCTCATAATCGATGAAATCTCCTGGGTAACACGTTCC  
+HWI-EAS443:3:83:668:1377#0/1  
abVRVaWY[^VTWWYHU`]ZW]Y`¥\_a]VJYTV]^RGYVP  
@HWI-EAS443:3:83:670:1106#0/1  
ATTTTTGTAGAAGCTTTTTGCTCCAGCATGAGGACATGCT  
+HWI-EAS443:3:83:670:1106#0/1  
abbbbabaaa\_`¥aaaaaba^`\_]`aaa`a`a\_]Z¥`\_`\_\_  
@HWI-EAS443:3:83:671:908#0/1  
ATCGATTATGAGGAGCTAAGAGAGCAATTGAGCTCAGTGT

+HWI-EAS443:3:83:671:908#0/1  
abba^bbaabaaa¥ab`aaa^aaaaa^\_aaa`a¥\_a^a^  
@HWI-EAS443:3:83:700:71#0/1  
TGGCTGGATCCTGGGAAATCCAGAGTGTGAATCACTCTCC  
+HWI-EAS443:3:83:700:71#0/1  
aab\_\_a\_Z\_[^\_\_`^\_¥W¥¥\_¥\_W`V\_¥]ZSZUVV[US  
@HWI-EAS443:3:83:757:1207#0/1  
ATTTTACCACAAATGCGATAACACGTGCATGGAAAGTGTC  
+HWI-EAS443:3:83:757:1207#0/1  
^aabaabbb`a^aabbbaaaaaaab\_baabaaaa`b]aZH  
@HWI-EAS443:3:83:778:1035#0/1  
AGGTGGTTGAACTCTTACCTACTGCTGTGAACTGTGTAT  
+HWI-EAS443:3:83:778:1035#0/1  
ab`Rab]aaaa^a[aaab]aaaaaaaa\_a\_a\_aa\_a]aa  
@HWI-EAS443:3:83:804:392#0/1  
CAATTGAGCTCAGTGTGCATCATTTGAAAGTTTGAGATAT  
+HWI-EAS443:3:83:804:392#0/1  
`\_a\_]\_]Z^baZ[]bVY`^UX`aa``]abb^a^aa^a`a]  
@HWI-EAS443:3:83:897:1694#0/1  
CCGGCTCTACTAGTGTCCAGTAATAGTTCATTCTCCCTTC  
+HWI-EAS443:3:83:897:1694#0/1  
abaa``\_RUZa\_]R]Xa``¥^Y]X¥UV^V^^\_\_a]Z\_^]  
@HWI-EAS443:3:83:909:395#0/1  
GCTGGCTGGATCCTGGGAAATCCAGAGTGTGAATCACTCT  
+HWI-EAS443:3:83:909:395#0/1  
aaaZZ\_\_^]VYV¥U0^R]a`\_]^SQ^SZ`T¥^`VNZZZ\_Z  
@HWI-EAS443:3:83:914:1444#0/1  
GTTGGTCTATTGGAAAATGAAAGAACTTTGGACTACCAC  
+HWI-EAS443:3:83:914:1444#0/1  
a`aa^aaaaaaa`b]```\_\_a[a^\_\_`\_\_^```\_\_]  
@HWI-EAS443:3:83:921:1262#0/1  
GAACTTATATGAAAAGGTAAGAAGCCAGTAAAAAACAAT  
+HWI-EAS443:3:83:921:1262#0/1  
a`a^aaaa`bbaa`aaa\_aaaaa`a`aa`a```a\_\_a``  
@HWI-EAS443:3:83:92:528#0/1  
CGGGAAACTATGCAAATAAGAGGGGTAGCCCCATTGCAT  
+HWI-EAS443:3:83:92:528#0/1  
a`aa\_``¥]]Za]WfU\_\_¥b`W`b`PL¥YZ\_]PHRIY^[T  
@HWI-EAS443:3:83:979:841#0/1  
GCTGGCTGGATCCTGGGAAATCCAGAGTGTGAATCACTCT  
+HWI-EAS443:3:83:979:841#0/1  
aa`a``]\_\_YVIa\_ZaX`U\_`^SXVYZ`aX¥¥^¥¥M\_\_W¥  
@HWI-EAS443:3:83:98:1263#0/1  
GGCCCAATCATGACTCGAACAAAGGTGTAACGGCAGCATG  
+HWI-EAS443:3:83:98:1263#0/1  
]Sbba¥`a`]¥]]a\_a`Ja\_^P\_]YPPZ^¥^[[`^BBBBB  
@HWI-EAS443:3:84:1019:1367#0/1  
GATCTATTCAACTGTCGCCAGTTCATTGGTACTGGTAGTC  
+HWI-EAS443:3:84:1019:1367#0/1  
aaaaa`bababaaa]aaa\_`^a`a\_a`a^a^\_\_Va\_S]

@HWI-EAS443:3:84:1042:159#0/1  
GACAAGTTGTATTGCAATCGTGGACTGGTGTATCTGAAAT  
+HWI-EAS443:3:84:1042:159#0/1  
a``abaaaaaaaaaaa\_aaa`a\_aa`\_`aa]b\_a`^aa\_^\_\_  
@HWI-EAS443:3:84:1057:636#0/1  
GAACGTGTTACCCAGGAGATTTTCATCGATTATGAGGAGCT  
+HWI-EAS443:3:84:1057:636#0/1  
aab¥`^b\_YY`aa[aaaa`[^\_ZR[`aZZ¥`Z\_\_`^YT¥  
@HWI-EAS443:3:84:1075:880#0/1  
TTACCCCATCTATTTCTTCTCTGTTTAATTTTGCTTCCTC  
+HWI-EAS443:3:84:1075:880#0/1  
ab`X^\_``aaaabaaaaababa`aaa`aaaa`\_`a]^a\_  
@HWI-EAS443:3:84:1079:1381#0/1  
GAACTCTTTACCTACTGCTGTGAAGTGTATTTCATCTTT  
+HWI-EAS443:3:84:1079:1381#0/1  
XW`b``ab`b]a`bab`abbb`]a\_ababVabbX\_aabaa  
@HWI-EAS443:3:84:1080:955#0/1  
ATTTTACCACAAATGCGATAACACGTGCATGGAAAGTGTC  
+HWI-EAS443:3:84:1080:955#0/1  
`ab`aab`b`a\_\_a^aaa\_¥`a\_a[aa`Ya^`a\_] [aP\_  
@HWI-EAS443:3:84:1087:655#0/1  
CTCTATCAGAATGCAGATGCATATGTTTTTGTGGGGACAT  
+HWI-EAS443:3:84:1087:655#0/1  
abb^U^a`b`¥bbba`a`aa\_baab`aa`bbababba`aa  
@HWI-EAS443:3:84:1103:1192#0/1  
TACAGCAAGAAGTTCAAGCCGAAATAGCAATAAGACCCA  
+HWI-EAS443:3:84:1103:1192#0/1  
\_ZaW\_a^baQQ\_¥`V\_[Z[W``aa`aaaVaa^S\_`Ya[¥Y  
@HWI-EAS443:3:84:1118:1058#0/1  
CAAAAACATATGCATCTGCATTCTGATAGAGACTTTGTTG  
+HWI-EAS443:3:84:1118:1058#0/1  
abbbbaabba`aaaaaabab^aaaaabb`aa`baaa^a]  
@HWI-EAS443:3:84:1124:492#0/1  
GTAAAATTCAAAGCAGCCGTTTCCAATTTCCCTTGGCATTG  
+HWI-EAS443:3:84:1124:492#0/1  
aabbbabaabaaaXaa`\_aaaa\_``aa`]Sa`a`^\_``a  
@HWI-EAS443:3:84:1127:1682#0/1  
CTTTGGGTCTTATTGCTATTTCCGGCTTGAACCTTCTTGCT  
+HWI-EAS443:3:84:1127:1682#0/1  
\_\_b\_`¥¥\_aa\_baaa\_aa``\_]Z]Y````^aQ]\_] [[^¥^  
@HWI-EAS443:3:84:114:453#0/1  
GCTGGCTGGATCCTGGGAAATCCAGAGTGTGAATCACTCT  
+HWI-EAS443:3:84:114:453#0/1  
aaaaaa\_a¥]^a`¥``a]Wa^a`Y\_^aU\_¥Z¥V¥S^¥VUV  
@HWI-EAS443:3:84:1175:1863#0/1  
GACAAGTTGTATTGCAATCGTGGACTGGTGTATCTGAAAT  
+HWI-EAS443:3:84:1175:1863#0/1  
aabZRa`aa`Y]Wb`a\_a]^R\_V¥W`U[Q`Ya]\_S`\_\_\_\_  
@HWI-EAS443:3:84:123:179#0/1  
GACCAACAAAGTCTCTATCAGAATGCAGATGCATATGTTT

+HWI-EAS443:3:84:123:179#0/1  
a\_bb\_bb`Zab`abab`bbbb^Ta`abaa`a`aaaab`aa  
@HWI-EAS443:3:84:1273:1985#0/1  
AATGGAACGTGTTACCCAGGAGATTTTCATCGATTATGAGG  
+HWI-EAS443:3:84:1273:1985#0/1  
aaa\_aaa[\_]^`aZaa`\_\_a^`a\_W¥\_`^`^a\_\_`\_^  
@HWI-EAS443:3:84:1293:426#0/1  
AGCCAGTTAAAAACAATGCCAAGGAAATTGGAAACGGCT  
+HWI-EAS443:3:84:1293:426#0/1  
a\_\_¥^aT\_\_[[`V``\_]a¥¥`W^a]]\_\_]\_]¥^]`^[^  
@HWI-EAS443:3:84:1318:1004#0/1  
TGTAGAGACCCATTAGAGCACATCCAGAAACTGATTGCCC  
+HWI-EAS443:3:84:1318:1004#0/1  
a`[^`aaaa`\_a`Z]aa\_\_a]aa)`aaaa^^`\_a\_a^WZ  
@HWI-EAS443:3:84:131:427#0/1  
GAAGTCCTCGTGCTATGGGGCATTACCATCCATCTACTA  
+HWI-EAS443:3:84:131:427#0/1  
a¥a`\_aaaba\_aa]ORaY`aa\_aaa¥a`\_[aa^[`VSZ\_[  
@HWI-EAS443:3:84:1339:1010#0/1  
TTTTTGTGGGACATCAAGATACAGCAAGAAGTTCAAGCC  
+HWI-EAS443:3:84:1339:1010#0/1  
a\_aaa`¥a`\_`\_^`\_`¥^\_]aa\_a`\_`\_\_^\_W\_]\_]\_X^  
@HWI-EAS443:3:84:1375:485#0/1  
ACGATTCAAATGTGAAGAACTTATATGAAAAGGTAAGAAG  
+HWI-EAS443:3:84:1375:485#0/1  
`\_b]aa^R[aab^\_aW`a``aaaab`\_a\_b`Wa¥a``^  
@HWI-EAS443:3:84:1404:146#0/1  
CTCCCATTTCAGAATATACATCCGATCACAATTGGAAAAT  
+HWI-EAS443:3:84:1404:146#0/1  
aW`Ua\_baaR\_baab[b`^aa`\_a\_aPa^a\_aaa\_^\_]`\_  
@HWI-EAS443:3:84:1549:1197#0/1  
GGTTTCATTGAAGGGGGTGGACAGGGATGGTAGATGGAT  
+HWI-EAS443:3:84:1549:1197#0/1  
aaa`a`ab]a¥\_ba¥a\_]Yaaa\_]a`a`aaY`\_`\_\_aW\_  
@HWI-EAS443:3:84:1600:1939#0/1  
GAAATTGGAAACGGCTGCTTTGAATTTTACCACAAATGCG  
+HWI-EAS443:3:84:1600:1939#0/1  
a`aa`ba^`b`ba`a`[[\_]T`XaaaWNW]Sa`aNZYW  
@HWI-EAS443:3:84:164:649#0/1  
TATTTGGGGCCATTGCCGTTTCATTGAAGGGGGTGGAC  
+HWI-EAS443:3:84:164:649#0/1  
a\_a^aaaaaa^a`aaaa^aU]a\_PW`^Ya`a^`\_Ua^RU  
@HWI-EAS443:3:84:190:267#0/1  
CCGGCTTGAACCTTCTTGCTGTATCTTGATGTCCCCACAAA  
+HWI-EAS443:3:84:190:267#0/1  
abbaa`a]¥a\_a`a^`a\_\_a`\_`\_\_a\_\_^\_]`]^`^^S  
@HWI-EAS443:3:84:198:367#0/1  
CAATGTAGGACCATGAGCTTGCTGTGGAGAGTGATTCA  
+HWI-EAS443:3:84:198:367#0/1  
aabb[[[\_ZX\_a`]¥\_]¥aa`a\_a`UaY]Y\_\_\_\_\_`]¥¥



+HWI-EAS443:3:84:444:338#0/1  
aabb]`aaa\_aaa`\_\_a]^\_a^^`\_`¥`^`\_`\_][Y]\_]  
@HWI-EAS443:3:84:467:1690#0/1  
GTCATGATTGGCCATGAACTTGTCTTGGGAATATCTCA  
+HWI-EAS443:3:84:467:1690#0/1  
\_`aaVWZ`\_`\_bZ¥aaa^^a`aaWaba`bb^V¥^[``aa  
@HWI-EAS443:3:84:514:1987#0/1  
GTGAAGTGTATTTCATCTTTTCAATAACAGAATTTACTT  
+HWI-EAS443:3:84:514:1987#0/1  
a[^^`\_`S¥\_a¥^]X]^`^]]`^]\_`a\_a\_^`^[\_¥`\_`^  
@HWI-EAS443:3:84:535:229#0/1  
CAATGAAACCGCAATGGCCCCAAATAGGCCTCTAGATTG  
+HWI-EAS443:3:84:535:229#0/1  
a`bab`bbaaa`bbb\_baa\_^aa]````a`\_a^¥S\_^W\_  
@HWI-EAS443:3:84:536:1157#0/1  
CTACATTAATGATAAAGGGAAAGAAGTCCTCGTGCTATGG  
+HWI-EAS443:3:84:536:1157#0/1  
aaab`]^[`^WK^`Y\_¥^RV`aa\_^WZa`\_a\_Z¥¥[\_\_\_\_[  
@HWI-EAS443:3:84:541:1741#0/1  
GGGACATCAAGATACAGCAAGAAGTTCAAGCCGAAATAG  
+HWI-EAS443:3:84:541:1741#0/1  
\_W^bb`abbbababbbabbb`baZ]abaaaaa`a`baa]  
@HWI-EAS443:3:84:584:1867#0/1  
AAATCCTTGTGATTCCAGCTTTACCCCATCTATTTCTTC  
+HWI-EAS443:3:84:584:1867#0/1  
a¥aaaaaa`\_\_a`aaa^[SR`a`a]X`a^\_\_a\_aa¥\_a\_\_  
@HWI-EAS443:3:84:601:1105#0/1  
GAACTCTTTACCTACTGCTGTGAAGTGTATTTCATCTTT  
+HWI-EAS443:3:84:601:1105#0/1  
aaa`aaa`aaaaa`aa\_\_a^`\_\_\_\_`]a]a\_\_`^`^`\_`  
@HWI-EAS443:3:84:603:1620#0/1  
CAATGCCAAGGAAATTGGAAACGGCTGCTTTGAATTTTAC  
+HWI-EAS443:3:84:603:1620#0/1  
a`^aaaba¥a`Va`aa`aa\_Y\_a```\_LO]]HU]W\_\_aMJ  
@HWI-EAS443:3:84:638:1273#0/1  
AAGAACTTATATGAAAAGGTAAGAAGCCAGTTAAAAACA  
+HWI-EAS443:3:84:638:1273#0/1  
¥baaaaabbaaba`\_¥aaa]aaaaaaaaa^aaaa`¥a`a  
@HWI-EAS443:3:84:63:1633#0/1  
GGCTGGTGTATAGCACCCCTGGGTGTCTGACAAGTTGT  
+HWI-EAS443:3:84:63:1633#0/1  
a`baa\_[``a`V]\_aaabaa¥a`\_ZR¥[`a]a`[¥`Z\_\_W  
@HWI-EAS443:3:84:64:1758#0/1  
ATTTTACCACAAATGCGATAACACGTGCATGGAAAGTGC  
+HWI-EAS443:3:84:64:1758#0/1  
`] ^T^ba`^`[\_YUZ^[\_¥Y^aZ\_QVW`\_VOY[`WZ]WX  
@HWI-EAS443:3:84:676:1147#0/1  
CTGGTGTATAGCACCCCTGGGTGTCTGACAAGTTGTAT  
+HWI-EAS443:3:84:676:1147#0/1  
abbaSa^abbaa`]a]baaa`\_SUAWaaa`^]aaZ\_]Y\_W



@HWI-EAS443:3:84:704:1042#0/1  
ATTTGCTGAGCTTTGGGTATGAATTTCTTTTTTAACTAG  
+HWI-EAS443:3:84:704:1042#0/1  
abbaabab\_`[\`aaaaVa^a\_U`aaa\_aaaaaaWW]¥^  
@HWI-EAS443:3:84:731:1490#0/1  
GGATATGCAGCCGACCTGAAGAGCACACAGAATGCCATTG  
+HWI-EAS443:3:84:731:1490#0/1  
aZQub\_]a`SY]YVSXVN]VTRYPHQVYYRHNX¥aJUQ]^  
@HWI-EAS443:3:84:76:453#0/1  
GTGGGGACATCAAGATACAGCAAGAAGTTCAAGCCGGAAA  
+HWI-EAS443:3:84:76:453#0/1  
a^aa\_`X¥Ya\_a[a\_\_a\_`a`aa`S]`ZUaa]`\_^\_^]X\_  
@HWI-EAS443:3:84:803:631#0/1  
TAGATTTCCAGTTGCTTCGAATGTTATTTTGTCTCCCGGC  
+HWI-EAS443:3:84:803:631#0/1  
aa\_R¥^`a¥Z\_Z`VZ]Y\_¥Z]`^^ZSZa\_TRZ¥\_k]¥VP  
@HWI-EAS443:3:84:804:1714#0/1  
GCCGGGAGACAAAATAACATTCGAAGCAACTGGAAATCTA  
+HWI-EAS443:3:84:804:1714#0/1  
]Z`\_H¥```baba```\_SaababZ]b`babbbba¥^bbb`  
@HWI-EAS443:3:84:809:342#0/1  
ATGAAAGAACTTTGGACTACCACGATTCAAATGTGAAGAA  
+HWI-EAS443:3:84:809:342#0/1  
\_`ba`aaa^]^^```aaab\_Z`abaaaa`a`aa^ba`a^`  
@HWI-EAS443:3:84:813:646#0/1  
GATGAAATCTCCTGGGTAACACGTTCCATTGTCTGAACTA  
+HWI-EAS443:3:84:813:646#0/1  
`RU[ZW]a`a`^WDS]S[U` `\_`[\_a][XXUDOYWKX^WX  
@HWI-EAS443:3:84:857:356#0/1  
ATCTACTAGTGCTGACCAACAAAGTCTCTATCAGAATGCA  
+HWI-EAS443:3:84:857:356#0/1  
SYV^^U` `YH^ZP\_^Ya\_Z]`¥\_`Yaab^aaba¥PX¥\_a  
@HWI-EAS443:3:84:860:1316#0/1  
AGCCTCCCATTTCAGAATATACATCCGATCACAATTGGAA  
+HWI-EAS443:3:84:860:1316#0/1  
aabaabbbab`aba^aaaaaab`aaaa` `aaaa\_]Z`]  
@HWI-EAS443:3:84:864:1784#0/1  
AGCCAGTTAAAAACAATGCCAAGGAAATTGGAAACGGCT  
+HWI-EAS443:3:84:864:1784#0/1  
]]`a`IG¥^a^aaXR^aP`R0` `Z¥\_[][[`Y\_]``[V^U  
@HWI-EAS443:3:84:864:39#0/1  
CACGTGTATCGCATTGTGGTAAAATTCAAAGCAGCCGT  
+HWI-EAS443:3:84:864:39#0/1  
`]abTbRba\_¥` `aa` `¥baUaa`]a\_\_¥^`\_\_` `]¥\_X  
@HWI-EAS443:3:84:864:601#0/1  
ATTGCCGTTTCATTGAAGGGGGTGGACAGGGATGGTAG  
+HWI-EAS443:3:84:864:601#0/1  
`\_aa\_bb\_U\_b\_J¥a[WJVab\_`bV]\_[a`^a]Q]aUTZ¥  
@HWI-EAS443:3:84:870:1618#0/1  
CTTCGAATGTTATTTTGTCTCCCGGCTCTACTAGTGCCA

+HWI-EAS443:3:84:870:1618#0/1  
aaaaaaaa\_aaaaaa^aa`aa^\_\_\_\_\_]^ZXZV\_\_]  
@HWI-EAS443:3:84:875:1633#0/1  
GCCGGTTTCATTGAAGGGGGTGGACAGGGATGGTAGATG  
+HWI-EAS443:3:84:875:1633#0/1  
ZZ\_¥]YT\_¥]`\_WW\_¥TUKXYL^VV\_UZWRTONHRV^BBB  
@HWI-EAS443:3:84:897:47#0/1  
GGCTGGTGTTTATAGCACCTTGGGTGTCTGACAAGTTGT  
+HWI-EAS443:3:84:897:47#0/1  
ababba[b`bbaaa`aa[\_[aba`a]aYT\_a^]\_`\_Za\_X  
@HWI-EAS443:3:84:898:434#0/1  
GCCAGTTAAAAACAATGCCAAGGAAATTGGAACGGCTG  
+HWI-EAS443:3:84:898:434#0/1  
a`abbabaaaaa`aabaa`aaaaa`aa``a`a^[a]  
@HWI-EAS443:3:84:911:825#0/1  
CAGAATATACATCCGATCACAATTGGAAAATGTCCAAAAT  
+HWI-EAS443:3:84:911:825#0/1  
aaabbbabababbbbaaaaaaabbba`ab`aa^P`aa  
@HWI-EAS443:3:84:936:89#0/1  
AGAGTTCAACCACCTGGAAAAAGAATAGAGAATTTAAAT  
+HWI-EAS443:3:84:936:89#0/1  
aa`aT\_a\_`\_^a\_]`ba\_\_]\_]¥\_^\_a]aa\_^]\_aa^T]\_  
@HWI-EAS443:3:84:958:595#0/1  
CATGAACCTGTCTTGGGAATATCTCAAACCTTTCAAATG  
+HWI-EAS443:3:84:958:595#0/1  
`babba\_bba[a\_a`b^a]Pba`ab\_a`a]a\_[^aa`a]a  
@HWI-EAS443:3:85:100:932#0/1  
TGGGGACATCAAGATACAGCAAGAAGTTCAAGCCGAAAT  
+HWI-EAS443:3:85:100:932#0/1  
```baaa¥]a`a^aaaa\_ab`Y]aYUaa\_`\_`a[OU^]  
@HWI-EAS443:3:85:1095:1413#0/1  
AGGTAAGAAGCCAGTTAAAAACAATGCCAAGGAAATTGG  
+HWI-EAS443:3:85:1095:1413#0/1  
abaRaabaa^[a^\_]`¥\_\_`a^\_\_aaaT\_a\_a\_\_¥`a]\_  
@HWI-EAS443:3:85:1136:33#0/1  
GCACTAGTAGATGGATGGTGAATGCCCCATAGCACGAGGA  
+HWI-EAS443:3:85:1136:33#0/1  
a]P]XGXPY¥T¥]W^YLLZ[TY^VJJNQQTNQVW[VZQR  
@HWI-EAS443:3:85:1148:966#0/1  
TGCTCATTTTGTGGTGATAACCGTACCATCCATCTACCA  
+HWI-EAS443:3:85:1148:966#0/1  
KW\_RQZZXVb\_WUTXN¥U^W]]XTO[WQXXSWMFWS]R[B  
@HWI-EAS443:3:85:1179:1491#0/1  
ATATCCCAAGACAAGTTCATGGCCCAATCATGACTCGA  
+HWI-EAS443:3:85:1179:1491#0/1  
abbbbaaa`aaaaU`a`\_abaaa\_a¥\_a\_a¥\_`aa^`Y\_^  
@HWI-EAS443:3:85:1220:811#0/1  
AAAGAAGTCCTCGTGCTATGGGGCATTACCATCCATCTA  
+HWI-EAS443:3:85:1220:811#0/1  
\_`\_`¥]]L[\_V\_]\_a`aaa^`a]P]`\_`a^`\_]\_aaaY`a

@HWI-EAS443:3:85:124:1509#0/1  
CTCCTCATAATCGATGAAATCTCCTGGGTAACACGTTCCA  
+HWI-EAS443:3:85:124:1509#0/1  
aaaba^`]¥`^aa[\_`\_]\_`aaa\_`^`Z`W^Wa^T^aY^  
@HWI-EAS443:3:85:1258:1250#0/1  
GCTTTTTGCTCCAGCATGAGGACATGCTGCCGTTACACCT  
+HWI-EAS443:3:85:1258:1250#0/1  
a`bbbbaaaa`aaaa^a\_aa`^`]^`^\_Z]a^``U`ZY\_  
@HWI-EAS443:3:85:1259:500#0/1  
GCCAGTTAAAAACAATGCCAAGGAAATTGGAAACGGCTG  
+HWI-EAS443:3:85:1259:500#0/1  
a\_aaa\_aaaa\_aa^aaab````aa\_\_\_`\_``\_\_\_^]`^Z` [  
@HWI-EAS443:3:85:1321:1106#0/1  
AAGGAAATTGGAAACGGCTGCTTTGAATTTTACCACAAAT  
+HWI-EAS443:3:85:1321:1106#0/1  
aab`abbbaaaaaaba`a`PW`^HQ[ZaaaTU¥YI^\_aM  
@HWI-EAS443:3:85:1407:1368#0/1  
GGGGCATTACCATCCATCTACTAGTGCTGACCAACAAAG  
+HWI-EAS443:3:85:1407:1368#0/1  
N^b[[abbb\_b\_bb`\_`bbabababaaT\_a`¥W[abbbaa  
@HWI-EAS443:3:85:1417:1414#0/1  
TGAGTATTTGGGTAGTCATAAGTCCCATTTTGGACTT  
+HWI-EAS443:3:85:1417:1414#0/1  
^a\_ZYaaaaXSzBz\_aT`a`\_\_\_\_\_^aaa\_aa`^`\_a\_  
@HWI-EAS443:3:85:1436:804#0/1  
GAACTTCTTGCTGTATCTTGATGTCCCCACAAAAACATAT  
+HWI-EAS443:3:85:1436:804#0/1  
aababbabba\_bbaaaaaaabba\_]`[aaa`````^`a\_a  
@HWI-EAS443:3:85:1455:126#0/1  
CTCGTCAATGGCATTCTGTGTGCTCTTCAGGTCGGCTGCA  
+HWI-EAS443:3:85:1455:126#0/1  
abbbabababbaabbabb^b\_bYbaab\_aab`aba`\_aZR  
@HWI-EAS443:3:85:1460:1775#0/1  
GATTTCCAGTTGCTTCGAATGTTATTTTGTCTCCCGGCTC  
+HWI-EAS443:3:85:1460:1775#0/1  
a`a`\_]`\_a^^a\_\_\_]`U]^]Q^^\_]`^YLNZXYTY]XXZZ  
@HWI-EAS443:3:85:147:169#0/1  
GTCCCCACAAAAACATATGCATCTGCATTCTGATAGAGAC  
+HWI-EAS443:3:85:147:169#0/1  
a`a^aa^^Taa\_[\_XX[ZY]^]\_a¥YRZPXQU]YPPXW  
@HWI-EAS443:3:85:1498:479#0/1  
AGATACACCAGTCCACGATTGCAATACAACCTTGTCAGACA  
+HWI-EAS443:3:85:1498:479#0/1  
\_¥`aaKa^¥ba[`ZYOSZP\_]Wba\_\_LWbUa]aa[TYXZa  
@HWI-EAS443:3:85:1501:1046#0/1  
GCTTGAACCTTCTTGCTGTATCTTGATGTCCCCACAAAAAC  
+HWI-EAS443:3:85:1501:1046#0/1  
\_aaXb\_aZ`bU`¥Ra]Mb`Xb\_b^Maab]JYa[a`abaL  
@HWI-EAS443:3:85:1504:930#0/1  
GGGGACATCAAGATACAGCAAGAAGTTCAAGCCGAAATA

+HWI-EAS443:3:85:1504:930#0/1  
aa^^\_\_aa`aaa`a\_aa\_aaa`a]]R\_\_\_U]aa\_^`Z  
@HWI-EAS443:3:85:1505:1412#0/1  
GCTTCCTCTGAGTATTTTGGGTAGTCATAAGTCCCATTTT  
+HWI-EAS443:3:85:1505:1412#0/1  
a^[LDTT¥Z\_X¥TR^`\_]`¥\_NRNLTGX[PZLTOJQX¥^¥  
@HWI-EAS443:3:85:152:1708#0/1  
AAACAATGCCAAGGAAATTGGAAACGGCTGCTTTGAATTT  
+HWI-EAS443:3:85:152:1708#0/1  
a¥¥aaa`aa`^`[U^aa`\_\_\_`aa¥Y`\_WOJ[¥LVYM[Z  
@HWI-EAS443:3:85:1543:1096#0/1  
CCGGCTTGAACCTTCTGCTGTATCTTGATGTCACAAA  
+HWI-EAS443:3:85:1543:1096#0/1  
a`^ZW`\_X`R[`\_GZWT^ZTS¥aT\_] [[a^ZNP`` []YY  
@HWI-EAS443:3:85:1594:1051#0/1  
GCCGGGAGACAAAATAACATTCGAAGCAACTGGAAATCTA  
+HWI-EAS443:3:85:1594:1051#0/1  
a`\_`aa\_a\_^a`^`\_\_ [a`a\_[a^\_]^^Wa\_a\_`\_\_^^  
@HWI-EAS443:3:85:1607:498#0/1  
GGCATTCTGTGTGCTCTTCAGGTCGGCTGCATATCCTGAC  
+HWI-EAS443:3:85:1607:498#0/1  
a`¥`a]]aa`\_ZaZW¥`V[`¥[RT\_UV]a¥\_¥a[^^¥TZG  
@HWI-EAS443:3:85:1609:1247#0/1  
GCTGGCTGGATCCTGGGAAATCCAGAGTGTGAATCACTCT  
+HWI-EAS443:3:85:1609:1247#0/1  
a]T\_XQXaTZXQSa^a\_VZ[RP\_TPNSPWGRZ[VOLWQJJ  
@HWI-EAS443:3:85:160:165#0/1  
CACTGTAGAGACCCATTAGAGCACATCCAGAACTGATTG  
+HWI-EAS443:3:85:160:165#0/1  
aaaaa]a^``]`¥`\_`^]¥¥^`^`¥YZY]V[TN[^\_^ZW^  
@HWI-EAS443:3:85:1668:340#0/1  
AAGCCAGTTAAAAACAATGCCAAGGAAATTGGAAACGGC  
+HWI-EAS443:3:85:1668:340#0/1  
aaZYV``]a`\_`XV\_]a^`XXZ]USZW[]a[RZ¥`^XX^B  
@HWI-EAS443:3:85:1678:789#0/1  
TAGTAATCTCGTCAATGGCATTCTGTGTGCTCTTCAGGTC  
+HWI-EAS443:3:85:1678:789#0/1  
\_^bVZZ[aa]a¥]\_\_Z`\_\_aa`a`a\_aYa[aW``Q\_[`YY  
@HWI-EAS443:3:85:1692:1778#0/1  
CATTCTGTGTGCTCTTCAGGTCGGCTGCATATCCTGACCC  
+HWI-EAS443:3:85:1692:1778#0/1  
`aaaaba[ [¥\_]a[ab\_^a\_¥\_a\_\_\_a¥a`a\_W¥\_\_¥Y¥W  
@HWI-EAS443:3:85:176:756#0/1  
AGATGGATGGTACGGTTATCACCATCAAAATGAGCAGGGG  
+HWI-EAS443:3:85:176:756#0/1  
¥ab]`b`aaa^aaa` [a]\_\_\_`XUXX\_``a¥¥Z¥\_\_\_N¥X  
@HWI-EAS443:3:85:179:255#0/1  
CTTCCTCTGAGTATTTTGGGTAGTCATAAGTCCCATTTT  
+HWI-EAS443:3:85:179:255#0/1  
^abbaabbb``SR``Y`b`¥VW\_^a`a¥VZ^``X^`a`^`a

@HWI-EAS443:3:85:208:288#0/1  
ATGGCATTCTGTGTGCTCTTCAGGTCGGCTGCATATCCTG  
+HWI-EAS443:3:85:208:288#0/1  
`a` `aaaaaaaZaZaaaaaa` ^`L¥Z^` ^]VOQVWHUW\_  
@HWI-EAS443:3:85:211:1960#0/1  
TAATCGATGAAATCTCCTGGGTAACACGTTCCATTGTCTG  
+HWI-EAS443:3:85:211:1960#0/1  
]LZ\_YPZ^bab\_a[HWaWR`QL]a[[aYZ`a`a[[\_N^^[  
@HWI-EAS443:3:85:211:781#0/1  
TCTTGCTGTATCTTGATGTCCCCACAAAAACATATGCATC  
+HWI-EAS443:3:85:211:781#0/1  
^`[^\_¥Z\_a`aa\_[b`^aaabaaa\_]\_WQI[`Q]VXZ]Z^  
@HWI-EAS443:3:85:219:826#0/1  
ATTGCCGGTTTCATTGAAGGGGGGTGGACAGGGATGGTAG  
+HWI-EAS443:3:85:219:826#0/1  
VTZ`aaa^NZa^JaabQRR`a\_a`M¥¥^[]]ZPX^aaN]`  
@HWI-EAS443:3:85:259:1953#0/1  
CAGAATGCAGATGCATATGTTTTGTGGGGACATCAAGAT  
+HWI-EAS443:3:85:259:1953#0/1  
ab` `a`aaa\_a\_aaa\_a`^a`\_`\_aZY]]^`\_a]\_\_[Z`]  
@HWI-EAS443:3:85:260:1023#0/1  
GAACTCTTTACCTACTGCTGTGAAGTGTATTTCATCTTT  
+HWI-EAS443:3:85:260:1023#0/1  
\_ZOUZ^`a^[^XDZ[\_a`\_\_^`TY^aZRax\_XX¥VWVZ`\_  
@HWI-EAS443:3:85:315:1737#0/1  
GGCCATGAACTTGTCTTGGGAATATCTCAAACCTTTCA  
+HWI-EAS443:3:85:315:1737#0/1  
U`aaa`aa\_]`\_`Y^¥¥`^`\_]\_YZU^`aa`b`Y]`\_`a`a]  
@HWI-EAS443:3:85:340:1589#0/1  
TAGATTTCCAGTTGCTTCGAATGTTATTTTGTCTCCCGGC  
+HWI-EAS443:3:85:340:1589#0/1  
aa^R^aaa^a^Va[``]a`]Waa\_WZ``a`\_`^^`a`\_`^SW  
@HWI-EAS443:3:85:373:1657#0/1  
TTCATCTTTTCAATAACAGAATTTACTTTGTTAGTAATCT  
+HWI-EAS443:3:85:373:1657#0/1  
ababaababaababaaaa`aa`ab`a`aa`aaa^aaa`\_  
@HWI-EAS443:3:85:400:1175#0/1  
GAAGTCCTCGTGCTATGGGGCATTACCATCCATCTACTA  
+HWI-EAS443:3:85:400:1175#0/1  
aa^¥^aa`aa¥aaa`\_`\_`[\_`\_aa\_\_\_a¥`^^^\_`^`\_]`¥  
@HWI-EAS443:3:85:403:133#0/1  
GGAAATTGGAAACGGCTGCTTTGAATTTTACCACAAATGC  
+HWI-EAS443:3:85:403:133#0/1  
\_baaaaaaa¥`a`aa[\_aUXX`PKZV\_\_\_^RWRX^^¥XWW  
@HWI-EAS443:3:85:459:976#0/1  
CGATGAAATCTCCTGGGTAACACGTTCCATTGTCTGAACT  
+HWI-EAS443:3:85:459:976#0/1  
ab\_V\_]`^b`abbXb]aObX^¥[a`abba`[\_`[b^`\_\_\_\_`  
@HWI-EAS443:3:85:49:1653#0/1  
ATTGAAAATGTCCAAAATATGTAAAAAGCACAAAATTGA

+HWI-EAS443:3:85:49:1653#0/1  
aa` `]^aaa\_a^`\_\_a\_\_`a` `Ya\_[a`]^\_\_`\_¥I¥^^\_  
@HWI-EAS443:3:85:502:1406#0/1  
ACCGTACCATCCATCTACCATCCCTGTCCACCCCCCTTCA  
+HWI-EAS443:3:85:502:1406#0/1  
aaaZ]^S\_Q`abbaa\_^\_S]^`aaa`aQ]\_\_b^¥` `[E[a  
@HWI-EAS443:3:85:507:1284#0/1  
GGGCATTCCATCCATCTACTAGTGCTGACCAACAAAGT  
+HWI-EAS443:3:85:507:1284#0/1  
¥R]a\_T^¥a`\_V`\_Z]^Y]aa^[ `Waa^`aa` [aa`]^ZW  
@HWI-EAS443:3:85:519:1646#0/1  
CCCGGCTCTACTAGTGCCAGTAATAGTTCATTCTCCCTT  
+HWI-EAS443:3:85:519:1646#0/1  
aababbbbaa`aba\_aaaab[\_bb`a\_Xaaaaabaaaaaa  
@HWI-EAS443:3:85:581:1225#0/1  
CACTGAGCTCAATTGCTCTCTTAGCTCCTCATAATCGATG  
+HWI-EAS443:3:85:581:1225#0/1  
aaaaaaaa` ``\_a`aaaaaa`aaaa`\_a`a`aaa`aaa\_]`  
@HWI-EAS443:3:85:591:1605#0/1  
GGGACATTCTCAATCCTGTGGCCAGTCTCAATTTTGTGC  
+HWI-EAS443:3:85:591:1605#0/1  
aaaab¥bbb¥aabbabba` ]aa`aa`^` ``\_\_` ``aa\_Zaa  
@HWI-EAS443:3:85:676:228#0/1  
GAATTTACTTTGTTAGTAATCTCGTCAATGGCATTCTGTG  
+HWI-EAS443:3:85:676:228#0/1  
^\_\_¥aaaaaaaa`aaa¥aaa`a\_a[ `a` `a` `a` `^` ` `Y`  
@HWI-EAS443:3:85:725:1718#0/1  
TGGAAAATGAAAGAAGCTTTGGACTACCACGATTCAAATGT  
+HWI-EAS443:3:85:725:1718#0/1  
`ab¥ba\_bZb` ``^aYa`ZVH`\_`bba\_bbbbaa`\_aa[ `a¥  
@HWI-EAS443:3:85:745:1298#0/1  
GAAAAGGTAAGAAGCCAGTTAAAAACAATGCCAAGGAAA  
+HWI-EAS443:3:85:745:1298#0/1  
[S\_Q¥XOMY^X[UW`\_ZTa¥^SZ`aaaa`a¥a^D¥QS]X  
@HWI-EAS443:3:85:753:757#0/1  
GCTGGCTGGATCCTGGGAAATCCAGAGTGTGAATCACTCT  
+HWI-EAS443:3:85:753:757#0/1  
aabbaaaabXaa`^aaaaaa`a^¥a` ]¥]^a`\_`\_a^^^¥\_  
@HWI-EAS443:3:85:775:930#0/1  
ACTTCTTGCTGTATCTTGATGTCCCCACAAAAACATATGC  
+HWI-EAS443:3:85:775:930#0/1  
\_b¥\_Z`¥^`\_Kb¥Vab`¥U¥`aa^^^aUY]a`a\_aaa`\_W  
@HWI-EAS443:3:85:786:1932#0/1  
ATTTTGGGTAGTCATAAGTCCCATTTTTTGACACTTTCCAT  
+HWI-EAS443:3:85:786:1932#0/1  
`^baaa`aGa`^aaaba`ZZ\_aaaa`aaaa\_a\_aa^aV`\_`  
@HWI-EAS443:3:85:804:1612#0/1  
GAAGTCCTCGTGTATGGGGCATTCCATCCATCTACTA  
+HWI-EAS443:3:85:804:1612#0/1  
aa`\_^aa`aaY¥a\_a\_a`\_a\_aaaa`\_a^a`a\_a` `` `^`

@HWI-EAS443:3:85:804:891#0/1  
GCTGCTTTGAATTTTACCACAAATGCGATAACACGTGCAT  
+HWI-EAS443:3:85:804:891#0/1  
`a\_XUa`aaa````aa`aaa\_a``\_W\_\_\_\_\_aV[]`S`\_  
@HWI-EAS443:3:85:874:1291#0/1  
ATCCTGACCCCTGCTCATTTTGATGGTGATAACCGTACCA  
+HWI-EAS443:3:85:874:1291#0/1  
\_R^^^\_^]\_`UU¥XNU\_UNVU¥VSXUUUU¥^¥WRRQWTYY  
@HWI-EAS443:3:85:874:1770#0/1  
GGGGTCAGGATATGCAGCCGACCTGAAGAGCACACAGAAT  
+HWI-EAS443:3:85:874:1770#0/1  
`¥Z\_V\_WU^¥T¥¥\_WP`¥a]`^a`^`aXa¥[X[]¥WR[^  
@HWI-EAS443:3:85:901:1689#0/1  
GGAAACGGCTGCTTTGAATTTTACCACAAATGCGATAACA  
+HWI-EAS443:3:85:901:1689#0/1  
abaT`baaba\_XY]]H[]Z\_aaRL[] []`GH^]]PY^RZ  
@HWI-EAS443:3:85:95:15#0/1  
GTGCTCTTCAGGTCGGCTGCATATCCTGACCCCTGCTCAT  
+HWI-EAS443:3:85:95:15#0/1  
a[¥]SS]X\_YR]K]\_\_¥[¥TYTYWRSPSWRTTSSPPTOKR  
@HWI-EAS443:3:85:960:811#0/1  
CAGCCGTTTCCAATTTCCCTTGGCATTGTTTTTAACTGGC  
+HWI-EAS443:3:85:960:811#0/1  
^UX\_\_a\_X`¥UXPWS\_^NWLY¥YVUVXIWZV^TZY]Z[WQ  
@HWI-EAS443:3:86:1010:1029#0/1  
GGAAAATGAAAGAACTTTGGACTACCACGATTCAAATGTG  
+HWI-EAS443:3:86:1010:1029#0/1  
ab```abaaa`[W\_^a[`aa\_\_a``]a[TZ\_\_a]\_\_a\_Za  
@HWI-EAS443:3:86:1024:1366#0/1  
GAAGTTCAAGCCGAAATAGCAATAAGACCCAAAGTGAGG  
+HWI-EAS443:3:86:1024:1366#0/1  
abb^¥abbbaa\_^\_[aaaaUa`aaaW[`]\_\_`\_\_aW\_`¥X  
@HWI-EAS443:3:86:1026:1034#0/1  
CTGGCTGGATCCTGGGAAATCCAGAGTGTGAATCACTCTC  
+HWI-EAS443:3:86:1026:1034#0/1  
`\_]¥```ab`]X]ZX`aab`ZWb¥aa`babaaa`a]\_^aW  
@HWI-EAS443:3:86:1030:1516#0/1  
CCCGGCTCTACTAGTGTCCAGTAATAGTTCATTCTCCCTT  
+HWI-EAS443:3:86:1030:1516#0/1  
ab\_¥]\_b`¥\_\_V]aVXUQ``\_]^b^J\_a`aaQWMNTLW¥  
@HWI-EAS443:3:86:103:139#0/1  
GAACTCTTTACCTACTGCTGTGAAGTGTGATTTCATCTTT  
+HWI-EAS443:3:86:103:139#0/1  
a`aaaaaaabaaa^\_aaaa¥a^`^aa[a^\_a``\_`Z```  
@HWI-EAS443:3:86:1056:588#0/1  
GGGACATCAAGATACAGCAAGAAGTTCAAGCCGAAATAG  
+HWI-EAS443:3:86:1056:588#0/1  
abbaaaaaabbaab\_bbabbbaab[a`b`a\_\_aa``\_aaa  
@HWI-EAS443:3:86:1076:236#0/1  
GGTGGACAGGGATGGTAGATGGATGGTACGGTTATCACCA

+HWI-EAS443:3:86:1076:236#0/1  
aa\_ba\_`ba\_[]a`¥`aZWaa^`\_V\_Va^¥^Z^WWWU¥  
@HWI-EAS443:3:86:1115:715#0/1  
GGGGCATTACCATCCATCTACTAGTGTGACCAACAAAG  
+HWI-EAS443:3:86:1115:715#0/1  
aba`bbba`\_Zabaabb`bbab\_babbbba`abaaaa  
@HWI-EAS443:3:86:1141:1656#0/1  
ATTCTGTGTCTTTCAGGTCGGCTGCATATCCTGACCCC  
+HWI-EAS443:3:86:1141:1656#0/1  
abaaaa\_aab`a¥ba\_b\_\_W]a\_`aa¥a\_b`VU\_]`S\_Q¥  
@HWI-EAS443:3:86:1154:879#0/1  
GCTGGTGTATTAGCACCCCTTGGGTGTCTGACAAGTTGTA  
+HWI-EAS443:3:86:1154:879#0/1  
a[`¥aa]aa]a\_a[aaa\_\_`b\_aSa``]a\_]\_Ua]^^Z[  
@HWI-EAS443:3:86:1196:1269#0/1  
ATGAGGACATGCTGCCGTTACACCTTTGTTGAGTCATGA  
+HWI-EAS443:3:86:1196:1269#0/1  
````a`a^`a¥`^\_T\_`aaY``aa`¥\_VZ]JIWPHLZ^X  
@HWI-EAS443:3:86:1244:913#0/1  
GTCCCCACAAAACATATGCATCTGCATTCTGATAGAGAC  
+HWI-EAS443:3:86:1244:913#0/1  
\_`VWRR]b¥T\_OYY¥¥Ta¥SV`Ya\_XSb`Za¥Ybb\_`^`Y  
@HWI-EAS443:3:86:1287:1331#0/1  
CACGATTCAAATGTGAAGAAGTTATATGAAAAGGTAAGAA  
+HWI-EAS443:3:86:1287:1331#0/1  
ababbabb`bbbabbbbaabbbbbb`aba¥babaa  
@HWI-EAS443:3:86:1313:174#0/1  
GCCCCATTGCATTTGGGTAAATGTAACATTGCTGGCTGGA  
+HWI-EAS443:3:86:1313:174#0/1  
`XV¥S^¥`[¥PXUW\_`[P[PR[^Z]UWU¥^[W^Z^X¥W]N  
@HWI-EAS443:3:86:1319:581#0/1  
GAGCTCAATTGCTCTCTTAGCTCCTCATAATCGATGAAAT  
+HWI-EAS443:3:86:1319:581#0/1  
aaaa`babaa^[aa`aaaaX`\_`a[`a]Z\_`a\_\_a`````  
@HWI-EAS443:3:86:1348:318#0/1  
CTTTGTTAGTAATCTCGTCAATGGCATTCTGTGTGCTCTT  
+HWI-EAS443:3:86:1348:318#0/1  
V\_\_[¥^`a`Sba^`bb\_IW¥WV\_^X`\_¥T\_bYb¥¥^UI[]  
@HWI-EAS443:3:86:1382:1364#0/1  
ATATGTTTTGTGGGACATCAAGATACAGCAAGAAGTTC  
+HWI-EAS443:3:86:1382:1364#0/1  
abaa\_`abb`]`a`aaa[X¥Z\_T\_aab\_\_baa\_¥]T[\_  
@HWI-EAS443:3:86:1487:1455#0/1  
CCTCATAATCGATGAAATCTCCTGGGTAACACGTTCCATT  
+HWI-EAS443:3:86:1487:1455#0/1  
U\_b`bbbbbabbababbbbababb^Y^`ababbba`bbb  
@HWI-EAS443:3:86:1490:594#0/1  
CATGAGGACATGCTGCCGTTACACCTTTGTTGAGTCATG  
+HWI-EAS443:3:86:1490:594#0/1  
H\_baaabaabbb^ba`YaZa]]b\_a\_]bb`[SaabU`bbV



@HWI-EAS443:3:86:1518:1532#0/1  
GACAAAATAACATTCTGAAGCAACTGGAAATCTAGTGGTAC  
+HWI-EAS443:3:86:1518:1532#0/1  
``^]aaa\_``]a`]¥`a\_W]a\_aaa\_]aY`aWa\_Ya]  
@HWI-EAS443:3:86:1556:823#0/1  
AAGCCAGTTAAAAACAATGCCAAGGAAATTGGAAACGGC  
+HWI-EAS443:3:86:1556:823#0/1  
aab¥¥bba`Y\_\_`a¥`b`aa^`a\_aa]¥Ua`¥\_\_^\_^\_[U  
@HWI-EAS443:3:86:1588:607#0/1  
AGTCCTCGTCTATGGGGCATTACCATCCATCTACTAGT  
+HWI-EAS443:3:86:1588:607#0/1  
`baa`a`ba]\_b`ab[bbV`baaaYG^`VX^`^aa\_`a\_W  
@HWI-EAS443:3:86:1611:1096#0/1  
ACAGAATTTACTTTGTTAGTAATCTCGTCAATGGCATTCT  
+HWI-EAS443:3:86:1611:1096#0/1  
a\_baaababa^ababbbba`aabab¥ba^a^`a¥K[`aS\_  
@HWI-EAS443:3:86:1666:74#0/1  
GTTGCTTCGAATGTTATTTGTCTCCCGCTCTACTAGTG  
+HWI-EAS443:3:86:1666:74#0/1  
`RZa\_`bPaWx^W\_X```YOXR\_^JOS\_VXYYRXRTWY  
@HWI-EAS443:3:86:1716:1056#0/1  
ATGAGGACATGCTGCCGTTACACCTTTGTTTCGAGTCATGA  
+HWI-EAS443:3:86:1716:1056#0/1  
aaabbababb`baa]baaaXaU[\_a`a^a]`\_`UU^`a\_  
@HWI-EAS443:3:86:1717:519#0/1  
GAACTCTTACCTACTGCTGTGAACTGTGTATTCATCTTT  
+HWI-EAS443:3:86:1717:519#0/1  
V[abbb¥`b\_L`a\_aaY¥```]aP`bab`¥bb\_a¥G\_ab  
@HWI-EAS443:3:86:1744:1851#0/1  
TAAAAAGCACAAAATTGAGACTGGCCACAGGATTGAGGAA  
+HWI-EAS443:3:86:1744:1851#0/1  
abababa`a`aa]aaaa\_a¥`a¥\_\_aU]`a¥^`¥[^X^X^  
@HWI-EAS443:3:86:1760:284#0/1  
GCACGTGTTATCGCATTTGTGGTAAAATTCAAAGCAGCCG  
+HWI-EAS443:3:86:1760:284#0/1  
``b`aaa^bbb^ba\_bb`X]bba`bbbbbabaa]H¥]TQa  
@HWI-EAS443:3:86:1785:109#0/1  
AAGCCAGTTAAAAACAATGCCAAGGAAATTGGAAACGGC  
+HWI-EAS443:3:86:1785:109#0/1  
ab^a`a`bbba^aa¥aaba`a`a^Y\_\_a\_\_X\_]`NPZV  
@HWI-EAS443:3:86:232:1550#0/1  
CAGGTCGGCTGCATATCCTGACCCCTGCTCATTTTGATGG  
+HWI-EAS443:3:86:232:1550#0/1  
]NOQV\_aaaaaa\_]`T^]NXVU\_¥ZHTYQ^T¥[\_¥[ZLTU  
@HWI-EAS443:3:86:235:1033#0/1  
GCTGCTTTGAATTTTACCACAAATGCGATAACACGTGCAT  
+HWI-EAS443:3:86:235:1033#0/1  
¥V¥NY`aZS\_P\_WY^\_U^a\_\_YVR]\_Y\_¥\_]`[^]X\_W]L  
@HWI-EAS443:3:86:29:479#0/1  
GCTGACCAACAAAGTCTCTATCAGAATGCAGATGCATATG

+HWI-EAS443:3:86:29:479#0/1  
aba]a]ab^aaa`a¥]a`aaS^a\_T[L\_UU`UV]LU^ZY\_  
@HWI-EAS443:3:86:300:1646#0/1  
TTCATCGATTATGAGGAGCTAAGAGAGCAATTGAGCTCAG  
+HWI-EAS443:3:86:300:1646#0/1  
aa\_a\_\_a```\_\_\_\_\_^]]`ZZ]X^^\_¥\_ZZ¥]¥]ZZ]^  
@HWI-EAS443:3:86:323:432#0/1  
CTCTTTACTACTGCTGTGAAGTGTATTTCATCTTTTCA  
+HWI-EAS443:3:86:323:432#0/1  
abbbbbbbbb`ababb\_a`a`ab^``aaaaaaaaaaaaa  
@HWI-EAS443:3:86:328:1515#0/1  
ATGGCATTCTGTGTGCTCTTCAGGTCGGCTGCATATCCTG  
+HWI-EAS443:3:86:328:1515#0/1  
a\_]\_aaaa`\_\_Yaaaa`\_\_a`^W\_a]a[\_[\_Z[W[WU¥  
@HWI-EAS443:3:86:338:582#0/1  
GGGGACATCAAGATACAGCAAGAAGTTCAAGCCGAAATA  
+HWI-EAS443:3:86:338:582#0/1  
abba`a`a`[a`a`ba\_aba`]]`[b\_b\_\_a\_^\_]\_\_  
@HWI-EAS443:3:86:37:1668#0/1  
AACAGAATTTACTTTGTTAGTAATCTCGTCAATGGCATTCT  
+HWI-EAS443:3:86:37:1668#0/1  
`aa`\_aaa`aaaa`\_a\_a] []aa```\_aX`^]]V`^]\_  
@HWI-EAS443:3:86:405:176#0/1  
CCTCTGAGTATTTTGGGTAGTCATAAGTCCCATTTTTGAC  
+HWI-EAS443:3:86:405:176#0/1  
aa`bab\_a]`babaaaa¥a]\_aa`\_]`\_a¥^a\_a^^]^X  
@HWI-EAS443:3:86:431:622#0/1  
CAAAGCTCAGCAAATCCTACATTAATGATAAAGGGAAAGA  
+HWI-EAS443:3:86:431:622#0/1  
a`XQ^aaaba\_¥a\_Y`a]`YT`XYa\_[aa\_\_W`LL¥a`  
@HWI-EAS443:3:86:456:570#0/1  
CTTGTCTTGGGAATATCTCAAACCTTTCAAATGATGACA  
+HWI-EAS443:3:86:456:570#0/1  
aaaa^aaaabaa\_a`\_`a`aaaa\_a`^`a`\_a`\_`^`  
@HWI-EAS443:3:86:461:825#0/1  
GAGCACATCCAGAACTGATTGCCCCAGGGAGACTACCA  
+HWI-EAS443:3:86:461:825#0/1  
a`bbb`bbbbaaa`ab`b`^bb`a`a`ba`\_aa^Za\_V^  
@HWI-EAS443:3:86:494:1058#0/1  
TGCCCCCAGGGAGACTACCAAGTACCAATGAACTGGCGACA  
+HWI-EAS443:3:86:494:1058#0/1  
¥`b`[]XX\_W`b^a]T\_]¥TMX0`¥F^URZRU¥[U]ZX¥  
@HWI-EAS443:3:86:535:369#0/1  
ATGTTTTTGTGGGACATCAAGATACAGCAAGAAGTTCAA  
+HWI-EAS443:3:86:535:369#0/1  
abbaabbbb]bbaa`baaaaaaa`aa`\_aa`b¥`\_a\_  
@HWI-EAS443:3:86:542:1545#0/1  
GAATTTACTTTGTTAGTAATCTCGTCAATGGCATTCTGTG  
+HWI-EAS443:3:86:542:1545#0/1  
`RX\_XaSZ¥¥\_¥^\_a`]^\_¥ab¥\_W`^`^a]a``¥^TQY

@HWI-EAS443:3:86:551:982#0/1  
CTTTTTCCAGGTGGTTGAACTCTTTACCTACTGCTGTGA  
+HWI-EAS443:3:86:551:982#0/1  
ZWbbbb`ab`^`\_ab]H]¥Q¥]`aab`MaM^]¥¥\_[aaZ\_S  
@HWI-EAS443:3:86:590:20#0/1  
GATCCTGGGAAATCCAGAGTGTGAATCACTCTCCACAGCA  
+HWI-EAS443:3:86:590:20#0/1  
aa\_a^\_]\_a`\_a`Z`a`V\_^`Za\_`¥X\_[\_[^XRVU[`WT  
@HWI-EAS443:3:86:599:1975#0/1  
ATTCCTCAATCCTGTGGCCAGTCTCAATTTTGTGCTTTTT  
+HWI-EAS443:3:86:599:1975#0/1  
aba``aaab`a]`¥¥`\_a`SXZaZ\_a```a^]X^^aa`a  
@HWI-EAS443:3:86:603:480#0/1  
ACTAGATTTCCAGTTGCTTCGAATGTTATTTTGTCTCCCG  
+HWI-EAS443:3:86:603:480#0/1  
abbabaabbaaab]aabbaaaaa`\_`aaabaaa\_``\_]Xa  
@HWI-EAS443:3:86:640:1184#0/1  
GTTAAAAACAATGCCAAGGAAATTGGAAACGGCTGCTTT  
+HWI-EAS443:3:86:640:1184#0/1  
a^bbbabbabbabababbaaaa`\_a\_[ab`\_`\_\_`G¥\_a  
@HWI-EAS443:3:86:645:170#0/1  
CTCGTCAATGGCATTCTGTGTGCTCTTCAGGTCGGCTGCA  
+HWI-EAS443:3:86:645:170#0/1  
a¥\_\_\_[\_\_\_]T¥I``aa\_TM\_TR¥`P¥ZLO``XFT]ZR^HX  
@HWI-EAS443:3:86:676:1264#0/1  
AGAAGACAAGCATAACGGGAACTATGCAAATAAGAGGG  
+HWI-EAS443:3:86:676:1264#0/1  
aaaaa`^WS¥\_\_\_^a^\_aZ[R\_[^`MWZKMXV^UWRZVNT  
@HWI-EAS443:3:86:698:670#0/1  
TTCGAATGTTATTTTGTCTCCCGCTCTACTAGTGTCCAG  
+HWI-EAS443:3:86:698:670#0/1  
^abb`abb\_^[^aab````a^¥b]T`a\_VX]^aP¥]RZ\_a  
@HWI-EAS443:3:86:710:260#0/1  
AGCCAGTTAAAAACAATGCCAAGGAAATTGGAAACGGCT  
+HWI-EAS443:3:86:710:260#0/1  
aaa``````aaaa\_][][^\_[Xa\_\_`]¥``a\_`\_\_`[SVU`  
@HWI-EAS443:3:86:715:147#0/1  
GTGGGGACATCAAGATACAGCAAGAAGTTCAAGCCGGAAA  
+HWI-EAS443:3:86:715:147#0/1  
]Sa\_a`\_]`^M`ab`]a]^a`V]`a]¥TQa`aaW[`\_Z[U  
@HWI-EAS443:3:86:716:2040#0/1  
GTTGCTTCGAATGTTATTTTGTCTCCCGCTCTACTAGTG  
+HWI-EAS443:3:86:716:2040#0/1  
a\_\_\_`aa`a`^aaa\_```aa`^\_\_\_`\_`\_\_^Z\_Z^^¥\_QUTV  
@HWI-EAS443:3:86:72:1291#0/1  
GAGCTTGCTGTGGAGAGTGATTCACACTCTGGATTTCCCA  
+HWI-EAS443:3:86:72:1291#0/1  
^Zbbbbbb`\_]a`aa\_a\_aaaa\_bba^ab`\_\_\_\_\_aaa\_  
@HWI-EAS443:3:86:81:532#0/1  
ACGGTTATCACCATCAAATGAGCAGGGGTCAGGATATGC

+HWI-EAS443:3:86:81:532#0/1  
aa\_¥\_`a`\_a`[¥\_¥S`¥Z^^`][XJMRP\_¥¥^FQ¥  
@HWI-EAS443:3:86:820:1870#0/1  
AGCAAATCCTACATTAATGATAAAGGGAAAGAAGTCCTCG  
+HWI-EAS443:3:86:820:1870#0/1  
a`bbaaabaaaaaaa]`aaa`a`\_aab`aa\_^\_\_\_\_\_  
@HWI-EAS443:3:86:843:1199#0/1  
CCCAATCATGACTCGAACAAAGGTGTAACGGCAGCATGTC  
+HWI-EAS443:3:86:843:1199#0/1  
`b`^^baa\_a`^[abbbb]`¥S^^aaaa\_a^X\_¥VBB  
@HWI-EAS443:3:86:846:735#0/1  
GCTGGCTGGATCCTGGGAAATCCAGAGTGTGAATCACTCT  
+HWI-EAS443:3:86:846:735#0/1  
abbabbbbaaabbbbaabba`b`^`a\_`^]abTa^aZa  
@HWI-EAS443:3:86:876:654#0/1  
GGGGACATCAAGATACAGCAAGAAGTTCAAGCCGGAAATA  
+HWI-EAS443:3:86:876:654#0/1  
Yabbbabb]bb`aa``]Xab^]Ja\_aaa\_^aXab`[^aa  
@HWI-EAS443:3:86:928:1328#0/1  
GGGCCATGAACCTTGTCTTGGGGAATATCTCAAACCTTTCA  
+HWI-EAS443:3:86:928:1328#0/1  
abaaaa[baU^`^a¥b]\_X\_aU]baa^`aaYaMK]`V^  
@HWI-EAS443:3:86:949:1209#0/1  
GTTACCCAGGAGATTTTCATCGATTATGAGGAGCTAAGAGA  
+HWI-EAS443:3:86:949:1209#0/1  
TZZ¥`a\_^]I]]`bb^XTZ^]S\_¥]X^VWVQXMHW[]]aS  
@HWI-EAS443:3:86:968:279#0/1  
GTTGGTCAGCACTAGTAGATGGATGGTGAATGCCCCATAG  
+HWI-EAS443:3:86:968:279#0/1  
^\_``\_T`b[Uvb^babb^a`^XabaWa[``^MFZ]aa]¥  
@HWI-EAS443:3:87:1073:1216#0/1  
AAGTCCTCGTGCTATGGGGCATTACCATCCATCTACTAG  
+HWI-EAS443:3:87:1073:1216#0/1  
aaaaaaa\_a`aZa`aa¥[]aaaa`\_\_a\_a\_\_\_\_\_a\_`a  
@HWI-EAS443:3:87:1088:332#0/1  
ACTAGATTTCCAGTTGCTTCGAATGTTATTTTGTCTCCCG  
+HWI-EAS443:3:87:1088:332#0/1  
aaaabaabb`\_aa^aaaa\_]¥\_aa^`a`a`\_\_\_\_\_]\_X^  
@HWI-EAS443:3:87:108:908#0/1  
GATCTATTCAACTGTCGCCAGTTCATTGGTACTGGTAGTC  
+HWI-EAS443:3:87:108:908#0/1  
aa]¥^aa``a\_U^`\_]\_NK`VZVYa^W[S\_\_][Y]U¥POK  
@HWI-EAS443:3:87:1116:715#0/1  
CTCATAATCGATGAAATCTCCTGGGTAACACGTTCCATTG  
+HWI-EAS443:3:87:1116:715#0/1  
abaabbbbabababaabaaaa`a`aaaa`a`¥aa`a  
@HWI-EAS443:3:87:1164:261#0/1  
GTCAGCACTAGTAGATGGATGGTGAATGCCCCATAGCACG  
+HWI-EAS443:3:87:1164:261#0/1  
aa]aa`a^a`a\_`b\_aaa^aaa^aaaaaY]X]a^\_a]\_Wa

@HWI-EAS443:3:87:1187:1681#0/1  
GACAAAATAACATTCTGAAGCAACTGGAAATCTAGTGGTAC  
+HWI-EAS443:3:87:1187:1681#0/1  
aa\_bbbbbbbbaaaabbaaaaaaab\_aaab`aaa]a`]aa  
@HWI-EAS443:3:87:1191:906#0/1  
AAATAACATTCTGAAGCAACTGGAAATCTAGTGGTACCGAG  
+HWI-EAS443:3:87:1191:906#0/1  
aaabba\_bab¥a\_```a`Zaa`\_aaaXa`a^`Y[a^¥a`a  
@HWI-EAS443:3:87:1197:1095#0/1  
ATCAAGATACAGCAAGAAGTTCAAGCCGAAATAGCAATA  
+HWI-EAS443:3:87:1197:1095#0/1  
`baa`^aaa\_b`abbaaaa`\_baaT]aa`\_^a`\_^aa\_a  
@HWI-EAS443:3:87:1258:1845#0/1  
AAGCTCAGCAAATCCTACATTAATGATAAAGGAAAGAAG  
+HWI-EAS443:3:87:1258:1845#0/1  
aa\_aa¥]a`a\_^\_^]\_¥``aaa\_X\_[\_\_Z`S^[\_^^^N  
@HWI-EAS443:3:87:1259:637#0/1  
TCTTGCTGTATCTTGATGTCCCCACAAAAACATATGCATC  
+HWI-EAS443:3:87:1259:637#0/1  
aaaa\_ab\_ba\_aa`aaa\_a\_^]`\_`a`\_a]\_a`\_\_\_\_\_`\_`  
@HWI-EAS443:3:87:126:73#0/1  
GGGGGGTGGACAGGGATGGTAGATGGATGGTACGGTTATC  
+HWI-EAS443:3:87:126:73#0/1  
aa^¥a`S¥YWST¥\_\_QZU^RV\_WVW^WVZXWVUWSVSKB  
@HWI-EAS443:3:87:1337:1267#0/1  
AACAAAGTCTCTATCAGAATGCAGATGCATATGTTTTTGT  
+HWI-EAS443:3:87:1337:1267#0/1  
aaaWXaTabVa``abbaaa]^]a`Sa\_a\_aab`aa\_[aU  
@HWI-EAS443:3:87:1348:548#0/1  
GGGACATCAAGATACAGCAAGAAGTTCAAGCCGAAATAG  
+HWI-EAS443:3:87:1348:548#0/1  
abaaabaaaa^`aabb`abaa\_b]aaa`bU`a`\_a`aaa  
@HWI-EAS443:3:87:1361:1552#0/1  
AGACAAAATAACATTCTGAAGCAACTGGAAATCTAGTGGTA  
+HWI-EAS443:3:87:1361:1552#0/1  
ab\_`babbbba``ba`ba```a`abba`aaa]ba[XYa\_b  
@HWI-EAS443:3:87:1363:163#0/1  
ATCGATTATGAGGAGCTAAGAGAGCAATTGAGCTCAGTGT  
+HWI-EAS443:3:87:1363:163#0/1  
a^W¥abbbba`V`[Z`^abaaa`Y`Ya^\_\_`\_XLZ¥Y`U`Z  
@HWI-EAS443:3:87:1397:475#0/1  
CTGCCGTTACACCTTTGTTGAGTCATGATTGGCCATGA  
+HWI-EAS443:3:87:1397:475#0/1  
abaUG\_bbabb`ababbbbaabaa`bbb`ba[bb\_aabba  
@HWI-EAS443:3:87:1397:821#0/1  
GGGTGTCTGACAAGTTGTATTGCAATCGTGGACTGGTGTA  
+HWI-EAS443:3:87:1397:821#0/1  
a`¥G`b[`bbY]Ub`abaab^ba`bbUbTb^WSa]a^]Wb  
@HWI-EAS443:3:87:1437:1393#0/1  
TAGAGACCCATTAGAGCACATCCAGAAACTGATTGCCCCC

+HWI-EAS443:3:87:1437:1393#0/1  
abb`a\_`a\_aaa]aaaaa`b\_]aaaaa¥aa\_`\_aTYTV^  
@HWI-EAS443:3:87:1458:398#0/1  
GCTGGATCCTGGGAAATCCAGAGTGTGAATCACTCTCCAC  
+HWI-EAS443:3:87:1458:398#0/1  
a`aa`SaVV^\_a\_W`¥^TF[\_]aW\_W^^V`¥¥¥SZQS¥W  
@HWI-EAS443:3:87:1463:702#0/1  
AGCCAGTTAAAAACAATGCCAAGGAAATTGGAAACGGCT  
+HWI-EAS443:3:87:1463:702#0/1  
\_]SMSZXa`¥W^`X[`a[^UFUZaX[UX¥^QL[``Wa\_Ga  
@HWI-EAS443:3:87:151:1644#0/1  
AATCGATGAAATCTCCTGGGTAACACGTTCCATTGTCTGA  
+HWI-EAS443:3:87:151:1644#0/1  
Y\_`aa^aa\_a^aaaa^¥a¥¥Y`\_\_a^[[[a\_\_\_\_]\_]^\_¥[  
@HWI-EAS443:3:87:1527:1506#0/1  
GAACGTGTTACCCAGGAGATTTTCATCGATTATGAGGAGCT  
+HWI-EAS443:3:87:1527:1506#0/1  
aba`a`aa[baaaa`]baaabaYaa``aababa`ab`a]a  
@HWI-EAS443:3:87:1527:175#0/1  
TCTTCAGGTCGGCTGCATATCCTGACCCCTGCTCATTTTG  
+HWI-EAS443:3:87:1527:175#0/1  
a`aa\_`\_]^aa¥\_`¥U^`a¥^`[^YQVR[[T\_W^¥^¥[Q  
@HWI-EAS443:3:87:1536:208#0/1  
TGCCGGTTTCATTGAAGGGGGTGGACAGGGATGGTAGAT  
+HWI-EAS443:3:87:1536:208#0/1  
H¥UFZVVbb^bbbbVTa[a¥SaZ\_X¥FV\_bb^a`a¥\_`^¥  
@HWI-EAS443:3:87:1548:607#0/1  
TGGACATTTGGACTTACAATGCCGAAGTTGGTTCTATT  
+HWI-EAS443:3:87:1548:607#0/1  
`b`VG¥abb^PPaaaaaWWba`]a\_XUb^`]UaU\_^\_^`  
@HWI-EAS443:3:87:1616:1632#0/1  
GGTGTTTATAGCACCCCTGGGTGTCTGACAAGTTGTATTG  
+HWI-EAS443:3:87:1616:1632#0/1  
aa[a`bbaaa`]a\_`]aa`\_aYa\_\_a`^Xa]\_\_`]a]`  
@HWI-EAS443:3:87:1666:1469#0/1  
CCTCTGAGTATTTTGGGTAGTCATAAGTCCCATTTTGGAC  
+HWI-EAS443:3:87:1666:1469#0/1  
Y¥\_X`b`abb`K\_baba\_X``baab\_aaba\_bbbababbbb  
@HWI-EAS443:3:87:1686:800#0/1  
GCTGGATCCTGGGAAATCCAGAGTGTGAATCACTCTCCAC  
+HWI-EAS443:3:87:1686:800#0/1  
aa]RW`a¥^aX^¥a`a]N^a^b¥\_`aa`aT]^\_¥^XU\_¥  
@HWI-EAS443:3:87:1703:220#0/1  
TCCGGCTTGAACCTTCTTGCTGTATCTTGATGTCCCCACAA  
+HWI-EAS443:3:87:1703:220#0/1  
a`[a\_W`a¥`aP`Zaa`U`a\_\_aTa`[]`¥UZTSP]W¥\_  
@HWI-EAS443:3:87:1771:1618#0/1  
GTCAGGATATGCAGCCGACCTGAAGAGCACACAGAATGCC  
+HWI-EAS443:3:87:1771:1618#0/1  
aZH\_a\_\_a^`a¥Y`^^\_WHI^\_XV¥U`V]R^VXYX^VXX

@HWI-EAS443:3:87:197:987#0/1  
GCTGGCTGGATCCTGGGAAATCCAGAGTGTGAATCACTCT  
+HWI-EAS443:3:87:197:987#0/1  
aba`aa`^ba`]aY`aa`a^\_a¥[[^U\_U^^X^^\_¥¥^U  
@HWI-EAS443:3:87:206:1525#0/1  
GTCTGACAAGTTGTATTGCAATCGTGGACTGGTGTATCTG  
+HWI-EAS443:3:87:206:1525#0/1  
^I¥b[Z`Y`\_R\_\_\_\_`a]aaaV¥aaY[¥¥\_[\_\_YaNXV\_]`  
@HWI-EAS443:3:87:211:1318#0/1  
CCTCTGAGTATTTTGGGTAGTCATAAGTCCCATTTTGTGAC  
+HWI-EAS443:3:87:211:1318#0/1  
\_aSaa\_\_a`¥]\_Y`\_\_^L\_¥Wq]X^`^0^^\_P¥X`X`^]`  
@HWI-EAS443:3:87:252:1636#0/1  
GAGCTTGCTGTGGAGAGTGATTCACACTCTGGATTTCCCA  
+HWI-EAS443:3:87:252:1636#0/1  
ab\_bab^aaa`aaaZ]UZVW``aa\_a\_`a^[\_]`^\_`^a  
@HWI-EAS443:3:87:267:1048#0/1  
CCGTTACACCTTTGTTTCGAGTCATGATTGGCCATGAACT  
+HWI-EAS443:3:87:267:1048#0/1  
aab\_aaaaaaaaa^`a`R`aaa^`\_`¥`YWP\_`^^X\_  
@HWI-EAS443:3:87:281:556#0/1  
GAACTTTGGACTACCACGATTCAAATGTGAAGAACTTATA  
+HWI-EAS443:3:87:281:556#0/1  
`aaabaa`aaabaaaaabaa`aa^aaa[b\_a\_a\_aaaaa  
@HWI-EAS443:3:87:309:905#0/1  
AGAAGTCCTCGTGCTATGGGGCATTACCATCCATCTACT  
+HWI-EAS443:3:87:309:905#0/1  
aaaaa¥`aaaaZ^`a`\_`[Z\_^`a`¥`\_Za\_\_\_\_\_^\_]`W\_  
@HWI-EAS443:3:87:338:1133#0/1  
AATCGATGAAATCTCCTGGGTAACACGTTCCATTGTCTGA  
+HWI-EAS443:3:87:338:1133#0/1  
a`aaa]\_aaaa`\_]^\_\_a`\_ZYS`[¥\_^\_\_`\_^Z]Z\_^]`^  
@HWI-EAS443:3:87:396:1916#0/1  
CATGAGCTTGCTGTGGAGAGTGATTCACACTCTGGATTTC  
+HWI-EAS443:3:87:396:1916#0/1  
aaYY^`\_[a[aa\_\_\_Q\_¥YOKH¥a]aa]`b`\_`¥XaY\_`[`  
@HWI-EAS443:3:87:404:212#0/1  
ATCAGAATGCAGATGCATATGTTTTTGTGGGGACATCAAG  
+HWI-EAS443:3:87:404:212#0/1  
¥¥baX`aabWbbbU\_a¥aab`bbbb\_[]ab\_\_`]\_^a\_`^`  
@HWI-EAS443:3:87:438:1119#0/1  
GGAGCTAAGAGAGCAATTGAGCTCAGTGCATCATTGAA  
+HWI-EAS443:3:87:438:1119#0/1  
abaaaabbbaaa\_aaaba`aaaa`aa\_]a]\_```aaaaa`\_  
@HWI-EAS443:3:87:439:1886#0/1  
GCTGCTTTGAATTTTACCACAAATGCGATAACACGTGCAT  
+HWI-EAS443:3:87:439:1886#0/1  
a¥XZFTX]]\_]Y\_X`\_`a]¥YV¥^¥a]¥SFYR]YWQX[[¥  
@HWI-EAS443:3:87:440:1542#0/1  
CACGTGTTATCGCATTTGTGGTAAAATTCAAAGCAGCCGT

+HWI-EAS443:3:87:440:1542#0/1  
aaaa]a\_aba`aa\_abab^`Z¥bbaaa`aba` `aa[aaa]  
@HWI-EAS443:3:87:449:1597#0/1  
CTTCCTCTGAGTATTTTGGGTAGTCATAAGTCCCATTTTT  
+HWI-EAS443:3:87:449:1597#0/1  
abaaab\_b`b\_]ababaY\_\_Ta`^aaaaa` [ `aY`aaa`a  
@HWI-EAS443:3:87:44:507#0/1  
TGTGGGGACATCAAGATACAGCAAGAAGTTCAAGCCGGAA  
+HWI-EAS443:3:87:44:507#0/1  
¥[R[YH^`\_`\_`\_¥¥W`bbab¥Wab]`\_SW\_`Xa^Z`¥T]  
@HWI-EAS443:3:87:511:1336#0/1  
GCTTCCTCTGAGTATTTTGGGTAGTCATAAGTCCCATTTTT  
+HWI-EAS443:3:87:511:1336#0/1  
aa`^^\_¥¥aa]]S` `^)`aVQV]RW¥`^\_R¥P\_a[^a^a\_X  
@HWI-EAS443:3:87:538:1223#0/1  
CTGGTGTATAGCACCTTGGGTGTCTGACAAGTTGTAT  
+HWI-EAS443:3:87:538:1223#0/1  
aab\_[[ZaXaaa` `aa]aa\_^XZV` `a`]J\_`\_`\_`^a[a`  
@HWI-EAS443:3:87:594:1165#0/1  
TGGGGACATCAAGATACAGCAAGAAGTTCAAGCCGGAAAT  
+HWI-EAS443:3:87:594:1165#0/1  
a]aabbababbabaaa`baaabbaYaZ^aa[\_a\_a`\_` `a  
@HWI-EAS443:3:87:625:921#0/1  
GTCCTCGTGCTATGGGGCATTACCATCCATCTACTAGTG  
+HWI-EAS443:3:87:625:921#0/1  
a^¥^`\_`\_`\_W`\_`\_`\_`[Z`Z`\_`¥]\_Za`W¥^¥¥¥\_ZU^YW^Y`W\_  
@HWI-EAS443:3:87:639:1957#0/1  
TGGGGACATCAAGATACAGCAAGAAGTTCAAGCCGGAAAT  
+HWI-EAS443:3:87:639:1957#0/1  
\_aa`^` `aaaabbabaaabaaabbaaa[^a^aaa` ` `a\_` ` ]  
@HWI-EAS443:3:87:662:1358#0/1  
TCGTGCTATGGGGCATTACCATCCATCTACTAGTGCTGA  
+HWI-EAS443:3:87:662:1358#0/1  
aaa]abaa]a[ZZ^a`]aaaabba\_aaaaaaaa¥`\_`\_`\_`aa  
@HWI-EAS443:3:87:691:1710#0/1  
GCACGTGTTATCGCATTTGTGGTAAAATTCAAAGCAGCCG  
+HWI-EAS443:3:87:691:1710#0/1  
`ba^UaU`a^Q\_b[``Z^L`][aaaaaT\_S\_`\_`\_`\_`ZP[  
@HWI-EAS443:3:87:714:419#0/1  
GGGGACATCAAGATACAGCAAGAAGTTCAAGCCGGAAATA  
+HWI-EAS443:3:87:714:419#0/1  
aaabaaabaabaaaaabbaabba]b\_aaaaaX\_aa\_`aaa  
@HWI-EAS443:3:87:723:1793#0/1  
CTTCTCTGTTTAATTTTGGTTCCTCTGAGTATTTTGGGTA  
+HWI-EAS443:3:87:723:1793#0/1  
abbbabba\_bbb`aabbbbbbbbbbaaa\_baaaaaaa]b  
@HWI-EAS443:3:87:731:178#0/1  
CAAGATACAGCAAGAAGTTCAAGCCGGAAATAGCAATAAG  
+HWI-EAS443:3:87:731:178#0/1  
ababaababaaabbbbaa\_aaa`b\_aaa\_aa\_a`aaa`a]`



@HWI-EAS443:3:87:743:182#0/1  
AAGCCAGTTAAAAACAATGCCAAGGAAATTGGAAACGGC  
+HWI-EAS443:3:87:743:182#0/1  
UY¥aV¥`Z`aaa\_Zaaaaa]V¥`aaZ\_Q¥``]UN]P^\_\_  
@HWI-EAS443:3:87:768:843#0/1  
CCATGCACGTGTTATCGCATTGTGGTAAAATTCAAAGCA  
+HWI-EAS443:3:87:768:843#0/1  
¥abbbb]bb[bb]]ba`V`bba[]abbbbbba^R¥\_a\_a  
@HWI-EAS443:3:87:807:306#0/1  
ATTCAACAGACACTGTAGACACAGTACTAGAAAAGAATGT  
+HWI-EAS443:3:87:807:306#0/1  
]a[YUT`bb`b\_¥¥aV`b]X¥X`YR[Q[SXG[X\_a[[[[U  
@HWI-EAS443:3:87:863:273#0/1  
CATCATTTGAAAGTTTGAGATATCCCCAAGACAAGTTC  
+HWI-EAS443:3:87:863:273#0/1  
\_aa\_a[Zbbb`bb[`abaaaa`a^`aaaaaa`[]\_`\_\_  
@HWI-EAS443:3:87:881:1066#0/1  
CTTCTCTGAGTATTTGGGTAGTCATAAGTCCCATTTTT  
+HWI-EAS443:3:87:881:1066#0/1  
ababa`¥`bbbKZ\_]bVZT`bb`Y[a¥`TMSaaaVbbb\_a  
@HWI-EAS443:3:87:90:975#0/1  
ATGTTTTTGTGGGACATCAAGATACAGCAAGAAGTTCAA  
+HWI-EAS443:3:87:90:975#0/1  
]LZYaab^a¥aaa^a`a¥`]\_^Z^]a\_`\_aa]^`YWS]^  
@HWI-EAS443:3:87:912:373#0/1  
CCACGATTCAAATGTGAAGAACTTATATGAAAAGGTAAGA  
+HWI-EAS443:3:87:912:373#0/1  
abbab\_b]b^`abb^ba`baa\_babbbbb`a`^^`^a`ab  
@HWI-EAS443:3:87:916:318#0/1  
CAAAGTCTCTATCAGAATGCAGATGCATATGTTTTTGTGG  
+HWI-EAS443:3:87:916:318#0/1  
`bbbbabbbbbbbbabbbbabbbbaabbbbabbbb`ba  
@HWI-EAS443:3:87:995:606#0/1  
GGGACATCAAGATACAGCAAGAAGTTCAAGCCGAAATAG  
+HWI-EAS443:3:87:995:606#0/1  
abaaabbaaaaaa`baaaba^`]`\_`aaa\_Z`W¥Xaa\_a  
@HWI-EAS443:3:88:1007:1281#0/1  
CCGGCTTGAACCTTCTTGCTGTATCTTGATGTCCCCACAAA  
+HWI-EAS443:3:88:1007:1281#0/1  
`bbaa^\_\_aaa¥^ZaababbUa`abaaa\_aRUaa`\_\_`a]  
@HWI-EAS443:3:88:1016:1027#0/1  
GTGGGACATCAAGATACAGCAAGAAGTTCAAGCCGAAA  
+HWI-EAS443:3:88:1016:1027#0/1  
a¥^`]`[[[aaR`\_\_\_\_\_a`aQ`\_aaY`aV[\_\_\_\_a[W^a`]a  
@HWI-EAS443:3:88:1052:406#0/1  
GAGAGCAATTGAGCTCAGTGCATCATTGAAAGTTTGA  
+HWI-EAS443:3:88:1052:406#0/1  
abaab`abbaaaaa`bb]a^aaaaabaaaa`aaaZaaaa  
@HWI-EAS443:3:88:1065:1454#0/1  
GGGCCATGAACCTTGTCTTGGGAATATCTCAAACCTTCA

+HWI-EAS443:3:88:1065:1454#0/1  
ab]\_IaUa\_UaaaaU\_^[\^\_\_a^^a¥^¥\_\_`\_\_]V\_^\_\_`  
@HWI-EAS443:3:88:1103:271#0/1  
ATGAAACCGCAATGGCCCCAAATAGGCCTCTAGATTGAA  
+HWI-EAS443:3:88:1103:271#0/1  
a`a¥`¥]^`^`^`\_aa^`X\_]^b^U^YZ\_X^U`ZaZ`^a[`  
@HWI-EAS443:3:88:1111:1206#0/1  
TCGAATGTTATTTTGTCTCCCGCTCTACTAGTGCCAGT  
+HWI-EAS443:3:88:1111:1206#0/1  
aab^¥a`aa^abbbaa`baaaaa\_aaaaY`SYZZZZ`Xa^  
@HWI-EAS443:3:88:1124:1948#0/1  
CATATCCTGACCCCTGCTCATTGATGGTGATAACCGTA  
+HWI-EAS443:3:88:1124:1948#0/1  
^bbbaa\_bbb^bbbababbbabbabb`babab\_bba[aab  
@HWI-EAS443:3:88:112:1277#0/1  
CACTTTCCATGCACGTGTTATCGCATTGTGGTAAAATTC  
+HWI-EAS443:3:88:112:1277#0/1  
\_]`^a\_Z¥`^`\_Z\_aa\_aRVaa`Yaa`[a\_\_\_¥^T\_]\_\_X  
@HWI-EAS443:3:88:1171:843#0/1  
GCAACTGGAAATCTAGTGGTACCGAGATATGCATTTCGCAA  
+HWI-EAS443:3:88:1171:843#0/1  
aH^aW\_baa^R\_Y[a\_X¥SLa`]]aa\_\_\_a\_]aa`^a^\_^  
@HWI-EAS443:3:88:1196:59#0/1  
AACTATTACTGGACACTAGTAGAGCCGGGAGACAAAATAA  
+HWI-EAS443:3:88:1196:59#0/1  
aa`bbbbbb`abaaab^b`b`ab\_a\_[baa[a¥`a^aa`aa  
@HWI-EAS443:3:88:1203:320#0/1  
GACCAACAAAGTCTCTATCAGAATGCAGATGCATATGTTT  
+HWI-EAS443:3:88:1203:320#0/1  
aa[^bb^bbab\_^b^`aaYbbbaaab\_aa`\_b\_aaaab]aa  
@HWI-EAS443:3:88:1257:900#0/1  
AGAAGTTC AAGCCGAAATAGCAATAAGACCCAAAGTGAG  
+HWI-EAS443:3:88:1257:900#0/1  
ab¥Wa)`^b`\_]\_a][aaa\_\_\_a\_\_aWa`^`\_]W]WaR\_Z\_  
@HWI-EAS443:3:88:1305:1395#0/1  
GCTGCTTTGAATTTTACCACAAATGCGATAACACGTGCAT  
+HWI-EAS443:3:88:1305:1395#0/1  
abaa`aaaaaaabaa\_aa`aa`aa^aa`^`^aaa]a`^`\_  
@HWI-EAS443:3:88:1314:861#0/1  
GCTCAATTGCTCTCTTAGCTCCTCATAATCGATGAAATCT  
+HWI-EAS443:3:88:1314:861#0/1  
aabbbbbbbbab`b^aabbaaab`aaaaaa`baaaaa[a  
@HWI-EAS443:3:88:1350:267#0/1  
ACTTCTTGCTGTATCTTGATGTCCCCACAAAACATATGC  
+HWI-EAS443:3:88:1350:267#0/1  
a`ba\_abbabbaab^abbaaa`\_`a`a`aaa\_a\_a`aaaa  
@HWI-EAS443:3:88:1372:1843#0/1  
CAAAGGTGTAACGGCAGCATGTCCTCATGCTGGAGCAAAA  
+HWI-EAS443:3:88:1372:1843#0/1  
`bab`\_`bbbaababab`aa¥N`\_babbKbbabKb\_a[\_]

@HWI-EAS443:3:88:1417:1491#0/1  
AAGTCCTCGTGCTATGGGGCATTACCATCCATCTACTAG  
+HWI-EAS443:3:88:1417:1491#0/1  
aaa\_``abaaZaa`a\_a`R`aaSa^Q\_a^Zaa^aa¥aa\_  
@HWI-EAS443:3:88:1433:338#0/1  
TCTTCAGGTCGGCTGCATATCCTGACCCCTGCTCATTTTG  
+HWI-EAS443:3:88:1433:338#0/1  
aabaYaa`\_aaa\_\_a^aaaa[`a\_`S¥[¥aXR`[\_a^\_X  
@HWI-EAS443:3:88:145:495#0/1  
TTCCGGCTTGAACCTTGTGCTGTATCTTGATGTCCCCACA  
+HWI-EAS443:3:88:145:495#0/1  
XZ``Y^`ZaXT]Y\_]`TR]MWOMWX]RGQZZFTLWVYOM  
@HWI-EAS443:3:88:1496:174#0/1  
GGGGACATCAAGATACAGCAAGAAGTTCAAGCCGAAATA  
+HWI-EAS443:3:88:1496:174#0/1  
aa]aUa`abbaaab\_ab]abaaaaYa[aaW\_a`W`]¥a  
@HWI-EAS443:3:88:1550:452#0/1  
GGGACATCAAGATACAGCAAGAAGTTCAAGCCGAAATAG  
+HWI-EAS443:3:88:1550:452#0/1  
a`]^\_`a\_aaaa\_a^`a^aaaa\_`\_`0a^a^^a\_\_^\_]`a  
@HWI-EAS443:3:88:1629:1303#0/1  
GAATCACTCTCCACAGCAAGCTCATGGTCCTACATTGTGG  
+HWI-EAS443:3:88:1629:1303#0/1  
`a[aY`Yb``][``\_`^aaa]`^^a\_[US`\_\_\_\_`S[[U^`  
@HWI-EAS443:3:88:168:789#0/1  
AGGAAATTGGAAACGGCTGCTTTGAATTTTACCACAAATG  
+HWI-EAS443:3:88:168:789#0/1  
^^^Saba`\_¥[\_]\_aaa`^TTY]QJP[X\_[[WZVPYQYKP  
@HWI-EAS443:3:88:1732:824#0/1  
ATATGTTTTTGTGGGACATCAAGATACAGCAAGAAGTTC  
+HWI-EAS443:3:88:1732:824#0/1  
abbbbbbb`aaabbaaa[abbababb^aa`````a^  
@HWI-EAS443:3:88:1756:57#0/1  
AATGGAACGTGTTACCCAGGAGATTTTCATCGATTATGAGG  
+HWI-EAS443:3:88:1756:57#0/1  
ababaab^b\_a`aa`]aa\_¥\_a`aa`^`^a^a\_]`\_\_a\_  
@HWI-EAS443:3:88:1772:167#0/1  
ATCACAATTGAAAATGTCCAAAATATGTAAAAAGCACAA  
+HWI-EAS443:3:88:1772:167#0/1  
ababa`^aaba`bb`aaaabbaabbb¥baaaab]aY`a  
@HWI-EAS443:3:88:190:888#0/1  
GTGTGCTCTTCAGGTCGGCTGCATATCCTGACCCCTGCTC  
+HWI-EAS443:3:88:190:888#0/1  
aHa\_abW\_R¥a`a`V]]a^]]\_VTT]^WF^Y¥¥XZUYP^L  
@HWI-EAS443:3:88:24:1177#0/1  
ATCTAGAGGCCTATTTGGGGCCATTGCCGTTTCATTGAA  
+HWI-EAS443:3:88:24:1177#0/1  
aaaaaaa]]aaaa\_a`¥]`aab`^`\_`[SM\_`a\_aaZYZ  
@HWI-EAS443:3:88:250:1335#0/1  
CTGTGTGCTCTTCAGGTCGGCTGCATATCCTGACCCCTGC

+HWI-EAS443:3:88:250:1335#0/1  
aaaaaZbbabaaaaaa¥b^Xa`aa`a`a`a]\_\_a\_`\_a\_Z[  
@HWI-EAS443:3:88:276:138#0/1  
TAGATTTCCAGTTGCTTCGAATGTTATTTTGTCTCCCGGC  
+HWI-EAS443:3:88:276:138#0/1  
aaa¥aaa`a`a\_aaaaaa\_\_`a^a\_\_\_\_`\_^Z]^^X\_^^^  
@HWI-EAS443:3:88:315:1860#0/1  
GCACTAGTAGATGGATGGTGAATGCCCCATAGCACGAGGA  
+HWI-EAS443:3:88:315:1860#0/1  
^abbbab`baa`aaaa]J¥ababbbbaa^a`a`aa`Xa  
@HWI-EAS443:3:88:319:1538#0/1  
ATTTCTTGGCATTGTTTTTAACTGGCTTCTTACCTTTT  
+HWI-EAS443:3:88:319:1538#0/1  
\_abWbbba`X`[b¥`Yabb^bb`¥[R¥aa]aaaa^TL]b  
@HWI-EAS443:3:88:358:1299#0/1  
CAGAACTGATTGCCCCAGGGAGACTACCAGTACCAATG  
+HWI-EAS443:3:88:358:1299#0/1  
aa¥\_bbab\_]ba]\_aba¥a^]OH`N`ZRU[a[a\_Vaa\_`  
@HWI-EAS443:3:88:361:1085#0/1  
GCTGCTTTGAATTTTACCACAAATGCGATAACACGTGCAT  
+HWI-EAS443:3:88:361:1085#0/1  
ZW\_`bbb\_bbbaaa\_W\_ba]XbaZW¥Xa]`b`baa`[X\_  
@HWI-EAS443:3:88:428:866#0/1  
GGGACATCAAGATACAGCAAGAAGTTCAAGCCGGAAATA  
+HWI-EAS443:3:88:428:866#0/1  
`abbbbbbab\_ababbbaabbabab^\_bba`aabaaaaa  
@HWI-EAS443:3:88:42:249#0/1  
GGTCAGGATATGCAGCCGACCTGAAGAGCACACAGAATGC  
+HWI-EAS443:3:88:42:249#0/1  
aSG]¥`\_`[[a[\_\_\_\_`Z^`¥ZW^^Z¥¥RUT[¥BBBBBBBBB  
@HWI-EAS443:3:88:522:1587#0/1  
GCTGCTTTGAATTTTACCACAAATGCGATAACACGTGCAT  
+HWI-EAS443:3:88:522:1587#0/1  
^aaababaababbaa^aabaa\_]aaa\_a¥a`Taa]\_`]a`  
@HWI-EAS443:3:88:529:847#0/1  
CAGAACTGATTGCCCCAGGGAGACTACCAGTACCAATG  
+HWI-EAS443:3:88:529:847#0/1  
^XQ\_XUZZ^T¥YZ\_WZUY\_a\_ZZa`\_`X][[W[W[O[R[Y  
@HWI-EAS443:3:88:551:1677#0/1  
CACACTCTGTTAACCTTCTAGAAGACAAGCATAACGGGAA  
+HWI-EAS443:3:88:551:1677#0/1  
ababaaaaba\_a`\_\_a`a\_a]`a^a\_a]`ba`aa[^[\_aa  
@HWI-EAS443:3:88:561:288#0/1  
AGCCGGGAGACAAAATAACATTCGAAGCAACTGGAAATCT  
+HWI-EAS443:3:88:561:288#0/1  
`]b`b`b\_aa\_¥Ya]Y^Z^[\`YaZRva[QZYZY\_¥IYYZ]  
@HWI-EAS443:3:88:56:1028#0/1  
GTTTGAGATATTCCCAAGACAAGTTCATGGCCCAATCAT  
+HWI-EAS443:3:88:56:1028#0/1  
`aaba^W[aa`¥T\_`¥GX\_`^VT¥XUZ[\_P^^^T[Y^

@HWI-EAS443:3:88:661:1435#0/1  
CCAGTACCAATGAACTGGCGACAGTTGAATAGATCGCCAA  
+HWI-EAS443:3:88:661:1435#0/1  
`a\_^]baba`\_]`aaaa`aaa`Xa^¥[\_`\_aa`[a^a`  
@HWI-EAS443:3:88:69:1805#0/1  
AGAAGTCCTCGTGCTATGGGGCATTACCATCCATCTACT  
+HWI-EAS443:3:88:69:1805#0/1  
aaaa`¥a\_\_`\_W]`¥`W¥Y¥S\_Z\_¥`a`X`YQ¥^¥UW\_^T  
@HWI-EAS443:3:88:716:1363#0/1  
GAAGTCCTCGTGCTATGGGGCATTACCATCCATCTACTA  
+HWI-EAS443:3:88:716:1363#0/1  
aa`^¥\_baba¥\_^aa[ZXUDYabbaaa^ba`a\_\_\_bb`a`  
@HWI-EAS443:3:88:718:1154#0/1  
CAAGTTGTATTGCAATCGTGGACTGGTGTATCTGAAATGA  
+HWI-EAS443:3:88:718:1154#0/1  
aaab\_baabaababbbbbb`aa`aaa`\_a`aa\_aa\_`a``a  
@HWI-EAS443:3:88:71:340#0/1  
CTCCCATTTTCAGAATATACATCCGATCACAATTGGAAAAT  
+HWI-EAS443:3:88:71:340#0/1  
Q\_a`\_]`\_a`^a`^a`\_T\_Zba`aZ^a`^aW]`\_]¥`¥  
@HWI-EAS443:3:88:814:1765#0/1  
CAACTGGAAATCTAGTGGTACCGAGATATGCATTCGCAAT  
+HWI-EAS443:3:88:814:1765#0/1  
a`aa^\_ababbabba\_\_bUa`abaaa]a\_aaa]]a¥a`aa  
@HWI-EAS443:3:88:849:388#0/1  
AACAAATGCCAAGGAAATTGGAAACGGCTGCTTTGAATTTT  
+HWI-EAS443:3:88:849:388#0/1  
ababbab`\_baaaaaabaaa\_aa`\_a`a^FYa`SR\_R`\_a  
@HWI-EAS443:3:88:850:253#0/1  
TGACAAGTTGTATTGCAATCGTGGACTGGTGTATCTGAAA  
+HWI-EAS443:3:88:850:253#0/1  
aba¥abbaabaa\_abaaab`b]\_aa\_aaX\_aYaaaaaa]`  
@HWI-EAS443:3:88:853:1823#0/1  
ACAGAATTTACTTTGTTAGTAATCTCGTCAATGGCATTCT  
+HWI-EAS443:3:88:853:1823#0/1  
\_¥]bT`a\_QWK\_]aaZa`\_XU[]Y`P[GSQO^^X[`]UZ  
@HWI-EAS443:3:88:865:1194#0/1  
CTTCCTCTGAGTATTTTGGGTAGTCATAAGTCCCATTTTT  
+HWI-EAS443:3:88:865:1194#0/1  
abbaa`^b`S\_J\_^¥`]abbZb`^^`b`b`]RY^`b]ZY[  
@HWI-EAS443:3:88:878:202#0/1  
GTGCTCTTCAGGTCGGCTGCATATCCTGACCCCTGCTCAT  
+HWI-EAS443:3:88:878:202#0/1  
``bbb]a^bbbaWZ\_]Zbbba\_Z^a`aaa`[]Z]a`]YVa  
@HWI-EAS443:3:88:930:55#0/1  
TGGCTGGATCCTGGGAAATCCAGAGTGTGAATCACTCTCC  
+HWI-EAS443:3:88:930:55#0/1  
\_[]a^ZXa^H¥`ba\_^^aQ]^`aYJ]G\_¥V¥OY^¥X^UP  
@HWI-EAS443:3:88:940:641#0/1  
GATACAGCAAGAAGTTCAAGCCGAAATAGCAATAAGACC

+HWI-EAS443:3:88:940:641#0/1  
ZQXOZZUYR[^[Y\_UG]aTMZa¥YRYO¥TZYZ`VITX¥SN  
@HWI-EAS443:3:88:971:1232#0/1  
TCTCTATCAGAATGCAGATGCATATGTTTTTGTGGGGACA  
+HWI-EAS443:3:88:971:1232#0/1  
`b`a`b`a`aaa]``ab]ab\_^a\_aa\_aaaba]^a¥aa`a  
@HWI-EAS443:3:88:972:265#0/1  
CTCTTTACTACTGCTGTGAAGTGTATTTCATCTTTTCA  
+HWI-EAS443:3:88:972:265#0/1  
aa\_bbbb`abaabbabb[ba`^baaa\_aab`abaabab^a  
@HWI-EAS443:3:88:979:1398#0/1  
TCATTGGTACTGGTAGTCTCCCTGGGGCAATCAGTTTCT  
+HWI-EAS443:3:88:979:1398#0/1  
abaa`b`Q\_aa\_XY^]QXZ\_a`[Q\_¥S\_[]]PLFQQQ]QX  
@HWI-EAS443:3:88:987:76#0/1  
ATTTCCAGTTGCTTCAATGTTATTTTGTCTCCCGGCTCT  
+HWI-EAS443:3:88:987:76#0/1  
abba^`ababb^baab^aab`a\_aaaab]]`\_`\_aZ\_X^  
@HWI-EAS443:3:88:98:1450#0/1  
CCTGGACATTTGGACTTACAATGCCGAAGTGTGGTTCTA  
+HWI-EAS443:3:88:98:1450#0/1  
`¥U`ZWa[``R¥¥`a¥`\_aa^a`W`aZa]^¥GYZWWW^¥Q  
@HWI-EAS443:3:89:1024:1010#0/1  
GCTGCTTTGAATTTTACCACAAATGCGATAACACGTGCAT  
+HWI-EAS443:3:89:1024:1010#0/1  
a`aa\_aaaaaaaaaaaaa\_a`aa\_aa\_a\_``^a\_]a\_`\_  
@HWI-EAS443:3:89:1060:1834#0/1  
ATCGATTATGAGGAGCTAAGAGAGCAATTGAGCTCAGTGT  
+HWI-EAS443:3:89:1060:1834#0/1  
aaa`\_bb\_aa`a` `[MZaaaab\_[L`aZ¥ZaaaYT\_\_U\_]`  
@HWI-EAS443:3:89:1065:566#0/1  
GAAGCCAGTTAAAAACAATGCCAAGGAAATTGGAAACGG  
+HWI-EAS443:3:89:1065:566#0/1  
a`aaaabbaba`aaaa`aaaa`\_aaa`````\_a\_`^a```  
@HWI-EAS443:3:89:1124:823#0/1  
CGGCTTGAACCTTCTTGCTGTATCTTGATGTCCCCACAAAA  
+HWI-EAS443:3:89:1124:823#0/1  
¥`aa`\_Q¥¥[\_\_a\_¥T]\_¥Q\_^[[`[\_Y¥V]\_V¥`aa`b  
@HWI-EAS443:3:89:1125:951#0/1  
AGCTTTTTGCTCCAGCATGAGGACATGCTGCCGTTACACC  
+HWI-EAS443:3:89:1125:951#0/1  
aababbabaabaabbbbbbbabba\_baaaaa``a`^``\_]`  
@HWI-EAS443:3:89:1142:1367#0/1  
GCTAGTTAAAAAAGGAAATTCATACCCAAAGCTCAGCAAA  
+HWI-EAS443:3:89:1142:1367#0/1  
]aa^\_¥T^^a`\_bb`¥XZ`b\_``a`U^\_abaa^]aaa`a  
@HWI-EAS443:3:89:1151:522#0/1  
AAAACAATGCCAAGGAAATTGGAAACGGCTGCTTTGAATT  
+HWI-EAS443:3:89:1151:522#0/1  
abaa\_ababb¥`bbabaaab^]\_a`a`]\_]FOVYMDMV^

@HWI-EAS443:3:89:1165:822#0/1  
CCGGCTCTACTAGTGTCCAGTAATAGTTCATTCTCCCTTC  
+HWI-EAS443:3:89:1165:822#0/1  
``^`bbba¥`b\_\_\_a\_`aabaabaa^ababb`a``aaab`  
@HWI-EAS443:3:89:1186:98#0/1  
TGCATTCTGATAGAGACTTTGTTGGTCAGCACTAGTAGAT  
+HWI-EAS443:3:89:1186:98#0/1  
abYaaaaabaaTa`aa]aaaa]a\_`ZU^]QUL[\_Y^aW\_  
@HWI-EAS443:3:89:1216:394#0/1  
CAGAATTTACTTTGTTAGTAATCTCGTCAATGGCATTCTG  
+HWI-EAS443:3:89:1216:394#0/1  
Z¥` `b\_¥abb\_`bbbbabZZbbabbbab`[]` `aaa\_bb  
@HWI-EAS443:3:89:122:1359#0/1  
ATTTTCAGAATATACATCCGATCACAATTGGAAAATGTCCA  
+HWI-EAS443:3:89:122:1359#0/1  
aaaa`a\_`^a`a\_]\_`a` `aa^\_`¥Z\_\_\_]\_`^W[`][][\_`  
@HWI-EAS443:3:89:1283:926#0/1  
ATTTTGGGTAGTCATAAGTCCCATTTTTGACACTTTCCAT  
+HWI-EAS443:3:89:1283:926#0/1  
^bbbab¥bUbaX¥]a¥\_`¥Y^aWababba\_`[a^aaa\_`^`\_  
@HWI-EAS443:3:89:1304:1298#0/1  
CGGCTCTACTAGTGTCCAGTAATAGTTCATTCTCCCTTCT  
+HWI-EAS443:3:89:1304:1298#0/1  
a\_aaba` `^a\_]` `aaa\_aYaaa`\_]\_a`a`a^aZ\_`^\_a]\_  
@HWI-EAS443:3:89:1342:1178#0/1  
GCTGGCTGGATCCTGGGAAATCCAGAGTGTGAATCACTCT  
+HWI-EAS443:3:89:1342:1178#0/1  
\_aaa`aaaaaa`aa¥aaa\_a]Xa` ` `a[\_[]Va¥Z` [¥U^  
@HWI-EAS443:3:89:1390:205#0/1  
GCTGCTTTGAATTTTACCACAAATGCGATAACACGTGCAT  
+HWI-EAS443:3:89:1390:205#0/1  
a`\_a]\_a` `\_\_`^` `a`]^`^\_Y^\_]aV[^`^ZW\_V\_Z\_U]]  
@HWI-EAS443:3:89:1408:833#0/1  
AAATTTTTGTAGAAGCTTTTTGCTCCAGCATGAGGACATG  
+HWI-EAS443:3:89:1408:833#0/1  
¥L¥a]a\_b¥Y]UZXPaa]\_aa[[LR]^USW`]aaXI]YX  
@HWI-EAS443:3:89:1444:1568#0/1  
ATTTTGGGTAGTCATAAGTCCCATTTTTGACACTTTCCAT  
+HWI-EAS443:3:89:1444:1568#0/1  
¥Xa¥ab`YM^bbX^ba` ` `]^`\_baba\_a\_`^\_bbaa\_`\_]\_Z  
@HWI-EAS443:3:89:1510:1729#0/1  
CGTGTATCGCATTGTGGTAAAATTCAAAGCAGCCGTTT  
+HWI-EAS443:3:89:1510:1729#0/1  
^b`aabbaaa\_a^¥aaab`\_baVabaQ`bba\_a\_Y]a\_`^`  
@HWI-EAS443:3:89:153:1023#0/1  
GCTGGCTGGATCCTGGGAAATCCAGAGTGTGAATCACTCT  
+HWI-EAS443:3:89:153:1023#0/1  
aa^`\_aa`\_VXN[TV`]V\_a¥\_a\_`^Y^S]S^^^TT¥¥T[V  
@HWI-EAS443:3:89:1555:1675#0/1  
CATTCTGTGTGCTCTTCAGGTCGGCTGCATATCCTGACCC

+HWI-EAS443:3:89:1555:1675#0/1  
`bbabaaabaaSaababbbaaababb`bbb`]a\_ab\_\_Z  
@HWI-EAS443:3:89:1608:1040#0/1  
TTTGCTTCCTCTGAGTATTTTGGGTAGTCATAAGTCCCAT  
+HWI-EAS443:3:89:1608:1040#0/1  
aba`a\_b]`b^bbaa`abaaaabaW`\_`¥`a^``¥[WY\_`  
@HWI-EAS443:3:89:160:167#0/1  
AACTTGTCAGACACCCAAGGGTGCTATAAACACCAGCCTC  
+HWI-EAS443:3:89:160:167#0/1  
L[abab`abababaaa^aaaaTaa`]`aa`^\_a^V`^^^\_  
@HWI-EAS443:3:89:1632:1959#0/1  
CTCTTCAGGTCGGCTGCATATCCTGACCCCTGCTCATTTT  
+HWI-EAS443:3:89:1632:1959#0/1  
[a\_\_bbbbbaVabb`bbbbbaabb]]]\_aaaa]`baaa  
@HWI-EAS443:3:89:1656:242#0/1  
GGGGCATTACCATCCATCTACTAGTGCTGACCAACAAAG  
+HWI-EAS443:3:89:1656:242#0/1  
`baa^][aY]^^`^]\_b0\_`\_\_^aV^U``\_YYY]X^^Z\_  
@HWI-EAS443:3:89:1665:570#0/1  
AAAATATGTAAAAAGCACAAAATTGAGACTGGCCACAGGA  
+HWI-EAS443:3:89:1665:570#0/1  
`bZa`baaR^bbaab`baba`ababaaa\_\_aaZZ\_0¥\_`[  
@HWI-EAS443:3:89:1666:123#0/1  
TGAAGGGGGGTGGACAGGGATGGTAGATGGATGGTACGGT  
+HWI-EAS443:3:89:1666:123#0/1  
[^`\_^aa`aa\_`X`\_HMZF0ba[R]Y[\_`aX\_a¥N\_BBBB  
@HWI-EAS443:3:89:1671:377#0/1  
GCAGGGGTCAGGATATGCAGCCGACCTGAAGAGCACACAG  
+HWI-EAS443:3:89:1671:377#0/1  
a\_abbba^abaaaaabaa`aa`^ba\_Waa\_ab^bZa``¥`\_  
@HWI-EAS443:3:89:182:1250#0/1  
CTGGTGTATCTGAAATGATAATACCAGATCCAGCATTCT  
+HWI-EAS443:3:89:182:1250#0/1  
aaa`K`aaZ`abb`¥bbba`bb`babaabaab`^bbaa  
@HWI-EAS443:3:89:210:881#0/1  
ATTTGCTGAGCTTTGGGTATGAATTTCTTTTTTAACTAG  
+HWI-EAS443:3:89:210:881#0/1  
aaaaaaab\_aabaaaa]`aa``aaaa`aaaa`\_`\_a^\_  
@HWI-EAS443:3:89:211:255#0/1  
TGAAAAGGTAAGAAGCCAGTTAAAAACAATGCCAAGGAA  
+HWI-EAS443:3:89:211:255#0/1  
abaaaaaSSbaabaaa^aaaa]aaaaa\_``]\_\_Ya¥^\_  
@HWI-EAS443:3:89:255:621#0/1  
CACGTGTTATCGCATTTGTGGTAAAATTCAAAGCAGCCGT  
+HWI-EAS443:3:89:255:621#0/1  
abbb\_bbabbab\_abbbb\_ab\_bbb`a``aa`a`aa]`a`  
@HWI-EAS443:3:89:339:351#0/1  
CTGGCTGGATCCTGGGAAATCCAGAGTGTGAATCACTCTC  
+HWI-EAS443:3:89:339:351#0/1  
a\_[\_`\_b\_bZaaZ\_aR\_Tab\_^aaaUaV\_Ra¥]XV`\_\_aa\_



@HWI-EAS443:3:89:373:807#0/1  
ATAACATTCGAAGCAACTGGAAATCTAGTGGTACCGAGAT  
+HWI-EAS443:3:89:373:807#0/1  
a\_a`a]`\_baa\_aa\_`aab\_a`aaaaaa]a^^aa\_a`a`  
@HWI-EAS443:3:89:374:175#0/1  
TACGGTTATCACCATCAAAATGAGCAGGGGTCAGGATATG  
+HWI-EAS443:3:89:374:175#0/1  
aaaab^aa`aa[ [ `^¥\_a`\_a^\_XX` `a\_V]W\_Y[¥`¥X  
@HWI-EAS443:3:89:40:324#0/1  
CAACTGGAAATCTAGTGGTACCGAGATATGCATTGCAAT  
+HWI-EAS443:3:89:40:324#0/1  
a\_`aaaa\_a\_a` ``aZa`W`\_`a`a`\_`^a\_a\_^\_\_^\_Y\_  
@HWI-EAS443:3:89:512:1884#0/1  
ATCGATGAAATCTCCTGGGTAACACGTTCCATTGTCTGAA  
+HWI-EAS443:3:89:512:1884#0/1  
WY]\_R][^Q¥U]¥a^TH]]S\_W¥ZWW^\_] ^]J[\_¥\_¥HVZ  
@HWI-EAS443:3:89:533:334#0/1  
GGACTGGTGTATCTGAAATGATAATACCAGATCCAGCATT  
+HWI-EAS443:3:89:533:334#0/1  
`J]` `]ZKY`a` `aVU`^`^`\_\_XW¥`a\_Y[^Y[]\_`\_¥  
@HWI-EAS443:3:89:559:369#0/1  
GATGACACTGAGCTCAATTGCTCTCTTAGCTCCTCATAAT  
+HWI-EAS443:3:89:559:369#0/1  
W¥V`¥^]ab`Mabba[^a`\_\_aababbab[[ ` `aa`ba`b  
@HWI-EAS443:3:89:560:137#0/1  
TTCTTGCTGTATCTTGATGTCCCCACAAAACATATGCAT  
+HWI-EAS443:3:89:560:137#0/1  
aaaaaaaaab`a` `aaa`\_a\_`a`]a` `¥^` `]`^`\_\_W`\_  
@HWI-EAS443:3:89:563:1850#0/1  
GCTGGCTGGATCCTGGGAAATCCAGAGTGTGAATCACTCT  
+HWI-EAS443:3:89:563:1850#0/1  
abbYQ\_bb\_VVYY\_]\_` `a`¥¥` `RWaZVQ^a]LZ^¥` ¥^  
@HWI-EAS443:3:89:571:1228#0/1  
TGCCGGTTTCATTGAAGGGGGTGGACAGGGATGGTAGAT  
+HWI-EAS443:3:89:571:1228#0/1  
a^abbaa`abb`a\_¥\_\_`aa`b^a`Y¥` `^`\_aa`¥\_aa^  
@HWI-EAS443:3:89:578:319#0/1  
GGGGGGTGGACAGGGATGGTAGATGGATGGTACGGTTATC  
+HWI-EAS443:3:89:578:319#0/1  
aaaa` `Vaa`a`aa`[^aaW]aY[a[\_\_\_`ZK[\_\_\_[V¥[NL  
@HWI-EAS443:3:89:589:602#0/1  
GCTGGATCCTGGGAAATCCAGAGTGTGAATCACTCTCCAC  
+HWI-EAS443:3:89:589:602#0/1  
`aaba`bbba\_a`^aaa`aabaa\_a¥aa`\_\_a`a` `]\_a\_  
@HWI-EAS443:3:89:597:808#0/1  
TAAGAAGCCAGTTAAAAACAATGCCAAGGAAATTGGAAA  
+HWI-EAS443:3:89:597:808#0/1  
aaa` `aa`a\_a`\_\_`\_\_a` `a`\_\_^a`\_`^^`\_`^Z^\_  
@HWI-EAS443:3:89:612:732#0/1  
ATCATTGAAAGGTTTGGAGATATTCCCCAAGACAAGTTCA

+HWI-EAS443:3:89:612:732#0/1  
\_`a[Za^aSWQWUIXP¥a\_WII^ba¥\_`UR\_`^\_UZZ¥SY  
@HWI-EAS443:3:89:625:1985#0/1  
AAATGAGCAGGGGTCAGGATATGCAGCCGACCTGAAGAGC  
+HWI-EAS443:3:89:625:1985#0/1  
a\_`aabbbabab`\_bbaaaaa`aaa\_aa`aaaaaa\_aa  
@HWI-EAS443:3:89:688:448#0/1  
TGCCGGTTTCATTGAAGGGGGGTGGACAGGGATGGTAGAT  
+HWI-EAS443:3:89:688:448#0/1  
abababaabaabba\_ab`bbaa`aaaaaaaaabb\_Waaaa  
@HWI-EAS443:3:89:762:164#0/1  
CAGGGAGACTACAGTACCAATGAACTGGCGACAGTTGAA  
+HWI-EAS443:3:89:762:164#0/1  
aaa¥W\_`aa[aQNN\_Q^\_\_``[baaabaRa\_H]\_[[QO]  
@HWI-EAS443:3:89:769:627#0/1  
GATGAAATCTCCTGGGTAACACGTTCCATTGTCTGAACTA  
+HWI-EAS443:3:89:769:627#0/1  
a`aR\_]a`a``\_a¥[TZ`X`X\_\_[\_^^\_`^PZZ^Y^]]  
@HWI-EAS443:3:89:797:1249#0/1  
GGAGATTTTCATCGATTATGAGGAGCTAAGAGAGCAATTGA  
+HWI-EAS443:3:89:797:1249#0/1  
ab`YW\_baS\_aa\_YZ`baaaa\_]Z¥ZK^[]a`]WZ^^Tb[  
@HWI-EAS443:3:89:896:1664#0/1  
GCCGGTTTCATTGAAGGGGGGTGGACAGGGATGGTAGATG  
+HWI-EAS443:3:89:896:1664#0/1  
abb`¥X``[^`^ZJW[`\_`]]`\_]a^0\_X¥a\_\_NWa^^^`  
@HWI-EAS443:3:89:898:686#0/1  
CGGGAAACTATGCAAACAACTAAGAGGGGTAGCCCCATTGCAT  
+HWI-EAS443:3:89:898:686#0/1  
a`¥`X]\_`bbb]a]aaaa¥aa\_¥\_¥a`Z`^]b\_bTab  
@HWI-EAS443:3:89:948:978#0/1  
TGATGTCCCCACAAAAACATATGCATCTGCATTCTGATAG  
+HWI-EAS443:3:89:948:978#0/1  
`[aab\_aaaaaaa^aaaa`aa\_aa`a`\_aaa]aaaa\_  
@HWI-EAS443:3:89:955:695#0/1  
CGGGAAACTATGCAAACAACTAAGAGGGGTAGCCCCATTGCAT  
+HWI-EAS443:3:89:955:695#0/1  
`ba`bababb`aababab`b`abbaaa\_b¥^\_aa\_bb\_ab  
@HWI-EAS443:3:89:973:1725#0/1  
GCACGTGTTATCGCATTGTGGTAAAATTCAAAGCAGCCG  
+HWI-EAS443:3:89:973:1725#0/1  
abbbbaabbaababbbb\_bbabbbabababab`aa\_aa  
@HWI-EAS443:3:8:1005:188#0/1  
GTGGGACATCAAGATACAGCAAGAAGTTCAAGCCGGAAA  
+HWI-EAS443:3:8:1005:188#0/1  
a\_aa¥X¥`X\_WYN[YZYJT¥FV[RYFSX¥X^WQNQUBBBB  
@HWI-EAS443:3:8:1015:440#0/1  
CCCATTTTGGACACTTCCATGCACGTGTTATCGCATTG  
+HWI-EAS443:3:8:1015:440#0/1  
X^bbbbbbbabababbbababba\_b`abbaab^a^`bbb]

@HWI-EAS443:3:8:1034:764#0/1  
GTCTTATTGCTATTTCCGGCTTGAACCTTCTTGCTGTATCT  
+HWI-EAS443:3:8:1034:764#0/1  
aa¥a]b\_`a]b\_\_\_a^UaaSa[\_]VUVPV\_\_X]\_V^UM[  
@HWI-EAS443:3:8:1056:476#0/1  
GCTGCTTTGAATTTTACCACAAATGCGATAACACGTGCAT  
+HWI-EAS443:3:8:1056:476#0/1  
aaa`¥`^¥XYV^a`WXZZ^W[^YT¥T[WY^XMVV]N\_R]]  
@HWI-EAS443:3:8:1059:583#0/1  
ATCAGAATGCAGATGCATATGTTTTGTGGGGACATCAAG  
+HWI-EAS443:3:8:1059:583#0/1  
ab`baaaa``aaaaba^aaab\_\_aa`a\_b`\_]\_^\_\_\_]\_\_\_\_  
@HWI-EAS443:3:8:1090:109#0/1  
TTATATGAAAAGGTAAGAAGCCAGTTAAAAACAATGCCA  
+HWI-EAS443:3:8:1090:109#0/1  
S^`\_¥^aa`¥a\_aJaa]bbba¥bb`aababaa\_a`aaTQZ  
@HWI-EAS443:3:8:1101:476#0/1  
ATCGATTATGAGGAGCTAAGAGAGCAATTGAGCTCAGTGT  
+HWI-EAS443:3:8:1101:476#0/1  
aaY`aab]bbabaabaaaa\_a`\_`\_\_`ba]a`Z^]``Iaa  
@HWI-EAS443:3:8:1108:692#0/1  
GATGGTTTCCTGGACATTTGGACTTACAATGCCGAAGTGT  
+HWI-EAS443:3:8:1108:692#0/1  
a[^^^U```\_a`^]]Z`a\_\_\_¥^^^Z^]\_^\_YZX]Z^^Z  
@HWI-EAS443:3:8:1126:1046#0/1  
GCCGGTTTCATTGAAGGGGGTGGACAGGGATGGTAGATG  
+HWI-EAS443:3:8:1126:1046#0/1  
aabb`¥ba]`bab^\_a`a^aaMa`^¥XaY[¥\_\_^Z[[[P\_  
@HWI-EAS443:3:8:118:1863#0/1  
CATCATTTGAAAGTTTGAGATATCCCCAAGACAAGTTC  
+HWI-EAS443:3:8:118:1863#0/1  
a`]`X`]ZP\_a[\_SZSSRaSaYaRHMW]\_^X^^U\_]YX¥[  
@HWI-EAS443:3:8:1197:732#0/1  
TTCTTGCTGTATCTTGATGTCCCCACAAAACATATGCAT  
+HWI-EAS443:3:8:1197:732#0/1  
Z[¥XX\_^Y`U^P^^¥]¥Y\_Sa^^`a\_aa\_X\_V][[]S]L]\_  
@HWI-EAS443:3:8:1199:836#0/1  
GGAAATTGAAACGGCTGCTTTGAATTTTACCACAAATGC  
+HWI-EAS443:3:8:1199:836#0/1  
`[^`\_^\_[[Z`¥RL[[VX]RJVUKHTLQZXNJPOBBBBBBB  
@HWI-EAS443:3:8:1235:1326#0/1  
CAATTGAAAATGTCCAAAATATGTA AAAAGCACAAAATT  
+HWI-EAS443:3:8:1235:1326#0/1  
a\_aUV\_```aaYa¥a`¥[\_\_aabb```\_`aaaY`¥\_`[\_a¥  
@HWI-EAS443:3:8:1248:1308#0/1  
ATTTTGCTTCTCTGAGTATTTTGGGTAGTCATAAGTCCC  
+HWI-EAS443:3:8:1248:1308#0/1  
aabbaa^aa]aa`ab`\_¥abaaaa]`^aa`]aa`\_\_\_N\_\_  
@HWI-EAS443:3:8:1277:1528#0/1  
GGAGATTTTCATCGATTATGAGGAGCTAAGAGAGCAATTGA

+HWI-EAS443:3:8:1277:1528#0/1  
YR¥aV\_b[\_`Y[baa¥aba\_\_aaa]\_]Yaaaaa]\_\_W¥\_^  
@HWI-EAS443:3:8:1388:1893#0/1  
AAAACATATGCATCTGCATTCTGATAGAGACTTTGTTGGT  
+HWI-EAS443:3:8:1388:1893#0/1  
ab`\_a^^baaTa`W^a\_`a]a\_\_`a^`aSa```\_aY\_]`  
@HWI-EAS443:3:8:1412:128#0/1  
CTTCCTCTGAGTATTTTGGGTAGTCATAAGTCCCATTTTT  
+HWI-EAS443:3:8:1412:128#0/1  
a\_^[a`Ybb`aZZ¥aZaaa\_]\_\_WXW[^`\_`Y]W¥W]]]a^`  
@HWI-EAS443:3:8:1415:961#0/1  
CGGTACCACTAGATTTCCAGTTGCTTCCAATGTTATTTTG  
+HWI-EAS443:3:8:1415:961#0/1  
abbUabbbbabbbabba]`ababbVba\_aa`aa\_b^abbbb  
@HWI-EAS443:3:8:1493:1065#0/1  
ATTTTTGACACTTTCCATGCACGTGTTATCGCATTTGTGG  
+HWI-EAS443:3:8:1493:1065#0/1  
Y¥[YW\_^¥W`YYVY\_IQK\_YQO\_L\_¥[X¥0]DMWOPa^a]  
@HWI-EAS443:3:8:149:647#0/1  
AGAAGACAAGCATAACGGGAAACTATGCAAATAAGAGGG  
+HWI-EAS443:3:8:149:647#0/1  
aa`a\_`aaaa`aaaa^^^a`a`\_aaa`]\_\_\_\_]\_`a\_\_^Wa  
@HWI-EAS443:3:8:1607:92#0/1  
CTTTTTTATTTAAATTCTCTATTCTTTTTTCCAGGTGGTT  
+HWI-EAS443:3:8:1607:92#0/1  
abbbbbbbbbbb`a`bbbbbbbbbbabbbbbbba`aba\_ba`^`  
@HWI-EAS443:3:8:1680:192#0/1  
TGGCTGGATCCTGGGAAATCCAGAGTGTGAATCACTCTCC  
+HWI-EAS443:3:8:1680:192#0/1  
aaa]aaa\_\_¥¥¥¥^`^^^\_SS¥¥W\_V\_W¥WWWUWQUWSU  
@HWI-EAS443:3:8:1716:1882#0/1  
ATTCAAAGCAGCCGTTTCCAATTTCTTGGCATTGTTTTT  
+HWI-EAS443:3:8:1716:1882#0/1  
a`\_a``\_\_\_\_^^¥a^\_\_^Z\_Z`\_\_ZVZ\_^^ZZZZ\_X^]]B  
@HWI-EAS443:3:8:217:1960#0/1  
AAGTCCTCGTGCTATGGGGCATTACCATCCATCTACTAG  
+HWI-EAS443:3:8:217:1960#0/1  
a`a¥aa`a\_[Q\_\_\_\_^V^\_^\_\_\_\_^\_W¥\_^^\_a^Z¥a\_]\_S  
@HWI-EAS443:3:8:256:143#0/1  
GGAACGTGTTACCCAGGAGATTTTCATCGATTATGAGGAGC  
+HWI-EAS443:3:8:256:143#0/1  
`baaabYa\_`aa`Yaa\_]a¥\_`\_]¥Va]]\_`^\_`^Y\_V  
@HWI-EAS443:3:8:266:952#0/1  
GGCCATTGCCGTTTTCATTGAAGGGGGGTGGACAGGGATG  
+HWI-EAS443:3:8:266:952#0/1  
aba\_aaaaa^b`¥aa]aaaa^Zaaba^b¥Z`]¥^]``^\_`  
@HWI-EAS443:3:8:288:1972#0/1  
GGGGCATTACCATCCATCTACTAGTGCTGACCAACAAAG  
+HWI-EAS443:3:8:288:1972#0/1  
abaababbbbaabaaaaaabaY]YX`a`ba^aaWa[a`

@HWI-EAS443:3:8:304:446#0/1  
GGGGACATCAAGATACAGCAAGAAGTTCAAGCCGGAAATA  
+HWI-EAS443:3:8:304:446#0/1  
aa][[YYY[aQa\_`]^`^`]^`a^^\_VVU\_]^NU[\_]^P^^  
@HWI-EAS443:3:8:358:1957#0/1  
AGCAAATCCTACATTAATGATAAAGGGAAAGAAGTCCTCG  
+HWI-EAS443:3:8:358:1957#0/1  
a[b`^a`bb\_b\_¥^¥aaaaa^b`aa\_\_\_\_`aa`^aZ\_aS`a  
@HWI-EAS443:3:8:384:1120#0/1  
GCACGTGTTATCGCATTTGTGGTAAAATTCAAAGCAGCCG  
+HWI-EAS443:3:8:384:1120#0/1  
aabab\_``¥bWba^aaaaZ[aaRaaa`\_a\_^\_Y¥]\_\_¥W\_  
@HWI-EAS443:3:8:420:150#0/1  
CGTGTACCAGGAGATTTTCATCGATTATGAGGAGCTAAG  
+HWI-EAS443:3:8:420:150#0/1  
`bYbb`[[`YX\_XS\_R]aXW\_VV`^K^UZaaa\_Q\_G[]`a  
@HWI-EAS443:3:8:426:123#0/1  
CTCTTCAGGTCGGCTGCATATCCTGACCCCTGCTCATTTT  
+HWI-EAS443:3:8:426:123#0/1  
a\_OY`ZabbY\_a`\_`a¥UZa`\_^[^\_\_ZQZ\_^W\_¥¥`U¥¥  
@HWI-EAS443:3:8:459:1417#0/1  
CTGGCTTCTTACCTTTTCATATAAGTTCTTCACATTTGAA  
+HWI-EAS443:3:8:459:1417#0/1  
X`a`aabbbababbbbbbbbbb`aaaababbb`aa```ba  
@HWI-EAS443:3:8:460:1426#0/1  
TGAATTTCTTTTTTAACTAGCCATATTAATTTTTGTAG  
+HWI-EAS443:3:8:460:1426#0/1  
aaaaaa]a[a\_a`\_\_^a\_aUS`U`a^a\_a\_a`\_¥\_aa[a^  
@HWI-EAS443:3:8:46:863#0/1  
ATCCCTGTCCACCCCTTCAATGAAACCGCAATGGCCC  
+HWI-EAS443:3:8:46:863#0/1  
`abaa`a^[\`a`X\_¥aa`\_a\_\_`[\`aaaa¥\_]¥¥¥¥U^  
@HWI-EAS443:3:8:576:537#0/1  
GGGGACATCAAGATACAGCAAGAAGTTCAAGCCGGAAATA  
+HWI-EAS443:3:8:576:537#0/1  
abaaa`Ya^\_ab\_a`abaaaaa\_a^]\_a\_a^]`\_`URVa  
@HWI-EAS443:3:8:586:119#0/1  
TGAACTTCTTGCTGTATCTTGATGTCCCCACAAAACATA  
+HWI-EAS443:3:8:586:119#0/1  
aaaa`aaa`aba\_a\_aaaa`\_`a\_\_\_W\_\_Z^^\_^\_]\_\_  
@HWI-EAS443:3:8:600:1150#0/1  
GCTTGAACTTCTTGCTGTATCTTGATGTCCCCACAAAAC  
+HWI-EAS443:3:8:600:1150#0/1  
ababb`babb\_aabaab`ba\_aaaaabaa`a^a`\_`P\_\_`  
@HWI-EAS443:3:8:600:483#0/1  
GAAGTCCTCGTGTATGGGGCATTACCATCCATCTACTA  
+HWI-EAS443:3:8:600:483#0/1  
aaaa\_aaaab`a\_aaaa\_a`\_```\_`\_Qa¥\_Z\_\_^Z\_U][  
@HWI-EAS443:3:8:605:429#0/1  
GACAATGGAACGTGTACCAGGAGATTTTCATCGATTATG

+HWI-EAS443:3:8:605:429#0/1  
a\_aa]]a`\_a`aJa\_[`\_a¥R`aX` `[\_XFU^\_\_^[^^]a  
@HWI-EAS443:3:8:633:434#0/1  
ATTTTACCACAAATGCGATAACACGTGCATGGAAAGTGTC  
+HWI-EAS443:3:8:633:434#0/1  
abaabbaaa\_bbaabaaaa`aa\_]a\_\_\_`aY^\_`¥]a]\_  
@HWI-EAS443:3:8:652:219#0/1  
GGACCATGAGCTTGCTGTGGAGAGTGATTCACACTCTGGA  
+HWI-EAS443:3:8:652:219#0/1  
`abaabbba`\_aaaaaa`aa`a\_a¥\_\_\_\_\_U`WaU]S¥\_[U  
@HWI-EAS443:3:8:705:736#0/1  
GTTTCCTGGACATTTGGACTTACAATGCCGAAGTGTGGT  
+HWI-EAS443:3:8:705:736#0/1  
a]¥Y`\_]`^`¥^`[a`aa\_a\_]aZ][¥]¥[\_\_\_`]`\_`YG[¥B  
@HWI-EAS443:3:8:719:947#0/1  
AGATTTCCAGTTGCTTCCAATGTTATTTTGTCTCCCGGCT  
+HWI-EAS443:3:8:719:947#0/1  
XW]RZ`\_¥UV\_b¥]Z]]Y]aX¥X`¥\_\_aV\_[NW\_U¥]]FX  
@HWI-EAS443:3:8:76:1397#0/1  
GGCTGGATCCTGGAAATCCAGAGTGTGAATCACTCTCCA  
+HWI-EAS443:3:8:76:1397#0/1  
aaaaabXaaaaaaaa\_bbaa`a^`aXa`\_`\_a\_aa]`\_`aaa  
@HWI-EAS443:3:8:794:107#0/1  
GGGGACATCAAGATACAGCAAGAAGTTCAAGCCGGAAATA  
+HWI-EAS443:3:8:794:107#0/1  
¥a`a`\_`b[XP^\_aaVRbbaaaaT^aYbSb^aS]\_aZ^\_\_¥  
@HWI-EAS443:3:8:835:122#0/1  
GTTATTTTGTCTCCCGGCTCTACTAGTGTCCAGTAATAGT  
+HWI-EAS443:3:8:835:122#0/1  
aabaaaaaa`\_`\_`\_\_a\_\_\_^\_X^WW]\_ZXZ^`ZW[XXXZ  
@HWI-EAS443:3:8:84:504#0/1  
GGGAAATCCAGAGTGTGAATCACTCTCCACAGCAAGCTCA  
+HWI-EAS443:3:8:84:504#0/1  
aaa]][^W\_bYGYQZT\_Ubba¥\_b]\_aaa`Q]`TY\_[Za\_  
@HWI-EAS443:3:8:852:446#0/1  
GGGGACATCAAGATACAGCAAGAAGTTCAAGCCGGAAATA  
+HWI-EAS443:3:8:852:446#0/1  
¥`\_`b¥a¥^`b^a`a\_aaaaaabbabZ]a\_]`aSbaU\_Yba  
@HWI-EAS443:3:8:853:975#0/1  
CAGGAGATTTTCATCGATTATGAGGAGCTAAGAGAGCAATT  
+HWI-EAS443:3:8:853:975#0/1  
aUbb^`\_`\_`bb\_Yaababaabbaa`\_`b\_aa\_a]a`^W^[\_`  
@HWI-EAS443:3:8:865:1440#0/1  
AATCGATGAAATCTCCTGGGTAACACGTTCCATTGTCTGA  
+HWI-EAS443:3:8:865:1440#0/1  
a\_\_aba`ba¥`aU`a`\_aa\_¥aS]a^`\_`a[\_¥¥\_WZa\_^  
@HWI-EAS443:3:8:870:448#0/1  
CTGTGTGCTCTCAGGTCGGCTGCATATCCTGACCCCTGC  
+HWI-EAS443:3:8:870:448#0/1  
\_bababbbbbbbbbbb`abbabb\_aaaaa`aaaV`¥`aa^

@HWI-EAS443:3:8:881:963#0/1  
ATTTTACCACAAATGCGATAACACGTGCATGGAAAGTGTC  
+HWI-EAS443:3:8:881:963#0/1  
aba`aaa`b`a`aaa^a\_`a^`\_a[aT^^^\_^\_]Y\_Y\_S\_  
@HWI-EAS443:3:8:905:828#0/1  
CAGGGATGGTAGATGGATGGTACGGTTATCACCATCAAAA  
+HWI-EAS443:3:8:905:828#0/1  
`¥bbbaabb\_bbbZaababa\_b]aa¥aa\_\_a\_\_`aUaaa`  
@HWI-EAS443:3:8:939:378#0/1  
TCAAGATACAGCAAGAAGTTCAAGCCGAAATAGCAATAA  
+HWI-EAS443:3:8:939:378#0/1  
¥bTaaaa`W]]aYab\_¥`RY^aTYRQ\_aZZ]`W^Z[]^¥[  
@HWI-EAS443:3:8:998:318#0/1  
CAAAATATGTAAAAAGCACAAAATTGAGACTGGCCACAGG  
+HWI-EAS443:3:8:998:318#0/1  
aa`a\_baaaa\_b`\_`aaabba`^`\_baaa]^\_aH`\_H]S`  
@HWI-EAS443:3:90:1000:1252#0/1  
GATCCTGGGAAATCCAGAGTGTGAATCACTCTCCACAGCA  
+HWI-EAS443:3:90:1000:1252#0/1  
a^\_aaaa`\_`a\_a\_a`\_aZa^aa`\_\_`\_\_\_`a]a^``¥a  
@HWI-EAS443:3:90:1027:25#0/1  
GGAAAGAAGTCCTCGTGCTATGGGGCATTACCATCCATC  
+HWI-EAS443:3:90:1027:25#0/1  
¥a\_]TWS^`H\_YS¥b`^J[¥aaaa^]U`YQ[\_`\_ZZ¥\_`^N  
@HWI-EAS443:3:90:1032:1247#0/1  
GAAGAACTTATATGAAAAGGTAAGAAGCCAGTTAAAAAAC  
+HWI-EAS443:3:90:1032:1247#0/1  
aaa^abaaab\_^abaaa`ba\_babaa`aaba`a`aaXaa`  
@HWI-EAS443:3:90:1059:1193#0/1  
GGCTGGATCCTGGGAAATCCAGAGTGTGAATCACTCTCCA  
+HWI-EAS443:3:90:1059:1193#0/1  
aa¥T¥¥XX]W`^a]OZ]`XXb`¥`^]P`[^ZV¥IV[]`^]  
@HWI-EAS443:3:90:1061:480#0/1  
AAAGTCTCTATCAGAATGCAGATGCATATGTTTTTGTGGG  
+HWI-EAS443:3:90:1061:480#0/1  
ab`b\_abaa^babbaa\_aaab]aaa\_a`aa``a\_aa``\_`  
@HWI-EAS443:3:90:1072:1713#0/1  
CATCGATTATGAGGAGCTAAGAGAGCAATTGAGCTCAGTG  
+HWI-EAS443:3:90:1072:1713#0/1  
aabbbbbbaabbabbbbabab`bbbbbbbbbbbbSabb\_^b  
@HWI-EAS443:3:90:1082:1306#0/1  
AGTCCTCGTGCTATGGGGCATTACCATCCATCTACTAGT  
+HWI-EAS443:3:90:1082:1306#0/1  
`a`aaaa]]`\_\_\_a`\_]\_Z^\_a`\_V[\_\_\_]\_a]¥`\_`^a\_Z  
@HWI-EAS443:3:90:1087:204#0/1  
CCGGTTTCATTGAAGGGGGTGGACAGGGATGGTAGATGG  
+HWI-EAS443:3:90:1087:204#0/1  
abbaabbaabbbabbbbabab\_bba`aaaaababWaaa\_aa  
@HWI-EAS443:3:90:1103:1184#0/1  
GGAACGTGTTACCCAGGAGATTTTCATCGATTATGAGGAGC

+HWI-EAS443:3:90:1103:1184#0/1  
abab`aababbaaaaaaab[aba`aa`b\_aaabaaaaa`  
@HWI-EAS443:3:90:1113:145#0/1  
GAGTATTTTGGGTAGTCATAAGTCCCATTTTGGACACTTT  
+HWI-EAS443:3:90:1113:145#0/1  
aab]aabaaaa]aa]\_`aaa^Q]Z\_a`aaa^^`^`]  
@HWI-EAS443:3:90:1121:827#0/1  
GAAGTCCTCGTGCTATGGGGCATTACCATCCATCTACTA  
+HWI-EAS443:3:90:1121:827#0/1  
abaa`a^abbabaaabaaaa\_aaa`a`\_aa\_\_a`^aa\_a`  
@HWI-EAS443:3:90:1136:1387#0/1  
TAGAGACTTTGTTGGTCAGCACTAGTAGATGGATGGTGAA  
+HWI-EAS443:3:90:1136:1387#0/1  
`bbaa`a\_R¥`\_aaa0a]`\_^U]`aRR``\_\_\_\_]^^\_V`a^  
@HWI-EAS443:3:90:1143:328#0/1  
TCTGTGTCTCTTCAGGTCGGCTGCATATCCTGACCCCTG  
+HWI-EAS443:3:90:1143:328#0/1  
aaab``Z`aa¥`a^a`]`\_`ZX`\_W^\_a\_[Xa^UVS]U[S  
@HWI-EAS443:3:90:1162:371#0/1  
CGGCTGCTTTGAATTTTACCACAAATGCGATAACACGTGC  
+HWI-EAS443:3:90:1162:371#0/1  
`baaabXZ]`YY^aabb`S]\_\_[aaWa^a`\_`\_a0`Xa^`X  
@HWI-EAS443:3:90:119:1975#0/1  
CAAAAACATATGCATCTGCATTCTGATAGAGACTTTGTTG  
+HWI-EAS443:3:90:119:1975#0/1  
aaa`aa`a`a`\_aaaaa^`\_aa\_aaa\_\_\_\_\_^\_W^]Z^]  
@HWI-EAS443:3:90:1210:1323#0/1  
CTAGTAGATGGATGGTGAATGCCCCATAGCACGAGGACTT  
+HWI-EAS443:3:90:1210:1323#0/1  
abab`aba^`X^aa^aa`aba[S[^aa\_aa`\_`^aa`W]a  
@HWI-EAS443:3:90:1215:406#0/1  
TCCGGCTTGAACTTCTTGCTGTATCTTGATGTCCCACAA  
+HWI-EAS443:3:90:1215:406#0/1  
aa\_aa`bbY^aXab^aa`^a¥Z]a]aa`\_a``aXW]]]a¥  
@HWI-EAS443:3:90:1229:734#0/1  
AGCCGGGAGACAAAATAACATTGCAAGCAACTGGAAATCT  
+HWI-EAS443:3:90:1229:734#0/1  
``\_`abaaa`ab\_]aaaaaaaaa`^a^\_a^`a``\_aa^`  
@HWI-EAS443:3:90:1233:1367#0/1  
ATTTTGGGTAGTCATAAGTCCCATTTTGGACACTTTCCAT  
+HWI-EAS443:3:90:1233:1367#0/1  
abbab``a^aa`aaaa]a`]`aabaaa\_\_a``\_a`Wa`  
@HWI-EAS443:3:90:1255:1974#0/1  
GAAGTCCTCGTGCTATGGGGCATTACCATCCATCTACTA  
+HWI-EAS443:3:90:1255:1974#0/1  
^b[¥I\_a`bZ^a`bba[bbYab\_a^ZH]X[JK`G`[]\_T  
@HWI-EAS443:3:90:1291:1444#0/1  
GCTGGCTGGATCCTGGGAAATCCAGAGTGTGAATCACTCT  
+HWI-EAS443:3:90:1291:1444#0/1  
a^bba`a¥¥\_OW`Z\_\_X[[]S]U]aP[PQR^TXYU\_UXPZ



@HWI-EAS443:3:90:1332:498#0/1  
AATCTCGTCAATGGCATTCTGTGTGCTCTTCAGGTCGGCT  
+HWI-EAS443:3:90:1332:498#0/1  
aababababbaaaa]aabaaaa]Za[`Zaa[aa\_¥Qaa¥\_  
@HWI-EAS443:3:90:1340:512#0/1  
GCTTCCTCTGAGTATTTTGGGTAGTCATAAGTCCCATTTT  
+HWI-EAS443:3:90:1340:512#0/1  
`]X^XV]X^`\_YRaa¥ZW`Z^\_W[¥¥]]P]`L\_NNU`\_\_a  
@HWI-EAS443:3:90:1358:1847#0/1  
TGTGGGGACATCAAGATACAGCAAGAAGTTCAAGCCGGAA  
+HWI-EAS443:3:90:1358:1847#0/1  
abababbbaaaa^aaaaa^bb`bbaaaaZ`\_ba\_¥\_\_`\_a  
@HWI-EAS443:3:90:1375:2027#0/1  
TGGGGACATCAAGATACAGCAAGAAGTTCAAGCCGGAAAT  
+HWI-EAS443:3:90:1375:2027#0/1  
[`¥aaa]Zb\_VX`\_K0a[UUba^V]b]VIa¥`\_VKPR`b^  
@HWI-EAS443:3:90:1392:1031#0/1  
ATTGCTATTTCCGGCTTGAACCTTGCTGTATCTTGATG  
+HWI-EAS443:3:90:1392:1031#0/1  
`babR]ab`\_JX`\_Z[\_a\_]a`Ta`\_R\_¥W\_\_BBBBBBB  
@HWI-EAS443:3:90:1393:1315#0/1  
AAATAACATTTCGAAGCAACTGGAAATCTAGTGGTACCGAG  
+HWI-EAS443:3:90:1393:1315#0/1  
]bbb`bbb`b`\_`a`[\_`a\_bba`aaa`aaa\_baWaa\_aaa  
@HWI-EAS443:3:90:1402:944#0/1  
CAATGGCATTCTGTGTGCTCTTCAGGTCGGCTGCATATCC  
+HWI-EAS443:3:90:1402:944#0/1  
[\_`\_\_\_^X`ab\_b[\_`\_`¥ba\_\_\_ba^W]b\_GY`H`bbaS`  
@HWI-EAS443:3:90:1405:311#0/1  
ATAACGGGAAACTATGCAAATAAGAGGGGTAGCCCCATT  
+HWI-EAS443:3:90:1405:311#0/1  
abb\_[a\_^aa`G``aa``\_a\_a\_`aSaa``\_X`TW^[WX^  
@HWI-EAS443:3:90:1416:767#0/1  
ATTCCCCAAGACAAGTTCATGGCCCAATCATGACTCGAAC  
+HWI-EAS443:3:90:1416:767#0/1  
abbaa`abba`aba\_b`aaaa^\_a\_a`aaaa^aaa``]  
@HWI-EAS443:3:90:1439:990#0/1  
TAAGAAGCCAGTTAAAAACAATGCCAAGGAAATTGGAAA  
+HWI-EAS443:3:90:1439:990#0/1  
ab`aabaaba`aaaa`\_]W\_aaaS\_\_^aa\_]\_^a\_^`  
@HWI-EAS443:3:90:144:838#0/1  
CAATGGAACGTGTACCCAGGAGATTTTCATCGATTATGAG  
+HWI-EAS443:3:90:144:838#0/1  
a\_ww]\_\_^RQW\_Z[KZ^V[\_WYaXWJ]UQZ]\_V¥^T]a\_\_  
@HWI-EAS443:3:90:146:1119#0/1  
AGCAACTGGAAATCTAGTGGTACCGAGATATGCATTCGCA  
+HWI-EAS443:3:90:146:1119#0/1  
aababaababaa`aaaa^a\_^bba`aaa``aaaa`\_a^`a  
@HWI-EAS443:3:90:1515:1135#0/1  
TTTTGCTTCCTCTGAGTATTTTGGGTAGTCATAAGTCCCA



@HWI-EAS443:3:90:30:1608#0/1  
CAAAAACATATGCATCTGCATTCTGATAGAGACTTTGTGTTG  
+HWI-EAS443:3:90:30:1608#0/1  
ab`b`^aaaaaaa`a`aa`aaaaa``aaa``a\_\_\_aY``  
@HWI-EAS443:3:90:318:1700#0/1  
GGATGGTACGGTTATCACCATCAAATGAGCAGGGGTCAG  
+HWI-EAS443:3:90:318:1700#0/1  
`baaabababa]bbXaZ]a`U\_baaa`a\_T\_aaaaaV`ab  
@HWI-EAS443:3:90:324:1213#0/1  
CTTTGTTAGTAATCTCGTCAATGGCATTCTGTGTGCTCTT  
+HWI-EAS443:3:90:324:1213#0/1  
a\_]Z¥P[VVUUVR[]]PVO[L[^]]Y¥]VPYRaZ^[XP  
@HWI-EAS443:3:90:335:1572#0/1  
GCCCCATTGCATTTGGGTAAATGTAACATTGCTGGCTGGA  
+HWI-EAS443:3:90:335:1572#0/1  
aaa`^TSa\_]aa^V[[aP¥0¥\_`¥]W\_ZZ^^Z^¥TT^¥SZ  
@HWI-EAS443:3:90:384:1148#0/1  
ATGAAATCTCCTGGGTAACACGTTCCATTGTCTGAACTAG  
+HWI-EAS443:3:90:384:1148#0/1  
]bZV¥¥^baba`\_]^^[YZV\_\_NZVWXXJ\_ZZ`a``\_[aY  
@HWI-EAS443:3:90:423:383#0/1  
GGTTTCCTGGACATTTGGACTTACAATGCCGAAGTGTGG  
+HWI-EAS443:3:90:423:383#0/1  
ab\_¥b\_[`bbYLS``]baS¥QaVaa\_\_^aaa^^\_[a¥¥a]  
@HWI-EAS443:3:90:445:2015#0/1  
ACAGAATTTACTTTGTTAGTAATCTCGTCAATGGCATTCT  
+HWI-EAS443:3:90:445:2015#0/1  
W`Wa[`a`^baX[baS^`^Ubaaa`a`[`a`[]SS`\_^aa  
@HWI-EAS443:3:90:483:106#0/1  
GTGGGGACATCAAGATACAGCAAGAAGTTCAAGCCGGAAA  
+HWI-EAS443:3:90:483:106#0/1  
a`Z[\_[X\_YYWRM`^\_`\_]`\_`\_`Z^aOSW`NZWZ^\_W^^  
@HWI-EAS443:3:90:488:1601#0/1  
TGTGTATTACATCTTTTCAATAACAGAATTTACTTTGTTAG  
+HWI-EAS443:3:90:488:1601#0/1  
aa^bYaaaabaabbb`a\_\_``bba`aabbaa`aaa`\_baa  
@HWI-EAS443:3:90:501:411#0/1  
CGGTTTCATTGAAGGGGGTGGACAGGGATGGTAGATGGA  
+HWI-EAS443:3:90:501:411#0/1  
abbbabbbbbb`bb`babbabbaabaaa`ab`aaaaaaa  
@HWI-EAS443:3:90:538:239#0/1  
GGGGACATCAAGATACAGCAAGAAGTTCAAGCCGGAAATA  
+HWI-EAS443:3:90:538:239#0/1  
aV`a[0[[abX]`aQV`[Z\_a\_W[¥W^\_aZ¥]Xa\_U\_[QT  
@HWI-EAS443:3:90:660:521#0/1  
CTTCTTGCTGTATCTTGATGTCCCCACAAAAACATATGCA  
+HWI-EAS443:3:90:660:521#0/1  
abbbbaba\_baabbbbbbabaaaaabaaZabab`aaabaa  
@HWI-EAS443:3:90:684:470#0/1  
GCTGGCTGGATCCTGGGAAATCCAGAGTGTGAATCACTCT

+HWI-EAS443:3:90:684:470#0/1  
abbaabaaa`\_¥\_a]ba`aaa`]`a`aW]¥a\_a\_]\_\_\_\_Z[  
@HWI-EAS443:3:90:685:1112#0/1  
CAAGAAGTTCAAGCCGAAATAGCAATAAGACCCAAAGTG  
+HWI-EAS443:3:90:685:1112#0/1  
a`¥bTH¥\_LV^`\_]ba\_a`\_]a]a\_\_b[baZPW`\_aa0a  
@HWI-EAS443:3:90:711:1299#0/1  
GTCAGCACTAGTAGATGGATGGTGAATGCCCCATAGCACG  
+HWI-EAS443:3:90:711:1299#0/1  
a\_aaaaaa\_aa]bbaa`^a\_b`Uaaaa\_\_aa\_aV`a`a¥a  
@HWI-EAS443:3:90:772:216#0/1  
GTGGGGACATCAAGATACAGCAAGAAGTTCAAGCCGGAAA  
+HWI-EAS443:3:90:772:216#0/1  
\_H\_aaZZTSSZ[Z`\_ZVU\_^\_\_\_\_VM^Y¥YZYLNT^VXGR  
@HWI-EAS443:3:90:800:2031#0/1  
ATGAATTTCTTTTTTAACTAGCCATATTAATTTTTTGTA  
+HWI-EAS443:3:90:800:2031#0/1  
abb`a\_]Xabba```a\_b`abba\_bababbbabaaaa[^b  
@HWI-EAS443:3:90:830:1351#0/1  
AATGGCATTCTGTGTGCTCTTCAGGTCGGCTGCATATCCT  
+HWI-EAS443:3:90:830:1351#0/1  
aaa^Z`baaaba\_a\_babaaaaa^[\_`ab`ba`aaa\_a\_  
@HWI-EAS443:3:90:858:1874#0/1  
AATTTACTTTGTTAGTAATCTCGTCAATGGCATTCTGTGT  
+HWI-EAS443:3:90:858:1874#0/1  
a`[aba]¥bba``a¥\_aa```ba]]a`YQ[¥`a¥\_a^[\`X  
@HWI-EAS443:3:90:910:1940#0/1  
CTTTTCAATAACAGAATTTACTTTGTTAGTAATCTCGTCA  
+HWI-EAS443:3:90:910:1940#0/1  
K\_RXa``aX`a`a`a`\_aa`bb```\_YXaWWa``¥¥[¥Xab  
@HWI-EAS443:3:90:919:1573#0/1  
GCCAGTTAAAAACAATGCCAAGGAAATTGGAAACGGCTG  
+HWI-EAS443:3:90:919:1573#0/1  
ab`b^a`^]a`[\_aaa\_a\_aba\_[^\_`a^Za[``\_\_UI  
@HWI-EAS443:3:90:938:926#0/1  
GTAATCTCGTCAATGGCATTCTGTGTGCTCTTCAGGTCGG  
+HWI-EAS443:3:90:938:926#0/1  
^]b`baaaaUa\_aa]Z`aa`aa`\_\_\_\_]\_`a`^[\_T[[\_  
@HWI-EAS443:3:90:942:862#0/1  
GTGGGGACATCAAGATACAGCAAGAAGTTCAAGCCGGAAA  
+HWI-EAS443:3:90:942:862#0/1  
a\_a`a]NJ\_\_`VXPU]XZ¥`^`]P]¥LN[Q[ZU^WZQU  
@HWI-EAS443:3:90:948:1988#0/1  
TCCGGCTTGAACCTTCTTGCTGTATCTTGATGTCCCCACAA  
+HWI-EAS443:3:90:948:1988#0/1  
abbbaaa`\_aa]]a\_\_aaa`aQ`][`a`a`^\_aU\_\_`Xa`  
@HWI-EAS443:3:90:94:1187#0/1  
GCTGCTTTGAATTTTACCACAAATGCGATAACACGTGCAT  
+HWI-EAS443:3:90:94:1187#0/1  
aa[^Z^¥[¥Q``\_\_\_\_`TZ\_]V[\_Z^SXU¥UX¥\_XZ[¥T

@HWI-EAS443:3:91:1012:1486#0/1  
CAGGGGTCAGGATATGCAGCCGACCTGAAGAGCACACAGA  
+HWI-EAS443:3:91:1012:1486#0/1  
`\_\_aa\_\_\_\_\_]bbbab\_W\_\_bbbbba\_`abbababaa  
@HWI-EAS443:3:91:1027:1392#0/1  
ATTTCCAGTTGCTTCAATGTTATTTTGTCTCCCGGCTCT  
+HWI-EAS443:3:91:1027:1392#0/1  
abbaaaabaaaaa`baaabaa^aaaa`a\_aZ¥`\_\_]^  
@HWI-EAS443:3:91:1066:1226#0/1  
ATCGATGAAATCTCCTGGGTAACACGTTCCATTGTCTGAA  
+HWI-EAS443:3:91:1066:1226#0/1  
^Xab]ba`aXaaaa\_aaa`W\_ZKU\_a`[\_^\_[\_]^^\_Y]  
@HWI-EAS443:3:91:1088:68#0/1  
CTTATATGAAAAGGTAAGAAGCCAGTTAAAAACAATGCC  
+HWI-EAS443:3:91:1088:68#0/1  
`ba`b`baaaaababbabbba\_bbb\_bbbabbabbabb¥^  
@HWI-EAS443:3:91:1099:1349#0/1  
ATTCTGTGTGCTTTCAGGTCGGCTGCATATCCTGACCCC  
+HWI-EAS443:3:91:1099:1349#0/1  
a\_\_a\_\_a^a`a^a`aa\_^aa^a`a\_^`^S`¥¥¥\_W¥Y  
@HWI-EAS443:3:91:1152:127#0/1  
CACTTTGGGCTTATTGCTATTTCCGGCTTGAACCTCTTG  
+HWI-EAS443:3:91:1152:127#0/1  
\_baaaab[aab\_b`babababba`ab\_a`a\_aIaaVaaa  
@HWI-EAS443:3:91:1177:881#0/1  
AATTTTACCACAAATGCGATAACACGTGCATGGAAAGTGT  
+HWI-EAS443:3:91:1177:881#0/1  
aa`bbbab\_bababbabaaab`aab\_a`abba\_\_aa\_aa  
@HWI-EAS443:3:91:1229:824#0/1  
AGATACAGCAAGAAGTTCAAGCCGAAATAGCAATAAGAC  
+HWI-EAS443:3:91:1229:824#0/1  
abTY^`b]\_aaR¥¥`S`^aT`Z\_baa`b[b`abab`V`^  
@HWI-EAS443:3:91:1254:1089#0/1  
CTCGTCAATGGCATTCTGTGTGCTTTCAGGTCGGCTGCA  
+HWI-EAS443:3:91:1254:1089#0/1  
]bbabbbabababbbbabab]bababbba\_bababbaa  
@HWI-EAS443:3:91:1266:284#0/1  
ACACCAGTCCACGATTGCAATACAACCTTGTCAGACACCCA  
+HWI-EAS443:3:91:1266:284#0/1  
`aa\_a]]\_aa`\_a`\_`a`\_`\_`[``U``a\_V``WV\_Y[0]  
@HWI-EAS443:3:91:1271:1941#0/1  
GGGGACATCAAGATACAGCAAGAAGTTCAAGCCGAAATA  
+HWI-EAS443:3:91:1271:1941#0/1  
aba`aaaaabbaaa`b`^`b`a\_aY`^a`Y]a\_\_a\_]`  
@HWI-EAS443:3:91:1284:168#0/1  
CATTCTGTGTGCTTTCAGGTCGGCTGCATATCCTGACCC  
+HWI-EAS443:3:91:1284:168#0/1  
abbbbbbbaaabbbaa`abbabbabbbaabbbaV`  
@HWI-EAS443:3:91:1346:1672#0/1  
TAGAGACCCATTAGAGCACATCCAGAACTGATTGCCCCC

+HWI-EAS443:3:91:1346:1672#0/1  
a^H^a\_`\_`^¥]a`a\_a[X]^Z`\_`\_\_\_\_\_¥Z[aXMWWW  
@HWI-EAS443:3:91:1351:294#0/1  
TGCTGGCTGGATCCTGGGAAATCCAGAGTGTGAATCACTC  
+HWI-EAS443:3:91:1351:294#0/1  
\_baaZWQVa\_SXJMY`bHaaZIWaW¥ZZ`Za^aZG\_RBB  
@HWI-EAS443:3:91:1373:1159#0/1  
CAAGATACAGCAAGAAGTTCAAGCCGAAATAGCAATAAG  
+HWI-EAS443:3:91:1373:1159#0/1  
`bbbbbbbbbabbbbabbbbabbbbabbbbbbZbabba`  
@HWI-EAS443:3:91:1379:1134#0/1  
GACAATGGAACGTGTTACCCAGGAGATTCATCGATTATG  
+HWI-EAS443:3:91:1379:1134#0/1  
aa¥\_`^aab\_`IaW^¥`\_`\_WZY^`\_`]\_\_\_ZR^]¥Z\_VLOZ  
@HWI-EAS443:3:91:1423:1319#0/1  
TGTCTGACAAGTTGTATTGCAATCGTGGACTGGTGTATCT  
+HWI-EAS443:3:91:1423:1319#0/1  
aaaaaaaa`a\_aa]aaa\_Zaaa\_a\_\_a\_^aa`¥a\_`^a  
@HWI-EAS443:3:91:1439:1359#0/1  
ACCATCCATCTACTAGTGTGACCAACAAAGTCTCTATCA  
+HWI-EAS443:3:91:1439:1359#0/1  
\_a\_abaaababa\_b\_a\_`ab`a`aaa\_`^`aPZa\_baaab  
@HWI-EAS443:3:91:1470:1593#0/1  
TGCTGGCTGGATCCTGGGAAATCCAGAGTGTGAATCACTC  
+HWI-EAS443:3:91:1470:1593#0/1  
ab\_aaY\_a`¥Z^^]YaaaV`a`\_\_`ZZa¥`S\_^\_S]W\_S  
@HWI-EAS443:3:91:1496:963#0/1  
GATTGGGCCATGAACCTGTCTTGGGGAATATCTCAAACCT  
+HWI-EAS443:3:91:1496:963#0/1  
`\_\_`aaaXK¥]¥U]0\_\_bINaZT^\_XUV\_[\_WaX^¥]UU]  
@HWI-EAS443:3:91:1535:145#0/1  
AGATTTCCAGTTGCTTCGAATGTTATTTTGTCTCCCGGCT  
+HWI-EAS443:3:91:1535:145#0/1  
\_a^aa`aa`][\_a\_a¥``\_abX`[\_aaaZZa^][a¥U^  
@HWI-EAS443:3:91:1590:288#0/1  
TTCTTGCTGTATCTTGATGTCCCCACAAAACATATGCAT  
+HWI-EAS443:3:91:1590:288#0/1  
aaZ]^\_`^`a\_aaa``[]WQ¥RU^`X]\_`\_`^`\_`Z\_`^  
@HWI-EAS443:3:91:1591:837#0/1  
CAACTTTTTTATTTAAATTCTCTATTCTTTTTTCCAGGTG  
+HWI-EAS443:3:91:1591:837#0/1  
aba\_bbbba`bb\_ba`^b^abbbabb^b`aab`[^aa\_U`  
@HWI-EAS443:3:91:159:409#0/1  
AAGATACAGCAAGAAGTTCAAGCCGAAATAGCAATAAGA  
+HWI-EAS443:3:91:159:409#0/1  
abbabbbbbbbbaab\_aabaaabbaabaaba\_aaaaa  
@HWI-EAS443:3:91:1688:64#0/1  
CAAGAAGTTCAAGCCGAAATAGCAATAAGACCCAAAGTG  
+HWI-EAS443:3:91:1688:64#0/1  
abbbbabababaab^bbbabbabaaabbbba```a`a\_N^

@HWI-EAS443:3:91:1710:1475#0/1  
AGCCATATTAATTTTTGTAGAAGCTTTTTGCTCCAGCAT  
+HWI-EAS443:3:91:1710:1475#0/1  
[aZSU`^^¥bZS^b`bbb¥aL\_¥`bb[X`^]FY[ZI\_QY]  
@HWI-EAS443:3:91:1749:767#0/1  
ATTAATTTTTGTAGAAGCTTTTTGCTCCAGCATGAGGAC  
+HWI-EAS443:3:91:1749:767#0/1  
a\_ab\_]baabba^aaaa\_aaa`a¥Ya\_Y`^]a\_\_`XW`]  
@HWI-EAS443:3:91:195:1145#0/1  
CCGGGAGACAAAATAACATTCGAAGCAACTGGAAATCTAG  
+HWI-EAS443:3:91:195:1145#0/1  
a\_b`a[]U\_a\_`a`¥¥\_\_\_\_`ZY^`¥^`^QLU[V]GW^Y  
@HWI-EAS443:3:91:268:1648#0/1  
ATCAGAATGCAGATGCATATGTTTTGTGGGACATCAAG  
+HWI-EAS443:3:91:268:1648#0/1  
`Sa]TVZWT]TTJZW\_[ZMV`T¥W¥U¥]\_YYYZUZZ[TQV  
@HWI-EAS443:3:91:270:1094#0/1  
TGCCGTTTTATTGAAGGGGGTGGACAGGGATGGTAGAT  
+HWI-EAS443:3:91:270:1094#0/1  
aa`ba^aaa\_aaa]`a`aaa`Waa]^`a`¥^\_]W]^W  
@HWI-EAS443:3:91:279:502#0/1  
CCCGGCTCTACTAGTGTCCAGTAATAGTTCATTCTCCCTT  
+HWI-EAS443:3:91:279:502#0/1  
ab``abaa\_Ya`a\_aZ\_aZaX\_a`Za¥`\_\_`¥\_¥¥\_\_^  
@HWI-EAS443:3:91:322:1126#0/1  
CATCAAGATACAGCAAGAAGTTCAAGCCGAAATAGCAAT  
+HWI-EAS443:3:91:322:1126#0/1  
abbabbbbaabbbbaabbbab\_abbbba]bb`a¥^ab\_a\_a  
@HWI-EAS443:3:91:354:1215#0/1  
AACTGATTGCCCCAGGGAGACTACCAGTACCAATGAACT  
+HWI-EAS443:3:91:354:1215#0/1  
`\_aZ\_a`^`aaa`¥`a`[¥Z[\_`^`[^[¥a\_S¥\_[^`[UP  
@HWI-EAS443:3:91:355:372#0/1  
GATGGATGGTACGGTTATCACCATCAAAATGAGCAGGGGT  
+HWI-EAS443:3:91:355:372#0/1  
\_ZZ`SQ]ZUNXFRRWZVJFOHOTTUQYPPUVUWUY¥¥UYU  
@HWI-EAS443:3:91:357:202#0/1  
TGGGCCATGAACCTGTCTTGGGGAATATCTCAAACCTTTC  
+HWI-EAS443:3:91:357:202#0/1  
abbaaa`a`a\_aaa\_`aaaa\_`Z```\_`\_a]`Y^^\_W  
@HWI-EAS443:3:91:373:1226#0/1  
TGTGTGCTCTTCAGGTCCGCTGCATATCCTGACCCCTGCT  
+HWI-EAS443:3:91:373:1226#0/1  
``\_a[`b\_``\_abbaXZa\_a`\_\_Z^V``\_Z\_\_a]a`QY\_  
@HWI-EAS443:3:91:39:1387#0/1  
TGGTACTGGTAGTCTCCCTGGGGCAATCAGTTTCTGGAT  
+HWI-EAS443:3:91:39:1387#0/1  
ab\_abbW\_^¥`S`ZW[]]^X`\_TNRL\_¥XQBBBBBBBB  
@HWI-EAS443:3:91:405:1875#0/1  
AACAAAGTCTCTATCAGAATGCAGATGCATATGTTTTGT

+HWI-EAS443:3:91:405:1875#0/1  
abbbaba\_a`aaaa`b`aa`^aaa`\_`aa]\_a]^a^`Z  
@HWI-EAS443:3:91:40:374#0/1  
TCGTGGTAGTCCAAAGTTCTTTTCATTTTCCAATAGAACCA  
+HWI-EAS443:3:91:40:374#0/1  
aabaaa]a^Y]`aa`X`Y`\_]W¥```¥\_Z^^^[[PO^V  
@HWI-EAS443:3:91:429:1928#0/1  
CTGGCTGGATCCTGGGAAATCCAGAGTGTGAATCACTCTC  
+HWI-EAS443:3:91:429:1928#0/1  
abaabbb`b`aaaa`aabbRb`baaa^`\_`aa\_\_ba\_`^^  
@HWI-EAS443:3:91:439:1353#0/1  
AGACTTTGTTGGTCAGCACTAGTAGATGGATGGTGAATGC  
+HWI-EAS443:3:91:439:1353#0/1  
aaa`a`a]]bba``aaa][a¥a\_aa\_\_a\_\_Za\_[]`b``aZ  
@HWI-EAS443:3:91:496:863#0/1  
GACACTAGTAGAGCCGGGAGACAAAATAACATTTCGAAGCA  
+HWI-EAS443:3:91:496:863#0/1  
a```\_a`aW]a^`\_]`\_\_Z\_¥]^Z\_]]]^W^WW]ZZ]Z]  
@HWI-EAS443:3:91:520:1401#0/1  
ATTGAAGGGGGTGGACAGGGATGGTAGATGGATGGTACG  
+HWI-EAS443:3:91:520:1401#0/1  
Q\_``¥T[b¥V\_aU`[ab\_babbabaYabb`bab]ab]bX]  
@HWI-EAS443:3:91:537:1091#0/1  
ATCATTGAAAGGTTTGAGATATTCCCAAGACAAGTTCA  
+HWI-EAS443:3:91:537:1091#0/1  
a`^^aZ`aabbba\_baa``^b¥bab`bb\_baaaaa\_aaa  
@HWI-EAS443:3:91:539:931#0/1  
ATTGCAATCGTGGACTGGTGTATCTGAAATGATAATACCA  
+HWI-EAS443:3:91:539:931#0/1  
ZV[[a\_^Ya`^TSS\_`^¥`a```b`ba`a¥`ZZ¥]a¥WZ^  
@HWI-EAS443:3:91:555:164#0/1  
GCAAATCCTACATTAATGATAAAGGAAAGAAGTCCTCGT  
+HWI-EAS443:3:91:555:164#0/1  
a[RSRUPURXW]XZTRY`]QNTYSQSQRVWWYUPWVOYU  
@HWI-EAS443:3:91:665:276#0/1  
GGGGACATCAAGATACAGCAAGAAGTTCAAGCCGAAAATA  
+HWI-EAS443:3:91:665:276#0/1  
aaaZSU\_a^\_aW\_\_`aV^a\_^Z`RZ^]^`U]X^ZX^W¥  
@HWI-EAS443:3:91:666:211#0/1  
CCGGCTCTACTAGTGTCCAGTAATAGTTCATTCTCCCTTC  
+HWI-EAS443:3:91:666:211#0/1  
`bYaS¥aa^¥\_H¥SU\_UbIa\_[T^a\_TX¥X`ba\_UGV]aX  
@HWI-EAS443:3:91:677:187#0/1  
AGCCAGTTAAAAACAATGCCAAGGAAATTGGAAACGGCT  
+HWI-EAS443:3:91:677:187#0/1  
ab\_]`b¥aaaaaaa`a`a^Y``\_aa\_\_`\_]\_]`[\_W¥V¥  
@HWI-EAS443:3:91:730:973#0/1  
GTGCTGACCAACAAAGTCTCTATCAGAATGCAGATGCATA  
+HWI-EAS443:3:91:730:973#0/1  
aQ[\_^aZ\_^`\_]`\_\_^W]]^`Y\_\_`]Y]]\_NX[]W]^Z^Z



@HWI-EAS443:3:91:732:1684#0/1  
CCCCGCTCTACTAGTGTCCAGTAATAGTTCATTCTCCCTT  
+HWI-EAS443:3:91:732:1684#0/1  
abb\_bbaaa``ba\_Ka^HY]^baa`¥`\_Ya`bYa``\_a\_  
@HWI-EAS443:3:91:756:569#0/1  
CAGGGATGGTAGATGGATGGTACGGTTATCACCATCAAAA  
+HWI-EAS443:3:91:756:569#0/1  
]a^^`abbbIaa[QaT^a`^Qba\_YZ^`Z`]T¥`a``\_aa  
@HWI-EAS443:3:91:771:1101#0/1  
CAGGGATGGTAGATGGATGGTACGGTTATCACCATCAAAA  
+HWI-EAS443:3:91:771:1101#0/1  
a[\_ababb\_¥a\_Z\_bbbabb^`abbabba]a`aaaaaaaa  
@HWI-EAS443:3:91:827:2042#0/1  
AATCGATGAAATCTCCTGGGTAACACGTTCCATTGTCTGA  
+HWI-EAS443:3:91:827:2042#0/1  
¥aba\_b¥^XaaV\_\_`aaaa`Gbab`[WQG]aaa[\_]^a¥  
@HWI-EAS443:3:91:845:72#0/1  
TCGCCAGTTCATTGGTACTGGTAGTCTCCCTGGGGGCAAT  
+HWI-EAS443:3:91:845:72#0/1  
]VOX`¥aU`P¥aaaa[a`aa¥VSaUSYRYXQ[`BBBBBBB  
@HWI-EAS443:3:91:861:839#0/1  
GGATCCTGGGAAATCCAGAGTGTGAATCACTCTCCACAGC  
+HWI-EAS443:3:91:861:839#0/1  
a^][aa\_a^^a¥`a`a]^SaT`]a\_`]N\_]`\_\_]]\_\_`aU  
@HWI-EAS443:3:91:900:430#0/1  
CTGGCTGGATCCTGGGAAATCCAGAGTGTGAATCACTCTC  
+HWI-EAS443:3:91:900:430#0/1  
[I\_b`Xba[P[¥a`ZZ¥^T\_¥MV\_aUa`a\_P¥]JJ`X[Y`  
@HWI-EAS443:3:91:911:640#0/1  
TTTTGATGGTGATAACCGTACCATCCATCTACCATCCCTG  
+HWI-EAS443:3:91:911:640#0/1  
U]]a\_XW\_aGb`ab`aYa\_a^XVTR`\_]PXaaa\_\_Y\_^aa  
@HWI-EAS443:3:91:938:1037#0/1  
ATCTTGATGTCCCCACAAAAACATATGCATCTGCATTCTG  
+HWI-EAS443:3:91:938:1037#0/1  
aabb`babaaa]NZab`\_\_`¥baaa`\_`aa\_aa\_aa\_[aa  
@HWI-EAS443:3:91:966:763#0/1  
CTCGTCAATGGCATTCTGTGTGCTTTCAGGTGGGCTGCA  
+HWI-EAS443:3:91:966:763#0/1  
abbababaaabbbabbbbabbaab`bbabbb\_]aaabbab  
@HWI-EAS443:3:91:971:522#0/1  
AAAAAGTTGATGATGGTTTCCTGGACATTTGGACTTACAA  
+HWI-EAS443:3:91:971:522#0/1  
abaaab\_bbabbaa^baaaaaaba``abbbaaaaaaaaaaa  
@HWI-EAS443:3:91:979:1765#0/1  
TGCTGGCTGGATCCTGGGAAATCCAGAGTGTGAATCACTC  
+HWI-EAS443:3:91:979:1765#0/1  
¥\_bbb`]\_]Z¥VX``¥\_¥`ZM[T]\_ONQa¥^b`b[`^a]  
@HWI-EAS443:3:92:1009:793#0/1  
CAGAATGCAGATGCATATGTTTTTGTGGGGACATCAAGAT

+HWI-EAS443:3:92:1009:793#0/1  
aabbbbbabbbbaababbababab\_baaaa`aaaaaa`  
@HWI-EAS443:3:92:1014:919#0/1  
TAGAGACTTTGTTGGTCAGCACTAGTAGATGGATGGTGAA  
+HWI-EAS443:3:92:1014:919#0/1  
aaaab`aa`aaa`a\_\_\_a\_\_Y`^a]^a\_aa\_^`\_Q]aZ  
@HWI-EAS443:3:92:1016:1533#0/1  
CACCATCCATCTACTAGTGCTGACCAACAAAGTCTCTATC  
+HWI-EAS443:3:92:1016:1533#0/1  
ababbabV\_a[baaaaa`abb\_bb``\_\_\_ab\_aabaaba  
@HWI-EAS443:3:92:1110:1414#0/1  
TTCATCGATTATGAGGAGCTAAGAGAGCAATTGAGCTCAG  
+HWI-EAS443:3:92:1110:1414#0/1  
aaa`aaa[¥\_`a]aa^`W`]`^`aa¥\_a^`^\_X[\_  
@HWI-EAS443:3:92:1126:705#0/1  
GATGAAATCTCCTGGGTAACACGTTCCATTGTCTGAACTA  
+HWI-EAS443:3:92:1126:705#0/1  
a\_ababaa]aaaa`b]Yaa`a\_Z\_aa]aaaa`a`\_]V\_\_  
@HWI-EAS443:3:92:1128:1711#0/1  
TGCATATCTCGGTACCACTAGATTTCCAGTTGCTTCGAAT  
+HWI-EAS443:3:92:1128:1711#0/1  
aaa¥V`ZYX`VDRY[a[¥a`a[^a`S¥YLT`\_^`\_]`^]  
@HWI-EAS443:3:92:1171:298#0/1  
AGAGGAAGCAAAATTAACAGAGAAGAAATAGATGGGGTA  
+HWI-EAS443:3:92:1171:298#0/1  
ababaaaa`\_ab`abaaaS\_b\_`]\_a]\_\_`^`^`^`\_Z\_  
@HWI-EAS443:3:92:1217:66#0/1  
CAATGTAGGACCATGAGCTTGCTGTGGAGAGTGATTCACA  
+HWI-EAS443:3:92:1217:66#0/1  
K\_abK[ab\_abNWaaaa]Ka\_a\_aaa^WURYa[UY[BBBB  
@HWI-EAS443:3:92:1252:1110#0/1  
GCTAGTTAAAAAGGAAATTCATACCCAAAGCTCAGCAAA  
+HWI-EAS443:3:92:1252:1110#0/1  
]`ba\_abba\_`aba¥`aYa]]a¥b\_[Ybbb`a`aadW]^  
@HWI-EAS443:3:92:1308:817#0/1  
ACTTTGTTAGTAATCTCGTCAATGGCATTCTGTGTGCTCT  
+HWI-EAS443:3:92:1308:817#0/1  
aaaabaaab`aaa^a`b\_aa`aa\_aa\_aa^a^\_Ya]`  
@HWI-EAS443:3:92:1358:15#0/1  
ATTGCAATCGTGGACTGGTGTATCTGAAATGATAATACCA  
+HWI-EAS443:3:92:1358:15#0/1  
aaaaabaaab`baa\_aaaZb^aa]aa\_\_\_a\_\_`a``\_XU\_  
@HWI-EAS443:3:92:1393:1292#0/1  
CTTGCTGTATCTTGATGTCCCCACAAAAACATATGCATCT  
+HWI-EAS443:3:92:1393:1292#0/1  
`\_bbabb¥baab\_V`aa\_b`aaaa`aa^bb\_\_aa`b^a  
@HWI-EAS443:3:92:1443:752#0/1  
CTTCTTGCTGTATCTTGATGTCCCCACAAAAACATATGCA  
+HWI-EAS443:3:92:1443:752#0/1  
abaab`bIbb]bb`bbba¥bb`¥\_``]aa¥]^aaaaZFZ

@HWI-EAS443:3:92:1499:183#0/1  
CTCGTGCTATGGGGCATTACCATCCATCTACTAGTGCTG  
+HWI-EAS443:3:92:1499:183#0/1  
abbabbabbbZaab^bbb^baZaa]abbabb\_b`a^a¥` `@  
@HWI-EAS443:3:92:1539:585#0/1  
CACGATTCAAATGTGAAGAACTTATATGAAAAGGTAAGAA  
+HWI-EAS443:3:92:1539:585#0/1  
aa]\_Z^b^ab^`aY`Z¥b`b\_bb]babbaaa`bb`aaaaa  
@HWI-EAS443:3:92:1603:1729#0/1  
TTCAGGTCGGCTGCATATCCTGACCCCTGCTCATTTTGAT  
+HWI-EAS443:3:92:1603:1729#0/1  
aa` `aa\_\_a\_`aaS\_aa`\_a\_\_a^`W\_\_R^¥\_a`\_^X¥`  
@HWI-EAS443:3:92:165:1444#0/1  
AATATACATCCGATCACAATTGGAAAATGTCCAAAATATG  
+HWI-EAS443:3:92:165:1444#0/1  
Wb^Z]¥` `RX^aa]W\_X]`W¥¥TY]`WDSXaXV`R[a\_XL  
@HWI-EAS443:3:92:1671:1273#0/1  
TGAATGCCCCATAGCACGAGGACTTCTTTCCCTTTATCAT  
+HWI-EAS443:3:92:1671:1273#0/1  
abb`aab\_aTbbbaaa\_abb`aaaaa`\_b`]M\_a\_a``\_b  
@HWI-EAS443:3:92:1703:1302#0/1  
TCTTGCTGTATCTTGATGTCCCCACAAAACATATGCATC  
+HWI-EAS443:3:92:1703:1302#0/1  
a]\_^baabRa[`YZa`Ua]aY[Za\_a\_]X`[^\_a`Z\_`]  
@HWI-EAS443:3:92:1712:1320#0/1  
ATTTAAATAAAAAAGTTGATGATGGTTTCCTGGACATTTG  
+HWI-EAS443:3:92:1712:1320#0/1  
¥U^[b`aab]\_baaWSaa\_aaa^`V¥\_SV\_a]a^\_\_\_\_aS  
@HWI-EAS443:3:92:1735:921#0/1  
GGGACATCAAGATACAGCAAGAAGTTCAAGCCGAAATAG  
+HWI-EAS443:3:92:1735:921#0/1  
abaaaa` `a^Y\_aaaa`^`bbaab^`F\_aa]]a\_``\_a`\_  
@HWI-EAS443:3:92:1776:1535#0/1  
CACACTCTGTAACTTCTAGAAGACAAGCATAACGGGAA  
+HWI-EAS443:3:92:1776:1535#0/1  
ab\_\_Ua^[`\_\_^aXS\_a¥ZZRZ\_[P¥^]]\_S]¥XU]]¥XX  
@HWI-EAS443:3:92:208:566#0/1  
ATTCAAATGTGAAGAACTTATATGAAAAGGTAAGAAGCCA  
+HWI-EAS443:3:92:208:566#0/1  
abbba`a^aa\_aab`aaaaaba`a`a\_aaa[aaaba`\_¥a  
@HWI-EAS443:3:92:224:1928#0/1  
CTTTGGGTCTTATTGCTATTTCCGGCTTGAACCTCTTGCT  
+HWI-EAS443:3:92:224:1928#0/1  
ab`[\_`]Ob`abaa`aa\_aa\_]^[^Xaa^[W[^[]` `WUJ  
@HWI-EAS443:3:92:226:306#0/1  
TTTTCATATAAGTTCTTCACATTTGAATCGTGGTAGTCCA  
+HWI-EAS443:3:92:226:306#0/1  
aba^^ab``\_Z^^`aaa`\_a\_a`a`\_\_` `a]``WZZQV]^  
@HWI-EAS443:3:92:286:580#0/1  
CAGGAGATTTTCATCGATTATGAGGAGCTAAGAGAGCAATT

+HWI-EAS443:3:92:286:580#0/1  
a[\_XXZWa^VZTM[`W^YX]^T[^GZFQ[\_\_\_ZZT]QOQ^Y  
@HWI-EAS443:3:92:335:434#0/1  
AAATTGGAAACGGCTGCTTTGAATTTTACCACAAATGCGA  
+HWI-EAS443:3:92:335:434#0/1  
^a\_aba^``baa\_V`Y¥^`X¥¥\_`aa\_]\_\_[]aZY¥[\_¥  
@HWI-EAS443:3:92:395:1025#0/1  
CAGAAACTGATTGCCCCAGGGAGACTACCAGTACCAATG  
+HWI-EAS443:3:92:395:1025#0/1  
abb`Z\_abbaaaaaaaaaaaaa`aba`aa````\_`a\_^````  
@HWI-EAS443:3:92:397:1805#0/1  
GGAAATTGGAAACGGCTGCTTTGAATTTTACCACAAATGC  
+HWI-EAS443:3:92:397:1805#0/1  
abaaaaa`\_aaaaabaa[T`\_S^¥UYaaUSY\_W^`aUBB  
@HWI-EAS443:3:92:409:930#0/1  
CGTGTTACCCAGGAGATTTTCATCGATTATGAGGAGCTAAG  
+HWI-EAS443:3:92:409:930#0/1  
aaX]aa\_aaZTY¥\_]H`a`¥Y^\_a`\_¥```]a\_\_\_^^^[\`  
@HWI-EAS443:3:92:434:995#0/1  
GAAGGGAGAATGAACTATTACTGGACACTAGTAGAGCCGG  
+HWI-EAS443:3:92:434:995#0/1  
`babaa\_]`aaa\_aaaaaaaa`a`a`aaa]a]aa^a[¥\_a  
@HWI-EAS443:3:92:440:420#0/1  
GGTCAGGATATGCAGCCGACCTGAAGAGCACACAGAATGC  
+HWI-EAS443:3:92:440:420#0/1  
a`¥abaaaaaaaaaaaa`a`a`\_\_aWaa\_a`\_`a\_\_\_a¥  
@HWI-EAS443:3:92:530:515#0/1  
GCCGTTACACCTTTGTTGAGTCATGATTGGGCCATGAAC  
+HWI-EAS443:3:92:530:515#0/1  
aa``\_b`a\_\_Y^]aa`babbaa`a`a^^ab]a`^]a\_a\_  
@HWI-EAS443:3:92:605:415#0/1  
CATCATTTGAAAGTTTGGAGATATTTCCCAAGACAAGTTC  
+HWI-EAS443:3:92:605:415#0/1  
aaaaabbbbaaabb`abbbbbbbaaa`ab`ab`a\_a\_^a  
@HWI-EAS443:3:92:635:1063#0/1  
ATTTCCAGTTGCTTCGAATGTTATTTTGTCTCCCGCTCT  
+HWI-EAS443:3:92:635:1063#0/1  
V`baa¥ab[Z\_]aaabaab[^Za\_]a`\_^Y^\_S`b\_a^N  
@HWI-EAS443:3:92:647:775#0/1  
AACAAAGTCTCTATCAGAATGCAGATGCATATGTTTTTGT  
+HWI-EAS443:3:92:647:775#0/1  
\_`b^Z[a`\_a^\_aaaa\_¥aab\_ZXaaa`Y\_a``^a```a[  
@HWI-EAS443:3:92:657:979#0/1  
GTTACCCAGGAGATTTTCATCGATTATGAGGAGCTAAGAGA  
+HWI-EAS443:3:92:657:979#0/1  
aabbbbbbbaaaabbbb`abbabaaaaabb]a\_ab`\_```a  
@HWI-EAS443:3:92:705:1303#0/1  
ATTGAGCTCAGTGTTCATCATTTGAAAGTTTGGAGATATTC  
+HWI-EAS443:3:92:705:1303#0/1  
a^\_baaaaaa¥R¥^^]aaa`a`Ya^V^Z`\_a\_^`\_`\_`\_]

@HWI-EAS443:3:92:714:583#0/1  
GCTGGCTGGATCCTGGGAAATCCAGAGTGTGAATCACTCT  
+HWI-EAS443:3:92:714:583#0/1  
aaTa`a\_\_YVSLYV[]RKX\_STVKVY¥PYS¥¥^VZ^UU[S  
@HWI-EAS443:3:92:715:1948#0/1  
ATGGTTTCCTGGACATTTGGACTTACAATGCCGAAGTGT  
+HWI-EAS443:3:92:715:1948#0/1  
a\_baXV\_]a`aaX]^aaa^`NX`\_\_a]Ra\_]a^YZ]RWX  
@HWI-EAS443:3:92:778:1113#0/1  
AGTCCTCGTGCTATGGGGCATTACCATCCATCTACTAGT  
+HWI-EAS443:3:92:778:1113#0/1  
aa]¥`abUa`\_aaa`\_\_aa`a`\_`a`\_\_aa\_^`¥  
@HWI-EAS443:3:92:891:226#0/1  
ATTTCTTCTCTGTTTAAATTTTGCTTCTCTGAGTATTTTG  
+HWI-EAS443:3:92:891:226#0/1  
abb`bbab`bb`abbbbbbbbabba`babbbb`bb`bab  
@HWI-EAS443:3:92:912:829#0/1  
GAATGCCCCATAGCACGAGGACTTCTTCCCTTATCATT  
+HWI-EAS443:3:92:912:829#0/1  
¥Z[Z`a[]S^Z]¥^b^XZLIN¥]Y]b¥`¥QGXY`^^[W`a  
@HWI-EAS443:3:92:914:537#0/1  
TAGATTTCCAGTTGCTTCCAATGTTATTTTGTCTCCCGGC  
+HWI-EAS443:3:92:914:537#0/1  
aaa\_aa`^a`a`\_aa^`\_`a\_a^a`a`^[\_^Z]]`X  
@HWI-EAS443:3:92:975:1274#0/1  
AACAAAGTCTCTATCAGAATGCAGATGCATATGTTTTGT  
+HWI-EAS443:3:92:975:1274#0/1  
a`\_aa`\_aZH`\_`]]`\_`\_a\_\_a^`\_]]`\_`\_a\_aa^a]^  
@HWI-EAS443:3:92:976:1304#0/1  
TTTTGCTTCTCTGAGTATTTTGGGTAGTCATAAGTCCCA  
+HWI-EAS443:3:92:976:1304#0/1  
]\_b^V\_Z\_NHYb`a[aNZa]S`XaaY]a\_\_\_\_\_PZ]ZLV`  
@HWI-EAS443:3:93:1091:311#0/1  
GACAATGGAACGTGTTACCCAGGAGATTTTCATCGATTATG  
+HWI-EAS443:3:93:1091:311#0/1  
a¥[`]^`][Q]Y`Y`\_UZ[\_X[WWV]]¥ZX]Y]X]]X^]  
@HWI-EAS443:3:93:1101:548#0/1  
GCTGGCTGGATCCTGGGAAATCCAGAGTGTGAATCACTCT  
+HWI-EAS443:3:93:1101:548#0/1  
a`baaaaa`]a¥a^`a\_Ra`a`aa`[`[^Q]`a`U^S\_¥^  
@HWI-EAS443:3:93:1144:1331#0/1  
GCTGGCTGGATCCTGGGAAATCCAGAGTGTGAATCACTCT  
+HWI-EAS443:3:93:1144:1331#0/1  
a¥`a]]XUX]¥Z¥Y`YUZ^TXVZ]S¥S]S`U[PM¥UNSB  
@HWI-EAS443:3:93:1147:696#0/1  
TCATAATCGATGAAATCTCCTGGGTAACACGTTCCATTGT  
+HWI-EAS443:3:93:1147:696#0/1  
\_Ybaaa`Z`a`]]`aaaa\_^aa`]]`a]a]`\_ZSS`\_]`^]  
@HWI-EAS443:3:93:1152:2008#0/1  
GCTGGCTGGATCCTGGGAAATCCAGAGTGTGAATCACTCT

+HWI-EAS443:3:93:1152:2008#0/1  
a\$aaaa`\_QP][YY]a`aZ^\_]¥¥]P^Z^¥¥]^¥T^  
@HWI-EAS443:3:93:1152:841#0/1  
CAAGGAAATTGGAAACGGCTGCTTTGAATTTTACCACAAA  
+HWI-EAS443:3:93:1152:841#0/1  
aaaaQ^`X`abb¥aaaab`YaFTVUPKK^\_]UGXVP[`  
@HWI-EAS443:3:93:1155:434#0/1  
GAAAGAAGTCCTCGTGCTATGGGGCATTACCATCCATCT  
+HWI-EAS443:3:93:1155:434#0/1  
a\$aa^`aa]U]^UZ^`\_\_`aa\_^PZ\_[TZ]^`]ZSSXQZ  
@HWI-EAS443:3:93:119:2023#0/1  
CAGAATTTACTTTGTTAGTAATCTCGTCAATGGCATTCTG  
+HWI-EAS443:3:93:119:2023#0/1  
\_¥\_^aaaab`]baU¥[ab\_`a`a]\_aaaVPYa^^X^aB  
@HWI-EAS443:3:93:1222:1104#0/1  
GCCAGTTAAAAACAATGCCAAGGAAATTGGAAACGGCTG  
+HWI-EAS443:3:93:1222:1104#0/1  
a\$aaa`a\_aa]Y[Xa\_`a^]`]a`Y^^`^]`\_^`\_0¥\_  
@HWI-EAS443:3:93:129:235#0/1  
CTGGCTGGATCCTGGGAAATCCAGAGTGTGAATCACTCTC  
+HWI-EAS443:3:93:129:235#0/1  
aab`Za`]Z\_]^]^`a\_aa\_`a`a\$WaW`\_¥`^ZUYWWU  
@HWI-EAS443:3:93:1355:1095#0/1  
CACGATTCAAATGTGAAGAACTTATATGAAAAGGTAAGAA  
+HWI-EAS443:3:93:1355:1095#0/1  
¥a`ba¥b¥bb¥bbab`aba`abb¥b\_bbb\_abb¥abbba  
@HWI-EAS443:3:93:1371:1232#0/1  
TTTTTACATATTTTGGACATTTTCCAATTGTGATCGGATG  
+HWI-EAS443:3:93:1371:1232#0/1  
abaaPS^aaX^]a]]][a^`aa\_XS]\_`¥^Wa\_¥V\_^\_]B  
@HWI-EAS443:3:93:1408:213#0/1  
CAGAATTTACTTTGTTAGTAATCTCGTCAATGGCATTCTG  
+HWI-EAS443:3:93:1408:213#0/1  
aaaZ^`aZ]R\_`ba]\_aa[aaaYZF[¥T¥]H]\_¥a\_VLT`  
@HWI-EAS443:3:93:144:443#0/1  
GTTAGTAATCTCGTCAATGGCATTCTGTGTGCTCTTCAGG  
+HWI-EAS443:3:93:144:443#0/1  
a\_aa`\_\_aa\_aab]aaaa\_`a`\_]\_^]`\_`W\_¥^^X[\_`  
@HWI-EAS443:3:93:1460:1390#0/1  
GATACAGCAAGAAGTTCAAGCCGAAATAGCAATAAGACC  
+HWI-EAS443:3:93:1460:1390#0/1  
aaU[Ubbaaa`a\_a\_\_][a`\_X\_\_a`^\_\_\_0`\_aa^]¥I[  
@HWI-EAS443:3:93:149:1202#0/1  
GCACTAGTAGATGGATGGTGAATGCCCCATAGCACGAGGA  
+HWI-EAS443:3:93:149:1202#0/1  
a`Y`a[\_Vb]Y^bbb[aaG`bb¥aaaaab`a^]baaZ`\_\_  
@HWI-EAS443:3:93:1528:973#0/1  
AATTTTTGTAGAAGCTTTTTGCTCCAGCATGAGGACATGC  
+HWI-EAS443:3:93:1528:973#0/1  
\_\_bbabaVV`baa\_X]a`aa`U]SS``¥\_W\_^]X\_Y

@HWI-EAS443:3:93:1548:1065#0/1  
AAGCCAGTTAAAAACAATGCCAAGGAAATTGGAAACGGC  
+HWI-EAS443:3:93:1548:1065#0/1  
a^a`Y`b`\_\_a^^\_a\_a\_aaa`\_]`^¥[[]]`Z^YT[^  
@HWI-EAS443:3:93:1550:1226#0/1  
CATAAGTCCCATTTTTGACACTTTCCATGCACGTGTTATC  
+HWI-EAS443:3:93:1550:1226#0/1  
`\_bbbbab¥abbbbbbbba^babba`\_aba\_aab`a\_aaaa  
@HWI-EAS443:3:93:1566:1835#0/1  
AGAAGTCCTCGTGCTATGGGGCATTACCATCCATCTACT  
+HWI-EAS443:3:93:1566:1835#0/1  
`baTWaWX¥[a]a[Zaaaa`a`a\_]`^aS`a^WZXUN`W`  
@HWI-EAS443:3:93:1606:871#0/1  
CTTAGCTCCTCATAATCGATGAAATCTCCTGGGTAACACG  
+HWI-EAS443:3:93:1606:871#0/1  
a¥]`\_¥`bb`baaYaa`a^a^Yaa]aXOPV`b\_\_[¥XTS\_  
@HWI-EAS443:3:93:1733:1233#0/1  
ATTCAAAGCAGCCGTTTCCAATTTCTTGCCATTGTTTTT  
+HWI-EAS443:3:93:1733:1233#0/1  
abbaaaaa\_baY`a¥ba`\_^`a`a^Ua]\_]\_Za]`\_aa\_a  
@HWI-EAS443:3:93:1741:392#0/1  
TGCTATTTCCGGCTTGAACCTTGCTGTATCTTGATGTC  
+HWI-EAS443:3:93:1741:392#0/1  
[]`aaab`aaba`\_bb\_\_[\_aaaaR^`a^`\_aa`\_\_LZYX  
@HWI-EAS443:3:93:1749:735#0/1  
AGATGCATATGTTTTTGTGGGGACATCAAGATACAGCAAG  
+HWI-EAS443:3:93:1749:735#0/1  
a`a`X\_baaab\_aabaa^aa`¥`\_]`\_^\_]`]`a]a\_R\_aa  
@HWI-EAS443:3:93:1776:949#0/1  
AACAAAGTCTCTATCAGAATGCAGATGCATATGTTTTTGT  
+HWI-EAS443:3:93:1776:949#0/1  
aaabaaa`aaaaaa\_baaa\_a\_aa\_^a]a`\_ab\_a^`\_^`  
@HWI-EAS443:3:93:180:1029#0/1  
CAAGATACAGCAAGAAGTTCAAGCCGAAATAGCAATAAG  
+HWI-EAS443:3:93:180:1029#0/1  
]`\_^bbZbb\_baab`^^`\_^\_\_b\_aaaaa`\_a`][aa\_\_a\_  
@HWI-EAS443:3:93:208:1063#0/1  
CAATGGAACGTGTTACCCAGGAGATTTTCATCGATTATGAG  
+HWI-EAS443:3:93:208:1063#0/1  
aaaaaa]a^a^a`aaa`¥\_aa[`]\_\_\_\_`\_]a^][^]\_]\_  
@HWI-EAS443:3:93:242:1666#0/1  
AAGTTGTATTGCAATCGTGGACTGGTGTATCTGAAATGAT  
+HWI-EAS443:3:93:242:1666#0/1  
XR`TZW]a¥ababb\_a]XP]ab^\_S[^^`abbaa\_b^]`  
@HWI-EAS443:3:93:269:891#0/1  
AAGCCAGTTAAAAACAATGCCAAGGAAATTGGAAACGGC  
+HWI-EAS443:3:93:269:891#0/1  
aaabaa`R^aaX`aaa\_aaa`a`\_a`^¥\_\_a`^`[]`^^  
@HWI-EAS443:3:93:272:869#0/1  
TTTGTTAGTAATCTCGTCAATGGCATTCTGTGTGCTCTTC

+HWI-EAS443:3:93:272:869#0/1  
Wa\_`ba[`abb\_aa^`0¥`Z\_XU`aWP\_a`TSU^]TLZXV  
@HWI-EAS443:3:93:291:806#0/1  
GCAGGGGTCAGGATATGCAGCCGACCTGAAGAGCACACAG  
+HWI-EAS443:3:93:291:806#0/1  
^^aabb`0``]b\_]aabSa`aba]^aaa\_aaa^``\_¥aa  
@HWI-EAS443:3:93:301:305#0/1  
ATCATTGAAAGGTTTGAGATATCCCCAAGACAAGTTCA  
+HWI-EAS443:3:93:301:305#0/1  
Ya\_^\_aaaa\_Z^¥T`¥]`a\_\_`\_`\_]`\_\_\_\_\_W^]X]YB  
@HWI-EAS443:3:93:304:602#0/1  
GGGACATCAAGATACAGCAAGAAGTTCAAGCCGAAATAG  
+HWI-EAS443:3:93:304:602#0/1  
aaaa\_aa`a`a`\_`\_aa`aaa`\_a^`\_b\_a`^a`X^^`\_`  
@HWI-EAS443:3:93:333:100#0/1  
GTTATTTGTCTCCCGCTCTACTAGTGTCCAGTAATAGT  
+HWI-EAS443:3:93:333:100#0/1  
a`a]a``aa\_\_`\_`W\_\_^^]`¥R]XVYRYXYX]YYZWZZZ  
@HWI-EAS443:3:93:373:1003#0/1  
ATCAAGATACAGCAAGAAGTTCAAGCCGAAATAGCAATA  
+HWI-EAS443:3:93:373:1003#0/1  
a`a¥^`baa\_aaaaba^aa]``baa\_^\_a]`[]\_a^X``a  
@HWI-EAS443:3:93:399:211#0/1  
GATTTCCAGTTGCTTCGAATGTTATTTTGTCTCCCGGCTC  
+HWI-EAS443:3:93:399:211#0/1  
aabbbaab\_a^aaaab[\_ab^a`aa`aa`\_``][\_`]]^  
@HWI-EAS443:3:93:413:576#0/1  
GTCATCATTTGAAAGTTTGAGATATCCCCAAGACAAGT  
+HWI-EAS443:3:93:413:576#0/1  
aa\_^`¥`aaaaU\_\_a`X``\_`Y[^¥\_U[[Q`T`V]`[]\_Z  
@HWI-EAS443:3:93:423:1878#0/1  
GGGCATTCACCATCCATCTACTAGTGTGCTGACCAACAAAGT  
+HWI-EAS443:3:93:423:1878#0/1  
`[R]YNZZ^¥TWX^abYaT^T[XWP\_XYT]`ZFY¥NZ]JO  
@HWI-EAS443:3:93:448:144#0/1  
GATGGTAGATGGATGGTACGGTTATCACCATCAAAATGAG  
+HWI-EAS443:3:93:448:144#0/1  
a`aZM[aZO[a]Z`a\_Z`¥`\_¥^V¥Y[LLSYV[^[^R^BB  
@HWI-EAS443:3:93:49:448#0/1  
TTTGCTTCTCTGAGTATTTTGGGTAGTCATAAGTCCCAT  
+HWI-EAS443:3:93:49:448#0/1  
aaZXWaaa`a\_a`aa^aaa\_``aa]^a^`W\_\_T\_YXX¥^\_  
@HWI-EAS443:3:93:503:521#0/1  
GCCGGGAGACAAAATAACATTCGAAGCAACTGGAAATCTA  
+HWI-EAS443:3:93:503:521#0/1  
a\_a`aa\_aa\_a`\_a`]Z^``\_`a\_^a`\_`]\_a\_^\_^^Z\_\_  
@HWI-EAS443:3:93:535:300#0/1  
GAACTATTACTGGACTAGTAGAGCCGGGAGACAAAATA  
+HWI-EAS443:3:93:535:300#0/1  
aaaaa\_`aa`a`^`\_`a`[Zaa\_]`^\_a[U^Z]]]Z¥]¥



@HWI-EAS443:3:93:542:1216#0/1  
ATTTCCAGTTGCTTCGAATGTTATTTTGTCTCCCGGCTCT  
+HWI-EAS443:3:93:542:1216#0/1  
`aaa\_`^a^\_aaa\_a\_¥aa\_a\_abaa[ZNa\_Wa\_W[`^Z  
@HWI-EAS443:3:93:55:1833#0/1  
GTGTCTGACAAGTTGTATTGCAATCGTGGACTGGTGTATC  
+HWI-EAS443:3:93:55:1833#0/1  
a\_aaaaaabbbbabaabba\_bbbaa`a`a`\_a]`]aa\_  
@HWI-EAS443:3:93:575:1379#0/1  
TGCTCTTCAGGTCGGCTGCATATCCTGACCCCTGCTCATT  
+HWI-EAS443:3:93:575:1379#0/1  
`^b[F[[X^^YSW¥R\_¥]`]ZaZ¥VSV\_]¥Y`XTP]NYXB  
@HWI-EAS443:3:93:577:906#0/1  
GAGTGATTCACTCTGGATTTCCCAGGATCCAGCCAGCA  
+HWI-EAS443:3:93:577:906#0/1  
XaU\_a¥Vba\_a^aba[b`KU^I\_a`aZU\_a`aaa\_J¥Z\_a  
@HWI-EAS443:3:93:579:179#0/1  
GCTTGAACTTCTTGCTGTATCTTGATGTCCCCACAAAAAC  
+HWI-EAS443:3:93:579:179#0/1  
Zabb]]aJbaabb^V`^[ab]bbb]`]a]IQY[abUXa^`  
@HWI-EAS443:3:93:596:17#0/1  
GGAAATTGGAAACGGCTGCTTTGAATTTTACCACAAATGC  
+HWI-EAS443:3:93:596:17#0/1  
a`\_`\_`\_`a`\_Z`^\_aLO^^FOWXX\_[JFXUHVVYVBB  
@HWI-EAS443:3:93:601:883#0/1  
CACCTTTGTTTCGAGTCATGATTGGGCCATGAACTTGCTT  
+HWI-EAS443:3:93:601:883#0/1  
aaa\_aaab\_aaab^b`ab`aaa`a`\_`\_]\_`^`\_`]¥aa  
@HWI-EAS443:3:93:608:831#0/1  
GTCCTCGTCTATGGGCATTACCATCCATCTACTAGTG  
+HWI-EAS443:3:93:608:831#0/1  
]R¥\_aSTOTN`VTF[]WJS\_\_[\_UZ¥\_\_I^\_\_^][[ZGRX  
@HWI-EAS443:3:93:624:1821#0/1  
GCCGGTTTCATTGAAGGGGGTGGACAGGGATGGTAGATG  
+HWI-EAS443:3:93:624:1821#0/1  
a`aaaY`\_`\_`\_`adWaa`]aa]T\_]¥¥\_Z¥YQX^^W¥^^BB  
@HWI-EAS443:3:93:632:1502#0/1  
GGTAAATGTAACATTGCTGGCTGGATCCTGGGAAATCCAG  
+HWI-EAS443:3:93:632:1502#0/1  
^^E¥a]`\_`\_Z]`]]\_aT[\_`Pa[]YV]QXX¥][UXQBBB  
@HWI-EAS443:3:93:676:1363#0/1  
GGTGGACAGGGATGGTAGATGGATGGTACGGTTATCACCA  
+HWI-EAS443:3:93:676:1363#0/1  
`\_`a`\_`\_`aaa\_a`aW`\_`\_]a\_\_\_^¥Na]Y^¥\_¥LV\_¥U¥  
@HWI-EAS443:3:93:710:1438#0/1  
AGGGGGTGGACAGGGATGGTAGATGGATGGTACGGTTAT  
+HWI-EAS443:3:93:710:1438#0/1  
abbaa^]XV\_[\_`\_aaaa`^Sab\_\_aa^[aGa\_a`VXZW  
@HWI-EAS443:3:93:733:262#0/1  
AACGTGTTACCCAGGAGATTTTCATCGATTATGAGGAGCTA

+HWI-EAS443:3:93:733:262#0/1  
]a])baa`R^b\_^Z\_aYaZ]\_J`SaZZaW\_ZW`aW`XVG  
@HWI-EAS443:3:93:753:694#0/1  
AGTCCTCGTGCTATGGGGCATTACCATCCATCTACTAGT  
+HWI-EAS443:3:93:753:694#0/1  
a`[aabbbaaaa\_aaS]a\_b`aab`R[\_\_\_U]`\_`a[\_a^¥  
@HWI-EAS443:3:93:754:661#0/1  
TGTTATCGCATTGTGGTAAAATTCAAAGCAGCCGTTTCC  
+HWI-EAS443:3:93:754:661#0/1  
aa\_aaaa^a]aa``]a\_Za^]\_a\_^`\_^^^\_X\_^]^^X  
@HWI-EAS443:3:93:788:1288#0/1  
TTCCAATTGTGATCGGATGTATATTCTGAAATGGGAGGCT  
+HWI-EAS443:3:93:788:1288#0/1  
a``a````\_a\_^V]a^Za]][^\_Y^Y¥]^\_Y^N`VPU  
@HWI-EAS443:3:93:797:992#0/1  
AGTTGCTTCGAATGTTATTTTGTCTCCCGGCTCTACTAGT  
+HWI-EAS443:3:93:797:992#0/1  
\_¥``\_aab`b`aa`¥`[``a`aaa\_\_\_RRW^]aVTMR\_PN  
@HWI-EAS443:3:93:838:28#0/1  
GATTTCCAGTTGCTTCGAATGTTATTTTGTCTCCCGGCTC  
+HWI-EAS443:3:93:838:28#0/1  
aLa`\_¥¥]a¥`^Z^[[¥^Z`aZ^^`]^Y[KDWSSRBBBBB  
@HWI-EAS443:3:93:862:1519#0/1  
ATTCGAAGCAACTGGAAATCTAGTGGTACCGAGATATGCA  
+HWI-EAS443:3:93:862:1519#0/1  
\_\_aa]Y]\_\_\_\_\_^\_\_\_\_\_a]^Y\_^`X\_^W\_\_R\_]\_Z\_¥][Z^  
@HWI-EAS443:3:93:878:644#0/1  
GTGAAGAACTTATATGAAAAGGTAAGAAGCCAGTTAAAAA  
+HWI-EAS443:3:93:878:644#0/1  
¥P\_^\_\_OSJXa`ZYX]N\_\_KYQS]W[a\_\_PQ`a\_^`P[UT  
@HWI-EAS443:3:93:948:1150#0/1  
TCTTTACCTACTGCTGTGAAGTGTATTTCATCTTTTCAA  
+HWI-EAS443:3:93:948:1150#0/1  
QU]a¥¥bb`aab[X\_aNZ``^`]R¥R`aYWa`\_aWa\_^a]  
@HWI-EAS443:3:93:968:2036#0/1  
GACTACCAGTACCAATGAACTGGCGACAGTTGAATAGATC  
+HWI-EAS443:3:93:968:2036#0/1  
aaa`KbaTHGaXa`aa`\_`aZO[aTUaX\_`^aS``\_HY  
@HWI-EAS443:3:93:980:822#0/1  
CTAGATTTCCAGTTGCTTCGAATGTTATTTTGTCTCCCGG  
+HWI-EAS443:3:93:980:822#0/1  
aaababbbab`a`ababaabZ]\_b\_a`baa`a[`a\_]R\_b  
@HWI-EAS443:3:93:988:754#0/1  
GGGACATCAAGATACAGCAAGAAGTTCAAGCCGGAAATAG  
+HWI-EAS443:3:93:988:754#0/1  
\_`XTZ[ZW\_\_\_NTY`¥¥\_aaY¥YZW^Wa]]\_[[V¥^\_^^\_  
@HWI-EAS443:3:93:989:1827#0/1  
AGCTCAATTGCTCTTAGCTCCTCATAATCGATGAAATC  
+HWI-EAS443:3:93:989:1827#0/1  
aZ^]`aab`aaa]`aa\_a]¥`\_aa\_\_^aa^¥\_\_\_\_[`\_\_\_]\_

@HWI-EAS443:3:93:992:1938#0/1  
TGGCTGGATCCTGGGAAATCCAGAGTGTGAATCACTCTCC  
+HWI-EAS443:3:93:992:1938#0/1  
aaaa`a`\_\_b`aa`aaa`Uaa`a`V¥Z]aa\_]a\_^V^¥¥  
@HWI-EAS443:3:94:1002:150#0/1  
CAAATCCTACATTAATGATAAAGGGAAAGAAGTCCTCGTG  
+HWI-EAS443:3:94:1002:150#0/1  
aabaaa\_a\_^`baa\_ab\_a]\_`a\_\_[\`a\_`\_^RZ^]\_Z]  
@HWI-EAS443:3:94:1030:1133#0/1  
TCTCCCGGCTCTACTAGTGTCCAGTAATAGTTCATTCTCC  
+HWI-EAS443:3:94:1030:1133#0/1  
aabaaa]`aaba^]`\_^`\_a\_aa]\_`\_aaS]^`Q`RW  
@HWI-EAS443:3:94:105:1528#0/1  
GACCAACAAAGTCTCTATCAGAATGCAGATGCATATGTTT  
+HWI-EAS443:3:94:105:1528#0/1  
ZVa\_Z¥\_S[\`\_]\_P]^¥^aaSYPU\_S\_Q¥XNR][[¥¥\_SYS  
@HWI-EAS443:3:94:1082:1215#0/1  
TAAGAGAGCAATTGAGCTCAGTGCATCATTGAAAGGTT  
+HWI-EAS443:3:94:1082:1215#0/1  
aaaaa\_aaaaa`¥^^`\_`\_^a^]^`\_^aa`\_`\_^`¥Z\_  
@HWI-EAS443:3:94:116:882#0/1  
CTAGTTCAGACAATGGAACGTGTACCAGGAGATTCAT  
+HWI-EAS443:3:94:116:882#0/1  
a\_a\_¥\_aa\_`aa][`aXa^\_S`]]]^`^`^ZZ\_^X^WZ^  
@HWI-EAS443:3:94:1212:950#0/1  
ACTTTGGGTCTTATTGCTATTTCCGGCTTGAACCTTCTTGC  
+HWI-EAS443:3:94:1212:950#0/1  
¥[aaXbbaW^aV\_Uaa\_`aa\_aZa^¥aaTRaGV`G`X`W  
@HWI-EAS443:3:94:1260:1072#0/1  
GCAGCCGTTTCCAATTTCCCTTGGCATTGTTTTTAACTGG  
+HWI-EAS443:3:94:1260:1072#0/1  
`[^a]QU`Y¥0[YR\_aYO\_]XaaY¥^Wa¥^^`\_`^`]]]\_^  
@HWI-EAS443:3:94:1280:90#0/1  
ATCTCGTCAATGGCATTCTGTGTGCTCTTCAGGTCGGCTG  
+HWI-EAS443:3:94:1280:90#0/1  
`a`a\_a[U```a`aa`\_a\_`^`N\_G\_`[\`¥]S]^¥V¥¥  
@HWI-EAS443:3:94:1298:531#0/1  
ATCTACTAGTGCTGACCAACAAAGTCTCTATCAGAATGCA  
+HWI-EAS443:3:94:1298:531#0/1  
\_\_\_ZY]\_^VHQ]\_^QWYaTY^^`RM[R[[^V¥a\_YQXOU  
@HWI-EAS443:3:94:1335:1279#0/1  
GTCAGGATATGCAGCCGACCTGAAGAGCACACAGAATGCC  
+HWI-EAS443:3:94:1335:1279#0/1  
a^T¥NT[a\_aPRR[``\_]ZLXX^PVW\_F^VBBBBBBBBBB  
@HWI-EAS443:3:94:1338:808#0/1  
TTGCAATACAACCTTGTCAGACACCCAAGGGTGCTATAAAC  
+HWI-EAS443:3:94:1338:808#0/1  
a`a`a`ba]``^aaaU^\_a`a\_a`Z``^`[aUa\_a]\_`\_^Y  
@HWI-EAS443:3:94:133:717#0/1  
GGGGACATCAAGATACAGCAAGAAGTTCAAGCCGAAATA

+HWI-EAS443:3:94:133:717#0/1  
abab^\_baba`baaaaab`\_aaaaa^`aaYa¥\_a]\_`^`  
@HWI-EAS443:3:94:135:1352#0/1  
ATCTCGGTACCACTAGATTTCCAGTTGCTTGAATGTTAT  
+HWI-EAS443:3:94:135:1352#0/1  
\_Sa¥b`F`T`ZQ^aa`Q]`a\_YYLta]^`V[Y\_`[T]W]  
@HWI-EAS443:3:94:1429:1695#0/1  
GGGGTGGACAGGGATGGTAGATGGATGGTACGGTTATCAC  
+HWI-EAS443:3:94:1429:1695#0/1  
Ub\_]`¥b\_XVb[b]^\_b\_aa]Iab[¥b[XbIbbNaaYI[Z  
@HWI-EAS443:3:94:1446:1248#0/1  
GCTCCTCATAATCGATGAAATCTCCTGGGTAACACGTTCC  
+HWI-EAS443:3:94:1446:1248#0/1  
[a[^aV`aba[Ta]a`Ra^\_a[`P¥`a`^`H]Wa[[TG  
@HWI-EAS443:3:94:1471:89#0/1  
TTGGACATTTTCCAATTGTGATCGGATGTATATTCTGAAA  
+HWI-EAS443:3:94:1471:89#0/1  
aaab`]\_a`aa^Z]\_aaa^a^`]\_\_X^`PX^X\_¥PX]VZZ  
@HWI-EAS443:3:94:149:1052#0/1  
TCAAGATACAGCAAGAAGTTCAAGCCGAAATAGCAATAA  
+HWI-EAS443:3:94:149:1052#0/1  
`aYbY`V^aaab¥^ZW¥IZaa\_aON\_Z[\_ZYWZ\_`P¥\_]`  
@HWI-EAS443:3:94:1502:1794#0/1  
GACAAGTTGTATTGCAATCGTGGACTGGTGTATCTGAAAT  
+HWI-EAS443:3:94:1502:1794#0/1  
`T]b``S¥\_\_ba¥X0`a\_PZRV[XXaba[\_W`^R^YU[OS  
@HWI-EAS443:3:94:1516:1964#0/1  
AGAAGTCCTCGTGCTATGGGGCATTACCATCCATCTACT  
+HWI-EAS443:3:94:1516:1964#0/1  
\_ba]¥HSYaNb¥^GS\_\_\_\_^aSaa[S`¥¥Y¥YY\_\_W\_[G\_  
@HWI-EAS443:3:94:1537:1228#0/1  
CAAAGTCTCTATCAGAATGCAGATGCATATGTTTTTGTGG  
+HWI-EAS443:3:94:1537:1228#0/1  
ab\_¥a¥ba``¥`J`¥\_aa`a^Y]a[]aaa`a`\_aaRYZ  
@HWI-EAS443:3:94:1538:721#0/1  
GCCAGTTAAAAACAATGCCAAGGAAATTGGAAACGGCTG  
+HWI-EAS443:3:94:1538:721#0/1  
^ab]babbbabbb\_ab`b]aaabba`]aaa\_aaa^aa`aY  
@HWI-EAS443:3:94:1554:451#0/1  
AAAGGAAATTCATACCCAAAGCTCAGCAAATCCTACATTA  
+HWI-EAS443:3:94:1554:451#0/1  
a^^b`[a`a`\_bUWa\_\_\_b^aUaa^b^SWa\_\_^]YS^\_PP  
@HWI-EAS443:3:94:1567:64#0/1  
GTCTCAATTTTGTGCTTTTTACATATTTTGGACATTTTCC  
+HWI-EAS443:3:94:1567:64#0/1  
aY]a¥¥\_aaaa[aV^`\_\_V]`\_]`^`\_\_[[Y`^\_^YU  
@HWI-EAS443:3:94:1594:23#0/1  
TGTGGGACATCAAGATACAGCAAGAAGTTCAAGCCGGAA  
+HWI-EAS443:3:94:1594:23#0/1  
ab^bbaaa^`a\_\_\_b`\_`^`a]`a`]^a]\_Y`\_`UUa[ZX

@HWI-EAS443:3:94:1609:1294#0/1  
AGCTCCTCATAATCGATGAAATCTCCTGGGTAACACGTTC  
+HWI-EAS443:3:94:1609:1294#0/1  
[UMYa`b`aabab`]a^\_ZaaYU[PZY¥WWSY\_^a`]Y`M  
@HWI-EAS443:3:94:160:1013#0/1  
CAGGGATGGTAGATGGATGGTACGGTTATCACCATCAAAA  
+HWI-EAS443:3:94:160:1013#0/1  
a^¥aaaaaZH¥`a`aaZaa\_Xa¥¥]U]\_\_Y]X\_VPT[\_^U  
@HWI-EAS443:3:94:1618:211#0/1  
TGCTGGCTGGATCCTGGGAAATCCAGAGTGTGAATCACTC  
+HWI-EAS443:3:94:1618:211#0/1  
aa``]aaaa`a[SV\_aa\_\_\_aa\_\_\_Y¥\_SZ¥a^Z[QXBBB  
@HWI-EAS443:3:94:1673:729#0/1  
GAGCAATTGAGCTCAGTGTTCATTTTCAAAGGTTTGAGA  
+HWI-EAS443:3:94:1673:729#0/1  
a`ababbbbaab\_aabb\_a\_aaab`abaaaaaaa]aaaaaa  
@HWI-EAS443:3:94:1675:1086#0/1  
GAAGTTCAAGCCGAAATAGCAATAAGACCCAAAGTGAGG  
+HWI-EAS443:3:94:1675:1086#0/1  
[^aaa\_bb\_U^]¥\_VZba^aZR[^a[^ba\_\_Ya¥]Ra[\_\_\_  
@HWI-EAS443:3:94:168:1586#0/1  
TTGACACTTTCCATGCACGTGTTATCGCATTGTGGTAAA  
+HWI-EAS443:3:94:168:1586#0/1  
aKbVb\_a`aYaa`I`aV\_`W`Raa\_^\_X^``\_`U\_TN[^\_  
@HWI-EAS443:3:94:170:171#0/1  
CTGGTGTATAGCACCCCTGGGTGTCTGACAAGTTGTAT  
+HWI-EAS443:3:94:170:171#0/1  
abababbbbabbaab¥]ba``¥`Ub]`a``P]Va\_`a\_`^  
@HWI-EAS443:3:94:1715:1135#0/1  
AAGCCAGTTAAAAACAATGCCAAGGAAATTGGAAACGGC  
+HWI-EAS443:3:94:1715:1135#0/1  
^[S]^aaVa\_aa^`a\_ZZ\_\_`[]]``ZO¥\_[\_aQ[^a`S  
@HWI-EAS443:3:94:1748:1031#0/1  
TGGGGACATCAAGATACAGCAAGAAGTTCAAGCCGAAAT  
+HWI-EAS443:3:94:1748:1031#0/1  
aaaaa`aaa``aa``\_aa\_\_`aa]^a]\_\_a`\_]¥XX]Z\_  
@HWI-EAS443:3:94:1753:480#0/1  
GCATATGTTTTTGTGGGGACATCAAGATACAGCAAGAAGT  
+HWI-EAS443:3:94:1753:480#0/1  
a`abaabaaabab`a^`aa`aa```a`abaaa`aaa`\_aW  
@HWI-EAS443:3:94:1780:931#0/1  
GAATTTTACCACAAATGCGATAACACGTGCATGGAAAGTG  
+HWI-EAS443:3:94:1780:931#0/1  
`R^[`\_ba\_[aXbbaab¥^ab¥abbba`bJVab\_aa`aN  
@HWI-EAS443:3:94:193:1147#0/1  
AAATTTTTGTAGAAGCTTTTTGCTCCAGCATGAGGACATG  
+HWI-EAS443:3:94:193:1147#0/1  
aa`aa`aaa`a^\_`aa`a`aa\_^aa\_\_\_\_\_]``\_W[X\_]`  
@HWI-EAS443:3:94:231:602#0/1  
CAGATGCATATGTTTTTGTGGGGACATCAAGATACAGCAA

+HWI-EAS443:3:94:231:602#0/1  
aab]ab`a\_Y]\_^\_\_baa]a\_a\_\_[\`¥a\_a`\_¥XP`aX\_a  
@HWI-EAS443:3:94:234:742#0/1  
GGGAGAATGAACTATTACTGGACACTAGTAGAGCCGGGAG  
+HWI-EAS443:3:94:234:742#0/1  
a`^`¥`\_`ZWY\_\_^[\_]^]^^\_\_\_\_]Z]]]\_¥Y^Z^X]  
@HWI-EAS443:3:94:239:1844#0/1  
GGGGTCAGGATATGCAGCCGACCTGAAGAGCACACAGAAT  
+HWI-EAS443:3:94:239:1844#0/1  
aaab\_bbbbbbb`bbabababaabaaaaa`aaaaaaa\_  
@HWI-EAS443:3:94:251:500#0/1  
GAGCAATTGAGCTCAGTGTCATCATTGAAAGTTTGAGA  
+HWI-EAS443:3:94:251:500#0/1  
abb^]`bba`\_aa¥ba]a`\_aa`aaaaab\_\_\_a^`\_aaba  
@HWI-EAS443:3:94:288:293#0/1  
AAAGAACTTTGGACTACCACGATTCAAATGTGAAGAACTT  
+HWI-EAS443:3:94:288:293#0/1  
aa¥`R`YYY^a¥`\_¥Y`Z]X\_^^^Z\_Z¥\_aY`\_U^¥OFYV  
@HWI-EAS443:3:94:383:169#0/1  
TGTGTATTCATCTTTTCAATAACAGAATTTACTTTGTAG  
+HWI-EAS443:3:94:383:169#0/1  
aa\_a`aaa`a\_a`a`\_`\_`Z^\_\_a]\_`\_`\_^`^\_\_]\_^\_  
@HWI-EAS443:3:94:392:269#0/1  
CTAGATTTCCAGTTGCTTCGAATGTTATTTTGTCTCCCGG  
+HWI-EAS443:3:94:392:269#0/1  
aZbbb¥baaab`¥Ub\_\_abb]ab]a[[]`a`aY\_[aa\_aa  
@HWI-EAS443:3:94:395:157#0/1  
GAATTTACTTTGTTAGTAATCTCGTCAATGGCATTCTGTG  
+HWI-EAS443:3:94:395:157#0/1  
a`aaaa^aaab`aaa]`a`\_a^a^^^]]^^XY`\_]\_Z\_  
@HWI-EAS443:3:94:484:287#0/1  
ATGTAACATTGCTGGCTGGATCCTGGGAAATCCAGAGTGT  
+HWI-EAS443:3:94:484:287#0/1  
^U¥U¥¥WZ¥bbb`a`X`^ZY\_^a[`X`[[YZF¥T`^aN\_Y  
@HWI-EAS443:3:94:512:1406#0/1  
TGTTTTTGTGGGACATCAAGATACAGCAAGAAGTTCAAG  
+HWI-EAS443:3:94:512:1406#0/1  
¥\_V¥[`]^K^XZ\_\_`aaaa[``]a\_^`Y`\_V\_M`¥`aaaa  
@HWI-EAS443:3:94:517:762#0/1  
CAGAGTGTGAATCACTCTCCACAGCAAGCTCATGGTCCTA  
+HWI-EAS443:3:94:517:762#0/1  
aabab\_b\_babbabb`\_aababba`\_a`a`\_aa`]\_]`\_  
@HWI-EAS443:3:94:518:932#0/1  
AGCAACTGGAAATCTAGTGGTACCGAGATATGCATTCGCA  
+HWI-EAS443:3:94:518:932#0/1  
``ab`aaaa`\_a`\_ba`baIaa\_b`aa\_\_\_a\_a`\_a`^a  
@HWI-EAS443:3:94:582:1344#0/1  
GCTGCTTTGAATTTTACCACAAATGCGATAACACGTGCAT  
+HWI-EAS443:3:94:582:1344#0/1  
^`]\_VVab¥¥RQXY\_¥\_U\_¥^Z¥W\_R[Ua`XVa`aaaQ]¥

@HWI-EAS443:3:94:593:1418#0/1  
CTGGATCCTGGGAAATCCAGAGTGTGAATCACTCTCCACA  
+HWI-EAS443:3:94:593:1418#0/1  
a`aaa`aaaaba^aaa`aaZ`b\_a\_aaa`aa¥`\_`¥V^`a  
@HWI-EAS443:3:94:660:339#0/1  
GTGAAGAACTTATATGAAAAGGTAAGAAGCCAGTTAAAAA  
+HWI-EAS443:3:94:660:339#0/1  
`U`ZR]UXW^YaY¥¥¥¥¥\_Y¥YaP\_^aa\_`^Z¥aW\_[TXO[  
@HWI-EAS443:3:94:665:739#0/1  
ATATGTTTTTGTGGGACATCAAGATACAGCAAGAAGTTC  
+HWI-EAS443:3:94:665:739#0/1  
aaaab^ba\_bb\_a\_aaaa`a`a`]aa`a`\_^`a\_aa]\_\_  
@HWI-EAS443:3:94:667:1342#0/1  
TGGGGCTACCCCTTTAGTTTGCATAGTTTCCCGTTATGC  
+HWI-EAS443:3:94:667:1342#0/1  
`bab`baaaaaba\_aaaa¥a^Q[[a`^^ab\_\_`^^`\_aWQ  
@HWI-EAS443:3:94:705:1739#0/1  
GACAAGTTGTATTGCAATCGTGGACTGGTGTATCTGAAAT  
+HWI-EAS443:3:94:705:1739#0/1  
aaba`\_Yaabb\_aaabb`a\_abaaa`a\_Uaaaaaa^`a\_  
@HWI-EAS443:3:94:778:677#0/1  
GATGCATATGTTTTTGTGGGACATCAAGATACAGCAAGA  
+HWI-EAS443:3:94:778:677#0/1  
ZZY[Q`]ZaaR^X¥`Z\_\_W¥R^b^WYHT]a[[Q][G^aZ]  
@HWI-EAS443:3:94:823:521#0/1  
TAGATTTCCAGTTGCTTCGAATGTTATTTTGTCTCCCGGC  
+HWI-EAS443:3:94:823:521#0/1  
aaa]Naaaa\_a^a`aaa\_a\_`ab\_`^`aa`Z^\_`]^[^\_\_Z  
@HWI-EAS443:3:94:876:1859#0/1  
CAAGATACAGCAAGAAGTTCAAGCCGAAATAGCAATAAG  
+HWI-EAS443:3:94:876:1859#0/1  
aaaaY^`^^a`¥a`a`aZa`a\_a\_\_`]`[\_`\_\_\_\_`\_`]  
@HWI-EAS443:3:94:88:1263#0/1  
GAGAGCAATTGAGCTCAGTGCATCATTGAAAGGTTTGA  
+HWI-EAS443:3:94:88:1263#0/1  
]Taa^[a^aaa`^aaaa¥ZX\_ZYWUS]]aa`^]WHPa[a  
@HWI-EAS443:3:94:915:33#0/1  
GATACAGCAAGAAGTTCAAGCCGAAATAGCAATAAGACC  
+HWI-EAS443:3:94:915:33#0/1  
a\_aa\_abaabaaQa^aa`aa[Sa^`¥\_\_`aU¥^`^\_`]ZW  
@HWI-EAS443:3:94:918:144#0/1  
ATTGAAGGGGGGTGGACAGGGATGGTAGATGGATGGTACG  
+HWI-EAS443:3:94:918:144#0/1  
`bbb^ababbbb^aab`aa^b`]\_\_]aaaab^\_`aaQaIa  
@HWI-EAS443:3:94:919:1586#0/1  
GTTATTTTGTCTCCCGCTCTACTAGTGTCCAGTAATAGT  
+HWI-EAS443:3:94:919:1586#0/1  
a`babbbaaa`aa`\_¥`a`a\_^`\_ZZ\_^\_^\_\_Z\_a^\_ZX  
@HWI-EAS443:3:94:926:1231#0/1  
GAGCAATTGAGCTCAGTGCATCATTGAAAGGTTTGA

+HWI-EAS443:3:94:926:1231#0/1  
^aa^aba`a`aa^ab[a^aa`a`baa``aa``Ybabaaa  
@HWI-EAS443:3:94:935:1058#0/1  
CACGATTGCAATACTTGTGACACACCAAGGGTGCTA  
+HWI-EAS443:3:94:935:1058#0/1  
aZT`a^U\_¥`a\_\_T\_a`\_[a^Z^\_Y¥a¥[\_`\_]`¥WZT^¥  
@HWI-EAS443:3:94:95:1304#0/1  
GGCTGGTGTTTATAGCACCTTGGGTGTCTGACAAGTTGT  
+HWI-EAS443:3:94:95:1304#0/1  
aaa`aaXa^`\_`aa\_aa`\_]\_a`^`^\_X\_V\_\_¥ZW^^`X]OX  
@HWI-EAS443:3:94:967:545#0/1  
AGTCCTCGTGCTATGGGGCATTACCATCCATCTACTAGT  
+HWI-EAS443:3:94:967:545#0/1  
aaa^Xa`a`\_`aa^`a`\_[\_\_``\_a\_¥\_]\_[\_\_]\_dW`]\_¥  
@HWI-EAS443:3:94:982:1262#0/1  
TGCTGGCTGGATCCTGGGAAATCCAGAGTGTGAATCACTC  
+HWI-EAS443:3:94:982:1262#0/1  
abbaaabaa\_^a]`aba\_aaaa`a^]Va`a\_a`YaR[X  
@HWI-EAS443:3:95:1011:421#0/1  
GGTTTCCTGGACATTTGGACTTACAATGCCGAAGTTGG  
+HWI-EAS443:3:95:1011:421#0/1  
aa\_aaY`baba\_aaaa`^aa`\_a`aa^`a^a\_aa]^`^`  
@HWI-EAS443:3:95:1035:575#0/1  
CATTTGGGTAAATGTAACATTGCTGGCTGGATCCTGGGAA  
+HWI-EAS443:3:95:1035:575#0/1  
abbbbbbbbabbbbabbbbabbbbbb`aaaaaaa`b  
@HWI-EAS443:3:95:1060:1541#0/1  
GGGACATCAAGATACAGCAAGAAGTTCAAGCCGAAATAG  
+HWI-EAS443:3:95:1060:1541#0/1  
a`aa``\_`aaa\_aaa\_aa\_a`a`\_`aX^`b\_\_^Z``^¥^\_`^\_  
@HWI-EAS443:3:95:1107:666#0/1  
TTGGAACGGCTGCTTTGAATTTTACCACAAATGCGATAA  
+HWI-EAS443:3:95:1107:666#0/1  
a¥\_\_abb`\_`aa`P]^aba]^`a^bYW¥TSQaYPXZT`````  
@HWI-EAS443:3:95:1195:983#0/1  
AAAAAGCACAAAATTGAGACTGGCCACAGGATTGAGGAAT  
+HWI-EAS443:3:95:1195:983#0/1  
abaaaaabbaa`babba\_^^`ba`a`U]ab0^a^PZ¥W\_\_  
@HWI-EAS443:3:95:1249:1177#0/1  
CATTCTGTGTGCTCTTCAGGTCGGCTGCATATCCTGACCC  
+HWI-EAS443:3:95:1249:1177#0/1  
]b\_b`bbbb`a`bb`\_`abbb\_bZaabaJaba``]ba`a¥V  
@HWI-EAS443:3:95:1268:1604#0/1  
GAGTGATTCACACTCTGGATTTCCCAGGATCCAGCCAGCA  
+HWI-EAS443:3:95:1268:1604#0/1  
aaa[aaaaa`T`a`\_\_aa\_aa`Z`a^`[`aQT[a¥R^a[a  
@HWI-EAS443:3:95:1301:747#0/1  
CTGGCTGGATCCTGGGAAATCCAGAGTGTGAATCACTCTC  
+HWI-EAS443:3:95:1301:747#0/1  
aa\_[\_`baba`aab^^^`\_FHYa`\_[aNaaa]R\_SaX\_]



@HWI-EAS443:3:95:1308:543#0/1  
TGCCGGTTTCATTGAAGGGGGTGGACAGGGATGGTAGAT  
+HWI-EAS443:3:95:1308:543#0/1  
Tbbbababa\_bbbbaaa`aabZba]`bbab``baMaaa¥  
@HWI-EAS443:3:95:1351:395#0/1  
CATTCTGTGTGCTCTTCAGGTCGGCTGCATATCCTGACCC  
+HWI-EAS443:3:95:1351:395#0/1  
]bb\_W`Taabb¥`^bbbbb^X`aabb`bbbb\_ZaabV\_G  
@HWI-EAS443:3:95:136:261#0/1  
ATATGTTTTTGTGGGACATCAAGATACAGCAAGAAGTTC  
+HWI-EAS443:3:95:136:261#0/1  
^a\_aaWa`aaa]a`aba]\_\_¥aaaa^\_[aa\_`aa\_]aZ\_Z  
@HWI-EAS443:3:95:1471:819#0/1  
CAAGATACAGCAAGAAGTTCAGCCGAAATAGCAATAAG  
+HWI-EAS443:3:95:1471:819#0/1  
`bbaabbbb``abb`bb[aYbab\_`abaaabaa^b^bbab  
@HWI-EAS443:3:95:1512:1011#0/1  
GGGACATCAAGATACAGCAAGAAGTTCAGCCGAAATA  
+HWI-EAS443:3:95:1512:1011#0/1  
aa`\_\_NTMF¥U`a]\_aaaW[`VT^\_T[[\_Q\_WR`]]¥V`]  
@HWI-EAS443:3:95:1616:570#0/1  
GCTGCTTTGAATTTTACCACAAATGCGATAACACGTGCAT  
+HWI-EAS443:3:95:1616:570#0/1  
aaabaaaaaabaab`bY^a]aaa`aXaaa\_]a\_a]`[\_\_\_  
@HWI-EAS443:3:95:1628:384#0/1  
CCTCTGAGTATTTTGGGTAGTCATAAGTCCCATTTTGGAC  
+HWI-EAS443:3:95:1628:384#0/1  
abbb`¥a``bbbbb`bbaXU\_bbbaabbb\_W\_bbbb``^X  
@HWI-EAS443:3:95:1668:638#0/1  
GGTTTCCTGGACATTTGGACTTACAATGCCGAAGTGTGG  
+HWI-EAS443:3:95:1668:638#0/1  
`aaa\_Ta\_aa\_`aa\_aba\_]aaa^`a\_a]^a]`[aa^^`\_`  
@HWI-EAS443:3:95:166:1958#0/1  
GAACTCTTTACCTACTGCTGTGAAGTGTATTTCATCTTT  
+HWI-EAS443:3:95:166:1958#0/1  
Lb`[SW\_ab```¥YZXWxa\_OV¥I¥VTPGR^a[\_dW`aa  
@HWI-EAS443:3:95:1748:1791#0/1  
TAGATTTCCAGTTGCTTCGAATGTTATTTTGTCTCCCGGC  
+HWI-EAS443:3:95:1748:1791#0/1  
`bbbaaa^aba\_b`¥ba\_``abb`baabaa\_\_Xa`ZW^WI  
@HWI-EAS443:3:95:1750:474#0/1  
ATCAGAATGCAGATGCATATGTTTTTGTGGGACATCAAG  
+HWI-EAS443:3:95:1750:474#0/1  
a\_¥\_abab`[aaa^`[`aa\_baaabaa`ab`W`Xa^a\_`  
@HWI-EAS443:3:95:1775:1077#0/1  
TGGGACATCAAGATACAGCAAGAAGTTCAGCCGAAAT  
+HWI-EAS443:3:95:1775:1077#0/1  
abbbba`b`^`baa^baababa`\_^a¥]`a`\_aaba¥¥`X  
@HWI-EAS443:3:95:1784:1307#0/1  
CAGAATTTACTTTGTTAGTAATCTCGTCAATGGCATTCTG

+HWI-EAS443:3:95:1784:1307#0/1  
`bb`bbbbbabbbbaa`aabbabb`baaba\_b\_`bab^aa  
@HWI-EAS443:3:95:188:608#0/1  
GTGAACTGTGTATTCATCTTTTCAATAACAGAATTTACTT  
+HWI-EAS443:3:95:188:608#0/1  
\_`[`abaaa\_`\_]`a`aaaaaaaa`aa```a\_^`a\_a`\_`a  
@HWI-EAS443:3:95:281:318#0/1  
GCTATTTCCGGCTTGAACCTTCTTGCTGTATCTTGATGTCC  
+HWI-EAS443:3:95:281:318#0/1  
a``baaa¥V`a`aaa]baab\_X¥¥aaa\_``^\_\_``]\_H^¥  
@HWI-EAS443:3:95:30:1211#0/1  
GATAAAGGGAAGAAGTCCTCGTGCTATGGGGCATTACC  
+HWI-EAS443:3:95:30:1211#0/1  
R\_Y`a¥a[V¥¥]`aZaa``bbab\_a^^b`Z\_`^Z`aa`V  
@HWI-EAS443:3:95:328:786#0/1  
TCCCGGCTCTACTAGTGTCCAGTAATAGTTCATTCTCCCT  
+HWI-EAS443:3:95:328:786#0/1  
aaba\_]a[^PU]XYUY[U¥[TRN\_P[W[T^\_S\_\_\_\_\_^W¥¥  
@HWI-EAS443:3:95:338:1253#0/1  
CGAATGTTATTTTGTCTCCCGGCTCTACTAGTGTCCAGTA  
+HWI-EAS443:3:95:338:1253#0/1  
ab`aab\_\_a\_a`XWR]```[^¥W[^YVP¥U¥PPFTWN`WY  
@HWI-EAS443:3:95:351:918#0/1  
GGGACATCAAGATACAGCAAGAAGTTCAAGCCGGAAATA  
+HWI-EAS443:3:95:351:918#0/1  
U^`b¥abab`b`\_\_baa\_bbbq]a`Z^ab^baZ^aaa\_``  
@HWI-EAS443:3:95:356:50#0/1  
GCTCATTTTGTATGGTATAACCGTACCATCCATCTACCAT  
+HWI-EAS443:3:95:356:50#0/1  
a`ab^aba`baaaa`baaa\_TXa[^¥¥`VEK[``\_\_VSW^  
@HWI-EAS443:3:95:383:1078#0/1  
GCACGTGTTATCGCATTTGTGGTAAAATTCAAAGCAGCCG  
+HWI-EAS443:3:95:383:1078#0/1  
abbbb]a^\_ba\_\_Ybabba`b\_`a`Xba`abW`b`\_bb]a  
@HWI-EAS443:3:95:47:1465#0/1  
CCCCACAAAAACATATGCATCTGCATTCTGATAGAGACTT  
+HWI-EAS443:3:95:47:1465#0/1  
abab`a`X`aY`S`aaaaaaa`a`aaaaa`aaa`a`]``  
@HWI-EAS443:3:95:492:1858#0/1  
CCTCTGAGTATTTTGGGTAGTCATAAGTCCCATTTTGGAC  
+HWI-EAS443:3:95:492:1858#0/1  
abbbbbbbbabbbbbbb`\_bbbbbbbaab^bbbbbaaba  
@HWI-EAS443:3:95:520:1752#0/1  
TACCCAGGAGATTTTCATCGATTATGAGGAGCTAAGAGAGC  
+HWI-EAS443:3:95:520:1752#0/1  
`b[Z\_\_Q\_bb`bab[b`bb`babbaa`aaaZa]]¥a`aZP  
@HWI-EAS443:3:95:538:854#0/1  
GGGACATCAAGATACAGCAAGAAGTTCAAGCCGGAAATAG  
+HWI-EAS443:3:95:538:854#0/1  
aba`]a]^\_aaaa`ab`baba`b\_`aa¥a^[aa\_\_\_\_`\_a

@HWI-EAS443:3:95:578:601#0/1  
GGACAGGGATGGTAGATGGATGGTACGGTTATCACCATCA  
+HWI-EAS443:3:95:578:601#0/1  
]]b\_V¥bbaabaabbaaabbbabPbabbabaaaa`[aa[`  
@HWI-EAS443:3:95:596:545#0/1  
CAAAAACATATGCATCTGCATTCTGATAGAGACTTTGTTG  
+HWI-EAS443:3:95:596:545#0/1  
abVabb\_`aa\_aaa`\_^aaaaabb`aba`]aaab\_\_^a  
@HWI-EAS443:3:95:606:987#0/1  
CGGGAGACAAAATAACATTCTGAAGCAACTGGAAATCTAGT  
+HWI-EAS443:3:95:606:987#0/1  
ab^^Ua]abbaaab`a`b]]`aa`aaa`]Y]ab^b`aZ  
@HWI-EAS443:3:95:629:1412#0/1  
TGTGGGGACATCAAGATACAGCAAGAAGTTCAAGCCGGAA  
+HWI-EAS443:3:95:629:1412#0/1  
a`[^\_]XVRH¥a``[^\_`a`[\_aa[Y`QWZ¥^[a]`X[Z  
@HWI-EAS443:3:95:62:49#0/1  
CAGAATTTACTTTGTTAGTAATCTCGTCAATGGCATTCTG  
+HWI-EAS443:3:95:62:49#0/1  
`abaaabbXa`aaa[aaa`aaaa\_ba\_aa\_a```\_]\_`\_  
@HWI-EAS443:3:95:643:1755#0/1  
CCGGGAGACAAAATAACATTCTGAAGCAACTGGAAATCTAG  
+HWI-EAS443:3:95:643:1755#0/1  
a\_P]aIDYa\_QKN[Y¥\_`VMP\_¥U]U^aXYSX^NGU]UZ]  
@HWI-EAS443:3:95:647:1477#0/1  
CATGAACCTTGTCTTGGGAATATCTCAAACCTTTCAAATG  
+HWI-EAS443:3:95:647:1477#0/1  
[\_\_\_`bbbbbabbbb`¥Zbbbbbbbb`\_\_a`b`\_a``  
@HWI-EAS443:3:95:652:1016#0/1  
GCTGCTTTGAATTTTACCACAAATGCGATAACACGTGCAT  
+HWI-EAS443:3:95:652:1016#0/1  
aa^^Y\_b\_¥\_aZ^a^`a^aa\_ba[^`aT\_^aa]]a0aa  
@HWI-EAS443:3:95:66:1742#0/1  
TTCGAATGTTATTTTGTCTCCCGCTCTACTAGTGTCCAG  
+HWI-EAS443:3:95:66:1742#0/1  
`abaaaa^abaaaa\_\_a`aaa`a¥a]\_\_a\_^[\_Z\_\_\_`  
@HWI-EAS443:3:95:698:1585#0/1  
ATTTGAATCGTGGTAGTCCAAAGTTCTTTTCAATTTTCCAAT  
+HWI-EAS443:3:95:698:1585#0/1  
[¥``\_]`Z\_XRU¥`\_\_¥Tabbaaa[O\_Y^`R¥ab`^`abG  
@HWI-EAS443:3:95:743:1435#0/1  
ATTTTGTCTCCTCTGAGTATTTTGGGTAGTCATAAGTCCC  
+HWI-EAS443:3:95:743:1435#0/1  
¥\_ZYX^^¥\_\_¥X\_[\_¥\_U`[^XZ¥Z¥N^¥W¥\_Y\_PYDWVR  
@HWI-EAS443:3:95:74:44#0/1  
CGGGAGACAAAATAACATTCTGAAGCAACTGGAAATCTAGT  
+HWI-EAS443:3:95:74:44#0/1  
`abbbb`baabbbbaababbaabaababbbbab\_bba^  
@HWI-EAS443:3:95:753:1481#0/1  
AATTGAGCTCAGTGCATCATTGAAAGTTTGAGATATT

+HWI-EAS443:3:95:753:1481#0/1  
]ba[^\_b\_J^b\_]aQaaaa`aaabaa` `a\_aaabba^aaa  
@HWI-EAS443:3:95:766:1768#0/1  
GAGCAATTGAGCTCAGTGCATCATTGAAAGTTTGAGA  
+HWI-EAS443:3:95:766:1768#0/1  
abaaba`b`baaa`aa`a\_abaaaaa`aaaa¥¥aaa\_a  
@HWI-EAS443:3:95:798:1149#0/1  
AAGCCAGTTAAAAACAATGCCAAGGAAATTGGAAACGGC  
+HWI-EAS443:3:95:798:1149#0/1  
a^ZY\_a]\_`[\_a^W^]\_\_\_¥U^\_^\_] []]^\_¥TXU¥Y]]W  
@HWI-EAS443:3:95:876:1519#0/1  
GGCTGCTTTGAATTTACCACAAATGCGATAACACGTGCA  
+HWI-EAS443:3:95:876:1519#0/1  
O]bbbbbbb`babbbbbbbbbbbbbabbbbabbbbb\_b  
@HWI-EAS443:3:95:962:427#0/1  
CAAAGTCTCTATCAGAATGCAGATGCATATGTTTTGTGG  
+HWI-EAS443:3:95:962:427#0/1  
`abab\_`bbbbbabbbbaabbbbaababbbbbbaaaa  
@HWI-EAS443:3:95:985:928#0/1  
CATTCTGTGTCTTTCAGGTCGGCTGCATATCCTGACCC  
+HWI-EAS443:3:95:985:928#0/1  
aabbabbbbbbababbbba` `babbabbbb`bbaa`\_  
@HWI-EAS443:3:96:1008:829#0/1  
CGTCAATGGCATTCTGTGTGCTCTTCAGGTCGGCTGCATA  
+HWI-EAS443:3:96:1008:829#0/1  
^\_X^J\_\_\_`b^`a`\_bb[^ab\_XXb]aabaa`ab\_aa\_aW`  
@HWI-EAS443:3:96:1030:1187#0/1  
AATCGATGAAATCTCCTGGGTAACACGTTCCATTGTCTGA  
+HWI-EAS443:3:96:1030:1187#0/1  
`aaabbbbaa`aaaa`aba`U[aZ`Xaa\_aa\_a\_a^aa^  
@HWI-EAS443:3:96:1035:1402#0/1  
CGTTATGCTTGTCTTCTAGAAGGTTAACAGAGTGTGTAC  
+HWI-EAS443:3:96:1035:1402#0/1  
aaaabaaaaaba^`a`aaa`a\_^U` `aU\_a^`X]HaY]aX  
@HWI-EAS443:3:96:104:565#0/1  
GAAAGTTTGGATATTCCTCAAGACAAGTTCATGGCCCA  
+HWI-EAS443:3:96:104:565#0/1  
a`\_`[\_b\_bb` `aab\_a`aa` ` `\_]`\_`ZX`^^]¥^\_VXV  
@HWI-EAS443:3:96:1082:95#0/1  
TGCTGGCTGGATCCTGGGAAATCCAGAGTGTGAATCACTC  
+HWI-EAS443:3:96:1082:95#0/1  
^bY\_X\_IOba[[V]`aaa¥W`aUW]`¥`\_aPXX^[U¥VN¥  
@HWI-EAS443:3:96:1120:329#0/1  
GCTGGCTGGATCCTGGGAAATCCAGAGTGTGAATCACTCT  
+HWI-EAS443:3:96:1120:329#0/1  
a`aa`\_¥Y\_Z^¥¥\_VFX`^V[WW`S`S^UXS^VVVSU[  
@HWI-EAS443:3:96:112:870#0/1  
ATGGTTTCTGGACATTTGGACTTACAATGCCGAAGTGT  
+HWI-EAS443:3:96:112:870#0/1  
aa]aP]S\_a\_`WOZ\_a\_]aa`S[\_`\_\_a\_`^\_a¥^VU[WX

@HWI-EAS443:3:96:1149:802#0/1  
ATTCTGTGTCTTCAGGTCGGCTGCATATCCTGACCCC  
+HWI-EAS443:3:96:1149:802#0/1  
`ab`a`^`¥`^Xaaa`^adWa`a`\_`a^¥`^`\_SaZU^QUW^  
@HWI-EAS443:3:96:114:2036#0/1  
ACTAGATTTCCAGTTGCTTCGAATGTTATTTTGTCTCCCG  
+HWI-EAS443:3:96:114:2036#0/1  
^`\_¥^¥W]]abaaaa`^ZXaZaaa`Y\_Ya`aYWSZ^\_]X  
@HWI-EAS443:3:96:1172:471#0/1  
TTCCTCTGAGTATTTTGGGTAGTCATAAGTCCCATTTTGTG  
+HWI-EAS443:3:96:1172:471#0/1  
`b`a]V^`bU`¥\_Q^X¥]Taba`a^`VTIa\_a^b`a[  
@HWI-EAS443:3:96:1209:360#0/1  
GCTGGCTGGATCCTGGGAAATCCAGAGTGTGAATCACTCT  
+HWI-EAS443:3:96:1209:360#0/1  
aabba`bbb`^UYbabb`aZaQ¥aaZaW`YaWa\_U\_P\_V`  
@HWI-EAS443:3:96:1221:345#0/1  
GGGAGACAAAATAACATTCCAAGCAACTGGAAATCTAGTG  
+HWI-EAS443:3:96:1221:345#0/1  
aba`T`[]`a`a\_aa]aa^^^\_ZX`a`WZaaX`\_]Xa  
@HWI-EAS443:3:96:1256:1778#0/1  
AATCGATGAAATCTCCTGGGTAACACGTTCCATTGTCTGA  
+HWI-EAS443:3:96:1256:1778#0/1  
aa\_Wa`ab\_aa\_X`\_¥Uaa¥X`\_Va]\_^\_¥X^`V]WZ`\_^  
@HWI-EAS443:3:96:1267:368#0/1  
TAGTAATCTCGTCAATGGCATTCTGTGTGCTCTTCAGGTC  
+HWI-EAS443:3:96:1267:368#0/1  
^]¥ZaaaY`HbaQaaUaaXFR]X^aXbU]L¥Xa`Q[BBBB  
@HWI-EAS443:3:96:1281:1084#0/1  
AAAGAAGTCTCGTGCTATGGGGCATTCCACCATCCATCTA  
+HWI-EAS443:3:96:1281:1084#0/1  
abbb`a`\_aaa[bab]a`Y`a]`a`V\_XS]a\_U`aQ`a  
@HWI-EAS443:3:96:1298:852#0/1  
GTGGGGACATCAAGATACAGCAAGAAGTTCAAGCCGGAAA  
+HWI-EAS443:3:96:1298:852#0/1  
`\_a[[b`¥aaaaaaaaa\_a`¥\_a`\_`¥MU\_a`a]X`^^^`  
@HWI-EAS443:3:96:1330:2026#0/1  
GCTGGCTGGATCCTGGGAAATCCAGAGTGTGAATCACTCT  
+HWI-EAS443:3:96:1330:2026#0/1  
a^`a`Zaaa`\_¥aVa]RX¥`VYV`\_G[KUV`[\_`¥WV¥VBB  
@HWI-EAS443:3:96:1380:1362#0/1  
GGGGACATCAAGATACAGCAAGAAGTTCAAGCCGGAAAATA  
+HWI-EAS443:3:96:1380:1362#0/1  
ab\_aa`a`\_`\_a`\_a`\_aT[a^]`\_NUTa`\_PF¥Z`^^`\_`  
@HWI-EAS443:3:96:1409:736#0/1  
CGGGAGACAAAATAACATTCCAAGCAACTGGAAATCTAGT  
+HWI-EAS443:3:96:1409:736#0/1  
`bba^aaaaabbb\_a]baaab¥^^`aR[a`\_`a`Yaab¥  
@HWI-EAS443:3:96:1452:123#0/1  
TCTATTTCTTCTGTTTAATTTTGTCTCCTCTGAGTATT

+HWI-EAS443:3:96:1452:123#0/1  
aabaabaWXbaabJb\_bbb`¥bbbbXYba^SbPb`Zb[¥ab  
@HWI-EAS443:3:96:1456:1980#0/1  
TATTCCCCAAGACAAGTTCATGGCCCAATCATGACTCGAA  
+HWI-EAS443:3:96:1456:1980#0/1  
abbbba`aabba`aab^aaa]^a\_\_^`\_\_V^`b`U`RYPB  
@HWI-EAS443:3:96:1542:1776#0/1  
ATTTCTTCTCTGTTTAAATTTTGCTTCCTCTGAGTATTTTG  
+HWI-EAS443:3:96:1542:1776#0/1  
aabb\_bbVbY\_b\_b¥Vbbaab`¥aL[aIbbba^`¥[bab  
@HWI-EAS443:3:96:1550:111#0/1  
ACCCAGGAGATTCATCGATTATGAGGAGCTAAGAGAGCA  
+HWI-EAS443:3:96:1550:111#0/1  
``aabaabaabaa\_^0[^aa\_a``\_TTX^WUZOTXVRDV  
@HWI-EAS443:3:96:1559:1380#0/1  
CCAGCATGAGGACATGCTGCCGTTACACCTTTGTTTCGAGT  
+HWI-EAS443:3:96:1559:1380#0/1  
¥¥¥b[a\_a^b¥X`Xb``aTMTa¥^aU^SP\_W¥\_URJYWRW  
@HWI-EAS443:3:96:1565:809#0/1  
AATCGATGAAATCTCCTGGGTAACACGTTCCATTGTCTGA  
+HWI-EAS443:3:96:1565:809#0/1  
aaaYb^aVaaaaWb`\_`aa^0a¥^a]aX\_WW`aa`V[^a\_  
@HWI-EAS443:3:96:156:308#0/1  
TGCTATGGGGCATTACCATCCATCTACTAGTGCTGACCA  
+HWI-EAS443:3:96:156:308#0/1  
[`abb[^`Y`]^`aUZ\_YY\_aRYaaa\_ba[aaXa``a`QU]  
@HWI-EAS443:3:96:1610:1796#0/1  
CGTCAATGGCATTCTGTGTGCTCTTCAGGTCCGGCTGCATA  
+HWI-EAS443:3:96:1610:1796#0/1  
`aU\_Za`Y]aa]aaa\_G¥a[]`Ub`abYWOXbaZ^a]X]^`  
@HWI-EAS443:3:96:1652:1485#0/1  
GACAAGCATAACGGGAAACTATGCAAATAAGAGGGGTAG  
+HWI-EAS443:3:96:1652:1485#0/1  
a[LV¥^S\_aW`V`\_]0^a]W^^RO]WWU[OV`W`[\_ZUBB  
@HWI-EAS443:3:96:1735:1316#0/1  
GAGTATTTTGGGTAGTCATAAGTCCCATTTTGGACTTT  
+HWI-EAS443:3:96:1735:1316#0/1  
abaQ`aa`W]a\_G\_^S^Ya^U[]GNT]^`a¥`a]]\_Y[XB  
@HWI-EAS443:3:96:1764:108#0/1  
GTTATTTTGTCTCCCGCTCTACTAGTGCCAGTAATAGT  
+HWI-EAS443:3:96:1764:108#0/1  
a`a]aaa``¥T`Y[QQ]Q]WXWUWZ¥MSNOPQ\_UBBBBBB  
@HWI-EAS443:3:96:275:77#0/1  
TCTTTACCTACTGCTGTGAAGTGTGATTTCATCTTTTCAA  
+HWI-EAS443:3:96:275:77#0/1  
aaaba`X[Z¥[aa`aa[b\_^Yaa\_a]RZa¥^^T]^`\_\_YYP  
@HWI-EAS443:3:96:294:206#0/1  
AATCGATGAAATCTCCTGGGTAACACGTTCCATTGTCTGA  
+HWI-EAS443:3:96:294:206#0/1  
¥U[`VNV\_`a^Y]\_Z^¥aa^W`ZXXR^WLJLT[NWXXUUB

@HWI-EAS443:3:96:305:226#0/1  
CGTCAATGGCATTCTGTGTGCTCTTCAGGTCGGCTGCATA  
+HWI-EAS443:3:96:305:226#0/1  
aa\_aa`Uaababbabaaa¥a]aaa\_Xa\_a¥a\_a\_¥`]^\_`  
@HWI-EAS443:3:96:322:1800#0/1  
ATCGATGAAATCTCCTGGGTAACACGTTCCATTGTCTGAA  
+HWI-EAS443:3:96:322:1800#0/1  
``\_a`b`ba¥babaYaba0aaabaa^\_aZ^^\_aSa^\_\_\_\_  
@HWI-EAS443:3:96:329:1035#0/1  
GGGGACATCAAGATACAGCAAGAAGTTCAAGCCGGAATA  
+HWI-EAS443:3:96:329:1035#0/1  
`b[babaab]`b¥baabbaaba`ab\_^\_aab`a^a`a\_a`  
@HWI-EAS443:3:96:354:129#0/1  
TGCATATCTCGGTACCACTAGATTTCCAGTTGCTTCGAAT  
+HWI-EAS443:3:96:354:129#0/1  
S\_a`bZ¥Vb¥ZY^a0aaaVTaaRVbMSH\_G¥G¥`\_`aSHW  
@HWI-EAS443:3:96:366:1221#0/1  
AAAGTCTCTATCAGAATGCAGATGCATATGTTTTTGTGGG  
+HWI-EAS443:3:96:366:1221#0/1  
a^Z\_0\_`X[Z][¥RXYaQYWHZWX]¥XPSRV\_^`V]XX0T  
@HWI-EAS443:3:96:373:1668#0/1  
GGGTCTTATTGCTATTTCCGGCTTGAACCTTCTGCTGTAT  
+HWI-EAS443:3:96:373:1668#0/1  
aa`Ga[]`\_`\_]\_a\_\_\_aa¥[a]QN^]¥YSRY[V¥]OBB  
@HWI-EAS443:3:96:388:1038#0/1  
GGAGATTTTCATCGATTATGAGGAGCTAAGAGAGCAATTGA  
+HWI-EAS443:3:96:388:1038#0/1  
^RSYNW\_`aY]]`¥^`^[Y¥]YW\_]WUVUX]]\_`^]]XW¥B  
@HWI-EAS443:3:96:409:652#0/1  
ATTTACTTTGTTAGTAATCTCGTCAATGGCATTCTGTGTG  
+HWI-EAS443:3:96:409:652#0/1  
`¥bba\_abb^bab`aa\_\_`a¥`a`[[aa`G\_X\_^\_a  
@HWI-EAS443:3:96:439:1325#0/1  
ATGGTTTCTGACATTTGGACTTACAATGCCGAACCTGTT  
+HWI-EAS443:3:96:439:1325#0/1  
aaaaS¥`aaaa\_a`\_`\_`aW\_]\_`\_`\_`aW^\_]\_]\_X\_^X^  
@HWI-EAS443:3:96:440:573#0/1  
TGCTTCCTCTGAGTATTTTGGGTAGTCATAAGTCCCATTT  
+HWI-EAS443:3:96:440:573#0/1  
a``TYa^[]`Y[F[^VZ¥[]S`aX]]ZTTZI]XX¥¥¥¥  
@HWI-EAS443:3:96:442:257#0/1  
GGATATGCAGCCGACCTGAAGAGCACACAGAATGCCATTG  
+HWI-EAS443:3:96:442:257#0/1  
`bbbaa`\_\_bWR`[[[\_aaaa\_\_[a[a[\_a^]a\_[]¥\_`Y\_  
@HWI-EAS443:3:96:465:988#0/1  
GGGGCATTACCATCCATCTACTAGTGCTGACCAACAAAG  
+HWI-EAS443:3:96:465:988#0/1  
aaaaa`aaba\_aaaa\_a`a\_\_aaVa\_\_\_\_`]\_`Y`\_\_  
@HWI-EAS443:3:96:482:1888#0/1  
TACGGTTATCACCATCAAATGAGCAGGGTCCAGGATATG

+HWI-EAS443:3:96:482:1888#0/1  
abaX`bb^baaba]aYba```[aa`\_aURaaYa¥^VS  
@HWI-EAS443:3:96:514:296#0/1  
CCCCCTTCAATGAAACCGCAATGGCCCCAAATAGGCCT  
+HWI-EAS443:3:96:514:296#0/1  
ZOYYNZ]a\_aZR]a`a`W`XR^[[\_^PQST]\_]U^VVSTT  
@HWI-EAS443:3:96:549:1179#0/1  
GATGAAATCTCCTGGGTAACACGTTCCATTGTCTGAACTA  
+HWI-EAS443:3:96:549:1179#0/1  
[ababbbbbbbba\_bb`bbbbbaabbaaabbaa`a\_  
@HWI-EAS443:3:96:56:1522#0/1  
AAGCCAGTTAAAAACAATGCCAAGGAAATTGGAACGGC  
+HWI-EAS443:3:96:56:1522#0/1  
aaYZM^TZa\_\_^VU^]^¥X\_XUZZ]TXV]]V]ZWWYSBBB  
@HWI-EAS443:3:96:597:590#0/1  
AATTTTTGTAGAAGCTTTTTGCTCCAGCATGAGGACATGC  
+HWI-EAS443:3:96:597:590#0/1  
`\_aabbab`a`¥a`a`a`aaaa`aa\_^`\_\_\_`aX\_\_\_`¥  
@HWI-EAS443:3:96:62:1799#0/1  
ACCCAAGGTGCTATAAACACCAGCCTCCCATTTTCAAGAT  
+HWI-EAS443:3:96:62:1799#0/1  
\_`baa\_a[\_Rwa`aabb]\_a\_a\_a]Z¥aaVa\_``\_a^``^  
@HWI-EAS443:3:96:642:1063#0/1  
AATGATAAAGGGAAAGAAGTCCTCGTGCTATGGGGCATT  
+HWI-EAS443:3:96:642:1063#0/1  
^Ubbbbba]baaab\_bb\_\_b`a\_b`baa\_`bab`a`abaa^  
@HWI-EAS443:3:96:683:1993#0/1  
GAAATGCTGGATCTGGTATTATCATTTCAGATACACCAGT  
+HWI-EAS443:3:96:683:1993#0/1  
aabba\_aaa`baa`ba0aaaaaaaaa`baaaaaaa[a^\_  
@HWI-EAS443:3:96:693:1662#0/1  
AAGTCCTCGTGCTATGGGGCATTACCATCCATCTACTAG  
+HWI-EAS443:3:96:693:1662#0/1  
a]WYX`a`aX`X`a`[]^ZZS^^¥a¥SX\_^V`^`a`\_Z  
@HWI-EAS443:3:96:697:594#0/1  
CTTCTTGCTGTATCTTGATGTCCCCACAAAACATATGCA  
+HWI-EAS443:3:96:697:594#0/1  
abbbabbabaabbbbbbbbab`aaaaabaaaaababab\_a  
@HWI-EAS443:3:96:718:796#0/1  
TCCTGACCCCTGCTCATTGATGGTGATAACCGTACCAT  
+HWI-EAS443:3:96:718:796#0/1  
aaaaa`a`aa`a\_aa`aaa¥`a`Va`a\_¥`W`¥Q`  
@HWI-EAS443:3:96:736:275#0/1  
AGAAGTTCAAGCCGAAATAGCAATAAGACCCAAAGTGAG  
+HWI-EAS443:3:96:736:275#0/1  
aaa\_aX\_\_baa^Xa\_^`^`\_a`\_`\_Y^^]OV`\_^`R\_]`  
@HWI-EAS443:3:96:756:1620#0/1  
GCTTGAACCTTCTTGCTGTATCTTGATGTCCCCACAAAAC  
+HWI-EAS443:3:96:756:1620#0/1  
]aa`bbbab`[a^bbbabbb]aab¥Y\_VPab\_a`\_¥a



@HWI-EAS443:3:96:777:450#0/1  
CTTCCTCTGAGTATTTTGGGTAGTCATAAGTCCCATTTTT  
+HWI-EAS443:3:96:777:450#0/1  
aaaa\_aaaaaaUaaa\_aaaaX\_a[\_\_\_`W`W^^]¥\_\_^^  
@HWI-EAS443:3:96:790:1748#0/1  
TTTTGTAGAAGCTTTTTGCTCCAGCATGAGGACATGCTG  
+HWI-EAS443:3:96:790:1748#0/1  
aaaa\_]T\_aaa]Xaa^]TVT[`Z\_W¥a`a\_¥U]]¥BBBBB  
@HWI-EAS443:3:96:825:1306#0/1  
CATCTTTTCAATAACAGAATTTACTTTGTTAGTAATCTCG  
+HWI-EAS443:3:96:825:1306#0/1  
a\_]\_]\_abbbbabbbaaaabb`a`U`abbabab^ba^0``b  
@HWI-EAS443:3:96:866:1886#0/1  
ATTCTGTGTGCTCTTCAGGTCGGCTGCATATCCTGACCCC  
+HWI-EAS443:3:96:866:1886#0/1  
\_XU\_aa[\_aa``[aa[`V`G\_a`^¥¥LUZ[`^aZZ\_\_WR`  
@HWI-EAS443:3:96:885:944#0/1  
GAGCAATTGAGCTCAGTGCATCATTGAAAGTTTGAGA  
+HWI-EAS443:3:96:885:944#0/1  
aa`baaba`aaa\_aaa\_aa`aaa\_baa`[\_aaaXaaa`aa  
@HWI-EAS443:3:96:887:1952#0/1  
CTTATATGAAAAGGTAAGAAGCCAGTTAAAAACAATGCC  
+HWI-EAS443:3:96:887:1952#0/1  
SVY¥[ba^`\_[\_ba0Y`Zbb`Y^W¥[^\_PW``¥baaba`Y  
@HWI-EAS443:3:96:904:81#0/1  
CATGATTGGCCATGAACTTGTCTTGGGGAATATCTCAA  
+HWI-EAS443:3:96:904:81#0/1  
abaa^bbbbb^U[\_a\_Y^[bbb`Saaa^`b`\_ba\_F^\_a\_a  
@HWI-EAS443:3:96:955:296#0/1  
TTGCAATCGTGGACTGGTGTATCTGAAATGATAATACCAG  
+HWI-EAS443:3:96:955:296#0/1  
`X``^00F¥Ya]T0]a\_W[YU^Z¥aSU[^aW^^¥¥^OXUB  
@HWI-EAS443:3:96:989:1212#0/1  
AGCCAGTTAAAAACAATGCCAAGGAAATTGGAAACGGCT  
+HWI-EAS443:3:96:989:1212#0/1  
Z\_\_a`\_Zaa`X]\_X¥\_Ra`VDWL`\_¥Ra`¥`a\_TT0[\_ZB  
@HWI-EAS443:3:96:993:67#0/1  
CAAATAACATTGAAGCAACTGGAAATCTAGTGGTACCG  
+HWI-EAS443:3:96:993:67#0/1  
`baabb\_aXbX^Yba^aV^aObaba`ab^a``\_b`X^^^a  
@HWI-EAS443:3:97:1004:471#0/1  
ATGGTTTCTGGACATTTGGACTTACAATGCCGAAGTGT  
+HWI-EAS443:3:97:1004:471#0/1  
aa`Z[a\_`[`aaa\_`^`aaaa\_`Xaa\_]\_`aa¥XV^`[¥P]^  
@HWI-EAS443:3:97:1040:318#0/1  
CTCGTGTATGGGCATTACCATCCATCTACTAGTGCTG  
+HWI-EAS443:3:97:1040:318#0/1  
`a^bbbabbbbbbabbbaabbbbabbbabbaab`ab  
@HWI-EAS443:3:97:1066:177#0/1  
CTTGTTGATTCCAGCTTTACCCCATCTATTTCTTCTCTGT

+HWI-EAS443:3:97:1066:177#0/1  
abbb\_bbbbbTababbbb\_^`aaababab¥baYbaaba  
@HWI-EAS443:3:97:1086:1113#0/1  
CATCAAGATACAGCAAGAAGTTCAAGCCGAAATAGCAAT  
+HWI-EAS443:3:97:1086:1113#0/1  
Uaabaabb`bbaab`babaPV]a`a[[`bb``bbb\_aaa  
@HWI-EAS443:3:97:1143:1612#0/1  
TTCCGGCTTGAACCTTCTTGCTGTATCTTGATGTCCCCACA  
+HWI-EAS443:3:97:1143:1612#0/1  
aaU^]a\_aa\_¥]J]a\_aa`Q]Y¥\_aQ\_aaY\_^]UY^^^Z\_  
@HWI-EAS443:3:97:115:1239#0/1  
ATCCTGACCCCTGCTCATTTTGTGGTGATAACCGTACCA  
+HWI-EAS443:3:97:115:1239#0/1  
a^Y]ZY^Y^^ZX]^VY^XVYYXVYOX]XVYXBBBBBBBB  
@HWI-EAS443:3:97:1333:1687#0/1  
AACAAAGTCTCTATCAGAATGCAGATGCATATGTTTTGT  
+HWI-EAS443:3:97:1333:1687#0/1  
^¥H^]baZ\_aRaaa`bb]]\_^W[a\_]]`aaaa^`a^ON  
@HWI-EAS443:3:97:1350:856#0/1  
ACTTCTTGCTGTATCTTGATGTCCCCACAAAACATATGC  
+HWI-EAS443:3:97:1350:856#0/1  
a`bb\_baaaaa\_aa`bbaa\_aa\_¥¥^\_WWW\_^\_[^XXT]^  
@HWI-EAS443:3:97:1434:366#0/1  
AATCGATGAAATCTCCTGGGTAACACGTTCCATTGTCTGA  
+HWI-EAS443:3:97:1434:366#0/1  
ab¥RRL^V\_a^a0SR]^¥b]UV`Z^^`PDO\_\_\_^M`` [  
@HWI-EAS443:3:97:1467:133#0/1  
GTGGGGACATCAAGATACAGCAAGAAGTTCAAGCCGAAA  
+HWI-EAS443:3:97:1467:133#0/1  
a\_\_\_U\_\_\_R`^X^)`^][Y\_^V]\_^YY[WXV[VYUY]VYVV  
@HWI-EAS443:3:97:1477:980#0/1  
GCGAATGCATATCTCGGTACCACTAGATTTCCAGTTGCTT  
+HWI-EAS443:3:97:1477:980#0/1  
`ab\_\_`baab\_aYa\_aaZa¥aa\_a\_a`aa`VZ¥\_\_`a¥aa  
@HWI-EAS443:3:97:1531:716#0/1  
GATATGCATTGCAATGGTAAGAAATGCTGGATCTGGTAT  
+HWI-EAS443:3:97:1531:716#0/1  
aaW^\_\_\_aa\_]`Qa^\_aWSaa\_¥¥`^PUP`[]][S]]X[¥  
@HWI-EAS443:3:97:1639:334#0/1  
AAATACTCAGAGGAAGCAAAATTAACAGAGAAGAAATAG  
+HWI-EAS443:3:97:1639:334#0/1  
ab`¥`bb¥aT¥]UZ^[Y^a`^ab^aaS][```aa\_a``]Z  
@HWI-EAS443:3:97:1680:646#0/1  
GGGACATCAAGATACAGCAAGAAGTTCAAGCCGAAATAG  
+HWI-EAS443:3:97:1680:646#0/1  
¥0¥\_\_aa[a\_[\_\_`]ab¥a`a`aT]^\_aWW`]]\_]`^Z  
@HWI-EAS443:3:97:1705:1516#0/1  
AAGGAAATTGGAACGGCTGCTTTGAATTTTACCACAAAT  
+HWI-EAS443:3:97:1705:1516#0/1  
a`bYa\_aabb]^a^SZ^aaaXGV^OFQYa\_[GUY¥I]Z^B

@HWI-EAS443:3:97:175:1880#0/1  
GAATATACATCCGATCACAATTGGAAAATGTCCAAAATAT  
+HWI-EAS443:3:97:175:1880#0/1  
`babbbbabaaaab\_abaaaa`baaabaaa^a¥aaY`\_aa  
@HWI-EAS443:3:97:1788:1584#0/1  
AGCAAATCCTACATTAATGATAAAGGGAAAGAAGTCCTCG  
+HWI-EAS443:3:97:1788:1584#0/1  
abS`\_a`aa\_a0aba`aaa`a`a`^a^`\_\_`]\_\_¥\_0^Z\_  
@HWI-EAS443:3:97:182:1203#0/1  
AAGCCAGTTAAAAACAATGCCAAGGAAATTGGAAACGGC  
+HWI-EAS443:3:97:182:1203#0/1  
ab`Zaa`¥`^a`\_aaa\_\_a`a`^a`¥```\_`¥^`Y¥\_B  
@HWI-EAS443:3:97:214:1749#0/1  
TGTTCCGATCATGATTGGGCCATGAACTTGTCTTGGGGAA  
+HWI-EAS443:3:97:214:1749#0/1  
ab\_baa]aXa^a``aa¥a]\_a`aaaXaa]`\_aYa\_a^  
@HWI-EAS443:3:97:280:670#0/1  
CGATGAAATCTCCTGGGTAACACGTTCCATTGTCTGAACT  
+HWI-EAS443:3:97:280:670#0/1  
abb`YZ`ab`]S¥abaG^``a`¥aaa^a\_a\_aaa]¥Ia  
@HWI-EAS443:3:97:290:1618#0/1  
CAAGATACAGCAAGAAGTTCAAGCCGAAATAGCAATAAG  
+HWI-EAS443:3:97:290:1618#0/1  
aa]Q]U^aaa^abaa]a¥\_aba[`^`^^`\_\_`[``\_`^a¥\_  
@HWI-EAS443:3:97:331:879#0/1  
CACGTGTTATCGCATTTGTGGTAAAATTCAAAGCAGCCGT  
+HWI-EAS443:3:97:331:879#0/1  
a[aaX\_QRY¥P¥QFZ\_¥\_Wa]Ya\_aW¥Z¥¥WFORWZ^OYB  
@HWI-EAS443:3:97:369:54#0/1  
CACCCCTTCAATGAAACCGCAATGGCCCAAATAGGC  
+HWI-EAS443:3:97:369:54#0/1  
^WPT00\_]bb`]``a^¥`T[\_W]a[`^`bYFZ\_\_a`[a`YT  
@HWI-EAS443:3:97:378:314#0/1  
GGGGCATTACCATCCATCTACTAGTGCTGACCAACAAAG  
+HWI-EAS443:3:97:378:314#0/1  
abb`ab`abaaaaabbbaab]aaaRaaaba\_```aa\_\_a  
@HWI-EAS443:3:97:408:758#0/1  
AAAAACAATGCCAAGGAAATTGGAAACGGCTGCTTTGAA  
+HWI-EAS443:3:97:408:758#0/1  
aaa`aa`baa`\_`a`ba`\_\_a\_a`^Z^]`a[a¥FS]]FRX  
@HWI-EAS443:3:97:421:1289#0/1  
ATGGCCCAATCATGACTCGAACAAAGGTGTAACGGCAGCA  
+HWI-EAS443:3:97:421:1289#0/1  
^Vba`aa`\_a```aaaa`aa`\_a\_aaT`Y\_aT¥]]aZBB  
@HWI-EAS443:3:97:431:978#0/1  
ATTAGAGCACATCCAGAACTGATTGCCCCAGGGAGACT  
+HWI-EAS443:3:97:431:978#0/1  
a`b`^`bbbababbbabab`babbabaa\_b`abaa\_aa\_a  
@HWI-EAS443:3:97:451:422#0/1  
TGTGGGGACATCAAGATACAGCAAGAAGTTCAAGCCGGAA

+HWI-EAS443:3:97:451:422#0/1  
abSa^aabaaY#a\_aaa`\_\_a`a^a]\_aGU\_`^\_\_0\_a]]  
@HWI-EAS443:3:97:470:226#0/1  
GCTCAGCAAATCCTACATTAATGATAAAGGGAAAGAAGTC  
+HWI-EAS443:3:97:470:226#0/1  
a`]X#a```\_XY\_[QJ]#\_#]`\_#\_]]^`\_]S]]]#Y^WT  
@HWI-EAS443:3:97:516:1449#0/1  
GGGAAAGAAGTCCTCGTGCTATGGGGCATTACCATCCAT  
+HWI-EAS443:3:97:516:1449#0/1  
a`a`bbabaVZbab`b#TYa`a\_[`a`\_a^\_a^#a\_[Wa`  
@HWI-EAS443:3:97:535:1146#0/1  
GGCTAGTTAAAAAGGAAATTCATACCCAAAGCTCAGCAA  
+HWI-EAS443:3:97:535:1146#0/1  
#^bb\_``b`\_PXb`^\_Q[[]S]a^[baaabXbVaNa^a^V  
@HWI-EAS443:3:97:596:1412#0/1  
CTTCAGGTCGGCTGCATATCCTGACCCCTGCTCATTTTGA  
+HWI-EAS443:3:97:596:1412#0/1  
abbabba`bbbabbaabbbabb`baaZaaa\_a^aab`a`^  
@HWI-EAS443:3:97:604:482#0/1  
AATTGGAAAATGTCCAAAATATGTAAAAAGCACAAAATTG  
+HWI-EAS443:3:97:604:482#0/1  
aba`\_aa`ab`aaa]``aaa^`baaa\_[`a`^`aba`a\_\_  
@HWI-EAS443:3:97:654:1691#0/1  
AACAAAGTCTCTATCAGAATGCAGATGCATATGTTTTTGT  
+HWI-EAS443:3:97:654:1691#0/1  
a``Yaa``\_aaa[[]aaa#[a\_`^a]`a`#aT[`^`^T  
@HWI-EAS443:3:97:70:187#0/1  
GGGACATCAAGATACAGCAAGAAGTTCAAGCCGAAATAG  
+HWI-EAS443:3:97:70:187#0/1  
\_`^`^`\_Y^`^`^\_a\_Y^#a^]aTZYYPYUPXKRWUZ[X[  
@HWI-EAS443:3:97:794:1584#0/1  
CAAGATACAGCAAGAAGTTCAAGCCGAAATAGCAATAAG  
+HWI-EAS443:3:97:794:1584#0/1  
aaa^[`a`^`H#aX^ab\_b\_a]Z\_\_[baa`a`aYaX#aab  
@HWI-EAS443:3:98:1017:1363#0/1  
TGATAGAGACTTTGTTGGTCAGCACTAGTAGATGGATGGT  
+HWI-EAS443:3:98:1017:1363#0/1  
aa]Z`a\_]\_\_a`a`M]]YZV`[NZ\_`\_a^V#^][^YX`[T  
@HWI-EAS443:3:98:1046:410#0/1  
ATTCTGTGTGCTCTTCAGGTCGGCTGCATATCCTGACCCC  
+HWI-EAS443:3:98:1046:410#0/1  
abbabb\_`aaabaaa`aaa^`\_a`a`Ya`a`Z`\_`\_#`^Z  
@HWI-EAS443:3:98:1064:914#0/1  
GGAACGTGTTACCCAGGAGATTTTCATCGATTATGAGGAGC  
+HWI-EAS443:3:98:1064:914#0/1  
aa`RL#\_]`aaS#Y^a]a#Ra`a[[a^\_V]a\_\_aY[#\_`[`  
@HWI-EAS443:3:98:1070:1433#0/1  
GGGGCATTACCATCCATCTACTAGTGCTGACCAACAAAG  
+HWI-EAS443:3:98:1070:1433#0/1  
^aaa]a]\_aa\_a]b[abaaabJaaaZa`aaaZ``a\_a\_`^`

@HWI-EAS443:3:98:108:555#0/1  
AGCAACTGGAAATCTAGTGGTACCGAGATATGCATTCGCA  
+HWI-EAS443:3:98:108:555#0/1  
aa¥`a¥aa`aaa`\_]aa]a\_Z^\_¥a\_a`\_\_\_\_]``\_^¥]^  
@HWI-EAS443:3:98:1195:846#0/1  
CTAGATTTCCAGTTGCTTCCAATGTTATTTTGTCTCCCGG  
+HWI-EAS443:3:98:1195:846#0/1  
H¥¥V````ZSYba`\_¥bbab\_b^bbbbbbbbb[F]WTV^[  
@HWI-EAS443:3:98:1230:1441#0/1  
GTTGCTTCCAATGTTATTTTGTCTCCCGGCTCTACTAGTG  
+HWI-EAS443:3:98:1230:1441#0/1  
^[\_a^aU\_b]``Y^aab]\_\_¥¥N\_X\_]`\_W[T]YN¥^¥BB  
@HWI-EAS443:3:98:1259:1560#0/1  
GGGCCATGAACCTTGTCTTGGGAATATCTCAAACCTTCA  
+HWI-EAS443:3:98:1259:1560#0/1  
abaaaaa^Z^KUaaPSa`b`aa^aa[]N\_Taa¥R]a]\_`]  
@HWI-EAS443:3:98:1295:1200#0/1  
ATCATTTGAAAGTTTGGAGATATCCCCAAGACAAGTTCA  
+HWI-EAS443:3:98:1295:1200#0/1  
\_ba]bbbbbbab^P¥baab\_ba`a¥]]a`aa`]a\_`Z``\_  
@HWI-EAS443:3:98:1342:866#0/1  
GGGGACATCAAGATACAGCAAGAAGTTCAAGCCGAAATA  
+HWI-EAS443:3:98:1342:866#0/1  
ab^baabaaaaaab`bbaabaabV`a``aZWaa]]\_a\_  
@HWI-EAS443:3:98:1354:685#0/1  
GAGCAGGGGTCAGGATATGCAGCCGACCTGAAGAGCACAC  
+HWI-EAS443:3:98:1354:685#0/1  
aabaaba`a^]abaaaabb`aaa\_`a\_`aaa`a`aXa¥`\_  
@HWI-EAS443:3:98:1358:681#0/1  
GCCAGTTAAAAACAATGCCAAGGAAATTGGAAACGGCTG  
+HWI-EAS443:3:98:1358:681#0/1  
abab`^abbbbbbabbbb`^bbbaaa`babaababa\_aa  
@HWI-EAS443:3:98:1379:1452#0/1  
GGGACTACCAGTACCAATGAACTGGCGACAGTTGAATAG  
+HWI-EAS443:3:98:1379:1452#0/1  
Z\_¥¥aaa\_V[V\_U[RO¥aba]ba`b\_X¥`^`bT`^R^aa`  
@HWI-EAS443:3:98:1406:541#0/1  
CATTGCTGGCTGGATCCTGGGAAATCCAGAGTGTGAATCA  
+HWI-EAS443:3:98:1406:541#0/1  
ababbaaab`bbbaabb[TXa`aaaa\_bbab¥bbb^a`\_b  
@HWI-EAS443:3:98:146:848#0/1  
AGCACCTTGGGTGTCTGACAAGTTGTATTGCAATCGTGG  
+HWI-EAS443:3:98:146:848#0/1  
^¥]]HYabaWU\_^UPQ\_^\_aa]U`¥ZYRH^R[NOV¥\_PZ`  
@HWI-EAS443:3:98:1529:429#0/1  
GACACTTTCCATGCACGTGTTATCGCATTTGTGGTAAAAT  
+HWI-EAS443:3:98:1529:429#0/1  
a\_N]X\_V¥¥^ [¥S^\_]U\_a\_\_\_\_`^\_W\_`0\_\_W\_a^\_\_`]  
@HWI-EAS443:3:98:1619:1511#0/1  
TTCTTCTCTGTTTAAATTTTGTCTCCTCTGAGTATTTTGGG

+HWI-EAS443:3:98:1619:1511#0/1  
aa\_aa\_``a\_aaaaa\_aaa^`^\_]a\_a`a^KZa\_`\_`\_X  
@HWI-EAS443:3:98:1625:471#0/1  
GCTAGTTAAAAAGGAAATTCATACCCAAAGCTCAGCAAA  
+HWI-EAS443:3:98:1625:471#0/1  
`b`ababb^F^baaaaab\_abaa\_``aaaa¥\_`a`\_aaa  
@HWI-EAS443:3:98:1700:1477#0/1  
AACTTGTCTTGGGAATATCTCAAACCTTTCAAATGATGA  
+HWI-EAS443:3:98:1700:1477#0/1  
`b[bab`aaabbaabab\_a^a\_a\_Xa\_a\_`\_a`\_a`\_a  
@HWI-EAS443:3:98:173:899#0/1  
CCCAGGAGATTCATCGATTATGAGGAGCTAAGAGAGCAA  
+HWI-EAS443:3:98:173:899#0/1  
aa`\_H\_aab`a`aaabb`\_a\_baaaa`a\_a\_aa``\_a^]\_  
@HWI-EAS443:3:98:174:1289#0/1  
CGTGCATGGAAAGTGTCAAAAATGGGACTTATGACTACCC  
+HWI-EAS443:3:98:174:1289#0/1  
a\_G[¥Q\_``ZR[\_N\_`]W^X[[]YRXHH¥¥]``^RR¥  
@HWI-EAS443:3:98:201:1174#0/1  
GCTGCATATCCTGACCCCTGCTCATTGATGGTGATAAC  
+HWI-EAS443:3:98:201:1174#0/1  
aVZb¥F^`WEXG\_UZZ][Z`^`\_`\_YU\_¥¥¥YTQWWWQ¥B  
@HWI-EAS443:3:98:218:1027#0/1  
TAATCGATGAAATCTCCTGGGTAACACGTTCCATTGTCTG  
+HWI-EAS443:3:98:218:1027#0/1  
aaa`aa`\_a\_a]\_a`a`\_aXU]`\_¥T`¥\_[X]]^Z]\_`  
@HWI-EAS443:3:98:226:399#0/1  
AGGTAAGAAGCCAGTTAAAAACAATGCCAAGGAAATTGG  
+HWI-EAS443:3:98:226:399#0/1  
ab`S[b`aa\_[`b¥`aaaU`Z^a`\_a]T`]¥^ZW\_\_^a]  
@HWI-EAS443:3:98:263:1478#0/1  
GCTGGCTGGATCCTGGGAAATCCAGAGTGTGAATCACTCT  
+HWI-EAS443:3:98:263:1478#0/1  
aaa`aa`aa\_\_aa`\_a\_^a`^]a`\_\_`W\_Sa¥`]]`¥^W¥  
@HWI-EAS443:3:98:302:1909#0/1  
CAGTTAAAAACAATGCCAAGGAAATTGGAAACGGCTGCT  
+HWI-EAS443:3:98:302:1909#0/1  
a`^]a^a`^]`aa^bbaaa^\_XXaaa\_a¥aaa\_`\_^]TRV  
@HWI-EAS443:3:98:417:1832#0/1  
AAATTTTTGTAGAAGCTTTTTGCTCCAGCATGAGGACATG  
+HWI-EAS443:3:98:417:1832#0/1  
\_bbba[[\_b¥aa^Xaaa\_a`^bXa\_aa\_a\_\_a`\_`0a\_Y  
@HWI-EAS443:3:98:449:1467#0/1  
CCAGGAGATTCATCGATTATGAGGAGCTAAGAGAGCAAT  
+HWI-EAS443:3:98:449:1467#0/1  
a`¥\_OP`RXYa]R[Z`a[[]HSX`YV`¥U`aPU\_UX\_\_¥0¥  
@HWI-EAS443:3:98:481:1695#0/1  
AAGAAATGCTGGATCTGGTATTATCATTTCAGATACACCA  
+HWI-EAS443:3:98:481:1695#0/1  
a`\_a`X]Xa\_\_\_\_\_^`\_`Z^\_aa`a\_\_\_\_\_`\_]\_\_`\_]\_[U¥

@HWI-EAS443:3:98:482:1063#0/1  
ATTCTGTGTCTTCAGGTCGGCTGCATATCCTGACCCC  
+HWI-EAS443:3:98:482:1063#0/1  
abb`aaabaaYaaabaaaa¥aa\_\_a]S\_\_a`¥¥\_[^UY^Q  
@HWI-EAS443:3:98:504:492#0/1  
CCTCACTTTGGGTCTTATTGCTATTTCCGGCTTGAACCTC  
+HWI-EAS443:3:98:504:492#0/1  
aa[^¥\_`b^`abHQ\_`¥bba]`abbbZUZaX`a``][`a\_  
@HWI-EAS443:3:98:510:662#0/1  
TACGGTTATCACCATCAAAATGAGCAGGGGTCAGGATATG  
+HWI-EAS443:3:98:510:662#0/1  
`a``^Xbbaab`aa`]T`a```Z\_\_¥aa\_aT\_\_aa\_\_a\_\_  
@HWI-EAS443:3:98:532:956#0/1  
CAAAAATGGGACTTATGACTACCCAAAATACTCAGAGGAA  
+HWI-EAS443:3:98:532:956#0/1  
V]bS^``^`\_0TV]\_Y[aaaba\_YY]`\_J[ba``a\_ba\_^  
@HWI-EAS443:3:98:550:356#0/1  
GCCGGGAGACAAAATAACATTCCAAGCAACTGGAAATCTA  
+HWI-EAS443:3:98:550:356#0/1  
\_[^aa\_\_a^W]```a`a^`\_`aa`\_a^`\_V`\_\_]\_`0\_\_  
@HWI-EAS443:3:98:76:887#0/1  
CAATGTAGGACCATGAGCTTGCTGTGGAGAGTGATTCACA  
+HWI-EAS443:3:98:76:887#0/1  
[`b`]aaabb^GV\_aX¥bbbb`a]¥abab¥a^aaaaaaaa  
@HWI-EAS443:3:98:832:448#0/1  
CCGGCTCTACTAGTGTCCAGTAATAGTTCATTCTCCCTTC  
+HWI-EAS443:3:98:832:448#0/1  
aaaaaabbTZ]ab\_bX¥a`a[`\_b¥aT\_\_\_a`Y]K\_\_\_`\_`  
@HWI-EAS443:3:98:849:1168#0/1  
GTCAGGATATGCAGCCGACCTGAAGAGCACACAGAATGCC  
+HWI-EAS443:3:98:849:1168#0/1  
aV[``\_`^X^a\_[[```ZW¥\_`YY\_¥`\_\_¥¥W^`MQQ¥WW  
@HWI-EAS443:3:98:880:1266#0/1  
GGGGCCATTGCCGTTTCATTGAAGGGGGGTGGACAGGGA  
+HWI-EAS443:3:98:880:1266#0/1  
\_¥``\_\_aa\_\_\_\_\_a`X\_a`a`a`[ ]\_a\_\_Z`U\_\_WN]^ZaZ  
@HWI-EAS443:3:98:908:1067#0/1  
CAGTCTCAATTTTGTGCTTTTTACATATTTTGGACATTTT  
+HWI-EAS443:3:98:908:1067#0/1  
aab[\_babbbabbbbabbbba`bbabbbb¥`\_`bbba  
@HWI-EAS443:3:98:913:857#0/1  
GACAAGTTGTATTGCAATCGTGGACTGGTGTATCTGAAAT  
+HWI-EAS443:3:98:913:857#0/1  
aa\_aab\_aaaaaaaaaabaaa\_aaa`aaXa^aa\_a`]a`a`  
@HWI-EAS443:3:98:976:40#0/1  
GGGGACATCAAGATACAGCAAGAAGTTCAAGCCGGAAATA  
+HWI-EAS443:3:98:976:40#0/1  
aaaa]V`a]aYa]\_\_\_abY`a`\_^aVY[`^aU]^ZRR^X  
@HWI-EAS443:3:99:1005:413#0/1  
CAAGATACAGCAAGAAGTTCAAGCCGGAAATAGCAATAAG

+HWI-EAS443:3:99:1005:413#0/1  
\_K`b`^^^a^Y^ba`U`W\_Z^a^[\`ba\_a¥[^aRa^^a`b  
@HWI-EAS443:3:99:1146:547#0/1  
GATTGCCCCAGGGAGACTACCAGTACCAATGAACTGGCG  
+HWI-EAS443:3:99:1146:547#0/1  
^¥ZZ`¥Q¥[aaa`ZRaa^^]WD¥^P\_]Q]aZ]¥^H\_Z[FT  
@HWI-EAS443:3:99:1159:1464#0/1  
CATCAAGATACAGCAAGAAGTTCAAGCCGGAAATAGCAAT  
+HWI-EAS443:3:99:1159:1464#0/1  
Vaa^\_bbbb\_bb[bbbabbbbbba^IababXba`bab\_b  
@HWI-EAS443:3:99:1180:728#0/1  
CTTTACTACTGCTGTGAACTGTGTATTCATCTTTTCAAT  
+HWI-EAS443:3:99:1180:728#0/1  
¥bbbbbbaba`\_b\_aab`ab\_ababa¥a`\_bbbbbbb\_b`b  
@HWI-EAS443:3:99:1186:405#0/1  
AACTGATTGCCCCAGGGAGACTACCAGTACCAATGAACT  
+HWI-EAS443:3:99:1186:405#0/1  
aa`\_a\_bb\_[[T]aaab\_¥a`X[a\_W`a\_]ZRZ]b\_\_Ya  
@HWI-EAS443:3:99:122:885#0/1  
CCAGCATGAGGACATGCTGCCGTTACACCTTTGTTTCGAGT  
+HWI-EAS443:3:99:122:885#0/1  
aa\_^]XZ^)`aa\_W\_aa\_a^[aZ¥ZZ^ZV^¥\_UZ[[\_W\_B  
@HWI-EAS443:3:99:1304:222#0/1  
GGGACATCAAGATACAGCAAGAAGTTCAAGCCGGAAATA  
+HWI-EAS443:3:99:1304:222#0/1  
aaaa`^a]\_W[a`\_\_ZaaH\_a\_U[a`T^X^]V`\_]^^a\_  
@HWI-EAS443:3:99:1361:373#0/1  
GGAAACGGCTGCTTTGAATTTTACCACAAATGCGATAACA  
+HWI-EAS443:3:99:1361:373#0/1  
ab`aaa`bb`^HTZ\_TTYX[aaXJ[\_P[]`XXUaPZBBBB  
@HWI-EAS443:3:99:1364:469#0/1  
AAAAACAATGCCAAGGAAATTGGAAACGGCTGCTTTGAAT  
+HWI-EAS443:3:99:1364:469#0/1  
ab¥aa\_aa`a`b^ba\_aaba`YZ¥\_Ya^\_abP\_^\_¥S[`  
@HWI-EAS443:3:99:1366:113#0/1  
CCTCTGAGTATTTTGGGTAGTCATAAGTCCCATTTTGGAC  
+HWI-EAS443:3:99:1366:113#0/1  
X\_\_bbXbb¥bbbbabbabbaaabbbb`^\_abbaabb]^R  
@HWI-EAS443:3:99:1380:1720#0/1  
CATGATTGGCCATGAACTTGTCTTGGGGAATATCTCAA  
+HWI-EAS443:3:99:1380:1720#0/1  
XbaaaabbaabWbbbb¥bbbaKbbbabbbbbbbabb`abb  
@HWI-EAS443:3:99:1403:1561#0/1  
CAGAATGCAGATGCATATGTTTTTGTGGGGACATCAAGAT  
+HWI-EAS443:3:99:1403:1561#0/1  
`bb\_a`YI^^¥S\_\_b`a`b¥ababaaa¥\_`a[^`a\_\_a\_a  
@HWI-EAS443:3:99:1431:346#0/1  
TGTGGGGACATCAAGATACAGCAAGAAGTTCAAGCCGGAA  
+HWI-EAS443:3:99:1431:346#0/1  
ab\_b\_bbaaab`\_abaa`aaa\_abb`\_b^a^a\_bX^``\_\_



@HWI-EAS443:3:99:143:367#0/1  
ATGGTTTCCTGGACATTTGGACTTACAATGCCGAAGTGT  
+HWI-EAS443:3:99:143:367#0/1  
^``\_Ua^a\_``\_`VX\_aaaa`\_]\_Q¥]aaa`]Y]¥W\_]WZ  
@HWI-EAS443:3:99:1451:703#0/1  
TGTCCCCACAAAACATATGCATCTGCATTCTGATAGAGA  
+HWI-EAS443:3:99:1451:703#0/1  
¥baab\_Xaabb\_ababaX\_bXbbIab\_`a`^`baaa[V]a  
@HWI-EAS443:3:99:149:1443#0/1  
TTCCTTGGCATTGTTTTTAACTGGCTTCTTACCTTTTCA  
+HWI-EAS443:3:99:149:1443#0/1  
^bb¥KRS\_Y\_\_X\_TZZ]PU`aRXXa]V¥OGZ[WU¥YW[RB  
@HWI-EAS443:3:99:154:472#0/1  
AGTTGATGATGGTTTCCTGGACATTTGGACTTACAATGCC  
+HWI-EAS443:3:99:154:472#0/1  
``bbbbbbbbbbbabbb^bbbaa`bbbbbb]¥\_a\_]W]\_\_`  
@HWI-EAS443:3:99:1651:1223#0/1  
CATCAAGATACAGCAAGAAGTTCAAGCCGAAATAGCAAT  
+HWI-EAS443:3:99:1651:1223#0/1  
aWG[``^`YaV\_SRaY\_bb[]^bZ¥VHXa`a]b]L]^`  
@HWI-EAS443:3:99:1670:688#0/1  
GGGACATCAAGATACAGCAAGAAGTTCAAGCCGAAATAG  
+HWI-EAS443:3:99:1670:688#0/1  
abaa\_bbab`aaabbbbabbbbaa^a`aa`\_\_ab`\_\_aab  
@HWI-EAS443:3:99:172:1184#0/1  
TAAGAAGCCAGTTAAAAACAATGCCAAGGAAATTGGAAA  
+HWI-EAS443:3:99:172:1184#0/1  
\_b`baa]bbb^bbbbbaa\_b`abaZ`a\_a`a```a\_aa^  
@HWI-EAS443:3:99:1745:886#0/1  
AGGAGATTTTCATCGATTATGAGGAGCTAAGAGAGCAATTG  
+HWI-EAS443:3:99:1745:886#0/1  
a\_K]^`aaaa[]a``]\_aa]SX\_^X\_a`\_^¥[\_R\_\_^Z`  
@HWI-EAS443:3:99:1781:1148#0/1  
CGGCTCTACTAGTGTCCAGTAATAGTTCATTCTCCCTTCT  
+HWI-EAS443:3:99:1781:1148#0/1  
ab\_``a`a]b`R¥PZ¥]Za]Za]]¥aaa\_a`I`]]T\_¥G\_  
@HWI-EAS443:3:99:209:1955#0/1  
GGGACATTCCTCAATCCTGTGGCCAGTCTCAATTTTGTGC  
+HWI-EAS443:3:99:209:1955#0/1  
`baaabb]babbbba`aa`a[bZbaY^a\_a]`ab````^\_  
@HWI-EAS443:3:99:249:1365#0/1  
GTCAGCACTAGTAGATGGATGGTGAATGCCCCATAGCACG  
+HWI-EAS443:3:99:249:1365#0/1  
a\_`aaaa\_aaaX``aaa`\_\_a\_W``\_\_\_\_Y\_``[\_\_\_\_^  
@HWI-EAS443:3:99:26:1194#0/1  
CATTCTGTGTGCTCTTCAGGTCGGCTGCATATCCTGACCC  
+HWI-EAS443:3:99:26:1194#0/1  
aaaaabbab`baaaaab`\_`\_Vbaabaa^Z`\_^\_a\_aaZY\_  
@HWI-EAS443:3:99:299:568#0/1  
CCATGAGCTTGCTGTGGAGAGTGATTACACTCTGGATTT

+HWI-EAS443:3:99:299:568#0/1  
`a]b^W\_TY\_^]\_]\_aXbZa`^WUa`\_aaT\_PWJ¥\_\_  
@HWI-EAS443:3:99:319:1084#0/1  
GATGAAATCTCCTGGGTAACACGTTCCATTGTCTGAACTA  
+HWI-EAS443:3:99:319:1084#0/1  
\_WZ\_¥ZZ^^¥]T^`¥a^\_\_`[TZZ\_WKY`X]¥M^`V^W]\_  
@HWI-EAS443:3:99:31:705#0/1  
GATGCATATGTTTTTGTGGGACATCAAGATACAGCAAGA  
+HWI-EAS443:3:99:31:705#0/1  
aaVb]aaaa`T`]\_^Z^]aaR^]`Y\_\_`U^Z[`aP]a`^  
@HWI-EAS443:3:99:321:1290#0/1  
AGCCATATTAATTTTTGTAGAAGCTTTTTGCTCCAGCAT  
+HWI-EAS443:3:99:321:1290#0/1  
aaaV\_aa^`Zybaaa`^V`UQXaZ^]a^XP[\_\_\_aUaZY  
@HWI-EAS443:3:99:346:1304#0/1  
CGAATGTTATTTTTGTCTCCCGCTCTACTAGTGTCCAGTA  
+HWI-EAS443:3:99:346:1304#0/1  
]b[bbbbabbb`b`bbb`]bababa\_`Uabaabaaaab^a  
@HWI-EAS443:3:99:356:1453#0/1  
GAAGCTTTTTGCTCCAGCATGAGGACATGCTGCCGTTACA  
+HWI-EAS443:3:99:356:1453#0/1  
abb]abb]`[aba`ab`ababa]\_abaaab`UFWaVa\_\_a  
@HWI-EAS443:3:99:366:1752#0/1  
GGGACATCAAGATACAGCAAGAAGTTCAAGCCGAAATAG  
+HWI-EAS443:3:99:366:1752#0/1  
`U\_XVXVUaPU`YW`SWW`ZZ[XZL]]]aWJW\_`]]PXWB  
@HWI-EAS443:3:99:375:335#0/1  
TCGAATGTTATTTTTGTCTCCCGCTCTACTAGTGTCCAGT  
+HWI-EAS443:3:99:375:335#0/1  
a`aabab]abba`aaaaaa]aa\_^¥^`\_\_`X\_^YWW`[  
@HWI-EAS443:3:99:418:29#0/1  
ACGTGTTACCCAGGAGATTTTCATCGATTATGAGGAGCTAA  
+HWI-EAS443:3:99:418:29#0/1  
aab`aa`aaaaaaY\_W\_`\_`Y`¥a\_\_\_Yaa^\_a[\_BBBB  
@HWI-EAS443:3:99:421:252#0/1  
CTTCTCTGAGTATTTTTGGGTAGTCATAAGTCCCATTTTT  
+HWI-EAS443:3:99:421:252#0/1  
[\_baY`\_bbba`\_bbba]baabaabbab^a\_\_abaaba  
@HWI-EAS443:3:99:454:1257#0/1  
GTTACCCAGGAGATTTTCATCGATTATGAGGAGCTAAGAGA  
+HWI-EAS443:3:99:454:1257#0/1  
\_aaa\_a`aaa\_aaaaa\_a^b`^a^\_a\_\_`^`\_\_`\_\_^  
@HWI-EAS443:3:99:462:1216#0/1  
GTGGGACATCAAGATACAGCAAGAAGTTCAAGCCGAAA  
+HWI-EAS443:3:99:462:1216#0/1  
aa`aaa`aaaa\_a\_\_`aaaa`\_\_a]^]b^`¥X`\_] ]^  
@HWI-EAS443:3:99:483:1956#0/1  
GCTTCTCTGAGTATTTTTGGGTAGTCATAAGTCCCATTTTT  
+HWI-EAS443:3:99:483:1956#0/1  
ab^^aaaa]\_aaXYb^\_aa]b\_]WLUT]¥\_aZU^^Y\_```

@HWI-EAS443:3:99:535:958#0/1  
GCTGTATCTTGATGTCCCCACAAAAACATATGCATCTGCA  
+HWI-EAS443:3:99:535:958#0/1  
aaaaR\_a\_a\_aaa`\_\_a^a]¥X\_X]^`W\_[]`^^^SMW`X]  
@HWI-EAS443:3:99:53:523#0/1  
ATTTGCTGAGCTTTGGGTATGAATTTCTTTTTTAACTAG  
+HWI-EAS443:3:99:53:523#0/1  
`\_Ya`\_baRaba`ba^a\_ZU`^^`a]YW]aaaa`YL¥a``  
@HWI-EAS443:3:99:550:1596#0/1  
TAGATTTCCAGTTGCTTCGAATGTTATTTTGTCTCCCGGC  
+HWI-EAS443:3:99:550:1596#0/1  
abaaaaaaaa`a\_aa`a`a^aaaUa`a`aa¥`\_a]\_\_\_^X  
@HWI-EAS443:3:99:559:996#0/1  
AACCGTACCATCCATCTACCATCCCTGTCCACCCCTTC  
+HWI-EAS443:3:99:559:996#0/1  
a]\_`\_^ab^`\_Xa`]\_\_X\_[¥a`^^\_a¥\_\_a\_W^[V\_]QX  
@HWI-EAS443:3:99:608:1094#0/1  
GACACTTCCATGCACGTGTTATCGCATTGTGGTAAAAT  
+HWI-EAS443:3:99:608:1094#0/1  
aba`abbabbaabaaab^`^aaaaaaaa`aa[aa]b`a`a  
@HWI-EAS443:3:99:632:1627#0/1  
GAACTGTGTATTCATCTTTTCAATAACAGAATTTACTTTG  
+HWI-EAS443:3:99:632:1627#0/1  
a`\_TX]U`Iaaa]`¥`aaa```a`\_`¥aa`^`\_\_a\_]``^a  
@HWI-EAS443:3:99:639:751#0/1  
GGCTGGATCCTGGGAAATCCAGAGTGTGAATCACTCTCCA  
+HWI-EAS443:3:99:639:751#0/1  
¥\_]abba`]aaaabaaba`a`bS\_PW`a`Zaa^`\_[]¥Z`  
@HWI-EAS443:3:99:673:1277#0/1  
GGACATCAAGATACAGCAAGAAGTTCAAGCCGAAATAGC  
+HWI-EAS443:3:99:673:1277#0/1  
ab][\_[^¥YX^ODY¥a]Y]a[^]MLWU`\_UXaWTKS^[UU  
@HWI-EAS443:3:99:723:886#0/1  
CATCCATCTACTAGTGCTGACCAACAAAGTCTCTATCAGA  
+HWI-EAS443:3:99:723:886#0/1  
abaa`aaaaa]baa`a`baaa`a`\_`\_XW]\_``\_a`a^aa`  
@HWI-EAS443:3:99:752:192#0/1  
GCCGGTTTCATTGAAGGGGGTGGACAGGGATGGTAGATG  
+HWI-EAS443:3:99:752:192#0/1  
aZ``a`]a]^a`a\_\_a`a`\_`[Ta[YY^a]`¥^`^WYYUSY  
@HWI-EAS443:3:99:814:1019#0/1  
CACCATCCATCTACTAGTGCTGACCAACAAAGTCTCTATC  
+HWI-EAS443:3:99:814:1019#0/1  
abbaabb^abbababaa`bbbabbabbbbab`^babba\_  
@HWI-EAS443:3:99:826:816#0/1  
AATCGATGAAATCTCCTGGGTAACACGTTCCATTGTCTGA  
+HWI-EAS443:3:99:826:816#0/1  
ab\_`^``aaaaa```aaaaa^^`aa`\_`^`\_¥aa\_aYL\_`\_  
@HWI-EAS443:3:99:841:596#0/1  
GCTCCTCATAATCGATGAAATCTCCTGGGTAACACGTTCC

+HWI-EAS443:3:99:841:596#0/1  
a\_a^]`\_\_YZ]`\_`\_[a^`VaS^\_a\_\_TWY]`U\_Z^R\_  
@HWI-EAS443:3:99:877:1148#0/1  
GACACTTTCATGCACGTGTTATCGCATTGTGGTAAAAT  
+HWI-EAS443:3:99:877:1148#0/1  
P\_¥¥\_¥^T`XX\_``b\_bYbb\_bb\_``a\_WX^`a¥a`  
@HWI-EAS443:3:99:930:92#0/1  
GAACTCTTTACCTACTGCTGTGAACTGTGTATTCATCTTT  
+HWI-EAS443:3:99:930:92#0/1  
aaa`babaaa`abbabbababbaa]ababaabbWabYaab  
@HWI-EAS443:3:99:968:336#0/1  
AGCCAGTTAAAAACAATGCCAAGGAAATTGGAAACGGCT  
+HWI-EAS443:3:99:968:336#0/1  
aY`aaabbaaaaa`aaaa\_\_a`aa^[]`a`\_\_`[\_`[B  
@HWI-EAS443:3:99:998:710#0/1  
AGCCAGTTAAAAACAATGCCAAGGAAATTGGAAACGGCT  
+HWI-EAS443:3:99:998:710#0/1  
aaa`a`U`a`\_`\_`\_a`aa`\_\_aa`\_^`a`\_^`[]`\_`  
@HWI-EAS443:3:9:1004:1117#0/1  
GTGGGGACATCAAGATACAGCAAGAAGTTCAAGCCGGAAA  
+HWI-EAS443:3:9:1004:1117#0/1  
aP]]Z\_LV`¥Ya¥VXX^\_\_WG¥\_WWWYMWG[[]TEWVU^[]  
@HWI-EAS443:3:9:1009:1979#0/1  
GCACATCCAGAACTGATTGCCCCAGGGAGACTACCGT  
+HWI-EAS443:3:9:1009:1979#0/1  
aab¥ba\_[b\_baaYaaa`a\_Z^[Qa\_^\_\_^aW\_\_W¥\_\_T  
@HWI-EAS443:3:9:1192:574#0/1  
CAGAACTGATTGCCCCAGGGAGACTACCGTACCAATG  
+HWI-EAS443:3:9:1192:574#0/1  
ab``a\_abbabbbbaaZaababa`aaaaaa^``\_aa^`\_aa  
@HWI-EAS443:3:9:1205:131#0/1  
ACAGAATTTACTTTGTTAGTAATCTCGTCAATGGCATTCT  
+HWI-EAS443:3:9:1205:131#0/1  
a`bbU`aWbaSaa`]\_\_aS^YWU]`a]W¥YW]PMPZZZ[  
@HWI-EAS443:3:9:1250:1754#0/1  
GGCATTCTGTGTGCTCTCAGGTCGGCTGCATATCCTGAC  
+HWI-EAS443:3:9:1250:1754#0/1  
^aUbUbZabba`ZQ\_ZabZba^aa`a]ba^`b`a]aISbQ  
@HWI-EAS443:3:9:1258:1125#0/1  
CTGGCTGGATCCTGGGAAATCCAGAGTGTGAATCACTCTC  
+HWI-EAS443:3:9:1258:1125#0/1  
`babaab^^b\_ZbabU`aba\_\_aa`^VZ\_b`aaZa`^¥`^  
@HWI-EAS443:3:9:1349:1349#0/1  
CTCGTGCTATGGGCGATTACCATCCATCTACTAGTGCTG  
+HWI-EAS443:3:9:1349:1349#0/1  
\_a[[]Y\_IUX\_bV^OQ`\_ab]Q]aWU]`\_Zba^X`[`Xaa  
@HWI-EAS443:3:9:1381:811#0/1  
CCATGAACCTTGCTTGGGGAATATCTCAAACCTTTCAAAT  
+HWI-EAS443:3:9:1381:811#0/1  
a¥bbb]\_abbb`aabb``]\_aa\_b`a`\_aa\_aaba\_a\_aa

@HWI-EAS443:3:9:1412:1299#0/1  
GATGAAATCTCCTGGGTAACACGTTCCATTGTCTGAACTA  
+HWI-EAS443:3:9:1412:1299#0/1  
aa`aaaaaaa\_\_\_`\_a^`\_]aZ^`\_]X\_a^^^Z\_]¥Z\_\_\_  
@HWI-EAS443:3:9:1415:2024#0/1  
AGCTCCTCATAATCGATGAAATCTCCTGGGTAACACGTTCC  
+HWI-EAS443:3:9:1415:2024#0/1  
aba`XY`\_aaaaaQbaY`````\_[aMZ¥a`aV````aYVPZT  
@HWI-EAS443:3:9:1415:251#0/1  
CATTGCTGGCTGGATCCTGGGAAATCCAGAGTGTGAATCA  
+HWI-EAS443:3:9:1415:251#0/1  
ababbbbbbaaa`\_aZ\_aaab\_\_a`¥N\_a^\_WaW``^]X^  
@HWI-EAS443:3:9:1529:593#0/1  
GCTTCCTCTGAGTATTTTGGGTAGTCATAAGTCCCATTTT  
+HWI-EAS443:3:9:1529:593#0/1  
a`ba`]a^aa\_a\_\_aa`aa`Y``]`]^a^^ZXZZ\_a^``  
@HWI-EAS443:3:9:1595:1380#0/1  
GGGAGGCTGGTGTATATAGCACCTTGGGTGTCTGACAAG  
+HWI-EAS443:3:9:1595:1380#0/1  
aabHba\_\_bb\_aaa]aaabWaQH][\_\_a`X\_URaaWN[Ya  
@HWI-EAS443:3:9:1620:488#0/1  
CATGCGAACAATTCAACAGACACTGTAGACACAGTACTAG  
+HWI-EAS443:3:9:1620:488#0/1  
aab`\_bbbbbbbbb¥bbabbbab\_bb`abaUa\_ab\_a[aa`  
@HWI-EAS443:3:9:1767:640#0/1  
ATTTTACCACAAATGCGATAACACGTGCATGGAAAGTGTC  
+HWI-EAS443:3:9:1767:640#0/1  
abaab`Q``\_aaaaaaaaa`Y\_Y\_\_aHa\_a`\_`¥YP\_]G  
@HWI-EAS443:3:9:1782:1096#0/1  
AGTAGATGGATGGTGAATGCCCCATAGCACGAGGACTTCT  
+HWI-EAS443:3:9:1782:1096#0/1  
\_XWQ\_YSab\_bZbTa¥Zab`]WX[]¥X[SV``\_`BBBBBB  
@HWI-EAS443:3:9:198:615#0/1  
TGGGGCATTACCATCCATCTACTAGTGCTGACCAACAAA  
+HWI-EAS443:3:9:198:615#0/1  
Vaabaabaaabaaaaaba`abaaa`\_a`aaaa`````]\_`  
@HWI-EAS443:3:9:204:2034#0/1  
CACAAATGCGATAACACGTGCATGGAAAGTGTCAAAAATG  
+HWI-EAS443:3:9:204:2034#0/1  
abaabbab`aaa\_a^\_bW\_aba^`\_b\_baR\_\_\_bbbaa`\_`  
@HWI-EAS443:3:9:284:268#0/1  
GGGGACATCAAGATACAGCAAGAAGTTCAAGCCGAAATA  
+HWI-EAS443:3:9:284:268#0/1  
a\_\_\_\_\_ZQ¥`UZ^`]\_V\_\_^^```\_[^YW\_^\_V]X]\_XXVVY  
@HWI-EAS443:3:9:306:462#0/1  
AGCCAGTTAAAAACAATGCCAAGGAAATTGGAAACGGCT  
+HWI-EAS443:3:9:306:462#0/1  
```a`\_W\_Tabaaa\_a`a`U`a\_a[[[]a``]TS]]\_ZBB  
@HWI-EAS443:3:9:392:678#0/1  
ATCTTGATGTCCCCACAAAAACATATGCATCTGCATTCTG

+HWI-EAS443:3:9:392:678#0/1  
aaaa\_aaaaa`a^a`\_a`\_\_a`aa\_[`a\_\_aa`\_`\_^a\_  
@HWI-EAS443:3:9:39:82#0/1  
AAAACATATGCATCTGCATTCTGATAGAGACTTTGTTGGT  
+HWI-EAS443:3:9:39:82#0/1  
^aaaaabaaa`aabab]a``¥````\_``\_^^ZX`¥¥]\_X  
@HWI-EAS443:3:9:422:394#0/1  
CGTCAATGGCATTCTGTGTGCTCTTCAGGTCGGCTGCATA  
+HWI-EAS443:3:9:422:394#0/1  
abXa``^`aa``a`aaaaZaaa\_aa`\_aa^¥`[\_aa¥¥\_`^  
@HWI-EAS443:3:9:445:1432#0/1  
CTCCCGGCTCTACTAGTGTCCAGTAATAGTTCATTCTCCC  
+HWI-EAS443:3:9:445:1432#0/1  
aabbbaababbbb``b\_b^`ba^V`aa¥XYabaaa`aaaa  
@HWI-EAS443:3:9:47:518#0/1  
ATGTTTTTGTGGGACATCAAGATACAGCAAGAAGTTCAA  
+HWI-EAS443:3:9:47:518#0/1  
¥¥^^`¥Y¥MZ\_ZZ]bb`[\_X[P\_Z`\_\_^Z^\_XU\_XQO]Y  
@HWI-EAS443:3:9:483:855#0/1  
GTGTATTCATCTTTTCAATAACAGAATTTACTTTGTTAGT  
+HWI-EAS443:3:9:483:855#0/1  
\_0^V\_]`^¥¥^\_\_[\_a^]\_^\_ZZ\_\_^`^`aVY[aaaa[^aa[  
@HWI-EAS443:3:9:534:1727#0/1  
GCTGGCTGGATCCTGGGAAATCCAGAGTGTGAATCACTCT  
+HWI-EAS443:3:9:534:1727#0/1  
abaa`babaabbbb[b`a`bbabaa^a`Za]`aba\_a^\_``  
@HWI-EAS443:3:9:53:201#0/1  
CTCTTTACTACTGCTGTGAAGTGTGTATTCATCTTTTCA  
+HWI-EAS443:3:9:53:201#0/1  
aba^a`Z`a\_S`aaaa\_a`a`aa]a¥````\_a`\_^\_\_^a[  
@HWI-EAS443:3:9:53:607#0/1  
GTATTTTGGGTAGTCATAAGTCCCATTTTGGACTTTTCC  
+HWI-EAS443:3:9:53:607#0/1  
¥W]a¥abbaYV`b`a\_RZ¥bPZZ^`^`aaa\_]aaQU\_U\_X  
@HWI-EAS443:3:9:551:47#0/1  
GCTGGATCTGGTATTATCATTTCAGATACACCAGTCCACG  
+HWI-EAS443:3:9:551:47#0/1  
aaaba]a[aba\_bbbabaababaabaaaaaa`aaa\_a`aa  
@HWI-EAS443:3:9:60:1511#0/1  
ATATGCATCTGCATTCTGATAGAGACTTTGTTGGTCAGCA  
+HWI-EAS443:3:9:60:1511#0/1  
aaa`\_`a^a^a^`aa]``^`\_\_\_]\_WZ`^^\_ZX^PMN]]\_B  
@HWI-EAS443:3:9:639:903#0/1  
CAAGATACAGCAAGAAGTTCAAGCCGAAATAGCAATAAG  
+HWI-EAS443:3:9:639:903#0/1  
^^YbbaZ^ab`\_baZYb¥a\_bab``ab`]a\_aaaaa\_baa  
@HWI-EAS443:3:9:661:208#0/1  
GGGACATCAAGATACAGCAAGAAGTTCAAGCCGAAATA  
+HWI-EAS443:3:9:661:208#0/1  
aSjW\_¥^YP`[\_^¥\_`a`SXaYS`\_RZV\_XZXZ^XZ^ZZ^

@HWI-EAS443:3:9:702:1324#0/1  
CACTGTAGAGACCCATTAGAGCACATCCAGAACTGATTG  
+HWI-EAS443:3:9:702:1324#0/1  
ab\_¥a]abaaaa\_`aa`aa`\_U`aaaa\_aaa`aa\_]a  
@HWI-EAS443:3:9:712:54#0/1  
TAGGACCATGAGCTTGCTGTGGAGAGTGATTCACACTCTG  
+HWI-EAS443:3:9:712:54#0/1  
aabaaa\_\_aaaa`aaa`aba\_\_¥[Va^`^¥\_\_\_U\_W\_a  
@HWI-EAS443:3:9:722:1744#0/1  
AAGTCCTCGTGCTATGGGGCATTACCATCCATCTACTAG  
+HWI-EAS443:3:9:722:1744#0/1  
aaaUZV^\_a¥]^`\_\_aUVZ\_UZa^\_Q`¥¥]^`^\_\_\_  
@HWI-EAS443:3:9:727:207#0/1  
GCCGGTTTCATTGAAGGGGGTGGACAGGGATGGTAGATG  
+HWI-EAS443:3:9:727:207#0/1  
a`\_a`HUZRR\_\_Z¥a`Z[\_ZGX¥PSSW^USU^SPYSSBB  
@HWI-EAS443:3:9:747:2016#0/1  
ATATGTAAAAAGCACAAAATTGAGACTGGCCACAGGATTG  
+HWI-EAS443:3:9:747:2016#0/1  
abaab^a]ba¥\_¥`a¥[`b]aba\_\_WZ\_a¥\_aT\_a^Z\_\_S  
@HWI-EAS443:3:9:776:37#0/1  
AATGATAAAGGGAAAGAAGTCCTCGTGCTATGGGGCATTG  
+HWI-EAS443:3:9:776:37#0/1  
`baabba`abbaabab`abaa`a\_b]a\_a`]a\_a`V^a`]  
@HWI-EAS443:3:9:789:577#0/1  
CTGACAAGTTGTATTGCAATCGTGGACTGGTGTATCTGAA  
+HWI-EAS443:3:9:789:577#0/1  
`^Z``Za`0aa`\_`Z]N]ZXa\_^a^\_Y[^\_Y^P^ZV`\_\_¥  
@HWI-EAS443:3:9:80:935#0/1  
CTAGATTTCCAGTTGCTTCGAATGTTATTTTGTCTCCCGG  
+HWI-EAS443:3:9:80:935#0/1  
aa``bbbbaba`aaabaaab][`baaaaaaaaa`aaaa`¥a  
@HWI-EAS443:3:9:821:1848#0/1  
GGCTGGTGTATTATAGCACCTTGGGTGTCTGACAAGTTGT  
+HWI-EAS443:3:9:821:1848#0/1  
ab`baa`X`aa\_a`¥aY`a``S^\_U`U\_]\_[U^Z[Z\_R^  
@HWI-EAS443:3:9:827:1213#0/1  
ATTCTGTGTCTTTCAGGTCGGCTGCATATCCTGACCCC  
+HWI-EAS443:3:9:827:1213#0/1  
`[```a`aUbaaaaa`\_a[N\_Z¥a[^a[\_baX\_\_S`ZZ]G  
@HWI-EAS443:3:9:873:72#0/1  
GGGGACATCAAGATACAGCAAGAAGTTCAAGCCGAAATA  
+HWI-EAS443:3:9:873:72#0/1  
a``\_VW\_[XZ^\_VW]ZZ\_ZZ]\_ZV]VXX¥WZRRWXZXZZZ  
@HWI-EAS443:3:9:885:1241#0/1  
TGGTAGTCCAAAGTTCTTTTCTTTTCCAATAGAACCAACA  
+HWI-EAS443:3:9:885:1241#0/1  
aba¥`a^\_a\_a`a]`aaa][\_a`^\_\_`a``a``\_[-`^^  
@HWI-EAS443:3:9:900:1545#0/1  
GGGACATCAAGATACAGCAAGAAGTTCAAGCCGAAATAG

+HWI-EAS443:3:9:900:1545#0/1  
aaaaaaaaabaaaa`\_`b^aaa`\_aZ`\_b`a^]aa]`^\_``  
@HWI-EAS443:3:9:926:734#0/1  
CCGGGAGACAAAATAACATTCTGAAGCAACTGGAAATCTAG  
+HWI-EAS443:3:9:926:734#0/1  
abbbaWaababaababbVbbabbab\_aa\_abbba`a\_baa  
@HWI-EAS443:3:48:666:243#0/1  
ATCAGGCACTCCTCGATTGCTTCATATAGCCCCTCAAGAT  
+HWI-EAS443:3:48:666:243#0/1  
\_W^``aaWS^ZP`Y`Xab`]bb^aaab¥bRQZWG]`UV\_Q  
@HWI-EAS443:3:37:1673:12#0/1  
AATTGAATCCATCGACAATGTGATGGGAATGATCGNNATA  
+HWI-EAS443:3:37:1673:12#0/1  
a\_aS^ab`aZ``\_a¥0^aaaaba\_aba\_^DSY\_a[DD¥`Y  
@HWI-EAS443:3:16:880:387#0/1  
GGGGAATTGAATCCATCGACAATGTGATGGGAATGATCGG  
+HWI-EAS443:3:16:880:387#0/1  
ab\_a]bbab``a`\_`\_aaa\_`]\_a]``^U]a\_\_\_\_][U^\_  
@HWI-EAS443:3:30:791:1380#0/1  
GGGGAATTGAATCCATCGACAATGTGATGGGAATGATCGG  
+HWI-EAS443:3:30:791:1380#0/1  
^^``\_`aaa\_`^`aaa`a````¥[``\_W\_\_^X`\_a[TW[]  
@HWI-EAS443:3:34:103:1739#0/1  
GGGGAATTGAATCCATCGACAATGTGATGGGAATGATCGG  
+HWI-EAS443:3:34:103:1739#0/1  
abab\_b`baWb`bbbabWbbbaYYWbTaabbb`Ua^\_a\_  
@HWI-EAS443:3:64:412:595#0/1  
TGAGAATGGGAGACCTCCACTACCTCCAGAGCAGAAATGA  
+HWI-EAS443:3:64:412:595#0/1  
ab`^Yaaaaaa\_\_\_\_[J]\_U`\_`¥``\_`^a\_\_¥\_`V`¥`¥V  
@HWI-EAS443:3:58:1578:158#0/1  
GAAAGACACCCACGGTCGATTCTGAGCCATTCCAATTATTC  
+HWI-EAS443:3:58:1578:158#0/1  
a¥`]Q[^Y`U`XS^`WX]ZBBBBBBBBBBBBBBBBBBBB  
@HWI-EAS443:3:37:1072:398#0/1  
GGCTCGAATCGACCGTGGGTGTCTTTCAAACAGAATCTGG  
+HWI-EAS443:3:37:1072:398#0/1  
]\_¥`baa^\_¥\_`\_a¥XP\_]M[QZ¥a\_OT[L\_\_WaaVUU[W  
@HWI-EAS443:3:61:897:293#0/1  
CAGGGATAANTGGCATGGCTCGAATCGACCGTGGGTGTCT  
+HWI-EAS443:3:61:897:293#0/1  
a`\_a\_Ta\_]D]``bbababa\_TWZ]VXRJRYNYaZBBBBB  
@HWI-EAS443:3:33:958:1061#0/1  
AGGGGTTCTTCTTGTCTTCTGATGTGTAGTTTTTTGAT  
+HWI-EAS443:3:33:958:1061#0/1  
¥YWT TT\_Z¥YVN¥abYJZ`¥\_^]aZ\_`^`¥ZGV`^]XNX\_  
@HWI-EAS443:3:88:1601:1908#0/1  
AGGGGTTCTTCTTGTCTTCTGATGTGTATTTTTTTGAT  
+HWI-EAS443:3:88:1601:1908#0/1  
XaZ`a^b```¥bbbb¥0aa\_`aaa`b]Yab¥E]bbbaab



@HWI-EAS443:3:94:1298:1692#0/1  
GAAGCAGATACTGGGCCATAAGGACCAGGAGTGGAGGCTG  
+HWI-EAS443:3:94:1298:1692#0/1  
a\_`\_\_a]W`^^aVXY^Z\_¥`¥W^ZIT¥YIWPaZX¥BBBB  
@HWI-EAS443:3:37:820:538#0/1  
GACCTCCACTCCTGGTCCTTATGGCCCAGTATCTGCTTCT  
+HWI-EAS443:3:37:820:538#0/1  
aa\_``[aaaa`¥¥\_\_¥¥\_a\_]a`\_\_\_\_^^U\_¥\_Y¥¥\_¥¥¥  
@HWI-EAS443:3:59:1006:1046#0/1  
CACCTCCACTCCTGGTCCTTATGGCCCAGTATCTGCTTCT  
+HWI-EAS443:3:59:1006:1046#0/1  
aaa`a^X^aaaaa]\_Z\_\_aa\_\_^^a`a\_dW]V^`SNM\_N¥  
@HWI-EAS443:3:14:789:232#0/1  
GAAGCAGATACTGGGCCATAAGGACCAGGAGTGGAGGAAA  
+HWI-EAS443:3:14:789:232#0/1  
a`\_\_`\_a`\_\_]\_^]\_\_W]\_^\_a`^YV^¥`YVNMX]^Y^Y^Y^  
@HWI-EAS443:3:16:1652:526#0/1  
GAAGCAGATACTGGGCCATAAGGACCAGGAGTGGAGGAAA  
+HWI-EAS443:3:16:1652:526#0/1  
a\_baa`bVT]Q¥baTJY`ba]]\_\_aN\_baU¥Wa^Ub\_Z¥\_  
@HWI-EAS443:3:18:662:1540#0/1  
GAAGCAGATACTGGGCCATAAGGACCAGGAGTGGAGGAAA  
+HWI-EAS443:3:18:662:1540#0/1  
aaaaaa`U[aa`XXZa`\_\_`a``[\_Y`\_`\_]`X]]^\_Z]^\_  
@HWI-EAS443:3:22:1396:1256#0/1  
GAAGCAGATACTGGGCCATAAGGACCAGGAGTGGAGGAAA  
+HWI-EAS443:3:22:1396:1256#0/1  
`\_^`\_\_a`\_\_\_\_^[][\_`\_Y`^Y`¥\_VKULK^^`^^¥^  
@HWI-EAS443:3:22:761:1788#0/1  
GAAGCAGATACTGGGCCATAAGGACCAGGAGTGGAGGAAA  
+HWI-EAS443:3:22:761:1788#0/1  
`]^RWZa^`abVa``[``¥aaXV`X[``\_]PY``a\_V]`  
@HWI-EAS443:3:26:1613:1623#0/1  
GAAGCAGATACTGGGCCATAAGGACCAGGAGTGGAGGAAA  
+HWI-EAS443:3:26:1613:1623#0/1  
aVaa\_\_bX\_a`a\_\_\_\_Z\_\_```a`\_]`^aaXa]a`]`\_X\_^  
@HWI-EAS443:3:47:1524:1456#0/1  
GAAGCAGATACTGGGCCATAAGGACCAGGAGTGGAGGAAA  
+HWI-EAS443:3:47:1524:1456#0/1  
``]`U`^aaa`aabG\_]a\_\_aa^¥[Zaa^\_Ya\_¥`\_\_Z\_  
@HWI-EAS443:3:52:1760:882#0/1  
GAAGCAGATACTGGGCCATAAGGACCAGGAGTGGAGGAAA  
+HWI-EAS443:3:52:1760:882#0/1  
a\_]XVW`¥]a]ZXV¥NU`¥^YRW]UVSWSW^ZWQRYUS¥[  
@HWI-EAS443:3:54:195:251#0/1  
GAAGCAGATACTGGGCCATAAGGACCAGGAGTGGAGGAAA  
+HWI-EAS443:3:54:195:251#0/1  
aaaaaabaaaaaaaaa````aaa`\_`\_a`¥aUa`\_`\_¥\_\_  
@HWI-EAS443:3:57:1463:298#0/1  
TTCCTCCACTCCTGGTCCTTATGGCCCAGTATCTGCTTCT

+HWI-EAS443:3:57:1463:298#0/1  
a^` [a` [V\_LX]a\_JQa\_\_\_\_` `YPMX[^P`]U^WR[SZ  
@HWI-EAS443:3:57:1521:1428#0/1  
GAAGCAGATACTGGGCCATAAGGACCAGGAGTGGAGGAAA  
+HWI-EAS443:3:57:1521:1428#0/1  
aZS`a[[`bURZa]Y\_\_abaaQLaTR[\_a\_`¥aW\_^Ta\_`  
@HWI-EAS443:3:68:307:99#0/1  
GAAGCAGATACTGGGCCATAAGGACCAGGAGTGGAGGAAA  
+HWI-EAS443:3:68:307:99#0/1  
aaaaaaaa\_\_[^Z\_\_\_\_a]\_a`\_Z`\_[]\_]VYV`]^\_¥VL]  
@HWI-EAS443:3:80:1050:962#0/1  
AGAAGCAGATACTGGGCCATAAGGACCAGGAGTGGAGGAA  
+HWI-EAS443:3:80:1050:962#0/1  
abaab`ba\_b`aa\_aa\_\_\_\_aaaa` `]]`ba¥aXaa\_a`\_`  
@HWI-EAS443:3:86:1246:1479#0/1  
AGAAGCAGATACTGGGCCATAAGGACCAGGAGTGGAGGAA  
+HWI-EAS443:3:86:1246:1479#0/1  
ab[aWS\_]a\_a\_TT\_ab[K¥b¥\_X\_¥MYbaZbaaSYaRUa  
@HWI-EAS443:3:8:1127:347#0/1  
GAAGCAGATACTGGGCCATAAGGACCAGGAGTGGAGGAAA  
+HWI-EAS443:3:8:1127:347#0/1  
aX]^aab\_a`aaa`\_]\_a\_\_b` [NR¥`\_Ya]\_^UaaZ\_\_  
@HWI-EAS443:3:25:910:171#0/1  
CATCCTAGTGCTGGGAAGGACCCTAAGAAAACAGGAGGAC  
+HWI-EAS443:3:25:910:171#0/1  
ababb\_bbaa\_^bbbbbbb`aaabaabba`baaaaabaa0  
@HWI-EAS443:3:97:744:930#0/1  
CTCGGACGAAAAGGCAACGAACCCGATCGTGCCTTCATTT  
+HWI-EAS443:3:97:744:930#0/1  
¥^` [¥ab¥]W` [HXabaab[aa`ZbXF\_\_R`a[IT[FOaB  
@HWI-EAS443:3:76:684:113#0/1  
TCCCATCCTGTTGTATATGAGGCCCATGCAACTGGCAAGT  
+HWI-EAS443:3:76:684:113#0/1  
Vbbba^bb^Uabb`ab]b\_aaSTN[^b¥Xa`U^`V\_YXaV  
@HWI-EAS443:3:63:1059:537#0/1  
ATGATAACCTATACATAATGTGTCTGCATTTGCGGGTGCC  
+HWI-EAS443:3:63:1059:537#0/1  
`]Za^Uaa]¥VZaTXbaa\_I\_^^^abVJY\_a]YJYH\_BBB  
@HWI-EAS443:3:6:1736:814#0/1  
TTGGGGAATATCTAAAACCTTTCAAATGATGACACTGAGC  
+HWI-EAS443:3:6:1736:814#0/1  
^` `Y`¥b¥SZ`S]H^^aY¥RZVYa\_aaba[0\_[aR]a\_\_J  
@HWI-EAS443:3:88:601:1380#0/1  
GCTCAGAGTCATCATTTGAAAGGTTTGAGATATTCCCCAA  
+HWI-EAS443:3:88:601:1380#0/1  
Ua\_a¥]DWabbVaYY`aa^\_\_\_\_[Tba`b\_bb¥aSb^a]\_b  
@HWI-EAS443:3:99:183:1546#0/1  
GGGAATATCTCAAACCTTTCAAATGGTGACACTGAGCTCA  
+HWI-EAS443:3:99:183:1546#0/1  
a¥W\_]a]WX¥\_abaYQYa¥` [\_aX\_XF[^\_a\_[\_\_]\_^T\_

@HWI-EAS443:3:88:655:415#0/1  
GTGGGAATATCTCAAACCTTTCAAATGATGACTGAGCT  
+HWI-EAS443:3:88:655:415#0/1  
]Q]a`¥[¥`aZ\_X\_``^`aa^^]a\_[\_^^^\_a\_¥^¥  
@HWI-EAS443:3:25:906:1567#0/1  
CTGGGAATATCTCAAACCTTTCAAATGATGACTGAGC  
+HWI-EAS443:3:25:906:1567#0/1  
a\_U[]X]TaYa`baba^]S`]a[[ab[aa^bb\_a[]a`SY  
@HWI-EAS443:3:34:1271:1932#0/1  
CGGGGAATATCTCAAACCTTTCAAATGATGACTGAGCT  
+HWI-EAS443:3:34:1271:1932#0/1  
abba\_¥V\_\_\_[]a`^\_a¥Q]\_Y`a¥U\_aU``]``\_O]YWBB  
@HWI-EAS443:3:39:1216:1073#0/1  
CGGGGAATATCTCAAACCTTTCAAATGATGACTGAGCT  
+HWI-EAS443:3:39:1216:1073#0/1  
H\_b\_X\_aa^`bba^a^`abbb``S[``babba``X`b`\_X`  
@HWI-EAS443:3:3:1240:1196#0/1  
CGGGGAATATCTCAAACCTTTCAAATGATGACTGAGCT  
+HWI-EAS443:3:3:1240:1196#0/1  
ababbZV`aa\_aa`]a]a\_a`aaa`aaaaa^a\_a\_`\_W`  
@HWI-EAS443:3:57:1553:779#0/1  
CGGGGAATATCTCAAACCTTTCAAATGATGACTGAGCT  
+HWI-EAS443:3:57:1553:779#0/1  
aaZ`a\_b\_^b]a\_bbb`abbbabaabbbb^b``\_bbab`b  
@HWI-EAS443:3:95:1552:77#0/1  
CGGGGAATATCTCAAACCTTTCAAATGATGACTGAGCT  
+HWI-EAS443:3:95:1552:77#0/1  
ab`a`Uba`baaT^Xb[I\_abaabbbbabbbWb\_`bab`b  
@HWI-EAS443:3:10:949:1370#0/1  
TTGGGAATATCTCAAACCTTTCAAATGATGACTGAGC  
+HWI-EAS443:3:10:949:1370#0/1  
``aa`aZ`a`aa\_\_`a`\_`\_`\_¥a^\_\_`^^\_]^[YVV^]  
@HWI-EAS443:3:15:527:954#0/1  
GGGAATATCTCAAACCTTTCAAATGATGACTGAGCTC  
+HWI-EAS443:3:15:527:954#0/1  
abbaU]a]aaaabaaaaaaaaa````\_aa`aa\_a`a\_]a  
@HWI-EAS443:3:15:634:655#0/1  
GGAATATCTCAAACCTTTCAAATGATGACTGAGCTCAA  
+HWI-EAS443:3:15:634:655#0/1  
aa[\_`Z^\_]Zaa\_]`a\_\_`Y\_\_]\_^¥^\_Z^^]^^^\_]^^\_]`  
@HWI-EAS443:3:18:1775:1360#0/1  
CTTGGGAATATCTCAAACCTTTCAAATGATGACTGAG  
+HWI-EAS443:3:18:1775:1360#0/1  
aa^a`baWab\_b¥`aaaaS¥aaa\_a\_``a`\_aa``\_`\_]`  
@HWI-EAS443:3:26:1719:1846#0/1  
GCTCAGTGTATCATTTGAAAGGTTTGAGATATTCCCCAA  
+HWI-EAS443:3:26:1719:1846#0/1  
^\_¥Z¥`Y¥^^^b¥bb`b``a`X[]¥\_UUa\_S\_b`a]]Va]  
@HWI-EAS443:3:28:769:304#0/1  
GAGCTCAGTGTATCATTTGAAAGGTTTGAGATATTCCCC

+HWI-EAS443:3:28:769:304#0/1  
aVQQ^S[H]b[OXaUaaUa`U[^]\_P`U`a\_] ^YUZUF  
@HWI-EAS443:3:28:801:1561#0/1  
TGGGGAATATCTCAAACCTTTCAAATGATGACACTGAGCT  
+HWI-EAS443:3:28:801:1561#0/1  
`^¥a`^bbaaa\_a^baa]a`aaa\_a\_^`\_\_a\_a`^`\_`\_\_  
@HWI-EAS443:3:29:446:975#0/1  
GGGGAATATCTCAAACCTTTCAAATGATGACACTGAGCTC  
+HWI-EAS443:3:29:446:975#0/1  
`XZZX^aT^^`b\_X`a`aaaa]`^Ya\_a\_]\_XS¥a  
@HWI-EAS443:3:31:1334:1029#0/1  
CTTGGGGAATATCTCAAACCTTTCAAATGATGACACTGAG  
+HWI-EAS443:3:31:1334:1029#0/1  
aabaabaababbababb`babaab`bbbaaaaaa`aa\_  
@HWI-EAS443:3:33:1669:679#0/1  
TGAGCTCAGTGCATCATTTGAAAGGTTTGAGATATTCCC  
+HWI-EAS443:3:33:1669:679#0/1  
\_b`aaa`\_`baabaXbbb`baa\_baXa`baaR`aXMZ\_  
@HWI-EAS443:3:34:1547:376#0/1  
TGGGGAATATCTCAAACCTTTCAAATGATGACACTGAGCT  
+HWI-EAS443:3:34:1547:376#0/1  
¥bbbb`aba[0¥]a`a¥`a^Z^a]V]W¥a\_XR¥¥\_Q¥G¥  
@HWI-EAS443:3:34:495:1883#0/1  
GGGGAATATCTCAAACCTTTCAAATGATGACACTGAGCTC  
+HWI-EAS443:3:34:495:1883#0/1  
ab\_ababbba¥bbbb¥a`bab\_aaa^`\_aabbaW`aZ^^G  
@HWI-EAS443:3:35:1373:675#0/1  
CTTGGGGAATATCTCAAACCTTTCAAATGATGACACTGAG  
+HWI-EAS443:3:35:1373:675#0/1  
abb`bababbbbababb\_aabba`a`abaababbaab\_a  
@HWI-EAS443:3:38:168:1334#0/1  
TTGGGGAATATCTCAAACCTTTCAAATGATGACACTGAGC  
+HWI-EAS443:3:38:168:1334#0/1  
ab^T`\_Z`aa[aabaSXa`W`a\_b`UY\_a`\_a^a\_[[\_ZI  
@HWI-EAS443:3:38:251:1193#0/1  
GGGGAATATCTCAAACCTTTCAAATGATGACACTGAGCTC  
+HWI-EAS443:3:38:251:1193#0/1  
aa`aa`abbaaaaabaaa\_aa^¥`a`a`^`W`^`a`^`  
@HWI-EAS443:3:38:677:1046#0/1  
CTTGGGGAATATCTCAAACCTTTCAAATGATGACACTGAG  
+HWI-EAS443:3:38:677:1046#0/1  
aaaa\_`¥TSW\_`¥W`aa^[`aa^^^`^]Z]TY¥`X]^R  
@HWI-EAS443:3:40:533:688#0/1  
CTCAGTGCATCATTTGAAAGGTTTGAGATATTCCCAAG  
+HWI-EAS443:3:40:533:688#0/1  
abbbbababababbbbb`b`bb^L`Vaaaababbbba  
@HWI-EAS443:3:42:1438:1476#0/1  
GGAATATCTCAAACCTTTCAAATGATGACACTGAGCTCAA  
+HWI-EAS443:3:42:1438:1476#0/1  
^SOV^YU`VLOY\_[¥[\_a^SPX]YUYTXTUWHVVRWWW

@HWI-EAS443:3:43:205:599#0/1  
GGGGAATATCTCAAACCTTTCAAATGATGACACTGAGCTC  
+HWI-EAS443:3:43:205:599#0/1  
aa``[``a`a`aaaa]\_``\_\_\_\_\_¥[``\_]\_^^\_^]\_\_\_\_\_]]^  
@HWI-EAS443:3:46:606:957#0/1  
CTTGGGGAATATCTCAAACCTTTCAAATGATGACACTGAG  
+HWI-EAS443:3:46:606:957#0/1  
abbb\_bb¥bb\_bab]bba\_abbbaabbabbbabbaaabb\_  
@HWI-EAS443:3:48:1614:516#0/1  
GGGAATATCTCAAACCTTTCAAATGATGACACTGAGCTCA  
+HWI-EAS443:3:48:1614:516#0/1  
a`ZU\_aW\_\_\_\_Wa^[X``aaY]\_]^]¥\_\_\_\_^\_TV`\_WNZU^  
@HWI-EAS443:3:48:539:421#0/1  
GGGAATATCTCAAACCTTTCAAATGATGACACTGAGCTCA  
+HWI-EAS443:3:48:539:421#0/1  
a¥^W^\_¥`Wa^]\_]¥^`^^^W\_aV^^\_T\_^^`Z^UUV\_  
@HWI-EAS443:3:49:1458:164#0/1  
CTTGGGGAATATCTCAAACCTTTCAAATGATGACACTGAG  
+HWI-EAS443:3:49:1458:164#0/1  
abbb`aa`abab\_abbbbabbbbabababaaaaabaaa]]  
@HWI-EAS443:3:49:370:75#0/1  
CTTGGGGAATATCTCAAACCTTTCAAATGATGACACTGAG  
+HWI-EAS443:3:49:370:75#0/1  
abaabbbabbaabaabb`bbaba`abbbaabba`\_`bab  
@HWI-EAS443:3:51:15:1181#0/1  
CTTGGGGAATATCTCAAACCTTTCAAATGATGACACTGAG  
+HWI-EAS443:3:51:15:1181#0/1  
abbbba\_\_a`abaaaaaaa\_`aaaa`a^aa\_a`^aa\_\_\_\_`  
@HWI-EAS443:3:54:292:1088#0/1  
CTTGGGGAATATCTCAAACCTTTCAAATGATGACACTGAG  
+HWI-EAS443:3:54:292:1088#0/1  
aaX[bb]Wa]Ya\_b\_aaW]`a[a`aT[``b`^\_``\_\_\_\_`\_a  
@HWI-EAS443:3:57:930:1020#0/1  
CTTGGGGAATATCTCAAACCTTTCAAATGATGACACTGAG  
+HWI-EAS443:3:57:930:1020#0/1  
aaV\_aab\_]b^aaa`ab]V`a\_`a`aa¥aa^aa[a]¥¥\_`  
@HWI-EAS443:3:59:1293:340#0/1  
GGGGAATATCTCAAACCTTTCAAATGATGACACTGAGCTC  
+HWI-EAS443:3:59:1293:340#0/1  
abba\_ab\_a\_aaaaa\_aaaa`aaaa\_aaaa`^a\_aYX^\_Z  
@HWI-EAS443:3:59:1772:919#0/1  
CTTGGGGAATATCTCAAACCTTTCAAATGATGACACTGAG  
+HWI-EAS443:3:59:1772:919#0/1  
a\_\_\_\_`b^baa\_b^\_¥`aa^ba`^R]Z^QJWYM  
@HWI-EAS443:3:5:1117:739#0/1  
GGGAATATCTCAAACCTTTCAAATGATGACACTGAGCTCA  
+HWI-EAS443:3:5:1117:739#0/1  
aa`aa]b\_aY`]]\_a`a`\_a`a\_\_a\_[a[`a^`][^^  
@HWI-EAS443:3:60:108:433#0/1  
GGGGAATATCTCAAACCTTTCAAATGATGACACTGAGCTC

+HWI-EAS443:3:60:108:433#0/1  
ab\_]\_aaaa`aaaa^\_``\_a````\_`\_a]`^Z^RY¥[R  
@HWI-EAS443:3:61:1644:855#0/1  
GCTCAGTGCATCATTGAAAGGTTTGAGATATTCCCCAA  
+HWI-EAS443:3:61:1644:855#0/1  
a]SWSFWX^¥[[O\_^`\_IY`a^WX`Y¥[UPZSXOZSXXT  
@HWI-EAS443:3:61:786:1026#0/1  
GCTCAGTGCATCATTGAAAGGTTTGAGATATTCCCCAA  
+HWI-EAS443:3:61:786:1026#0/1  
aa\_`[]Ya^``\_ZL]aaa¥`Z][V[^\_W]\_[a\_¥Y[[VYX  
@HWI-EAS443:3:61:904:1315#0/1  
GGAATATCTCAAACCTTTCAAATGATGACACTGAGCTCAA  
+HWI-EAS443:3:61:904:1315#0/1  
```aa^`T\_YR\_YV]aaa]``^Z[Y`YUV\_]`^UXTXYY\_  
@HWI-EAS443:3:62:656:114#0/1  
CTTGGGAATATCTCAAACCTTTCAAATGATGACACTGAG  
+HWI-EAS443:3:62:656:114#0/1  
abbbbbbbabbbbbbbbbabbbbbabbbbbbb`baabaa  
@HWI-EAS443:3:63:433:551#0/1  
GGGAATATCTCAAACCTTTCAAATGATGACACTGAGCTC  
+HWI-EAS443:3:63:433:551#0/1  
abab`a^aaaa`aaa`aaa]aaa^````a\_``\_`^a  
@HWI-EAS443:3:64:101:525#0/1  
TTGAGCTCAGTGCATCATTGAAAGGTTTGAGATATTCC  
+HWI-EAS443:3:64:101:525#0/1  
a``\_]`^`aaXa\_a`a`aaaa`a\_`aaYa`a`a\_```\_`^  
@HWI-EAS443:3:64:1267:1181#0/1  
GGGAATATCTCAAACCTTTCAAATGATGACACTGAGCTC  
+HWI-EAS443:3:64:1267:1181#0/1  
abaa`bbab`abbbaa\_b`abbaabaaaaab\_`a`a``\_  
@HWI-EAS443:3:64:64:107#0/1  
TTGAGCTCAGTGCATCATTGAAAGGTTTGAGATATTCC  
+HWI-EAS443:3:64:64:107#0/1  
aab^aa`aa\_b^`^`aUaaa\_\_\_a\_Z`^``\_`a\_`^\_Z  
@HWI-EAS443:3:65:969:1167#0/1  
TGAGCTCAGTGCATCATTGAAAGGTTTGAGATATTCCC  
+HWI-EAS443:3:65:969:1167#0/1  
`¥aa]T\_^a^a]ba^``babaZa\_¥a`bbaa^aaaaaWa]  
@HWI-EAS443:3:67:1407:1019#0/1  
GCTCAGTGCATCATTGAAAGGTTTGAGATATTCCCCAA  
+HWI-EAS443:3:67:1407:1019#0/1  
aababa\_baaab`aRbb``aaa\_aaaaaaa`a``\_]`^`a  
@HWI-EAS443:3:6:228:1956#0/1  
GGAATATCTCAAACCTTTCAAATGATGACACTGAGCTCAA  
+HWI-EAS443:3:6:228:1956#0/1  
¥aaXa`b`¥0]ba^aV^Ta`^^a\_a]Yaaaa]^`H`^Y`  
@HWI-EAS443:3:70:103:1716#0/1  
TGGGAATATCTCAAACCTTTCAAATGATGACACTGAGCT  
+HWI-EAS443:3:70:103:1716#0/1  
a^aaa\_T^^bbabbb\_`baaaba\_a\_\_aa\_aaaa\_\_^`a\_

@HWI-EAS443:3:72:1190:537#0/1  
CTTGGGAATATCTCAAACCTTTCAAATGATGACTGAG  
+HWI-EAS443:3:72:1190:537#0/1  
¥b\_bba`]`baab`\_`bbSbbaaa]\_a`ba`bb[bYa`ab  
@HWI-EAS443:3:77:777:400#0/1  
CTTGGGAATATCTCAAACCTTTCAAATGATGACTGAG  
+HWI-EAS443:3:77:777:400#0/1  
a`^aabbab\_]`bb¥aab`babbab^aa`abb\_baUbab  
@HWI-EAS443:3:7:1166:1902#0/1  
CTCAGTGCATCATTTGAAAGTTTGAGATATCCCCAAG  
+HWI-EAS443:3:7:1166:1902#0/1  
ababbabaabbabbbbbbbaaabbabbbabab`ZX]aaa  
@HWI-EAS443:3:81:1038:1029#0/1  
GGGAATATCTCAAACCTTTCAAATGATGACTGAGCTC  
+HWI-EAS443:3:81:1038:1029#0/1  
^a`aa^ba]`\_^a¥`\_^¥^aa\_XY`aaa^`aa]\_a`¥[U  
@HWI-EAS443:3:82:125:432#0/1  
GGGAATATCTCAAACCTTTCAAATGATGACTGAGCTC  
+HWI-EAS443:3:82:125:432#0/1  
aaaa`\_`aaaaabaaa`a`aaa`aa`\_aa`\_a`a\_a\_\_`  
@HWI-EAS443:3:83:254:1871#0/1  
GGGAATATCTCAAACCTTTCAAATGATGACTGAGCTC  
+HWI-EAS443:3:83:254:1871#0/1  
¥Z\_aa`\_Xaaa\_\_¥U\_\_[W`aa`^Y\_]````\_[]\_\_aZ`  
@HWI-EAS443:3:84:1169:403#0/1  
GGGAATATCTCAAACCTTTCAAATGATGACTGAGCTC  
+HWI-EAS443:3:84:1169:403#0/1  
\_abbaabbbVa`^a^Q\_^^`\_a`\_]`^`aaa¥aaba¥Ya`  
@HWI-EAS443:3:89:861:1825#0/1  
GGGAATATCTCAAACCTTTCAAATGATGACTGAGCTC  
+HWI-EAS443:3:89:861:1825#0/1  
aaaa`aWW\_a[bb]aaaaabaaaa\_[^a]\_a`a^a\_a`\_\_  
@HWI-EAS443:3:8:1121:2043#0/1  
CTTGGGAATATCTCAAACCTTTCAAATGATGACTGAG  
+HWI-EAS443:3:8:1121:2043#0/1  
^^bb\_a^^bbbbbVbbbb`^^b`bb¥bbbbbbb]baabbb  
@HWI-EAS443:3:8:152:547#0/1  
CTTGGGAATATCTCAAACCTTTCAAATGATGACTGAG  
+HWI-EAS443:3:8:152:547#0/1  
abbbabbY`babaabaa\_a`aa`aa`aa\_aaaa\_\_\_\_\_`  
@HWI-EAS443:3:8:66:364#0/1  
CTTGGGAATATCTCAAACCTTTCAAATGATGACTGAG  
+HWI-EAS443:3:8:66:364#0/1  
abababaa]\_^aa\_aaaaaa¥`\_]`[a]`\_\_a\_\_a`¥aa\_  
@HWI-EAS443:3:90:833:228#0/1  
GCTCAGTGCATCATTTGAAAGTTTGAGATATCCCCAA  
+HWI-EAS443:3:90:833:228#0/1  
a]baaa`b^¥aa\_aabab```aa]`aa\_a]`aa[`¥\_]```  
@HWI-EAS443:3:94:1303:45#0/1  
GGGAATATCTCAAACCTTTCAAATGATGACTGAGCTCA

+HWI-EAS443:3:94:1303:45#0/1  
aZRYM^Y\_GU^`¥YTWY]^0[]`\_\_UVZ]SWOQXNYNXHL  
@HWI-EAS443:3:95:482:570#0/1  
GGGGAATATCTCAAACCTTTCAAATGATGACACTGAGCTC  
+HWI-EAS443:3:95:482:570#0/1  
^baVTaa\_\_b\_abb¥a\_bbaabaa`aaaab`a\_Ya`a`\_]\_  
@HWI-EAS443:3:95:541:112#0/1  
AGCTCAGTGTTCATCATTGAAAGTTTGAGATATCCCCA  
+HWI-EAS443:3:95:541:112#0/1  
aaaa\_ab`a`aa^\_baaa\_`b\_]`aa`a`\_aa^\_]\_]\_  
@HWI-EAS443:3:97:1526:609#0/1  
CTTGGGGAATATCTCAAACCTTTCAAATGATGACACTGAG  
+HWI-EAS443:3:97:1526:609#0/1  
aabb\_`babbabaaabbbbaabbb\_\_aabaaaaaaaa`aa  
@HWI-EAS443:3:98:792:797#0/1  
CTTGGGGAATATCTCAAACCTTTCAAATGATGACACTGAG  
+HWI-EAS443:3:98:792:797#0/1  
abbbbbba`babbbbbbaabbbabaabbbabbbb`abab  
@HWI-EAS443:3:99:1100:625#0/1  
GGGGAATATCTCAAACCTTTCAAATGATGACACTGAGCTC  
+HWI-EAS443:3:99:1100:625#0/1  
a\_]\_PXa]FYU`Zaa¥SX`a\_a`\_`\_Z[\_`\_]Yaa\_^H\_]\_  
@HWI-EAS443:3:99:565:1161#0/1  
CTTGGGGAATATCTCAAACCTTTCAAATGATGACACTGAG  
+HWI-EAS443:3:99:565:1161#0/1  
abbbbbbb[`\_¥a`^aaabaTaaba`aba`b`\_`^a\_\_a\_a  
@HWI-EAS443:3:100:1412:263#0/1  
AAAGCGCAAACCCAGAAGATTTGTCCTTCCAGGGGCGCGG  
+HWI-EAS443:3:100:1412:263#0/1  
a¥XXGa]a¥N¥¥KaQX\_X^KO`BBBBBBBBBBBBBBBBB  
@HWI-EAS443:3:38:1230:1098#0/1  
GATCCCAGAATGTGTTCTCTAATGCAAGTTCAANACTTC  
+HWI-EAS443:3:38:1230:1098#0/1  
^\_b]b]baabaaa\_Y¥aba^]aababZ^bYXR`[DX]a\_[  
@HWI-EAS443:3:86:1044:1430#0/1  
GAAGTGTGAACCTTGCATTAGAGAACACATTCNGGGATC  
+HWI-EAS443:3:86:1044:1430#0/1  
`a\_\_OXs`Y`aM`\_aaaa^a\_aZ[`aXa`]ZDW`\_]`¥  
@HWI-EAS443:3:8:1371:1656#0/1  
AATGGATCCCAGAATGTGTTCTCTAATGCAAGTTCAAAA  
+HWI-EAS443:3:8:1371:1656#0/1  
abVMTZV\_RL¥[WR`a`L^VWb^`\_^aaY`XXa]`HX[HQ  
@HWI-EAS443:3:80:123:1287#0/1  
CCGACCTTCTGGGAAGTGTGAACCTTGCATTAGAGAACA  
+HWI-EAS443:3:80:123:1287#0/1  
^HLX\_^V\_a`[\_\_\_[[\_T^U[¥UVV\_¥¥\_a`W\_\_`¥\_¥W\_  
@HWI-EAS443:3:64:922:1244#0/1  
GTCCCAGAATGTGTTCTCTAATGCAAGTTCAACACTTCC  
+HWI-EAS443:3:64:922:1244#0/1  
a`aa`aaaaba\_a`aa`a`\_`aaa\_\_Zaaa\_\_a`\_\_^



@HWI-EAS443:3:8:1248:859#0/1  
GTGTTCTCTAATGCAAGTTCAACTTCCCAGAAGGTCT  
+HWI-EAS443:3:8:1248:859#0/1  
\_P\_XZ^a\_a`Z`aX^\_\_[\_Q]¥S[V[[YNVNZ[U\_SNOB  
@HWI-EAS443:3:13:1335:379#0/1  
GTTGAACCTTGCATTAGAGAACACATTCTGGGATCCATTC  
+HWI-EAS443:3:13:1335:379#0/1  
a^b`a]\_`^`\_a\_]aX\_]\_Y]X^`^U\_\_^XXUY]\_^W  
@HWI-EAS443:3:1:956:1656#0/1  
GATCCCAGAATGTGTTCTCTAATGCAAGTTCAACTTC  
+HWI-EAS443:3:1:956:1656#0/1  
a`a0^Z`\_`^aV`^`X\_Ya``\_Z^`\_VNTV\_\_Z^BBB  
@HWI-EAS443:3:22:1030:369#0/1  
AGAATGTGTTCTCTAATGCAAGTTCAACTTCCCAGAA  
+HWI-EAS443:3:22:1030:369#0/1  
ab\_`bb[ba`aabaaaaa]`a\_``aa^`\_a\_\_`^^`\_\_  
@HWI-EAS443:3:23:937:1412#0/1  
GAAGTGTGAACCTTGCATTAGAGAACACATTCTGGGATC  
+HWI-EAS443:3:23:937:1412#0/1  
a]YaZ`\_a\_Y¥`Z`a`aaaa`]a`b^a`\_a\_a]`a^\_  
@HWI-EAS443:3:24:405:167#0/1  
GGATCCCAGAATGTGTTCTCTAATGCAAGTTCAACTT  
+HWI-EAS443:3:24:405:167#0/1  
a¥^LR`\_GPHMW]MXRa\_]T\_^U[Z^¥\_T^W[^Z¥QWYWB  
@HWI-EAS443:3:26:588:707#0/1  
CCAGAATGTGTTCTCTAATGCAAGTTCAACTTCCCAG  
+HWI-EAS443:3:26:588:707#0/1  
`a¥b`bb]Nababaaaaabaa`baa`aababb``aa\_a\_  
@HWI-EAS443:3:33:528:369#0/1  
CCCAGAATGTGTTCTCTAATGCAAGTTCAACTTCCCA  
+HWI-EAS443:3:33:528:369#0/1  
abb`ab`bb`babbaaaaaabaaaW`aba¥\_`]^\_\_`  
@HWI-EAS443:3:33:771:745#0/1  
AGAATGTGTTCTCTAATGCAAGTTCAACTTCCCAGAA  
+HWI-EAS443:3:33:771:745#0/1  
¥abb\_^]bbbaa]ab\_abbabab\_ab\_baaaa\_^a[\_aaa  
@HWI-EAS443:3:3:1367:1421#0/1  
ATCCCAGAATGTGTTCTCTAATGCAAGTTCAACTTCC  
+HWI-EAS443:3:3:1367:1421#0/1  
a`bWaab`[abWa\_a`aaaa`0aaaY`X`^\_\_a]^`[X  
@HWI-EAS443:3:42:1543:1480#0/1  
GACCTTCTGGGAAGTGTGAACCTTGCATTAGAGAACACA  
+HWI-EAS443:3:42:1543:1480#0/1  
a¥SNU`¥``]a]¥aYya\_ZY`]UT[`\_aa`\_a]`]aTaZZ  
@HWI-EAS443:3:42:988:902#0/1  
CCCAGAATGTGTTCTCTAATGCAAGTTCAACTTCCCA  
+HWI-EAS443:3:42:988:902#0/1  
abbaaabbbababbbbaa`aaaa`a¥abaaaa\_a`aa\_\_  
@HWI-EAS443:3:43:1105:950#0/1  
CAGAATGTGTTCTCTAATGCAAGTTCAACTTCCCAGA

+HWI-EAS443:3:43:1105:950#0/1  
abbbbbbabbbbbbabbbbabbbabababbbbaaa`ab`  
@HWI-EAS443:3:48:1684:2032#0/1  
GGATCCCAGAATGTGTTCTCTAATGCAAGGTTCAACACTT  
+HWI-EAS443:3:48:1684:2032#0/1  
aa^aa`Q````\_`a\_bRaaa\_¥\_[ ]U]a\_^¥RZZ¥\_U`S¥^  
@HWI-EAS443:3:4:1107:91#0/1  
AATGTGTTCTCTAATGCAAGGTTCAACACTTCCCAGAAGG  
+HWI-EAS443:3:4:1107:91#0/1  
aabbbaa`a`b`abaab\_\_^b\_aSTaH`\_aa\_N`[a]Za\_  
@HWI-EAS443:3:50:489:1678#0/1  
ATCCCAGAATGTGTTCTCTAATGCAAGGTTCAACACTTCC  
+HWI-EAS443:3:50:489:1678#0/1  
ab`aaaaaa\_bab`aaa`aaa````\_aaZ````aU`^`\_\_\_\_  
@HWI-EAS443:3:51:1123:38#0/1  
CCAGAATGTGTTCTCTAATGCAAGGTTCAACACTTCCCAG  
+HWI-EAS443:3:51:1123:38#0/1  
abbbbabbbbabbbbababababaaaaaaaaaaaaaaaa`\_aa  
@HWI-EAS443:3:54:989:918#0/1  
GAATGTGTTCTCTAATGCAAGGTTCAACACTTCCCAGAAG  
+HWI-EAS443:3:54:989:918#0/1  
a`\_ba]]aa]a`aa\_a\_]a¥`]¥\_\_`\_¥a`^`^^W^]]^^]  
@HWI-EAS443:3:59:24:104#0/1  
GATCCCAGAATGTGTTCTCTAATGCAAGGTTCAACACTTC  
+HWI-EAS443:3:59:24:104#0/1  
aaa`[\_a\_\_\_\_a\_`\_`T`\_`[R`\_\_XNZ^W¥V¥\_YYW¥¥T  
@HWI-EAS443:3:61:1177:893#0/1  
ATCCCAGAATGTGTTCTCTAATGCAAGGTTCAACACTTCC  
+HWI-EAS443:3:61:1177:893#0/1  
aaa`]\_a`^aa\_a¥`\_aaba\_aa`aU`aY`\_a¥¥^`\_^WT  
@HWI-EAS443:3:63:133:278#0/1  
AGAATGTGTTCTCTAATGCAAGGTTCAACACTTCCCAGAA  
+HWI-EAS443:3:63:133:278#0/1  
]\_QVV`X\_Za\_Z`aUWZYU^[WZ`Y^^\_[UV¥aa¥GH^TG  
@HWI-EAS443:3:64:732:1880#0/1  
TTCTGGGAAGTGTGAACTTGCATTAGAGAACACATTCT  
+HWI-EAS443:3:64:732:1880#0/1  
aa\_a`a]`a`^a\_a^`aa]ZW^`a\_\_a]\_]\_\_\_\_\_V^S  
@HWI-EAS443:3:67:1317:1300#0/1  
AGAATGTGTTCTCTAATGCAAGGTTCAACACTTCCCAGAA  
+HWI-EAS443:3:67:1317:1300#0/1  
ab\_aabab\_a^a`aa^a`aa¥a`¥aaaa\_a¥\_\_¥`¥```¥  
@HWI-EAS443:3:68:1341:1240#0/1  
GGATCCCAGAATGTGTTCTCTAATGCAAGGTTCAACACTT  
+HWI-EAS443:3:68:1341:1240#0/1  
¥\_b`abb````\_bba`bbabbbb`babUb\_FZabbbbaa\_  
@HWI-EAS443:3:68:434:1545#0/1  
GACCTTCTGGGAAGTGTGAACTTGCATTAGAGAACACA  
+HWI-EAS443:3:68:434:1545#0/1  
ab`bbbbbb^`Vba`ababbaabab`abaaa`bb`a\_abb

@HWI-EAS443:3:69:1030:655#0/1  
CTGGGAAGTGTGAACCTTGCATTAGAGAACACATTCTGG  
+HWI-EAS443:3:69:1030:655#0/1  
aba`b\_ab\_babbaaaaaabaababa`aa`aba`a\_`aa\_  
@HWI-EAS443:3:69:1286:74#0/1  
CCAGAATGTGTTCTCTAATGCAAGGTTCAACACTTCCCAG  
+HWI-EAS443:3:69:1286:74#0/1  
S\_\_`M^[`ba`K¥b¥WR¥[b]ba^babaabTbbb]\_S\_bb  
@HWI-EAS443:3:69:725:995#0/1  
AATGTGTTCTCTAATGCAAGGTTCAACACTTCCCAGAAGG  
+HWI-EAS443:3:69:725:995#0/1  
]`R¥Z``¥aaa\_aa[]]a¥H[X\_baRXa`]Z\_`a`YXKZR  
@HWI-EAS443:3:6:1475:379#0/1  
GACCTTCTGGGAAGTGTGAACCTTGCATTAGAGAACACA  
+HWI-EAS443:3:6:1475:379#0/1  
aa^\_aa\_aaa\_^\_a^a`aa\_\_Y]^^^]\_`\_^^`]^]\_Y^  
@HWI-EAS443:3:70:1034:1930#0/1  
CAGAATGTGTTCTCTAATGCAAGGTTCAACACTTCCCAGA  
+HWI-EAS443:3:70:1034:1930#0/1  
`b]¥\_aP`Vaa^a`aXTU\_`a\_\_[¥aaaaabXP[]]¥`^Y  
@HWI-EAS443:3:70:1746:992#0/1  
TGGGAAGTGTGAACCTTGCATTAGAGAACACATTCTGGG  
+HWI-EAS443:3:70:1746:992#0/1  
aaabbbbaa`abbbbaabbbbaabbbababbaabbaaaaa`a`  
@HWI-EAS443:3:72:1428:1886#0/1  
AGAATGTGTTCTCTAATGCAAGGTTCAACACTTCCCAGAA  
+HWI-EAS443:3:72:1428:1886#0/1  
abZa`b\_baaaa`bbaab`a`¥]\_`[aa`aa`a¥^¥a\_`\_  
@HWI-EAS443:3:72:1617:1356#0/1  
CCCAGAATGTGTTCTCTAATGCAAGGTTCAACACTTCCCA  
+HWI-EAS443:3:72:1617:1356#0/1  
aaaaaaabb\_babaaaaa¥aa`aZaa¥a\_aa`aaa``\_^\_  
@HWI-EAS443:3:78:1649:720#0/1  
CAGAATGTGTTCTCTAATGCAAGGTTCAACACTTCCCAGA  
+HWI-EAS443:3:78:1649:720#0/1  
a`^Ua\_Z\_a^\_^]Z¥\_^NU]`^\_`T^]b`aba\_UWX[Q^^  
@HWI-EAS443:3:79:1637:1419#0/1  
GGAATGGATCCCAGAATGTGTTCTCTAATGCAAGGTTCAA  
+HWI-EAS443:3:79:1637:1419#0/1  
`a^\_abbbab¥^`a^a`^¥a]a¥aaaa]``X¥a^`I^Uaa  
@HWI-EAS443:3:81:105:784#0/1  
CAGAATGTGTTCTCTAATGCAAGGTTCAACACTTCCCAGA  
+HWI-EAS443:3:81:105:784#0/1  
a^RVS[aS^]`a^`a^U`\_a`Q``\_\_aaa¥```\_\_¥Q`\_X  
@HWI-EAS443:3:81:1207:532#0/1  
CCCAGAATGTGTTCTCTAATGCAAGGTTCAACACTTCCCA  
+HWI-EAS443:3:81:1207:532#0/1  
a^abb]bbba``bbbabbaabaaaa`\_baabab\_ba\_a\_a  
@HWI-EAS443:3:81:879:254#0/1  
CCAGAATGTGTTCTCTAATGCAAGGTTCAACACTTCCCAG

+HWI-EAS443:3:81:879:254#0/1  
abYVWR¥ZM\_aabbbZ]R\_`P`aaXaaW[\_LWXZbX\_a`  
@HWI-EAS443:3:84:132:1549#0/1  
AATGTGTTCTCTAATGCAAGTTCAACACTTCCCAGAAGG  
+HWI-EAS443:3:84:132:1549#0/1  
aa`\_Y]``aaaa`]^`QZ^U\_\_Z``\_\_a\_\_V¥\_\_¥  
@HWI-EAS443:3:86:1366:1474#0/1  
AGAATGTGTTCTCTAATGCAAGTTCAACACTTCCCAGAA  
+HWI-EAS443:3:86:1366:1474#0/1  
abbbbaabab`b\_bbbbb[babaTaaaaabaaa`\_aaaa`  
@HWI-EAS443:3:87:1656:1657#0/1  
ATCCCAGAATGTGTTCTCTAATGCAAGTTCAACACTTCC  
+HWI-EAS443:3:87:1656:1657#0/1  
a^VYVaa\_bbb`\_V\_Pa\_aa`\_a\_\_a¥G`^`\_`a`\_^YV  
@HWI-EAS443:3:88:1076:700#0/1  
CCAGAATGTGTTCTCTAATGCAAGTTCAACACTTCCCAG  
+HWI-EAS443:3:88:1076:700#0/1  
aaabaabb`aaaababaaaaa``\_[aaaaZ``aa\_\_`^`  
@HWI-EAS443:3:96:1147:1406#0/1  
CAGAATGTGTTCTCTAATGCAAGTTCAACACTTCCCAGA  
+HWI-EAS443:3:96:1147:1406#0/1  
abab`bb[bbaabbababa`baa`^a`\_aXa\_aa\_a`aaa  
@HWI-EAS443:3:9:857:805#0/1  
CCAGAATGTGTTCTCTAATGCAAGTTCAACACTTCCCAG  
+HWI-EAS443:3:9:857:805#0/1  
ab]a`\_a^E^^`a`a``aa`\_aa\_X\_Y^a\_a\_]\_\_[T`\_  
@HWI-EAS443:3:100:236:73#0/1  
CAGACCTTCTGGGAAGTGTGAACTTGCATTAGAGAACA  
+HWI-EAS443:3:100:236:73#0/1  
aaaa`aaa`\_baaW\_]HaS`¥[QN[``XO`^^SZ`^^BB  
@HWI-EAS443:3:10:717:1035#0/1  
CAGACCTTCTGGGAAGTGTGAACTTGCATTAGAGAACA  
+HWI-EAS443:3:10:717:1035#0/1  
aa\_¥bbbbaa]`[`baP^abb^baaa`aabaabba`aaaa  
@HWI-EAS443:3:14:974:2034#0/1  
CAGACCTTCTGGGAAGTGTGAACTTGCATTAGAGAACA  
+HWI-EAS443:3:14:974:2034#0/1  
`aaW\_Y]``]``\_aWba^aSb^a^P\_a^]¥a\_^]JaYa^\_\_  
@HWI-EAS443:3:31:27:870#0/1  
CAGACCTTCTGGGAAGTGTGAACTTGCATTAGAGAACA  
+HWI-EAS443:3:31:27:870#0/1  
ababab``aab\_¥\_a\_X`\_\_aa`aaaaaaaa]a`^aa`  
@HWI-EAS443:3:39:1162:564#0/1  
TGTTCTCTAATGCAAGTTCAACACTTCCCAGAAGGTCTG  
+HWI-EAS443:3:39:1162:564#0/1  
a`aaaaaa\_aaaa\_]aaU`a`a`\_`a^a^^[[[[`^WU^  
@HWI-EAS443:3:3:141:96#0/1  
CAGACCTTCTGGGAAGTGTGAACTTGCATTAGAGAACA  
+HWI-EAS443:3:3:141:96#0/1  
aV]bbXL¥aaaa\_]¥VH]]a[¥a\_]`\_b^```]`YXTBBBB

@HWI-EAS443:3:62:1031:972#0/1  
CAGACCTTCTGGGAAGTGTGAACCTTGCATTAGAGAACA  
+HWI-EAS443:3:62:1031:972#0/1  
`^a`b^aaa^aaa\_00Taa\_U\_a\_[XU^`Raa]`\_Wa]a  
@HWI-EAS443:3:65:427:1040#0/1  
CAGACCTTCTGGGAAGTGTGAACCTTGCATTAGAGAACA  
+HWI-EAS443:3:65:427:1040#0/1  
aaaaa`aaa`^\_a\_\_a^aaaa`a\_a\_]\_\_`^`[^\_\_\_\_^`  
@HWI-EAS443:3:86:796:1456#0/1  
CAGACCTTCTGGGAAGTGTGAACCTTGCATTAGAGAACA  
+HWI-EAS443:3:86:796:1456#0/1  
aa`¥aaaa`ab]¥]``Sa\_aa^aYS^`a``\_\_`¥`\_^`]  
@HWI-EAS443:3:9:1009:1812#0/1  
CAGACCTTCTGGGAAGTGTGAACCTTGCATTAGAGAACA  
+HWI-EAS443:3:9:1009:1812#0/1  
Zaba]`bbbbaba\_bb]b^b`abb[aYa\_b`baaabb`a`  
@HWI-EAS443:3:87:1361:1318#0/1  
ATAATCACTNAGTTTGAGTTCAGTGCACATTTGGATGTAG  
+HWI-EAS443:3:87:1361:1318#0/1  
ab`baab`]DQa\_aaaa`X`\_`\_a`\_`\_aa``]a`dWa\_  
@HWI-EAS443:3:23:622:594#0/1  
GTTCTCTAATGCAAGTTCAACACTTCCCAGAAGGTCTGG  
+HWI-EAS443:3:23:622:594#0/1  
aababb]bb\_Z`a]b`Yabbaaaaaa\_``a``dWN¥aa\_  
@HWI-EAS443:3:58:1217:1678#0/1  
GTTCTCTAATGCAAGTTCAACACTTCCCAGAAGGTCTGG  
+HWI-EAS443:3:58:1217:1678#0/1  
aYa[``]a`^\_]\_a]]]T]M`^¥`WUV^YV^`¥¥^ZUS\_ZU  
@HWI-EAS443:3:93:262:280#0/1  
CCAGACCTTCTGGGAAGTGTGAACCTTGCATTAGAGAACA  
+HWI-EAS443:3:93:262:280#0/1  
aaaaaaaa`aTaa]KHTU`U`a^TUYYS^]\_aU\_\_^]Y]¥  
@HWI-EAS443:3:43:1030:598#0/1  
ATCATAATCACTAAGTTTGAGTTCAGTGCACATTTGGATG  
+HWI-EAS443:3:43:1030:598#0/1  
X``\_^\_b`a`aa]\_```bba`aa`^^aaaaaaaaaa]aaa  
@HWI-EAS443:3:47:502:446#0/1  
AAAAGCGAAAGCAGGTACTGATCCAAAATGGAAGGCTTTG  
+HWI-EAS443:3:47:502:446#0/1  
a`a`b``\_^`aaaa^a\_`a\_a^b^\_\_\_\_]]YUX^[[^`^  
@HWI-EAS443:3:97:1679:1901#0/1  
CGAAAGCAGGTACTGATCCNAAATGGAAGGCTTTGTGCGA  
+HWI-EAS443:3:97:1679:1901#0/1  
abaabb]abb\_baaba`aND[aaabaaaaaWaaab\_a¥a\_  
@HWI-EAS443:3:9:338:618#0/1  
CGAAAGCAGGTACTGATCCAAANATGGAAGGCTTTGTGCGA  
+HWI-EAS443:3:9:338:618#0/1  
aa]a`Z]`Y]U``^a``V^a[DUaa¥a\_`[U¥^\_\_^\_S]\_  
@HWI-EAS443:3:23:372:1468#0/1  
GCGCGAAAGCAGGTACTGATCCAAAATGGAAGGCTTTGTG

+HWI-EAS443:3:23:372:1468#0/1  
aa]]¥\_ZZZ^\_]VRa^¥¥]\_[`a¥N^\_AZ`XYV[ZYSVWZ  
@HWI-EAS443:3:3:1375:1320#0/1  
GGCGAAAGCAGGTACTGATCCAAAATGGAAGGCTTTGTGT  
+HWI-EAS443:3:3:1375:1320#0/1  
a`K\_aJOM\_]VXL]aab]OLGT[aJT\_WHUabX¥\_S\_W\_V  
@HWI-EAS443:3:18:1375:1804#0/1  
CGCGAAAGCAGGTACTGATCCAAAATGGAAGGCTTTGTGC  
+HWI-EAS443:3:18:1375:1804#0/1  
aZa^T`aa``a\_aa\_aa`a\_aa`\_`\_Y`\_^``a^a]^]  
@HWI-EAS443:3:23:1712:2023#0/1  
CAGCGAAAGCAGGTACTGATCCAAAATGGAAGGCTTTGTG  
+HWI-EAS443:3:23:1712:2023#0/1  
a`aa\_ab`\_]R[\_aS]baaUYa\_¥a¥\_^a]`SDS`a`V¥  
@HWI-EAS443:3:28:1616:417#0/1  
CGCGAAAGCAGGTACTGATCCAAAATGGAAGGCTTTGTGC  
+HWI-EAS443:3:28:1616:417#0/1  
ab`bb`bbaabaaaabbbb`abba`baababba\_bbbaaX  
@HWI-EAS443:3:28:528:1227#0/1  
GGCGAAAGCAGGTACTGATCCAAAATGGAAGGCTTTGTGC  
+HWI-EAS443:3:28:528:1227#0/1  
Vbabba]]bba^Xbababbbababbabbaa\_V``bb``ab  
@HWI-EAS443:3:39:334:365#0/1  
GGCGAAAGCAGGTACTGATCCAAAATGGAAGGCTTTGTGC  
+HWI-EAS443:3:39:334:365#0/1  
a\_\_^QOQZ¥^^\_V`aWaV\_a]\_\_¥\_]SQ`ZN]Y\_YX]UVY  
@HWI-EAS443:3:43:906:152#0/1  
CGCGAAAGCAGGTACTGATCCAAAATGGAAGGCTTTGTGC  
+HWI-EAS443:3:43:906:152#0/1  
`\_\_\_\_Sa]`Z]^UH`WU`a`UR`UY¥\_b]VOXba``ba][¥  
@HWI-EAS443:3:55:846:1182#0/1  
CGCGAAAGCAGGTACTGATCCAAAATGGAAGGCTTTGTGC  
+HWI-EAS443:3:55:846:1182#0/1  
abbabbbb\_bbb]U¥b`b`b\_abb`Ubabaaababa`V  
@HWI-EAS443:3:80:634:858#0/1  
CGCGAAAGCAGGTACTGATCCAAAATGGAAGGCTTTGTGC  
+HWI-EAS443:3:80:634:858#0/1  
a``baaaaaaba\_aaaaa`aaa^^aa`\_aa]aaa\_a`^a^  
@HWI-EAS443:3:100:923:347#0/1  
AGCGAAAGCAGGTACTGATCCAAAATGGAAGGCTTTGTGC  
+HWI-EAS443:3:100:923:347#0/1  
aa]ba¥aba\_a`Ua]aaQ\_\_`[^\_\_\_\_`a\_^¥`]a``aY\_^  
@HWI-EAS443:3:13:1453:1672#0/1  
CGAAAGCAGGTACTGATCCAAAATGGAAGGCTTTGTGCGA  
+HWI-EAS443:3:13:1453:1672#0/1  
`baaaaa`a\_a`aaa`aa`aaaa]aa\_\_[¥`\_\_Xa]]\_  
@HWI-EAS443:3:22:280:1680#0/1  
GAAAGCAGGTACTGATCCAAAATGGAAGGCTTTGTGCGAC  
+HWI-EAS443:3:22:280:1680#0/1  
abbaa\_b\_QVbb\_Zaa`ab`\_[aa`aa\_aaW]\_a^`aaa\_

@HWI-EAS443:3:24:1148:364#0/1  
AGCGAAAGCAGGTACTGATCCAAAATGGAAGGCTTTGTGC  
+HWI-EAS443:3:24:1148:364#0/1  
ababab`a\_aab\_b\_a^aa^\_`aa`b]`aaa`^^`\_]`¥  
@HWI-EAS443:3:33:990:703#0/1  
AGCGAAAGCAGGTACTGATCCAAAATGGAAGGCTTTGTGC  
+HWI-EAS443:3:33:990:703#0/1  
a[K\_[FWbYY[0Q]\_`aa\_\_Yaa^]]aX^`XaRRV¥aSVS  
@HWI-EAS443:3:34:138:125#0/1  
AGCGAAAGCAGGTACTGATCCAAAATGGAAGGCTTTGTGC  
+HWI-EAS443:3:34:138:125#0/1  
`\_aaaaaaaa[a\_V`a`a`aa\_\_`a[^^\_NQ^\_^][YY]X  
@HWI-EAS443:3:38:1162:643#0/1  
AGCGAAAGCAGGTACTGATCCAAAATGGAAGGCTTTGTGC  
+HWI-EAS443:3:38:1162:643#0/1  
aaaa]`a`^`aV\_aaaa`Z\_aaa]``[aVQTU^`Z`X`0  
@HWI-EAS443:3:39:1578:1266#0/1  
GCGAAAGCAGGTACTGATCCAAAATGGAAGGCTTTGTGCG  
+HWI-EAS443:3:39:1578:1266#0/1  
aa`^aa`aa`\_a\_]Z\_\_`^[^\_\_a]\_[^\_QV]aZVYQU  
@HWI-EAS443:3:3:347:1247#0/1  
AGCGAAAGCAGGTACTGATCCAAAATGGAAGGCTTTGTGC  
+HWI-EAS443:3:3:347:1247#0/1  
\_bbbaabaabaR`a`^Sa^a\_Ua^a`^`^0\_^]`\_¥aW  
@HWI-EAS443:3:45:74:1127#0/1  
AGCGAAAGCAGGTACTGATCCAAAATGGAAGGCTTTGTGC  
+HWI-EAS443:3:45:74:1127#0/1  
a¥^^abaaaba`¥`¥]\_X[R^\_]^[\_]¥\_a``]`a¥a]¥Z  
@HWI-EAS443:3:45:810:1910#0/1  
AGCGAAAGCAGGTACTGATCCAAAATGGAAGGCTTTGTGC  
+HWI-EAS443:3:45:810:1910#0/1  
\_]aaabbbbaaUaa`aa^ZV]\_aaa]\_``^``\_``\_`¥  
@HWI-EAS443:3:49:1538:265#0/1  
CGAAAGCAGGTACTGATCCAAAATGGAAGGCTTTGTGCGA  
+HWI-EAS443:3:49:1538:265#0/1  
TY¥XX^X[RSaV]a`Xbaaa`\_a^^`X]]`a`a¥¥\_``  
@HWI-EAS443:3:50:982:328#0/1  
AGCGAAAGCAGGTACTGATCCAAAATGGAAGGCTTTGTGC  
+HWI-EAS443:3:50:982:328#0/1  
aba`bbbbbaba\_babbaaaa`aa\_aa`\_a\_a\_aaaa\_a`  
@HWI-EAS443:3:51:1015:1784#0/1  
CGAAAGCAGGTACTGATCCAAAATGGAAGGCTTTGTGCGA  
+HWI-EAS443:3:51:1015:1784#0/1  
`b\_b```bbaababaaabaa`aaaaaaaa¥a[ba]VXa]aa  
@HWI-EAS443:3:55:506:120#0/1  
AGCGAAAGCAGGTACTGATCCAAAATGGAAGGCTTTGTGC  
+HWI-EAS443:3:55:506:120#0/1  
Yab`aaaa\_ab`\_aaabbaabbaaaaaaaaaaaa`aaa\_a\_  
@HWI-EAS443:3:58:685:1524#0/1  
GCGAAAGCAGGTACTGATCCAAAATGGAAGGCTTTGTGCG

+HWI-EAS443:3:58:685:1524#0/1  
\_U``\_a¥\_a`Xaa\_aa`a`aaa`\_a``Y^`\_a`¥\_]\_  
@HWI-EAS443:3:65:1204:339#0/1  
AGCGAAAGCAGGTACTGATCCAAAATGGAAGGCTTTGTGC  
+HWI-EAS443:3:65:1204:339#0/1  
V¥aba`\_^bbba][`Y`^¥ab`YZ`]\_ZRaaaa]Z`\_  
@HWI-EAS443:3:66:1531:477#0/1  
GAAAGCAGGTACTGATCCAAAATGGAAGGCTTTGTGCGAC  
+HWI-EAS443:3:66:1531:477#0/1  
aX`a[a`a]`^aaYaa\_\_a\_\_a\_[P[ZWR¥XWV^XKUVU  
@HWI-EAS443:3:68:1193:352#0/1  
GCGAAAGCAGGTACTGATCCAAAATGGAAGGCTTTGTGCG  
+HWI-EAS443:3:68:1193:352#0/1  
aaba`aaabaa\_aa`aa`\_`a`ab`\_]\_\_\_\_\_`aY\_\_`  
@HWI-EAS443:3:69:1319:159#0/1  
CGAAAGCAGGTACTGATCCAAAATGGAAGGCTTTGTGCGA  
+HWI-EAS443:3:69:1319:159#0/1  
aba^`aa`aa[^`\_a]`\_`Z[aZ\_^`Z\_\_ZZZ^`W^Y\_Y  
@HWI-EAS443:3:75:1164:1024#0/1  
AGCGAAAGCAGGTACTGATCCAAAATGGAAGGCTTTGTGC  
+HWI-EAS443:3:75:1164:1024#0/1  
abb`¥aab`abaa`abbba`^`abba\_aaaa\_aba`\_]`  
@HWI-EAS443:3:78:326:550#0/1  
AGCGAAAGCAGGTACTGATCCAAAATGGAAGGCTTTGTGC  
+HWI-EAS443:3:78:326:550#0/1  
aabb`abbab`]aa`a\_\_aaa`aa`^`\_\_^`\_\_R]X  
@HWI-EAS443:3:80:1076:709#0/1  
CGAAAGCAGGTACTGATCCAAAATGGAAGGCTTTGTGCGA  
+HWI-EAS443:3:80:1076:709#0/1  
aabbaabbb`ab`ababa\_baabbaaaabb[aaaaa`\_`\_  
@HWI-EAS443:3:84:1024:1685#0/1  
GCGAAAGCAGGTACTGATCCAAAATGGAAGGCTTTGTGCG  
+HWI-EAS443:3:84:1024:1685#0/1  
^`b`a`]``Y`a`¥aa`baa`aaaa^aaa`^UUa^a  
@HWI-EAS443:3:8:823:620#0/1  
GAAAGCAGGTACTGATCCAAAATGGAAGGCTTTGTGCGAC  
+HWI-EAS443:3:8:823:620#0/1  
a^`a\_aa`]\_\_a^^Z\_\_^Z\_^a^^]\_^]]^`Y\_V\_]`  
@HWI-EAS443:3:96:1363:1747#0/1  
CGAAAGCAGGTACTGATCCAAAATGGAAGGCTTTGTGCGA  
+HWI-EAS443:3:96:1363:1747#0/1  
abbbaa`aba[bYbba\_Y]a`a\_\_aaa]XD[aaa¥aR`a  
@HWI-EAS443:3:96:510:210#0/1  
AGCGAAAGCAGGTACTGATCCAAAATGGAAGGCTTTGTGC  
+HWI-EAS443:3:96:510:210#0/1  
aaab`a`a`aa]a`\_`\_`[[^`\_^`\_a^^^`\_^^`\_]V^U  
@HWI-EAS443:3:98:732:363#0/1  
AGCGAAAGCAGGTACTGATCCAAAATGGAAGGCTTTGTGC  
+HWI-EAS443:3:98:732:363#0/1  
`b`\_Za^aaabXaaabaa`aa\_a\_\_aa`\_`\_a[ab`\_Y`S



@HWI-EAS443:3:9:137:1319#0/1  
GAAAGCAGGTACTGATCCAAAATGGAAGGCTTTGTGCGAC  
+HWI-EAS443:3:9:137:1319#0/1  
a`aaa\_\_^a^b`aaa`a\_a`\_\_\_\_a`^`\_`\_`^¥`\_]\_`¥  
@HWI-EAS443:3:9:872:923#0/1  
GAAAGCAGGTACTGATCCAAAATGGAAGGCTTTGTGCGAC  
+HWI-EAS443:3:9:872:923#0/1  
`¥^a[Z[HZ^SXa`aa\_[Y^X[^ZY`ZX^U`\_]YHDTV  
@HWI-EAS443:3:14:1604:515#0/1  
CGCTAGGGCGAAAGCAGGTCAAATATATTCAATATGGAGA  
+HWI-EAS443:3:14:1604:515#0/1  
ab`b^[[Sa¥aS]\_UQ`aIY¥\_`¥Ua][Z]]ZZX`]^TWZ  
@HWI-EAS443:3:46:1715:1246#0/1  
GCGAAAGCAGGTCAAATATATTCAATATGGAGAAACCCCA  
+HWI-EAS443:3:46:1715:1246#0/1  
][`[WU\_X`]VMX]]\_a¥[`aa]\_[a`YZa¥][¥]NZYY^  
@HWI-EAS443:3:84:772:161#0/1  
CGCGCGAAAGCAGGTCAAATATATTCAATTTGGAGAGAAT  
+HWI-EAS443:3:84:772:161#0/1  
a`ab\_aZ^¥b`aaa]aaaa`aaaa`\_`aaaa\_\_aZa^¥^  
@HWI-EAS443:3:27:1287:885#0/1  
GAGAAAGCGAAAGCAGGTCAAATATATTCAATATGGAGAG  
+HWI-EAS443:3:27:1287:885#0/1  
aaaaa`\_`baaaba\_aa`\_`aaaaaa`aa`\_`aaaa`^a\_a  
@HWI-EAS443:3:40:1017:1053#0/1  
GACCTGCGAAAGCAGGTCAAATATATTCAATATGGAGAGA  
+HWI-EAS443:3:40:1017:1053#0/1  
aaa`aa`aaa`\_`\_]\_aYa`]^a`\_\_\_\_[ZQX]¥[\_VZ`W`V  
@HWI-EAS443:3:6:312:748#0/1  
AAAAAGCGAAAGCAGGTCAAATATATTCAATATGGAGAG  
+HWI-EAS443:3:6:312:748#0/1  
aa`aa`\_`a`^a`^^\_aWZ]a\_a`\_a\_]`\_a\_aaXUaZ`  
@HWI-EAS443:3:59:1177:1807#0/1  
CGCGAAAGCAGGGCAAATATATTCAATATGGAGAGAATAA  
+HWI-EAS443:3:59:1177:1807#0/1  
abP`] ]^aaaa`MS`JaYXa`aaY`\_`a^TW[Y\_]Y\_^  
@HWI-EAS443:3:100:1778:920#0/1  
TCGCGCGAAAGCAGGTCAAATATATTCAATATGGAGAGAA  
+HWI-EAS443:3:100:1778:920#0/1  
aaba`abbbaaaaaU`baaaabaaaU\_\_aaaa^^`\_`a`a  
@HWI-EAS443:3:33:694:428#0/1  
CGCCAGCGAAAGCAGGTCAAATATATTCAATATGGAGAGA  
+HWI-EAS443:3:33:694:428#0/1  
abbabaaa^bbbabaa^abbaaaaaaa`aa`\_`a`^a^a\_  
@HWI-EAS443:3:37:99:444#0/1  
CGCCAGCGAAAGCAGGTCAAATATATTCAATATGGAGAGA  
+HWI-EAS443:3:37:99:444#0/1  
abba\_a`a^[]`a[a\_M`\_`aaaa`\_`^FY\_a^aa\_aYa`  
@HWI-EAS443:3:42:1730:1484#0/1  
GGACGCGAAAGCAGGTCAAATATATTCAATATGGAGAGAA

+HWI-EAS443:3:42:1730:1484#0/1  
``baaa`a\_\_aa`^a\_a\_aaba\_X`a\_a`b`a^¥^a\_a`\_  
@HWI-EAS443:3:45:1439:471#0/1  
CGCGGCGAAAGCAGGTCAAATATATTCAATATGGAGAGAA  
+HWI-EAS443:3:45:1439:471#0/1  
``Z^babZaaaaZWYFT^`aYZ¥a[¥¥[\_\_\_a\_T¥Q`Y`  
@HWI-EAS443:3:49:1607:550#0/1  
AGATGCGAAAGCAGGTCAAATATATTCAATATGGAGAGAA  
+HWI-EAS443:3:49:1607:550#0/1  
\_ba]`^a`^bbXY]aab\_]bab^baaaababba]`Ua¥a  
@HWI-EAS443:3:63:891:309#0/1  
GTCCGCGAAAGCAGGTCAAATATATTCAATATGGAGAGAA  
+HWI-EAS443:3:63:891:309#0/1  
a]aaa`a`a\_a`aa[aaa^`\_a\_a\_\_\_]a[`a\_^`¥\_\_\_  
@HWI-EAS443:3:70:639:1836#0/1  
CCCTGCGAAAGCAGGTCAAATATATTCAATATGGAGAGAA  
+HWI-EAS443:3:70:639:1836#0/1  
abaaaaabbb¥baa\_^aaaa`aaaaaaa`aa`]aa^]a  
@HWI-EAS443:3:75:140:1103#0/1  
GTCCGCGAAAGCAGGTCAAATATATTCAATATGGAGAGAA  
+HWI-EAS443:3:75:140:1103#0/1  
a[ba`aaaaabaaaa`aS\_Xa`]`^\_bZT^`aWYa`^¥ZR  
@HWI-EAS443:3:78:588:1122#0/1  
TGGAAGCGAAAGCAGGTCAAATATATTCAATATGGAGAGA  
+HWI-EAS443:3:78:588:1122#0/1  
aab^X¥aaaaQ[]`aa\_`aaaaaaa`\_aaaaaa`^a¥`\_  
@HWI-EAS443:3:10:902:265#0/1  
GCGAAAGCAGGGCAAATATATTCAATATGGAGAGAATAAA  
+HWI-EAS443:3:10:902:265#0/1  
aZVTKMUQY¥^UTVREMVVYXXUZVSVXVMXSVU[SYWY  
@HWI-EAS443:3:16:230:1318#0/1  
CGAAAGCAGGTCAATATATTCAATATGGAGAGAATAAAA  
+HWI-EAS443:3:16:230:1318#0/1  
ab`Z`aa`^\_P]E[\_`¥aaaa\_a^aaa\_a^¥\_S]ab`Ya  
@HWI-EAS443:3:37:1338:888#0/1  
AGCGAAAGCAGGGCAAATATATTCAATATGGAGAGAATAA  
+HWI-EAS443:3:37:1338:888#0/1  
a`ab`aab]S[`G`X[aX[a`aa\_a\_[\_PX[baa``^a]  
@HWI-EAS443:3:42:692:1761#0/1  
CGAAAGCAGGCCAAATATATTCAATATGGAGAGAATAAAA  
+HWI-EAS443:3:42:692:1761#0/1  
a`aa`abb`D[baaab^bb^\_b`aaab^^````\_aaa`a  
@HWI-EAS443:3:49:1421:197#0/1  
AGCGAAAGCAGGGCAAATATATTCAATATGGAGAGAATAA  
+HWI-EAS443:3:49:1421:197#0/1  
]SO\_QY]Y¥OYTH]][[[S\_STTYXP`YaVSS\_VSYN]VB  
@HWI-EAS443:3:60:642:571#0/1  
GCGAAAGCAGGTCAAATATATTCAATATGGAGAGTATAAA  
+HWI-EAS443:3:60:642:571#0/1  
aaa\_aXa^[\_aZa[``Y\_`aa\_\_^`\_aa`¥`¥\_Y\_^\_]\_

@HWI-EAS443:3:72:987:1874#0/1  
GCGAAAGCAGGCCAAATATATTCAATATGGAGAGAATAAAA  
+HWI-EAS443:3:72:987:1874#0/1  
aaU[L]aaaa]QY`a¥]aSY\_[\_aS\_YP]^)`S¥[Y\_\_^]  
@HWI-EAS443:3:89:964:250#0/1  
CGAAAGCAGGACAAATATATTCAATATGGAGAGAATAAAA  
+HWI-EAS443:3:89:964:250#0/1  
ababbbbabaXaabbbababaaaab`bbb\_b\_aa`aaa``  
@HWI-EAS443:3:24:569:1674#0/1  
CTCGCGAAAGCAGGTCAAATATATTCAATATGGAGAGAAT  
+HWI-EAS443:3:24:569:1674#0/1  
Y`^b`\_b`\_bab^V`babbbb\_bbbbb\_bbbba`aabbb\_  
@HWI-EAS443:3:32:466:783#0/1  
GACAGCGAAAGCAGGTCAAATATATTCAATATGGAGAGAA  
+HWI-EAS443:3:32:466:783#0/1  
abaaaa^)^aaaaa[aa`aa\_a\_[\_T¥^[``a\_`W\_X\_  
@HWI-EAS443:3:35:1189:41#0/1  
GGCAGCGAAAGCAGGTCAAATATATTCAATATGGAGAGAA  
+HWI-EAS443:3:35:1189:41#0/1  
```ab^b¥X\_a`^]aP^aaa```[]\_\_V`^^a`\_]`\_Y\_  
@HWI-EAS443:3:43:43:756#0/1  
CTCAGCGAAAGCAGGTCAAATATATTCAATATGGAGAGAA  
+HWI-EAS443:3:43:43:756#0/1  
a\_H`^¥V^^^aX\_]XQZ`^¥`a^]^^\_YQ`^`a`¥``a`Z  
@HWI-EAS443:3:49:344:838#0/1  
GCCAGCGAAAGCAGGTCAAATATATTCAATATGGAGAGAA  
+HWI-EAS443:3:49:344:838#0/1  
ab\_\_aabaaaaaa¥a\_aa`a`aa\_``¥[[a\_aa\_]``a^`  
@HWI-EAS443:3:49:71:1138#0/1  
GCGGCGAAAGCAGGTCAAATATATTCAATATGGAGAGAAT  
+HWI-EAS443:3:49:71:1138#0/1  
aaab`a¥``]aaa^\_\_a`a\_a\_aa\_`\_`\_aaa\_a\_a]a^  
@HWI-EAS443:3:53:1260:169#0/1  
GGCAGCGAAAGCAGGTCAAATATATTCAATATGGAGAGAA  
+HWI-EAS443:3:53:1260:169#0/1  
ababb^bb`bb\_aabaaaaabaaabb]`abaa``\_b\_aY^  
@HWI-EAS443:3:55:202:844#0/1  
GAGGCGAAAGCAGGTCAAATATATTCAATATGGAGAGAAT  
+HWI-EAS443:3:55:202:844#0/1  
a\_b`aaVLU\_a`aa¥aU`a`]b\_ba\_a\_b`a`bW^`Ua\_`  
@HWI-EAS443:3:58:1560:1841#0/1  
GGCGCGAAAGCAGGTCAAATATATTCAATATGGAGAGAAT  
+HWI-EAS443:3:58:1560:1841#0/1  
a]]`\_`^``¥GYa^U\_\_`T]V^]\_Z^W[]XX[ZWZZSWV^  
@HWI-EAS443:3:64:41:1655#0/1  
CAAAGCGAAAGCAGGTCAAATATATTCAATATGGAGAGAA  
+HWI-EAS443:3:64:41:1655#0/1  
a¥X¥]^\_a\_b`baZXX]\_b`aa`a[`a`¥a\_`]W¥\_\_\_W\_  
@HWI-EAS443:3:67:1413:1404#0/1  
CGAAGCGAAAGCAGGTCAAATATATTCAATATGGAGAGAA

+HWI-EAS443:3:67:1413:1404#0/1  
\_b¥¥abbb`ba¥aaaabbbbbbaabaa¥abb`Yab` `ab  
@HWI-EAS443:3:89:510:1881#0/1  
GCTGCGAAAGCAGGTCAAATATATTCAATATGGAGAGAAT  
+HWI-EAS443:3:89:510:1881#0/1  
aa\_]`¥Y^W¥]^¥ZW[a`\_` `a^a]aaa` `^0Za]^\_S^  
@HWI-EAS443:3:1:1088:740#0/1  
GAAAGCAGGTCAAATATATTCAATATGGANAGAATAAAAAG  
+HWI-EAS443:3:1:1088:740#0/1  
aaaaa`aa¥Vaba`aabaaa\_\_`b\_aa\_XDSa\_\_a`^`¥B  
@HWI-EAS443:3:23:1059:1042#0/1  
CGAAAGCAGGTNAAATATATTCAATATGGAGAGAATAAAA  
+HWI-EAS443:3:23:1059:1042#0/1  
a\_abbbbbba`SD^abbbb`babaab`bbaab`^[[baaab  
@HWI-EAS443:3:30:541:1043#0/1  
CGAAAGCAGGTCAAATATATTCANTATGGAGAGAATAAAA  
+HWI-EAS443:3:30:541:1043#0/1  
aabbbbbbb`]bb`b` `aaabYD¥aaa`\_a\_aa`¥a]`\_`  
@HWI-EAS443:3:69:1002:1992#0/1  
CGAAANCAGGTCAAATATATTCAATATGGAGAGAATAAAA  
+HWI-EAS443:3:69:1002:1992#0/1  
` `a\_]D]bbb\_bba^\_ba`baaa\_a`bba`a`\_a`\_` `bb  
@HWI-EAS443:3:78:515:282#0/1  
GCGAAAGCAGGTCAAANATATTCAATATGGAGAGAATAAA  
+HWI-EAS443:3:78:515:282#0/1  
aa`\_]abaaaa¥[ `a[D[¥` ` `^` `a`aaZa\_a\_` ` `^  
@HWI-EAS443:3:78:596:540#0/1  
CGAAAGCANGTCAAATATATTCAATATGGAGAGAATAAAA  
+HWI-EAS443:3:78:596:540#0/1  
ab¥ba`b^D]\_abbbb\_bbb` `a`babbbaaabaabaaa  
@HWI-EAS443:3:11:341:1914#0/1  
CGGCGAAAGCAGGTCAAATATATTCAATATGGAGAGAATA  
+HWI-EAS443:3:11:341:1914#0/1  
aaaaaa`aaaaa`]a`\_aaa\_`a`aa\_` ` `a`\_` `]\_`a  
@HWI-EAS443:3:16:1165:1364#0/1  
GCGCGAAAGCAGGTCAAATATATTCAATATGGAGAGAATA  
+HWI-EAS443:3:16:1165:1364#0/1  
abaaa`\_`baaa`]aa` `aaaaaaa`aa`aaa`a^a` ` `a  
@HWI-EAS443:3:20:659:337#0/1  
GCGCGAAAGCAGGTCAAATATATTCAATATGGAGAGAATA  
+HWI-EAS443:3:20:659:337#0/1  
a¥SR]QZSQ[[aWTVSMOVSVWFOYSOJNF^LL]SYPOYS  
@HWI-EAS443:3:25:869:1643#0/1  
GCGCGAAAGCAGGTCAAATATATTCAATATGGAGAGAATA  
+HWI-EAS443:3:25:869:1643#0/1  
a\_Ya]R`Y]Y\_]\_0]aaaS`\_`^` `^`\_[W^`¥X`WZ¥VX\_  
@HWI-EAS443:3:27:1461:858#0/1  
GCAGCGAAAGCAGGTCAAATATATTCAATATGGAGAGAAT  
+HWI-EAS443:3:27:1461:858#0/1  
aZaa\_baaaba`aaYaa`\_aaa\_a`\_`\_`a`aaaYa]a^^`\_`

@HWI-EAS443:3:27:1648:866#0/1  
CTGCGAAAGCAGGTCAAATATATTCAATATGGAGAGAATA  
+HWI-EAS443:3:27:1648:866#0/1  
]T\_UUP\_TG^¥SV`YIUUX[S¥Y^`QX¥GX¥XZX\_a¥V[]  
@HWI-EAS443:3:32:1176:90#0/1  
CTGCGAAAGCAGGTCAAATATATTCAATATGGAGAGAATA  
+HWI-EAS443:3:32:1176:90#0/1  
\_``]SNWYW`¥^aPP]aa`ab[`[XTORH`¥^M`N\_X[Z[  
@HWI-EAS443:3:33:1304:743#0/1  
GCGCGAAAGCAGGTCAAATATATTCAATATGGAGAGAATA  
+HWI-EAS443:3:33:1304:743#0/1  
a]^V]]YQTQRaXTV]]X]YWR¥¥¥¥X[X¥¥TTPR[NR]X  
@HWI-EAS443:3:37:1384:1117#0/1  
GCGCGAAAGCAGGTCAAATATATTCAATATGGAGAGAATA  
+HWI-EAS443:3:37:1384:1117#0/1  
a^b\_a¥aV`a`aaG¥\_[]a\_a\_aa\_a`a[aa]b\_[]a``  
@HWI-EAS443:3:42:733:911#0/1  
CGGCGAAAGCAGGTCAAATATATTCAATATGGAGAGAATA  
+HWI-EAS443:3:42:733:911#0/1  
aaabbaababaaa^\_baa`aaaaaa\_aabba\_b`a\_aa`  
@HWI-EAS443:3:46:1595:226#0/1  
CGGCGAAAGCAGGTCAAATATATTCAATATGGAGAGAATA  
+HWI-EAS443:3:46:1595:226#0/1  
`bbabTV^¥a`bbP\_a``baa`aaU\_\_a\_aaa]b^a^\_a^  
@HWI-EAS443:3:47:527:1071#0/1  
GGGCGAAAGCAGGTCAAATATATTCAATATGGAGAGAATA  
+HWI-EAS443:3:47:527:1071#0/1  
`b]¥[V^baaa`Naaa^aaaa`Z`aa`^^^^^]a`\_a\_  
@HWI-EAS443:3:54:1690:89#0/1  
CGGCGAAAGCAGGTCAAATATATTCAATATGGAGAGAATA  
+HWI-EAS443:3:54:1690:89#0/1  
ab`abbbbbbb^`babbabbbbabababaaab\_baabb  
@HWI-EAS443:3:66:1600:1083#0/1  
CAAGCGAAAGCAGGTCAAATATATTCAATATGGAGAGAAT  
+HWI-EAS443:3:66:1600:1083#0/1  
aaababaaabaaaaWaaaa`a\_aaaa`a`aa`^a\_aZ`\_  
@HWI-EAS443:3:67:701:1943#0/1  
ACCGAAAGCAGGTCAAATATATTCAATATGGAGAGAATA  
+HWI-EAS443:3:67:701:1943#0/1  
WF¥`^a`Y`YIS^a\_a`\_`aa`a`X¥a\_a\_W]T`Y^`\_aa  
@HWI-EAS443:3:72:373:1361#0/1  
CGGCGAAAGCAGGTCAAATATATTCAATATGGAGAGAATA  
+HWI-EAS443:3:72:373:1361#0/1  
aV\_ba¥aaaaaaa^\_\_ZX`a\_a`]^W^\_a\_[Z\_^a¥¥^\_  
@HWI-EAS443:3:95:1585:420#0/1  
GAAGCGAAAGCAGGTCAAATATATTCAATATGGAGAGAAT  
+HWI-EAS443:3:95:1585:420#0/1  
ab^¥^babbaa`b\_SabYba`ba`a]a`aa\_aa`bS``Ya  
@HWI-EAS443:3:21:1101:541#0/1  
GGCGAAAGCAGGTCAAATATATTCAATATGGAGAGAATA

+HWI-EAS443:3:21:1101:541#0/1  
`V\_a\_a`a`a]a`U`\_`\_`a^aW`a]^`\_`\_`a\_]aV`] ]^^\_  
@HWI-EAS443:3:28:48:634#0/1  
CGCGAAAGCAGGTCAAATATATTCAATATGGAGAGAATAA  
+HWI-EAS443:3:28:48:634#0/1  
aYa^Z\_Y¥aa\_aXaZ\_[^\_a`\_`\_]T]X[^]X¥[^`^¥^X[  
@HWI-EAS443:3:29:1055:330#0/1  
GGCGAAAGCAGGTCAAATATATTCAATATGGAGAGAATAA  
+HWI-EAS443:3:29:1055:330#0/1  
a`]aY^¥\_b[^\_IZ][¥a¥]\_Z]XRYX¥`\_]a\_\_`[\_BB  
@HWI-EAS443:3:33:1388:277#0/1  
GGCGAAAGCAGGTCAAATATATTCAATATGGAGAGAATAA  
+HWI-EAS443:3:33:1388:277#0/1  
ababaaaaaaaa]aaaa`a`aa\_\_\_\_`aa``]Z]\_Y^^\_^  
@HWI-EAS443:3:33:1529:1048#0/1  
GGCGAAAGCAGGTCAAATATATTCAATATGGAGAGAATAA  
+HWI-EAS443:3:33:1529:1048#0/1  
abbbbbbabab^b\_aaababbabbabaa`ab\_\_U[\_]a\_a`  
@HWI-EAS443:3:38:246:230#0/1  
GGCGAAAGCAGGTCAAATATATTCAATATGGAGAGAATAA  
+HWI-EAS443:3:38:246:230#0/1  
aaaZ^aa`aaaa]abba`a^a`aa\_\_a`aa\_[`]\_\_`\_`\_  
@HWI-EAS443:3:39:1397:533#0/1  
CGCGAAAGCAGGTCAAATATATTCAATATGGAGAGAATAA  
+HWI-EAS443:3:39:1397:533#0/1  
a`abbbbbabbabaaa`abababba\_]aabba]aa`aaba\_  
@HWI-EAS443:3:40:1036:321#0/1  
TGCGAAAGCAGGTCAAATATATTCAATATGGAGAGAATAA  
+HWI-EAS443:3:40:1036:321#0/1  
^babaaababaa[aba¥babaa``^Z\_\_a¥¥a`a`\_`\_`[  
@HWI-EAS443:3:40:865:613#0/1  
CGCGAAAGCAGGTCAAATATATTCAATATGGAGAGAATAA  
+HWI-EAS443:3:40:865:613#0/1  
abbb\_babbabbabbbaabaabaaa\_aaaa`b¥b¥[aaa  
@HWI-EAS443:3:42:1470:1827#0/1  
CGCGAAAGCAGGTCAAATATATTCAATATGGAGAGAATAA  
+HWI-EAS443:3:42:1470:1827#0/1  
^aY¥bbaaZabaU```bb^aaaa`b`babbbba\_b`aaaa  
@HWI-EAS443:3:44:1287:1820#0/1  
CAGCGAAAGCAGGTCAAATATATTCAATATGGAGAGAATA  
+HWI-EAS443:3:44:1287:1820#0/1  
a`abbbbbbbabb\_bbbbbbbbbbababbbbabababba  
@HWI-EAS443:3:44:904:2046#0/1  
NGCGAAAGCAGGTCAAATATATTCAATATGGAGAGAATAA  
+HWI-EAS443:3:44:904:2046#0/1  
DMVX[[[[[Y[[ZYZZ[[[V[[[[WYY[Z][Y[[ZY[[[[[[  
@HWI-EAS443:3:46:1376:803#0/1  
TGCGAAAGCAGGTCAAATATATTCAATATGGAGAGAATAA  
+HWI-EAS443:3:46:1376:803#0/1  
abaaababaabbV`a\_Y\_`aaaa`\_\_aabba\_a`b^`aaa

@HWI-EAS443:3:47:1736:132#0/1  
CGCGAAAGCAGGTCAAATATATTCAATATGGAGAGAATAA  
+HWI-EAS443:3:47:1736:132#0/1  
``a^ZQ[\_babaZZ¥]a`a`a\_V\_`a\_aaa^a]a]^`\_]  
@HWI-EAS443:3:53:1259:867#0/1  
TGCGAAAGCAGGTCAAATATATTCAATATGGAGAGAATAA  
+HWI-EAS443:3:53:1259:867#0/1  
¥`¥b\_YWaWS¥\_XP\_bbbaaa`aaaababb^aa`aaa`  
@HWI-EAS443:3:53:819:620#0/1  
GGCGAAAGCAGGTCAAATATATTCAATATGGAGAGAATAA  
+HWI-EAS443:3:53:819:620#0/1  
ab\_babababb\_bbbabbbbbbbaaababb`[baba`ba`  
@HWI-EAS443:3:54:970:1011#0/1  
CGCGAAAGCAGGTCAAATATATTCAATATGGAGAGAATAA  
+HWI-EAS443:3:54:970:1011#0/1  
abbababbaabb]abaa`aa\_aaaX]a\_baa\_b^a^`aaa  
@HWI-EAS443:3:61:1283:533#0/1  
CGCGAAAGCAGGTCAAATATATTCAATATGGAGAGAATAA  
+HWI-EAS443:3:61:1283:533#0/1  
\_bbbbbaabbb`bbbbbbbbba`b`bb]`a\_a`\_a`  
@HWI-EAS443:3:63:596:1168#0/1  
CGCGAAAGCAGGTCAAATATATTCAATATGGAGAGAATAA  
+HWI-EAS443:3:63:596:1168#0/1  
abab]`Xbb¥aa^aaZ^a\_aaaaa\_a\_aa\_\_a\_a^`aaa  
@HWI-EAS443:3:69:1332:1268#0/1  
TGCGAAAGCAGGTCAAATATATTCAATATGGAGAGAATAA  
+HWI-EAS443:3:69:1332:1268#0/1  
U[`\_[\_¥`bb¥]`[\_a\_a^^^a[`^\_b^¥`YP]abbab`]  
@HWI-EAS443:3:6:665:1850#0/1  
TGCGAAAGCAGGTCAAATATATTCAATATGGAGAGAATAA  
+HWI-EAS443:3:6:665:1850#0/1  
¥`bb[bbb`bb¥F\_b\_aaba^aba\_Saa¥abab`baaa]W  
@HWI-EAS443:3:6:75:1899#0/1  
CGCGAAAGCAGGTCAAATATATTCAATATGGAGAGAATAA  
+HWI-EAS443:3:6:75:1899#0/1  
a`bbb\_bba`a]H]bbbbab`baa^baabb¥`bbabbabb  
@HWI-EAS443:3:70:650:544#0/1  
CGCGAAAGCAGGTCAAATATATTCAATATGGAGAGAATAA  
+HWI-EAS443:3:70:650:544#0/1  
^\_a`¥\_S\_[NWa^`\_XX\_UV`aaaaY\_\_]^X]aYb^]`aa  
@HWI-EAS443:3:72:1437:415#0/1  
CGCGAAAGCAGGTCAAATATATTCAATATGGAGAGAATAA  
+HWI-EAS443:3:72:1437:415#0/1  
abbb`abb`bbaabbbbbbbbbba^abbbbbbabaab`bba  
@HWI-EAS443:3:73:1733:150#0/1  
GGCGAAAGCAGGTCAAATATATTCAATATGGAGAGAATAA  
+HWI-EAS443:3:73:1733:150#0/1  
ab`a`aaa^a\_a\_^aaaa`a`aa]`\_a`aa^]a]a[S\_\_\_\_  
@HWI-EAS443:3:74:1033:723#0/1  
CGCGAAAGCAGGTCAAATATATTCAATATGGAGAGAATAA

+HWI-EAS443:3:74:1033:723#0/1  
abbbb\_`ababb[ba` `a^abbbabbabb`bababbaa  
@HWI-EAS443:3:77:1369:194#0/1  
CAGCGAAAGCAGGTCAAATATATTCAATATGGAGAGAATA  
+HWI-EAS443:3:77:1369:194#0/1  
abb¥b`\_abbb`X`bbbaba`aaaaabaX`aaabaab`  
@HWI-EAS443:3:78:727:985#0/1  
GGCGAAAGCAGGTCAAATATATTCAATATGGAGAGAATAA  
+HWI-EAS443:3:78:727:985#0/1  
aabbb\_baaaa\_bbbbaababaa`^aabaa`aaa`aaaa  
@HWI-EAS443:3:81:618:546#0/1  
CGCGAAAGCAGGTCAAATATATTCAATATGGAGAGAATAA  
+HWI-EAS443:3:81:618:546#0/1  
ab]Z`J^`^^¥¥0¥\_¥\_Za`]X^`^¥]\_[`\_U`¥a]XZ]]  
@HWI-EAS443:3:85:1551:939#0/1  
CGCGAAAGCAGGTCAAATATATTCAATATGGAGAGAATAA  
+HWI-EAS443:3:85:1551:939#0/1  
`babVV]aX^`a`ab\_ab0ZZa^a\_\_`\_aaaX\_]\_KZ\_]\_  
@HWI-EAS443:3:85:1793:256#0/1  
NCGAAAGCAGGTCAAATATATTCAATATGGAGAGAATAAA  
+HWI-EAS443:3:85:1793:256#0/1  
DMSMMSTLSMTRRRVWXBBBBBBBBBBBBBBBBBBBBBBB  
@HWI-EAS443:3:86:319:1125#0/1  
TCTTCATGTACTCTTATTTTCAGTGTGGAGGTTGCCCG  
+HWI-EAS443:3:86:319:1125#0/1  
a]ab¥Y¥`a^` `aa`ba^`Za^a]W]a¥Za`^` `X[  
@HWI-EAS443:3:87:1114:1618#0/1  
TGCGAAAGCAGGTCAAATATATTCAATATGGAGAGAATAA  
+HWI-EAS443:3:87:1114:1618#0/1  
aa`aa`\_`aaaa[`aa`a` `aa`\_` `aa¥¥a\_a^`\_`\_`  
@HWI-EAS443:3:91:758:1455#0/1  
TGCGAAAGCAGGTCAAATATATTCAATATGGAGAGAATAA  
+HWI-EAS443:3:91:758:1455#0/1  
\_babbb`bbaaa\_aabbaabbbba\_\_babb^^]`a`^aa  
@HWI-EAS443:3:91:985:142#0/1  
TGCGAAAGCAGGTCAAATATATTCAATATGGAGAGAATAA  
+HWI-EAS443:3:91:985:142#0/1  
ab`aa` `a\_a`W\_aa`a`a` ` `Y`¥`a\_Y`]\_Z\_\_^]  
@HWI-EAS443:3:93:968:300#0/1  
AGCGAAAGCAGGTCAAATATATTCAATATGGAGAGAATAG  
+HWI-EAS443:3:93:968:300#0/1  
]bbbaa^Yba¥][a^ZRa]`\_baaY¥aI`\_¥`Ya]`T[a  
@HWI-EAS443:3:94:740:21#0/1  
CGCGAAAGCAGGTCAAATATATTCAATATGGAGAGAATAA  
+HWI-EAS443:3:94:740:21#0/1  
aa^bb`^`[a`^`QYSSQXZa]^`\_¥]T^^`W\_]a]TIV]  
@HWI-EAS443:3:100:1598:1296#0/1  
CGAAAGCAGGTCAAATATATTCAATATGGAGAGAATAAAA  
+HWI-EAS443:3:100:1598:1296#0/1  
`bbbbbbbabababbbbbb\_bbbbbbab]T]babbb`aa



@HWI-EAS443:3:10:1095:79#0/1  
CGAAAGCAGGTCAAATATATTCAATATGGAGAGAATAAAA  
+HWI-EAS443:3:10:1095:79#0/1  
`bba\_ba`bb\_aa\_abababa^^\_a^aaa[aYb^¥` `a\_^  
@HWI-EAS443:3:10:1681:1507#0/1  
AGCGAAAGCAGGTCAAATATATTCAATATGGAGAGAATAA  
+HWI-EAS443:3:10:1681:1507#0/1  
^aaba`bbabbI^aVaaaXbaaH^ab¥bbaWbabYbaa]  
@HWI-EAS443:3:12:193:867#0/1  
CGAAAGCAGGTCAAATATATTCAATATGGAGAGAATAAAA  
+HWI-EAS443:3:12:193:867#0/1  
aaab]abaab^aa\_aa`aaaaaaaaaaa\_\_b\_a\_``aa``  
@HWI-EAS443:3:12:505:971#0/1  
AGCGAAAGCAGGTCAAATATATTCAATATGGAGAGAATAA  
+HWI-EAS443:3:12:505:971#0/1  
aa\_aaaab^\_\_\_YY^`a`\_^`\_\_\_\_K\_¥\_\_^[\_^\_]`^`^  
@HWI-EAS443:3:12:68:1399#0/1  
GCGAAAGCAGGTCAAATATATTCAATATGGAGAGAATAAAA  
+HWI-EAS443:3:12:68:1399#0/1  
[`aUab\_a\_V]F]aY\_aaaaba`] ^aba` `aa` `^] ^aaa  
@HWI-EAS443:3:12:821:1114#0/1  
GAAAGCAGGTCAAATATATTCAATATGGAGAGAATAAAAAG  
+HWI-EAS443:3:12:821:1114#0/1  
aababa`bb]ababbaabba` `aaabb` ^b\_a^`aaaaaa  
@HWI-EAS443:3:13:1677:692#0/1  
CGAAAGCAGGTCAAATATATTCAATATGGAGAGAATAAAA  
+HWI-EAS443:3:13:1677:692#0/1  
`b]Xaa`a¥UPZaa` `aa\_]¥` ^\_aaa\_a`Y^a^\_a\_\_¥^  
@HWI-EAS443:3:13:502:261#0/1  
GCGAAAGCAGGTCAAATATATTCAATATGGAGAGAATAAAA  
+HWI-EAS443:3:13:502:261#0/1  
aaabVV\_`a`ZSa`a[aa][`\_\_`\_`¥`a]V\_[a¥`\_`\_^  
@HWI-EAS443:3:14:1772:1260#0/1  
GCGAAAGCAGGTCAAATATATTCAATATGGAGAGAATAAAA  
+HWI-EAS443:3:14:1772:1260#0/1  
a`a\_T`a\_aaaY^]Z^\_[^^`^^]` ``UM[Y]]^^]\_  
@HWI-EAS443:3:14:616:211#0/1  
GCGAAAGCAGGTCAAATATATTCAATATGGAGAGAATAAAA  
+HWI-EAS443:3:14:616:211#0/1  
abbabaababb\_aaaaaaaaabaaaaaaaaa\_b^b^\_aWa`  
@HWI-EAS443:3:15:1054:546#0/1  
GCGAAAGCAGGTCAAATATATTCAATATGGAGAGAATAAAA  
+HWI-EAS443:3:15:1054:546#0/1  
a[Z\_^` `aaa`P]aa]¥` `Z` ` \_YXYTaaa\_aVaST^\_[^  
@HWI-EAS443:3:16:1184:315#0/1  
GCGAAAGCAGGTCAAATATATTCAATATGGAGAGAATAAAA  
+HWI-EAS443:3:16:1184:315#0/1  
abYX]]`aa]a¥^a\_\_^Ya\_]Y\_ZT¥^\_a`Y\_^a[\_\_\_UW¥  
@HWI-EAS443:3:19:101:491#0/1  
GCGAAAGCAGGTCAAATATATTCAATATGGAGAGAATAAAA

+HWI-EAS443:3:19:101:491#0/1  
¥aZ¥^L`b¥^b`\_aa^T^bba\_ab`a`ab^b\_b`\_^]ba  
@HWI-EAS443:3:19:840:505#0/1  
AGCGAAAGCAGGTCAAATATATTCAATATGGAGAGAATAA  
+HWI-EAS443:3:19:840:505#0/1  
]baabaY[ba^a\_^\_aaa\_a^a]\_\_a`aaV^a¥\_\_\_\_]\_a  
@HWI-EAS443:3:1:1602:1306#0/1  
CGAAAGCAGGTCAAATATATTCAATATGGAGAGAATAAAA  
+HWI-EAS443:3:1:1602:1306#0/1  
[aU`\_a¥`b¥]¥bbbabaab\_^bba\_b^b\_bWa]]babbbB  
@HWI-EAS443:3:1:1736:791#0/1  
GCGAAAGCAGGTCAAATATATTCAATATGGAGAGAATAAAA  
+HWI-EAS443:3:1:1736:791#0/1  
a\_b`aba^a\_a]¥\_^`a`\_\_\_\_^\_\_`aa^[\_^\_^^\_BB  
@HWI-EAS443:3:20:1162:1930#0/1  
CGAAAGCAGGTCAAATATATTCAATATGGAGAGAATAAAA  
+HWI-EAS443:3:20:1162:1930#0/1  
aaY^\_\_`aa¥[aa\_a^[````^a`aa[a\_^V^]\_``\_a^`  
@HWI-EAS443:3:21:685:630#0/1  
CGAAAGCAGGTCAAATATATTCAATATGGAGAGAATAAAA  
+HWI-EAS443:3:21:685:630#0/1  
aaJZOG]^¥QNTW`a`Y¥]\_\_¥OYW^Y]LN\_V¥]^W^X\_\_  
@HWI-EAS443:3:22:1251:597#0/1  
CGAAAGCAGGTCAAATATATTCAATATGGAGAGAATAAAA  
+HWI-EAS443:3:22:1251:597#0/1  
abbbbbbaa`b\_ababbababbaa`babab`b`a`aaa`aa  
@HWI-EAS443:3:22:813:1465#0/1  
GCGAAAGCAGGTCAAATATATTCAATATGGAGAGAATAAAA  
+HWI-EAS443:3:22:813:1465#0/1  
a^OW¥¥]]ZZ¥M`\_aVWV]W][\_^P`P^\_VQ¥X]^Y\_^  
@HWI-EAS443:3:23:1717:89#0/1  
AGCGAAAGCAGGTCAAATATATTCAATATGGAGAGAATAA  
+HWI-EAS443:3:23:1717:89#0/1  
aa[`¥bbbaabb¥^b^[^\_aKY^XDF`abaaIaRa`XWY\_  
@HWI-EAS443:3:23:697:459#0/1  
GAAAGCAGGTCAAATATATTCAATATGGAGAGAATAAAAAG  
+HWI-EAS443:3:23:697:459#0/1  
ab`a`abaa]`aaa`a`aa`\_`a\_aa`\_\_\_\_a^^\_a]\_aa  
@HWI-EAS443:3:24:1096:690#0/1  
GCGAAAGCAGGTCAAATATATTCAATATGGAGAGAATAAAA  
+HWI-EAS443:3:24:1096:690#0/1  
a`^^]^`aa[``[^a\_a\_a`a^¥`\_aaa]``aY\_\_¥\_\_  
@HWI-EAS443:3:24:1509:1667#0/1  
GAAAGCAGGTCAAATATATTCAATATGGAGAGAATAAAAAG  
+HWI-EAS443:3:24:1509:1667#0/1  
`bbbabbbbaabbbbabababaa`aabab`bab`aabaab\_  
@HWI-EAS443:3:24:1674:1761#0/1  
GAAAGCAGGTCAAATATATTCAATATGGAGAGAATAAAAAG  
+HWI-EAS443:3:24:1674:1761#0/1  
Z¥a¥`b¥bbY^`\_`bbb`abaaY`^\_b\_\_bbbaaab[aba

@HWI-EAS443:3:24:1750:1822#0/1  
GCGAAAGCAGGTCAAATATATTCAATATGGAGAGAATAAA  
+HWI-EAS443:3:24:1750:1822#0/1  
a\_aa` `[NXPKQTZZ]` \_[\_]S]Z]Z\_TVN^[VI]TS^Z  
@HWI-EAS443:3:25:210:1147#0/1  
AGCGAAAGCAGGTCAAATATATTCAATATGGAGAGAATAA  
+HWI-EAS443:3:25:210:1147#0/1  
aaababaabbaa]baababaaaaba`aaa` `\_a\_aaa\_`a  
@HWI-EAS443:3:25:860:678#0/1  
AGCGAAAGCAGGTCAAATATATTCAATATGGAGAGAATAA  
+HWI-EAS443:3:25:860:678#0/1  
abbbbb\_bbbbb\_aabbbbaaaaaa%a]aaa\_baa\_aaa`  
@HWI-EAS443:3:26:432:808#0/1  
CGAAAGCAGGTCAAATATATTCAATATGGAGAGAATAAA  
+HWI-EAS443:3:26:432:808#0/1  
aaaabba\_aa^aa` `aaaaa\_`aa\_aa` \_`\_aaaa]a\_  
@HWI-EAS443:3:27:1382:2037#0/1  
CCTTCATGTACTCTTATTTTCAGTGTGGAGGTTGCCCG  
+HWI-EAS443:3:27:1382:2037#0/1  
abbb`bbaabaaaaabbbaaaa\_b\_aaaa\_aa]a[\_\_\_^`  
@HWI-EAS443:3:27:1720:1721#0/1  
AGCGAAAGCAGGTCAAATATATTCAATATGGAGAGAATAA  
+HWI-EAS443:3:27:1720:1721#0/1  
^^aba` `aaaba]X`aaaab`a%T`aaaa`a[a\_aY\_[``  
@HWI-EAS443:3:28:1082:863#0/1  
GAAAGCAGGTCAAATATATTCAATATGGAGAGAATAAAAG  
+HWI-EAS443:3:28:1082:863#0/1  
`^`]a` `` `bba]aaaabbba\_aabab\_b`a`aaaaaa  
@HWI-EAS443:3:28:1474:170#0/1  
GCGAAAGCAGGTCAAATATATTCAATATGGAGAGAATAAA  
+HWI-EAS443:3:28:1474:170#0/1  
a\_a`aaaa\_aa[\_`\_```\_a^[\_^`^`\_]`]]\_`^]  
@HWI-EAS443:3:28:314:491#0/1  
AGCGAAAGCAGGTCAAATATATTCAATATGGAGAGAATAA  
+HWI-EAS443:3:28:314:491#0/1  
abb\_X^` `aaa`\_bbabaaa`aaaaaaaaaZ\_a`aaa\_aa  
@HWI-EAS443:3:28:824:1146#0/1  
GCGAAAGCAGGTCAAATATATTCAATATGGAGAGAATAAA  
+HWI-EAS443:3:28:824:1146#0/1  
ab^\_]`bb]¥aQ]aa\_a`^\_a\_b\_a`aaa\_aa\_aa\_a\_aa  
@HWI-EAS443:3:28:86:1949#0/1  
CGAAAGCAGGTCAAATATATTCAATATGGAGAGAATAAA  
+HWI-EAS443:3:28:86:1949#0/1  
a\_aaa^aa\_\_[aa`a`a`\_a\_a\_¥`\_a\_]¥^¥^`^a`]a  
@HWI-EAS443:3:29:196:1123#0/1  
GCGAAAGCAGGTCAAATATATTCAATATGGAGAGAATAAA  
+HWI-EAS443:3:29:196:1123#0/1  
abab^T`b¥`a^baaaa\_aaaaa^H\_`a¥\_]`\_W\_`aaa  
@HWI-EAS443:3:29:292:1315#0/1  
AGCGAAAGCAGGTCAAATATATTCAATATGGAGAGAATAA

+HWI-EAS443:3:29:292:1315#0/1  
a`aaaaa`aa`W\_aaaa```^a\_\_\_¥`\_\_^`^^]`  
@HWI-EAS443:3:2:427:656#0/1  
GCGAAAGCAGGTCAAATATATTCAATATGGAGAGAATAAAA  
+HWI-EAS443:3:2:427:656#0/1  
\_PY[ZYa¥X\_XDT¥XWT^[¥`aZ[YV¥\_]KPXX\_XX[^ZR  
@HWI-EAS443:3:30:1278:1683#0/1  
CGAAAGCAGGTCAAATATATTCAATATGGAGAGAATAAAA  
+HWI-EAS443:3:30:1278:1683#0/1  
a`U`T`^baa\_bYW¥a^`^aZPU^a^`a`\_`a¥PV`^^a  
@HWI-EAS443:3:30:774:191#0/1  
AGCGAAAGCAGGTCAAATATATTCAATATGGAGAGAATAA  
+HWI-EAS443:3:30:774:191#0/1  
a`aa\_a\_a`aaaZaa`a`\_a`\_`^`^`a`[\_]`^[]`^^  
@HWI-EAS443:3:31:21:1576#0/1  
AGCGAAAGCAGGTCAAATATATTCAATATGGAGAGAATAA  
+HWI-EAS443:3:31:21:1576#0/1  
Y`\_`¥VTX[] [T\_GZZIXT[TSMa[aWUT\_^]`^\_Z¥\_[S]^  
@HWI-EAS443:3:31:273:1588#0/1  
CGAAAGCAGGTCAAATATATTCAATATGGAGAGAATAAAA  
+HWI-EAS443:3:31:273:1588#0/1  
a]HZ^QYW[YO¥] [XZXST`^^Z¥`^UZZ[QXN]Z\_]VZ  
@HWI-EAS443:3:32:107:28#0/1  
GCGAAAGCAGGTCAAATATATTCAATATGGAGAGAATAAAA  
+HWI-EAS443:3:32:107:28#0/1  
aa`00Za[WY[YX[T[YNWTZ^^X[]Y^[VQYOXKXSRQB  
@HWI-EAS443:3:32:1340:1741#0/1  
AGCGAAAGCAGGTCAAATATATTCAATATGGAGAGAATAA  
+HWI-EAS443:3:32:1340:1741#0/1  
]ba\_bbb^ba\_aSabbaaaa\_aaa`\_`aa`^^a^a]V[¥a  
@HWI-EAS443:3:32:1604:705#0/1  
CGAAAGCAGGTCAAATATATTCAATATGGAGAGAATAAAA  
+HWI-EAS443:3:32:1604:705#0/1  
\_bbb^Va\_[^\_a`b^a]aba^\_\_aaaaTYbaa\_aaaa\_a  
@HWI-EAS443:3:32:507:527#0/1  
CGAAAGCAGGTCAAATATATTCAATATGGAGAGAATAAAA  
+HWI-EAS443:3:32:507:527#0/1  
abba\_^ba`a^bbaaaaabaaa\_a`ba`^a\_a`]`Xa^a  
@HWI-EAS443:3:34:1538:1349#0/1  
GCGAAAGCAGGTCAAATATATTCAATATGGAGAGAATAAAA  
+HWI-EAS443:3:34:1538:1349#0/1  
aa]¥a\_aaab` []`\_`aaa]aa]\_U¥¥aa`\_\_X`YW[NU^  
@HWI-EAS443:3:34:20:1669#0/1  
CGAAAGCAGGTCAAATATATTCAATATGGAGAGAATAAAA  
+HWI-EAS443:3:34:20:1669#0/1  
\_^¥bbab\_b`^baZ¥abbaaba\_¥aabba\_aaa`b```b  
@HWI-EAS443:3:34:35:1984#0/1  
CGAAAGCAGGTCAAATATATTCAATATGGAGAGAATAAAA  
+HWI-EAS443:3:34:35:1984#0/1  
`X]a`^aaa[Ua`^a`a`a`\_`¥Y^`\_`¥¥`\_]`^Y^^]^S

@HWI-EAS443:3:35:1255:577#0/1  
GCGAAAGCAGGTCAAATATATTCAATATGGAGAGAATAAAA  
+HWI-EAS443:3:35:1255:577#0/1  
aaaa`aYaaaXaaa\_`^^^aa\_`¥`^`\_`a^aY\_]`^]YVL  
@HWI-EAS443:3:36:694:389#0/1  
CGAAAGCAGGTCAAATATATTCAATATGGAGAGAATAAAA  
+HWI-EAS443:3:36:694:389#0/1  
`baa]`ba`¥aa^aa\_a`aa`a^`\_`^a^`]`^`^^`  
@HWI-EAS443:3:36:769:1736#0/1  
CGAAAGCAGGTCAAATATATTCAATATGGAGAGAATAAAA  
+HWI-EAS443:3:36:769:1736#0/1  
\_ZYG0Y`aaVK]\_SZ]`¥]MX^W¥\_`¥[LZN`Za`¥V\_Z  
@HWI-EAS443:3:37:1230:81#0/1  
AGCGAAAGCAGGTCAAATATATTCAATATGGAGAGAATAA  
+HWI-EAS443:3:37:1230:81#0/1  
ab`bbbaaaa`[¥]^baa`aba`a`a\_aT¥]a[a\_a\_a[  
@HWI-EAS443:3:37:206:1148#0/1  
GCGAAAGCAGGTCAAATATATTCAATATGGAGAGAATAAAA  
+HWI-EAS443:3:37:206:1148#0/1  
aaa\_Z\_Z^a\_[N\_]¥\_`S][\_`^^`[[a`WZV[F[¥¥^Y`¥  
@HWI-EAS443:3:37:310:1814#0/1  
GCGAAAGCAGGTCAAATATATTCAATATGGAGAGAATAAAA  
+HWI-EAS443:3:37:310:1814#0/1  
`b\_bV^Uaa[aXbaaaaa\_\_^\_aZHx`^YaIaYY¥`\_^]¥  
@HWI-EAS443:3:37:427:247#0/1  
AGCGAAAGCAGGTCAAATATATTCAATATGGAGAGAATAA  
+HWI-EAS443:3:37:427:247#0/1  
aaa¥`a`a`\_b^aaaaa^a`a`a^Pa`\_¥Y^\_¥`\_¥\_aY  
@HWI-EAS443:3:38:1606:947#0/1  
AGCGAAAGCAGGTCAAATATATTCAATATGGAGAGAATAA  
+HWI-EAS443:3:38:1606:947#0/1  
aba[^bb^\_Z`\_^\_ba`aa`TXa`^a¥PVZYaX\_\_^P  
@HWI-EAS443:3:38:1619:1837#0/1  
GAAAGCAGGTCAAATATATTCAATATGGAGAGAATAAAAAG  
+HWI-EAS443:3:38:1619:1837#0/1  
a^a]][]YKL[^[]`^^`^`]^¥\_[]`^^¥¥¥XXT]XX] []Y  
@HWI-EAS443:3:39:1457:1469#0/1  
GCGAAAGCAGGTCAAATATATTCAATATGGAGAGAATAAAA  
+HWI-EAS443:3:39:1457:1469#0/1  
\_[Y]Z]a`Va[Saa^aYW\_T]]XU\_\_S^`\_NV[`\_^]S[H  
@HWI-EAS443:3:40:100:1648#0/1  
CTTCATGTACTTTATTTTCAGTGTGGAGGTTGCCCGT  
+HWI-EAS443:3:40:100:1648#0/1  
HY`aa^T^\_b`\_bbbaa`a\_bab¥[U[U\_¥X¥`YW]V]¥  
@HWI-EAS443:3:40:801:627#0/1  
GAAAGCAGGTCAAATATATTCAATATGGAGAGAATAAAAAG  
+HWI-EAS443:3:40:801:627#0/1  
a`aYYa\_`¥`a`^^`\_`^^`]`^^`^`\_Y`^^`XX[\_\_\_]YZ  
@HWI-EAS443:3:42:1150:265#0/1  
CGAAAGCAGGTCAAATATATTCAATATGGAGAGAATAAAA

+HWI-EAS443:3:42:1150:265#0/1  
ab^^^aab\_[aaa`baa^a`¥^`aabba\_b]a\_`a[TZ\_  
@HWI-EAS443:3:42:460:1275#0/1  
AGCGAAAGCAGGTCAAATATATTCAATATGGAGAGAATAA  
+HWI-EAS443:3:42:460:1275#0/1  
`¥`^¥Y]aa^`]S``aaVaY)`aa\_`^`aa\_Z\_]\_Z`^`[¥  
@HWI-EAS443:3:42:808:1511#0/1  
AGCGAAAGCAGGTCAAATATATTCAATATGGAGAGAATAA  
+HWI-EAS443:3:42:808:1511#0/1  
[S[\_\_\_Y\_\_XTZ`[`ba^aaa^ab`\_]a`a\_]aYa^a\_``  
@HWI-EAS443:3:42:839:1960#0/1  
CGAAAGCAGGTCAAATATATTCAATATGGAGAGAATAAAA  
+HWI-EAS443:3:42:839:1960#0/1  
R]¥¥^ab`¥¥N`¥`^`¥[Z¥bb\_^¥bbbb¥b\_¥abaabb\_  
@HWI-EAS443:3:43:249:1685#0/1  
CGAAAGCAGGTCAAATATATTCAATATGGAGAGAATAAAA  
+HWI-EAS443:3:43:249:1685#0/1  
aa\_ba]abaa`aabbabaabb`bbbbbbbaabbaabbbba  
@HWI-EAS443:3:44:845:306#0/1  
CGAAAGCAGGTCAAATATATTCAATATGGAGAGAATAAAA  
+HWI-EAS443:3:44:845:306#0/1  
aa\_`^a``YaaZ`aaaaa`a``¥[\_Yaaa^a^a]¥``\_^\_  
@HWI-EAS443:3:44:926:255#0/1  
GCGAAAGCAGGTCAAATATATTCAATATGGAGAGAATAAA  
+HWI-EAS443:3:44:926:255#0/1  
aa`[aa\_S\_¥[`^`a]a`aaZ\_\_a\_\_a\_[a\_a[]`a[[  
@HWI-EAS443:3:44:936:87#0/1  
AGCGAAAGCAGGTCAAATATATTCAATATGGAGAGAATAA  
+HWI-EAS443:3:44:936:87#0/1  
aabbbaab`aab¥`a`\_a\_b`aa¥``a\_baa[a\_a^a\_a\_]`  
@HWI-EAS443:3:45:304:1926#0/1  
AGCGAAAGCAGGTCAAATATATTCAATATGGAGAGAATAA  
+HWI-EAS443:3:45:304:1926#0/1  
\_aababbaab\_baaabbaabaaa`abbb``a\_``\_aaaa  
@HWI-EAS443:3:46:1153:968#0/1  
GCGAAAGCAGGTCAAATATATTCAATATGGAGAGAATAAA  
+HWI-EAS443:3:46:1153:968#0/1  
aaaaa^`aaaa]\_a``^`^`\_`\_\_\_`\_aa`]a^a^\_a``\_  
@HWI-EAS443:3:46:1324:190#0/1  
AGCGAAAGCAGGTCAAATATATTCAATATGGAGAGAATAA  
+HWI-EAS443:3:46:1324:190#0/1  
\_a`babbbaaZaaZ`aaa`aa`aaa[Za`aaa]a\_a\_\_\_aa  
@HWI-EAS443:3:46:1460:563#0/1  
AGCGAAAGCAGGTCAAATATATTCAATATGGAGAGAATAA  
+HWI-EAS443:3:46:1460:563#0/1  
a^baaabbaabb`aaaab`aaaa\_^\_b\_bba^a\_a\_`\_\_`  
@HWI-EAS443:3:46:983:572#0/1  
GAAAGCAGGTCAAATATATTCAATATGGAGAGAATAAAAAG  
+HWI-EAS443:3:46:983:572#0/1  
a``ab`aaa`]aa`aaa\_baa\_^aaaa\_b\_a^\_`\_\_`a

@HWI-EAS443:3:47:1261:1551#0/1  
GAAAGCAGGTCAAATATATTCAATATGGAGAGAATAAAAG  
+HWI-EAS443:3:47:1261:1551#0/1  
VYbbaababbXbbbbbbbaaaZbbbabbb`a[]aabaaaa`  
@HWI-EAS443:3:47:127:1155#0/1  
GCGAAAGCAGGTCAAATATATTCAATATGGAGAGAATAAA  
+HWI-EAS443:3:47:127:1155#0/1  
aaba]b`baa`aababbbbaa¥`aaaa¥\_a^`\_\_aaa`  
@HWI-EAS443:3:48:1178:1628#0/1  
GCGAAAGCAGGTCAAATATATTCAATATGGAGAGAATAAA  
+HWI-EAS443:3:48:1178:1628#0/1  
`W`a]]`^[\_aTJW^a¥UZ`Y¥HZa`]^a^^U`VY^`\_]  
@HWI-EAS443:3:49:1223:394#0/1  
GCGAAAGCAGGTCAAATATATTCAATATGGAGAGAATAAA  
+HWI-EAS443:3:49:1223:394#0/1  
abaaaba`aba`aabbababb`b`babba`b`b\_aab`a  
@HWI-EAS443:3:49:1517:1237#0/1  
GCGAAAGCAGGTCAAATATATTCAATATGGAGAGAATAAA  
+HWI-EAS443:3:49:1517:1237#0/1  
aa\_]aaa`ba\_a`aaaa`a`a`a`aaa]a^a]\_a`\_\_  
@HWI-EAS443:3:4:1525:1310#0/1  
GAAAGCAGGTCAAATATATTCAATATGGAGAGAATAAAAG  
+HWI-EAS443:3:4:1525:1310#0/1  
aa]^b^¥]¥`Z`][a`a`aa`[¥aaaa^\_b`\_`a]^`Y  
@HWI-EAS443:3:4:1764:337#0/1  
AGCGAAAGCAGGTCAAATATATTCAATATGGAGAGAATAA  
+HWI-EAS443:3:4:1764:337#0/1  
\_a``[aabaaaXMJ]`Yaa`a\_\_YT^`[\_W]]`]^\_Z  
@HWI-EAS443:3:50:1379:1485#0/1  
CGAAAGCAGGTCAAATATATTCAATATGGAGAGAATAAAA  
+HWI-EAS443:3:50:1379:1485#0/1  
aa`\_b`\_`\_`ba¥ba`aaba¥aababa^aaba`bbaaa  
@HWI-EAS443:3:51:308:32#0/1  
GCGAAAGCAGGTCAAATATATTCAATATGGAGAGAATAAA  
+HWI-EAS443:3:51:308:32#0/1  
abbbbaaba`ba]aaaababaaaa`aabba\_b`aa\_a`\_`  
@HWI-EAS443:3:51:508:912#0/1  
CGAAAGCAGGTCAAATATATTCAATATGGAGAGAATAAAA  
+HWI-EAS443:3:51:508:912#0/1  
a`aabbabbbaabb`aaYV`baaaab^`a\_baa`aaaa  
@HWI-EAS443:3:52:1097:1765#0/1  
CGAAAGCAGGTCAAATATATTCAATATGGAGAGAATAAAA  
+HWI-EAS443:3:52:1097:1765#0/1  
^ba^Vbaa`a`bbb`[`aab\_aaa`^aaa\_aaaabaa^a`  
@HWI-EAS443:3:52:1787:528#0/1  
GCGAAAGCAGGTCAAATATATTCAATATGGAGAGAATAAA  
+HWI-EAS443:3:52:1787:528#0/1  
\_Q\_aa[`[PSP[a^\_Y[Z¥V`[¥¥`\_`T¥]¥^WX`XR¥  
@HWI-EAS443:3:52:530:688#0/1  
AAACAATTTCGACATTAATTGATGGCCATCCGAATTCCTTT

+HWI-EAS443:3:52:530:688#0/1  
aaaaaaaaa\_`^aaa\_\_aM`^^^`^\_\_\_\_`]Z`\_\_\_\_^^^`^`\_  
@HWI-EAS443:3:52:871:354#0/1  
CGAAAGCAGGTCAAATATATTCAATATGGAGAGAATAAAA  
+HWI-EAS443:3:52:871:354#0/1  
]ba`b`abbbYabaab`b`b\_ba\_bbbba]babaaa\_a^b  
@HWI-EAS443:3:53:1000:1509#0/1  
GAAAGCAGGTCAAATATATTCAATATGGAGAGAATAAAAAG  
+HWI-EAS443:3:53:1000:1509#0/1  
a\_`aa`aaaW^`^aa\_aaa``\_[`\_a\_a\_a\_\_\_\_\_]^]`^  
@HWI-EAS443:3:53:1367:1473#0/1  
AGCGAAAGCAGGTCAAATATATTCAATATGGAGAGAATAA  
+HWI-EAS443:3:53:1367:1473#0/1  
a\_Z^abbb\_ab`Z]^aaaaaaaaaaaaabaaXbaaa``a\_  
@HWI-EAS443:3:53:207:1128#0/1  
AGCGAAAGCAGGTCAAATATATTCAATATGGAGAGAATAA  
+HWI-EAS443:3:53:207:1128#0/1  
a]`aa`aaaaa\_abaa``aaaaa\_¥a\_aaa^a\_\_Z`^`\_  
@HWI-EAS443:3:53:856:1253#0/1  
GCGAAAGCAGGTCAAATATATTCAATATGGAGAGAATAAAA  
+HWI-EAS443:3:53:856:1253#0/1  
^ab`bba`^a\_\_aababbaabba\_\_babbbba¥`aaaaaa  
@HWI-EAS443:3:53:973:620#0/1  
GCGAAAGCAGGTCAAATATATTCAATATGGAGAGAATAAAA  
+HWI-EAS443:3:53:973:620#0/1  
aaa````aa`a¥\_a`]aaa]a`\_^`a\_`\_`]^^`^^``aZ  
@HWI-EAS443:3:54:1149:541#0/1  
CGAAAGCAGGTCAAATATATTCAATATGGAGAGAATAAAA  
+HWI-EAS443:3:54:1149:541#0/1  
aaa¥baaa\_\_bbb`babb^\_b``aaabbbbabbbbabba  
@HWI-EAS443:3:54:1529:1120#0/1  
GCGAAAGCAGGTCAAATATATTCAATATGGAGAGAATAAAA  
+HWI-EAS443:3:54:1529:1120#0/1  
a`ba`abaaab^aaaabab\_ba\_a`a`aaa`a\_a^aa`a`  
@HWI-EAS443:3:55:1473:650#0/1  
CGAAAGCAGGTCAAATATATTCAATATGGAGAGAATAAAA  
+HWI-EAS443:3:55:1473:650#0/1  
a\_PJ]VSYZZOZ¥`YSY\_W\_ZSZW[FYT]T\_T`N¥Z^VMW  
@HWI-EAS443:3:55:963:828#0/1  
CCTTCATGTACTCTTATTTTCAGTGTTTGGAGGTTGCCCG  
+HWI-EAS443:3:55:963:828#0/1  
`bbbabbbbabbabbbbabbbaabbbbbb`bb\_abaab  
@HWI-EAS443:3:55:979:2008#0/1  
AGCGAAAGCAGGTCAAATATATTCAATATGGAGAGAATAA  
+HWI-EAS443:3:55:979:2008#0/1  
]```\_Z\_a¥aaa\_X[a`a\_^a^`aYa\_aaa`aTXXa`a^`\_  
@HWI-EAS443:3:57:912:750#0/1  
CGAAAGCAGGTCAAATATATTCAATATGGAGAGAATAAAA  
+HWI-EAS443:3:57:912:750#0/1  
aaU[Za\_XLZ^W]VYaP`V[Ya\_]¥Za\_RQ^G[[`^R^`\_`



@HWI-EAS443:3:57:946:836#0/1  
CGAAAGCAGGTCAAATATATTCAATATGGAGAGAATAAAA  
+HWI-EAS443:3:57:946:836#0/1  
abbbbbbaaab\_ab`\_abbabbaaabbbbababababaa  
@HWI-EAS443:3:57:974:408#0/1  
AGCGAAAGCAGGTCAAATATATTCAATATGGAGAGAATAA  
+HWI-EAS443:3:57:974:408#0/1  
^¥a`]^^^]^`b`\_[\_aaa\_aaaaaba\_b\_b``a`  
@HWI-EAS443:3:60:638:415#0/1  
AGCGAAAGCAGGTCAAATATATTCAATATGGAGAGAATAA  
+HWI-EAS443:3:60:638:415#0/1  
]T^\_QY¥Xaa`[aa[`¥Q\_aa\_`YW¥Vq]Z]aZa\_aa`]  
@HWI-EAS443:3:60:919:1951#0/1  
GCGAAAGCAGGTCAAATATATTCAATATGGAGAGAATAAAA  
+HWI-EAS443:3:60:919:1951#0/1  
aab\_\_`aa`S[HUa\_V¥Ua[]¥[W\_]Y^^`Z`^]WXWX^S  
@HWI-EAS443:3:61:478:950#0/1  
CGAAAGCAGGTCAAATATATTCAATATGGAGAGAATAAAA  
+HWI-EAS443:3:61:478:950#0/1  
`bb`]aaabb`aab`aaa\_aaba`a\_`a^\_^¥]\_`\_\_^\_  
@HWI-EAS443:3:61:958:433#0/1  
CGAAAGCAGGTCAAATATATTCAATATGGAGAGAATAAAA  
+HWI-EAS443:3:61:958:433#0/1  
abbbbbbbbabababbbabb`bbbbbbabbbbabbaab  
@HWI-EAS443:3:62:1601:1137#0/1  
GAAAGCAGGTCAAATATATTCAATATGGAGAGAATAAAAAG  
+HWI-EAS443:3:62:1601:1137#0/1  
aa`aaaaba`]aaaaaaaa`aa\_`aa\_a\_a\_^a\_\_`a\_  
@HWI-EAS443:3:62:902:860#0/1  
CGAAAGCAGGTCAAATATATTCAATATGGAGAGAATAAAA  
+HWI-EAS443:3:62:902:860#0/1  
aX¥Q`a^¥Z¥^^b`[a^\_^`b`]`a[`a`Xa]ZPZ`W^ZV  
@HWI-EAS443:3:63:1205:792#0/1  
CGAAAGCAGGTCAAATATATTCAATATGGAGAGAATAAAA  
+HWI-EAS443:3:63:1205:792#0/1  
^baababbbbaab\_bb`b`bbbbbaabb^ababbbbabbb  
@HWI-EAS443:3:64:71:1587#0/1  
AGCGAAAGCAGGTCAAATATATTCAATATGGAGAGAATAA  
+HWI-EAS443:3:64:71:1587#0/1  
aWaU^TZ`]`UTaUa¥R¥[^\_\_[W^H]YMXKRP^Y\_\_[]Y^  
@HWI-EAS443:3:65:1000:1273#0/1  
GCGAAAGCAGGTCAAATATATTCAATATGGAGAGAATAAAA  
+HWI-EAS443:3:65:1000:1273#0/1  
\_b`YV]ab^baWaa``a\_\_\_\_\_aba`a[aaa^baa``aa`\_  
@HWI-EAS443:3:65:1316:1124#0/1  
AGCGAAAGCAGGTCAAATATATTCAATATGGAGAGAATAA  
+HWI-EAS443:3:65:1316:1124#0/1  
`a^`ZW\_b\_Z\_ba¥Waaba`\_]a\_a^aaa\_`¥b`\_]`aa^  
@HWI-EAS443:3:66:654:299#0/1  
CGAAAGCAGGTCAAATATATTCAATATGGAGAGAATAAAA

+HWI-EAS443:3:66:654:299#0/1  
¥a`Y`a\_T\_b`aaabb`¥^\_aa`aabb¥aab`Y`Z\_a  
@HWI-EAS443:3:67:1138:782#0/1  
GCGAAAGCAGGTCAAATATATTCAATATGGAGAGAATAAA  
+HWI-EAS443:3:67:1138:782#0/1  
`aaWX`a`Q\_XP^a\_Ua^\_]`^^^`\_^`^^\_Y]][^]\_Z  
@HWI-EAS443:3:67:140:1169#0/1  
GAAAGCAGGTCAAATATATTCAATATGGAGAGAATAAAAAG  
+HWI-EAS443:3:67:140:1169#0/1  
aaYZG[`V^U]X]R\_¥^`a\_a\_\_`[^aZ[\_\_\_`]^ [WNUYG  
@HWI-EAS443:3:67:397:814#0/1  
GCGAAAGCAGGTCAAATATATTCAATATGGAGAGAATAAA  
+HWI-EAS443:3:67:397:814#0/1  
``^JTxaa]]L]\_Z[Xa`W`^`[^`VX¥¥W[R`WWW`Z  
@HWI-EAS443:3:68:1577:578#0/1  
CGAAAGCAGGTCAAATATATTCAATATGGAGAGAATAAAA  
+HWI-EAS443:3:68:1577:578#0/1  
abbbbbbbbbbbabbbbbbbabbbbbbbabbbbbbbba  
@HWI-EAS443:3:68:211:1375#0/1  
AGCGAAAGCAGGTCAAATATATTCAATATGGAGAGAATAA  
+HWI-EAS443:3:68:211:1375#0/1  
aaa`^aa\_aaa`[aaaa`a\_\_\_\_\_a`\_]a¥\_`^a\_¥]\_]\_\_  
@HWI-EAS443:3:68:427:378#0/1  
CGAAAGCAGGTCAAATATATTCAATATGGAGAGAATAAAA  
+HWI-EAS443:3:68:427:378#0/1  
ab¥\_aab\_aa^aaaaaaaaaaaa`\_a`aa`\_a\_a`\_a`a`\_`  
@HWI-EAS443:3:68:437:261#0/1  
GCGAAAGCAGGTCAAATATATTCAATATGGAGAGAATAAA  
+HWI-EAS443:3:68:437:261#0/1  
a`¥`X^¥ba\_]L^^Y\_ZYWZ`\_a]Z`\_`aa\_a\_`\_\_\_\_`a\_  
@HWI-EAS443:3:68:727:794#0/1  
GCGAAAGCAGGTCAAATATATTCAATATGGAGAGAATAAA  
+HWI-EAS443:3:68:727:794#0/1  
aa`^`^^`aaa¥aab^`aa`aaa^]a\_aaa\_\_\_\_\_`aZ  
@HWI-EAS443:3:68:895:461#0/1  
GAAAGCAGGTCAAATATATTCAATATGGAGAGAATAAAAAG  
+HWI-EAS443:3:68:895:461#0/1  
a`]ba`aaaWaa`aaa`Ta`\_]¥`[aa`^a`a\_\_a\_\_a\_  
@HWI-EAS443:3:69:1358:1044#0/1  
GAAAGCAGGTCAAATATATTCAATATGGAGAGAATAAAAAG  
+HWI-EAS443:3:69:1358:1044#0/1  
a¥¥YZX`]Q^¥aXG`] [YVLT\_Y\_\_\_\_R^TU[ ] [H`YG  
@HWI-EAS443:3:69:1506:943#0/1  
GCGAAAGCAGGTCAAATATATTCAATATGGAGAGAATAAA  
+HWI-EAS443:3:69:1506:943#0/1  
\_bbbabbbbbbaabbbbbbbabbaabbbbb`b`baababa  
@HWI-EAS443:3:69:258:811#0/1  
AGCGAAAGCAGGTCAAATATATTCAATATGGAGAGAATAA  
+HWI-EAS443:3:69:258:811#0/1  
aaaa^Ya`]Q\_`Ya`a\_a``Xa`\_\_\_\_a^\_\_\_\_^a^`Y^\_\_\_\_

@HWI-EAS443:3:6:438:1930#0/1  
CGAAAGCAGGTCAAATATATTCAATATGGAGAGAATAAAA  
+HWI-EAS443:3:6:438:1930#0/1  
aabba`abb[R[abbaababaaaaaab\_aaaaa\_aaaaa  
@HWI-EAS443:3:70:707:2016#0/1  
CGAAAGCAGGTCAAATATATTCAATATGGAGAGAATAAAA  
+HWI-EAS443:3:70:707:2016#0/1  
aZYT`a`XZaP^`U^b`¥Z[^```a[b\_``LZZ]^aaaa  
@HWI-EAS443:3:70:873:2017#0/1  
GAAAGCAGGTCAAATATATTCAATATGGAGAGAATAAAAG  
+HWI-EAS443:3:70:873:2017#0/1  
^]abbbab^V^bb`baa`bbbbbbbaabaabbb`baaba  
@HWI-EAS443:3:71:1096:1872#0/1  
CTTCATGTACTTTATTTTCAGTGTTTGGAGGTTGCCCGT  
+HWI-EAS443:3:71:1096:1872#0/1  
Y`babbbbbbbaababbabb`aabb\_bba\_`ab  
@HWI-EAS443:3:71:1367:889#0/1  
CGAAAGCAGGTCAAATATATTCAATATGGAGAGAATAAAA  
+HWI-EAS443:3:71:1367:889#0/1  
Xaa¥``ab`¥\_`bbbbbbbaaabbabbbb`ababbaaW  
@HWI-EAS443:3:71:148:1601#0/1  
CGAAAGCAGGTCAAATATATTCAATATGGAGAGAATAAAA  
+HWI-EAS443:3:71:148:1601#0/1  
aa¥`¥^a`\_`^aaaa^¥\_\_`\_a\_\_\_Y\_`]]\_¥\_^`^`^\_\_  
@HWI-EAS443:3:71:179:31#0/1  
GAAAGCAGGTCAAATATATTCAATATGGAGAGAATAAAAG  
+HWI-EAS443:3:71:179:31#0/1  
aaa`aa`a\_Za```]`aU\_\_\_]Z\_]`a^Za]`]]]\_X¥][  
@HWI-EAS443:3:71:308:260#0/1  
CCTTCATGTACTTTATTTTCAGTGTTTGGAGGTTGCCCG  
+HWI-EAS443:3:71:308:260#0/1  
K\_ZaTRzBZ[Z¥QZ`a^bbbabbb`b`^abaa\_b¥\_a\_aaa  
@HWI-EAS443:3:71:958:613#0/1  
CGAAAGCAGGTCAAATATATTCAATATGGAGAGAATAAAA  
+HWI-EAS443:3:71:958:613#0/1  
`baba`aaaa]\_a`aaaaaba\_`^b`bbaaa`a`aa`a\_\_  
@HWI-EAS443:3:72:1082:388#0/1  
AGCGAAAGCAGGTCAAATATATTCAATATGGAGAGAATAA  
+HWI-EAS443:3:72:1082:388#0/1  
ab\_a`baZQab\_¥^¥`]b\_b^`a[\_[aaa`]¥[[a\_aa\_`  
@HWI-EAS443:3:72:1400:1235#0/1  
AGCGAAAGCAGGTCAAATATATTCAATATGGAGAGAATAA  
+HWI-EAS443:3:72:1400:1235#0/1  
aaa^aa^`aaa]]abaa`aa\_aa\_\_[\_aaa^`]a\_\_a\_`  
@HWI-EAS443:3:72:392:816#0/1  
AGCGAAAGCAGGTCAAATATATTCAATATGGAGAGAATAA  
+HWI-EAS443:3:72:392:816#0/1  
aaa]U¥^a¥QVa]aaaa\_]`aa``ZT`¥aa`Xa]`^`\_aa  
@HWI-EAS443:3:73:1668:236#0/1  
GCGAAAGCAGGTCAAATATATTCAATATGGAGAGAATAAAA



@HWI-EAS443:3:76:955:1065#0/1  
CGAAAGCAGGTCAAATATATTCAATATGGAGAGAATAAAA  
+HWI-EAS443:3:76:955:1065#0/1  
abbb[bbbbbaabaababababaababba]a\_ba\_aa`aa  
@HWI-EAS443:3:76:967:551#0/1  
CGAAAGCAGGTCAAATATATTCAATATGGAGAGAATAAAA  
+HWI-EAS443:3:76:967:551#0/1  
`bbbbbb`^ab`abbabbbababa`babb^`aabaaaaaa  
@HWI-EAS443:3:76:979:1190#0/1  
CGAAAGCAGGTCAAATATATTCAATATGGAGAGAATAAAA  
+HWI-EAS443:3:76:979:1190#0/1  
abbb``bbbaabbabbbabaaabbabbbba`aaaab`ab  
@HWI-EAS443:3:77:141:439#0/1  
CGAAAGCAGGTCAAATATATTCAATATGGAGAGAATAAAA  
+HWI-EAS443:3:77:141:439#0/1  
abZVZa^]aaPaa^^^a]Z`a\_\_aa¥aa¥Z^^``¥\_WZ¥`  
@HWI-EAS443:3:77:444:133#0/1  
AGCGAAAGCAGGTCAAATATATTCAATATGGAGAGAATAA  
+HWI-EAS443:3:77:444:133#0/1  
]aaaVaZaabaTT¥¥^a\_Z\_]^¥^^\_\_\_`^Y`V^\_]^]\_  
@HWI-EAS443:3:77:885:209#0/1  
CGAAAGCAGGTCAAATATATTCAATATGGAGAGAATAAAA  
+HWI-EAS443:3:77:885:209#0/1  
\_b\_ba\_aba^TZV\_¥aa`T```aYVYbbbVbYb^aaaaa`  
@HWI-EAS443:3:78:1177:1607#0/1  
GCGAAAGCAGGTCAAATATATTCAATATGGAGAGAATAAAA  
+HWI-EAS443:3:78:1177:1607#0/1  
aba[[\_^`¥]XQVabbb)`Xa`]a``^^aa`aU^]¥a``a  
@HWI-EAS443:3:78:1683:1551#0/1  
AGCGAAAGCAGGTCAAATATATTCAATATGGAGAGAATAA  
+HWI-EAS443:3:78:1683:1551#0/1  
aaaaaaaa`aabV^aaaa\_b\_aa^\_\_a\_a`a\_a\_a^`\_\_  
@HWI-EAS443:3:78:73:1647#0/1  
AGCGAAAGCAGGTCAAATATATTCAATATGGAGAGAATAA  
+HWI-EAS443:3:78:73:1647#0/1  
Y\_bb\_[[\_Y\_OL\_¥`\_`¥YZ]]`\_Z]¥`\_VOTTINP]``  
@HWI-EAS443:3:79:230:348#0/1  
CGAAAGCAGGTCAAATATATTCAATATGGAGAGAATAAAA  
+HWI-EAS443:3:79:230:348#0/1  
abaUab\_`baYa\_VXa]aaaaa`[\_X`aa`a\_a^^`a\_\_`  
@HWI-EAS443:3:79:442:502#0/1  
GCGAAAGCAGGTCAAATATATTCAATATGGAGAGAATAAAA  
+HWI-EAS443:3:79:442:502#0/1  
abb\_aaaa`aa\_aa\_V\_aa\_a`^[^aa`a\_a^a\_a`\_`a`\_  
@HWI-EAS443:3:7:1166:1191#0/1  
GCGAAAGCAGGTCAAATATATTCAATATGGAGAGAATAAAA  
+HWI-EAS443:3:7:1166:1191#0/1  
a`aaa`ZFN`WG[^\_W\_``^[aXU^][\_]`ZaZ\_[S[Y\_]`  
@HWI-EAS443:3:7:272:632#0/1  
GAAAGCAGGTCAAATATATTCAATATGGAGAGAATAAAAAG

+HWI-EAS443:3:7:272:632#0/1  
aaaaaaa`a^`a`aa`^YaY\_\_`\_\_\_\_`UX\_\_\_\_[\_^¥Y^``  
@HWI-EAS443:3:80:407:1848#0/1  
CGAAAGCAGGTCAAATATATTCAATATGGAGAGAATAAAA  
+HWI-EAS443:3:80:407:1848#0/1  
a\_aabab`XF\_`aabaa`a`\_aaaa]PY]^`\_\_`````  
@HWI-EAS443:3:80:735:108#0/1  
AGCGAAAGCAGGTCAAATATATTCAATATGGAGAGAATAA  
+HWI-EAS443:3:80:735:108#0/1  
a`^a\_b`a]`bbXP\_b]^bYXa]VaZa^bab]b\_bX`baQ  
@HWI-EAS443:3:80:933:1811#0/1  
AGCGAAAGCAGGTCAAATATATTCAATATGGAGAGAATAA  
+HWI-EAS443:3:80:933:1811#0/1  
aZbbabbaabba`^aaa`\_a¥aaaX\_aYaa`\_a\_a`a^a  
@HWI-EAS443:3:81:949:130#0/1  
CGAAAGCAGGTCAAATATATTCAATATGGAGAGAATAAAA  
+HWI-EAS443:3:81:949:130#0/1  
aa]aaa`^aa\_\_`a¥aaaa`\_`a\_aa\_Ya¥a]\_a\_^\_]`  
@HWI-EAS443:3:82:1715:1011#0/1  
AGCGAAAGCAGGTCAAATATATTCAATATGGAGAGAATAA  
+HWI-EAS443:3:82:1715:1011#0/1  
X\_WUY`aYaba^\_b`Y`^aR`^`^`Y`^[bbZ^\_^`ZV  
@HWI-EAS443:3:83:563:826#0/1  
AGCGAAAGCAGGTCAAATATATTCAATATGGAGAGAATAA  
+HWI-EAS443:3:83:563:826#0/1  
]abb^¥¥bbaabYbb`aaabaaa`aaaaaa^b\_a`aaaa  
@HWI-EAS443:3:83:939:857#0/1  
GCGAAAGCAGGTCAAATATATTCAATATGGAGAGAATAAAA  
+HWI-EAS443:3:83:939:857#0/1  
aaaZa\_aaa`b^^`¥Zaaa\_aaa`a`aa^¥a^a\_[`aa\_  
@HWI-EAS443:3:84:1145:1656#0/1  
AGCGAAAGCAGGTCAAATATATTCAATATGGAGAGAATAA  
+HWI-EAS443:3:84:1145:1656#0/1  
S[\_a]V¥baab`P`aa\_aYa`\_YX`a\_aa`^a`a¥]`a`  
@HWI-EAS443:3:84:253:1731#0/1  
AGCGAAAGCAGGTCAAATATATTCAATATGGAGAGAATAA  
+HWI-EAS443:3:84:253:1731#0/1  
a`b^a`a\_b`^^`^aaaa`a`a`^^`\_`aaZ`¥\_^Z^]Y  
@HWI-EAS443:3:85:1295:1135#0/1  
AGCGAAAGCAGGTCAAATATATTCAATATGGAGAGAATAA  
+HWI-EAS443:3:85:1295:1135#0/1  
a`¥`b`\_`\_M[aaJYaabbYYYbaa\_\_a\_ab^M^]aa`aaa  
@HWI-EAS443:3:85:646:123#0/1  
AGCGAAAGCAGGTCAAATATATTCAATATGGAGAGAATAA  
+HWI-EAS443:3:85:646:123#0/1  
a^ba\_abba`^YDZ`¥U`aPa¥^\_¥aVa`a]aQa\_Y``]  
@HWI-EAS443:3:86:976:53#0/1  
CGAAAGCAGGTCAAATATATTCAATATGGAGAGAATAAAA  
+HWI-EAS443:3:86:976:53#0/1  
I`aa[\_YXb\_\_bbbbaab`b`\_Y¥b¥abaabab`bbbaa

@HWI-EAS443:3:87:1074:1229#0/1  
GAAAGCAGGTCAAATATATTCAATATGGAGAGAATAAAAG  
+HWI-EAS443:3:87:1074:1229#0/1  
X[]^a^^a]FZ]¥\_a^a[X`W`\_VVaa\_V`^O\_T]ZQ¥[S  
@HWI-EAS443:3:87:1686:320#0/1  
AGCGAAAGCAGGTCAAATATATTCAATATGGAGAGAATAA  
+HWI-EAS443:3:87:1686:320#0/1  
aaN^aabb\_ba^¥`b`aaaXXaaaa`aa\_W]a^a\_\_\_a`  
@HWI-EAS443:3:88:733:905#0/1  
CGAAAGCAGGTCAAATATATTCAATATGGAGAGAATAAA  
+HWI-EAS443:3:88:733:905#0/1  
aaabaabaaa\_ab^ababaaaa`baba`a\_a\_\_aaaa  
@HWI-EAS443:3:88:840:1000#0/1  
AGCGAAAGCAGGTCAAATATATTCAATATGGAGAGAATAA  
+HWI-EAS443:3:88:840:1000#0/1  
aaba\_aabbaabW`bb`bababaaaa`abaab`ba^aaa  
@HWI-EAS443:3:88:967:1671#0/1  
GCGAAAGCAGGTCAAATATATTCAATATGGAGAGAATAAA  
+HWI-EAS443:3:88:967:1671#0/1  
aaaa`[baaba`[baab¥aa`aaa]a`aaaa`a\_aaaa  
@HWI-EAS443:3:89:79:1493#0/1  
AGCGAAAGCAGGTCAAATATATTCAATATGGAGAGAATAA  
+HWI-EAS443:3:89:79:1493#0/1  
aJaXaaaa`WXaNbaa`\_\_^TYaa\_\_^`a]T`Y\_^\_¥\_\_  
@HWI-EAS443:3:89:811:742#0/1  
GCGAAAGCAGGTCAAATATATTCAATATGGAGAGAATAAA  
+HWI-EAS443:3:89:811:742#0/1  
aa`aa\_aa`aaY`aa\_aaa\_aa`\_\_aaaa^\_a^a^^G¥`\_  
@HWI-EAS443:3:8:1021:1569#0/1  
CGAAAGCAGGTCAAATATATTCAATATGGAGAGAATAAA  
+HWI-EAS443:3:8:1021:1569#0/1  
aba\_aa\_b`b\_aababb`\_aaba`a`ba`a`a`aaaaa`  
@HWI-EAS443:3:8:129:930#0/1  
GAAAGCAGGTCAAATATATTCAATATGGAGAGAATAAAAG  
+HWI-EAS443:3:8:129:930#0/1  
aba`aaa¥aS`^a^\_aaYaaa`\_`\_a\_]`\_]`\_]`\_`\_\_  
@HWI-EAS443:3:8:375:1366#0/1  
GCGAAAGCAGGTCAAATATATTCAATATGGAGAGAATAAA  
+HWI-EAS443:3:8:375:1366#0/1  
`\_Z^[]`b`¥\_P[]aa^bbba^GYV[Uaaa]`\_aY^a^\_\_  
@HWI-EAS443:3:90:135:336#0/1  
GCGAAAGCAGGTCAAATATATTCAATATGGAGAGAATAAA  
+HWI-EAS443:3:90:135:336#0/1  
abba\_UVaaaaS`ba^aaa\_\_aa]S^\_a``^aX^]U`a`\_  
@HWI-EAS443:3:90:432:1381#0/1  
GCGAAAGCAGGTCAAATATATTCAATATGGAGAGAATAAA  
+HWI-EAS443:3:90:432:1381#0/1  
abbaa\_baabaJaaaaabaaaa`\_]aaaa\_]a`^aa\_a`\_  
@HWI-EAS443:3:90:433:333#0/1  
AGCGAAAGCAGGTCAAATATATTCAATATGGAGAGAATAA

+HWI-EAS443:3:90:433:333#0/1  
U```¥UZaba`^P`aY`aaaaba\_`^aaaaa\_a\_a`Y`a\_  
@HWI-EAS443:3:90:879:364#0/1  
CTTCATGTACTCTTATTTTCAGTGTGGAGGTTGCCCGT  
+HWI-EAS443:3:90:879:364#0/1  
abba^bb`a\_aabbabbbbaba\_\_bababbbbaaa`bbb`  
@HWI-EAS443:3:91:588:324#0/1  
GAAAGCAGGTCAAATATATTCAATATGGAGAGAATAAAAAG  
+HWI-EAS443:3:91:588:324#0/1  
a\_`a\_aa`]aa\_`aaaa]\_`^aaaa`\_\_[\_`\_aa\_a]  
@HWI-EAS443:3:92:150:364#0/1  
AGCGAAAGCAGGTCAAATATATTCAATATGGAGAGAATAA  
+HWI-EAS443:3:92:150:364#0/1  
abab\_aaaa`aaZ^a`a\_]`^\_]`^`\_\_a`^a]^`^`¥]`\_]  
@HWI-EAS443:3:92:1644:1820#0/1  
GAAAGCAGGTCAAATATATTCAATATGGAGAGAATAAAAAG  
+HWI-EAS443:3:92:1644:1820#0/1  
`aU¥bU`\_\_¥ab¥\_a^\_LG]¥\_Ya^^aaV\_^\_¥¥a[GN\_Y  
@HWI-EAS443:3:92:836:1275#0/1  
GCGAAAGCAGGTCAAATATATTCAATATGGAGAGAATAAAA  
+HWI-EAS443:3:92:836:1275#0/1  
a]ZO^\_aaS`Z]a]a[\_`\_]`^\_¥¥\_`Y`Ya^\_\_^Y]VZ  
@HWI-EAS443:3:94:255:588#0/1  
GCGAAAGCAGGTCAAATATATTCAATATGGAGAGAATAAAA  
+HWI-EAS443:3:94:255:588#0/1  
aab^T]]Z]aYLV¥]TZ^[XP^a\_]¥RY^`Y\_X`][^]`^¥  
@HWI-EAS443:3:94:388:1331#0/1  
AGCGAAAGCAGGTCAAATATATTCAATATGGAGAGAATAA  
+HWI-EAS443:3:94:388:1331#0/1  
`babbbbaaaaa]abbaaabbaa`Ya`aa\_¥a`a\_a\_aa  
@HWI-EAS443:3:95:1030:1596#0/1  
GAAAGCAGGTCAAATATATTCAATATGGAGAGAATAAAAAG  
+HWI-EAS443:3:95:1030:1596#0/1  
aaab`]aa`\_abaaaaaaaaaabaa`aa^b\_a`a`\_`aa  
@HWI-EAS443:3:95:1701:1139#0/1  
CGAAAGCAGGTCAAATATATTCAATATGGAGAGAATAAAA  
+HWI-EAS443:3:95:1701:1139#0/1  
abbaW\_b\_Pa¥abbaabbbbaLbbbbbbbaaba`ba`b^  
@HWI-EAS443:3:96:1470:457#0/1  
GAAAGCAGGTCAAATATATTCAATATGGAGAGAATAAAAAG  
+HWI-EAS443:3:96:1470:457#0/1  
a\_ab`abab[X^]¥`abb\_a[aaa\_[YYbYSa\_baa\_aa  
@HWI-EAS443:3:96:883:1718#0/1  
CGAAAGCAGGTCAAATATATTCAATATGGAGAGAATAAAA  
+HWI-EAS443:3:96:883:1718#0/1  
ab\_¥^b]\_`ZWYab]aaba[^Y^`a`aa]\_a\_a`\_\_aa`a  
@HWI-EAS443:3:99:102:1901#0/1  
CGAAAGCAGGTCAAATATATTCAATATGGAGAGAATAAAA  
+HWI-EAS443:3:99:102:1901#0/1  
\_bb\_a`\_a]Xaa`aa\_a\_T\_W`U`a`a^^`S\_U^\_Z`



@HWI-EAS443:3:99:943:1168#0/1  
CGAAAGCAGGTCAAATATATTCAATATGGAGAGAATAAAA  
+HWI-EAS443:3:99:943:1168#0/1  
abbbbbaaa`b[\_baVabbaba`baa`aba\_aaa[^b\_a``  
@HWI-EAS443:3:9:1531:325#0/1  
AGCGAAAGCAGGTCAAATATATTCAATATGGAGAGAATAA  
+HWI-EAS443:3:9:1531:325#0/1  
ab\_aaabababaZ^baaaabaaa`\_a`aa¥\_aaa`\_aaa  
@HWI-EAS443:3:9:413:1671#0/1  
CGAAAGCAGGTCAAATATATTCAATATGGAGAGAATAAAA  
+HWI-EAS443:3:9:413:1671#0/1  
abba`a\_aaY¥abbbbaaaaa`a[aaaaa\_\_`^a`\_`aaa  
@HWI-EAS443:3:56:773:1941#0/1  
CAGATTGCTTCAAATGAGAATGTGGAAAGCATGGACTCGA  
+HWI-EAS443:3:56:773:1941#0/1  
WP\_ba`b\_ba0a`aW\_\_\_\_X¥aaJbba0¥HHab¥bbIYDP¥  
@HWI-EAS443:3:70:1362:124#0/1  
GGTTCACACTTCCCAGAAGGTCTGGTCTGCAGGTGCTG  
+HWI-EAS443:3:70:1362:124#0/1  
aaZ`^W`]a`]a^P]aaY`bZXGaXYa`\_]UaVY^  
@HWI-EAS443:3:71:968:768#0/1  
GCCACAGAAATCAGAGCATCTGCCGGGAGAATGATTGGTG  
+HWI-EAS443:3:71:968:768#0/1  
a`Y`aa`\_]¥a`[¥PT¥Q``¥^H[SFDH]]V[IE0¥^SFK  
@HWI-EAS443:3:68:1647:248#0/1  
GGTTCAGATTGCTTCAAATGAGAATGTGGAAACCATGGAC  
+HWI-EAS443:3:68:1647:248#0/1  
aa^a\_a¥`\_a[\_\_\_^`^]¥]\_\_a`Y\_]`^Z]T]¥¥XXX  
@HWI-EAS443:3:73:767:1704#0/1  
GGATGCCACAGAAATCAGAGCATCTGTCGGGAGAATGATT  
+HWI-EAS443:3:73:767:1704#0/1  
a^MRa\_aUV¥]\_]a¥a\_ONX\_¥ZX\_TKQ\_YFX\_RSFVVLN  
@HWI-EAS443:3:89:722:1205#0/1  
GCCAGGATGCCACAGAAATCAGAGCATCTGTCGGGAGAAT  
+HWI-EAS443:3:89:722:1205#0/1  
aaQaaaZ`aUFQ]\_\_Q\_a`\_a¥]]X\_a`baGVa^GM`]XG  
@HWI-EAS443:3:98:954:1138#0/1  
GGGGTTCAGATTGCTTCAAATGAGAATGTGGAAACCATGG  
+HWI-EAS443:3:98:954:1138#0/1  
abbb[K]abbb`abaabbbabbababb[bbaabaaabb\_  
@HWI-EAS443:3:9:1391:2026#0/1  
GGATGCCACAGAAATCAGAGCATCTGTCGGGAGAATGATT  
+HWI-EAS443:3:9:1391:2026#0/1  
a[ZZXNOS\_b]]`aLM¥YN^\_\_\_\_^`RNXZHPZV[UBBBB  
@HWI-EAS443:3:73:1596:1085#0/1  
CAGAGATTGCTTGGAGAAGCTGTGATGAGAATGGGAGAC  
+HWI-EAS443:3:73:1596:1085#0/1  
ab]\_U]\_^TZ¥^¥¥`\_R\_YDW\_\_Va\_\_^U]FY`\_^ZD¥W]  
@HWI-EAS443:3:60:1626:906#0/1  
TGGCTGTGAGTAAGTATGCTAGAGTTCCGTTTTTCGTTTCA

+HWI-EAS443:3:60:1626:906#0/1  
aa`abb^[[\_T¥ULYU`^Y]\_a\_]WHVY`]aa^G\_M``Y¥  
@HWI-EAS443:3:73:833:90#0/1  
ATCCGAATCCTTTTGGTCGCTGTCTGGCTGTCAGTAAGTA  
+HWI-EAS443:3:73:833:90#0/1  
a`\_\_a`aaa`aaaa`\_^`aa`¥a\_\_¥`aZU¥¥UZV^V¥  
@HWI-EAS443:3:63:1591:1391#0/1  
GGCGGGGAGTCTTCGAGCTCTCGGACGAAAATGCAACGAA  
+HWI-EAS443:3:63:1591:1391#0/1  
R`aZa]]Q\_Uba`^^U`]]`Wa^[Z]LPVU]GTbZ^BBBB  
@HWI-EAS443:3:22:1515:2013#0/1  
ATAAGCACCATTTCCATATACTGGAGATCCTCCATACA  
+HWI-EAS443:3:22:1515:2013#0/1  
abaa`a`[aa\_\_¥aS` `[a`a`^TOWaWUYG[VN]¥\_¥^  
@HWI-EAS443:3:61:574:849#0/1  
ATCCCATGGCTGTATGGAGGATCTCCAGTATAAGGGAATG  
+HWI-EAS443:3:61:574:849#0/1  
`a^a`bbbbabb¥^]a]\_\_]W[b\_a\_R\_XYRW\_\_\_aUZW]  
@HWI-EAS443:3:29:1747:683#0/1  
ATTTGAATGGATGTCAATCCGACTCTACTTTTCTATTCC  
+HWI-EAS443:3:29:1747:683#0/1  
abbbbbbbbbbab^`abaZ[^¥Zb`aa^abab¥ab\_aaa]  
@HWI-EAS443:3:22:41:841#0/1  
CCATTTGACTGGATGTCAATCCGACTCTACTTTTCTAAA  
+HWI-EAS443:3:22:41:841#0/1  
aaaYW]S[F[a` `]\_Y\_]UWW¥XS` `^a`ZYWaa]\_^`^]  
@HWI-EAS443:3:50:1598:1563#0/1  
ATTATTTTTGCCGTCTGAGTTCTTCAATGGGGGAACAGAT  
+HWI-EAS443:3:50:1598:1563#0/1  
a\_` [` `baba\_W^a]\_\_\_`RPYSLG¥Y¥]PF[ `^^XU¥SV  
@HWI-EAS443:3:5:1773:1219#0/1  
TGTAACAATGCTGTGGTAATGCCAGCCCATGGTACAGCC  
+HWI-EAS443:3:5:1773:1219#0/1  
`bbab`bbba\_Y\_b^a^a]\_a¥V[aT¥^][a]XPGL¥¥BB  
@HWI-EAS443:3:9:1783:548#0/1  
TTCATTATTTTTGCCGTCTGAGTTATTCAATGGTGAACA  
+HWI-EAS443:3:9:1783:548#0/1  
aba^U¥a\_bbaaRL` `¥aab\_X`PX]Ha`\_aaP^^¥\_]\_  
@HWI-EAS443:3:23:1451:1294#0/1  
TAAATTCATTATTTTTGCCGTCTGAGTTCTTCAATGGGGG  
+HWI-EAS443:3:23:1451:1294#0/1  
`^a` `bbb`X¥¥`baa` [¥` `baY`b]¥^aa¥]V^aFW`I  
@HWI-EAS443:3:92:1632:385#0/1  
TAAATTCATTATTTTTGCCGTCTGAGTTCTTCAATGGCGG  
+HWI-EAS443:3:92:1632:385#0/1  
``]`ba^Tba[b`\_aabSIb\_Paa\_b]]Yaa\_aaYaaNWN  
@HWI-EAS443:3:96:1254:1189#0/1  
CAAACATTTGAATGGATGTCAATCCGACTCTACTTNTCC  
+HWI-EAS443:3:96:1254:1189#0/1  
]ab`J`b¥bbaa^bb\_aaaJbKaaUH[P]`UaVRW]D]¥Y

@HWI-EAS443:3:35:169:763#0/1  
CATTTGAATGGATGTCAATCCGACTCTACTTTTCCTAAAC  
+HWI-EAS443:3:35:169:763#0/1  
abZ]aaa¥a^b`b]W^`abbY¥`a\_V\_``\_`a\_a^I¥J  
@HWI-EAS443:3:47:1057:658#0/1  
CATCTGTAGTCTTTGATGAACAATTGAAGAGCCATCTGGG  
+HWI-EAS443:3:47:1057:658#0/1  
aa`abababbbbbbbbbbb]abbbababb`a`baaba`  
@HWI-EAS443:3:10:1749:1033#0/1  
AACCATTTGAATGGATGTCAATCCGACTCTACTTTTCCTA  
+HWI-EAS443:3:10:1749:1033#0/1  
aaa]bbbaa\_aaaa`ab`^a\_`¥\_aYO\_]`^X`a``WW\_a  
@HWI-EAS443:3:10:549:1357#0/1  
AACCATTTGAATGGATGTCAATCCGACTCTACTTTTCCTA  
+HWI-EAS443:3:10:549:1357#0/1  
a^[`babbba`ab]aaa[```]Y^a^¥aaa\_¥`]\_\_S¥^a  
@HWI-EAS443:3:10:957:218#0/1  
TGTAACAATGCTGTGGTAATGCCAGCCCATGGTCCAGCC  
+HWI-EAS443:3:10:957:218#0/1  
aaabbaaababaaba```aaa\_\_\_\_]YZZ^^^a\_TVS]\_VU  
@HWI-EAS443:3:11:1755:1044#0/1  
AAACCATTTGAATGGATGTCAATCCGACTCTACTTTTCCT  
+HWI-EAS443:3:11:1755:1044#0/1  
¥aa\_a`bbb\_```[``a]TZa`]XaWX\_[\_]\_`\_\_Y]^  
@HWI-EAS443:3:11:603:82#0/1  
CAAACCATTTGAATGGATGTCAATCCGACTCTACTTTTCCT  
+HWI-EAS443:3:11:603:82#0/1  
aba]a^a\_bbb\_aabaa`b]\_`\_`^a]^]\_\_¥\_\_^\_^  
@HWI-EAS443:3:15:1549:107#0/1  
AACCATTTGAATGGATGTCAATCCGACTCTACTTTTCCTA  
+HWI-EAS443:3:15:1549:107#0/1  
aaaaabbabaaaa\_bb¥aaba[^¥U]XWa\_\_aaaa\_[`a  
@HWI-EAS443:3:16:325:2011#0/1  
AACCATTTGAATGGATGTCAATCCGACTCTACTTTTCCTA  
+HWI-EAS443:3:16:325:2011#0/1  
^RN\_RW]GWX^IO][PSWWNW]^SOO[[]TLTYU[UVV[¥  
@HWI-EAS443:3:16:884:562#0/1  
ATTATTTTTGCCGTCTGAGTTCTTCAATGGTGAACAGAT  
+HWI-EAS443:3:16:884:562#0/1  
O¥\_\_aabaabab\_`bab¥S]bX\_b^X[^a\_`bYH\_\_VZ¥`  
@HWI-EAS443:3:17:1713:473#0/1  
AAACCATTTGAATGGATGTCAATCCGACTCTACTTTTCCT  
+HWI-EAS443:3:17:1713:473#0/1  
a¥a`¥^aabbaa`a`¥aa\_\_\_\_\_XX¥[]`[\_`Y\_^^`[[\_  
@HWI-EAS443:3:1:510:521#0/1  
AAACCATTTGAATGGATGTCAATCCGACTCTACTTTTCCT  
+HWI-EAS443:3:1:510:521#0/1  
aaa\_`aaa\_a`aaaa]ab¥[[aa`\_`[S`Y\_\_Za\_a`SVB  
@HWI-EAS443:3:20:128:22#0/1  
AAATTCATTATTTTTGCCGTCTGAGTTCTTCAATGGTGA

+HWI-EAS443:3:20:128:22#0/1  
\_¥Z`UYX]^UYT^^b^`baZ\_ba`NZ^a`ZX\_a`YUa]Y  
@HWI-EAS443:3:20:161:540#0/1  
CCAGACCTATGATTGGACATTAACAGAAATCAACCGGCA  
+HWI-EAS443:3:20:161:540#0/1  
a¥WWTU`a`aaa[U`VY\_`\_]a¥¥\_T]aYY`R`[Z`\_VY  
@HWI-EAS443:3:20:358:1947#0/1  
AAACCATTTGAATGGATGTCAATCCGACTCTACTTTTCCT  
+HWI-EAS443:3:20:358:1947#0/1  
a`^W\_] [Na]¥\_`I`Z`P^SU[S[¥TY] [TT¥]V^^]O  
@HWI-EAS443:3:22:1223:625#0/1  
ACCATTTGAATGGATGTCAATCCGACTCTACTTTTCCTAA  
+HWI-EAS443:3:22:1223:625#0/1  
a¥\_`ab`a^\_abaa]^`ba\_¥Z`Ua\_aUUaaa`YYa`a  
@HWI-EAS443:3:22:942:1380#0/1  
AACCATTTGAATGGATGTCAATCCGACTCTACTTTTCCTA  
+HWI-EAS443:3:22:942:1380#0/1  
aa`\_a`aaa^aa`a`\_[a\_\_^^^X^\_]^^`^^`\_`^\_a  
@HWI-EAS443:3:24:1006:1019#0/1  
AACCATTTGAATGGATGTCAATCCGACTCTACTTTTCCTA  
+HWI-EAS443:3:24:1006:1019#0/1  
`a`aabbabaaab[¥a`^`a`\_`^aaa\_\_aa`aY^aa  
@HWI-EAS443:3:24:1725:1200#0/1  
AAATTCATTATTTTTGCCGTCTGAGTTCTTCAATGGTGGA  
+HWI-EAS443:3:24:1725:1200#0/1  
abbbbababbbbbbbbaabbabbbbab`bb`aaaab]baa  
@HWI-EAS443:3:25:1028:902#0/1  
CATTATTTTTGCCGTCTGAGTTCTTCAATGGTGGAACAGA  
+HWI-EAS443:3:25:1028:902#0/1  
SW^a`ab`\_b`bab`bba¥abaaaa^abbb`[bbbaNa`a  
@HWI-EAS443:3:25:533:1320#0/1  
ACCATTTGAATGGATGTCAATCCGACTCTACTTTTCCTAA  
+HWI-EAS443:3:25:533:1320#0/1  
`\_`b`^`\_¥]aZPXZ\_b]a]a`¥Q]W[[^V```aa^`aaa  
@HWI-EAS443:3:25:570:590#0/1  
TGTAACAATGCTGTGGTAATGCCAGCCCATGGTCCAGCC  
+HWI-EAS443:3:25:570:590#0/1  
`¥`W]\_`\_]bba\_a`b`X`aaaaZb```a]aa`P`^a`¥a  
@HWI-EAS443:3:27:980:453#0/1  
AAATTCATTATTTTTGCCGTCTGAGTTCTTCAATGGTGGA  
+HWI-EAS443:3:27:980:453#0/1  
V¥¥Z`\_¥W^baU^^¥ZVab`ab\_[`W`\_`][aaa\_OK`a^  
@HWI-EAS443:3:2:1246:508#0/1  
ATTATTTTTGCCGTCTGAGTTCTTCAATGGTGGAACAGAT  
+HWI-EAS443:3:2:1246:508#0/1  
a^aaababa`a^b`¥ab\_a\_aaaa^`aa`^a``\_`^\_a¥\_  
@HWI-EAS443:3:30:1242:1363#0/1  
AACCATTTGAATGGATGTCAATCCGACTCTACTTTTCCTA  
+HWI-EAS443:3:30:1242:1363#0/1  
Z[ ]\_\_aaaaZ\_\_\_X\_a\_V^]]a^`aY\_aa`^a```XSTZa

@HWI-EAS443:3:30:564:959#0/1  
AACCATTTGAATGGATGTCAATCCGACTCTACTTTTCCTA  
+HWI-EAS443:3:30:564:959#0/1  
abbbbbbb`abaaaabab[\_aaaa`a]\_`a`a`\_`\_`^`  
@HWI-EAS443:3:34:1664:1781#0/1  
AACCATTTGAATGGATGTCAATCCGACTCTACTTTTCCTA  
+HWI-EAS443:3:34:1664:1781#0/1  
\_aabababbabbaaaaba`aaaWa^^a`aaM^`[\_`YY^`  
@HWI-EAS443:3:34:1734:1266#0/1  
AAACCATTTGAATGGATGTCAATCCGACTCTACTTTTCCT  
+HWI-EAS443:3:34:1734:1266#0/1  
abab^aabb\_a]aaX\_aY\_]Z^ZZ¥a\_^\_SaWM\_\_\_\_[^U^  
@HWI-EAS443:3:35:150:92#0/1  
GCTGGACCATGGGCTGGCATTACCACAGCATTGTTTACAG  
+HWI-EAS443:3:35:150:92#0/1  
`babaaba\_a]a`bab\_b]aYabba]FWa[\_]Y[\_aa`a\_  
@HWI-EAS443:3:39:1392:107#0/1  
AACCATTTGAATGGATGTCAATCCGACTCTACTTTTCCTA  
+HWI-EAS443:3:39:1392:107#0/1  
aa\_Xa^aYa¥]`aa^a`]U^^Z`I`GX\_YU]V[^\_UGZ^Z  
@HWI-EAS443:3:39:1704:542#0/1  
CTGTAAACAATGCTGTGGTAATGCCAGCCCATGGTCCAGC  
+HWI-EAS443:3:39:1704:542#0/1  
`a^`aa``bbbbbbbab\_b`aba^^[a``[XUZQYRR^T  
@HWI-EAS443:3:39:458:1372#0/1  
AACCATTTGAATGGATGTCAATCCGACTCTACTTTTCCTA  
+HWI-EAS443:3:39:458:1372#0/1  
]^aa\_a\_aaZX^a\_a\_]\_a`\_`\_^X]`\_\_\_\_V¥a`\_Z\_]\_  
@HWI-EAS443:3:40:1217:183#0/1  
CTGTAAACAATGCTGTGGTAATGCCAGCCCATGGTCCAGC  
+HWI-EAS443:3:40:1217:183#0/1  
abbabababbabaab`aaZbaa`a`\_Uaa`[\_^^Q\_^^[U  
@HWI-EAS443:3:40:790:389#0/1  
AAACCATTTGAATGGATGTCAATCCGACTCTACTTTTCCT  
+HWI-EAS443:3:40:790:389#0/1  
aaaa\_aaaaaa]`aa`\_a]`^\_[^¥¥H]]\_^WXUY]`]\_\_  
@HWI-EAS443:3:42:1549:1142#0/1  
AAACCATTTGAATGGATGTCAATCCGACTCTACTTTTCCT  
+HWI-EAS443:3:42:1549:1142#0/1  
]a\_\_\_\_a`aa``aa^a]\_bV[^V^[]]Y]`]\_Y]a`aa`¥¥  
@HWI-EAS443:3:43:598:474#0/1  
AACCATTTGAATGGATGTCAATCCGACTCTACTTTTCCTA  
+HWI-EAS443:3:43:598:474#0/1  
]PYa¥`aaa\_V^`[X¥^TS[^[YY]X[^[ZLYV]\_^[WYW  
@HWI-EAS443:3:44:1626:477#0/1  
ACCATTTGAATGGATGTCAATCCGACTCTACTTTTCCTAA  
+HWI-EAS443:3:44:1626:477#0/1  
```abbbbababaaab\_^`aa]¥aZZ`aa[Y`aa]]¥`a`  
@HWI-EAS443:3:44:1725:1171#0/1  
AAACCATTTGAATGGATGTCAATCCGACTCTACTTTTCCT

+HWI-EAS443:3:44:1725:1171#0/1  
aaa`aabab^aaaa\_aaaaa`WZZ`[\_]`\_a^Y\_  
@HWI-EAS443:3:44:479:869#0/1  
AAACCATTTGAATGGATGTCAATCCGACTCTACTTTTCCT  
+HWI-EAS443:3:44:479:869#0/1  
`^`ab]¥`baa^`a\_`bUaa\_WT[a`\_a\_\_aPa[U`W[Y  
@HWI-EAS443:3:47:1277:1610#0/1  
AAACCATTTGAATGGATGTCAATCCGACTCTACTTTTCCT  
+HWI-EAS443:3:47:1277:1610#0/1  
abbaabbabbaaaaaa^`\_a\_`^`^^`\_\_\_\_]\_\_`a^¥a  
@HWI-EAS443:3:50:835:250#0/1  
AACCATTTGAATGGATGTCAATCCGACTCTACTTTTCCTA  
+HWI-EAS443:3:50:835:250#0/1  
`ba`ababbabab^aba`^aa\_\_\_\_`^]aXaa\_aa`aY]ab  
@HWI-EAS443:3:51:271:73#0/1  
CAAACCATTTGAATGGATGTCAATCCGACTCTACTTTTCC  
+HWI-EAS443:3:51:271:73#0/1  
abbb`abbbbaabbbab`\_aaa`\_a`\_b^a\_]`aaa\_\_  
@HWI-EAS443:3:51:753:1527#0/1  
CATTATTTTTGCCGTCTGAGTTCTTCAATGGTGGACAGA  
+HWI-EAS443:3:51:753:1527#0/1  
aabbbbbbbbbbb`bbab\_]abababa\_abaaa`bab  
@HWI-EAS443:3:52:1549:2016#0/1  
ATCTGTAGTCTTTGATGAACAATTGAAGAGCCATCTGGGC  
+HWI-EAS443:3:52:1549:2016#0/1  
]VWXXM\_\_X[a\_]\_]`a[SY]aX^]aU\_WX\_SV^[QWK  
@HWI-EAS443:3:53:1643:29#0/1  
ATCTGTAGTCTTTGATGAACAATTGAAGAGCCATCTGGGC  
+HWI-EAS443:3:53:1643:29#0/1  
a¥]¥aZaa`[bb\_R\_aba`R`]a`aa\_PYaUH`bX\_T\_WS  
@HWI-EAS443:3:54:1371:1003#0/1  
ACCATTTGAATGGATGTCAATCCGACTCTACTTTTCCTAA  
+HWI-EAS443:3:54:1371:1003#0/1  
a\_b`b`bb^aba][aaY[a^``TN[`UaTZ`\_a`¥X^a\_  
@HWI-EAS443:3:57:320:329#0/1  
AACCATTTGAATGGATGTCAATCCGACTCTACTTTTCCTA  
+HWI-EAS443:3:57:320:329#0/1  
a`aa`baabaaaaaaa[^`\_a`\_aW^a```\_a`aaZ^aa  
@HWI-EAS443:3:58:1622:760#0/1  
GGCTGGACCATGGGCTGGCATTACCACAGCATTGTTTACA  
+HWI-EAS443:3:58:1622:760#0/1  
aa\_a\_a`a`\_a^^`\_\_```\_`aa^`aa`a\_\_aa\_^a`^S\_  
@HWI-EAS443:3:58:277:625#0/1  
GCTGGACCATGGGCTGGCATTACCACAGCATTGTTTACAG  
+HWI-EAS443:3:58:277:625#0/1  
aa]aQ\_`aa`a`]a]a`\_\_\_\_`aa`^`\_a``[\_`\_]W[aa  
@HWI-EAS443:3:58:660:965#0/1  
AATTCATTATTTTTGCCGTCTGAGTTCTTCAATGGTGGAA  
+HWI-EAS443:3:58:660:965#0/1  
a`a`a`baWaaa^`\_aaa]^aa`\_]\_\_a\_aa\_a\_^]\_\_^`

@HWI-EAS443:3:59:1534:1371#0/1  
CATTATTTTTGCCGTCTGAGTTCTTCAATGGTGGAACAGA  
+HWI-EAS443:3:59:1534:1371#0/1  
a\_aKb`aba[a`abbV^ab``bbb`¥babbYK[\_WXU^`]  
@HWI-EAS443:3:59:298:94#0/1  
AAACCATTTGAATGGATGTCAATCCGACTCTACTTTTCCT  
+HWI-EAS443:3:59:298:94#0/1  
a`a\_aaaaaa^a`aa`a^Y^Y\_]\_^XX^\_\_ZV]\_X¥^]^  
@HWI-EAS443:3:59:583:832#0/1  
ACCATTTGAATGGATGTCAATCCGACTCTACTTTTCCTAA  
+HWI-EAS443:3:59:583:832#0/1  
a`abaaaaaa]aba\_a\_a```a`a¥`aa¥^```ZS\_\_\_\_  
@HWI-EAS443:3:59:915:370#0/1  
GAGTTCTTCAATGGTGGAACAGATCTTCATGATCTCGGAG  
+HWI-EAS443:3:59:915:370#0/1  
T\_¥I^X`¥¥`\_ba`Sab]ba`bS]WV]b¥]¥I`URFF]UX  
@HWI-EAS443:3:5:1070:990#0/1  
CTGTAAACAATGCTGTGGTAATGCCAGCCCATGGTCCAGC  
+HWI-EAS443:3:5:1070:990#0/1  
^T[¥\_\_WX\_\_X[W¥\_SVTPZ\_X^XVXa]LS^\_P\_[VX]VB  
@HWI-EAS443:3:5:1369:282#0/1  
ACCATTTGAATGGATGTCAATCCGACTCTACTTTTCCTAA  
+HWI-EAS443:3:5:1369:282#0/1  
aabbb`baaabbaab^\_aaaG\_a`^a]^`aYaba`¥Xaba  
@HWI-EAS443:3:60:1344:1356#0/1  
ATTATTTTTGCCGTCTGAGTTCTTCAATGGTGGAACAGAT  
+HWI-EAS443:3:60:1344:1356#0/1  
abbbba`aa`a`aX\_aaaa^a\_aaaaa\_aZa\_]¥MU\_\_\_\_  
@HWI-EAS443:3:65:104:947#0/1  
ATTCATTATTTTTGCCGTCTGAGTTCTTCAATGGTGGAAC  
+HWI-EAS443:3:65:104:947#0/1  
a`ab^aaaaaaaaa`a`aa]aa]aaaY`\_a\_^Vsa`\_`^  
@HWI-EAS443:3:66:1355:936#0/1  
GGCTGGACCATGGGCTGGCATTACCACAGCATTGTTTACA  
+HWI-EAS443:3:66:1355:936#0/1  
ab]b]a]J¥a[U`YL[aa\_\_aY]^aW^aaa`a`XYaa]\_a  
@HWI-EAS443:3:66:576:1376#0/1  
GGCTGGACCATGGGCTGGCATTACCACAGCATTGTTTACA  
+HWI-EAS443:3:66:576:1376#0/1  
a`ba¥]aba¥`\_VVa[aabaaabbaaaa```aaa\_aaa`^  
@HWI-EAS443:3:6:717:277#0/1  
AACCATTTGAATGGATGTCAATCCGACTCTACTTTTCCTA  
+HWI-EAS443:3:6:717:277#0/1  
`bI]bbbbbbbb`aabaXb]a]\_a\_Sb^\_¥IHa]a\_Qaa  
@HWI-EAS443:3:70:1046:1032#0/1  
AAACCATTTGAATGGATGTCAATCCGACTCTACTTTTCCT  
+HWI-EAS443:3:70:1046:1032#0/1  
a^a`aaaaaaaaa`a`a¥\_[\_^]^¥\_^^¥YZ]^^]YY]  
@HWI-EAS443:3:72:339:458#0/1  
AACCATTTGAATGGATGTCAATCCGACTCTACTTTTCCTA

+HWI-EAS443:3:72:339:458#0/1  
a]abaabbbbaabaaa`\_aaaaaa`\_\_a`\_\_X`aa`^a\_a  
@HWI-EAS443:3:73:541:106#0/1  
GCTGGACCATGGGCTGGCATTACCACAGCATTGTTTACAG  
+HWI-EAS443:3:73:541:106#0/1  
Yaba[aZ]`aaaaaa]\_abbabaaaXbb^bbb`bbab^ab  
@HWI-EAS443:3:74:1579:542#0/1  
ACCATTTGAATGGATGTCAATCCGACTCTACTTTTCCTAA  
+HWI-EAS443:3:74:1579:542#0/1  
a\_\_abbaa^abba`b`a`aaa`aZ\_b``¥Y\_aa]]]aaa  
@HWI-EAS443:3:74:937:663#0/1  
AACCATTTGAATGGATGTCAATCCGACTCTACTTTTCCTA  
+HWI-EAS443:3:74:937:663#0/1  
aaaaaabbbbaaab`aa]abaaa\_\_]aa^a\_Vaa\_a^`a  
@HWI-EAS443:3:75:1112:1208#0/1  
ACCATTTGAATGGATGTCAATCCGACTCTACTTTTCCTAA  
+HWI-EAS443:3:75:1112:1208#0/1  
Obb\_bababaV`¥baa\_aabaZ]X¥^baaaYaaaa`\_a\_b  
@HWI-EAS443:3:76:1590:1088#0/1  
TAAATTCATTATTTTTGCCGTCTGAGTTCTTCAATGGTGG  
+HWI-EAS443:3:76:1590:1088#0/1  
a`^`aa\_\_aa]aaa`\_a^[a\_\_`Z\_\_`[a^V\_\_^`¥[¥[  
@HWI-EAS443:3:76:497:371#0/1  
TATCTGTAGTCTTTGATGAACAATTGAAGAGCCATCTGGG  
+HWI-EAS443:3:76:497:371#0/1  
aaaaabaaa\_`baaaba`a`\_aaaaaa`\_a^\_a^^^`^a  
@HWI-EAS443:3:77:404:1221#0/1  
AATTCATTATTTTTGCCGTCTGAGTTCTTCAATGGTGGAA  
+HWI-EAS443:3:77:404:1221#0/1  
aaaa`aaaaaaa\_\_aaa`]a`\_a[`a`a``\_aa\_[`\_`a  
@HWI-EAS443:3:78:1619:155#0/1  
AATTCATTATTTTTGCCGTCTGAGTTCTTCAATGGTGGAA  
+HWI-EAS443:3:78:1619:155#0/1  
aaaaW`a`\_a\_aaa^^U[Y^\_a\_a]¥Y\_\_[\_^\_a][^TW]  
@HWI-EAS443:3:79:1282:1490#0/1  
AACCATTTGAATGGATGTCAATCCGACTCTACTTTTCCTA  
+HWI-EAS443:3:79:1282:1490#0/1  
aYT\_P\_a^[Q¥`a`^TaTX[U]^UORa`aUT[¥T[¥Z\_a  
@HWI-EAS443:3:79:1382:1204#0/1  
CTGTAACAATGCTGTGGTAATGCCAGCCCATGGTCCAGC  
+HWI-EAS443:3:79:1382:1204#0/1  
abbZVaZT[UTZVZ^STV`\_W]^aXaXVYML]`ZPXL¥aa  
@HWI-EAS443:3:80:1745:1947#0/1  
AAACCATTTGAATGGATGTCAATCCGACTCTACTTTTCCT  
+HWI-EAS443:3:80:1745:1947#0/1  
aaa\_\_a`a`a`\_`\_\_aa]`\_^]^^]T][\_TT]]]]]\_¥  
@HWI-EAS443:3:83:802:161#0/1  
AAACCATTTGAATGGATGTCAATCCGACTCTACTTTTCCT  
+HWI-EAS443:3:83:802:161#0/1  
aaa`aaaaaa\_``aaaab]^`\_\_]\_\_YV\_]\_\_Y`\_`¥]^



@HWI-EAS443:3:83:938:505#0/1  
ACCATTTGAATGGATGTCAATCCGACTCTACTTTTCCTAA  
+HWI-EAS443:3:83:938:505#0/1  
\_`b^abZV]^`a]^`ab]^a^a^`^]VP]^a`aa`aaaa^`aaa  
@HWI-EAS443:3:84:1400:128#0/1  
AATTCATTATTTTTGCCGTCTGAGTTCTTCAATGGTGGAA  
+HWI-EAS443:3:84:1400:128#0/1  
U[ababba¥`aaabaV`b[abb0ba\_`b\_]¥VYPa\_\_a[L  
@HWI-EAS443:3:85:292:1428#0/1  
AAACCATTTGAATGGATGTCAATCCGACTCTACTTTTCCT  
+HWI-EAS443:3:85:292:1428#0/1  
aab`\_\_`aaaaaa¥^a\_aZa^Y`aaY¥a\_\_`\_\_a``\_YZ^  
@HWI-EAS443:3:86:1004:730#0/1  
AAACCATTTGAATGGATGTCAATCCGACTCTACTTTTCCT  
+HWI-EAS443:3:86:1004:730#0/1  
abbaaabababa\_a\_aabb`\_`a`\_]`^a`b\_\_`aba¥X`  
@HWI-EAS443:3:86:1494:771#0/1  
ATTATTTTTGCCGTCTGAGTTCTTCAATGGTGGAACAGAT  
+HWI-EAS443:3:86:1494:771#0/1  
a```bbb^¥`\_¥`babbaba\_¥`b]aaa`bZaa`Z`aa`\_  
@HWI-EAS443:3:87:1024:1689#0/1  
GGCTGGACCATGGGCTGGCATTACCACAGCATTGTTTACA  
+HWI-EAS443:3:87:1024:1689#0/1  
abaaaabbbbaaaaa\_babaabba\_abZb`abbbaaa`aab  
@HWI-EAS443:3:87:296:340#0/1  
ATTCATTATTTTTGCCGTCTGAGTTCTTCAATGGTGGAAC  
+HWI-EAS443:3:87:296:340#0/1  
a\_a\_X¥ab`aa]^`a`a\_a`aa`U```aaaY`ZRRaa\_\_\_\_  
@HWI-EAS443:3:88:1593:695#0/1  
AACCATTTGAATGGATGTCAATCCGACTCTACTTTTCCTA  
+HWI-EAS443:3:88:1593:695#0/1  
aa`b\_babb\_ba¥baabZaa\_a`Saa¥Y`a\_Sab`YY¥^\_  
@HWI-EAS443:3:90:541:1805#0/1  
AACCATTTGAATGGATGTCAATCCGACTCTACTTTTCCTA  
+HWI-EAS443:3:90:541:1805#0/1  
a¥`aaaa`aa^a`\_^\_Z\_\_aaaZ\_X^S^^]W`XWYGNN`  
@HWI-EAS443:3:92:1777:1881#0/1  
TGTAACAATGCTGTGGTAATGCCAGCCCATGGTCCAGCC  
+HWI-EAS443:3:92:1777:1881#0/1  
abZ^\_QZ^aabb`]^`\_¥`aa`^]^`\_\_X\_]V[Z^U`YV¥UY  
@HWI-EAS443:3:95:1069:698#0/1  
AAATTCATTATTTTTGCCGTCTGAGTTCTTCAATGGTGGAA  
+HWI-EAS443:3:95:1069:698#0/1  
aa¥baY`a0`baaa`````]Z^aXaaaaaa`Y`abb\_a\_[  
@HWI-EAS443:3:9:763:1883#0/1  
AACCATTTGAATGGATGTCAATCCGACTCTACTTTTCCTA  
+HWI-EAS443:3:9:763:1883#0/1  
aa[Zaaa`aa`a`^a\_\_ZS\_\_]¥^XZV\_]\_^Z^]X^ZZ^`  
@HWI-EAS443:3:8:1459:1085#0/1  
ATTCATCTTGATCTTGGAGGTTCCATTGGTTCTCAAATA

+HWI-EAS443:3:8:1459:1085#0/1  
a`\_P]\_aX]`a`aaaaXLYa^SMDL¥PXL¥0\_GWG¥FRGN  
@HWI-EAS443:3:11:1305:82#0/1  
ATTTTCATCTTGATCTTGGAGGTTCCATTGGTTCTCACATA  
+HWI-EAS443:3:11:1305:82#0/1  
aaa`¥b\_`aZa\_aab[P\_`V¥0^ZZ^\_[XXQTPWWVZN  
@HWI-EAS443:3:17:1488:1031#0/1  
ATTTTCATCTTGATCTTGGAGGTTCCATTGGTTCTCACATA  
+HWI-EAS443:3:17:1488:1031#0/1  
`baa`aaZaab^^¥babaaaVT[`^^T[YNZ`]UX]W^`  
@HWI-EAS443:3:53:985:1980#0/1  
GAAAGAATATGGGGAAGATCCGAAAATCGAAACTAACAAA  
+HWI-EAS443:3:53:985:1980#0/1  
aaa`\_abbbabbabb`\_aKbab\_ab`]bb^Xaa]`\_a\_  
@HWI-EAS443:3:5:621:1077#0/1  
ATTTTCATCTTGATCTTGGAGGTTCCATTGGTTCTCACATA  
+HWI-EAS443:3:5:621:1077#0/1  
a¥baaa`\_¥Ya`aa`\_a`Wa^^`\_W[\_SX^W]^Y\_BB  
@HWI-EAS443:3:62:668:1309#0/1  
ATTTTCATCTTGATCTTGGAGGTTCCATTGGTTCTCACATA  
+HWI-EAS443:3:62:668:1309#0/1  
aaaa`]aa`]a]aaa`aa^\_^U]NN¥NYUZ`\_¥\_UYSR  
@HWI-EAS443:3:69:1477:679#0/1  
CGAAGGTTCCAGGTTCCAGATTGTCCCTAAGTGCCTGAAC  
+HWI-EAS443:3:69:1477:679#0/1  
ab`\_a\_R\_\_`a¥`¥\_a\_H^^`\_aaa`aaa¥\_YY\_]\_]\_  
@HWI-EAS443:3:77:1765:82#0/1  
ATTTTCATCTTGATCTTGGAGGTTCCATTGGTTCTCACATA  
+HWI-EAS443:3:77:1765:82#0/1  
abbbabbabbbababbbabb¥`W]`a`ZZQ^S[S[^T  
@HWI-EAS443:3:99:143:486#0/1  
GTGAGAACCAATGGAACCTCCAAGATCAAGATGAAATGGG  
+HWI-EAS443:3:99:143:486#0/1  
aab`baaaaaaaaa¥RX\_\_\_\_\_^a\_\_^Z`¥^aZWW\_^]^  
@HWI-EAS443:3:22:1581:214#0/1  
TCTGGGCTCTTCAGCAGATTGAGAGCATGATTGAGGCCGA  
+HWI-EAS443:3:22:1581:214#0/1  
a[a]a^Z`^a`a]\_`a]\_a`\_X\_TX`\_`\_]\_^\_UVTT  
@HWI-EAS443:3:61:262:1337#0/1  
CATGGAAATGAGGCGCTGCCTTCTTCACTCTTTCAGCAG  
+HWI-EAS443:3:61:262:1337#0/1  
abbbba`\_`bbbbbababa`aaaaba`b]PQ^\_\_\_\_]¥\_YZXN  
@HWI-EAS443:3:74:159:1899#0/1  
GAAGGCAGCGCCTCATTTCCATGCCCATTTTCATCCTGAT  
+HWI-EAS443:3:74:159:1899#0/1  
W\_Taabba\_]\_^\_`a`\_`a]a`\_Z¥T`^`W[\_GYN^a  
@HWI-EAS443:3:85:1076:204#0/1  
AGAAGACTCGGGCTCAATCATGCTCTCAATCTGCTGAAGA  
+HWI-EAS443:3:85:1076:204#0/1  
V]¥]\_¥ZQ\_]XPQ¥^Z^\_\_ZY]¥[ZYWW^`^RZWaa`\_¥J

@HWI-EAS443:3:67:1179:437#0/1  
TTGAGATCAAGATGAAATGGGGCATGGAAATGAGGCGCTG  
+HWI-EAS443:3:67:1179:437#0/1  
aaa\_`a[[aa^`a\_Y`aaa^\_\_a`\_a\_a\_aa`¥]a¥`\_  
@HWI-EAS443:3:11:934:1111#0/1  
GCAGATTGAGAGCATGATTGAGGCCGAGTCTTCTGTCAA  
+HWI-EAS443:3:11:934:1111#0/1  
a`Xa\_aaa¥`Xa`\_a^a\_Z\_]a`[U`Y`TS]]UZ\_YY¥^R  
@HWI-EAS443:3:12:538:528#0/1  
GAAGACTCGGCCTCAATCATGCTCTCAATCTGCTGAAGAG  
+HWI-EAS443:3:12:538:528#0/1  
^¥`\_QWZ^^`ZZ`\_\_^TZ\_XZ]\_a[aa\_[\_\_V^X]`\_\_Y  
@HWI-EAS443:3:14:895:1534#0/1  
AGATCAAGATGAAATGGGGCATGGAAATGAGGCGCTGCCT  
+HWI-EAS443:3:14:895:1534#0/1  
\_P```]a[\_a\_a]¥¥]XU]X[a\_\_a^\_a[^[\_]]Q][W  
@HWI-EAS443:3:17:968:461#0/1  
CTCTTCAGCAGATTGAGAGCATGATTGAGGCCGAGTCTTC  
+HWI-EAS443:3:17:968:461#0/1  
aa```[Ya`V`^a\_a0a^ZZ]\_a\_]V^a]\_T^V¥VX]\_0  
@HWI-EAS443:3:18:1074:587#0/1  
CTCTTCAGCAGATTGAGAGCATGATTGAGGCCGAGTCTTC  
+HWI-EAS443:3:18:1074:587#0/1  
H]SZXW\_XQX]\_b`b`bUbbVQ[¥abbbb¥¥IUUR\_KJZ  
@HWI-EAS443:3:21:1415:127#0/1  
GATCAAGATGAAATGGGGCATGGAAATGAGGCGCTGCCTT  
+HWI-EAS443:3:21:1415:127#0/1  
a`aU¥\_a¥`\_\_[]a\_^\_¥`^\_^]XY]\_X]]X`XX\_YYYYX  
@HWI-EAS443:3:22:306:1424#0/1  
GAAGAAGGCAGCGCCTCATTTCATGCCCATTTTCATCTT  
+HWI-EAS443:3:22:306:1424#0/1  
`a[I¥`W]baab^\_bab^aaaaa```a^a\_X``]a`]a^Z  
@HWI-EAS443:3:22:445:847#0/1  
CCAAGATCAAGATGAAATGGGGCATGGAAATGAGGCGCTG  
+HWI-EAS443:3:22:445:847#0/1  
a`a``^^^`a^]`¥[[^Q[^]\_^^¥V¥[Z^\_]ZZ^^¥^  
@HWI-EAS443:3:22:621:1326#0/1  
AGCAGATTGAGAGCATGATTGAGGCCGAGTCTTCTGTCAA  
+HWI-EAS443:3:22:621:1326#0/1  
Ya`^^`aa¥^aa\_\_\_`bWUZWU\_aQ^R^Wa\_\_\_`\_\_Y^`\_  
@HWI-EAS443:3:24:1208:406#0/1  
GAAGACTCGGCCTCAATCATGCTCTCAATCTGCTGAAGAG  
+HWI-EAS443:3:24:1208:406#0/1  
aa[^bM^\_bbV]`XW]`T]Z\_Q\_`¥W\_\_\_[\_\_VR`a[```a  
@HWI-EAS443:3:25:1614:1825#0/1  
AGCAGATTGAGAGCATGATTGAGGCCGAGTCTTCTGTCAA  
+HWI-EAS443:3:25:1614:1825#0/1  
]Q\_`baba`baXa`bba]Wa\_W`Wa^\_VaaYaZ`UYX\_  
@HWI-EAS443:3:26:1117:794#0/1  
CAAGATCAAGATGAAATGGGGCATGGAAATGAGGCGCTGC

+HWI-EAS443:3:26:1117:794#0/1  
ab¥a]^b`bab\_¥baaa`aV`aaaa¥`aaaW][\_a\_`\_@  
@HWI-EAS443:3:26:1716:1296#0/1  
CAGAAGACTCGGCCTCAATCATGCTCTCAATCTGCTGAAG  
+HWI-EAS443:3:26:1716:1296#0/1  
[bb`b`abba¥ZYU\_UQ\_aUaaba]GV¥^aa]`N`[\_a  
@HWI-EAS443:3:26:859:1740#0/1  
CAGCAGATTGAGAGCATGATTGAGGCCGAGTCTTCTGTCA  
+HWI-EAS443:3:26:859:1740#0/1  
abbbb`a`abbaabba`baaZLU`bV^`\_\_`\_aaaa]``  
@HWI-EAS443:3:2:1402:1840#0/1  
GAAGAAGGCAGCGCCTCATTCCATGCCCCATTCATCTT  
+HWI-EAS443:3:2:1402:1840#0/1  
\_a`U\_a^aaa[\_Y\_\_`J[`aaa^)`\_NRH^[Q\_aWRMDTB  
@HWI-EAS443:3:2:536:494#0/1  
AGAAGACTCGGCCTCAATCATGCTCTCAATCTGCTGAAGA  
+HWI-EAS443:3:2:536:494#0/1  
`aWIVZ``\_X`a`ZXW^QRQYUVZ\_P^`PN\_¥RV\_]¥a^  
@HWI-EAS443:3:31:192:1642#0/1  
GAAGACTCGGCCTCAATCATGCTCTCAATCTGCTGAAGAG  
+HWI-EAS443:3:31:192:1642#0/1  
\_b`Zbbbbabab^a`ab`[Tb\_bU]T`a`]ZX¥]¥IH^N  
@HWI-EAS443:3:32:1184:1530#0/1  
CTCCAAGATCAAGATGAAATGGGGCATGGAAATGAGGCCG  
+HWI-EAS443:3:32:1184:1530#0/1  
abba\_\_`a^```aaaa[\_aaa[XXa\_a`^\_aa``\_\_a`a  
@HWI-EAS443:3:37:335:1354#0/1  
CTCTTCAGCAGATTGAGAGCATGATTGAGGCCGAGTCTTC  
+HWI-EAS443:3:37:335:1354#0/1  
abbbba`Y`abb`a```aaaa¥aba`\_aaYaa^)`]a[\_Y  
@HWI-EAS443:3:3:1480:1365#0/1  
CGGATTTTCCCATATTCTTTCATTGCCTTTTCCGCAAGC  
+HWI-EAS443:3:3:1480:1365#0/1  
abaFROX\_`Z]YWa[b¥X\_a]aaba`WY\_]aa`aa\_a`^B  
@HWI-EAS443:3:43:503:651#0/1  
AACCTCCAAGATCAAGATGAAATGGGGCATGGAAATGAGG  
+HWI-EAS443:3:43:503:651#0/1  
a\_\_aaba\_Sa`a\_¥`a\_\_`aS\_`a¥Y`\_\_\_a\_\_[^`^a\_] ]  
@HWI-EAS443:3:44:1213:612#0/1  
GACAGAAGACTCGGCCTCAATCATGCTCTCAATCTGCTGA  
+HWI-EAS443:3:44:1213:612#0/1  
a`aab`aa^aaaa`]a\_`)\_`\_a`W[[^`\_\_X\_\_[^`\_¥  
@HWI-EAS443:3:4:1300:1258#0/1  
GAAGACTCGGCCTCAATCATGCTCTCAATCTGCTGAAGAG  
+HWI-EAS443:3:4:1300:1258#0/1  
aXX]\_XXR¥aM^ZY\_WLX¥SQMURYVUPRBBBBBBBBBB  
@HWI-EAS443:3:52:315:990#0/1  
CAGAAGACTCGGCCTCAATCATGCTCTCAATCTGCTGAAG  
+HWI-EAS443:3:52:315:990#0/1  
`Waaa\_a`aab]^X]WZQVYOFr[¥[XY¥[S¥\_Y]ZJWV

@HWI-EAS443:3:55:72:275#0/1  
GAAGACTCGGCCTCAATCATGCTCTCAATCTGCTGAAGAG  
+HWI-EAS443:3:55:72:275#0/1  
aaaa\_a`a^Z`¥UZVLVZ]YJNXVYVXNRQZ¥RYVPUZU]  
@HWI-EAS443:3:56:847:419#0/1  
CTCTTCAGCAGATTGAGAGCATGATTGAGGCCGAGTCTTC  
+HWI-EAS443:3:56:847:419#0/1  
aaaba`Z``a`a``]]`VX````^a¥][¥¥`YZ^)][]  
@HWI-EAS443:3:57:1266:231#0/1  
GAAGACTCGGCCTCAATCATGCTCTCAATCTGCTGAAGAG  
+HWI-EAS443:3:57:1266:231#0/1  
a`^WV\_aYa\_RY\_\_¥\_[\_[TSNVW[TX¥X¥¥aV¥\_RU^U\_  
@HWI-EAS443:3:64:497:1444#0/1  
CTTCAGCAGATTGAGAGCATGATTGAGGCCGAGTCTTCTG  
+HWI-EAS443:3:64:497:1444#0/1  
¥b`^^Y^`^XWa\_`b`aa`[]a]H[¥Q]^]aaa]`V^`aX  
@HWI-EAS443:3:66:704:1810#0/1  
CTTCAGCAGATTGAGAGCATGATTGAGGCCGAGTCTTCTG  
+HWI-EAS443:3:66:704:1810#0/1  
aaaaa`aba`aaaaa`a`ab\_a\_`\_W``\_a\_^a\_`\_`\_]  
@HWI-EAS443:3:68:675:1337#0/1  
GATCAAGATGAAATGGGGCATGGAAATGAGGCGCTGCCTT  
+HWI-EAS443:3:68:675:1337#0/1  
aaababb^a\_URXbaab\_baX`a`aa`a`\_aaaaa`\_]\_\_  
@HWI-EAS443:3:71:1562:518#0/1  
CTCCAAGATCAAGATGAAATGGGGCATGGAAATGAGGCGC  
+HWI-EAS443:3:71:1562:518#0/1  
`baabbbbbbbababbaabba`a]babbaaaabaaa^aY  
@HWI-EAS443:3:74:1417:440#0/1  
AGCAGATTGAGAGCATGATTGAGGCCGAGTCTTCTGTCAA  
+HWI-EAS443:3:74:1417:440#0/1  
aaaaaababaaaaaaaaaaaaaaaa`^\_a`a`\_aa``b\_[``  
@HWI-EAS443:3:75:1658:1462#0/1  
GAAGAAGGCAGCGCCTCATTTCATGCCCATTTTCATCTT  
+HWI-EAS443:3:75:1658:1462#0/1  
aaabaabaaabaa`\_b\_aaaa\_aa`aa]\_a\_aaa^\_a¥``  
@HWI-EAS443:3:77:299:884#0/1  
AGCAGATTGAGAGCATGATTGAGGCCGAGTCTTCTGTCAA  
+HWI-EAS443:3:77:299:884#0/1  
aa\_`a\_\_aa\_\_aa^^ab\_^Z`[\_a\_]`Z^WZ]V\_UY]]  
@HWI-EAS443:3:77:520:438#0/1  
GAAGACTCGGCCTCAATCATGCTCTCAATCTGCTGAAGAG  
+HWI-EAS443:3:77:520:438#0/1  
abbbabbaba[baaaaZa¥¥¥aaa`\_`a]ZXaZY][¥NXV  
@HWI-EAS443:3:78:838:1437#0/1  
GAAGAAGGCAGCGCCTCATTTCATGCCCATTTTCATCTT  
+HWI-EAS443:3:78:838:1437#0/1  
\_]`\_VQ\_^^^\_X\_aZX]Z[``]`^¥QZ]]Y]ZUTY]^^X  
@HWI-EAS443:3:79:1476:826#0/1  
CGCCTCATTTCATGCCCATTTTCATCTTGATCTTGGAGG

+HWI-EAS443:3:79:1476:826#0/1  
O\_````bb`a`aa`¥R¥¥`bbbb¥bb```abb\_`bbabb  
@HWI-EAS443:3:7:327:1383#0/1  
ATCAAGATGAAATGGGGCATGGAAATGAGGCGCTGCCTTC  
+HWI-EAS443:3:7:327:1383#0/1  
^^^Z`]ROZ^ZQ\_\_UU\_[Z^ZZU¥][TY[^]Z^]UN[BB  
@HWI-EAS443:3:82:305:1692#0/1  
CAAGATGAAATGGGGCATGGAAATGAGGCGCTGCCTTCTT  
+HWI-EAS443:3:82:305:1692#0/1  
`QQZ\_SXXUPXYRM[QMFY\_P^¥[¥U\_^^^aBBBBBBBBB  
@HWI-EAS443:3:83:764:41#0/1  
AGAAGACTCGGCCTCAATCATGCTCTCAATCTGCTGAAGA  
+HWI-EAS443:3:83:764:41#0/1  
^]\_b]WV^aab\_Z`¥a]¥M]\_YR\_`a]¥T¥[a^F¥`T[]Q  
@HWI-EAS443:3:84:56:727#0/1  
CAAGATCAAGATGAAATGGGGCATGGAAATGAGGCGCTGC  
+HWI-EAS443:3:84:56:727#0/1  
aaaY¥[\_T^aU`aZ]^\_\_\_\_]Xa`^\_Z]^\_X^\_]U^^  
@HWI-EAS443:3:89:615:1167#0/1  
CAGAAGACTCGGCCTCAATCATGCTCTCAATCTGCTGAAG  
+HWI-EAS443:3:89:615:1167#0/1  
a\_¥`b``abaa¥X^baa]¥`bb]aaaa^U^aa]a]``aa  
@HWI-EAS443:3:91:615:372#0/1  
CCAAGATCAAGATGAAATGGGGCATGGAAATGAGGCGCTG  
+HWI-EAS443:3:91:615:372#0/1  
a\_^Zab^a\_T\_bbbb¥]\_\_\_\_ab`bbb]abaaab`XTaP`b  
@HWI-EAS443:3:92:502:452#0/1  
GCAGATTGAGAGCATGATTGAGGCCGAGTCTTCTGTCAAA  
+HWI-EAS443:3:92:502:452#0/1  
`b¥\_F]ab`b¥b^]\_a```¥N\_a```\_bX[a`¥T\_RKXTX  
@HWI-EAS443:3:93:383:1094#0/1  
CAGAAGACTCGGCCTCAATCATGCTCTCAATCTGCTGAAG  
+HWI-EAS443:3:93:383:1094#0/1  
a\_\_a\_\_U`aaa\_T\_XV¥S¥WU\_\_¥Q]¥TN`^¥\_HU\_RKTB  
@HWI-EAS443:3:94:129:596#0/1  
CTCATTTCCATGCCCCATTTTCATCTTGATCTTGGAGGTTC  
+HWI-EAS443:3:94:129:596#0/1  
\_\_Q]bbbbbaaba\_T¥aaab`^[\_a]aaaaa^][aGY\_  
@HWI-EAS443:3:94:228:1108#0/1  
CTCTTCAGCAGATTGAGAGCATGATTGAGGCCGAGTCTTC  
+HWI-EAS443:3:94:228:1108#0/1  
\_K^aa¥ab¥aa`aa[a`a`aa`aa]a\_\_]a\_dWU\_\_X  
@HWI-EAS443:3:97:1405:1335#0/1  
GAAGACTCGGCCTCAATCATGCTCTCAATCTGCTGAAGAG  
+HWI-EAS443:3:97:1405:1335#0/1  
aaNb``bbaaPPa]^^^ab[¥DYXa\_\_aaS]PS¥]\_a^\_\_  
@HWI-EAS443:3:98:1193:1103#0/1  
TTTGACAGAAGACTCGGCCTCAATCATGCTCTCAATCTGC  
+HWI-EAS443:3:98:1193:1103#0/1  
aa`aX`\_aaa\_¥\_a`a`]Y`¥^`\_X\_^^^U\_]\_\_^Y^`Y

@HWI-EAS443:3:98:417:702#0/1  
GAAGACTCGGCCTCAATCATGCTCTCAATCTGCTGAAGAG  
+HWI-EAS443:3:98:417:702#0/1  
`[X`^`^`^`XW\_[`W`Y`\_`[]V\_]¥¥[^`aTYaRNW\_\_  
@HWI-EAS443:3:32:1674:805#0/1  
TGGATAGCAAATAGTAGCNTTGCCACAACACTTCAATGC  
+HWI-EAS443:3:32:1674:805#0/1  
\_aaa^^\_aa`]\_bYabYD^\_\_VX^R\_`Y]a\_aWaZI[^`^  
@HWI-EAS443:3:80:353:48#0/1  
TGGATAGCAAATAGTAGCATTGCCACAANTACTTCAATGC  
+HWI-EAS443:3:80:353:48#0/1  
abb`babbabbbbbb\_bbaabaaa\_a`bTD^a`a`\_a`\_a`  
@HWI-EAS443:3:11:1300:37#0/1  
CAAATAGTAGCATTGCCACAACACTTCAATGCATGTNTG  
+HWI-EAS443:3:11:1300:37#0/1  
VW`b¥b^`Y`IY`\_`\_`[^aXa¥Qba\_T¥`\_\_\_\_aaRDXb  
@HWI-EAS443:3:16:572:1836#0/1  
ATGGATAGCAAATAGAAGCATTGCCACAACACTTCAATG  
+HWI-EAS443:3:16:572:1836#0/1  
PHO^Ja¥a`bb\_ZSH^a\_\_\_Y]Ta\_`^a[a[[¥¥MaaZ^  
@HWI-EAS443:3:2:556:1788#0/1  
ATGGATAGCAAATAATAGCATTGCCACAACACTTCAATG  
+HWI-EAS443:3:2:556:1788#0/1  
aa[^`a¥aar^b^aa[Y\_a]][^¥W¥¥¥YP]`W`[S^W]¥  
@HWI-EAS443:3:3:161:1177#0/1  
ATGGATAGCAAATAGTAGCATTGCCACAATACTTCAATG  
+HWI-EAS443:3:3:161:1177#0/1  
aXU\_Tba[]bb\_aUaWS]TaZYUYMa`^aSa`IVQGaaBB  
@HWI-EAS443:3:54:1331:1245#0/1  
ATGGATAGAAAATAGTAGCATTGCCACAACACTTCAATG  
+HWI-EAS443:3:54:1331:1245#0/1  
YY`ZUX]]F[VZa^\_N][VXa^`WZWJ^ZMY^^^W]]\_S  
@HWI-EAS443:3:6:633:161#0/1  
ATGGATAGCAAATAGGAGCATTGCCACAACACTTCAATG  
+HWI-EAS443:3:6:633:161#0/1  
`bbba[bb]b^ab`H`b^Y``¥W\_`V``¥\_\_\_\_`\_\_`\_\_`  
@HWI-EAS443:3:88:1052:1883#0/1  
GCNAATAGTAGCATTGCCACAACACTTCAATGCATGTGT  
+HWI-EAS443:3:88:1052:1883#0/1  
aSD^¥a\_`¥b`Xaaa\_a`aab`a`b^\_b\_a\_aaaaaa]\_^  
@HWI-EAS443:3:88:1696:1732#0/1  
ATGGATAGCAAATAGTAGGATTGCCACAACACTTCAATG  
+HWI-EAS443:3:88:1696:1732#0/1  
`^`^`a`ba^XJa\_SW^[WH\_\_¥P]aabZWZb[^`aaa^a\_  
@HWI-EAS443:3:95:1601:862#0/1  
ATGGATATCAAATAGTAGCATTGCCACAACACTTCAATG  
+HWI-EAS443:3:95:1601:862#0/1  
aYQ\_[¥VPZ\_\_\_\_]\_aVYV^\_`La[P\_QS^ZQ^IZ[RUU\_X  
@HWI-EAS443:3:98:1054:1689#0/1  
ATGGATAGCAAATAGTAGCATTGCCACGACTACTTCAATG

+HWI-EAS443:3:98:1054:1689#0/1  
P)`^\_UaUa\_a^^V¥HJbbabXUI``aT`baa\_[b¥XbV]  
@HWI-EAS443:3:49:1343:1731#0/1  
GCAAATAGTAGCATTGCCACAACACTACTTCAATGNATGTGT  
+HWI-EAS443:3:49:1343:1731#0/1  
^J[W`RO¥Y^VPZUR`Y[¥KZLGZ\_BBBBBBBBBBBBBBB  
@HWI-EAS443:3:6:1017:1686#0/1  
AGCAAATAGTANCATTGCCACAACACTACTTCAATGCATGTG  
+HWI-EAS443:3:6:1017:1686#0/1  
aa^`ab\_bb][D[a\_]\_]U)a``]ab¥aaabaaa[bbb\_a  
@HWI-EAS443:3:83:508:1620#0/1  
TAGCAANTAGTAGCATTGCCACAACACTACTTCAATGCATGT  
+HWI-EAS443:3:83:508:1620#0/1  
[abbaZD[`]U¥aaab¥\_\_a\_abba^aaaabbbaa```aZ  
@HWI-EAS443:3:87:1167:1440#0/1  
AGCAAATAGTAGCATTGCCNCAACACTACTTCAATGCATGTG  
+HWI-EAS443:3:87:1167:1440#0/1  
\_^\_abb\_ba]baZaa]aZ]DP`b\_\_a]aa`a\_aba`adWa  
@HWI-EAS443:3:24:722:957#0/1  
TAGATAGCAAATAGTAGCATTGCCACAACACTACTTCAATGC  
+HWI-EAS443:3:24:722:957#0/1  
aWZ\_a``abb`a¥SX\_a`W`¥Y`\_a^aa]^a\_[`^`^]`G  
@HWI-EAS443:3:30:175:1903#0/1  
GAAGTAGTTGTGGCAATGCTACTATTTGCTATCCCCGCCGG  
+HWI-EAS443:3:30:175:1903#0/1  
a`WYGRNV[aUXTaab¥`aX¥\_¥`ZUMS[MMYa]IY`BBB  
@HWI-EAS443:3:20:51:761#0/1  
ATGGATAGCAAATAGTAGCATTGCCACAACACTNCTTCAATG  
+HWI-EAS443:3:20:51:761#0/1  
a``ZQ¥Ta\_a`\_\_\_\_Z`a``]\_W]^Z`\_TDR\_Z\_^^]^  
@HWI-EAS443:3:20:647:1271#0/1  
AGCAAATAGTAGCATTGCCACAACACTACTTCAATGCATGNG  
+HWI-EAS443:3:20:647:1271#0/1  
Zab`]¥aba`a\_`\_¥a\_aa`a\_a`L[¥`Y`a\_`aa^TDL  
@HWI-EAS443:3:33:990:1356#0/1  
CAAATAGTAGCATTGCCACAACACTACTTCAATGCATGTGGG  
+HWI-EAS443:3:33:990:1356#0/1  
a[aa\_bUJY``OYGYa``aaaS]\_X\_`aUaXGX^¥ZIXDT  
@HWI-EAS443:3:3:1449:766#0/1  
TATGGATAGCAAATAGTAGCCTTGCCACAACACTACTTCAAT  
+HWI-EAS443:3:3:1449:766#0/1  
a\_abb\_a]TXa\_]a`]Ya\_VD[ba^`YTY\_Ra\_]\_`]^¥\_  
@HWI-EAS443:3:40:154:1279#0/1  
TATGGATAGCAAATAGTAGCATTGCCCAACACTACTTCAAT  
+HWI-EAS443:3:40:154:1279#0/1  
abab[a]H[aaaaaaa[\_`a[a\_]a[H]VZ]aaa\_\_b`Y^  
@HWI-EAS443:3:27:1529:2047#0/1  
NGGATAGCAAATAGTAGCATTGCCACAACACTACTTCAATGC  
+HWI-EAS443:3:27:1529:2047#0/1  
DNVQLVWVZWVTTUUYUUUVUTQNTRUVWVWVTTTRVNVP



@HWI-EAS443:3:34:58:78#0/1  
GGATAGCAAATAGTAGCATTGCCACAACACTTCAATGGA  
+HWI-EAS443:3:34:58:78#0/1  
aa^\_\_aaaa\_`^\_Waa\_\_\_^`\_`\_\_Y^^\_^\_]\_\_U]WEP  
@HWI-EAS443:3:35:47:1429#0/1  
GGATAGCAAATAGTAGCATTGCCACAACACTTCAACGCA  
+HWI-EAS443:3:35:47:1429#0/1  
¥¥¥X\_bb`\_a\_¥¥Z`^`\_`\_\_b`\_¥`a^[aaa`¥M¥]X  
@HWI-EAS443:3:3:187:618#0/1  
GCAAATAGTAGCATTGCCACAACACTTCAATGCATGTGA  
+HWI-EAS443:3:3:187:618#0/1  
aabb`^b^abaa`a`¥`W`a¥a]aaa`Ia`aa\_^aaBBB  
@HWI-EAS443:3:100:536:1382#0/1  
TGGATAGCAAATAGTAGCATTGCCACAACACTTCAATGC  
+HWI-EAS443:3:100:536:1382#0/1  
abba\_`Zb]]ZbbWaaaaaaa`aaaa`aa`aa`a`^^^  
@HWI-EAS443:3:10:1068:999#0/1  
TGGATAGCAAATAGTAGCATTGCCACAACACTTCAATGC  
+HWI-EAS443:3:10:1068:999#0/1  
abb^a`b`ba`\_`X\_a`\_`a`\_¥a^a`]]`]a\_¥\_\_]`^  
@HWI-EAS443:3:11:1307:801#0/1  
TGGATAGCAAATAGTAGCATTGCCACAACACTTCAATGC  
+HWI-EAS443:3:11:1307:801#0/1  
aaaaaaaaaaaaaaaaZaa\_aaaa`\_^aa]\_`]]`X\_^\_a]  
@HWI-EAS443:3:11:1637:1426#0/1  
TGGATAGCAAATAGTAGCATTGCCACAACACTTCAATGC  
+HWI-EAS443:3:11:1637:1426#0/1  
abaa`ab\_baaaaa\_\_aUaaa`\_^\_`^a`\_`\_U`Xa\_\_aX  
@HWI-EAS443:3:12:413:1547#0/1  
TGGATAGCAAATAGTAGCATTGCCACAACACTTCAATGC  
+HWI-EAS443:3:12:413:1547#0/1  
abaaaa]aaaaba`Hab\_\_aa`\_a\_\_a`^`a¥`\_^aa\_a^  
@HWI-EAS443:3:14:36:1870#0/1  
TGGATAGCAAATAGTAGCATTGCCACAACACTTCAATGC  
+HWI-EAS443:3:14:36:1870#0/1  
^ab^\_¥bbab`bXZUabb\_b`\_a\_¥ab`^abaa`aba`aa  
@HWI-EAS443:3:15:479:1066#0/1  
TGGATAGCAAATAGTAGCATTGCCACAACACTTCAATGC  
+HWI-EAS443:3:15:479:1066#0/1  
abbbabbbabbb`a[bbab`bbba\_bbbbabbbaba^aaa  
@HWI-EAS443:3:16:527:1591#0/1  
TGGATAGCAAATAGTAGCATTGCCACAACACTTCAATGC  
+HWI-EAS443:3:16:527:1591#0/1  
`a`aa\_F¥b]]`ab^W^]aa\_\_a[YYa[`abb\_U^`a\_a\_  
@HWI-EAS443:3:18:306:290#0/1  
TGGATAGCAAATAGTAGCATTGCCACAACACTTCAATGC  
+HWI-EAS443:3:18:306:290#0/1  
aa`\_aabaaaabaa]aaa`aa`a\_¥`\_`a`\_`aaa`\_a^\_\_\_\_  
@HWI-EAS443:3:1:1252:524#0/1  
TGGATAGCAAATAGTAGCATTGCCACAACACTTCAATGC

+HWI-EAS443:3:1:1252:524#0/1  
abb^^^ZTa`aaaa\_\_a[aa`Z`\_\_a^a\_G`\_\_]\_BB  
@HWI-EAS443:3:20:148:1993#0/1  
TGGATAGCAAATAGTAGCATTGCCACAACACTTCAATGC  
+HWI-EAS443:3:20:148:1993#0/1  
[[]`b\_aaaba^`b`]^a`a`]]X\_aaa]aabaa\_aaa`aa  
@HWI-EAS443:3:20:701:605#0/1  
TGGATAGCAAATAGTAGCATTGCCACAACACTTCAATGC  
+HWI-EAS443:3:20:701:605#0/1  
abb`¥Z¥aabbaaa¥aa`aa]a\_[W]]a\_aaa]Y^Y\_\_^  
@HWI-EAS443:3:23:1334:1334#0/1  
TGGATAGCAAATAGTAGCATTGCCACAACACTTCAATGC  
+HWI-EAS443:3:23:1334:1334#0/1  
]`a^a`¥[\_aZV¥\_NY\_^]]aaa]\_aaaa`aaa\_aZ^a\_  
@HWI-EAS443:3:23:1434:1358#0/1  
TGGATAGCAAATAGTAGCATTGCCACAACACTTCAATGC  
+HWI-EAS443:3:23:1434:1358#0/1  
[]aa\_U[YbaWa^aX`Q]a\_YY\_\_^aUX^aLa^S`a^ZW  
@HWI-EAS443:3:24:1002:963#0/1  
TGGATAGCAAATAGTAGCATTGCCACAACACTTCAATGC  
+HWI-EAS443:3:24:1002:963#0/1  
a````aaba[Y^]`Waaaaaa`aaaaaa\_aa`aa`a`X`]  
@HWI-EAS443:3:24:412:773#0/1  
TGGATAGCAAATAGTAGCATTGCCACAACACTTCAATGC  
+HWI-EAS443:3:24:412:773#0/1  
ab```\_`abaa`a`[`aaXaaa`a`aaaa\_aaa\_]`\_\_a^  
@HWI-EAS443:3:24:877:1932#0/1  
TGGATAGCAAATAGTAGCATTGCCACAACACTTCAATGC  
+HWI-EAS443:3:24:877:1932#0/1  
`b`a`aaa`aabba[a[aaa]\_aa`aaa\_aaaaaabaaa`  
@HWI-EAS443:3:26:238:459#0/1  
TGGATAGCAAATAGTAGCATTGCCACAACACTTCAATGC  
+HWI-EAS443:3:26:238:459#0/1  
abb\_]X)^`^`aa¥b`a`aa¥a```aaa`\_aa\_a^Z]a`  
@HWI-EAS443:3:26:532:239#0/1  
TGGATAGCAAATAGTAGCATTGCCACAACACTTCAATGC  
+HWI-EAS443:3:26:532:239#0/1  
a```b^aababaa\_aba`aa`a`aaaa`a`a`a`a`a^`a^  
@HWI-EAS443:3:28:521:463#0/1  
TGGATAGCAAATAGTAGCATTGCCACAACACTTCAATGC  
+HWI-EAS443:3:28:521:463#0/1  
Yaa`b\_I`\_bab^]Sab`aaa\_a]]\_baaaa¥^aaYW]¥[  
@HWI-EAS443:3:29:1655:344#0/1  
TGGATAGCAAATAGTAGCATTGCCACAACACTTCAATGC  
+HWI-EAS443:3:29:1655:344#0/1  
ab¥\_Q[UZbaaabaZ`aaab[¥[\_\_a^a]aa\_aaaa`aG  
@HWI-EAS443:3:31:104:643#0/1  
TGGATAGCAAATAGTAGCATTGCCACAACACTTCAATGC  
+HWI-EAS443:3:31:104:643#0/1  
]a¥Y]aabaQL\_baWS`\_`^aa\_¥ZaY`aa[``^aaL`\_`^

@HWI-EAS443:3:34:67:731#0/1  
TGGATAGCAAATAGTAGCATTGCCACAACACTACTTCAATGC  
+HWI-EAS443:3:34:67:731#0/1  
aba` `[aaabaaaa]aab¥`a\_baaa`^`aaaaaaa\_\_`  
@HWI-EAS443:3:35:1242:586#0/1  
TGGATAGCAAATAGTAGCATTGCCACAACACTACTTCAATGC  
+HWI-EAS443:3:35:1242:586#0/1  
[a\_TZXa]aabX\_¥FYb`Z`^aab^YUZa\_Z¥a`b`^a\_`  
@HWI-EAS443:3:35:203:222#0/1  
TGGATAGCAAATAGTAGCATTGCCACAACACTACTTCAATGC  
+HWI-EAS443:3:35:203:222#0/1  
ab\_aaaa`b\_^abaW^a`^a\_]aaa`aaa^aa\_]^Z\_[`¥  
@HWI-EAS443:3:36:1195:571#0/1  
TGGATAGCAAATAGTAGCATTGCCACAACACTACTTCAATGC  
+HWI-EAS443:3:36:1195:571#0/1  
\_bbbb\_bbbbaab` `b\_]baaabaaba`ab\_aaa`]]aa  
@HWI-EAS443:3:36:1259:1071#0/1  
TGGATAGCAAATAGTAGCATTGCCACAACACTACTTCAATGC  
+HWI-EAS443:3:36:1259:1071#0/1  
a\_U\_YM[\_aab`¥\_Y)`[aaa]aa\_aa`\_ab[a`a\_J[a\_  
@HWI-EAS443:3:37:1042:1747#0/1  
TGGATAGCAAATAGTAGCATTGCCACAACACTACTTCAATGC  
+HWI-EAS443:3:37:1042:1747#0/1  
\_Za`\_^)^aa`\_UXF` `\_N¥\_a^^`\_^`\_V¥]]`a`^U[W  
@HWI-EAS443:3:3:585:994#0/1  
TGGATAGCAAATAGTAGCATTGCCACAACACTACTTCAATGC  
+HWI-EAS443:3:3:585:994#0/1  
¥aba[(` `V\_^a]^LJa\_aabaTT^U]^aW\_\_\_¥UZ\_]b\_  
@HWI-EAS443:3:40:640:998#0/1  
TGGATAGCAAATAGTAGCATTGCCACAACACTACTTCAATGC  
+HWI-EAS443:3:40:640:998#0/1  
abaaabbabaabaa\_aaaaaaaaaa[I]a`aaa\_\_ZZ`aa  
@HWI-EAS443:3:42:1543:1144#0/1  
TGGATAGCAAATAGTAGCATTGCCACAACACTACTTCAATGC  
+HWI-EAS443:3:42:1543:1144#0/1  
T\_\_\_\_^Va`aba\_^XRba[MabaTaa[\_S\_aaa]PNZ^Y\_`  
@HWI-EAS443:3:42:263:95#0/1  
TGGATAGCAAATAGTAGCATTGCCACAACACTACTTCAATGC  
+HWI-EAS443:3:42:263:95#0/1  
abbaa[abba`a`\_\_aaaaaaaaY[aaa\_``^aY\_\_[\_``  
@HWI-EAS443:3:42:920:887#0/1  
TGGATAGCAAATAGTAGCATTGCCACAACACTACTTCAATGC  
+HWI-EAS443:3:42:920:887#0/1  
ab\_TZ[`aa`b`\_`W\_bbabaaa\_[¥aaaaa\_aa^^^aa]  
@HWI-EAS443:3:45:1288:990#0/1  
TGGATAGCAAATAGTAGCATTGCCACAACACTACTTCAATGC  
+HWI-EAS443:3:45:1288:990#0/1  
aaa`a\_a`a\_\_a`\_]`a\_\_`a^^^\_^\_\_X\_\_^\_\_]\_\_^\_  
@HWI-EAS443:3:46:374:706#0/1  
TGGATAGCAAATAGTAGCATTGCCACAACACTACTTCAATGC

+HWI-EAS443:3:46:374:706#0/1  
\_`¥0`^a`Y^aa[Z]aaaa\_aaaa¥a\_\_a``\_a``aa  
@HWI-EAS443:3:49:13:656#0/1  
TGGATAGCAAATAGTAGCATTGCCACAACACTTCAATGC  
+HWI-EAS443:3:49:13:656#0/1  
^`^¥WX`\_W^\_R]Z[\_Z¥LTY¥^`YXX\_aZY^]^USXXR  
@HWI-EAS443:3:49:611:455#0/1  
TGGATAGCAAATAGTAGCATTGCCACAACACTTCAATGC  
+HWI-EAS443:3:49:611:455#0/1  
aa`aa`\_\_ba^aa`PabY^aaa\_Q]`aaaab`aa^aT\_aa  
@HWI-EAS443:3:50:758:1982#0/1  
TGGATAGCAAATAGTAGCATTGCCACAACACTTCAATGC  
+HWI-EAS443:3:50:758:1982#0/1  
[\_`]Z^X¥bb^X[RF]XY`XR^a]T]ab^WTa]]W\_YT\_\_  
@HWI-EAS443:3:51:1349:246#0/1  
TGGATAGCAAATAGTAGCATTGCCACAACACTTCAATGC  
+HWI-EAS443:3:51:1349:246#0/1  
abaaabaabaabaaXab¥]aaa\_\_a`aa\_aa\_aa`aaa`¥  
@HWI-EAS443:3:52:1298:558#0/1  
TGGATAGCAAATAGTAGCATTGCCACAACACTTCAATGC  
+HWI-EAS443:3:52:1298:558#0/1  
[baYa^a\_a\_\_\_a\_W^`Ya¥Y^^X\_a\_\_a\_[\_\_\_a\_^`]  
@HWI-EAS443:3:52:1359:1668#0/1  
TGGATAGCAAATAGTAGCATTGCCACAACACTTCAATGC  
+HWI-EAS443:3:52:1359:1668#0/1  
ab]\_W`]L][aa\_[U`Y`^a^a^QXX^`0^aYaaW`]\_XH  
@HWI-EAS443:3:52:19:607#0/1  
TGGATAGCAAATAGTAGCATTGCCACAACACTTCAATGC  
+HWI-EAS443:3:52:19:607#0/1  
ab`¥¥aa\_aa¥\_aYXaaa\_a`\_Z`¥``]`a\_\_^`a`]]^  
@HWI-EAS443:3:52:418:122#0/1  
TGGATAGCAAATAGTAGCATTGCCACAACACTTCAATGC  
+HWI-EAS443:3:52:418:122#0/1  
abb\_\_\_a\_a`\_a`\_Y`a\_\_`\_a`\_\_\_`\_]\_\_Ya\_\_\_^^\_¥  
@HWI-EAS443:3:55:698:1399#0/1  
TGGATAGCAAATAGTAGCATTGCCACAACACTTCAATGC  
+HWI-EAS443:3:55:698:1399#0/1  
aaa\_bba]baaba`^aa``aaa`aaaa``aaaa^aaaa\_  
@HWI-EAS443:3:56:1012:1035#0/1  
TGGATAGCAAATAGTAGCATTGCCACAACACTTCAATGC  
+HWI-EAS443:3:56:1012:1035#0/1  
a¥^\_PXba^]^a``Z`baa]\_\_\_^X¥^^aT\_a\_a`dT¥`P  
@HWI-EAS443:3:58:1196:1112#0/1  
TGGATAGCAAATAGTAGCATTGCCACAACACTTCAATGC  
+HWI-EAS443:3:58:1196:1112#0/1  
aaa\_a[\_`aa^aaa^`a`[\_`\_]`^`\_`V\_a]\_\_\_`\_]\_a]  
@HWI-EAS443:3:59:172:237#0/1  
TGGATAGCAAATAGTAGCATTGCCACAACACTTCAATGC  
+HWI-EAS443:3:59:172:237#0/1  
abba`aZabbaaa`]`aaa`\_\_a\_\_aZ\_W^U^\_\_^Z^\_Z

@HWI-EAS443:3:59:1773:740#0/1  
TGGATAGCAAATAGTAGCATTGCCACAACACTTCAATGC  
+HWI-EAS443:3:59:1773:740#0/1  
\_`^\_baa^bbbb`baab`b`^`bbbb\_`^`¥F\_aa]¥ZOX  
@HWI-EAS443:3:59:663:386#0/1  
TGGATAGCAAATAGTAGCATTGCCACAACACTTCAATGC  
+HWI-EAS443:3:59:663:386#0/1  
ab\_abababaabab\_ba`abbaaaaaS\_aaXaaa\_^aaX  
@HWI-EAS443:3:59:903:1798#0/1  
TGGATAGCAAATAGTAGCATTGCCACAACACTTCAATGC  
+HWI-EAS443:3:59:903:1798#0/1  
abaa[aaaaaaaa`baaaaaababbbbXaaa\_^`aM  
@HWI-EAS443:3:61:1511:356#0/1  
TGGATAGCAAATAGTAGCATTGCCACAACACTTCAATGC  
+HWI-EAS443:3:61:1511:356#0/1  
abb`aab`babbaa\_abaaaaabababa`aaa`\_\_a^`^U  
@HWI-EAS443:3:61:1512:1275#0/1  
TGGATAGCAAATAGTAGCATTGCCACAACACTTCAATGC  
+HWI-EAS443:3:61:1512:1275#0/1  
ab\_aabbabbbbaa^bba`aab`\_abb`aba``[a\_\_\_U  
@HWI-EAS443:3:61:777:1616#0/1  
TGGATAGCAAATAGTAGCATTGCCACAACACTTCAATGC  
+HWI-EAS443:3:61:777:1616#0/1  
ab`ba^abbbba`babbbababXabbaabbaaaa`\_U  
@HWI-EAS443:3:63:870:149#0/1  
TGGATAGCAAATAGTAGCATTGCCACAACACTTCAATGC  
+HWI-EAS443:3:63:870:149#0/1  
a`¥[X^¥aaa`\_P```\_`^`\_Z[^V^]^^][^YVPS¥X  
@HWI-EAS443:3:64:1376:1804#0/1  
TGGATAGCAAATAGTAGCATTGCCACAACACTTCAATGC  
+HWI-EAS443:3:64:1376:1804#0/1  
SY\_`^^\_R`b^aaa[a¥]\_\_YD[[]]YR[[\_```\_\_a````]  
@HWI-EAS443:3:64:1493:1508#0/1  
TGGATAGCAAATAGTAGCATTGCCACAACACTTCAATGC  
+HWI-EAS443:3:64:1493:1508#0/1  
aa`aaaa`ba`baa]aaaa`a`aaaaa\_aa\_b`\_a`^a^  
@HWI-EAS443:3:64:1678:193#0/1  
TGGATAGCAAATAGTAGCATTGCCACAACACTTCAATGC  
+HWI-EAS443:3:64:1678:193#0/1  
aa]`aababaaba`Pab]]`^]Y^[\_]V`^a\_`Y]aY  
@HWI-EAS443:3:65:873:113#0/1  
TGGATAGCAAATAGTAGCATTGCCACAACACTTCAATGC  
+HWI-EAS443:3:65:873:113#0/1  
aba`\_`aaTVRZYF^[^X]UYS[[]][^^R]]\_`^]VLYW\_X  
@HWI-EAS443:3:66:1336:752#0/1  
TGGATAGCAAATAGTAGCATTGCCACAACACTTCAATGC  
+HWI-EAS443:3:66:1336:752#0/1  
[```¥a]Zabaaa]Zaaaa\_`¥aaa`a\_a`a\_`Z\_^\_]  
@HWI-EAS443:3:68:1099:514#0/1  
TGGATAGCAAATAGTAGCATTGCCACAACACTTCAATGC

+HWI-EAS443:3:68:1099:514#0/1  
Y¥`UZab`ba^aa^`ZM]XM\_ab]^aaabaaa\_`Y\_`  
@HWI-EAS443:3:68:967:946#0/1  
TGGATAGCAAATAGTAGCATTGCCACA ACTACTTCAATGC  
+HWI-EAS443:3:68:967:946#0/1  
a\_XZa\_aabXaaaY¥baa`a`a`aa\_`a`a\_]a^^a¥  
@HWI-EAS443:3:6:1467:217#0/1  
TGGATAGCAAATAGTAGCATTGCCACA ACTACTTCAATGC  
+HWI-EAS443:3:6:1467:217#0/1  
ab\_aaa\_W]a`aaaXaaZZ`\_`SS]W^\_U\_\_Z^]S\_^]^X  
@HWI-EAS443:3:70:563:2007#0/1  
TGGATAGCAAATAGTAGCATTGCCACA ACTACTTCAATGC  
+HWI-EAS443:3:70:563:2007#0/1  
Yb\_]`ab`aa\_b¥ZZ\_aYaabaU`\_S]a\_ba`b`Y`b  
@HWI-EAS443:3:74:994:957#0/1  
TGGATAGCAAATAGTAGCATTGCCACA ACTACTTCAATGC  
+HWI-EAS443:3:74:994:957#0/1  
`b`aaabbb¥]aa]Y`aa¥a\_\_W\_\_a`W\_\_a\_]`X`a`  
@HWI-EAS443:3:75:1553:747#0/1  
TGGATAGCAAATAGTAGCATTGCCACA ACTACTTCAATGC  
+HWI-EAS443:3:75:1553:747#0/1  
]bb`^^`]bbaZaSxabaaaabYV\_^a^\_a`]UYW][]^Z  
@HWI-EAS443:3:77:1520:993#0/1  
TGGATAGCAAATAGTAGCATTGCCACA ACTACTTCAATGC  
+HWI-EAS443:3:77:1520:993#0/1  
^aba`a]\_\_aa`b[`b¥¥¥`aZ^`\_\_`bT\_a\_ab¥aba  
@HWI-EAS443:3:77:246:307#0/1  
TGGATAGCAAATAGTAGCATTGCCACA ACTACTTCAATGC  
+HWI-EAS443:3:77:246:307#0/1  
¥aaa¥R\_b]ba`^`bb\_RZa`b^Z\_]Y^a\_¥]aaaaaa\_  
@HWI-EAS443:3:7:472:1157#0/1  
TGGATAGCAAATAGTAGCATTGCCACA ACTACTTCAATGC  
+HWI-EAS443:3:7:472:1157#0/1  
abba`]aaba`aba\_\_a\_aaaaa\_a`a`aa`^`¥\_\_¥¥[  
@HWI-EAS443:3:7:568:595#0/1  
TGGATAGCAAATAGTAGCATTGCCACA ACTACTTCAATGC  
+HWI-EAS443:3:7:568:595#0/1  
^bbaaab`aaa\_[Sa¥VW`aa\_W]¥]a¥\_a`\_\_a\_]`\_`  
@HWI-EAS443:3:80:223:106#0/1  
TGGATAGCAAATAGTAGCATTGCCACA ACTACTTCAATGC  
+HWI-EAS443:3:80:223:106#0/1  
a`a\_aa\_b¥`aa]``]Xaa\_\_^\_]`[]`Z^\_\_^\_^X`Z  
@HWI-EAS443:3:82:259:172#0/1  
TGGATAGCAAATAGTAGCATTGCCACA ACTACTTCAATGC  
+HWI-EAS443:3:82:259:172#0/1  
abbaaabaa\_aab\_aa`aa`a`a`aa`\_a`a`a`\_`a`  
@HWI-EAS443:3:83:955:924#0/1  
TGGATAGCAAATAGTAGCATTGCCACA ACTACTTCAATGC  
+HWI-EAS443:3:83:955:924#0/1  
[`a`aababaaabaa`b\_aa`aa^a¥aaaababbab^aa`

@HWI-EAS443:3:84:392:1654#0/1  
TGGATAGCAAATAGTAGCATTGCCACAACACTACTTCAATGC  
+HWI-EAS443:3:84:392:1654#0/1  
aaaaa]`abaaaaa¥a`aaaa`aaaaa`ba`aa\_\_\_\_  
@HWI-EAS443:3:84:456:473#0/1  
TGGATAGCAAATAGTAGCATTGCCACAACACTACTTCAATGC  
+HWI-EAS443:3:84:456:473#0/1  
a\_\_N\_aa[``YaaZN¥]Z^aa[a^X`]\_a``a`aa`\_]a\_  
@HWI-EAS443:3:86:1477:485#0/1  
TGGATAGCAAATAGTAGCATTGCCACAACACTACTTCAATGC  
+HWI-EAS443:3:86:1477:485#0/1  
aabaaaaabbbabb]bb\_abaa`^aZaa^ba\_ba¥a``aH  
@HWI-EAS443:3:87:596:563#0/1  
TGGATAGCAAATAGTAGCATTGCCACAACACTACTTCAATGC  
+HWI-EAS443:3:87:596:563#0/1  
¥baaaT^b¥UF[U\_V¥\_]\_]¥X][¥T][b]a``a\_aa\_  
@HWI-EAS443:3:89:1411:1626#0/1  
TGGATAGCAAATAGTAGCATTGCCACAACACTACTTCAATGC  
+HWI-EAS443:3:89:1411:1626#0/1  
a`a`a^a`\_aaa`\_0\_a[aaaaQ\_a\_aa]a\_^`aWa\_\_`[  
@HWI-EAS443:3:89:338:38#0/1  
TGGATAGCAAATAGTAGCATTGCCACAACACTACTTCAATGC  
+HWI-EAS443:3:89:338:38#0/1  
]b`````Za`aba\_Z`baaa]bb[a¥a`^a¥UaaYa`a`R  
@HWI-EAS443:3:8:1148:1472#0/1  
TGGATAGCAAATAGTAGCATTGCCACAACACTACTTCAATGC  
+HWI-EAS443:3:8:1148:1472#0/1  
`a`a]aSa\_^a\_\_Raaa¥a`aWX\_[^[]\_^W^`HaX`a\_  
@HWI-EAS443:3:8:1414:895#0/1  
TGGATAGCAAATAGTAGCATTGCCACAACACTACTTCAATGC  
+HWI-EAS443:3:8:1414:895#0/1  
``bX\_U[¥]aab``NZaSW]a]\_[a¥\_a``Q`a[\_]\_aQ  
@HWI-EAS443:3:91:319:240#0/1  
TGGATAGCAAATAGTAGCATTGCCACAACACTACTTCAATGC  
+HWI-EAS443:3:91:319:240#0/1  
ababaaaabb`bab^abaaaaaa^`a`\_aa\_\_`aa\_\_a\_  
@HWI-EAS443:3:92:268:88#0/1  
TGGATAGCAAATAGTAGCATTGCCACAACACTACTTCAATGC  
+HWI-EAS443:3:92:268:88#0/1  
aba[\_`a````\_¥¥^a]\_``^]\_^]^^^]^^X^^X^Z`X  
@HWI-EAS443:3:92:380:1615#0/1  
TGGATAGCAAATAGTAGCATTGCCACAACACTACTTCAATGC  
+HWI-EAS443:3:92:380:1615#0/1  
abaaaa]^b`\_aaa\_b`aaaaaaaaaaaaaaaaabaaaa  
@HWI-EAS443:3:92:922:1266#0/1  
TGGATAGCAAATAGTAGCATTGCCACAACACTACTTCAATGC  
+HWI-EAS443:3:92:922:1266#0/1  
aa`]\_aa]b``a\_Y`a\_\_\_\_`^[]``^`]a\_``^\_] [  
@HWI-EAS443:3:93:401:505#0/1  
TGGATAGCAAATAGTAGCATTGCCACAACACTACTTCAATGC

+HWI-EAS443:3:93:401:505#0/1  
aa`U`Z^aba\_]b\_aab¥]\_ba`[aa^V]Waaaa\_aaaaZ  
@HWI-EAS443:3:93:855:1050#0/1  
TGGATAGCAAATAGTAGCATTGCCACAACACTACTTCAATGC  
+HWI-EAS443:3:93:855:1050#0/1  
aaaaa`a]aaaaa`^aa\_aaa`aa`^a\_\_\_a\_\_\_`\_a\_\_\_^  
@HWI-EAS443:3:98:408:1572#0/1  
TGGATAGCAAATAGTAGCATTGCCACAACACTACTTCAATGC  
+HWI-EAS443:3:98:408:1572#0/1  
aaa^aaa`baaaaa¥aa`aa`a`aaa`\_a\_\_\_`\_`^`^`\_`  
@HWI-EAS443:3:7:1173:169#0/1  
GTATGGATAGCAAATNGTAGCATTGCCACAACACTACTTCAA  
+HWI-EAS443:3:7:1173:169#0/1  
`\_aabb`b`\_baaaaXD[``a]\_aa\_^a¥`^`\_U`U`U`  
@HWI-EAS443:3:100:1314:540#0/1  
AGCAAATAGTAGCATTGCCACAACACTACTTCAATGCATGTG  
+HWI-EAS443:3:100:1314:540#0/1  
ab``a\_a`b\_aZ\_\_\_X`\_`aaaa][a\_aa\_a]aa\_^\_aWa  
@HWI-EAS443:3:100:492:196#0/1  
ATAGCAAATAGTAGCATTGCCACAACACTACTTCAATGCATG  
+HWI-EAS443:3:100:492:196#0/1  
`a¥V¥`b`Sa\_\_Yba]¥V`YY]aab\_aaaaaUaaWYX¥`b  
@HWI-EAS443:3:100:771:1081#0/1  
AGCAAATAGTAGCATTGCCACAACACTACTTCAATGCATGTG  
+HWI-EAS443:3:100:771:1081#0/1  
`\_a`ab`Z¥Zaa^`ba¥\_V\_bbb`aa]^a\_b`^`¥^bb[b  
@HWI-EAS443:3:10:1379:1464#0/1  
ATAGCAAATAGTAGCATTGCCACAACACTACTTCAATGCATG  
+HWI-EAS443:3:10:1379:1464#0/1  
aabaaaaabaZba^\_aab\_a``aa\_aa````\_``^`U`^`\_`  
@HWI-EAS443:3:10:1474:433#0/1  
AGCAAATAGTAGCATTGCCACAACACTACTTCAATGCATGTG  
+HWI-EAS443:3:10:1474:433#0/1  
aaabaaaab^bb\_aaaa\_\_a\_aa`aa\_aa\_a\_`a¥^aa^a  
@HWI-EAS443:3:10:285:1465#0/1  
AGCAAATAGTAGCATTGCCACAACACTACTTCAATGCATGTG  
+HWI-EAS443:3:10:285:1465#0/1  
aTa`[\_`¥`b\_Z`^^\_[bbabb[\_\_\_a]a```^`aaa`X¥  
@HWI-EAS443:3:10:663:187#0/1  
ATAGCAAATAGTAGCATTGCCACAACACTACTTCAATGCATG  
+HWI-EAS443:3:10:663:187#0/1  
\_Z\_b`baaaaZN\_baaaa]``a\_aa`Ya`\_`a`^^`^^^a  
@HWI-EAS443:3:10:706:154#0/1  
AGCAAATAGTAGCATTGCCACAACACTACTTCAATGCATGTG  
+HWI-EAS443:3:10:706:154#0/1  
abaaa]baa\_ba\_a\_`a]a]a`a`W\_`^`^`\_a]`\_\_Z`  
@HWI-EAS443:3:11:908:572#0/1  
AGCAAATAGTAGCATTGCCACAACACTACTTCAATGCATGTG  
+HWI-EAS443:3:11:908:572#0/1  
abab^abbb\_bbaaaaabbaaba\_aaaaaYa\_aa``aa^a



@HWI-EAS443:3:12:1407:1493#0/1  
AGCAAATAGTAGCATTGCCACAACACTTCAATGCATGTG  
+HWI-EAS443:3:12:1407:1493#0/1  
a`aaaZb`b^aba[bbbaaa]`a\_`b\_aaaa[abaYba\_a  
@HWI-EAS443:3:12:1555:1584#0/1  
AGCAAATAGTAGCATTGCCACAACACTTCAATGCATGTG  
+HWI-EAS443:3:12:1555:1584#0/1  
UY`¥`^`\_\_Y\_babab\_`^`aX`aa`a\_aa]a\_`a\_`aaXa  
@HWI-EAS443:3:12:1595:1708#0/1  
AGCAAATAGTAGCATTGCCACAACACTTCAATGCATGTG  
+HWI-EAS443:3:12:1595:1708#0/1  
ab``aaaab¥a`W`aaa`aa^a^^`Za`\_\_^\_aZ^\_aX`  
@HWI-EAS443:3:12:719:1523#0/1  
AGCAAATAGTAGCATTGCCACAACACTTCAATGCATGTG  
+HWI-EAS443:3:12:719:1523#0/1  
]a`babb`Z\_V\_]NZX^[SYG¥S¥`b¥Y]X`b`[Z`baW\_  
@HWI-EAS443:3:13:869:420#0/1  
AGCAAATAGTAGCATTGCCACAACACTTCAATGCATGTG  
+HWI-EAS443:3:13:869:420#0/1  
^bbabba`bab`P\_]a`aab``^`a\_a]``a^`aa\_aa[b  
@HWI-EAS443:3:13:944:902#0/1  
GCAAATAGTAGCATTGCCACAACACTTCAATGCATGTG  
+HWI-EAS443:3:13:944:902#0/1  
a¥X^bbb]N]b`baZ\_X``\_\_T]\_\_\_a\_\_bW¥a^\_aa\_\_`  
@HWI-EAS443:3:14:1757:1614#0/1  
GATAGCAAATAGTAGCATTGCCACAACACTTCAATGCAT  
+HWI-EAS443:3:14:1757:1614#0/1  
a^^SWO]^^^\_XWR^IX^]^UZXXSZU]X]Z¥G]XXXZXV  
@HWI-EAS443:3:14:586:390#0/1  
AGCAAATAGTAGCATTGCCACAACACTTCAATGCATGTG  
+HWI-EAS443:3:14:586:390#0/1  
aaaa`a\_a¥`\_Wa`a]^\_Ya\_`\_^\_]`[\_^^a^X`Z\_  
@HWI-EAS443:3:14:586:578#0/1  
AGCAAATAGTAGCATTGCCACAACACTTCAATGCATGTG  
+HWI-EAS443:3:14:586:578#0/1  
a\_a`ba^b`H`W`aaa\_aaa`a`M`a[aaa^^]a¥\_``U`  
@HWI-EAS443:3:14:926:1452#0/1  
GCAAATAGTAGCATTGCCACAACACTTCAATGCATGTG  
+HWI-EAS443:3:14:926:1452#0/1  
`abbbbbb¥]bbabb\_aaaaaa`¥abaaaab]`\_\_aaa\_UO  
@HWI-EAS443:3:14:988:1178#0/1  
GCAAATAGTAGCATTGCCACAACACTTCAATGCATGTG  
+HWI-EAS443:3:14:988:1178#0/1  
aaa`\_NLL0]]SP]a`^XP`[\_NZ\_\_LYRY`a`^\_YQ¥Y  
@HWI-EAS443:3:15:1120:385#0/1  
AGCAAATAGTAGCATTGCCACAACACTTCAATGCATGTG  
+HWI-EAS443:3:15:1120:385#0/1  
abbbbbb\_bbbabbb\_aaabaaaaabba\_aaa``bb\_a  
@HWI-EAS443:3:15:708:1030#0/1  
AGCAAATAGTAGCATTGCCACAACACTTCAATGCATGTG

+HWI-EAS443:3:15:708:1030#0/1  
ababbbba`Naa\_`baaaaaabbaaa`abbbaaa`aa^b  
@HWI-EAS443:3:15:921:1693#0/1  
GCAAATAGTAGCATTGCCACAACACTTCAATGCATGTGT  
+HWI-EAS443:3:15:921:1693#0/1  
abbababYQ`aaabba]a`abbabbaaa]bbab\_abb\_a\_  
@HWI-EAS443:3:15:928:578#0/1  
AGCAAATAGTAGCATTGCCACAACACTTCAATGCATGTG  
+HWI-EAS443:3:15:928:578#0/1  
]\_V\_\_\_\_[S\_ZS[[U\_aZ`WPH\_^]¥RYS^T``a[aaaSa  
@HWI-EAS443:3:15:941:35#0/1  
AGCAAATAGTAGCATTGCCACAACACTTCAATGCATGTG  
+HWI-EAS443:3:15:941:35#0/1  
`bab\_bbbbbW`Vbbbb\_N]Raa`bb[`aa`^bb\_\_ab`a  
@HWI-EAS443:3:16:1238:802#0/1  
AGCAAATAGTAGCATTGCCACAACACTTCAATGCATGTG  
+HWI-EAS443:3:16:1238:802#0/1  
ab`bb`b\_\_Xabaaaa`\_``aaaa\_aa\_^¥`aHXaa^a  
@HWI-EAS443:3:16:297:683#0/1  
AGCAAATAGTAGCATTGCCACAACACTTCAATGCATGTG  
+HWI-EAS443:3:16:297:683#0/1  
abaabbbb]Y`aaab\_a\_a^W\_a[aaaa]¥aa¥a\_aaaRa  
@HWI-EAS443:3:16:312:1819#0/1  
AGCAAATAGTAGCATTGCCACAACACTTCAATGCATGTG  
+HWI-EAS443:3:16:312:1819#0/1  
^[\`bb]\_a]Ybb`¥`VU`bbbabY[bbaaaab`a`aa`^\_  
@HWI-EAS443:3:16:738:1628#0/1  
GGATAGCAAATAGTAGCATTGCCACAACACTTCAATGCA  
+HWI-EAS443:3:16:738:1628#0/1  
`a]¥PW\_OXZ\_\_J]W`^[[R^a\_`J¥LS^aSV^]XZQUQ  
@HWI-EAS443:3:16:948:1360#0/1  
AGCAAATAGTAGCATTGCCACAACACTTCAATGCATGTG  
+HWI-EAS443:3:16:948:1360#0/1  
a`aaaaa]^Naaaaaaa\_aaVaa[aaa\_\_]b]^aY^\_aX`  
@HWI-EAS443:3:17:1499:1015#0/1  
AGCAAATAGTAGCATTGCCACAACACTTCAATGCATGTG  
+HWI-EAS443:3:17:1499:1015#0/1  
abababbab`bb^]a\_\_a`a`a`^\_aaaa\_^¥`a^`adW`  
@HWI-EAS443:3:18:1588:873#0/1  
GGATAGCAAATAGTAGCATTGCCACAACACTTCAATGCA  
+HWI-EAS443:3:18:1588:873#0/1  
^a0[a\_RX]^\_Oa¥Ua¥]a\_a[PQY[VFZ^RX^W`VV¥]]  
@HWI-EAS443:3:18:1734:426#0/1  
GGATAGCAAATAGTAGCATTGCCACAACACTTCAATGCA  
+HWI-EAS443:3:18:1734:426#0/1  
^`Va`b`babbbb`ab^`aaZa``\_\_a\_a`Za]P]\_\_\_\_^  
@HWI-EAS443:3:19:1076:255#0/1  
GCAAATAGTAGCATTGCCACAACACTTCAATGCATGTGT  
+HWI-EAS443:3:19:1076:255#0/1  
aaa¥X¥`[LXaa`a`\_Y[]a`\_``\_\_\_\_^¥R\_UZ`\_U\_X

@HWI-EAS443:3:19:1550:1535#0/1  
ATGCATTGAAGTAGTTGTGGCAATGCTACTATTTGCTATC  
+HWI-EAS443:3:19:1550:1535#0/1  
^U]OY¥^LXPaz[ZW\_`FXV^`XWX¥^YGRG[¥[[UYSUB  
@HWI-EAS443:3:19:580:204#0/1  
AGCAAATAGTAGCATTGCCACAACACTTCAATGCATGTG  
+HWI-EAS443:3:19:580:204#0/1  
aaabbbba¥ab]aaaaaaaa`abaaaaaaaa`a]a  
@HWI-EAS443:3:1:1594:980#0/1  
AGCAAATAGTAGCATTGCCACAACACTTCAATGCATGTG  
+HWI-EAS443:3:1:1594:980#0/1  
`b`ba`bbb\_`baabaaa`\_baa`\_aa`aa\_a]aaaBB  
@HWI-EAS443:3:1:649:223#0/1  
GCAAATAGTAGCATTGCCACAACACTTCAATGCATGTGT  
+HWI-EAS443:3:1:649:223#0/1  
a`a`aa`T[a\_a`^]T\_`\_]\_\_¥\_a^\_aU\_^\_\_Z]`^BBB  
@HWI-EAS443:3:20:1530:39#0/1  
AGCAAATAGTAGCATTGCCACAACACTTCAATGCATGTG  
+HWI-EAS443:3:20:1530:39#0/1  
aaaaabab^bb[a\_aaa`aaa^\_aa\_aa[baaa^\_aa]\_  
@HWI-EAS443:3:20:607:600#0/1  
AGCAAATAGTAGCATTGCCACAACACTTCAATGCATGTG  
+HWI-EAS443:3:20:607:600#0/1  
aaQ\_]\_a\_\_Z`ab^]``]a[`a\_¥^V¥^]`a\_a```aPa  
@HWI-EAS443:3:20:912:1811#0/1  
AGCAAATAGTAGCATTGCCACAACACTTCAATGCATGTG  
+HWI-EAS443:3:20:912:1811#0/1  
aYbb\_S¥\_VQb]^]aYZbaabb\_\_a`ba\_ab`\_\_^`\_a]`  
@HWI-EAS443:3:21:1104:1891#0/1  
AGCAAATAGTAGCATTGCCACAACACTTCAATGCATGTG  
+HWI-EAS443:3:21:1104:1891#0/1  
^ZKa`Y¥TU\_S]ZV\_\_Vba`¥¥XZ\_`\_[Z\_b[[Z\_^aSGa  
@HWI-EAS443:3:21:221:736#0/1  
GCAAATAGTAGCATTGCCACAACACTTCAATGCATGTGT  
+HWI-EAS443:3:21:221:736#0/1  
aab\_aa\_^]`a`]a^`aaaaaaaa````^aa`\_`aa^aW  
@HWI-EAS443:3:22:1633:127#0/1  
AGCAAATAGTAGCATTGCCACAACACTTCAATGCATGTG  
+HWI-EAS443:3:22:1633:127#0/1  
ab\_aaaaab\_`^]\_aaa]\_\_\_a\_Z\_`^`\_X\_\_^`^¥`aXa  
@HWI-EAS443:3:23:1660:1250#0/1  
AGCAAATAGTAGCATTGCCACAACACTTCAATGCATGTG  
+HWI-EAS443:3:23:1660:1250#0/1  
VaTa`^Ta^aabaa]]\_aaa`bbVabY^a\_[^`bU]`aUa  
@HWI-EAS443:3:23:229:605#0/1  
GGATAGCAAATAGTAGCATTGCCACAACACTTCAATGCA  
+HWI-EAS443:3:23:229:605#0/1  
aa\_a``aba`a`^Za\_a]\_]\_\_\_\_^^^\_`^`\_\_^^\_\_Z`Z^  
@HWI-EAS443:3:23:506:438#0/1  
AGCAAATAGTAGCATTGCCACAACACTTCAATGCATGTG

+HWI-EAS443:3:23:506:438#0/1  
Ob\_ba\_a`a[ `ab\_^¥`¥V]^aa]^¥a]aa^]abTIbb\_b  
@HWI-EAS443:3:24:1079:657#0/1  
AGCAAATAGTAGCATTGCCACAACACTTCAATGCATGTG  
+HWI-EAS443:3:24:1079:657#0/1  
` `bbbbbbbaabbbbb`aaaababbabaab]abababab  
@HWI-EAS443:3:24:1223:13#0/1  
AGCAAATAGTAGCATTGCCACAACACTTCAATGCATGTG  
+HWI-EAS443:3:24:1223:13#0/1  
a`a`ab\_Z]NSb[\_bbaa`X`^Z]a^\_\_[Xaaa^\_\_aa^a  
@HWI-EAS443:3:24:1715:922#0/1  
AGCAAATAGTAGCATTGCCACAACACTTCAATGCATGTG  
+HWI-EAS443:3:24:1715:922#0/1  
a`abbbbaYabbaaaaaa`aa`aa\_aaaaaa\_`aa\_a  
@HWI-EAS443:3:24:179:1212#0/1  
TAGCAAATAGTAGCATTGCCACAACACTTCAATGCATGT  
+HWI-EAS443:3:24:179:1212#0/1  
aabaa^abbbW^aa^aabaaaa\_aabbaabbaaaaaaba\_  
@HWI-EAS443:3:24:323:1579#0/1  
AGCAAATAGTAGCATTGCCACAACACTTCAATGCATGTG  
+HWI-EAS443:3:24:323:1579#0/1  
¥W\_T¥UZ`\_W¥Z¥PYZ^\_aaZa¥][^ZZ]¥\_R]`Ya\_^TX  
@HWI-EAS443:3:24:355:355#0/1  
AGCAAATAGTAGCATTGCCACAACACTTCAATGCATGTG  
+HWI-EAS443:3:24:355:355#0/1  
`bbbbbbabaWbbbaaaaba`aaaaabaaaa\_`a\_`\_aZ`  
@HWI-EAS443:3:25:647:187#0/1  
ATGCATTGAAGTAGTTGTGGCAATGCTACTATTTGCTATC  
+HWI-EAS443:3:25:647:187#0/1  
\_a`ab\_b^`ba]aaXab¥`[\_`a[YU]YP[\_\_\_\_]RVX\_[V  
@HWI-EAS443:3:28:1658:1592#0/1  
GGATAGCAAATAGTAGCATTGCCACAACACTTCAATGCA  
+HWI-EAS443:3:28:1658:1592#0/1  
aa\_]\_aZZ\_[]XWR`T`aX]ZYVL¥UYXWQQOSVWYZSW  
@HWI-EAS443:3:28:229:1168#0/1  
AGCAAATAGTAGCATTGCCACAACACTTCAATGCATGTG  
+HWI-EAS443:3:28:229:1168#0/1  
\_`bbabaaTIbaa`a]Zbbaaabb`a\_abbb`aaba`a\_a  
@HWI-EAS443:3:28:925:100#0/1  
GCAAATAGTAGCATTGCCACAACACTTCAATGCATGTGT  
+HWI-EAS443:3:28:925:100#0/1  
aYa\_P`a`[¥][^`a^¥]UV`ZSa[]\_\_X\_¥¥\_WY`aY`W  
@HWI-EAS443:3:2:1110:76#0/1  
GGATAGCAAATAGTAGCATTGCCACAACACTTCAATGCA  
+HWI-EAS443:3:2:1110:76#0/1  
a`\_\_`a\_\_`^`\_\_X\_aW`\_]XYX\_^X^^Z]^Z]`WZ  
@HWI-EAS443:3:2:1218:366#0/1  
AGCAAATAGTAGCATTGCCACAACACTTCAATGCATGTG  
+HWI-EAS443:3:2:1218:366#0/1  
`bab`abab[b`\_aa\_]\_S]Qab\_b``aa[aabbM\_aa\_b

@HWI-EAS443:3:2:1289:1714#0/1  
AGCAAATAGTAGCATTGCCACAACACTTCAATGCATGTG  
+HWI-EAS443:3:2:1289:1714#0/1  
aaa\_abaaa\_baYaba^a\_a`aa^aa\_aa[aaaaVY[aaa  
@HWI-EAS443:3:2:1464:1753#0/1  
GGATAGCAAATAGTAGCATTGCCACAACACTTCAATGCA  
+HWI-EAS443:3:2:1464:1753#0/1  
aa]^a[\_\_\_\_`S\_W\_aS]\_Y^VUZ^¥^Z\_WZ¥^O¥UZYUX  
@HWI-EAS443:3:30:1292:296#0/1  
AGCAAATAGTAGCATTGCCACAACACTTCAATGCATGTG  
+HWI-EAS443:3:30:1292:296#0/1  
[H\_`b]bbb[a\_V\_¥`Q\_`a\_aab]^`ba\_`abbXY`]Za  
@HWI-EAS443:3:30:189:66#0/1  
GGATAGCAAATAGTAGCATTGCCACAACACTTCAATGCA  
+HWI-EAS443:3:30:189:66#0/1  
aa`\_`a`^^^`\_R`a^aa`\_\_^`a\_Z\_\_\_\_`^X¥^\_`ZW  
@HWI-EAS443:3:31:1329:1719#0/1  
GGATAGCAAATAGTAGCATTGCCACAACACTTCAATGCA  
+HWI-EAS443:3:31:1329:1719#0/1  
Z`XJX^Zaba\_RQQM\_U¥aaaU^aa`aRP]\_¥Waa^W`]N  
@HWI-EAS443:3:31:462:1340#0/1  
AGCAAATAGTAGCATTGCCACAACACTTCAATGCATGTG  
+HWI-EAS443:3:31:462:1340#0/1  
QJX]ba`b\_X^Y¥aaWRa`a`a[Ja\_`^\_YaV[Y\_]\_aQ[  
@HWI-EAS443:3:31:470:1096#0/1  
GCAAATAGTAGCATTGCCACAACACTTCAATGCATGTGT  
+HWI-EAS443:3:31:470:1096#0/1  
ab¥YYV]a]SSa`aZT`a]\_aZW\_a`[Za\_K]Y\_\_\_WLT  
@HWI-EAS443:3:31:677:1347#0/1  
GCAAATAGTAGCATTGCCACAACACTTCAATGCATGTGT  
+HWI-EAS443:3:31:677:1347#0/1  
abaab\_`aWaaV[`aWaaa`a\_\_`a\_]ab`\_aa^]a[`X  
@HWI-EAS443:3:32:1071:1148#0/1  
AGCAAATAGTAGCATTGCCACAACACTTCAATGCATGTG  
+HWI-EAS443:3:32:1071:1148#0/1  
Z]ababb\_b\_abaaaa`ab`baYab\_aaWb`a`a`aa\_a  
@HWI-EAS443:3:32:1680:1608#0/1  
AGCAAATAGTAGCATTGCCACAACACTTCAATGCATGTG  
+HWI-EAS443:3:32:1680:1608#0/1  
¥a`¥Y¥\_Y\_¥`^`^`^Z¥YaYK[]a^^XbZ[¥a\_baZZ  
@HWI-EAS443:3:32:99:1908#0/1  
GCAAATAGTAGCATTGCCACAACACTTCAATGCATGTGT  
+HWI-EAS443:3:32:99:1908#0/1  
`bbbaab[V^ab]aaSbaabbbbabbaabaUa`baa`]ZM  
@HWI-EAS443:3:33:158:812#0/1  
AGCAAATAGTAGCATTGCCACAACACTTCAATGCATGTG  
+HWI-EAS443:3:33:158:812#0/1  
aa\_b`Y¥\_`^]a[aba`]baba^^U^\_]X\_aaZU^a]]Y]`  
@HWI-EAS443:3:33:185:1128#0/1  
AGCAAATAGTAGCATTGCCACAACACTTCAATGCATGTG

+HWI-EAS443:3:33:185:1128#0/1  
aaba]aaY^Zaaaa\_\_aaYaYa\_aa\_`aa\_]`a^\_\_X\_  
@HWI-EAS443:3:33:844:1328#0/1  
AGCAAATAGTAGCATTGCCACAACACTACTTCAATGCATGTG  
+HWI-EAS443:3:33:844:1328#0/1  
a^`ba\_\_Z`]a]aaa`\_a`a`aa`a^\_`adW`W\_`]a  
@HWI-EAS443:3:34:155:848#0/1  
GGATAGCAAATAGTAGCATTGCCACAACACTACTTCAATGCA  
+HWI-EAS443:3:34:155:848#0/1  
UR\_¥W\_a^^a\_Z^Zaa\_Q]a\_]aa¥¥\_aabbaaa\_a`a  
@HWI-EAS443:3:34:165:750#0/1  
GCAAATAGTAGCATTGCCACAACACTACTTCAATGCATGTGT  
+HWI-EAS443:3:34:165:750#0/1  
a`a]a^b\_]`baY\_\_^\_aTaaZa\_`a`a`\_a\_\_[UUa\_\_Y  
@HWI-EAS443:3:34:321:1928#0/1  
AGCAAATAGTAGCATTGCCACAACACTACTTCAATGCATGTG  
+HWI-EAS443:3:34:321:1928#0/1  
``bb`\_[bX[aa`[`PUYaa`abaSa[^\_baa^¥^]SPVI  
@HWI-EAS443:3:35:1257:301#0/1  
GCAAATAGTAGCATTGCCACAACACTACTTCAATGCATGTGT  
+HWI-EAS443:3:35:1257:301#0/1  
aaaa`aab]ab```a`aaa\_aa\_`a^a`ba\_`a`\_aaY]Y  
@HWI-EAS443:3:35:1441:797#0/1  
GCAAATAGTAGCATTGCCACAACACTACTTCAATGCATGTGT  
+HWI-EAS443:3:35:1441:797#0/1  
aa\_ababbYaab`a`aaVYXa\_a^a\_b^baaaaa`ba\_a\_  
@HWI-EAS443:3:35:1614:1056#0/1  
AGCAAATAGTAGCATTGCCACAACACTACTTCAATGCATGTG  
+HWI-EAS443:3:35:1614:1056#0/1  
]\_Z\_\_[^RYF^WYY^YVY`YQ^b`]NbYX^\_]`RX```\_a  
@HWI-EAS443:3:36:133:214#0/1  
AGCAAATAGTAGCATTGCCACAACACTACTTCAATGCATGTG  
+HWI-EAS443:3:36:133:214#0/1  
aabbaaa[a]aaW]\_b`baaabbba]aa\_aaaaa`a^`^^  
@HWI-EAS443:3:36:514:271#0/1  
AGCAAATAGTAGCATTGCCACAACACTACTTCAATGCATGTG  
+HWI-EAS443:3:36:514:271#0/1  
]babbaabb\_bb\_Zaaaaaabaaa`a``aaa`aa`\_a^a  
@HWI-EAS443:3:37:1161:896#0/1  
AGCAAATAGTAGCATTGCCACAACACTACTTCAATGCATGTG  
+HWI-EAS443:3:37:1161:896#0/1  
ab\_\_aaba```abb^`a`a^]^^a`Y`aG\_]T`^RaaXa  
@HWI-EAS443:3:37:1636:1278#0/1  
AGCAAATAGTAGCATTGCCACAACACTACTTCAATGCATGTG  
+HWI-EAS443:3:37:1636:1278#0/1  
`b\_¥Y`b`bba¥YVa\_b\_aabbbba\_baLZ\_abb``a[a  
@HWI-EAS443:3:37:231:694#0/1  
GCAAATAGTAGCATTGCCACAACACTACTTCAATGCATGTGT  
+HWI-EAS443:3:37:231:694#0/1  
aaa[^]XWLZb^)`W[]\_X\_a\_]Ra\_\_bUFYP\_T[\_U`Y

@HWI-EAS443:3:38:1500:388#0/1  
GGATAGCAAATAGTAGCATTGCCACAACACTTCAATGCA  
+HWI-EAS443:3:38:1500:388#0/1  
aX[YYa^b][ ]\_[0aa`XRZOPYWX¥¥\_YX]X][W^ULS  
@HWI-EAS443:3:39:187:1178#0/1  
GCAAATAGTAGCATTGCCACAACACTTCAATGCATGTGT  
+HWI-EAS443:3:39:187:1178#0/1  
abbabba¥[aab`a`aabbbaaaaabb`bbb\_`a^\_b`a[  
@HWI-EAS443:3:39:479:232#0/1  
ATAGCAAATAGTAGCATTGCCACAACACTTCAATGCATG  
+HWI-EAS443:3:39:479:232#0/1  
ab\_babbbbaUa[`a¥Iaaababaaaaabaa^U`aa`¥a`a  
@HWI-EAS443:3:39:923:734#0/1  
AGCAAATAGTAGCATTGCCACAACACTTCAATGCATGTG  
+HWI-EAS443:3:39:923:734#0/1  
^U[`QGYUaSaa]\_``]XILTR`¥Za]a^YORY^^0]]U^  
@HWI-EAS443:3:40:1204:195#0/1  
AGCAAATAGTAGCATTGCCACAACACTTCAATGCATGTG  
+HWI-EAS443:3:40:1204:195#0/1  
\_aWaa[^ba`bba¥`bbaZ^a]\_ababa\_aaaaa`Z\_\_¥]  
@HWI-EAS443:3:42:1578:1453#0/1  
GATAGCAAATAGTAGCATTGCCACAACACTTCAATGCAT  
+HWI-EAS443:3:42:1578:1453#0/1  
][`aabbb\_abaabbabbbaba\_aa`aaaa^^a`ab\_`a  
@HWI-EAS443:3:42:262:958#0/1  
AGCAAATAGTAGCATTGCCACAACACTTCAATGCATGTG  
+HWI-EAS443:3:42:262:958#0/1  
\_aZabaaS`Zbab\_a¥]]aaaaZaabaabaaaaaa`a\_a  
@HWI-EAS443:3:43:1020:678#0/1  
AGCAAATAGTAGCATTGCCACAACACTTCAATGCATGTG  
+HWI-EAS443:3:43:1020:678#0/1  
ab\_abbbbbababbbbbbababaabbabbb`bbbaabba  
@HWI-EAS443:3:43:1067:1478#0/1  
AGCAAATAGTAGCATTGCCACAACACTTCAATGCATGTG  
+HWI-EAS443:3:43:1067:1478#0/1  
aa`baabbaabbaabbaaaaaaaaab`baabaaa^abb`a  
@HWI-EAS443:3:43:1371:1014#0/1  
GGATAGCAAATAGTAGCATTGCCACAACACTTCAATGCA  
+HWI-EAS443:3:43:1371:1014#0/1  
ab`a\_aabaabba\_abaaaaa`\_``aa^aa^aa`a`aa\_\_  
@HWI-EAS443:3:43:1690:401#0/1  
AGCAAATAGTAGCATTGCCACAACACTTCAATGCATGTG  
+HWI-EAS443:3:43:1690:401#0/1  
^bbbbbba\_aabb^aab`^S[bab]`aaaaaaa`[`bba\_  
@HWI-EAS443:3:43:215:73#0/1  
GGATAGCAAATAGTAGCATTGCCACAACACTTCAATGCA  
+HWI-EAS443:3:43:215:73#0/1  
abbabbbb\_bbaa¥`b]R]aaaaaa`a\_ab``b\_`^^a\_\_  
@HWI-EAS443:3:43:228:1925#0/1  
GCAAATAGTAGCATTGCCACAACACTTCAATGCATGTGT

+HWI-EAS443:3:43:228:1925#0/1  
aa\_bbbb`baabbbabababbabbabbabbaa`bbb\_bY  
@HWI-EAS443:3:44:1041:1905#0/1  
AGCAAATAGTAGCATTGCCACAACACTTCAATGCATGTG  
+HWI-EAS443:3:44:1041:1905#0/1  
¥abb]XaYYP\_X`aa`0\_`^a^[Za¥\_^^aa`aY\_U\_]\_  
@HWI-EAS443:3:44:1335:1623#0/1  
AGCAAATAGTAGCATTGCCACAACACTTCAATGCATGTG  
+HWI-EAS443:3:44:1335:1623#0/1  
`\_`b[S`ab`\_b`\_VW``]]FTQ\_a`\_aaa`V``U`]a\_\_  
@HWI-EAS443:3:44:1700:1700#0/1  
GCAAATAGTAGCATTGCCACAACACTTCAATGCATGTGT  
+HWI-EAS443:3:44:1700:1700#0/1  
a^\_[ZS`YZR\_[S\_GQPvX^¥[R]UY\_[V[W^`YS]]Y\_S  
@HWI-EAS443:3:44:1775:831#0/1  
AGCAAATAGTAGCATTGCCACAACACTTCAATGCATGTG  
+HWI-EAS443:3:44:1775:831#0/1  
]YYX[a\_V¥GX``U`¥¥^YZaX\_[Y]SaaX[``^]O]\_QU  
@HWI-EAS443:3:46:23:933#0/1  
AGCAAATAGTAGCATTGCCACAACACTTCAATGCATGTG  
+HWI-EAS443:3:46:23:933#0/1  
a\_aab`a``N][aa]a\_b\_\_^`[]`a`\_]`\_`[]Pa\_]`  
@HWI-EAS443:3:46:578:1187#0/1  
ATAGCAAATAGTAGCATTGCCACAACACTTCAATGCATG  
+HWI-EAS443:3:46:578:1187#0/1  
a^aaab`^\_YaXaa`\_aa\_]`^a`¥`a\_a\_\_`a^^\_\_a\_  
@HWI-EAS443:3:47:1122:1968#0/1  
AGCAAATAGTAGCATTGCCACAACACTTCAATGCATGTG  
+HWI-EAS443:3:47:1122:1968#0/1  
aYI`abbbV[]`]abab``a`aaWaa`a`\_a``a\_`aaRa  
@HWI-EAS443:3:47:1719:817#0/1  
AGCAAATAGTAGCATTGCCACAACACTTCAATGCATGTG  
+HWI-EAS443:3:47:1719:817#0/1  
a\_ab`[``Y\_JabX``¥^aa\_aba`aa`a`aa`¥\_]\_``Z`  
@HWI-EAS443:3:49:1144:1203#0/1  
GCAAATAGTAGCATTGCCACAACACTTCAATGCATGTGT  
+HWI-EAS443:3:49:1144:1203#0/1  
\_`^b\_bbZa¥`b^]abba`\_`bbaaababaab]abaaab]b\_  
@HWI-EAS443:3:49:1481:650#0/1  
AGCAAATAGTAGCATTGCCACAACACTTCAATGCATGTG  
+HWI-EAS443:3:49:1481:650#0/1  
\_bbbab`^`bbbbbb]\_aaaaabbbaa\_aa````\_baaa  
@HWI-EAS443:3:49:223:1442#0/1  
AGCAAATAGTAGCATTGCCACAACACTTCAATGCATGTG  
+HWI-EAS443:3:49:223:1442#0/1  
abbabaa\_XPZ`KXb\_Q¥`b^\_`Sb`aaa]aa`bWabb`b  
@HWI-EAS443:3:4:127:1477#0/1  
AGCAAATAGTAGCATTGCCACAACACTTCAATGCATGTG  
+HWI-EAS443:3:4:127:1477#0/1  
aaaa\_\_aa\_abbaaa]^`]aaaa^aa`\_a`aa`aaaa\_a



@HWI-EAS443:3:4:143:1958#0/1  
GGATAGCAAATAGTAGCATTGCCACAACACTTCAATGCA  
+HWI-EAS443:3:4:143:1958#0/1  
aZaW¥`ZY`UVJITRO[WOR]VX]Z^[[UX`X\_XXYU`\_  
@HWI-EAS443:3:50:1449:1709#0/1  
AGCAAATAGTAGCATTGCCACAACACTTCAATGCATGTG  
+HWI-EAS443:3:50:1449:1709#0/1  
aaababaZV¥aa]`[`a`Yaaa\_H\_aa\_a]a\_`]R^aaZ[  
@HWI-EAS443:3:50:176:1508#0/1  
AGCAAATAGTAGCATTGCCACAACACTTCAATGCATGTG  
+HWI-EAS443:3:50:176:1508#0/1  
]b\_abbaa\_Pa\_Z`ba`YVSaa`bb`aaaa]¥aLabb`\_  
@HWI-EAS443:3:51:1119:832#0/1  
GATAGCAAATAGTAGCATTGCCACAACACTTCAATGCAT  
+HWI-EAS443:3:51:1119:832#0/1  
\_`T[¥I`aaaab`aaaab]\_¥]\_aa`¥a``aaaa`aa¥`a  
@HWI-EAS443:3:51:478:871#0/1  
AGCAAATAGTAGCATTGCCACAACACTTCAATGCATGTG  
+HWI-EAS443:3:51:478:871#0/1  
\_ab`¥I`^abaa\_\_aabaa`\_aa^aa\_abab^aa\_a^aGa  
@HWI-EAS443:3:52:512:1550#0/1  
GCAAATAGTAGCATTGCCACAACACTTCAATGCATGTGT  
+HWI-EAS443:3:52:512:1550#0/1  
aaaaa\_aaT`b\_aa`\_a\_^\_a\_aa`\_a^`¥`aaaaa^\_Y  
@HWI-EAS443:3:52:524:40#0/1  
AGCAAATAGTAGCATTGCCACAACACTTCAATGCATGTG  
+HWI-EAS443:3:52:524:40#0/1  
]\_]\_\_¥]bb\_\_`\_aa`Vaaa]`a`a\_Yaa]`^\_a^Zb`U\_  
@HWI-EAS443:3:52:995:1821#0/1  
AGCAAATAGTAGCATTGCCACAACACTTCAATGCATGTG  
+HWI-EAS443:3:52:995:1821#0/1  
`[ab^Z]a¥^ba\_\_b\_V]]W¥¥bTba^a[Taaaa`\_aa\_a  
@HWI-EAS443:3:54:1320:1405#0/1  
GGATAGCAAATAGTAGCATTGCCACAACACTTCAATGCA  
+HWI-EAS443:3:54:1320:1405#0/1  
aba`baab\_bbba``babbaaaaaaba\_bbaba^a^\_aa\_  
@HWI-EAS443:3:54:32:1688#0/1  
AGCAAATAGTAGCATTGCCACAACACTTCAATGCATGTG  
+HWI-EAS443:3:54:32:1688#0/1  
X`a`[b¥aH\_\_Vaa`¥YaaaaaYZaa`]^XXaa`aa`S]  
@HWI-EAS443:3:54:909:842#0/1  
GATAGCAAATAGTAGCATTGCCACAACACTTCAATGCAT  
+HWI-EAS443:3:54:909:842#0/1  
ZV¥`\_NQR]¥\_V^YRVX\_^\_[S^\_\_¥`\_`bbaYaYX¥]a\_  
@HWI-EAS443:3:55:1434:499#0/1  
GCAAATAGTAGCATTGCCACAACACTTCAATGCATGTGT  
+HWI-EAS443:3:55:1434:499#0/1  
aba`\_bbbabbbbbbabaaba^ab\_baaaaab[\_bb`b^  
@HWI-EAS443:3:55:1777:1223#0/1  
AGCAAATAGTAGCATTGCCACAACACTTCAATGCATGTG

+HWI-EAS443:3:55:1777:1223#0/1  
a`ba\_aabaZ`a`a^Xaaaaa]¥a\_aaYaaaa`a`Ya  
@HWI-EAS443:3:55:815:768#0/1  
CATGCATTGAAGTAGTTGTGGCAATGCTACTATTTGCTAT  
+HWI-EAS443:3:55:815:768#0/1  
abaa\_abaa`\_a^`a\_aa]aaY\_\_`a[\_a\_ZZ]a`\_\_[TH  
@HWI-EAS443:3:55:834:224#0/1  
ATAGCAAATAGTAGCATTGCCACAACACTTCAATGCATG  
+HWI-EAS443:3:55:834:224#0/1  
aaaa`baabaa\_ab\_aaa`\_^`\_aa^aa\_aa\_a`a`\_aa  
@HWI-EAS443:3:55:841:1781#0/1  
AGCAAATAGTAGCATTGCCACAACACTTCAATGCATGTG  
+HWI-EAS443:3:55:841:1781#0/1  
ab`bbbbbbUbbbaaaba\_babaaaa\_ba`baaa^abb\_a  
@HWI-EAS443:3:56:1531:1037#0/1  
AGCAAATAGTAGCATTGCCACAACACTTCAATGCATGTG  
+HWI-EAS443:3:56:1531:1037#0/1  
a\_abaaabb`\_b\_abaaa`aaa\_aa\_bb\_a\_ab^\_ab`b  
@HWI-EAS443:3:56:1587:1847#0/1  
GATAGCAAATAGTAGCATTGCCACAACACTTCAATGCAT  
+HWI-EAS443:3:56:1587:1847#0/1  
`aaaabaaaba\_^bb`\_aba`aaaa\_aaaa`Ya`aaZ`  
@HWI-EAS443:3:56:1619:155#0/1  
GCAAATAGTAGCATTGCCACAACACTTCAATGCATGTGT  
+HWI-EAS443:3:56:1619:155#0/1  
¥ZY^Sa`aabb¥SZ^HH]W^`P]aQa`W\_¥X[XXVa[[Q  
@HWI-EAS443:3:56:166:370#0/1  
AGCAAATAGTAGCATTGCCACAACACTTCAATGCATGTG  
+HWI-EAS443:3:56:166:370#0/1  
`b`^`\_b`Zbbabaaabaaabb`b\_aa¥a`aaaaab^a  
@HWI-EAS443:3:56:523:164#0/1  
AGCAAATAGTAGCATTGCCACAACACTTCAATGCATGTG  
+HWI-EAS443:3:56:523:164#0/1  
a`aba`a]JS`b¥\_\_]^`^Q¥[aU[\_^U`\_]aXUa[¥^a]a  
@HWI-EAS443:3:57:1056:112#0/1  
GCAAATAGTAGCATTGCCACAACACTTCAATGCATGTGT  
+HWI-EAS443:3:57:1056:112#0/1  
aabbabab^aba`aabaaa\_aa`aa``\_aa\_a]^aa^aW  
@HWI-EAS443:3:57:304:1645#0/1  
AGCAAATAGTAGCATTGCCACAACACTTCAATGCATGTG  
+HWI-EAS443:3:57:304:1645#0/1  
ab\_baab^Y]baaaabab\_\_aba\_aa`a`aaaaY\_aaYZ\_  
@HWI-EAS443:3:58:1264:702#0/1  
AGCAAATAGTAGCATTGCCACAACACTTCAATGCATGTG  
+HWI-EAS443:3:58:1264:702#0/1  
aabbbbbbbbabbaaba\_aabaaaaabaaaaaaaaa\_abb`b  
@HWI-EAS443:3:58:1504:1031#0/1  
GCAAATAGTAGCATTGCCACAACACTTCAATGCATGTGT  
+HWI-EAS443:3:58:1504:1031#0/1  
aa\_a`baa\_a^aaba`a`^a\_Zaa\_aaVa`\_`\_a\_X[Z

@HWI-EAS443:3:58:1766:1716#0/1  
AGCAAATAGTAGCATTGCCACAACACTTCAATGCATGTG  
+HWI-EAS443:3:58:1766:1716#0/1  
\_¥Q¥TYb`a]\_\_^`a`[XQ]W]\_RZ¥0[X¥`^T\_Y`\_¥a  
@HWI-EAS443:3:58:924:1176#0/1  
AGCAAATAGTAGCATTGCCACAACACTTCAATGCATGTG  
+HWI-EAS443:3:58:924:1176#0/1  
¥\_\_a`aa\_¥]``a]aaa^\_`Va\_Wa`^aa[\_]a\_]aZYa  
@HWI-EAS443:3:59:1504:1078#0/1  
GCAAATAGTAGCATTGCCACAACACTTCAATGCATGTGT  
+HWI-EAS443:3:59:1504:1078#0/1  
¥\_H^bbb\_bb`Z[bbabaaaaabbbabb¥`b\_a```\_\_a¥  
@HWI-EAS443:3:59:1788:1724#0/1  
AGCAAATAGTAGCATTGCCACAACACTTCAATGCATGTG  
+HWI-EAS443:3:59:1788:1724#0/1  
aaababbbaa\_bb[aaaa`aa`aaabaabbba]aa\_^``]\_  
@HWI-EAS443:3:5:1063:1379#0/1  
AGCAAATAGTAGCATTGCCACAACACTTCAATGCATGTG  
+HWI-EAS443:3:5:1063:1379#0/1  
Ya\_aabb¥baba¥aba`]H\_¥VbWbaabaXWZ]aT\_ab`B  
@HWI-EAS443:3:5:39:1750#0/1  
AGCAAATAGTAGCATTGCCACAACACTTCAATGCATGTG  
+HWI-EAS443:3:5:39:1750#0/1  
`¥aaa¥`a¥Yaaa`aXT^`bab¥ba`aaaa`X`aa^bZ¥  
@HWI-EAS443:3:60:1644:540#0/1  
GATAGCAAATAGTAGCATTGCCACAACACTTCAATGCAT  
+HWI-EAS443:3:60:1644:540#0/1  
a^`¥a`b\_ab\_aZ]^T]a`^[[^Wa]L\_`^\_\_`\_\_`[\_`\_  
@HWI-EAS443:3:60:714:700#0/1  
AGCAAATAGTAGCATTGCCACAACACTTCAATGCATGTG  
+HWI-EAS443:3:60:714:700#0/1  
abbbbbbb`bbaabbaaa`aab`aaaaaab\_aa^\_aa]a  
@HWI-EAS443:3:61:1276:1780#0/1  
AGCAAATAGTAGCATTGCCACAACACTTCAATGCATGTG  
+HWI-EAS443:3:61:1276:1780#0/1  
^JY\_aa`^^Vaa[aaaaabaa`[]`aaa¥PX`\_YM¥]¥PW  
@HWI-EAS443:3:61:1278:497#0/1  
GCAAATAGTAGCATTGCCACAACACTTCAATGCATGTGT  
+HWI-EAS443:3:61:1278:497#0/1  
a\_a\_```\_Z``]Y```````````\_\_`\_\_`\_\_`^^XTZ\_]XWX  
@HWI-EAS443:3:61:76:316#0/1  
AGCAAATAGTAGCATTGCCACAACACTTCAATGCATGTG  
+HWI-EAS443:3:61:76:316#0/1  
abb`\_S¥`N\_b^a`a]bbba`Yb[\_]`¥`[\_`a`\_WW]S`  
@HWI-EAS443:3:62:1727:1685#0/1  
GGATAGCAAATAGTAGCATTGCCACAACACTTCAATGCA  
+HWI-EAS443:3:62:1727:1685#0/1  
aba``]abbabb[]aaaaab^\_\_a\_aa^bb^ab`a`aa`a  
@HWI-EAS443:3:62:195:288#0/1  
AGCAAATAGTAGCATTGCCACAACACTTCAATGCATGTG

+HWI-EAS443:3:62:195:288#0/1  
`bb\_abbba]ba` `aabbaaa\_X` `^` `aaa` ¥Xa`^a`^a  
@HWI-EAS443:3:62:59:245#0/1  
GCAAATAGTAGCATTGCCACAACACTACTTCAATGCATGTGT  
+HWI-EAS443:3:62:59:245#0/1  
a\_a¥\_¥^WP`\_V^^X^U^\_^^\_¥\_^]Z]]\_]YZ]ZZ]OZY  
@HWI-EAS443:3:62:896:866#0/1  
GGATAGCAAATAGTAGCATTGCCACAACACTACTTCAATGCA  
+HWI-EAS443:3:62:896:866#0/1  
ab^[a^`b`]^^aZ\_a`V^UY` `Z^\_]` `aa` `a]X¥aa\_  
@HWI-EAS443:3:62:955:859#0/1  
AGCAAATAGTAGCATTGCCACAACACTACTTCAATGCATGTG  
+HWI-EAS443:3:62:955:859#0/1  
a` `ba` a` \_^aa` `a` `aaaa` [\_]` ` ` ` ` \_\_\_\_Y` `Z`  
@HWI-EAS443:3:64:1283:2030#0/1  
GATAGCAAATAGTAGCATTGCCACAACACTACTTCAATGCAT  
+HWI-EAS443:3:64:1283:2030#0/1  
abaa]aaa\_baaGba[aaa`a`aaaa`^`a`\_\_`a`\_` ` ` ]]  
@HWI-EAS443:3:64:1458:369#0/1  
GCAAATAGTAGCATTGCCACAACACTACTTCAATGCATGTGT  
+HWI-EAS443:3:64:1458:369#0/1  
\_V^baabb` ` \_Yab]aa[` ¥` a` \_b` \_b` Ra` ` bU^` \_aYbU  
@HWI-EAS443:3:64:865:2010#0/1  
AGCAAATAGTAGCATTGCCACAACACTACTTCAATGCATGTG  
+HWI-EAS443:3:64:865:2010#0/1  
a^Z` bbbaaZba\_XZa` ^W]aaa` `a` \_` `aaaa` [aa]a  
@HWI-EAS443:3:65:1153:1493#0/1  
GCAAATAGTAGCATTGCCACAACACTACTTCAATGCATGTGT  
+HWI-EAS443:3:65:1153:1493#0/1  
aab` \_bb` a[ ` ^` [\_aaaaaaababaaa` `aaa` ^aa` ^aZ  
@HWI-EAS443:3:66:1142:1769#0/1  
GCAAATAGTAGCATTGCCACAACACTACTTCAATGCATGTGT  
+HWI-EAS443:3:66:1142:1769#0/1  
abbbbb` ]\_baaaaaaaabaaabbbaaaaaa` `aaa]aX  
@HWI-EAS443:3:66:1284:1208#0/1  
AGCAAATAGTAGCATTGCCACAACACTACTTCAATGCATGTG  
+HWI-EAS443:3:66:1284:1208#0/1  
^¥` aaa[ ^X^` \_` ^` b¥a` ` \_aa` \_S` \_b` ` ` aYa]` ` a` ` a` \_]V  
@HWI-EAS443:3:66:187:1378#0/1  
AGCAAATAGTAGCATTGCCACAACACTACTTCAATGCATGTG  
+HWI-EAS443:3:66:187:1378#0/1  
\_¥bbaba` a` \_abb]aa` \_bbba` `bbabaa` `aaa` ` ` `aaa` `^` \_  
@HWI-EAS443:3:66:716:707#0/1  
AGCAAATAGTAGCATTGCCACAACACTACTTCAATGCATGTG  
+HWI-EAS443:3:66:716:707#0/1  
abab` `bab` ^` \_Z` ` `ba` `aaa]` `aa` `a]` ` ` \_SZaa` `a]` \_  
@HWI-EAS443:3:67:1293:1583#0/1  
GGATAGCAAATAGTAGCATTGCCACAACACTACTTCAATGCA  
+HWI-EAS443:3:67:1293:1583#0/1  
ab[bababbbaaa]Q]T` \_ab` `¥^` a` ` `aa` ^` ba` \_aY` `a` ` ^` \_`

@HWI-EAS443:3:67:1763:1906#0/1  
GGATAGCAAATAGTAGCATTGCCACAACACTTCAATGCA  
+HWI-EAS443:3:67:1763:1906#0/1  
aba^^`abbaaa^WaaW\_aa\_\_\_a\_``]`a\_`Z\_\_^Y`[\_  
@HWI-EAS443:3:67:360:1043#0/1  
AGCAAATAGTAGCATTGCCACAACACTTCAATGCATGTG  
+HWI-EAS443:3:67:360:1043#0/1  
^abb^aa¥\_VbaaUaaab`\_aXbbb¥babbb¥\_b^Va`Wb  
@HWI-EAS443:3:67:365:834#0/1  
AGCAAATAGTAGCATTGCCACAACACTTCAATGCATGTG  
+HWI-EAS443:3:67:365:834#0/1  
ab`a`a`T[[[]`aa`aaa`Za\_aa\_a`a]`a`^`a^\_`Xa  
@HWI-EAS443:3:67:674:1442#0/1  
AGCAAATAGTAGCATTGCCACAACACTTCAATGCATGTG  
+HWI-EAS443:3:67:674:1442#0/1  
\_Z`babaaa^a]bbba`b`]a\_b`aaaa`aaa\_aaaa[R¥  
@HWI-EAS443:3:67:712:1545#0/1  
AGCAAATAGTAGCATTGCCACAACACTTCAATGCATGTG  
+HWI-EAS443:3:67:712:1545#0/1  
aaabaabba\_b`b¥aa`aaaaaaaaaaaaab\_``aa`a^a  
@HWI-EAS443:3:68:1412:332#0/1  
AGCAAATAGTAGCATTGCCACAACACTTCAATGCATGTG  
+HWI-EAS443:3:68:1412:332#0/1  
[GYb]X\_R^\_^\_]\_b[U¥aa`ZSW`\_G^]J\_ZXa`XYXWa  
@HWI-EAS443:3:68:1417:850#0/1  
GCAAATAGTAGCATTGCCACAACACTTCAATGCATGTGT  
+HWI-EAS443:3:68:1417:850#0/1  
a^\_\_\_a^\_X`a^]\_^Y\_^]^^\_^^\_\_\_]^^Z]`ZW\_^W^U  
@HWI-EAS443:3:68:365:1721#0/1  
AGCAAATAGTAGCATTGCCACAACACTTCAATGCATGTG  
+HWI-EAS443:3:68:365:1721#0/1  
aaabbbab\_]aaaa`aaaaaba``baaaaa\_````X`  
@HWI-EAS443:3:68:542:837#0/1  
AGCAAATAGTAGCATTGCCACAACACTTCAATGCATGTG  
+HWI-EAS443:3:68:542:837#0/1  
abbbbbbbb\_bbbababaaabababbaabaaabaab\_a  
@HWI-EAS443:3:68:820:167#0/1  
AGCAAATAGTAGCATTGCCACAACACTTCAATGCATGTG  
+HWI-EAS443:3:68:820:167#0/1  
abbaababbW^b`U`ab`baaaa\_aaaaaa\_aaa``a^a  
@HWI-EAS443:3:69:1192:473#0/1  
GCAAATAGTAGCATTGCCACAACACTTCAATGCATGTGT  
+HWI-EAS443:3:69:1192:473#0/1  
aaaaaaaaa]aa]aaaa^a\_``\_aa\_`\_]a\_\_a\_\_`aW\_]`  
@HWI-EAS443:3:69:214:277#0/1  
AGTATGGATAGCAAATAGGAGCATTGCCACAACACTTCA  
+HWI-EAS443:3:69:214:277#0/1  
^`RS`b\_WaYRPZ`^^VDT]U\_^^V`^SOZaVNY[[UW  
@HWI-EAS443:3:6:1749:938#0/1  
AGCAAATAGTAGCATTGCCACAACACTTCAATGCATGTG

+HWI-EAS443:3:6:1749:938#0/1  
aa\_b`abaa\_\_b\_aaa`^^a\_aa]a`]aa^a` `a^\_ab^a  
@HWI-EAS443:3:6:516:1511#0/1  
AGCAAATAGTAGCATTGCCACAACACTACTTCAATGCATGTG  
+HWI-EAS443:3:6:516:1511#0/1  
`^`abaaaa¥` ``\_\_a¥]¥a\_YaWab\_aa[`` `a¥a`a^a  
@HWI-EAS443:3:6:644:1558#0/1  
ATAGCAAATAGTAGCATTGCCACAACACTACTTCAATGCATG  
+HWI-EAS443:3:6:644:1558#0/1  
aa`aaaabaaaXab^bba\_\_a\_a`\_aaa`a`aa`a\_\_aa  
@HWI-EAS443:3:6:802:660#0/1  
GCAAATAGTAGCATTGCCACAACACTACTTCAATGCATGTGT  
+HWI-EAS443:3:6:802:660#0/1  
a^aaaaabZaaa`aaa^\_a]`a\_aa\_aa`a\_\_a¥^adWaW  
@HWI-EAS443:3:70:752:1329#0/1  
AGCAAATAGTAGCATTGCCACAACACTACTTCAATGCATGTG  
+HWI-EAS443:3:70:752:1329#0/1  
aaaaa\_R` `¥`a`aa`\_bbaabaaaa` `a`\_`aa^\_a^ [  
@HWI-EAS443:3:70:884:1400#0/1  
GCAAATAGTAGCATTGCCACAACACTACTTCAATGCATGTGT  
+HWI-EAS443:3:70:884:1400#0/1  
ab\_Y^` `[Paabbaa`babb¥baaaa`^¥a` `^`aWa¥` [  
@HWI-EAS443:3:71:1219:473#0/1  
AGCAAATAGTAGCATTGCCACAACACTACTTCAATGCATGTG  
+HWI-EAS443:3:71:1219:473#0/1  
ababbbbbb^abaaaaba`aaaaabbbaaabaab`aaa]a  
@HWI-EAS443:3:71:1372:930#0/1  
GCAAATAGTAGCATTGCCACAACACTACTTCAATGCATGTGT  
+HWI-EAS443:3:71:1372:930#0/1  
a[ba\_bbb`abaabbaaaa\_abaaaabbbaaaaa`ab]b]  
@HWI-EAS443:3:71:635:238#0/1  
TAGCAAATAGTAGCATTGCCACAACACTACTTCAATGCATGT  
+HWI-EAS443:3:71:635:238#0/1  
aababbbaba]aa\_aaaaa^aaaa`aa`ba\_aaaa^` `a]  
@HWI-EAS443:3:71:97:317#0/1  
AGCAAATAGTAGCATTGCCACAACACTACTTCAATGCATGTG  
+HWI-EAS443:3:71:97:317#0/1  
aaabbbb^a\_abaaa`\_aaaaa`\_aaaaaa\_a` `aaZ`  
@HWI-EAS443:3:72:464:243#0/1  
ATAGCAAATAGTAGCATTGCCACAACACTACTTCAATGCATG  
+HWI-EAS443:3:72:464:243#0/1  
abababababa\_bbaabaaa`a\_aa\_aaa`aa^\_`aZ`aa  
@HWI-EAS443:3:73:1214:1043#0/1  
GCAAATAGTAGCATTGCCACAACACTACTTCAATGCATGTGT  
+HWI-EAS443:3:73:1214:1043#0/1  
aababbb`\_bbaaaaaaa`aaaaaba`aaab`\_aa^a]  
@HWI-EAS443:3:73:1232:270#0/1  
GCAAATAGTAGCATTGCCACAACACTACTTCAATGCATGTGT  
+HWI-EAS443:3:73:1232:270#0/1  
a` [QLWQZRJUULZXQLJZM[ZPXNNWZ][SWPUPS^N]N

@HWI-EAS443:3:73:196:435#0/1  
AGCAAATAGTAGCATTGCCACAACACTTCAATGCATGTG  
+HWI-EAS443:3:73:196:435#0/1  
`bbbaabaa[aaaaaaaaaaaa`aaaaaa`aaaa\_aaZ\_  
@HWI-EAS443:3:73:375:1163#0/1  
AGCAAATAGTAGCATTGCCACAACACTTCAATGCATGTG  
+HWI-EAS443:3:73:375:1163#0/1  
a`bbbbbbba\_bbaabaabaaaa^aa^aaabba`aa`a¥W[  
@HWI-EAS443:3:73:433:568#0/1  
GCAAATAGTAGCATTGCCACAACACTTCAATGCATGTGT  
+HWI-EAS443:3:73:433:568#0/1  
`Za¥U\_XLQaa`ZV[[\_WKTa¥XX]`¥[¥[X]X[\_aW^V  
@HWI-EAS443:3:73:875:856#0/1  
AGCAAATAGTAGCATTGCCACAACACTTCAATGCATGTG  
+HWI-EAS443:3:73:875:856#0/1  
abbbbbbaaaZbbabbaababbab`abaaaaabab`aab`b  
@HWI-EAS443:3:74:1087:1296#0/1  
GCAAATAGTAGCATTGCCACAACACTTCAATGCATGTGT  
+HWI-EAS443:3:74:1087:1296#0/1  
\_WXURWX]ORQPNMTXUPW¥]aaaYVOTLYUSRUNT`N]O  
@HWI-EAS443:3:74:1249:77#0/1  
AGCAAATAGTAGCATTGCCACAACACTTCAATGCATGTG  
+HWI-EAS443:3:74:1249:77#0/1  
aVbbbabbaa`ZbabaK`\_V^]Sab`ab]abb`bbb^a  
@HWI-EAS443:3:74:78:148#0/1  
AGCAAATAGTAGCATTGCCACAACACTTCAATGCATGTG  
+HWI-EAS443:3:74:78:148#0/1  
`Z¥`aaaaaWU`a[\_`a\_`^`^`^`^`\_]`^`^^^`^^  
@HWI-EAS443:3:74:81:205#0/1  
GCAAATAGTAGCATTGCCACAACACTTCAATGCATGTGT  
+HWI-EAS443:3:74:81:205#0/1  
a`^`^`\_^]aa^^`^^a\_`\_`\_]`\_¥Y¥W^]Y\_\_XY]W^X  
@HWI-EAS443:3:74:961:1638#0/1  
AGCAAATAGTAGCATTGCCACAACACTTCAATGCATGTG  
+HWI-EAS443:3:74:961:1638#0/1  
]bbbbbbbbbaaaa\_ba`bbbbbbbaabbbbbbaaaa\_aaa^a  
@HWI-EAS443:3:75:618:1322#0/1  
AGCAAATAGTAGCATTGCCACAACACTTCAATGCATGTG  
+HWI-EAS443:3:75:618:1322#0/1  
^¥\_`aYabb`bbbb[`aa]¥aba]Z]Yaabba\_ba`aWb  
@HWI-EAS443:3:75:765:1583#0/1  
GGATAGCAAATAGTAGCATTGCCACAACACTTCAATGCA  
+HWI-EAS443:3:75:765:1583#0/1  
`babb[bbbab\_\_\_\_bbbaaaa`aaababba`aaba`aaa  
@HWI-EAS443:3:76:1629:486#0/1  
AGCAAATAGTAGCATTGCCACAACACTTCAATGCATGTG  
+HWI-EAS443:3:76:1629:486#0/1  
```^`^`ab]aa`Y^^ab^abab`\_```bbaa`ab^`aa¥b  
@HWI-EAS443:3:77:591:661#0/1  
ATAGCAAATAGTAGCATTGCCACAACACTTCAATGCATG

+HWI-EAS443:3:77:591:661#0/1  
a`^aaaaaaa]baaaaaZaaaa\_\_aa`a\_`aaaa`aa  
@HWI-EAS443:3:77:617:2036#0/1  
GGATAGCAAATAGTAGCATTGCCACAACACTTCAATGCA  
+HWI-EAS443:3:77:617:2036#0/1  
``a`babb`bb\_¥baaaaa\_`abaaaaaa`aaaa\_^`  
@HWI-EAS443:3:78:903:873#0/1  
GGATAGCAAATAGTAGCATTGCCACAACACTTCAATGCA  
+HWI-EAS443:3:78:903:873#0/1  
Z\_babbbbbbbbabbbbababbabbaabbbbbbaabab  
@HWI-EAS443:3:79:1020:1877#0/1  
GGATAGCAAATAGTAGCATTGCCACAACACTTCAATGCA  
+HWI-EAS443:3:79:1020:1877#0/1  
aba¥babbbba`\_ab`bbbbbabbbb\_ababaSaaaaaa  
@HWI-EAS443:3:79:419:1538#0/1  
AGCAAATAGTAGCATTGCCACAACACTTCAATGCATGTG  
+HWI-EAS443:3:79:419:1538#0/1  
abbbZb^TZ][\_abaaaba^Y^`abaa\_baaa]\_]a]a  
@HWI-EAS443:3:7:1240:612#0/1  
GGATAGCAAATAGTAGCATTGCCACAACACTTCAATGCA  
+HWI-EAS443:3:7:1240:612#0/1  
Ua\_U\_¥babbbba]abb]`bb[WUa^ba`b`\_a]\_`aaaX¥  
@HWI-EAS443:3:7:1262:1337#0/1  
ATAGCAAATAGTAGCATTGCCACAACACTTCAATGCATG  
+HWI-EAS443:3:7:1262:1337#0/1  
ab\_]`^a]`aaaTbb``baa\_Ya\_]`^Waa\_aa\_a[[a¥^aa  
@HWI-EAS443:3:7:824:691#0/1  
AGCAAATAGTAGCATTGCCACAACACTTCAATGCATGTG  
+HWI-EAS443:3:7:824:691#0/1  
a^abbbba^Z^\_b\_babbaa][baaW^a`¥]^aaY0]`b]X  
@HWI-EAS443:3:80:338:1219#0/1  
ATAGCAAATAGTAGCATTGCCACAACACTTCAATGCATG  
+HWI-EAS443:3:80:338:1219#0/1  
a`a`baaaaa]aa`]a\_`aaaa`a`aaaaa\_````a\_  
@HWI-EAS443:3:80:392:2027#0/1  
AGCAAATAGTAGCATTGCCACAACACTTCAATGCATGTG  
+HWI-EAS443:3:80:392:2027#0/1  
\_[ab`]VaaY^]a¥]Za\_^\_aaa[]a^\_\_`a\_`Y`\_\_`^`  
@HWI-EAS443:3:80:655:1970#0/1  
AGCAAATAGTAGCATTGCCACAACACTTCAATGCATGTG  
+HWI-EAS443:3:80:655:1970#0/1  
aaa[\_`a^M\_a^OWRX\_`[¥`a`\_\_[Z[Q\_`TY``X¥G\_  
@HWI-EAS443:3:80:678:482#0/1  
AGCAAATAGTAGCATTGCCACAACACTTCAATGCATGTG  
+HWI-EAS443:3:80:678:482#0/1  
`bbbbbb`b`babbaaaaaabbaababbababbaaab`a  
@HWI-EAS443:3:81:1357:1095#0/1  
AGCAAATAGTAGCATTGCCACAACACTTCAATGCATGTG  
+HWI-EAS443:3:81:1357:1095#0/1  
ab\_aZabba]`\_aabaa]\_aa^Z]`a\_ba\_a\_^\_\_^aaY`



@HWI-EAS443:3:81:30:929#0/1  
AGCAAATAGTAGCATTGCCACAACACTTCAATGCATGTG  
+HWI-EAS443:3:81:30:929#0/1  
aaaba[aaaYaa``a`b`aaaaa`\_]\_`a`U`\_a\_`a^`  
@HWI-EAS443:3:83:107:1432#0/1  
GGATAGCAAATAGTAGCATTGCCACAACACTTCAATGCA  
+HWI-EAS443:3:83:107:1432#0/1  
aa\_\_\_\_`aaa]\_`ZS`\_\_^Z^\_\_¥\_`Z¥^]`\_YY^\_PYX^^  
@HWI-EAS443:3:83:1662:138#0/1  
AGCAAATAGTAGCATTGCCACAACACTTCAATGCATGTG  
+HWI-EAS443:3:83:1662:138#0/1  
`Z]`bab`aba^abbaa]^^``]aa^a\_U¥^``[Zaa¥X  
@HWI-EAS443:3:83:1785:240#0/1  
GGATAGCAAATAGTAGCATTGCCACAACACTTCAATGCA  
+HWI-EAS443:3:83:1785:240#0/1  
a`aXX0^a¥aa^ZT``0^^¥`\_W^^`WVW]SSYFYYVYOY  
@HWI-EAS443:3:83:668:459#0/1  
AGCAAATAGTAGCATTGCCACAACACTTCAATGCATGTG  
+HWI-EAS443:3:83:668:459#0/1  
abbb^Wa`ba`aaa`b`ba\_abaabaaba`a^aab]ab^a  
@HWI-EAS443:3:83:73:1705#0/1  
GCAAATAGTAGCATTGCCACAACACTTCAATGCATGTGT  
+HWI-EAS443:3:83:73:1705#0/1  
aa`aabaa[a`bba\_`aaaa^`^]a^[a^VZ\_`¥]`[`V  
@HWI-EAS443:3:84:426:540#0/1  
GCAAATAGTAGCATTGCCACAACACTTCAATGCATGTGT  
+HWI-EAS443:3:84:426:540#0/1  
a`U`]a]b[aababbab`]aaaaaaaab¥a]`aa]aa`a[  
@HWI-EAS443:3:85:1273:1678#0/1  
AGCAAATAGTAGCATTGCCACAACACTTCAATGCATGTG  
+HWI-EAS443:3:85:1273:1678#0/1  
``\_babbbb[b]`abb\_aaaaba\_aa\_aa`a`abaaaa[a  
@HWI-EAS443:3:85:130:1273#0/1  
GCAAATAGTAGCATTGCCACAACACTTCAATGCATGTGT  
+HWI-EAS443:3:85:130:1273#0/1  
a`bXRP¥`\_b]`YX`\_`]``a`X\_\_R]`\_[XU\_WZaT]]  
@HWI-EAS443:3:85:374:304#0/1  
AGCAAATAGTAGCATTGCCACAACACTTCAATGCATGTG  
+HWI-EAS443:3:85:374:304#0/1  
^abb^[aa`X^]baaZ¥bbbaY\_bba\_b`^`aVa]Z`\_Rb  
@HWI-EAS443:3:85:952:308#0/1  
GCAAATAGTAGCATTGCCACAACACTTCAATGCATGTGT  
+HWI-EAS443:3:85:952:308#0/1  
a]`XPUX[ZX]Y][Za\_NYUWZYP]U[ZZ^SU[QW\_\_V\_Z  
@HWI-EAS443:3:86:1412:1849#0/1  
AGCAAATAGTAGCATTGCCACAACACTTCAATGCATGTG  
+HWI-EAS443:3:86:1412:1849#0/1  
XbIbbbaabaabaVbbba`¥b^a^[^aabaaZ¥]b¥\_bb^]  
@HWI-EAS443:3:87:1366:1331#0/1  
AGCAAATAGTAGCATTGCCACAACACTTCAATGCATGTG

+HWI-EAS443:3:87:1366:1331#0/1  
aaabbbba`a`abbbba\_babaabaab`aaaaa\_aab¥b  
@HWI-EAS443:3:87:325:1637#0/1  
AGCAAATAGTAGCATTGCCACAACACTTCAATGCATGTG  
+HWI-EAS443:3:87:325:1637#0/1  
Z^`bbba^\_a¥`¥\_ab`^`aa¥]````]ab¥\_ZWa\_^K\_  
@HWI-EAS443:3:87:758:598#0/1  
AGCAAATAGTAGCATTGCCACAACACTTCAATGCATGTG  
+HWI-EAS443:3:87:758:598#0/1  
ababbabbaabaababbaaa\_bbaaaaaaaaaa`abb\_b  
@HWI-EAS443:3:88:1275:1711#0/1  
AGCAAATAGTAGCATTGCCACAACACTTCAATGCATGTG  
+HWI-EAS443:3:88:1275:1711#0/1  
a\_]`babbb\_abaabab`[^`a`aa\_aaa`aa\_aaa\_b  
@HWI-EAS443:3:88:90:318#0/1  
AGCAAATAGTAGCATTGCCACAACACTTCAATGCATGTG  
+HWI-EAS443:3:88:90:318#0/1  
ababbaba^G\_abba]ba`ba`Z]aa`aab]``a\_T\_a^a  
@HWI-EAS443:3:8:1341:37#0/1  
AGCAAATAGTAGCATTGCCACAACACTTCAATGCATGTG  
+HWI-EAS443:3:8:1341:37#0/1  
ab]aa`bab[ab[^`aaa\_U\_\_a^T]`¥a`Z]\_`MWa¥R`  
@HWI-EAS443:3:90:493:754#0/1  
ATAGCAAATAGTAGCATTGCCACAACACTTCAATGCATG  
+HWI-EAS443:3:90:493:754#0/1  
aa^\_`aV]a`Tab]aa\_aaaaaaaaaaaaaaaaZaa\_aaa  
@HWI-EAS443:3:90:566:1050#0/1  
AGCAAATAGTAGCATTGCCACAACACTTCAATGCATGTG  
+HWI-EAS443:3:90:566:1050#0/1  
Zaaa^¥`baT``V\_aabbbba`aa`aa`bb`Xa]ZG][\_  
@HWI-EAS443:3:90:989:1193#0/1  
AGCAAATAGTAGCATTGCCACAACACTTCAATGCATGTG  
+HWI-EAS443:3:90:989:1193#0/1  
a`a`^¥`b\_bb[\_`abaaaabaab`aaaaa`aa`ba\_a  
@HWI-EAS443:3:91:300:1236#0/1  
AGCAAATAGTAGCATTGCCACAACACTTCAATGCATGTG  
+HWI-EAS443:3:91:300:1236#0/1  
abb`bbabaabbb\_babbaaaa`aaaaa`]`aaaaa\_a  
@HWI-EAS443:3:91:561:1959#0/1  
AGCAAATAGTAGCATTGCCACAACACTTCAATGCATGTG  
+HWI-EAS443:3:91:561:1959#0/1  
aabaa`a`U`aaaa`baab`aa`aa\_\_aaa`\_\_a\_Z`  
@HWI-EAS443:3:91:757:980#0/1  
AGCAAATAGTAGCATTGCCACAACACTTCAATGCATGTG  
+HWI-EAS443:3:91:757:980#0/1  
abbbbbbbbabbaabbbbaabbbbbbbbabbbabbaabbbab  
@HWI-EAS443:3:92:1132:202#0/1  
TAGCAAATAGTAGCATTGCCACAACACTTCAATGCATGT  
+HWI-EAS443:3:92:1132:202#0/1  
aaaaa^^ab^Ybb¥Y]a`aaa\_a\_\_a\_aaY\_]\_a^^aaY

@HWI-EAS443:3:92:1561:322#0/1  
AGCAAATAGTAGCATTGCCACAACACTTCAATGCATGTG  
+HWI-EAS443:3:92:1561:322#0/1  
abaabbbbbbabb\_abbaaaa\_aa^aa]aaaaaaaa`ab\_a  
@HWI-EAS443:3:92:1754:1472#0/1  
GCAAATAGTAGCATTGCCACAACACTTCAATGCATGTGT  
+HWI-EAS443:3:92:1754:1472#0/1  
a`I^¥aaaG^aa`]LY]\_`^U\_W]ZVRO\_`¥^\_¥^]]^aZ  
@HWI-EAS443:3:92:237:1513#0/1  
AGCAAATAGTAGCATTGCCACAACACTTCAATGCATGTG  
+HWI-EAS443:3:92:237:1513#0/1  
a`ab`aaaa][aaa`a\_aa\_`aa\_`a`\_a`\_^``\_``]\_  
@HWI-EAS443:3:92:391:1860#0/1  
AGCAAATAGTAGCATTGCCACAACACTTCAATGCATGTG  
+HWI-EAS443:3:92:391:1860#0/1  
Xbab^b`]Sb^¥b]]WaYZYbb]b`MYa\_Wa\_\_\_\_\_a`[a  
@HWI-EAS443:3:92:480:1688#0/1  
GGATAGCAAATAGTAGCATTGCCACAACACTTCAATGCA  
+HWI-EAS443:3:92:480:1688#0/1  
UZaXb0b`babbVTab¥¥bbbabbaa`\_ab¥ab`b\_aaba  
@HWI-EAS443:3:92:598:161#0/1  
AGCAAATAGTAGCATTGCCACAACACTTCAATGCATGTG  
+HWI-EAS443:3:92:598:161#0/1  
\_bbbabba`Naa`^b]aaaa[ba\_ab\_baaaa`a¥aaa[a  
@HWI-EAS443:3:93:1615:806#0/1  
GCAAATAGTAGCATTGCCACAACACTTCAATGCATGTGT  
+HWI-EAS443:3:93:1615:806#0/1  
a\_a`¥`T`]\_a\_¥aaa^N¥Ra\_Za¥U^]W\_\_\_\_\_WW\_\_X^W  
@HWI-EAS443:3:94:301:566#0/1  
GGATAGCAAATAGTAGCATTGCCACAACACTTCAATGCA  
+HWI-EAS443:3:94:301:566#0/1  
^baaababa^]ab\_aaaa\_aa`aaaa\_aa\_aa\_aa`]]`  
@HWI-EAS443:3:94:304:422#0/1  
ATAGCAAATAGTAGCATTGCCACAACACTTCAATGCATG  
+HWI-EAS443:3:94:304:422#0/1  
\_\_a]Ta``a`PVaaa\_`a`\_`a`a`X\_a`\_``^]`W^\_a  
@HWI-EAS443:3:95:1231:1559#0/1  
ATAGCAAATAGTAGCATTGCCACAACACTTCAATGCATG  
+HWI-EAS443:3:95:1231:1559#0/1  
`aa\_bbbbbbb`Haabbbbaa\_aa^ab^ab\_`\_Ia`\_`]^bZ  
@HWI-EAS443:3:95:1549:834#0/1  
AGCAAATAGTAGCATTGCCACAACACTTCAATGCATGTG  
+HWI-EAS443:3:95:1549:834#0/1  
abaababbbabbbbbbbaa\_a`bb`bbabaaaaab\_aaa^a  
@HWI-EAS443:3:96:1187:983#0/1  
GCAAATAGTAGCATTGCCACAACACTTCAATGCATGTGT  
+HWI-EAS443:3:96:1187:983#0/1  
abababaa]ab]`aaaa`^\_aa\_ab\_aa]a`a^Xaa]a]  
@HWI-EAS443:3:96:1414:1238#0/1  
AGCAAATAGTAGCATTGCCACAACACTTCAATGCATGTG

+HWI-EAS443:3:96:1414:1238#0/1  
`^^bababaZab`aa\_\_`¥`Z`a\_b^aa]^`a`S^aa^[  
@HWI-EAS443:3:96:1461:678#0/1  
AGCAAATAGTAGCATTGCCACAACACTTCAATGCATGTG  
+HWI-EAS443:3:96:1461:678#0/1  
XZZTa]b`V]baaa¥TZa`PZRNaRa[0\_JbaN\_a^Wa  
@HWI-EAS443:3:96:1512:1680#0/1  
AGCAAATAGTAGCATTGCCACAACACTTCAATGCATGTG  
+HWI-EAS443:3:96:1512:1680#0/1  
abbb^`b\_b]bb`aabb`U\_`0[aa]bGb`aa\_aaa]b  
@HWI-EAS443:3:96:297:1533#0/1  
AGCAAATAGTAGCATTGCCACAACACTTCAATGCATGTG  
+HWI-EAS443:3:96:297:1533#0/1  
Xab`^U^^bbbbbb`aaaabab`bb]babbbba\_abab\_b  
@HWI-EAS443:3:96:897:1162#0/1  
ATAGCAAATAGTAGCATTGCCACAACACTTCAATGCATG  
+HWI-EAS443:3:96:897:1162#0/1  
\_b`bbbaaaY¥]`aU[`baaabaaaPaaaa^L¥`]`Uabb  
@HWI-EAS443:3:97:680:875#0/1  
AGCAAATAGTAGCATTGCCACAACACTTCAATGCATGTG  
+HWI-EAS443:3:97:680:875#0/1  
Y\_bZ`S`^\_\_YVab`aa]^]baV¥aab`bba¥WZb\_`Z^  
@HWI-EAS443:3:97:777:1728#0/1  
AGCAAATAGTAGCATTGCCACAACACTTCAATGCATGTG  
+HWI-EAS443:3:97:777:1728#0/1  
ab^bbbbbb`baaaba`ababb^a^aaaabaab`aba`a  
@HWI-EAS443:3:98:1140:764#0/1  
AGCAAATAGTAGCATTGCCACAACACTTCAATGCATGTG  
+HWI-EAS443:3:98:1140:764#0/1  
aaaaaabab\_Saabb`\_`aaa`aa\_aa\_a\_ab]\_aa^b  
@HWI-EAS443:3:98:1168:537#0/1  
ATAGCAAATAGTAGCATTGCCACAACACTTCAATGCATG  
+HWI-EAS443:3:98:1168:537#0/1  
¥`aa¥a\_aaab^bbaabaa]``a`\_ab\_aaa`a`aV\_ab  
@HWI-EAS443:3:98:1189:1620#0/1  
AGCAAATAGTAGCATTGCCACAACACTTCAATGCATGTG  
+HWI-EAS443:3:98:1189:1620#0/1  
ab]ababbbabb`bbbbaabaaa^ab\_aa`aab`aaa\_a  
@HWI-EAS443:3:98:769:895#0/1  
AGCAAATAGTAGCATTGCCACAACACTTCAATGCATGTG  
+HWI-EAS443:3:98:769:895#0/1  
abaaaabaa\_aa\_¥bbabaaaa]aaaaaaaa`aa`aa]b  
@HWI-EAS443:3:99:1142:1874#0/1  
AGCAAATAGTAGCATTGCCACAACACTTCAATGCATGTG  
+HWI-EAS443:3:99:1142:1874#0/1  
aaWbaaba`S`\_aba\_`aa^ab]ab^\_a`aaaa¥a`aX¥  
@HWI-EAS443:3:99:286:1677#0/1  
GCAAATAGTAGCATTGCCACAACACTTCAATGCATGTG  
+HWI-EAS443:3:99:286:1677#0/1  
aSW\_a`aaUa\_\_[]^\_aZ]YY^W[UM^\_ZW^Z`U[¥^V^U

@HWI-EAS443:3:99:518:686#0/1  
GGATAGCAAATAGTAGCATTGCCACAACACTTCAATGCA  
+HWI-EAS443:3:99:518:686#0/1  
aa[``a^\_a\_\_`T`a[V¥]^Z¥\_\_\_`^\_^]¥¥Z]]U\_X^  
@HWI-EAS443:3:99:651:337#0/1  
AGCAAATAGTAGCATTGCCACAACACTTCAATGCATGTG  
+HWI-EAS443:3:99:651:337#0/1  
ab]Kbbaaa`ab[``aaa`]\_a\_aaa`T\_a]¥YZ]WL`aNH  
@HWI-EAS443:3:9:1536:1365#0/1  
GGATAGCAAATAGTAGCATTGCCACAACACTTCAATGCA  
+HWI-EAS443:3:9:1536:1365#0/1  
^^^\_[b]`a]aa^H`b^X`\_a\_Va]\_`Sa\_R¥aRa^`\_¥\_  
@HWI-EAS443:3:100:1268:576#0/1  
ATGGATAGCAAATAGTAGCATTGCCACAACACTTCAATG  
+HWI-EAS443:3:100:1268:576#0/1  
aab\_baab`ba[]aa\_aa¥abaa^YaXaaUa[^a\_Ua`¥B  
@HWI-EAS443:3:100:169:831#0/1  
ATGGATAGCAAATAGTAGCATTGCCACAACACTTCAATG  
+HWI-EAS443:3:100:169:831#0/1  
ab\_XT^QZ]\_TOWaaI]]^TP\_a]ZY^`\_X`\_]``¥]\_Y^  
@HWI-EAS443:3:100:385:274#0/1  
ATGGATAGCAAATAGTAGCATTGCCACAACACTTCAATG  
+HWI-EAS443:3:100:385:274#0/1  
Va``]`¥b]^ZINXaQV\_YPZU]Z\_XZ¥`R`a[^RF^BBB  
@HWI-EAS443:3:10:1273:1592#0/1  
ATGGATAGCAAATAGTAGCATTGCCACAACACTTCAATG  
+HWI-EAS443:3:10:1273:1592#0/1  
``baaabaababba`Waa^aa`]Y```aa`\_a\_]\_a\_\_\_\_  
@HWI-EAS443:3:10:708:795#0/1  
ATGGATAGCAAATAGTAGCATTGCCACAACACTTCAATG  
+HWI-EAS443:3:10:708:795#0/1  
[``a`a]`\_]ZZ`Z`¥V\_a`aaaaR[aaa]aa\_aa\_]P\_[  
@HWI-EAS443:3:11:1567:769#0/1  
ATGGATAGCAAATAGTAGCATTGCCACAACACTTCAATG  
+HWI-EAS443:3:11:1567:769#0/1  
abbb`aaa`aaa^QV[a`^a¥¥[\_\_\_\_a]V\_`^`^T^\_[`  
@HWI-EAS443:3:11:947:1668#0/1  
ATGGATAGCAAATAGTAGCATTGCCACAACACTTCAATG  
+HWI-EAS443:3:11:947:1668#0/1  
abb\_aaaa\_bba```]aaa`\_\_¥^^a\_a`]`a`\_^\_a\_^a  
@HWI-EAS443:3:12:1330:946#0/1  
ATGGATAGCAAATAGTAGCATTGCCACAACACTTCAATG  
+HWI-EAS443:3:12:1330:946#0/1  
aabaaaa`[aaaaaa^aa\_```\_\_X`[\_`Y]]V]\_Y^^^]  
@HWI-EAS443:3:12:1585:1549#0/1  
ATGGATAGCAAATAGTAGCATTGCCACAACACTTCAATG  
+HWI-EAS443:3:12:1585:1549#0/1  
`aaaaaababaaaa\_^\_a\_aaa\_^\_]``¥`a]aaI```\_X  
@HWI-EAS443:3:12:419:786#0/1  
ATGGATAGCAAATAGTAGCATTGCCACAACACTTCAATG

+HWI-EAS443:3:12:419:786#0/1  
`aba\_`a`aaaa^Z`\_`a`\_\_^\_a\_a`aZ``\_`^  
@HWI-EAS443:3:12:699:1626#0/1  
ATGGATAGCAAATAGTAGCATTGCCACAACACTTCAATG  
+HWI-EAS443:3:12:699:1626#0/1  
]ababa`^`aaa[b\_R]a\_X`\_^\_aaaV\_aZ]aX`\_^  
@HWI-EAS443:3:13:246:1753#0/1  
ATGGATAGCAAATAGTAGCATTGCCACAACACTTCAATG  
+HWI-EAS443:3:13:246:1753#0/1  
`Z]\_`aaZ\_ba`^]`^`\_`a\_\_a\_]`]^`^¥RX`¥a\_]`  
@HWI-EAS443:3:15:1291:1226#0/1  
ATGGATAGCAAATAGTAGCATTGCCACAACACTTCAATG  
+HWI-EAS443:3:15:1291:1226#0/1  
WT`^`\_^\_[Za¥U\_]X\_\_PU\_\_[UTWJ\_\_¥S\_Y\_X]\_^Y^  
@HWI-EAS443:3:15:1537:607#0/1  
ATGGATAGCAAATAGTAGCATTGCCACAACACTTCAATG  
+HWI-EAS443:3:15:1537:607#0/1  
abbbab`babaaaa\_aaa`aba`\_a^aa`aa^aaU`a\_a  
@HWI-EAS443:3:15:838:552#0/1  
ATGGATAGCAAATAGTAGCATTGCCACAACACTTCAATG  
+HWI-EAS443:3:15:838:552#0/1  
`X\_bb`\_]\_baa^\_YX\_]`^aa\_aV\_ZZ`\_\_a\_aa]]a^a  
@HWI-EAS443:3:16:1514:1423#0/1  
ATGGATAGCAAATAGTAGCATTGCCACAACACTTCAATG  
+HWI-EAS443:3:16:1514:1423#0/1  
S`^`[¥T\_a`bbVb\_TY\_¥^[STXH\_S\_bUYX\_^^¥]\_aT`  
@HWI-EAS443:3:17:986:584#0/1  
ATGGATAGCAAATAGTAGCATTGCCACAACACTTCAATG  
+HWI-EAS443:3:17:986:584#0/1  
aaaY[aa`baaaa`FQa^[^a\_¥\_\_`\_]`¥\_`^\_\_`¥^`  
@HWI-EAS443:3:18:1349:1345#0/1  
ATGGATAGCAAATAGTAGCATTGCCACAACACTTCAATG  
+HWI-EAS443:3:18:1349:1345#0/1  
UYaa\_\_YWF^URZaWT]\_X[W`U\_V^\_\_XJX¥X`^\_X[\_Z  
@HWI-EAS443:3:18:1509:487#0/1  
ATGGATAGCAAATAGTAGCATTGCCACAACACTTCAATG  
+HWI-EAS443:3:18:1509:487#0/1  
`aba\_`a`aaaa\_aaWba`aaa^\_aa`\_a\_\_a`^`\_\_X`a  
@HWI-EAS443:3:18:399:1935#0/1  
ATGGATAGCAAATAGTAGCATTGCCACAACACTTCAATG  
+HWI-EAS443:3:18:399:1935#0/1  
a`\_`a`\_`Za`baa\_0a\_\_\_^\_`^`\_aa\_a\_^a\_]`[a`]Z  
@HWI-EAS443:3:19:1143:307#0/1  
ATGGATAGCAAATAGTAGCATTGCCACAACACTTCAATG  
+HWI-EAS443:3:19:1143:307#0/1  
``bba\_\_bbbb`aabMSa`^^a[DO\_[`XT^`P]a[[`]¥  
@HWI-EAS443:3:19:1274:1816#0/1  
ATGGATAGCAAATAGTAGCATTGCCACAACACTTCAATG  
+HWI-EAS443:3:19:1274:1816#0/1  
]Z¥WZ]¥^\_\_aba`[L^`^b\_X]]TG^aYU\_J``[a`TX

@HWI-EAS443:3:19:412:619#0/1  
ATGGATAGCAAATAGTAGCATTGCCACAACACTACTTCAATG  
+HWI-EAS443:3:19:412:619#0/1  
abbba\_^\`Xabbaa]Zaa`a`a\_]aaYaa^\_a\_\_aa`\_\_\_\_  
@HWI-EAS443:3:1:962:389#0/1  
ATGGATAGCAAATAGTAGCATTGCCACAACACTACTTCAATG  
+HWI-EAS443:3:1:962:389#0/1  
abba\_a[`\Xa`Za\_\_Xaa\_\_\_\_`YaU\_\_^`\_`^Va^O\_^BB  
@HWI-EAS443:3:20:1643:1022#0/1  
ATGGATAGCAAATAGTAGCATTGCCACAACACTACTTCAATG  
+HWI-EAS443:3:20:1643:1022#0/1  
aa¥a\_V`^WZa¥¥¥YZ\_^FL]XMVVRSSVOY^^¥]RUOXY  
@HWI-EAS443:3:20:1661:1311#0/1  
ATGGATAGCAAATAGTAGCATTGCCACAACACTACTTCAATG  
+HWI-EAS443:3:20:1661:1311#0/1  
a¥baab¥bS`S`ab`^abUHY\_bZ¥aYaaX`\_Z\_SU\_aPS  
@HWI-EAS443:3:22:364:1074#0/1  
ATGGATAGCAAATAGTAGCATTGCCACAACACTACTTCAATG  
+HWI-EAS443:3:22:364:1074#0/1  
aaaaa]aa\_aaa\_a\_Z`a`\_`^\_`\_]a`a[^`\_\_^\_]^\_  
@HWI-EAS443:3:22:577:1141#0/1  
ATGGATAGCAAATAGTAGCATTGCCACAACACTACTTCAATG  
+HWI-EAS443:3:22:577:1141#0/1  
^`]V^`X^Z\_Y\_\_a¥TZYYZ]UYV[DY[[Y^YMOST^¥RU  
@HWI-EAS443:3:23:348:598#0/1  
ATGGATAGCAAATAGTAGCATTGCCACAACACTACTTCAATG  
+HWI-EAS443:3:23:348:598#0/1  
aababa]`\_]`a`aaa]aaaa`\_\_`a`^\_a\_\_a^`\_`aa\_\_`  
@HWI-EAS443:3:24:141:874#0/1  
ATGGATAGCAAATAGTAGCATTGCCACAACACTACTTCAATG  
+HWI-EAS443:3:24:141:874#0/1  
aaaaaa`aabaaaaZa`][`aa`\_]\_aa`aaa`aa\_`\_`  
@HWI-EAS443:3:24:350:769#0/1  
ATGGATAGCAAATAGTAGCATTGCCACAACACTACTTCAATG  
+HWI-EAS443:3:24:350:769#0/1  
a`ba`aaaabaaa\_\_¥aaaY^`\_aa\_a\_a\_`a]`\_`a\_`a  
@HWI-EAS443:3:25:588:233#0/1  
ATGGATAGCAAATAGTAGCATTGCCACAACACTACTTCAATG  
+HWI-EAS443:3:25:588:233#0/1  
aabaa[\_a\_bab`aa`abaaaa`a`aba]`a^`aaaa]a  
@HWI-EAS443:3:25:731:779#0/1  
ATGGATAGCAAATAGTAGCATTGCCACAACACTACTTCAATG  
+HWI-EAS443:3:25:731:779#0/1  
¥¥[\_`¥a\_`aa`ba\_`S\_aaa`a^`^¥`ba\_a^\_X^b  
@HWI-EAS443:3:25:958:1562#0/1  
ATGGATAGCAAATAGTAGCATTGCCACAACACTACTTCAATG  
+HWI-EAS443:3:25:958:1562#0/1  
aaabbabaabbbbaa]¥a`aaa\_aaaaa`aa\_aaaa`\_`  
@HWI-EAS443:3:26:869:470#0/1  
ATGGATAGCAAATAGTAGCATTGCCACAACACTACTTCAATG

+HWI-EAS443:3:26:869:470#0/1  
abaaaaaaaaaaaa`VYaa`a\_a\_\_\_\_\_`a^aa\_a`\_a\_`  
@HWI-EAS443:3:26:872:1534#0/1  
ATGGATAGCAAATAGTAGCATTGCCACAACACTACTTCAATG  
+HWI-EAS443:3:26:872:1534#0/1  
^^ab^`a`a\_ZZ`[QY]W][T\_aa`\_aa\_¥]\_\_\_X¥YY`  
@HWI-EAS443:3:27:472:1259#0/1  
ATGGATAGCAAATAGTAGCATTGCCACAACACTACTTCAATG  
+HWI-EAS443:3:27:472:1259#0/1  
`¥[Za`aabbb¥a\_]T]]aaa]¥`WIWSVa^]\_aX`aUZZ  
@HWI-EAS443:3:27:561:701#0/1  
ATGGATAGCAAATAGTAGCATTGCCACAACACTACTTCAATG  
+HWI-EAS443:3:27:561:701#0/1  
aabaaaX\_aaa`aa¥[a\_aa`Z\_\_aaaa`\_\_\_\_`U]a^`  
@HWI-EAS443:3:27:603:63#0/1  
ATGGATAGCAAATAGTAGCATTGCCACAACACTACTTCAATG  
+HWI-EAS443:3:27:603:63#0/1  
aab[b`b`bab¥aa`Z]bba`\_a¥a`\_a`a\_aa`a\_^aa¥`  
@HWI-EAS443:3:27:766:1744#0/1  
ATGGATAGCAAATAGTAGCATTGCCACAACACTACTTCAATG  
+HWI-EAS443:3:27:766:1744#0/1  
^IVZ[```^aY^`¥Ya^VT[aR]aa]`¥Y¥V[`]N\_aYU  
@HWI-EAS443:3:28:285:1237#0/1  
ATGGATAGCAAATAGTAGCATTGCCACAACACTACTTCAATG  
+HWI-EAS443:3:28:285:1237#0/1  
abVbaS`b\_]Y`¥¥F]¥`W\_\_`aaaaaY]\_\_\_\_\_]]aY\_a  
@HWI-EAS443:3:28:475:596#0/1  
ATGGATAGCAAATAGTAGCATTGCCACAACACTACTTCAATG  
+HWI-EAS443:3:28:475:596#0/1  
aaba`a`a¥ba[`aa]`〕`\_\_`U`\_a\_\_YX\_`〕\_aa\_a^\_  
@HWI-EAS443:3:28:866:744#0/1  
ATGGATAGCAAATAGTAGCATTGCCACAACACTACTTCAATG  
+HWI-EAS443:3:28:866:744#0/1  
Ua^\_`bb`bba`^SP[\_[\_`aaaZ[U\_[XaaUaaVa]`a  
@HWI-EAS443:3:29:920:1903#0/1  
ATGGATAGCAAATAGTAGCATTGCCACAACACTACTTCAATG  
+HWI-EAS443:3:29:920:1903#0/1  
Y]¥VZ^¥K^aa`XXWQ`][aZ]X\_[aWa]Xaa\_[\_Z`^¥V  
@HWI-EAS443:3:30:868:77#0/1  
ATGGATAGCAAATAGTAGCATTGCCACAACACTACTTCAATG  
+HWI-EAS443:3:30:868:77#0/1  
abbb`aab^babaa`\_aba^a`\_\_^Y`W`a]\_`X^^X[  
@HWI-EAS443:3:32:1197:1643#0/1  
ATGGATAGCAAATAGTAGCATTGCCACAACACTACTTCAATG  
+HWI-EAS443:3:32:1197:1643#0/1  
aab`aa`ab`bab`]a`aa\_aWa`aaa]^b\_a^]aa]]  
@HWI-EAS443:3:32:856:1431#0/1  
ATGGATAGCAAATAGTAGCATTGCCACAACACTACTTCAATG  
+HWI-EAS443:3:32:856:1431#0/1  
]Y\_ba\_VR¥babb\_QGba`W`\_abbY]baY^^`VFL[\_[



@HWI-EAS443:3:32:989:1819#0/1  
ATGGATAGCAAATAGTAGCATTGCCACAACACTTCAATG  
+HWI-EAS443:3:32:989:1819#0/1  
`[\`aaa^]\`a`R]MLZ`aa¥]a]X\_aa]OS[ZTZ[\`YY  
@HWI-EAS443:3:33:1236:1843#0/1  
ATGGATAGCAAATAGTAGCATTGCCACAACACTTCAATG  
+HWI-EAS443:3:33:1236:1843#0/1  
aa`aa`a`^aaa`a\_T`]\`\_\_\_^]]`Yaa^]\_0]]W\_\_¥V  
@HWI-EAS443:3:34:1015:1302#0/1  
ATGGATAGCAAATAGTAGCATTGCCACAACACTTCAATG  
+HWI-EAS443:3:34:1015:1302#0/1  
a\_^a]][]\_`aa`YN^`]]a`^S]]]¥]U¥aW^WU^[]UB  
@HWI-EAS443:3:34:455:26#0/1  
ATGGATAGCAAATAGTAGCATTGCCACAACACTTCAATG  
+HWI-EAS443:3:34:455:26#0/1  
^bbba¥Xa`baaaaaYabaaa\_^\_a^]\_\_`[\`a\_`WWYa  
@HWI-EAS443:3:34:66:1828#0/1  
ATGGATAGCAAATAGTAGCATTGCCACAACACTTCAATG  
+HWI-EAS443:3:34:66:1828#0/1  
T^a]aa]aaa`Y0¥SD[]^Z^`Waa``aaa[[R^\_a``]T  
@HWI-EAS443:3:35:1297:562#0/1  
ATGGATAGCAAATAGTAGCATTGCCACAACACTTCAATG  
+HWI-EAS443:3:35:1297:562#0/1  
aaa`a\_\_[\`aa`a`aXab^\_a]¥]]\_a^R)`\_[\`a]\_a]\_  
@HWI-EAS443:3:35:1620:1105#0/1  
ATGGATAGCAAATAGTAGCATTGCCACAACACTTCAATG  
+HWI-EAS443:3:35:1620:1105#0/1  
Ma^]]UTYX^Zaba^^¥aWN¥¥^`WU¥U`]a]]b\_HV\_XY  
@HWI-EAS443:3:37:1687:668#0/1  
ATGGATAGCAAATAGTAGCATTGCCACAACACTTCAATG  
+HWI-EAS443:3:37:1687:668#0/1  
ab]G]\_bbba`abaa^ab]aabY`aa^abYaabab`aaa`  
@HWI-EAS443:3:37:420:15#0/1  
ATGGATAGCAAATAGTAGCATTGCCACAACACTTCAATG  
+HWI-EAS443:3:37:420:15#0/1  
\_`bbbaaaaaab\_aba¥aba^aaabaV^]GDTaa`\_`\_[]^a  
@HWI-EAS443:3:38:1296:1513#0/1  
ATGGATAGCAAATAGTAGCATTGCCACAACACTTCAATG  
+HWI-EAS443:3:38:1296:1513#0/1  
a`¥L\_\_`[\`aa\_X]\_`a\_\_aR^`Va\_aT¥aU^\_S`¥YW  
@HWI-EAS443:3:38:474:197#0/1  
ATGGATAGCAAATAGTAGCATTGCCACAACACTTCAATG  
+HWI-EAS443:3:38:474:197#0/1  
a\_`]W^PZU\_`^`^WTDPY]U\_]\_]XN]TYMR]M]YYZ\_TY  
@HWI-EAS443:3:39:251:858#0/1  
ATGGATAGCAAATAGTAGCATTGCCACAACACTTCAATG  
+HWI-EAS443:3:39:251:858#0/1  
aaa`ZVP`baaaaa`Y`b`a\_\_\_`aZZYaa][¥aa\_a[^\_  
@HWI-EAS443:3:39:86:644#0/1  
ATGGATAGCAAATAGTAGCATTGCCACAACACTTCAATG

+HWI-EAS443:3:39:86:644#0/1  
\_`b^HW`]'\_V\_a`[T[Y\_^a` `a¥T\_['a^`\_`^\_WT[`  
@HWI-EAS443:3:3:1136:1132#0/1  
ATGGATAGCAAATAGTAGCATTGCCACAACACTTCAATG  
+HWI-EAS443:3:3:1136:1132#0/1  
aabaaa\_babaaaaWab^ab`aa^`\_baW`a^\_a\_a\_\_a  
@HWI-EAS443:3:3:1596:1839#0/1  
ATGGATAGCAAATAGTAGCATTGCCACAACACTTCAATG  
+HWI-EAS443:3:3:1596:1839#0/1  
abbbbab^]abaaaa]bbaaaa\_\_Sa¥aa[aaVa^Ta`\_\_  
@HWI-EAS443:3:3:694:2000#0/1  
ATGGATAGCAAATAGTAGCATTGCCACAACACTTCAATG  
+HWI-EAS443:3:3:694:2000#0/1  
[DV`aX^a\_^Q]R]XV^^MS]NNYGaOW¥I^YWWWUU\_BB  
@HWI-EAS443:3:40:1741:101#0/1  
ATGGATAGCAAATAGTAGCATTGCCACAACACTTCAATG  
+HWI-EAS443:3:40:1741:101#0/1  
aaba`aaa\_`a`aaaQ\_`Z]a`a^W^a\_OY]\_W\_\_ZP]¥[  
@HWI-EAS443:3:42:515:197#0/1  
ATGGATAGCAAATAGTAGCATTGCCACAACACTTCAATG  
+HWI-EAS443:3:42:515:197#0/1  
abbaaaa^\_\_aaaaa¥aaaaa\_``]\_`]``aa\_aa^a```  
@HWI-EAS443:3:44:1310:1835#0/1  
ATGGATAGCAAATAGTAGCATTGCCACAACACTTCAATG  
+HWI-EAS443:3:44:1310:1835#0/1  
ababa`aaXaaaaaaZ\_a` `aa¥UZ`Wa`X`\_Z\_\_V\_\_\_\_Z  
@HWI-EAS443:3:44:197:732#0/1  
ATGGATAGCAAATAGTAGCATTGCCACAACACTTCAATG  
+HWI-EAS443:3:44:197:732#0/1  
abaaaaa`aba`aa\_0aaaaa]T]aa¥`Xa\_a\_\_`aaa^`  
@HWI-EAS443:3:44:413:1621#0/1  
ATGGATAGCAAATAGTAGCATTGCCACAACACTTCAATG  
+HWI-EAS443:3:44:413:1621#0/1  
^a\_^Y`aabab``T`aa`aa\_]Y^[aa`\_a[\_`^a`\_^  
@HWI-EAS443:3:45:1267:1726#0/1  
ATGGATAGCAAATAGTAGCATTGCCACAACACTTCAATG  
+HWI-EAS443:3:45:1267:1726#0/1  
a^^```\_Z[\_aab¥^^`¥¥\_`]SP[a]a`^]a¥aa^\_Y\_`  
@HWI-EAS443:3:46:1043:1825#0/1  
ATGGATAGCAAATAGTAGCATTGCCACAACACTTCAATG  
+HWI-EAS443:3:46:1043:1825#0/1  
aY¥Q¥aWOY`aa`\_P^]\_^`[¥Y^Y`^\_a^\_]¥\_]LS  
@HWI-EAS443:3:46:418:638#0/1  
ATGGATAGCAAATAGTAGCATTGCCACAACACTTCAATG  
+HWI-EAS443:3:46:418:638#0/1  
\_bbbaa¥b]bab[b`Ya^a^aa\_aaa\_b`a\_Z\_aaaa\_\_a  
@HWI-EAS443:3:47:1457:295#0/1  
ATGGATAGCAAATAGTAGCATTGCCACAACACTTCAATG  
+HWI-EAS443:3:47:1457:295#0/1  
ab`bbba\_\_\_aab\_`U`b\_abba^]a\_aa\_¥`Y``^a\_\_^

@HWI-EAS443:3:47:241:1895#0/1  
ATGGATAGCAAATAGTAGCATTGCCACAACACTTCAATG  
+HWI-EAS443:3:47:241:1895#0/1  
aba]aa]a]aba`\_a\_b[Y]a]`\_^a]aa\_]a^a`Ra`^¥  
@HWI-EAS443:3:48:1553:1500#0/1  
ATGGATAGCAAATAGTAGCATTGCCACAACACTTCAATG  
+HWI-EAS443:3:48:1553:1500#0/1  
aaba\_a\_[Zba]aVZN`aa\_a^aV¥\_]`XW[]X\_[^\_`^[  
@HWI-EAS443:3:49:1021:655#0/1  
ATGGATAGCAAATAGTAGCATTGCCACAACACTTCAATG  
+HWI-EAS443:3:49:1021:655#0/1  
abbbabbaaabbbabaaa`ba\_]a`aaaabaabb`aaab  
@HWI-EAS443:3:49:548:108#0/1  
ATGGATAGCAAATAGTAGCATTGCCACAACACTTCAATG  
+HWI-EAS443:3:49:548:108#0/1  
]`a^]¥U¥abb`^`]\_^Y[`bX]¥^XR]`PX\_X\_\_````\_  
@HWI-EAS443:3:4:1289:749#0/1  
ATGGATAGCAAATAGTAGCATTGCCACAACACTTCAATG  
+HWI-EAS443:3:4:1289:749#0/1  
aaba`S\_`]aa`\_[]Z[aW^a^^Z^^Z¥¥^^^R^]X\_]\_]\_  
@HWI-EAS443:3:4:423:1299#0/1  
ATGGATAGCAAATAGTAGCATTGCCACAACACTTCAATG  
+HWI-EAS443:3:4:423:1299#0/1  
ab^S[ `[XW[\_\_\_[OPFV¥UXaY[PTZ¥aUMP¥LZPJWO[\_  
@HWI-EAS443:3:4:445:49#0/1  
ATGGATAGCAAATAGTAGCATTGCCACAACACTTCAATG  
+HWI-EAS443:3:4:445:49#0/1  
^ZZ\_[\_]b]` []W^aURUY`YZUL[H^`]Y\_^QYS]B  
@HWI-EAS443:3:50:1445:1987#0/1  
ATGGATAGCAAATAGTAGCATTGCCACAACACTTCAATG  
+HWI-EAS443:3:50:1445:1987#0/1  
`QH\_Z¥`T`]YYa^XXaaRY\_a` []X]a\_IG`SR\_^baQW  
@HWI-EAS443:3:50:1634:742#0/1  
ATGGATAGCAAATAGTAGCATTGCCACAACACTTCAATG  
+HWI-EAS443:3:50:1634:742#0/1  
[P]baWV]\_bb¥\_aW0¥¥\_Y\_a^`V`Z]a[]` `a]¥^^[a  
@HWI-EAS443:3:50:185:1854#0/1  
ATGGATAGCAAATAGTAGCATTGCCACAACACTTCAATG  
+HWI-EAS443:3:50:185:1854#0/1  
abb\_ab]Z\_abb`\_]\_abaaa`P¥aaaa^` `¥a`Xaa^a  
@HWI-EAS443:3:50:439:670#0/1  
ATGGATAGCAAATAGTAGCATTGCCACAACACTTCAATG  
+HWI-EAS443:3:50:439:670#0/1  
ab^baab`aabbb\_`\_^¥bbbbaababbaabaabaa`\_b  
@HWI-EAS443:3:50:97:854#0/1  
ATGGATAGCAAATAGTAGCATTGCCACAACACTTCAATG  
+HWI-EAS443:3:50:97:854#0/1  
a`b^bb`bbbbaba`abb\_abb` `^a[a`¥a` `aa]`abb  
@HWI-EAS443:3:51:1008:1517#0/1  
ATGGATAGCAAATAGTAGCATTGCCACAACACTTCAATG

+HWI-EAS443:3:51:1008:1517#0/1  
]`aaaaa`\_aaaaaa^`a¥V^aZ\_\_aYba^aa¥aa]a`\_a  
@HWI-EAS443:3:51:100:166#0/1  
ATGGATAGCAAATAGTAGCATTGCCACAACACTTCAATG  
+HWI-EAS443:3:51:100:166#0/1  
`b`\_\_S\_a\_a¥\_]^[Z^a[\_a`XW\_XX^\_W``T`\_Y^^Z\_  
@HWI-EAS443:3:51:1258:958#0/1  
ATGGATAGCAAATAGTAGCATTGCCACAACACTTCAATG  
+HWI-EAS443:3:51:1258:958#0/1  
[^bbabaXP\_bab`V¥`bababa]¥)`b`^abaa`\_aaaa  
@HWI-EAS443:3:51:650:176#0/1  
ATGGATAGCAAATAGTAGCATTGCCACAACACTTCAATG  
+HWI-EAS443:3:51:650:176#0/1  
aabbaba`aabb`^V^`Z]a`a^`aY`a\_\_a[\_`]a^^a  
@HWI-EAS443:3:52:1002:398#0/1  
ATGGATAGCAAATAGTAGCATTGCCACAACACTTCAATG  
+HWI-EAS443:3:52:1002:398#0/1  
abbbbaabaaaa`Z`a`aa`\_\_\_\_`\_aa^aa\_\_`a  
@HWI-EAS443:3:52:1160:1941#0/1  
ATGGATAGCAAATAGTAGCATTGCCACAACACTTCAATG  
+HWI-EAS443:3:52:1160:1941#0/1  
abaaaa^Y^bb`a`Q]ab\_a\_a`X[a\_a]¥`\_\_\_\_aa^\_a  
@HWI-EAS443:3:52:956:1124#0/1  
ATGGATAGCAAATAGTAGCATTGCCACAACACTTCAATG  
+HWI-EAS443:3:52:956:1124#0/1  
aabaaa`a`bbaaa`]aaa`ab\_^`a`aa`aaaa`a`\_a  
@HWI-EAS443:3:53:370:1555#0/1  
ATGGATAGCAAATAGTAGCATTGCCACAACACTTCAATG  
+HWI-EAS443:3:53:370:1555#0/1  
^X]^a`ZW¥^b`^^SP\_`V0¥YXZZ\_a^¥]¥[`aaa`a\_0  
@HWI-EAS443:3:54:115:159#0/1  
ATGGATAGCAAATAGTAGCATTGCCACAACACTTCAATG  
+HWI-EAS443:3:54:115:159#0/1  
`bbbaaaaaaaaaab\_ab`aa`\_a^aa^`a^aa^\_`^a  
@HWI-EAS443:3:54:1556:1486#0/1  
ATGGATAGCAAATAGTAGCATTGCCACAACACTTCAATG  
+HWI-EAS443:3:54:1556:1486#0/1  
a\_Za`Wa\_Y\_b¥¥`Y^`Z¥a]XYXZaa`^X\_^aYR¥\_¥]  
@HWI-EAS443:3:54:1565:890#0/1  
ATGGATAGCAAATAGTAGCATTGCCACAACACTTCAATG  
+HWI-EAS443:3:54:1565:890#0/1  
^b`abba`Xaa^b\_bab`¥[b]^T\_\_aa`S^`Sb]UZ`b`  
@HWI-EAS443:3:55:1012:643#0/1  
ATGGATAGCAAATAGTAGCATTGCCACAACACTTCAATG  
+HWI-EAS443:3:55:1012:643#0/1  
abbbbb`babbaaaa\_abaabba\_aa^a\_Xaa^a`Ya\_aa  
@HWI-EAS443:3:55:127:1590#0/1  
ATGGATAGCAAATAGTAGCATTGCCACAACACTTCAATG  
+HWI-EAS443:3:55:127:1590#0/1  
[^`a`a]\_]bbaa^XPXa\_¥`X^`[^aW[]`^^^`a\_^\_

@HWI-EAS443:3:55:1597:620#0/1  
GGATGGATAGCAAATAGTAGCATTGCCACAACACTACTTCAA  
+HWI-EAS443:3:55:1597:620#0/1  
\_Jaba¥`a[^\_b¥]`X`¥`bb\_X¥`^`bbab``]WS^^  
@HWI-EAS443:3:55:297:60#0/1  
ATGGATAGCAAATAGTAGCATTGCCACAACACTACTTCAATG  
+HWI-EAS443:3:55:297:60#0/1  
abbbaaab\_bbaa\_a\_ab`\_a`a`\_\_`^`\_a`^]\_aa  
@HWI-EAS443:3:56:271:312#0/1  
ATGGATAGCAAATAGTAGCATTGCCACAACACTACTTCAATG  
+HWI-EAS443:3:56:271:312#0/1  
abaaa^ababb`ba\_aaaaaaa\_a\_a\_X^\_a`a`]\_`a  
@HWI-EAS443:3:56:293:1435#0/1  
ATGGATAGCAAATAGTAGCATTGCCACAACACTACTTCAATG  
+HWI-EAS443:3:56:293:1435#0/1  
aba^`b`a``bbaaa\_aaaaab`^aa`a`a`¥\_aa`a`aa  
@HWI-EAS443:3:56:393:1654#0/1  
ATGGATAGCAAATAGTAGCATTGCCACAACACTACTTCAATG  
+HWI-EAS443:3:56:393:1654#0/1  
`¥`bVXbbb^Z^[`VRZZV`a`b]`SZYa^a`¥a[\_P[a  
@HWI-EAS443:3:56:842:1913#0/1  
ATGGATAGCAAATAGTAGCATTGCCACAACACTACTTCAATG  
+HWI-EAS443:3:56:842:1913#0/1  
aab^`aaa][a[^aYQ`aW\_aa]^\_Waa\_\_aX^]Z`\_]`^  
@HWI-EAS443:3:57:1407:2016#0/1  
ATGGATAGCAAATAGTAGCATTGCCACAACACTACTTCAATG  
+HWI-EAS443:3:57:1407:2016#0/1  
aaba`aab`aaa`aa]aa^a`a^X]a^aa^`a¥]aV^\_\_\_\_  
@HWI-EAS443:3:58:1251:423#0/1  
ATGGATAGCAAATAGTAGCATTGCCACAACACTACTTCAATG  
+HWI-EAS443:3:58:1251:423#0/1  
`bbbab\_\_]aa`aa¥U`[¥`aa`\_a`aaZ```a]Z\_a`a  
@HWI-EAS443:3:58:622:1615#0/1  
ATGGATAGCAAATAGTAGCATTGCCACAACACTACTTCAATG  
+HWI-EAS443:3:58:622:1615#0/1  
aa]I¥]aa`\_`\_aa\_Wa\_\_\_\_`[SU`]\_`a[\_`\_a]a\_\_^  
@HWI-EAS443:3:59:1126:1166#0/1  
ATGGATAGCAAATAGTAGCATTGCCACAACACTACTTCAATG  
+HWI-EAS443:3:59:1126:1166#0/1  
aaab\_aaaabbaa]a¥baa¥a`\_`aaab¥aa\_\_`aYX\_^¥  
@HWI-EAS443:3:59:1443:84#0/1  
ATGGATAGCAAATAGTAGCATTGCCACAACACTACTTCAATG  
+HWI-EAS443:3:59:1443:84#0/1  
a`bb\_bab\_b`ab`a\_ab`\_aaaaaa\_a^aaX¥aaWX\_`]  
@HWI-EAS443:3:59:1538:741#0/1  
ATGGATAGCAAATAGTAGCATTGCCACAACACTACTTCAATG  
+HWI-EAS443:3:59:1538:741#0/1  
abbbabbb^bb`bb\_W^\_[]aaaa`a`^a`aY`aaTZ`\_Z  
@HWI-EAS443:3:59:675:82#0/1  
ATGGATAGCAAATAGTAGCATTGCCACAACACTACTTCAATG

+HWI-EAS443:3:59:675:82#0/1  
abbbaaaa`aa\_aa`¥aa`aaa]a`\_\_\_\_`^\_`¥PX]^^  
@HWI-EAS443:3:5:691:1969#0/1  
ATGGATAGCAAATAGTAGCATTGCCACAACACTTCAATG  
+HWI-EAS443:3:5:691:1969#0/1  
¥`aa\_a^XU`\_¥aaXa\_\_a`]YS`^\_\_]LU\_S``0a`BB  
@HWI-EAS443:3:5:875:1554#0/1  
ATGGATAGCAAATAGTAGCATTGCCACAACACTTCAATG  
+HWI-EAS443:3:5:875:1554#0/1  
a¥aaaabaSba\_¥\_a`b`Waa^a¥\_]aa\_\_a]\_`^aaBB  
@HWI-EAS443:3:60:1358:922#0/1  
ATGGATAGCAAATAGTAGCATTGCCACAACACTTCAATG  
+HWI-EAS443:3:60:1358:922#0/1  
`bbb\_aab^abaaaaY\_aaaa[``aa\_aa`aaXaa^a`\_`  
@HWI-EAS443:3:60:392:865#0/1  
ATGGATAGCAAATAGTAGCATTGCCACAACACTTCAATG  
+HWI-EAS443:3:60:392:865#0/1  
a]aaa`^\_\_aaa``\_W\_a\_]\_`^\_aR``\_Z\_]Z]`aa^^  
@HWI-EAS443:3:61:1062:18#0/1  
ATGGATAGCAAATAGTAGCATTGCCACAACACTTCAATG  
+HWI-EAS443:3:61:1062:18#0/1  
ZZ\_bba\_\_]\_a]a`\_[^`aV]\_]\_a\_\_\_YW\_XKZ¥LVXX[  
@HWI-EAS443:3:61:1568:1226#0/1  
ATGGATAGCAAATAGTAGCATTGCCACAACACTTCAATG  
+HWI-EAS443:3:61:1568:1226#0/1  
`bZbab`b`ba\_a\_WQ^`aaaaabbXa`a`a^a\_\_¥^]]  
@HWI-EAS443:3:61:327:338#0/1  
ATGGATAGCAAATAGTAGCATTGCCACAACACTTCAATG  
+HWI-EAS443:3:61:327:338#0/1  
a¥aXXXTa¥b`\_bbX0]Z\_b\_Y`b^WX[b`\_aababb`\_a  
@HWI-EAS443:3:62:101:967#0/1  
ATGGATAGCAAATAGTAGCATTGCCACAACACTTCAATG  
+HWI-EAS443:3:62:101:967#0/1  
\_ababa`abab\_V\_]aa]`aa`\_a`^`S`\_aa\_a¥`[^\_  
@HWI-EAS443:3:62:976:823#0/1  
ATGGATAGCAAATAGTAGCATTGCCACAACACTTCAATG  
+HWI-EAS443:3:62:976:823#0/1  
\_`^`a\_¥Ya]`baaaa`a^¥a\_V^`]\_]\_`^`a`aV`Y`\_  
@HWI-EAS443:3:63:224:271#0/1  
ATGGATAGCAAATAGTAGCATTGCCACAACACTTCAATG  
+HWI-EAS443:3:63:224:271#0/1  
]bb\_aa`^[ba\_]\_\_Z`a¥NU`a^]\_`a`\_a\_\_^Y`a\_\_  
@HWI-EAS443:3:63:925:479#0/1  
ATGGATAGCAAATAGTAGCATTGCCACAACACTTCAATG  
+HWI-EAS443:3:63:925:479#0/1  
``aa`R`a][aZVW\_¥XZX`a^U^UTT]aYUb]`XU^Y\_a  
@HWI-EAS443:3:64:1069:1064#0/1  
ATGGATAGCAAATAGTAGCATTGCCACAACACTTCAATG  
+HWI-EAS443:3:64:1069:1064#0/1  
aaaaa`a]aaaa`a`]a¥^^a\_X^]]^\_aW\_a\_\_\_^`¥[

@HWI-EAS443:3:64:1453:1439#0/1  
ATGGATAGCAAATAGTAGCATTGCCACAACACTTCAATG  
+HWI-EAS443:3:64:1453:1439#0/1  
Q¥^¥\_]\_aaba^`aZMY[Z^\_a[\_`\_]`^aa`]X]] [U  
@HWI-EAS443:3:65:226:306#0/1  
ATGGATAGCAAATAGTAGCATTGCCACAACACTTCAATG  
+HWI-EAS443:3:65:226:306#0/1  
aaaa`a`a`]a\_aaZ`a`W\_`\_\_\_\_\_`a\_\_`\_\_\_\_`]]\_`  
@HWI-EAS443:3:65:423:272#0/1  
ATGGATAGCAAATAGTAGCATTGCCACAACACTTCAATG  
+HWI-EAS443:3:65:423:272#0/1  
aY\_YS¥Y]X^X`¥]\_V]a]I^\_¥YY\_aV^Y^a]\_\_Y`U¥\_  
@HWI-EAS443:3:66:1020:1483#0/1  
ATGGATAGCAAATAGTAGCATTGCCACAACACTTCAATG  
+HWI-EAS443:3:66:1020:1483#0/1  
a``\_a`a\_aa\_`aa\_L`¥`\_aa\_\_\_\_\_aaq]`a]a`]^`^`  
@HWI-EAS443:3:66:1351:1233#0/1  
ATGGATAGCAAATAGTAGCATTGCCACAACACTTCAATG  
+HWI-EAS443:3:66:1351:1233#0/1  
¥¥]R]GMR\_Y¥¥Y\_a]X¥U¥Z\_^TUSY\_VUZ[JY\_ZZ`SZ  
@HWI-EAS443:3:67:444:879#0/1  
ATGGATAGCAAATAGTAGCATTGCCACAACACTTCAATG  
+HWI-EAS443:3:67:444:879#0/1  
aa`SX`aa`a`aa`[S\_a\_Taa\_\_a[`\_YV]a]\_`a\_\_\_\_  
@HWI-EAS443:3:68:1753:352#0/1  
ATGGATAGCAAATAGTAGCATTGCCACAACACTTCAATG  
+HWI-EAS443:3:68:1753:352#0/1  
a¥\_\_aYa\_Y\_aaa]]Yaa`aa]]a]a`R[`X^`¥``\_]`  
@HWI-EAS443:3:68:288:1604#0/1  
ATGGATAGCAAATAGTAGCATTGCCACAACACTTCAATG  
+HWI-EAS443:3:68:288:1604#0/1  
aaaaa`a`aa\_a\_]Wa]a\_`\_Va\_]\_a¥Y\_`Z^\_^\_^]  
@HWI-EAS443:3:68:72:508#0/1  
ATGGATAGCAAATAGTAGCATTGCCACAACACTTCAATG  
+HWI-EAS443:3:68:72:508#0/1  
aabaa``babaaaa`¥`a¥H\_a`\_]Z]`Z`\_\_¥a^^`^^`  
@HWI-EAS443:3:69:330:241#0/1  
ATGGATAGCAAATAGTAGCATTGCCACAACACTTCAATG  
+HWI-EAS443:3:69:330:241#0/1  
a`bbZ¥H¥\_]aV^a^[[RXQa]]]`¥Z\_[KQNR\_`L¥^TT  
@HWI-EAS443:3:69:775:1898#0/1  
ATGGATAGCAAATAGTAGCATTGCCACAACACTTCAATG  
+HWI-EAS443:3:69:775:1898#0/1  
aaa`a^aabaaaa\_XaVaaa¥Va`]`aa`a`a`\_`aa`\_  
@HWI-EAS443:3:69:90:1689#0/1  
ATGGATAGCAAATAGTAGCATTGCCACAACACTTCAATG  
+HWI-EAS443:3:69:90:1689#0/1  
aa\_]a\_a`a^a]a]Ya]\_^\_]\_\_¥`\_a^^\_]X^a\_^YX  
@HWI-EAS443:3:6:449:331#0/1  
ATGGATAGCAAATAGTAGCATTGCCACAACACTTCAATG

+HWI-EAS443:3:6:449:331#0/1  
aba``\_b\_aa\_]\_a¥aaY`VaZL]XT`a`a]a\_\_`\_[`  
@HWI-EAS443:3:70:329:1653#0/1  
ATGGATAGCAAATAGTAGCATTGCCACAACACTTCAATG  
+HWI-EAS443:3:70:329:1653#0/1  
`¥`aa`U`Taa`^Xa`a`a^aa^aa^`a`\_]\_]\_  
@HWI-EAS443:3:70:380:462#0/1  
ATGGATAGCAAATAGTAGCATTGCCACAACACTTCAATG  
+HWI-EAS443:3:70:380:462#0/1  
a`a`aaaa]^\_a\_Y\_\_aZ\_]a`\_]`\_\_^^\_Z\_]^\_  
@HWI-EAS443:3:70:671:1203#0/1  
ATGGATAGCAAATAGTAGCATTGCCACAACACTTCAATG  
+HWI-EAS443:3:70:671:1203#0/1  
`^b``\_a\_abaa``\_X^\_a]a`aa`aa`aaa\_a\_\_\_\_  
@HWI-EAS443:3:70:774:905#0/1  
ATGGATAGCAAATAGTAGCATTGCCACAACACTTCAATG  
+HWI-EAS443:3:70:774:905#0/1  
\_\_`ba\_^P`\_abb\_Waaaaba]aaa¥baa\_aa]aa^aa`  
@HWI-EAS443:3:71:1594:923#0/1  
ATGGATAGCAAATAGTAGCATTGCCACAACACTTCAATG  
+HWI-EAS443:3:71:1594:923#0/1  
abbaabba\_bbaa\_\_aa`[`aa\_\_`aaaaaa`\_\_^\_\_  
@HWI-EAS443:3:71:189:530#0/1  
ATGGATAGCAAATAGTAGCATTGCCACAACACTTCAATG  
+HWI-EAS443:3:71:189:530#0/1  
[bbaa\_aaba`Y`^^[^aa`aa`ba`aa`Z]a`aa`\_¥^Y  
@HWI-EAS443:3:71:275:1894#0/1  
ATGGATAGCAAATAGTAGCATTGCCACAACACTTCAATG  
+HWI-EAS443:3:71:275:1894#0/1  
a]a`\_Y\_N¥baa`SQJ]W\_]VG\_]\_b`\_VH¥ZRWOXXZW  
@HWI-EAS443:3:72:605:1293#0/1  
ATGGATAGCAAATAGTAGCATTGCCACAACACTTCAATG  
+HWI-EAS443:3:72:605:1293#0/1  
`\_[^a\_]YXYaXa\_\_Xa`a\_\_`a``\_\_`^^a`\_]`^`\_¥  
@HWI-EAS443:3:72:926:1446#0/1  
ATGGATAGCAAATAGTAGCATTGCCACAACACTTCAATG  
+HWI-EAS443:3:72:926:1446#0/1  
aaaaaa`\_abbaaa^aadWaa`\_aZ`aaa`aa\_a``^¥  
@HWI-EAS443:3:73:1129:678#0/1  
ATGGATAGCAAATAGTAGCATTGCCACAACACTTCAATG  
+HWI-EAS443:3:73:1129:678#0/1  
aabaaa^`a`aaaa[aa\_\_aaa``\_aa``a``aaa\_``  
@HWI-EAS443:3:74:1085:109#0/1  
ATGGATAGCAAATAGTAGCATTGCCACAACACTTCAATG  
+HWI-EAS443:3:74:1085:109#0/1  
abababbb\_bbabbb\_ab\_abab^]\_`aba`a\_a`Zaa`a  
@HWI-EAS443:3:74:153:1804#0/1  
ATGGATAGCAAATAGTAGCATTGCCACAACACTTCAATG  
+HWI-EAS443:3:74:153:1804#0/1  
\_``\_a`]U[aa\_Z]VXa^a\_``¥aabaab]^¥Y¥a`]¥T



@HWI-EAS443:3:74:1671:866#0/1  
ATGGATAGCAAATAGTAGCATTGCCACAACACTTCAATG  
+HWI-EAS443:3:74:1671:866#0/1  
a`\_Z^XGYba^^]aZa]aX`a]Y¥`\_`\_H][\_\_`a`Z[  
@HWI-EAS443:3:74:190:1466#0/1  
ATGGATAGCAAATAGTAGCATTGCCACAACACTTCAATG  
+HWI-EAS443:3:74:190:1466#0/1  
abaaaa]`\_abaabaWba\_^`a`aaaaVaa`aaaaaa`\_`\_  
@HWI-EAS443:3:76:327:1822#0/1  
ATGGATAGCAAATAGTAGCATTGCCACAACACTTCAATG  
+HWI-EAS443:3:76:327:1822#0/1  
\_`]VXU^^]bbVG\_a^\_]][¥Y\_W`[`X\_aWa¥]R\_a\_H^  
@HWI-EAS443:3:76:413:476#0/1  
ATGGATAGCAAATAGTAGCATTGCCACAACACTTCAATG  
+HWI-EAS443:3:76:413:476#0/1  
ab```Xababa]Z^``aa\_RaaaXJVaaa`a`aa`^`\_`\_  
@HWI-EAS443:3:76:46:383#0/1  
ATGGATAGCAAATAGTAGCATTGCCACAACACTTCAATG  
+HWI-EAS443:3:76:46:383#0/1  
`b^¥^Y]^^`[`WZ[S]¥¥V\_Y[YZ^[Y¥TW[WXV¥]ZV^  
@HWI-EAS443:3:77:120:1870#0/1  
ATGGATAGCAAATAGTAGCATTGCCACAACACTTCAATG  
+HWI-EAS443:3:77:120:1870#0/1  
a^b`VYJ^Z`aZ¥^YK[]`]¥\_S[`aa`bXX^TQY`a\_V¥  
@HWI-EAS443:3:77:1769:534#0/1  
ATGGATAGCAAATAGTAGCATTGCCACAACACTTCAATG  
+HWI-EAS443:3:77:1769:534#0/1  
ababba\_Z\_bbaa`YUaaZ`aaaa`a^b`]^`^`^b\_aa^¥  
@HWI-EAS443:3:78:1106:335#0/1  
ATGGATAGCAAATAGTAGCATTGCCACAACACTTCAATG  
+HWI-EAS443:3:78:1106:335#0/1  
abb`\_a`a`aaa`a`Xab¥\_a\_\_\_¥`¥\_a[`a]a`Za\_\_\_  
@HWI-EAS443:3:78:247:278#0/1  
ATGGATAGCAAATAGTAGCATTGCCACAACACTTCAATG  
+HWI-EAS443:3:78:247:278#0/1  
`b`U\_aa¥Q\_SP]a]TU\_]H\_`aRa]]\_\_\_\_\_^`[\_^^¥\_  
@HWI-EAS443:3:78:372:513#0/1  
ATGGATAGCAAATAGTAGCATTGCCACAACACTTCAATG  
+HWI-EAS443:3:78:372:513#0/1  
^`babbb¥bbabbbbTbb`R`babbbab`babbaabbaab  
@HWI-EAS443:3:78:473:141#0/1  
ATGGATAGCAAATAGTAGCATTGCCACAACACTTCAATG  
+HWI-EAS443:3:78:473:141#0/1  
^bbb`aa``baaaaa¥bb\_P`a]`aaaaa``a\_`^`a`\_a  
@HWI-EAS443:3:79:716:105#0/1  
ATGGATAGCAAATAGTAGCATTGCCACAACACTTCAATG  
+HWI-EAS443:3:79:716:105#0/1  
abbbbababbbbaa\_abbaaab```a\_aa\_`aaaa\_`aaa  
@HWI-EAS443:3:79:967:1850#0/1  
ATGGATAGCAAATAGTAGCATTGCCACAACACTTCAATG

+HWI-EAS443:3:79:967:1850#0/1  
aaa]aaa^bbaaaa`\_]`\_Z`aaa`a\_aba`\_aa`\_Z\_a^\_  
@HWI-EAS443:3:7:1044:49#0/1  
ATGGATAGCAAATAGTAGCATTGCCACAACACTTCAATG  
+HWI-EAS443:3:7:1044:49#0/1  
aaa\_^\_aa`a\_a`U`a\_]a`^\_^^\_a¥`\_Z^U]\_^a  
@HWI-EAS443:3:7:1355:141#0/1  
ATGGATAGCAAATAGTAGCATTGCCACAACACTTCAATG  
+HWI-EAS443:3:7:1355:141#0/1  
\_b`baa\_\_X`aaa^X`R`]`a¥ZTQ^a`^`Za^G\_\_]`  
@HWI-EAS443:3:7:541:2038#0/1  
ATGGATAGCAAATAGTAGCATTGCCACAACACTTCAATG  
+HWI-EAS443:3:7:541:2038#0/1  
a`\_`aa[aaaa\_aaZaa\_a`\_\_\_¥\_Za`X`\_¥`\_¥`\_]`  
@HWI-EAS443:3:7:911:308#0/1  
ATGGATAGCAAATAGTAGCATTGCCACAACACTTCAATG  
+HWI-EAS443:3:7:911:308#0/1  
`bb`aaY¥Z`aa`^U^ZWRa`VWHN^a\_a`TVa\_W¥VU[  
@HWI-EAS443:3:80:311:1482#0/1  
ATGGATAGCAAATAGTAGCATTGCCACAACACTTCAATG  
+HWI-EAS443:3:80:311:1482#0/1  
Sa\_]`aa\_ab]V`\_XT\_Z`aaa]WZ`a^aa\_aa[]`¥WZ  
@HWI-EAS443:3:80:359:1558#0/1  
ATGGATAGCAAATAGTAGCATTGCCACAACACTTCAANG  
+HWI-EAS443:3:80:359:1558#0/1  
aaaa[`\_`aa]aaaZa]a^`]]¥a```[^`a`\_`aYDL  
@HWI-EAS443:3:81:103:1636#0/1  
ATGGATAGCAAATAGTAGCATTGCCACAACACTTCAATG  
+HWI-EAS443:3:81:103:1636#0/1  
[]SY`]¥`aUKZQ¥`S`]`a^]]`^`a^WR\_a\_WR[]]^\_  
@HWI-EAS443:3:81:175:1125#0/1  
ATGGATAGCAAATAGTAGCATTGCCACAACACTTCAATG  
+HWI-EAS443:3:81:175:1125#0/1  
aabaaa`ab`[a`^T^aaZ`a^baaaaa`aa`a`a`\_¥Y  
@HWI-EAS443:3:82:1195:442#0/1  
ATGGATAGCAAATAGTAGCATTGCCACAACACTTCAATG  
+HWI-EAS443:3:82:1195:442#0/1  
aab\_baabWbbaaba]ab¥aaaa`a\_abaabaaa`a`aa  
@HWI-EAS443:3:83:1676:1934#0/1  
ATGGATAGCAAATAGTAGCATTGCCACAACACTTCAATG  
+HWI-EAS443:3:83:1676:1934#0/1  
aa^bW`M`Z`bYa¥\_abb0aa`JSbS`a`VDY`]aa\_a  
@HWI-EAS443:3:83:93:753#0/1  
ATGGATAGCAAATAGTAGCATTGCCACAACACTTCAATG  
+HWI-EAS443:3:83:93:753#0/1  
aaYZ^S[¥[IZ^\_YUL`\_OJYY¥SONR¥^^\_`^]TFQS]  
@HWI-EAS443:3:84:564:1820#0/1  
ATGGATAGCAAATAGTAGCATTGCCACAACACTTCAATG  
+HWI-EAS443:3:84:564:1820#0/1  
\_]`aaa`^`aaa[PV\_W^`]a[Wa¥`ZW]^a`a¥aaaWX

@HWI-EAS443:3:85:835:837#0/1  
ATGGATAGCAAATAGTAGCATTGCCACAACACTTCAATG  
+HWI-EAS443:3:85:835:837#0/1  
aba\_\_YW\_^\_aa[]`QV^¥LW`ZS¥]a^X\_^\_a]Z¥aX¥a  
@HWI-EAS443:3:86:1311:744#0/1  
ATGGATAGCAAATAGTAGCATTGCCACAACACTTCAATG  
+HWI-EAS443:3:86:1311:744#0/1  
abbaa`ababbabba\_bb`aaaa`\_a\_aaY`a\_aa[````  
@HWI-EAS443:3:88:1200:761#0/1  
ATGGATAGCAAATAGTAGCATTGCCACAACACTTCAATG  
+HWI-EAS443:3:88:1200:761#0/1  
abbbaaababbbaaa\_bb¥`aaaaa\_abaa\_aaaaaaaa  
@HWI-EAS443:3:89:1305:1757#0/1  
ATGGATAGCAAATAGTAGCATTGCCACAACACTTCAATG  
+HWI-EAS443:3:89:1305:1757#0/1  
ababbbaa^b\_aba`¥aaaaaba`\_a\_ba`aa`\_````\_a  
@HWI-EAS443:3:89:1415:1784#0/1  
ATGGATAGCAAATAGTAGCATTGCCACAACACTTCAATG  
+HWI-EAS443:3:89:1415:1784#0/1  
aa^P[a`¥a`\_W\_aR\_RVX`\_`^^OYU`aU]a\_a\_Wa\_\_X  
@HWI-EAS443:3:8:643:1807#0/1  
ATGGATAGCAAATAGTAGCATTGCCACAACACTTCAATG  
+HWI-EAS443:3:8:643:1807#0/1  
a\_a`¥\_XGYaa`Y\_aY\_\_]^\_[Y\_]^V^`ZY^^U]U[ZW^  
@HWI-EAS443:3:90:419:2012#0/1  
ATGGATAGCAAATAGTAGCATTGCCACAACACTTCAATG  
+HWI-EAS443:3:90:419:2012#0/1  
`^^aaXI`\_aT^\_ZW¥`\_`V¥T[Y`¥]a^\_a`YQYYV¥Z  
@HWI-EAS443:3:91:1315:2003#0/1  
ATGGATAGCAAATAGTAGCATTGCCACAACACTTCAATG  
+HWI-EAS443:3:91:1315:2003#0/1  
¥V]]b¥JT`Xb¥¥abX]^Z¥aaa^Y][^aU[YEF`^b\_[[  
@HWI-EAS443:3:91:595:716#0/1  
ATGGATAGCAAATAGTAGCATTGCCACAACACTTCAATG  
+HWI-EAS443:3:91:595:716#0/1  
`bbbaaababbaaaa\_```aaaa`aaa`a\_a`aaaaa^^`  
@HWI-EAS443:3:91:695:706#0/1  
ATGGATAGCAAATAGTAGCATTGCCACAACACTTCAATG  
+HWI-EAS443:3:91:695:706#0/1  
abbaabbaZab]baa^a`]^`aaaa```aa`ab`aaaa`\_a  
@HWI-EAS443:3:92:208:731#0/1  
ATGGATAGCAAATAGTAGCATTGCCACAACACTTCAATG  
+HWI-EAS443:3:92:208:731#0/1  
¥baaaa]W¥aaaaXRX`aX¥`\_`Z\_]Y^a^`\_Za`]a\_\_\_\_  
@HWI-EAS443:3:93:254:1532#0/1  
ATGGATAGCAAATAGTAGCATTGCCACAACACTTCAATG  
+HWI-EAS443:3:93:254:1532#0/1  
U^WFZ]T]Y`¥]XRUM[`¥b`RQ]\_U\_]\_VZ`[PU\_^QY\_  
@HWI-EAS443:3:93:701:1787#0/1  
ATGGATAGCAAATAGTAGCATTGCCACAACACTTCAATG

+HWI-EAS443:3:93:701:1787#0/1  
a`a`][\_\_\_\_a\_\_^\_Za^\_\_\_\_^]X`Z]a\_]^\`^]\_  
@HWI-EAS443:3:94:1011:1067#0/1  
ATGGATAGCAAATAGTAGCATTGCCACAACACTTCAATG  
+HWI-EAS443:3:94:1011:1067#0/1  
\_U^^ab\_bba]YVbK]¥U[bb[]S¥Vaa`bab\_\_bba`  
@HWI-EAS443:3:94:1275:1846#0/1  
ATGGATAGCAAATAGTAGCATTGCCACAACACTTCAATG  
+HWI-EAS443:3:94:1275:1846#0/1  
`baaaaa]]^aa\_]`Saa`aa\_a\_\_`^aaXaaa`\_¥a\_\_a  
@HWI-EAS443:3:94:239:1514#0/1  
ATGGATAGCAAATAGTAGCATTGCCACAACACTTCAATG  
+HWI-EAS443:3:94:239:1514#0/1  
\_ZX]¥`\_\_a\_S^aa^a`\_\_`a\_[Z`¥a\_ZTaa`\_`Y`\_\_a  
@HWI-EAS443:3:94:99:113#0/1  
ATGGATAGCAAATAGTAGCATTGCCACAACACTTCAATG  
+HWI-EAS443:3:94:99:113#0/1  
aaab\_aaa^a`\_\_`Z`a^\_\_`\_\_^]^^^]]^]]Z  
@HWI-EAS443:3:95:1003:1556#0/1  
ATGGATAGCAAATAGTAGCATTGCCACAACACTTCAATG  
+HWI-EAS443:3:95:1003:1556#0/1  
`]]]aaa`aba`b\_a^\_b]]aa\_ab\_]a\_aa\_\_a`Wa`^^  
@HWI-EAS443:3:96:1381:1958#0/1  
ATGGATAGCAAATAGTAGCATTGCCACAACACTTCAATG  
+HWI-EAS443:3:96:1381:1958#0/1  
``bb\_b`b`baa\_aUI`b\_\_\_\_`Z[M`a`S`aXa¥¥a0Z\_  
@HWI-EAS443:3:96:1718:370#0/1  
ATGGATAGCAAATAGTAGCATTGCCACAACACTTCAATG  
+HWI-EAS443:3:96:1718:370#0/1  
aaa\_¥a]`\_a`^^R^^aJ^\_`ZYPRRTH\_`Y`WS\_¥]B  
@HWI-EAS443:3:97:736:421#0/1  
ATGGATAGCAAATAGTAGCATTGCCACAACACTTCAATG  
+HWI-EAS443:3:97:736:421#0/1  
a\_bb`a`a`ba\_aaa¥aa¥\_aaa\_]\_Z\_a]a`^`\_]\_\_\_\_a  
@HWI-EAS443:3:97:762:1344#0/1  
ATGGATAGCAAATAGTAGCATTGCCACAACACTTCAATG  
+HWI-EAS443:3:97:762:1344#0/1  
aa\_¥ba^aabababbYbb`baaabbaaaaaabS\_`¥aa^^  
@HWI-EAS443:3:97:880:1035#0/1  
ATGGATAGCAAATAGTAGCATTGCCACAACACTTCAATG  
+HWI-EAS443:3:97:880:1035#0/1  
^a\_b¥¥Y`\_aab`^\_P^b]S\_```a\_Xa]Z^a]a¥`a\_\_b  
@HWI-EAS443:3:97:968:1971#0/1  
ATGGATAGCAAATAGTAGCATTGCCACAACACTTCAATG  
+HWI-EAS443:3:97:968:1971#0/1  
abaaaabaab^aaa^¥aa\_aaa\_a\_a¥aa^\_aXa`Taa`a  
@HWI-EAS443:3:98:357:839#0/1  
ATGGATAGCAAATAGTAGCATTGCCACAACACTTCAATG  
+HWI-EAS443:3:98:357:839#0/1  
aaaaa`b^ab\_`\_a][aaa`\_]`W^]]\_\_^\_\_W^]\_^]W`

@HWI-EAS443:3:98:814:977#0/1  
ATGGATAGCAAATAGTAGCATTGCCACAACACTTCAATG  
+HWI-EAS443:3:98:814:977#0/1  
abbaaaa^abaaaa\_baaaab¥¥a`Y``\_aa\_]a[aaaa  
@HWI-EAS443:3:99:1572:660#0/1  
ATGGATAGCAAATAGTAGCATTGCCACAACACTTCAATG  
+HWI-EAS443:3:99:1572:660#0/1  
aaa`\_aaaabaa\_bb\_aaYaaa\_Y\_`\_aa^`a^aa^\_\_¥`  
@HWI-EAS443:3:99:743:1309#0/1  
ATGGATAGCAAATAGTAGCATTGCCACAACACTTCAATG  
+HWI-EAS443:3:99:743:1309#0/1  
a`a`aa\_babb]a`^YVabbaa\_\_a\_Q]\_ab`0`aZaa\_]`  
@HWI-EAS443:3:99:881:1314#0/1  
ATGGATAGCAAATAGTAGCATTGCCACAACACTTCAATG  
+HWI-EAS443:3:99:881:1314#0/1  
abbbab[^a``abbaabba\_`a`]`T`Z^aZa`Y\_a¥^`  
@HWI-EAS443:3:10:633:1728#0/1  
TATGGATAGCAAATAGTAGCATTGCCACAACACTTCAAT  
+HWI-EAS443:3:10:633:1728#0/1  
aaab¥`aaaa`aabaXaa^a\_aaa`b\_aaYab[Yaaaa]  
@HWI-EAS443:3:11:138:137#0/1  
TATGGATAGCAAATAGTAGCATTGCCACAACACTTCAAT  
+HWI-EAS443:3:11:138:137#0/1  
``aa]a\_XX\_^S¥RMFU\_a[ZOO\_`XMYQ[R[`P[]L][B  
@HWI-EAS443:3:13:263:1013#0/1  
TATGGATAGCAAATAGTAGCATTGCCACAACACTTCAAT  
+HWI-EAS443:3:13:263:1013#0/1  
]XY``¥OWYY\_`aaZYR`aa^aaSa]\_aa`L``^]`\_`a]  
@HWI-EAS443:3:13:413:1006#0/1  
TATGGATAGCAAATAGTAGCATTGCCACAACACTTCAAT  
+HWI-EAS443:3:13:413:1006#0/1  
aaabaa`^]`^`aaa`Pa`a`\_]W]a^]]¥L]aY\_¥T^aY  
@HWI-EAS443:3:14:787:942#0/1  
TATGGATAGCAAATAGTAGCATTGCCACAACACTTCAAT  
+HWI-EAS443:3:14:787:942#0/1  
aaaaaa`aa¥``aa\_]X\_¥\_Q]^Y\_\_aX¥¥W\_`S\_^Z  
@HWI-EAS443:3:15:1160:275#0/1  
TATGGATAGCAAATAGTAGCATTGCCACAACACTTCAAT  
+HWI-EAS443:3:15:1160:275#0/1  
aabaa\_`^`\_\_a]Y^aW\_a\_]`\_^\_^X]^¥¥^0\_\_\_\_^^  
@HWI-EAS443:3:33:987:2029#0/1  
TATGGATAGCAAATAGTAGCATTGCCACAACACTTCAAT  
+HWI-EAS443:3:33:987:2029#0/1  
aaab^a`aa\_aba\_a\_Z¥¥Y]\_a¥^`^[\`a\_[W][^[\_Z  
@HWI-EAS443:3:37:873:159#0/1  
TATGGATAGCAAATAGTAGCATTGCCACAACACTTCAAT  
+HWI-EAS443:3:37:873:159#0/1  
aa\_aa`a`Ta\_a^aH]^UR¥`\_]WYRL`Y\_\_`\_Y\_\_U  
@HWI-EAS443:3:3:98:852#0/1  
TATGGATAGCAAATAGTAGCATTGCCACAACACTTCAAT

+HWI-EAS443:3:3:98:852#0/1  
a\_aabaaW\_\_ab`^a[aa][\_\_]Z\_]aa]`aX]W\_`¥  
@HWI-EAS443:3:43:709:792#0/1  
TATGGATAGCAAATAGTAGCATTGCCACAACACTTCAAT  
+HWI-EAS443:3:43:709:792#0/1  
abbb^aa`\_^b\_`aQ`]\_T`aaaa`]`^\_aa`aa]aa\_  
@HWI-EAS443:3:53:714:156#0/1  
TATGGATAGCAAATAGTAGCATTGCCACAACACTTCAAT  
+HWI-EAS443:3:53:714:156#0/1  
aaabb^a^\_Za`^a\_aX]a]`a``\_\_U¥`Z]\_Sa^S[\_X  
@HWI-EAS443:3:55:55:1888#0/1  
TATGGATAGCAAATAGTAGCATTGCCACAACACTTCAAT  
+HWI-EAS443:3:55:55:1888#0/1  
aaa\_S^aa][aa^\_\_[T`a\_\_\_aY¥`UXaaY]^W]^\_\_a]  
@HWI-EAS443:3:58:1627:509#0/1  
TATGGATAGCAAATAGTAGCATTGCCACAACACTTCAAT  
+HWI-EAS443:3:58:1627:509#0/1  
aaa`\_a]^X`\_\_\_\_^Z`X^\_a[W`\_^`\_Za^U`V`]\_  
@HWI-EAS443:3:61:1535:1037#0/1  
TATGGATAGCAAATAGTAGCATTGCCACAACACTTCAAT  
+HWI-EAS443:3:61:1535:1037#0/1  
ab`\_`\_a¥¥X`a`¥¥`¥¥a¥Z^\_W^QW^`W`YW^[Z\_YN  
@HWI-EAS443:3:63:85:1458#0/1  
TATGGATAGCAAATAGTAGCATTGCCACAACACTTCAAT  
+HWI-EAS443:3:63:85:1458#0/1  
a[`[\_Y`Z`]`^Y`^^TZ]¥RZZY`a][a^]Za`X[`\_NO  
@HWI-EAS443:3:65:751:983#0/1  
TATGGATAGCAAATAGTAGCATTGCCACAACACTTCAAT  
+HWI-EAS443:3:65:751:983#0/1  
\_TXaOPW`]Z\_Za]¥XP```W\_UO\_a]a][W`^`a\_X[\_W  
@HWI-EAS443:3:68:194:1934#0/1  
TATGGATAGCAAATAGTAGCATTGCCACAACACTTCAAT  
+HWI-EAS443:3:68:194:1934#0/1  
aaaaaa\_aV]ba`¥\_]Y`Za`aX`T`\_\_]aa\_]\_a`SW  
@HWI-EAS443:3:69:315:1309#0/1  
TATGGATAGCAAATAGTAGCATTGCCACAACACTTCAAT  
+HWI-EAS443:3:69:315:1309#0/1  
a\_aa^^`¥`\_`aaXXUU¥U¥a\_a¥aaaaa\_^Z¥a`¥`Z¥  
@HWI-EAS443:3:85:401:1555#0/1  
TATGGATAGCAAATAGTAGCATTGCCACAACACTTCAAT  
+HWI-EAS443:3:85:401:1555#0/1  
`abb`^\_bb[bba``]Xaa\_aa`^aa`\_`a`aaZ\_a`a\_]`  
@HWI-EAS443:3:88:367:1617#0/1  
TATGGATAGCAAATAGTAGCATTGCCACAACACTTCAAT  
+HWI-EAS443:3:88:367:1617#0/1  
`babaaaaX`^baa`SYa]^aaaXU^`\_aa\_\_a`\_aaa`Y  
@HWI-EAS443:3:89:413:1284#0/1  
TATGGATAGCAAATAGTAGCATTGCCACAACACTTCAAT  
+HWI-EAS443:3:89:413:1284#0/1  
[\_]QXYM]O\_Z\_V¥`¥LH`a`]a^a`b`]\_`a^PR`[¥T

@HWI-EAS443:3:90:42:1580#0/1  
TATGGATAGCAAATAGTAGCATTGCCACAACACTACTTCAAT  
+HWI-EAS443:3:90:42:1580#0/1  
aaa¥U`^VYZ`¥a\_a`[a[VZWVY¥¥R¥^aa¥a^^^`UU  
@HWI-EAS443:3:95:569:1218#0/1  
TATGGATAGCAAATAGTAGCATTGCCACAACACTACTTCAAT  
+HWI-EAS443:3:95:569:1218#0/1  
a`baa\_[^a^\_aaa\_]U\_`[YaaUa]a`^\_XU`^\_\_VXaX  
@HWI-EAS443:3:96:77:1814#0/1  
TATGGATAGCAAATAGTAGCATTGCCACAACACTACTTCAAT  
+HWI-EAS443:3:96:77:1814#0/1  
a\_X¥aaa`aa`aba^¥Za]VY]]¥a]U[a^``]Sa¥\_a`]  
@HWI-EAS443:3:9:871:636#0/1  
TATGGATAGCAAATAGTAGCATTGCCACAACACTACTTCAAT  
+HWI-EAS443:3:9:871:636#0/1  
aaa```a^\_0`aaa`\_X`a```a`¥Z^]a`X`\_V^aX\_\_]  
@HWI-EAS443:3:10:189:338#0/1  
GTATGGATAGCAAATAGTAGCATTGCCACAACACTACTTCAA  
+HWI-EAS443:3:10:189:338#0/1  
aSW^`\_`\_YY]Z`¥X¥]^XZZ]]XX¥XUUR]]WZ]Z]YUXZ  
@HWI-EAS443:3:10:475:575#0/1  
GTATGGATAGCAAATAGTAGCATTGCCACAACACTACTTCAA  
+HWI-EAS443:3:10:475:575#0/1  
`WVSH\_XSN`\_`\_OWOXZZ\_\_WXYXQWXWS^OX]O\_ZZ[Z  
@HWI-EAS443:3:11:202:1247#0/1  
GTATGGATAGCAAATAGTAGCATTGCCACAACACTACTTCAA  
+HWI-EAS443:3:11:202:1247#0/1  
]\_]`aba```\_ba]]aaXXaaaTY]`aaa]LW]``a]aa`  
@HWI-EAS443:3:13:936:674#0/1  
GTATGGATAGCAAATAGTAGCATTGCCACAACACTACTTCAA  
+HWI-EAS443:3:13:936:674#0/1  
a¥¥^\_`NO^UMX\_a`YRVXYOOV[VYZV[\_]]TQLWZX[]  
@HWI-EAS443:3:15:1039:1415#0/1  
GTATGGATAGCAAATAGTAGCATTGCCACAACACTACTTCAA  
+HWI-EAS443:3:15:1039:1415#0/1  
aVa^aa^\_`Z``\_`^W`\_\_^\_]X]^\_Z\_a¥^`Z^W^Z  
@HWI-EAS443:3:19:1452:1890#0/1  
GTATGGATAGCAAATAGTAGCATTGCCACAACACTACTTCAA  
+HWI-EAS443:3:19:1452:1890#0/1  
a^aa`a]T^`Sa`\_]`\_S``[\_W\_^\_¥Y`^^^`X^^X\_Z  
@HWI-EAS443:3:20:525:378#0/1  
GTATGGATAGCAAATAGTAGCATTGCCACAACACTACTTCAA  
+HWI-EAS443:3:20:525:378#0/1  
aHVav`]W[XZ`^\_¥TQY¥Z^¥\_¥U¥T[\_XZ¥]WWW[W  
@HWI-EAS443:3:21:1684:414#0/1  
GTATGGATAGCAAATAGTAGCATTGCCACAACACTACTTCAA  
+HWI-EAS443:3:21:1684:414#0/1  
\_\_`a^SY`a]\_\_]a^[X]aZ]^]TLTX^\_W\_^Z^^VZ]  
@HWI-EAS443:3:24:760:1025#0/1  
GTATGGATAGCAAATAGTAGCATTGCCACAACACTACTTCAA

+HWI-EAS443:3:24:760:1025#0/1  
` `]W^ba` `aaa` aabaZaa` [ `aaa` a` aa` \_a` \_` \_a^  
@HWI-EAS443:3:32:1077:1171#0/1  
GTATGGATAGCAAATAGTAGCATTGCCACAACACTACTTCAA  
+HWI-EAS443:3:32:1077:1171#0/1  
a^¥` ]a` \_ \_[]ba` \_ UX` `` \_` ^¥] \_\_\_\_\_ `Z\_¥` ]]] [V  
@HWI-EAS443:3:32:1733:1520#0/1  
GTATGGATAGCAAATAGTAGCATTGCCACAACACTACTTCAA  
+HWI-EAS443:3:32:1733:1520#0/1  
a] `aa[Y` ^` ]aa\_]¥VTYaXR]]]XWQW]^X\_U]Z^^a^  
@HWI-EAS443:3:33:644:35#0/1  
GTATGGATAGCAAATAGTAGCATTGCCACAACACTACTTCAA  
+HWI-EAS443:3:33:644:35#0/1  
YQ]a` ^PR[\_Wa[^ZX` N¥` `` \_[U[a^]^[SYLYZ^SOW¥  
@HWI-EAS443:3:35:1243:365#0/1  
GTATGGATAGCAAATAGTAGCATTGCCACAACACTACTTCAA  
+HWI-EAS443:3:35:1243:365#0/1  
aaa^a^0[\_b^` ` [ `aa]ab] [\_` ¥¥\_Y` V\_` ^` [a^a¥`  
@HWI-EAS443:3:35:1572:1102#0/1  
GTATGGATAGCAAATAGTAGCATTGCCACAACACTACTTCAA  
+HWI-EAS443:3:35:1572:1102#0/1  
a^aa\_aa` ^` \_]a` [\_]\_¥¥¥¥]YZX] `UVXZ]aaZa^aVP  
@HWI-EAS443:3:39:1014:338#0/1  
GTATGGATAGCAAATAGTAGCATTGCCACAACACTACTTCAA  
+HWI-EAS443:3:39:1014:338#0/1  
a^aaa^¥Y` ` ^a` \_a` X^a^^` \_` \_Z\_` \_]Y^]^^¥W^Y  
@HWI-EAS443:3:42:1536:63#0/1  
GTATGGATAGCAAATAGTAGCATTGCCACAACACTACTTCAA  
+HWI-EAS443:3:42:1536:63#0/1  
a^^aba` \_` \_a` \_` \_a` \_X\_a0]a^` ^XZ[]]Z\_]W` ^` \_U  
@HWI-EAS443:3:53:1161:416#0/1  
GTATGGATAGCAAATAGTAGCATTGCCACAACACTACTTCAA  
+HWI-EAS443:3:53:1161:416#0/1  
a^¥aaaaaa[N\_]W` a^Xa` \_` ^a` \_]][Sa` ^` \_Ya` \_]`  
@HWI-EAS443:3:55:1398:466#0/1  
GTATGGATAGCAAATAGTAGCATTGCCACAACACTACTTCAA  
+HWI-EAS443:3:55:1398:466#0/1  
a\_aabba` \_a` a` \_` \_aa` ^aa^aaaa` \_` \_` \_]aa\_adW` \_`  
@HWI-EAS443:3:56:1171:706#0/1  
GTATGGATAGCAAATAGTAGCATTGCCACAACACTACTTCAA  
+HWI-EAS443:3:56:1171:706#0/1  
a` \_` \_a` ^` ^` Ua[\_\_\_ZN¥a¥^] ]\_` ^YY^^` ^NZ]Z^[X\_` ^`  
@HWI-EAS443:3:59:907:2024#0/1  
GTATGGATAGCAAATAGTAGCATTGCCACAACACTACTTCAA  
+HWI-EAS443:3:59:907:2024#0/1  
a` \_` \_aaaa` `` `aa` aa^^` `` \_` \_aa` \_` aaaaaU^` ZZX^^]  
@HWI-EAS443:3:60:108:152#0/1  
GTATGGATAGCAAATAGTAGCATTGCCACAACACTACTTCAA  
+HWI-EAS443:3:60:108:152#0/1  
a\_Z^` \_X^Y^` \_]X\_] ]\_X\_] ]X]^]YZPS]XXZZZZZZXZ



@HWI-EAS443:3:61:1335:1471#0/1  
GTATGGATAGCAAATAGTAGCATTGCCACAACACTACTTCAA  
+HWI-EAS443:3:61:1335:1471#0/1  
a0\_VOS][[\_`\_\_¥W\_UQY[]ZX]^aZO]^\_^^ZZUZROWW  
@HWI-EAS443:3:62:1371:2008#0/1  
GTATGGATAGCAAATAGTAGCATTGCCACAACACTACTTCAA  
+HWI-EAS443:3:62:1371:2008#0/1  
a[`]¥]\_U]\_[a`¥]a\_0\_YYY`W¥RNYS`\_] ]^0\_]\_`^  
@HWI-EAS443:3:62:727:545#0/1  
GTATGGATAGCAAATAGTAGCATTGCCACAACACTACTTCAA  
+HWI-EAS443:3:62:727:545#0/1  
a^aaaa`a\_a`aaaaa^abaaa``]\_`a`^`^`^`^`a\_  
@HWI-EAS443:3:63:841:1878#0/1  
GTATGGATAGCAAATAGTAGCATTGCCACAACACTACTTCAA  
+HWI-EAS443:3:63:841:1878#0/1  
\_PYXS¥``ZSZ`]\_NZSQ^^USU[]RUT]VMVY]BBBBB  
@HWI-EAS443:3:68:608:1778#0/1  
GTATGGATAGCAAATAGTAGCATTGCCACAACACTACTTCAA  
+HWI-EAS443:3:68:608:1778#0/1  
`ZYWY`]RYZ``[a¥^a[b```aa`baba¥`^`aa``aa^  
@HWI-EAS443:3:71:451:258#0/1  
GTATGGATAGCAAATAGTAGCATTGCCACAACACTACTTCAA  
+HWI-EAS443:3:71:451:258#0/1  
a\_bbaa`aaaabaa`a`Raaaa`\_a`a`aaaaab`a\_\_aa  
@HWI-EAS443:3:76:1555:1575#0/1  
GTATGGATAGCAAATAGTAGCATTGCCACAACACTACTTCAA  
+HWI-EAS443:3:76:1555:1575#0/1  
`^`¥\_`¥\_\_XG]¥Z[\_`SXZ]]]W¥VX]W^^Z^\_ZZMBBB  
@HWI-EAS443:3:78:737:672#0/1  
GTATGGATAGCAAATAGTAGCATTGCCACAACACTACTTCAA  
+HWI-EAS443:3:78:737:672#0/1  
`X`] ]^^XU]aba]U]UXTXR¥`\_\_ [RX[YQWK\_^a¥XVK  
@HWI-EAS443:3:90:783:657#0/1  
GTATGGATAGCAAATAGTAGCATTGCCACAACACTACTTCAA  
+HWI-EAS443:3:90:783:657#0/1  
aaabaa\_]\_aaa`a\_`0`a\_`a`\_^\_]a\_^`\_^a\_`\_^  
@HWI-EAS443:3:94:1218:560#0/1  
GTATGGATAGCAAATAGTAGCATTGCCACAACACTACTTCAA  
+HWI-EAS443:3:94:1218:560#0/1  
aX```a`Z]`¥a\_\_`^\_Z\_`]\_a]]]W^^a^Z\_\_Z\_]Z^]  
@HWI-EAS443:3:100:458:1919#0/1  
AGTATGGATAGCAAATAGTAGCATTGCCACAACACTACTTCA  
+HWI-EAS443:3:100:458:1919#0/1  
aa¥aaaaaa^a\_baaaaa^a`a``[^a\_]a`W[aZ\_`^\_  
@HWI-EAS443:3:1:687:135#0/1  
AGTATGGATAGCAAATAGTAGCATTGCCACAACACTACTTCA  
+HWI-EAS443:3:1:687:135#0/1  
abWa`YX\_[]`^^a`V\_MGSYHW]¥X]GOFU^S^^BBBBB  
@HWI-EAS443:3:50:1340:1575#0/1  
CAGTATGGATAGCAAATAGTAGCATTGCCACAACACTACTTC

+HWI-EAS443:3:50:1340:1575#0/1  
a^¥^a^aa^\_[`aaaa^][X¥` ``^0^`^^]ZSX\_W\_\_U  
@HWI-EAS443:3:72:1174:1187#0/1  
CAGTATGGATAGCAAATAGTAGCATTGCCACAACACTCTTC  
+HWI-EAS443:3:72:1174:1187#0/1  
aba[\_^`aa^¥]aa\_\_`aV¥\_ZYaa`a\_aaaa`\_``\_\_a  
@HWI-EAS443:3:83:1710:1493#0/1  
AGTATGGATAGCAAATAGTAGCATTGCCACAACACTCTTCA  
+HWI-EAS443:3:83:1710:1493#0/1  
`^^bb\_aa`\_K^`\_[^^W^UYX^YVHZ\_]aYQ\_]^N]  
@HWI-EAS443:3:83:753:804#0/1  
AGTATGGATAGCAAATAGTAGCATTGCCACAACACTCTTCA  
+HWI-EAS443:3:83:753:804#0/1  
ab\_abb¥¥\_^\_Y]\_Uab]\_^`aa` `^\_YY\_^`a`U\_dW^  
@HWI-EAS443:3:18:386:1501#0/1  
GAGGCCGAGTCTTCTGTCAAAGAGAAAGACATGGAAATTG  
+HWI-EAS443:3:18:386:1501#0/1  
`babbb\_aaaab`]ab\_aaba]aZaaaaaaaa`[ `aaa`Z  
@HWI-EAS443:3:6:316:253#0/1  
TACAGATTTTGGCAGTAAGGTCCTGCACACTTTCACCACT  
+HWI-EAS443:3:6:316:253#0/1  
aaaaaaaa`S`S^a\_a]a\_¥]Y[\_\_\_]\_Z¥\_^¥^`\_]\_¥\_  
@HWI-EAS443:3:83:1087:778#0/1  
CACACGGCAAATCTGTATTCAACAGTCTATATGCGTCTC  
+HWI-EAS443:3:83:1087:778#0/1  
a`baYaaXbba`]]`aRYb`[[a[XaX][bRV]¥R[S¥]X  
@HWI-EAS443:3:1:1012:1247#0/1  
GGGGTATATGAAGCAATCGAGGAGTGCCTGATTAATGATC  
+HWI-EAS443:3:1:1012:1247#0/1  
`aa\_Ja`]a`a\_a]aY\_]a^` `Y\_N^VY\_a^[\_`^`^^BB  
@HWI-EAS443:3:31:169:780#0/1  
AGTGGGCAAATCTGTATTCAACAGTCTATATGCGTCTCC  
+HWI-EAS443:3:31:169:780#0/1  
aaZ]^a^baS]\_aaab\_aaaa^`] `a¥V^^` `a\_^\_¥`]  
@HWI-EAS443:3:31:216:1159#0/1  
AGCTGATTGAGAGCATGATTGAGGCCGAGTCTTCTGTCAA  
+HWI-EAS443:3:31:216:1159#0/1  
`^\_[a`bb]S^a¥`¥^abaaYZ\_aba¥^`^b`]aaa^`aa  
@HWI-EAS443:3:1:252:1574#0/1  
GATTGAGGCCGAGTCTTCTGGCAAAGAGAAAGACATGACC  
+HWI-EAS443:3:1:252:1574#0/1  
[]UP`[a\_a]R`a\_\_SaHJWFHXPPF¥\_^¥]aXa[ `a[BB  
@HWI-EAS443:3:23:1714:449#0/1  
CCAGGGATCATTAGTCAGGCACTCCTCGATTGCTTCATAT  
+HWI-EAS443:3:23:1714:449#0/1  
aaQZ`b\_^]aTT^JXPW[XST^`¥[U^^]\_[SS^^¥Z\_UZ  
@HWI-EAS443:3:33:705:1225#0/1  
ATGTCTTTCACTTTGACAGAAGACTCGGCCTCAATCATGC  
+HWI-EAS443:3:33:705:1225#0/1  
[\_`\_G\_\_a`\_]\_ba^XZa`b`aa]ZabYaZa¥XU\_] [\_G¥a

@HWI-EAS443:3:36:1151:1221#0/1  
CTTTCTTTGACCGAAGACTCGGCCTCAATCATGCTCTC  
+HWI-EAS443:3:36:1151:1221#0/1  
Ya`Ubbba`aa`babaaa`Z``\_YX\_U[[[\_Y¥aaaaY\_]a  
@HWI-EAS443:3:37:135:203#0/1  
TTCTCTTTGACAGAAGACTCGGCCTCAATCCTGCTCTCAA  
+HWI-EAS443:3:37:135:203#0/1  
abb]aaaabT`ba\_a`R\_`aa``a\_a¥aZNH¥Z`[\_`\_aa¥  
@HWI-EAS443:3:40:546:984#0/1  
AAGCAATCGAGGAGTGCCTGATTAGTGATCCCTGGGTTTT  
+HWI-EAS443:3:40:546:984#0/1  
a¥]abbaaa[a`\_^`^`aaaa```]V[[[aa```aUV`]^  
@HWI-EAS443:3:4:257:1015#0/1  
GACGCATATAGACTGTTGAATACAGATTTTTCCAGTAAGG  
+HWI-EAS443:3:4:257:1015#0/1  
aa¥X`U\_^Q¥Z¥ZabZ^SZ\_]¥T[OY\_¥]G]WXYIY\_BB  
@HWI-EAS443:3:50:467:170#0/1  
ATAGACTGTTCAATACAGATTTTTGCCAGTAAGGTCCTGCA  
+HWI-EAS443:3:50:467:170#0/1  
ab``\_abaI\_Q[\_¥`I\_]`aaYUSNXH[]W^LQWPQQ]  
@HWI-EAS443:3:62:450:1957#0/1  
GTCTTTCTTTGACAGAAGACTCGGACTCAATCATGCTC  
+HWI-EAS443:3:62:450:1957#0/1  
a]a``J`¥HR`PNR¥]Q`bZ[^aSNRDU]XSZPUZ[G\_GZ  
@HWI-EAS443:3:71:529:692#0/1  
CCCTAAGTGCCTGAACAATGAGAAGCACTTTTCTCGATTC  
+HWI-EAS443:3:71:529:692#0/1  
abbY\_R[LV\_\_aa¥X\_^`¥XXZaab[HX`a]aaaa`\_`\_  
@HWI-EAS443:3:77:52:434#0/1  
CATGTCTTTCTTTGACAGAAGACTCGGCCTCCATCATG  
+HWI-EAS443:3:77:52:434#0/1  
aaaa`bab]aab[aa]¥\_b``\_TJWXVOM`VQYHGGPT]L  
@HWI-EAS443:3:82:1723:1180#0/1  
CTCTTTGACAGAAGACTCGGGCTCAATCATGCTCTCAATC  
+HWI-EAS443:3:82:1723:1180#0/1  
[\_babb`K[babb[baabbbIababb[P\_\_`Y`^``ba[a  
@HWI-EAS443:3:83:842:152#0/1  
CGAGTGCCCACTTAAATTGGCTTGTTCATGTTCTT  
+HWI-EAS443:3:83:842:152#0/1  
aa[]Q]SZVWw[D]\_SWU\_[V]VM[F¥WZYSJW¥MVYPU  
@HWI-EAS443:3:84:672:1757#0/1  
GGCTATATGAAGCAATCAAGGAGTGCCTGATTAATGATCC  
+HWI-EAS443:3:84:672:1757#0/1  
T^bbbbbbb]Xbabab`YJYZaab^a`[aaV^`b¥aa\_SK\_  
@HWI-EAS443:3:86:1377:464#0/1  
GTCTTTCTTTGACAGAAGACTCGGCCTCAATAATGCTC  
+HWI-EAS443:3:86:1377:464#0/1  
aa\_bbbaa`bbaba\_abbaa\_\_b^aa^`\_a\_`H[`]W`W  
@HWI-EAS443:3:8:689:564#0/1  
GGGCTATATGAAGCAATCGAGGAGTGACTGATTAATGATC

+HWI-EAS443:3:8:689:564#0/1  
ab`^\_]UaaaaTU`U`]^aa]¥0FTGH`\_aaaaT0b\_H]  
@HWI-EAS443:3:90:998:548#0/1  
GGATCATTAATCAGGCACTCCTCGATTCTTCATATAGCC  
+HWI-EAS443:3:90:998:548#0/1  
^aaab]bb¥a^\_]ab`aaa\_Z^b`]^`a`\_a\_aaaaaa\_`  
@HWI-EAS443:3:42:390:1453#0/1  
ATGTCTTTCTCTTTGACAGAAGACTCGGCCTCAATCACGC  
+HWI-EAS443:3:42:390:1453#0/1  
a[b^a\_bJab\_G[SaQ`ba^YPZa``S\_\_`G^VXVQYBBB  
@HWI-EAS443:3:83:702:1841#0/1  
TCCGCTGAATCGAGAAAATTGCTTCTCATTGTTTCAGGCAC  
+HWI-EAS443:3:83:702:1841#0/1  
aa\_V```a\_V`aP\_\_¥^[]^\_\_`^)^R¥^¥`V\_T\_N\_[\_V  
@HWI-EAS443:3:90:304:1472#0/1  
TTGTGGAGACGCATATAGACTGTTGAATACAGATTTTCC  
+HWI-EAS443:3:90:304:1472#0/1  
^ba]aa¥aa\_aa\_a\_\_a`[^Y`G[RZW]^V]Ytz^^[GM]  
@HWI-EAS443:3:18:650:429#0/1  
CAAAATCTGTATTCAACAGTCTATATGCGTCNCCACAAC  
+HWI-EAS443:3:18:650:429#0/1  
ab`XR[^ZaTXS\_abb[T`^]a`S^`a`^XZDUT\_Z`SR\_  
@HWI-EAS443:3:48:586:806#0/1  
GGGCTATATNAAGCAATCGAGGAGTGCCTGATTAATGATC  
+HWI-EAS443:3:48:586:806#0/1  
abaTa\_a\_YDU[a\_aaa`a\_a\_Ua]a\_\_a`]^`\_\_\_^a^^]  
@HWI-EAS443:3:78:1054:190#0/1  
GGCTATATGAAGCAATCGAGGAGTGCCTGATTAATNATCC  
+HWI-EAS443:3:78:1054:190#0/1  
aa``Ua`\_XP¥aL`\_XJ¥^\_YU[P`TT[]UZ^^ZVDR[NT  
@HWI-EAS443:3:78:510:1201#0/1  
GGGCTATATGAAGCAATCGAGGAGTGCCTGATTAATGATC  
+HWI-EAS443:3:78:510:1201#0/1  
ab`b`bbaabbaba`^aba`aaaa`aa[D¥`abaa`aaab  
@HWI-EAS443:3:84:1203:508#0/1  
GCAGGACCTTACTGGCAAATCTGTATTCAANAGTCTATA  
+HWI-EAS443:3:84:1203:508#0/1  
aY]QXUQOR]^ZN\_aU[\_SWYZ]P`Ya^PGDUZY^]Z^^  
@HWI-EAS443:3:36:139:385#0/1  
CGGGTCATGTCTTTCTCTTTGACAGAAGACTCGGCCTCAA  
+HWI-EAS443:3:36:139:385#0/1  
aaaa]baab`baaaaaabaaaaaT``]a\_\_a^a`W`SJ  
@HWI-EAS443:3:37:223:2023#0/1  
GTAAAATCTGTATTCAACAGTCTATATGCGTCTCCACAAC  
+HWI-EAS443:3:37:223:2023#0/1  
\_Tbaaa]][]M`a[\_^^^a\_Ua`\_QSV]]SWaY`¥TV]¥S  
@HWI-EAS443:3:54:396:1101#0/1  
GNGCTATATGAAGCAATCGAGGAGTGCCTGATTAATGATC  
+HWI-EAS443:3:54:396:1101#0/1  
RD[VWbbabbb\_ab¥S`aW¥\_aa¥aaaYaaVX¥]\_\_b\_XY

@HWI-EAS443:3:76:619:1806#0/1  
TGGGTCATGTCTTTCTTTGACAGAAGACTCGGCCTCAA  
+HWI-EAS443:3:76:619:1806#0/1  
[bbbJ`^Z``]aa`abb\_a`b`\_a\_VW[`aaY]]a^VWY`  
@HWI-EAS443:3:79:363:1217#0/1  
CCCTAAGTGCCTGAACAATGAGAAGCAATTTTCTCGATCA  
+HWI-EAS443:3:79:363:1217#0/1  
V\_` [bbb\_Q\_b[\_aWW\_LX\_\_Y\_\_U` [Q[^a]baaa]ZXF  
@HWI-EAS443:3:79:568:405#0/1  
CAGGCAAAATCTGTATTCAACAGTCTATATGCGTCTCCAC  
+HWI-EAS443:3:79:568:405#0/1  
a¥`aa`^aabaab\_aaaaa`\_a\_aa\_a]``\_a¥\_^\_^]^  
@HWI-EAS443:3:96:267:336#0/1  
TAAGTGCCTGAACAATGAGAAGCAATTTTCTCGATTCACC  
+HWI-EAS443:3:96:267:336#0/1  
aabb^babbbba`^aaaa\_baaa`aaaaaa\_a¥aaa`^^¥N  
@HWI-EAS443:3:15:1264:661#0/1  
ACCCTAAGTGCCTGAACAATGAGAAGCAATTTTCTCGATT  
+HWI-EAS443:3:15:1264:661#0/1  
aaa^aa``^\_VYaa\_a\_aa`\_`a`aaXa\_a\_``aa[``^^`  
@HWI-EAS443:3:33:1629:1175#0/1  
NATGTCTTTCTCTTTGACAGAAGACTCGGCCTCAATCATG  
+HWI-EAS443:3:33:1629:1175#0/1  
DMQNYVVXZUUUZXXWVVRZVWVXUXZUXVGVZZXVU  
@HWI-EAS443:3:53:1754:1317#0/1  
AGACTGTTGAATACAGATTTTGCCAGTAAGTCCTGCACG  
+HWI-EAS443:3:53:1754:1317#0/1  
\_a\_\_bb`b`Qa`\_\_Vb^\_aaaX`Z`\_Xaa`YMW\_```[\_OX  
@HWI-EAS443:3:72:972:619#0/1  
GCGAGGAGTGCCTGATTAATGATCCCTGGGTTTTGCTTAA  
+HWI-EAS443:3:72:972:619#0/1  
aaa`^a^a[]a`aa¥aaa``aZ``¥¥a\_¥]U`\_\_a\_\_`\_[  
@HWI-EAS443:3:11:1073:695#0/1  
ATGTCTTTCTCTTTGACAGAAGACTCGGCCTCAATCATGC  
+HWI-EAS443:3:11:1073:695#0/1  
X\_aZ` `aaabbb¥ZbaZ`aa¥\_NG¥aaZYV[Wa¥¥T¥a^D  
@HWI-EAS443:3:11:1370:1352#0/1  
GGGCTATATGAAGCAATCGAGGAGTGCCTGATTAATGATC  
+HWI-EAS443:3:11:1370:1352#0/1  
aaa\_a]¥a\_a\_SUHY[V[[U[YSUWXOIJ\_W][UZ[VQSU  
@HWI-EAS443:3:11:809:1001#0/1  
AATCGAGAAAATTGCTTCTCATTGTTTCAGGCACTTAGGGA  
+HWI-EAS443:3:11:809:1001#0/1  
aaa`^a`\_]aaaa` `aaaa\_a`aa^`a` `]Z^a\_\_\_\_\_^`\_  
@HWI-EAS443:3:11:988:215#0/1  
CGCATATAGACTGTTGAATACAGATTTTGCCAGTAAGGTC  
+HWI-EAS443:3:11:988:215#0/1  
abbbbbbababbbbbV¥bb^^a\_V^babXWVYaX`\_a\_aWT  
@HWI-EAS443:3:12:37:891#0/1  
GTCCCTAAGTGCCTGAACAATGAGAAGCAATTTTCTCGAT

+HWI-EAS443:3:12:37:891#0/1  
`aaaaaa]^a^\_ab`aaa`aa\_baaa\_a\_`a\_\_aa`\_`  
@HWI-EAS443:3:12:60:597#0/1  
TGTCTTTCTCTTTGACAGAAGACTCGGCCTCAATCATGCT  
+HWI-EAS443:3:12:60:597#0/1  
aa\_aaa\_aaa`^`a\_\_\_\_\_`\_Y\_^\_¥¥^^]]^^XVYVTTY  
@HWI-EAS443:3:12:979:1705#0/1  
AGAAAATTGCTTCTCATTGTTTCAGGCACTTAGGGACAACC  
+HWI-EAS443:3:12:979:1705#0/1  
ababaabbbbaa`\_`\_`aaaa\_aY`XZ\_a\_aa\_WY`^U\_a[Y  
@HWI-EAS443:3:13:1016:1714#0/1  
GGTTGTCCCTAAGTGCCTGAACAATGAGAAGCAATTTTCT  
+HWI-EAS443:3:13:1016:1714#0/1  
a[DWbWab]aba^SbZUb[b\_KbaZTUa`aWb^babbWb  
@HWI-EAS443:3:13:1650:524#0/1  
ATGTCTTTCTCTTTGACAGAAGACTCGGCCTCAATCATGC  
+HWI-EAS443:3:13:1650:524#0/1  
a\_\_Q]\_^T`abb^bRRXRv`[\_^\_Y^PX^\_ZKP]GW]V]  
@HWI-EAS443:3:13:487:1249#0/1  
GTCTTTCTCTTTGACAGAAGACTCGGCCTCAATCATGCTC  
+HWI-EAS443:3:13:487:1249#0/1  
`aabbbbbbbaaaaaabbbba`a`aaaaaa`a\_\_¥a`aaY\_  
@HWI-EAS443:3:13:97:1493#0/1  
CAAAACCCAGGGATCATTAAATCAGGCACTCCTCGATTGCT  
+HWI-EAS443:3:13:97:1493#0/1  
aWk`\_ba\_Z¥^`\_`^`]a\_b`\_]\_a[]aa`\_]\_[^a\_]Y\_W  
@HWI-EAS443:3:14:1233:503#0/1  
GATTGAGAGCATGATTGAGGCCGAGTCTTCTGTCAAAGAG  
+HWI-EAS443:3:14:1233:503#0/1  
a`a`a`a^^`\_`aa`\_\_^\_]^^\_AY[^\_]^\_YVY^Y]Y]  
@HWI-EAS443:3:14:925:1887#0/1  
GGCTATATGAAGCAATCGAGGAGTGCCTGATTAATGATCC  
+HWI-EAS443:3:14:925:1887#0/1  
a`baaab[^abaaaa\_b`\_]\_`X\_^a\_a`\_a`\_^^`Y]\_  
@HWI-EAS443:3:15:1275:1494#0/1  
ATCGAGGAGTGCCTGATTAATGATCCCTGGGTTTTGCTTA  
+HWI-EAS443:3:15:1275:1494#0/1  
ZiA`[bb[^`baYb`Yb\_aa`]\_^J`aba]NPZbaa\_Ha  
@HWI-EAS443:3:15:694:1573#0/1  
GCTATATGAAGCAATCGAGGAGTGCCTGATTAATGATCCC  
+HWI-EAS443:3:15:694:1573#0/1  
`b¥YL`\_XX]\_aaaX\_]aa`^a`a`a`ZQ]S]]a\_I\_aY\_  
@HWI-EAS443:3:15:846:376#0/1  
GGGATCATTAAATCAGGCACTCCTCGATTGCTTCATATAGC  
+HWI-EAS443:3:15:846:376#0/1  
aaJWbW[[aW\_bbaab`baabaaab\_aa`^`aaabaaba[\_  
@HWI-EAS443:3:17:1128:160#0/1  
GGGCTATATGAAGCAATCGAGGAGTGCCTGATTAATGATC  
+HWI-EAS443:3:17:1128:160#0/1  
abbaaaaaaa`aaaaa`\_`\_a\_Z`^a]\_\_\_\_^]^^^\_¥X

@HWI-EAS443:3:17:1460:1717#0/1  
GGGCTATATGAAGCAATCGAGGAGTGCCTGATTAATGATC  
+HWI-EAS443:3:17:1460:1717#0/1  
[TW\_aU¥^aa^Zab`[\_^Z^]N\_T`a`0a]\_`XM``]ZX  
@HWI-EAS443:3:17:1612:1021#0/1  
GTCTTTCTTTGACAGAAGACTCGGCCTCAATCATGCTC  
+HWI-EAS443:3:17:1612:1021#0/1  
aa^aaa`a`aaaa\_\_\_a\_`aX^aVa^^V`V\_\_\_V^`]PYV  
@HWI-EAS443:3:17:1654:749#0/1  
GCAATCGAGGAGTGCCTGATTAATGATCCCTGGGTTTTGC  
+HWI-EAS443:3:17:1654:749#0/1  
Zab`¥```ba]]J\_\_Ya`aa]aaa[`aY¥aaba`V^^``]  
@HWI-EAS443:3:17:279:997#0/1  
TGAATCGAGAAAATTGCTTCTCATTGTTTCAGGCACTTAGG  
+HWI-EAS443:3:17:279:997#0/1  
aa\_V\_a`[\_`aZ\_aa\_aa\_`a`aa\_``]^\_\_]\_``\_]^\_]\_  
@HWI-EAS443:3:17:354:399#0/1  
GTTGTCCCTAAGTGCCTGAACAATGAGAAGCAATTTTCTC  
+HWI-EAS443:3:17:354:399#0/1  
aaaaZaaaa¥`^aa`\_a\_dW`a\_\_^\_a\_a^`]`^\_^`\_`\_  
@HWI-EAS443:3:18:1115:424#0/1  
TTTCTCTTTGACAGAAGACTCGGCCTCAATCATGCTCTCA  
+HWI-EAS443:3:18:1115:424#0/1  
W¥Wa^QXZUUab`]ZZ^^aUI\_]RY\_X^]]TST^TXZNUP  
@HWI-EAS443:3:18:1395:818#0/1  
GGACCTTACTGGCAAAATCTGTATTCAACAGTCTATATGC  
+HWI-EAS443:3:18:1395:818#0/1  
a\_a]\_`a\_\_]`a¥```]aaV``Z]^\_V\_\_^]]^^\_\_Z^]W  
@HWI-EAS443:3:18:1658:927#0/1  
CTTTCTCTTTGACAGAAGACTCGGCCTCAATCATGCTCTC  
+HWI-EAS443:3:18:1658:927#0/1  
abbb¥babbbba^bbaaa^\_P¥a^Za```\_`\_`a^Z`Y\_R  
@HWI-EAS443:3:18:512:103#0/1  
CTCTTTGACAGAAGACTCGGCCTCAATCATGCTCTCAATC  
+HWI-EAS443:3:18:512:103#0/1  
`babbbabaabbbbaa`\_ab\_a`¥aa\_\_a\_¥[a\_``]\_]X  
@HWI-EAS443:3:18:717:556#0/1  
GAGCATGATTGAGGCCGAGTCTTCTGTCAAAGAGAAAGAC  
+HWI-EAS443:3:18:717:556#0/1  
`V`a]UX\_WZZZ]\_Y`]Ua]aY¥QF^X¥XJV]UaP^I^]X  
@HWI-EAS443:3:19:1047:948#0/1  
GGGCTATATGAAGCAATCGAGGAGTGCCTGATTAATGATC  
+HWI-EAS443:3:19:1047:948#0/1  
\_b`abbbba`b``a\_bab`b`ab\_a¥^¥[aa\_aaaaaa\_\_¥  
@HWI-EAS443:3:19:181:704#0/1  
AATCGAGGAGTGCCTGATTAATGATCCCTGGGTTTTGCTT  
+HWI-EAS443:3:19:181:704#0/1  
aaaa`YaaVaX\_\_\_`aZ\_[]\_`Y]\_ZZ^Za^\_]^^^\_]\_  
@HWI-EAS443:3:19:976:1672#0/1  
TCCCTAAGTGCCTGAACAATGAGAAGCAATTTTCTCGATT

+HWI-EAS443:3:19:976:1672#0/1  
\_aaa]aZHX\_\_aa`\_X\_aba`[Z`aaa\_`aR\_a\_  
@HWI-EAS443:3:1:1049:1061#0/1  
AAGCAATCGAGGAGTGCCTGATTAATGATCCCTGGGTTTT  
+HWI-EAS443:3:1:1049:1061#0/1  
`aaV\_`^^a^ba\_]LZ^F^aX`\_`\_Wa[\_RT\_Yaa\_R\_BB  
@HWI-EAS443:3:1:373:86#0/1  
GGTTGTCCCTAAGTGCCTGAACAATGAGAAGCAATTTTCT  
+HWI-EAS443:3:1:373:86#0/1  
abS\_a\_XR`]K\_aQQYYX`G[RX^`\_\_\_\_^R`]\_aBBBB  
@HWI-EAS443:3:20:1088:1895#0/1  
GTCTTTCTCTTTGACAGAAGACTCGGCCTCAATCATGCTC  
+HWI-EAS443:3:20:1088:1895#0/1  
^P\_UZ]VS\_LVZZV^\_aZQUP^R]\_Y^YW\_YYVJOF^\_N^  
@HWI-EAS443:3:20:1506:57#0/1  
GATCATTAAATCAGGCACTCCTCGATTGCTTCATATAGCCC  
+HWI-EAS443:3:20:1506:57#0/1  
aa`^`bbaabaab``\_b¥`¥a`^aZ`^W¥[]\_¥YSUQ  
@HWI-EAS443:3:21:1387:1594#0/1  
GTCTTTCTCTTTGACAGAAGACTCGGCCTCAATCATGCTC  
+HWI-EAS443:3:21:1387:1594#0/1  
aY\_a`\_¥\_\_`^a¥^¥^\_^^]^[^V]UXYXX¥]XRVYVUYW  
@HWI-EAS443:3:21:612:465#0/1  
TTTCTCTTTGACAGAAGACTCGGCCTCAATCATGCTCTCA  
+HWI-EAS443:3:21:612:465#0/1  
aaaaaaaa\_a`a`\_a```a^aa¥V¥X\_¥[M`Y[TU¥Z]]  
@HWI-EAS443:3:21:654:635#0/1  
GGGCTATATGAAGCAATCGAGGAGTGCCTGATTAATGATC  
+HWI-EAS443:3:21:654:635#0/1  
aaaaabbaab`aaabbaaa\_aa`Y`¥`ab`\_a`^`a\_]`  
@HWI-EAS443:3:22:1010:1617#0/1  
CATGTCTTTCTCTTTGACAGAAGACTCGGCCTCAATCATG  
+HWI-EAS443:3:22:1010:1617#0/1  
a\_PPW^a[``¥YaaXZ\_W^V`¥]VNH]00^XPWU]GY\_UQ  
@HWI-EAS443:3:23:1320:525#0/1  
GGCTATATGAAGCAATCGAGGAGTGCCTGATTAATGATCC  
+HWI-EAS443:3:23:1320:525#0/1  
a`aaa[aaaa`aa\_Xa\_a`ZZR`]\_¥^^^^`\_]a]^¥X  
@HWI-EAS443:3:23:1465:1457#0/1  
CTTTCTCTTTGACAGAAGACTCGGCCTCAATCATGCTCTC  
+HWI-EAS443:3:23:1465:1457#0/1  
`bb\_aba`aaa]aaaaba`\_`a]¥V]¥`¥T]Y]\_Z]XT  
@HWI-EAS443:3:23:1572:1562#0/1  
GAGACGCATATAGACTGTTGAATACAGATTTTGCCAGTAA  
+HWI-EAS443:3:23:1572:1562#0/1  
abaaab`a¥baab^a`\_HLY\_U]`^¥]\_`[RMSX^RXS  
@HWI-EAS443:3:23:1748:1299#0/1  
GCTATATGAAGCAATCGAGGAGTGCCTGATTAATGATCCC  
+HWI-EAS443:3:23:1748:1299#0/1  
a¥TL[aZaa\_\_a]a]^Q¥^^aLQ¥¥X¥RP¥]WX[^QGOT



@HWI-EAS443:3:23:244:1494#0/1  
GGGCTATATGAAGCAATCGAGGAGTGCCTGATTAATGATC  
+HWI-EAS443:3:23:244:1494#0/1  
`a`bbbbbbbbbabbba\_aaaa¥\_ababaabaaaa`aa\_  
@HWI-EAS443:3:23:429:238#0/1  
GCTGAATCGAGAAAATTGCTTCTCATTGTTTCAGGCACTTA  
+HWI-EAS443:3:23:429:238#0/1  
aabaaa\_\_aaa\_a`aa[aaa\_`a\_aaa`\_a``a\_^\_^^``  
@HWI-EAS443:3:23:704:626#0/1  
GGCTATATGAAGCAATCGAGGAGTGCCTGATTAATGATCC  
+HWI-EAS443:3:23:704:626#0/1  
\_aa\_a]W\_a`aa]¥a`a`^Q`aV\_aa]¥Y[]a^[]¥T^\_  
@HWI-EAS443:3:23:800:1273#0/1  
GGGATCATTAAATCAGGCACTCCTCGATTGCTTCATATAGC  
+HWI-EAS443:3:23:800:1273#0/1  
a[aXa\_abab`baaaaaaaaaa`\_\_\_\_\_[]`\_`a`a[]]  
@HWI-EAS443:3:24:1620:389#0/1  
TGTCTTTCTCTTTGACAGAAGACTCGGCCTCAATCATGCT  
+HWI-EAS443:3:24:1620:389#0/1  
aaaWbababababa¥aaaabaaa\_\_\_`P^a\_[]`^]a]TT^  
@HWI-EAS443:3:24:1695:821#0/1  
TGGCAAATCTGTATTCAACAGTCTATATGCGTCTCCACA  
+HWI-EAS443:3:24:1695:821#0/1  
]`bbbbbbbbbabb`ba`abaabbbbbbaaaaa`a`a  
@HWI-EAS443:3:24:170:838#0/1  
CTCTTTGACAGAAGACTCGGCCTCAATCATGCTCTCAATC  
+HWI-EAS443:3:24:170:838#0/1  
abSa¥W^[]`X[W¥\_a^X[OZZR\_a`¥RQUU¥GY^XVY  
@HWI-EAS443:3:24:1763:1618#0/1  
CTAAGTGCCTGAACAATGAGAAGCAATTTTCTCGATTGATCAG  
+HWI-EAS443:3:24:1763:1618#0/1  
`¥`bb`^`bbbaa]bbabbbabaaaaabbYbabba]`b  
@HWI-EAS443:3:24:988:589#0/1  
GCTATATGAAGCAATCGAGGAGTGCCTGATTAATGATCCC  
+HWI-EAS443:3:24:988:589#0/1  
^abbbabaababba`aa¥a^[[^\_`a`\_^``aa\_a]\_Y\_  
@HWI-EAS443:3:25:1231:651#0/1  
AAGCAAAACCCAGGATCATTAAATCAGGCACTCCTCGATT  
+HWI-EAS443:3:25:1231:651#0/1  
abab\_abbabbaabaaaabbbb¥aabaa\_aaa`aaaba\_^  
@HWI-EAS443:3:25:569:1632#0/1  
GTCATGTCTTTCTCTTTGACAGAAGACTCGGCCTCAATCA  
+HWI-EAS443:3:25:569:1632#0/1  
]P\_RW[[a\_W`^MW`¥`SWUU]¥^S[U]UXHV^Y¥QZBB  
@HWI-EAS443:3:26:1665:1498#0/1  
ATGAAGCAATCGAGGAGTGCCTGATTAATGATCCCTGGGT  
+HWI-EAS443:3:26:1665:1498#0/1  
abbaaaaaaaba`a\_b^a\_^aa`aaaa`aa`\_]`a\_aW  
@HWI-EAS443:3:26:954:1201#0/1  
ATCGAGAAAATTGCTTCTCATTGTTTCAGGCACTTAGGGAC

+HWI-EAS443:3:26:954:1201#0/1  
X[a`a)`abaaaaaaaaa\_\_`a`\_]\_\_`^a`a``S\_¥  
@HWI-EAS443:3:27:1019:1972#0/1  
GGGCTATATGAAGCAATCGAGGAGTGCCTGATTAATGATC  
+HWI-EAS443:3:27:1019:1972#0/1  
]]b`ababbabb`a`aab`aaa]a^aaUaa^^\_aa^Ya^Z  
@HWI-EAS443:3:27:111:873#0/1  
CTTTCTTTTGACAGAAGACTCGGCCTCAATCATGCTCTC  
+HWI-EAS443:3:27:111:873#0/1  
a`¥`aaa][^\_\_\_\_`¥[][[`^a`\_^YR]XXXRSLTITTTX  
@HWI-EAS443:3:27:301:1489#0/1  
GGGCTATATGAAGCAATCGAGGAGTGCCTGATTAATGATC  
+HWI-EAS443:3:27:301:1489#0/1  
`bbbb`abaaab`\_a\_abaa`aaa]`ba`aa\_ab\_X^a]a  
@HWI-EAS443:3:28:1734:1683#0/1  
CTAAGTGCCTGAACAATGAGAAGCAATTTTCTCGATTGATCAG  
+HWI-EAS443:3:28:1734:1683#0/1  
Vab`\_\_baa`bab]bb^bbbbbb]b\_]`aa]bbbaaa[`a  
@HWI-EAS443:3:28:185:1112#0/1  
CTTTCTTTTGACAGAAGACTCGGCCTCAATCATGCTCTC  
+HWI-EAS443:3:28:185:1112#0/1  
aabab`\_a[```aaaa`¥``]WXZ[^X`^T[]]\_^a^`R]  
@HWI-EAS443:3:28:585:1154#0/1  
GCATGATTGAGCCGAGTCTTCTGTCAAAGAGAAAGACAT  
+HWI-EAS443:3:28:585:1154#0/1  
``[\_bb`aaaabbaaa]Yaaaaaa\_aa]T]\_a¥]a\_aYY`  
@HWI-EAS443:3:29:1137:1459#0/1  
ATTGAGGCCGAGTCTTCTGTCAAAGAGAAAGACATGACCA  
+HWI-EAS443:3:29:1137:1459#0/1  
a`a^`\_]\_\_]\_\_Z]^\_]`^Z^^]]]ZZZ^]¥^]`^XZ^X]B  
@HWI-EAS443:3:29:1223:1038#0/1  
CTTACTGGCAAATCTGTATTCAACAGTCTATATGCGTCT  
+HWI-EAS443:3:29:1223:1038#0/1  
abbba`abbbaabbaba`bbV`aa\_ab\_ab`baaaaba\_a  
@HWI-EAS443:3:29:185:51#0/1  
GGGCTATATGAAGCAATCGAGGAGTGCCTGATTAATGATC  
+HWI-EAS443:3:29:185:51#0/1  
¥`W`\_^\_HQY\_Q\_¥W\_\_ba`I`aa`TW^¥Xa`X]\_TZ^XP`  
@HWI-EAS443:3:29:809:404#0/1  
CAGGTTGTCCCTAAGTGCCTGAACAATGAGAAGCAATTTT  
+HWI-EAS443:3:29:809:404#0/1  
a`\_bXbb\_baba¥`Z^]aYaaaa]a`abaaYaaa`X`¥aa  
@HWI-EAS443:3:2:1009:748#0/1  
CTTTCTTTTGACAGAAGACTCGGCCTCAATCATGCTCTC  
+HWI-EAS443:3:2:1009:748#0/1  
aabbabaaabb\_a``¥¥a\_\_a\_a`P`\_¥¥^`X\_ZS^\_Y\_\_  
@HWI-EAS443:3:2:104:235#0/1  
GGGCTATATGAAGCAATCGAGGAGTGCCTGATTAATGATC  
+HWI-EAS443:3:2:104:235#0/1  
U\_bbbabbbba\_bbaa`XWab\_aX\_Naa`L\_aa^aaZa^

@HWI-EAS443:3:2:1587:1935#0/1  
CAGGGATCATTAAATCAGGCACTCCTCGATTGCTTCATATA  
+HWI-EAS443:3:2:1587:1935#0/1  
aa`abW`]abaaY`\_]a`¥^[a\_[a]aaa]aNJ\_X^`BB  
@HWI-EAS443:3:2:1609:1085#0/1  
GGCTATATGAAGCAATCGAGGAGTGCCTGATTAATGATCC  
+HWI-EAS443:3:2:1609:1085#0/1  
aa^a`aa`ba[\_]\_\_\_\_]a`^`X\_]VU`]X\_^]]]XXYU  
@HWI-EAS443:3:30:1384:791#0/1  
GAAGCAATCGAGGAGTGCCTGATTAATGATCCCTGGGTTT  
+HWI-EAS443:3:30:1384:791#0/1  
aX``^Y^\_Ua`a¥QYZ`[U``Z\_a]\_\_[]]YXSX^`]Z^]  
@HWI-EAS443:3:30:174:1483#0/1  
GGGCTATATGAAGCAATCGAGGAGTGCCTGATTAATGATC  
+HWI-EAS443:3:30:174:1483#0/1  
aa]baabba\_S\_`b^^[ba^¥a^`]Za`a]]Za\_a\_\_\_\_\_`  
@HWI-EAS443:3:30:543:2011#0/1  
CCCAGGGATCATTAAATCAGGCACTCCTCGATTGCTTCATA  
+HWI-EAS443:3:30:543:2011#0/1  
ababaa`a\_^[^[]`^aa^¥aa`\_`a`a\_a¥ZZaZ\_^\_\_a  
@HWI-EAS443:3:30:624:1416#0/1  
GGCTATATGAAGCAATCGAGGAGTGCCTGATTAATGATCC  
+HWI-EAS443:3:30:624:1416#0/1  
abbb¥W`a^^`a]\_ab\_[`¥I¥[aaba`aZbbabaa¥ab  
@HWI-EAS443:3:30:652:270#0/1  
GTCTTTCTCTTTGACAGAAGACTCGGCCTCAATCATGCTC  
+HWI-EAS443:3:30:652:270#0/1  
a]aaaa`aaaaaa\_a\_a\_a\_^`\_]a\_^WS[Z\_^ZXY]XY^  
@HWI-EAS443:3:30:864:188#0/1  
ATGAAGCAATCGAGGAGTGCCTGATTAATGATCCCTGGGT  
+HWI-EAS443:3:30:864:188#0/1  
abb]aa]babababa`a]``\_`a^a\_a]``\_^`¥\_\_\_Z¥W  
@HWI-EAS443:3:30:985:1037#0/1  
AATCGAGGAGTGCCTGATTAATGATCCCTGGGTTTTGCTT  
+HWI-EAS443:3:30:985:1037#0/1  
\_ZT^UVTZQ\_YZX\_]a`TUPT\_aUV[`\_aY[TUFX^OTP  
@HWI-EAS443:3:31:1084:1344#0/1  
CTATATGAAGCAATCGAGGAGTGCCTGATTAATGATCCCT  
+HWI-EAS443:3:31:1084:1344#0/1  
\_^`¥\_U]a]a¥`^`\_X^¥a¥P\_`aaa\_[W]^]a\_\_a`a¥  
@HWI-EAS443:3:31:1427:1917#0/1  
GAGCATGATTGAGGCCGAGTCTTCTGTCAAAGAGAAAGAC  
+HWI-EAS443:3:31:1427:1917#0/1  
¥bbaaaaa^bbb`bba`b`\_\_ba`aa``a`a\_aaaaaaa^  
@HWI-EAS443:3:31:577:1915#0/1  
GCAATCGAGGAGTGCCTGATTAATGATCCCTGGGTTTTGC  
+HWI-EAS443:3:31:577:1915#0/1  
``b\_\_`Za`\_bb^bbb^a`^T\_b[abUba``\_¥]G^aYa^  
@HWI-EAS443:3:31:818:1309#0/1  
AAGCAATCGAGGAGTGCCTGATTAATGATCCCTGGGTTTT

+HWI-EAS443:3:31:818:1309#0/1  
[ \_Y]b^aa`YaaVVUa\_aa^a^\_\_^[aa\_\_a^NST`\_]  
@HWI-EAS443:3:32:523:1198#0/1  
GGGCTATATGAAGCAATCGAGGAGTGCCTGATTAATGATC  
+HWI-EAS443:3:32:523:1198#0/1  
HZbb\_bbbaa^\_\_a^ab[¥¥`bb[a]bbbaaba^bab\_ab  
@HWI-EAS443:3:32:706:1189#0/1  
GGCTATATGAAGCAATCGAGGAGTGCCTGATTAATGATCC  
+HWI-EAS443:3:32:706:1189#0/1  
`bbbb`bbab`bbbabbabaaa^]ababaa``aaaaa  
@HWI-EAS443:3:32:71:424#0/1  
GCTGAATCGAGAAAATTGCTTCTCATTGTTTCAGGCACTTA  
+HWI-EAS443:3:32:71:424#0/1  
a\_Y`\_]a¥NXXaa^^[ ]`a]a\_\_`X[ `X]^\_W\_^¥]]Y]  
@HWI-EAS443:3:32:79:931#0/1  
CCCTAAGTGCCTGAACAATGAGAAGCAATTTTCTCGATTC  
+HWI-EAS443:3:32:79:931#0/1  
a^]Y^]WN[Z`a`T[Z]\_ZUU¥J]`a`WV[ `Za\_¥¥I¥¥`  
@HWI-EAS443:3:33:1448:1583#0/1  
CAATCGAGGAGTGCCTGATTAATGATCCCTGGGTTTTGCT  
+HWI-EAS443:3:33:1448:1583#0/1  
ababab^\_`b]`a\_abaaaaaaaa^R`Z`aZ¥Y^\_\_^]\_  
@HWI-EAS443:3:33:1490:554#0/1  
GGCTATATGAAGCAATCGAGGAGTGCCTGATTAATGATCC  
+HWI-EAS443:3:33:1490:554#0/1  
ababab`baaabaaaaaba`aab\_aaXab\_aaU\_\_`\_`V¥  
@HWI-EAS443:3:33:409:975#0/1  
GTCCCTAAGTGCCTGAACAATGAGAAGCAATTTTCTCGAT  
+HWI-EAS443:3:33:409:975#0/1  
`¥bbb^bb^\_abaaabbaabaaba`[`````a\_aaa\_\_  
@HWI-EAS443:3:33:623:683#0/1  
GGCTATATGAAGCAATCGAGGAGTGCCTGATTAATGATCC  
+HWI-EAS443:3:33:623:683#0/1  
`b`\_a[bbaaaaaZ¥aaW\_^Y`X\_`P^R]`TT[VSXX\_  
@HWI-EAS443:3:33:766:1367#0/1  
AGAGCATGATTGAGGCCGAGTCTTCTGTCAAAGAGAAAAGA  
+HWI-EAS443:3:33:766:1367#0/1  
NZPab`\_QV\_VQ^JQX\_[ `]`b¥`aUHM¥\_\_UX\_`¥GZQ]  
@HWI-EAS443:3:34:1077:582#0/1  
GAGAAAATTGCTTCTCATTGTTTCAGGCACTTAGGGACAAC  
+HWI-EAS443:3:34:1077:582#0/1  
a\_`YZZ]X[Y¥a`^^\_^`[[¥[VS\_VUZU¥^^^][VWUWUZ  
@HWI-EAS443:3:34:1177:1349#0/1  
GGCTATATGAAGCAATCGAGGAGTGCCTGATTAATGATCC  
+HWI-EAS443:3:34:1177:1349#0/1  
Q\_ababbbbaaab\_bbbababbabbbbaaabbb`ba`  
@HWI-EAS443:3:35:1183:796#0/1  
CATGATTGAGGCCGAGTCTTCTGTCAAAGAGAAAAGACATG  
+HWI-EAS443:3:35:1183:796#0/1  
``[T\_aY`UURba\_]`aaV`[XWSL[ ]¥VKZ]S]aYF¥HE

@HWI-EAS443:3:35:1421:367#0/1  
GGGCTATATGAAGCAATCGAGGAGTGCCTGATTAATGATC  
+HWI-EAS443:3:35:1421:367#0/1  
aa`[\_]Z¥\_\_]^)aZ[`\_\_\_Z]X`[[Z^a]Y^a]Z]\_ZY]  
@HWI-EAS443:3:36:1015:1890#0/1  
AGCAAAACCCAGGGATCATTAAATCAGGCACTCCTCGATTG  
+HWI-EAS443:3:36:1015:1890#0/1  
aab`L\_\_aa`aa```\_aa`aaa`aaa\_\_`¥Y¥`\_`Y\_¥]  
@HWI-EAS443:3:36:1701:1180#0/1  
GGCTATATGAAGCAATCGAGGAGTGCCTGATTAATGATCC  
+HWI-EAS443:3:36:1701:1180#0/1  
abbbbbbbbaaa`aa`aY^a^a^`¥^^a^a\_\_^`YV^Xa  
@HWI-EAS443:3:36:48:296#0/1  
GATCATTAAATCAGGCACTCCTCGATTGCTTCATATAGCCC  
+HWI-EAS443:3:36:48:296#0/1  
a\_]aa`aaUaa^a\_`Ya¥a\_`aaX\_]¥`^`^`^`Y`Y``\_`  
@HWI-EAS443:3:36:700:692#0/1  
TGCAGGACCTTACTGGCAAATCTGTATTCAACAGTCTAT  
+HWI-EAS443:3:36:700:692#0/1  
^bb`)]`aba\_ab¥a`baa^`a`aY\_``\_`[`U^a^`aa^  
@HWI-EAS443:3:36:860:75#0/1  
GGGCTATATGAAGCAATCGAGGAGTGCCTGATTAATGATC  
+HWI-EAS443:3:36:860:75#0/1  
aaaa`aaaa]`aaZYaa`\_\_aaTYZa`0\_`\_ZV[^Z^^]`  
@HWI-EAS443:3:37:1464:846#0/1  
GATTGAGGCCGAGTCTTCTGTCAAAGAGAAAGACATGACC  
+HWI-EAS443:3:37:1464:846#0/1  
a`aY]````V¥R\_XQ\_[S[\_LZ[SW\_U[ONH¥`V\_^\_[QK  
@HWI-EAS443:3:37:1518:609#0/1  
GGGCTATATGAAGCAATCGAGGAGTGCCTGATTAATGATC  
+HWI-EAS443:3:37:1518:609#0/1  
abbaaababaaaa`abaaa`ba`a^a\_\_aXaaaa\_\_aaa¥  
@HWI-EAS443:3:37:384:1553#0/1  
GCAGGACCTTACTGGCAAATCTGTATTCAACAGTCTATA  
+HWI-EAS443:3:37:384:1553#0/1  
`bba\_bbabbbaababbbbaabab`baabVQ\_a\_\_baaaa  
@HWI-EAS443:3:38:1058:1157#0/1  
GGGCTATATGAAGCAATCGAGGAGTGCCTGATTAATGATC  
+HWI-EAS443:3:38:1058:1157#0/1  
ab`bbbbbb\_ba\_``babaa``aa\_aa\_a`V`^a\_a\_¥`U  
@HWI-EAS443:3:38:158:1694#0/1  
GGGATCATTAAATCAGGCACTCCTCGATTGCTTCATATAGC  
+HWI-EAS443:3:38:158:1694#0/1  
U`babbbbaa]abbbb\_Mabbbb`ab^Na[b^\_abab^X  
@HWI-EAS443:3:38:175:927#0/1  
CTGTTGAATACAGATTTT GCCAGTAAGGTCCTGCACACTT  
+HWI-EAS443:3:38:175:927#0/1  
aaa\_aaaaaaaaa^`aa`^aa[`]aaa`Y\_]\_`a````\_\_`  
@HWI-EAS443:3:38:629:734#0/1  
GGCTATATGAAGCAATCGAGGAGTGCCTGATTAATGATCC

+HWI-EAS443:3:38:629:734#0/1  
`[aaaa`\_\_Z\_\_\_`\_^Xa][SYV]^[\_]Z^\_Z[\_]^ZZ  
@HWI-EAS443:3:38:955:512#0/1  
GGGCTATATGAAGCAATCGAGGAGTGCCTGATTAATGATC  
+HWI-EAS443:3:38:955:512#0/1  
X\_Q\_¥¥W`X]bRRUY`¥Za\_b\_N¥Ha\_\_X`X^`a`abXKF  
@HWI-EAS443:3:38:981:679#0/1  
CAGGACCTTACTGGCAAAATCTGTATTCAACAGTCTATAT  
+HWI-EAS443:3:38:981:679#0/1  
`bbZ\_aaa`\_^¥S^)`ababaaaabba`\_`U```)`ba\_a]  
@HWI-EAS443:3:39:1580:667#0/1  
GTCTTTCTCTTTGACAGAAGACTCGGCCTCAATCATGCTC  
+HWI-EAS443:3:39:1580:667#0/1  
aHPZaZY]\_a\_ZaU`YX¥^]O]Y^)`V\_UYLIIOVRLTPS  
@HWI-EAS443:3:39:1700:1318#0/1  
CATGTCTTTCTCTTTGACAGAAGACTCGGCCTCAATCATG  
+HWI-EAS443:3:39:1700:1318#0/1  
abbaV\_bbaaaababaaaa\_Sa\_\_`a[a[a\_Y]\_]^\_\_[Q  
@HWI-EAS443:3:39:269:803#0/1  
TATGAAGCAATCGAGGAGTGCCTGATTAATGATCCCTGGG  
+HWI-EAS443:3:39:269:803#0/1  
[RT¥^`[\_]Z\_\_^V¥^¥^]YPZ^\_TWZ\_W]\_V¥¥Z]]\_]U  
@HWI-EAS443:3:39:29:1168#0/1  
GGCTATATGAAGCAATCGAGGAGTGCCTGATTAATGATCC  
+HWI-EAS443:3:39:29:1168#0/1  
]aa]O[ ]\_`^` `a]a^^\_V]XT]VW\_]ZUX[¥]]VYU[¥[  
@HWI-EAS443:3:39:467:247#0/1  
GGGCTATATGAAGCAATCGAGGAGTGCCTGATTAATGATC  
+HWI-EAS443:3:39:467:247#0/1  
`bbaa^abbb`^abbbbab\_aa\_a]a`aaa\_\_`aY^a\_]¥  
@HWI-EAS443:3:3:1111:331#0/1  
GGGCTATATGAAGCAATCGAGGAGTGCCTGATTAATGATC  
+HWI-EAS443:3:3:1111:331#0/1  
abb`a]aa]\_]`Z`aaaa]aa]aYaPV]`\_\_` ``]\_^]Q  
@HWI-EAS443:3:3:286:563#0/1  
GGGCTATATGAAGCAATCGAGGAGTGCCTGATTAATGATC  
+HWI-EAS443:3:3:286:563#0/1  
ab`aaaaaaaa`a`\_^a^a`^\_X^^]a]\_\_\_\_]^^]]W  
@HWI-EAS443:3:3:665:1913#0/1  
GACGCATATAGACTGTTGAATACAGATTTTGCCAGTAAGG  
+HWI-EAS443:3:3:665:1913#0/1  
`bGaa`aaa\_¥a]`[N[`^YTW¥a\_PBBBBBBBBBBBBBB  
@HWI-EAS443:3:3:723:1030#0/1  
GGGCTATATGAAGCAATCGAGGAGTGCCTGATTAATGATC  
+HWI-EAS443:3:3:723:1030#0/1  
``\_]¥¥\_¥\_`^\_`a\_`\_OU]R`]TVJa[HUaZV^^THY\_VB  
@HWI-EAS443:3:3:930:216#0/1  
GGCTATATGAAGCAATCGAGGAGTGCCTGATTAATGATCC  
+HWI-EAS443:3:3:930:216#0/1  
O\_b\_YVX` `¥¥¥[abbaa¥¥\_`\_bXPXb`aab`b]]a]KQ



+HWI-EAS443:3:44:106:1630#0/1  
ab\_\_^[baba\_[abba\_¥baba^a`W`aababbab`baa  
@HWI-EAS443:3:44:674:1000#0/1  
GGCTATATGAAGCAATCGAGGAGTGCCTGATTAATGATCC  
+HWI-EAS443:3:44:674:1000#0/1  
aaab`abbaaababaaaa\_aa^a]``^`\_]aa\_]``]\_^^  
@HWI-EAS443:3:45:1765:211#0/1  
TTGTCCCTAAGTGCCTGAACAATGAGAAGCAATTTTCTCG  
+HWI-EAS443:3:45:1765:211#0/1  
aaa`\_`aaaaa]a`aa`a^```a\_aa```]`Y`\_``^`^`\_  
@HWI-EAS443:3:45:35:555#0/1  
GCAAAACCCAGGGATCATTAAATCAGGCACTCCTCGATTGC  
+HWI-EAS443:3:45:35:555#0/1  
a`[¥`\_`aaa^^`\_\_\_`a`^`^`\_`^`\_`Z`\_]Y¥^[\_[[YZW  
@HWI-EAS443:3:45:868:1694#0/1  
CAAAACCCAGGGATCATTAAATCAGGCACTCCTCGATTGCT  
+HWI-EAS443:3:45:868:1694#0/1  
ab`bb`bbbaaaba`baabba`bb\_aaaaaaaaabaS\_aa  
@HWI-EAS443:3:46:317:919#0/1  
GGGCTATATGAAGCAATCGAGGAGTGCCTGATTAATGATC  
+HWI-EAS443:3:46:317:919#0/1  
a`baabbbbaaaaaaaaa\_aaaa`aYa\_\_aa\_a`aa`a``\_  
@HWI-EAS443:3:46:753:402#0/1  
AGAAAATTGCTTCTCATTGTTTCAGGCACTTAGGGACAACC  
+HWI-EAS443:3:46:753:402#0/1  
^`bb[QRV]^`¥U`¥YYS\_aaZ``W^^aba]XU^YXSWOF  
@HWI-EAS443:3:46:992:497#0/1  
GGCTATATGAAGCAATCGAGGAGTGCCTGATTAATGATCC  
+HWI-EAS443:3:46:992:497#0/1  
aa`aaa`aa`\_a\_aa`^a^`a^`Y[\_V^a^`\_`^`\_`^XW[  
@HWI-EAS443:3:47:1134:729#0/1  
TGAGAGCATGATTGAGGCCGAGTCTTCTGTCAAAGAGAAA  
+HWI-EAS443:3:47:1134:729#0/1  
aaaaaaaa`\_aa^\_a`aa\_]`^`^W`^¥`\_XY]^^Z\_[^]  
@HWI-EAS443:3:47:164:1701#0/1  
AGGTTGTCCCTAAGTGCCTGAACAATGAGAAGCAATTTTC  
+HWI-EAS443:3:47:164:1701#0/1  
a]\_Uaa`\_`aa\_¥^`\_X`]`\_`\_`\_`\_`^`a][`^`\_a^`\_Y  
@HWI-EAS443:3:47:484:1049#0/1  
CTCTTTGACAGAAGACTCGGCCTCAATCATGCTCTCAATC  
+HWI-EAS443:3:47:484:1049#0/1  
`¥\_]b`[P^`¥`\_ab\_Z`\_ab`[XRRYUWW¥^[SUXV[`\_RV  
@HWI-EAS443:3:47:539:385#0/1  
GTCTTTCTCTTTGACAGAAGACTCGGCCTCAATCATGCTC  
+HWI-EAS443:3:47:539:385#0/1  
aaa]ba\_a`bbaa\_aaa`[a^XHV¥`\_V]RG[[\_W]^ZNYS  
@HWI-EAS443:3:47:870:474#0/1  
GTCTTTCTCTTTGACAGAAGACTCGGCCTCAATCATGCTC  
+HWI-EAS443:3:47:870:474#0/1  
a``aa`\_a`aa`aY\_\_\_\_\_^X^^YX\_XY]XY]]V]RPTY



@HWI-EAS443:3:48:1703:690#0/1  
GTGCAGGACCTTACTGGCAAATCTGTATTCAACAGTCTA  
+HWI-EAS443:3:48:1703:690#0/1  
aVb\_]]]]\_`Z][Z¥^^`\_Y¥`\_\_`YW¥`^¥][U[^]^Z  
@HWI-EAS443:3:48:1778:1049#0/1  
GATTGAGGCCGAGTCTTCTGTCAAAGAGAAAGACATGACC  
+HWI-EAS443:3:48:1778:1049#0/1  
aaa]WYYY¥\_`Z^P¥a`^U]V][\_Za]\_U^[^W^XW]^WG  
@HWI-EAS443:3:48:541:1353#0/1  
GCTATATGAAGCAATCGAGGAGTGCCTGATTAATGATCCC  
+HWI-EAS443:3:48:541:1353#0/1  
a`aaabbbaaa\_a```aaa\_\_`^`^\_aa\_a\_`\_`¥\_\_\_Z¥  
@HWI-EAS443:3:48:675:240#0/1  
ATGTCTTTCTTTGACAGAAGACTCGGCCTCAATCATGC  
+HWI-EAS443:3:48:675:240#0/1  
abbb\_bbbbabababR`bba`ba]a\_bbW]aZa`XUX^VT  
@HWI-EAS443:3:49:1519:1229#0/1  
AAGCAATCGAGGAGTGCCTGATTAATGATCCCTGGGTTTT  
+HWI-EAS443:3:49:1519:1229#0/1  
T`a`Za`XZa`^¥`¥¥UZ\_P`ZZ\_Y^X]ZVQZa]aY]a`  
@HWI-EAS443:3:49:299:42#0/1  
CGAGGAGTGCCTGATTAATGATCCCTGGGTTTTGCTTAAT  
+HWI-EAS443:3:49:299:42#0/1  
UXZbb]`b¥WVa`ababb`YXX00abb¥WZUV`]`b`aa  
@HWI-EAS443:3:49:446:906#0/1  
GTCTTTCTTTGACAGAAGACTCGGCCTCAATCATGCTC  
+HWI-EAS443:3:49:446:906#0/1  
a\_`aa\_]`^R]`^\_SV]`U^URRVP¥TSUZNRVSWTYVWSS  
@HWI-EAS443:3:49:811:1019#0/1  
CAGGACCTTACTGGCAAATCTGTATTCAACAGTCTATAT  
+HWI-EAS443:3:49:811:1019#0/1  
abbbababbbbbbbbbbbbababbabbabb`aba`babbb  
@HWI-EAS443:3:49:858:1252#0/1  
GTCTTTCTTTGACAGAAGACTCGGCCTCAATCATGCTC  
+HWI-EAS443:3:49:858:1252#0/1  
`\_X`a`a`Ybaa`[\_\_\_`a`^XaV``YY¥VR]\_Y]^VV^U  
@HWI-EAS443:3:4:1107:1925#0/1  
CGAGAAAATTGCTTCTCATTGTTTCAGGCACTTAGGGACAA  
+HWI-EAS443:3:4:1107:1925#0/1  
`b¥T^VV\_YK\_a\_T^a`b^Vba[[b\_baaba\_aV\_Uba\_a  
@HWI-EAS443:3:4:975:536#0/1  
CTAAGTGCCTGAACAATGAGAAGCAATTTTCTCGATTGAG  
+HWI-EAS443:3:4:975:536#0/1  
abaab\_b\_`bbaaY\_`abaaaaaaa`aaa¥a]b\_`\_\_\_B  
@HWI-EAS443:3:50:1455:1793#0/1  
AGGACCTTACTGGCAAATCTGTATTCAACAGTCTATATG  
+HWI-EAS443:3:50:1455:1793#0/1  
[¥bb\_bV[a\_]R^Yabaa]S^ZG[Y[aZ^¥^aPU^\_TBBB  
@HWI-EAS443:3:50:1534:1922#0/1  
AATCGAGGAGTGCCTGATTAATGATCCCTGGGTTTTGCTT

+HWI-EAS443:3:50:1534:1922#0/1  
`baa`b]a[a¥WFQXb\_¥]T`\_ZVMILT`\_UDRW]^QFXS  
@HWI-EAS443:3:50:297:804#0/1  
GATTGAGGCCGAGTCTTCTGTCAAAGAGAAAGACATGACC  
+HWI-EAS443:3:50:297:804#0/1  
``^Za`YWVZaa`W)`\_OY¥\_UT[abaaaZX]a``a`Y\_]  
@HWI-EAS443:3:50:399:438#0/1  
GGGCTATATGAAGCAATCGAGGAGTGCCTGATTAATGATC  
+HWI-EAS443:3:50:399:438#0/1  
`bbbbabbbbbbbbabababbababaabb`bbaabaaa  
@HWI-EAS443:3:50:424:1152#0/1  
GAGACGCATATAGACTGTTGAATACAGATTTTGCCAGTAA  
+HWI-EAS443:3:50:424:1152#0/1  
``baabaaabaaaa^b`^\_\_X¥^RDRYTZ`a^SOX]^U^]  
@HWI-EAS443:3:51:1125:1810#0/1  
GGCTATATGAAGCAATCGAGGAGTGCCTGATTAATGATCC  
+HWI-EAS443:3:51:1125:1810#0/1  
^\_bb]bbaa]\_a^`Y\_ba`aab\_b```]a¥\_aaaaaaaZ  
@HWI-EAS443:3:51:1185:347#0/1  
GTTGTCCCTAAGTGCCTGAACAATGAGAAGCAATTTTCTC  
+HWI-EAS443:3:51:1185:347#0/1  
a\_aa]^U[a\_``U^[\_ba\_`^\_[]`]]]\_aT`Za\_a`][U  
@HWI-EAS443:3:51:296:1177#0/1  
GGCTATATGAAGCAATCGAGGAGTGCCTGATTAATGATCC  
+HWI-EAS443:3:51:296:1177#0/1  
\_`T¥\_QY¥^^`\_XaWa^^`Y\_RG^YQ¥\_QVU`ZFFRTLW  
@HWI-EAS443:3:51:45:1405#0/1  
GGCTATATGAAGCAATCGAGGAGTGCCTGATTAATGATCC  
+HWI-EAS443:3:51:45:1405#0/1  
abaa\_aab¥\_\_aaaa`aa[`^¥`Z`\_^a]V[\_Z]\_a^\_]\_  
@HWI-EAS443:3:51:57:1144#0/1  
AAGCAAAACCCAGGGATCATTAAATCAGGCACTCCTCGATT  
+HWI-EAS443:3:51:57:1144#0/1  
\_\_NS`Za\_aSab\_baTa\_\_^a¥a`\_`aa]\_Za`\_aaa\_]`  
@HWI-EAS443:3:51:626:1255#0/1  
GAAGCAATCGAGGAGTGCCTGATTAATGATCCCTGGGTTT  
+HWI-EAS443:3:51:626:1255#0/1  
`a\_¥¥`\_a]\_````a\_\_a]aa^`]]``a`a^`\_`\_S][  
@HWI-EAS443:3:52:819:592#0/1  
CTTTCTTTTGACAGAAGACTCGGCCTCAATCATGCTCTC  
+HWI-EAS443:3:52:819:592#0/1  
`aba`abbbbbbb]baba\_a`aa^]aaZ^```aZ`a  
@HWI-EAS443:3:53:161:1550#0/1  
GTCTTTCTTTTGACAGAAGACTCGGCCTCAATCATGCTC  
+HWI-EAS443:3:53:161:1550#0/1  
¥\_^baabaa]`¥U¥\_\_a\_X[\_¥a\_a^[IZWXXHEKUV¥U  
@HWI-EAS443:3:53:269:161#0/1  
GAGCATGATTGAGGCCGAGTCTTCTGTCAAAGAGAAAGAC  
+HWI-EAS443:3:53:269:161#0/1  
a¥Q^Ya^aaXVZSa]¥[DUMV]TP]a[VVW]\_^`UOVZ[O

@HWI-EAS443:3:53:477:1012#0/1  
CAGGGATCATTAATCAGGCACTCCTCGATTGCTTCATATA  
+HWI-EAS443:3:53:477:1012#0/1  
ab]babab¥bb¥`\_`bbaaaaaaaa`aaaa[aa\_aaaaa  
@HWI-EAS443:3:53:671:1099#0/1  
CAATCGAGGAGTGCCTGATTAATGATCCCTGGGTTTTGCT  
+HWI-EAS443:3:53:671:1099#0/1  
abbbbbbbbbbababbbbbbbbbbbabbbbbbab`bbbaab  
@HWI-EAS443:3:53:841:615#0/1  
CATGTCTTTCTCTTTGACAGAAGACTCGGCCTCAATCATG  
+HWI-EAS443:3:53:841:615#0/1  
abbaabbbb\_¥^`bb`[```\_abaaabba¥]Xa`^ZW^XX  
@HWI-EAS443:3:54:1188:999#0/1  
GATCATTAATCAGGCACTCCTCGATTGCTTCATATAGCCC  
+HWI-EAS443:3:54:1188:999#0/1  
`a¥^b`[[]a`\_YaU`a^QU\_W)`a`)]`baR`\_baaXNNP  
@HWI-EAS443:3:55:1084:625#0/1  
ATGTCTTTCTCTTTGACAGAAGACTCGGCCTCAATCATGC  
+HWI-EAS443:3:55:1084:625#0/1  
abbaabbbababbbaa\_a`a`^\_a\_a\_¥\_a^aa`Ta\_[V  
@HWI-EAS443:3:55:1497:327#0/1  
TGATTGAGGCCGAGTCTTCTGTCAAAGAGAAAGACATGAC  
+HWI-EAS443:3:55:1497:327#0/1  
abbbbbba^^aa`^^^ab\_aba\_aa^^``a`a\_Z`\_`¥  
@HWI-EAS443:3:55:929:1143#0/1  
ATTGAGGCCGAGTCTTCTGTCAAAGAGAAAGACATGACCA  
+HWI-EAS443:3:55:929:1143#0/1  
a`[[]aba]I]Z`U`ZL¥`\_[[][\_a]\_\_`aY¥RXTaaW)`  
@HWI-EAS443:3:56:105:913#0/1  
GATCATTAATCAGGCACTCCTCGATTGCTTCATATAGCCC  
+HWI-EAS443:3:56:105:913#0/1  
]W\_\_\_^`WX\_a^a`a`)]```\_a`][\_a]^`[U¥`\_RV\_  
@HWI-EAS443:3:56:1082:500#0/1  
CAGGGATCATTAATCAGGCACTCCTCGATTGCTTCATATA  
+HWI-EAS443:3:56:1082:500#0/1  
Wab`[`bbaab¥\_\_W\_aaYaZaYaba``U¥bT^^Y^b`aa  
@HWI-EAS443:3:56:1679:1619#0/1  
AGCAAAACCCAGGGATCATTAATCAGGCACTCCTCGATTG  
+HWI-EAS443:3:56:1679:1619#0/1  
``a\_0\_¥`]¥¥\_]Z^X^baa[a`a]T]]ZU]^]^a^]]  
@HWI-EAS443:3:56:1727:1656#0/1  
GGCTATATGAAGCAATCGAGGAGTGCCTGATTAATGATCC  
+HWI-EAS443:3:56:1727:1656#0/1  
[`baXa\_¥\_\_\_[abbbabb`ba\_[^`abaa``bbba¥aZR  
@HWI-EAS443:3:56:1771:391#0/1  
GAATCGAGAAAATTGCTTCTCATTGTTTCAGGCACTTAGGG  
+HWI-EAS443:3:56:1771:391#0/1  
a^`Y\_¥aa\_]\_UYJTUa[\_Y\_RXSXZUY]Z¥\_]\_\_aZZW  
@HWI-EAS443:3:56:24:1609#0/1  
ATGTCTTTCTCTTTGACAGAAGACTCGGCCTCAATCATGC

+HWI-EAS443:3:56:24:1609#0/1  
abaaab`bab\_bbaba`abaa\_^\_\_aa\_\_a\_`a``]`\_ZT  
@HWI-EAS443:3:56:649:275#0/1  
GGGCTATATGAAGCAATCGAGGAGTGCCTGATTAATGATC  
+HWI-EAS443:3:56:649:275#0/1  
abaaa\_]^[Z]^S\_a]aTY`]YYN[TVS[^`UVX[¥Y`YVV  
@HWI-EAS443:3:56:932:1190#0/1  
CAGGGATCATTAAATCAGGCACTCCTCGATTGCTTCATATA  
+HWI-EAS443:3:56:932:1190#0/1  
abbbbaaabab]bababbabba`abbbbababaaabaaa  
@HWI-EAS443:3:57:180:497#0/1  
CGAGAAAATTGCTTCTCATTGTTTCAGGCACTTAGGGACAA  
+HWI-EAS443:3:57:180:497#0/1  
aa\_aVH]]aabaa\_a]^^`aaUa\_`a\_\_```]Y`¥aa\_\_\_\_  
@HWI-EAS443:3:57:372:188#0/1  
AAAGTGTGCAGGACCTTACTGGCAAATCTGTATTCAACA  
+HWI-EAS443:3:57:372:188#0/1  
``^`W\_\_\_Y`a]a`aa\_W]\_\_Z[^]W\_]`[¥ZZ[[^¥Z  
@HWI-EAS443:3:57:975:816#0/1  
GTCTTTCTTTGACAGAAGACTCGGCCTCAATCATGCTC  
+HWI-EAS443:3:57:975:816#0/1  
aa\_baaaa¥baaa\_`a`\_a\_\_```]`\_\_\_\_^`[R^¥YQ¥Z  
@HWI-EAS443:3:58:276:906#0/1  
GTCTTTCTTTGACAGAAGACTCGGCCTCAATCATGCTC  
+HWI-EAS443:3:58:276:906#0/1  
`PTW[MUOXXV`^^[XZLPYNJV^BBBBBBBBBBBBBBB  
@HWI-EAS443:3:59:1749:1771#0/1  
GGATCATTAAATCAGGCACTCCTCGATTGCTTCATATAGCC  
+HWI-EAS443:3:59:1749:1771#0/1  
aba`\_aaba`a\_aZVZa\_a\_\_``aaa`aaa\_¥\_^\_WY¥ZV  
@HWI-EAS443:3:59:74:1391#0/1  
GCTATATGAAGCAATCGAGGAGTGCCTGATTAATGATCCC  
+HWI-EAS443:3:59:74:1391#0/1  
ab¥]^b`b`\_]W]]`a`Z]]RWXXa`W`W`PYYR\_YYRTU  
@HWI-EAS443:3:5:397:571#0/1  
CTCTTTGACAGAAGACTCGGCCTCAATCATGCTCTCAATC  
+HWI-EAS443:3:5:397:571#0/1  
abbbabbabbaabbababb`\_aababbabbabababab¥  
@HWI-EAS443:3:5:986:978#0/1  
GTTGTGGAGACGCATATAGACTGTTGAATACAGATTTTGC  
+HWI-EAS443:3:5:986:978#0/1  
aaab]aaaa^a^a\_a`¥X\_aWaVP^]ZLYVQX^]BBB  
@HWI-EAS443:3:60:1449:1046#0/1  
GTCTTTCTTTGACAGAAGACTCGGCCTCAATCATGCTC  
+HWI-EAS443:3:60:1449:1046#0/1  
a\_\_aa`aaZaaWX^R]`aZZU\_\_Q\_\_WWTQQZLLYMWV]W  
@HWI-EAS443:3:60:1732:975#0/1  
CTTTCTTTGACAGAAGACTCGGCCTCAATCATGCTCTC  
+HWI-EAS443:3:60:1732:975#0/1  
\_W¥^^`\_`a^W^X]RYa^]\_^Za\_VW]]¥\_TU[X\_\_]WZ

@HWI-EAS443:3:60:1788:1068#0/1  
GGGCTATATGAAGCAATCGAGGAGTGCCTGATTAATGATC  
+HWI-EAS443:3:60:1788:1068#0/1  
`bba¥`bbbbbbabbab\_````a^`aaa`a`aaa\_``  
@HWI-EAS443:3:60:426:973#0/1  
GGGCTATATGAAGCAATCGAGGAGTGCCTGATTAATGATC  
+HWI-EAS443:3:60:426:973#0/1  
`X]\_`Y`aaa]`¥X\_a`a`¥a^Z`M]¥^^^Y^^\_^[[Z[]  
@HWI-EAS443:3:61:476:285#0/1  
GCTGAATCGAGAAAATTGCTTCTCATTGTTCCAGGCACTTA  
+HWI-EAS443:3:61:476:285#0/1  
a\_a\_ba^^^\_XX]\_^]¥[XW^R]W]\_W]^TMMZRWRZXX  
@HWI-EAS443:3:61:701:249#0/1  
GAAGCAATCGAGGAGTGCCTGATTAATGATCCCTGGGTTT  
+HWI-EAS443:3:61:701:249#0/1  
a`aa\_aa`^b]\_`X`^aY]\_aZ¥^`^^^]]XYX]^\_`ZZ^  
@HWI-EAS443:3:61:763:1283#0/1  
CAGGGATCATTAAATCAGGCACTCCTCGATTGCTTCATATA  
+HWI-EAS443:3:61:763:1283#0/1  
\_Yabbaabbb]`abaabbabbaaab]]a`aa][\_\_a\_\_  
@HWI-EAS443:3:62:1194:678#0/1  
GGGCTATATGAAGCAATCGAGGAGTGCCTGATTAATGATC  
+HWI-EAS443:3:62:1194:678#0/1  
aa\_VX^\_U¥`a`]U^^a`ZozRL\_UZOL¥aV¥]XV]SV]]  
@HWI-EAS443:3:62:1239:1180#0/1  
CGCATATAGACTGTTGAATACAGATTTTGCCAGTAAGGTC  
+HWI-EAS443:3:62:1239:1180#0/1  
abbbab]]bbbabJZaab\_¥\_a^]Waa`]b\_J^Zaa`aIa  
@HWI-EAS443:3:62:1474:1035#0/1  
CATGATTGAGGCCGAGTCTTCTGTCAAAGAGAAAGACATG  
+HWI-EAS443:3:62:1474:1035#0/1  
X\_^`T`babba`babaabX`b]a`a`aab\_a`[V^X  
@HWI-EAS443:3:62:1577:1442#0/1  
GCTATATGAAGCAATCGAGGAGTGCCTGATTAATGATCCC  
+HWI-EAS443:3:62:1577:1442#0/1  
a`aaabb\_aaaaa`aaaa\_¥`¥\_\_\_aa\_\_a\_]`^^^  
@HWI-EAS443:3:63:1145:237#0/1  
ATATGAAGCAATCGAGGAGTGCCTGATTAATGATCCCTGG  
+HWI-EAS443:3:63:1145:237#0/1  
aa^a\_`W\_V\_^^`]aa]]UZ]a\_a^a]YVUa`^[]YX]a  
@HWI-EAS443:3:63:353:602#0/1  
GGGCTATATGAAGCAATCGAGGAGTGCCTGATTAATGATC  
+HWI-EAS443:3:63:353:602#0/1  
ab]b^]\_]a`\_`¥^aab`aa\_\_Uaa`a^\_`\_`\_`^\_a  
@HWI-EAS443:3:64:1028:1839#0/1  
CAGGGATCATTAAATCAGGCACTCCTCGATTGCTTCATATA  
+HWI-EAS443:3:64:1028:1839#0/1  
aaa^]]\_]a`¥UU^aQ¥Y\_b\_]\_\_Z[\_]a]\_NG]`¥V\_  
@HWI-EAS443:3:64:1243:88#0/1  
CTTTCTTTTGACAGAAGACTCGGCCTCAATCATGCTCTC

+HWI-EAS443:3:64:1243:88#0/1  
abbbbabbbbaa^ababb`\_a\_bbY`\_`\_`a]a`Z¥\_[`¥  
@HWI-EAS443:3:64:55:1797#0/1  
CAGGGATCATTAAATCAGGCACTCCTCGATTGCTTCATATA  
+HWI-EAS443:3:64:55:1797#0/1  
ab\_\_^bYa\_aaba\_aaX¥^`]\_¥\_\_\_]X\_]XR]¥YR]BBB  
@HWI-EAS443:3:65:1234:558#0/1  
GCAAAACCCAGGGATCATTAAATCAGGCACTCCTCGATTGC  
+HWI-EAS443:3:65:1234:558#0/1  
a]¥¥[¥¥`[]]``¥^`^]V^`a¥`]``^WSY¥]`[¥ZZ  
@HWI-EAS443:3:65:1502:2041#0/1  
CAGGGATCATTAAATCAGGCACTCCTCGATTGCTTCATATA  
+HWI-EAS443:3:65:1502:2041#0/1  
``]babaa`bababbb[bbabbb]bbbaab]`bbabbbbb  
@HWI-EAS443:3:65:955:275#0/1  
ATTGAGGCCGAGTCTTCTGTCAAAGAGAAAGACATGACCA  
+HWI-EAS443:3:65:955:275#0/1  
abaa`aaa\_``a]aaa¥Ya\_\_`\_Y\_\_\_]¥]\_]XM^T\_¥^  
@HWI-EAS443:3:66:1203:1830#0/1  
GGGCTATATGAAGCAATCGAGGAGTGCCTGATTAATGATC  
+HWI-EAS443:3:66:1203:1830#0/1  
¥``aT`¥a^`¥\_`^`b^`LR¥W\_]ZZYM\_aSaQa]aa`]R  
@HWI-EAS443:3:66:1220:1417#0/1  
AGGGATCATTAAATCAGGCACTCCTCGATTGCTTCATATAG  
+HWI-EAS443:3:66:1220:1417#0/1  
aaaaaaaaabaa`a\_]^aa`¥\_¥¥aa`\_`\_`\_]\_a\_]Z  
@HWI-EAS443:3:66:1366:30#0/1  
GGCTATATGAAGCAATCGAGGAGTGCCTGATTAATGATCC  
+HWI-EAS443:3:66:1366:30#0/1  
a]]^]¥]a\_XV¥XZPXUWR[`SYOUMVZRTRTTZ\_VUSJ  
@HWI-EAS443:3:66:13:1695#0/1  
AGACTGTTGAATACAGATTTTGCCAGTAAGGCCTGCACA  
+HWI-EAS443:3:66:13:1695#0/1  
SXT\_`^````a\_\_\_Z`aWa`aWba\_U\_\_\_R^Va]WT]¥[R  
@HWI-EAS443:3:66:150:771#0/1  
GGGCTATATGAAGCAATCGAGGAGTGCCTGATTAATGATC  
+HWI-EAS443:3:66:150:771#0/1  
aaab`babaaaaa\_\_aaaaZaa\_aXaa\_aa`a\_\_``\_^]]  
@HWI-EAS443:3:66:1637:239#0/1  
GGAAAGTGTGCAGGACCTTACTGGCAAAATCTGTATTCAA  
+HWI-EAS443:3:66:1637:239#0/1  
`aaaababaa`aba^a^baa^a`a¥aa`aa\_aa]`a`U`]  
@HWI-EAS443:3:66:397:498#0/1  
CAGGGATCATTAAATCAGGCACTCCTCGATTGCTTCATATA  
+HWI-EAS443:3:66:397:498#0/1  
`\_[]]¥U\_Q]a[V¥\_]WV`a]Z`U\_`¥\_TZ[]]]`\_X^U`  
@HWI-EAS443:3:67:1157:2044#0/1  
GGGCTATATGAAGCAATCGAGGAGTGCCTGATTAATGATC  
+HWI-EAS443:3:67:1157:2044#0/1  
abbbbbbbbbbabaabaaaaa`aa]aaaa`^a\_]Y[\_\_¥

@HWI-EAS443:3:67:1518:971#0/1  
GGGATCATTAATCAGGCACTCCTCGATTGCTTCATATAGC  
+HWI-EAS443:3:67:1518:971#0/1  
U¥aQUW\_\_bTT¥aaaab^b]YbJ`baaba¥Za\_Waaa^^V  
@HWI-EAS443:3:67:1522:452#0/1  
ATGAAGCAATCGAGGAGTGCCTGATTAATGATCCCTGGGT  
+HWI-EAS443:3:67:1522:452#0/1  
V\_a`abbbb¥a`abbab\_b`X^baab¥babbaZ]`babQ  
@HWI-EAS443:3:67:290:681#0/1  
GTCATGTCTTTCTCTTTGACAGAAGACTCGGCCTCAATCA  
+HWI-EAS443:3:67:290:681#0/1  
aab]baaabbbbaabbbaaabababaaaaaaa\_\_S``\_a  
@HWI-EAS443:3:67:578:1022#0/1  
ATGTCTTTCTCTTTGACAGAAGACTCGGCCTCAATCATGC  
+HWI-EAS443:3:67:578:1022#0/1  
]a`aaa`abab`b`baab`a]\_a`aaa\_aa\_aaaa\_`^T^`  
@HWI-EAS443:3:68:1113:1537#0/1  
GGGCTATATGAAGCAATCGAGGAGTGCCTGATTAATGATC  
+HWI-EAS443:3:68:1113:1537#0/1  
R^aabbbV`a\_a\_bb`ba`Wa\_aababab`a`bbabaaaa  
@HWI-EAS443:3:68:209:752#0/1  
GCTGAATCGAGAAAATTGCTTCTCATTGTTTCAGGCACTTA  
+HWI-EAS443:3:68:209:752#0/1  
abbabbabaaababbaa``aaaa`aaaa`aaaa\_\_a\_``\_  
@HWI-EAS443:3:69:1143:477#0/1  
CTTACTGGCAAAATCTGTATTCAACAGTCTATATGCGTCT  
+HWI-EAS443:3:69:1143:477#0/1  
abbbbbbbabbbabbbbbabbbbaaaab``baababa``aa  
@HWI-EAS443:3:69:1230:463#0/1  
GGGCTATATGAAGCAATCGAGGAGTGCCTGATTAATGATC  
+HWI-EAS443:3:69:1230:463#0/1  
`¥Ua[bbaa¥`aa¥\_bN^[VXaZQU[ah`]\_\_aa`aZaYJ  
@HWI-EAS443:3:69:1726:1859#0/1  
GGGCTATATGAAGCAATCGAGGAGTGCCTGATTAATGATC  
+HWI-EAS443:3:69:1726:1859#0/1  
``^`b``abb^`abba\_]W\_aa¥``baa\_^aa^]aaa\_  
@HWI-EAS443:3:69:47:1588#0/1  
ATGTCTTTCTCTTTGACAGAAGACTCGGCCTCAATCATGC  
+HWI-EAS443:3:69:47:1588#0/1  
aaa\_baaaaaaaa]`aa``\_[Xa\_a]^``^a`^^^\_]X]  
@HWI-EAS443:3:6:1170:1935#0/1  
AGGACCTTACTGGCAAAATCTGTATTCAACAGTCTATATG  
+HWI-EAS443:3:6:1170:1935#0/1  
[``\_a¥aaa[``^a`aaaa[\_b¥aa\_``\_Z`]¥[a``\_\_  
@HWI-EAS443:3:6:1292:743#0/1  
GTTGTCCCTAAGTGCCTGAACAATGAGAAGCAATTTTCTC  
+HWI-EAS443:3:6:1292:743#0/1  
aaa^]``abba\_``]aabaa\_a`aaY]\_aa`a\_aa\_a\_a^  
@HWI-EAS443:3:6:220:312#0/1  
GGATCATTAATCAGGCACTCCTCGATTGCTTCATATAGCC

+HWI-EAS443:3:6:220:312#0/1  
aba^RW]^a`a]`aa\_`\_¥X¥`^]\_YYR^\_T\_\_\_\_[]\_[B  
@HWI-EAS443:3:6:391:247#0/1  
CTTTCTCTTTGACAGAAGACTCGGCCTCAATCATGCTCTC  
+HWI-EAS443:3:6:391:247#0/1  
abb`aaabbbab^bbbbbaabba`aa`ab¥]b[a\_aX`^  
@HWI-EAS443:3:70:116:1533#0/1  
GCTGAATCGAGAAAATTGCTTCTCATTGTTTCAGGCACTTA  
+HWI-EAS443:3:70:116:1533#0/1  
ab`a\_ZZa]QT```aYX^a[\_`¥a`R[\_WYa`\_^PX][Z  
@HWI-EAS443:3:70:1189:66#0/1  
GCAGGACCTTACTGGCAAATCTGTATTCAACAGTCTATA  
+HWI-EAS443:3:70:1189:66#0/1  
a`]]]\_\_\_\_`aa\_[`a\_[\_`\_\_abY``\_UYZR`XO\_X^X  
@HWI-EAS443:3:70:215:1667#0/1  
GCAAAACCCAGGGATCATTAAATCAGGCACTCCTCGATTGC  
+HWI-EAS443:3:70:215:1667#0/1  
\_`QKW`a`a`ZZ`^a```bbbab`^a\_b`aa`bab[¥^^  
@HWI-EAS443:3:70:37:193#0/1  
GGGATCATTAAATCAGGCACTCCTCGATTGCTTCATATAGC  
+HWI-EAS443:3:70:37:193#0/1  
a`\_[aZ[aaaaa\_S`aa[]`\_`\_`a`[\_\_\_\_¥¥^V\_\_^\_]¥  
@HWI-EAS443:3:71:1473:1103#0/1  
CTGTTGAATACAGATTTTGCCAGTAAGGTCCTGCACACTT  
+HWI-EAS443:3:71:1473:1103#0/1  
abbabbbbbbbbab`bbbbbaabaabbbba^bbabab`ba  
@HWI-EAS443:3:71:1717:1209#0/1  
TTTCTCTTTGACAGAAGACTCGGCCTCAATCATGCTCTCA  
+HWI-EAS443:3:71:1717:1209#0/1  
aabaababaaaaaa`a`aa]\_aa\_¥\_`a\_¥[`\_\_Z^  
@HWI-EAS443:3:71:646:750#0/1  
TGTGCAGGACCTTACTGGCAAATCTGTATTCAACAGTCT  
+HWI-EAS443:3:71:646:750#0/1  
a]U`]aaa`\_a\_`a]Xa\_aa`^]a`^¥aa^a\_Z\_`ZVZ  
@HWI-EAS443:3:71:71:734#0/1  
GGGCTATATGAAGCAATCGAGGAGTGCCTGATTAATGATC  
+HWI-EAS443:3:71:71:734#0/1  
``]Z\_UY^`aW`S^b¥]``]TZNRUZ`^ZPW``aZYS[Y  
@HWI-EAS443:3:72:144:1327#0/1  
GTCTTTCTCTTTGACAGAAGACTCGGCCTCAATCATGCTC  
+HWI-EAS443:3:72:144:1327#0/1  
`\_a`^aaab`aaa`aaa]aa`\_YZaa¥a^]U]]IMRY[  
@HWI-EAS443:3:72:1499:109#0/1  
GAATCGAGAAAATTGCTTCTCATTGTTTCAGGCACTTAGGG  
+HWI-EAS443:3:72:1499:109#0/1  
a\_]PY]\_Xa\_[^`\_W[]Y]VV\_\_^RZO]]¥MUV`]Y^UV  
@HWI-EAS443:3:72:520:214#0/1  
GACCTTACTGGCAAATCTGTATTCAACAGTCTATATGCG  
+HWI-EAS443:3:72:520:214#0/1  
aaaaabaa`a``baaaaaab\_`aaaa`]^a]aa\_a\_`\_^\_



@HWI-EAS443:3:72:632:1021#0/1  
GAAGCAATCGAGGAGTGCCTGATTAATGATCCCTGGGTTT  
+HWI-EAS443:3:72:632:1021#0/1  
Z¥^^`W^baaWaT\_UXbbb]b[bbbb]ba]bb\_\_ba\_P\_¥  
@HWI-EAS443:3:73:1074:1129#0/1  
GCTGAATCGAGAAAATTGCTTCTCATTGTTTCAGGCACTTA  
+HWI-EAS443:3:73:1074:1129#0/1  
aaa^a`[SR¥a[[\_TTU`\_R[\_]Z][`\_NVY]\_\_\_\_[V[\_[  
@HWI-EAS443:3:73:1079:1399#0/1  
TGGTCATGTCTTTCTCTTTGACAGAAGACTCGGCCTCAAT  
+HWI-EAS443:3:73:1079:1399#0/1  
aab]bbbbbaabbbaaaabbaaaaaaaaa`]a\_[][^]^a\_  
@HWI-EAS443:3:73:108:864#0/1  
TCTCTTTGACAGAAGACTCGGCCTCAATCATGCTCTCAAT  
+HWI-EAS443:3:73:108:864#0/1  
aa`baaa\_Y`[^a`]^`a][\_a^\_¥`\_^^\_\_^\_¥Y[Y  
@HWI-EAS443:3:73:1111:1755#0/1  
GGGCTATATGAAGCAATCGAGGAGTGCCTGATTAATGATC  
+HWI-EAS443:3:73:1111:1755#0/1  
`^`baaabbbab\_bab`^a\_X^`^a`[\_]\_aaaaaa`]  
@HWI-EAS443:3:73:1279:1651#0/1  
CTTTCTCTTTGACAGAAGACTCGGCCTCAATCATGCTCTC  
+HWI-EAS443:3:73:1279:1651#0/1  
aaaa\_S]\_aaa`aaa`a\_Zaa[^a^YXP[^[\_aYUPVUXL  
@HWI-EAS443:3:73:1660:1994#0/1  
TGATTGAGGCCGAGTCTTCTGTCAAAGAGAAAAGACATGAC  
+HWI-EAS443:3:73:1660:1994#0/1  
`bb`Ma^babab^\_X`aHaWa``\_¥^WXa`aa`a``\_\_a  
@HWI-EAS443:3:73:1789:1001#0/1  
GTCTTTCTCTTTGACAGAAGACTCGGCCTCAATCATGCTC  
+HWI-EAS443:3:73:1789:1001#0/1  
\_W\_^\_baaaba`]\_^`^^a`¥¥]\_[\_[PYVW[\_WVUXQXV¥  
@HWI-EAS443:3:73:209:682#0/1  
GTCTTTCTCTTTGACAGAAGACTCGGCCTCAATCATGCTC  
+HWI-EAS443:3:73:209:682#0/1  
`[ba\_]aaaa`aX^\_XXY]^a`^`\_\_^`UVTVNTNRRTTVZ  
@HWI-EAS443:3:73:395:1937#0/1  
CAGGACCTTACTGGCAAATCTGTATTCAACAGTCTATAT  
+HWI-EAS443:3:73:395:1937#0/1  
^`\_aabba`\_^YRR\_a\_a`^[a`W¥¥Y\_`a\_a]Z\_[`\_a[  
@HWI-EAS443:3:73:879:74#0/1  
GTCTTTCTCTTTGACAGAAGACTCGGCCTCAATCATGCTC  
+HWI-EAS443:3:73:879:74#0/1  
a\_^`aa]a^`^`a\_\_[^\_\_^\_]`^`\_`XYZUXX¥XU]USWY  
@HWI-EAS443:3:74:1039:839#0/1  
GGGAAAGTGTGCAGGACCTTACTGGCAAATCTGTATTCA  
+HWI-EAS443:3:74:1039:839#0/1  
```]abb[a[b\_^`^`]\_\_aa`aa]aaaZY\_a`aaW[\_]^\_  
@HWI-EAS443:3:74:1257:456#0/1  
ATGTCTTTCTCTTTGACAGAAGACTCGGCCTCAATCATGC

+HWI-EAS443:3:74:1257:456#0/1  
¥X]L\_¥a\_R\_S\_\_b\_^Xaaabaa`aZ`^J[aY]a¥^a`^\_  
@HWI-EAS443:3:74:1455:2015#0/1  
GGGCTATATGAAGCAATCGAGGAGTGCCTGATTAATGATC  
+HWI-EAS443:3:74:1455:2015#0/1  
aa\_N\_aa]a\_aa^`aa[W\_[`\_`\_`Y[YJVa]^X`]VX^NW  
@HWI-EAS443:3:74:304:1207#0/1  
ATTAAGCAAAACCCAGGGATCATTAAATCAGGCACTCCTCG  
+HWI-EAS443:3:74:304:1207#0/1  
\_X\_Y]]aY¥^V`aaZTN[]\_`\_\_`Y¥Z\_\_]]`\_\_[Z[^  
@HWI-EAS443:3:74:770:617#0/1  
GCAGGACCTTACTGGCAAAATCTGTATTCAACAGTCTATA  
+HWI-EAS443:3:74:770:617#0/1  
\_aba` `bababbbbabbbbabab`aabbabbabbabbbba  
@HWI-EAS443:3:75:1035:1751#0/1  
GACCTTACTGGCAAAATCTGTATTCAACAGTCTATATGCG  
+HWI-EAS443:3:75:1035:1751#0/1  
aabbb]`aaa`¥ababbbb\_bbb\_]bab\_aababa\_` [  
@HWI-EAS443:3:75:1732:1431#0/1  
TTGGTCATGTCTTTCTCTTTGACAGAAGACTCGGCCTCAA  
+HWI-EAS443:3:75:1732:1431#0/1  
X^`a¥]`b`YZabb`a`baa`a\_a`aaaaa\_bb\_Za^aa  
@HWI-EAS443:3:75:826:254#0/1  
GTCTTTCTCTTTGACAGAAGACTCGGCCTCAATCATGCTC  
+HWI-EAS443:3:75:826:254#0/1  
\_]¥]\_`ab`aVaa^\_\_` `aZ\_¥^` `]YY^` `^^`W¥W[¥  
@HWI-EAS443:3:76:1672:1252#0/1  
CAGGACCTTACTGGCAAAATCTGTATTCAACAGTCTATAT  
+HWI-EAS443:3:76:1672:1252#0/1  
abb`\_abb`baa^`^a`aaa\_aa[\_a\_`^`R¥`W^a]\_Za  
@HWI-EAS443:3:76:1792:1346#0/1  
GACCTTACTGGCAAAATCTGTATTCAACAGTCTATATGCG  
+HWI-EAS443:3:76:1792:1346#0/1  
a^a` `baaaabaa\_a\_]Z\_`¥^aa`^\_X^`]]aa`\_\_Y¥`  
@HWI-EAS443:3:76:985:107#0/1  
GGTTGTCCCTAAGTGCCTGAACAATGAGAAGCAATTTTCT  
+HWI-EAS443:3:76:985:107#0/1  
aa^a]^¥¥X^]^`X^WX`\_]\_ZX^\_Z`Z\_\_R^^^^]^X`  
@HWI-EAS443:3:77:1101:982#0/1  
GGGCTATATGAAGCAATCGAGGAGTGCCTGATTAATGATC  
+HWI-EAS443:3:77:1101:982#0/1  
aaaaaaaaaaaa`a\_aaaaa^aa\_a]\_\_aaa\_\_a`\_`\_`\_^ [  
@HWI-EAS443:3:77:1385:824#0/1  
GGCTATATGAAGCAATCGAGGAGTGCCTGATTAATGATCC  
+HWI-EAS443:3:77:1385:824#0/1  
abab¥aa`\_aab`aa`a[^aX]ZXHPaaaa`\_]a]¥¥YX  
@HWI-EAS443:3:77:1392:2012#0/1  
ATGTCTTTCTCTTTGACAGAAGACTCGGCCTCAATCATGC  
+HWI-EAS443:3:77:1392:2012#0/1  
aba\_TG\_¥bbZba\_b^a`aa`]a]]W\_PLYa¥\_\_` `a[`]

@HWI-EAS443:3:77:41:368#0/1  
GCTGAATCGAGAAAATTGCTTCTCATTGTTTCAGGCACTTA  
+HWI-EAS443:3:77:41:368#0/1  
abaa\_b`aaa`a\_a`aaa`^\_^¥`\_^WW]\_\_^^\_^Y\_Y\_  
@HWI-EAS443:3:77:529:2021#0/1  
CTTTCTCTTTGACAGAAGACTCGGCCTCAATCATGCTCTC  
+HWI-EAS443:3:77:529:2021#0/1  
aaaaaabaa`aaaaa]``\_a`\_aZ`\_a[[ZSUWV^^¥  
@HWI-EAS443:3:77:766:441#0/1  
GATCATTAATCAGGCACTCCTCGATTGCTTCATATAGCCC  
+HWI-EAS443:3:77:766:441#0/1  
a`b`bba`````¥]ababaY\_b`\_`ab`bb`abbaaa]b]  
@HWI-EAS443:3:77:900:1036#0/1  
GGCTATATGAAGCAATCGAGGAGTGCCTGATTAATGATCC  
+HWI-EAS443:3:77:900:1036#0/1  
aa`]^Z\_a\_XZ\_V\_\_\_\_TZ][QO`¥a\_XW]\_Y¥Z[Z^\_]  
@HWI-EAS443:3:78:1078:1187#0/1  
ATTGAGGCCGAGTCTTCTGTCAAAGAGAAAAGACATGACCA  
+HWI-EAS443:3:78:1078:1187#0/1  
a`\_WG[]^YLZPTYZ]YYYYWZ^NYUXVW]WUMRXZVXSZ  
@HWI-EAS443:3:78:219:1552#0/1  
GATCATTAATCAGGCACTCCTCGATTGCTTCATATAGCCC  
+HWI-EAS443:3:78:219:1552#0/1  
][`\_bba`aaba`abbabbaaaa`a\_aa`ba`aa]\_a`\_  
@HWI-EAS443:3:78:993:206#0/1  
GCAAAACCCAGGGATCATTAAATCAGGCACTCCTCGATTGC  
+HWI-EAS443:3:78:993:206#0/1  
aa`[^a¥a`aaba`\_a`\_]\_a\_a`\_\_\_\_Z`\_]`Z`¥^Z  
@HWI-EAS443:3:79:213:1936#0/1  
CTTTCTCTTTGACAGAAGACTCGGCCTCAATCATGCTCTC  
+HWI-EAS443:3:79:213:1936#0/1  
^XTQQJbaSX`ab^X]^S`b^Y¥]JWb\_GVNM]MH[^  
@HWI-EAS443:3:79:406:893#0/1  
AGACTGTTGAATACAGATTTTGCCAGTAAGGCCTGCACA  
+HWI-EAS443:3:79:406:893#0/1  
ZZ]\_]¥R\_aV\_RXZXS¥\_¥`¥`\_¥^X^^`Y^¥TU]Z`\_]  
@HWI-EAS443:3:80:412:998#0/1  
CTTTCTCTTTGACAGAAGACTCGGCCTCAATCATGCTCTC  
+HWI-EAS443:3:80:412:998#0/1  
ababbabaZ`¥Taabb\_aaba`\_baba```X`\_^¥a\_\_\_\_  
@HWI-EAS443:3:81:1273:1567#0/1  
CTCTTTGACAGAAGACTCGGCCTCAATCATGCTCTCAATC  
+HWI-EAS443:3:81:1273:1567#0/1  
aa`aaa¥RWaa¥HKX\_\_\_\_\_`¥Y[Z\_[QXFQVVVYV^]]U  
@HWI-EAS443:3:81:1576:1305#0/1  
TTGGTCATGTCTTTCTTTGACAGAAGACTCGGCCTCAA  
+HWI-EAS443:3:81:1576:1305#0/1  
Va¥\_NRUaba\_baaa]]¥ZZNTQ[\_S\_[\_GX\_]RNW^0]N  
@HWI-EAS443:3:81:322:307#0/1  
GCTATATGAAGCAATCGAGGAGTGCCTGATTAATGATCCC

+HWI-EAS443:3:81:322:307#0/1  
\_`a^a\_\_aa`\_`a^`^`^]XZ\_Z¥\_^`]`\_^^\_X\_^]S^W  
@HWI-EAS443:3:81:684:1655#0/1  
GCTATATGAAGCAATCGAGGAGTGCCTGATTAATGATCCC  
+HWI-EAS443:3:81:684:1655#0/1  
`bbaaba``aaaaaaaaa`a]a`\_a\_a`aa`\_aa`\_`\_`  
@HWI-EAS443:3:82:1323:465#0/1  
GGGCTATATGAAGCAATCGAGGAGTGCCTGATTAATGATC  
+HWI-EAS443:3:82:1323:465#0/1  
I¥bbb`\_`aa`aXWWa\_[\_^`XQT¥^XYF[ ]\_`a]^abZJZ  
@HWI-EAS443:3:82:186:841#0/1  
GCAGGACCTTACTGGCAAATCTGTATTCAACAGTCTATA  
+HWI-EAS443:3:82:186:841#0/1  
abaaaaabbaba^aaaY`babab^aaa`aaa\_a¥a`^^`  
@HWI-EAS443:3:82:436:888#0/1  
CTTTCTCTTTGACAGAAGACTCGGCCTCAATCATGCTCTC  
+HWI-EAS443:3:82:436:888#0/1  
a\_[X]^bbab¥]b`]¥`^]a]bZ^U[`¥`\_`\_IYa]Ya`a  
@HWI-EAS443:3:82:745:557#0/1  
CTTTCTCTTTGACAGAAGACTCGGCCTCAATCATGCTCTC  
+HWI-EAS443:3:82:745:557#0/1  
\_^\_^\_^\_]X\_ZZSa[^\_]XX\_a[W\_Z[0]XaQO^UZ`UU  
@HWI-EAS443:3:82:889:661#0/1  
GACGCATATAGACTGTTGAATACAGATTTTGCCAGTAAGG  
+HWI-EAS443:3:82:889:661#0/1  
`\_`¥`\_]a¥ab^aaaaXYNZX\_\_NX¥OV]a^V[[SUM[VLT  
@HWI-EAS443:3:83:866:1669#0/1  
TTTCTCTTTGACAGAAGACTCGGCCTCAATCATGCTCTCA  
+HWI-EAS443:3:83:866:1669#0/1  
aaa`\_`aaa`\_`aaa]`a¥`\_`^^\_`^`\_]`^`\_`^W\_]\_]\_^`  
@HWI-EAS443:3:84:1569:406#0/1  
GAAGCAATCGAGGAGTGCCTGATTAATGATCCCTGGGTTT  
+HWI-EAS443:3:84:1569:406#0/1  
a`b\_Z¥bbab`abab`a\_\_aaabbbabaaaPa^ab`bVa\_  
@HWI-EAS443:3:84:1573:758#0/1  
ATGTCTTTCTCTTTGACAGAAGACTCGGCCTCAATCATGC  
+HWI-EAS443:3:84:1573:758#0/1  
[bba]a`a`a`\_`babaabbbbba`\_]ba`a^^]bb`^W\_]`  
@HWI-EAS443:3:84:343:169#0/1  
GGGCTATATGAAGCAATCGAGGAGTGCCTGATTAATGATC  
+HWI-EAS443:3:84:343:169#0/1  
aaaaabaa`aaaa`aaaa`a`\_`Z`\_`\_`\_]`^`\_]G[ ]`  
@HWI-EAS443:3:85:169:1892#0/1  
GGGCTATATGAAGCAATCGAGGAGTGCCTGATTAATGATC  
+HWI-EAS443:3:85:169:1892#0/1  
ab^aaaa`^aU\_a[V\_a`\_`Ua]PTVGa\_a\_^^`\_`\_`a^S[  
@HWI-EAS443:3:85:384:847#0/1  
ATGTCTTTCTCTTTGACAGAAGACTCGGCCTCAATCATGC  
+HWI-EAS443:3:85:384:847#0/1  
aaa\_aaaa]aa`a`a`a`\_`\_`¥^^a]`[ ]`[IWa`^`\_`]]`

@HWI-EAS443:3:85:856:333#0/1  
GGGCTATATGAAGCAATCGAGGAGTGCCTGATTAATGATC  
+HWI-EAS443:3:85:856:333#0/1  
`bbaaaaaba\_aa`a``a^a^^]\_^\_aa^\_\_a\_\_\_¥\_\_  
@HWI-EAS443:3:86:874:584#0/1  
GGGCTATATGAAGCAATCGAGGAGTGCCTGATTAATGATC  
+HWI-EAS443:3:86:874:584#0/1  
abaabbbabbbab\_aaaa`a``a`a`\_abaaab[`a\_`]  
@HWI-EAS443:3:87:1666:1822#0/1  
CGAGAAAATTGCTTCTCATTGTTTCAGGCACTTAGGGACAA  
+HWI-EAS443:3:87:1666:1822#0/1  
\_b\_baa[aS]baaW\_aW`\_a[a^aaaa`^aaaaa`^`  
@HWI-EAS443:3:87:220:760#0/1  
GGGCTATATGAAGCAATCGAGGAGTGCCTGATTAATGATC  
+HWI-EAS443:3:87:220:760#0/1  
\_aa^baaaaaa¥aaaaaa`a```]\_\_\_\_aa\_a```]\_`\_\_^  
@HWI-EAS443:3:87:366:1183#0/1  
GGCTATATGAAGCAATCGAGGAGTGCCTGATTAATGATCC  
+HWI-EAS443:3:87:366:1183#0/1  
]`abaab¥baa\_a`b\_a\_babb\_F^`b`]Uaababb]]`  
@HWI-EAS443:3:87:576:1018#0/1  
GCTGAATCGAGAAAATTGCTTCTCATTGTTTCAGGCACTTA  
+HWI-EAS443:3:87:576:1018#0/1  
U\_[ZV\_UXaa¥Z¥U`SHXWQ`\_]a`^aWW¥T]PM]Z]Q\_[  
@HWI-EAS443:3:88:1110:1749#0/1  
GGCTATATGAAGCAATCGAGGAGTGCCTGATTAATGATCC  
+HWI-EAS443:3:88:1110:1749#0/1  
S¥ab`[`abb\_`b]`\_`\_a\_``]¥RWa\_b`aabba\_¥`]  
@HWI-EAS443:3:88:1228:1197#0/1  
GGCTATATGAAGCAATCGAGGAGTGCCTGATTAATGATCC  
+HWI-EAS443:3:88:1228:1197#0/1  
ab`^ZVV`^USZQN¥OW¥^UTXRGRHZP]¥¥`UXY[VVZ\_  
@HWI-EAS443:3:88:695:790#0/1  
GGCTATATGAAGCAATCGAGGAGTGCCTGATTAATGATCC  
+HWI-EAS443:3:88:695:790#0/1  
ababbbbabbabbbbaabaaaa`aaaa\_`a`aaa`a\_`  
@HWI-EAS443:3:88:741:854#0/1  
GCTGAATCGAGAAAATTGCTTCTCATTGTTTCAGGCACTTA  
+HWI-EAS443:3:88:741:854#0/1  
abbbbbabbabbbb`aababbab\_bbbbabaabb\_a`baa  
@HWI-EAS443:3:88:82:367#0/1  
CTTTCTTTTGACAGAAGACTCGGCCTCAATCATGCTCTC  
+HWI-EAS443:3:88:82:367#0/1  
ab\_aabbaa`aZa`a\_]a\_aaaa\_^]]`[Y]]^^\_`]^`^¥  
@HWI-EAS443:3:89:1207:656#0/1  
TGTCTTTCTTTTGACAGAAGACTCGGCCTCAATCATGCT  
+HWI-EAS443:3:89:1207:656#0/1  
a``abbb\_``aaaa```aaaa`a`a`\_\_\_\_^`\_\_^\_\_\_\_]S[  
@HWI-EAS443:3:89:374:1013#0/1  
CTTTCTTTTGACAGAAGACTCGGCCTCAATCATGCTCTC

+HWI-EAS443:3:89:374:1013#0/1  
a\_]bbabbbaba\_¥`bbbbabbba`a`a\_baaa`\_^`aa`  
@HWI-EAS443:3:8:1102:1397#0/1  
GGGCTATATGAAGCAATCGAGGAGTGCCTGATTAATGATC  
+HWI-EAS443:3:8:1102:1397#0/1  
abbaab\_]bZ`Ub]`b]`YbbIb]aVZbYZ`aaaa\_]`  
@HWI-EAS443:3:8:1603:1271#0/1  
ATTGAGGCCGAGTCTTCTGTCAAAGAGAAAGACATGACCA  
+HWI-EAS443:3:8:1603:1271#0/1  
aaba`aa\_]`^aTX\_[X]a]U\_]`^`X`Y`^`^X^ZZ^ZX^  
@HWI-EAS443:3:8:1683:441#0/1  
GGGCTATATGAAGCAATCGAGGAGTGCCTGATTAATGATC  
+HWI-EAS443:3:8:1683:441#0/1  
abaaaaaaab```\_aaa\_a^aa^``[RYaa¥``\_\_[\_`\_\_Z  
@HWI-EAS443:3:8:741:1246#0/1  
ATGAAGCAATCGAGGAGTGCCTGATTAATGATCCCTGGGT  
+HWI-EAS443:3:8:741:1246#0/1  
`aa`Wa\_aaaa`bYXaYaVY```[\_````YY[XZ\_dWZU  
@HWI-EAS443:3:8:794:818#0/1  
GGGCTATATGAAGCAATCGAGGAGTGCCTGATTAATGATC  
+HWI-EAS443:3:8:794:818#0/1  
`abababbbababbaabbbbaabaaaa\_\_ab\_aaaaa\_\_\_\_  
@HWI-EAS443:3:8:834:1649#0/1  
GGGCTATATGAAGCAATCGAGGAGTGCCTGATTAATGATC  
+HWI-EAS443:3:8:834:1649#0/1  
^`a]ba`ab`]bbbbaabaaa\_a`\_abb`\_`a`aa[\_`  
@HWI-EAS443:3:90:1305:1416#0/1  
GGCTATATGAAGCAATCGAGGAGTGCCTGATTAATGATCC  
+HWI-EAS443:3:90:1305:1416#0/1  
abababbbba\_aaaaba^b`b`baa`aY]ab\_bbb`a\_aa\_Z  
@HWI-EAS443:3:90:227:1467#0/1  
GCTATATGAAGCAATCGAGGAGTGCCTGATTAATGATCCC  
+HWI-EAS443:3:90:227:1467#0/1  
aa\_aaaaaaa`aa`^a`a`a`\_`^V^^Xaa\_]`\_`¥]^^]^^]]  
@HWI-EAS443:3:90:761:1247#0/1  
ATGTCTTTCTCTTTGACAGAAGACTCGGCCTCAATCATGC  
+HWI-EAS443:3:90:761:1247#0/1  
aab\_abbbbaabbaa`ab``[^aaa^a`a`a`¥`\_¥[^[\_  
@HWI-EAS443:3:90:914:1622#0/1  
TGTCTTTCTCTTTGACAGAAGACTCGGCCTCAATCATGCT  
+HWI-EAS443:3:90:914:1622#0/1  
a\_LZabba\_abbbb\_a`Z^X\_[¥H¥[IaaY]aUN`[GS^  
@HWI-EAS443:3:91:1008:321#0/1  
AGCAAAACCCAGGGATCATTAAATCAGGCACTCCTCGATTG  
+HWI-EAS443:3:91:1008:321#0/1  
\_X`]\_\_`\_Q]aa^XV^a```RX`a[``Z^\_]UZ[WV]U]^  
@HWI-EAS443:3:91:1161:752#0/1  
AGCAAAACCCAGGGATCATTAAATCAGGCACTCCTCGATTG  
+HWI-EAS443:3:91:1161:752#0/1  
^^a\_XT`\_]`¥^bba]]\_aaab\_\_`Z[Sab\_a`a^`aa\_a

@HWI-EAS443:3:92:1327:59#0/1  
GATCATTAAATCAGGCACTCCTCGATTGCTTCATATAGCCC  
+HWI-EAS443:3:92:1327:59#0/1  
aYX^[a\_[YRPaYYaT\_RR[G]\_YPPT\_\_OY\_QOYRKNO  
@HWI-EAS443:3:93:1158:244#0/1  
GATTGAGGCCGAGTCTTCTGTCAAAGAGAAAGACATGACC  
+HWI-EAS443:3:93:1158:244#0/1  
aaaaa``¥[]\_a\_[`\_Y[a\_\_^\_^^[XYXY^X¥]¥VWV  
@HWI-EAS443:3:93:1618:470#0/1  
CTTTCTTTTGACAGAAGACTCGGCCTCAATCATGCTCTC  
+HWI-EAS443:3:93:1618:470#0/1  
`bbb`babbabaababbab`a`bb[\_\_\_Ua`^)`\_aZ[Z\_a  
@HWI-EAS443:3:93:1693:411#0/1  
CTTTCTTTTGACAGAAGACTCGGCCTCAATCATGCTCTC  
+HWI-EAS443:3:93:1693:411#0/1  
aab\_L]\_¥X^^V¥ab`X``\_`X\_ZSX]P`¥[[[^OMMHWU  
@HWI-EAS443:3:93:175:1850#0/1  
AGCAAAACCCAGGGATCATTAAATCAGGCACTCCTCGATTG  
+HWI-EAS443:3:93:175:1850#0/1  
a\_\_YL[a0\_bb\_Q00`a`aWK[[b^`\_]\_[[\_`^TL\_RY]  
@HWI-EAS443:3:93:57:605#0/1  
GGCTATATGAAGCAATCGAGGAGTGCCTGATTAATGATCC  
+HWI-EAS443:3:93:57:605#0/1  
aaa\_T[¥VX\_¥TO\_JZ`WQY`T`ZVSSURW\_Q\_]UPYUTX  
@HWI-EAS443:3:94:1122:592#0/1  
GGTTGTCCCTAAGTGCCTGAACAATGAGAAGCAATTTTCT  
+HWI-EAS443:3:94:1122:592#0/1  
aa`b^S\_R^ab`\_`WSXab^b^a`Ya`a][``a\_a`]a``  
@HWI-EAS443:3:94:687:1863#0/1  
AAGCAATCGAGGAGTGCCTGATTAATGATCCCTGGGTTTT  
+HWI-EAS443:3:94:687:1863#0/1  
a^VP`W`YHSZaT[I¥¥Q\_``]`a^S`]LGLLJZZ`Q¥\_[  
@HWI-EAS443:3:95:491:1068#0/1  
CAGGTTGTCCCTAAGTGCCTGAACAATGAGAAGCAATTTT  
+HWI-EAS443:3:95:491:1068#0/1  
a]b)`b[Y]a)`aJ\_`\_\_aaIaX¥¥aaaY^a\_[aHY\_Z`  
@HWI-EAS443:3:95:612:1856#0/1  
GGGCTATATGAAGCAATCGAGGAGTGCCTGATTAATGATC  
+HWI-EAS443:3:95:612:1856#0/1  
ababbbbbbb`abbbbbbb`aaaaaa]aa\_aa`a`aaa``^\_  
@HWI-EAS443:3:95:97:511#0/1  
ATATGAAGCAATCGAGGAGTGCCTGATTAATGATCCCTGG  
+HWI-EAS443:3:95:97:511#0/1  
aabaaa``aaa`a`ba^aXaa\_`a^`\_`^a`\_\_^^Zaaa  
@HWI-EAS443:3:96:1770:346#0/1  
CTGAATCGAGAAAATTGCTTCTCATTGTTTCAGGCACTTAG  
+HWI-EAS443:3:96:1770:346#0/1  
ababbb]abaaaaba`aaa^\_aa`a`a\_\_]a\_a\_X]\_\_`a  
@HWI-EAS443:3:96:302:234#0/1  
GGCTATATGAAGCAATCGAGGAGTGCCTGATTAATGATCC

+HWI-EAS443:3:96:302:234#0/1  
]ba\_bba[b]bb]aaa]^^aYUaXaV\_a`] `X^`a`\_^  
@HWI-EAS443:3:96:903:1092#0/1  
CCCTAAGTGCCTGAACAATGAGAAGCAATTTTCTCGATTC  
+HWI-EAS443:3:96:903:1092#0/1  
aTY`Y¥¥Jba]]ZbbKab^a`a`bb`aabaUaV\_YabaXb  
@HWI-EAS443:3:97:115:1755#0/1  
GCTGAATCGAGAAAATTGCTTCTCATTGTTTCAGGCACTTA  
+HWI-EAS443:3:97:115:1755#0/1  
aaaaaa[]a\_Y[``a`\_^`^]R`^`\_^`QZ^Z[ZZVZWU]  
@HWI-EAS443:3:97:903:137#0/1  
AGACTGTTGAATACAGATTTTGCCAGTAAGTCCTGCACA  
+HWI-EAS443:3:97:903:137#0/1  
aaY`\_^`bb\_aaa`aa`aa`W[X^a[``aaX[^`\_]\_V\_  
@HWI-EAS443:3:97:917:531#0/1  
ACCTTACTGGCAAAATCTGTATTCAACAGTCTATATGCGT  
+HWI-EAS443:3:97:917:531#0/1  
a]Y\_]a]``a]\_aa\_]aa]\_`aT`¥X[\_[``a^`\_]`^\_  
@HWI-EAS443:3:98:1129:178#0/1  
AATCGAGAAAATTGCTTCTCATTGTTTCAGGCACTTAGGGA  
+HWI-EAS443:3:98:1129:178#0/1  
a\_ZYaZ¥\_a``a`\_W``]aZS¥`\_\_\_W]]QP]X¥¥Y^\_Z  
@HWI-EAS443:3:98:841:32#0/1  
ATGTCTTTCTTTGACAGAAGACTCGGCCTCAATCATGC  
+HWI-EAS443:3:98:841:32#0/1  
\_b\_WQa¥]`^[]b¥XU¥ab]]]]]a`aa[\_`Z^ZZEDUa`  
@HWI-EAS443:3:99:1033:160#0/1  
CAGTTGTCCCTAAGTGCCTGAACAATGAGAAGCAATTTT  
+HWI-EAS443:3:99:1033:160#0/1  
VbbbbbabaZUabbb`bbaabbaSabbabbabaabaabaa  
@HWI-EAS443:3:99:56:1187#0/1  
GTCTTTCTTTGACAGAAGACTCGGCCTCAATCATGCTC  
+HWI-EAS443:3:99:56:1187#0/1  
aY\_a`a]\_a\_\_\_`^`\_a\_a\_^¥^\_a]X]Z[Q^\_]\_ZWT]X  
@HWI-EAS443:3:9:1258:1528#0/1  
GTCTTTCTTTGACAGAAGACTCGGCCTCAATCATGCTC  
+HWI-EAS443:3:9:1258:1528#0/1  
a]\_baa`aabab\_\_aaaa\_\_\_`V\_\_X^a\_^\_]Y\_^WMYN  
@HWI-EAS443:3:9:1504:1239#0/1  
GCATGATTGAGCCGAGTCTTCTGTCAAAGAGAAAGACAT  
+HWI-EAS443:3:9:1504:1239#0/1  
a\_[a]\_VSLs`QFU\_W¥MZZVM[WOR]FJWT¥V]]WSW]S  
@HWI-EAS443:3:9:487:862#0/1  
GAAAATTGCTTCTCATTGTTTCAGGCACTTAGGGACAACCT  
+HWI-EAS443:3:9:487:862#0/1  
`Zaa]aa]`^U\_X`\_`\_aaaaQV[\_aa\_a\_R[[a\_NY¥\_  
@HWI-EAS443:3:9:690:156#0/1  
TTTCTCTTTGACAGAAGACTCGGCCTCAATCATGCTCTCA  
+HWI-EAS443:3:9:690:156#0/1  
aaa```a```]^`\_^\_]ZZ\_^ZUWZZZZZX]WZZZWZ



@HWI-EAS443:3:81:895:255#0/1  
CAATGCTTCAATCCAATGATCGTCGAGCTTGCAGAGAAGC  
+HWI-EAS443:3:81:895:255#0/1  
a`\_[aa`a]a^ZSMY`a\_`¥\_`V\_]`\_RUVU^^ZYK  
@HWI-EAS443:3:54:261:450#0/1  
GCCCCCAGTTTCGATTTTCGATCTTCCCCATATTCTTT  
+HWI-EAS443:3:54:261:450#0/1  
abbbbab^\_a\_bbaaaba^\_[aQ]L¥aaab\_aa[baa`a`  
@HWI-EAS443:3:74:1047:257#0/1  
AAAAGCAAAGAATATGGGGAAGATCCGAAAATCGAAACT  
+HWI-EAS443:3:74:1047:257#0/1  
\_¥bb^aabba\_abbbabbbbabaa\_aaabbbaaa\_aa¥a  
@HWI-EAS443:3:56:1000:1433#0/1  
GCCTCTTTAGTTTCGATTTTCGGATCTTCCCCATATTCTT  
+HWI-EAS443:3:56:1000:1433#0/1  
a¥\_a\_baa`^`aa`a)`aa`^`Za)`a[^]^`a\_aa]a`  
@HWI-EAS443:3:81:495:1742#0/1  
CCCCCAGTTTCGATTTTCGGATCTTCCCCATATTCTTTCA  
+HWI-EAS443:3:81:495:1742#0/1  
[^R\_b\_b`\_ab\_P\_^`Z\_X`RTX`]Z^^`^^^aa^a\_`¥`  
@HWI-EAS443:3:26:284:543#0/1  
AAAAGAAAGAATATGGGGAAGATCCGAAAATCGAAACTAA  
+HWI-EAS443:3:26:284:543#0/1  
a`a`baaab`abaaa\_ba¥aaaaab`aa]aaa^aa`^^`  
@HWI-EAS443:3:7:51:664#0/1  
GAAAGAATATGGGGAAGATCCNAAAATCGAAACTAACAAAG  
+HWI-EAS443:3:7:51:664#0/1  
^]a`^^`abbaaaaaab`a¥YDZabaa¥a`\_aaaa\_`aaa  
@HWI-EAS443:3:91:153:1463#0/1  
TTGTTAGTNTCGATTTTCGGATCTTCCCCATATTCTTTCA  
+HWI-EAS443:3:91:153:1463#0/1  
aaa\_`\_`\_TD¥aaZ^\_\_\_\_^XZZZ]^XZZ]^]Z\_^Y^^\_^^  
@HWI-EAS443:3:67:560:356#0/1  
AATGAAAGAATATGGGGAAGATCCGAAAATCGAAACTACA  
+HWI-EAS443:3:67:560:356#0/1  
aa`^a^¥\_\_^a\_`a[`^aaa\_]Z`¥\_\_\_\_`]¥^^\_^^\_^^  
@HWI-EAS443:3:27:540:1560#0/1  
TGCCGACCAAAGTCTCCCACCGAACTTCTCCAGCCTTGAA  
+HWI-EAS443:3:27:540:1560#0/1  
U¥\_abb`^`^[`¥L[]]b\_`\_\_Zaba`abaaaabbaZOWS  
@HWI-EAS443:3:28:302:809#0/1  
GCTTGCCGACCAAAGTCTCCCACCGAACTTCTCCAGCCTT  
+HWI-EAS443:3:28:302:809#0/1  
^aaabbbb`aaT\_`abab\_abbaaa`\_aaaaaaaa\_a\_b\_  
@HWI-EAS443:3:28:436:785#0/1  
AAGAATATGGGGAAGATCCGAAAATCGAAACTAACAAAGTT  
+HWI-EAS443:3:28:436:785#0/1  
TZ\_Y^a^^aa\_`^^`aaa`^aba`b\_W\_`a`^^`^X`  
@HWI-EAS443:3:34:1477:741#0/1  
AATGAAAGAATATGGGGAAGATCCGAAAATCGAAACTAAC

+HWI-EAS443:3:34:1477:741#0/1  
X¥` `]` `¥Zaba]aZV^a^\_Y¥aU¥Ta^a¥OZM[WQSYWB  
@HWI-EAS443:3:3:1432:488#0/1  
AAAGAATATGGGAAGATCCGAAAATCGAACTAACAAGT  
+HWI-EAS443:3:3:1432:488#0/1  
aab`aaababaaaaabaa`^a`abaa\_b^^`^`\_`]a\_a]  
@HWI-EAS443:3:51:113:1803#0/1  
TGAAAGAATATGGGAAGATCCGAAAATCGAACTAACAA  
+HWI-EAS443:3:51:113:1803#0/1  
ab^X^\_a\_]¥aaab`ba`YMYaabaZ[][^`Z¥^\_a¥  
@HWI-EAS443:3:59:1620:628#0/1  
AAAGAATATGGGAAGATCCGAAAATCGAACTAACAAGT  
+HWI-EAS443:3:59:1620:628#0/1  
ababbaa\_a^\_ab¥\_baZTY\_^ab\_a^b]]aYa[\_TU]]X  
@HWI-EAS443:3:80:325:64#0/1  
AAGAATATGGGAAGATCCGAAAATCGAACTAACAAGTT  
+HWI-EAS443:3:80:325:64#0/1  
¥\_ab\_^\_\_bbabaab`]Q^aa^Y\_a[`] `Z\_^aa[V^\_^  
@HWI-EAS443:3:98:1516:1666#0/1  
GGCAATGAAAGAATATGGGAAGATCCGAAAATCGAACT  
+HWI-EAS443:3:98:1516:1666#0/1  
abQ^]\_\_HU0\_PT^X¥aaZY]Wa`XFL\_\_`a\_aHb`Z^[a  
@HWI-EAS443:3:22:1197:726#0/1  
ATCGACGACTGGCAAAATCTGTATTCAACAGTCTATATGC  
+HWI-EAS443:3:22:1197:726#0/1  
aaaabaaa\_\_a\_aaaaa\_aa^^a]S`aW\_`YY^\_\_Z\_^Z  
@HWI-EAS443:3:33:1341:1261#0/1  
GATGGATTCCGAGCCGAACGGCTGCATTGAGGGGAAGCGTT  
+HWI-EAS443:3:33:1341:1261#0/1  
a^b`\_\_bb\_aaaRaaSaR^¥¥aXJWUOSYURWFXYBBBBB  
@HWI-EAS443:3:81:1461:420#0/1  
GCTTCGTCTCTTTCCGACTGACGAAAGGAATCCCATAGAC  
+HWI-EAS443:3:81:1461:420#0/1  
YaWQTTH^T`]^XVPYQMVT¥Z\_YM¥YWY[XSIZZV^]VN  
@HWI-EAS443:3:92:1603:987#0/1  
GATGGATTCCGAGCCGAACGGCTGCATTGAGGGCAAGGTTT  
+HWI-EAS443:3:92:1603:987#0/1  
a\_`¥b^a^[\_`^[]a`^a`^\_[FXYNFKKNV^UZUGV[¥  
@HWI-EAS443:3:100:954:751#0/1  
CTCTTCGCCTCTTTCCGACTGACGAAAGGAATACCATAGA  
+HWI-EAS443:3:100:954:751#0/1  
abS¥Xa^HaZP`b^`\_[] []aaU[\_a\_SNHaYFH^[] [aB  
@HWI-EAS443:3:25:1443:167#0/1  
CTCTCCGATTGGCCATGTTCCCGATTTGTTTTCAAAGAAT  
+HWI-EAS443:3:25:1443:167#0/1  
abbbbbbbbbbbbbbaaaabaa`^`abba\_ba\_V^` `aaa\_  
@HWI-EAS443:3:33:1724:633#0/1  
ATCAGGCACTCCTCGATTGCTTCATATAGCCCTCGAAGAT  
+HWI-EAS443:3:33:1724:633#0/1  
^¥`bb]baab\_aaab\_W\_a\_ZZ[\_`a\_\_aU\_¥GLERXSVP

@HWI-EAS443:3:36:1028:180#0/1  
GATGGATTGAGCCGAACGGCTGCATTTAGGGCAAGCTTT  
+HWI-EAS443:3:36:1028:180#0/1  
aU`bb\_aaaa\_]\_[\_\_`\_\_¥Z\_XP¥ZVDIT^UQRNPQSTR  
@HWI-EAS443:3:51:215:188#0/1  
ATGGATTGAGCCGAACGGCTGCATTGAGGGGAAGCTTTC  
+HWI-EAS443:3:51:215:188#0/1  
[\_a\_aabaaaa[X]``\_a^JY`V¥YUEPSX¥GO]VLO^QQ  
@HWI-EAS443:3:52:528:681#0/1  
GATGGATTGAGCCGAACGGCTGCATTGAGGGCTAGCTTT  
+HWI-EAS443:3:52:528:681#0/1  
a[\_bb^a\_X[\_`\_a`XQ`T¥¥VTVV^PURRNL¥QFWWTQNU  
@HWI-EAS443:3:73:177:1169#0/1  
CTCCGATTGGCCATGTTTCCGATTTTTTTTTCAAAGAATTC  
+HWI-EAS443:3:73:177:1169#0/1  
a`b`]¥a\_a¥aZa]]U^¥[\_`a¥STYGMP[[[¥X`WYXNP  
@HWI-EAS443:3:80:23:669#0/1  
CTCCGATTGGCCATGTTTCCGATTTGTTTTCCAAGAATTC  
+HWI-EAS443:3:80:23:669#0/1  
abaa\_WX0[aa`V^[] [Y^YZTZXXTY][UFXSISHYXV  
@HWI-EAS443:3:88:278:1302#0/1  
CTCCGCTTGGCCATGTTTCCGATTTGTTTTCAAAGAATTC  
+HWI-EAS443:3:88:278:1302#0/1  
aaabZG¥a\_a^`\_`[\_`aa`^W`a]W]^`a\_UW`a]¥` `a  
@HWI-EAS443:3:31:1007:1299#0/1  
GGCCCTTACTGGCAAATCTGTATTCAACAGTCTATATGC  
+HWI-EAS443:3:31:1007:1299#0/1  
aababa`aa^`aa^[\_`a\_aa]aa`aaYaaZ\_a¥\_¥\_\_V  
@HWI-EAS443:3:35:1012:2031#0/1  
AGCTTGCCCTCAATGCAGCCGTTCCGCTCGAATCCATTTA  
+HWI-EAS443:3:35:1012:2031#0/1  
aaa]aaaaabaa`a]b`a`\_[\_`\_]XZUHJVgBg]BBBB  
@HWI-EAS443:3:3:42:517#0/1  
TTCGCCTCTTTCGACTGACGAAAGGAATCCCATAGAGCT  
+HWI-EAS443:3:3:42:517#0/1  
\_aa\_a`¥`aa`\_P¥]^`a¥`U^\_[X¥\_\_[[U^^¥`^\_U¥  
@HWI-EAS443:3:98:1006:2024#0/1  
GACTCTCCGATTGGCCATGTTTCCGATTTGTTTTCAAGAA  
+HWI-EAS443:3:98:1006:2024#0/1  
[TZa¥`U^`b`b`X\_\_aTbaa[aJ`a`bX^\_]X]b]ba  
@HWI-EAS443:3:17:1790:879#0/1  
ATGGATTGAGCCGAACGGCTGCATTGANGGCAAGCTTTC  
+HWI-EAS443:3:17:1790:879#0/1  
aaaa`\_a\_\_a`Z[a\_¥¥`^UW\_VVTYSRDS\_QXWNTNZWL  
@HWI-EAS443:3:39:126:1790#0/1  
AGAAGGAAGACGGAAAACAAACCTGTATGGGNTCATTATA  
+HWI-EAS443:3:39:126:1790#0/1  
^[aa]`\_aa`a`¥^aaa`a`\_\_\_\_`\_\_¥PDXa\_\_^[\_`^  
@HWI-EAS443:3:44:1754:1713#0/1  
TCTCCGATTGGCCATGTTTCCGATTNGTTTTCAAAGAATT

+HWI-EAS443:3:44:1754:1713#0/1  
^OT]¥\_RWYa\_`\_\_\_`R[¥^[URIMVDW^[ZOKXXYVV¥QR  
@HWI-EAS443:3:92:680:1470#0/1  
CTTNTATAATGAACCCATACAGGTTTGTTCCTCCGTTCC  
+HWI-EAS443:3:92:680:1470#0/1  
Y]YD]b`ZaabbabaabbbabbZa\_abbbWba]bb`a^  
@HWI-EAS443:3:75:497:39#0/1  
CTCCGATTGGCCATGTTTCCGATTTGTTTTCAAAGAATTA  
+HWI-EAS443:3:75:497:39#0/1  
aaaaba`[aa¥XYZ[X`¥OZ]¥X\_`]T\_`\_G¥^ZaYS]^N  
@HWI-EAS443:3:100:845:277#0/1  
CTCCGATTGGCCATGTTTCCGATTTGTTTTCAAAGAATTC  
+HWI-EAS443:3:100:845:277#0/1  
a\_a`aa`a^a`[\_`aYa`]^M^aaZX\_\_\_^]^`¥0¥BB  
@HWI-EAS443:3:10:24:529#0/1  
GATGGATTGAGCCGAACGGCTGCATTGAGGGCAAGCTTT  
+HWI-EAS443:3:10:24:529#0/1  
a\_^XYYS[S[^`\_`[Z¥VPP^BBBBBBBBBBBBBBBBBB  
@HWI-EAS443:3:13:1659:251#0/1  
TGACTCTCCGATTGGCCATGTTTCCGATTTGTTTTCAAAG  
+HWI-EAS443:3:13:1659:251#0/1  
`bb\_a\_a^a`\_^`\_^RY¥Z^Y\_aWVRV]\_]VZ^[SUZZB  
@HWI-EAS443:3:14:831:940#0/1  
CTCTCCGATTGGCCATGTTTCCGATTTGTTTTCAAAGAAT  
+HWI-EAS443:3:14:831:940#0/1  
L\_`bb`[\_`¥b¥^¥bbZS`^Wa^Taa\_b]`\_a]a]`aT\_a  
@HWI-EAS443:3:16:1255:1928#0/1  
GATGGATTGAGCCGAACGGCTGCATTGAGGGCAAGCTTT  
+HWI-EAS443:3:16:1255:1928#0/1  
\_\_abbaa`\_`[\_`a`aa`b^`\_a[a\_aPRP¥\_aaU[\_YSVa]  
@HWI-EAS443:3:17:1775:1231#0/1  
CTCCGATTGGCCATGTTTCCGATTTGTTTTCAAAGAATTC  
+HWI-EAS443:3:17:1775:1231#0/1  
a`\_abaaba`^`^`aIa^XU\_X][\_a\_\_a]Z`\_]\_^U^[W  
@HWI-EAS443:3:17:754:1139#0/1  
CTCCGATTGGCCATGTTTCCGATTTGTTTTCAAAGAATTC  
+HWI-EAS443:3:17:754:1139#0/1  
aa```]a]aXa`^¥Y[aa^]UV]\_`¥Z\_]^[^`a`^ZRJ  
@HWI-EAS443:3:19:377:719#0/1  
CTCCGATTGGCCATGTTTCCGATTTGTTTTCAAAGAATTC  
+HWI-EAS443:3:19:377:719#0/1  
a\_aa`Y`a\_abaa`a`aaaa¥NZaa`N]a\_ZYaaR\_Z^`\_  
@HWI-EAS443:3:19:500:620#0/1  
CTCTCCGATTGGCCATGTTTCCGATTTGTTTTCAAAGAAT  
+HWI-EAS443:3:19:500:620#0/1  
TWababbaZ]ba`aaaa`aaaaWY\_aXX¥aaaaaa]¥`a  
@HWI-EAS443:3:19:964:1739#0/1  
CTCTCCGATTGGCCATGTTTCCGATTTGTTTTCAAAGAAT  
+HWI-EAS443:3:19:964:1739#0/1  
abababbbbbbbaaaaa`^ab`aaaaaaa\_aaa`aaa`````

@HWI-EAS443:3:20:1161:551#0/1  
CTCTCCGATTGGCCATGTTTCCGATTTGTTTTCAAAGAAT  
+HWI-EAS443:3:20:1161:551#0/1  
abbb`b`baaabX[]a`Xaa^a`\_\_aaa`a`S]`aaaY^  
@HWI-EAS443:3:22:356:1265#0/1  
CTCTCCGATTGGCCATGTTTCCGATTTGTTTTCAAAGAAT  
+HWI-EAS443:3:22:356:1265#0/1  
aaa`a[\_^]ZU\_\_]^\_Xa`\_``]\_``\_]\_`\_T\_\_^X^^^  
@HWI-EAS443:3:23:1357:417#0/1  
CTCTCCGATTGGCCATGTTTCCGATTTGTTTTCAAAGAAT  
+HWI-EAS443:3:23:1357:417#0/1  
ab^baabbaba[aa`¥`ba[`a`[aaaVaa\_[]aba[\_`  
@HWI-EAS443:3:24:1584:1638#0/1  
GGAAGACGAAAACAAACCTGTATGGGTTTCATTATAAAAG  
+HWI-EAS443:3:24:1584:1638#0/1  
\_`^`[^W`aaa\_\_Q[a`Y]aaR^]a[[J^[\_a\_aZN[]\_`^  
@HWI-EAS443:3:25:141:14#0/1  
CTCTCCGATTGGCCATGTTTCCGATTTGTTTTCAAAGAAT  
+HWI-EAS443:3:25:141:14#0/1  
`bb`¥0Zbbabaa^aa\_Saba`a``]\_YG\_aa¥QYHXWJS  
@HWI-EAS443:3:25:142:2025#0/1  
TTTATAATGAACCCATACAGGTTTGTTCCTTCCTT  
+HWI-EAS443:3:25:142:2025#0/1  
`\_a[\_aa^^LWaaaZ`\_a^\_NW\_aX[]\_a¥^\_Ya]S[  
@HWI-EAS443:3:25:1653:1462#0/1  
TAATGAACCCATACAGGTTTGTTCCTTCCTTCTTT  
+HWI-EAS443:3:25:1653:1462#0/1  
a`abbab`a`aaa`aaa^`a]`a\_]\_]`^X]\_`^Z\_\_\_\_  
@HWI-EAS443:3:25:795:85#0/1  
CTCCGATTGGCCATGTTTCCGATTTGTTTTCAAAGAATTC  
+HWI-EAS443:3:25:795:85#0/1  
abbbbbbbbbbb`a`bba^`Z`bb\_\_`aaXZaa\_`^`aa¥  
@HWI-EAS443:3:26:652:337#0/1  
GGGTGACTCTCCGATTGGCCATGTTTCCGATTTGTTTTCA  
+HWI-EAS443:3:26:652:337#0/1  
aa\_Z\_aa`a\_a`a^X\_a\_]WTQQO^`¥\_]Z]^XLT\_YLU  
@HWI-EAS443:3:26:84:149#0/1  
ATGGATTGAGCCGAACGGCTGCATTGAGGGCAAGCTTTC  
+HWI-EAS443:3:26:84:149#0/1  
aaaaaaaa`[\_aa\_```\_\_\_^]V[P[NZVSZVJXRSZ[XB  
@HWI-EAS443:3:27:1057:976#0/1  
GTCTATGGGATTCTTTCGTCAGTCCGAAAGAGGCGAAGA  
+HWI-EAS443:3:27:1057:976#0/1  
a`aa`b`Y`aaaa\_a`a`a`\_`a]`\_``````¥]^\_\_\_\_\_  
@HWI-EAS443:3:27:1146:264#0/1  
GATGGATTGAGCCGAACGGCTGCATTGAGGGCAAGCTTT  
+HWI-EAS443:3:27:1146:264#0/1  
]bbba``aaaa`\_\_a`^YbaZ]RFNS[`¥¥`\_WW\_]QZ¥^  
@HWI-EAS443:3:2:1118:351#0/1  
CTCCGATTGGCCATGTTTCCGATTTGTTTTCAAAGAATTC

+HWI-EAS443:3:2:1118:351#0/1  
aW`b^ZbT`OSS[a\_^a\_Sa\_H\_Y\_aG¥\_ZP^Qa`UV¥^S  
@HWI-EAS443:3:30:925:1379#0/1  
GGAAGACGGAAAACAAACCTGTATGGGTTTCATTATAAAAAG  
+HWI-EAS443:3:30:925:1379#0/1  
^`Y^aa`babaababbbab^aaaabaa]aabaaaa`^^`  
@HWI-EAS443:3:31:1214:902#0/1  
CTCTCCGATTGGCCATGTTTCCGATTTGTTTTCAAAGAAT  
+HWI-EAS443:3:31:1214:902#0/1  
abbbb`b\_bbb\_bbbb¥]bb`ba`ba`bba^abaaaba  
@HWI-EAS443:3:31:549:501#0/1  
CTCTCCGATTGGCCATGTTTCCGATTTGTTTTCAAAGAAT  
+HWI-EAS443:3:31:549:501#0/1  
a`b\_abbaba]a]S\_[`\_`a]a`S[aa`\_aaaY¥^`\_`\_\_  
@HWI-EAS443:3:32:342:1512#0/1  
CTTTGAAAACAAATCGGAAACATGGCCAATCGGAGAGTCA  
+HWI-EAS443:3:32:342:1512#0/1  
aU`V^ZSW`Z\_YUWXLN\_¥^\_YHN\_\_¥ZV[VTTW[WU¥B  
@HWI-EAS443:3:34:271:1263#0/1  
CTCCGATTGGCCATGTTTCCGATTTGTTTTCAAAGAATTC  
+HWI-EAS443:3:34:271:1263#0/1  
abbbb`aaaabb\_a¥Uababb`aaaaaabaa]bVa`aa`  
@HWI-EAS443:3:34:473:890#0/1  
CTCCGATTGGCCATGTTTCCGATTTGTTTTCAAAGAATTC  
+HWI-EAS443:3:34:473:890#0/1  
aabaa`aa\_aa`\_a¥aa`\_]W]a\_\_V^\_`^[\_UV^]YY  
@HWI-EAS443:3:36:1071:1105#0/1  
CTCTCCGATTGGCCATGTTTCCGATTTGTTTTCAAAGAAT  
+HWI-EAS443:3:36:1071:1105#0/1  
aba]aba]aababa\_]^\_aa`a`^aaa^a^^]]]a]^\_  
@HWI-EAS443:3:36:1682:1514#0/1  
CTCCGATTGGCCATGTTTCCGATTTGTTTTCAAAGAATTC  
+HWI-EAS443:3:36:1682:1514#0/1  
aaa`^YQVR¥`X[[\_U[UOUZWW[\_a]^a\_ZUVXXJTUTS  
@HWI-EAS443:3:36:799:1468#0/1  
CTCCGATTGGCCATGTTTCCGATTTGTTTTCAAAGAATTC  
+HWI-EAS443:3:36:799:1468#0/1  
a^a`¥UZa`a`\_]\_]¥aTXZ^VX`]YP[\_`^[\_YPIYZ^\_\_  
@HWI-EAS443:3:37:1448:1175#0/1  
TGACTCTCCGATTGGCCATGTTTCCGATTTGTTTTCAAAG  
+HWI-EAS443:3:37:1448:1175#0/1  
aba^a¥a^aa¥]a`\_Z¥\_[Waa\_\_YZXaZ]¥]`\_Q`YR  
@HWI-EAS443:3:38:1746:455#0/1  
AAGAAGGAAGACGGAAAACAAACCTGTATGGGTTTCATTAT  
+HWI-EAS443:3:38:1746:455#0/1  
aabaabb`aba\_a`aaaaa`a\_\_`a`aa\_VQV\_Y]a\_\_]  
@HWI-EAS443:3:39:992:65#0/1  
CTTTTATAATGAACCCATACAGGTTTGTTCCTTCC  
+HWI-EAS443:3:39:992:65#0/1  
¥^baa`Z`a\_aaaV\_a[YQ`b]^Y`a`YMG^\_Y^a[F

@HWI-EAS443:3:3:575:1623#0/1  
TTTGAAAACAAATCGGAAACATGGCCAATCGGAGAGTCAC  
+HWI-EAS443:3:3:575:1623#0/1  
aa¥aa]VaUaa`\_QHNP[aUWaa\_YGRWSG]NW\_W]QNZB  
@HWI-EAS443:3:43:966:444#0/1  
AGAAGGAAGACGGAAAACAAACCTGTATGGGTTTCATTATA  
+HWI-EAS443:3:43:966:444#0/1  
¥]V¥¥\_\_¥¥W]^Z¥`XaU¥a]`\_bbY¥\_a\_`Z`\_`baaZ[  
@HWI-EAS443:3:45:1019:483#0/1  
TGACTCTCCGATTGGCCATGTTTCCGATTTGTTTTCAAAG  
+HWI-EAS443:3:45:1019:483#0/1  
abaaaaaaaa`aaaa\_\_`\_]¥adW\_`X`aa^aa[DX\_\_[  
@HWI-EAS443:3:47:1277:727#0/1  
CTCCGATTGGCCATGTTTCCGATTTGTTTTCAAAGAATTC  
+HWI-EAS443:3:47:1277:727#0/1  
ababbabbbab\_abbabbY^`^abb\_\_ab\_P]aaaa\_ab^  
@HWI-EAS443:3:47:1316:1758#0/1  
TGACTCTCCGATTGGCCATGTTTCCGATTTGTTTTCAAAG  
+HWI-EAS443:3:47:1316:1758#0/1  
\_a^Y`^ZWZ```]\_]PX]SMYVHX\_NU]TX[SZZRX¥ZZ  
@HWI-EAS443:3:47:1421:1970#0/1  
AAAGAAGGAAGACGGAAAACAAACCTGTATGGGTTTCATTA  
+HWI-EAS443:3:47:1421:1970#0/1  
abaaaaaaaa\_aaa\_a[aaa`]\_^`\_V``]\_¥^^¥Y^\_Y\_Y]  
@HWI-EAS443:3:47:181:1679#0/1  
CTCCGATTGGCCATGTTTCCGATTTGTTTTCAAAGAATTC  
+HWI-EAS443:3:47:181:1679#0/1  
^ab\_Xbbb`baa\_[^SbbUYRQabbX\_bb]G^X^`^\_aUW  
@HWI-EAS443:3:49:1350:294#0/1  
CTCTCCGATTGGCCATGTTTCCGATTTGTTTTCAAAGAAT  
+HWI-EAS443:3:49:1350:294#0/1  
ababaababbabaa\_bbaba`abWabb]\_bbb^aaaaaaa  
@HWI-EAS443:3:49:1605:1158#0/1  
CTCTCCGATTGGCCATGTTTCCGATTTGTTTTCAAAGAAT  
+HWI-EAS443:3:49:1605:1158#0/1  
a`ba`bbabbbbaa`a^abaW]`]abbaaabaa]]a\_W]a  
@HWI-EAS443:3:49:173:751#0/1  
CTCCGATTGGCCATGTTTCCGATTTGTTTTCAAAGAATTC  
+HWI-EAS443:3:49:173:751#0/1  
abbbbabaabaaabbabbaa\_0\_bab`abba`baaaaaba  
@HWI-EAS443:3:50:367:1614#0/1  
GATGGATTCCGACCGAACGGCTGCATTGAGGGCAAGCTTT  
+HWI-EAS443:3:50:367:1614#0/1  
a¥aabaaaR^Xa^T``]¥¥WZW^NVOYX[Z¥TMU^BBBBB  
@HWI-EAS443:3:51:1614:899#0/1  
CTCTCCGATTGGCCATGTTTCCGATTTGTTTTCAAAGAAT  
+HWI-EAS443:3:51:1614:899#0/1  
`abbabbbb`b`\_aa]bbbV`aabbaZ^abb`b`\_abb  
@HWI-EAS443:3:52:90:1254#0/1  
TATAATGAACCCATACAGGTTTGTTCCTCCTCCTCCT

+HWI-EAS443:3:52:90:1254#0/1  
aaabaaaa^aaaa^\_a]Uaa` `aaa\_a[Y^a`\_` `¥Y\_  
@HWI-EAS443:3:53:476:182#0/1  
GTGACTCTCCGATTGGCCATGTTTCCGATTTGTTTTCAAA  
+HWI-EAS443:3:53:476:182#0/1  
a\_a\_^a[ZS[]NN]]¥RTRYXV\_`PV[SW^RLW^\_]LLV¥  
@HWI-EAS443:3:58:1554:1648#0/1  
CTCTCCGATTGGCCATGTTTCCGATTTGTTTTCAAAGAAT  
+HWI-EAS443:3:58:1554:1648#0/1  
aba`a\_bab\_V`V[^ZQXaa][a]`\_WTab`GW¥^aW\_a  
@HWI-EAS443:3:59:1588:954#0/1  
GATGGATTCCGAGCCGAACGGCTGCATTGAGGGCAAGCTTT  
+HWI-EAS443:3:59:1588:954#0/1  
`aab\_baa`aaaa]^\_aaa` `a\_V\_a\_]Z\_ZUZRDDKRX  
@HWI-EAS443:3:59:1740:544#0/1  
CTCCGATTGGCCATGTTTCCGATTTGTTTTCAAAGAATTC  
+HWI-EAS443:3:59:1740:544#0/1  
]abbbbbbbba`\_\_Xa\_\_^[\_ba¥Ybb\_ZW` `^UPa]J  
@HWI-EAS443:3:5:129:615#0/1  
CTCTCCGATTGGCCATGTTTCCGATTTGTTTTCAAAGAAT  
+HWI-EAS443:3:5:129:615#0/1  
ab`bbab`abbbaa\_]ab`^`Z\_aaa\_aa` `a]aaaa  
@HWI-EAS443:3:5:331:27#0/1  
GATGGATTCCGAGCCGAACGGCTGCATTGAGGGCAAGCTTT  
+HWI-EAS443:3:5:331:27#0/1  
]`abaX^aabab]Za\_aXab`^aLYJVWG^`[BBBBBBBB  
@HWI-EAS443:3:60:1705:35#0/1  
CTCCGATTGGCCATGTTTCCGATTTGTTTTCAAAGAATTC  
+HWI-EAS443:3:60:1705:35#0/1  
aaabaaaabaa` `]a`aa]` `X^\_`T]`a¥MT[YZ]X`]W  
@HWI-EAS443:3:61:20:1030#0/1  
CTCCGATTGGCCATGTTTCCGATTTGTTTTCAAAGAATTC  
+HWI-EAS443:3:61:20:1030#0/1  
^bbabba`a\_b^a`¥Ya`ba^J[bab]aaa^SOVY]^\_a0  
@HWI-EAS443:3:61:27:200#0/1  
CTCTCCGATTGGCCATGTTTCCGATTTGTTTTCAAAGAAT  
+HWI-EAS443:3:61:27:200#0/1  
aabbbbaabababaZ^b[^`aYaWQX`a\_]aa`YR` `Z[\_`  
@HWI-EAS443:3:63:506:1574#0/1  
CTCCGATTGGCCATGTTTCCGATTTGTTTTCAAAGAATTC  
+HWI-EAS443:3:63:506:1574#0/1  
aaa`ZV]¥YYa\_ZXT¥` `aa^¥W` ¥YR^\_^Z\_YY^¥]\_]\_^  
@HWI-EAS443:3:63:92:707#0/1  
CTCTCCGATTGGCCATGTTTCCGATTTGTTTTCAAAGAAT  
+HWI-EAS443:3:63:92:707#0/1  
\_Z¥b`bb`baa`\_YS^[^aaaaYFW` ¥[TX` `]`Q]]^¥^  
@HWI-EAS443:3:65:1502:1747#0/1  
GATGGATTCCGAGCCGAACGGCTGCATTGAGGGCAAGCTTT  
+HWI-EAS443:3:65:1502:1747#0/1  
`\_X¥VT¥RW^` ¥Y¥RV[BBBBBBBBBBBBBBBBBBBB



@HWI-EAS443:3:66:1267:945#0/1  
ATGGATTTCGAGCCGAACGGCTGCATTGAGGGCAAGCTTTC  
+HWI-EAS443:3:66:1267:945#0/1  
`aaa`ab`^¥aa`\_]\_Z\_]Z]a\_X]¥WEMV¥[XTV^U[[[V  
@HWI-EAS443:3:66:1412:738#0/1  
GATGGATTTCGAGCCGAACGGCTGCATTGAGGGCAAGCTTT  
+HWI-EAS443:3:66:1412:738#0/1  
aaabbabaaa\_`aTa\_[]][\_\_W\_¥^ZHRVZaSU][UU[^  
@HWI-EAS443:3:69:611:1747#0/1  
CTCCGATTGGCCATGTTTCCGATTTGTTTTCAAAGAATTC  
+HWI-EAS443:3:69:611:1747#0/1  
abbbaa`aaaaa]Z\_]aaaa\_0[`a`Y`a`aa`\_\_\_\_a`]  
@HWI-EAS443:3:6:119:1923#0/1  
GACTCTCCGATTGGCCATGTTTCCGATTTGTTTTCAAAGA  
+HWI-EAS443:3:6:119:1923#0/1  
abbab^a`baaaba¥]aa\_`a\_a`Z`QbaaZa^]Qaba`B  
@HWI-EAS443:3:70:589:263#0/1  
AAAGAAGGAAGACGGAAAACAAACCTGTATGGGTTTCATTA  
+HWI-EAS443:3:70:589:263#0/1  
aaaaa`a`\_\_`a`aaaa`\_]`\_]`^`\_]`\_`^`^`^`^`^`^`\_`  
@HWI-EAS443:3:71:560:1781#0/1  
CTTTTATAATGAACCCATACAGTTTGTGTTTCCGTCTTCC  
+HWI-EAS443:3:71:560:1781#0/1  
^^b``a[a`a`\_]`bbb^`bbbaa]abaabbabb`aabaaa  
@HWI-EAS443:3:71:830:1093#0/1  
CTCCGATTGGCCATGTTTCCGATTTGTTTTCAAAGAATTC  
+HWI-EAS443:3:71:830:1093#0/1  
abbbb`a`abba`a``aaaa\_aabaXbb\_Ya^baaabab  
@HWI-EAS443:3:72:902:1604#0/1  
CTCCGATTGGCCATGTTTCCGATTTGTTTTCAAAGAATTC  
+HWI-EAS443:3:72:902:1604#0/1  
a^bb]XXa^Qa\_`aVaaaY\_]`[^VQS^aaW]``]]X^^W  
@HWI-EAS443:3:74:1114:467#0/1  
TGACTCTCCGATTGGCCATGTTTCCGATTTGTTTTCAAAG  
+HWI-EAS443:3:74:1114:467#0/1  
\_`aa\_[a`\_MYab¥]\_T[Y^^a¥XX¥ab`LZaaa¥^]\_X  
@HWI-EAS443:3:74:948:62#0/1  
CTCCGATTGGCCATGTTTCCGATTTGTTTTCAAAGAATTC  
+HWI-EAS443:3:74:948:62#0/1  
abZ\_\_I\_^abK^[\_RY\_[bVS\_[b^[V^bTG]`U\_abaaB  
@HWI-EAS443:3:75:968:1461#0/1  
ATGGATTTCGAGCCGAACGGCTGCATTGAGGGCAAGCTTTC  
+HWI-EAS443:3:75:968:1461#0/1  
\_`T¥¥\_ba]aa\_\_`aZ`Z`aaV[\_[Z^]\_\_`\_a\_LVUY¥  
@HWI-EAS443:3:76:1176:573#0/1  
CTCCGATTGGCCATGTTTCCGATTTGTTTTCAAAGAATTC  
+HWI-EAS443:3:76:1176:573#0/1  
aabb`¥abbba`ba\_WbZa`]H`a`ZT\_aa^\_]`^aU^]\_]  
@HWI-EAS443:3:76:1205:112#0/1  
CTCCGATTGGCCATGTTTCCGATTTGTTTTCAAAGAATTC

+HWI-EAS443:3:76:1205:112#0/1  
`abaaa`baba^^a¥Yab\_\_`W`aba\_aaa]\_aaa]^``\_  
@HWI-EAS443:3:76:215:1232#0/1  
CTTTTATAATGAACCCATACAGTTTGTTCCTTCCGTCTCC  
+HWI-EAS443:3:76:215:1232#0/1  
``bbbb\_H\_bb`Z`bb^bbb`^\_T¥`\_`a¥a\_ba\_\_aaaba  
@HWI-EAS443:3:78:170:586#0/1  
CTCTCCGATTGGCCATGTTTCCGATTTGTTTTCAAAGAAT  
+HWI-EAS443:3:78:170:586#0/1  
a`b]`]]PWQ^S^]VXZK[WW[[UV]]M¥^^\_VSWZNTT  
@HWI-EAS443:3:80:309:521#0/1  
ATGGATTGAGCCGAACGGCTGCATTGAGGGCAAGCTTTC  
+HWI-EAS443:3:80:309:521#0/1  
¥a\_[]`^^bbbaa^a`^aa`^a^]W]HLLQRMRYSVQTXF  
@HWI-EAS443:3:81:1018:383#0/1  
CTCCGATTGGCCATGTTTCCGATTTGTTTTCAAAGAATTC  
+HWI-EAS443:3:81:1018:383#0/1  
aa`VGXa\_\_XXaYR`U¥`UQTMOX^\_L\_V][R^¥XWSUPM  
@HWI-EAS443:3:81:1243:1360#0/1  
CTCTCCGATTGGCCATGTTTCCGATTTGTTTTCAAAGAAT  
+HWI-EAS443:3:81:1243:1360#0/1  
aa¥bVa^Zaab`^aa[``aa`^UU\_a`^T]\_a\_a^a]Y]`  
@HWI-EAS443:3:82:244:1604#0/1  
CTCTTCGCCTCTTTCCGACTGACGAAAGGAATCCCATAGA  
+HWI-EAS443:3:82:244:1604#0/1  
a^a`]^`^`\_[]`Z[]RPFU\_XOXN[R^QP]^ZLZ`VWYY  
@HWI-EAS443:3:83:199:427#0/1  
CTCTTCGCCTCTTTCCGACTGACGAAAGGAATCCCATAGA  
+HWI-EAS443:3:83:199:427#0/1  
aabb^aabaaa\_aaa`\_[]\_a`^a````[¥\_a\_[]\_[]\_[]\_[]\_¥  
@HWI-EAS443:3:84:1553:503#0/1  
CTCCGATTGGCCATGTTTCCGATTTGTTTTCAAAGAATTC  
+HWI-EAS443:3:84:1553:503#0/1  
abbbbbbb`^`a`\_aba]aaabbbbaabbVaa`ba`aa\_  
@HWI-EAS443:3:84:575:587#0/1  
CTCCGATTGGCCATGTTTCCGATTTGTTTTCAAAGAATTC  
+HWI-EAS443:3:84:575:587#0/1  
XabaZ[[aaX\_b¥\_UI]a`\_QV`^aaXa^¥WZ^^aa`\_Ya  
@HWI-EAS443:3:85:410:1710#0/1  
CTCTCCGATTGGCCATGTTTCCGATTTGTTTTCAAAGAAT  
+HWI-EAS443:3:85:410:1710#0/1  
aabab\_a\_`YF[````Yaaa`]T]``ZVa]aa¥Y\_\_``\_  
@HWI-EAS443:3:86:504:1224#0/1  
GGGTGACTCTCCGATTGGCCATGTTTCCGATTTGTTTTCA  
+HWI-EAS443:3:86:504:1224#0/1  
abb[ababaa`^aaa`a`a`^`a`^`\_XVaa]\_a\_a^a  
@HWI-EAS443:3:86:901:781#0/1  
CTCTCCGATTGGCCATGTTTCCGATTTGTTTTCAAAGAAT  
+HWI-EAS443:3:86:901:781#0/1  
abba^`ba^``¥b`H[]`¥``b\_0¥^ab`a`[\_¥^Za]\_a

@HWI-EAS443:3:87:91:295#0/1  
GAAAGCTTGCCCTCAATGCAGCCGTTCCGGCTCGAATCCAT  
+HWI-EAS443:3:87:91:295#0/1  
a\_aMa`\_]\_aa\_a]WZ¥\_\_\_¥\_^TWY¥¥YYZNNSVVUWU  
@HWI-EAS443:3:88:1265:358#0/1  
CTCCGATTGGCCATGTTTCCGATTTGTTTTCAAAGAATTC  
+HWI-EAS443:3:88:1265:358#0/1  
`\_\_a`¥`a`a`\_b\_aS\_a`ab`[U\_b`Y]Z`\_`bba`  
@HWI-EAS443:3:8:1218:872#0/1  
CTCCGATTGGCCATGTTTCCGATTTGTTTTCAAAGAATTC  
+HWI-EAS443:3:8:1218:872#0/1  
abbabbbabaaabab\_bb[abaabab`bbb¥aaaaa\_a`\_  
@HWI-EAS443:3:8:1653:1918#0/1  
GAATTCCTTTGAAAACAAATCGGAAACATGGCCAATCGGAG  
+HWI-EAS443:3:8:1653:1918#0/1  
]abb`b`bb]bbIa`aaabS\_ab`\_`aaaaaHV\_\_`\_`^`  
@HWI-EAS443:3:8:277:481#0/1  
CTCCGATTGGCCATGTTTCCGATTTGTTTTCAAAGAATTC  
+HWI-EAS443:3:8:277:481#0/1  
`aa`aa^^`Z[U\_¥U]]]]\_UZx\_¥^`\_`\_]`\_\_\_\_\_`  
@HWI-EAS443:3:90:1132:674#0/1  
CTCTTCGCCTCTTTCCGACTGACGAAAGGAATCCCATAGA  
+HWI-EAS443:3:90:1132:674#0/1  
abbbbbbbbbbbbaabbaabbabba`abbabbb¥^a`a`\_  
@HWI-EAS443:3:90:164:1150#0/1  
TGGGTGACTCTCCGATTGGCCATGTTTCCGATTTGTTTTC  
+HWI-EAS443:3:90:164:1150#0/1  
abba`bZbbaabaaaaabaaa`\_\_aba`a`\_`aa`\_`aaX  
@HWI-EAS443:3:90:749:491#0/1  
GGGTGACTCTCCGATTGGCCATGTTTCCGATTTGTTTTCA  
+HWI-EAS443:3:90:749:491#0/1  
aaa0a`a`a`^^¥¥¥]a`X\_a`^`X¥]TW\_\_XX^¥WX  
@HWI-EAS443:3:91:265:1529#0/1  
CTCCGATTGGCCATGTTTCCGATTTGTTTTCAAAGAATTC  
+HWI-EAS443:3:91:265:1529#0/1  
`bbb^aa`abbb\_aR^abaa\_S^aa`\_`aa`a]a]`\_]`a^  
@HWI-EAS443:3:91:698:1293#0/1  
CTCCGATTGGCCATGTTTCCGATTTGTTTTCAAAGAATTC  
+HWI-EAS443:3:91:698:1293#0/1  
`bbbbabababbabbaabbbba`bb`\_baaa`baaaaaa  
@HWI-EAS443:3:92:399:877#0/1  
CTCTTCGCCTCTTTCCGACTGACGAAAGGAATCCCATAGA  
+HWI-EAS443:3:92:399:877#0/1  
^TW\_a]W`]RWZ\_aV]^a^^a^^`XY`Z^a`^]S¥\_^[Z  
@HWI-EAS443:3:93:895:313#0/1  
ATGGATTGAGCCGAACGGCTGCATTGAGGGCAAGCTTTC  
+HWI-EAS443:3:93:895:313#0/1  
a`bbU`aaa`a^aa`aVa`a`bSaW¥¥W^a[LR¥^NU^WW  
@HWI-EAS443:3:93:916:1640#0/1  
TGGGTGACTCTCCGATTGGCCATGTTTCCGATTTGTTTTC

+HWI-EAS443:3:93:916:1640#0/1  
Ya^WH^[\_¥\_]\_Y\_b]]]¥\_a\_¥VOYZ¥MS^ROVS`Y]```]  
@HWI-EAS443:3:95:698:941#0/1  
CTCCGATTGGCCATGTTTCCGATTTGTTTTCAAAGAATTC  
+HWI-EAS443:3:95:698:941#0/1  
aabb[bbbbaa¥\_a^\_a^\_a`abab\_abbaaaa\_aba`  
@HWI-EAS443:3:97:100:354#0/1  
CTCTCCGATTGGCCATGTTTCCGATTTGTTTTCAAAGAAT  
+HWI-EAS443:3:97:100:354#0/1  
^aaabab`bbbbaaa\_aYa`^¥`¥`aa`Z`a\_Q\_a`aaa\_  
@HWI-EAS443:3:97:1077:1031#0/1  
ATGGATTGAGCCGAACGGCTGCATTGAGGGCAAGCTTTC  
+HWI-EAS443:3:97:1077:1031#0/1  
abbbbaa^Zba\_a\_aba^a`a]aZ\_UVXYX`]JV[UYZ\_YM  
@HWI-EAS443:3:97:486:1636#0/1  
CTCTCCGATTGGCCATGTTTCCGATTTGTTTTCAAAGAAT  
+HWI-EAS443:3:97:486:1636#0/1  
\_babbX\_aabbbbbXaX]b`bY[aa`\_b`[Z]^aU`Wa  
@HWI-EAS443:3:97:909:968#0/1  
CTCCGATTGGCCATGTTTCCGATTTGTTTTCAAAGAATTC  
+HWI-EAS443:3:97:909:968#0/1  
¥a]a`\_R]a`YW\_`]]S]\_P]`¥¥[R[Y[L[\_¥aLQ]PX  
@HWI-EAS443:3:9:858:1101#0/1  
CTCCGATTGGCCATGTTTCCGATTTGTTTTCAAAGAATTC  
+HWI-EAS443:3:9:858:1101#0/1  
abb\_XVba`^XUS[aabb¥V`[`]Yb`aa^W\_]U¥[¥aaW  
@HWI-EAS443:3:13:401:1403#0/1  
CCCATATTCTTTCATTGCCTTTTCCGCAAGCTCGAAGATC  
+HWI-EAS443:3:13:401:1403#0/1  
a\_]¥VJbaa[bbb`bZSa\_bbaabbVabbLXa]UMH^b^^  
@HWI-EAS443:3:19:405:751#0/1  
GATCGTCGAGCTTGGCGAAAAGGCAATGAAAGAATATGGG  
+HWI-EAS443:3:19:405:751#0/1  
aaaaa`abaaa`aa]aa¥a`a]aa\_ab``\_`\_^`\_a]\_  
@HWI-EAS443:3:10:419:574#0/1  
CACCGATTTGAGATAATTGAAGGAAGAGACCGATATGCGT  
+HWI-EAS443:3:10:419:574#0/1  
aaabbaabbbb`bbbbaabbZbaab`aaaa\_a\_aa\_aa`^  
@HWI-EAS443:3:11:679:331#0/1  
GGCTCTTCCCCATCTTCTTTCATTGCCTTTTCCGCAAGCT  
+HWI-EAS443:3:11:679:331#0/1  
``G`S`[``\_`\_`Mab`bab\_bbba`bbbbbbb]abbaZa  
@HWI-EAS443:3:44:773:2035#0/1  
GCGCGAAAANGCAATGAAAGAATATGGGGAAGATCCGAA  
+HWI-EAS443:3:44:773:2035#0/1  
aX[ZVb`\_`PDUZa\_^a^aV¥\_¥¥\_¥\_^WU[P\_^ZZZ]Z]  
@HWI-EAS443:3:11:1618:1823#0/1  
GCGGAAAAGGCAATGAAAGAATATGGGGAAGATCAGAAAA  
+HWI-EAS443:3:11:1618:1823#0/1  
U`a\_\_[\_Sa`[ZY`b``]\_X[aaaVYP][]¥X[GGQX`aa

@HWI-EAS443:3:85:293:1716#0/1  
CTCTTCCCCTCTTTCGGACTGACGAAAGGAATCCCATAGA  
+HWI-EAS443:3:85:293:1716#0/1  
a`\_Z]S^b][V#aZUZ`\_TaaaaU]¥VJOaVDER]\_\_X`  
@HWI-EAS443:3:33:184:161#0/1  
CGAGCTTGCGGAAAAGGCAATGAAAGAATATGGGGAACCT  
+HWI-EAS443:3:33:184:161#0/1  
a`VS\_aVa\_Y]`MQRVV]WT``WSV]VLPJY[TUYUZWSW  
@HWI-EAS443:3:84:262:642#0/1  
TCCCCATATTCTTTCATTGCCTTTTCCGCAAGCTCGANGA  
+HWI-EAS443:3:84:262:642#0/1  
a`````b]ba``ababbabaaaaaabaaba`aaa[D¥`  
@HWI-EAS443:3:43:1712:1468#0/1  
AAAANGCAATGAAAGAATATGGGGAAGATCCGAAAATCGA  
+HWI-EAS443:3:43:1712:1468#0/1  
a\_b]D[ba`b¥^^`b`bbb\_baba]ab\_b\_aaabbaa]aa  
@HWI-EAS443:3:13:623:187#0/1  
CGCCCCATATTCTTTCATTGCCTTTTCCGCAAGCTCGACG  
+HWI-EAS443:3:13:623:187#0/1  
V\_bbb`\_a]bbZ\_^bbbbbaa`\_`aaaabbaababa¥a  
@HWI-EAS443:3:31:595:401#0/1  
ACCCCATATTCTTTCATTGCCTTTTCCGCAAGCTCGACGA  
+HWI-EAS443:3:31:595:401#0/1  
Zabbab¥Kbbbb`bbabaaabbb`bbabbbbabbbb¥baa  
@HWI-EAS443:3:62:1150:1982#0/1  
GTTCCCATATTCTTTCATTGCCTTTTCCGCAAGCTCGAC  
+HWI-EAS443:3:62:1150:1982#0/1  
`\_bbbbbabbbbababbbb`abbbba¥Ybbba`[```b  
@HWI-EAS443:3:12:1199:1347#0/1  
CTTGCGGAAAAGGCAATGAAAGAATATGGGGAAGATCCGA  
+HWI-EAS443:3:12:1199:1347#0/1  
aaaabaaabb`babbbbbbaa`abbbba`abaaba^\_b`  
@HWI-EAS443:3:19:325:648#0/1  
AAGGCAATGAAAGAATATGGGGAAGATCCGAAAATCGAAA  
+HWI-EAS443:3:19:325:648#0/1  
aababb^aaaaa`aa\_aaaaaaba\_a`aa`b``\_\_\_`a  
@HWI-EAS443:3:19:635:679#0/1  
GAAAAGGCAATGAAAGAATATGGGGAAGATCCGAAAATCG  
+HWI-EAS443:3:19:635:679#0/1  
\_U`R^a[]W^aY`\_¥SZ^a`\_^PY¥^ZY[\_\_\_U`TV\_]`  
@HWI-EAS443:3:25:1238:101#0/1  
TTTCGATTTTTCGGATCTTCCCCATATTCTTTCATTGCCTT  
+HWI-EAS443:3:25:1238:101#0/1  
`abab\_aaaa\_aUL\_N\_aWM[MR\_Saa^a``QY`]\_]R\_\_  
@HWI-EAS443:3:28:1551:564#0/1  
GGAAAAGGCAATGAAAGAATATGGGGAAGATCCGAAAATC  
+HWI-EAS443:3:28:1551:564#0/1  
aaaa`aa]a\_aa`\_`a`\_`]X`\_\_a^Y]\_^\_^S  
@HWI-EAS443:3:28:760:1326#0/1  
AAGGCAATGAAAGAATATGGGGAAGATCCGAAAATCGAAA

+HWI-EAS443:3:28:760:1326#0/1  
\_ ^]\_\_baaaaa`\_aaa`a`¥`^]Z^]a`aa`a`\_`\_`^`  
@HWI-EAS443:3:28:95:1267#0/1  
CTTGCGGAAAAGGCAATGAAAGAATATGGGGAAGATCCGA  
+HWI-EAS443:3:28:95:1267#0/1  
aa\_X`a`\_]`aaZN\_aaaa\_V]\_W]¥`^`\_Y]¥^`\_] ^] ^`  
@HWI-EAS443:3:32:242:1150#0/1  
CTTCCCATATTCTTTCATTGCCTTTTCCGCAAGCTCGAC  
+HWI-EAS443:3:32:242:1150#0/1  
abbbaba^`bbbbabbbbbbbbbbbbaaba\_`bbbb\_b  
@HWI-EAS443:3:32:97:198#0/1  
GATCTTCCCATATTCTTTCATTGCCTTTTCCGCAAGCTC  
+HWI-EAS443:3:32:97:198#0/1  
`G\_Vaa`\_a\_Za^babbbb\_aaaaabaaaa\_aa`a`R`\_\_  
@HWI-EAS443:3:36:609:1031#0/1  
TTGCGGAAAAGGCAATGAAAGAATATGGGGAAGATCCGAA  
+HWI-EAS443:3:36:609:1031#0/1  
\_]`a`^Mabb`¥Yaabbaa^¥]^aa`W¥\_aaa\_]baa`W  
@HWI-EAS443:3:38:827:1858#0/1  
CTTCCCATATTCTTTCATTGCCTTTTCCGCAAGCTCGAC  
+HWI-EAS443:3:38:827:1858#0/1  
abbbbbbbbbbbbbbbbbbbbbbbbbbbab[bba\_aa\_bV  
@HWI-EAS443:3:40:1496:260#0/1  
TCCCATATTCTTTCATTGCCTTTTCCGCAAGCTCGACGA  
+HWI-EAS443:3:40:1496:260#0/1  
^LYZaaaR\_a[a\_`\_\_a`a`\_a`\_^U]`\_`¥U[W^\_ZT^Y  
@HWI-EAS443:3:44:197:238#0/1  
CGATTTTCGGATCTTCCCATATTCTTTCATTGCCTTTTC  
+HWI-EAS443:3:44:197:238#0/1  
abXaaaaabaU^Xaa]^aaaa¥aaaaaaaaaaaa\_`aaa`\_  
@HWI-EAS443:3:44:281:318#0/1  
GCTTGCGGAAAAGGCAATGAAAGAATATGGGGAAGATCCG  
+HWI-EAS443:3:44:281:318#0/1  
a^aaaaaa\_aaZ]a`a`aa¥^]¥Y`\_`\_\_\_^`RU^`^Y¥^  
@HWI-EAS443:3:44:547:901#0/1  
GCGGAAAAGGCAATGAAAGAATATGGGGAAGATCCGAAAA  
+HWI-EAS443:3:44:547:901#0/1  
abbbabababab`bbab`a[[\_aa`aaa^a`aaa[^\_a\_`\_`\_  
@HWI-EAS443:3:47:1500:1543#0/1  
CTTGCGGAAAAGGCAATGAAAGAATATGGGGAAGATCCGA  
+HWI-EAS443:3:47:1500:1543#0/1  
aabaabbabababababab`\_a`aaaa\_\_\_a¥Y`\_\_\_Z`\_  
@HWI-EAS443:3:4:1522:965#0/1  
CTTGCGGAAAAGGCAATGAAAGAATATGGGGAAGATCCGA  
+HWI-EAS443:3:4:1522:965#0/1  
\_ab]\_a\_\_aaaaaaaabb`\_`\_a\_\_`a`a\_\_a`^a^WYZ`\_  
@HWI-EAS443:3:50:46:1472#0/1  
GTTCGAGCTTGCGGAAAAGGCAATGAAAGAATATGGGGAAG  
+HWI-EAS443:3:50:46:1472#0/1  
aZH[VZVZ\_^X\_`SZ][[\_UaYaa[UZ`^`\_`^¥^`\_`¥Y[^

@HWI-EAS443:3:53:517:300#0/1  
ATTTTCGGATCTTCCCATATTCTTTCATTGCCTTTTCCG  
+HWI-EAS443:3:53:517:300#0/1  
`aaabbbbZ\_[aaabbbbRbbbbbbb\_abbba^bbba¥ab  
@HWI-EAS443:3:54:197:334#0/1  
GCTTGCAGAAAAGGCAATGAAAGAATATGGGGAAGATCCG  
+HWI-EAS443:3:54:197:334#0/1  
aa^b`bb][\_\_\_\_\_aW`YU^]a]\_a`\_\_[^\_^\_^ZXUa  
@HWI-EAS443:3:58:363:1336#0/1  
GTCTGAGCTTGCAGAAAAGGCAATGAAAGAATATGGGGAAG  
+HWI-EAS443:3:58:363:1336#0/1  
a]`\_^aaa\_aabaaa`Ya\_aa^aa^]\_`W]]\_``\_\_\_\_Z`\_`  
@HWI-EAS443:3:64:1161:569#0/1  
ATCTTCCCATATTCTTTCATTGCCTTTTCCGCAAGCTCG  
+HWI-EAS443:3:64:1161:569#0/1  
`b`bbb\_`babbbbbbbbabbbbaabbbbaaaabbabb`  
@HWI-EAS443:3:65:202:262#0/1  
CTTCCCATATTCTTTCATTGCCTTTTCCGCAAGCTCGAC  
+HWI-EAS443:3:65:202:262#0/1  
\_XX\_[\_aa¥[``bb\_Z`\_[``bb`\_abbbb¥a`\_U`Y\_WSV  
@HWI-EAS443:3:66:1361:468#0/1  
GTCTGAGCTTGCAGAAAAGGCAATGAAAGAATATGGGGAAG  
+HWI-EAS443:3:66:1361:468#0/1  
a¥SXQ[``aa^aa[V¥^a`¥[Za]S\_\_a[OU^^`\_]\_ZX]  
@HWI-EAS443:3:67:493:803#0/1  
GCGGAAAAGGCAATGAAAGAATATGGGGAAGATCCGAAAA  
+HWI-EAS443:3:67:493:803#0/1  
^abba[````aa[aaaaaaaaabaaa`abaaaaabaaba  
@HWI-EAS443:3:69:1504:881#0/1  
CGTCGAGCTTGCAGAAAAGGCAATGAAAGAATATGGGGAA  
+HWI-EAS443:3:69:1504:881#0/1  
aaVbbabaa\_a\_baYa\_`aaaaab\_a^a]\_``a`^^^`^  
@HWI-EAS443:3:6:1373:1243#0/1  
TTGCGGAAAAGGCAATGAAAGAATATGGGGAAGATCCGAA  
+HWI-EAS443:3:6:1373:1243#0/1  
abbab`abaaTaaa^ab``\_a\_`a`\_¥\_\_a\_]a\_\_S`\_`a  
@HWI-EAS443:3:70:562:1340#0/1  
CTTCCCATATTCTTTCATTGCCTTTTCCGCAAGCTCGAC  
+HWI-EAS443:3:70:562:1340#0/1  
`bbaaa`Za\_bbba`a`\_`¥bb]babbbb`WWaab¥ba  
@HWI-EAS443:3:70:589:1989#0/1  
TTTCGGATCTTCCCATATTCTTTCATTGCCTTTTCCGCA  
+HWI-EAS443:3:70:589:1989#0/1  
aa\_a`SS]Y^a`T^aZaYaa`aaabba`abbaaaaa`b  
@HWI-EAS443:3:72:300:1586#0/1  
CTTCCCATATTCTTTCATTGCCTTTTCCGCAAGCTCGAC  
+HWI-EAS443:3:72:300:1586#0/1  
\_]`abbaWa¥```b`bbbabab`bbababba``aab`U`  
@HWI-EAS443:3:72:706:1674#0/1  
GAAAAGGCAATGAAAGAATATGGGGAAGATCCGAAAATCG

+HWI-EAS443:3:72:706:1674#0/1  
¥` `aaa^bb`¥R]¥aa`bb\_`a] `ab`aaabaaaaaa¥T  
@HWI-EAS443:3:72:89:453#0/1  
CTTCCCATATTCTTTCATTGCCTTTTCCGCAAGCTCGAC  
+HWI-EAS443:3:72:89:453#0/1  
^bbbaa\_P¥bb`\_babbabb` `bbbabbaaba]bbabbbb  
@HWI-EAS443:3:74:940:1786#0/1  
GTTTCGATTTTTCGGATCTTCCCATATTCTTTCATTGCCT  
+HWI-EAS443:3:74:940:1786#0/1  
a]aabaY` ` [ ` [ZSHRO\_Y] `Ya`\_Z\_\_^`\_]aZ`^^VP[  
@HWI-EAS443:3:76:657:1961#0/1  
AGGCAATGAAAGAATATGGGGAAGATCCGAAAATCGAAAC  
+HWI-EAS443:3:76:657:1961#0/1  
\_Y\_bb`bb^ba` ` ` `^aW]Zaaaa`\_aa`^^a\_`]\_\_a[  
@HWI-EAS443:3:76:743:1308#0/1  
CGATTTTTCGGATCTTCCCATATTCTTTCATTGCCTTTTC  
+HWI-EAS443:3:76:743:1308#0/1  
aaYabb\_aa` [\_Xaa\_^`¥^]Z[ ` `a^` `aa` `¥\_[\_a`\_`  
@HWI-EAS443:3:77:1476:784#0/1  
CGTCGAGCTTTCGGAAAAGGCAATGAAAGAATATGGGGAA  
+HWI-EAS443:3:77:1476:784#0/1  
`bab`bbabbbb` `babbbb[bbbbbbbbbbabbbbaU\_bb  
@HWI-EAS443:3:79:721:1878#0/1  
AGGCAATGAAAGAATATGGGGAAGATCCGAAAATCGAAAC  
+HWI-EAS443:3:79:721:1878#0/1  
`[W]ba\_¥¥` `]a`Z\_¥YSZV\_]a` `a¥a`^a^`Ua\_^]  
@HWI-EAS443:3:7:821:1116#0/1  
GAAAAGGCAATGAAAGAATATGGGGAAGATCCGAAAATCG  
+HWI-EAS443:3:7:821:1116#0/1  
aaaY^`baaa`aZ[\_aY\_a\_\_\_^^\_^^^\_\_ [N]^\_\_` [X\_  
@HWI-EAS443:3:83:31:1149#0/1  
GCGGAAAAGGCAATGAAAGAATATGGGGAAGATCCGAAAA  
+HWI-EAS443:3:83:31:1149#0/1  
aab\_¥^^` `a\_\_`a[Y\_`Y\_` `\_\_]^\_\_`\_]Z[\_^]\_`]  
@HWI-EAS443:3:91:1717:815#0/1  
GGATCTTCCCATATTCTTTCATTGCCTTTTCCGCAAGCT  
+HWI-EAS443:3:91:1717:815#0/1  
aaH[Z^a^¥ZUX]Z^`W`\_a[\_` `X^X\_a\_^ZX`Y\_]WRX  
@HWI-EAS443:3:96:1789:788#0/1  
TTGCGGAAAAGGCAATGAAAGAATATGGGGAAGATCCGAA  
+HWI-EAS443:3:96:1789:788#0/1  
Y^T`aba¥T[\_GZ`]\_^PPQ] ` \_T\_VZYZ\_\_a^ZY[W[\_B  
@HWI-EAS443:3:21:1498:1017#0/1  
ATCGAAGGTTCCAGGTTCCAGGTTGCCCTAAGAGCATGA  
+HWI-EAS443:3:21:1498:1017#0/1  
^\_[V]ZLUZ]\_Z¥]XV¥XUYRVRWX` ¥0¥BBBBBBBBBBBB  
@HWI-EAS443:3:49:444:754#0/1  
AAGATCGAAGGTTCCAGGTTCCAGGTTGTCGCTAAGTGGC  
+HWI-EAS443:3:49:444:754#0/1  
\_R^aa] `^0`aQSUW\_Z]]HX` [ ]aBBBBBBBBBBBBBBBB



@HWI-EAS443:3:16:940:664#0/1  
CGCCTTTCTTCAGTCTCTTCAGCAGATTGAGAGCATGATT  
+HWI-EAS443:3:16:940:664#0/1  
aa`\_]X\_a[a`]Y\_]Z`\_[]` [ZZX\_ZZY]U\_TVZ¥a]Q  
@HWI-EAS443:3:14:1512:736#0/1  
TATATGGAAATGAGGCGCNGCCTTCTTCAGTCTCTTCAGC  
+HWI-EAS443:3:14:1512:736#0/1  
\_¥``aaa]¥a[M^` [V\_XDYVYWZV\_] [U\_NG^WZ^W^YZ  
@HWI-EAS443:3:80:994:1623#0/1  
AGAGGCGCTGGCTTCTTCAGTCTCTTCAGCAGATTGAGAG  
+HWI-EAS443:3:80:994:1623#0/1  
^XWO^b\_\_VVHU[aXa¥^aaJPZTVXGNX``a^S[PGM]G  
@HWI-EAS443:3:21:493:146#0/1  
ATGGAAATGAGGCGCTGCCTTCTTCAGTCTCTTCAGAAGA  
+HWI-EAS443:3:21:493:146#0/1  
aab`\_[aaa`aa`\_]\_a`]]`\_^\_[]\_U\_\_`^Y][¥FX`Y  
@HWI-EAS443:3:30:1631:1199#0/1  
CAATCATGCTCTCAATCTGCTGAAGAGACTGAAGAATGAA  
+HWI-EAS443:3:30:1631:1199#0/1  
abb`YUaaZb]``]`abbab¥]OZ[[UX\_G`a`¥`U¥¥aIZ  
@HWI-EAS443:3:34:1362:1807#0/1  
TGGGAATGAGGCGCTGCCTTCTTCAGTCTCTTCAGCAGAT  
+HWI-EAS443:3:34:1362:1807#0/1  
aa\_I\_abbabb¥ba]a\_aaa\_¥bV]bIYba`\_Uaa\_Y\_YW  
@HWI-EAS443:3:40:1237:1784#0/1  
GCTACCTTCTTCAGTCTCTTCAGCAGATTGAGAGCATGAT  
+HWI-EAS443:3:40:1237:1784#0/1  
aaMDH`]QZZZU[^UV¥]¥[Z\_^WPPRLRU¥VUWOPW^Y  
@HWI-EAS443:3:6:1765:1145#0/1  
ATGGAAATGAGGCGCTGCCTTCTTCAGTCTCTTCAGGAGA  
+HWI-EAS443:3:6:1765:1145#0/1  
a^abVSa`\_`\_aaWa\_b`^`bXTX`\_`a]Y`[a]Y]`BBBB  
@HWI-EAS443:3:28:531:1750#0/1  
AGGAAATGAGGCGCTGCCTNCTTCAGTCTCTTCAGCAGAT  
+HWI-EAS443:3:28:531:1750#0/1  
aa`¥]aaaaU\_aaba^\_bYDZaaZ`^^aa\_aa\_]`T`\_\_X  
@HWI-EAS443:3:11:1666:403#0/1  
CGAAGGTTCCAGGTTCCAGGTTGTCCGTAAGTGCCTGAAC  
+HWI-EAS443:3:11:1666:403#0/1  
aa]aUUZaa^baaYa[[U]^]aa\_YRN`\_[aXaTW¥aX\_R  
@HWI-EAS443:3:12:1382:44#0/1  
ATGGAAATGAGGCGCTGCCTTCTTCAGTGTCTTCAGCAGA  
+HWI-EAS443:3:12:1382:44#0/1  
aab¥Waa]`b\_a\_ba\_aZZ\_VP`\_U]YQDXR[WGVTNQaB  
@HWI-EAS443:3:1:204:601#0/1  
ATGGAAATGAGGCGCTGCCTTCTTCAGTCTCTTAAGCAGA  
+HWI-EAS443:3:1:204:601#0/1  
]a^^`Z`a\_T\_YG¥ZP^FOV^UZYZULWGJ][BBBBBBB  
@HWI-EAS443:3:20:379:161#0/1  
ATCGAAGGTTCCAGGGTCCAGGTTGTCCCTAAGTGCCTGA

+HWI-EAS443:3:20:379:161#0/1  
\_][\_]TY`VaZ¥R^YHQ[UxwOLQsBBBBBBBBBBBBBBB  
@HWI-EAS443:3:21:520:1698#0/1  
AAGATCGAAGGTTCCAAGTTCCAGGTTGCCCTAAGTGCC  
+HWI-EAS443:3:21:520:1698#0/1  
a][XMZVXRP¥]TKSPFRT^a`]URVRUM\_S\_M^PTRLVY  
@HWI-EAS443:3:25:429:468#0/1  
CGAAGATTCCAGGTTCCAGGTTGCCCTAAGTGCCCTGAAC  
+HWI-EAS443:3:25:429:468#0/1  
P\_bbbabb`¥¥`^^b`a\_bU`WW\_b`^Q\_¥babbba\_M  
@HWI-EAS443:3:26:1654:364#0/1  
ATGGAAATGAGGCGCTGCCTTCGTCAGTCTCTTCAGCAGA  
+HWI-EAS443:3:26:1654:364#0/1  
aaY^baQTU¥^[aZ\_\_^BBBBBBBBBBBBBBBBBBBBBBB  
@HWI-EAS443:3:29:1019:822#0/1  
GCTGCCTTCTTCAGTCTCTTCACCAGATTGAGAGCATGAT  
+HWI-EAS443:3:29:1019:822#0/1  
\_V^aX¥`a`aaa\_]aaa¥ZXJ¥\_U\_\_`Y¥[U\_X\_\_a^  
@HWI-EAS443:3:2:995:699#0/1  
ATGGAAATGAGGCGCTGCCTTCTTGAGTCTCTTCAGCAGA  
+HWI-EAS443:3:2:995:699#0/1  
a`bb`a^`a`baVa`a\_\_aa\_]¥FY]^UaQ]^ZaU`a¥  
@HWI-EAS443:3:33:1592:1136#0/1  
ATGGAAATGAGGCGCTGCCTTCTTGAGTCTCTTCAGCAGA  
+HWI-EAS443:3:33:1592:1136#0/1  
\_]Z\_`baU`¥\_U]aSQWVNRLDVZZT^TTLRZU[N\_Q  
@HWI-EAS443:3:34:1657:1324#0/1  
GAAGGTTCCAGGTTCCAGGGTGTCCCTAAGTGCCCTGAACA  
+HWI-EAS443:3:34:1657:1324#0/1  
ababa^aa`aba\_a[Qa\_aN`[SZ\_U¥a`Y¥SVW`W\_QW  
@HWI-EAS443:3:36:1053:446#0/1  
TGGATAGCAAATAGTAGCATTGCCACAACACTTCACTGC  
+HWI-EAS443:3:36:1053:446#0/1  
\_bb\_a`¥]\_`^]X`Yba\_Q^a¥a`]Y`\_a\_]a^\_]HWa\_  
@HWI-EAS443:3:37:752:771#0/1  
GCAAATAGTAGCATTGCCACAACACTTCACTGCATGTGT  
+HWI-EAS443:3:37:752:771#0/1  
abbaaaba^bbaaaaaaa\_b`b\_\_a`^bQHx\_]\_`Za^  
@HWI-EAS443:3:44:887:354#0/1  
ATCGAAGGGTCCAGGTTCCAGGTTGCCCTAAGTGCCCTGA  
+HWI-EAS443:3:44:887:354#0/1  
aaaaaa\_\_OYWZ[¥a[ROV¥¥XQ[BBBBBBBBBBBBBBBBB  
@HWI-EAS443:3:45:1280:1436#0/1  
ATGGAAATGAGGCGCTGCCTTCTTTAGTCTCTTCAGCAGA  
+HWI-EAS443:3:45:1280:1436#0/1  
abb[`[bbaabaSZ\_Z¥W`¥\_Va¥N]PLG^Z`¥X¥¥Q]Y  
@HWI-EAS443:3:45:1493:776#0/1  
CAATCATGCTCTCAATGTGCTGAAGAGACTGAAGAAGGCA  
+HWI-EAS443:3:45:1493:776#0/1  
`\_W\_\_\_W`abb^U¥SaHX\_a\_b]abW[[Ua`^Q`\_`P`UJ

@HWI-EAS443:3:4:1239:1035#0/1  
ATCGAAGGTTCCAGGTTCCAGGTTGTCCCAAGTGCCTGA  
+HWI-EAS443:3:4:1239:1035#0/1  
\_Z`a`]`^VSSRQTRQVZSZOYL¥VPRBBBBBBBBBBBB  
@HWI-EAS443:3:52:1715:1375#0/1  
CAAGATCGAAGGTTCCAGGTTCCAGGTTGTCCCTAAGTGC  
+HWI-EAS443:3:52:1715:1375#0/1  
aa`bb[b\_ba¥X\_`[¥`]LR``X]]O\_a^VRR\_[\_^V]P  
@HWI-EAS443:3:55:34:106#0/1  
ATCGAAGGTTCCAGGTTCCAGGTTGTCCCTAAGTGCCTGA  
+HWI-EAS443:3:55:34:106#0/1  
aaab`abb[\_]`UX¥KY\_][aXH[ZQRQZZBBBBBBBBBB  
@HWI-EAS443:3:57:1122:108#0/1  
GATCGAAGGTTCCAGGTTCCAGGTTGTCCCTAGGTGCCTG  
+HWI-EAS443:3:57:1122:108#0/1  
aaa\_aaaaW\_\_\_]`a^a^T[``N`^UWX¥W^WG\_T¥]^  
@HWI-EAS443:3:62:1026:1631#0/1  
ATCGAAGGTTCCAGGTTCCAGGTTGTCCCTAAGTTCCTGA  
+HWI-EAS443:3:62:1026:1631#0/1  
a`Tab`a`U\_\_RMV[U\_aa]]WQ[]WU^aV¥ZGGGV¥\_Z[  
@HWI-EAS443:3:62:1589:820#0/1  
GATCGAAGGTTCCAGGTTCCAGGTTGTCCCTAAGTGCCTG  
+HWI-EAS443:3:62:1589:820#0/1  
aaaaa¥aaaU`[^\_aa]aV`a`¥\_\_\_¥\_\_\_`\_\_¥\_U[^a  
@HWI-EAS443:3:64:457:992#0/1  
ATCTGCTGAAGACTGAAGAAGGCAGCGCCTCATTCCA  
+HWI-EAS443:3:64:457:992#0/1  
¥[\_[``\_WVW[ZVF[X¥[X^\_TTR¥WXXaa\_¥ZaXGY^UXU  
@HWI-EAS443:3:67:936:299#0/1  
GCTCTCGATCTGCTGAAGACTGAAGAAGGCAGCGCCTC  
+HWI-EAS443:3:67:936:299#0/1  
aabb`¥F[``a`aaa`aaaaZ^a``a\_`\_\_`\_\_\_YZ\_^  
@HWI-EAS443:3:6:466:573#0/1  
GTTCCAGGATGTCCCTAAGTGCCTGAACAATGAGAAGCAA  
+HWI-EAS443:3:6:466:573#0/1  
aSUNaV[OLZXUNRUN]VUTFV\_]\_^YGP[]\_W]BBBBBB  
@HWI-EAS443:3:73:600:248#0/1  
ATGGAAATGAGGCGCTGCCTTCTTCTGTCTCTTCAGCAGA  
+HWI-EAS443:3:73:600:248#0/1  
aaba`aaaaa^aa`a\_\_\_`\_\_a^^`\_[\_]`]]]]^\_]`  
@HWI-EAS443:3:78:1100:401#0/1  
CTTCAGCAGATTGAGAGCATGATTGAGGCGGAGTCTTCTG  
+HWI-EAS443:3:78:1100:401#0/1  
[GYLRVaab]]\_Q]\_[YN]]V]UPYa]aZD]\_^VVP^`\_]`  
@HWI-EAS443:3:82:663:72#0/1  
ATCGAAGGTTCCAGGTTCCAGGTTGTCCCTAAGTGAAGTGA  
+HWI-EAS443:3:82:663:72#0/1  
ababaZ^bP`U^S]]JW\_Z¥[`GWVZZ[RXSSFYDKY^N  
@HWI-EAS443:3:85:1014:370#0/1  
AAGATCGAAGGTTCCAGGTTCCAGGTTGTCCCTACGTGCC



@HWI-EAS443:3:13:568:1346#0/1  
ATGGAAATGAGGCGCTGCNTTCTTCAGTCTCTTCAGCAGA  
+HWI-EAS443:3:13:568:1346#0/1  
aZ`b]abaaa`aba^][[DVa¥`^WZ\_\_`[\_\_a[`^¥`aT  
@HWI-EAS443:3:26:329:1787#0/1  
ATCGAAGGTTCCAGGNTCCAGGTTGCCCTAAGTGCCTGA  
+HWI-EAS443:3:26:329:1787#0/1  
aaaabb\_\_P\_¥\_RXXDZ]`WY[LYPYWa`\_Z^GPU[¥^[X  
@HWI-EAS443:3:33:1596:1114#0/1  
TGCCTTCTTCAGNCTCTTCAGCAGATTGAGAGCATGATTG  
+HWI-EAS443:3:33:1596:1114#0/1  
\_baaababb`a^D[b`baaaa\_`a`a`a[a^XDV^`\_`\_`^  
@HWI-EAS443:3:48:1455:1094#0/1  
TGCCTTCTTCAGTCTCTTCAGCAGATTGAGNGCATGATTG  
+HWI-EAS443:3:48:1455:1094#0/1  
\_Z`aabVbaaaa¥`aaa]¥\_`\_\_U`aa\_YD[]\_``]\_^  
@HWI-EAS443:3:66:806:1615#0/1  
ATGGAAATGAGGCGCTGCCTTCTTCAGTCTNTTCAGCAGA  
+HWI-EAS443:3:66:806:1615#0/1  
aa`a\_^\_\_\_\_]Z\_QY`[a\_Y`[¥X`W]O]QDNUU[^^^Z  
@HWI-EAS443:3:70:1764:1893#0/1  
ATCGAAGGTTCCAGGTTCCAGGTTGCCCTAAGTGNCTGA  
+HWI-EAS443:3:70:1764:1893#0/1  
ab`^a^a\_YZYVXPHYZ\_BBBBBBBBBBBBBBBBBBBB  
@HWI-EAS443:3:86:1398:462#0/1  
CTTCTTCAGTCTCTTCAGCAGATTGAGAGCNTGATTGAGG  
+HWI-EAS443:3:86:1398:462#0/1  
abbbbabbbb^babbbba\_bbbbbbbbabYD]babbaaba  
@HWI-EAS443:3:98:1443:1517#0/1  
ATGGNAATGAGGCGCTGCCTTCTTCAGTCTCTTCAGCAGA  
+HWI-EAS443:3:98:1443:1517#0/1  
aab¥D[`abab^^b[a\_XSaaR^a`\_bYL`Q\_aYaVM\_a^  
@HWI-EAS443:3:13:1651:762#0/1  
CGTGGAAATGAGGCGCTGCCTTCTTCAGTCTCTTCAGCAG  
+HWI-EAS443:3:13:1651:762#0/1  
`Zaababbbbaaaaaa¥^`a\_\_W\_\_\_aZTaZ`a¥^\_\_]a  
@HWI-EAS443:3:21:555:532#0/1  
GCCCTTCTTCAGTCTCTTCAGCAGATTGAGAGCATGATTG  
+HWI-EAS443:3:21:555:532#0/1  
KV\_`\_UZ][Y``ZW\_`ZY^ZZPU^Qa`^`ba^ZUGR[^XN  
@HWI-EAS443:3:30:1650:1132#0/1  
AGGCGCTGCCTTCTTCAGTCTCTTCAGCAGATTGAGAGAA  
+HWI-EAS443:3:30:1650:1132#0/1  
`Z[a``a`YN^\_F¥VKPTR[\_]`OTW`WR`SBBBBBBBBB  
@HWI-EAS443:3:35:626:265#0/1  
CTGCTGCCTTCTTCAGTCTCTTCAGCAGATTGAGAGCATG  
+HWI-EAS443:3:35:626:265#0/1  
`bbbaabbaaaaba``aaaaaaaa`^Z\_aaa\_```a¥\_  
@HWI-EAS443:3:37:676:1271#0/1  
GTGCTGCCTTCTTCAGTCTCTTCAGCAGATTGAGAGCATG

+HWI-EAS443:3:37:676:1271#0/1  
`aabbbbaaaabaaba`baaaabaaba`JV¥]U][aaaZ\_  
@HWI-EAS443:3:46:910:252#0/1  
CAATCATGCTCTCAATCTGCTGAAGAGACTGAAGAAGGAA  
+HWI-EAS443:3:46:910:252#0/1  
]HTa\_S¥baa`\_a\_ab\_aaIaaa]bM^^¥`\_a^aaa]L¥  
@HWI-EAS443:3:72:279:207#0/1  
CTGCTGCCTTCTTCAGTCTCTTCAGCAGATTGAGAGCATG  
+HWI-EAS443:3:72:279:207#0/1  
aa`bbbbabbbbbbbabbabbbbbbaababbbbaabaab  
@HWI-EAS443:3:78:93:1633#0/1  
CTGCTGCCTTCTTCAGTCTCTTCAGCAGATTGAGAGCATG  
+HWI-EAS443:3:78:93:1633#0/1  
aaaa`a`\_a^`a\_V`a`\_\_`¥`Z\_Y^\_[^¥^X^\_¥¥  
@HWI-EAS443:3:80:184:1796#0/1  
GCGCCTTCTTCAGTCTCTTCAGCAGATTGAGAGCATGATT  
+HWI-EAS443:3:80:184:1796#0/1  
ab^bb]aba\_aba\_b`Vab¥`baaaaa\_aa`\_aa\_ab\_X  
@HWI-EAS443:3:87:406:868#0/1  
CGATGGGTTCAATATAAAAGGAAGGTCTCATTGAGAAAT  
+HWI-EAS443:3:87:406:868#0/1  
ab\_bbbbabbbbbbaababbbbbbaa\_aabbbb`babbaba  
@HWI-EAS443:3:97:1667:1154#0/1  
GCTGCCTTCTTCAGTCTCTTCAGCAGATTGAGAGCATGNT  
+HWI-EAS443:3:97:1667:1154#0/1  
abbbaZ`b]T^QabTL^Zba`]¥¥¥b\_ab^^`\_\_P`RVDU  
@HWI-EAS443:3:10:885:1979#0/1  
TGGCGCTGCCTTCTTCAGTCTCTTCAGCAGATTGAGAGCA  
+HWI-EAS443:3:10:885:1979#0/1  
abaaa\_aaa\_\_¥\_a`a¥\_ZaT`\_Z\_aY`X^¥`\_¥¥\_¥V[  
@HWI-EAS443:3:13:515:747#0/1  
AGCTGCCTTCTTCAGTCTCTTCAGCAGATTGAGAGCATGA  
+HWI-EAS443:3:13:515:747#0/1  
aabaaa`aaaaa\_\_a`\_`aa[\_`\_a^^`\_``]`Y]^`\_  
@HWI-EAS443:3:21:179:2034#0/1  
TGGCGCTGCCTTCTTCAGTCTCTTCAGCAGATTGAGAGCA  
+HWI-EAS443:3:21:179:2034#0/1  
a\_aabb\_abba`bbbb\_\_^a`a`ab`Uaa^^`\_aa]`a\_\_  
@HWI-EAS443:3:25:1372:1308#0/1  
TGCTGCCTTCTTCAGTCTCTTCAGCAGATTGAGAGCATGA  
+HWI-EAS443:3:25:1372:1308#0/1  
X0]¥a[aaba\_]`a\_L[a]TTPZ¥aY\_]¥UQYXR`V^R[Y  
@HWI-EAS443:3:30:1793:707#0/1  
NATGGAATGAGGCGCTGCCTTCTTCAGTCTCTTCAGCAG  
+HWI-EAS443:3:30:1793:707#0/1  
DOUSTRLRWSSWWSUBBBBBBBBBBBBBBBBBBBBBBBB  
@HWI-EAS443:3:31:1227:1716#0/1  
TGCTGCCTTCTTCAGTCTCTTCAGCAGATTGAGAGCATGA  
+HWI-EAS443:3:31:1227:1716#0/1  
aababbbababaaaaa]aaa`aaaaaaaa`a`^¥a`\_a

@HWI-EAS443:3:32:959:1189#0/1  
TGCTGCCTTCTTCAGTCTCTTCAGCAGATTGAGAGCATGA  
+HWI-EAS443:3:32:959:1189#0/1  
aaa\_`aaa`a`a\_a`]aaa\_aa¥\_\_]a\_^a\_`¥`NU\_[Z  
@HWI-EAS443:3:34:1248:35#0/1  
TGCTGCCTTCTTCAGTCTCTTCAGCAGATTGAGAGCATGA  
+HWI-EAS443:3:34:1248:35#0/1  
aa`aaW^]aV\_`Z\_a^R^aa`X[\_¥`a[^`Y`^a¥Q\_^\_  
@HWI-EAS443:3:44:109:131#0/1  
TGCTGCCTTCTTCAGTCTCTTCAGCAGATTGAGAGCATGA  
+HWI-EAS443:3:44:109:131#0/1  
\_aa[bbaa`ab\_a\_a[\_aaa[\_aa\_`]``\_a\_aV``[W  
@HWI-EAS443:3:45:1032:231#0/1  
TGGCGCTGCCTTCTTCAGTCTCTTCAGCAGATTGAGAGCA  
+HWI-EAS443:3:45:1032:231#0/1  
Z`R`]`a`WtQ]T`aaV^ZXaX`RMU]XS`T`^]S^GXUV  
@HWI-EAS443:3:45:1747:1178#0/1  
TGCTGCCTTCTTCAGTCTCTTCAGCAGATTGAGAGCATGA  
+HWI-EAS443:3:45:1747:1178#0/1  
^b\_bb\_aababbaab`baba\_`a\_\_a\_`aa\_a\_a^\_]a\_  
@HWI-EAS443:3:46:1555:79#0/1  
TCCTTCTTCAGTCTCTTCAGCAGATTGAGAGCATGATTGA  
+HWI-EAS443:3:46:1555:79#0/1  
a^\_a\_\_aa\_^a^`¥\_a\_\_`]`]\_^\_]^[^¥Y^\_]YYY  
@HWI-EAS443:3:46:168:1289#0/1  
AGCTGCCTTCTTCAGTCTCTTCAGCAGATTGAGAGCATGA  
+HWI-EAS443:3:46:168:1289#0/1  
`W\_aaaaa]ab````ZT\_[aa`a\_\_aa\_aaaaa`^Va\_`a  
@HWI-EAS443:3:52:578:527#0/1  
TGCTGCCTTCTTCAGTCTCTTCAGCAGATTGAGAGCATGA  
+HWI-EAS443:3:52:578:527#0/1  
aab]baab`a`^Y¥^]`a]`^\_[`a]¥aa^a]````\_Z[  
@HWI-EAS443:3:60:1506:877#0/1  
GTGCTCTCAATCTGCTGAAGAGACTGAAGAAGGCAGCGCC  
+HWI-EAS443:3:60:1506:877#0/1  
`\_baaaaa`aa`b`ba`abZa\_]aa]a\_\_`a]Q`aU`¥W  
@HWI-EAS443:3:62:801:798#0/1  
TGCTGCCTTCTTCAGTCTCTTCAGCAGATTGAGAGCATGA  
+HWI-EAS443:3:62:801:798#0/1  
abba^ba]\_b\_aZS]GZ`aaa\_aaa`a^\_aa\_aZRYX¥`a  
@HWI-EAS443:3:68:232:922#0/1  
CGCCTTCTTCAGTCTCTTCAGCAGATTGAGAGCATGATTG  
+HWI-EAS443:3:68:232:922#0/1  
aaaaa`aaaaa\_\_`a`a`Q]\_J\_``a\_]`\_````a`^^\_  
@HWI-EAS443:3:71:1688:673#0/1  
TGCTGCCTTCTTCAGTCTCTTCAGCAGATTGAGAGCATGA  
+HWI-EAS443:3:71:1688:673#0/1  
```ab\_PZaI`^W^^[¥`Z[`¥XZUZ\_]\_\_a¥\_U\_V]XUZ  
@HWI-EAS443:3:72:1560:697#0/1  
TGCTGCCTTCTTCAGTCTCTTCAGCAGATTGAGAGCATGA





@HWI-EAS443:3:11:142:1082#0/1  
ATCGAAGGTTCCAGGTTCCAGGTTGCCCTAAGTGCCTGA  
+HWI-EAS443:3:11:142:1082#0/1  
aba` `[`\_L[H\_¥¥`Z^`X\_^R^XMV`]SV^XGVMOLVS  
@HWI-EAS443:3:11:1526:996#0/1  
CTGCTGAAGAGACTGAAGAAGGCAGCGCCTCATTCCATA  
+HWI-EAS443:3:11:1526:996#0/1  
a`aZabbbb`[aaa]babbbab`a¥\_X\_a`[a^\_[\_[aa  
@HWI-EAS443:3:11:1726:866#0/1  
GCTGCCTTCTTCAGTCTCTTCAGCAGATTGAGAGCATGAT  
+HWI-EAS443:3:11:1726:866#0/1  
^a¥YP\_W]``[`]`[ZR]a^]a^\_^Q\_^URHR`TQ[`aB  
@HWI-EAS443:3:11:1779:1279#0/1  
CGCTGCCTTCTTCAGTCTCTTCAGCAGATTGAGAGCATGA  
+HWI-EAS443:3:11:1779:1279#0/1  
]\_bbbaa`bZ\_Lab[bbY`¥a^[ZabXZVba`^]X¥[a^  
@HWI-EAS443:3:11:442:1533#0/1  
GATCGAAGGTTCCAGGTTCCAGGTTGCCCTAAGTGCCTG  
+HWI-EAS443:3:11:442:1533#0/1  
aa[aba]`W[\_a`NVZP[`aa[QSVTVT]¥VS^YJUNV^W  
@HWI-EAS443:3:12:1018:1491#0/1  
CTGCCTTCTTCAGTCTCTTCAGCAGATTGAGAGCATGATT  
+HWI-EAS443:3:12:1018:1491#0/1  
]^`a\_aaaa\_bY]a]aZYa\_V][\_]`^`\_`\_aUZQR[\_\_\_\_[  
@HWI-EAS443:3:12:102:130#0/1  
CCAAGATCGAAGGTTCCAGGTTCCAGGTTGCCCTAAGTG  
+HWI-EAS443:3:12:102:130#0/1  
aaaaa`\_aaYa`\_S\_\_a\_Z\_Y\_[[\_^]VW^WW^¥Y[QZW¥  
@HWI-EAS443:3:12:140:1762#0/1  
GCTGCCTTCTTCAGTCTCTTCAGCAGATTGAGAGCATGAT  
+HWI-EAS443:3:12:140:1762#0/1  
JabXb\_R¥`\_TaW¥H\_bb`\_a]abb`\_`a\_X\_aX`aTRXa^  
@HWI-EAS443:3:12:43:764#0/1  
ATGGAAATGAGGCGCTGCCTTCTTCAGTCTCTTCAGCAGA  
+HWI-EAS443:3:12:43:764#0/1  
`X]b¥P^aaa`W`T]``a```]`aRO¥TRXY\_\_WXTT^T  
@HWI-EAS443:3:12:770:1050#0/1  
GGCGCTGCCTTCTTCAGTCTCTTCAGCAGATTGAGAGCAT  
+HWI-EAS443:3:12:770:1050#0/1  
aabbaaaaa`a`\_a\_a`a`aaS\_aaaa\_\_aaa^\_a`\_¥  
@HWI-EAS443:3:12:814:1429#0/1  
ATGGAAATGAGGCGCTGCCTTCTTCAGTCTCTTCAGCAGA  
+HWI-EAS443:3:12:814:1429#0/1  
a\_]Z\_bb`aaa^]a^\_¥V`\_\_\_\_`^^`VT[]`YS¥`]^^^  
@HWI-EAS443:3:12:829:436#0/1  
ATGGAAATGAGGCGCTGCCTTCTTCAGTCTCTTCAGCAGA  
+HWI-EAS443:3:12:829:436#0/1  
a[bba\_¥`bbbabbaaaaaab`ab`\_b¥\_a\_\_a`\_`\_\_`T  
@HWI-EAS443:3:13:1121:875#0/1  
GCCTTCTTCAGTCTCTTCAGCAGATTGAGAGCATGATTGA

+HWI-EAS443:3:13:1121:875#0/1  
aabbabbab`abaaa\_ab`ab`aab\_b\_b\_aabaaaa\_  
@HWI-EAS443:3:13:223:1933#0/1  
TGGAAATGAGGCGCTGCCTTCTTCAGTCTTTCAGCAGAT  
+HWI-EAS443:3:13:223:1933#0/1  
aaaaabbZba\_bbbaba\_aaaaaab`\_babaaa`\_`a`aa  
@HWI-EAS443:3:13:496:1231#0/1  
ATGGAAATGAGGCGCTGCCTTCTTCAGTCTTTCAGCAGA  
+HWI-EAS443:3:13:496:1231#0/1  
a`\_]`aaaa\_a\_a]`\_a`W`\_]`VZ`\_`^`[^N\_\_\_\_  
@HWI-EAS443:3:13:565:655#0/1  
TGCCTTCTTCAGTCTTTCAGCAGATTGAGAGCATGATTG  
+HWI-EAS443:3:13:565:655#0/1  
aaaaaaaaabab`aaaa`a`a`baaaaaa`\_`a`aa\_^\_  
@HWI-EAS443:3:13:633:1418#0/1  
AGATCGAAGTTCCAGGTTCCAGGTTGCCCTAAGTGCCT  
+HWI-EAS443:3:13:633:1418#0/1  
U`a`aaa`]\_] [OUVXL\_\_X\_^YRZLLX\_]^]\_WNZSU]  
@HWI-EAS443:3:13:757:677#0/1  
ATGGAAATGAGGCGCTGCCTTCTTCAGTCTTTCAGCAGA  
+HWI-EAS443:3:13:757:677#0/1  
a\_[ZZaab^U^`a\_]a`¥a`\_`aaaU\_]\_] [ ]\_aG¥\_U  
@HWI-EAS443:3:14:486:432#0/1  
CCAAGATCGAAGTTCCAGGTTCCAGGTTGCCCTAAGTG  
+HWI-EAS443:3:14:486:432#0/1  
]Z^Y¥][^`a^T`WUaT¥]^F¥aXRZ]NT[Y¥[^`^]QUG¥  
@HWI-EAS443:3:14:660:1997#0/1  
CAATCATGCTCTCAATCTGCTGAAGAGACTGAAGAAGGCA  
+HWI-EAS443:3:14:660:1997#0/1  
abaaaa]\_]`Raaaa`\_`a`aX`\_`PRMRU`^^`TPBB  
@HWI-EAS443:3:15:1369:1528#0/1  
CAATCATGCTCTCAATCTGCTGAAGAGACTGAAGAAGGCA  
+HWI-EAS443:3:15:1369:1528#0/1  
aa`aaa[[aVaaa^a`\_`\_aaS\_^U`^X`\_`\_^\_]`^ZN\_  
@HWI-EAS443:3:15:227:1615#0/1  
GAAATGAGGCGCTGCCTTCTTCAGTCTTTCAGCAGATTG  
+HWI-EAS443:3:15:227:1615#0/1  
aabb\_^a^]ba`aa`a`ab`b`a\_aaaaaZ\_Y`\_`\_`¥  
@HWI-EAS443:3:15:316:604#0/1  
ATCGAAGTTCCAGGTTCCAGGTTGCCCTAAGTGCCTGA  
+HWI-EAS443:3:15:316:604#0/1  
abbbb`a\_F\_Y]a\_aV[^`UU`0[\_VU`^X]]TGWMNQ^0  
@HWI-EAS443:3:15:611:1802#0/1  
ATGGAAATGAGGCGCTGCCTTCTTCAGTCTTTCAGCAGA  
+HWI-EAS443:3:15:611:1802#0/1  
aa`]bbaa^a`Zb`aa`\_[U¥a¥ab`a[^^aZZZ\_]`^aY  
@HWI-EAS443:3:15:957:91#0/1  
CAATCATGCTCTCAATCTGCTGAAGAGACTGAAGAAGGCA  
+HWI-EAS443:3:15:957:91#0/1  
aabaaa`a]\_]\_aaa`\_]`\_a\_a`\_`\_Y`^^^a\_^][^^VU



+HWI-EAS443:3:18:1437:1519#0/1  
¥]bb`bbbaabaaba\_ab\_`\_\_aaU\_Yaa\_ab\_a^aaaa`  
@HWI-EAS443:3:19:1112:87#0/1  
ATGGAAATGAGGCGCTGCCTTCTTCAGTCTCTTCAGCAGA  
+HWI-EAS443:3:19:1112:87#0/1  
aa^Z^ab¥Y`b``]Z\_b¥\_\_a¥¥[G^GY[\_RXaUSaT\_`¥  
@HWI-EAS443:3:19:1325:907#0/1  
CTCAAATGAGACCTTCCTTTTATAATGAACCCATACAGGT  
+HWI-EAS443:3:19:1325:907#0/1  
aab`][aaaba\_ZSbba`a`aaa\_Rabaaa`\_\_aa^aa`S  
@HWI-EAS443:3:19:1541:1657#0/1  
ATGGAAATGAGGCGCTGCCTTCTTCAGTCTCTTCAGCAGA  
+HWI-EAS443:3:19:1541:1657#0/1  
a¥]\_X[]a]aa^\_a\_a`U`aaTaa``][Y`Ua\_¥\_\_V\_ZT  
@HWI-EAS443:3:19:241:697#0/1  
CTGCCTTCTTCAGTCTCTTCAGCAGATTGAGAGCATGATT  
+HWI-EAS443:3:19:241:697#0/1  
^^aW\_\_Y`a^aa¥Q\_^b^[\_[]a\_a`\_^YZP\_TSa`QLP  
@HWI-EAS443:3:19:479:315#0/1  
GGTTCCAGGTTCCAGGTTGCCCTAAGTGCCTGAACAATG  
+HWI-EAS443:3:19:479:315#0/1  
ababbb^aVYaabaa^`aa`aaa]`Z¥\_]aa``[\_\_^a  
@HWI-EAS443:3:19:509:1617#0/1  
ATGGAAATGAGGCGCTGCCTTCTTCAGTCTCTTCAGCAGA  
+HWI-EAS443:3:19:509:1617#0/1  
aOXGUS]]ab][a\_aPZH`Y[`H\_\_X[G¥WSP]YSNWQVB  
@HWI-EAS443:3:19:709:557#0/1  
GATCGAAGGTTCCAGGTTCCAGGTTGCCCTAAGTGCCTG  
+HWI-EAS443:3:19:709:557#0/1  
aaaaaaaaaa¥a]\_[^Z]¥¥``aU\_\_[[^^`¥`U\_¥W^\_  
@HWI-EAS443:3:19:715:1479#0/1  
CTGCCTTCTTCAGTCTCTTCAGCAGATTGAGAGCATGATT  
+HWI-EAS443:3:19:715:1479#0/1  
aa\_aa`aa``]]aX`\_a``\_`\_\_^^`a\_]¥`\_]^^]Z  
@HWI-EAS443:3:1:1282:588#0/1  
CGCTGCCTTCTTCAGTCTCTTCAGCAGATTGAGAGCATGA  
+HWI-EAS443:3:1:1282:588#0/1  
U\_\_Z^TY\_¥\_[UW\_^]a^M\_N[`a^\_]b\_ba`[\_M\_aaB  
@HWI-EAS443:3:1:423:365#0/1  
ATTTATGTACACTCCCTTCATTATGTATTAGTAGCCCTG  
+HWI-EAS443:3:1:423:365#0/1  
abba^abab`aaa`\_a`aaaaa\_aaa¥`\_^`aO\_OBB  
@HWI-EAS443:3:20:1740:921#0/1  
CGGAAAACAAACCTGTATGGGTTTATTATAAAAGGAAGGT  
+HWI-EAS443:3:20:1740:921#0/1  
a¥\_\_`¥V\_V¥``aaaW^Vb\_ZJ]WX\_^X]``Y\_¥`\_IYLV  
@HWI-EAS443:3:20:1778:518#0/1  
ATGGAAATGAGGCGCTGCCTTCTTCAGTCTCTTCAGCAGA  
+HWI-EAS443:3:20:1778:518#0/1  
aaaa]\_aRW]baYa\_\_`^ZX`VZXDHZQO[X`\_QYVVTBB

@HWI-EAS443:3:21:1327:56#0/1  
AGATCGAAGGTTCCAGGTTCCAGGTTGTCCCTAAGTGCCT  
+HWI-EAS443:3:21:1327:56#0/1  
aba`]X^bb`XaYaZ]^XSY[Za`Q#a]SPP]XZ#PaWU]  
@HWI-EAS443:3:21:1717:1410#0/1  
ATGGAAATGAGGCGCTGCCTTCTTCAGTCTCTTCAGCAGA  
+HWI-EAS443:3:21:1717:1410#0/1  
aaab^U`Yaaa\_`a^\_a\_^\_^^\_] ^VPP^]\_[WW`PR^V  
@HWI-EAS443:3:21:310:310#0/1  
TCGAAGGTTCCAGGTTCCAGGTTGTCCCTAAGTGCCTGAA  
+HWI-EAS443:3:21:310:310#0/1  
W\_a^Z#\_]aa\_#\_a#Y\_#\_#`[^Z]^`^^^Z`ZR]][^a]]  
@HWI-EAS443:3:22:1529:1185#0/1  
ATGGAAATGAGGCGCTGCCTTCTTCAGTCTCTTCAGCAGA  
+HWI-EAS443:3:22:1529:1185#0/1  
`\_a]#H\_a^^#`aUaa\_`a[Pa]aY`VPY`][SF[RP\_]`  
@HWI-EAS443:3:22:560:2042#0/1  
ATCGAAGGTTCCAGGTTCCAGGTTGTCCCTAAGTGCCTGA  
+HWI-EAS443:3:22:560:2042#0/1  
a\_\_\_`a#^LVYXSSSQUR[PLMJOMRYWVMWWSOLTRRLU  
@HWI-EAS443:3:22:713:1435#0/1  
AGGCGCTGCCTTCTTCAGTCTCTTCAGCAGATTGAGAGCA  
+HWI-EAS443:3:22:713:1435#0/1  
NYaaT]H]NQ\_Y^\_T`L]V^XNRT\_`^`TNNP[KTFFZZVB  
@HWI-EAS443:3:23:1600:1211#0/1  
AATCATGCTCTCAATCTGCTGAAGAGACTGAAGAAGGCAG  
+HWI-EAS443:3:23:1600:1211#0/1  
`b`bbbb`a`\_`a#Z`b`a`][a]a\_abaZa\_`a`^\_a`  
@HWI-EAS443:3:23:1664:777#0/1  
ATGGAAATGAGGCGCTGCCTTCTTCAGTCTCTTCAGCAGA  
+HWI-EAS443:3:23:1664:777#0/1  
#U\_`aaa\_baZXX`Xa^PZ`\_S`XU\_]QX`^]`TUSLS]S  
@HWI-EAS443:3:23:1665:1089#0/1  
TGGAATGAGGCGCTGCCTTCTTCAGTCTCTTCAGCAGAT  
+HWI-EAS443:3:23:1665:1089#0/1  
aba`bbabaaa^ba`aZ#aa]\_a[#\_Q[a\_#\_Q[\_#W\_QQ  
@HWI-EAS443:3:23:505:1179#0/1  
ATCGAAGGTTCCAGGTTCCAGGTTGTCCCTAAGTGCCTGA  
+HWI-EAS443:3:23:505:1179#0/1  
\_aaaa]`NY\_]NY^GP]aX[VRRPUU\_VNR^XTTFZXWR  
@HWI-EAS443:3:24:1226:599#0/1  
ACGGAAAACAAACCTGTATGGGTTTATTATAAAAGGAAGG  
+HWI-EAS443:3:24:1226:599#0/1  
^`^a`Z#V`^#aRV`Xabbaa[aWabba`a`aaba\_\_aa  
@HWI-EAS443:3:24:1460:634#0/1  
GGGCTACTGAATACATAATGAAGGGAGTGTACATAAATAC  
+HWI-EAS443:3:24:1460:634#0/1  
aab\_bbabbaabbaab`aaaa[aaaa\_a\_a\_aa\_a\_aa\_  
@HWI-EAS443:3:24:353:819#0/1  
ATGGAAATGAGGCGCTGCCTTCTTCAGTCTCTTCAGCAGA

+HWI-EAS443:3:24:353:819#0/1  
a\_`aaaa¥aaa\_\_Z^a`\_\_\_\_\_aa^Z`XX\_\_`QX\_Y]^Y  
@HWI-EAS443:3:25:117:322#0/1  
ATGGAATGAGGCGCTGCCTTCTTCAGTCTTTCAGCAGA  
+HWI-EAS443:3:25:117:322#0/1  
aaababaabaaaaaa`aa`aaaa`\_a^a```^[\_^X^¥  
@HWI-EAS443:3:25:1697:1906#0/1  
CCAAGATCGAAGGTTCCAGGTTCCAGGTTGCCCTAAGTG  
+HWI-EAS443:3:25:1697:1906#0/1  
a\_bbb`Y^VT^a\_QKY`aa`M^Q^aZZG[XSVDY]]]TRL  
@HWI-EAS443:3:25:1781:1243#0/1  
TCAGTATCATTTCTCAAATGAGACCTTCCTTTTATAATGA  
+HWI-EAS443:3:25:1781:1243#0/1  
aaaaa\_a\_a`ba`aa`a\_`\_a`^¥`\_YP`\_\_^]\_^]]V  
@HWI-EAS443:3:25:237:570#0/1  
CAATCATGCTCTCAATCTGCTGAAGAGACTGAAGAAGGCA  
+HWI-EAS443:3:25:237:570#0/1  
U``¥bb\_aaab`\_ba]bbba\_V]a`]aaa`]Yaa]W]a[]  
@HWI-EAS443:3:25:57:1717#0/1  
ATGGAATGAGGCGCTGCCTTCTTCAGTCTTTCAGCAGA  
+HWI-EAS443:3:25:57:1717#0/1  
a\_]\_aa`a`a`\_a\_a`\_a`\_aaa`aa\_\_^`\_`ZVZ`¥X^  
@HWI-EAS443:3:25:993:594#0/1  
TGGAAATGAGGCGCTGCCTTCTTCAGTCTTTCAGCAGAT  
+HWI-EAS443:3:25:993:594#0/1  
abb`aaaaa`aaaaaa\_[\_a\_aa\_a`^`^a¥W¥\_^^`¥^  
@HWI-EAS443:3:26:1076:929#0/1  
CAGGGCTACTGAATACATAATGAAGGGAGTGACATAAAT  
+HWI-EAS443:3:26:1076:929#0/1  
aaaaa`aaabaaa`aa\_a\_\_aaa\_a[``Wa]\_\_\_\_\_^a\_\_  
@HWI-EAS443:3:26:1742:1541#0/1  
CGAAGGTTCCAGGTTCCAGGTTGCCCTAAGTGCCTGAAC  
+HWI-EAS443:3:26:1742:1541#0/1  
abbbbaaab`a]¥aaabba`a\_a`\_a`ab]a\_aab\_aY  
@HWI-EAS443:3:26:222:475#0/1  
TGGAAATGAGGCGCTGCCTTCTTCAGTCTTTCAGCAGAT  
+HWI-EAS443:3:26:222:475#0/1  
V\_V[`ab[ZX0\_]\_]\_aZSZ]b]]J^b]R`aaaY^]a^UX]  
@HWI-EAS443:3:26:33:141#0/1  
GCGCTGCCTTCTTCAGTCTTTCAGCAGATTGAGAGCATG  
+HWI-EAS443:3:26:33:141#0/1  
abbbbaaaaa`aaa\_aaa`\_aaZY\_a\_a]\_a\_\_\_\_\_`X[\_  
@HWI-EAS443:3:26:452:206#0/1  
GCTGCCTTCTTCAGTCTTTCAGCAGATTGAGAGCATGAT  
+HWI-EAS443:3:26:452:206#0/1  
a]]^M[a`TYWT\_HP`^^Z[NOVR`I[\_YRXQZ[WFQBB  
@HWI-EAS443:3:26:563:684#0/1  
GTTCCAGGTTCCAGGTTGCCCTAAGTGCCTGAACAATGA  
+HWI-EAS443:3:26:563:684#0/1  
a¥`a`\_`^Z[\_`^`a\_]\_`W]`\_\_\_\_`]0^Z^]\_^\_V^^\_]`^

@HWI-EAS443:3:26:618:142#0/1  
ATGGAAATGAGGCGCTGCCTTCTTCAGTCTCTTCAGCAGA  
+HWI-EAS443:3:26:618:142#0/1  
aabaaabbaba\_aa`a``\_`\_]aa¥\_aW^\_\_\_\_]^\_^\_  
@HWI-EAS443:3:26:643:267#0/1  
AGCCCTCCAAGATCGAAGGTTCCAGGTTCCAGGTTGTCCTC  
+HWI-EAS443:3:26:643:267#0/1  
aa^aa``^aaaa`a`aa^P^R^\_¥¥TZ^^^\_S¥^SSTR  
@HWI-EAS443:3:27:1319:560#0/1  
CTGCCTTCTTCAGTCTCTTCAGCAGATTGAGAGCATGATT  
+HWI-EAS443:3:27:1319:560#0/1  
abbaaabaab`a`¥\_Zaaaa\_aaaaaaaaa¥a[aaa`^\_  
@HWI-EAS443:3:27:1347:723#0/1  
TTGTTCCAGGCACTTAGGGACAACCTGGAACCTGGAACCTT  
+HWI-EAS443:3:27:1347:723#0/1  
^Za`^^^UX^J[\_^`^b`\_[¥P[P^NSaVFL¥ZWWYFVS  
@HWI-EAS443:3:27:1613:43#0/1  
GCGCTGCCTTCTTCAGTCTCTTCAGCAGATTGAGAGCATG  
+HWI-EAS443:3:27:1613:43#0/1  
aHaa`XZ[a\_R]]SSOPP\_^Va¥TOIW^Q\_[WSZN^GMBB  
@HWI-EAS443:3:27:1678:123#0/1  
GATCGAAGGTTCCAGGTTCCAGGTTGCCCTAAGTGCCTG  
+HWI-EAS443:3:27:1678:123#0/1  
aba`bbabbaaaUa`a``^`a`^^`\_Y`]`¥\_V`\_Y\_]`  
@HWI-EAS443:3:27:400:468#0/1  
ATCGAAGGTTCCAGGTTCCAGGTTGCCCTAAGTGCCTGA  
+HWI-EAS443:3:27:400:468#0/1  
aba`abbaS[Q[W^^O\_]^TU]G¥^WW]\_]Z¥PW]QWYWR  
@HWI-EAS443:3:27:73:849#0/1  
ATGGAAATGAGGCGCTGCCTTCTTCAGTCTCTTCAGCAGA  
+HWI-EAS443:3:27:73:849#0/1  
a^a]``aabaaaa`aaa^a^\_a`]aV``a\_] [¥XV¥]]  
@HWI-EAS443:3:28:1708:1488#0/1  
GCGCTGCCTTCTTCAGTCTCTTCAGCAGATTGAGAGCATG  
+HWI-EAS443:3:28:1708:1488#0/1  
a\_Z^XaX^\_aZa\_\_X^G[a\_\_YS\_a\_Va[[[^R^¥¥RRRZ  
@HWI-EAS443:3:28:511:344#0/1  
CCAAGATCGAAGGTTCCAGGTTCCAGGTTGCCCTAAGTG  
+HWI-EAS443:3:28:511:344#0/1  
Y``aaabaab]b`\_aa`[¥PV\_U^¥``X`]aaa[aa`P^  
@HWI-EAS443:3:28:719:829#0/1  
GCTGCCTTCTTCAGTCTCTTCAGCAGATTGAGAGCATGAT  
+HWI-EAS443:3:28:719:829#0/1  
aaaaaaaa\_aaaaa[`aaa```a\_]`¥\_aaa`\_`^^a\_\_`  
@HWI-EAS443:3:29:33:1586#0/1  
ATGGAAATGAGGCGCTGCCTTCTTCAGTCTCTTCAGCAGA  
+HWI-EAS443:3:29:33:1586#0/1  
a\_aaYaa`]``\_aa`\_]``^Y\_[YVR[[\_¥[UUZBBBB  
@HWI-EAS443:3:29:400:54#0/1  
ATGGAAATGAGGCGCTGCCTTCTTCAGTCTCTTCAGCAGA

+HWI-EAS443:3:29:400:54#0/1  
aabbaaa^`X[]`\_\_]^a^[Z`aX¥]\_[YQ¥KYB BBBB  
@HWI-EAS443:3:29:494:874#0/1  
CAATCATGCTCTCAATCTGCTGAAGAGACTGAAGAAGGCA  
+HWI-EAS443:3:29:494:874#0/1  
aa\_aaaaabaaaa`a\_a`a`UW\_`\_\_^^`\_\_]``\_¥`^  
@HWI-EAS443:3:29:530:1693#0/1  
ATGGAAATGAGGCGCTGCCTTCTTCAGTCTCTTCAGCAGA  
+HWI-EAS443:3:29:530:1693#0/1  
RGUPWaaa¥aXW[baZ\_aW¥K¥VaZa`\_]\_bb\_a\_[QabBB  
@HWI-EAS443:3:2:1132:289#0/1  
ATGGAAATGAGGCGCTGCCTTCTTCAGTCTCTTCAGCAGA  
+HWI-EAS443:3:2:1132:289#0/1  
a`aaaa\_b^a`\_a¥Ya`[¥`W\_aW¥[YS¥¥^¥U¥WWW^U  
@HWI-EAS443:3:2:128:430#0/1  
CAATCATGCTCTCAATCTGCTGAAGAGACTGAAGAAGGCA  
+HWI-EAS443:3:2:128:430#0/1  
aba^a`aa¥Ya\_````aabXa\_^a`\_\_\_U`^aaS¥^¥\_W  
@HWI-EAS443:3:2:508:1007#0/1  
ATGGAAATGAGGCGCTGCCTTCTTCAGTCTCTTCAGCAGA  
+HWI-EAS443:3:2:508:1007#0/1  
¥T\_aR]¥a¥^b^JZ]^]V¥Y]O]Z][`UL^[NXL¥XYS¥[  
@HWI-EAS443:3:30:1630:893#0/1  
CTTCCTTTTATAATGAACCCATACAGTTTGTTCCTCGTC  
+HWI-EAS443:3:30:1630:893#0/1  
aaab¥abbbab`bbbbaa[\_`aaa`aaXaaa`aa\_^V\_W^  
@HWI-EAS443:3:30:1677:1712#0/1  
TGGAAATGAGGCGCTGCCTTCTTCAGTCTCTTCAGCAGAT  
+HWI-EAS443:3:30:1677:1712#0/1  
^Y\_aa]bb\_]^^`a\_]ab`]aNX\_a`b\_\_a[\_a[¥RVSYG]  
@HWI-EAS443:3:31:1007:1320#0/1  
ATGGAAATGAGGCGCTGCCTTCTTCAGTCTCTTCAGCAGA  
+HWI-EAS443:3:31:1007:1320#0/1  
[U\_ba`Waaba^abaaaa```a`aa`^`\_`a`^a`\_`\_^W  
@HWI-EAS443:3:31:127:881#0/1  
TCGAAGGTTCCAGGTTCCAGGTTGTCCTAAGTGCCTGAA  
+HWI-EAS443:3:31:127:881#0/1  
W¥`W]^`a[^]¥]\_]W]ab\_\_aTYXX]a^U\_]ZTQa[LVRH  
@HWI-EAS443:3:31:490:1088#0/1  
ATGGAAATGAGGCGCTGCCTTCTTCAGTCTCTTCAGCAGA  
+HWI-EAS443:3:31:490:1088#0/1  
¥aa\_a`[\_a`aUaaaa`\_]^^`aa`a]N\_X`aaa````^¥  
@HWI-EAS443:3:31:595:1255#0/1  
ATGGAAATGAGGCGCTGCCTTCTTCAGTCTCTTCAGCAGA  
+HWI-EAS443:3:31:595:1255#0/1  
XR¥a\_U^a`Z^[^U`VTL¥[aa\_W\_\_aMLQ^ZYSPKPROF  
@HWI-EAS443:3:32:1224:1482#0/1  
ATGGAAATGAGGCGCTGCCTTCTTCAGTCTCTTCAGCAGA  
+HWI-EAS443:3:32:1224:1482#0/1  
aaba\_ba\_\_Z\_\_\_a\_aa\_YabWaa]a\_X`a\_aa¥aUa`QW



@HWI-EAS443:3:32:1432:1676#0/1  
GCTGCCTTCTTCAGTCTCTTCAGCAGATTGAGAGCATGAT  
+HWI-EAS443:3:32:1432:1676#0/1  
``aa`a^]a\_``]R^]\_`]Q]Y¥¥]V[\_`¥X]X¥Y¥\_aU  
@HWI-EAS443:3:32:1493:322#0/1  
TGCAGGGCTACTGAATACATAATGAAGGGAGTGTACATAA  
+HWI-EAS443:3:32:1493:322#0/1  
ab\_PQ]H^[^L\_a`^Z]`¥ZS^aa\_SX\_¥[aXaX^X\_`¥X  
@HWI-EAS443:3:32:251:112#0/1  
ATCGAAGGTTCCAGGTTCCAGGTTGCCCTAAGTGCCTGA  
+HWI-EAS443:3:32:251:112#0/1  
a\_a^`^`\_N¥VULSUWZNYVWZYUQSWYWWSSWQVWUWUG  
@HWI-EAS443:3:32:333:508#0/1  
GTTCCAGGTTGCCCTAAGTGCCTGAACAATGAGAAGCAA  
+HWI-EAS443:3:32:333:508#0/1  
a`a`ab\_]\_ba^a```\_^]Z`b```^^)`^X)`T^aa\_`a^  
@HWI-EAS443:3:32:587:1218#0/1  
TGCCTTCTTCAGTCTCTTCAGCAGATTGAGAGCATGATTG  
+HWI-EAS443:3:32:587:1218#0/1  
abbabbaaa^`aabbaabaaa\_a`aaa\_\_W`a`\_aa¥\_Z  
@HWI-EAS443:3:33:104:312#0/1  
ATCGAAGGTTCCAGGTTCCAGGTTGCCCTAAGTGCCTGA  
+HWI-EAS443:3:33:104:312#0/1  
a¥baabaaT\_¥aHOVLS``]TZQVYTR¥`BBBBBBBBBBBB  
@HWI-EAS443:3:33:177:523#0/1  
GAAGGTTCCAGGTTCCAGGTTGCCCTAAGTGCCTGAACA  
+HWI-EAS443:3:33:177:523#0/1  
ab]bbabba\_\_\_\_`a`b]aa\_a`\_bbba]a`^`[^a\_a\_a  
@HWI-EAS443:3:33:768:311#0/1  
GCTGCCTTCTTCAGTCTCTTCAGCAGATTGAGAGCATGAT  
+HWI-EAS443:3:33:768:311#0/1  
a\_\_a\_]¥TW\_\_XU`\_`aaVN^^\_[X]N¥¥\_¥¥N¥TN¥\_¥W  
@HWI-EAS443:3:33:981:945#0/1  
CAATCATGCTCTCAATCTGCTGAAGAGACTGAAGAAGGCA  
+HWI-EAS443:3:33:981:945#0/1  
abaa`b¥ab`[ba`aaa^\_`aa`b\_HY\_\_¥\_[\_`^`Z¥\_\_  
@HWI-EAS443:3:34:1312:1474#0/1  
ATGGAAATGAGGCGCTGCCTTCTTCAGTCTCTTCAGCAGA  
+HWI-EAS443:3:34:1312:1474#0/1  
`a``\_aaaaaa`aaaaaaa`a\_`aa``\_aa``aWZYV]XM  
@HWI-EAS443:3:34:34:1054#0/1  
GCTGCCTTCTTCAGTCTCTTCAGCAGATTGAGAGCATGAT  
+HWI-EAS443:3:34:34:1054#0/1  
abbbbbbaaaaaba^aaabaaaa^[¥``aaaaaa\_¥]\_\_a^  
@HWI-EAS443:3:34:946:733#0/1  
GCTGCCTTCTTCAGTCTCTTCAGCAGATTGAGAGCATGAT  
+HWI-EAS443:3:34:946:733#0/1  
aaUSVN\_\_VXU]VYVPU`[\_`OVP[YPS``S[VWJPUUBB  
@HWI-EAS443:3:35:1127:1144#0/1  
GATCGAAGGTTCCAGGTTCCAGGTTGCCCTAAGTGCCTG

+HWI-EAS443:3:35:1127:1144#0/1  
`^\_[b^¥^]W``)\_YTZa``¥]QU]\_\_R¥aZaXXOSFX[V  
@HWI-EAS443:3:35:1186:1553#0/1  
GCGCTGCCTTCTTCAGTCTCTTCAGCAGATTGAGAGCATG  
+HWI-EAS443:3:35:1186:1553#0/1  
`baabababb`abba`aabaaa\_a\_¥a`aabaaaa¥a\_a  
@HWI-EAS443:3:35:1231:318#0/1  
GCTGCCTTCTTCAGTCTCTTCAGCAGATTGAGAGCATGAT  
+HWI-EAS443:3:35:1231:318#0/1  
[abb¥a]``bba¥\_GWaS`\_aabaWI]]Uaaa`^Za`X¥  
@HWI-EAS443:3:35:1449:626#0/1  
ATGGAAATGAGGCGCTGCCTTCTTCAGTCTCTTCAGCAGA  
+HWI-EAS443:3:35:1449:626#0/1  
aa`[U``¥]¥XZVTXVVSXXXHS^¥V]VXX]\_RXV[UXZM  
@HWI-EAS443:3:35:1493:460#0/1  
GCTGCCTTCTTCAGTCTCTTCAGCAGATTGAGAGCATGAT  
+HWI-EAS443:3:35:1493:460#0/1  
aba^aa^OY`]bTYZ]]][a[V¥\_T[OR[aa¥a¥]YVW[[[  
@HWI-EAS443:3:35:851:1577#0/1  
GGGTTCAATATAAAAGGAAGGTCTCATTGAGAAATGATA  
+HWI-EAS443:3:35:851:1577#0/1  
S\_`S[^Z\_`a\_V¥\_`SZ^^^R\_`b[\_^^XSWa`b^YU\_`^  
@HWI-EAS443:3:36:107:1218#0/1  
ATGGAAATGAGGCGCTGCCTTCTTCAGTCTCTTCAGCAGA  
+HWI-EAS443:3:36:107:1218#0/1  
¥aaaaabaaaa`aab\_aaa\_`a`aa`^Va\_a\_\_Y[\_aZZU  
@HWI-EAS443:3:36:1392:2035#0/1  
CAATCATGCTCTCAATCTGCTGAAGAGACTGAAGAAGGCA  
+HWI-EAS443:3:36:1392:2035#0/1  
V]Y`aba\_\_\_\_]\_V`Z\_\_U]]^`b`\_a¥P¥aT\_\_a`¥^WZ  
@HWI-EAS443:3:36:1536:38#0/1  
CGAAGGTTCCAGGTTCCAGGTTGCCCTAAGTGCCTGAAC  
+HWI-EAS443:3:36:1536:38#0/1  
ababbbabbbbaababbbabb`aaaa¥ab\_a[\_bba\_`  
@HWI-EAS443:3:36:319:592#0/1  
TGGAAATGAGGCGCTGCCTTCTTCAGTCTCTTCAGCAGAT  
+HWI-EAS443:3:36:319:592#0/1  
abbbbaaab]baaabaaaa`aaa\_\_WZa\_`a^a\_`^`\_\_  
@HWI-EAS443:3:37:117:546#0/1  
GAAGGTTCCAGGTTCCAGGTTGCCCTAAGTGCCTGAACA  
+HWI-EAS443:3:37:117:546#0/1  
aaaaaV^aaaaaY`a\_aa\_T\_a¥\_a\_`^\_`\_¥a\_`  
@HWI-EAS443:3:37:1303:1417#0/1  
ATGGAAATGAGGCGCTGCCTTCTTCAGTCTCTTCAGCAGA  
+HWI-EAS443:3:37:1303:1417#0/1  
Za^¥`aa`bbbaab¥a`\_]ababbaa^]aT`a``a``P\_`^  
@HWI-EAS443:3:37:1547:1097#0/1  
ATGGAAATGAGGCGCTGCCTTCTTCAGTCTCTTCAGCAGA  
+HWI-EAS443:3:37:1547:1097#0/1  
abbaaabab]a[a`a`a\_`\_`^baW^b¥aWbaa]aaT[ZV

@HWI-EAS443:3:37:278:49#0/1  
GCTGCCTTCTTCAGTCTCTTCAGCAGATTGAGAGCATGAT  
+HWI-EAS443:3:37:278:49#0/1  
a\_`a``a``a\_\_a¥\_a`a[X^^W^^\_¥QU¥U\_^¥¥[Z[  
@HWI-EAS443:3:38:1280:509#0/1  
GAAGGTTCCAGGTTCCAGGTTGCCCTAAGTGCCTGAACA  
+HWI-EAS443:3:38:1280:509#0/1  
abbaaP`ba```]aaaaba^aaa`\_^`]ZVV]R[`a][RR  
@HWI-EAS443:3:38:1300:312#0/1  
GAAGGTTCCAGGTTCCAGGTTGCCCTAAGTGCCTGAACA  
+HWI-EAS443:3:38:1300:312#0/1  
aaaba\_aaaa`\_]``\_`aXaa^\_^`\_]V]XY^]]^]V  
@HWI-EAS443:3:38:1408:569#0/1  
CGAAGGTTCCAGGTTCCAGGTTGCCCTAAGTGCCTGAAC  
+HWI-EAS443:3:38:1408:569#0/1  
aba^\_`X\_ba``a^aaaaba`aa^aaaab[WT^Z^`a]`G  
@HWI-EAS443:3:38:1571:1351#0/1  
CATGCTCTCAATCTGCTGAAGAGACTGAAGAAGGCAGCGC  
+HWI-EAS443:3:38:1571:1351#0/1  
aa`\_aabbbb`X]`X\_a`^ba[`a`a^R]U^P]ZK[U  
@HWI-EAS443:3:38:979:1672#0/1  
ATGGAAATGAGGCGCTGCCTTCTTCAGTCTCTTCAGCAGA  
+HWI-EAS443:3:38:979:1672#0/1  
UI[(`\_]\_^XX]VYa`[\_T\_Y^Q[¥FZaLZYU[]]QGXVTYG  
@HWI-EAS443:3:39:1561:243#0/1  
ATGGAAATGAGGCGCTGCCTTCTTCAGTCTCTTCAGCAGA  
+HWI-EAS443:3:39:1561:243#0/1  
\_\_ba``\_aa^\_]a`a[YVYZ]a^V^]]`XR¥RQX00XR  
@HWI-EAS443:3:39:1728:539#0/1  
ATGGAAATGAGGCGCTGCCTTCTTCAGTCTCTTCAGCAGA  
+HWI-EAS443:3:39:1728:539#0/1  
a`bb``a\_babaa``a¥W¥\_`¥\_`]`aZX`V¥\_W\_YY^\_V  
@HWI-EAS443:3:39:883:1954#0/1  
AGGTTCCAGGTTCCAGGTTGCCCTAAGTGCCTGAACAAT  
+HWI-EAS443:3:39:883:1954#0/1  
aSRU[a`a^XUJZYa`\_Z¥[VZDX^\_YXNQVVXY^\_^\_¥0  
@HWI-EAS443:3:39:947:1046#0/1  
ATGGAAATGAGGCGCTGCCTTCTTCAGTCTCTTCAGCAGA  
+HWI-EAS443:3:39:947:1046#0/1  
^¥¥XR\_^Z¥\_¥¥Wb]RYTX^¥OX\_[S[LS^X[¥YWWJFWW  
@HWI-EAS443:3:3:1565:470#0/1  
ATGGAAATGAGGCGCTGCCTTCTTCAGTCTCTTCAGCAGA  
+HWI-EAS443:3:3:1565:470#0/1  
[aa`^a]\_]\_aa\_a\_\_\_\_XQV`SX\_U¥¥S[]L[UUW¥URVT  
@HWI-EAS443:3:3:170:840#0/1  
TGCCTTCTTCAGTCTCTTCAGCAGATTGAGAGCATGATTG  
+HWI-EAS443:3:3:170:840#0/1  
abaaaa\_aaa\_baYaaaa``a[aaaa`\_a]a\_\_\_\_aa`\_a  
@HWI-EAS443:3:3:238:1114#0/1  
ATGGAAATGAGGCGCTGCCTTCTTCAGTCTCTTCAGCAGA

+HWI-EAS443:3:3:238:1114#0/1  
VFZaWa`aaaa\_Za`¥a`\_Z¥W`\_¥¥aV¥\_U`^¥XWZ¥U  
@HWI-EAS443:3:40:1057:787#0/1  
CGAAGGTTCCAGGTTCCAGGTTGCCCTAAGTGCCTGAAC  
+HWI-EAS443:3:40:1057:787#0/1  
IaaSbbWb`baba]b`abbab\_baa]^\_K`aY` `b]aVa^  
@HWI-EAS443:3:40:649:1611#0/1  
ATGGAAATGAGGCGCTGCCTTCTTCAGTCTCTTCAGCAGA  
+HWI-EAS443:3:40:649:1611#0/1  
\_ZaXL¥aZa`XU^^a`aaa`\_a¥\_U]¥Sa`^`X^J¥\_\_YP  
@HWI-EAS443:3:40:658:1418#0/1  
GATCGAAGGTTCCAGGTTCCAGGTTGCCCTAAGTGCCTG  
+HWI-EAS443:3:40:658:1418#0/1  
aaa\_aaa` `SZZ[T]¥U` `a` [ ]Q`\_P[[^V`^WT[^SW\_  
@HWI-EAS443:3:42:113:1379#0/1  
CAGGGCTACTGAATACATAATGAAGGGAGTGTACATAAAT  
+HWI-EAS443:3:42:113:1379#0/1  
ab]` `aa^W¥b]ba]a\_a`aa` `a[\_a`aZaZa\_a[I^a\_  
@HWI-EAS443:3:42:1498:407#0/1  
GCGCTGCCTTCTTCAGTCTCTTCAGCAGATTGAGAGCATG  
+HWI-EAS443:3:42:1498:407#0/1  
abbbbbbabbbbbbbaaaa`aababbaabaabb\_a`aaaaa  
@HWI-EAS443:3:42:1502:1131#0/1  
CAAGATCGAAGGTTCCAGGTTCCAGGTTGCCCTAAGTGC  
+HWI-EAS443:3:42:1502:1131#0/1  
aabbabbabbab¥b`b^X`¥b`a`ab\_aa`\_\_^aaaaRa\_  
@HWI-EAS443:3:42:1683:811#0/1  
ATGGAAATGAGGCGCTGCCTTCTTCAGTCTCTTCAGCAGA  
+HWI-EAS443:3:42:1683:811#0/1  
¥WW`\_^\_\_bbabbYbaa\_WZ\_a¥\_XH[ `H¥aT\_\_]VX^¥\_P  
@HWI-EAS443:3:43:1144:52#0/1  
TGGAAATGAGGCGCTGCCTTCTTCAGTCTCTTCAGCAGAT  
+HWI-EAS443:3:43:1144:52#0/1  
`bbaa\_bbabbab`bbaa`a\_aaaab[Ybaaa\_\_a\_[aW\_  
@HWI-EAS443:3:43:1198:336#0/1  
ATCTGCTGAAGAGACTGAAGAAGGCAGCGCCTCATTCCA  
+HWI-EAS443:3:43:1198:336#0/1  
][ ` `a^a^W^¥Ta\_\_\_¥a` `] ` `]]Za¥aaa`^a` `X^XT  
@HWI-EAS443:3:43:411:72#0/1  
CATGCTCTCAATCTGCTGAAGAGACTGAAGAAGGCAGCGC  
+HWI-EAS443:3:43:411:72#0/1  
abbb`abbab\_b\_bb\_baaabab`a`a` `a\_\_aa`^aU`Y  
@HWI-EAS443:3:43:862:990#0/1  
ATGGAAATGAGGCGCTGCCTTCTTCAGTCTCTTCAGCAGA  
+HWI-EAS443:3:43:862:990#0/1  
aabb`\_bab¥\_aa`aaa`^a^^aaa`aZ[\_[\_`\_¥X^`^a[  
@HWI-EAS443:3:43:946:1270#0/1  
AGGCGCTGCCTTCTTCAGTCTCTTCAGCAGATTGAGAGCA  
+HWI-EAS443:3:43:946:1270#0/1  
a`¥`baba]\_aaYaaa`a¥¥aYaa`a[\_a\_Z^a`^¥\_^V¥

@HWI-EAS443:3:44:1406:1754#0/1  
ATGGAAATGAGGCGCTGCCTTCTTCAGTCTCTTCAGCAGA  
+HWI-EAS443:3:44:1406:1754#0/1  
a\_aa]\_a\_\_\_\_^U\_`\_` [W`U^V[ZN¥\_YW¥V¥¥SW¥UP^T  
@HWI-EAS443:3:44:1704:112#0/1  
GCCTTCTTCAGTCTCTTCAGCAGATTGAGAGCATGATTGA  
+HWI-EAS443:3:44:1704:112#0/1  
a\_[\_aUab\_`aaa`^`\_\_\_\_a^Y\_Y\_a]]\_]^^X`]X^^UX  
@HWI-EAS443:3:44:1704:624#0/1  
CTTCCTTTTATAATGAACCCATACAGTTTGTTCCTCGTC  
+HWI-EAS443:3:44:1704:624#0/1  
abb`abbbbbbbabbaa```aaa`aba`b`aa\_a``¥a`X  
@HWI-EAS443:3:44:201:738#0/1  
ATGGAAATGAGGCGCTGCCTTCTTCAGTCTCTTCAGCAGA  
+HWI-EAS443:3:44:201:738#0/1  
a]aaababb`aaa\_aaaaa\_a^`a`^`^`^`a\_\_\_\_`a^X`^  
@HWI-EAS443:3:44:419:1225#0/1  
CTCAATCTGCTGAAGAGACTGAAGAAGGCAGCGCCTCATT  
+HWI-EAS443:3:44:419:1225#0/1  
aX\_YQ¥¥W]]R]]\_ ^Y^`Z]\_] ] ] ] ] ZOFZZTSN[PR\_¥  
@HWI-EAS443:3:44:808:261#0/1  
GTTCCAGGTTCCAGGTTGCCCTAAGTGCCTGAACAATGA  
+HWI-EAS443:3:44:808:261#0/1  
a\_aa`aa\_V`^`]^`a\_[\_¥`\_`\_\_\_\_]R`\_R``WXS VN[^^  
@HWI-EAS443:3:44:852:127#0/1  
CTTCTTCAGTCTCTTCAGCAGATTGAGAGCATGATTGAGG  
+HWI-EAS443:3:44:852:127#0/1  
a`abaa`ab\_\_b\_aa`a`a`aa`b`a^a`a``^\_\_\_\_`  
@HWI-EAS443:3:44:903:1071#0/1  
CGCTGCCTTCTTCAGTCTCTTCAGCAGATTGAGAGCATGA  
+HWI-EAS443:3:44:903:1071#0/1  
`a\_^^\_]b\_Ya\_\_\_\_a\_^b¥ba\_`^][¥¥Z]¥`^ [¥]¥aa\_  
@HWI-EAS443:3:45:1280:728#0/1  
GATCGAAGGTTCCAGGTTCCAGGTTGCCCTAAGTGCCTG  
+HWI-EAS443:3:45:1280:728#0/1  
a`aaaa`aa\_aaa`aW`]a\_aY\_`X][^\_`^WT\_]X^\_  
@HWI-EAS443:3:45:1390:1836#0/1  
CAATCATGCTCTCAATCTGCTGAAGAGACTGAAGAAGGCA  
+HWI-EAS443:3:45:1390:1836#0/1  
aa```bbb`b^\_`bbbaab^a`a^¥`aa\_aWUYaaa¥^\_¥  
@HWI-EAS443:3:45:1485:696#0/1  
GGCGCTGCCTTCTTCAGTCTCTTCAGCAGATTGAGAGCAT  
+HWI-EAS443:3:45:1485:696#0/1  
aaa`bbbaabbaab\_ab`aa``aaaa^aaa`aa`a\_a[[`  
@HWI-EAS443:3:45:235:1240#0/1  
GGCGCTGCCTTCTTCAGTCTCTTCAGCAGATTGAGAGCAT  
+HWI-EAS443:3:45:235:1240#0/1  
^babbbbabab]baba`abbbb`aa]bbbabbababaaa  
@HWI-EAS443:3:45:732:968#0/1  
ATTTATGTACTCCCTTCATTATGTATTAGTAGCCCTG

+HWI-EAS443:3:45:732:968#0/1  
S`b\_b\_TW¥a^Ua^JXVXV¥YXRQ\_P¥^¥X0^WUVY¥¥  
@HWI-EAS443:3:46:1517:927#0/1  
CTTCCTTTTATAATGAACCCATACAGTTTGTTCGTC  
+HWI-EAS443:3:46:1517:927#0/1  
Y^¥[ZabbaS^ab`b\_YZ`T¥a`bbb`X[`a```\_¥Z`Z]  
@HWI-EAS443:3:46:1520:1940#0/1  
GCTGCCTTCTTCAGTCTCTTCAGCAGATTGAGAGCATGAT  
+HWI-EAS443:3:46:1520:1940#0/1  
`aa`Z\_a^[a¥Y\_U`\_\_`\_W¥[]¥`U¥\_]W\_¥^WT^^ZU  
@HWI-EAS443:3:46:1634:915#0/1  
CGGAAAACAAACCTGTATGGTTTCATTATAAAAGGAAGGT  
+HWI-EAS443:3:46:1634:915#0/1  
aabaa\_\_`a]Z[^^^Za\_a`a]a]^a\_\_aa`Z\_\_UW^^¥]  
@HWI-EAS443:3:47:1180:1838#0/1  
CAATCATGCTCTCAATCTGCTGAAGAGACTGAAGAAGGCA  
+HWI-EAS443:3:47:1180:1838#0/1  
Y`a]bbaK\_VaY`\_^Z`]M]bXT`aa\_YSSZ`\_aa]`V\_  
@HWI-EAS443:3:47:1354:1368#0/1  
ATCTGCTGAAGAGACTGAAGAAGGCAGCGCCTCATTCCA  
+HWI-EAS443:3:47:1354:1368#0/1  
aabb^[aa`a¥Z\_ZaZX¥`^V`]X¥]XR^a`\_a^Za`UY`  
@HWI-EAS443:3:47:456:989#0/1  
GCTGCCTTCTTCAGTCTCTTCAGCAGATTGAGAGCATGAT  
+HWI-EAS443:3:47:456:989#0/1  
a\_a`^aaa`aa`a¥\_a\_aa¥`\_]¥`^`\_\_\_\_\_]-¥``\_  
@HWI-EAS443:3:47:570:646#0/1  
GATCGAAGGTTCCAGGTTCCAGGTTGCCCTAAGTGCCTG  
+HWI-EAS443:3:47:570:646#0/1  
[a`aXR\_baZ^\_^]¥^RZa```]`G[\_ZUZ[ZYUMWTVY`\_  
@HWI-EAS443:3:48:1030:498#0/1  
CTGCCTTCTTCAGTCTCTTCAGCAGATTGAGAGCATGATT  
+HWI-EAS443:3:48:1030:498#0/1  
aab]¥a`[]aaa]`Q\_\_aZQ[ZYG\_P```]`ZLUFVZ`¥`Y  
@HWI-EAS443:3:48:1500:134#0/1  
CAATCTGCTGAAGAGACTGAAGAAGGCAGCGCCTCATTTC  
+HWI-EAS443:3:48:1500:134#0/1  
aabaRY`\_abb^^`[WQbaUWLU¥[Y\_a\_\_\_\_]YQ]^]ZT  
@HWI-EAS443:3:48:1683:375#0/1  
CCAAGATCGAAGGTTCCAGGTTCCAGGTTGCCCTAAGTG  
+HWI-EAS443:3:48:1683:375#0/1  
\_\_\_¥^`b`a\_aab`^`\_Z`[\_]^bbaTa]\_W]]baa`RW  
@HWI-EAS443:3:48:417:141#0/1  
AAACAAACCTGTATGGTTTCATTATAAAAGGAAGGTCTCA  
+HWI-EAS443:3:48:417:141#0/1  
aa]a`bZ]bab[aaaabZ`\_aaaaa]W\_\_baa]^`^¥\_a\_\_  
@HWI-EAS443:3:48:664:735#0/1  
CTGCCTTCTTCAGTCTCTTCAGCAGATTGAGAGCATGATT  
+HWI-EAS443:3:48:664:735#0/1  
\_aa`^`\_`aaaabVabaab¥¥\_aaa`aaa`\_X`[[]```\_`

@HWI-EAS443:3:49:559:529#0/1  
ATGGAAATGAGGCGCTGCCTTCTTCAGTCTCTTCAGCAGA  
+HWI-EAS443:3:49:559:529#0/1  
abba[aabbabaaaab\_aaa`aa`aa\_a]a`X\_\_\_\_]a`  
@HWI-EAS443:3:49:957:1169#0/1  
TGGAAATGAGGCGCTGCCTTCTTCAGTCTCTTCAGCAGAT  
+HWI-EAS443:3:49:957:1169#0/1  
\_bba^a^a^`aa`\_ZVU\_a`ZVZ^[]\_W]`P\_aWZZ[]  
@HWI-EAS443:3:4:454:1365#0/1  
CGAAGGTTCCAGGTTCCAGGTTGCCCTAAGTGCCTGAAC  
+HWI-EAS443:3:4:454:1365#0/1  
abaZab\_aa^aba`aa\_babNaa\_\_\_\_]aaaa^a`aa`S  
@HWI-EAS443:3:4:508:1642#0/1  
CAATCATGCTCTCAATCTGCTGAAGAGACTGAAGAAGGCA  
+HWI-EAS443:3:4:508:1642#0/1  
aa^Z^VH`aaXbXbaZS\_\_P\_T\_aa`aa`Raa]`Va`Y`Y`  
@HWI-EAS443:3:4:55:1266#0/1  
ATTTATGTACTCCCTTCATTATGTATTAGTAGCCCTG  
+HWI-EAS443:3:4:55:1266#0/1  
abb^`^YDY[`TTZTSZZ]P`GM]QHY[[aBBBBBBBBBB  
@HWI-EAS443:3:50:1493:632#0/1  
ATGGAAATGAGGCGCTGCCTTCTTCAGTCTCTTCAGCAGA  
+HWI-EAS443:3:50:1493:632#0/1  
abb`aa`aa`^aabbbaX^a]`aa`b[]baa^]`\_Y^a`  
@HWI-EAS443:3:50:538:77#0/1  
TGGAAATGAGGCGCTGCCTTCTTCAGTCTCTTCAGCAGAT  
+HWI-EAS443:3:50:538:77#0/1  
abb\_b^`abaaab`ab[aS^V^`\_`NX`\_`b^aa\_V[S`  
@HWI-EAS443:3:51:1267:499#0/1  
TTTATGTACTCCCTTCATTATGTATTAGTAGCCCTGC  
+HWI-EAS443:3:51:1267:499#0/1  
`WZ\_ab\_UQ`[RMVX`^`XWZ]^QYZUVMF[]WFOOVJ  
@HWI-EAS443:3:51:379:34#0/1  
TGGAAATGAGGCGCTGCCTTCTTCAGTCTCTTCAGCAGAT  
+HWI-EAS443:3:51:379:34#0/1  
abbbabbbbababaaaa`bb\_bbaa`aaa`aa\_ab`a`  
@HWI-EAS443:3:51:647:1666#0/1  
TGGAAATGAGGCGCTGCCTTCTTCAGTCTCTTCAGCAGAT  
+HWI-EAS443:3:51:647:1666#0/1  
abaYaabbaa[ab`aaa\_a\_]b`^aV\_\_Z\_aS^aZ]]GP  
@HWI-EAS443:3:52:1004:1170#0/1  
GGAAATGAGGCGCTGCCTTCTTCAGTCTCTTCAGCAGATT  
+HWI-EAS443:3:52:1004:1170#0/1  
aaaaabbbbabababba\_bbaab`a`ab\_aa\_ab`ab^aa  
@HWI-EAS443:3:52:1331:153#0/1  
CTTCTTCAGTCTCTTCAGCAGATTGAGAGCATGATTGAGG  
+HWI-EAS443:3:52:1331:153#0/1  
aab`K`\_]b[Qa`b^R`b^`NU^^]`TVG\_\_X`^`]`  
@HWI-EAS443:3:52:284:1054#0/1  
ATGGAAATGAGGCGCTGCCTTCTTCAGTCTCTTCAGCAGA

+HWI-EAS443:3:52:284:1054#0/1  
abbbabaabaaaaba`\_`aa`a`^aa^a^`a\_aa\_\_`\_`  
@HWI-EAS443:3:52:693:1849#0/1  
GCTGCCTTCTTCAGTCTCTTCAGCAGATTGAGAGCATGAT  
+HWI-EAS443:3:52:693:1849#0/1  
\_a]RHV`ZQXGXZTaa]¥]W¥TVPKSLQOVZSPUQ[U  
@HWI-EAS443:3:53:1643:338#0/1  
AACAAACCTGTATGGGTTTCATTATAAAAGGAAGGTCTCAT  
+HWI-EAS443:3:53:1643:338#0/1  
ab¥a`^a^`\_Y¥`\_]`b\_\_b`baaaaa^`b]]¥LZa¥\_\_  
@HWI-EAS443:3:53:209:309#0/1  
ATGGAAATGAGGCGCTGCCTTCTTCAGTCTCTTCAGCAGA  
+HWI-EAS443:3:53:209:309#0/1  
a`ab¥abababb`aa`a]aaa\_`aa^a^`a^`^^`¥¥a^  
@HWI-EAS443:3:53:225:1092#0/1  
CAATCATGCTCTCAATCTGCTGAAGAGACTGAAGAAGGCA  
+HWI-EAS443:3:53:225:1092#0/1  
a`^abbbabbbb`\_]`aab]ab¥a]`baabb`aaaa`\_^  
@HWI-EAS443:3:53:486:1218#0/1  
GTTTCATTATAAAAGGAAGGTCTCATTGAGAAATGATACT  
+HWI-EAS443:3:53:486:1218#0/1  
\_ZT]YZ^]]UW\_]¥WTOTN]]ZQZU]]`Y`XVGW`\_a[T]  
@HWI-EAS443:3:54:323:1304#0/1  
GCTGCCTTCTTCAGTCTCTTCAGCAGATTGAGAGCATGAT  
+HWI-EAS443:3:54:323:1304#0/1  
aaabbabaabbaaa^\_baaaaabaaaZ`aa`aaa`a`aa\_  
@HWI-EAS443:3:54:388:351#0/1  
GGCGCTGCCTTCTTCAGTCTCTTCAGCAGATTGAGAGCAT  
+HWI-EAS443:3:54:388:351#0/1  
^¥\_`aaabZa`R`\_¥Waaaa]aaaZ]^aa]ab[^^^``Ya  
@HWI-EAS443:3:54:463:303#0/1  
ATGGAAATGAGGCGCTGCCTTCTTCAGTCTCTTCAGCAGA  
+HWI-EAS443:3:54:463:303#0/1  
^NYU\_WQRT\_\_[¥ZY[XRT]YRMZS^XRJ[W\_ZOW^FPWX  
@HWI-EAS443:3:54:73:1853#0/1  
ATGGAAATGAGGCGCTGCCTTCTTCAGTCTCTTCAGCAGA  
+HWI-EAS443:3:54:73:1853#0/1  
a`ab\_aaaaab[\_aa¥XQ\_¥`^^`\_\_^PTX¥\_¥^¥¥UQZ¥  
@HWI-EAS443:3:55:129:1803#0/1  
GTTTCATTATAAAAGGAAGGTCTCATTGAGAAATGATACT  
+HWI-EAS443:3:55:129:1803#0/1  
`¥^a]`T][W`\_]UU\_]YY`[^Y¥\_T[WTWPX[¥YRZ[W  
@HWI-EAS443:3:55:1499:913#0/1  
AATCATGCTCTCAATCTGCTGAAGAGACTGAAGAAGGCAG  
+HWI-EAS443:3:55:1499:913#0/1  
M\_Z¥[¥Z`¥]\_^Y`YZ]][]`a]baa^\_aa]\_`IZXXONb  
@HWI-EAS443:3:55:348:1833#0/1  
GCTGCCTTCTTCAGTCTCTTCAGCAGATTGAGAGCATGAT  
+HWI-EAS443:3:55:348:1833#0/1  
aa`aabbaP]aa`a\_a`a\_`aaZ`\_\_\_\_`a]^[]`\_\_`^Z`\_`



@HWI-EAS443:3:55:477:1250#0/1  
CAGGCACTTAGGGACAACCTGGAACCTGGAACCTTCGATC  
+HWI-EAS443:3:55:477:1250#0/1  
`^bb` `bbaabb\_babab`abaabbab^aaaa\_abaa^^`  
@HWI-EAS443:3:55:65:2011#0/1  
CGGAAAACAAACCTGTATGGGTTTCATTATAAAAGGAAGGT  
+HWI-EAS443:3:55:65:2011#0/1  
]RWZX`a`WMTKOLVNTDTPQY¥^[TNXR\_¥VMKDPMD  
@HWI-EAS443:3:56:1611:306#0/1  
TCAATCATGCTCTCAATCTGCTGAAGAGACTGAAGAAGGC  
+HWI-EAS443:3:56:1611:306#0/1  
\_P`a\_\_a`aW`XaP^\_Z\_a`¥`a\_^a^a\_Z]\_\_\_\_\_Y^[SM  
@HWI-EAS443:3:56:939:847#0/1  
GCTGCCTTCTTCAGTCTCTTCAGCAGATTGAGAGCATGAT  
+HWI-EAS443:3:56:939:847#0/1  
aabbaabb`ba`^` `aaaaaaa` `^a\_aaa\_a\_\_\_\_\_` `^  
@HWI-EAS443:3:57:248:878#0/1  
ATGGAAATGAGGCGCTGCCTTCTTCAGTCTCTTCAGCAGA  
+HWI-EAS443:3:57:248:878#0/1  
aa` `abbabbba^a\_aaaa`aaaa\_]aPY`a` ` \_` ^¥P`V  
@HWI-EAS443:3:57:815:871#0/1  
ATGGAAATGAGGCGCTGCCTTCTTCAGTCTCTTCAGCAGA  
+HWI-EAS443:3:57:815:871#0/1  
¥Z`ab¥`Y]aa` `aY^`aZ[`U\_a\_X\_QR^a]`U`^]V]Y  
@HWI-EAS443:3:58:1224:495#0/1  
TGGAAATGAGGCGCTGCCTTCTTCAGTCTCTTCAGCAGAT  
+HWI-EAS443:3:58:1224:495#0/1  
U]\_Vb`bb\_`baaRYb`¥a^H`XPXOXIa`U]a\_`V¥WT`  
@HWI-EAS443:3:58:1295:171#0/1  
GGAAATGAGGCGCTGCCTTCTTCAGTCTCTTCAGCAGATT  
+HWI-EAS443:3:58:1295:171#0/1  
`\_`abaa^b^]a` `N¥]]Y\_`UYX[MZS¥Y¥]]SQYSY]  
@HWI-EAS443:3:58:211:1003#0/1  
ATGGAAATGAGGCGCTGCCTTCTTCAGTCTCTTCAGCAGA  
+HWI-EAS443:3:58:211:1003#0/1  
Z`¥\_IU`a]a^S^XaX`Z]aYZ]`]W]ZaV]XYVTUPPZN  
@HWI-EAS443:3:58:517:1900#0/1  
GAAGGTTCCAGGTTCCAGGTTGCCCTAAGTGCCTGAACA  
+HWI-EAS443:3:58:517:1900#0/1  
^abaa` `baa\_\_`ab`aaQ`aa\_\_aZ\_ba[U\_`\_ba`a[F  
@HWI-EAS443:3:58:96:858#0/1  
GTTCCAGGTTCCAGGTTGCCCTAAGTGCCTGAACAATGA  
+HWI-EAS443:3:58:96:858#0/1  
aaa¥` `¥`aba]aa]\_`Za` `a¥[UUZWZZa[UVUFZ\_U  
@HWI-EAS443:3:59:1693:98#0/1  
GCCTTCTTCAGTCTCTTCAGCAGATTGAGAGCATGATTGA  
+HWI-EAS443:3:59:1693:98#0/1  
a]^`bZab`\_bYP\_\_aaZ` ` ` \_bZaba\_a^aV¥aaUL]`W  
@HWI-EAS443:3:59:828:685#0/1  
CTGCCTTCTTCAGTCTCTTCAGCAGATTGAGAGCATGATT

+HWI-EAS443:3:59:828:685#0/1  
aababZbabaaab]ababaaa\_a`aabbab]a]`X#b`]  
@HWI-EAS443:3:5:1158:727#0/1  
CTTCCTTTTATAATGAACCCATACAGTTTGTTCCTCGTC  
+HWI-EAS443:3:5:1158:727#0/1  
aY\_`a]ab\_b\_[Ta^YGSX¥[JTP`aWJXZPY]\_aBBBBB  
@HWI-EAS443:3:5:1357:1220#0/1  
ATCGAAGTTCCAGGTTCCAGGTTGCCCTAAGTGCCTGA  
+HWI-EAS443:3:5:1357:1220#0/1  
^babbab`NYUUX[ZU]OWULXKX][L\_R][[FQPPUBBB  
@HWI-EAS443:3:5:182:771#0/1  
ATGGAATGAGGCGCTGCCTTCTTCAGTCTCTTCAGCAGA  
+HWI-EAS443:3:5:182:771#0/1  
\_Z\_a¥XNUa)`^YLP^[\_^\_TRX]YZXZWUQXTM\_`P[[U  
@HWI-EAS443:3:5:524:1191#0/1  
GAAGGTTCCAGGTTCCAGGTTGCCCTAAGTGCCTGAACA  
+HWI-EAS443:3:5:524:1191#0/1  
a\_bbbabba\_aaM`[aaa\_GaaZHza\_[T¥Ha^^\_a\_`YB  
@HWI-EAS443:3:5:558:373#0/1  
TGGAAATGAGGCGCTGCCTTCTTCAGTCTCTTCAGCAGAT  
+HWI-EAS443:3:5:558:373#0/1  
`aaab`bbbbaaa`aaaZaa\_abQ`a¥\_a]aa¥\_`Z`VXB  
@HWI-EAS443:3:5:789:1607#0/1  
CGCTGCCTTCTTCAGTCTCTTCAGCAGATTGAGAGCATGA  
+HWI-EAS443:3:5:789:1607#0/1  
abbbb`bb\_T\_baaba¥b`ba\_a`\_bba`abaaaa[`\_a`  
@HWI-EAS443:3:60:1523:689#0/1  
ATGAGGCGCTGCCTTCTTCAGTCTCTTCAGCAGATTGAGA  
+HWI-EAS443:3:60:1523:689#0/1  
aaba¥aba`a\_V`[^`\_a`^a¥a`\_]`\_\_`U^YQ\_aY^\_Y  
@HWI-EAS443:3:60:1662:307#0/1  
ATGGAATGAGGCGCTGCCTTCTTCAGTCTCTTCAGCAGA  
+HWI-EAS443:3:60:1662:307#0/1  
[^`[^`\_a`aba^`]a`a^X¥`U]X]H[QFO]WX]FVUMYa¥  
@HWI-EAS443:3:60:544:226#0/1  
CAATCATGCTCTCAATCTGCTGAAGAGACTGAAGAAGGCA  
+HWI-EAS443:3:60:544:226#0/1  
aa^^\_aaaa\_a^]aa`aa`aa\_aa\_a`\_a\_\_`\_`\_\_`  
@HWI-EAS443:3:61:467:231#0/1  
ATCGAAGTTCCAGGTTCCAGGTTGCCCTAAGTGCCTGA  
+HWI-EAS443:3:61:467:231#0/1  
aaaa`]ba]]^]S][JY`[VZSHVZQS[ZRTURNXRTVRV  
@HWI-EAS443:3:61:648:1176#0/1  
AGATCGAAGTTCCAGGTTCCAGGTTGCCCTAAGTGCCT  
+HWI-EAS443:3:61:648:1176#0/1  
abaaaaaa\_aXaa`aa^Vaaa[a\_Y`a`\_a\_\_]^ZWX\_Y]  
@HWI-EAS443:3:61:870:1334#0/1  
CTGCCTTCTTCAGTCTCTTCAGCAGATTGAGAGCATGATT  
+HWI-EAS443:3:61:870:1334#0/1  
ab`abbbbbbbbaa\_bbbbbbbabaaaaaaa`aaaaabUY

@HWI-EAS443:3:62:1512:1128#0/1  
GTTCCAGTTGTCCCTAAGTGCCTGAACAATGAGAAGCAA  
+HWI-EAS443:3:62:1512:1128#0/1  
aab`aaaaVba\_aaaaaa`^Y^\_aa`^aaaaaaa`aaa\_  
@HWI-EAS443:3:62:857:651#0/1  
CAATCATGCTCTCAATCTGCTGAAGAGACTGAAGAAGGCA  
+HWI-EAS443:3:62:857:651#0/1  
a¥^¥^[`bZbaa][`bb¥]abW`aaa`aa`abaaU^[`a  
@HWI-EAS443:3:62:93:276#0/1  
GCTGCCTTCTTCAGTCTTTCAGCAGATTGAGAGCATGAT  
+HWI-EAS443:3:62:93:276#0/1  
a`^`^]a^]aaaU^^`YYVYa[Y¥^^\_XTX[\_]V\_^V  
@HWI-EAS443:3:63:149:1521#0/1  
CCAAGATCGAAGGTTCCAGGTTCCAGGTTGTCCCTAAGTG  
+HWI-EAS443:3:63:149:1521#0/1  
ab\_SSZ^^¥\_UPR[a`\_a^^MO\_a[^aZZH¥FY\_\_a^NKJ  
@HWI-EAS443:3:64:1185:730#0/1  
CAATCTGCTGAAGAGACTGAAGAAGGCAGCGCCTCATTTC  
+HWI-EAS443:3:64:1185:730#0/1  
aabbab[bbbabbbabaaa`abaaa`b^aaabaaaa``¥  
@HWI-EAS443:3:65:1119:292#0/1  
ATGGAAATGAGGCGCTGCCTTCTTCAGTCTTTCAGCAGA  
+HWI-EAS443:3:65:1119:292#0/1  
aaaaa`aabaa\_Ya\_a`¥¥`a¥aaS`a`\_`^a`¥\_\_W¥^¥  
@HWI-EAS443:3:65:166:938#0/1  
CTTCTTCAGTCTTTCAGCAGATTGAGAGCATGATTGAGG  
+HWI-EAS443:3:65:166:938#0/1  
aaa``aaaa^`a``aaaa`a`\_a`[`````Z^a^^[^Z¥  
@HWI-EAS443:3:65:258:741#0/1  
AAATTGCTTCTCATTGTTTCAGGCACTTAGGGACAACCTGG  
+HWI-EAS443:3:65:258:741#0/1  
a`]b]^ba`aaaZ\_aa^aaaa`[\_a`aa`\_\_\_`dWa^\_Y  
@HWI-EAS443:3:65:356:1001#0/1  
ATGGAAATGAGGCGCTGCCTTCTTCAGTCTTTCAGCAGA  
+HWI-EAS443:3:65:356:1001#0/1  
a[\_I¥[R^ZZa```[[aa\_`a``ZP\_\_\_[aaaaXJV]`VG  
@HWI-EAS443:3:65:528:567#0/1  
AGATCGAAGGTTCCAGGTTCCAGGTTGTCCCTAAGTGCCT  
+HWI-EAS443:3:65:528:567#0/1  
aaaaaa`\_^aX`a`^¥^a]¥\_]V\_]^^`]^[¥VTX]Y¥  
@HWI-EAS443:3:66:1604:324#0/1  
GTTCCAGTTGTCCCTAAGTGCCTGAACAATGAGAAGCAA  
+HWI-EAS443:3:66:1604:324#0/1  
a```¥a\_aX¥^`]]]\_a^\_Y^X^^\_]^Y\_]\_]^`\_`V\_Y  
@HWI-EAS443:3:66:1764:58#0/1  
GCCTTCTTCAGTCTTTCAGCAGATTGAGAGCATGATTGA  
+HWI-EAS443:3:66:1764:58#0/1  
`aaZ\_abb\_a]^\_aZZ`]^^¥a¥^`a\_aa`a¥U]^`[X\_  
@HWI-EAS443:3:66:24:608#0/1  
CCTTCCTTTTATAATGAACCCATACAGTTTGTTCCTCGT

+HWI-EAS443:3:66:24:608#0/1  
aba`¥^aa`^`^\_S\_¥\_V\_\_WY[YX]`[SV[\_]\_\_\_XZ[^  
@HWI-EAS443:3:66:292:1000#0/1  
ATCGAAGGTTCCAGGTTCCAGGTTGCCCTAAGTGCCTGA  
+HWI-EAS443:3:66:292:1000#0/1  
aab]aa]\_TZ[Z[]]^`\_XX[X\_WT]`\_RVRLOY[¥SPS  
@HWI-EAS443:3:66:44:142#0/1  
ATGGAAATGAGGCGCTGCCTTCTTCAGTCTCTTCAGCAGA  
+HWI-EAS443:3:66:44:142#0/1  
`OPP[b]PW\_P[X]W[QZ^Z^¥Z]QZBBBBBBBBBBBB  
@HWI-EAS443:3:66:897:1574#0/1  
CTGCCTTCTTCAGTCTCTTCAGCAGATTGAGAGCATGATT  
+HWI-EAS443:3:66:897:1574#0/1  
abaaaababbaaa\_]aaba\_aaaaa\_aaa\_a\_a`aaab\_a  
@HWI-EAS443:3:67:1099:1478#0/1  
CTGCCTTCTTCAGTCTCTTCAGCAGATTGAGAGCATGATT  
+HWI-EAS443:3:67:1099:1478#0/1  
`a\_abbaaababa`X`^`aaZ\_a\_a\_]`^`^`aa\_]aa^`  
@HWI-EAS443:3:67:1183:362#0/1  
CAATCATGCTCTCAATCTGCTGAAGAGACTGAAGAAGGCA  
+HWI-EAS443:3:67:1183:362#0/1  
ababbbbabbabbbababbbbaabbaaabaababaa`  
@HWI-EAS443:3:67:1572:1300#0/1  
ATGGAAATGAGGCGCTGCCTTCTTCAGTCTCTTCAGCAGA  
+HWI-EAS443:3:67:1572:1300#0/1  
^¥\_\_YOX¥a\_b\_W¥X[^X¥a[L¥b`]¥TQYI`UD¥\_L[\_¥  
@HWI-EAS443:3:67:243:493#0/1  
GCTGCCTTCTTCAGTCTCTTCAGCAGATTGAGAGCATGAT  
+HWI-EAS443:3:67:243:493#0/1  
aba^`aaaaaa^a^`a\_a\_`\_`[[`\_`\_a^`¥]¥\_\_¥\_W  
@HWI-EAS443:3:67:363:80#0/1  
CTTCTTCAGTCTCTTCAGCAGATTGAGAGCATGATTGAGG  
+HWI-EAS443:3:67:363:80#0/1  
abbbbbbabbabbbb`abbbaabb`a`b\_`a`ba\_`^\_a  
@HWI-EAS443:3:67:417:353#0/1  
CTCAATCATGCTCTCAATCTGCTGAAGAGACTGAAGAAGG  
+HWI-EAS443:3:67:417:353#0/1  
abb`bbbbbabbababaababbaba`ba`aa\_aaaaa\_  
@HWI-EAS443:3:67:972:482#0/1  
ATGGAAATGAGGCGCTGCCTTCTTCAGTCTCTTCAGCAGA  
+HWI-EAS443:3:67:972:482#0/1  
a```]b]^a¥U\_aa`[^`^`a¥¥`\_\_`X]^\_aZVY`Q¥aX  
@HWI-EAS443:3:68:1386:1198#0/1  
GGAAATGAGGCGCTGCCTTCTTCAGTCTCTTCAGCAGATT  
+HWI-EAS443:3:68:1386:1198#0/1  
aa^``SW^YZ¥]U¥aQSVXVV[^^YNJUztURVOSV¥RU¥  
@HWI-EAS443:3:68:1449:951#0/1  
CAAGATCGAAGGTTCCAGGTTCCAGGTTGCCCTAAGTGC  
+HWI-EAS443:3:68:1449:951#0/1  
`abb`bbbbbabab^a^`a^`Z^abb\_bb^]]¥````YXY

@HWI-EAS443:3:68:1481:1378#0/1  
GGCACTTAGGGACAACCTGGAACCTGGAACCTTCGATCTT  
+HWI-EAS443:3:68:1481:1378#0/1  
abbbabbbb\_baabbab\_aaaa\_a`aaa¥`\_\_a`Uab  
@HWI-EAS443:3:68:1697:1189#0/1  
ATGGAAATGAGGCGCTGCCTTCTTCAGTCTCTTCAGCAGA  
+HWI-EAS443:3:68:1697:1189#0/1  
`b\_a`aba¥\_\_abaab\_a`b[ba^`\_\_a`aa^a[^aaU  
@HWI-EAS443:3:68:194:224#0/1  
ACGGAACAAACCTGTATGGGTTTATTATAAAAGGAAGG  
+HWI-EAS443:3:68:194:224#0/1  
a`]SWaa`^\_\_`a`TbTX¥RI¥`^^a`\_\_\_aVY^[]  
@HWI-EAS443:3:69:1132:319#0/1  
TGGAAATGAGGCGCTGCCTTCTTCAGTCTCTTCAGCAGAT  
+HWI-EAS443:3:69:1132:319#0/1  
abb]aabb\_aa¥aaaa\_`aaXaaa[aZ\_`a\_aZP\_U[a\_`  
@HWI-EAS443:3:69:1483:2010#0/1  
TCTCAATCTGCTGAAGAGACTGAAGAAGGCAGCGCCTCAT  
+HWI-EAS443:3:69:1483:2010#0/1  
a`aa`¥`\_a\_aa`aa\_\_]`a\_\_\_\_\_¥`\_aY[\_SXZ\_¥  
@HWI-EAS443:3:69:1509:357#0/1  
GATCGAAGGTTCCAGGTTCCAGGTTGCCCTAAGTGCCTG  
+HWI-EAS443:3:69:1509:357#0/1  
abaabbaa`aaa`aaa]a`aaaaX`a^^^\_a`]aWaV]\_\_  
@HWI-EAS443:3:69:1658:871#0/1  
AAGATCGAAGGTTCCAGGTTCCAGGTTGCCCTAAGTGCC  
+HWI-EAS443:3:69:1658:871#0/1  
ab`]\_^b\_a\_^PZYaabZZXJ]ba^F^aYSPTa`]\_N`\_  
@HWI-EAS443:3:69:457:1182#0/1  
AAGGTTCCAGGTTCCAGGTTGCCCTAAGTGCCTGAACAA  
+HWI-EAS443:3:69:457:1182#0/1  
`Y^[F¥a\_aaYM\_a\_YZXSIX[a\_^[^XWO\_\_ST¥WO^]]  
@HWI-EAS443:3:69:66:1691#0/1  
GCTGCCTTCTTCAGTCTCTTCAGCAGATTGAGAGCATGAT  
+HWI-EAS443:3:69:66:1691#0/1  
a`XYbb^\_X¥`ba]YYa`N\_]0¥`aaa`aa`XU[¥XY¥U  
@HWI-EAS443:3:69:913:1737#0/1  
CTGCCTTCTTCAGTCTCTTCAGCAGATTGAGAGCATGATT  
+HWI-EAS443:3:69:913:1737#0/1  
\_V[\_`b]b[\_]aVSZb`a`aa]a`b^aaa^aR[]a`a\_\_Z  
@HWI-EAS443:3:6:144:1916#0/1  
GCTCTCAATCTGCTGAAGAGACTGAAGAAGGCAGCGCCTC  
+HWI-EAS443:3:6:144:1916#0/1  
aa\_a``\_]\_abaabbZabaaba^`aa`abaaa^aaV\_`a^¥  
@HWI-EAS443:3:6:156:1872#0/1  
GAAGGTTCCAGGTTCCAGGTTGCCCTAAGTGCCTGAACA  
+HWI-EAS443:3:6:156:1872#0/1  
aaa^a\_a`[aX`\_a[]a`^¥aTN¥a\_a`ZVUa\_¥[W\_\_Y  
@HWI-EAS443:3:6:295:336#0/1  
GCTGCCTTCTTCAGTCTCTTCAGCAGATTGAGAGCATGAT

+HWI-EAS443:3:6:295:336#0/1  
aaaba`aa\_aaaaa\_`a\_a\_\_`¥\_a¥\_`^`\_\_\_\_aa\_\_  
@HWI-EAS443:3:6:313:1854#0/1  
ATGGAAATGAGGCGCTGCCTTCTTCAGTCTCTTCAGCAGA  
+HWI-EAS443:3:6:313:1854#0/1  
^[P[`¥aY[`a\_b`[ZYaa¥]R^X[a\_WPUX^a`V]\_`a  
@HWI-EAS443:3:6:681:616#0/1  
GCGCTGCCTTCTTCAGTCTCTTCAGCAGATTGAGAGCATG  
+HWI-EAS443:3:6:681:616#0/1  
ab\_]RS^^PPaTGY`RQWT\_^LU`NPZU]aZ\_`^[FT[a  
@HWI-EAS443:3:70:1474:1196#0/1  
CGCTGCCTTCTTCAGTCTCTTCAGCAGATTGAGAGCATGA  
+HWI-EAS443:3:70:1474:1196#0/1  
abbababbbbbbabba\_bbbbbba`baabbab`b\_aabb  
@HWI-EAS443:3:70:520:1095#0/1  
TGGAAATGAGGCGCTGCCTTCTTCAGTCTCTTCAGCAGAT  
+HWI-EAS443:3:70:520:1095#0/1  
abbX[a¥\_bbabb`babaaZY]\_^\_a\_`SZaa`\_`\_RX  
@HWI-EAS443:3:70:850:1662#0/1  
TCGAAGGTTCCAGGTTCCAGGTTGCCCTAAGTGCCTGAA  
+HWI-EAS443:3:70:850:1662#0/1  
\_b[^^[b]aaba]\_^aaa`¥aV`a]`\_`a\_¥RZ\_\_^`^^a  
@HWI-EAS443:3:70:922:329#0/1  
TCTCAATCTGCTGAAGAGACTGAAGAAGGCAGCGCCTCAT  
+HWI-EAS443:3:70:922:329#0/1  
`abaabbaaaaaaaaaaab\_^a`baaaaa\_aaa\_`X¥a\_`  
@HWI-EAS443:3:70:994:1785#0/1  
CATGCTCTCAATCTGCTGAAGAGACTGAAGAAGGCAGCGC  
+HWI-EAS443:3:70:994:1785#0/1  
aZX\_]\_[\_Q^a`\_W\_`a[Wa]¥a\_TX[\_\_\_XZTR\_\_\_UUSS  
@HWI-EAS443:3:71:1704:111#0/1  
CAATCATGCTCTCAATCTGCTGAAGAGACTGAAGAAGGCA  
+HWI-EAS443:3:71:1704:111#0/1  
Kbba]a\_\_YaabWbbba`bbba[\_abbbKbbab\_abaa[[  
@HWI-EAS443:3:71:713:267#0/1  
GGAAATGAGGCGCTGCCTTCTTCAGTCTCTTCAGCAGATT  
+HWI-EAS443:3:71:713:267#0/1  
ab]`aabaZ``Z[b\_a^VP`]V\_UaadW\_XP\_bZVXIDY  
@HWI-EAS443:3:71:890:1904#0/1  
ATGGAAATGAGGCGCTGCCTTCTTCAGTCTCTTCAGCAGA  
+HWI-EAS443:3:71:890:1904#0/1  
aa`]\_ba]¥¥ZQ[¥`^`\_\_\_^Y]`^`\_\_^Xa`¥V¥\_¥UV[[]]  
@HWI-EAS443:3:72:1022:674#0/1  
CCAGGTTGCCCTAAGTGCCTGAACAATGAGAAGCAATTT  
+HWI-EAS443:3:72:1022:674#0/1  
a]a¥bab`¥[Z¥aaaaM^`aaaa\_`^`a`a`aaa^\_a`  
@HWI-EAS443:3:72:228:1841#0/1  
ATGGAAATGAGGCGCTGCCTTCTTCAGTCTCTTCAGCAGA  
+HWI-EAS443:3:72:228:1841#0/1  
a¥U¥[K]\_\_`^^a^^Z^a\_]^[^Y]aZZR]X\_YYXZRWWV]

@HWI-EAS443:3:72:488:1178#0/1  
GATCGAAGGTTCCAGGTTCCAGGTTGTCCCTAAGTGCCTG  
+HWI-EAS443:3:72:488:1178#0/1  
]aa\_ZW`aa¥abab`\_\_aaa`a`Vaa[aaaZ]\_aVW^a\_`  
@HWI-EAS443:3:72:510:1630#0/1  
CAATCATGCTCTCAATCTGCTGAAGAGACTGAAGAAGGCA  
+HWI-EAS443:3:72:510:1630#0/1  
a\_`aZV[^Ra¥ba\_Za\_\_a`\_QX^^^UV\_\_\_V^¥NV\_\_\_  
@HWI-EAS443:3:72:553:2010#0/1  
TCGAAGGTTCCAGGTTCCAGGTTGTCCCTAAGTGCCTGAA  
+HWI-EAS443:3:72:553:2010#0/1  
abb\_Z^a`aba]R[N^bba^¥Z]ZY\_\_]]\_]XMY]\_^aa\_  
@HWI-EAS443:3:72:583:226#0/1  
CGAAGGTTCCAGGTTCCAGGTTGTCCCTAAGTGCCTGAAC  
+HWI-EAS443:3:72:583:226#0/1  
aa\_]a\_N\_]a\_ZZY`]]ZZaT\_aY\_]Z`\_`aY¥Z^\_a]ZY  
@HWI-EAS443:3:73:1470:1582#0/1  
CAATCATGCTCTCAATCTGCTGAAGAGACTGAAGAAGGCA  
+HWI-EAS443:3:73:1470:1582#0/1  
aU^a]aIaT`ZYU]^L\_Q]aa\_b¥X\_\_aa`\_`a[\_GGV  
@HWI-EAS443:3:73:1620:320#0/1  
GCTGCCTTCTTCAGTCTCTTCAGCAGATTGAGAGCATGAT  
+HWI-EAS443:3:73:1620:320#0/1  
aZU[^RVZ\_ZZUYRRT^RUYNW\_WTVRYT[T[YLSUSBBB  
@HWI-EAS443:3:73:1666:229#0/1  
TGGAAATGAGGCGCTGCCTTCTTCAGTCTCTTCAGCAGAT  
+HWI-EAS443:3:73:1666:229#0/1  
abaabbaaba[a`ba`\_`aZab\_`a¥V`[a]VY`¥Z\_[-`  
@HWI-EAS443:3:73:379:849#0/1  
CAAGATCGAAGGTTCCAGGTTCCAGGTTGTCCCTAAGTGC  
+HWI-EAS443:3:73:379:849#0/1  
abaaa`a`Z`aV\_`]]ZV\_\_`Z]X\_Z[^`\_ZZ^UUW[  
@HWI-EAS443:3:73:393:465#0/1  
CAAGATCGAAGGTTCCAGGTTCCAGGTTGTCCCTAAGTGC  
+HWI-EAS443:3:73:393:465#0/1  
\_aabKaaabba[Wa^HWN0[`aRIZ`^a\_VHG\_]^[N\_G  
@HWI-EAS443:3:73:694:1429#0/1  
TCGAAGGTTCCAGGTTCCAGGTTGTCCCTAAGTGCCTGAA  
+HWI-EAS443:3:73:694:1429#0/1  
^aT`[\_S\_¥[N¥`]J[^]\_a^¥\_]Y`]¥Z\_]UX`[[`]\_\_\_  
@HWI-EAS443:3:74:1065:15#0/1  
ATGGAAATGAGGCGCTGCCTTCTTCAGTCTCTTCAGCAGA  
+HWI-EAS443:3:74:1065:15#0/1  
^abbaaa`baaa]ba\_bX`aaXaa[\_a]Ua]a`]Z`WX\_]`  
@HWI-EAS443:3:74:1488:1309#0/1  
GCGCTGCCTTCTTCAGTCTCTTCAGCAGATTGAGAGCATG  
+HWI-EAS443:3:74:1488:1309#0/1  
aaa`ba^baaab``\_Sa\_`a`aW^a`\_aa`a\_b`[\_\_\_  
@HWI-EAS443:3:74:391:402#0/1  
ATGGAAATGAGGCGCTGCCTTCTTCAGTCTCTTCAGCAGA

+HWI-EAS443:3:74:391:402#0/1  
aabbbaaaaaaabaabaa`aaaaaa`^`aaaa`\_`\_\_`]  
@HWI-EAS443:3:74:434:455#0/1  
CTGCCTTCTTCAGTCTCTTCAGCAGATTGAGAGCATGATT  
+HWI-EAS443:3:74:434:455#0/1  
`^[bbbaabaaa¥M^`a]baba^a¥ababa[Y\_\_`a`a  
@HWI-EAS443:3:74:667:690#0/1  
CTGCCTTCTTCAGTCTCTTCAGCAGATTGAGAGCATGATT  
+HWI-EAS443:3:74:667:690#0/1  
abbabbbabbbbaabaabba]ba\_baba`aaaab`abba`  
@HWI-EAS443:3:75:102:417#0/1  
ATGGAAATGAGGCGCTGCCTTCTTCAGTCTCTTCAGCAGA  
+HWI-EAS443:3:75:102:417#0/1  
a¥`a`aa^U^a`\_]`^^`Y`^Q`\_]¥¥PX`¥T¥Q00Q¥`\_Y  
@HWI-EAS443:3:75:1157:934#0/1  
AAGGTTCCAGGTTCCAGGTTGCCCTAAGTGCCTGAACAA  
+HWI-EAS443:3:75:1157:934#0/1  
ab`\_]ab\_a^`^aa`baa^aa]aa`aaaa[^[\_aa\_\_V`\_`  
@HWI-EAS443:3:75:1239:447#0/1  
CAGGCACTTAGGACAACCTGGAACCTGGAACCTTCGATC  
+HWI-EAS443:3:75:1239:447#0/1  
a^`a`aba¥¥`Z^¥aaaaZaaZ]QX`aa^a^`^XT\_V`a  
@HWI-EAS443:3:75:139:602#0/1  
GACGAAAACAAACCTGTATGGGTTTCATTATAAAAGGAAG  
+HWI-EAS443:3:75:139:602#0/1  
`a¥baabX`a\_Q^baa`\_aaaa¥F\_aaaaaa`aaX¥`a\_a  
@HWI-EAS443:3:75:1561:812#0/1  
GCTGCCTTCTTCAGTCTCTTCAGCAGATTGAGAGCATGAT  
+HWI-EAS443:3:75:1561:812#0/1  
\_`[\_`RT]aW^`\_`\_S[]I]¥U]]WP`¥`]WM¥\_aTX`a`¥  
@HWI-EAS443:3:75:1772:1913#0/1  
CAGGCACTTAGGACAACCTGGAACCTGGAACCTTCGATC  
+HWI-EAS443:3:75:1772:1913#0/1  
]bb¥\_b\_``baaab``baa`]V]adW`abbbaabb]a`]Z  
@HWI-EAS443:3:76:1356:1293#0/1  
ATCGAAGGTTCCAGGTTCCAGGTTGCCCTAAGTGCCTGA  
+HWI-EAS443:3:76:1356:1293#0/1  
abab^a^]WY¥YJQZU^SXQU[Q^XSHT¥XRZYSTO0Y[W  
@HWI-EAS443:3:76:253:1542#0/1  
ATCGAAGGTTCCAGGTTCCAGGTTGCCCTAAGTGCCTGA  
+HWI-EAS443:3:76:253:1542#0/1  
aaaab\_a`U`¥`][ZL[¥]PW¥M[KX[¥XJW]SSVQTSVY  
@HWI-EAS443:3:77:302:816#0/1  
ATGGAAATGAGGCGCTGCCTTCTTCAGTCTCTTCAGCAGA  
+HWI-EAS443:3:77:302:816#0/1  
aT`a^a]a]]Zaaaaaa`\_\_a\_aa^^U`\_]`ZX^`\_`^Y  
@HWI-EAS443:3:77:471:1590#0/1  
ATCGAAGGTTCCAGGTTCCAGGTTGCCCTAAGTGCCTGA  
+HWI-EAS443:3:77:471:1590#0/1  
a`aa`a`\_R\_\_^RS[PZ^YJQZS]WRWS^]PQJLVW[SR





+HWI-EAS443:3:7:190:1133#0/1  
aabbab\_J`^^WV\_Q^X]K]]V^VSI[\_[O[RDR[SRBB  
@HWI-EAS443:3:7:241:1104#0/1  
TGGAAATGAGGCGCTGCCTTCTTCAGTCTCTTCAGCAGAT  
+HWI-EAS443:3:7:241:1104#0/1  
aaaTT^a\_\_UXaa`abab`a`a`Z]W`aaaa^b]a`aW`  
@HWI-EAS443:3:7:327:1318#0/1  
AGGCGCTGCCTTCTTCAGTCTCTTCAGCAGATTGAGAGCA  
+HWI-EAS443:3:7:327:1318#0/1  
a`¥aa^aa¥[¥`\_\_`\_¥\_NXQ\_\_\_]^¥[VZTX[PM¥SQVB  
@HWI-EAS443:3:7:359:1424#0/1  
ATGGAAATGAGGCGCTGCCTTCTTCAGTCTCTTCAGCAGA  
+HWI-EAS443:3:7:359:1424#0/1  
\_`b`\_aaaaaaaa\_aaQ\_`a¥^Ya`]¥¥]XV]UUY`W`T  
@HWI-EAS443:3:7:708:1100#0/1  
ATGGAAATGAGGCGCTGCCTTCTTCAGTCTCTTCAGCAGA  
+HWI-EAS443:3:7:708:1100#0/1  
abaa]aabaaaa\_a\_]\_aa¥aa¥`\_WZaU`\_W^W¥SI  
@HWI-EAS443:3:7:925:692#0/1  
ATCGAAGTTCCAGGTTCCAGGTTGCCCTAAGTGCCTGA  
+HWI-EAS443:3:7:925:692#0/1  
ababaab\_R`V\_[Y]V`]][]\_S]SVZ^[RU[VJYNVZRB  
@HWI-EAS443:3:7:986:202#0/1  
ATGGAAATGAGGCGCTGCCTTCTTCAGTCTCTTCAGCAGA  
+HWI-EAS443:3:7:986:202#0/1  
aabbaaaaaaaaa]b]\_a`W\_\_Y[a^¥a¥V`U`WU¥^WW¥W  
@HWI-EAS443:3:80:1034:743#0/1  
CCAAGATCGAAGGTTCCAGGTTCCAGGTTGCCCTAAGTG  
+HWI-EAS443:3:80:1034:743#0/1  
aabaaab\_baaaa^aaXaba`aa\_^aa\_a\_\_W^]aa\_YZZ  
@HWI-EAS443:3:80:1330:782#0/1  
TCTCAATCTGCTGAAGAGACTGAAGAAGGCAGCGCCTCAT  
+HWI-EAS443:3:80:1330:782#0/1  
aXbZ\_\_`]bbbbaaaaabaa]`aUaa^a\_[`a\_`]HaZZT  
@HWI-EAS443:3:80:1396:325#0/1  
CTGCCTTCTTCAGTCTCTTCAGCAGATTGAGAGCATGATT  
+HWI-EAS443:3:80:1396:325#0/1  
ab¥FS^`U¥`Z^a^^aaa[]¥\_Z^bY]]b`aUUN^aa\_a[  
@HWI-EAS443:3:80:249:1952#0/1  
CAATCATGCTCTCAATCTGCTGAAGAGACTGAAGAAGGCA  
+HWI-EAS443:3:80:249:1952#0/1  
a\_baaa[T`a`a`\_`a`[\_`^a`\_\_\_`ZZ\_\_T`UN^^  
@HWI-EAS443:3:80:745:901#0/1  
GCTGCCTTCTTCAGTCTCTTCAGCAGATTGAGAGCATGAT  
+HWI-EAS443:3:80:745:901#0/1  
aaaaaaaaaaaa`aa\_aaaaa`aaa`a\_aa`\_`^\_a`¥]``  
@HWI-EAS443:3:80:871:1224#0/1  
TGCCCACTTCAATTGGCTTGTTTTCTTCATGTTCTTTGTC  
+HWI-EAS443:3:80:871:1224#0/1  
a\_a\_abb`bab¥b¥^aabaVPTDW¥``[UZIW]¥`aaYRG

@HWI-EAS443:3:80:904:664#0/1  
ATGGAAATGAGGCGCTGCCTTCTTCAGTCTCTTCAGCAGA  
+HWI-EAS443:3:80:904:664#0/1  
abba]a`\_¥\_b`^bb`[[a¥\_]Y]0^a\_`^X¥a^]`X  
@HWI-EAS443:3:81:1116:1830#0/1  
ATCATGCTCTCAATCTGCTGAAGAGACTGAAGAAGGCAGC  
+HWI-EAS443:3:81:1116:1830#0/1  
a`baa]¥babaaaa\_a^abaaabaa`^\_aa`a`a`^^`\_¥  
@HWI-EAS443:3:81:402:110#0/1  
ATGGAAATGAGGCGCTGCCTTCTTCAGTCTCTTCAGCAGA  
+HWI-EAS443:3:81:402:110#0/1  
a\_bbaa`b\_bbaZaa^]Ya\_a^^a`Z\_RRYR\_\_MG[EUXY  
@HWI-EAS443:3:81:62:1163#0/1  
TCCAGGTTGTCCCTAAGTGCCTGAACAATGAGAAGCAATT  
+HWI-EAS443:3:81:62:1163#0/1  
`ba`\_`\_a^[aa`a`X\_Y`^aaa^X^`\_]`¥`aaaZ[`^  
@HWI-EAS443:3:81:663:44#0/1  
CGAAGGTTCCAGGTTCCAGGTTGTCCCTAAGTGCCTGAAC  
+HWI-EAS443:3:81:663:44#0/1  
a\_SW[aP^P¥QYPX\_`T[[\_T\_aVRFXUU^[FMILQUPSR  
@HWI-EAS443:3:81:840:899#0/1  
AGGCGCTGCCTTCTTCAGTCTCTTCAGCAGATTGAGAGCA  
+HWI-EAS443:3:81:840:899#0/1  
`\_abb`^^a]\_¥aa`Z0Z]¥^a^\_[S[Z]\_`\_]\_\_^X]¥  
@HWI-EAS443:3:81:934:1303#0/1  
ATGGAAATGAGGCGCTGCCTTCTTCAGTCTCTTCAGCAGA  
+HWI-EAS443:3:81:934:1303#0/1  
a`[Z`\_aaaba\_aYa`aa`aaaa\_\_\_\_`a\_`a\_^S]]Y\_  
@HWI-EAS443:3:82:1003:297#0/1  
TGGAAATGAGGCGCTGCCTTCTTCAGTCTCTTCAGCAGAT  
+HWI-EAS443:3:82:1003:297#0/1  
^]a\_^bbbb`babZ]\_[N[ZZZZ`\_aZ[aZ¥\_]`a`]]MX  
@HWI-EAS443:3:82:1088:421#0/1  
CTGCCTTCTTCAGTCTCTTCAGCAGATTGAGAGCATGATT  
+HWI-EAS443:3:82:1088:421#0/1  
ab`a`bbbbbbbaXa`ba`aaaabbbbbbb`^^`bb  
@HWI-EAS443:3:82:1158:637#0/1  
ATGGAAATGAGGCGCTGCCTTCTTCAGTCTCTTCAGCAGA  
+HWI-EAS443:3:82:1158:637#0/1  
`¥ba`abaaaa\_ab\_aaa¥a`aab`\_a\_\_aa`a^\_\_\_\_a]  
@HWI-EAS443:3:82:1243:1012#0/1  
GCTGCCTTCTTCAGTCTCTTCAGCAGATTGAGAGCATGAT  
+HWI-EAS443:3:82:1243:1012#0/1  
abbb`^b\_]a]JZbRP]]`aZ^ZUTb`^baW`W]Q^a\_b`  
@HWI-EAS443:3:82:291:548#0/1  
TGGAAATGAGGCGCTGCCTTCTTCAGTCTCTTCAGCAGAT  
+HWI-EAS443:3:82:291:548#0/1  
aabababbaaa`baaa`^^aab`^^a¥`^a`¥Za`¥a\_\_  
@HWI-EAS443:3:82:583:471#0/1  
TCATTATAAAAGGAAGGTCTCATTTGAGAAATGATACTGA



@HWI-EAS443:3:86:433:634#0/1  
AGCCCTCCAAGATCGAAGGTTCCAGGTTCCAGGTTGTCCC  
+HWI-EAS443:3:86:433:634#0/1  
`\_baabb¥`]aaaa`[Q^aTa`Z`a^L\_¥XIT^Q[\_W[^  
@HWI-EAS443:3:86:616:1532#0/1  
AGGTTCCAGGTTCCAGGTTGTCCCTAAGTGCCTGAACAAT  
+HWI-EAS443:3:86:616:1532#0/1  
[FSNR¥S\_a`U\_a\_[a`NZ\_[abZNU]\_Y\_`\_`[\_a\_`¥^  
@HWI-EAS443:3:86:84:1995#0/1  
CAAGATCGAAGGTTCCAGGTTCCAGGTTGTCCCTAAGTGC  
+HWI-EAS443:3:86:84:1995#0/1  
a)`aaa\_`^Za\_LX]aK]^U\_`b\_TDP^RXa``¥]¥ZRP¥  
@HWI-EAS443:3:87:1094:450#0/1  
ATGGAAATGAGGCGCTGCCTTCTTCAGTCTCTTCAGCAGA  
+HWI-EAS443:3:87:1094:450#0/1  
a]aa[aabb`a`\_aaaa`\_`¥]aa\_`Z^aa\_a]``^[]`  
@HWI-EAS443:3:87:637:264#0/1  
GAAGGTTCCAGGTTCCAGGTTGTCCCTAAGTGCCTGAACA  
+HWI-EAS443:3:87:637:264#0/1  
aabaaZbaaaba]aa``b[aa\_`\_`aaaaU\_a]¥a]\_\_a  
@HWI-EAS443:3:87:875:854#0/1  
CAATCATGCTCTCAATCTGCTGAAGAGACTGAAGAAGGCA  
+HWI-EAS443:3:87:875:854#0/1  
abaaa¥SW`[¥abbb]aa````\_b][`a]^`^aaa`\_`\_  
@HWI-EAS443:3:88:27:235#0/1  
GCCTTCTTCAGTCTCTTCAGCAGATTGAGAGCATGATTGA  
+HWI-EAS443:3:88:27:235#0/1  
a\_Y]W\_W\_a]ZYXX\_ZUXS[XITSYWYQWRVVRUY[KRRR  
@HWI-EAS443:3:88:631:775#0/1  
GGGCTACTGAATACATAATGAAGGGAGTGTACATAAATAC  
+HWI-EAS443:3:88:631:775#0/1  
abababbbbaabaaaaaaa`abaaa`a`aUaaaa`a`aa  
@HWI-EAS443:3:88:790:1918#0/1  
TGGAATGAGGCGCTGCCTTCTTCAGTCTCTTCAGCAGAT  
+HWI-EAS443:3:88:790:1918#0/1  
[\_a]a]RK[W\_\_a[X\_ab¥b`aabaSV\_Vb\_abbba]abU  
@HWI-EAS443:3:89:385:317#0/1  
ATCGAAGGTTCCAGGTTCCAGGTTGTCCCTAAGTGCCTGA  
+HWI-EAS443:3:89:385:317#0/1  
aa`a``aXOOP¥FZXEMNYP`ZGRPUWWBBBBBBBBBBBB  
@HWI-EAS443:3:89:779:689#0/1  
GATCGAAGGTTCCAGGTTCCAGGTTGTCCCTAAGTGCCTG  
+HWI-EAS443:3:89:779:689#0/1  
X¥bb¥\_ZbaM¥Q\_abYS][`a``b]\_QZ]^Z`a^K^XI^V  
@HWI-EAS443:3:8:1182:946#0/1  
CGCTGCCTTCTTCAGTCTCTTCAGCAGATTGAGAGCATGA  
+HWI-EAS443:3:8:1182:946#0/1  
ababbaa`babbb]a`]aaaaaa`ab`aaaa`a\_aa\_a  
@HWI-EAS443:3:8:132:1496#0/1  
ATGGAAATGAGGCGCTGCCTTCTTCAGTCTCTTCAGCAGA

+HWI-EAS443:3:8:132:1496#0/1  
abXQ\_baabbaabba]``\_`[\_`\_\_aXYSaW¥R`]V^^HYF  
@HWI-EAS443:3:8:1450:1181#0/1  
GGTTCCAGGTTCCAGGTTGCCCTAAGTGCCTGAACAATG  
+HWI-EAS443:3:8:1450:1181#0/1  
`b`b`^`[bY^a`Wb`]^`b`\_`Xaaa]aZb`\_ab\_¥[\_`\_aa  
@HWI-EAS443:3:8:221:1036#0/1  
AAGATCGAAGGTTCCAGGTTCCAGGTTGCCCTAAGTGCC  
+HWI-EAS443:3:8:221:1036#0/1  
aaa\_\_aYS\_``\_]\_\_¥SXX[\_¥\_`UP^XX^^Y¥^VWX]XX  
@HWI-EAS443:3:90:214:63#0/1  
ATGGAAATGAGGCGCTGCCTTCTTCAGTCTCTTCAGCAGA  
+HWI-EAS443:3:90:214:63#0/1  
aaa`a\_Ya`[Xa`a\_\_^¥V^\_^[a`V]X]]]XXX^XXUO  
@HWI-EAS443:3:90:242:1043#0/1  
ATGGAAATGAGGCGCTGCCTTCTTCAGTCTCTTCAGCAGA  
+HWI-EAS443:3:90:242:1043#0/1  
`\_`\_a\_aaa`a\_``a``aa\_\_aa``\_\_`\_````\_\_X]\_^]]^  
@HWI-EAS443:3:90:506:1220#0/1  
ATCGAAGGTTCCAGGTTCCAGGTTGCCCTAAGTGCCTGA  
+HWI-EAS443:3:90:506:1220#0/1  
abbb\_^aa`Z\_L^XZ\_YSO\_aZ^UZ¥ZaZ`SVMVaR[XQ  
@HWI-EAS443:3:90:681:1349#0/1  
GGGCTACTGAATACATAATGAAGGGAGTGACATAAATAC  
+HWI-EAS443:3:90:681:1349#0/1  
\_WPXUb`aa]\_[\_]```aaa`^aa`¥aW\_X[¥HO[PZ]]]  
@HWI-EAS443:3:90:681:259#0/1  
GAGGCGCTGCCTTCTTCAGTCTCTTCAGCAGATTGAGAGC  
+HWI-EAS443:3:90:681:259#0/1  
abaaabbbbbaaaa\_baaaa`a\_aa\_aa`aa\_a\_a^a^^^  
@HWI-EAS443:3:90:748:677#0/1  
GAAATGAGGCGCTGCCTTCTTCAGTCTCTTCAGCAGATTG  
+HWI-EAS443:3:90:748:677#0/1  
WUQ`aZ]aaa\_`¥]J00[Y]`QTVVNUWa`X¥[FRXSNW[  
@HWI-EAS443:3:91:348:480#0/1  
ATGGAAATGAGGCGCTGCCTTCTTCAGTCTCTTCAGCAGA  
+HWI-EAS443:3:91:348:480#0/1  
aaba\_aaaaa`a`aa\_\_`a\_\_a`\_\_W`]^^^¥^^TSWX  
@HWI-EAS443:3:92:1047:1129#0/1  
CTCAATCATGCTCTCAATCTGCTGAAGAGACTGAAGAAGG  
+HWI-EAS443:3:92:1047:1129#0/1  
a``[\_```aaab^aaYa¥]ba[bbb]aZba]`a\_aaU]a\_  
@HWI-EAS443:3:92:233:674#0/1  
GTTCCAGGTTGCCCTAAGTGCCTGAACAATGAGAAGCAA  
+HWI-EAS443:3:92:233:674#0/1  
```aaa^\_W^aZZ]Y¥0]WUZR¥a]``¥`^`¥\_`^Q^YUS  
@HWI-EAS443:3:92:368:1258#0/1  
ATGGAAATGAGGCGCTGCCTTCTTCAGTCTCTTCAGCAGA  
+HWI-EAS443:3:92:368:1258#0/1  
a[]`abaa]`TWa`a\_]Y¥^a\_\_`\_^X^^\_][]Y^T^^U

@HWI-EAS443:3:92:392:631#0/1  
GCCTTCTTCAGTCTCTTCAGCAGATTGAGAGCATGATTGA  
+HWI-EAS443:3:92:392:631#0/1  
a\_\_\_\_\_^^^\_]PY^\_]\_Z[\_YZ]U^^`[¥PXW^U¥\_W¥¥Y  
@HWI-EAS443:3:92:50:1169#0/1  
CGCTGCCTTCTTCAGTCTCTTCAGCAGATTGAGAGCATGA  
+HWI-EAS443:3:92:50:1169#0/1  
abbaaaaaaa`aa`ZXa`aaaa`¥^P`[V]`\_a^\_\_Y^\_]`  
@HWI-EAS443:3:93:1297:1326#0/1  
GCCTTCTTCAGTCTCTTCAGCAGATTGAGAGCATGATTGA  
+HWI-EAS443:3:93:1297:1326#0/1  
a\_] [¥]^PZXNVLNNWQXPVGXVP^[¥JY¥UV[`\_]GQF  
@HWI-EAS443:3:93:1342:171#0/1  
GGAAATGAGGCGCTGCCTTCTTCAGTCTCTTCAGCAGATT  
+HWI-EAS443:3:93:1342:171#0/1  
aa\_`W\_b]aaaa^a¥NT[`¥a\_\_a\_¥¥\_¥^¥^^[T¥\_SYB  
@HWI-EAS443:3:93:31:725#0/1  
GCTGCCTTCTTCAGTCTCTTCAGCAGATTGAGAGCATGAT  
+HWI-EAS443:3:93:31:725#0/1  
ab\_`]\_`a`X[¥WZ\_a]^`Y``]Y^^JR]^P^^\_`WZ¥TY  
@HWI-EAS443:3:93:332:640#0/1  
ATGGAAATGAGGCGCTGCCTTCTTCAGTCTCTTCAGCAGA  
+HWI-EAS443:3:93:332:640#0/1  
a`baVaaa\_aa^\_YZPVG¥YRU\_\_¥V^¥V\_¥ZPQ]WN¥¥B  
@HWI-EAS443:3:93:461:740#0/1  
ATGGAAATGAGGCGCTGCCTTCTTCAGTCTCTTCAGCAGA  
+HWI-EAS443:3:93:461:740#0/1  
a\_aaVJ[`aU``\_`S`^[¥¥Za\_Y\_]WZZ`¥\_WT¥Y^\_S  
@HWI-EAS443:3:94:1365:1417#0/1  
ATTGCTTCTCATTGTTTCAGGCACTTAGGGACAACCTGGAA  
+HWI-EAS443:3:94:1365:1417#0/1  
aabaaaaabab```a`a\_[]aa`aaaaabaaaa[¥`¥¥`a  
@HWI-EAS443:3:94:296:1323#0/1  
CGAAGGTTCCAGGTTCCAGGTTGCCCTAAGTGCCTGAAC  
+HWI-EAS443:3:94:296:1323#0/1  
aa]a\_aUS`a\_a\_Z^aaaa\_W`\_X\_]\_¥\_[]U\_\_YX\_X]^  
@HWI-EAS443:3:94:642:991#0/1  
GTTCCAGGTTGCCCTAAGTGCCTGAACAATGAGAAGCAA  
+HWI-EAS443:3:94:642:991#0/1  
^^b`b\_\_`U```aa`bZSZ]¥\_aaa¥`a\_b````baaa\_a\_  
@HWI-EAS443:3:95:1396:291#0/1  
GTTCATTATAAAAGGAAGGTCTCATTGAGAAATGATACT  
+HWI-EAS443:3:95:1396:291#0/1  
`ab\_a\_baa¥`aaaaT^`b¥Ka`\_a`abaa¥``bb[a`V^  
@HWI-EAS443:3:95:512:609#0/1  
CGAAGGTTCCAGGTTCCAGGTTGCCCTAAGTGCCTGAAC  
+HWI-EAS443:3:95:512:609#0/1  
^\_abb``bbb\_a^^aaaaababaa]aabaaa]^\_aaaa]P  
@HWI-EAS443:3:96:1694:1368#0/1  
CAATCATGCTCTCAATCTGCTGAAGAGACTGAAGAAGGCA

+HWI-EAS443:3:96:1694:1368#0/1  
¥a`]]bbbb`Ya\_WZ\_¥]bWLa¥`a\_b`^U¥a`^aaaX]  
@HWI-EAS443:3:96:350:985#0/1  
TCCAGGTTGCCCTAAGTGCCTGAACAATGAGAAGCAATT  
+HWI-EAS443:3:96:350:985#0/1  
abab\_b`aa`a¥]aaa¥Zaa`aa\_a\_aaaa`]aa]\_a`a`  
@HWI-EAS443:3:96:472:717#0/1  
TGGAAATGAGGCGCTGCCTTCTTCAGTCTCTTCAGCAGAT  
+HWI-EAS443:3:96:472:717#0/1  
]bbU]abZYW`U`a¥ZX[V\_a`XUX[¥\_\_\_\_\_`[[aT¥  
@HWI-EAS443:3:97:1052:931#0/1  
CTCAAATGAGACCTTCCTTTTATAATGAACCCATACAGGT  
+HWI-EAS443:3:97:1052:931#0/1  
T`\_bab\_baba\_Xbb`bbbabbbbababbababb\_]aXaa  
@HWI-EAS443:3:97:367:1606#0/1  
CGCTGCCTTCTTCAGTCTCTTCAGCAGATTGAGAGCATGA  
+HWI-EAS443:3:97:367:1606#0/1  
abba`\_]aaabbaabaabaababbaba[aab`aaa\_a`aa  
@HWI-EAS443:3:97:375:763#0/1  
ATGCTCTCAATCTGCTGAAGAGACTGAAGAAGGCAGCGCC  
+HWI-EAS443:3:97:375:763#0/1  
a`]VY``b]baabb\_a`\_aaZa`Y`aaa`^aS¥R\_\_U\_] [  
@HWI-EAS443:3:98:1212:296#0/1  
ATGGAAATGAGGCGCTGCCTTCTTCAGTCTCTTCAGCAGA  
+HWI-EAS443:3:98:1212:296#0/1  
aaaaa`abbabb^a``a^^aaH`^`^`\_UaX`aY^\_N[a\_  
@HWI-EAS443:3:98:153:1350#0/1  
ATCGAAGGTTCCAGGTTCCAGGTTGCCCTAAGTGCCTGA  
+HWI-EAS443:3:98:153:1350#0/1  
aaaaaaaa0]LZV¥a0^\_\_K\_]0^¥^UMXXV\_OVS[VVVV  
@HWI-EAS443:3:98:741:156#0/1  
ATCATGCTCTCAATCTGCTGAAGAGACTGAAGAAGGCAGC  
+HWI-EAS443:3:98:741:156#0/1  
\_a][]bb`a[UTaaaaT^NVQ`]ab`\_ba`aaa`¥\_ZaZ  
@HWI-EAS443:3:98:927:180#0/1  
AGATCGAAGGTTCCAGGTTCCAGGTTGCCCTAAGTGCCT  
+HWI-EAS443:3:98:927:180#0/1  
^]bbaa]\_ba]b^U`ab\_b^aa`\_`aa`S\_Z\_]\_aX\_GX\_  
@HWI-EAS443:3:98:95:1038#0/1  
ATGGAAATGAGGCGCTGCCTTCTTCAGTCTCTTCAGCAGA  
+HWI-EAS443:3:98:95:1038#0/1  
\_W\_b\_\_Z[b`XSZ\_\_V`a\_^`Z^a^`a[[^YWaa\_WVXZL  
@HWI-EAS443:3:99:1049:881#0/1  
ATGGAAATGAGGCGCTGCCTTCTTCAGTCTCTTCAGCAGA  
+HWI-EAS443:3:99:1049:881#0/1  
[W][Z¥`^^\_b`YZ]WP]¥TL¥QPa\_^`Y]\_H\_VSTaZ  
@HWI-EAS443:3:9:101:1883#0/1  
ATGGAAATGAGGCGCTGCCTTCTTCAGTCTCTTCAGCAGA  
+HWI-EAS443:3:9:101:1883#0/1  
abUaZN]S¥¥ZU`aa`^a`^`\_]\_^]\_aQRXX\_\_aa¥\_\_\_\_]



@HWI-EAS443:3:9:1227:544#0/1  
ATGGAAATGAGGCGCTGCCTTCTTCAGTCTCTTCAGCAGA  
+HWI-EAS443:3:9:1227:544#0/1  
`][baaaab`aaaa]a]X¥^F¥a[]`VXaTa\_S]\_RY]]  
@HWI-EAS443:3:9:859:188#0/1  
AATCTGCTGAAGAGACTGAAGAAGGCAGCGCCTCATTTC  
+HWI-EAS443:3:9:859:188#0/1  
S\_`a]bU]ba`aa¥G¥X[\_`a\_^`Z[a`U¥LL^V`]NYND  
@HWI-EAS443:3:59:1738:243#0/1  
ATAGCAAATAGTAGCATTGCCACA ACTACTTTAATGAATG  
+HWI-EAS443:3:59:1738:243#0/1  
VW\_\_¥¥bbabbaaaZ\_a^a`]a`a]^aa\_ZDZ[ZSG¥ZV  
@HWI-EAS443:3:54:1384:951#0/1  
GGACAGTATGGATAGCAAATAGTANGATTGCCACA ACTAC  
+HWI-EAS443:3:54:1384:951#0/1  
]RP\_]VPZa^`P\_[^XX]] [¥PKVDDTRYWWPWX^V[¥N  
@HWI-EAS443:3:65:917:1336#0/1  
CAGGTACTGATCCAAAATGGAAGGCTTTGTGCGACANTGC  
+HWI-EAS443:3:65:917:1336#0/1  
`ba`\_bbaababbbbaaaa\_a]\_aa`a\_]aaaa^D[a`  
@HWI-EAS443:3:79:16:295#0/1  
CAGGTACTNATCCAAAATGGAAGGCTTTGTGCGACAATGC  
+HWI-EAS443:3:79:16:295#0/1  
`^a`\_aaVD¥\_Za`XOWXXZ]Ua` ``][XTR\_[ZW``^UZR  
@HWI-EAS443:3:48:592:1639#0/1  
AGTATGGATAGCAAATAGGAGCATTGCCACA ACTACTTGA  
+HWI-EAS443:3:48:592:1639#0/1  
aSRWVI]\_aabaRWLVHXJVZHRWZY\_QU^]]Za[W][LX  
@HWI-EAS443:3:76:1203:852#0/1  
ATCGAAGGTTCCAGGTTCCAGGTTGCCCTAAGGGCCTGA  
+HWI-EAS443:3:76:1203:852#0/1  
aa`aaabbYZQP]W\_Y¥N¥P\_\_NPRMDWPTYBBBBBBBB  
@HWI-EAS443:3:10:1221:1971#0/1  
CAGGTACTGATCCAAAATGGAAGGCTTTGTGCGACAATGC  
+HWI-EAS443:3:10:1221:1971#0/1  
abaa`aa`abba]abbbba\_baaa\_`^`a\_aZab]ba`a\_  
@HWI-EAS443:3:10:812:1023#0/1  
AGCAGGTACTGATCCAAAATGGAAGGCTTTGTGCGACAAT  
+HWI-EAS443:3:10:812:1023#0/1  
\_\_OIZSaab`baZ[`XI]\_Sa^YYTa\_aa\_]a^]`W\_a  
@HWI-EAS443:3:14:1343:1817#0/1  
AGCAGGTACTGATCCAAAATGGAAGGCTTTGTGCGACAAT  
+HWI-EAS443:3:14:1343:1817#0/1  
\_[¥bba\_aRa^T]]T¥P\_`^aabaab` `` `][Ua^aa^a^a  
@HWI-EAS443:3:14:863:1114#0/1  
CAGGTACTGATCCAAAATGGAAGGCTTTGTGCGACAATGC  
+HWI-EAS443:3:14:863:1114#0/1  
a`aYUZ`Z[SYa`\_`^[[UYZS[\_]]]\_Y^]Y]]\_Y^\_S  
@HWI-EAS443:3:15:1181:158#0/1  
AGCAGGTACTGATCCAAAATGGAAGGCTTTGTGCGACAAT

+HWI-EAS443:3:15:1181:158#0/1  
\_ ^ZY¥ZbX]abX¥J\_baaV`a\_Y¥KRK[]TVQUQSNWaP\_  
@HWI-EAS443:3:16:1193:283#0/1  
AGCAGGTACTGATCCAAAATGGAAGGCTTTGTGCGACAAT  
+HWI-EAS443:3:16:1193:283#0/1  
a]^]]YJY¥\_a¥]¥N¥a`][a`\_`]^`\_`XLY^^¥Z]S¥  
@HWI-EAS443:3:17:1276:535#0/1  
AAGCAGGTACTGATCCAAAATGGAAGGCTTTGTGCGACAA  
+HWI-EAS443:3:17:1276:535#0/1  
a`^\_W\_W`Z[QYa[U¥\_YY]\_W[[\_[\_\_\_\_`VaT]WW^]  
@HWI-EAS443:3:19:100:1017#0/1  
AGCAGGTACTGATCCAAAATGGAAGGCTTTGTGCGACAAT  
+HWI-EAS443:3:19:100:1017#0/1  
\_Y\_^\_a[aa]aa`^a^]UX`^\_aQ^[\_][U[\_^\_^\_ZZ\_  
@HWI-EAS443:3:1:906:680#0/1  
GGTACTGATCCAAAATGGAAGGCTTTGTGCGACAATGCTT  
+HWI-EAS443:3:1:906:680#0/1  
aa¥aaaa`a[Zaa\_`\_`a\_`^`[\_`a\_`]aX`^Z`^\_`S`B  
@HWI-EAS443:3:23:813:222#0/1  
CAGGTACTGATCCAAAATGGAAGGCTTTGTGCGACAATGC  
+HWI-EAS443:3:23:813:222#0/1  
abbbabbbbbbbaabbabbabbbb[ab`^`ababa\_babaT  
@HWI-EAS443:3:24:1686:607#0/1  
CAGGTACTGATCCAAAATGGAAGGCTTTGTGCGACAATGC  
+HWI-EAS443:3:24:1686:607#0/1  
a\_baababbbbbb`aabbaabb^babaadWabYbaaa\_  
@HWI-EAS443:3:24:354:1135#0/1  
CAGGTACTGATCCAAAATGGAAGGCTTTGTGCGACAATGC  
+HWI-EAS443:3:24:354:1135#0/1  
`aaa[^^a`¥^aba]`aa\_`a`^`^`a\_\_aZ\_a\_\_\_a^`^`\_  
@HWI-EAS443:3:27:1408:1483#0/1  
AAAGCAGGTACTGATCCAAAATGGAAGGCTTTGTGCGACA  
+HWI-EAS443:3:27:1408:1483#0/1  
a\_HO^^]\_L]\_a¥[aN^`a]a`^`[b\_^\_W\_a\_\_\_aVRWXa  
@HWI-EAS443:3:2:1784:523#0/1  
AGCAGGTACTGATCCAAAATGGAAGGCTTTGTGCGACAAT  
+HWI-EAS443:3:2:1784:523#0/1  
ab\_a\_\_¥\_]aX`aZO\_¥Y^\_TY^\_]a^`]^\_0]XY\_V\_¥V  
@HWI-EAS443:3:34:355:1581#0/1  
ACAGTATGGCTAGCAAATAGTAGCATTGCCACA ACTACTT  
+HWI-EAS443:3:34:355:1581#0/1  
U`bb^V^V¥KZ`^`aT^^^b0[OXP]WJ^^`^YFY¥\_Qa  
@HWI-EAS443:3:36:1302:822#0/1  
AGCAGGTACTGATCCAAAATGGAAGGCTTTGTGCGACAAT  
+HWI-EAS443:3:36:1302:822#0/1  
\_`¥W\_\_`a\_W]RT`aZ]J[\_Q¥¥[Q[XTWZWNQVYWRHYU  
@HWI-EAS443:3:42:1024:1907#0/1  
AAAGCAGGTACTGATCCAAAATGGAAGGCTTTGTGCGACA  
+HWI-EAS443:3:42:1024:1907#0/1  
`^`aY\_`^`]UU\_Y^Ya]]\_]\_^]`\_]\_¥G¥\_`^\_¥\_Z\_]\_[W`

@HWI-EAS443:3:42:1458:1099#0/1  
CAGGTACTGATCCAAAATGGAAGGCTTTGTGCGACAATGC  
+HWI-EAS443:3:42:1458:1099#0/1  
a¥GU\_aYQ\_^a`\_[\_[PUa`¥\_]TN]`aaZ]ZP[V\_[aa^  
@HWI-EAS443:3:42:834:444#0/1  
AAGCAGGTACTGATCCAAAATGGAAGGCTTTGTGCGACAA  
+HWI-EAS443:3:42:834:444#0/1  
\_`\_aaaZLWP[b\_a\_\_`^\_a`^^`\_X^a\_\_U`\_a^^U^  
@HWI-EAS443:3:44:1468:277#0/1  
CAGGTACTGATCCAAAATGGAAGGCTTTGTGCGACAATGC  
+HWI-EAS443:3:44:1468:277#0/1  
aT]YFQK]\_Z¥XQSTYSTZXZZ¥¥PFX[YVQMNvZ]LRMM  
@HWI-EAS443:3:49:72:175#0/1  
CAGGTACTGATCCAAAATGGAAGGCTTTGTGCGACAATGC  
+HWI-EAS443:3:49:72:175#0/1  
`]Y`Za]aa\_`\_`^`a`¥X^P]\_\_\_ZZY¥`S][V\_]YVN  
@HWI-EAS443:3:4:1011:1114#0/1  
CAGGTACTGATCCAAAATGGAAGGCTTTGTGCGACAATGC  
+HWI-EAS443:3:4:1011:1114#0/1  
a\_]ZPYb[T`]AJ`ZSR\_]`¥P\_aTb]¥aVbUb^\_``\_WR  
@HWI-EAS443:3:4:1529:1498#0/1  
AGCAGGTACTGATCCAAAATGGAAGGCTTTGTGCGACAAT  
+HWI-EAS443:3:4:1529:1498#0/1  
a\_``a`Z\_[[SY`Y^\_[`[`]\_^[\_`U^]U[]][XSFY\_]`  
@HWI-EAS443:3:50:1262:1202#0/1  
CAGGTACTGATCCAAAATGGAAGGCTTTGTGCGACAATGC  
+HWI-EAS443:3:50:1262:1202#0/1  
abaabbabbbbbbbbabbb`babb`bbabababa\_babbb  
@HWI-EAS443:3:50:1561:402#0/1  
GCAGGTACTGATCCAAAATGGAAGGCTTTGTGCGACAATG  
+HWI-EAS443:3:50:1561:402#0/1  
]\_\_\_\_\_U¥aa`a`]]\_`aaaa`a\_]\_[\_\_aaZ\_\_\_\_\_¥]¥a`  
@HWI-EAS443:3:51:236:23#0/1  
AAGCAGGTACTGATCCAAAATGGAAGGCTTTGTGCGACAA  
+HWI-EAS443:3:51:236:23#0/1  
aabaabb[a^ab`a^`a]`a`aa`a```aaa\_a¥a^[]`  
@HWI-EAS443:3:52:494:1578#0/1  
GTAAGGTACTGATCCAAAATGGAAGGCTTTGTGCGACAATGCTTC  
+HWI-EAS443:3:52:494:1578#0/1  
aaaaa]babYY`aaa\_\_\_YV`a`a[\_YV\_aa¥`a\_a\_a  
@HWI-EAS443:3:55:1373:831#0/1  
CAGGTACTGATCCAAAATGGAAGGCTTTGTGCGACAATGC  
+HWI-EAS443:3:55:1373:831#0/1  
a[Y¥H`a\_^[a^a\_\_\_P[\_\_\_¥WLXU]a^`W`Ra\_XY]Q¥\_  
@HWI-EAS443:3:5:1372:1809#0/1  
AAAGCAGGTACTGATCCAAAATGGAAGGCTTTGTGCGACA  
+HWI-EAS443:3:5:1372:1809#0/1  
aabb]baa^aT```\_a`b`a]`a^Y\_\_VSYV^`^\_X\_]BB  
@HWI-EAS443:3:60:263:1364#0/1  
GGTACTGATCCAAAATGGAAGGCTTTGTGCGACAATGCTT



@HWI-EAS443:3:75:121:446#0/1  
GGACAGTATGGATAGCAAATAGTAGCATTCCCACAACACTAC  
+HWI-EAS443:3:75:121:446#0/1  
^\_H\_ab\_X[\_[Z]`BBBBBBBBBBBBBBBBBBBBBBBB  
@HWI-EAS443:3:75:419:1910#0/1  
AGCAGGTACTGATCCAAAATGGAAGGCTTTGTGCGACAAT  
+HWI-EAS443:3:75:419:1910#0/1  
a]ab^\_Zbba`a`\_aaaa\_`^ba^ba`\_]\_a\_\_\_aa\_  
@HWI-EAS443:3:78:52:396#0/1  
AGCAGGTACTGATCCAAAATGGAAGGCTTTGTGCGACAAT  
+HWI-EAS443:3:78:52:396#0/1  
\_Ua¥aaLZ`Ya\_\_^aab^H^\_[[]¥\_aTQ\_\_U\_\_\_\_Z`¥`  
@HWI-EAS443:3:7:1341:1017#0/1  
GTACTGATCCAAAATGGAAGGCTTTGTGCGACAATGCTTC  
+HWI-EAS443:3:7:1341:1017#0/1  
a`aaaa\_a^aaaa\_`^aa`aaXaa`^]aXaa^`^][`\_R  
@HWI-EAS443:3:80:101:219#0/1  
AGCAGGTACTGATCCAAAATGGAAGGCTTTGTGCGACAAT  
+HWI-EAS443:3:80:101:219#0/1  
\_Z\_[Z]PXXZ\_\_`¥`T)`VYR\_ZV\_W\_Z]X]WX\_X^UU\_  
@HWI-EAS443:3:84:1583:1627#0/1  
AGCAGGTACTGATCCAAAATGGAAGGCTTTGTGCGACAAT  
+HWI-EAS443:3:84:1583:1627#0/1  
aaS`PJY]ZZY`a^¥]aa`[Y`a]\_a[`aa`\_aYaWYMM\_  
@HWI-EAS443:3:85:108:1898#0/1  
AGCAGGTACTGATCCAAAATGGAAGGCTTTGTGCGACAAT  
+HWI-EAS443:3:85:108:1898#0/1  
`aaaaYL\_]`\_aYSUa`¥¥¥`\_`YY]^YMSNW\_]\_\_a\_Z  
@HWI-EAS443:3:87:1540:1790#0/1  
AGCAGGTACTGATCCAAAATGGAAGGCTTTGTGCGACAAT  
+HWI-EAS443:3:87:1540:1790#0/1  
\_\_OVaa`\_¥aa\_\_RY`aaaab\_bYRSX¥\_aWTWD[\_X\_Ua  
@HWI-EAS443:3:87:208:786#0/1  
AGCAGGTACTGATCCAAAATGGAAGGCTTTGTGCGACAAT  
+HWI-EAS443:3:87:208:786#0/1  
a``^aZWaaa\_a\_aY`\_a```aa`\_X¥`¥¥Z\_^\_`aa]`  
@HWI-EAS443:3:8:102:1605#0/1  
AAAGCAGGTACTGATCCAAAATGGAAGGCTTTGTGCGACA  
+HWI-EAS443:3:8:102:1605#0/1  
aaaaaa\_Z^a`\_``^`\_aaaa`\_]a[¥R\_\_^]\_^^¥]\_¥[  
@HWI-EAS443:3:8:1282:379#0/1  
AAAGCAGGTACTGATCCAAAATGGAAGGCTTTGTGCGACA  
+HWI-EAS443:3:8:1282:379#0/1  
aa`\_]aba\_a^aa`\_YY````\_a\_a\_[`\_Z`\_`\_^^W]ZV^  
@HWI-EAS443:3:8:193:857#0/1  
CAGGTACTGATCCAAAATGGAAGGCTTTGTGCGACAATGC  
+HWI-EAS443:3:8:193:857#0/1  
a][Y[aa\_a`a`aaaa`\_`[\_]`\_`\_aa^aZ\_\_`a``\_Y  
@HWI-EAS443:3:8:639:1950#0/1  
GCAAATAGTAGCATTGCCACAACACTACTTTAATGCATGTGT

+HWI-EAS443:3:8:639:1950#0/1  
abbaa\_b\_Qa]¥aa\_]\_a\_aaa`\_`Za\_\_aa]PH`\_^0\_R  
@HWI-EAS443:3:8:710:1173#0/1  
AAGCAGGTACTGATCCAAAATGGAAGGCTTTGTGCGACAA  
+HWI-EAS443:3:8:710:1173#0/1  
\_V¥WbaaV`\_]XSHaUN[aYa[Z]^¥UT\_\_`YHS¥Z¥W¥\_B  
@HWI-EAS443:3:91:846:221#0/1  
GCAGGTACTGATCCAAAATGGAAGGCTTTGTGCGACAATG  
+HWI-EAS443:3:91:846:221#0/1  
a^`\_`Za][^]Z¥]^\_Z]^\_¥^W¥Z`\_Z^Z^ZV^]Z^  
@HWI-EAS443:3:92:243:1353#0/1  
CAGGTACTGATCCAAAATGGAAGGCTTTGTGCGACAATGC  
+HWI-EAS443:3:92:243:1353#0/1  
a`\_]`baaa`bbbaa[[\_aa]^ba\_\_a]a`aaaa\_`\_  
@HWI-EAS443:3:93:1371:672#0/1  
CAGGTACTGATCCAAAATGGAAGGCTTTGTGCGACAATGC  
+HWI-EAS443:3:93:1371:672#0/1  
X^bb\_bbbabbbVbbbab`bbbabababb\_baab`bbb`a  
@HWI-EAS443:3:93:1406:119#0/1  
AGCAGGTACTGATCCAAAATGGAAGGCTTTGTGCGACAAT  
+HWI-EAS443:3:93:1406:119#0/1  
a\_Ya`aU]W^`^\_¥]a`\_`\_aaa\_^a^`W\_^\_X\_YWXZ\_  
@HWI-EAS443:3:98:357:1610#0/1  
CAGGTACTGATCCAAAATGGAAGGCTTTGTGCGACAATGC  
+HWI-EAS443:3:98:357:1610#0/1  
a]Z¥0`a^\_]P\_¥\_¥\_a]URaUR]\_^`Z`Z`I^`^`\_W`X  
@HWI-EAS443:3:9:1226:1740#0/1  
AGCAGGTACTGATCCAAAATGGAAGGCTTTGTGCGACAAT  
+HWI-EAS443:3:9:1226:1740#0/1  
\_XRWH[N\_^Zbaa`^Taba`^a]a\_\_0`¥\_¥X\_G\_U[]`U  
@HWI-EAS443:3:11:459:1217#0/1  
GGACAGTATGGATAGCAAATAGTAGCATTGCCACAACACTAC  
+HWI-EAS443:3:11:459:1217#0/1  
aaaabb\_aaaba`aa¥aba`[Xa`]]`\_\_\_\_[aa[\_a[  
@HWI-EAS443:3:18:1208:146#0/1  
GACAGTATGGATAGCAAATAGTAGCATTGCCACAACACTACT  
+HWI-EAS443:3:18:1208:146#0/1  
a`b`\_[ababaa`aaaab`]^\_a\_LV`aa¥`\_]a`\_aaa`  
@HWI-EAS443:3:20:444:113#0/1  
GACAGTATGGATAGCAAATAGTAGCATTGCCACAACACTACT  
+HWI-EAS443:3:20:444:113#0/1  
]bbb\_]bbbaX`b^SYb^`baP`ba`^bb`aa`\_a\_a`I[  
@HWI-EAS443:3:21:38:1729#0/1  
GACAGTATGGATAGCAAATAGTAGCATTGCCACAACACTACT  
+HWI-EAS443:3:21:38:1729#0/1  
\_aab\_\_baaaa`a]^`Y\_a\_PaU¥UZaSWX`\_`a]`a\_]`  
@HWI-EAS443:3:32:928:1886#0/1  
GGACAGTATGGATAGCAAATAGTAGCATTGCCACAACACTAC  
+HWI-EAS443:3:32:928:1886#0/1  
`[XL¥XN`Y0^a\_XUZ¥a\_^]OLYU¥XW\_VZ¥MOY]]N\_^

@HWI-EAS443:3:42:86:1642#0/1  
GGACAGTATGGATAGCAAATAGTAGCATTGCCACAACACTAC  
+HWI-EAS443:3:42:86:1642#0/1  
]bbab`\_\_]b`Y\_ZT^b[Y\_a[SW[S]aaaa`Yaa[UaW  
@HWI-EAS443:3:48:809:1698#0/1  
GGACAGTATGGATAGCAAATAGTAGCATTGCCACAACACTAC  
+HWI-EAS443:3:48:809:1698#0/1  
abMa[a^`¥ba]Zaabbba\_\_\_aW¥aa^W]ZYQ\_`W^\_^  
@HWI-EAS443:3:49:525:396#0/1  
GGACAGTATGGATAGCAAATAGTAGCATTGCCACAACACTAC  
+HWI-EAS443:3:49:525:396#0/1  
abaabbabbbba`^`]`aaa[Y`a]`aa^]^^YaaV`a¥  
@HWI-EAS443:3:4:154:197#0/1  
GACAGTATGGATAGCAAATAGTAGCATTGCCACAACACTACT  
+HWI-EAS443:3:4:154:197#0/1  
abb`b[b`bbbX`a`aaa`¥]H`Z\_YY]aa`aZZ`P`\_XZ  
@HWI-EAS443:3:4:473:703#0/1  
GACAGTATGGATAGCAAATAGTAGCATTGCCACAACACTACT  
+HWI-EAS443:3:4:473:703#0/1  
aa`ba[aa`ba`]aXaaa`¥WP`\_]X]aa]]`\_`X`\_`\_`  
@HWI-EAS443:3:50:393:139#0/1  
GGACAGTATGGATAGCAAATAGTAGCATTGCCACAACACTAC  
+HWI-EAS443:3:50:393:139#0/1  
aaa^ab`aaaa`\_a\_aa^¥YW[[\_`\_^R]PM]\_V^\_X  
@HWI-EAS443:3:51:1415:1128#0/1  
GGACAGTATGGATAGCAAATAGTAGCATTGCCACAACACTAC  
+HWI-EAS443:3:51:1415:1128#0/1  
^aaT¥\_TXS\_b`\_Y[T`¥b]Z¥¥`b]Ua\_Ka`a`¥^RaaZ  
@HWI-EAS443:3:53:1594:1165#0/1  
GGACAGTATGGATAGCAAATAGTAGCATTGCCACAACACTAC  
+HWI-EAS443:3:53:1594:1165#0/1  
[I¥aSaYba`^ba`aU\_UW\_WX\_Z\_W\_Z[¥Q]aXYX[X]  
@HWI-EAS443:3:54:1573:1598#0/1  
GACAGTATGGATAGCAAATAGTAGCATTGCCACAACACTACT  
+HWI-EAS443:3:54:1573:1598#0/1  
aaaab`aa`^`\_`a\_\_`a`¥¥Z`^¥`Y¥\_[[]\_^]\_Q`  
@HWI-EAS443:3:57:174:497#0/1  
GGACAGTATGGATAGCAAATAGTAGCATTGCCACAACACTAC  
+HWI-EAS443:3:57:174:497#0/1  
a\_\_aab^aaaa`aaa`\_]`\_a^XU\_aTG[a\_\_[PY]ZT^¥Z  
@HWI-EAS443:3:5:1245:1401#0/1  
GGACAGTATGGATAGCAAATAGTAGCATTGCCACAACACTAC  
+HWI-EAS443:3:5:1245:1401#0/1  
abaab`a`abb`\_`\_\_[aaa]^Y¥a`U`\_a`^¥`P`\_`\_a`W  
@HWI-EAS443:3:61:1222:990#0/1  
ACAGTATGGATAGCAAATAGTAGCATTGCCACAACACTACTT  
+HWI-EAS443:3:61:1222:990#0/1  
aabb\_bab^^aa`¥\_aba`a[``[J]]T]\_\_\_\_^^GZYX¥X  
@HWI-EAS443:3:61:856:48#0/1  
GGACAGTATGGATAGCAAATAGTAGCATTGCCACAACACTAC

+HWI-EAS443:3:61:856:48#0/1  
aa^`¥`U]``\_XXUZ]\_XYZXTX¥WW^XXXXYXZWPWYY  
@HWI-EAS443:3:67:564:1675#0/1  
GGACAGTATGGATAGCAAATAGTAGCATTGCCACAACACTAC  
+HWI-EAS443:3:67:564:1675#0/1  
abbbbb[baa`ba\_]`baba^aZaa`^a`U\_abaab`]bV  
@HWI-EAS443:3:70:1177:258#0/1  
GGACAGTATGGATAGCAAATAGTAGCATTGCCACAACACTAC  
+HWI-EAS443:3:70:1177:258#0/1  
abaaabYb`baaaa[aabaaa`[aa^Y\_`a``a^``0\_aR  
@HWI-EAS443:3:82:209:307#0/1  
ACAGTATGGATAGCAAATAGTAGCATTGCCACAACACTACTT  
+HWI-EAS443:3:82:209:307#0/1  
abab\_¥aba\_]aaaaa`^[R`a\_\_\_a\_]P^\_\_\_\_\_¥\_\_  
@HWI-EAS443:3:89:803:1720#0/1  
GGACAGTATGGATAGCAAATAGTAGCATTGCCACAACACTAC  
+HWI-EAS443:3:89:803:1720#0/1  
Q\_Sa^a\_b`^aaZ^¥WZ\_b\_\_¥Vba]^¥`bba\_Z^aa`\_F  
@HWI-EAS443:3:90:673:830#0/1  
GGACAGTATGGATAGCAAATAGTAGCATTGCCACAACACTAC  
+HWI-EAS443:3:90:673:830#0/1  
`b```b\_babbbb`\_W^b^a¥``]aaTJZaRa[aba`\_]`\_  
@HWI-EAS443:3:90:682:1269#0/1  
GGACAGTATGGATAGCAAATAGTAGCATTGCCACAACACTAC  
+HWI-EAS443:3:90:682:1269#0/1  
aa`aaa]`aaa\_`a\_\_baa`a\_Ya`\_X\_\_\_\_\_]`aW```]  
@HWI-EAS443:3:93:1575:701#0/1  
GACAGTATGGATAGCAAATAGTAGCATTGCCACAACACTACT  
+HWI-EAS443:3:93:1575:701#0/1  
a\_ab`X\_\_\_ZaZ`T``b`aa`\_a^]\_`aYPF]S\_aRZ`0a  
@HWI-EAS443:3:94:1003:293#0/1  
GGACAGTATGGATAGCAAATAGTAGCATTGCCACAACACTAC  
+HWI-EAS443:3:94:1003:293#0/1  
aba\_`b\_aab\_\_^]^¥aa\_]`Q\_a`]aa¥NWX^\_\_W^^V  
@HWI-EAS443:3:98:320:399#0/1  
ACAGTATGGATAGCAAATAGTAGCATTGCCACAACACTACTT  
+HWI-EAS443:3:98:320:399#0/1  
a``a[aaab^`\_\_\_a\_`^`U\_aX\_\_\_`[]\_`^`X\_\_Y^\_  
@HWI-EAS443:3:18:1541:846#0/1  
CAATGCTTCAATCCAGTGATCGTCGAGCTTGC GGAAAAGG  
+HWI-EAS443:3:18:1541:846#0/1  
`bbbbabaab`aaaabaaaa`a\_`^^a```a¥]\_\_`]\_\_Z  
@HWI-EAS443:3:33:1114:1958#0/1  
CTTTGTGCGACAATGCTTCAATCCAATGATCGCCGAGCTT  
+HWI-EAS443:3:33:1114:1958#0/1  
¥\_`^`a\_\_\_\_\_¥¥¥\_Sa`ab``X`]a[^baa`UR`\_TMFGV  
@HWI-EAS443:3:37:604:1039#0/1  
CTTTGTGCGACAATGCTTCAATCCAATGATCGCCGAGCTT  
+HWI-EAS443:3:37:604:1039#0/1  
`baa`X`b`\_aa]aaaa`a^aab\_Y\_aTVb^G¥a]aaSP



@HWI-EAS443:3:58:573:713#0/1  
TGCCTTTTCCGCAAGCTCGACGATCATTGGATTTAAGCAT  
+HWI-EAS443:3:58:573:713#0/1  
a`aaaa\_]\_a^aa]\_\_[Y[Z`^ZYX]¥WZUURDKOFNVW  
@HWI-EAS443:3:62:1621:1076#0/1  
AAGCAGTACTGATTCAAAATGGAAGGCTTTGTGCGACAA  
+HWI-EAS443:3:62:1621:1076#0/1  
O][V[QZV`\_SaU¥S¥b¥a\_^\_b]`YR]RX¥^ZOR¥ab¥¥  
@HWI-EAS443:3:81:1292:764#0/1  
CATATTCTTTCATTGCCTTTTCCGCAAGCTCGACGATATT  
+HWI-EAS443:3:81:1292:764#0/1  
a\_^JR¥\_b^ba\_b]Zb[¥baa`ababaV`aaa]aa^`GG\_  
@HWI-EAS443:3:44:345:456#0/1  
CATATTCTTTCATTGCCTTTTCCGCAANCTCGACGATCAT  
+HWI-EAS443:3:44:345:456#0/1  
R[bJZaaaaX`WVa¥\_H¥baUa¥`¥`[D]aZbaVa\_`¥0\_  
@HWI-EAS443:3:60:643:458#0/1  
CAGGTTCCAGGTTGTCCCTAAGTGCCTGAACAANGAGAAG  
+HWI-EAS443:3:60:643:458#0/1  
ababWbabaab`^a\_aba`U¥b\_a\_U^b`a]^PD¥a`^ab  
@HWI-EAS443:3:25:1411:1924#0/1  
TGCATATTCTTTCATTGCCTTTTCCGCAAGCTCGACGATC  
+HWI-EAS443:3:25:1411:1924#0/1  
`SQ[VH]\_aaS]¥X[T\_[TYVY[]Z]S]TJMQ¥YXTZUZY  
@HWI-EAS443:3:30:368:163#0/1  
CGGCTGCTTCTCATTGTTTCAGGCACTTAGGGACAACCTGG  
+HWI-EAS443:3:30:368:163#0/1  
Z\_bba`]Z]QZ^`\_QWWZ¥W^WZ`a`a¥ZT^W[\_\_\_NX¥BB  
@HWI-EAS443:3:76:1787:115#0/1  
CTTCAATCCAATGATCGTCGAGCTTGCAGAAAAGGCAAAG  
+HWI-EAS443:3:76:1787:115#0/1  
abb[aabbaabbab`bb^baaXbba\_bb`aaaba[`\_ab  
@HWI-EAS443:3:7:1524:284#0/1  
GACCAAAGTCTCCCACCGAACTTCTCCAGCCTTGAAAACA  
+HWI-EAS443:3:7:1524:284#0/1  
^baababb`\_baa\_``QbaaUaaWa\_¥aa\_¥a`\_^`\_W\_  
@HWI-EAS443:3:88:969:1478#0/1  
ATGCCTTTTCCGCAAGCTCGACGATCATTGGATTGAAGCA  
+HWI-EAS443:3:88:969:1478#0/1  
`V\_b\_b¥b^^¥\_¥`a^a`W^RQb\_``^\_aVMY]TXUXI[  
@HWI-EAS443:3:12:1723:787#0/1  
CAGGTTCCAGGTTGTCCCTAAGTGCCTGAACAATGAGAAG  
+HWI-EAS443:3:12:1723:787#0/1  
\_a`a^`a`\_\_\_\_Y`\_]\_a]`ba^`¥`RW\_]aaW^`a`^aba  
@HWI-EAS443:3:14:1462:1196#0/1  
CCAGGTTCCAGGTTGTCCCTAAGTGCCTGAACAATGAGAA  
+HWI-EAS443:3:14:1462:1196#0/1  
^\_b`\_]ZWbb\_]Z\_¥`^aabaW]^b`aa^``]S`aa  
@HWI-EAS443:3:14:1700:1449#0/1  
CAGGTTCCAGGTTGTCCCTAAGTGCCTGAACAATGAGAAG

+HWI-EAS443:3:14:1700:1449#0/1  
abbbabbabba`a]W^V]aaaa]b`\_aaaa]aab`aaaa  
@HWI-EAS443:3:18:1207:1308#0/1  
CGACCAAAGTCTCCCACCGAACTTCTCCAGCCTTGAAAAC  
+HWI-EAS443:3:18:1207:1308#0/1  
aabaabbaa`baaaaa\_aa\_^`\_]a`\_`]aaaa¥\_]`  
@HWI-EAS443:3:18:492:191#0/1  
CATATTCTTTCATTGCCTTTTCCGCAAGCTCGACGATCAT  
+HWI-EAS443:3:18:492:191#0/1  
a^aa\_W\_a¥a]`a\_\_^aaa^aa`a`^\_XYVU¥\_]QRVZ\_  
@HWI-EAS443:3:24:1183:764#0/1  
CTTTGTGCGACAATGCTTCAATCCAATGATCGTCGAGCTT  
+HWI-EAS443:3:24:1183:764#0/1  
abbb`bbaab^bbab`aaabbbabbababba`aaa```  
@HWI-EAS443:3:24:1792:1368#0/1  
CCAGGTTCCAGGTTGCCCTAAGTGCCTGAACAATGAGAA  
+HWI-EAS443:3:24:1792:1368#0/1  
aabbb^[^`\_bb```aa\_Vab^aVaXV`baaaababaaba  
@HWI-EAS443:3:24:266:535#0/1  
GTTTTCAAGGCTGGAGAAGTTCGGTGGGAGACTTTGGTCG  
+HWI-EAS443:3:24:266:535#0/1  
aaa\_a`aaa\_\_`ab\_]V]`W]Z]\_S\_^\_Z\_U^`^aR¥VRG  
@HWI-EAS443:3:25:74:1979#0/1  
AAAGTTTTCAAGGCTGGAGAAGTTCGGTGGGAGACTTTGG  
+HWI-EAS443:3:25:74:1979#0/1  
`¥a`¥\_\_aa`\_¥]a```^^`\_\_U^\_Z\_TV[WVVV[WV\_HN  
@HWI-EAS443:3:26:872:287#0/1  
TTTTCAAGGCTGGAGAAGTTCGGTGGGAGACTTTGGTCGG  
+HWI-EAS443:3:26:872:287#0/1  
a`a`aaaSY``a]J^`\_aW\_Y[[^[[XV`¥VU¥Z]]NWSB  
@HWI-EAS443:3:27:561:858#0/1  
ACCAAAGTCTCCCACCGAACTTCTCCAGCCTTGAAAACCT  
+HWI-EAS443:3:27:561:858#0/1  
]abY¥V]`[]aaba`^R``[baH¥Y^YSXVa\_ZaaSaa^a  
@HWI-EAS443:3:28:548:1450#0/1  
TGCTTCAATCCAATGATCGTCGAGCTTGCGGAAAAGGCAA  
+HWI-EAS443:3:28:548:1450#0/1  
abbaaaabaaba\_abb`b`]aaaa^)`[`ba\_aa```^`aa  
@HWI-EAS443:3:29:505:551#0/1  
AAAGTTTTCAAGGCTGGAGAAGTTCGGTGGGAGACTTTGG  
+HWI-EAS443:3:29:505:551#0/1  
]\_K¥¥``^b\_V\_XSXUPUbOQ]XS`^RFR]L]TFXL`BBB  
@HWI-EAS443:3:2:1417:652#0/1  
AAAGTTTTCAAGGCTGGAGAAGTTCGGTGGGAGACTTTGG  
+HWI-EAS443:3:2:1417:652#0/1  
^`]\_H¥ZWYW\_aaaSa¥Q\_[V\_R^Y`\_F]XXZHWWWsx^B  
@HWI-EAS443:3:30:120:460#0/1  
GGTTCCAGGTTGCCCTAAGTGCCTGAACAATGAGAAGCA  
+HWI-EAS443:3:30:120:460#0/1  
a`Z¥`a¥\_\_Ta`\_`a[I]`U```^a``a`¥T¥\_^\_\_[Y^

@HWI-EAS443:3:30:620:1068#0/1  
GCCTTTTCCGCAAGCTCGACGATCATTGGATTGAAGCATT  
+HWI-EAS443:3:30:620:1068#0/1  
ab`^Z`Wb]aba`[`T\_Y]ZMUKRNBBSBBBBBBBBBBBB  
@HWI-EAS443:3:31:481:1817#0/1  
ATTCTTTTCATTGCCTTTTCCGCAAGCTCGACGATCATTGG  
+HWI-EAS443:3:31:481:1817#0/1  
Mabbaabbba`¥`bbababb\_aabaaabbbbaaaabaW`  
@HWI-EAS443:3:32:901:1013#0/1  
CATATTCTTTCATTGCCTTTTCCGCAAGCTCGACGATCAT  
+HWI-EAS443:3:32:901:1013#0/1  
abb\_babbbbbbba``abbbaaa`ba\_a```[[a`^^aa  
@HWI-EAS443:3:34:1050:1196#0/1  
CAATGCTTCAATCCAATGATCGTTCGAGCTTGCAGAAAAGG  
+HWI-EAS443:3:34:1050:1196#0/1  
aa`aaaaaaaaaaaaaaaa`aa]`a\_\_\_\_\_^\_\_`^^]\_^WZ  
@HWI-EAS443:3:34:1189:1290#0/1  
CTTCAATCCAATGATCGTTCGAGCTTGCAGAAAAGGCAATG  
+HWI-EAS443:3:34:1189:1290#0/1  
aa`a\_X¥Y^`\_aZaT[\_aY\_PY]`\_QHZXKW]X`QJYOYY  
@HWI-EAS443:3:34:1426:1512#0/1  
CATATTCTTTCATTGCCTTTTCCGCAAGCTCGACGATCAT  
+HWI-EAS443:3:34:1426:1512#0/1  
`\_¥U^aa`b^aaba¥`\_`aaa`W]]Z¥PX]Y¥ZXXUBBBB  
@HWI-EAS443:3:35:1300:366#0/1  
CCAAAGTCTCCACCGAACTTCTCCAGCCTTGAAAACCTT  
+HWI-EAS443:3:35:1300:366#0/1  
a`^T[WaU¥]`\_¥]`\_\_`\_aa^^¥XV[\_`]^Y`¥¥\_`^`  
@HWI-EAS443:3:35:1375:295#0/1  
AAAGTTTTCAAGGCTGGAGAAGTTCGGTGGGAGACTTTGG  
+HWI-EAS443:3:35:1375:295#0/1  
aaab`\_`a`¥Zaa``aaS`W^`[ZUZ`W`\_`¥^WY¥^¥TY  
@HWI-EAS443:3:39:1548:878#0/1  
GGTTCCAGGTTGTCCCTAAGTGCCTGAACAATGAGAAGCA  
+HWI-EAS443:3:39:1548:878#0/1  
aa^aabaab\_aa\_\_`aaaa`]a\_\_aa^`\_aYY`\_a\_\_`^`  
@HWI-EAS443:3:45:830:1535#0/1  
CATATTCTTTCATTGCCTTTTCCGCAAGCTCGACGATCAT  
+HWI-EAS443:3:45:830:1535#0/1  
ab\_¥abb`\_UZ¥^bbabbaaaVa\_^baa`¥P\_a[b`J¥ZP  
@HWI-EAS443:3:48:1221:360#0/1  
AATGCTTCAATCCAATGATCGTTCGAGCTTGCAGAAAAGGC  
+HWI-EAS443:3:48:1221:360#0/1  
`XKZaKXa`\_b^``]aba`¥¥\_`]LYW`]XP^YU[WZ\_\_Q  
@HWI-EAS443:3:53:712:144#0/1  
AATGCTTCAATCCAATGATCGTTCGAGCTTGCAGAAAAGGC  
+HWI-EAS443:3:53:712:144#0/1  
aaa`Y`b[\_]a`\_aaba^`[aY[\_`a\_^Za^[\_`Ya^]SK  
@HWI-EAS443:3:54:378:185#0/1  
GCCTTTTCCGCAAGCTCGACGATCATTGGATTGAAGCATT

+HWI-EAS443:3:54:378:185#0/1  
aa\_`aa`\_\_a[Y`UVTZZNU\_YSSUU[\_¥VYBBBBBBBBBB  
@HWI-EAS443:3:55:1232:1541#0/1  
CAATGCTTCAATCCAATGATCGTCGAGCTTGC GGAAAAGG  
+HWI-EAS443:3:55:1232:1541#0/1  
abaa``bababa`aaabbbabaaaab\_a`a\_bb\_^```a  
@HWI-EAS443:3:55:146:286#0/1  
GGTTCCAGGTTGTCCCTAAGTGCCTGAACAATGAGAAGCA  
+HWI-EAS443:3:55:146:286#0/1  
ab^a\_`¥`^`a^`\_]\_`\_`^a^`\_]\_`][[\_`Y`^`\_`^`  
@HWI-EAS443:3:59:13:1186#0/1  
AAAGTTTTCAAGGCTGGAGAAGTTCGGTGGGAGACTTTGG  
+HWI-EAS443:3:59:13:1186#0/1  
\_ZXTGOZ^`\_]\_a`a\_¥RQUVLHW`T[IUBBBBBBBBBBBB  
@HWI-EAS443:3:5:1386:432#0/1  
CAATGCTTCAATCCAATGATCGTCGAGCTTGC GGAAAAGG  
+HWI-EAS443:3:5:1386:432#0/1  
abaabTNWYaaXU]a`bbab`aU\_\_^aW[\_`Va`aH`BBB  
@HWI-EAS443:3:62:331:1354#0/1  
CAATGCTTCAATCCAATGATCGTCGAGCTTGC GGAAAAGG  
+HWI-EAS443:3:62:331:1354#0/1  
Y`b¥¥`b`Ma]abba^¥b`bbb\_aaaa\_¥[] [a]\_\_WHW[  
@HWI-EAS443:3:62:508:1212#0/1  
CCAGGTTCCAGGTTGTCCCTAAGTGCCTGAACAATGAGAA  
+HWI-EAS443:3:62:508:1212#0/1  
a\_aa]^`\_`aa]^aaZaaa`^a\_`\_a\_aa\_\_\_\_\_^[\_\_ [a`  
@HWI-EAS443:3:62:515:203#0/1  
GGTTCCAGGTTGTCCCTAAGTGCCTGAACAATGAGAAGCA  
+HWI-EAS443:3:62:515:203#0/1  
a`X]\_XFX]V\_] ^¥^]PNLYYYYYY]XVUQNQXVYTVXXV  
@HWI-EAS443:3:64:1417:964#0/1  
CAATGATCGTCGAGCTTGC GGAAAAGGCAATGAAAGAATA  
+HWI-EAS443:3:64:1417:964#0/1  
aaaa`aa`^` [b\_b\_`aa¥]]XT¥W`\_\_aa\_aY^`\_]\_\_\_\_  
@HWI-EAS443:3:64:159:514#0/1  
CCAGGTTCCAGGTTGTCCCTAAGTGCCTGAACAATGAGAA  
+HWI-EAS443:3:64:159:514#0/1  
aaa\_a^aaaaaa^aa\_\_aa`\_aa^\_a\_aa^\_\_a\_\_`\_`¥`  
@HWI-EAS443:3:66:1294:1277#0/1  
GCTTCAATCCAATGATCGTCGAGCTTGC GGAAAAGGCAAT  
+HWI-EAS443:3:66:1294:1277#0/1  
a]a\_Y\_W\_ZX]Za`Z]^ZZXT^SX¥[UYZVZ^[Y[Z^UZ  
@HWI-EAS443:3:6:926:827#0/1  
GCCTTTTCCGCAAGCTCGACGATCATTGGATTGAAGCATT  
+HWI-EAS443:3:6:926:827#0/1  
aaaaaaaaa`aba[a^a\_\_a\_]X\_``\_`]^a\_ [¥`R\_`^`  
@HWI-EAS443:3:70:999:406#0/1  
AGGTTCCAGGTTGTCCCTAAGTGCCTGAACAATGAGAAGC  
+HWI-EAS443:3:70:999:406#0/1  
ab`PXab`abK`a¥I``Wb[]`aaY```VYbab` [ab\_bY

@HWI-EAS443:3:71:370:1098#0/1  
ATATTCTTTCATTGCCTTTTCCGCAAGCTCGACGATCATT  
+HWI-EAS443:3:71:370:1098#0/1  
a^J^a]ababbabaaaa`aaaaaba`a`a\_]a\_\_]-¥\_\_  
@HWI-EAS443:3:72:710:1621#0/1  
TGCCTTTTCCGCAAGCTCGACGATCATTGGATTGAAGCAT  
+HWI-EAS443:3:72:710:1621#0/1  
¥¥ab]babbbbbb`\_¥T\_]P\_¥Z\_[F[¥U\_XW[GS¥V^OJ  
@HWI-EAS443:3:73:57:1433#0/1  
GCTTCTCATTGTTCAGGCACTTAGGGACAACCTGGAACCT  
+HWI-EAS443:3:73:57:1433#0/1  
abaababbabaaaabaaaabaaaa^\_aaa`Taa^\_\_]Z\_a^  
@HWI-EAS443:3:73:908:764#0/1  
CCAGGTTCCAGTTGTCCCTAAGTGCCTGAACAATGAGAA  
+HWI-EAS443:3:73:908:764#0/1  
aaaaa\_aaaaa¥¥¥^\_a\_a`aa]a^\_aa\_\_^`aa^`a  
@HWI-EAS443:3:76:346:51#0/1  
GCCTTTTCCGCAAGCTCGACGATCATTGGATTGAAGCATT  
+HWI-EAS443:3:76:346:51#0/1  
a`\_^W\_¥UZ\_^VUWUUTYPVYJLMNNYV[TVSBBBBBBBB  
@HWI-EAS443:3:77:556:995#0/1  
CCATATTCTTTCATTGCCTTTTCCGCAAGCTCGACGATCA  
+HWI-EAS443:3:77:556:995#0/1  
abbb\_bbbbbabbbbbbbbbabbbbbbb^babaaa`aa`  
@HWI-EAS443:3:80:796:633#0/1  
CATTGCCTTTTCCGCAAGCTCGACGATCATTGGATTGAAG  
+HWI-EAS443:3:80:796:633#0/1  
abbbbaabbaaaa`b[Z`aab``a¥aY[aaaa^\_\_`Z\_]`  
@HWI-EAS443:3:81:144:1970#0/1  
CAATGCTTCAATCCAATGATCGTCGAGCTTGCGGAAAAGG  
+HWI-EAS443:3:81:144:1970#0/1  
aaa\_^bY[a`\_aaa\_^\_]a^Za\_[`XZ[^ZY]]^[V  
@HWI-EAS443:3:81:47:273#0/1  
CCATATTCTTTCATTGCCTTTTCCGCAAGCTCGACGATCA  
+HWI-EAS443:3:81:47:273#0/1  
`^TYJ[``aZa\_\_^¥\_\_a\_UZ\_¥\_\_\_a[NYT`[[W[SVUG  
@HWI-EAS443:3:82:1097:1327#0/1  
CTTTGTGCGACAATGCTTCAATCCAATGATCGTCGAGCTT  
+HWI-EAS443:3:82:1097:1327#0/1  
Xbbb`^\_XUabb]bbbabaa`^`b\_aZ`^baa`^`aa\_X`  
@HWI-EAS443:3:82:444:681#0/1  
GCCTTTTCCGCAAGCTCGACGATCATTGGATTGAAGCATT  
+HWI-EAS443:3:82:444:681#0/1  
aZXZTZXQ¥[Xa[NP[XDPX[NTXLRWMLMUWMRINLYR  
@HWI-EAS443:3:82:932:1397#0/1  
TATTCTTTCATTGCCTTTTCCGCAAGCTCGACGATCATTG  
+HWI-EAS443:3:82:932:1397#0/1  
`[a`baZW^baV¥ab\_UV`^]`^bbb`a`a^YX^YST`b¥  
@HWI-EAS443:3:85:1532:844#0/1  
CAATGCTTCAATCCAATGATCGTCGAGCTTGCGGAAAAGG

+HWI-EAS443:3:85:1532:844#0/1  
abab`aabbabaabaaaaTa^aa`a^aa\_]ba\_\_\_\_\_a]  
@HWI-EAS443:3:85:1639:194#0/1  
CAATGATCGTCGAGCTTGCAGAAAAGGCAATGAAAGAATA  
+HWI-EAS443:3:85:1639:194#0/1  
a\_`bbbaZ`]b¥`^`a`\_aaa`^\_a^G\_`aa^``a[\_\_\_\_  
@HWI-EAS443:3:85:996:297#0/1  
CAATGCTTCAATCCAATGATCGTCGAGCTTGCAGAAAAGG  
+HWI-EAS443:3:85:996:297#0/1  
abbbaba`abZ]aXZabba\_]b[^]aaYa¥a`aaY]aZZZ  
@HWI-EAS443:3:89:1199:1345#0/1  
CAGGTTCCAGGTTGCCCTAAGTGCCTGAACAATGAGAAG  
+HWI-EAS443:3:89:1199:1345#0/1  
aab\_]babbbba`babbbbabbbabbbb\_a`babbbbbb  
@HWI-EAS443:3:93:552:227#0/1  
GCTTCTCATTGTTCAAGCACTTAGGGACAACCTGGAACCT  
+HWI-EAS443:3:93:552:227#0/1  
a^ab``a¥aaa\_^U^`\_aa\_a\_`a\_a^`\_¥\_\_\_\_Y¥\_¥U\_  
@HWI-EAS443:3:94:338:325#0/1  
ACCAAAGTCTCCCACCGAATTCTCCAGCCTTGAAAATT  
+HWI-EAS443:3:94:338:325#0/1  
`abab```a`a`\_a`abaa\_`^a`¥R\_\_a^`a\_\_`\_]`V  
@HWI-EAS443:3:95:1576:1068#0/1  
CTTTGTGCGACAATGCTTCAATCCAATGATCGTCGAGCTT  
+HWI-EAS443:3:95:1576:1068#0/1  
abb\_UNXOXaKSbbUbb][Vab`UabbaV\_]\_`Vb`bNM^  
@HWI-EAS443:3:96:962:785#0/1  
TGCCTTTTCCGCAAGCTCGACGATCATTGGATTGAAGCAT  
+HWI-EAS443:3:96:962:785#0/1  
aaa)`baa`)]`aaa\_[a\_\_[Wa`[[[\_a]^`¥G¥B  
@HWI-EAS443:3:97:614:575#0/1  
AAAGTTTTCAAGGCTGGAGAAGTTCGGTGGGAGACTTTGG  
+HWI-EAS443:3:97:614:575#0/1  
abaa¥aaaaa\_b``\_baZ`[\_][^\_aTW\_\_Y`S¥\_\_\_\_VY  
@HWI-EAS443:3:99:1206:504#0/1  
AAAGTTTTCAAGGCTGGAGAAGTTCGGTGGGAGACTTTGG  
+HWI-EAS443:3:99:1206:504#0/1  
`^`\_\_abaaaaba^aab[aYaa^a\_\_`P\_a^Q\_NQ\_\_aMZ  
@HWI-EAS443:3:36:743:497#0/1  
TCGGTTTCGTTGCCTTCTCGTCCGAGAGCTCGAAGACTCC  
+HWI-EAS443:3:36:743:497#0/1  
T\_T^``]X\_abbbbbbaaTOZb]bYWQUa]Z]IW^aaaaa  
@HWI-EAS443:3:39:499:858#0/1  
GACCCTTCATTGCTCATGTCAAAGGAAGGCACGATCGGGT  
+HWI-EAS443:3:39:499:858#0/1  
\_¥`^¥R^]I\_\_\_\_]Z`aX]Y]XZX]\_QW¥]\_aX`]QYO^[B  
@HWI-EAS443:3:5:1787:496#0/1  
GGGCTCTTGTCTCTGATATGTGGCATCATTGAGTTGGA  
+HWI-EAS443:3:5:1787:496#0/1  
¥`b]b\_bbbbb`b`bbbbbbbabbbbbbabb\_abbabb\_a

@HWI-EAS443:3:80:1142:1421#0/1  
GTCGCTGTCTGGCTGTCAGTAAGTATGCTAGAGTTCCGTT  
+HWI-EAS443:3:80:1142:1421#0/1  
a\_a`^aa[\_^U^]^ZV]^XZ]\_SYZQT[OLSZMZVS¥GU  
@HWI-EAS443:3:85:1531:832#0/1  
GTCGTTTTTAAACAATTCTACACTAATTGATGGCCATCCG  
+HWI-EAS443:3:85:1531:832#0/1  
\_X[Y^^^[^PXPQZXVPKFVKX¥BBBBBBBBBBBBBBBBBB  
@HWI-EAS443:3:10:287:95#0/1  
AGCAGGCACACCATTTGAATGGATGTCAATCCGACTCTAC  
+HWI-EAS443:3:10:287:95#0/1  
abbaba`^Haa\_\_`a\_\_¥\_`a`]^¥aX]\_\_\_\_SW`ZZZSXXW  
@HWI-EAS443:3:20:1778:1370#0/1  
CAGGCAAACCATTTGAATGGATGTCAATCCGATTCTACTT  
+HWI-EAS443:3:20:1778:1370#0/1  
^a`b`bb`¥bbab`^\_bb`TaY`\_Ma`baXa^FV¥aba`a  
@HWI-EAS443:3:29:735:886#0/1  
AAGCAGGCAAACCATTTGAATGGATGTGATCCGACTCTA  
+HWI-EAS443:3:29:735:886#0/1  
^`bbbaaaabbbbbbbbaabaaaa^a]a]^a]S[^\_]`^  
@HWI-EAS443:3:32:1577:1739#0/1  
AAAGCAGGCAAACCATTTGAATGGATGTGAATCCGACTCT  
+HWI-EAS443:3:32:1577:1739#0/1  
a\_¥K`a^`bbabY[a]^ab\_` ``^0\_aQFYa¥GV^Z^^a\_  
@HWI-EAS443:3:36:1265:683#0/1  
AAGCAGGCAAACCATTTCAATGGATGTCAATCCGACTCTA  
+HWI-EAS443:3:36:1265:683#0/1  
aa]a]WS\_b^]R`aa¥RZ`UY]]`UW\_XSORYWXX\_QF  
@HWI-EAS443:3:44:1780:710#0/1  
AAAGCAGGCAGACCATTTGAATGGATGTCAATCCGACTCT  
+HWI-EAS443:3:44:1780:710#0/1  
`a^Z`^b\_]`aZU\_¥aaa`XYaaa\_aaU\_]¥ZGRZTR`PZ  
@HWI-EAS443:3:77:1454:460#0/1  
GGCAAACCATTTGAATGGATGTCAATCCGAATCTACTTTT  
+HWI-EAS443:3:77:1454:460#0/1  
`XSNVZXR[\_¥[^`VN¥U]^`QQ[^¥[MGV^NVLXU\_Y  
@HWI-EAS443:3:81:780:927#0/1  
GCAGGTAAACCATTTGAATGGATGTCAATCCGACTCTACT  
+HWI-EAS443:3:81:780:927#0/1  
a` `\_ZH[aa\_a`a`\_a\_a`aa\_\_\_^Z\_\_\_\_\_]¥Z]]Z\_^Z\_  
@HWI-EAS443:3:94:1449:503#0/1  
AGCAGGCAAACCATTTGAATGGATGTCAATCCGGCTCTAC  
+HWI-EAS443:3:94:1449:503#0/1  
aabaaaaM^aa¥`^a\_\_ZaY]S¥\_aXK[^^^]LaHLYSR^G  
@HWI-EAS443:3:29:789:1488#0/1  
AAAGCAGGCAAACCATTTGAATGGATGTCAANCCGACTCT  
+HWI-EAS443:3:29:789:1488#0/1  
\_\_\_baaa^`a`^^]aa[ba]aba`\_aYUUaYDPXWP^a\_\_  
@HWI-EAS443:3:49:1483:1061#0/1  
AGCAGGCAAACCATTTGAATGGATGTCAATCCNACTCTAC

+HWI-EAS443:3:49:1483:1061#0/1  
^`a`a`\_bb^aababaaaa\_^^aa[[\_a`[WDP¥\_W]¥Y  
@HWI-EAS443:3:94:1733:721#0/1  
GCGCAAACCATTTGAATGGATGTCAATCCGACTCTACTTT  
+HWI-EAS443:3:94:1733:721#0/1  
]HYa`bb^^^\_ZQWZaZ[`ZaSYR]VJN[aU^]VW^\_]KY  
@HWI-EAS443:3:99:609:1052#0/1  
AGGCAAACCATTTGAATGGATGTCAATCCGACTCTACTNT  
+HWI-EAS443:3:99:609:1052#0/1  
aaa`aa`aaaa`a`[aa`aaS\_^`¥^a^S`\_^`^^XD¥  
@HWI-EAS443:3:2:992:715#0/1  
AAAGCAGGCAAACCATTTGAATGGATGTCAATCCGACTCN  
+HWI-EAS443:3:2:992:715#0/1  
a\_[bZ]a`^`^U\_Ya^aa\_]abb`abZWMa`X\_a[P]RD  
@HWI-EAS443:3:100:1737:36#0/1  
AGGCAAACCATTTGAATGGATGTCAATCCGACTCTACTTT  
+HWI-EAS443:3:100:1737:36#0/1  
a^Z[a\_¥^[``\_\_^`¥^W¥¥`QU]¥XYOLRO^X^ZZX]B  
@HWI-EAS443:3:10:242:862#0/1  
CAGGCAAACCATTTGAATGGATGTCAATCCGACTCTACTT  
+HWI-EAS443:3:10:242:862#0/1  
`¥`S`^`aa]bbbbaaaa`Ya[NM^Z`V^VWYLYX`]\_W  
@HWI-EAS443:3:10:245:1302#0/1  
AGCAGGCAAACCATTTGAATGGATGTCAATCCGACTCTAC  
+HWI-EAS443:3:10:245:1302#0/1  
a\_aa¥\_ba\_a`aaa]`aaaa\_a]`[a\_a\_\_¥\_ZX\_[^ZT  
@HWI-EAS443:3:10:399:659#0/1  
AAAGCAGGCAAACCATTTGAATGGATGTCAATCCGACTCT  
+HWI-EAS443:3:10:399:659#0/1  
abVIW`QXY`b]LU\_a\_P]^`\_Y\_XBBBBBBBBBBBBBBB  
@HWI-EAS443:3:10:954:1126#0/1  
AGCAGGCAAACCATTTGAATGGATGTCAATCCGACTCTAC  
+HWI-EAS443:3:10:954:1126#0/1  
]¥W¥bb\_`[^adM`]aba\_a`[`a\_]aaa]ZZ^[MUUa\_U  
@HWI-EAS443:3:12:1081:2031#0/1  
AGCAGGCAAACCATTTGAATGGATGTCAATCCGACTCTAC  
+HWI-EAS443:3:12:1081:2031#0/1  
`^^`aa`\_YZ¥JbY`]¥`U^XWa¥ZQ\_\_YXY[XZUU^WR  
@HWI-EAS443:3:12:1382:1214#0/1  
AAAGCAGGCAAACCATTTGAATGGATGTCAATCCGACTCT  
+HWI-EAS443:3:12:1382:1214#0/1  
aaa`\_aaaaaaa\_\_aaaaa`aa`\_aa^]\_]\_¥¥aZU`]^  
@HWI-EAS443:3:13:1526:236#0/1  
AAGCAGGCAAACCATTTGAATGGATGTCAATCCGACTCTA  
+HWI-EAS443:3:13:1526:236#0/1  
aab```a]a[a¥]^\_\_`\_\_a`^]]`VFV^\_YY]ZZZZZY  
@HWI-EAS443:3:14:561:850#0/1  
GGCAAACCATTTGAATGGATGTCAATCCGACTCTACTTTT  
+HWI-EAS443:3:14:561:850#0/1  
aa`abbaaaaa`\_aaba`\_bGa\_aaa`a\_^a`a`^`\_`



@HWI-EAS443:3:15:1709:991#0/1  
AGCAGGCAAACCATTTGAATGGATGTCAATCCGACTCTAC  
+HWI-EAS443:3:15:1709:991#0/1  
abbbababba\_aaaaaaaa`aa`aa[[`aa[[aXY\_Y``Y`  
@HWI-EAS443:3:16:169:1695#0/1  
AAAGCAGGCAAACCATTTGAATGGATGTCAATCCGACTCT  
+HWI-EAS443:3:16:169:1695#0/1  
a¥a\_a`a`bbabaa`aaa]``XSa^aXa`\_]WXHTZ`^\_  
@HWI-EAS443:3:17:1780:1163#0/1  
AAAGCAGGCAAACCATTTGAATGGATGTCAATCCGACTCT  
+HWI-EAS443:3:17:1780:1163#0/1  
aba^^aba^baa^^^a`aa\_\_`]W[\_a^W`] [US^YUXX^  
@HWI-EAS443:3:18:123:578#0/1  
AAGCAGGCAAACCATTTGAATGGATGTCAATCCGACTCTA  
+HWI-EAS443:3:18:123:578#0/1  
aQIYa\_a\_VT¥``aaXST`ZUU^¥QV\_RWWY¥¥YSJQTX]R  
@HWI-EAS443:3:18:499:1485#0/1  
GGCAAACCATTTGAATGGATGTCAATCCGACTCTACTTTT  
+HWI-EAS443:3:18:499:1485#0/1  
aaabZ``^¥abbaba\_]\_b^\_R\_aaaa`[\_^`\_WQY^aa  
@HWI-EAS443:3:19:446:1672#0/1  
GCAAACCATTTGAATGGATGTCAATCCGACTCTACTTTTC  
+HWI-EAS443:3:19:446:1672#0/1  
`bb\_aaab\_ab``¥aa\_a\_¥^aaa`\_a\_\_`\_R`a`Ua^aY  
@HWI-EAS443:3:19:736:1104#0/1  
AGCAGGCAAACCATTTGAATGGATGTCAATCCGACTCTAC  
+HWI-EAS443:3:19:736:1104#0/1  
`b\_¥`^a\_]\_a`aaaaaa^`^\_aY]]`\_a[]YX\_`¥^¥  
@HWI-EAS443:3:20:1207:234#0/1  
GCAGGCAAACCATTTGAATGGATGTCAATCCGACTCTACT  
+HWI-EAS443:3:20:1207:234#0/1  
aaaaaabaa^a`aaaa\_a`aa``a^^`\_X¥`WY]Y^]W]  
@HWI-EAS443:3:20:805:833#0/1  
AAGCAGGCAAACCATTTGAATGGATGTCAATCCGACTCTA  
+HWI-EAS443:3:20:805:833#0/1  
a\_S^Q¥Z\_]\_\_`\_\_`aa`X\_^ [XV]¥W\_^^X]X\_WR]]ZW  
@HWI-EAS443:3:21:1664:1407#0/1  
GGCAAACCATTTGAATGGATGTCAATCCGACTCTACTTTT  
+HWI-EAS443:3:21:1664:1407#0/1  
a`XV[\_XZaaaa`¥Za\_a[`a]\_`^`\_H]\_`^¥NV^VY]\_X  
@HWI-EAS443:3:21:276:1743#0/1  
AGCAGGCAAACCATTTGAATGGATGTCAATCCGACTCTAC  
+HWI-EAS443:3:21:276:1743#0/1  
a[ab\_aaa^aaaa`\_\_aa\_\_^a\_]`^\_\_\_\_Z^]YW\_`^]\_]  
@HWI-EAS443:3:23:217:538#0/1  
AAGCAGGCAAACCATTTGAATGGATGTCAATCCGACTCTA  
+HWI-EAS443:3:23:217:538#0/1  
ab^bb]aabb]aaabbb\_aaaba`\_a\_\_aaa`\_a^^a``\_  
@HWI-EAS443:3:23:525:1326#0/1  
AAGCAGGCAAACCATTTGAATGGATGTCAATCCGACTCTA

+HWI-EAS443:3:23:525:1326#0/1  
aa`ab`aa^^`\_]`a\_\_\_^`¥^^`¥W\_aYZ\_WZWX^^]  
@HWI-EAS443:3:25:415:51#0/1  
AGCAGGCAAACCATTTGAATGGATGTCAATCCGACTCTAC  
+HWI-EAS443:3:25:415:51#0/1  
abaaabaa[aaaaaaaa`\_\_aa``a¥¥V\_`^``]X\_Z`^Z  
@HWI-EAS443:3:26:900:925#0/1  
AAGCAGGCAAACCATTTGAATGGATGTCAATCCGACTCTA  
+HWI-EAS443:3:26:900:925#0/1  
\_\_\_a]UIa\_[[[\_V^a]W``]¥^TYHP\_Z^^`]SJUTZX  
@HWI-EAS443:3:28:882:763#0/1  
AGCAGGCAAACCATTTGAATGGATGTCAATCCGACTCTAC  
+HWI-EAS443:3:28:882:763#0/1  
aZYL]ba\_P]RHPX`¥^\_a^^]S¥aZVW[XMT^¥PPYXWG  
@HWI-EAS443:3:29:1226:792#0/1  
AGGCAAACCATTTGAATGGATGTCAATCCGACTCTACTTT  
+HWI-EAS443:3:29:1226:792#0/1  
aaaaaaaa`aaaaaaaa`a^``aZ]]¥[[Q]Z¥a)`\_¥\_\_`  
@HWI-EAS443:3:29:1469:1187#0/1  
GGCAAACCATTTGAATGGATGTCAATCCGACTCTACTTTT  
+HWI-EAS443:3:29:1469:1187#0/1  
aa[H^`]URaXX\_ba\_a^[ZOUT^ZZ^a`V[]YOYT[^  
@HWI-EAS443:3:29:744:1509#0/1  
AGCAGGCAAACCATTTGAATGGATGTCAATCCGACTCTAC  
+HWI-EAS443:3:29:744:1509#0/1  
Z`a^]Y\_\_\_[`\_VV`\_¥X¥aYULV\_W^a]Z^`¥[YT\_^¥B  
@HWI-EAS443:3:31:180:1013#0/1  
GGCAAACCATTTGAATGGATGTCAATCCGACTCTACTTTT  
+HWI-EAS443:3:31:180:1013#0/1  
aa`\_]a`aV\_aaaaa^aaa`G]\_]\_aa^)``Ya^[]\_  
@HWI-EAS443:3:32:502:136#0/1  
GGCAAACCATTTGAATGGATGTCAATCCGACTCTACTTTT  
+HWI-EAS443:3:32:502:136#0/1  
``babbabaaaaaaaa`aaa\_aZ``a^^^¥Y[^`]\_U^^\_^  
@HWI-EAS443:3:33:749:243#0/1  
AAGCAGGCAAACCATTTGAATGGATGTCAATCCGACTCTA  
+HWI-EAS443:3:33:749:243#0/1  
a\_bbbbaababaaaaaab`a\_aaa^aWaaa^^Z\_X]^]]]  
@HWI-EAS443:3:34:1426:1647#0/1  
GGCAAACCATTTGAATGGATGTCAATCCGACTCTACTTTT  
+HWI-EAS443:3:34:1426:1647#0/1  
`abb¥^aTY^^U^aaabab\_\_PWY¥[]¥XVG`XYVPZa``  
@HWI-EAS443:3:35:443:574#0/1  
GCAGGCAAACCATTTGAATGGATGTCAATCCGACTCTACT  
+HWI-EAS443:3:35:443:574#0/1  
abbbbb\_aaabaabaaaaaaaaaaa\_¥]\_^a`¥]\_^a\_\_\_\_  
@HWI-EAS443:3:35:481:45#0/1  
AAGCAGGCAAACCATTTGAATGGATGTCAATCCGACTCTA  
+HWI-EAS443:3:35:481:45#0/1  
aba\_V`aa`]\_aaa\_`a\_\_\_a``[^WVO[]]]^UX]^][

@HWI-EAS443:3:38:1770:1212#0/1  
AAAGCAGGCAAACCATTTGAATGGATGTCAATCCGACTCT  
+HWI-EAS443:3:38:1770:1212#0/1  
a¥^\_`aaba\_GW^`a]Y`b^]abb`aa\_bXSPFPYSURVV  
@HWI-EAS443:3:39:1561:856#0/1  
GGCAAACCATTTGAATGGATGTCAATCCGACTCTACTTTT  
+HWI-EAS443:3:39:1561:856#0/1  
`]Y\_`^`X¥aa\_```a``^a¥``]`WXY^VWT]]S\_Z`V  
@HWI-EAS443:3:3:917:576#0/1  
GGCAAACCATTTGAATGGATGTCAATCCGACTCTACTTTT  
+HWI-EAS443:3:3:917:576#0/1  
¥¥Q¥¥a^`aabbabb`[a\_a`UVSaaQS\_\_^\_U`YY^aa`  
@HWI-EAS443:3:40:1310:1025#0/1  
AGCAGGCAAACCATTTGAATGGATGTCAATCCGACTCTAC  
+HWI-EAS443:3:40:1310:1025#0/1  
[`abbbbbbbbaaaaaab`baa`a¥aaV^^`[T`\_a`[\_  
@HWI-EAS443:3:40:551:968#0/1  
GGCAAACCATTTGAATGGATGTCAATCCGACTCTACTTTT  
+HWI-EAS443:3:40:551:968#0/1  
aaaaaZ[¥\_W`a`]a\_\_^ZG]\_\_\_\_]\_GYQWS¥U[X^¥X  
@HWI-EAS443:3:42:431:216#0/1  
CAGGCAAACCATTTGAATGGATGTCAATCCGACTCTACTT  
+HWI-EAS443:3:42:431:216#0/1  
[`bbbbbbYbaabbababbbbaaab]aaa`aaa`ba`aaba  
@HWI-EAS443:3:46:10:1007#0/1  
GGCAAACCATTTGAATGGATGTCAATCCGACTCTACTTTT  
+HWI-EAS443:3:46:10:1007#0/1  
\_O[YUYaV[X\_``]Y^aWXXX[WZWY¥M[XEZWUYS[W\_  
@HWI-EAS443:3:47:1443:1104#0/1  
GAAAAGAAGGCCAAACTGGCAAATGTTGTGAGGAAGATGA  
+HWI-EAS443:3:47:1443:1104#0/1  
a^aa\_baa\_a\_]\_]¥`\_^a\_]`Z`\_V^]`\_XZa]X^Z  
@HWI-EAS443:3:47:1584:1484#0/1  
AGCAGGCAAACCATTTGAATGGATGTCAATCCGACTCTAC  
+HWI-EAS443:3:47:1584:1484#0/1  
``a^ba`aa\_X^ababaabaY]]\_R`aa\_WX]XN^\_\_\_\_^  
@HWI-EAS443:3:48:476:1209#0/1  
GCAGGCAAACCATTTGAATGGATGTCAATCCGACTCTACT  
+HWI-EAS443:3:48:476:1209#0/1  
a`\_\_XS¥GOY]Z```[VQ]YY`]PX[W^VR[FO\_MY¥PX  
@HWI-EAS443:3:49:1408:1012#0/1  
GCAGGCAAACCATTTGAATGGATGTCAATCCGACTCTACT  
+HWI-EAS443:3:49:1408:1012#0/1  
aYSZaU`S^¥a^`Y^aW`a[\_Z`^QS[]ZN¥W¥STY[TG[  
@HWI-EAS443:3:49:1470:242#0/1  
GGCAAACCATTTGAATGGATGTCAATCCGACTCTACTTTT  
+HWI-EAS443:3:49:1470:242#0/1  
aa`bbbaaabbbbaababbbba\_`aa\_Xaa[aZa`]aaaa  
@HWI-EAS443:3:4:121:1948#0/1  
GTAGAGTCGGATTGACATCCATTCAAATGGTTTGCCTGCT

+HWI-EAS443:3:4:121:1948#0/1  
a]aaaaSaa\_^^^`Z\_\_\_\_a^[]\_`a\_UX^UO^^¥OX^Z¥  
@HWI-EAS443:3:50:1436:486#0/1  
AGGCAAACCATTTGAATGGATGTCAATCCGACTCTACTTT  
+HWI-EAS443:3:50:1436:486#0/1  
aba^baa`aabbbaaab[`aa`\_\_a`]¥`^Xa]a`^aaa  
@HWI-EAS443:3:50:1679:1145#0/1  
GGCAAACCATTTGAATGGATGTCAATCCGACTCTACTTTT  
+HWI-EAS443:3:50:1679:1145#0/1  
ababbbbaabbbbaabbb`ab`\_aab`\_a^`\_`aa\_aaaa  
@HWI-EAS443:3:50:296:1544#0/1  
AGGCAAACCATTTGAATGGATGTCAATCCGACTCTACTTT  
+HWI-EAS443:3:50:296:1544#0/1  
aba`bbbaa`bbbaaa`a`aba\_aab^^a\_\_a\_\_aY¥`]  
@HWI-EAS443:3:50:959:1237#0/1  
AAAGCAGGCAAACCATTTGAATGGATGTCAATCCGACTCT  
+HWI-EAS443:3:50:959:1237#0/1  
aa`a^`^¥aa\_\_`aba^XS]`\_Y`\_`a^a`YY]aXIaWa  
@HWI-EAS443:3:51:634:485#0/1  
AGCAGGCAAACCATTTGAATGGATGTCAATCCGACTCTAC  
+HWI-EAS443:3:51:634:485#0/1  
abaaababaaaaababbaabaaaab`[aaaa^\_`¥a^a`^  
@HWI-EAS443:3:53:291:1451#0/1  
GCAGGCAAACCATTTGAATGGATGTCAATCCGACTCTACT  
+HWI-EAS443:3:53:291:1451#0/1  
a[`b`\_`^^`aaa]aba`aaa`a`aaX^W\_a`V¥\_a^RX\_  
@HWI-EAS443:3:55:336:28#0/1  
AGGCAAACCATTTGAATGGATGTCAATCCGACTCTACTTT  
+HWI-EAS443:3:55:336:28#0/1  
^`ab¥W\_]\_\_^b`baaabbaab`[W¥\_VZaZMX]a[Y^aa  
@HWI-EAS443:3:55:663:1333#0/1  
AAGCAGGCAAACCATTTGAATGGATGTCAATCCGACTCTA  
+HWI-EAS443:3:55:663:1333#0/1  
Y^`b`^VSS`ab`aXPQ]W^¥Z\_a]W]a¥Q]aa^W¥WT]U  
@HWI-EAS443:3:55:893:1537#0/1  
AGCAGGCAAACCATTTGAATGGATGTCAATCCGACTCTAC  
+HWI-EAS443:3:55:893:1537#0/1  
abaa^baaabaaaaaba\_a`^¥`a^]]aa``\_[Y`]-[W  
@HWI-EAS443:3:58:115:908#0/1  
GCAGGCAAACCATTTGAATGGATGTCAATCCGACTCTACT  
+HWI-EAS443:3:58:115:908#0/1  
`ba`]bbaba`aaaa\_aa`a`aa`^^\_a[^^X^^`\_[TZ  
@HWI-EAS443:3:58:1772:1064#0/1  
AGGCAAACCATTTGAATGGATGTCAATCCGACTCTACTTT  
+HWI-EAS443:3:58:1772:1064#0/1  
aa\_\_a`a`aaaa`aaaa`\_]`a`^^\_]S\_]`\_`  
@HWI-EAS443:3:58:365:115#0/1  
AGGCAAACCATTTGAATGGATGTCAATCCGACTCTACTTT  
+HWI-EAS443:3:58:365:115#0/1  
aaa`a`]`a\_aaaaa`\_aa`\_a^]`\_`^`WX\_]`^X\_a`

@HWI-EAS443:3:5:282:1491#0/1  
AGCAGGCAAACCATTTGAATGGATGTCAATCCGACTCTAC  
+HWI-EAS443:3:5:282:1491#0/1  
abaaa\_`b`^W`aa\_^baa]a^a\_aZ\_a`Y^]XPMRX\_`^  
@HWI-EAS443:3:60:1097:1172#0/1  
AAAGCAGGCAAACCATTTGAATGGATGTCAATCCGACTCT  
+HWI-EAS443:3:60:1097:1172#0/1  
aZJ`aaa[``^TYXZY`\_dM\_YX^VO¥BBBBBBBBBBBBB  
@HWI-EAS443:3:62:186:850#0/1  
GCAAACCATTTGAATGGATGTCAATCCGACTCTACTTTTC  
+HWI-EAS443:3:62:186:850#0/1  
`aWU¥ab\_aX\_¥\_W\_b^][`WXMZ¥VU[V¥]`[[X]YV^Y  
@HWI-EAS443:3:64:1152:1343#0/1  
AGGCAAACCATTTGAATGGATGTCAATCCGACTCTACTTT  
+HWI-EAS443:3:64:1152:1343#0/1  
^ZX^X`]PZ`]aaaaa^``]VS`a\_YV]HXa\_`[]\_\_a  
@HWI-EAS443:3:64:1493:1615#0/1  
AAGCAGGCAAACCATTTGAATGGATGTCAATCCGACTCTA  
+HWI-EAS443:3:64:1493:1615#0/1  
aaaaba]abbba\_aaaa```a`a\_`a]\_^`\_a\_]Y`X\_\_  
@HWI-EAS443:3:64:1549:289#0/1  
AAAGCAGGCAAACCATTTGAATGGATGTCAATCCGACTCT  
+HWI-EAS443:3:64:1549:289#0/1  
aba\_aa\_aaaa`^\_abaaaaaaa````\_a^^]Y^Z0[^\_  
@HWI-EAS443:3:65:1477:1297#0/1  
AGCAGGCAAACCATTTGAATGGATGTCAATCCGACTCTAC  
+HWI-EAS443:3:65:1477:1297#0/1  
\_XH¥¥\_`Y`^TZ¥a\_\_`\_\_`]^\_`\_Y`][^]¥PS[]]\_S  
@HWI-EAS443:3:65:716:1111#0/1  
TGAAAAGAAGGCCAAACTGGCAAATGTTGTGAGGAAGATG  
+HWI-EAS443:3:65:716:1111#0/1  
RU\_¥L¥a^WUOZ¥SRP^P]U¥QW^QUU`XW]YTTQX[MTY  
@HWI-EAS443:3:66:423:1452#0/1  
CAGGCAAACCATTTGAATGGATGTCAATCCGACTCTACTT  
+HWI-EAS443:3:66:423:1452#0/1  
`¥ZXbbaaaYZaa\_[^]X\_Ya\_a[\_¥\_XU\_V]ZNX[^¥[^  
@HWI-EAS443:3:67:233:727#0/1  
AGGCAAACCATTTGAATGGATGTCAATCCGACTCTACTTT  
+HWI-EAS443:3:67:233:727#0/1  
\_XZ^¥^\_`a\_a^RN`aa\_`a[VW^\_Z]LV]`^[[[WY¥  
@HWI-EAS443:3:68:1442:1030#0/1  
AGGCAAACCATTTGAATGGATGTCAATCCGACTCTACTTT  
+HWI-EAS443:3:68:1442:1030#0/1  
aZUZ^`[JYWa]`a¥[V\_][[¥\_WLSTZ^¥Y^¥USSYH]^Z  
@HWI-EAS443:3:68:1549:1994#0/1  
AGGCAAACCATTTGAATGGATGTCAATCCGACTCTACTTT  
+HWI-EAS443:3:68:1549:1994#0/1  
aaa^aaaaaaaaaaa`aaa````]Z\_`\_\_^`]Y\_W¥WW]^  
@HWI-EAS443:3:69:535:503#0/1  
AGCAGGCAAACCATTTGAATGGATGTCAATCCGACTCTAC

+HWI-EAS443:3:69:535:503#0/1  
]bbab``]bbaababaZ`aa`¥`a\_a`[`a^`\_aaaa`¥  
@HWI-EAS443:3:6:1147:316#0/1  
GGCAAACCATTTGAATGGATGTCAATCCGACTCTACTTTT  
+HWI-EAS443:3:6:1147:316#0/1  
a\_^X`\_^M^\_\_a\_\_^a]]\_\_WV\_WZXV]YXTX¥XX]]^B  
@HWI-EAS443:3:6:1717:414#0/1  
AGCAGGCAAACCATTTGAATGGATGTCAATCCGACTCTAC  
+HWI-EAS443:3:6:1717:414#0/1  
`R`babbbUa`b¥`b`\_`b¥`a`[L`\_aRWYYS`S`^Z  
@HWI-EAS443:3:6:294:1314#0/1  
GGCAAACCATTTGAATGGATGTCAATCCGACTCTACTTTT  
+HWI-EAS443:3:6:294:1314#0/1  
]I\_abaaba`aa]\_`^]\_\_aaV^`\_^¥W]]`a\_\_`a\_¥  
@HWI-EAS443:3:70:1511:580#0/1  
AAAGCAGGCAAACCATTTGAATGGATGTCAATCCGACTCT  
+HWI-EAS443:3:70:1511:580#0/1  
aaaaaba`aaa^a\_aabaaaba`\_a^]``X]\_^\_^\_  
@HWI-EAS443:3:70:962:954#0/1  
AGGCAAACCATTTGAATGGATGTCAATCCGACTCTACTTT  
+HWI-EAS443:3:70:962:954#0/1  
aa\_aa`^`a`aaaaaaaa`a^`\_\_\_\_\_^`\_^`^`\_  
@HWI-EAS443:3:73:1095:1357#0/1  
AGCAGGCAAACCATTTGAATGGATGTCAATCCGACTCTAC  
+HWI-EAS443:3:73:1095:1357#0/1  
aaa^aaa`a`a`a`\_\_aa\_a^aZN]\_ZT[WV^]]]P  
@HWI-EAS443:3:73:663:225#0/1  
AGGCAAACCATTTGAATGGATGTCAATCCGACTCTACTTT  
+HWI-EAS443:3:73:663:225#0/1  
a\_ab\_]abaa`^aaaa`¥^^`\_aaa¥`a`]a[``\_\_\_`  
@HWI-EAS443:3:73:704:1085#0/1  
CAGGCAAACCATTTGAATGGATGTCAATCCGACTCTACTT  
+HWI-EAS443:3:73:704:1085#0/1  
ab^b`b`aababaaaa^aa`]`b`aaaaaa^aaa`]a`  
@HWI-EAS443:3:74:214:822#0/1  
AGCAGGCAAACCATTTGAATGGATGTCAATCCGACTCTAC  
+HWI-EAS443:3:74:214:822#0/1  
`aa^\_\_a^Vaaa]aaa`^`\_a`a`[\_]\_^\_ZZX¥^]\_Z[  
@HWI-EAS443:3:74:611:13#0/1  
AAAGCAGGCAAACCATTTGAATGGATGTCAATCCGACTCT  
+HWI-EAS443:3:74:611:13#0/1  
abbbabbbbabaaabbabaaaaa`b^¥`a¥]^`YS¥Y[  
@HWI-EAS443:3:74:78:848#0/1  
AAAGCAGGCAAACCATTTGAATGGATGTCAATCCGACTCT  
+HWI-EAS443:3:74:78:848#0/1  
\_aa`\_]a¥b][^a\_\_a`\_a```a\_]\_U\_``^\_\_^RXO]  
@HWI-EAS443:3:75:812:1242#0/1  
AAGCAGGCAAACCATTTGAATGGATGTCAATCCGACTCTA  
+HWI-EAS443:3:75:812:1242#0/1  
I¥\_\_VY`ba^`a¥`bba`a`\_`aabaa]S[Naa\_b`Y^M^V

@HWI-EAS443:3:76:1279:796#0/1  
AGGCAAACCATTTGAATGGATGTCAATCCGACTCTACTTT  
+HWI-EAS443:3:76:1279:796#0/1  
^a^\_\_Z\_a]]b^`\_^`a¥0Ua\_ZV\_[YX`[S^[QWQV]^  
@HWI-EAS443:3:76:325:639#0/1  
AGGCAAACCATTTGAATGGATGTCAATCCGACTCTACTTT  
+HWI-EAS443:3:76:325:639#0/1  
aaaaabaaa`aa`aaaa`a^a¥`^\_\_\_\_^\_a^`^\_a^\_  
@HWI-EAS443:3:76:637:1519#0/1  
GCAAACCATTTGAATGGATGTCAATCCGACTCTACTTTTC  
+HWI-EAS443:3:76:637:1519#0/1  
aa\_XN^\_a\_NRQPQ]\_^\_[ ]VT]XV\_\_OLPLFF[PS^ZZV  
@HWI-EAS443:3:77:1016:1211#0/1  
GCAGGCAAACCATTTGAATGGATGTCAATCCGACTCTACT  
+HWI-EAS443:3:77:1016:1211#0/1  
a`]YQ^\_\_\_\_`aa]YH`a`]ZT]``V[T]XZTZ¥U\_`¥\_X^  
@HWI-EAS443:3:77:1785:238#0/1  
GAAAAGTAGAGTCGGATTGACATCCATTCAAATGGTTTGC  
+HWI-EAS443:3:77:1785:238#0/1  
¥WZVSZQPUZR\_]ROXWP]VHMTMI[OOZ¥WUOOWTUTSX  
@HWI-EAS443:3:78:1586:1011#0/1  
GGCAAACCATTTGAATGGATGTCAATCCGACTCTACTTTT  
+HWI-EAS443:3:78:1586:1011#0/1  
\_baaab]a`bbbaaabbaa\_aWaaaX\_aY\_a^`¥R[aaa  
@HWI-EAS443:3:78:887:861#0/1  
AAAGCAGGCAAACCATTTGAATGGATGTCAATCCGACTCT  
+HWI-EAS443:3:78:887:861#0/1  
aZ]]Wa`¥` `[ `a`a\_aaa`^`\_¥SQ[^a^W¥^]]\_Z`  
@HWI-EAS443:3:79:1529:110#0/1  
AGGCAAACCATTTGAATGGATGTCAATCCGACTCTACTTT  
+HWI-EAS443:3:79:1529:110#0/1  
a`babaaY¥`bb`b\_abb`¥ab`\_`abZ¥a`\_aYa^G\_a`  
@HWI-EAS443:3:79:414:510#0/1  
AAGCAGGCAAACCATTTGAATGGATGTCAATCCGACTCTA  
+HWI-EAS443:3:79:414:510#0/1  
aaaab``babaaa`aaaaa`\_aa\_a¥```\_]¥PU]]\_\_  
@HWI-EAS443:3:79:522:128#0/1  
GTAGAGTCGGATTGACATCCATTCAAATGGTTTGCCTGCT  
+HWI-EAS443:3:79:522:128#0/1  
]abaaa`abaa\_`^`a`\_`U^aa\_\_`\_\_\_\_]`[[[Z`^^^  
@HWI-EAS443:3:7:150:355#0/1  
AAAGTAGAGTCGGATTGACATCCATTCAAATGGTTTGCCT  
+HWI-EAS443:3:7:150:355#0/1  
a]abR]aab^aa\_\_\_\_\_`a^`]^\_a^a^`\_]\_\_\_\_aXZW\_^]\_  
@HWI-EAS443:3:81:1479:740#0/1  
AAAGCAGGCAAACCATTTGAATGGATGTCAATCCGACTCT  
+HWI-EAS443:3:81:1479:740#0/1  
ab]^¥`ba\_ba^a0`bbba\_aaaaPNX^\_aa^X[`W¥^Y\_  
@HWI-EAS443:3:81:171:543#0/1  
AGCAGGCAAACCATTTGAATGGATGTCAATCCGACTCTAC

+HWI-EAS443:3:81:171:543#0/1  
a`aaaaaaa`a\_``\_aT`a`a`Z^¥]\_]\_\_W^^]]^  
@HWI-EAS443:3:82:450:1027#0/1  
GTAGAGTCGGATTGACATCCATTCAAATGGTTTGCCTGCT  
+HWI-EAS443:3:82:450:1027#0/1  
a````¥NZ``^][`\_`\_Z¥`Z[U¥RUV^\_RLQZ[W\_]X[Z  
@HWI-EAS443:3:83:1032:910#0/1  
AAGCAGGCAAACCATTTGAATGGATGTCAATCCGACTCTA  
+HWI-EAS443:3:83:1032:910#0/1  
`a`]Z\_^aYSZa```\_\_ZT[aa^]]¥VY]`[W\_¥¥Y[\_`X  
@HWI-EAS443:3:83:1526:882#0/1  
AGCAGGCAAACCATTTGAATGGATGTCAATCCGACTCTAC  
+HWI-EAS443:3:83:1526:882#0/1  
aaaaa^aaaaa\_a`abaa`ba`]aaW^a`SOa`a\_^a\_^  
@HWI-EAS443:3:85:1750:419#0/1  
AGCAGGCAAACCATTTGAATGGATGTCAATCCGACTCTAC  
+HWI-EAS443:3:85:1750:419#0/1  
]WQ¥¥]\_aa`¥]b\_¥^\_aaZ[W`aWLW[WGY¥RO[¥[\_I  
@HWI-EAS443:3:85:749:1874#0/1  
AAGCAGGCAAACCATTTGAATGGATGTCAATCCGACTCTA  
+HWI-EAS443:3:85:749:1874#0/1  
aa[a][Za]VVR¥a¥`\_aa]ZU¥Y^^^\_\_a\_Y^\_VO^TVY  
@HWI-EAS443:3:87:1145:411#0/1  
AGCAGGCAAACCATTTGAATGGATGTCAATCCGACTCTAC  
+HWI-EAS443:3:87:1145:411#0/1  
aa^aab\_bbaS]]aaba\_\_b``\_aa^]a\_\_^Xa\_^`\_a\_W  
@HWI-EAS443:3:87:488:874#0/1  
GCAAACCATTTGAATGGATGTCAATCCGACTCTACTTTTC  
+HWI-EAS443:3:87:488:874#0/1  
aba`aaabaa^aaa`a\_^a`Y]Y0¥\_`[^\_]Z]```^\_a\_  
@HWI-EAS443:3:88:427:1086#0/1  
AGGCAAACCATTTGAATGGATGTCAATCCGACTCTACTTT  
+HWI-EAS443:3:88:427:1086#0/1  
a\_]aaaaabaaaa^aaaaaa[``\_`a`\_Z`\_`aY`\_`  
@HWI-EAS443:3:88:656:67#0/1  
GGCAAACCATTTGAATGGATGTCAATCCGACTCTACTTTT  
+HWI-EAS443:3:88:656:67#0/1  
`aQUP\_a^Za\_Za```bb`abXNZ]Z¥U]V\_]^\_Z^aa``  
@HWI-EAS443:3:88:720:155#0/1  
AGCAGGCAAACCATTTGAATGGATGTCAATCCGACTCTAC  
+HWI-EAS443:3:88:720:155#0/1  
aa\_¥aaaa`]```aaa]\_\_`\_\_^`¥]\_]V^^]X^]]ZW  
@HWI-EAS443:3:89:104:535#0/1  
GGCAAACCATTTGAATGGATGTCAATCCGACTCTACTTTT  
+HWI-EAS443:3:89:104:535#0/1  
a`abbbbaaaabbbbaabbaab\_a`Yaaaa\_aa\_aa\_a`aa  
@HWI-EAS443:3:89:1187:1842#0/1  
CAGGCAAACCATTTGAATGGATGTCAATCCGACTCTACTT  
+HWI-EAS443:3:89:1187:1842#0/1  
Xb`aaabbaabbb¥baabb`bbb¥W\_bZFYV`VYD]b¥^]



@HWI-EAS443:3:89:1362:1408#0/1  
AGGCAAACCATTTGAATGGATGTCAATCCGACTCTACTTT  
+HWI-EAS443:3:89:1362:1408#0/1  
a\_babaaa`baabb`baab\_ab[abaa`\_aaaa\_aa]a\_a  
@HWI-EAS443:3:8:1142:1025#0/1  
GGCAAACCATTTGAATGGATGTCAATCCGACTCTACTTTT  
+HWI-EAS443:3:8:1142:1025#0/1  
a`aW[\_]\_X^aZVM\_X^XT\_PLVY]ZRQYQ[TVQLO]Y]  
@HWI-EAS443:3:92:1000:499#0/1  
AAAGCAGGCAAACCATTTGAATGGATGTCAATCCGACTCT  
+HWI-EAS443:3:92:1000:499#0/1  
abb`aaaaaaa`\_¥aaaaa`\_ab`aa`\_a`a^`[\_`\_X¥¥]  
@HWI-EAS443:3:94:282:528#0/1  
AAAGCAGGCAAACCATTTGAATGGATGTCAATCCGACTCT  
+HWI-EAS443:3:94:282:528#0/1  
aaaa`]^`a`\_]`\_`\_]a^`\_a`\_`\_X¥¥^^`[][][]]  
@HWI-EAS443:3:97:1129:1321#0/1  
AGCAGGCAAACCATTTGAATGGATGTCAATCCGACTCTAC  
+HWI-EAS443:3:97:1129:1321#0/1  
a``aaaaabaa[aa`aa`a``¥^aa]]`a`XVW]Z\_S¥YM  
@HWI-EAS443:3:99:188:1818#0/1  
GCAGGCAAACCATTTGAATGGATGTCAATCCGACTCTACT  
+HWI-EAS443:3:99:188:1818#0/1  
aabbbbbb\_babbbabbbba`ab`\_baaa`a^\_a`aa`\_`  
@HWI-EAS443:3:99:275:1628#0/1  
AGGCAAACCATTTGAATGGATGTCAATCCGACTCTACTTT  
+HWI-EAS443:3:99:275:1628#0/1  
a^^]abbX\_aa`\_`\_a`aa`\_`^aXUY`UY¥\_W][X[`Z\_\_\_\_  
@HWI-EAS443:3:9:198:838#0/1  
AGGCAAACCATTTGAATGGATGTCAATCCGACTCTACTTT  
+HWI-EAS443:3:9:198:838#0/1  
a^^`\_`]a`\_]`^]a`]`Z`\_`a[¥UXYZa`\_`[¥Wa]TW¥[  
@HWI-EAS443:3:27:984:2040#0/1  
GATGGATTCCGACCGAACGGCTNCATTGAGGGCAAGCTTT  
+HWI-EAS443:3:27:984:2040#0/1  
abbaa\_]\_a¥aaabaaaa\_\_aXDQVVUVRY\_]LPXMJN\_Z  
@HWI-EAS443:3:68:667:1561#0/1  
CCCCATTCCCATTAGGGCATTNTGGACAAAGCGTCTACG  
+HWI-EAS443:3:68:667:1561#0/1  
abbbbbbb``bbbbbb\_aa`\_`b¥D^][babbb`aa\_]aaaa  
@HWI-EAS443:3:62:1177:1163#0/1  
CGCCCCATTCCCATTAGGGCATTNTGGACAAAGCGTCTA  
+HWI-EAS443:3:62:1177:1163#0/1  
abb\_ba]babaa`\_`aaa`]aa^aa^a`Xa`]Ya¥\_]¥`\_`  
@HWI-EAS443:3:88:1059:633#0/1  
CACCCATTCCCATTAGGGCATTNTGGACAAAGCGTCTA  
+HWI-EAS443:3:88:1059:633#0/1  
`X`a`bbaba`aa`aabbabaabbaabbba`\_`\_`b`\_`ab  
@HWI-EAS443:3:91:1556:737#0/1  
TGCCCCATTCCCATTAGGGCATTNTGGACAAAGCGTCTA

+HWI-EAS443:3:91:1556:737#0/1  
abaaaabab`aaaabaa\_aabbaaaaaa¥a`aaZa\_¥aa  
@HWI-EAS443:3:16:1220:1312#0/1  
GCCCCATTCCCATTAGGGCATTGGACAAAGCGTCTAC  
+HWI-EAS443:3:16:1220:1312#0/1  
a`]]^ZZZ`\_WY]PRJZ¥aa`aa^VPVY`]UZ^\_YQTPYU  
@HWI-EAS443:3:48:121:1454#0/1  
GCCCCATTCCCATTAGGGCATTGGACAAAGCGTCTAC  
+HWI-EAS443:3:48:121:1454#0/1  
^b]aabbb`aaaa`aa`aa`abaaa`a`aa\_a\_a¥SaaU  
@HWI-EAS443:3:90:1288:1553#0/1  
GCCCCATTCCCATTAGGGCATTGGACAAAGCGTCTAC  
+HWI-EAS443:3:90:1288:1553#0/1  
]Z¥ZZ\_aR\_\_aTbaab[0]b]aW¥VZ^^ZZaa^QaPDX\_F  
@HWI-EAS443:3:10:539:1465#0/1  
CCCCATTCCCATTAGGGCATTGGACAAAGCGTCTACG  
+HWI-EAS443:3:10:539:1465#0/1  
abbbbaaaaaaaba¥aa\_aaaaa`]a¥aaaa`a`^aa¥\_  
@HWI-EAS443:3:13:427:956#0/1  
CCCCATTCCCATTAGGGCATTGGACAAAGCGTCTACG  
+HWI-EAS443:3:13:427:956#0/1  
a`aaa\_¥aX\_aa^b\_a`aaV\_\_aaV\_]`[\_^aX¥¥`^\_  
@HWI-EAS443:3:35:128:1835#0/1  
CCCCATTCCCATTAGGGCATTGGACAAAGCGTCTACG  
+HWI-EAS443:3:35:128:1835#0/1  
abaab`abab^`aaa[V¥baaa¥Z¥Y[^\_H]V`]¥bYLZ¥  
@HWI-EAS443:3:39:206:170#0/1  
CCCCATTCCCATTAGGGCATTGGACAAAGCGTCTACG  
+HWI-EAS443:3:39:206:170#0/1  
aabbaaabaa`^^`Za\_^a\_a^`\_aVa`\_`\_¥^\_W¥^^[[  
@HWI-EAS443:3:49:381:1952#0/1  
TCCCCATTCCCATTAGGGCATTGGACAAAGCGTCTAC  
+HWI-EAS443:3:49:381:1952#0/1  
aa`a]aa`a`\_aaa`aVZ`¥a`aa`]Za¥a^^`]Y¥\_a¥  
@HWI-EAS443:3:51:1479:1880#0/1  
CCCATTCCCATTAGGGCATTGGACAAAGCGTCTACGC  
+HWI-EAS443:3:51:1479:1880#0/1  
a`a`[aY`XVaa\_aaaa¥`b`\_\_^PZQ`\_\_YaT¥`T^V  
@HWI-EAS443:3:58:29:482#0/1  
CCCCATTCCCATTAGGGCATTGGACAAAGCGTCTACG  
+HWI-EAS443:3:58:29:482#0/1  
abb^abaa]abaaab¥`aaa\_a`a`\_a¥`a\_a¥`a`^^  
@HWI-EAS443:3:5:1229:1036#0/1  
CCCATTCCCATTAGGGCATTGGACAAAGCGTCTACGC  
+HWI-EAS443:3:5:1229:1036#0/1  
aW^`a\_M[R\_aYGR`]MY\_]\_R]`a`aaRabaa\_[`BBBB  
@HWI-EAS443:3:73:571:1806#0/1  
TCCCCATTCCCATTAGGGCATTGGACAAAGCGTCTAC  
+HWI-EAS443:3:73:571:1806#0/1  
abbbbaa\_]bbaaaa`a¥^^`aa\_`\_]Zaaa`^`\_U^^a^



+HWI-EAS443:3:16:1003:192#0/1  
aaaaa\_ababbaa`aaaa\_\_`^a[aVaa`\_\_Zaa¥^ZQ`\_  
@HWI-EAS443:3:16:456:1265#0/1  
AATAAATACCTAGAAGAGCATCCCAGTGCTGGGAAGGACC  
+HWI-EAS443:3:16:456:1265#0/1  
a^`bbb\_ba`ba[`¥`a^Z\_\_a`a`\_`\_] [¥a]^XY\_\_  
@HWI-EAS443:3:20:693:1053#0/1  
ATACCTAGAAGAGCATCCCAGTGCTGGGAAGGACCCTAAG  
+HWI-EAS443:3:20:693:1053#0/1  
a\_aaUaa]S`W]a]Xa\_``YaXa\_] ^`\_`\_\_¥\_] ^Z\_^`]  
@HWI-EAS443:3:29:527:1219#0/1  
GGGTCCTCCCAGCACTGGGATGCTCTTCTAGGTATTTAT  
+HWI-EAS443:3:29:527:1219#0/1  
Y`XOZ]X\_a]\_PU]Q¥W\_\_YQTa` [ `]¥^]] ¥GEJXVXWB  
@HWI-EAS443:3:31:403:67#0/1  
ATACCTAGAAGAGCATCCCAGTGCTGGGAAGGACCCTAAG  
+HWI-EAS443:3:31:403:67#0/1  
aX]aaabaaaba`b\_[^a``a¥a]^\_a\_\_\_\_`^¥¥]WW^¥^  
@HWI-EAS443:3:34:1109:1567#0/1  
ATAAATACCTAGAAGAGCATCCCAGTGCTGGGAAGGACCC  
+HWI-EAS443:3:34:1109:1567#0/1  
aa`ba`a\_a`baaa\_``aa`^X^\_\_Y^`\_`\_^\_\_]^ ^INNDH  
@HWI-EAS443:3:42:515:1873#0/1  
ATAAATACCTAGAAGAGCATCCCAGTGCTGGGAAGGACCC  
+HWI-EAS443:3:42:515:1873#0/1  
aaaaabbaaaa\_[\_a^G\_aa\_`b\_`\_\_\_\_\_ZR\_`\_] `a]X¥  
@HWI-EAS443:3:45:407:58#0/1  
ATAAATACCTAGAAGAGCATCCCAGTGCTGGGAAGGACCC  
+HWI-EAS443:3:45:407:58#0/1  
abbabbaaabbaababaaa\_a`ab\_ba`baa`aba`a`\_`\_  
@HWI-EAS443:3:46:1499:1697#0/1  
AATACCTAGAAGAGCATCCCAGTGCTGGGAAGGACCCTAA  
+HWI-EAS443:3:46:1499:1697#0/1  
^ZZY\_¥\_`a¥\_VX^¥a^X¥W¥WG]Y[\_\_\_\_[\_\_\_\_]^XY]^S  
@HWI-EAS443:3:49:543:1652#0/1  
AGGGTCCTCCCAGCACTGGGATGCTCTTCTAGGTATTTA  
+HWI-EAS443:3:49:543:1652#0/1  
ab`][babbaaaaaabaa`aa\_aa`\_`aaaaa]V\_ba`a  
@HWI-EAS443:3:54:437:722#0/1  
AATAAATACCTAGAAGAGCATCCCAGTGCTGGGAAGGACC  
+HWI-EAS443:3:54:437:722#0/1  
aa]¥^Z][\_a`\_`\_`b]aa`\_¥\_aa\_Z\_W^ba^W[`aZWO  
@HWI-EAS443:3:61:452:2000#0/1  
AATAAATACCTAGAAGAGCATCCCAGTGCTGGGAAGGACC  
+HWI-EAS443:3:61:452:2000#0/1  
aa``a^`^`\_ab\_\_a`a`a`\_a\_aa^V^^UXKX^YVUZWT  
@HWI-EAS443:3:62:142:210#0/1  
AATAAATACCTAGAAGAGCATCCCAGTGCTGGGAAGGACC  
+HWI-EAS443:3:62:142:210#0/1  
aaa][ba\_aaa``^¥^\_a`a^`aa`aY`\_^\_\_]V]\_]Y¥

@HWI-EAS443:3:65:1351:18#0/1  
ATAAATACCTAGAAGAGCATCCCAGTGCTGGGAAGGACCC  
+HWI-EAS443:3:65:1351:18#0/1  
R\_\_ab\_`\_¥aba``ba`aa`abaaa\_b`baaaa``\_N  
@HWI-EAS443:3:68:48:206#0/1  
GGGTCCTCCCAGCACTGGGATGCTCTTCTAGGTATTTAT  
+HWI-EAS443:3:68:48:206#0/1  
aba\_bbbbbbaaaaaaaaaa`aa`a\_\_`\_a\_\_`PX`\_\_¥a  
@HWI-EAS443:3:71:1095:1074#0/1  
ATAAATACCTAGAAGAGCATCCCAGTGCTGGGAAGGACCC  
+HWI-EAS443:3:71:1095:1074#0/1  
aaaaaaaa`aba`aaaa`aa`a]`\_^a^\_a]`\_\_Y]]  
@HWI-EAS443:3:74:1630:244#0/1  
GGTCCTCCCAGCACTGGGATGCTCTTCTAGGTATTTATT  
+HWI-EAS443:3:74:1630:244#0/1  
`¥`aba`abb`babbb`b\_bbab`bbabab]Va\_baaba  
@HWI-EAS443:3:83:1435:785#0/1  
GGGTCCTCCCAGCACTGGGATGCTCTTCTAGGTATTTAT  
+HWI-EAS443:3:83:1435:785#0/1  
aa`U``^UVUaP\_LY[][^]U`RDZYa`LZ[VVMW¥^[U]  
@HWI-EAS443:3:8:1034:1688#0/1  
GGTCCTCCCAGCACTGGGATGCTCTTCTAGGTATTTATT  
+HWI-EAS443:3:8:1034:1688#0/1  
ab`a[Uaaa]`a]aab\_\_[aa\_a[^^b\_b^ITa^]`aa  
@HWI-EAS443:3:91:373:205#0/1  
ATAAATACCTAGAAGAGCATCCCAGTGCTGGGAAGGACCC  
+HWI-EAS443:3:91:373:205#0/1  
abbabbabbbbbbb[abbbbaa`bbabbaab`^\_aa  
@HWI-EAS443:3:92:1575:1527#0/1  
GAAAGATGAGCTTCTTGAAAATTTGCAGGCCTACCAGAAG  
+HWI-EAS443:3:92:1575:1527#0/1  
a[]aa`aaaNG]]X]ZXPaaW\_aaVX^]NVGR^QR]a]Ja  
@HWI-EAS443:3:32:622:293#0/1  
TAGTTTTTTTACTCTAGCTCTATGTTGACAAAATGACCAT  
+HWI-EAS443:3:32:622:293#0/1  
a`^\_abaaabaaaa\_¥]a\_a`a\_\_\_`\_aa`a][¥`¥\_X  
@HWI-EAS443:3:76:905:1216#0/1  
CCTAGCTCNATGTTGACAAAATGACCATCGTCAACATCCA  
+HWI-EAS443:3:76:905:1216#0/1  
abbbabb[DYbb\_aaaaaab`^^`\_\_`P\_U]^ZZ`\_]]\_  
@HWI-EAS443:3:100:80:1541#0/1  
GTAGTTTTTTTACTCTAGCTCTATGTTGACAATATGACCAT  
+HWI-EAS443:3:100:80:1541#0/1  
Z]Y^`¥a^bbbaY^aa^^\_\_ZT`b¥aaaZa[Y\_L\_`\_V¥B  
@HWI-EAS443:3:10:796:788#0/1  
GTAGTTTTTTTACTCTAGCTCTATGTTGACAAAATGGCCAT  
+HWI-EAS443:3:10:796:788#0/1  
a[PZOGYXUTWXTSUWTDMUZZX¥WLQUPTVVXYUGGZBB  
@HWI-EAS443:3:22:1233:1329#0/1  
GTTTTTTTACTCTAGCTCTAAGTTGACAAAATGACCATCGT

+HWI-EAS443:3:22:1233:1329#0/1  
aa\_\_`aa]a`\_\_`\_\_\_\_\_aVG^`\_`]]\_`^\_\_\_\_U^]\_\_^V%G  
@HWI-EAS443:3:29:1313:1236#0/1  
GTAGTTTTTTACTCTAGCTCTATATTGACAAAATGACCAT  
+HWI-EAS443:3:29:1313:1236#0/1  
\_ILZX]`b`U%V]a`\_`%a^UVT^OYX^%aaaZXZ\_WT%WY  
@HWI-EAS443:3:37:865:963#0/1  
GTAGTTTTTTACTCTAGCTCTATGTTGACACAATGACCAT  
+HWI-EAS443:3:37:865:963#0/1  
\_W\_`XYa\_a`a`\_a^^[%^^^Y]`^^\_`^`OGZNX%[V`[S  
@HWI-EAS443:3:40:738:1034#0/1  
TTTTACTCTAGCTCTATGTTGACAAACTGACCATCGTCAA  
+HWI-EAS443:3:40:738:1034#0/1  
abbababbab```aaaa`aaa^`]GV%a\_]`^%`]SYO^  
@HWI-EAS443:3:53:653:1363#0/1  
TTTTACTCTAGCTCTATGTTGACAAATTGACCATCGTCAA  
+HWI-EAS443:3:53:653:1363#0/1  
a\_b]b]^a`]`^%`X]^`%`P\_\_aaa\_]`WUWa\_aRYTU  
@HWI-EAS443:3:67:1167:727#0/1  
TTTTACTCTAGCTCTATGTTGACACAATGACCATCGTCA  
+HWI-EAS443:3:67:1167:727#0/1  
abbaab`aaaa\_aa`aaa\_`a\_^TFX`a\_a\_a`^`\_]X`  
@HWI-EAS443:3:76:167:251#0/1  
GTAGTTTTTTAGTCTAGCTCTATGTTGACAAAATGACCAT  
+HWI-EAS443:3:76:167:251#0/1  
a^JZLS\_aQZRKU]]^[[^]`^Y^WXZ[UG^XWZSOVWUVS  
@HWI-EAS443:3:80:305:457#0/1  
GTAGTCTTTTACTCTAGCTCTATGTTGACAAAATGACCAT  
+HWI-EAS443:3:80:305:457#0/1  
aa]\_MMMJ\_`^a\_PP`RVP\_XTWa]`TYVaaPaNNBBBBB  
@HWI-EAS443:3:81:68:416#0/1  
GTTTTTTACTCTAGCTCTATGTTGACAACATGACCATCGT  
+HWI-EAS443:3:81:68:416#0/1  
aW][\_`%`GZS`XaTNXUURZ\_VZ\_XXQRFQMX]]PHPO]I  
@HWI-EAS443:3:85:180:1277#0/1  
GTAGTTTTTCACTCTAGCTCTATGTTGACAAAATGACCAT  
+HWI-EAS443:3:85:180:1277#0/1  
]S%b%Zaa[%Y````\_`a`aaa`a^``Z\_aa]V%`a`a`\_  
@HWI-EAS443:3:94:833:1148#0/1  
GTTTTTTACTCTAGCTCTATGTTGACAAAATGAGCATCGT  
+HWI-EAS443:3:94:833:1148#0/1  
`PSNX\_[UP[]ZOMW^GVVLXXPJZUWSOSS[LBBBBBBB  
@HWI-EAS443:3:3:559:215#0/1  
AGTTTTTTTACTCTAGCTCTATGTTGACAAAATGACCATC  
+HWI-EAS443:3:3:559:215#0/1  
`ba\_\_baaa`aa\_`a^\_a]a`a`^a\_\_a%````\_`^W^^^Y  
@HWI-EAS443:3:94:42:1116#0/1  
AGCTTTTTTACTCTAGCTCTATGTTGACAAAATGACCATCG  
+HWI-EAS443:3:94:42:1116#0/1  
\_`XW\_\_YMR^``aY`b`\_aaVX]`%``Y[]`^RYR^X\_aRRU



+HWI-EAS443:3:12:972:1494#0/1  
aabbabbbabbab`aabaa\_aaaba`aa^a``aaaa\_Waa  
@HWI-EAS443:3:13:1197:1050#0/1  
TCTAGCTCTATGTTGACAAAATGACCATCGTCAACATCCA  
+HWI-EAS443:3:13:1197:1050#0/1  
aaaa`\_^a[^a`a`Q¥]\_\_\_\_^Z^\_\_S[YY\_\_N]VX0]  
@HWI-EAS443:3:13:1420:2007#0/1  
GTAGTTTTTTACTCTAGCTCTATGTTGACAAAATGACCAT  
+HWI-EAS443:3:13:1420:2007#0/1  
a^aa[T]``W¥`YZNXX[[]YUXY][TXUW[[VYUWO[  
@HWI-EAS443:3:13:1692:492#0/1  
TAGTTTTTTACTCTAGCTCTATGTTGACAAAATGACCATC  
+HWI-EAS443:3:13:1692:492#0/1  
¥`Q\_U^W\_^S`XQZ¥]`\_aLTaYaa`L[¥URSUTBBBBB  
@HWI-EAS443:3:14:1129:1280#0/1  
GTAGTTTTTTACTCTAGCTCTATGTTGACAAAATGACCAT  
+HWI-EAS443:3:14:1129:1280#0/1  
aX`aU^``aa¥]\_\_\_\_`\_¥Z^\_¥¥YY\_]`\_`\_¥\_^X¥X  
@HWI-EAS443:3:14:407:903#0/1  
GTAGTTTTTTACTCTAGCTCTATGTTGACAAAATGACCAT  
+HWI-EAS443:3:14:407:903#0/1  
aQ`b^``Za`a\_\_a\_a¥a`a\_\_\_\_[\_\_^`¥\_^`\_]`^^]  
@HWI-EAS443:3:15:1234:991#0/1  
GTAGTTTTTTACTCTAGCTCTATGTTGACAAAATGACCAT  
+HWI-EAS443:3:15:1234:991#0/1  
a`Za\_a`aaaa\_a\_a\_^\_\_\_\_aa`a\_]K¥^`]¥`aa`¥¥`^  
@HWI-EAS443:3:15:1551:545#0/1  
TTTTTACTCTAGCTCTATGTTGACAAAATGACCATCGTCA  
+HWI-EAS443:3:15:1551:545#0/1  
abbaaa\_b`aaa\_a`aaaa\_aa\_\_\_\_`^`\_`]WR`^S]XW^  
@HWI-EAS443:3:15:589:806#0/1  
TAGTTTTTTACTCTAGCTCTATGTTGACAAAATGACCATC  
+HWI-EAS443:3:15:589:806#0/1  
a¥Y¥`Yb``\_`baYR[W]a`a`a]`aUUWV]aZ\_a`K]\_  
@HWI-EAS443:3:15:864:1745#0/1  
GTAGTTTTTTACTCTAGCTCTATGTTGACAAAATGACCAT  
+HWI-EAS443:3:15:864:1745#0/1  
^YZ^PQZ[^``¥][`^¥¥^\_[\_VX`\_]a]\_^ZY¥UU]T  
@HWI-EAS443:3:16:1526:719#0/1  
GTAGTTTTTTACTCTAGCTCTATGTTGACAAAATGACCAT  
+HWI-EAS443:3:16:1526:719#0/1  
a`a`aaaa`^^`^^`\_^`¥\_[^^^Y`^¥]`\_^\_Y^^W^Y  
@HWI-EAS443:3:17:340:1117#0/1  
GGTAGTTTTTTACTCTAGCTCTATGTTGACAAAATGACCA  
+HWI-EAS443:3:17:340:1117#0/1  
ab^`\_`[`aabaaa^`a`aaa`aa\_a\_a`^````a\_\_\_\_^\_a  
@HWI-EAS443:3:17:599:1233#0/1  
TCTAGCTCTATGTTGACAAAATGACCATCGTCAACATCCA  
+HWI-EAS443:3:17:599:1233#0/1  
S\_¥I¥\_R\_b\_bbZ]^UR[^U¥]Y\_IOMZ]]XQ^^VU`aa





+HWI-EAS443:3:22:990:1101#0/1  
^UT]^[\^W¥¥X\_Y¥ZO¥\_\_\_\_\_OWV¥UYXPYWKR\_¥WTSB  
@HWI-EAS443:3:24:118:852#0/1  
CTAGCTCTATGTTGACAAAATGACCATCGTCAACATCCAC  
+HWI-EAS443:3:24:118:852#0/1  
`abbbbbbbbaa`bbbaa¥ababbaa^aaa¥`baaa`a\_LW  
@HWI-EAS443:3:24:1496:67#0/1  
GTAGTTTTTTACTCTAGCTCTATGTTGACAAAATGACCAT  
+HWI-EAS443:3:24:1496:67#0/1  
a[^\_G¥]\_^[FNVOZ[]YTQY[[]][[YYSUXQQRYZVMVB  
@HWI-EAS443:3:24:150:1108#0/1  
GTAGTTTTTTACTCTAGCTCTATGTTGACAAAATGACCAT  
+HWI-EAS443:3:24:150:1108#0/1  
a`Ya^\_aaa`aa```aaa\_aa`a````\_`^aa¥¥^^\_¥W`^  
@HWI-EAS443:3:24:483:976#0/1  
GTTTTTTACTCTAGCTCTATGTTGACAAAATGACCATCGT  
+HWI-EAS443:3:24:483:976#0/1  
a\_`[^a\_aaa`a]\_\_^Y^a`]][\_a`a`]^X^Z\_^]]Y  
@HWI-EAS443:3:24:595:685#0/1  
GTTTTTTACTCTAGCTCTATGTTGACAAAATGACCATCGT  
+HWI-EAS443:3:24:595:685#0/1  
aa]aaaX]Waa\_] [¥]\_a`\_a¥¥\_`^]U\_[^]Z]]`[O]T  
@HWI-EAS443:3:24:688:1266#0/1  
GGTAGTTTTTTACTCTAGCTCTATGTTGACAAAATGACCA  
+HWI-EAS443:3:24:688:1266#0/1  
a\_]aa]\_\_aa\_a`\_\_`\_\_^\_\_^\_]\_^]]\_\_\_\_]]^X]^  
@HWI-EAS443:3:25:1027:263#0/1  
TAGTTTTTTACTCTAGCTCTATGTTGACAAAATGACCATC  
+HWI-EAS443:3:25:1027:263#0/1  
a`b\_aabaabaaaa`a\_a\_a`aa````^`\_`\_\_\_\_^^X\_^X  
@HWI-EAS443:3:25:1134:644#0/1  
AGTTTTTTACTCTAGCTCTATGTTGACAAAATGACCATCG  
+HWI-EAS443:3:25:1134:644#0/1  
abaabbbbbabbbbaabababaaaaa`aaaaaa\_\_aa[^  
@HWI-EAS443:3:25:525:438#0/1  
GTAGTTTTTTACTCTAGCTCTATGTTGACAAAATGACCAT  
+HWI-EAS443:3:25:525:438#0/1  
a[\_`X]\_\_\_\_\_Y]T^[^YXS^Z^UU^^ZWRXVYXXXVPQS  
@HWI-EAS443:3:26:1592:630#0/1  
GTTTTTTACTCTAGCTCTATGTTGACAAAATGACCATCGT  
+HWI-EAS443:3:26:1592:630#0/1  
a```aaa`\_¥`[\_MZ[a¥\_\_Z^WUOZ`]^^[OUWPMWB  
@HWI-EAS443:3:26:1760:568#0/1  
TAGTTTTTTACTCTAGCTCTATGTTGACAAAATGACCATC  
+HWI-EAS443:3:26:1760:568#0/1  
aab\_abbabaab^aba`b^aaaa`aaaY\_a`aaa^TP\_`W  
@HWI-EAS443:3:26:19:1625#0/1  
GTTTTTTACTCTAGCTCTATGTTGACAAAATGACCATCGT  
+HWI-EAS443:3:26:19:1625#0/1  
a`aaaaaaaaaaa\_aaaaaaaa`¥aa`aa[\_```\_\_\_\_\_`¥T



+HWI-EAS443:3:30:194:1793#0/1  
aSQ[\_\_\_`]¥¥aaYa`WF\_\_a]W^`[\_[a`]YG¥OM[\_\_\_`W  
@HWI-EAS443:3:30:719:1037#0/1  
GTTTTTTACTCTAGCTCTATGTTGACAAAATGACCATCGT  
+HWI-EAS443:3:30:719:1037#0/1  
`[¥a`a`^Waa^X0]¥[[a[SU^Z^^^Ya[\_]PZ^^FYOB  
@HWI-EAS443:3:31:61:293#0/1  
GTAGTTTTTTACTCTAGCTCTATGTTGACAAAATGACCAT  
+HWI-EAS443:3:31:61:293#0/1  
a\_aa¥\_`¥a\_a`\_\_[aR\_^`TU¥\_]PV[^N^QWZ^[NPS  
@HWI-EAS443:3:31:902:349#0/1  
TACTCTAGCTCTATGTTGACAAAATGACCATCGTCAACAT  
+HWI-EAS443:3:31:902:349#0/1  
aaaab\_\_¥\_]Y[^`[a`a`^aa`a`^X[\_]TT^XX`Y  
@HWI-EAS443:3:32:1504:1777#0/1  
GTAGTTTTTTACTCTAGCTCTATGTTGACAAAATGACCAT  
+HWI-EAS443:3:32:1504:1777#0/1  
a`aa``aaaa`a``\_^`\_aa`\_]`\_]`a``]\_^a^a`  
@HWI-EAS443:3:32:562:218#0/1  
GTAGTTTTTTACTCTAGCTCTATGTTGACAAAATGACCAT  
+HWI-EAS443:3:32:562:218#0/1  
a\_aa]\_aa`a``\_\_`]^[\_\_^^\_]\_\_^\_^^]]]]^X^Z  
@HWI-EAS443:3:33:216:170#0/1  
GTAGTTTTTTACTCTAGCTCTATGTTGACAAAATGACCAT  
+HWI-EAS443:3:33:216:170#0/1  
¥L\_b]\_aaa`^`aa[Z\_Ya\_\_^U^`[U^`\_S]YYW^] ^  
@HWI-EAS443:3:33:278:36#0/1  
GTTTTTTACTCTAGCTCTATGTTGACAAAATGACCATCGT  
+HWI-EAS443:3:33:278:36#0/1  
a\_XV[a`¥a¥^ZXZW\_Z`ZaXVUZ^Y[V¥]]]VY]RQXY  
@HWI-EAS443:3:33:418:771#0/1  
TAGTTTTTTACTCTAGCTCTATGTTGACAAAATGACCATC  
+HWI-EAS443:3:33:418:771#0/1  
ZX\_S`a^aa^`a]`V]`Sa^]]¥J]XZ`\_PY]VT[FVWYS  
@HWI-EAS443:3:33:55:1387#0/1  
CTAGCTCTATGTTGACAAAATGACCATCGTCAACATCCAC  
+HWI-EAS443:3:33:55:1387#0/1  
a[^T\_\_aW^\_a^^`\_Z^WW[¥`\_`[¥`PHX¥¥\_\_Z^Y\_Z  
@HWI-EAS443:3:34:1595:128#0/1  
TTTTTACTCTAGCTCTATGTTGACAAAATGACCATCGTCA  
+HWI-EAS443:3:34:1595:128#0/1  
```bb]a^0ZabRb^]\_] ^Waa\_^Y¥]YU]¥ORXXBBBBB  
@HWI-EAS443:3:34:491:1659#0/1  
GTAGTTTTTTACTCTAGCTCTATGTTGACAAAATGACCAT  
+HWI-EAS443:3:34:491:1659#0/1  
`RK`SXXY^Xa^\_a\_]TR]\_X][[KRVS\_Za`¥TT]WTSU  
@HWI-EAS443:3:35:1066:784#0/1  
GTAGTTTTTTACTCTAGCTCTATGTTGACAAAATGACCAT  
+HWI-EAS443:3:35:1066:784#0/1  
a\_aa`aaaaaa\_a`\_a`\_`a`````]`\_]\_]WZ]^Z^^\_^]

@HWI-EAS443:3:35:1282:185#0/1  
GGTAGTTTTTACTCTAGCTCTATGTTGACAAAATGACCA  
+HWI-EAS443:3:35:1282:185#0/1  
¥\_0]\_X`babab`]`a]``¥`]]aa`a^a`aa\_\_`\_]`Y`  
@HWI-EAS443:3:35:1584:539#0/1  
GTAGTTTTTACTCTAGCTCTATGTTGACAAAATGACCAT  
+HWI-EAS443:3:35:1584:539#0/1  
aVW]\_`^Ya]X\_\_UW`X[VN[V]XQY[QSYW]TVN[G\_BB  
@HWI-EAS443:3:35:1713:1490#0/1  
GTAGTTTTTACTCTAGCTCTATGTTGACAAAATGACCAT  
+HWI-EAS443:3:35:1713:1490#0/1  
a`a`aaabbaaaa`a``\_\_a\_a`\_`[`Xaaaa`\_`X]S¥  
@HWI-EAS443:3:35:727:778#0/1  
GTAGTTTTTACTCTAGCTCTATGTTGACAAAATGACCAT  
+HWI-EAS443:3:35:727:778#0/1  
a`aaY]aaa\_Zaaa]Z\_`a``Z`a`\_`\_\_`]^`[^]]\_\_\_\_^  
@HWI-EAS443:3:35:749:449#0/1  
GTAGTTTTTACTCTAGCTCTATGTTGACAAAATGACCAT  
+HWI-EAS443:3:35:749:449#0/1  
^^ab]]aaaaaaaa`a``\_\_a¥\_\_Y`a^aa`ZZ\_^]`\_U  
@HWI-EAS443:3:35:856:215#0/1  
TTTTACTCTAGCTCTATGTTGACAAAATGACCATCGTCAA  
+HWI-EAS443:3:35:856:215#0/1  
`^T`aba¥¥]a`\_`aa]]Y]a`\_`¥Q¥^¥U¥X¥YZXUX[G  
@HWI-EAS443:3:35:890:410#0/1  
GTAGTTTTTACTCTAGCTCTATGTTGACAAAATGACCAT  
+HWI-EAS443:3:35:890:410#0/1  
]Y^\_]`[``a`aa`aa`]^`a`a\_a^^`¥Z\_\_¥]`\_]ZU  
@HWI-EAS443:3:36:1727:1627#0/1  
TTTTTACTCTAGCTCTATGTTGACAAAATGACCATCGTC  
+HWI-EAS443:3:36:1727:1627#0/1  
a`ab`ba^aa`aZ`¥M]a\_\_¥SRZPZ\_¥\_^aMUTWX¥XL]  
@HWI-EAS443:3:37:1037:275#0/1  
GTTTTTACTCTAGCTCTATGTTGACAAAATGACCATCGT  
+HWI-EAS443:3:37:1037:275#0/1  
a\_a`aa`\_aX`a¥``````\_`[``\_`^]PLS¥Z¥]\_^\_\_X  
@HWI-EAS443:3:37:1292:608#0/1  
GTAGTTTTTACTCTAGCTCTATGTTGACAAAATGACCAT  
+HWI-EAS443:3:37:1292:608#0/1  
aZ]\_WZ\_aa`]a`\_a`^\_V^]aa\_a`[aQO[``^^¥\_\_^  
@HWI-EAS443:3:37:1684:860#0/1  
GTAGTTTTTACTCTAGCTCTATGTTGACAAAATGACCAT  
+HWI-EAS443:3:37:1684:860#0/1  
a^`\_X\_a\_a`a`\_¥\_a¥ZWUa`\_\_Y^W^XKW¥\_\_\_\_^Y]^S  
@HWI-EAS443:3:38:1655:211#0/1  
GTAGTTTTTACTCTAGCTCTATGTTGACAAAATGACCAT  
+HWI-EAS443:3:38:1655:211#0/1  
a\_ab`a`aba^][U^a\_Y`]\_^``]\_`[^ZWWZYOVZZYQ  
@HWI-EAS443:3:3:538:416#0/1  
GTAGTTTTTACTCTAGCTCTATGTTGACAAAATGACCAT

+HWI-EAS443:3:3:538:416#0/1  
a]`b\_\_aa\_aa^]]`a¥]¥a\_\_`^^\_\_X^\_\_]]\_\_ZY^^  
@HWI-EAS443:3:40:346:499#0/1  
GTAGTTTTTTACTCTAGCTCTATGTTGACAAAATGACCAT  
+HWI-EAS443:3:40:346:499#0/1  
a¥]ZXaa`\_\_Z^^\_\_¥¥¥X[^]Y]^\_]ZNTRLZTRQ  
@HWI-EAS443:3:42:333:802#0/1  
GTAGTTTTTTACTCTAGCTCTATGTTGACAAAATGACCAT  
+HWI-EAS443:3:42:333:802#0/1  
a]¥\_X\_aaaaaaaaaaaaa`aa`[¥a`Y`]W^`a`aa^[\_  
@HWI-EAS443:3:43:1092:847#0/1  
GTTTTTTACTCTAGCTCTATGTTGACAAAATGACCATCGT  
+HWI-EAS443:3:43:1092:847#0/1  
a\_aaaaab\_aaa\_\_a\_a`\_]a^^\_^\_\_\_\_`^\_]^[[\_W  
@HWI-EAS443:3:43:1130:256#0/1  
TAGTTTTTTACTCTAGCTCTATGTTGACAAAATGACCATC  
+HWI-EAS443:3:43:1130:256#0/1  
]J\_Z`¥`¥\_Y^]¥\_V^]a[`aab]aaa\_`^]a\_¥W^]`[  
@HWI-EAS443:3:43:1148:75#0/1  
TAGTTTTTTACTCTAGCTCTATGTTGACAAAATGACCATC  
+HWI-EAS443:3:43:1148:75#0/1  
aab\_aaaaa\_a^`aa`\_\_a`a`]``\_Z`¥\_^^\_XU^\_X  
@HWI-EAS443:3:43:1502:1218#0/1  
GTAGTTTTTTACTCTAGCTCTATGTTGACAAAATGACCAT  
+HWI-EAS443:3:43:1502:1218#0/1  
`Y]\_Zaaaaa``^``^\_\_`\_a\_^\_¥Y\_\_^^X^\_]ZX^Z  
@HWI-EAS443:3:44:379:766#0/1  
GTAGTTTTTTACTCTAGCTCTATGTTGACAAAATGACCAT  
+HWI-EAS443:3:44:379:766#0/1  
`[`b\_aaaaaaaaa^aaa\_a\_a`aa[aa^]``a\_`\_^`V`\_  
@HWI-EAS443:3:44:563:128#0/1  
GTTTTTTACTCTAGCTCTATGTTGACAAAATGACCATCGT  
+HWI-EAS443:3:44:563:128#0/1  
a^[\_`\_`\_\_^\_[^`\_]`^^\_]^\_¥XX\_]^[^XVV[XX[U  
@HWI-EAS443:3:44:701:1243#0/1  
GTTTTTTACTCTAGCTCTATGTTGACAAAATGACCATCGT  
+HWI-EAS443:3:44:701:1243#0/1  
a\_`aaa\_`a]]`\_YY^a\_\_`]`\_\_]\_\_\_\_^¥^]X]XW]Y  
@HWI-EAS443:3:45:319:755#0/1  
GTAGTTTTTTACTCTAGCTCTATGTTGACAAAATGACCAT  
+HWI-EAS443:3:45:319:755#0/1  
a\_ab\_aaaaaa````a`\_`\_a\_a`````[W^\_````a`\_`\_`\_  
@HWI-EAS443:3:45:541:21#0/1  
GTTTTTTACTCTAGCTCTATGTTGACAAAATGACCATCGT  
+HWI-EAS443:3:45:541:21#0/1  
`OL]``^VSY]Y]WWSZPU]TRZTTTZ^¥¥V¥TTVTQTR  
@HWI-EAS443:3:45:646:602#0/1  
GTTTTTTACTCTAGCTCTATGTTGACAAAATGACCATCGT  
+HWI-EAS443:3:45:646:602#0/1  
`OXa]Z`¥`ZZ\_\_YUa^\_\_aa^`\_^YZ\_\_\_\_]]][¥U^TU]W

@HWI-EAS443:3:46:1312:19#0/1  
GTAGTTTTTTACTCTAGCTCTATGTTGACAAAATGACCAT  
+HWI-EAS443:3:46:1312:19#0/1  
aYS\_GT\_aX[PY¥]\_V\_ZYQZUZ`TYUX¥TTQX^XVSUV  
@HWI-EAS443:3:46:1317:1405#0/1  
TCTAGCTCTATGTTGACAAAATGACCATCGTCAACATCCA  
+HWI-EAS443:3:46:1317:1405#0/1  
a\_aba`a\_a`aa\_a`>`a`>`a`Z`\_\_UWY\_]`^V^W[]]  
@HWI-EAS443:3:46:1756:361#0/1  
GTAGTTTTTTACTCTAGCTCTATGTTGACAAAATGACCAT  
+HWI-EAS443:3:46:1756:361#0/1  
aX`XZ\_a\_\_a\_\_Z^^¥¥]Y]^^^]\_X]]^^]]UUZWYYY  
@HWI-EAS443:3:46:857:670#0/1  
TTTTTACTCTAGCTCTATGTTGACAAAATGACCATCGTCA  
+HWI-EAS443:3:46:857:670#0/1  
abbbaaaaaaa`a\_a`ab`aa`\_\_a^`a^^`\_`XaXQY  
@HWI-EAS443:3:47:72:952#0/1  
TTTTACTCTAGCTCTATGTTGACAAAATGACCATCGTCAA  
+HWI-EAS443:3:47:72:952#0/1  
abaaaaa^aaa`^\_a`aa`aa\_¥`\_`a`\_\_\_\_]a`WXY\_Z  
@HWI-EAS443:3:47:823:810#0/1  
AGTTTTTTACTCTAGCTCTATGTTGACAAAATGACCATCG  
+HWI-EAS443:3:47:823:810#0/1  
]aX\_b`a\_bb`babab¥baaab`^ba¥`aa\_abY\_S\_`M[  
@HWI-EAS443:3:48:1302:1823#0/1  
ACTCTAGCTCTATGTTGACAAAATGACCATCGTCAACATC  
+HWI-EAS443:3:48:1302:1823#0/1  
¥a^`bb`UZ]^a`a`X]\_Q¥aaa`a]ZUX\_NWQN¥¥LZ¥M  
@HWI-EAS443:3:49:1476:56#0/1  
AGTTTTTTACTCTAGCTCTATGTTGACAAAATGACCATCG  
+HWI-EAS443:3:49:1476:56#0/1  
abL]Ua`^`^`[`aab`TZQV^S\_\_^\_TL[aa`b^`Q\_aaTZ  
@HWI-EAS443:3:4:1196:1684#0/1  
GTAGTTTTTTACTCTAGCTCTATGTTGACAAAATGACCAT  
+HWI-EAS443:3:4:1196:1684#0/1  
`UJTMV\_\_]\_aUWPP^[W¥T[^^^[Y`^S[V][[OYBBBB  
@HWI-EAS443:3:4:368:1385#0/1  
AGTTTTTTACTCTAGCTCTATGTTGACAAAATGACCATCG  
+HWI-EAS443:3:4:368:1385#0/1  
aa¥aKaaab`b\_`aa\_a]\_\_`a`^`a^^Sa]a]\_^]^^U\_  
@HWI-EAS443:3:50:464:694#0/1  
GTAGTTTTTTACTCTAGCTCTATGTTGACAAAATGACCAT  
+HWI-EAS443:3:50:464:694#0/1  
\_Y`baZabba^VVSaYY`aW^Ya[Raa]Xaa`aaa\_SL¥\_  
@HWI-EAS443:3:51:1112:1787#0/1  
AGTTTTTTACTCTAGCTCTATGTTGACAAAATGACCATCG  
+HWI-EAS443:3:51:1112:1787#0/1  
aabaa\_baaaababa\_abbaZbabb\_aaa\_aa]^`Z`\_ab  
@HWI-EAS443:3:51:181:136#0/1  
GTAGTTTTTTACTCTAGCTCTATGTTGACAAAATGACCAT

+HWI-EAS443:3:51:181:136#0/1  
a`^`^aaaaa`\_a^^^a^^\_\_\_\_\_^^`¥\_`]X[¥^[X¥ZZ  
@HWI-EAS443:3:51:906:805#0/1  
GTAGTTTTTTACTCTAGCTCTATGTTGACAAAATGACCAT  
+HWI-EAS443:3:51:906:805#0/1  
a[¥STa]aaV]T]\_aXaaX\_]RY]XZLQ\_a`WUX\_^G\_T  
@HWI-EAS443:3:52:1118:1655#0/1  
GTAGTTTTTTACTCTAGCTCTATGTTGACAAAATGACCAT  
+HWI-EAS443:3:52:1118:1655#0/1  
a\_`aZ`aaa`Za^a\_\_\_^U\_\_`\_^`^X\_^``\_\_^]R]\_  
@HWI-EAS443:3:52:1758:620#0/1  
GTAGTTTTTTACTCTAGCTCTATGTTGACAAAATGACCAT  
+HWI-EAS443:3:52:1758:620#0/1  
Z]a`]abbbab\_aaaaZ^a^`aa]`\_R]\_aaaa¥R¥X¥`\_  
@HWI-EAS443:3:52:841:167#0/1  
TTTACTCTAGCTCTATGTTGACAAAATGACCATCGTCAAC  
+HWI-EAS443:3:52:841:167#0/1  
ab`\_G¥aaaa`a^a\_aaU`^R[\_a\_\_\_\_\_XZ\_]aUO[¥]  
@HWI-EAS443:3:52:922:945#0/1  
GTTTTTTACTCTAGCTCTATGTTGACAAAATGACCATCGT  
+HWI-EAS443:3:52:922:945#0/1  
a`a`aaa`a\_\_\_```\_]`\_\_`]\_\_^Y\_^`^\_Z]^`W^Y  
@HWI-EAS443:3:52:979:945#0/1  
TTTTACTCTAGCTCTATGTTGACAAAATGACCATCGTCAA  
+HWI-EAS443:3:52:979:945#0/1  
abbaa\_aaa`]¥aaa`ab\_a]\_\_```\_\_`\_ZT\_\_^`X¥^^  
@HWI-EAS443:3:53:460:900#0/1  
GTTTTTTACTCTAGCTCTATGTTGACAAAATGACCATCGT  
+HWI-EAS443:3:53:460:900#0/1  
`U^¥^`aa\_YWZ][][¥^\_ZZU[T¥XZP^]YT\_VOZ[^]T  
@HWI-EAS443:3:53:637:191#0/1  
GTAGTTTTTTACTCTAGCTCTATGTTGACAAAATGACCAT  
+HWI-EAS443:3:53:637:191#0/1  
aaabaabbaab`a\_aabaa^aa`a\_aa\_^a\_a``aa^\_a`  
@HWI-EAS443:3:53:9:710#0/1  
GTAGTTTTTTACTCTAGCTCTATGTTGACAAAATGACCAT  
+HWI-EAS443:3:53:9:710#0/1  
``aa]`\_aa`\_Za`\_a```^`^`a]\_\_^]`^Y`\_`\_^\_X^]  
@HWI-EAS443:3:54:1370:537#0/1  
AGTTTTTTACTCTAGCTCTATGTTGACAAAATGACCATCG  
+HWI-EAS443:3:54:1370:537#0/1  
R[T^XQ^`V`aX¥WNYbbb¥Xb``aabbbaaY]`abVYRa  
@HWI-EAS443:3:54:1735:1762#0/1  
GTAGTTTTTTACTCTAGCTCTATGTTGACAAAATGACCAT  
+HWI-EAS443:3:54:1735:1762#0/1  
aabbabbbbaa`aYaaa`^aa`a\_aa`^a[a\_aaa^T\_\_  
@HWI-EAS443:3:54:507:917#0/1  
TTTTACTCTAGCTCTATGTTGACAAAATGACCATCGTCAA  
+HWI-EAS443:3:54:507:917#0/1  
abbaa`baaa`aa`a\_aa`aa``\_a`\_`^a`\_`\_`[`XX\_]`







@HWI-EAS443:3:63:323:926#0/1  
GTAGTTTTTTACTCTAGCTCTATGTTGACAAAATGACCAT  
+HWI-EAS443:3:63:323:926#0/1  
\_XX`[\_aa]aa`a\_a^^¥¥¥V^][^^[WY¥\_¥YT^]X¥P  
@HWI-EAS443:3:64:370:491#0/1  
GTAGTTTTTTACTCTAGCTCTATGTTGACAAAATGACCAT  
+HWI-EAS443:3:64:370:491#0/1  
a\_[`Y\_aa`aa\_a^`\_`\_\_\_\_\_a^`^^`\_¥^^]]YZ\_Z  
@HWI-EAS443:3:64:665:1515#0/1  
GTAGTTTTTTACTCTAGCTCTATGTTGACAAAATGACCAT  
+HWI-EAS443:3:64:665:1515#0/1  
aa`bbababb^¥bbab`aaaba`a`W]\_`baba^\_Y`b`  
@HWI-EAS443:3:64:856:811#0/1  
GTTTTTTACTCTAGCTCTATGTTGACAAAATGACCATCGT  
+HWI-EAS443:3:64:856:811#0/1  
^PMJWWX¥HSXTTXUY]^N^^UY]V\_NZRLVV¥]BBBBB  
@HWI-EAS443:3:65:866:2042#0/1  
TAGTTTTTTACTCTAGCTCTATGTTGACAAAATGACCATC  
+HWI-EAS443:3:65:866:2042#0/1  
a¥aZ`bab\_baab^\_\_aaaaSa^\_a\_\_`aa\_\_\_^`\_¥`aaX  
@HWI-EAS443:3:66:1058:199#0/1  
TAGTTTTTTACTCTAGCTCTATGTTGACAAAATGACCATC  
+HWI-EAS443:3:66:1058:199#0/1  
]a]aaabbb`aaaaaaaa`ab^aa`aa^`a\_a^¥\_^\_  
@HWI-EAS443:3:66:1209:355#0/1  
GTAGTTTTTTACTCTAGCTCTATGTTGACAAAATGACCAT  
+HWI-EAS443:3:66:1209:355#0/1  
`P\_\_¥aa``aa`V[a\_Y\_W]Z[\_ZV`[YY][`[WUWLW^  
@HWI-EAS443:3:66:1565:1936#0/1  
GTAGTTTTTTACTCTAGCTCTATGTTGACAAAATGACCAT  
+HWI-EAS443:3:66:1565:1936#0/1  
aX[aZ`XU^`V`Z¥¥^N]^\_X^W^\_^]^[\_XXWGG]]  
@HWI-EAS443:3:66:294:1842#0/1  
GTAGTTTTTTACTCTAGCTCTATGTTGACAAAATGACCAT  
+HWI-EAS443:3:66:294:1842#0/1  
`¥\_\_\_`aaa`X`¥^a[aaa\_a\_\_^^]WZa`a]]Y\_\_]a^  
@HWI-EAS443:3:67:1140:266#0/1  
GTAGTTTTTTACTCTAGCTCTATGTTGACAAAATGACCAT  
+HWI-EAS443:3:67:1140:266#0/1  
^OL\_NW]]\_U¥Y[¥MZ\_UUWWP^¥VSUOPMMKXYQYWPTT  
@HWI-EAS443:3:67:1237:1494#0/1  
GTAGTTTTTTACTCTAGCTCTATGTTGACAAAATGACCAT  
+HWI-EAS443:3:67:1237:1494#0/1  
a]a`^`aa\_a`\_\_`^`\_\_`^`\_`a^`^^`^`\_\_`^`]U\_^  
@HWI-EAS443:3:67:415:954#0/1  
GTAGTTTTTTACTCTAGCTCTATGTTGACAAAATGACCAT  
+HWI-EAS443:3:67:415:954#0/1  
a]Y[Q^aa\_\_TV\_[UV[WW^a\_ZNO[^a^a^UYHTBBB  
@HWI-EAS443:3:67:543:1608#0/1  
TAGTTTTTTACTCTAGCTCTATGTTGACAAAATGACCATC

+HWI-EAS443:3:67:543:1608#0/1  
a\_^\_abababbbaaab`baaaaaa\_a^aaaaV`a`a\_a]`a  
@HWI-EAS443:3:67:714:413#0/1  
TTTTACTCTAGCTCTATGTTGACAAAATGACCATCGTCAA  
+HWI-EAS443:3:67:714:413#0/1  
aa`SW\_baaaa]`\_a]Y``\_a¥\_a\_\_`\_W][ ]`\_YYMMX¥  
@HWI-EAS443:3:68:1081:138#0/1  
GTAGTTTTTTACTCTAGCTCTATGTTGACAAAATGACCAT  
+HWI-EAS443:3:68:1081:138#0/1  
a\_``]aaaaa\_`a`a`\_]\_]`\_a\_\_\_\_\_[^\_^\_]\_\_ZZ^V  
@HWI-EAS443:3:68:23:240#0/1  
GTAGTTTTTTACTCTAGCTCTATGTTGACAAAATGACCAT  
+HWI-EAS443:3:68:23:240#0/1  
a\_``^^\_a\_aaa\_a]^^]`\_a]\_\_^\_]`^\_\_\_^^^ZX]Z  
@HWI-EAS443:3:68:500:246#0/1  
TAGTTTTTTACTCTAGCTCTATGTTGACAAAATGACCATC  
+HWI-EAS443:3:68:500:246#0/1  
ZS\_0Q¥a^X`b\_\_¥Ya\_a```X\_]b\_^Za]]aa]`¥`ZDY  
@HWI-EAS443:3:70:1264:740#0/1  
GTAGTTTTTTACTCTAGCTCTATGTTGACAAAATGACCAT  
+HWI-EAS443:3:70:1264:740#0/1  
U`T`XUbZ\_]a`aa]¥b^[`Za^\_[\_¥[`^R^`UT¥¥P]^  
@HWI-EAS443:3:70:278:1008#0/1  
GTTTTTTACTCTAGCTCTATGTTGACAAAATGACCATCGT  
+HWI-EAS443:3:70:278:1008#0/1  
aaZZaa\_¥aab`]W`V`a]\_a^```a]a`V\_¥][ ]`^a[T  
@HWI-EAS443:3:70:472:908#0/1  
GTAGTTTTTTACTCTAGCTCTATGTTGACAAAATGACCAT  
+HWI-EAS443:3:70:472:908#0/1  
aYXX\_\_[aaS`]ab[\_abaa^\_\_a\_a^`L`baX\_a\_\_^`¥  
@HWI-EAS443:3:70:648:571#0/1  
TTTTACTCTAGCTCTATGTTGACAAAATGACCATCGTCA  
+HWI-EAS443:3:70:648:571#0/1  
abaaaaaa\_\_``````aaa\_`\_V\_^\_¥T]`aa\_\_¥¥\_Q[W  
@HWI-EAS443:3:71:1028:655#0/1  
GTAGTTTTTTACTCTAGCTCTATGTTGACAAAATGACCAT  
+HWI-EAS443:3:71:1028:655#0/1  
a`^\_GZa`¥aaRaa`aaaa¥0`a\_a`X\_\_a\_^]]^aY¥^  
@HWI-EAS443:3:72:211:1698#0/1  
CTCTAGCTCTATGTTGACAAAATGACCATCGTCAACATCC  
+HWI-EAS443:3:72:211:1698#0/1  
a`a`a``¥`¥a`a^`¥ab`]`a^Zaa``^`[U`^XV[V^^  
@HWI-EAS443:3:72:590:1412#0/1  
TAGCTCTATGTTGACAAAATGACCATCGTCAACATCCACA  
+HWI-EAS443:3:72:590:1412#0/1  
abaaab^]`a`aaaaab\_aZX\_`a``]R\_`a]a\_aX[S¥  
@HWI-EAS443:3:72:601:1577#0/1  
GTAGTTTTTTACTCTAGCTCTATGTTGACAAAATGACCAT  
+HWI-EAS443:3:72:601:1577#0/1  
a¥W`]aaaaa\_aaa`a`a`aa`aa\_a^a\_aaa]\_\_\_\_]`a]

@HWI-EAS443:3:73:1717:1073#0/1  
GTAGTTTTTTACTCTAGCTCTATGTTGACAAAATGACCAT  
+HWI-EAS443:3:73:1717:1073#0/1  
a]^`\_\_^`\_\_[]¥a\_\_^WZ^^^a`^^Z]\_[YYYYZVYYT  
@HWI-EAS443:3:73:1768:432#0/1  
TTTTACTCTAGCTCTATGTTGACAAAATGACCATCGTCAA  
+HWI-EAS443:3:73:1768:432#0/1  
aaaa¥Q¥]^`PQXQ]\_aaaa`[]a\_WVWT]LN\_]W[KHV`  
@HWI-EAS443:3:73:199:1781#0/1  
TAGTTTTTTACTCTAGCTCTATGTTGACAAAATGACCATC  
+HWI-EAS443:3:73:199:1781#0/1  
^W[Z`a`^`baa¥^Z]¥a¥`¥[W^^`^^^^UX^[[`^\_  
@HWI-EAS443:3:74:1657:926#0/1  
GTAGTTTTTTACTCTAGCTCTATGTTGACAAAATGACCAT  
+HWI-EAS443:3:74:1657:926#0/1  
a\_aa^aaaaab\_a`\_\_`]a\_a`a`a`a]a`\_^X`YX^X  
@HWI-EAS443:3:74:821:1802#0/1  
GTAGTTTTTTACTCTAGCTCTATGTTGACAAAATGACCAT  
+HWI-EAS443:3:74:821:1802#0/1  
aab^V^XY[[aa\_a]\_\_`[aaa¥PZ`][\_\_`[[^Y`^H`Q  
@HWI-EAS443:3:77:1342:475#0/1  
AGTTTTTTACTCTAGCTCTATGTTGACAAAATGACCATCG  
+HWI-EAS443:3:77:1342:475#0/1  
abbbbaabbb`a`bbabbab`bbabbbbbbbababab`[aaa\_  
@HWI-EAS443:3:77:979:273#0/1  
TTTTACTCTAGCTCTATGTTGACAAAATGACCATCGTCAA  
+HWI-EAS443:3:77:979:273#0/1  
abbabaa`aaa^a`aaab\_aaa\_aa`\_`^^`\_W`^¥\_WY\_\_  
@HWI-EAS443:3:78:1613:1664#0/1  
GTAGTTTTTTACTCTAGCTCTATGTTGACAAAATGACCAT  
+HWI-EAS443:3:78:1613:1664#0/1  
a¥W\_]`\_ba`\_`[\_\_\_¥^ZYV\_]PYXWU]\_\_\_]Z^XVX¥]  
@HWI-EAS443:3:78:397:143#0/1  
TTTTACTCTAGCTCTATGTTGACAAAATGACCATCGTCA  
+HWI-EAS443:3:78:397:143#0/1  
aaab`^^\_aa^a\_\_`^a\_\_\_`\_\_\_^`^\_]Z\_^X\_ZU[  
@HWI-EAS443:3:78:399:1271#0/1  
GTTTTTTACTCTAGCTCTATGTTGACAAAATGACCATCGT  
+HWI-EAS443:3:78:399:1271#0/1  
aaaaabb^`\_a`\_P\_aaa]^`[`¥a^aV¥Y[\_Z\_R]¥YWV  
@HWI-EAS443:3:78:923:362#0/1  
GTTTTTTACTCTAGCTCTATGTTGACAAAATGACCATCGT  
+HWI-EAS443:3:78:923:362#0/1  
a`^^aa^a\_a\_a\_\_\_^`\_\_\_]\_\_\_]\_^\_\_\_\_`^Z\_^X]Z  
@HWI-EAS443:3:79:1194:1306#0/1  
GTAGTTTTTTACTCTAGCTCTATGTTGACAAAATGACCAT  
+HWI-EAS443:3:79:1194:1306#0/1  
aYaa^[`baab\_a\_aa\_a`]\_a`a`\_a\_aa\_\_a`\_^]Xa`  
@HWI-EAS443:3:79:366:289#0/1  
GTAGTTTTTTACTCTAGCTCTATGTTGACAAAATGACCAT



@HWI-EAS443:3:81:314:88#0/1  
GTAGTTTTTTACTCTAGCTCTATGTTGACAAAATGACCAT  
+HWI-EAS443:3:81:314:88#0/1  
a]aa]\_`\_aa\_\_`^a`\_\_^\_\_^`^\_\_^Z^]`^Z`\_`^Z`]]  
@HWI-EAS443:3:81:676:634#0/1  
GTAGTTTTTTACTCTAGCTCTATGTTGACAAAATGACCAT  
+HWI-EAS443:3:81:676:634#0/1  
a^XXY^W^`^`\_`a`a`\_`\_`\_`U`^S^a[W`\_`\_`^`[W\_Z  
@HWI-EAS443:3:81:938:571#0/1  
GTAGTTTTTTACTCTAGCTCTATGTTGACAAAATGACCAT  
+HWI-EAS443:3:81:938:571#0/1  
a\_\_a^\_aba^a`a]aaa\_`\_`a`a`^`\_Y^\_\_^`\_`a\_ZV`\_`  
@HWI-EAS443:3:83:205:751#0/1  
GTAGTTTTTTACTCTAGCTCTATGTTGACAAAATGACCAT  
+HWI-EAS443:3:83:205:751#0/1  
`RW[ZZNX`\_`^W^T^R^a`QX`\_Y]`VZ^VQTZRZ\_[[V  
@HWI-EAS443:3:83:345:246#0/1  
GTTTTTTACTCTAGCTCTATGTTGACAAAATGACCATCGT  
+HWI-EAS443:3:83:345:246#0/1  
a\_\_aaaaaa`\_`Za^\_W`^`\_`\_`\_`^]`^]`X]]XX`N  
@HWI-EAS443:3:84:1305:233#0/1  
GTAGTTTTTTACTCTAGCTCTATGTTGACAAAATGACCAT  
+HWI-EAS443:3:84:1305:233#0/1  
a\_aa\_`baaa`\_`\_`\_`aX\_S]\_`\_`a^aa`V]^`\_`^`[ZZ]]  
@HWI-EAS443:3:84:132:2008#0/1  
TAGTTTTTTACTCTAGCTCTATGTTGACAAAATGACCATC  
+HWI-EAS443:3:84:132:2008#0/1  
a\_a\_aaaaaaa`aaa`\_`aa`a`a`^`\_`aaa`\_`aa`\_`a`\_`a`\_`  
@HWI-EAS443:3:84:1457:970#0/1  
TTTTTACTCTAGCTCTATGTTGACAAAATGACCATCGTCA  
+HWI-EAS443:3:84:1457:970#0/1  
aba^[\_`[a\_^^\_W]Z`aaa\_ab^^a`a`\_`a`\_`^W]^S[]U  
@HWI-EAS443:3:84:320:180#0/1  
GTTTTTTACTCTAGCTCTATGTTGACAAAATGACCATCGT  
+HWI-EAS443:3:84:320:180#0/1  
`\_]`[R\_\_YWS]ZTS[]\_YYYZVS\_\_UROYTXXYYONPNSO  
@HWI-EAS443:3:84:956:1324#0/1  
CTCTAGCTCTATGTTGACAAAATGACCATCGTCAACATCC  
+HWI-EAS443:3:84:956:1324#0/1  
O\_]\_a`abZY`¥¥¥U`\_`T`b]b\_bUUbb`\_`¥TR`¥b\_bb`\_`b`  
@HWI-EAS443:3:85:1142:431#0/1  
GTAGTTTTTTACTCTAGCTCTATGTTGACAAAATGACCAT  
+HWI-EAS443:3:85:1142:431#0/1  
a`¥`a^`\_a`\_`a`^`V`\_`]Y][^`^`^`^`¥`\_`\_`\_`\_`\_`XV^^  
@HWI-EAS443:3:85:698:1445#0/1  
TCTAGCTCTATGTTGACAAAATGACCATCGTCAACATCCA  
+HWI-EAS443:3:85:698:1445#0/1  
aba`¥aaaaabaa`\_`\_`a`a`aa`\_]\_`aaa`\_`¥PX]`\_]a`\_`\_`\_`  
@HWI-EAS443:3:85:97:1178#0/1  
GTAGTTTTTTACTCTAGCTCTATGTTGACAAAATGACCAT

+HWI-EAS443:3:85:97:1178#0/1  
a^Q`Y`aaaa\_]\_¥¥\_`\_[Y`\_]V`¥\_`^`\_][`^`  
@HWI-EAS443:3:86:1090:915#0/1  
GTAGTTTTTTACTCTAGCTCTATGTTGACAAAATGACCAT  
+HWI-EAS443:3:86:1090:915#0/1  
a`aa\_aaaa`]a`aaa\_\_\_\_aaaaaa^]a\_\_\_\_a`\_]\_\_\_\_  
@HWI-EAS443:3:86:1351:1430#0/1  
GTTTTTTACTCTAGCTCTATGTTGACAAAATGACCATCGT  
+HWI-EAS443:3:86:1351:1430#0/1  
a¥^\_a`¥aa\_SY\_a\_\_aa\_a\_\_\_\_a\_]`\_\_`^^]X\_¥W]X  
@HWI-EAS443:3:86:1531:1455#0/1  
TAGTTTTTTACTCTAGCTCTATGTTGACAAAATGACCATC  
+HWI-EAS443:3:86:1531:1455#0/1  
aba\_bbbbb¥aaaaab\_a`aaaa`[aaa\_aaa\_`^`S  
@HWI-EAS443:3:86:1610:1788#0/1  
GTTTTTTACTCTAGCTCTATGTTGACAAAATGACCATCGT  
+HWI-EAS443:3:86:1610:1788#0/1  
`\_aaaaaaXa`a\_X\_]\_\_aa\_`\_VS`^[]¥Y¥]U^\_AY[  
@HWI-EAS443:3:86:814:758#0/1  
TCTAGCTCTATGTTGACAAAATGACCATCGTCAACATCCA  
+HWI-EAS443:3:86:814:758#0/1  
]Y\_Q]aaV]QX\_^^^R[\_\_\_][\_`VSWY]¥\_R]TXX[VQOS  
@HWI-EAS443:3:87:1037:1335#0/1  
GTAGTTTTTTACTCTAGCTCTATGTTGACAAAATGACCAT  
+HWI-EAS443:3:87:1037:1335#0/1  
a[aa`a`aa`a]a`\_a`X`[aaaa]W^[¥^\_aa]\_¥Z\_\_  
@HWI-EAS443:3:87:1625:1044#0/1  
GTAGTTTTTTACTCTAGCTCTATGTTGACAAAATGACCAT  
+HWI-EAS443:3:87:1625:1044#0/1  
a[^aPabb`baVa`aa\_\_a]`aaa``[`Z``^a`a^UT^a  
@HWI-EAS443:3:87:487:1610#0/1  
TCTAGCTCTATGTTGACAAAATGACCATCGTCAACATCCA  
+HWI-EAS443:3:87:487:1610#0/1  
ababa`bbaaaa\_aa`aba`aaaa\_a`\_]`[^`]^`^a]\_  
@HWI-EAS443:3:88:193:1205#0/1  
TAGTTTTTTACTCTAGCTCTATGTTGACAAAATGACCATC  
+HWI-EAS443:3:88:193:1205#0/1  
abb`a`b\_a\_a\_`abXbaba\_aa`]abba`aaaaa\_`a`  
@HWI-EAS443:3:88:898:977#0/1  
GTAGTTTTTTACTCTAGCTCTATGTTGACAAAATGACCAT  
+HWI-EAS443:3:88:898:977#0/1  
`abbV^`baab^aaaaa]aaaa`a\_aaa\_aa`^`\_`^`^`  
@HWI-EAS443:3:89:1311:647#0/1  
GTAGTTTTTTACTCTAGCTCTATGTTGACAAAATGACCAT  
+HWI-EAS443:3:89:1311:647#0/1  
^TYa\_[]`¥a\_YVYUVa\_`Y\_`\_`WaW^W^Z]\_¥X^OKZ\_  
@HWI-EAS443:3:89:497:102#0/1  
GTAGTTTTTTACTCTAGCTCTATGTTGACAAAATGACCAT  
+HWI-EAS443:3:89:497:102#0/1  
a\_ab\_aaaaa\_`]aaa\_\_\_\_a\_a`^`\_`Z]\_`^`^^`\_`^W^`



@HWI-EAS443:3:89:639:1834#0/1  
GTAGTTTTTTACTCTAGCTCTATGTTGACAAAATGACCAT  
+HWI-EAS443:3:89:639:1834#0/1  
a\_ab\_aaaaaaaaab\_a\_aaaa\_aaa`aba``\_aa\_a`  
@HWI-EAS443:3:90:1073:1018#0/1  
TAGTTTTTTACTCTAGCTCTATGTTGACAAAATGACCATC  
+HWI-EAS443:3:90:1073:1018#0/1  
aba^`babbbab`babbbabbbba\_a`aaaaab\_a\_[aa\_  
@HWI-EAS443:3:90:1375:1214#0/1  
GTAGTTTTTTACTCTAGCTCTATGTTGACAAAATGACCAT  
+HWI-EAS443:3:90:1375:1214#0/1  
`SS^¥a¥aZVQRaR^¥V¥[]\_aYSYUQT`X\_XWYLQYX  
@HWI-EAS443:3:90:645:1988#0/1  
GTTTTTTACTCTAGCTCTATGTTGACAAAATGACCATCGT  
+HWI-EAS443:3:90:645:1988#0/1  
^Saab``^`\_b[a\_\_Za\_`Ra\_]`^ZY\_\_\_\_]\_\_\_\_]^Y^`S  
@HWI-EAS443:3:91:1501:421#0/1  
CTCTAGCTCTATGTTGACAAAATGACCATCGTCAACATCC  
+HWI-EAS443:3:91:1501:421#0/1  
V\_0¥bbabZ`aabbabb\_a\_aabb¥WNabVYLSSYVa^\_T  
@HWI-EAS443:3:91:864:407#0/1  
GTAGTTTTTTACTCTAGCTCTATGTTGACAAAATGACCAT  
+HWI-EAS443:3:91:864:407#0/1  
aQTY\_^\_\_S]\_YUXY¥[WLX]]][UXX]^S]YY][VXVX  
@HWI-EAS443:3:92:180:673#0/1  
TAGTTTTTTACTCTAGCTCTATGTTGACAAAATGACCATC  
+HWI-EAS443:3:92:180:673#0/1  
^\_aaababaaaa`bbbaa`ba`baaaaaabaa``aa`a\_\_  
@HWI-EAS443:3:93:1160:402#0/1  
GTAGTTTTTTACTCTAGCTCTATGTTGACAAAATGACCAT  
+HWI-EAS443:3:93:1160:402#0/1  
aZT\_LW]\_\_`]P¥¥\_`aVZN^^¥[HZYWVOOJVW\_BBBBB  
@HWI-EAS443:3:93:1556:369#0/1  
TTTTTACTCTAGCTCTATGTTGACAAAATGACCATCGTCA  
+HWI-EAS443:3:93:1556:369#0/1  
Y`^ba]^¥`V^a^VGZ\_aa`\_Z]V[\_\_\_\_^YW\_Z¥XNZBBB  
@HWI-EAS443:3:93:1577:1081#0/1  
GTAGTTTTTTACTCTAGCTCTATGTTGACAAAATGACCAT  
+HWI-EAS443:3:93:1577:1081#0/1  
a^a`Vaaaa`a^a\_aaa]\_]a^aa^`^^^^\_\_`\_`^W[\_a  
@HWI-EAS443:3:93:674:1325#0/1  
GTAGTTTTTTACTCTAGCTCTATGTTGACAAAATGACCAT  
+HWI-EAS443:3:93:674:1325#0/1  
a^ab^\_aaaa`a\_\_aa`\_\_^\_`a`\_\_X]Y``a^\_^]YY`\_  
@HWI-EAS443:3:94:1304:821#0/1  
GTAGTTTTTTACTCTAGCTCTATGTTGACAAAATGACCAT  
+HWI-EAS443:3:94:1304:821#0/1  
a[`\_T^\_\_¥`\_PPWWZVP^[Z[\_`PU[]¥\_[^]Y¥YYHIM  
@HWI-EAS443:3:94:1401:256#0/1  
GTAGTTTTTTACTCTAGCTCTATGTTGACAAAATGACCAT

+HWI-EAS443:3:94:1401:256#0/1  
a]ab\_]aa\_`^¥¥\_\_`Sa¥\_¥a\_¥^`]U]^]^^¥^NGR]  
@HWI-EAS443:3:94:1471:1466#0/1  
GTAGTTTTTTACTCTAGCTCTATGTTGACAAAATGACCAT  
+HWI-EAS443:3:94:1471:1466#0/1  
`OQ^LYaa^Y]XNO]¥\_MYK`^Y¥VP\_\_]\_ZOV\_\_YOFQY  
@HWI-EAS443:3:94:208:151#0/1  
GTTTTTTACTCTAGCTCTATGTTGACAAAATGACCATCGT  
+HWI-EAS443:3:94:208:151#0/1  
a^\_`a`\_a^\_`^¥\_`^Y\_\_^^]`^][^][^][W[X  
@HWI-EAS443:3:95:347:982#0/1  
GTTTTTTACTCTAGCTCTATGTTGACAAAATGACCATCGT  
+HWI-EAS443:3:95:347:982#0/1  
a^a^a`\_a[`a`a`¥\_\_`\_aa^`\_`^\_\_`\_\_^\_\_Za\_]\_X  
@HWI-EAS443:3:96:1213:1549#0/1  
TAGTTTTTTACTCTAGCTCTATGTTGACAAAATGACCATC  
+HWI-EAS443:3:96:1213:1549#0/1  
a\_b^¥^aaba`\_U`\_\_a^\_\_`aPX`[Z[`^\_a`[[^]YV  
@HWI-EAS443:3:96:1271:561#0/1  
GTAGTTTTTTACTCTAGCTCTATGTTGACAAAATGACCAT  
+HWI-EAS443:3:96:1271:561#0/1  
a]Z\_PX¥\_ab`P`\_a[SJaW[X][WPWXW]W¥\_¥V^W[BB  
@HWI-EAS443:3:96:1449:751#0/1  
GTTTTTTACTCTAGCTCTATGTTGACAAAATGACCATCGT  
+HWI-EAS443:3:96:1449:751#0/1  
`TaaabaaabYaa`ZbPa\_aaZ\_^`Wa`a`\_\_`^I\_^U\_\_  
@HWI-EAS443:3:96:1454:1476#0/1  
TTTTTACTCTAGCTCTATGTTGACAAAATGACCATCGTCA  
+HWI-EAS443:3:96:1454:1476#0/1  
a[aaZ\_P]V^[ZTbY\_W`YX`\_`X[TVS[Y[TY\_^S\_XSU  
@HWI-EAS443:3:97:428:18#0/1  
GTAGTTTTTTACTCTAGCTCTATGTTGACAAAATGACCAT  
+HWI-EAS443:3:97:428:18#0/1  
¥HZ`T¥^`\_\_R\_[TXaZ\_Z\_]\_a[[[YXXX¥\_NQLQY  
@HWI-EAS443:3:97:605:422#0/1  
GTAGTTTTTTACTCTAGCTCTATGTTGACAAAATGACCAT  
+HWI-EAS443:3:97:605:422#0/1  
aU\_a^`aaaa¥\_\_`\_a\_\_[a][`¥\_`^\_V]`\_\_\_\_^YY]]  
@HWI-EAS443:3:97:639:932#0/1  
GTAGTTTTTTACTCTAGCTCTATGTTGACAAAATGACCAT  
+HWI-EAS443:3:97:639:932#0/1  
^NW\_Za`aa\_\_\_\_`YY`\_V\_[\_\_\_\_Y\_]WO][\_]\_\_[W][\_`^  
@HWI-EAS443:3:98:1285:607#0/1  
GTAGTTTTTTACTCTAGCTCTATGTTGACAAAATGACCAT  
+HWI-EAS443:3:98:1285:607#0/1  
a`\_b]\_aaaa\_a¥aa`¥a^a\_aa^\_a^^`a^^aa\_Y[\_`  
@HWI-EAS443:3:98:379:1667#0/1  
GTAGTTTTTTACTCTAGCTCTATGTTGACAAAATGACCAT  
+HWI-EAS443:3:98:379:1667#0/1  
aaaa`aaabaaaaabaaa`aaaa`a`a`aaaa\_a^\_a`

@HWI-EAS443:3:98:509:426#0/1  
GTTTTTACTCTAGCTCTATGTTGACAAAATGACCATCGT  
+HWI-EAS443:3:98:509:426#0/1  
^RTX`^[]T`[Zaa`\_Z\_^Y[W^^¥¥Z^\_]`\_[]¥¥¥W`X  
@HWI-EAS443:3:99:366:1306#0/1  
GTAGTTTTTACTCTAGCTCTATGTTGACAAAATGACCAT  
+HWI-EAS443:3:99:366:1306#0/1  
^Xb^PF[aYbWM^aaaZ`\_a¥a`Uaa]`[]`\_Y\_BBBBB  
@HWI-EAS443:3:99:435:367#0/1  
TTTTTACTCTAGCTCTATGTTGACAAAATGACCATCGTC  
+HWI-EAS443:3:99:435:367#0/1  
`b\_^bb`QVY¥^Y`\_a`ba^aa]R[[]`\_a`^^^aWaT0`  
@HWI-EAS443:3:9:423:1220#0/1  
GTAGTTTTTACTCTAGCTCTATGTTGACAAAATGACCAT  
+HWI-EAS443:3:9:423:1220#0/1  
a\_a`TQXa]W]¥P]W¥`\_¥\_\_\_YY¥TTZ^\_VPY¥^]¥V^Z  
@HWI-EAS443:3:88:1118:980#0/1  
GTAGTTTTTACTCTAGCTCTATGTTGGCAAAAATGACCAT  
+HWI-EAS443:3:88:1118:980#0/1  
a^^`\_¥]¥Za`\_`\_¥Z`YYY`\_\_[Y¥Ya]`]]\_Y\_\_UZ^^  
@HWI-EAS443:3:100:1133:527#0/1  
GGCGTCATATACAACAGGATGGGAACAGTGACCACAGAAG  
+HWI-EAS443:3:100:1133:527#0/1  
aa0Jaa`a\_a^)`\_`]V^[aaaa[\_\_\_Z\_G`\_T\_\_\_^a¥BB  
@HWI-EAS443:3:61:1375:273#0/1  
CAGCCTTCTGTGGTCACTGTTCCCATCCTGTTGTATATGA  
+HWI-EAS443:3:61:1375:273#0/1  
H[ `[0\_b\_\_\_]`abb\_a`\_`b`b`Z`b`\_`^]b\_K¥bb]]  
@HWI-EAS443:3:75:760:170#0/1  
GGGGCTCATATACAACAGGATGGGAACAGTGACCACAGAA  
+HWI-EAS443:3:75:760:170#0/1  
a`¥QQ^^¥]]TS]\_X¥¥]XT\_a\_aZYP[[Pa\_\_UVLR¥`\_`  
@HWI-EAS443:3:85:420:1934#0/1  
CTGTTCCCATCCTGTTGTATATGAGACCCATGCAACTGGC  
+HWI-EAS443:3:85:420:1934#0/1  
ab^X\_SZ]^W^aR`\_`WHZUS¥QXaG`[\_bZFYZLV¥FFR  
@HWI-EAS443:3:17:35:1002#0/1  
GGCTATGGAACAGATGGCTGGATCGAGCGAACAGGCCGCA  
+HWI-EAS443:3:17:35:1002#0/1  
\_^\_¥VRGZYX]QMQX]UBBBBBBBBBBBBBBBBBBBBBBBB  
@HWI-EAS443:3:13:519:1652#0/1  
GGCCATTCCATGAGAGCCTCAAGATCTGTGTTCTTTCCTG  
+HWI-EAS443:3:13:519:1652#0/1  
aa]DYTaZVQPvY]\_\_\_]PSV]H\_SXS]M¥XV^[^ZNPg¥  
@HWI-EAS443:3:16:371:615#0/1  
TGCCATTCCATGAGAGCCTCAAGATCTGTGTTCTTTCCTG  
+HWI-EAS443:3:16:371:615#0/1  
`ba`\_baabaabbaaaba`b`a`aaZb^)]`\_`\_a`\_a`  
@HWI-EAS443:3:21:1251:1243#0/1  
GGCCATTCCATGAGAGCCTCAAGATCTGTGTTCTTTCCTG



@HWI-EAS443:3:19:91:1426#0/1  
ATTCCATGAGAGCCTCAAGATCTGTGTTCTTTCCTGCAAA  
+HWI-EAS443:3:19:91:1426#0/1  
`aaa\_aaaa¥¥`ZXaaaa¥[]\_Ua^^[[`\_]XWLU][^  
@HWI-EAS443:3:23:1414:1058#0/1  
AGGAAAGAACACAGATCTTGAGGCTCTCATGGAATGGCTA  
+HWI-EAS443:3:23:1414:1058#0/1  
^\_]¥b`bYbab]\_ba]a`aaQZ^¥`\_[X]¥X^UPH]¥¥¥  
@HWI-EAS443:3:23:693:621#0/1  
AGCCATTCCATGAGAGCCTCAAGATCTGTGTTCTTTCCTG  
+HWI-EAS443:3:23:693:621#0/1  
aaa`\_a\_a`aa`\_a\_`\_\_^R\_`\_`\_ZaZ^[\_`^\_]Z^^  
@HWI-EAS443:3:25:1773:1985#0/1  
AGCCATTCCATGAGAGCCTCAAGATCTGTGTTCTTTCCTG  
+HWI-EAS443:3:25:1773:1985#0/1  
ab`bbaaaaaabb[a¥^a\_\_aaaa]`\_`X\_W^Xa^`\_U]^  
@HWI-EAS443:3:28:1536:1534#0/1  
ATTCCATGAGAGCCTCAAGATCTGTGTTCTTTCCTGCAAA  
+HWI-EAS443:3:28:1536:1534#0/1  
aaaaabaaaaa\_\_¥¥\_a^a`\_b\_b^a^aa`^[aaW\_`^  
@HWI-EAS443:3:39:1114:1423#0/1  
AGCCATTCCATGAGAGCCTCAAGATCTGTGTTCTTTCCTG  
+HWI-EAS443:3:39:1114:1423#0/1  
aababaaabaa\_`^`\_aa^`[Y\_`^`\_a^\_Y^]`\_¥^Y  
@HWI-EAS443:3:39:1320:1082#0/1  
AGCCATTCCATGAGAGCCTCAAGATCTGTGTTCTTTCCTG  
+HWI-EAS443:3:39:1320:1082#0/1  
`````\_`a```a^`aaaa\_^]W\_[¥`\_`a\_b\_]aa`\_\_\_\_]  
@HWI-EAS443:3:39:695:208#0/1  
GCCATTCCATGAGAGCCTCAAGATCTGTGTTCTTTCCTGC  
+HWI-EAS443:3:39:695:208#0/1  
aba]`aaa]^`\_\_^`\_[Z]]a][WW\_Y`U]V]^ZZ[Y^V  
@HWI-EAS443:3:42:71:713#0/1  
AGCCATTCCATGAGAGCCTCAAGATCTGTGTTCTTTCCTG  
+HWI-EAS443:3:42:71:713#0/1  
^abaa`abba]aa]aaaa`aX^`\_\_`aa^a\_`\_`a\_`\_`^`  
@HWI-EAS443:3:44:1448:1835#0/1  
AGCCATTCCATGAGAGCCTCAAGATCTGTGTTCTTTCCTG  
+HWI-EAS443:3:44:1448:1835#0/1  
^Za`\_a[QZX^aUUUY[Y\_`\_`[[X]X`\_`Ua]VfV\_]VVY¥  
@HWI-EAS443:3:45:111:807#0/1  
AGCCATTCCATGAGAGCCTCAAGATCTGTGTTCTTTCCTG  
+HWI-EAS443:3:45:111:807#0/1  
a[Z¥^`\_V00aVTZaab`ZZW]XYQ[X\_^PaZa^`\_]¥[Za  
@HWI-EAS443:3:48:884:809#0/1  
AGCCATTCCATGAGAGCCTCAAGATCTGTGTTCTTTCCTG  
+HWI-EAS443:3:48:884:809#0/1  
abaaabaaa\_ab`b\_aaaa^`^a\_a`aa^`^a\_aaa^`\_`a  
@HWI-EAS443:3:55:82:1272#0/1  
AGCCATTCCATGAGAGCCTCAAGATCTGTGTTCTTTCCTG

+HWI-EAS443:3:55:82:1272#0/1  
¥^^\_X[OWX]SU]aTGR\_V0a`VOLVaXZ¥FTDT]`XLVZ  
@HWI-EAS443:3:56:1334:548#0/1  
TAGCCATTCCATGAGAGCCTCAAGATCTGTGTTCTTTCCT  
+HWI-EAS443:3:56:1334:548#0/1  
a]`aRW^a\_a`^V`ZXX¥[^^[\_¥]¥aXNa\_`[a\_]RWV  
@HWI-EAS443:3:58:728:1149#0/1  
AGCCATTCCATGAGAGCCTCAAGATCTGTGTTCTTTCCTG  
+HWI-EAS443:3:58:728:1149#0/1  
^a]abaa\_a`]`aaa`]aba\_`aaa\_aa\_a^\_\_aa`\_\_T\_  
@HWI-EAS443:3:61:1424:1217#0/1  
AGCCATTCCATGAGAGCCTCAAGATCTGTGTTCTTTCCTG  
+HWI-EAS443:3:61:1424:1217#0/1  
`aaaabaaaaa`a\_a¥aab`¥aa`aa`\_a\_aYa\_\_VXX¥  
@HWI-EAS443:3:63:897:310#0/1  
AGCCATTCCATGAGAGCCTCAAGATCTGTGTTCTTTCCTG  
+HWI-EAS443:3:63:897:310#0/1  
`X¥¥`babaaa`a\_a\_b\_a[``[\_]aaZ\_R`\_```aX`  
@HWI-EAS443:3:64:741:17#0/1  
GCCATTCCATGAGAGCCTCAAGATCTGTGTTCTTTCCTGC  
+HWI-EAS443:3:64:741:17#0/1  
aa\_aa`\_```a¥`^\_^\_\_Y]^\_^^^\_\_]`\_]`\_^V]¥^V  
@HWI-EAS443:3:67:1354:496#0/1  
AGCCATTCCATGAGAGCCTCAAGATCTGTGTTCTTTCCTG  
+HWI-EAS443:3:67:1354:496#0/1  
aaa^ab[`aa\_]a\_\_^`\_a\_a^a^]`aX\_X\_]\_aa]V]\_  
@HWI-EAS443:3:67:1610:1176#0/1  
ATTCCATGAGAGCCTCAAGATCTGTGTTCTTTCCTGCAAA  
+HWI-EAS443:3:67:1610:1176#0/1  
]`bbabb`bb\_ab`Uab`\_a`aaa¥bbbabbbaabb\_aba  
@HWI-EAS443:3:68:583:1531#0/1  
ATTCCATGAGAGCCTCAAGATCTGTGTTCTTTCCTGCAAA  
+HWI-EAS443:3:68:583:1531#0/1  
a]]aaaa]XU^]aaZ\_Y[`a]`\_`S\_X\_\_`\_`a`]^^\_\_^  
@HWI-EAS443:3:73:577:1942#0/1  
AGCCATTCCATGAGAGCCTCAAGATCTGTGTTCTTTCCTG  
+HWI-EAS443:3:73:577:1942#0/1  
`Q¥`aa\_a^a¥a]Y\_\_aa\_^\_^`^a`\_]aU^aZ\_]\_RPV  
@HWI-EAS443:3:78:1037:674#0/1  
AGCCATTCCATGAGAGCCTCAAGATCTGTGTTCTTTCCTG  
+HWI-EAS443:3:78:1037:674#0/1  
]]XSQ\_\_VZ```¥ba\_^Q`TZ`U^Z]b\_aX]¥a`]S¥a  
@HWI-EAS443:3:81:1454:1090#0/1  
GCCATTCCATGAGAGCCTCAAGATCTGTGTTCTTTCCTGC  
+HWI-EAS443:3:81:1454:1090#0/1  
a¥¥Xab\_a\_aa[R]¥\_`bT\_aa`aZaY\_]a^b`a^\_]a^  
@HWI-EAS443:3:82:1180:695#0/1  
AGCCATTCCATGAGAGCCTCAAGATCTGTGTTCTTTCCTG  
+HWI-EAS443:3:82:1180:695#0/1  
\_a]Ya`bbaaa]U^]a\_\_a]Ya]aa^aaGb¥\_[baa^¥`a

@HWI-EAS443:3:82:358:1680#0/1  
AGCCATTCCATGAGAGCCTCAAGATCTGTGTTCTTTCTG  
+HWI-EAS443:3:82:358:1680#0/1  
ZQ^^`¥Z\_\_¥NSX^LZZS\_^Ra[S]R[VXR^Q`\_VVV]QJ  
@HWI-EAS443:3:83:424:1876#0/1  
AGCCATTCCATGAGAGCCTCAAGATCTGTGTTCTTTCTG  
+HWI-EAS443:3:83:424:1876#0/1  
\_P[a`a`aaaY¥VYYU`a^`\_\_\_^¥\_\_aU`] [\_`^Ya`^^  
@HWI-EAS443:3:83:502:1984#0/1  
CATTCCATGAGAGCCTCAAGATCTGTGTTCTTTCTGCAA  
+HWI-EAS443:3:83:502:1984#0/1  
a\_a`aaWaUVPZ[^[S¥aV\_QPZaURV][¥[^\_aVL¥\_[  
@HWI-EAS443:3:84:1638:1413#0/1  
GCCATTCCATGAGAGCCTCAAGATCTGTGTTCTTTCTGC  
+HWI-EAS443:3:84:1638:1413#0/1  
aZ]`a`\_`TFN^W¥\_SUSN¥a[`W\_RU`\_`Ua^\_ZUZWW  
@HWI-EAS443:3:85:1579:1296#0/1  
AGCCATTCCATGAGAGCCTCAAGATCTGTGTTCTTTCTG  
+HWI-EAS443:3:85:1579:1296#0/1  
\_¥\_b`\_b^TZ`aa]S[W\_¥\_R^][ ]`S\_TW`a]`\_\_^`  
@HWI-EAS443:3:89:912:451#0/1  
AGCCATTCCATGAGAGCCTCAAGATCTGTGTTCTTTCTG  
+HWI-EAS443:3:89:912:451#0/1  
aaSZU\_[W^[ZU[bWa`\_`Ua¥`\_`a\_aaX]Na¥^a` [ ]Va  
@HWI-EAS443:3:91:1221:1962#0/1  
AGCCATTCCATGAGAGCCTCAAGATCTGTGTTCTTTCTG  
+HWI-EAS443:3:91:1221:1962#0/1  
aaa^a¥]a\_a]a\_\_^`\_`^¥\_`[\_0`\_ZaZ\_Z\_Z\_^Z[\_  
@HWI-EAS443:3:93:840:91#0/1  
AGCCATTCCATGAGAGCCTCAAGATCTGTGTTCTTTCTG  
+HWI-EAS443:3:93:840:91#0/1  
\_QVaaaaY\_YaY[a^^^` [ `YbX^¥]W^\_]`Z[[ZVWX\_  
@HWI-EAS443:3:95:1082:1422#0/1  
CATTCCATGAGAGCCTCAAGATCTGTGTTCTTTCTGCAA  
+HWI-EAS443:3:95:1082:1422#0/1  
abb`aa]b^ZZ\_b[ `aab` ``bVb\_bbZb\_ba^NOa[ `b\_  
@HWI-EAS443:3:95:1352:661#0/1  
AGCCATTCCATGAGAGCCTCAAGATCTGTGTTCTTTCTG  
+HWI-EAS443:3:95:1352:661#0/1  
`aSVbbb\_Wbbbaaba^Z\_aaa^a`bb]b`aYbabSW``  
@HWI-EAS443:3:48:354:1148#0/1  
TTCTGTTTTTCATGCCTGATTAGTGGATTGGTGGGAGGAGG  
+HWI-EAS443:3:48:354:1148#0/1  
aaaab`aaa`\_`a\_^aa^aa\_a^aaYaaaa]BBBBBBBBB  
@HWI-EAS443:3:75:1683:159#0/1  
ACCATTCTGTTTTAATGCCTGATTAGTGGATTGGTGGGAG  
+HWI-EAS443:3:75:1683:159#0/1  
abaXbbbb`ba`Ha`b\_YabWbba^^aa`b``¥[a\_BBB  
@HWI-EAS443:3:5:1027:84#0/1  
ATTCTGTTTTTCATGCCTGATTAGTGGATTGGTGGGGTAG

+HWI-EAS443:3:5:1027:84#0/1  
a¥]Q[WH^`^[Z[`a\_Iba^ba[bWY^^``BBBBBBBBBBBB  
@HWI-EAS443:3:68:330:1449#0/1  
CACCAATCCACTAATCAGGCATGAAAACAGAATGCCGCTC  
+HWI-EAS443:3:68:330:1449#0/1  
^SUWSR[UHVX]^aJZNVQS¥SPTVNL[NXBBBBBBBBBB  
@HWI-EAS443:3:87:871:1038#0/1  
ATTCTGTTTTTCATGCCTGATTAGTGGATTGGTGGGAGGAG  
+HWI-EAS443:3:87:871:1038#0/1  
abbbaba`baaab\_`aaV\_aaa\_\_a\_a`^`^BBBBBBBBBB  
@HWI-EAS443:3:98:1612:453#0/1  
ATTCTGTTTTTCATGCCTGATTAGTGGATTGGTGGGGGAG  
+HWI-EAS443:3:98:1612:453#0/1  
aba\_]¥\_bba]`abaabbaabab\_b\_ab^aaZBBBBBBBB  
@HWI-EAS443:3:8:1358:1016#0/1  
CACCATTCTGTTTTTCATGCCTGATTAGTGGATGGGTGGGA  
+HWI-EAS443:3:8:1358:1016#0/1  
ab`OV¥aZbbY`[^^^abbaaba`b¥`X\_U¥`H¥aY`\_BB  
@HWI-EAS443:3:13:822:305#0/1  
CATTCTGTTTTTCATGCCTGATTAGTGGATTGGTGGGAGGA  
+HWI-EAS443:3:13:822:305#0/1  
aabbaab`]bbb\_aaa`ab\_aa`aRaa]`abaXaBBBBBB  
@HWI-EAS443:3:67:1733:850#0/1  
GCCATTCTGTTTTTCATGCCTGATTAGTGGATTGGTGGGAG  
+HWI-EAS443:3:67:1733:850#0/1  
a]babbabbabb``abaaababbab``aaaa]^Yb[BBB  
@HWI-EAS443:3:98:1017:1338#0/1  
CACCAATCCACTAATCAGGCATGAAAACNGAATGGTGCTG  
+HWI-EAS443:3:98:1017:1338#0/1  
aababbb`abababa`bbb\_bbbbb`¥DZbbba\_aabb  
@HWI-EAS443:3:51:886:1567#0/1  
CACCATTCTGTTTTTCATGCCTGATTAGTGGATTGGTGGGA  
+HWI-EAS443:3:51:886:1567#0/1  
Y\_b^W`a\_bba\_Y]aaaa`[a`]a\_H^S\_aZa]ab\_b`BB  
@HWI-EAS443:3:52:624:326#0/1  
TAATCAGGCATGAAAACAGAATGGTGCTGGCCAGCACTAG  
+HWI-EAS443:3:52:624:326#0/1  
Zb\_L[\_a]`S]aSa\_QXZ¥WN\_aSa`^P¥`[FQQH¥NPOF  
@HWI-EAS443:3:81:1052:1134#0/1  
GCACCATTCTGTTTTTCATGCCTGATTAGTGGATTGGTGGG  
+HWI-EAS443:3:81:1052:1134#0/1  
aaa\_U\_IW^R`]UR^^]¥]`aa]¥[X`BBBBBBBBBBBB  
@HWI-EAS443:3:100:160:307#0/1  
CAGCACCATTCTGTTTTTCATGCCTGATTAGTGGATTGGTG  
+HWI-EAS443:3:100:160:307#0/1  
a`a]Y`T\_a```b\_Y\_aa\_abV^aa\_`]^\_V^W]]ZBBBB  
@HWI-EAS443:3:11:228:166#0/1  
CACCAATCCACTAATCAGGCATGAAAACAGAATGGTGCTG  
+HWI-EAS443:3:11:228:166#0/1  
a]Qa0`\_aa]^`XTSUV\_\_`XP^UR¥^\_TJX]BBBBBBBB



@HWI-EAS443:3:27:1383:1042#0/1  
CACCAATCCACTAATCAGGCATGAAAACAGAATGGTGCTG  
+HWI-EAS443:3:27:1383:1042#0/1  
^bbabb\_b[aaaba``abaaabaaa\_\_`ab\_\_aa`Q^^\_\_  
@HWI-EAS443:3:28:445:486#0/1  
CACCAATCCACTAATCAGGCATGAAAACAGAATGGTGCTG  
+HWI-EAS443:3:28:445:486#0/1  
¥W`W]XX`\_Z\_a^^XZ`]XX`¥¥\_¥SP[\_`ZYRWUDV^Y¥  
@HWI-EAS443:3:33:310:1439#0/1  
CACCAATCCACTAATCAGGCATGAAAACAGAATGGTGCTG  
+HWI-EAS443:3:33:310:1439#0/1  
aaab\_Y¥aaaaa`\_\_`\_`\_aa`\_¥I[¥```]`\_Y[VU¥^^¥  
@HWI-EAS443:3:36:282:1886#0/1  
CACCAATCCACTAATCAGGCATGAAAACAGAATGGTGCTG  
+HWI-EAS443:3:36:282:1886#0/1  
aaba`]^aaa`aa¥a`\_¥`a`a`a\_]UZ`¥\_\_VWWW`ZY  
@HWI-EAS443:3:37:277:1752#0/1  
CACCAATCCACTAATCAGGCATGAAAACAGAATGGTGCTG  
+HWI-EAS443:3:37:277:1752#0/1  
a`]U^aTZ\_U\_Ya]Qa\_a`a`a`a[^¥¥S[V¥]ZUS\_W¥  
@HWI-EAS443:3:40:1565:725#0/1  
GCACCATTCTGTTTTTCATGCCTGATTAGTGGATTGGTGGT  
+HWI-EAS443:3:40:1565:725#0/1  
`XMJVVK[LN`PBBBBBBBBBBBBBBBBBBBBBBBBBBBB  
@HWI-EAS443:3:43:1060:1526#0/1  
CAGCACCATTCTGTTTTTCATGCCTGATTAGTGGATTGGTG  
+HWI-EAS443:3:43:1060:1526#0/1  
a`\_\_abbbbaabbabbbaabb\_\_bbabaaa\_aaaa`aa^`  
@HWI-EAS443:3:43:1255:785#0/1  
CACCAATCCACTAATCAGGCATGAAAACAGAATGGTGCTG  
+HWI-EAS443:3:43:1255:785#0/1  
`a^Vva`SZS[TUT¥\_W^\_\_aa]TaT\_[]^W[`\_ZTXZ`]  
@HWI-EAS443:3:4:1005:558#0/1  
ACCACCAATCCACTAATCAGGCATGAAAACAGAATGGTGC  
+HWI-EAS443:3:4:1005:558#0/1  
a\_¥``\_aaa\_^a]a`\_a^\_W^¥\_aa\_\_\_\_\_X``\_\_\_\_^`X`H  
@HWI-EAS443:3:50:1714:1652#0/1  
CACCAATCCACTAATCAGGCATGAAAACAGAATGGTGCTG  
+HWI-EAS443:3:50:1714:1652#0/1  
`\_`U^PO\_T`¥b]XW\_]U\_]¥R`aJQZVL[] [PX¥aZab  
@HWI-EAS443:3:50:227:162#0/1  
CACCAATCCACTAATCAGGCATGAAAACAGAATGGTGCTG  
+HWI-EAS443:3:50:227:162#0/1  
`babbabbbabbba`bbab\_aabaa`a`ab`abaa¥aZ`a  
@HWI-EAS443:3:51:1290:2028#0/1  
CACCAATCCACTAATCAGGCATGAAAACAGAATGGTGCTG  
+HWI-EAS443:3:51:1290:2028#0/1  
aab\_¥b`abbbab`¥Uab`Z`^¥a`a`bbbbbbaa`GpPaa  
@HWI-EAS443:3:55:117:1414#0/1  
CACCAATCCACTAATCAGGCATGAAAACAGAATGGTGCTG

+HWI-EAS443:3:55:117:1414#0/1  
abbb\_\_baaaabbaab\_a`ababaaa\_aaaa`aa]Va`a`  
@HWI-EAS443:3:55:803:1595#0/1  
CACCAATCCACTAATCAGGCATGAAAACAGAATGGTGCTG  
+HWI-EAS443:3:55:803:1595#0/1  
`b`abbba`bbbaaaaba\_bbaaaaaaaaaaba]^a]aa  
@HWI-EAS443:3:56:585:57#0/1  
GCCAGCACCATTCTGTTTTTCATGCCTGATTAGTGGATTGG  
+HWI-EAS443:3:56:585:57#0/1  
a^`\_`^`\_]X`\_\_\_aX]^\_]X\_]X\_\_V^^V\_Y\_]Y^[YY  
@HWI-EAS443:3:59:1515:602#0/1  
CACCAATCCACTAATCAGGCATGAAAACAGAATGGTGCTG  
+HWI-EAS443:3:59:1515:602#0/1  
abaUbbba\_a`ab\_b^`\_V^abbbbaabbb\_ba`VSaaa  
@HWI-EAS443:3:5:853:1272#0/1  
CACCAATCCACTAATCAGGCATGAAAACAGAATGGTGCTG  
+HWI-EAS443:3:5:853:1272#0/1  
U\_aT^`a¥`]\_]`b¥`^¥aabb`\_bb^abbbbbV`[`b  
@HWI-EAS443:3:63:1020:1672#0/1  
GCCAGCACCATTCTGTTTTTCATGCCTGATTAGTGGATTGG  
+HWI-EAS443:3:63:1020:1672#0/1  
aXTVbb^`]RZ`]`abaaba]¥`¥`ba^`]USa`]`\_[\_  
@HWI-EAS443:3:63:242:1294#0/1  
CACCAATCCACTAATCAGGCATGAAAACAGAATGGTGCTG  
+HWI-EAS443:3:63:242:1294#0/1  
ababbbbbbbaabaabaabaaa`aa`aaaaa`aa^a\_\_`  
@HWI-EAS443:3:63:600:1589#0/1  
CACCAATCCACTAATCAGGCATGAAAACAGAATGGTGCTG  
+HWI-EAS443:3:63:600:1589#0/1  
aV`¥TX`bb^SSWaZa]Z`U\_Y\_]\_[UZ¥Q[[FONY\_X¥X  
@HWI-EAS443:3:66:56:1693#0/1  
CACCAATCCACTAATCAGGCATGAAAACAGAATGGTGCTG  
+HWI-EAS443:3:66:56:1693#0/1  
aaa`]``¥¥^[¥^[[`YU`\_^^\_[TZ¥^T^XWWW]VU  
@HWI-EAS443:3:67:1133:1072#0/1  
GCCAGCACCATTCTGTTTTTCATGCCTGATTAGTGGATTGG  
+HWI-EAS443:3:67:1133:1072#0/1  
aa`aaaaaaaaZaaSa\_aa`a\_\_a`\_\_a¥`Wa`W`\_\_U  
@HWI-EAS443:3:68:780:742#0/1  
ACCACCAATCCACTAATCAGGCATGAAAACAGAATGGTGC  
+HWI-EAS443:3:68:780:742#0/1  
[X]aUbb]YY`bY\_PRaana`VZab[a[Sa`[¥\_a\_PP\_\_  
@HWI-EAS443:3:6:628:1359#0/1  
CACCAATCCACTAATCAGGCATGAAAACAGAATGGTGCTG  
+HWI-EAS443:3:6:628:1359#0/1  
aaaabaaba\_aaaa\_aba`aba`aa`\_a`aaaaQIZV]`  
@HWI-EAS443:3:6:968:1309#0/1  
CACCAATCCACTAATCAGGCATGAAAACAGAATGGTGCTG  
+HWI-EAS443:3:6:968:1309#0/1  
aabbbb`¥¥b`]aabb`bababba^`bbababa^[baab

@HWI-EAS443:3:74:1132:1191#0/1  
GCACCATTCTGTTTTTCATGCCTGATTAGTGGATTGGTGGT  
+HWI-EAS443:3:74:1132:1191#0/1  
aaaaabbbbbbbabbaabbababb`aaa\_\_aaaabbaWaaM  
@HWI-EAS443:3:75:783:1364#0/1  
GCACCATTCTGTTTTTCATGCCTGATTAGTGGATTGGTGGT  
+HWI-EAS443:3:75:783:1364#0/1  
ababbbaaabbb^aaabaaa`aaa]aaaa^aaa``\_X`\_R  
@HWI-EAS443:3:81:960:76#0/1  
CACCAATCCACTAATCAGGCATGAAAACAGAATGGTGCTG  
+HWI-EAS443:3:81:960:76#0/1  
YYXab]`¥``abaabaabaaabbbay]¥`bbaaab\_a`ab  
@HWI-EAS443:3:84:1089:1955#0/1  
CACCAATCCACTAATCAGGCATGAAAACAGAATGGTGCTG  
+HWI-EAS443:3:84:1089:1955#0/1  
]Ub`bb\_aa^abaSSaaaa`baaaaa`b\_a``\_aV\_^  
@HWI-EAS443:3:85:726:539#0/1  
CACCAATCCACTAATCAGGCATGAAAACAGAATGGTGCTG  
+HWI-EAS443:3:85:726:539#0/1  
aaa^`\_abbaab`]^ab[[abaaaa^^``]a]aa\_Qa\_Ya  
@HWI-EAS443:3:86:259:339#0/1  
CACCAATCCACTAATCAGGCATGAAAACAGAATGGTGCTG  
+HWI-EAS443:3:86:259:339#0/1  
aa^\_Zaba\_a\_a\_^`R^`\_V`\_ZRTQ¥Z[SNS¥\_N\_]W]  
@HWI-EAS443:3:87:1128:1734#0/1  
CACCAATCCACTAATCAGGCATGAAAACAGAATGGTGCTG  
+HWI-EAS443:3:87:1128:1734#0/1  
abb`babbb]ba]ab[a¥S¥^ba\_^a`^baaabXGRaW¥\_  
@HWI-EAS443:3:91:1663:341#0/1  
CACCAATCCACTAATCAGGCATGAAAACAGAATGGTGCTG  
+HWI-EAS443:3:91:1663:341#0/1  
abb`bbbb\_bbbbb`\_`bbabbbabab`bbbbbabUb`ab  
@HWI-EAS443:3:9:993:765#0/1  
CACCAATCCACTAATCAGGCATGAAAACAGAATGGTGCTG  
+HWI-EAS443:3:9:993:765#0/1  
a`\_]Q]`^¥aaaa`ab`X^\_^\_\_^`a`\_a`SaY`a  
@HWI-EAS443:3:100:1355:1796#0/1  
CAGACGAGCACTGGAGCTAGGATGAGTCCCAATAGTTATC  
+HWI-EAS443:3:100:1355:1796#0/1  
`bb\_UGYbababbbababaabbbaa`VXbb[bbbb[H[a  
@HWI-EAS443:3:21:1429:493#0/1  
ATGAGAACTATTGGGACTCATCCTAGCTGCAGTGCTGGTC  
+HWI-EAS443:3:21:1429:493#0/1  
`bb]^T`b`baa`Z^[]\_\_a`aZab`ZHSaY\_]\_a[YZ  
@HWI-EAS443:3:22:946:206#0/1  
TTTCAGACCAGCACTGGGGCTAGGATGAGTCCCAATAGTT  
+HWI-EAS443:3:22:946:206#0/1  
RR\_GYY[JW¥bZ[Q\_bQRXYU``[]P^\_a]aXDP`^¥¥SQ  
@HWI-EAS443:3:95:1015:1649#0/1  
GAACTATTGGGACTGATCCTAGCTCCAGTGCTGGTCTGAA

+HWI-EAS443:3:95:1015:1649#0/1  
a^¥a` `ZT]X\_TXF` ` [[]S^Sa\_WZ]a[a\_[NYaa\_X  
@HWI-EAS443:3:97:762:904#0/1  
AGAACTATTGGGACTCATCCTAGCTCAAGTGCTGGTCTGA  
+HWI-EAS443:3:97:762:904#0/1  
`a[b\_TW\_a[[FRbZ`baaabb]V[PD[`X]FWb^^M\_\_^  
@HWI-EAS443:3:26:1156:552#0/1  
CTTTCAGACCAGCACTGGAGCTAGGATGAGTCNCAATAGT  
+HWI-EAS443:3:26:1156:552#0/1  
abbba`aaZaa^\_a]a\_\_aZZa`aa\_aaY` [D¥aaa\_a^  
@HWI-EAS443:3:47:1631:1778#0/1  
GACCNGCACTGGAGCTAGGATGAGTCCCAATAGTTCTCAT  
+HWI-EAS443:3:47:1631:1778#0/1  
aaaUDT¥a]\_]\_XX\_[Y]\_aZV\_VPJZVZRRY[UJLS¥TZZ  
@HWI-EAS443:3:61:1651:1095#0/1  
CAGCACTGGAGCTAGGATGAGTCCCAATAGTTCTCATTTC  
+HWI-EAS443:3:61:1651:1095#0/1  
ab]a\_bZb`aaVV\_bbbbbabbb\_bb]aaRaM[VHJ`HL  
@HWI-EAS443:3:81:750:1418#0/1  
TATCAGACCAGCACTGGAGCTAGGATGAGTCCCAATAGTT  
+HWI-EAS443:3:81:750:1418#0/1  
a]QX^`aaY`SZ`aU`a` `WP¥G^Y^^QI\_]\_]\_]^R[UW  
@HWI-EAS443:3:11:677:1142#0/1  
AGACCAGCACTGGAGCTAGGATGAGTCCCAATAGTTCTCA  
+HWI-EAS443:3:11:677:1142#0/1  
aaaXNOUQaa¥T]SUX\_X[SMUU¥VN¥\_ [T¥Z\_^YWNT¥\_  
@HWI-EAS443:3:13:382:141#0/1  
CTTTCAGACCAGCACTGGAGCTAGGATGAGTCCCAATAGT  
+HWI-EAS443:3:13:382:141#0/1  
aaaaa[][\_a]¥]\_]aa` [aYZ\_V\_W^\_]\_YUWV]R]]\_U  
@HWI-EAS443:3:15:1156:1826#0/1  
CTTTCAGACCAGCACTGGAGCTAGGATGAGTCCCAATAGT  
+HWI-EAS443:3:15:1156:1826#0/1  
¥\_` `R[aX¥` `abaZaba[aba]ZVb^Y`WRW\_bbbaZa  
@HWI-EAS443:3:15:1439:276#0/1  
GAACTATTGGGACTCATCCTAGCTCCAGTGCTGGTCTGAA  
+HWI-EAS443:3:15:1439:276#0/1  
aaaababaaa\_a\_a\_aaa`aa\_Va^]\_]Ya^^\_ ^UT`a^^  
@HWI-EAS443:3:15:1514:1101#0/1  
CTTTCAGACCAGCACTGGAGCTAGGATGAGTCCCAATAGT  
+HWI-EAS443:3:15:1514:1101#0/1  
^abbb`babbbbaabbbbabbb`a[abb\_SY` `[aabab\_  
@HWI-EAS443:3:15:1710:707#0/1  
CTTTCAGACCAGCACTGGAGCTAGGATGAGTCCCAATAGT  
+HWI-EAS443:3:15:1710:707#0/1  
aa]\_` `]b` \_\_\_^] ^abb\_aa¥`aa`aaab\_`X¥`aab\_W  
@HWI-EAS443:3:17:1182:315#0/1  
TTTCAGACCAGCACTGGAGCTAGGATGAGTCCCAATAGTT  
+HWI-EAS443:3:17:1182:315#0/1  
a` `a`aaa\_[]\_]RVa[\_aY]\_]ZV^\_]XX]UN]Y^]YR[

@HWI-EAS443:3:17:1253:634#0/1  
TGAGAACTATTGGGACTCATCCTAGCTCCAGTGCTGGTCT  
+HWI-EAS443:3:17:1253:634#0/1  
^\_SbabRbTa]a\_b[¥a¥¥aQGY\_¥H]YNNRF^WMY^MQS  
@HWI-EAS443:3:19:620:567#0/1  
TATTGGGACTCATCCTAGCTCCAGTGCTGGTCTGAAAGAT  
+HWI-EAS443:3:19:620:567#0/1  
aabaaa`^baabaaa\_\_aa` `aaa^\_^`aaU`aa\_`\_\_\_\_`  
@HWI-EAS443:3:20:544:1903#0/1  
GAACTATTGGGACTCATCCTAGCTCCAGTGCTGGTCTGAA  
+HWI-EAS443:3:20:544:1903#0/1  
Z\_bbbababb\_aa[baabba`¥`bb\_b[\_a`a\_]IKb\_ab  
@HWI-EAS443:3:21:1104:890#0/1  
CTTTCAGACCAGCACTGGAGCTAGGATGAGTCCCAATAGT  
+HWI-EAS443:3:21:1104:890#0/1  
abbabbbab`a\_bbaaaa\_aaaaba\_\_a\_¥]a`Raaa`\_[  
@HWI-EAS443:3:27:196:1714#0/1  
GAACTATTGGGACTCATCCTAGCTCCAGTGCTGGTCTGAA  
+HWI-EAS443:3:27:196:1714#0/1  
aabbbbb`^abbbbaabbab`abbbba\_abaaa\_bb`ab  
@HWI-EAS443:3:28:828:641#0/1  
CTTTCAGACCAGCACTGGAGCTAGGATGAGTCCCAATAGT  
+HWI-EAS443:3:28:828:641#0/1  
abbbabaabbbabbabaaababa` `aa`aaa`baaab]  
@HWI-EAS443:3:29:519:704#0/1  
CTTTCAGACCAGCACTGGAGCTAGGATGAGTCCCAATAGT  
+HWI-EAS443:3:29:519:704#0/1  
abaabbb`bbb`a`aaa`X[a]aaa[`\_\_a]aa`[`] [¥^  
@HWI-EAS443:3:30:1499:1098#0/1  
CTTTCAGACCAGCACTGGAGCTAGGATGAGTCCCAATAGT  
+HWI-EAS443:3:30:1499:1098#0/1  
\_Z\_¥ZaYGRa\_X]^\_\_`a\_`Y][a]T¥\_Z¥Q\_VQ[R¥\_YV  
@HWI-EAS443:3:30:328:520#0/1  
GAGAACTATTGGGACTCATCCTAGCTCCAGTGCTGGTCTG  
+HWI-EAS443:3:30:328:520#0/1  
aaaaa\_baaaa`a\_baaaaaaaa`a` `aaa¥Zaa]`\_U^X  
@HWI-EAS443:3:30:475:1932#0/1  
GACCAGCACTGGAGCTAGGATGAGTCCCAATAGTTCTCAT  
+HWI-EAS443:3:30:475:1932#0/1  
abbbbabbb`aab`babb\_a`¥a`\_bbabaaa^Z`\_`\_aa  
@HWI-EAS443:3:31:1239:1331#0/1  
TTTCAGACCAGCACTGGAGCTAGGATGAGTCCCAATAGTT  
+HWI-EAS443:3:31:1239:1331#0/1  
ab[aaaaaXZ^Yaa\_b\_\_\_\_[Y`Y]X]YS^QY^V`\_^a\_Y]  
@HWI-EAS443:3:33:260:932#0/1  
GAGAACTATTGGGACTCATCCTAGCTCCAGTGCTGGTCTG  
+HWI-EAS443:3:33:260:932#0/1  
a^baYaiaaaaa`K`aabaaaa^aa` `Z^`Z^`WX]\_^  
@HWI-EAS443:3:35:1692:1672#0/1  
GAACTATTGGGACTCATCCTAGCTCCAGTGCTGGTCTGAA

+HWI-EAS443:3:35:1692:1672#0/1  
G^a`bbbaa\_\_abaabb^]Zbbbbaaa^abbabbbabaa\_b  
@HWI-EAS443:3:37:257:1528#0/1  
CTTTCAGACCAGCACTGGAGCTAGGATGAGTCCCAATAGT  
+HWI-EAS443:3:37:257:1528#0/1  
aaa`ab`aaa^Waa`\_``\_]\_^`Z[Y^^NII^^`\_^SUYW  
@HWI-EAS443:3:39:1007:208#0/1  
TTTCAGACCAGCACTGGAGCTAGGATGAGTCCCAATAGTT  
+HWI-EAS443:3:39:1007:208#0/1  
¥a\_\_aa\_aa¥]S]aa\_W\_b^U^]RYPY]VDRFFLW`Za¥Z  
@HWI-EAS443:3:40:1515:2017#0/1  
TATTGGGACTCATCCTAGCTCCAGTGCTGGTCTGAAAGAT  
+HWI-EAS443:3:40:1515:2017#0/1  
[aa`aaaa`a`\_`\_aaaa`\_`\_\_Xab\_aaX^`\_`¥]¥aY  
@HWI-EAS443:3:44:1674:277#0/1  
CAGCACTGGAGCTAGGATGAGTCCCAATAGTTCTCATTGC  
+HWI-EAS443:3:44:1674:277#0/1  
aa[aaa\_¥U¥^`\_`\_^XS]YIRSTN[T]^YYR[VZ¥W]R  
@HWI-EAS443:3:44:834:441#0/1  
CTTTCAGACCAGCACTGGAGCTAGGATGAGTCCCAATAGT  
+HWI-EAS443:3:44:834:441#0/1  
`aaa`aaZ`a^baaa`a[U\_¥\_[aa[\_a\_]NPIMVaa^aM  
@HWI-EAS443:3:45:785:531#0/1  
CTTTCAGACCAGCACTGGAGCTAGGATGAGTCCCAATAGT  
+HWI-EAS443:3:45:785:531#0/1  
abbb`bbbaab``aabbabaaabb``a`a¥`a\_aa``a]  
@HWI-EAS443:3:46:395:1265#0/1  
CTTTCAGACCAGCACTGGAGCTAGGATGAGTCCCAATAGT  
+HWI-EAS443:3:46:395:1265#0/1  
`bbbbaabaabaaaba]ab\_aa`\_aaa\_a\_¥^]`aaaVP  
@HWI-EAS443:3:48:18:1532#0/1  
GAACTATTGGGACTCATCCTAGCTCCAGTGCTGGTCTGAA  
+HWI-EAS443:3:48:18:1532#0/1  
¥ZZZZ¥\_YYY¥`¥\_aa\_a`\_UV][X[[XPY[W]WRY\_ZVU  
@HWI-EAS443:3:50:444:721#0/1  
CTTTCAGACCAGCACTGGAGCTAGGATGAGTCCCAATAGT  
+HWI-EAS443:3:50:444:721#0/1  
`bbbabbbb`bbaabbb`baaa^a`aaaa`][\_aa`¥Y`  
@HWI-EAS443:3:52:105:685#0/1  
CTTTCAGACCAGCACTGGAGCTAGGATGAGTCCCAATAGT  
+HWI-EAS443:3:52:105:685#0/1  
abab\_aaaa[aa`b`a`a`\_\_`\_^¥`Y¥W^\_^P^\_WT  
@HWI-EAS443:3:60:1173:1583#0/1  
TTTCAGACCAGCACTGGAGCTAGGATGAGTCCCAATAGTT  
+HWI-EAS443:3:60:1173:1583#0/1  
^W^^^aaZN¥\_\_`RZaa`QX\_aZ^¥[`Q`XFO\_^`\_RU¥  
@HWI-EAS443:3:63:1186:458#0/1  
CTTTCAGACCAGCACTGGAGCTAGGATGAGTCCCAATAGT  
+HWI-EAS443:3:63:1186:458#0/1  
S¥b``a`\_T`baYbbaabbb¥^]]bbbabaab`Za]

@HWI-EAS443:3:66:26:1211#0/1  
CAGACCAGCACTGGAGCTAGGATGAGTCCCAATAGTTCTC  
+HWI-EAS443:3:66:26:1211#0/1  
aa\_^b]¥R\_`b`^Waaa\_a\_\_`¥`^`¥\_a\_XQSa^Z¥^\_  
@HWI-EAS443:3:6:418:629#0/1  
GAACTATTGGGACTCATCCTAGCTCCAGTGCTGGTCTGAA  
+HWI-EAS443:3:6:418:629#0/1  
WSaJbabbbI¥`b`adMa^baaaSaabHU][`aSYa[\_\_\_  
@HWI-EAS443:3:70:1371:1459#0/1  
CAGACCAGCACTGGAGCTAGGATGAGTCCCAATAGTTCTC  
+HWI-EAS443:3:70:1371:1459#0/1  
ab\_babbabbaa`a^aabbbaaa`a``¥aaaaa\_a¥\_  
@HWI-EAS443:3:71:915:1193#0/1  
CTTTCAGACCAGCACTGGAGCTAGGATGAGTCCCAATAGT  
+HWI-EAS443:3:71:915:1193#0/1  
abbabbbbabbaabaaaaa`a`aa`\_babaaa\_  
@HWI-EAS443:3:72:1147:285#0/1  
GAGAACTATTGGGACTCATCCTAGCTCCAGTGCTGGTCTG  
+HWI-EAS443:3:72:1147:285#0/1  
a\_a^Za`a`[\_`\_a`a\_]\_]\_]W]]X\_YU\_]XU^]  
@HWI-EAS443:3:72:253:1889#0/1  
AGACCAGCACTGGAGCTAGGATGAGTCCCAATAGTTCTCA  
+HWI-EAS443:3:72:253:1889#0/1  
\_^aaZNaaxTPY[`V[SNYZZQPSa\_`[^[^UGQ^X^\_  
@HWI-EAS443:3:73:1000:1956#0/1  
CTTTCAGACCAGCACTGGAGCTAGGATGAGTCCCAATAGT  
+HWI-EAS443:3:73:1000:1956#0/1  
aaababaabaa\_aaaa\_\_`\_`\_a]\_^Y^`^X\_a`\_]`\_]  
@HWI-EAS443:3:73:842:1412#0/1  
CTTTCAGACCAGCACTGGAGCTAGGATGAGTCCCAATAGT  
+HWI-EAS443:3:73:842:1412#0/1  
aba]b\_¥`baaY[aa^`Yaaa`Y][[J\_aaPWW\_\_\_`\_`\_Q  
@HWI-EAS443:3:77:867:832#0/1  
CTTTCAGACCAGCACTGGAGCTAGGATGAGTCCCAATAGT  
+HWI-EAS443:3:77:867:832#0/1  
ababbbbbbba`baab`a`abab`\_b`\_aaaaa  
@HWI-EAS443:3:78:79:1686#0/1  
ATGAGAACTATTGGGACTCATCCTAGCTCCAGTGCTGGTC  
+HWI-EAS443:3:78:79:1686#0/1  
aTOXZT`Z\_b¥XT][Y[X``[^aaXXa^][[]ZZ^[YPVZ  
@HWI-EAS443:3:82:656:531#0/1  
CTTTCAGACCAGCACTGGAGCTAGGATGAGTCCCAATAGT  
+HWI-EAS443:3:82:656:531#0/1  
abbbabbbba`baab\_abaabaa\_aaaa]aaa`aaaa\_  
@HWI-EAS443:3:82:699:1595#0/1  
CTTTCAGACCAGCACTGGAGCTAGGATGAGTCCCAATAGT  
+HWI-EAS443:3:82:699:1595#0/1  
a^UWa^XPY\_\_\_R`]P]aU]NSMYLZXT]YL][`XT[\_YR  
@HWI-EAS443:3:84:1137:1036#0/1  
GAACTATTGGGACTCATCCTAGCTCCAGTGCTGGTCTGAA

+HWI-EAS443:3:84:1137:1036#0/1  
^]K[a[baba]`Ta]bbab\_aa]aaaYaYbaYa`THaa`a  
@HWI-EAS443:3:85:715:1551#0/1  
TTCAGACCAGCACTGGAGCTAGGATGAGTCCCAATAGTTC  
+HWI-EAS443:3:85:715:1551#0/1  
a`a`aaa^b[aba\_U`\_]`aQ\_\_^X`U^a\_\_a^U^X  
@HWI-EAS443:3:88:73:73#0/1  
CTTTCAGACCAGCACTGGAGCTAGGATGAGTCCCAATAGT  
+HWI-EAS443:3:88:73:73#0/1  
¥abbbbab]`^bb\_abY]bb^aaa\_Wa]bU¥\_aaa\_VZF  
@HWI-EAS443:3:91:1181:140#0/1  
ATGAGAACTATTGGGACTCATCCTAGCTCCAGTGCTGGTC  
+HWI-EAS443:3:91:1181:140#0/1  
]¥T¥bb^a¥ab\_0\_Y`\_UYZaRa\_YZ]baYa^aQLRbU\_P  
@HWI-EAS443:3:92:274:519#0/1  
TATTGGGACTCATCCTAGCTCCAGTGCTGGTCTGAAAGAT  
+HWI-EAS443:3:92:274:519#0/1  
SUU]`\_]`^a`Y`^IOL¥XU`Ya`¥a[N]¥`]LYU\_Y  
@HWI-EAS443:3:96:134:602#0/1  
GAACTATTGGGACTCATCCTAGCTCCAGTGCTGGTCTGAA  
+HWI-EAS443:3:96:134:602#0/1  
a`a[\_aaa\_`VRN]\_\_a\_XMS[aNNN^RLNRWUXVUUVPU  
@HWI-EAS443:3:98:273:393#0/1  
CTTTCAGACCAGCACTGGAGCTAGGATGAGTCCCAATAGT  
+HWI-EAS443:3:98:273:393#0/1  
]¥`[QX][bb\_```aba`QOQ\_UZabUU]`OGOY]a¥`bG  
@HWI-EAS443:3:9:144:871#0/1  
TTTCAGACCAGCACTGGAGCTAGGATGAGTCCCAATAGTT  
+HWI-EAS443:3:9:144:871#0/1  
aaW`a]Z^``aaba``aX`]\_aXSV`[a]M`YS¥W¥¥`V^  
@HWI-EAS443:3:25:1026:1048#0/1  
CCGTCGCTTTAAATACGGTTTGAAAAGAGGGCCTTCTACG  
+HWI-EAS443:3:25:1026:1048#0/1  
aaaUbbb]b\_OR\_bbW`[J\_[^]]]aaaa]YZ[Y[Z^a¥a  
@HWI-EAS443:3:57:656:279#0/1  
CGCTATGTTGACAAAATGACCATCGTCAACATCCACAGCA  
+HWI-EAS443:3:57:656:279#0/1  
]GQ¥¥W[QYT\_]Y¥¥YS[]\_Y]`\_PZ\_QS¥YX¥YZSUUT  
@HWI-EAS443:3:7:1653:73#0/1  
ACGGTTTGAAAANGAGGGCCTTCTACGGAAGGAGGGCCGGA  
+HWI-EAS443:3:7:1653:73#0/1  
a\_abU`ab]ZXD¥```^YSYU¥TPZHN¥BBBBBBBBBBBB  
@HWI-EAS443:3:100:1474:398#0/1  
ACAGGCATGAAAACAGAATGGTGCTGGCTAGAACTACGGC  
+HWI-EAS443:3:100:1474:398#0/1  
a^[\`bVba\_a`\_\_Waaaa\_\_\_Za¥aRQT¥^^S\_N\_^BBBB  
@HWI-EAS443:3:73:555:1540#0/1  
ATCAGGCATGAAAACAGAATGGCGCTGGCTAGCACTACGG  
+HWI-EAS443:3:73:555:1540#0/1  
aOPV`^a]\_^a¥\_[[\`^a\_\_¥LT`\_a`\_SX``[S][F



@HWI-EAS443:3:82:558:1665#0/1  
ATCAGGCATGAAAACAGAATGGTGCTGGCTAGCACNACGG  
+HWI-EAS443:3:82:558:1665#0/1  
aaa`¥Uaab`babaa`aaa` ]`Q¥\_aZ[a¥a\_a¥MDXX\_L  
@HWI-EAS443:3:61:1591:1316#0/1  
CAGGCATGAAAACAGAATGGTGCTGGCTAGCACTACGGGA  
+HWI-EAS443:3:61:1591:1316#0/1  
ababbbbabbbbbbbbbbbbbbbbabbbbbbb`aY`aSa`G[  
@HWI-EAS443:3:15:1395:688#0/1  
ATCAGGCATGAAAACAGAATGGTGCTGGCTAGCACTACGG  
+HWI-EAS443:3:15:1395:688#0/1  
a`babbabbaaaa`abaaa`Xa`aba\_aaaaaZ``¥Z\_  
@HWI-EAS443:3:23:102:1999#0/1  
ATCAGGCATGAAAACAGAATGGTGCTGGCTAGCACTACGG  
+HWI-EAS443:3:23:102:1999#0/1  
a`\_aY\_bba^aa`\_a^`\_`^Y¥\_\_\_\_Za\_aN``Q^\_W¥  
@HWI-EAS443:3:31:1787:396#0/1  
CGTAGTGCTAGCCAGCACCATTCTGTTTTTCATGCCTGATT  
+HWI-EAS443:3:31:1787:396#0/1  
aaU\_]VX^a\_\_[ZZW\_abT0\_b\_Yab^¥\_XN`¥MIWba[Z  
@HWI-EAS443:3:36:324:134#0/1  
AATCAGGCATGAAAACAGAATGGTGCTGGCTAGCACTACG  
+HWI-EAS443:3:36:324:134#0/1  
a`aaYaaba`ba`aX]^`Z\_]Y`a^`^]]\_W\_XY^]]  
@HWI-EAS443:3:38:1470:428#0/1  
CGTAGTGCTAGCCAGCACCATTCTGTTTTTCATGCCTGATT  
+HWI-EAS443:3:38:1470:428#0/1  
abU\_\_X`ab¥]H]¥Z]aa\_U]]aa\_LZ`a\_X^^[UXa¥[Z  
@HWI-EAS443:3:49:1429:1793#0/1  
CGTAGTGCTAGCCAGCACCATTCTGTTTTTCATGCCTGATT  
+HWI-EAS443:3:49:1429:1793#0/1  
`aa`b`babb[aabbab\_`bab\_`[\_aba`aab\_a\_bZaa  
@HWI-EAS443:3:52:1698:2000#0/1  
AGCCGTAGTGCTAGCCAGCACCATTCTGTTTTTCATGCCTG  
+HWI-EAS443:3:52:1698:2000#0/1  
aa`aaa]]Z`a]^]Q¥[aZ`\_]\_aa`\_a[P`aXY]XRL[a  
@HWI-EAS443:3:54:783:1753#0/1  
AATCAGGCATGAAAACAGAATGGTGCTGGCTAGCACTACG  
+HWI-EAS443:3:54:783:1753#0/1  
aa[ba`a\_a[aaa`ababaa^^ZQ¥aaa\_aaaa`\_]V]^X  
@HWI-EAS443:3:54:792:411#0/1  
AATCAGGCATGAAAACAGAATGGTGCTGGCTAGCACTACG  
+HWI-EAS443:3:54:792:411#0/1  
`^`]abba`b]Z]aaab]aa\_\_Zb`aaaaa`^¥a][[a  
@HWI-EAS443:3:58:581:786#0/1  
ATCAGGCATGAAAACAGAATGGTGCTGGCTAGCACTACGG  
+HWI-EAS443:3:58:581:786#0/1  
Z\_\_W`\_¥[bbb^]W[\_¥\_]`YMV^\_]SZ\_]\_a¥XLY\_  
@HWI-EAS443:3:74:1419:1758#0/1  
AATCAGGCATGAAAACAGAATGGTGCTGGCTAGCACTACG

+HWI-EAS443:3:74:1419:1758#0/1  
aaa\_`ababbbbaaaaaaba`\_]`a\_a\_aa\_]\_\_\_\_[]  
@HWI-EAS443:3:75:1018:59#0/1  
AATCAGGCATGAAAACAGAATGGTGCTGGCTAGCACTACG  
+HWI-EAS443:3:75:1018:59#0/1  
^^`b]aa`[abaaYW]abaa]aaVa`aba`Y`]^\_`[L\_  
@HWI-EAS443:3:76:371:984#0/1  
AATCAGGCATGAAAACAGAATGGTGCTGGCTAGCACTACG  
+HWI-EAS443:3:76:371:984#0/1  
`ZP`b\_^aa`^a]`T```a\_\_`\_a\_[¥¥a^\_a^V]]YH¥  
@HWI-EAS443:3:77:1159:332#0/1  
AATCAGGCATGAAAACAGAATGGTGCTGGCTAGCACTACG  
+HWI-EAS443:3:77:1159:332#0/1  
abaabbaabbaabaabaaaa\_Xa`aaa\_a^a]^`^`^]a  
@HWI-EAS443:3:7:534:409#0/1  
ATCAGGCATGAAAACAGAATGGTGCTGGCTAGCACTACGG  
+HWI-EAS443:3:7:534:409#0/1  
aaaabb`bbbaaaaa`aaa`aaTa\_`a\_\_`[`aV`QVaQaa  
@HWI-EAS443:3:83:1267:29#0/1  
ATCAGGCATGAAAACAGAATGGTGCTGGCTAGCACTACGG  
+HWI-EAS443:3:83:1267:29#0/1  
TaZR¥`\_`bbbbbX]X\_¥^`\_]ZVb¥[¥[¥¥L]^`LOSSMVB  
@HWI-EAS443:3:86:315:609#0/1  
CGTAGTGCTAGCCAGCACCATTCTGTTTTTCATGCCTGATT  
+HWI-EAS443:3:86:315:609#0/1  
a]^`bbabbaabbaaaaabbaaaaabb\_`a`aba``\_aa\_\_a  
@HWI-EAS443:3:89:67:805#0/1  
AATCAGGCATGAAAACAGAATGGTGCTGGCTAGCACTACG  
+HWI-EAS443:3:89:67:805#0/1  
\_X]Z^]]^YUaYS^Z\_]XJ¥^[¥L¥`^a]SV\_^`RU[UR  
@HWI-EAS443:3:90:806:799#0/1  
AATCAGGCATGAAAACAGAATGGTGCTGGCTAGCACTACG  
+HWI-EAS443:3:90:806:799#0/1  
aa`aaaba[abaa\_¥aaaa`a`W`\_\_`¥a\_¥^¥¥]N\_  
@HWI-EAS443:3:93:1327:1183#0/1  
AATCAGGCATGAAAACAGAATGGTGCTGGCTAGCACTACG  
+HWI-EAS443:3:93:1327:1183#0/1  
`\_`aab\_aaa\_\_\_\_]aa\_a[\_`\_¥\_Y\_`a^a`aY^R[YX`  
@HWI-EAS443:3:96:1772:1289#0/1  
CGTAGTGCTAGCCAGCACCATTCTGTTTTTCATGCCTGATT  
+HWI-EAS443:3:96:1772:1289#0/1  
abb```b[bb^Vaab^aba\_bbab\_[aa`ab\_]bb\_^`  
@HWI-EAS443:3:26:732:1473#0/1  
GACAAAATGACCATCGTCAACATCCACAGCACTTTGGGGG  
+HWI-EAS443:3:26:732:1473#0/1  
¥Z`]VHQ^aaW`^a[^`b]b]^`ab¥\_^XRZ`a``aP¥QWN  
@HWI-EAS443:3:92:670:68#0/1  
GAGGGGACAAGATTGGTCTTGTCTTTAGCCATTCCATGAG  
+HWI-EAS443:3:92:670:68#0/1  
aXa¥G`YV[\_a[¥[\_`XW^\_`YV[^`^U[^R[[V[XVSVU

@HWI-EAS443:3:81:1091:1819#0/1  
CAATGGCTAAAGACAAGACCAATCTTGTCACCTCTGACTA  
+HWI-EAS443:3:81:1091:1819#0/1  
J^a0`¥^``ZX\_\_SY^bbbaTF]a¥`VU`]aaGT\_^Ta\_  
@HWI-EAS443:3:17:1197:889#0/1  
AATGGCTAAAGACAAGACCAATCTTGTCACCTCTGACTAA  
+HWI-EAS443:3:17:1197:889#0/1  
ababaaabaa`][a\_Z\_¥a``\_`\_^[\_a[Z^]a``]\_\_[  
@HWI-EAS443:3:27:819:511#0/1  
AATGGCTAAAGACAAGACCAATCTTGTCACCTCTGACTAA  
+HWI-EAS443:3:27:819:511#0/1  
aabaT`aabaS\_QP]]^Z[^]¥N]a^[[Z\_]Z\_\_VJSU[  
@HWI-EAS443:3:34:1346:1646#0/1  
CAGAGGTGACAAGATTGGTCTTGCTTTAGCCATTCCATG  
+HWI-EAS443:3:34:1346:1646#0/1  
aaaaaaG`b^a`aa\_\_aa^aaa^a``a\_`\_]\_^]V^V^  
@HWI-EAS443:3:39:1020:90#0/1  
ATGGAATGGCTAAAGACAAGACCAATCTTGTCACCTCTGA  
+HWI-EAS443:3:39:1020:90#0/1  
`bba``ba`aaa`aaa¥aaa\_\_]^]X^^\_YQZW^^^¥[V  
@HWI-EAS443:3:39:1429:1309#0/1  
GTCAGAGGTGACAAGATTGGTCTTGCTTTAGCCATTCCA  
+HWI-EAS443:3:39:1429:1309#0/1  
aX`a]Y\_Z[]^`[`a\_\_]``Y\_]^\_Y^`\_^VUY^WTTU  
@HWI-EAS443:3:40:1337:580#0/1  
GAGGTGACAAGATTGGTCTTGCTTTAGCCATTCCATGAG  
+HWI-EAS443:3:40:1337:580#0/1  
\_¥X\_N`WY¥]`ZV[\_]¥]]`T[[Y]NW¥SVW^¥[W[[YT  
@HWI-EAS443:3:43:260:1457#0/1  
GAGGTGACAAGATTGGTCTTGCTTTAGCCATTCCATGAG  
+HWI-EAS443:3:43:260:1457#0/1  
ZK\_RYV\_bba^Wa`\_¥WR\_a¥¥Q\_a`^K^W^b]\_L\_X^`[  
@HWI-EAS443:3:43:901:145#0/1  
CATGGAATGGCTAAAGACAAGACCAATCTTGTCACCTCTG  
+HWI-EAS443:3:43:901:145#0/1  
`bbbabb]baaabbaa]aaaaa\_``\_Z^aa\_``\_\_a^`\_  
@HWI-EAS443:3:44:1364:1023#0/1  
GGAATGGCTAAAGACAAGACCAATCTTGTCACCTCTGACT  
+HWI-EAS443:3:44:1364:1023#0/1  
`aaaaaaa`aaa\_^[]\_[]^`^\_\_V\_\_¥\_ZXRYU^^VX¥  
@HWI-EAS443:3:45:885:1095#0/1  
ATGGAATGGCTAAAGACAAGACCAATCTTGTCACCTCTGA  
+HWI-EAS443:3:45:885:1095#0/1  
abb^aaa``aa`aa`a]aaa^ZY`¥a\_a\_^ZP][X`W`][  
@HWI-EAS443:3:48:1114:515#0/1  
GGAATGGCTAAAGACAAGACCAATCTTGTCACCTCTGACT  
+HWI-EAS443:3:48:1114:515#0/1  
````\_a\_ZZ`aa]aYQ¥a`a¥Z]^\_[]U[]ZZZT\_\_ZV¥  
@HWI-EAS443:3:48:1365:819#0/1  
CAGAGGTGACAAGATTGGTCTTGCTTTAGCCATTCCATG

+HWI-EAS443:3:48:1365:819#0/1  
\_\_`\_\_Q\_`aa]bbb]bbbTZ^bbaabbbab``aba\_] ]^a  
@HWI-EAS443:3:4:1598:217#0/1  
CAGAGGTGACAAGATTGGTCTTGTCTTTAGCCATTCCATG  
+HWI-EAS443:3:4:1598:217#0/1  
aabbbbabaab\_b[baX[a¥\_a]a\_baaa\_[R]a\_¥W¥a\_  
@HWI-EAS443:3:54:1202:1164#0/1  
CATGGAATGGCTAAAGACAAGACCAATCTTGTACCTCTG  
+HWI-EAS443:3:54:1202:1164#0/1  
abaaa`abb]b]bba^V¥b^V¥¥^^R\_P]]]WKZYXaP`R  
@HWI-EAS443:3:54:561:1563#0/1  
CAGAGGTGACAAGATTGGTCTTGTCTTTAGCCATTCCATG  
+HWI-EAS443:3:54:561:1563#0/1  
aZHN]\_Ja[^ZNRYa`abaab\_[¥abYb¥Vvbaaba]aa^  
@HWI-EAS443:3:59:1269:1206#0/1  
GTCAGAGGTGACAAGATTGGTCTTGTCTTTAGCCATTCCA  
+HWI-EAS443:3:59:1269:1206#0/1  
```aa`a`]\_]`¥V¥`¥^]]^a``Z[\_aa`R^]UUXV  
@HWI-EAS443:3:60:507:1353#0/1  
CATGGAATGGCTAAAGACAAGACCAATCTTGTACCTCTG  
+HWI-EAS443:3:60:507:1353#0/1  
abbb\_aabbb`bbbb[aa¥a\_a]`abaa]`a\_a``a`\_\_Y  
@HWI-EAS443:3:62:928:1058#0/1  
AGAGGTGACAAGATTGGTCTTGTCTTTAGCCATTCCATGA  
+HWI-EAS443:3:62:928:1058#0/1  
a`Z\_bX`K^]b]Sabaa`aab`ST^a]a]ba`\_]X`\_]a  
@HWI-EAS443:3:64:1054:1970#0/1  
CAGAGGTGACAAGATTGGTCTTGTCTTTAGCCATTCCATG  
+HWI-EAS443:3:64:1054:1970#0/1  
aaaaa`W[`aa]]^```\_W\_`^¥Y\_`\_\_a\_\_[\_]\_\_\_\_]WW  
@HWI-EAS443:3:65:695:162#0/1  
ATGGAATGGCTAAAGACAAGACCAATCTTGTACCTCTGA  
+HWI-EAS443:3:65:695:162#0/1  
\_a````[a^[aa\_Z\_\_bbYOWZ]aaaa¥aSZEW\_¥Y^¥XP  
@HWI-EAS443:3:68:158:920#0/1  
GAGGTGACAAGATTGGTCTTGTCTTTAGCCATTCCATGAG  
+HWI-EAS443:3:68:158:920#0/1  
`^^`KHZZQS]]WU\_^Q^¥[¥KY¥Z[¥X¥U]XNYaTQSNT  
@HWI-EAS443:3:69:1084:1513#0/1  
CAGAGGTGACAAGATTGGTCTTGTCTTTAGCCATTCCATG  
+HWI-EAS443:3:69:1084:1513#0/1  
^¥`X0[RZY]a^^]aW\_]W]\_^a\_aaa]ZY]bb\_TU`]¥R  
@HWI-EAS443:3:70:229:1424#0/1  
GGAATGGCTAAAGACAAGACCAATCTTGTACCTCTGACT  
+HWI-EAS443:3:70:229:1424#0/1  
aa``aababbaYaa``Xaaa`][`Z`¥^a`a^Z^`]\_\_Z  
@HWI-EAS443:3:75:397:1351#0/1  
GAGGTGACAAGATTGGTCTTGTCTTTAGCCATTCCATGAG  
+HWI-EAS443:3:75:397:1351#0/1  
a[`XG]`baaa`aa^`Zabaaa`aa`aa`aa```^`][^\_

@HWI-EAS443:3:78:1391:1420#0/1  
GAGGTGACAAGATTGGTCTTGTCTTTAGCCATTCCATGAG  
+HWI-EAS443:3:78:1391:1420#0/1  
aYVWSQ¥0`La\_`\_a`\_^Z`\_\_^]``[QG[¥SPG^X]T\_  
@HWI-EAS443:3:85:721:1700#0/1  
CATGGAATGGCTAAAGACAAGACCAATCTTGTACCTCTG  
+HWI-EAS443:3:85:721:1700#0/1  
]Xbbb\_YJ\_UNY^`YY¥a`ZQ^SZ][SVSZW\_Za]K¥^J[  
@HWI-EAS443:3:88:238:1345#0/1  
GGAATGGCTAAAGACAAGACCAATCTTGTACCTCTGACT  
+HWI-EAS443:3:88:238:1345#0/1  
T`aL][ba\_\_a]`Z``]b`b^abXb\_aaW¥L]¥]\_``ZT`  
@HWI-EAS443:3:89:292:1710#0/1  
ATGGAATGGCTAAAGACAAGACCAATCTTGTACCTCTGA  
+HWI-EAS443:3:89:292:1710#0/1  
^b]bb\_\_aa`aa`a`Z```a``a`^X]S\_\_\_\_\_Wa\_aZZ[  
@HWI-EAS443:3:8:48:821#0/1  
CATGGAATGGCTAAAGACAAGACCAATCTTGTACCTCTG  
+HWI-EAS443:3:8:48:821#0/1  
aa]bb¥a\_V¥aa^a`[`aa\_\_\_\_\_]`X`[W[`Z¥¥¥\_`^Z]\_  
@HWI-EAS443:3:90:453:514#0/1  
GAGGTGACAAGATTGGTCTTGTCTTTAGCCATTCCATGAG  
+HWI-EAS443:3:90:453:514#0/1  
[`ab]\_]aX^b\_a\_[Z^aaaa^aaa\_aaa\_`a]^`a`\_`]  
@HWI-EAS443:3:94:1123:1278#0/1  
GAGGTGACAAGATTGGTCTTGTCTTTAGCCATTCCATGAG  
+HWI-EAS443:3:94:1123:1278#0/1  
aaa`b`a\_aaaaaa^aaaba\_aaa`aa\_a\_a]Z`^`\_\_  
@HWI-EAS443:3:94:874:1295#0/1  
CAGAGGTGACAAGATTGGTCTTGTCTTTAGCCATTCCATG  
+HWI-EAS443:3:94:874:1295#0/1  
aa````\_aaZ]aa\_a`\_X\_aaaZN¥a`a`\_\_`a\_\_\_\_\_¥M  
@HWI-EAS443:3:9:55:1685#0/1  
GAGGTGACAAGATTGGTCTTGTCTTTAGCCATTCCATGAG  
+HWI-EAS443:3:9:55:1685#0/1  
¥b`][^^aba]aaaYa\_aaaa^a¥[aa^aZ`\_XaU^]\_`\_  
@HWI-EAS443:3:50:1013:1128#0/1  
CAGCAAAGCAAAAGCAGGTAGATATTTAAAGATGAGTCTT  
+HWI-EAS443:3:50:1013:1128#0/1  
abbbbbbbbbbbbb`babXbaabbbbbbbbabbaaba  
@HWI-EAS443:3:77:327:1163#0/1  
AAGCAAAAGCAGGTAGATATTTAAATATGAGTCTTCTAAC  
+HWI-EAS443:3:77:327:1163#0/1  
¥YS`¥\_`ZZLZ]\_M[\_a[aa^a`ZYT[aa`^]aIa\_ZPU  
@HWI-EAS443:3:66:720:2000#0/1  
CTCGCAAAAGCAGGTAGATATTTAAAGATGAGTCTTCTAA  
+HWI-EAS443:3:66:720:2000#0/1  
`abbbaba¥Va`aaMaa\_aaa`aaa^a`^`\_]`\_]`\_aa  
@HWI-EAS443:3:82:1170:1419#0/1  
CTCGCAAAAGCAGGTAGATATTTAAAGATGAGTCTTCTAA

+HWI-EAS443:3:82:1170:1419#0/1  
¥a\_a]abb¥YI¥\_\_¥aa^^a`b\_`bbbaabbaaa`ba^a]  
@HWI-EAS443:3:19:428:986#0/1  
CCGAAAAGCAGGTAGATATTTAAAGATGAGTCTTCTAAC  
+HWI-EAS443:3:19:428:986#0/1  
a`^`b\_^^abaaa^aaaaaaaaaaaaa`a`^`a`a\_\_a`  
@HWI-EAS443:3:18:1535:690#0/1  
CGCAAAAGCAGGTAGATATTTAAAGATGAGTCTTCTAAC  
+HWI-EAS443:3:18:1535:690#0/1  
^`^`abbb^`a`aSbbbbbbabbaba`a`^`ab`¥`aa\_T  
@HWI-EAS443:3:90:491:1224#0/1  
CGCAAAAGCAGGTAGATATTTAAAGATGAGTCTTCTAAC  
+HWI-EAS443:3:90:491:1224#0/1  
`babba¥`b`ab]ababb\_bbbb`\_aaba`a`b`\_aaaa¥  
@HWI-EAS443:3:11:732:1909#0/1  
AGCAGGTAGATATTTAAAGATGAGTCTTCTAACCGAGGTC  
+HWI-EAS443:3:11:732:1909#0/1  
¥Waa` `[bba`aYa`a]`aSa\_a¥R^YLVaa[ ]^\_]Y[  
@HWI-EAS443:3:22:488:1021#0/1  
AGCAGGTAGATATTTAAAGATGAGTCTTCTAACCGAGGTC  
+HWI-EAS443:3:22:488:1021#0/1  
`aaabb[ `M`\_¥`baa\_Z\_`a]aa^`\_`^`b\_]T]^\_S^  
@HWI-EAS443:3:30:1399:43#0/1  
CAAAAGCAGGTAGATATTTAAAGATGAGTCTTCTAACCGA  
+HWI-EAS443:3:30:1399:43#0/1  
abbbbabababababbbbbbbaa`baaaa`\_baab`a^WYa  
@HWI-EAS443:3:30:1603:50#0/1  
CAGGTAGATATTTAAAGATGAGTCTTCTAACCGAGGTCGA  
+HWI-EAS443:3:30:1603:50#0/1  
aaab\_ba^`abbbbaabaabaa\_`b`aa\_`a`a^`\_ZGT0  
@HWI-EAS443:3:31:1645:1748#0/1  
AGCAGGTAGATATTTAAAGATGAGTCTTCTAACCGAGGTC  
+HWI-EAS443:3:31:1645:1748#0/1  
Yaa^\_aabbbaababaaaZ\_ba^`aaa]V`a]P^\_`aYRL  
@HWI-EAS443:3:34:1662:1585#0/1  
CAAAAGCAGGTAGATATTTAAAGATGAGTCTTCTAACCGA  
+HWI-EAS443:3:34:1662:1585#0/1  
abba^Z¥^`¥bba`]aa`[a`aa\_aaaX`^]X\_]ZVOPX  
@HWI-EAS443:3:40:1774:907#0/1  
GCAGGTAGATATTTAAAGATGAGTCTTCTAACCGAGGTCG  
+HWI-EAS443:3:40:1774:907#0/1  
\_FZPMKDRNLT]XPYXS[WS`VX]YBBBBBBBBBBBBBBB  
@HWI-EAS443:3:42:1082:298#0/1  
CAAAAGCAGGTAGATATTTAAAGATGAGTCTTCTAACCGA  
+HWI-EAS443:3:42:1082:298#0/1  
abbaba`\_aaSaa^aaaaaa\_aa`a`\_Z\_`^`\_`\_¥Z`^W  
@HWI-EAS443:3:42:1573:371#0/1  
GCAAAAGCAGGTAGATATTTAAAGATGAGTCTTCTAACCG  
+HWI-EAS443:3:42:1573:371#0/1  
`a^YWWYVXX\_H]TZXRW]V¥SWWS^O^]UWZOZ` `ZOL

@HWI-EAS443:3:47:1474:1786#0/1  
AAAGCAGGTAGATATTTAAAGATGAGTCTTCTAACCGAGG  
+HWI-EAS443:3:47:1474:1786#0/1  
\_abbba^^U]`aaabbbaa`\_a\_a^¥^Y`[^a¥YX]Y\_Y  
@HWI-EAS443:3:48:1535:1443#0/1  
AAAAGCAGGTAGATATTTAAAGATGAGTCTTCTAACCGAG  
+HWI-EAS443:3:48:1535:1443#0/1  
Y¥[^`Z^a\_bb^aa^`\_a`^aaabaaZ]aa^[`][X[\_\_\_  
@HWI-EAS443:3:52:966:652#0/1  
CAAAAGCAGGTAGATATTTAAAGATGAGTCTTCTAACCGA  
+HWI-EAS443:3:52:966:652#0/1  
aaaa¥b\_]ab]ab`a]bbaaab\_aaaa\_\_aa`aaa^]\_\_\_  
@HWI-EAS443:3:55:793:1253#0/1  
CAAAAGCAGGTAGATATTTAAAGATGAGTCTTCTAACCGA  
+HWI-EAS443:3:55:793:1253#0/1  
ab[bbbabb¥bbaabbbbbaaaabbbbbaabbbbba]aa  
@HWI-EAS443:3:56:244:787#0/1  
GCAAAAAGCAGGTAGATATTTAAAGATGAGTCTTCTAACCG  
+HWI-EAS443:3:56:244:787#0/1  
`b¥aaaaaaaaXa`aaaaa`aaaa`aa`\_aa\_aa``\_\_\_  
@HWI-EAS443:3:60:1176:273#0/1  
GCAAAAAGCAGGTAGATATTTAAAGATGAGTCTTCTAACCG  
+HWI-EAS443:3:60:1176:273#0/1  
Y\_a`[^a^`^PYa``[ababaaba^a\_aY0[]\_\_`[[\_\_\_  
@HWI-EAS443:3:61:268:143#0/1  
CAAAAGCAGGTAGATATTTAAAGATGAGTCTTCTAACCGA  
+HWI-EAS443:3:61:268:143#0/1  
`bbaabbbb`bbaa^abb¥ZM`aaa]b`aab\_aa`¥^a^  
@HWI-EAS443:3:61:769:1604#0/1  
AAAGCAGGTAGATATTTAAAGATGAGTCTTCTAACCGAGG  
+HWI-EAS443:3:61:769:1604#0/1  
aa`TY^¥aX\_[SZaa^a¥YaaQS^¥^Pba`U\_\_`\_]\_YYR  
@HWI-EAS443:3:65:1525:1063#0/1  
GCAAAAAGCAGGTAGATATTTAAAGATGAGTCTTCTAACCG  
+HWI-EAS443:3:65:1525:1063#0/1  
`^VZ¥`\_]V`a^\_\_`^^\_]^^^[^aXX]^\_^YU]  
@HWI-EAS443:3:73:929:1098#0/1  
AGCAGGTAGATATTTAAAGATGAGTCTTCTAACCGAGGTC  
+HWI-EAS443:3:73:929:1098#0/1  
aaaaaaZaaaa\_aa\_aaaa]`aaaZ``\_\_\_aaa^`^\_]Z^  
@HWI-EAS443:3:76:1554:1425#0/1  
AAAGCAGGTAGATATTTAAAGATGAGTCTTCTAACCGAGG  
+HWI-EAS443:3:76:1554:1425#0/1  
^a`a`Y`Ga\_aaabb`¥[R]a`b`a]\_aaX\_`WP`V^U  
@HWI-EAS443:3:76:505:831#0/1  
AGCAGGTAGATATTTAAAGATGAGTCTTCTAACCGAGGTC  
+HWI-EAS443:3:76:505:831#0/1  
abbaaaSbbaaaaaa\_baaaaaa\_aa`a^`aaa\_\_^Y`  
@HWI-EAS443:3:79:564:1587#0/1  
GCAAAAAGCAGGTAGATATTTAAAGATGAGTCTTCTAACCG

+HWI-EAS443:3:79:564:1587#0/1  
\_baba^`a`ZRaa\_\_aaa\_Yaaaa\_]a[Z\_`\_\_`\_a^`^  
@HWI-EAS443:3:86:1027:571#0/1  
AGCAAAAGCAGGTAGATATTTAAAGATGAGTCTTCTAACC  
+HWI-EAS443:3:86:1027:571#0/1  
abaa`b^]`^`baN^a`baab^baaZa\_b\_b\_R^a\_a\_aa¥  
@HWI-EAS443:3:87:1155:1481#0/1  
GCAAAAGCAGGTAGATATTTAAAGATGAGTCTTCTAACCG  
+HWI-EAS443:3:87:1155:1481#0/1  
^¥aba`ba¥\_]J`baaabaa`a`[^`^`a¥\_\_aaaa¥Ua  
@HWI-EAS443:3:95:1277:227#0/1  
AGCAAAAGCAGGTAGATATTTAAAGATGAGTCTTCTAACC  
+HWI-EAS443:3:95:1277:227#0/1  
aWQMHSZR\_a\_Q¥UT\_a]XX[N\_`XV]\_XbTNaaWUYWMM  
@HWI-EAS443:3:96:340:2011#0/1  
AAAGCAGGTAGATATTTAAAGATGAGTCTTCTAACCGAGG  
+HWI-EAS443:3:96:340:2011#0/1  
aaa`aa`¥R^aa`aa\_aa`aa`\_^\_Y^`¥`^`\_XTXXBB  
@HWI-EAS443:3:96:672:996#0/1  
AGCAAAAGCAGGTAGATATTTAAAGATGAGTCTTCTAACC  
+HWI-EAS443:3:96:672:996#0/1  
]`babb\_bbbbb\_`b`a`bb`^^¥`]abaa`[ba\_aa`aa  
@HWI-EAS443:3:97:1625:220#0/1  
GCAAAAGCAGGTAGATATTTAAAGATGAGTCTTCTAACCG  
+HWI-EAS443:3:97:1625:220#0/1  
`aXPZa¥G]a`G`]a[\_]a]\_\_Y]]^XUUR\_ZBBBBBBB  
@HWI-EAS443:3:97:181:535#0/1  
AAAAGCAGGTAGATATTTAAAGATGAGTCTTCTAACCGAG  
+HWI-EAS443:3:97:181:535#0/1  
S\_\_\_\_^`Ya¥^Y\_aZa\_I¥T]^a^^`\_b]Va`a^`]YYT]  
@HWI-EAS443:3:17:1130:159#0/1  
ATAGACGGAAAGTGGATGAGAGAACTCNTCCTTTATGACA  
+HWI-EAS443:3:17:1130:159#0/1  
`baba]baaaaa\_aa\_\_a\_aY¥¥a\_YUDTW]]]][\_]^V]  
@HWI-EAS443:3:29:68:1564#0/1  
AATAGACGGAAAGTGGATGAGAGAACTCATCCTTTATGAC  
+HWI-EAS443:3:29:68:1564#0/1  
aaaa\_aaa\_`[^`^SY\_\_¥]T][X`Y^X\_\_^`^`][^Z[Y  
@HWI-EAS443:3:69:879:1392#0/1  
GGATAAGAGAACTCATCCTTTATGACAAAGAAGAAATAAG  
+HWI-EAS443:3:69:879:1392#0/1  
a``UF[]¥[VZZ\_]Paaa`a`U]`\_[]]]\_\_^SWa\_¥P  
@HWI-EAS443:3:50:1159:140#0/1  
AGTTGATCAGAATGATCAAACGTGGAATCAATGACCGAAA  
+HWI-EAS443:3:50:1159:140#0/1  
abab\_ababaaabaaba`aa\_a\_aa`aaaa\_a``\_a\_a¥`]  
@HWI-EAS443:3:86:1244:1657#0/1  
GCCAGGATGCCACAGAAATCAGAGCATCTGTAGGAAGAAT  
+HWI-EAS443:3:86:1244:1657#0/1  
\_ZV^OV]^HT]XYIL¥¥MFY`]PUS[XZ\_TEM]¥]UZBB



@HWI-EAS443:3:91:1069:1293#0/1  
CTGGTCCTTATGGCCCAGTATCTGCTTCTTAGTCCCAGGG  
+HWI-EAS443:3:91:1069:1293#0/1  
abbb^abbbbabaababb`abbaaaabaaa^^`a`aaaa  
@HWI-EAS443:3:68:861:244#0/1  
TCCTGGAAGTAAAGAAGCAGATACTGGGCCATAAGGACCAG  
+HWI-EAS443:3:68:861:244#0/1  
aaaa``a`aa¥```\_aaa`\_aa\_aaa`]`\_`````^U\_`  
@HWI-EAS443:3:25:780:1580#0/1  
TACCCTGGAAGTAAAGAAGCAGATACTGGGCCATAAGGACC  
+HWI-EAS443:3:25:780:1580#0/1  
abbaabbaabab`\_`aaa`aaa`aa``\_`]a`aa`a\_\_^X  
@HWI-EAS443:3:46:1436:752#0/1  
GGTCCTTATGGCCCAGTATCTGCTTCTTAGTCCAGGGTA  
+HWI-EAS443:3:46:1436:752#0/1  
a`YYYaa^\_WWZRaa\_[]]``\_T¥^`\_X]`¥`XV^^^[]Q]  
@HWI-EAS443:3:75:766:1027#0/1  
TGGTCCTTATGGCCCAGTATCTGCTTCTTAGTCCAGGGT  
+HWI-EAS443:3:75:766:1027#0/1  
]b^]`b\_\_a¥\_Waa\_[]`baa\_Y[]`aaaabaaaa````P  
@HWI-EAS443:3:76:275:227#0/1  
GGTCCTTATGGCCCAGTATCTGCTTCTTAGTCCAGGGTA  
+HWI-EAS443:3:76:275:227#0/1  
a[HXZW`¥S\_PPSXUWV\_WUSUSZSWWWKNTWX¥UX¥QGW  
@HWI-EAS443:3:58:1545:866#0/1  
CGGGCATCTGTTGGAAGAATGATTGGTGGAATCGGGAGAT  
+HWI-EAS443:3:58:1545:866#0/1  
aab¥X\_b\_aa0ZaaS`bbY`aY`[¥\_I\_a^]\_Z¥¥\_PYV^  
@HWI-EAS443:3:64:1768:1438#0/1  
GCTTTCCACNAGAGGGTGCAGATTGCTTCAAATGAGAAT  
+HWI-EAS443:3:64:1768:1438#0/1  
]ab`U`U^PD[ZXabba`UUba`b\_aYbaa\_]aa[Q^`^  
@HWI-EAS443:3:44:1566:836#0/1  
CTCTTGTCTCTGATATGTGGCATCATTCAAGTTGGAATG  
+HWI-EAS443:3:44:1566:836#0/1  
`aababaa`b`bb`aaabaaaaa\_aaa]a`a``aa^\_a\_  
@HWI-EAS443:3:63:1073:891#0/1  
GAGCATCCCAGTGCTGGGAAGGACCCTAAGAAAAGGAGGA  
+HWI-EAS443:3:63:1073:891#0/1  
\_\_aabaaaa^`ab``ba`^aaa\_aaaaaa^\_Xaaaaa`  
@HWI-EAS443:3:82:855:741#0/1  
GAGCATCCCAGTGCTGGGAAGGACCCTAAGAAAAGGAGGA  
+HWI-EAS443:3:82:855:741#0/1  
]¥W\_\_a\_]`\_a\_[a`\_\_V\_XZ\_baY\_Y\_\_[\_WOZba\_R]  
@HWI-EAS443:3:9:660:325#0/1  
AAGAGCATCCCAGTGCTGGGAAGGACCCTAAGAAAATCTG  
+HWI-EAS443:3:9:660:325#0/1  
aaaaaaaaaaa`aa]a\_aaa``````^^^`\_\_``\_]\_U\_`  
@HWI-EAS443:3:79:976:32#0/1  
CCTTGTCTCTGATATGTGGCATCATTCAAGTTGGAATGC

+HWI-EAS443:3:79:976:32#0/1  
aab`bb`\_ababab\_bbab^^aba]b¥`\_b`aaXa\_\_`a^  
@HWI-EAS443:3:40:1758:1963#0/1  
AGCTGACCGTGCCAGGAAGATGAGGTCTTCAATCTCAGCG  
+HWI-EAS443:3:40:1758:1963#0/1  
YMV]abYJW¥]\_V[M^¥``\_[\_]UMbaaZ[\_[\_`aaV` [  
@HWI-EAS443:3:13:1409:567#0/1  
GGAAGACAAGAGAAGAACCCCGCACTCAGAATGGCCCAGC  
+HWI-EAS443:3:13:1409:567#0/1  
\_¥0\_b`^^]\_`aZ^a`\_aWYZZN`Z`U^\_¥[]VRNRP[[Q  
@HWI-EAS443:3:18:1291:455#0/1  
GGAAGACAAGAGAAGAACCCCGCACTCAGAATGGCCCAGC  
+HWI-EAS443:3:18:1291:455#0/1  
ZUL¥aVa\_[¥]W`¥\_X¥ZZa`b^^\_a¥`a^Z^a]ZWQ[a\_  
@HWI-EAS443:3:25:850:1458#0/1  
GGAAGACAAGAGAAGAACCCCGCACTCAGAATGGCCCAGC  
+HWI-EAS443:3:25:850:1458#0/1  
ababaaaa\_a`a`a\_baa\_aa`a\_]`a\_\_`W^\_Y\_]\_¥¥  
@HWI-EAS443:3:2:1521:783#0/1  
GGAAGACAAGAGAAGAACCCCGCACTCAGAATGGCCCAGC  
+HWI-EAS443:3:2:1521:783#0/1  
aY\_YUPVXH¥[VS[^[\_YPTU]UZTSYZVWWWUUVBBBBB  
@HWI-EAS443:3:34:1233:838#0/1  
CANGAAGACAAGAGAAGAACCCCGCACTCAGAATGAGGTG  
+HWI-EAS443:3:34:1233:838#0/1  
a¥DY`abbbbab`ba`ab`ababaaabaabaaaa``\_G¥  
@HWI-EAS443:3:36:533:627#0/1  
GGAAGACAAGAGAAGAACCCCGCACTCAGAATGGCCCAGC  
+HWI-EAS443:3:36:533:627#0/1  
aaaa]^a`U\_aa^^a`aaaaaaa^aa`a[X`\_a¥^\_\_\_\_  
@HWI-EAS443:3:48:1207:510#0/1  
GGAAGACAAGAGAAGAACCCCGCACTCAGAATGGCCCAGC  
+HWI-EAS443:3:48:1207:510#0/1  
a^Xa\_\_^`\_a¥a¥]a\_\_[]ZU\_ZU¥[\_`YVT\_¥TUUU^Y  
@HWI-EAS443:3:54:363:1832#0/1  
CCATCATCATTCTGAGTGCGGGTTCTTCTTGT  
+HWI-EAS443:3:54:363:1832#0/1  
aba\_ba\_G^bbabbbbaaabYaa\_`a^aba^aa\_\_aa\_  
@HWI-EAS443:3:57:375:1223#0/1  
GAAAGCTAGGAAGACAAGAGAAGAACCCCGCACTCAGAAT  
+HWI-EAS443:3:57:375:1223#0/1  
aab`abbaaaaba`\_aaa`aa\_aaaa`aa\_a]aaaa\_^a  
@HWI-EAS443:3:8:1092:1886#0/1  
GAAGACAAGAGAAGAACCCCGCACTCAGAATGATCAATGA  
+HWI-EAS443:3:8:1092:1886#0/1  
`Z[`aa\_[^aa\_X`]^¥\_HSYUaZR]Z\_^Y]a^VY\_\_W¥]  
@HWI-EAS443:3:96:1677:1768#0/1  
GGAAGACAAGAGAAGAACCCCGCACTCAGAATGGCCCAGC  
+HWI-EAS443:3:96:1677:1768#0/1  
`ZT\_ba]Xa`[abbaaba\_Ja\_]\_aa\_ba\_`aaY[[^aQ

@HWI-EAS443:3:9:695:1488#0/1  
GGAAGACAAGAGAAGAACCCCGCACTCAGAATGGCCCAGC  
+HWI-EAS443:3:9:695:1488#0/1  
a]]`¥¥\_[^`aYaaa`a^¥`\_¥W`\_`\_a`RZ^]`XS`^]  
@HWI-EAS443:3:52:669:1732#0/1  
CACGAAGACAAGAGATGAACCCCGCACTCAGAATGAAGTG  
+HWI-EAS443:3:52:669:1732#0/1  
[]QDSR\_aa[\_Sa`^Va\_\_\_\_`\_]\_XX\_¥a\_[a¥Y[¥U¥YQV  
@HWI-EAS443:3:69:204:286#0/1  
ATCAGGAAGACAAGAGAAGAACCCCGCACTCCGAATGGCC  
+HWI-EAS443:3:69:204:286#0/1  
\_`bVbba^`baaVa`ba\_abaaaaabbaaaT`aa[`GN]  
@HWI-EAS443:3:92:1218:349#0/1  
TAAACATCAGGAAGACAAGAGAAGAACCCCGAACTCAGAA  
+HWI-EAS443:3:92:1218:349#0/1  
Y\_G\_bb`\_[`b`^bb``]aXbb\_abbX\_MI`IaH]Z`b^a  
@HWI-EAS443:3:29:1539:1465#0/1  
AGGAAGACAAGAGAAGAACCCCGCACTCAGAATGGCCCAG  
+HWI-EAS443:3:29:1539:1465#0/1  
abaaaba`\_`\_ab\_aa`aaHaabV\_^^Vaaaa\_aZ]^U\_^  
@HWI-EAS443:3:31:813:531#0/1  
CTGGGCCATTCTGAGTGCGGGTCTTCTCTTGTCTTCCT  
+HWI-EAS443:3:31:813:531#0/1  
abbZabaabaaabbaabba`a^babbabaaaa\_aaa\_\_^  
@HWI-EAS443:3:44:1308:1031#0/1  
GGCCATAGGAAGACAAGAGAAGAACCCCGCACTCAGAATG  
+HWI-EAS443:3:44:1308:1031#0/1  
aabaaaabaaaa^a\_a`aa`aaZ^¥`a\_`¥`\_a\_\_`\_  
@HWI-EAS443:3:65:1741:697#0/1  
CTGGGCCATTCTGAGTGCGGGTCTTCTCTTGTCTTCCT  
+HWI-EAS443:3:65:1741:697#0/1  
aababbbaaa`a\_NZS\_`^Za`K\_aa^`b\_a\_¥Z\_a`QL[  
@HWI-EAS443:3:87:566:58#0/1  
AAAGCTAGGAAGACAAGAGAAGAACCCCGCACTCAGAATG  
+HWI-EAS443:3:87:566:58#0/1  
Zaa\_[b[baa]baab\_a\_b\_aa`a`][aa`^aa\_a][aa  
@HWI-EAS443:3:95:913:1578#0/1  
GAGGAAGACAAGAGAAGAACCCCGCACTCAGAATGGCCCA  
+HWI-EAS443:3:95:913:1578#0/1  
HZbbb`a`bab]\_baab`ba`[b`b\_bTb`bT`bb[W`a  
@HWI-EAS443:3:10:641:442#0/1  
CAGGAAGACAAGAGAAGAACCCCGCACTCAGAATGGCCCA  
+HWI-EAS443:3:10:641:442#0/1  
aabaX^baaaaa`aaabab`^^`a\_`a`a\_`¥``ZNW\_  
@HWI-EAS443:3:20:1109:1112#0/1  
CAGGAAGACAAGAGAAGAACCCCGCACTCAGAATGGCCCA  
+HWI-EAS443:3:20:1109:1112#0/1  
\_]bbaaaababaaaaba`a[aa^a\_`aa]a`a¥^``]N\_`  
@HWI-EAS443:3:25:1658:321#0/1  
TGGGCCATTCTGAGTGCGGGTCTTCTCTTGTCTTCCTG

+HWI-EAS443:3:25:1658:321#0/1  
\_abaa`bab]abaa\_]`baa`]a]aaVa^aaa^]`aVX`a  
@HWI-EAS443:3:25:993:1808#0/1  
CAGGAAGACAAGAGAAGAACCCCGCACTCAGAATGGCCCA  
+HWI-EAS443:3:25:993:1808#0/1  
abb`bbb`abb`bbbb]`baa\_aa]aaa`abb\_`[a`[\_a  
@HWI-EAS443:3:36:536:786#0/1  
GGAAGACAAGAGAAGAACCCCGCACTCAGAATGAATGTGC  
+HWI-EAS443:3:36:536:786#0/1  
aaaaa`a`Wa`a`aaaaa``aaaa``a`a\_```]¥``¥\_`  
@HWI-EAS443:3:38:1624:883#0/1  
CAGGAAGACAAGAGAAGAACCCCGCACTCAGAATGGCCCA  
+HWI-EAS443:3:38:1624:883#0/1  
a`babbb]`a`aaaababa\_^\_ab`aa`aXMV¥¥^Z]TUT  
@HWI-EAS443:3:40:453:626#0/1  
CAGGAAGACAAGAGAAGAACCCCGCACTCAGAATGTCTTG  
+HWI-EAS443:3:40:453:626#0/1  
\_\_bbb\_b\_\_`b`\_^\_a\_babb^b\_`a`aaaa\_aa[\_W\_^  
@HWI-EAS443:3:46:969:267#0/1  
CAGGAAGACAAGAGAAGAACCCCGCACTCAGAATGGCCCA  
+HWI-EAS443:3:46:969:267#0/1  
`]^`^aaaa[^ZaXaWaa\_a^[]\_aaa]^P\_\_¥^^][UGJV  
@HWI-EAS443:3:65:1160:373#0/1  
CAGGAAGACAAGAGAAGAACCCCGCACTCAGAATGGCCCA  
+HWI-EAS443:3:65:1160:373#0/1  
abbb`\_baaaaba`bbaba\_\_aaaaaaaaaaaaa`\_¥Wa  
@HWI-EAS443:3:72:450:1772#0/1  
TGGGCCATTCTGAGTGCGGGTTCTTCTTGTCTTCTG  
+HWI-EAS443:3:72:450:1772#0/1  
Y\_RQYaW`a\_b[```¥b\_WI¥W\_¥Yb`JZYba\_`aa\_Q¥U  
@HWI-EAS443:3:73:128:1342#0/1  
CAGGAAGACAAGAGAAGAACCCCGCACTCAGAATGGCCCA  
+HWI-EAS443:3:73:128:1342#0/1  
aa\_a\_a^]aa\_`\_```\_[]`\_\_`\_Y```]`\_^]UT¥Y\_¥¥¥  
@HWI-EAS443:3:76:697:880#0/1  
CAGGAAGACAAGAGAAGAACCCCGCACTCAGAATGGCCCA  
+HWI-EAS443:3:76:697:880#0/1  
a^ababa]aa^b`a```]\_aaa```aa`aaa^`\_\_¥VY\_`  
@HWI-EAS443:3:96:1607:1917#0/1  
CAGGAAGACAAGAGAAGAACCCCGCACTCAGAATGTGGGC  
+HWI-EAS443:3:96:1607:1917#0/1  
\_`abbba\_bZbaa`abb`aYRQZa^a]ZW`^YY¥^\_b`Z\_  
@HWI-EAS443:3:68:1561:1244#0/1  
CAGGAAGACAAGNGAAGAACCCCGCACTCAGAATGAAGGG  
+HWI-EAS443:3:68:1561:1244#0/1  
a^bbb`a\_aaa[D^a`baa¥[¥abX^¥a\_Yb\_aaa`\_ZF]  
@HWI-EAS443:3:70:1385:745#0/1  
CAGGAAGACAAGAGAAGAACCCCGCACTCAGAATCAAGTT  
+HWI-EAS443:3:70:1385:745#0/1  
`¥\_TTYR]`U\_¥^bbbV\_]`\_[]`¥^\_NUYXQM]aJP\_[]¥M

@HWI-EAS443:3:100:750:553#0/1  
AGCTAGGAAGACAAGAGAAGAACCCCGCACTCAGAATGAA  
+HWI-EAS443:3:100:750:553#0/1  
S\_SV^V^`\_[U\_aa¥]ba`b\_abaa^b[U\_\_Q¥a\_bb`B  
@HWI-EAS443:3:11:72:1187#0/1  
GGGCCATTCTGAGTGCGGGTTCTTCTTGTCTTCCTGA  
+HWI-EAS443:3:11:72:1187#0/1  
aaaa`[`aaaaaU\_\_aXX]\_^`aa]^a[``aZ^]¥aa`\_\_  
@HWI-EAS443:3:14:595:1081#0/1  
GGAAGACAAGAGAAGAACCCCGCACTCAGAATGAAGAGGA  
+HWI-EAS443:3:14:595:1081#0/1  
aa\_Sb`\_a\_\_]``[[\_aZaa\_a^P¥][R\_^`\_]\_\_G¥ZU  
@HWI-EAS443:3:17:389:666#0/1  
GGGCCATTCTGAGTGCGGGTTCTTCTTGTCTTCCTGA  
+HWI-EAS443:3:17:389:666#0/1  
ababbbabbabaaRaababb\_aabaaa`aaa`aaa`aaa  
@HWI-EAS443:3:19:1091:878#0/1  
GGGCCATTCTGAGTGCGGGTTCTTCTTGTCTTCCTGA  
+HWI-EAS443:3:19:1091:878#0/1  
\_bbbbbbabbab`bbbbbaabbbabbbbaa\_bbaaba`  
@HWI-EAS443:3:23:509:649#0/1  
AGCTAGGAAGACAAGAGAAGAACCCCGCACTCAGAATGAA  
+HWI-EAS443:3:23:509:649#0/1  
[aU\_aS[\_]]TZ`^HYa¥\_aaa[baW`J¥`\_aa^S[`Na  
@HWI-EAS443:3:25:1422:799#0/1  
GCTAGGAAGACAAGAGAAGAACCCCGCACTCAGAATGAAT  
+HWI-EAS443:3:25:1422:799#0/1  
aZa\_aa`\_a\_[aa`\_a`\_\_\_\_N¥W¥YY¥WWWKMKI¥LMU  
@HWI-EAS443:3:44:896:641#0/1  
TAGGAAGACAAGAGAAGAACCCCGCACTCAGAATGAATGT  
+HWI-EAS443:3:44:896:641#0/1  
a\_a`\_ab\_^\_\_a^a\_a\_¥`^]\_^\_^Y^\_^YZUY^`^W]\_S  
@HWI-EAS443:3:45:564:958#0/1  
CAGAAAGACAAGAGAAGAACCCCGCACTCAGAATGAAGTG  
+HWI-EAS443:3:45:564:958#0/1  
aabaabaa\_aab`a\_\_ba¥`Yaaaaa^```\_`aa`^¥\_aZa  
@HWI-EAS443:3:51:149:1838#0/1  
GGGCCATTCTGAGTGCGGGTTCTTCTTGTCTTCCTGA  
+HWI-EAS443:3:51:149:1838#0/1  
a\_abaaXZaaY[WLY[`[PYV¥T^\_\_\_\_US^X`^VS]ZR  
@HWI-EAS443:3:76:893:708#0/1  
TAGGAAGACAAGAGAAGAACCCCGCACTCAGAATGAATGT  
+HWI-EAS443:3:76:893:708#0/1  
aa\_^`\_\_`a`\_\_aaaaaa`a\_a`aa]Za`\_¥Z`aa]]aa]  
@HWI-EAS443:3:77:633:566#0/1  
GGGCCATTCTGAGTGCGGGTTCTTCTTGTCTTCCTGA  
+HWI-EAS443:3:77:633:566#0/1  
ababa]bbbbba]aaab`b\_\_bbbabaabbaaabaabaa  
@HWI-EAS443:3:80:715:792#0/1  
GCTAGGAAGACAAGAGAAGAACCCCGCACTCAGAATGAAT

+HWI-EAS443:3:80:715:792#0/1  
]`aPXX`aU¥\_\_a\_aaaa]¥PZ[V`^Z^`\_^¥`¥XQa  
@HWI-EAS443:3:90:297:1070#0/1  
GGAAGACAAGAGAAGAACCCCGCACTCAGAATGAAGGGGA  
+HWI-EAS443:3:90:297:1070#0/1  
^^Wababb[bSa^`bba`aUbbaa`aaaa`\_aVV`a]^S  
@HWI-EAS443:3:15:740:450#0/1  
GACAAGAGAAGAACCCCGCACTCAGAATGAAGTGGTTGAT  
+HWI-EAS443:3:15:740:450#0/1  
a`ab\_\_`\_\_aa\_\_`\_\_aa`a\_\_^^`\_\_`\_\_UaaX``]T  
@HWI-EAS443:3:23:758:349#0/1  
ACAAGAGAAGAACCCCGCACTCAGAATGAAGTGGGAAGATG  
+HWI-EAS443:3:23:758:349#0/1  
\_\_]¥a\_XY\_bXZUO[PaZ]FXU¥`V\_P]¥G^N^aRFUPW[  
@HWI-EAS443:3:29:1694:1056#0/1  
ATCAGGAAGACAAGAGAAGAACCCCGCAGTCAGAATGAAG  
+HWI-EAS443:3:29:1694:1056#0/1  
]RNZa¥¥`^]`¥XP]`X\_a`TX[^a]ZG¥ST]Z^`a¥X¥  
@HWI-EAS443:3:31:1593:631#0/1  
GACAAGAGAAGAACCCCGCAATCAGAATGAAGTGGATGAT  
+HWI-EAS443:3:31:1593:631#0/1  
a`b^]Tb\_`ZSXTaPSZSa0aP\_aUQ[`IZ]FWXBBBBB  
@HWI-EAS443:3:38:1686:881#0/1  
GGGGTTCTTCTTGTCTTCCTGATGTGTAGTTTTTTGATT  
+HWI-EAS443:3:38:1686:881#0/1  
aaa¥\_aaabaa]a\_b\_\_aaZ\_`¥]\_^a`WG]^\_^YZXW  
@HWI-EAS443:3:47:78:259#0/1  
GGAAGCCAAGAGAAGAACCCCGCACTCAGAATGAAGTGGA  
+HWI-EAS443:3:47:78:259#0/1  
a\_aa[DT\_X¥\_a¥aaZ[U\_`^ZQY[SN]ZUTa\_UVFJ\_V\_  
@HWI-EAS443:3:4:911:1164#0/1  
CAGGAAGACAAGAGAAGAACCCCGCACTCAGAAAGAAGTG  
+HWI-EAS443:3:4:911:1164#0/1  
a^\_¥\_``\_\_V`[a`aa]`XPUR\_X¥\_`UXaUU``¥¥aQ\_  
@HWI-EAS443:3:53:1274:1087#0/1  
CAGGAAGACAAGAGAAGAACCCCGCACTCAGAATGTAGTG  
+HWI-EAS443:3:53:1274:1087#0/1  
abababb\_abbbbabbbba[a^babab\_ab^abb`ab\_a  
@HWI-EAS443:3:57:1197:1761#0/1  
GGAAGACAAGAGAAGAACCCCGCACTCAGAATGTAGTGGA  
+HWI-EAS443:3:57:1197:1761#0/1  
a`\_XTVR]WH[\_`a¥Ya[NLYQRYLQY^\_W^Z[FS]G¥UU  
@HWI-EAS443:3:59:88:587#0/1  
CGGGTTCTTCTTGTCTTCCTGATGTGTAGTTTTTTGAT  
+HWI-EAS443:3:59:88:587#0/1  
^`UNY\_V]a`VH\_aabZ]Y]^aQW`R]PNYBBBBBBBBBB  
@HWI-EAS443:3:60:395:1996#0/1  
TGCGGGTTCTTCTTGTCTTCCTGATGTGTAGTTTTTTG  
+HWI-EAS443:3:60:395:1996#0/1  
Va¥YU`b^]^Va[``\_]WGO`RRVTQGTXX¥PQDP\_`I[Q

@HWI-EAS443:3:6:944:459#0/1  
ACAAGAGAAGAACCCCGCACTCAGAATGAAGAGGATGATG  
+HWI-EAS443:3:6:944:459#0/1  
\_N\_abab`bb]a`^Y]^H`]PL\_\_a` `a]]Ga\_Z\_\_PaB  
@HWI-EAS443:3:70:1632:1908#0/1  
CAGGAAGACAAGAGAAGAAGAACTCCGCACTCAGAATGAAGTG  
+HWI-EAS443:3:70:1632:1908#0/1  
abababbbbbbbbabab]abb`abaaa\_aba\_Xaaa^^`\_a  
@HWI-EAS443:3:76:1384:1475#0/1  
CGGGGTTCTTCTTGTCTTCCTGATGTGTAATTTTTTGAT  
+HWI-EAS443:3:76:1384:1475#0/1  
]aS` `K[baa\_ab\_^[bZ`bZ\_a\_] [a\_`aaIaa\_\_b`b`  
@HWI-EAS443:3:80:1447:616#0/1  
ATCCACTTCATTCTGAGTGCGGGTTCTTGTCTTGTCTTC  
+HWI-EAS443:3:80:1447:616#0/1  
¥R`X\_W^^`a^\_OYb¥RYbabb^[aaUV]Y¥G¥]\_X[[\_G  
@HWI-EAS443:3:81:248:1628#0/1  
GAAGCCAAGAGAAGAACCCCGCACTCAGAATGAAGTGGAT  
+HWI-EAS443:3:81:248:1628#0/1  
ZS\_[FN]\_\_QX]a^Yab¥]a` `\_]\_HYYZ^` [YYKHS^V  
@HWI-EAS443:3:84:1662:519#0/1  
GGGGTTCTTCTTGTCTTCCTGATGTGTAGTTTTTGATT  
+HWI-EAS443:3:84:1662:519#0/1  
Z\_bb]aab` ]^J\_UW¥b]ba\_ababba¥\_[F[bbb`bbaa  
@HWI-EAS443:3:85:1789:1015#0/1  
CAGGAAGACAAGAGAAGAACCCCGCACTCAGAAAGAAGTG  
+HWI-EAS443:3:85:1789:1015#0/1  
a\_a\_S\_` ]a\_TU\_Q^a[0[ ` \_` [[ ` ` ]Y]V[VOVXV[VVFV  
@HWI-EAS443:3:88:212:1043#0/1  
GACAAGAGAAGAACCCCGCACTCCGAATGAAGTGGATGAT  
+HWI-EAS443:3:88:212:1043#0/1  
` ` ` ^P^[ [TZQP¥^QJ¥UOWVS]GVP[SRVP¥BBBBBBBB  
@HWI-EAS443:3:91:265:1611#0/1  
CCACCTCATTCTGAGTGCGGGTTCTTCTTGTCTTCCT  
+HWI-EAS443:3:91:265:1611#0/1  
abba¥` `T\_aaaWW^V\_aa`¥\_Vaa\_[\_\_^]\_` ]` [\_\_^^  
@HWI-EAS443:3:92:1669:1686#0/1  
GAAGACAAGAGAAGAACCCCGCACTCAGAATGAAGAGGAT  
+HWI-EAS443:3:92:1669:1686#0/1  
][abb\_bbbV[b` [ ]bUaa\_RN\_YJ]IbMbUaba\_Hb[a`  
@HWI-EAS443:3:92:447:1783#0/1  
GACAATAGAAGAACCCCGCACTCAGAATGAAGTGGATGAT  
+HWI-EAS443:3:92:447:1783#0/1  
S^U\_PGO¥T¥\_\_\_bbU]b\_YKbba`Mabba`OIY]aUT\_¥  
@HWI-EAS443:3:1:1245:1301#0/1  
ATCAGGAAGACAAGAGAAGAACCCCGCACTCAGAATGTAG  
+HWI-EAS443:3:1:1245:1301#0/1  
aaaabba`b\_` ]U`aaaa\_XaZUNX¥QSV]RXa^P^BBBB  
@HWI-EAS443:3:20:1506:531#0/1  
GGCCATTCTGAGTGCGGGTTCTTCTTGTCTTCCTGAT

+HWI-EAS443:3:20:1506:531#0/1  
abUa]`aX`XP`\_a\_aab]Za^ba]`Za`0^Xa`^Z``^¥  
@HWI-EAS443:3:28:308:565#0/1  
ATCAGGAAGACAAGAGAAGAACCCCGCACTCAGAATGGCC  
+HWI-EAS443:3:28:308:565#0/1  
aaaV]VZUV\_a`a`\_a\_J\_^¥¥WZaa`\_Z]^a]\_aQS[]I  
@HWI-EAS443:3:62:1336:1610#0/1  
ATCAGGAAGACAAGAGAAGAACCCCGCACTCAGAATGGCC  
+HWI-EAS443:3:62:1336:1610#0/1  
abUZbbV[^^aZ]\_^ab]\_X]¥Qb`\_b``aa\_\_\_V` []  
@HWI-EAS443:3:62:1596:376#0/1  
ATCAGGAAGACAAGAGAAGAACCCCGCACTCAGAATGGCC  
+HWI-EAS443:3:62:1596:376#0/1  
a`aabbaabaaaabababbaa`\_`\_a\_a\_aaaba]^a`a^  
@HWI-EAS443:3:64:1730:496#0/1  
GGCCATTCTGAGTGCGGGTTCTTCTTGTCTTCTCCTGAT  
+HWI-EAS443:3:64:1730:496#0/1  
aba`abbaab\_b\_a`baabWa^aa\_a\_aaa``aa\_^a\_\_\_  
@HWI-EAS443:3:6:1174:637#0/1  
GGAAGACAAGAGAAGAACCCCGCACTCAGAATGAAGTNGA  
+HWI-EAS443:3:6:1174:637#0/1  
a^XUXUY\_\_`Z`Z`PSNQOTYVYXXRS]YQZ\_YBBBBBB  
@HWI-EAS443:3:70:690:1116#0/1  
AGGAAGACAAGAGAAGAACCCCGCACTCAGAATGAAGAGG  
+HWI-EAS443:3:70:690:1116#0/1  
`WZ\_bb\_abYXQZa¥HZba\_a¥T^aa[Z^`¥¥Z¥aaaGVT  
@HWI-EAS443:3:71:797:939#0/1  
ATCAGGAAGACAAGAGAAGAACCCCGCACTCAGAATGGCC  
+HWI-EAS443:3:71:797:939#0/1  
abbbaba^aaababab`bbaaaaaababa`bbaa`a`\_ [   
@HWI-EAS443:3:72:480:1156#0/1  
AAGACAAGAGAAGAACCCCGCACTCAGAATGAAGTGGNTG  
+HWI-EAS443:3:72:480:1156#0/1  
aaa`` []a^\_a\_\_aa`aa`\_a`aa`aa\_\_`a`^\_U`LDU\_  
@HWI-EAS443:3:80:1329:318#0/1  
GGCCATTCTGAGTGCGGGTTCTTCTTGTCTTCTCCTGAT  
+HWI-EAS443:3:80:1329:318#0/1  
I\_bababbbbbb`¥``babbabb]b`bb\_bSbb[aaaab  
@HWI-EAS443:3:91:915:1931#0/1  
GGCCATTCTGAGTGCGGGTTCTTCTTGTCTTCTCCTGAT  
+HWI-EAS443:3:91:915:1931#0/1  
aX`\_^ZZaZaXUGZT]a]XP`\_`\_]¥]R`\_]^[ ]¥`U]U  
@HWI-EAS443:3:11:1252:2000#0/1  
CATCAGGAAGACAAGAGAAGAACCCCGCACTCNGAATGAA  
+HWI-EAS443:3:11:1252:2000#0/1  
¥[YaWKS`\_\_`W\_[\_W^\_V]`baa¥LO[^GYMDT[¥Ha¥[  
@HWI-EAS443:3:12:414:1148#0/1  
ATCAGGAAGACAANAGAAGAACCCCGCACTCAGAATGAAG  
+HWI-EAS443:3:12:414:1148#0/1  
aabaaa`aa`ab[D[a^a^ba\_\_a\_a\_a\_a\_aa``aaa^a



@HWI-EAS443:3:17:848:939#0/1  
CAGGAAGACAAGAGANGAACCCCGCACTCAGAATGAAGTG  
+HWI-EAS443:3:17:848:939#0/1  
aab`Xabaabaaab¥D[a\_a\_\_\_a[aaa`a^\_aa¥^\_I`  
@HWI-EAS443:3:19:1523:658#0/1  
CAGGAAGNCAAGAGAAGAACCCCGCACTCAGAATGAAGTG  
+HWI-EAS443:3:19:1523:658#0/1  
abbbbb^DYbbbbbbbbbba`\_abaa`aaaa\_aaa[\_aRa  
@HWI-EAS443:3:21:1336:1770#0/1  
CAGGAAGACAAGAGAAGAACNCCCGCACTCAGAATGAAGTG  
+HWI-EAS443:3:21:1336:1770#0/1  
W\_a`abb\_]a]ba`a\_\_X[VDYaaZa\_\_aaaa[a^a^¥KY  
@HWI-EAS443:3:32:1331:1173#0/1  
ATCAGGNAGACAAGAGAAGAACCCCGCACTCAGAATGAAG  
+HWI-EAS443:3:32:1331:1173#0/1  
aaaaa[D[a`aaa`\_aa`a`^]a\_]\_\_^a]\_^a^¥Y  
@HWI-EAS443:3:33:872:609#0/1  
CGGGGTTCTTCTTGTCTTCCTGATGTGTANTTTTTGAT  
+HWI-EAS443:3:33:872:609#0/1  
abb`aZbabbbabbb`abbaabb]aa\_b`WD[aaab`aa  
@HWI-EAS443:3:65:1084:98#0/1  
CAGGAAGACAAGAGAAGANCCCGCACTCAGAATGAAGTG  
+HWI-EAS443:3:65:1084:98#0/1  
a\_^aa^abababbbbaab^DV]`aaababaa`aaab\_\_b\_a  
@HWI-EAS443:3:72:993:1257#0/1  
CAAAAAATACACATCAGGNAGACAAGAGAAGAACCCCGCA  
+HWI-EAS443:3:72:993:1257#0/1  
aba``\_]a\_babba`ab¥D^aabaabaabaaa\_aa`b\_a  
@HWI-EAS443:3:73:693:58#0/1  
ATCATCCACNTCATTCTGAGTGCGGGGTTCTTCTTGTGTC  
+HWI-EAS443:3:73:693:58#0/1  
a`b[^`^\_[DZZWbbaba\_a`b`ba`¥\_\_a\_a\_aZ`[QQZ  
@HWI-EAS443:3:73:911:1040#0/1  
CAGGAAGACAAGAGAAGAACCCCGCACTNAGAATGAAGTG  
+HWI-EAS443:3:73:911:1040#0/1  
aabb\_bab`aabab[abb^Y\_\_`\_aaa¥D¥a\_\_aa`aYa  
@HWI-EAS443:3:85:1321:1981#0/1  
GGAAGACAAGAGAAGAACCCCGNACTCAGAATGAAGTGGA  
+HWI-EAS443:3:85:1321:1981#0/1  
\_] [¥`ZZGYOXB BBBB BBBB BBBB BBBB BBBB BBBB  
@HWI-EAS443:3:88:324:1022#0/1  
ACAAGAGAAGAACNCCCGCACTCAGAATGAAGTGGATGATG  
+HWI-EAS443:3:88:324:1022#0/1  
`a^`]aa]\_a\_Z[D[aaaaa\_a\_\_\_\_\_aa]\_`R]\_U]`XR[  
@HWI-EAS443:3:89:1491:1137#0/1  
CAGGAAGACAAGAGAANAACCCCGCACTCAGAATGAAGTG  
+HWI-EAS443:3:89:1491:1137#0/1  
a¥bb]bba`\_]baab[DZ]UU`ab^a^a\_a\_[aaa\_Y`M\_  
@HWI-EAS443:3:98:595:1265#0/1  
CATCAGGAAGACAAGAGAAGAACCCCGNACTCAGAATGAA

+HWI-EAS443:3:98:595:1265#0/1  
`b\_Y\_ba\_] [DZb^\_^¥^Z]aa` `¥\_ ^DWIZ` a¥V^]a\_V  
@HWI-EAS443:3:16:861:1931#0/1  
CAGGAAGACAAGAGAAGAACCCCGCACTCAGAATGAAGCG  
+HWI-EAS443:3:16:861:1931#0/1  
\_]\_Ra\_¥\_bb[ ` \_baZabb]^ba` bXY\_U\_P`b]R¥` [J]  
@HWI-EAS443:3:2:215:573#0/1  
GCCATTCTGAGTGC GGGTTCTTCTTGTCTTCCTGATG  
+HWI-EAS443:3:2:215:573#0/1  
aa\_aa` ` \_\_\_a^` S` ` `a^]\_\_Y\_¥\_` [ [ ] ^^¥X^^Y]^  
@HWI-EAS443:3:33:966:1965#0/1  
CAGGAAGACAAGAGAAGAACCCCGCACTCAGAATGAAGGG  
+HWI-EAS443:3:33:966:1965#0/1  
^` S¥]a] ` [^a^WaZa` ` \_QV^a]^ZF]aa]YW]` QVXGa  
@HWI-EAS443:3:42:1310:1952#0/1  
GCCATTCTGAGTGC GGGTTCTTCTTGTCTTCCTGATG  
+HWI-EAS443:3:42:1310:1952#0/1  
aaaZP\_¥¥\_VX^XTXJNSNP`Y[U\_Y` \_^UZ^RTSX¥XLW  
@HWI-EAS443:3:44:771:229#0/1  
CAGGAAGACAAGAGAAGAACCCCGCACTCAGAATGAAGAG  
+HWI-EAS443:3:44:771:229#0/1  
aabbabababbabbaabbbaaa`baa`a`aa` ` \_`ba`b\_a  
@HWI-EAS443:3:45:1049:1689#0/1  
GCACACATCAGGAAGACAAGAGAAGAACCCCGCACTCAGA  
+HWI-EAS443:3:45:1049:1689#0/1  
IG\_SY\_^a¥\_baaaa[\_a]W\_\_Y` ^¥\_\_XYX^a` ` ^Q\_aZ  
@HWI-EAS443:3:56:298:207#0/1  
GGAAGACAAGAGAAGAACCCCGCACTCAGAATGAAGTGCA  
+HWI-EAS443:3:56:298:207#0/1  
V\_`a^ [¥WJ\_` ¥\_\_ ` ^`W]SX`Y^SQ\_¥\_R\_ [ ]S¥NXQT  
@HWI-EAS443:3:63:582:1360#0/1  
AGACAAGAGAAGAACCCCGCACTCAGAATGAAGTGGATTA  
+HWI-EAS443:3:63:582:1360#0/1  
^Z\_a` ` [ ]TR\_] `a` ` ^^^L^\_^\_^` \_\_\_\_] [ ]U\_ZYZU]  
@HWI-EAS443:3:80:725:2006#0/1  
CAGGAAGACAAGAGAAGAACCCCGCACTCAGAATGAAGGG  
+HWI-EAS443:3:80:725:2006#0/1  
^` `VZ\_\_ ^YW[Z[H\_X¥X`ZZ]Z[W^]U` ^ZU` ]]]S]F[  
@HWI-EAS443:3:89:1683:482#0/1  
GCCATTCTGAGTGC GGGTTCTTCTTGTCTTCCTGATG  
+HWI-EAS443:3:89:1683:482#0/1  
a]\_\_aa` abaa^^`baaa\_a]aa^a^aaa` ^\_a^\_` ` ^a\_  
@HWI-EAS443:3:95:531:1574#0/1  
AGCCACTTCATTCTGAGTGC GGGTTCTTCTTGTCTTC  
+HWI-EAS443:3:95:531:1574#0/1  
a¥aabaaaaaaabaa`WXa^bbaa]a`aaba`b`a\_aaa\_  
@HWI-EAS443:3:14:748:916#0/1  
AATCAGGAAGACAAGAGAAGAACCCCGCACTCAGAATGAA  
+HWI-EAS443:3:14:748:916#0/1  
a]aa\_aa][ ` \_\_`W\_ [ ] ^^`aU] ^^`X` [ ] \_\_\_] \_\_\_\_]]

@HWI-EAS443:3:39:1403:1724#0/1  
TGGGGTCTCTCTTGTCTTCCTGATGTGTATTTTTTGAT  
+HWI-EAS443:3:39:1403:1724#0/1  
¥W^Z¥^^]Z]^`^`SLYUI¥]W\_GNT`UWDT\_a`YNTR  
@HWI-EAS443:3:44:1464:1317#0/1  
GATCCACTTCATTCTGAGTGCGGGTCTTCTCTTGTCTT  
+HWI-EAS443:3:44:1464:1317#0/1  
VaK[\_UVb\_b\_a[\_]`Ra\_bbbabaR[b^^aa`Z]bX\_ZN  
@HWI-EAS443:3:66:1430:722#0/1  
CAGGAAGACAAGAGAAGAACCCCGCACTCAGAATGAAGTA  
+HWI-EAS443:3:66:1430:722#0/1  
YUb`WZa[ab`b`YYaa\_a``abbbaaaab\_babb`abTb  
@HWI-EAS443:3:100:435:874#0/1  
ATCAGGAAGACAAGAGAAGAACCCCGCACTCAGAATGAAG  
+HWI-EAS443:3:100:435:874#0/1  
a¥a`bbaaa]\_aab\_aaaaa\_`\_¥a`\_]`\_a^a\_a]]B  
@HWI-EAS443:3:10:128:80#0/1  
AGGAAGACAAGAGAAGAACCCCGCACTCAGAATGAAGTGG  
+HWI-EAS443:3:10:128:80#0/1  
abbaab`aa\_aa` `a`\_]Va\_^^\_]^\_V^^aYY`V`]  
@HWI-EAS443:3:10:152:1364#0/1  
CAGGAAGACAAGAGAAGAACCCCGCACTCAGAATGAAGTG  
+HWI-EAS443:3:10:152:1364#0/1  
a`[ababbabV]abbababbaabaabbbbababbbba[T]  
@HWI-EAS443:3:10:251:543#0/1  
GAAGACAAGAGAAGAACCCCGCACTCAGAATGAAGTGGAT  
+HWI-EAS443:3:10:251:543#0/1  
a[[]VWYV\_]]]^XX]VZXRXUZZ^RXWZWZGRZXXW  
@HWI-EAS443:3:10:334:806#0/1  
GACAAGAGAAGAACCCCGCACTCAGAATGAAGTGGATGAT  
+HWI-EAS443:3:10:334:806#0/1  
a[]a¥ZZZQ[\_VZUXVR`\_¥VZUY`J\_]\_]V\_U]`YV[]R  
@HWI-EAS443:3:10:498:994#0/1  
CAGGAAGACAAGAGAAGAACCCCGCACTCAGAATGAAGTG  
+HWI-EAS443:3:10:498:994#0/1  
^\_b`¥aa\_a]Saa`ba`a`aa` `]a\_aUa\_a\_` `Q\_aVa  
@HWI-EAS443:3:10:580:693#0/1  
CAGGAAGACAAGAGAAGAACCCCGCACTCAGAATGAAGTG  
+HWI-EAS443:3:10:580:693#0/1  
abbbbbbbbabababa`aaba`\_ab^baaaab\_aab`aa\_b  
@HWI-EAS443:3:10:593:1908#0/1  
CAGGAAGACAAGAGAAGAACCCCGCACTCAGAATGAAGTG  
+HWI-EAS443:3:10:593:1908#0/1  
[bW\_bUY`^\_UU`\_a\_b]b^Z¥V¥U` `Yab` `Z^YSXaGa  
@HWI-EAS443:3:10:683:85#0/1  
CATCAGGAAGACAAGAGAAGAACCCCGCACTCAGAATGAA  
+HWI-EAS443:3:10:683:85#0/1  
a\_\_\_Y` `[YbaZ^¥` ` `a^a]¥VVZXNRG\_H][R]ZU[[  
@HWI-EAS443:3:10:785:1527#0/1  
CACATCAGGAAGACAAGAGAAGAACCCCGCACTCAGAATG

+HWI-EAS443:3:10:785:1527#0/1  
abaabbabbab`aaa`aa`aaaa\_``\_a\_`\_\_\_`a^`a`  
@HWI-EAS443:3:11:1579:1550#0/1  
CATCAGGAAGACAAGAGAAGAACCCCGCACTCAGAATGAA  
+HWI-EAS443:3:11:1579:1550#0/1  
a\_aXQ¥aa]aa[\_Y]\_QV[``RQRYVNLU]N]RURVBBB  
@HWI-EAS443:3:11:1620:1361#0/1  
GGAAGACAAGAGAAGAACCCCGCACTCAGAATGAAGTGGA  
+HWI-EAS443:3:11:1620:1361#0/1  
]`NabVa\_a\_a]K`aaa`\_`a\_`Iba`a`Za`a`[R^WZ  
@HWI-EAS443:3:11:430:1589#0/1  
GACAAGAGAAGAACCCCGCACTCAGAATGAAGTGGATGAT  
+HWI-EAS443:3:11:430:1589#0/1  
`aa`S¥aaab`\_a`a`]aa`a`\_^`\_\_`\_\_XMX^]\_\_^Y  
@HWI-EAS443:3:12:1586:1744#0/1  
AGACAAGAGAAGAACCCCGCACTCAGAATGAAGTGGATGA  
+HWI-EAS443:3:12:1586:1744#0/1  
aba^aaaab`\_aa^VRV¥a^¥]^`^`^`\_]XXNXVOTBB  
@HWI-EAS443:3:12:1718:1606#0/1  
ATCAGGAAGACAAGAGAAGAACCCCGCACTCAGAATGAAG  
+HWI-EAS443:3:12:1718:1606#0/1  
ababbbaaba\_aab`b^ab\_aXU\_\_b``Z\_]\_a¥]\_a^  
@HWI-EAS443:3:12:441:1290#0/1  
GGAAGACAAGAGAAGAACCCCGCACTCAGAATGAAGTGGA  
+HWI-EAS443:3:12:441:1290#0/1  
T\_a^a`bbbb\_bb\_]M\_aab]W\_T`aaJZTOXbR^]G`a  
@HWI-EAS443:3:12:625:1191#0/1  
ATCAGGAAGACAAGAGAAGAACCCCGCACTCAGAATGAAG  
+HWI-EAS443:3:12:625:1191#0/1  
aaY^^a[\_a\_]`\_`\_a\_¥aXTSU\_^¥`VV\_VV\_XO]RKKM  
@HWI-EAS443:3:12:655:1383#0/1  
CAGGAAGACAAGAGAAGAACCCCGCACTCAGAATGAAGTG  
+HWI-EAS443:3:12:655:1383#0/1  
a`b`\_b`Y\_bb\_]bbaab`^[a\_a\_aaaaa\_ab`a^^Sa  
@HWI-EAS443:3:13:1144:1388#0/1  
GACAAGAGAAGAACCCCGCACTCAGAATGAAGTGGATGAT  
+HWI-EAS443:3:13:1144:1388#0/1  
a\_bb`\_`baaaaa`XY\_a\_aaaaa\_aaa`aUa\_¥a`\_R  
@HWI-EAS443:3:13:1161:92#0/1  
ATCCACTTCATTCTGAGTGCGGGTTCTTCTTGTCTTC  
+HWI-EAS443:3:13:1161:92#0/1  
\_`a[[]^P¥`aaX[\_R¥\_b`a]¥aNaa`^aV`\_S¥Va\_Z  
@HWI-EAS443:3:13:1776:1388#0/1  
CAGGAAGACAAGAGAAGAACCCCGCACTCAGAATGAAGTG  
+HWI-EAS443:3:13:1776:1388#0/1  
abb`a`a`b]aa```aaX[^H`NYPW\_\_\_\_[KXa`^GPUT  
@HWI-EAS443:3:14:776:1049#0/1  
GGAAGACAAGAGAAGAACCCCGCACTCAGAATGAAGTGGA  
+HWI-EAS443:3:14:776:1049#0/1  
\_UJ`a\_a[Xa\_]a`Z\_¥`T^\_Z^¥Z\_\_`WV\_¥W¥KMRW^

@HWI-EAS443:3:14:891:73#0/1  
CAGGAAGACAAGAGAAGAACCCCGCACTCAGAATGAAGTG  
+HWI-EAS443:3:14:891:73#0/1  
`\_a`¥U[XNY¥a[[L\_] ^]RRR\_`MRUWWP^WX¥`W]]WV  
@HWI-EAS443:3:15:1036:473#0/1  
GGAAGACAAGAGAAGAACCCCGCACTCAGAATGAAGTGGA  
+HWI-EAS443:3:15:1036:473#0/1  
abbaba````aaaabaaa\_\_\_b`aaa``\_\_aaa^\_a0`aa  
@HWI-EAS443:3:15:1342:1979#0/1  
CAGGAAGACAAGAGAAGAACCCCGCACTCAGAATGAAGTG  
+HWI-EAS443:3:15:1342:1979#0/1  
`abbb\_bb`baaababbba^baaaabab]aaabbbba[R^  
@HWI-EAS443:3:15:1387:1812#0/1  
CAGGAAGACAAGAGAAGAACCCCGCACTCAGAATGAAGTG  
+HWI-EAS443:3:15:1387:1812#0/1  
``bbabb`^^a\_Z]\_aa\_\_\_`[Y`P¥YS`a^aaa`a¥][  
@HWI-EAS443:3:15:206:44#0/1  
GGAAGACAAGAGAAGAACCCCGCACTCAGAATGAAGTGGA  
+HWI-EAS443:3:15:206:44#0/1  
aWP\_a]\_\_\_aS[\_\_\_^XY^YX\_] ^]^XXX]XU^]XVUWYWU  
@HWI-EAS443:3:16:657:1207#0/1  
ACATCAGGAAGACAAGAGAAGAACCCCGCACTCAGAATGA  
+HWI-EAS443:3:16:657:1207#0/1  
ab¥`^¥a^`^a`aaY^`^]a^¥a`^a`aX`[^^^]\_\_\_\_¥  
@HWI-EAS443:3:16:74:939#0/1  
ATCATCCACTTCATTCTGAGTGCGGGTTCTTCTCTTGTC  
+HWI-EAS443:3:16:74:939#0/1  
aaababbaaaaaa`a`aaa]aa`^Y`^aa`\_\_`a`^`^a  
@HWI-EAS443:3:16:782:909#0/1  
AGACAAGAGAAGAACCCCGCACTCAGAATGAAGTGGATGA  
+HWI-EAS443:3:16:782:909#0/1  
`aaaU`aZ^^X``]`aa]aaa]\_`\_a`\_`Z^`X\_\_ZW\_]`  
@HWI-EAS443:3:17:1057:363#0/1  
ATCCACTTCATTCTGAGTGCGGGTTCTTCTCTTGCTTTC  
+HWI-EAS443:3:17:1057:363#0/1  
`[\_a`^^a`\_a\_]`^[¥V¥a\_Z[]V\_\_`¥T[]\_X^YX]]^  
@HWI-EAS443:3:17:1427:1160#0/1  
GGAAGACAAGAGAAGAACCCCGCACTCAGAATGAAGTGGA  
+HWI-EAS443:3:17:1427:1160#0/1  
abaX]UWY]ba`a\_a\_a[^a`\_\_ZXUaQaU[\_`\_]U`R`\_]`  
@HWI-EAS443:3:17:1472:358#0/1  
GGAAGACAAGAGAAGAACCCCGCACTCAGAATGAAGTGGA  
+HWI-EAS443:3:17:1472:358#0/1  
aa^\_\_\_\_`a\_a\_\_a\_\_¥XZVa]]^]X`X]^\_Y\_X^]]`  
@HWI-EAS443:3:17:183:1740#0/1  
ATCAGGAAGACAAGAGAAGAACCCCGCACTCAGAATGAAG  
+HWI-EAS443:3:17:183:1740#0/1  
a\_aaa]]S\_U]^Z\_]WX^\_Y^[MY¥^P[T¥X[U¥[T[\_`  
@HWI-EAS443:3:17:333:591#0/1  
CAGGAAGACAAGAGAAGAACCCCGCACTCAGAATGAAGTG

+HWI-EAS443:3:17:333:591#0/1  
`OZaW]Z[\_]\_SU\_V[[Y\_¥RT]`[R\_^]\_¥]\_aX¥[U^  
@HWI-EAS443:3:17:334:939#0/1  
CATCAGGAAGACAAGAGAAGAACCCCGCACTCAGAATGAA  
+HWI-EAS443:3:17:334:939#0/1  
aa¥^aaaYaa\_\_`^]¥a\_\_¥^aZ¥¥¥`\_\_¥¥`^¥]¥¥`¥¥  
@HWI-EAS443:3:17:89:1618#0/1  
GGAAGACAAGAGAAGAACCCCGCACTCAGAATGAAGTGGA  
+HWI-EAS443:3:17:89:1618#0/1  
aaaa¥¥aa^]`\_`\_aa`\_\_aa\_a`aaZ^^^P]`R\_Y\_  
@HWI-EAS443:3:17:976:2016#0/1  
GACAAGAGAAGAACCCCGCACTCAGAATGAAGTGGATGAT  
+HWI-EAS443:3:17:976:2016#0/1  
abaa\_bbZb`\_aaaaaa\_aaa`aa`aaaa`a^\_\_\_\_¥\_U  
@HWI-EAS443:3:18:482:1968#0/1  
CAGGAAGACAAGAGAAGAACCCCGCACTCAGAATGAAGTG  
+HWI-EAS443:3:18:482:1968#0/1  
QT[N\_Q¥[bb^b]WR`\_Y^[V¥Y[] [XNT]`JQZ`RZR]  
@HWI-EAS443:3:18:750:258#0/1  
CATCAGGAAGACAAGAGAAGAACCCCGCACTCAGAATGAA  
+HWI-EAS443:3:18:750:258#0/1  
aa\_^]a`aa`aaaa`aZza]`\_X^^a]^U]^Y`YY`]UY  
@HWI-EAS443:3:18:949:493#0/1  
ATCAGGAAGACAAGAGAAGAACCCCGCACTCAGAATGAAG  
+HWI-EAS443:3:18:949:493#0/1  
aa^[a`Yab``aaa\_baa[^a`\_a`]a^`[aa]\_\_a[Z]  
@HWI-EAS443:3:19:108:828#0/1  
GGAAGACAAGAGAAGAACCCCGCACTCAGAATGAAGTGGA  
+HWI-EAS443:3:19:108:828#0/1  
`]VZ`M`¥T\_\_aV^UZ[^\_¥]U\_^Y`^\_RDW`[^\_VYVY  
@HWI-EAS443:3:19:1160:533#0/1  
AGACAAGAGAAGAACCCCGCACTCAGAATGAAGTGGATGA  
+HWI-EAS443:3:19:1160:533#0/1  
aaaaaabaa`aaaa\_]¥`\_`a`\_`a`\_`a`\_`a0a`^^\_]`  
@HWI-EAS443:3:19:1445:745#0/1  
AGAGGAATGAACAAGGACAAACCCTCTGGAGCAAAACAAA  
+HWI-EAS443:3:19:1445:745#0/1  
abaabababaa^aa`aa\_b`\_[\_Sa\_aa\_aYa^\_``\_``  
@HWI-EAS443:3:19:1597:1088#0/1  
CATCAGGAAGACAAGAGAAGAACCCCGCACTCAGAATGAA  
+HWI-EAS443:3:19:1597:1088#0/1  
US¥R¥b[SV[bUb\_S]b`ab[aZW`Zaa`\_[ZbbLS\_WW¥  
@HWI-EAS443:3:19:403:1437#0/1  
CAGGAAGACAAGAGAAGAACCCCGCACTCAGAATGAAGTG  
+HWI-EAS443:3:19:403:1437#0/1  
`abaabb`\_Z\_a[`ba`bbababbaaaa^a`aaa\_a\_¥a  
@HWI-EAS443:3:1:1149:900#0/1  
AGACAAGAGAAGAACCCCGCACTCAGAATGAAGTGGATGA  
+HWI-EAS443:3:1:1149:900#0/1  
aa[aa¥WJ\_`a[a^\_Y[a`a^a^\_aa]aaPGXKY`\_¥BB

@HWI-EAS443:3:20:1422:1384#0/1  
ACAAGAGAAGAACCCCGCACTCAGAATGAAGTGGATGATG  
+HWI-EAS443:3:20:1422:1384#0/1  
aUXa[a[\_^aV`[XYRR`^MJS\_WVS`\_`¥\_GRJQ\_TRST  
@HWI-EAS443:3:20:1438:1691#0/1  
CAGGAAGACAAGAGAAGAACCCCGCACTCAGAATGAAGTG  
+HWI-EAS443:3:20:1438:1691#0/1  
aaaa`aaaaabaabaaabaWq]¥`\_a¥a\_\_a```a[[`T\_  
@HWI-EAS443:3:20:541:990#0/1  
AGGAAGACAAGAGAAGAACCCCGCACTCAGAATGAAGTGG  
+HWI-EAS443:3:20:541:990#0/1  
ZZa`a^abba`[[a[aUb`\_aba\_]^^``\_aaa^`MK[\_  
@HWI-EAS443:3:20:875:610#0/1  
CATCATCCACTTCATTCTGAGTGCGGGTTCTTCTTGT  
+HWI-EAS443:3:20:875:610#0/1  
a]baaSa\_b\_bbbaaaa`a`a]aZ]]XaS`Sb`Ta\_\_``\_  
@HWI-EAS443:3:21:1751:1494#0/1  
GGAAGACAAGAGAAGAACCCCGCACTCAGAATGAAGTGGA  
+HWI-EAS443:3:21:1751:1494#0/1  
Ua```\_abbb]VUb`^\_aSH`a`]G]NVWX]\_a^`¥][XY  
@HWI-EAS443:3:21:196:488#0/1  
ATCCACTTCATTCTGAGTGCGGGTTCTTCTTGTCTTC  
+HWI-EAS443:3:21:196:488#0/1  
a\_aaa\_aaaa`aaa]``^a\_a`\_\_Y`\_``^`^`^`a^\_``Z  
@HWI-EAS443:3:22:1032:776#0/1  
ATCCACTTCATTCTGAGTGCGGGTTCTTCTTGTCTTC  
+HWI-EAS443:3:22:1032:776#0/1  
aaa`a`aabaaa\_aa`aWa\_``a`\_a\_a`\_a\_a^a^\_a\_\_  
@HWI-EAS443:3:22:1067:1151#0/1  
ATCAGGAAGACAAGAGAAGAACCCCGCACTCAGAATGAAG  
+HWI-EAS443:3:22:1067:1151#0/1  
aa`^``aabaaa`a`aa¥aaaa\_\_\_`\_`^`\_``^`^`a^]a  
@HWI-EAS443:3:22:1079:617#0/1  
AGGAAGACAAGAGAAGAACCCCGCACTCAGAATGAAGTGG  
+HWI-EAS443:3:22:1079:617#0/1  
a[baabb`bab\_a`a``aaa]\_aaa`a^¥a^`\_a¥\_aVaa  
@HWI-EAS443:3:22:199:1406#0/1  
GACAAGAGAAGAACCCCGCACTCAGAATGAAGTGGATGAT  
+HWI-EAS443:3:22:199:1406#0/1  
aabbV]\_baabaab\_babab\_aUabaa¥a`bbYb`[\_aaJ  
@HWI-EAS443:3:23:1220:652#0/1  
GGAAGACAAGAGAAGAACCCCGCACTCAGAATGAAGTGGGA  
+HWI-EAS443:3:23:1220:652#0/1  
abaabaaa``]baaa`a\_a`X\_a\_\_]]\_\_`\_`a^]`W\_\_X  
@HWI-EAS443:3:23:1242:1056#0/1  
GACAAGAGAAGAACCCCGCACTCAGAATGAAGTGGATGAT  
+HWI-EAS443:3:23:1242:1056#0/1  
a]UQ\_a\_a[]`\_^¥[^^a\_\_RPZS[V[[^QVZQYWRQ]VT  
@HWI-EAS443:3:23:876:469#0/1  
CAGGAAGACAAGAGAAGAACCCCGCACTCAGAATGAAGTG

+HWI-EAS443:3:23:876:469#0/1  
ababbbbaababababaab]`aaaa`aa\_ab\_`aaa`aYa  
@HWI-EAS443:3:23:913:1365#0/1  
CACATCAGGAAGACAAGAGAAGAACCCCGCACTCAGAATG  
+HWI-EAS443:3:23:913:1365#0/1  
`bbbb`bababbbbababbbabbaabaabbaaaababbb  
@HWI-EAS443:3:23:973:795#0/1  
CATCATCCACTTCATTCTGAGTGC GGGTCTTCTTGT  
+HWI-EAS443:3:23:973:795#0/1  
aaaaabaabbbb]aaa\_abab]aab^`Yaaaa]a`a\_\_`  
@HWI-EAS443:3:24:1066:772#0/1  
AAGACAAGAGAAGAACCCCGCACTCAGAATGAAGTGGATG  
+HWI-EAS443:3:24:1066:772#0/1  
`bbaaa¥a]`aaaaaa[`aa`^`a[aU]aaa`aRa`\_^\_  
@HWI-EAS443:3:24:458:1078#0/1  
AGGAAGACAAGAGAAGAACCCCGCACTCAGAATGAAGTGG  
+HWI-EAS443:3:24:458:1078#0/1  
`^T`Y\_a]¥SS¥ab¥YaS\_a`\_V]\_a`\_`¥`\_X¥aW`\_  
@HWI-EAS443:3:24:479:1508#0/1  
ATCAGGAAGACAAGAGAAGAACCCCGCACTCAGAATGAAG  
+HWI-EAS443:3:24:479:1508#0/1  
a`\_abbaabba`]a\_aaa\_ab`a`[a`¥[aaaUa]`a\_a  
@HWI-EAS443:3:24:825:1289#0/1  
CAGGAAGACAAGAGAAGAACCCCGCACTCAGAATGAAGTGG  
+HWI-EAS443:3:24:825:1289#0/1  
a`Y\_WX^ba]ZIU\_b`abXUW]baaaa`aa\_\_`a`a^Ma  
@HWI-EAS443:3:25:1248:1383#0/1  
ATCAGGAAGACAAGAGAAGAACCCCGCACTCAGAATGAAG  
+HWI-EAS443:3:25:1248:1383#0/1  
a\_R`\_\_aabaab^b\_bbbbab[a`aaa`^`a`a`\_`a]YYa  
@HWI-EAS443:3:25:489:1002#0/1  
CAGGAAGACAAGAGAAGAACCCCGCACTCAGAATGAAGTGG  
+HWI-EAS443:3:25:489:1002#0/1  
abbbbb`abbaab\_babbbabbbabbabaabbbbaa^U[  
@HWI-EAS443:3:25:667:912#0/1  
CATCAGGAAGACAAGAGAAGAACCCCGCACTCAGAATGAA  
+HWI-EAS443:3:25:667:912#0/1  
a\_ba^aba^^bb\_Q`aaababbaaaaaaaaaaaaaa[a`aa`  
@HWI-EAS443:3:26:1080:1681#0/1  
ATCAGGAAGACAAGAGAAGAACCCCGCACTCAGAATGAAG  
+HWI-EAS443:3:26:1080:1681#0/1  
ZRX`babbb^bbbaa]aZa\_a`a`aaaa`a\_\_a\_\_[\_]aa  
@HWI-EAS443:3:26:946:964#0/1  
AGACAAGAGAAGAACCCCGCACTCAGAATGAAGTGGATGA  
+HWI-EAS443:3:26:946:964#0/1  
ababa]`a`[abaaa`\_`aaaa\_\_aa\_[aaT^aV`a`^a^  
@HWI-EAS443:3:27:863:881#0/1  
TTCATTCTGAGTGC GGGTCTTCTTGTCTTCCTGATG  
+HWI-EAS443:3:27:863:881#0/1  
\_b\_Y\_\_`]b`bQ`a^^YP[\_a\_\_X\_N\_]aWSS\_\_^\_a\_U]



@HWI-EAS443:3:27:865:1188#0/1  
CAGGAAGACAAGAGAAGAACCCCGCACTCAGAATGAAGTG  
+HWI-EAS443:3:27:865:1188#0/1  
`]bababababab\_aaaZbaabaaa`a\_aab`\_`aa^aN  
@HWI-EAS443:3:27:959:1878#0/1  
GGAAGACAAGAGAAGAACCCCGCACTCAGAATGAAGTGGA  
+HWI-EAS443:3:27:959:1878#0/1  
`bTU]aaa¥UZa\_\_Y`\_]MX\_]`^aQU¥\_¥\_[^Z\_[Q¥W¥  
@HWI-EAS443:3:27:966:879#0/1  
GGAAGACAAGAGAAGAACCCCGCACTCAGAATGAAGTGGA  
+HWI-EAS443:3:27:966:879#0/1  
^U¥\_^[\`^^Q^`\_`^]`^XXY][\_`[]T[¥[X^UN[V`YR  
@HWI-EAS443:3:28:1546:422#0/1  
GGAAGACAAGAGAAGAACCCCGCACTCAGAATGAAGTGGA  
+HWI-EAS443:3:28:1546:422#0/1  
``aaa`\_¥`\_`aa`]`a^^[]`\_`aaY]a`aaa`^YNV]^  
@HWI-EAS443:3:29:1000:561#0/1  
CAGGAAGACAAGAGAAGAACCCCGCACTCAGAATGAAGTG  
+HWI-EAS443:3:29:1000:561#0/1  
abbababbabbabaabab\_aab\_a\_a`baaaa`b¥a  
@HWI-EAS443:3:29:1052:1659#0/1  
CAGGAAGACAAGAGAAGAACCCCGCACTCAGAATGAAGTG  
+HWI-EAS443:3:29:1052:1659#0/1  
aa`abb\_abbabbabYb^ba\_[[\_aaaa`aaaaabb\_\_b¥\_  
@HWI-EAS443:3:29:1155:259#0/1  
CACATCAGGAAGACAAGAGAAGAACCCCGCACTCAGAATG  
+HWI-EAS443:3:29:1155:259#0/1  
aabba\_bbbbbba\_baaaaaaaaaba^^\_babaaabba`ba  
@HWI-EAS443:3:29:19:18#0/1  
GACAAGAGAAGAACCCCGCACTCAGAATGAAGTGGATGAT  
+HWI-EAS443:3:29:19:18#0/1  
a`a`a`a\_aaUaa````\_`\_\_\_\_]`^`]]^^VY\_V¥^]XXBB  
@HWI-EAS443:3:29:219:739#0/1  
CAGGAAGACAAGAGAAGAACCCCGCACTCAGAATGAAGTG  
+HWI-EAS443:3:29:219:739#0/1  
a`ba]Va`ab\_\_aaaa``aaaaa`aa\_aX]Za\_a\_\_aQa  
@HWI-EAS443:3:29:978:102#0/1  
CAGGAAGACAAGAGAAGAACCCCGCACTCAGAATGAAGTG  
+HWI-EAS443:3:29:978:102#0/1  
a``bbbababbbba`aaabaMbb]babaaba`aba¥b[b  
@HWI-EAS443:3:2:1248:931#0/1  
AGAGGAATGAACAAGGACAAACCCTCTGGAGCAAAACAAA  
+HWI-EAS443:3:2:1248:931#0/1  
abbabababab\_aaa`aaaaa\_^\_a\_baXTVV`aa`]a\_^  
@HWI-EAS443:3:2:1302:1715#0/1  
CAGGAAGACAAGAGAAGAACCCCGCACTCAGAATGAAGTG  
+HWI-EAS443:3:2:1302:1715#0/1  
]babbbbab`b\_aa\_bab^¥]Raa`aZaba\_]a`\_aQa  
@HWI-EAS443:3:2:1322:536#0/1  
AGACAAGAGAAGAACCCCGCACTCAGAATGAAGTGGATGA

+HWI-EAS443:3:2:1322:536#0/1  
^\_]aUb]\_UZ`aa`RJ]T]X¥[a\_Z][[]]MUa^`XQaaB  
@HWI-EAS443:3:2:841:573#0/1  
AGACAAGAGAAGAACCCCGCACTCAGAATGAAGTGGATGA  
+HWI-EAS443:3:2:841:573#0/1  
ab]Z]]^[\_XZ¥a[VUXZP][]SV]SJS¥X[FWW\_RUUB  
@HWI-EAS443:3:30:1193:1764#0/1  
CAGGAAGACAAGAGAAGAACCCCGCACTCAGAATGAAGTG  
+HWI-EAS443:3:30:1193:1764#0/1  
¥^b^a`\_bbbbbabbaabaab^bab`baaa``aa\_¥aQa  
@HWI-EAS443:3:30:120:101#0/1  
GACAAGAGAAGAACCCCGCACTCAGAATGAAGTGGATGAT  
+HWI-EAS443:3:30:120:101#0/1  
a]]^Zb`a[`ba]a^\_\_b`\_^XZZa[````[\_N\_]]]]]]]  
@HWI-EAS443:3:30:1282:213#0/1  
CATCATCCACTTCTTCTGAGTGCGGGGTTCTTCTTGT  
+HWI-EAS443:3:30:1282:213#0/1  
a`babbb```bb\_aaaa`^aaUaWabab]\_^\_b[aG^a^^  
@HWI-EAS443:3:30:1355:211#0/1  
CTTCATTCTGAGTGCGGGGTTCTTCTTGTCTTCCTGAT  
+HWI-EAS443:3:30:1355:211#0/1  
abaZa^\_U\_bb`\_b\_a`\_^aa[XaT`]aa`\_K`RM\_¥[a  
@HWI-EAS443:3:30:1708:1666#0/1  
AGGAAGACAAGAGAAGAACCCCGCACTCAGAATGAAGTGG  
+HWI-EAS443:3:30:1708:1666#0/1  
ab\_aa`[`aaaU\_\_\_S`^¥Z`aa\_\_]^\_[^`aWS]Y]V  
@HWI-EAS443:3:30:294:1784#0/1  
ATCCACTTCTTCTGAGTGCGGGGTTCTTCTTGTCTTC  
+HWI-EAS443:3:30:294:1784#0/1  
I¥bbbaaabZa\_ba^aaY`aXaa0`aa¥`\_b^¥¥Va^¥\_  
@HWI-EAS443:3:30:657:1190#0/1  
CATCAGGAAGACAAGAGAAGAACCCCGCACTCAGAATGAA  
+HWI-EAS443:3:30:657:1190#0/1  
`b`bbbb\_ba`bba^^``¥```]aaaa\_\_]``a``\_aZ\_  
@HWI-EAS443:3:31:196:646#0/1  
CAGGAAGACAAGAGAAGAACCCCGCACTCAGAATGAAGTG  
+HWI-EAS443:3:31:196:646#0/1  
a^aaaa`a`]aa\_\_^a]a^aY`aa\_\_\_`\_`^¥`]X^X¥  
@HWI-EAS443:3:31:351:1473#0/1  
GGAAGACAAGAGAAGAACCCCGCACTCAGAATGAAGTGGA  
+HWI-EAS443:3:31:351:1473#0/1  
`\_\_[\_]ba]RSa¥b\_aab`aa^baa]\_\_]\_\_`Z^WL[\_Y  
@HWI-EAS443:3:31:590:1717#0/1  
CAGGAAGACAAGAGAAGAACCCCGCACTCAGAATGAAGTG  
+HWI-EAS443:3:31:590:1717#0/1  
`U\_XWOSaba[\_\_\_]Y[`Z^`a[`]\_^\_^X^^^U]]NIR  
@HWI-EAS443:3:32:1111:764#0/1  
AGGAAGACAAGAGAAGAACCCCGCACTCAGAATGAAGTGG  
+HWI-EAS443:3:32:1111:764#0/1  
abb`ab\_aabaa\_aaaa\_a\_aa^a`a`a\_\_aaa^aUa`

@HWI-EAS443:3:32:1136:963#0/1  
CATCAGGAAGACAAGAGAAGAACCCCGCACTCAGAATGAA  
+HWI-EAS443:3:32:1136:963#0/1  
a`U\_¥S¥UV\_OU^FVaaZZ`^^YwaH`\_S[POT0a^ZSS]  
@HWI-EAS443:3:32:537:1268#0/1  
CAGGAAGACAAGAGAAGAACCCCGCACTCAGAATGAAGTG  
+HWI-EAS443:3:32:537:1268#0/1  
aXU]aZT\_a]]a]`a`VXa`aa]a¥``Y^[[HR^^QJNN\_  
@HWI-EAS443:3:33:1082:1460#0/1  
GAAGACAAGAGAAGAACCCCGCACTCAGAATGAAGTGGAT  
+HWI-EAS443:3:33:1082:1460#0/1  
abba]b`aaaa`aaa`baaU\_aa^\_a^\_\_\_\_^XMISR\_\_\_\_  
@HWI-EAS443:3:33:1138:280#0/1  
CATCATCCACTTCATTCTGAGTGCGGGTTCTTCTTGT  
+HWI-EAS443:3:33:1138:280#0/1  
aa]baaa\_a]a\_^abbbab]a¥^)`a]\_\_b\_aV[\_]\_aa¥  
@HWI-EAS443:3:33:1256:496#0/1  
AGACAAGAGAAGAACCCCGCACTCAGAATGAAGTGGATGA  
+HWI-EAS443:3:33:1256:496#0/1  
ab]`aa`aaaabaaaa\_b`^a`\_a^`a`^]YY`^X^\_X  
@HWI-EAS443:3:33:1293:954#0/1  
CAGGAAGACAAGAGAAGAACCCCGCACTCAGAATGAAGTG  
+HWI-EAS443:3:33:1293:954#0/1  
aa[`a`a^a^b`]b`b\_a`¥^¥]aa^Uba`W[Xa\_a\_aTW  
@HWI-EAS443:3:33:678:34#0/1  
GGAAGACAAGAGAAGAACCCCGCACTCAGAATGAAGTGGGA  
+HWI-EAS443:3:33:678:34#0/1  
ab``ZPZ`]aaTYaUZ]NUNH`\_^¥SUN\_XX]YQVUVXVU  
@HWI-EAS443:3:33:903:1233#0/1  
GACAAGAGAAGAACCCCGCACTCAGAATGAAGTGGATGAT  
+HWI-EAS443:3:33:903:1233#0/1  
Y^\_[¥[Taa`Ua¥`^`bYYY[WaWWL\_^`]a^Q]a]a¥\_`  
@HWI-EAS443:3:34:1078:1351#0/1  
ATCAGGAAGACAAGAGAAGAACCCCGCACTCAGAATGAAG  
+HWI-EAS443:3:34:1078:1351#0/1  
a`ab\_b]aaaa`bZ\_P¥Y[^\_a`^X]Ya\_ULW[VRN^]B  
@HWI-EAS443:3:34:1255:1256#0/1  
CAGGAAGACAAGAGAAGAACCCCGCACTCAGAATGAAGTG  
+HWI-EAS443:3:34:1255:1256#0/1  
aaaaYL[a]\_`a\_\_¥¥`\_\_^`^a¥ZW¥\_¥¥¥¥^YWNBB  
@HWI-EAS443:3:34:1449:334#0/1  
CAGGAAGACAAGAGAAGAACCCCGCACTCAGAATGAAGTG  
+HWI-EAS443:3:34:1449:334#0/1  
aaaaabbabbababaabaa\_^\_\_b\_a¥¥]`a¥Z^¥RU^Q`  
@HWI-EAS443:3:35:306:308#0/1  
AGACAAGAGAAGAACCCCGCACTCAGAATGAAGTGGATGA  
+HWI-EAS443:3:35:306:308#0/1  
aaI\_\_ba`aab`Z\_aaaaa\_R[]`\_`R^\_\_QG[R^YY^` [  
@HWI-EAS443:3:35:336:291#0/1  
ATCAGGAAGACAAGAGAAGAACCCCGCACTCAGAATGAAG

+HWI-EAS443:3:35:336:291#0/1  
aabab\_Yab¥aa\_baa\_\_`\_aba``aa\_a^`V[Y\_a`^S\_  
@HWI-EAS443:3:36:1686:1155#0/1  
ATCAGGAAGACAAGAGAAGAACCCCGCACTCAGAATGAAG  
+HWI-EAS443:3:36:1686:1155#0/1  
]aab``b\_a`a`\_`a`aaa]\_[\_^\_a[^`\_][[SV¥a\_]a  
@HWI-EAS443:3:36:714:199#0/1  
CAGGAAGACAAGAGAAGAACCCCGCACTCAGAATGAAGTG  
+HWI-EAS443:3:36:714:199#0/1  
`RQPGXVS^¥W\_YH][`ZZ]\_\_`YF[Y[GSURT[TLMDP  
@HWI-EAS443:3:36:964:1146#0/1  
ATCAGGAAGACAAGAGAAGAACCCCGCACTCAGAATGAAG  
+HWI-EAS443:3:36:964:1146#0/1  
`abbba]b\_Zbaab\_b[ba^¥aaa\_aa\_aaa\_aY¥`\_aR\_  
@HWI-EAS443:3:37:1278:585#0/1  
CAGGAAGACAAGAGAAGAACCCCGCACTCAGAATGAAGTG  
+HWI-EAS443:3:37:1278:585#0/1  
abbbaab[aba`a`\_a`R`[a^`a`W^aG\_[[aa^^aU`  
@HWI-EAS443:3:37:19:729#0/1  
CAGGAAGACAAGAGAAGAACCCCGCACTCAGAATGAAGTG  
+HWI-EAS443:3:37:19:729#0/1  
`\_]\_Y\_X`¥aa¥`Z]UX`¥^^a`\_^`^^USLYW]XR[U¥  
@HWI-EAS443:3:38:1591:1761#0/1  
CATCAGGAAGACAAGAGAAGAACCCCGCACTCAGAATGAA  
+HWI-EAS443:3:38:1591:1761#0/1  
[a`bbbbbbbaab`bbb]baabaaaab`aUZ]^`^\_aa\_P  
@HWI-EAS443:3:38:1680:16#0/1  
AGGAAGACAAGAGAAGAACCCCGCACTCAGAATGAAGTGG  
+HWI-EAS443:3:38:1680:16#0/1  
abb]abaaa]^`\_]Za`]¥Z`\_a\_]Y]UXUVYUVXVZYXG  
@HWI-EAS443:3:38:1718:899#0/1  
GCGGGTTCCTTCTTGTCTTCCTGATGTGTATTTTTTGA  
+HWI-EAS443:3:38:1718:899#0/1  
aaaaa^Gaaa`^\_`aaa`a`a`a`a`\_`^\_]XZG`^^a^]W  
@HWI-EAS443:3:38:1786:366#0/1  
ATCAGGAAGACAAGAGAAGAACCCCGCACTCAGAATGAAG  
+HWI-EAS443:3:38:1786:366#0/1  
abaaabbbb\_aaa`[aa`aaa[`a\_aaaaXY]Z][]aX^Y  
@HWI-EAS443:3:38:486:1560#0/1  
AGAGGAATGAACAAGGACAAACCCTCTGGAGCAAAACAAA  
+HWI-EAS443:3:38:486:1560#0/1  
`a¥Z\_ab]\_U\_]`^a`^]\_¥`¥a\_a``^a\_[Y`\_`\_¥aa`Z  
@HWI-EAS443:3:38:503:1090#0/1  
CAGGAAGACAAGAGAAGAACCCCGCACTCAGAATGAAGTG  
+HWI-EAS443:3:38:503:1090#0/1  
aaabbab`aaa\_ab[]bbaaaabaab``^`a\_aaa`\_RZ  
@HWI-EAS443:3:39:1381:317#0/1  
GGAAGACAAGAGAAGAACCCCGCACTCAGAATGAAGTGGGA  
+HWI-EAS443:3:39:1381:317#0/1  
aa\_\_`¥\_\_\_a^\_ZW`^`¥U¥Y\_¥YZWVW\_UYV¥WV¥W¥VW

@HWI-EAS443:3:39:1439:1793#0/1  
CAGGAAGACAAGAGAAGAACCCCGCACTCAGAATGAAGTG  
+HWI-EAS443:3:39:1439:1793#0/1  
abbbbbbbba\_b`\_```baa\_¥a[\_`b¥a`a[W¥`a\_\_UWT  
@HWI-EAS443:3:39:1445:522#0/1  
GACAAGAGAAGAACCCCGCACTCAGAATGAAGTGGATGAT  
+HWI-EAS443:3:39:1445:522#0/1  
\_aU¥X\_`a`WbaPLS]`aYPPa[UaS``aGFRS`b]`]YY  
@HWI-EAS443:3:39:1701:1214#0/1  
GACAAGAGAAGAACCCCGCACTCAGAATGAAGTGGATGAT  
+HWI-EAS443:3:39:1701:1214#0/1  
aaaa`a]baa\_`a^[\_`\_a¥a]¥^)`X[\_`WPWO¥\_V^]PL  
@HWI-EAS443:3:39:249:1194#0/1  
CATCAGGAAGACAAGAGAAGAACCCCGCACTCAGAATGAA  
+HWI-EAS443:3:39:249:1194#0/1  
ab`ba]`a\_T]\_```\_a`]\_]XR]\_`[\_`¥`\_`^Z\_\_Q\_\_¥X^  
@HWI-EAS443:3:39:562:206#0/1  
CAGGAAGACAAGAGAAGAACCCCGCACTCAGAATGAAGTG  
+HWI-EAS443:3:39:562:206#0/1  
aaabbbbbabbabaababa]`\_a`aa\_a]aW]\_a^\_aW`  
@HWI-EAS443:3:39:83:764#0/1  
ATCAGGAAGACAAGAGAAGAACCCCGCACTCAGAATGAAG  
+HWI-EAS443:3:39:83:764#0/1  
\_]ab`^`\_a`aaaa`\_U`aaaa\_^Zaa]a^a^ZWT```S\_\_  
@HWI-EAS443:3:3:1757:1287#0/1  
AGACAAGAGAAGAACCCCGCACTCAGAATGAAGTGGATGA  
+HWI-EAS443:3:3:1757:1287#0/1  
]babba`^abbbbaa\_\_a`Z`\_a`\_a\_\_aa\_]a]a¥^aa]  
@HWI-EAS443:3:40:1385:1606#0/1  
CATCCACTTCATTCTGAGTGCGGGTTCCTTCTTGTCTT  
+HWI-EAS443:3:40:1385:1606#0/1  
aaba\_bbaaaabbbb`babbbb`\_¥`ab[aabbb[aa\_  
@HWI-EAS443:3:42:1229:1126#0/1  
GGAAGACAAGAGAAGAACCCCGCACTCAGAATGAAGTGGGA  
+HWI-EAS443:3:42:1229:1126#0/1  
\_aaba\_a`aaab`\_a`\_`a¥\_baa^`\_```\_\_aa`¥aWaa¥  
@HWI-EAS443:3:43:1155:431#0/1  
CACATCAGGAAGACAAGAGAAGAACCCCGCACTCAGAATG  
+HWI-EAS443:3:43:1155:431#0/1  
a]``XG\_a\_U\_^YP]bbXa`aa`\_ZW`Za`^YY[[[\_[aa`  
@HWI-EAS443:3:43:1204:1082#0/1  
GGAAGACAAGAGAAGAACCCCGCACTCAGAATGAAGTGGGA  
+HWI-EAS443:3:43:1204:1082#0/1  
`abbabbbbaababaaba^^`aaa`aa`b^`aa\_\_a[a`\_  
@HWI-EAS443:3:43:1353:994#0/1  
AGACAAGAGAAGAACCCCGCACTCAGAATGAAGTGGATGA  
+HWI-EAS443:3:43:1353:994#0/1  
ab¥^Z^bVba`abaWXXVb]]W]^Ya\_\_aa\_[\_Z^¥¥^T  
@HWI-EAS443:3:43:1395:779#0/1  
CAGGAAGACAAGAGAAGAACCCCGCACTCAGAATGAAGTG

+HWI-EAS443:3:43:1395:779#0/1  
¥aba\_`bb`H0\_ab`a`W`abab`a`a¥`aaZZaZX\_]b  
@HWI-EAS443:3:43:1716:1213#0/1  
CAGGAAGACAAGAGAAGAACCCCGCACTCAGAATGAAGTG  
+HWI-EAS443:3:43:1716:1213#0/1  
a[aba^U¥^bbb]\_]\_\_abb[abaaa`a\_a\_]aa[SaVa  
@HWI-EAS443:3:43:1780:1037#0/1  
GACAAGAGAAGAACCCCGCACTCAGAATGAAGTGGATGAT  
+HWI-EAS443:3:43:1780:1037#0/1  
a\_aaa`ab`aaaa\_\_^\_a^`a\_\_a]Y]\_XY^YaXY\_\_XV  
@HWI-EAS443:3:43:267:534#0/1  
AAGACAAGAGAAGAACCCCGCACTCAGAATGAAGTGGATG  
+HWI-EAS443:3:43:267:534#0/1  
abb\_`a\_a`baaaaa`\_\_\_a`\_`\_`a`a^aa]^`Va`\_^a  
@HWI-EAS443:3:43:660:233#0/1  
GACAAGAGAAGAACCCCGCACTCAGAATGAAGTGGATGAT  
+HWI-EAS443:3:43:660:233#0/1  
aaab\_aababbabZ¥aaba\_\_\_Q]a^a[\_\_\_`O]W[\_aWW  
@HWI-EAS443:3:44:1407:1502#0/1  
CAGGAAGACAAGAGAAGAACCCCGCACTCAGAATGAAGTG  
+HWI-EAS443:3:44:1407:1502#0/1  
aaabaa\_U[a]\_]W]\_[aa`\_a\_\_\_`^a]\_^`aa¥]`\_`  
@HWI-EAS443:3:44:1571:1649#0/1  
CAGGAAGACAAGAGAAGAACCCCGCACTCAGAATGAAGTG  
+HWI-EAS443:3:44:1571:1649#0/1  
^¥aWabY^aaW`aaaXaaa\_]a\_aaaUa\_[a^]`aaQ`  
@HWI-EAS443:3:44:1603:1798#0/1  
ATCAGGAAGACAAGAGAAGAACCCCGCACTCAGAATGAAG  
+HWI-EAS443:3:44:1603:1798#0/1  
aa^abaaa`^Uaa`^XXW`a]YNPFWX`IWUTTZZSLR  
@HWI-EAS443:3:44:296:924#0/1  
GAAGACAAGAGAAGAACCCCGCACTCAGAATGAAGTGGAT  
+HWI-EAS443:3:44:296:924#0/1  
a`a]^`a`a]W\_a]^`a^\_a\_a^`\_]`[\_X¥^\_Y]]Z\_\_Z]  
@HWI-EAS443:3:44:736:1303#0/1  
CAGGAAGACAAGAGAAGAACCCCGCACTCAGAATGAAGTG  
+HWI-EAS443:3:44:736:1303#0/1  
a\_bba\_`a\_b¥\_aa`]Zaba]\_¥aaa\_a`[a`aa`\_¥U^  
@HWI-EAS443:3:44:950:908#0/1  
GACAAGAGAAGAACCCCGCACTCAGAATGAAGTGGATGAT  
+HWI-EAS443:3:44:950:908#0/1  
aabbabaaababbaaaabaa`aab`abba\_a^aa`aa\_^  
@HWI-EAS443:3:45:1032:720#0/1  
GGAAGACAAGAGAAGAACCCCGCACTCAGAATGAAGTGGGA  
+HWI-EAS443:3:45:1032:720#0/1  
a[``a\_]`^b]^`^`\_Y[X[`¥¥Y`^^^`]^`UY^O\_]`  
@HWI-EAS443:3:45:140:902#0/1  
GACAAGAGAAGAACCCCGCACTCAGAATGAAGTGGATGAT  
+HWI-EAS443:3:45:140:902#0/1  
aaaa]aaaaaaaa[\_`aaaa\_\_`\_aX^aaW[aQa¥Z^a\_\_

@HWI-EAS443:3:45:1438:1468#0/1  
CAGGAAGACAAGAGAAGAACCCCGCACTCAGAATGAAGTG  
+HWI-EAS443:3:45:1438:1468#0/1  
abbbbab`bbababaaabb`X^\_baa\_`\_\_\_\_`\_aa\_[aUa  
@HWI-EAS443:3:45:276:675#0/1  
AGGAAGACAAGAGAAGAACCCCGCACTCAGAATGAAGTGG  
+HWI-EAS443:3:45:276:675#0/1  
aaUaab\_aaaaa\_a\_ab`\_\_`a`a`aaa¥`aa]]aXa\_  
@HWI-EAS443:3:46:1138:2036#0/1  
CATCAGGAAGACAAGAGAAGAACCCCGCACTCAGAATGAA  
+HWI-EAS443:3:46:1138:2036#0/1  
a``][`aa\_``\_[]a¥R]`aaaaUU\_\_\_a^^]\_^\_\_\_\_^  
@HWI-EAS443:3:46:1197:1325#0/1  
ATCAGGAAGACAAGAGAAGAACCCCGCACTCAGAATGAAG  
+HWI-EAS443:3:46:1197:1325#0/1  
\_ZbZ\_V]SaU`[ZaaaYa`a`XXU[a\_```X`a¥^a\_ZS]  
@HWI-EAS443:3:46:1271:58#0/1  
TACACATCAGGAAGACAAGAGAAGAACCCCGCACTCAGAA  
+HWI-EAS443:3:46:1271:58#0/1  
aa\_aZab`\_ab`\_a]\_\_\_a`\_V\_a^\_\_¥[]aYSW^XY`Y]  
@HWI-EAS443:3:46:1499:547#0/1  
CAGGAAGACAAGAGAAGAACCCCGCACTCAGAATGAAGTG  
+HWI-EAS443:3:46:1499:547#0/1  
RPW\_a¥^T¥^W`Xb[S^b¥]H]\_a`a]^\_QU^]`aUV^L\_  
@HWI-EAS443:3:46:1653:497#0/1  
CAGGAAGACAAGAGAAGAACCCCGCACTCAGAATGAAGTG  
+HWI-EAS443:3:46:1653:497#0/1  
^ab`aa`\_`W[aZa\_`\_^aa\_XZ\_`a\_]``]]\_aX]`W¥  
@HWI-EAS443:3:46:456:1453#0/1  
GGAAGACAAGAGAAGAACCCCGCACTCAGAATGAAGTGGA  
+HWI-EAS443:3:46:456:1453#0/1  
\_\_\_\_S\_`¥ba^[^ZVX[^Q^YL[X\_Z¥V[\_][`aY[]LSY^  
@HWI-EAS443:3:46:893:1863#0/1  
CTTCATTCTGAGTGCGGGTTCTTCTTGTCTTCTTGAT  
+HWI-EAS443:3:46:893:1863#0/1  
abbaabbabbaa^babbbbaaaabababab`\_baa^b`aa  
@HWI-EAS443:3:46:902:1593#0/1  
GGAAGACAAGAGAAGAACCCCGCACTCAGAATGAAGTGGA  
+HWI-EAS443:3:46:902:1593#0/1  
aZZaaaa```]\_\_\_\_\_a`\_ZYaZ`^`\_\_`¥R¥ZUNYS[ZY  
@HWI-EAS443:3:47:1186:1208#0/1  
GACAAGAGAAGAACCCCGCACTCAGAATGAAGTGGATGAT  
+HWI-EAS443:3:47:1186:1208#0/1  
aaa]]ba]\_a\_a`\_`a\_\_aU¥]]\_]\_X]\_\_XF^0\_^]\_`VN  
@HWI-EAS443:3:47:1249:1188#0/1  
CAGGAAGACAAGAGAAGAACCCCGCACTCAGAATGAAGTG  
+HWI-EAS443:3:47:1249:1188#0/1  
abbbbababbbbabbbabba``abaaaa`baaba\_aYa  
@HWI-EAS443:3:47:1377:1137#0/1  
GACAAGAGAAGAACCCCGCACTCAGAATGAAGTGGATGAT

+HWI-EAS443:3:47:1377:1137#0/1  
`V\_JW`PaSXZ¥][GVR`[YROOV^PTT¥VNQRXZW]XQS  
@HWI-EAS443:3:47:732:535#0/1  
GACAAGAGAAGAACCCCGCACTCAGAATGAAGTGGATGAT  
+HWI-EAS443:3:47:732:535#0/1  
¥^aZ`aZSVaZWtX¥W`\_`Y`^]L¥S¥a]Y[aY`]XaaZ[  
@HWI-EAS443:3:48:1678:634#0/1  
CAGGAAGACAAGAGAAGAACCCCGCACTCAGAATGAAGTG  
+HWI-EAS443:3:48:1678:634#0/1  
aa`a`\_aa`aa`ab`\_`aaaa]]^a^Y]a`[aWW^aUXaU\_  
@HWI-EAS443:3:48:755:2011#0/1  
ATCATCCACTTCATTCTGAGTGC GGGTTCTTCTCTTGTC  
+HWI-EAS443:3:48:755:2011#0/1  
`^a`a`\_`[`^`a\_X\_aa\_Q¥`^]]WT`aa^^]T^]\_[Z  
@HWI-EAS443:3:48:768:109#0/1  
ATTCTGAGTGC GGGTTCTTCTTGTCTTCCTGATGTGT  
+HWI-EAS443:3:48:768:109#0/1  
abbbababababbba\_baba[aabab`\_aa\_\_aa`\_a`\_]  
@HWI-EAS443:3:49:1221:847#0/1  
CAGGAAGACAAGAGAAGAACCCCGCACTCAGAATGAAGTG  
+HWI-EAS443:3:49:1221:847#0/1  
]Zabbbbbbbbbababbaa`abbaa`b`ab`abaaab¥`  
@HWI-EAS443:3:49:1351:599#0/1  
GACAAGAGAAGAACCCCGCACTCAGAATGAAGTGGATGAT  
+HWI-EAS443:3:49:1351:599#0/1  
ababaZabaaaa`¥Yaab]````\_`^`ba`^a¥a`\_a\_\_\_\_  
@HWI-EAS443:3:49:975:278#0/1  
CAGGAAGACAAGAGAAGAACCCCGCACTCAGAATGAAGTG  
+HWI-EAS443:3:49:975:278#0/1  
Vba\_b`b]aa[baabbbbaaab]ab\_aZab``bb`\_aS`  
@HWI-EAS443:3:49:996:1302#0/1  
CAGGAAGACAAGAGAAGAACCCCGCACTCAGAATGAAGTG  
+HWI-EAS443:3:49:996:1302#0/1  
abaabbbabbbbbbabaababababaaab\_abb\_ab\_a  
@HWI-EAS443:3:4:306:252#0/1  
ATCAGGAAGACAAGAGAAGAACCCCGCACTCAGAATGAAG  
+HWI-EAS443:3:4:306:252#0/1  
aSSYa\_\_¥aUT]^\_V^^ZYGTRWYVVVUY^¥XYV^BBB  
@HWI-EAS443:3:4:393:1262#0/1  
AAGACAAGAGAAGAACCCCGCACTCAGAATGAAGTGGATG  
+HWI-EAS443:3:4:393:1262#0/1  
aa`¥^\_Y`\_a`]UZ`\_`^a`\_a\_P\_a]¥a\_]`^aTS^]\_a  
@HWI-EAS443:3:4:56:693#0/1  
CAGGAAGACAAGAGAAGAACCCCGCACTCAGAATGAAGTG  
+HWI-EAS443:3:4:56:693#0/1  
`]¥\_K[TZ`\_`V¥\_a¥M\_TOS]X¥TYXXMRP¥¥U]R¥\_aUB  
@HWI-EAS443:3:4:974:286#0/1  
CAGGAAGACAAGAGAAGAACCCCGCACTCAGAATGAAGTG  
+HWI-EAS443:3:4:974:286#0/1  
a[bbbbbaaab\_a`aaaa\_\_a\_a\_a¥\_a^^aa¥][K¥



@HWI-EAS443:3:4:996:1813#0/1  
ATCAGGAAGACAAGAGAAGAACCCCGCACTCAGAATGAAG  
+HWI-EAS443:3:4:996:1813#0/1  
RLUaaaX`a^[^aa\_b¥bbTaw]^T]\_¥\_a\_^]RZI`RZ`  
@HWI-EAS443:3:50:1391:1584#0/1  
GGAAGACAAGAGAAGAACCCCGCACTCAGAATGAAGTGA  
+HWI-EAS443:3:50:1391:1584#0/1  
a\_PHX^^a¥`\_]\_^\_\_^YU]NNX]R]OY^RVX\_UR`W^YX  
@HWI-EAS443:3:50:1625:424#0/1  
ATCCACTTCATTCTGAGTGC GGGTTCTTCTCTTGTCTTC  
+HWI-EAS443:3:50:1625:424#0/1  
aba`abbba¥bbabaabaaaa\_^b\_\_Ybbababaaa\_ba\_  
@HWI-EAS443:3:50:1782:1018#0/1  
CAGGAAGACAAGAGAAGAACCCCGCACTCAGAATGAAGTG  
+HWI-EAS443:3:50:1782:1018#0/1  
Q\_`bb\_\_¥`bb\_^\_aa[¥a\_¥\_bb```abb¥\_aa\_^\_Kb  
@HWI-EAS443:3:51:114:1408#0/1  
GGAAGACAAGAGAAGAACCCCGCACTCAGAATGAAGTGA  
+HWI-EAS443:3:51:114:1408#0/1  
aba^Zabb^`aTX`aaa\_^a[\_\_\_\_aaUX`a]^aXa]^  
@HWI-EAS443:3:51:1241:904#0/1  
CAGGAAGACAAGAGAAGAACCCCGCACTCAGAATGAAGTG  
+HWI-EAS443:3:51:1241:904#0/1  
a^`a`¥`Y^abababa]\_aa]\_baaaaaaa\_aaa\_]aYa  
@HWI-EAS443:3:51:1409:720#0/1  
TTCTGAGTGC GGGTTCTTCTCTTGTCTTCCTGATGTGTA  
+HWI-EAS443:3:51:1409:720#0/1  
aaabaaa]babba`Vaab`\_aab`baabb\_\_aa`aa[a\_\_  
@HWI-EAS443:3:51:1412:1450#0/1  
TTCATTCTGAGTGC GGGTTCTTCTCTTGTCTTCCTGATG  
+HWI-EAS443:3:51:1412:1450#0/1  
a\_ZRa`^a\_a^`bVa\_\_aWaI[[ZaU]]`XS]aU[ZaR[a  
@HWI-EAS443:3:51:141:1170#0/1  
GACAAGAGAAGAACCCCGCACTCAGAATGAAGTGGATGAT  
+HWI-EAS443:3:51:141:1170#0/1  
V\_b`a`bbbabbbb]aba\_Z`W`aU`abba]Xa`Yab``  
@HWI-EAS443:3:51:493:1447#0/1  
CATCAGGAAGACAAGAGAAGAACCCCGCACTCAGAATGAA  
+HWI-EAS443:3:51:493:1447#0/1  
]Z^¥H\_a^Y¥N\_aaUH^XV\_YZHV`aaa\_aa`YVS¥a^\_  
@HWI-EAS443:3:51:723:934#0/1  
CAGGAAGACAAGAGAAGAACCCCGCACTCAGAATGAAGTG  
+HWI-EAS443:3:51:723:934#0/1  
[a`¥VXb``TaZ`U¥`b`¥`\_ba]]a\_abaabaab\_b  
@HWI-EAS443:3:51:776:1771#0/1  
GGAAGACAAGAGAAGAACCCCGCACTCAGAATGAAGTGA  
+HWI-EAS443:3:51:776:1771#0/1  
`baaaaab\_aaa^a`a^`^[¥`\_aa\_a\_Y]T`¥¥a]^a]  
@HWI-EAS443:3:51:968:220#0/1  
AGACAAGAGAAGAACCCCGCACTCAGAATGAAGTGGATGA

+HWI-EAS443:3:51:968:220#0/1  
abaaa\_aaaaaba`Xa^^\_a[a`a`aab`b^ba\_aa^  
@HWI-EAS443:3:52:1174:1063#0/1  
CCACTTCATTCTGAGTGC GGGTCTTCTTGTCTTCCT  
+HWI-EAS443:3:52:1174:1063#0/1  
aababbbabbabaaa\_aabaaa]a^aa`a^aaaa`aa^Va  
@HWI-EAS443:3:52:132:706#0/1  
GGAAGACAAGAGAAGAACCCCGCACTCAGAATGAAGTGA  
+HWI-EAS443:3:52:132:706#0/1  
`ba\_a\_a`Za^a\_aa¥`a]\_\_a`^[\_aYZ\_a]^aY`Y  
@HWI-EAS443:3:53:1161:1706#0/1  
CAGGAAGACAAGAGAAGAACCCCGCACTCAGAATGAAGTG  
+HWI-EAS443:3:53:1161:1706#0/1  
Ta\_a\_abbaabbb`bbabbaabbbabbbbababbbbaa  
@HWI-EAS443:3:53:1195:1092#0/1  
CACATCAGGAAGACAAGAGAAGAACCCCGCACTCAGAATG  
+HWI-EAS443:3:53:1195:1092#0/1  
Q`]¥ba]bbbb\_babbbabbbba`aabab[b\_babbbb`b  
@HWI-EAS443:3:53:1329:263#0/1  
GACAAGAGAAGAACCCCGCACTCAGAATGAAGTGGATGAT  
+HWI-EAS443:3:53:1329:263#0/1  
aa\_bab\_babba[[[¥b]\_\_a\_ab\_aaa`\_^aaa`[]  
@HWI-EAS443:3:53:1587:1578#0/1  
CAGGAAGACAAGAGAAGAACCCCGCACTCAGAATGAAGTG  
+HWI-EAS443:3:53:1587:1578#0/1  
ZaabbbbbHbba`bab\_aa\_\_`abab[b\_abaabaaZb`b  
@HWI-EAS443:3:53:635:227#0/1  
GACAAGAGAAGAACCCCGCACTCAGAATGAAGTGGATGAT  
+HWI-EAS443:3:53:635:227#0/1  
aXT`¥ZT`\_a\_^Y^\_]YY^^]V\_WV¥`Y]\_Y\_VZ]]YW  
@HWI-EAS443:3:53:816:988#0/1  
CAGGAAGACAAGAGAAGAACCCCGCACTCAGAATGAAGTG  
+HWI-EAS443:3:53:816:988#0/1  
abbbbab]bbabbbbbbabb`bbabbbbabbaabb\_ab]a  
@HWI-EAS443:3:54:1167:1025#0/1  
CAGGAAGACAAGAGAAGAACCCCGCACTCAGAATGAAGTG  
+HWI-EAS443:3:54:1167:1025#0/1  
U\_bba[[`aaXa¥abb]`baa`bba\_ab`b\_abbbb`[R[  
@HWI-EAS443:3:54:1306:1804#0/1  
CAGGAAGACAAGAGAAGAACCCCGCACTCAGAATGAAGTG  
+HWI-EAS443:3:54:1306:1804#0/1  
abbbabbbbbb]bb]^ba\_]aabaa]baab`abbaSbXb  
@HWI-EAS443:3:54:130:1113#0/1  
GACAAGAGAAGAACCCCGCACTCAGAATGAAGTGGATGAT  
+HWI-EAS443:3:54:130:1113#0/1  
aW[Y\_a`W]a`a[\_\_\_a^^`\_]\_VPXXSYV[^]SZZW  
@HWI-EAS443:3:54:1480:903#0/1  
GGAAGACAAGAGAAGAACCCCGCACTCAGAATGAAGTGA  
+HWI-EAS443:3:54:1480:903#0/1  
a¥abbaababa¥`a\_aa`\_]`\_\_aa^```\_aa`Xb]a\_\_

@HWI-EAS443:3:54:1657:133#0/1  
CAGGAAGACAAGAGAAGAACCCCGCACTCAGAATGAAGTG  
+HWI-EAS443:3:54:1657:133#0/1  
aaaa^\_[¥Ta\_XXVMRQ^^T¥[[aR[]JUaa\_Q¥[JH[G\_  
@HWI-EAS443:3:54:1755:1173#0/1  
CAGGAAGACAAGAGAAGAACCCCGCACTCAGAATGAAGTG  
+HWI-EAS443:3:54:1755:1173#0/1  
a]Vbb¥¥`\_a`Ub\_]aV]Waaba^`bY¥KR[ab`UWa`Ga  
@HWI-EAS443:3:54:505:155#0/1  
CACATCAGGAAGACAAGAGAAGAACCCCGCACTCAGAATG  
+HWI-EAS443:3:54:505:155#0/1  
aa`^aa`bb`aa`\_aZa\_a\_\_\_\_\_`]]]T\_\_\_\_]^\_X`]T]\_  
@HWI-EAS443:3:54:833:699#0/1  
GACAAGAGAAGAACCCCGCACTCAGAATGAAGTGGATGAT  
+HWI-EAS443:3:54:833:699#0/1  
`VVWPa\_\_L]aaYRP¥\_a^^^\_ZYaSV[^RXaY\_`Y]^PU  
@HWI-EAS443:3:55:104:856#0/1  
CAGGAAGACAAGAGAAGAACCCCGCACTCAGAATGAAGTG  
+HWI-EAS443:3:55:104:856#0/1  
a``\_]a`a`Z\_baaaa^R^^`\_a]W]``\_`aZT]aP[^U`  
@HWI-EAS443:3:55:1249:1393#0/1  
CAGGAAGACAAGAGAAGAACCCCGCACTCAGAATGAAGTG  
+HWI-EAS443:3:55:1249:1393#0/1  
a```aabaa`bbba`abbbbaaab`babb`a`bbaaa^b  
@HWI-EAS443:3:55:1259:500#0/1  
GACAAGAGAAGAACCCCGCACTCAGAATGAAGTGGATGAT  
+HWI-EAS443:3:55:1259:500#0/1  
aaaa`b`````\_aYXY\_baaaa]\_a[^aa`^aVa\_^`\_Y]  
@HWI-EAS443:3:55:1454:621#0/1  
CATCATCCACTTCATTCTGAGTGCGGGTCTTCTCTTGT  
+HWI-EAS443:3:55:1454:621#0/1  
ababbaaaa`bb^aaaabZ`a]]aaaa```\_`ba]a^baaa  
@HWI-EAS443:3:55:1520:496#0/1  
GGAAGACAAGAGAAGAACCCCGCACTCAGAATGAAGTGGA  
+HWI-EAS443:3:55:1520:496#0/1  
ab`a`aaaaa\_a\_aa```YZ\_a]``]``\_a^\_aa\_]a[\_a]  
@HWI-EAS443:3:55:363:1086#0/1  
CAGGAAGACAAGAGAAGAACCCCGCACTCAGAATGAAGTG  
+HWI-EAS443:3:55:363:1086#0/1  
a`aa]b\_]a^\_^]\_a`\_`^`ba`WYaaa\_\_b```\_H]¥FZ  
@HWI-EAS443:3:55:421:1524#0/1  
CAGGAAGACAAGAGAAGAACCCCGCACTCAGAATGAAGTG  
+HWI-EAS443:3:55:421:1524#0/1  
abbabaa\_bb]a\_aa\_bababa`babaaaaaaba[Y`¥`  
@HWI-EAS443:3:56:1029:508#0/1  
ACAAGAGAAGAACCCCGCACTCAGAATGAAGTGGATGATG  
+HWI-EAS443:3:56:1029:508#0/1  
]`\_a\_]`\_aa[^aa^```aaa`^`\_\_ab¥R`Qab\_`a¥\_a  
@HWI-EAS443:3:56:222:631#0/1  
GGAAGACAAGAGAAGAACCCCGCACTCAGAATGAAGTGGA



@HWI-EAS443:3:58:636:416#0/1  
GACAAGAGAAGAACCCCGCACTCAGAATGAAGTGGATGAT  
+HWI-EAS443:3:58:636:416#0/1  
\_a`\_]`a`\_]\_baa`^`aaa`\_a`\_a\_\_aa[^`]aa`\_a^¥  
@HWI-EAS443:3:59:1090:1379#0/1  
ATCAGGAAGACAAGAGAAGAACCCCGCACTCAGAATGAAG  
+HWI-EAS443:3:59:1090:1379#0/1  
aa`bbab`baaaa`bbaaabaabaabbabba^a\_a^^\_^W  
@HWI-EAS443:3:59:1362:1661#0/1  
CATTCTGAGTGC GGGTTCTTCTTTGTCTTCCTGATGTG  
+HWI-EAS443:3:59:1362:1661#0/1  
`\_baabbbb`\_bbbb¥aabbabbbbbba^Q]bYZT]Z[  
@HWI-EAS443:3:59:1392:55#0/1  
ATCAGGAAGACAAGAGAAGAACCCCGCACTCAGAATGAAG  
+HWI-EAS443:3:59:1392:55#0/1  
a[`ab`W[bW`a`b]b`\_]\_\_aVVWZaT`[aWS¥[]YWVWW  
@HWI-EAS443:3:59:1746:1602#0/1  
GACAAGAGAAGAACCCCGCACTCAGAATGAAGTGGATGAT  
+HWI-EAS443:3:59:1746:1602#0/1  
aa\_aaa^a`\_aaa^SZa\_aTa`\_`^aaa`\_]Z\_]R]OV  
@HWI-EAS443:3:59:1757:524#0/1  
GACAAGAGAAGAACCCCGCACTCAGAATGAAGTGGATGAT  
+HWI-EAS443:3:59:1757:524#0/1  
a`\_0¥]\_]\_]baba\_a^^`\_a`\_a\_[\_ab¥XHP¥^NOZOS  
@HWI-EAS443:3:59:323:1389#0/1  
AGGAAGACAAGAGAAGAACCCCGCACTCAGAATGAAGTGG  
+HWI-EAS443:3:59:323:1389#0/1  
aaaaaa\_\_aa\_a`\_`aaa`^X\_a`\_`\_a]\_RVZ]]RMORM  
@HWI-EAS443:3:5:1293:1480#0/1  
CAGGAAGACAAGAGAAGAACCCCGCACTCAGAATGAAGTG  
+HWI-EAS443:3:5:1293:1480#0/1  
VabbVbb¥`\_`abbb^abba^^aabba[ab`bbbbba\_b\_b  
@HWI-EAS443:3:60:1449:907#0/1  
CAGGAAGACAAGAGAAGAACCCCGCACTCAGAATGAAGTG  
+HWI-EAS443:3:60:1449:907#0/1  
aabbaba`\_babab`aaaa\_\_\_`\_a`\_a\_]`V`aa`¥a¥a  
@HWI-EAS443:3:60:474:1832#0/1  
GAAGACAAGAGAAGAACCCCGCACTCAGAATGAAGTGGAT  
+HWI-EAS443:3:60:474:1832#0/1  
`bbaaababa`ab\_a`¥Ya`\_a`\_a`¥W][[```\_`[¥\_Z\_\_\_Z  
@HWI-EAS443:3:61:114:563#0/1  
CATCCACTTCATTCTGAGTGC GGGTTCTTCTTTGTCTT  
+HWI-EAS443:3:61:114:563#0/1  
a`¥W\_\_¥`Z`U[^`^a`\_S\_]bab\_KOUO[\_SGTU¥P¥V^  
@HWI-EAS443:3:61:159:1739#0/1  
CAGGAAGACAAGAGAAGAACCCCGCACTCAGAATGAAGTG  
+HWI-EAS443:3:61:159:1739#0/1  
aabbbb`bbbb`aaaa\_Y\_abbaababaabaa\_¥¥W^]QX  
@HWI-EAS443:3:61:305:916#0/1  
CAGGAAGACAAGAGAAGAACCCCGCACTCAGAATGAAGTG

+HWI-EAS443:3:61:305:916#0/1  
abbbbbbbbbbbbabbbbbbbbbbaabaaa\_aa`\_a¥`  
@HWI-EAS443:3:61:45:940#0/1  
CAGGAAGACAAGAGAAGAACCCCGCACTCAGAATGAAGTG  
+HWI-EAS443:3:61:45:940#0/1  
]XZZ[\_QWZYHZ\_Zaa\_¥¥[^`VZGY[XHREL¥`RUSL[  
@HWI-EAS443:3:61:494:1411#0/1  
CAGGAAGACAAGAGAAGAACCCCGCACTCAGAATGAAGTG  
+HWI-EAS443:3:61:494:1411#0/1  
abbbbbbb`bbbbbaY`b]bbbbbbbbbbabaa`bba\_`Ya  
@HWI-EAS443:3:61:68:965#0/1  
CAGGAAGACAAGAGAAGAACCCCGCACTCAGAATGAAGTG  
+HWI-EAS443:3:61:68:965#0/1  
Q¥[a\_bbbaaa\_]bb\_¥¥\_\_[ab\_U[]¥WW^¥\_baaUJO  
@HWI-EAS443:3:62:1021:1091#0/1  
CAGGAAGACAAGAGAAGAACCCCGCACTCAGAATGAAGTG  
+HWI-EAS443:3:62:1021:1091#0/1  
\_^baabbaab\_babaaaaa`aa`\_]`a`a`a`X\_aXa  
@HWI-EAS443:3:62:510:884#0/1  
GGAAGACAAGAGAAGAACCCCGCACTCAGAATGAAGTGGA  
+HWI-EAS443:3:62:510:884#0/1  
aa[¥[Ua[XaSaa\_a^a¥\_¥a`]\_\_X]^`V^)^RV\_V^U  
@HWI-EAS443:3:62:617:1627#0/1  
CAGGAAGACAAGAGAAGAACCCCGCACTCAGAATGAAGTG  
+HWI-EAS443:3:62:617:1627#0/1  
ababaaabaa`ab[ab\_^`aa`a\_a\_\_aaa`\_\_aa]^`^a  
@HWI-EAS443:3:62:624:739#0/1  
AGACAAGAGAAGAACCCCGCACTCAGAATGAAGTGGATGA  
+HWI-EAS443:3:62:624:739#0/1  
a`a¥`baaaba\_\_`]^baa]aa\_a\_\_a\_PZaVa`¥Z`Y  
@HWI-EAS443:3:63:1448:486#0/1  
CAGGAAGACAAGAGAAGAACCCCGCACTCAGAATGAAGTG  
+HWI-EAS443:3:63:1448:486#0/1  
aab`\_bbbabaa]`abbbbaaabaabbaaaa\_abb^L\_\_b  
@HWI-EAS443:3:63:1542:1614#0/1  
ATCAGGAAGACAAGAGAAGAACCCCGCACTCAGAATGAAG  
+HWI-EAS443:3:63:1542:1614#0/1  
]¥¥Z][V\_\_\_V[FLH\_a]ZP]W\_a]\_[`MUJV¥[^]V]W  
@HWI-EAS443:3:63:1581:970#0/1  
GACAAGAGAAGAACCCCGCACTCAGAATGAAGTGGATGAT  
+HWI-EAS443:3:63:1581:970#0/1  
aa]a\_a`\_^a\_\_a\_]\_^a\_a]\_a\_`Za\_`]X`X`^^\_]`^]  
@HWI-EAS443:3:63:1673:804#0/1  
CAGGAAGACAAGAGAAGAACCCCGCACTCAGAATGAAGTG  
+HWI-EAS443:3:63:1673:804#0/1  
aabbabbaa`]`abaabaa`¥`bbaaaa`a\_aaa`a\_a  
@HWI-EAS443:3:63:416:877#0/1  
GACAAGAGAAGAACCCCGCACTCAGAATGAAGTGGATGAT  
+HWI-EAS443:3:63:416:877#0/1  
aaba`aaaaaaaaaaba`aaaa\_\_aa\_¥a^a\_\_aX]

@HWI-EAS443:3:63:957:726#0/1  
GGAAGACAAGAGAAGAACCCCGCACTCAGAATGAAGTGGA  
+HWI-EAS443:3:63:957:726#0/1  
aaa[a^b\_[¥ZV¥aaaaa\_a`aa\_]\_a^`^`\_]THY¥¥  
@HWI-EAS443:3:64:1159:391#0/1  
CAGGAAGACAAGAGAAGAACCCCGCACTCAGAATGAAGTG  
+HWI-EAS443:3:64:1159:391#0/1  
^^`\_\_^aaX¥S]ab]Z\_]\_\_]¥`¥`\_N\_^b]abbTWYV^  
@HWI-EAS443:3:64:1755:1579#0/1  
ATCAGGAAGACAAGAGAAGAACCCCGCACTCAGAATGAAG  
+HWI-EAS443:3:64:1755:1579#0/1  
aa¥^abaaaa\_a[``a\_]`\_a\_`\_^a[\_]\_\_\_a^^`W]\_  
@HWI-EAS443:3:64:343:1029#0/1  
CAGGAAGACAAGAGAAGAACCCCGCACTCAGAATGAAGTG  
+HWI-EAS443:3:64:343:1029#0/1  
¥W\_IYababbY`Y\_¥\_]a]\_^T]]a¥\_\_\_]XXVU¥`TN]T`  
@HWI-EAS443:3:65:1337:227#0/1  
CAGGAAGACAAGAGAAGAACCCCGCACTCAGAATGAAGTG  
+HWI-EAS443:3:65:1337:227#0/1  
Z¥a`a`bb]bbabZ\_b`\_¥Sab\_¥\_b^`]babbb\_W\_\_a  
@HWI-EAS443:3:65:1408:325#0/1  
GGAAGACAAGAGAAGAACCCCGCACTCAGAATGAAGTGGA  
+HWI-EAS443:3:65:1408:325#0/1  
aaaaa`\_aaa`aa`aaa\_]^^`]]`V^a]^`Y`Y\_^^  
@HWI-EAS443:3:65:415:517#0/1  
ATCATCCACTTCATTCTGAGTGCGGGTTCTTCTCTTGTC  
+HWI-EAS443:3:65:415:517#0/1  
aaab`aaaaaaaa`aa`¥a^`a`\_Y\_X``\_\_\_\_^`]`]^a  
@HWI-EAS443:3:65:553:1086#0/1  
CAGGAAGACAAGAGAAGAACCCCGCACTCAGAATGAAGTG  
+HWI-EAS443:3:65:553:1086#0/1  
aU\_a\_\_W`bRXU[\_[Uaa\_\_W]aa`S[`WVY`N`XMRNV  
@HWI-EAS443:3:66:1287:480#0/1  
CAGGAAGACAAGAGAAGAACCCCGCACTCAGAATGAAGTG  
+HWI-EAS443:3:66:1287:480#0/1  
abbbbbbaabbbab`b`^a][¥a^aaaaaaaaa¥QZ¥a  
@HWI-EAS443:3:66:1655:836#0/1  
ATCAGGAAGACAAGAGAAGAACCCCGCACTCAGAATGAAG  
+HWI-EAS443:3:66:1655:836#0/1  
[\_a^`X`a\_\_\_aba`bb`Za`a^]aa\_RaXab[Ta`X\_a  
@HWI-EAS443:3:66:1664:901#0/1  
AGGAAGACAAGAGAAGAACCCCGCACTCAGAATGAAGTGG  
+HWI-EAS443:3:66:1664:901#0/1  
aababbaaabbabaabbaa``\_ba\_aaaaa`abaa\_bVaa  
@HWI-EAS443:3:66:1746:1287#0/1  
CACTTCATTCTGAGTGCGGGTTCTTCTTGTCTTCTCCTG  
+HWI-EAS443:3:66:1746:1287#0/1  
a^R`ba]`aabb`b][TZZP[¥a``¥`ababb`aba]^aa  
@HWI-EAS443:3:66:414:395#0/1  
GGAAGACAAGAGAAGAACCCCGCACTCAGAATGAAGTGGA

+HWI-EAS443:3:66:414:395#0/1  
a]Wa`XY^V^\_a[``\_\_^V[`^Y`\_a]^`^V\_G`^^  
@HWI-EAS443:3:66:520:947#0/1  
CAGGAAGACAAGAGAAGAACCCCGCACTCAGAATGAAGTG  
+HWI-EAS443:3:66:520:947#0/1  
abbaaa[`aa`a]`\_\_^`aa`a`¥`[a`\_L^`[R]U`  
@HWI-EAS443:3:67:1010:1432#0/1  
CAGGAAGACAAGAGAAGAACCCCGCACTCAGAATGAAGTG  
+HWI-EAS443:3:67:1010:1432#0/1  
abbbbaabbbbaabbbbbbababbabbaaba`aaaa^b  
@HWI-EAS443:3:67:1234:1331#0/1  
ATCAGGAAGACAAGAGAAGAACCCCGCACTCAGAATGAAG  
+HWI-EAS443:3:67:1234:1331#0/1  
a`^[b`aa`aaa`a`aa\_aa\_``a\_a\_`\_`a`\_`a\_``  
@HWI-EAS443:3:67:424:1447#0/1  
CAGGAAGACAAGAGAAGAACCCCGCACTCAGAATGAAGTG  
+HWI-EAS443:3:67:424:1447#0/1  
\_aaaa^[a\_YX[¥QaXaa`]``aaa`a\_^Z]\_a]Y]N[  
@HWI-EAS443:3:68:1001:821#0/1  
ATCCACTTCTTCTGAGTGC GGGTTCTTCTTCTTGTCTTC  
+HWI-EAS443:3:68:1001:821#0/1  
aa\_abbabbbbaaa`aabb`bb\_babbababaa\_abba  
@HWI-EAS443:3:68:1070:466#0/1  
GGAAGACAAGAGAAGAACCCCGCACTCAGAATGAAGTGGA  
+HWI-EAS443:3:68:1070:466#0/1  
abaaaaa`]abaaaaa`\_aaaa`a\_a^^aa¥^aWa\_¥  
@HWI-EAS443:3:68:1228:1766#0/1  
GGGTTCTTCTTGTCTTCTTCTGATGTGTATTTTTGATTA  
+HWI-EAS443:3:68:1228:1766#0/1  
`abZ¥a`b]baaY^[W\_¥[¥[Y`\_^\_YZD^aa]a`aa`a  
@HWI-EAS443:3:68:558:710#0/1  
GGAAGACAAGAGAAGAACCCCGCACTCAGAATGAAGTGGA  
+HWI-EAS443:3:68:558:710#0/1  
ababaaaaa`b`aaaa`\_aaa`a`\_a\_aaa^^aUa\_¥  
@HWI-EAS443:3:69:1120:2004#0/1  
AGGAAGACAAGAGAAGAACCCCGCACTCAGAATGAAGTG  
+HWI-EAS443:3:69:1120:2004#0/1  
`]X¥^`a`]YZZaa]YaaU]`a]aa`\_a^^^\_ZQYWYX  
@HWI-EAS443:3:69:1290:738#0/1  
CAGGAAGACAAGAGAAGAACCCCGCACTCAGAATGAAGTG  
+HWI-EAS443:3:69:1290:738#0/1  
a``abbbabbbbaababaa`babaaabaab`a`^a  
@HWI-EAS443:3:69:198:1661#0/1  
CAGGAAGACAAGAGAAGAACCCCGCACTCAGAATGAAGTG  
+HWI-EAS443:3:69:198:1661#0/1  
abaa`\_`bbbaa`\_a`abaaaaa`^`\_a^^`a\_]¥V\_  
@HWI-EAS443:3:69:340:539#0/1  
CAGGAAGACAAGAGAAGAACCCCGCACTCAGAATGAAGTG  
+HWI-EAS443:3:69:340:539#0/1  
aaba\_a`ab\_bbabbbbaa`\_aaa`a`a`\_aa`^a]a



@HWI-EAS443:3:69:668:213#0/1  
CAGGAAGACAAGAGAAGAACCCCGCACTCAGAATGAAGTG  
+HWI-EAS443:3:69:668:213#0/1  
abbbbaabbabaaaabb`a`aaaaaaaa\_`aa\_\_\_^a  
@HWI-EAS443:3:6:244:940#0/1  
CAGGAAGACAAGAGAAGAACCCCGCACTCAGAATGAAGTG  
+HWI-EAS443:3:6:244:940#0/1  
aU]OY``^JZLWaIX]W^]TLGZaYZTQVS`XQ\_aX]BBB  
@HWI-EAS443:3:6:451:1542#0/1  
GAAGACAAGAGAAGAACCCCGCACTCAGAATGAAGTGGAT  
+HWI-EAS443:3:6:451:1542#0/1  
]\_a`^`b]abaaaa\_`]]]aa`aaaaba``aaaaZbZ^`  
@HWI-EAS443:3:6:650:990#0/1  
AGGAAGACAAGAGAAGAACCCCGCACTCAGAATGAAGTGG  
+HWI-EAS443:3:6:650:990#0/1  
aaaaaaaa`aa``a`aa`\_\_¥^a^`]``^`^`^`\_ZNXB  
@HWI-EAS443:3:6:773:1824#0/1  
CAGGAAGACAAGAGAAGAACCCCGCACTCAGAATGAAGTG  
+HWI-EAS443:3:6:773:1824#0/1  
a\_aaabbabbaaaaaabba``baa``a\_babbaabaab¥b  
@HWI-EAS443:3:70:1083:1491#0/1  
CAGGAAGACAAGAGAAGAACCCCGCACTCAGAATGAAGTG  
+HWI-EAS443:3:70:1083:1491#0/1  
S¥a\_ab``aaWaSbba``bb]baabbab[b]I\_ba^`a\_b  
@HWI-EAS443:3:70:1728:1594#0/1  
ATCAGGAAGACAAGAGAAGAACCCCGCACTCAGAATGAAG  
+HWI-EAS443:3:70:1728:1594#0/1  
a\_^\_b`\_aaUaaaa`aY\_ZQ`¥\_¥Taa\_\_\_N¥`]\_a`\_\_a  
@HWI-EAS443:3:71:1525:1565#0/1  
CAGGAAGACAAGAGAAGAACCCCGCACTCAGAATGAAGTG  
+HWI-EAS443:3:71:1525:1565#0/1  
Z[\_U\_\_^`aabaSTbbb]\_`¥¥b\_a^[ba`ZZab^[aHa  
@HWI-EAS443:3:71:1700:214#0/1  
CAGGAAGACAAGAGAAGAACCCCGCACTCAGAATGAAGTG  
+HWI-EAS443:3:71:1700:214#0/1  
abb\_0¥a^V\_[Q¥ZZabaaZ\_¥Z`]\_aaa]XUZ]^ [RVU]  
@HWI-EAS443:3:71:306:1272#0/1  
GGAAGACAAGAGAAGAACCCCGCACTCAGAATGAAGTGGA  
+HWI-EAS443:3:71:306:1272#0/1  
]\_Sa\_baV\_baa]\_]bb```b``\_W\_a\_^X`aa\_X^G[¥^  
@HWI-EAS443:3:71:333:1509#0/1  
GGAAGACAAGAGAAGAACCCCGCACTCAGAATGAAGTGGA  
+HWI-EAS443:3:71:333:1509#0/1  
^Z^abaaab\_Mabb``Ybbbb[bbaaaR¥``S\_\_\_aN` [a  
@HWI-EAS443:3:71:479:211#0/1  
CAGGAAGACAAGAGAAGAACCCCGCACTCAGAATGAAGTG  
+HWI-EAS443:3:71:479:211#0/1  
aabbab``\_b\_]Xaaa^aa`\_`\_a`a]aa``\_[a`ZW^V\_  
@HWI-EAS443:3:71:523:469#0/1  
CACATCAGGAAGACAAGAGAAGAACCCCGCACTCAGAATG

+HWI-EAS443:3:71:523:469#0/1  
a\_^ab]abaa`bYabXba]P[]]ba[ZG\_a\_a^\_]aaSZa  
@HWI-EAS443:3:72:1172:1508#0/1  
CAGGAAGACAAGAGAAGAACCCCGCACTCAGAATGAAGTG  
+HWI-EAS443:3:72:1172:1508#0/1  
abbbbbbab\_a^bbaaab\_baa`aaaaaaaaaaaaaUa  
@HWI-EAS443:3:72:1240:1916#0/1  
ATCCACTTCTTCTGAGTGCGGGTCTTCTTGTCTTC  
+HWI-EAS443:3:72:1240:1916#0/1  
]][\_YRXY`\_PW¥N[Z^TU[LWRTMM[SWYYP[GQVTTH  
@HWI-EAS443:3:72:1481:1634#0/1  
CAGGAAGACAAGAGAAGAACCCCGCACTCAGAATGAAGTG  
+HWI-EAS443:3:72:1481:1634#0/1  
`Vaa^`[babaaabbbbaZ\_aaaa\_aa[a``]\_bUHVa  
@HWI-EAS443:3:72:302:2015#0/1  
CAGGAAGACAAGAGAAGAACCCCGCACTCAGAATGAAGTG  
+HWI-EAS443:3:72:302:2015#0/1  
abaaaba\_aaa`^aaa`\_baa`\_aba`\_a^`]^Z`]YTNT  
@HWI-EAS443:3:72:544:1392#0/1  
GGAAGACAAGAGAAGAACCCCGCACTCAGAATGAAGTGGA  
+HWI-EAS443:3:72:544:1392#0/1  
^T^][\_\_OR¥`[^`^`\_a\_aa`]^`\_\_[XX\_YWYT[RL  
@HWI-EAS443:3:73:1013:874#0/1  
GGAAGACAAGAGAAGAACCCCGCACTCAGAATGAAGTGGA  
+HWI-EAS443:3:73:1013:874#0/1  
```\_\_aa\_]\_\_]aa`a`\_`\_aaaaa``]\_aa\_\_a[¥`\_`  
@HWI-EAS443:3:73:283:1217#0/1  
ATCAGGAAGACAAGAGAAGAACCCCGCACTCAGAATGAAG  
+HWI-EAS443:3:73:283:1217#0/1  
aaa^aaWILZaX]]\_`\_XZR`a\_a\_`\_^^]\_`^¥[Y[S[T  
@HWI-EAS443:3:73:467:249#0/1  
CAGGAAGACAAGAGAAGAACCCCGCACTCAGAATGAAGTG  
+HWI-EAS443:3:73:467:249#0/1  
aaabbbabbbabaaaabaa`]`\_baa````b`aaa\_`a]`  
@HWI-EAS443:3:73:495:527#0/1  
GACAAGAGAAGAACCCCGCACTCAGAATGAAGTGGATGAT  
+HWI-EAS443:3:73:495:527#0/1  
aYV^`a`KW]RZ`[¥\_aXMVYZ]]HU[¥WX\_Xa¥VVUVV  
@HWI-EAS443:3:73:704:645#0/1  
AGGAAGACAAGAGAAGAACCCCGCACTCAGAATGAAGTGG  
+HWI-EAS443:3:73:704:645#0/1  
ab`ab`\_aaab`aaab`aa\_aaaa`\_a\_`\_`a]\_aV`\_`  
@HWI-EAS443:3:73:883:1400#0/1  
GACAAGAGAAGAACCCCGCACTCAGAATGAAGTGGATGAT  
+HWI-EAS443:3:73:883:1400#0/1  
aY]aba]`\_aa`\_aaa\_a`a`a`aX`a`\_`\_U\_^^]`\_]  
@HWI-EAS443:3:74:152:1461#0/1  
CAGGAAGACAAGAGAAGAACCCCGCACTCAGAATGAAGTG  
+HWI-EAS443:3:74:152:1461#0/1  
a^`\_Y\_Zab]b\_H^X¥¥W`a`WaS`\_`]\_TZH\_Z]SQXUY

@HWI-EAS443:3:74:278:2017#0/1  
CACATCAGGAAGACAAGAGAAGAACCCCGCACTCAGAATG  
+HWI-EAS443:3:74:278:2017#0/1  
aab`abaYaa`\_aabb^a\_aa¥aa`aa^aa\_\_a]\_]`R  
@HWI-EAS443:3:74:424:1806#0/1  
GGAAGACAAGAGAAGAACCCCGCACTCAGAATGAAGTGGA  
+HWI-EAS443:3:74:424:1806#0/1  
aW]a\_\_`U[\_`^¥T[`] [\_^¥¥\_\_YX\_WT]^]^XX]TT]X  
@HWI-EAS443:3:75:109:986#0/1  
ACAAGAGAAGAACCCCGCACTCAGAATGAAGTGGATGATG  
+HWI-EAS443:3:75:109:986#0/1  
aaaab``aaa`a``\_\_aaa^`\_`^\_\_`^^\_X]Y]Y^UY]  
@HWI-EAS443:3:75:169:453#0/1  
GACAAGAGAAGAACCCCGCACTCAGAATGAAGTGGATGAT  
+HWI-EAS443:3:75:169:453#0/1  
a`a`aba`aaaab\_aaaaaa`aa] [\_`aZ\_aN``\_]`\_]  
@HWI-EAS443:3:75:363:133#0/1  
CAGGAAGACAAGAGAAGAACCCCGCACTCAGAATGAAGTG  
+HWI-EAS443:3:75:363:133#0/1  
aaba`aba\_a`baaaaaa^`\_`a``^\_\_a¥\_`a\_¥\_W`  
@HWI-EAS443:3:76:1018:709#0/1  
CAGGAAGACAAGAGAAGAACCCCGCACTCAGAATGAAGTG  
+HWI-EAS443:3:76:1018:709#0/1  
aabbababbbbabbaabbbbabbbabbbabbaabba`]P^  
@HWI-EAS443:3:76:471:1883#0/1  
ATCAGGAAGACAAGAGAAGAACCCCGCACTCAGAATGAAG  
+HWI-EAS443:3:76:471:1883#0/1  
`a\_\_U]\_XZaaZZ][ ]`a\_aaaa\_[`Y\_^\_\_[X[VW^]Z  
@HWI-EAS443:3:77:1085:131#0/1  
AGACAAGAGAAGAACCCCGCACTCAGAATGAAGTGGATGA  
+HWI-EAS443:3:77:1085:131#0/1  
abZabab`aabaa`] [\_\_b]aaa\_a[``\_`a\_]aU\_a\_]a\_  
@HWI-EAS443:3:77:1282:842#0/1  
CATCATCCACTTCATTCTGAGTGCGGGTTCTTCTTGT  
+HWI-EAS443:3:77:1282:842#0/1  
`bbbbbbbababbabbbabbaaab\_b`a`abaaa^b`abaa  
@HWI-EAS443:3:77:1575:521#0/1  
CATCAGGAAGACAAGAGAAGAACCCCGCACTCAGAATGAA  
+HWI-EAS443:3:77:1575:521#0/1  
^ab`````\_a\_X¥``^ba`T¥¥¥¥¥¥ab``¥`bbbaba]`  
@HWI-EAS443:3:77:297:1317#0/1  
CAGGAAGACAAGAGAAGAACCCCGCACTCAGAATGAAGTG  
+HWI-EAS443:3:77:297:1317#0/1  
abaaaababaaaa\_aa\_aa`\_a`aa`a^a\_`V\_`\_^[\_W\_  
@HWI-EAS443:3:77:794:2017#0/1  
GGAAGACAAGAGAAGAACCCCGCACTCAGAATGAAGTGGA  
+HWI-EAS443:3:77:794:2017#0/1  
R¥`a¥ab\_V\_X¥aKWab`Y\_`bba\_]`bbKb`baW`H]^a  
@HWI-EAS443:3:78:1126:610#0/1  
GGAAGACAAGAGAAGAACCCCGCACTCAGAATGAAGTGGA

+HWI-EAS443:3:78:1126:610#0/1  
aZS]bSUTQsXaSP[SQVQQP\_[VU]UNNLSWZSRZW¥[B  
@HWI-EAS443:3:78:1176:1787#0/1  
AGACAAGAGAAGAACCCCGCACTCAGAATGAAGTGGATGA  
+HWI-EAS443:3:78:1176:1787#0/1  
Ubb`a^Y¥bT^TZa`\_\_I`^aaa`a\_aS¥\_`^J[TaSa`  
@HWI-EAS443:3:78:242:862#0/1  
ATCCACTTCATTCTGAGTGCGGGTTCTTCTTGTCTTC  
+HWI-EAS443:3:78:242:862#0/1  
a`aba``aaaaaa`\_]\_Waaa``Z`^`^`a^``^`\_\_\_\_  
@HWI-EAS443:3:78:512:195#0/1  
CATCAGGAAGACAAGAGAAGAACCCCGCACTCAGAATGAA  
+HWI-EAS443:3:78:512:195#0/1  
abbaa\_\_`aa\_a`Va^b`\_a``¥YZZa^¥W\_^Y\_^U`\_VY  
@HWI-EAS443:3:78:568:1983#0/1  
CAGGAAGACAAGAGAAGAACCCCGCACTCAGAATGAAGTG  
+HWI-EAS443:3:78:568:1983#0/1  
aa[\_aa\_`^`^`^`a\_aaa]]\_Za`\_^`^`]^`^^]]\_]X^  
@HWI-EAS443:3:78:763:651#0/1  
GGAAGACAAGAGAAGAACCCCGCACTCAGAATGAAGTGGA  
+HWI-EAS443:3:78:763:651#0/1  
aaQY]YZ[U``¥FW\_\_\_ZWYYV]]YX\_PXWV^]OV\_SRPS  
@HWI-EAS443:3:78:859:1836#0/1  
GGAAGACAAGAGAAGAACCCCGCACTCAGAATGAAGTGGA  
+HWI-EAS443:3:78:859:1836#0/1  
a\_^Z¥V]aXa[\_Z^`SaZX\_]aU^ZZU[`R¥a`UW`N^\_X  
@HWI-EAS443:3:78:919:371#0/1  
GGAAGACAAGAGAAGAACCCCGCACTCAGAATGAAGTGGA  
+HWI-EAS443:3:78:919:371#0/1  
a`\_aa\_^`\_a\_a`\_a\_a\_\_\_V\_]`^Y`^^`^^`^^XXHT^^  
@HWI-EAS443:3:79:1333:763#0/1  
GACAAGAGAAGAACCCCGCACTCAGAATGAAGTGGATGAT  
+HWI-EAS443:3:79:1333:763#0/1  
aa`aba`aaaa\_]a\_b`a\_aa`a^aaa`^a¥aa\_\_\_`^`  
@HWI-EAS443:3:79:766:1906#0/1  
CATCAGGAAGACAAGAGAAGAACCCCGCACTCAGAATGAA  
+HWI-EAS443:3:79:766:1906#0/1  
a\_X¥Z\_\_aUUW\_¥RT`\_`a\_VZaU]]T]]`¥FZ[` [OTRXZ  
@HWI-EAS443:3:7:1053:545#0/1  
CATCATCCACTTCATTCTGAGTGCGGGTTCTTCTTGT  
+HWI-EAS443:3:7:1053:545#0/1  
a\_bb\_\_[\_`baab`aab]bbab\_b[aabbaa`aa^a\_aaa\_  
@HWI-EAS443:3:7:1375:1544#0/1  
GACAAGAGAAGAACCCCGCACTCAGAATGAAGTGGATGAT  
+HWI-EAS443:3:7:1375:1544#0/1  
aKO`RS`\_\_[\_`a\_a`\_`NNP`N[aT\_a`ZQaV¥\_W`Y\_Y  
@HWI-EAS443:3:7:137:878#0/1  
CAGGAAGACAAGAGAAGAACCCCGCACTCAGAATGAAGTG  
+HWI-EAS443:3:7:137:878#0/1  
abbbaab`baabaa`aa[baaa\_aaa\_aa`\_`\_`aa`¥[R^

@HWI-EAS443:3:7:1502:599#0/1  
ATCAGGAAGACAAGAGAAGAACCCCGCACTCAGAATGAAG  
+HWI-EAS443:3:7:1502:599#0/1  
`a^abaaaba^aaa\_b`aa\_`UZU^aU\_XYIVVKM][LR[  
@HWI-EAS443:3:7:297:1101#0/1  
CATCAGGAAGACAAGAGAAGAACCCCGCACTCAGAATGAA  
+HWI-EAS443:3:7:297:1101#0/1  
]\_aa^X]aa\_aaRSVaR\_W``XHP[\_HLVR]\_\_HM\_\_BB  
@HWI-EAS443:3:7:413:80#0/1  
CAGGAAGACAAGAGAAGAACCCCGCACTCAGAATGAAGTG  
+HWI-EAS443:3:7:413:80#0/1  
`babaabaab`aaaaabaaa¥Taa¥`Ua\_^aN\_^aW¥]Wa  
@HWI-EAS443:3:7:418:18#0/1  
CAGGAAGACAAGAGAAGAACCCCGCACTCAGAATGAAGTG  
+HWI-EAS443:3:7:418:18#0/1  
`bbb`abaaaab\_a\_ab`a\_Z`aa¥`\_\_[a¥\_^`Y¥ZKY  
@HWI-EAS443:3:7:859:467#0/1  
CATCAGGAAGACAAGAGAAGAACCCCGCACTCAGAATGAA  
+HWI-EAS443:3:7:859:467#0/1  
a`a`aa`ZZa`¥a\_aX]]\_a\_a¥N]P^W\_]`\_]\_a^Xaa]^  
@HWI-EAS443:3:80:1039:578#0/1  
CAGGAAGACAAGAGAAGAACCCCGCACTCAGAATGAAGTG  
+HWI-EAS443:3:80:1039:578#0/1  
`[``a[^[aa`XZ`XTa`\_aa^\_\_\_\_\_]`\_\_Z^\_`]YXS\_  
@HWI-EAS443:3:80:1539:1416#0/1  
ATCAGGAAGACAAGAGAAGAACCCCGCACTCAGAATGAAG  
+HWI-EAS443:3:80:1539:1416#0/1  
aa\_`babbbbaa\_aaaa`aaaS][U\_]`[a\_^a\_``a^¥Y  
@HWI-EAS443:3:80:374:1427#0/1  
TCATCCACTTCTTCTGAGTGCGGGTTCTTCTTGTCT  
+HWI-EAS443:3:80:374:1427#0/1  
aababbbbababaaaaaaaa]aaaa\_a¥aaaab`\_aaa\_\_`  
@HWI-EAS443:3:80:750:187#0/1  
GGAAGACAAGAGAAGAACCCCGCACTCAGAATGAAGTGGA  
+HWI-EAS443:3:80:750:187#0/1  
abaabaaaab¥baa\_aa^a^\_b\_\_\_\_`\_\_`\_\_aa^^\_]`\_]`  
@HWI-EAS443:3:81:1501:1547#0/1  
ATCAGGAAGACAAGAGAAGAACCCCGCACTCAGAATGAAG  
+HWI-EAS443:3:81:1501:1547#0/1  
`\_Y`aaa^a\_\_a\_a\_a```aa\_YYWq]`W\_HU^\_\_¥[KVX  
@HWI-EAS443:3:81:871:1323#0/1  
CAGGAAGACAAGAGAAGAACCCCGCACTCAGAATGAAGTG  
+HWI-EAS443:3:81:871:1323#0/1  
TXYXPZQ\_aQQW`[TQ]M]Z]\_a^¥[aa\_0¥PKU\_``RNZ  
@HWI-EAS443:3:81:872:332#0/1  
CAGGAAGACAAGAGAAGAACCCCGCACTCAGAATGAAGTG  
+HWI-EAS443:3:81:872:332#0/1  
abbb`bba`a`bba`bbaba\_aaa\_``aa`a\_aaa`aa\_a  
@HWI-EAS443:3:81:945:862#0/1  
GGAAGACAAGAGAAGAACCCCGCACTCAGAATGAAGTGGA

+HWI-EAS443:3:81:945:862#0/1  
aba`\_aab`]Vb]UaaaaX`aaa` `aa]` `] `a\_[a¥a\_`  
@HWI-EAS443:3:82:1203:549#0/1  
GGAAGACAAGAGAAGAACCCCGCACTCAGAATGAAGTGGA  
+HWI-EAS443:3:82:1203:549#0/1  
ababaaaaaba`aaaa`^a^b\_a\_`^\_a\_\_ab\_^[RVaa  
@HWI-EAS443:3:82:1326:322#0/1  
CAGGAAGACAAGAGAAGAACCCCGCACTCAGAATGAAGTG  
+HWI-EAS443:3:82:1326:322#0/1  
ab```bb`bbbbbbbabbaSabbabbba]¥abbbbabab  
@HWI-EAS443:3:82:1466:667#0/1  
GACAAGAGAAGAACCCCGCACTCAGAATGAAGTGGATGAT  
+HWI-EAS443:3:82:1466:667#0/1  
\_TR\_\_`S¥VV]¥a¥]QS¥Ia[a\_IZ¥a^`¥`bP`\_\_¥\_]M  
@HWI-EAS443:3:82:484:629#0/1  
CAGGAAGACAAGAGAAGAACCCCGCACTCAGAATGAAGTG  
+HWI-EAS443:3:82:484:629#0/1  
aaabbbbbbb`b`baa]\_baabb\_bba`a`a`^aba¥¥T¥  
@HWI-EAS443:3:82:509:614#0/1  
GGAAGACAAGAGAAGAACCCCGCACTCAGAATGAAGTGGA  
+HWI-EAS443:3:82:509:614#0/1  
abaaaaaaaa`aa\_a[``a\_XZ`aa^``\_a]``a^U^X`\_]`  
@HWI-EAS443:3:82:871:306#0/1  
AGACAAGAGAAGAACCCCGCACTCAGAATGAAGTGGATGA  
+HWI-EAS443:3:82:871:306#0/1  
aU`ab]]]Zba[[Y``[[b`b]]]U\_b\_UUaUI`^XRNX]S  
@HWI-EAS443:3:82:954:1740#0/1  
GGAAGACAAGAGAAGAACCCCGCACTCAGAATGAAGTGGA  
+HWI-EAS443:3:82:954:1740#0/1  
\_]\_bbabb[FYW^aZ`baaa[a]``^aaaa^aa]¥aUaaa  
@HWI-EAS443:3:83:1265:1283#0/1  
CAGGAAGACAAGAGAAGAACCCCGCACTCAGAATGAAGTG  
+HWI-EAS443:3:83:1265:1283#0/1  
aabbbabbbbabababb`bbba` `abbabaababbbba`WS^  
@HWI-EAS443:3:83:1484:1910#0/1  
CAGGAAGACAAGAGAAGAACCCCGCACTCAGAATGAAGTG  
+HWI-EAS443:3:83:1484:1910#0/1  
aab\_b`ab`Yb`aaabaa]a^[[Qa]aXa\_aa]aaa\_``[b  
@HWI-EAS443:3:83:177:739#0/1  
GGAAGACAAGAGAAGAACCCCGCACTCAGAATGAAGTGGA  
+HWI-EAS443:3:83:177:739#0/1  
aaaaaaaaa`\_a\_aaaYa\_a`a\_```\_\_a[Z`a]^^T\_\_]  
@HWI-EAS443:3:83:26:1537#0/1  
ATCAGGAAGACAAGAGAAGAACCCCGCACTCAGAATGAAG  
+HWI-EAS443:3:83:26:1537#0/1  
^`a`aaa^aaa¥¥a]Z¥^ZZ`aaa`^` `]\_`\_`¥U¥Z¥[\_  
@HWI-EAS443:3:83:542:157#0/1  
CATCCACTTCATTCTGAGTGCGGGTTCCTTCTTGTCTT  
+HWI-EAS443:3:83:542:157#0/1  
a`UWa^aa` `Xaa`a\_\_aW\_\_aa]\_Z^^`¥[\_]`¥¥SX]]

@HWI-EAS443:3:83:692:1216#0/1  
ATCAGGAAGACAAGAGAAGAACCCCGCACTCAGAATGAAG  
+HWI-EAS443:3:83:692:1216#0/1  
a\_b\_\_ZX¥`\_`\_]WY`aaabb]ZV]]`a[\_aa^V\_\_a^¥R  
@HWI-EAS443:3:84:1193:915#0/1  
CATCAGGAAGACAAGAGAAGAACCCCGCACTCAGAATGAA  
+HWI-EAS443:3:84:1193:915#0/1  
a\_b\_[baaaa`a\_aab^a[aa\_\_\_\_\_`aa`b^`a`aa\_\_V  
@HWI-EAS443:3:84:1455:726#0/1  
CAGGAAGACAAGAGAAGAACCCCGCACTCAGAATGAAGTG  
+HWI-EAS443:3:84:1455:726#0/1  
[\_[abbbb[abbbbaaa\_[\_[aZZH\_SWJ`[abb`b[a  
@HWI-EAS443:3:84:1638:667#0/1  
ATCAGGAAGACAAGAGAAGAACCCCGCACTCAGAATGAAG  
+HWI-EAS443:3:84:1638:667#0/1  
```aba]^`^]Ma\_a¥b`a\_YT^`^b`\_X`X\_a\_^aa]Ga  
@HWI-EAS443:3:84:1704:233#0/1  
GGAAGACAAGAGAAGAACCCCGCACTCAGAATGAAGTGGA  
+HWI-EAS443:3:84:1704:233#0/1  
]abaa`\_\_^b\_\_aaa]^UXRMbN`Ra^\_a\_a¥SPaU\_UR  
@HWI-EAS443:3:84:1781:1315#0/1  
ATCAGGAAGACAAGAGAAGAACCCCGCACTCAGAATGAAG  
+HWI-EAS443:3:84:1781:1315#0/1  
ab`¥^aabaaba¥[¥aa`\_aZZP[aa\_\_aa]WYaX[[]\_`  
@HWI-EAS443:3:84:364:561#0/1  
CAGGAAGACAAGAGAAGAACCCCGCACTCAGAATGAAGTG  
+HWI-EAS443:3:84:364:561#0/1  
XO\_[\_R^[b`bb[¥W\_[`[aa\_`^`¥`\_a`QW]^YDUQS  
@HWI-EAS443:3:86:1481:295#0/1  
CAGGAAGACAAGAGAAGAACCCCGCACTCAGAATGAAGTG  
+HWI-EAS443:3:86:1481:295#0/1  
abZ]Xabaaa]b\_bbbb\_\_VJZabYb`b``baaab\_\_aZa  
@HWI-EAS443:3:86:1675:542#0/1  
CAGGAAGACAAGAGAAGAACCCCGCACTCAGAATGAAGTG  
+HWI-EAS443:3:86:1675:542#0/1  
`\_bb`bbabb`a\_bbbbb^W\_`\_`bbbb[bbbbbb¥U`Sb  
@HWI-EAS443:3:86:212:324#0/1  
GACAAGAGAAGAACCCCGCACTCAGAATGAAGTGGATGAT  
+HWI-EAS443:3:86:212:324#0/1  
aaaaab```ba\_a`\_\_`a`aaZ`a^\_\_a\_\_\_Ta\_\_^`]R  
@HWI-EAS443:3:86:562:2032#0/1  
AGGAAGACAAGAGAAGAACCCCGCACTCAGAATGAAGTGG  
+HWI-EAS443:3:86:562:2032#0/1  
\_bba]aaabaa`aaabbb\_]`\_`aa\_`^`\_`\_\_\_\_a\_`^Xa^  
@HWI-EAS443:3:87:1184:22#0/1  
GGAAGACAAGAGAAGAACCCCGCACTCAGAATGAAGTGGA  
+HWI-EAS443:3:87:1184:22#0/1  
¥aaab`\_aab`aaabaa\_Z`¥bZ`¥a^`a¥¥\_b\_\_aWa`\_  
@HWI-EAS443:3:87:1267:1326#0/1  
AGGAAGACAAGAGAAGAACCCCGCACTCAGAATGAAGTGG

+HWI-EAS443:3:87:1267:1326#0/1  
`b\_\_\_T`W`ba`Z`bb```abaaab`ab]\_bbYF]Saa  
@HWI-EAS443:3:87:1554:755#0/1  
GGAAGACAAGAGAAGAACCCCGCACTCAGAATGAAGTGGA  
+HWI-EAS443:3:87:1554:755#0/1  
WS]Z`b`YY`YWX\_bZ¥[FUV^R\_WZ¥aa]`aa^[]RZ]]  
@HWI-EAS443:3:87:273:1542#0/1  
CAGGAAGACAAGAGAAGAACCCCGCACTCAGAATGAAGTG  
+HWI-EAS443:3:87:273:1542#0/1  
WK\_\_b`¥X\_[\_\_QZO¥S\_XaU\_\_aab]YHU]T[`aa^`\_Na  
@HWI-EAS443:3:87:803:250#0/1  
ACACATCAGGAAGACAAGAGAAGAACCCCGCACTCAGAAT  
+HWI-EAS443:3:87:803:250#0/1  
]a]ZY`aS```[ba`XR\_`\_]`b[a\_[Y¥b`\_^\_V¥^U¥`  
@HWI-EAS443:3:88:571:1533#0/1  
CATCAGGAAGACAAGAGAAGAACCCCGCACTCAGAATGAA  
+HWI-EAS443:3:88:571:1533#0/1  
```a\_\_\_\_]\_\_¥]\_^¥]`VYS\_````X`^a^¥[`WSWXX[  
@HWI-EAS443:3:88:573:791#0/1  
ATCAGGAAGACAAGAGAAGAACCCCGCACTCAGAATGAAG  
+HWI-EAS443:3:88:573:791#0/1  
`aaabbabba`aab\_baaaaaaaaa`a`aa\_a\_\_aa`^a  
@HWI-EAS443:3:89:1183:2038#0/1  
CAGGAAGACAAGAGAAGAACCCCGCACTCAGAATGAAGTG  
+HWI-EAS443:3:89:1183:2038#0/1  
aa^bbaa\_\_`\_aaabb`bbbURDZZWMWRaU[abaa^ZUR  
@HWI-EAS443:3:89:1419:828#0/1  
GGAAGACAAGAGAAGAACCCCGCACTCAGAATGAAGTGGA  
+HWI-EAS443:3:89:1419:828#0/1  
aa`aaa\_`ab`b`\_baa```\_]ba\_[\_^`a]^aa^X`\_]`\_X  
@HWI-EAS443:3:89:1482:112#0/1  
GGAAGACAAGAGAAGAACCCCGCACTCAGAATGAAGTGGA  
+HWI-EAS443:3:89:1482:112#0/1  
`bb`aa`a`a\_a`b``¥XQ^aQ`R\_`aa^[]a¥XPPYXZ  
@HWI-EAS443:3:89:1504:1462#0/1  
CAGGAAGACAAGAGAAGAACCCCGCACTCAGAATGAAGTG  
+HWI-EAS443:3:89:1504:1462#0/1  
Yab[bbbaaabbaabbb\_b[bbbbbb`bVbbbabbb`[R^  
@HWI-EAS443:3:89:1634:168#0/1  
ATCAGGAAGACAAGAGAAGAACCCCGCACTCAGAATGAAG  
+HWI-EAS443:3:89:1634:168#0/1  
abaW¥`aa¥¥¥a[W[a\_aa`aSaXRb^a[a]`a\_]`a]^a  
@HWI-EAS443:3:89:278:1262#0/1  
GGAAGACAAGAGAAGAACCCCGCACTCAGAATGAAGTGGA  
+HWI-EAS443:3:89:278:1262#0/1  
``\_aa]abb`ab`bbabb`a\_baaa\_``[^^a\_[aRYa`  
@HWI-EAS443:3:89:553:2014#0/1  
ATCAGGAAGACAAGAGAAGAACCCCGCACTCAGAATGAAG  
+HWI-EAS443:3:89:553:2014#0/1  
a]bb^`b¥Z\_aabZa\_Z^`a]b]aaaa\_\_aa]¥[a[\_aa



@HWI-EAS443:3:89:662:1259#0/1  
CAGGAAGACAAGAGAAGAACCCCGCACTCAGAATGAAGTG  
+HWI-EAS443:3:89:662:1259#0/1  
[bbab\_[a\_ab`\_\_TXb]`bbb]a]aa[¥J^^QXababX]  
@HWI-EAS443:3:89:935:1394#0/1  
GGAAGACAAGAGAAGAACCCCGCACTCAGAATGAAGTGGA  
+HWI-EAS443:3:89:935:1394#0/1  
^`TQW^\_]aba]Z\_Z`aa\_a¥]TXa[XUXXa^`^XaU]\_S  
@HWI-EAS443:3:8:737:575#0/1  
GGAAGACAAGAGAAGAACCCCGCACTCAGAATGAAGTGGA  
+HWI-EAS443:3:8:737:575#0/1  
aa¥aa\_a`\_a\_a[^a`\_^[^\_\_]\_]\_\_a]]\_a]]\_Ua^]  
@HWI-EAS443:3:91:126:1120#0/1  
CAGGAAGACAAGAGAAGAACCCCGCACTCAGAATGAAGTG  
+HWI-EAS443:3:91:126:1120#0/1  
a\_bb`¥[aa\_aa\_`[W^a^\_XP¥a``]^GQ]V]YW[P¥S\_  
@HWI-EAS443:3:91:145:999#0/1  
CAGGAAGACAAGAGAAGAACCCCGCACTCAGAATGAAGTG  
+HWI-EAS443:3:91:145:999#0/1  
\_S\_]][^\_¥[\_\_U^`^`]^`a^[`aaV[\_a¥\_]HU¥NV`H`  
@HWI-EAS443:3:91:308:1986#0/1  
ATCAGGAAGACAAGAGAAGAACCCCGCACTCAGAATGAAG  
+HWI-EAS443:3:91:308:1986#0/1  
aabaaaa`aaaa`aaaa\_`^`\_`\_`a`\_\_`\_`^\_\_\_\_]^\_  
@HWI-EAS443:3:91:393:1096#0/1  
CAGGAAGACAAGAGAAGAACCCCGCACTCAGAATGAAGTG  
+HWI-EAS443:3:91:393:1096#0/1  
`\_ZR[V[WaaZZZWP]\_\_b`^S[¥a[L]RZNXQ\_^XYFM  
@HWI-EAS443:3:91:504:367#0/1  
TCCACTTCATTCTGAGTGCGGGTTCTTCTTGTCTTCC  
+HWI-EAS443:3:91:504:367#0/1  
abaaaaaabaaaa\_b\_a`ba`a^`^\_\_\_\_`a`a^`\_`]^\_  
@HWI-EAS443:3:91:593:216#0/1  
CAGGAAGACAAGAGAAGAACCCCGCACTCAGAATGAAGTG  
+HWI-EAS443:3:91:593:216#0/1  
abbabbbbb\_bbabbbbbabbab`abaaaababaaa^b  
@HWI-EAS443:3:91:625:637#0/1  
CAGGAAGACAAGAGAAGAACCCCGCACTCAGAATGAAGTG  
+HWI-EAS443:3:91:625:637#0/1  
aabbaaba`babbbbaaaabbbabababbaabbbabUa  
@HWI-EAS443:3:91:936:790#0/1  
ATCAGGAAGACAAGAGAAGAACCCCGCACTCAGAATGAAG  
+HWI-EAS443:3:91:936:790#0/1  
abba`babaababaaaaa[^a`\_b`a\_aaab]^`ab\_\_a  
@HWI-EAS443:3:92:661:514#0/1  
CATCAGGAAGACAAGAGAAGAACCCCGCACTCAGAATGAA  
+HWI-EAS443:3:92:661:514#0/1  
abbabbb^baaaaaa`aa^]^`\_`a^¥aa[`a\_\_`aZ`  
@HWI-EAS443:3:93:1114:768#0/1  
GACAAGAGAAGAACCCCGCACTCAGAATGAAGTGGATGAT



@HWI-EAS443:3:96:369:943#0/1  
GGAAGACAAGAGAAGAACCCCGCACTCAGAATGAAGTGGA  
+HWI-EAS443:3:96:369:943#0/1  
aZU^a\_¥VSVVX\_a]JMX¥Y^aZ\_`][^ULP¥\_VU\_S^^R  
@HWI-EAS443:3:96:511:732#0/1  
GACAAGAGAAGAACCCCGCACTCAGAATGAAGTGGATGAT  
+HWI-EAS443:3:96:511:732#0/1  
a`aa`baa\_`a\_a`)[[a\_a]`\_\_b¥``a¥¥aW`\_¥\_\_\_\_  
@HWI-EAS443:3:97:1032:462#0/1  
ACAAGAGAAGAACCCCGCACTCAGAATGAAGTGGATGATG  
+HWI-EAS443:3:97:1032:462#0/1  
abb\_WZb\_^aU\_`^¥Z¥aa`a¥a\_\_aab`ab^aa\_aaU^a  
@HWI-EAS443:3:97:1138:1867#0/1  
CAGGAAGACAAGAGAAGAACCCCGCACTCAGAATGAAGTG  
+HWI-EAS443:3:97:1138:1867#0/1  
a`\_bVbbb`bababaaabaab^[abbH[bbbb\_abbba\_b  
@HWI-EAS443:3:97:1170:1165#0/1  
GGAAGACAAGAGAAGAACCCCGCACTCAGAATGAAGTGGA  
+HWI-EAS443:3:97:1170:1165#0/1  
ab\_aaaabaaab\_abaa`X[\_a\_a\_\_aa\_\_aa`Y`Sa\_`  
@HWI-EAS443:3:97:1551:138#0/1  
GAAGACAAGAGAAGAACCCCGCACTCAGAATGAAGTGGAT  
+HWI-EAS443:3:97:1551:138#0/1  
aa`a¥^\_aa^`^^V¥]¥UTW^Y^UWWW¥YYYYYYTMMUW  
@HWI-EAS443:3:97:497:486#0/1  
CATCATCCACTTCATTCTGAGTGCGGGTTCTTCTCTTGT  
+HWI-EAS443:3:97:497:486#0/1  
abba]aaabbbb^`abVaaU]PbabaaaG]\_aa\_`\_aaaa  
@HWI-EAS443:3:97:653:560#0/1  
ATCAGGAAGACAAGAGAAGAACCCCGCACTCAGAATGAAG  
+HWI-EAS443:3:97:653:560#0/1  
aaaa^aaab`aaaaabaaaa\_\_[\_a`\_`\_`[]\_]\_a^\_a  
@HWI-EAS443:3:97:95:241#0/1  
ATCCACTTCATTCTGAGTGCGGGTTCTTCTTGTCTTC  
+HWI-EAS443:3:97:95:241#0/1  
¥WW\_a[]a¥VS^)`a[a^b]ZZaYFWP]]]]T\_`a`¥\_`U  
@HWI-EAS443:3:98:1132:1110#0/1  
CATCAGGAAGACAAGAGAAGAACCCCGCACTCAGAATGAA  
+HWI-EAS443:3:98:1132:1110#0/1  
Zbab\_babbbbaaba]aabbbb^bbUa¥aabababbabbb  
@HWI-EAS443:3:98:1220:1399#0/1  
ATCATCCACTTCATTCTGAGTGCGGGTTCTTCTTGTCTTC  
+HWI-EAS443:3:98:1220:1399#0/1  
a`\_`¥`^]abbX`a`S`bXW^¥VY]\_XNaY`ZK\_\_a¥V]\_  
@HWI-EAS443:3:98:283:105#0/1  
GGAAGACAAGAGAAGAACCCCGCACTCAGAATGAAGTGGA  
+HWI-EAS443:3:98:283:105#0/1  
aba\_b\_\_a\_a^a^`a\_^\_W]a]^`]^`]]\_`XYZKW^X  
@HWI-EAS443:3:98:317:890#0/1  
AGACAAGAGAAGAACCCCGCACTCAGAATGAAGTGGATGA

+HWI-EAS443:3:98:317:890#0/1  
abaaa^^`\_aaa`a\_\_[`a\_a]\_`a\_\_`aX¥`R``\_`^a^  
@HWI-EAS443:3:98:446:873#0/1  
ATCCACTTCATTCTGAGTGC GGGTTCTTCTTGTCTTC  
+HWI-EAS443:3:98:446:873#0/1  
`Ya\_a\_`^PZ\_aa[`H`V\_[a`\_a¥aa\_\_]aQ\_\_a\_XU[P  
@HWI-EAS443:3:99:109:1364#0/1  
GAAGACAAGAGAAGAACCCCGCACTCAGAATGAAGTGGAT  
+HWI-EAS443:3:99:109:1364#0/1  
[`bbb^baabbabbaab^ab\_a`^baa[\_bbaaUYDR^[X  
@HWI-EAS443:3:9:1286:81#0/1  
ATCAGGAAGACAAGAGAAGAACCCCGCACTCAGAATGAAG  
+HWI-EAS443:3:9:1286:81#0/1  
ab`bb`[bba`bX\_ba]aaaaWSVG^a\_Xa\_\_a``aaZ``  
@HWI-EAS443:3:9:1714:633#0/1  
CATCAGGAAGACAAGAGAAGAACCCCGCACTCAGAATGAA  
+HWI-EAS443:3:9:1714:633#0/1  
`b\_aYbbb```XaXbbb`bbbWW\_V]a[¥a^a[V^a^``W  
@HWI-EAS443:3:9:187:1919#0/1  
CAGGAAGACAAGAGAAGAACCCCGCACTCAGAATGAAGTG  
+HWI-EAS443:3:9:187:1919#0/1  
`a\_\_\_\_`\_`\_\_`a`^a\_YWaba`Y]Za`a\_aa]aa``Z¥Qa  
@HWI-EAS443:3:9:219:381#0/1  
CAGGAAGACAAGAGAAGAACCCCGCACTCAGAATGAAGTG  
+HWI-EAS443:3:9:219:381#0/1  
\_abbbb\_b\_\_babbb\_abbbb]`abba\_b\_baaabaabIb  
@HWI-EAS443:3:9:905:683#0/1  
AGACAAGAGAAGAACCCCGCACTCAGAATGAAGTGGATGA  
+HWI-EAS443:3:9:905:683#0/1  
`a\_ab]b[b`[baa^aUab]a\_\_^`aYTaa`^aX`a¥]a¥  
@HWI-EAS443:3:4:1388:1656#0/1  
GACGAATTCACAATGGTTGGGAGAAGAGTAACAGCTATTC  
+HWI-EAS443:3:4:1388:1656#0/1  
]XI[RPZa``]]YZ^UQXX¥SN]R¥a]]LN]U[¥RXBBBB  
@HWI-EAS443:3:45:564:1166#0/1  
AGGAGATGAGAGGGATAAGAGTCAGCAAAATGGGAGTAGA  
+HWI-EAS443:3:45:564:1166#0/1  
^Y```X^aa[U`^`\_b\_^\_ab``b`b¥\_\_a`\_aa^a^baa  
@HWI-EAS443:3:84:431:1354#0/1  
GAGAATTCATCTACTCCCATTTTGCTGACTCTTATCCCTC  
+HWI-EAS443:3:84:431:1354#0/1  
a`UDV[aaa^\_a\_]a`\_U]\_a[\_`Y]Xa\_\_Z\_\_^^`^  
@HWI-EAS443:3:2:914:1447#0/1  
GAAGAATTCACAATGGTTGGGAGAAGAGCAACAGGTATTC  
+HWI-EAS443:3:2:914:1447#0/1  
RYa`\_¥\_¥b`^]X¥a\_[Y¥aUWaVZa^a^]V[]\_F¥a]VO  
@HWI-EAS443:3:36:977:1767#0/1  
GAAGAATTCACAATGGTTGGGAGAAGAGCAAGAGCTATTC  
+HWI-EAS443:3:36:977:1767#0/1  
`KU\_S`Zaa\_H`\_¥Y\_V]aTGLNY]]U]UHAG^VY\_NUHP

@HWI-EAS443:3:47:1075:1901#0/1  
AATAGCTGTTGCTCTTCTCCCAACCATTGTGAATTGTTCA  
+HWI-EAS443:3:47:1075:1901#0/1  
aa`aaaa¥[GW¥Y¥\_RTUX[Z]QBBBBBBBBBBBBBBBB  
@HWI-EAS443:3:94:1731:1436#0/1  
GAAGAATTCACAATGGTTGGGAGAAGAGCAAGAGCTATTC  
+HWI-EAS443:3:94:1731:1436#0/1  
^aab`aba`b\_ba\_baa^baba`aab\_a`aaUbaGaaa`W  
@HWI-EAS443:3:14:942:1689#0/1  
AGAATAGCTGTTGCTCTTCTCCCAACCATTGTGAATTATT  
+HWI-EAS443:3:14:942:1689#0/1  
aaaWa\_``aaHU^¥ZLZ[TZ[¥LPYYW][OMSUNP[MHT]  
@HWI-EAS443:3:94:1409:658#0/1  
GCAGAGAGGGATAAGAGTCAGCAAAATGGGAGTAGATGAA  
+HWI-EAS443:3:94:1409:658#0/1  
a`[^`^`\_a\_]`[\_^\_a^\_Z[^`ZZ[]ZZW\_[[WY]ZY[]Y]  
@HWI-EAS443:3:50:1351:222#0/1  
TAAGAATTCACAATGGTTGGGAGAAGAGCAACAGCTATTC  
+HWI-EAS443:3:50:1351:222#0/1  
G]bbb`bbb`¥baabbbbZ``a\_bb^`V[bba`baabb\_\_  
@HWI-EAS443:3:24:1244:1924#0/1  
CTGAGAGGGATAAGAGTCAGCAAAATGGGAGTAGATGAAT  
+HWI-EAS443:3:24:1244:1924#0/1  
`bbaaa\_Yaa`a````U`a¥)`aaa`b`U`aZb`\_¥^a`\_  
@HWI-EAS443:3:2:43:34#0/1  
GAGGGATAAGAGTCAGCAAAATGGGAGTAGATGAATACTC  
+HWI-EAS443:3:2:43:34#0/1  
a\_a`a¥¥¥\_a`U[\_`\_¥RYVY`Y\_P^PW^W[YSZWZWWQ  
@HWI-EAS443:3:30:575:237#0/1  
GAAGAATTCACAATGGTTGGGAGAAGAGCAACAGCTATTC  
+HWI-EAS443:3:30:575:237#0/1  
a``````aaaa\_[ZaaZ][`^^[`¥¥YW[\_¥S]]¥PWTVZB  
@HWI-EAS443:3:46:198:1831#0/1  
AGGGATAAGAGTCAGCAAAATGGGAGTAGATGAATACTCC  
+HWI-EAS443:3:46:198:1831#0/1  
aaa)`abaZ`aW`a^`\_`a^\_\_\_a`\_]Gaa]\_a\_\_\_\_\_¥\_  
@HWI-EAS443:3:56:952:428#0/1  
GATAAGAGTCAGCAAAATGGGAGTAGATGAATACTCCAGC  
+HWI-EAS443:3:56:952:428#0/1  
`aaaaaaaa`a`b^\_\_\_^`a^a]a]\_a\_a`]``a\_\_]\_^`\_  
@HWI-EAS443:3:58:1045:613#0/1  
GAAGAATTCACAATGGTTGGGAGAAGAGCAACAGCTATTC  
+HWI-EAS443:3:58:1045:613#0/1  
a\_]a\_`a`aa\_a`aaa[`ZW\_W¥^\_\_^a[^]^Y\_^\_AU  
@HWI-EAS443:3:62:587:964#0/1  
GAAGAATTCACAATGGTTGGGAGAAGAGCAACAGCTATTC  
+HWI-EAS443:3:62:587:964#0/1  
a]Xa`aaa`aaa\_a\_a^`\_\_^`\_`\_`\_a\_[\_Y`^X¥]]^  
@HWI-EAS443:3:64:891:398#0/1  
GAAGAATTCACAATGGTTGGGAGAAGAGCAACAGCTATTC

+HWI-EAS443:3:64:891:398#0/1  
¥`aXZ\_Z^X\_bbabb[FWabaaaX^`¥`ab^aab^YP\_a]  
@HWI-EAS443:3:6:298:161#0/1  
GAAGAATTCACAATGGTTGGGAGAAGAGCAACAGCTATTC  
+HWI-EAS443:3:6:298:161#0/1  
aa`aa^a[a\_N^`a`b\_a\_aaYa]¥\_W\_W¥\_^^`Z\_\_ZBB  
@HWI-EAS443:3:81:1573:90#0/1  
GAAGACAAGAGATATGGCCCAGCATTGAGCATCAATGAAC  
+HWI-EAS443:3:81:1573:90#0/1  
aaYyHN]]ZQ^H`N¥`Z]¥HaWX¥MFOYQVHOY[W^RUS  
@HWI-EAS443:3:89:1015:142#0/1  
GAAGAATTCACAATGGTTGGGAGAAGAGCAACAGCTATTC  
+HWI-EAS443:3:89:1015:142#0/1  
abbbabbbbbbabaabb\_aa`\_a\_`a`a`\_Z`aY`¥\_ZV  
@HWI-EAS443:3:91:1343:1466#0/1  
GAGGGATAAGAGTCAGCAAAATGGGAGTAGATGAATACTC  
+HWI-EAS443:3:91:1343:1466#0/1  
a`^\_a¥\_a\_a\_a¥]\_`^[]\_`^aa]¥\_W\_a^Wa¥U^VYU  
@HWI-EAS443:3:91:936:964#0/1  
GAAGAATTCACAATGGTTGGGAGAAGAGCAACAGCTATTC  
+HWI-EAS443:3:91:936:964#0/1  
aWa`\_a`\_aa\_^\_\_a]\_]\_^`Z¥`V`]X[W^]ZXZ^¥Z  
@HWI-EAS443:3:97:746:1789#0/1  
AGGGATAAGAGTCAGCAAAATGGGAGTAGATGAATACTCC  
+HWI-EAS443:3:97:746:1789#0/1  
ab\_ba`\_aa\_\_]aaa`abaa\_aa]\_a^a\_a\_``\_aa¥\_¥V  
@HWI-EAS443:3:8:1442:1527#0/1  
ATCCGAATTCCTTTGGTCGCTGTCTGACTGTCAGAAAGTA  
+HWI-EAS443:3:8:1442:1527#0/1  
aaZRbb\_\_a`aa^`I`^¥a]\_aa0]JFXaUWBBBBBBBBBB  
@HWI-EAS443:3:35:256:326#0/1  
GGGACGTGGTGTGGTAATGAAACGAAACGGGAGTCTAG  
+HWI-EAS443:3:35:256:326#0/1  
aaa[abVR\_^b[UyT]JWaaIb]a`BBBBBBBBBBBBBBBB  
@HWI-EAS443:3:7:502:1368#0/1  
GACACTAATTGATGGCCATCCGAATCCTTTTGGTCGCTGT  
+HWI-EAS443:3:7:502:1368#0/1  
ab\_baaZaa`ab`^P^]\_\_^aaaa`WHW\_¥\_]H¥H`¥Z¥B  
@HWI-EAS443:3:11:636:652#0/1  
GGTGAATAAGCATCAATGAACTGAGCAATCTTGCAAAAAG  
+HWI-EAS443:3:11:636:652#0/1  
ab\_bbaabbabb`baa\_aba^aaaa`a``aaaa\_a\_a\_a  
@HWI-EAS443:3:32:951:1227#0/1  
AAGAGAAGAACCCCGCACTCAGAATGAAGTGAAGCCCTA  
+HWI-EAS443:3:32:951:1227#0/1  
aa\_a^`b]abaaa]aYa`\_`a¥`aaa``aUa¥[\_ZLU^^X  
@HWI-EAS443:3:34:794:545#0/1  
AAGAGATGCCAGCATTAAGCATCAATGAACTGAGCAATC  
+HWI-EAS443:3:34:794:545#0/1  
\_`aaa¥\_ab[aabaaa`\_aaa`^`a^`^`aaY^\_a^^]\_

@HWI-EAS443:3:40:1194:250#0/1  
TGGATGATGGGCAAAGAAGACAAGAGATATGGCCCAGCAT  
+HWI-EAS443:3:40:1194:250#0/1  
abbabb^¥^YaPZ`XY]]Z]^^^Y]]RXUVZZ]P]^a]S  
@HWI-EAS443:3:45:389:297#0/1  
TGAGAAATCATTGCCATCATCCACTTCATTCTGAGTGCGG  
+HWI-EAS443:3:45:389:297#0/1  
aa`[¥a`a\_a`^a\_Wa`\_\_^[LX^\_W\_\_ZR^\_]\_Z\_U\_Z  
@HWI-EAS443:3:61:1007:689#0/1  
AAGAGATGCCAGCATTAAAGCATCAATGAACTGAGCAATC  
+HWI-EAS443:3:61:1007:689#0/1  
abb\_aaaabbaab`ab`[]baQ\_b``aba``R]aa``\_[  
@HWI-EAS443:3:62:1601:1417#0/1  
GGATGATACAAGAGATATGGCCCAGCATTAAAGCATCAATG  
+HWI-EAS443:3:62:1601:1417#0/1  
aa[a]X`[^\_]Xa`a`Y[]\_]\_^\_^\_\_^`\_\_[]ZXY[\_\_\_  
@HWI-EAS443:3:63:1700:1390#0/1  
GCTCAGTTCATTGATGCTTAATGCTGGGCCATAGAGTCCC  
+HWI-EAS443:3:63:1700:1390#0/1  
aaaaaba`¥\_aa^Xa\_\_\_a\_aab`a^\_]`^`^aaa\_a¥VV^  
@HWI-EAS443:3:78:319:897#0/1  
AGAAGAACCCCGCACTCAGAATGAAGTGGATGAAGGCCTC  
+HWI-EAS443:3:78:319:897#0/1  
`XU\_^\_\_^aaa]aaa¥a^Za``[][[V[Q]]`[^¥SV[^  
@HWI-EAS443:3:7:288:145#0/1  
AATGGACATGGCCCAGCATTAAAGCATCAATGAACTGAGCA  
+HWI-EAS443:3:7:288:145#0/1  
`Vaba^Za[X^`ZQN]]\_U^^VZWSTTZWWWXUYVYXBB  
@HWI-EAS443:3:86:783:1081#0/1  
GAGAAGAACCCCGCACTCAGAATGAAGTGGATGGATTCT  
+HWI-EAS443:3:86:783:1081#0/1  
a]a]^YS^¥`VUb]a]aa[aZYaa]\_aWaaX`VX]Z\_\_\_X  
@HWI-EAS443:3:95:601:1272#0/1  
GAGAAGAACCCCGCACTCAGAATGAAGTGGATGGGCAATA  
+HWI-EAS443:3:95:601:1272#0/1  
]W]ZbaX\_bbbb]b\_aa`abaaa`[Xb]ababb^ZZ\_aaa  
@HWI-EAS443:3:96:885:891#0/1  
CAGATGAGGCCAGCATTAAAGCATCAATGAACTGAGCAAT  
+HWI-EAS443:3:96:885:891#0/1  
aZY\_¥\_\_a^]¥```]a^`^[`[a[[L[aa`YYa`]\_\_\_]\_\_\_  
@HWI-EAS443:3:97:1337:790#0/1  
AGAATTCGGATGGCCATCAATTAGTGTGCAATCCTTTTGG  
+HWI-EAS443:3:97:1337:790#0/1  
Z\_\_babb]\_\_^`]`HY`]¥`a^`]Ya^``a\_\_[^\_`\_T`X  
@HWI-EAS443:3:99:225:1798#0/1  
ATTACCTATGGCCCAGCATTAAAGCATCAATGAACTGAGC  
+HWI-EAS443:3:99:225:1798#0/1  
aa`baaa`a\_X`a\_aa\_`a^^a`\_a`X^^\_\_^\_\_XX^]\_X  
@HWI-EAS443:3:9:541:408#0/1  
GATTGCTCAGTTCATTGATGCTTAATGCTGGGCATCTCTT

+HWI-EAS443:3:9:541:408#0/1  
aaaaa`a\_\_`a\_\_aaa`a`aa`\_a^S^`\_Z`^Y`\_]`  
@HWI-EAS443:3:93:991:1831#0/1  
GAGAAGAACCCCGCACTCAGAATGAAGCGGATGATGGGAA  
+HWI-EAS443:3:93:991:1831#0/1  
aaa]]\_J¥a\_aabaa\_TX`¥aaaNG¥G\_aZ\_aRN^RDR¥  
@HWI-EAS443:3:95:1569:28#0/1  
GAGAGCATTAAGCATCAATGAACTGAGCAATCTTGAAAA  
+HWI-EAS443:3:95:1569:28#0/1  
`I`]bW^aYaa`VRY\_a¥`a[YYaa¥`U\_\_^U`]`VGXUYX  
@HWI-EAS443:3:20:705:1876#0/1  
CAAGAGAAGNACCCCGCACTCAGAATGAAGAGGATGATGG  
+HWI-EAS443:3:20:705:1876#0/1  
[`ba[Kb]YD]S`b\_YWa`]USRHa^IbNYGPX^I\_Y¥G\_  
@HWI-EAS443:3:55:1475:1232#0/1  
GCTGGTGCTCTTCTCCCAACCATTGTGAATTCTNCATACC  
+HWI-EAS443:3:55:1475:1232#0/1  
\_]\_UG¥^QS¥TUW¥RZXYZIO[] [TXTZXR]BBBBBBBBB  
@HWI-EAS443:3:96:1349:1974#0/1  
CAAGAGAAGAACCCCGCACTCAGAATGAAGTGGATGATGGC  
+HWI-EAS443:3:96:1349:1974#0/1  
`ba\_aaaabab`R^b\_Y^aX[a^¥aa[WWW[S`\_a\_\_XB  
@HWI-EAS443:3:18:1324:325#0/1  
CAAGAGAGCATTAAGCATCAATGAACTGAGCAATCTTGCA  
+HWI-EAS443:3:18:1324:325#0/1  
aaaa`babaaaaab`aa`aaa^\_Z`^\_a\_a`a\_a\_a\_\_  
@HWI-EAS443:3:18:181:1595#0/1  
CTCAGAATGGCCCAGCATTAAAGCATCAATGAACTGAGCAA  
+HWI-EAS443:3:18:181:1595#0/1  
`a^bb^\_abb^S¥`aa`[[`b`aba`\_a`a`\_`\_`a^ba  
@HWI-EAS443:3:20:302:516#0/1  
CTCAGAATGGCCCAGCATTAAAGCATCAATGAACTGAGCAA  
+HWI-EAS443:3:20:302:516#0/1  
^I\_aa`WX^`¥¥`\_a`\_\_a`\_`^`\_\_`\_`VvX]^]^]\_V  
@HWI-EAS443:3:31:589:710#0/1  
CAGAATAGCATCAATGAACTGAGCAATCTTGCAAAAAGGAG  
+HWI-EAS443:3:31:589:710#0/1  
`¥]^aaaaaaa`Waa\_U\_aaaaaZ`\_`\_`a\_¥GY[aa\_a  
@HWI-EAS443:3:33:563:640#0/1  
ATGGACATGGCCCAGCATTAAAGCATCAATGAACTGAGCAA  
+HWI-EAS443:3:33:563:640#0/1  
aa^ab`]JR\_\_`aa\_\_]^`\_`a`^^Z]^`\_]Q^ZX`Z]^  
@HWI-EAS443:3:45:1329:1113#0/1  
CAGAATAGCATCAATGAACTGAGCAATCTTGCAAAAAGGAG  
+HWI-EAS443:3:45:1329:1113#0/1  
`]a¥K`aa^Y`SS[YY¥a[a`U[`\_`a]aV\_YaP^^a`R`  
@HWI-EAS443:3:58:1742:1469#0/1  
GAAGAACCCCGCACTCAGAATGAAGTGGATGATGATTATT  
+HWI-EAS443:3:58:1742:1469#0/1  
aaaaaa\_a\_\_a^\_a`\_b]W`a^]]U`P¥\_aZ`a]^`\_\_`\_`



@HWI-EAS443:3:5:1564:1202#0/1  
CAAGAGAAGAACCCCGCACTCAGAATGAAGTGGAGAAGGG  
+HWI-EAS443:3:5:1564:1202#0/1  
`abbbbababbaY\_bbb\_b`aaaabba\_bTba`a`aaab  
@HWI-EAS443:3:60:1083:171#0/1  
CAGAATAGCATCAATGAACTGAGCAATCTTGCAAAAGGAG  
+HWI-EAS443:3:60:1083:171#0/1  
abbbba`baaaaaaaaa`aaaa`aaaaaa\_\_\_\_\_`^^^`  
@HWI-EAS443:3:60:388:1168#0/1  
CAGGAACATCAATGAACTGAGCAATCTTGCAAAAGGAGAG  
+HWI-EAS443:3:60:388:1168#0/1  
\_Ua^Y`aaaa^\_aa``aaa\_aaa¥```a`\_Z[]]\_^`\_]  
@HWI-EAS443:3:68:969:607#0/1  
GAGAAGAACCCCGCACTCAGAATGAAGTGGATGAGGCACA  
+HWI-EAS443:3:68:969:607#0/1  
aab`ababaa\_\_b\_aaa\_a\_\_aa\_[aYa]^`\_]\_^`^`^`\_  
@HWI-EAS443:3:76:371:579#0/1  
AGAGATGCCAGCATTAAAGCATCAATGAACTGAGCAATCT  
+HWI-EAS443:3:76:371:579#0/1  
aa\_b]abaaaaa`aaaa`a`\_`\_\_`^``a^^^\_a`\_¥\_]a  
@HWI-EAS443:3:79:425:95#0/1  
GGATGATGGCAAAGAAGACAAGAGATATGGCCAGCATT  
+HWI-EAS443:3:79:425:95#0/1  
^aKXbbaab`aSX[\_`^^RWW\_\_`]GU]b^]XNU]]ZQM  
@HWI-EAS443:3:96:1443:2027#0/1  
AAGATTGCTCAGTTCATTGATGCTTAATGCTGGGAATCTC  
+HWI-EAS443:3:96:1443:2027#0/1  
a`a^GbaLPST¥RVR¥NN\_¥X]T``Y\_\_aZXZa\_GaMDTB  
@HWI-EAS443:3:98:1251:1827#0/1  
AGATTGCTCAGTTCATTGATGCTTAATGCTGGGCNATCTC  
+HWI-EAS443:3:98:1251:1827#0/1  
`a\_a`aYa¥ba[¥aaa`aa`a\_\_aaa\_[MRa\_UIDZ[0`\_  
@HWI-EAS443:3:36:1144:2012#0/1  
AGATTGCTCAGTTCATTGATGCTTAATGCTNGGCCATCTC  
+HWI-EAS443:3:36:1144:2012#0/1  
a``TZab\_aYT`a^\_ZWT¥RWT^a``[a`MDPUaaaL\_^\_  
@HWI-EAS443:3:25:1352:1344#0/1  
AGATGGCTCAGCATTAAAGCATCAATGAACTGAGCAATCTT  
+HWI-EAS443:3:25:1352:1344#0/1  
Z^¥WTWbabbbab`¥\_]Z¥¥]`\_`a`]a¥`Y`a\_Z]]\_`X  
@HWI-EAS443:3:77:630:12#0/1  
AGAAGAACCCCGCACTCAGAATGAAGTGNNTGATGGCAAT  
+HWI-EAS443:3:77:630:12#0/1  
abbaa^¥Zaa]b)``a`^aZYaa\_\_aU[DDR^U][UQUV]  
@HWI-EAS443:3:83:1324:2029#0/1  
TATGGCCAGCATTANGCATCAATGAACTGANCAATCTTG  
+HWI-EAS443:3:83:1324:2029#0/1  
a`V¥WZ\_IX`^a]^DV\_^N¥aTa[\_\_HUa¥DPKaIa\_US  
@HWI-EAS443:3:12:1568:946#0/1  
AGAATATTAAGCATCAATGAACTGAGCAATCTTGCAAAAG

+HWI-EAS443:3:12:1568:946#0/1  
a\_^aab`b]aa\_`\_[^^b\_`Ua\_^][\_\_\_Y`^aY^Y]]\_  
@HWI-EAS443:3:1:1655:896#0/1  
GAAGAACCCCGCACTCAGAATGAAGTGGATGATGGGCAAA  
+HWI-EAS443:3:1:1655:896#0/1  
aYaa`\_KYSGYZ\_X\$PXaUSX]VP^Na\_N\_ZQ\$ZRBBBB  
@HWI-EAS443:3:24:287:1935#0/1  
GAAGAACCCCGCACTCAGAATGAAGTGGATGATGGGCAAA  
+HWI-EAS443:3:24:287:1935#0/1  
ZZ\_aabbba`abba[a\_bVababa[Y`aa\_ba]\_\_\_`aab  
@HWI-EAS443:3:2:1225:1317#0/1  
GAGATGCCAGCATTAAAGCATCAATGAACTGAGCAATCTT  
+HWI-EAS443:3:2:1225:1317#0/1  
abbaabaYabaaaaabaaa`aab^a\_aaaa`a\_Ya\_  
@HWI-EAS443:3:33:379:1728#0/1  
GAGATGCCAGCATTAAAGCATCAATGAACTGAGCAATCTT  
+HWI-EAS443:3:33:379:1728#0/1  
a^Z`]Vaba\_`a]]T\_]a`[a`\_SXY\$^Z`RZ`\_\_\$Z^  
@HWI-EAS443:3:37:1430:935#0/1  
AGAAGAAGCATCAATGAACTGAGCAATCTTGCAAAAGGAG  
+HWI-EAS443:3:37:1430:935#0/1  
\_\_\_`a`bbbaaaaaab`\$`aa^Y\_a`aYbQ`\_]\_]\_aa^a  
@HWI-EAS443:3:42:109:1558#0/1  
GAATGAAGCATCAATGAACTGAGCAATCTTGCAAAAGGAG  
+HWI-EAS443:3:42:109:1558#0/1  
\_bab`bbabbab`aaabbabaababbbbbbbaab`aa\_aa  
@HWI-EAS443:3:42:796:1683#0/1  
ATCAGGGCCAGCATTAAAGCATCAATGAACTGAGCAATCT  
+HWI-EAS443:3:42:796:1683#0/1  
ab\_bVJD[aaaaa`aaaaa`\_a\_aa\_aa\_a\_\_^`a\_a`  
@HWI-EAS443:3:50:1030:286#0/1  
TGGACATGGCCAGCATTAAAGCATCAATGAACTGAGCAAT  
+HWI-EAS443:3:50:1030:286#0/1  
aaZ\_YKYW\_]\$Za]XS^b]S[^aa[\_`aa]]W[[a]Y^W  
@HWI-EAS443:3:51:1433:849#0/1  
TGGACATGGCCAGCATTAAAGCATCAATGAACTGAGCAAT  
+HWI-EAS443:3:51:1433:849#0/1  
abab\$baaa`\_aa\$abaaa`\_`\_\_\_aa`Ya`\_a`\_`a  
@HWI-EAS443:3:60:888:1321#0/1  
NGAAGAACCCCGCACTCAGAATGAAGTGGATGATGGGGTG  
+HWI-EAS443:3:60:888:1321#0/1  
DNUVVUVVWUUUUUVVUUUVVUUUVUUUUUUUUUUUUUU  
@HWI-EAS443:3:63:915:419#0/1  
CCGCCATCCACTTCTTCTGAGTGCGGGTCTTCTCTT  
+HWI-EAS443:3:63:915:419#0/1  
]a`[\_`aa\_b`^^a`^`aaaaa[aaaaaV\_\_aa`\_`\$a`  
@HWI-EAS443:3:64:1398:1405#0/1  
CTCCTTTTGCAAGATTGCTCAGTTCATTGATGCTTCTTCT  
+HWI-EAS443:3:64:1398:1405#0/1  
\_ba`bbbb`baaaba`aaabb\_baaaabbba\_aaaaa\_a

@HWI-EAS443:3:71:1157:854#0/1  
GAAGAACCCCGCACTCAGAATGAAGTGGATGATGGGCAAA  
+HWI-EAS443:3:71:1157:854#0/1  
aaa]^bbb`a\_`aaaba\_aaa\_a]aaa`a\_`a]Y^`\_`  
@HWI-EAS443:3:71:1322:1057#0/1  
CTCCTTTTGCAAGATTGCTCAGTTCATTGATGCTTCTTCT  
+HWI-EAS443:3:71:1322:1057#0/1  
aaa`abbbabaaa`aaaa`aa[aabaabaaa^a\_a^]a  
@HWI-EAS443:3:71:1473:2018#0/1  
GAAGAACCCCGCACTCAGAATGAAGTGGATGATGGGCAAC  
+HWI-EAS443:3:71:1473:2018#0/1  
a\_aZ`abbabaa`\_\_^ZXS\_a`¥a`\_a`]`\_\_`Z\_`¥VZ¥  
@HWI-EAS443:3:71:271:786#0/1  
GAAGAACCCCGCACTCAGAATGAAGTGGATGATGGGCAAA  
+HWI-EAS443:3:71:271:786#0/1  
^]J\_aaa`W\_b`^a]`a\_`]^aQW\_L\_`U``^Q\_\_`ZQ¥  
@HWI-EAS443:3:71:726:1465#0/1  
GAGATGCCAGCATTAAGCATCAATGAAGTGGATGATGGGCAAA  
+HWI-EAS443:3:71:726:1465#0/1  
[^WT`\_baa^QR]Y^`\_U^[]b]aTQ0a`SZ[aaa]YL[¥  
@HWI-EAS443:3:79:388:1075#0/1  
GAAGAACCCCGCACTCAGAATGAAGTGGATGATGGGCAAA  
+HWI-EAS443:3:79:388:1075#0/1  
abbabaaa\_]`[]a`aa`V``^Pa¥a¥U\_^Z^a\_[SX\_¥  
@HWI-EAS443:3:85:998:613#0/1  
GAAGAACCCCGCACTCAGAATGAAGTGGATGATGGGCAAA  
+HWI-EAS443:3:85:998:613#0/1  
aabbab\_a`abab\_a`aaa`aaV`aVaa\_aa]aaaaZ\_^\_  
@HWI-EAS443:3:90:1610:333#0/1  
AGAAGAAGCATCAATGAAGTGGATGATGGGCAAAAGGAG  
+HWI-EAS443:3:90:1610:333#0/1  
ab`aaa`bT¥\_\_\_bYaZ^OTH\_baa^W[\_]bZU[Z][aS^  
@HWI-EAS443:3:90:1774:266#0/1  
AGGCACTCCTTTTGCAAGATTGCTCAGTTCATTGATGCTT  
+HWI-EAS443:3:90:1774:266#0/1  
^ababaaa^`\_`aa\_aaaa`aa]W]`a\_aaaa`a\_aa[\_`  
@HWI-EAS443:3:92:1373:1440#0/1  
GAGATGCCAGCATTAAGCATCAATGAAGTGGATGATGGGCAAA  
+HWI-EAS443:3:92:1373:1440#0/1  
a\_aa`a¥a\_a\_aaaaa`^`\_aaaa`\_\_a\_`\_¥a^`Ua^  
@HWI-EAS443:3:94:44:1019#0/1  
CATCAATGAAGTGGATGATGGGCAAAAGGAGAGACAGTC  
+HWI-EAS443:3:94:44:1019#0/1  
aQYVNJaaU[`Y¥Z`ZN]QX]¥ZW¥]P¥Q`^`\_`IWH[G[  
@HWI-EAS443:3:95:1587:987#0/1  
GGCGTTCATCCACTTCATTCTGAGTGC GGGTTCTTCTCT  
+HWI-EAS443:3:95:1587:987#0/1  
abab[`b[Q¥^`\_[baabaaa`a\_]FZb`a[a^a\_ZaUa  
@HWI-EAS443:3:96:572:1191#0/1  
ATCAATGAAGTGGATGATGGGCAAAAGGAGAGAATCTGA

+HWI-EAS443:3:96:572:1191#0/1  
a`b\_a\_Z¥Z[\_a\_a\_X¥baaaaaa^Y`ZZaa`a]aaa``  
@HWI-EAS443:3:99:410:280#0/1  
AGCGACTCTCCTTTTGCAAGATTGCTCAGTTCATTGATGC  
+HWI-EAS443:3:99:410:280#0/1  
abaaa\_a`a``aaaa¥\_\_a\_aa`\_\_\_\_`^^^\_\_\_\_^\_]`  
@HWI-EAS443:3:9:919:723#0/1  
TGGACATGGCCCAGCATTAAAGCATCAATGAACTGAGCAAT  
+HWI-EAS443:3:9:919:723#0/1  
abbbZa`R]^aaaWaaaaaU^a`^`bW\_]`\_]\_W`\_\_  
@HWI-EAS443:3:49:964:799#0/1  
ACATGGCCCAGNATTAAGCATCAATGAACTGAGCAATCTT  
+HWI-EAS443:3:49:964:799#0/1  
a\_\_¥T`a`^aYDY\_a`\_`\_\_^`\_^`X]\_\_^`\_a`^a^\_\_  
@HWI-EAS443:3:100:1753:907#0/1  
CCCATCATCCACTTCATTCTGAGTGCGGGGTTGTTCTCTT  
+HWI-EAS443:3:100:1753:907#0/1  
]]ba]\_\_OWab`bXXa\_aaaa\_a`a^a\_\_b¥^GY]Q`S`a  
@HWI-EAS443:3:33:1303:1164#0/1  
GGCCATGATCCACTTCATTCTGAGTGCGGGGTTCTTCTCT  
+HWI-EAS443:3:33:1303:1164#0/1  
`^ab``Iaa]\_]TWZ\_¥baaa]aa\_aUaaaa¥V¥]`Q¥^`  
@HWI-EAS443:3:33:374:1410#0/1  
CAAGAGAAGAACCCCGCACTCAGAATGAAGTGAATGATGA  
+HWI-EAS443:3:33:374:1410#0/1  
`Z]Z`UYV`ab]]X]Ja[SZYVL^`XTQZRVL¥KX`GPF  
@HWI-EAS443:3:40:171:488#0/1  
AGAACCCCGCACTCAGAATGAAGTGGATAATGGCAATGAT  
+HWI-EAS443:3:40:171:488#0/1  
[a`aabaaaa]aaaa\_a`\_a``W]^FYWV[¥Z]U]QQRR  
@HWI-EAS443:3:72:1183:555#0/1  
GAAGAGGAGAACCCCGCACTCAGAATGAAGTGGATGATGG  
+HWI-EAS443:3:72:1183:555#0/1  
UX\_[U\_IQX0\_XOZZa\_Saa¥\_\_N][WR\_[YGY[R\_XBBB  
@HWI-EAS443:3:79:561:758#0/1  
AAGAGAAGAACCCCGCACTCAGAATGAAGTGAATGATGGG  
+HWI-EAS443:3:79:561:758#0/1  
a\_a\_a]\_S\_aab^aaa`b]\_\_`^`\_aa`[\_\_RNWa¥aaI¥  
@HWI-EAS443:3:94:252:1654#0/1  
GAAGCATCAATGACCTGAGCAATCTTGCAAAAGGAGAGAA  
+HWI-EAS443:3:94:252:1654#0/1  
XV^aa]a]U\_ZTPF]^`]ZUMO]WIY¥]XVXY[U\_[S\_`  
@HWI-EAS443:3:94:865:1427#0/1  
CAAGCATCAATGAACTGAGCAATCTTGAAAAGGAGAGAA  
+HWI-EAS443:3:94:865:1427#0/1  
a\_]\_]\_aUTWa]YSR[aTVVW¥]a`VZUEXXL]^`T^a\_a\_Y  
@HWI-EAS443:3:16:511:1557#0/1  
CAGAATGGCCCAGCATTAAAGCATCAATGAACTGAGCAATC  
+HWI-EAS443:3:16:511:1557#0/1  
`aJaa[\_¥]^aaaa^\_aaUa\_\_^\_]\_`¥a\_\_W^¥^`\_VS

@HWI-EAS443:3:17:1261:1858#0/1  
GAAGAACCCCGCACTCAGAATGAAGTGGATGATGGCCATA  
+HWI-EAS443:3:17:1261:1858#0/1  
]XRTT\_XXU\_[\_a¥RSXSXXX¥NTOHNVSPYLP^LJBB  
@HWI-EAS443:3:17:323:650#0/1  
GATTGCTCAGTTCATTGATGCTTAATGCTGGGCCATCTCT  
+HWI-EAS443:3:17:323:650#0/1  
\_baaab`aVb^abaa`a\_``aa`a`S¥a`\_`a`^`\_`^`Y^  
@HWI-EAS443:3:17:482:102#0/1  
GATTCATTAAGCATCAATGAACTGAGCAATCTTGCAAAG  
+HWI-EAS443:3:17:482:102#0/1  
¥JW]``a¥`Ua\_^¥U^]]`\_SXaZ^\_]\_\_Y\_\_`^]SPU\_  
@HWI-EAS443:3:20:867:1315#0/1  
GAAGAAGCATCAATGAACTGAGCAATCTTGCAAAGGAGA  
+HWI-EAS443:3:20:867:1315#0/1  
^aabbb`aabaaaaaba[`aaaaaaaa`Ya\_aa`\_  
@HWI-EAS443:3:25:1161:1610#0/1  
AAGGGATATGGCCAGCATTAAAGCATCAATGAACTGAGCA  
+HWI-EAS443:3:25:1161:1610#0/1  
\_VaL`\_`b\_\_bbbaaW^`aab`ba]`a]Za[`XZ\_a[`a  
@HWI-EAS443:3:27:703:1318#0/1  
AGATAGCATTAAAGCATCAATGAACTGAGCAATCTTGCAA  
+HWI-EAS443:3:27:703:1318#0/1  
a^V]a`¥a\_aR``[``^`\_`^`\_`^]`^`\_`^]`^Y\_]\_\_YW  
@HWI-EAS443:3:28:910:884#0/1  
GCCGTCATCCACTTCATTCTGAGTGC GGGTTCTTCTCTT  
+HWI-EAS443:3:28:910:884#0/1  
ab]]`aa`U\_aZ\_\_\_^a\_¥^\_Z^Z\_¥\_`^ZW¥¥\_\_U^]¥\_  
@HWI-EAS443:3:32:493:1189#0/1  
AAGACAAGAGATATGGCCAGCATTAAAGCATCAATGCACT  
+HWI-EAS443:3:32:493:1189#0/1  
\_aa]`a]^a\_^Z]Yaab¥¥R]Y`]¥ZWV]a[\_Q[\_ZK]`U  
@HWI-EAS443:3:32:772:1569#0/1  
GATGGGCAAAGAAGACAAGAGATATGGCCAGCATTAAACC  
+HWI-EAS443:3:32:772:1569#0/1  
^¥`\_`aabYY¥]YV]a\_V][XW`\_NOW\_^OG[IL`YNZ¥F^  
@HWI-EAS443:3:34:969:1809#0/1  
GCATCAATGAACTGAGCAATCTTGCAAAGGAGAGAGAGC  
+HWI-EAS443:3:34:969:1809#0/1  
]R]XSXH]aYa`ZPZ]XXJNTUXNN[RL[]NQLLWUR^\_B  
@HWI-EAS443:3:42:88:1222#0/1  
AGAATCCTCATTGTTGGGCAAAGAAGACAAGAGATATGGCC  
+HWI-EAS443:3:42:88:1222#0/1  
aa^H^N\_\_aaa``aa`a\_\_a`````\_`a```^`X\_^`]  
@HWI-EAS443:3:43:261:1910#0/1  
AAGAGATATGGCCAGCATTAAAGCATCAATGAACTGCGCA  
+HWI-EAS443:3:43:261:1910#0/1  
ZZ]U]b`WFW\_V[[]X]\_aaaa\_\_ZVXWV¥`]ZVZ¥HX]a  
@HWI-EAS443:3:45:1673:1971#0/1  
GAAGAATTCACAATGGTTGGGAGAAGAGCAACAGCTGTTC

+HWI-EAS443:3:45:1673:1971#0/1  
]Q[\_ZGXaT`TJRXWPOGU`UXQSNJSBBBBBBBBBBBB  
@HWI-EAS443:3:45:687:1787#0/1  
GAAGAAGCATCAATGAACTGAGCAATCTTGCAAAGGAGA  
+HWI-EAS443:3:45:687:1787#0/1  
^ba\_ab\_Wab\_aaa`Y^\_a\_aJ`^a`^aa^SaY\_\_`W^^`  
@HWI-EAS443:3:46:232:676#0/1  
TGGCGGCAAAGAAGACAAGAGATATGGCCCAGCATTAAAGC  
+HWI-EAS443:3:46:232:676#0/1  
aab\_abXL[a]P[VR\_\_aZULR][UY^[¥V[Y\_^\_\_U  
@HWI-EAS443:3:49:1386:1781#0/1  
AGAAGAACCCCGCACTCAGAATGAAGTGGATGATGGTAAT  
+HWI-EAS443:3:49:1386:1781#0/1  
[bYU^b\_LVVO¥TWPY¥]GPSa^aYOH]aSa`[M[IM[^Y  
@HWI-EAS443:3:57:971:1270#0/1  
GAAGAAGCATCAATGAACTGAGCAATCTTGCAAAGGAGA  
+HWI-EAS443:3:57:971:1270#0/1  
`Y^Z^`aaa`\_`aZaa^^¥[¥^`\_`\_]\_[^]Z\_a[]\_\_  
@HWI-EAS443:3:58:844:1220#0/1  
CGCACATTTTGGGCAAAGAAGACAAGAGATATGGCCCAGC  
+HWI-EAS443:3:58:844:1220#0/1  
a^`\_`¥a`aaa`\_\_`\_\_a^]^[^aaa`a^`YXY\_¥¥  
@HWI-EAS443:3:59:1073:467#0/1  
GAAGAAGCATCAATGAACTGAGCAATCTTGCAAAGGAGA  
+HWI-EAS443:3:59:1073:467#0/1  
\_Va]aX`^[\_`^^aaa\_a`[¥]a\_¥a\_a^VLYXXZSY]  
@HWI-EAS443:3:68:399:613#0/1  
AGAAGAACCCCGCACTCAGAATGAAGTGGATGATGGGCAA  
+HWI-EAS443:3:68:399:613#0/1  
U[V¥G¥V\_¥]aabU\_\_][W\_W^\_[Y\_¥^YS[JH¥\_HH^V  
@HWI-EAS443:3:68:881:1310#0/1  
AGAGAAGCATCAATGAACTGAGCAATCTTGCAAAGGAGA  
+HWI-EAS443:3:68:881:1310#0/1  
aaabaaabaaa`````baa\_[^aaa`\_a\_aaa`a`\_\_`a`  
@HWI-EAS443:3:6:83:1277#0/1  
CAGAATGGCCCAGCATTAAAGCATCAATGAACTGAGCAATC  
+HWI-EAS443:3:6:83:1277#0/1  
a`[\_`^a)```^`[aa\_aa^^P^\_ZW`a^`\_[\_`V  
@HWI-EAS443:3:70:1130:1607#0/1  
GATTGCTCAGTTCATTGATGCTTAATGCTGGGCCATCTCT  
+HWI-EAS443:3:70:1130:1607#0/1  
a`abb`bbb[bbbbbb`T`ababaaa^a`]^aba\_aa`  
@HWI-EAS443:3:73:783:1881#0/1  
GATTGCTCAGTTCATTGATGCTTAATGCTGGGCCATCTCT  
+HWI-EAS443:3:73:783:1881#0/1  
`baaababba\_`aba`aa^`a\_aa`\_`^^RZa`\_`a\_a\_  
@HWI-EAS443:3:77:1028:1160#0/1  
CGCACATTTTGGGCAAAGAAGACAAGAGATATGGCCCAGC  
+HWI-EAS443:3:77:1028:1160#0/1  
ababb`bbbbbb\_bbbbbbbbabaaabbaba`abaaaa

@HWI-EAS443:3:82:644:808#0/1  
TAACCATCAATGAACTGAGCAATCTTGCAAAAGGAGAGAA  
+HWI-EAS443:3:82:644:808#0/1  
Z\_[0\_a¥\_^¥SSS[¥Z[PY`\_¥\_\_¥ZYa\_THZZHXUO¥V  
@HWI-EAS443:3:83:862:1612#0/1  
AGAAGAACCCCGCACTCAGAATGAAGTGGATGATGGGCAA  
+HWI-EAS443:3:83:862:1612#0/1  
U[\_ZW`a]aab`Z]\_Z\_aUa`\_aa0aU`aa\_Yaa]U\_\_  
@HWI-EAS443:3:84:646:1167#0/1  
GAAGAAGCATCAATGAACTGAGCAATCTTGCAAAAGGAGA  
+HWI-EAS443:3:84:646:1167#0/1  
W¥aY`VZ\_Z¥`ba`ba]aa`¥aa`^[[Y\_V^[R[S[a^  
@HWI-EAS443:3:87:1658:296#0/1  
AAAGAATTGACACTAATTGATGGCCATCCGAATCCTTTT  
+HWI-EAS443:3:87:1658:296#0/1  
^a^JbabbabUS¥\_b`a`\_X]a`[]`]aa``\_[Y`Z^]W^  
@HWI-EAS443:3:89:315:406#0/1  
CATCAAGCATCAATGAACTGAGCAATCTTGCAAAAGGAGA  
+HWI-EAS443:3:89:315:406#0/1  
abbbaaaa\_\_^`Uba¥aab^Raaaba`aaaa\_a\_a]``a  
@HWI-EAS443:3:98:889:1577#0/1  
GATTGCTCAGTTCATTGATGCTTAATGCTGGGCCATCTCT  
+HWI-EAS443:3:98:889:1577#0/1  
aaaabbaaabbaaabbaaaaaaaaaaaaa¥^a`^\_[aa^a`  
@HWI-EAS443:3:11:911:1521#0/1  
GTGGCCCAGCATTAAAGCNTCAATGAACTGAGCAATCTTGC  
+HWI-EAS443:3:11:911:1521#0/1  
RZb]WabYV\_\_WZNP¥ZD[\_X\_QRXab\_¥Sba\_¥OH¥Xb]  
@HWI-EAS443:3:100:1091:1391#0/1  
GAGATAGGGCCAGCATTAAAGCATCAATGAACTGAGCAAT  
+HWI-EAS443:3:100:1091:1391#0/1  
a`b^aUD¥aW¥0]a\_Y`\_\_\_`W[\_R^^[¥WV]R¥Y\_ZWBB  
@HWI-EAS443:3:100:382:1508#0/1  
GATTGCTCAGTTCATTGATGCGTAATGCTGGGCCATATCT  
+HWI-EAS443:3:100:382:1508#0/1  
^a```]M^Z]JN^XPLRXT[THQ]^\_\_b\_\_\_[]TO[MURBB  
@HWI-EAS443:3:10:1644:94#0/1  
CTCATTGTTGGGCAAAGAAGACAAGAGATAAGGCCAGCAT  
+HWI-EAS443:3:10:1644:94#0/1  
ab¥bbbbbbbbb`abbbbab`baaabaaaHab\_]Sa^]`a  
@HWI-EAS443:3:10:607:2001#0/1  
AAACAATTGACACTAAGTATGATGGCCATCCGAATCCTTTT  
+HWI-EAS443:3:10:607:2001#0/1  
`ba\_\_^]Ya\_a\_Y]Y¥aHZ``¥aXWaaQNNXK^YRSVJX]  
@HWI-EAS443:3:11:1361:1796#0/1  
AAACAATTGACACTAATTGATGGCCATCAGAATCCTTTT  
+HWI-EAS443:3:11:1361:1796#0/1  
`aa\_^b`aY¥¥a]IbbXbaKbaaXZYa`\_IW\_J`a\_[]`aa  
@HWI-EAS443:3:11:1433:975#0/1  
CTTTTGCAAGATTGCTCAGTTCATTGATGATTAATGCTGG

+HWI-EAS443:3:11:1433:975#0/1  
^VP^]¥aUM[OLZ`Q]MG^W`\_\_^Za`aJX` `a\_a\_W\_\_  
@HWI-EAS443:3:11:1591:1960#0/1  
AAGAGATATGGCCCAGCATTAAGCATCAAGGAACTGAGCA  
+HWI-EAS443:3:11:1591:1960#0/1  
aaa\_a\_a`a`ZFU^I^\_aTV` `^^^¥Z^^GNW^O\_RWVX\_  
@HWI-EAS443:3:12:121:1480#0/1  
CAGCATTACGCATCAATGAACTGAGCAATCTTGCAAAAAGG  
+HWI-EAS443:3:12:121:1480#0/1  
a^`aa¥ZaI]b]¥`a\_aPa\_aSaM\_baaa^\_\_a^]U]^[[  
@HWI-EAS443:3:12:91:783#0/1  
AGAGATATGGCCCAGCATTACGCATCAATGAACTGAGCAA  
+HWI-EAS443:3:12:91:783#0/1  
`aa¥X]`^VY¥RQ^QX[]^WG][Y]Z\_G\_^][UZYZPZ]`  
@HWI-EAS443:3:14:98:1385#0/1  
AGAAGAACCCCGCACTCAGAATGAAGGGGATGATGGCAAT  
+HWI-EAS443:3:14:98:1385#0/1  
TRHZ]aZ^a^^^`a]¥QW]P]TX[WG¥P`\_[US¥¥`[¥¥  
@HWI-EAS443:3:15:1070:441#0/1  
GAGAAGAACCCCGCACTCAGAATGACGTGGATGATGGCAA  
+HWI-EAS443:3:15:1070:441#0/1  
¥ababbbbaaab^^`aa[`aa¥a\_b`ba[aa\_\_aaY`\_  
@HWI-EAS443:3:15:1170:1836#0/1  
GGGCAAAGAAGACAAGAGATATGGCCCAACATTAAGCATC  
+HWI-EAS443:3:15:1170:1836#0/1  
a^Z^`MZ¥I¥]^`SaaX¥a`[RNR\_HQ¥Iabab`[JZ^aa  
@HWI-EAS443:3:16:1053:1505#0/1  
AGAAGACAAGCGATATGGCCCAGCATTAAGCATCAATGAA  
+HWI-EAS443:3:16:1053:1505#0/1  
ab\_V\_Zaaa^FYWZ^OSY`¥R`WV^\_\_a\_UYY^¥^^]¥^  
@HWI-EAS443:3:17:1057:584#0/1  
GAGAAGAACCCCGCACTCAGAATGAAGAGGATGATGGCAA  
+HWI-EAS443:3:17:1057:584#0/1  
a\_\_X\_ZaZ[QUa`HSVZVV]UH`^WG^U\_SUSSQU^XUY]  
@HWI-EAS443:3:19:972:81#0/1  
GAGATATGGCCCAGCATTAGGCATCAATGAACTGAGCAAT  
+HWI-EAS443:3:19:972:81#0/1  
a[`b` `a\_b\_Q^\_a[T`\_WI`V¥aY`^aa\_^[\_^XVUO\_  
@HWI-EAS443:3:1:1051:442#0/1  
AAGAGATATGGCCAAGCATTAAGCATCAATGAACTGAGCA  
+HWI-EAS443:3:1:1051:442#0/1  
^`baba^b[bb\_PfZ\_R\_^¥a`b^a^[a¥\_\_^aY^a\_\_SB  
@HWI-EAS443:3:1:769:1332#0/1  
GAAGAACCCCGCACTCAGAATGAAGTGGATGATGGGAATG  
+HWI-EAS443:3:1:769:1332#0/1  
aU[b`ba`¥Tb]UV`\_`b[a\_a\_UaRa\_[[a]]`[G]\_\_B  
@HWI-EAS443:3:22:1070:1627#0/1  
TAAGCATCAATGAACTGAGCAATCATGCAAAAAGGAGAGAA  
+HWI-EAS443:3:22:1070:1627#0/1  
aa[W]baa^aa`aa[aa¥`]aa^WDXa` `¥\_[¥aa` `aaa



@HWI-EAS443:3:22:1116:1384#0/1  
ATTAAGCATCAATGAACTGAGCAATCTTCCAAAAGGAGAG  
+HWI-EAS443:3:22:1116:1384#0/1  
\_PZ¥Y\_XF][PFZUZ¥[\_\_U]ZU]LU]MDKXRGUPYSVR]  
@HWI-EAS443:3:22:307:1798#0/1  
ATGGCCCAGCATTAAAGCATCAATCAACTGAGCAATCTTGC  
+HWI-EAS443:3:22:307:1798#0/1  
aTRS]a]]TSa`¥WZ^b`SYPZPDYZLZ^UX^\_X\_YG\_X  
@HWI-EAS443:3:22:382:1860#0/1  
AGAGTTATGGCCCAGCATTAAAGCATCAATGAACTGAGCAA  
+HWI-EAS443:3:22:382:1860#0/1  
a`a]Yab`a\_a`\_a\_aa\_\_aa\_\_Y^a`\_`[`a^[^^^```  
@HWI-EAS443:3:22:707:2028#0/1  
GAGATAGGGCCCAGCATTAAAGCATCAATGAACTGAGCAAT  
+HWI-EAS443:3:22:707:2028#0/1  
aaaT\_ZDMPZY]]XYa`\_^Y^^S` `[QW[RYO]^0[SSG¥  
@HWI-EAS443:3:23:1379:1866#0/1  
GCATTAAGCATCAATGAACTGAGCAATCTTGCAACAGGAG  
+HWI-EAS443:3:23:1379:1866#0/1  
aab`\_bb¥b`aaaa`a`a\_aa¥a` ``\_\_a`a^\_]RXZX]  
@HWI-EAS443:3:25:91:1623#0/1  
CATTAAGCGTCAATGAACTGAGCAATCTTGCAAAAAGGAGA  
+HWI-EAS443:3:25:91:1623#0/1  
aaabb`ab\_]bba`¥a[aaZY^ab¥aa`aaaa^[Xaa`a]  
@HWI-EAS443:3:27:317:986#0/1  
TTTTTAAACAATTGACACTAATTGATGCCATCCGAATT  
+HWI-EAS443:3:27:317:986#0/1  
aYY[a\_] [` ``Ra^¥aaa]\_XPTaZLOLFR^UJ^`\_^VZY  
@HWI-EAS443:3:28:1216:1390#0/1  
ATTAAGCATCAATAAACTGAGCAATCTTGCAAAAAGGAGAG  
+HWI-EAS443:3:28:1216:1390#0/1  
aaaab`aaa`aaa^`a\_\_a` `` `` `]\_\_\_^^^`\_\_^`  
@HWI-EAS443:3:28:1398:867#0/1  
ATATGGCCCAGCATTAAAGCATCAATGAACTGAGCCATCTT  
+HWI-EAS443:3:28:1398:867#0/1  
aa¥`aab]a`aQX\_\_`aaX` ]^^^^[^ [^W\_^ [LFX\_]\_Z  
@HWI-EAS443:3:29:1261:2027#0/1  
CATTAACCATCAATGAACTGAGCAATCTTGCAAAAAGGAGA  
+HWI-EAS443:3:29:1261:2027#0/1  
^b[]^NGO[`a\_V¥]]` ]`a^¥\_a\_[\_ba[abbYaabab`  
@HWI-EAS443:3:2:1293:1924#0/1  
AAACAATTGACACTAATTGATGGCCATCCGAATTATTTT  
+HWI-EAS443:3:2:1293:1924#0/1  
aa\_HV¥U]aR[V`I¥^\_]PZQW¥P]a[\_VOSUZQG\_]BB  
@HWI-EAS443:3:2:587:1832#0/1  
AGATTGCTCAGTTTATTGATGCTTAATGCTGGGCCATATC  
+HWI-EAS443:3:2:587:1832#0/1  
` ]`aa`aaaa¥GV]aaX]Z`\_0a`SH\_\_¥\_\_JT0FQ\_a]G  
@HWI-EAS443:3:31:601:935#0/1  
GCCATCATCCACTTCATTCTGAGTGCGGGGCTCTTCTT

+HWI-EAS443:3:31:601:935#0/1  
a\_`Z]^`ZbWUP`R]\_\_¥QMGXaNU[VZS\_VPaRQ¥Y^SB  
@HWI-EAS443:3:31:676:1018#0/1  
TAAGCATCAATGAACTGAGCAATCTTGCAAAAAGAAGAGAA  
+HWI-EAS443:3:31:676:1018#0/1  
aa`aaaaabaaaaaa^a\_aaaa`aaa\_a``]`aa`  
@HWI-EAS443:3:32:447:312#0/1  
GAGAAGAAACCCGCACTCAGAATGAAGTGGATGATGGCAA  
+HWI-EAS443:3:32:447:312#0/1  
aaSYa`^]H`^¥aUQVYPYUR]WRLQLOTZVW]WXKTMX  
@HWI-EAS443:3:32:486:1953#0/1  
GAGAAGAACCCGCACTCAGAACGAAGTGGATGATGGCAA  
+HWI-EAS443:3:32:486:1953#0/1  
VbXQ\_Z`[\_`ba¥\_]bYUa\_[VQ¥WW`Nba`aaI]bGbZ¥  
@HWI-EAS443:3:33:1457:147#0/1  
CCCAGCATTAAAGCATCAATGAACTGAGGAATCTTGCAAAA  
+HWI-EAS443:3:33:1457:147#0/1  
Y\_V\_\_\_\_\_^`\_^\_\_aa\_\_`aaa`\_¥ZLW]`NR^\_YWY[S  
@HWI-EAS443:3:33:1619:1015#0/1  
GAGAAGAACCCGCACTCAGAATGAAGTGGATGAGGGCAA  
+HWI-EAS443:3:33:1619:1015#0/1  
aa`aa\_ab^¥`\_bWS`[\_`Z\_aa^ZVGTZ]YGVH\_YNQQ  
@HWI-EAS443:3:34:1025:1290#0/1  
GAAGACAAGAGATATGGCCCAGCATTAAAGCGTCAATGAAC  
+HWI-EAS443:3:34:1025:1290#0/1  
`\_\_\_a`\_¥\_]aaa\_[W^`[SX``])`¥VYVY]^\_VZ[^B  
@HWI-EAS443:3:34:1168:440#0/1  
AGAAGAACCCCGCACTCAGAATGAAGCGGATGATGGCAAT  
+HWI-EAS443:3:34:1168:440#0/1  
]baZba¥S\_P\_aY`\_a\_^]a[b[\_GZ\_\_aaNFLUNPKM  
@HWI-EAS443:3:34:295:810#0/1  
CAAGAGAAGAACCCCGCACTCAGAAAGAAGTGGATGATGG  
+HWI-EAS443:3:34:295:810#0/1  
aababbbbbbba`baa`aaaa`a]aaaV\_bN``\_a`\_\_UR  
@HWI-EAS443:3:36:258:700#0/1  
AGAAGAACCCCGCATTGAGCAATGAAGTGGATGATGGCAAT  
+HWI-EAS443:3:36:258:700#0/1  
]aW0\_```baa\_a^M^a\_b]`]^`MaV\_^W\_\_^a]\_]`]  
@HWI-EAS443:3:36:490:1198#0/1  
GAGAAGACCCCGCACTCAGAATGAAGTGGATGATGGCAA  
+HWI-EAS443:3:36:490:1198#0/1  
`^bba`ZMZaa]Xa[abJ^^H¥PP\_[U`¥\_MPYLO¥aZG  
@HWI-EAS443:3:37:1407:195#0/1  
AACAATTCGACACTAATTGATGGCCATCCTAATTCTTTTG  
+HWI-EAS443:3:37:1407:195#0/1  
\_ZZ`bab]aaaa^¥`a`][T`aX`ZW^\_aFNW`\_TT\_dWR  
@HWI-EAS443:3:37:1654:1771#0/1  
GGGTATGTAGAATTCACAATGGTTGGGAGAAGAGCAACAG  
+HWI-EAS443:3:37:1654:1771#0/1  
aa`YT\_`^aaaa`aab]\_\_a\_]\_`YY`UPY`a\_^a\_^

@HWI-EAS443:3:37:812:738#0/1  
AACAAATTCGACACTAATTGATGGCCATCCGCATTCTTTTG  
+HWI-EAS443:3:37:812:738#0/1  
ZSaa\_bbb]\_a^`][\_]a`]\`bba\_`^^bFK¥\_^a\_aaab  
@HWI-EAS443:3:37:901:1716#0/1  
AGAGATATGGCCCAGCATTAAAGCATCAATGCACTGAGCAA  
+HWI-EAS443:3:37:901:1716#0/1  
`a[[\_]a]a`a\_WWa\_aa\_a]\`Xa`\_a^TDF^Y[]\_¥aa^  
@HWI-EAS443:3:38:1525:466#0/1  
ATTAAGCATCAATGAACTGAGCTATCTTGCAAAAGGAGAG  
+HWI-EAS443:3:38:1525:466#0/1  
aabaabaaaa][^\_a][aa]a`a`a\_baa]W^Y]a]]]\_[  
@HWI-EAS443:3:38:850:90#0/1  
AAGAACCCCGCACCCAGAATGAAGTGGATGATGGCAATGA  
+HWI-EAS443:3:38:850:90#0/1  
aa[\_babab\_aaa\_]\_^UU\_a[^aSaa[[\_V\_]RQ]VZR  
@HWI-EAS443:3:38:989:720#0/1  
CTCATTTTGGGCAAAGAAGACAAGAGATATTGCCAGCAT  
+HWI-EAS443:3:38:989:720#0/1  
[\_`bb`¥`¥ZQYZXZ`a]\`YXaVVZZ^Y\_KTI^PZXOUN\_^  
@HWI-EAS443:3:39:762:789#0/1  
TTAAGCATCCATGAACTGAGCAATCTTGCAAAAGGAGAGA  
+HWI-EAS443:3:39:762:789#0/1  
a]b`ab\_aba`\_a\_aa`a^`\_a`\_a`]\`a\_VZ^a\_\_`\_a\_  
@HWI-EAS443:3:39:833:299#0/1  
ATGGCCCAGCATTAAAGCATCAATGAACTGAGGAATCTTGC  
+HWI-EAS443:3:39:833:299#0/1  
]X[[\_VUO[\_`YIMX[RUFSPTOP¥RYSTNLPFTTRLUTSU  
@HWI-EAS443:3:3:431:1522#0/1  
AACAAATTCGACACTAATTGATGGCCATCCGAATTCTTTTG  
+HWI-EAS443:3:3:431:1522#0/1  
]bbaa]OYbaaaaa`Uaab^`\_`^ba\_`VF[aIG^a`\_B  
@HWI-EAS443:3:3:847:1877#0/1  
GAGATATGGCCCAGAATTAAGCATCAATGAACTGAGCAAT  
+HWI-EAS443:3:3:847:1877#0/1  
a\_\_^]a^`Wb^^a`bGa\_aaTa¥\_^ZW`¥Z^¥ZZ\_`]Wa\_S  
@HWI-EAS443:3:40:1278:546#0/1  
CAAGAGAAGAACCCCGCACTCAGAATGAAGTGGCTGATGG  
+HWI-EAS443:3:40:1278:546#0/1  
\_`\_Z^^¥^XZ¥ZYR]\`¥]a`\_]a\_]ZKaL]PFL^XX]a  
@HWI-EAS443:3:40:641:1370#0/1  
CAATTCGACACTAATTGATGGCCATCCGCATTCTTTTGGT  
+HWI-EAS443:3:40:641:1370#0/1  
a\_ba\_aa]]`a]\`a\_Y\_\_`YS]aaX]]][GZ^^][]XSY¥Y  
@HWI-EAS443:3:43:1130:1075#0/1  
AGAAGAGCCCCGCACTCAGAATGAAGTGGATGATGGCAAT  
+HWI-EAS443:3:43:1130:1075#0/1  
Wb^b^]a]Y¥baa\_a`U]\_Sa¥aaa¥YY[aPP[PR]OXa  
@HWI-EAS443:3:44:1284:73#0/1  
CAAGAGAAGAACCCCGTACTCAGAATGAAGTGGATGATGG

+HWI-EAS443:3:44:1284:73#0/1  
aaaaa`aabbba`\_^aa` `` `aa\_\_aa]Ya]aaY`aY^a[  
@HWI-EAS443:3:45:1780:586#0/1  
TAGCTGTTGCTCTTCTCCCAACCATTGTGACTTCTTCATA  
+HWI-EAS443:3:45:1780:586#0/1  
Y\_[Z^bb`[L\_W]\_S\_ZZ]`bZS[\_` `ZYLF]\_L¥][X[Q  
@HWI-EAS443:3:45:995:705#0/1  
TAAGCATCAATGAACTGAGCAAACCTGCAAAAGGAGAGAA  
+HWI-EAS443:3:45:995:705#0/1  
aa[a\_\_aabaabaaaab`baa\_a`bab\_a[``ba`a`ab]  
@HWI-EAS443:3:46:1057:164#0/1  
ATTAAGCATCAATGAACTGAGCAATCTTGTAAGGAGAGAG  
+HWI-EAS443:3:46:1057:164#0/1  
aaaaab\_`a`\_`\_`\_`\_]a`^`\_^`\_`\_`\_aZ]]]^`\_]`^`  
@HWI-EAS443:3:47:990:576#0/1  
CTCATTGTTGGCAAAGAAGACATGAGATATGGCCAGCAT  
+HWI-EAS443:3:47:990:576#0/1  
ababbabbbab`bbaaaaa\_abb`b`a`aaaaY[ `a`aa  
@HWI-EAS443:3:49:1142:1085#0/1  
GAGAAGAACCCCGCACTCAGAAAGAAGTGGATGATGGCAA  
+HWI-EAS443:3:49:1142:1085#0/1  
OPaV` `¥b¥¥Y0[¥Taa[X¥Ta¥aM[b^¥M\_b[¥a`V^^`  
@HWI-EAS443:3:49:229:1129#0/1  
GCATTAAGCATCAATGAACTGAGGAATCTTGCAAAAGGAG  
+HWI-EAS443:3:49:229:1129#0/1  
aa^X`ZZ¥^a` `XZbZYKZ`^WDST¥MV]`YZS¥][^`a  
@HWI-EAS443:3:4:108:780#0/1  
CATTAAGCATCAATGAACTGACCAATCTTGCAAAAGGAGA  
+HWI-EAS443:3:4:108:780#0/1  
`aaYaa^Ya¥La¥abPUa`a¥H^U^LSZ[aI[USRZ]ZBB  
@HWI-EAS443:3:4:1095:1062#0/1  
GAAGAACCCCGCACTCAGAATGAAGTGGATGATGGGAATG  
+HWI-EAS443:3:4:1095:1062#0/1  
¥[\_S^Z^J¥S\_^^^aUP¥I]`[ZLVTb^S`YZ\_]GQZGYH  
@HWI-EAS443:3:50:1257:152#0/1  
CTCCTTTTGCACGATTGCTCAGTTCATTGATGCTTAATGC  
+HWI-EAS443:3:50:1257:152#0/1  
ababbbbba`abbaabbaa`babaababba`[baaaba\_  
@HWI-EAS443:3:50:779:1598#0/1  
AGATTGCTCAGTTTATTGATGCTTAATGCTGGCCATATC  
+HWI-EAS443:3:50:779:1598#0/1  
abaaaaabaabaaaaa^`aa\_baa`a`aa\_aa\_[aa`a¥  
@HWI-EAS443:3:51:528:898#0/1  
AAGAGATATGCCCCAGCATTAAAGCATCAATGAACTGAGCA  
+HWI-EAS443:3:51:528:898#0/1  
`a`aa¥`aa`S`]SSa¥aa`a^Z`¥aYWaaa\_^aa0[^`\_  
@HWI-EAS443:3:53:434:1955#0/1  
AGAAGACAAGAGATATGGCCAGCATTAAAGCAACAATGAA  
+HWI-EAS443:3:53:434:1955#0/1  
\_`^Y¥X`\_V¥XMX[[QU^`\_`\_]`^OX`a¥HZ\_^S[X\_YaRN



+HWI-EAS443:3:63:1223:493#0/1  
abaaa\_a`a\_\_a\_`b]aaa\_`aYa`\_\_aZ^a`S¥]\_\_^  
@HWI-EAS443:3:66:1141:1375#0/1  
CAGCATTAAAGCTTCAATGAACTGAGCAATCTTGCAAAAAGG  
+HWI-EAS443:3:66:1141:1375#0/1  
aaa`aaZZW\_]0\_bYbabUUN¥^^abaaVa`VZa0JLTa[  
@HWI-EAS443:3:66:288:333#0/1  
CAATGAACTGAGCAATCTTGCAAAAAGGAGAGAACGCTAAT  
+HWI-EAS443:3:66:288:333#0/1  
a`aaa\_]abaYaabaa\_a`a\_a`aa\_a`aa¥[MT^]]V  
@HWI-EAS443:3:69:1562:59#0/1  
CTCATTGTTGGCAAAGAAGACAAGAGATGTGGCCAGCAT  
+HWI-EAS443:3:69:1562:59#0/1  
V`bbbbbbbbbaa`^bbbbba\_abbbbaWabaa^`ab`ab  
@HWI-EAS443:3:71:1175:131#0/1  
CAAGAGAAGAACCACGCACTCAGAATGAAGTGGATGATGG  
+HWI-EAS443:3:71:1175:131#0/1  
Za`\_\_¥\_SK¥b[\_Y\_a`^^a\_`R[a]a\_YVaYH[aXS`W  
@HWI-EAS443:3:72:1324:631#0/1  
AGAGAAGAACCACGCACTCAGAATGAAGTGGATGATGGCA  
+HWI-EAS443:3:72:1324:631#0/1  
abaa^ababTF[\_ab^[\_`ab\_aab`X]S[baa`aWaa^^  
@HWI-EAS443:3:72:1641:1949#0/1  
GCCATGATCCACTTCATTCTGAGTGC GGGTTCTTCTCTT  
+HWI-EAS443:3:72:1641:1949#0/1  
a^a\_VKV`TZ0\_`\_VPXa`W\_Y\_Va[aa`]U`aaa\_]PW\_  
@HWI-EAS443:3:72:464:574#0/1  
AAACAATTTCGACACTAATTGATGGCCATCCGCATTCTTTT  
+HWI-EAS443:3:72:464:574#0/1  
\_baa^¥a`\_^^aa^]F[VY¥¥Xa``¥]Y`a[HQ^a]^^[W  
@HWI-EAS443:3:73:1640:104#0/1  
GCTCAGTTCATTGAAGCTTAATGCTGGCCATATCTCTTG  
+HWI-EAS443:3:73:1640:104#0/1  
aababbbbaabbbbaUa^baaabba^abaa^V`aaaZa[a`b  
@HWI-EAS443:3:73:512:1863#0/1  
GAAGAACCCCGCACTCAGAATGAAGCGGATGATGGCAATG  
+HWI-EAS443:3:73:512:1863#0/1  
]\_b[T\_a`\_TZb^`Ya\_\_WRaTF¥LX[¥¥^MLS[[DHSS  
@HWI-EAS443:3:74:1008:473#0/1  
CCAGCATTAAAGCATCAATGAACTGAGCAATATTGCAAAAAG  
+HWI-EAS443:3:74:1008:473#0/1  
a`T`^a`\_a^^]PPab¥`S¥^a\_]baWP]`abQa`][b  
@HWI-EAS443:3:74:320:266#0/1  
GAAGAACCCCGCACTCAGAATGAAGAGGATGATGGCAATG  
+HWI-EAS443:3:74:320:266#0/1  
R\_`^bbW^\_a\_¥X\_baV`aV^[\_J]DXY^TaSD¥`XP]a`  
@HWI-EAS443:3:75:387:1063#0/1  
GCCCAGCATTAAAGCATCAATGAACTGAGCAATCTAGCAAA  
+HWI-EAS443:3:75:387:1063#0/1  
aaa]¥Zaaa\_`\_\_`a\_Z]^a]Y¥`a^S\_`]`\_aa`aT^\_\_

@HWI-EAS443:3:76:903:1054#0/1  
AAGAGAAGAACCCCGCACTCAGAATGAAGAGGATGATGGC  
+HWI-EAS443:3:76:903:1054#0/1  
aaYFV¥UU`aSbYR`^Y¥b]`PX]aaa]FNT]\_¥FFFV\_  
@HWI-EAS443:3:77:1080:1576#0/1  
AATTCGACACTAATTGATGGCCATCCGAATTCCTTTGGTC  
+HWI-EAS443:3:77:1080:1576#0/1  
a`bbaaaabaaa\_a`]aaa\_`a\_aa`^\_a`^^^`a\_W]  
@HWI-EAS443:3:78:561:490#0/1  
CAGCATTAAAGCATCAATGAACTGAGCAATCTTGTAAGG  
+HWI-EAS443:3:78:561:490#0/1  
`[`aaa`a¥]\_S¥\_a\_Z¥¥UL^a[]Ya[^X`\_^JU\_\_Z`^  
@HWI-EAS443:3:78:660:670#0/1  
AGAAGAACCCCGCACTCAGAAAGAAGTGGATGATGGCAAT  
+HWI-EAS443:3:78:660:670#0/1  
aaa`aaaa`a\_aa\_`a`\_[]`a`\_`X]^[\_`\_^^X^[]  
@HWI-EAS443:3:78:850:530#0/1  
AAGAAGACAAGGGATATGGCCAGCATTAAAGCATCAATGA  
+HWI-EAS443:3:78:850:530#0/1  
abaabb\_baa`\_aa`a]\_a\_^`\_`\_\_aa\_]`^`\_a\_Z  
@HWI-EAS443:3:79:482:1947#0/1  
AGATTCCTCAGTTCATTGATGCTTAATGCTGGGCCATATC  
+HWI-EAS443:3:79:482:1947#0/1  
a]\_]UH\_Pa¥]T]b`YZY[VS]W\_aaZaaY]VSY\_aX\_\_\_\_  
@HWI-EAS443:3:80:1002:1903#0/1  
GAGAAGAACCCCGCACTCAGAAAGAAGTGGATGATGGCAA  
+HWI-EAS443:3:80:1002:1903#0/1  
aaaaabaaa`aaaa[]`YaaI\_\_`¥`T^UX^`U\_WPPQ  
@HWI-EAS443:3:83:224:1118#0/1  
GCATTAAGCATCAATGAACTGAGCAATCTTGCAACAGGAG  
+HWI-EAS443:3:83:224:1118#0/1  
a]ZZ`[^aaXG\_\_X\_]V`Q]a^`]a[¥]^Zaa`\_JTa]^  
@HWI-EAS443:3:83:672:990#0/1  
AAGAGAGGAACCCCGCACTCAGAATGAAGTGGATGATGGC  
+HWI-EAS443:3:83:672:990#0/1  
aab\_aaa\_aY`aaaaaaaa\_a`aa\_\_aV\_a`\_]\_\_[[  
@HWI-EAS443:3:83:746:1158#0/1  
CAAGAGAAGAACCCCGCACTCAGAATGAAGAGGATGATGG  
+HWI-EAS443:3:83:746:1158#0/1  
^b\_\_¥\_ZRN]\_[a\_]`¥¥¥UM]ZZ]a]UZFW`]Y¥H]VY  
@HWI-EAS443:3:83:940:603#0/1  
GAAGAACCCCGCACTCAGAATGAAGTGGATGGTGGCAATG  
+HWI-EAS443:3:83:940:603#0/1  
^ZWO^`aa\_]THXZRVZ[QRaMJXIVaG¥^KKX`KGK]a  
@HWI-EAS443:3:84:1302:166#0/1  
AGAGATATGGCCAGCATTAAAGAATCAATGAACTGAGCAA  
+HWI-EAS443:3:84:1302:166#0/1  
[`[a[Z^a`Y\_PSYTI¥Z`¥S]H^^)`[a^VS¥]aY\_V[¥  
@HWI-EAS443:3:86:1536:15#0/1  
GAAGAACCCCGCACTCAGAATGAAGTGGATGATGGGAATG

+HWI-EAS443:3:86:1536:15#0/1  
^a`¥YVZTMTDOXUVZ\_LY\_]TL[P¥[RY[BBBBBBBBBB  
@HWI-EAS443:3:86:1591:130#0/1  
AAGAGAAGAACCCCGCACTCAGAATGAAGTGCATGATGGC  
+HWI-EAS443:3:86:1591:130#0/1  
aa\_]^`X^GWGN\_T\_U¥^Q`SWYUWW^UWQZ¥ZTWWUQ  
@HWI-EAS443:3:8:532:1915#0/1  
AAACAATTGACACTAATTGATGGCCATCTGAATTCTTTT  
+HWI-EAS443:3:8:532:1915#0/1  
¥V¥NVaXJYYUa]\_\_\_\_\_]QQN`WW`TaYXFZ^¥GWY\_^YB  
@HWI-EAS443:3:8:864:1104#0/1  
AAACAATTGACACTAATTGATAGCCATCCGAATTCTTTT  
+HWI-EAS443:3:8:864:1104#0/1  
abbababaaaaabaaa`aaaaa`\_\_aa\_aba`aa`aaa`  
@HWI-EAS443:3:90:1450:234#0/1  
CATTAAGCATCAATGAACTGAGCAATATTGCAAAAGGAGA  
+HWI-EAS443:3:90:1450:234#0/1  
Q\_^bba`b^`a]`¥I[Y`\_]¥¥¥Ga¥`VX`W^ZU]ab  
@HWI-EAS443:3:92:383:494#0/1  
CAAGAGAAGAACCCCGCACTCAGAAAGAAGTGGATGATGG  
+HWI-EAS443:3:92:383:494#0/1  
aa`aaa`X`aaaa\_a`^]\_]\_a\_\_\_\_\_]\_`Ua]]\_aX^^]  
@HWI-EAS443:3:93:1324:1886#0/1  
TAAGCATCAATGAACTGAGCAATCTTGAAAAGGAGAGAA  
+HWI-EAS443:3:93:1324:1886#0/1  
a\_b`T¥bbV^\_[Naba¥ZVWaa]aY`[D[Y[^^\_RaW`\_`  
@HWI-EAS443:3:93:770:1093#0/1  
AGAGATATGACCCAGCATTAAAGCATCAATGAACTGAGCAA  
+HWI-EAS443:3:93:770:1093#0/1  
¥]`baa\_ababa`ab`bbb``aaaa\_a`baVS`aa\_a]a\_  
@HWI-EAS443:3:94:1705:490#0/1  
CAAGAGAAGAACCCCGCACTCAGAATGAAGTGGATGATGG  
+HWI-EAS443:3:94:1705:490#0/1  
YXbbb`Ybab[b^U`]D[a`^`UWa`]V¥\_]`^b\_UaU¥aa  
@HWI-EAS443:3:94:529:91#0/1  
TCTCCTTTTGCAGATTGCTCGGTTTCATTGATGCTTAATG  
+HWI-EAS443:3:94:529:91#0/1  
Q^^`aXY^aQ¥\_`XPT\_Y\_]YH][XIVa^\_YW`Y\_ZVXZY  
@HWI-EAS443:3:95:1180:1426#0/1  
AGAAGAACCCCGCACTCAGAATGAAGGGGATGATGGCAAT  
+HWI-EAS443:3:95:1180:1426#0/1  
Ybb`\_Ub\_] [G[\_[RTV]`aaaaYaG`b\_Vb`a`X]IS\_  
@HWI-EAS443:3:95:32:1043#0/1  
AAGAGAAGAACCCCGCACTCAGAAAGAAGTGGATGATGGC  
+HWI-EAS443:3:95:32:1043#0/1  
^Q\_abaaba`[\_`aabba]aaaa`Za[`aTa`\_`UQ]\_^  
@HWI-EAS443:3:96:1405:687#0/1  
TAAGCATCAATGAACTGAGCTATCTTGCAAAAGGAGAGAA  
+HWI-EAS443:3:96:1405:687#0/1  
aaaZJ]aY^aaU]a^aaa\_Q\_\_a^\_YaX\_]`^Pa\_Xa\_Y\_\_



@HWI-EAS443:3:9:1777:1056#0/1  
CAATTCGACACTAATTGATGGTCATCCGAATTCTTTTGGT  
+HWI-EAS443:3:9:1777:1056#0/1  
aaa\_abbabbbba\_bba`aaZF¥b[\_aaa`bYbbab`V¥  
@HWI-EAS443:3:9:816:1849#0/1  
AGAAGAACCCCGCACTCAGAATGAAGTTGATGATGGCAAT  
+HWI-EAS443:3:9:816:1849#0/1  
a\_]a\_aa[^^^]^\_^\_]¥^[\_`\_\_XKHRWRM\_Z^Z¥Z\_V^  
@HWI-EAS443:3:11:848:1343#0/1  
GAGATGGCCCAGCATTAAAGCATCAATGAACTGAGCAATCT  
+HWI-EAS443:3:11:848:1343#0/1  
`baa\_aabaaaaaaaa`a`a```````^^a\_\_a^``\_]\_  
@HWI-EAS443:3:14:1247:711#0/1  
ATCAAGCATCAATGAACTGAGCAATCTTGCAAAAAGGAGAG  
+HWI-EAS443:3:14:1247:711#0/1  
¥aaa^`ZX]WVZaaaa]^a`\_]`a`]^Z```[]\_aY¥a\_a  
@HWI-EAS443:3:14:1311:1707#0/1  
AGATAAGCATCAATGAACTGAGCAATCTTGCAAAAAGGAGA  
+HWI-EAS443:3:14:1311:1707#0/1  
`W¥abab¥aa[^a]`aaa`\_a```aa`^`W`\_Z\_a[^\_\_  
@HWI-EAS443:3:16:942:1683#0/1  
GAAGAACCCCGCACTCAGAATGAAGTGGATGATGGCAGTG  
+HWI-EAS443:3:16:942:1683#0/1  
\_XUSW\_^\_ab^¥^¥TIQFX`XOW¥VY\_RZH¥P¥WNPLGP]  
@HWI-EAS443:3:24:1098:1100#0/1  
AGCATTAAAGCATCAATGAACTGAGCAATCTTGCAAAAACGA  
+HWI-EAS443:3:24:1098:1100#0/1  
a[^a]\_`\_]`[^aa[a`TQPRRZR]I¥Q^[H^]`¥PS^LU  
@HWI-EAS443:3:24:650:346#0/1  
ATGAGACAAGAGATATGGCCCAGCATTAAAGCATCAATGAA  
+HWI-EAS443:3:24:650:346#0/1  
a`aaaaaaaa\_\_a`a]\_\_`¥^\_\_^```a\_\_Y`^]]^]]\_`^  
@HWI-EAS443:3:24:951:1805#0/1  
AGAATGGCCCAGCATTAAAGCATCAATGAACTGAGCAATCT  
+HWI-EAS443:3:24:951:1805#0/1  
a\_\_a\_a`a`a`\_]Xaa\_aaaW]\_\_¥¥a`^\_\_Z\_Y\_\_Z`^¥V^  
@HWI-EAS443:3:25:1018:209#0/1  
AGAATGGCCCAGCATTAAAGCATCAATGAACTGAGCAATCT  
+HWI-EAS443:3:25:1018:209#0/1  
````ab``Y]aa¥`a[aaaZ``]]a\_a]¥\_\_^`]\_\_^X\_  
@HWI-EAS443:3:25:1064:437#0/1  
TGCCCATCATCCACTTCATTCTGAGTGC GGGTTCTTCTC  
+HWI-EAS443:3:25:1064:437#0/1  
aaaU`b][a¥¥`\_a`[¥[PP[\_Z]VG]H[\_XVFUZa`R^N  
@HWI-EAS443:3:26:533:1073#0/1  
AGAAGACAAGAGATATGGCCCAGCATTAAAGCATCAATAAA  
+HWI-EAS443:3:26:533:1073#0/1  
[`S]T0^¥H^0`aZ`U\_a\_b^[^aa`a¥U[a`[Y\_`GaZ  
@HWI-EAS443:3:26:742:1476#0/1  
ATCAAGCATCAATGAACTGAGCAATCTTGCAAAAAGGAGAG

+HWI-EAS443:3:26:742:1476#0/1  
¥^`bb`Ua^[^aMbaW`\_a`aa\_bb`bT^aa`\_\_\_aa`  
@HWI-EAS443:3:2:1400:1811#0/1  
ATCATGGCCCAGCATTAAAGCATCAATGAACTGAGCAATCT  
+HWI-EAS443:3:2:1400:1811#0/1  
a¥\_aa^\_U`^^\_^]`^`\_Z^`^^\_`^Z\_V\_]`^X^Z]V]  
@HWI-EAS443:3:2:1705:1900#0/1  
AAGGGCCCAGCATTAAAGCATCAATGAACTGAGCAATCTTG  
+HWI-EAS443:3:2:1705:1900#0/1  
¥``aba[UXb[^UY]aa`\_]P`a\_^\_]`^\_0\_TRM^^\_  
@HWI-EAS443:3:31:499:775#0/1  
GAGAAGAACCCCGCACTCAGAATGAAGTGGATGATGGGCA  
+HWI-EAS443:3:31:499:775#0/1  
`bbbbabbaaaabaa`aab\_aaaa\_[P[a\_`a]\_``````  
@HWI-EAS443:3:33:645:1298#0/1  
AGAGAAGAACCCCGCACTCAGAATGAAGTGGATGATGACA  
+HWI-EAS443:3:33:645:1298#0/1  
[^VUW¥ZX[aVZVTaaa¥a]Y]b\_aaGGFH\_\_X\_VUXP^`  
@HWI-EAS443:3:34:1305:1229#0/1  
GCGAAGAAGACAAGAGATATGGCCCAGCATTAAAGCATCAA  
+HWI-EAS443:3:34:1305:1229#0/1  
a`UX`^\_]`\_`\_[]Y¥`]N^X\_YYR¥`\_`\_\_MWUUUW^B  
@HWI-EAS443:3:35:1013:979#0/1  
GAGAAGAACCCCGCACTCAGAATGAAGTGGATGATGGGCA  
+HWI-EAS443:3:35:1013:979#0/1  
a\_]`a[aS`^¥`YW¥Q^`Y[XH¥Y[RPF[WZU[TLUSWLW  
@HWI-EAS443:3:36:1011:662#0/1  
AAGAGAAGAACCCCGCACTCAGAATGAAGTGGATGATAGG  
+HWI-EAS443:3:36:1011:662#0/1  
aZbWbaZaba`a`b\_aa\_`\_`\_`a]ZaZa\_]\_a\_V]¥\_  
@HWI-EAS443:3:3:346:1616#0/1  
GAGAAGAACCCCGCACTCAGAATGAAGTGGATGATGGAAA  
+HWI-EAS443:3:3:346:1616#0/1  
ababaabbaa^a\_`Za`baa^ab\_aaY`^a`aa`\_YNSV  
@HWI-EAS443:3:3:74:860#0/1  
GAGATGGCCCAGCATTAAAGCATCAATGAACTGAGCAATCT  
+HWI-EAS443:3:3:74:860#0/1  
aba[abaaab`U¥aaaa[b^aaababaaaSaaaaaaa`a[  
@HWI-EAS443:3:42:293:1598#0/1  
AGAATGGCCCAGCATTAAAGCATCAATGAACTGAGCAATCT  
+HWI-EAS443:3:42:293:1598#0/1  
WRY^^¥]\_\_\_^^^ZX\_]`Z]]]¥VWW\_\_[ZZZV]^S[X  
@HWI-EAS443:3:44:115:1319#0/1  
ATCATGGCCCAGCATTAAAGCATCAATGAACTGAGCAATCT  
+HWI-EAS443:3:44:115:1319#0/1  
a\_aa^X[\_W][`[OX\_]\_PTZYa¥]]XY^]^ZUX^]^¥TZ  
@HWI-EAS443:3:47:1109:1381#0/1  
GATGAGAAGAACCCCGCACTCAGAATGAAGTGGATGATGG  
+HWI-EAS443:3:47:1109:1381#0/1  
GU[bb\_[]`¥¥baX¥abbbb\_^[]Vbb\_`b^ab`Ta¥Z^`

@HWI-EAS443:3:47:312:702#0/1  
AGATAAGCATCAATGAACTGAGCAATCTTGCAAAGGAGA  
+HWI-EAS443:3:47:312:702#0/1  
a^¥a¥aaaa¥Q]abWa¥`X^`Pa`\_]aaa``\_\_^aa`a  
@HWI-EAS443:3:49:937:1496#0/1  
GAGATGGCCCAGCATTAAAGCATCAATGAACTGAGCAATCT  
+HWI-EAS443:3:49:937:1496#0/1  
]¥a`^\_a[[Y`\_`a\_\_`^`¥\_]`a[\_]`^]]U]^`  
@HWI-EAS443:3:4:1314:297#0/1  
AAGAGATATGGCCCAGCATTAAAGCATCAATGAACTGATCA  
+HWI-EAS443:3:4:1314:297#0/1  
K`\_a\_b\_b\_ab¥^\_ab`bb\_b[aaa^^`QVbR\_U^aPF[\_  
@HWI-EAS443:3:4:1557:360#0/1  
GAGAAGAACCCCGCACTCAGAATGAAGTGGATGATGGGAA  
+HWI-EAS443:3:4:1557:360#0/1  
a\_a\_YLY`^]]\_\_WU^¥\_]ZSX^[NQ]SaXX\_]SX]BBBB  
@HWI-EAS443:3:50:1078:1611#0/1  
TGATGGGCAAAGAAGACAAGAGATATGGCCCAGCATTAAAG  
+HWI-EAS443:3:50:1078:1611#0/1  
ab`aabbba`a`]ab^]\_a\_a`\_a^a`Z]U[^S`\_\_\_Ya  
@HWI-EAS443:3:52:1324:1960#0/1  
ATCAAGCATCAATGAACTGAGCAATCTTGCAAAGGAGAG  
+HWI-EAS443:3:52:1324:1960#0/1  
`bbbbba^\_aba`]`aaaTaa^aaa`abana^\_`\_]YXa  
@HWI-EAS443:3:54:1017:237#0/1  
TTGATTGATGCTTAATGCTGGCCATATCTCTTGTCTTCT  
+HWI-EAS443:3:54:1017:237#0/1  
`THW^\_Y^aQ`b`a`\_[Q[a^[\_a[`WRZaaa¥GR^]]  
@HWI-EAS443:3:56:612:882#0/1  
GAGAGCATTAAAGCATCAATGAACTGAGCAATCTTGCAA  
+HWI-EAS443:3:56:612:882#0/1  
aaa`aaaa]`a`aa`^`\_a\_\_\_a\_]a\_aa`^^^`]^`\_\_^  
@HWI-EAS443:3:57:1524:1701#0/1  
AAGAAGCATCAATGAACTGAGCAATCTTGCAAAGGAGAG  
+HWI-EAS443:3:57:1524:1701#0/1  
ab`aa`\_a\_a`ab\_\_\_a`\_aa^[\_`aa^`\_\_^^`¥a`]  
@HWI-EAS443:3:57:328:285#0/1  
GAGATGGCCCAGCATTAAAGCATCAATGAACTGAGCAATCT  
+HWI-EAS443:3:57:328:285#0/1  
a^a`¥aaa`\_`¥YaYa¥[¥V`a`X^\_a`\_U^^]`ZZZX][  
@HWI-EAS443:3:59:1739:1789#0/1  
AGAATGGCCCAGCATTAAAGCATCAATGAACTGAGCAATCT  
+HWI-EAS443:3:59:1739:1789#0/1  
a^\_a\_]Za^\_[YGWX]aZ]ZX\_]W\_aS\_`]]H[XMSO\_U]  
@HWI-EAS443:3:62:1652:594#0/1  
GAGAAGAACCCCGCACTCAGAATGAAGTGGATGATGGNAA  
+HWI-EAS443:3:62:1652:594#0/1  
a`]]`aaa\_]`a]`\_a\_^a\_\_`^X`Ya`U[aY^\_YDUZ  
@HWI-EAS443:3:62:737:1121#0/1  
AGAAGACAAGAGATATGGCCCAGCATTAAAGCATCAATCAA

+HWI-EAS443:3:62:737:1121#0/1  
¥`^aa`aa\_`\_]`a]a^[^]a```aa`\_]```a[\_a\_]F[]  
@HWI-EAS443:3:63:1054:1927#0/1  
TGCCCATCATCCACTTCATTCTGAGTGC GGGTTCTTCTC  
+HWI-EAS443:3:63:1054:1927#0/1  
aabba^aa`\_¥N[\_`aa[aaaaPT\_H^\_Y\_a¥H[\_a`G\_]`  
@HWI-EAS443:3:64:1020:1822#0/1  
AGAATGGCCCAGCATTAAAGCATCAATGAACTGAGCAATCT  
+HWI-EAS443:3:64:1020:1822#0/1  
\_Yaa`^Z¥`aYX^ba\_\_a\_T\_\_`\_\_`[Y]X`\_\_\_\_]`\_\_]`  
@HWI-EAS443:3:6:484:1006#0/1  
GACAAGAGATATGGCCCAGCATTAAAGCATCAATGAACNGA  
+HWI-EAS443:3:6:484:1006#0/1  
^^`YFYa`baba`^`^`\_]a`a]a`\_`\_`¥aaaYTDR`  
@HWI-EAS443:3:74:1393:994#0/1  
ATCAAGCATCAATGAACTGAGCAATCTTGCAAAGGAGAG  
+HWI-EAS443:3:74:1393:994#0/1  
ababbbabbaaaabaaaabababaa`aabaa``aaa`aaa  
@HWI-EAS443:3:75:1300:1298#0/1  
GAGATGGCCCAGCATTAAAGCATCAATGAACTGAGCAATCT  
+HWI-EAS443:3:75:1300:1298#0/1  
\_VOTaa`aa`aa\_a`aaaaX^a¥\_\_a`\_\_\_\_a[\_`X`\_`\_^  
@HWI-EAS443:3:78:678:1029#0/1  
GAGATGGCCCAGCATTAAAGCATCAATGAACTGAGCAATCT  
+HWI-EAS443:3:78:678:1029#0/1  
a]^a`^`a`]][^¥aaa][T\_`aa`\_a\_\_`a\_\_]aaa\_\_Z`  
@HWI-EAS443:3:81:1353:578#0/1  
AAGAGAAGAACCCCGCACTCAGAATGAAGTGGATGATAGC  
+HWI-EAS443:3:81:1353:578#0/1  
aba`^`ab\_ab\_]a`b`aYa\_aa\_aaa\_\_a[aaaab`^`a\_Y  
@HWI-EAS443:3:81:1372:238#0/1  
CACGATTGCTCAGTTCATTGATGCTTAATGCTGGGCCATA  
+HWI-EAS443:3:81:1372:238#0/1  
a^ab^bbabZI]aaaaZab¥^aaZ¥aa]`a^\_\_]\_^X\_a\_  
@HWI-EAS443:3:82:484:117#0/1  
CTCTCCTTTTGCAAGATTGCTCAGTTCATTGATGCTTCTT  
+HWI-EAS443:3:82:484:117#0/1  
aaaZ`a]ab`SaY]a]LaaT^ZV\_¥U\_^aaVW]^VN]^a\_  
@HWI-EAS443:3:83:1142:1034#0/1  
GAGATGGCCCAGCATTAAAGCATCAATGAACTGAGCAATCT  
+HWI-EAS443:3:83:1142:1034#0/1  
`aaa`ab`^`aaa\_aaaaaaVaa\_aaa`a`^`^`^`^`a`\_`\_\_  
@HWI-EAS443:3:86:546:553#0/1  
AAGAAGCATCAATGAACTGAGCAATCTTGCAAAGGAGAG  
+HWI-EAS443:3:86:546:553#0/1  
\_\_bba`^`a`^`aaaaaaa`a`a`^`^`^`^`^`¥Y`a`aaa  
@HWI-EAS443:3:89:1075:1052#0/1  
CAAGAGAAGAACCCCGCACTCAGAATGAAGTGGATGAGGG  
+HWI-EAS443:3:89:1075:1052#0/1  
Sa`RX\_`abababa¥b\_\_ba`aa\_bab^J[ZbaYJ^YI\_]`

@HWI-EAS443:3:92:50:46#0/1  
GAGAAGAACCCCGCACTCAGAATGAAGTGGATGATGGGCA  
+HWI-EAS443:3:92:50:46#0/1  
a`^\_aa[\_R^[]aXQ\_NY[]UUU¥GUYH[]]BBBBBBBBBB  
@HWI-EAS443:3:94:1407:1842#0/1  
GAGATGGCCAGCATTAAAGCATCAATGAAGTGGCAATCT  
+HWI-EAS443:3:94:1407:1842#0/1  
`WaaU^a`^`a``¥aaaabY¥aa^¥¥aab]b`ab^aWMTa  
@HWI-EAS443:3:94:1480:288#0/1  
AGATTGCTCAGTTCATTGATGCTTAATGCTGGGCCATCTC  
+HWI-EAS443:3:94:1480:288#0/1  
a`aaaa^`\_`\_`\_aWa\_`^]`a^a\_\_¥\_`]W\_^WG[\_Z^O  
@HWI-EAS443:3:96:998:735#0/1  
CTCTCCTTTTGCAAGATTGCTCAGTTCATTGATGCTTCTT  
+HWI-EAS443:3:96:998:735#0/1  
\_VZ¥[TZ\_V[WZ]``^W\_SW¥ZWX`U`\_\_P]]]F]`T`X  
@HWI-EAS443:3:98:1550:1367#0/1  
AAGAATTCGACACTAATTGATGGCCATCCGAATTCTTTTG  
+HWI-EAS443:3:98:1550:1367#0/1  
a]Lb`ZZ\_a\_a`a\_]bab`[`b\_]Kb^abaI\_`^a`a^^  
@HWI-EAS443:3:98:1583:1664#0/1  
GAGAAGAGAAGAACCCCGCACTCAGAATGAAGTGGATGAT  
+HWI-EAS443:3:98:1583:1664#0/1  
a^VUZZ`V^aa^^SUZG`[XURRXY^]^MVXG\_GQRZ]W  
@HWI-EAS443:3:99:250:1812#0/1  
GAGAAGAACCCCGCACTCAGAATGAAGTGGATGATGGAAA  
+HWI-EAS443:3:99:250:1812#0/1  
`XUUZaaaVH^[¥WR\_^X¥¥RVN`KRZHa]a^LNNZBBBB  
@HWI-EAS443:3:10:1378:1104#0/1  
AGAAGACNAGAGATATGGCCAGCATTAAAGCATCAATGAA  
+HWI-EAS443:3:10:1378:1104#0/1  
ababaa[D[baaaaa\_aaa\_^aa\_^aaaa\_`\_^]^a```  
@HWI-EAS443:3:12:1594:1612#0/1  
GAANAACCCCGCACTCAGAATGAAGTGGATGATGGCAATG  
+HWI-EAS443:3:12:1594:1612#0/1  
aaWDNz\_\_YYaL]\_`ZV]R¥^¥RW`U[]YR]GW[VPWWWB  
@HWI-EAS443:3:13:1094:1104#0/1  
GCATTAAGCATCAATGAANTGAGCAATCTTGCAAAGGAG  
+HWI-EAS443:3:13:1094:1104#0/1  
a\_aaa`]\_\_\_`^^\_`Y]WDX\_]^Z]\_^]`^^XU^Z]^Z¥  
@HWI-EAS443:3:14:1094:371#0/1  
GCCCAGCATTAAAGCATCAATGAAGTGGCAATCTTGCAA  
+HWI-EAS443:3:14:1094:371#0/1  
aY`\_PX]X[\_a`]TS[`^XW\_Z]^\_YWMDPWS[^Z^V]ZW  
@HWI-EAS443:3:19:498:588#0/1  
AAAGAAGACAANAGATATGGCCAGCATTAAAGCATCAATG  
+HWI-EAS443:3:19:498:588#0/1  
a\_Y\_]a`\_`ZDwa^^\_Y\_\_`]a]]\_]\_a^ZZ]]VW\_]^  
@HWI-EAS443:3:22:1670:718#0/1  
TTTTTNAACAATTCGACACTAATTGATGGCCATCCGAATT

+HWI-EAS443:3:22:1670:718#0/1  
aa\_a[ DZ` [ ` a ^ [ \_ ] aW` ^ ` ^ [ \_ ] ] SY¥Z] XXYZ\_ ]  
@HWI-EAS443:3:29:983:1131#0/1  
CCCAGCATTAAGCATCAATGAACTNAGCAATCTTGCAAAA  
+HWI-EAS443:3:29:983:1131#0/1  
abab`\_bababaaaaaaabaa`a¥D[ ` ^aaa` `aaa\_\_\_^  
@HWI-EAS443:3:30:355:1378#0/1  
TTTAAACAATTGACACTAATTGATGNCCATCCGAATTCT  
+HWI-EAS443:3:30:355:1378#0/1  
ab`Y[ aab` aaaaabbba^ba` `a` ZD^aa` aa` a¥` a\_\_\_  
@HWI-EAS443:3:36:1184:726#0/1  
GAAGACAANAGATATGGCCCAGCATTAAGCATCAATGAAC  
+HWI-EAS443:3:36:1184:726#0/1  
^`S] Ya` YD] aa` ZZ¥[ ` ] [LW¥aa` ^X¥` ^U^Z] [[X] a  
@HWI-EAS443:3:40:1373:97#0/1  
AGAAGAACCCCGCACTCAGAATGAAGTNGATGATGGCAAT  
+HWI-EAS443:3:40:1373:97#0/1  
abaab`a\_`\_^a\_`\_` [ \_a\_ ] `a] X\_MDXXYaV^` ^UUU^  
@HWI-EAS443:3:43:1429:1221#0/1  
CAGCATTAAGCATCAATGAACTGAGCNATCTTGCAAAAAGG  
+HWI-EAS443:3:43:1429:1221#0/1  
abbaabbbb¥aWb] ababaa` bbaaSDUbaaa\_`\_` a\_` aS  
@HWI-EAS443:3:46:1701:1083#0/1  
ACAAGAGATATGGCCCAGCATTAAAGCNTCAATGAACTGAG  
+HWI-EAS443:3:46:1701:1083#0/1  
aZ] P X¥` [ ] ^ [ ` U\_ TH¥YP` aU] P` UDTQY [ ] V¥XV] U^\_  
@HWI-EAS443:3:46:197:835#0/1  
CAATTCGACACTAATTGATGGCCATCNGAATTCTTTTGGT  
+HWI-EAS443:3:46:197:835#0/1  
a^\_b` `b` ^` ^` a^` ^] aaaaaYYZ` aZDZYZ^` Xaa` \_] ^Y  
@HWI-EAS443:3:47:702:1684#0/1  
CAAGAGAAGAACCCCGCNCTCAGAATGAAGTGGATGATGG  
+HWI-EAS443:3:47:702:1684#0/1  
aa¥` ¥¥` a` `bb\_` ^a [ DWXabZaa [ ba` \_R ] \_ [ ` V` ^U [ ]  
@HWI-EAS443:3:48:369:1206#0/1  
GAGATATGGCCCAGCATTAAGCATCAANGAACTGAGCAAT  
+HWI-EAS443:3:48:369:1206#0/1  
aa] R¥aVZ¥` a] ] Z¥\_X\_` \_TWU¥TY [ DW^W] a` `XWW [ ]  
@HWI-EAS443:3:48:511:1464#0/1  
CAGCATTAAGCATCAATGAACTGNGCAATCTTGCAAAAAGG  
+HWI-EAS443:3:48:511:1464#0/1  
abaabbbbabbaa\_aabb` ¥\_b^DW\_b\_a^a\_aWSZNKW`  
@HWI-EAS443:3:50:1132:667#0/1  
ACAAGAGANATGGCCCAGCATTAAGCATCAATGAACTGAG  
+HWI-EAS443:3:50:1132:667#0/1  
ab^] bbb] D] abbb\_b` aYbbbaaaaaaaa` aaaaaaa^a  
@HWI-EAS443:3:50:590:1020#0/1  
AGAAGAACCCCGCACTCAGAATNAAGTGGATGATGGCAAT  
+HWI-EAS443:3:50:590:1020#0/1  
a` ] b` baa\_babaaaaaab` b [ DX` b` baaaba\_a` ` ] \_a

@HWI-EAS443:3:52:1468:277#0/1  
GAGAAGAACCCCGCACTCAGAATGAAGTNGATGATGGCAA  
+HWI-EAS443:3:52:1468:277#0/1  
^`ba^]\_a`¥`ab\_[V[a^aZVZY[Z]SDYW\_`V[¥[WVZ  
@HWI-EAS443:3:52:963:1781#0/1  
GAGAAGAACCCCGNACTCAGAATGAAGTGGATGATGGCAA  
+HWI-EAS443:3:52:963:1781#0/1  
aaaaaaaa` `][D[\_\_`\_a^`a`\_`^aZ¥a\_a\_^^^ZZ^\_  
@HWI-EAS443:3:55:866:1882#0/1  
TCCTTNTGCAAGATTGCTCAGTTCATTGATGCTTAATGCT  
+HWI-EAS443:3:55:866:1882#0/1  
X\_VZUD][\_[P^aYV\_ZTU\_a]aZ^^]S]a]U]ZaQa`V]  
@HWI-EAS443:3:59:1346:905#0/1  
AAGAAGACAAGNGATATGGCCCAGCATTAAAGCATCAATGA  
+HWI-EAS443:3:59:1346:905#0/1  
`^bbabbbba^D]aaaaaaaa\_a^aababbaaWaa\_XQa`^  
@HWI-EAS443:3:60:1149:2010#0/1  
CAATTCGACACTAATTGATGGCCATCNGAATTCCTTTGGT  
+HWI-EAS443:3:60:1149:2010#0/1  
]bbb\_[b]abaabbbbab[a`bbabMDZaa`a\_a`a¥`\_G  
@HWI-EAS443:3:60:1479:719#0/1  
GAAGACAAGAGATATGGCCCAGCATTAAAGCATCNATGAAC  
+HWI-EAS443:3:60:1479:719#0/1  
aabbaaab\_baaa`aaaa\_aa\_a`\_aa\_``\_NDX`[^a^  
@HWI-EAS443:3:61:1009:1448#0/1  
ACAATTCGACACTAATTGATGGCCATCCGAATTCNTTGG  
+HWI-EAS443:3:61:1009:1448#0/1  
aba`aab^`aa`aaaaaaaa\_`¥aabaa` `` ``]N¥DX[VJ  
@HWI-EAS443:3:66:1527:596#0/1  
GAGATATGGCNCAGCATTAAAGCATCAATGAACTGAGCAAT  
+HWI-EAS443:3:66:1527:596#0/1  
a`b^aaaaaXDYab`a\_`^`a^a`^`\_aa]`\_`\_W`]\_`a  
@HWI-EAS443:3:6:1351:1835#0/1  
GAAGAACCCCGCACTCAGANTGAAGTGGATGATGGCAATG  
+HWI-EAS443:3:6:1351:1835#0/1  
aaab`\_RT[\_`XZU]a``ZDYa¥QaYa`Q`\_TLBBBBBBB  
@HWI-EAS443:3:74:689:1124#0/1  
AAGAGAAGAANCCCGCACTCAGAATGAAGTGGATGATGGC  
+HWI-EAS443:3:74:689:1124#0/1  
ab\_Z`b¥`b^D^aaaaaaaa`a`aaa`a\_aaa\_aa¥`X^  
@HWI-EAS443:3:75:975:245#0/1  
GCCNTCATCCACTTCATTCTGAGTGC GGGTTCTTCTCTT  
+HWI-EAS443:3:75:975:245#0/1  
a`¥D¥ab]\_aa`ba^aaa\_a`\_a\_`^aaa`V\_¥a`^Y\_W\_^  
@HWI-EAS443:3:81:1044:1515#0/1  
AAACAATTCGACACTAATTGATGGCCATCCGAATTCNTTT  
+HWI-EAS443:3:81:1044:1515#0/1  
aa\_a¥U]a\_[[a^`a\_`^`][O^`\_U`\_]¥\_XRDW\_]`  
@HWI-EAS443:3:82:474:1144#0/1  
GAGATATGGCCCAGCATTAAAGCATCNATGAACTGAGCAAT

+HWI-EAS443:3:82:474:1144#0/1  
\_¥R¥^Y^aba\_]¥[]¥\_Y¥\_aWUDY`^VY`][ ]]  
@HWI-EAS443:3:86:1061:1822#0/1  
CAGCATTNAGCATCAATGAACTGAGCAATCTTGCAAAAAGG  
+HWI-EAS443:3:86:1061:1822#0/1  
X\_¥R\_^WD^\_¥\_\_T\_[¥`^YWY^`WG^`a`\_`ZNT`a¥^Z  
@HWI-EAS443:3:88:184:1038#0/1  
TTTTAAANAATTGACACTAATTGATGGCCATCCGAATTC  
+HWI-EAS443:3:88:184:1038#0/1  
abbab`YD]a`aaaaaba`^`a\_\_`\_`^`\_`\_`a`\_`\_W`\_`  
@HWI-EAS443:3:8:1521:983#0/1  
CCATCATCCACTTCATTCTGAGTGNGGGGTTCTTCTCTTG  
+HWI-EAS443:3:8:1521:983#0/1  
aa`^`baaZba`^`aaaYa`\_`[VDY`aaG[ZaaX`¥][ ]]  
@HWI-EAS443:3:91:1257:1737#0/1  
CTCATTGTTGGCAAAGAAGACAAGAGNTATGGCCCAGCAT  
+HWI-EAS443:3:91:1257:1737#0/1  
a]b]bbbbbaaa`^`ba¥aa^aab`UDP`aaaa`b`0`a  
@HWI-EAS443:3:92:1270:105#0/1  
CAAGAGAAGAANCCCGCACTCAGAATGAAGTGGATGATGG  
+HWI-EAS443:3:92:1270:105#0/1  
`bbbbbbab^b[D[aab]aaa`a[[¥bb^\_ZM]WW[b]ab¥  
@HWI-EAS443:3:94:586:1496#0/1  
ATTAAGCATCAATGAACTGAGCNATCTTGCAAAAAGGAGAG  
+HWI-EAS443:3:94:586:1496#0/1  
aaaaa\_aaa\_a`^`aaaa\_`^`aMDY\_`^`a`\_`\_`^`\_`\_`[a^^  
@HWI-EAS443:3:97:205:1266#0/1  
CAAGAGAAGAACCNCGCACTCAGAATGAAGTGGATGATGG  
+HWI-EAS443:3:97:205:1266#0/1  
abababbaaaba[D[aaa`\_`\_`a\_aaa\_\_aX`]\_ab^^a]  
@HWI-EAS443:3:9:1139:64#0/1  
TTAAGCATCAATGANCTGAGCAATCTTGCAAAAAGGAGAGA  
+HWI-EAS443:3:9:1139:64#0/1  
^aa`N]a`aaa[YDY\_a]aSa^`0aX^W[XSY\_UW\_Y\_Z  
@HWI-EAS443:3:13:102:1455#0/1  
AGAGAAGAACCCCGCACTCAGAATGAAGTGGATGATGGAA  
+HWI-EAS443:3:13:102:1455#0/1  
\_`[\_`\_W¥`¥`ab\_\_bbabb^baaa^^RXNaaTIaQQ¥GP  
@HWI-EAS443:3:25:151:1922#0/1  
GAATGGCCCAGCATTAAAGCATCAATGAACTGAGCAATCTT  
+HWI-EAS443:3:25:151:1922#0/1  
Za`¥WY\_aa\_\_bba`\_`^`Wbabbb\_]`a\_a`][ ]ZZ`\_`^`  
@HWI-EAS443:3:30:1539:1570#0/1  
AGATGGCCCAGCATTAAAGCATCAATGAACTGAGCAATCTT  
+HWI-EAS443:3:30:1539:1570#0/1  
aaa`a`b`aa`aaaaa\_a`\_`[^`\_\_\_\_¥`\_`^`V\_]¥MZ^  
@HWI-EAS443:3:32:1213:2011#0/1  
GAATGGCCCAGCATTAAAGCATCAATGAACTGAGCAATCTT  
+HWI-EAS443:3:32:1213:2011#0/1  
aaaabababaaaaaaa\_\_a\_aaaa\_\_a\_\_\_\_`\_]\_\_`^`\_`\_`



@HWI-EAS443:3:35:1145:1116#0/1  
TCATGGCCCAGCATTAAAGCATCAATGAACTGAGCAATCTT  
+HWI-EAS443:3:35:1145:1116#0/1  
aab`aaaa`\_\_aaaa`a`aa\_aa^Z\_aa\_\_Ya`Y]a^]  
@HWI-EAS443:3:38:757:1017#0/1  
GAAAGAGAAGAACCCCGCACTCAGAATGAAGTGGATGATG  
+HWI-EAS443:3:38:757:1017#0/1  
aaaaaaaa`\_¥[aaaa`\_`\_]XU[\_]^]VXX]]\_Y^X  
@HWI-EAS443:3:3:1360:2022#0/1  
AAAGAAGACAAGAGATATGGCCCAGCATTAAAGCATCAAGG  
+HWI-EAS443:3:3:1360:2022#0/1  
\_aaaa^b]\_Xaa`a\_Va]`]XS]^\_X^\_]`\_X\_¥0^VGZ  
@HWI-EAS443:3:49:599:1191#0/1  
GAAGAACCCCGCACTCAGAATGAAGTGGATGATGGCAAAG  
+HWI-EAS443:3:49:599:1191#0/1  
`a`aa^aaaa`aY`\_``````\_`^a`^aa[Ha`ZX\_\_¥  
@HWI-EAS443:3:54:724:701#0/1  
ACATGGCCCAGCATTAAAGCATCAATGAACTGAGCAATCTT  
+HWI-EAS443:3:54:724:701#0/1  
aa`\_aaa\_\_aa¥`]aaaa\_a`\_`U`a`W`\_]aS`\_]`^  
@HWI-EAS443:3:56:1039:1768#0/1  
GAAGAACCCCGCACTCAGAATGAAGTGGATGATGGCAAAG  
+HWI-EAS443:3:56:1039:1768#0/1  
a\_aaa]`a`a`^\_^^aa]a\_]\_Y`\_````^]V]]^  
@HWI-EAS443:3:58:1605:629#0/1  
AGAGAAGAACCCCGCACTCAGAATGAAGTGGATGATGGGC  
+HWI-EAS443:3:58:1605:629#0/1  
`baaaabaa\_\_`aaaa`a`^`\_aZVa¥a`]\_a\_¥¥\_¥  
@HWI-EAS443:3:58:627:1284#0/1  
AGGAGAAGAACCCCGCACTCAGAATGAAGTGGATGATGGC  
+HWI-EAS443:3:58:627:1284#0/1  
]LVY`\_]\_Z`^H]a^PVX]`\_V[PP¥]XG^R`R\_[G\_]\_  
@HWI-EAS443:3:63:642:142#0/1  
AAAGAATTGGATGGCCATCAATTAGTGTGGAATTGTTCA  
+HWI-EAS443:3:63:642:142#0/1  
\_\_W[Yb\_\_`YVJR`[N][\_aVUT[XWQQGMTNY`\_[TSRX  
@HWI-EAS443:3:65:1401:251#0/1  
AGAAGAACCCCGCACTCAGAATGAAGTGGATGATGGCATC  
+HWI-EAS443:3:65:1401:251#0/1  
abaabaa\_``aa`a^a]``^^aa¥¥a¥`^[\_a^^]\_Y^XE  
@HWI-EAS443:3:66:674:511#0/1  
AGGAGAAGAACCCCGCACTCAGAATGAAGTGGATGATGGC  
+HWI-EAS443:3:66:674:511#0/1  
VFU[^aW¥¥Z\_b^TZ`aaaZ¥]0]`bWL\_^\_JZ`ZVQ^[  
@HWI-EAS443:3:67:1641:83#0/1  
AGATGGCCCAGCATTAAAGCATCAATGAACTGAGCAATCTT  
+HWI-EAS443:3:67:1641:83#0/1  
]\_¥K\_\_YVaab¥¥baa^PGSWV^`\_a]WJRa¥^YTGXUYX  
@HWI-EAS443:3:68:317:1465#0/1  
TGCAAGATTGCTCAGTTCATTGATGCTTAATGCTGGGCAT

+HWI-EAS443:3:68:317:1465#0/1  
a`a`\_]\_aaa`aaaa`aaa`][aaba`aa`aaZXW\_\_`  
@HWI-EAS443:3:71:135:487#0/1  
GCCCATCATCCACTTCATTCTGAGTGCGGGTTCTTCTCT  
+HWI-EAS443:3:71:135:487#0/1  
\_`babbb[`aab\_aaa^[`]^X¥I]a`a]a`aaa\_a\_a  
@HWI-EAS443:3:72:961:1739#0/1  
AGAGCATTAAGCATCAATGAACTGAGCAATCTTGCAAAAAG  
+HWI-EAS443:3:72:961:1739#0/1  
a`[U]^`aa¥¥¥`[``\_[a`]a^a\_a`\_a`[\_]^Z\_U  
@HWI-EAS443:3:74:1599:1375#0/1  
GNAAGAAGACAAGAGATATGGCCAGCATTAAAGCATCAA  
+HWI-EAS443:3:74:1599:1375#0/1  
^D[aa]aab`aaRaUb\_^¥T\_]VSJTNV[Z\_SOZR¥UUVW  
@HWI-EAS443:3:77:964:763#0/1  
TGGCCATCATCCACTTCATTCTGAGTGCGGGTTCTTCTC  
+HWI-EAS443:3:77:964:763#0/1  
a`^ab\_\_\_a\_\_\_^bbaaV`abbaab]a``bbb\_aaaa^a¥  
@HWI-EAS443:3:7:632:564#0/1  
GCGGCAAAGAAGACAAGAGATATGGCCAGCATTAAAGCAT  
+HWI-EAS443:3:7:632:564#0/1  
aaaaaaaa^abbbaaa\_aaaa\_a\_^]aa^a`\_\_\_\_\_¥`  
@HWI-EAS443:3:89:1335:1632#0/1  
AGAGCATTAAGCATCAATGAACTGAGCAATCTTGCAAAAAG  
+HWI-EAS443:3:89:1335:1632#0/1  
a^WVYbaaaba]b`WQ¥]a^a]\_\_]QW`a^``b[ZYIaa  
@HWI-EAS443:3:91:536:1795#0/1  
GCCATCATCCACTTCATTCTGAGTGCGGGTTCTTCTCNT  
+HWI-EAS443:3:91:536:1795#0/1  
\_S^[a[K`aa¥\_]XLUPXV`\_YSW\_SLSZQT^YX\_T¥KDR  
@HWI-EAS443:3:94:569:196#0/1  
AGAAGAACCCCGCACTCAGAATGAAGTGGATGATGGCACT  
+HWI-EAS443:3:94:569:196#0/1  
QTG^\_WVU¥^`WR`aU`\_b\_ZbaV[b^]]V¥a`H]a]PFS  
@HWI-EAS443:3:94:770:1886#0/1  
GAATGGCCAGCATTAAAGCATCAATGAACTGAGCAATCTT  
+HWI-EAS443:3:94:770:1886#0/1  
a`ba]aaabababaabaa`aa`aaaa`aaa`\_a\_a`XUR  
@HWI-EAS443:3:96:1083:1465#0/1  
CAAGAGAAGAACCCCGCACTCAGAATGAAGTGGATGATAA  
+HWI-EAS443:3:96:1083:1465#0/1  
Zabbbabb`bbaabaabbaaaababbb\_babaaabaaaa  
@HWI-EAS443:3:96:117:1116#0/1  
AAGAGATATGGCCAGCATTAAAGCATCAATGAACTGAGTA  
+HWI-EAS443:3:96:117:1116#0/1  
\_VYa`NL\_FX`VHGJ^P^V]\_W\_BBBBBBBBBBBBBBBB  
@HWI-EAS443:3:9:225:777#0/1  
GCCCATCATCCACTTCATTCTGAGTGCGGGTTCTTCTCT  
+HWI-EAS443:3:9:225:777#0/1  
abU\_XZ]``a`\_XX`a`a]USQR[^[\_``]YU]^Y^]\_]]

@HWI-EAS443:3:100:298:1751#0/1  
AAGAGAAGAACCCCGCACTCAGAATGAAGTGGATGATGGG  
+HWI-EAS443:3:100:298:1751#0/1  
]¥`a`a^`]]ZYFWS\_a`Ha]`baYaa[G0]a]aUZVQF  
@HWI-EAS443:3:10:1052:1867#0/1  
GATGGCCCAGCATTAAAGCATCAATGAACTGAGCAATCTTG  
+HWI-EAS443:3:10:1052:1867#0/1  
][a¥b^b\_\_^Xa]aabb\_aaaa`a¥\_¥\_\_Y^aaa^]Ya]`  
@HWI-EAS443:3:10:117:332#0/1  
CGGGCAAAGAAGACAAGAGATATGGCCCAGCATTAAAGCAT  
+HWI-EAS443:3:10:117:332#0/1  
abbabbbab\_Kabbaaa`baaa^a[`]aaa``aaaY]a``  
@HWI-EAS443:3:12:1144:55#0/1  
GCTCTCCTTTTGAAGATTGCTCAGTTCATTGATGCTTAA  
+HWI-EAS443:3:12:1144:55#0/1  
`b\_Z\_W¥^aa```a`a[`b¥aa`a\_^]]a`a[\_a¥¥a\_\_  
@HWI-EAS443:3:12:921:442#0/1  
AGCCATCATCCACTTCATTCTGAGTGCGGGTCTTCTCT  
+HWI-EAS443:3:12:921:442#0/1  
a`]Zaaabaa`[aaa`aaaXba¥^^aa`a]\_[-[`Qa  
@HWI-EAS443:3:13:1035:168#0/1  
NTGGCCCAGCATTAAAGCATCAATGAACTGAGCAATCTTGC  
+HWI-EAS443:3:13:1035:168#0/1  
DNVWVTVVWVUXYUUTUYXXUWVWYUWVYWYUUTUYXZYX  
@HWI-EAS443:3:15:1207:1373#0/1  
CAATTCGACACTAATTGATGGCCATCCGAATTCTTTTGGA  
+HWI-EAS443:3:15:1207:1373#0/1  
`a¥^`\_0OW\_]aWYWY\_GT`[V¥\_\_\_XSYJ^ZR```S^WD  
@HWI-EAS443:3:15:1445:336#0/1  
GAAGCATCAATGAACTGAGCAATCTTGCAAAGGAGAGAA  
+HWI-EAS443:3:15:1445:336#0/1  
aa```^aaaabb¥a^ba`a\_a¥a^`aa]`\_`ab`\_aaa\_\_  
@HWI-EAS443:3:16:418:339#0/1  
ATGCCATCATCCACTTCATTCTGAGTGCGGGTCTTCTC  
+HWI-EAS443:3:16:418:339#0/1  
aba`baaabaaaaa`aa\_\_a`]`]a^`^`^]^^`^\_\_  
@HWI-EAS443:3:17:1240:1378#0/1  
CGGGCAAAGAAGACAAGAGATATGGCCCAGCATTAAAGCAT  
+HWI-EAS443:3:17:1240:1378#0/1  
]\_S^a`bb`W¥ab`^b[baab\_TW]]abaYb^`a\_^`aa  
@HWI-EAS443:3:17:1486:1739#0/1  
ATAAGCATCAATGAACTGAGCAATCTTGCAAAGGAGAGA  
+HWI-EAS443:3:17:1486:1739#0/1  
ZX]\_WYb`Y`]aa[a\_aZ[]XYa`a`RVU]\_a[]\_]\_[-  
@HWI-EAS443:3:17:175:1808#0/1  
CCTCTCCTTTTGAAGATTGCTCAGTTCATTGATGCTTAA  
+HWI-EAS443:3:17:175:1808#0/1  
¥`\_`bbbaa`\_bba]baa[^ab\_]J`ab]]a`Zaaaba  
@HWI-EAS443:3:24:1680:751#0/1  
AGCCATCATCCACTTCATTCTGAGTGCGGGTCTTCTCT

+HWI-EAS443:3:24:1680:751#0/1  
`^a`ZZ¥\_]\_]\_]\_S`][Z\_]¥a[a`a`]VP`Y[UY[\_  
@HWI-EAS443:3:25:1321:140#0/1  
GAAGAGATATGGCCCAGCATTAAAGCATCAATGAACTGAGC  
+HWI-EAS443:3:25:1321:140#0/1  
HYa^\_aab`aa¥¥a\_aabb`b\_abbbaabbbab\_bbab]  
@HWI-EAS443:3:25:1619:1668#0/1  
GATGGCCCAGCATTAAAGCATCAATGAACTGAGCAATCTTG  
+HWI-EAS443:3:25:1619:1668#0/1  
aYPY[Q^LFSYT^X[¥QN]WXST[[V^RVVYUXRVWVYY  
@HWI-EAS443:3:26:1651:967#0/1  
AAGAGAAGAACCCCGCACTCAGAATGAAGTGGATGATGGG  
+HWI-EAS443:3:26:1651:967#0/1  
aab\_aa]aabbb])bba`aa`b\_`Tab¥a^\_[a¥[aXD  
@HWI-EAS443:3:26:911:209#0/1  
AAGAGAAGAACCCCGCACTCAGAATGAAGTGGATGATGGG  
+HWI-EAS443:3:26:911:209#0/1  
`abbaab`aa`¥^a\_a\_^P^a^] ^YQU`H^ZZZYUV0^V  
@HWI-EAS443:3:27:544:393#0/1  
AAGAGAAGAACCCCGCACTCAGAATGAAGTGGATGATGGG  
+HWI-EAS443:3:27:544:393#0/1  
a]]`a[]VLaa¥aY[a^Z[`V^\_V¥`RL[\_a[P`a\_Z¥OD  
@HWI-EAS443:3:27:987:518#0/1  
AGAAGAACCCCGCACTCAGAATGAAGTGGATGATGGCAAC  
+HWI-EAS443:3:27:987:518#0/1  
]aaa\_baaXS`bZ[\_ZaXaa\_¥¥PR[J¥`aY[a\_FUXM  
@HWI-EAS443:3:28:1037:837#0/1  
GAGAAGAACCCCGCACTCAGAATGAAGTGGATGATGGCAN  
+HWI-EAS443:3:28:1037:837#0/1  
aabaababaaa`b`a\_aaaa`aa`\_aXa`aab\_`^`WZD  
@HWI-EAS443:3:32:152:1776#0/1  
GGGGCAAAGAAGACAAGAGATATGGCCCAGCATTAAAGCAT  
+HWI-EAS443:3:32:152:1776#0/1  
^OZZba\_]\_`ZSZ\_a\_aZ`[ZT\_^ba^Y][[YU^P\_ZZ  
@HWI-EAS443:3:33:584:1426#0/1  
AAGAGAAGAACCCCGCACTCAGAATGAAGTGGATGATGGG  
+HWI-EAS443:3:33:584:1426#0/1  
^Z^`baX\_]`b^aa[`^\_a\_\_a`¥\_¥SZZS]\_VVVW¥  
@HWI-EAS443:3:36:1743:2003#0/1  
GAAGAGAAGAACCCCGCACTCAGAATGAAGTGGATGATGG  
+HWI-EAS443:3:36:1743:2003#0/1  
HXbab\_[S`bbb\_PZ^bb\_ba]baUZ`UaTMR¥a`VSZ[[  
@HWI-EAS443:3:37:867:1331#0/1  
CATGGCCCAGCATTAAAGCATCAATGAACTGAGCAATCTTG  
+HWI-EAS443:3:37:867:1331#0/1  
aaUTZaaa`aaaaaaaaaab`a`\_`a`\_]Z\_a`\_\_^] ^\_  
@HWI-EAS443:3:40:993:863#0/1  
AGCCCAGCATTAAAGCATCAATGAACTGAGCAATCTTGCAA  
+HWI-EAS443:3:40:993:863#0/1  
Y^a`^\_bbaaa\_a\_¥aaab`\_Z¥b\_a`abab¥bbaaa^0^

@HWI-EAS443:3:45:378:328#0/1  
GAAGCATCAATGAACTGAGCAATCTTGCAAAAGGAGAGAA  
+HWI-EAS443:3:45:378:328#0/1  
abbb`ab`a`abaa`aaaa`aaaa`aaaa\_``aa`aaaa`  
@HWI-EAS443:3:49:342:1327#0/1  
AGCCATCATCCACTTCATTCTGAGTGCGGGGTTCTTCTCT  
+HWI-EAS443:3:49:342:1327#0/1  
ab`aabbba`aa`aa`abb[aaaVW[^a^a^X[\_aa^a\_a  
@HWI-EAS443:3:51:462:1145#0/1  
CATGGCCCAGCATTAAAGCATCAATGAACTGAGCAATCTTG  
+HWI-EAS443:3:51:462:1145#0/1  
^a]abaa]`baaaa`ab\_`a[\_abaaaaXVa^`ba`aaa  
@HWI-EAS443:3:54:568:1023#0/1  
GAAGCATCAATGAACTGAGCAATCTTGCAAAAGGAGAGAA  
+HWI-EAS443:3:54:568:1023#0/1  
\_XX^`¥^^¥OWU¥\_V]YWaY^^¥UXT\_`[¥X¥`]W]XU\_^  
@HWI-EAS443:3:55:198:593#0/1  
AGCCATCATCCACTTCATTCTGAGTGCGGGGTTCTTCTCT  
+HWI-EAS443:3:55:198:593#0/1  
a`bbabaaab`aaabaab`aaa`a\_`\_b[aaVa`a`a`aa  
@HWI-EAS443:3:57:1645:159#0/1  
GCTCTCCTTTTGCAAGATTGCTCAGTTCATTGATGCTTAA  
+HWI-EAS443:3:57:1645:159#0/1  
````\_U`]bbbaaZa\_baaaa`^]b^`]¥`aaa\_a^````\_  
@HWI-EAS443:3:58:1034:251#0/1  
TGGGTATGAAGAATTCACAATGGTTGGGAGAAGAGCAACA  
+HWI-EAS443:3:58:1034:251#0/1  
`ba^P[abXabaaR`Z\_\_¥¥``aZ]^\_\_X\_XQ\_W`R¥¥T¥  
@HWI-EAS443:3:62:1175:208#0/1  
AAGAGAAGAACCCCGCACTCAGAATGAAGTGGATGATGGA  
+HWI-EAS443:3:62:1175:208#0/1  
``]bbJS`aaUWZUa\_\_`a`\_a`W`a`\_\_TVWY\_a]W]TK  
@HWI-EAS443:3:63:1091:932#0/1  
CGGGTATGAAGAATTCACAATGGTTGGGAGAAGAGCAACA  
+HWI-EAS443:3:63:1091:932#0/1  
abbaI¥\_\_PPY^¥bbbb`]R]T¥SJ]^`Z`Z`NZ`\_[Z[N¥  
@HWI-EAS443:3:65:541:764#0/1  
GATGGCCCAGCATTAAAGCATCAATGAACTGAGCAATCTTG  
+HWI-EAS443:3:65:541:764#0/1  
a\_\_¥[Y¥aaaWaYV]X]aVY\_YZ^`WN[ZPW\_`^^\_Z]Y  
@HWI-EAS443:3:66:1087:1505#0/1  
NAAGAACCCCGCACTCAGAATGAAGTGGATGATGGCAATG  
+HWI-EAS443:3:66:1087:1505#0/1  
DKWYUYUVUSUTXVYVWVYVWUVVUVYUYRUVVSRVXVV  
@HWI-EAS443:3:69:1235:790#0/1  
AGCCATCATCCACTTCATTCTGAGTGCGGGGTTCTTCTCT  
+HWI-EAS443:3:69:1235:790#0/1  
aa`Y`Y`\_a[\_]a``aa¥V]^`aUaZ\_a]\_Y\_VU¥X\_P¥  
@HWI-EAS443:3:69:1451:1397#0/1  
AAGAGAAGAACCCCGCACTCAGAATGAAGTGGATGATGGG

+HWI-EAS443:3:69:1451:1397#0/1  
\_\_`^^\_a\_\_`W[ZV\_W[[Z^`X^Z`aa^¥T`Taa\_W[a¥a  
@HWI-EAS443:3:69:1792:1488#0/1  
NGAAGACAAGAGATATGGCCCAGCATTAAAGCATCAATGAA  
+HWI-EAS443:3:69:1792:1488#0/1  
DKWWUYUUTVMMMMVWTUTWYUTUWWRTUVQOQWWWWTXX  
@HWI-EAS443:3:6:1617:1368#0/1  
ACTCCTTTTGCAGATTGCTCAGTTCATTGATGCTTAATG  
+HWI-EAS443:3:6:1617:1368#0/1  
Zaaaabbbb¥]bbbbbbbab\_ab`a^abaaaa\_b`a``a  
@HWI-EAS443:3:71:1152:893#0/1  
CCCATCATCCACTTCATTCTGAGTGCGGGTCTTCTCTT  
+HWI-EAS443:3:71:1152:893#0/1  
abbbbbbbbbbbbbbbbbbababababb`bbba`baab  
@HWI-EAS443:3:73:1020:612#0/1  
AGCCATCATCCACTTCATTCTGAGTGCGGGTCTTCTCT  
+HWI-EAS443:3:73:1020:612#0/1  
`a`S`aa]V\_`¥`\_RZ`a\_aa^ST``]Z]V¥Y]aZ\_Y`  
@HWI-EAS443:3:73:425:1732#0/1  
CTGCCATCATCCACTTCATTCTGAGTGCGGGTCTTCTC  
+HWI-EAS443:3:73:425:1732#0/1  
aaab`a`a\_^]``]a]a`V¥Z]```¥\_\_\_¥¥JITa`^]\_\_  
@HWI-EAS443:3:76:346:2046#0/1  
NAATTCGACACTAATTGATGGCCATCCGAATTCTTTTGGT  
+HWI-EAS443:3:76:346:2046#0/1  
DPWXXYYXYVXVXWSYXZZXVWWWVWZUWXZRWSLL  
@HWI-EAS443:3:80:677:1904#0/1  
ATGCCATCATCCACTTCATTCTGAGTGCGGGTCTTCTC  
+HWI-EAS443:3:80:677:1904#0/1  
aa`aaa`\_]`^baaaa`a`a\_]\_\_X\_\_[VW[X\_\_^\_^\_]  
@HWI-EAS443:3:82:899:1008#0/1  
NAAGAGAAGAACCCCGCACTCAGAATGAAGTGGATGATGG  
+HWI-EAS443:3:82:899:1008#0/1  
DOWVXVWVWXXYXXYYYXXYXUXYYYXYUYWXUXXT  
@HWI-EAS443:3:87:1568:529#0/1  
CGGGTATGAAGAATTCACAATGGTTGGGAGAAGAGCAACA  
+HWI-EAS443:3:87:1568:529#0/1  
[bababbabbaabbbbababb\_aabaa`bb`ab\_ba]b  
@HWI-EAS443:3:89:1136:285#0/1  
AGCCATCATCCACTTCATTCTGAGTGCGGGTCTTCTCT  
+HWI-EAS443:3:89:1136:285#0/1  
`a^^abb\_UY\_¥UU¥\_\_TXR¥\_]`^GX``]XUN][^`]XRa  
@HWI-EAS443:3:89:1666:219#0/1  
AGCCATCATCCACTTCATTCTGAGTGCGGGTCTTCTCT  
+HWI-EAS443:3:89:1666:219#0/1  
`a`^bbaaa]\_a^aa`aaa^a`^U^a¥^]aaUaV\_\_U`H\_  
@HWI-EAS443:3:90:1226:687#0/1  
GAAGCATCAATGAACTGAGCAATCTTGAAAAGGAGAGAA  
+HWI-EAS443:3:90:1226:687#0/1  
aba\_`bbabbb`a\_bb`aabaaZaaa^a[`\_a``\_aaa\_



+HWI-EAS443:3:100:319:897#0/1  
``\_a`ZY`a\_a\_[OFXXV\_]X\_\_\_\_¥Z\_\_\_\_]¥TPX]]YXB  
@HWI-EAS443:3:100:421:1383#0/1  
CCCAGCATTAAGCATCAATGAACTGAGCAATCTTGCAAAA  
+HWI-EAS443:3:100:421:1383#0/1  
a`Y\_TTb`baab`J]Y[Vbaa\_^a¥Y^[a\_]b\_^`aYB  
@HWI-EAS443:3:100:462:1301#0/1  
CAATTCGACACTAATTGATGGCCATCCGAATTCTTTTGGT  
+HWI-EAS443:3:100:462:1301#0/1  
¥`\_Kbbbab`ab`]`bab[K]\_ba^YY\_[W``abaa^\_]`  
@HWI-EAS443:3:100:570:415#0/1  
TAAGCATCAATGAACTGAGCAATCTTGCAAAAAGGAGAGAA  
+HWI-EAS443:3:100:570:415#0/1  
ab`^ZZa]¥\_aaa^`aaaa\_`\_a]\_\_b]Y\_\_[\_a\_aa``B  
@HWI-EAS443:3:100:571:202#0/1  
AGAAGACAAGAGATATGGCCCAGCATTAAAGCATCAATGAA  
+HWI-EAS443:3:100:571:202#0/1  
^YVab`\_^aa\_a\_\_`\_aa`\_\_`a\_\_\_\_a\_a]\_`\_U\_]`[B  
@HWI-EAS443:3:100:580:52#0/1  
GAAGAACCCCGCACTCAGAATGAAGTGGATGATGGCAATG  
+HWI-EAS443:3:100:580:52#0/1  
a[\_a[\_NLW\_W]¥\_VU¥¥U\_\_ZW^W]\_W¥YSY\_¥BBBBB  
@HWI-EAS443:3:100:698:575#0/1  
GCATTAAGCATCAATGAACTGAGCAATCTTGCAAAAAGGAG  
+HWI-EAS443:3:100:698:575#0/1  
`ba¥\_H0¥ZX]\_]aa`¥aaba¥^aab`\_aa`S`\_¥N\_IT`  
@HWI-EAS443:3:100:731:499#0/1  
GCATTAAGCATCAATGAACTGAGCAATCTTGCAAAAAGGAG  
+HWI-EAS443:3:100:731:499#0/1  
S^baU¥b¥SZYaabb`K¥ba\_XUaSa`^``YGQaaGP¥bB  
@HWI-EAS443:3:100:798:341#0/1  
AGAAGACAAGAGATATGGCCCAGCATTAAAGCATCAATGAA  
+HWI-EAS443:3:100:798:341#0/1  
abaa``\_aaa\_aa\_\_\_\_aaa¥``\_^a`\_a`\_`^`\_¥]`\_]  
@HWI-EAS443:3:100:844:1340#0/1  
AGAGATATGGCCCAGCATTAAAGCATCAATGAACTGAGCAA  
+HWI-EAS443:3:100:844:1340#0/1  
aa[`b^XY^`aSP\_a¥WZaa¥LOY`0Ha[a[\_SWa`a^`]  
@HWI-EAS443:3:100:902:515#0/1  
AGAGAAGAACCCCGCACTCAGAATGAAGTGGATGATGGCA  
+HWI-EAS443:3:100:902:515#0/1  
]YF]```b`X`ZaX^```\_ba]bba\_¥D]b\_]b¥Ua`ZX  
@HWI-EAS443:3:10:106:280#0/1  
AGAAGAACCCCGCACTCAGAATGAAGTGGATGATGGCAAT  
+HWI-EAS443:3:10:106:280#0/1  
aaaabaaaaab`aa```a`\_`a`\_aZ`a]```^`\_U]^`\_`  
@HWI-EAS443:3:10:1103:1179#0/1  
AAGAGATATGGCCCAGCATTAAAGCATCAATGAACTGAGCA  
+HWI-EAS443:3:10:1103:1179#0/1  
K`\_\_bb\_bV^IY[aba^]ab\_]N\_V¥b^`Ta`^^WYWa\_a



@HWI-EAS443:3:10:1155:1780#0/1  
TTAAGCATCAATGAACTGAGCAATCTTGCAAAGGAGAGA  
+HWI-EAS443:3:10:1155:1780#0/1  
¥Y^]^^[\_`a`ZV\_]JWOX[]WZUR`¥^\_Sa]Z`\_ZX¥UX  
@HWI-EAS443:3:10:1179:539#0/1  
ATTAAGCATCAATGAACTGAGCAATCTTGCAAAGGAGAG  
+HWI-EAS443:3:10:1179:539#0/1  
a`aa]aX]¥Y\_]\_\_[¥^\_\_I[X[^^^\_Z\_I^^¥][[]\_X  
@HWI-EAS443:3:10:120:828#0/1  
ATTAAGCATCAATGAACTGAGCAATCTTGCAAAGGAGAG  
+HWI-EAS443:3:10:120:828#0/1  
aa`aaaa\_````a`^`\_a\_a`]^^```\_a\_`U^`\_`^`\_\_  
@HWI-EAS443:3:10:121:1612#0/1  
CAAAAGAATTCCGATGGCCATCAATTAGTGTCGAATTGTT  
+HWI-EAS443:3:10:121:1612#0/1  
aaababbbbab`aa`aaabbbba]`aaa\_\_`aaabbaaa\_a  
@HWI-EAS443:3:10:1257:1212#0/1  
GATGCTTAATGCTGGCCATATCTCTTGTCTTCTTTGCC  
+HWI-EAS443:3:10:1257:1212#0/1  
aZ`¥Y\_^\_Z]a^)`^Y¥[]¥^¥]]Y]]\_U^]Y]]W]SUP  
@HWI-EAS443:3:10:1417:524#0/1  
CAAGATTGCTCAGTTCATTGATGCTTAATGCTGGGCCATA  
+HWI-EAS443:3:10:1417:524#0/1  
\_bbabb^aab]bbbb`bbba`ba`bbb`baT`aaPQO]`a  
@HWI-EAS443:3:10:1422:738#0/1  
AAGAAGACAAGAGATATGGCCCAGCATTAAAGCATCAATGA  
+HWI-EAS443:3:10:1422:738#0/1  
abbbba`bbbabaaaaaa\_]`a]aa\_a\_a]```\_^aa\_  
@HWI-EAS443:3:10:1443:64#0/1  
AAGAGAAGAACCCCGCACTCAGAATGAAGTGGATGATGGC  
+HWI-EAS443:3:10:1443:64#0/1  
aaaaa```aa][¥T¥U¥V`]]^Z\_\_XW]¥T]\_U]]VYQYT  
@HWI-EAS443:3:10:144:1800#0/1  
TAAGCATCAATGAACTGAGCAATCTTGCAAAGGAGAGAA  
+HWI-EAS443:3:10:144:1800#0/1  
W\_\_¥¥`\_¥U\_ba`^a\_UV`^b]\_XH]S¥Y\_^X`\_aabb]a  
@HWI-EAS443:3:10:1493:1071#0/1  
CATTAAGCATCAATGAACTGAGCAATCTTGCAAAGGAGAGA  
+HWI-EAS443:3:10:1493:1071#0/1  
Z[bbb`^¥b``¥bbbbbbb`^`]baaa\_abaaa`^a¥\_ba  
@HWI-EAS443:3:10:1493:1185#0/1  
ATTTTGGCAAAGAAGACAAGAGATATGGCCCAGCATTAA  
+HWI-EAS443:3:10:1493:1185#0/1  
abbaa`a]abaaaa]¥`\_a`a\_\_a\_\_\_\_\_WY[[[\_X^\_\_\_\_`  
@HWI-EAS443:3:10:1496:107#0/1  
ACAAGAGATATGGCCCAGCATTAAAGCATCAATGAACTGAG  
+HWI-EAS443:3:10:1496:107#0/1  
aTaU^Tba`ZWT]\_YJL[¥X]\_[[]¥RXUXVQRYXW]Z^  
@HWI-EAS443:3:10:1616:127#0/1  
TAAGCATCAATGAACTGAGCAATCTTGCAAAGGAGAGAA

+HWI-EAS443:3:10:1616:127#0/1  
aaa^\_`z\_a\_]Z]^Z\_Z]X^Z]Z]XZZZZZZXXZZZZ  
@HWI-EAS443:3:10:1748:1062#0/1  
CAAGAGAAGAACCCCGCACTCAGAATGAAGTGGATGATGG  
+HWI-EAS443:3:10:1748:1062#0/1  
ab^bbbbbbabb^Ubb`baba\_aabba\_\_^bbSaa¥`bb  
@HWI-EAS443:3:10:391:643#0/1  
CAGCATTAAAGCATCAATGAACTGAGCAATCTTGCAAAAAGG  
+HWI-EAS443:3:10:391:643#0/1  
aaabbbbbbb\_babaabbaa`ababbbbaaaaaa`a`a\_^  
@HWI-EAS443:3:10:414:427#0/1  
AGATTGCTCAGTTCATTGATGCTTAATGCTGGGCCATATC  
+HWI-EAS443:3:10:414:427#0/1  
aba``bb^]0^aa`b`aaaaaaaa`aa[T`aa^\_aa`\_Y  
@HWI-EAS443:3:10:462:1260#0/1  
AACAATTCGACACTAATTGATGGCCATCCGAATTCTTTTG  
+HWI-EAS443:3:10:462:1260#0/1  
a``[]^a`^Z`\_S]a]]Y[\_[ZP¥``ULL\_]\_]WS¥^Z]]  
@HWI-EAS443:3:10:534:1709#0/1  
CATTAAGCATCAATGAACTGAGCAATCTTGCAAAAAGGAGA  
+HWI-EAS443:3:10:534:1709#0/1  
\_`\_b`abXb]]baa]^¥K\_a`\_aba¥a\_`¥Xaba`¥bb`b  
@HWI-EAS443:3:10:545:814#0/1  
AGAAGAACCCCGCACTCAGAATGAAGTGGATGATGGCAAT  
+HWI-EAS443:3:10:545:814#0/1  
LUR`¥`TX^\_QZ\_ZXUX^a[`aaSIaG^aY[aZRV[LX]]  
@HWI-EAS443:3:10:559:401#0/1  
AAGAGAAGAACCCCGCACTCAGAATGAAGTGGATGATGGC  
+HWI-EAS443:3:10:559:401#0/1  
\_aa`aRabab\_] [[```\_a`Za^a``\_^aV`\_\_\_\_^]a`^  
@HWI-EAS443:3:10:574:1015#0/1  
CATTAAGCATCAATGAACTGAGCAATCTTGCAAAAAGGAGA  
+HWI-EAS443:3:10:574:1015#0/1  
^Xa^a[YZ^`^\_X`^Ka¥^LZX¥¥¥¥`¥Z`\_RSXSGOV\_S  
@HWI-EAS443:3:10:587:1462#0/1  
CAAGAGAAGAACCCCGCACTCAGAATGAAGTGGATGATGG  
+HWI-EAS443:3:10:587:1462#0/1  
abbbabbbbbba]babaaa`aaa`aaa`aWba\_\_a\_\_^  
@HWI-EAS443:3:10:880:398#0/1  
TGCTCAGTTCATTGATGCTTAATGCTGGGCCATATCTCTT  
+HWI-EAS443:3:10:880:398#0/1  
^Y`ab`a[aZ^aa``\_`Za[Z\_a`Wa```YVU^`X]R`^  
@HWI-EAS443:3:10:902:1183#0/1  
CAAGAGATATGGCCCAGCATTAAAGCATCAATGAACTGAGC  
+HWI-EAS443:3:10:902:1183#0/1  
\_X`\_¥`^¥^\_baba^a\_\_\_\_`\_`\_XXX`R^Wa`aaVXTaa¥  
@HWI-EAS443:3:10:96:1578#0/1  
AAGAGATATGGCCCAGCATTAAAGCATCAATGAACTGAGCA  
+HWI-EAS443:3:10:96:1578#0/1  
\_R\_Z\_a`Y0]QOU\_\_W¥aSXa\_Wa\_T\_W^````^`\_X\_¥^Y

@HWI-EAS443:3:11:1026:76#0/1  
CAATTCGACACTAATTGATGGCCATCCGAATTCTTTTGGT  
+HWI-EAS443:3:11:1026:76#0/1  
abbbaabaabab`aaabaab` `]ab\_aa`\_a`^aa` `a`^  
@HWI-EAS443:3:11:1027:766#0/1  
CAAGAGAAGAACCCCGCACTCAGAATGAAGTGGATGATGG  
+HWI-EAS443:3:11:1027:766#0/1  
a]]QP^\_aa]VR\_U[\_^Wa`Z\_`R`a`RU^G]\_]X`X]BB  
@HWI-EAS443:3:11:1060:1535#0/1  
CATTGATGCTTAATGCTGGCCATATCTCTTGTCTTCTTT  
+HWI-EAS443:3:11:1060:1535#0/1  
`bbbbbabababbabbbbab`Jbbbb\_b`bbaa`ba]aba  
@HWI-EAS443:3:11:1124:479#0/1  
AAAGAAGACAAGAGATATGGCCAGCATTAAAGCATCAATG  
+HWI-EAS443:3:11:1124:479#0/1  
T[Vaa`¥b\_W¥`a\_a\_XXa\_[H¥`Y\_a\_]a]a\_\_RL^[W^  
@HWI-EAS443:3:11:1144:1275#0/1  
AAACAATTCGACACTAATTGATGGCCATCCGAATTCTTTT  
+HWI-EAS443:3:11:1144:1275#0/1  
[aaa¥a^`^ZV[^T]^XZ]PQSN[F\_`[USLR\_dW[] `B  
@HWI-EAS443:3:11:1182:1382#0/1  
ATTAAGCATCAATGAACTGAGCAATCTTGCAAAAAGGAGAG  
+HWI-EAS443:3:11:1182:1382#0/1  
aaaa]\_Ya\_a` `a`VX\_a`¥^a\_\_\_\_aa\_]a[\_\_\_a`^`\_`a  
@HWI-EAS443:3:11:1196:99#0/1  
CCCAGCATTAAAGCATCAATGAACTGAGCAATCTTGCAAAA  
+HWI-EAS443:3:11:1196:99#0/1  
a`abb`^aa` `aaaaJ` [ab\_\_\_`aWVaaTX\_]\_\_aT`^UP  
@HWI-EAS443:3:11:1247:1809#0/1  
CATTAAAGCATCAATGAACTGAGCAATCTTGCAAAAAGGAGA  
+HWI-EAS443:3:11:1247:1809#0/1  
aab¥babbbbabbbbaabbb\_ab\_bbbabba`bbb^bbbbb  
@HWI-EAS443:3:11:1326:559#0/1  
TAAGCATCAATGAACTGAGCAATCTTGCAAAAAGGAGAGAA  
+HWI-EAS443:3:11:1326:559#0/1  
^\_a`a^`a^b^^a`^a¥^b\_\_baY\_W\_V`aa`a^`baba\_  
@HWI-EAS443:3:11:1437:1251#0/1  
GACAAGAGATATGGCCAGCATTAAAGCATCAATGAACTGA  
+HWI-EAS443:3:11:1437:1251#0/1  
aaa`a`a`\_a`\_`\_\_^]aaX`\_\_]\_^]\_^[]Z]\_^XZU]]  
@HWI-EAS443:3:11:1441:1964#0/1  
CATTAAAGCATCAATGAACTGAGCAATCTTGCAAAAAGGAGA  
+HWI-EAS443:3:11:1441:1964#0/1  
H\_^`^abbbababbZUa]\_bbaa`aaab0`\_W`a`b` `ba  
@HWI-EAS443:3:11:1460:722#0/1  
CAATTCGACACTAATTGATGGCCATCCGAATTCTTTTGGT  
+HWI-EAS443:3:11:1460:722#0/1  
`bbbaaabbb`b`baaabba\_^b`\_\_b[abb[baaaaaa  
@HWI-EAS443:3:11:1610:1783#0/1  
CAAGAGAAGAACCCCGCACTCAGAATGAAGTGGATGATGG

+HWI-EAS443:3:11:1610:1783#0/1  
Nbbababaaba`aabbV^`^b^Y[Y[[M[I^]T[[ZLa[  
@HWI-EAS443:3:11:258:719#0/1  
CAAGAGAAGAACCCCGCACTCAGAATGAAGTGGATGATGG  
+HWI-EAS443:3:11:258:719#0/1  
]Z\_aaa[[aaa`a\_\_a`aa`\_]`Ya\_]ZaX`\_¥X`QY\_Z  
@HWI-EAS443:3:11:287:308#0/1  
CATTTTGGGCAAAGAAGACAAGAGATATGGCCCAGCATT  
+HWI-EAS443:3:11:287:308#0/1  
a)`^]abaaaa`a`aZa`\_]Xa]\_\_[SW]Y]]¥ZX¥\_\_]]  
@HWI-EAS443:3:11:331:1610#0/1  
GAAGAACCCCGCACTCAGAATGAAGTGGATGATGGCAATG  
+HWI-EAS443:3:11:331:1610#0/1  
`aaY\_aaa`\_\_`\_Ya\_`VZ`¥^V\_R\_]XX[YV^VVXY]Y  
@HWI-EAS443:3:11:475:1290#0/1  
AGATTGCTCAGTTCATTGATGCTTAATGCTGGGCCATATC  
+HWI-EAS443:3:11:475:1290#0/1  
Z]^S\_abb`ZZ[aaaa`a\_`¥]a\_\_`aaJ\_Z\_\_^\_\_\_\_\_  
@HWI-EAS443:3:11:559:486#0/1  
CTCTCCTTTTGCAAGATTGCTCAGTTCATTGATGCTTAAT  
+HWI-EAS443:3:11:559:486#0/1  
aaa\_a\_]WWa\_b[aaU[```]`^aWW¥[a\_^[\_V^a^a  
@HWI-EAS443:3:11:699:393#0/1  
TTTGGGCAAAGAAGACAAGAGATATGGCCCAGCATTAAAGC  
+HWI-EAS443:3:11:699:393#0/1  
abbbaa`a`ab`a`a`a`aaaa`a^\_\_\_\_\_]\_\_`X`\_`^aW  
@HWI-EAS443:3:11:716:1670#0/1  
TAAGCATCAATGAAGTGAAGCAATCTTGCAAAAAGGAGAGAA  
+HWI-EAS443:3:11:716:1670#0/1  
ab¥aaXGwa^\_SZVV[\_\_\_a¥ba\_a\_Z`a\_W\_ZXXa\_\_\_\_`\_  
@HWI-EAS443:3:11:805:1189#0/1  
ATTAAGCATCAATGAAGTGAAGCAATCTTGCAAAAAGGAGAG  
+HWI-EAS443:3:11:805:1189#0/1  
¥`^V^[XU¥V]^aa\_YZaXNZYa^[YW]a^¥[W¥`V^\_\_a  
@HWI-EAS443:3:11:874:730#0/1  
ATGGCCCAGCATTAAAGCATCAATGAAGTGAAGCAATCTTG  
+HWI-EAS443:3:11:874:730#0/1  
]`b`]^XQHza`[WZ`X```[Z][[\_^\_][`¥Y\_^a]Y^G  
@HWI-EAS443:3:11:927:70#0/1  
GCCATCATCCACTTCATTCTGAGTGCAGGGTTCTTCTCTT  
+HWI-EAS443:3:11:927:70#0/1  
[aab[aa[]bbab\_V]abIZ`aaY¥aabaa][\_``^a^\_]  
@HWI-EAS443:3:12:1030:1580#0/1  
AGAAGAACCCCGCACTCAGAATGAAGTGGATGATGGCAAT  
+HWI-EAS443:3:12:1030:1580#0/1  
aabb\_aba`aa\_a`aa`b`aa`\_aVa`\_`a^`X[Z`V  
@HWI-EAS443:3:12:1123:393#0/1  
AACAAATTCGACACTAATTGATGGCCATCCGAATTCTTTTG  
+HWI-EAS443:3:12:1123:393#0/1  
\_\_aab\_\_]aaa\_W^U\_]aa^X\_]X¥\_W]\_aa`a\_\_`\_`[B

@HWI-EAS443:3:12:1182:759#0/1  
ATTAAGCATCAATGAACTGAGCAATCTTGCAAAAGGAGAG  
+HWI-EAS443:3:12:1182:759#0/1  
aa````^\_aa\_\_^`\_\_^^^W\_``[^[TRT]^\_^\_  
@HWI-EAS443:3:12:1187:1456#0/1  
AAGAGAAGAACCCCGCACTCAGAATGAAGTGGATGATGGC  
+HWI-EAS443:3:12:1187:1456#0/1  
a`a]Yaaba`\_¥V]aY\_aa\_`a\_\_^\_\_\_\_V`[Z\_a[Z^\_S  
@HWI-EAS443:3:12:1238:500#0/1  
GAGAAGAACCCCGCACTCAGAATGAAGTGGATGATGGCAA  
+HWI-EAS443:3:12:1238:500#0/1  
a\_a`\_a\_a^\_[]a¥\_]\_^[]\_\_a[[aX`\_]`Y^^XXY  
@HWI-EAS443:3:12:1268:1039#0/1  
AAGAGAAGAACCCCGCACTCAGAATGAAGTGGATGATGGC  
+HWI-EAS443:3:12:1268:1039#0/1  
aaa\_baa]\_a`Y\_\_a]`\_a^^aX]\_a\_XaX\_a]\_a]V  
@HWI-EAS443:3:12:1287:468#0/1  
CAAGAGAAGAACCCCGCACTCAGAATGAAGTGGATGATGG  
+HWI-EAS443:3:12:1287:468#0/1  
abb\_]aabbbb^]ZXbaa\_baab^aab`VaUbaa\_aW^\_]  
@HWI-EAS443:3:12:1325:1041#0/1  
AGAGAAGAACCCCGCACTCAGAATGAAGTGGATGATGGCA  
+HWI-EAS443:3:12:1325:1041#0/1  
`\_W`¥\_RU`¥¥WZa\_0[^]^\_T]^`XZ]T`^\_a`\_R¥YRB  
@HWI-EAS443:3:12:134:936#0/1  
GAAGACAAGAGATATGGCCCAGCATTAAGCATCAATGAAC  
+HWI-EAS443:3:12:134:936#0/1  
aaabaaaab\_ba\_aZaaba\_\_``\_a`\_a\_\_`\_\_\_\_`\_\_^  
@HWI-EAS443:3:12:1407:418#0/1  
CTCTCCTTTTGCAAGATTGCTCAGTTCATTGATGCTTAAT  
+HWI-EAS443:3:12:1407:418#0/1  
`bab^`aaaaaaaabbabbaba\_b\_aaaa`a`^aa`\_\_a  
@HWI-EAS443:3:12:1471:1141#0/1  
GAGATATGGCCCAGCATTAAGCATCAATGAACTGAGCAAT  
+HWI-EAS443:3:12:1471:1141#0/1  
``bZbbabbb`^R`\_a`abaa\_]aaSaa`^aI`\_`\_a\_\_a\_  
@HWI-EAS443:3:12:1656:1143#0/1  
TAAGCATCAATGAACTGAGCAATCTTGCAAAAGGAGAGAA  
+HWI-EAS443:3:12:1656:1143#0/1  
`baX`a^]aa¥YSYY]aaI¥T[Va\_b\_][UZaa\_a\_[\_¥  
@HWI-EAS443:3:12:1658:1280#0/1  
AGAAGAACCCCGCACTCAGAATGAAGTGGATGATGGCAAT  
+HWI-EAS443:3:12:1658:1280#0/1  
`bb`]\_aUaaa`XbS]KXU[]F[Y\_XG^]aUSaaaPQP]B  
@HWI-EAS443:3:12:1670:692#0/1  
AGACAAGAGATATGGCCCAGCATTAAGCATCAATGAACTG  
+HWI-EAS443:3:12:1670:692#0/1  
aaa`]Ia`aaaa`\_`¥^\_\_0^````\_][\_]WZ`\_Z^Z^B  
@HWI-EAS443:3:12:185:225#0/1  
AGAAGAACCCCGCACTCAGAATGAAGTGGATGATGGCAAT

+HWI-EAS443:3:12:185:225#0/1  
\_`b]Zab`]aaab\_\_a`b`aaa]]aX``¥\_a]]a`X^\_^  
@HWI-EAS443:3:12:27:148#0/1  
CTCAGTTCATTGATGCTTAATGCTGGCCATATCTCTTGT  
+HWI-EAS443:3:12:27:148#0/1  
S\_a``ZW\_aZXaa¥abb```ab]\_Y`]a]`¥¥^^aa\_S]]  
@HWI-EAS443:3:12:410:1228#0/1  
CAGCATTAAAGCATCAATGAACTGAGCAATCTTGCAAAAAGG  
+HWI-EAS443:3:12:410:1228#0/1  
aa`aaaaab\_a\_a`aaaa`a`aaaa\_a`a`\_a\_\_a`^a¥  
@HWI-EAS443:3:12:439:700#0/1  
AAACAATTCGACACTAATTGATGGCCATCCGAATTCTTTT  
+HWI-EAS443:3:12:439:700#0/1  
aa¥`¥^`\_`\_`^^`^^`^^[T^]`^]]`^^X^^]^  
@HWI-EAS443:3:12:473:1930#0/1  
GAGAAGAACCCCGCACTCAGAATGAAGTGGATGATGGCAA  
+HWI-EAS443:3:12:473:1930#0/1  
aba`babbbaa^`[aI^a`\_\_a`aa\_]XMTU¥\_^]\_^X^\_  
@HWI-EAS443:3:12:588:353#0/1  
AGAGATATGGCCCAGCATTAAAGCATCAATGAACTGAGCAA  
+HWI-EAS443:3:12:588:353#0/1  
ab]a`^bb\_\_bLWHa]`b\_a`\_aaaa^Ua\_aZ`\_`\_]  
@HWI-EAS443:3:12:651:49#0/1  
CAAGAGAAGAACCCCGCACTCAGAATGAAGTGGATGATGG  
+HWI-EAS443:3:12:651:49#0/1  
^baaab^ab\_aa\_aaa\_¥\_\_^Z^^Z`\_\_Y`X\_]U]`XU]]  
@HWI-EAS443:3:12:669:1050#0/1  
GAGAAGAACCCCGCACTCAGAATGAAGTGGATGATGGCAA  
+HWI-EAS443:3:12:669:1050#0/1  
a```aaa\_aaa^\_]``aa`a`aaa`¥aVa\_\_\_\_`\_\_`URY\_  
@HWI-EAS443:3:12:767:1677#0/1  
TTTAAACAATTCGACACTAATTGATGGCCATCCGAATTCT  
+HWI-EAS443:3:12:767:1677#0/1  
¥¥]b`V`a`a`\_\_Yaa^`^^`^`\_\_`\_]`\_\_XZa^`XSV¥  
@HWI-EAS443:3:12:775:1962#0/1  
GAGAAGAACCCCGCACTCAGAATGAAGTGGATGATGGCAA  
+HWI-EAS443:3:12:775:1962#0/1  
a`aabaaa`\_a\_a¥a\_S\_]R`a`\_RDT\_^^\_TPW¥G^]  
@HWI-EAS443:3:12:837:1140#0/1  
AAGAGATATGGCCCAGCATTAAAGCATCAATGAACTGAGCA  
+HWI-EAS443:3:12:837:1140#0/1  
aa`Ra`]\_\_aa`baa¥`\_aa\_a[`a`\_``\_``]\_\_`]\_a^]  
@HWI-EAS443:3:12:838:178#0/1  
CAAGAGAAGAACCCCGCACTCAGAATGAAGTGGATGATGG  
+HWI-EAS443:3:12:838:178#0/1  
a^ab¥a`\_a\_aa\_aP`¥\_Y\_¥XY¥^Z`XSY¥WUS[BBBB  
@HWI-EAS443:3:12:928:580#0/1  
CATTAAAGCATCAATGAACTGAGCAATCTTGCAAAAAGGAGA  
+HWI-EAS443:3:12:928:580#0/1  
abababbab\_b`bbba`\_`\_a^bab`\_`[aab¥aa`ab]\_\_\_\_

@HWI-EAS443:3:13:1099:1693#0/1  
AAACAATTGCACACTAATTGATGGCCATCCGAATTCTTTT  
+HWI-EAS443:3:13:1099:1693#0/1  
a``^aa`\_``Ta¥``a¥[¥]^[^`S]Z[YP^\_]`Z^W  
@HWI-EAS443:3:13:1139:1087#0/1  
AGAGATATGGCCCAGCATTAAGCATCAATGAACTGAGCAA  
+HWI-EAS443:3:13:1139:1087#0/1  
`^T`Wa\_HSb\_\_Zab`[aa\_TU[¥FO^S^aUU¥GPVaaSB  
@HWI-EAS443:3:13:1162:616#0/1  
AGAAGACAAGAGATATGGCCCAGCATTAAGCATCAATGAA  
+HWI-EAS443:3:13:1162:616#0/1  
```abaaa]a\_a`a``a`a\_[a`]a`a\_]aX\_`]\_X\_\_Z^  
@HWI-EAS443:3:13:1349:931#0/1  
CAATTCGACACTAATTGATGGCCATCCGAATTCTTTTGGT  
+HWI-EAS443:3:13:1349:931#0/1  
Z^X`a`b\_bbbbbY[\_¥]``aa\_W\_ba\_`aaaa\_a^][  
@HWI-EAS443:3:13:1467:1307#0/1  
GTTCAATTGATGCTTAATGCTGGCCATATCTTGTCTTC  
+HWI-EAS443:3:13:1467:1307#0/1  
a^a^aa\_a`aaYaa`^aa^a\_\_`\_¥\_a\_`^\_Z\_aaZZ``[  
@HWI-EAS443:3:13:1477:1094#0/1  
TAAGCATCAATGAACTGAGCAATCTTGCAAAAGGAGAGAA  
+HWI-EAS443:3:13:1477:1094#0/1  
abaaaaa\_a`baaa^aa`a`\_``aa`[\_`]^a\_]a\_`\_^  
@HWI-EAS443:3:13:147:775#0/1  
GCCCAGCATTAAGCATCAATGAACTGAGCAATCTTGCAAA  
+HWI-EAS443:3:13:147:775#0/1  
aa`\_a`¥a`\_``\_\_a\_``\_Z¥\_\_^\_¥\_\_]\_^[\_]U  
@HWI-EAS443:3:13:1553:1859#0/1  
GAAGACAAGAGATATGGCCCAGCATTAAGCATCAATGAAC  
+HWI-EAS443:3:13:1553:1859#0/1  
abb\_abb`a`b\_`abaabbbabbbbbbba`bb^bbba[Y[  
@HWI-EAS443:3:13:1579:463#0/1  
AGAAGACAAGAGATATGGCCCAGCATTAAGCATCAATGAA  
+HWI-EAS443:3:13:1579:463#0/1  
ab``bba\_aaabaaaaa`^\_aa]aaa\_`aS`^``\_`a[\_  
@HWI-EAS443:3:13:1589:691#0/1  
CAAGAGAAGAACCCCGCACTCAGAATGAAGTGGATGATGG  
+HWI-EAS443:3:13:1589:691#0/1  
`a]\_]a[`a`\_]GZUaWa\_[\_]\_[^`aV^\_RY]Y]^]YYV  
@HWI-EAS443:3:13:1695:1872#0/1  
TATGGCCCAGCATTAAGCATCAATGAACTGAGCAATCTTG  
+HWI-EAS443:3:13:1695:1872#0/1  
[^abYR[Wb]Vabab``aba0^\_babba``^`¥aa\_Y`^a  
@HWI-EAS443:3:13:170:1621#0/1  
TAAGCATCAATGAACTGAGCAATCTTGCAAAAGGAGAGAA  
+HWI-EAS443:3:13:170:1621#0/1  
abb`babbbbaabbbabbbbbbbaaaaaaaa`aabaaaa  
@HWI-EAS443:3:13:1748:1563#0/1  
CAATTCGACACTAATTGATGGCCATCCGAATTCTTTTGGT

+HWI-EAS443:3:13:1748:1563#0/1  
abbb`Zababa\_`baaa\_aa`Kaa\_]U]\_a`^N¥aaba]]  
@HWI-EAS443:3:13:262:85#0/1  
CCATCATCCACTTCATTCTGAGTGC GGGTCTTCTCTTG  
+HWI-EAS443:3:13:262:85#0/1  
a\_TH\_UY\_R]\_^K¥[¥NN[ZZWVZUZ`TUUU^YNLUVBBB  
@HWI-EAS443:3:13:333:1966#0/1  
AGAAGACAAGAGATATGGCCCAGCATTAAAGCATCAATGAA  
+HWI-EAS443:3:13:333:1966#0/1  
a^aa\_`aaa`\_`a`\_XGW`UW`\_`^aYY`\_`^\_X`]\_\_Z]^  
@HWI-EAS443:3:13:334:1831#0/1  
GCAAAGAAGACAAGAGATATGGCCCAGCATTAAAGCATCAA  
+HWI-EAS443:3:13:334:1831#0/1  
aabaaabbbaaaaaaaaaab`\_aaaaa]aaaaaa\_aa^a`a  
@HWI-EAS443:3:13:514:854#0/1  
TATGGCCCAGCATTAAAGCATCAATGAACTGAGCAATCTTG  
+HWI-EAS443:3:13:514:854#0/1  
ab\_abaa`ba\_baa`aaaa`\_a\_\_YW`Y`\_`^¥Xa\_\_\_^¥`  
@HWI-EAS443:3:13:655:1192#0/1  
GAAGACAAGAGATATGGCCCAGCATTAAAGCATCAATGAAC  
+HWI-EAS443:3:13:655:1192#0/1  
`\_`^[]\_WaaaaX^Y[`a¥V`\_`\_a`\_]`X¥`]]a\_\_ZY\_R  
@HWI-EAS443:3:13:729:1619#0/1  
CAATTCGACACTAATTGATGGCCATCCGAATCTTTTGGT  
+HWI-EAS443:3:13:729:1619#0/1  
\_aZOM[\_\_\_`\_`aS`JH`\_`^USV`\_`XU]\_S^]YNU[PIV`R  
@HWI-EAS443:3:13:78:22#0/1  
AAGAGAAGAACCCCGCACTCAGAATGAAGTGGATGATGGC  
+HWI-EAS443:3:13:78:22#0/1  
^S\_\_\_X^ZV`\_`\_`aN]\_\_^\_`¥\_`^\_]T^X]]WUU]\_YR  
@HWI-EAS443:3:13:83:246#0/1  
GAAGAACCCCGCACTCAGAATGAAGTGGATGATGGCAATG  
+HWI-EAS443:3:13:83:246#0/1  
\_`^Y\_UWaaaaa`a`\_V\_`^\_`\_]¥`U`\_]`XU]\_`^YHSP  
@HWI-EAS443:3:13:841:1399#0/1  
GAGAAGAACCCCGCACTCAGAATGAAGTGGATGATGGCAA  
+HWI-EAS443:3:13:841:1399#0/1  
a`babbabbaaaaaaaaaaaaaYaaa`^a]`a`^a^\_\_\_^]\_  
@HWI-EAS443:3:13:961:70#0/1  
CTCATTTTGGGCAAAGAAGACAAGAGATATGGCCCAGCAT  
+HWI-EAS443:3:13:961:70#0/1  
aaXYaaa`a]¥P\_X`a`\_`a^X][aWa]¥Z]`\_`^WW]\_X]Z  
@HWI-EAS443:3:14:1034:1981#0/1  
GAAGACAAGAGATATGGCCCAGCATTAAAGCATCAATGAAC  
+HWI-EAS443:3:14:1034:1981#0/1  
a`\_`a^\_a]X`\_`a^`\_`[Z^W`^^URW[\_`^NT]]X]^U^UW  
@HWI-EAS443:3:14:1048:1401#0/1  
AGAAGAACCCCGCACTCAGAATGAAGTGGATGATGGCAAT  
+HWI-EAS443:3:14:1048:1401#0/1  
\_\_TORVXR\_\_¥¥^^ZTX\_Y]`\_`¥P[UK[\_TNYQQ][[¥[^



@HWI-EAS443:3:14:1084:347#0/1  
GAAGACAAGAGATATGGCCCAGCATTAAAGCATCAATGAAC  
+HWI-EAS443:3:14:1084:347#0/1  
a\_a` `` `a\_\_^^\_]\_]\_[^\_\_X^\_^] []^^ZZ^^ZZZZ  
@HWI-EAS443:3:14:1238:42#0/1  
CTCTCCTTTTGCAAGATTGCTCAGTTCATTGATGCTTAAT  
+HWI-EAS443:3:14:1238:42#0/1  
abbbbbbbba^bbbaabb`aaab`aa`aaaaab\_``a]a  
@HWI-EAS443:3:14:1252:1576#0/1  
AGAAGACAAGAGATATGGCCCAGCATTAAAGCATCAATGAA  
+HWI-EAS443:3:14:1252:1576#0/1  
aa\_\_baaaab`aa`aaa`a`P`\_\_a`\_a\_`]\_\_^\_]\_\_]^  
@HWI-EAS443:3:14:1417:308#0/1  
TTTTTAAACAATTCGACACTAATTGATGGCCATCCGAATT  
+HWI-EAS443:3:14:1417:308#0/1  
XX`\_ba\_^J¥bbaab\_Q` [ `ZaY^a^`\_VHXYXYWW¥^[¥  
@HWI-EAS443:3:14:1476:1597#0/1  
AAGAGATATGGCCCAGCATTAAAGCATCAATGAACTGAGCA  
+HWI-EAS443:3:14:1476:1597#0/1  
`aaaa¥aaaaa\_`¥`\_`\_\_`aa[]]^\_\_¥a`^^Z]\_¥TLT  
@HWI-EAS443:3:14:1567:1500#0/1  
TTAAGCATCAATGAACTGAGCAATCTTGCAAAAGGAGAGA  
+HWI-EAS443:3:14:1567:1500#0/1  
aabab\_aaaaaaaaaa][aaa`\_[\_^`a\_¥\_^]X\_^`^U\_  
@HWI-EAS443:3:14:1638:79#0/1  
GCATTAAGCATCAATGAACTGAGCAATCTTGCAAAAGGAG  
+HWI-EAS443:3:14:1638:79#0/1  
a^`¥R\_ZTVWYG TU^RNQXSSMXRZ]Q]XSTTTXMUGBB  
@HWI-EAS443:3:14:1650:1667#0/1  
GAGATATGGCCCAGCATTAAAGCATCAATGAACTGAGCAAT  
+HWI-EAS443:3:14:1650:1667#0/1  
VX`bU^^bb\_P]Y` [¥¥b`ba¥^\_W`WZWGMS^U¥Z`a]\_  
@HWI-EAS443:3:14:333:1293#0/1  
TAAGCATCAATGAACTGAGCAATCTTGCAAAAGGAGAGAA  
+HWI-EAS443:3:14:333:1293#0/1  
\_]aaaWa[^`^a\_\_\_\_]`\_Y`Q`a` [aa`^W] [\_S`^\_\_ [  
@HWI-EAS443:3:14:349:1555#0/1  
AAGAGATATGGCCCAGCATTAAAGCATCAATGAACTGAGCA  
+HWI-EAS443:3:14:349:1555#0/1  
aabVbaababX`baY`aaa\_Yaaa\_a\_aa`]aa]`^\_\_Ya  
@HWI-EAS443:3:14:43:1440#0/1  
CAAGAGAAGAACCCCGCACTCAGAATGAAGTGGATGATGG  
+HWI-EAS443:3:14:43:1440#0/1  
aabbaba\_[Z`aa` `` `b]Zaa`b^Z`aV]aY`]\_]`\_\_^\_  
@HWI-EAS443:3:14:477:1582#0/1  
AAGAGATATGGCCCAGCATTAAAGCATCAATGAACTGAGCA  
+HWI-EAS443:3:14:477:1582#0/1  
``^`aa`a[]a`^^`^`aaY\_a`\_^[\_`\_\_^Z`\_]`^\_\_Za  
@HWI-EAS443:3:14:47:1625#0/1  
TAAGCATCAATGAACTGAGCAATCTTGCAAAAGGAGAGAA

+HWI-EAS443:3:14:47:1625#0/1  
ZYX\_\_WP]S[]]Q\_^[XX[\_a\_`[aa`Y¥[HSY`¥[]^0  
@HWI-EAS443:3:14:537:1659#0/1  
GAAGAACCCCGCACTCAGAATGAAGTGGATGATGGCAATG  
+HWI-EAS443:3:14:537:1659#0/1  
\_aa`abbbaa`abaabab]baaa^`Yaaaaaaaa`\_aaa\_  
@HWI-EAS443:3:14:601:976#0/1  
GATATGGCCAGCATTAAAGCATCAATGAACTGAGCAATCT  
+HWI-EAS443:3:14:601:976#0/1  
a[S`^aab`aa`aaa`^Z`^aa[G`^\_Q^^\_a`\_X  
@HWI-EAS443:3:14:749:1578#0/1  
CATTAAAGCATCAATGAACTGAGCAATCTTGCAAAAGGAGA  
+HWI-EAS443:3:14:749:1578#0/1  
]ba`^X^^Ya]`]a^ZX\_V]aa`a`^`]RaS^aa]\_\_\_\_  
@HWI-EAS443:3:14:749:934#0/1  
AGATTGCTCAGTTCATTGATGCTTAATGCTGGGCCATATC  
+HWI-EAS443:3:14:749:934#0/1  
aa`a`a`aaa^a\_`a`a`\_¥^`\_[\_a\_]Y\_X`^`\_\_\_\_[  
@HWI-EAS443:3:14:752:1859#0/1  
GAGAAGAACCCCGCACTCAGAATGAAGTGGATGATGGCAA  
+HWI-EAS443:3:14:752:1859#0/1  
]¥\_bb^aabb¥b\_`a`\_[\_`^a^a\_G`UaS`^^[XU\_UY\_  
@HWI-EAS443:3:14:755:425#0/1  
TAAGCATCAATGAACTGAGCAATCTTGCAAAAGGAGAGAA  
+HWI-EAS443:3:14:755:425#0/1  
X`bb`X`a\_VaUTaa`ZT[]]Vab[abVSbaX^Tb\_bQ^  
@HWI-EAS443:3:14:755:716#0/1  
CAAGAGATATGGCCAGCATTAAAGCATCAATGAACTGAGC  
+HWI-EAS443:3:14:755:716#0/1  
aa\_b\_aa`\_`\_a\_Y\_`^^[^`\_]`ZZX^^^\_]^^[V[B  
@HWI-EAS443:3:15:103:455#0/1  
ATTGCTCAGTTCATTGATGCTTAATGCTGGGCCATATCTC  
+HWI-EAS443:3:15:103:455#0/1  
YRa\_a¥\_]\_\_X\_Zaab`X¥][XZ^`\_HR¥`^ab\_Y]\_`[X  
@HWI-EAS443:3:15:106:1056#0/1  
CATTAAAGCATCAATGAACTGAGCAATCTTGCAAAAGGAGA  
+HWI-EAS443:3:15:106:1056#0/1  
aabbba`a¥abaab\_aaa\_\_a\_a\_`a`aa`aY\_\_aa^a\_  
@HWI-EAS443:3:15:1085:898#0/1  
AACAAATTCGACACTAATTGATGGCCATCCGAATTCTTTTG  
+HWI-EAS443:3:15:1085:898#0/1  
a`\_]^aa`^]aV¥`RZ]YZWXX¥VNRGVYSSTZQLYRYQU  
@HWI-EAS443:3:15:1107:1774#0/1  
CATTAAAGCATCAATGAACTGAGCAATCTTGCAAAAGGAGA  
+HWI-EAS443:3:15:1107:1774#0/1  
abbabb`abbbbbbabbbbaabbbbbbabbbbababbbbab  
@HWI-EAS443:3:15:1128:1918#0/1  
CAGCATTAAAGCATCAATGAACTGAGCAATCTTGCAAAAGG  
+HWI-EAS443:3:15:1128:1918#0/1  
a¥Za\_V¥^¥abb^Ya\_^a¥a\_Y[`a`aVY`UV\_a`\_X`0

@HWI-EAS443:3:15:131:1655#0/1  
CATTAAAGCATCAATGAACTGAGCAATCTTGCAAAGGAGA  
+HWI-EAS443:3:15:131:1655#0/1  
GW¥`R[aYS\_T\_a^bVb`b]\_S\_U^`X`Z```YH]a`U¥U  
@HWI-EAS443:3:15:1412:1421#0/1  
GCCCAGCATTAAAGCATCAATGAACTGAGCAATCTTGCAA  
+HWI-EAS443:3:15:1412:1421#0/1  
a^QR[]X]YONWIRVTRMYRVX^SUV]ZBBBBBBBBBBBB  
@HWI-EAS443:3:15:1468:1584#0/1  
ATATGGCCCAGCATTAAAGCATCAATGAACTGAGCAATCTT  
+HWI-EAS443:3:15:1468:1584#0/1  
a`^\_a^Z\_Z`^Y\_``aa`]]aZ]``X^]Qa`^YO[`a]a^  
@HWI-EAS443:3:15:1479:1794#0/1  
AAGACAAGAGATATGGCCCAGCATTAAAGCATCAATGAACT  
+HWI-EAS443:3:15:1479:1794#0/1  
aaW`\_baa\_`^`S\_a\_\_Y\_`^`\_\_a\_\_`TT\_\_¥]\_]\_\_`X^  
@HWI-EAS443:3:15:1484:1598#0/1  
GAAGAACCCCGCACTCAGAATGAAGTGGATGATGGCAATG  
+HWI-EAS443:3:15:1484:1598#0/1  
a\_[`^aaaaa`aa\_`]][\_`\_]P]W`\_]\_`Y[a[SUTV[  
@HWI-EAS443:3:15:1491:721#0/1  
GAAGACAAGAGATATGGCCCAGCATTAAAGCATCAATGAAC  
+HWI-EAS443:3:15:1491:721#0/1  
^`aX\_\_ab\_aaa`\_[IX\_aaa¥a`\_N¥^^`]`a\_\_`^R  
@HWI-EAS443:3:15:1629:790#0/1  
TAAGCATCAATGAACTGAGCAATCTTGCAAAGGAGAGAA  
+HWI-EAS443:3:15:1629:790#0/1  
¥Va`^`aSS¥Y\_¥`L[W]`I`baW\_¥\_aabXXb¥a¥^^aa  
@HWI-EAS443:3:15:1635:1751#0/1  
AAACAATTCGACACTAATTGATGGCCATCCGAATTCTTTT  
+HWI-EAS443:3:15:1635:1751#0/1  
`aaa\_aa]ba^aaaaS¥`aa`a\_[a]^`^`\_\_W`][^  
@HWI-EAS443:3:15:1688:1315#0/1  
ATTAAGCATCAATGAACTGAGCAATCTTGCAAAGGAGAG  
+HWI-EAS443:3:15:1688:1315#0/1  
\_aaaab\_aa\_aaa\_aa\_a`````\_`\_]````\_]`^a\_`^`^`  
@HWI-EAS443:3:15:197:125#0/1  
TAAGCATCAATGAACTGAGCAATCTTGCAAAGGAGAGAA  
+HWI-EAS443:3:15:197:125#0/1  
abaaaba\_aabba`aaZa`a\_\_`\_`^b\_\_¥`^aVa``^a\_  
@HWI-EAS443:3:15:299:1698#0/1  
AGAAGAACCCCGCACTCAGAATGAAGTGGATGATGGCAAT  
+HWI-EAS443:3:15:299:1698#0/1  
aabaababab`aaaaa`\_a\_a`aa\_aX\_]\_`^`^`\_`^`\_a  
@HWI-EAS443:3:15:301:1835#0/1  
GAAGAACCCCGCACTCAGAATGAAGTGGATGATGGCAATG  
+HWI-EAS443:3:15:301:1835#0/1  
\_\_`^`bbbbbab`a`\_aaaaa`aa\_a^aX``a\_\_`a\_`a\_a  
@HWI-EAS443:3:15:313:935#0/1  
ATATGGCCCAGCATTAAAGCATCAATGAACTGAGCAATCTT

+HWI-EAS443:3:15:313:935#0/1  
`\_`^`aaa\_ababa`a`a```baa\_\_^U[] []aba^`\_\_¥  
@HWI-EAS443:3:15:345:1659#0/1  
CAGCATTAAAGCATCAATGAACTGAGCAATCTTGCAAAAAGG  
+HWI-EAS443:3:15:345:1659#0/1  
]babbbaabaab¥\_\_Q¥aabbb`abab¥a`aab\_aaba\_¥  
@HWI-EAS443:3:15:360:77#0/1  
ATTAAGCATCAATGAACTGAGCAATCTTGCAAAAAGGAGAG  
+HWI-EAS443:3:15:360:77#0/1  
aaa`aaa\_aaa^`a^`^`\_]\_^\_aaa]^`\_]\_Y[W]`[`^^  
@HWI-EAS443:3:15:439:1135#0/1  
AGAAGAACCCCGCACTCAGAATGAAGTGGATGATGGCAAT  
+HWI-EAS443:3:15:439:1135#0/1  
W¥^¥ZW\_abbaa]aa^V\_\_aa]b^^a\_`]S^baaaaaXY^  
@HWI-EAS443:3:15:480:77#0/1  
CAAGAGAAGAACCCCGCACTCAGAATGAAGTGGATGATGG  
+HWI-EAS443:3:15:480:77#0/1  
abbbbbbabb`ab`aabaaaa``baaaba^[D[`^aa\_^a^  
@HWI-EAS443:3:15:502:677#0/1  
CTCATTGTTGGGCAAAGAAGACAAGAGATATGGCCCAGCAT  
+HWI-EAS443:3:15:502:677#0/1  
a`babTRaV`a\_]aR0^^a^aa¥\_`^W\_aZ\_[L][U[^[\_Y  
@HWI-EAS443:3:15:671:845#0/1  
ATATGGCCCAGCATTAAAGCATCAATGAACTGAGCAATCTT  
+HWI-EAS443:3:15:671:845#0/1  
aa¥ababaa[aaa`abaaaaaa`aaaaaa[\_\_\_aaaaaa`¥  
@HWI-EAS443:3:15:76:906#0/1  
AACAATTCGACACTAATTGATGGCCATCCGAATCCTTTTG  
+HWI-EAS443:3:15:76:906#0/1  
ab``\_aaaa`\_\_aa`a`a`a`\_¥^^\_[\_aa^``]`\_\_\_\_`[  
@HWI-EAS443:3:15:876:1458#0/1  
GAAGACAAGAGATATGGCCCAGCATTAAAGCATCAATGAAC  
+HWI-EAS443:3:15:876:1458#0/1  
a^]\_Y^`]W]W]aaYZH¥T\_a[^`^¥^XWY^]\_ZUZ]^]U  
@HWI-EAS443:3:15:910:1190#0/1  
TTAAGCATCAATGAACTGAGCAATCTTGCAAAAAGGAGAGA  
+HWI-EAS443:3:15:910:1190#0/1  
aaba`aRW¥\_\_a¥aaa`aaa]a``Y\_aa^^Y\_]U\_[\_a``  
@HWI-EAS443:3:15:924:218#0/1  
CTCAGTTCATTGATGCTTAATGCTGGCCATATCTCTTGT  
+HWI-EAS443:3:15:924:218#0/1  
Xb[Q\_U]`Y^aa]aaY\_ZJ\_Z]]][bJ[\_T`aX\_\_a]aaY  
@HWI-EAS443:3:15:945:949#0/1  
GAGATATGGCCCAGCATTAAAGCATCAATGAACTGAGCAAT  
+HWI-EAS443:3:15:945:949#0/1  
aaaaaaa`^\_\_Y\_a`aaaa`aa``\_\_\_\_`^`\_¥]^`\_]`^\_  
@HWI-EAS443:3:15:956:1088#0/1  
CTCCTTTTGCAAGATTGCTCAGTTCATTGATGCTTAATGC  
+HWI-EAS443:3:15:956:1088#0/1  
\_Y\_\_R]S\_`a\_a^ZT¥`[\_[T^[]`Q\_baa`¥K[abaa^W

@HWI-EAS443:3:15:995:466#0/1  
CAAGAGAAGAACCCCGCACTCAGAATGAAGTGGATGATGG  
+HWI-EAS443:3:15:995:466#0/1  
aaba[¥a\_Y]¥ZXZ^a^ZWU\_¥UY]\_\_JP[R\_YW]b`I^W  
@HWI-EAS443:3:16:1046:254#0/1  
TAAGCATCAATGAACTGAGCAATCTTGCAAAAGGAGAGAA  
+HWI-EAS443:3:16:1046:254#0/1  
TaaQ[PYVX\_`^K`[VU]R`[aUYV^^aXF\_VXX\_]W`^P  
@HWI-EAS443:3:16:1113:558#0/1  
CAAGAGAAGAACCCCGCACTCAGAATGAAGTGGATGATGG  
+HWI-EAS443:3:16:1113:558#0/1  
`\_Za¥bb`ab\_¥P¥]ab`aabab]a`YP\_G¥a\_`a]]a¥  
@HWI-EAS443:3:16:111:539#0/1  
GAAGAACCCCGCACTCAGAATGAAGTGGATGATGGCAATG  
+HWI-EAS443:3:16:111:539#0/1  
a`a`^`aa`aaa^a`¥\_`^^\_a^)`Ya\_^^`X^]]XX]]  
@HWI-EAS443:3:16:1124:516#0/1  
AAACAATTTCGACACTAATTGATGGCCATCCGAATCTTTT  
+HWI-EAS443:3:16:1124:516#0/1  
Z]Z^^\_`aba`\_Z`\_aaUUa[\_HU\_RFJ[`X]]\_]\_]S`  
@HWI-EAS443:3:16:1571:806#0/1  
TAAGCATCAATGAACTGAGCAATCTTGCAAAAGGAGAGAA  
+HWI-EAS443:3:16:1571:806#0/1  
aaab``baaab`a¥aa\_baa`baaaa`\_\_`\_aa^a\_aa\_  
@HWI-EAS443:3:16:166:87#0/1  
AAGAGAAGAACCCCGCACTCAGAATGAAGTGGATGATGGC  
+HWI-EAS443:3:16:166:87#0/1  
]^I0]^UTSQ^R`ZRS]\_]`[[`L[\_[WGZJTTLPVV^U[\_  
@HWI-EAS443:3:16:1776:1129#0/1  
AACAAATTCGACACTAATTGATGGCCATCCGAATCTTTTG  
+HWI-EAS443:3:16:1776:1129#0/1  
aZa`XaaWabaa\_b`Va`\_Z`]MY]`a[¥^a\_\_\_M\_`a]]  
@HWI-EAS443:3:16:209:533#0/1  
ATGGCCCAGCATTAAAGCATCAATGAACTGAGCAATCTTGC  
+HWI-EAS443:3:16:209:533#0/1  
]b\_b`][`]a^)`]S]a`\_[^`Z]`[``[YX¥a^\_`^a\_  
@HWI-EAS443:3:16:21:2005#0/1  
TTAAGCATCAATGAACTGAGCAATCTTGCAAAAGGAGAGA  
+HWI-EAS443:3:16:21:2005#0/1  
^a``^b^¥`b\_b^baaaabaaba`a[aab`aaabaa\_aaa  
@HWI-EAS443:3:16:293:844#0/1  
CAATTCGACACTAATTGATGGCCATCCGAATCTTTTGGT  
+HWI-EAS443:3:16:293:844#0/1  
aaa^aa]Q`a`TVV[^`][U^`]^\_^`H`\_\_Y\_U\_^UY  
@HWI-EAS443:3:16:307:1115#0/1  
TAAGCATCAATGAACTGAGCAATCTTGCAAAAGGAGAGAA  
+HWI-EAS443:3:16:307:1115#0/1  
a\_aaa[abZ``¥]\_aa`a]a^a`\_a`aa^Ua[b\_\_\_\_\_aa`  
@HWI-EAS443:3:16:366:680#0/1  
CATTAAAGCATCAATGAACTGAGCAATCTTGCAAAAGGAGA

+HWI-EAS443:3:16:366:680#0/1  
]\_¥abab\_ZSYF[¥`aaa^PYZ`aaaaTabS]K¥¥aaN¥\_  
@HWI-EAS443:3:16:404:115#0/1  
TAAGCATCAATGAACTGAGCAATCTTGCAAAAGGAGAGAA  
+HWI-EAS443:3:16:404:115#0/1  
`bbbaabbaabbaaaa`[b]a)`aaaaa]\_\_aa\_a\_a`\_  
@HWI-EAS443:3:16:540:1286#0/1  
CCAGCATTAAAGCATCAATGAACTGAGCAATCTTGCAAAAG  
+HWI-EAS443:3:16:540:1286#0/1  
abaabbaabaabaaaaabaabaaaaaaaaaaaaa\_a^\_\_^\_a  
@HWI-EAS443:3:16:541:413#0/1  
CAAGAGAAGAACCCCGCACTCAGAATGAAGTGGATGATGG  
+HWI-EAS443:3:16:541:413#0/1  
¥]X`UaZUWU¥¥¥a``[a[`^aRZ^^¥K[V\_aYyaRF[[  
@HWI-EAS443:3:16:593:114#0/1  
GAAGAACCCCGCACTCAGAATGAAGTGGATGATGGCAATG  
+HWI-EAS443:3:16:593:114#0/1  
aaa\_aaa`\_`a`\_^^^a\_\_\_`\_\_XMZ\_^Z^^]\_\_]ZZZ^  
@HWI-EAS443:3:16:600:837#0/1  
GACAAGAGATATGGCCAGCATTAAAGCATCAATGAACTGA  
+HWI-EAS443:3:16:600:837#0/1  
aY]]S][aW\_Y\_^UT\_`^][¥\_PMX]^^ZV]]\_]YXWWW]  
@HWI-EAS443:3:16:640:1381#0/1  
AACAATTCGACACTAATTGATGGCCATCCGAATTCCTTTTG  
+HWI-EAS443:3:16:640:1381#0/1  
aa\_¥R\_a`b\_aab`K[aaaa^a\_Vaa\_aa\_Y^\_\_\_a^`\_`\_  
@HWI-EAS443:3:16:730:321#0/1  
AGAAGACAAGAGATATGGCCAGCATTAAAGCATCAATGAA  
+HWI-EAS443:3:16:730:321#0/1  
`]a``^aabWb\_a^Va\_aa^`^a]\_\_\_\_\_]UTYZ[W]Z\_  
@HWI-EAS443:3:16:804:312#0/1  
AGAAGAACCCCGCACTCAGAATGAAGTGGATGATGGCAAT  
+HWI-EAS443:3:16:804:312#0/1  
aba`^\_Z\_aaaa^¥\_`aaa\_V`a[V]Waa[]¥W[V`Z^ZW  
@HWI-EAS443:3:16:95:964#0/1  
AACAATTCGACACTAATTGATGGCCATCCGAATTCCTTTTG  
+HWI-EAS443:3:16:95:964#0/1  
\_¥\_`\_ZZ[NYZWa)`¥[\_^^`a`^¥a\_`^`^W]^Y[]`\_]`  
@HWI-EAS443:3:17:101:322#0/1  
GTCAGCAAAATGGGAGTAGATGAATACTCCAGCACGGAGA  
+HWI-EAS443:3:17:101:322#0/1  
a````bb^J`]aaa^][aaaa`a`^\_a\_aa`aa`]S\_W\_N  
@HWI-EAS443:3:17:1059:563#0/1  
AGAAGAACCCCGCACTCAGAATGAAGTGGATGATGGCAAT  
+HWI-EAS443:3:17:1059:563#0/1  
\_Z\_abZb`a\_¥b\_a`\_a¥b\_]VTXaUa\_Q\_a]]\_`WUY^  
@HWI-EAS443:3:17:1245:428#0/1  
GAGAAGAACCCCGCACTCAGAATGAAGTGGATGATGGCAA  
+HWI-EAS443:3:17:1245:428#0/1  
a^a`ba\_a`aaaa`\_`\_ab\_]aa]\_aZaa]\_\_Y]a\_YX]

@HWI-EAS443:3:17:1247:305#0/1  
CTCATTGTTGGCAAAGAAGACAAGAGATATGGCCCAGCAT  
+HWI-EAS443:3:17:1247:305#0/1  
abab`bbaa`ba``baaba\_bab[baaa`aa\_^]`a]a\_  
@HWI-EAS443:3:17:1286:113#0/1  
CAGCATTAAAGCATCAATGAACTGAGCAATCTTGCAAAAAGG  
+HWI-EAS443:3:17:1286:113#0/1  
``baaaaaa`aaaaab`a`a`\_a`W\_^```\_\_W\_^a^  
@HWI-EAS443:3:17:1547:264#0/1  
GCAAAGAAGACAAGAGATATGGCCCAGCATTAAAGCATCAA  
+HWI-EAS443:3:17:1547:264#0/1  
aaaaabbbbaa]a\_a`a\_a`a\_[W]\_\_¥a`^\_^\_0\_^U^^  
@HWI-EAS443:3:17:1560:437#0/1  
CCAGCATTAAAGCATCAATGAACTGAGCAATCTTGCAAAAAG  
+HWI-EAS443:3:17:1560:437#0/1  
\_`¥a]`a`a^^]\_a^a``]S\_Zab`a¥`aa\_Y^]`XN¥\_  
@HWI-EAS443:3:17:1583:1017#0/1  
AGAAGACAAGAGATATGGCCCAGCATTAAAGCATCAATGAA  
+HWI-EAS443:3:17:1583:1017#0/1  
`baa]^aYR^]SY\_\_WYZYPSU`\_a`Y[N[W\_SWWP[X^  
@HWI-EAS443:3:17:1660:34#0/1  
CATTAAAGCATCAATGAACTGAGCAATCTTGCAAAAAGGAGA  
+HWI-EAS443:3:17:1660:34#0/1  
abbabbbbabbbabbaaaa\_\_aaaa`baa[a`a`b`^aa  
@HWI-EAS443:3:17:1671:393#0/1  
CAGCATTAAAGCATCAATGAACTGAGCAATCTTGCAAAAAGG  
+HWI-EAS443:3:17:1671:393#0/1  
aabaaaabaa`aa`\_baaa\_a`a\_]a`a¥a`a[ ]\_^^`\_  
@HWI-EAS443:3:17:1703:570#0/1  
TAAGCATCAATGAACTGAGCAATCTTGCAAAAAGGAGAGAA  
+HWI-EAS443:3:17:1703:570#0/1  
\_^]bba\_a]T[TWR]aaa\_^`XH`]`Ya^a`a\_T^\_[a¥  
@HWI-EAS443:3:17:1744:1673#0/1  
TAAGCATCAATGAACTGAGCAATCTTGCAAAAAGGAGAGAA  
+HWI-EAS443:3:17:1744:1673#0/1  
[`[^Y\_^`^\_]WaTVVZ\_\_S`¥[[\_b\_YV¥¥¥`X`^V`X  
@HWI-EAS443:3:17:192:1412#0/1  
GAGATATGGCCCAGCATTAAAGCATCAATGAACTGAGCAAT  
+HWI-EAS443:3:17:192:1412#0/1  
\_S\_aab\_baababaaaa]^a[ ]aaaa`b]aaa``aaaa  
@HWI-EAS443:3:17:291:466#0/1  
GAAGAACCCCGCACTCAGAATGAAGTGGATGATGGCAATG  
+HWI-EAS443:3:17:291:466#0/1  
\_baU¥b]abba`ab]\_^`[S\_\_U]]UYTSVZUXZNTUV¥0  
@HWI-EAS443:3:17:351:539#0/1  
CTCATTGTTGGCAAAGAAGACAAGAGATATGGCCCAGCAT  
+HWI-EAS443:3:17:351:539#0/1  
^`bbbbbbbaaa^bbbbbbbaababaabaaa`][a]\_a  
@HWI-EAS443:3:17:384:1180#0/1  
GACAAGAGATATGGCCCAGCATTAAAGCATCAATGAACTGA

+HWI-EAS443:3:17:384:1180#0/1  
a^aaaa`a`a\_] [a`a\_a`aa\_a`\_a\_\_\_\_`\_]¥[^^^]W  
@HWI-EAS443:3:17:469:231#0/1  
CAAGAGAAGAACCCCGCACTCAGAATGAAGTGGATGATGG  
+HWI-EAS443:3:17:469:231#0/1  
\_Ybb`Y`\_a\_¥`bb]`aa`b`\_aa[a\_^aa`\_^  
@HWI-EAS443:3:17:494:1645#0/1  
AGATTGCTCAGTTCATTGATGCTTAATGCTGGGCCATATC  
+HWI-EAS443:3:17:494:1645#0/1  
aaaaaZaabaa^\_\_`aa\_aa\_aa`a]]\_a^\_Z¥\_\_a`\_`\_  
@HWI-EAS443:3:17:671:505#0/1  
CCAGCATTAAGCATCAATGAACTGAGCAATCTTGCAAAG  
+HWI-EAS443:3:17:671:505#0/1  
a¥`aabaaXabb¥aaab`aaaaa]aaaa^\_YaUN\_R¥`  
@HWI-EAS443:3:17:739:169#0/1  
GAGATATGGCCAGCATTAAAGCATCAATGAACTGAGCAAT  
+HWI-EAS443:3:17:739:169#0/1  
a`aaYa`a`¥]S^a\_] ^`^W]]^]\_^XY^XXWX]UZ^X  
@HWI-EAS443:3:17:82:1465#0/1  
CAGCATTAAAGCATCAATGAACTGAGCAATCTTGCAAAGG  
+HWI-EAS443:3:17:82:1465#0/1  
`b`abbabaaaaab^0\_aaaaaYa`abaa`T`a`\_`aYXaW  
@HWI-EAS443:3:17:842:491#0/1  
CAATTCGACACTAATTGATGGCCATCCGAATCTTTTGGT  
+HWI-EAS443:3:17:842:491#0/1  
abb`baabababaaa`\_^`a\_a`]]a`^^`^\_aa`\_]]  
@HWI-EAS443:3:18:1013:1626#0/1  
CAGCATTAAAGCATCAATGAACTGAGCAATCTTGCAAAGG  
+HWI-EAS443:3:18:1013:1626#0/1  
a]T\_USa]]^`^`\_NVWURWYZPZ`^`\_YVOOTRIVLW[O  
@HWI-EAS443:3:18:1034:964#0/1  
AGAGAAGAACCCCGCACTCAGAATGAAGTGGATGATGGCA  
+HWI-EAS443:3:18:1034:964#0/1  
¥ZUWOWa`a]]\_a]\_\_`RUZ`\_aGU`Z^X`¥\_\_GGVY\_  
@HWI-EAS443:3:18:1069:884#0/1  
TAAGCATCAATGAACTGAGCAATCTTGCAAAGGAGAGAA  
+HWI-EAS443:3:18:1069:884#0/1  
a\_Y`¥`]Z\_\_ab`\_`aa\_aZ`aaa]\_a`aa\_]a\_Y\_\_a¥`  
@HWI-EAS443:3:18:1133:285#0/1  
GAAGAACCCCGCACTCAGAATGAAGTGGATGATGGCAATG  
+HWI-EAS443:3:18:1133:285#0/1  
]\_]¥V\_^Z^`a]`a^^^`VZV^]¥\_V` [¥^\_VU[ZRW[R[^  
@HWI-EAS443:3:18:1223:425#0/1  
GAGATATGGCCAGCATTAAAGCATCAATGAACTGAGCAAT  
+HWI-EAS443:3:18:1223:425#0/1  
a\_b^`a`aa`^`\_aT`\_`^`\_] ^`X^`^`XLXT]Y]R¥]^  
@HWI-EAS443:3:18:1253:1174#0/1  
AGAAGAACCCCGCACTCAGAATGAAGTGGATGATGGCAAT  
+HWI-EAS443:3:18:1253:1174#0/1  
aaba^aa`a`aaaa\_\_a`a`^a`\_^[YRUaV\_\_`\_`^^^



@HWI-EAS443:3:18:1364:1595#0/1  
CTCATTGTTGGCAAAGAAGACAAGAGATATGGCCCAGCAT  
+HWI-EAS443:3:18:1364:1595#0/1  
^^^`bZbb]`b]]ZbYbba¥ab\_baab¥¥MaIIbbG`Y  
@HWI-EAS443:3:18:1409:110#0/1  
TAAGCATCAATGAACTGAGCAATCTTGCAAAAGGAGAGAA  
+HWI-EAS443:3:18:1409:110#0/1  
V\_[P\_XY^aa\_Z\_b`bab^RX]Tba]]^¥`\_a]P\_]`\_\_  
@HWI-EAS443:3:18:1469:833#0/1  
ATATGGCCCAGCATTAAAGCATCAATGAACTGAGCAATCTT  
+HWI-EAS443:3:18:1469:833#0/1  
aaaa]VaaaaY\_a`^][ZW¥¥W]TTVQWX\_`^\_XYP¥UY^  
@HWI-EAS443:3:18:1495:1246#0/1  
GCTGTTGCTCTTCTCCCAACCATTGTGAATTCTTCATACC  
+HWI-EAS443:3:18:1495:1246#0/1  
aaaaU^\_aa`aa^`a\_`[[[]]QZ`XZ¥YMW`TY\_XMW  
@HWI-EAS443:3:18:1508:1666#0/1  
AAGAGAAGAACCCCGCACTCAGAATGAAGTGGATGATGGC  
+HWI-EAS443:3:18:1508:1666#0/1  
aaaaaaaaa`^Uaa`]]]]U[^Z[\_X]\_V[ZWX^XX[XV  
@HWI-EAS443:3:18:153:1549#0/1  
TTAAGCATCAATGAACTGAGCAATCTTGCAAAAGGAGAGA  
+HWI-EAS443:3:18:153:1549#0/1  
aabaabbabba\_^`aaa`a`aba`\_a`aaa`aa``aaa  
@HWI-EAS443:3:18:1545:1228#0/1  
TAAGCATCAATGAACTGAGCAATCTTGCAAAAGGAGAGAA  
+HWI-EAS443:3:18:1545:1228#0/1  
aabb`aa`aaaa\_a^a¥[W[^`aW\_\_aZ`^^\_a\_^a\_^`^  
@HWI-EAS443:3:18:1579:1200#0/1  
AAGACAAGAGATATGGCCCAGCATTAAAGCATCAATGAACT  
+HWI-EAS443:3:18:1579:1200#0/1  
aZZ]`aa[¥\_`]^]^^]\_^\_XZ`^\_^\_Y\_]^[Z]XZ  
@HWI-EAS443:3:18:1580:219#0/1  
CTCATTGTTGGCAAAGAAGACAAGAGATATGGCCCAGCAT  
+HWI-EAS443:3:18:1580:219#0/1  
abbbbbbb`b`bbbbbbba\_aaaaba`b]aa[GWaaTaa  
@HWI-EAS443:3:18:1593:550#0/1  
AGAGAAGAACCCCGCACTCAGAATGAAGTGGATGATGGCA  
+HWI-EAS443:3:18:1593:550#0/1  
¥VQa`aa`a[NNa`^`\_`^`\_\_\_\_a^^aXaRU\_aQ[ZYZJP  
@HWI-EAS443:3:18:1756:1617#0/1  
GATATGGCCCAGCATTAAAGCATCAATGAACTGAGCAATCT  
+HWI-EAS443:3:18:1756:1617#0/1  
S\_b`abbab]^][Zbbbbbb`ab`\_a\_X`a^aT\_`Ra``W^  
@HWI-EAS443:3:18:298:723#0/1  
GAAGAACCCCGCACTCAGAATGAAGTGGATGATGGCAATG  
+HWI-EAS443:3:18:298:723#0/1  
a\_V^aaaaaaaa`\_\_`^`^`\_\_`]^a0a`]^\_]`][NUY\_  
@HWI-EAS443:3:18:299:654#0/1  
GAAGAACCCCGCACTCAGAATGAAGTGGATGATGGCAATG

+HWI-EAS443:3:18:299:654#0/1  
`\_abbababa\_babbb`b][ab[]]\_a\_``aa`aa`a[`b  
@HWI-EAS443:3:18:404:2036#0/1  
GAAGACAAGAGATATGGCCCAGCATTAAAGCATCAATGAAC  
+HWI-EAS443:3:18:404:2036#0/1  
ab\_`b`a¥^b`a\_b]VJW^Z¥\_a`[]^`Y\_^a^]Y\_\_]  
@HWI-EAS443:3:18:535:1153#0/1  
TTAAGCATCAATGAACTGAGCAATCTTGCAAAAGGAGAGA  
+HWI-EAS443:3:18:535:1153#0/1  
aa\_^`aaaaaa`\_`a^[]a\_`[\_\_\_`a`\_\_\_\_`\_\_`a`  
@HWI-EAS443:3:18:598:1429#0/1  
CAATTCGACACTAATTGATGGCCATCCGAATTCTTTTGGT  
+HWI-EAS443:3:18:598:1429#0/1  
aa¥a¥a`\_`aaaa¥`\_`a^^Wa`a^Z`Z\_[\_\_^^]]^W[V  
@HWI-EAS443:3:18:690:1322#0/1  
AGACAAGAGATATGGCCCAGCATTAAAGCATCAATGAACTG  
+HWI-EAS443:3:18:690:1322#0/1  
`\_]V^OQ¥`a\_a]]`YY`¥¥aaa\_T`\_\_a\_]\_]\_]\_]W[U  
@HWI-EAS443:3:18:755:1604#0/1  
AGAGAAGAACCCCGCACTCAGAATGAAGTGGATGATGGCA  
+HWI-EAS443:3:18:755:1604#0/1  
aba\_a]]aaaa\_aaa\_\_a\_`\_`\_\_^]WMYX\_\_V\_¥\_] ]  
@HWI-EAS443:3:18:832:1427#0/1  
GAAGAACCCCGCACTCAGAATGAAGTGGATGATGGCAATG  
+HWI-EAS443:3:18:832:1427#0/1  
RO^WYb[¥W¥Zaa^Z^¥UZ`ZSZ¥\_HIa^abaSXY]]¥GU  
@HWI-EAS443:3:18:835:906#0/1  
CCAGCATTAAAGCATCAATGAACTGAGCAATCTTGCAAAAG  
+HWI-EAS443:3:18:835:906#0/1  
aa`\_`aaaaaaaa`\_`aa`\_\_\_\_`\_]`^^`\_`^\_\_\_\_X]]\_`  
@HWI-EAS443:3:19:1023:575#0/1  
AGAAGAACCCCGCACTCAGAATGAAGTGGATGATGGCAAT  
+HWI-EAS443:3:19:1023:575#0/1  
aaabaaa`\_`aaaa\_a`\_a\_a`a\_\_aW`a^[a¥¥aa¥¥¥¥  
@HWI-EAS443:3:19:1039:1222#0/1  
GGCCCAGCATTAAAGCATCAATGAACTGAGCAATCTTGCAA  
+HWI-EAS443:3:19:1039:1222#0/1  
^]b¥a¥Q^Z¥TXU¥`^¥]HW¥^^T^^]¥\_LZ`Y` `a`Y[a  
@HWI-EAS443:3:19:1063:1896#0/1  
GAGATATGGCCCAGCATTAAAGCATCAATGAACTGAGCAAT  
+HWI-EAS443:3:19:1063:1896#0/1  
aa\_bbbaa^a`abb`aaabaaabaaabaaaa\_aaUa`a  
@HWI-EAS443:3:19:1103:407#0/1  
GATTGCTCAGTTCATTGATGCTTAATGCTGGGCCATATCT  
+HWI-EAS443:3:19:1103:407#0/1  
aaa]`]a`T`XZaX]\_a[`\_`\_]`]W`[X\_a¥UJMY]^XX^  
@HWI-EAS443:3:19:1127:1410#0/1  
AGAAGACAAGAGATATGGCCCAGCATTAAAGCATCAATGAA  
+HWI-EAS443:3:19:1127:1410#0/1  
aaa\_\_aa^T\_`a¥`\_`a`^\_\_a^^`^`\_\_\_\_[\_`\_]Z\_^^^

@HWI-EAS443:3:19:1160:801#0/1  
AACAAATTCGACACTAATTGATGGCCATCCGAATTCTTTTG  
+HWI-EAS443:3:19:1160:801#0/1  
ab`baaaaaaaaa\_aa`Y^a\_aa\_]a`\_`\_]\_aa^\_\_\_\_`  
@HWI-EAS443:3:19:1452:40#0/1  
ATTGATGCTTAATGCTGGGCCATATCTCTTGTCTTCTTTG  
+HWI-EAS443:3:19:1452:40#0/1  
`Z^b]^\_\_\_\_`aaa¥^a\_a\_\_R[`a`\_]`YJXa]aS`^Y[  
@HWI-EAS443:3:19:1506:630#0/1  
TTTTTAAACAATTCGACACTAATTGATGGCCATCCGAATT  
+HWI-EAS443:3:19:1506:630#0/1  
a`aa\_0¥aa]`[\_a`aaaa`]\_¥\_a]a^^^aW^\_a^YOY  
@HWI-EAS443:3:19:1610:810#0/1  
CTTTTGCAAGATTGCTCAGTTCATTGATGCTTAATGCTGG  
+HWI-EAS443:3:19:1610:810#0/1  
\_bb\_bb\_`b`^aba]b\_a^^baaa`a`bUbaa`a\_aXU  
@HWI-EAS443:3:19:1646:496#0/1  
GAAGAACCCCGCACTCAGAATGAAGTGGATGATGGCAATG  
+HWI-EAS443:3:19:1646:496#0/1  
`aabaa]ZWQb\_\_^a¥\_a¥`\_`^^\_]aYS^`]V\_VUUU]^  
@HWI-EAS443:3:19:34:449#0/1  
ATTAAGCATCAATGAACTGAGCAATCTTGCAAAAGGAGAG  
+HWI-EAS443:3:19:34:449#0/1  
aY`a¥\_aa\_a`ZP\_\_\_\_`[XS^`[`X[`^^¥[P[\_X^  
@HWI-EAS443:3:19:487:1654#0/1  
AAGACAAGAGATATGGCCCAGCATTAAAGCATCAATGAACT  
+HWI-EAS443:3:19:487:1654#0/1  
a`]aaa`a\_a\_a^]\_`\_\_`]^\_]\_`[\_Z`^]Z^\_Z]  
@HWI-EAS443:3:19:523:1786#0/1  
GAAGACAAGAGATATGGCCCAGCATTAAAGCATCAATGAAC  
+HWI-EAS443:3:19:523:1786#0/1  
Za`aa`baabab`b`a¥b`aa]abbaaa`aaaa\_\_aYa\_a  
@HWI-EAS443:3:19:692:1523#0/1  
CATTAAGCATCAATGAACTGAGCAATCTTGCAAAAGGAGA  
+HWI-EAS443:3:19:692:1523#0/1  
abbba^ababbaba¥a^]a\_U\_aa\_aaa\_\_a\_]^\_\_W¥]`  
@HWI-EAS443:3:19:734:1979#0/1  
GAAGAACCCCGCACTCAGAATGAAGTGGATGATGGCAATG  
+HWI-EAS443:3:19:734:1979#0/1  
^bbabbaa`abbaa]abaaaa`^YMY`Y^a\_\_]\_`\_a  
@HWI-EAS443:3:19:74:1575#0/1  
CTCCTTTTGCAAGATTGCTCAGTTCATTGATGCTTAATGC  
+HWI-EAS443:3:19:74:1575#0/1  
aababbab¥baa\_a`aaaaaa`\_aaaa`\_`a`a`aa`\_\_  
@HWI-EAS443:3:19:774:1820#0/1  
GCAAAGAAGACAAGAGATATGGCCCAGCATTAAAGCATCAA  
+HWI-EAS443:3:19:774:1820#0/1  
a`aa\_baaa[`^]aaaSa\_]\_\_\_\_a\_¥^HUa`^\_\_^\_[]  
@HWI-EAS443:3:19:833:459#0/1  
AGAAGAACCCCGCACTCAGAATGAAGTGGATGATGGCAAT

+HWI-EAS443:3:19:833:459#0/1  
a\_\_`^`aa`ab``aaab\_\_aa[\_aUb^Z^a]`\_]TW^^  
@HWI-EAS443:3:19:840:1458#0/1  
AGAAGACAAGAGATATGGCCCAGCATTAAAGCATCAATGAA  
+HWI-EAS443:3:19:840:1458#0/1  
aa[ZaaaT[[V^X]\_]GP]Y[[^YS\_`V]X[NQ[WX^Y  
@HWI-EAS443:3:19:87:1405#0/1  
AGCATTAAAGCATCAATGAACTGAGCAATCTTGCAAAAAGGA  
+HWI-EAS443:3:19:87:1405#0/1  
aa`[\_a\_]`aaaa]^`a`T]]`[]`X`\_a`¥W[]^  
@HWI-EAS443:3:19:898:1983#0/1  
AGACAAGAGATATGGCCCAGCATTAAAGCATCAATGAACTG  
+HWI-EAS443:3:19:898:1983#0/1  
a¥`\_`^ZZ[^\_VZ^X[^]YY`]Z`XTRV^Z]^ZWWZXS  
@HWI-EAS443:3:19:898:467#0/1  
CAATTCGACACTAATTGATGGCCATCCGAATCTTTTGGT  
+HWI-EAS443:3:19:898:467#0/1  
abbbabaaaaaaaa`a`\_aa`^aa\_\_`a\_\_`a\_\_\_a^aT]  
@HWI-EAS443:3:19:908:922#0/1  
AAACAATTGACACTAATTGATGGCCATCCGAATCTTTT  
+HWI-EAS443:3:19:908:922#0/1  
\_a[ba`XaW`abaaa^]U]a¥V`a^a]]^Xa`\_WU\_\_\_a  
@HWI-EAS443:3:19:911:1821#0/1  
TTTTTAAACAATTGACACTAATTGATGGCCATCCGAATT  
+HWI-EAS443:3:19:911:1821#0/1  
[``\_U`aX`aaa^\_\_^bba\_\_^^^aY\_R\_a`Z``WU¥UX  
@HWI-EAS443:3:19:919:1354#0/1  
CAAGAGAAGAACCCCGCACTCAGAATGAAGTGGATGATGG  
+HWI-EAS443:3:19:919:1354#0/1  
ababbbabaababbabaaaaaaaaaaaaa`aVaa\_`a\_\_\_\_  
@HWI-EAS443:3:19:954:1816#0/1  
GAAGAACCCCGCACTCAGAATGAAGTGGATGATGGCAATG  
+HWI-EAS443:3:19:954:1816#0/1  
`b`bbabbbab`babaaa`baXTR[^aaa\_\_\_\_`\_^\_\_Y  
@HWI-EAS443:3:1:1003:966#0/1  
CAAGAGAAGAACCCCGCACTCAGAATGAAGTGGATGATGG  
+HWI-EAS443:3:1:1003:966#0/1  
`abaa`\_baaaa]]`\_aa\_aWaa\_aba^\_a^a````^`aB  
@HWI-EAS443:3:1:1039:1558#0/1  
AAGAGATATGGCCCAGCATTAAAGCATCAATGAACTGAGCA  
+HWI-EAS443:3:1:1039:1558#0/1  
`a`a\_]a`Ua`aY^aa\_ab\_`a`^aa\_\_`\_¥`aJ```\_`^B  
@HWI-EAS443:3:1:1085:109#0/1  
ATTAAGCATCAATGAACTGAGCAATCTTGCAAAAAGGAGAG  
+HWI-EAS443:3:1:1085:109#0/1  
aaaa`U^aS^\_aa]\_]`a^`\_¥^\_[\_`^][Y^^SQaBB  
@HWI-EAS443:3:1:1222:206#0/1  
AGAAGAACCCCGCACTCAGAATGAAGTGGATGATGGCAAT  
+HWI-EAS443:3:1:1222:206#0/1  
aa\_a\_aa\_a¥Za\_¥¥^¥`ZVR`^¥WNXXTO\_WBBBBBBB

@HWI-EAS443:3:1:1296:1812#0/1  
CAGCATTAAGCATCAATGAACTGAGCAATCTTGCAAAGG  
+HWI-EAS443:3:1:1296:1812#0/1  
Y[aabbbaba\_bbaaab\_a^baabaab\_¥\_aaWb\_bbaB  
@HWI-EAS443:3:1:1310:350#0/1  
AGCATTAAGCATCAATGAACTGAGCAATCTTGCAAAGGA  
+HWI-EAS443:3:1:1310:350#0/1  
`b^bbbbbbaaabaa`bba\_aa\_ab`aaa0a``¥aSZ¥\_aB  
@HWI-EAS443:3:1:133:1813#0/1  
CAAGAGAAGAACCCCGCACTCAGAATGAAGTGGATGATGG  
+HWI-EAS443:3:1:133:1813#0/1  
`b]bb]bbaWa`\_aaa\_b\_aaabb\_bbbaaaa`a\_bbBBB  
@HWI-EAS443:3:1:176:1665#0/1  
CAATTCGACACTAATTGATGGCCATCCGAATTCTTTTGGT  
+HWI-EAS443:3:1:176:1665#0/1  
]ab`]babab^bb`^`]bbab`IbaaLbba`bLbbbb^\_\_  
@HWI-EAS443:3:1:202:1309#0/1  
AAACAATTGACACTAATTGATGGCCATCCGAATTCTTTT  
+HWI-EAS443:3:1:202:1309#0/1  
aa¥T\_bb¥[[[aa]^UHTWPY[\_TKWa`U[a^YBBBBBBB  
@HWI-EAS443:3:1:308:332#0/1  
TAAGCATCAATGAACTGAGCAATCTTGCAAAGGAGAGAA  
+HWI-EAS443:3:1:308:332#0/1  
[`ba`\_RY`^^^a¥\_abab]aaa\_a^^`\_\_aa`[aZ`BB  
@HWI-EAS443:3:1:39:1641#0/1  
AGAAGAACCCCGCACTCAGAATGAAGTGGATGATGGCAAT  
+HWI-EAS443:3:1:39:1641#0/1  
aVU¥WRYVYVS¥\_`^`UMXYSY\_QTBBBBBBBBBBBBBBB  
@HWI-EAS443:3:1:546:1044#0/1  
AACAAATTCGACACTAATTGATGGCCATCCGAATTCTTTTG  
+HWI-EAS443:3:1:546:1044#0/1  
\_`baaaaaa^b`aaa`^^\_aaZaZa\_X\_a`^^`X\_aBBB  
@HWI-EAS443:3:1:671:508#0/1  
AAGAGAAGAACCCCGCACTCAGAATGAAGTGGATGATGGC  
+HWI-EAS443:3:1:671:508#0/1  
^`a^b\_\_`\_]¥V¥a]^`V]^X¥]]R¥aU`VY^`BBBBB  
@HWI-EAS443:3:1:706:1209#0/1  
GAAGAACCCCGCACTCAGAATGAAGTGGATGATGGCAATG  
+HWI-EAS443:3:1:706:1209#0/1  
T^ba[I¥YaU`\_]`S]baV`bY\_a]ab¥]`\_\_aZDF^BB  
@HWI-EAS443:3:1:753:1036#0/1  
CCCAGCATTAAGCATCAATGAACTGAGCAATCTTGCAAAGG  
+HWI-EAS443:3:1:753:1036#0/1  
¥^aaabbabb[abbb]bbbab`^bbbbb\_baba`¥a]Waa`  
@HWI-EAS443:3:1:773:1676#0/1  
CAAGAGATATGGCCAGCATTAAGCATCAATGAACTGAGC  
+HWI-EAS443:3:1:773:1676#0/1  
Vbbbbbbbbbabaabbb\_bbb\_baaKa`Wbbbb`aaaaaaY  
@HWI-EAS443:3:1:795:1119#0/1  
CAAGAGAAGAACCCCGCACTCAGAATGAAGTGGATGATGG

+HWI-EAS443:3:1:795:1119#0/1  
abbbb`ab`ba`\_abaa`aHaba`bba`^N^`aa^`BB  
@HWI-EAS443:3:1:84:861#0/1  
TATGGCCCAGCATTAAAGCATCAATGAACTGAGCAATCTTG  
+HWI-EAS443:3:1:84:861#0/1  
]b[V^aZ[`a^Yb`a`\_\_a]Za`\_]aaaS^UYO^BB  
@HWI-EAS443:3:20:1054:1904#0/1  
GAGATATGGCCCAGCATTAAAGCATCAATGAACTGAGCAAT  
+HWI-EAS443:3:20:1054:1904#0/1  
`a¥aaa¥`aa`aaabaabaa\_aa`aaa\_aa¥]^YWa`]  
@HWI-EAS443:3:20:1078:660#0/1  
CAAGAGAAGAACCCCGCACTCAGAATGAAGTGGATGATGG  
+HWI-EAS443:3:20:1078:660#0/1  
abbbaa`abaaa`ab\_aaa`\_a`aaba^a]ba\_aa`\_\_  
@HWI-EAS443:3:20:1107:731#0/1  
AAGAGATATGGCCCAGCATTAAAGCATCAATGAACTGAGCA  
+HWI-EAS443:3:20:1107:731#0/1  
a]^`aaba\_a\_aaaaa`aaaaa[`\_a`aaa\_\_\_\_\_`\_aW\_  
@HWI-EAS443:3:20:1302:1117#0/1  
AGAAGAACCCCGCACTCAGAATGAAGTGGATGATGGCAAT  
+HWI-EAS443:3:20:1302:1117#0/1  
\_b]aV¥`¥T¥aV¥]^U]VX]^`[Ma`]a\_]`[[`^W  
@HWI-EAS443:3:20:1481:367#0/1  
AAGAGAAGAACCCCGCACTCAGAATGAAGTGGATGATGGC  
+HWI-EAS443:3:20:1481:367#0/1  
aa\_W]]`aa][ZV\_Y]^`\_V]W[^^]\_T¥^Z^aV][VL  
@HWI-EAS443:3:20:1593:1274#0/1  
AGAAGACAAGAGATATGGCCCAGCATTAAAGCATCAATGAA  
+HWI-EAS443:3:20:1593:1274#0/1  
`^`\_a]^Z]^\_a`V^Za`aS^XWRa`\_]\_]X]\_Y]WV  
@HWI-EAS443:3:20:1632:284#0/1  
AGAAGACAAGAGATATGGCCCAGCATTAAAGCATCAATGAA  
+HWI-EAS443:3:20:1632:284#0/1  
\_U`\_aa[`abaaaaR^a]XW]aZa\_aa`^F¥^U^\_]^^^  
@HWI-EAS443:3:20:20:1039#0/1  
GCTCAGTTCATTGATGCTTAATGCTGGGCCATATCTCTTG  
+HWI-EAS443:3:20:20:1039#0/1  
^\_]\_W]ZZa^\_]]]^`a\_W\_^]a\_^P^`[¥]^X]YZ]^`  
@HWI-EAS443:3:20:218:569#0/1  
CAGCATTAAAGCATCAATGAACTGAGCAATCTTGCAAAAAGG  
+HWI-EAS443:3:20:218:569#0/1  
\_UXY¥W\_abZa^¥^aa^aa\_¥]\_`¥^Z]]¥aZ`\_\_`^VZV  
@HWI-EAS443:3:20:252:328#0/1  
CAATTCGACACTAATTGATGGCCATCCGAATTCTTTTGGT  
+HWI-EAS443:3:20:252:328#0/1  
ab`Y`baabab^aaaaa\_a]^`a¥`¥a]TY^aa\_a`\_aW  
@HWI-EAS443:3:20:340:1350#0/1  
GATATGGCCCAGCATTAAAGCATCAATGAACTGAGCAATCT  
+HWI-EAS443:3:20:340:1350#0/1  
H¥a[Y]^`a`^`aaa`^`ZaabWa]Zaa`\_UaZJ^aa^\_

@HWI-EAS443:3:20:384:1000#0/1  
TAAGAGTCAGCAAATGGGAGTAGATGAATACTCCAGCAC  
+HWI-EAS443:3:20:384:1000#0/1  
aaa`abV^\_\_a\_aaaa]aa\_a^a]X\_\_`a\_^`\_a`\_]]\_  
@HWI-EAS443:3:20:47:784#0/1  
CAATTCGACACTAATTGATGGCCATCCGAATTCTTTTGGT  
+HWI-EAS443:3:20:47:784#0/1  
abbaaaa]`aaa]]^`\_`\_V`\_\_aa^X``¥a^a`\_\_V  
@HWI-EAS443:3:20:497:503#0/1  
AACAAATTCGACACTAATTGATGGCCATCCGAATTCTTTTG  
+HWI-EAS443:3:20:497:503#0/1  
Z^\_baVW¥S^\_Q¥\_`X^]¥[\_]W]WT`¥YQ\_[IZa\_`a  
@HWI-EAS443:3:20:508:1261#0/1  
AAGAGAAGAACCCCGCACTCAGAATGAAGTGGATGATGGC  
+HWI-EAS443:3:20:508:1261#0/1  
aaaabaaa[baaaaaa`a\_\_a]\_\_a\_^\_Ra^\_\_aU^^WV  
@HWI-EAS443:3:20:571:1994#0/1  
GAGATATGGCCAGCATTAAGCATCAATGAACTGAGCAAT  
+HWI-EAS443:3:20:571:1994#0/1  
`aaX\_b\_aababbZaa[[a`aaXbaaV¥Xb`aa\_abaaa]  
@HWI-EAS443:3:20:621:713#0/1  
CCAGCATTAAGCATCAATGAACTGAGCAATCTTGCAAAAAG  
+HWI-EAS443:3:20:621:713#0/1  
aaaa`^`]]`X\_\_^`aa\_`X^^¥a\_\_\_^]\_Z^Z^YU¥\_  
@HWI-EAS443:3:20:65:507#0/1  
AGAGAAGAACCCCGCACTCAGAATGAAGTGGATGATGGCA  
+HWI-EAS443:3:20:65:507#0/1  
aaabaaab`b`aaaa`ab`aaa\_^a^aa`a^\_\_`^]  
@HWI-EAS443:3:20:700:1603#0/1  
CAGCATTAAGCATCAATGAACTGAGCAATCTTGCAAAAAG  
+HWI-EAS443:3:20:700:1603#0/1  
^bbabaa`a[`b`aa\_b`aabba\_aaaaa^aaa\_a`a`^  
@HWI-EAS443:3:20:745:1131#0/1  
AGAAGAACCCCGCACTCAGAATGAAGTGGATGATGGCAAT  
+HWI-EAS443:3:20:745:1131#0/1  
WaUW[^\_\_V\_^\_b¥]a\_\_]aa^RZ¥Zaa[^`^¥U`^VU]\_  
@HWI-EAS443:3:20:790:1930#0/1  
ATTTTGGCAAAGAAGACAAGAGATATGGCCAGCATTAA  
+HWI-EAS443:3:20:790:1930#0/1  
a\_`a`^]]\_\_aa```\_\_`\_]`\_a^\_X^]\_¥`\_Z]^Z]\_Z  
@HWI-EAS443:3:20:795:1977#0/1  
AGAAGACAAGAGATATGGCCAGCATTAAAGCATCAATGAA  
+HWI-EAS443:3:20:795:1977#0/1  
a¥aa\_aa```\_`^b\_aI]^a`a¥¥^`^`\_`\_aZ^a¥]WNX  
@HWI-EAS443:3:20:898:595#0/1  
AGAAGAACCCCGCACTCAGAATGAAGTGGATGATGGCAAT  
+HWI-EAS443:3:20:898:595#0/1  
`\_X\_¥Z`a`\_bb`ab`ab`a`\_]R`[aa\_\_a`\_a]YZ[\_  
@HWI-EAS443:3:20:906:1176#0/1  
GGCCAGCATTAAAGCATCAATGAACTGAGCAATCTTGCAA

+HWI-EAS443:3:20:906:1176#0/1  
abaa[ `a¥\_ ` `aZaZ]¥^`aa\_¥]aa\_aY\_a\_]\_^a\_]\_  
@HWI-EAS443:3:21:1052:339#0/1  
AAACAATTGACACTAATTGATGGCCATCCGAATTCTTTT  
+HWI-EAS443:3:21:1052:339#0/1  
aa`]aaaa`b^\_aZ` ` `\_\_\_\_\_W]U\_\_]] `XW^^Q¥\_^]  
@HWI-EAS443:3:21:107:1886#0/1  
GAAGACAAGAGATATGGCCCAGCATTAAAGCATCAATGAAC  
+HWI-EAS443:3:21:107:1886#0/1  
aa[Zabba[¥[ `^aZYIb]Y`\_¥b\_aa¥ZaR¥a\_`PR\_¥W  
@HWI-EAS443:3:21:1259:769#0/1  
CATTAAGCATCAATGAACTGAGCAATCTTGCAAAAGGAGA  
+HWI-EAS443:3:21:1259:769#0/1  
¥` `U¥Z`V[[b^W`\_Y^^^\_Ob^^^aaba^VTX\_bb^a`b  
@HWI-EAS443:3:21:1385:464#0/1  
AAGAGATATGGCCCAGCATTAAAGCATCAATGAACTGAGCA  
+HWI-EAS443:3:21:1385:464#0/1  
aab`aaa¥aaaZ`aaaXa`a\_W` ` `]^a¥F[¥^Wa^UaSW  
@HWI-EAS443:3:21:1548:1904#0/1  
CAAGAGAAGAACCCCGCACTCAGAATGAAGTGGATGATGG  
+HWI-EAS443:3:21:1548:1904#0/1  
abbbabbbaaba¥\_`b`b\_a`aa^\_aa\_\_\_Xa] ` `a\_]Xa  
@HWI-EAS443:3:21:1552:473#0/1  
AACAAATTCGACACTAATTGATGGCCATCCGAATTCTTTTG  
+HWI-EAS443:3:21:1552:473#0/1  
VZ¥`]U]a\_aZa`aaZ^V\_] [[aZ¥\_`]R\_XHW[^`\_^^^  
@HWI-EAS443:3:21:1591:1759#0/1  
AGAAGACAAGAGATATGGCCCAGCATTAAAGCATCAATGAA  
+HWI-EAS443:3:21:1591:1759#0/1  
\_ba` `a\_\_Q^]\_W\_aZ]^[[W`UW\_]a\_]^^ZYVY]W[  
@HWI-EAS443:3:21:1595:219#0/1  
CAATTCGACACTAATTGATGGCCATCCGAATTCTTTTGGT  
+HWI-EAS443:3:21:1595:219#0/1  
\_baa]D[bab\_babbabb`aa`a¥VO\_^\_bbX`bbaaWO  
@HWI-EAS443:3:21:1601:848#0/1  
AGAAGACAAGAGATATGGCCCAGCATTAAAGCATCAATGAA  
+HWI-EAS443:3:21:1601:848#0/1  
aaaaaaaaab` `` `a`\_XU[\_`Z]\_` `^\_^\_S\_[]`W]  
@HWI-EAS443:3:21:1677:1556#0/1  
GGGCAAAGAAGACAAGAGATATGGCCCAGCATTAAAGCATC  
+HWI-EAS443:3:21:1677:1556#0/1  
]`aaabbaabb`a`\_aaa`Taaa`^\_]`a^` ` `a]\_^\_  
@HWI-EAS443:3:21:1767:964#0/1  
GATATGGCCCAGCATTAAAGCATCAATGAACTGAGCAATCT  
+HWI-EAS443:3:21:1767:964#0/1  
\_\_]` [[aVIWbV[a¥`YZ][a`\_\_T^\_]\_`¥¥PX` `]U[  
@HWI-EAS443:3:21:1788:220#0/1  
CAATTCGACACTAATTGATGGCCATCCGAATTCTTTTGGT  
+HWI-EAS443:3:21:1788:220#0/1  
a`Z]\_`¥Y\_^a]X¥][STNYKVRPYMR`YY^YLUX[V^]Y





+HWI-EAS443:3:22:1466:942#0/1  
a]a`aa`aaa¥a`a`\_`a\_]`Y\_\_\_^^[]^U[]\_]^  
@HWI-EAS443:3:22:1474:1426#0/1  
ATTAAGCATCAATGAACTGAGCAATCTTGCAAAAGGAGAG  
+HWI-EAS443:3:22:1474:1426#0/1  
aa\_aaa\_\_`a`aa\_]YP]]^\_[\_Y]¥`\_SGX\_¥^`]]^¥\_  
@HWI-EAS443:3:22:1474:305#0/1  
AGAGAAGAACCCCGCACTCAGAATGAAGTGGATGATGGCA  
+HWI-EAS443:3:22:1474:305#0/1  
aba`b`b\_ba\_a\_baaaba`aa^aa[^aRaaV^a]\_a\_VZ  
@HWI-EAS443:3:22:190:1814#0/1  
AAGAACCCCGCACTCAGAATGAAGTGGATGATGGCAATGA  
+HWI-EAS443:3:22:190:1814#0/1  
aa`aabaaa^aa`\_a\_^`\_[XUSKP]\_]U`X]R]\_\_^RX  
@HWI-EAS443:3:22:217:1965#0/1  
CTTTTGCAAGATTGCTCAGTTCATTGATGCTTAATGCTGG  
+HWI-EAS443:3:22:217:1965#0/1  
aaa`a]a`aab`a`\_\_ba^\_`baa\_\_^`aaa``aa\_a^[¥  
@HWI-EAS443:3:22:299:1664#0/1  
GAGAAGAACCCCGCACTCAGAATGAAGTGGATGATGGCAA  
+HWI-EAS443:3:22:299:1664#0/1  
^Yaaa`a\_\_`bbba]aaaY\_SW``^`ZN]a\_U¥UZ^]U`T  
@HWI-EAS443:3:22:308:681#0/1  
CAATTCGACACTAATTGATGGCCATCCGAATCTTTTGGT  
+HWI-EAS443:3:22:308:681#0/1  
aa]abaa\_aaaaa`aa\_]`a`a````\_`\_a`a\_\_YX  
@HWI-EAS443:3:22:383:1639#0/1  
GCATTAAGCATCAATGAACTGAGCAATCTTGCAAAAGGAG  
+HWI-EAS443:3:22:383:1639#0/1  
aaba`bbaaaabaaa`abaa`aaaa`a\_\_`a````\_`^a`  
@HWI-EAS443:3:22:39:1076#0/1  
CCATCATCCACTTCATTCTGAGTGC GGTTCTTCTCTTG  
+HWI-EAS443:3:22:39:1076#0/1  
\_\_aaaa`ab\_a]\_\_S\_ab``¥\_V`^\_Z`^W\_Z\_¥]]aaaa  
@HWI-EAS443:3:22:444:217#0/1  
CAATTCGACACTAATTGATGGCCATCCGAATCTTTTGGT  
+HWI-EAS443:3:22:444:217#0/1  
abbabababaaaa^aaa`\_a\_a^a\_\_¥a\_a`\_Zaaa\_[]Z  
@HWI-EAS443:3:22:456:1213#0/1  
CTCAGTTCATTGATGCTTAATGCTGGCCATATCTCTTGT  
+HWI-EAS443:3:22:456:1213#0/1  
aV^`^V[bU]^]^ab\_aa\_aa[aZW¥Z^]\_a^aaa`^\_a¥  
@HWI-EAS443:3:22:524:1713#0/1  
CAATTCGACACTAATTGATGGCCATCCGAATCTTTTGGT  
+HWI-EAS443:3:22:524:1713#0/1  
a``aaa\_ba`aa\_aY\_W^[^aVa]aa\_\_`\_^\_\_\_\_Y]¥U  
@HWI-EAS443:3:22:598:1308#0/1  
GAGAAGAACCCCGCACTCAGAATGAAGTGGATGATGGCAA  
+HWI-EAS443:3:22:598:1308#0/1  
a[\_^\_U\_]`Qaa[U\_a\_]\_\_Y^\_[Z\_X[V[UTUVVP]]X

@HWI-EAS443:3:22:622:314#0/1  
GAAGAACCCCGCACTCAGAATGAAGTGGATGATGGCAATG  
+HWI-EAS443:3:22:622:314#0/1  
aabaaaaa`\_\_a\_^`\_\_\_\_\_aXY`U^\_^\_\_\_V\_^\_[\_Z^  
@HWI-EAS443:3:22:681:104#0/1  
CATTAAGCATCAATGAACTGAGCAATCTTGCAAAAGGAGA  
+HWI-EAS443:3:22:681:104#0/1  
abbbbbbb`abbbbb`abaabaaaaaab``\_`^aa`aa  
@HWI-EAS443:3:22:734:676#0/1  
AAGAGATATGGCCAGCATTAAAGCATCAATGAACTGAGCA  
+HWI-EAS443:3:22:734:676#0/1  
`aa]aaababba\_\_^]Z^aaaaaY\_aa`\_]a\_\_^\_[aa  
@HWI-EAS443:3:22:862:1040#0/1  
AACAAATTCGACACTAATTGATGGCCATCCGAATCTTTTG  
+HWI-EAS443:3:22:862:1040#0/1  
ZSZV\_a`ZZ`aaRaZ\_aaaS[ZXU\_YZZT[MR^]W]]\_`^`  
@HWI-EAS443:3:22:875:1909#0/1  
CAATTCGACACTAATTGATGGCCATCCGAATCTTTTGGT  
+HWI-EAS443:3:22:875:1909#0/1  
\_[a¥]WV[`aaaa`Z0Q]¥[`a^^U[]WV^NPGX]\_\_XNU  
@HWI-EAS443:3:23:1019:42#0/1  
TAAGCATCAATGAACTGAGCAATCTTGCAAAAGGAGAGAA  
+HWI-EAS443:3:23:1019:42#0/1  
^\_bbab`abb`a`aaa``aaaab^aab^`\_`\_[a\_\_a`a` [  
@HWI-EAS443:3:23:1080:1358#0/1  
TAAGCATCAATGAACTGAGCAATCTTGCAAAAGGAGAGAA  
+HWI-EAS443:3:23:1080:1358#0/1  
]¥`^`bab\_abbaa]a\_X^aa¥`aa`baa[L\_a`^aa^aa  
@HWI-EAS443:3:23:1125:1190#0/1  
CAAGAGATATGGCCAGCATTAAAGCATCAATGAACTGAGC  
+HWI-EAS443:3:23:1125:1190#0/1  
\_\_Xbbaab`a`abab\_\_a¥aZ^ababaaab`b\_abb``a  
@HWI-EAS443:3:23:1134:385#0/1  
CCATCATCCACTTCATTCTGAGTGCGGGGTTCTTCTCTTG  
+HWI-EAS443:3:23:1134:385#0/1  
aabaabaaaaa``\_aaaa\_\_X\_\_`a`ZaXa\_]aX`^[  
@HWI-EAS443:3:23:1161:937#0/1  
AAGAGAAGAACCCCGCACTCAGAATGAAGTGGATGATGGC  
+HWI-EAS443:3:23:1161:937#0/1  
a`aaa``\_aa`aa``a¥¥[]a^^Xaaa`Vaa\_^^^\_\_YN  
@HWI-EAS443:3:23:1188:1145#0/1  
GAAGAACCCCGCACTCAGAATGAAGTGGATGATGGCAATG  
+HWI-EAS443:3:23:1188:1145#0/1  
aa`\_aa`a`^b¥[\_`\_`ba]\_a^^aX)`¥^\_[\_`[X^^a  
@HWI-EAS443:3:23:1197:1391#0/1  
CCATCATCCACTTCATTCTGAGTGCGGGGTTCTTCTCTTG  
+HWI-EAS443:3:23:1197:1391#0/1  
aabbbbbbbbabbbbaabbabaabaaaa`aa\_aabaabaaaa  
@HWI-EAS443:3:23:1315:1108#0/1  
GAAGAACCCCGCACTCAGAATGAAGTGGATGATGGCAATG

+HWI-EAS443:3:23:1315:1108#0/1  
aaa\_aa\_`\_^a^\_Z`^^\_¥^]¥^Y^R^\_X]\_VR]QUTYYY  
@HWI-EAS443:3:23:1378:2037#0/1  
CATTAAAGCATCAATGAACTGAGCAATCTTGCAAAAAGGAGA  
+HWI-EAS443:3:23:1378:2037#0/1  
``a`a``^a[`a^`aa\_a\_aa\_a\_^[[`¥][\_]aa\_`  
@HWI-EAS443:3:23:1395:1392#0/1  
TAAGCATCAATGAACTGAGCAATCTTGCAAAAAGGAGAGAA  
+HWI-EAS443:3:23:1395:1392#0/1  
ababb`baX`ab\_a``aaaa`\_\_aaaaaaa\_aV^aaadW  
@HWI-EAS443:3:23:1396:400#0/1  
AAGAGAAGAACCCCGCACTCAGAATGAAGTGGATGATGGC  
+HWI-EAS443:3:23:1396:400#0/1  
aa\_aa\_aa`\_[Y[\_a\_\_[\_^a\_\_[\_`^a^a`\_\_\_\_][`ZY  
@HWI-EAS443:3:23:1445:1325#0/1  
CAATTCGACACTAATTGATGGCCATCCGAATTCTTTTGGT  
+HWI-EAS443:3:23:1445:1325#0/1  
V]ab][MY^¥aS^XX\_\_[¥^^UPX``]TXaX]]]aVabJ^  
@HWI-EAS443:3:23:1470:152#0/1  
AAGAAGACAAGAGATATGGCCCAGCATTAAAGCATCAATGA  
+HWI-EAS443:3:23:1470:152#0/1  
aababa^ba¥`¥b]P\_\_\_NT^U^\_UTZZ^`PP¥MWZYXY  
@HWI-EAS443:3:23:1556:379#0/1  
AGAAGAACCCCGCACTCAGAATGAAGTGGATGATGGCAAT  
+HWI-EAS443:3:23:1556:379#0/1  
aaaa`\_`V`UYa\_`V]U\_aZS]\_R]^Za^Z`^]VZ\_WWZV  
@HWI-EAS443:3:23:199:1265#0/1  
CAAGAGAAGAACCCCGCACTCAGAATGAAGTGGATGATGG  
+HWI-EAS443:3:23:199:1265#0/1  
a¥ZZT]aY]\_\_`\_`X[aa\_\_[\_[]\_\_J00J^X][\_VRBB  
@HWI-EAS443:3:23:274:1532#0/1  
CAAGAGAAGAACCCCGCACTCAGAATGAAGTGGATGATGG  
+HWI-EAS443:3:23:274:1532#0/1  
aaaaaa]aa[aaa\_]Z]^a^^\_\_^^`Z^]GZTYV\_XYV]  
@HWI-EAS443:3:23:288:617#0/1  
CATTAAAGCATCAATGAACTGAGCAATCTTGCAAAAAGGAGA  
+HWI-EAS443:3:23:288:617#0/1  
`^WV]\_\_TM\_aY`Y`]U^Q[UUX`[TZ[^a]H]¥\_`[Z`  
@HWI-EAS443:3:23:300:1005#0/1  
ATTAAGCATCAATGAACTGAGCAATCTTGCAAAAAGGAGAG  
+HWI-EAS443:3:23:300:1005#0/1  
`aab^¥``aa`a`\_¥\_aa\_a```^`^a\_\_\_\_\_`\_]\_\_`  
@HWI-EAS443:3:23:376:1600#0/1  
AACAATTCGACACTAATTGATGGCCATCCGAATTCTTTTG  
+HWI-EAS443:3:23:376:1600#0/1  
aaaaa`\_b`aaaa`aa`¥`\_`^a`\_`¥aaa``\_\_\_\_`\_\_\_\_  
@HWI-EAS443:3:23:450:992#0/1  
GCATTAAGCATCAATGAACTGAGCAATCTTGCAAAAAGGAG  
+HWI-EAS443:3:23:450:992#0/1  
abbaa^aabaaaaaaaaaaaa`aa`baaaa`a`a\_a[aT¥`



+HWI-EAS443:3:23:971:1012#0/1  
a``\_aa`a`aa`a`a^aa\_aa`\_^[][[Y\_TM[]^  
@HWI-EAS443:3:24:1023:1633#0/1  
AGAGAAGAACCCCGCACTCAGAATGAAGTGGATGATGGCA  
+HWI-EAS443:3:24:1023:1633#0/1  
`ba`abbbbaa\_ba^`Zaaa\_Z`aa\_\_YMZa`^aZU`ZTX  
@HWI-EAS443:3:24:103:1662#0/1  
CAGCATTAAAGCATCAATGAACTGAGCAATCTTGCAAAAAGG  
+HWI-EAS443:3:24:103:1662#0/1  
\_¥`a`\_Y``\_a\_Z`a`^aa`aa\_V[a¥`\_a^W\_\_Y[  
@HWI-EAS443:3:24:1055:227#0/1  
AGAGAAGAACCCCGCACTCAGAATGAAGTGGATGATGGCA  
+HWI-EAS443:3:24:1055:227#0/1  
aaa\_a[``bbababaa\_bX\_\_^aab^¥[IZ[]``\_]GY\_  
@HWI-EAS443:3:24:1066:1089#0/1  
AGAAGAACCCCGCACTCAGAATGAAGTGGATGATGGCAAT  
+HWI-EAS443:3:24:1066:1089#0/1  
ab`]YOYba]Vb¥[\_`\_`a[\_`¥`aaY\_X]^`\_^ZVS¥\_Z  
@HWI-EAS443:3:24:1074:299#0/1  
GAGAAGAACCCCGCACTCAGAATGAAGTGGATGATGGCAA  
+HWI-EAS443:3:24:1074:299#0/1  
a^\_\_^QG[]UUX]TXXWVW^XUYXYX]U¥XRYUYNYXXUX  
@HWI-EAS443:3:24:1138:705#0/1  
CATTAAAGCATCAATGAACTGAGCAATCTTGCAAAAAGGAGA  
+HWI-EAS443:3:24:1138:705#0/1  
H\_baa\_baaaabb`baabbb¥abbb`abbbab`bbbbbbb  
@HWI-EAS443:3:24:1170:483#0/1  
AGAAGAACCCCGCACTCAGAATGAAGTGGATGATGGCAAT  
+HWI-EAS443:3:24:1170:483#0/1  
T`U\_W¥PRXVaabbQU[`ZabaORVb`bbb]MYL\_HG^ba  
@HWI-EAS443:3:24:1604:425#0/1  
AGAGAAGAACCCCGCACTCAGAATGAAGTGGATGATGGCA  
+HWI-EAS443:3:24:1604:425#0/1  
]\_`b`aaaa`ba]a]a^a\_]aaa`Za]a\_\_`b]a\_ZY¥  
@HWI-EAS443:3:24:1646:63#0/1  
TGGCCCAGCATTAAAGCATCAATGAACTGAGCAATCTTGCA  
+HWI-EAS443:3:24:1646:63#0/1  
abb^` `[b[aaaa]\_Q[UU\_UX^^[YY`]\_¥\_¥]O\_UZUW  
@HWI-EAS443:3:24:1678:141#0/1  
ATGGCCCAGCATTAAAGCATCAATGAACTGAGCAATCTTGC  
+HWI-EAS443:3:24:1678:141#0/1  
aabb``aab\_aaaa\_aU\_`]a^\_Y\_\_¥aV^^^Z^^\_Z  
@HWI-EAS443:3:24:1688:89#0/1  
GAAGAACCCCGCACTCAGAATGAAGTGGATGATGGCAATG  
+HWI-EAS443:3:24:1688:89#0/1  
`^bbbb`aW`b\_baa^``\_aaa`\_XM^¥TRaX[aX^G^J¥  
@HWI-EAS443:3:24:1690:1933#0/1  
GGCAAAGAAGACAAGAGATATGGCCCAGCATTAAAGCATCA  
+HWI-EAS443:3:24:1690:1933#0/1  
aba^]aab¥`b`b\_Gaa¥\_\_^bM\_] [```\_¥aW\_^\_RG[

@HWI-EAS443:3:24:247:685#0/1  
AAACAATTCGACACTAATTGATGGCCATCCGAATTCTTTT  
+HWI-EAS443:3:24:247:685#0/1  
abbabbbba^L^`bb\_^][Y`aXa¥a\_`^\_a`[\_\_\_a\_\_\_Y  
@HWI-EAS443:3:24:268:1574#0/1  
TTGGGCAAAGAAGACAAGAGATATGGCCCAGCATTAAAGCA  
+HWI-EAS443:3:24:268:1574#0/1  
``ba\_a[aab\_[\_bab`\_aaa\_aY\_a\_aab^a`a`ba\_\_a  
@HWI-EAS443:3:24:337:1958#0/1  
CAAGAGATATGGCCCAGCATTAAAGCATCAATGAACTGAGC  
+HWI-EAS443:3:24:337:1958#0/1  
Z\_XV\_T\_X`aVJ\_Z\_aaT^b[abYa¥[^Xa\_a^b\_KU`a]  
@HWI-EAS443:3:24:405:1246#0/1  
ATTTTGGGCAAAGAAGACAAGAGATATGGCCCAGCATTAA  
+HWI-EAS443:3:24:405:1246#0/1  
`abaaa\_aaaaa`a¥aaaa`a\_aaa^\_aa\_a\_`a\_\_\_\_  
@HWI-EAS443:3:24:460:120#0/1  
TCAGCAAAATGGGAGTAGATGAATACTCCAGCACGGAGAG  
+HWI-EAS443:3:24:460:120#0/1  
a`ab\_a`a``aa\_aY`a^`^\_\_\_\_^\_\_]\_^`^`X`X\_  
@HWI-EAS443:3:24:490:743#0/1  
CAAGAGAAGAACCCCGCACTCAGAATGAAGTGGATGATGG  
+HWI-EAS443:3:24:490:743#0/1  
\_U[\_bb[aab`\_aZaabaa\_babaaaba[bUaaaaa\_`aa  
@HWI-EAS443:3:24:497:1254#0/1  
ATTAAGCATCAATGAACTGAGCAATCTTGCAAAAGGAGAG  
+HWI-EAS443:3:24:497:1254#0/1  
aaa\_a\_aaaa`aa\_a^a^^\_aa\_\_a\_\_\_\_]\_``^]a`\_  
@HWI-EAS443:3:24:587:1570#0/1  
AACAATTCGACACTAATTGATGGCCATCCGAATTCTTTTG  
+HWI-EAS443:3:24:587:1570#0/1  
``b^[Y`¥Zabab\_]`Y]a`a^\_\_a¥Y\_a\_aa]R^Z`W\_  
@HWI-EAS443:3:24:802:1529#0/1  
GATATGGCCCAGCATTAAAGCATCAATGAACTGAGCAATCT  
+HWI-EAS443:3:24:802:1529#0/1  
ab`aaa`aba\_a\_aa]`aY\_aa\_\_`]\_Z``\_Z^\_]`^^\_  
@HWI-EAS443:3:24:920:978#0/1  
CTCCTTTTGCAAGATTGCTCAGTTCATTGATGCTTAATGC  
+HWI-EAS443:3:24:920:978#0/1  
abaaaba`aa¥F[aaaaaaaa^aaaaa``ab\_a\_baa\_`  
@HWI-EAS443:3:24:961:904#0/1  
GAAGACAAGAGATATGGCCCAGCATTAAAGCATCAATGAAC  
+HWI-EAS443:3:24:961:904#0/1  
aaaaa`a¥\_aa¥a^`^\_[¥^\_^^\_XXO[¥U^¥WWW]X  
@HWI-EAS443:3:24:993:280#0/1  
TAAGCATCAATGAACTGAGCAATCTTGCAAAAGGAGAGAA  
+HWI-EAS443:3:24:993:280#0/1  
abbbabaabaabaa^aa`a`aaa\_aaa\_``\_aa\_\_a`aa`  
@HWI-EAS443:3:25:1065:712#0/1  
AGATTGCTCAGTTCATTGATGCTTAATGCTGGGCCATATC

+HWI-EAS443:3:25:1065:712#0/1  
abbbbbbbbabbbbaab`bbbabbaabaa`aaaaa¥  
@HWI-EAS443:3:25:1236:1392#0/1  
GAAGAACCCCGCACTCAGAATGAAGTGGATGATGGCAATG  
+HWI-EAS443:3:25:1236:1392#0/1  
aaaaaaT^a^ba\_`^`a^`\_`\_\_\_\_Y\_`\_^]\_X\_XX\_X]^  
@HWI-EAS443:3:25:124:619#0/1  
AAACAATTTCGACACTAATTGATGGCCATCCGAATTCTTTT  
+HWI-EAS443:3:25:124:619#0/1  
abaaaaabaab[\_aa`\_`a`W`^a^a`\_\_`\_\_^`\_`a\_^  
@HWI-EAS443:3:25:1258:1501#0/1  
TAAGCATCAATGAACTGAGCAATCTTGCAAAAGGAGAGAA  
+HWI-EAS443:3:25:1258:1501#0/1  
`aaaaaba`ab\_Xa^[\_[W`aaYa`\_b`\_PW^a\_T\_a`a`  
@HWI-EAS443:3:25:1421:542#0/1  
ATTAAGCATCAATGAACTGAGCAATCTTGCAAAAGGAGAG  
+HWI-EAS443:3:25:1421:542#0/1  
ab``¥¥¥^b]bbaba¥JZa\_]\_aaa[aaa^\_YYa\_``aaa  
@HWI-EAS443:3:25:1441:1483#0/1  
AAACAATTTCGACACTAATTGATGGCCATCCGAATTCTTTT  
+HWI-EAS443:3:25:1441:1483#0/1  
Ja`¥`b`b`^abbbYQ^a¥a`abb¥S`\_]\_YL^WaZJ\_`^`  
@HWI-EAS443:3:25:1484:1666#0/1  
TTAAGCATCAATGAACTGAGCAATCTTGCAAAAGGAGAGA  
+HWI-EAS443:3:25:1484:1666#0/1  
abbbbbbbbaabbbbbaaaaaaaaaaaaa`^a[`] `aaaa` `a  
@HWI-EAS443:3:25:1625:784#0/1  
GAGAAGAACCCCGCACTCAGAATGAAGTGGATGATGGCAA  
+HWI-EAS443:3:25:1625:784#0/1  
a`\_] ^XWXTTP\_aTY]UHX`¥¥¥¥RWLJ\_^]\_UXBBBBBB  
@HWI-EAS443:3:25:1649:422#0/1  
CTCATTGTTGGCAAAGAAGACAAGAGATATGGCCAGCAT  
+HWI-EAS443:3:25:1649:422#0/1  
ab`bbbbabaa\_bbbbb`bbbabababbbaba`abbXab  
@HWI-EAS443:3:25:1664:1637#0/1  
CAGCATTAAAGCATCAATGAACTGAGCAATCTTGCAAAAGG  
+HWI-EAS443:3:25:1664:1637#0/1  
\_bb`ababaabbbababbbab`baab^aba`bb`a¥`\_^a  
@HWI-EAS443:3:25:1690:1037#0/1  
CAGCAAAATGGGAGTAGATGAATACTCCAGCACGGAGAGA  
+HWI-EAS443:3:25:1690:1037#0/1  
`b` `` `bbbbbbba]aabbbbbb` `a\_\_bb^aS\_a^aY^¥  
@HWI-EAS443:3:25:20:1052#0/1  
CCAGCATTAAAGCATCAATGAACTGAGCAATCTTGCAAAAG  
+HWI-EAS443:3:25:20:1052#0/1  
ab`abaaababa`aZT\_aYU\_`\_¥`aa`\_` `` `a^^[¥^Y  
@HWI-EAS443:3:25:247:2020#0/1  
TTAAGCATCAATGAACTGAGCAATCTTGCAAAAGGAGAGA  
+HWI-EAS443:3:25:247:2020#0/1  
^aa\_Y`Z]\_`aaVb`b`aa]bb^`b^]¥aab` `` `^ [a`^a



@HWI-EAS443:3:25:366:1471#0/1  
ATTGCTCAGTTCATTGATGCTTAATGCTGGGCCATATCTC  
+HWI-EAS443:3:25:366:1471#0/1  
[`¥YY]a[¥Ua`^`^`^`a]X`[`a]YVU^`aRVVaY\_  
@HWI-EAS443:3:25:410:1318#0/1  
AAGAACCCCGCACTCAGAATGAAGTGGATGATGGCAATGA  
+HWI-EAS443:3:25:410:1318#0/1  
ababbbbab`aaaaaa[a`aa^a]a\_a\_a`^^^`\_`\_\_^]  
@HWI-EAS443:3:25:44:1150#0/1  
AGAGAAGAACCCCGCACTCAGAATGAAGTGGATGATGGCA  
+HWI-EAS443:3:25:44:1150#0/1  
aaaaababababbabaaaa``aaa¥\_\_\_aa`\_a`\_`[\_^  
@HWI-EAS443:3:25:599:1296#0/1  
AAGAGATATGGCCAGCATTAAAGCATCAATGAACTGAGCA  
+HWI-EAS443:3:25:599:1296#0/1  
a\_a`^aaba\_abba\_\_aaa\_a\_]aa`]aa¥aa^\_a\_\_`  
@HWI-EAS443:3:25:625:1061#0/1  
CCCAGCATTAAAGCATCAATGAACTGAGCAATCTTGCAAAA  
+HWI-EAS443:3:25:625:1061#0/1  
``abb`b\_b`ba¥`a`baabaaa`¥aaaabbab]aa  
@HWI-EAS443:3:25:656:695#0/1  
GAGAAGAACCCCGCACTCAGAATGAAGTGGATGATGGCAA  
+HWI-EAS443:3:25:656:695#0/1  
aaaa`aaaa`\_ba`Ya`Y]\_\_\_¥]WMV^W]XHT]\_QWS  
@HWI-EAS443:3:25:809:1922#0/1  
TTAAGCATCAATGAACTGAGCAATCTTGCAAAAAGGAGAGA  
+HWI-EAS443:3:25:809:1922#0/1  
abbb\_bbabbbbbabababbaabaaaaaaaab\_aaaab  
@HWI-EAS443:3:25:859:663#0/1  
TGGGCAAAGAAGACAAGAGATATGGCCAGCATTAAAGCAT  
+HWI-EAS443:3:25:859:663#0/1  
aabbaaa`babbaaaa\_aaaa\_\_`a\_]aaZaa````X^\_  
@HWI-EAS443:3:25:92:1341#0/1  
TTAAGCATCAATGAACTGAGCAATCTTGCAAAAAGGAGAGA  
+HWI-EAS443:3:25:92:1341#0/1  
[(`T`ba¥¥YY\_TXY[HWS[\_`T[aY[¥WYZ]`T`Y`^`\_  
@HWI-EAS443:3:26:1081:361#0/1  
TTTTAAACAATTGACACTAATTGATGGCCATCCGAATTC  
+HWI-EAS443:3:26:1081:361#0/1  
aaaaa``¥baa`X\_\_`a\_\_^)`ZX]a]\_[a][¥]¥]X^N  
@HWI-EAS443:3:26:1108:1504#0/1  
AAGAGATATGGCCAGCATTAAAGCATCAATGAACTGAGCA  
+HWI-EAS443:3:26:1108:1504#0/1  
Xba[S\_¥OVTX¥`aa]S^]\_V^aa\_VYUX]a]\_UZ`YaX`  
@HWI-EAS443:3:26:1146:1362#0/1  
AGAAGAACCCCGCACTCAGAATGAAGTGGATGATGGCAAT  
+HWI-EAS443:3:26:1146:1362#0/1  
abab`bb`aa`aaa^`a`aaRaaVaa``a]^Z[V]^\_  
@HWI-EAS443:3:26:1219:1387#0/1  
CCATCATCCACTTCATTCTGAGTGCGGGTCTTCTCTTG

+HWI-EAS443:3:26:1219:1387#0/1  
ababaaaaaaaaabaaaaaaaa`a]a\_aaa`^`aaa\_a\_a`a  
@HWI-EAS443:3:26:1230:521#0/1  
CAAGAGAAGAACCCCGCACTCAGAATGAAGTGGATGATGG  
+HWI-EAS443:3:26:1230:521#0/1  
\_a``abbbbbbaa[^bbbababaabbaaa[baaab\_ZZ^  
@HWI-EAS443:3:26:1361:213#0/1  
AGAAGACAAGAGATATGGCCCAGCATTAAAGCATCAATGAA  
+HWI-EAS443:3:26:1361:213#0/1  
abb\_I`b\_aabb`b\_b[`]NZa]a\_aaaa]a\_^]aa`a  
@HWI-EAS443:3:26:137:1453#0/1  
CTCTCCTTTTGCAAGATTGCTCAGTTCATTGATGCTTAAT  
+HWI-EAS443:3:26:137:1453#0/1  
a``^ba]W¥]X]\_K\_X]\_a\_\_\_V[P\_`[`V[a\_`¥V`VV  
@HWI-EAS443:3:26:141:989#0/1  
GAGATATGGCCAGCATTAAAGCATCAATGAACTGAGCAAT  
+HWI-EAS443:3:26:141:989#0/1  
¥¥XaabababbaT]]a`aaba[`a\_Z[a`¥ab`aa\_aa¥^  
@HWI-EAS443:3:26:1745:906#0/1  
CTCCTTTTGCAAGATTGCTCAGTTCATTGATGCTTAATGC  
+HWI-EAS443:3:26:1745:906#0/1  
¥R\_W¥`b`\_babbbb`bb`[`aXb`bbabbXb¥ab`\_^\_S  
@HWI-EAS443:3:26:221:603#0/1  
AAGAGAAGAACCCCGCACTCAGAATGAAGTGGATGATGGC  
+HWI-EAS443:3:26:221:603#0/1  
^abV`^UQ¥b¥a[aW[¥\_`a¥aT¥`¥NQFTU^FYW\_Y]  
@HWI-EAS443:3:26:264:259#0/1  
AAGAGAAGAACCCCGCACTCAGAATGAAGTGGATGATGGC  
+HWI-EAS443:3:26:264:259#0/1  
aa`]aaa\_aaaa`[aa\_\_\_a^\_U`\_a\_Z`G``^\_a]X\_^X  
@HWI-EAS443:3:26:449:1702#0/1  
AGAAGAACCCCGCACTCAGAATGAAGTGGATGATGGCAAT  
+HWI-EAS443:3:26:449:1702#0/1  
a^aa\_aa`aa`a`a`\_^a\_`\_]\_\_X\_\_\_^\_^^\_^]]]¥  
@HWI-EAS443:3:26:493:980#0/1  
AACAATTCGACACTAATTGATGGCCATCCGAATTCTTTTG  
+HWI-EAS443:3:26:493:980#0/1  
]`ab`aab]a`bb`Z```aa`\_aa\_b`Zaa\_```\_aa\_aZ  
@HWI-EAS443:3:26:504:400#0/1  
TAAGCATCAATGAACTGAGCAATCTTGCAAAAAGGAGAGAA  
+HWI-EAS443:3:26:504:400#0/1  
a\_baa\_\_W^Z¥a[\_]aaa^WaYa\_aaa`^^b^Z¥`^aaa\_  
@HWI-EAS443:3:26:519:1907#0/1  
TAAGCATCAATGAACTGAGCAATCTTGCAAAAAGGAGAGAA  
+HWI-EAS443:3:26:519:1907#0/1  
aab¥^`\_bbb\_bab\_`\_aabb\_R¥^W¥aaaU^a\_¥\_aLaa  
@HWI-EAS443:3:26:559:242#0/1  
GCATTAAGCATCAATGAACTGAGCAATCTTGCAAAAAGGAG  
+HWI-EAS443:3:26:559:242#0/1  
aaabbbbbaaaaaaaaa`a\_aa`aaaa`aaaa\_a`\_a\_\_a

@HWI-EAS443:3:26:57:655#0/1  
AACAAATTCGACACTAATTGATGGCCATCCGAATTCTTTTG  
+HWI-EAS443:3:26:57:655#0/1  
`a`aa^`\_`aa^]aa\_`a`]\_\_a`\_a`^¥]^W^^T]]W  
@HWI-EAS443:3:26:600:173#0/1  
GCCATCATCCACTTCATTCTGAGTGC GGGTTCTTCTCTT  
+HWI-EAS443:3:26:600:173#0/1  
aaa\_a`aaaZ]]¥V]aa`\_\_a¥Ysa`a\_a[V\_][[\_^V[\_  
@HWI-EAS443:3:26:70:396#0/1  
AGAAGAACCCCGCACTCAGAATGAAGTGGATGATGGCAAT  
+HWI-EAS443:3:26:70:396#0/1  
abbbbaabaaaaa`a`\_a`\_a\_Y`\_VaaZ[`]\_\_`\_] ]]  
@HWI-EAS443:3:26:735:183#0/1  
GAAGAACCCCGCACTCAGAATGAAGTGGATGATGGCAATG  
+HWI-EAS443:3:26:735:183#0/1  
^`bbbabaaabaaa`\_aa`aaa`\_aXaa`\_a^[\_^WZ\_][  
@HWI-EAS443:3:26:912:1971#0/1  
GAAGAACCCCGCACTCAGAATGAAGTGGATGATGGCAATG  
+HWI-EAS443:3:26:912:1971#0/1  
ababbbbbbbaa\_aabaa\_baYLY`baaa\_\_0\_a\_aa  
@HWI-EAS443:3:27:1019:743#0/1  
GAAGAACCCCGCACTCAGAATGAAGTGGATGATGGCAATG  
+HWI-EAS443:3:27:1019:743#0/1  
`^[\_`Q`X`babUab^Xa¥\_aa\_¥a¥aa`^`\_`[aaZQ]\_\_  
@HWI-EAS443:3:27:1060:1941#0/1  
CAAGAGAAGAACCCCGCACTCAGAATGAAGTGGATGATGG  
+HWI-EAS443:3:27:1060:1941#0/1  
]YRUTIXZ\_^`\_`\_0^WZ¥aZT[[\_RF¥G\_`^UaaQ[V  
@HWI-EAS443:3:27:1093:751#0/1  
CCAGCATTAAGCATCAATGAACTGAGCAATCTTGCAAAAAG  
+HWI-EAS443:3:27:1093:751#0/1  
a^`b\_¥`Y\_Q]]T\_^`\_aYZH^^VM]P¥T\_\_aa`SLP[\_  
@HWI-EAS443:3:27:110:1524#0/1  
TAAGCATCAATGAACTGAGCAATCTTGCAAAAAGGAGAGAA  
+HWI-EAS443:3:27:110:1524#0/1  
abaaaabbaabaababa\_^baaaaaTZaa\_a^b^\_aa\_aa  
@HWI-EAS443:3:27:1135:940#0/1  
AATTCGACACTAATTGATGGCCATCCGAATTCTTTTGGTC  
+HWI-EAS443:3:27:1135:940#0/1  
aba[`aaba\_aaaa`^aa0]a^`Y]`\_\_a\_]aa````\_ZZ  
@HWI-EAS443:3:27:127:1647#0/1  
AGAAGAACCCCGCACTCAGAATGAAGTGGATGATGGCAAT  
+HWI-EAS443:3:27:127:1647#0/1  
``ab¥`aabbbbaaaaa` `[`aa\_\_`Y^`[\_`\_\_\_\_\_Z^Z  
@HWI-EAS443:3:27:1352:1765#0/1  
AATTCGACACTAATTGATGGCCATCCGAATTCTTTTGGTC  
+HWI-EAS443:3:27:1352:1765#0/1  
aaaaaaaaa\_aaa````\_`^a\_a^\_a\_a````Z`a^a\_[ZX  
@HWI-EAS443:3:27:1610:1490#0/1  
TTAAGCATCAATGAACTGAGCAATCTTGCAAAAAGGAGAGA

+HWI-EAS443:3:27:1610:1490#0/1  
aaaaab`aaaaaaa^a`\_a\_a\_dW\_aa\_a\_\_^a`\_\_a``  
@HWI-EAS443:3:27:167:1790#0/1  
CTCCTTTTGCAAGATTGCTCAGTTCATTGATGCTTAATGC  
+HWI-EAS443:3:27:167:1790#0/1  
aabaa\_b`ab\_aaa`\_a`\_a`a¥^a`\_ZaX[^`\_\_a`a`a  
@HWI-EAS443:3:27:186:368#0/1  
AGAAGACAAGAGATATGGCCCAGCATTAAAGCATCAATGAA  
+HWI-EAS443:3:27:186:368#0/1  
aaaaa`aa\_b\_aa]`\_[\_\_aaa`\_a^`\_`\_\_\_\_`\_]\_^\_\_]]  
@HWI-EAS443:3:27:203:1084#0/1  
GAAGAACCCCGCACTCAGAATGAAGTGGATGATGGCAATG  
+HWI-EAS443:3:27:203:1084#0/1  
abbbbabbbbabbbbab`aaa`b¥baaabaaaaa`aa  
@HWI-EAS443:3:27:489:293#0/1  
GAAGAACCCCGCACTCAGAATGAAGTGGATGATGGCAATG  
+HWI-EAS443:3:27:489:293#0/1  
abbbabaabbaaaaa`\_a`aaa[[a^ba`\_a¥X`\_W^`\_`  
@HWI-EAS443:3:27:670:167#0/1  
ATTGCTCAGTTCATTGATGCTTAATGCTGGGCCATATCTC  
+HWI-EAS443:3:27:670:167#0/1  
¥Z`]a`a\_^Z`\_`\_`[a^]Z`a^adW]\_XZHRM[Z[^[\_[\_  
@HWI-EAS443:3:27:692:897#0/1  
GAAGAACCCCGCACTCAGAATGAAGTGGATGATGGCAATG  
+HWI-EAS443:3:27:692:897#0/1  
aaaa\_aaaa`aa\_\_\_\_\_¥a\_^`\_¥¥ZMUZYZ\_WY^^WY¥¥T  
@HWI-EAS443:3:27:699:431#0/1  
GATATGGCCCAGCATTAAAGCATCAATGAACTGAGCAATCT  
+HWI-EAS443:3:27:699:431#0/1  
aaaa\_]abaaa`\_\_\_\_`aa\_a`[\_]\_aa`\_`\_]^Wa^a\_^]`  
@HWI-EAS443:3:27:807:407#0/1  
CAAGAGAAGAACCCCGCACTCAGAATGAAGTGGATGATGG  
+HWI-EAS443:3:27:807:407#0/1  
¥bb\_¥`¥]`abbba^babQaaaaZ¥[aaaa[ba^adW`b\_  
@HWI-EAS443:3:27:83:1464#0/1  
CAGCATTAAAGCATCAATGAACTGAGCAATCTTGCAAAAAGG  
+HWI-EAS443:3:27:83:1464#0/1  
aa^bbaabbaabaa\_\_a`a]`\_`^`\_`aaa\_aa`\_aa\_¥\_a\_  
@HWI-EAS443:3:27:858:1942#0/1  
AGAAGAACCCCGCACTCAGAATGAAGTGGATGATGGCAAT  
+HWI-EAS443:3:27:858:1942#0/1  
aZa^¥¥^aab`XOK^^R]NR[WYP]\_G`^`\_¥¥GW¥`\_¥\_P  
@HWI-EAS443:3:27:862:1897#0/1  
GCAAAGAAGACAAGAGATATGGCCCAGCATTAAAGCATCAA  
+HWI-EAS443:3:27:862:1897#0/1  
aaabaabaaaba`a`aaa`^`\_\_\_\_`][^a[Z`\_`^`^¥[\_\_\_  
@HWI-EAS443:3:27:955:632#0/1  
CAAGAGAAGAACCCCGCACTCAGAATGAAGTGGATGATGG  
+HWI-EAS443:3:27:955:632#0/1  
aabaab`bb`baaaaaa`a`[a\_]aa`\_a]`a`\_`a\_a\_\_

@HWI-EAS443:3:28:1123:1290#0/1  
AACAAATTCGACACTAATTGATGGCCATCCGAATCCTTTTG  
+HWI-EAS443:3:28:1123:1290#0/1  
``a`aaa^[aaaa\_\_\_`a`aaaaa^^``]``\_`\_^\_  
@HWI-EAS443:3:28:1157:1020#0/1  
GAAGAACCCCGCACTCAGAATGAAGTGGATGATGGCAATG  
+HWI-EAS443:3:28:1157:1020#0/1  
T`¥a```bbbbab]aaXW¥\_bbaaa`aaa``^V^`W]]Y]  
@HWI-EAS443:3:28:1209:1797#0/1  
AACAAATTCGACACTAATTGATGGCCATCCGAATCCTTTTG  
+HWI-EAS443:3:28:1209:1797#0/1  
a¥V`a\_\_baW`aaa[Y¥PVaa^UUY\_HNZWY]\_\_\_`X[^Y  
@HWI-EAS443:3:28:1291:1949#0/1  
ATTTTGGGCAAAGAAGACAAGAGATATGGCCCAGCATTAA  
+HWI-EAS443:3:28:1291:1949#0/1  
`]WYaaYY``aaaZa\_^^`\_\_`\_`a\_]\_]\_\_UU\_ZWYZ^\_\_  
@HWI-EAS443:3:28:1299:31#0/1  
ATTAAGCATCAATGAACTGAGCAATCTTGCAAAAAGGAGAG  
+HWI-EAS443:3:28:1299:31#0/1  
abbbaaaaa[aaba^aaa`a^\_a^aYaaa^\_\_\_X`P^a\_a  
@HWI-EAS443:3:28:1450:699#0/1  
CATTAAGCATCAATGAACTGAGCAATCTTGCAAAAAGGAGA  
+HWI-EAS443:3:28:1450:699#0/1  
abb`bbabbbbbbbbbababa`a`bab`babaaa`abbaba  
@HWI-EAS443:3:28:146:1810#0/1  
GAGAAGAACCCCGCACTCAGAATGAAGTGGATGATGGCAA  
+HWI-EAS443:3:28:146:1810#0/1  
aaabU^`Xabbb[bb\_]b`aa^]a^¥aV`\_a\_a\_[\_\_^¥]  
@HWI-EAS443:3:28:146:409#0/1  
AAGAGAAGAACCCCGCACTCAGAATGAAGTGGATGATGGC  
+HWI-EAS443:3:28:146:409#0/1  
a`a\_\_U[]¥aaa\_] []V]^`\_a`]\_^Z]\_Y`\_\_^\_] ]^SZ  
@HWI-EAS443:3:28:1475:231#0/1  
GAGAAGAACCCCGCACTCAGAATGAAGTGGATGATGGCAA  
+HWI-EAS443:3:28:1475:231#0/1  
\_aba` `ab]ZVR[]YMX¥U\_PMY[LMXBBBBBBBBBBBBB  
@HWI-EAS443:3:28:1480:1424#0/1  
GAGATATGGCCCAGCATTAAAGCATCAATGAACTGAGCAAT  
+HWI-EAS443:3:28:1480:1424#0/1  
aab^[\_`aZ\_^¥¥Y\_\_aaa]^YX[YY[\_^ [ZS[V¥^U\_\_]  
@HWI-EAS443:3:28:1492:1232#0/1  
ATTGCCATCATCCACTTCATTCTGAGTGC GGGTTCTTCT  
+HWI-EAS443:3:28:1492:1232#0/1  
abbb]]``]`aaZ^aa\_aabaYaa`Q^L]U^]U\_aa`U]  
@HWI-EAS443:3:28:1493:986#0/1  
ATATGGCCCAGCATTAAAGCATCAATGAACTGAGCAATCTT  
+HWI-EAS443:3:28:1493:986#0/1  
T`b\_W\_b`\_Q\_Xaa[ab]\_\_bZ`¥[a¥a`^a`¥\_aaSS\_I  
@HWI-EAS443:3:28:1635:915#0/1  
AACAAATTCGACACTAATTGATGGCCATCCGAATCCTTTT

+HWI-EAS443:3:28:1635:915#0/1  
aba]bbbaaba`b^a`aaaa``\_`\_]Ya\_\_aa¥a```  
@HWI-EAS443:3:28:1757:1646#0/1  
TTTTTAAACAATTGACACTAATTGATGGCCATCCGAATT  
+HWI-EAS443:3:28:1757:1646#0/1  
Z`[\_Z¥¥S]a^`YI¥`aa\_\_ab^``a\_``\_]a]¥``a[Z`  
@HWI-EAS443:3:28:190:1766#0/1  
CTCAGTTCATTGATGCTTAATGCTGGGCCATATCTCTTGT  
+HWI-EAS443:3:28:190:1766#0/1  
`X`[PFZ¥Y]Z`^U\_QPZa\_aaa`YIZaaaPY`a\_]Y\_YM  
@HWI-EAS443:3:28:220:1730#0/1  
CAATTCGACACTAATTGATGGCCATCCGAATTCTTTTGGT  
+HWI-EAS443:3:28:220:1730#0/1  
aaa`a`Xaa\_b`aa^VXaTNG¥aa]aaXaR^\_a\_\_^\_]\_X  
@HWI-EAS443:3:28:269:1431#0/1  
AAGAGATATGGCCAGCATTAAAGCATCAATGAACTGAGCA  
+HWI-EAS443:3:28:269:1431#0/1  
aaaaaaaa`a`a`U`^¥`\_aa\_a`\_a`````\_`a\_^\_¥\_`  
@HWI-EAS443:3:28:323:1726#0/1  
AGCTGTTGCTCTTCTCCAACCATTGTGAATTCTTCATAC  
+HWI-EAS443:3:28:323:1726#0/1  
``a]XWa¥`]XGT¥]\_a`[¥Z]SV`UULTV[VLO¥\_ZFHM  
@HWI-EAS443:3:28:42:1353#0/1  
CTCTCCTTTTGCAAGATTGCTCAGTTCATTGATGCTTAAT  
+HWI-EAS443:3:28:42:1353#0/1  
abb\_¥^`^ab`aS[U]`aabaa^`X^aa`baaaaa¥^)`  
@HWI-EAS443:3:28:493:635#0/1  
AAGAAGACAAGAGATATGGCCAGCATTAAAGCATCAATGA  
+HWI-EAS443:3:28:493:635#0/1  
aS]YO[a^a`[]YXW^\_a`a]XW]U¥Y^YQV¥VU^ZY^]]  
@HWI-EAS443:3:28:522:676#0/1  
CTCATTGCTGGCAAAGAAGACAAGAGATATGGCCAGCAT  
+HWI-EAS443:3:28:522:676#0/1  
abb^aabaa]bbbaabbab]a`\_]`a`aa\_```YUZ^Ya^  
@HWI-EAS443:3:28:590:1906#0/1  
AGAAGACAAGAGATATGGCCAGCATTAAAGCATCAATGAA  
+HWI-EAS443:3:28:590:1906#0/1  
aabbabab`aaaaaa`^^aaa`\_ab\_]aa\_aa^\_aa¥^`a  
@HWI-EAS443:3:28:702:1044#0/1  
AAGAGAAGAACCCCGCACTCAGAATGAAGTGGATGATGGC  
+HWI-EAS443:3:28:702:1044#0/1  
abaa`aaaaa\_a`\_aaa`\_^Z`]\_\_^\_S\_]X¥\_YY]U]  
@HWI-EAS443:3:28:71:1217#0/1  
GATTGCTCAGTTCATTGATGCTTAATGCTGGGCCATATCT  
+HWI-EAS443:3:28:71:1217#0/1  
aWU¥ab```\_Y]]¥aa^¥YW`^]UYZa`YYPW\_TTWOWZS  
@HWI-EAS443:3:28:755:586#0/1  
CTCTCCTTTTGCAAGATTGCTCAGTTCATTGATGCTTAAT  
+HWI-EAS443:3:28:755:586#0/1  
abbababbaab^aaaaa`baaaaa\_a`\_b`\_aa`a``H`a

@HWI-EAS443:3:28:795:1426#0/1  
TGCTCAGTTCATTGATGCTTAATGCTGGGCCATATCTCTT  
+HWI-EAS443:3:28:795:1426#0/1  
[aababb`^\_ba\_`a`aab`bbaaa\_a\_\_bX`aaa[aY`\_  
@HWI-EAS443:3:28:808:1419#0/1  
CAAGAGAAGAACCCCGCACTCAGAATGAAGTGGATGATGG  
+HWI-EAS443:3:28:808:1419#0/1  
aT^`aabaZU\_abaaaabb]aaZFZa\_H`VH¥R\_\_a]Y`W  
@HWI-EAS443:3:28:991:1123#0/1  
AGAGATATGGCCCAGCATTAAAGCATCAATGAACTGAGCAA  
+HWI-EAS443:3:28:991:1123#0/1  
Y`bbaabaaaa]¥]baba¥aaba[`b`]Waa\_a``\_aaY]  
@HWI-EAS443:3:29:1023:1535#0/1  
CCATCATCCACTTCATTCTGAGTGC GGGTTCTTCTCTTG  
+HWI-EAS443:3:29:1023:1535#0/1  
aaaa]aZVWab\_aa\_¥¥`^H^PR^TaXI^Q]UaZ\_`V`^B  
@HWI-EAS443:3:29:1098:1429#0/1  
GAAGACAAGAGATATGGCCCAGCATTAAAGCATCAATGAAC  
+HWI-EAS443:3:29:1098:1429#0/1  
\_Z\_S]\_R\_aYT[¥`]WQU^W^¥TV`X`^`a[Z]`^^^`Z  
@HWI-EAS443:3:29:1099:1102#0/1  
CATTAAAGCATCAATGAACTGAGCAATCTTGCAAAGGAGA  
+HWI-EAS443:3:29:1099:1102#0/1  
^Q]¥\_XVa¥\_b`Y`]ZVS¥a`¥`]¥ZZ^a][Y]S]``V¥[  
@HWI-EAS443:3:29:1137:902#0/1  
GATTGCTCAGTTCATTGATGCTTAATGCTGGGCCATATCT  
+HWI-EAS443:3:29:1137:902#0/1  
`^aaaa`[\_`\_Y]aaaaaaa\_a\_`ZaaaZa\_aa\_a\_a\_\_`  
@HWI-EAS443:3:29:1169:41#0/1  
GAGAAGAACCCCGCACTCAGAATGAAGTGGATGATGGCAA  
+HWI-EAS443:3:29:1169:41#0/1  
a]b`aaaa\_\_a`aV\_^`[^`]\_a`][\_T\_\_\_\_\_`^]]^Y]]  
@HWI-EAS443:3:29:1176:1544#0/1  
GCATTAAGCATCAATGAACTGAGCAATCTTGCAAAGGAG  
+HWI-EAS443:3:29:1176:1544#0/1  
aab\_a\_babbabaaaaaa`a\_`aaaa``aaaa\_`aaaa`a  
@HWI-EAS443:3:29:1196:170#0/1  
ATTAAGCATCAATGAACTGAGCAATCTTGCAAAGGAGAG  
+HWI-EAS443:3:29:1196:170#0/1  
aaaa`X\_\_a``\_\_\_\_[VX`^`X`P]\_\_]]]\_^a^^\_`^\_  
@HWI-EAS443:3:29:1343:595#0/1  
CAAGAGATATGGCCCAGCATTAAAGCATCAATGAACTGAGC  
+HWI-EAS443:3:29:1343:595#0/1  
abbbabaaaabbaaa`a`aa`^aa^W`\_``aa``\_`a\_a^  
@HWI-EAS443:3:29:1345:921#0/1  
CCAGCATTAAAGCATCAATGAACTGAGCAATCTTGCAAAG  
+HWI-EAS443:3:29:1345:921#0/1  
a`bbbbbbbb`baabbbbaa\_baab\_aab`bab`aa`\_a  
@HWI-EAS443:3:29:1432:1541#0/1  
CAAGAGAAGAACCCCGCACTCAGAATGAAGTGGATGATGG

+HWI-EAS443:3:29:1432:1541#0/1  
aaY`W`aabaa`¥RYaa¥`\_\_`^a^`a`[Z`Sa`^`\_[Z`\_  
@HWI-EAS443:3:29:1550:1229#0/1  
GCATTAAGCATCAATGAACTGAGCAATCTTGCAAAAGGAG  
+HWI-EAS443:3:29:1550:1229#0/1  
aaa`Yaba^a`^`\_\_``]\_\_a`\_`0`X^`\_]a]TXZZ\_\_]a  
@HWI-EAS443:3:29:1567:1833#0/1  
ATTAAGCATCAATGAACTGAGCAATCTTGCAAAAGGAGAG  
+HWI-EAS443:3:29:1567:1833#0/1  
Z¥[]YWZZXWw[Xaa[KVaZ]\_`W[XZY`^`^^`\_XX`\_`^  
@HWI-EAS443:3:29:199:483#0/1  
AGAGATATGGCCCAGCATTAAAGCATCAATGAACTGAGCAA  
+HWI-EAS443:3:29:199:483#0/1  
]b\_Y`J`UF^Z`Z]^`b\_PQ\_]W^\_aa¥`\_`[Y[UXP[Z]]  
@HWI-EAS443:3:29:263:1133#0/1  
GAGAAGAACCCCGCACTCAGAATGAAGTGGATGATGGCAA  
+HWI-EAS443:3:29:263:1133#0/1  
aab^babbbbaaaaaaaaaa`aaa]aYa`\_\_a\_]`^``\_\_`  
@HWI-EAS443:3:29:339:1087#0/1  
AGCATTAAAGCATCAATGAACTGAGCAATCTTGCAAAAGGA  
+HWI-EAS443:3:29:339:1087#0/1  
\_abba`[\_aa¥`aaaaa]`\_\_\_\_\_a`\_`\_`\_`\_`\_`\_`X^¥\_X^  
@HWI-EAS443:3:29:377:802#0/1  
GAAGAACCCCGCACTCAGAATGAAGTGGATGATGGCAATG  
+HWI-EAS443:3:29:377:802#0/1  
a\_b`]aa\_aa`aaa\_a`\_Z\_aa]^aQa\_Y`]¥^^ZZWW¥  
@HWI-EAS443:3:29:399:1806#0/1  
TATGGCCCAGCATTAAAGCATCAATGAACTGAGCAATCTTG  
+HWI-EAS443:3:29:399:1806#0/1  
\_b\_bbZ¥`XQ^b\_Xb¥J`\_b\_bb\_¥a]aaWV¥^`Uab`Xa  
@HWI-EAS443:3:29:459:1018#0/1  
GAAGAACCCCGCACTCAGAATGAAGTGGATGATGGCAATG  
+HWI-EAS443:3:29:459:1018#0/1  
aabaaa`[`baaa\_aaa`\_`^`\_Y¥Wa\_\_U`^¥¥V\_[V]^  
@HWI-EAS443:3:29:45:694#0/1  
AGAAGACAAGAGATATGGCCCAGCATTAAAGCATCAATGAA  
+HWI-EAS443:3:29:45:694#0/1  
a`aaaaaaaa`aa`a`\_`^a`\_`\_`\_`\_`^`^Za[]¥SY]^^^  
@HWI-EAS443:3:29:543:223#0/1  
GATTGCTCAGTTCATTGATGCTTAATGCTGGCCATATCT  
+HWI-EAS443:3:29:543:223#0/1  
a]``baa`ab```aabaa``aaaaa`^`aa\_aa\_\_`[`  
@HWI-EAS443:3:29:585:1082#0/1  
AGAAGAACCCCGCACTCAGAATGAAGTGGATGATGGCAAT  
+HWI-EAS443:3:29:585:1082#0/1  
aS]baaaaaa`aa`a`a^X]\_`\_`^`Y\_]`[¥`]]\_\_\_\_\_Y  
@HWI-EAS443:3:29:659:440#0/1  
CCAGCATTAAAGCATCAATGAACTGAGCAATCTTGCAAAAG  
+HWI-EAS443:3:29:659:440#0/1  
¥`¥`\_`\_`bbV¥][b¥a\_Y`baYZ][P^]a\_V`aa\_¥a]`Q^



@HWI-EAS443:3:29:714:136#0/1  
TTTTTAAACAATTGACACTAATTGATGGCCATCCGAATT  
+HWI-EAS443:3:29:714:136#0/1  
¥aZ`bbb¥F¥a`^`a^^`a\_Z¥]TX¥GYY^aaWQ[^BBBB  
@HWI-EAS443:3:29:754:1387#0/1  
GAGATATGGCCAGCATTAAAGCATCAATGAACTGAGCAAT  
+HWI-EAS443:3:29:754:1387#0/1  
abbbba`^bbb`abaabaabaaaaa`a`a\_\_\_aa`a\_  
@HWI-EAS443:3:29:878:1703#0/1  
AGAGATATGGCCAGCATTAAAGCATCAATGAACTGAGCAA  
+HWI-EAS443:3:29:878:1703#0/1  
]a^]aaa\_\_`a\_\_a\_\_aa\_aa]\_\_^]\_\_\_W^a^\_U\_\_X`\_  
@HWI-EAS443:3:29:911:713#0/1  
CAAGAGAAGAACCCCGCACTCAGAATGAAGTGGATGATGG  
+HWI-EAS443:3:29:911:713#0/1  
aaT`\_XZZb``aaaabbW`\_a[a\_U`bS^bQab^\_a`Sa`  
@HWI-EAS443:3:29:942:1516#0/1  
GAAGAACCCCGCACTCAGAATGAAGTGGATGATGGCAATG  
+HWI-EAS443:3:29:942:1516#0/1  
aaa[`bbbababbaaaaa¥^ba`\_`Sa\_^aaZ^`a`^V`^  
@HWI-EAS443:3:2:1105:740#0/1  
AGAAGAACCCCGCACTCAGAATGAAGTGGATGATGGCAAT  
+HWI-EAS443:3:2:1105:740#0/1  
abaaa`a`\_`\_`aaaa`^a^ZaaU^^M[^X`\_^]\_WUY^^  
@HWI-EAS443:3:2:1195:1616#0/1  
GAGAAGAACCCCGCACTCAGAATGAAGTGGATGATGGCAA  
+HWI-EAS443:3:2:1195:1616#0/1  
a\_aT]OZ`YV]\_`R^WWY]aRV^\_¥^\_G[ZUY`YGRYXBB  
@HWI-EAS443:3:2:1415:1359#0/1  
AAGAGAAGAACCCCGCACTCAGAATGAAGTGGATGATGGC  
+HWI-EAS443:3:2:1415:1359#0/1  
aaba`]Yaa`\_]T[`U^`a`\_`a`\_aa`^aVa\_\_\_\_^Y\_ZB  
@HWI-EAS443:3:2:1427:2006#0/1  
AGATTGCTCAGTTCATTGATGCTTAATGCTGGGCCATATC  
+HWI-EAS443:3:2:1427:2006#0/1  
aa``a`\_`\_`^a\_WOaa\_a^\_a]`\_`\_`^WW\_X]U^\_\_\_\_ZK  
@HWI-EAS443:3:2:1467:1718#0/1  
GCCATCATCCACTTCATTCTGAGTGC GGGTTCTTCTCTT  
+HWI-EAS443:3:2:1467:1718#0/1  
aZRW`Y[Z¥R¥Z`a¥¥^aY\_^[\`TUTPYR¥WXRLTTVQ^B  
@HWI-EAS443:3:2:148:1949#0/1  
CAAGAGAAGAACCCCGCACTCAGAATGAAGTGGATGATGG  
+HWI-EAS443:3:2:148:1949#0/1  
aabbab]abb`\_aZRbabaa\_b^a`b`baa]a`aaaa\_\_^  
@HWI-EAS443:3:2:160:1034#0/1  
GAAGAACCCCGCACTCAGAATGAAGTGGATGATGGCAATG  
+HWI-EAS443:3:2:160:1034#0/1  
abbbbaaabbbaUaaaa\_aba\_ab^aaa\_a`\_`^]\_`¥a  
@HWI-EAS443:3:2:1653:640#0/1  
GAAGACAAGAGATATGGCCAGCATTAAAGCATCAATGAAC



@HWI-EAS443:3:2:791:1469#0/1  
TAAGCATCAATGAACTGAGCAATCTTGCAAAGGAGAGAA  
+HWI-EAS443:3:2:791:1469#0/1  
abaaaa\_a`b`aa¥aaa`[aa\_\_aa```````aa^a`a`\_  
@HWI-EAS443:3:2:793:1739#0/1  
AGAAGAACCCCGCACTCAGAATGAAGTGGATGATGGCAAT  
+HWI-EAS443:3:2:793:1739#0/1  
^`Zaa\_a\_a^XXNQ]\_Uaa\_]U`\_X`P^]N¥\_R]\_UGQIY  
@HWI-EAS443:3:2:836:1625#0/1  
ATTTTGGCAAAGAAGACAAGAGATATGGCCCAGCATTAA  
+HWI-EAS443:3:2:836:1625#0/1  
abbba^```]^aaaa[aaa`aaaa\_a\_a\_] ^T]\_Z^a`^\_  
@HWI-EAS443:3:2:953:692#0/1  
TAAGCATCAATGAACTGAGCAATCTTGCAAAGGAGAGAA  
+HWI-EAS443:3:2:953:692#0/1  
aa`a\_`a^]aa^a\_`````]`\_a^``\_Y]¥Y\_`]U`^`\_X  
@HWI-EAS443:3:2:955:540#0/1  
GTTTTTAAACAATTTCGACACTAATTGATGGCCATCCGAAT  
+HWI-EAS443:3:2:955:540#0/1  
a]\_Z` ` [WT¥S[V^]W]`]^ZX[]^[¥¥¥VMYZTVZVW[  
@HWI-EAS443:3:30:1110:1813#0/1  
TGCCATCATCCACTTCATTCTGAGTGC GGGTCTTCTCT  
+HWI-EAS443:3:30:1110:1813#0/1  
aa]bbbaa`aabaabaabaaaaSX[\_bP[H]]^aQ]Y\_  
@HWI-EAS443:3:30:1131:1323#0/1  
AGAAGAACCCCGCACTCAGAATGAAGTGGATGATGGCAAT  
+HWI-EAS443:3:30:1131:1323#0/1  
aa\_a\_aaba`aaaa`aa\_a\_aaa\_\_a^a]`aa\_`^XY^X\_  
@HWI-EAS443:3:30:1377:1759#0/1  
AACAATTCGACACTAATTGATGGCCATCCGAATTCTTTTG  
+HWI-EAS443:3:30:1377:1759#0/1  
XVQa\_WY]Yba\_OXtb`bb^TNO]R\_^JM^OPO[W\_`]QZ  
@HWI-EAS443:3:30:1404:790#0/1  
CATTAAGCATCAATGAACTGAGCAATCTTGCAAAGGAGA  
+HWI-EAS443:3:30:1404:790#0/1  
aaa^bY`V\_^abbbb]```aa\_`````¥a]```\_a\_a^¥SY`a  
@HWI-EAS443:3:30:1600:867#0/1  
CATTAAGCATCAATGAACTGAGCAATCTTGCAAAGGAGA  
+HWI-EAS443:3:30:1600:867#0/1  
ab\_baab^`aaabbb]^\_aa\_`Za\_a\_a`¥Xa` `\_\_\_\_]\_`  
@HWI-EAS443:3:30:1631:60#0/1  
AACAATTCGACACTAATTGATGGCCATCCGAATTCTTTTG  
+HWI-EAS443:3:30:1631:60#0/1  
a`[b`[]`\_babXba`[a\_[ZaQRGU\_FTV]aaaQ¥]Y`[  
@HWI-EAS443:3:30:177:1807#0/1  
CCAGCATTAAAGCATCAATGAACTGAGCAATCTTGCAAAG  
+HWI-EAS443:3:30:177:1807#0/1  
aaa`aa`\_aa\_aZ`aa`^`\_]a\_\_\_\_]a`Y¥\_`^¥^`\_]]\_W  
@HWI-EAS443:3:30:1784:1998#0/1  
CAATTCGACACTAATTGATGGCCATCCGAATTCTTTTGGT

+HWI-EAS443:3:30:1784:1998#0/1  
a\_^a[aabaa^`abaa^aaa[aWa`¥\_^YY\_a\_\_\_\_^\_a[G  
@HWI-EAS443:3:30:204:294#0/1  
GGCCCAGCATTAAAGCATCAATGAACTGAGCAATCTTGCAA  
+HWI-EAS443:3:30:204:294#0/1  
aabbaabaaaaabbaa`a\_]a```aa`\_a`aa``\_\_a\_\_W  
@HWI-EAS443:3:30:241:1024#0/1  
AGAAGACAAGAGATATGGCCCAGCATTAAAGCATCAATGAA  
+HWI-EAS443:3:30:241:1024#0/1  
``b`aaaaaaaa`\_]``aaaa`aa\_aaa`\_a^a`^^^^  
@HWI-EAS443:3:30:342:659#0/1  
GAAGACAAGAGATATGGCCCAGCATTAAAGCATCAATGAAC  
+HWI-EAS443:3:30:342:659#0/1  
aaaaaabaaaa`\_`a\_aaaa`\_a\_\_\_\_[[^a^a]\_\_`Z^]  
@HWI-EAS443:3:30:398:1797#0/1  
TATGGCCCAGCATTAAAGCATCAATGAACTGAGCAATCTTG  
+HWI-EAS443:3:30:398:1797#0/1  
\_AY[R\_bb`^b^X]aWa\_]Zb`\_a`ZY][URUa\_NQ`\_Y\_  
@HWI-EAS443:3:30:45:2015#0/1  
CAGCAAAATGGGAGTAGATGAATACTCCAGCACGGAGAGA  
+HWI-EAS443:3:30:45:2015#0/1  
^\_Zaaaa`]]\_]\_^PaTS^^`a]U]\_a]URa\_a[VOVUZ]  
@HWI-EAS443:3:30:485:110#0/1  
ATTAAGCATCAATGAACTGAGCAATCTTGCAAAAGGAGAG  
+HWI-EAS443:3:30:485:110#0/1  
aba\_Za\_T`a¥b``Yab`a]aab`\_X`^`[\_^VP]^]`\_\_  
@HWI-EAS443:3:30:531:1630#0/1  
AGAGATATGGCCCAGCATTAAAGCATCAATGAACTGAGCAA  
+HWI-EAS443:3:30:531:1630#0/1  
Y]RWZ]X```ba`S\_aa`\_ba¥ba¥b\_aa[`WaW¥\_\_^a\_  
@HWI-EAS443:3:30:557:1243#0/1  
GAAGAACCCCGCACTCAGAATGAAGTGGATGATGGCAATG  
+HWI-EAS443:3:30:557:1243#0/1  
`^^a^a[`^a`Xa`a[^`aXaaa`\_T`¥SZ`\_`^¥RW[\_\_\_  
@HWI-EAS443:3:30:640:2021#0/1  
CAAGAGAAGAACCCCGCACTCAGAATGAAGTGGATGATGG  
+HWI-EAS443:3:30:640:2021#0/1  
aaa`\_a¥M`aaaa`a`a\_^\_]\_^U`\_]\_]\_V^]]Y]]VXV  
@HWI-EAS443:3:30:65:1257#0/1  
GATTGCTCAGTTCATTGATGCTTAATGCTGGCCATATCT  
+HWI-EAS443:3:30:65:1257#0/1  
^^aaababaaa`baaaaaaaaa`¥aa`a`\_Y\_aba\_a\_a\_  
@HWI-EAS443:3:30:674:300#0/1  
GCATTAAGCATCAATGAACTGAGCAATCTTGCAAAAGGAG  
+HWI-EAS443:3:30:674:300#0/1  
¥^aa\_aa^^aa`a`\_a¥Yaa]a^aaa]``aaaa`\_a``a  
@HWI-EAS443:3:30:681:278#0/1  
GAAGAACCCCGCACTCAGAATGAAGTGGATGATGGCAATG  
+HWI-EAS443:3:30:681:278#0/1  
`aaaaa`\_`aba`[\_`¥X`\_`\_`a`\_aY\_S\_^a`\_\_VW^^]\_

@HWI-EAS443:3:30:819:1384#0/1  
TTTTTAAACAATTGACACTAATTGATGGCCATCCGAATT  
+HWI-EAS443:3:30:819:1384#0/1  
[^U\_aba`\_`¥Xaaaba``¥`YY^ZJVaa\_[\_Y¥`a^\_  
@HWI-EAS443:3:30:837:371#0/1  
GCCATCATCCACTTCATTCTGAGTGC GGGTTCTTCTCTT  
+HWI-EAS443:3:30:837:371#0/1  
a^Xaa\_aaY`aa`a`aa^a]\_a¥\_¥`a`a¥^`^U]¥\_]  
@HWI-EAS443:3:30:901:1027#0/1  
TATGGCCCAGCATTAAAGCATCAATGAACTGAGCAATCTTG  
+HWI-EAS443:3:30:901:1027#0/1  
^bZb^¥`a\_^^`ba^^^T]aaaa^Q¥aa\_YX¥^`\_Y\_]a  
@HWI-EAS443:3:31:1041:1811#0/1  
AGAAGAACCCCGCACTCAGAATGAAGTGGATGATGGCAAT  
+HWI-EAS443:3:31:1041:1811#0/1  
a¥Zaa`^]PV[]]M¥^`ZY\_^^^\_[V]\_YU]]Y^Y]VXU  
@HWI-EAS443:3:31:1440:1697#0/1  
AAGAACCCCGCACTCAGAATGAAGTGGATGATGGCAATGA  
+HWI-EAS443:3:31:1440:1697#0/1  
aa]aa`\_\_a`[]¥][U\_`\_X\_UU````U]¥]]R[YUY  
@HWI-EAS443:3:31:1633:1026#0/1  
CAGCATTAAAGCATCAATGAACTGAGCAATCTTGCAAAAAGG  
+HWI-EAS443:3:31:1633:1026#0/1  
abb\_bbbbbba`b`babbab\_baaba\_ababaaaa\_aab\_  
@HWI-EAS443:3:31:1642:897#0/1  
GAGAAGAACCCCGCACTCAGAATGAAGTGGATGATGGCAA  
+HWI-EAS443:3:31:1642:897#0/1  
a^a¥bb[a`Tb\_ba[YaaabN¥aa\_]aUaa\_```\_aaH`Y  
@HWI-EAS443:3:31:371:1125#0/1  
CATTAAAGCATCAATGAACTGAGCAATCTTGCAAAAAGGAGA  
+HWI-EAS443:3:31:371:1125#0/1  
abbabZ\_bbabbaaa]Xaba`aabbaba`abaaaaa`aa  
@HWI-EAS443:3:31:383:419#0/1  
ATTTTGGGCAAAGAAGACAAGAGATATGGCCCAGCATTAA  
+HWI-EAS443:3:31:383:419#0/1  
`]aaabaabbaaaaaaaaaaaaaa`a\_a\_a\_\_\_\_`a\_\_]^  
@HWI-EAS443:3:31:419:1765#0/1  
GAAGAACCCCGCACTCAGAATGAAGTGGATGATGGCAATG  
+HWI-EAS443:3:31:419:1765#0/1  
]bbbbbbabb`bbbbbaabbabbbaY]\_aaaa¥T]\_aUN  
@HWI-EAS443:3:31:467:1769#0/1  
GCCATCATCCACTTCATTCTGAGTGC GGGTTCTTCTCTT  
+HWI-EAS443:3:31:467:1769#0/1  
`b¥HUY`ZbbbaUV\_a`^bY[bbN¥^UJ]\_\_NZbaba`aa\_  
@HWI-EAS443:3:31:484:853#0/1  
AAACAATTGACACTAATTGATGGCCATCCGAATCTTTT  
+HWI-EAS443:3:31:484:853#0/1  
`\_S\_a^aaa```a`a`\_\_¥¥V¥Za`\_a^^\_^[[^^]]  
@HWI-EAS443:3:31:500:429#0/1  
TTAAGCATCAATGAACTGAGCAATCTTGCAAAAAGGAGAGA

+HWI-EAS443:3:31:500:429#0/1  
ab`b`babaaabaaaaaabaaaa`a`aa]`\_aaa\_a`aa  
@HWI-EAS443:3:31:543:1178#0/1  
CAATTCGACACTAATTGATGGCCATCCGAATTCTTTTGGT  
+HWI-EAS443:3:31:543:1178#0/1  
a```abaaa`\_X\_]`¥¥]aaa\_aa``^^¥\_`\_^UV  
@HWI-EAS443:3:31:565:1417#0/1  
GAGATATGGCCAGCATTAAAGCATCAATGAACTGAGCAAT  
+HWI-EAS443:3:31:565:1417#0/1  
Z¥ab`]Z]X`^aX^`b\_aa[Y\_baa\_L^Y]Yb¥W]aba]Y  
@HWI-EAS443:3:31:655:1452#0/1  
AGAAGAACCCCGCACTCAGAATGAAGTGGATGATGGCAAT  
+HWI-EAS443:3:31:655:1452#0/1  
Ya`\_^`\_b`a\_]`aaa^US`\_a`UXFZaU[^[Z`Y^[UV  
@HWI-EAS443:3:31:702:1695#0/1  
AGAAGACAAGAGATATGGCCAGCATTAAAGCATCAATGAA  
+HWI-EAS443:3:31:702:1695#0/1  
^\_¥aa^baa`X]ZVZX]X`ba]a\_\_N[V\_`¥VY`Y^^XYZ  
@HWI-EAS443:3:31:709:1706#0/1  
GAAGAACCCCGCACTCAGAATGAAGTGGATGATGGCAATG  
+HWI-EAS443:3:31:709:1706#0/1  
V^\_V¥ab\_bbb]\_¥\_b\_ab\_aT¥Z`GY[b`^`a`Mb\_]X^  
@HWI-EAS443:3:31:739:1878#0/1  
CATTAAGCATCAATGAACTGAGCAATCTTGCAAAAGGAGA  
+HWI-EAS443:3:31:739:1878#0/1  
ab\_bb`]`babaaa\_aab```]`a\_a`a`a`a^¥^\_[\_\_a  
@HWI-EAS443:3:31:86:24#0/1  
GCATTAAGCATCAATGAACTGAGCAATCTTGCAAAAGGAG  
+HWI-EAS443:3:31:86:24#0/1  
`aa`^^`a[`a`\_a\_]Y]\_¥S^\_¥^^\_\_Y`\_^YW[[[\_  
@HWI-EAS443:3:31:886:759#0/1  
AAGAGAAGAACCCCGCACTCAGAATGAAGTGGATGATGGC  
+HWI-EAS443:3:31:886:759#0/1  
```aabbab`ba`babb`^b`^b`aaaaU^\_]ZWaa]^]\_S  
@HWI-EAS443:3:31:93:198#0/1  
GCCCAGCATTAAAGCATCAATGAACTGAGCAATCTTGCAAA  
+HWI-EAS443:3:31:93:198#0/1  
]baXYW^^YXRW\_Xa`SXT^`ZaZ\_N]^¥a]a]^aYINX  
@HWI-EAS443:3:32:1180:914#0/1  
GAGAAGAACCCCGCACTCAGAATGAAGTGGATGATGGCAA  
+HWI-EAS443:3:32:1180:914#0/1  
a\_bT^`\_`ababaaaaaXa][\_ab^`\_`^a\_```a\_\_^^Z]Z  
@HWI-EAS443:3:32:1213:151#0/1  
AGAGATATGGCCAGCATTAAAGCATCAATGAACTGAGCAA  
+HWI-EAS443:3:32:1213:151#0/1  
`bbbbaaab`\_\_aa`aaa]aa\_a`UUa`]]`Y¥a`^b]aY  
@HWI-EAS443:3:32:1361:1824#0/1  
CTCATTTTGGGCAAAGAAGACAAGAGATATGGCCAGCAT  
+HWI-EAS443:3:32:1361:1824#0/1  
aba\_bb`Ya`\_a`TWabaOb\_aba^ab`b`b¥]Sa`b`a\_

@HWI-EAS443:3:32:1402:1668#0/1  
TAAGCATCAATGAACTGAGCAATCTTGCAAAAAGGAGAGAA  
+HWI-EAS443:3:32:1402:1668#0/1  
abb\_aaa`aaa`a\_a`a\_aaa\_\_\_Z`\_\_\_`aX^\_a``\_  
@HWI-EAS443:3:32:1437:105#0/1  
CTCTCCTTTTGCAAGATTGCTCAGTTCATTGATGCTTAAT  
+HWI-EAS443:3:32:1437:105#0/1  
aabbbbbbbabbababbbbbbbbab`abbb[bbabbbab  
@HWI-EAS443:3:32:1544:1284#0/1  
AGAAGACAAGAGATATGGCCCAGCATTAAAGCATCAATGAA  
+HWI-EAS443:3:32:1544:1284#0/1  
a^abWMa`V¥]Xa`a^aY\_\_`\_S[\_a¥\_^Z^`Z\_X`\_\_`  
@HWI-EAS443:3:32:1573:839#0/1  
TTAAGCATCAATGAACTGAGCAATCTTGCAAAAAGGAGAGA  
+HWI-EAS443:3:32:1573:839#0/1  
]a]aaZW¥b`^`\_]Y^SXb]a`^U`^aVZ^[[a]Sbaaa  
@HWI-EAS443:3:32:1591:952#0/1  
GCCATCATCCACTTCATTCTGAGTGC GG GTTCTTCTCTT  
+HWI-EAS443:3:32:1591:952#0/1  
aR]\_`SNX`^Z^]\_¥¥^TU Y^¥\_W\_¥\_`\_YQ¥QWQS`\_] ]  
@HWI-EAS443:3:32:1624:452#0/1  
CAGCATTAAAGCATCAATGAACTGAGCAATCTTGCAAAAAGG  
+HWI-EAS443:3:32:1624:452#0/1  
aaaVbbbbbbabba[`baaabbbab^aaa¥bab]]Q]aab  
@HWI-EAS443:3:32:164:735#0/1  
CAATTCGACACTAATTGATGGCCATCCGAATTCTTTTGGT  
+HWI-EAS443:3:32:164:735#0/1  
aaXZ\_`a¥aa\_]JV00MQ[VXZV[^`VYPXV[[ZR[TRPV  
@HWI-EAS443:3:32:179:1189#0/1  
ATATGGCCCAGCATTAAAGCATCAATGAACTGAGCAATCTT  
+HWI-EAS443:3:32:179:1189#0/1  
YV``\_]bbbaba`\_\_YT[¥]YaYY\_`P\_a¥]^[\_ZZMP[]  
@HWI-EAS443:3:32:283:1236#0/1  
AGTTCATTGATGCTTAATGCTGGGCCATATCTTGTCTT  
+HWI-EAS443:3:32:283:1236#0/1  
[Ta``Yababab^bb^aabaa`¥a`a``bba`aa\_]b`^  
@HWI-EAS443:3:32:433:1576#0/1  
AGAGATATGGCCCAGCATTAAAGCATCAATGAACTGAGCAA  
+HWI-EAS443:3:32:433:1576#0/1  
``b`baba`\_abbaa\_a`aa]^aa`\_\_a\_V`aa\_]^^`\_V  
@HWI-EAS443:3:32:449:1378#0/1  
CCAGCATTAAAGCATCAATGAACTGAGCAATCTTGCAAAAAG  
+HWI-EAS443:3:32:449:1378#0/1  
^``^a\_b^SXSZ\_\_a[a``aaaa\_ZMT`Z¥aZZR`aT¥TQ  
@HWI-EAS443:3:32:918:185#0/1  
AACAAATTCGACACTAATTGATGGCCATCCGAATTCTTTTG  
+HWI-EAS443:3:32:918:185#0/1  
a^S\_aaaa\_\_^`Z^\_\_`\_\_^\_Z]U]^]]^\_]X`^^\_  
@HWI-EAS443:3:32:93:1881#0/1  
TAAGCATCAATGAACTGAGCAATCTTGCAAAAAGGAGAGAA

+HWI-EAS443:3:32:93:1881#0/1  
¥bbba\_aab`^TT^a[a\_aaaaba`aaaa]¥V\_¥RS^YS  
@HWI-EAS443:3:33:1023:1787#0/1  
GAGAAGAACCCCGCACTCAGAATGAAGTGGATGATGGCAA  
+HWI-EAS443:3:33:1023:1787#0/1  
a`\_a\_aaaa`a`aaa^`^a`\_`a`U¥`US\_¥^`^SUNRT^  
@HWI-EAS443:3:33:1082:791#0/1  
AGAGATATGGCCCAGCATTAAAGCATCAATGAACTGAGCAA  
+HWI-EAS443:3:33:1082:791#0/1  
abbbbababbaaab`baaaaa`aa\_\_`\_`a[IX\_\_`^aa  
@HWI-EAS443:3:33:124:185#0/1  
CAGCATTAAAGCATCAATGAACTGAGCAATCTTGCAAAAGG  
+HWI-EAS443:3:33:124:185#0/1  
aabbaaab\_bbbbaaaabaaaaaaaaa\_a\_\_\_a\_\_^\_\_\_  
@HWI-EAS443:3:33:1279:1417#0/1  
ATATGGCCCAGCATTAAAGCATCAATGAACTGAGCAATCTT  
+HWI-EAS443:3:33:1279:1417#0/1  
^\_baa]`]aaaa`¥\_¥`Va`Wa`a^¥Z^`\_^GZ^^^G\_^  
@HWI-EAS443:3:33:1292:93#0/1  
AAGACAAGAGATATGGCCCAGCATTAAAGCATCAATGAACT  
+HWI-EAS443:3:33:1292:93#0/1  
a]b`Y^ZUSWa]aY\_a`X¥``0[ ]\_\_`XMXSXY]]^SPO  
@HWI-EAS443:3:33:1327:365#0/1  
TAAGCATCAATGAACTGAGCAATCTTGCAAAAGGAGAGAA  
+HWI-EAS443:3:33:1327:365#0/1  
¥b``\_H]YX^aaW\_\_`\_SaS\_\_^U¥R[YU¥ZGX]TUZX\_¥  
@HWI-EAS443:3:33:1684:1336#0/1  
AAGAGAAGAACCCCGCACTCAGAATGAAGTGGATGATGGC  
+HWI-EAS443:3:33:1684:1336#0/1  
aaa`aa`aa`\_^`\_]a^`^`\_]`ZKM\_V\_LDT\_YRW^Y  
@HWI-EAS443:3:33:174:44#0/1  
AACAAATTCGACACTAATTGATGGCCATCCGAATTCTTTTG  
+HWI-EAS443:3:33:174:44#0/1  
^Y````¥aaa`a`]Z^^`]X^`\_[ ]X]^`X[WWW[\_^XX  
@HWI-EAS443:3:33:436:267#0/1  
TAAGCATCAATGAACTGAGCAATCTTGCAAAAGGAGAGAA  
+HWI-EAS443:3:33:436:267#0/1  
a\_YX]\_`a`^ba]Yaaa\_aa]`aa`\_\_`^]Z¥Z¥^\_\_\_\_\_  
@HWI-EAS443:3:33:54:757#0/1  
CAAGAGAAGAACCCCGCACTCAGAATGAAGTGGATGATGG  
+HWI-EAS443:3:33:54:757#0/1  
a^a]aaa]bY^abaabbaaaa]aX¥`aZ\_aS`aY¥a[T\_\_  
@HWI-EAS443:3:33:562:1865#0/1  
ATTAAGCATCAATGAACTGAGCAATCTTGCAAAAGGAGAG  
+HWI-EAS443:3:33:562:1865#0/1  
\_¥V\_LWY¥a`V¥¥R[aaa[VS^]ab][\_a]^MZVS]``^  
@HWI-EAS443:3:33:563:330#0/1  
AACAAATTCGACACTAATTGATGGCCATCCGAATTCTTTTG  
+HWI-EAS443:3:33:563:330#0/1  
`a`aZI]Z^aaaaa\_\_`\_V\_^XMXZ\_^VRZ]RX\_^[[ ]]Z



@HWI-EAS443:3:33:617:948#0/1  
AAGAAGACAAGAGATATGGCCCAGCATTAAAGCATCAATGA  
+HWI-EAS443:3:33:617:948#0/1  
aaa`a\_aaaaa\_\_a`a^`¥\_\_]Z^\_a\_^[\`^\_Z]X\_^]Z]  
@HWI-EAS443:3:33:692:176#0/1  
GAAGAACCCCGCACTCAGAATGAAGTGGATGATGGCAATG  
+HWI-EAS443:3:33:692:176#0/1  
[Y¥¥IH]a`)]\_[]WKU¥P¥a^[VS\_ZQUTSJMNLT]]  
@HWI-EAS443:3:33:699:1930#0/1  
GAAGAACCCCGCACTCAGAATGAAGTGGATGATGGCAATG  
+HWI-EAS443:3:33:699:1930#0/1  
]``abbbaaa`b`a`baa\_aa\_a^\_Wa[Y\_[YMY]^^]V]  
@HWI-EAS443:3:33:724:1469#0/1  
GAGATATGGCCCAGCATTAAAGCATCAATGAACTGAGCAAT  
+HWI-EAS443:3:33:724:1469#0/1  
``ba^`¥b\_bbb`Yabaaba[aa^a\_]`¥\_`[\_S\_a^\_YZ  
@HWI-EAS443:3:33:760:156#0/1  
AGAAGACAAGAGATATGGCCCAGCATTAAAGCATCAATGAA  
+HWI-EAS443:3:33:760:156#0/1  
aa`\_aaa^`a\_a`Z`¥`V`¥Z]]Z\_]V^\_ZZZUZXWZX  
@HWI-EAS443:3:33:82:720#0/1  
CCCAGCATTAAAGCATCAATGAACTGAGCAATCTTGCAAAA  
+HWI-EAS443:3:33:82:720#0/1  
abbaaa`aaa¥aa^`aaaa`aa``\_``\_``^``\_XNZ  
@HWI-EAS443:3:33:838:1678#0/1  
AACAATTCGACACTAATTGATGGCCATCCGAATTCTTTTG  
+HWI-EAS443:3:33:838:1678#0/1  
a`aab\_aa[aabaaaa``a\_\_S\_\_a]^`^\_\_^V]W^^]]W  
@HWI-EAS443:3:33:871:966#0/1  
CAAGAGAAGAACCCCGCACTCAGAATGAAGTGGATGATGG  
+HWI-EAS443:3:33:871:966#0/1  
ab`bbb`bbbbbaaaaaYaa\_b\_aa\_a\_a^\_]`^[VNX¥  
@HWI-EAS443:3:34:1089:940#0/1  
AAGAGAAGAACCCCGCACTCAGAATGAAGTGGATGATGGC  
+HWI-EAS443:3:34:1089:940#0/1  
Z¥¥]]]``^¥WZZ``\_[] [N^FWY`YS\_T]^RV\_VNYBB  
@HWI-EAS443:3:34:1129:1037#0/1  
AGAGAAGAACCCCGCACTCAGAATGAAGTGGATGATGGCA  
+HWI-EAS443:3:34:1129:1037#0/1  
ababababbabbaaaaaabaaa`baa^a\_a\_a^`¥\_X\_Y^  
@HWI-EAS443:3:34:1173:1643#0/1  
CATTTTGGGCAAAGAAGACAAGAGATATGGCCCAGCATTAA  
+HWI-EAS443:3:34:1173:1643#0/1  
\_¥aZab^T`a`bbb\_a```]]`aU\_^\_I¥KY[\_Ya\_[]UX  
@HWI-EAS443:3:34:117:1565#0/1  
GATTGCTCAGTTCATTGATGCTTAATGCTGGGCCATATCT  
+HWI-EAS443:3:34:117:1565#0/1  
abaaabaaaa\_abaaaaa\_aaaaaaa``Y``]]\_``aZ`  
@HWI-EAS443:3:34:1232:1400#0/1  
CATTAAAGCATCAATGAACTGAGCAATCTTGCAAAAAGGAGA

+HWI-EAS443:3:34:1232:1400#0/1  
abbbbbbbbbbbbbb`bbbabababaababaa\_\_\_b\_\_aa  
@HWI-EAS443:3:34:1258:493#0/1  
AGAAGACAAGAGATATGGCCCAGCATTAAAGCATCAATGAA  
+HWI-EAS443:3:34:1258:493#0/1  
`^`Z\_V\_\_Y\_^a¥^`ab\_ZX[W^X]`T¥]`]Z]ZQYPYVY  
@HWI-EAS443:3:34:1276:898#0/1  
AAGAGATATGGCCCAGCATTAAAGCATCAATGAACTGAGCA  
+HWI-EAS443:3:34:1276:898#0/1  
VS^a]V^]]``]aaa]]a[[a\_]YZT`]¥]GJ[Sa^\_VV  
@HWI-EAS443:3:34:1334:1325#0/1  
GAGATATGGCCCAGCATTAAAGCATCAATGAACTGAGCAAT  
+HWI-EAS443:3:34:1334:1325#0/1  
^¥bba\_^bbbabaaaa`a`baaaaaabbaa]]¥¥VZ^¥^  
@HWI-EAS443:3:34:1414:794#0/1  
AAGAAGACAAGAGATATGGCCCAGCATTAAAGCATCAATGA  
+HWI-EAS443:3:34:1414:794#0/1  
abaaaa`aab\_a`aa`]aa¥Y[`\_\_^a`\_UWX\_XTMRBB  
@HWI-EAS443:3:34:1422:966#0/1  
TTAAGCATCAATGAACTGAGCAATCTTGCAAAAGGAGAGA  
+HWI-EAS443:3:34:1422:966#0/1  
a^VZ\_`abb`a`aWQTa\_Waaaa`^aYa\_[XPY^XYO\_]Z  
@HWI-EAS443:3:34:1645:274#0/1  
TAAGCATCAATGAACTGAGCAATCTTGCAAAAGGAGAGAA  
+HWI-EAS443:3:34:1645:274#0/1  
abaa\_`a`]aba^¥a\_`Z]``]]`\_\_a^UW]X\_X^][  
@HWI-EAS443:3:34:172:958#0/1  
GAAGACAAGAGATATGGCCCAGCATTAAAGCATCAATGAAC  
+HWI-EAS443:3:34:172:958#0/1  
aa[a\_aa`\_\_YZ]^`^^`\_`aZ\_`a][¥\_^\_`S[]^]]  
@HWI-EAS443:3:34:185:497#0/1  
AGAAGAACCCCGCACTCAGAATGAAGTGGATGATGGCAAT  
+HWI-EAS443:3:34:185:497#0/1  
]SXH¥Ya`aVZa\_\_YZ\_¥NTZ¥aM]\_U\_WU^XNR¥PLGPZ  
@HWI-EAS443:3:34:268:1838#0/1  
GACAAGAGATATGGCCCAGCATTAAAGCATCAATGAACTGA  
+HWI-EAS443:3:34:268:1838#0/1  
Y\_^`^¥V^[a\_^¥`a\_YZbb`a\_YT\_bXba\_[a]^KQS^  
@HWI-EAS443:3:34:288:1750#0/1  
GAGATATGGCCCAGCATTAAAGCATCAATGAACTGAGCAAT  
+HWI-EAS443:3:34:288:1750#0/1  
Y\_^a^aa¥Z`aa`\_bb`bbb[`aabb^`Y\_aba¥[Y¥`W^  
@HWI-EAS443:3:34:305:958#0/1  
AGAAGAACCCCGCACTCAGAATGAAGTGGATGATGGCAAT  
+HWI-EAS443:3:34:305:958#0/1  
\_\_¥`^b^`aaaabab]YRa\_]`]Gwa]`a\_X\_[¥a]HV]¥  
@HWI-EAS443:3:34:411:611#0/1  
AACAATTCGACACTAATTGATGGCCATCCGAATTCTTTTG  
+HWI-EAS443:3:34:411:611#0/1  
a^`WX]Y\_]aV]`^RYZ]]]NUD¥TOUZZTZNVQPWB BBB

@HWI-EAS443:3:34:429:109#0/1  
CAATTCGACACTAATTGATGGCCATCCGAATTCTTTTGGT  
+HWI-EAS443:3:34:429:109#0/1  
`^\_aT`V^aa\_a¥SZ`V[aW`[¥WTW[[L^YW^^\_]ZZB  
@HWI-EAS443:3:34:537:1517#0/1  
CAATTCGACACTAATTGATGGCCATCCGAATTCTTTTGGT  
+HWI-EAS443:3:34:537:1517#0/1  
a]P]a[]PZYNLXZWZ`]UN[¥YLT SWWGL¥UV\_BBBBB  
@HWI-EAS443:3:34:644:1297#0/1  
AGAAGAACCCCGCACTCAGAATGAAGTGGATGATGGCAAT  
+HWI-EAS443:3:34:644:1297#0/1  
aa\_Y\_a\_abaa`aaaa`a\_a`\_¥¥TaY\_\_\_U]WVZ^^^  
@HWI-EAS443:3:34:74:823#0/1  
TTAAGCATCAATGAACTGAGCAATCTTGCAAAAGGAGAGA  
+HWI-EAS443:3:34:74:823#0/1  
aab\_aba`b^Zbb¥¥aaaYbaaaabaaba`¥a`aaaaa  
@HWI-EAS443:3:34:833:502#0/1  
CAAGAGAAGAACCCCGCACTCAGAATGAAGTGGATGATGG  
+HWI-EAS443:3:34:833:502#0/1  
ababab]]b`^b`aa`a`a`aa`a`\_`aUa\_^`aYX^]  
@HWI-EAS443:3:34:847:1680#0/1  
CAAGAGAAGAACCCCGCACTCAGAATGAAGTGGATGATGG  
+HWI-EAS443:3:34:847:1680#0/1  
abb]aab\_bbabbaa]aa`\_aa`\_`\_\_\_^V\_\_ZT\_] ]\_S  
@HWI-EAS443:3:34:891:1151#0/1  
GCATTAAGCATCAATGAACTGAGCAATCTTGCAAAAGGAG  
+HWI-EAS443:3:34:891:1151#0/1  
a`aa[aaaa`\_`\_`\_`\_\_^a`\_`\_`\_`\_]¥XX[XZ¥VOZ  
@HWI-EAS443:3:34:926:224#0/1  
AGAGATATGGCCAGCATTAAGCATCAATGAACTGAGCAA  
+HWI-EAS443:3:34:926:224#0/1  
abbabababaa^aa¥W^aaaa\_a^^`\_`\_]X\_Z^¥PTZ  
@HWI-EAS443:3:35:1107:1330#0/1  
CAATTCGACACTAATTGATGGCCATCCGAATTCTTTTGGT  
+HWI-EAS443:3:35:1107:1330#0/1  
\_[aa`a¥`b`baba]X^`aa\_b^aa\_bb][^\_aaaaa`V  
@HWI-EAS443:3:35:1149:637#0/1  
TTAAGCATCAATGAACTGAGCAATCTTGCAAAAGGAGAGA  
+HWI-EAS443:3:35:1149:637#0/1  
ababaabaaa^`ab`aaaaaa`a\_a`[`a``a`]`a\_a`\_`\_`  
@HWI-EAS443:3:35:1247:1141#0/1  
ATTAAGCATCAATGAACTGAGCAATCTTGCAAAAGGAGAG  
+HWI-EAS443:3:35:1247:1141#0/1  
abab^ZZa^a`Z¥^^`[`a^]X^¥\_]\_a`a]UXP`\_Ya]a  
@HWI-EAS443:3:35:1301:1222#0/1  
CAGCATTAAGCATCAATGAACTGAGCAATCTTGCAAAAGG  
+HWI-EAS443:3:35:1301:1222#0/1  
aaabb^]`ab\_b`YU`a¥a`aa`¥a`aUaba`\_\_`a\_Ua\_\_  
@HWI-EAS443:3:35:1404:126#0/1  
CCCAGCATTAAGCATCAATGAACTGAGCAATCTTGCAAAA

+HWI-EAS443:3:35:1404:126#0/1  
aa\_abXa]a^ab\_U¥Z^a^¥U0¥`TX¥¥VYXaYY^Y^OG  
@HWI-EAS443:3:35:1409:1917#0/1  
GAAGACAAGAGATATGGCCCAGCATTAAAGCATCAATGAAC  
+HWI-EAS443:3:35:1409:1917#0/1  
\_aabbaa\_]\_aaaa\_a`a[`a]aaa\_a]`a`^`a\_Z¥\_[]  
@HWI-EAS443:3:35:1531:1356#0/1  
CAAGAGAAGAACCCCGCACTCAGAATGAAGTGGATGATGG  
+HWI-EAS443:3:35:1531:1356#0/1  
ab``\_bbbbbababbabbbaab[a`a\_bb`bb`aa\_a`b  
@HWI-EAS443:3:35:1599:948#0/1  
GAAGAACCCCGCACTCAGAATGAAGTGGATGATGGCAATG  
+HWI-EAS443:3:35:1599:948#0/1  
aaY¥]`abab`aT`\_SU\_a\_ab]^aYaUQ]^LSa]NZ\_00  
@HWI-EAS443:3:35:168:53#0/1  
GAGAAGAACCCCGCACTCAGAATGAAGTGGATGATGGCAA  
+HWI-EAS443:3:35:168:53#0/1  
aabaaa`aa`^aba`\_\_\_\_\_aZ^]\_[]\_X^VX^YY]]VVV  
@HWI-EAS443:3:35:226:159#0/1  
CAAGAGAAGAACCCCGCACTCAGAATGAAGTGGATGATGG  
+HWI-EAS443:3:35:226:159#0/1  
a\_bbUaa[a\_\_aaaabaaa\_a`aW\_a\_\_Y\_X`^^\_\_^]`U  
@HWI-EAS443:3:35:35:2019#0/1  
AAACAATTCGACACTAATTGATGGCCATCCGAATTCCTTTT  
+HWI-EAS443:3:35:35:2019#0/1  
`¥V]^`Y`V]`aaa¥`XWFW\_RP¥\_\_Na`YWFTX\_]]]T  
@HWI-EAS443:3:35:506:798#0/1  
ACAAGAGATATGGCCCAGCATTAAAGCATCAATGAACTGAG  
+HWI-EAS443:3:35:506:798#0/1  
a¥a`\_`\_a¥a\_a^aa`[Vaa¥^a¥]a^^YS\_^]0`¥\_ZZU  
@HWI-EAS443:3:35:624:605#0/1  
AACAATTCGACACTAATTGATGGCCATCCGAATTCCTTTTG  
+HWI-EAS443:3:35:624:605#0/1  
aaaa^a\_baaaba`a```a`\_^a^`]]a\_`aa\_^`^\_\_  
@HWI-EAS443:3:35:728:212#0/1  
AACAATTCGACACTAATTGATGGCCATCCGAATTCCTTTTG  
+HWI-EAS443:3:35:728:212#0/1  
\_]Z\_aa\_0\_aa`UT[^`TSYZTYZN[¥W]TXNVFJNTWZW  
@HWI-EAS443:3:35:730:702#0/1  
AGAGAAGAACCCCGCACTCAGAATGAAGTGGATGATGGCA  
+HWI-EAS443:3:35:730:702#0/1  
aa]¥I]`\_]\_[X`a^`X]YYYYVV[\_Y\_Q^[T]XXPT[LV  
@HWI-EAS443:3:35:81:945#0/1  
AAGAAGACAAGAGATATGGCCCAGCATTAAAGCATCAATGA  
+HWI-EAS443:3:35:81:945#0/1  
aaa[U^aa¥a`^`a``\_]\_[a`\_\_U[\_][Q[^``a]]^^Z  
@HWI-EAS443:3:35:829:1063#0/1  
TTTTTAAACAATTCGACACTAATTGATGGCCATCCGAATT  
+HWI-EAS443:3:35:829:1063#0/1  
aaaaaaaaabaaa\_\_\_\_`ab\_\_\_\_`aa^\_]^V`]]Y`Y^^^

@HWI-EAS443:3:36:1050:2044#0/1  
TAAGCATCAATGAACTGAGCAATCTTGCAAAAGGAGAGAA  
+HWI-EAS443:3:36:1050:2044#0/1  
aba]bbbabbbaaa\_^^aU\_a\_a\_]Y\_Ya\_\_\_SU^[a\_ZY  
@HWI-EAS443:3:36:1178:1033#0/1  
AAGAGAAGAACCCCGCACTCAGAATGAAGTGGATGATGGC  
+HWI-EAS443:3:36:1178:1033#0/1  
aaa`aW`a`\_\_\_aaa[\_a\_\_\_\_\_Y]\_a\_VaYaUYX`\_W\_]`^  
@HWI-EAS443:3:36:1282:307#0/1  
GATTGCTCAGTTCATTGATGCTTAATGCTGGGCCATATCT  
+HWI-EAS443:3:36:1282:307#0/1  
Z`a`abb\_¥^`]`aaa`a`a`aa`a`\_R\_a\_VZZa^`W]  
@HWI-EAS443:3:36:1295:616#0/1  
GAAGAACCCCGCACTCAGAATGAAGTGGATGATGGCAATG  
+HWI-EAS443:3:36:1295:616#0/1  
]abbbabbb\_¥^`]`\_VaS\_aba¥XP¥\_aa\_\_Y^`XP\_XZ  
@HWI-EAS443:3:36:143:1468#0/1  
AAGAGATATGGCCAGCATTAAAGCATCAATGAACTGAGCA  
+HWI-EAS443:3:36:143:1468#0/1  
aa\_a^U`b^\_[aaa^^aa`^`aZa`\_]`¥\_\_X¥Y]^^^`\_  
@HWI-EAS443:3:36:1520:896#0/1  
CATTAAGCATCAATGAACTGAGCAATCTTGCAAAAGGAGA  
+HWI-EAS443:3:36:1520:896#0/1  
ab\_aa```aaWGPabXbX`\_Xa[bVbb¥Xab\_RRa¥Y¥\_W  
@HWI-EAS443:3:36:1601:1336#0/1  
CAAGAGAAGAACCCCGCACTCAGAATGAAGTGGATGATGG  
+HWI-EAS443:3:36:1601:1336#0/1  
aaab][aaabba][Wb[ba\_]X\_`bb\_`a`\_¥``aaa¥]  
@HWI-EAS443:3:36:167:215#0/1  
GAGAAGAACCCCGCACTCAGAATGAAGTGGATGATGGCAA  
+HWI-EAS443:3:36:167:215#0/1  
¥ZbWRUWaa[`a^ZSXaa```aba[``L`R]\_a]Y^Z^UZ  
@HWI-EAS443:3:36:1701:1435#0/1  
AAGAGAAGAACCCCGCACTCAGAATGAAGTGGATGATGGC  
+HWI-EAS443:3:36:1701:1435#0/1  
`ZX]a¥b\_aa`a`^^Va¥`^\_a^\_\_\_^T`Tq]X^\_WZ`Y`  
@HWI-EAS443:3:36:1788:1261#0/1  
TTAAGCATCAATGAACTGAGCAATCTTGCAAAAGGAGAGA  
+HWI-EAS443:3:36:1788:1261#0/1  
aba\_a\_Ja^^^`aZ]WXWxa^`\_a\_a`\_^`]Y\_a\_W`^`\_  
@HWI-EAS443:3:36:210:94#0/1  
GCATTAAGCATCAATGAACTGAGCAATCTTGCAAAAGGAG  
+HWI-EAS443:3:36:210:94#0/1  
aabaa]`aaX\_a^`aa\_`\_`aY`aa`\_\_`\_`\_`\_^]X`\_^\_  
@HWI-EAS443:3:36:268:984#0/1  
ATTAAGCATCAATGAACTGAGCAATCTTGCAAAAGGAGAG  
+HWI-EAS443:3:36:268:984#0/1  
aaa^a\_aa`a`\_`\_`aa^[U^a\_\_^a^\_`\_]\_\_]]\_]\_  
@HWI-EAS443:3:36:445:23#0/1  
GTTCATTGATGCTTAATGCTGGGCCATATCTCTTGTCTTC

+HWI-EAS443:3:36:445:23#0/1  
`Y]]¥Z\_[OY¥X^ZZX¥\_¥X^VW]QJSSU^WWWZYSTWYY  
@HWI-EAS443:3:36:466:1282#0/1  
AGAGATATGGCCCAGCATTAAAGCATCAATGAACTGAGCAA  
+HWI-EAS443:3:36:466:1282#0/1  
^^V`K\_^`]¥^^a]Z¥¥^`a[¥¥a`^Z\_USU\_¥¥QU[a]H  
@HWI-EAS443:3:36:468:1409#0/1  
AGAAGAACCCCGCACTCAGAATGAAGTGGATGATGGCAAT  
+HWI-EAS443:3:36:468:1409#0/1  
a\_UU]\_`a`aaaa\_\_aaaZ`^a]T^WZ]XXa[\_^Z[\_]  
@HWI-EAS443:3:36:489:1755#0/1  
CAATTCGACACTAATTGATGGCCATCCGAATCCTTTTGGT  
+HWI-EAS443:3:36:489:1755#0/1  
[aabUababbb¥`a`\_`]T\_¥a`b\_a[aa`^^Y^U^U\_\_V  
@HWI-EAS443:3:36:561:514#0/1  
AAGAGAAGAACCCCGCACTCAGAATGAAGTGGATGATGGC  
+HWI-EAS443:3:36:561:514#0/1  
aaa`a\_]`^`¥`a`aaa`a`a]`^Z`\_V^aXa^X^\_\_]]U\_  
@HWI-EAS443:3:36:591:1405#0/1  
AATTCGACACTAATTGATGGCCATCCGAATCCTTTTGGTC  
+HWI-EAS443:3:36:591:1405#0/1  
``S]`Z¥`[]]\_TR]]Z]U`Za^]a\_UY¥[U]^]\_^^O\_  
@HWI-EAS443:3:36:674:1908#0/1  
CATTAAAGCATCAATGAACTGAGCAATCTTGCAAAAGGAGA  
+HWI-EAS443:3:36:674:1908#0/1  
^a`bbbbbbbbbb^babba`a`b`aaaaaba\_aaaa`a  
@HWI-EAS443:3:36:680:1348#0/1  
GCATTAAGCATCAATGAACTGAGCAATCTTGCAAAAGGAG  
+HWI-EAS443:3:36:680:1348#0/1  
^`RY`^W^b\_V`\_[V]^]aa`a\_a]ST\_[`aZYJ[\_`U\_Z  
@HWI-EAS443:3:36:698:1324#0/1  
GAGAAGAACCCCGCACTCAGAATGAAGTGGATGATGGCAA  
+HWI-EAS443:3:36:698:1324#0/1  
a¥a`bbabbbbaabaabbbabaaba\_`R``aaa\_`a^`a^  
@HWI-EAS443:3:36:758:1408#0/1  
AAGAACCCCGCACTCAGAATGAAGTGGATGATGGCAATGA  
+HWI-EAS443:3:36:758:1408#0/1  
][¥[\_ab``aba\_Q[``^]YT`\_V^b[\_`]S\_\_R¥[\_]\_U  
@HWI-EAS443:3:36:767:1302#0/1  
AGAGATATGGCCCAGCATTAAAGCATCAATGAACTGAGCAA  
+HWI-EAS443:3:36:767:1302#0/1  
abaababa\_aaaaa^abaaa````aa\_a```]^^\_\_a`Z  
@HWI-EAS443:3:36:801:717#0/1  
GAAGAACCCCGCACTCAGAATGAAGTGGATGATGGCAATG  
+HWI-EAS443:3:36:801:717#0/1  
`b¥`bbbabbbbaaa[^`aaa¥]`^`\_a```\_]aa`]\_^  
@HWI-EAS443:3:36:844:73#0/1  
CAGCATTAAAGCATCAATGAACTGAGCAATCTTGCAAAAGG  
+HWI-EAS443:3:36:844:73#0/1  
aabbbbabbbbaabaabbaaaa`a`]\_aaaa\_`\_V[aZ

@HWI-EAS443:3:36:897:1274#0/1  
CATTAAAGCATCAATGAACTGAGCAATCTTGCAAAAGGAGA  
+HWI-EAS443:3:36:897:1274#0/1  
abaa`\_`b]aa`aaaa`a`aaa`aaa`aa` `[\_\_\_aW`  
@HWI-EAS443:3:37:1036:801#0/1  
AAGAGATATGGCCCAGCATTAAAGCATCAATGAACTGAGCA  
+HWI-EAS443:3:37:1036:801#0/1  
\_a`\_`aa`abaaaa^ba`aa`\_`aaa]`[GY`aa`[H]`\_`  
@HWI-EAS443:3:37:1042:1429#0/1  
AGAGATATGGCCCAGCATTAAAGCATCAATGAACTGAGCAA  
+HWI-EAS443:3:37:1042:1429#0/1  
^`\_]`]b[\_aaX]a`\_]`aaZ`aaa`]\_\_LUZa`\_]`a`\_`  
@HWI-EAS443:3:37:1046:1703#0/1  
AGAAGACAAGAGATATGGCCCAGCATTAAAGCATCAATGAA  
+HWI-EAS443:3:37:1046:1703#0/1  
aaaaaa````^a`\_`a^]¥^a`^^a`\_]X`\_`\_a`^^`\_`  
@HWI-EAS443:3:37:1068:655#0/1  
ATTTTGGGCAAAGAAGACAAGAGATATGGCCCAGCATTAA  
+HWI-EAS443:3:37:1068:655#0/1  
]ab]bbbab^[^]`\_`^aa^^¥`^aaaa^R`^\_`a`aa][`  
@HWI-EAS443:3:37:1080:313#0/1  
TAAGCATCAATGAACTGAGCAATCTTGCAAAAGGAGAGAA  
+HWI-EAS443:3:37:1080:313#0/1  
ab\_babbababbbbab`Z`W`ababa¥T^LI[aaabaabZ  
@HWI-EAS443:3:37:1136:1762#0/1  
CTCTCCTTTTGCAAGATTGCTCAGTTCATTGATGCTTAAT  
+HWI-EAS443:3:37:1136:1762#0/1  
aaab`¥`\_aab`abb`\_`\_[WUbbba^a`bbb¥aba]]aabba  
@HWI-EAS443:3:37:1146:181#0/1  
TAAGCATCAATGAACTGAGCAATCTTGCAAAAGGAGAGAA  
+HWI-EAS443:3:37:1146:181#0/1  
abaaaaaaaaaaaaa\_Ra^a^aa`\_`a`^`[MQ[a`^\_`aaa¥  
@HWI-EAS443:3:37:1493:646#0/1  
CTCATTTTGGGCAAAGAAGACAAGAGATATGGCCCAGCAT  
+HWI-EAS443:3:37:1493:646#0/1  
abaabbbbbbbb`aaaaaaaaaaaaab`\_]M[\_b`\_`\_aaa`\_`  
@HWI-EAS443:3:37:1569:131#0/1  
GAGATATGGCCCAGCATTAAAGCATCAATGAACTGAGCAAT  
+HWI-EAS443:3:37:1569:131#0/1  
aaa`aaaaaa]W]^Xa`\_`\_`YYV^]^\_`Z]XNUV]]Z¥W`ZW  
@HWI-EAS443:3:37:1583:1530#0/1  
GAAGAACCCCGCACTCAGAATGAAGTGGATGATGGCAATG  
+HWI-EAS443:3:37:1583:1530#0/1  
a`\_`aUaaaZaa`a`\_`^\_a]]aaa`a[a]`L][aaRQWZX^  
@HWI-EAS443:3:37:1659:1614#0/1  
CAAGAGAAGAACCCCGCACTCAGAATGAAGTGGATGATGG  
+HWI-EAS443:3:37:1659:1614#0/1  
aa`^aba¥Ybbbb`U`SX`\_`baaW[b\_Za]]0¥Za^aXQ[  
@HWI-EAS443:3:37:1716:1887#0/1  
GGGTATGAAGAATTCACAATGGTTGGGAGAAGAGCAACAG

+HWI-EAS443:3:37:1716:1887#0/1  
ab]L]\_\_\_ba`aa]V`aaa\_aaZa`a^^aVa\_a\_`\_^aa]  
@HWI-EAS443:3:37:430:46#0/1  
GAAGAACCCCGCACTCAGAATGAAGTGGATGATGGCAATG  
+HWI-EAS443:3:37:430:46#0/1  
a`\_\_^`a\_\_``\_\_\_^]Y\_XVX^IRVW^YVXYUY]^XYNUY  
@HWI-EAS443:3:37:442:1974#0/1  
CATTAAGCATCAATGAACTGAGCAATCTTGCAAAAGGAGA  
+HWI-EAS443:3:37:442:1974#0/1  
abaab¥`^abab`a^aba`\_`Ya`a\_a\_\_YbYER`\_¥]Z]  
@HWI-EAS443:3:37:493:1667#0/1  
AAGAGAAGAACCCCGCACTCAGAATGAAGTGGATGATGGC  
+HWI-EAS443:3:37:493:1667#0/1  
[USY[`a`]^¥a[baaa\_\_`\_[T\_`a^ZWKXUXX^¥^]VJ  
@HWI-EAS443:3:37:499:853#0/1  
AGAAGAACCCCGCACTCAGAATGAAGTGGATGATGGCAAT  
+HWI-EAS443:3:37:499:853#0/1  
aaaaabaaaaaaaaaaaaa]aaa^\_\_Ya^Y^`]^\_][`\_ \_  
@HWI-EAS443:3:37:502:494#0/1  
AGAAGAACCCCGCACTCAGAATGAAGTGGATGATGGCAAT  
+HWI-EAS443:3:37:502:494#0/1  
`Y[`baa`bbaa`a`a]\_a`\_abWKaT]]]\_a[[aa`Xa\_  
@HWI-EAS443:3:37:503:1379#0/1  
CCCAGCATTAAGCATCAATGAACTGAGCAATCTTGCAAAA  
+HWI-EAS443:3:37:503:1379#0/1  
abaU`b]RM\_SVa`Xaaaa`UU`\_\_\_\_^ZUT`^Z``Y]^W  
@HWI-EAS443:3:37:548:1028#0/1  
GAAGACAAGAGATATGGCCCAGCATTAAGCATCAATGAAC  
+HWI-EAS443:3:37:548:1028#0/1  
ab` `b`[Naa`]Mb[`aba`a\_bb¥^b[^G]]a\_`\_\_^`X  
@HWI-EAS443:3:37:560:1402#0/1  
AGAGAAGAACCCCGCACTCAGAATGAAGTGGATGATGGCA  
+HWI-EAS443:3:37:560:1402#0/1  
¥^aa`\_^bab\_\_aa]baa^¥aaa\_aa]\_V^^\_X`[TSY\_\_  
@HWI-EAS443:3:37:56:1146#0/1  
AAAGAAGACAAGAGATATGGCCCAGCATTAAGCATCAATG  
+HWI-EAS443:3:37:56:1146#0/1  
¥bbaababab`a^ba`aa\_Vaa^T^aa\_\_TUZbaWa[0¥U  
@HWI-EAS443:3:37:62:1100#0/1  
CTCATTTTGGGCAAAGAAGACAAGAGATATGGCCCAGCAT  
+HWI-EAS443:3:37:62:1100#0/1  
a`aaaaaa`^a\_X]` `¥Q¥a¥`VY]ZVXX[a`]^`\_^^^  
@HWI-EAS443:3:37:673:1408#0/1  
ACAAGAGATATGGCCCAGCATTAAGCATCAATGAACTGAG  
+HWI-EAS443:3:37:673:1408#0/1  
\_baab`baaa]^aaaa\_aY¥T]]]^Y^TNY\_`^`\_]\_\_  
@HWI-EAS443:3:37:931:1128#0/1  
GACAAGAGATATGGCCCAGCATTAAGCATCAATGAACTGA  
+HWI-EAS443:3:37:931:1128#0/1  
VSab`aT¥¥bbaabaaT`]a¥abaX]aXYNV\_aa\_Z\_]`¥



@HWI-EAS443:3:37:933:1298#0/1  
GAGAAGAACCCCGCACTCAGAATGAAGTGGATGATGGCAA  
+HWI-EAS443:3:37:933:1298#0/1  
`^[N]aa^\_]Y`a`aaaX\_\_ba`]]a[[TVa`[Z]P]YR  
@HWI-EAS443:3:37:993:641#0/1  
CAATTCGACACTAATTGATGGCCATCCGAATTCTTTTGGT  
+HWI-EAS443:3:37:993:641#0/1  
`ON]]a[\_aaaaa^^aa\_\_¥Xb]`^^^YHJL\_¥¥\_\_V¥¥T  
@HWI-EAS443:3:38:1001:1505#0/1  
CAAGAGAAGAACCCCGCACTCAGAATGAAGTGGATGATGG  
+HWI-EAS443:3:38:1001:1505#0/1  
aa^b\_]aa[\_¥IXa`^\_aUa\_`Z\_`aXXVGX\_]\_]XYY  
@HWI-EAS443:3:38:1043:841#0/1  
CCAGCATTAAGCATCAATGAACTGAGCAATCTTGCAAAAG  
+HWI-EAS443:3:38:1043:841#0/1  
aaaaabbbba`\_abab`ab¥`aaaaaaY^¥`\_`^^\_`^`X  
@HWI-EAS443:3:38:1148:411#0/1  
CAATTCGACACTAATTGATGGCCATCCGAATTCTTTTGGT  
+HWI-EAS443:3:38:1148:411#0/1  
ababbbabbbS\_abbbbbbbaabbaabb^a`aUbaaaaX  
@HWI-EAS443:3:38:1321:855#0/1  
CAGCATTAAGCATCAATGAACTGAGCAATCTTGCAAAAGG  
+HWI-EAS443:3:38:1321:855#0/1  
abbababb`aa`aabbbaaaaaaaaaa0`\_a^`aa\_dW  
@HWI-EAS443:3:38:1336:754#0/1  
AACAAATTCGACACTAATTGATGGCCATCCGAATTCTTTTG  
+HWI-EAS443:3:38:1336:754#0/1  
aaaaaa`aaa\_]\_\_`\_¥\_\_\_aa]a^^^ZVV]ZT[^^^U  
@HWI-EAS443:3:38:1410:1434#0/1  
GCTCAGTTCATTGATGCTTAATGCTGGCCATATCTCTTG  
+HWI-EAS443:3:38:1410:1434#0/1  
^\_^aYbSaa^`S\_I\_\_^]YR\_YI]Q[\_\_NXaZ^S\_XXWX  
@HWI-EAS443:3:38:1504:1614#0/1  
GAAGAACCCCGCACTCAGAATGAAGTGGATGATGGCAATG  
+HWI-EAS443:3:38:1504:1614#0/1  
aba`aa`bbabU`W\_a^`W]`a\_[^Wb`aYZ^U\_XRSZ¥X  
@HWI-EAS443:3:38:1587:121#0/1  
GAGAAGAACCCCGCACTCAGAATGAAGTGGATGATGGCAA  
+HWI-EAS443:3:38:1587:121#0/1  
a[b`abaaaa^[\_^^^UZ\_X^\_\_Y^aYaGYXXYY]HVY  
@HWI-EAS443:3:38:1688:797#0/1  
CATTAAGCATCAATGAACTGAGCAATCTTGCAAAAGGAGA  
+HWI-EAS443:3:38:1688:797#0/1  
ab`^^`ba^^baaaabaaaaaaaaabba`ZT[¥\_¥a`a]  
@HWI-EAS443:3:38:201:1811#0/1  
GAAGAACCCCGCACTCAGAATGAAGTGGATGATGGCAATG  
+HWI-EAS443:3:38:201:1811#0/1  
abaa`bbbbbaaaaabaaaa`aaa]a`a`\_`Y\_Z^¥a^\_  
@HWI-EAS443:3:38:335:849#0/1  
GAAGACAAGAGATATGGCCAGCATTAAGCATCAATGAAC

+HWI-EAS443:3:38:335:849#0/1  
a\_¥` ]b` `]VZ]Pa[[a[T\_V¥\_V¥]\_YYY^\_^\_R\_^ [WS  
@HWI-EAS443:3:38:349:1175#0/1  
AGAGATATGGCCCAGCATTAAAGCATCAATGAACTGAGCAA  
+HWI-EAS443:3:38:349:1175#0/1  
aaa` `a¥^^ab]a`aa\_a\_aa¥aa¥a\_\_^\_V\_^ [^^^`\_^  
@HWI-EAS443:3:38:430:1431#0/1  
CAATTCGACACTAATTGATGGCCATCCGAATTCTTTTGGT  
+HWI-EAS443:3:38:430:1431#0/1  
ab]a[baaaaa`\_^a\_\_`^^]`\_]`^a`\_]X^Y\_^] ^SOV  
@HWI-EAS443:3:38:530:1767#0/1  
AAGAGAAGAACCCCGCACTCAGAATGAAGTGGATGATGGC  
+HWI-EAS443:3:38:530:1767#0/1  
` `aa]`\_`YX\_Z[Z`aa`a`\_` `V¥[¥` []ORTY]¥PTQXS  
@HWI-EAS443:3:38:605:1463#0/1  
ATTTTGGGCAAAGAAGACAAGAGATATGGCCCAGCATTAA  
+HWI-EAS443:3:38:605:1463#0/1  
aaa`aa\_abaaaaaaaaa`\_`aa\_a\_]\_^WX^\_^`X\_^  
@HWI-EAS443:3:38:741:580#0/1  
GAAGAACCCCGCACTCAGAATGAAGTGGATGATGGCAATG  
+HWI-EAS443:3:38:741:580#0/1  
abbbb`bbbb`aa`baba`aaaa]aa`\_`\_\_\_\_^[¥\_\_[  
@HWI-EAS443:3:38:875:1885#0/1  
AGAAGACAAGAGATATGGCCCAGCATTAAAGCATCAATGAA  
+HWI-EAS443:3:38:875:1885#0/1  
aaaaa` `aa`\_`Z^[\_a¥][a`\_`\_^`\_VKTYUYX¥X^S  
@HWI-EAS443:3:38:879:1483#0/1  
GAAGACAAGAGATATGGCCCAGCATTAAAGCATCAATGAAC  
+HWI-EAS443:3:38:879:1483#0/1  
SY`\_bb^^b^baaaVbaaaabaab^`¥a`j]PTR\_aaVT  
@HWI-EAS443:3:38:911:1127#0/1  
TTTTTAAACAATTTCGACACTAATTGATGGCCATCCGAATT  
+HWI-EAS443:3:38:911:1127#0/1  
abbbbbaaabaaa`\_`aabaaaaa^aa^`WZ`\_`¥^`^a]  
@HWI-EAS443:3:39:1017:725#0/1  
GAGATATGGCCCAGCATTAAAGCATCAATGAACTGAGCAAT  
+HWI-EAS443:3:39:1017:725#0/1  
W`\_`^¥`\_`\_`b^aXa[a^W\_UNW[a`\_]`a]aZaZT\_[]` `V  
@HWI-EAS443:3:39:1077:694#0/1  
CCAGCATTAAAGCATCAATGAACTGAGCAATCTTGCAAAAAG  
+HWI-EAS443:3:39:1077:694#0/1  
aa^a^`a\_]`\_`\_Z\_a^`aaX[aa\_0`]`\_a`^`a`W[]W]  
@HWI-EAS443:3:39:109:568#0/1  
CTTTTGCAAGATTGCTCAGTTCATTGATGCTTAATGCTGG  
+HWI-EAS443:3:39:109:568#0/1  
aaaaa`bba\_T^\_aaaa`a]aaaaa`\_]\_aaaa\_^]a[\_]  
@HWI-EAS443:3:39:1114:1162#0/1  
AAGAGATATGGCCCAGCATTAAAGCATCAATGAACTGAGCA  
+HWI-EAS443:3:39:1114:1162#0/1  
T¥a`\_`aWW[SX\_aZ¥S\_aa^a^Z^`^\_]`^`ZT`T¥WY[^`

@HWI-EAS443:3:39:1117:1793#0/1  
GAAGAACCCCGCACTCAGAATGAAGTGGATGATGGCAATG  
+HWI-EAS443:3:39:1117:1793#0/1  
aWX\_b`\_]\_a¥X]]F¥a\_Z]SR\_`]aT[^`]aVSXUW\_^ZR  
@HWI-EAS443:3:39:1177:1778#0/1  
GAGATATGGCCAGCATTAAAGCATCAATGAACTGAGCAAT  
+HWI-EAS443:3:39:1177:1778#0/1  
]¥\_¥^\_ZXZ¥]`\_W\_ZZ^`XVUZV]WX[]]¥LQW]aV[\_R  
@HWI-EAS443:3:39:1501:1393#0/1  
GAGAAGAACCCCGCACTCAGAATGAAGTGGATGATGGCAA  
+HWI-EAS443:3:39:1501:1393#0/1  
a]b[U^abaa`ab`[\_`a\_\_a\_\_a`¥a\_Z[¥[X`X]]^Z^^  
@HWI-EAS443:3:39:1552:1835#0/1  
GCATTAAGCATCAATGAACTGAGCAATCTTGCAAAGGAG  
+HWI-EAS443:3:39:1552:1835#0/1  
aababbb`\_ba`a\_\_a`a^aV\_a`aV`a`\_`M[^\_^`\_W\_  
@HWI-EAS443:3:39:1608:1935#0/1  
AAGAGAAGAACCCCGCACTCAGAATGAAGTGGATGATGGC  
+HWI-EAS443:3:39:1608:1935#0/1  
aabaaa¥b`aa^W\_]aaWT]UaZW``¥a`]UTT[aYV[UT  
@HWI-EAS443:3:39:1609:54#0/1  
AATTCGACACTAATTGATGGCCATCCGAATCTTTTGGTC  
+HWI-EAS443:3:39:1609:54#0/1  
aaaaab\_aa`aa`aaa`\_]`V^`^`\_`^]\_\_^RW^^]]UYX  
@HWI-EAS443:3:39:1655:944#0/1  
TTTTTAAACAATTCGACACTAATTGATGGCCATCCGAATT  
+HWI-EAS443:3:39:1655:944#0/1  
a^]aZ^RGX`aa`PaTS^¥TY[YW¥WQYRYOU[MWWBBBB  
@HWI-EAS443:3:39:1745:358#0/1  
CAAGAGAAGAACCCCGCACTCAGAATGAAGTGGATGATGG  
+HWI-EAS443:3:39:1745:358#0/1  
`\_¥¥¥X`¥aba]aK^\_VVab`bbU\_[]\_¥ZJM^UJXZGSL  
@HWI-EAS443:3:39:1750:1215#0/1  
AACAAATTCGACACTAATTGATGGCCATCCGAATCTTTTG  
+HWI-EAS443:3:39:1750:1215#0/1  
VabVb¥¥¥YaWaUZH]Y^W¥\_`V^ab`\_^]PSV]```Y`X  
@HWI-EAS443:3:39:234:264#0/1  
GAAGAACCCCGCACTCAGAATGAAGTGGATGATGGCAATG  
+HWI-EAS443:3:39:234:264#0/1  
a\_¥`\_]TY]a`\_`ZZXR\_YFY\_WVYH¥\_VYZSWTQWVRY  
@HWI-EAS443:3:39:241:2004#0/1  
GATTGCTCAGTTCATTGATGCTTAATGCTGGGCCATATCT  
+HWI-EAS443:3:39:241:2004#0/1  
`[aa]`a]N[^YaYaa]]\_]XYaa`\_`aY]YVY]`a`\_`Y  
@HWI-EAS443:3:39:375:192#0/1  
AACAAATTCGACACTAATTGATGGCCATCCGAATCTTTTG  
+HWI-EAS443:3:39:375:192#0/1  
¥aa`QSW\_`Z¥Ta]^]\_`¥]V[Zaa]N\_a^^ZTVP[ZZ[^  
@HWI-EAS443:3:39:40:1658#0/1  
CTCATTGCTGGCAAAGAAGACAAGAGATATGGCCAGCAT



@HWI-EAS443:3:3:1186:1890#0/1  
AGCTGTTGCTCTTCTCCCAACCATTGTGAATTCTTCATAC  
+HWI-EAS443:3:3:1186:1890#0/1  
abbaa`aaaa\_aa]a`Xaaa]¥a`a`¥\_\_U\_aX`]U¥\_¥N  
@HWI-EAS443:3:3:1198:568#0/1  
CAATTCGACACTAATTGATGGCCATCCGAATTCTTTTGGT  
+HWI-EAS443:3:3:1198:568#0/1  
a^Q`¥\_QX]a¥SZ`Ta^Vaa]T`[Za\_b\_X\_]^`\_]Z\_\_N  
@HWI-EAS443:3:3:123:1640#0/1  
GAAGAACCCCGCACTCAGAATGAAGTGGATGATGGCAATG  
+HWI-EAS443:3:3:123:1640#0/1  
V¥\_¥ZQ\_`\_a\_b\_baa¥`a`aaa`aRUT¥a\_`aa[\_¥PZU  
@HWI-EAS443:3:3:1268:459#0/1  
GATTGCTCAGTTCATTGATGCTTAATGCTGGCCATATCT  
+HWI-EAS443:3:3:1268:459#0/1  
Ia^`\_`\_Sa^`[`Yabaa]Zb`^ZY[`^S]ba\_NV^S[a`a  
@HWI-EAS443:3:3:1365:1028#0/1  
GCATTAAGCATCAATGAAGTGAAGTGGATGATGGCAATG  
+HWI-EAS443:3:3:1365:1028#0/1  
aaa)`\_`Ta`\_`a\_\_\_\_\_S\_Xa]Y^^^`^a^]`^`VYZ^[Z^  
@HWI-EAS443:3:3:136:253#0/1  
CAATTCGACACTAATTGATGGCCATCCGAATTCTTTTGGT  
+HWI-EAS443:3:3:136:253#0/1  
ab\_bba\_aaaaa]aaaa`aa]\_aa][`a\_]`\_aa`a\_`\_]  
@HWI-EAS443:3:3:1388:583#0/1  
ATTTTGGGCAAAGAAGACAAGAGATATGGCCAGCATTAA  
+HWI-EAS443:3:3:1388:583#0/1  
a`Y]Y¥WWTaa¥\_bYa\_W]IaOXW[\_`^PXOU^aG[^X\_\_  
@HWI-EAS443:3:3:1526:205#0/1  
GCATTAAGCATCAATGAAGTGAAGTGGATGATGGCAATG  
+HWI-EAS443:3:3:1526:205#0/1  
^`\_`abaa¥Y\_aWaWaT[a[¥\_U\_\_\_a\_\_\_]\_aPT[WQ]YX^  
@HWI-EAS443:3:3:1544:1161#0/1  
CAATTCGACACTAATTGATGGCCATCCGAATTCTTTTGGT  
+HWI-EAS443:3:3:1544:1161#0/1  
a\_¥\_baabbbaabbba`\_`\_U\_Ya¥aaab`aba\_aa`aU\_`  
@HWI-EAS443:3:3:1669:1290#0/1  
CAAGAGAAGAACCCCGCACTCAGAATGAAGTGGATGATGG  
+HWI-EAS443:3:3:1669:1290#0/1  
\_aab`\_]Z\_ab`Y]a¥S`aabY[YZ]b[ZW¥b¥`abYZ`^  
@HWI-EAS443:3:3:193:1678#0/1  
TAAGCATCAATGAAGTGAAGTGGATGATGGCAATG  
+HWI-EAS443:3:3:193:1678#0/1  
aa^[^`a`abbaab¥`bT[`aa¥]]¥aaa`Wa`aL^[O\_Z  
@HWI-EAS443:3:3:391:1816#0/1  
GAAGAACCCCGCACTCAGAATGAAGTGGATGATGGCAATG  
+HWI-EAS443:3:3:391:1816#0/1  
`aab`aa`a]\_[\_aa¥]\_[aa`Ua`\_a\_a`^\_Z`[UX\_\_^  
@HWI-EAS443:3:3:600:1560#0/1  
CATTAAGCATCAATGAAGTGAAGTGGATGATGGCAATG

+HWI-EAS443:3:3:600:1560#0/1  
a\_0^bbbabb`abbaaab`aaabba`aaa`a`aa`aa`aa  
@HWI-EAS443:3:3:615:1407#0/1  
AAGAGAAGAACCCCGCACTCAGAATGAAGTGGATGATGGC  
+HWI-EAS443:3:3:615:1407#0/1  
aab\_b\_ba`aZ`^\_a\_a`a¥`aW``\_^\_\_U\_\_]\_\_X]Z¥Z  
@HWI-EAS443:3:3:623:915#0/1  
CAGTTCATTGATGCTTAATGCTGGGCCATATCTCTTGCTCT  
+HWI-EAS443:3:3:623:915#0/1  
`¥`R[T\_aa]aaa\_a\_¥TTa\_]a\_\_Z]a^]IX\_\_`^\_\_]a  
@HWI-EAS443:3:3:850:959#0/1  
TAAGCATCAATGAACTGAGCAATCTTGCAAAAGGAGAGAA  
+HWI-EAS443:3:3:850:959#0/1  
aaabaaa`a\_aaa`^aa¥^[a\_a^aaa¥\_\_\_\_`a^^`\_a\_^  
@HWI-EAS443:3:3:870:1568#0/1  
AGATTGCTCAGTTCATTGATGCTTAATGCTGGGCCATATC  
+HWI-EAS443:3:3:870:1568#0/1  
aaaaaaaaaaaa`a\_abaababWaa\_aaa\_\_`\_]¥^`a^aZ  
@HWI-EAS443:3:3:907:550#0/1  
AGATTGCTCAGTTCATTGATGCTTAATGCTGGGCCATATC  
+HWI-EAS443:3:3:907:550#0/1  
^`aa\_a`aaab`a[\_a`a`aa\_aaa`a[\_`\_`\_0\_^\_\_0  
@HWI-EAS443:3:3:930:70#0/1  
TTAAGCATCAATGAACTGAGCAATCTTGCAAAAGGAGAGA  
+HWI-EAS443:3:3:930:70#0/1  
aaa\_a^aZa^\_aa^\_aa^bWaU`Y`WaY¥[¥UaW[]^\_^  
@HWI-EAS443:3:3:944:610#0/1  
AGAAGAACCCCGCACTCAGAATGAAGTGGATGATGGCAAT  
+HWI-EAS443:3:3:944:610#0/1  
abaabab¥`]]`]aYa\_\_a^^\_a`¥aXaa^^`Y\_`^]¥¥\_  
@HWI-EAS443:3:3:975:1820#0/1  
AAGAGATATGGCCCAGCATTAAAGCATCAATGAACTGAGCA  
+HWI-EAS443:3:3:975:1820#0/1  
aa`a]Z^a`\_aTSW[aVa[]a`[[K\_G\_\_^U^\_X[^¥YV\_  
@HWI-EAS443:3:40:1166:361#0/1  
CAAGAGAAGAACCCCGCACTCAGAATGAAGTGGATGATGG  
+HWI-EAS443:3:40:1166:361#0/1  
abbbbb`bbbbbaabbbabaab`aaa\_J`^abY`aa`\_a  
@HWI-EAS443:3:40:1278:629#0/1  
TTTTTAAACAATTCGACACTAATTGATGGCCATCCGAATT  
+HWI-EAS443:3:40:1278:629#0/1  
aaab`aaa`a\_aaaa^\_a`a^]`\_\_^X^Z\_Za]\_\_`[]^^  
@HWI-EAS443:3:40:1302:656#0/1  
CATTAAGCATCAATGAACTGAGCAATCTTGCAAAAGGAGA  
+HWI-EAS443:3:40:1302:656#0/1  
`bb``aba\_abababaababab`a`aaa`a``[W]ba\_aa  
@HWI-EAS443:3:40:1456:324#0/1  
ATTGCTCAGTTCATTGATGCTTAATGCTGGGCCATATCTC  
+HWI-EAS443:3:40:1456:324#0/1  
abbbbaababa`baa`aaaa]`a`aaa`S`aaaXa\_a\_

@HWI-EAS443:3:40:1539:1273#0/1  
ATTGATGCTTAATGCTGGCCATATCTCTTGTCTTCTTTG  
+HWI-EAS443:3:40:1539:1273#0/1  
abbbbaaaabaaaa`aa`^a\_aa`a`a`^`^^`aaaa`\_  
@HWI-EAS443:3:40:1672:1249#0/1  
AACAAATTCGACACTAATTGATGGCCATCCGAATTCTTTTG  
+HWI-EAS443:3:40:1672:1249#0/1  
aaabbba[aa`aZa`\_aaaa`a\_a]\_^a`Z`\_a\_a`\_a\_  
@HWI-EAS443:3:40:18:1611#0/1  
AAGACAAGAGATATGGCCCAGCATTAAAGCATCAATGAACT  
+HWI-EAS443:3:40:18:1611#0/1  
abaaaa`aaa`aa\_\_\_aaa`\_aa`\_[G^a[]\_¥Y\_¥[]`^  
@HWI-EAS443:3:40:231:544#0/1  
TAAGCATCAATGAACTGAGCAATCTTGCAAAAAGGAGAGAA  
+HWI-EAS443:3:40:231:544#0/1  
abbaaaaa¥S\_aa`aaaaaaW`aaaZaT]¥¥`¥Y]P\_^\_  
@HWI-EAS443:3:40:289:580#0/1  
AGAAGAACCCCGCACTCAGAATGAAGTGGATGATGGCAAT  
+HWI-EAS443:3:40:289:580#0/1  
aaabaaaab`a`a\_aa`aX]`\_^[^V`]\_\_\_\_\_V\_]a\_[[  
@HWI-EAS443:3:40:387:319#0/1  
TAAGCATCAATGAACTGAGCAATCTTGCAAAAAGGAGAGAA  
+HWI-EAS443:3:40:387:319#0/1  
abb]ba`aaaaaa]aa`aaaaZa\_\_`Za^`\_\_\_^]`[a`[  
@HWI-EAS443:3:40:484:949#0/1  
GAGAAGAACCCCGCACTCAGAATGAAGTGGATGATGGCAA  
+HWI-EAS443:3:40:484:949#0/1  
a`a`\_`¥¥[]]\_^\_\_^^]U\_]^^`UUYY]]VVYSTVZVRW  
@HWI-EAS443:3:40:575:363#0/1  
CAGCATTAAAGCATCAATGAACTGAGCAATCTTGCAAAAAGG  
+HWI-EAS443:3:40:575:363#0/1  
`bab`bbabb\_bbbbY`b^bbba]]K]UbWbbb¥VYaaa  
@HWI-EAS443:3:40:631:1336#0/1  
GAAGACAAGAGATATGGCCCAGCATTAAAGCATCAATGAAC  
+HWI-EAS443:3:40:631:1336#0/1  
aa`^[aa``Z^Y]`¥UZ`X]^¥¥\_]ULXTZYX¥XZXU¥Y  
@HWI-EAS443:3:40:66:1363#0/1  
CATTAAAGCATCAATGAACTGAGCAATCTTGCAAAAAGGAGA  
+HWI-EAS443:3:40:66:1363#0/1  
abbabbaaaabaaaa^^aa`aaaa`a`]a`aZJYZ^\_\_\_\_  
@HWI-EAS443:3:40:799:842#0/1  
ATTAAGCATCAATGAACTGAGCAATCTTGCAAAAAGGAGAG  
+HWI-EAS443:3:40:799:842#0/1  
UYWW[\_\_\_¥\_`U\_]aSHX``Y`VWUaa[S]\_JWRG][Q^OY  
@HWI-EAS443:3:40:830:336#0/1  
TAAGCATCAATGAACTGAGCAATCTTGCAAAAAGGAGAGAA  
+HWI-EAS443:3:40:830:336#0/1  
aaaaaaa`¥W`a`\_`\_\_`a`Z¥^^^X¥G[¥[`¥Y¥U`X¥  
@HWI-EAS443:3:42:1107:1244#0/1  
ATTAAGCATCAATGAACTGAGCAATCTTGCAAAAAGGAGAG

+HWI-EAS443:3:42:1107:1244#0/1  
`\_bbbababaaaabaaabaaaabaaaabaa``\_aa`aa`  
@HWI-EAS443:3:42:1155:276#0/1  
TGCAAGATTGCTCAGTTCATTGATGCTTAATGCTGGGCCA  
+HWI-EAS443:3:42:1155:276#0/1  
abaa\_ba]`\_^a\_¥a^a\_¥`¥Xa`^a`````\_`a\_]\_\_\_\_  
@HWI-EAS443:3:42:1244:1023#0/1  
TAAGCATCAATGAACTGAGCAATCTTGCAAAAGGAGAGAA  
+HWI-EAS443:3:42:1244:1023#0/1  
ab\_bbaaaabbaaa^aaabaaab\_aabaa\_\_\_b\_\_aab]  
@HWI-EAS443:3:42:1267:89#0/1  
AGAAGAACCCCGCACTCAGAATGAAGTGGATGATGGCAAT  
+HWI-EAS443:3:42:1267:89#0/1  
abba`aba`^]`aaaa]\_a`\_aaWS^Maa`\_`[[a]¥VV¥  
@HWI-EAS443:3:42:131:1790#0/1  
AAACAATTGACACTAATTGATGGCCATCCGAATCTTTT  
+HWI-EAS443:3:42:131:1790#0/1  
a^\_]aaa`[`]`UY`XY[]\_^]U\_^aP`^YVY\_^^^Z\_  
@HWI-EAS443:3:42:1408:315#0/1  
GAGAAGAACCCCGCACTCAGAATGAAGTGGATGATGGCAA  
+HWI-EAS443:3:42:1408:315#0/1  
`T`^b`X\_UUZaa\_]¥\_a¥U`^X^aab^^ab`ab`ROX  
@HWI-EAS443:3:42:1589:1806#0/1  
ATTAAGCATCAATGAACTGAGCAATCTTGCAAAAGGAGAG  
+HWI-EAS443:3:42:1589:1806#0/1  
a`aaa`^ZV\_^[\_]`Y`^^```\_¥Z^X]\_]\_\_¥  
@HWI-EAS443:3:42:374:1510#0/1  
AAGAGAAGAACCCCGCACTCAGAATGAAGTGGATGATGGC  
+HWI-EAS443:3:42:374:1510#0/1  
ab```^`^]\_aaaaaaa````¥aaa\_¥^Y\_U]Z`[X¥XT  
@HWI-EAS443:3:42:419:1085#0/1  
GCATTAAGCATCAATGAACTGAGCAATCTTGCAAAAGGAG  
+HWI-EAS443:3:42:419:1085#0/1  
aaa``\_aYS¥^^`\_]`[\_^^\_\_\_^`\_\_\_\_]Z[ZX`^[\_  
@HWI-EAS443:3:42:537:1675#0/1  
GACAAGAGATATGGCCCAGCATTAAAGCATCAATGAACTGA  
+HWI-EAS443:3:42:537:1675#0/1  
^`bX^ZW\_[ab¥SRHW`[]]Z^]\_SFQaaSLW^G]\_a  
@HWI-EAS443:3:42:630:428#0/1  
CCATCATCCACTTCATTCTGAGTGCGGGTTCTTCTCTTG  
+HWI-EAS443:3:42:630:428#0/1  
ab`bbbbbbabbbabbbabbaaaa`bbba\_babbabaabb  
@HWI-EAS443:3:42:914:95#0/1  
AGAAGACAAGAGATATGGCCCAGCATTAAAGCATCAATGAA  
+HWI-EAS443:3:42:914:95#0/1  
aaa`bbbbbababb`babb\_X\_ab]`aaa`aXaaZ`a`^¥[  
@HWI-EAS443:3:42:918:1974#0/1  
AGAAGAACCCCGCACTCAGAATGAAGTGGATGATGGCAAT  
+HWI-EAS443:3:42:918:1974#0/1  
`bba\_ab^aYa`aaaaaa`a[]\_\_aU`¥^`¥Z^XL`aV



@HWI-EAS443:3:43:1068:438#0/1  
GAGAAGAACCCCGCACTCAGAATGAAGTGGATGATGGCAA  
+HWI-EAS443:3:43:1068:438#0/1  
aaaaaZ]a`\_]aa\_`\_]\_X\_]^X[MX\_X]\_Y^^]U]^  
@HWI-EAS443:3:43:1126:50#0/1  
AGAAGAACCCCGCACTCAGAATGAAGTGGATGATGGCAAT  
+HWI-EAS443:3:43:1126:50#0/1  
O]`R\_a`b¥Q\_\_R\_¥`aYX¥`^X\_\_a¥U¥^H[``XT¥`  
@HWI-EAS443:3:43:1138:725#0/1  
GAGATATGGCCAGCATTAAAGCATCAATGAACTGAGCAAT  
+HWI-EAS443:3:43:1138:725#0/1  
a`aaab`bbbaaaa`aaaaa^^`\_aaaa`\_`\_¥^]\_`\_  
@HWI-EAS443:3:43:1213:1891#0/1  
AGAAGAACCCCGCACTCAGAATGAAGTGGATGATGGCAAT  
+HWI-EAS443:3:43:1213:1891#0/1  
ab`Z]aa\_¥\_]WGWP`^^`^T`a]V`[\_P`\_]WXUYYPa\_  
@HWI-EAS443:3:43:1263:1047#0/1  
CATTAAAGCATCAATGAACTGAGCAATCTTGCAAAAAGGAGA  
+HWI-EAS443:3:43:1263:1047#0/1  
a`bbbbb^bba\_aaaaaabaaa\_a`a\_baa\_a¥a\_a`[aa  
@HWI-EAS443:3:43:1286:166#0/1  
TAAGCATCAATGAACTGAGCAATCTTGCAAAAAGGAGAGAA  
+HWI-EAS443:3:43:1286:166#0/1  
```ba`aaaaabaaaaa`^]a`Z`^`Z`¥a\_  
@HWI-EAS443:3:43:1417:354#0/1  
GCCATCATCCACTTCATTCTGAGTGCGGGTTCTTCTCTT  
+HWI-EAS443:3:43:1417:354#0/1  
aaabbaba`ba`ba^aababba\_\_baa`aa^a`aa¥a\_a`  
@HWI-EAS443:3:43:1422:1937#0/1  
AAGAGAAGAACCCCGCACTCAGAATGAAGTGGATGATGGC  
+HWI-EAS443:3:43:1422:1937#0/1  
abbaaabaYa\_YX`^a[`¥\_]`\_`a^^[Y\_[¥]¥Z]¥^W  
@HWI-EAS443:3:43:1452:1158#0/1  
AAGAAGACAAGAGATATGGCCAGCATTAAAGCATCAATGA  
+HWI-EAS443:3:43:1452:1158#0/1  
a\_\_Xaa¥]`b`ab`ab`aYa\_\_]a\_aa`^U¥Z`X]\_\_\_¥  
@HWI-EAS443:3:43:1488:1497#0/1  
GACAAGAGATATGGCCAGCATTAAAGCATCAATGAACTGA  
+HWI-EAS443:3:43:1488:1497#0/1  
\_b]````bbbb[b`[`abb]b````\_X`¥a\_aabaaaa`  
@HWI-EAS443:3:43:151:764#0/1  
AAGAGAAGAACCCCGCACTCAGAATGAAGTGGATGATGGC  
+HWI-EAS443:3:43:151:764#0/1  
WZW`aWO\_\_Y`\_`ab`V`aa^Z\_\_abXU\_]`a\_¥a\_\_\_^¥  
@HWI-EAS443:3:43:155:1588#0/1  
ATTAAGCATCAATGAACTGAGCAATCTTGCAAAAAGGAGAG  
+HWI-EAS443:3:43:155:1588#0/1  
a`ba\_aaaX`[^Z]`\_`[¥]`a\_¥a`\_Z\_\_^\_]`]]]\_\_\_\_  
@HWI-EAS443:3:43:1566:1743#0/1  
AGAGAAGAACCCCGCACTCAGAATGAAGTGGATGATGGCA



@HWI-EAS443:3:44:123:973#0/1  
GGGCAAAGAAGACAAGAGATATGGCCCAGCATTAAAGCATC  
+HWI-EAS443:3:44:123:973#0/1  
aaa`\_^Z`^aaaa`\_aa`a`\_]¥`^aa\_a`a`\_aY\_\_\_\_  
@HWI-EAS443:3:44:1270:230#0/1  
GAAGACAAGAGATATGGCCCAGCATTAAAGCATCAATGAAC  
+HWI-EAS443:3:44:1270:230#0/1  
aaaaa`a\_a`]`\_`\_`\_^`\_\_`[^`^`\_¥¥^^^]UX^XQZX  
@HWI-EAS443:3:44:1454:1359#0/1  
CAAGAGAAGAACCCCGCACTCAGAATGAAGTGGATGATGG  
+HWI-EAS443:3:44:1454:1359#0/1  
aa\_babaaabbaaa\_b`aaaa`aa\_aa^`a]a`]aa]^\_`  
@HWI-EAS443:3:44:1517:970#0/1  
CAATTCGACACTAATTGATGGCCATCCGAATTCTTTTGGT  
+HWI-EAS443:3:44:1517:970#0/1  
ababbbbaabaa`aaaaaaa`ba`a`\_ba`a`\_a\_aaa`Y  
@HWI-EAS443:3:44:1567:1046#0/1  
GATATGGCCCAGCATTAAAGCATCAATGAACTGAGCAATCT  
+HWI-EAS443:3:44:1567:1046#0/1  
aZGPTN[LUW`\_FXWMWR`]QTPZYYSRUUN[X¥P[TOFS  
@HWI-EAS443:3:44:1581:580#0/1  
GAGATATGGCCCAGCATTAAAGCATCAATGAACTGAGCAAT  
+HWI-EAS443:3:44:1581:580#0/1  
^`b`]a[``\_W]]Z][V]\_¥`][YUV]\_aZ¥T¥ZWaTX\_¥  
@HWI-EAS443:3:44:1608:1693#0/1  
TATGGCCCAGCATTAAAGCATCAATGAACTGAGCAATCTTG  
+HWI-EAS443:3:44:1608:1693#0/1  
a`\_OWYX`^XZaTa`[ZXW\_XY]a\_W]ZSSX\_ZXXSS^S[  
@HWI-EAS443:3:44:1616:740#0/1  
TAAGCATCAATGAACTGAGCAATCTTGCAAAAAGGAGAGAA  
+HWI-EAS443:3:44:1616:740#0/1  
aaaaaaaaaabb\_aa```aabb\_\_aaaa`\_`\_a`]aaa`  
@HWI-EAS443:3:44:1727:1566#0/1  
TAAGCATCAATGAACTGAGCAATCTTGCAAAAAGGAGAGAA  
+HWI-EAS443:3:44:1727:1566#0/1  
a\_a]\_aa```aa\_\_\_\_\_`\_a\_\_Z`^^¥`XZZ\_]Z`^^^Z  
@HWI-EAS443:3:44:1737:598#0/1  
TGGGCAAAGAAGACAAGAGATATGGCCCAGCATTAAAGCAT  
+HWI-EAS443:3:44:1737:598#0/1  
[`a\_a\_UW¥¥¥\_aa``aaba`]¥a`¥NY`^`[¥[M^ZWS  
@HWI-EAS443:3:44:1760:1914#0/1  
ATATGGCCCAGCATTAAAGCATCAATGAACTGAGCAATCTT  
+HWI-EAS443:3:44:1760:1914#0/1  
aabZ`a^a]Z^\_]`\_W^\_]\_^ZZ`]S\_W^Z]UO^WTK^U  
@HWI-EAS443:3:44:237:765#0/1  
CAATTCGACACTAATTGATGGCCATCCGAATTCTTTTGGT  
+HWI-EAS443:3:44:237:765#0/1  
a\_W\_baa\_bb```aa`a`\_]a`¥```¥a`^a`^a`^`^][X  
@HWI-EAS443:3:44:301:1545#0/1  
GCATTAAGCATCAATGAACTGAGCAATCTTGCAAAAAGGAG

+HWI-EAS443:3:44:301:1545#0/1  
aababaa]V\_a`^`\_a\_Ta`¥HOU]\_adW\_`^¥SS¥[Y\_  
@HWI-EAS443:3:44:405:1587#0/1  
GCTCAGTTCATTGATGCTTAATGCTGGGCCATATCTCTTG  
+HWI-EAS443:3:44:405:1587#0/1  
aa`a^Z^aab`^^^abV^aaaa]a[]NXaaaaaaa\_a[\_`  
@HWI-EAS443:3:44:630:1334#0/1  
AGAAGAACCCCGCACTCAGAATGAAGTGGATGATGGCAAT  
+HWI-EAS443:3:44:630:1334#0/1  
`Z`ab\_X]\_U¥aa¥```^ab]^X`^aa`\_a[\_`]W^YX  
@HWI-EAS443:3:44:685:926#0/1  
AAAGAAGACAAGAGATATGGCCCAGCATTAAAGCATCAATG  
+HWI-EAS443:3:44:685:926#0/1  
aaba\_aa`aabaa^a\_]¥aa^a\_^\_\_\_\_`\_\_^]^`\_`]  
@HWI-EAS443:3:45:1032:253#0/1  
AGATTGCTCAGTTCATTGATGCTTAATGCTGGGCCATATC  
+HWI-EAS443:3:45:1032:253#0/1  
abaaab`aa`a\_a`aaaa`a`\_a`\_a`a¥`\_`\_¥\_a^\_X  
@HWI-EAS443:3:45:1038:704#0/1  
AAGAGATATGGCCCAGCATTAAAGCATCAATGAACTGAGCA  
+HWI-EAS443:3:45:1038:704#0/1  
Z¥XX¥ZV^^a^]\_aab\_[\_`^`^`\_aZ^\_aaVZ]^`^Wa[]  
@HWI-EAS443:3:45:1304:572#0/1  
ATTAAGCATCAATGAACTGAGCAATCTTGCAAAAGGAGAG  
+HWI-EAS443:3:45:1304:572#0/1  
aabaabaaa\_`aa]`^^^a\_`a`a\_a`\_`^\_`a\_`a`a`a`  
@HWI-EAS443:3:45:134:1807#0/1  
GAAGACAAGAGATATGGCCCAGCATTAAAGCATCAATGAAC  
+HWI-EAS443:3:45:134:1807#0/1  
aaaba\_aa`a`aaaaa\_`\_`Y\_aaaa`\_`\_a\_\_^`^`\_`^`  
@HWI-EAS443:3:45:1482:273#0/1  
ATTAAGCATCAATGAACTGAGCAATCTTGCAAAAGGAGAG  
+HWI-EAS443:3:45:1482:273#0/1  
aaaaa``aaaaba^\_\_`a\_\_^a`^`^a\_a]\_\_^^a\_`^`\_a  
@HWI-EAS443:3:45:1560:787#0/1  
AGAAGAACCCCGCACTCAGAATGAAGTGGATGATGGCAAT  
+HWI-EAS443:3:45:1560:787#0/1  
`¥V^`a]aWUZ`¥Z]¥X¥¥Y]aa¥[]¥`^`][^][Y[NV[[  
@HWI-EAS443:3:45:1625:821#0/1  
GAAGAACCCCGCACTCAGAATGAAGTGGATGATGGCAATG  
+HWI-EAS443:3:45:1625:821#0/1  
aaabaaa`\_aa`^`^`\_a^`^`a]aZa]]aa]\_\_`]¥\_¥Y  
@HWI-EAS443:3:45:1718:590#0/1  
CCATCATCCACTTCATTCTGAGTGCGGGGTTCTTCTCTTG  
+HWI-EAS443:3:45:1718:590#0/1  
``bbbbbbbabbbbbbb`bababbb``aabbabaaab  
@HWI-EAS443:3:45:172:860#0/1  
AAGAGAAGAACCCCGCACTCAGAATGAAGTGGATGATGGC  
+HWI-EAS443:3:45:172:860#0/1  
aab`b`bbab^a`^`a`\_a`\_a`\_a`\_bb^^^\_b`aaa\_a\_dW

@HWI-EAS443:3:45:226:1324#0/1  
AAGAGAAGAACCCCGCACTCAGAATGAAGTGGATGATGGC  
+HWI-EAS443:3:45:226:1324#0/1  
^b`a\_\_\_S\_\_\_X[\_\_\_[¥Z\_^^^`^`]\_\_¥\_V¥\_[^S[W[UR  
@HWI-EAS443:3:45:281:1366#0/1  
CAGCAAAATGGGAGTAGATGAATACTCCAGCACGGAGAGA  
+HWI-EAS443:3:45:281:1366#0/1  
aaa`baVa[baaa`Pab]ab`aaa`a`]a\_aa`a`\_a`\_Z  
@HWI-EAS443:3:45:35:644#0/1  
AAGAGAAGAACCCCGCACTCAGAATGAAGTGGATGATGGC  
+HWI-EAS443:3:45:35:644#0/1  
a`\_\_^`]^abaaaa`\_aa`aaa\_a```]`S`]]\_a^YW[T  
@HWI-EAS443:3:45:409:129#0/1  
TATGGCCAGCATTAAAGCATCAATGAACTGAGCAATCTTG  
+HWI-EAS443:3:45:409:129#0/1  
^[T]¥`aaP][a`^ZNZ[G¥T^Z¥XR]`\_\_Z¥TXN]`^  
@HWI-EAS443:3:45:538:2013#0/1  
TCCTTTTGAAGATTGCTCAGTTCATTGATGCTTAATGCT  
+HWI-EAS443:3:45:538:2013#0/1  
a`aaaba^^`a`aa]a`\_\_`^`\_\_a`\_\_a[a`a^\_`^¥Z  
@HWI-EAS443:3:45:543:42#0/1  
AGAGAAGAACCCCGCACTCAGAATGAAGTGGATGATGGCA  
+HWI-EAS443:3:45:543:42#0/1  
abaaabba\_RaI`a``aaa`[\_`a^]aUaa^\_aX^aZNY  
@HWI-EAS443:3:45:599:593#0/1  
CATTAAAGCATCAATGAACTGAGCAATCTTGCAAAAGGAGA  
+HWI-EAS443:3:45:599:593#0/1  
aababbbbaaaabbbba]b`bbaabbabaabba``aa^b`aa  
@HWI-EAS443:3:45:619:1264#0/1  
TTTTTAAACAATTCGACACTAATTGATGGCCATCCGAATT  
+HWI-EAS443:3:45:619:1264#0/1  
aabaaaaaaaaaaa\_aa\_a`a`\_\_`\_\_`\_Y\_Wa\_X\_\_`\_`\_`  
@HWI-EAS443:3:45:639:833#0/1  
GACAAGAGATATGGCCAGCATTAAAGCATCAATGAACTGA  
+HWI-EAS443:3:45:639:833#0/1  
`Z\_a]a\_a^Z[¥ZNT^a¥a``\_]\_a``\_[RZ\_]a]\_^]  
@HWI-EAS443:3:45:657:927#0/1  
AGAAGAACCCCGCACTCAGAATGAAGTGGATGATGGCAAT  
+HWI-EAS443:3:45:657:927#0/1  
aaa``[`aaa[a`a`a`\_\_`\_\_¥a`^`V\_a]\_a\_]\_]X^`Z  
@HWI-EAS443:3:45:792:1249#0/1  
AAGAGAAGAACCCCGCACTCAGAATGAAGTGGATGATGGC  
+HWI-EAS443:3:45:792:1249#0/1  
a¥^``L^ZKaQ[\_\_\_a`^^a`\_`\_OP[aW^\_Ra^`\_¥]MSUW  
@HWI-EAS443:3:45:7:1010#0/1  
CAATTCGACACTAATTGATGGCCATCCGAATTCTTTTGGT  
+HWI-EAS443:3:45:7:1010#0/1  
abba¥`\_`ab`aaa``\_¥¥\_a`\_\_`^^]\_\_^^\_]\_aa\_YYW  
@HWI-EAS443:3:45:887:1629#0/1  
CAAGATTGCTCAGTTCATTGATGCTTAATGCTGGCCATA

+HWI-EAS443:3:45:887:1629#0/1  
ab]baVvaabV]\_QOV¥aaY`IaRV\_aa^\_RZUY`SUUVW  
@HWI-EAS443:3:45:907:1594#0/1  
AGAGATATGGCCAGCATTAAAGCATCAATGAACTGAGCAA  
+HWI-EAS443:3:45:907:1594#0/1  
Sa\_\_a\_``[`[OX\_WO\_\_V\_ZRMQR\_a]0^`XX^a[TEX^  
@HWI-EAS443:3:45:957:1430#0/1  
AGAAGACAAGAGATATGGCCAGCATTAAAGCATCAATGAA  
+HWI-EAS443:3:45:957:1430#0/1  
\_a\_Vbba`Sa`W`La\_`bWXWT`¥\_GZa[R^Z]SP[¥S^\_  
@HWI-EAS443:3:45:957:1868#0/1  
GAAGACAAGAGATATGGCCAGCATTAAAGCATCAATGAAC  
+HWI-EAS443:3:45:957:1868#0/1  
abaaa\_`aa\_`\_`[^^^`W\_^]`XZ``WP¥]^^^X]X]Z  
@HWI-EAS443:3:46:1001:1075#0/1  
GAAGAACCCCGCACTCAGAATGAAGTGGATGATGGCAATG  
+HWI-EAS443:3:46:1001:1075#0/1  
a\_\_aTU[VOYaaYP]aU¥V\_\_\_^]\_V¥¥]]¥^^\_^RY¥]]  
@HWI-EAS443:3:46:1036:792#0/1  
ATTAAGCATCAATGAACTGAGCAATCTTGCAAAAGGAGAG  
+HWI-EAS443:3:46:1036:792#0/1  
aaaa\_a`[a¥XVa`\_\_`\_`\_a\_\_U`]`\_\_]]^Ya`^`^\_  
@HWI-EAS443:3:46:1090:732#0/1  
CATTAAGCATCAATGAACTGAGCAATCTTGCAAAAGGAGA  
+HWI-EAS443:3:46:1090:732#0/1  
aba`ab`bbabaaa`a`abaabaaabaaaa\_aa`aba`aa  
@HWI-EAS443:3:46:1138:1136#0/1  
TGGGCAAAGAAGACAAGAGATATGGCCAGCATTAAAGCAT  
+HWI-EAS443:3:46:1138:1136#0/1  
aabaaaaabaaaa\_a\_a`a`a`\_`\_^\_]]`\_^`aa`a`¥\_\_  
@HWI-EAS443:3:46:1404:1522#0/1  
TAAGCATCAATGAACTGAGCAATCTTGCAAAAGGAGAGAA  
+HWI-EAS443:3:46:1404:1522#0/1  
a\_Z\_aYbbbaaa`aaa¥^a`\_`\_`b`^`\_`\_]a`Saaa`\_  
@HWI-EAS443:3:46:1500:1579#0/1  
AAGAGAAGAACCCCGCACTCAGAATGAAGTGGATGATGGC  
+HWI-EAS443:3:46:1500:1579#0/1  
`abaa[ab`aaa\_¥VaZ`\_a\_a]]`\_a`aX`\_[H[UXYXL  
@HWI-EAS443:3:46:1509:1007#0/1  
GAGAAGAACCCCGCACTCAGAATGAAGTGGATGATGGCAA  
+HWI-EAS443:3:46:1509:1007#0/1  
^^baaba\_\_aa`\_aY`a`a`\_`aaX`a`]`V¥`^a\_aaV^`  
@HWI-EAS443:3:46:1703:135#0/1  
CAAGAGAAGAACCCCGCACTCAGAATGAAGTGGATGATGG  
+HWI-EAS443:3:46:1703:135#0/1  
\_¥^]]VYX¥\_¥SX¥L\_SWOWLY\_YSY^U[[N^¥XRZTB  
@HWI-EAS443:3:46:1726:829#0/1  
AGAAGACAAGAGATATGGCCAGCATTAAAGCATCAATGAA  
+HWI-EAS443:3:46:1726:829#0/1  
`Sa`[a[FWZW`UR^WU`WRWFYW\_\_\_\_a][T[UOX^¥Q[W

@HWI-EAS443:3:46:172:1882#0/1  
ATTGATGCTTAATGCTGGCCATATCTCTTGTCTTCTTTG  
+HWI-EAS443:3:46:172:1882#0/1  
`\_ab[WaaaaaaaaJa\_PTKbbOR¥`a`baa`\_aa\_ba`  
@HWI-EAS443:3:46:1744:1715#0/1  
CAAGAGAAGAACCCCGCACTCAGAATGAAGTGGATGATGG  
+HWI-EAS443:3:46:1744:1715#0/1  
`M`b`L¥`Yab`^GXV`U^]RWa^¥Q`\_NPYXY[]`]^T[  
@HWI-EAS443:3:46:183:463#0/1  
CAAGAGAAGAACCCCGCACTCAGAATGAAGTGGATGATGG  
+HWI-EAS443:3:46:183:463#0/1  
aa`babaaaaaaaaaaaaaaaa\_a\_abb^bZaa\_aa]``\_  
@HWI-EAS443:3:46:211:1350#0/1  
CAAGAGAAGAACCCCGCACTCAGAATGAAGTGGATGATGG  
+HWI-EAS443:3:46:211:1350#0/1  
`aabaa`b`b`a`a`aaa`a\_\_aa]\_a[`\_\_^TFR\_  
@HWI-EAS443:3:46:254:146#0/1  
GACAAGAGATATGGCCAGCATTAAAGCATCAATGAACTGA  
+HWI-EAS443:3:46:254:146#0/1  
aaaaab\_baaa`aa`\_`a\_a`a``\_^^[^¥a`^^]^^\_  
@HWI-EAS443:3:46:517:1894#0/1  
CATTAAGCATCAATGAACTGAGCAATCTTGCAAAAAGGAGA  
+HWI-EAS443:3:46:517:1894#0/1  
abb]abbbbb`a^b`ba\_aaaaabaV^aa¥a`a\_\_`aa`  
@HWI-EAS443:3:46:615:450#0/1  
GAGATATGGCCAGCATTAAAGCATCAATGAACTGAGCAAT  
+HWI-EAS443:3:46:615:450#0/1  
a`a`b`a\_a`a`aaa`\_`\_`^Z\_a`]\_\_`\_^`\_]^`  
@HWI-EAS443:3:46:647:229#0/1  
GGCAAAGAAGACAAGAGATATGGCCAGCATTAAAGCATCA  
+HWI-EAS443:3:46:647:229#0/1  
ab]a`abaab\_\_aaaa`\_a^`\_¥`\_`a^a\_\_\_\_\_Q\_^]Z  
@HWI-EAS443:3:46:708:177#0/1  
GAGAAGAACCCCGCACTCAGAATGAAGTGGATGATGGCAA  
+HWI-EAS443:3:46:708:177#0/1  
a\_a`W^`]\_^SV`\_[Y¥]ZYT¥`\_VU^R¥¥MZ`[]\_\_[U^  
@HWI-EAS443:3:46:752:345#0/1  
CTCTCCTTTTGCAAGATTGCTCAGTTCATTGATGCTTAAT  
+HWI-EAS443:3:46:752:345#0/1  
abbbababb\_bbbbaabbbbabababbbbaababbbbaa  
@HWI-EAS443:3:46:822:1005#0/1  
AGAAGACAAGAGATATGGCCAGCATTAAAGCATCAATGAA  
+HWI-EAS443:3:46:822:1005#0/1  
aaaaa`aa`baa`a\_aa^\_]^^^`\_`\_`^\_]^\_[Z^`^^^  
@HWI-EAS443:3:46:976:1392#0/1  
AACAAATTCGACACTAATTGATGGCCATCCGAATCCTTTTG  
+HWI-EAS443:3:46:976:1392#0/1  
^¥`\_¥^^`Y`¥PY`a]NLV[X^YQV]Z`UX[TPDWP^[Z¥  
@HWI-EAS443:3:47:1002:1960#0/1  
GAAGAACCCCGCACTCAGAATGAAGTGGATGATGGCAATG

+HWI-EAS443:3:47:1002:1960#0/1  
aabaaaa¥\_`^[]VaTY`X\_a\_]UZWXU]Y^[¥VYV^]Y]  
@HWI-EAS443:3:47:104:901#0/1  
AAGAGAAGAACCCCGCACTCAGAATGAAGTGGATGATGGC  
+HWI-EAS443:3:47:104:901#0/1  
ab[aaaabaa`a\_aaba`a^\_a\_`aa\_\_aUa]^^aX`a\_^  
@HWI-EAS443:3:47:1108:763#0/1  
CCAGCATTAAGCATCAATGAACTGAGCAATCTTGCAAAAAG  
+HWI-EAS443:3:47:1108:763#0/1  
a`Z`aab`a`¥\_abaa^ba^aZa\_¥aVaaaa\_a\_^Z`^`  
@HWI-EAS443:3:47:1136:1154#0/1  
GGCCCAGCATTAAGCATCAATGAACTGAGCAATCTTGCAA  
+HWI-EAS443:3:47:1136:1154#0/1  
Q\_¥a`a¥a`a`VY`Y¥\_Z^b`^YYR`a\_a^X^`b¥ab¥VY  
@HWI-EAS443:3:47:1280:1612#0/1  
CAAGAGAAGAACCCCGCACTCAGAATGAAGTGGATGATGG  
+HWI-EAS443:3:47:1280:1612#0/1  
abbabbab^a`a\_\_`\_]aab\_abaaaba[\_Ga`^Z`aaa[  
@HWI-EAS443:3:47:1322:1359#0/1  
TAAGCATCAATGAACTGAGCAATCTTGCAAAAAGGAGAGAA  
+HWI-EAS443:3:47:1322:1359#0/1  
abaa`a`a^aa[aa`a\_\_aY^^`\_a\_\_¥\_Z^^\_\_^V\_]\_¥  
@HWI-EAS443:3:47:1373:825#0/1  
GGGTATGAAGAATTCACAATGGTTGGGAGAAGAGCAACAG  
+HWI-EAS443:3:47:1373:825#0/1  
abb]bbb^abaaaaaab\_baa\_aaaaU`]Xa``Y\_\_^\_a  
@HWI-EAS443:3:47:1524:1053#0/1  
ATTGCTCAGTTCATTGATGCTTAATGCTGGGCCATATCTC  
+HWI-EAS443:3:47:1524:1053#0/1  
aa^``a]PYMT]\_`a`YYaSY]\_\_\_RY\_Z[X¥TY¥W\_X^U  
@HWI-EAS443:3:47:1524:763#0/1  
ATTAAGCATCAATGAACTGAGCAATCTTGCAAAAAGGAGAG  
+HWI-EAS443:3:47:1524:763#0/1  
abaaaa`¥a`YUX]¥\_`aa\_a^\_\_a`\_W\_^\_ZZQ]YT^X\_  
@HWI-EAS443:3:47:1567:1233#0/1  
AGAGAAGAACCCCGCACTCAGAATGAAGTGGATGATGGCA  
+HWI-EAS443:3:47:1567:1233#0/1  
`baaabbaba\_\_aa^]\_a^\_a\_aa\_]\_]\_X\_\_^`aZ\_\_^ZO  
@HWI-EAS443:3:47:1695:1549#0/1  
ATTAAGCATCAATGAACTGAGCAATCTTGCAAAAAGGAGAG  
+HWI-EAS443:3:47:1695:1549#0/1  
Y````^a`\_a`bI\_]\_`aZaL]`U[aZ^HS][P^RWWZZ  
@HWI-EAS443:3:47:1785:695#0/1  
CCCAGCATTAAGCATCAATGAACTGAGCAATCTTGCAAAA  
+HWI-EAS443:3:47:1785:695#0/1  
abbb`\_aa`]baa]\_K^abb]]a`a[`^a\_aYa\_a`aa\_]`  
@HWI-EAS443:3:47:202:1946#0/1  
GAGAAGAACCCCGCACTCAGAATGAAGTGGATGATGGCAA  
+HWI-EAS443:3:47:202:1946#0/1  
`bb`[aaba[`]YbaSabb^\_aaa[¥[]\_]U[bI\_a`P`^`



@HWI-EAS443:3:47:204:1118#0/1  
TAAGCATCAATGAACTGAGCAATCTTGCAAAAGGAGAGAA  
+HWI-EAS443:3:47:204:1118#0/1  
a\_bbbX`YS\_`\_\_a^b`a\_a`aa]a¥Y\_]T\_\_`[Yba¥  
@HWI-EAS443:3:47:254:360#0/1  
CAAAGAAGACAAGAGATATGGCCCAGCATTAAAGCATCAAT  
+HWI-EAS443:3:47:254:360#0/1  
aaa`bbbbbababaaaabaaaa`aa`aaaa`Y\_a\_aaa  
@HWI-EAS443:3:47:30:800#0/1  
TTAAGCATCAATGAACTGAGCAATCTTGCAAAAGGAGAGA  
+HWI-EAS443:3:47:30:800#0/1  
]YaaUYYa[^^]XV^a^aaVZ\_ZZ\_UQ\_a`YU\_]^^`\_]a  
@HWI-EAS443:3:47:321:605#0/1  
CAAGAGAAGAACCCCGCACTCAGAATGAAGTGGATGATGG  
+HWI-EAS443:3:47:321:605#0/1  
\_\_b\_bbbbaabb\_`¥\_a`\_aaaaab\_]`^baY`^V¥aa  
@HWI-EAS443:3:47:476:399#0/1  
GAAGACAAGAGATATGGCCCAGCATTAAAGCATCAATGAAC  
+HWI-EAS443:3:47:476:399#0/1  
aaaaaaaa\_bab\_a\_a¥\_¥T¥Z`Z\_\_\_^]\_^X^]Y]^\_XWZ  
@HWI-EAS443:3:47:480:992#0/1  
CATTAAAGCATCAATGAACTGAGCAATCTTGCAAAAGGAGA  
+HWI-EAS443:3:47:480:992#0/1  
[abbbab`^aabbbbb`baaaaa`aaaaa]]\_`]aaabb  
@HWI-EAS443:3:47:524:1263#0/1  
GAGAAGAACCCCGCACTCAGAATGAAGTGGATGATGGCAA  
+HWI-EAS443:3:47:524:1263#0/1  
aa\_\_aba`aR\_]^[^[]`Y`a^Vaa^`X^\_^]\_]\_^XU]  
@HWI-EAS443:3:47:533:148#0/1  
GAGATATGGCCCAGCATTAAAGCATCAATGAACTGAGCAAT  
+HWI-EAS443:3:47:533:148#0/1  
aaaa`a^^a^`^^a`\_]\_]U¥^XYWY\_Y¥Y^]XZWWW¥  
@HWI-EAS443:3:47:593:394#0/1  
AAACAATTGACACTAATTGATGGCCATCCGAATTCTTTT  
+HWI-EAS443:3:47:593:394#0/1  
a`a¥a`aabba`\_\_a^^a`a¥aa\_[T]^WZ^YR]^ZU`\_  
@HWI-EAS443:3:47:917:17#0/1  
CCATCATCCACTTCATTCTGAGTGCGGGTTCCTCTCTTG  
+HWI-EAS443:3:47:917:17#0/1  
Waabb`aab]babbaba`]a`a\_a^\_baa``\_a^HZ[bab  
@HWI-EAS443:3:48:1084:36#0/1  
AGACAAGAGATATGGCCCAGCATTAAAGCATCAATGAACTG  
+HWI-EAS443:3:48:1084:36#0/1  
`^^\_Z¥bb\_V\_^Y`WRT[[b]]a\_WP`^^`\_RY\_aa^\_]`a  
@HWI-EAS443:3:48:1126:1184#0/1  
AACAAATTGACACTAATTGATGGCCATCCGAATTCTTTTG  
+HWI-EAS443:3:48:1126:1184#0/1  
Z\_0¥`¥a\_\_S¥abS`a`aSU¥UU\_UHRY\_MY]V^XYZ[I  
@HWI-EAS443:3:48:1186:1135#0/1  
AGAGAAGAACCCCGCACTCAGAATGAAGTGGATGATGGCA

+HWI-EAS443:3:48:1186:1135#0/1  
aa`b\_`¥aa\_b]\_aa``aaaaabbZ¥`Rb`X`]Xaa``a  
@HWI-EAS443:3:48:1277:1651#0/1  
TTAAGCATCAATGAACTGAGCAATCTTGCAAAAGGAGAGA  
+HWI-EAS443:3:48:1277:1651#0/1  
SWTVGON\_0``Q\_\_RZaV\_aP[``VZJOXIX``\_Ya]T`VX  
@HWI-EAS443:3:48:1289:831#0/1  
AGAAGAACCCCGCACTCAGAATGAAGTGGATGATGGCAAT  
+HWI-EAS443:3:48:1289:831#0/1  
YZ¥R¥Wa\_H]TUQ¥`][a\_[aa\_YRMY]\_^TV`QOLZ^N  
@HWI-EAS443:3:48:1436:207#0/1  
CATTGATGCTTAATGCTGGCCATATCTCTTGTCTTCTTT  
+HWI-EAS443:3:48:1436:207#0/1  
aabbab`b^baaaaa`abaaa^aa`aZa`aaa`\_a\_\_aa¥  
@HWI-EAS443:3:48:1441:181#0/1  
AGAAGAACCCCGCACTCAGAATGAAGTGGATGATGGCAAT  
+HWI-EAS443:3:48:1441:181#0/1  
Uba\_T^aaa]]ba\_\_]]\_¥\_a^a^`WaaWZ`RGW[RWPP  
@HWI-EAS443:3:48:1560:354#0/1  
AGAAGAACCCCGCACTCAGAATGAAGTGGATGATGGCAAT  
+HWI-EAS443:3:48:1560:354#0/1  
aba^aaaa\_`^`¥````a][\_a\_ZaWa`^]`U^[UUU^Y  
@HWI-EAS443:3:48:158:318#0/1  
CTCCTTTTGCAAGATTGCTCAGTTCATTGATGCTTAATGC  
+HWI-EAS443:3:48:158:318#0/1  
abaabbab\_babba\_ababaaaaaabaaaa\_b`a`aa`  
@HWI-EAS443:3:48:15:506#0/1  
TTTTTAAACAATTCGACACTAATTGATGGCCATCCGAATT  
+HWI-EAS443:3:48:15:506#0/1  
abbba`a`ababaaaaaa`aaaa\_aa`a[``¥[Z]]\_\_^  
@HWI-EAS443:3:48:1747:1294#0/1  
TAAGCATCAATGAACTGAGCAATCTTGCAAAAGGAGAGAA  
+HWI-EAS443:3:48:1747:1294#0/1  
\_\_¥```aaaabba`^aZ^`b```a`^`ab]Xaa\_a`aa\_  
@HWI-EAS443:3:48:259:1917#0/1  
CATTAAGCATCAATGAACTGAGCAATCTTGCAAAAGGAGA  
+HWI-EAS443:3:48:259:1917#0/1  
[babbba`b^baa`abbbbbbabab``a`aab\_aa\_aa  
@HWI-EAS443:3:48:293:966#0/1  
CATTAAGCATCAATGAACTGAGCAATCTTGCAAAAGGAGA  
+HWI-EAS443:3:48:293:966#0/1  
abbb`¥¥bbabaabbabba\_aaaaab`bbba\_\_`aaaaaa  
@HWI-EAS443:3:48:729:1462#0/1  
TTTTTAAACAATTCGACACTAATTGATGGCCATCCGAATT  
+HWI-EAS443:3:48:729:1462#0/1  
ababbb`X¥\_`bbabaabaaaaaaaaaaaaaaaa`^a\_\_`a  
@HWI-EAS443:3:48:925:1636#0/1  
CATTAAGCATCAATGAACTGAGCAATCTTGCAAAAGGAGA  
+HWI-EAS443:3:48:925:1636#0/1  
ab``bbbabbbbbbabbbaabbbbaabab\_a`a`aaa`

@HWI-EAS443:3:48:926:1710#0/1  
GATTGCTCAGTTCATTGATGCTTAATGCTGGGCCATATCT  
+HWI-EAS443:3:48:926:1710#0/1  
a^Z[^T^Y¥^[ZNY`Y[[¥[R`a\_\_\_^PTYS¥VY¥Z^\_YZ  
@HWI-EAS443:3:49:1085:1718#0/1  
CATTAAGCATCAATGAACTGAGCAATCTTGCAAAAGGAGA  
+HWI-EAS443:3:49:1085:1718#0/1  
abbbbbbbbabbbbbbbbabbbbbbababb`aaa`ba  
@HWI-EAS443:3:49:1128:613#0/1  
ATTTTGGCAAAGAAGACAAGAGATATGGCCCAGCATTAA  
+HWI-EAS443:3:49:1128:613#0/1  
J\_`ab`b`R\_b`¥a\_\_¥Z^\_b\_a`^^`aY¥¥^XYZ`b`  
@HWI-EAS443:3:49:1186:1378#0/1  
CAGCATTAAAGCATCAATGAACTGAGCAATCTTGCAAAAGG  
+HWI-EAS443:3:49:1186:1378#0/1  
`bbbbbb`aba`\_]aaaY\_R^b^^\_aa^`a```]]Zaba  
@HWI-EAS443:3:49:1295:658#0/1  
GCTCAGTTCATTGATGCTTAATGCTGGGCCATATCTCTTG  
+HWI-EAS443:3:49:1295:658#0/1  
\_a\_a`VYbb\_]aaaaaY\_a]`Y]\_\_^`\_a[a][¥a\_`a  
@HWI-EAS443:3:49:1300:592#0/1  
AAGAGAAGAACCCCGCACTCAGAATGAAGTGGATGATGGC  
+HWI-EAS443:3:49:1300:592#0/1  
UXYV[[¥a`aa]\_a``\_RU\_S\_VX`aZZaPa`PXaWX\_bZ  
@HWI-EAS443:3:49:1387:623#0/1  
CTCATTTTGGCAAAGAAGACAAGAGATATGGCCCAGCAT  
+HWI-EAS443:3:49:1387:623#0/1  
a`abbbabbabbaa`bab`a`a`a\_baaaaa`P[\_a¥aa  
@HWI-EAS443:3:49:1452:1960#0/1  
AAGAGAAGAACCCCGCACTCAGAATGAAGTGGATGATGGC  
+HWI-EAS443:3:49:1452:1960#0/1  
aaYaZ]aaaa`a`a`a\_a\_\_a`]\_`\_R`V\_]\_^`\_^]V  
@HWI-EAS443:3:49:1453:492#0/1  
AGAAGAACCCCGCACTCAGAATGAAGTGGATGATGGCAAT  
+HWI-EAS443:3:49:1453:492#0/1  
ababbbb`aab\_aaaa`b`]baY\_aY`a\_\_`[[¥LV[P  
@HWI-EAS443:3:49:1487:1968#0/1  
GCATTAAGCATCAATGAACTGAGCAATCTTGCAAAAGGAG  
+HWI-EAS443:3:49:1487:1968#0/1  
`abaabaaZaa`aaaaa`aa\_a\_`aa^a\_a]\_^\_\_a`]a  
@HWI-EAS443:3:49:1595:395#0/1  
GAGATATGGCCCAGCATTAAAGCATCAATGAACTGAGCAAT  
+HWI-EAS443:3:49:1595:395#0/1  
a]babaabbbbaa¥W[`a[YX^V^a\_]¥^¥¥]Y[^¥W¥\_a  
@HWI-EAS443:3:49:1632:411#0/1  
AAACAATTGACACTAATTGATGGCCATCCGAATCTTTT  
+HWI-EAS443:3:49:1632:411#0/1  
]\_`V`b`RI\_b`\_Za^`\_\_a`]¥SU]aa`TR¥\_^YH[ab]  
@HWI-EAS443:3:49:282:959#0/1  
GAAGAACCCCGCACTCAGAATGAAGTGGATGATGGCAATG

+HWI-EAS443:3:49:282:959#0/1  
a]]bV`a`a`a`a`a\_a`Za\_aa`Y]X[``\_¥X[Z^``\_  
@HWI-EAS443:3:49:286:428#0/1  
GAGAAGAACCCCGCACTCAGAATGAAGTGGATGATGGCAA  
+HWI-EAS443:3:49:286:428#0/1  
aaaV`ba]XXYa\_F¥X[`Q`Z``]¥VYH`]T¥`NQ]SMS`  
@HWI-EAS443:3:49:330:731#0/1  
AGAAGAACCCCGCACTCAGAATGAAGTGGATGATGGCAAT  
+HWI-EAS443:3:49:330:731#0/1  
a¥aU`bba^[abaa]^`^¥QT`\_\_^\_aS^¥ZR\_RRaTHWY  
@HWI-EAS443:3:49:403:1414#0/1  
AAAGAAGACAAGAGATATGGCCCAGCATTAAAGCATCAATG  
+HWI-EAS443:3:49:403:1414#0/1  
``¥bbb`ab`b^ba`[[aaa\_\_[aaU\_a^\_\_\_\_]¥P`a`\_  
@HWI-EAS443:3:49:428:1926#0/1  
AAGAGAAGAACCCCGCACTCAGAATGAAGTGGATGATGGC  
+HWI-EAS443:3:49:428:1926#0/1  
aaa^Z\_bbaa`RU^\_\_^]`V`\_`Z\_\_^`^\_\_\_\_¥ZYW  
@HWI-EAS443:3:49:436:682#0/1  
ATTAAGCATCAATGAAGTGGATGATGGC  
+HWI-EAS443:3:49:436:682#0/1  
abbbab`abaaabbaaab`aa`aaa\_aaa\_a`\_aaa^b`a  
@HWI-EAS443:3:49:508:1703#0/1  
AAACAATTGACACTAATTGATGGCCATCCGAATCCTTTT  
+HWI-EAS443:3:49:508:1703#0/1  
[^b\_[\_`a`a¥a¥¥W]\_¥`¥Y\_aW¥W`TZM¥XS[VRX^¥[  
@HWI-EAS443:3:49:552:565#0/1  
CCCAGCATTAAAGCATCAATGAAGTGGATGATGGCAAAA  
+HWI-EAS443:3:49:552:565#0/1  
aba\_ZX^abaa`aaa`aaa`\_`aa\_b\_aaa\_aaa\_\_\_\_`\_  
@HWI-EAS443:3:49:586:1929#0/1  
AGAAGAACCCCGCACTCAGAATGAAGTGGATGATGGCAAT  
+HWI-EAS443:3:49:586:1929#0/1  
ab``a`bab]aaa`\_aa`baaaa\_\_X\_a^`^`Y\_]\_\_`  
@HWI-EAS443:3:49:615:1450#0/1  
GAAGAACCCCGCACTCAGAATGAAGTGGATGATGGCAATG  
+HWI-EAS443:3:49:615:1450#0/1  
`bbabbaab`bbb`baaaaaabaa^baaab\_aaaV\_]aa  
@HWI-EAS443:3:49:719:1187#0/1  
ATTTTGGCAAAGAAGACAAGAGATATGGCCCAGCATTAA  
+HWI-EAS443:3:49:719:1187#0/1  
ab]`bbaa\_a`bba`baa`Zaaa`a`\_aa`\_]aa\_aaa`\_  
@HWI-EAS443:3:49:80:1466#0/1  
GCTCAGTTCATTGATGCTTAATGCTGGCCATATCTCTTG  
+HWI-EAS443:3:49:80:1466#0/1  
`aK¥IW¥aaaYb`]aaY`T`WY]\_``R[PRX`I`¥`¥`W]  
@HWI-EAS443:3:49:832:1244#0/1  
ATTGCTCAGTTCATTGATGCTTAATGCTGGCCATATCTC  
+HWI-EAS443:3:49:832:1244#0/1  
abaaab``abaabbb^abbab\_ba`^`\_`baa¥¥`aaa`a`

@HWI-EAS443:3:49:853:360#0/1  
CCAGCATTAAGCATCAATGAACTGAGCAATCTTGCAAAAG  
+HWI-EAS443:3:49:853:360#0/1  
aa]aa`X\_`Vbaa][`Xaaaa\_aa`a`^`a`ab\_\_\_\_]]a  
@HWI-EAS443:3:49:889:1924#0/1  
AGAAGAACCCCGCACTCAGAATGAAGTGGATGATGGCAAT  
+HWI-EAS443:3:49:889:1924#0/1  
aaabaa\_aaaaba\_\_b\_aaU^aa\_]a^^aWaaS`\_\_V^\_\_  
@HWI-EAS443:3:49:947:807#0/1  
GAGATATGGCCCAGCATTAAGCATCAATGAACTGAGCAAT  
+HWI-EAS443:3:49:947:807#0/1  
``aa\_]L\_a\_]`^]Wa\_W]WXUYP]\_[`K^`a[MY]`  
@HWI-EAS443:3:4:1081:598#0/1  
TAAGCATCAATGAACTGAGCAATCTTGCAAAAGGAGAGAA  
+HWI-EAS443:3:4:1081:598#0/1  
aaaaa]^\_Zaa^)`\_a\_`a`^^^`[\_W]X`]a`\_`\_`\_`  
@HWI-EAS443:3:4:1086:1590#0/1  
AGAGATATGGCCCAGCATTAAGCATCAATGAACTGAGCAA  
+HWI-EAS443:3:4:1086:1590#0/1  
abbbaba^a\_]a\_baa`abaaa`a]`aa`a^a\_\_`]^`^aa  
@HWI-EAS443:3:4:1176:1782#0/1  
AAGAGATATGGCCCAGCATTAAGCATCAATGAACTGAGCA  
+HWI-EAS443:3:4:1176:1782#0/1  
a^b\_bRabaab\_Z`ab^`aaaa\_WGYYS\_GRa\_^U^\_HB  
@HWI-EAS443:3:4:1199:1586#0/1  
AAGAACCCCGCACTCAGAATGAAGTGGATGATGGCAATGA  
+HWI-EAS443:3:4:1199:1586#0/1  
aaaaa`a\_aa]`R^^``¥a\_V]aV`a[ ]`\_^\_\_Y]Y^\_]  
@HWI-EAS443:3:4:1199:622#0/1  
GAGATATGGCCCAGCATTAAGCATCAATGAACTGAGCAAT  
+HWI-EAS443:3:4:1199:622#0/1  
aab¥¥^R]`\_]I\_a\_a\_\_RZ`OQ^\_^\_[b[Y``a[^I¥\_\_  
@HWI-EAS443:3:4:121:903#0/1  
AGAAGACAAGAGATATGGCCCAGCATTAAGCATCAATGAA  
+HWI-EAS443:3:4:121:903#0/1  
aaa\_aaa][baaa`a`a`a`\_a`a^a`\_a\_`^`\_`^`^`\_\_\_\_\_  
@HWI-EAS443:3:4:1228:1440#0/1  
AGAAGACAAGAGATATGGCCCAGCATTAAGCATCAATGAA  
+HWI-EAS443:3:4:1228:1440#0/1  
aU\_aa\_\_a\_`]^`\_\_^UW¥^`\_\_^`^`^]\_W^WZYZ`^^[  
@HWI-EAS443:3:4:1264:918#0/1  
GAGATATGGCCCAGCATTAAGCATCAATGAACTGAGCAAT  
+HWI-EAS443:3:4:1264:918#0/1  
a`aaa`\_a`\_]`[\_a^\_`\_`\_`[\_XY]`a]¥X`\_Z\_X\_^^  
@HWI-EAS443:3:4:127:1990#0/1  
GAGATATGGCCCAGCATTAAGCATCAATGAACTGAGCAAT  
+HWI-EAS443:3:4:127:1990#0/1  
]]baba¥abb^a`aaa\_\_b``bba\_a`aSa\_Z`R````^a[  
@HWI-EAS443:3:4:143:163#0/1  
CAAGAGAAGAACCCCGCACTCAGAATGAAGTGGATGATGG

+HWI-EAS443:3:4:143:163#0/1  
abbb`baababa`aa`a\_]`^aZ`¥\_\_TaW^\_\_ZY\_X  
@HWI-EAS443:3:4:1441:296#0/1  
ATAAGAGTCAGCAAAATGGGAGTAGATGAATACTCCAGCA  
+HWI-EAS443:3:4:1441:296#0/1  
ab`aaa\_^`a[aaabab\_aXaa^\_Y^^^`RaXY`RV  
@HWI-EAS443:3:4:1468:612#0/1  
CTCTCCTTTTGCAAGATTGCTCAGTTCATTGATGCTTAAT  
+HWI-EAS443:3:4:1468:612#0/1  
a\_`VVV^`¥ab¥baa`a\_`\_`\_]\_Vaa[WW`^`aaXa  
@HWI-EAS443:3:4:1550:706#0/1  
AGACAAGAGATATGGCCAGCATTAAAGCATCAATGAACTG  
+HWI-EAS443:3:4:1550:706#0/1  
abb\_babaa`aa`^\_]`a`^`aa`\_`\_`\_]`^\_Z^^  
@HWI-EAS443:3:4:1611:549#0/1  
CTCTCCTTTTGCAAGATTGCTCAGTTCATTGATGCTTAAT  
+HWI-EAS443:3:4:1611:549#0/1  
ab`^]ba`aa`aaa]ab[a^^a`\_`\_`a`aUaa^Xa  
@HWI-EAS443:3:4:23:1853#0/1  
AAGAGAAGAACCCCGCACTCAGAATGAAGTGGATGATGGC  
+HWI-EAS443:3:4:23:1853#0/1  
abaa[`^aa`[\_aaaa\_`a`\_`\_`X`P^\_\_\_]X[U  
@HWI-EAS443:3:4:25:539#0/1  
CAAAGAAGACAAGAGATATGGCCAGCATTAAAGCATCAAT  
+HWI-EAS443:3:4:25:539#0/1  
Y[¥`b]Zb`Vbba`baZV\_]bXaaVa[^X`a`XV]] [Y\_`  
@HWI-EAS443:3:4:31:1544#0/1  
ATTAAGCATCAATGAACTGAGCAATCTTGCAAAAGGAGAG  
+HWI-EAS443:3:4:31:1544#0/1  
a`a\_a`a`VY`\_\_aX\_]`[Z\_`^^\_NW[X[S]\_Wa^`  
@HWI-EAS443:3:4:343:231#0/1  
CAAGAGAAGAACCCCGCACTCAGAATGAAGTGGATGATGG  
+HWI-EAS443:3:4:343:231#0/1  
]abbabaabbbaabbbbaababa\_a`baabQbb\_ab\_Xaa  
@HWI-EAS443:3:4:432:1897#0/1  
ATTAAGCATCAATGAACTGAGCAATCTTGCAAAAGGAGAG  
+HWI-EAS443:3:4:432:1897#0/1  
aaaaa]a^\_WXaa^a^^MY\_^XU¥a\_aab¥^\_^W^\_\_a`a  
@HWI-EAS443:3:4:460:711#0/1  
GAGAAGAACCCCGCACTCAGAATGAAGTGGATGATGGCAA  
+HWI-EAS443:3:4:460:711#0/1  
a`a\_aa`a`\_`Za`[\_`¥a¥¥\_`¥W[K¥¥]\_`¥¥\_`YZ¥  
@HWI-EAS443:3:4:50:1679#0/1  
TTTTTAAACAATTGACACTAATTGATGGCCATCCGAATT  
+HWI-EAS443:3:4:50:1679#0/1  
¥^^\_V\_VY`\_a0JY][L[\_PTS]YP\_H[DDHZVZUPLTYB  
@HWI-EAS443:3:4:527:1951#0/1  
AGAGATATGGCCAGCATTAAAGCATCAATGAACTGAGCAA  
+HWI-EAS443:3:4:527:1951#0/1  
`ba^U`\_a\_HaZ\_X`\_a\_a`S¥aaYISQVUBBBBBBBBB



+HWI-EAS443:3:50:1229:1615#0/1  
aWV\_ab^\_a`\_a]a`ab]aa`\_\_`\_\_a\_\_a`W`[\_aa\_a  
@HWI-EAS443:3:50:1234:836#0/1  
ATTAAGCATCAATGAACTGAGCAATCTTGCAAAAGGAGAG  
+HWI-EAS443:3:50:1234:836#0/1  
``J¥¥^b`a[HWU^WJ^a`L^TaW[J^[\_LaU[PUI]aaX  
@HWI-EAS443:3:50:1401:347#0/1  
AAGATTGCTCAGTTCATTGATGCTTAATGCTGGGCCATAT  
+HWI-EAS443:3:50:1401:347#0/1  
`aaaZ^`T^aaaZa]a`XQ^`a^aa\_X``¥]^aa]PZa\_a  
@HWI-EAS443:3:50:1553:349#0/1  
TTAAGCATCAATGAACTGAGCAATCTTGCAAAAGGAGAGA  
+HWI-EAS443:3:50:1553:349#0/1  
`b]`V¥aSPUU^b^`abaZV`\_`\_]¥]T]]SP\_aa[a^a[  
@HWI-EAS443:3:50:219:91#0/1  
AGAAGAACCCCGCACTCAGAATGAAGTGGATGATGGCAAT  
+HWI-EAS443:3:50:219:91#0/1  
`UX`abaRVW¥VTbV¥\_¥Uaa]b\_H]¥aa]\_a^a`aP¥`a  
@HWI-EAS443:3:50:290:177#0/1  
AGAAGACAAGAGATATGGCCCAGCATTAAAGCATCAATGAA  
+HWI-EAS443:3:50:290:177#0/1  
`ababbba`^]bb`aaba\_aXaa¥aaabaS\_a`^a\_a`]a  
@HWI-EAS443:3:50:366:376#0/1  
AACAAATTCGACACTAATTGATGGCCATCCGAATCTTTTG  
+HWI-EAS443:3:50:366:376#0/1  
`aabbbaabaabVbaaa¥aa]^\_`^¥a`\_`\_]\_a\_¥```Y\_  
@HWI-EAS443:3:50:433:90#0/1  
AACAAATTCGACACTAATTGATGGCCATCCGAATCTTTTG  
+HWI-EAS443:3:50:433:90#0/1  
ababbba\_ba`b`b^bbaaaaa^^`a`\_`a`[aabaa  
@HWI-EAS443:3:50:458:874#0/1  
AAGACAAGAGATATGGCCCAGCATTAAAGCATCAATGAACT  
+HWI-EAS443:3:50:458:874#0/1  
^aa\_¥]`aa`ba`a¥\_Z\_]Z¥`^]`^W[]`V`\_`ba`]Za  
@HWI-EAS443:3:50:482:266#0/1  
CATTGCCATCATCCACTTCATTCTGAGTGC GGGTTCTTC  
+HWI-EAS443:3:50:482:266#0/1  
aabbaabaYaa``aaaa`bbabb^¥0a\_aabY^b¥a\_\_  
@HWI-EAS443:3:50:487:1936#0/1  
GATTGCTCAGTTCATTGATGCTTAATGCTGGGCCATATCT  
+HWI-EAS443:3:50:487:1936#0/1  
^]\_`bba`\_`b`a``bbba`\_`^aaaaaaaaa[¥`aa`\_`a  
@HWI-EAS443:3:50:496:1716#0/1  
ATTAAGCATCAATGAACTGAGCAATCTTGCAAAAGGAGAG  
+HWI-EAS443:3:50:496:1716#0/1  
a¥]¥K\_VWa[¥0V[TaUQX\_aX]Z¥Y^^^U\_]\_\_\_\_[]¥¥`  
@HWI-EAS443:3:50:585:365#0/1  
ATTGATGCTTAATGCTGGGCCATATCTCTTGTCTTCTTTG  
+HWI-EAS443:3:50:585:365#0/1  
`babab`^b`aabaab^P\_aaa[a\_a^abaa`a\_\_\_aaa





+HWI-EAS443:3:51:247:1397#0/1  
`bbabbbba`ababababa\_aaaaabaab\_a`a\_aaa`ba  
@HWI-EAS443:3:51:305:724#0/1  
TTAAGCATCAATGAACTGAGCAATCTTGCAAAAGGAGAGA  
+HWI-EAS443:3:51:305:724#0/1  
aba`aa^a\_`ZVV\_[^Z`]W`[aa¥UP]]abUJ]^a  
@HWI-EAS443:3:51:30:237#0/1  
ATTAAGCATCAATGAACTGAGCAATCTTGCAAAAGGAGAG  
+HWI-EAS443:3:51:30:237#0/1  
`b\_\_`a^Z]W]K]X]TP¥\_]^^`a^`¥a`\_PT[ba¥``a  
@HWI-EAS443:3:51:346:193#0/1  
GAGAAGAACCCCGCACTCAGAATGAAGTGGATGATGGCAA  
+HWI-EAS443:3:51:346:193#0/1  
a`aab`ba\_aaa`a`a^aa\_`aa`^a\_aa\_\_a\_`a`^\_\_  
@HWI-EAS443:3:51:515:1787#0/1  
AAACAATTGACACTAATTGATGGCCATCCGAATTCTTTT  
+HWI-EAS443:3:51:515:1787#0/1  
aaa\_\_aa\_a```a\_aaaa`T```^^¥\_^^]]\_`^`^`\_\_`  
@HWI-EAS443:3:51:599:599#0/1  
AGAAGAACCCCGCACTCAGAATGAAGTGGATGATGGCAAT  
+HWI-EAS443:3:51:599:599#0/1  
abaaaaa`\_\_a\_`^`\_`\_`\_`\_a]^\_0]\_V^a]U]^\_[Z  
@HWI-EAS443:3:51:665:990#0/1  
CATTAGCATCAATGAACTGAGCAATCTTGCAAAAGGAGA  
+HWI-EAS443:3:51:665:990#0/1  
abbab`bbbaabbbb\_a\_bbb¥bbbb`bababbabbaabb  
@HWI-EAS443:3:51:725:640#0/1  
GAAGAACCCCGCACTCAGAATGAAGTGGATGATGGCAATG  
+HWI-EAS443:3:51:725:640#0/1  
^aa``baaa`baaaaaabaab\_\_a^abaaa\_`aYX\_`a`  
@HWI-EAS443:3:51:835:617#0/1  
GAGAAGAACCCCGCACTCAGAATGAAGTGGATGATGGCAA  
+HWI-EAS443:3:51:835:617#0/1  
T`baZbbbbbbabb`bb^`aa`ba\_]`[\_ba\_ab^aba\_[a  
@HWI-EAS443:3:51:950:361#0/1  
GGCAAAGAAGACAAGAGATATGGCCAGCATTAGCATCA  
+HWI-EAS443:3:51:950:361#0/1  
ab``]aaaaa`a[a¥a`¥a]`\_]^[aaZ^a``\_a\_`\_\_^  
@HWI-EAS443:3:51:954:1381#0/1  
CCCAGCATTAGCATCAATGAACTGAGCAATCTTGCAAAA  
+HWI-EAS443:3:51:954:1381#0/1  
ab```abbbbbbaabbbbaa`baababaaabab¥aaa`  
@HWI-EAS443:3:51:962:728#0/1  
AGAAGAACCCCGCACTCAGAATGAAGTGGATGATGGCAAT  
+HWI-EAS443:3:51:962:728#0/1  
]XZ\_b]¥\_\_\_Zaab\_baaa]aa[Z¥[G\_]N¥^a``]U[W`  
@HWI-EAS443:3:51:975:1614#0/1  
CAATTCGACACTAATTGATGGCCATCCGAATTCTTTTGGT  
+HWI-EAS443:3:51:975:1614#0/1  
abbbbabb\_bY`^aaa`[Ya\_a\_\_¥WO\_¥`aa¥]b^^\_XL

@HWI-EAS443:3:52:1021:1945#0/1  
TAAGCATCAATGAACTGAGCAATCTTGCAAAAGGAGAGAA  
+HWI-EAS443:3:52:1021:1945#0/1  
ab`W¥abba[aaaa`S]aa\_\_a\_a`\_^[\_Wa\_\_\_`\_a`  
@HWI-EAS443:3:52:1208:1163#0/1  
GAGAAGAACCCCGCACTCAGAATGAAGTGGATGATGGCAA  
+HWI-EAS443:3:52:1208:1163#0/1  
`^X[``aX`\_a\_\_¥\_U^`^\_\_\_YX`X`\_X^aUX\_\_XX^  
@HWI-EAS443:3:52:1331:509#0/1  
GCAAGATTGCTCAGTTCATTGATGCTTAATGCTGGGCCAT  
+HWI-EAS443:3:52:1331:509#0/1  
`^¥]]¥b]X\_WN¥[\_a\_\_WL^NZ\_Z`\_a]`a[YOYSURX\_  
@HWI-EAS443:3:52:1461:1504#0/1  
TAAGCATCAATGAACTGAGCAATCTTGCAAAAGGAGAGAA  
+HWI-EAS443:3:52:1461:1504#0/1  
TaL^`ba\_baab¥¥^aY\_a`^``\_aaZOYaa`abZX]P\_`  
@HWI-EAS443:3:52:1481:1746#0/1  
CAAGAGAAGAACCCCGCACTCAGAATGAAGTGGATGATGG  
+HWI-EAS443:3:52:1481:1746#0/1  
[\_^a`ab¥`[\_ba\_ab]`Y`\_ab\_a]b^ab[ab[baaY¥]  
@HWI-EAS443:3:52:1527:66#0/1  
CAAGAGATATGGCCAGCATTAAAGCATCAATGAACTGAGC  
+HWI-EAS443:3:52:1527:66#0/1  
abaUYa`U^]¥K\_I`ba^a`\_X^`a[^¥N[SSa\_`W¥G  
@HWI-EAS443:3:52:155:1295#0/1  
GCATTAAGCATCAATGAACTGAGCAATCTTGCAAAAGGAG  
+HWI-EAS443:3:52:155:1295#0/1  
abbaabaaaaaaaa`Y`a`Ya\_a`aaa`aaaR`]a^^a  
@HWI-EAS443:3:52:1579:930#0/1  
GACAAGAGATATGGCCAGCATTAAAGCATCAATGAACTGA  
+HWI-EAS443:3:52:1579:930#0/1  
\_`bWGWVaaY\_\_]TW^a]QZaa]`[XYZ`^^Za^¥[\_`[^  
@HWI-EAS443:3:52:1599:285#0/1  
CTCCTTTTGCAAGATTGCTCAGTTCATTGATGCTTAATGC  
+HWI-EAS443:3:52:1599:285#0/1  
aa`¥^ba¥ZVZY)`a]^¥]R\_[Zaaaa`\_U^a¥`]a`YTG  
@HWI-EAS443:3:52:1622:2022#0/1  
AAGAGAAGAACCCCGCACTCAGAATGAAGTGGATGATGGC  
+HWI-EAS443:3:52:1622:2022#0/1  
a`b`a`b\_a`¥FX¥``^aX[aX\_aa`W]`\_\_^\_\_^]]R  
@HWI-EAS443:3:52:166:1880#0/1  
TATGGCCAGCATTAAAGCATCAATGAACTGAGCAATCTTG  
+HWI-EAS443:3:52:166:1880#0/1  
ababWbaaa\_b`a`a\_]Vaaaaaa\_aa\_a\_\_`a`]`a\_`a  
@HWI-EAS443:3:52:1727:1977#0/1  
AGAAGAACCCCGCACTCAGAATGAAGTGGATGATGGCAAT  
+HWI-EAS443:3:52:1727:1977#0/1  
¥^¥b^\_b¥I¥SaY¥¥\_XXY[^a`\_`^`\_`^`\_a\_WTLFWRY  
@HWI-EAS443:3:52:196:114#0/1  
CCATCATCCACTTCATTCTGAGTGCGGGGTTCTTCTCTTG

+HWI-EAS443:3:52:196:114#0/1  
aaaaaab\_aa\_aaaaa`ab`b`a\_abaa\_a\_a`^a]aa\_  
@HWI-EAS443:3:52:34:1013#0/1  
AACAAATTCGACACTAATTGATGGCCATCCGAATTCTTTTG  
+HWI-EAS443:3:52:34:1013#0/1  
¥S\_aa`a`\_\_\_`a\_a`\_`\_\_\_¥\_\_¥^]`PS[]Y\_\_]`^  
@HWI-EAS443:3:52:381:96#0/1  
GAAGACAAGAGATATGGCCCAGCATTAAAGCATCAATGAAC  
+HWI-EAS443:3:52:381:96#0/1  
aaaa\_\_a]`^a^`\_]\_[X^^`] ^Y\_]X`ZZ]ZWZ^]ZZZ  
@HWI-EAS443:3:52:395:1468#0/1  
CAGCATTAAAGCATCAATGAACTGAGCAATCTTGCAAAAGG  
+HWI-EAS443:3:52:395:1468#0/1  
[G]`XT\_`^]`TOYWW`Z[X]^¥[`]UTTW\_[``]WRT¥]  
@HWI-EAS443:3:52:409:584#0/1  
CAATTCGACACTAATTGATGGCCATCCGAATTCTTTTGGT  
+HWI-EAS443:3:52:409:584#0/1  
aaaaa`ba\_baabb]]`]ZXWZV]QSQ`a^YVNZ\_a`[[X  
@HWI-EAS443:3:52:488:519#0/1  
GGCCCAGCATTAAAGCATCAATGAACTGAGCAATCTTGCAA  
+HWI-EAS443:3:52:488:519#0/1  
aaaaaababbaaaaa\_\_aa\_\_a]``]a`a\_a\_\_[\_`[ZZ`  
@HWI-EAS443:3:52:492:1945#0/1  
AACAAATTCGACACTAATTGATGGCCATCCGAATTCTTTTG  
+HWI-EAS443:3:52:492:1945#0/1  
a`^\_\_`a`a\_\_aV`VU[U^S\_J^`\_\_^X]\_\_W\_ZNNB  
@HWI-EAS443:3:52:52:1425#0/1  
GAGAAGAACCCCGCACTCAGAATGAAGTGGATGATGGCAA  
+HWI-EAS443:3:52:52:1425#0/1  
aabaaaaaaaaaaaa`aa^^¥]`a\_YVKY`¥`\_V^\_\_V]]  
@HWI-EAS443:3:52:678:640#0/1  
AGAAGAACCCCGCACTCAGAATGAAGTGGATGATGGCAAT  
+HWI-EAS443:3:52:678:640#0/1  
^baaaaaa`aaa`aa`a`^aa^\_aYaa¥aa]`\_a^\_\_`  
@HWI-EAS443:3:52:771:719#0/1  
ATTAAGCATCAATGAACTGAGCAATCTTGCAAAAGGAGAG  
+HWI-EAS443:3:52:771:719#0/1  
aaabSLYaZNW[`[\_][a`]][]Y`\_^a^^QXWa`U` `a  
@HWI-EAS443:3:52:861:1053#0/1  
TCTCTCCTTTTGCAAGATTGCTCAGTTCATTGATGCTTAA  
+HWI-EAS443:3:52:861:1053#0/1  
aa]V^`]a\_aa`[[^^¥a^^\_WY[Q\_^^`a`\_\_V`\_`^  
@HWI-EAS443:3:52:905:1260#0/1  
AACAAATTCGACACTAATTGATGGCCATCCGAATTCTTTTG  
+HWI-EAS443:3:52:905:1260#0/1  
`a\_b`ababaaaaba`aa\_\_XZ\_\_^^¥\_\_aa[`aa\_¥  
@HWI-EAS443:3:52:949:157#0/1  
CTCTCTCCGTGCTGGAGTATTCATCTACTCCCATTTTGCT  
+HWI-EAS443:3:52:949:157#0/1  
T^ba]a¥¥Waa\_Xa¥babbab`aaa`]U` `a\_Ua` `^^V\_

@HWI-EAS443:3:53:1033:1412#0/1  
AGACAAGAGATATGGCCCAGCATTAAAGCATCAATGAACTG  
+HWI-EAS443:3:53:1033:1412#0/1  
^ab[bbbabb\_bb^abX^Xa`bbbb¥WPab\_ab`b]V`a[  
@HWI-EAS443:3:53:1040:2027#0/1  
ATTGCTCAGTTCATTGATGCTTAATGCTGGGCCATATCTC  
+HWI-EAS443:3:53:1040:2027#0/1  
aa``a¥a\_Zab^]¥X\_]ZU[a^[`\_] ^IXOV¥\_a\_\_`Y  
@HWI-EAS443:3:53:1096:1739#0/1  
GAGATATGGCCCAGCATTAAAGCATCAATGAACTGAGCAAT  
+HWI-EAS443:3:53:1096:1739#0/1  
aa`\_]`a]\_QY``\_a`aa^`S`a`\_a¥¥]VKZ¥¥]WXZ[  
@HWI-EAS443:3:53:1323:1054#0/1  
CTCATTTTGGGCAAAGAAGACAAGAGATATGGCCCAGCAT  
+HWI-EAS443:3:53:1323:1054#0/1  
`bbbbbbbbbabaabb`bbaaabbbbbbbbb]aaaba\_ba  
@HWI-EAS443:3:53:1563:1512#0/1  
GCTCAGTTCATTGATGCTTAATGCTGGGCCATATCTCTTG  
+HWI-EAS443:3:53:1563:1512#0/1  
a[U¥TZaaPX`RL]GM^¥[Y`[M]¥Y¥`\_]\_Y[]S`aY  
@HWI-EAS443:3:53:1588:973#0/1  
AACAATTCGACACTAATTGATGGCCATCCGAATTCTTTTG  
+HWI-EAS443:3:53:1588:973#0/1  
a`a]Zbbb\_a¥\_]`aa\_^^a`YWUJaba¥`^^^`\_Xaaa\_N  
@HWI-EAS443:3:53:182:511#0/1  
GAAGAACCCCGCACTCAGAATGAAGTGGATGATGGCAATG  
+HWI-EAS443:3:53:182:511#0/1  
aaa`S`¥aTab^]``\_]`0Ua`]T^Q`a^`aWV]\_]VY^¥  
@HWI-EAS443:3:53:262:1260#0/1  
AAGAGAAGAACCCCGCACTCAGAATGAAGTGGATGATGGC  
+HWI-EAS443:3:53:262:1260#0/1  
aaa`\_W\_aaaY^Z\_\_\_\_\_`RTXZ¥`ZW^Xa[W]\_YY\_XS  
@HWI-EAS443:3:53:270:1087#0/1  
AGAAGAACCCCGCACTCAGAATGAAGTGGATGATGGCAAT  
+HWI-EAS443:3:53:270:1087#0/1  
\_]W\_^bb`aa^R¥^a[\_TX]`b\_Q^P¥\_^^^]WZTQSQa  
@HWI-EAS443:3:53:27:308#0/1  
CATTAAGCATCAATGAACTGAGCAATCTTGCAAAGGAGA  
+HWI-EAS443:3:53:27:308#0/1  
```a^[aaa\_\_^]Z\_]VZ\_^^baaVa¥YI]Y]^YSaa]a\_  
@HWI-EAS443:3:53:298:1094#0/1  
ATTAAGCATCAATGAACTGAGCAATCTTGCAAAGGAGAG  
+HWI-EAS443:3:53:298:1094#0/1  
\_\_aa^^`ab^Vaba0PV`\_[b`¥aa\_aYZa`Z`\_a¥`a¥Y  
@HWI-EAS443:3:53:37:1329#0/1  
CTTTTGCAAGATTGCTCAGTTCATTGATGCTTAATGCTGG  
+HWI-EAS443:3:53:37:1329#0/1  
ab\_ab¥`Zb\_[a\_``]aab`Sa]ZT``aabb^]Y\_a]]a]  
@HWI-EAS443:3:53:455:700#0/1  
AAGAGAAGAACCCCGCACTCAGAATGAAGTGGATGATGGC

+HWI-EAS443:3:53:455:700#0/1  
aabab\_abaaa`aa]T\_a\_aa\_\_aa]P`]aY^Ya]Wa\_R  
@HWI-EAS443:3:53:551:1646#0/1  
AGAAGACAAGAGATATGGCCCAGCATTAAAGCATCAATGAA  
+HWI-EAS443:3:53:551:1646#0/1  
aab`baab\_b\_aabb\_aab`aaaabaa`aa^aaaaaa^\_  
@HWI-EAS443:3:53:778:1238#0/1  
AGAAGAACCCCGCACTCAGAATGAAGTGGATGATGGCAAT  
+HWI-EAS443:3:53:778:1238#0/1  
ab^a^aabaaaaa`aaab\_abaaab[\_a`aa`aab]^aa  
@HWI-EAS443:3:53:82:843#0/1  
ATTAAGCATCAATGAACTGAGCAATCTTGCAAAAGGAGAG  
+HWI-EAS443:3:53:82:843#0/1  
aaaaa^^¥`a`aaaZ`]¥[\_LY[``\_\_a\_`[PW`aU`^]  
@HWI-EAS443:3:53:964:866#0/1  
GAGATATGGCCCAGCATTAAAGCATCAATGAACTGAGCAAT  
+HWI-EAS443:3:53:964:866#0/1  
aaaaabaaa`]¥]a\_aa`\_aZ]\_\_`\_a\_`Ya\_\_a]][]  
@HWI-EAS443:3:54:1130:1508#0/1  
TAAGCATCAATGAACTGAGCAATCTTGCAAAAGGAGAGAA  
+HWI-EAS443:3:54:1130:1508#0/1  
]aa`\_b]aaba^\_Vb^^`V\_aaaaa`UaZ\_\_ba]`a^\_\_  
@HWI-EAS443:3:54:1213:871#0/1  
CATTAAGCATCAATGAACTGAGCAATCTTGCAAAAGGAGA  
+HWI-EAS443:3:54:1213:871#0/1  
aaab\_ab`bab[abb\_aabaaaaaa^aaba``\_]a\_`b`  
@HWI-EAS443:3:54:1261:1822#0/1  
CAAGAGAAGAACCCCGCACTCAGAATGAAGTGGATGATGG  
+HWI-EAS443:3:54:1261:1822#0/1  
^¥¥[`b¥[\_[\_Z[W`b[baX^IZ]ab``]^F\_^`Ib¥\_R\_  
@HWI-EAS443:3:54:1267:361#0/1  
GCCCAGCATTAAAGCATCAATGAACTGAGCAATCTTGCAAA  
+HWI-EAS443:3:54:1267:361#0/1  
a\_^^`\_a\_aaa\_¥Wa^¥\_\_aa\_\_^`\_]`\_`a[a]aW] []  
@HWI-EAS443:3:54:1282:860#0/1  
ATTTTGGGCAAAGAAGACAAGAGATATGGCCCAGCATTAA  
+HWI-EAS443:3:54:1282:860#0/1  
[abba`a`aababaaaaa\_aaaaaaaaaa^X`a]aa\_aa  
@HWI-EAS443:3:54:1294:433#0/1  
AGAAGAACCCCGCACTCAGAATGAAGTGGATGATGGCAAT  
+HWI-EAS443:3:54:1294:433#0/1  
ababbaaaaYaa`^a\_a`^aaaa]aYaa^aa`X¥aX^``  
@HWI-EAS443:3:54:1363:1866#0/1  
ATTGCCATCATCCACTTCATTCTGAGTGC GGGTTCTTCT  
+HWI-EAS443:3:54:1363:1866#0/1  
aaaaaabbaa``\_a[a`Y^aa^aa\_a]a^a`]^`\_`\_`Z`  
@HWI-EAS443:3:54:1426:1156#0/1  
TTAAGCATCAATGAACTGAGCAATCTTGCAAAAGGAGAGA  
+HWI-EAS443:3:54:1426:1156#0/1  
ab`a`abb\_\_aaaa^a`\_a\_aaa`aaa\_a\_`a`\_a\_aa

@HWI-EAS443:3:54:1645:1141#0/1  
CAAAATGGGAGTAGATGAATACTCCAGCACGGAGAGAGTG  
+HWI-EAS443:3:54:1645:1141#0/1  
ab``ababbab\_aV\_\_^^abbabab^^^\_`aa\_a]a]aWa  
@HWI-EAS443:3:54:1711:363#0/1  
TAAGCATCAATGAACTGAGCAATCTTGCAAAAGGAGAGAA  
+HWI-EAS443:3:54:1711:363#0/1  
`¥^`W[b``aaaaaaaa^VH\_`aaa`a[`a\_[Za^]Zaaa  
@HWI-EAS443:3:54:1727:1786#0/1  
GGGCAAAGAAGACAAGAGATATGGCCCAGCATTAAAGCATC  
+HWI-EAS443:3:54:1727:1786#0/1  
a`aUUWK]X[a¥0`¥aM[`P^^ZZZ^WLHHEZOKTUUWWR  
@HWI-EAS443:3:54:174:1098#0/1  
CATTAAGCATCAATGAACTGAGCAATCTTGCAAAAGGAGA  
+HWI-EAS443:3:54:174:1098#0/1  
aa\_VaZ^bbabababbbb¥]aba`ba¥aaaa^`YabaUTb  
@HWI-EAS443:3:54:268:477#0/1  
AACAAATTCGACACTAATTGATGGCCATCCGAATTCTTTTG  
+HWI-EAS443:3:54:268:477#0/1  
`Z\_`[Saab]ba^¥Q\_aa`XUbabaaaa¥U¥Xaa`^\_ab^  
@HWI-EAS443:3:54:444:184#0/1  
TAAGCATCAATGAACTGAGCAATCTTGCAAAAGGAGAGAA  
+HWI-EAS443:3:54:444:184#0/1  
Z]¥H\_RW^ab\_WNV`\_a^ZW[^]`aadW`][Ya`Xa``[\_  
@HWI-EAS443:3:54:493:1595#0/1  
CAAGAGAAGAACCCCGCACTCAGAATGAAGTGGATGATGG  
+HWI-EAS443:3:54:493:1595#0/1  
Ta]\_ab\_baab]]aabWa\_\_[bbbbba\_aaabbabbb`  
@HWI-EAS443:3:54:575:537#0/1  
AAACAATTCGACACTAATTGATGGCCATCCGAATTCTTTT  
+HWI-EAS443:3:54:575:537#0/1  
aa^a\_`b`aaa`baa``aaa``b]a]a`\_aaa`aaY`aa\_  
@HWI-EAS443:3:54:600:969#0/1  
GAAGAACCCCGCACTCAGAATGAAGTGGATGATGGCAATG  
+HWI-EAS443:3:54:600:969#0/1  
aa`a`aaa\_`a\_`\_\_`\_b¥^aa\_]`Va`^`a^\_`^`\_Y^  
@HWI-EAS443:3:54:603:367#0/1  
GATTGCTCAGTTCATTGATGCTTAATGCTGGGCCATATCT  
+HWI-EAS443:3:54:603:367#0/1  
aaaaaaaa\_a^\_a`a¥aaa``aa`¥aa[aa¥\_\_\_Z\_\_\_]\_  
@HWI-EAS443:3:54:610:316#0/1  
AAGAGAAGAACCCCGCACTCAGAATGAAGTGGATGATGGC  
+HWI-EAS443:3:54:610:316#0/1  
`]b`¥aa¥T`a¥^YaZa]a^aba`^`SQ]UaWUX\_¥[a]F  
@HWI-EAS443:3:54:707:1961#0/1  
CAAGAGAAGAACCCCGCACTCAGAATGAAGTGGATGATGG  
+HWI-EAS443:3:54:707:1961#0/1  
a]```bbb\_`a`JYaa\_aaa`\_aaY\_]`^Ta]b^`X\_`M`a  
@HWI-EAS443:3:54:80:581#0/1  
GAAGAACCCCGCACTCAGAATGAAGTGGATGATGGCAATG

+HWI-EAS443:3:54:80:581#0/1  
aa]a^¥` `\_\_aaaa\_\_` [Y\_a^`Ya`^]\_YY`^^ZV[[  
@HWI-EAS443:3:54:890:1862#0/1  
AGAGAAGAACCCCGCACTCAGAATGAAGTGGATGATGGCA  
+HWI-EAS443:3:54:890:1862#0/1  
[bT` `bababb]]¥baUb^aaaabaa\_b^a`a`a` `adU¥  
@HWI-EAS443:3:54:987:1039#0/1  
TTTTTAAACAATTGACACTAATTGATGGCCATCCGAATT  
+HWI-EAS443:3:54:987:1039#0/1  
aZ\_¥b[ `S[aa¥`a\_K\_W\_a\_aYVa`aXT¥MXY¥YXFY]Z  
@HWI-EAS443:3:54:992:1359#0/1  
CAAGAGATATGGCCCAGCATTAAAGCATCAATGAACTGAGC  
+HWI-EAS443:3:54:992:1359#0/1  
a` `ZY]¥\_YFYV]MVZ\_`a^^^\_]`aa`\_X]^^` `]aXZTQ  
@HWI-EAS443:3:55:1032:312#0/1  
CCAGCATTAAAGCATCAATGAACTGAGCAATCTTGCAAAAAG  
+HWI-EAS443:3:55:1032:312#0/1  
abbbabab`ab`aaa`bbababaab`baaaabb^a]`^`a  
@HWI-EAS443:3:55:1095:782#0/1  
GCATTAAGCATCAATGAACTGAGCAATCTTGCAAAAAGGAG  
+HWI-EAS443:3:55:1095:782#0/1  
a`a`aaa^`\_`^Z^^`Y\_]^^¥\_]\_]^Z\_¥^XWWWX\_Y¥^  
@HWI-EAS443:3:55:1119:708#0/1  
AGATTGCTCAGTTCATTGATGCTTAATGCTGGGCCATATC  
+HWI-EAS443:3:55:1119:708#0/1  
]baa`bZ^aaba` `]^Y^W]a\_a\_\_¥^\_ZP\_a¥[V^a¥\_P  
@HWI-EAS443:3:55:1141:852#0/1  
AGAAGACAAGAGATATGGCCCAGCATTAAAGCATCAATGAA  
+HWI-EAS443:3:55:1141:852#0/1  
ab` `baaaa`Ua\_¥\_[Ya`\_]a\_a]a¥^aa^\_\_]X^]\_¥  
@HWI-EAS443:3:55:1387:443#0/1  
CAATTCGACACTAATTGATGGCCATCCGAATTCTTTTGGT  
+HWI-EAS443:3:55:1387:443#0/1  
ababb^Z`abbaabbbbbbaa[baaabbbba`aabbab`  
@HWI-EAS443:3:55:147:1631#0/1  
AAGAGAAGAACCCCGCACTCAGAATGAAGTGGATGATGGC  
+HWI-EAS443:3:55:147:1631#0/1  
aaa[aa`aa]Y]]` `\_\_a¥X^Y]\_YV^S`^^]^W]]]Y  
@HWI-EAS443:3:55:1639:849#0/1  
AAACAATTGACACTAATTGATGGCCATCCGAATTCTTTT  
+HWI-EAS443:3:55:1639:849#0/1  
aaa`aaa`aba\_a\_aa`a`a` `]\_\_a` `^aaa`]R\_`aa  
@HWI-EAS443:3:55:320:879#0/1  
AACAAATTCGACACTAATTGATGGCCATCCGAATTCTTTT  
+HWI-EAS443:3:55:320:879#0/1  
]¥ab]aaaaaab`aaaa[aa`a[a` `\_\_aa\_R\_` [ `aa\_`  
@HWI-EAS443:3:55:377:128#0/1  
GAAGAACCCCGCACTCAGAATGAAGTGGATGATGGCAATG  
+HWI-EAS443:3:55:377:128#0/1  
a]^\_\_aaZV\_aaUU`^YaS]`a][\_N`\_V`aTWZ[PPV\_`



@HWI-EAS443:3:55:417:72#0/1  
GCTCAGTTCATTGATGCTTAATGCTGGCCATATCTCTTG  
+HWI-EAS443:3:55:417:72#0/1  
aaa`^b\_a`abb`\_a\_aaa\_aa\_\_a`a^`a^a]a\_`a  
@HWI-EAS443:3:55:547:453#0/1  
CAATTCGACACTAATTGATGGCCATCCGAATTCTTTTGGT  
+HWI-EAS443:3:55:547:453#0/1  
aa`baba]abaaa\_a`a]a\_\_^\_\_aW¥^¥[aa]^`\_a^`\_  
@HWI-EAS443:3:55:563:1768#0/1  
AGAAGACAAGAGATATGGCCCAGCATTAAAGCATCAATGAA  
+HWI-EAS443:3:55:563:1768#0/1  
`a`R^¥aZRWYG[a^MY\_]T[`RWJ¥V`XW[\_^PR]HTS  
@HWI-EAS443:3:55:850:544#0/1  
CAAGAGAAGAACCCCGCACTCAGAATGAAGTGGATGATGG  
+HWI-EAS443:3:55:850:544#0/1  
ababbbbab\_ba`a`baaaaaa^abb`b^baaaaa\_``  
@HWI-EAS443:3:55:8:1500#0/1  
AACAAATTCGACACTAATTGATGGCCATCCGAATTCTTTTG  
+HWI-EAS443:3:55:8:1500#0/1  
Y`¥SYaVJ¥abb[¥`\_a\_TaYFSaVaQGTOK]TPO^MaWW  
@HWI-EAS443:3:56:1005:1057#0/1  
AACAAATTCGACACTAATTGATGGCCATCCGAATTCTTTTG  
+HWI-EAS443:3:56:1005:1057#0/1  
]babbaabba`aab`\_`baaa[\_[aa`aaaaa^aaaa]  
@HWI-EAS443:3:56:1022:1514#0/1  
AAGAGAAGAACCCCGCACTCAGAATGAAGTGGATGATGGC  
+HWI-EAS443:3:56:1022:1514#0/1  
a`aaaaaaa\_a`a^\_a]Xa]`a^\_aRa`\_aX^\_[V  
@HWI-EAS443:3:56:1101:1676#0/1  
GGCCCAGCATTAAAGCATCAATGAACTGAGCAATCTTGCAA  
+HWI-EAS443:3:56:1101:1676#0/1  
¥F¥\_abb`ba`\_b]a`a]a]Y^^a]\_^aa]V]```\_\_\_\_Z  
@HWI-EAS443:3:56:1312:57#0/1  
AAGACAAGAGATATGGCCCAGCATTAAAGCATCAATGAACT  
+HWI-EAS443:3:56:1312:57#0/1  
a`a\_0\_¥^Wa^\_XU[GGZX]VYXY^^]XZZXSTZZWZGO  
@HWI-EAS443:3:56:1615:1674#0/1  
CAGCATTAAAGCATCAATGAACTGAGCAATCTTGCAAAAGG  
+HWI-EAS443:3:56:1615:1674#0/1  
aababbbbabaa`bababbaabaaa`bbbabab[aab^aa  
@HWI-EAS443:3:56:222:301#0/1  
GAAGAACCCCGCACTCAGAATGAAGTGGATGATGGCAATG  
+HWI-EAS443:3:56:222:301#0/1  
aa]a\_a\_a`aaa^^`¥a¥]`\_U¥YIZa¥^`WW]\_Y¥¥^Z  
@HWI-EAS443:3:56:246:1673#0/1  
AGAAGAACCCCGCACTCAGAATGAAGTGGATGATGGCAAT  
+HWI-EAS443:3:56:246:1673#0/1  
\_JZa\_b`\_`[^[a¥^]¥TLW`ZSHL\_]^^U^]GRRS]S  
@HWI-EAS443:3:56:51:1017#0/1  
GAAGACAAGAGATATGGCCCAGCATTAAAGCATCAATGAAC

+HWI-EAS443:3:56:51:1017#0/1  
`bbbaaU\_aabaabaa`aba^a`aaa¥` `\_\_aa\_`aa` `\_  
@HWI-EAS443:3:56:734:254#0/1  
TAAGCATCAATGAACTGAGCAATCTTGCAAAAGGAGAGAA  
+HWI-EAS443:3:56:734:254#0/1  
aaaa`aa` `aaaa\_aaaa¥a`a` `b\_\_^[Ya`^a\_aa[  
@HWI-EAS443:3:56:85:1445#0/1  
AGATATGGCCCAGCATTAAAGCATCAATGAACTGAGCAATC  
+HWI-EAS443:3:56:85:1445#0/1  
^` ` \_` `bab`^a¥b`^[\_Z]W\_[VW^[a]U` ` \_` `a\_\_\_\_  
@HWI-EAS443:3:56:907:1036#0/1  
GAGATATGGCCCAGCATTAAAGCATCAATGAACTGAGCAAT  
+HWI-EAS443:3:56:907:1036#0/1  
` `a`ba`^Z`aaa\_¥aaaaaa\_`aa` `b` ` \_` `[¥^aa]\_a  
@HWI-EAS443:3:56:917:1555#0/1  
TAAGCATCAATGAACTGAGCAATCTTGCAAAAGGAGAGAA  
+HWI-EAS443:3:56:917:1555#0/1  
aaa`]aaaaaaaa]a\_aaY`\_a^a`a\_\_\_\_\_aa^aa`a\_  
@HWI-EAS443:3:56:98:827#0/1  
CAATTCGACACTAATTGATGGCCATCCGAATTCTTTTGGT  
+HWI-EAS443:3:56:98:827#0/1  
` `aababba]^aaa\_aaa`a`a\_a`\_\_a[`aa`aaa`\_\_]  
@HWI-EAS443:3:57:1043:1752#0/1  
AGAGAAGAACCCCGCACTCAGAATGAAGTGGATGATGGCA  
+HWI-EAS443:3:57:1043:1752#0/1  
a\_bbbbbbbba^bbbbabaaaa\_]baabZbaaaaaaa\_Q`  
@HWI-EAS443:3:57:1154:827#0/1  
GAAGAACCCCGCACTCAGAATGAAGTGGATGATGGCAATG  
+HWI-EAS443:3:57:1154:827#0/1  
aaaaabaa`abaa`a\_\_a\_\_aa]\_aWa`^a\_U[X`ZZZ¥]  
@HWI-EAS443:3:57:116:1104#0/1  
CAATTCGACACTAATTGATGGCCATCCGAATTCTTTTGGT  
+HWI-EAS443:3:57:116:1104#0/1  
aa\_^Z`U`\_Y[`H\_[Y`\_\_¥]Z\_\_]\_VZ\_\_U\_Y^\_Y\_XY  
@HWI-EAS443:3:57:1234:598#0/1  
AAGAACCCCGCACTCAGAATGAAGTGGATGATGGCAATGA  
+HWI-EAS443:3:57:1234:598#0/1  
aaaa`¥a]]b`a\_a\_\_b\_Zaaa\_aXa\_Zaa[``XZZ]]\_`^  
@HWI-EAS443:3:57:1473:564#0/1  
AACAAATTCGACACTAATTGATGGCCATCCGAATTCTTTTGG  
+HWI-EAS443:3:57:1473:564#0/1  
aa`aaaa]aaaabaaa`a\_aaYVW`WUa``a`^a\_aa]  
@HWI-EAS443:3:57:1597:802#0/1  
TTGCCATCATCCACTTCATTCTGAGTGCGGGGTTCTTCTC  
+HWI-EAS443:3:57:1597:802#0/1  
`\_¥]aaa`ab` ` \_bbaaba`aa\_a\_a\_a^aa`^a\_[a\_  
@HWI-EAS443:3:57:1606:993#0/1  
AGCATTAAAGCATCAATGAACTGAGCAATCTTGCAAAAGGA  
+HWI-EAS443:3:57:1606:993#0/1  
`bab¥a`] ^aaa\_aa`aaaaVR¥¥b^a^bab`Z`] ^b`^`

@HWI-EAS443:3:57:1636:1060#0/1  
CTCTCCTTTTGCAAGATTGCTCAGTTCATTGATGCTTAAT  
+HWI-EAS443:3:57:1636:1060#0/1  
abababa`aab\_aaaaaa`aaaa\_baaa```aa\_b`\_`a  
@HWI-EAS443:3:57:1658:552#0/1  
CAAGAGAAGAACCCCGCACTCAGAATGAAGTGGATGATGG  
+HWI-EAS443:3:57:1658:552#0/1  
abb`aa^\_aaaa[baaaa\_`¥]b\_aa`¥^b¥b`[aa[¥Z\_  
@HWI-EAS443:3:57:19:48#0/1  
GAGAAGAACCCCGCACTCAGAATGAAGTGGATGATGGCAA  
+HWI-EAS443:3:57:19:48#0/1  
a[b]`a^^a`a`aZ[[Z^[^PV¥^Z[\_T^^TU\_QNVWMB  
@HWI-EAS443:3:57:210:565#0/1  
CCATCATCCACTTCATTCTGAGTGC GGGTTCTTCTCTTG  
+HWI-EAS443:3:57:210:565#0/1  
aaaaa`aaaa`aa`a`a`aZ\_\_a`a\_V`\_``Y`\_a\_V  
@HWI-EAS443:3:57:318:1217#0/1  
ATTTTGGGCAAAGAAGACAAGAGATATGGCCCAGCATTAA  
+HWI-EAS443:3:57:318:1217#0/1  
`\_bbb`¥`abaT`^^^abb]a`^\_a`a`ba\_aa`aa]¥`  
@HWI-EAS443:3:57:353:1500#0/1  
AGATTGCTCAGTTCATTGATGCTTAATGCTGGGCCATATC  
+HWI-EAS443:3:57:353:1500#0/1  
a`^`\_\_¥`\_\_`Z¥`^]]^¥¥^]^XW\_X¥^¥ZZZ]Z]^WV  
@HWI-EAS443:3:57:416:93#0/1  
CATTAAGCATCAATGAACTGAGCAATCTTGCAAAAGGAGA  
+HWI-EAS443:3:57:416:93#0/1  
abbbabbaabba^bbaaabaaaaaa`a`baa\_^\_ba^a`  
@HWI-EAS443:3:57:443:899#0/1  
CAGCATTAAAGCATCAATGAACTGAGCAATCTTGCAAAAGG  
+HWI-EAS443:3:57:443:899#0/1  
aa¥\_a`ababaaaaa]aaa`a`a`]¥a`a`b``Q\_\_aa  
@HWI-EAS443:3:57:444:770#0/1  
TAAGCATCAATGAACTGAGCAATCTTGCAAAAGGAGAGAA  
+HWI-EAS443:3:57:444:770#0/1  
\_`]aaa``aaa`aY^aaaa`a]a```a]\_]Xa`]a`a\_\_  
@HWI-EAS443:3:57:457:1266#0/1  
CAAGATTGCTCAGTTCATTGATGCTTAATGCTGGGCCATA  
+HWI-EAS443:3:57:457:1266#0/1  
^^b\_H\_aa`aZ`bXXZbb[`ZaYO\_a^]bab\_Y[L[bXaa  
@HWI-EAS443:3:57:457:309#0/1  
ATTAAGCATCAATGAACTGAGCAATCTTGCAAAAGGAGAG  
+HWI-EAS443:3:57:457:309#0/1  
^RYb[\_SS^[RU`\_K][^YF]a¥Y]Sa^RSaY``YVV`a  
@HWI-EAS443:3:57:468:1969#0/1  
AGAAGAACCCCGCACTCAGAATGAAGTGGATGATGGCAAT  
+HWI-EAS443:3:57:468:1969#0/1  
a`aa]bbbaV^aa[`aa`\_[aUR\_a¥Z````\_`VZLNQXY  
@HWI-EAS443:3:57:490:238#0/1  
AGAAGAACCCCGCACTCAGAATGAAGTGGATGATGGCAAT

+HWI-EAS443:3:57:490:238#0/1  
ab`Ya]aa`\_]a\_`^a][a^\_\_`\_]U\_Xa]^V`^X`\_U]Z]  
@HWI-EAS443:3:57:506:1457#0/1  
CTCATTGTTGGGCAAAGAAGACAAGAGATATGGCCCAGCAT  
+HWI-EAS443:3:57:506:1457#0/1  
abbbbbbbabbaabb`bbbaabbaaababaaaa\_`aa`ab  
@HWI-EAS443:3:57:527:1387#0/1  
AGAAGACAAGAGATATGGCCCAGCATTAAAGCATCAATGAA  
+HWI-EAS443:3:57:527:1387#0/1  
aaaaaa\_`b`Ta`a`a`Y^\_a`]a\_\_\_`ZR[^W\_[\_¥\_[  
@HWI-EAS443:3:57:654:1343#0/1  
GATTGCTCAGTTCATTGATGCTTAATGCTGGGCCATATCT  
+HWI-EAS443:3:57:654:1343#0/1  
\_bbbbabbbbabbbbbbabbbbbbbaa`b\_ba`bbbbbab  
@HWI-EAS443:3:57:678:514#0/1  
GAGAAGAACCCCGCACTCAGAATGAAGTGGATGATGGCAA  
+HWI-EAS443:3:57:678:514#0/1  
aaaW\_X^PXH\_]ZYT\_]¥aXXaX[^Ra^V^`XR¥¥YXN  
@HWI-EAS443:3:57:918:503#0/1  
AACAAATTCGACACTAATTGATGGCCATCCGAATTCTTTTG  
+HWI-EAS443:3:57:918:503#0/1  
a^abaabbbbaa\_abaaaaa^\_Xa`a`\_aa\_Yaa^`\_]¥  
@HWI-EAS443:3:58:1108:578#0/1  
GAAGACAAGAGATATGGCCCAGCATTAAAGCATCAATGAAC  
+HWI-EAS443:3:58:1108:578#0/1  
aaa`\_\_a`a\_a^`\_\_a\_^]`¥\_\_\_`]\_^]\_ZZ^`^Z]Z  
@HWI-EAS443:3:58:1261:1503#0/1  
TTTTTAAACAATTCGACACTAATTGATGGCCATCCGAATT  
+HWI-EAS443:3:58:1261:1503#0/1  
aa\_^^aa`aaaaa\_a\_RY\_\_\_SZ`XU]`Y[U^]QU][Y¥`  
@HWI-EAS443:3:58:1296:451#0/1  
AAGAGAAGAACCCCGCACTCAGAATGAAGTGGATGATGGC  
+HWI-EAS443:3:58:1296:451#0/1  
\_^]`baV\_^a`V]ab\_aaaa`a¥T¥`RU]Xa`VZa[¥^`a  
@HWI-EAS443:3:58:1460:510#0/1  
GAAGAACCCCGCACTCAGAATGAAGTGGATGATGGCAATG  
+HWI-EAS443:3:58:1460:510#0/1  
aaY]U][¥\_Xaa`a\_Ya\_\_\_`RYaT^aXY`MY`\_`RNR[W  
@HWI-EAS443:3:58:1515:428#0/1  
CAAGAGAAGAACCCCGCACTCAGAATGAAGTGGATGATGG  
+HWI-EAS443:3:58:1515:428#0/1  
\_bbbbbabababab`bab\_b`aaabbaa\_a`b^¥bb\_\_`b  
@HWI-EAS443:3:58:1632:1561#0/1  
CCATCATCCACTTCATTCTGAGTGC GG GTTCTTCTCTTG  
+HWI-EAS443:3:58:1632:1561#0/1  
abaa^bbbaabbaaab\_aa`a`aaaabb\_a\_ba`aaaaa  
@HWI-EAS443:3:58:1635:1745#0/1  
CAAGAGAAGAACCCCGCACTCAGAATGAAGTGGATGATGG  
+HWI-EAS443:3:58:1635:1745#0/1  
abaa`]`aabb`aa`aaaabaab\_babbaa^abaaba]S]

@HWI-EAS443:3:58:1636:836#0/1  
GAGATATGCCCCAGCATTAAAGCATCAATGAACTGAGCAAT  
+HWI-EAS443:3:58:1636:836#0/1  
a`b`a`\_a`\_`^`\_`\_`a`\_Z`\_]\_\_`^\_]00]]¥`  
@HWI-EAS443:3:58:1669:291#0/1  
CAAGAGATATGCCCCAGCATTAAAGCATCAATGAACTGAGC  
+HWI-EAS443:3:58:1669:291#0/1  
^`\_`abbaa`\_`\_`aabaaba\_aa\_aaZ`aaa^]`\_`a\_ba  
@HWI-EAS443:3:58:1676:1715#0/1  
AGAAGAACCCCGCACTCAGAATGAAGTGGATGATGGCAAT  
+HWI-EAS443:3:58:1676:1715#0/1  
a¥VW\_U^V]V`\_X^RS`[KJ¥`]WZV\_]W^]QK¥[USNS  
@HWI-EAS443:3:58:350:1653#0/1  
GATTGCTCAGTTCATTGATGCTTAATGCTGGGCCATATCT  
+HWI-EAS443:3:58:350:1653#0/1  
\_aaaaaaaa`aaba]aa`aaaa`aa`\_a`¥Y`\_a\_]a  
@HWI-EAS443:3:58:470:1112#0/1  
AGAAGACAAGAGATATGCCCCAGCATTAAAGCATCAATGAA  
+HWI-EAS443:3:58:470:1112#0/1  
¥^Z^`\_a¥\_Z[``\_YZ`[`a]\_WUU\_`^]`^W]Y\_]Z]¥  
@HWI-EAS443:3:58:48:1323#0/1  
TTTTGGGCAAAGAAGACAAGAGATATGCCCCAGCATTAAAG  
+HWI-EAS443:3:58:48:1323#0/1  
M^bab¥bbb\_`\_`ab`a`a¥b`a`\_`aaa`aa^]a\_^\_Y^a]  
@HWI-EAS443:3:58:587:1936#0/1  
AACAAATTCGACACTAATTGATGGCCATCCGAATTCTTTTG  
+HWI-EAS443:3:58:587:1936#0/1  
\_S^UZW¥\_XZTOXY\_^UNU]a^DV^`]]¥WYV[WXTU^WT  
@HWI-EAS443:3:58:814:313#0/1  
GAGAAGAACCCCGCACTCAGAATGAAGTGGATGATGGCAA  
+HWI-EAS443:3:58:814:313#0/1  
a`\_]a`^a\_Z^Za`\_^]a`Z0[a^]X\_T\_\_`^a\_][ZRT[  
@HWI-EAS443:3:58:916:788#0/1  
GCCCAGCATTAAAGCATCAATGAACTGAGCAATCTTGCAAA  
+HWI-EAS443:3:58:916:788#0/1  
a\_[I[b]¥VXZMX[\_ZWVT[\_¥¥GZ\_Sa^RTZ^aZ`XWVS  
@HWI-EAS443:3:58:96:2024#0/1  
GAAGAACCCCGCACTCAGAATGAAGTGGATGATGGCAATG  
+HWI-EAS443:3:58:96:2024#0/1  
aab`]`aaa`\_`aa`aaaP]`\_a`\_YYa]]ZY\_]X^X^]`^T  
@HWI-EAS443:3:59:1130:84#0/1  
GCATTAAGCATCAATGAACTGAGCAATCTTGCAAAAGGAG  
+HWI-EAS443:3:59:1130:84#0/1  
aaa`baab\_aa`\_`\_abaa\_a\_ab\_a\_a`aa`U[\_]YX`Z^  
@HWI-EAS443:3:59:115:1026#0/1  
AAACAATTCGACACTAATTGATGGCCATCCGAATTCTTTT  
+HWI-EAS443:3:59:115:1026#0/1  
`baaaaaaaaa\_a]`a`aa\_]`\_`\_`^¥^`aaXRZZUWZ\_W  
@HWI-EAS443:3:59:1217:1271#0/1  
GAAGACAAGAGATATGCCCCAGCATTAAAGCATCAATGAAC

+HWI-EAS443:3:59:1217:1271#0/1  
abbbba\_\_^a^aaaa\_b\_Y`^¥ab\_aa`\_`[]aX\_[V^\_N  
@HWI-EAS443:3:59:1254:531#0/1  
GAGAAGAACCCCGCACTCAGAATGAAGTGGATGATGGCAA  
+HWI-EAS443:3:59:1254:531#0/1  
a`U]¥a`^^\_X`^`^Ya`^aRRa\_]HaGa`YO]G]YYGVY  
@HWI-EAS443:3:59:1285:1542#0/1  
AGAAGACAAGAGATATGGCCCAGCATTAAAGCATCAATGAA  
+HWI-EAS443:3:59:1285:1542#0/1  
aaa]bb^\_\_bZ\_```a`\_\_\_¥aa\_bb\_aaYUH\_^¥VRY]Z  
@HWI-EAS443:3:59:1313:1870#0/1  
TATGGCCCAGCATTAAAGCATCAATGAACTGAGCAATCTTG  
+HWI-EAS443:3:59:1313:1870#0/1  
VVY`^Z^a[```¥Ubb`YY\_G]b\_`^ba`aaY[[a]G]U[  
@HWI-EAS443:3:59:1387:1102#0/1  
CAATTCGACACTAATTGATGGCCATCCGAATTCTTTTGGT  
+HWI-EAS443:3:59:1387:1102#0/1  
ababbbbaabaaaaabbaaaabaaabb`]b]^ba][bZZ  
@HWI-EAS443:3:59:1584:71#0/1  
ACAATTCGACACTAATTGATGGCCATCCGAATTCCTTTTGG  
+HWI-EAS443:3:59:1584:71#0/1  
\_\_¥`¥`¥baa`^`bZaab^)`V[Q]aabaaQT\_UUUPW^Y  
@HWI-EAS443:3:59:1649:244#0/1  
AAGAGAAGAACCCCGCACTCAGAATGAAGTGGATGATGGC  
+HWI-EAS443:3:59:1649:244#0/1  
VbbWa\_\_b\_b`ba`aa`\_b\_]P\_aaaYb]b\_\_a`SM\_]V  
@HWI-EAS443:3:59:1685:345#0/1  
AAACAATTCGACACTAATTGATGGCCATCCGAATTCCTTTT  
+HWI-EAS443:3:59:1685:345#0/1  
aa¥V`^`^^^aa]a`^a]Y[¥\_]`[]`\_ZT\_¥¥TU^¥W  
@HWI-EAS443:3:59:1690:1379#0/1  
GAAGAACCCCGCACTCAGAATGAAGTGGATGATGGCAATG  
+HWI-EAS443:3:59:1690:1379#0/1  
abba`aabaab\_aaaa`\_[abaa\_b]aaabaP^`XNX[WL  
@HWI-EAS443:3:59:455:1686#0/1  
AACAATTCGACACTAATTGATGGCCATCCGAATTCCTTTT  
+HWI-EAS443:3:59:455:1686#0/1  
\_^\_¥a`][H^\_¥[\_\_`a¥`^¥R\_`^`¥a```V\_[[UVWYQ  
@HWI-EAS443:3:59:59:1196#0/1  
CAAGAGAAGAACCCCGCACTCAGAATGAAGTGGATGATGG  
+HWI-EAS443:3:59:59:1196#0/1  
aba`^a`^`^`a`^`aaaa\_\_`a`a\_\_aa[Z\_V\_^]ZVSZUT  
@HWI-EAS443:3:59:648:1308#0/1  
AGACAAGAGATATGGCCCAGCATTAAAGCATCAATGAACTG  
+HWI-EAS443:3:59:648:1308#0/1  
a\_Z`\_aa^)`\_aaYaYa\_a`^aaaa`¥]a`^Y[a`ZZ\_]`  
@HWI-EAS443:3:59:683:1065#0/1  
CCCAGCATTAAAGCATCAATGAACTGAGCAATCTTGCAAAA  
+HWI-EAS443:3:59:683:1065#0/1  
`a\_PYX^¥R\_ZaaZ^^SSVbX\_^`aN¥`a]\_X]SaZY]aR

@HWI-EAS443:3:59:781:1079#0/1  
CAAGAGAAGAACCCCGCACTCAGAATGAAGTGGATGATGG  
+HWI-EAS443:3:59:781:1079#0/1  
abababababbba`abaa\_a`aaaaaba`a]\_`^a^Y^\_Y  
@HWI-EAS443:3:59:798:448#0/1  
TAAGCATCAATGAACTGAGCAATCTTGCAAAAGGAGAGAA  
+HWI-EAS443:3:59:798:448#0/1  
`a¥a]bbbb^`a`\_\_b```]\_Z\_aa`a\_a\_W]a\_V^Waa[  
@HWI-EAS443:3:59:852:1246#0/1  
AACAAATTCGACACTAATTGATGGCCATCCGAATCCTTTTG  
+HWI-EAS443:3:59:852:1246#0/1  
abaabbbbabbaZ`abaaaaabaa`a`]aa¥[Ua\_¥  
@HWI-EAS443:3:59:90:1209#0/1  
AGAAGAACCCCGCACTCAGAATGAAGTGGATGATGGCAAT  
+HWI-EAS443:3:59:90:1209#0/1  
abaaaaabaaaba`\_`aaa\_aa\_^Z]`\_]¥V[]YJQLSX  
@HWI-EAS443:3:59:950:409#0/1  
AGAAGAACCCCGCACTCAGAATGAAGTGGATGATGGCAAT  
+HWI-EAS443:3:59:950:409#0/1  
aaZV`aa^VW`b^] []`\_b`^`[`YY`PaaXZYXQ¥VNQS^  
@HWI-EAS443:3:59:982:414#0/1  
ATTGATGCTTAATGCTGGCCATATCTCTTGTCTTCTTTG  
+HWI-EAS443:3:59:982:414#0/1  
abbaabbabbbbaa`abaaa`abaaaaaab^`aaZ]^\_¥  
@HWI-EAS443:3:59:994:331#0/1  
AGAGAAGAACCCCGCACTCAGAATGAAGTGGATGATGGCA  
+HWI-EAS443:3:59:994:331#0/1  
abababbaa````baaaaa`b`aaba[bUba]\_b\_YZa]]  
@HWI-EAS443:3:5:1095:2035#0/1  
AGAAGAACCCCGCACTCAGAATGAAGTGGATGATGGCAAT  
+HWI-EAS443:3:5:1095:2035#0/1  
aabaabb[^`\_b\_a^a`a\_\_`\_a^\_XIWYVXa¥Y\_\_Y]\_^  
@HWI-EAS443:3:5:1098:395#0/1  
TTAAGCATCAATGAACTGAGCAATCTTGCAAAAGGAGAGA  
+HWI-EAS443:3:5:1098:395#0/1  
U¥a^^abb]baZa`S^``ab^`bVa`\_\_JXTTtb\_\_^a[B  
@HWI-EAS443:3:5:1137:1661#0/1  
GAAGACAAGAGATATGGCCAGCATTAAAGCATCAATGAAC  
+HWI-EAS443:3:5:1137:1661#0/1  
ab`]b[\_\_\_`aaaa[aa\_`^aaaaaaaaRHRa\_]a\_\_\_aB  
@HWI-EAS443:3:5:1214:304#0/1  
CAGCATTAAAGCATCAATGAACTGAGCAATCTTGCAAAAGG  
+HWI-EAS443:3:5:1214:304#0/1  
a\_a`abab`U`ab`bbbb^baabab]``a\_\_bb¥aaaa¥a  
@HWI-EAS443:3:5:1490:1484#0/1  
AGACAAGAGATATGGCCAGCATTAAAGCATCAATGAACTG  
+HWI-EAS443:3:5:1490:1484#0/1  
abbSbbbbbaabaV\_``aaa`aaa\_a`^aa\_``a`a`Xaa  
@HWI-EAS443:3:5:170:2013#0/1  
AAACAATTCGACACTAATTGATGGCCATCCGAATCCTTTT

+HWI-EAS443:3:5:170:2013#0/1  
¥a\_ab¥¥Y]N]\_a¥¥ab`a`bY`^aaa\_aba\_aa`]a\_[^  
@HWI-EAS443:3:5:172:685#0/1  
CTCATTGTTGGCAAAGAAGACAAGAGATATGGCCCAGCAT  
+HWI-EAS443:3:5:172:685#0/1  
abbaa[bbbab`aabababaa\_aabaaa\_a¥a`a`a`\_  
@HWI-EAS443:3:5:191:1917#0/1  
TAAGCATCAATGAACTGAGCAATCTTGCAAAAGGAGAGAA  
+HWI-EAS443:3:5:191:1917#0/1  
aba`bbbb`b[Y\_\_YWUbwR`b^KTV]]a`[aV\_bbab]]  
@HWI-EAS443:3:5:378:1845#0/1  
AAGAGAAGAACCCCGCACTCAGAATGAAGTGGATGATGGC  
+HWI-EAS443:3:5:378:1845#0/1  
aba`a``a\_\_]Paaa`aa`]Y]a`¥X[V\_Va[BBBB  
@HWI-EAS443:3:5:384:460#0/1  
AACAAATTCGACACTAATTGATGGCCATCCGAATTCTTTTG  
+HWI-EAS443:3:5:384:460#0/1  
a`b¥bbba\_aa`baa]aab`a]RP`a``]`a\_]`a\_\_a  
@HWI-EAS443:3:5:412:1433#0/1  
CAGCATTAAAGCATCAATGAACTGAGCAATCTTGCAAAAGG  
+HWI-EAS443:3:5:412:1433#0/1  
^QVX^]PQ`Z¥`R\_YM^`\_]VX]]aYaaU^[SU`JaYPTB  
@HWI-EAS443:3:5:681:112#0/1  
AAACAATTCGACACTAATTGATGGCCATCCGAATTCTTTT  
+HWI-EAS443:3:5:681:112#0/1  
abaR`bbbVba^a[bba\_aba\_\_]aaab\_^aa`aa^a\_^a  
@HWI-EAS443:3:5:724:933#0/1  
AGAAGAACCCCGCACTCAGAATGAAGTGGATGATGGCAAT  
+HWI-EAS443:3:5:724:933#0/1  
abaababaaa`baa`ba`a``ab`\_a]a\_^`X]a`Y[\_\_\_  
@HWI-EAS443:3:5:908:911#0/1  
AAGAAGACAAGAGATATGGCCCAGCATTAAAGCATCAATGA  
+HWI-EAS443:3:5:908:911#0/1  
abba¥aaa`¥baa`a^aabaX\_aa`a`aaa^^`X\_^aa`  
@HWI-EAS443:3:5:909:1963#0/1  
AAGAGAAGAACCCCGCACTCAGAATGAAGTGGATGATGGC  
+HWI-EAS443:3:5:909:1963#0/1  
aaaab[b\_a`TaY\_aQa\_\_`\_a``\_\_`\_U\_\_^^`\_H¥BB  
@HWI-EAS443:3:60:1066:1347#0/1  
AGAGATATGGCCCAGCATTAAAGCATCAATGAACTGAGCAA  
+HWI-EAS443:3:60:1066:1347#0/1  
a`a\_\_]]¥a^\_]a^aaaa\_aa]a^aa^]]a^aW]\_Sa\_  
@HWI-EAS443:3:60:1106:661#0/1  
AACAAATTCGACACTAATTGATGGCCATCCGAATTCTTTTG  
+HWI-EAS443:3:60:1106:661#0/1  
]aaaaaabaab\_aaaaa\_\_`^`¥`ZaWa\_\_``]`\_```  
@HWI-EAS443:3:60:1108:1232#0/1  
CAATTCGACACTAATTGATGGCCATCCGAATTCTTTTGGT  
+HWI-EAS443:3:60:1108:1232#0/1  
\_LZQ`^XUZ]¥a^RZ\_V^SYYQT]VVULWXLV]`US\_NY



@HWI-EAS443:3:60:1110:1047#0/1  
TTTAAACAATTCGACACTAATTGATGGCCATCCGAATTCT  
+HWI-EAS443:3:60:1110:1047#0/1  
`aaaa`aZaaaa^a\_\_X\_`^aZ[\_[[\_U\_]^X^¥[\_¥\_  
@HWI-EAS443:3:60:1121:486#0/1  
CATTGCCATCATCCACTTCATTCTGAGTGC GGGTTCTTC  
+HWI-EAS443:3:60:1121:486#0/1  
`a[UaZSU¥U]\_TM¥]a]Y[N]XVXLLTV^`¥`^UUM^XW  
@HWI-EAS443:3:60:1135:1460#0/1  
GAGAAGAACCCCGCACTCAGAATGAAGTGGATGATGGCAA  
+HWI-EAS443:3:60:1135:1460#0/1  
a\_a\_¥`^`^[\_`^`\_\_\_^VR^`\_]X`U\_VZ]]UUZYXX^  
@HWI-EAS443:3:60:1306:785#0/1  
GAAGAACCCCGCACTCAGAATGAAGTGGATGATGGCAATG  
+HWI-EAS443:3:60:1306:785#0/1  
aaaaaa`\_aab\_a\_`aaa^`aa^aYa\_]aaY^`^]`^`  
@HWI-EAS443:3:60:1311:1296#0/1  
GGGGTATGAAGAATTCACAATGGTTGGGAGAAGAGCAACA  
+HWI-EAS443:3:60:1311:1296#0/1  
aaaaWa`\_]a^a`\_\_`\_]`\_X]Z]]Z\_Z^^Z\_ZZ^ZZ  
@HWI-EAS443:3:60:1333:197#0/1  
TAAGCATCAATGAACTGAGCAATCTTGCAAAAGGAGAGAA  
+HWI-EAS443:3:60:1333:197#0/1  
ababbabaaa`^aaZa```¥\_]`^]¥aaa[aa\_b^^b\_aa]  
@HWI-EAS443:3:60:1475:1208#0/1  
AAGAACCCCGCACTCAGAATGAAGTGGATGATGGCAATGA  
+HWI-EAS443:3:60:1475:1208#0/1  
]¥J]RX]a`b¥¥\_\_a`b]a\_T[ZYRT^TVTXBBBBBBBBB  
@HWI-EAS443:3:60:1577:780#0/1  
GAAGAACCCCGCACTCAGAATGAAGTGGATGATGGCAATG  
+HWI-EAS443:3:60:1577:780#0/1  
a`aY````^\_^aU[\_\_\_XaUaa`W`SUS^`\_¥]O`O]^^^  
@HWI-EAS443:3:60:1578:288#0/1  
TTTTTAAACAATTCGACACTAATTGATGGCCATCCGAATT  
+HWI-EAS443:3:60:1578:288#0/1  
aabaaaa\_\_aaa`Z`]¥`\_`\_^\_\_\_\_\_`^YT¥[TT\_TZ¥¥  
@HWI-EAS443:3:60:1663:1829#0/1  
CAATTCGACACTAATTGATGGCCATCCGAATTCTTTTGGT  
+HWI-EAS443:3:60:1663:1829#0/1  
]Xb`bbbU`a[b]^G¥b^]a[]UadWJ`Uab^aaa`WaU]  
@HWI-EAS443:3:60:1666:853#0/1  
GAGAAGAACCCCGCACTCAGAATGAAGTGGATGATGGCAA  
+HWI-EAS443:3:60:1666:853#0/1  
aaa\_aaaaa`a^^`a`Wa\_\_a\_TU`Y`\_^\_a^^]R^U¥  
@HWI-EAS443:3:60:1742:1299#0/1  
AAGAGATATGGCCAGCATTAAAGCATCAATGAACTGAGCA  
+HWI-EAS443:3:60:1742:1299#0/1  
aaaa`aabWYa\_`Waaaaa``[]a\_S\_aa\_\_\_\_[`]\_WP`  
@HWI-EAS443:3:60:1761:446#0/1  
CATTAAGCATCAATGAACTGAGCAATCTTGCAAAAGGAGA

+HWI-EAS443:3:60:1761:446#0/1  
abbbbab\_ab`abaaaaaaa\_aaa`aaa`a\_]\_\_a%\_b`  
@HWI-EAS443:3:60:184:367#0/1  
CAATTCGACACTAATTGATGGCCATCCGAATTCTTTTGGT  
+HWI-EAS443:3:60:184:367#0/1  
a\_R\_W^]NYa\_]MPTYPV%X^XRV[TXUYZSYSMIKUQ  
@HWI-EAS443:3:60:195:949#0/1  
CCCAGCATTAAGCATCAATGAAGCAATCTTGCAAAA  
+HWI-EAS443:3:60:195:949#0/1  
aaa^\_\_`aaaa\_^^`\_]\_]\_]\_^^`SSY^XYWX]WTV  
@HWI-EAS443:3:60:34:1260#0/1  
GACAAGAGATATGGCCCAGCATTAAGCATCAATGAAGCA  
+HWI-EAS443:3:60:34:1260#0/1  
%`bbbbababa^b\_a\_ba`baaaaa\_a\_aa`aaa]\_^`  
@HWI-EAS443:3:60:398:334#0/1  
CTCTCCTTTTGCAAGATTGCTCAGTTCATTGATGCTTAAT  
+HWI-EAS443:3:60:398:334#0/1  
`abbaaababaaabbabaaa`\_b\_a\_a`\_````\_a\_a]^  
@HWI-EAS443:3:60:422:1239#0/1  
CAATTCGACACTAATTGATGGCCATCCGAATTCTTTTGGT  
+HWI-EAS443:3:60:422:1239#0/1  
`\_Z]abaabab`U[\_^WXT]^`a^\_]W`%\_a`]%NY]VUU  
@HWI-EAS443:3:60:475:1862#0/1  
CAATTCGACACTAATTGATGGCCATCCGAATTCTTTTGGT  
+HWI-EAS443:3:60:475:1862#0/1  
abbbaaaaaabaaaa`\_\_a`\_Zaaa`\_```aa`W````\_]`  
@HWI-EAS443:3:60:705:520#0/1  
GAAGAACCCCGCACTCAGAATGAAGTGGATGATGGCAATG  
+HWI-EAS443:3:60:705:520#0/1  
a)`aaa``bb`a%a`]b``a^Yb]aa^`a^^`\_\_%Y]^`  
@HWI-EAS443:3:60:72:454#0/1  
GAAGAACCCCGCACTCAGAATGAAGTGGATGATGGCAATG  
+HWI-EAS443:3:60:72:454#0/1  
aaaa\_\_aa``aa[\_`\_]\_]\_`a]S`X`%YY\_YV[Z]YVV^  
@HWI-EAS443:3:60:758:837#0/1  
CATTAAAGCATCAATGAAGCAATCTTGCAAAAAGGAGA  
+HWI-EAS443:3:60:758:837#0/1  
abbbaababaaabaababbabababbaaa`\_a%aa[`aa  
@HWI-EAS443:3:60:811:52#0/1  
GAGAAGAACCCCGCACTCAGAATGAAGTGGATGATGGCAA  
+HWI-EAS443:3:60:811:52#0/1  
a`a[aa`a^][[a\_`^\_]`VV^`[VaY`\_]`Y^\_YWWY  
@HWI-EAS443:3:60:850:1534#0/1  
TAAGCATCAATGAAGCAATCTTGCAAAAAGGAGAGAA  
+HWI-EAS443:3:60:850:1534#0/1  
^`X``%TWXVZaaR`\_a[``b\_[]a^^aVXSYIW`%`]  
@HWI-EAS443:3:60:959:1674#0/1  
ATTTTGGGCAAAGAAGACAAGAGATATGGCCAGCATTAA  
+HWI-EAS443:3:60:959:1674#0/1  
`abba\_aa\_aaa``aaa`a\_\_\_a\_^`\_]`%]^ZWa^^`\_^

@HWI-EAS443:3:61:1011:1090#0/1  
CAATTCGACACTAATTGATGGCCATCCGAATTCTTTTGGT  
+HWI-EAS443:3:61:1011:1090#0/1  
]b]b`aY]\_abbbbbbb]aaaba¥aabab`^`R^a\_\_\_\_\_  
@HWI-EAS443:3:61:1246:170#0/1  
ATTAAGCATCAATGAACTGAGCAATCTTGCAAAAGGAGAG  
+HWI-EAS443:3:61:1246:170#0/1  
aaabaaaa^a\_aa\_\_\_aa\_aa^X`aa\_a\_]\_YY\_\_[\_Y^  
@HWI-EAS443:3:61:1322:597#0/1  
CCATCATCCACTTCATTCTGAGTGC GGGTTCTTCTCTTG  
+HWI-EAS443:3:61:1322:597#0/1  
abbbabaaaa`bbaabbaaba]baaa[b^`]aaVaY`^^  
@HWI-EAS443:3:61:1337:152#0/1  
AGAAGACAAGAGATATGGCCCAGCATTAAAGCATCAATGAA  
+HWI-EAS443:3:61:1337:152#0/1  
abaabaaaababaaaab`aa\_aaa`a\_aX][^^]`^ZZ  
@HWI-EAS443:3:61:1362:54#0/1  
CAGCATTAAAGCATCAATGAACTGAGCAATCTTGCAAAAGG  
+HWI-EAS443:3:61:1362:54#0/1  
Kba^bbbbVaa\_b¥`ba\_bbbbababbb\_]a¥a[Iaaa  
@HWI-EAS443:3:61:1597:1814#0/1  
GAAGACAAGAGATATGGCCCAGCATTAAAGCATCAATGAAC  
+HWI-EAS443:3:61:1597:1814#0/1  
aaaa`Pa\_]T]aU^P]Z^[Y]a\_\_^[LPYTTZ^XNNNH  
@HWI-EAS443:3:61:1746:1133#0/1  
GCATTAAGCATCAATGAACTGAGCAATCTTGCAAAAGGAG  
+HWI-EAS443:3:61:1746:1133#0/1  
\_RYa]PYZT¥TW¥\_a^XUY\_]aY]`\_]\_Z¥PWXWV]WZW  
@HWI-EAS443:3:61:210:1190#0/1  
TTTTTAAACAATTCGACACTAATTGATGGCCATCCGAATT  
+HWI-EAS443:3:61:210:1190#0/1  
aab`b]YK\_^\_\_baaa`Y`aa]Z[a¥Za^]a\_¥``\_YYXY  
@HWI-EAS443:3:61:246:1731#0/1  
TAAGCATCAATGAACTGAGCAATCTTGCAAAAGGAGAGAA  
+HWI-EAS443:3:61:246:1731#0/1  
ab`]`aaaaabaaaa`X\_aa`R¥a\_\_`a\_a`\_¥][V^\_\_]  
@HWI-EAS443:3:61:271:571#0/1  
GCATTAAGCATCAATGAACTGAGCAATCTTGCAAAAGGAG  
+HWI-EAS443:3:61:271:571#0/1  
`\_^Z]Y\_]W[^\_]S^\_[[Q¥]SIY\_]Y[[VTTL]YWU  
@HWI-EAS443:3:61:313:1828#0/1  
AGCTGTTGCTCTTCTCCAACCATTGTGAATTCTTCATAC  
+HWI-EAS443:3:61:313:1828#0/1  
aaaaaa^aa`^`¥^`baaaa`Y]ZZTX^Y]STT¥X[VWS  
@HWI-EAS443:3:61:313:496#0/1  
GATTGCTCAGTTCATTGATGCTTAATGCTGGCCATATCT  
+HWI-EAS443:3:61:313:496#0/1  
a]X^U^T\_X[U``[¥¥TSYV[Y[SQQ[Y¥YQQZWZ¥Z[NT  
@HWI-EAS443:3:61:460:254#0/1  
AACAAATTCGACACTAATTGATGGCCATCCGAATTCTTTTG

+HWI-EAS443:3:61:460:254#0/1  
`a\_abbbaaaaa^]aaa\_\_^^`a`^`\_\_^\_^[^a^^[  
@HWI-EAS443:3:61:565:314#0/1  
AGAAGACAAGAGATATGGCCCAGCATTAAAGCATCAATGAA  
+HWI-EAS443:3:61:565:314#0/1  
````a`ba]\_aa]ZZ^`\_\_\_\_RX\_¥^YX[[\_ZY]\_] ^ZQ  
@HWI-EAS443:3:61:642:1015#0/1  
AAACAATTTCGACACTAATTGATGGCCATCCGAATTCTTTT  
+HWI-EAS443:3:61:642:1015#0/1  
`¥a¥\_`bbb¥a^bbb¥¥`a¥S\_a`b`JZaaa`¥a^¥`a^`  
@HWI-EAS443:3:61:908:475#0/1  
AATTTCGACACTAATTGATGGCCATCCGAATTCTTTTGGTC  
+HWI-EAS443:3:61:908:475#0/1  
abbab`Wabaa`a`a]baa[]`V[bab[¥Z`\_a\_a\_\_\_¥U  
@HWI-EAS443:3:62:1131:1833#0/1  
GAAGAACCCCGCACTCAGAATGAAGTGGATGATGGCAATG  
+HWI-EAS443:3:62:1131:1833#0/1  
aab`aaaa`abaa`aa`aa]aa`]aRaa`aa^]aa0[`a\_  
@HWI-EAS443:3:62:118:1375#0/1  
GCATTAAGCATCAATGAAGTGGCAATCTTGCAAAAGGAG  
+HWI-EAS443:3:62:118:1375#0/1  
a`aR]\_`\_`[\_[]Yaa¥`[¥TY\_\_]X¥\_\_]\_XPYYY^]]^  
@HWI-EAS443:3:62:1289:1351#0/1  
TTAAGCATCAATGAAGTGGCAATCTTGCAAAAGGAGAGA  
+HWI-EAS443:3:62:1289:1351#0/1  
abbbaTZZZ^¥\_Z[[]\_]X\_aa¥\_`^`V]]^\_RV\_ZY\_\_a`  
@HWI-EAS443:3:62:1350:690#0/1  
CAATTTCGACACTAATTGATGGCCATCCGAATTCTTTTGGT  
+HWI-EAS443:3:62:1350:690#0/1  
aab¥T`aaabaaa]^`Z\_]aa`]aa`ZaZ^a`^`^]NTDPQ  
@HWI-EAS443:3:62:13:1905#0/1  
ATTTTGGGCAAAGAAGACAAGAGATATGGCCCAGCATTAA  
+HWI-EAS443:3:62:13:1905#0/1  
a^`]aaa¥¥W`aaa^¥L`\_`Y^V¥W`^]Y]YZXPX\_¥X\_Y  
@HWI-EAS443:3:62:1556:2042#0/1  
AGAGAAGAACCCCGCACTCAGAATGAAGTGGATGATGGCA  
+HWI-EAS443:3:62:1556:2042#0/1  
]b]b]b`aa¥a]^`ab`a\_Ya]\_`\_`[^\_T¥]^aa]RX]RY  
@HWI-EAS443:3:62:161:1586#0/1  
AGAGAAGAACCCCGCACTCAGAATGAAGTGGATGATGGCA  
+HWI-EAS443:3:62:161:1586#0/1  
\_^ZRYRMO\_^a\_V¥`¥]V[]VY\_YV¥YOJW¥¥ZNVQLKNS  
@HWI-EAS443:3:62:1654:253#0/1  
TAAGCATCAATGAAGTGGCAATCTTGCAAAAGGAGAGAA  
+HWI-EAS443:3:62:1654:253#0/1  
UQ[\_[\_YWTaaaXU]¥^W`a¥Z]YZa]O¥ORF^VS]V`^`  
@HWI-EAS443:3:62:1666:344#0/1  
GCTGTTGCTCTTCTCCCAACCATTTGTGAATTCTTCATACC  
+HWI-EAS443:3:62:1666:344#0/1  
\_`aab¥a\_[VW\_]``aY]Y^^VV\_WZ^R]ZYFX^ZT\_Qaa

@HWI-EAS443:3:62:169:1763#0/1  
GAAGAACCCCGCACTCAGAATGAAGTGGATGATGGCAATG  
+HWI-EAS443:3:62:169:1763#0/1  
a`[aabbabaWa\_`aa[aaaJaaaQ¥\_`^`\_\_GPP\_\_`^  
@HWI-EAS443:3:62:1742:301#0/1  
TTAAGCATCAATGAACTGAGCAATCTTGCAAAAGGAGAGA  
+HWI-EAS443:3:62:1742:301#0/1  
¥aVbaXa^`ba[\_`^^`YV^\_VY¥X\_X]]^S^]Vb]W\_  
@HWI-EAS443:3:62:199:1498#0/1  
CTCATTTTGGGCAAAGAAGACAAGAGATATGGCCCAGCAT  
+HWI-EAS443:3:62:199:1498#0/1  
a\_abbabbb`b^¥\_Z`bb^]\_^`aab\_Z]a```\_ab`  
@HWI-EAS443:3:62:260:1862#0/1  
TTTTTAAACAATTGACACTAATTGATGGCCATCCGAATT  
+HWI-EAS443:3:62:260:1862#0/1  
Y`¥\_`a\_TQ`¥^`\_R\_¥aba\_b]ZP\_\_OHOX`]ZaHQVN`  
@HWI-EAS443:3:62:304:171#0/1  
CAATTCGACACTAATTGATGGCCATCCGAATTCTTTTGGT  
+HWI-EAS443:3:62:304:171#0/1  
M`a`V]bbaUa[b[aa]]bb\_aba`[XQW\_aLLL`^^V  
@HWI-EAS443:3:62:347:1218#0/1  
TTAAGCATCAATGAACTGAGCAATCTTGCAAAAGGAGAGA  
+HWI-EAS443:3:62:347:1218#0/1  
^a`^aaaa`aaaaaaaa`^a`Ya`aaa]¥¥Wa\_]\_a[\_  
@HWI-EAS443:3:62:377:645#0/1  
AGAAGAACCCCGCACTCAGAATGAAGTGGATGATGGCAAT  
+HWI-EAS443:3:62:377:645#0/1  
aa`aabbbaabbaaaa`[^]aa^V`[a`^\_] [\_ZZ\_\_^  
@HWI-EAS443:3:62:390:1572#0/1  
AGAGATATGGCCCAGCATTAAAGCATCAATGAACTGAGCAA  
+HWI-EAS443:3:62:390:1572#0/1  
abbababaaaab`]`bba`aaaaaaa`aaa^^`\_`\_\_aaa  
@HWI-EAS443:3:62:43:919#0/1  
GAAGAACCCCGCACTCAGAATGAAGTGGATGATGGCAATG  
+HWI-EAS443:3:62:43:919#0/1  
¥aS¥\_abaaaba\_\_`baa^```\_Z`V`\_^YX]]`[ZS[¥  
@HWI-EAS443:3:62:477:28#0/1  
CAAGATTGCTCAGTTCATTGATGCTTAATGCTGGGCCATA  
+HWI-EAS443:3:62:477:28#0/1  
abbbbbbbbaaababbbbabab\_aaa`aaa\_aaa`^`\_Q  
@HWI-EAS443:3:62:50:505#0/1  
GACAAGAGATATGGCCCAGCATTAAAGCATCAATGAACTGA  
+HWI-EAS443:3:62:50:505#0/1  
a]aa\_b\_a`a`Z^\_^^`a[\_\_\_Y¥\_\_^W[[^]^¥WWW  
@HWI-EAS443:3:62:549:480#0/1  
AAGAGAAGAACCCCGCACTCAGAATGAAGTGGATGATGGC  
+HWI-EAS443:3:62:549:480#0/1  
a[a]\_abb]aaa\_abbaaaaWN`aU\_`Vaa\_`aY]a]Z  
@HWI-EAS443:3:62:681:1761#0/1  
AAGAGAAGAACCCCGCACTCAGAATGAAGTGGATGATGGC

+HWI-EAS443:3:62:681:1761#0/1  
aX\_aaaaa\_a\_\_S]aa`\_[a\_\_^\_\_`^]\_U`\_]¥\_X^^]S  
@HWI-EAS443:3:62:719:44#0/1  
TAAGCATCAATGAACTGAGCAATCTTGCAAAAGGAGAGAA  
+HWI-EAS443:3:62:719:44#0/1  
abbbabb^Zabaaabb¥b`aaa\_aaba`^]Xa^^a\_aaS  
@HWI-EAS443:3:62:838:1191#0/1  
TATGGCCCGCATTAAGCATCAATGAACTGAGCAATCTTG  
+HWI-EAS443:3:62:838:1191#0/1  
aaabaabb[ba`aabaa^`]aaabaa`\_aaa`\_a^^\_a`\_`  
@HWI-EAS443:3:62:867:42#0/1  
AGAAGAACCCCGCACTCAGAATGAAGTGGATGATGGCAAT  
+HWI-EAS443:3:62:867:42#0/1  
\_¥`^b`aba`ab`\_a^a`bJ\_ab^Pa¥aaSY`[\_a¥¥V¥^  
@HWI-EAS443:3:62:901:1561#0/1  
ATTAAGCATCAATGAACTGAGCAATCTTGCAAAAGGAGAG  
+HWI-EAS443:3:62:901:1561#0/1  
aaaaaabb\_a]\_a[^\_aa]\_]`¥a\_a`X]aY`\_`Z^]`\_]  
@HWI-EAS443:3:62:905:1703#0/1  
CAGCATTAAGCATCAATGAACTGAGCAATCTTGCAAAAGG  
+HWI-EAS443:3:62:905:1703#0/1  
[HZR¥a[a\_]UT^`\_Y\_aaaaa\_^]W\_a`]\_Za^ZZ[ZZ\_  
@HWI-EAS443:3:62:912:1604#0/1  
GCATTAAGCATCAATGAACTGAGCAATCTTGCAAAAGGAG  
+HWI-EAS443:3:62:912:1604#0/1  
aabaaba`\_ab`a`aa`baaa`aIa`\_a`\_a^a^`^`¥`\_  
@HWI-EAS443:3:62:928:339#0/1  
TAAGCATCAATGAACTGAGCAATCTTGCAAAAGGAGAGAA  
+HWI-EAS443:3:62:928:339#0/1  
aa`baaaaa`bbaa\_aa\_aaaaa`\_aa`a^\_a^aa\_a^aa`  
@HWI-EAS443:3:62:955:790#0/1  
CTCTCCTTTTGCAAGATTGCTCAGTTCATTGATGCTTAAT  
+HWI-EAS443:3:62:955:790#0/1  
aaaaaabaa]aaa`a\_aa`\_`^`^`\_`\_\_a`\_a\_\_¥`Z^  
@HWI-EAS443:3:62:997:1969#0/1  
GAAGAACCCCGCACTCAGAATGAAGTGGATGATGGCAATG  
+HWI-EAS443:3:62:997:1969#0/1  
^YVX\_baba\_aaaaab`ZT`¥¥]\_PIZ\_aaaXGZTRX^]\_  
@HWI-EAS443:3:63:1108:586#0/1  
TAAGCATCAATGAACTGAGCAATCTTGCAAAAGGAGAGAA  
+HWI-EAS443:3:63:1108:586#0/1  
ZY\_`¥Z\_a`[^XP¥`^PMX^`aYYR^b]WXPU`ZR`X`\_`B  
@HWI-EAS443:3:63:12:1987#0/1  
CAAGAGAAGAACCCCGCACTCAGAATGAAGTGGATGATGG  
+HWI-EAS443:3:63:12:1987#0/1  
aaaaa\_]aa]aa^a`^a\_a\_\_\_ZV[\_^P^YSNTUY[VRYV  
@HWI-EAS443:3:63:1430:845#0/1  
CAAGAGAAGAACCCCGCACTCAGAATGAAGTGGATGATGG  
+HWI-EAS443:3:63:1430:845#0/1  
aa^ba\_W[a`\_`\_`a\_bbbba\_\_baa`a\_^a¥aba\_a^[\_`\_`

@HWI-EAS443:3:63:1486:334#0/1  
CAATTCGACACTAATTGATGGCCATCCGAATTCTTTTGGT  
+HWI-EAS443:3:63:1486:334#0/1  
\_bbbbbaabbbbbbabbbbbbb\_bbbbbbbba\_\_a`bbaaaaa  
@HWI-EAS443:3:63:1564:381#0/1  
GATATGGCCCAGCATTAAAGCATCAATGAACTGAGCAATCT  
+HWI-EAS443:3:63:1564:381#0/1  
a\_\_a`aaa^¥[\_^`¥[\_`a]^\_\_^`\_^]ZZ]^`^^]ZX\_  
@HWI-EAS443:3:63:1616:463#0/1  
CATTAAGCATCAATGAACTGAGCAATCTTGCAAAGGAGA  
+HWI-EAS443:3:63:1616:463#0/1  
abbbbbbb^bb`aababba\_\_ab`a`b`aaY]^`\_a^V`  
@HWI-EAS443:3:63:1655:344#0/1  
ATTGATGCTTAATGCTGGGCCATATCTTGTCTTCTTTG  
+HWI-EAS443:3:63:1655:344#0/1  
aabbaabaabaaa`\_aaaa`aaaaa`\_a`\_\_a`\_a^a\_  
@HWI-EAS443:3:63:339:741#0/1  
ATTAAGCATCAATGAACTGAGCAATCTTGCAAAGGAGAG  
+HWI-EAS443:3:63:339:741#0/1  
`^ZJ¥baab```YaaaXXZbb`ab`aaa[[`R`[]a^`  
@HWI-EAS443:3:63:426:65#0/1  
AGAAGAACCCCGCACTCAGAATGAAGTGGATGATGGCAAT  
+HWI-EAS443:3:63:426:65#0/1  
`bbaaaaa`aba\_aa`Ya^\_a\_]aYa\_X`ZR\_\_Y]]Y  
@HWI-EAS443:3:63:459:1041#0/1  
TAAACAATTCGACACTAATTGATGGCCATCCGAATTCTTT  
+HWI-EAS443:3:63:459:1041#0/1  
`bb`\_RK^aa]X^aa\_] [\_^a`\_\_Ra[`W`[[R]YR]\_\_]\_  
@HWI-EAS443:3:63:514:640#0/1  
GAGAAGAACCCCGCACTCAGAATGAAGTGGATGATGGCAA  
+HWI-EAS443:3:63:514:640#0/1  
\_V¥]Y\_TY[W¥]¥YVVZ]¥\_VV]aWPYFY^ZTYLQXYSRO  
@HWI-EAS443:3:63:558:714#0/1  
AGATTGCTCAGTTCATTGATGCTTAATGCTGGGCCATATC  
+HWI-EAS443:3:63:558:714#0/1  
a\_a\_\_`a`a`a`]\_`aaaa`aaa\_a\_\_`]\_`\_\_`^a``\_a  
@HWI-EAS443:3:63:57:1330#0/1  
CATTAAGCATCAATGAACTGAGCAATCTTGCAAAGGAGA  
+HWI-EAS443:3:63:57:1330#0/1  
\_R\_a[\_W\_\_¥]ZZ¥\_YY\_aaa^\_Y\_`^]U^a¥T]¥`WJ[Y  
@HWI-EAS443:3:63:626:47#0/1  
TAAGCATCAATGAACTGAGCAATCTTGCAAAGGAGAGAA  
+HWI-EAS443:3:63:626:47#0/1  
ababaaaaababT\_\_a`X`aa`a`\_aa\_a]^`[a\_¥a^`^N  
@HWI-EAS443:3:63:643:55#0/1  
AGAAGACAAGAGATATGGCCCAGCATTAAAGCATCAATGAA  
+HWI-EAS443:3:63:643:55#0/1  
`bbaaaa`\_[a`aaXI]`a`a]Z`X`Y`¥¥¥\_`Z^`W¥  
@HWI-EAS443:3:63:774:1868#0/1  
TTAAGCATCAATGAACTGAGCAATCTTGCAAAGGAGAGA

+HWI-EAS443:3:63:774:1868#0/1  
\_`YX[UabZQZb¥ba^^b¥a`]b\_a`a\_\_`aaaa`\_a`ab  
@HWI-EAS443:3:63:799:1194#0/1  
CAAGAGAAGAACCCCGCACTCAGAATGAAGTGGATGATGG  
+HWI-EAS443:3:63:799:1194#0/1  
`abb]aU`b¥babbabaaa\_aaa`¥aa`^S`a\_aa][`]  
@HWI-EAS443:3:63:853:1835#0/1  
AAGACAAGAGATATGGCCCAGCATTAAAGCATCAATGAACT  
+HWI-EAS443:3:63:853:1835#0/1  
^]Wa\_`¥U¥]^\_a[X\_\_aa\_Q]a]]aaZZ¥^[`Z[¥]\_¥\_  
@HWI-EAS443:3:63:990:1367#0/1  
GAAGAACCCCGCACTCAGAATGAAGTGGATGATGGCAATG  
+HWI-EAS443:3:63:990:1367#0/1  
abaaab^b`bbaaaaaaaa¥baa\_`]aa\_\_\_\_]`aa[]`]  
@HWI-EAS443:3:64:101:1127#0/1  
GATTGCTCAGTTCATTGATGCTTAATGCTGGGCCATATCT  
+HWI-EAS443:3:64:101:1127#0/1  
aaaaabaaab`aaaaabaaaaaa]aaa`a\_`a\_aaaa``  
@HWI-EAS443:3:64:1022:850#0/1  
AAGAAGACAAGAGATATGGCCCAGCATTAAAGCATCAATGA  
+HWI-EAS443:3:64:1022:850#0/1  
`babaaab`b`aaaab`aZa`Y[`¥aaa]a`¥a`a`[`¥[  
@HWI-EAS443:3:64:1082:756#0/1  
CCAGCATTAAAGCATCAATGAACTGAGCAATCTTGCAAAAG  
+HWI-EAS443:3:64:1082:756#0/1  
aaaabbaaaaaaaa\_a\_\_aaa`]`a`\_a\_a\_aaaaa\_^\_^a  
@HWI-EAS443:3:64:124:777#0/1  
TAAGCATCAATGAACTGAGCAATCTTGCAAAAGGAGAGAA  
+HWI-EAS443:3:64:124:777#0/1  
a\_\_abbaaaaaaaaaaaaaaaaaaaaaaaa`a`aY``\_aa`a\_  
@HWI-EAS443:3:64:1268:1228#0/1  
AACAAATTCGACACTAATTGATGGCCATCCGAATTCTTTTG  
+HWI-EAS443:3:64:1268:1228#0/1  
`[PYa`ab`a[`^`bbaba`ZUa`a\_a`baaa\_W\_`a`\_  
@HWI-EAS443:3:64:1302:1876#0/1  
AGAAGAACCCCGCACTCAGAATGAAGTGGATGATGGCAAT  
+HWI-EAS443:3:64:1302:1876#0/1  
^abaa`baZbaa^YPVZ[a0RO\_a]RPaVYQT^X\_a^J[P  
@HWI-EAS443:3:64:143:1973#0/1  
GAGAAGAACCCCGCACTCAGAATGAAGTGGATGATGGCAA  
+HWI-EAS443:3:64:143:1973#0/1  
^a]a\_ZW`b`b`\_`bbaa^Z\_\_baaaaZ`\_`\_][VSV¥\_\_  
@HWI-EAS443:3:64:1517:300#0/1  
TTTTTAAACAATTCGACACTAATTGATGGCCATCCGAATT  
+HWI-EAS443:3:64:1517:300#0/1  
abbbabaa`a\_aa^]a\_a\_aa\_\_aa`Ya\_[Q\_`]`^`^¥`¥  
@HWI-EAS443:3:64:1518:592#0/1  
GATTGCTCAGTTCATTGATGCTTAATGCTGGGCCATATCT  
+HWI-EAS443:3:64:1518:592#0/1  
^QVYU¥U]0]VRY\_a\_VY]LR^XX¥^YOQ]`\_VJORS¥SY



@HWI-EAS443:3:64:1531:1040#0/1  
AGAGAAGAACCCCGCACTCAGAATGAAGTGGATGATGGCA  
+HWI-EAS443:3:64:1531:1040#0/1  
^\_aaabbaba\_\_`b`a\_b\_^b¥aaa`\_a^a\_^a`\_\_a[¥W  
@HWI-EAS443:3:64:1661:590#0/1  
TTTTTAAACAATTCGACACTAATTGATGGCCATCCGAATT  
+HWI-EAS443:3:64:1661:590#0/1  
ababaa`TQ` `[ [¥[YSSW`X` ¥Z¥]¥PQJRWT¥V^U  
@HWI-EAS443:3:64:194:1335#0/1  
CAAGAGATATGGCCCAGCATTAAAGCATCAATGAACTGAGC  
+HWI-EAS443:3:64:194:1335#0/1  
```][YWM[TNT\_]TPQUXOYVPPTU[SPQOZVMPXYT[W  
@HWI-EAS443:3:64:207:1971#0/1  
AGAAGAACCCCGCACTCAGAATGAAGTGGATGATGGCAAT  
+HWI-EAS443:3:64:207:1971#0/1  
aaa`]aaaaaaa\_[`H[[[^a\_a\_YWX\_X`\_\_¥Z]^\_V]]  
@HWI-EAS443:3:64:335:807#0/1  
GAAGAACCCCGCACTCAGAATGAAGTGGATGATGGCAATG  
+HWI-EAS443:3:64:335:807#0/1  
aa\_Vaaaa\_]`U[\_``^^`a^[YX`\_^\_^Y]\_]Y\_Y  
@HWI-EAS443:3:64:349:294#0/1  
AAGAGATATGGCCCAGCATTAAAGCATCAATGAACTGAGCA  
+HWI-EAS443:3:64:349:294#0/1  
XPZ[[¥W[YNQ\_[Y`\_^`\_XXY\_Y]]X]\_\_\_ZU\_]ZW[^  
@HWI-EAS443:3:64:352:1865#0/1  
CAGCATTAAAGCATCAATGAACTGAGCAATCTTGCAAAAAGG  
+HWI-EAS443:3:64:352:1865#0/1  
¥¥Zb^SXbaaabbb[^V`b\_]`Ya\_X`a^^SFX\_¥a]\_YZ  
@HWI-EAS443:3:64:41:947#0/1  
GACAAGAGATATGGCCCAGCATTAAAGCATCAATGAACTGA  
+HWI-EAS443:3:64:41:947#0/1  
`abb`aU^V¥U`bab\_ba`abaabaa`Xa`a]aaa¥YaY[  
@HWI-EAS443:3:64:48:969#0/1  
GAGAAGAACCCCGCACTCAGAATGAAGTGGATGATGGCAA  
+HWI-EAS443:3:64:48:969#0/1  
`Z\_U\_`aa^aaa^]¥]a\_XH]R\_` `aTOJOWI^T¥X]^U[  
@HWI-EAS443:3:64:542:150#0/1  
AAGAGAAGAACCCCGCACTCAGAATGAAGTGGATGATGGC  
+HWI-EAS443:3:64:542:150#0/1  
`^^^aaaa¥a```[a`Z^Y¥^]N]^¥\_[T^WW]]WUZSW  
@HWI-EAS443:3:64:542:468#0/1  
CAAGAGAAGAACCCCGCACTCAGAATGAAGTGGATGATGG  
+HWI-EAS443:3:64:542:468#0/1  
]YY\_S\_XIZRXW¥^ZaXVRXS¥`YO^`YO[OWWSM]YW\_X  
@HWI-EAS443:3:64:558:157#0/1  
GATTGCTCAGTTCATTGATGCTTAATGCTGGGCCATATCT  
+HWI-EAS443:3:64:558:157#0/1  
aaaaaa`a`a\_a\_a`\_\_\_\_`\_a\_a`\_]U^`X^]V]^Z\_] ^  
@HWI-EAS443:3:64:830:1929#0/1  
GATATGGCCCAGCATTAAAGCATCAATGAACTGAGCAATCT

+HWI-EAS443:3:64:830:1929#0/1  
`bb`a`abab\_\_a`ab`^aaabaaaaaa`¥aa\_aaa`  
@HWI-EAS443:3:64:909:948#0/1  
AGAGATATGGCCCAGCATTAAAGCATCAATGAACTGAGCAA  
+HWI-EAS443:3:64:909:948#0/1  
a`aaaabaaaaab\_aaaaa\_aa`a`aa`aa`^`\_`a  
@HWI-EAS443:3:64:930:138#0/1  
AGATTGCTCAGTTCATTGATGCTTAATGCTGGGCCATATC  
+HWI-EAS443:3:64:930:138#0/1  
]aaaabbaaab\_aaaaab`a`aaa`a`\_^`]^Z`\_`\_aU  
@HWI-EAS443:3:64:934:720#0/1  
CAAGAGAAGAACCCCGCACTCAGAATGAAGTGGATGATGG  
+HWI-EAS443:3:64:934:720#0/1  
aa]`\_`baabaaa`a`aaa\_a`\_a\_\_aa`^`Yaa¥aa\_\_\_^  
@HWI-EAS443:3:65:1099:1463#0/1  
AGAAGAACCCCGCACTCAGAATGAAGTGGATGATGGCAAT  
+HWI-EAS443:3:65:1099:1463#0/1  
a`aaZ`ba``baa\_TX`aa\_aa``\_aU`\_¥`a`[\_`\_`¥^^  
@HWI-EAS443:3:65:1118:156#0/1  
GCCATCATCCACTTCATTCTGAGTGC GGGTTCTTCTCTT  
+HWI-EAS443:3:65:1118:156#0/1  
aaaaaZ`a`[\_]\_\_ZZa[\_]^[\_Ya\_¥¥[¥^^^V\_U¥\_  
@HWI-EAS443:3:65:1131:860#0/1  
AGAAGAACCCCGCACTCAGAATGAAGTGGATGATGGCAAT  
+HWI-EAS443:3:65:1131:860#0/1  
abaa]`\_`aa``baa^aaa`[\_ab`\_aGaa\_aa]`\_`^]`\_`  
@HWI-EAS443:3:65:1166:1996#0/1  
ATTAAGCATCAATGAACTGAGCAATCTTGCAAAAGGAGAG  
+HWI-EAS443:3:65:1166:1996#0/1  
a^Xaaa`\_`^¥]¥]``aa`\_`\_`\_`[\_`^a]`\_`\_`\_`YT`^`  
@HWI-EAS443:3:65:1187:600#0/1  
AAGAGATATGGCCCAGCATTAAAGCATCAATGAACTGAGCA  
+HWI-EAS443:3:65:1187:600#0/1  
a`babaababbaaaaaabaaa`aaaaaaa`¥a\_aa`a\_a  
@HWI-EAS443:3:65:1250:619#0/1  
CAAGAGATATGGCCCAGCATTAAAGCATCAATGAACTGAGC  
+HWI-EAS443:3:65:1250:619#0/1  
`bbbb`ababbaabbaa`aaaaabaaaaaaa\_aaaa^  
@HWI-EAS443:3:65:1368:656#0/1  
CTCATTGTTGGCAAAGAAGACAAGAGATATGGCCCAGCAT  
+HWI-EAS443:3:65:1368:656#0/1  
ababababbabaabaaabbaa\_b`baaaaaa``aa]a`  
@HWI-EAS443:3:65:1385:1147#0/1  
AGAAGAACCCCGCACTCAGAATGAAGTGGATGATGGCAAT  
+HWI-EAS443:3:65:1385:1147#0/1  
`bab\_]abb^^bababa``aabb`\_bZaaaab\_ab`[^aa  
@HWI-EAS443:3:65:1434:693#0/1  
TTAAGCATCAATGAACTGAGCAATCTTGCAAAAGGAGAGA  
+HWI-EAS443:3:65:1434:693#0/1  
J`bbba`¥ba^¥aaaa\_¥¥`]^`^`aa`\_`\_`^`\_`Yb]Yaa`a



+HWI-EAS443:3:66:1090:1596#0/1  
a^Ub]``aa]aa¥P^aYQY]V\_]XVZ\_]V]^^Y^VTV^\_  
@HWI-EAS443:3:66:1137:851#0/1  
GAGAAGAACCCCGCACTCAGAATGAAGTGGATGATGGCAA  
+HWI-EAS443:3:66:1137:851#0/1  
a`aabbaaa`a`a\_^`a`\_a\_\_\_\_\_]\_aR`]^`\_R]\_\_U]U  
@HWI-EAS443:3:66:1396:389#0/1  
GCCATCATCCACTTCATTCTGAGTGC GGGTTCTTCTCTT  
+HWI-EAS443:3:66:1396:389#0/1  
aabbb`bbaababbaabbaaab\_bab`aab`aa`a\_ba  
@HWI-EAS443:3:66:1488:376#0/1  
ATTAAGCATCAATGAACTGAGCAATCTTGCAAAGGAGAG  
+HWI-EAS443:3:66:1488:376#0/1  
abb`ab`aaaaa`a`a`^Y[a`a``\_a\_`¥`¥^]a`^```  
@HWI-EAS443:3:66:1522:1007#0/1  
CAATTCGACACTAATTGATGGCCATCCGAATTCTTTTGGT  
+HWI-EAS443:3:66:1522:1007#0/1  
ab``\_`a\_aab\_^Y¥a`\_X\_[a\_aa\_\_\_V\_]V\_¥UVXVZR  
@HWI-EAS443:3:66:1580:1285#0/1  
AGAAGACAAGAGATATGGCCCAGCATTAAAGCATCAATGAA  
+HWI-EAS443:3:66:1580:1285#0/1  
X^^Y¥¥^`bYZb]]]aaa]\_XS\_\_a¥¥``a\_\_][\_\_][YXM  
@HWI-EAS443:3:66:1600:665#0/1  
CAAGAGAAGAACCCCGCACTCAGAATGAAGTGGATGATGG  
+HWI-EAS443:3:66:1600:665#0/1  
abbaaabbbab^ab\_aaba^b``b``\_b¥aaaaaa\_] [  
@HWI-EAS443:3:66:1677:1571#0/1  
CATTAAGCATCAATGAACTGAGCAATCTTGCAAAGGAGA  
+HWI-EAS443:3:66:1677:1571#0/1  
abbbba`abbaaaaa\_b]abaaaaaab^`\_aa`]`\_  
@HWI-EAS443:3:66:1758:1195#0/1  
AAAGAAGACAAGAGATATGGCCCAGCATTAAAGCATCAATG  
+HWI-EAS443:3:66:1758:1195#0/1  
\_[^aaaba\_a[b\_`aa^`a\_] [Z`^]X[\_¥`^Za\_]`¥  
@HWI-EAS443:3:66:210:1261#0/1  
TTTTGGGCAAAGAAGACAAGAGATATGGCCCAGCATTAAAG  
+HWI-EAS443:3:66:210:1261#0/1  
aa`¥aZa\_V¥\_aaa\_a]V]Z]]^\_]\_W[`\_¥¥YYWP[¥\_  
@HWI-EAS443:3:66:342:611#0/1  
AAGAGAAGAACCCCGCACTCAGAATGAAGTGGATGATGGC  
+HWI-EAS443:3:66:342:611#0/1  
aa\_W\_\_\_a\_a\_``aa`a`\_P`YV^`]S\_V^`^Y\_]YPZ^  
@HWI-EAS443:3:66:494:1271#0/1  
AAAGAAGACAAGAGATATGGCCCAGCATTAAAGCATCAATG  
+HWI-EAS443:3:66:494:1271#0/1  
`^^`b`a`aaa^^aa^`^`]`^aa^`]`\_`a]aa\_a```¥  
@HWI-EAS443:3:66:578:580#0/1  
CAGCATTAAAGCATCAATGAACTGAGCAATCTTGCAAAGG  
+HWI-EAS443:3:66:578:580#0/1  
`abbaabaaabaabbabaaabaabb]`a^aa`a`]¥aa



+HWI-EAS443:3:67:1419:374#0/1  
aa`aV`abaaa\_WV`a^P^[\`aaa`\_\_U¥YT^[aa^aS  
@HWI-EAS443:3:67:148:2003#0/1  
AAGAGAAGAACCCCGCACTCAGAATGAAGTGGATGATGGC  
+HWI-EAS443:3:67:148:2003#0/1  
aULVTXTP]\_^XTWUW`V[VNUR]WR[SWFOSQLZ¥TMDH  
@HWI-EAS443:3:67:1518:1628#0/1  
AGAGAAGAACCCCGCACTCAGAATGAAGTGGATGATGGCA  
+HWI-EAS443:3:67:1518:1628#0/1  
[\`¥bb`bbb^Z¥ab`a`b`][abaa`a\_aa`aa^\_a[\_^  
@HWI-EAS443:3:67:1688:1116#0/1  
CAATTCGACACTAATTGATGGCCATCCGAATTCTTTTGGT  
+HWI-EAS443:3:67:1688:1116#0/1  
abbbbabb`\_^bba`\_`ZV¥\_aab¥b\_aaa`aabaaW]  
@HWI-EAS443:3:67:174:497#0/1  
GAAGAACCCCGCACTCAGAATGAAGTGGATGATGGCAATG  
+HWI-EAS443:3:67:174:497#0/1  
aaa`aaaaaaa\_aa\_]`aa^\_\_Ra\_^\_a^]^^]U\_\_Y  
@HWI-EAS443:3:67:361:2042#0/1  
AGAGATATGGCCCAGCATTAAAGCATCAATGAACTGAGCAA  
+HWI-EAS443:3:67:361:2042#0/1  
aaa`\_\_`\_\_^a]`\_^`a^]`\_V`\_\_\_^\_X^XXWV^]U\_¥  
@HWI-EAS443:3:67:36:1566#0/1  
AGAGAAGAACCCCGCACTCAGAATGAAGTGGATGATGGCA  
+HWI-EAS443:3:67:36:1566#0/1  
^a\_\_abaab`¥`a¥aa`¥`\_\_\_`]XZ^`W\_\_\_¥W[VZXRZ  
@HWI-EAS443:3:67:380:306#0/1  
AAACAATTTCGACACTAATTGATGGCCATCCGAATTCTTTT  
+HWI-EAS443:3:67:380:306#0/1  
a`aa`Za\_a`a\_b\_[aa`^`^\_ZS^\_\_]\_T[V\_^Z¥W^^^  
@HWI-EAS443:3:67:413:762#0/1  
AGAAGACAAGAGATATGGCCCAGCATTAAAGCATCAATGAA  
+HWI-EAS443:3:67:413:762#0/1  
Ub`aa\_\_QR\_`UMY¥PU\_a`T\_TT\_YV[SQLLRORYP\_XR  
@HWI-EAS443:3:67:41:1809#0/1  
TAAGCATCAATGAACTGAGCAATCTTGCAAAAGGAGAGAA  
+HWI-EAS443:3:67:41:1809#0/1  
aa¥Va`\_a]`ZX¥\_a\_Y¥^a`¥`\_ZT¥ZZR¥ZT[YYZ]M  
@HWI-EAS443:3:67:446:1069#0/1  
ATGGCCCAGCATTAAAGCATCAATGAACTGAGCAATCTTGC  
+HWI-EAS443:3:67:446:1069#0/1  
a\_TP\_¥`baaaZ¥ZZLWT]`\_`[[^^XWYX[\_\_\_]UZR¥T  
@HWI-EAS443:3:67:488:1294#0/1  
CAAGAGAAGAACCCCGCACTCAGAATGAAGTGGATGATGG  
+HWI-EAS443:3:67:488:1294#0/1  
`\_]\_] [bbVY`[\_ba]`ZbaaTa\_\_\_OHVUUaTNYV]U]^  
@HWI-EAS443:3:67:525:1765#0/1  
TAAGCATCAATGAACTGAGCAATCTTGCAAAAGGAGAGAA  
+HWI-EAS443:3:67:525:1765#0/1  
]bba`Yaab`\_\_`ab\_YUa\_Ya`a\_aa\_S]aX[]]^`aa^

@HWI-EAS443:3:67:552:670#0/1  
TAAGCATCAATGAACTGAGCAATCTTGCAAAAGGAGAGAA  
+HWI-EAS443:3:67:552:670#0/1  
abbabbababbbbaaaa\_Y`aaaaaaaaa]YYaaaa\_aaa  
@HWI-EAS443:3:67:556:144#0/1  
CAATTCGACACTAATTGATGGCCATCCGAATTCTTTTGGT  
+HWI-EAS443:3:67:556:144#0/1  
`]`\_bbbabba`^a\_Zaaaaaaaa`\_a¥]`a`a][[]V  
@HWI-EAS443:3:67:612:1575#0/1  
ATTTTGGCAAAGAAGACAAGAGATATGGCCCAGCATTAA  
+HWI-EAS443:3:67:612:1575#0/1  
Z`aab[]a`ba`\_]bab`]`aaaa\_¥]`a[^`a`\_aa  
@HWI-EAS443:3:67:612:782#0/1  
GCATTAAGCATCAATGAACTGAGCAATCTTGCAAAAGGAG  
+HWI-EAS443:3:67:612:782#0/1  
aababbaabaabaaba`aaaaaaaaaababa\_\_\_\_aa`a  
@HWI-EAS443:3:67:623:1301#0/1  
GATTGCTCAGTTCATTGATGCTTAATGCTGGCCATATCT  
+HWI-EAS443:3:67:623:1301#0/1  
a]aa[aYa`a]\_`a`a^¥\_`\_aa`\_`W`X\_ZW¥]a`Ya`  
@HWI-EAS443:3:67:641:1691#0/1  
TTTTTAAACAATTCGACACTAATTGATGGCCATCCGAATT  
+HWI-EAS443:3:67:641:1691#0/1  
aabbbb\_aba`aaa\_aabaaaa\_\_\_\_a^^¥aab^`\_`a`  
@HWI-EAS443:3:67:71:691#0/1  
CAATTCGACACTAATTGATGGCCATCCGAATTCTTTTGGT  
+HWI-EAS443:3:67:71:691#0/1  
aa`aaaa\_aa`aa`\_a`\_a`aa\_\_\_\_^\_\_\_\_]\_\_\_\_]\_Y  
@HWI-EAS443:3:67:804:1460#0/1  
GAGATATGGCCCAGCATTAAAGCATCAATGAACTGAGCAAT  
+HWI-EAS443:3:67:804:1460#0/1  
RV^T¥¥VSZ^a`[HUT`bbbbYY¥b\_JX\_]`^`T^aaaa¥  
@HWI-EAS443:3:67:848:95#0/1  
AAACAATTCGACACTAATTGATGGCCATCCGAATTCTTTT  
+HWI-EAS443:3:67:848:95#0/1  
aba^a¥[aa`Z\_aWZ[`WaX`^Y`S¥VRGXZUPPTPWIZ^  
@HWI-EAS443:3:67:865:73#0/1  
AAGAGATATGGCCCAGCATTAAAGCATCAATGAACTGAGCA  
+HWI-EAS443:3:67:865:73#0/1  
aZ\_X^UbZYab`\_`\_bYaba\_¥ba`\_]R^aZ\_ZSa]\_X\_  
@HWI-EAS443:3:67:882:1142#0/1  
GAGAAGAACCCCGCACTCAGAATGAAGTGGATGATGGCAA  
+HWI-EAS443:3:67:882:1142#0/1  
aaaaaaaa`aaaaaa`a`a`a`aaa\_\_aY``\_\_`\_^Z\_]^^  
@HWI-EAS443:3:67:904:366#0/1  
TGCCATCATCCACTTCATTCTGAGTGCGGGGTTCTTCTCT  
+HWI-EAS443:3:67:904:366#0/1  
a[aa\_[aaa[¥\_\_^¥\_a`^\_]a^`V^\_[\_\_`X\_\_\_\_XY\_¥`  
@HWI-EAS443:3:67:913:1627#0/1  
ATTAAGCATCAATGAACTGAGCAATCTTGCAAAAGGAGAG

+HWI-EAS443:3:67:913:1627#0/1  
a]abb]aabaaab\_\_a`a\_a`aa\_aba\_a^\_] [\_a\_\_`a\_  
@HWI-EAS443:3:67:969:109#0/1  
AAGAGATATGGCCCAGCATTAAAGCATCAATGAACTGAGCA  
+HWI-EAS443:3:67:969:109#0/1  
aab`abbb`aaa`\_aaa`aaa`a`^aa\_aa\_]\_Zaa\_\_^\_  
@HWI-EAS443:3:68:1037:1617#0/1  
GCCATCATCCACTTCATTCTGAGTGC GGGTCTTCTCTT  
+HWI-EAS443:3:68:1037:1617#0/1  
abbbbbbbabbabbbbaba`baaa`aaa`aa^aaaa`b\_aa  
@HWI-EAS443:3:68:1068:665#0/1  
AGAAGACAAGAGATATGGCCCAGCATTAAAGCATCAATGAA  
+HWI-EAS443:3:68:1068:665#0/1  
aba`bbbaa`aaaaa``Xaaa`baaa`a`a`a[¥`\_aa``  
@HWI-EAS443:3:68:1077:1131#0/1  
AAGAACCCCGCACTCAGAATGAAGTGGATGATGGCAATGA  
+HWI-EAS443:3:68:1077:1131#0/1  
¥¥¥\_abb`a``\_¥Y\_a``^[````¥\_] [ ` ] ^X¥ [ ^ ] \_\_ ^ [   
@HWI-EAS443:3:68:1138:849#0/1  
AAGAGAAGAACCCCGCACTCAGAATGAAGTGGATGATGGC  
+HWI-EAS443:3:68:1138:849#0/1  
aaa¥aSY[ZYX\_\_UaRQ\_\_\_Ya]\_`\_]WNWY[PPWaZS[QQ  
@HWI-EAS443:3:68:1171:1554#0/1  
AGCTGTTGCTCTTCTCCCAACCATTGTGAATTCTTCATAC  
+HWI-EAS443:3:68:1171:1554#0/1  
aa\_\_aY`a``\_]WX¥a¥[[^\_\_Y¥TT\_^\_[ZFT¥PW^]S  
@HWI-EAS443:3:68:1195:625#0/1  
TATGGCCCAGCATTAAAGCATCAATGAACTGAGCAATCTTG  
+HWI-EAS443:3:68:1195:625#0/1  
abY\_aaa```\_]aaaaa]\_`a\_aaaa`\_`a^\_a`a`a`a`a`a`  
@HWI-EAS443:3:68:1359:226#0/1  
GAAGAACCCCGCACTCAGAATGAAGTGGATGATGGCAATG  
+HWI-EAS443:3:68:1359:226#0/1  
a`aa]a\_a`¥a`^`^`aa[]ba\_]`QaaZa``Z\_\_¥^^\_¥  
@HWI-EAS443:3:68:1503:726#0/1  
TAAGCATCAATGAACTGAGCAATCTTGCAAAAGGAGAGAA  
+HWI-EAS443:3:68:1503:726#0/1  
abbaabaaaaaaaaa\_\_`aaa`aaaaa\_\_`^a`\_`\_aa`  
@HWI-EAS443:3:68:1518:1686#0/1  
AAGAAGACAAGAGATATGGCCCAGCATTAAAGCATCAATGA  
+HWI-EAS443:3:68:1518:1686#0/1  
````bb`ba`a`aaa`R^^ab[a`\_aaa]\_\_a`\_`\_`\_`  
@HWI-EAS443:3:68:1587:512#0/1  
ATTAAGCATCAATGAACTGAGCAATCTTGCAAAAGGAGAG  
+HWI-EAS443:3:68:1587:512#0/1  
aba`^`¥X]a\_a]W`\_a]a\_\_a\_\_\_`a`TU[]^`¥`\_`Y`^`  
@HWI-EAS443:3:68:1620:1580#0/1  
AGAGATATGGCCCAGCATTAAAGCATCAATGAACTGAGCAA  
+HWI-EAS443:3:68:1620:1580#0/1  
a`bba¥b`bV`Y`¥aa^^`b`^Xba\_ba`b`aa^^`aaa\_



@HWI-EAS443:3:68:178:1500#0/1  
GCAAAGAAGACAAGAGATATGGCCCAGCATTAAGCATCAA  
+HWI-EAS443:3:68:178:1500#0/1  
`\_TZa^aaa^aab``````a¥[\_`\_`Y`a`aa`aa^a]V  
@HWI-EAS443:3:68:200:1225#0/1  
GAAGAACCCCGCACTCAGAATGAAGTGGATGATGGCAATG  
+HWI-EAS443:3:68:200:1225#0/1  
O\_`¥^abbbaTa`\_^[¥`U\_a\_]I¥G\_b\_a]¥P[ZGZYVR  
@HWI-EAS443:3:68:291:1883#0/1  
TTAAGCATCAATGAACTGAGCAATCTTGCAAAGGAGAGA  
+HWI-EAS443:3:68:291:1883#0/1  
a[aaaaUaba\_^]^aa`U]`bbbab`a`a`[`]Z¥\_U\_ZS  
@HWI-EAS443:3:68:32:1185#0/1  
GAGAAGAACCCCGCACTCAGAATGAAGTGGATGATGGCAA  
+HWI-EAS443:3:68:32:1185#0/1  
^]ZVX\_Tabaaa^]\_a]a\_]QFX`\_Z¥N\_\_`Z^X^V¥VR\_  
@HWI-EAS443:3:68:511:192#0/1  
GAAGAACCCCGCACTCAGAATGAAGTGGATGATGGCAATG  
+HWI-EAS443:3:68:511:192#0/1  
Wa]VV\_bb\_bbaVUa\_X^`Xa\_W[aFZ]H]a\_a`^ODPXX  
@HWI-EAS443:3:68:583:806#0/1  
AGACAAGAGATATGGCCCAGCATTAAGCATCAATGAACTG  
+HWI-EAS443:3:68:583:806#0/1  
aaaaa]a]aaaa^\_aaaaa`aa\_aa\_^Y`[\_[\_^]Z^^  
@HWI-EAS443:3:68:604:926#0/1  
GAAGACAAGAGATATGGCCCAGCATTAAGCATCAATGAAC  
+HWI-EAS443:3:68:604:926#0/1  
abbba\_¥bba\_a`aaa`aaa\_abbX\_aaaaaaaaa`a`\_`  
@HWI-EAS443:3:68:631:1231#0/1  
AAAGAAGACAAGAGATATGGCCCAGCATTAAGCATCAATG  
+HWI-EAS443:3:68:631:1231#0/1  
Za`a`bbba]¥\_aa^a`[^aaa^aaa^a`]^\_^[Z`¥¥]  
@HWI-EAS443:3:68:631:536#0/1  
CAATTCGACACTAATTGATGGCCATCCGAATTCTTTTGGT  
+HWI-EAS443:3:68:631:536#0/1  
a]`¥]a]aa]¥aaa`aa`a`Y`aa¥`][S¥¥\_`a`[Z[[  
@HWI-EAS443:3:68:740:735#0/1  
GCATTAAGCATCAATGAACTGAGCAATCTTGCAAAGGAG  
+HWI-EAS443:3:68:740:735#0/1  
aabaaaaba`aaaa`a\_^\_\_aaa`\_\_aa`\_`^\_^\_`a  
@HWI-EAS443:3:68:761:1587#0/1  
ATTAAGCATCAATGAACTGAGCAATCTTGCAAAGGAGAG  
+HWI-EAS443:3:68:761:1587#0/1  
aa\_aaa^aaaaaaa`Y`^^^Y^aaaa`[¥]`\_¥[`^W\_`\_  
@HWI-EAS443:3:68:789:681#0/1  
ATTAAGCATCAATGAACTGAGCAATCTTGCAAAGGAGAG  
+HWI-EAS443:3:68:789:681#0/1  
^^`[G]``\_`¥^\_\_^[a¥[STRUURSZSUX¥YYW\_]UZ]V  
@HWI-EAS443:3:68:882:274#0/1  
CAATTCGACACTAATTGATGGCCATCCGAATTCTTTTGGT

+HWI-EAS443:3:68:882:274#0/1  
¥[ `Xa\_`b`bbbaababb`bbbb`Z\_`bbbab]Z¥`  
@HWI-EAS443:3:68:900:768#0/1  
AGAAGACAAGAGATATGGCCCAGCATTAAGCATCAATGAA  
+HWI-EAS443:3:68:900:768#0/1  
aaaaaaa`\_a\_aaa\_`^`\_`aa\_a`\_`YX¥\_\_`\_\_\_\_`  
@HWI-EAS443:3:69:1019:1872#0/1  
CAAGAGATATGGCCCAGCATTAAGCATCAATGAACTGAGC  
+HWI-EAS443:3:69:1019:1872#0/1  
abbaaaaaa]`\_a\_a`^aa`\_a^aa`\_`\_`\_`\_a\_a]\_\_\_\_  
@HWI-EAS443:3:69:1237:389#0/1  
GAAGAACCCCGCACTCAGAATGAAGTGGATGATGGCAATG  
+HWI-EAS443:3:69:1237:389#0/1  
a`aaa]aabXaaa^a^]\_V¥a`\_aaYb^]\_\_LZ^`^]\_`a  
@HWI-EAS443:3:69:1244:275#0/1  
TAAGCATCAATGAACTGAGCAATCTTGCAAAAGGAGAGAA  
+HWI-EAS443:3:69:1244:275#0/1  
abaaaaaaaa`\_a¥a\_\_\_\_^\_]a^a`^`\_`^\_a`^a\_a^¥  
@HWI-EAS443:3:69:129:1316#0/1  
CATTTTGGGCAAAGAAGACAAGAGATATGGCCCAGCATTA  
+HWI-EAS443:3:69:129:1316#0/1  
a]\_a`¥]WX\_]`^[]¥Y`\_ZPVV¥\_¥YS¥ZY[^V^]VW[  
@HWI-EAS443:3:69:1496:880#0/1  
AGAAGAACCCCGCACTCAGAATGAAGTGGATGATGGCAAT  
+HWI-EAS443:3:69:1496:880#0/1  
aaabbMY¥b`a\_ba`aa]a\_U`aaab`b]`a``abJZ\_a\_  
@HWI-EAS443:3:69:1659:318#0/1  
GCATTAAGCATCAATGAACTGAGCAATCTTGCAAAAGGAG  
+HWI-EAS443:3:69:1659:318#0/1  
ababbbbaaabaabaaa`a`aaaaa\_aab\_\_`^\_a``a  
@HWI-EAS443:3:69:1764:831#0/1  
TTAAGCATCAATGAACTGAGCAATCTTGCAAAAGGAGAGA  
+HWI-EAS443:3:69:1764:831#0/1  
R¥^ZY[S\_[XX`a^a`S[FZZTTVZZUT\_]WYU\_¥¥Z\_`^`  
@HWI-EAS443:3:69:279:1455#0/1  
TGCCATCATCCACTTCATTCTGAGTGC GGGTTCTTCTCT  
+HWI-EAS443:3:69:279:1455#0/1  
`]abbaa¥\_`b`baa`^a```````[ab```]S\_aaaaaa  
@HWI-EAS443:3:69:290:1589#0/1  
AGAGAAGAACCCCGCACTCAGAATGAAGTGGATGATGGCA  
+HWI-EAS443:3:69:290:1589#0/1  
aaaabbabbababaaaaa`\_a[```\_\_aXa`\_`^`]]^Ua^  
@HWI-EAS443:3:69:36:70#0/1  
TGGGCAAAGAAGACAAGAGATATGGCCCAGCATTAAGCAT  
+HWI-EAS443:3:69:36:70#0/1  
\_babba\_`aa^aa`a]a\_a^`]a`\_]X\_]\_]\_]\_]\_]¥]Y  
@HWI-EAS443:3:69:372:278#0/1  
ATTTTGGGCAAAGAAGACAAGAGATATGGCCCAGCATTA  
+HWI-EAS443:3:69:372:278#0/1  
abaabb`¥aaaa`^a``a`\_aa\_aa]\_\_\_\_VV]\_\_````\_`

@HWI-EAS443:3:69:509:1474#0/1  
ATTTTGGCAAAGAAGACAAGAGATATGGCCCAGCATTAA  
+HWI-EAS443:3:69:509:1474#0/1  
aaa¥a\_]aZ]a¥aX[¥`a^a\_\_`\_`^[Za\_\_`^ZU^`\_`  
@HWI-EAS443:3:69:660:119#0/1  
CAGCATTAAAGCATCAATGAACTGAGCAATCTTGCAAAGG  
+HWI-EAS443:3:69:660:119#0/1  
aabbbbabaaabbaaab`aabaaaa`a\_aaa\_a^`\_a`  
@HWI-EAS443:3:69:686:573#0/1  
AGAAGAACCCCGCACTCAGAATGAAGTGGATGATGGCAAT  
+HWI-EAS443:3:69:686:573#0/1  
a[^\_X\_aaa]\_a[``aaa`NZaaa`\_Haa\_``]YY`Z[^  
@HWI-EAS443:3:69:699:76#0/1  
CTCATTTTGGCAAAGAAGACAAGAGATATGGCCCAGCAT  
+HWI-EAS443:3:69:699:76#0/1  
aba^abbbbbbb^bbabbabaX`\_a\_baaa\_a`¥¥Z`\_]a`  
@HWI-EAS443:3:6:1009:1294#0/1  
TAAGCATCAATGAACTGAGCAATCTTGCAAAGGAGAGAA  
+HWI-EAS443:3:6:1009:1294#0/1  
YbVaV¥\_`^`U^\_VT\_]\_]babaH`abPYYa^ab\_b`a``  
@HWI-EAS443:3:6:1039:673#0/1  
CAAGAGAAGAACCCCGCACTCAGAATGAAGTGGATGATGG  
+HWI-EAS443:3:6:1039:673#0/1  
aa]b`Z`bbbaa\_aabaaaa\_\_b]a`ba¥b^a\_\_aa^aYa  
@HWI-EAS443:3:6:1109:1081#0/1  
TTTTAAACAATTGACACTAATTGATGGCCATCCGAATTC  
+HWI-EAS443:3:6:1109:1081#0/1  
aaba`ba¥aabbab`aa`aaaaa``a^a\_a\_WWa\_\_`^[  
@HWI-EAS443:3:6:1165:777#0/1  
AAACAATTGACACTAATTGATGGCCATCCGAATTCCTTT  
+HWI-EAS443:3:6:1165:777#0/1  
`Z`J\_ab``\_aa]X]Va]\_b\_a^NQFZ\_[¥^aT\_a^aaBB  
@HWI-EAS443:3:6:1623:669#0/1  
ATTGATGCTTAATGCTGGCCATATCTCTTGTCTTCTTTG  
+HWI-EAS443:3:6:1623:669#0/1  
`bbbaabSa^aab`a`a\_PXYa`a\_aX^a`\_¥aa0\_`^`  
@HWI-EAS443:3:6:166:393#0/1  
GAGATATGGCCCAGCATTAAAGCATCAATGAACTGAGCAAT  
+HWI-EAS443:3:6:166:393#0/1  
aa`aaa`aaaaa`\_ba`aaa\_``^`````\_`^`\_`\_\_\_\_\_  
@HWI-EAS443:3:6:1674:1232#0/1  
GAAGAACCCCGCACTCAGAATGAAGTGGATGATGGCAATG  
+HWI-EAS443:3:6:1674:1232#0/1  
abbbba`\_abaaaa`aa`abba`b[aa^aa\_\_a\_]\_``a  
@HWI-EAS443:3:6:1734:1747#0/1  
AGAAGACAAGAGATATGGCCCAGCATTAAAGCATCAATGAA  
+HWI-EAS443:3:6:1734:1747#0/1  
a\_Xab[a¥¥X`baaaa\_`0`RU`^SUJa`aY\_`^0a\_XBB  
@HWI-EAS443:3:6:208:240#0/1  
CAAGAGATATGGCCCAGCATTAAAGCATCAATGAACTGAGC

+HWI-EAS443:3:6:208:240#0/1  
a` [¥TZ]^^Z]^]aYXY[]a` [Z^`] ` \_UU][NX^\_^`Z  
@HWI-EAS443:3:6:243:1028#0/1  
GCTCAGTTCATTGATGCTTAATGCTGGGCCATATCTCTTG  
+HWI-EAS443:3:6:243:1028#0/1  
a` `]F[\_N]a^a^\_\_Z`\_] ^SP]\_¥WX¥\_\_^`Z^Z\_]¥  
@HWI-EAS443:3:6:429:1189#0/1  
GAAGAACCCCGCACTCAGAATGAAGTGGATGATGGCAATG  
+HWI-EAS443:3:6:429:1189#0/1  
\_¥bbaa][aaaa¥^aab[\_aa¥¥aXa`a\_a\_^a]FY\_\_`  
@HWI-EAS443:3:6:492:1092#0/1  
GAAGAACCCCGCACTCAGAATGAAGTGGATGATGGCAATG  
+HWI-EAS443:3:6:492:1092#0/1  
aa` ` ^NWYVaa` [U]\_ZVV^`X]^V¥WZV^XYVYUVXVB  
@HWI-EAS443:3:6:532:1642#0/1  
AAGAGAAGAACCCCGCACTCAGAATGAAGTGGATGATGGC  
+HWI-EAS443:3:6:532:1642#0/1  
[¥^M`]]`a^abbbbW`¥a^ab`b^bbT`Taab\_U`a`WR  
@HWI-EAS443:3:6:538:1912#0/1  
AGATTGCTCAGTTCATTGATGCTTAATGCTGGGCCATATC  
+HWI-EAS443:3:6:538:1912#0/1  
^Z¥\_Za]aaaaXZZH¥aa^a` [aaaa\_\_aUTZ`^`^B  
@HWI-EAS443:3:6:588:1463#0/1  
CAAGAGAAGAACCCCGCACTCAGAATGAAGTGGATGATGG  
+HWI-EAS443:3:6:588:1463#0/1  
¥^\_¥UbZaa\_Y^¥KabaY[X`abaaabaV`ab\_b[b\_H`a  
@HWI-EAS443:3:6:861:679#0/1  
ATGCTGGGCCATATCTCTTGTCTTCTTTGCCAAAATGAG  
+HWI-EAS443:3:6:861:679#0/1  
aabbbba`\_aabbb^bVa^^` `b`^abb¥\_`aa`aabab  
@HWI-EAS443:3:6:947:375#0/1  
TTAAGCATCAATGAACTGAGCAATCTTGCAAAAGGAGAGA  
+HWI-EAS443:3:6:947:375#0/1  
]bab`Y^¥`a¥a\_[a\_]a\_aa^X^\_aaaG`\_]aa\_aaa\_  
@HWI-EAS443:3:70:1058:1558#0/1  
CAAAGAAGACAAGAGATATGGCCCAGCATTAAAGCATCAAT  
+HWI-EAS443:3:70:1058:1558#0/1  
a`a`bba`bbabbaababa\_Za`b]a\_ba`aX` `aabaa`  
@HWI-EAS443:3:70:1193:1387#0/1  
AGATTGCTCAGTTCATTGATGCTTAATGCTGGGCCATATC  
+HWI-EAS443:3:70:1193:1387#0/1  
a\_aa`\_`aaabb\_aa`a`\_`a`\_aa`a`a`\_`¥^^`\_a\_\_\_\_  
@HWI-EAS443:3:70:1264:1097#0/1  
GATTGCTCAGTTCATTGATGCTTAATGCTGGGCCATATCT  
+HWI-EAS443:3:70:1264:1097#0/1  
]abb\_aaabbab` `aabbbb`bbbaaaabbb` `aababaa  
@HWI-EAS443:3:70:1299:1163#0/1  
CAGCATTAAAGCATCAATGAACTGAGCAATCTTGCAAAAGG  
+HWI-EAS443:3:70:1299:1163#0/1  
a^^bbbbb\_aababbabbbbaaab`ab`a`aaa^` `aa\_\_a`

@HWI-EAS443:3:70:1355:2022#0/1  
CATTAGCATCAATGAACTGAGCAATCTTGCAAAGGAGA  
+HWI-EAS443:3:70:1355:2022#0/1  
^aTTX`Za¥`a¥bb^[ab¥]`\_b`^RPP\_a^^aa`a^aa  
@HWI-EAS443:3:70:1407:1171#0/1  
AGAAGACAAGAGATATGGCCCAGCATTAAAGCATCAATGAA  
+HWI-EAS443:3:70:1407:1171#0/1  
`\_`a¥¥¥`abaaaa`aaaa``]a\_aaa`]a``a\_]\_a\_\_\_\_  
@HWI-EAS443:3:70:1415:1747#0/1  
AGAGATATGGCCCAGCATTAAAGCATCAATGAACTGAGCAA  
+HWI-EAS443:3:70:1415:1747#0/1  
`ba[`baaJ]a^Ub``aa\_aaaaa``b\_`a`\_G^aaa\_`a  
@HWI-EAS443:3:70:1683:806#0/1  
CAAGAGAAGAACCCCGCACTCAGAATGAAGTGGATGATGG  
+HWI-EAS443:3:70:1683:806#0/1  
abbbbbbb`bbaabab`bab^abaabbaaZa`]^aa^a]a  
@HWI-EAS443:3:70:1716:412#0/1  
AGAGATATGGCCCAGCATTAAAGCATCAATGAACTGAGCAA  
+HWI-EAS443:3:70:1716:412#0/1  
\_a`\_bbabbaa`Zabbbab^b^¥aaabaa`]Z¥b`a^  
@HWI-EAS443:3:70:172:518#0/1  
AAAGAAGACAAGAGATATGGCCCAGCATTAAAGCATCAATG  
+HWI-EAS443:3:70:172:518#0/1  
\_abbbb\_]\_babaaa`aa`^aabaaaa`a`a\_aa`aa\_a  
@HWI-EAS443:3:70:464:1549#0/1  
AGAGATATGGCCCAGCATTAAAGCATCAATGAACTGAGCAA  
+HWI-EAS443:3:70:464:1549#0/1  
aa`]``a^^Yaa^a`aa`^RY¥^Va^]a\_\_`Y[^]\_``\_  
@HWI-EAS443:3:70:49:1417#0/1  
GAGATATGGCCCAGCATTAAAGCATCAATGAACTGAGCAAT  
+HWI-EAS443:3:70:49:1417#0/1  
`Xa]]\_T\_\_aaaa\_aa\_W]\_\_a]^`\_Z^^X^\_^][[^\_]Z  
@HWI-EAS443:3:70:519:1853#0/1  
CAATTCGACACTAATTGATGGCCATCCGAATCCTTTTGGT  
+HWI-EAS443:3:70:519:1853#0/1  
`ZY^`\_X\_a`\_`[JUSZ^W^^`]ZU`ZW[VTWVUTNUQLL  
@HWI-EAS443:3:70:546:1133#0/1  
GCCCAGCATTAAAGCATCAATGAACTGAGCAATCTTGCAA  
+HWI-EAS443:3:70:546:1133#0/1  
aba`^`ab\_`b^aa^a\_a\_a¥X`a``a\_XWVaa`^`aZW^  
@HWI-EAS443:3:70:563:223#0/1  
AAACAATTTCGACACTAATTGATGGCCATCCGAATCCTTTT  
+HWI-EAS443:3:70:563:223#0/1  
¥^¥^a\_¥\_¥¥\_]```][Z[]][YX¥`^ZR¥a\_]][XMT\_XW  
@HWI-EAS443:3:70:574:353#0/1  
GAGAAGAACCCCGCACTCAGAATGAAGTGGATGATGGCAA  
+HWI-EAS443:3:70:574:353#0/1  
abbaaaYba`aaaaabaa\_b\_abbS^a]\_a^`aXY`a^Y^  
@HWI-EAS443:3:70:647:2017#0/1  
AGAAGACAAGAGATATGGCCCAGCATTAAAGCATCAATGAA

+HWI-EAS443:3:70:647:2017#0/1  
aaaba`aaaaa\_a`a\_]\_baa^\_aa^\_\_Y^]\_\_\_\_\_^^\_^  
@HWI-EAS443:3:70:66:582#0/1  
CAATTCGACACTAATTGATGGCCATCCGAATTCTTTTGGT  
+HWI-EAS443:3:70:66:582#0/1  
`T`a`aa`aa\_aUQ\_\_Y]`YX``UP`\_]TUR[^]^VV^V  
@HWI-EAS443:3:70:77:199#0/1  
CAGCATTAAAGCATCAATGAACTGAGCAATCTTGCAAAAAGG  
+HWI-EAS443:3:70:77:199#0/1  
U\_YY^a\_SQ\_¥^Z]¥\_¥a\_\_a^]H]a\_S\_a``a\_]T]\_``  
@HWI-EAS443:3:70:840:1999#0/1  
TAAGCATCAATGAACTGAGCAATCTTGCAAAAAGGAGAGAA  
+HWI-EAS443:3:70:840:1999#0/1  
aaYV^X\_a]a``\_`aa\_aab^ZZa`Y^`YOKTHZ\_]Z`\_`  
@HWI-EAS443:3:70:890:1591#0/1  
GTTCATTGATGCTTAATGCTGGGCCATATCTCTTGTCTTC  
+HWI-EAS443:3:70:890:1591#0/1  
a``\_Sa`baXRaa`abaaa\_a`a^a\_a[a`a`a`¥¥a`\_]`  
@HWI-EAS443:3:70:896:663#0/1  
CAAGAGAAGAACCCCGCACTCAGAATGAAGTGGATGATGG  
+HWI-EAS443:3:70:896:663#0/1  
abab`bbbbabbbbabbbbbaaaabba`ZT¥b\_ab\_`aa  
@HWI-EAS443:3:70:972:880#0/1  
CTCCTTTTGCAAGATTGCTCAGTTCATTGATGCTTAATGC  
+HWI-EAS443:3:70:972:880#0/1  
aabbabbaaabaaaaabaaaa`aaaaaaa`aa\_aaaa\_  
@HWI-EAS443:3:70:989:279#0/1  
GAAGAACCCCGCACTCAGAATGAAGTGGATGATGGCAATG  
+HWI-EAS443:3:70:989:279#0/1  
]^¥Z\_\_`]a`aaa`a^a`¥]aa\_a`V¥`\_\_a\_\_a\_UT¥^`  
@HWI-EAS443:3:71:1014:677#0/1  
AGAAGACAAGAGATATGGCCCAGCATTAAAGCATCAATGAA  
+HWI-EAS443:3:71:1014:677#0/1  
aa`ab`baabaaa`a`\_a`a`\_a\_ba\_a¥`a`a``aaa]a  
@HWI-EAS443:3:71:1141:365#0/1  
GAGAAGAACCCCGCACTCAGAATGAAGTGGATGATGGCAA  
+HWI-EAS443:3:71:1141:365#0/1  
Za\_\_abbbbaaabaaaa`aaaaab\_ab`aa`ab[aaaQ]]  
@HWI-EAS443:3:71:1170:390#0/1  
CCAGCATTAAAGCATCAATGAACTGAGCAATCTTGCAAAAAG  
+HWI-EAS443:3:71:1170:390#0/1  
aabbabaa^¥^bbb`babaaaabbXbaabb\_baabab^Wa  
@HWI-EAS443:3:71:1225:908#0/1  
TTAAGCATCAATGAACTGAGCAATCTTGCAAAAAGGAGAGA  
+HWI-EAS443:3:71:1225:908#0/1  
YZ[NRYa[abbbbaUYa[S\_TS^Z\_[Wa]NSWTVWIa^aU  
@HWI-EAS443:3:71:1239:166#0/1  
CATTAAAGCATCAATGAACTGAGCAATCTTGCAAAAAGGAGA  
+HWI-EAS443:3:71:1239:166#0/1  
`baabbba^aaaaabababa`b^aa``bba\_aa`aaa^`^

@HWI-EAS443:3:71:1482:1241#0/1  
CATTAAAGCATCAATGAACTGAGCAATCTTGCAAAGGAGA  
+HWI-EAS443:3:71:1482:1241#0/1  
`bb`bbbbbbbbbbbababb\_babbbbabbb\_aaaaba`aa  
@HWI-EAS443:3:71:1555:408#0/1  
AGAGATATGGCCAGCATTAAAGCATCAATGAACTGAGCAA  
+HWI-EAS443:3:71:1555:408#0/1  
\_aabb``^`^`[\_[ZababY\_]a^^a\_aaaa^ba^[\_ZaWaZ  
@HWI-EAS443:3:71:1663:1741#0/1  
AGTTCATTGATGCTTAATGCTGGCCATATCTCTTGTCTT  
+HWI-EAS443:3:71:1663:1741#0/1  
aabaabb`aaa`aa`bba\_\_a^ZXaa`ab^baaa`a\_aa  
@HWI-EAS443:3:71:1663:833#0/1  
GAAGAACCCCGCACTCAGAATGAAGTGGATGATGGCAATG  
+HWI-EAS443:3:71:1663:833#0/1  
aaaa]\_^`\_`a]^YaZ\_\_VV`aU]\_W\_aX\_^]\_\_[\_WZWW[  
@HWI-EAS443:3:71:1715:1064#0/1  
TTAAGCATCAATGAACTGAGCAATCTTGCAAAGGAGAGA  
+HWI-EAS443:3:71:1715:1064#0/1  
abbaabab]aaaa\_a`aaa%G]^a]aaba`\_\_aba^a`aa  
@HWI-EAS443:3:71:1786:198#0/1  
GCATTAAGCATCAATGAACTGAGCAATCTTGCAAAGGAG  
+HWI-EAS443:3:71:1786:198#0/1  
a`baaa\_b^aa\_aaaaaa\_aa\_a^\_W]^a`aY``\_]a\_]`  
@HWI-EAS443:3:71:294:702#0/1  
CTCCTTTTGCAAGATTGCTCAGTTCATTGATGCTTAATGC  
+HWI-EAS443:3:71:294:702#0/1  
abbaabbaaaaaaaaaaaaaaaaaaaaa`baaaaaaaaa`  
@HWI-EAS443:3:71:349:1153#0/1  
CATTAAAGCATCAATGAACTGAGCAATCTTGCAAAGGAGA  
+HWI-EAS443:3:71:349:1153#0/1  
aaaaaa`b`\_b\_\_a`W\_a`\_\_````\_`\_\_^\_]V[[\_^]\_]`  
@HWI-EAS443:3:71:391:1108#0/1  
CAATTCGACACTAATTGATGGCCATCCGAATTCTTTTGGT  
+HWI-EAS443:3:71:391:1108#0/1  
`R\_`ab\_`^b%aa%`Y`ZHS]a\_a[Q^K]Ya\_[\_^^^T  
@HWI-EAS443:3:71:425:459#0/1  
ATTAAGCATCAATGAACTGAGCAATCTTGCAAAGGAGAG  
+HWI-EAS443:3:71:425:459#0/1  
a\_a`]``\_a`^^\_W`\_Y[]^\_^\_^\_]\_][]^]V\_¥\_  
@HWI-EAS443:3:71:508:1563#0/1  
GAGAAGAACCCCGCACTCAGAATGAAGTGGATGATGGCAA  
+HWI-EAS443:3:71:508:1563#0/1  
a\_^X^aa\_b\_baaaab\_`¥]a^^\_aYZ¥Xaa\_Z\_W^^V  
@HWI-EAS443:3:71:594:498#0/1  
ATTAAGCATCAATGAACTGAGCAATCTTGCAAAGGAGAG  
+HWI-EAS443:3:71:594:498#0/1  
aaa\_¥aa^baaa[LO]aa\_]a`^`\_`a^^`]Y[]\_\_[\_a\_`  
@HWI-EAS443:3:71:712:611#0/1  
CAAGAGAAGAACCCCGCACTCAGAATGAAGTGGATGATGG

+HWI-EAS443:3:71:712:611#0/1  
`bbb^aa\_abba^\_abbaaba`a^baab\_ba^aa\_a`  
@HWI-EAS443:3:71:741:952#0/1  
TATGGCCCAGCATTAAAGCATCAATGAACTGAGCAATCTTG  
+HWI-EAS443:3:71:741:952#0/1  
a¥V`¥bbaQZZ`¥a^`YZ[a]a¥V`\_\_\_\_`aa\_\_`\_\_\_\_  
@HWI-EAS443:3:71:771:393#0/1  
GATATGGCCCAGCATTAAAGCATCAATGAACTGAGCAATCT  
+HWI-EAS443:3:71:771:393#0/1  
aa\_a¥aba\_a]aYa^]aaaYY[a`a^ZZ\_]Z¥[a\_W[Z¥`  
@HWI-EAS443:3:71:773:1121#0/1  
AAGAGAAGAACCCCGCACTCAGAATGAAGTGGATGATGGC  
+HWI-EAS443:3:71:773:1121#0/1  
a`RW]`[X\_R]^¥\_`Z\_\_\_\_]^`XO` `[Z]L\_VT`\_[[SRH  
@HWI-EAS443:3:71:80:541#0/1  
CAGCATTAAAGCATCAATGAACTGAGCAATCTTGCAAAAGG  
+HWI-EAS443:3:71:80:541#0/1  
^`ab`\_`ba\_\_bb``abaZY\_aa`a\_^aaa`^\_]YQ```  
@HWI-EAS443:3:71:811:1041#0/1  
TTGCCATCATCCACTTCATTCTGAGTGCGGGTTCTTCTC  
+HWI-EAS443:3:71:811:1041#0/1  
abababbbbaba\_^bb`abaaaaab`abbaaa]a\_a`a`a  
@HWI-EAS443:3:71:852:804#0/1  
TAAGCATCAATGAACTGAGCAATCTTGCAAAAGGAGAGAA  
+HWI-EAS443:3:71:852:804#0/1  
^b¥bbaba^abbab`bbba¥]Zbababbaa``bb`babaa  
@HWI-EAS443:3:71:882:248#0/1  
CTCATTGTTGGGCAAAGAAGACAAGAGATATGGCCCAGCAT  
+HWI-EAS443:3:71:882:248#0/1  
¥`b]\_b`b`]`UV\_U`a``¥\_NPUZ`¥`HX¥UYXHXGa¥  
@HWI-EAS443:3:71:937:733#0/1  
CTCTCCTTTTGCAAGATTGCTCAGTTCATTGATGCTTAAT  
+HWI-EAS443:3:71:937:733#0/1  
abbbabb`aabaab`babaaa```aabaabaaaaaa`a  
@HWI-EAS443:3:72:1044:1638#0/1  
CTCCTTTTGCAAGATTGCTCAGTTCATTGATGCTTAATGC  
+HWI-EAS443:3:72:1044:1638#0/1  
abaaaabaabaabaaaabaaaa\_aaaaaaaaa`aaa`a  
@HWI-EAS443:3:72:1253:405#0/1  
CTCTCCTTTTGCAAGATTGCTCAGTTCATTGATGCTTAAT  
+HWI-EAS443:3:72:1253:405#0/1  
\_\_^\_bbbbbabUb`bb`]`MbJZb]b`aa¥b`bbba\_b[S  
@HWI-EAS443:3:72:1276:1990#0/1  
GAGAAGAACCCCGCACTCAGAATGAAGTGGATGATGGCAA  
+HWI-EAS443:3:72:1276:1990#0/1  
^]bba\_aaaabb[bb[`b`JaTbba\_[XZX`^a\_\_`Y\_\_a  
@HWI-EAS443:3:72:1331:674#0/1  
CATTGCCATCATCCACTTCATTCTGAGTGCGGGTTCTTC  
+HWI-EAS443:3:72:1331:674#0/1  
aaa[b]baaababa`baabaV`baab`babbaa\_a\_\_ab



@HWI-EAS443:3:72:1389:891#0/1  
AAAGAAGACAAGAGATATGGCCCAGCATTAAAGCATCAATG  
+HWI-EAS443:3:72:1389:891#0/1  
a\_\_¥]\_^aaab\_b\_aaa^`a`\_adWaa^aaa`a`^`a\_\_  
@HWI-EAS443:3:72:1395:332#0/1  
AGAAGAACCCCGCACTCAGAATGAAGTGGATGATGGCAAT  
+HWI-EAS443:3:72:1395:332#0/1  
aaabaabaaaabab`a\_aaaaabaaa\_ba`aa\_\_a\_W`\_^  
@HWI-EAS443:3:72:1495:1590#0/1  
CCAGCATTAAAGCATCAATGAACTGAGCAATCTTGCAAAAG  
+HWI-EAS443:3:72:1495:1590#0/1  
^¥`\_W`a^ab`^a\_^`Y`aa`\_a]`aaaa¥\_]aaU\_^`\_a  
@HWI-EAS443:3:72:1745:1416#0/1  
AAGAGATATGGCCCAGCATTAAAGCATCAATGAACTGAGCA  
+HWI-EAS443:3:72:1745:1416#0/1  
ZY\_T\_a`bZ¥V\_aaZY¥¥W\_a^^^a\_a]W`aYa\_a]Za]`  
@HWI-EAS443:3:72:1772:2034#0/1  
ATTAAGCATCAATGAACTGAGCAATCTTGCAAAAGGAGAG  
+HWI-EAS443:3:72:1772:2034#0/1  
a\_\_\_\_]\_`[\_`\_`\_`¥^]^[^^\_\_[]W]][\_^^^Y]][\_^¥  
@HWI-EAS443:3:72:371:1074#0/1  
CTCAGTTCATTGATGCTTAATGCTGGGCCATATCTCTTGT  
+HWI-EAS443:3:72:371:1074#0/1  
aaaa]IaV\_aa`a[\_\_\_aUYVR`¥RWSUYNY¥ZYV¥XaX\_G  
@HWI-EAS443:3:72:415:849#0/1  
TTTTTAAACAATTCGACACTAATTGATGGCCATCCGAATT  
+HWI-EAS443:3:72:415:849#0/1  
aaaaaaaaaaa^a`a`a\_a\_^\_\_\_^Y`]]X\_\_\_^\_\_^^W\_^  
@HWI-EAS443:3:72:487:1306#0/1  
CAATTCGACACTAATTGATGGCCATCCGAATTCTTTTGGT  
+HWI-EAS443:3:72:487:1306#0/1  
`]Z`\_aa`\_baa]a^`^YZ`]a][¥`\_`a`W\_`[[[^^UUV  
@HWI-EAS443:3:72:55:1383#0/1  
GAAGAACCCCGCACTCAGAATGAAGTGGATGATGGCAATG  
+HWI-EAS443:3:72:55:1383#0/1  
Z\_aZ[bb`b`baab`\_L\_\_QTZ¥ZaGa\_\_\_a]Wa`]^Zaa  
@HWI-EAS443:3:72:570:999#0/1  
AAGAGATATGGCCCAGCATTAAAGCATCAATGAACTGAGCA  
+HWI-EAS443:3:72:570:999#0/1  
```aaaabaaaba`aaaba\_aa`^]\_aa`aa`aa`^``\_a  
@HWI-EAS443:3:72:640:265#0/1  
TTTTTAAACAATTCGACACTAATTGATGGCCATCCGAATT  
+HWI-EAS443:3:72:640:265#0/1  
^`Y¥YQT\_b``¥bb^WY\_VVU^^``aaa`R¥^¥WQ^W[VW  
@HWI-EAS443:3:72:697:1160#0/1  
GAGAAGAACCCCGCACTCAGAATGAAGTGGATGATGGCAA  
+HWI-EAS443:3:72:697:1160#0/1  
aaaaaaaaaaaaaaaa`aaaa`aa\_\_a¥``\_\_a^[a^^\_\_  
@HWI-EAS443:3:72:817:1976#0/1  
GAAGAACCCCGCACTCAGAATGAAGTGGATGATGGCAATG

+HWI-EAS443:3:72:817:1976#0/1  
a`Y`b`abaaa`a`^`\_\_\_\_`[YWW]\_\_\_`]^`\_]UY  
@HWI-EAS443:3:72:99:398#0/1  
AGAAGACAAGAGATATGGCCAGCATTAAAGCATCAATGAA  
+HWI-EAS443:3:72:99:398#0/1  
a^a]¥Y[^aYaL\_¥\_WY\_WV`\_`ZSSY[\_ZUS]]¥^`Y^  
@HWI-EAS443:3:73:1001:2041#0/1  
CTCTCCTTTTGCAAGATTGCTCAGTTCATTGATGCTTAAT  
+HWI-EAS443:3:73:1001:2041#0/1  
\_bbaabaaa`abaaa`a\_aaaa`\_aaaa`\_a\_\_aa\_a`  
@HWI-EAS443:3:73:1044:835#0/1  
CATTAAAGCATCAATGAACTGAGCAATCTTGCAAAAGGAGA  
+HWI-EAS443:3:73:1044:835#0/1  
\_]ZYZ]Z\_¥Z¥XVZVJ[ZZ\_aa`Y`a\_¥¥J]`SZ^LQXU  
@HWI-EAS443:3:73:1209:922#0/1  
GAAGAACCCCGCACTCAGAATGAAGTGGATGATGGCAATG  
+HWI-EAS443:3:73:1209:922#0/1  
aaaa`abaa`a]^`^a`\_]`[\_aa\_]a]a\_\_`\_`\_`[]`\_\_\_\_  
@HWI-EAS443:3:73:1255:1079#0/1  
GAAGACAAGAGATATGGCCAGCATTAAAGCATCAATGAAC  
+HWI-EAS443:3:73:1255:1079#0/1  
G]^`^abbbaa`ababaaaba\_bb\_abbbaabbbbbbbaabb  
@HWI-EAS443:3:73:1308:432#0/1  
AGATTGCTCAGTTCATTGATGCTTAATGCTGGGCCATATC  
+HWI-EAS443:3:73:1308:432#0/1  
Xa¥¥aa\_^W¥HT\_^Z\_aZ\_abaab\_¥\_]`aaa¥TVaa\_a\_  
@HWI-EAS443:3:73:1332:1307#0/1  
CAAGAGAAGAACCCCGCACTCAGAATGAAGTGGATGATGG  
+HWI-EAS443:3:73:1332:1307#0/1  
abbbabbbbbb`bbbbbabaaa`abba`\_Vbbaaa`\_aa  
@HWI-EAS443:3:73:1334:1514#0/1  
TAAGCATCAATGAACTGAGCAATCTTGCAAAAGGAGAGAA  
+HWI-EAS443:3:73:1334:1514#0/1  
abbaa`]a\_]`aaaa`aa`\_`\_`aa[aa^`\_]a`]a`aa\_  
@HWI-EAS443:3:73:1368:87#0/1  
GAAGAACCCCGCACTCAGAATGAAGTGGATGATGGCAATG  
+HWI-EAS443:3:73:1368:87#0/1  
`bUK^aSYUX\_ZGX`ZW\_VZ[¥OM\_V\_OOPSBBBBBBBBB  
@HWI-EAS443:3:73:1426:491#0/1  
CAATTCGACACTAATTGATGGCCATCCGAATTCTTTTGGT  
+HWI-EAS443:3:73:1426:491#0/1  
ab\_]X`]aabW`\_Ra]\_U[\_L\_[^`X`X\_]\_ZaXaVT¥Q  
@HWI-EAS443:3:73:1667:1362#0/1  
CAGCATTAAAGCATCAATGAACTGAGCAATCTTGCAAAAGG  
+HWI-EAS443:3:73:1667:1362#0/1  
abbbbabbbbaabaaabaaa\_bbab`aaaaaab\_a\_\_\_aa  
@HWI-EAS443:3:73:1777:901#0/1  
AGATTGCTCAGTTCATTGATGCTTAATGCTGGGCCATATC  
+HWI-EAS443:3:73:1777:901#0/1  
`\_¥[TY\_\_P^]U^]\_¥UZY]\_^]MX^ZW¥YSIPJRQR¥Q]

@HWI-EAS443:3:73:1781:563#0/1  
GAAGAACCCCGCACTCAGAATGAAGTGGATGATGGCAATG  
+HWI-EAS443:3:73:1781:563#0/1  
W\_a]¥\_Z[¥ab¥\_\_]``b`ba`^aa]WZ\_S]Y¥\_TGQZWa  
@HWI-EAS443:3:73:191:1611#0/1  
AGAAGAACCCCGCACTCAGAATGAAGTGGATGATGGCAAT  
+HWI-EAS443:3:73:191:1611#0/1  
aaaaaaaaaba``a^a`\_\_\_\_[^]XY^\_^][^]W^^^]  
@HWI-EAS443:3:73:213:1416#0/1  
ATGGCCCAGCATTAAAGCATCAATGAACTGAGCAATCTTGC  
+HWI-EAS443:3:73:213:1416#0/1  
a``aaaZ^`^^a\_^\_Z¥\_^^\_¥Y\_^YX^\_\_^UP\_]^\_  
@HWI-EAS443:3:73:360:1810#0/1  
ACTCTCTCCGTGCTGGAGTATTCATCTACTCCCATTTTGC  
+HWI-EAS443:3:73:360:1810#0/1  
[``]a¥aa¥P`aX^]¥^U]Y¥a`¥a¥`a][\_`\_^WYYW  
@HWI-EAS443:3:73:502:830#0/1  
GAGAAGAACCCCGCACTCAGAATGAAGTGGATGATGGCAA  
+HWI-EAS443:3:73:502:830#0/1  
Y^`b[bbbbbababab`a`aab]\_`Z^a`b]NU``¥Q  
@HWI-EAS443:3:73:740:667#0/1  
GAGATATGGCCAGCATTAAAGCATCAATGAACTGAGCAAT  
+HWI-EAS443:3:73:740:667#0/1  
`a]a`VY]bb]Za\_]S\_a`¥`aaL`TaY\_XZ]TY[[X\_  
@HWI-EAS443:3:73:941:2026#0/1  
AGAAGAACCCCGCACTCAGAATGAAGTGGATGATGGCAAT  
+HWI-EAS443:3:73:941:2026#0/1  
`^¥Z\_a¥aabaW``a`^Z¥Z^aaaaSa`[a]]ZTTX[X  
@HWI-EAS443:3:74:1184:1863#0/1  
CATTAAAGCATCAATGAACTGAGCAATCTTGCAAAAGGAGA  
+HWI-EAS443:3:74:1184:1863#0/1  
abbabaaaa]bbaabab`a]G[`aa\_ba`aYaaaaaa\_\_a  
@HWI-EAS443:3:74:1273:1799#0/1  
AAGAGAAGAACCCCGCACTCAGAATGAAGTGGATGATGGC  
+HWI-EAS443:3:74:1273:1799#0/1  
a[\_S\_¥]baaaa¥aaW`aaa``¥`aa`SaRb\_]\_aa¥`TH  
@HWI-EAS443:3:74:1316:904#0/1  
CCAGCATTAAAGCATCAATGAACTGAGCAATCTTGCAAAAG  
+HWI-EAS443:3:74:1316:904#0/1  
aa`a`a`a`ab`b``ba[aaba]bbaab`bbbaaaaaa  
@HWI-EAS443:3:74:1337:985#0/1  
GAGATATGGCCAGCATTAAAGCATCAATGAACTGAGCAAT  
+HWI-EAS443:3:74:1337:985#0/1  
^Y\_`a`Y`^]]`^b`]`\_ba]`^P¥aaX]Wa``]Z\_\_a  
@HWI-EAS443:3:74:1356:1479#0/1  
CAATTCGACACTAATTGATGGCCATCCGAATTCTTTTGGT  
+HWI-EAS443:3:74:1356:1479#0/1  
`bbbabbabbabaa\_aba`\_\_`aa\_]aa\_a`^[\_Ya`]Y  
@HWI-EAS443:3:74:1384:319#0/1  
CAATTCGACACTAATTGATGGCCATCCGAATTCTTTTGGT

+HWI-EAS443:3:74:1384:319#0/1  
Kabbb\_bbabbbbabbbba\_^bbSbbbababbbbaVa  
@HWI-EAS443:3:74:1419:744#0/1  
AAGAGAAGAACCCCGCACTCAGAATGAAGTGGATGATGGC  
+HWI-EAS443:3:74:1419:744#0/1  
\_a`I\_[a`aY`]XY[a`a[aa¥`a`XaNb`a]\_^VZ]  
@HWI-EAS443:3:74:1446:1234#0/1  
AAGAGATATGGCCAGCATTAAAGCATCAATGAACTGAGCA  
+HWI-EAS443:3:74:1446:1234#0/1  
a\_bMaba¥S¥]]`V]\_bX\_aa`][\_Z`]\_\_^\_a]TR^  
@HWI-EAS443:3:74:1540:1121#0/1  
AGAGAAGAACCCCGCACTCAGAATGAAGTGGATGATGGCA  
+HWI-EAS443:3:74:1540:1121#0/1  
`¥N[N¥`\_]`¥`Q\$ab\_N]][]a[[]^`]¥aG`a^]W  
@HWI-EAS443:3:74:1559:697#0/1  
GAAGACAAGAGATATGGCCAGCATTAAAGCATCAATGAAC  
+HWI-EAS443:3:74:1559:697#0/1  
aa]\_`]`aaaa\_\_a````\_SZa`\_b\_\_]`ZYTZ`\_\_\_\_]  
@HWI-EAS443:3:74:1564:692#0/1  
TTAAGCATCAATGAACTGAGCAATCTTGCAAAAGGAGAGA  
+HWI-EAS443:3:74:1564:692#0/1  
`¥a`b`aba^\_baab`aaaaaaaa`\_aa]aa`\_aY\_a\_aa  
@HWI-EAS443:3:74:1620:2022#0/1  
CATTAAAGCATCAATGAACTGAGCAATCTTGCAAAAGGAGA  
+HWI-EAS443:3:74:1620:2022#0/1  
aab]babaaaabbbbaabbbba`babbab^abaaabb`W[aa  
@HWI-EAS443:3:74:164:1604#0/1  
CATTAAAGCATCAATGAACTGAGCAATCTTGCAAAAGGAGA  
+HWI-EAS443:3:74:164:1604#0/1  
abab^baba^Qa`a`aaa\_\_`¥a```a`^a`a`\_]`]^¥\_  
@HWI-EAS443:3:74:167:233#0/1  
AATTCGACACTAATTGATGGCCATCCGAATCTTTTGGTC  
+HWI-EAS443:3:74:167:233#0/1  
]\_Z]VZZ```][W\_]¥[`]¥`RXV¥XNVYLPUV[¥]QN  
@HWI-EAS443:3:74:203:588#0/1  
ATTTTGGGCAAAGAAGACAAGAGATATGGCCAGCATTAA  
+HWI-EAS443:3:74:203:588#0/1  
abbbaaaabaaa]]]a`aaaaaa^][`\_a]¥¥^Ya`\_`¥  
@HWI-EAS443:3:74:32:1730#0/1  
CAAGAGAAGAACCCCGCACTCAGAATGAAGTGGATGATGG  
+HWI-EAS443:3:74:32:1730#0/1  
`\_\_]\_^U`a`aaaa`a`a\_a]S``VW]\_\_LY`a]N[0^[  
@HWI-EAS443:3:74:372:1628#0/1  
AGAAGAACCCCGCACTCAGAATGAAGTGGATGATGGCAAT  
+HWI-EAS443:3:74:372:1628#0/1  
T[VW``UUWZaaa\_R`WZWa`PFQ[N^MQW[TRXRY]\_  
@HWI-EAS443:3:74:427:410#0/1  
ATTAAGCATCAATGAACTGAGCAATCTTGCAAAAGGAGAG  
+HWI-EAS443:3:74:427:410#0/1  
aaaaaa`a`````aa`\_`aa`\_^\_\_a^`\_`a^]\_\_a]^a`\_`

@HWI-EAS443:3:74:437:1356#0/1  
GAAGAACCCCGCACTCAGAATGAAGTGGATGATGGCAATG  
+HWI-EAS443:3:74:437:1356#0/1  
aa`UW\_aba]`b`a¥^`XP¥^]]W[¥XXY^^¥]SVXVSV[  
@HWI-EAS443:3:74:439:1759#0/1  
CAATTCGACACTAATTGATGGCCATCCGAATTCTTTTGGT  
+HWI-EAS443:3:74:439:1759#0/1  
`Z^`^a\_a]b\_aZa\_`\_[\_W]\_a]S]aZ\_\_\_]\_]Y\_^\_VNU  
@HWI-EAS443:3:74:511:1325#0/1  
CAAGAGATATGGCCCAGCATTAAAGCATCAATGAACTGAGC  
+HWI-EAS443:3:74:511:1325#0/1  
a\_\_abaaab`aa\_bbaabaa\_a`aaa\_\_]Xa`aa]\_^`\_a  
@HWI-EAS443:3:74:542:1331#0/1  
GATTGCTCAGTTCATTGATGCTTAATGCTGGGCCATATCT  
+HWI-EAS443:3:74:542:1331#0/1  
aaY\_W]`aa^Z]aaa]`Y`aa\_a\_\_¥]\_aXN]`a`a\_`]`  
@HWI-EAS443:3:74:695:402#0/1  
AGCTGTTGCTCTTCTCCCAACCATTGTGAATTCTTCATAC  
+HWI-EAS443:3:74:695:402#0/1  
aaabbaaa`aaa`a`aaa^^[a`^`QP^`Ya`^^a^W  
@HWI-EAS443:3:74:711:1145#0/1  
AGAAGAACCCCGCACTCAGAATGAAGTGGATGATGGCAAT  
+HWI-EAS443:3:74:711:1145#0/1  
`a\_^aa]b\_bba`a`[a^^`\_XN]STaZ[\_]Z^`\_UTVQ  
@HWI-EAS443:3:74:812:1406#0/1  
CAATTCGACACTAATTGATGGCCATCCGAATTCTTTTGGT  
+HWI-EAS443:3:74:812:1406#0/1  
aa]aab\_¥]aba`[`¥aa`[]\_abaaaa`¥`aaa\_[^^^U  
@HWI-EAS443:3:74:820:267#0/1  
AAACAATTGACACTAATTGATGGCCATCCGAATTCTTTT  
+HWI-EAS443:3:74:820:267#0/1  
aaa`bab`aaa\_b\_aa`aaaaa^^\_[a`]a`^`\_a\_a``a  
@HWI-EAS443:3:74:829:98#0/1  
AAGACAAGAGATATGGCCCAGCATTAAAGCATCAATGAACT  
+HWI-EAS443:3:74:829:98#0/1  
aa`\_\_aaa¥a\_a`\_`\_\_^^\_]\_]\_^`XX`V]¥]\_Z]Z]  
@HWI-EAS443:3:74:96:1885#0/1  
AAGAGAAGAACCCCGCACTCAGAATGAAGTGGATGATGGC  
+HWI-EAS443:3:74:96:1885#0/1  
¥]`a`a]TZ`X`[a^^a`\_\_VQU`a\_¥a`JSV¥RQHWRU  
@HWI-EAS443:3:75:1027:963#0/1  
ATATGGCCCAGCATTAAAGCATCAATGAACTGAGCAATCTT  
+HWI-EAS443:3:75:1027:963#0/1  
a[RS\_\_aaaab`]a\_a``aa\_\_^[`a`\_]\_\_a`a^]¥\_[  
@HWI-EAS443:3:75:1168:1250#0/1  
TTTTAAACAATTGACACTAATTGATGGCCATCCGAATTC  
+HWI-EAS443:3:75:1168:1250#0/1  
abaabb]abaaaaaaabaa`a`a`\_a\_a```aa`\_a\_  
@HWI-EAS443:3:75:1202:1139#0/1  
AAGAGATATGGCCCAGCATTAAAGCATCAATGAACTGAGCA

+HWI-EAS443:3:75:1202:1139#0/1  
abbabbabaaaaaabaabaaaaaaa`abba`aaa\_a`a  
@HWI-EAS443:3:75:1205:1441#0/1  
GAGATATGGCCAGCATTAAAGCATCAATGAACTGAGCAAT  
+HWI-EAS443:3:75:1205:1441#0/1  
`[Y]Uaa[X`aa`aa`\_\_aa\_\_\_\_\_[^aY``\_Y\_a#a][  
@HWI-EAS443:3:75:1255:179#0/1  
CATTAAAGCATCAATGAACTGAGCAATCTTGCAAAAAGGAGA  
+HWI-EAS443:3:75:1255:179#0/1  
Vbbbbbaabbbbbbbbbbbbbbbbabbbabbbbbbbbb  
@HWI-EAS443:3:75:1350:639#0/1  
GCATTAAGCATCAATGAACTGAGCAATCTTGCAAAAAGGAG  
+HWI-EAS443:3:75:1350:639#0/1  
W#bb\_b`a`\_ZZ]R#¥`ZY`R`bXMTX^]b\_b`\_Ybb`b  
@HWI-EAS443:3:75:1483:1010#0/1  
CAATTCGACACTAATTGATGGCCATCCGAATTCTTTTGGT  
+HWI-EAS443:3:75:1483:1010#0/1  
abbbb^aab`abbabaaaaaba]^baaaaXaba`^\_a  
@HWI-EAS443:3:75:1483:266#0/1  
AGAAGAACCCCGCACTCAGAATGAAGTGGATGATGGCAAT  
+HWI-EAS443:3:75:1483:266#0/1  
ababbab`aab`a^a\_\_a]aab^\_a#ba\_aa#`a\_XZ\_\_  
@HWI-EAS443:3:75:1564:1833#0/1  
CAAAGAAGACAAGAGATATGGCCAGCATTAAAGCATCAAT  
+HWI-EAS443:3:75:1564:1833#0/1  
ababbaa^babaaaaba`aaa`baaa\_aaaaa\_`aa\_\_aa  
@HWI-EAS443:3:75:191:42#0/1  
AAGAGAAGAACCCCGCACTCAGAATGAAGTGGATGATGGC  
+HWI-EAS443:3:75:191:42#0/1  
VbaS\_Ub^#M\_ab]b]OZ`a[Z¥#aaQZ[R#¥#Z`ZLRZ`T  
@HWI-EAS443:3:75:263:1401#0/1  
CCAGCATTAAAGCATCAATGAACTGAGCAATCTTGCAAAAAG  
+HWI-EAS443:3:75:263:1401#0/1  
#a]U\_KXWT`aa]YS]XJV#N]XNFaQRTV^V\_a`#^^`  
@HWI-EAS443:3:75:269:1755#0/1  
CCATCATCCACTTCATTCTGAGTGC GGGTTCTTCTCTTG  
+HWI-EAS443:3:75:269:1755#0/1  
abbabb\_baab`aaaaaa]Xa^`]]\_]`\_`\_a\_a\_^\_  
@HWI-EAS443:3:75:309:1649#0/1  
GCATTAAGCATCAATGAACTGAGCAATCTTGCAAAAAGGAG  
+HWI-EAS443:3:75:309:1649#0/1  
ab`SaaLaabaaa]a`VX^a`a`bba\_ba\_aa\_TWa\_\_^a  
@HWI-EAS443:3:75:334:1185#0/1  
TAAGCATCAATGAACTGAGCAATCTTGCAAAAAGGAGAGAA  
+HWI-EAS443:3:75:334:1185#0/1  
^#[#bbbababba#ab\_VabbaaabaabbYa`a#aaa#^a  
@HWI-EAS443:3:75:374:1006#0/1  
GAGATATGGCCAGCATTAAAGCATCAATGAACTGAGCAAT  
+HWI-EAS443:3:75:374:1006#0/1  
`aV]\_UK]aa\_#\_aY#\_a\_X^Q^a^S#U^\_a\_[U^\_]Z\_

@HWI-EAS443:3:75:480:609#0/1  
CATTAGCATCAATGAACTGAGCAATCTTGCAAAGGAGA  
+HWI-EAS443:3:75:480:609#0/1  
abbbb`baababbbbbbbbaabbbabbbb`aaaabaaab  
@HWI-EAS443:3:75:614:1336#0/1  
TAAGCATCAATGAACTGAGCAATCTTGCAAAGGAGAGAA  
+HWI-EAS443:3:75:614:1336#0/1  
abb\_ba`a`aa`aaaa`\_`\_`a`^[VY^^`a\_aa  
@HWI-EAS443:3:75:681:425#0/1  
GAGAAGAACCCCGCACTCAGAATGAAGTGGATGATGGCAA  
+HWI-EAS443:3:75:681:425#0/1  
a[[\_`a`\_bb^`ab`Waba`ZaaaaXY`[aUWaa`Z]`[Y¥  
@HWI-EAS443:3:75:699:33#0/1  
ATTAAGCATCAATGAACTGAGCAATCTTGCAAAGGAGAG  
+HWI-EAS443:3:75:699:33#0/1  
aaaaa`aa`\_aa`\_\_aa^a^a`\_\_`\_a^^`[]`^a\_\_  
@HWI-EAS443:3:75:705:1931#0/1  
GAGAAGAACCCCGCACTCAGAATGAAGTGGATGATGGCAA  
+HWI-EAS443:3:75:705:1931#0/1  
U\_UJ¥\_a¥\_``\_X\_Z]¥¥Y^TZW[[TZSZZ\_`^Z]a¥U  
@HWI-EAS443:3:75:746:31#0/1  
AAGAGATATGGCCAGCATTAGCATCAATGAACTGAGCA  
+HWI-EAS443:3:75:746:31#0/1  
abbbbbbbba[`\_babbaabaaa`a`bb\_a^aa\_a]`  
@HWI-EAS443:3:75:775:1073#0/1  
TAAGCATCAATGAACTGAGCAATCTTGCAAAGGAGAGAA  
+HWI-EAS443:3:75:775:1073#0/1  
a¥aabbbbab\_bbbabb`aabaab\_bbab`a\_aaba``b`  
@HWI-EAS443:3:75:816:1832#0/1  
CTCATTGTCGAAAGAAGACAAGAGATATGGCCAGCAT  
+HWI-EAS443:3:75:816:1832#0/1  
a`Ya¥Wb`[Tbb`bVWV¥¥\_`abbbba`bb[\_aU^baaa`  
@HWI-EAS443:3:75:838:1427#0/1  
TAAGCATCAATGAACTGAGCAATCTTGCAAAGGAGAGAA  
+HWI-EAS443:3:75:838:1427#0/1  
abbbba`\_aabba`ba`b]^bbabbbbaabbbabbabaaba  
@HWI-EAS443:3:75:96:267#0/1  
GAAGAACCCCGCACTCAGAATGAAGTGGATGATGGCAATG  
+HWI-EAS443:3:75:96:267#0/1  
¥\_babUbbba]\_bba`abaWaaaa`b¥bb\_aa`\_`aa`a\_  
@HWI-EAS443:3:75:991:1617#0/1  
CAATTCGACACTAATTGATGGCCATCCGAATTCTTTTGGT  
+HWI-EAS443:3:75:991:1617#0/1  
abba\_`babbab\_``\_\_`¥a\_a``aaaa`aX`aa[^a\_]`  
@HWI-EAS443:3:75:996:627#0/1  
TAAGCATCAATGAACTGAGCAATCTTGCAAAGGAGAGAA  
+HWI-EAS443:3:75:996:627#0/1  
\_abba`]W]aaaV[]aa`[^\_a`^`\_]`[Z`]aa^RZ^`\_  
@HWI-EAS443:3:76:1276:1029#0/1  
TAAGCATCAATGAACTGAGCAATCTTGCAAAGGAGAGAA

+HWI-EAS443:3:76:1276:1029#0/1  
abbb`b]aaaa\_]¥a`aa\_a\_`a[^`W``[a\_U`a\_a^  
@HWI-EAS443:3:76:1311:1796#0/1  
TAAGCATCAATGAACTGAGCAATCTTGCAAAAGGAGAGAA  
+HWI-EAS443:3:76:1311:1796#0/1  
ab`a`abbaaa`a\_a\_a`a\_\_¥a`\_\_\_\_\_a\_\_a`\_a^  
@HWI-EAS443:3:76:1430:387#0/1  
AGATTGCTCAGTTCATTGATGCTTAATGCTGGGCCATATC  
+HWI-EAS443:3:76:1430:387#0/1  
\_`a`]X\_\_\_¥`X]M[abbabbYbbaW```aYPMUWX¥¥[U  
@HWI-EAS443:3:76:1548:81#0/1  
GAGAAGAACCCGCACTCAGAATGAAGTGGATGATGGCAA  
+HWI-EAS443:3:76:1548:81#0/1  
aa]``\_`a¥¥ZV\_RZV\_WZ\_]^^\_YZ]Z\_VTH`VUVRDKZ  
@HWI-EAS443:3:76:1579:1252#0/1  
CAGCATTAAGCATCAATGAACTGAGCAATCTTGCAAAAGG  
+HWI-EAS443:3:76:1579:1252#0/1  
abbbba^a\_^`aa^`\_bbaa````]a[aaa\_``a`\_`[]]^  
@HWI-EAS443:3:76:1597:1094#0/1  
AGAAGACAAGAGATATGGCCCAGCATTAAGCATCAATGAA  
+HWI-EAS443:3:76:1597:1094#0/1  
ababa\_Ibbbabaaa\_ab\_aabaababaaaY`a`\_\_a\_\_a  
@HWI-EAS443:3:76:1600:1829#0/1  
ATGGCCCAGCATTAAGCATCAATGAACTGAGCAATCTTGC  
+HWI-EAS443:3:76:1600:1829#0/1  
a`] `a^aa\_b`\_aaa]a``aaaa\_\_\_\_\_`¥\_Va`\_W\_^^^  
@HWI-EAS443:3:76:1642:1570#0/1  
CAATTCGACACTAATTGATGGCCATCCGAATTCTTTTGGT  
+HWI-EAS443:3:76:1642:1570#0/1  
]bbb`a¥```abba^aaa\_^^aaba```aaa\_V]aa[``b`  
@HWI-EAS443:3:76:1671:302#0/1  
ATGGCCCAGCATTAAGCATCAATGAACTGAGCAATCTTGC  
+HWI-EAS443:3:76:1671:302#0/1  
aaaa]]^ab¥a`aa\_¥`a`\_a`^^^\_\_^\_V``R]\_\_Z  
@HWI-EAS443:3:76:1786:898#0/1  
CCATCATCCACTTCATTCTGAGTGC GGGTTCTTCTCTTG  
+HWI-EAS443:3:76:1786:898#0/1  
abbb¥b]bbbZbaaabba\_aa`W`]^^`b\_a`baaa\_ba`  
@HWI-EAS443:3:76:326:566#0/1  
TTTTGGGCAAAGAAGACAAGAGATATGGCCCAGCATTAAG  
+HWI-EAS443:3:76:326:566#0/1  
^^R`b[TS\_SXVURY`IX[WWWX`[]`RHYaXRXT\_R]Y^  
@HWI-EAS443:3:76:328:279#0/1  
CAATTCGACACTAATTGATGGCCATCCGAATTCTTTTGGT  
+HWI-EAS443:3:76:328:279#0/1  
abbbbabbbbabbbbaaaa``\_`abaa`a\_^`a]^`a\_[YZ  
@HWI-EAS443:3:76:357:665#0/1  
CATTAAGCATCAATGAACTGAGCAATCTTGCAAAAGGAGA  
+HWI-EAS443:3:76:357:665#0/1  
abbbbbba`abbbbbabab`Ybbb\_bbbbaaabaabaaba



@HWI-EAS443:3:76:528:1058#0/1  
GATATGGCCCAGCATTAAAGCATCAATGAACTGAGCAATCT  
+HWI-EAS443:3:76:528:1058#0/1  
a\_X`ITW[\_YTW[\_\_\_ZZ`aa¥\_a`NP[[aVNLV^a\_[]X^  
@HWI-EAS443:3:76:621:1216#0/1  
AAAGAAGACAAGAGATATGGCCCAGCATTAAAGCATCAATG  
+HWI-EAS443:3:76:621:1216#0/1  
aaa`]b`Zaabaaaa]a\_\_aa^a¥Xa``aa\_aa\_`\_``^  
@HWI-EAS443:3:76:629:1523#0/1  
AGAAGAACCCCGCACTCAGAATGAAGTGGATGATGGCAAT  
+HWI-EAS443:3:76:629:1523#0/1  
XR[\_Ybaa``[``^`[b^M[aaa`TXXUR\_Wa¥W¥[RQ^^  
@HWI-EAS443:3:76:765:1025#0/1  
TTTTTAAACAATTGACACTAATTGATGGCCATCCGAATT  
+HWI-EAS443:3:76:765:1025#0/1  
^babbb`Z[aaba`aaabaa^``a``a`Z\_aa\_a¥`a`a`  
@HWI-EAS443:3:76:799:75#0/1  
TTTTTAAACAATTGACACTAATTGATGGCCATCCGAATT  
+HWI-EAS443:3:76:799:75#0/1  
`bba]`a`Za`a][[XR`V]\_\_¥^\_\_^[YRWW^VU\_W^¥T  
@HWI-EAS443:3:76:82:1203#0/1  
CAGCATTAAAGCATCAATGAACTGAGCAATCTTGCAAAAAGG  
+HWI-EAS443:3:76:82:1203#0/1  
`[^bb`bbbaa`bbaaab^``\_W¥babbabaaaba`¥VZ`  
@HWI-EAS443:3:76:850:1218#0/1  
ATTAAGCATCAATGAACTGAGCAATCTTGCAAAAAGGAGAG  
+HWI-EAS443:3:76:850:1218#0/1  
a`YVaa``a^\_\_a[¥\_\_\_^\_]aa`[[]\_\_aU¥[^\_^^`\_`  
@HWI-EAS443:3:76:892:78#0/1  
GATTGCTCAGTTCATTGATGCTTAATGCTGGGCCATATCT  
+HWI-EAS443:3:76:892:78#0/1  
aa`a\_W]`\_a^a^^aaa`\_a^a`\_]\_^W^`¥WTY¥^^^X^  
@HWI-EAS443:3:76:969:1936#0/1  
AAGAGAAGAACCCCGCACTCAGAATGAAGTGGATGATGGC  
+HWI-EAS443:3:76:969:1936#0/1  
abaaabbbaba`\_a`aaaa`a```\_\_\_a]``aaa`\_\_Y^  
@HWI-EAS443:3:77:1053:1841#0/1  
TAAGCATCAATGAACTGAGCAATCTTGCAAAAAGGAGAGAA  
+HWI-EAS443:3:77:1053:1841#0/1  
]b`ab]aZ]aa`\_aabaZa`\_aab```a`\_a\_\_^`\_a\_aa  
@HWI-EAS443:3:77:1195:1996#0/1  
AAGAGAAGAACCCCGCACTCAGAATGAAGTGGATGATGGC  
+HWI-EAS443:3:77:1195:1996#0/1  
ab`\_`aab\_aba`\_a```\_a\_a\_\_a`aa]aZa^a``\_]\_\_0  
@HWI-EAS443:3:77:1290:757#0/1  
AGAAGAACCCCGCACTCAGAATGAAGTGGATGATGGCAAT  
+HWI-EAS443:3:77:1290:757#0/1  
`^¥aVa`R¥baVaa]aa`aQ```b\_aW]Z`aaa`[bGa`a  
@HWI-EAS443:3:77:1379:1637#0/1  
AAGAAGACAAGAGATATGGCCCAGCATTAAAGCATCAATGA

+HWI-EAS443:3:77:1379:1637#0/1  
ababbbb`aaa\_b`aa[bb^\_\_aa¥b`abba`aaaa\_aa`  
@HWI-EAS443:3:77:1497:66#0/1  
AAGAGAAGAACCCCGCACTCAGAATGAAGTGGATGATGGC  
+HWI-EAS443:3:77:1497:66#0/1  
]ababaabbaba`ab`\_b`ba]bb`bSba\_abZ]^a¥  
@HWI-EAS443:3:77:1758:962#0/1  
CAAGAGAAGAACCCCGCACTCAGAATGAAGTGGATGATGG  
+HWI-EAS443:3:77:1758:962#0/1  
abbbbbbbabba]bab`baab`\_aab^`\_Vab]ab\_\_aa  
@HWI-EAS443:3:77:221:2042#0/1  
AAAGAAGACAAGAGATATGGCCAGCATTAAAGCATCAATG  
+HWI-EAS443:3:77:221:2042#0/1  
aaaaXa¥aaVY[`aa\_a^[`a`aa\_^a^^[``a]^`Z`\_\_  
@HWI-EAS443:3:77:255:159#0/1  
AAGAGATATGGCCAGCATTAAAGCATCAATGAACTGAGCA  
+HWI-EAS443:3:77:255:159#0/1  
¥]babaa`aaba`\_a`aa`\_¥aa\_\_\_^`\_^]\_¥]^]\_¥\_  
@HWI-EAS443:3:77:357:614#0/1  
AACAAATTCGACACTAATTGATGGCCATCCGAATTCCTTTTG  
+HWI-EAS443:3:77:357:614#0/1  
abaa`baaaaa`aaaa\_\_`\_\_]a`a`a\_\_a^^]\_]a^a  
@HWI-EAS443:3:77:359:563#0/1  
TAAGCATCAATGAACTGAGCAATCTTGCAAAAGGAGAGAA  
+HWI-EAS443:3:77:359:563#0/1  
abSP\_`\_`aaa`\_[[aaa^`\_`a`a`a`\_`[Za`\_a¥a\_\_  
@HWI-EAS443:3:77:380:1858#0/1  
GAAGACAAGAGATATGGCCAGCATTAAAGCATCAATGAAC  
+HWI-EAS443:3:77:380:1858#0/1  
SW\_]¥`b\_L¥¥W^a`aa`\_b\_[]\_^aZU^aa`b\_[P¥X^\_  
@HWI-EAS443:3:77:388:1219#0/1  
TAAGCATCAATGAACTGAGCAATCTTGCAAAAGGAGAGAA  
+HWI-EAS443:3:77:388:1219#0/1  
^¥\_\_bb`\_a`\_bbaa`aaaa¥\_\_^`\_a\_Y¥a`\_`\_`\_\_V  
@HWI-EAS443:3:77:413:587#0/1  
CATTAAGCATCAATGAACTGAGCAATCTTGCAAAAGGAGA  
+HWI-EAS443:3:77:413:587#0/1  
abab\_¥`babbabbabaabaabbb`\_ababbaaaababb  
@HWI-EAS443:3:77:50:1826#0/1  
ATTAAGCATCAATGAACTGAGCAATCTTGCAAAAGGAGAG  
+HWI-EAS443:3:77:50:1826#0/1  
aa\_aa]a\_aaaa`\_`Y`\_`[\_`aa`]\_\_\_\_`^\_]\_]^[^¥\_¥  
@HWI-EAS443:3:77:587:50#0/1  
GAGATATGGCCAGCATTAAAGCATCAATGAACTGAGCAAT  
+HWI-EAS443:3:77:587:50#0/1  
a¥\_SVZV^`W]¥^\_`R]U\_ZOXYVSUX^\_ZRVY\_TZWWWP  
@HWI-EAS443:3:77:645:372#0/1  
CAAGAGAAGAACCCCGCACTCAGAATGAAGTGGATGATGG  
+HWI-EAS443:3:77:645:372#0/1  
abb\_[a\_bbbbaa`aabbbaaa\_baaaabWba`\_aa^aa

@HWI-EAS443:3:77:741:901#0/1  
AGAGATATGGCCCAGCATTAAAGCATCAATGAACTGAGCAA  
+HWI-EAS443:3:77:741:901#0/1  
V`b\_]ba¥aX`b``Xb[a^J^\_^\_a]b\_¥a^Y`\_\_`\_[a  
@HWI-EAS443:3:77:775:1025#0/1  
CTCTCCTTTTGCAAGATTGCTCAGTTCATTGATGCTTAAT  
+HWI-EAS443:3:77:775:1025#0/1  
`bbba`bba`abbb`baabaabaa\_aaabaa\_\_\_aa`X]  
@HWI-EAS443:3:77:781:325#0/1  
ATTTTGGGCAAAGAAGACAAGAGATATGGCCCAGCATTAA  
+HWI-EAS443:3:77:781:325#0/1  
\_Ya\_a`\_bbbaaaaab]aaaaa`aab`a`aa`aa¥aa\_aa  
@HWI-EAS443:3:77:912:1481#0/1  
GAGAAGAACCCCGCACTCAGAATGAAGTGGATGATGGCAA  
+HWI-EAS443:3:77:912:1481#0/1  
\_\_U¥¥^Xaa^aX^bba]b\_YZ\_\_bXW¥RbY^aaaaaa^¥a  
@HWI-EAS443:3:78:1195:1433#0/1  
GATATGGCCCAGCATTAAAGCATCAATGAACTGAGCAATCT  
+HWI-EAS443:3:78:1195:1433#0/1  
``]`XaW\_[\_``[^^^a`\_\_[]R¥]\_\_]\_Y`\_\_^]]^UN^  
@HWI-EAS443:3:78:1236:1055#0/1  
GAGATATGGCCCAGCATTAAAGCATCAATGAACTGAGCAAT  
+HWI-EAS443:3:78:1236:1055#0/1  
aaaaaa`a```V^V^a\_a]\_Z\_^^^\_\_\_a¥\_`\_\_\_`^\_  
@HWI-EAS443:3:78:1366:26#0/1  
GAAGAACCCCGCACTCAGAATGAAGTGGATGATGGCAATG  
+HWI-EAS443:3:78:1366:26#0/1  
^QQ]R`[NTP¥UQQZGYaQ[]QQW[Y]TLG]NT``SYRSY  
@HWI-EAS443:3:78:1420:886#0/1  
AGAAGACAAGAGATATGGCCCAGCATTAAAGCATCAATGAA  
+HWI-EAS443:3:78:1420:886#0/1  
¥VQWb\_aYH`YbU`][SLS]GO\_X\_aR^V`Z\_\_a`X`WY  
@HWI-EAS443:3:78:197:1134#0/1  
GAGAAGAACCCCGCACTCAGAATGAAGTGGATGATGGCAA  
+HWI-EAS443:3:78:197:1134#0/1  
a]]U\_`abb\_`\_W\_``]aaa]J]\_]XaYa]]`\_]S``\_[[  
@HWI-EAS443:3:78:259:1099#0/1  
GAAGAACCCCGCACTCAGAATGAAGTGGATGATGGCAATG  
+HWI-EAS443:3:78:259:1099#0/1  
]XQUR[`a][^aJ`aaNS[ZU`¥\_`G¥][R^Y[a\_\_^PR[  
@HWI-EAS443:3:78:335:1920#0/1  
AGAAGAACCCCGCACTCAGAATGAAGTGGATGATGGCAAT  
+HWI-EAS443:3:78:335:1920#0/1  
UZ\_T\_R\_a`bbb\_R¥Ya`QHSO]ZPG]aYLW`\_a]K^J\_  
@HWI-EAS443:3:78:438:1050#0/1  
AGAAGACAAGAGATATGGCCCAGCATTAAAGCATCAATGAA  
+HWI-EAS443:3:78:438:1050#0/1  
aaaaaaa`aaaa\_aa\_\_]\_^\_a\_\_\_\_\_a\_^`\_\_`\_^\_]Y^  
@HWI-EAS443:3:78:725:950#0/1  
GAAGAACCCCGCACTCAGAATGAAGTGGATGATGGCAATG

+HWI-EAS443:3:78:725:950#0/1  
^`\_\_abbbbaaa`abaabVb`baaW\_a`a]]¥]Y``[\_``  
@HWI-EAS443:3:78:744:78#0/1  
TTAAGCATCAATGAACTGAGCAATCTTGCAAAAAGGAGAGA  
+HWI-EAS443:3:78:744:78#0/1  
aabaa\_ab``aa`\_`a`^a]\_^`^`a]^^]\_`\_[a``  
@HWI-EAS443:3:78:748:1142#0/1  
AGAAGACAAGAGATATGGCCCAGCATTAAAGCATCAATGAA  
+HWI-EAS443:3:78:748:1142#0/1  
aaaa`aaa`baa`\_a`\_`a`\_`a`^a`\_`a`\_`a`\_`^`\_`\_`  
@HWI-EAS443:3:78:773:1730#0/1  
AGAAGACAAGAGATATGGCCCAGCATTAAAGCATCAATGAA  
+HWI-EAS443:3:78:773:1730#0/1  
aaaa\_a`\_]`^aaa`\_`\_\_aa]\_]a\_aa`]\_\_\_\_\_]^`^^  
@HWI-EAS443:3:78:782:1594#0/1  
GAAGAACCCCGCACTCAGAATGAAGTGGATGATGGCAATG  
+HWI-EAS443:3:78:782:1594#0/1  
\_TZO¥ba\_\_\_aaWb]a\_Q¥Wa¥`Y[Ga^¥M[T\_`WOSQL\_  
@HWI-EAS443:3:78:818:410#0/1  
TAAGCATCAATGAACTGAGCAATCTTGCAAAAAGGAGAGAA  
+HWI-EAS443:3:78:818:410#0/1  
YaUa]TSTYbabZWIWbV`^VaaVab[ba`U`b`\_aa[  
@HWI-EAS443:3:78:864:869#0/1  
AAACAATTCGACACTAATTGATGGCCATCCGAATTCCTTTT  
+HWI-EAS443:3:78:864:869#0/1  
aaa^aaaaa^`aa\_aa^\_`a`[XS¥M`\_`[\_`\_] [[[[\_^]¥  
@HWI-EAS443:3:78:893:1321#0/1  
AAACAATTCGACACTAATTGATGGCCATCCGAATTCCTTTT  
+HWI-EAS443:3:78:893:1321#0/1  
aaa]a`\_`\_`aZ`a`\_`a\_]\_]ZZX\_¥a^\_[U¥¥^] [\_]] [  
@HWI-EAS443:3:79:102:1320#0/1  
AACAAATTCGACACTAATTGATGGCCATCCGAATTCCTTTTG  
+HWI-EAS443:3:79:102:1320#0/1  
a`]]V^\_a\_Zaa\_\_`\_¥TX¥^YM[`[K\_]¥YYUW^[V]Y[  
@HWI-EAS443:3:79:1070:1184#0/1  
CTTTTGCAAGATTGCTCAGTTCATTGATGCTTAATGCTGG  
+HWI-EAS443:3:79:1070:1184#0/1  
aabababbabab`bbabbbaabbbbaa\_ababaa`\_`a`\_`ba  
@HWI-EAS443:3:79:1112:1995#0/1  
TAAGCATCAATGAACTGAGCAATCTTGCAAAAAGGAGAGAA  
+HWI-EAS443:3:79:1112:1995#0/1  
``b`^^a\_]`¥Z\_U[\_]¥OS`aaa¥`\_`aaY``¥^\_a`aa  
@HWI-EAS443:3:79:1126:542#0/1  
AAGAAGACAAGAGATATGGCCCAGCATTAAAGCATCAATGA  
+HWI-EAS443:3:79:1126:542#0/1  
abbb`bbaaab`^a`a\_a`^aaaaaaaaa¥]^`\_`\_`\_`  
@HWI-EAS443:3:79:1345:725#0/1  
AAGAGATATGGCCCAGCATTAAAGCATCAATGAACTGAGCA  
+HWI-EAS443:3:79:1345:725#0/1  
\_\_bbbbabbZa\_aaaabb\_YZabb¥b\_bbbbaa`b]]aba

@HWI-EAS443:3:79:1431:981#0/1  
CCAGCATTAAGCATCAATGAACTGAGCAATCTTGCAAAAG  
+HWI-EAS443:3:79:1431:981#0/1  
``bb^b``^ba\_a`Ya^`baaba^`baaaYIa[a`ZXT]b  
@HWI-EAS443:3:79:1487:1984#0/1  
AGAAGAACCCCGCACTCAGAATGAAGTGGATGATGGCAAT  
+HWI-EAS443:3:79:1487:1984#0/1  
aba\_bbbaaa``a[aaaaaaa`\_ab^aaa\_a\_\_a^`]\_`  
@HWI-EAS443:3:79:149:1236#0/1  
GGGCAAAGAAGACAAGAGATATGGCCCAGCATTAAGCATC  
+HWI-EAS443:3:79:149:1236#0/1  
^aba[X[ba¥abbbbab^bbabbba`¥`abaaba]`aab  
@HWI-EAS443:3:79:1515:1887#0/1  
AGAAGACAAGAGATATGGCCCAGCATTAAGCATCAATGAA  
+HWI-EAS443:3:79:1515:1887#0/1  
]`Ub\_b`aa^aba`ababSNWaaH¥aaa¥`XJaGZSa¥]]  
@HWI-EAS443:3:79:1531:1101#0/1  
CAATTCGACACTAATTGATGGCCATCCGAATCTTTTGGT  
+HWI-EAS443:3:79:1531:1101#0/1  
abbbbbbbaabababbbbaaba\_`ab\_`baaab^ab\_aaY^  
@HWI-EAS443:3:79:1575:472#0/1  
AGATTGCTCAGTTCATTGATGCTTAATGCTGGGCCATATC  
+HWI-EAS443:3:79:1575:472#0/1  
``a[^a\_aabTY\_a[aZV^\_a\_aa\_ZaaW\_a`SQU\_`^`]  
@HWI-EAS443:3:79:167:561#0/1  
CTCTCCTTTTGCAAGATTGCTCAGTTCATTGATGCTTAAT  
+HWI-EAS443:3:79:167:561#0/1  
aU`Q\_baTV^b]Z]aRFVU¥X¥\_\_T¥YYT[X^Na]]UNL[  
@HWI-EAS443:3:79:408:463#0/1  
CAGCATTAAGCATCAATGAACTGAGCAATCTTGCAAAAGG  
+HWI-EAS443:3:79:408:463#0/1  
aaabVZ`a¥ZV`ab\_a]aa\_^aa``\_`^U\_^aa\_Y\_aa[a`  
@HWI-EAS443:3:79:410:349#0/1  
GGCCCAGCATTAAGCATCAATGAACTGAGCAATCTTGCAA  
+HWI-EAS443:3:79:410:349#0/1  
J\_b\_\_`¥¥^baX\_bbY`\_a`bbb\_bb`babba\_[\_a\_Z¥Z  
@HWI-EAS443:3:79:686:192#0/1  
CATTAAGCATCAATGAACTGAGCAATCTTGCAAAAGGAGA  
+HWI-EAS443:3:79:686:192#0/1  
^V]^aY`TaZ\_aaaM`a`]V^a^b]HZZZ][GRU]a¥¥`  
@HWI-EAS443:3:79:938:229#0/1  
TAAGCATCAATGAACTGAGCAATCTTGCAAAAGGAGAGAA  
+HWI-EAS443:3:79:938:229#0/1  
ab`baba\_\_bab`b]b`ab\_bbaW`abaaa``b¥aaaaba  
@HWI-EAS443:3:79:952:1442#0/1  
CAAGAGAAGAACCCCGCACTCAGAATGAAGTGGATGATGG  
+HWI-EAS443:3:79:952:1442#0/1  
^¥aa^a`Wa\_\_Za]QVWR[ZaW\_Z¥ab[\_ZZ¥ZR\_\_aa`  
@HWI-EAS443:3:7:103:1186#0/1  
CAAGAGAAGAACCCCGCACTCAGAATGAAGTGGATGATGG

+HWI-EAS443:3:7:103:1186#0/1  
abbbbabab`aba`aaab\_``aaaaaYab¥aa]`\_\_Z\_^  
@HWI-EAS443:3:7:1048:1360#0/1  
GATTGCTCAGTTCATTGATGCTTAATGCTGGGCCATATCT  
+HWI-EAS443:3:7:1048:1360#0/1  
ababaaab`b^a`aaba`b^aa`\_aa\_^a`aY\_a\_a`¥a  
@HWI-EAS443:3:7:1141:1199#0/1  
CATTAAGCATCAATGAACTGAGCAATCTTGCAAAAAGGAGA  
+HWI-EAS443:3:7:1141:1199#0/1  
abbbbbbab`bbbbabb`a`babaa]abb\_a`\_`ba]aa  
@HWI-EAS443:3:7:114:291#0/1  
CAAGATTGCTCAGTTCATTGATGCTTAATGCTGGGCCATA  
+HWI-EAS443:3:7:114:291#0/1  
\_\_aa`^^a`a\_baYaaba`a`aaa]a[]a`[\_\_\_\_`a`\_a  
@HWI-EAS443:3:7:1210:826#0/1  
ATTAAGCATCAATGAACTGAGCAATCTTGCAAAAAGGAGAG  
+HWI-EAS443:3:7:1210:826#0/1  
Y[XYZ`\_]aa¥P\_SQ\_aZ]X[ZP¥^^`\_^RZUY^¥^Ra^`  
@HWI-EAS443:3:7:1238:731#0/1  
ATTAAGCATCAATGAACTGAGCAATCTTGCAAAAAGGAGAG  
+HWI-EAS443:3:7:1238:731#0/1  
aa`aaa¥Za¥Z`a^a^`a^¥\_^]W\_`a]]^\_^`^]\_\_  
@HWI-EAS443:3:7:1532:766#0/1  
CAAGAGATATGGCCAGCATTAAAGCATCAATGAACTGAGC  
+HWI-EAS443:3:7:1532:766#0/1  
abab``bb`ab`a`a`bbaaaa\_aaaaaa``[```a\_  
@HWI-EAS443:3:7:158:1259#0/1  
AGATTGCTCAGTTCATTGATGCTTAATGCTGGGCCATATC  
+HWI-EAS443:3:7:158:1259#0/1  
aaa]¥U¥^\_V[F\_aa]¥a`NY0aa`]YbaIa[\_¥WaNY\_\_  
@HWI-EAS443:3:7:1684:1157#0/1  
AGAGAAGAACCCCGCACTCAGAATGAAGTGGATGATGGCA  
+HWI-EAS443:3:7:1684:1157#0/1  
`aa]a^`\_P]a`\_Va`b^\_b]\_`a[RUVaaR^aX]W^YV  
@HWI-EAS443:3:7:1723:1133#0/1  
AGAAGACAAGAGATATGGCCAGCATTAAAGCATCAATGAA  
+HWI-EAS443:3:7:1723:1133#0/1  
aaaaWa^a`a`aaaa`^`^S]`\_Z\_^\_\_`a^\_\_MQR\_YUO  
@HWI-EAS443:3:7:391:85#0/1  
CATTGCCATCATCCACTTCATTCTGAGTGC GGGTTCTTC  
+HWI-EAS443:3:7:391:85#0/1  
a`[abSaa`^aa[¥`X`PZ`^]a^H[¥a^\_\_aV^^\_]U  
@HWI-EAS443:3:7:597:566#0/1  
AGAAGACAAGAGATATGGCCAGCATTAAAGCATCAATGAA  
+HWI-EAS443:3:7:597:566#0/1  
[babb`ab``\_ba`]`bb`a`¥`Zaaaa`^¥`]\_a\_`[\_\_  
@HWI-EAS443:3:7:598:718#0/1  
GCATTAAGCATCAATGAACTGAGCAATCTTGCAAAAAGGAG  
+HWI-EAS443:3:7:598:718#0/1  
a`^`aaa^Raaaa\_aaaa]\_`[\_Y`\_\_¥\_]a]¥YZYaa[`

@HWI-EAS443:3:7:609:553#0/1  
GAGAAGAACCCCGCACTCAGAATGAAGTGGATGATGGCAA  
+HWI-EAS443:3:7:609:553#0/1  
abbabbaba]aab\_a\_aa`aaaa\_\_a]aaaa^\_a^W^`  
@HWI-EAS443:3:7:754:1214#0/1  
AAGAACCCCGCACTCAGAATGAAGTGGATGATGGCAATGA  
+HWI-EAS443:3:7:754:1214#0/1  
ab^aa]\_`ab¥aZa`abaaa`XRaRb\_\_aa¥\_\_`]\_R\_`]  
@HWI-EAS443:3:7:779:947#0/1  
CAAGAGAAGAACCCCGCACTCAGAATGAAGTGGATGATGG  
+HWI-EAS443:3:7:779:947#0/1  
a`\_`\_`aabb^aaa^a]a`aVK¥\_`b`^Xa[aaXSa\_Y[M  
@HWI-EAS443:3:80:1011:155#0/1  
TTTTTAAACAATTGACACTAATTGATGGCCATCCGAATT  
+HWI-EAS443:3:80:1011:155#0/1  
abbababaZP\_`aa\_a\_`b^aaa\_`[]Z`YX^`a\_SZ¥^`]  
@HWI-EAS443:3:80:1055:571#0/1  
AAACAATTGACACTAATTGATGGCCATCCGAATTCTTTT  
+HWI-EAS443:3:80:1055:571#0/1  
aZ\_\_QW¥`\_`Z`\_S\_U\_OZ\_aX[VT[\_\_\_\_]]ZRY\_RV`Y`  
@HWI-EAS443:3:80:1160:1222#0/1  
AACAATTGACACTAATTGATGGCCATCCGAATTCTTTTG  
+HWI-EAS443:3:80:1160:1222#0/1  
`[\_`abaa^\_[\_aaaabb\_Y\_`aaa\_aZY[a`¥`¥P`\_`aYV  
@HWI-EAS443:3:80:1215:1989#0/1  
AGAAGAACCCCGCACTCAGAATGAAGTGGATGATGGCAAT  
+HWI-EAS443:3:80:1215:1989#0/1  
[\_`Ybb[b¥bUUZ¥ZT]b[aaa]\_Y\_XR¥aY`a`^Z¥G^]U  
@HWI-EAS443:3:80:1348:623#0/1  
AAGAGAAGAACCCCGCACTCAGAATGAAGTGGATGATGGC  
+HWI-EAS443:3:80:1348:623#0/1  
aababababbaa\_`\_`baaaab`aba\_\_b[aa\_ab\_`aZR  
@HWI-EAS443:3:80:1361:1928#0/1  
GAAGAACCCCGCACTCAGAATGAAGTGGATGATGGCAATG  
+HWI-EAS443:3:80:1361:1928#0/1  
abbbbbb\_`abaa\_aaa\_a`a`\_bY`^¥X\_`]]X\_`\_`\_`  
@HWI-EAS443:3:80:1421:936#0/1  
CATTAAGCATCAATGAACTGAGCAATCTTGCAAAGGAGA  
+HWI-EAS443:3:80:1421:936#0/1  
OTbbZZ`YYaZ¥^¥Y]`¥^Z`^`a^H\_¥aab`U`^`¥^a  
@HWI-EAS443:3:80:1464:839#0/1  
CTCATTGTTGGCAAAGAAGACAAGAGATATGGCCCAGCAT  
+HWI-EAS443:3:80:1464:839#0/1  
abaabbbbababaaabaaba`aaa\_a`\_aaa`^ZT`a¥\_\_  
@HWI-EAS443:3:80:1749:1736#0/1  
GCAAAGAAGACAAGAGATATGGCCCAGCATTAAGCATCAA  
+HWI-EAS443:3:80:1749:1736#0/1  
a^]]P\_W]^¥\_]^^a]X]W\_]Y^]YS]^ZU¥ZYRRNX]  
@HWI-EAS443:3:80:343:1735#0/1  
AGAAGAACCCCGCACTCAGAATGAAGTGGATGATGGCAAT

+HWI-EAS443:3:80:343:1735#0/1  
]W¥SM`a`Y]0\_bbab]S[]XZY\_`P`VT`aUNT\_]\_\_W  
@HWI-EAS443:3:80:470:1915#0/1  
AGAAGAACCCCGCACTCAGAATGAAGTGGATGATGGCAAT  
+HWI-EAS443:3:80:470:1915#0/1  
^`b`\_`^X^aaa^a```¥`\_\_aV\_a]\_`[^WUY¥`V  
@HWI-EAS443:3:80:516:2042#0/1  
GAGATATGGCCAGCATTAAAGCATCAATGAACTGAGCAAT  
+HWI-EAS443:3:80:516:2042#0/1  
¥YY^\_UZZ`a`]a`RHOR^\_V^\_R]U^V¥U\_Y[[[ZX`IW  
@HWI-EAS443:3:80:541:458#0/1  
CAATTCGACACTAATTGATGGCCATCCGAATTCTTTTGGT  
+HWI-EAS443:3:80:541:458#0/1  
a¥P¥Saa\_T`UUXaa`TX[SU\_XIU[^YST^WaaWL]`Q  
@HWI-EAS443:3:80:545:1690#0/1  
AACAATTCGACACTAATTGATGGCCATCCGAATTCTTTTG  
+HWI-EAS443:3:80:545:1690#0/1  
aaaaaaaa`a\_a`¥a[\_`\_^`\_`^`¥[[[\_`\_`\_]`^  
@HWI-EAS443:3:80:54:1873#0/1  
GGCCAGCATTAAAGCATCAATGAACTGAGCAATCTTGCAA  
+HWI-EAS443:3:80:54:1873#0/1  
ZWbb`^`bbab^Sabbabbbbabab¥babb\_ba]bab]  
@HWI-EAS443:3:80:617:280#0/1  
GAAGAACCCCGCACTCAGAATGAAGTGGATGATGGCAATG  
+HWI-EAS443:3:80:617:280#0/1  
aaaaaa``aaaaa^`\_]`^Xa`[^\_T`V^^]YVZ¥SVY[[  
@HWI-EAS443:3:80:619:1540#0/1  
CTCTCCTTTTGCAAGATTGCTCAGTTCATTGATGCTTAAT  
+HWI-EAS443:3:80:619:1540#0/1  
a]bbaa[aa`abaaa`b`aabbabaabbaaa]\_abaaa\_a  
@HWI-EAS443:3:80:681:1702#0/1  
AAGAGATATGGCCAGCATTAAAGCATCAATGAACTGAGCA  
+HWI-EAS443:3:80:681:1702#0/1  
]X[¥R¥^`YS^aa]P\_]UOSU]\_\_Y[`¥WZPQZ^\_[Q[Y[  
@HWI-EAS443:3:80:688:1460#0/1  
GAAGAACCCCGCACTCAGAATGAAGTGGATGATGGCAATG  
+HWI-EAS443:3:80:688:1460#0/1  
ZV\_abbbb\_X0\_ab\_[aXQ`a\_Z]aI\_H]Y]\_]\_^Q]\_W`  
@HWI-EAS443:3:80:822:858#0/1  
GCATTAAGCATCAATGAACTGAGCAATCTTGCAAAAAGGAG  
+HWI-EAS443:3:80:822:858#0/1  
abaaaa`a\_b`\_`Zbaaaaa]`a`aaaaab]````a`]  
@HWI-EAS443:3:80:837:1447#0/1  
GAAGAACCCCGCACTCAGAATGAAGTGGATGATGGCAATG  
+HWI-EAS443:3:80:837:1447#0/1  
aaa`aaaa`aaa`\_a\_a`\_`a^^`X\_\_\_\_\_`]\_`\_UZ[]¥  
@HWI-EAS443:3:80:871:627#0/1  
GCCCAGCATTAAAGCATCAATGAACTGAGCAATCTTGCAAA  
+HWI-EAS443:3:80:871:627#0/1  
a`PXJ¥aaZa`[LWTZ`\_T`\_`YPP¥SSZZUYZSX^¥VOMO



@HWI-EAS443:3:80:872:761#0/1  
AGAAGACAAGAGATATGGCCCAGCATTAAGCATCAATGAA  
+HWI-EAS443:3:80:872:761#0/1  
\_a`^`aa`a`baaa\_`^]X`aa^\_a\_a\_a¥Za``\_`¥[\_  
@HWI-EAS443:3:80:878:130#0/1  
TTTAAACAATTGACACTAATTGATGGCCATCCGAATTCT  
+HWI-EAS443:3:80:878:130#0/1  
aabaaa\_aaa`\_a]^a^a`\_`\_a`^\_`^]]`\_Z^\_\_^a\_Z\_  
@HWI-EAS443:3:80:92:314#0/1  
AGCATTAAGCATCAATGAACTGAGCAATCTTGCAAAGGA  
+HWI-EAS443:3:80:92:314#0/1  
[`aaaa^aa¥aaa`aa\_\_`a`^a\_a\_aa```\_\_\_\_\_]^\_  
@HWI-EAS443:3:80:97:471#0/1  
TAAGCATCAATGAACTGAGCAATCTTGCAAAGGAGAGAA  
+HWI-EAS443:3:80:97:471#0/1  
\_Y\_[Z]^Q]N^T]Za`ZUZb`\_a¥`^[b`SPT`a`¥^`ZS  
@HWI-EAS443:3:81:1007:2033#0/1  
AAACAATTGACACTAATTGATGGCCATCCGAATTCTTTT  
+HWI-EAS443:3:81:1007:2033#0/1  
ababa`\_ab`bbb`aba``[a`a^]bb`aaa^[aaaa`aa  
@HWI-EAS443:3:81:1008:278#0/1  
GAAGAACCCCGCACTCAGAATGAAGTGGATGATGGCAATG  
+HWI-EAS443:3:81:1008:278#0/1  
aaaa`a```^b`\_\_a\_bV`\_a^]\_]`aV^aY`\_\_PRYW^  
@HWI-EAS443:3:81:1576:1132#0/1  
GAAGAACCCCGCACTCAGAATGAAGTGGATGATGGCAATG  
+HWI-EAS443:3:81:1576:1132#0/1  
aabaaaMa```baYa`ab]]aa\_\_`P`a[aa\_\_`aV¥0`\_  
@HWI-EAS443:3:81:1676:341#0/1  
AAGAGAAGAACCCCGCACTCAGAATGAAGTGGATGATGGC  
+HWI-EAS443:3:81:1676:341#0/1  
a``QZ]JaX`QGGVW]^GY]\_]`[RYZUU[H¥\_ZN`UBBBB  
@HWI-EAS443:3:81:1747:961#0/1  
CATTAAGCATCAATGAACTGAGCAATCTTGCAAAGGAGA  
+HWI-EAS443:3:81:1747:961#0/1  
^aba]abaS\_^¥bab\_^a¥bbbYZ\_[¥a`\_aa]aaaa\_] ]  
@HWI-EAS443:3:81:24:764#0/1  
TAAGCATCAATGAACTGAGCAATCTTGCAAAGGAGAGAA  
+HWI-EAS443:3:81:24:764#0/1  
abaaa[ababbb[Zaab[aaaaaaaaa`^^Y`a]a`aa\_  
@HWI-EAS443:3:81:363:1647#0/1  
AAACAATTGACACTAATTGATGGCCATCCGAATTCTTTT  
+HWI-EAS443:3:81:363:1647#0/1  
aaaaaa\_\_a\_aaa``¥YZZ\_aUZX`\_`\_Z\_^a\_[¥]]¥\_U  
@HWI-EAS443:3:81:467:741#0/1  
CAAGAGAAGAACCCCGCACTCAGAATGAAGTGGATGATGG  
+HWI-EAS443:3:81:467:741#0/1  
abaa]^]X`aaabaa`aaaa``aVa``\_^aSa\_[aa^Z^^  
@HWI-EAS443:3:81:529:972#0/1  
AGAAGACAAGAGATATGGCCCAGCATTAAGCATCAATGAA



@HWI-EAS443:3:82:343:1817#0/1  
CATTAAAGCATCAATGAACTGAGCAATCTTGCAAAAGGAGA  
+HWI-EAS443:3:82:343:1817#0/1  
`ba]bb^`^\_`^Z]`a`aaaaZ`aa`a`\_\_a\_QZ¥[¥\_``  
@HWI-EAS443:3:82:461:1569#0/1  
TAAGCATCAATGAACTGAGCAATCTTGCAAAAGGAGAGAA  
+HWI-EAS443:3:82:461:1569#0/1  
^`XWY¥`b`^W¥[aU[SGUa````X`b[]\_NYaWGY\_Sa\_  
@HWI-EAS443:3:82:482:307#0/1  
GAAGACAAGAGATATGGCCCAGCATTAAAGCATCAATGAAC  
+HWI-EAS443:3:82:482:307#0/1  
a^ababaabaaaa`aaa\_a\_aaa``\_[[``^```\_aa`\_]`  
@HWI-EAS443:3:82:510:510#0/1  
GAAGAACCCCGCACTCAGAATGAAGTGGATGATGGCAATG  
+HWI-EAS443:3:82:510:510#0/1  
]\_`a\_\_\_aaa``a^```]`^^a`[R]Pa\_Z`a\_\_\_¥]XN]`  
@HWI-EAS443:3:82:826:629#0/1  
AAGAGAAGAACCCCGCACTCAGAATGAAGTGGATGATGGC  
+HWI-EAS443:3:82:826:629#0/1  
aaaba`bbbbaaababaaaab^aaba`b]baaab\_^aaa  
@HWI-EAS443:3:82:830:904#0/1  
CAAGAGAAGAACCCCGCACTCAGAATGAAGTGGATGATGG  
+HWI-EAS443:3:82:830:904#0/1  
abab`aa`ba``aabb`aaaaaba]aba`a]a`a`a\_\_`\_  
@HWI-EAS443:3:82:861:1849#0/1  
GAAGACAAGAGATATGGCCCAGCATTAAAGCATCAATGAAC  
+HWI-EAS443:3:82:861:1849#0/1  
a]aaa`aab`a\_\_a\_\_a]a\_Ya``aaaa````a`\_a\_\_\_^  
@HWI-EAS443:3:82:876:1312#0/1  
GAGAAGAACCCCGCACTCAGAATGAAGTGGATGATGGCAA  
+HWI-EAS443:3:82:876:1312#0/1  
a^babbbbbbba`aaa`abaaa]baaaa\_aaaaaa^]a]a\_  
@HWI-EAS443:3:82:888:1299#0/1  
AGCTGTTGCTCTTCTCCCAACCATTGTGAATTCTTCATAC  
+HWI-EAS443:3:82:888:1299#0/1  
a]a\_\_T\_]`aa\_]`[``aa¥\_W][[``¥W]XX^WQ¥`\_\_¥`\_  
@HWI-EAS443:3:83:1053:1226#0/1  
GAAGAACCCCGCACTCAGAATGAAGTGGATGATGGCAATG  
+HWI-EAS443:3:83:1053:1226#0/1  
a\_]`b`aabb^¥\_aaaa\_\_aa^^\_]\_a\_\_a[^^`]Y\_[W  
@HWI-EAS443:3:83:1110:810#0/1  
GAGAAGAACCCCGCACTCAGAATGAAGTGGATGATGGCAA  
+HWI-EAS443:3:83:1110:810#0/1  
aaaZ^\_a`[¥```\_\_a\_aa0\_¥a^a^`¥YTFQYaY][IY\_^  
@HWI-EAS443:3:83:1200:257#0/1  
GAGAAGAACCCCGCACTCAGAATGAAGTGGATGATGGCAA  
+HWI-EAS443:3:83:1200:257#0/1  
a``\_aaaaX¥`\_a]a\_a\_\_`^\_\_a\_]a[a^]\_`W]]\_ZVY  
@HWI-EAS443:3:83:1250:977#0/1  
CTCTCCTTTTGCAAGATTGCTCAGTTCATTGATGCTTAAT

+HWI-EAS443:3:83:1250:977#0/1  
Y]W\_[a`\_`a\_¥^a\_U¥\_X[^`^`¥`\_b`¥`\_a^S]\_`W  
@HWI-EAS443:3:83:1290:1480#0/1  
CAATTCGACACTAATTGATGGCCATCCGAATTCTTTTGGT  
+HWI-EAS443:3:83:1290:1480#0/1  
aaa\_aaaa`aaaa`[¥]`][`Xa^a\_¥\_``\_]`^`\_`^a`^W  
@HWI-EAS443:3:83:1416:1215#0/1  
CATTAAGCATCAATGAACTGAGCAATCTTGCAAAAAGGAGA  
+HWI-EAS443:3:83:1416:1215#0/1  
^Y\_\_W\_I[``ba`\_bXPP]``a]Va``^^\_GX`\_[\_a¥`^  
@HWI-EAS443:3:83:1553:1239#0/1  
TTTTTAAACAATTCGACACTAATTGATGGCCATCCGAATT  
+HWI-EAS443:3:83:1553:1239#0/1  
^Zbaa`ba^baaaY]`\_[Sa`^`^aaW\_\_\_X\_]`[\_[\_^]  
@HWI-EAS443:3:83:1771:133#0/1  
ATATGGCCCAGCATTAAAGCATCAATGAACTGAGCAATCTT  
+HWI-EAS443:3:83:1771:133#0/1  
]Q]U\_[^R^bb]aa`aaaX[WV\_a`IZL]]]aY`^a[\_]  
@HWI-EAS443:3:83:183:225#0/1  
GATTGCTCAGTTCATTGATGCTTAATGCTGGGCCATATCT  
+HWI-EAS443:3:83:183:225#0/1  
abaaaaabaa`aa\_aaaa`aa``a\_a`a\_a]`a````````  
@HWI-EAS443:3:83:215:906#0/1  
GAGAAGAACCCCGCACTCAGAATGAAGTGGATGATGGCAA  
+HWI-EAS443:3:83:215:906#0/1  
aababa`bbbbaaba¥Za\_b\_X\_a¥\_aTaaa\_]Y^\_a^a^  
@HWI-EAS443:3:83:271:1040#0/1  
AGATTGCTCAGTTCATTGATGCTTAATGCTGGGCCATATC  
+HWI-EAS443:3:83:271:1040#0/1  
TUX[Z[^\_]WY]^]Z[^ZXY```aXT^\_[`[R^a\_]WW`  
@HWI-EAS443:3:83:316:52#0/1  
GTGCTGGAGTATTCATCTACTCCCATTTTGCTGACTCTTA  
+HWI-EAS443:3:83:316:52#0/1  
a]a`\_\_a`aV\_a][``\_`\_^]`]]`\_\_\_\_`^^`WU`]\_\_]  
@HWI-EAS443:3:83:349:65#0/1  
AGCTGTTGCTCTTCTCCCAACCATTGTGAATTCTTCATAC  
+HWI-EAS443:3:83:349:65#0/1  
\_^baa]aa\_\_^\_\_OX`\_^\_\_XW]X`\_]WZ\_]S\_]Z^QF  
@HWI-EAS443:3:83:521:1895#0/1  
CATTAAGCATCAATGAACTGAGCAATCTTGCAAAAAGGAGA  
+HWI-EAS443:3:83:521:1895#0/1  
ab\_aa¥\_bbaabaaaabba`\_aaaaa`]Z`aa`^a\_\_a\_  
@HWI-EAS443:3:83:552:325#0/1  
CCTTTTGCAAGATTGCTCAGTTCATTGATGCTTAATGCTG  
+HWI-EAS443:3:83:552:325#0/1  
`\_Z\_\_\_aa]¥\_]`abaaaabaa]aa`\_\_aaaa`a`aa``\_  
@HWI-EAS443:3:83:603:596#0/1  
AAGAGAAGAACCCCGCACTCAGAATGAAGTGGATGATGGC  
+HWI-EAS443:3:83:603:596#0/1  
``]aaaaaba`Zaab``\_aaa`]ab`¥aWa`\_`a^^`\_`\_`



+HWI-EAS443:3:84:1343:463#0/1  
a\_aa`YaaW^aaa`Y`a\_]a\_X\_\_\_\_`Za`]ZaZ^[a\_W^  
@HWI-EAS443:3:84:1352:176#0/1  
AAGAGAAGAACCCCGCACTCAGAATGAAGTGGATGATGGC  
+HWI-EAS443:3:84:1352:176#0/1  
aa\_a`a\_`aa¥`\_]a`[aX`aaXaa¥]]G`\_]aaX\_`^Z  
@HWI-EAS443:3:84:1353:1319#0/1  
AGATTGCTCAGTTCATTGATGCTTAATGCTGGGCCATATC  
+HWI-EAS443:3:84:1353:1319#0/1  
^F^¥`ab\_b¥¥\_baa\_]ba`Ya[ababb^`aa]HR`¥aaR  
@HWI-EAS443:3:84:1521:1902#0/1  
TAAGCATCAATGAACTGAGCAATCTTGCAAAAAGGAGAGAA  
+HWI-EAS443:3:84:1521:1902#0/1  
¥QZ`a`\_VZaab\_\_RW]L`I¥aaU\_`a\_\_^[[`a\_\_[U\_`^  
@HWI-EAS443:3:84:1532:1222#0/1  
CAGCATTAAAGCATCAATGAACTGAGCAATCTTGCAAAAAGG  
+HWI-EAS443:3:84:1532:1222#0/1  
`bbbbbbbabba\_bbb\_bbbbaabbb`aababbab\_ba`aba  
@HWI-EAS443:3:84:1619:463#0/1  
AACAAATTCGACACTAATTGATGGCCATCCGAATTCTTTTG  
+HWI-EAS443:3:84:1619:463#0/1  
aa^U¥`Z\_b¥K\_Y)`ZZ¥\_\_Y`ZLX]QRG¥Q^`XJ[X`PD  
@HWI-EAS443:3:84:187:435#0/1  
AGAGATATGGCCCAGCATTAAAGCATCAATGAACTGAGCAA  
+HWI-EAS443:3:84:187:435#0/1  
^bab]a\_`\_]`aaaa`a[a]`a`a`\_`^`¥]\_\_`]¥¥  
@HWI-EAS443:3:84:225:379#0/1  
TTAAGCATCAATGAACTGAGCAATCTTGCAAAAAGGAGAGA  
+HWI-EAS443:3:84:225:379#0/1  
\_X¥¥`¥\_a`Ya`¥V¥aa``aaa`a]TaY`T`^¥a\_aa\_\_  
@HWI-EAS443:3:84:390:1950#0/1  
ATTAAGCATCAATGAACTGAGCAATCTTGCAAAAAGGAGAG  
+HWI-EAS443:3:84:390:1950#0/1  
T`W\_YDY```]ZS]\_Y]RS¥Raa\_\_a`WS\_¥P[Y`S¥\_\_\_\_  
@HWI-EAS443:3:84:39:135#0/1  
CAATTCGACACTAATTGATGGCCATCCGAATTCTTTTGGT  
+HWI-EAS443:3:84:39:135#0/1  
`[R¥a`][aaba`Z`a\_`\_\_^aa\_\_^Z^XFY[Q^Y[V[UW  
@HWI-EAS443:3:84:415:52#0/1  
CAAGAGAAGAACCCCGCACTCAGAATGAAGTGGATGATGG  
+HWI-EAS443:3:84:415:52#0/1  
ab]bbb`abbaaaabbabba`^^`aba`a^ba\_aaa\_aa  
@HWI-EAS443:3:84:428:827#0/1  
TATGGCCCAGCATTAAAGCATCAATGAACTGAGCAATCTTG  
+HWI-EAS443:3:84:428:827#0/1  
aZ^^a`ZTaaaa`]aa^^ZaY^aa`aa`aY]]\_]^aaZ\_  
@HWI-EAS443:3:84:471:470#0/1  
TTCTCTCCTTTTGCAAGATTGCTCAGTTCATTGATGCTTA  
+HWI-EAS443:3:84:471:470#0/1  
aa`a\_aaaaaa`aaa`\_`\_]\_¥^\_\_\_\_`\_a\_a\_\_a\_`\_`

@HWI-EAS443:3:84:485:1724#0/1  
TTGCCATCATCCACTTCATTCTGAGTGCGGGTTCTTCTC  
+HWI-EAS443:3:84:485:1724#0/1  
a\_ab\_a\_\_W¥aaa¥aa\_`\_`a^]¥^[]``[[RT\_\_][]\_a  
@HWI-EAS443:3:84:535:1561#0/1  
GAGATATGGCCCAGCATTAAGCATCAATGAACTGAGCAAT  
+HWI-EAS443:3:84:535:1561#0/1  
aaVZTVGP`aWZ^`Q^Y¥]\_]`YXaY`\_`aLP[\_SGSZ^[Z  
@HWI-EAS443:3:84:536:765#0/1  
GCATTAAGCATCAATGAACTGAGCAATCTTGCAAAAGGAG  
+HWI-EAS443:3:84:536:765#0/1  
aab`aa]a`¥a`\_`aa\_\_\_aZ`^`\_^\_\_a`\_^`\_^Ya^^\_  
@HWI-EAS443:3:84:644:570#0/1  
GACAAGAGATATGGCCCAGCATTAAGCATCAATGAACTGA  
+HWI-EAS443:3:84:644:570#0/1  
\_Z`aaa^aaaa\_`aaa`\_`\_a\_\_`a`\_]Z\_a^[]`aZ^^`\_^  
@HWI-EAS443:3:84:689:27#0/1  
CAATTCGACACTAATTGATGGCCATCCGAATTCTTTTGGT  
+HWI-EAS443:3:84:689:27#0/1  
\_UXWS¥\_RMZXX\_P^]b]^`\_a\_WP\_¥TQ[WX[WWYN[XL  
@HWI-EAS443:3:84:741:763#0/1  
AAGAGAAGAACCCCGCACTCAGAATGAAGTGGATGATGGC  
+HWI-EAS443:3:84:741:763#0/1  
aa\_Z^\_abaaaa¥\_ba`\_`aaa^`ab\_[aXa\_^aa\_\_`\_Y  
@HWI-EAS443:3:84:821:525#0/1  
AACAAATTCGACACTAATTGATGGCCATCCGAATTCTTTTG  
+HWI-EAS443:3:84:821:525#0/1  
a`ab\_aaabaab`aa`aa^a\_a`aaaa`\_`\_aa`\_`a`aa`  
@HWI-EAS443:3:85:1012:127#0/1  
ATTAAGCATCAATGAACTGAGCAATCTTGCAAAAGGAGAG  
+HWI-EAS443:3:85:1012:127#0/1  
a[abba]\_a`\_`aa\_\_\_`\_]a\_]\_\_^a^a^]¥X[\_`V`]a  
@HWI-EAS443:3:85:116:1156#0/1  
GATTGCTCAGTTCATTGATGCTTAATGCTGGGCCATATCT  
+HWI-EAS443:3:85:116:1156#0/1  
ababababab\_`b`abaaaaaa`aaaa`^`ba[\_a`\_`a  
@HWI-EAS443:3:85:1184:202#0/1  
AAGAGAAGAACCCCGCACTCAGAATGAAGTGGATGATGGC  
+HWI-EAS443:3:85:1184:202#0/1  
a`a\_aaaaaa\_\_\_]\_\_^W`a^a][a`XX^W`^ZWaXV\_aI  
@HWI-EAS443:3:85:1235:1080#0/1  
AAGATTGCTCAGTTCATTGATGCTTAATGCTGGGCCATAT  
+HWI-EAS443:3:85:1235:1080#0/1  
[Ya¥aa`^a\_N¥TVP[`aabab`\_`a`^`aba^VW`\_`Y`\_`\_\_  
@HWI-EAS443:3:85:1369:1106#0/1  
GAGAAGAACCCCGCACTCAGAATGAAGTGGATGATGGCAA  
+HWI-EAS443:3:85:1369:1106#0/1  
aab]¥a`\_^¥aa`[]Y]^^^^^a^V`Q`\_`Y¥a]¥a\_VLQ  
@HWI-EAS443:3:85:1382:39#0/1  
CAGCATTAAGCATCAATGAACTGAGCAATCTTGCAAAAGG

+HWI-EAS443:3:85:1382:39#0/1  
aba¥ba]abaaabababbab\_b`ab]a\_a`aab`Y`^¥b`  
@HWI-EAS443:3:85:1397:1546#0/1  
AATTTCGACACTAATTGATGGCCATCCGAATTCTTTTGGTC  
+HWI-EAS443:3:85:1397:1546#0/1  
`ab\_^b\_[b]`aa[`b`^`^\_Ya`\_OK[a\_^`\_`a`aaLBB  
@HWI-EAS443:3:85:1431:627#0/1  
GGGCAAAGAAGACAAGAGATATGGCCCAGCATTAAAGCATC  
+HWI-EAS443:3:85:1431:627#0/1  
abVVRZ^YV]aaS\_Yba^a\_aa`\_Z^R¥RN`\_`\_`Q`Z¥0  
@HWI-EAS443:3:85:1574:602#0/1  
TAAGCATCAATGAACTGAGCAATCTTGCAAAAAGGAGAGAA  
+HWI-EAS443:3:85:1574:602#0/1  
aaa\_U]aa\_\_aa`YG^a[R¥`\_`aSaYZV]\_U]a`^a\_a^]  
@HWI-EAS443:3:85:1581:770#0/1  
GAAGAACCCCGCACTCAGAATGAAGTGGATGATGGCAATG  
+HWI-EAS443:3:85:1581:770#0/1  
a\_aaaa\_a]ab`b`\_`¥aaa`aa`^YPQ]\_`a^]]aVV¥^P  
@HWI-EAS443:3:85:1738:543#0/1  
GAGATATGGCCCAGCATTAAAGCATCAATGAACTGAGCAAT  
+HWI-EAS443:3:85:1738:543#0/1  
a`aa`a]`\_\_V^`\_`a`¥\_a^\_]^[`\_\_^`Z\_^¥Z^\_X  
@HWI-EAS443:3:85:201:744#0/1  
CAATTCGACACTAATTGATGGCCATCCGAATTCTTTTGGT  
+HWI-EAS443:3:85:201:744#0/1  
abaaaa\_Z\_baa\_a`\_a`\_`Zaaa`]^^^¥`\_aa^`\_Z`¥  
@HWI-EAS443:3:85:235:786#0/1  
GCCATCATCCACTTCATTCTGAGTGC GGGTTCTTCTCTT  
+HWI-EAS443:3:85:235:786#0/1  
aaba`\_]a\_aaaa`\_aaaaaaaa`]aa\_aaN\_]aZ`\_`\_a]  
@HWI-EAS443:3:85:289:76#0/1  
TAAGCATCAATGAACTGAGCAATCTTGCAAAAAGGAGAGAA  
+HWI-EAS443:3:85:289:76#0/1  
aaaaa`\_^`]\_a\_\_\_\_\_`\_a`\_a`^`aa]¥W[Paa]\_[-]^  
@HWI-EAS443:3:85:319:979#0/1  
ATTAAGCATCAATGAACTGAGCAATCTTGCAAAAAGGAGAG  
+HWI-EAS443:3:85:319:979#0/1  
aaab^]baaaaab`\_Yaa`^aa`¥`\_a\_\_a`\_]\_a\_¥a`\_`  
@HWI-EAS443:3:85:339:1673#0/1  
CATTAAAGCATCAATGAACTGAGCAATCTTGCAAAAAGGAGA  
+HWI-EAS443:3:85:339:1673#0/1  
aOba`aaaa\_b`aV``ba`^S]`^a\_]aa¥aYSaa`\_^]T  
@HWI-EAS443:3:85:50:1571#0/1  
GATTGCTCAGTTCATTGATGCTTAATGCTGGGCCATATCT  
+HWI-EAS443:3:85:50:1571#0/1  
a`^HV\_]\_SQZYZ\_a`XaYa\_]aaYZMV¥WWY^QQXUYTP  
@HWI-EAS443:3:85:686:636#0/1  
AACAAATTCGACACTAATTGATGGCCATCCGAATTCTTTTG  
+HWI-EAS443:3:85:686:636#0/1  
aa`Z¥\_]\_T\_¥]`aY^\_^\_^ZYV`\_`\_[U]^\_TVX[^\_^\_X



@HWI-EAS443:3:85:721:1478#0/1  
GAAGAACCCCGCACTCAGAATGAAGTGGATGATGGCAATG  
+HWI-EAS443:3:85:721:1478#0/1  
ZX``\_W\_YaaYb¥^aa[^`a^H¥baT`a`baS\_dW^^^]S  
@HWI-EAS443:3:85:776:873#0/1  
AAAGAAGACAAGAGATATGGCCCAGCATTAAAGCATCAATG  
+HWI-EAS443:3:85:776:873#0/1  
aaaaaa\_aa`S`a```a\_¥a`aaa¥]```¥^aYR[\_\_\_\_\_  
@HWI-EAS443:3:85:881:23#0/1  
AGAAGAACCCCGCACTCAGAATGAAGTGGATGATGGCAAT  
+HWI-EAS443:3:85:881:23#0/1  
aaa`aaaa\_\_\_baa`\_`^a]^aa\_`^Ua\_^^`^^a]U]]^  
@HWI-EAS443:3:85:925:803#0/1  
TTTTTAAACAATTGACACTAATTGATGGCCATCCGAATT  
+HWI-EAS443:3:85:925:803#0/1  
abababa[^`a`aa\_aaaaa``aaaa``\_]\_^a`^\_a`^a\_  
@HWI-EAS443:3:85:92:1712#0/1  
GAGATATGGCCAGCATTAAAGCATCAATGAACTGAGCAAT  
+HWI-EAS443:3:85:92:1712#0/1  
]\_Q¥Xba\_^\_ba[^`bbab]a\_]a`aa\_T[aaa^YWb[^\_  
@HWI-EAS443:3:85:931:1257#0/1  
GGGCAAAGAAGACAAGAGATATGGCCCAGCATTAAAGCATC  
+HWI-EAS443:3:85:931:1257#0/1  
\_b^^ab\_bbab`b\_aa[ab^a\_ba^\_Yab`aa[aaG``^¥  
@HWI-EAS443:3:86:1001:1538#0/1  
CAATTCGACACTAATTGATGGCCATCCGAATTCTTTTGGT  
+HWI-EAS443:3:86:1001:1538#0/1  
a]bbYK`bbabb]\_aY¥`a]a¥^`\_`bb[aa]V\_^`]]Na  
@HWI-EAS443:3:86:1010:821#0/1  
GATATGGCCAGCATTAAAGCATCAATGAACTGAGCAATCT  
+HWI-EAS443:3:86:1010:821#0/1  
a`a`^aY\_]QS\_]\_a\_a`]VY`Z\_¥¥¥Wa[ZST^T`^UTY  
@HWI-EAS443:3:86:1044:840#0/1  
ATATGGCCCAGCATTAAAGCATCAATGAACTGAGCAATCTT  
+HWI-EAS443:3:86:1044:840#0/1  
U\_U[ab¥U\_bZab\_] [\_`^L`aab``T[]]baUb\_VR]\_  
@HWI-EAS443:3:86:1075:1481#0/1  
CTCTCCTTTTGCAAGATTGCTCAGTTCATTGATGCTTAAT  
+HWI-EAS443:3:86:1075:1481#0/1  
abaaaaaaba`abbaaaaa\_aaaa`b\_a\_Y\_`\_baaab  
@HWI-EAS443:3:86:1234:967#0/1  
CAATTCGACACTAATTGATGGCCATCCGAATTCTTTTGGT  
+HWI-EAS443:3:86:1234:967#0/1  
abbbb`b`ababbbbaabaa\_babaa]baaab^bba`a^]  
@HWI-EAS443:3:86:1242:1262#0/1  
GCATTAAGCATCAATGAACTGAGCAATCTTGAAAAGGAG  
+HWI-EAS443:3:86:1242:1262#0/1  
Y`[[aaa`¥``aVQ\_WL\_RYWV¥¥¥¥\_\_ab\_Y]QQU^\_X`  
@HWI-EAS443:3:86:160:581#0/1  
AACCAATTCGACACTAATTGATGGCCATCCGAATTCTTTTG

+HWI-EAS443:3:86:160:581#0/1  
a^YaS^` `[^^^\_V\_aR0]`a\_^`¥aVOYVYZOWZa\_]`  
@HWI-EAS443:3:86:1635:815#0/1  
TTTAAACAATTGACACTAATTGATGGCCATCCGAATTCT  
+HWI-EAS443:3:86:1635:815#0/1  
`baaba^aaba[a\_\_`a`a`\_a^¥VLWZaaOX\_^`^X\_  
@HWI-EAS443:3:86:1747:1410#0/1  
TAAGCATCAATGAACTGAGCAATCTTGCAAAAGGAGAGAA  
+HWI-EAS443:3:86:1747:1410#0/1  
a`¥^aab^^]`Z`Xa]a`U```\_aaa\_\_aa\_ba]`\_a\_\_  
@HWI-EAS443:3:86:186:284#0/1  
AGAGAAGAACCCCGCACTCAGAATGAAGTGGATGATGGCA  
+HWI-EAS443:3:86:186:284#0/1  
``aa]`aaZ`aabb\_Xa\_a`TYY^`^\_\_Xaa\_¥aS\_`\_]LZ  
@HWI-EAS443:3:86:245:1075#0/1  
AGAAGACAAGAGATATGGCCCAGCATTAAAGCATCAATGAA  
+HWI-EAS443:3:86:245:1075#0/1  
^^^`a`YYUab``^¥G]Zaaaa\_`a``]\_`aS\_``\_\_  
@HWI-EAS443:3:86:249:1027#0/1  
GAAGAACCCCGCACTCAGAATGAAGTGGATGATGGCAATG  
+HWI-EAS443:3:86:249:1027#0/1  
`a`Y`bba\_\_`a`\_]`[^`^`\_¥F[`S`a¥`^YW¥TZWWX[  
@HWI-EAS443:3:86:319:140#0/1  
TGCTCAGTTCATTGATGCTTAATGCTGGGCCATATCTCTT  
+HWI-EAS443:3:86:319:140#0/1  
aa`aa]a`b`ab`a`\_a`a`a[aa^¥`[]\_\_^a^a`W\_^  
@HWI-EAS443:3:86:337:1270#0/1  
CATTAAGCATCAATGAACTGAGCAATCTTGCAAAAGGAGA  
+HWI-EAS443:3:86:337:1270#0/1  
abb\_\_`bbaba`aaaaaaaa`baaaaaa][Q^`aa\_``  
@HWI-EAS443:3:86:343:682#0/1  
CAAGAGATATGGCCCAGCATTAAAGCATCAATGAACTGAGC  
+HWI-EAS443:3:86:343:682#0/1  
a]aa\_\_]\_bUaa`¥^]\_^\_\_a\_\_]a\_\_Z\_\_]]\_`^^`R  
@HWI-EAS443:3:86:41:902#0/1  
AGACAAGAGATATGGCCCAGCATTAAAGCATCAATGAACTG  
+HWI-EAS443:3:86:41:902#0/1  
aba\_Y[\_^a`^¥¥a\_a\_``]SX¥`¥[\_`^YWMY\_YYV]]  
@HWI-EAS443:3:86:467:575#0/1  
AAGAGATATGGCCCAGCATTAAAGCATCAATGAACTGAGCA  
+HWI-EAS443:3:86:467:575#0/1  
T^PI\_b`a]UR¥^Ya\_\_Sa`\_¥¥a[^Y^`aa```]`YaW`  
@HWI-EAS443:3:86:482:2040#0/1  
CAAGAGAAGAACCCCGCACTCAGAATGAAGTGGATGATGG  
+HWI-EAS443:3:86:482:2040#0/1  
`abbabababb^bbbbbaabb`aabaaaa]aa`aa\_\_`a  
@HWI-EAS443:3:86:537:599#0/1  
TAAGCATCAATGAACTGAGCAATCTTGCAAAAGGAGAGAA  
+HWI-EAS443:3:86:537:599#0/1  
aab`aaaaaaaa\_a`a``aa`aaaaaaaa`a`\_b`\_a`aa\_

@HWI-EAS443:3:86:53:247#0/1  
AGACAAGAGATATGGCCCAGCATTAAGCATCAATGAACTG  
+HWI-EAS443:3:86:53:247#0/1  
aba`[^`Y]LZ^\_a``¥\_ZPP]\_aW¥WSPWXM¥ZZJFQ^  
@HWI-EAS443:3:86:675:1478#0/1  
AAGAGAAGAACCCCGCACTCAGAATGAAGTGGATGATGGC  
+HWI-EAS443:3:86:675:1478#0/1  
``^]ON`aaa`aaa`aa]\_`\_¥`\_`\_\_`\_¥\_`[[X]NG  
@HWI-EAS443:3:86:851:1411#0/1  
AGAGAAGAACCCCGCACTCAGAATGAAGTGGATGATGGCA  
+HWI-EAS443:3:86:851:1411#0/1  
aba\_a`¥baaaabaaaa`W]^`^\_a^Ta\_aaa\_`a¥[[  
@HWI-EAS443:3:87:1058:1545#0/1  
GAAGAACCCCGCACTCAGAATGAAGTGGATGATGGCAATG  
+HWI-EAS443:3:87:1058:1545#0/1  
aaaaa``a``a\_a`a`¥YZ\_\_a\_\_aYa]^a^N\_`\_U]^`^`  
@HWI-EAS443:3:87:1073:1510#0/1  
ATTAAGCATCAATGAACTGAGCAATCTTGCAAAAGGAGAG  
+HWI-EAS443:3:87:1073:1510#0/1  
aaa\_aa`^`aa\_a`\_`a`\_a^`\_a^\_\_\_\_\_¥W\_XY\_`\_]\_\_  
@HWI-EAS443:3:87:1230:1989#0/1  
GAGAAGAACCCCGCACTCAGAATGAAGTGGATGATGGCAA  
+HWI-EAS443:3:87:1230:1989#0/1  
[a\_b`[bbbWabbaabbW`baa\_bb`WUJ`^`ba`aa]\_a  
@HWI-EAS443:3:87:1429:358#0/1  
GAAGAACCCCGCACTCAGAATGAAGTGGATGATGGCAATG  
+HWI-EAS443:3:87:1429:358#0/1  
aaaaaaaa¥]¥\_Y``a\_aa[\_aa^^a]`a]\_aX\_`]VP^¥^  
@HWI-EAS443:3:87:1493:37#0/1  
CCAGCATTAAGCATCAATGAACTGAGCAATCTTGCAAAAG  
+HWI-EAS443:3:87:1493:37#0/1  
``^\_¥^aaaa`^a]¥]abaSaaa]¥`¥]\_aYU`^`¥\_\_\_b  
@HWI-EAS443:3:87:1520:140#0/1  
AAGAAGACAAGAGATATGGCCCAGCATTAAGCATCAATGA  
+HWI-EAS443:3:87:1520:140#0/1  
aXa¥`bb`aab\_`bbaa```^aa\_a`\_aa``S\_aY\_\_aa\_  
@HWI-EAS443:3:87:1585:1179#0/1  
GAAGAACCCCGCACTCAGAATGAAGTGGATGATGGCAATG  
+HWI-EAS443:3:87:1585:1179#0/1  
a`\_a\_a\_]S[`S`aa]\_aW^`aVFZQ`]^\_\_VaXZRTY^\_  
@HWI-EAS443:3:87:1641:577#0/1  
GCTCAGTTCATTGATGCTTAATGCTGGCCATATCTCTTG  
+HWI-EAS443:3:87:1641:577#0/1  
aaaaabababb`baaaabaa`aa`aaaa\_\_aaaa\_a`aaa  
@HWI-EAS443:3:87:173:1587#0/1  
CAAGAGAAGAACCCCGCACTCAGAATGAAGTGGATGATGG  
+HWI-EAS443:3:87:173:1587#0/1  
aaa`R`¥a]\_aaaaaaaa\_\_`a\_]\_`^]`X\_]^^]]^U  
@HWI-EAS443:3:87:1743:950#0/1  
TAAGCATCAATGAACTGAGCAATCTTGCAAAAGGAGAGAA

+HWI-EAS443:3:87:1743:950#0/1  
a\_b\_\_]V\_J\_a]UaS[]U`^S\_a^VPJG\_UJ[ab^a]\_^a  
@HWI-EAS443:3:87:178:1517#0/1  
AAGAGATATGGCCCAGCATTAAAGCATCAATGAACTGAGCA  
+HWI-EAS443:3:87:178:1517#0/1  
ab`U¥I\_`U[S[¥X¥aaa`aaa`]aa]YX0]`[QPW][  
@HWI-EAS443:3:87:185:512#0/1  
AAGAGAAGAACCCCGCACTCAGAATGAAGTGGATGATGGC  
+HWI-EAS443:3:87:185:512#0/1  
`baVaa]aa]\_\_`^a¥[Y\_`[`W\_]^W^aY\_\_`]LXMDM  
@HWI-EAS443:3:87:265:347#0/1  
AAGAGAAGAACCCCGCACTCAGAATGAAGTGGATGATGGC  
+HWI-EAS443:3:87:265:347#0/1  
aa]\_]\_^V`^\_aXa`\_a\_\_`^\_a`^`\_\_^`Y`U[\_aW\_\_QZ  
@HWI-EAS443:3:87:427:1706#0/1  
CAATTCGACACTAATTGATGGCCATCCGAATTCTTTTGGT  
+HWI-EAS443:3:87:427:1706#0/1  
U\_[[\_a\_W]Za[bb`^`\_\_VXS¥\_U`b^K¥SZUWTSVaG  
@HWI-EAS443:3:87:480:1986#0/1  
ATTGATGCTTAATGCTGGCCATATCTCTTGTCTTCTTTG  
+HWI-EAS443:3:87:480:1986#0/1  
`^a\_¥\_aa^¥a]a`aZ]aaa`^aaaa`a`^a[aa`a`\_\_Y  
@HWI-EAS443:3:87:492:1241#0/1  
AAGAGAAGAACCCCGCACTCAGAATGAAGTGGATGATGGC  
+HWI-EAS443:3:87:492:1241#0/1  
a\_aabab`aaaX`aaa`\_\_a`aa`\_a\_\_`Ya`\_\_`\_[\_^  
@HWI-EAS443:3:87:523:341#0/1  
CTTTTGCAAGATTGCTCAGTTCATTGATGCTTAATGCTGG  
+HWI-EAS443:3:87:523:341#0/1  
abbaa`^a`abbbbabb^bbbbbbabbabbab^bbaaab  
@HWI-EAS443:3:87:527:1089#0/1  
GACAAGAGATATGGCCCAGCATTAAAGCATCAATGAACTGA  
+HWI-EAS443:3:87:527:1089#0/1  
abaaababbab`aaaaaa]aaaaaaaa^`a\_a```\_`^`  
@HWI-EAS443:3:87:636:674#0/1  
GATATGGCCCAGCATTAAAGCATCAATGAACTGAGCAATCT  
+HWI-EAS443:3:87:636:674#0/1  
¥`)]`[aa`ab`[]`[`b^a\_abY`aaaa`^YZ[^a`^`a¥  
@HWI-EAS443:3:87:660:1539#0/1  
AGAAGACAAGAGATATGGCCCAGCATTAAAGCATCAATGAA  
+HWI-EAS443:3:87:660:1539#0/1  
aaa`aaaaabaaa`^`a`b`a[[aaa`a`\_aa`\_a`a```  
@HWI-EAS443:3:87:773:892#0/1  
AAGAACCCCGCACTCAGAATGAAGTGGATGATGGCAATGA  
+HWI-EAS443:3:87:773:892#0/1  
abaaba^^\_aaaaa`¥W]ab`[¥QZa`\_b^Za¥Z¥][`  
@HWI-EAS443:3:87:827:389#0/1  
GCATTAAGCATCAATGAACTGAGCAATCTTGCAAAAGGAG  
+HWI-EAS443:3:87:827:389#0/1  
aaaT[\_`a\_a`]^`a]]VY`TZa`\_¥a[`W[]a\_[Z]^`a`

@HWI-EAS443:3:87:854:1459#0/1  
ATTAAGCATCAATGAACTGAGCAATCTTGCAAAAGGAGAG  
+HWI-EAS443:3:87:854:1459#0/1  
aaaaa`aaa\_a^aaa^\_\_\_``[^a\_^^^`]]\_`\_  
@HWI-EAS443:3:88:1080:1383#0/1  
GATATGGCCAGCATTAAAGCATCAATGAACTGAGCAATCT  
+HWI-EAS443:3:88:1080:1383#0/1  
aaa\_PYa\_]`¥YZX`X]QQM^¥OXVXUO]VUWV¥ZT[YU^  
@HWI-EAS443:3:88:1112:1384#0/1  
CAAGAGAAGAACCCCGCACTCAGAATGAAGTGGATGATGG  
+HWI-EAS443:3:88:1112:1384#0/1  
[a`¥K^¥[a`¥WQOZT`aQ]aW\_WUSZ\_QPLa\_`S`KI^\_  
@HWI-EAS443:3:88:1115:1054#0/1  
ATTAAGCATCAATGAACTGAGCAATCTTGCAAAAGGAGAG  
+HWI-EAS443:3:88:1115:1054#0/1  
\_\_V\_aaaaaaZX`^[aTaQX\_aa]`aa`aSa¥ZH^a¥baa  
@HWI-EAS443:3:88:1124:426#0/1  
ACAAGAGATATGGCCAGCATTAAAGCATCAATGAACTGAG  
+HWI-EAS443:3:88:1124:426#0/1  
a`aaaI\_a\_a^]a\_[a`]`]\_]\_`a\_\_^\_\_\_a\_Y\_^`]a  
@HWI-EAS443:3:88:1171:1255#0/1  
GAAGAACCCCGCACTCAGAATGAAGTGGATGATGGCAATG  
+HWI-EAS443:3:88:1171:1255#0/1  
a`bb[baaaa`aa`X`aa`aa[^Vaa`aaXa`a[[aRa  
@HWI-EAS443:3:88:1258:1398#0/1  
GACAAGAGATATGGCCAGCATTAAAGCATCAATGAACTGA  
+HWI-EAS443:3:88:1258:1398#0/1  
a\_N\_T`\_aaaaaaY^Zaaa¥a\_a`\_ZG^a\_\_\_`\_\_`Y\_^\_  
@HWI-EAS443:3:88:1275:1027#0/1  
GAAGAACCCCGCACTCAGAATGAAGTGGATGATGGCAATG  
+HWI-EAS443:3:88:1275:1027#0/1  
a\_Z\_aa`a]aaZaaa\_`a`aa\_\_aUaa\_`a¥a\_UWU\_\_a  
@HWI-EAS443:3:88:136:968#0/1  
CAATTCGACACTAATTGATGGCCATCCGAATTCTTTTGGT  
+HWI-EAS443:3:88:136:968#0/1  
a]aaabaabaab\_a`aaa`a[a`a`a[a¥¥`aa\_\_\_UX[X  
@HWI-EAS443:3:88:1551:577#0/1  
AGCATTAAAGCATCAATGAACTGAGCAATCTTGCAAAAGGA  
+HWI-EAS443:3:88:1551:577#0/1  
\_aU`b]aTM[SHTX[aZQU\_`TSFK`aP^a\_YVa^¥Y\_Q  
@HWI-EAS443:3:88:1667:187#0/1  
GAAGACAAGAGATATGGCCAGCATTAAAGCATCAATGAAC  
+HWI-EAS443:3:88:1667:187#0/1  
aaa]¥N¥]^aba`\_\_a[IZ]a\_aa\_S\_X^[[\_]]`]PVM  
@HWI-EAS443:3:88:188:1476#0/1  
GAGAAGAACCCCGCACTCAGAATGAAGTGGATGATGGCAA  
+HWI-EAS443:3:88:188:1476#0/1  
a¥X]JT\_^ZZ^¥PWULX`^ZTPUVZ\_V`]YZSVV[GJLR  
@HWI-EAS443:3:88:258:671#0/1  
AAACAATTGACACTAATTGATGGCCATCCGAATTCTTTT

+HWI-EAS443:3:88:258:671#0/1  
aaa\_\_baaabaabaaa`aa`a^a]a\_a\_`\_a`\_`^`\_`^`\_  
@HWI-EAS443:3:88:312:1179#0/1  
CCAGCATTAAGCATCAATGAACTGAGCAATCTTGCAAAAAG  
+HWI-EAS443:3:88:312:1179#0/1  
abb`abbabaa¥^aaaa^b`b^aVaaaXa`a`b`a`^aa  
@HWI-EAS443:3:88:316:1402#0/1  
GCATTAAGCATCAATGAACTGAGCAATCTTGCAAAAAGGAG  
+HWI-EAS443:3:88:316:1402#0/1  
a]]\_a¥¥^a¥a[^¥Z]¥`\_Waa\_a]T\_\_[]U`ZR[YR]  
@HWI-EAS443:3:88:488:432#0/1  
AAGAGATATGGCCAGCATTAAGCATCAATGAACTGAGCA  
+HWI-EAS443:3:88:488:432#0/1  
aababaaaaa`aaaaaaaaaY`\_\_a\_a`\_`\_^`\_`^a`\_  
@HWI-EAS443:3:88:579:1651#0/1  
AATTCGACACTAATTGATGGCCATCCGAATCTTTTGGTC  
+HWI-EAS443:3:88:579:1651#0/1  
^b\_^a¥aaaa`aa\_a\_]T]aVa]a`ZS[^^\_a\_aVVXS\_  
@HWI-EAS443:3:88:639:232#0/1  
GGCAAAGAAGACAAGAGATATGGCCAGCATTAAGCATCA  
+HWI-EAS443:3:88:639:232#0/1  
^abbaabbabaab`abbbbabbbbaababaaabbaaaaa  
@HWI-EAS443:3:88:717:87#0/1  
CCATCATCCACTTCATTCTGAGTGCGGGTTCTTCTCTTG  
+HWI-EAS443:3:88:717:87#0/1  
abbbbbaabababbbabbabbab`babbab\_b`bb\_b\_bbb  
@HWI-EAS443:3:88:828:524#0/1  
AGAAGAACCCCGCACTCAGAATGAAGTGGATGATGGCAAT  
+HWI-EAS443:3:88:828:524#0/1  
aa`^]b`bb`abb^^aaaa\_¥\_a\_abXb`\_]bUaaaa\_\_a  
@HWI-EAS443:3:88:852:1342#0/1  
CAAGAGATATGGCCAGCATTAAGCATCAATGAACTGAGC  
+HWI-EAS443:3:88:852:1342#0/1  
abaaabbab[`aaaaa\_aaaa\_`^^a```aa\_[`\_``[  
@HWI-EAS443:3:88:899:1022#0/1  
GATTGCTCAGTTCATTGATGCTTAATGCTGGCCATATCT  
+HWI-EAS443:3:88:899:1022#0/1  
`bS¥¥¥V[aa]a\_ZSZ^`\_`a`¥\_babW^`ZY]\_\_Ua¥U  
@HWI-EAS443:3:88:902:1591#0/1  
GCCATCATCCACTTCATTCTGAGTGCGGGTTCTTCTCTT  
+HWI-EAS443:3:88:902:1591#0/1  
ababa`bbbba[`W\_\_a`\_b]abaaaa`a¥abaa^a0a`  
@HWI-EAS443:3:88:917:1038#0/1  
CAAGAGAAGAACCCCGCACTCAGAATGAAGTGGATGATGG  
+HWI-EAS443:3:88:917:1038#0/1  
\_] ^V[\_¥R¥aP\_aa^R¥]WaaV^SN\_ZJO\_P]RFRaNYa¥  
@HWI-EAS443:3:89:1059:1110#0/1  
TATGGCCAGCATTAAGCATCAATGAACTGAGCAATCTTG  
+HWI-EAS443:3:89:1059:1110#0/1  
abXaaaba[b`a\_]aa`\_a\_a`aa\_a\_\_\_`a^a```\_\_`a

@HWI-EAS443:3:89:1126:976#0/1  
ATTAAGCATCAATGAACTGAGCAATCTTGCAAAAGGAGAG  
+HWI-EAS443:3:89:1126:976#0/1  
aa`baaa`a\_[a\_a\_a^TYaaa\_a^¥\_a`aa]\_[\_a\_\_  
@HWI-EAS443:3:89:1196:1514#0/1  
GAGAAGAACCCCGCACTCAGAATGAAGTGGATGATGGCAA  
+HWI-EAS443:3:89:1196:1514#0/1  
`b`a`a`]ab^a`\_]a`\_]`\_]aRa\_^\_a]^[ZRY]  
@HWI-EAS443:3:89:1310:1814#0/1  
TATGGCCAGCATTAAAGCATCAATGAACTGAGCAATCTTG  
+HWI-EAS443:3:89:1310:1814#0/1  
]b]b`YXabYU`ab`aXQXabTX^^aa[¥]`¥^R^U¥a¥  
@HWI-EAS443:3:89:1319:150#0/1  
TTTTTAAACAATTGACACTAATTGATGGCCATCCGAATT  
+HWI-EAS443:3:89:1319:150#0/1  
abbababa`baaaabaaa`aaaaaaaa^\_^a]\_]`\_a\_  
@HWI-EAS443:3:89:1360:35#0/1  
AGAAGACAAGAGATATGGCCAGCATTAAAGCATCAATGAA  
+HWI-EAS443:3:89:1360:35#0/1  
a\_aaba`aaa``aaaa`\_]`\_Z`a^¥\_^]^[¥]`\_]X  
@HWI-EAS443:3:89:1364:998#0/1  
AGAAGAACCCCGCACTCAGAATGAAGTGGATGATGGCAAT  
+HWI-EAS443:3:89:1364:998#0/1  
aabbabba`\_aaaaa`aa`abb^`^M¥aa¥^SZa\_WV\_^  
@HWI-EAS443:3:89:138:325#0/1  
CTCATTGTTGGCAAAGAAGACAAGAGATATGGCCAGCAT  
+HWI-EAS443:3:89:138:325#0/1  
]X]Q^]QTZ[UW¥YT]`]\_\_\_UGZYa\_RZY¥Y¥¥Z¥RY¥T  
@HWI-EAS443:3:89:1445:1049#0/1  
AGAAGAACCCCGCACTCAGAATGAAGTGGATGATGGCAAT  
+HWI-EAS443:3:89:1445:1049#0/1  
a`baaba`a`ababa``\_b\_aaa\_\_a^a^`\_\_\_\_^a¥^¥]  
@HWI-EAS443:3:89:1486:1157#0/1  
TAAGCATCAATGAACTGAGCAATCTTGCAAAAGGAGAGAA  
+HWI-EAS443:3:89:1486:1157#0/1  
a\_]`YYb^a`\_[¥\_Q]b]\_]\_]G^T¥\_]NQ¥]JU\_]\_^`  
@HWI-EAS443:3:89:1545:1163#0/1  
AGAAGACAAGAGATATGGCCAGCATTAAAGCATCAATGAA  
+HWI-EAS443:3:89:1545:1163#0/1  
\_`baaa`aabbba\_a\_a`\_\_aaaa`aaaa\_aa¥¥^\_\_\_\_`  
@HWI-EAS443:3:89:254:618#0/1  
TTAAGCATCAATGAACTGAGCAATCTTGCAAAAGGAGAGA  
+HWI-EAS443:3:89:254:618#0/1  
abb`abbaba`aaa^aaa]abaZ`a``a\_X]``aa\_a`aa  
@HWI-EAS443:3:89:258:1006#0/1  
GAAGAACCCCGCACTCAGAATGAAGTGGATGATGGCAATG  
+HWI-EAS443:3:89:258:1006#0/1  
aaaaaba]`\_`aa`a`a¥``a]\_aU`\_\_Y`¥X\_\_^W^[\_  
@HWI-EAS443:3:89:258:1098#0/1  
GATTGCTCAGTTCATTGATGCTTAATGCTGGCCATATCT

+HWI-EAS443:3:89:258:1098#0/1  
[abbbb]aab`S^`ab[T`a\_R¥a)`aaa`\_aaa¥a]Q`  
@HWI-EAS443:3:89:339:924#0/1  
GAAGACAAGAGATATGGCCCAGCATTAAGCATCAATGAAC  
+HWI-EAS443:3:89:339:924#0/1  
```aaa^[^\_aaab\_aaa`aa`aa`R]\_a\_`\_\_\_\_]Sa\_  
@HWI-EAS443:3:89:359:894#0/1  
CATTGCCATCATCCACTTCATTCTGAGTGC GGGGTTCTTC  
+HWI-EAS443:3:89:359:894#0/1  
\_XZaaa¥`^bTS]R)``VW`^YWGRQ\_`[`OTVXYWHL  
@HWI-EAS443:3:89:429:741#0/1  
ATTAAGCATCAATGAACTGAGCAATCTTGCAAAGGAGAG  
+HWI-EAS443:3:89:429:741#0/1  
a]VaZ^Pa\_a`aa\_\_U[`^`¥¥`^\_\_\_\_]`\_[S¥^XRS^]\_  
@HWI-EAS443:3:89:499:146#0/1  
CAAGAGAAGAACCCCGCACTCAGAATGAAGTGGATGATGG  
+HWI-EAS443:3:89:499:146#0/1  
abbbbababbbbaaaabbaaababa`ab[\_b]aaa`a`^aa  
@HWI-EAS443:3:89:537:1383#0/1  
CAGCATTAAGCATCAATGAACTGAGCAATCTTGCAAAGG  
+HWI-EAS443:3:89:537:1383#0/1  
¥^a\_`[S`¥¥^S¥ba`^S`Z\_]¥¥Zb`a`baa`^T]aa  
@HWI-EAS443:3:89:619:1976#0/1  
AGAGAAGAACCCCGCACTCAGAATGAAGTGGATGATGGCA  
+HWI-EAS443:3:89:619:1976#0/1  
aaababaabaaa\_aaa`aaa\_a\_aa^aaX`\_\_`^^^  
@HWI-EAS443:3:89:634:606#0/1  
TAAGCATCAATGAACTGAGCAATCTTGCAAAGGAGAGAA  
+HWI-EAS443:3:89:634:606#0/1  
abbbba)`abb\_SZ`aabbb¥bbbaa\_ba^^\_¥aa^aaa`\_  
@HWI-EAS443:3:89:693:1457#0/1  
ATTAAGCATCAATGAACTGAGCAATCTTGCAAAGGAGAG  
+HWI-EAS443:3:89:693:1457#0/1  
aaaaaaaaaaaa`aaa`\_aaa\_a\_aa`\_\_`\_]\_^```  
@HWI-EAS443:3:89:694:773#0/1  
CAATTCGACACTAATTGATGGCCATCCGAATTCTTTTGGT  
+HWI-EAS443:3:89:694:773#0/1  
^]\_`XU[V^aZa¥ZZOTX^ZOY^Z[UZUM¥TRU``XZ`VP  
@HWI-EAS443:3:89:711:1630#0/1  
AGAAGAACCCCGCACTCAGAATGAAGTGGATGATGGCAAT  
+HWI-EAS443:3:89:711:1630#0/1  
aaaaa[ba`b)`abaa`\_aa[`a`\_aGb^`aaaX¥a\_Z^^  
@HWI-EAS443:3:89:736:1174#0/1  
GAGAAGAACCCCGCACTCAGAATGAAGTGGATGATGGCAA  
+HWI-EAS443:3:89:736:1174#0/1  
a`\_`])`\_aa\_a`\_a\_]`\_aY\_\_\_\_]U\_X\_\_[`^`XX^^UUY  
@HWI-EAS443:3:89:744:1579#0/1  
GAAGAACCCCGCACTCAGAATGAAGTGGATGATGGCAATG  
+HWI-EAS443:3:89:744:1579#0/1  
¥¥W`T`a`\_ZZX¥\_¥`[Z[^ZZVQ^X]UVa¥Q\_UZNVZ`]



@HWI-EAS443:3:89:858:1063#0/1  
TTAAGCATCAATGAACTGAGCAATCTTGCAAAAGGAGAGA  
+HWI-EAS443:3:89:858:1063#0/1  
ab¥^aba]\_Y[\_`\_`a]aaaa\_\_a[`aaaX\_``\_a¥`a`aa  
@HWI-EAS443:3:89:890:185#0/1  
GAGAAGAACCCCGCACTCAGAATGAAGTGGATGATGGCAA  
+HWI-EAS443:3:89:890:185#0/1  
aabaaaa`ZZ]a``\_`^\_a^\_a`^]\_Ua\_\_^`]]]]VW[  
@HWI-EAS443:3:89:895:953#0/1  
GAGATATGGCCAGCATTAAAGCATCAATGAACTGAGCAAT  
+HWI-EAS443:3:89:895:953#0/1  
aa]a`]^a\_]a`ababbbaa`aa^`\_`baaa\_a\_¥\_aaa\_  
@HWI-EAS443:3:89:899:1910#0/1  
TTTTGCAAGATTGCTCAGTTCATTGATGCTTAATGCTGGG  
+HWI-EAS443:3:89:899:1910#0/1  
a```\_¥a^aaaa`a^¥^bKa]a¥Zaa`\_U``a^`a]\_\_\_\_\_`  
@HWI-EAS443:3:89:928:1229#0/1  
AGAAGAACCCCGCACTCAGAATGAAGTGGATGATGGCAAT  
+HWI-EAS443:3:89:928:1229#0/1  
\_^[b[WaaTF[aU\_W`OMa\_``a^^a0^\_\_Ya[^WTFZ[\_  
@HWI-EAS443:3:89:95:2022#0/1  
CCAGCATTAAAGCATCAATGAACTGAGCAATCTTGCAAAAG  
+HWI-EAS443:3:89:95:2022#0/1  
ab]`abaa`[[b]`a`¥\_]Z\_WJUV\_a`\_a^Y^ZY`a^W  
@HWI-EAS443:3:89:985:691#0/1  
GGGCAAAGAAGACAAGAGATATGGCCAGCATTAAAGCATC  
+HWI-EAS443:3:89:985:691#0/1  
abaaaaa\_]b\_aaaaa`aa\_aaa^¥^`¥aaa`a\_^`^U  
@HWI-EAS443:3:89:992:581#0/1  
CAAGAGATATGGCCAGCATTAAAGCATCAATGAACTGAGC  
+HWI-EAS443:3:89:992:581#0/1  
\_aaa`aa¥baW`\_\_¥^`bbb]aY^TabbY`bbababbWba  
@HWI-EAS443:3:8:1014:448#0/1  
AGATTGCTCAGTTCATTGATGCTTAATGCTGGGCCATATC  
+HWI-EAS443:3:8:1014:448#0/1  
aa\_aa`X]aaba`W`b`aSaa¥`\_`Wa\_\_\_\_^¥¥[U]`\_`]  
@HWI-EAS443:3:8:1197:184#0/1  
CTTTTGCAAGATTGCTCAGTTCATTGATGCTTAATGCTGG  
+HWI-EAS443:3:8:1197:184#0/1  
aab`aaaaaaa`aU^X`a`\_\_a`¥a^\_aZ``]X\_^¥V`^  
@HWI-EAS443:3:8:1215:531#0/1  
TGGGCAAAGAAGACAAGAGATATGGCCAGCATTAAAGCAT  
+HWI-EAS443:3:8:1215:531#0/1  
ab\_b\_[aaa\_\_a`\_a^`\_a\_]`Y]^]]]]U\_\_]]Y^^]^  
@HWI-EAS443:3:8:1216:1852#0/1  
GATTGCTCAGTTCATTGATGCTTAATGCTGGGCCATATCT  
+HWI-EAS443:3:8:1216:1852#0/1  
aa`¥a^aa\_¥a^[\_^a``\_Z`\_a`\_`\_`^`\_]ZZZ^`\_aV\_  
@HWI-EAS443:3:8:122:1408#0/1  
AAGAGAAGAACCCCGCACTCAGAATGAAGTGGATGATGGC

+HWI-EAS443:3:8:122:1408#0/1  
a`^\_a\_a\_a`\_\_\_\_\_`X]\_U\_]\_^W\_W\_]XY^X[WW]  
@HWI-EAS443:3:8:1253:367#0/1  
AGAAGACAAGAGATATGGCCCAGCATTAAAGCATCAATGAA  
+HWI-EAS443:3:8:1253:367#0/1  
\_`\_aaaaa`b[`aaa`a^aS^`a^`\_`a\_\_^`^^Xa\_^\_  
@HWI-EAS443:3:8:1266:1358#0/1  
GCCATCATCCACTTCATTCTGAGTGC GGGTTCTTCTCTT  
+HWI-EAS443:3:8:1266:1358#0/1  
aKTXRHXQ[]X]^`^XH\_NNR¥QFZIR^\_\_ZPMPVZZR^U  
@HWI-EAS443:3:8:1273:663#0/1  
GAGAAGAACCCCGCACTCAGAATGAAGTGGATGATGGCAA  
+HWI-EAS443:3:8:1273:663#0/1  
a`aa^a\_a\_\_\_\_^a`\_Z`¥a]^`^`XL¥W`\_¥\_^VWU¥WSU  
@HWI-EAS443:3:8:1287:822#0/1  
TAAGCATCAATGAACTGAGCAATCTTGCAAAAGGAGAGAA  
+HWI-EAS443:3:8:1287:822#0/1  
ab`aaa`aa`b^]\_`^`a^a`N\_]a`^]a`^`\_\_a^  
@HWI-EAS443:3:8:1313:469#0/1  
AACAATTCGACACTAATTGATGGCCATCCGAATCCTTTTG  
+HWI-EAS443:3:8:1313:469#0/1  
aa`aabbba]^a^`\_\_`Zba`aa¥aa\_] [a`^`\_]\_a`WX  
@HWI-EAS443:3:8:1320:44#0/1  
AGAGATATGGCCCAGCATTAAAGCATCAATGAACTGAGCAA  
+HWI-EAS443:3:8:1320:44#0/1  
``^b¥V¥abb`a`a\_b`\_`a`WWFR[[aXY\_\_0aS\_  
@HWI-EAS443:3:8:1431:1706#0/1  
CAGCATTAAAGCATCAATGAACTGAGCAATCTTGCAAAAGG  
+HWI-EAS443:3:8:1431:1706#0/1  
ab^Xab¥b\_b\_babab`bb`bbb^R\_aa`\_`a`\_`a`  
@HWI-EAS443:3:8:151:1926#0/1  
CAAGAGATATGGCCCAGCATTAAAGCATCAATGAACTGAGC  
+HWI-EAS443:3:8:151:1926#0/1  
a`aa^Y]¥b^a`PQ`U¥`[XZY[XT\_] [¥^\_SRQK[GY\_  
@HWI-EAS443:3:8:1527:422#0/1  
TTAAGCATCAATGAACTGAGCAATCTTGCAAAAGGAGAGA  
+HWI-EAS443:3:8:1527:422#0/1  
aba^a\_ab`a\_aaa\_Sa^^\_\_¥a]a`^^`^\_]`\_`^`^\_  
@HWI-EAS443:3:8:1530:1426#0/1  
AAGAGAAGAACCCCGCACTCAGAATGAAGTGGATGATGGC  
+HWI-EAS443:3:8:1530:1426#0/1  
a`b`aaaaaaZ\_\_\_a`\_]aYZa[^`^Z\_Ya\_R]^X]XX  
@HWI-EAS443:3:8:1541:1050#0/1  
TTTTAAACAATTCGACACTAATTGATGGCCATCCGAATTC  
+HWI-EAS443:3:8:1541:1050#0/1  
a`\_`a`aa`\_`a]`\_]`a[aa\_aa\_aZ\_RS\_]XMKY^Z^]S  
@HWI-EAS443:3:8:1576:466#0/1  
AAGAGATATGGCCCAGCATTAAAGCATCAATGAACTGAGCA  
+HWI-EAS443:3:8:1576:466#0/1  
``a]ba\_aX[Y]Q^`Y`a`^\_\_ [IX[\_`\_`\_Z\_Z]^W^V]

@HWI-EAS443:3:8:162:1364#0/1  
AAGAGAAGAACCCCGCACTCAGAATGAAGTGGATGATGGC  
+HWI-EAS443:3:8:162:1364#0/1  
a]`aSabZaaSW^Ra`a\_^\_aU`aaUVa¥G`\_^YaUYZ¥L  
@HWI-EAS443:3:8:1750:681#0/1  
CTCATTGTTGGGCAAAGAAGACAAGAGATATGGCCCAGCAT  
+HWI-EAS443:3:8:1750:681#0/1  
¥\_bbb\_a^\_Z\_abb`bb`\_aab`\_^abab\_YbXXQ[^W]a  
@HWI-EAS443:3:8:302:1062#0/1  
CCCAGCATTAAAGCATCAATGAACTGAGCAATCTTGCAAAA  
+HWI-EAS443:3:8:302:1062#0/1  
a`[`a¥X\_]`^aa`\_[a`a\_\_]\_\_[aS\_]\_`^[\_]¥P[]  
@HWI-EAS443:3:8:335:569#0/1  
GAAGAACCCCGCACTCAGAATGAAGTGGATGATGGCAATG  
+HWI-EAS443:3:8:335:569#0/1  
¥\_a]]bbbab`a\_\_]\_b]]`b\_ab]]aa`bY\_aSFZ^]a  
@HWI-EAS443:3:8:429:1403#0/1  
GATTGCTCAGTTCATTGATGCTTAATGCTGGCCATATCT  
+HWI-EAS443:3:8:429:1403#0/1  
TNF]\_WZa]`[\_a^]ab``Z[a`\_[ZZb`¥YUT``X`P¥\_  
@HWI-EAS443:3:8:473:1705#0/1  
TTTTTAAACAATTCGACACTAATTGATGGCCATCCGAATT  
+HWI-EAS443:3:8:473:1705#0/1  
abb¥bbbab`babX]abababaaaU`a^\_`b[\_aa^^P  
@HWI-EAS443:3:8:48:1896#0/1  
GAAGACAAGAGATATGGCCCAGCATTAAAGCATCAATGAAC  
+HWI-EAS443:3:8:48:1896#0/1  
``]U```aa\_]``¥P¥Jb]L\_PZ]]\_ZX[]\_W¥H\_T¥aaa  
@HWI-EAS443:3:8:83:1447#0/1  
AGAGAAGAACCCCGCACTCAGAATGAAGTGGATGATGGCA  
+HWI-EAS443:3:8:83:1447#0/1  
ab\_aaaa\_aaQ`\_`[]SZ^[]]¥^]¥G[]XRZ^]¥STV  
@HWI-EAS443:3:8:88:821#0/1  
CAATTCGACACTAATTGATGGCCATCCGAATTCTTTTGGT  
+HWI-EAS443:3:8:88:821#0/1  
a\_b`bbaaab\_abbabaaaabaXa\_``baaab\_ababa\_a  
@HWI-EAS443:3:8:898:1685#0/1  
ATTTTGGGCAAAGAAGACAAGAGATATGGCCCAGCATTAA  
+HWI-EAS443:3:8:898:1685#0/1  
`bbaa`\_a`aaaaba\_aW`aaa\_`aZ\_\_^YX``0\_\_^\_\_  
@HWI-EAS443:3:8:900:1019#0/1  
AGAGAAGAACCCCGCACTCAGAATGAAGTGGATGATGGCA  
+HWI-EAS443:3:8:900:1019#0/1  
aaaa^`aaaa\_`a\_a```^¥X]`aY]^U\_^^]`]U^^RU  
@HWI-EAS443:3:8:903:793#0/1  
GAAGACAAGAGATATGGCCCAGCATTAAAGCATCAATGAAC  
+HWI-EAS443:3:8:903:793#0/1  
a¥`[^aaa`\_\_\_ULVR^\_WQ\_[Q\_[ZS^QOX]^^^Z[[ZY  
@HWI-EAS443:3:8:944:186#0/1  
AGCATTAAAGCATCAATGAACTGAGCAATCTTGCAAAAAGGA

+HWI-EAS443:3:8:944:186#0/1  
aba`aa¥aa^]aZ]\_`bZa]ab\_`YZ\_`^aaaZS¥X\_a[]  
@HWI-EAS443:3:8:94:498#0/1  
TTTTGGGCAAAGAAGACAAGAGATATGGCCAGCATTAAAG  
+HWI-EAS443:3:8:94:498#0/1  
abb\_abaaaba[YI\_a[aRaX^\_[a\_¥TSY^X`]a¥]`^^  
@HWI-EAS443:3:8:978:1087#0/1  
TTTTTAAACAATTGACACTAATTGATGGCCATCCGAATT  
+HWI-EAS443:3:8:978:1087#0/1  
\_aa\_a`]U\_^a]¥`a\_]`\_[X\_]`^^`^^0^[Z^\_\_W`^  
@HWI-EAS443:3:90:1036:293#0/1  
CAATTCGACACTAATTGATGGCCATCCGAATTCTTTTGGT  
+HWI-EAS443:3:90:1036:293#0/1  
`\_\_bWb¥aba```abSY^`aa\_X`]\_]`a\_\_\_a`aa]YN  
@HWI-EAS443:3:90:109:712#0/1  
GAAGAACCCCGCACTCAGAATGAAGTGGATGATGGCAATG  
+HWI-EAS443:3:90:109:712#0/1  
a]a\_]¥^aaaa\_[Yaa]^NX\_¥UKU]a^^`a^\_UN]]\_\_]  
@HWI-EAS443:3:90:1143:680#0/1  
AAGAGATATGGCCAGCATTAAAGCATCAATGAACTGAGCA  
+HWI-EAS443:3:90:1143:680#0/1  
\_[a]aaaa\_a]a`a\_a\_aaaaa\_\_a\_]aaa`a0a\_\_a¥a  
@HWI-EAS443:3:90:129:1180#0/1  
AAAGAAGACAAGAGATATGGCCAGCATTAAAGCATCAATG  
+HWI-EAS443:3:90:129:1180#0/1  
aa`a]ba`bbbbaab`]``\_b^a`a`^^[[[]``Z\_\_\_\_`\_  
@HWI-EAS443:3:90:1316:864#0/1  
CAATTCGACACTAATTGATGGCCATCCGAATTCTTTTGGT  
+HWI-EAS443:3:90:1316:864#0/1  
`\_bbabbbbab`¥]^`Z`baa`R\_\_X`]^aaa\_\_X  
@HWI-EAS443:3:90:136:980#0/1  
CCATCATCCACTTCATTCTGAGTGC GG GTTCTTCTCTTG  
+HWI-EAS443:3:90:136:980#0/1  
[aTS]KY`[]\_[[\_¥b^bb\_¥`V]]]abZV¥\_\_U]bZ`aa  
@HWI-EAS443:3:90:137:396#0/1  
GAGAAGAACCCCGCACTCAGAATGAAGTGGATGATGGCAA  
+HWI-EAS443:3:90:137:396#0/1  
aaaYQ^```Z[a^`\_\_^\_RaH]¥¥^MPV]SR0^OR]VXYV  
@HWI-EAS443:3:90:1564:855#0/1  
AAACAATTGACACTAATTGATGGCCATCCGAATTCTTTT  
+HWI-EAS443:3:90:1564:855#0/1  
[^ZQ\_b`¥`ba]aYaaa^`[[\_aX\_N¥aZ``]aaXFX`[V  
@HWI-EAS443:3:90:1602:1803#0/1  
AAGAACCCCGCACTCAGAATGAAGTGGATGATGGCAATGA  
+HWI-EAS443:3:90:1602:1803#0/1  
ab\_aba`R^babaa¥Y`aaaa`[G]`¥\_b^\_aXS[X\_\_\_\_  
@HWI-EAS443:3:90:1614:1763#0/1  
GACAAGAGATATGGCCAGCATTAAAGCATCAATGAACTGA  
+HWI-EAS443:3:90:1614:1763#0/1  
a^a`UJYaU^`^a`^\_`ZVZ\_\_\_\_^\_YRTW^Y^]ZZ^X^Z

@HWI-EAS443:3:90:1731:767#0/1  
AGCATTAAGCATCAATGAACTGAGCAATCTTGCAAAAGGA  
+HWI-EAS443:3:90:1731:767#0/1  
\_^`bb`b`[ `bb^bbb\_^[abaYa\_`^a^aba\_\_U^\_a\_  
@HWI-EAS443:3:90:1782:853#0/1  
CAAGAGAAGAACCCCGCACTCAGAATGAAGTGGATGATGG  
+HWI-EAS443:3:90:1782:853#0/1  
`bbbbbbabbabab`ababaaaabSaa` `ab^bbZ^a` [^^  
@HWI-EAS443:3:90:200:1876#0/1  
GAGTCAGCAAAATGGGAGTAGATGAATACTCCAGCACGGA  
+HWI-EAS443:3:90:200:1876#0/1  
^\_T[a`^Xaa\_aV[TUZ]Va\_\_TXV^[Y\_\_a^QLV`\_N¥V  
@HWI-EAS443:3:90:24:605#0/1  
AGAAGACAAGAGATATGGCCCAGCATTAAAGCATCAATGAA  
+HWI-EAS443:3:90:24:605#0/1  
aaa`a\_aa`a]\_\_¥^VVP\_\_ZT[\_^ZZ`XX\_[XZR^ZZZW  
@HWI-EAS443:3:90:376:241#0/1  
AGAGATATGGCCCAGCATTAAAGCATCAATGAACTGAGCAA  
+HWI-EAS443:3:90:376:241#0/1  
abTba¥a\_aaa` `` ` \_aa\_a\_\_`¥`W^\_\_^^^\_^\_] ^S\_  
@HWI-EAS443:3:90:451:1383#0/1  
TTTTTAAACAATTGACACTAATTGATGGCCATCCGAATT  
+HWI-EAS443:3:90:451:1383#0/1  
abbaabbaabaaU`V¥aaaaa`\_Y`\_a`Ua`\_`\_^]\_¥`\_^  
@HWI-EAS443:3:90:468:760#0/1  
AAGAGAAGAACCCCGCACTCAGAATGAAGTGGATGATGGC  
+HWI-EAS443:3:90:468:760#0/1  
]`a`b[^\_^]`b]\_X\_` `^b[X` `¥^`QaaX[aX]a\_Y  
@HWI-EAS443:3:90:473:805#0/1  
GAGAAGAACCCCGCACTCAGAATGAAGTGGATGATGGCAA  
+HWI-EAS443:3:90:473:805#0/1  
^V`]aaaaaaa\_aaa`\_a`\_`aa\_^\_Xa\_^]\_Y¥\_\_WUR  
@HWI-EAS443:3:90:481:625#0/1  
CTCATTGCGCAAAGAAGACAAGAGATATGGCCCAGCAT  
+HWI-EAS443:3:90:481:625#0/1  
`¥Z`abbb`a¥aaaab]^aaaaY]]baaaaa^V]`a^`Z  
@HWI-EAS443:3:90:543:1642#0/1  
CAATTCGACACTAATTGATGGCCATCCGAATTCTTTTGGT  
+HWI-EAS443:3:90:543:1642#0/1  
`]`][`[RU]a[ `aaa[^[W¥Z`\_YR¥X[X][\_UY\_ZZR^Y  
@HWI-EAS443:3:90:569:1819#0/1  
CTTTTGCAAGATTGCTCAGTTCATTGATGCTTAATGCTGG  
+HWI-EAS443:3:90:569:1819#0/1  
ab]b^`bbb\_b\_baaaba\_]`b\_\_aaaabaab` `aa^a\_  
@HWI-EAS443:3:90:636:1836#0/1  
AACAAATTCGACACTAATTGATGGCCATCCGAATTCTTTTG  
+HWI-EAS443:3:90:636:1836#0/1  
^¥`a\_aZ[S]]\_¥` `¥VQZ¥a][\_W^aa¥[Q¥[GXa[IUB  
@HWI-EAS443:3:90:909:658#0/1  
TAAGCATCAATGAACTGAGCAATCTTGCAAAAGGAGAGAA

+HWI-EAS443:3:90:909:658#0/1  
XXaaaW¥`Z\_^SWYGWZS]R\_^[a]VZ¥\_OR`]OTa¥]ZV  
@HWI-EAS443:3:91:1000:1042#0/1  
CCGTGCTGGAGTATTCATCTACTCCCATTTTGCTGACTCT  
+HWI-EAS443:3:91:1000:1042#0/1  
aab`a`\_b\_bbGbbabaa\_ba`bb`U`b`a]aa`a`aa  
@HWI-EAS443:3:91:1115:192#0/1  
TATGGCCCAGCATTAAAGCATCAATGAACTGAGCAATCTTG  
+HWI-EAS443:3:91:1115:192#0/1  
aaaaaaaa^\_a`aa\_aa[\_`\_\_`a`^\_]``^]`^`[]`  
@HWI-EAS443:3:91:1308:562#0/1  
AAACAATTCGACACTAATTGATGGCCATCCGAATTCTTTT  
+HWI-EAS443:3:91:1308:562#0/1  
`aa[a`aa`\_`KP]aaaa`\_`\_\_[ZXZ]LMZ^¥Y`X`\_¥^  
@HWI-EAS443:3:91:1355:318#0/1  
GAGAAGAACCCCGCACTCAGAATGAAGTGGATGATGGCAA  
+HWI-EAS443:3:91:1355:318#0/1  
aaW[a^a]a`TYbU]FQWSb^b[aSG]X[[M^aO^aUVRU  
@HWI-EAS443:3:91:1367:831#0/1  
AAACAATTCGACACTAATTGATGGCCATCCGAATTCTTTT  
+HWI-EAS443:3:91:1367:831#0/1  
ab``aabaaaaa`abaa`aaaa`¥ba\_\_a`\_``]a\_``  
@HWI-EAS443:3:91:1405:162#0/1  
TAAGCATCAATGAACTGAGCAATCTTGCAAAAGGAGAGAA  
+HWI-EAS443:3:91:1405:162#0/1  
``aa``\_\_bba[\_Y\_a[]W`aa`a^aX^^^a¥¥\_``\_`  
@HWI-EAS443:3:91:1459:1083#0/1  
TAAGCATCAATGAACTGAGCAATCTTGCAAAAGGAGAGAA  
+HWI-EAS443:3:91:1459:1083#0/1  
XZ[Ya¥]aU]] [ZTFS]a`Y`aa`aYba`UTUa[[a^`\_Y  
@HWI-EAS443:3:91:1465:1699#0/1  
ATTGATGCTTAATGCTGGCCATATCTCTTGTCTTCTTTG  
+HWI-EAS443:3:91:1465:1699#0/1  
¥aaa¥aaaW`baabGabaa]G^aaaSaVb`WVXaa0a]`^  
@HWI-EAS443:3:91:1727:300#0/1  
CTCATTTTGGGCAAAGAAGACAAGAGATATGGCCCAGCAT  
+HWI-EAS443:3:91:1727:300#0/1  
abaabbbbbbbabaaabbbbabbbbaabbaaaaRO\_bW]\_  
@HWI-EAS443:3:91:32:1575#0/1  
CAAGAGAAGAACCCCGCACTCAGAATGAAGTGGATGATGG  
+HWI-EAS443:3:91:32:1575#0/1  
`bb`baaabba`abaabaaa]a`aadW]`\_aa`a`^a  
@HWI-EAS443:3:91:331:1726#0/1  
AACAAATTCGACACTAATTGATGGCCATCCGAATTCTTTT  
+HWI-EAS443:3:91:331:1726#0/1  
aYb`Yaaba\_M\_aa`aX`a`\_`^aaa\_a`aaa`\_\_\_\_\_`^`  
@HWI-EAS443:3:91:459:1092#0/1  
TGGGCAAAGAAGACAAGAGATATGGCCCAGCATTAAAGCAT  
+HWI-EAS443:3:91:459:1092#0/1  
abbabaa]aba`aa`aaaa`\_`\_`\_`\_`aaaa`a`\_\_\_\_\_

@HWI-EAS443:3:91:54:1127#0/1  
AGAGAAGAACCCCGCACTCAGAATGAAGTGGATGATGGCA  
+HWI-EAS443:3:91:54:1127#0/1  
aa`bab`\_aa^aaa`a^\_\_\_`\_\_\_^^`Va\_^^\_^V^YYV  
@HWI-EAS443:3:91:981:1187#0/1  
ATTTTGGGCAAAGAAGACAAGAGATATGGCCCAGCATTAA  
+HWI-EAS443:3:91:981:1187#0/1  
`bbababbabaaabbb`baababaab^ab\_a\_aa^aa`a`  
@HWI-EAS443:3:91:998:957#0/1  
AAGAGATATGGCCCAGCATTAAAGCATCAATGAACTGAGCA  
+HWI-EAS443:3:91:998:957#0/1  
a```baa\_abaaa`aaabaaa][a`aaaabaaa\_a``a\_a  
@HWI-EAS443:3:92:1018:1312#0/1  
CAATTCGACACTAATTGATGGCCATCCGAATTCTTTTGGT  
+HWI-EAS443:3:92:1018:1312#0/1  
abb`b^Q\_b[[bb\_H\_Y¥^]a`WbWa\_^KZ`]`aa]]]a\_  
@HWI-EAS443:3:92:103:671#0/1  
AAGAGAAGAACCCCGCACTCAGAATGAAGTGGATGATGGC  
+HWI-EAS443:3:92:103:671#0/1  
`]]`aa`aaa^\_``a¥^]a`\_^Z``S]^Y\_]U]\_XX]]]  
@HWI-EAS443:3:92:1065:402#0/1  
GCATTAAGCATCAATGAACTGAGCAATCTTGCAAAAAGGAG  
+HWI-EAS443:3:92:1065:402#0/1  
abaabb^aaabaaaaaaaa^\_aaaa`aaa¥`\_^\_a\_\_a  
@HWI-EAS443:3:92:109:1337#0/1  
GATATGGCCCAGCATTAAAGCATCAATGAACTGAGCAATCT  
+HWI-EAS443:3:92:109:1337#0/1  
ab\_aa`]aa¥``aaa`aaY¥^[¥`[¥VR\_^\_\_`aa[\_\_\_]  
@HWI-EAS443:3:92:1219:497#0/1  
AGAAGAACCCCGCACTCAGAATGAAGTGGATGATGGCAAT  
+HWI-EAS443:3:92:1219:497#0/1  
aaaaaaaa^aU`b`\_\_\_`aa`\_aa\_aXaa\_a]\_\_\_Y]^\_  
@HWI-EAS443:3:92:1273:1832#0/1  
GAAGAACCCCGCACTCAGAATGAAGTGGATGATGGCAATG  
+HWI-EAS443:3:92:1273:1832#0/1  
\_aaaba``b`bX]\_Yaa\_\_[^`Ua`MaRZ]bS`\_^aWY\_^  
@HWI-EAS443:3:92:1351:1178#0/1  
AAGAGAAGAACCCCGCACTCAGAATGAAGTGGATGATGGC  
+HWI-EAS443:3:92:1351:1178#0/1  
`a`¥Waaaaa`\_\_b\_\_`a^\_a`b¥PVaXa^^`a¥^`a]  
@HWI-EAS443:3:92:1412:116#0/1  
GATTGCTCAGTTCATTGATGCTTAATGCTGGGCCATATCT  
+HWI-EAS443:3:92:1412:116#0/1  
abaabaa`]\_\_a^\_aaa\_aa]aa``a`Saa\_\_XW\_\_\_\_`]`  
@HWI-EAS443:3:92:1506:1137#0/1  
AATGAACTGAGCAATCTTGCAAAAAGGAGAGAAGGCTAATG  
+HWI-EAS443:3:92:1506:1137#0/1  
ab`baaabbabbbbaaaabbaaaaaab`baba]aa]a\_`aa  
@HWI-EAS443:3:92:1684:427#0/1  
AGAAGACAAGAGATATGGCCCAGCATTAAAGCATCAATGAA

+HWI-EAS443:3:92:1684:427#0/1  
^b^a^N\_`aabaaaa^]]^]P\_`^a]]R[¥L¥\_\_\_\_\_]  
@HWI-EAS443:3:92:222:1237#0/1  
CATTAAGCATCAATGAACTGAGCAATCTTGCAAAAGGAGA  
+HWI-EAS443:3:92:222:1237#0/1  
aa¥a`ba`Wba¥0`a^a\_]YRbb`RZTb\_aa`¥XXa\_Y\_a  
@HWI-EAS443:3:92:284:262#0/1  
AAAGAAGACAAGAGATATGGCCCAGCATTAAAGCATCAATG  
+HWI-EAS443:3:92:284:262#0/1  
a`abaaaa]```\_¥`\_a]¥W¥\_NW`Z`^Z\_\_]]XZ]¥[Z  
@HWI-EAS443:3:92:388:1542#0/1  
GATTGCTCAGTTCATTGATGCTTAATGCTGGGCCATATCT  
+HWI-EAS443:3:92:388:1542#0/1  
`[XZ[]X^aVRV¥`\_\_\_\_^OQT]ZWFVRXTZTTY[Y^^^UX  
@HWI-EAS443:3:92:451:1734#0/1  
AACAAATTCGACACTAATTGATGGCCATCCGAATTCTTTTG  
+HWI-EAS443:3:92:451:1734#0/1  
ab]^\_aaaaaaa`\_]a`Y`dW\_\_`a`^`\_`\_[a`¥^^\_\_S  
@HWI-EAS443:3:92:529:1296#0/1  
CTCATTGTTGGGCAAAGAAGACAAGAGATATGGCCCAGCAT  
+HWI-EAS443:3:92:529:1296#0/1  
abb[\_^^¥XXV`YZ\_[\_¥`\_[^M]¥a\_ZXY¥WX`¥XS\_W  
@HWI-EAS443:3:92:610:1911#0/1  
CATTAAGCATCAATGAACTGAGCAATCTTGCAAAAGGAGA  
+HWI-EAS443:3:92:610:1911#0/1  
¥^¥\_S`a`^a^Z`]V]¥yb\_`V][\_a\_bZ¥ZY\_b¥YS`aa  
@HWI-EAS443:3:92:673:1013#0/1  
AGAGATATGGCCCAGCATTAAAGCATCAATGAACTGAGCAA  
+HWI-EAS443:3:92:673:1013#0/1  
RN]`Yaaaba^`aaabaab\_[^`aa`\_aaa`a\_\_\_\_][`a  
@HWI-EAS443:3:92:70:767#0/1  
AGAAGAACCCCGCACTCAGAATGAAGTGGATGATGGCAAT  
+HWI-EAS443:3:92:70:767#0/1  
a]aaa```¥`\_a\_\_XTZ)`V[a\_YRaV^^X^`Z[^]YYX]  
@HWI-EAS443:3:92:753:213#0/1  
AAGAGAAGAACCCCGCACTCAGAATGAAGTGGATGATGGC  
+HWI-EAS443:3:92:753:213#0/1  
aaa`aaa`aa`a\_]b``\_a`\_a\_\_aa^^`X`\_^]a¥]\_\_V  
@HWI-EAS443:3:92:795:1608#0/1  
AACAAATTCGACACTAATTGATGGCCATCCGAATTCTTTTG  
+HWI-EAS443:3:92:795:1608#0/1  
Y\_0]\_`a`aaa`[a`W\_aa]aa`^`]a\_aa^`]]U]V]^a  
@HWI-EAS443:3:92:864:1502#0/1  
ACAAGAGATATGGCCCAGCATTAAAGCATCAATGAACTGAG  
+HWI-EAS443:3:92:864:1502#0/1  
abaaaaaa\_a`aaa]^aa`ba\_aa`a``````a``````\_^\_^  
@HWI-EAS443:3:92:910:912#0/1  
AAGAGAAGAACCCCGCACTCAGAATGAAGTGGATGATGGC  
+HWI-EAS443:3:92:910:912#0/1  
`]^`\_aYa`aa\_^\_]a`\_\_\_\_\_^a^Va`]^aY```\_\_a\_X]¥[



@HWI-EAS443:3:92:924:275#0/1  
AGAGAAGAACCCCGCACTCAGAATGAAGTGGATGATGGCA  
+HWI-EAS443:3:92:924:275#0/1  
aba`a\_ba\_[Ya#a`aXa[a`aaaa\_^^Uaa\_`b^`\_`\_]V  
@HWI-EAS443:3:92:99:1412#0/1  
GAGATATGGCCAGCATTAAAGCATCAATGAACTGAGCAAT  
+HWI-EAS443:3:92:99:1412#0/1  
\_a`\_]bZaa^Z`\_\_\_aaaa`a`^`a`^`^aaaaS```a\_  
@HWI-EAS443:3:93:1139:243#0/1  
GAGATATGGCCAGCATTAAAGCATCAATGAACTGAGCAAT  
+HWI-EAS443:3:93:1139:243#0/1  
aaaa\_a\_aa^]^^^aaaa\_a]\_`T#Za`]]^^^Y\_G]]]  
@HWI-EAS443:3:93:1220:532#0/1  
AGAGAAGAACCCCGCACTCAGAATGAAGTGGATGATGGCA  
+HWI-EAS443:3:93:1220:532#0/1  
`b\_S\_babb`ba\_bbaabaaaabab`aZR#[aba`a\_PM`  
@HWI-EAS443:3:93:1287:1179#0/1  
CAAGAGAAGAACCCCGCACTCAGAATGAAGTGGATGATGG  
+HWI-EAS443:3:93:1287:1179#0/1  
^babV`b[a\_`a`\_[babL]]a]Zb^R^#XZ\_a`a]`P``  
@HWI-EAS443:3:93:148:1492#0/1  
GAAGAACCCCGCACTCAGAATGAAGTGGATGATGGCAATG  
+HWI-EAS443:3:93:148:1492#0/1  
a\_`a`baaaaaa[`WL#\_aa\_[^V`^`^`\_]`\_[SVWZ^`^`  
@HWI-EAS443:3:93:1501:704#0/1  
GAAGAACCCCGCACTCAGAATGAAGTGGATGATGGCAATG  
+HWI-EAS443:3:93:1501:704#0/1  
a\_b^`ab`aU`Z^Xaaa]\_Vaa\_a\_#N]#`^`]TDM][\_  
@HWI-EAS443:3:93:1580:1753#0/1  
CAAGAGATATGGCCAGCATTAAAGCATCAATGAACTGAGC  
+HWI-EAS443:3:93:1580:1753#0/1  
abaaa\_ab#bbba`\_ba#^aaa`a^a\_`aaba`#aa\_aZ  
@HWI-EAS443:3:93:1703:750#0/1  
TGCTCAGTTCATTGATGCTTAATGCTGGGCCATATCTCTT  
+HWI-EAS443:3:93:1703:750#0/1  
abU\_ZU]bbab`a`\_babbbaaa^^`^Q#a`\_aaa`\_aaa  
@HWI-EAS443:3:93:178:667#0/1  
AGAAGACAAGAGATATGGCCAGCATTAAAGCATCAATGAA  
+HWI-EAS443:3:93:178:667#0/1  
aab\_aa`\_a\_a\_a`^^a`aa`^`^`\_^^\_^^^Z`^^  
@HWI-EAS443:3:93:211:329#0/1  
CAATTCGACACTAATTGATGGCCATCCGAATTCCTTTTGGT  
+HWI-EAS443:3:93:211:329#0/1  
a`baabaaabaaaaaaa`aaZ`a`\_`\_`^aa`\_`\_`ZX  
@HWI-EAS443:3:93:239:908#0/1  
AACAAATTCGACACTAATTGATGGCCATCCGAATTCCTTTG  
+HWI-EAS443:3:93:239:908#0/1  
aaaaV\_abYYaba`R]^#\_a\_a]#]aY]^`^]\_U`^\_Z]^  
@HWI-EAS443:3:93:263:844#0/1  
AAACAATTCGACACTAATTGATGGCCATCCGAATTCCTTT

+HWI-EAS443:3:93:263:844#0/1  
a]Uaa^`a^^\_¥\_^\_]^^`^^ZS\_¥`U^W\_XUZXU\_X^^  
@HWI-EAS443:3:93:271:380#0/1  
CAAGAGAAGAACCCCGCACTCAGAATGAAGTGGATGATGG  
+HWI-EAS443:3:93:271:380#0/1  
a`aa[^\_aaaa`\_\_a^`\_]X\_]R\_]\_[RYX\_]X\_]\_Y]]U  
@HWI-EAS443:3:93:327:1355#0/1  
AACAATTCGACACTAATTGATGGCCATCCGAATTCTTTTG  
+HWI-EAS443:3:93:327:1355#0/1  
a]ababa]aab``abab`R]``\_b\_a\_\_ZRPYa\_¥U^\_W¥  
@HWI-EAS443:3:93:37:1583#0/1  
GATATGGCCCAGCATTAAAGCATCAATGAACTGAGCAATCT  
+HWI-EAS443:3:93:37:1583#0/1  
^b`aZ\_a[`]\_``¥^]Y`\_\_^R`\_]\_[\_`^Z\_^]]^]U^  
@HWI-EAS443:3:93:421:591#0/1  
GCTCAGTTCATTGATGCTTAATGCTGGGCCATATCTCTTG  
+HWI-EAS443:3:93:421:591#0/1  
a\_aaa`\_aaa\_```aaa^`\_a`a^`]\_\_]`\_\_`^`]^`^\_  
@HWI-EAS443:3:93:440:981#0/1  
GATTGCTCAGTTCATTGATGCTTAATGCTGGGCCATATCT  
+HWI-EAS443:3:93:440:981#0/1  
`\_a\_^Y^FQ]TZaS^^]\_aa\_aY¥\_]\_\_]`^T¥\_W\_Z`\_]  
@HWI-EAS443:3:93:500:331#0/1  
AGAGATATGGCCCAGCATTAAAGCATCAATGAACTGAGCAA  
+HWI-EAS443:3:93:500:331#0/1  
`\_^baa`\_\_VWS]aaXY]]\_`a]^WTY¥\_a^a\_]\_^SS` [  
@HWI-EAS443:3:93:541:1764#0/1  
TAAGCATCAATGAACTGAGCAATCTTGCAAAAAGGAGAGAA  
+HWI-EAS443:3:93:541:1764#0/1  
`\_babbaaabbbaaa`ZaXa\_``ab]aa¥^`¥`aa`\_Wb`  
@HWI-EAS443:3:93:616:1979#0/1  
GAGATATGGCCCAGCATTAAAGCATCAATGAACTGAGCAAT  
+HWI-EAS443:3:93:616:1979#0/1  
`aaaTb]aa`\_aaaaba\_aa`aaa^\_a\_a``\_a^\_\_G^``  
@HWI-EAS443:3:93:624:334#0/1  
GAGAAGAACCCCGCACTCAGAATGAAGTGGATGATGGCAA  
+HWI-EAS443:3:93:624:334#0/1  
a\_a]`¥[ ]^`^`^`\_W]]]]```VV^T\_WV^^XV^^YU^  
@HWI-EAS443:3:93:945:1507#0/1  
AAGAGATATGGCCCAGCATTAAAGCATCAATGAACTGAGCA  
+HWI-EAS443:3:93:945:1507#0/1  
aXa¥bb`aaaaaa`¥ab`a\_¥^`aa^\_U`a`\_]aT\_\_^a  
@HWI-EAS443:3:94:1079:115#0/1  
ATTAAGCATCAATGAACTGAGCAATCTTGCAAAAAGGAGAG  
+HWI-EAS443:3:94:1079:115#0/1  
a`]V\_ZW\_KRWYb^XYZ`Y]b¥`\_a\_a0aS¥P[U¥Z]a^b  
@HWI-EAS443:3:94:1129:409#0/1  
AGCTGTTGCTCTTCTCCAACCATTTGTGAATTCTTCATAC  
+HWI-EAS443:3:94:1129:409#0/1  
^a`¥R\_`^ba^^[`¥Q^ba^HOP^QFRYX`U\_XaZNYZKE

@HWI-EAS443:3:94:112:1287#0/1  
TAAGCATCAATGAACTGAGCAATCTTGCAAAAGGAGAGAA  
+HWI-EAS443:3:94:112:1287#0/1  
aa^`ab]`aaabab\_`aVaaV^\_a`aaY`\_\_`aa\_aaaa`  
@HWI-EAS443:3:94:1150:1551#0/1  
AGTCAGCAAAATGGGAGTAGATGAATACTCCAGCACGGAG  
+HWI-EAS443:3:94:1150:1551#0/1  
\_b``a]b^ababbbbaa^]baaa\_`aa^`aaaaaV`aa\_a  
@HWI-EAS443:3:94:1155:802#0/1  
GAGAAGAACCCCGCACTCAGAATGAAGTGGATGATGGCAA  
+HWI-EAS443:3:94:1155:802#0/1  
aa`[``aaaZ\_\_a`a\_a]\_a^\_`a][`V`\_^\_a]^\_\_^Y]  
@HWI-EAS443:3:94:120:1843#0/1  
AGAGAAGAACCCCGCACTCAGAATGAAGTGGATGATGGCA  
+HWI-EAS443:3:94:120:1843#0/1  
abaaZ\_babbbba[a\_J]\_a[^`^a\_\_^S\_0\_]`Z\_^]]VT]  
@HWI-EAS443:3:94:1248:1033#0/1  
AACAAATTCGACACTAATTGATGGCCATCCGAATTCTTTTG  
+HWI-EAS443:3:94:1248:1033#0/1  
^X`baba]b\_aaX\_]a``\_a\_aW^aaZ^a\_\_a^ZW\_\_[^`  
@HWI-EAS443:3:94:1278:498#0/1  
AAAGAAGACAAGAGATATGGCCCAGCATTAAAGCATCAATG  
+HWI-EAS443:3:94:1278:498#0/1  
aabbbaba^^baabbaaaaaa\_`ab\_a^aa`a^aa`\_```  
@HWI-EAS443:3:94:1368:489#0/1  
TAAGCATCAATGAACTGAGCAATCTTGCAAAAGGAGAGAA  
+HWI-EAS443:3:94:1368:489#0/1  
abba`aaaaabb\_a`aaaa^aaa^aaa^`\_`\_a\_\_``\_a\_  
@HWI-EAS443:3:94:1373:699#0/1  
GAGATATGGCCCAGCATTAAAGCATCAATGAACTGAGCAAT  
+HWI-EAS443:3:94:1373:699#0/1  
aaa```[abZ`a\_`aa`aa```a\_^`][a\_]^[Z]]^^`  
@HWI-EAS443:3:94:1491:1932#0/1  
AAGAGATATGGCCCAGCATTAAAGCATCAATGAACTGAGCA  
+HWI-EAS443:3:94:1491:1932#0/1  
aaaaa`aa\_Vaa^Zba\_a^abaaX]\_Xab¥aY^S`aaaZa  
@HWI-EAS443:3:94:1496:133#0/1  
AGAAGAACCCCGCACTCAGAATGAAGTGGATGATGGCAAT  
+HWI-EAS443:3:94:1496:133#0/1  
^ba]a[^`^^UZ]XYS^\_Y`UY`ZU[a0[[Y]\_^ZQPYGY]  
@HWI-EAS443:3:94:1511:127#0/1  
AGATTGCTCAGTTCATTGATGCTTAATGCTGGGCCATATC  
+HWI-EAS443:3:94:1511:127#0/1  
a^\_a\_aa^`][`\_`¥\_\_aa\_]b0b^`\_ab¥\_\_¥a^]]\_`^\_\_  
@HWI-EAS443:3:94:1629:1184#0/1  
AGAAGAACCCCGCACTCAGAATGAAGTGGATGATGGCAAT  
+HWI-EAS443:3:94:1629:1184#0/1  
aaabaaa[[Yaa¥aa\_\_a]a`a[^`XMXXWZaX``^RRRX  
@HWI-EAS443:3:94:1652:110#0/1  
ATGGCCCAGCATTAAAGCATCAATGAACTGAGCAATCTTGC

+HWI-EAS443:3:94:1652:110#0/1  
aa\_]G¥¥Y`^aa\_\_`¥Y`\_^\_a]R[0^\_X¥RPQV]\_^[X  
@HWI-EAS443:3:94:1653:1326#0/1  
ATGGCCCAGCATTAAAGCATCAATGAACTGAGCAATCTTGC  
+HWI-EAS443:3:94:1653:1326#0/1  
a\_a]W\_]`a^aaa\_a^`a[^[aa[\_¥]Z^^U`^\_V\_^\_R  
@HWI-EAS443:3:94:1676:1689#0/1  
AGCATTAAAGCATCAATGAACTGAGCAATCTTGCAAAAAGGA  
+HWI-EAS443:3:94:1676:1689#0/1  
aa^aba`b]`^Yaaaa]aaaaaabaa^a\_a`LY^aaZP  
@HWI-EAS443:3:94:1759:1725#0/1  
AGCATTAAAGCATCAATGAACTGAGCAATCTTGCAAAAAGGA  
+HWI-EAS443:3:94:1759:1725#0/1  
aaab`aaaaWaa`Zaaa\_¥W`\_^a`\_^]a[`[^[^a[]  
@HWI-EAS443:3:94:1783:287#0/1  
AACAATTCGACACTAATTGATGGCCATCCGAATTCTTTTG  
+HWI-EAS443:3:94:1783:287#0/1  
a``aaaa^ba\_a^aaa`^]Z``]WU]XV``^Z\_\_[\_`\_\_X[  
@HWI-EAS443:3:94:263:591#0/1  
GACAAGAGATATGGCCCAGCATTAAAGCATCAATGAACTGA  
+HWI-EAS443:3:94:263:591#0/1  
a`\_^¥`\_^`^¥Z\_^[Z^Z^Y¥^`\_^]^Y^^]]]]Y]Y]Y]  
@HWI-EAS443:3:94:32:1839#0/1  
TTTTAAACAATTTCGACACTAATTGATGGCCATCCGAATTC  
+HWI-EAS443:3:94:32:1839#0/1  
¥aaaaaaabb`]aaa\_aa`aa`\_\_a`Y```a¥`[^`a^^Y  
@HWI-EAS443:3:94:368:1939#0/1  
GAGAAGAACCCCGCACTCAGAATGAAGTGGATGATGGCAA  
+HWI-EAS443:3:94:368:1939#0/1  
]V[(`Ya`a]a]J¥bbTa\_b¥`a]Ua\_G`a\_[a\_GVaWa^  
@HWI-EAS443:3:94:575:1296#0/1  
AAAGAAGACAAGAGATATGGCCCAGCATTAAAGCATCAATG  
+HWI-EAS443:3:94:575:1296#0/1  
a\_]¥VTWaYa]OQ^\_RYVa]a\_\_W\_W^VV^]a\_X¥WFXMV  
@HWI-EAS443:3:94:639:1352#0/1  
TAAGCATCAATGAACTGAGCAATCTTGCAAAAAGGAGAGAA  
+HWI-EAS443:3:94:639:1352#0/1  
abbaaaaaabaabaaa`aaa`aaaa`a`\_^`a``aa\_aX  
@HWI-EAS443:3:94:696:113#0/1  
CAAGAGATATGGCCCAGCATTAAAGCATCAATGAACTGAGC  
+HWI-EAS443:3:94:696:113#0/1  
a`\_\_Sabaa`bb``a]aabaa`aaZ`a\_\_^aaS\_Y`X`]  
@HWI-EAS443:3:94:748:1937#0/1  
TAAGCATCAATGAACTGAGCAATCTTGCAAAAAGGAGAGAA  
+HWI-EAS443:3:94:748:1937#0/1  
abb`aa`aabaa`aa`a\_\_`aaa]]`a^a``\_a`\_aa\_aa  
@HWI-EAS443:3:94:834:508#0/1  
GATTGCTCAGTTCATTGATGCTTAATGCTGGGCCATATCT  
+HWI-EAS443:3:94:834:508#0/1  
aaaab`abaaaa`aabaaaaaaaaaaa`aaa\_a`aaaa^`

@HWI-EAS443:3:94:838:1347#0/1  
CAATTCGACACTAATTGATGGCCATCCGAATTCTTTTGGT  
+HWI-EAS443:3:94:838:1347#0/1  
a`^a^W¥¥K`abaY\_abb[^V¥aaW\_aaaa\_H\_bbaQWW  
@HWI-EAS443:3:94:854:2008#0/1  
CAAGAGAAGAACCCCGCACTCAGAATGAAGTGGATGATGG  
+HWI-EAS443:3:94:854:2008#0/1  
ab\_baba\_abbba\_aba`babbba\_baa]]LYaaabaaa`  
@HWI-EAS443:3:94:920:733#0/1  
GATTGCTCAGTTCATTGATGCTTAATGCTGGGCCATATCT  
+HWI-EAS443:3:94:920:733#0/1  
aaaaa[aa`a\_T¥`\_[a]Xa¥`\_WY\_\_U][`]SLT[U[O`  
@HWI-EAS443:3:94:956:328#0/1  
AAGAGAAGAACCCCGCACTCAGAATGAAGTGGATGATGGC  
+HWI-EAS443:3:94:956:328#0/1  
aabab\_aaaa\_QVH`[^S]Vab`Z`a\_¥`WaaXP`^R^\_Q  
@HWI-EAS443:3:95:1010:329#0/1  
CAATTCGACACTAATTGATGGCCATCCGAATTCTTTTGGT  
+HWI-EAS443:3:95:1010:329#0/1  
aabbbbbabababbbaab`bbbaabbbbbabbbbabab`  
@HWI-EAS443:3:95:1153:472#0/1  
GCAAAGAAGACAAGAGATATGGCCCAGCATTAAAGCATCAA  
+HWI-EAS443:3:95:1153:472#0/1  
a`aaaaaaaa`a\_a]aaaa^\_a\_]^\_\_\_\_a`````\_aZ^\_  
@HWI-EAS443:3:95:1595:1829#0/1  
GAAGACAAGAGATATGGCCCAGCATTAAAGCATCAATGAAC  
+HWI-EAS443:3:95:1595:1829#0/1  
¥bb¥b\_a\_bbbbb\_b¥XP[¥YJ]bbbaaZ][H]]a^Y¥R  
@HWI-EAS443:3:95:201:682#0/1  
GAGAAGAACCCCGCACTCAGAATGAAGTGGATGATGGCAA  
+HWI-EAS443:3:95:201:682#0/1  
aab\_bbabaa`aaaaaaaa\_a\_aaaa^aUa\_]`aa^`¥TY^  
@HWI-EAS443:3:95:235:1017#0/1  
CAATTCGACACTAATTGATGGCCATCCGAATTCTTTTGGT  
+HWI-EAS443:3:95:235:1017#0/1  
a¥^^aababb]aa`a[abbaXW]baW¥ab^`a^`aaa[`]  
@HWI-EAS443:3:95:278:234#0/1  
GAGAAGAACCCCGCACTCAGAATGAAGTGGATGATGGCAA  
+HWI-EAS443:3:95:278:234#0/1  
aaaaaa]a`[\_a[Za]]][UY[aa\_YZS\_]`^`V^¥NTWV  
@HWI-EAS443:3:95:352:813#0/1  
AAACAATTTCGACACTAATTGATGGCCATCCGAATTCTTTT  
+HWI-EAS443:3:95:352:813#0/1  
^¥\_aa\_a`Ra\_Z`ab`ZbVZX[]a\_H¥abaaaaaX0^¥T`  
@HWI-EAS443:3:95:369:506#0/1  
AAGAGATATGGCCCAGCATTAAAGCATCAATGAAGTGGATGATGGCA  
+HWI-EAS443:3:95:369:506#0/1  
a[GYa\_a\_RY][ba^X`aZ^bb\_aa`a\_]`T[[a]XWZ  
@HWI-EAS443:3:95:453:960#0/1  
CATTAAAGCATCAATGAAGTGGATGATGGCAAAGGAGA

+HWI-EAS443:3:95:453:960#0/1  
a¥X\_\_Y`a`^`¥J`\_aab`¥MWbb^^¥¥J¥aaa`¥ba`aZ  
@HWI-EAS443:3:95:454:1619#0/1  
AGAAGACAAGAGATATGGCCCAGCATTAAAGCATCAATGAA  
+HWI-EAS443:3:95:454:1619#0/1  
a[`Z]abbaba`aaa`\_aaa`^\_aaaa\_a^¥\_a\_\_`\_Y[  
@HWI-EAS443:3:95:497:700#0/1  
TGCCATCATCCACTTCATTCTGAGTGC GGGTTCTTCTCT  
+HWI-EAS443:3:95:497:700#0/1  
ababaaaba`a]a`abaaaaa\_a¥^`aaV`aaUa[`  
@HWI-EAS443:3:95:570:1051#0/1  
ATGAAGAATTCACAATGGTTGGGAGAAGAGCAACAGCTAT  
+HWI-EAS443:3:95:570:1051#0/1  
]abbaa\_\_`babbba`bb`babaaa\_]babaaaab`aaa  
@HWI-EAS443:3:95:715:1927#0/1  
GCATTAAGCATCAATGAACTGAGCAATCTTGCAAAAAGGAG  
+HWI-EAS443:3:95:715:1927#0/1  
abbbabbbbaaaabaabbba\_H¥b[baabaaaaab`aaa\_  
@HWI-EAS443:3:95:72:256#0/1  
TAAGCATCAATGAACTGAGCAATCTTGCAAAAAGGAGAGAA  
+HWI-EAS443:3:95:72:256#0/1  
aaa\_]aV^a\_aa\_TVW`aYI\_W\_^\_Z\_\_Z^¥\_aXTYWWBB  
@HWI-EAS443:3:95:768:650#0/1  
AGAAGACAAGAGATATGGCCCAGCATTAAAGCATCAATGAA  
+HWI-EAS443:3:95:768:650#0/1  
ab\_[baaa`^`aa\_aaaaa\_aa`aa\_aaa\_aaKa``]`\_  
@HWI-EAS443:3:95:862:298#0/1  
AGAAGAACCCCGCACTCAGAATGAAGTGGATGATGGCAAT  
+HWI-EAS443:3:95:862:298#0/1  
Z\_\_ab¥X`¥aba\_WS[a`XKabb\_\_¥0¥ab`a\_U¥XY¥Ya  
@HWI-EAS443:3:95:902:1602#0/1  
TTGATGCTTAATGCTGGCCATATCTCTTGTCTTCTTGC  
+HWI-EAS443:3:95:902:1602#0/1  
aababaaaabbaaaaa`aaababaaaaab\_abaaaba\_\_  
@HWI-EAS443:3:96:1232:1394#0/1  
AGAAGAACCCCGCACTCAGAATGAAGTGGATGATGGCAAT  
+HWI-EAS443:3:96:1232:1394#0/1  
aba```aZ`[X`TWDSW]SVabb]]\_U`]NN¥XV\_\_]0^]  
@HWI-EAS443:3:96:127:1455#0/1  
CAGCATTAAAGCATCAATGAACTGAGCAATCTTGCAAAAAGG  
+HWI-EAS443:3:96:127:1455#0/1  
abaaaaaaa^`a`\_\_aa¥a`[\_Y]]]\_\_`S\_^¥XZV\_\_  
@HWI-EAS443:3:96:1369:1219#0/1  
AGATTGCTCAGTTCATTGATGCTTAATGCTGGGCCATATC  
+HWI-EAS443:3:96:1369:1219#0/1  
aa]a`\_\_\_a\_a]```aaa`S`aa`^a`U\_]¥a¥Yaa\_a¥  
@HWI-EAS443:3:96:1369:1830#0/1  
CAATTCGACACTAATTGATGGCCATCCGAATTCTTTTGGT  
+HWI-EAS443:3:96:1369:1830#0/1  
aaTT\_¥\_\_U`W¥a`WTa`JZa[a]\_U\_\_a`\_YVa¥\_aHQ^

@HWI-EAS443:3:96:1374:143#0/1  
TTTTTAAACAATTGACACTAATTGATGGCCATCCGAATT  
+HWI-EAS443:3:96:1374:143#0/1  
aaVaW````\_UYS`^\_\_Z]\_\_W[`W[MMS[GHSKMDN[[]B  
@HWI-EAS443:3:96:1564:1894#0/1  
AGAGATATGGCCCAGCATTAAAGCATCAATGAACTGAGCAA  
+HWI-EAS443:3:96:1564:1894#0/1  
abaa` `aaaa\_VQ\_`L\_a`a`aa\_\_R\_\_`a^]\_^¥S]X^`  
@HWI-EAS443:3:96:157:1865#0/1  
CAAGAGAAGAACCCCGCACTCAGAATGAAGTGGATGATGG  
+HWI-EAS443:3:96:157:1865#0/1  
XU¥QR`¥K¥`\_W¥aaa]\_TK¥^`QS[¥VVRNZ]Z^VB BBB  
@HWI-EAS443:3:96:1594:240#0/1  
GAAGAACCCCGCACTCAGAATGAAGTGGATGATGGCAATG  
+HWI-EAS443:3:96:1594:240#0/1  
W]¥b`b`¥WV¥VW[^0¥[XWZYBBBBBBBBBBBBBBBB  
@HWI-EAS443:3:96:1693:839#0/1  
GAGAAGAACCCCGCACTCAGAATGAAGTGGATGATGGCAA  
+HWI-EAS443:3:96:1693:839#0/1  
aa[babaaa`¥\_a`aUa\_aa^`a\_\_\_^H¥WRWa^]\_XDL\_  
@HWI-EAS443:3:96:1723:197#0/1  
CAAGAGAAGAACCCCGCACTCAGAATGAAGTGGATGATGG  
+HWI-EAS443:3:96:1723:197#0/1  
Uba\_]b\_ba\_b`Jaaba\_[ZZ¥^`b^T[¥XQR[ZX[SSXB  
@HWI-EAS443:3:96:215:1183#0/1  
AGATTGCTCAGTTCATTGATGCTTAATGCTGGGCCATATC  
+HWI-EAS443:3:96:215:1183#0/1  
\_aaaabaaa]a\_a`Z`aaaaaaaa`aa^a`^aa`a]`a  
@HWI-EAS443:3:96:449:1747#0/1  
GAAGAACCCCGCACTCAGAATGAAGTGGATGATGGCAATG  
+HWI-EAS443:3:96:449:1747#0/1  
abaaa`\_`aababb\_aa`Z`bba^a\_a`aaa`a\_^]a^\_a  
@HWI-EAS443:3:96:477:575#0/1  
TAAGCATCAATGAACTGAGCAATCTTGCAAAAGGAGAGAA  
+HWI-EAS443:3:96:477:575#0/1  
aaab^aaaaaaaaab`a\_]b`a\_a\_a\_bZ\_\_WWa`\_b`aa\_  
@HWI-EAS443:3:96:481:1009#0/1  
GTTTTTAAACAATTGACACTAATTGATGGCCATCCGAAT  
+HWI-EAS443:3:96:481:1009#0/1  
a[aaaaabYaaaaaaaa`a\_a` ````^\_\_`^\_\_`Y\_^  
@HWI-EAS443:3:96:586:1952#0/1  
AAGAGAAGAACCCCGCACTCAGAATGAAGTGGATGATGGC  
+HWI-EAS443:3:96:586:1952#0/1  
aa\_[`^\_S\_aSVS\_KM`a\_]¥[\_W¥HVTZMaZUPUXVBBB  
@HWI-EAS443:3:96:645:1919#0/1  
AGAAGAACCCCGCACTCAGAATGAAGTGGATGATGGCAAT  
+HWI-EAS443:3:96:645:1919#0/1  
Z\_U`¥aZQ\_aZ^aaa^U^Zb[a\_OWZRX`abaa`[QZ\_]`  
@HWI-EAS443:3:96:749:1752#0/1  
ATTAAGCATCAATGAACTGAGCAATCTTGCAAAAGGAGAG

+HWI-EAS443:3:96:749:1752#0/1  
a`a^`\_`\_`[\_a[[a\_[ZOW\_\_Y\_\_aW¥\_]S]^U^\_  
@HWI-EAS443:3:96:758:1182#0/1  
AACAAATTCGACACTAATTGATGGCCATCCGAATTCTTTTG  
+HWI-EAS443:3:96:758:1182#0/1  
aaabaaa¥\_aaaa\_a`\_aWO[][\_WZZ[\_`\_`YZ]]  
@HWI-EAS443:3:96:878:1360#0/1  
GCAAGATTGCTCAGTTCATTGATGCTTAATGCTGGGCCAT  
+HWI-EAS443:3:96:878:1360#0/1  
^a]Xaaaa`aaSIa\_\_RV[U¥¥¥Y[\_]\_]YT¥[]`UTLQ  
@HWI-EAS443:3:96:919:2043#0/1  
AGAGAAGAACCCCGCACTCAGAATGAAGTGGATGATGGCA  
+HWI-EAS443:3:96:919:2043#0/1  
a]`a`a`aaYTV`a\_aR`aU`a]`\_aSa`a`]]ULX  
@HWI-EAS443:3:97:1021:1492#0/1  
CAATTCGACACTAATTGATGGCCATCCGAATTCTTTTGGT  
+HWI-EAS443:3:97:1021:1492#0/1  
abbbb`a`aa`[¥]`[aa`aaba\_¥b¥Ta^\_b`a\_]¥  
@HWI-EAS443:3:97:1147:1469#0/1  
CCATCATCCACTTCATTCTGAGTGCGGGGTTCTTCTCTTG  
+HWI-EAS443:3:97:1147:1469#0/1  
ababbab\_bb`bb`bbbbbbababababb`b`bbab`bab  
@HWI-EAS443:3:97:130:637#0/1  
TAAGCATCAATGAACTGAGCAATCTTGCAAAAGGAGAGAA  
+HWI-EAS443:3:97:130:637#0/1  
^`^^a\_\_aab`]^aKRZS`]^¥QZa]b\_[GUWSN[b\_[aa  
@HWI-EAS443:3:97:1335:1881#0/1  
AGAAGACAAGAGATATGGCCCAGCATTAAAGCATCAATGAA  
+HWI-EAS443:3:97:1335:1881#0/1  
ab`ZYXbaaaaaaaaa^`\_^J^aa\_a^aa\_W^`^\_\_a\_\_`  
@HWI-EAS443:3:97:1437:287#0/1  
TTTTAAACAATTTCGACACTAATTGATGGCCATCCGAATTC  
+HWI-EAS443:3:97:1437:287#0/1  
`b]baaa¥`\_aU^a[``a``a`X\_]T[¥X^MY[]\_XX  
@HWI-EAS443:3:97:1614:1763#0/1  
GAAGAACCCCGCACTCAGAATGAAGTGGATGATGGCAATG  
+HWI-EAS443:3:97:1614:1763#0/1  
aa]`aaaaaX\_a0aaabaaaa`aaSaa^a`\_WW`\_\_\_\_L  
@HWI-EAS443:3:97:1711:1022#0/1  
CCAGCATTAAAGCATCAATGAACTGAGCAATCTTGCAAAAG  
+HWI-EAS443:3:97:1711:1022#0/1  
aaaaVab`\_a`\_aaaa`aa\_aW]WZ`¥a^aa\_aa¥`^^`\_`  
@HWI-EAS443:3:97:266:255#0/1  
AGATTGCTCAGTTCATTGATGCTTAATGCTGGGCCATATC  
+HWI-EAS443:3:97:266:255#0/1  
abaaaaaaaa`aaaaaa\_aZaaaa`a\_\_a\_aY¥``\_][  
@HWI-EAS443:3:97:295:1363#0/1  
AGAGAAGAACCCCGCACTCAGAATGAAGTGGATGATGGCA  
+HWI-EAS443:3:97:295:1363#0/1  
\_aaa]^b\_[aa]ba`\_`\_[a]`\_\_\_\_^\_]a`\_\_Y^]\_¥]`



@HWI-EAS443:3:97:345:1277#0/1  
TTAAGCATCAATGAACTGAGCAATCTTGCAAAGGAGAGA  
+HWI-EAS443:3:97:345:1277#0/1  
\_`^`a][aaa`Y`][`\_`][Xaaa`][`^Za\_\_\_\_]^`^^a[\_`  
@HWI-EAS443:3:97:398:1953#0/1  
TTTTTAAACAATTCGACACTAATTGATGGCCATCCGAATT  
+HWI-EAS443:3:97:398:1953#0/1  
a^Y`^`\_`aa¥`a[\_`\_\_aXPa^\_\_¥[^YTUMV[WW\_aVXO  
@HWI-EAS443:3:97:402:662#0/1  
CATTAAAGCATCAATGAACTGAGCAATCTTGCAAAGGAGAGA  
+HWI-EAS443:3:97:402:662#0/1  
abbbabbbbbbabbabbabababaabbaaaabbaba  
@HWI-EAS443:3:97:464:1850#0/1  
AGAAGAACCCCGCACTCAGAATGAAGTGGATGATGGCAAT  
+HWI-EAS443:3:97:464:1850#0/1  
\_\_ba\_]baUUb^[]aa^b``¥]TNPTW\_a^X`RY]\_] [B  
@HWI-EAS443:3:97:541:1155#0/1  
GAAGAACCCCGCACTCAGAATGAAGTGGATGATGGCAATG  
+HWI-EAS443:3:97:541:1155#0/1  
YTYa¥Y`Wa\_R[\_G[U`b\_aa]^00\_a^]aa`HUG[H`SB  
@HWI-EAS443:3:97:560:891#0/1  
TAAGCATCAATGAACTGAGCAATCTTGCAAAGGAGAGAA  
+HWI-EAS443:3:97:560:891#0/1  
aaa^^aa]aabaaa`aab`a`a`aba`a`\_`aa\_aa```  
@HWI-EAS443:3:97:590:1558#0/1  
AGAAGACAAGAGATATGGCCCAGCATTAAAGCATCAATGAA  
+HWI-EAS443:3:97:590:1558#0/1  
a^aa```aa`][`\_`\_aZ\_R`^`\_Y]\_Za^^S]]^^^X¥  
@HWI-EAS443:3:97:658:335#0/1  
AAGACAAGAGATATGGCCCAGCATTAAAGCATCAATGAACT  
+HWI-EAS443:3:97:658:335#0/1  
Z¥a^\_abb¥SX]¥[Y\_Y[`aa^`¥`a\_[R\_SV\_]\_]\_W]  
@HWI-EAS443:3:97:712:1750#0/1  
ATTAAGCATCAATGAACTGAGCAATCTTGCAAAGGAGAGAG  
+HWI-EAS443:3:97:712:1750#0/1  
a`^`aa¥^``[X\_a\_]\_\_`\_`^`X`^a`\_Y\_[\_Z^\_]S[^`^`  
@HWI-EAS443:3:97:758:1896#0/1  
AGAAGAACCCCGCACTCAGAATGAAGTGGATGATGGCAAT  
+HWI-EAS443:3:97:758:1896#0/1  
aaU\_]¥baaZF¥¥^`^`aaS\_a\_a\_]^WNP^`^aNPZIVY[  
@HWI-EAS443:3:98:1157:1988#0/1  
AAGAAGACAAGAGATATGGCCCAGCATTAAAGCATCAATGA  
+HWI-EAS443:3:98:1157:1988#0/1  
`ba`aaa0a`aaaY\_a¥`\_X`Waa\_a`\_`^`\_]WOKU^^  
@HWI-EAS443:3:98:1180:907#0/1  
TTAAGCATCAATGAACTGAGCAATCTTGCAAAGGAGAGAGA  
+HWI-EAS443:3:98:1180:907#0/1  
aaaa\_a¥a\_\_`aa`^]a`\_Z^`\_`^`^aY`^Z^`\_`^`\_`\_`\_`  
@HWI-EAS443:3:98:133:263#0/1  
AAGAGATATGGCCCAGCATTAAAGCATCAATGAACTGAGCA

+HWI-EAS443:3:98:133:263#0/1  
aab\_aaaaa\_V¥^`aZa\_\_ZRT\_\_¥^\_X]\_Z^V¥^Z]G  
@HWI-EAS443:3:98:1435:1951#0/1  
AAGAGATATGCCCCAGCATTAAAGCATCAATGAACTGAGCA  
+HWI-EAS443:3:98:1435:1951#0/1  
`\_baaab\_P`^T0ZaaaaT[\_a`Ta[G]a\_aa`U`\_\_^`Y  
@HWI-EAS443:3:98:198:219#0/1  
TTAAGCATCAATGAACTGAGCAATCTTGCAAAAAGGAGAGA  
+HWI-EAS443:3:98:198:219#0/1  
S\_a`bb¥bbaLabY¥Ybbabb`]\_]\_^b^b\_a^a`ab\_b^  
@HWI-EAS443:3:98:250:323#0/1  
GCATTAAGCATCAATGAACTGAGCAATCTTGCAAAAAGGAG  
+HWI-EAS443:3:98:250:323#0/1  
aaaaaaaa`a`aYaa^`\_`\_`\_a¥a`\_\_^a\_\_¥W^a\_]a  
@HWI-EAS443:3:98:299:525#0/1  
GAGATATGCCCCAGCATTAAAGCATCAATGAACTGAGCAAT  
+HWI-EAS443:3:98:299:525#0/1  
aab¥aa`baa`[a\_]\_[Y¥[a]\_^Ka^`^^[^\_Y^R^¥]  
@HWI-EAS443:3:98:323:141#0/1  
TTTTTAAACAATTCGACACTAATTGATGGCCATCCGAATT  
+HWI-EAS443:3:98:323:141#0/1  
[^bbbabaaa`a\_]\_]`¥a`a\_aa\_aa\_\_¥aX\_]a]^a`  
@HWI-EAS443:3:98:33:524#0/1  
CATTAAGCATCAATGAACTGAGCAATCTTGCAAAAAGGAGA  
+HWI-EAS443:3:98:33:524#0/1  
¥aab`]`\_\_`]^\_\_a^`a`a`T^`[^ba¥QWWVY`b`a]  
@HWI-EAS443:3:98:341:757#0/1  
CCAGCATTAAAGCATCAATGAACTGAGCAATCTTGCAAAAAG  
+HWI-EAS443:3:98:341:757#0/1  
aa\_a\_abaaabaa`aY`baT\_\_\_`¥a`aY¥0\_\_aY`W[`\_  
@HWI-EAS443:3:98:457:1402#0/1  
TAAGCATCAATGAACTGAGCAATCTTGCAAAAAGGAGAGAA  
+HWI-EAS443:3:98:457:1402#0/1  
`a\_\_V`aaSN^bba^]T^¥¥`^WYaaa^a^YW^UYX]^]0  
@HWI-EAS443:3:98:487:407#0/1  
AAGAGAAGAACCCCGCACTCAGAATGAAGTGGATGATGGC  
+HWI-EAS443:3:98:487:407#0/1  
^\_\_T[X00X[Z`¥\_b^]ZaT]aaYa\_PN]LZaZH]^TNVS  
@HWI-EAS443:3:98:545:1906#0/1  
ATTAAGCATCAATGAACTGAGCAATCTTGCAAAAAGGAGAG  
+HWI-EAS443:3:98:545:1906#0/1  
`Y\_aa`bbaNba`bb`\_U\_^`b`Ua^\_a^aS\_\_b\_Y^aa  
@HWI-EAS443:3:98:555:1364#0/1  
AGAAGAACCCCGCACTCAGAATGAAGTGGATGATGGCAAT  
+HWI-EAS443:3:98:555:1364#0/1  
aaaaa]b\_a`\_aa`\_aa^\_]aaX\_WN¥`\_X`\_]\_\_^U^`]  
@HWI-EAS443:3:98:58:1286#0/1  
CATTAAGCATCAATGAACTGAGCAATCTTGCAAAAAGGAGA  
+HWI-EAS443:3:98:58:1286#0/1  
U^a^\_`a`\_`^YVR[XG¥^[^a\_aUMNT^`\_`a`VPZ]]Y\_

@HWI-EAS443:3:98:598:929#0/1  
GAGAAGAACCCCGCACTCAGAATGAAGTGGATGATGGCAA  
+HWI-EAS443:3:98:598:929#0/1  
a]a`b\_a\_\_\_\_\_a]`\_]\_`\_]aa¥ZaT``]^`XY^^UZU  
@HWI-EAS443:3:98:747:265#0/1  
GCATTAAGCATCAATGAACTGAGCAATCTTGCAAAAGGAG  
+HWI-EAS443:3:98:747:265#0/1  
\_Z^`]a^Z^`]a\_aa\_Y^^UR^R`[`¥\_^aOYU[Z\_]a  
@HWI-EAS443:3:98:785:911#0/1  
CAATTCGACACTAATTGATGGCCATCCGAATCTTTTGGT  
+HWI-EAS443:3:98:785:911#0/1  
abYaa^b`WaX``baba\_aOF]aa[`\_WYab]PZa\_0¥[O  
@HWI-EAS443:3:98:816:590#0/1  
GAAGACAAGAGATATGGCCAGCATTAAAGCATCAATGAAC  
+HWI-EAS443:3:98:816:590#0/1  
a]\_baa`bbabaaba`ba\_a¥babbaaab]`\_^a\_aaaa`  
@HWI-EAS443:3:98:821:1845#0/1  
CAATTCGACACTAATTGATGGCCATCCGAATCTTTTGGT  
+HWI-EAS443:3:98:821:1845#0/1  
abbbbabbbbabbabbbbabaabb\_bbbbbbabab`aaa  
@HWI-EAS443:3:98:849:983#0/1  
AACAATTCGACACTAATTGATGGCCATCCGAATCTTTTGG  
+HWI-EAS443:3:98:849:983#0/1  
`aab\_bbaba\_aabaaaaa`a\_\_a\_a\_aa``a\_`a`aa  
@HWI-EAS443:3:99:1018:1008#0/1  
AGAGATATGGCCAGCATTAAAGCATCAATGAACTGAGCAA  
+HWI-EAS443:3:99:1018:1008#0/1  
\_b`a\_bb`a^aa\_Z¥]aaaa`\_`^bYaa\_`Z`^a`a`X[`  
@HWI-EAS443:3:99:1069:1646#0/1  
TATGGCCAGCATTAAAGCATCAATGAACTGAGCAATCTTG  
+HWI-EAS443:3:99:1069:1646#0/1  
a]]^]SZU[QX\_¥\_`aW^a]X]\_a\_^aN^\_\_aQa\_ZQZ\_¥  
@HWI-EAS443:3:99:1095:1371#0/1  
AAGAGAAGAACCCCGCACTCAGAATGAAGTGGATGATGGC  
+HWI-EAS443:3:99:1095:1371#0/1  
[\_baa`^`ba[QRXa[ZHZaZb\_\_aa^^[KWXa`aa¥\_aQ  
@HWI-EAS443:3:99:1146:1286#0/1  
AGAGAAGAACCCCGCACTCAGAATGAAGTGGATGATGGCA  
+HWI-EAS443:3:99:1146:1286#0/1  
ab\_b]bbbb`b`ba\_aaba\_bbabb^abYba``b^¥I\_U\_  
@HWI-EAS443:3:99:1347:524#0/1  
TTTTAAACAATTCGACACTAATTGATGGCCATCCGAATTC  
+HWI-EAS443:3:99:1347:524#0/1  
`\_Y¥\_a]a\_VYKWOZ\_\_W]Ya^¥X``[YY\_\_VT\_`]^`]H  
@HWI-EAS443:3:99:1389:1314#0/1  
CAGCATTAAAGCATCAATGAACTGAGCAATCTTGCAAAAGG  
+HWI-EAS443:3:99:1389:1314#0/1  
Yb\_bbababbaba¥Xaaabbbbaababbaba`b\_bab`b[  
@HWI-EAS443:3:99:1448:239#0/1  
CAAGAGAAGAACCCCGCACTCAGAATGAAGTGGATGATGG

+HWI-EAS443:3:99:1448:239#0/1  
^babbbb`baaWa[]b`a\_`H][WS`a`\_[HU`\_]a\_Xa`  
@HWI-EAS443:3:99:1471:1661#0/1  
GAAGACAAGAGATATGGCCCAGCATTAAAGCATCAATGAAC  
+HWI-EAS443:3:99:1471:1661#0/1  
^XY`UJTGUP```U[YNWWOW¥R¥[¥WN]VYPDFYVZNBB  
@HWI-EAS443:3:99:1581:1855#0/1  
AGACAAGAGATATGGCCCAGCATTAAAGCATCAATGAACTG  
+HWI-EAS443:3:99:1581:1855#0/1  
ab`¥abab\_aIaaa`a`^bG]a^\_adMY`0\_]`\_\_[U[S  
@HWI-EAS443:3:99:1693:1119#0/1  
TAAGCATCAATGAACTGAGCAATCTTGCAAAAGGAGAGAA  
+HWI-EAS443:3:99:1693:1119#0/1  
Y^\_Z]b¥^a`ba`bY`^a`Qabb^bbb[`aTSaa`\_\_aaa  
@HWI-EAS443:3:99:267:709#0/1  
TTTTAAACAATTGACACTAATTGATGGCCATCCGAATTC  
+HWI-EAS443:3:99:267:709#0/1  
\_\_U[``RUHYUOSOR¥^`¥¥[\_aa`[XJUUMZIKaTXX]B  
@HWI-EAS443:3:99:292:305#0/1  
CCAGCATTAAAGCATCAATGAACTGAGCAATCTTGCAAAAG  
+HWI-EAS443:3:99:292:305#0/1  
aaaaa`abaaaa`a\_^Y`a\_a^a\_0a\_a\_\_\_\_\_X`a^UWXa  
@HWI-EAS443:3:99:391:1368#0/1  
GAAGAACCCCGCACTCAGAATGAAGTGGATGATGGCAATG  
+HWI-EAS443:3:99:391:1368#0/1  
`a``aaaaa\_bbaa``aaa^aaY\_aV¥`Xaa^]`^\_`W\_]`\_`  
@HWI-EAS443:3:99:473:846#0/1  
TGCCATCATCCACTTCATTCTGAGTGC GGGTTCTTCTCT  
+HWI-EAS443:3:99:473:846#0/1  
aa^`b``a]`^T^b`bab`\_ba^b¥a`babb\_a[aaZaaa  
@HWI-EAS443:3:99:503:719#0/1  
AAGAGAAGAACCCCGCACTCAGAATGAAGTGGATGATGGC  
+HWI-EAS443:3:99:503:719#0/1  
\_¥¥\_\_a`aZbab\_\_b]a\_]a^ba\_bb¥T¥L`b\_aa\_aaY[  
@HWI-EAS443:3:99:507:457#0/1  
AGAAGACAAGAGATATGGCCCAGCATTAAAGCATCAATGAA  
+HWI-EAS443:3:99:507:457#0/1  
]\_¥Yaba]VaY`\_]`^aZDVa\_VYZ``a[¥X[ZRY\_\_MZ  
@HWI-EAS443:3:99:612:816#0/1  
CAAGAGAAGAACCCCGCACTCAGAATGAAGTGGATGATGG  
+HWI-EAS443:3:99:612:816#0/1  
^^a`abbab]`aaaabaaQaaab`aba`aaR]a\_aa\_\_a]  
@HWI-EAS443:3:99:659:941#0/1  
GAAGAACCCCGCACTCAGAATGAAGTGGATGATGGCAATG  
+HWI-EAS443:3:99:659:941#0/1  
``]aaaa^aa`¥^`\_\_`b^U¥a`\_aXa`\_]\_a^`\_`Z^Y\_^  
@HWI-EAS443:3:99:716:729#0/1  
AGATTGCTCAGTTCATTGATGCTTAATGCTGGGCCATATC  
+HWI-EAS443:3:99:716:729#0/1  
aa`[`Y]a\_R\_Z^^¥XH\_]aba````][V^````^^¥```X

@HWI-EAS443:3:99:764:917#0/1  
AAGAGAAGAACCCCGCACTCAGAATGAAGTGGATGATGGC  
+HWI-EAS443:3:99:764:917#0/1  
`\_\_aa`a\_^aY^W]]^^`a^aaaaaU\_aU[``^`^`[¥S¥  
@HWI-EAS443:3:99:813:1479#0/1  
AGATTGCTCAGTTCATTGATGCTTAATGCTGGGCCATATC  
+HWI-EAS443:3:99:813:1479#0/1  
a`aaaaaaaaabaababa`aababaaa^aa`aa^\_aaa[  
@HWI-EAS443:3:99:822:890#0/1  
CAAGAGAAGAACCCCGCACTCAGAATGAAGTGGATGATGG  
+HWI-EAS443:3:99:822:890#0/1  
aaaaaa\_]XWXYa`^[^ZZa`Zb[aaaZS^\_b\_`\_a^[`]  
@HWI-EAS443:3:99:857:506#0/1  
GCCATCATCCACTTCATTCTGAGTGC GGGGTTCTTCTCTT  
+HWI-EAS443:3:99:857:506#0/1  
`ST\_PT¥Q`]TZQXL[TU]¥TXO¥DY[QNJOFV\_VYPS^  
@HWI-EAS443:3:9:1050:1361#0/1  
ATTTTGGCAAAGAAGACAAGAGATATGGCCCAGCATTAA  
+HWI-EAS443:3:9:1050:1361#0/1  
]QXaYW¥^I\_]¥a`Z]aba\_a[a\_W\_\_aR^^^`a^]R^a`  
@HWI-EAS443:3:9:106:1287#0/1  
GGCAAAGAAGACAAGAGATATGGCCCAGCATTAAAGCATCA  
+HWI-EAS443:3:9:106:1287#0/1  
aaba`a^`aaaab`^`aaa[``\_`^VaXa`\_]U\_\_\_\_[Y  
@HWI-EAS443:3:9:1070:195#0/1  
ATATGGCCCAGCATTAAAGCATCAATGAACTGAGCAATCTT  
+HWI-EAS443:3:9:1070:195#0/1  
¥]aaaaa\_V\_a[aaaaa\_X\_a\_^`a\_]\_\_\_\_^T[^\_X¥^  
@HWI-EAS443:3:9:1082:1323#0/1  
CAAGAGATATGGCCCAGCATTAAAGCATCAATGAACTGAGC  
+HWI-EAS443:3:9:1082:1323#0/1  
aabbab]ababaaaaaNa\_bba`S\_``\_`^a`¥a\_W^Y\_\_  
@HWI-EAS443:3:9:1093:759#0/1  
AACAAATTCGACACTAATTGATGGCCATCCGAATTCTTTTG  
+HWI-EAS443:3:9:1093:759#0/1  
a``aba`a¥aa\_a`a\_``a\_^^\_`^a\_\_\_\_a]]\_`^\_Z`\_\_  
@HWI-EAS443:3:9:1171:248#0/1  
GGGCAAAGAAGACAAGAGATATGGCCCAGCATTAAAGCATC  
+HWI-EAS443:3:9:1171:248#0/1  
aW¥FOZU^[P[UUVY¥¥Q^SW\_YWWKDKUYYYWGYYVYZVB  
@HWI-EAS443:3:9:1252:1045#0/1  
GAAGAACCCCGCACTCAGAATGAAGTGGATGATGGCAATG  
+HWI-EAS443:3:9:1252:1045#0/1  
a`aa`a`Z^\_aa\_]`^\_a^`a\_ZW`Xa\_`^¥[Z\_\_\_\_Y]Y\_Z  
@HWI-EAS443:3:9:1435:62#0/1  
TAAGCATCAATGAACTGAGCAATCTTGCAAAAGGAGAGAA  
+HWI-EAS443:3:9:1435:62#0/1  
aa\_[aa]a^aa^`a\_`[``\_¥\_`^T^^XX^¥X\_]`\_Z  
@HWI-EAS443:3:9:1435:879#0/1  
AAGAGAAGAACCCCGCACTCAGAATGAAGTGGATGATGGC

+HWI-EAS443:3:9:1435:879#0/1  
a[aa`babbaaa\_\_aa`\_aa`a^\_aa^^aY\_a^`a^``\_X  
@HWI-EAS443:3:9:1545:1192#0/1  
AGAAGACAAGAGATATGGCCCAGCATTAAAGCATCAATGAA  
+HWI-EAS443:3:9:1545:1192#0/1  
aab\_aa`b`bXaa\_ba^`¥Uaaa¥aa`a\_¥\_a]GaYbaa\_  
@HWI-EAS443:3:9:1562:517#0/1  
AACAAATTCGACACTAATTGATGGCCATCCGAATTCTTTTG  
+HWI-EAS443:3:9:1562:517#0/1  
``abab[`a\_a`aaba`aaa`\_a]\_a\_\_a¥`a\_]`a`\_\_  
@HWI-EAS443:3:9:1604:293#0/1  
ACAAGAGATATGGCCCAGCATTAAAGCATCAATGAACTGAG  
+HWI-EAS443:3:9:1604:293#0/1  
aa`^`PbaabR^V`\_^aZaa]\_^\_G^¥Z][`ST[0^^Z\_  
@HWI-EAS443:3:9:1677:936#0/1  
ATTAAGCATCAATGAACTGAGCAATCTTGCAAAAGGAGAG  
+HWI-EAS443:3:9:1677:936#0/1  
aaaa`\_\_`^^aaa\_\_^a\_\_a¥\_\_\_\_^`^a^¥Y^^`^^^\_`\_  
@HWI-EAS443:3:9:251:474#0/1  
CTCTCCTTTTGCAAGATTGCTCAGTTCATTGATGCTTAAT  
+HWI-EAS443:3:9:251:474#0/1  
a`X\_XW\_P¥QXT`YaZ^Y`^`K][TNW]][`¥Y\_Z^YZX^  
@HWI-EAS443:3:9:257:279#0/1  
CAGCATTAAAGCATCAATGAACTGAGCAATCTTGCAAAAGG  
+HWI-EAS443:3:9:257:279#0/1  
^bbaaa^Za^^¥W[Xaa`X[`a``Y^`\_]UWV¥``X¥]^  
@HWI-EAS443:3:9:294:702#0/1  
ATTGATGCTTAATGCTGGCCATATCTCTTGTCTTCTTTG  
+HWI-EAS443:3:9:294:702#0/1  
aabba`baabababaaaaa`\_aa[aaaaa`\_`\_aaaaa\_\_  
@HWI-EAS443:3:9:414:1381#0/1  
CAATTCGACACTAATTGATGGCCATCCGAATTCTTTTGGT  
+HWI-EAS443:3:9:414:1381#0/1  
abababaabbabaaaaa`a\_aaa`\_]``aaa\_aaaaa`]  
@HWI-EAS443:3:9:452:382#0/1  
GGGGTATGAAGAATTCACAATGGTTGGGAGAAGAGCAACA  
+HWI-EAS443:3:9:452:382#0/1  
aabb\_a`b`aba^aa\_aababb¥MVaa¥YY\_Y`\_aV\_TTY  
@HWI-EAS443:3:9:457:740#0/1  
CCATCATCCACTTCATTCTGAGTGCGGGTTCTTCTCTTG  
+HWI-EAS443:3:9:457:740#0/1  
aaaaaa]aaaa`\_`\_\_`\_a\_\_Ya\_a\_\_`^\_]\_\_]\_^`^]  
@HWI-EAS443:3:9:604:387#0/1  
AGACAAGAGATATGGCCCAGCATTAAAGCATCAATGAACTG  
+HWI-EAS443:3:9:604:387#0/1  
aba`a`babaaaaa`\_aaa`\_`\_`\_Y\_^`^^`\_^`^`^`  
@HWI-EAS443:3:9:730:1114#0/1  
CTCTCCTTTTGCAAGATTGCTCAGTTCATTGATGCTTAAT  
+HWI-EAS443:3:9:730:1114#0/1  
U\_bbZab\_\_\_ba`\_`\_bb`\_U`SZbKaba¥V`WTbKaWaaa

@HWI-EAS443:3:9:777:1177#0/1  
AAGAGATATGGCCCAGCATTAAAGCATCAATGAACTGAGCA  
+HWI-EAS443:3:9:777:1177#0/1  
\_`b\_Z\_ab\_]a]]V\_[a`]aaaaaaaa`aaaaPaa``\_a  
@HWI-EAS443:3:9:888:541#0/1  
AGAGATATGGCCCAGCATTAAAGCATCAATGAACTGAGCAA  
+HWI-EAS443:3:9:888:541#0/1  
`abbbbababb^ba\_bbab`b`aaaaab\_^`aa``]aa  
@HWI-EAS443:3:9:974:668#0/1  
AGATTGCTCAGTTCATTGATGCTTAATGCTGGGCCATATC  
+HWI-EAS443:3:9:974:668#0/1  
ab\_aabb\_aa]\_aaaaaaaa\_F[a\_a^^\_¥a^\_[``\_]`S  
@HWI-EAS443:3:80:521:1474#0/1  
ACCGCTAAGAGTCCCGTTTTCGTTTCATTACCAACTAC  
+HWI-EAS443:3:80:521:1474#0/1  
\_Za````a[PY¥a``\_Y¥````¥]`^a^a``\_]\_^``\_  
@HWI-EAS443:3:88:1485:1765#0/1  
AGGTAGAGTCCCGTTTTCGTTTCATTACAAACTACGTC  
+HWI-EAS443:3:88:1485:1765#0/1  
aZFT^babV^X^Z^V^a^b]a^GNaa`\_Ga\_GaBBBBBB  
@HWI-EAS443:3:79:1345:968#0/1  
GTCGTTTTTAAACAATTCGACACTAATTGATGCCATCCGA  
+HWI-EAS443:3:79:1345:968#0/1  
`bababbbbbbbababaab\_\_a\_aabaa`aaaXaa[^aa  
@HWI-EAS443:3:21:133:1136#0/1  
GTCCCGTTTCGTTTCATTACCAACTACGTCTCCTTGCCC  
+HWI-EAS443:3:21:133:1136#0/1  
`R\_a¥a¥`\_a^`[^`\_`Z^a]\_YHZ`^^`^¥Y[]S¥VJ  
@HWI-EAS443:3:74:811:336#0/1  
GTGGGGCGTAGTGTGGTAATGAAACGAAAACGGGACTCT  
+HWI-EAS443:3:74:811:336#0/1  
a\_aa^aa``\_bYbaaaaP`^`a`a`Va^\_aaZ¥^Z]V¥S¥  
@HWI-EAS443:3:20:1374:1433#0/1  
CCCGTTTTTCGTTTCATTACCAACTACGTGTCCCTTGCGC  
+HWI-EAS443:3:20:1374:1433#0/1  
`X]aU\_T]aa\_\_¥U0``JOY\_\_USS\_`\_\_XG]]GXW¥BBB  
@HWI-EAS443:3:66:627:412#0/1  
GGCGTAGTGTGGGAATGAAACGAAAACGGGACTCTAGCA  
+HWI-EAS443:3:66:627:412#0/1  
``a¥^\_WT[¥a\_ZG[\_YY[\_]Q^\_[YZUZ\_TVVRMT][]Y  
@HWI-EAS443:3:28:377:182#0/1  
CGGGCGTAGTGTGGTAATGAAACGAAAACGGGACTCTA  
+HWI-EAS443:3:28:377:182#0/1  
ab`abbb\_^`Xb¥abb]`\_¥¥\_a```]`aaaV`^VWU[]]\_  
@HWI-EAS443:3:45:891:522#0/1  
TGGGGCGTAGTGTGGTAATGAAACGAAAACGGGACTCTA  
+HWI-EAS443:3:45:891:522#0/1  
`ab^DUb¥Q\_^\_N^\_[XWW\_WVZ]U]W\_\_[U¥[]YNUJT[  
@HWI-EAS443:3:10:1592:1360#0/1  
TCCCGTTTTCGTTTCATTACCAACTACGTGCGCTTGCA

+HWI-EAS443:3:10:1592:1360#0/1  
a\_aa^bX\_P\_VV^]BBBBBBBBBBBBBBBBBBBBBBBB  
@HWI-EAS443:3:39:1161:1648#0/1  
NCCGTTTTTCGTTTCATTACCAACTACGTCACCTTGCCC  
+HWI-EAS443:3:39:1161:1648#0/1  
DOWXXYYYYXXYYUYYYWVUVUXXZZZZYYRNUXXYXTKM  
@HWI-EAS443:3:39:89:950#0/1  
CGCTAGAGTCCCGTTTTTCGTTTCATTACCAAACTACGTC  
+HWI-EAS443:3:39:89:950#0/1  
aa^`[\_R^\_Z]`M¥YX][OYQ[OUXX^NVPDV^Z]`SOW  
@HWI-EAS443:3:6:1645:620#0/1  
ACCCGTTTTTCGTTTCATTACCAACTACGTCACCTTGCC  
+HWI-EAS443:3:6:1645:620#0/1  
[[U`ba`bWaabb[aa\_b\_]`^V`Xa\_\_a\_¥GQX^]]OG  
@HWI-EAS443:3:15:948:1596#0/1  
GACGTAGTGTGGTAATGAAACGAAAACGGGACTCTTGAG  
+HWI-EAS443:3:15:948:1596#0/1  
]bba`ba`b`Vb\_`IbbbbbbY`[a\_b[b\_ba[ba\_`¥bb  
@HWI-EAS443:3:28:243:737#0/1  
GGGGCGTAGTGTGGTAATGAAACGAAAACGGGACTCTAG  
+HWI-EAS443:3:28:243:737#0/1  
S¥aY^`bR[¥ab¥FX¥`ab]\_VUaaba¥WU[]a\_a`  
@HWI-EAS443:3:34:501:1367#0/1  
GACGTAGTGTGGTAATGAAACGAAAACGGGACTCTTGAG  
+HWI-EAS443:3:34:501:1367#0/1  
abab\_ab^b\_aaaQ]aa^¥aba`X`aa`[^^^\_YX]Y  
@HWI-EAS443:3:94:1423:847#0/1  
GGGGCGTAGTGTGGTAATGAAACGAAAACGGGACTCTAG  
+HWI-EAS443:3:94:1423:847#0/1  
\_Z^\_Y`aaXa]aaaSS`^¥\_[`Z\_\_[]`U`\_^ZG^X\_X\_  
@HWI-EAS443:3:68:842:1320#0/1  
AGCTAGAGTCCCGTTTTTCGTTTCATTACCAANACTACGTC  
+HWI-EAS443:3:68:842:1320#0/1  
O\_b\_SW[T\_ab`]^WZ¥`ba\_\_]\_¥\_\_^][D[^WJ\_]X  
@HWI-EAS443:3:11:276:691#0/1  
CCCGTTTTTCGTTTCATTACCAACTACGTCACCTTGCCC  
+HWI-EAS443:3:11:276:691#0/1  
Y`\_a[O\_\_¥W^RV`]Ya]\_]`S]Q]]a`I]F¥YMT¥PZ\_  
@HWI-EAS443:3:15:399:1570#0/1  
GTCGTTTTTAAACAATTCGACAATAATTGATGGCCATCCG  
+HWI-EAS443:3:15:399:1570#0/1  
]`bbZ]]ab^aYV^SRYaX^DP`a\_H]aWZPZHO`UMQ  
@HWI-EAS443:3:43:341:1613#0/1  
CGTTTTTAAACAATTCGACACTAATTCATGGCCATCCGAA  
+HWI-EAS443:3:43:341:1613#0/1  
`b\_abbabbbbab`]babaaba`¥¥\_\_R^Ya¥\_^\_\_a  
@HWI-EAS443:3:49:1331:639#0/1  
GTCGTTTTTAAACAATTCGACACTAATTCATGGCCATCCG  
+HWI-EAS443:3:49:1331:639#0/1  
a¥`\_`]]\_R[YZQY\_\_Z\_]O]WRSMVSOWUZVSWZVOX]



@HWI-EAS443:3:5:1681:692#0/1  
ACGTAGTGTGGTAATGAAACGAAAAAGGGACTCTAGCAT  
+HWI-EAS443:3:5:1681:692#0/1  
a¥a^ba`b\_aaa^]\_b`aabPa`\_^\_Ga^\_\_Z`Ua^^`^`\_  
@HWI-EAS443:3:5:207:286#0/1  
GACGTAGTGTGGTAATGAAAAGAAAACGGGACTCTAGCA  
+HWI-EAS443:3:5:207:286#0/1  
XZ\_b¥WYVS`bab]YK\_YMT]]`I`¥PP^[aYMOGTKQ[B  
@HWI-EAS443:3:94:1233:1043#0/1  
GTCCCCGTTTTCGTTTCATTACCAACTACGTCGCCTTGC  
+HWI-EAS443:3:94:1233:1043#0/1  
\_¥VX\_\_aaba\_baa[WZb]a\_RaaP^^aa]a\_¥FYG\_[^S  
@HWI-EAS443:3:97:1034:217#0/1  
CCCCGTTTTCGTTTCATTACCAACTACGTCACCTTGCCC  
+HWI-EAS443:3:97:1034:217#0/1  
a\_ababbbbbbbbbbbbb\_P^b¥a`ab^ba`G]\_aabYIY  
@HWI-EAS443:3:9:714:1858#0/1  
ACGTAGTGTGGGAATGAAACGAAAACGGGACTCTAGCAT  
+HWI-EAS443:3:9:714:1858#0/1  
aaaY`¥Ha\_]aa0^\_XX[a¥S`\_a\_]\_\_^R]U[T\_]\_¥^  
@HWI-EAS443:3:34:1424:537#0/1  
GGNGACGTAGTGTGGTAATGAAACGAAAACGGGACTCTA  
+HWI-EAS443:3:34:1424:537#0/1  
a[DZ\_ab\_Za¥a\_aab[\_`a`¥a`Z`X`aa\_\_\_\_\_]UVUWV  
@HWI-EAS443:3:39:1412:1344#0/1  
AAAGACTTCGGATGGCCATCAATTAGTGTCGAATTGTGGA  
+HWI-EAS443:3:39:1412:1344#0/1  
abaaabbaaa`\_]T^`a]L[^`\_\_\_aQ[\_a\_X\_^aHZSXX  
@HWI-EAS443:3:97:873:1502#0/1  
CGCTTTTAAACAATTCGACACTAATTGATGGCCATCCGAA  
+HWI-EAS443:3:97:873:1502#0/1  
aa``aaa`a\_\_aaaaTJ¥aa`\_````^a^YPPW`\_UT[\_\_\_  
@HWI-EAS443:3:19:758:1681#0/1  
CGTTTTTAAACAATTCGACANTAATTGATGGCCATCCGAA  
+HWI-EAS443:3:19:758:1681#0/1  
ab\_aaaabaaababaaaa`¥DYaa``aa\_aW[]a`\_^`\_  
@HWI-EAS443:3:93:875:332#0/1  
GTCGTTTNTAAACAATTCGACACTAATTGATGGCCATCCG  
+HWI-EAS443:3:93:875:332#0/1  
a\_\_a`¥D¥aa\_^`\_a`\_^`\_a`\_^`\_^]`]¥Y¥]ZV`  
@HWI-EAS443:3:100:686:278#0/1  
AGGAAACAAGGTGTTTTTAAACAATTCGACACTAATTGA  
+HWI-EAS443:3:100:686:278#0/1  
aab^aaaaaba\_\_b\_abaaaa`a`a`\_aa]a^`^`¥^\_  
@HWI-EAS443:3:72:1725:709#0/1  
GGCGTAGTGTGGTAATGAAACGAAAACGGGACTCTAGCA  
+HWI-EAS443:3:72:1725:709#0/1  
abP\_[ab^^Vaa`HR]]a¥\_aZ^^^^Z^Y`[HVVUU\_VV  
@HWI-EAS443:3:72:199:1961#0/1  
CTTAGAAACAAGGTGTTTTTAAACAATTCGACACTAATT

+HWI-EAS443:3:72:199:1961#0/1  
abb`^a[Saa\_]a¥b^^`aaa^aW`aaaab\_aaaaaa^R  
@HWI-EAS443:3:97:553:742#0/1  
GGCGTAGTGTGGTAATGAAACGAAAACGGGACTCTAGCA  
+HWI-EAS443:3:97:553:742#0/1  
``ab``a`b`bbb]`aaaaa\_b\_aaaYaaa^Z`\_``[\_a  
@HWI-EAS443:3:52:1027:1818#0/1  
CGCTAGAGTCCCGTTTTTCGTTTCATTACCAACTACGTC  
+HWI-EAS443:3:52:1027:1818#0/1  
abab\_bbbaa`]baabbbb\_aa`aa\_bWQbbWbaa\_\_\_\_  
@HWI-EAS443:3:81:883:238#0/1  
CGCTAGAGTCCCGTTTTTCGTTTCATTACCAACTACGTC  
+HWI-EAS443:3:81:883:238#0/1  
ab¥bbbaaQYXa\_UY`X^¥\_]XU]X\_SX¥`aUWWYX¥Y  
@HWI-EAS443:3:100:997:1465#0/1  
CGTTTTTAAACAATTCGACACTAATTGATGGCCATCCGAA  
+HWI-EAS443:3:100:997:1465#0/1  
abIaaa]]\_H]a`aa[a^]\_\_\_^`a\_a\_\_`¥V]ZUS^`B  
@HWI-EAS443:3:10:1418:471#0/1  
TAGTGTGGTAATGAAACGAAAACGGGACTCTAGCATACT  
+HWI-EAS443:3:10:1418:471#0/1  
a[b\_^Z`[\_HZ]¥`\_`V\_]\_^¥K[]\_]WMUY]G\_^XNX  
@HWI-EAS443:3:11:1300:83#0/1  
GTCGTTTTTAAACAATTCGACACTAATTGATGGCCATCCG  
+HWI-EAS443:3:11:1300:83#0/1  
a`\_b\_aaaa`^ZZ\_^^`\_]^^]\_^Z\_\_`X¥XYWZ^ZYY^  
@HWI-EAS443:3:12:626:1314#0/1  
GTCGTTTTTAAACAATTCGACACTAATTGATGGCCATCCG  
+HWI-EAS443:3:12:626:1314#0/1  
aU]^R¥[\_]a¥^aa\_`[]WPYX^WV[VRWYS[\_¥\_TG\_`  
@HWI-EAS443:3:12:653:168#0/1  
CGTAGTGTGGTAATGAAACGAAAACGGGACTCTAGCATA  
+HWI-EAS443:3:12:653:168#0/1  
aaY\_aT\_J^a\_G¥aaaa[aaa\_`aaaa\_]¥\_V\_]^^^  
@HWI-EAS443:3:13:704:101#0/1  
GTCGTTTTTAAACAATTCGACACTAATTGATGGCCATCCG  
+HWI-EAS443:3:13:704:101#0/1  
a`\_^¥`^VYV]\_a\_\_\_[]WYY¥\_]^\_[\_^Y^]XZYYWVW  
@HWI-EAS443:3:14:1681:620#0/1  
GTCGTTTTTAAACAATTCGACACTAATTGATGGCCATCCG  
+HWI-EAS443:3:14:1681:620#0/1  
a][^LW^aa)`V[YXXY\_[WWZO^X[\_^UVFNWSZJN^  
@HWI-EAS443:3:15:1127:1109#0/1  
GTCGTTTTTAAACAATTCGACACTAATTGATGGCCATCCG  
+HWI-EAS443:3:15:1127:1109#0/1  
a^TaU]U`a[WVY[\_`XVZY]X[V0[S¥\_X\_YYU^P]Q^  
@HWI-EAS443:3:15:1222:424#0/1  
GTCGTTTTTAAACAATTCGACACTAATTGATGGCCATCCG  
+HWI-EAS443:3:15:1222:424#0/1  
a\_bb\_aaaaa^^`aaaaa`\_a\_a]^`\_`a\_`[V]a\_\_^a

@HWI-EAS443:3:15:943:1134#0/1  
GTCGTTTTAAACAATTCGACACTAATTGATGGCCATCCG  
+HWI-EAS443:3:15:943:1134#0/1  
]LSaXS]T\_U¥W\_PKV¥Y]¥TT]]NR^XNPM]ZVS`¥YFY  
@HWI-EAS443:3:18:1493:1074#0/1  
ATGCTAGAGTCCCGTTTTCGTTTCATTACCAACTACGT  
+HWI-EAS443:3:18:1493:1074#0/1  
``[`Y\_^Yb¥]¥`U[`a¥a`X\_VY]\_aaVVULOQ¥VT]N  
@HWI-EAS443:3:18:1513:1773#0/1  
TGCTAGAGTCCCGTTTTCGTTTCATTACCAACTACGTC  
+HWI-EAS443:3:18:1513:1773#0/1  
a\_Saab`aXa¥ab\_`aa\_a\_aa`\_a\_a`Y\_`]`Xa`X]^U  
@HWI-EAS443:3:18:906:1229#0/1  
GTCGTTTTAAACAATTCGACACTAATTGATGGCCATCCG  
+HWI-EAS443:3:18:906:1229#0/1  
aTa^aabaa`a¥^`^^adWW\_a\_]SWa```]`\_U^RY`WZ^  
@HWI-EAS443:3:19:1157:142#0/1  
GTCGTTTTAAACAATTCGACACTAATTGATGGCCATCCG  
+HWI-EAS443:3:19:1157:142#0/1  
aYaaT\_aa\_`\_[]\_¥^XOZT^\_U]Y]XYVWZ]]XTSVUXX  
@HWI-EAS443:3:19:1161:1688#0/1  
GTCGTTTTAAACAATTCGACACTAATTGATGGCCATCCG  
+HWI-EAS443:3:19:1161:1688#0/1  
`\_aaY\_\_aa`b¥¥a`aa^a¥W`\_\_`]]\_\_^¥a]`\_a^]Y\_  
@HWI-EAS443:3:19:1359:1329#0/1  
GTCGTTTTAAACAATTCGACACTAATTGATGGCCATCCG  
+HWI-EAS443:3:19:1359:1329#0/1  
a[aaW\_aaabbaaaaa^aa`baa`\_aaa^\_a[a\_`\_`]  
@HWI-EAS443:3:19:25:209#0/1  
GACGTAGTGTGGTAATGAAACGAAAACGGGACTCTAGCA  
+HWI-EAS443:3:19:25:209#0/1  
`¥`a[¥^OVZ\_a^SYOY[W]^XXTZ`ZYXW¥YWWZOVUSX  
@HWI-EAS443:3:19:625:191#0/1  
GTCGTTTTAAACAATTCGACACTAATTGATGGCCATCCG  
+HWI-EAS443:3:19:625:191#0/1  
a¥^aY\_]\_^`^0[`¥^^¥`]U]VY¥^]V[[[[ZWU]]TTRT  
@HWI-EAS443:3:1:618:524#0/1  
GACGTAGTGTGGTAATGAAACGAAAACGGGACTCTAGCA  
+HWI-EAS443:3:1:618:524#0/1  
aa\_aHaaPa¥\_a`WY[aaY`Ha¥]``0`^YUGMSW]BBB  
@HWI-EAS443:3:1:646:135#0/1  
ACGTAGTGTGGTAATGAAACGAAAACGGGACTCTAGCAT  
+HWI-EAS443:3:1:646:135#0/1  
aa`W`\_]aZaa`^)`^^\_\_aZ[NX\_\_S]Y]XXZWZBBBBB  
@HWI-EAS443:3:20:986:755#0/1  
GTCGTTTTAAACAATTCGACACTAATTGATGGCCATCCG  
+HWI-EAS443:3:20:986:755#0/1  
aZUZQUW]a^[OY]¥PZ]WJOPVZNQLOWWBBBBBBBBBB  
@HWI-EAS443:3:21:859:1164#0/1  
TGCTAGAGTCCCGTTTTCGTTTCATTACCAACTACGTC

+HWI-EAS443:3:21:859:1164#0/1  
abbaaab`bbbb\_aaaa]`aaaa`b`X`aZa^\_a\_\_\_a  
@HWI-EAS443:3:22:1682:819#0/1  
GACGTAGTGTGGTAATGAAACGAAAACGGGACTCTAGCA  
+HWI-EAS443:3:22:1682:819#0/1  
a`\_a^a\_baa`aZ^a]a¥^^Z]^\_`VW^[[Z\_W]ZWX¥  
@HWI-EAS443:3:23:1184:406#0/1  
GTCGTTTTTAAACAATTCGACACTAATTGATGGCCATCCG  
+HWI-EAS443:3:23:1184:406#0/1  
a]`b¥aaa]a`````]\_\_\_`¥\_a\_a\_\_\_\_\_a¥[P`\_¥V`  
@HWI-EAS443:3:23:1384:1136#0/1  
TGCTAGAGTCCCGTTTTTCGTTTCATTACCAACTACGTC  
+HWI-EAS443:3:23:1384:1136#0/1  
aaabbb`b\_a\_\_b`aab\_a`aaS\_aaa\_0a\_]aVaa^¥UR  
@HWI-EAS443:3:25:650:1721#0/1  
ACGTAGTGTGGTAATGAAACGAAAACGGGACTCTAGCAT  
+HWI-EAS443:3:25:650:1721#0/1  
aab\_ab^b`bb[]aba`aaa¥`aaaaY[\_[^\_]a]\_\_\_`a^  
@HWI-EAS443:3:26:1554:242#0/1  
CGTAGTGTGGTAATGAAACGAAAACGGGACTCTAGCATA  
+HWI-EAS443:3:26:1554:242#0/1  
abbbb`\_`bbb\_\_b]`¥a`0`^aaXZZbb[¥a[a`]Z``a  
@HWI-EAS443:3:26:1668:747#0/1  
GACGTAGTGTGGTAATGAAACGAAAACGGGACTCTAGCA  
+HWI-EAS443:3:26:1668:747#0/1  
a`^a^aWa\_aa`]a\_]``aU```a`Ra^\_SWZ]^]^WR  
@HWI-EAS443:3:26:549:1674#0/1  
GTCGTTTTTAAACAATTCGACACTAATTGATGGCCATCCG  
+HWI-EAS443:3:26:549:1674#0/1  
aaWONa[b¥aabab[TWbUa`Yaa\_a\_Za```N\_]a]]W\_  
@HWI-EAS443:3:27:1579:1549#0/1  
GTCGTTTTTAAACAATTCGACACTAATTGATGGCCATCCG  
+HWI-EAS443:3:27:1579:1549#0/1  
aY]a^abbbabY^¥\_aa`a`\_aZa`\_\_\_aa\_]\_¥`]SWa  
@HWI-EAS443:3:27:560:1040#0/1  
TCGTTTTTAAACAATTCGACACTAATTGATGGCCATCCGA  
+HWI-EAS443:3:27:560:1040#0/1  
aaa^aaaaa^]]`\_aa`a]`a`aa``\_[]^]V¥`a[[[^\_  
@HWI-EAS443:3:29:18:85#0/1  
CGTTTTTAAACAATTCGACACTAATTGATGGCCATCCGAA  
+HWI-EAS443:3:29:18:85#0/1  
ab^aaaaa¥aaaaaa`a\_aa`aRW]\_^VS^Q\_YVY\_]YOX  
@HWI-EAS443:3:29:466:1977#0/1  
GTCGTTTTTAAACAATTCGACACTAATTGATGGCCATCCG  
+HWI-EAS443:3:29:466:1977#0/1  
]T`]LNaa`\_¥^`a¥W¥`Vab]ZS[ZRY`^VVZ`\_T`¥B  
@HWI-EAS443:3:2:1442:884#0/1  
GTCGTTTTTAAACAATTCGACACTAATTGATGGCCATCCG  
+HWI-EAS443:3:2:1442:884#0/1  
`I]a[`¥^¥]`[Va\_\_[WVYY\_]\_`aX¥]QJSMPUXWBBB

@HWI-EAS443:3:2:1487:310#0/1  
GTCGTTTTAAACAATTCGACACTAATTGATGGCCATCCG  
+HWI-EAS443:3:2:1487:310#0/1  
a`¥`OX[[¥YZZZWT`ZUWUXUW`UTPUYUWMDORBBB  
@HWI-EAS443:3:30:1559:235#0/1  
GACGTAGTGTGGTAATGAAACGAAAACGGGACTCTAGCA  
+HWI-EAS443:3:30:1559:235#0/1  
¥W`\_b^b\_babbXKa^aba\_¥\_aU`b`Yaa^``YGUU¥NU  
@HWI-EAS443:3:32:263:236#0/1  
GACGTAGTGTGGTAATGAAACGAAAACGGGACTCTAGCA  
+HWI-EAS443:3:32:263:236#0/1  
a\_`a\_]aZa`aaaS\_\_YY]¥`\_\_\_`\_[W^X]URU[YY]X^  
@HWI-EAS443:3:32:605:1413#0/1  
GTCGTTTTAAACAATTCGACACTAATTGATGGCCATCCG  
+HWI-EAS443:3:32:605:1413#0/1  
\_Uaa[Z]^W^Z^[`\_[a]`\_a^^W\_^]\_^]^X^^\_W^\_W  
@HWI-EAS443:3:33:953:1111#0/1  
GACGTAGTGTGGTAATGAAACGAAAACGGGACTCTAGCA  
+HWI-EAS443:3:33:953:1111#0/1  
aa\_]ab`a`bbaVaaaa\_ZW`aaa¥[[¥\_WH\_] [U¥¥  
@HWI-EAS443:3:34:1055:1022#0/1  
GTCGTTTTAAACAATTCGACACTAATTGATGGCCATCCG  
+HWI-EAS443:3:34:1055:1022#0/1  
`\_ab\_`aaaa`]aa`a`a`\_`a\_\_a`\_`^`^`\_`^`[[^Z[[[  
@HWI-EAS443:3:34:367:1247#0/1  
GTCGTTTTAAACAATTCGACACTAATTGATGGCCATCCG  
+HWI-EAS443:3:34:367:1247#0/1  
a`aaXaaaab`[\_`a`a`\_`aaaa[\_U\_]`^`\_YYXU`V]RN  
@HWI-EAS443:3:34:775:1192#0/1  
ATGCTAGAGTCCCCTTTTCGTTTCATTACCAACTACTAGT  
+HWI-EAS443:3:34:775:1192#0/1  
Q[^^^aaa`aa^aWRZN]^]UW^V]`\_`^X¥SV]T\_[XBB  
@HWI-EAS443:3:35:640:860#0/1  
GTCGTTTTAAACAATTCGACACTAATTGATGGCCATCCG  
+HWI-EAS443:3:35:640:860#0/1  
a\_`^`\_aaabaa^]`a`^UK]`aa[Y^WZ¥UXX\_Z[[\_W\_  
@HWI-EAS443:3:36:1483:703#0/1  
GTCGTTTTAAACAATTCGACACTAATTGATGGCCATCCG  
+HWI-EAS443:3:36:1483:703#0/1  
a\_ab\_aaa\_\_`\_\_\_\_\_]`\_`\_W\_]\_^]Z^][VWV¥¥UZSX  
@HWI-EAS443:3:37:165:275#0/1  
GTCGTTTTAAACAATTCGACACTAATTGATGGCCATCCG  
+HWI-EAS443:3:37:165:275#0/1  
a^``[\_`aa^V^aaaa`\_a\_\_aa`\_`Z¥^^]X]T]`^`¥^  
@HWI-EAS443:3:38:162:1280#0/1  
GTCGTTTTAAACAATTCGACACTAATTGATGGCCATCCG  
+HWI-EAS443:3:38:162:1280#0/1  
a`b`^a`aa`abaa`\_`aa`aa`\_`aa`\_`\_X^Ya\_[-^`\_  
@HWI-EAS443:3:38:169:1440#0/1  
GACGTAGTGTGGTAATGAAACGAAAACGGGACTCTAGCA

+HWI-EAS443:3:38:169:1440#0/1  
abbaW^a`V\_`^`^Pab`Yba\_]¥b]ba`^`\_N¥`aVYZ\_a  
@HWI-EAS443:3:38:322:1762#0/1  
ATGCTAGAGTCCCCTTTTCGTTTCATTACCAACACTACGT  
+HWI-EAS443:3:38:322:1762#0/1  
`¥[a][a`b]] [R¥\_`^`X^^`\_][YVV]R^YU\_YQQ  
@HWI-EAS443:3:39:329:1649#0/1  
GTCGTTTTTAAACAATTCGACACTAATTGATGGCCATCCG  
+HWI-EAS443:3:39:329:1649#0/1  
aabbaaabab`\_abaaab\_a`baaaa`\_`\_XU`\_a`X\_]`  
@HWI-EAS443:3:39:914:1262#0/1  
GTCGTTTTTAAACAATTCGACACTAATTGATGGCCATCCG  
+HWI-EAS443:3:39:914:1262#0/1  
a)``]aaba`aaZa`aY¥^aWa^`\_ [¥\_aaXXX^aa\_`^`  
@HWI-EAS443:3:42:1668:200#0/1  
GTCGTTTTTAAACAATTCGACACTAATTGATGGCCATCCG  
+HWI-EAS443:3:42:1668:200#0/1  
aXabY]bbaaaa^`\_a`Z^¥^`\_a`aaaY\_¥[¥]`U[]^`  
@HWI-EAS443:3:43:1192:1885#0/1  
TGCTAGAGTCCCCTTTTCGTTTCATTACCAACACTACGTC  
+HWI-EAS443:3:43:1192:1885#0/1  
]bV[]Yab` []a¥QRbWT¥ZTbVZ]]a^`aa`aYG¥RW\_`  
@HWI-EAS443:3:43:1389:523#0/1  
GTCGTTTTTAAACAATTCGACACTAATTGATGGCCATCCG  
+HWI-EAS443:3:43:1389:523#0/1  
`]Za[\_babaa]```ba`]TU\_X\_Y\_```Z``VXQ¥¥Y0]  
@HWI-EAS443:3:43:508:802#0/1  
GTCGTTTTTAAACAATTCGACACTAATTGATGGCCATCCG  
+HWI-EAS443:3:43:508:802#0/1  
`XS^T]PPU```]WZTTPX\_] [VRNWX]BBBBBBBBBBBBB  
@HWI-EAS443:3:43:689:639#0/1  
GTCGTTTTTAAACAATTCGACACTAATTGATGGCCATCCG  
+HWI-EAS443:3:43:689:639#0/1  
a``]\_`\_`a¥]Z`Y`]¥[[SXa^ [¥]]VZLL^U^]WWUY]  
@HWI-EAS443:3:44:1122:98#0/1  
GTCGTTTTTAAACAATTCGACACTAATTGATGGCCATCCG  
+HWI-EAS443:3:44:1122:98#0/1  
a^ab\_aa\_`\_`\_`a[`a\_Z\_^`\_]¥X\_Z\_^XZ0]]ZXZ  
@HWI-EAS443:3:44:1452:165#0/1  
GTCGTTTTTAAACAATTCGACACTAATTGATGGCCATCCG  
+HWI-EAS443:3:44:1452:165#0/1  
ZS`bY^a\_¥Ua``abaV0]^ [^]`aaVZ\_YW\_]`\_]\_\_SOY  
@HWI-EAS443:3:45:1398:901#0/1  
GTCGTTTTTAAACAATTCGACACTAATTGATGGCCATCCG  
+HWI-EAS443:3:45:1398:901#0/1  
\_`ab]`baaaa`W\_`aa\_a`]a`]a`]\_`^^\_YXU[^W]Z  
@HWI-EAS443:3:45:190:839#0/1  
GTCGTTTTTAAACAATTCGACACTAATTGATGGCCATCCG  
+HWI-EAS443:3:45:190:839#0/1  
a``\_Za^aa¥^Y`¥V¥YUOP^]V¥UOSQJYPQS[Y¥OLVQ

@HWI-EAS443:3:46:1525:2038#0/1  
TAGTGTGGTAATGAAACGAAAACGGGACTCTAGCATACT  
+HWI-EAS443:3:46:1525:2038#0/1  
^ZbT^`aaYHP\_ZWZVa\_^]Z¥]Q]ZUTPV]\_TZKV¥VNY  
@HWI-EAS443:3:46:380:1381#0/1  
GTCGTTTTAAACAATTCGACACTAATTGATGGCCATCCG  
+HWI-EAS443:3:46:380:1381#0/1  
a^`a[\_aaaa\_aa\_`aaa^a`a^a\_]`\_`a\_aU`^`^Z^\_  
@HWI-EAS443:3:46:589:1441#0/1  
GTCGTTTTAAACAATTCGACACTAATTGATGGCCATCCG  
+HWI-EAS443:3:46:589:1441#0/1  
a^`]N\_`aaa`\_\_`aa\_]\_\_^a^a\_\_\_`X\_\_\_]V]Y\_]V][  
@HWI-EAS443:3:47:1093:844#0/1  
GTCGTTTTAAACAATTCGACACTAATTGATGGCCATCCG  
+HWI-EAS443:3:47:1093:844#0/1  
a¥ab`baabaa`Z`aaaaa[\_`\_`[\_aa\_\_`\_^\_^\_^WX[  
@HWI-EAS443:3:47:1440:1126#0/1  
GTCGTTTTAAACAATTCGACACTAATTGATGGCCATCCG  
+HWI-EAS443:3:47:1440:1126#0/1  
aabb`bbbbaa`\_aabaaa````a`\_a`\_a\_a`\_]``Y\_`  
@HWI-EAS443:3:47:1783:217#0/1  
GTCGTTTTAAACAATTCGACACTAATTGATGGCCATCCG  
+HWI-EAS443:3:47:1783:217#0/1  
`^`Y^bV^aaa\_S^Y^\_\_S]Z\_S`^^`]Z^SOVOWXSZU  
@HWI-EAS443:3:47:220:209#0/1  
GTCGTTTTAAACAATTCGACACTAATTGATGGCCATCCG  
+HWI-EAS443:3:47:220:209#0/1  
`LaaZX`b`Q`\_[a]\_Uba0\_\_\_]\_\_XX`^W`Y`\_^`^U^  
@HWI-EAS443:3:47:703:1987#0/1  
GTCGTTTTAAACAATTCGACACTAATTGATGGCCATCCG  
+HWI-EAS443:3:47:703:1987#0/1  
a\_aa^a`WOWaXVR`a[aaXYa]W\_\_a¥ZZY[YUP`YOR^  
@HWI-EAS443:3:48:1347:562#0/1  
GTCGTTTTAAACAATTCGACACTAATTGATGGCCATCCG  
+HWI-EAS443:3:48:1347:562#0/1  
``ab`abbaba`aaaaaaaa\_aaaaa```a`a[[\_`]]`  
@HWI-EAS443:3:49:1488:333#0/1  
GTCGTTTTAAACAATTCGACACTAATTGATGGCCATCCG  
+HWI-EAS443:3:49:1488:333#0/1  
aaab]aabaaaa``\_aa\_aa]aZa````\_^\_a¥Z]^`^TS¥  
@HWI-EAS443:3:49:400:1933#0/1  
GTCGTTTTAAACAATTCGACACTAATTGATGGCCATCCG  
+HWI-EAS443:3:49:400:1933#0/1  
V^¥b``¥b\_a\_a]baaabaa\_b\_aaaY\_`a[Wa\_0a^\_[a  
@HWI-EAS443:3:49:598:132#0/1  
GTCGTTTTAAACAATTCGACACTAATTGATGGCCATCCG  
+HWI-EAS443:3:49:598:132#0/1  
abab`babbbbaabbbb`baaaaaaaaaaaaaa\_\_aa\_]a  
@HWI-EAS443:3:49:653:795#0/1  
GTCGTTTTAAACAATTCGACACTAATTGATGGCCATCCG

+HWI-EAS443:3:49:653:795#0/1  
^a^baabbbbaaaaa`ab`aa^a\_aaaa`a`\_a\_[[`a\_\_a  
@HWI-EAS443:3:4:209:247#0/1  
ACGTAGTGTGGTAATGAAACGAAACGGGACTCTAGCAT  
+HWI-EAS443:3:4:209:247#0/1  
`aaZaa¥b^^aaY¥^¥`\_a\_^]\_^`\_\_^]]¥[\_W\_]Y^^  
@HWI-EAS443:3:51:401:1291#0/1  
ACGTAGTGTGGTAATGAAACGAAACGGGACTCTAGCAT  
+HWI-EAS443:3:51:401:1291#0/1  
aab`ab`baa^aQ\_\_\_SZa`U```aaZa`\_\_[\_]\_\_\_^`\_  
@HWI-EAS443:3:51:419:142#0/1  
TGCTAGAGTCCCGTTTTTCGTTTCATTACCAACTACGTC  
+HWI-EAS443:3:51:419:142#0/1  
¥[a¥[URSGN[¥UZX\_[¥]^WW]TWYSWQVFROYSVZTV  
@HWI-EAS443:3:51:478:53#0/1  
GACGTAGTGTGGTAATGAAACGAAACGGGACTCTAGCA  
+HWI-EAS443:3:51:478:53#0/1  
a\_aa\_\_b[a\_a`^]`^`b\_a^H][\_`\_Sa`TQXVV^\_U^  
@HWI-EAS443:3:53:872:206#0/1  
GACGTAGTGTGGTAATGAAACGAAACGGGACTCTAGCA  
+HWI-EAS443:3:53:872:206#0/1  
\_¥abab\_`a]ZaN¥`b\_\_`]^X`Z`Ra\_aUY`[XY]SY  
@HWI-EAS443:3:54:1244:1888#0/1  
CGTTTTTAAACAATTCGACACTAATTGATGGCCATCCGAA  
+HWI-EAS443:3:54:1244:1888#0/1  
ab\_abbabbbbabbbababb\_aaaa\_b\_babb`  
@HWI-EAS443:3:55:1379:1559#0/1  
TCGTTTTTAAACAATTCGACACTAATTGATGGCCATCCGA  
+HWI-EAS443:3:55:1379:1559#0/1  
a^b^aaaa\_aa¥a`\_\_\_\_\_^`\_`\_\_^`\_`\_\_^^¥X\_\_WX^`  
@HWI-EAS443:3:55:1617:661#0/1  
GTCGTTTTTAAACAATTCGACACTAATTGATGGCCATCCG  
+HWI-EAS443:3:55:1617:661#0/1  
`a`Tbababba`aab\_a`\_¥b\_aa```]\_a\_]\_¥a\_]Ya  
@HWI-EAS443:3:55:592:1143#0/1  
CGTAGTGTGGTAATGAAACGAAACGGGACTCTAGCATA  
+HWI-EAS443:3:55:592:1143#0/1  
ab`b]a`a`\_Y`^SVaa¥`^`\_]P^]\_^Z[WZ[^UZ]\_  
@HWI-EAS443:3:56:1386:929#0/1  
GTCGTTTTTAAACAATTCGACACTAATTGATGGCCATCCG  
+HWI-EAS443:3:56:1386:929#0/1  
a\_]b\_aaaa\_a^`\_a\_]\_\_Z`Y]\_^`¥S^\_\_^^X^]UVY  
@HWI-EAS443:3:56:823:1999#0/1  
GTCGTTTTTAAACAATTCGACACTAATTGATGGCCATCCG  
+HWI-EAS443:3:56:823:1999#0/1  
a]bb\_a^ba`^YX¥\_a^ZY`aXQU]aa^]a¥NWQ\_]RTT  
@HWI-EAS443:3:57:1654:1741#0/1  
TCGTTTTTAAACAATTCGACACTAATTGATGGCCATCCGA  
+HWI-EAS443:3:57:1654:1741#0/1  
a]b^^aaaa\_]\_^\_a\_^\_V`V\_[`]^\_Y\_]WYW`Y[U^^



@HWI-EAS443:3:57:847:438#0/1  
GTCGTTTTAAACAATTCGACACTAATTGATGGCCATCCG  
+HWI-EAS443:3:57:847:438#0/1  
aP^ba`aba`a]\_a\_`\_\_^[\_^]a\_^a``\_\_\_^[\_`\_`^`  
@HWI-EAS443:3:58:1180:479#0/1  
GTCGTTTTAAACAATTCGACACTAATTGATGGCCATCCG  
+HWI-EAS443:3:58:1180:479#0/1  
a[ab\_abaaa`\_^\_a`a`]a]`\_\_\_\_\_`\_\_\_V[U^\_^¥a  
@HWI-EAS443:3:59:415:1455#0/1  
GTCGTTTTAAACAATTCGACACTAATTGATGGCCATCCG  
+HWI-EAS443:3:59:415:1455#0/1  
a^`aH` `[bX\_a]\_`[aaZO^a^` `\_\_\_\_]YaU[]WWH¥R  
@HWI-EAS443:3:59:477:1450#0/1  
CGTTTTAAACAATTCGACACTAATTGATGGCCATCCGAA  
+HWI-EAS443:3:59:477:1450#0/1  
ab`abbaabY\_abbabaabbabaaab`b`a[\_\_\_a\_XV` `Z  
@HWI-EAS443:3:5:447:782#0/1  
GTCGTTTTAAACAATTCGACACTAATTGATGGCCATCCG  
+HWI-EAS443:3:5:447:782#0/1  
`V` ` ` \_aaaa`R[a\_a\_[a` \_\_\_\_` \_\_\_\_\_` ^\_a^YZ^]\_^a  
@HWI-EAS443:3:5:766:360#0/1  
GTCGTTTTAAACAATTCGACACTAATTGATGGCCATCCG  
+HWI-EAS443:3:5:766:360#0/1  
` `bbabbbbbaaa[babba` `^a`aaaa¥aaa[[[\_`a]]`  
@HWI-EAS443:3:60:1181:686#0/1  
CGTTTTAAACAATTCGACACTAATTGATGGCCATCCGAA  
+HWI-EAS443:3:60:1181:686#0/1  
abaabbbbbbbbbb\_Zaababaababaabaa`aa\_\_aaa  
@HWI-EAS443:3:60:1406:177#0/1  
GACGTAGTGTGGTAATGAAACGAAAACGGGACTCTAGCA  
+HWI-EAS443:3:60:1406:177#0/1  
a`W`LDV`a[a`]NRPZNLUUQWNPVOOP¥¥LVPTZGNLQ  
@HWI-EAS443:3:60:1675:428#0/1  
GTCGTTTTAAACAATTCGACACTAATTGATGGCCATCCG  
+HWI-EAS443:3:60:1675:428#0/1  
a`\_a]aaaa` `\_^\_\_` `[Y¥^`Y\_\_^\_\_\_\_]¥VYW\_]\_]\_`  
@HWI-EAS443:3:60:390:1240#0/1  
GTCGTTTTAAACAATTCGACACTAATTGATGGCCATCCG  
+HWI-EAS443:3:60:390:1240#0/1  
aWaxy]P\_a]]QWY[XYUY[WP\_YZU\_OOVRUWVVYZXTP  
@HWI-EAS443:3:60:420:939#0/1  
GTCGTTTTAAACAATTCGACACTAATTGATGGCCATCCG  
+HWI-EAS443:3:60:420:939#0/1  
aaaa`abaaaa` `aa`aaa`a`a`\_`\_\_\_\_¥][^Z`][Y\_`  
@HWI-EAS443:3:61:1315:971#0/1  
ACGTAGTGTGGTAATGAAACGAAAACGGGACTCTAGCAT  
+HWI-EAS443:3:61:1315:971#0/1  
a`^^`b\_aabbbZ`aaabbaa\_abaaa` `^¥^X^\_V]]]  
@HWI-EAS443:3:61:1413:189#0/1  
GTCGTTTTAAACAATTCGACACTAATTGATGGCCATCCG

+HWI-EAS443:3:61:1413:189#0/1  
`^Z^UU]¥WXZXJKO]^XXWOTZYTYX^YULHKM¥LQTQ  
@HWI-EAS443:3:61:670:346#0/1  
GTCGTTTTTAAACAATTCGACACTAATTGATGGCCATCCG  
+HWI-EAS443:3:61:670:346#0/1  
aZ^^¥`a`\_] ^V]¥]^¥^^^`^^VIX[XZ[TTRVZXXQT  
@HWI-EAS443:3:62:195:1292#0/1  
AGTGTGGTAATGAAACGAAAACGGGACTCTAGCATACTT  
+HWI-EAS443:3:62:195:1292#0/1  
abZ¥\_ba`P^ba]Z^baa\_]X`aZ¥¥FW\_aZWX\_\_`\_a]^  
@HWI-EAS443:3:62:366:1022#0/1  
TAGTGTGGTAATGAAACGAAAACGGGACTCTAGCATACT  
+HWI-EAS443:3:62:366:1022#0/1  
ZS\_Ub^bb`a¥`b\_X\_\_a`\_]\_aa`aaa][ ]TX``\_[W¥  
@HWI-EAS443:3:62:764:1223#0/1  
GTCGTTTTTAAACAATTCGACACTAATTGATGGCCATCCG  
+HWI-EAS443:3:62:764:1223#0/1  
a\_a\_\_abba`aa`aaa`a`aaaaaaaa`\_\_`^^^\_`aa\_  
@HWI-EAS443:3:64:141:677#0/1  
ACGTAGTGTGGTAATGAAACGAAAACGGGACTCTAGCAT  
+HWI-EAS443:3:64:141:677#0/1  
aab^]b^aaabaU]]`aaaaY]\_^`a``\_\_\_\_`^WDU\_\_\_\_^  
@HWI-EAS443:3:64:351:1757#0/1  
GTCGTTTTTAAACAATTCGACACTAATTGATGGCCATCCG  
+HWI-EAS443:3:64:351:1757#0/1  
aaaa¥aaaaba^`baaab\_`abaaaa\_^]`\_^]`\_X]`[  
@HWI-EAS443:3:64:596:968#0/1  
GACGTAGTGTGGTAATGAAACGAAAACGGGACTCTAGCA  
+HWI-EAS443:3:64:596:968#0/1  
a¥a[`WbaaabaaQa]a][abR¥I`aaa`\_`aaa`]Q\_YRU  
@HWI-EAS443:3:65:1230:91#0/1  
GTCGTTTTTAAACAATTCGACACTAATTGATGGCCATCCG  
+HWI-EAS443:3:65:1230:91#0/1  
aJXb`Sa\_a`¥a¥[ ]\_\_^^\_Z`\_]][^^]0^VWZ]WWX^  
@HWI-EAS443:3:65:482:115#0/1  
GACGTAGTGTGGTAATGAAACGAAAACGGGACTCTAGCA  
+HWI-EAS443:3:65:482:115#0/1  
a`ab¥`b\_b^aab¥¥a``\_aaU^```\_M``\_[S[T¥[QZ]  
@HWI-EAS443:3:66:1292:1178#0/1  
ACGTAGTGTGGTAATGAAACGAAAACGGGACTCTAGCAT  
+HWI-EAS443:3:66:1292:1178#0/1  
`\_¥\_abQ^^ba`PZT]S^^^R\_]aa]WVW`]SW\_[]X]\_\_  
@HWI-EAS443:3:68:1089:1435#0/1  
GACGTAGTGTGGTAATGAAACGAAAACGGGACTCTAGCA  
+HWI-EAS443:3:68:1089:1435#0/1  
aabb\_]`[b[aa`S[aaZ^aaR[]aa^WZ[^PYRZYS]\_\_  
@HWI-EAS443:3:68:988:983#0/1  
GACGTAGTGTGGTAATGAAACGAAAACGGGACTCTAGCA  
+HWI-EAS443:3:68:988:983#0/1  
aaaaX`\_P``aba¥]`ZS[\_a¥]Y`a`]]\_VWX]]Y^]Y\_

@HWI-EAS443:3:69:1375:258#0/1  
GTCGTTTTAAACAATTCGACACTAATTGATGGCCATCCG  
+HWI-EAS443:3:69:1375:258#0/1  
]X^`Z`Ta`[Y¥¥\_Xa`Na^W`]ZR^]¥ZZ^^0aX]WNW]  
@HWI-EAS443:3:6:490:514#0/1  
GTCGTTTTAAACAATTCGACACTAATTGATGGCCATCCG  
+HWI-EAS443:3:6:490:514#0/1  
a\_`b\_aaaaaaa\_aaa```aaa\_`\_`\_]a^\_^\_```]]\_  
@HWI-EAS443:3:70:485:908#0/1  
GTCGTTTTAAACAATTCGACACTAATTGATGGCCATCCG  
+HWI-EAS443:3:70:485:908#0/1  
^X\_`^`bbbb[¥`abaaa\_a\_0[aaaa`^`a^XEY``aa\_a  
@HWI-EAS443:3:71:1053:1272#0/1  
GTCGTTTTAAACAATTCGACACTAATTGATGGCCATCCG  
+HWI-EAS443:3:71:1053:1272#0/1  
a¥abUXab¥\_aZT[]^a`aa[a^aa^\_[[]`\_Xa\_`\_¥[\_  
@HWI-EAS443:3:73:197:367#0/1  
GACGTAGTGTGGTAATGAAACGAAAACGGGACTCTAGCA  
+HWI-EAS443:3:73:197:367#0/1  
\_aab[ab]aaaba¥a\_`¥\_a\_``[[]`PX[\_XSY^V][F]  
@HWI-EAS443:3:74:1454:20#0/1  
ATGCTAGAGTCCCCTTTTCGTTTCATTACCAACACTACGT  
+HWI-EAS443:3:74:1454:20#0/1  
`a``bbbabaa\_`aQ\_baabaaaY\_aaaW```Xa[``X¥Y  
@HWI-EAS443:3:74:279:738#0/1  
CGTTTTAAACAATTCGACACTAATTGATGGCCATCCGAA  
+HWI-EAS443:3:74:279:738#0/1  
aa\_aaaabaaaaa``aaaaa``aa`\_\_\_\_^\_\_`\_\_\_\_``\_  
@HWI-EAS443:3:74:82:1621#0/1  
GTCGTTTTAAACAATTCGACACTAATTGATGGCCATCCG  
+HWI-EAS443:3:74:82:1621#0/1  
a`ab\_\_[]`a\_aa[]¥\_a\_aab```aa`\_`a^\_^aaa]\_a¥  
@HWI-EAS443:3:74:906:1611#0/1  
GTCGTTTTAAACAATTCGACACTAATTGATGGCCATCCG  
+HWI-EAS443:3:74:906:1611#0/1  
aaab[abaabba`\_^aaa\_¥\_ba```\_\_\_\_aa\_`]a\_a^\_[Z  
@HWI-EAS443:3:75:1528:431#0/1  
GTCGTTTTAAACAATTCGACACTAATTGATGGCCATCCG  
+HWI-EAS443:3:75:1528:431#0/1  
aXa\_M``aa\_`\_Xa^`]]`\_¥aR\_^X\_R[\_[^]¥RS^YYW  
@HWI-EAS443:3:76:1131:66#0/1  
GTCGTTTTAAACAATTCGACACTAATTGATGGCCATCCG  
+HWI-EAS443:3:76:1131:66#0/1  
a\_]`N¥a``Y\_XT]Z`\_Z^XR^Y^ZZ\_]`^X]]XVLV]RXX  
@HWI-EAS443:3:76:131:1244#0/1  
CCCGTTTTCGTTTCATTACCAACACTACGTCTCCTTGCCC  
+HWI-EAS443:3:76:131:1244#0/1  
ababOW[¥\_ZI]Z`^aa\_¥b\_RU]^Y^]BBBBBBBBBBBB  
@HWI-EAS443:3:76:1404:1358#0/1  
ATGCTAGAGTCCCCTTTTCGTTTCATTACCAACACTACGT

+HWI-EAS443:3:76:1404:1358#0/1  
^b^^Sb\_SaU\_X¥VV\_a`]Z\_``\_SZ]bWQ¥]TSOZ¥Y[W  
@HWI-EAS443:3:76:312:360#0/1  
GTCGTTTTTAAACAATTCGACACTAATTGATGGCCATCCG  
+HWI-EAS443:3:76:312:360#0/1  
aS]UP^aa^ZTXWUQXYWSRV^URR[XTTUOWWR^[SWSV  
@HWI-EAS443:3:77:367:976#0/1  
GTCGTTTTTAAACAATTCGACACTAATTGATGGCCATCCG  
+HWI-EAS443:3:77:367:976#0/1  
\_]\_¥X¥a`]\_Y¥X^\_]\_]X\_^a`]¥]X[^]Y[WURWZ\_  
@HWI-EAS443:3:77:600:1411#0/1  
GTCGTTTTTAAACAATTCGACACTAATTGATGGCCATCCG  
+HWI-EAS443:3:77:600:1411#0/1  
^`aa]a\_babbbaa\_aaaaaaaaaaaa\_]\_ZX¥aa[`]\_  
@HWI-EAS443:3:77:645:236#0/1  
GTCGTTTTTAAACAATTCGACACTAATTGATGGCCATCCG  
+HWI-EAS443:3:77:645:236#0/1  
aJ]`R^S\_ZY]QRZW]PMSROXYWYVHPWOVUUGQTYVP  
@HWI-EAS443:3:77:960:559#0/1  
GACGTAGTGTGGTAATGAAACGAAAACGGGACTCTAGCA  
+HWI-EAS443:3:77:960:559#0/1  
`a\_a`abaaa^^aW`\_aaaYb`a\_`\_`Y`^¥]\_]`Z^\_^  
@HWI-EAS443:3:78:1064:403#0/1  
GTCGTTTTTAAACAATTCGACACTAATTGATGGCCATCCG  
+HWI-EAS443:3:78:1064:403#0/1  
^Va^`a^\_ZU\_a]`a\_Y\_]N¥N]^\_¥TP¥V¥PYVZ[XX^  
@HWI-EAS443:3:78:549:334#0/1  
CAAGGTGTTTTTAAACAATTCGACACTAATTGATGGCCA  
+HWI-EAS443:3:78:549:334#0/1  
ab`b¥D[¥TS`aa`Z]b\_`a[`]aa\_aY\_¥^\_aN[FXOVZ^  
@HWI-EAS443:3:80:1492:86#0/1  
GTCGTTTTTAAACAATTCGACACTAATTGATGGCCATCCG  
+HWI-EAS443:3:80:1492:86#0/1  
\_LZa¥aaaa`\_\_X\_^a`Z`]Y\_X\_][]^aX^^[VUU]QQV  
@HWI-EAS443:3:80:326:719#0/1  
CGTAGTGTGGTAATGAAACGAAAACGGGACTCTAGCATA  
+HWI-EAS443:3:80:326:719#0/1  
¥\_^Ua`bb``\_VWaXXJY`¥\_U^\_¥aZ¥aaUQ[U\_`a\_a¥  
@HWI-EAS443:3:80:429:1062#0/1  
GTCGTTTTTAAACAATTCGACACTAATTGATGGCCATCCG  
+HWI-EAS443:3:80:429:1062#0/1  
`^a\_V\_aaa^`] [Z`Z]`U\_a\_ZVUZ^X¥^`Z]a¥OW^^  
@HWI-EAS443:3:80:64:468#0/1  
GTAGTGTGGTAATGAAACGAAAACGGGACTCTAGCATA  
+HWI-EAS443:3:80:64:468#0/1  
aNQ\_N\_Vaa^MW`ZST[^U] [Z\_`¥Y¥ORNUXSXZTX[[V  
@HWI-EAS443:3:81:173:1494#0/1  
GTCGTTTTTAAACAATTCGACACTAATTGATGGCCATCCG  
+HWI-EAS443:3:81:173:1494#0/1  
aR]^VaXHVaaZ]\_]T¥V¥Ya]Y\_WUSM¥a^NQaa\_U^YF

@HWI-EAS443:3:82:554:1019#0/1  
TGCTAGAGTCCCGTTTTTCGTTTCATTACCAACTACTCGTC  
+HWI-EAS443:3:82:554:1019#0/1  
a^FYa^Q^aaa`\_YMaZ`^^`XOT]\_aTVX¥]a`^][XNT  
@HWI-EAS443:3:82:666:123#0/1  
ACGTAGTGTGGTAATGAAACGAAAACGGGACTCTAGCAT  
+HWI-EAS443:3:82:666:123#0/1  
V]aU\_ba\_\_a\_\_OUTM[Raa^a][a\_T`aa]Ia[ZVZ¥^\_  
@HWI-EAS443:3:85:1426:1497#0/1  
TGCTAGAGTCCCGTTTTTCGTTTCATTACCAACTACTCGTC  
+HWI-EAS443:3:85:1426:1497#0/1  
ababa[`aaZM[bJab\_ab`a\_Iab`aK[^]Ya^ab]\_a^  
@HWI-EAS443:3:86:277:1332#0/1  
GTCGTTTTTAAACAATTCGACACTAATTGATGGCCATCCG  
+HWI-EAS443:3:86:277:1332#0/1  
a]aZV¥```a\_\_aaa]`\_Z\_¥aa\_aa`\_`]^Z^^Z\_\_\_  
@HWI-EAS443:3:87:1211:582#0/1  
TAGTGTTGGTAATGAAACGAAAACGGGACTCTAGCATACT  
+HWI-EAS443:3:87:1211:582#0/1  
aab^b\_`a[Z`a^`aXa\_\_a\_\_^ZV^\_]^^¥¥\_a\_Va  
@HWI-EAS443:3:87:444:317#0/1  
GTCGTTTTTAAACAATTCGACACTAATTGATGGCCATCCG  
+HWI-EAS443:3:87:444:317#0/1  
`G¥T[a][OSU^\_a¥PMOTTKTQ¥QW]XWHZRMXSYTRUX  
@HWI-EAS443:3:88:865:874#0/1  
GTCGTTTTTAAACAATTCGACACTAATTGATGGCCATCCG  
+HWI-EAS443:3:88:865:874#0/1  
¥`b`baababbba`bbbaababbabbbabab`ababbaab  
@HWI-EAS443:3:89:1421:181#0/1  
GTCGTTTTTAAACAATTCGACACTAATTGATGGCCATCCG  
+HWI-EAS443:3:89:1421:181#0/1  
`¥^a]`\_aa]\_^Z`^^\_¥ZW`Z\_^]X\_^]UZX^]XZW  
@HWI-EAS443:3:89:150:695#0/1  
GGTCGTTTTTAAACAATTCGACACTAATTGATGGCCATCC  
+HWI-EAS443:3:89:150:695#0/1  
a`Z`Ua]¥]a^`\_P\_^a[``a^a`¥[\_`\_]\_\_a]^  
@HWI-EAS443:3:89:84:383#0/1  
GACGTAGTGTGGTAATGAAACGAAAACGGGACTCTAGCA  
+HWI-EAS443:3:89:84:383#0/1  
a`abZ]aXa[a]YQU^\_\_\_\_a\_^Va\_\_\_\_^ZX]Z]ZVVZZ  
@HWI-EAS443:3:8:497:245#0/1  
GTCGTTTTTAAACAATTCGACACTAATTGATGGCCATCCG  
+HWI-EAS443:3:8:497:245#0/1  
aU\_aY\_]\_\_Y\_]W``\_]\_]¥¥[\_YWY^[W[XZXX[[]^  
@HWI-EAS443:3:8:497:691#0/1  
GTCGTTTTTAAACAATTCGACACTAATTGATGGCCATCCG  
+HWI-EAS443:3:8:497:691#0/1  
aQU^KVaa``¥YX]U\_]\_^\_`^`]]¥X]¥^]WPU¥YQS[  
@HWI-EAS443:3:8:592:104#0/1  
CGTTTTTAAACAATTCGACACTAATTGATGGCCATCCGAA

+HWI-EAS443:3:8:592:104#0/1  
ab`aaaba`¥aaaa]bb\_aaaa`aa`\_`a\_\_^a\_U^a`^  
@HWI-EAS443:3:90:1771:1415#0/1  
GTCGTTTTTAAACAATTCGACACTAATTGATGGCCATCCG  
+HWI-EAS443:3:90:1771:1415#0/1  
¥GS[\_¥a]¥^\_UQ[W^aWq]TLXTXZXW[ZLWRPGPUGW\_  
@HWI-EAS443:3:90:561:1572#0/1  
GACGTAGTGTGGTAATGAAACGAAAACGGGACTCTAGCA  
+HWI-EAS443:3:90:561:1572#0/1  
\_`X¥Zab\_aY`ZXHWb` `[`b¥¥W^`\_`Y¥]N¥UY[[YY]  
@HWI-EAS443:3:91:104:639#0/1  
CGTTTTTAAACAATTCGACACTAATTGATGGCCATCCGAA  
+HWI-EAS443:3:91:104:639#0/1  
aa]abbbbaX`b`babbaaaaa`aaa`\_a`a`aa`\_`\_`  
@HWI-EAS443:3:92:54:761#0/1  
GTCGTTTTTAAACAATTCGACACTAATTGATGGCCATCCG  
+HWI-EAS443:3:92:54:761#0/1  
a`aa\_aaaa`[Xa`a`\_`]^a`\_`a\_\_`^`^XYT^WU[] [¥  
@HWI-EAS443:3:92:647:1705#0/1  
GTCGTTTTTAAACAATTCGACACTAATTGATGGCCATCCG  
+HWI-EAS443:3:92:647:1705#0/1  
]HX^T^`¥Qab^^YOWQ^`\_]Z]Z\_\_YH¥^]¥]\_aa\_^V`  
@HWI-EAS443:3:93:1744:205#0/1  
AGTGTGGTAATGAAACGAAAACGGGACTCTAGCATACTT  
+HWI-EAS443:3:93:1744:205#0/1  
a¥ab`bba\_]`aY\_aaL\_\_`\_`^\_U^SFZG]^WX^ZQJYa  
@HWI-EAS443:3:93:498:1135#0/1  
TCGTTTTTAAACAATTCGACACTAATTGATGGCCATCCGA  
+HWI-EAS443:3:93:498:1135#0/1  
aab\_bba^abY`baaaaaabbaa`aaaaa^¥ZaYaaa\_a`  
@HWI-EAS443:3:94:1156:586#0/1  
GACGTAGTGTGGTAATGAAACGAAAACGGGACTCTAGCA  
+HWI-EAS443:3:94:1156:586#0/1  
a^ab\_\_b]aaabaUXaa¥^aaU`\_\_`\_]\_\_\_¥SYG\_\_^]\_  
@HWI-EAS443:3:94:1748:208#0/1  
GTCGTTTTTAAACAATTCGACACTAATTGATGGCCATCCG  
+HWI-EAS443:3:94:1748:208#0/1  
abab\_bb`baaaSaaaZa^a`bXa\_a`¥]^\_ZP]Y\_YOQ^  
@HWI-EAS443:3:96:1011:600#0/1  
CGTAGTGTGGTAATGAAACGAAAACGGGACTCTAGCATA  
+HWI-EAS443:3:96:1011:600#0/1  
Zbabbbbbbb`aaaa^ab\_bbbb\_F\_aaaaaa`a`^aa  
@HWI-EAS443:3:96:1016:1539#0/1  
GTCGTTTTTAAACAATTCGACACTAATTGATGGCCATCCG  
+HWI-EAS443:3:96:1016:1539#0/1  
a]W``aaaaba^aaaba\_a`\_a\_aa\_a\_\_`\_`a\_a`\_aM[a  
@HWI-EAS443:3:96:846:1667#0/1  
AAGTTCGTTTTTAAACAATTCGACACTAATTGATGGCCAT  
+HWI-EAS443:3:96:846:1667#0/1  
a\_aaWbb`]baaab`abaaa`R^^`\_`aa`a^T`\_`\_S`Ya\_

@HWI-EAS443:3:96:89:1026#0/1  
ACGTAGTGTGGTAATGAAACGAAACGGGACTCTAGCAT  
+HWI-EAS443:3:96:89:1026#0/1  
aaa]`aY\_G`a`Z`a^^\_\_a\_]^\_\_Z^`ZG^W#W\_ZX^  
@HWI-EAS443:3:78:1678:1757#0/1  
NGTCGCTGTCTGACTGTCAGTAAGTATGCTAGAGTCCCGT  
+HWI-EAS443:3:78:1678:1757#0/1  
DNRUZXXXXXXZXXZZZWRZZWUZZXUBBBBBBBBBBB  
@HWI-EAS443:3:71:1315:1371#0/1  
GTTGGTAATGAAACGAAACGGGACTCTAGCATACTTACT  
+HWI-EAS443:3:71:1315:1371#0/1  
aaaba\_abaaaa^[a^`aa\_\_Z]\_\_aaaa`aa``a``]\_  
@HWI-EAS443:3:42:244:1017#0/1  
CANATATATTCAATATGGAGAGAATAAAGAACCGAGAGA  
+HWI-EAS443:3:42:244:1017#0/1  
Z^DZ^`a``bba``bb``abba^`b#`bbbbb`bbaUab  
@HWI-EAS443:3:97:1702:1537#0/1  
CAAATATATTCAATATGGAGAGAATAAAGAAGTGGAGAGAT  
+HWI-EAS443:3:97:1702:1537#0/1  
^bababbbba`]bbbaa`#\_Vbbbaa]baa\_a`aa  
@HWI-EAS443:3:31:1215:1409#0/1  
TCCATTATGGAGAGAATAAAGAAGTGGAGAGATCTAATGT  
+HWI-EAS443:3:31:1215:1409#0/1  
^\_WOF#[] [X#W#QU]Z\_T]aa]SQX\_]\_\_U#^]U\_`]  
@HWI-EAS443:3:12:451:368#0/1  
AAGCTAATGTGCTAATTGGGCAAGGGACGTCGTGTTGGG  
+HWI-EAS443:3:12:451:368#0/1  
#X\_H[#`#ZU[bX\_a]ab`^aa\_P]^b^Y#VH^Xa\_[H^B  
@HWI-EAS443:3:39:1277:1831#0/1  
AAATATATTCAATATGGAGAGAATAAAGAAGTGGAGAGAA  
+HWI-EAS443:3:39:1277:1831#0/1  
Tab#aba`aaJZ#XbbLVWta\_ba`a`aY`aFF[aXaUaX  
@HWI-EAS443:3:12:882:1198#0/1  
AAAAATATTCAATATGGAGAGAATAAAGAAGTGGAGAGAT  
+HWI-EAS443:3:12:882:1198#0/1  
V[NUPY#`Xa[VXRUYRL]^\_^R[HZ`W#``Ta]WaX#`  
@HWI-EAS443:3:50:1644:1734#0/1  
ATATATTCAATATGGAGAGAATAAAGAAGTGGAGAGTCT  
+HWI-EAS443:3:50:1644:1734#0/1  
`b`\_O^KY\_[\_U\_OWQb``R`aaW[a\_`aYaa[``\_ZGP`\_  
@HWI-EAS443:3:72:904:1175#0/1  
CAAATATATTCAATATGGAGAGAATAAAGAAGTGAACGA  
+HWI-EAS443:3:72:904:1175#0/1  
^OU^ZYVY[T[XWX\_^QTF^NYS^PXY#WZNTXRSJDWX  
@HWI-EAS443:3:100:1660:190#0/1  
ATTCAATATGGGAGAATAAAGAAGTGGAGAGATCTAATG  
+HWI-EAS443:3:100:1660:190#0/1  
`#ba`^bY\_S[F[[J^\_#[UUURZ[KTTZMaBBBBBBBBBB  
@HWI-EAS443:3:12:432:321#0/1  
GTCGTTTTTAAACAATTCCACACTAATTGATGGCCATCCG

+HWI-EAS443:3:12:432:321#0/1  
a\_`^¥aabaa`a`\_a^YV]]`\_\_VXSWUQ]P^VU[WWW  
@HWI-EAS443:3:13:1370:1576#0/1  
CAAATATATTCAATATGAAGAGAATAAAAGAACTGAGAGA  
+HWI-EAS443:3:13:1370:1576#0/1  
abaabbb`bbaa`babb`a`a\_`aab]aa``]aaaa`a  
@HWI-EAS443:3:14:1168:1141#0/1  
ATTC AATATGTAGAGAATAAAAGAACTGAGAGATCTAATG  
+HWI-EAS443:3:14:1168:1141#0/1  
\_``^`\_`^bbaaa```bb`a¥aa`]Xbaa¥`¥``aaa`\_a  
@HWI-EAS443:3:18:226:931#0/1  
ATTC AATATGGAGCGAATAAAAGAACTGAGAGATCTAATG  
+HWI-EAS443:3:18:226:931#0/1  
Y`bb`W¥]Vb`a]La]bT\_\_¥a¥aY`RVNN`JSa\_[\_aa  
@HWI-EAS443:3:1:565:1402#0/1  
CAGGTCAAATATATTCAATACGGAGAGAATAAAAGAACTG  
+HWI-EAS443:3:1:565:1402#0/1  
Y`bb`\_`bbbbbbbaa`abbbbabbabbbbbaaabbaa`bb  
@HWI-EAS443:3:22:1099:215#0/1  
ATATATTCAATATGGAGAGAAAAAAGAACTGAGAGATCT  
+HWI-EAS443:3:22:1099:215#0/1  
`aaaabb`]`aabbab\_b`\_aaaaaaaa\_aaba`aaWa  
@HWI-EAS443:3:27:164:254#0/1  
CAAATATATCCAATATGGAGAGAATAAAAGAACTGAGAGA  
+HWI-EAS443:3:27:164:254#0/1  
`a```a^a\_OW^`^]`\_¥V[]]W\_`^`^`^Y\_X]X^Z]]^  
@HWI-EAS443:3:28:1234:839#0/1  
CAAATATATTCAATATGGAGAGAATAAAAGAACCGAGAGA  
+HWI-EAS443:3:28:1234:839#0/1  
abbbbbbbbaaababbbababaabbabaa\_a[R¥`\_aaa  
@HWI-EAS443:3:34:1208:1408#0/1  
CAAATATATTGAATATGGAGAGAATAAAAGAACTGAGAGA  
+HWI-EAS443:3:34:1208:1408#0/1  
a```Yb^[a¥P¥`]a¥ZOR\_R][`]aba^`¥b`\_N\_FXP]  
@HWI-EAS443:3:35:1220:1854#0/1  
AAGCAGGTCAAATATATTCAATATGGAGAGAAAAAAGAA  
+HWI-EAS443:3:35:1220:1854#0/1  
aba`^^[Zaaa]a`\_\_`aa`aaa``^`\_`a`Y`a`^a^a  
@HWI-EAS443:3:36:1339:415#0/1  
AAGCAGGCCAAATATATTCAATATGGAGAGAATAAAAGAA  
+HWI-EAS443:3:36:1339:415#0/1  
a\_b```\_abaa`[]\_aa`aa`aaaa¥aZ`a]``a¥X`]  
@HWI-EAS443:3:36:656:19#0/1  
AATATATTCAATATGGGGAGAATAAAAGAACTGAGAGATC  
+HWI-EAS443:3:36:656:19#0/1  
UW^b\_\_\_\_S]^¥`\_XWF^Y`aZ[\_]H[Q^WGOZXP¥WUX  
@HWI-EAS443:3:37:277:1637#0/1  
AGCAGGTCAAATATATTCAATATGGAGAGACTAAAAGAAC  
+HWI-EAS443:3:37:277:1637#0/1  
`[\_SNWH[YSV\_\_\_\_\_^Y[^\_Y\_`]TNQLTIQXTN¥TGXR



@HWI-EAS443:3:37:723:135#0/1  
ATATATTCAATATGGAGAGAAAAAAGAACTGAGAGATCT  
+HWI-EAS443:3:37:723:135#0/1  
a\_b`ba^^¥aa¥bbaa`Yaa``\_aa^]]\_XYZ\_¥a\_ZX\_  
@HWI-EAS443:3:38:1705:423#0/1  
ATTCATATGGAGAAAATAAAAGAACTGAGAGATCTAATG  
+HWI-EAS443:3:38:1705:423#0/1  
abbababbbb\_b^ababa`abaaabaa^¥\_\_\_Zaa^a^  
@HWI-EAS443:3:40:503:1117#0/1  
AATATATTCAATATGGAGAGAATAAACGAACTGAGAGATC  
+HWI-EAS443:3:40:503:1117#0/1  
]\_\_¥`¥`aaaa\_`a^\_W\_aaaa^LYQO[]YJXQ¥UW^  
@HWI-EAS443:3:42:438:1910#0/1  
ATTCGATATGGAGAGAATAAAAGAACTGAGAGATCTAATG  
+HWI-EAS443:3:42:438:1910#0/1  
S¥¥S¥¥¥¥\_ZVPU¥SOPYVb\_\_aX]abab][`YPUa\_^Z  
@HWI-EAS443:3:43:1393:358#0/1  
CAAATATATTCAATAAGGAGAGAATAAAAGAACTGAGAGA  
+HWI-EAS443:3:43:1393:358#0/1  
ab\_\_bbbbababababababababab`abaa\_bbaabba  
@HWI-EAS443:3:44:767:1960#0/1  
ATTCATATGGAGAGAATAAAAGAACTGAGAGATCCAATG  
+HWI-EAS443:3:44:767:1960#0/1  
a^^a`YL[a`PRL]aJ`\_W¥U\_YWZG`\_a^X^]`^TGSZG[  
@HWI-EAS443:3:46:168:1234#0/1  
AAAGAACTGAGAGATCTAATGTCGCAGTCCCCGACCCGCG  
+HWI-EAS443:3:46:168:1234#0/1  
a`[aZX`a¥\_¥`a`\_a`aa`b`\_aX]a\_¥a[\_a]`]]¥SY  
@HWI-EAS443:3:46:477:233#0/1  
CAAATATATTCAATATGGAGAGAATAAAAGAACTGGGAGA  
+HWI-EAS443:3:46:477:233#0/1  
abbbbba^bbbaababba`bab\_abaaaaaa\_ab`aba  
@HWI-EAS443:3:49:839:1309#0/1  
GCAGGTCAAATATATTCTATATGGAGAGAATAAAAGAACT  
+HWI-EAS443:3:49:839:1309#0/1  
aaaa`\_abaabaaaa`a\_aaaa`]a]`^`aaaa\_a\_a^`  
@HWI-EAS443:3:55:1433:1768#0/1  
CAAATATATTGAATATGGAGAGAATAAAAGAACTGAGAGA  
+HWI-EAS443:3:55:1433:1768#0/1  
\_¥bababbb^F[bbVabb\_abaabaaaabaababbbabab  
@HWI-EAS443:3:58:1551:1276#0/1  
CAGGCCAAATATATTCAATATGGAGAGAATAAAAGAACTG  
+HWI-EAS443:3:58:1551:1276#0/1  
¥^\_△G]TZa¥a`[\_`\_]a`Vb^]\_[]`\_]`aab^[a`P]\_  
@HWI-EAS443:3:5:1144:1779#0/1  
CAAATATATTGAATATGGAGAGAATAAAAGAACTGAGAGA  
+HWI-EAS443:3:5:1144:1779#0/1  
P\_bWbabX¥aJY^bbb\_`U`bb]bbXW\_]a\_ab¥```b\_  
@HWI-EAS443:3:5:271:1250#0/1  
AGCAGGGCAAATATATTCAATATGGAGAGAATAAAAGAAC

+HWI-EAS443:3:5:271:1250#0/1  
abaa`aHaaaa`baa\_ba````aa`\_a`aaaaaa``^a^  
@HWI-EAS443:3:60:1657:220#0/1  
GGTCAAATATATTCAATATGGAGAGAAAAAAGAAGACTGAG  
+HWI-EAS443:3:60:1657:220#0/1  
aa\_a`a`aab`aa¥aaaa`¥[b\_a¥\_[[\_\_\_\_[-]\_]`aa  
@HWI-EAS443:3:60:990:441#0/1  
AATATATTCAATATGGAGAGAATAAAAGAAGACTGAGAGATC  
+HWI-EAS443:3:60:990:441#0/1  
]X`¥WRaaa¥T`^]^^^b`]^\_[]V]\_UQ¥WX¥U[]¥I  
@HWI-EAS443:3:61:1455:1602#0/1  
GAGAAAGCTAATGTGCTAATTGGGCAAGGGGAGGTGGTGT  
+HWI-EAS443:3:61:1455:1602#0/1  
aa\_`]Q^P¥\_¥]aR\_V`\_\_]]¥`\_\_X\_Y]]JFQYGYGSY  
@HWI-EAS443:3:64:1362:974#0/1  
ATTCAATATGGACAGAATAAAAGAAGACTGAGAGATCTAATG  
+HWI-EAS443:3:64:1362:974#0/1  
\_bb`ab\_V\_bbXQ0^\_aaaRXXY[`SV^K[`aZY\_UJV`a¥  
@HWI-EAS443:3:65:394:1767#0/1  
ATTCAATATGGAGAGAATAAAAGGACTGAGAGATCTAATG  
+HWI-EAS443:3:65:394:1767#0/1  
`aa`aa`\_aaa\_a`^\_aabaaa[F[aa\_aWa\_a\_\_`a\_a^  
@HWI-EAS443:3:68:46:643#0/1  
ATTCAATATGGAGAGAATAAAAGAAGACTGAGCGATCTAATG  
+HWI-EAS443:3:68:46:643#0/1  
aaaba\_babaaYa^ba¥abaabaS\_aa\_a]IX\_]\_\_V]\_\_  
@HWI-EAS443:3:69:658:1113#0/1  
AAGCAGGCCAAATATATTCAATATGGAGAGAATAAAAGAA  
+HWI-EAS443:3:69:658:1113#0/1  
]YJ\_] ^ZX\_bba]¥\_bVaXMWZYYYRT]ZYUO¥Q\_^]QGN  
@HWI-EAS443:3:69:909:964#0/1  
GTCAAATATATACAATATGGAGAGAATAAAAGAAGACTGAGA  
+HWI-EAS443:3:69:909:964#0/1  
a``S````Y`[DW`^^\_aaa\_a`¥[``[]`]]`\_a\_\_``  
@HWI-EAS443:3:6:532:557#0/1  
CAAATATATTCAATATGGAGAGAATAAAAGAAGACTGCGAGA  
+HWI-EAS443:3:6:532:557#0/1  
`bbbbbb`bbaababbb`aabaabbaaab]baaaZ^a`^  
@HWI-EAS443:3:70:1451:1263#0/1  
AATATATTCAATATGGAGAGAGTAAAGAAGACTGAGAGATC  
+HWI-EAS443:3:70:1451:1263#0/1  
Ia\_`T¥a`W\_bab^Z``aUXa\_a\_aaab\_\_^aa¥P[`^aY  
@HWI-EAS443:3:72:738:1404#0/1  
CAAATATATTCAATATGGAGAGAAAAAAGAAGACTGAGAGA  
+HWI-EAS443:3:72:738:1404#0/1  
abaaaa`baaaaa`a\_a`a``aaaa\_\_a`\_`a\_a\_`  
@HWI-EAS443:3:74:1090:49#0/1  
GTCAAATATATTCAATATGGAGAGAATAAATGAAGACTGAGA  
+HWI-EAS443:3:74:1090:49#0/1  
a[]aaaa\_a`aa\_`^a\_aba`a^a\_`a\_\_```]-[a`]-^

@HWI-EAS443:3:76:1452:1846#0/1  
TCAATATGGGAGAATAAAAGAACTGAGAGATCTAATGTC  
+HWI-EAS443:3:76:1452:1846#0/1  
`aaa[(`aaGZ]\_^S\_`a`\_\_a]\_\_`\_\_`\_]R^\_^R\_XW  
@HWI-EAS443:3:79:847:1471#0/1  
ATTCAATACGGAGAGAATAAAAGAACTGAGAGATCTAATG  
+HWI-EAS443:3:79:847:1471#0/1  
aba```baaaa\_a^Z`aaa`Y^aa\_\_`a\_aaa¥`\_a^a`  
@HWI-EAS443:3:81:753:1204#0/1  
AAGCAGGTCAAATATATTCAATATGGCGAGAATAAAAGAA  
+HWI-EAS443:3:81:753:1204#0/1  
a`aa\_`W`a\_aa`aa``\_[^\_a`XHZ¥`^)`^^^^`^  
@HWI-EAS443:3:82:1187:1353#0/1  
AGCAGGTCTAATATATTCAATATGGAGAGAATAAAAGAAC  
+HWI-EAS443:3:82:1187:1353#0/1  
^`b`\_]DR`abb]ba`]Y]aaaa`YWa^`Vaaaa[baa\_  
@HWI-EAS443:3:83:119:1026#0/1  
AATACATTCAATATGGAGAGAATAAAAGAACTGAGAGATC  
+HWI-EAS443:3:83:119:1026#0/1  
^TTRFR[]¥WOQO¥\_¥NUHTX`QROLY\_VMO[WT[¥[JV¥  
@HWI-EAS443:3:83:1527:1946#0/1  
AAGCAGGCCAAATATATTCAATATGGAGAGAATAAAAGAA  
+HWI-EAS443:3:83:1527:1946#0/1  
aabaa`^P[bba`\_`a\_YV¥^a\_ab\_^a^`\_`aa`Za^^\_  
@HWI-EAS443:3:87:1387:730#0/1  
CAAATATATTCAATATGGAGAGAATAGAAGAACTGAGAGA  
+HWI-EAS443:3:87:1387:730#0/1  
X^`R¥IZ`]Ya\_]¥^`a\_\_`YR]^bb\_]`a[^`aa  
@HWI-EAS443:3:89:1437:1197#0/1  
AAGCAGGCCAAATATATTCAATATGGAGAGAATAAAAGAA  
+HWI-EAS443:3:89:1437:1197#0/1  
¥abbaa]F[bb`a[aab^]]ab\_bab\_XWbaaaa`\_`aba  
@HWI-EAS443:3:92:1263:385#0/1  
ATTCAATATGGAGAGATTAAGAACTGAGAGATCTAATG  
+HWI-EAS443:3:92:1263:385#0/1  
`ab^baaabbb`a`b[G\_aaaa````aaaaaba`M`a``b  
@HWI-EAS443:3:94:346:1030#0/1  
ATTCAATATGGCGAGAATAAAAGAACTGAGAGATCTAATG  
+HWI-EAS443:3:94:346:1030#0/1  
XQXX¥`aY^\_RGXZ\_U]^]QHZ[[[^[\_N]XTY¥UZ^BBBB  
@HWI-EAS443:3:95:1093:570#0/1  
TTCAATATGGAGAGAATAAAAGAACCGAGAGATCTAATGT  
+HWI-EAS443:3:95:1093:570#0/1  
aba\_W```bb\_bab]U\_aa`aaaa\_M`aabaa`\_a^aaZ  
@HWI-EAS443:3:95:1431:401#0/1  
GGTCAAATATATACAATATGGAGAGAATAAAAGAACTGAG  
+HWI-EAS443:3:95:1431:401#0/1  
¥b¥aabab`b`b`\_abbaba[ab]baabaa`^ba[]aaa\_  
@HWI-EAS443:3:96:1686:1645#0/1  
GAGAAAGCTAATGTGCTAATTGGGCAAGGGGACGAGGTGT

+HWI-EAS443:3:96:1686:1645#0/1  
a^[¥MRZWWOJ¥PDXR^\_QR^[S[NOG[Y\_S^T[HYBBBB  
@HWI-EAS443:3:96:321:67#0/1  
AAAGAACTGAGAGATCTAATGTCGCAGTCCCGCACCCGCG  
+HWI-EAS443:3:96:321:67#0/1  
^[[\_b\_aUXba\_ab`\_Xb[aab\_aa]\_aXXZNa]BBBBBBB  
@HWI-EAS443:3:99:785:1799#0/1  
AAATATATTGAATATGGAGAGAATAAAAGAACTGAGAGAT  
+HWI-EAS443:3:99:785:1799#0/1  
`\_V^SXQYPJ\_aa^a¥a`X`Z^T`b¥^SNS¥[^U]\_`[\_  
@HWI-EAS443:3:34:570:1047#0/1  
CGNAAGCAGGTCAAATATATTCAATATGGAGAGAATAAAA  
+HWI-EAS443:3:34:570:1047#0/1  
^VDXQ`^]][\_N\_a^`¥S`\_\_`\_\_^Z¥[¥YX^XWX]]^^]Y  
@HWI-EAS443:3:67:1203:507#0/1  
AAGCAGGTCAAATATATTCAATATGGAGAGAATAAAAAAA  
+HWI-EAS443:3:67:1203:507#0/1  
aaaaaaaaZaaaa\_aaaaa\_¥a\_aaa]a`a^`\_`\_`\_`\_`a  
@HWI-EAS443:3:88:1164:785#0/1  
AGNTCAAATATATTCAATATGGAGAGAATAAAAGAACTGA  
+HWI-EAS443:3:88:1164:785#0/1  
`^DJ`baab^babba^ab`bb\_aa`b\_aaaa`abaa^aaa  
@HWI-EAS443:3:89:149:1359#0/1  
AANCAGGTCAAATATATTCAATATGGAGAGAATAAAAGAA  
+HWI-EAS443:3:89:149:1359#0/1  
\_]DW`a\_ab^[a\_`aaaa]R\_Y\_^`Y`^`¥[¥]\_¥a`aa  
@HWI-EAS443:3:100:742:738#0/1  
GTCAAATATATTCAATATGGAGAGAATAAANGAACTGAGA  
+HWI-EAS443:3:100:742:738#0/1  
aUT`aaaaaab]N]Zb`bb`X\_X\_`a```XDVXPG^a]^Y  
@HWI-EAS443:3:100:965:347#0/1  
CAAATNTATTCAATATGGAGAGAATAAAAGAACTGAGAGA  
+HWI-EAS443:3:100:965:347#0/1  
``ba]D]Y\_¥Y`aa]`\_]aS[¥Y^¥\_ZUY\_`Iab\_^aaa  
@HWI-EAS443:3:15:1219:1361#0/1  
AGCAGNTCAAATATATTCAATATGGAGAGAATAAAAGAAC  
+HWI-EAS443:3:15:1219:1361#0/1  
aabbWDP\_ba\_¥aaaaaaa`a`ab`Sa\_`Y\_``]`aa[a]  
@HWI-EAS443:3:18:1772:677#0/1  
AATATATTCAATATGGAGAGAATNAAAGAACTGAGAGATC  
+HWI-EAS443:3:18:1772:677#0/1  
`aaaaaaa\_`a^ba\_^a^a]\_ZDY\_`\_^`\_[a``\_`\_^\_Y  
@HWI-EAS443:3:21:1374:1881#0/1  
AAGCAGGTCAAATATATTCAATATGGAGAGAATANAAGAA  
+HWI-EAS443:3:21:1374:1881#0/1  
^^¥`aaaG`aa]aa`a```\_`\_]^^`S\_^`\_¥DX\_]`\_`  
@HWI-EAS443:3:23:1570:1217#0/1  
AAGCAGGTCAANATATATTCAATATGGAGAGAATAAAAGAA  
+HWI-EAS443:3:23:1570:1217#0/1  
ab`]`a^Ya^D¥baaabaa`\_a`aaa^a\_a\_\_`\_`\_^`\_`\_¥

@HWI-EAS443:3:24:1149:1822#0/1  
CAAATATATTCAATATGGAGAGANTAAAAGAACTGAGAGA  
+HWI-EAS443:3:24:1149:1822#0/1  
^^`aaa`a^\_^\_]`aT¥]a^X^D]\_^`[[`baab^aa`a  
@HWI-EAS443:3:28:1338:1931#0/1  
GGTCAAATATATTCAATATGGAGAGNATAAAAAGAACTGAG  
+HWI-EAS443:3:28:1338:1931#0/1  
aa[abbbaa``baa`aabb]aba¥D^^`b`\_aY`a`  
@HWI-EAS443:3:29:158:1245#0/1  
ATTCAATATGGAGAGAATAAAAAGAACTGAGNGATCTAATG  
+HWI-EAS443:3:29:158:1245#0/1  
a`¥\_VZ``aTVXQYYU]]\_`aa`¥aa][`ZDZ]\_^a]H[\_  
@HWI-EAS443:3:2:1320:586#0/1  
ATTCAATATGGAGAGAATAAAAANAAGAACTGAGAGATCTAATG  
+HWI-EAS443:3:2:1320:586#0/1  
abbabbbabbaabababababa^D^aabbbaabba]baaba  
@HWI-EAS443:3:30:1145:1587#0/1  
CAAATATATTCAATATGGAGNGAATAAAAAGAACTGAGAGA  
+HWI-EAS443:3:30:1145:1587#0/1  
a]ababa`ab``abaaa[DZ^`\_\_¥a¥\_\_\_U^\_¥\_`\_`  
@HWI-EAS443:3:30:474:1681#0/1  
AAGCAGGTCAAANATATTCAATATGGAGAGAATAAAAAGAA  
+HWI-EAS443:3:30:474:1681#0/1  
][]aa\_[X]\_\_SDYW\_]\_^]^^Y[]Y^]Y[ZYa`\_]VYV  
@HWI-EAS443:3:32:1630:1596#0/1  
CAAATANATTCAATATGGAGAGAATAAAAAGAACTGAGAGA  
+HWI-EAS443:3:32:1630:1596#0/1  
ababb]D^baWYab^bbaZaa``\_a`\_aabaa\_\_b^abba  
@HWI-EAS443:3:34:1137:1079#0/1  
AATATATTCAATATGGNGAGAATAAAAAGAACTGAGAGATC  
+HWI-EAS443:3:34:1137:1079#0/1  
Ybab^`aba`\_aaaZTD¥V¥`Ta`W`b`¥a[\_\_\_a^`¥\_XW  
@HWI-EAS443:3:34:1700:1746#0/1  
CAAATATATTCAATATGNAGAGAATAAAAAGAACTGAGAGA  
+HWI-EAS443:3:34:1700:1746#0/1  
```bb`bbbaabbbab]DRbaba^baaVba`aaa¥XJ]^P  
@HWI-EAS443:3:35:146:414#0/1  
GCAGGTCNAATATATTCAATATGGAGAGAATAAAAAGAACT  
+HWI-EAS443:3:35:146:414#0/1  
a`P]aQ[DX\_^`a\_a\_a`aaWaaaYaG¥[]][S`¥]\_\_¥^W  
@HWI-EAS443:3:35:252:1450#0/1  
CAAATATATTCAATATGGAGNGAATAAAAAGAACTGAGAGA  
+HWI-EAS443:3:35:252:1450#0/1  
abaaabaaaab^aaZaa\_\_YDZ``a`U``]a\_a\_\_a\_`]a  
@HWI-EAS443:3:37:381:255#0/1  
ATTCAATATGGAGAGAATAAANGAACTGAGAGATCTAATG  
+HWI-EAS443:3:37:381:255#0/1  
\_\_`\_^aa¥b\_UN\_L¥^Z\_[b]DYX\_a``LUPZZ\_]¥\_¥`^  
@HWI-EAS443:3:42:1300:945#0/1  
AAAGCAGGTCANATATATTCAATATGGAGAGAATAAAAAGA

+HWI-EAS443:3:42:1300:945#0/1  
¥bbaabaa]a[D]aababaaa^a`ab\_\_aa^\_aa`aaaaa  
@HWI-EAS443:3:42:1541:1594#0/1  
GAAAGCTAATGTGCTAATTGGGCAAGGGGACGTNGTGTTG  
+HWI-EAS443:3:42:1541:1594#0/1  
aa¥S[`bT[¥b[¥M]YV`S^UY\_[¥\_\_]a]\_bOD¥U`]\_\_  
@HWI-EAS443:3:45:1670:192#0/1  
AATATATTCAATATGGANAGAATAAAAGAACTGAGAGATC  
+HWI-EAS443:3:45:1670:192#0/1  
aa`ba`ba``\_ba`\_aTDSb¥`a`\_a\_a]a`]^`^^\_AY  
@HWI-EAS443:3:46:1531:1528#0/1  
AAAGCAGGTCAAATATATTCAATATGGAGAGAATAANAGA  
+HWI-EAS443:3:46:1531:1528#0/1  
aaaa`abaS\_a`a`a^aaa`^a^a`\_]a]a\_\_`\_YDX\_^  
@HWI-EAS443:3:51:529:581#0/1  
CAAATANATTCAATATGGAGAGAATAAAAGAACTGAGAGA  
+HWI-EAS443:3:51:529:581#0/1  
aa^aa]DVabbbababbb`b]a`abaa`a^`a\_aaaaaaa  
@HWI-EAS443:3:55:1225:886#0/1  
AGCAGGTCAAATATATTCAATATGGAGAGNATAAAAGAAC  
+HWI-EAS443:3:55:1225:886#0/1  
\_^`bbX\_bbbaabaaaa\_ab]ba`\_b`]D^aaa\_aa`a\_  
@HWI-EAS443:3:58:248:2043#0/1  
AATATATTCAATATGGAGNGAATAAAAGAACTGAGAGATC  
+HWI-EAS443:3:58:248:2043#0/1  
aa`X)`a\_a\_\_```\_^RDW][\_`\_\_ZVY\_]`]]^^\_]`^WO  
@HWI-EAS443:3:61:352:2011#0/1  
CAAATATATTCAATATGGAGAGAATAAAAGAANTGAGAGA  
+HWI-EAS443:3:61:352:2011#0/1  
ab\_`Y`b\_b\_ba\_b]baaabaa[a`bbb\_\_`ZDW]\_]\_S^  
@HWI-EAS443:3:64:903:91#0/1  
CAAATATATTCAATATGGAGAGAATAAANGAACTGAGAGA  
+HWI-EAS443:3:64:903:91#0/1  
aabbbbbb\_bbababaabba`abaaaa`¥D[\_aaaa^aaa\_  
@HWI-EAS443:3:68:1269:1567#0/1  
ATTC AATATGGAGAGAATAAAAGAACTGAGAGANCTAATG  
+HWI-EAS443:3:68:1269:1567#0/1  
aabbaab`aaaab\_a\_\_aaaab]`aaaab`\_a¥D[aa`aa  
@HWI-EAS443:3:78:1063:1178#0/1  
AATATATTCAATATGGAGNGAATAAAAGAACTGAGAGATC  
+HWI-EAS443:3:78:1063:1178#0/1  
^^aa\_Za`aa`ZR\_R¥¥D¥TW][[Z`a\_\_^¥`^Z]\_YT]  
@HWI-EAS443:3:79:1678:907#0/1  
ATTC AATATGGANAGAATAAAAGAACTGAGAGATCTAATG  
+HWI-EAS443:3:79:1678:907#0/1  
]bbbbbbbabab¥D[\_`bbabaaa^[\_aabY^`^][aXa^  
@HWI-EAS443:3:7:1285:1124#0/1  
GTCAAATATATTCAATATGGAGAGAATAAAAGANCTGAGA  
+HWI-EAS443:3:7:1285:1124#0/1  
aY\_ba`a`a`aaaa^b\_aa`Y^Z`^]a`\_a\_VDK`\_^\_`^

@HWI-EAS443:3:85:317:1455#0/1  
ATTCAATATGGAGAGAATAAAAGAACTGAGAGANCTAATG  
+HWI-EAS443:3:85:317:1455#0/1  
a\_ababa¥Y``\_b`a\_aa`a`¥]VXa\_`P[aZDV``^\_\_  
@HWI-EAS443:3:86:1300:967#0/1  
CAAATATATTCNATATGGAGAGAATAAAAGAACTGAGAGA  
+HWI-EAS443:3:86:1300:967#0/1  
aa\_`a¥abbaWD]bbba\_bbba`bbbbbbbaa\_bab¥`aa  
@HWI-EAS443:3:89:1195:482#0/1  
GCAGGTCAAATATATTCANTATGGAGAGAATAAAAGAACT  
+HWI-EAS443:3:89:1195:482#0/1  
abbbaabbbabababb¥D^abba`babaaaaabaa`a¥a  
@HWI-EAS443:3:8:1603:1197#0/1  
AGCTAATGTGCTAATTGGGCAAGGGACGTNGTGTGGTA  
+HWI-EAS443:3:8:1603:1197#0/1  
Vbb¥bbabaabbaa`X¥a^b\_aY`]YZaODZ\_bXL\_]W\_  
@HWI-EAS443:3:90:1053:313#0/1  
ATTCAATATGGAGAGAATAAAAGANCTGAGAGATCTAATG  
+HWI-EAS443:3:90:1053:313#0/1  
ab`\_`ab]bbb[babaabb\_bab[DQbbaaaa\_]b`aaa  
@HWI-EAS443:3:90:583:641#0/1  
AAATATATTCATATNGAGAGAATAAAAGAACTGAGAGAT  
+HWI-EAS443:3:90:583:641#0/1  
``^ba`]a```]R^DYaa^baaaa`\_`a`a^a\_aaa```  
@HWI-EAS443:3:90:722:2009#0/1  
AATATATTCATATGGAGAGAATAAAAGAACTNAGAGATC  
+HWI-EAS443:3:90:722:2009#0/1  
Uab\_¥\_bbb`¥M`baabY¥ZYa\_a]Yaab`^D¥R\_[`]]  
@HWI-EAS443:3:93:349:595#0/1  
ATTCAATATGGAGAGAATAAAAGAACTNAGAGATCTAATG  
+HWI-EAS443:3:93:349:595#0/1  
UUZ\_TW`X¥\_^W[PXOZS`]¥[\_a^OYDS^Y[W^¥Y]Q¥`  
@HWI-EAS443:3:98:1210:1251#0/1  
AAGCAGGTCAAATATATTCATATNGAGAGAATAAAAGAA  
+HWI-EAS443:3:98:1210:1251#0/1  
a\_\_^aba^``a`a`aaa\_a`\_[D¥\_a\_a^^`a\_\_\_^`\_  
@HWI-EAS443:3:98:505:1073#0/1  
AATATATTCATATGGAGAGAATAAAAGANCTGAGAGATC  
+HWI-EAS443:3:98:505:1073#0/1  
aa`aaaa`^aa`aaa`][^a¥a\_aaa`^¥DP`\_`\_a\_\_`\_  
@HWI-EAS443:3:99:1662:1185#0/1  
AAGCAGGTCAAATATATTCATATGGAGAGANTAAAAGAA  
+HWI-EAS443:3:99:1662:1185#0/1  
¥\_babaa[abbabab\_bbb`babb]\_\_aUDTaa\_aa\_a  
@HWI-EAS443:3:15:1490:576#0/1  
GCAGGTCAAATATATTCATATGGAGAGAATAAAAGAAAT  
+HWI-EAS443:3:15:1490:576#0/1  
`a^¥`P]aaaa]a\_^]V\_]^^^a\_^aWZW^^aU^W``[NZ  
@HWI-EAS443:3:25:642:695#0/1  
ATTCAATATGGAGAGAATAAAAGAACTGAGAGATCTAANG

+HWI-EAS443:3:25:642:695#0/1  
abbaaab`bba\_baa`abaaabaaaabababa\_aaba[D^  
@HWI-EAS443:3:2:1209:345#0/1  
CAAATATATTCAATATGGAGAGAATAAAAGAACTGAGANA  
+HWI-EAS443:3:2:1209:345#0/1  
aa]aaab\_aa¥`\_a^a`^^`\_aYX`]¥^]U¥WHX`\_^ZDW  
@HWI-EAS443:3:58:1708:60#0/1  
GGCAAATATATTCAATATGGAGAGAATAAAAGAACTGAGA  
+HWI-EAS443:3:58:1708:60#0/1  
ZGOVRa][aaaaVa`Y`¥]R\_M^YM[ ]`\_][ZX`a^]T  
@HWI-EAS443:3:58:92:1848#0/1  
ANTATATTCAATATGGAGAGAATAAAAGAACTGAGAGATC  
+HWI-EAS443:3:58:92:1848#0/1  
[D¥\_]U^YLTXU`W\_QXQSNY[aaa`^UJD[¥TY]YBBB  
@HWI-EAS443:3:65:1482:1652#0/1  
AGCAGGTCAAATATATTCAATATGGAGAGAATAAAAGACC  
+HWI-EAS443:3:65:1482:1652#0/1  
X^a]^TSLV\_b\_b[PX\_¥bba¥`[aKb\_OVabbbKT[^\_J  
@HWI-EAS443:3:77:668:1062#0/1  
AACAGGTCAAATATATTCAATATGGAGAGAATAAAAGAAC  
+HWI-EAS443:3:77:668:1062#0/1  
aaYSURP^`Z[Z]ZWW]aWW][a``[aZ^WRY¥\_`\_`[X^  
@HWI-EAS443:3:29:1511:1382#0/1  
AGCAGGTCAAATATATTCAATATGGAGAGAATAAAAGAAA  
+HWI-EAS443:3:29:1511:1382#0/1  
`WaZPZ[^Ya[SSa^NWWYY[Ya`a[`RZZ[Y[UMN^BBB  
@HWI-EAS443:3:50:376:969#0/1  
GAGGTCAAATATATTCAATATGGAGAGAATAAAAGAACTG  
+HWI-EAS443:3:50:376:969#0/1  
I\_a^`bbbbbb`a`bbbbaabb\_aTaa`\_babba`ba[`b  
@HWI-EAS443:3:77:237:2022#0/1  
NTCAAATATATTCAATATGGAGAGAATAAAAGAACTGAGA  
+HWI-EAS443:3:77:237:2022#0/1  
DIOQSOMMUPXWX[[YVY[XSUTZZXUQUX[X[[WW[Z  
@HWI-EAS443:3:95:1332:1757#0/1  
GAAATATATTCAATATGGAGAGAATAAAAGAACTGAGAGA  
+HWI-EAS443:3:95:1332:1757#0/1  
X`¥a`ba`b`¥bbb¥aba]`aaba`aab^\_`aaba``\_  
@HWI-EAS443:3:97:1792:108#0/1  
NTTCAATATGGAGAGAATAAAAGAACTGAGAGATCTAATG  
+HWI-EAS443:3:97:1792:108#0/1  
DMZXXZZXZXUXXZZXZZZZXZXZZXZXZXZXSZZWZZ  
@HWI-EAS443:3:100:1004:1385#0/1  
CAGGTCAAATATATTCAATATGGAGAGAATAAAAGAACTG  
+HWI-EAS443:3:100:1004:1385#0/1  
T\_`QW^`¥abbbba]^a^ab¥bbXOV`^b[bb`¥aba`GaB  
@HWI-EAS443:3:100:128:1236#0/1  
ATTCAATATGGAGAGAATAAAAGAACTGAGAGATCTAATG  
+HWI-EAS443:3:100:128:1236#0/1  
aaba¥^aa\_bb^bababa`^aX\_`¥V`a`a`a\_\_]aa\_b\_



@HWI-EAS443:3:100:134:1387#0/1  
GTCAAATATATTCAATATGGAGAGAATAAAAGAACTGAGA  
+HWI-EAS443:3:100:134:1387#0/1  
`Ya`¥aY\_bb¥`^Yaa`aVY]`\_^Yaaa`a^`\_[\_[a`  
@HWI-EAS443:3:100:1468:1660#0/1  
CAAATATATTCAATATGGAGAGAATAAAAGAACTGAGAGA  
+HWI-EAS443:3:100:1468:1660#0/1  
`bbbbabbbaV^`baaababbb`\_bbabbbb`abaaabb  
@HWI-EAS443:3:100:1702:1222#0/1  
ATTCAATATGGAGAGAATAAAAGAACTGAGAGATCTAATG  
+HWI-EAS443:3:100:1702:1222#0/1  
`ba\_ab¥^b¥]Ybab^abb¥aaY`bab`aa`R]aPb[Y¥b  
@HWI-EAS443:3:100:461:1723#0/1  
CAAATATATTCAATATGGAGAGAATAAAAGAACTGAGAGA  
+HWI-EAS443:3:100:461:1723#0/1  
aa`bbbaab`babaaaa`aaaaa`aaaa\_\_aaaa`  
@HWI-EAS443:3:100:480:718#0/1  
AAGCAGGTCAAATATATTCAATATGGAGAGAATAAAAGAA  
+HWI-EAS443:3:100:480:718#0/1  
¥baUH\_a\_bZ`¥a^aaaaU`^]aaaYa^b\_¥aaa\_a\_\_Y  
@HWI-EAS443:3:100:530:932#0/1  
AATATATTCAATATGGAGAGAATAAAAGAACTGAGAGATC  
+HWI-EAS443:3:100:530:932#0/1  
abaaa`ba`¥`a^aaaZbaa¥a`aa\_\_a^\_]aK\_a`a^`^  
@HWI-EAS443:3:100:685:1250#0/1  
CAAATATATTCAATATGGAGAGAATAAAAGAACTGAGAGA  
+HWI-EAS443:3:100:685:1250#0/1  
aZ\_]^bb`b]S^\_¥]`bbS\_¥^a`]aa`Z\_]W^]¥Y¥]Z  
@HWI-EAS443:3:100:76:1485#0/1  
CAAATATATTCAATATGGAGAGAATAAAAGAACTGAGAGA  
+HWI-EAS443:3:100:76:1485#0/1  
aabbaaa\_aaa`\_aaa¥X[\_^a¥\_a`]`a`\_a\_Y\_\_]\_^B  
@HWI-EAS443:3:100:832:820#0/1  
GCAGGTCAAATATATTCAATATGGAGAGAATAAAAGAACT  
+HWI-EAS443:3:100:832:820#0/1  
a`aaa¥aaaa[`aaaaaaaa\_aaa\_baa^\_b`\_a`^`\_`Wa  
@HWI-EAS443:3:10:1057:1660#0/1  
ATTCAATATGGAGAGAATAAAAGAACTGAGAGATCTAATG  
+HWI-EAS443:3:10:1057:1660#0/1  
ab`^a\_aabbaab]a`aabba```a¥aa``aa\_a]`a\_aa  
@HWI-EAS443:3:10:1080:1662#0/1  
ATTCAATATGGAGAGAATAAAAGAACTGAGAGATCTAATG  
+HWI-EAS443:3:10:1080:1662#0/1  
\_a[a`\_ZY\_]\_Z[PZZab^b`b^aa\_a`]\_]\_a\_N``aaa  
@HWI-EAS443:3:10:1154:998#0/1  
CAGGTCAAATATATTCAATATGGAGAGAATAAAAGAACTG  
+HWI-EAS443:3:10:1154:998#0/1  
a\_bb`\_bbaabbaa`V`ababbb¥baaaaabba`\_a\_ab  
@HWI-EAS443:3:10:1229:427#0/1  
ATTCAATATGGAGAGAATAAAAGAACTGAGAGATCTAATG

+HWI-EAS443:3:10:1229:427#0/1  
abb\_aab\_baa\_a^a\_aa` `` `` \_`Vaa`] \_a\_\_W``^\_a  
@HWI-EAS443:3:10:1242:1219#0/1  
ATTCAATATGGAGAGAATAAAAGAAGACTGAGAGATCTAATG  
+HWI-EAS443:3:10:1242:1219#0/1  
`bb`Yab`a^L`abaaba^\_a¥adWaaaaa`\_U``Z`a  
@HWI-EAS443:3:10:1414:1083#0/1  
CAAATATATTCAATATGGAGAGAATAAAAGAAGACTGAGAGA  
+HWI-EAS443:3:10:1414:1083#0/1  
][`¥[a^aa\_Izabb`^¥Zabaaa^[`ZaVV`G¥bababa  
@HWI-EAS443:3:10:168:415#0/1  
ATTCAATATGGAGAGAATAAAAGAAGACTGAGAGATCTAATG  
+HWI-EAS443:3:10:168:415#0/1  
aabbbaaaaab`aab`\_aaa\_aa`a```aaaaa\_\_`a\_\_a  
@HWI-EAS443:3:10:409:221#0/1  
AGCAGGTCAAATATATTCAATATGGAGAGAATAAAAGAAGACTGAGAGA  
+HWI-EAS443:3:10:409:221#0/1  
abbaab\_\_`b``aa`aa`\_\_aaaaa]a^a``a`\_`\_] ^S  
@HWI-EAS443:3:11:1037:743#0/1  
AATATATTCAATATGGAGAGAATAAAAGAAGACTGAGAGATC  
+HWI-EAS443:3:11:1037:743#0/1  
aa¥^aa`aaaab`aaa`b`a``aaaaa]aYS\_a`a\_a\_`[  
@HWI-EAS443:3:11:1256:907#0/1  
GTCAAATATATTCAATATGGAGAGAATAAAAGAAGACTGAGA  
+HWI-EAS443:3:11:1256:907#0/1  
a]abbaaa`[aa`^Wa¥ab\_]\_V`]^aa\_]``\_]Y\_````  
@HWI-EAS443:3:11:1683:1196#0/1  
AATATATTCAATATGGAGAGAATAAAAGAAGACTGAGAGATC  
+HWI-EAS443:3:11:1683:1196#0/1  
^aa\_Yabba\_]``bb^`\_`ab^Wa^aaaaa\_]b\_]a`aa`U  
@HWI-EAS443:3:11:495:266#0/1  
CAAATATATTCAATATGGAGAGAATAAAAGAAGACTGAGAGA  
+HWI-EAS443:3:11:495:266#0/1  
aa^abaaaa`a]aaaa`a\_a\_aaaaa`\_\_`Z^a\_\_]\_\_  
@HWI-EAS443:3:11:528:1072#0/1  
ATATATTCAATATGGAGAGAATAAAAGAAGACTGAGAGATCT  
+HWI-EAS443:3:11:528:1072#0/1  
aaaa`aaa\_X`aaa`Za`^`^a`]V`aa`[X`^a¥a\_^]\_\_  
@HWI-EAS443:3:11:663:621#0/1  
ATTCAATATGGAGAGAATAAAAGAAGACTGAGAGATCTAATG  
+HWI-EAS443:3:11:663:621#0/1  
aaaaa\_a`aaa```^^aa¥`^a`\_`\_\_a`a^a`\_`\_`^^`  
@HWI-EAS443:3:11:678:592#0/1  
CAAATATATTCAATATGGAGAGAATAAAAGAAGACTGAGAGA  
+HWI-EAS443:3:11:678:592#0/1  
`bbaabbabbbbbabbbaa\_b\_baaaaaaaaaaaa`  
@HWI-EAS443:3:11:679:536#0/1  
CAAATATATTCAATATGGAGAGAATAAAAGAAGACTGAGAGA  
+HWI-EAS443:3:11:679:536#0/1  
aaa^]`^aa^DU`\_a`aaa]a\_a`\_`\_`^`¥X\_]\_`\_`¥a^

@HWI-EAS443:3:11:727:800#0/1  
AAAGCAGGTCAAATATATTCAATATGGAGAGAATAAAAAGA  
+HWI-EAS443:3:11:727:800#0/1  
]a[aaaaXaaaa`^]a\_a][aaa`\_W\_[\_Y¥^`\_`\_a\_\_  
@HWI-EAS443:3:11:762:1494#0/1  
ATTCATATGGAGAGAATAAAAAGAACTGAGAGATCTAATG  
+HWI-EAS443:3:11:762:1494#0/1  
¥^ba\_ba¥¥^J¥¥^b^X]0^L[Ra`S`aZ`\_aaPY\_\_aa  
@HWI-EAS443:3:11:927:117#0/1  
CAAATATATTCAATATGGAGAGAATAAAAAGAACTGAGAGA  
+HWI-EAS443:3:11:927:117#0/1  
abbbbbbbbbbababbb`b`babbabaabaa`bbaaaba  
@HWI-EAS443:3:11:930:1176#0/1  
ATTCATATGGAGAGAATAAAAAGAACTGAGAGATCTAATG  
+HWI-EAS443:3:11:930:1176#0/1  
\_`a`^`V`^`¥aYV^¥b]¥V`\_]`^`^aa[`WYS¥]X^`  
@HWI-EAS443:3:11:937:1398#0/1  
TTCAATATGGAGAGAATAAAAAGAACTGAGAGATCTAATGT  
+HWI-EAS443:3:11:937:1398#0/1  
aa]]aa]aaSZ`Y^Z`a\_U\_a[\_`]\_\_`a¥`\_`\_ZX`^^`W  
@HWI-EAS443:3:12:1063:1982#0/1  
AATATATTCAATATGGAGAGAATAAAAAGAACTGAGAGATC  
+HWI-EAS443:3:12:1063:1982#0/1  
¥`L\_a`\_]\_YSU]SVWY]¥\_a`U``\_[]]OV`aZ`\_aUZ  
@HWI-EAS443:3:12:1313:1436#0/1  
ATATATTCAATATGGAGAGAATAAAAAGAACTGAGAGATCT  
+HWI-EAS443:3:12:1313:1436#0/1  
aabb`ba`a`baaaaWa\_a`\_\_aaa^a`^]\_a`a`¥`^W`  
@HWI-EAS443:3:12:1468:576#0/1  
GTCAAATATATTCAATATGGAGAGAATAAAAAGAACTGAGA  
+HWI-EAS443:3:12:1468:576#0/1  
aY^aWWW^a¥XaXULTa`\_`RQWHTXZa`¥^]VWWT]][]]  
@HWI-EAS443:3:12:1539:1544#0/1  
CAAATATATTCAATATGGAGAGAATAAAAAGAACTGAGAGA  
+HWI-EAS443:3:12:1539:1544#0/1  
aba`b^a`a\_]\_X^^aaa`¥a`a`[\_`]¥\_Ya\_\_ZZa^  
@HWI-EAS443:3:12:1624:749#0/1  
GTCAAATATATTCAATATGGAGAGAATAAAAAGAACTGAGA  
+HWI-EAS443:3:12:1624:749#0/1  
aa¥aaabaaaaOP`\_`a\_aa[\_`^a^^`\_a`]S\_\_[^W^^^  
@HWI-EAS443:3:12:268:1159#0/1  
GTCAAATATATTCAATATGGAGAGAATAAAAAGAACTGAGA  
+HWI-EAS443:3:12:268:1159#0/1  
a^\_QVa\_X^a\_YXabbaa`Y\_]aaZ^`[]\_]`^\_]`[aWa  
@HWI-EAS443:3:12:549:1194#0/1  
ATTCATATGGAGAGAATAAAAAGAACTGAGAGATCTAATG  
+HWI-EAS443:3:12:549:1194#0/1  
aabaaababb`bZa\_ab`aa\_\_aa\_aaa\_a`aa`a`\_`  
@HWI-EAS443:3:12:643:409#0/1  
ATTCATATGGAGAGAATAAAAAGAACTGAGAGATCTAATG

+HWI-EAS443:3:12:643:409#0/1  
`aa]Y`]bba\_aaa]V¥^ZX```aZ`abaaaa`aaa`a  
@HWI-EAS443:3:12:699:1770#0/1  
ATTCAATATGGAGAGAATAAAAGAACTGAGAGATCTAATG  
+HWI-EAS443:3:12:699:1770#0/1  
`aaaba\_`a\_a\_aa`a`a`a`aaaa\_`^a^b\_``Zaa^aB  
@HWI-EAS443:3:12:716:920#0/1  
AGCAGGTCAAATATATTCAATATGGAGAGAATAAAAGAAC  
+HWI-EAS443:3:12:716:920#0/1  
^`b\_[`HQ[\_ba^^b`aa`¥`¥b¥^Ya[`X^[\_¥ZTU\_a]  
@HWI-EAS443:3:13:1029:354#0/1  
ATTCAATATGGAGAGAATAAAAGAACTGAGAGATCTAATG  
+HWI-EAS443:3:13:1029:354#0/1  
aba``aa`aaa\_a]^^`aaaa`a\_`\_a`a\_```````\_`  
@HWI-EAS443:3:13:1403:1175#0/1  
AGCAGGTCAAATATATTCAATATGGAGAGAATAAAAGAAC  
+HWI-EAS443:3:13:1403:1175#0/1  
aababa\_\_ab^baa\_aa\_\_`a]a`a^a^a`^\_\_aa\_`\_¥  
@HWI-EAS443:3:13:1429:910#0/1  
AGCAGGTCAAATATATTCAATATGGAGAGAATAAAAGAAC  
+HWI-EAS443:3:13:1429:910#0/1  
[[a`bb]]a\_\_a^b[a^RYbbabb\_bYbZ¥aa\_]Y`\_^¥  
@HWI-EAS443:3:13:1463:1014#0/1  
AATATATTCAATATGGAGAGAATAAAAGAACTGAGAGATC  
+HWI-EAS443:3:13:1463:1014#0/1  
aaa\_a^a\_\_a^a^a\_\_TYUa]W``^]]^`[\_U`¥¥[^]  
@HWI-EAS443:3:13:1761:841#0/1  
ATTCAATATGGAGAGAATAAAAGAACTGAGAGATCTAATG  
+HWI-EAS443:3:13:1761:841#0/1  
Z^SX`a\_Z^^¥][J^[]aU\_^W^]S\_^Z]aY]U]0¥^\_WB  
@HWI-EAS443:3:13:420:401#0/1  
CAAATATATTCAATATGGAGAGAATAAAAGAACTGAGAGA  
+HWI-EAS443:3:13:420:401#0/1  
aaabbaaabaabaa`aaa`aaa`aaaa`baa`aaa  
@HWI-EAS443:3:13:565:280#0/1  
ATATATTCAATATGGAGAGAATAAAAGAACTGAGAGATCT  
+HWI-EAS443:3:13:565:280#0/1  
aa`aa`aaaa]`aa^aY][`a`a\_``^`]`a\_``\_]^^  
@HWI-EAS443:3:13:65:1594#0/1  
CAAATATATTCAATATGGAGAGAATAAAAGAACTGAGAGA  
+HWI-EAS443:3:13:65:1594#0/1  
aa^b]VZabaaWaW\_a`Y^a]`^^\_a`aa][\_\_\_\_`aTa\_`  
@HWI-EAS443:3:13:726:1729#0/1  
CAAATATATTCAATATGGAGAGAATAAAAGAACTGAGAGA  
+HWI-EAS443:3:13:726:1729#0/1  
abbbabbaaa`a`a`aaa\_a`aaa`aa````\_a^````\_]`  
@HWI-EAS443:3:13:903:607#0/1  
AGCAGGTCAAATATATTCAATATGGAGAGAATAAAAGAAC  
+HWI-EAS443:3:13:903:607#0/1  
¥\_bb`b``a\_ba¥\_a\_V]^]\_\_aba¥a]a\_V\_a`aa`a\_

@HWI-EAS443:3:13:940:874#0/1  
CAAATATATTCAATATGGAGAGAATAAAAGAACTGAGAGA  
+HWI-EAS443:3:13:940:874#0/1  
aaabbaa`baaaabbbababaaa`aaaaaaaaaaaa\_aaa  
@HWI-EAS443:3:14:1053:793#0/1  
AGCAGGTCAAATATATTCAATATGGAGAGAATAAAAGAAC  
+HWI-EAS443:3:14:1053:793#0/1  
abbaaa\_\_baabaa`aaa`aaa`a[b^aZ\_a``]\_`\_\_a  
@HWI-EAS443:3:14:105:862#0/1  
CAAATATATTCAATATGGAGAGAATAAAAGAACTGAGAGA  
+HWI-EAS443:3:14:105:862#0/1  
abbaaaaaaaaaaaaaa\_¥`Z`^[`a`Za`\_^`\_`\_`\_`aa  
@HWI-EAS443:3:14:1088:1811#0/1  
AGCAGGTCAAATATATTCAATATGGAGAGAATAAAAGAAC  
+HWI-EAS443:3:14:1088:1811#0/1  
aabb]bYabaaabaaabb`a`\_a`\_^a``aaabbaa\_aa]  
@HWI-EAS443:3:14:1273:168#0/1  
AAGCAGGTCAAATATATTCAATATGGAGAGAATAAAAGAA  
+HWI-EAS443:3:14:1273:168#0/1  
`\_aV`aa\_aaaaa`aaaa]`\_`\_aa`\_a]a`^`\_\_`^`\_`^^  
@HWI-EAS443:3:14:1329:744#0/1  
ATTCAATATGGAGAGAATAAAAGAACTGAGAGATCTAATG  
+HWI-EAS443:3:14:1329:744#0/1  
`bbb\_babbbbbbb^bbbaabaabaababaa``aaaaabb  
@HWI-EAS443:3:14:1449:246#0/1  
AGCAGGTCAAATATATTCAATATGGAGAGAATAAAAGAAC  
+HWI-EAS443:3:14:1449:246#0/1  
\_\_b`\_Z`aabaZX\_a`[P`a`abaVb^a`\_a`\_`\_aa`\_0  
@HWI-EAS443:3:14:1593:192#0/1  
ATTCAATATGGAGAGAATAAAAGAACTGAGAGATCTAATG  
+HWI-EAS443:3:14:1593:192#0/1  
abaa``aabb\_b]a^\_a`a\_aa^`]a\_\_`\_]\_X`^^^`  
@HWI-EAS443:3:14:1676:1486#0/1  
CAAATATATTCAATATGGAGAGAATAAAAGAACTGAGAGA  
+HWI-EAS443:3:14:1676:1486#0/1  
aaaabaaabbaabb^bbbab\_b^a¥baabb¥a^aa\_^b`\_`  
@HWI-EAS443:3:14:280:180#0/1  
CAAATATATTCAATATGGAGAGAATAAAAGAACTGAGAGA  
+HWI-EAS443:3:14:280:180#0/1  
abba`aaaaaZ¥^\_aa`\_a^a^`a\_\_```X`^a`a`\_^\_`  
@HWI-EAS443:3:14:539:147#0/1  
CAAATATATTCAATATGGAGAGAATAAAAGAACTGAGAGA  
+HWI-EAS443:3:14:539:147#0/1  
aababbbbbbaababbbababaaababbaaab\_ababaa`  
@HWI-EAS443:3:14:644:313#0/1  
AATATATTCAATATGGAGAGAATAAAAGAACTGAGAGATC  
+HWI-EAS443:3:14:644:313#0/1  
a^a`b]aaaa¥a\_a``^^^a`a`¥aYY^`aX`\_a\_a[[R\_Y  
@HWI-EAS443:3:14:784:972#0/1  
CAAATATATTCAATATGGAGAGAATAAAAGAACTGAGAGA



@HWI-EAS443:3:16:1242:478#0/1  
GTCAAATATATTCAATATGGAGAGAATAAAAGAACTGAGA  
+HWI-EAS443:3:16:1242:478#0/1  
aaaa`ab`aaaaa`babb`\_b\_b\_`aaa]aa\_a]aa\_\_a  
@HWI-EAS443:3:16:1271:1184#0/1  
GTCAAATATATTCAATATGGAGAGAATAAAAGAACTGAGA  
+HWI-EAS443:3:16:1271:1184#0/1  
a\_aba`abaaaaa\_a`aaa]a^aa`aaa\_a`\_aYa`^`\_  
@HWI-EAS443:3:16:1482:659#0/1  
AAGCAGGTCAAATATATTCAATATGGAGAGAATAAAAGAA  
+HWI-EAS443:3:16:1482:659#0/1  
aW[^aa`aab^ZaYb]`a\_]¥a`ab^]a]a¥[\_M^`\_a^\_  
@HWI-EAS443:3:16:1616:933#0/1  
CAGGTCAAATATATTCAATATGGAGAGAATAAAAGAACTG  
+HWI-EAS443:3:16:1616:933#0/1  
ab`baZab`aa^¥bb]^¥bababYbZb```a`^a^^`^a]  
@HWI-EAS443:3:16:408:809#0/1  
CAAATATATTCAATATGGAGAGAATAAAAGAACTGAGAGA  
+HWI-EAS443:3:16:408:809#0/1  
US¥``WaSYVa]^Yba`UUb\_[Qa]Zb][K¥^^IZaaba`  
@HWI-EAS443:3:16:905:734#0/1  
AAGCAGGTCAAATATATTCAATATGGAGAGAATAAAAGAA  
+HWI-EAS443:3:16:905:734#0/1  
U¥`b`^¥a`\_¥ab]a]`]aaabaV]a^^Z`^`aba``a¥`a  
@HWI-EAS443:3:16:920:816#0/1  
ATTCAATATGGAGAGAATAAAAGAACTGAGAGATCTAATG  
+HWI-EAS443:3:16:920:816#0/1  
aabaaababababab\_ab\_aa\_a\_a^a\_aa`aaa\_aa¥aa  
@HWI-EAS443:3:16:950:1669#0/1  
ATATTCAATATGGAGAGAATAAAAGAACTGAGAGATCTAA  
+HWI-EAS443:3:16:950:1669#0/1  
¥`bbb`\_Vab\_`\_[^\_]Y\_`\_a^`XQT`aa^````\_aaa  
@HWI-EAS443:3:17:1290:855#0/1  
GTCAAATATATTCAATATGGAGAGAATAAAAGAACTGAGA  
+HWI-EAS443:3:17:1290:855#0/1  
a\_\_a`L`S``aaX\_a`Yaa[Z`]^\_\_a[¥[Z\_]\_W``^]  
@HWI-EAS443:3:17:1496:812#0/1  
AAATATATTCAATATGGAGAGAATAAAAGAACTGAGAGAT  
+HWI-EAS443:3:17:1496:812#0/1  
aa`aaaaba\_a\_a^ab`]a\_a\_\_a\_\_a\_a\_\_]a\_\_\_\_^`\_\_  
@HWI-EAS443:3:17:1594:1810#0/1  
AATATATTCAATATGGAGAGAATAAAAGAACTGAGAGATC  
+HWI-EAS443:3:17:1594:1810#0/1  
`a^^[abaRXXbb¥T\_WaaYa\_]`a`a^X``\_W^\_baaa[  
@HWI-EAS443:3:17:1619:446#0/1  
AAGCAGGTCAAATATATTCAATATGGAGAGAATAAAAGAA  
+HWI-EAS443:3:17:1619:446#0/1  
abba\_aa^`aaaa`aa]a\_a\_a`\_\_a^\_]`a\_\_¥\_``^  
@HWI-EAS443:3:17:208:1826#0/1  
AGCAGGTCAAATATATTCAATATGGAGAGAATAAAAGAAC

+HWI-EAS443:3:17:208:1826#0/1  
^¥`^¥H^baba]\_ZW¥Z`^a¥\_\_aaa]]aaa`[a]\_a^  
@HWI-EAS443:3:17:271:1096#0/1  
AGCAGGTCAAATATATTCAATATGGAGAGAATAAAAGAAC  
+HWI-EAS443:3:17:271:1096#0/1  
`UU\_ULU]^XS]^ZZ`a¥[MZQYOMT]R`YW^Q\_]TGW`]  
@HWI-EAS443:3:17:360:917#0/1  
AGCAGGTCAAATATATTCAATATGGAGAGAATAAAAGAAC  
+HWI-EAS443:3:17:360:917#0/1  
`P`\_]`Ya¥`a]¥`\_\_[\_^`\_RWZ\_^[Y]RPX\_]`^^^]  
@HWI-EAS443:3:17:593:498#0/1  
ATTCAATATGGAGAGAATAAAAGAACTGAGAGATCTAATG  
+HWI-EAS443:3:17:593:498#0/1  
aa[aaabab]T`¥```a\_bbY]WPN[\_b\_aUa\_aXa\_Yaa  
@HWI-EAS443:3:17:858:285#0/1  
CAAATATATTCAATATGGAGAGAATAAAAGAACTGAGAGA  
+HWI-EAS443:3:17:858:285#0/1  
\_bb`Y`b`bYV¥aY`abab]baa\_bV^Y\_aa[ `a`aa\_\_  
@HWI-EAS443:3:17:876:102#0/1  
AATATATTCAATATGGAGAGAATAAAAGAACTGAGAGATC  
+HWI-EAS443:3:17:876:102#0/1  
\_W^]b^aR`a¥aaabb]aXaW\_a\_\_]`\_[V[a\_^`a\_^`]  
@HWI-EAS443:3:18:103:1273#0/1  
CAAATATATTCAATATGGAGAGAATAAAAGAACTGAGAGA  
+HWI-EAS443:3:18:103:1273#0/1  
`\_]ZZWaaa\_a`[aaZ``\_¥Pa^¥a\_^L[\_\_\_\_\_`\_  
@HWI-EAS443:3:18:1047:1879#0/1  
AGCAGGTCAAATATATTCAATATGGAGAGAATAAAAGAAC  
+HWI-EAS443:3:18:1047:1879#0/1  
a\_aa[] [aaaa`aa````\_^aaa`^a^`^\_\_a``\_^]\_]`  
@HWI-EAS443:3:18:1054:212#0/1  
GCAGGTCAAATATATTCAATATGGAGAGAATAAAAGAACT  
+HWI-EAS443:3:18:1054:212#0/1  
^`^bb¥Z`\_`ba\_Xa\_]`\_bT`b]^`^`aKYP^baa]ba`a  
@HWI-EAS443:3:18:1212:615#0/1  
ATTCAATATGGAGAGAATAAAAGAACTGAGAGATCTAATG  
+HWI-EAS443:3:18:1212:615#0/1  
^¥\_aYabY]^aaa\_aa`a``]Ya\_aIaa]a`a¥a`a\_]aa  
@HWI-EAS443:3:18:1391:1783#0/1  
CAAATATATTCAATATGGAGAGAATAAAAGAACTGAGAGA  
+HWI-EAS443:3:18:1391:1783#0/1  
V^a¥^¥abb`^bbbaabbb`abb¥baab\_aab```babbb  
@HWI-EAS443:3:18:1476:833#0/1  
CAAATATATTCAATATGGAGAGAATAAAAGAACTGAGAGA  
+HWI-EAS443:3:18:1476:833#0/1  
a`]ZaZaM`a`\_`b\_a^ZS^V^NWa\_aaba^¥Za``a\_a[  
@HWI-EAS443:3:18:1613:786#0/1  
CAAATATATTCAATATGGAGAGAATAAAAGAACTGAGAGA  
+HWI-EAS443:3:18:1613:786#0/1  
abbbbababbaaaa^abb\_b\_b` `a`baaaaa`aaaa`a^



@HWI-EAS443:3:18:292:1593#0/1  
CAGGTCAAATATATTCAATATGGAGAGAATAAAAGAACTG  
+HWI-EAS443:3:18:292:1593#0/1  
¥[UZx\_`^YX^¥Q¥]]]]ZV]\_VU]^a]]X]]¥^¥^XOX\_  
@HWI-EAS443:3:18:472:716#0/1  
GTCAAATATATTCAATATGGAGAGAATAAAAGAACTGAGA  
+HWI-EAS443:3:18:472:716#0/1  
aV^FY`[ZXaYVWSV\_`¥`a\_\_\_\_[W^[X\_\_\_\_\_¥W¥\_¥\_^¥  
@HWI-EAS443:3:18:483:469#0/1  
TCAATATGGAGAGAATAAAAGAACTGAGAGATCTAATGTC  
+HWI-EAS443:3:18:483:469#0/1  
]a¥J`¥U\_b`a`aa`aaaaa]a]a\_aaaa`\_\_\_\_\_¥aa¥U  
@HWI-EAS443:3:18:594:868#0/1  
AAATATATTCAATATGGAGAGAATAAAAGAACTGAGAGAT  
+HWI-EAS443:3:18:594:868#0/1  
aaabababba`^aaaa\_a\_a^^\_a`a`\_\_\_\_]aa````\_`^  
@HWI-EAS443:3:18:646:702#0/1  
AATATATTCAATATGGAGAGAATAAAAGAACTGAGAGATC  
+HWI-EAS443:3:18:646:702#0/1  
^abba¥bbbaa`ab^P^`a`aba`]]`\_aaaa`\_`a`\_¥  
@HWI-EAS443:3:18:890:47#0/1  
GTCAAATATATTCAATATGGAGAGAATAAAAGAACTGAGA  
+HWI-EAS443:3:18:890:47#0/1  
\_W[aa`a^^\_``]\_\_`\_``]Ya^\_Y^\_^\_^^\_][][]Z][  
@HWI-EAS443:3:18:922:188#0/1  
AATATATTCAATATGGAGAGAATAAAAGAACTGAGAGATC  
+HWI-EAS443:3:18:922:188#0/1  
[a^¥aVa¥Za`aTb`bZ^Va\_\_a\_\_a`X[`Xaa\_`\_`\_^S  
@HWI-EAS443:3:18:953:821#0/1  
AGCAGGTCAAATATATTCAATATGGAGAGAATAAAAGAAC  
+HWI-EAS443:3:18:953:821#0/1  
^abbaa^\_^`a`\_\_aba^`aa``a\_b]`aaaa\_a``\_ZP  
@HWI-EAS443:3:19:1166:1435#0/1  
GTCAAATATATTCAATATGGAGAGAATAAAAGAACTGAGA  
+HWI-EAS443:3:19:1166:1435#0/1  
a\_\_bbaaaaaaaaa`aa`aa\_``^a\_aa`aa`````^\_\_`^`  
@HWI-EAS443:3:19:1252:436#0/1  
AGCAGGTCAAATATATTCAATATGGAGAGAATAAAAGAAC  
+HWI-EAS443:3:19:1252:436#0/1  
`]VQZ\_GW\_V\_\_T^]`aY¥¥^\_a\_ZWa¥]U``a\_a^^^[[  
@HWI-EAS443:3:19:1394:1420#0/1  
ATTCAATATGGAGAGAATAAAAGAACTGAGAGATCTAATG  
+HWI-EAS443:3:19:1394:1420#0/1  
¥``aY`YZZ`^\_aabY^VYXY¥^a^Y\_`baaa¥^Zba`\_a  
@HWI-EAS443:3:19:1522:702#0/1  
CAAATATATTCAATATGGAGAGAATAAAAGAACTGAGAGA  
+HWI-EAS443:3:19:1522:702#0/1  
aabababbabababbaba`baba`ab\_`aaZ`\_aaa\_aa`  
@HWI-EAS443:3:19:209:524#0/1  
CAGGTCAAATATATTCAATATGGAGAGAATAAAAGAACTG

+HWI-EAS443:3:19:209:524#0/1  
aabb]abbbbababa\_abaabaaaa\_baaabaaaa\_a`a`  
@HWI-EAS443:3:19:222:1183#0/1  
GCAGGTCAAATATATTCAATATGGAGAGAATAAAAGAACT  
+HWI-EAS443:3:19:222:1183#0/1  
abaaa\_abababbab]bbaa`baaaa`aaaa`a`\_\_ba`  
@HWI-EAS443:3:19:27:543#0/1  
AGCAGGTCAAATATATTCAATATGGAGAGAATAAAAGAAC  
+HWI-EAS443:3:19:27:543#0/1  
W^\_bbb\_^\_]bbaaa`a`K¥P\_aa\_bX\_a\_\_a\_\_\_\_\_`]  
@HWI-EAS443:3:19:359:1270#0/1  
CAAATATATTCAATATGGAGAGAATAAAAGAACTGAGAGA  
+HWI-EAS443:3:19:359:1270#0/1  
`YXM]aa`b`Y`a`\_\_aaZa\_a`\_\_aaa`ZPW^`^a^a^]  
@HWI-EAS443:3:19:498:1003#0/1  
AAGCAGGTCAAATATATTCAATATGGAGAGAATAAAAGAA  
+HWI-EAS443:3:19:498:1003#0/1  
a`^aba\_aba\_bbabaaaa^a\_aba[aaa\_\_aaaa[a\_a  
@HWI-EAS443:3:19:551:1183#0/1  
CAAATATATTCAATATGGAGAGAATAAAAGAACTGAGAGA  
+HWI-EAS443:3:19:551:1183#0/1  
abbaabbabbaaab`bbb`bab`\_`babbb`aa`a`b\_a\_a  
@HWI-EAS443:3:19:559:108#0/1  
ATTCAATATGGAGAGAATAAAAGAACTGAGAGATCTAATG  
+HWI-EAS443:3:19:559:108#0/1  
`bb`\_\_a¥b]a^U^]\_\_^\_a`\_\_\_`\_\_X\_[[]\_]¥0]a  
@HWI-EAS443:3:19:71:609#0/1  
GTCAAATATATTCAATATGGAGAGAATAAAAGAACTGAGA  
+HWI-EAS443:3:19:71:609#0/1  
a\_aaaaa^`Za`]Y^¥Z`a\_\_\_Z]^a¥a\_\_\_]^\_YS]^[]  
@HWI-EAS443:3:1:1048:373#0/1  
CAAATATATTCAATATGGAGAGAATAAAAGAACTGAGAGA  
+HWI-EAS443:3:1:1048:373#0/1  
\_ba`b^¥aab`T`]a]a¥`\_aa[Wa`a`aaa`]\_a\_^\_aB  
@HWI-EAS443:3:1:1110:1110#0/1  
AGCAGGTCAAATATATTCAATATGGAGAGAATAAAAGAAC  
+HWI-EAS443:3:1:1110:1110#0/1  
a¥a\_a`YX`\_\_`a\_]a^RLM¥^\_aaXaVa^^\_S\_[]¥BBB  
@HWI-EAS443:3:1:1262:197#0/1  
AAAGCAGGTCAAATATATTCAATATGGAGAGAATAAAAGA  
+HWI-EAS443:3:1:1262:197#0/1  
aa]aVabaVD[^aY`\_^¥Y\_^aaaaWa[a]]a\_\_^BBB  
@HWI-EAS443:3:1:1481:1398#0/1  
AAATATATTCAATATGGAGAGAATAAAAGAACTGAGAGAT  
+HWI-EAS443:3:1:1481:1398#0/1  
aaaabb\_aa]a\_baaaa^a`aa`aa\_\_\_a`Ya`\_`a`aB  
@HWI-EAS443:3:1:671:408#0/1  
ATTCAATATGGAGAGAATAAAAGAACTGAGAGATCTAATG  
+HWI-EAS443:3:1:671:408#0/1  
abbaa]a]\_baab[aZ^`aaa¥]a\_P]`b\_aaa`SaaBBB

@HWI-EAS443:3:1:702:225#0/1  
CAAATATATTCAATATGGAGAGAATAAAAGAACTGAGAGA  
+HWI-EAS443:3:1:702:225#0/1  
abbabba`aa`aaaaaba]ba`^`a`\_`a```]a`a\_a\_`  
@HWI-EAS443:3:1:757:1624#0/1  
ATTCAATATGGAGAGAATAAAAGAACTGAGAGATCTAATG  
+HWI-EAS443:3:1:757:1624#0/1  
\_\_b¥abaa`¥X¥VY`aaaa\_aa^aaaa`aaY\_\_aaBB  
@HWI-EAS443:3:20:109:343#0/1  
ATTCAATATGGAGAGAATAAAAGAACTGAGAGATCTAATG  
+HWI-EAS443:3:20:109:343#0/1  
aa^aa`a\_aa`]a`\_`aaa\_\_\_]`\_`\_`X\_\_\_^¥^`\_`\_`  
@HWI-EAS443:3:20:1189:943#0/1  
GTCAAATATATTCAATATGGAGAGAATAAAAGAACTGAGA  
+HWI-EAS443:3:20:1189:943#0/1  
a\_\_a¥Z\_]`\_a\_]W\_]aaa]`^`^`\_a``¥`]^[^]`^^  
@HWI-EAS443:3:20:1379:77#0/1  
CAAATATATTCAATATGGAGAGAATAAAAGAACTGAGAGA  
+HWI-EAS443:3:20:1379:77#0/1  
aba`a^b`aa]¥ab`bbb\_a``Y`[\_`\_a`\_`\_\_`\_a`  
@HWI-EAS443:3:20:1470:787#0/1  
ATTCAATATGGAGAGAATAAAAGAACTGAGAGATCTAATG  
+HWI-EAS443:3:20:1470:787#0/1  
aaba\_\_aab`aabab`aaaaaa^a^aaaa`a``aa`aa  
@HWI-EAS443:3:20:1541:1647#0/1  
GTCAAATATATTCAATATGGAGAGAATAAAAGAACTGAGA  
+HWI-EAS443:3:20:1541:1647#0/1  
`XRR\_a^PWPZYaTR]OUX]T`Qa`]PY[\_TRLPR¥OWGV  
@HWI-EAS443:3:20:1623:684#0/1  
AATATATTCAATATGGAGAGAATAAAAGAACTGAGAGATC  
+HWI-EAS443:3:20:1623:684#0/1  
aababaaba^aa\_aaa\_b\_aa`aaa\_aa\_a\_aa\_a\_]`][  
@HWI-EAS443:3:20:31:491#0/1  
AATATATTCAATATGGAGAGAATAAAAGAACTGAGAGATC  
+HWI-EAS443:3:20:31:491#0/1  
aaa`a\_a[^^\_W`a]Y`Z\_]`^¥[[]¥R¥X]X¥X¥[[Y  
@HWI-EAS443:3:20:388:416#0/1  
CAAATATATTCAATATGGAGAGAATAAAAGAACTGAGAGA  
+HWI-EAS443:3:20:388:416#0/1  
abbbbbbbababababab`a^baaaab`abbaaaa  
@HWI-EAS443:3:20:491:59#0/1  
GTCAAATATATTCAATATGGAGAGAATAAAAGAACTGAGA  
+HWI-EAS443:3:20:491:59#0/1  
a¥`a`a\_a`a`\_`\_`abaY`]a^^`\_`^`\_`^`\_`^`\_`^`\_`  
@HWI-EAS443:3:20:677:1947#0/1  
AAAGCAGGTCAAATATATTCAATATGGAGAGAATAAAAGA  
+HWI-EAS443:3:20:677:1947#0/1  
a`a\_aa\_\_[`aaaa`aaa`\_`\_`^`¥]\_\_`\_`\_`a``¥`  
@HWI-EAS443:3:20:842:1688#0/1  
ATTCAATATGGAGAGAATAAAAGAACTGAGAGATCTAATG

+HWI-EAS443:3:20:842:1688#0/1  
a^`[\_a`aaa`aaa\_baaaa`Za`\_]Y^\_a\_a]a\_`\_]\_  
@HWI-EAS443:3:21:1179:1641#0/1  
ATTCAATATGGAGAGAATAAAAGAACTGAGAGATCTAATG  
+HWI-EAS443:3:21:1179:1641#0/1  
¥YabZO[¥¥¥\_`a`ZH¥a\_baaa`VI¥Q\_``aa`\_a`YXY  
@HWI-EAS443:3:21:1187:1001#0/1  
CAAATATATTCAATATGGAGAGAATAAAAGAACTGAGAGA  
+HWI-EAS443:3:21:1187:1001#0/1  
``bbab]bbbbaa``[`X]baa^`^a`aaaaa`aa`aaa  
@HWI-EAS443:3:21:1290:579#0/1  
GTCAAATATATTCAATATGGAGAGAATAAAAGAACTGAGA  
+HWI-EAS443:3:21:1290:579#0/1  
a¥\_aa`a`a\_a\_][^`\_`a`]a\_`[¥^\_]`^`\_]\_^^^  
@HWI-EAS443:3:21:1708:513#0/1  
AATATATTCAATATGGAGAGAATAAAAGAACTGAGAGATC  
+HWI-EAS443:3:21:1708:513#0/1  
aaaa\_`^`a\_\_^a]\_a\_UaU\_]\_`^`^^^[]W\_]Y[^Z[  
@HWI-EAS443:3:21:1733:398#0/1  
GGTCAAATATATTCAATATGGAGAGAATAAAAGAACTGAG  
+HWI-EAS443:3:21:1733:398#0/1  
Y\_V[`Y^aaaW^^M`aaYa^[W\_]a]Ya\_]\_``¥\_[\_a]`  
@HWI-EAS443:3:21:423:2017#0/1  
AAGCAGGTCAAATATATTCAATATGGAGAGAATAAAAGAA  
+HWI-EAS443:3:21:423:2017#0/1  
a\_`[`V[]a`a``]^`[\_a`\_¥\_\_\_\_]\_[]^`\_\_^`^V`¥]\_  
@HWI-EAS443:3:21:449:1532#0/1  
AGCAGGTCAAATATATTCAATATGGAGAGAATAAAAGAAC  
+HWI-EAS443:3:21:449:1532#0/1  
`^aaX^F¥¥aaX`\_aa\_a``a\_`[ST`^`\_`\_\_\_\_`Z`]`\_  
@HWI-EAS443:3:21:54:2010#0/1  
AGCAGGTCAAATATATTCAATATGGAGAGAATAAAAGAAC  
+HWI-EAS443:3:21:54:2010#0/1  
aabaaaVbbXab]aa¥Z`a\_a\_aa\_``^`\_\_\_\_`a\_`[¥\_\_^  
@HWI-EAS443:3:21:613:1971#0/1  
ATTCAATATGGAGAGAATAAAAGAACTGAGAGATCTAATG  
+HWI-EAS443:3:21:613:1971#0/1  
aaaaa``aaba`a`a`\_`\_`aba`\_`\_¥\_a^aa\_^]`^`\_\_\_\_  
@HWI-EAS443:3:21:73:1660#0/1  
ATTCAATATGGAGAGAATAAAAGAACTGAGAGATCTAATG  
+HWI-EAS443:3:21:73:1660#0/1  
aaaba]\_]aaaa`\_\_a``aaaa[aaa`a]a\_a`a\_a`][  
@HWI-EAS443:3:21:904:424#0/1  
GTCAAATATATTCAATATGGAGAGAATAAAAGAACTGAGA  
+HWI-EAS443:3:21:904:424#0/1  
a`aabaaaaa\_aa\_aaaaa`a`a\_`a`\_aaa\_``````^`  
@HWI-EAS443:3:22:1045:262#0/1  
GTCAAATATATTCAATATGGAGAGAATAAAAGAACTGAGA  
+HWI-EAS443:3:22:1045:262#0/1  
a\_\_aaaaa`\_aa^a\_a\_aaa\_a^a\_`a^`\_\_^`^`\_\_]\_

@HWI-EAS443:3:22:1053:1137#0/1  
GCAGGTCAAATATATTCAATATGGAGAGAATAAAAGAACT  
+HWI-EAS443:3:22:1053:1137#0/1  
S`¥T`\_`X^`a`b`X\_X[a\_b\_]P¥Z\_\_a^a^YYSH¥W\_  
@HWI-EAS443:3:22:1100:1917#0/1  
AAGCAGGTCAAATATATTCAATATGGAGAGAATAAAAGAA  
+HWI-EAS443:3:22:1100:1917#0/1  
aa\_UaT\_HX¥`\_]ZXXa`W\_SRNZZ[`WY^S\_SQ^\_VU^  
@HWI-EAS443:3:22:1266:252#0/1  
TTCAATATGGAGAGAATAAAAGAACTGAGAGATCTAATGT  
+HWI-EAS443:3:22:1266:252#0/1  
]a\_Waa\_`aa\_`U^ZR^a`aa[¥[L¥X\_\_^^\_^V`[[\_WB  
@HWI-EAS443:3:22:1302:507#0/1  
AATATATTCAATATGGAGAGAATAAAAGAACTGAGAGATC  
+HWI-EAS443:3:22:1302:507#0/1  
aa\_]a`\_`¥\_`b\_aaa¥a[a^``\_`\_`¥\_`^]Y\_`^`\_`^¥  
@HWI-EAS443:3:22:1314:1740#0/1  
AATATATTCAATATGGAGAGAATAAAAGAACTGAGAGATC  
+HWI-EAS443:3:22:1314:1740#0/1  
^¥YXSH\_a^^[`]aaa]¥Raabaab\_WX`Z`^P]\_¥¥]UP  
@HWI-EAS443:3:22:1548:583#0/1  
GTCAAATATATTCAATATGGAGAGAATAAAAGAACTGAGA  
+HWI-EAS443:3:22:1548:583#0/1  
a`\_aaaaaa`aaa`a`aaa]b]a\_`a``a\_]\_^`\_`]\_  
@HWI-EAS443:3:22:1572:568#0/1  
GAGAAAGCTAATGTGCTAATTGGGCAAGGGGACGTGGTGT  
+HWI-EAS443:3:22:1572:568#0/1  
a\_aYY]WUWIN[\_Za\_\_`\_aW\_`[¥UUaX[^WV`UNWG[U  
@HWI-EAS443:3:22:1701:1799#0/1  
GTCAAATATATTCAATATGGAGAGAATAAAAGAACTGAGA  
+HWI-EAS443:3:22:1701:1799#0/1  
`Z^`a`a\_aWaa\_\_\_`]aa\_Va]\_]`\_]\_^Z[Z]]\_]^  
@HWI-EAS443:3:22:188:984#0/1  
AAATATATTCAATATGGAGAGAATAAAAGAACTGAGAGAT  
+HWI-EAS443:3:22:188:984#0/1  
a]`\_]a\_`a\_]a\_`\_]`W`¥\_\_\_\_\_^X\_]\_]Z\_]\_]^^  
@HWI-EAS443:3:22:217:696#0/1  
ATTCAATATGGAGAGAATAAAAGAACTGAGAGATCTAATG  
+HWI-EAS443:3:22:217:696#0/1  
abaaa`baab^aa¥aaaa`^\_aa`aa`[``aaa\_`aa\_aa  
@HWI-EAS443:3:22:271:143#0/1  
AAGCAGGTCAAATATATTCAATATGGAGAGAATAAAAGAA  
+HWI-EAS443:3:22:271:143#0/1  
a\_`aa^][aaa`Y[^a]W\_`^\_`^¥V]]\_]`\_]\_]^^¥\_  
@HWI-EAS443:3:22:443:1224#0/1  
AAATATATTCAATATGGAGAGAATAAAAGAACTGAGAGAT  
+HWI-EAS443:3:22:443:1224#0/1  
`V\_Za^`a]]X¥`aa¥`¥]OY`[Y^^P[\_Z[X\_`^Y[\_^Y  
@HWI-EAS443:3:22:778:553#0/1  
ATTCAATATGGAGAGAATAAAAGAACTGAGAGATCTAATG

+HWI-EAS443:3:22:778:553#0/1  
abbabaaaaba\_baa`aaabaa^`aaaaabaa`\_a]aaa  
@HWI-EAS443:3:22:819:318#0/1  
AAGCAGGTCAAATATATTCAATATGGAGAGAATAAAAGAA  
+HWI-EAS443:3:22:819:318#0/1  
aaa`a`]aaaa`a`\_`\_`aaa\_aaaZ`^`\_``a`\_`^`\_`  
@HWI-EAS443:3:23:1026:546#0/1  
AAATATATTCAATATGGAGAGAATAAAAGAACTGAGAGAT  
+HWI-EAS443:3:23:1026:546#0/1  
aaababaaa\_a`a\_aaa^a\_\_S``\_a^aa]^[\_a^`^`]  
@HWI-EAS443:3:23:1356:546#0/1  
GTCAAATATATTCAATATGGAGAGAATAAAAGAACTGAGA  
+HWI-EAS443:3:23:1356:546#0/1  
^a\_\_¥`\_Z``^\_S[¥b\_]¥Ya^a\_]^^Z]\_`\_`¥^a]`\_`  
@HWI-EAS443:3:23:1418:1310#0/1  
CAAATATATTCAATATGGAGAGAATAAAAGAACTGAGAGA  
+HWI-EAS443:3:23:1418:1310#0/1  
abbba\_b`babba`bbb`baabaabaab^babPa¥aabb\_  
@HWI-EAS443:3:23:1443:1804#0/1  
AAAGCAGGTCAAATATATTCAATATGGAGAGAATAAAAGA  
+HWI-EAS443:3:23:1443:1804#0/1  
[^`aa^`a``aa`\_Saaaa[\_aa`aa]`\_G`\_aaa``\_``  
@HWI-EAS443:3:23:1598:1289#0/1  
CAAATATATTCAATATGGAGAGAATAAAAGAACTGAGAGA  
+HWI-EAS443:3:23:1598:1289#0/1  
Ybb\_\_bbabbabbabbbbaaaaabbbbabababbbbab  
@HWI-EAS443:3:23:1659:1824#0/1  
ATATATTCAATATGGAGAGAATAAAAGAACTGAGAGATCT  
+HWI-EAS443:3:23:1659:1824#0/1  
aaa`bba¥`ab`bbaab`aaaaa\_`\_`a]a```^a`]`  
@HWI-EAS443:3:23:316:175#0/1  
ATATATTCAATATGGAGAGAATAAAAGAACTGAGAGATCT  
+HWI-EAS443:3:23:316:175#0/1  
Y``aba\_¥a`^aabb```a`abaaaaaaYa`a`aa^\_\_a  
@HWI-EAS443:3:23:708:1185#0/1  
CAAATATATTCAATATGGAGAGAATAAAAGAACTGAGAGA  
+HWI-EAS443:3:23:708:1185#0/1  
a`abaabababbaaaaa`a`Vaa\_aa\_aa`¥a`\_`a`a\_a  
@HWI-EAS443:3:23:883:545#0/1  
CAGGTCAAATATATTCAATATGGAGAGAATAAAAGAACTG  
+HWI-EAS443:3:23:883:545#0/1  
`bbb`abbbb^bab]b\_aabaa\_a`\_aaaaaaaaa\_`^`  
@HWI-EAS443:3:23:92:670#0/1  
TTCAATATGGAGAGAATAAAAGAACTGAGAGATCTAATGT  
+HWI-EAS443:3:23:92:670#0/1  
aa^aVaa`a^YaaaWa][`aY`T^a`Y`a[a^``a\_\_\_W  
@HWI-EAS443:3:23:994:1356#0/1  
CAAATATATTCAATATGGAGAGAATAAAAGAACTGAGAGA  
+HWI-EAS443:3:23:994:1356#0/1  
abb^`¥¥¥abaa^abbaaab`][a`aaaa`]````a`\_`a`

@HWI-EAS443:3:24:1003:1898#0/1  
AAATATATTCAATATGGAGAGAATAAAAGAACTGAGAGAT  
+HWI-EAS443:3:24:1003:1898#0/1  
Y`X¥¥S`a`Y¥T0^^aYbYV`]aaaaaY]U`[^`aa`S  
@HWI-EAS443:3:24:1031:382#0/1  
AGCAGGTCAAATATATTCAATATGGAGAGAATAAAAGAAC  
+HWI-EAS443:3:24:1031:382#0/1  
a\_babb\_a¥Z^`¥]ba^a]`\_`\_aUa]]¥aaaa\_a^`]  
@HWI-EAS443:3:24:1112:331#0/1  
ATTCAATATGGAGAGAATAAAAGAACTGAGAGATCTAATG  
+HWI-EAS443:3:24:1112:331#0/1  
aabaabbabbaaa`baabaaaaaa]aaa`aaaa^ba`aa  
@HWI-EAS443:3:24:1222:941#0/1  
ATTCAATATGGAGAGAATAAAAGAACTGAGAGATCTAATG  
+HWI-EAS443:3:24:1222:941#0/1  
abbabbbbbbababbbbbbbaabbbbbbabbabb  
@HWI-EAS443:3:24:1245:188#0/1  
CAAATATATTCAATATGGAGAGAATAAAAGAACTGAGAGA  
+HWI-EAS443:3:24:1245:188#0/1  
VM`a^`¥abVK`\_a[¥Y`^^Z`S^aa]```]YD^aaa\_a\_  
@HWI-EAS443:3:24:1350:554#0/1  
CAAATATATTCAATATGGAGAGAATAAAAGAACTGAGAGA  
+HWI-EAS443:3:24:1350:554#0/1  
\_`¥\_ab]¥¥W0¥Z¥Xb\_WGTV\_\_U^baa\_Y\_baY]a]R^Z  
@HWI-EAS443:3:24:1494:534#0/1  
ATTCAATATGGAGAGAATAAAAGAACTGAGAGATCTAATG  
+HWI-EAS443:3:24:1494:534#0/1  
abbabba`abbababaababaaa\_a^bb]bababPba`bb  
@HWI-EAS443:3:24:1601:177#0/1  
ATTCAATATGGAGAGAATAAAAGAACTGAGAGATCTAATG  
+HWI-EAS443:3:24:1601:177#0/1  
abba\_abbbb`b^b\_\_a`aaaa\_a\_aa`\_`\_]Q`\_^]\_  
@HWI-EAS443:3:24:1619:1158#0/1  
CAAATATATTCAATATGGAGAGAATAAAAGAACTGAGAGA  
+HWI-EAS443:3:24:1619:1158#0/1  
][[[\_`\_¥`\_`\_[U\_^\_aX^VT¥`R¥WWWZ`^¥babaaa\_`^`  
@HWI-EAS443:3:24:387:875#0/1  
AGCAGGTCAAATATATTCAATATGGAGAGAATAAAAGAAC  
+HWI-EAS443:3:24:387:875#0/1  
aaba`aPaaba]aa`aaa`\_aaaaa`\_a]Q]a\_aa\_\_`\_  
@HWI-EAS443:3:24:444:102#0/1  
AGCAGGTCAAATATATTCAATATGGAGAGAATAAAAGAAC  
+HWI-EAS443:3:24:444:102#0/1  
\_b^`]YQZa]QXaaaa[\_`\_a\_\_aaY`^a]Z]`[Z`^^Z  
@HWI-EAS443:3:24:44:1798#0/1  
AATATATTCAATATGGAGAGAATAAAAGAACTGAGAGATC  
+HWI-EAS443:3:24:44:1798#0/1  
ab\_aaaa`bbaaabaa```\_aaa\_baa[aa\_a\_a\_a\_a\_a\_a  
@HWI-EAS443:3:24:586:1454#0/1  
CAAATATATTCAATATGGAGAGAATAAAAGAACTGAGAGA

+HWI-EAS443:3:24:586:1454#0/1  
`a`Z^`N¥ba]\_aa\_V^^^a`[aaaaa\_``aaaaa\_a^  
@HWI-EAS443:3:24:766:1265#0/1  
CAAATATATTCAATATGGAGAGAATAAAAGAACTGAGAGA  
+HWI-EAS443:3:24:766:1265#0/1  
`abbabb``\_`Xabb`baabaabab]\_a`a^aaabbaaaa  
@HWI-EAS443:3:24:860:852#0/1  
ATTCAATATGGAGAGAATAAAAGAACTGAGAGATCTAATG  
+HWI-EAS443:3:24:860:852#0/1  
a¥\_\_\_`\_H[]OT\_Zb]UU`¥\_0a\_`Q`aI````Z]a\_``ab  
@HWI-EAS443:3:25:1043:1821#0/1  
ATTCAATATGGAGAGAATAAAAGAACTGAGAGATCTAATG  
+HWI-EAS443:3:25:1043:1821#0/1  
aa¥\_YRUY^b````\_WVYP]aaa`\_aZ[Y^Uaaa`\_[aZYa  
@HWI-EAS443:3:25:1079:1092#0/1  
ATTCAATATGGAGAGAATAAAAGAACTGAGAGATCTAATG  
+HWI-EAS443:3:25:1079:1092#0/1  
a\_baZ`bbNXWUTH\_S\_Z¥ba`YZ`K]ba`b]b`WVaY^]  
@HWI-EAS443:3:25:1236:190#0/1  
AGCAGGTCAAATATATTCAATATGGAGAGAATAAAAGAAC  
+HWI-EAS443:3:25:1236:190#0/1  
^``bbb````\_``\_¥\_TS^`b[V`YH¥]`UO^]``\_`Z^a^  
@HWI-EAS443:3:25:1412:1935#0/1  
CAAATATATTCAATATGGAGAGAATAAAAGAACTGAGAGA  
+HWI-EAS443:3:25:1412:1935#0/1  
aVbab`bbbbbbbababbabaa\_aaaa\_bb\_a`ba`¥a  
@HWI-EAS443:3:25:1497:149#0/1  
ATTCAATATGGAGAGAATAAAAGAACTGAGAGATCTAATG  
+HWI-EAS443:3:25:1497:149#0/1  
abbbbbbbbabbbbabbbbbbababbaaaaa`¥aa`aa  
@HWI-EAS443:3:25:1599:1487#0/1  
AAATATATTCAATATGGAGAGAATAAAAGAACTGAGAGAT  
+HWI-EAS443:3:25:1599:1487#0/1  
abbbabbbbaaababaaab[a`aaaaaaaa`^aa`aaa`\_  
@HWI-EAS443:3:25:165:1395#0/1  
ATTCAATATGGAGAGAATAAAAGAACTGAGAGATCTAATG  
+HWI-EAS443:3:25:165:1395#0/1  
`¥`b¥¥IV\_aaa]bb`abbbaabb\_a^`aba^aaaaaaa  
@HWI-EAS443:3:25:1694:1700#0/1  
AGCAGGTCAAATATATTCAATATGGAGAGAATAAAAGAAC  
+HWI-EAS443:3:25:1694:1700#0/1  
``¥bb\_a`bbbbaaabaa`aa`aaa\_a`b`aa\_``aaa`]  
@HWI-EAS443:3:25:1788:849#0/1  
AAGCAGGTCAAATATATTCAATATGGAGAGAATAAAAGAA  
+HWI-EAS443:3:25:1788:849#0/1  
aaa`abb`a`bbb`babbbaababb`\_b`b`aaa^^```a  
@HWI-EAS443:3:25:242:1412#0/1  
CAAATATATTCAATATGGAGAGAATAAAAGAACTGAGAGA  
+HWI-EAS443:3:25:242:1412#0/1  
aabbbbbbbbabbbbabbbbab\_bbbbbbbbaabbbab`b





+HWI-EAS443:3:26:688:616#0/1  
YZ[b^a¥Q`^a\_\_^V^a^`]b\_S\_¥VHYP\_babaaaa  
@HWI-EAS443:3:26:845:1920#0/1  
CAAATATATTCAATATGGAGAGAATAAAAGAACTGAGAGA  
+HWI-EAS443:3:26:845:1920#0/1  
Xabbb`bbbbbbbabababbbbbb`abaaabbbba  
@HWI-EAS443:3:26:982:1818#0/1  
CAAATATATTCAATATGGAGAGAATAAAAGAACTGAGAGA  
+HWI-EAS443:3:26:982:1818#0/1  
ab^a\_b`aaX\_aaaaa`V`\_`a\_\_a`a\_a`a\_a`a  
@HWI-EAS443:3:27:1012:798#0/1  
ATTC AATATGGAGAGAATAAAAGAACTGAGAGATCTAATG  
+HWI-EAS443:3:27:1012:798#0/1  
abbbbababa^[b]ba`aa\_aJ]`X`a\_\_a`aa`aa\_aa  
@HWI-EAS443:3:27:1131:630#0/1  
ATATATTCAATATGGAGAGAATAAAAGAACTGAGAGATCT  
+HWI-EAS443:3:27:1131:630#0/1  
aaab`^`\_`aaaa\_Z\_aX^¥\_a`]`ZZ^^\_a\_\_`aa`S\_  
@HWI-EAS443:3:27:1217:1927#0/1  
GGTCAAATATATTCAATATGGAGAGAATAAAAGAACTGAG  
+HWI-EAS443:3:27:1217:1927#0/1  
ab`baaabbbbabbaabbaa\_\_^\_aaabaaaa^¥a`aa  
@HWI-EAS443:3:27:167:158#0/1  
GTCAAATATATTCAATATGGAGAGAATAAAAGAACTGAGA  
+HWI-EAS443:3:27:167:158#0/1  
aabbaaaaa^aa`^aaaa`b\_a\_\_a`]aa`\_\_\_\_`  
@HWI-EAS443:3:27:1726:564#0/1  
ATTC AATATGGAGAGAATAAAAGAACTGAGAGATCTAATG  
+HWI-EAS443:3:27:1726:564#0/1  
^ba]\_\_a`\_\_a]\_X]`WaV]a^YG`X`^W^\_SX^ZRBBBB  
@HWI-EAS443:3:27:1738:933#0/1  
AATATATTCAATATGGAGAGAATAAAAGAACTGAGAGATC  
+HWI-EAS443:3:27:1738:933#0/1  
`abababaaaabaaba\_b\_a`\_aa`aa`a^`aa`aa^W  
@HWI-EAS443:3:27:219:1990#0/1  
ATTC AATATGGAGAGAATAAAAGAACTGAGAGATCTAATG  
+HWI-EAS443:3:27:219:1990#0/1  
¥^ab^abbbb\_a\_a^abaab¥b`bba`a\_bY\_aba`aaa  
@HWI-EAS443:3:27:266:547#0/1  
CAAATATATTCAATATGGAGAGAATAAAAGAACTGAGAGA  
+HWI-EAS443:3:27:266:547#0/1  
aba`[G[^Y^X]a^abb`^\_\_aY`¥a`^aWZZ\_a`\_`\_`\_  
@HWI-EAS443:3:27:284:800#0/1  
AATATATTCAATATGGAGAGAATAAAAGAACTGAGAGATC  
+HWI-EAS443:3:27:284:800#0/1  
aaaaa^aaa\_aa\_a`\_`\_a^a\_\_a`\_`\_`\_`^Z\_\_\_^`\_`\_`\_`  
@HWI-EAS443:3:27:398:816#0/1  
CAAATATATTCAATATGGAGAGAATAAAAGAACTGAGAGA  
+HWI-EAS443:3:27:398:816#0/1  
a\_SL[YTY`\_aWU^UZa\_X\_Q\_¥S¥[[HY[ZZZ]\_]`W^^

@HWI-EAS443:3:27:415:1417#0/1  
CAAATATATTCAATATGGAGAGAATAAAAGAACTGAGAGA  
+HWI-EAS443:3:27:415:1417#0/1  
abaU¥^`baabbaabb\_aZ`]\_`aaaaab]\_b`a`aab`a  
@HWI-EAS443:3:27:483:953#0/1  
AATATATTCAATATGGAGAGAATAAAAGAACTGAGAGATC  
+HWI-EAS443:3:27:483:953#0/1  
`bbababbaaaaaa[`b[aa[`a]\_aa\_a`\_`aa\_a`^\_  
@HWI-EAS443:3:27:673:805#0/1  
ATTC AATATGGAGAGAATAAAAGAACTGAGAGATCTAATG  
+HWI-EAS443:3:27:673:805#0/1  
aabbb\_baaa`]baba`bbbbbbbabab`aaba`aaaaaab  
@HWI-EAS443:3:27:919:1875#0/1  
AAGCAGGTCAAATATATTCAATATGGAGAGAATAAAAGAA  
+HWI-EAS443:3:27:919:1875#0/1  
aaaaaaaW`bbaab`aaaa\_a``a\_¥aa`^`aa`a\_¥``  
@HWI-EAS443:3:28:1081:1764#0/1  
CAAATATATTCAATATGGAGAGAATAAAAGAACTGAGAGA  
+HWI-EAS443:3:28:1081:1764#0/1  
abbbbbbbbabaaaabbaabab`aaaaaaaaaaaaaaaa`a  
@HWI-EAS443:3:28:1188:964#0/1  
CAGGTCAAATATATTCAATATGGAGAGAATAAAAGAACTG  
+HWI-EAS443:3:28:1188:964#0/1  
¥`ZXM`X\_^`¥^^^bbb^`Y`\_b¥bbaaa\_a^]aa`baa¥  
@HWI-EAS443:3:28:1268:830#0/1  
GTCAAATATATTCAATATGGAGAGAATAAAAGAACTGAGA  
+HWI-EAS443:3:28:1268:830#0/1  
``^aabaaaabaaa^aaabbaa\_a\_]aaa```^`\_\_`a```]  
@HWI-EAS443:3:28:1565:707#0/1  
CAGGTCAAATATATTCAATATGGAGAGAATAAAAGAACTG  
+HWI-EAS443:3:28:1565:707#0/1  
XVRR[G]\_UX\_`^a^Ta¥aYV[aaba^[aaaba\_`S¥VVa  
@HWI-EAS443:3:28:1784:621#0/1  
AAGCAGGTCAAATATATTCAATATGGAGAGAATAAAAGAA  
+HWI-EAS443:3:28:1784:621#0/1  
a]ZP`aY`YS`[^R]P`[[[Z¥\_aaY¥]`^¥^\_\_Y\_\_\_\_  
@HWI-EAS443:3:28:312:1577#0/1  
CAAATATATTCAATATGGAGAGAATAAAAGAACTGAGAGA  
+HWI-EAS443:3:28:312:1577#0/1  
aa¥^aa`aaaa`aaa]\_a\_a`a\_a`aa`aa\_\_^a]a\_a  
@HWI-EAS443:3:28:369:512#0/1  
AATATATTCAATATGGAGAGAATAAAAGAACTGAGAGATC  
+HWI-EAS443:3:28:369:512#0/1  
aaaaa\_aa`^`a`a`Z[a\_`\_`aa^a`\_\_`]\_\_`^a\_`^]  
@HWI-EAS443:3:28:516:1156#0/1  
CAAATATATTCAATATGGAGAGAATAAAAGAACTGAGAGA  
+HWI-EAS443:3:28:516:1156#0/1  
a``^abbababaaaabbaababab`aaba`a\_aaa``aa  
@HWI-EAS443:3:28:748:823#0/1  
CAAATATATTCAATATGGAGAGAATAAAAGAACTGAGAGA

+HWI-EAS443:3:28:748:823#0/1  
ab\_a`¥a^`bbabbbbab`aaaab`abbaaaabaaa`  
@HWI-EAS443:3:28:818:290#0/1  
GGTCAAATATATTCAATATGGAGAGAATAAAAGAACTGAG  
+HWI-EAS443:3:28:818:290#0/1  
aZLW`b^¥a\_¥a[a``a\_aa\_V\_\_a[`\_aa\_`a]`¥`a^`  
@HWI-EAS443:3:29:1016:466#0/1  
CAAATATATTCAATATGGAGAGAATAAAAGAACTGAGAGA  
+HWI-EAS443:3:29:1016:466#0/1  
`bbbbbbbabbbbabbbbabbbbabababbababa  
@HWI-EAS443:3:29:1045:1100#0/1  
GGTCAAATATATTCAATATGGAGAGAATAAAAGAACTGAG  
+HWI-EAS443:3:29:1045:1100#0/1  
\_`XZ`aaa\_`\_\_VYLS[b^`U``^^\_\_b[Z¥`a[`\_a\_  
@HWI-EAS443:3:29:1429:1696#0/1  
CAAATATATTCAATATGGAGAGAATAAAAGAACTGAGAGA  
+HWI-EAS443:3:29:1429:1696#0/1  
]XZ^Y\_`¥X`XU]`X`bbVb^aaba\_Z^b`X^J\_`aW^X\_  
@HWI-EAS443:3:29:1478:1139#0/1  
CAAATATATTCAATATGGAGAGAATAAAAGAACTGAGAGA  
+HWI-EAS443:3:29:1478:1139#0/1  
abbabbbabbaababaa`a\_aaaabaa`a`a\_ba`b\_a^  
@HWI-EAS443:3:29:50:17#0/1  
GCAGGTCAAATATATTCAATATGGAGAGAATAAAAGAACT  
+HWI-EAS443:3:29:50:17#0/1  
a\_V¥`X\_]`^`^`^^\_¥^Z^\_`^YV¥[`¥[YZQXNZR[Y¥  
@HWI-EAS443:3:29:51:606#0/1  
AGCAGGTCAAATATATTCAATATGGAGAGAATAAAAGAAC  
+HWI-EAS443:3:29:51:606#0/1  
`ba]a``aV¥\_aaa`>`a^^aaa`^a^`[V^aa[0[W\_Y  
@HWI-EAS443:3:29:86:32#0/1  
AGCAGGTCAAATATATTCAATATGGAGAGAATAAAAGAAC  
+HWI-EAS443:3:29:86:32#0/1  
aaa^a\_0a]^X\_aa\_`\_]`^a^\_a\_Z`^`TY]`W\_]¥^^  
@HWI-EAS443:3:2:1194:834#0/1  
GTCAAATATATTCAATATGGAGAGAATAAAAGAACTGAGA  
+HWI-EAS443:3:2:1194:834#0/1  
aSW^LXLV¥H\_Z^Y]YNPRSW¥X]UX¥YXUWYYQJQX]]Y  
@HWI-EAS443:3:2:123:879#0/1  
AGCAGGTCAAATATATTCAATATGGAGAGAATAAAAGAAC  
+HWI-EAS443:3:2:123:879#0/1  
a\_^`a^]\_aaa`\_^Y`a\_\_\_\_\_`^W\_\_^^`\_\_\_\_^^\_^[  
@HWI-EAS443:3:2:1372:1908#0/1  
CAAATATATTCAATATGGAGAGAATAAAAGAACTGAGAGA  
+HWI-EAS443:3:2:1372:1908#0/1  
aaaaabbabaaaaabbab`aaaaaba\_``\_a\_a\_a`a  
@HWI-EAS443:3:2:1627:1458#0/1  
CAAATATATTCAATATGGAGAGAATAAAAGAACTGAGAGA  
+HWI-EAS443:3:2:1627:1458#0/1  
a]abbab\_\_b[\_aa`\_`b`\_L¥`a\_aa``^¥a[`\_¥^a¥\_







+HWI-EAS443:3:32:401:1281#0/1  
aaYaWV[V[\_Y^SR¥Y`^^¥`¥]Y`〕`〔XQ^S〕\_UIT[  
@HWI-EAS443:3:32:574:1986#0/1  
ATTCAATATGGAGAGAATAAAAGAACTGAGAGATCTAATG  
+HWI-EAS443:3:32:574:1986#0/1  
aa`a^aa\_a` `` \_\_\_\_aaa`a^`^`^`¥a^^^`\_\_`^`\_  
@HWI-EAS443:3:33:1052:1165#0/1  
GCAGGTCAAATATATTCAATATGGAGAGAATAAAAGAACT  
+HWI-EAS443:3:33:1052:1165#0/1  
aa^^]aaba\_V\_¥a]`^`^`\_aZQ\_Y¥]`\_\_WST^Y¥YY  
@HWI-EAS443:3:33:1117:598#0/1  
AAGCAGGTCAAATATATTCAATATGGAGAGAATAAAAGAA  
+HWI-EAS443:3:33:1117:598#0/1  
a^bb`\_`X^aaVaaa[baa\_aa\_aaa]`]a\_^]`\_`^Y^`\_  
@HWI-EAS443:3:33:1319:166#0/1  
AAGCAGGTCAAATATATTCAATATGGAGAGAATAAAAGAA  
+HWI-EAS443:3:33:1319:166#0/1  
\_bbba`\_`bb`aa]ZQaba`aa]aaaNa`\_`^^`〕`\_`\_`[a  
@HWI-EAS443:3:33:1463:1462#0/1  
AATATATTCAATATGGAGAGAATAAAAGAACTGAGAGATC  
+HWI-EAS443:3:33:1463:1462#0/1  
¥b^ZXV]aa[V\_\_aadWaa¥¥W^]\_\_^T^X¥]aZ^^\_\_ZZG  
@HWI-EAS443:3:33:1719:2026#0/1  
AATATATTCAATATGGAGAGAATAAAAGAACTGAGAGATC  
+HWI-EAS443:3:33:1719:2026#0/1  
`aabaa`aaa`a`baaaa`\_¥\_aaaa^`^`X`X`^`Z`S  
@HWI-EAS443:3:33:1750:1470#0/1  
CAAATATATTCAATATGGAGAGAATAAAAGAACTGAGAGA  
+HWI-EAS443:3:33:1750:1470#0/1  
abbbbbbbabbbaababba`a`aaaab^aa¥`\_Sa^`^`a\_  
@HWI-EAS443:3:33:347:1270#0/1  
ATTCAATATGGAGAGAATAAAAGAACTGAGAGATCTAATG  
+HWI-EAS443:3:33:347:1270#0/1  
ababaaaWa`\_`a¥UZaa`a]¥^a`\_\_`a¥`¥S\_\_aa\_\_`  
@HWI-EAS443:3:33:353:433#0/1  
AAATATATTCAATATGGAGAGAATAAAAGAACTGAGAGAT  
+HWI-EAS443:3:33:353:433#0/1  
aa`\_`a`\_`\_\_\_\_aa`Wa[\_]¥`^`^`^`\_\_`[]^`\_]`^^`[  
@HWI-EAS443:3:33:415:369#0/1  
GTCAAATATATTCAATATGGAGAGAATAAAAGAACTGAGA  
+HWI-EAS443:3:33:415:369#0/1  
a`bbb\_b^`\_`aaa`a`aaa]a\_a\_\_`a`\_`\_`\_`[^`^`\_]`^`  
@HWI-EAS443:3:33:579:92#0/1  
GCAGGTCAAATATATTCAATATGGAGAGAATAAAAGAACT  
+HWI-EAS443:3:33:579:92#0/1  
aaU[\_MUY\_OW\_a¥^`\_RH¥^]`\_`]¥`WWZX]WOX^TQ¥SW  
@HWI-EAS443:3:33:608:1817#0/1  
CAAATATATTCAATATGGAGAGAATAAAAGAACTGAGAGA  
+HWI-EAS443:3:33:608:1817#0/1  
]aaYaXZ[Y^baa\_]YXR\_\_]Y^`\_I`\_`\_`\_`aH`]`\_\_`^`\_`



@HWI-EAS443:3:33:618:1431#0/1  
CAAATATATTCAATATGGAGAGAATAAAAGAACTGAGAGA  
+HWI-EAS443:3:33:618:1431#0/1  
abb`bbaababaaaaabaaa`aaaaaa`a\_\_`Z`\_a\_``a  
@HWI-EAS443:3:33:627:251#0/1  
CAAATATATTCAATATGGAGAGAATAAAAGAACTGAGAGA  
+HWI-EAS443:3:33:627:251#0/1  
aaabaaaaaaa¥abaaaa]`^a^\_\_`\_\_a\_]V\_^Y^[\_[\_  
@HWI-EAS443:3:33:640:1289#0/1  
ATATATTCAATATGGAGAGAATAAAAGAACTGAGAGATCT  
+HWI-EAS443:3:33:640:1289#0/1  
]G¥YDTZ`V`a`aaYRSOXSQ]\_YaZ¥WPV[¥OY]`\_]X]  
@HWI-EAS443:3:33:879:105#0/1  
GCAGGTCAAATATATTCAATATGGAGAGAATAAAAGAACT  
+HWI-EAS443:3:33:879:105#0/1  
\_`^bb¥bbbaa`aaaaa\_baabb\_a]a[aaaZa\_`^^W\_  
@HWI-EAS443:3:34:1142:1740#0/1  
CAAATATATTCAATATGGAGAGAATAAAAGAACTGAGAGA  
+HWI-EAS443:3:34:1142:1740#0/1  
abbb\_b`\_\_aaaa^`b`\_`aa\_a`aaaa`a]W¥S]^^SX  
@HWI-EAS443:3:34:1327:739#0/1  
CAAATATATTCAATATGGAGAGAATAAAAGAACTGAGAGA  
+HWI-EAS443:3:34:1327:739#0/1  
a`\_]`a`baaaabaab`ab`a\_aa\_\_aaa\_\_\_\_`\_]`^^  
@HWI-EAS443:3:34:1567:459#0/1  
CAAATATATTCAATATGGAGAGAATAAAAGAACTGAGAGA  
+HWI-EAS443:3:34:1567:459#0/1  
abbbabbaaaaaabbabbb\_a\_b`ab\_\_abaaa^`¥aU\_^\_  
@HWI-EAS443:3:34:1590:245#0/1  
GTCAAATATATTCAATATGGAGAGAATAAAAGAACTGAGA  
+HWI-EAS443:3:34:1590:245#0/1  
aaabbabaaabbbaaa\_aaa^a\_a\_^a^\_a`a^^[\_][^  
@HWI-EAS443:3:34:17:1228#0/1  
TCAATATGGAGAGAATAAAAGAACTGAGAGATCTAATGTC  
+HWI-EAS443:3:34:17:1228#0/1  
aaaaa¥\_aa^b\_aa\_`aaPa`\_][\_]a¥`X^\_]Z\_W¥  
@HWI-EAS443:3:34:356:1619#0/1  
ATTCAATATGGAGAGAATAAAAGAACTGAGAGATCTAATG  
+HWI-EAS443:3:34:356:1619#0/1  
]b¥aT[|^a\_¥HSZ`^Q]aa[¥Raaa\_\_`S`¥a\_aaa^]]  
@HWI-EAS443:3:34:521:1541#0/1  
CAAATATATTCAATATGGAGAGAATAAAAGAACTGAGAGA  
+HWI-EAS443:3:34:521:1541#0/1  
a]NZ`\_] [RWJZW]VRW]`\_¥]^a]K^RTDZ`\_`NGSTXBB  
@HWI-EAS443:3:34:862:1559#0/1  
GTCAAATATATTCAATATGGAGAGAATAAAAGAACTGAGA  
+HWI-EAS443:3:34:862:1559#0/1  
aabbbbbbbaabababaa\_`abbbbbbbaaa^a\_```  
@HWI-EAS443:3:34:962:1908#0/1  
AATATATTCAATATGGAGAGAATAAAAGAACTGAGAGATC

+HWI-EAS443:3:34:962:1908#0/1  
]X¥`^\_S`\_ZX^[\_V]^¥Z\_\_`a`a`U]]¥¥^^\_X][Z  
@HWI-EAS443:3:35:1055:1152#0/1  
CAAATATATTCAATATGGAGAGAATAAAAGAACTGAGAGA  
+HWI-EAS443:3:35:1055:1152#0/1  
abbbbYb`abaa`aaabb`a\_baaa`b```aa`aaa`a\_a  
@HWI-EAS443:3:35:150:902#0/1  
GTCAAATATATTCAATATGGAGAGAATAAAAGAACTGAGA  
+HWI-EAS443:3:35:150:902#0/1  
aabaalJa`aaaaba`a[`aa``a`]`YK]Z``a`a`][  
@HWI-EAS443:3:35:1625:1756#0/1  
CAAATATATTCAATATGGAGAGAATAAAAGAACTGAGAGA  
+HWI-EAS443:3:35:1625:1756#0/1  
T¥U`a`\_\_b`[^\_aba]OU^abaab[`¥[aa\_Y^`b[a]b  
@HWI-EAS443:3:35:393:1384#0/1  
CAAATATATTCAATATGGAGAGAATAAAAGAACTGAGAGA  
+HWI-EAS443:3:35:393:1384#0/1  
abbbb\_bbbabZ\_babbaYaana\_b```¥\_babaab`aa`  
@HWI-EAS443:3:35:590:644#0/1  
AAGCAGGTCAAATATATTCAATATGGAGAGAATAAAAGAA  
+HWI-EAS443:3:35:590:644#0/1  
L]\_a`¥XQ\_a`\_`^¥a`^aWW`^[aWKY¥^T]Z\_]Z\_¥[X  
@HWI-EAS443:3:36:1050:2002#0/1  
CAAATATATTCAATATGGAGAGAATAAAAGAACTGAGAGA  
+HWI-EAS443:3:36:1050:2002#0/1  
ababbbbababaaaabbaaa`b`aabb\_aaa]]^a`aa¥\_  
@HWI-EAS443:3:36:1417:905#0/1  
AATATATTCAATATGGAGAGAATAAAAGAACTGAGAGATC  
+HWI-EAS443:3:36:1417:905#0/1  
`abababb`^`a\_aa`ab^a\_\_aa\_aa]\_\_a`^`\_`\_`\_a  
@HWI-EAS443:3:36:1469:1485#0/1  
TTCAATATGGAGAGAATAAAAGAACTGAGAGATCTAATGT  
+HWI-EAS443:3:36:1469:1485#0/1  
[aaa`^S`aabZ`\_\_b`a`^`aWW¥`\_``\_b]¥¥aa`a\_R  
@HWI-EAS443:3:36:1641:376#0/1  
AATATATTCAATATGGAGAGAATAAAAGAACTGAGAGATC  
+HWI-EAS443:3:36:1641:376#0/1  
a\_baaaabaa\_aa`ab\_aWaa\_a`a^XW`\_\_```\_a`\_]\_  
@HWI-EAS443:3:36:1709:1236#0/1  
CAAATATATTCAATATGGAGAGAATAAAAGAACTGAGAGA  
+HWI-EAS443:3:36:1709:1236#0/1  
a¥¥`X^Ma¥^aYaaa\_a^\_VV][\_`\_ZZ¥`VT¥`¥XXY[S  
@HWI-EAS443:3:36:246:1244#0/1  
GCAGGTCAAATATATTCAATATGGAGAGAATAAAAGAACT  
+HWI-EAS443:3:36:246:1244#0/1  
a^abaYbbabaa^Yaa`]^^\_\_aYX]^\_`\_\_a\_a¥WWW]  
@HWI-EAS443:3:36:522:989#0/1  
GCAGGTCAAATATATTCAATATGGAGAGAATAAAAGAACT  
+HWI-EAS443:3:36:522:989#0/1  
abaaa^b^^aaaa^a`a^aa[aaa\_a^\_\_``aaaa^Va`^`

@HWI-EAS443:3:36:550:1889#0/1  
ATTCAATATGGAGAGAATAAAAGAACTGAGAGATCTAATG  
+HWI-EAS443:3:36:550:1889#0/1  
aZa^¥^`]a]UX`¥Yaa\_a[RLY]^\_^YWU^\_^a¥0]^Y  
@HWI-EAS443:3:36:779:1645#0/1  
CAAATATATTCAATATGGAGAGAATAAAAGAACTGAGAGA  
+HWI-EAS443:3:36:779:1645#0/1  
aZWUZ`]¥VW`S\_a`Y\_SOVYTPXU¥^I\_^ZZ¥UZWZ^S]  
@HWI-EAS443:3:36:801:1205#0/1  
AGCAGGTCAAATATATTCAATATGGAGAGAATAAAAGAAC  
+HWI-EAS443:3:36:801:1205#0/1  
^^`S\_ba`^¥` `[a`Y[\_\_a¥bb`^`]b]\_`\_a^\_^¥\_a  
@HWI-EAS443:3:37:1133:1546#0/1  
AATATATTCAATATGGAGAGAATAAAAGAACTGAGAGATC  
+HWI-EAS443:3:37:1133:1546#0/1  
aabaaa`aababaa`\_a¥\_\_a\_aaaa]^Xba`\_`aaa\_\_  
@HWI-EAS443:3:37:1275:1077#0/1  
CAAATATATTCAATATGGAGAGAATAAAAGAACTGAGAGA  
+HWI-EAS443:3:37:1275:1077#0/1  
abbabbb]baaaababbaabaa¥abbaa^]aaaa`\_`aaa  
@HWI-EAS443:3:37:1292:1874#0/1  
AATATATTCAATATGGAGAGAATAAAAGAACTGAGAGATC  
+HWI-EAS443:3:37:1292:1874#0/1  
abaaaa`aa`^a\_`^^^]a`aaa`XaVa\_\_a\_`^`]S  
@HWI-EAS443:3:37:154:796#0/1  
GCAGGTCAAATATATTCAATATGGAGAGAATAAAAGAACT  
+HWI-EAS443:3:37:154:796#0/1  
ab`bb¥bbbab\_babbbaaa`aaa\_aabYa\_\_Qabaaa`a  
@HWI-EAS443:3:37:281:1301#0/1  
AGCAGGTCAAATATATTCAATATGGAGAGAATAAAAGAAC  
+HWI-EAS443:3:37:281:1301#0/1  
aaa`a`]^`abaa\_a\_aaaaa\_\_`\_\_`XNXaW\_\_¥L¥  
@HWI-EAS443:3:37:400:1553#0/1  
AATATATTCAATATGGAGAGAATAAAAGAACTGAGAGATC  
+HWI-EAS443:3:37:400:1553#0/1  
^Uaaa¥aaaa`aa`a^`a^Y\_`^`a^U`VHL¥\_]a^\_]a^^  
@HWI-EAS443:3:37:70:1347#0/1  
ATATTCAATATGGAGAGAATAAAAGAACTGAGAGATCTAA  
+HWI-EAS443:3:37:70:1347#0/1  
^aT¥aaaaaaab¥[¥^aa]aa`aa\_`a`¥0J\_\_\_a[``a`  
@HWI-EAS443:3:37:992:505#0/1  
ATTCAATATGGAGAGAATAAAAGAACTGAGAGATCTAATG  
+HWI-EAS443:3:37:992:505#0/1  
[a`^^`¥aab^^K¥¥a`bbb`aTq]Y`aa]GXaa\_`¥baaa  
@HWI-EAS443:3:38:1084:1856#0/1  
GTCAAATATATTCAATATGGAGAGAATAAAAGAACTGAGA  
+HWI-EAS443:3:38:1084:1856#0/1  
a\_`Y^SU]a`R\_`\_]\_¥\_aHS][Z¥YTZa]YQYUULSYS]  
@HWI-EAS443:3:38:1249:791#0/1  
AATATATTCAATATGGAGAGAATAAAAGAACTGAGAGATC

+HWI-EAS443:3:38:1249:791#0/1  
aaa`b\_aaa`a\_aa^^a^a`aa`a[]\_]Z\_^\_^\_]\_W  
@HWI-EAS443:3:38:1280:874#0/1  
AATATATTCAATATGGAGAGAATAAAAGAACTGAGAGATC  
+HWI-EAS443:3:38:1280:874#0/1  
aa`aa]a`Y``]\_a\_¥a`^\_a]aa\_^\_^Z]]\_¥^`]WX  
@HWI-EAS443:3:38:1295:1906#0/1  
CAAATATATTCAATATGGAGAGAATAAAAGAACTGAGAGA  
+HWI-EAS443:3:38:1295:1906#0/1  
]\_\_ZS\_]][WZ0Q]R\_aZYZaaa[`¥aaaV¥^S¥KZY[^  
@HWI-EAS443:3:38:1342:243#0/1  
CAAATATATTCAATATGGAGAGAATAAAAGAACTGAGAGA  
+HWI-EAS443:3:38:1342:243#0/1  
aa\_]aab`bab^]a`bba\_aZ`]\_^aa\_a[W\_]a`\_]^`Y  
@HWI-EAS443:3:38:1379:39#0/1  
ATTCAATATGGAGAGAATAAAAGAACTGAGAGATCTAATG  
+HWI-EAS443:3:38:1379:39#0/1  
`babaa`Ybba^a[\_aaa^¥\_aaa`a\_]Z^^`\_¥]a\_[^  
@HWI-EAS443:3:38:1518:1434#0/1  
CAAATATATTCAATATGGAGAGAATAAAAGAACTGAGAGA  
+HWI-EAS443:3:38:1518:1434#0/1  
abbabba`ba\_\_\_aaabaaaW`a\_aaaaa`QZ]`^\_a`^  
@HWI-EAS443:3:38:1612:1031#0/1  
ATTCAATATGGAGAGAATAAAAGAACTGAGAGATCTAATG  
+HWI-EAS443:3:38:1612:1031#0/1  
abbaa^bbbb^\_a^babba`aaa]a^`a^Z]^\_]\_^\_\_  
@HWI-EAS443:3:38:1642:671#0/1  
ATTCAATATGGAGAGAATAAAAGAACTGAGAGATCTAATG  
+HWI-EAS443:3:38:1642:671#0/1  
abbaaababbab`\_b[bbb^b`b`bbba]a\_]F]aa\_P  
@HWI-EAS443:3:38:1709:225#0/1  
ATTCAATATGGAGAGAATAAAAGAACTGAGAGATCTAATG  
+HWI-EAS443:3:38:1709:225#0/1  
abbabbbabbbab`baabaabbbbabbbba\_a\_a\_aa\_a^  
@HWI-EAS443:3:38:1781:2007#0/1  
GTCAAATATATTCAATATGGAGAGAATAAAAGAACTGAGA  
+HWI-EAS443:3:38:1781:2007#0/1  
`aabbbbbbbba[a`babb`ab`abaaW[U[¥[^`^\_\_U  
@HWI-EAS443:3:38:258:946#0/1  
CAAATATATTCAATATGGAGAGAATAAAAGAACTGAGAGA  
+HWI-EAS443:3:38:258:946#0/1  
aa`Z`aa\_aaaa\_`^aa`R`\_\_\_\_`^^``]\_^`\_\_\_\_  
@HWI-EAS443:3:38:353:1150#0/1  
TCAATATGGAGAGAATAAAAGAACTGAGAGATCTAATGTC  
+HWI-EAS443:3:38:353:1150#0/1  
aba`aaaa\_Y`\_a]aa`Ta\_]\_Y\_\_a]a`^^V\_`^^\_`V  
@HWI-EAS443:3:38:484:1180#0/1  
GTCAAATATATTCAATATGGAGAGAATAAAAGAACTGAGA  
+HWI-EAS443:3:38:484:1180#0/1  
a`abbaa¥`aba`a¥aaaa`a`aa`a^`\_\_\_\_]^`\_`\_\_

@HWI-EAS443:3:38:507:1052#0/1  
ATTCAATATGGAGAGAATAAAAGAACTGAGAGATCTAATG  
+HWI-EAS443:3:38:507:1052#0/1  
\_aababbbbbb`baaabbbbaaaabaaba`a\_aaabaa`  
@HWI-EAS443:3:38:561:118#0/1  
CAAATATATTCAATATGGAGAGAATAAAAGAACTGAGAGA  
+HWI-EAS443:3:38:561:118#0/1  
ababbabbbabaab\_abaaaabaaa`aa``\_a\_aaaaaa^  
@HWI-EAS443:3:38:798:36#0/1  
CAAATATATTCAATATGGAGAGAATAAAAGAACTGAGAGA  
+HWI-EAS443:3:38:798:36#0/1  
aabaaa[\_a`^````aaa^a^a\_a`a\_\_\_Z[^]\_\_`^\_\_^  
@HWI-EAS443:3:38:928:363#0/1  
ATATTCAATATGGAGAGAATAAAAGAACTGAGAGATCTAA  
+HWI-EAS443:3:38:928:363#0/1  
ab\_bbbbbbbba`babaaa`a^]aaaaa\_\_`a`a^\_ab]  
@HWI-EAS443:3:39:1362:1257#0/1  
GTCAAATATATTCAATATGGAGAGAATAAAAGAACTGAGA  
+HWI-EAS443:3:39:1362:1257#0/1  
aabbabbbbabbaaaa\_aaa\_b]`\_\_aa`\_a`a`a`a\_\_  
@HWI-EAS443:3:39:1723:1591#0/1  
GTCAAATATATTCAATATGGAGAGAATAAAAGAACTGAGA  
+HWI-EAS443:3:39:1723:1591#0/1  
a]¥a`\_`\_`^`\_V^^\_\_^U\_]\_Y^\_Y\_]\_^]^Z][[Z  
@HWI-EAS443:3:39:205:551#0/1  
AAGCAGGTCAAATATATTCAATATGGAGAGAATAAAAGAA  
+HWI-EAS443:3:39:205:551#0/1  
^^ba¥bb`\_¥`aab^abaaaa`ab`\_a`a`aa`aa`\_`\_`  
@HWI-EAS443:3:39:422:1931#0/1  
AATATATTCAATATGGAGAGAATAAAAGAACTGAGAGATC  
+HWI-EAS443:3:39:422:1931#0/1  
a]^a¥^`aa^\_a\_`¥Y`S\_`a\_`^`^Y`X¥[Y`Za]\_[W  
@HWI-EAS443:3:39:433:1838#0/1  
CAAATATATTCAATATGGAGAGAATAAAAGAACTGAGAGA  
+HWI-EAS443:3:39:433:1838#0/1  
aa\_aaaaaaaaa`aa`a\_\_\_]\_\_a`aaZ`]\_^`\_\_\_\_\_]\_  
@HWI-EAS443:3:39:706:128#0/1  
CAGGTCAAATATATTCAATATGGAGAGAATAAAAGAACTG  
+HWI-EAS443:3:39:706:128#0/1  
abab¥abbababaaaaa`a`aaa]a\_a^````^a`a^`^\_`^  
@HWI-EAS443:3:39:941:1884#0/1  
AATATATTCAATATGGAGAGAATAAAAGAACTGAGAGATC  
+HWI-EAS443:3:39:941:1884#0/1  
`b\_aa`aaaa`aa^aa`^`^`aaaa\_Y``V[] [Z¥\_]TK  
@HWI-EAS443:3:3:1133:487#0/1  
AAGCAGGTCAAATATATTCAATATGGAGAGAATAAAAGAA  
+HWI-EAS443:3:3:1133:487#0/1  
aaba]ab`]a^abab`ba\_\_\_aaaa^a]a]`a`^`^\_`^`  
@HWI-EAS443:3:3:1179:90#0/1  
CAAATATATTCAATATGGAGAGAATAAAAGAACTGAGAGA

+HWI-EAS443:3:3:1179:90#0/1  
`ba`baa[aa`aaa`ab`\_a[`^^a`^^\_¥W`¥`]Y[¥a]  
@HWI-EAS443:3:3:1209:1079#0/1  
CAAATATATTCAATATGGAGAGAATAAAAGAACTGAGAGA  
+HWI-EAS443:3:3:1209:1079#0/1  
abbbbbabbbaababbb`babaaaaaaaaa^aaaaaa  
@HWI-EAS443:3:3:128:788#0/1  
CAAATATATTCAATATGGAGAGAATAAAAGAACTGAGAGA  
+HWI-EAS443:3:3:128:788#0/1  
abbbbbabbabbbbabababbaabbaab\_aaaaaa  
@HWI-EAS443:3:3:1313:862#0/1  
GCAGGTCAAATATATTCAATATGGAGAGAATAAAAGAACT  
+HWI-EAS443:3:3:1313:862#0/1  
`^¥W`¥^[`\_]R^\_\_¥U]\_a]]\_¥Q\_V`V]^¥^[`\_S]S[  
@HWI-EAS443:3:3:1395:231#0/1  
AATATATTCAATATGGAGAGAATAAAAGAACTGAGAGATC  
+HWI-EAS443:3:3:1395:231#0/1  
aababaaa`aabaaa^b\_a`\_a```\_a^^Ya`^^`[\_W  
@HWI-EAS443:3:3:1401:1820#0/1  
TTCAATATGGAGAGAATAAAAGAACTGAGAGATCTAATGT  
+HWI-EAS443:3:3:1401:1820#0/1  
aba`\_b`abb^b\_a^abb`a``aXa\_a\_aa`WS``\_a[  
@HWI-EAS443:3:3:1480:1019#0/1  
AATATATTCAATATGGAGAGAATAAAAGAACTGAGAGATC  
+HWI-EAS443:3:3:1480:1019#0/1  
a`bababaaa`aaaaa]b\_ba\_a`a```^\_aa`a`\_\_T  
@HWI-EAS443:3:3:1511:767#0/1  
AAATATATTCAATATGGAGAGAATAAAAGAACTGAGAGAT  
+HWI-EAS443:3:3:1511:767#0/1  
`¥ab`aabbaaaaaaba\_bab`abaa`aa``^aa`aa\_\_\_\_  
@HWI-EAS443:3:3:1543:439#0/1  
AGCAGGTCAAATATATTCAATATGGAGAGAATAAAAGAAC  
+HWI-EAS443:3:3:1543:439#0/1  
^`aabYDS]Z^`Y`¥\_ba\_P\_¥^`a^a¥^¥a^```\_aa^\_W  
@HWI-EAS443:3:3:180:1348#0/1  
CAAATATATTCAATATGGAGAGAATAAAAGAACTGAGAGA  
+HWI-EAS443:3:3:180:1348#0/1  
¥^aaZabab`bbY¥bbbaaababbabab^`aaabbab\_a  
@HWI-EAS443:3:3:452:1182#0/1  
AAGCAGGTCAAATATATTCAATATGGAGAGAATAAAAGAA  
+HWI-EAS443:3:3:452:1182#0/1  
`abbabbLaba¥baaa`ba`b`bb`a[a`^abaaaaa  
@HWI-EAS443:3:3:498:478#0/1  
AATATATTCAATATGGAGAGAATAAAAGAACTGAGAGATC  
+HWI-EAS443:3:3:498:478#0/1  
aaaab\_baaaab`aaa]b^a`\_a\_\_\_\_aa\_¥Y`````\_¥  
@HWI-EAS443:3:3:735:738#0/1  
ATTCATATGGAGAGAATAAAAGAACTGAGAGATCTAATG  
+HWI-EAS443:3:3:735:738#0/1  
\_aabaab^bbbaa\_b\_aaaa\_a`\_`[aa```aaaZaa`aa

@HWI-EAS443:3:3:773:1003#0/1  
CAAATATATTCAATATGGAGAGAATAAAAGAACTGAGAGA  
+HWI-EAS443:3:3:773:1003#0/1  
aba^baaaaa`\_\_babaa^b^aaaab`]``^aYaa`b\_a^  
@HWI-EAS443:3:3:824:1611#0/1  
AATATATTCAATATGGAGAGAATAAAAGAACTGAGAGATC  
+HWI-EAS443:3:3:824:1611#0/1  
a``ba]`T¥RW^\_\_b\_\_bX`]\_a`^^[]a\_V\_``]^\_`^W  
@HWI-EAS443:3:3:883:420#0/1  
CAAATATATTCAATATGGAGAGAATAAAAGAACTGAGAGA  
+HWI-EAS443:3:3:883:420#0/1  
ab]bbW[Naa`aaa[bba^b^aa\_aaa[a\_[\_\_a`Ma^`  
@HWI-EAS443:3:3:926:1368#0/1  
ATTC AATATGGAGAGAATAAAAGAACTGAGAGATCTAATG  
+HWI-EAS443:3:3:926:1368#0/1  
]aWOTY\_V`UWK]Ya[aaYY]ZXXVH\_`aY\_`\_\_\_\_Y^]Pa  
@HWI-EAS443:3:3:954:174#0/1  
AAATATATTCAATATGGAGAGAATAAAAGAACTGAGAGAT  
+HWI-EAS443:3:3:954:174#0/1  
¥Z]¥[]\_a\_] [S^R^b`Y]\_b\_X`aa¥aa[\_Z\_aX]X\_] [

@HWI-EAS443:3:40:1053:645#0/1  
CAAATATATTCAATATGGAGAGAATAAAAGAACTGAGAGA  
+HWI-EAS443:3:40:1053:645#0/1  
abb`babaaaaababbaaa```aa]G]Ra\_\_^\_a`\_a^`  
@HWI-EAS443:3:40:1092:1043#0/1  
AAAGCAGGTCAAATATATTCAATATGGAGAGAATAAAAGA  
+HWI-EAS443:3:40:1092:1043#0/1  
aaaababa\_`baaaaaaaaa` [aaaaX\_\_`\_\_\_\_a\_¥a\_^  
@HWI-EAS443:3:40:1100:1709#0/1  
ATTC AATATGGAGAGAATAAAAGAACTGAGAGATCTAATG  
+HWI-EAS443:3:40:1100:1709#0/1  
abbaaa`a`aaaab`¥aaaabaaaZ`a\_aaa\_aaaa`\_  
@HWI-EAS443:3:40:1108:1791#0/1  
ATATATTCAATATGGAGAGAATAAAAGAACTGAGAGATCT  
+HWI-EAS443:3:40:1108:1791#0/1  
]\_X¥¥^ba`b``ZSU¥¥\_¥aaba`]¥V^T]aaa`^Pa^  
@HWI-EAS443:3:40:1191:1373#0/1  
TCAATATGGAGAGAATAAAAGAACTGAGAGATCTAATGTC  
+HWI-EAS443:3:40:1191:1373#0/1  
¥QJZZ\_]\_] ]b\_aU]]^\_a\_`a^`¥P^QZ^`Y` [``^OU  
@HWI-EAS443:3:40:1557:429#0/1  
CAAATATATTCAATATGGAGAGAATAAAAGAACTGAGAGA  
+HWI-EAS443:3:40:1557:429#0/1  
a`a`^bb\_aaa\_\_\_\_^babab^baab¥U\_[a`^^aaab\_ba  
@HWI-EAS443:3:40:1635:66#0/1  
ATATATTCAATATGGAGAGAATAAAAGAACTGAGAGATCT  
+HWI-EAS443:3:40:1635:66#0/1  
abababba`aa\_bba]a\_a`a\_\_^¥^]U[```a\_a\_^\_\_  
@HWI-EAS443:3:40:1667:1316#0/1  
ATTC AATATGGAGAGAATAAAAGAACTGAGAGATCTAATG

+HWI-EAS443:3:40:1667:1316#0/1  
aabaaababb````a\_aaaaaaaaa`Z`aaa\_aa`aaa^\_`  
@HWI-EAS443:3:40:1685:104#0/1  
ATTCAATATGGAGAGAATAAAAGAACTGAGAGATCTAATG  
+HWI-EAS443:3:40:1685:104#0/1  
aaa`\_bbaaaa\_b^ba[a`a`ab^`^ab\_a\_a\_aaaY``a  
@HWI-EAS443:3:40:1704:139#0/1  
CAAATATATTCAATATGGAGAGAATAAAAGAACTGAGAGA  
+HWI-EAS443:3:40:1704:139#0/1  
^a``babababbbbbbaabbabbb\_R`^a`\_`bbabaaa  
@HWI-EAS443:3:40:183:1041#0/1  
AAAGCAGGTCAAATATATTCAATATGGAGAGAATAAAAGA  
+HWI-EAS443:3:40:183:1041#0/1  
aa`^\_aa]aa`a`a\_\_\_aa\_\_\_a`\_X[[\_\_¥\_S¥ZQaX]  
@HWI-EAS443:3:40:205:1785#0/1  
GTCAAATATATTCAATATGGAGAGAATAAAAGAACTGAGA  
+HWI-EAS443:3:40:205:1785#0/1  
\_]a¥aaaYaa`\_\_^]\_a`a`\_]X`SZI^aa^^a]^`¥a  
@HWI-EAS443:3:40:277:2035#0/1  
AGCAGGTCAAATATATTCAATATGGAGAGAATAAAAGAAC  
+HWI-EAS443:3:40:277:2035#0/1  
`^aaa`[`aaa`\_`^\_\_a`¥`\_`\_^^^[\_^a`¥^¥Z^`^  
@HWI-EAS443:3:40:775:1467#0/1  
CAAATATATTCAATATGGAGAGAATAAAAGAACTGAGAGA  
+HWI-EAS443:3:40:775:1467#0/1  
]bbbabbabbaaaba¥^`¥bbX`b\_N`Ua¥ab````aaa  
@HWI-EAS443:3:40:892:1053#0/1  
GCAGGTCAAATATATTCAATATGGAGAGAATAAAAGAACT  
+HWI-EAS443:3:40:892:1053#0/1  
aabab¥ba¥a`\_aaaaaaaaaaa^]aS`Vaa\_a\_a\_a`\_`  
@HWI-EAS443:3:40:910:1215#0/1  
ATTCAATATGGAGAGAATAAAAGAACTGAGAGATCTAATG  
+HWI-EAS443:3:40:910:1215#0/1  
aabaaaaaaaa\_a^^\_aaa]a``\_`^]\_¥`\_`\_a\_a\_\_\_\_a  
@HWI-EAS443:3:42:1172:1169#0/1  
GTCAAATATATTCAATATGGAGAGAATAAAAGAACTGAGA  
+HWI-EAS443:3:42:1172:1169#0/1  
aaaba^bababaa`aaaaaa`a\_aaaaaa`a``a]`a`a\_  
@HWI-EAS443:3:42:118:367#0/1  
AGCAGGTCAAATATATTCAATATGGAGAGAATAAAAGAAC  
+HWI-EAS443:3:42:118:367#0/1  
aab`b\_M\_a\_a`\_aaa`a`\_`a`aaa]a^a^aa\_a^a`\_a`  
@HWI-EAS443:3:42:1268:1895#0/1  
CAAATATATTCAATATGGAGAGAATAAAAGAACTGAGAGA  
+HWI-EAS443:3:42:1268:1895#0/1  
abbbbb`bab\_bbbbbbababX^bbbaa\_babb[`ababab  
@HWI-EAS443:3:42:1320:1458#0/1  
AGCAGGTCAAATATATTCAATATGGAGAGAATAAAAGAAC  
+HWI-EAS443:3:42:1320:1458#0/1  
abaa[T^Va]ab`a\_\_\_^`abYb`\_]``aa`a``\_a\_\_Y





+HWI-EAS443:3:43:1487:911#0/1  
P\_¥¥\_a¥¥`^^[S^`baV[a`¥]\_¥``ab¥Z\_`\_`^aa  
@HWI-EAS443:3:43:1541:785#0/1  
AGCAGGTCAAATATATTCAATATGGAGAGAATAAAAGAAC  
+HWI-EAS443:3:43:1541:785#0/1  
^Xa\_bbba¥abb¥¥a\_^aa`^aaaaY]Wa¥\_a]`P[`^WV  
@HWI-EAS443:3:43:206:1157#0/1  
ATTCAATATGGAGAGAATAAAAGAACTGAGAGATCTAATG  
+HWI-EAS443:3:43:206:1157#0/1  
abbbbbb]a[b[b]b\_]aa`aaaa`a[aZ^\_aaaa\_`a  
@HWI-EAS443:3:43:294:817#0/1  
GTCAAATATATTCAATATGGAGAGAATAAAAGAACTGAGA  
+HWI-EAS443:3:43:294:817#0/1  
a\_abaaa¥`Ua\_\_`[\_`aaa]a¥]\_Y`\_`^\_\_[[¥\_\_a\_\_  
@HWI-EAS443:3:43:339:59#0/1  
GTCAAATATATTCAATATGGAGAGAATAAAAGAACTGAGA  
+HWI-EAS443:3:43:339:59#0/1  
aOX[`^YRa`^]`TU\_`[WR]RXZT¥^^UV[RZXXYV]^  
@HWI-EAS443:3:43:628:1159#0/1  
ATTCAATATGGAGAGAATAAAAGAACTGAGAGATCTAATG  
+HWI-EAS443:3:43:628:1159#0/1  
abbbba\_bab`baaaa\_aabaaa`a\_aaa\_``a`\_aa\_aa  
@HWI-EAS443:3:43:644:176#0/1  
AGCAGGTCAAATATATTCAATATGGAGAGAATAAAAGAAC  
+HWI-EAS443:3:43:644:176#0/1  
`ababbaaaabbaaaba```a`bbb\_a\_]X\_aaaaaa`a\_  
@HWI-EAS443:3:43:799:280#0/1  
GTCAAATATATTCAATATGGAGAGAATAAAAGAACTGAGA  
+HWI-EAS443:3:43:799:280#0/1  
a]`\_]`^`aa^`^[\_`a]\_aZU\_]`]]`^^^Z¥V[^^^]]^  
@HWI-EAS443:3:44:117:287#0/1  
AGCAGGTCAAATATATTCAATATGGAGAGAATAAAAGAAC  
+HWI-EAS443:3:44:117:287#0/1  
aaaX¥a¥\_aaabaa`X`a][^aabaX\_U\_]\_a]]]]][^V  
@HWI-EAS443:3:44:1456:991#0/1  
AGCAGGTCAAATATATTCAATATGGAGAGAATAAAAGAAC  
+HWI-EAS443:3:44:1456:991#0/1  
aaaaaaR]aaaab`aa]\_YUa`aaaXa^`¥\_a]\_a\_WUaR  
@HWI-EAS443:3:44:1459:341#0/1  
GTCAAATATATTCAATATGGAGAGAATAAAAGAACTGAGA  
+HWI-EAS443:3:44:1459:341#0/1  
a]a\_`[^^^¥`]\_UU\_U¥`^Z\_Z`W]]^XX^]ZZZV^X^Z  
@HWI-EAS443:3:44:1636:1836#0/1  
AATATATTCAATATGGAGAGAATAAAAGAACTGAGAGATC  
+HWI-EAS443:3:44:1636:1836#0/1  
a\_baa`b\_¥\_VaaabW]`\_a^\_`a^^R^ZZ`^^`^\_]`^Z  
@HWI-EAS443:3:44:1673:699#0/1  
AATATATTCAATATGGAGAGAATAAAAGAACTGAGAGATC  
+HWI-EAS443:3:44:1673:699#0/1  
^`a^a`abb^0`bb`ZVa\_baaa]a[``aTXZaaa\_a[``[

@HWI-EAS443:3:44:408:597#0/1  
GTCAAATATATTCAATATGGAGAGAATAAAAGAACTGAGA  
+HWI-EAS443:3:44:408:597#0/1  
aabaaabab\_baa\_\_aababYa]b\_aaaa\_a\_`a`a``aa  
@HWI-EAS443:3:44:751:702#0/1  
ATTCAATATGGAGAGAATAAAAGAACTGAGAGATCTAATG  
+HWI-EAS443:3:44:751:702#0/1  
`aba]\_aababab\_a\_\_abaaa`\_a^aaa`\_a^\_Va````\_  
@HWI-EAS443:3:45:1378:1712#0/1  
AGCAGGTCAAATATATTCAATATGGAGAGAATAAAAGAAC  
+HWI-EAS443:3:45:1378:1712#0/1  
a¥`aaa¥YU^H]\_a^aZR]^a¥a\_\_Za[]X^a\_a\_SV]UT  
@HWI-EAS443:3:45:1755:1133#0/1  
GTCAAATATATTCAATATGGAGAGAATAAAAGAACTGAGA  
+HWI-EAS443:3:45:1755:1133#0/1  
]R^]]Y``\_Z]aXYZ^V[\_YYa^aZ¥`\_YVY\_[ZV¥\_^^Z  
@HWI-EAS443:3:45:226:789#0/1  
ATTCAATATGGAGAGAATAAAAGAACTGAGAGATCTAATG  
+HWI-EAS443:3:45:226:789#0/1  
abbaaababbb\_baaaaaaaa`aa`\_aaaaaaaaaaaa`ab  
@HWI-EAS443:3:45:22:1270#0/1  
AATATATTCAATATGGAGAGAATAAAAGAACTGAGAGATC  
+HWI-EAS443:3:45:22:1270#0/1  
^]^^TW\_P\_a\_\_¥Z]^b]^V\_]\_\_WY``U¥^^`V[a]S`  
@HWI-EAS443:3:45:422:1455#0/1  
TATATTCAATATGGAGAGAATAAAAGAACTGAGAGATCTA  
+HWI-EAS443:3:45:422:1455#0/1  
aaaaaaaa`a`aaa^a^a^\_a\_``aa\_\_Za^`]a\_\_^^`\_  
@HWI-EAS443:3:45:653:1729#0/1  
AGCAGGTCAAATATATTCAATATGGAGAGAATAAAAGAAC  
+HWI-EAS443:3:45:653:1729#0/1  
a`\_``a[aaaaaa`\_aa^`\_a`aa\_]``\_````aa\_^\_]\_Y  
@HWI-EAS443:3:45:705:298#0/1  
AAATATATTCAATATGGAGAGAATAAAAGAACTGAGAGAT  
+HWI-EAS443:3:45:705:298#0/1  
aabba¥¥b``¥]a^a^^¥`\_a^\_a`aaaa`\_U\_a\_`\_a\_^  
@HWI-EAS443:3:45:894:1620#0/1  
AAGCAGGTCAAATATATTCAATATGGAGAGAATAAAAGAA  
+HWI-EAS443:3:45:894:1620#0/1  
a^a`]W]^a]¥a`\_``][W`\_`^]`^`W`^^\_\_YY]]\_  
@HWI-EAS443:3:45:940:1432#0/1  
GGTCAAATATATTCAATATGGAGAGAATAAAAGAACTGAG  
+HWI-EAS443:3:45:940:1432#0/1  
X\_M[^aa¥`a]a`aVY`^bb^`ba`\_^aa]aab[ `[a`aa  
@HWI-EAS443:3:46:1203:605#0/1  
ATTCAATATGGAGAGAATAAAAGAACTGAGAGATCTAATG  
+HWI-EAS443:3:46:1203:605#0/1  
abbbbbbabbbab[b\_aaabbab]aabbbbaababbaab  
@HWI-EAS443:3:46:1205:756#0/1  
CAAATATATTCAATATGGAGAGAATAAAAGAACTGAGAGA

+HWI-EAS443:3:46:1205:756#0/1  
a]S\_^La\_`\_``[aabaX`T`UZ\_\_YX[\_YW]`a^\_\_\_\_^  
@HWI-EAS443:3:46:1517:1270#0/1  
ATTCAATATGGAGAGAATAAAAGAACTGAGAGATCTAATG  
+HWI-EAS443:3:46:1517:1270#0/1  
aaaaa^a^aa\_``a^]a`\_a\_\_\_a^`a`\_\_\_\_^^^\_]^\\$  
@HWI-EAS443:3:46:1524:1534#0/1  
AGCAGGTCAAATATATTCAATATGGAGAGAATAAAAGAAC  
+HWI-EAS443:3:46:1524:1534#0/1  
`bbabb\_abba`aa]ba\_`ababab\_a`baaaa\_`aa^aZ  
@HWI-EAS443:3:46:1638:1876#0/1  
CAAATATATTCAATATGGAGAGAATAAAAGAACTGAGAGA  
+HWI-EAS443:3:46:1638:1876#0/1  
aa¥aaaaabba[¥`a`^\_b]a\_\_\_`aaa`^`\_^]a`a\_  
@HWI-EAS443:3:46:1729:87#0/1  
AGCAGGTCAAATATATTCAATATGGAGAGAATAAAAGAAC  
+HWI-EAS443:3:46:1729:87#0/1  
abbabb\_\_aaaa\_aabaa\_\_a\_abbXa^a]]\_\_\_\_^`U\_X  
@HWI-EAS443:3:46:499:686#0/1  
GTCAAATATATTCAATATGGAGAGAATAAAAGAACTGAGA  
+HWI-EAS443:3:46:499:686#0/1  
aa\_^\_]aZaaa]ZaaaU`ba[\_L\_]a^`Z`aa\_a^`^`ZQ  
@HWI-EAS443:3:46:932:1728#0/1  
TATATTCAATATGGAGAGAATAAAAGAACTGAGAGATCTA  
+HWI-EAS443:3:46:932:1728#0/1  
`b`XYU[Sa]b\_baRPF[Y]^aa[`XaVJX`[\_`\_\_`^aa  
@HWI-EAS443:3:47:1028:1865#0/1  
ATTCAATATGGAGAGAATAAAAGAACTGAGAGATCTAATG  
+HWI-EAS443:3:47:1028:1865#0/1  
]b`]Wab`a¥¥`^Q`^`\_ba`aa\_aX`Yaaaa\_aUT`[\_  
@HWI-EAS443:3:47:1279:1701#0/1  
AAAGCAGGTCAAATATATTCAATATGGAGAGAATAAAAGA  
+HWI-EAS443:3:47:1279:1701#0/1  
abaaaaba`ab`a\_a^aa`\_`\_aa`ba¥a\_a`aaaa`\_¥]  
@HWI-EAS443:3:47:1303:769#0/1  
GTCAAATATATTCAATATGGAGAGAATAAAAGAACTGAGA  
+HWI-EAS443:3:47:1303:769#0/1  
a\_NVXH]T¥aa¥^UQW]NS\_P`¥^WV^[[\_XT][¥YRZNV  
@HWI-EAS443:3:47:1351:124#0/1  
AGCAGGTCAAATATATTCAATATGGAGAGAATAAAAGAAC  
+HWI-EAS443:3:47:1351:124#0/1  
ab\_abb``abaaababaa`\_b`ba^\_a^b`^aa\_\_`aZ\_[  
@HWI-EAS443:3:47:1432:1419#0/1  
CAAATATATTCAATATGGAGAGAATAAAAGAACTGAGAGA  
+HWI-EAS443:3:47:1432:1419#0/1  
abbbbabbbaabbbabbbabYbaabbaaabaaaabaaaa`  
@HWI-EAS443:3:47:1464:1000#0/1  
CAAATATATTCAATATGGAGAGAATAAAAGAACTGAGAGA  
+HWI-EAS443:3:47:1464:1000#0/1  
U¥bbab`[a\_¥b``¥\_\_\_bba^\_]a`a\_[aaaa``abaaa

@HWI-EAS443:3:47:1491:1657#0/1  
CAAATATATTCAATATGGAGAGAATAAAAGAACTGAGAGA  
+HWI-EAS443:3:47:1491:1657#0/1  
U`\_\_\_ba^a`Zbabbb`\_ba`ZZ^X`abaa[[`^\_^a`  
@HWI-EAS443:3:47:1496:975#0/1  
ATTC AATATGGAGAGAATAAAAGAACTGAGAGATCTAATG  
+HWI-EAS443:3:47:1496:975#0/1  
abaa^baabab\_b\_b\_aaaaaa]\_\_aa^)`a^\_¥`\_`\_`a  
@HWI-EAS443:3:47:1584:1406#0/1  
CAAATATATTCAATATGGAGAGAATAAAAGAACTGAGAGA  
+HWI-EAS443:3:47:1584:1406#0/1  
abbabababaaaababbb`b]a``aaa\_`a`a\_aaaaaa`  
@HWI-EAS443:3:47:1629:1063#0/1  
ATATATTCAATATGGAGAGAATAAAAGAACTGAGAGATCT  
+HWI-EAS443:3:47:1629:1063#0/1  
abbb^X^`\_YbaVbb\_b`b\_[`aaaa¥SIO\_\_\_\_`aa¥ZY`  
@HWI-EAS443:3:47:1646:488#0/1  
ATTC AATATGGAGAGAATAAAAGAACTGAGAGATCTAATG  
+HWI-EAS443:3:47:1646:488#0/1  
`b`baababbbYb\_``aaaaaaaaaaaaaaaa`a[aaaaa  
@HWI-EAS443:3:47:172:675#0/1  
ATTC AATATGGAGAGAATAAAAGAACTGAGAGATCTAATG  
+HWI-EAS443:3:47:172:675#0/1  
abbb`ab`bbbaa`a\_ab`aaaa`a\_a\_aaa``\_^\_aaaa  
@HWI-EAS443:3:47:439:1936#0/1  
CAAATATATTCAATATGGAGAGAATAAAAGAACTGAGAGA  
+HWI-EAS443:3:47:439:1936#0/1  
abb\_abbbbbbbabbbbb]babbbbabbaaaaaaa`a  
@HWI-EAS443:3:47:457:1064#0/1  
ATTC AATATGGAGAGAATAAAAGAACTGAGAGATCTAATG  
+HWI-EAS443:3:47:457:1064#0/1  
`^^^a]`ba`a^a^baaaaaaa`a`aaa]`^aa]\_a\_\_a  
@HWI-EAS443:3:47:479:451#0/1  
ATTC AATATGGAGAGAATAAAAGAACTGAGAGATCTAATG  
+HWI-EAS443:3:47:479:451#0/1  
aabbaabbbba`ababbaaaaaabaaaaaa¥ab`ab  
@HWI-EAS443:3:47:480:376#0/1  
CAAATATATTCAATATGGAGAGAATAAAAGAACTGAGAGA  
+HWI-EAS443:3:47:480:376#0/1  
abbabVbbaab^abbabbabab``aababaaa^abababa  
@HWI-EAS443:3:47:484:19#0/1  
ATTC AATATGGAGAGAATAAAAGAACTGAGAGATCTAATG  
+HWI-EAS443:3:47:484:19#0/1  
^`baZ`\_abZYb`bVZ`\_aT]\_\_\_\_T\_aabab^RH`aaaa  
@HWI-EAS443:3:47:642:122#0/1  
CAAATATATTCAATATGGAGAGAATAAAAGAACTGAGAGA  
+HWI-EAS443:3:47:642:122#0/1  
`a^¥^`bbb^baab¥Vba`baaa^a]\_a¥a[Yaaaaa``[  
@HWI-EAS443:3:47:827:367#0/1  
CAAATATATTCAATATGGAGAGAATAAAAGAACTGAGAGA

+HWI-EAS443:3:47:827:367#0/1  
a`a``¥b^bb\_aab]bbaab[aaaaY`aaba\_\_abab`aa  
@HWI-EAS443:3:47:960:662#0/1  
TTCAATATGGAGAGAATAAAAGAACTGAGAGATCTAATGT  
+HWI-EAS443:3:47:960:662#0/1  
aba]aa[bab\_bab\_]¥^a]\_a]\_aaaa\_aa^a\_`a^a`^  
@HWI-EAS443:3:48:1207:1881#0/1  
CAAATATATTCAATATGGAGAGAATAAAAGAACTGAGAGA  
+HWI-EAS443:3:48:1207:1881#0/1  
aabbbbbbabbaabababa\_aaabbbbaa\_[a\_abaaab]  
@HWI-EAS443:3:48:1513:274#0/1  
ATTCAATATGGAGAGAATAAAAGAACTGAGAGATCTAATG  
+HWI-EAS443:3:48:1513:274#0/1  
`\_`aabYXa`aH[\_b\_a`¥Z^ZY^`Y\_T`]aa\_RGX`]`Y  
@HWI-EAS443:3:48:1544:479#0/1  
ATTCAATATGGAGAGAATAAAAGAACTGAGAGATCTAATG  
+HWI-EAS443:3:48:1544:479#0/1  
YZYbbb\_S`^Uaabb[b]`Ya`a¥\_aV^]a\_aZaW\_a`  
@HWI-EAS443:3:48:1625:624#0/1  
GTCAAATATATTCAATATGGAGAGAATAAAAGAACTGAGA  
+HWI-EAS443:3:48:1625:624#0/1  
aP\_\_\_¥a\_a``\_[\_\_\_\_]`^`[a^\_ZVZ\_^¥\_^XTXXU¥YS  
@HWI-EAS443:3:48:1654:599#0/1  
AGCAGGTCAAATATATTCAATATGGAGAGAATAAAAGAAC  
+HWI-EAS443:3:48:1654:599#0/1  
abaabb`bbbaaa`\_bba\_`aaaba\_a\_b`X`\_[\_aa`\_¥  
@HWI-EAS443:3:48:16:1184#0/1  
CAAATATATTCAATATGGAGAGAATAAAAGAACTGAGAGA  
+HWI-EAS443:3:48:16:1184#0/1  
¥`b^]a\_LW`^]Xaa`a^Z\_¥a`Q``^a```a^aa\_¥\_`  
@HWI-EAS443:3:48:248:988#0/1  
ATTCAATATGGAGAGAATAAAAGAACTGAGAGATCTAATG  
+HWI-EAS443:3:48:248:988#0/1  
abbbaaa\_abb\_b`a`aaa^aa\_\_\_W``a`a\_``a^\_``  
@HWI-EAS443:3:48:310:673#0/1  
AATATATTCAATATGGAGAGAATAAAAGAACTGAGAGATC  
+HWI-EAS443:3:48:310:673#0/1  
aaabaaaaaaaaaaba`baa`aaaaaa`a\_aaaa`a`\_^  
@HWI-EAS443:3:48:365:113#0/1  
GTCAAATATATTCAATATGGAGAGAATAAAAGAACTGAGA  
+HWI-EAS443:3:48:365:113#0/1  
a]\_a^\_\_\_^`a^\_UY]¥a`XX`X]R[\_[^ZTaZZZZYZ]Z  
@HWI-EAS443:3:49:101:1734#0/1  
ATTCAATATGGAGAGAATAAAAGAACTGAGAGATCTAATG  
+HWI-EAS443:3:49:101:1734#0/1  
aba\_^bbab¥^^]baabaaaaba`[a]aaaaaaaa`a`  
@HWI-EAS443:3:49:133:2020#0/1  
ATATATTCAATATGGAGAGAATAAAAGAACTGAGAGATCT  
+HWI-EAS443:3:49:133:2020#0/1  
``]Waba¥\_b¥a`Waa\_VI¥babaa^\_a]\_K\_I\_`aYaa

@HWI-EAS443:3:49:1356:484#0/1  
ATTCAATATGGAGAGAATAAAAGAACTGAGAGATCTAATG  
+HWI-EAS443:3:49:1356:484#0/1  
[bbbbb^TYabbbbbbbaabbabbaaabba\_abb]a\_Zab  
@HWI-EAS443:3:49:1463:1270#0/1  
ATTCAATATGGAGAGAATAAAAGAACTGAGAGATCTAATG  
+HWI-EAS443:3:49:1463:1270#0/1  
aaW¥¥abYaaa^a[^WXaba]a]a[ab¥Z]QU][ZZY^\_  
@HWI-EAS443:3:49:148:925#0/1  
AGCAGGTCAAATATATTCAATATGGAGAGAATAAAAGAAC  
+HWI-EAS443:3:49:148:925#0/1  
a`ab\_b\_ababbaabaa`aaaaa^b`b``aaaaaaa\_  
@HWI-EAS443:3:49:1543:1960#0/1  
AAGCAGGTCAAATATATTCAATATGGAGAGAATAAAAGAA  
+HWI-EAS443:3:49:1543:1960#0/1  
Z\_¥Y¥b\_T^`[[T]¥QWX\_aaaVGY]Ya\_¥HZTO\_U``][  
@HWI-EAS443:3:49:1615:1737#0/1  
GGTCAAATATATTCAATATGGAGAGAATAAAAGAACTGAG  
+HWI-EAS443:3:49:1615:1737#0/1  
ab^bbb^a]aabab^`ba`a]b[aa\_aa`a^^`^aaa\_  
@HWI-EAS443:3:49:1684:1141#0/1  
ATATTCAATATGGAGAGAATAAAAGAACTGAGAGATCTAA  
+HWI-EAS443:3:49:1684:1141#0/1  
a`Y\_a`]]b[a\_a\_b\_a`aaaa`\_]a^adW\_a`]`¥\_\_\_\_  
@HWI-EAS443:3:49:1714:393#0/1  
AGCAGGTCAAATATATTCAATATGGAGAGAATAAAAGAAC  
+HWI-EAS443:3:49:1714:393#0/1  
[``a`NVaSaab^[`ZSZ^\_Y`W¥Y¥`\_Z^^^aX]WY^L  
@HWI-EAS443:3:49:461:1433#0/1  
AATATATTCAATATGGAGAGAATAAAAGAACTGAGAGATC  
+HWI-EAS443:3:49:461:1433#0/1  
Q¥\_]¥aYaababa]`¥]b\_bX``aaa`¥\_a]a]]\_a`aaZ  
@HWI-EAS443:3:49:70:497#0/1  
CAAATATATTCAATATGGAGAGAATAAAAGAACTGAGAGA  
+HWI-EAS443:3:49:70:497#0/1  
abbbba¥^aba^aba\_WS`aa`M[ba¥a\_¥^\_]`aY^W[^  
@HWI-EAS443:3:49:780:984#0/1  
ATTCAATATGGAGAGAATAAAAGAACTGAGAGATCTAATG  
+HWI-EAS443:3:49:780:984#0/1  
aba\_aa`aa`\_\_`Z^]V`aaa\_[\_a¥\_a`a`¥a`[\_`aa`  
@HWI-EAS443:3:49:893:1287#0/1  
CAAATATATTCAATATGGAGAGAATAAAAGAACTGAGAGA  
+HWI-EAS443:3:49:893:1287#0/1  
aaaa`^ab`a`YUVabb`b\_ba^aaaa^aa\_V\_baa\_a`  
@HWI-EAS443:3:49:962:380#0/1  
AGCAGGTCAAATATATTCAATATGGAGAGAATAAAAGAAC  
+HWI-EAS443:3:49:962:380#0/1  
^^aXaa``\_aa\_¥\_a`^^aa`]a`a\_b¥ba^aaaaa`a^  
@HWI-EAS443:3:49:9:595#0/1  
GTCAAATATATTCAATATGGAGAGAATAAAAGAACTGAGA

+HWI-EAS443:3:49:9:595#0/1  
`^\_aaa`abbbbaabbab`aa```aaaaaaaa^a\_a\_a  
@HWI-EAS443:3:4:1058:51#0/1  
CAAATATATTCAATATGGAGAGAATAAAAGAACTGAGAGA  
+HWI-EAS443:3:4:1058:51#0/1  
abbbbbbabbba`aabb`baa`ab`a`a`\_^[aa\_a`a`  
@HWI-EAS443:3:4:1197:1074#0/1  
TTCAATATGGAGAGAATAAAAGAACTGAGAGATCTAATGT  
+HWI-EAS443:3:4:1197:1074#0/1  
`b`Y^a^abaR`XUW`aaa\_^XTS[¥a`\_\_\_\_`[V`\_]¥TX  
@HWI-EAS443:3:4:1561:213#0/1  
AATATATTCAATATGGAGAGAATAAAAGAACTGAGAGATC  
+HWI-EAS443:3:4:1561:213#0/1  
aab`^^aa\_]`a^\_aaUb^a^\_a^`\_^`^YYaW^\_]`^V  
@HWI-EAS443:3:4:1671:1861#0/1  
CAAATATATTCAATATGGAGAGAATAAAAGAACTGAGAGA  
+HWI-EAS443:3:4:1671:1861#0/1  
abbbbababaa^abVaabbba`a]aaaaa```a^a`aaa`a  
@HWI-EAS443:3:4:395:1138#0/1  
CAAATATATTCAATATGGAGAGAATAAAAGAACTGAGAGA  
+HWI-EAS443:3:4:395:1138#0/1  
ab\_\_bab]bbaaababb\_bPa\_aaaaa`a`\_^a¥`b\_a^  
@HWI-EAS443:3:4:448:1061#0/1  
GGTCAAATATATTCAATATGGAGAGAATAAAAGAACTGAG  
+HWI-EAS443:3:4:448:1061#0/1  
a]MX\_^W^[\_\_¥XSZT[T\_a`Q^]`XW¥`^^\_\_ZUW[Y\_^  
@HWI-EAS443:3:4:558:1764#0/1  
AGCAGGTCAAATATATTCAATATGGAGAGAATAAAAGAAC  
+HWI-EAS443:3:4:558:1764#0/1  
Yaa¥aaSX[^\_HZ`a¥\_\_a\_T]S`[[a\_^]SU`]\_BBBB  
@HWI-EAS443:3:4:660:341#0/1  
CAAATATATTCAATATGGAGAGAATAAAAGAACTGAGAGA  
+HWI-EAS443:3:4:660:341#0/1  
`b\_a\_T[`baa`Y]\_aa`]ba¥Y¥WX`\_\_[¥^W¥^`^a\_a  
@HWI-EAS443:3:4:784:336#0/1  
ATTCAATATGGAGAGAATAAAAGAACTGAGAGATCTAATG  
+HWI-EAS443:3:4:784:336#0/1  
ab\_0]ab`aaa`b\_b\_abaa^abW¥\_aaaa\_aY¥L¥```\_a  
@HWI-EAS443:3:4:914:346#0/1  
ATTCAATATGGAGAGAATAAAAGAACTGAGAGATCTAATG  
+HWI-EAS443:3:4:914:346#0/1  
abbaa`abbbb\_b`b\_abbaaaa\_a`baaab\_a]aa`ab  
@HWI-EAS443:3:4:940:877#0/1  
ATTCAATATGGAGAGAATAAAAGAACTGAGAGATCTAATG  
+HWI-EAS443:3:4:940:877#0/1  
aaba`ababb``a`\_Y]baa`aa\_a`aaa\_aa\_a]aa`aa  
@HWI-EAS443:3:50:1077:780#0/1  
AATATATTCAATATGGAGAGAATAAAAGAACTGAGAGATC  
+HWI-EAS443:3:50:1077:780#0/1  
aa`¥^\_bba\_`b`b]baYVa^aaa\_\_aa\_aWb`aaaa`aY



@HWI-EAS443:3:50:1155:1859#0/1  
AAATATATTCAATATGGAGAGAATAAAAGAACTGAGAGAT  
+HWI-EAS443:3:50:1155:1859#0/1  
]a\_bab`aa\_a\_aaaa\_\_\_\_\_a^a`b^aaa`¥aa`a^a]`  
@HWI-EAS443:3:50:1241:1497#0/1  
AGCAGGTCAAATATATTCAATATGGAGAGAATAAAAGAAC  
+HWI-EAS443:3:50:1241:1497#0/1  
aba`bbUabbabab\_ba`a`babba\_bXba`aaaa\_¥\_`^  
@HWI-EAS443:3:50:1430:221#0/1  
AGCAGGTCAAATATATTCAATATGGAGAGAATAAAAGAAC  
+HWI-EAS443:3:50:1430:221#0/1  
UYR`a^Y\_`\_\_VUaab^a^baa\_a¥EV[ba\_`\_aMaa^I]  
@HWI-EAS443:3:50:1451:18#0/1  
TATATTCAATATGGAGAGAATAAAAGAACTGAGAGATCTA  
+HWI-EAS443:3:50:1451:18#0/1  
aba`bbbaaab`bbb^b\_b\_ab\_aa\_a`^^a\_\_a^a\_aZa`  
@HWI-EAS443:3:50:1461:867#0/1  
ATATATTCAATATGGAGAGAATAAAAGAACTGAGAGATCT  
+HWI-EAS443:3:50:1461:867#0/1  
abbaaabaa^babbbab¥bY`b[\_aaa\_a`baa`aa\_a\_a  
@HWI-EAS443:3:50:151:1738#0/1  
CAAATATATTCAATATGGAGAGAATAAAAGAACTGAGAGA  
+HWI-EAS443:3:50:151:1738#0/1  
aabX\_a¥JZbYWT`a`bb[]¥¥\_Z]\_XYX^\_aaaYOXY¥X  
@HWI-EAS443:3:50:1702:1160#0/1  
GTCAAATATATTCAATATGGAGAGAATAAAAGAACTGAGA  
+HWI-EAS443:3:50:1702:1160#0/1  
aa¥aabb\_b``WV\_``\_\_Y\_VYU^00U` `¥`[^Y¥`]]¥¥  
@HWI-EAS443:3:50:17:851#0/1  
AATATATTCAATATGGAGAGAATAAAAGAACTGAGAGATC  
+HWI-EAS443:3:50:17:851#0/1  
`aa\_¥aUaa^aa^`]\_¥a¥a\_\_W\_\_Ua^aa\_\_¥\_¥WS`\_¥  
@HWI-EAS443:3:50:264:219#0/1  
AGCAGGTCAAATATATTCAATATGGAGAGAATAAAAGAAC  
+HWI-EAS443:3:50:264:219#0/1  
`ba`bb¥\_b\_]bbbabb`^ab`\_¥\_aaaaaaaaababaaa  
@HWI-EAS443:3:50:540:1106#0/1  
CAAATATATTCAATATGGAGAGAATAAAAGAACTGAGAGA  
+HWI-EAS443:3:50:540:1106#0/1  
a`bbbbbbabbaaababba\_a`baaaaaaaaa\_a`aaaaaaa  
@HWI-EAS443:3:50:597:993#0/1  
ATTCAATATGGAGAGAATAAAAGAACTGAGAGATCTAATG  
+HWI-EAS443:3:50:597:993#0/1  
abb\_babXabb`baabbaabbbaaa\_abaababa^ab\_ba  
@HWI-EAS443:3:50:600:610#0/1  
CAAATATATTCAATATGGAGAGAATAAAAGAACTGAGAGA  
+HWI-EAS443:3:50:600:610#0/1  
\_`]\_\_b\_W^`^¥`a`¥Z`\_a]ba^`^ab``````a\_`aa  
@HWI-EAS443:3:51:1011:271#0/1  
AGCAGGTCAAATATATTCAATATGGAGAGAATAAAAGAAC



@HWI-EAS443:3:51:94:847#0/1  
CAAATATATTCAATATGGAGAGAATAAAAGAACTGAGAGA  
+HWI-EAS443:3:51:94:847#0/1  
aSY\_a`baaaaaba`bbaXa^aaabaVVbb\_b]aaabaa\_  
@HWI-EAS443:3:52:1009:373#0/1  
AAATATATTCAATATGGAGAGAATAAAAGAACTGAGAGAT  
+HWI-EAS443:3:52:1009:373#0/1  
abab^a`a`\_`\_]``aaa\_`^\_\_\_\_`\_\_\_\_^\_\_^a\_`\_\_`^\_  
@HWI-EAS443:3:52:1282:994#0/1  
GTCAAATATATTCAATATGGAGAGAATAAAAGAACTGAGAGA  
+HWI-EAS443:3:52:1282:994#0/1  
aV`[[Z^U^Z`[QUS]Zb][Q`]`YV[¥[¥[^ZTT]^W¥S  
@HWI-EAS443:3:52:1403:440#0/1  
ATTCATATGGAGAGAATAAAAGAACTGAGAGATCTAATG  
+HWI-EAS443:3:52:1403:440#0/1  
^`[Z`b`abZWQa\_bbbbab\_b`Y]a`b\_b]ba`Haaab`  
@HWI-EAS443:3:52:1568:1099#0/1  
CAAATATATTCAATATGGAGAGAATAAAAGAACTGAGAGA  
+HWI-EAS443:3:52:1568:1099#0/1  
abb\_b``aba^]bbab`bZ``baabba`abababaab`aa  
@HWI-EAS443:3:52:1783:204#0/1  
GGTCAAATATATTCAATATGGAGAGAATAAAAGAACTGAG  
+HWI-EAS443:3:52:1783:204#0/1  
aa`aaabbaaabaabaabb^`\_a\_a\_\_a\_aaa\_a``a^`\_  
@HWI-EAS443:3:52:1783:263#0/1  
GTCAAATATATTCAATATGGAGAGAATAAAAGAACTGAGAGA  
+HWI-EAS443:3:52:1783:263#0/1  
a¥aa\_T[\_aZaXUP^`Z^]OVQML[Y[WSR^K¥PU`\_UQS  
@HWI-EAS443:3:52:412:1302#0/1  
GTCAAATATATTCAATATGGAGAGAATAAAAGAACTGAGAGA  
+HWI-EAS443:3:52:412:1302#0/1  
\_X¥SR^aU]TSTYSPWOZa^W]QYF[X[OOW`SLJP^WR\_  
@HWI-EAS443:3:52:682:1837#0/1  
AGCAGGTCAAATATATTCAATATGGAGAGAATAAAAGAAC  
+HWI-EAS443:3:52:682:1837#0/1  
``aaaa^abaaaaaaa`a`aaaa\_\_a\_\_``aa`aa``\_`^  
@HWI-EAS443:3:52:830:636#0/1  
GTCAAATATATTCAATATGGAGAGAATAAAAGAACTGAGAGA  
+HWI-EAS443:3:52:830:636#0/1  
aV\_HOYT¥ZUaXb`U`Q\_a`T\_¥ZRU`X^`^WQ\_Z``\_\_¥  
@HWI-EAS443:3:52:840:226#0/1  
AATATATTCAATATGGAGAGAATAAAAGAACTGAGAGATC  
+HWI-EAS443:3:52:840:226#0/1  
a`a[WT`]V¥]\_VRaXV^U`SXa[`[UaTX`^]]U^S\_Z  
@HWI-EAS443:3:53:1043:1847#0/1  
ATATATTCAATATGGAGAGAATAAAAGAACTGAGAGATCT  
+HWI-EAS443:3:53:1043:1847#0/1  
``\_XZa`aY\_aS``S`b]^TSS`a\_aXV^HTa``aa\_\_RV  
@HWI-EAS443:3:53:1088:943#0/1  
CAAATATATTCAATATGGAGAGAATAAAAGAACTGAGAGA

+HWI-EAS443:3:53:1088:943#0/1  
^bbb^W^Labbaab\_b`aSXYb]bb^`¥`aaaba]`abbb  
@HWI-EAS443:3:53:1191:1993#0/1  
ATTCAATATGGAGAGAATAAAAGAACTGAGAGATCTAATG  
+HWI-EAS443:3:53:1191:1993#0/1  
^ba`aab`b`^a^Xb`\_^I[`baa]aa`bba`a\_aaab^  
@HWI-EAS443:3:53:135:1512#0/1  
ATTCAATATGGAGAGAATAAAAGAACTGAGAGATCTAATG  
+HWI-EAS443:3:53:135:1512#0/1  
a]bbbaaab`aaX^`aa`\_aaa\_abaabaaaaa`aa\_aa  
@HWI-EAS443:3:53:1379:229#0/1  
AATATATTCAATATGGAGAGAATAAAAGAACTGAGAGATC  
+HWI-EAS443:3:53:1379:229#0/1  
`ab`^^`^a`b\_bIb¥aQZXTVaa`b^^¥`a\_\_a`b`a\_aN  
@HWI-EAS443:3:53:1430:367#0/1  
AGCAGGTCAAATATATTCAATATGGAGAGAATAAAAGAAC  
+HWI-EAS443:3:53:1430:367#0/1  
ab`baa^bababababba\_]a\_aaa\_a^b`a`a\_aaaa`]  
@HWI-EAS443:3:53:1437:415#0/1  
CAAATATATTCAATATGGAGAGAATAAAAGAACTGAGAGA  
+HWI-EAS443:3:53:1437:415#0/1  
```ba`¥\_bbaab]`^¥`VV\_]bba`baaa¥VSba\_b`a¥  
@HWI-EAS443:3:53:1719:765#0/1  
AAGCAGGTCAAATATATTCAATATGGAGAGAATAAAAGAA  
+HWI-EAS443:3:53:1719:765#0/1  
a\_¥`a\_¥^abbbabaaaaa`aaaa^]Y\_\_\_\_\_`a\_a`\_\_\_\_  
@HWI-EAS443:3:53:1743:1967#0/1  
GTCAAATATATTCAATATGGAGAGAATAAAAGAACTGAGA  
+HWI-EAS443:3:53:1743:1967#0/1  
abaaababbabb\_aababba`b\_b^aaaaaa`a¥^a`a``  
@HWI-EAS443:3:53:17:1551#0/1  
ATTCAATATGGAGAGAATAAAAGAACTGAGAGATCTAATG  
+HWI-EAS443:3:53:17:1551#0/1  
aaabab`ababa`a]W]a\_a`TT`\_a\_a`````]a\_\_``  
@HWI-EAS443:3:53:213:695#0/1  
ATTCAATATGGAGAGAATAAAAGAACTGAGAGATCTAATG  
+HWI-EAS443:3:53:213:695#0/1  
\_`ab\_Q\_Z`\_\_Va[abbbbb`\_`S¥\_W```]`\_ab`ba]a`  
@HWI-EAS443:3:53:232:1913#0/1  
GTCAAATATATTCAATATGGAGAGAATAAAAGAACTGAGA  
+HWI-EAS443:3:53:232:1913#0/1  
^T`X\_\_X¥TabbUN\_ab`W`aZ]]][Yb]]]a]\_`Wa\_\_Z¥  
@HWI-EAS443:3:53:357:1732#0/1  
ATTCAATATGGAGAGAATAAAAGAACTGAGAGATCTAATG  
+HWI-EAS443:3:53:357:1732#0/1  
aababbbaaba[```bbbabbaaaaaaaa^aa`aaaba  
@HWI-EAS443:3:53:649:1134#0/1  
AAGCAGGTCAAATATATTCAATATGGAGAGAATAAAAGAA  
+HWI-EAS443:3:53:649:1134#0/1  
\_]\_`Y\_a`W]^¥\_¥`]^^[PY\_^aaYUZ^b\_X\_```¥\_[U

@HWI-EAS443:3:54:334:544#0/1  
GTCAAATATATTCAATATGGAGAGAATAAAAGAACTGAGA  
+HWI-EAS443:3:54:334:544#0/1  
a[¥^aaa[b`b`aaaa\_abaZa\_aZ^a^^^¥^\_¥aa` [¥  
@HWI-EAS443:3:54:472:998#0/1  
CAAATATATTCAATATGGAGAGAATAAAAGAACTGAGAGA  
+HWI-EAS443:3:54:472:998#0/1  
`aa[``\_T\_aaaaaa^aa\_b\_a\_aa`]¥`]^`aa\_aaaa  
@HWI-EAS443:3:54:538:1572#0/1  
ATTCAATATGGAGAGAATAAAAGAACTGAGAGATCTAATG  
+HWI-EAS443:3:54:538:1572#0/1  
aV\_``^\_TU[¥¥S`^^`baaaaa^`[\_F]a]¥W\_`]^`a  
@HWI-EAS443:3:54:595:516#0/1  
AATATATTCAATATGGAGAGAATAAAAGAACTGAGAGATC  
+HWI-EAS443:3:54:595:516#0/1  
aaa[``\_aaa`\_b`aaa¥a`a\_\_a`\_^`Z]^`^^`\_^`\_^`^  
@HWI-EAS443:3:54:820:1304#0/1  
ATTCAATATGGAGAGAATAAAAGAACTGAGAGATCTAATG  
+HWI-EAS443:3:54:820:1304#0/1  
`bbab`b`bbb`aab\_baabVaaa\_aaaaaabaWba`aa  
@HWI-EAS443:3:54:937:1318#0/1  
AAGCAGGTCAAATATATTCAATATGGAGAGAATAAAAGAA  
+HWI-EAS443:3:54:937:1318#0/1  
aaaaabbababababaaa`aaabaa`a^a`aa`a`a`\_a  
@HWI-EAS443:3:54:946:1844#0/1  
ATTCAATATGGAGAGAATAAAAGAACTGAGAGATCTAATG  
+HWI-EAS443:3:54:946:1844#0/1  
abbbaba¥aab\_[a`aa¥baaaa\_a^\_aaaaaa`aa`^aa  
@HWI-EAS443:3:55:1211:567#0/1  
CAAATATATTCAATATGGAGAGAATAAAAGAACTGAGAGA  
+HWI-EAS443:3:55:1211:567#0/1  
\_abbbba`abbbbbbbbaabbbabbbbbbbbabbbbabbb  
@HWI-EAS443:3:55:1308:62#0/1  
CAAATATATTCAATATGGAGAGAATAAAAGAACTGAGAGA  
+HWI-EAS443:3:55:1308:62#0/1  
ab¥b`abbabbaab`bab\_aaaa`aaa`\_b\_a^ba^b[a^  
@HWI-EAS443:3:55:1407:432#0/1  
CAAATATATTCAATATGGAGAGAATAAAAGAACTGAGAGA  
+HWI-EAS443:3:55:1407:432#0/1  
ab`^bbbbbaaY`b`aVabb`b`bbb^]b]a^babb^ab  
@HWI-EAS443:3:55:1450:1374#0/1  
ATATATTCAATATGGAGAGAATAAAAGAACTGAGAGATCT  
+HWI-EAS443:3:55:1450:1374#0/1  
abababaaaabaaba`a\_a\_abaaaaaaa`aaa\_aa`^a  
@HWI-EAS443:3:55:1758:1569#0/1  
CAAATATATTCAATATGGAGAGAATAAAAGAACTGAGAGA  
+HWI-EAS443:3:55:1758:1569#0/1  
]bbbbab\_bbabba`a`Z`baaabbaaab\_baababa  
@HWI-EAS443:3:55:1761:1844#0/1  
AGCAGGTCAAATATATTCAATATGGAGAGAATAAAAGAAC

+HWI-EAS443:3:55:1761:1844#0/1  
Y[¥VZT[]V¥N]T`Ya¥aPXQWOPULZRX]N\_^a\_[\_\_XW  
@HWI-EAS443:3:55:623:983#0/1  
CAAATATATTCAATATGGAGAGAATAAAAGAACTGAGAGA  
+HWI-EAS443:3:55:623:983#0/1  
aaba`\_`¥bbaaabab`b`aaa\_aabaaa\_abab\_aa  
@HWI-EAS443:3:55:649:515#0/1  
TATTCAATATGGAGAGAATAAAAGAACTGAGAGATCTAAT  
+HWI-EAS443:3:55:649:515#0/1  
aabbabababba\_a`baaa`aaaaa`aaaaaa`aaaaa  
@HWI-EAS443:3:55:668:1464#0/1  
ATTC AATATGGAGAGAATAAAAGAACTGAGAGATCTAATG  
+HWI-EAS443:3:55:668:1464#0/1  
[\_aWZ^baabXZ\_IZ^a\_a^aa]^¥^`aaaa`aaaaa`  
@HWI-EAS443:3:55:69:1348#0/1  
ATATATTCAATATGGAGAGAATAAAAGAACTGAGAGATCT  
+HWI-EAS443:3:55:69:1348#0/1  
aaa`\_a`a`aaaa^\_a`¥`\_`\_`^^^`\_`\_]\_^\_[^  
@HWI-EAS443:3:55:784:148#0/1  
CAAATATATTCAATATGGAGAGAATAAAAGAACTGAGAGA  
+HWI-EAS443:3:55:784:148#0/1  
aa^Z`a[^aa`]b\_aaaYaWa¥`\_`\_^`Y[\_aa[a\_a^  
@HWI-EAS443:3:55:896:114#0/1  
AATATATTCAATATGGAGAGAATAAAAGAACTGAGAGATC  
+HWI-EAS443:3:55:896:114#0/1  
aaaaaaab\_\_\_\_a`aaaXa^a^\_a^`\_a\_\_^a`\_`^a^V  
@HWI-EAS443:3:56:1043:1345#0/1  
AGCAGGTCAAATATATTCAATATGGAGAGAATAAAAGAAC  
+HWI-EAS443:3:56:1043:1345#0/1  
V^^aa`^aabba`^^¥`ab`b\_Z¥a[aa\_ab^a\_a[aU  
@HWI-EAS443:3:56:1094:1287#0/1  
CAGGTCAAATATATTCAATATGGAGAGAATAAAAGAACTG  
+HWI-EAS443:3:56:1094:1287#0/1  
^WY¥TVYZSZT^Z¥WYLZ^]XOZXKXTXUOZNT]ZQVZ[  
@HWI-EAS443:3:56:117:1872#0/1  
GCAGGTCAAATATATTCAATATGGAGAGAATAAAAGAACT  
+HWI-EAS443:3:56:117:1872#0/1  
\_WVT`OU¥\_¥SXWVZTZWU]]`QVWV¥[U`[Z\_a^XXQT  
@HWI-EAS443:3:56:1313:1562#0/1  
ATTC AATATGGAGAGAATAAAAGAACTGAGAGATCTAATG  
+HWI-EAS443:3:56:1313:1562#0/1  
abaa]aaabbb\_bababbaaaaa[[]aa[a`a\_a`\_a\_aa  
@HWI-EAS443:3:56:1388:1604#0/1  
CAAATATATTCAATATGGAGAGAATAAAAGAACTGAGAGA  
+HWI-EAS443:3:56:1388:1604#0/1  
abbbbbbbbbb`bbbbbbbaaa`abbababbaaabbaaba  
@HWI-EAS443:3:56:264:613#0/1  
GCAGGTCAAATATATTCAATATGGAGAGAATAAAAGAACT  
+HWI-EAS443:3:56:264:613#0/1  
aa\_ba\_aaba]aaaa`a`a`aZa`a\_\_`a`^^`]^Z`

@HWI-EAS443:3:56:433:1266#0/1  
ATATATTCAATATGGAGAGAATAAAAGAACTGAGAGATCT  
+HWI-EAS443:3:56:433:1266#0/1  
[TI¥Z[\_a]T[U\_WXS]W\_PS]\_Y¥Z¥]\_¥\_U¥\_]¥S[X]  
@HWI-EAS443:3:56:449:1075#0/1  
AAAGCAGGTCAAATATATTCAATATGGAGAGAATAAAAGA  
+HWI-EAS443:3:56:449:1075#0/1  
aa\_GWa`Xa`ab]b\_`aaPYPTa]aWZZaYa]aa\_aaaZ`  
@HWI-EAS443:3:56:566:1491#0/1  
AATATATTCAATATGGAGAGAATAAAAGAACTGAGAGATC  
+HWI-EAS443:3:56:566:1491#0/1  
aa\_aa\_a`a`¥\_R`aaVZ\_`Z\_\_`^\_^\_`^`\_\_`\_\_\_\_`  
@HWI-EAS443:3:56:865:773#0/1  
CAAATATATTCAATATGGAGAGAATAAAAGAACTGAGAGA  
+HWI-EAS443:3:56:865:773#0/1  
a]WO]V[^^¥a\_]Y[`¥VQWU^OW]```[`[YR[`Z[R]XW  
@HWI-EAS443:3:56:898:324#0/1  
GTCAAATATATTCAATATGGAGAGAATAAAAGAACTGAGA  
+HWI-EAS443:3:56:898:324#0/1  
a\_aaa`W`YX`^\_SaW\_aXF^Xa]^\_\_`\_XWZ\_S\_a^a]  
@HWI-EAS443:3:56:927:1323#0/1  
GTCAAATATATTCAATATGGAGAGAATAAAAGAACTGAGA  
+HWI-EAS443:3:56:927:1323#0/1  
a¥`a^U0¥ZS[T¥0V¥PaZUPYJ]```^T[Y[V]Z[]]^`  
@HWI-EAS443:3:56:981:624#0/1  
CAAATATATTCAATATGGAGAGAATAAAAGAACTGAGAGA  
+HWI-EAS443:3:56:981:624#0/1  
a\_`[`¥UQ\_abY^\_[^¥W[a]\_`a`]]]aa```aa`a`aa  
@HWI-EAS443:3:57:1206:621#0/1  
CAAATATATTCAATATGGAGAGAATAAAAGAACTGAGAGA  
+HWI-EAS443:3:57:1206:621#0/1  
aaY^bbbbbbbaaaaa\_b\_\_`b\_[`aaaaba`^ab\_b`aa  
@HWI-EAS443:3:57:1297:1615#0/1  
AAGCAGGTCAAATATATTCAATATGGAGAGAATAAAAGAA  
+HWI-EAS443:3:57:1297:1615#0/1  
aa`U¥`b¥aaZ``^`aaa]\_\_`WaaZ¥a\_a`aa\_aa`\_a`  
@HWI-EAS443:3:57:1303:1794#0/1  
CAGGTCAAATATATTCAATATGGAGAGAATAAAAGAACTG  
+HWI-EAS443:3:57:1303:1794#0/1  
ab]]Y`abbb`b`baabb`a`ZZNaZ[W^`^^Y\_\_a\_W^a  
@HWI-EAS443:3:57:1379:339#0/1  
AATATATTCAATATGGAGAGAATAAAAGAACTGAGAGATC  
+HWI-EAS443:3:57:1379:339#0/1  
a`b`abbb\_aaa`bbb\_b[b^Zbaaaaa`aaaaa^`aa^  
@HWI-EAS443:3:57:1438:1171#0/1  
ATTCAATATGGAGAGAATAAAAGAACTGAGAGATCTAATG  
+HWI-EAS443:3:57:1438:1171#0/1  
a\_a`]abab\_a\_a¥`^aaa`a`a\_\_a\_aaaaa\_a`a\_`^  
@HWI-EAS443:3:57:1549:1599#0/1  
CAAATATATTCAATATGGAGAGAATAAAAGAACTGAGAGA





@HWI-EAS443:3:58:1394:754#0/1  
ATTCAATATGGAGAGAATAAAAGAACTGAGAGATCTAATG  
+HWI-EAS443:3:58:1394:754#0/1  
a`\_aaUaaaba`a\_¥0S^a[``a[¥\_aaaaaaa^aa`ab  
@HWI-EAS443:3:58:1439:1854#0/1  
ATTCAATATGGAGAGAATAAAAGAACTGAGAGATCTAATG  
+HWI-EAS443:3:58:1439:1854#0/1  
a\_a`aaaab\_\_`a`aa`aaa\_a`\_\_¥a``\_aaa\_\_`a^aa  
@HWI-EAS443:3:58:1442:1295#0/1  
TCAATATGGAGAGAATAAAAGAACTGAGAGATCTAATGTC  
+HWI-EAS443:3:58:1442:1295#0/1  
aaXabaaaaWa\_aaab\_aa`T¥a\_aba`]\_\_\_\_^aaaaa¥X  
@HWI-EAS443:3:58:1688:427#0/1  
CAAATATATTCAATATGGAGAGAATAAAAGAACTGAGAGA  
+HWI-EAS443:3:58:1688:427#0/1  
abb\_bbbabbabababbbabaaaaababbaa`bbabb\_`  
@HWI-EAS443:3:58:203:279#0/1  
CAAATATATTCAATATGGAGAGAATAAAAGAACTGAGAGA  
+HWI-EAS443:3:58:203:279#0/1  
abb`abaaabaabaaba`b\_aaaaaaaaa`a\_a`aaa]  
@HWI-EAS443:3:58:32:1968#0/1  
ATTCAATATGGAGAGAATAAAAGAACTGAGAGATCTAATG  
+HWI-EAS443:3:58:32:1968#0/1  
aaaaa`aaa¥^[a^[```aaa\_^)`\_^^`]a\_\_¥U\_`\_¥Y  
@HWI-EAS443:3:58:441:1149#0/1  
GCAGGTCAAATATATTCAATATGGAGAGAATAAAAGAACT  
+HWI-EAS443:3:58:441:1149#0/1  
aa^^`[aa^\_aaa]\_\_¥^)`\_aa¥¥`^`¥¥)`¥¥`^`¥¥]¥  
@HWI-EAS443:3:58:528:1478#0/1  
CAAATATATTCAATATGGAGAGAATAAAAGAACTGAGAGA  
+HWI-EAS443:3:58:528:1478#0/1  
a^a`aaaa\_b\_\_aaaaa]Za^a]\_\_a[``\_`````\_\_a^^  
@HWI-EAS443:3:58:542:779#0/1  
ATTCAATATGGAGAGAATAAAAGAACTGAGAGATCTAATG  
+HWI-EAS443:3:58:542:779#0/1  
ab\_]aa]a¥a^a```aaaa]aa`a\_aaaaaa]`aaa\_`a  
@HWI-EAS443:3:58:64:1469#0/1  
CAAATATATTCAATATGGAGAGAATAAAAGAACTGAGAGA  
+HWI-EAS443:3:58:64:1469#0/1  
`b`a\_ba^`baa\_a`^a`[^^\_aaaaa`aa\_a`a\_a\_a  
@HWI-EAS443:3:59:1257:541#0/1  
AGCAGGTCAAATATATTCAATATGGAGAGAATAAAAGAAC  
+HWI-EAS443:3:59:1257:541#0/1  
]aabaa^`aaaabbb`aW[]abba\_bbbbb`ab`[Wa`Z  
@HWI-EAS443:3:59:1411:615#0/1  
ATTCAATATGGAGAGAATAAAAGAACTGAGAGATCTAATG  
+HWI-EAS443:3:59:1411:615#0/1  
abaabbbaabbaa`baaababbabababab^baa]\_a`\_  
@HWI-EAS443:3:59:163:239#0/1  
ATTCAATATGGAGAGAATAAAAGAACTGAGAGATCTAATG

+HWI-EAS443:3:59:163:239#0/1  
aaaa]`aaa^aaa[aaaaaaaa^\_^Za\_a\_`^\_¥]\_\_  
@HWI-EAS443:3:59:1734:590#0/1  
CAAATATATTCAATATGGAGAGAATAAAAGAACTGAGAGA  
+HWI-EAS443:3:59:1734:590#0/1  
aba\_baabba\_baaabbb`babbbbbbabba\_`ba]W``]  
@HWI-EAS443:3:59:1757:788#0/1  
AATATATTCAATATGGAGAGAATAAAAGAACTGAGAGATC  
+HWI-EAS443:3:59:1757:788#0/1  
\_`bbaabb¥\_\_^`bbaa\_baaaa\_`bbaa`^^`aRR¥\_Z  
@HWI-EAS443:3:59:195:1067#0/1  
AAATATATTCAATATGGAGAGAATAAAAGAACTGAGAGAT  
+HWI-EAS443:3:59:195:1067#0/1  
\_b`^^`abba]aaa`ba`a[```a^`]^`^Ya]a\_a^[[\_`^  
@HWI-EAS443:3:59:246:315#0/1  
ATTCAATATGGAGAGAATAAAAGAACTGAGAGATCTAATG  
+HWI-EAS443:3:59:246:315#0/1  
aabb]bbaa`Y`]b¥¥`a`\_\_aabaaaaba\_a`a\_\_`aa  
@HWI-EAS443:3:59:425:584#0/1  
TATATTCAATATGGAGAGAATAAAAGAACTGAGAGATCTA  
+HWI-EAS443:3:59:425:584#0/1  
abbaaa`aaa`aaa`a[b\_\_a`aaaa\_aaaa^`\_`ZX^a\_  
@HWI-EAS443:3:59:45:814#0/1  
AGCAGGTCAAATATATTCAATATGGAGAGAATAAAAGAAC  
+HWI-EAS443:3:59:45:814#0/1  
aabaaa[aaaaa`a`aaa\_\_a\_aa\_^aV`\_[\_\_`]^`^`\_  
@HWI-EAS443:3:59:575:827#0/1  
TATATTCAATATGGAGAGAATAAAAGAACTGAGAGATCTA  
+HWI-EAS443:3:59:575:827#0/1  
a\_babbaaYa[`ba\_a[a¥\_aaaaaa^a`aa\_\_`\_]\_`\_  
@HWI-EAS443:3:59:592:939#0/1  
AATATATTCAATATGGAGAGAATAAAAGAACTGAGAGATC  
+HWI-EAS443:3:59:592:939#0/1  
aaa`aaaa`\_aa`aa\_^a\_X0^aaaa`]\_\_\_\_a^]X^^Z  
@HWI-EAS443:3:59:751:1116#0/1  
AATATATTCAATATGGAGAGAATAAAAGAACTGAGAGATC  
+HWI-EAS443:3:59:751:1116#0/1  
`Zbbbaaabab`bbb`bab\_`bababaabaaaaa^\_aa¥  
@HWI-EAS443:3:59:854:178#0/1  
AGCAGGTCAAATATATTCAATATGGAGAGAATAAAAGAAC  
+HWI-EAS443:3:59:854:178#0/1  
aa^`aaWaaaabaaaaa`a`abb\_b\_a``\_a`\_^Y\_^Y  
@HWI-EAS443:3:5:1236:460#0/1  
CAAATATATTCAATATGGAGAGAATAAAAGAACTGAGAGA  
+HWI-EAS443:3:5:1236:460#0/1  
abab``b^[¥NZ``a^¥¥ab`aV`\_¥HIYY\_¥P`Xbaa]a  
@HWI-EAS443:3:5:183:897#0/1  
AGCAGGTCAAATATATTCAATATGGAGAGAATAAAAGAAC  
+HWI-EAS443:3:5:183:897#0/1  
aaba`aGabb`ab`^^^\_Q\_a\_a`¥U\_^a`^a\_W^`\_`aY

@HWI-EAS443:3:5:258:631#0/1  
CAGGTCAAATATATTCAATATGGAGAGAATAAAAGAACTG  
+HWI-EAS443:3:5:258:631#0/1  
abaaa\_abb`b`ab^a\_babbbb`bbb`abab\_bbba\_^b  
@HWI-EAS443:3:5:330:1564#0/1  
ATTC AATATGGAGAGAATAAAAGAACTGAGAGATCTAATG  
+HWI-EAS443:3:5:330:1564#0/1  
aVbW¥\_a`bbb\_^[\`aaa`aaa```^aabab`a`Yaaa`b  
@HWI-EAS443:3:60:1004:1589#0/1  
AGCAGGTCAAATATATTCAATATGGAGAGAATAAAAGAAC  
+HWI-EAS443:3:60:1004:1589#0/1  
aaaaaaZ\_aaaaaaab`a`a`aa`^aaa\_a``^aa]\_\_^  
@HWI-EAS443:3:60:1219:22#0/1  
CAAATATATTCAATATGGAGAGAATAAAAGAACTGAGAGA  
+HWI-EAS443:3:60:1219:22#0/1  
abbbbab\_bbababbbbab`baabaaaa\_a^aaa`aa`  
@HWI-EAS443:3:60:1636:2043#0/1  
AATATATTCAATATGGAGAGAATAAAAGAACTGAGAGATC  
+HWI-EAS443:3:60:1636:2043#0/1  
aa\_¥\_a[\`[¥aaaa\_^aWax\_a\_\_Z^]^aY^[]W\_^`\_^  
@HWI-EAS443:3:60:308:1341#0/1  
GTCAAATATATTCAATATGGAGAGAATAAAAGAACTGAGA  
+HWI-EAS443:3:60:308:1341#0/1  
aP¥Y[Q¥Zaaa^WU^\_^`\_\_\_W\_Y[\_\_\_TR^WZ\_S^^]]\_  
@HWI-EAS443:3:60:617:685#0/1  
GTCAAATATATTCAATATGGAGAGAATAAAAGAACTGAGA  
+HWI-EAS443:3:60:617:685#0/1  
`¥ababaaa`aa]\_^a\_aaa^a]a]]``\_\_^\_]¥^a\_\_\_\_`  
@HWI-EAS443:3:60:754:2023#0/1  
TCAATATGGAGAGAATAAAAGAACTGAGAGATCTAATGTC  
+HWI-EAS443:3:60:754:2023#0/1  
X\_\_\_\_^`a^aa]¥a\_aaaa`a`\_a\_aaaa`]^`^W]a```US  
@HWI-EAS443:3:60:78:158#0/1  
GTCAAATATATTCAATATGGAGAGAATAAAAGAACTGAGA  
+HWI-EAS443:3:60:78:158#0/1  
aaaa]X\_`aa\_Y\_[Y`U`aa¥a[a¥¥` `[J[`]]]\_\_Y\_]`  
@HWI-EAS443:3:60:954:520#0/1  
AGCAGGTCAAATATATTCAATATGGAGAGAATAAAAGAAC  
+HWI-EAS443:3:60:954:520#0/1  
X``Y`aaa¥\_`bababab`aabaaaaab\_a`aa`\_a\_a\_  
@HWI-EAS443:3:61:1194:1944#0/1  
AGCAGGTCAAATATATTCAATATGGAGAGAATAAAAGAAC  
+HWI-EAS443:3:61:1194:1944#0/1  
````YYZ\_]\_baZ`a^`b`a`\_`a^`]a\_a]\_`a`\_`]Y  
@HWI-EAS443:3:61:1205:1301#0/1  
ATTC AATATGGAGAGAATAAAAGAACTGAGAGATCTAATG  
+HWI-EAS443:3:61:1205:1301#0/1  
`bbabbbabbaabababbbba`bb`aaaaaba\_````aa`  
@HWI-EAS443:3:61:1325:1437#0/1  
AATATATTCAATATGGAGAGAATAAAAGAACTGAGAGATC

+HWI-EAS443:3:61:1325:1437#0/1  
\_`^`^a[ `\_a\_\_`^`abXbab^b^` `b^a`^a\_\_\_`^]¥T  
@HWI-EAS443:3:61:1363:950#0/1  
AAGCAGGTCAAATATATTCAATATGGAGAGAATAAAAGAA  
+HWI-EAS443:3:61:1363:950#0/1  
`\_ababb\_abbabababba` `a`bbb`b]a` `` `` \_` `` ^V  
@HWI-EAS443:3:61:1647:620#0/1  
GTCAAATATATTCAATATGGAGAGAATAAAAGAACTGAGA  
+HWI-EAS443:3:61:1647:620#0/1  
aa^¥\_\_a\_a]a\_Y\_^a]` `aX` [a` ]^` ¥\_\_\_W[[^[[Y[  
@HWI-EAS443:3:61:1706:1479#0/1  
AAATATATTCAATATGGAGAGAATAAAAGAACTGAGAGAT  
+HWI-EAS443:3:61:1706:1479#0/1  
aaaaaaaa`aaa`abaabab`abaaaa` `^]\_`^`^`^^  
@HWI-EAS443:3:61:441:459#0/1  
CAAATATATTCAATATGGAGAGAATAAAAGAACTGAGAGA  
+HWI-EAS443:3:61:441:459#0/1  
`b`bbbbbbbbbbbbbb`\_`\_b]Y\_Sa\_ba\_aaaa`aaaa  
@HWI-EAS443:3:61:519:1066#0/1  
GTCAAATATATTCAATATGGAGAGAATAAAAGAACTGAGA  
+HWI-EAS443:3:61:519:1066#0/1  
`¥^`^^`\_W^a\_\_a]]\_a¥UY]YGS[\_` `^V]^`[^Z[Y[  
@HWI-EAS443:3:61:572:459#0/1  
CAAATATATTCAATATGGAGAGAATAAAAGAACTGAGAGA  
+HWI-EAS443:3:61:572:459#0/1  
abaabbbbababbbabbaababa^aabbabaa\_aaa`baa  
@HWI-EAS443:3:61:580:1548#0/1  
AATATATTCAATATGGAGAGAATAAAAGAACTGAGAGATC  
+HWI-EAS443:3:61:580:1548#0/1  
abaaaaba^a`aaaa^^^¥`TL¥aa]V^aa`¥\_\_¥\_W\_[W  
@HWI-EAS443:3:61:618:1199#0/1  
ATTCAATATGGAGAGAATAAAAGAACTGAGAGATCTAATG  
+HWI-EAS443:3:61:618:1199#0/1  
abbab^babaa^a`baaaaa^Xa`^aaaa`a^]\_a\_] ]^  
@HWI-EAS443:3:61:661:130#0/1  
CAAATATATTCAATATGGAGAGAATAAAAGAACTGAGAGA  
+HWI-EAS443:3:61:661:130#0/1  
abbbbbbbbbbbabbabbab^b\_]aa`aaaa[aa`\_a\_\_  
@HWI-EAS443:3:61:830:439#0/1  
CAAATATATTCAATATGGAGAGAATAAAAGAACTGAGAGA  
+HWI-EAS443:3:61:830:439#0/1  
[¥YQ\_\_[\_`aXaa` `bbbb^\_XaX¥` ¥Z\_\_`^NN\_V\_[\_a[  
@HWI-EAS443:3:61:930:1559#0/1  
ATTCAATATGGAGAGAATAAAAGAACTGAGAGATCTAATG  
+HWI-EAS443:3:61:930:1559#0/1  
aaaaaabaa`a`aba`aaaaaaaa`aaaa^`[\_`a^`^`  
@HWI-EAS443:3:61:938:1617#0/1  
AAATATATTCAATATGGAGAGAATAAAAGAACTGAGAGAT  
+HWI-EAS443:3:61:938:1617#0/1  
`bbaababbabaaaba` `aaa\_ba]a`aaa`\_`^`\_`\_`]]

@HWI-EAS443:3:61:96:244#0/1  
AAGCAGGTCAAATATATTCAATATGGAGAGAATAAAAGAA  
+HWI-EAS443:3:61:96:244#0/1  
`^aaaa`Za^W`\_aa`\_a¥U¥`^]X`^`]^`\_`¥`^`]  
@HWI-EAS443:3:62:107:1285#0/1  
CAAATATATTCAATATGGAGAGAATAAAAGAACTGAGAGA  
+HWI-EAS443:3:62:107:1285#0/1  
aa^abbaaab¥^W¥ZaaV]aYU^aaYaaa`]^`a`¥]^`[[a  
@HWI-EAS443:3:62:1171:1231#0/1  
ATTCAATATGGAGAGAATAAAAGAACTGAGAGATCTAATG  
+HWI-EAS443:3:62:1171:1231#0/1  
abbaa\_aabbbab`baaaa`aaaa\_\_aaaabaaaaaaaaa  
@HWI-EAS443:3:62:1364:1087#0/1  
AAGCAGGTCAAATATATTCAATATGGAGAGAATAAAAGAA  
+HWI-EAS443:3:62:1364:1087#0/1  
a^`aabbXa`¥X¥^`b`^`a[aa^aaaZYTaaaa`U¥a`\_`  
@HWI-EAS443:3:62:1429:1599#0/1  
CAAATATATTCAATATGGAGAGAATAAAAGAACTGAGAGA  
+HWI-EAS443:3:62:1429:1599#0/1  
abaab`babbabbabababbb`abaabbababab\_bbab  
@HWI-EAS443:3:62:1522:222#0/1  
CAAATATATTCAATATGGAGAGAATAAAAGAACTGAGAGA  
+HWI-EAS443:3:62:1522:222#0/1  
abbbbbbbbbb`aababbbabaaaabbbbabab\_baaaa]U  
@HWI-EAS443:3:62:1647:1332#0/1  
AATATATTCAATATGGAGAGAATAAAAGAACTGAGAGATC  
+HWI-EAS443:3:62:1647:1332#0/1  
^aY`a\_ba¥`^`\_]bba^b]^`^`aa`^`a\_S`^`aa`aZa`a^`  
@HWI-EAS443:3:62:1663:1359#0/1  
CAAATATATTCAATATGGAGAGAATAAAAGAACTGAGAGA  
+HWI-EAS443:3:62:1663:1359#0/1  
`babbabaab\_aab`bbb\_b`aaaa`aaa`a\_a`\_`aa`\_`  
@HWI-EAS443:3:62:1711:1902#0/1  
AAGCAGGTCAAATATATTCAATATGGAGAGAATAAAAGAA  
+HWI-EAS443:3:62:1711:1902#0/1  
aaaaaaaaW`^`[^NaWbb`\_`^a`\_`¥a¥`]^`aY`]Y\_YS]a  
@HWI-EAS443:3:62:369:1656#0/1  
CAAATATATTCAATATGGAGAGAATAAAAGAACTGAGAGA  
+HWI-EAS443:3:62:369:1656#0/1  
aa`aba^aa`\_`a\_aa`[^`]^`Z`^``aba`^`^`¥]a\_a`\_`  
@HWI-EAS443:3:62:515:387#0/1  
GGTCAAATATATTCAATATGGAGAGAATAAAAGAACTGAG  
+HWI-EAS443:3:62:515:387#0/1  
a¥D]b\_T^aa`^aaa`^aaaa\_b\_aVa\_a`[X`\_`^`^`^`^`a`  
@HWI-EAS443:3:62:553:1146#0/1  
AGCAGGTCAAATATATTCAATATGGAGAGAATAAAAGAAC  
+HWI-EAS443:3:62:553:1146#0/1  
\_]aaa`Waaaa\_\_`aaa]`a`\_`\_`\_a]`\_`^a`\_`\_`\_`^`\_`\_`  
@HWI-EAS443:3:62:59:830#0/1  
GAGAATAAAAGAACTGAGAGATCTAATGTCACAGTCCCGC

+HWI-EAS443:3:62:59:830#0/1  
a]aaabaa[aaaaaaaa`Y`a`b\_\_\_\_\_a`a`\_]¥[`V[  
@HWI-EAS443:3:62:663:654#0/1  
AATATATTCAATATGGAGAGAATAAAAGAACTGAGAGATC  
+HWI-EAS443:3:62:663:654#0/1  
]baaa\_abb\_baaa`a\_baa``aa\_a`\_\_`\_a`a\_^\_a]a  
@HWI-EAS443:3:62:716:45#0/1  
AGGTCAAATATATTCAATATGGAGAGAATAAAAGAACTGA  
+HWI-EAS443:3:62:716:45#0/1  
aab\_aabaa^a`ba\_aaaaabb`b\_b\_\_aaa\_\_`Y\_Ya`U  
@HWI-EAS443:3:62:880:471#0/1  
GCAGGTCAAATATATTCAATATGGAGAGAATAAAAGAACT  
+HWI-EAS443:3:62:880:471#0/1  
aJab]LXY¥^YY\_`a`YW\_\_`\_`aaS\_a^a[0[a^^\_a\_  
@HWI-EAS443:3:63:1195:388#0/1  
AAGCAGGTCAAATATATTCAATATGGAGAGAATAAAAGAA  
+HWI-EAS443:3:63:1195:388#0/1  
aabaaaa\_`baaa\_a`baa\_\_a`aaa\_a]`Z¥a`a\_\_\_\_\_  
@HWI-EAS443:3:63:1204:426#0/1  
ATATATTCAATATGGAGAGAATAAAAGAACTGAGAGATCT  
+HWI-EAS443:3:63:1204:426#0/1  
abbbaabaaab\_aba]b]aa`abaaab`a`aaa\_`a\_\_aa  
@HWI-EAS443:3:63:1217:1126#0/1  
CAAATATATTCAATATGGAGAGAATAAAAGAACTGAGAGA  
+HWI-EAS443:3:63:1217:1126#0/1  
aaa`bbb`aa\_b`aabbab\_baabbaba``aabbab`ab]  
@HWI-EAS443:3:63:1237:75#0/1  
AATATATTCAATATGGAGAGAATAAAAGAACTGAGAGATC  
+HWI-EAS443:3:63:1237:75#0/1  
abana¥]a`\_`aaab^0aaa`\_¥a¥\_`\_\_`M[[\_a\_]\_^\_  
@HWI-EAS443:3:63:1280:1307#0/1  
ATTCAATATGGAGAGAATAAAAGAACTGAGAGATCTAATG  
+HWI-EAS443:3:63:1280:1307#0/1  
aabbabb`bY]^¥bbaabbaaaaa[aa\_aaa`\_aaab  
@HWI-EAS443:3:63:1286:880#0/1  
AAAGCAGGTCAAATATATTCAATATGGAGAGAATAAAAGA  
+HWI-EAS443:3:63:1286:880#0/1  
\_\_b`abb]b^abbbbabaaaababba``aa\_aaaa`aa  
@HWI-EAS443:3:63:1289:774#0/1  
TATTCAATATGGAGAGAATAAAAGAACTGAGAGATCTAAT  
+HWI-EAS443:3:63:1289:774#0/1  
a`aaaaaaaa`Xa\_aXY`\_^aa[^a`^`^`a`\_\_a\_\_`  
@HWI-EAS443:3:63:1408:1243#0/1  
GTCAAATATATTCAATATGGAGAGAATAAAAGAACTGAGA  
+HWI-EAS443:3:63:1408:1243#0/1  
a``aaaaaaaa`\_`aaaa^a\_a\_aa\_\_a\_\_\_\_`^`\_``]a  
@HWI-EAS443:3:63:1587:401#0/1  
GTCAAATATATTCAATATGGAGAGAATAAAAGAACTGAGA  
+HWI-EAS443:3:63:1587:401#0/1  
a\_`aaa\_\_a`a[[\_[\_\_\_aa]a[^^^\_a\_^]``\_]\_`\_``

@HWI-EAS443:3:63:855:1073#0/1  
AAAGCAGGTCAAATATATTCAATATGGAGAGAATAAAAAGA  
+HWI-EAS443:3:63:855:1073#0/1  
aaaaa\_aa]aaa`a\_a``a\_a`a\_a¥`^`[¥[\_`X\_\_¥  
@HWI-EAS443:3:63:974:1396#0/1  
ATATATTCAATATGGAGAGAATAAAAAGAACTGAGAGATCT  
+HWI-EAS443:3:63:974:1396#0/1  
a`^`^aaa\_aa`aaa\_]```aaa``]\_a``\_a`a`a^`a  
@HWI-EAS443:3:64:1072:1162#0/1  
CAAATATATTCAATATGGAGAGAATAAAAAGAACTGAGAGA  
+HWI-EAS443:3:64:1072:1162#0/1  
^\_aY\_ba^^YZa`^a\_\_`\_]`\_`aaa`a\_a\_aa`Ya\_  
@HWI-EAS443:3:64:131:1341#0/1  
GTCAAATATATTCAATATGGAGAGAATAAAAAGAACTGAGA  
+HWI-EAS443:3:64:131:1341#0/1  
]Y`^`¥`b`^^X]a\_a`aaX[a^`¥aaabab`^`\_`a\_a`  
@HWI-EAS443:3:64:175:1373#0/1  
CAAATATATTCAATATGGAGAGAATAAAAAGAACTGAGAGA  
+HWI-EAS443:3:64:175:1373#0/1  
a\_bbaba`aabbbaa^``aaa``aaaa\_a¥``a`a\_a\_a  
@HWI-EAS443:3:64:211:833#0/1  
CAAATATATTCAATATGGAGAGAATAAAAAGAACTGAGAGA  
+HWI-EAS443:3:64:211:833#0/1  
a`Y\_]a[aaaaaa`aa]]aYa\_\_a``a`aX\_\_a`^a`\_  
@HWI-EAS443:3:64:261:1107#0/1  
ATTCAATATGGAGAGAATAAAAAGAACTGAGAGATCTAATG  
+HWI-EAS443:3:64:261:1107#0/1  
^\_abbabbbbaa\_Q\_aaabaaba\_\_^\_aa`]\_a\_aaa\_aa  
@HWI-EAS443:3:64:266:1076#0/1  
AAAGCAGGTCAAATATATTCAATATGGAGAGAATAAAAAGA  
+HWI-EAS443:3:64:266:1076#0/1  
aaaaa`^`[ab``a`aaa`\_aaaaa\_\_`a`\_```a`Y\_[]`  
@HWI-EAS443:3:65:1281:699#0/1  
ATTCAATATGGAGAGAATAAAAAGAACTGAGAGATCTAATG  
+HWI-EAS443:3:65:1281:699#0/1  
a^`a\_Z`^aY\_[]]aY\_aY`\_\_YGR^``\_\_\_a^^Y`^Y^\_  
@HWI-EAS443:3:65:178:830#0/1  
AATATATTCAATATGGAGAGAATAAAAAGAACTGAGAGATC  
+HWI-EAS443:3:65:178:830#0/1  
aaaa^\_aa`a`a`a`¥^aYYX`\_aa\_\_\_\_\_^`\_]¥¥]]Z  
@HWI-EAS443:3:65:18:1339#0/1  
GTCAAATATATTCAATATGGAGAGAATAAAAAGAACTGAGA  
+HWI-EAS443:3:65:18:1339#0/1  
a[^Y^aaa^^a]L[[a\_aa\_]\_]aRY\_^[\_Z]^^^`\_]\_  
@HWI-EAS443:3:65:275:1879#0/1  
ATTCAATATGGAGAGAATAAAAAGAACTGAGAGATCTAATG  
+HWI-EAS443:3:65:275:1879#0/1  
X\_\_^Q\_abZYa\_RQI\_`bbab¥``¥ZZaaa^a\_Y`a`^\_  
@HWI-EAS443:3:65:477:893#0/1  
CAAATATATTCAATATGGAGAGAATAAAAAGAACTGAGAGA





@HWI-EAS443:3:66:413:419#0/1  
CAAATATATTCAATATGGAGAGAATAAAAGAACTGAGAGA  
+HWI-EAS443:3:66:413:419#0/1  
aababaaabaaa`aaaab`baaaaaaaa`aa`aa\_a^a\_  
@HWI-EAS443:3:66:569:1935#0/1  
AATATATTCAATATGGAGAGAATAAAAGAACTGAGAGATC  
+HWI-EAS443:3:66:569:1935#0/1  
aaaa\_a\_\_aaaa`\_\_[^a`\_a`Zaaa`^`\_`\_^[\_]]X\_  
@HWI-EAS443:3:66:742:1540#0/1  
GTCAAATATATTCAATATGGAGAGAATAAAAGAACTGAGA  
+HWI-EAS443:3:66:742:1540#0/1  
`Z`aaaaaa`aaa`^`\_a¥¥^a\_^]``a`^`\_]^\_`\_`^\_  
@HWI-EAS443:3:67:1140:1326#0/1  
GTCAAATATATTCAATATGGAGAGAATAAAAGAACTGAGA  
+HWI-EAS443:3:67:1140:1326#0/1  
aabbbbbbbaababbbaa`aaaabbbbaaaaaabaaaa  
@HWI-EAS443:3:67:122:1073#0/1  
ATATTCAATATGGAGAGAATAAAAGAACTGAGAGATCTAA  
+HWI-EAS443:3:67:122:1073#0/1  
aWOYa[TWGLLUXYaUaZZ^\_[OY¥GVWY]]\_S]SWXZZN  
@HWI-EAS443:3:67:1497:191#0/1  
CAAATATATTCAATATGGAGAGAATAAAAGAACTGAGAGA  
+HWI-EAS443:3:67:1497:191#0/1  
ababbbbbb`bbbabbaab`b`aabaabaaa`abaaaa  
@HWI-EAS443:3:67:1570:288#0/1  
CAAATATATTCAATATGGAGAGAATAAAAGAACTGAGAGA  
+HWI-EAS443:3:67:1570:288#0/1  
``a^aa[Q`\_a`Zbb¥[\_aaZ]bb^^^baX\_a\_bb`ab`  
@HWI-EAS443:3:67:1573:109#0/1  
ATTCAATATGGAGAGAATAAAAGAACTGAGAGATCTAATG  
+HWI-EAS443:3:67:1573:109#0/1  
`bbaY[\_`\_bbba`\_a]abaa\_aaa`aa`a`[\_`\_`^a^`\_]  
@HWI-EAS443:3:67:1694:1815#0/1  
ATTCAATATGGAGAGAATAAAAGAACTGAGAGATCTAATG  
+HWI-EAS443:3:67:1694:1815#0/1  
`abbb`b\_b`V[\_[b\_¥aba`\_a^^^aaa`^`[[aYa\_\_`\_  
@HWI-EAS443:3:67:301:65#0/1  
TATTCAATATGGAGAGAATAAAAGAACTGAGAGATCTAAT  
+HWI-EAS443:3:67:301:65#0/1  
aaabbbba`Z^b]X]^`V^^][]aaa`a`\_`\_]\_^[\_]\_\_  
@HWI-EAS443:3:67:577:794#0/1  
ATTCAATATGGAGAGAATAAAAGAACTGAGAGATCTAATG  
+HWI-EAS443:3:67:577:794#0/1  
^aXU¥\_PU`a`Ua`ZKYWPZ\_aSZZZTZ^\_]\_]W¥¥T]V  
@HWI-EAS443:3:67:638:821#0/1  
GTCAAATATATTCAATATGGAGAGAATAAAAGAACTGAGA  
+HWI-EAS443:3:67:638:821#0/1  
]R]aYPRTS\_]^[P[WWa¥OPXYV¥VUZTTZQLX\_] [GY  
@HWI-EAS443:3:67:904:1881#0/1  
AATATATTCAATATGGAGAGAATAAAAGAACTGAGAGATC

+HWI-EAS443:3:67:904:1881#0/1  
abaaaaaaaaa\_`\_]a``\_a`aa`\_\_^\_`\_a`\_`\_`^`  
@HWI-EAS443:3:67:924:1965#0/1  
ATTCAATATGGAGAGAATAAAAGAACTGAGAGATCTAATG  
+HWI-EAS443:3:67:924:1965#0/1  
```ba\_a¥aX[[aY)`bXa\_a^ZaX``\_]`a`a`aa``\_`  
@HWI-EAS443:3:67:97:880#0/1  
GTCAAATATATTCAATATGGAGAGAATAAAAGAACTGAGA  
+HWI-EAS443:3:67:97:880#0/1  
a\_b`\_¥W]Z¥^W^YGR][WXW]¥\_VW\_[]^UX^[X¥¥WS  
@HWI-EAS443:3:68:1018:441#0/1  
CAAATATATTCAATATGGAGAGAATAAAAGAACTGAGAGA  
+HWI-EAS443:3:68:1018:441#0/1  
a^bbbbb`bbaabbb`a`b^ba`bbba^]a\_bbaa^b^  
@HWI-EAS443:3:68:1067:938#0/1  
AAGCAGGTCAAATATATTCAATATGGAGAGAATAAAAGAA  
+HWI-EAS443:3:68:1067:938#0/1  
aaaa¥aaZ`^aaa`aaa`\_``\_aa`^a`\_`\_`a`Z^\_\_\_\_  
@HWI-EAS443:3:68:1080:45#0/1  
GGTCAAATATATTCAATATGGAGAGAATAAAAGAACTGAG  
+HWI-EAS443:3:68:1080:45#0/1  
ab^ab^aabaaba\_a`a`bba^b\_a\_\_aa`a``]]`a`\_  
@HWI-EAS443:3:68:1300:312#0/1  
AATATATTCAATATGGAGAGAATAAAAGAACTGAGAGATC  
+HWI-EAS443:3:68:1300:312#0/1  
abbbbabaabaabbb^a`ba]baaab\_a\_aa`\_aa\_\_^  
@HWI-EAS443:3:68:1340:1594#0/1  
ATTCAATATGGAGAGAATAAAAGAACTGAGAGATCTAATG  
+HWI-EAS443:3:68:1340:1594#0/1  
aaa`aabbbbaababa¥abaaaaaabaaaa``\_aaaaa  
@HWI-EAS443:3:68:1616:1197#0/1  
ATTCAATATGGAGAGAATAAAAGAACTGAGAGATCTAATG  
+HWI-EAS443:3:68:1616:1197#0/1  
aaaaX]b^aa]Ybaa`ab]`a`aa\_\_aa`a^X`\_`\_`a`\_`a  
@HWI-EAS443:3:68:1663:1577#0/1  
GGTCAAATATATTCAATATGGAGAGAATAAAAGAACTGAG  
+HWI-EAS443:3:68:1663:1577#0/1  
]RMa^^¥\_a^¥Z\_P\_aa\_aaa`^¥a]]`¥`ZX][ZP]aa`  
@HWI-EAS443:3:68:276:1858#0/1  
ATATATTCAATATGGAGAGAATAAAAGAACTGAGAGATCT  
+HWI-EAS443:3:68:276:1858#0/1  
`\_Z`]aa]`aaa`]Z]¥]`a\_aaaa^a`^[Y]Y]^\_[^`  
@HWI-EAS443:3:68:297:1691#0/1  
AGGTCAAATATATTCAATATGGAGAGAATAAAAGAACTGA  
+HWI-EAS443:3:68:297:1691#0/1  
a``]aaaaa`W`aaa`aaa`Z`^`¥^^`\_``\_`\_`\_`\_`\_`^`  
@HWI-EAS443:3:68:357:285#0/1  
AAGCAGGTCAAATATATTCAATATGGAGAGAATAAAAGAA  
+HWI-EAS443:3:68:357:285#0/1  
aaaaaaa]aaaaa`aa``\_a`\_a`^a\_a`\_`aa``\_`\_`

@HWI-EAS443:3:69:1026:672#0/1  
ATTCAATATGGAGAGAATAAAAGAACTGAGAGATCTAATG  
+HWI-EAS443:3:69:1026:672#0/1  
aaaa`aaa`ba\_a\_a\_aaa^`aa```aaaa`a^\_0a\_^\_a  
@HWI-EAS443:3:69:1069:1777#0/1  
CAAATATATTCAATATGGAGAGAATAAAAGAACTGAGAGA  
+HWI-EAS443:3:69:1069:1777#0/1  
aa```¥a\_`aba]Y\_aaaWaaa\_aaa`aaa``^`^`Va\_`  
@HWI-EAS443:3:69:1141:495#0/1  
ATTCAATATGGAGAGAATAAAAGAACTGAGAGATCTAATG  
+HWI-EAS443:3:69:1141:495#0/1  
`bb[abbabaaa^YaaaabaaabaaS]`\_ba`\_a[aaa`a  
@HWI-EAS443:3:69:1250:1985#0/1  
ATATATTCAATATGGAGAGAATAAAAGAACTGAGAGATCT  
+HWI-EAS443:3:69:1250:1985#0/1  
aabbabbbaabababaaa`aaabaaab`aaaaaaaa`a^`a  
@HWI-EAS443:3:69:1472:485#0/1  
CAAATATATTCAATATGGAGAGAATAAAAGAACTGAGAGA  
+HWI-EAS443:3:69:1472:485#0/1  
abbbbbbbabbaaaaabbb\_baa```aaaaaaaa`aaaaaaaa  
@HWI-EAS443:3:69:1739:1124#0/1  
GTCAAATATATTCAATATGGAGAGAATAAAAGAACTGAGA  
+HWI-EAS443:3:69:1739:1124#0/1  
`aabb`baaaaaaaaa\_aaaa\_]a^a`\_a```\_\_\_\_\_]`\_`\_`  
@HWI-EAS443:3:69:180:1249#0/1  
ATATTCAATATGGAGAGAATAAAAGAACTGAGAGATCTAA  
+HWI-EAS443:3:69:180:1249#0/1  
abbaaba`a`\_aa`aWa^\_aaaaa^aa`aa`````\_a`\_\_  
@HWI-EAS443:3:69:182:236#0/1  
AATATATTCAATATGGAGAGAATAAAAGAACTGAGAGATC  
+HWI-EAS443:3:69:182:236#0/1  
`^]`a^\_\_`^`\_aa`^`]a``[a]Z\_`W¥Y]¥X`^[[[  
@HWI-EAS443:3:69:356:1643#0/1  
CAAATATATTCAATATGGAGAGAATAAAAGAACTGAGAGA  
+HWI-EAS443:3:69:356:1643#0/1  
a`b`a`\_aaa`^aaaa\_a^¥\_]Ya`^a^^]]X]\_\_\_\_\_`\_\_  
@HWI-EAS443:3:69:380:539#0/1  
AATATATTCAATATGGAGAGAATAAAAGAACTGAGAGATC  
+HWI-EAS443:3:69:380:539#0/1  
aaaXaababababab`a¥a`\_aa[`]^[a``aaa````\_`\_`  
@HWI-EAS443:3:69:407:40#0/1  
TTCAATATGGAGAGAATAAAAGAACTGAGAGATCTAATGT  
+HWI-EAS443:3:69:407:40#0/1  
abaaabaabbab`a`]aaa[`a``]aa`a\_a^`\_``^a`]  
@HWI-EAS443:3:69:487:593#0/1  
GCAGGTCAAATATATTCAATATGGAGAGAATAAAAGAACT  
+HWI-EAS443:3:69:487:593#0/1  
aaabb`abbbabaa\_]`\_aa\_baa¥a]a`\_a`aa`a`a^`  
@HWI-EAS443:3:69:489:1544#0/1  
GGTCAAATATATTCAATATGGAGAGAATAAAAGAACTGAG

+HWI-EAS443:3:69:489:1544#0/1  
a`Za^[Xaba\_^ababaaa`]Y^Z^`a^b`a`aaaa\_b\_  
@HWI-EAS443:3:69:518:498#0/1  
CAAATATATTCAATATGGAGAGAATAAAAGAACTGAGAGA  
+HWI-EAS443:3:69:518:498#0/1  
^]VT`V`ZXb`Z]^]]X\_V\_YX^^[`]¥V^Za`\_Z][`  
@HWI-EAS443:3:69:88:38#0/1  
TCAATATGGAGAGAATAAAAGAACTGAGAGATCTAATGTC  
+HWI-EAS443:3:69:88:38#0/1  
aa\_\_a^bba\_a]`\_\_a`\_`^]`^]`\_\_^\_Z^]\_]W]`ZX  
@HWI-EAS443:3:69:897:1149#0/1  
AATATATTCAATATGGAGAGAATAAAAGAACTGAGAGATC  
+HWI-EAS443:3:69:897:1149#0/1  
aaaRaaaab`^a`aa`^a\_\_^\_aa`a`\_`\_`\_`\_`a\_\_^\_  
@HWI-EAS443:3:69:948:248#0/1  
GTCAAATATATTCAATATGGAGAGAATAAAAGAACTGAGA  
+HWI-EAS443:3:69:948:248#0/1  
a\_a`Z]a]a^aa\_]\_a]aaW]aG`\_¥a\_]\_\_^^\_]`\_Z^^  
@HWI-EAS443:3:69:998:831#0/1  
CAAATATATTCAATATGGAGAGAATAAAAGAACTGAGAGA  
+HWI-EAS443:3:69:998:831#0/1  
`OYUWZ]\_XZ][IUZ``]X`[YWUW`]U\_aW¥VP¥Z\_\_a]  
@HWI-EAS443:3:6:1028:1126#0/1  
CAAATATATTCAATATGGAGAGAATAAAAGAACTGAGAGA  
+HWI-EAS443:3:6:1028:1126#0/1  
abaaabbbbabbbaabbb\_babababbbbaabaabbbaaaa  
@HWI-EAS443:3:6:1067:120#0/1  
AATATATTCAATATGGAGAGAATAAAAGAACTGAGAGATC  
+HWI-EAS443:3:6:1067:120#0/1  
a``a\_\_abaa\_b\_aaa\_a\_a`^a\_]\_\_``]\_a\_]\_\_\_\_S  
@HWI-EAS443:3:6:1753:129#0/1  
AGCAGGTCAAATATATTCAATATGGAGAGAATAAAAGAAC  
+HWI-EAS443:3:6:1753:129#0/1  
`b`bbaPa¥a¥]]Wa¥\_`[¥]]aa¥Ya^aP]\_\_\_\_^ZUZ\_B  
@HWI-EAS443:3:6:1762:123#0/1  
CAAATATATTCAATATGGAGAGAATAAAAGAACTGAGAGA  
+HWI-EAS443:3:6:1762:123#0/1  
ab¥bbbbbab¥``bbbb][[b]]TbabbbbaaMbbabbab  
@HWI-EAS443:3:6:302:897#0/1  
AAATATATTCAATATGGAGAGAATAAAAGAACTGAGAGAT  
+HWI-EAS443:3:6:302:897#0/1  
^aaaaaaaa`\_aaaa]a[`\_\_a`a`a`\_`aa`\_\_a`]  
@HWI-EAS443:3:6:397:1448#0/1  
AGCAGGTCAAATATATTCAATATGGAGAGAATAAAAGAAC  
+HWI-EAS443:3:6:397:1448#0/1  
a¥aaaa`bb\_aaaa`a`aa`aa`\_^`\_`\_`a`a^]`U  
@HWI-EAS443:3:6:813:1629#0/1  
AGCAGGTCAAATATATTCAATATGGAGAGAATAAAAGAAC  
+HWI-EAS443:3:6:813:1629#0/1  
¥^\_aa^Z`baaa[^¥aa`Y\_\_a^a\_\_a]`\_`\_\_\_\_\_``[

@HWI-EAS443:3:6:831:21#0/1  
AAGCAGGTCAAATATATTCAATATGGAGAGAATAAAAAGAA  
+HWI-EAS443:3:6:831:21#0/1  
a\_^]a^U`ba\_a^aa]^[Z]Y`]a\_\_bX[`aa``¥`Z^\_  
@HWI-EAS443:3:6:937:1811#0/1  
CAAATATATTCAATATGGAGAGAATAAAAAGAACTGAGAGA  
+HWI-EAS443:3:6:937:1811#0/1  
Wbabbaybabb`Zbb¥bW¥a`aZb`babbabb\_abbabbb  
@HWI-EAS443:3:6:978:1387#0/1  
CAAATATATTCAATATGGAGAGAATAAAAAGAACTGAGAGA  
+HWI-EAS443:3:6:978:1387#0/1  
Xbbbaa]S`a``VbWaaa`a`bb\_JNabbaaa\_^Z`ab^b  
@HWI-EAS443:3:70:1067:1982#0/1  
GCAGGTCAAATATATTCAATATGGAGAGAATAAAAAGAACT  
+HWI-EAS443:3:70:1067:1982#0/1  
`ba`a`bbbaaabaaa`a`aaaa`a```aaaaaa`a`\_  
@HWI-EAS443:3:70:1395:1629#0/1  
AATATATTCAATATGGAGAGAATAAAAAGAACTGAGAGATC  
+HWI-EAS443:3:70:1395:1629#0/1  
aabbb`aaaaa]bb`]ba\_^aaaaaa^`a`a`\_`a`\_  
@HWI-EAS443:3:70:140:1748#0/1  
AGCAGGTCAAATATATTCAATATGGAGAGAATAAAAAGAAC  
+HWI-EAS443:3:70:140:1748#0/1  
a`aZ]\_Zaaaa`a`a`a`\_`\_`\_Y^`^`\_`\_`\_aa\_^]\_\_X  
@HWI-EAS443:3:70:1768:1413#0/1  
CAAATATATTCAATATGGAGAGAATAAAAAGAACTGAGAGA  
+HWI-EAS443:3:70:1768:1413#0/1  
`\_aa\_\_b`````]``^aaa^a\_aaaaa`aaa````\_`^`\_\_  
@HWI-EAS443:3:70:375:1139#0/1  
GCAGGTCAAATATATTCAATATGGAGAGAATAAAAAGAACT  
+HWI-EAS443:3:70:375:1139#0/1  
ab\_`a]aa\_a\_J\_Q`aa`a`^`aa\_aYa¥T¥a^aaa`\_`\_\_  
@HWI-EAS443:3:70:990:381#0/1  
AAGCAGGTCAAATATATTCAATATGGAGAGAATAAAAAGAA  
+HWI-EAS443:3:70:990:381#0/1  
aaaaaaaa`abaaaaaaaa\_\_a`````[a^a```\_`^`\_\_\_\_  
@HWI-EAS443:3:71:1224:2021#0/1  
ATTCAATATGGAGAGAATAAAAAGAACTGAGAGATCTAATG  
+HWI-EAS443:3:71:1224:2021#0/1  
Zb\_b`baa[aa[\_]`aa`aa^aaabba`a`a`a^aaaa[`  
@HWI-EAS443:3:71:1302:1218#0/1  
AGCAGGTCAAATATATTCAATATGGAGAGAATAAAAAGAAC  
+HWI-EAS443:3:71:1302:1218#0/1  
^¥abaYV`^a]WR`a¥Z\_aaYP`^aV]^`]]VZXQW`a`\_  
@HWI-EAS443:3:71:1311:2017#0/1  
TATATTCAATATGGAGAGAATAAAAAGAACTGAGAGATCTA  
+HWI-EAS443:3:71:1311:2017#0/1  
^`\_^a]ba^^a^]\_a]]b`aaaaa\_aa`a`\_`\_`a`\_`\_a`  
@HWI-EAS443:3:71:1560:19#0/1  
AGCAGGTCAAATATATTCAATATGGAGAGAATAAAAAGAAC

+HWI-EAS443:3:71:1560:19#0/1  
^¥U\_`aIaTTXa]a^ab`^[a\_ab`]a]a^`\_`]X\_]UQ  
@HWI-EAS443:3:71:1680:344#0/1  
CAAATATATTCAATATGGAGAGAATAAAAGAACTGAGAGA  
+HWI-EAS443:3:71:1680:344#0/1  
abbbbbbbbaabbbbabababbbbbbbbababbababa  
@HWI-EAS443:3:71:1737:1196#0/1  
CAAATATATTCAATATGGAGAGAATAAAAGAACTGAGAGA  
+HWI-EAS443:3:71:1737:1196#0/1  
abbbbbbababaab`bbaaaabaabbbbbaaa`bbbaaaa  
@HWI-EAS443:3:71:207:964#0/1  
CAAATATATTCAATATGGAGAGAATAAAAGAACTGAGAGA  
+HWI-EAS443:3:71:207:964#0/1  
^¥``abb]bbb`aaab`\_a]a^¥ab`a`aa`aa\_baaaa  
@HWI-EAS443:3:71:516:139#0/1  
ATTCAATATGGAGAGAATAAAAGAACTGAGAGATCTAATG  
+HWI-EAS443:3:71:516:139#0/1  
ababaabababab\_baabaaaaaaaaabaaaaa`aaa`aa  
@HWI-EAS443:3:71:670:873#0/1  
AGCAGGTCAAATATATTCAATATGGAGAGAATAAAAGAAC  
+HWI-EAS443:3:71:670:873#0/1  
aaaa[a\_a]¥``aaa`aaR\_\_aaa`a\_a¥`a`aaa`]]]  
@HWI-EAS443:3:71:853:799#0/1  
ATTCAATATGGAGAGAATAAAAGAACTGAGAGATCTAATG  
+HWI-EAS443:3:71:853:799#0/1  
abaaaa\_aba`a\_a`aaaaaaa`aa`a\_`a`a`aaa`aa  
@HWI-EAS443:3:71:896:1145#0/1  
CAAATATATTCAATATGGAGAGAATAAAAGAACTGAGAGA  
+HWI-EAS443:3:71:896:1145#0/1  
abba¥aa`]aaaa]\_b]\_aVaaaaaVaT`a\_\_aaa¥a`  
@HWI-EAS443:3:71:910:1035#0/1  
CAAATATATTCAATATGGAGAGAATAAAAGAACTGAGAGA  
+HWI-EAS443:3:71:910:1035#0/1  
abbaba^]baaaaaab`\_bXa`aa`a`a``aaaaa\_aaa  
@HWI-EAS443:3:71:972:1670#0/1  
CAAATATATTCAATATGGAGAGAATAAAAGAACTGAGAGA  
+HWI-EAS443:3:71:972:1670#0/1  
J]ba¥^bb`bb\_bbbb¥a\_a\_``¥abbb`^bbb\_aaaYb  
@HWI-EAS443:3:72:1098:1389#0/1  
TTCAATATGGAGAGAATAAAAGAACTGAGAGATCTAATGT  
+HWI-EAS443:3:72:1098:1389#0/1  
aa`W^`¥bba`]a\_S]\_a]aa\_V^\_a\_a`aZ``Uaa``a]  
@HWI-EAS443:3:72:1146:294#0/1  
AGCAGGTCAAATATATTCAATATGGAGAGAATAAAAGAAC  
+HWI-EAS443:3:72:1146:294#0/1  
¥`]ab`aYba]abba````aabba]a\_aaa^`aa`\_^`  
@HWI-EAS443:3:72:1262:783#0/1  
TTCAATATGGAGAGAATAAAAGAACTGAGAGATCTAATGT  
+HWI-EAS443:3:72:1262:783#0/1  
aaa^Z]`bbb`aaa`a\_KWa¥¥\_`a`\_a]`]^aa]aaW

@HWI-EAS443:3:72:1269:791#0/1  
AAAGCAGGTCAAATATATTCAATATGGAGAGAATAAAAGA  
+HWI-EAS443:3:72:1269:791#0/1  
a`^a]\_\_a[aaaaaaab``^a`\_\_aZa\_a``]a]]^^^  
@HWI-EAS443:3:72:1377:1964#0/1  
CAAATATATTCAATATGGAGAGAATAAAAGAACTGAGAGA  
+HWI-EAS443:3:72:1377:1964#0/1  
abbaabba`¥aaaa`]]aaa\_aaa\_a`\_``[]aaaa`  
@HWI-EAS443:3:72:1392:1724#0/1  
ATTCAATATGGAGAGAATAAAAGAACTGAGAGATCTAATG  
+HWI-EAS443:3:72:1392:1724#0/1  
aaaaaab`abb^^`a[abaa`bY`a`a`aaaaa\_aa``a  
@HWI-EAS443:3:72:1568:645#0/1  
TATATTCAATATGGAGAGAATAAAAGAACTGAGAGATCTA  
+HWI-EAS443:3:72:1568:645#0/1  
\_bb¥bbbababab^[R¥WbW\_a`\_aa\_Q¥^aa`a\_``a``a  
@HWI-EAS443:3:72:1760:665#0/1  
GGTCAAATATATTCAATATGGAGAGAATAAAAGAACTGAG  
+HWI-EAS443:3:72:1760:665#0/1  
aa]a`aabaaaaa\_\_aa`a`¥a^a\_\_`\_\_\_`a^^^\_\_^\_  
@HWI-EAS443:3:72:189:1619#0/1  
ATTCAATATGGAGAGAATAAAAGAACTGAGAGATCTAATG  
+HWI-EAS443:3:72:189:1619#0/1  
aaaaSV``aaa\_\_`a`^`aa]`\_a]a\_[\_`^¥¥\_\_``]`\_`  
@HWI-EAS443:3:72:260:70#0/1  
ATTCAATATGGAGAGAATAAAAGAACTGAGAGATCTAATG  
+HWI-EAS443:3:72:260:70#0/1  
aa`a`\_b\_bbbab^a`a\_\_`\_`[\_aa\_\_^a`^`\_``\_a  
@HWI-EAS443:3:72:408:475#0/1  
ATTCAATATGGAGAGAATAAAAGAACTGAGAGATCTAATG  
+HWI-EAS443:3:72:408:475#0/1  
aabbaab`b`a]`aaaaa`]^aaa\_aaa`a`aa[aa`\_a  
@HWI-EAS443:3:72:619:400#0/1  
AGCAGGTCAAATATATTCAATATGGAGAGAATAAAAGAAC  
+HWI-EAS443:3:72:619:400#0/1  
``aaaaaabbbaba`bba\_babbaWa]a`^aaaaa\_a`  
@HWI-EAS443:3:72:627:181#0/1  
TTCAATATGGAGAGAATAAAAGAACTGAGAGATCTAATGT  
+HWI-EAS443:3:72:627:181#0/1  
[a¥V]`a``\_W\_Z`\_```\_\_\_`^`\_\_]`a\_¥``Z`a\_aa^  
@HWI-EAS443:3:72:63:941#0/1  
AATATATTCAATATGGAGAGAATAAAAGAACTGAGAGATC  
+HWI-EAS443:3:72:63:941#0/1  
¥b\_]\_¥`^a\_aa``]\_a\_\_X\_]\_```^\_\_^\_^^]][]  
@HWI-EAS443:3:73:1185:1369#0/1  
CAAATATATTCAATATGGAGAGAATAAAAGAACTGAGAGA  
+HWI-EAS443:3:73:1185:1369#0/1  
abbabbbabaaaababbb`a`aaaaaaaaa`\_`aaaa`aaa  
@HWI-EAS443:3:73:1211:152#0/1  
CAAATATATTCAATATGGAGAGAATAAAAGAACTGAGAGA





@HWI-EAS443:3:73:648:910#0/1  
ATTCAATATGGAGAGAATAAAAGAACTGAGAGATCTAATG  
+HWI-EAS443:3:73:648:910#0/1  
abaaa`a`aba^a\_a`aaaa\_a`a`aa\_\_\_\_\_^^`\_`\_`]  
@HWI-EAS443:3:73:733:934#0/1  
CAAATATATTCAATATGGAGAGAATAAAAGAACTGAGAGA  
+HWI-EAS443:3:73:733:934#0/1  
ab^¥bbaabab^^babba`a`aaaa`aaaaaa`aaaa`a  
@HWI-EAS443:3:73:753:1089#0/1  
AGCAGGTCAAATATATTCAATATGGAGAGAATAAAAGAAC  
+HWI-EAS443:3:73:753:1089#0/1  
aab`aa^aaa`a\_a`aa\_\_\_\_aaaa`\_]a\_`aa`a\_\_\_\_\_^  
@HWI-EAS443:3:73:808:1859#0/1  
CAAATATATTCAATATGGAGAGAATAAAAGAACTGAGAGA  
+HWI-EAS443:3:73:808:1859#0/1  
a^Z]ZZ`¥Y\_a`¥]]TYWFHPX^]Y¥aa^WX`¥WY`X]¥[  
@HWI-EAS443:3:73:833:873#0/1  
ATTCAATATGGAGAGAATAAAAGAACTGAGAGATCTAATG  
+HWI-EAS443:3:73:833:873#0/1  
a`W`Z`¥Z^bVa[b¥`QHU\_UXT\_^`]a]^a[VYa¥a`^  
@HWI-EAS443:3:73:879:379#0/1  
ATTCAATATGGAGAGAATAAAAGAACTGAGAGATCTAATG  
+HWI-EAS443:3:73:879:379#0/1  
¥W\_b`¥baabbabaaaaa\_\_aabbU\_Ya[]ZU\_a`aaa`  
@HWI-EAS443:3:73:970:642#0/1  
ATTCAATATGGAGAGAATAAAAGAACTGAGAGATCTAATG  
+HWI-EAS443:3:73:970:642#0/1  
]bb`¥bbbab`\_]babb]aa^aY`[aaaaaaa`aa`ab  
@HWI-EAS443:3:74:1000:684#0/1  
AGCAGGTCAAATATATTCAATATGGAGAGAATAAAAGAAC  
+HWI-EAS443:3:74:1000:684#0/1  
¥^`\_baW`ba¥b¥`abaaa``aaba\_a\_aaabba`a`^W  
@HWI-EAS443:3:74:1493:431#0/1  
ATATATTCAATATGGAGAGAATAAAAGAACTGAGAGATCT  
+HWI-EAS443:3:74:1493:431#0/1  
```^^baaa`aaaa`\_`^baaaaa`aa^\_\_a\_aa`a`\_S\_  
@HWI-EAS443:3:74:1589:1576#0/1  
CAAATATATTCAATATGGAGAGAATAAAAGAACTGAGAGA  
+HWI-EAS443:3:74:1589:1576#0/1  
Ya¥bbbbbababbabbbaN`babb\_abb`aaabab`baaXa  
@HWI-EAS443:3:74:160:403#0/1  
ATTCAATATGGAGAGAATAAAAGAACTGAGAGATCTAATG  
+HWI-EAS443:3:74:160:403#0/1  
\_\_b^`\_`ab`^]Y\_baaaaaa`a]¥L¥a`b`a^a]a```a  
@HWI-EAS443:3:74:1645:406#0/1  
AAGCAGGTCAAATATATTCAATATGGAGAGAATAAAAGAA  
+HWI-EAS443:3:74:1645:406#0/1  
a\_V¥a^aaaaa\_bab`b^X\_`aab^^`Xb\_^aa]\_\_Y]\_  
@HWI-EAS443:3:74:1687:960#0/1  
AATATATTCAATATGGAGAGAATAAAAGAACTGAGAGATC

+HWI-EAS443:3:74:1687:960#0/1  
abbababbabb\_baa\_a`aa`a```baa`¥```a\_a`\_G  
@HWI-EAS443:3:74:384:1464#0/1  
GTCAAATATATTCAATATGGAGAGAATAAAAGAACTGAGA  
+HWI-EAS443:3:74:384:1464#0/1  
\_\_b`bb]^ab^aaYaaaa]T\_\_\_\_```\_a`IYZL]^`^`\_¥  
@HWI-EAS443:3:74:540:1914#0/1  
AAGCAGGTCAAATATATTCAATATGGAGAGAATAAAAGAA  
+HWI-EAS443:3:74:540:1914#0/1  
`Q¥aX`¥Ta`a^¥a`\_a\_aa```]^aW^\_Y]```\_`a`^`\_]  
@HWI-EAS443:3:74:553:673#0/1  
AGCAGGTCAAATATATTCAATATGGAGAGAATAAAAGAAC  
+HWI-EAS443:3:74:553:673#0/1  
¥`\_`^` `[b`aaaaaaaa\_baaaa^a\_]`^aaa`aa][a`  
@HWI-EAS443:3:74:637:1158#0/1  
AGCAGGTCAAATATATTCAATATGGAGAGAATAAAAGAAC  
+HWI-EAS443:3:74:637:1158#0/1  
aa`a^` [```aa\_aaa`a\_[`^a\_]\_aY\_¥\_\_\_\_\_Z^^`^^  
@HWI-EAS443:3:74:747:835#0/1  
GGTCAAATATATTCAATATGGAGAGAATAAAAGAACTGAG  
+HWI-EAS443:3:74:747:835#0/1  
U\_]```\_V¥aab`ZU^`¥b\_b`a`X^aUaZU`bbU[^bba]  
@HWI-EAS443:3:75:1178:1681#0/1  
CAAATATATTCAATATGGAGAGAATAAAAGAACTGAGAGA  
+HWI-EAS443:3:75:1178:1681#0/1  
aaabaabaaaaabaabbabaa`[aa\_`abaa`aab`aaa  
@HWI-EAS443:3:75:1231:1922#0/1  
ATTCATATGGAGAGAATAAAAGAACTGAGAGATCTAATG  
+HWI-EAS443:3:75:1231:1922#0/1  
abbbaaba^^^``aabbaaa``^aaXa[\_Ya\_a]]aa`aa  
@HWI-EAS443:3:75:1279:1288#0/1  
AATATATTCAATATGGAGAGAATAAAAGAACTGAGAGATC  
+HWI-EAS443:3:75:1279:1288#0/1  
PIPP^\_[¥¥]¥^OWT\_R¥Z\_STVZQ]^ZVTZa]\_ba[QRO  
@HWI-EAS443:3:75:1332:1197#0/1  
GTCAAATATATTCAATATGGAGAGAATAAAAGAACTGAGA  
+HWI-EAS443:3:75:1332:1197#0/1  
]FZaZ¥TJ^\_¥VQVYZOVa^XZMYPZW\_^^¥^^YJZZNTT  
@HWI-EAS443:3:75:1380:624#0/1  
AAAGCAGGTCAAATATATTCAATATGGAGAGAATAAAAGA  
+HWI-EAS443:3:75:1380:624#0/1  
ZZ`b]FRYSV\_baa`\_¥aYMUZ¥`X\_T[\_a\_Z`^`\_¥ab\_  
@HWI-EAS443:3:75:1400:759#0/1  
CAAATATATTCAATATGGAGAGAATAAAAGAACTGAGAGA  
+HWI-EAS443:3:75:1400:759#0/1  
abbbbbbbbbbb\_bbabbb\_¥aa`bbbbbbbbbbabbbbbbb  
@HWI-EAS443:3:75:1460:114#0/1  
GTCAAATATATTCAATATGGAGAGAATAAAAGAACTGAGA  
+HWI-EAS443:3:75:1460:114#0/1  
a¥¥baaa`aaaa``^a\_aba]a]a]]a\_\_\_\_\_`\_]```^`\_`\_`



+HWI-EAS443:3:76:1259:909#0/1  
abbbbbbabababbbbbbababaabbbbabab`bbaa\_ab  
@HWI-EAS443:3:76:1261:487#0/1  
AATATATTCAATATGGAGAGAATAAAAGAACTGAGAGATC  
+HWI-EAS443:3:76:1261:487#0/1  
`ZYY¥aZ]][YaP¥`]^`[a^^a`]NWP\_ZOW]X\_¥¥^XW  
@HWI-EAS443:3:76:1407:1420#0/1  
ATTCAATATGGAGAGAATAAAAGAACTGAGAGATCTAATG  
+HWI-EAS443:3:76:1407:1420#0/1  
abbbbaabbbbbab`aabbaabbaaa^baaaaaab\_aaaa  
@HWI-EAS443:3:76:209:136#0/1  
GCAGGTCAAATATATTCAATATGGAGAGAATAAAAGAACT  
+HWI-EAS443:3:76:209:136#0/1  
a\_WO]P\_¥`UU^W]YYWPy`[ZMMPZSY[¥[]YYBBBB  
@HWI-EAS443:3:76:489:1241#0/1  
ATATTCAATATGGAGAGAATAAAAGAACTGAGAGATCTAA  
+HWI-EAS443:3:76:489:1241#0/1  
\_aababaaa\_aa`a[a`aaa\_a`\_]\_`\_\_^a\_`\_`aa`  
@HWI-EAS443:3:76:521:1616#0/1  
AAGCAGGTCAAATATATTCAATATGGAGAGAATAAAAGAA  
+HWI-EAS443:3:76:521:1616#0/1  
`aT`\_¥YZaa^^a¥[`^aa^X`aaaY\_a\_`\_\_`\_a\_aVX¥  
@HWI-EAS443:3:76:790:952#0/1  
GGTCAAATATATTCAATATGGAGAGAATAAAAGAACTGAG  
+HWI-EAS443:3:76:790:952#0/1  
a`W^``\_\_]aa\_\_N[\_\_VYJW]aZ\_P^]\_^\_Y]G[Y[V^]  
@HWI-EAS443:3:77:1036:1023#0/1  
AAGCAGGTCAAATATATTCAATATGGAGAGAATAAAAGAA  
+HWI-EAS443:3:77:1036:1023#0/1  
a`Y`^]Z¥bbaabab]`ab\_aaba^SZbaa`Ya`\_`aa\_a  
@HWI-EAS443:3:77:1224:348#0/1  
AAGCAGGTCAAATATATTCAATATGGAGAGAATAAAAGAA  
+HWI-EAS443:3:77:1224:348#0/1  
`]aaba[U¥```Y`a^a\_aVY\_^b^JU^Ta``aaa`\_\_`\_  
@HWI-EAS443:3:77:1287:354#0/1  
AGCAGGTCAAATATATTCAATATGGAGAGAATAAAAGAAC  
+HWI-EAS443:3:77:1287:354#0/1  
aa^abaYZ`aa`bbaaba`\_babaaZbaba\_abaab`aX  
@HWI-EAS443:3:77:1570:659#0/1  
AAGCAGGTCAAATATATTCAATATGGAGAGAATAAAAGAA  
+HWI-EAS443:3:77:1570:659#0/1  
aaY]¥a````a`XXa\_aaU\_\_`\_a`^]`^aPU\_]\_^S\_Q  
@HWI-EAS443:3:77:1571:1399#0/1  
AGCAGGTCAAATATATTCAATATGGAGAGAATAAAAGAAC  
+HWI-EAS443:3:77:1571:1399#0/1  
`a\_aU\_0\_``ababab`Ya[bbbb[(`\_\_abaaaa`[Q  
@HWI-EAS443:3:77:1700:923#0/1  
TATATTCAATATGGAGAGAATAAAAGAACTGAGAGATCTA  
+HWI-EAS443:3:77:1700:923#0/1  
abbaaba\_aaaaba`baaa`aaaa\_ab]bV`aaaa`Uaa

@HWI-EAS443:3:77:27:290#0/1  
CAAATATATTCAATATGGAGAGAATAAAAGAACTGAGAGA  
+HWI-EAS443:3:77:27:290#0/1  
abbbbababbbbaaa¥bbb^b`baabaa`aa^a\_aaaaaa]  
@HWI-EAS443:3:77:318:1237#0/1  
AATATATTCAATATGGAGAGAATAAAAGAACTGAGAGATC  
+HWI-EAS443:3:77:318:1237#0/1  
`bb^aX^ab\_aaaaa\_a\_`aa`a[`aa\_^aaa\_\_a\_a`a  
@HWI-EAS443:3:77:326:115#0/1  
ATTCAATATGGAGAGAATAAAAGAACTGAGAGATCTAATG  
+HWI-EAS443:3:77:326:115#0/1  
aa]UOY\_Q\_`P[XYXFZ[JTaWVOY\_[]NY\_^UUY¥QOTX  
@HWI-EAS443:3:77:371:1982#0/1  
CAAATATATTCAATATGGAGAGAATAAAAGAACTGAGAGA  
+HWI-EAS443:3:77:371:1982#0/1  
aabb^b[U`bb`]abbaaT]``]T\_abaaa`b`a\_aaaaa  
@HWI-EAS443:3:77:406:359#0/1  
CAAATATATTCAATATGGAGAGAATAAAAGAACTGAGAGA  
+HWI-EAS443:3:77:406:359#0/1  
^\_X\_a¥a`^bbaa\_aVba[\_`b`bb]\_aaa\_`aaaa`ba  
@HWI-EAS443:3:78:1003:1662#0/1  
AATATATTCAATATGGAGAGAATAAAAGAACTGAGAGATC  
+HWI-EAS443:3:78:1003:1662#0/1  
a\_b\_a[[aY``[]a`\_[TUa¥M]aaaa¥^`\_a`\_\_^\_\_^  
@HWI-EAS443:3:78:117:1679#0/1  
GTCAAATATATTCAATATGGAGAGAATAAAAGAACTGAGA  
+HWI-EAS443:3:78:117:1679#0/1  
a\_a]aabb¥``aaa\_abba\_a]¥¥]`b`]X``\_a`\_a\_a  
@HWI-EAS443:3:78:1373:1670#0/1  
CAAATATATTCAATATGGAGAGAATAAAAGAACTGAGAGA  
+HWI-EAS443:3:78:1373:1670#0/1  
ababbabaab`b\_babba]a`aa\_aabaa`aa^aaaaaa\_  
@HWI-EAS443:3:78:1466:1384#0/1  
TCAATATGGAGAGAATAAAAGAACTGAGAGATCTAATGTC  
+HWI-EAS443:3:78:1466:1384#0/1  
`\_aababbaab`aaaaba\_a¥\_\_^aa`]a\_\_`¥`^`\_a]R  
@HWI-EAS443:3:78:354:1284#0/1  
AAATATATTCAATATGGAGAGAATAAAAGAACTGAGAGAT  
+HWI-EAS443:3:78:354:1284#0/1  
aa^]`aa`a\_]T``a`\_]a^`^\_\_`\_\_`]]^]X]X^Y^]  
@HWI-EAS443:3:78:507:201#0/1  
GGTCAAATATATTCAATATGGAGAGAATAAAAGAACTGAG  
+HWI-EAS443:3:78:507:201#0/1  
a\_G]^^Y\_a]YZW`¥^[[YTWW^]¥WI^UV¥^ZPYZX^]Z  
@HWI-EAS443:3:78:587:1034#0/1  
CAAATATATTCAATATGGAGAGAATAAAAGAACTGAGAGA  
+HWI-EAS443:3:78:587:1034#0/1  
aaabbbbabbb`]UPYa``a\_\_a\_aaaa\_`^\_\_aaa]¥`\_  
@HWI-EAS443:3:78:630:558#0/1  
ATATATTCAATATGGAGAGAATAAAAGAACTGAGAGATCT

+HWI-EAS443:3:78:630:558#0/1  
aa[a\_`\_a[^a\_aa`]b\_`\_`\_Y\_]\_^]\_\_\_\_^\_^^^\_\_S\_  
@HWI-EAS443:3:78:684:869#0/1  
AATATATTCAATATGGAGAGAATAAAAGAACTGAGAGATC  
+HWI-EAS443:3:78:684:869#0/1  
aa`[\_`a`\_`]a\_a\_\_Ua^`SYa\_`a\_`X]^\_\_a\_`^\_U¥  
@HWI-EAS443:3:78:726:690#0/1  
AAGCAGGTCAAATATATTCAATATGGAGAGAATAAAAGAA  
+HWI-EAS443:3:78:726:690#0/1  
a`\_]aaa^`aa\_\_\_\_`\_`[\_`a\_\_^\_a\_]\_¥\_[^\_^\_]]]]^  
@HWI-EAS443:3:78:797:934#0/1  
AATATATTCAATATGGAGAGAATAAAAGAACTGAGAGATC  
+HWI-EAS443:3:78:797:934#0/1  
aa\_aa\_b`^`[aaUaaa[a\_aa\_a\_\_`^\_aa^``a\_\_^`^¥  
@HWI-EAS443:3:78:809:1679#0/1  
TTCAATATGGAGAGAATAAAAGAACTGAGAGATCTAATGT  
+HWI-EAS443:3:78:809:1679#0/1  
a`b`\_`^¥^bb]aaaaaaaaaaaa\_a]aaa]``aa`\_a\_aaZ  
@HWI-EAS443:3:79:199:1096#0/1  
CAAATATATTCAATATGGAGAGAATAAAAGAACTGAGAGA  
+HWI-EAS443:3:79:199:1096#0/1  
aab`aaa]aaaaaa`aa`^a^\_a\_aaa\_\_`^`a`\_\_a¥`^\_  
@HWI-EAS443:3:79:204:528#0/1  
ATTCAATATGGAGAGAATAAAAGAACTGAGAGATCTAATG  
+HWI-EAS443:3:79:204:528#0/1  
]\_b``\_bb`\_X0¥a]]]bbaba`^]Y`a^baaaaabaa\_a  
@HWI-EAS443:3:79:247:1126#0/1  
GCAGGTCAAATATATTCAATATGGAGAGAATAAAAGAACT  
+HWI-EAS443:3:79:247:1126#0/1  
ab\_a^Zbaaa`a`\_a`\_`a^`¥`[\_`^\_Y\_\_a``][^`^^  
@HWI-EAS443:3:79:475:1412#0/1  
CAAATATATTCAATATGGAGAGAATAAAAGAACTGAGAGA  
+HWI-EAS443:3:79:475:1412#0/1  
a]\_X`^`^a¥]aaa\_a`Y¥]¥¥[\_aYWX^^RWa\_\_\_Za\_a  
@HWI-EAS443:3:79:517:241#0/1  
ATTCAATATGGAGAGAATAAAAGAACTGAGAGATCTAATG  
+HWI-EAS443:3:79:517:241#0/1  
]b^b`ab]aa`aa^aaa`UXaaa\_^^`]^`a```a`aaa  
@HWI-EAS443:3:79:56:1373#0/1  
CAAATATATTCAATATGGAGAGAATAAAAGAACTGAGAGA  
+HWI-EAS443:3:79:56:1373#0/1  
a]WZ`a[Z¥^`¥[\_Y\_ZY¥^[¥P¥``[[[Z[^\_W[^¥^[]  
@HWI-EAS443:3:79:606:95#0/1  
ATTCAATATGGAGAGAATAAAAGAACTGAGAGATCTAATG  
+HWI-EAS443:3:79:606:95#0/1  
abaa\_ab\_bababaaaaa`aaa\_\_^aa`\_`aa\_\_a```ab  
@HWI-EAS443:3:79:674:51#0/1  
AGCAGGTCAAATATATTCAATATGGAGAGAATAAAAGAAC  
+HWI-EAS443:3:79:674:51#0/1  
aaaabb\_aabaa`b`baaa\_aaaba^a`a``a]`a``^\_\_

@HWI-EAS443:3:79:675:1263#0/1  
GCAGGTCAAATATATTCAATATGGAGAGAATAAAAGAACT  
+HWI-EAS443:3:79:675:1263#0/1  
`a¥a`Yaa`]`¥`a`T`^V]P`aY[[\_WTO[a][[¥^`]^  
@HWI-EAS443:3:79:744:1025#0/1  
CAAATATATTCAATATGGAGAGAATAAAAGAACTGAGAGA  
+HWI-EAS443:3:79:744:1025#0/1  
abababa\_aaa\_aaaaba`a\_aYa``Y`[`aa\_a`a\_`aa  
@HWI-EAS443:3:79:793:1916#0/1  
AAAGCAGGTCAAATATATTCAATATGGAGAGAATAAAAGA  
+HWI-EAS443:3:79:793:1916#0/1  
a`VQ^`]QJ`b`W`a]¥¥Z]TP\_]`\_VN`]\_^¥[`]^[SW  
@HWI-EAS443:3:79:975:1866#0/1  
ATATATTCAATATGGAGAGAATAAAAGAACTGAGAGATCT  
+HWI-EAS443:3:79:975:1866#0/1  
`aaa^[]aX]^aaaa\_a]WWaa]aa]^aaYZa`\_a``U``  
@HWI-EAS443:3:7:1134:1550#0/1  
CAAATATATTCAATATGGAGAGAATAAAAGAACTGAGAGA  
+HWI-EAS443:3:7:1134:1550#0/1  
\_bbabbbbab¥bbababababbb`^bbbabbb  
@HWI-EAS443:3:7:1285:295#0/1  
ATTCAATATGGAGAGAATAAAAGAACTGAGAGATCTAATG  
+HWI-EAS443:3:7:1285:295#0/1  
abb\_aabaaa`ab\_baababa^Y[`^aaaaa]a]\_a^aa  
@HWI-EAS443:3:7:1411:108#0/1  
CAAATATATTCAATATGGAGAGAATAAAAGAACTGAGAGA  
+HWI-EAS443:3:7:1411:108#0/1  
aabababbbbaaabbbba`a^Z]baa`aaa¥W]b`ba^Z  
@HWI-EAS443:3:7:1498:1991#0/1  
AGCAGGTCAAATATATTCAATATGGAGAGAATAAAAGAAC  
+HWI-EAS443:3:7:1498:1991#0/1  
`aaaaa¥abbaabaabaaa\_a``\_\_a`a`\_\_aaaa\_`a^  
@HWI-EAS443:3:7:1571:1657#0/1  
AGCAGGTCAAATATATTCAATATGGAGAGAATAAAAGAAC  
+HWI-EAS443:3:7:1571:1657#0/1  
abV`bb\_`bb]b]b\_ba`aaa`abb`^abaa\_a`]^ba\_V  
@HWI-EAS443:3:7:1613:466#0/1  
GCAGGTCAAATATATTCAATATGGAGAGAATAAAAGAACT  
+HWI-EAS443:3:7:1613:466#0/1  
aWa\_aGWaa\_aaa`\_\_^\_a^a\_\_YV¥a]^`\_\_^[^^U]  
@HWI-EAS443:3:7:1740:1768#0/1  
CAAATATATTCAATATGGAGAGAATAAAAGAACTGAGAGA  
+HWI-EAS443:3:7:1740:1768#0/1  
abbbabbabbWabbabaTYbabY```aaaaaG[```\_`aa  
@HWI-EAS443:3:7:272:1073#0/1  
GTCAAATATATTCAATATGGAGAGAATAAAAGAACTGAGA  
+HWI-EAS443:3:7:272:1073#0/1  
`V``\_aaaaa`aXa`N¥b`N¥¥^`\_]\_[\_\_`Y^]Y]^P`  
@HWI-EAS443:3:7:400:974#0/1  
AATATATTCAATATGGAGAGAATAAAAGAACTGAGAGATC

+HWI-EAS443:3:7:400:974#0/1  
a`\_]`]]\_] [V^aaa^\_] ^XX\_Z[[ ]\_WaY¥aa\_` `` ]  
@HWI-EAS443:3:7:501:1446#0/1  
CAAATATATTCAATATGGAGAGAATAAAAGAACTGAGAGA  
+HWI-EAS443:3:7:501:1446#0/1  
abbbbbbbbbbbbbbababababbbbabbbab`\_abbabbb  
@HWI-EAS443:3:7:764:1057#0/1  
ATTCAATATGGAGAGAATAAAAGAACTGAGAGATCTAATG  
+HWI-EAS443:3:7:764:1057#0/1  
aaa\_`]a`aa`\_a]a`aa`\_RW\_X` `` `a]^X\_^`\_`  
@HWI-EAS443:3:7:849:764#0/1  
ATTCAATATGGAGAGAATAAAAGAACTGAGAGATCTAATG  
+HWI-EAS443:3:7:849:764#0/1  
abbabbbabba`babaabaaaaab`\_abba`baa`aa`aa  
@HWI-EAS443:3:7:925:1807#0/1  
CAAATATATTCAATATGGAGAGAATAAAAGAACTGAGAGA  
+HWI-EAS443:3:7:925:1807#0/1  
V`bbba\_b`b`abb`bbY¥bbbabbbababa`\_¥abaabb  
@HWI-EAS443:3:80:1491:1797#0/1  
GTCAAATATATTCAATATGGAGAGAATAAAAGAACTGAGA  
+HWI-EAS443:3:80:1491:1797#0/1  
\_`Y`aabaa`a`\_`aa`aa`\_aZ`^`\_a`a`^`\_`^`\_`W`\_`  
@HWI-EAS443:3:80:1553:1821#0/1  
CAAATATATTCAATATGGAGAGAATAAAAGAACTGAGAGA  
+HWI-EAS443:3:80:1553:1821#0/1  
`a`\_`\_`abbaa^¥aaa]Z]a\_a`\_`aaY]``aa`a`\_`\_`a  
@HWI-EAS443:3:80:1598:1612#0/1  
GTCAAATATATTCAATATGGAGAGAATAAAAGAACTGAGA  
+HWI-EAS443:3:80:1598:1612#0/1  
`a^a¥a]ab^baSa\_baa]¥`b`\_`\_`aa`aa`a\_X[¥^`\_`\_`  
@HWI-EAS443:3:80:383:350#0/1  
AATATATTCAATATGGAGAGAATAAAAGAACTGAGAGATC  
+HWI-EAS443:3:80:383:350#0/1  
a`aa\_T`a`\_¥`\_]aa\_aZ`[``YU]\_`\_`^`\_]^^`\_]^U  
@HWI-EAS443:3:80:628:480#0/1  
CAAATATATTCAATATGGAGAGAATAAAAGAACTGAGAGA  
+HWI-EAS443:3:80:628:480#0/1  
aaaaa`\_`abaaaab`ab`\_baa`\_`aaaa`\_`^a]`a`a`a`\_`  
@HWI-EAS443:3:80:656:785#0/1  
GCAGGTCAAATATATTCAATATGGAGAGAATAAAAGAACT  
+HWI-EAS443:3:80:656:785#0/1  
]^VDU^ab\_]SOVSSa`\_Ia[SX\_[Z`ZTYYP¥[NUNRR  
@HWI-EAS443:3:80:742:1980#0/1  
ATTCAATATGGAGAGAATAAAAGAACTGAGAGATCTAATG  
+HWI-EAS443:3:80:742:1980#0/1  
]¥Z`\_`W¥b¥`aabZQ^¥SWY`Y`¥^abba[a[a`\_`Ua`\_`^X  
@HWI-EAS443:3:80:772:462#0/1  
AGCAGGTCAAATATATTCAATATGGAGAGAATAAAAGAAC  
+HWI-EAS443:3:80:772:462#0/1  
abaaabaab^¥aaaababa`aaaaa]a\_a`aaaa`aa` ``



@HWI-EAS443:3:80:837:1063#0/1  
AATATATTCAATATGGAGAGAATAAAAGAACTGAGAGATC  
+HWI-EAS443:3:80:837:1063#0/1  
aabaa`baa^aa`a`a\_a\_a\_aaa``\_`a```\_a^a\_\_^\_  
@HWI-EAS443:3:81:1485:1195#0/1  
CAAATATATTCAATATGGAGAGAATAAAAGAACTGAGAGA  
+HWI-EAS443:3:81:1485:1195#0/1  
abaabbbabbbaaaa`bbaab`a`aaaaaab`a^aaaaaaa  
@HWI-EAS443:3:81:1739:1044#0/1  
AAATATATTCAATATGGAGAGAATAAAAGAACTGAGAGAT  
+HWI-EAS443:3:81:1739:1044#0/1  
`babababa\_\_ab`ab^``]b\_aaaaaa^`a\_aaa^a\_``  
@HWI-EAS443:3:81:215:1337#0/1  
CAAATATATTCAATATGGAGAGAATAAAAGAACTGAGAGA  
+HWI-EAS443:3:81:215:1337#0/1  
aba^aaa`aaa^a\_aa\_\_a\_``\_\_`aa`\_\_\_\_\_]`]^\_  
@HWI-EAS443:3:81:242:2032#0/1  
AATATATTCAATATGGAGAGAATAAAAGAACTGAGAGATC  
+HWI-EAS443:3:81:242:2032#0/1  
aY]X)`\_`aa]]\_\_^`]^Y\_¥\_\_\_\_\_Y¥\_^XV¥]¥]]YY  
@HWI-EAS443:3:81:291:1618#0/1  
CAAATATATTCAATATGGAGAGAATAAAAGAACTGAGAGA  
+HWI-EAS443:3:81:291:1618#0/1  
^RMSW¥]WX[]W[R[¥USQTRSTVXPW[[MSWZVYXYTY  
@HWI-EAS443:3:81:409:879#0/1  
CAAATATATTCAATATGGAGAGAATAAAAGAACTGAGAGA  
+HWI-EAS443:3:81:409:879#0/1  
abYV]bb^a^Z^TXa^a]PV^VX\_WV¥¥YaaaR¥[[]\_\_  
@HWI-EAS443:3:81:815:766#0/1  
CAAATATATTCAATATGGAGAGAATAAAAGAACTGAGAGA  
+HWI-EAS443:3:81:815:766#0/1  
Y`^J^`\_b`b`UYabba`Xbb¥¥a^`a^`aNaZab`ab`a  
@HWI-EAS443:3:81:944:1550#0/1  
AATATATTCAATATGGAGAGAATAAAAGAACTGAGAGATC  
+HWI-EAS443:3:81:944:1550#0/1  
aaaa`Jaa\_\_`]aa`\_\_[^]^\_\_`¥^WV[\_[\_^^¥]^  
@HWI-EAS443:3:81:945:770#0/1  
AGCAGGTCAAATATATTCAATATGGAGAGAATAAAAGAAC  
+HWI-EAS443:3:81:945:770#0/1  
`a`¥ab[¥baaaaa\_aaY^`[bb`\_a]a``aa`aa[]Y  
@HWI-EAS443:3:82:1507:1395#0/1  
CAGGTCAAATATATTCAATATGGAGAGAATAAAAGAACTG  
+HWI-EAS443:3:82:1507:1395#0/1  
a^bb]Uabba\_^bb^[\_ba\_a`Y¥ba`aaabbbbbb\_a\_b  
@HWI-EAS443:3:82:155:2012#0/1  
AGCAGGTCAAATATATTCAATATGGAGAGAATAAAAGAAC  
+HWI-EAS443:3:82:155:2012#0/1  
`ab¥]b[a`aaaaXa`ba```\_a^^Z`S`^a`\_a`\_]  
@HWI-EAS443:3:82:1744:1451#0/1  
ATTCAATATGGAGAGAATAAAAGAACTGAGAGATCTAATG

+HWI-EAS443:3:82:1744:1451#0/1  
abZbb\_bYbaaZ]ab`\_bba\_bb`aab[bababbaababb  
@HWI-EAS443:3:82:210:1356#0/1  
AAATATATTCAATATGGAGAGAATAAAAGAACTGAGAGAT  
+HWI-EAS443:3:82:210:1356#0/1  
aZa\_¥^¥`^a^`\_]\_]\_[Z^\_^\_SYU¥^[^\_^]^W]]  
@HWI-EAS443:3:82:233:1295#0/1  
ATTCAATATGGAGAGAATAAAAGAACTGAGAGATCTAATG  
+HWI-EAS443:3:82:233:1295#0/1  
aaab`[`aaaa\_a^a`aaaa`a^`aaaa`a`\_a\_¥^aa  
@HWI-EAS443:3:82:330:480#0/1  
AAGCAGGTCAAATATATTCAATATGGAGAGAATAAAAGAA  
+HWI-EAS443:3:82:330:480#0/1  
abaaaaa^baaaaaaaaaa`aaaa\_\_^a\_a\_aaZa``a  
@HWI-EAS443:3:82:374:813#0/1  
ATTCAATATGGAGAGAATAAAAGAACTGAGAGATCTAATG  
+HWI-EAS443:3:82:374:813#0/1  
^abba^abbababa`]aaaa`aYa`babaa``aaaa`aa  
@HWI-EAS443:3:82:444:1277#0/1  
AGCAGGTCAAATATATTCAATATGGAGAGAATAAAAGAAC  
+HWI-EAS443:3:82:444:1277#0/1  
a`\_XSV[\_]^Z]R]]YZ\_\_W]VVQ¥Y\_WST[Ua[W]VW]V  
@HWI-EAS443:3:82:471:546#0/1  
TATATTCAATATGGAGAGAATAAAAGAACTGAGAGATCTA  
+HWI-EAS443:3:82:471:546#0/1  
abbabbabbabaa`b`baaaa```aaa\_aaaa`aa`aaa  
@HWI-EAS443:3:82:744:1943#0/1  
CAAATATATTCAATATGGAGAGAATAAAAGAACTGAGAGA  
+HWI-EAS443:3:82:744:1943#0/1  
^`a¥Z`VZ`W^aaWX^`R0[aaZPSaZVW\_aa\_T\_a`\_`[  
@HWI-EAS443:3:82:768:581#0/1  
CAAATATATTCAATATGGAGAGAATAAAAGAACTGAGAGA  
+HWI-EAS443:3:82:768:581#0/1  
abbbaababb```abb`b`aabaaaaaaaaa`^\_a`  
@HWI-EAS443:3:82:789:822#0/1  
AAGCAGGTCAAATATATTCAATATGGAGAGAATAAAAGAA  
+HWI-EAS443:3:82:789:822#0/1  
aW``aaa^aab`aaa^aa``]a\_aa`Xa]a`\_aaa`a\_\_a  
@HWI-EAS443:3:82:851:782#0/1  
AAGCAGGTCAAATATATTCAATATGGAGAGAATAAAAGAA  
+HWI-EAS443:3:82:851:782#0/1  
a]aaa]aYab`aabbaa\_\_a`b`aaa^a\_ba\_ba`a\_a^`  
@HWI-EAS443:3:82:959:1535#0/1  
GCAGGTCAAATATATTCAATATGGAGAGAATAAAAGAACT  
+HWI-EAS443:3:82:959:1535#0/1  
^`\_USX\_\_\_b`Y\_Z`]]`Y\_aa\_V\_ZT][aab¥T]¥[[Z`  
@HWI-EAS443:3:82:96:895#0/1  
ATTCAATATGGAGAGAATAAAAGAACTGAGAGATCTAATG  
+HWI-EAS443:3:82:96:895#0/1  
a^aaaa`abba\_b`b^aa``^TY^aaa^a^]a`]\_\_\_a`a

@HWI-EAS443:3:82:989:99#0/1  
CAAATATATTCAATATGGAGAGAATAAAAGAACTGAGAGA  
+HWI-EAS443:3:82:989:99#0/1  
ababbbbabbaabbabbbababbbbbbabb`bb`baba  
@HWI-EAS443:3:83:1047:555#0/1  
ATTCAATATGGAGAGAATAAAAGAACTGAGAGATCTAATG  
+HWI-EAS443:3:83:1047:555#0/1  
aa\_aaaaYaba\_a\_b`ab```a\_\_^W\_a\_a^`a\_`^^`\_  
@HWI-EAS443:3:83:1091:560#0/1  
CAAATATATTCAATATGGAGAGAATAAAAGAACTGAGAGA  
+HWI-EAS443:3:83:1091:560#0/1  
abaabbbabbbbabbbbab`bbbaa^b`a\_ababa``  
@HWI-EAS443:3:83:1158:1935#0/1  
CAAATATATTCAATATGGAGAGAATAAAAGAACTGAGAGA  
+HWI-EAS443:3:83:1158:1935#0/1  
aaa^0bba^ab\_^bbbV`Y\_aa¥`aa`ab`a`¥abaYb`b  
@HWI-EAS443:3:83:1184:568#0/1  
CAAATATATTCAATATGGAGAGAATAAAAGAACTGAGAGA  
+HWI-EAS443:3:83:1184:568#0/1  
abb`bbbabb]a`abbbb^bbbaabbabab`a]bbaaba  
@HWI-EAS443:3:83:1202:1524#0/1  
CAGGTCAAATATATTCAATATGGAGAGAATAAAAGAACTG  
+HWI-EAS443:3:83:1202:1524#0/1  
[\_a^J\_X¥a\_`¥\_aZ^U`U`]X^`a`^bbb``a^Y^aab  
@HWI-EAS443:3:83:1384:964#0/1  
AATATATTCAATATGGAGAGAATAAAAGAACTGAGAGATC  
+HWI-EAS443:3:83:1384:964#0/1  
^S^ZTZP[LY]\_MYb`\_bVYOJa[ZYRaV[G[`P[P\_\_XG  
@HWI-EAS443:3:83:1526:898#0/1  
ATTCAATATGGAGAGAATAAAAGAACTGAGAGATCTAATG  
+HWI-EAS443:3:83:1526:898#0/1  
aaab]\_a`bbbW`abb[aa`aabSa\_aa\_a`a\_\_`^`\_`aa  
@HWI-EAS443:3:83:172:150#0/1  
CAAATATATTCAATATGGAGAGAATAAAAGAACTGAGAGA  
+HWI-EAS443:3:83:172:150#0/1  
a¥S\_\_\_IXa`b^Z^[^^^¥a[^`¥^`a\_[]W^]aa`bX\_S  
@HWI-EAS443:3:83:1739:844#0/1  
ATTCAATATGGAGAGAATAAAAGAACTGAGAGATCTAATG  
+HWI-EAS443:3:83:1739:844#0/1  
aab\_bbbabbb\_a`aaab\_`aa\_\_a`aa`aa\_`\_¥^a\_aa  
@HWI-EAS443:3:83:371:703#0/1  
CAAATATATTCAATATGGAGAGAATAAAAGAACTGAGAGA  
+HWI-EAS443:3:83:371:703#0/1  
aa[(`a^`aaa\_U\_\_a^a\_a`a\_\_\_\_]ZS[a^\_]\_\_\_\_``^  
@HWI-EAS443:3:83:549:1494#0/1  
AATATATTCAATATGGAGAGAATAAAAGAACTGAGAGATC  
+HWI-EAS443:3:83:549:1494#0/1  
`aa^\_a\_aba^a`aaa]a^a^`a`¥^a[a`aa\_`a`a]]  
@HWI-EAS443:3:83:745:1704#0/1  
ATTCAATATGGAGAGAATAAAAGAACTGAGAGATCTAATG

+HWI-EAS443:3:83:745:1704#0/1  
]bba`\_`YFRU\_V`^a]\_b]\_\_\_\_aT`\_`a\_Za]a\_\_`\_a`  
@HWI-EAS443:3:83:884:356#0/1  
ATTCAATATGGAGAGAATAAAAGAACTGAGAGATCTAATG  
+HWI-EAS443:3:83:884:356#0/1  
abbY\_]b¥[aa¥a]a`aaa^adW]a`^]\_a`]a\_a\_`[`a  
@HWI-EAS443:3:83:923:552#0/1  
AGCAGGTCAAATATATTCAATATGGAGAGAATAAAAGAAC  
+HWI-EAS443:3:83:923:552#0/1  
`ababa\_\_bb`ba`aaaa`baaa`\_a\_a\_\_aaa^\_a^\_]`  
@HWI-EAS443:3:84:1050:942#0/1  
CAAATATATTCAATATGGAGAGAATAAAAGAACTGAGAGA  
+HWI-EAS443:3:84:1050:942#0/1  
abbbbbbbabbaaababbaaaabaabbaaabaaaaabaab  
@HWI-EAS443:3:84:1250:230#0/1  
CAAATATATTCAATATGGAGAGAATAAAAGAACTGAGAGA  
+HWI-EAS443:3:84:1250:230#0/1  
T^aaW^^b`\_`Z`a`b`aVbaZaa\_`^`\_`bbaabbb`b\_  
@HWI-EAS443:3:84:1313:1607#0/1  
CAAATATATTCAATATGGAGAGAATAAAAGAACTGAGAGA  
+HWI-EAS443:3:84:1313:1607#0/1  
^ab`Uabb^^P[Vaababab[\_]¥ba]XZLHR\_`b\_^Nb  
@HWI-EAS443:3:84:1521:1982#0/1  
CAAATATATTCAATATGGAGAGAATAAAAGAACTGAGAGA  
+HWI-EAS443:3:84:1521:1982#0/1  
abbabbbabb\_baa`aa]WW\_aaabaaaaaab`a[¥Wa¥Y  
@HWI-EAS443:3:84:1627:711#0/1  
GTCAAATATATTCAATATGGAGAGAATAAAAGAACTGAGA  
+HWI-EAS443:3:84:1627:711#0/1  
`]abaaab`baa`\_aaaa\_a`a`\_aa`a`\_`a`\_a`a`a`  
@HWI-EAS443:3:84:289:963#0/1  
AAATATATTCAATATGGAGAGAATAAAAGAACTGAGAGAT  
+HWI-EAS443:3:84:289:963#0/1  
]`b^^aa`a`aaa]aa\_]\_]a^Y`\_`\_`^\_a^a^\_\_\_\_]]]  
@HWI-EAS443:3:84:300:457#0/1  
ATTCAATATGGAGAGAATAAAAGAACTGAGAGATCTAATG  
+HWI-EAS443:3:84:300:457#0/1  
``bbba`^`a[R^Z`a`aa\_]aa`aa\_]abaa]Y`a\_\_a  
@HWI-EAS443:3:84:448:763#0/1  
AAGCAGGTCAAATATATTCAATATGGAGAGAATAAAAGAA  
+HWI-EAS443:3:84:448:763#0/1  
`\_aaaaaXa\_\_WaYa]a`a\_S¥Yaa^\_a\_b\_aa\_aa¥`\_`\_`  
@HWI-EAS443:3:84:549:820#0/1  
ATTCAATATGGAGAGAATAAAAGAACTGAGAGATCTAATG  
+HWI-EAS443:3:84:549:820#0/1  
aabbaaaaaba\_a`aaa\_a`\_a`\_]\_`\_`aa\_a`\_\_aa^aa  
@HWI-EAS443:3:84:726:2011#0/1  
AGCAGGTCAAATATATTCAATATGGAGAGAATAAAAGAAC  
+HWI-EAS443:3:84:726:2011#0/1  
¥`aaa¥`\_bb\_a¥aab`\_\_ab\_baa`\_^\_a`aaaaaaaaaN

@HWI-EAS443:3:84:795:324#0/1  
ATTCAATATGGAGAGAATAAAAGAACTGAGAGATCTAATG  
+HWI-EAS443:3:84:795:324#0/1  
\_`^`a\_a`aaa¥a`Y^a`aaX`a\_a`\_¥`]a^a\_a`\_¥a  
@HWI-EAS443:3:84:824:1855#0/1  
ATATATTCAATATGGAGAGAATAAAAGAACTGAGAGATCT  
+HWI-EAS443:3:84:824:1855#0/1  
Va`^U`a^a]a]RZ[\_`aaa]`^T]\_AY`]]Sa]M]  
@HWI-EAS443:3:84:886:1203#0/1  
GTCAAATATATTCAATATGGAGAGAATAAAAGAACTGAGA  
+HWI-EAS443:3:84:886:1203#0/1  
a\_bb¥^a`a`ba`^aaa¥a\_aaa`aaaa^aaaa`a`a]\_  
@HWI-EAS443:3:84:938:818#0/1  
AGCAGGTCAAATATATTCAATATGGAGAGAATAAAAGAAC  
+HWI-EAS443:3:84:938:818#0/1  
XYZa¥aaaSa`^`b`\_[YXaaY`aL`Z¥WJ¥T]]\_a^ab  
@HWI-EAS443:3:84:945:828#0/1  
ATTCAATATGGAGAGAATAAAAGAACTGAGAGATCTAATG  
+HWI-EAS443:3:84:945:828#0/1  
`bbbbabaa`^bababb`aabbaabaaa`^aaaaba`a  
@HWI-EAS443:3:85:1013:601#0/1  
AATATATTCAATATGGAGAGAATAAAAGAACTGAGAGATC  
+HWI-EAS443:3:85:1013:601#0/1  
a\_^]\_aa]`]¥`aaba\_a\_aa`a`a[`aZ`¥[[`\_a`a`\_]  
@HWI-EAS443:3:85:1055:1774#0/1  
ATTCAATATGGAGAGAATAAAAGAACTGAGAGATCTAATG  
+HWI-EAS443:3:85:1055:1774#0/1  
¥\_¥a`aaT`\_]`^aaa¥K`Yb¥aaa`\_]`````WQ[\_RZY  
@HWI-EAS443:3:85:1080:1161#0/1  
CAAATATATTCAATATGGAGAGAATAAAAGAACTGAGAGA  
+HWI-EAS443:3:85:1080:1161#0/1  
`a`aa`bbb```babaa¥`^`^ba`ab`\_a`aaa\_ba`  
@HWI-EAS443:3:85:1132:206#0/1  
AATATATTCAATATGGAGAGAATAAAAGAACTGAGAGATC  
+HWI-EAS443:3:85:1132:206#0/1  
`bba`\_a`^aaaaaa^a^a`a`\_`\_`\_`\_`aaaa^YR  
@HWI-EAS443:3:85:1136:353#0/1  
AATATATTCAATATGGAGAGAATAAAAGAACTGAGAGATC  
+HWI-EAS443:3:85:1136:353#0/1  
a\_bbbabbaabaabb`a`b`abaaaaaaa`aaa`aaaa^  
@HWI-EAS443:3:85:1330:636#0/1  
AAAGCAGGTCAAATATATTCAATATGGAGAGAATAAAAGA  
+HWI-EAS443:3:85:1330:636#0/1  
^baba]aaHZaT`\_`\_bb^aWUP]`bbaT`^bVLY`a`aa`  
@HWI-EAS443:3:85:1384:775#0/1  
AAAGCAGGTCAAATATATTCAATATGGAGAGAATAAAAGA  
+HWI-EAS443:3:85:1384:775#0/1  
aaaa`aaaa`aaaa`aaaa`\_^b\_aa\_Xa\_a\_\_aaa\_\_`^  
@HWI-EAS443:3:85:1442:1955#0/1  
CAAATATATTCAATATGGAGAGAATAAAAGAACTGAGAGA

+HWI-EAS443:3:85:1442:1955#0/1  
aaabab^baa\_aaaabaa\_aaaaaaaaa]aaYa`a\_baa  
@HWI-EAS443:3:85:147:1892#0/1  
AAAGCAGGTCAAATATATTCAATATGGAGAGAATAAAAAGA  
+HWI-EAS443:3:85:147:1892#0/1  
abaS`^a\_UabY[`aa\_`aaZa[`aX\_a`a\_\_\_a`\_a^\_  
@HWI-EAS443:3:85:1716:1743#0/1  
CAAATATATTCAATATGGAGAGAATAAAAAGAACTGAGAGA  
+HWI-EAS443:3:85:1716:1743#0/1  
Jaabbbabb¥`abbaabbbabababbabb`bYbbabab`  
@HWI-EAS443:3:85:175:1038#0/1  
AAGCAGGTCAAATATATTCAATATGGAGAGAATAAAAAGAA  
+HWI-EAS443:3:85:175:1038#0/1  
aaa`Yaa]a¥¥¥aa[X¥aa)`\_`a\_Y`\_a]]\_`^\_\_Y]  
@HWI-EAS443:3:85:1780:331#0/1  
CAAATATATTCAATATGGAGAGAATAAAAAGAACTGAGAGA  
+HWI-EAS443:3:85:1780:331#0/1  
abbbba\_abaZaa`abaaab`b`aa\_a`aa``]aba``aa  
@HWI-EAS443:3:85:179:1977#0/1  
CAAATATATTCAATATGGAGAGAATAAAAAGAACTGAGAGA  
+HWI-EAS443:3:85:179:1977#0/1  
V\_^aa^^aV\_ab`VZ^a\_\_H¥\_a¥^``abb`\_babaabab  
@HWI-EAS443:3:85:742:1206#0/1  
CAAATATATTCAATATGGAGAGAATAAAAAGAACTGAGAGA  
+HWI-EAS443:3:85:742:1206#0/1  
a`^`]]`¥`^[]YZ`\_a\_Ya^a[[a^\_\_`\_[]Z\_] [[\_`^  
@HWI-EAS443:3:86:107:1184#0/1  
AATATATTCAATATGGAGAGAATAAAAAGAACTGAGAGATC  
+HWI-EAS443:3:86:107:1184#0/1  
aaaaa`abaaaaa`a`a`a]aaa]`a`a``\_\_`\_a`\_]`^  
@HWI-EAS443:3:86:1194:403#0/1  
TATATTCAATATGGAGAGAATAAAAAGAACTGAGAGATCTA  
+HWI-EAS443:3:86:1194:403#0/1  
a\_a\_aaaa`a\_ba`T^ab\_aa`a`aa\_¥aa``\_aYsa`  
@HWI-EAS443:3:86:1592:1682#0/1  
AAGCAGGTCAAATATATTCAATATGGAGAGAATAAAAAGAA  
+HWI-EAS443:3:86:1592:1682#0/1  
a¥bbaba`bbabaXR]bW^aababba`b^b`abaaaaa¥\_  
@HWI-EAS443:3:86:1791:1129#0/1  
AGCAGGTCAAATATATTCAATATGGAGAGAATAAAAAGAAC  
+HWI-EAS443:3:86:1791:1129#0/1  
aaabaa`abaaaababbaa`\_aaa`^a\_\_a`aaaa`^a]  
@HWI-EAS443:3:86:241:1659#0/1  
CAAATATATTCAATATGGAGAGAATAAAAAGAACTGAGAGA  
+HWI-EAS443:3:86:241:1659#0/1  
abbb]a`]a`Zaab\_]`a]ba¥\_Yaa`R^\_aaaaaa\_aa`  
@HWI-EAS443:3:86:282:860#0/1  
ATTCAATATGGAGAGAATAAAAAGAACTGAGAGATCTAATG  
+HWI-EAS443:3:86:282:860#0/1  
aaabaabaaaa[a`a`aaaa`a]a`\_aa\_a`\_\_`\_`\_`\_`a

@HWI-EAS443:3:86:602:1783#0/1  
CAAATATATTCAATATGGAGAGAATAAAAGAACTGAGAGA  
+HWI-EAS443:3:86:602:1783#0/1  
abbbaba`abaa`b`baa\_a\_\_\_aaaaaaaab[a`a`a\_a  
@HWI-EAS443:3:86:714:84#0/1  
AATATATTCAATATGGAGAGAATAAAAGAACTGAGAGATC  
+HWI-EAS443:3:86:714:84#0/1  
`bbbb\_ab\_aab`bb`baa`\_aaa\_aa`aYaa^a¥b^\_  
@HWI-EAS443:3:86:788:1169#0/1  
ATTCAATATGGAGAGAATAAAAGAACTGAGAGATCTAATG  
+HWI-EAS443:3:86:788:1169#0/1  
\_baba]baba\_¥`ab\_¥a]aa`^]a`abaaa`aaR\_a\_aa  
@HWI-EAS443:3:86:836:270#0/1  
GAGAAAGCTAATGTGCTAATTGGGCAAGGGGACGTGGTGT  
+HWI-EAS443:3:86:836:270#0/1  
aaaaa`aZa`\_`a]a`^)``a`^VZM`\_`\_]VG[RHUOU]  
@HWI-EAS443:3:86:849:2002#0/1  
GTCAAATATATTCAATATGGAGAGAATAAAAGAACTGAGA  
+HWI-EAS443:3:86:849:2002#0/1  
aWUOUOSO[MPTZX\_¥¥`]^RZL]]VZ\_NY^FQ^[ZTNG]  
@HWI-EAS443:3:86:918:645#0/1  
CAAATATATTCAATATGGAGAGAATAAAAGAACTGAGAGA  
+HWI-EAS443:3:86:918:645#0/1  
abb`¥aa]Za]Z¥aa`baaa\_b^`aaaU\_aa`U`aa\_aaa  
@HWI-EAS443:3:87:1046:1835#0/1  
TTCAATATGGAGAGAATAAAAGAACTGAGAGATCTAATGT  
+HWI-EAS443:3:87:1046:1835#0/1  
]Q\_¥¥a]S^`Y\_]bbbb`bbaaaaab`bZ\_Y]a`b]baa`  
@HWI-EAS443:3:87:1139:346#0/1  
ATTCAATATGGAGAGAATAAAAGAACTGAGAGATCTAATG  
+HWI-EAS443:3:87:1139:346#0/1  
abbaabbabab\_babaaaa\_baaa]aaaaaba]bbaaa  
@HWI-EAS443:3:87:1277:250#0/1  
AATATATTCAATATGGAGAGAATAAAAGAACTGAGAGATC  
+HWI-EAS443:3:87:1277:250#0/1  
aaa\_\_RZa`a\_]U]aa]aXaWWa`]^`Y^X`\_]`^T^]XZ  
@HWI-EAS443:3:87:1287:1276#0/1  
AATATATTCAATATGGAGAGAATAAAAGAACTGAGAGATC  
+HWI-EAS443:3:87:1287:1276#0/1  
a^a`^`^bbba`a`ba]`a^`a`aaaaaaaaaaaaaaaaaZ  
@HWI-EAS443:3:87:1582:1262#0/1  
CAAATATATTCAATATGGAGAGAATAAAAGAACTGAGAGA  
+HWI-EAS443:3:87:1582:1262#0/1  
¥`bbbbbbbaV]`baabaaaabbab`]aabaa\_aa`abb¥  
@HWI-EAS443:3:87:246:1778#0/1  
CAAATATATTCAATATGGAGAGAATAAAAGAACTGAGAGA  
+HWI-EAS443:3:87:246:1778#0/1  
abbbba\_abaaaaaaa¥¥`a`a`aaaaa`\_`a`a\_a^``\_  
@HWI-EAS443:3:87:524:1665#0/1  
ATTCAATATGGAGAGAATAAAAGAACTGAGAGATCTAATG

+HWI-EAS443:3:87:524:1665#0/1  
`aaZGYaabab^`Y#a]aa[a\_]YINabb`^Z]``aa[M  
@HWI-EAS443:3:87:671:504#0/1  
GTCAAATATATTCAATATGGAGAGAATAAAAGAACTGAGA  
+HWI-EAS443:3:87:671:504#0/1  
aU^^^WZ`Y^VZT0\_aa\_\_\_\_`H[^`^\_\_\_\_Z`^\_]U#`^\_`  
@HWI-EAS443:3:87:75:1383#0/1  
AATATATTCAATATGGAGAGAATAAAAGAACTGAGAGATC  
+HWI-EAS443:3:87:75:1383#0/1  
a^IZa`#aa`aaa`X^[[^\_`^a^]`\_`\_`[\_`\_Z`\_[]  
@HWI-EAS443:3:87:774:1143#0/1  
AGCAGGTCAAATATATTCAATATGGAGAGAATAAAAGAAC  
+HWI-EAS443:3:87:774:1143#0/1  
abba`]aaaab\_baa\_aaaaaaaaa\_a`a#aaa[aa\_aa\_  
@HWI-EAS443:3:87:787:1521#0/1  
CAAATATATTCAATATGGAGAGAATAAAAGAACTGAGAGA  
+HWI-EAS443:3:87:787:1521#0/1  
abb^`bbabbb`aaababab`baabaab]aaaaaaaaa  
@HWI-EAS443:3:88:102:1264#0/1  
AATATATTCAATATGGAGAGAATAAAAGAACTGAGAGATC  
+HWI-EAS443:3:88:102:1264#0/1  
`^^[^Y^Y\_a`aa]`aWa\_aW^]\_RPZX`a\_\_^\_\_\_\_X]\_  
@HWI-EAS443:3:88:1133:836#0/1  
ATTCAATATGGAGAGAATAAAAGAACTGAGAGATCTAATG  
+HWI-EAS443:3:88:1133:836#0/1  
aaabbabaabb\_b\_\_`bbbbababb`bbb\_bbbbbababbb  
@HWI-EAS443:3:88:121:679#0/1  
ATATTCAATATGGAGAGAATAAAAGAACTGAGAGATCTAA  
+HWI-EAS443:3:88:121:679#0/1  
^``[a[]`ba`a[U`[\_P#^S#0#Y^a#^X`Y`WV0#[R  
@HWI-EAS443:3:88:1302:294#0/1  
CAAATATATTCAATATGGAGAGAATAAAAGAACTGAGAGA  
+HWI-EAS443:3:88:1302:294#0/1  
Y^aabbb\_ba#``babbbbbbbbaababbbbbbaabab  
@HWI-EAS443:3:88:131:2023#0/1  
AATATATTCAATATGGAGAGAATAAAAGAACTGAGAGATC  
+HWI-EAS443:3:88:131:2023#0/1  
YZ\_a`a\_aaa\_``\_ZY\_`\_]`Sa\_`\_]#^#^]W\_W`^`]P  
@HWI-EAS443:3:88:1430:1856#0/1  
AAGCAGGTCAAATATATTCAATATGGAGAGAATAAAAGAA  
+HWI-EAS443:3:88:1430:1856#0/1  
aa\_b^W^\_a\_a^aba`a^Tabaabb^b\_\_V`aa`[aa\_a  
@HWI-EAS443:3:88:157:1793#0/1  
ATTCAATATGGAGAGAATAAAAGAACTGAGAGATCTAATG  
+HWI-EAS443:3:88:157:1793#0/1  
aaaa\_]a`aa]`]aa```aaaa`\_a^a`Za\_a]a\_`a`\_  
@HWI-EAS443:3:88:1592:973#0/1  
ATATATTCAATATGGAGAGAATAAAAGAACTGAGAGATCT  
+HWI-EAS443:3:88:1592:973#0/1  
`bbbbaba^aab`a`\_]ba^^aabaaaaa`aaaaaba`#b



@HWI-EAS443:3:88:1607:1339#0/1  
ATTCAATATGGAGAGAATAAAAGAACTGAGAGATCTAATG  
+HWI-EAS443:3:88:1607:1339#0/1  
aba`abb`bbaaab\_`bbaabbaa\_abaaaaa\_aa\_ab  
@HWI-EAS443:3:88:1666:37#0/1  
AGCAGGTCAAATATATTCAATATGGAGAGAATAAAAGAAC  
+HWI-EAS443:3:88:1666:37#0/1  
aaabbbbaabbaaaaabaaa`babbq][YUa````\_a\_a\_  
@HWI-EAS443:3:88:205:494#0/1  
CAAATATATTCAATATGGAGAGAATAAAAGAACTGAGAGA  
+HWI-EAS443:3:88:205:494#0/1  
aaabbbb\_bbab^babbb`b[b\_\_baa]\_a`^aaabaa\_  
@HWI-EAS443:3:88:278:700#0/1  
ATTCAATATGGAGAGAATAAAAGAACTGAGAGATCTAATG  
+HWI-EAS443:3:88:278:700#0/1  
`]bbaabaab[[aa`\_abaaa[a\_baaaa`aa[a`aaaa`  
@HWI-EAS443:3:88:623:1926#0/1  
ATTCAATATGGAGAGAATAAAAGAACTGAGAGATCTAATG  
+HWI-EAS443:3:88:623:1926#0/1  
`Y]Y¥]a\_ab^P^a``aaa\_\_][Z\_\_`\_¥]\_`\_^Y\_]\_`\_  
@HWI-EAS443:3:88:645:110#0/1  
CAAATATATTCAATATGGAGAGAATAAAAGAACTGAGAGA  
+HWI-EAS443:3:88:645:110#0/1  
`bbaabbaba\_a`b`bba¥b\_a\_\_aa``\_a`\_aa`\_``a  
@HWI-EAS443:3:88:977:230#0/1  
GTCAAATATATTCAATATGGAGAGAATAAAAGAACTGAGA  
+HWI-EAS443:3:88:977:230#0/1  
aY^^aaaaa\_aa¥`\_a]\_a`\_a]\_^\_\_\_\_`^]]^[\`\_]\_^  
@HWI-EAS443:3:89:1044:180#0/1  
CAAATATATTCAATATGGAGAGAATAAAAGAACTGAGAGA  
+HWI-EAS443:3:89:1044:180#0/1  
abbbbbbbabbaaababbbab\_baaaa`aaaa`aaaaaa  
@HWI-EAS443:3:89:1361:621#0/1  
CAAATATATTCAATATGGAGAGAATAAAAGAACTGAGAGA  
+HWI-EAS443:3:89:1361:621#0/1  
^a¥aba`\_bbYbbb``¥baabbbbaabbaabab\_babba  
@HWI-EAS443:3:89:1403:692#0/1  
CAAATATATTCAATATGGAGAGAATAAAAGAACTGAGAGA  
+HWI-EAS443:3:89:1403:692#0/1  
abbbbabbabbabbabbababbabbbbbbba\_bbbbbaa  
@HWI-EAS443:3:89:1709:1576#0/1  
CAAATATATTCAATATGGAGAGAATAAAAGAACTGAGAGA  
+HWI-EAS443:3:89:1709:1576#0/1  
`baa\_`babb` `[`ab^YKVRb¥[b\_]bbb\_a]^]]a\_aa  
@HWI-EAS443:3:89:1714:804#0/1  
CAAATATATTCAATATGGAGAGAATAAAAGAACTGAGAGA  
+HWI-EAS443:3:89:1714:804#0/1  
abbbabbbbaaabbbbbbabba`abbbbbb`bababbbab  
@HWI-EAS443:3:89:302:242#0/1  
CAAATATATTCAATATGGAGAGAATAAAAGAACTGAGAGA



@HWI-EAS443:3:8:380:509#0/1  
CAAATATATTCAATATGGAGAGAATAAAAGAACTGAGAGA  
+HWI-EAS443:3:8:380:509#0/1  
aa[abbabbb]`^b[\_bb\_aZ\_W\_a`aaa\_a\_]`a\_a\_a  
@HWI-EAS443:3:8:426:2018#0/1  
AATATATTCAATATGGAGAGAATAAAAGAACTGAGAGATC  
+HWI-EAS443:3:8:426:2018#0/1  
^a¥`aaa`a¥^QaVaa`aaaa`aaa`a\_¥^`a^aa¥PWZ  
@HWI-EAS443:3:8:446:1331#0/1  
TATATTCAATATGGAGAGAATAAAAGAACTGAGAGATCTA  
+HWI-EAS443:3:8:446:1331#0/1  
^`TJV\_`^¥¥```a[[`aaV^\_aaa```]T`ab¥¥ab]\_^\_a  
@HWI-EAS443:3:8:541:1418#0/1  
ATATATTCAATATGGAGAGAATAAAAGAACTGAGAGATCT  
+HWI-EAS443:3:8:541:1418#0/1  
aaab^aaa`^a`a`a\_a`\_\_aa`a`a`^\_]`\_\_\_\_`\_`\_\_\_\_  
@HWI-EAS443:3:8:553:1414#0/1  
ATTCAATATGGAGAGAATAAAAGAACTGAGAGATCTAATG  
+HWI-EAS443:3:8:553:1414#0/1  
Xb\_a]aabb^ababababbab[aaabaaa\_aab\_aa  
@HWI-EAS443:3:8:72:90#0/1  
AGCAGGTCAAATATATTCAATATGGAGAGAATAAAAGAAC  
+HWI-EAS443:3:8:72:90#0/1  
aa`\_aaWaaa\_a\_a¥`\_`\_\_^`aaZ`^`]^`\_][\_\_][\_  
@HWI-EAS443:3:8:791:809#0/1  
CAAATATATTCAATATGGAGAGAATAAAAGAACTGAGAGA  
+HWI-EAS443:3:8:791:809#0/1  
``¥Y``abbaY^ababbaR¥¥\_0\_\_^aaa]\_`]a\_ba]^  
@HWI-EAS443:3:8:798:1844#0/1  
AGCAGGTCAAATATATTCAATATGGAGAGAATAAAAGAAC  
+HWI-EAS443:3:8:798:1844#0/1  
aSYV]`Ia[`¥]V¥a¥]XT[a\_a^aZ[[`T\_\_`Z¥a\_KaX  
@HWI-EAS443:3:8:806:178#0/1  
AAAGCAGGTCAAATATATTCAATATGGAGAGAATAAAAGA  
+HWI-EAS443:3:8:806:178#0/1  
abbaaaba[aaa`aaa`aa\_\_a\_aa`^a^`^^`^^`\_]\_  
@HWI-EAS443:3:8:912:1021#0/1  
CAAATATATTCAATATGGAGAGAATAAAAGAACTGAGAGA  
+HWI-EAS443:3:8:912:1021#0/1  
aabbbbbbbbaabbbab\_a`baaabaabbab]abb`a`a  
@HWI-EAS443:3:8:927:1394#0/1  
AGCAGGTCAAATATATTCAATATGGAGAGAATAAAAGAAC  
+HWI-EAS443:3:8:927:1394#0/1  
^\_T^b]a^`aa^bab`^bbab]```¥a`a\_Va]`aaaa\_¥  
@HWI-EAS443:3:90:1060:1889#0/1  
ATATATTCAATATGGAGAGAATAAAAGAACTGAGAGATCT  
+HWI-EAS443:3:90:1060:1889#0/1  
aaa`aaa`aa¥\_aa`a¥a\_a`aaaa`a\_\_a^[a^\_]¥  
@HWI-EAS443:3:90:1354:1539#0/1  
ATTCAATATGGAGAGAATAAAAGAACTGAGAGATCTAATG

+HWI-EAS443:3:90:1354:1539#0/1  
Z\_\_\_b^baXa^Zbb`V\_^`VV\_b^Va`aababaaXa`aa\_  
@HWI-EAS443:3:90:1534:336#0/1  
AAAGCAGGTCAAATATATTCAATATGGAGAGAATAAAAGA  
+HWI-EAS443:3:90:1534:336#0/1  
abaYX`a^W]\_aababbabY`aba`aa^aa[\_a`aa`aaa  
@HWI-EAS443:3:90:156:1136#0/1  
AATATATTCAATATGGAGAGAATAAAAGAACTGAGAGATC  
+HWI-EAS443:3:90:156:1136#0/1  
YZ^QYY`¥ZZ`Z\_a¥H¥TOML\_¥UXU[[U^VOU]]]YYX  
@HWI-EAS443:3:90:315:1742#0/1  
AGCAGGTCAAATATATTCAATATGGAGAGAATAAAAGAAC  
+HWI-EAS443:3:90:315:1742#0/1  
\_aaVX¥SW\_a¥^aaa]V^\_]\_\_^aTa^aa\_¥aaUWP`SR  
@HWI-EAS443:3:90:31:720#0/1  
CAAATATATTCAATATGGAGAGAATAAAAGAACTGAGAGA  
+HWI-EAS443:3:90:31:720#0/1  
^`\_S`W\_a`a`a]`aab\_Y\_X\_X\_a¥]a`aZPXaa\_a``W  
@HWI-EAS443:3:90:426:1925#0/1  
TCAATATGGAGAGAATAAAAGAACTGAGAGATCTAATGTC  
+HWI-EAS443:3:90:426:1925#0/1  
aa`babb\_Z^`aabbaa[\_baaaaaaa^a`a`a\_aa`a^¥  
@HWI-EAS443:3:90:719:431#0/1  
GTCAAATATATTCAATATGGAGAGAATAAAAGAACTGAGA  
+HWI-EAS443:3:90:719:431#0/1  
[D[a`^VYW^a[Q^`[\_aPN]XV^\_``\_[ZWZT[\_`\_a^  
@HWI-EAS443:3:90:858:1027#0/1  
AAAGCAGGTCAAATATATTCAATATGGAGAGAATAAAAGA  
+HWI-EAS443:3:90:858:1027#0/1  
`bbaabbb\_abb`aabbaabaaaabba`a`^`aaaaaaa  
@HWI-EAS443:3:90:91:1374#0/1  
GCAGGTCAAATATATTCAATATGGAGAGAATAAAAGAACT  
+HWI-EAS443:3:90:91:1374#0/1  
a`^a^JY]^a\_\_R^^¥^[KY\_\_\_\_^\_\_¥VNZ`\_VLU\_\_TX  
@HWI-EAS443:3:91:1347:1902#0/1  
AGCAGGTCAAATATATTCAATATGGAGAGAATAAAAGAAC  
+HWI-EAS443:3:91:1347:1902#0/1  
aa^aabY\_bba`aaaa`aaaabb¥X[¥[aaaaa^a¥[Z^  
@HWI-EAS443:3:91:1404:820#0/1  
AGCAGGTCAAATATATTCAATATGGAGAGAATAAAAGAAC  
+HWI-EAS443:3:91:1404:820#0/1  
ab`\_ab`ababbab`bbaa`babbb[b\_baaaa`aaa\_\_]  
@HWI-EAS443:3:91:1496:683#0/1  
AAGCAGGTCAAATATATTCAATATGGAGAGAATAAAAGAA  
+HWI-EAS443:3:91:1496:683#0/1  
aT[S[a^Nb``[^]¥Yb`\_W[aaab]Xaa`a¥a`aa`aY¥  
@HWI-EAS443:3:91:1595:1746#0/1  
AAATATATTCAATATGGAGAGAATAAAAGAACTGAGAGAT  
+HWI-EAS443:3:91:1595:1746#0/1  
abba`babb^aab\_bba`a\_baaba`aaaa\_a`aaaa``

@HWI-EAS443:3:91:1617:481#0/1  
AATATATTCAATATGGAGAGAATAAAAGAACTGAGAGATC  
+HWI-EAS443:3:91:1617:481#0/1  
Vbbbb`baaa]b\_\_bbab`aabab`a\_ba`]babaabaa^  
@HWI-EAS443:3:91:1665:1364#0/1  
CAAATATATTCAATATGGAGAGAATAAAAGAACTGAGAGA  
+HWI-EAS443:3:91:1665:1364#0/1  
`bbbbbbbbbbbbbbbaabaabbbbbbaabbbb]bbb`bbb  
@HWI-EAS443:3:91:1694:499#0/1  
CAAATATATTCAATATGGAGAGAATAAAAGAACTGAGAGA  
+HWI-EAS443:3:91:1694:499#0/1  
ab^S]\_\_¥aLSXS¥R`]PS`¥^\_^\_]a`Naa^R]0]aT  
@HWI-EAS443:3:91:307:366#0/1  
AATATATTCAATATGGAGAGAATAAAAGAACTGAGAGATC  
+HWI-EAS443:3:91:307:366#0/1  
aaa^aaaa`aaa``a`a\_a]^\_``a\_\_\_\_]\_\_\_\_]\_\_^]^  
@HWI-EAS443:3:91:690:273#0/1  
CAAATATATTCAATATGGAGAGAATAAAAGAACTGAGAGA  
+HWI-EAS443:3:91:690:273#0/1  
`bbba`babbbaababba`baaaaaaaaa`a``a\_`a`a  
@HWI-EAS443:3:91:804:879#0/1  
ATATTCAATATGGAGAGAATAAAAGAACTGAGAGATCTAA  
+HWI-EAS443:3:91:804:879#0/1  
abbbbbabbabbaabab`aba`baaaa`aab`a```aaa  
@HWI-EAS443:3:92:1207:1251#0/1  
CAAATATATTCAATATGGAGAGAATAAAAGAACTGAGAGA  
+HWI-EAS443:3:92:1207:1251#0/1  
a^aaaaa`[0¥Zaa`aaaZ¥[b\_\_aaaa^a\_\_bYPZaY¥  
@HWI-EAS443:3:92:1284:1451#0/1  
AAGCAGGTCAAATATATTCAATATGGAGAGAATAAAAGAA  
+HWI-EAS443:3:92:1284:1451#0/1  
`\_aWabaUaaaba`aaa`W`aa\_aaa¥aaa`^aa`a\_]\_`  
@HWI-EAS443:3:92:1355:657#0/1  
CAAATATATTCAATATGGAGAGAATAAAAGAACTGAGAGA  
+HWI-EAS443:3:92:1355:657#0/1  
abb`bbbabbbaababbaa\_aaaabbabbaaa``aa`\_`\_  
@HWI-EAS443:3:92:1362:904#0/1  
AAATATATTCAATATGGAGAGAATAAAAGAACTGAGAGAT  
+HWI-EAS443:3:92:1362:904#0/1  
abaaab\_`^P```\_aaa^a\_a\_\_a`a¥aa`\_Xaa`a`\_\_  
@HWI-EAS443:3:92:1413:543#0/1  
CAAATATATTCAATATGGAGAGAATAAAAGAACTGAGAGA  
+HWI-EAS443:3:92:1413:543#0/1  
abbabbaabbabababab`b`a^aba`abbaa`bbb`aaa  
@HWI-EAS443:3:92:1445:1713#0/1  
AGCAGGTCAAATATATTCAATATGGAGAGAATAAAAGAAC  
+HWI-EAS443:3:92:1445:1713#0/1  
aa¥aaa\_```ba`aaa`^\_]Xa`a`[\_a\_]aaaa`a\_\_Y  
@HWI-EAS443:3:92:1508:1886#0/1  
GCAGGTCAAATATATTCAATATGGAGAGAATAAAAGAACT

+HWI-EAS443:3:92:1508:1886#0/1  
a`Raa[]Wa\_a\_aa`\_]aa`a\_VU`Ya[]]`\_]Y^[^  
@HWI-EAS443:3:92:1603:1695#0/1  
CAAATATATTCAATATGGAGAGAATAAAAGAACTGAGAGA  
+HWI-EAS443:3:92:1603:1695#0/1  
ab`bbabaaaaababbbbababb\_bb`bbbaa\_baaaaba  
@HWI-EAS443:3:92:217:1485#0/1  
CAAATATATTCAATATGGAGAGAATAAAAGAACTGAGAGA  
+HWI-EAS443:3:92:217:1485#0/1  
a`bbb¥babbabWbaba^^aaaaaaaaaaaa`a`aa\_a\_\_  
@HWI-EAS443:3:92:696:970#0/1  
TTCAATATGGAGAGAATAAAAGAACTGAGAGATCTAATGT  
+HWI-EAS443:3:92:696:970#0/1  
aaaa\_b]aba\_aaa`X`a`aa^`a^a`aaaa\_\_aa\_aaZ  
@HWI-EAS443:3:92:778:672#0/1  
ATTCAATATGGAGAGAATAAAAGAACTGAGAGATCTAATG  
+HWI-EAS443:3:92:778:672#0/1  
¥ab`b`baba¥Z^`\_^bb^aabaaaZ]a[Za^aT\_a^aa  
@HWI-EAS443:3:92:860:1944#0/1  
GTCAAATATATTCAATATGGAGAGAATAAAAGAACTGAGA  
+HWI-EAS443:3:92:860:1944#0/1  
aU`a^`[`a\_aa¥¥Y^`aa`a\_a`¥\_aa\_aa^\_a\_XXWZ  
@HWI-EAS443:3:92:894:1121#0/1  
AGGTCAAATATATTCAATATGGAGAGAATAAAAGAACTGA  
+HWI-EAS443:3:92:894:1121#0/1  
`aa¥abaaa\_a\_aa`\_`a\_aa\_]a^a^\_a`\_^a`\_^]`\_\_  
@HWI-EAS443:3:92:933:1431#0/1  
GTCAAATATATTCAATATGGAGAGAATAAAAGAACTGAGA  
+HWI-EAS443:3:92:933:1431#0/1  
¥TYUZ^aaa`\_`aab\_b\_¥¥TbVaU¥Vba`aaaa`aa\_  
@HWI-EAS443:3:93:1154:1709#0/1  
AAAGCAGGTCAAATATATTCAATATGGAGAGAATAAAAGA  
+HWI-EAS443:3:93:1154:1709#0/1  
aaa]`aa\_¥]aa\_a`a^a\_^]aaaa`\_]¥TV¥a^a\_\_\_^\_  
@HWI-EAS443:3:93:1208:186#0/1  
ATTCAATATGGAGAGAATAAAAGAACTGAGAGATCTAATG  
+HWI-EAS443:3:93:1208:186#0/1  
\_¥\_[\_aaabab]b^¥`\_b`aa\_¥¥\_\_baa`\_a\_\_Ua^¥\_b  
@HWI-EAS443:3:93:1247:701#0/1  
ATTCAATATGGAGAGAATAAAAGAACTGAGAGATCTAATG  
+HWI-EAS443:3:93:1247:701#0/1  
aa`a`bb`babaa\_bab`aaaaaaaaZaa\_aabaa]a\_\_bb  
@HWI-EAS443:3:93:1295:1475#0/1  
CAGGTCAAATATATTCAATATGGAGAGAATAAAAGAACTG  
+HWI-EAS443:3:93:1295:1475#0/1  
aaa^X¥aaaaaa¥aaa^V`¥abbaa[\_]\_a`a`\_\_^aVZa  
@HWI-EAS443:3:93:1575:981#0/1  
AAATATATTCAATATGGAGAGAATAAAAGAACTGAGAGAT  
+HWI-EAS443:3:93:1575:981#0/1  
a`baaa`a``aaa`aa`\_a`aaaa`^aa¥`\_`aa`\_\_YXZ

@HWI-EAS443:3:93:201:211#0/1  
AAGCAGGTCAAATATATTCAATATGGAGAGAATAAAAGAA  
+HWI-EAS443:3:93:201:211#0/1  
`Z\_aaa^U`a`a\_¥aWa`\_\_[\`aa\_^aZaWU`\_`WY^¥[  
@HWI-EAS443:3:93:256:1359#0/1  
AGCAGGTCAAATATATTCAATATGGAGAGAATAAAAGAAC  
+HWI-EAS443:3:93:256:1359#0/1  
``^SXaY\_`[Ta[\`aa\_¥^a\_a`a`\_[^a`¥a`\_\_]]\_]  
@HWI-EAS443:3:93:312:324#0/1  
ATTCAATATGGAGAGAATAAAAGAACTGAGAGATCTAATG  
+HWI-EAS443:3:93:312:324#0/1  
^bbbabbbba^aaaab`ab\_``]a`a`a`aa[^``¥`a  
@HWI-EAS443:3:93:342:1191#0/1  
ATTCAATATGGAGAGAATAAAAGAACTGAGAGATCTAATG  
+HWI-EAS443:3:93:342:1191#0/1  
\_ZZa]V\_`^[[¥¥\_a^]aaaa\_TS`][VZ`a```][`M¥a  
@HWI-EAS443:3:93:414:782#0/1  
CAAATATATTCAATATGGAGAGAATAAAAGAACTGAGAGA  
+HWI-EAS443:3:93:414:782#0/1  
`b\_XbbZX\_]a`¥b`aaaa\_]a`aa^`R`a¥a\_a`a`  
@HWI-EAS443:3:93:452:1839#0/1  
CAAATATATTCAATATGGAGAGAATAAAAGAACTGAGAGA  
+HWI-EAS443:3:93:452:1839#0/1  
a`¥aaY]aVWX¥aaa`[J`a\_`a`a`a\_Z^a`\_^[[`\_]\_  
@HWI-EAS443:3:93:521#0/1  
CAAATATATTCAATATGGAGAGAATAAAAGAACTGAGAGA  
+HWI-EAS443:3:93:521#0/1  
aa`baab`aaaa`a`aaaa`b\_`a`aaaa`a\_aaaa`a\_  
@HWI-EAS443:3:93:568:1174#0/1  
AAATATATTCAATATGGAGAGAATAAAAGAACTGAGAGAT  
+HWI-EAS443:3:93:568:1174#0/1  
aaaaaa\_`a`a\_a^aa`\_a\_a^\_``\_``^^``\_`^`\_`^`\_  
@HWI-EAS443:3:93:585:979#0/1  
GTCAAATATATTCAATATGGAGAGAATAAAAGAACTGAGA  
+HWI-EAS443:3:93:585:979#0/1  
`U]aaa`¥0Ya\_\_`aaW\_a`^`\_`^`\_`a[]\_\_^[\_\_\_\_^\_  
@HWI-EAS443:3:93:718:1181#0/1  
GTCAAATATATTCAATATGGAGAGAATAAAAGAACTGAGA  
+HWI-EAS443:3:93:718:1181#0/1  
PXa`[V\_bTQ]b\_\_b^bbb]\_baab¥`abb`bYFYabaab  
@HWI-EAS443:3:93:733:687#0/1  
TATATTCAATATGGAGAGAATAAAAGAACTGAGAGATCTA  
+HWI-EAS443:3:93:733:687#0/1  
`baaabbb`¥b`a`\_a`bba\_ba`^`a]aa\_a`a]¥]a  
@HWI-EAS443:3:93:843:1009#0/1  
CAAATATATTCAATATGGAGAGAATAAAAGAACTGAGAGA  
+HWI-EAS443:3:93:843:1009#0/1  
aaaaabaab\_\_a`aa`a`a`\_``^a\_`\_]aa`\_\_`  
@HWI-EAS443:3:93:920:875#0/1  
GTCAAATATATTCAATATGGAGAGAATAAAAGAACTGAGA

+HWI-EAS443:3:93:920:875#0/1  
aSabaaabb`\_`aaab^bba`a`b^aaaa\_`a`a`\_`a`a`  
@HWI-EAS443:3:93:943:176#0/1  
GTCAAATATATTCAATATGGAGAGAATAAAAGAACTGAGA  
+HWI-EAS443:3:93:943:176#0/1  
[S]0]b^^I[XQYa`NZ]RL]¥aZN¥I[XRZZU[BBBBB  
@HWI-EAS443:3:93:985:74#0/1  
CAAATATATTCAATATGGAGAGAATAAAAGAACTGAGAGA  
+HWI-EAS443:3:93:985:74#0/1  
aabab\_bb`baa`babbbab`b`\_b`\_a`\_`^\_aa`a\_a\_  
@HWI-EAS443:3:94:1011:758#0/1  
ATTC AATATGGAGAGAATAAAAGAACTGAGAGATCTAATG  
+HWI-EAS443:3:94:1011:758#0/1  
Z¥Y\_HRYZ\_b^`T\_Z]\_`^ZZ\_R]^`Za\_a`X]Y]\_aa  
@HWI-EAS443:3:94:1048:44#0/1  
ATATATTCAATATGGAGAGAATAAAAGAACTGAGAGATCT  
+HWI-EAS443:3:94:1048:44#0/1  
a\_aa^`aa\_baabb`b^b[aa`\_`aa]^`aa`\_`a\_a^a  
@HWI-EAS443:3:94:1088:427#0/1  
CAAATATATTCAATATGGAGAGAATAAAAGAACTGAGAGA  
+HWI-EAS443:3:94:1088:427#0/1  
a`bbbbbbbbb`\_`bbbaaab\_bbabaabbbbaabaabaaa  
@HWI-EAS443:3:94:1220:936#0/1  
CAAATATATTCAATATGGAGAGAATAAAAGAACTGAGAGA  
+HWI-EAS443:3:94:1220:936#0/1  
abbbbbbabbbbabbbbababaabaaaabaa`abababa  
@HWI-EAS443:3:94:1280:1411#0/1  
AATATATTCAATATGGAGAGAATAAAAGAACTGAGAGATC  
+HWI-EAS443:3:94:1280:1411#0/1  
`^a\_a\_]a`aa`[aaaUbbUaa\_a\_XV[`^`W^aa`^^^G  
@HWI-EAS443:3:94:1312:1491#0/1  
AATATATTCAATATGGAGAGAATAAAAGAACTGAGAGATC  
+HWI-EAS443:3:94:1312:1491#0/1  
aaaa`aaa`aba`\_a\_\_baa\_\_\_a\_\_\_`a`^^T  
@HWI-EAS443:3:94:1332:510#0/1  
CAAATATATTCAATATGGAGAGAATAAAAGAACTGAGAGA  
+HWI-EAS443:3:94:1332:510#0/1  
a`[`bababaaa^b]^baab`aa^`ab\_aaa^^baaa`a  
@HWI-EAS443:3:94:138:126#0/1  
CAAATATATTCAATATGGAGAGAATAAAAGAACTGAGAGA  
+HWI-EAS443:3:94:138:126#0/1  
aba]bVb]aaR][a]b^a`^PaZYaVa\_a[Ya^¥`]S^\_Z  
@HWI-EAS443:3:94:1441:70#0/1  
CAAATATATTCAATATGGAGAGAATAAAAGAACTGAGAGA  
+HWI-EAS443:3:94:1441:70#0/1  
aabbbbb`bb`babbbbaa`baabababbaa\_baaaaba  
@HWI-EAS443:3:94:1502:1858#0/1  
CAAATATATTCAATATGGAGAGAATAAAAGAACTGAGAGA  
+HWI-EAS443:3:94:1502:1858#0/1  
¥baaab`baa`Yaba`X`a^a^\_a\_a^a\_aaW\_aa\_^`



@HWI-EAS443:3:94:1600:1710#0/1  
ATTCAATATGGAGAGAATAAAAGAACTGAGAGATCTAATG  
+HWI-EAS443:3:94:1600:1710#0/1  
\_ab]a^aY\_b`IUPa\_`a^^a^¥]\_Saa\_a\_\_Y¥Ya\_Ga¥  
@HWI-EAS443:3:94:1609:434#0/1  
ATTCAATATGGAGAGAATAAAAGAACTGAGAGATCTAATG  
+HWI-EAS443:3:94:1609:434#0/1  
`b^`^`][`Yb¥aIaU\_^`][`XU\_Ua\_^a\_¥`\_IaaaXa  
@HWI-EAS443:3:94:1786:2001#0/1  
CAAATATATTCAATATGGAGAGAATAAAAGAACTGAGAGA  
+HWI-EAS443:3:94:1786:2001#0/1  
a\_K\_a[b¥aaa`aa`a`Za\_a`\_Y`[a`\_QWY^`aa\_\_  
@HWI-EAS443:3:94:183:991#0/1  
AGCAGGTCAAATATATTCAATATGGAGAGAATAAAAGAAC  
+HWI-EAS443:3:94:183:991#0/1  
U¥\_W\_`][aYU\_^abbb^aaZ]]HRFXV¥W^^abaa`YVG  
@HWI-EAS443:3:94:312:1341#0/1  
ATATATTCAATATGGAGAGAATAAAAGAACTGAGAGATCT  
+HWI-EAS443:3:94:312:1341#0/1  
aaaaa[\_a\_aa¥a[¥0\_\_a]RaaaX[¥]\_¥]¥`^``YY^  
@HWI-EAS443:3:94:321:1148#0/1  
AAGCAGGTCAAATATATTCAATATGGAGAGAATAAAAGAA  
+HWI-EAS443:3:94:321:1148#0/1  
abbbaaa)`a^\_`Qa`aa¥]aaaa\_`a^a]\_aaa\_\_`\_\_  
@HWI-EAS443:3:94:367:249#0/1  
CAAATATATTCAATATGGAGAGAATAAAAGAACTGAGAGA  
+HWI-EAS443:3:94:367:249#0/1  
aa[X`T`aaa\_`aaa]a\_`Ya\_Y`^[^^¥^]U^^[\_^\_Z  
@HWI-EAS443:3:94:577:1958#0/1  
ATTCAATATGGAGAGAATAAAAGAACTGAGAGATCTAATG  
+HWI-EAS443:3:94:577:1958#0/1  
\_\_`aaY¥`a^[[ba`][`a^bb`\_]aa`b`a\_bX0\_a`\_\_  
@HWI-EAS443:3:94:696:50#0/1  
AAATATATTCAATATGGAGAGAATAAAAGAACTGAGAGAT  
+HWI-EAS443:3:94:696:50#0/1  
a^[`P`V^`W¥W`Ta[^¥\_Y`S^[X^V]ZWZHW`^][^ZW  
@HWI-EAS443:3:94:893:371#0/1  
GTCAAATATATTCAATATGGAGAGAATAAAAGAACTGAGA  
+HWI-EAS443:3:94:893:371#0/1  
a^¥aa`\_`^^`^]^^\_\_aa`[a]\_]^^`^`\_]`][^][^]]  
@HWI-EAS443:3:94:900:1531#0/1  
AAATATATTCAATATGGAGAGAATAAAAGAACTGAGAGAT  
+HWI-EAS443:3:94:900:1531#0/1  
aaaa\_aaaa`\_]aaaa\_a\_a\_\_a\_\_a`\_a^[\_\_\_\_\_a\_\_\_\_  
@HWI-EAS443:3:94:944:762#0/1  
AGCAGGTCAAATATATTCAATATGGAGAGAATAAAAGAAC  
+HWI-EAS443:3:94:944:762#0/1  
a`a\_]]]aaaa\_]b]aa\_W\_a`aa`^^^a^aa`\_`^\_`^  
@HWI-EAS443:3:95:1075:1682#0/1  
AAGCAGGTCAAATATATTCAATATGGAGAGAATAAAAGAA

+HWI-EAS443:3:95:1075:1682#0/1  
`aaaa`a¥]]^aba\_Raa`T\_a^`aPZ`aa\_^a^X]\_^]]  
@HWI-EAS443:3:95:1128:881#0/1  
ATTCAATATGGAGAGAATAAAAGAACTGAGAGATCTAATG  
+HWI-EAS443:3:95:1128:881#0/1  
`bbb`^b\_ab`b]a`b^b^ab¥a\_aba`\_a]YYa^Xa\_  
@HWI-EAS443:3:95:1286:890#0/1  
ATTCAATATGGAGAGAATAAAAGAACTGAGAGATCTAATG  
+HWI-EAS443:3:95:1286:890#0/1  
^`^a^bba`a\_``¥b\_]abb\_`bX\_bab\_b`b`babb  
@HWI-EAS443:3:95:1364:983#0/1  
CAAATATATTCAATATGGAGAGAATAAAAGAACTGAGAGA  
+HWI-EAS443:3:95:1364:983#0/1  
abaaabbaa`U¥ababbaa`aabaabab^a]bbbaaba  
@HWI-EAS443:3:95:1371:1026#0/1  
CAAATATATTCAATATGGAGAGAATAAAAGAACTGAGAGA  
+HWI-EAS443:3:95:1371:1026#0/1  
abbaa^aba^WaZbb`ba`a\_abaababb`\_ba`baaaaa  
@HWI-EAS443:3:95:222:462#0/1  
AAATATATTCAATATGGAGAGAATAAAAGAACTGAGAGAT  
+HWI-EAS443:3:95:222:462#0/1  
aaX\_Ra^a`]RP`¥`¥[[¥\_\_¥\_\_a¥SNVZ]W^aP^]\_I]  
@HWI-EAS443:3:95:409:701#0/1  
CAAATATATTCAATATGGAGAGAATAAAAGAACTGAGAGA  
+HWI-EAS443:3:95:409:701#0/1  
ab^¥W^¥[Y\_YXaa]a¥PXSa\_`^`a\_a`a]`]aa^`\_  
@HWI-EAS443:3:95:471:418#0/1  
GCAGGTCAAATATATTCAATATGGAGAGAATAAAAGAACT  
+HWI-EAS443:3:95:471:418#0/1  
^a]``^Waababb^^a`]a`^aaZa`a\_\_a`a\_abY\_¥\_  
@HWI-EAS443:3:95:474:1313#0/1  
CAAATATATTCAATATGGAGAGAATAAAAGAACTGAGAGA  
+HWI-EAS443:3:95:474:1313#0/1  
\_a`]bbb\_`b`^`a\_a`bababbbb^`ba\_`]bba`ba  
@HWI-EAS443:3:95:878:558#0/1  
CAGGTCAAATATATTCAATATGGAGAGAATAAAAGAACTG  
+HWI-EAS443:3:95:878:558#0/1  
^V\_\_U\_YaYUX`\_^]S\_]`]^\_T¥\_Xb``]X\_Z]b`[¥`a  
@HWI-EAS443:3:95:896:455#0/1  
ATTCAATATGGAGAGAATAAAAGAACTGAGAGATCTAATG  
+HWI-EAS443:3:95:896:455#0/1  
`ab`a^a^abb\_a\_`Zaba`a`a\_b\_abab]`]`\_a\_]aa  
@HWI-EAS443:3:96:1039:1049#0/1  
CAAATATATTCAATATGGAGAGAATAAAAGAACTGAGAGA  
+HWI-EAS443:3:96:1039:1049#0/1  
a\_aaVTaabbba`a`aV\_XYSO\_a`a[^[^`a\_^\_\_^`\_  
@HWI-EAS443:3:96:1088:935#0/1  
TCAATATGGAGAGAATAAAAGAACTGAGAGATCTAATGTC  
+HWI-EAS443:3:96:1088:935#0/1  
a``a`aaa^a¥a\_aaaa``^a^`\_`\_\_^`^a`X``][

@HWI-EAS443:3:96:1182:1759#0/1  
AATATATTCAATATGGAGAGAATAAAAGAACTGAGAGATC  
+HWI-EAS443:3:96:1182:1759#0/1  
\_aa^Q`bba\_a`aaaa``\_a`a\_a\_a`a\_\_aa\_``^V^  
@HWI-EAS443:3:96:1202:1693#0/1  
AGCAGGTCAAATATATTCAATATGGAGAGAATAAAAGAAC  
+HWI-EAS443:3:96:1202:1693#0/1  
^`K`T[QZ\_Y]\_aa^`aaaa]`\_Y]]`YNZa^[\_`a]Z`  
@HWI-EAS443:3:96:123:1085#0/1  
ATATTCAATATGGAGAGAATAAAAGAACTGAGAGATCTAA  
+HWI-EAS443:3:96:123:1085#0/1  
``¥bbbaaa`a`]baa`babaaab`aWa\_aaab\_\_]aa^  
@HWI-EAS443:3:96:1267:694#0/1  
AATATATTCAATATGGAGAGAATAAAAGAACTGAGAGATC  
+HWI-EAS443:3:96:1267:694#0/1  
aaba`aaba`aa`baa`ba`\_\_a`\_`a\_\_`Z`a`\_aa]^¥  
@HWI-EAS443:3:96:1418:506#0/1  
CAAATATATTCAATATGGAGAGAATAAAAGAACTGAGAGA  
+HWI-EAS443:3:96:1418:506#0/1  
abbaba\_aaba`b¥aab\_aabLa\_aaa]\_\_\_baa`\_aa  
@HWI-EAS443:3:96:1547:1161#0/1  
ATTCAATATGGAGAGAATAAAAGAACTGAGAGATCTAATG  
+HWI-EAS443:3:96:1547:1161#0/1  
abba^\_`aba\_^b`b¥abba`\_\_`bTbbbbaaa`Kaa`bb  
@HWI-EAS443:3:96:1601:468#0/1  
AGCAGGTCAAATATATTCAATATGGAGAGAATAAAAGAAC  
+HWI-EAS443:3:96:1601:468#0/1  
\_RPV\_a^P\_[¥YV[^¥\_`aaa^¥`^\_aYa][ ]Z\_Y`a[XT  
@HWI-EAS443:3:96:1677:234#0/1  
AAGCAGGTCAAATATATTCAATATGGAGAGAATAAAAGAA  
+HWI-EAS443:3:96:1677:234#0/1  
[W`ba¥¥T[\_aaaLb`bbaa]a^]WY^¥Ra^]a`\_`\_W[a  
@HWI-EAS443:3:96:30:428#0/1  
CAAATATATTCAATATGGAGAGAATAAAAGAACTGAGAGA  
+HWI-EAS443:3:96:30:428#0/1  
^aba^]aa`aV]bY`aaabXba\_aXVV[\_^Z0]\_ZX\_]Y  
@HWI-EAS443:3:96:449:846#0/1  
CAAATATATTCAATATGGAGAGAATAAAAGAACTGAGAGA  
+HWI-EAS443:3:96:449:846#0/1  
ab\_^aaaaa\_]\_aa¥aaa\_a`b``\_¥¥[V\_\_¥\_a`a[\_\_\_\_  
@HWI-EAS443:3:96:523:1679#0/1  
ATTCAATATGGAGAGAATAAAAGAACTGAGAGATCTAATG  
+HWI-EAS443:3:96:523:1679#0/1  
V]Xbbbb\_\_babaU```bbbb`a\_Q[^]aaa¥a]U`a`\_a  
@HWI-EAS443:3:96:70:1888#0/1  
AAGCAGGTCAAATATATTCAATATGGAGAGAATAAAAGAA  
+HWI-EAS443:3:96:70:1888#0/1  
`\_SUZY^Uaa]UZUZ^^UY¥[L0¥WUU]KPPQX]TVRV]V  
@HWI-EAS443:3:96:807:103#0/1  
CAAATATATTCAATATGGAGAGAATAAAAGAACTGAGAGA

+HWI-EAS443:3:96:807:103#0/1  
a`ba\_baab`aababbbbab\_b\_aa`aaba`abaaaaaa  
@HWI-EAS443:3:96:97:914#0/1  
CAAATATATTCAATATGGAGAGAATAAAAGAACTGAGAGA  
+HWI-EAS443:3:96:97:914#0/1  
a``^`baaaa^¥`aabaab`^aa`a\_aa^[[a`a`\_\_\_\_  
@HWI-EAS443:3:97:106:1571#0/1  
CAGGTCAAATATATTCAATATGGAGAGAATAAAAGAACTG  
+HWI-EAS443:3:97:106:1571#0/1  
abbb\_abbbbbbbbb\_bbbaaaa`abbbbaabbaab``b  
@HWI-EAS443:3:97:1210:1513#0/1  
ATATATTCAATATGGAGAGAATAAAAGAACTGAGAGATCT  
+HWI-EAS443:3:97:1210:1513#0/1  
abab]ab`a`baabbab\_b^\_aa`a\_ba`\_a`aaaa\_aYa  
@HWI-EAS443:3:97:1231:1978#0/1  
AATATATTCAATATGGAGAGAATAAAAGAACTGAGAGATC  
+HWI-EAS443:3:97:1231:1978#0/1  
a`aZY]a`[VJ\_^Ra\_]a]a^``a^¥\_¥\_U\_\_\_\_^\_\_¥VD  
@HWI-EAS443:3:97:132:925#0/1  
GTCAAATATATTCAATATGGAGAGAATAAAAGAACTGAGA  
+HWI-EAS443:3:97:132:925#0/1  
a`a`aaaa\_Z``[`aaaaaa`\_a]``^a\_]`^`^`\_\_`\_\_  
@HWI-EAS443:3:97:186:800#0/1  
AATATATTCAATATGGAGAGAATAAAAGAACTGAGAGATC  
+HWI-EAS443:3:97:186:800#0/1  
W¥]Z\_aa]bb\_b``abPb^a`¥YR[OX`¥aI\_\_\_\_Yaa\_^P  
@HWI-EAS443:3:97:372:956#0/1  
GGTCAAATATATTCAATATGGAGAGAATAAAAGAACTGAG  
+HWI-EAS443:3:97:372:956#0/1  
a`FWab`ZX]``aaY\_aa\_[`a¥a`Qa`^TZaZUO[\_Q``  
@HWI-EAS443:3:97:417:231#0/1  
ATTCAATATGGAGAGAATAAAAGAACTGAGAGATCTAATG  
+HWI-EAS443:3:97:417:231#0/1  
abaRW^b¥aa\_W[`a^`\_a`\_\_^X¥^Z]T^\_U\_]Z^\_  
@HWI-EAS443:3:97:445:830#0/1  
CAAATATATTCAATATGGAGAGAATAAAAGAACTGAGAGA  
+HWI-EAS443:3:97:445:830#0/1  
abbababbbbaaabbbbaab\_baabaababaaaaaba`a  
@HWI-EAS443:3:97:486:1445#0/1  
AAGCAGGTCAAATATATTCAATATGGAGAGAATAAAAGAA  
+HWI-EAS443:3:97:486:1445#0/1  
XZ\_\_baa``aabaabaababab`abaWaaa]aaa¥`a\_aa  
@HWI-EAS443:3:97:548:1975#0/1  
ATTCAATATGGAGAGAATAAAAGAACTGAGAGATCTAATG  
+HWI-EAS443:3:97:548:1975#0/1  
a^¥bS^``¥^[UXZQZYW]¥`[\_a^W¥`\_a\_a^]T]\_\_\_\_  
@HWI-EAS443:3:97:651:764#0/1  
ATTCAATATGGAGAGAATAAAAGAACTGAGAGATCTAATG  
+HWI-EAS443:3:97:651:764#0/1  
`bba\_abaaba`Za^[baa`aa^\_\_`^`a^\_`^`\_a^aa

@HWI-EAS443:3:97:74:1060#0/1  
CAAATATATTCAATATGGAGAGAATAAAAGAACTGAGAGA  
+HWI-EAS443:3:97:74:1060#0/1  
¥¥VVV\_WQ¥` [WYaa^] ^S[] Z\_`^\_[^\_Y\_]W^` ]\_a`  
@HWI-EAS443:3:97:759:149#0/1  
ATTCAATATGGAGAGAATAAAAGAACTGAGAGATCTAATG  
+HWI-EAS443:3:97:759:149#0/1  
abbaa\_bbbbab`a`aaa\_aaa```aa`aa`\_a¥aa`\_`\_`  
@HWI-EAS443:3:97:877:1113#0/1  
AGCAGGTCAAATATATTCAATATGGAGAGAATAAAAGAAC  
+HWI-EAS443:3:97:877:1113#0/1  
Y`^\_ ]``Z`^`¥`¥bbbaa`b^bb`Ya^b[aab`]¥a`T`  
@HWI-EAS443:3:97:937:919#0/1  
GTCAAATATATTCAATATGGAGAGAATAAAAGAACTGAGA  
+HWI-EAS443:3:97:937:919#0/1  
^N]W]^```^aa\_a`\_T^UELQJZZ`¥\_W¥XR]T``W^U  
@HWI-EAS443:3:98:1213:700#0/1  
ATATTCAATATGGAGAGAATAAAAGAACTGAGAGATCTAA  
+HWI-EAS443:3:98:1213:700#0/1  
aaabbaaaaa`ab^a```aaab^^a\_aWab`a^a`\_Yaaa  
@HWI-EAS443:3:98:1400:203#0/1  
AAGCAGGTCAAATATATTCAATATGGAGAGAATAAAAGAA  
+HWI-EAS443:3:98:1400:203#0/1  
aWa`[Z]^T`a``\_a\_a\_]\_a^aa¥\_]Wa\_]a\_]^^¥\_  
@HWI-EAS443:3:98:1707:213#0/1  
CAAATATATTCAATATGGAGAGAATAAAAGAACTGAGAGA  
+HWI-EAS443:3:98:1707:213#0/1  
^^ab¥`a`b^¥U`bab¥KXVZb`\_aaaa\_b\_ZS`Q]R]aa  
@HWI-EAS443:3:98:296:600#0/1  
ATTCAATATGGAGAGAATAAAAGAACTGAGAGATCTAATG  
+HWI-EAS443:3:98:296:600#0/1  
aaa`\_abaabb\_a`\_```aaaaa\_aS```aa`\_`^`\_`^``  
@HWI-EAS443:3:98:346:1431#0/1  
AGCAGGTCAAATATATTCAATATGGAGAGAATAAAAGAAC  
+HWI-EAS443:3:98:346:1431#0/1  
YTG\_bb``\_baaa[G[ZW^^[^aXaaa`T\_QWXa\_``]\_ ]\_  
@HWI-EAS443:3:98:561:821#0/1  
AATATATTCAATATGGAGAGAATAAAAGAACTGAGAGATC  
+HWI-EAS443:3:98:561:821#0/1  
aaaaba`aaa\_aaaaa^`\_a``a``\_``\_``\_aa`aa`\_a\_  
@HWI-EAS443:3:98:593:1736#0/1  
ATTCAATATGGAGAGAATAAAAGAACTGAGAGATCTAATG  
+HWI-EAS443:3:98:593:1736#0/1  
abbbabaabb^baX[aaaaabaa`aabaa`^aaaaba`a`  
@HWI-EAS443:3:98:603:236#0/1  
GCAGGTCAAATATATTCAATATGGAGAGAATAAAAGAACT  
+HWI-EAS443:3:98:603:236#0/1  
aaaab\_abaaaababba`\_aaaba`a`b`aaa`aaa^`Z\_  
@HWI-EAS443:3:98:807:1824#0/1  
AGCAGGTCAAATATATTCAATATGGAGAGAATAAAAGAAC

+HWI-EAS443:3:98:807:1824#0/1  
aaaa`b\_\_ab`aa¥[aaa`\_a`a¥^[^]Zaaa`a^^¥\_]  
@HWI-EAS443:3:98:839:632#0/1  
AGCAGGTCAAATATATTCAATATGGAGAGAATAAAAGAAC  
+HWI-EAS443:3:98:839:632#0/1  
Y`]¥a``\_a\_baaa`\_bab`a\_a\_bb]\_aa^`bab\_aaa`R  
@HWI-EAS443:3:98:988:582#0/1  
AAGCAGGTCAAATATATTCAATATGGAGAGAATAAAAGAA  
+HWI-EAS443:3:98:988:582#0/1  
aab``]a``aaaa^aYaaa^aaaabbYa]a¥`^\_a`^\_a`  
@HWI-EAS443:3:99:1003:595#0/1  
AATATATTCAATATGGAGAGAATAAAAGAACTGAGAGATC  
+HWI-EAS443:3:99:1003:595#0/1  
ZV]^\_W¥\_a``¥]\_b\_Va¥a\_P]aZTU[ZR]Y]X^X`^]¥  
@HWI-EAS443:3:99:1380:1651#0/1  
CAAATATATTCAATATGGAGAGAATAAAAGAACTGAGAGA  
+HWI-EAS443:3:99:1380:1651#0/1  
Lbb]Z`^\_bba`b``ab`Zba\_baa`aabbbbbbbb`bab  
@HWI-EAS443:3:99:1748:94#0/1  
AAGCAGGTCAAATATATTCAATATGGAGAGAATAAAAGAA  
+HWI-EAS443:3:99:1748:94#0/1  
aaaaab`aaaaabaa^baa``aab`YK[]a^`\_a\_]\_^\_  
@HWI-EAS443:3:99:306:1808#0/1  
TTCAATATGGAGAGAATAAAAGAACTGAGAGATCTAATGT  
+HWI-EAS443:3:99:306:1808#0/1  
`ZX[XRZRb^ZX^ZQa`aaZTa¥P¥WV]W[\_]^IX^P[\_B  
@HWI-EAS443:3:99:575:923#0/1  
GTCAAATATATTCAATATGGAGAGAATAAAAGAACTGAGA  
+HWI-EAS443:3:99:575:923#0/1  
aaaaa]a`baaaaa\_\_aba\_a`a^aa`\_a`aaa`aa`^a  
@HWI-EAS443:3:99:632:1695#0/1  
AATATATTCAATATGGAGAGAATAAAAGAACTGAGAGATC  
+HWI-EAS443:3:99:632:1695#0/1  
aaaa`Q^aY`a\_aa````Za^a]baa`a¥aaa\_a\_a¥¥\_\_  
@HWI-EAS443:3:99:692:710#0/1  
CAAATATATTCAATATGGAGAGAATAAAAGAACTGAGAGA  
+HWI-EAS443:3:99:692:710#0/1  
abbbbaabbbbbbababbbbababaababaabaa`bbbbaa`  
@HWI-EAS443:3:99:776:469#0/1  
AATATATTCAATATGGAGAGAATAAAAGAACTGAGAGATC  
+HWI-EAS443:3:99:776:469#0/1  
ab^[`aaab^aaaaba\_`Xbbab¥a`a\_\_a`\_a\_a^b^aY  
@HWI-EAS443:3:99:833:1446#0/1  
GTCAAATATATTCAATATGGAGAGAATAAAAGAACTGAGA  
+HWI-EAS443:3:99:833:1446#0/1  
a\_`aaaaaa`aa`aab`aaa`a\_a`aaa`aa`\_\_^\_a`\_a  
@HWI-EAS443:3:99:869:398#0/1  
AAATATATTCAATATGGAGAGAATAAAAGAACTGAGAGAT  
+HWI-EAS443:3:99:869:398#0/1  
aaaaaaaaba`aaabb`\_b`a\_aaaaS`a[a^aaaa`a^`

@HWI-EAS443:3:99:947:531#0/1  
GCAGGTCAAATATATTCAATATGGAGAGAATAAAAGAACT  
+HWI-EAS443:3:99:947:531#0/1  
aaabaTaaaaaaa`aa`a`a\_aba^a^a^\_aa` `` `^\_Ya  
@HWI-EAS443:3:9:1029:1183#0/1  
AAGCAGGTCAAATATATTCAATATGGAGAGAATAAAAGAA  
+HWI-EAS443:3:9:1029:1183#0/1  
aaa`\_a¥\_aaaa`a\_\_\_\_`\_`\_a\_^]a]a[`\_\_\_\_\_^^  
@HWI-EAS443:3:9:103:1781#0/1  
GTCAAATATATTCAATATGGAGAGAATAAAAGAACTGAGA  
+HWI-EAS443:3:9:103:1781#0/1  
aY\_`]]YVZ[¥]¥K\_XT[[¥]`Z^[]]YVWYZYZWVHYVW  
@HWI-EAS443:3:9:1089:1843#0/1  
CAAATATATTCAATATGGAGAGAATAAAAGAACTGAGAGA  
+HWI-EAS443:3:9:1089:1843#0/1  
]bW`P`ZSbb`bab¥bXabbb]\_`bbabb`^b`aabWb`b  
@HWI-EAS443:3:9:1314:1116#0/1  
AATATATTCAATATGGAGAGAATAAAAGAACTGAGAGATC  
+HWI-EAS443:3:9:1314:1116#0/1  
^`\_Xa^\_a]bbbbbb^a]a\_ba\_bbaa`baa[aaabab\_a]  
@HWI-EAS443:3:9:1648:1170#0/1  
GTCAAATATATTCAATATGGAGAGAATAAAAGAACTGAGA  
+HWI-EAS443:3:9:1648:1170#0/1  
`\_\_aa`a`\_]a`^\_\_a^aaa\_\_]a[]`\_`\_^\_Y^[\_^^\_]`  
@HWI-EAS443:3:9:309:195#0/1  
CAAATATATTCAATATGGAGAGAATAAAAGAACTGAGAGA  
+HWI-EAS443:3:9:309:195#0/1  
aabbbbbbababbababbaabaa``aaaaab`a^aaaa\_a`  
@HWI-EAS443:3:9:610:376#0/1  
CAAATATATTCAATATGGAGAGAATAAAAGAACTGAGAGA  
+HWI-EAS443:3:9:610:376#0/1  
abbb`ba`bbaaababbb\_a\_a[aaaa`aa`\_`\_a`a`a^  
@HWI-EAS443:3:9:673:1328#0/1  
CAAATATATTCAATATGGAGAGAATAAAAGAACTGAGAGA  
+HWI-EAS443:3:9:673:1328#0/1  
aa^TSZNSaaa[``JQ^\_¥OL[FQU[\_]JNS[TY¥]JP¥B  
@HWI-EAS443:3:9:747:394#0/1  
AGCAGGTCAAATATATTCAATATGGAGAGAATAAAAGAAC  
+HWI-EAS443:3:9:747:394#0/1  
ab`bbaNaaa`b\_a`aa`\_ababba\_b]a]`aaaa\_\_`[  
@HWI-EAS443:3:9:773:1010#0/1  
AAGCAGGTCAAATATATTCAATATGGAGAGAATAAAAGAA  
+HWI-EAS443:3:9:773:1010#0/1  
a`^`aaa]aa`aa`aa\_aaaa^aa^a`\_`\_a`\_`\_`\_`  
@HWI-EAS443:3:9:803:219#0/1  
CAAATATATTCAATATGGAGAGAATAAAAGAACTGAGAGA  
+HWI-EAS443:3:9:803:219#0/1  
abbbbbbbaabbbabbbbabababbbbbbbaab`abbbaba  
@HWI-EAS443:3:9:978:1613#0/1  
GTCAAATATATTCAATATGGAGAGAATAAAAGAACTGAGA

+HWI-EAS443:3:9:978:1613#0/1  
aa`bbaaaaaa`a`b\_aaaa`\_aaaaaaaa\_a]a\_\_`\_  
@HWI-EAS443:3:9:995:42#0/1  
CAAATATATTCAATATGGAGAGAATAAAAGAACTGAGAGA  
+HWI-EAS443:3:9:995:42#0/1  
`bbababbbbbbbbbbbbbbb`bbbbabb`babbbabab  
@HWI-EAS443:3:70:748:607#0/1  
CGGCGAAAGCACGCAAACCATTTGAATGGATGTCAATCCG  
+HWI-EAS443:3:70:748:607#0/1  
a]]a[aaRaaTHN][L^bb]^Z\_\_YW¥S¥\_ZTYNTUSN[P  
@HWI-EAS443:3:54:601:744#0/1  
GATGGCGAAAGCAGGCAAACCATTTGAATGGATGTCAATT  
+HWI-EAS443:3:54:601:744#0/1  
`a¥aa\_VUZa]SYa¥W]]SXXS\_UNXHP]`X]W[BBBBBB  
@HWI-EAS443:3:91:93:566#0/1  
GGCGAAAGCAGGCAAACCATTTGAATGGATGGCAATCCGA  
+HWI-EAS443:3:91:93:566#0/1  
a¥TT]¥U]Z[`Y`VTOXXX\_`WYP¥VMUX]BBBBBBBBBB  
@HWI-EAS443:3:19:1599:125#0/1  
AGCGAAAGCAGGCAAACCATTTGAATGGATGTCAATGCGA  
+HWI-EAS443:3:19:1599:125#0/1  
a`b`X\_]bY^Ib[\_a`^bS[aXTa¥aWMYFW\_\_¥LV]Q  
@HWI-EAS443:3:66:889:854#0/1  
GTGCGCGAAAGCAGGCAAACCATTTGAATGGATGTCAATC  
+HWI-EAS443:3:66:889:854#0/1  
a`b`abb`^aa`a[aaaa`aaaa\_a\_a`a`\_aa^¥Z`\_\_  
@HWI-EAS443:3:79:1294:92#0/1  
CGGGCGAAAGCAGGCAAACCATTTGAATGGATGTCAATC  
+HWI-EAS443:3:79:1294:92#0/1  
`aaa`¥``bb¥bbaaabba\_`b\_aaaa`b\_aba]F¥`\_a  
@HWI-EAS443:3:95:1764:1767#0/1  
GTTGGCGAAAGCAGGCAAACCATTTGAATGGATGTCAATC  
+HWI-EAS443:3:95:1764:1767#0/1  
[`^`[Xa\_aa\_^a¥`^`^SUa\_\_ba]a[SYa\_`VP[YTI  
@HWI-EAS443:3:99:789:1342#0/1  
GGCGAAAGCAGGCAAACCATTTNAATGGATGTCAATCCGA  
+HWI-EAS443:3:99:789:1342#0/1  
`¥¥^]a¥Y^]TZb`aVY]^]^¥DR\_QZT\_Y`JDYb^[BBB  
@HWI-EAS443:3:47:560:299#0/1  
GCGAAAGCAGGCAAACCATTTGAATGGATGACAATCCGAC  
+HWI-EAS443:3:47:560:299#0/1  
\_\_K[SSXZa^^\_¥^UOZ`\_\_NSY``a¥\_a\_]`Z[UW¥^]  
@HWI-EAS443:3:56:992:1392#0/1  
GAAATGCTAGCAAGCATTGACCTAAAGTACTTCAATGAAT  
+HWI-EAS443:3:56:992:1392#0/1  
aaaa\_\_^ba¥`ba\_`aaa`]SX\_W¥aaRa`````\_aaa\_\_`  
@HWI-EAS443:3:52:534:381#0/1  
GAAAGCGAAAGCAGGCAAACCATTTGAATGGATGTCAATC  
+HWI-EAS443:3:52:534:381#0/1  
a]¥X\_^\_WZ\_YX]aa\_[]X[S[^\_^¥]aaX]]UQZTTO



@HWI-EAS443:3:67:139:1048#0/1  
AGCGAAAGCAGGCAAACCATTTGANTGGATGTCAATCCGA  
+HWI-EAS443:3:67:139:1048#0/1  
aab\_VYa`aaZaaaa`\_`a\_aa¥DX`Y]]V[\_Z[¥RS  
@HWI-EAS443:3:27:704:378#0/1  
GTGCGAAAGCAGGCAAACCATTTGAATGGATGTCAATCCG  
+HWI-EAS443:3:27:704:378#0/1  
a¥bbb`bbaababba^a\_abaaba\_aaa`a]\_a`^W]^  
@HWI-EAS443:3:6:1099:1316#0/1  
AAAGCAGGCAAACCATTTGAATGGATGTCAATCCGACTAT  
+HWI-EAS443:3:6:1099:1316#0/1  
aabaab`a[aZ`^W\_\_\_[aa¥]\_\_¥S`\_^Sa¥V\_BBBBBB  
@HWI-EAS443:3:7:1606:146#0/1  
ANCGAAAGCAGGCAAACCATTTGAATGGATGTCAATCCGA  
+HWI-EAS443:3:7:1606:146#0/1  
RDUaaa\_a]aU`V¥S\_¥\_\_`Ya`\_]\_XaX[]ZZU]]XXNBB  
@HWI-EAS443:3:16:412:649#0/1  
GGCGAAAGCAGGCAAACCATTTGAATGGATGTCAATCCGA  
+HWI-EAS443:3:16:412:649#0/1  
]`b¥\_abaZ`\_Va^a\_baa[b]`bVaZ`a`aa¥P^J]Y  
@HWI-EAS443:3:20:930:135#0/1  
GGCGAAAGCAGGCAAACCATTTGAATGGATGTCAATCCGA  
+HWI-EAS443:3:20:930:135#0/1  
aa`b¥`]`a`a`a`\_`\_]a\_\_\_^\_\_^\_QS^ZWOWZX  
@HWI-EAS443:3:3:1286:700#0/1  
GGCGAAAGCAGGCAAACCATTTGAATGGATGTCAATCCGA  
+HWI-EAS443:3:3:1286:700#0/1  
^abb`bbbbbbbaa`^\_\_aabab`Z]abaaaa\_Y]aaYY`Z  
@HWI-EAS443:3:3:219:774#0/1  
GGCGAAAGCAGGCAAACCATTTGAATGGATGTCAATCCGA  
+HWI-EAS443:3:3:219:774#0/1  
aba`T¥aa[0^\_R\_\_`X[[a`a\_ZX`U\_]¥GX[VVGKP[  
@HWI-EAS443:3:46:1761:1622#0/1  
TGCGAAAGCAGGCAAACCATTTGAATGGATGTCAATCCGA  
+HWI-EAS443:3:46:1761:1622#0/1  
Y\_aa^`ba`^aa`ab¥Z¥\_]`¥\_baa`a]^\_¥\_[H\_  
@HWI-EAS443:3:54:1174:1006#0/1  
GGCGAAAGCAGGCAAACCATTTGAATGGATGTCAATCCGA  
+HWI-EAS443:3:54:1174:1006#0/1  
`aTVa]S\_`aaYJ^RUJW[Z]aa^\_VPTZ]YVWUVQQSPW  
@HWI-EAS443:3:63:98:1784#0/1  
GGCGAAAGCAGGCAAACCATTTGAATGGATGTCAATCCGA  
+HWI-EAS443:3:63:98:1784#0/1  
^`bba\_aab]abbb`bbb[b`baaabaaaa`aab]baaa  
@HWI-EAS443:3:64:788:1971#0/1  
GGCGAAAGCAGGCAAACCATTTGAATGGATGTCAATCCGA  
+HWI-EAS443:3:64:788:1971#0/1  
aabbbbabbb^aabbbabbaabaaaaWaaa`aa\_\_\_[a  
@HWI-EAS443:3:85:151:1808#0/1  
GGCGAAAGCAGGCAAACCATTTGAATGGATGTCAATCCGA

+HWI-EAS443:3:85:151:1808#0/1  
]¥^a`aZYa]RYa`aa`TX\_¥Z`][UWT]X\_T]W]\_X¥  
@HWI-EAS443:3:88:358:1588#0/1  
TGCGAAAGCAGGCAAACCATTTGAATGGATGTCAATCCGA  
+HWI-EAS443:3:88:358:1588#0/1  
aba`abb`abaabbbbaabaaaa`a]`\_a`^aaaa\_^a  
@HWI-EAS443:3:94:318:847#0/1  
GGCGAAAGCAGGCAAACCATTTGAATGGATGTCAATCCGA  
+HWI-EAS443:3:94:318:847#0/1  
abbaa`Q\_[R`a`\_`\_`[\_`\_`a`\_`^a^\_Z\_R`\_YW\_Y`Q  
@HWI-EAS443:3:97:967:1048#0/1  
GGCGAAAGCAGGCAAACCATTTGAATGGATGTCAATCCGA  
+HWI-EAS443:3:97:967:1048#0/1  
^^`\_\_^`\_\_`¥XR^[^a]Waaab^U\_b```^OMZ]^W]ZM  
@HWI-EAS443:3:12:417:165#0/1  
GCGAAAGCAGGCAAACCATTTGAATGGATGTCAATCCGAC  
+HWI-EAS443:3:12:417:165#0/1  
aa\_\_\_\_[`a¥`\_]a`a\_`aa`a\_`^¥^\_`\_Z¥^^`¥^\_UW  
@HWI-EAS443:3:14:400:1732#0/1  
CGAAAGCAGGCAAACCATTTGAATGGATGTCAATCCGACT  
+HWI-EAS443:3:14:400:1732#0/1  
`¥\_aW`^`aa¥a^a`¥aaaa\_[ZT¥R^[\_\_aSa]ZR\_Z  
@HWI-EAS443:3:15:1219:179#0/1  
AGCGAAAGCAGGCAAACCATTTGAATGGATGTCAATCCGA  
+HWI-EAS443:3:15:1219:179#0/1  
`bbb]a`abaa`aaa]\_\_`\_aaaYaaa`W\_]LW\_\_UZ`aT  
@HWI-EAS443:3:15:338:1239#0/1  
AGCGAAAGCAGGCAAACCATTTGAATGGATGTCAATCCGA  
+HWI-EAS443:3:15:338:1239#0/1  
aaba`aa`¥a]a\_a[\_`\_`^\_\_\_\_^`^^\_\_R]][\_`\_`^]]  
@HWI-EAS443:3:18:981:1616#0/1  
GCGAAAGCAGGCAAACCATTTGAATGGATGTCAATCCGAC  
+HWI-EAS443:3:18:981:1616#0/1  
a\_XZ]a`\_]a\_a¥RT`[]Y¥aXZ`]T]]^O\_\_\_\_XKXYMR  
@HWI-EAS443:3:19:430:1902#0/1  
AGCGAAAGCAGGCAAACCATTTGAATGGATGTCAATCCGA  
+HWI-EAS443:3:19:430:1902#0/1  
aaaa`aa`\_a]\_aa`a`^a`\_`a\_\_\_\_^^^`[\_]\_`\_\_\_\_ZX  
@HWI-EAS443:3:19:511:1850#0/1  
GCGAAAGCAGGCAAACCATTTGAATGGATGTCAATCCGAC  
+HWI-EAS443:3:19:511:1850#0/1  
`ab`\_`bbbbabbbbbbbbab`bab\_baa¥^bb\_a`a`\_`  
@HWI-EAS443:3:19:769:527#0/1  
GCGAAAGCAGGCAAACCATTTGAATGGATGTCAATCCGAC  
+HWI-EAS443:3:19:769:527#0/1  
aaa^a¥`\_`Y```[^[W`\_`a```\_`a^\_\_U]^\_XUWZYQ  
@HWI-EAS443:3:1:1665:1584#0/1  
AGCGAAAGCAGGCAAACCATTTGAATGGATGTCAATCCGA  
+HWI-EAS443:3:1:1665:1584#0/1  
abba`¥^b\_b`a`aaaZ]\_aa^b`a\_a`\_aa\_Z`^R]BB

@HWI-EAS443:3:20:482:1119#0/1  
AGCGAAAGCAGGCAAACCATTTGAATGGATGTCAATCCGA  
+HWI-EAS443:3:20:482:1119#0/1  
a`X\_ZUXZ]a\_¥[^¥\_\_\_Z`\_^`[UX]XZ^Y^]]VITW]  
@HWI-EAS443:3:21:790:498#0/1  
CGAAAGCAGGCAAACCATTTGAATGGATGTCAATCCGACT  
+HWI-EAS443:3:21:790:498#0/1  
ab`]\_\_\_\_\_aY¥a\_UPV]\_\_¥OWaW]]^]aYUZa^\_UPUQR  
@HWI-EAS443:3:22:621:297#0/1  
AGCGAAAGCAGGCAAACCATTTGAATGGATGTCAATCCGA  
+HWI-EAS443:3:22:621:297#0/1  
a¥Tb[`ab`a`X`\_Z`W`¥UYaa¥\_^a^V]]VWYWLL¥]V  
@HWI-EAS443:3:22:72:1812#0/1  
CGAAAGCAGGCAAACCATTTGAATGGATGTCAATCCGACT  
+HWI-EAS443:3:22:72:1812#0/1  
aaaab\_ab`b]\_aa`aaa\_a\_a^a\_\_]\_Z``]^a\_^Z^^  
@HWI-EAS443:3:23:1388:1363#0/1  
AGCGAAAGCAGGCAAACCATTTGAATGGATGTCAATCCGA  
+HWI-EAS443:3:23:1388:1363#0/1  
^ab`\_Zaaaa\_[R`J¥ZW`\_a^X`\_¥ZaZZ[XaZUGU\_¥  
@HWI-EAS443:3:23:1557:1951#0/1  
AGCGAAAGCAGGCAAACCATTTGAATGGATGTCAATCCGA  
+HWI-EAS443:3:23:1557:1951#0/1  
`T¥a¥\_aaU¥U¥W`¥VPIRX^aXLYBBBBBBBBBBBBBBB  
@HWI-EAS443:3:25:482:1283#0/1  
CGAAAGCAGGCAAACCATTTGAATGGATGTCAATCCGACT  
+HWI-EAS443:3:25:482:1283#0/1  
aaZ^`abZ`b\_J\_baab`a]ab`a`\_\_a^`Z]^Wa`]]^  
@HWI-EAS443:3:26:524:20#0/1  
AGCGAAAGCAGGCAAACCATTTGAATGGATGTCAATCCGA  
+HWI-EAS443:3:26:524:20#0/1  
aa`[a^aa^```[aaaa\_W`a^0[`\_a¥`^`OJW¥R^]]T  
@HWI-EAS443:3:26:583:47#0/1  
CGAAAGCAGGCAAACCATTTGAATGGATGTCAATCCGACT  
+HWI-EAS443:3:26:583:47#0/1  
abbbbaa`b\_abbabbbbab\_b\_aabaabb`\_aaaaab^`a  
@HWI-EAS443:3:27:1411:1097#0/1  
GCGAAAGCAGGCAAACCATTTGAATGGATGTCAATCCGAC  
+HWI-EAS443:3:27:1411:1097#0/1  
aaa[aaaaaaaa]a\_^aaaaa^`\_`a`^a¥^\_a\_V]\_^X  
@HWI-EAS443:3:27:1567:1033#0/1  
AGCGAAAGCAGGCAAACCATTTGAATGGATGTCAATCCGA  
+HWI-EAS443:3:27:1567:1033#0/1  
a`¥a\_abbaab\_baaa]bab^^`\_]aaba`aWS^`[\_Pa^  
@HWI-EAS443:3:27:735:240#0/1  
GCGAAAGCAGGCAAACCATTTGAATGGATGTCAATCCGAC  
+HWI-EAS443:3:27:735:240#0/1  
aaa[aa`aa\_W^`\_\_\_\_\_¥PV^\_\_]]`X]]]VTWZZT  
@HWI-EAS443:3:30:337:227#0/1  
GCGAAAGCAGGCAAACCATTTGAATGGATGTCAATCCGAC

+HWI-EAS443:3:30:337:227#0/1  
`\_`TU¥S[EI[a[O^RVKTYUQOTZTMXBBBBBBBBBBBBB  
@HWI-EAS443:3:30:84:545#0/1  
GCGAAAGCAGGCAAACCATTTGAATGGATGTCAATCCGAC  
+HWI-EAS443:3:30:84:545#0/1  
abba]aa]0)`aa^a`bZ¥^a¥¥`][HVYa^^^^[¥¥\_Z]  
@HWI-EAS443:3:33:1046:561#0/1  
AGCGAAAGCAGGCAAACCATTTGAATGGATGTCAATCCGA  
+HWI-EAS443:3:33:1046:561#0/1  
`bb\_¥aabba`aabaa`aab`aa``\_a^XY`][[TQ  
@HWI-EAS443:3:33:1510:434#0/1  
GCGAAAGCAGGCAAACCATTTGAATGGATGTCAATCCGAC  
+HWI-EAS443:3:33:1510:434#0/1  
S\_Zaa^`aaM^bbKbY`aab`¥a\_\_YJa`\_][[T`WX[OT[  
@HWI-EAS443:3:34:1125:875#0/1  
AGCGAAAGCAGGCAAACCATTTGAATGGATGTCAATCCGA  
+HWI-EAS443:3:34:1125:875#0/1  
^¥`aaZX`bbb\_¥bab\_Z\_aabbaaaa[`\_b\_¥V`a]\_]W  
@HWI-EAS443:3:36:367:1155#0/1  
AGCGAAAGCAGGCAAACCATTTGAATGGATGTCAATCCGA  
+HWI-EAS443:3:36:367:1155#0/1  
aabaaababa`\_a]aaaa^a`a\_\_`\_a\_\_\_aZ``R¥a`^ [  
@HWI-EAS443:3:37:515:56#0/1  
AGCGAAAGCAGGCAAACCATTTGAATGGATGTCAATCCGA  
+HWI-EAS443:3:37:515:56#0/1  
a`aaaaababa`aa`a`\_a`aaa`^^a`SY\_][[GMY]^¥T  
@HWI-EAS443:3:39:503:1355#0/1  
GTCCGATTGACATCCATTCAAATGGTTTGCCTGCTTTCGC  
+HWI-EAS443:3:39:503:1355#0/1  
aabbbba`bbbabb`aabbaaaa]Yababa`aabbaa^]  
@HWI-EAS443:3:39:978:509#0/1  
GCGAAAGCAGGCAAACCATTTGAATGGATGTCAATCCGAC  
+HWI-EAS443:3:39:978:509#0/1  
aaaa\_\_b\_aaaaa\_a^\_\_\_^\_a¥]\_a]]`]ZW]]^ZW]ZO  
@HWI-EAS443:3:42:1519:1486#0/1  
CGAAAGCAGGCAAACCATTTGAATGGATGTCAATCCGACT  
+HWI-EAS443:3:42:1519:1486#0/1  
ab`aababbaabb`\_`aabaaababbbb`aaba\_aa`^\_  
@HWI-EAS443:3:42:759:571#0/1  
AGCGAAAGCAGGCAAACCATTTGAATGGATGTCAATCCGA  
+HWI-EAS443:3:42:759:571#0/1  
aaaa\_aaba`a`\_aa`\_`\_`aaa^\_\_a`\_`\_aW¥Z^`\_`\_¥V  
@HWI-EAS443:3:43:527:1469#0/1  
CGAAAGCAGGCAAACCATTTGAATGGATGTCAATCCGACT  
+HWI-EAS443:3:43:527:1469#0/1  
^aZ`bbb^^¥¥aZbab^``bbbba`aa`aabab\_[¥¥TQ^  
@HWI-EAS443:3:46:1759:446#0/1  
GTCCGATTGACATCCATTCAAATGGTTTGCCTGCTTTCGC  
+HWI-EAS443:3:46:1759:446#0/1  
a```]`\_aa`\_`\_]Y\_`^^`a\_^a]^^^UPX[ZU\_] ^Y\_Y

@HWI-EAS443:3:46:380:1390#0/1  
GCGAAAGCAGGCAAACCATTTGAATGGATGTCAATCCGAC  
+HWI-EAS443:3:46:380:1390#0/1  
aaa`a]`aaba`aa\_aaaa^`a`aa\_a]Ya`^V]^^Z  
@HWI-EAS443:3:47:227:1224#0/1  
GCGAAAGCAGGCAAACCATTTGAATGGATGTCAATCCGAC  
+HWI-EAS443:3:47:227:1224#0/1  
aaaaa\_`a^a`^^Z¥]aaa^W^`a`^T^RKXWSULYLO  
@HWI-EAS443:3:48:359:1366#0/1  
GCGAAAGCAGGCAAACCATTTGAATGGATGTCAATCCGAC  
+HWI-EAS443:3:48:359:1366#0/1  
abbaaabbbbaaaaaa`ababbaaab`aa\_\_^`\_]\_XV  
@HWI-EAS443:3:4:1008:156#0/1  
AGCGAAAGCAGGCAAACCATTTGAATGGATGTCAATCCGA  
+HWI-EAS443:3:4:1008:156#0/1  
ababaaab\_baa^a^a^aaaaa^^\_a`¥`a]W^^]UZ]Z  
@HWI-EAS443:3:51:141:628#0/1  
AGCGAAAGCAGGCAAACCATTTGAATGGATGTCAATCCGA  
+HWI-EAS443:3:51:141:628#0/1  
0\_\_`W¥\_I`\_]`^]`^\_ZV^a[S¥b^ba]a```\_Y]ZZa¥  
@HWI-EAS443:3:53:708:1780#0/1  
AGCGAAAGCAGGCAAACCATTTGAATGGATGTCAATCCGA  
+HWI-EAS443:3:53:708:1780#0/1  
a`aaaaa`aa`^aaa\_]a`\_a`a\_a``\_Z`a\_\_U\_]W  
@HWI-EAS443:3:59:342:475#0/1  
AGCGAAAGCAGGCAAACCATTTGAATGGATGTCAATCCGA  
+HWI-EAS443:3:59:342:475#0/1  
a`aa`^^^aabaaa^^`aa`aaa[^\_a\_\_\_a¥]V]XY]^X  
@HWI-EAS443:3:5:1149:440#0/1  
AGCGAAAGCAGGCAAACCATTTGAATGGATGTCAATCCGA  
+HWI-EAS443:3:5:1149:440#0/1  
ab^abaaZZ^aQZ^a`YXa`V^a]aaa\_aX\_\_X^Y\_¥\_BB  
@HWI-EAS443:3:5:1484:1031#0/1  
AGCGAAAGCAGGCAAACCATTTGAATGGATGTCAATCCGA  
+HWI-EAS443:3:5:1484:1031#0/1  
aaH^`abYab`YPYX\_\_\_W^^X¥^aa¥Y\_HY]\_XSWBB  
@HWI-EAS443:3:5:710:1488#0/1  
CGAAAGCAGGCAAACCATTTGAATGGATGTCAATCCGACT  
+HWI-EAS443:3:5:710:1488#0/1  
aa¥^aaba^N]`\_\_^`aaabb`a]a`aaa[a\_`Z¥^¥^`  
@HWI-EAS443:3:61:1520:1434#0/1  
GCGAAAGCAGGCAAACCATTTGAATGGATGTCAATCCGAC  
+HWI-EAS443:3:61:1520:1434#0/1  
a[WGPW\_`\_`\_]`^]`[[U¥¥\_W\_`^`^\_YPRVPMLOZZO  
@HWI-EAS443:3:61:768:1216#0/1  
CGAAAGCAGGCAAACCATTTGAATGGATGTCAATCCGACT  
+HWI-EAS443:3:61:768:1216#0/1  
a¥T\_[]`^^U]]Z]\_\_^\_\_a\_Y`^X^X]^SR\_Z]^YYZPX  
@HWI-EAS443:3:62:616:1580#0/1  
GCGAAAGCAGGCAAACCATTTGAATGGATGTCAATCCGAC

+HWI-EAS443:3:62:616:1580#0/1  
aaaaW]]aa`\_aaVaa\_\_`^^^\_\_^\_\_`\_`W\_\_\_\_]\_^YZ^  
@HWI-EAS443:3:63:1024:1748#0/1  
CGAAAGCAGGCAAACCATTTGAATGGATGTCAATCCGACT  
+HWI-EAS443:3:63:1024:1748#0/1  
ab^aaaa`a][aaaaabaaaa]\_`^`\_]X^]aWR\_U]`  
@HWI-EAS443:3:63:1439:1234#0/1  
AGCGAAAGCAGGCAAACCATTTGAATGGATGTCAATCCGA  
+HWI-EAS443:3:63:1439:1234#0/1  
aa]b\_bb```a\_a`aaba[`aaY¥[Xb]Z¥UNa[``\_`\_^\_]`  
@HWI-EAS443:3:64:868:918#0/1  
GCGAAAGCAGGCAAACCATTTGAATGGATGTCAATCCGAC  
+HWI-EAS443:3:64:868:918#0/1  
ab^abbaa\_aaaaaaa]`aa`\_\_aa[a````\_``\_`\_`¥¥  
@HWI-EAS443:3:65:57:1015#0/1  
CGAAAGCAGGCAAACCATTTGAATGGATGTCAATCCGACT  
+HWI-EAS443:3:65:57:1015#0/1  
aaZaba\_W^aaTWaaa[``\_Z]]\_\_`\_]`X\_Z`\_]`^TY]  
@HWI-EAS443:3:67:1599:1768#0/1  
GCGAAAGCAGGCAAACCATTTGAATGGATGTCAATCCGAC  
+HWI-EAS443:3:67:1599:1768#0/1  
\_ZZ[\_[\_HXX]`a\_^PLPZa[aZ[\_aBBBBBBBBBBBBBBB  
@HWI-EAS443:3:68:857:1796#0/1  
GTCGGATTGACATCCATTCAAATGGTTTGCCTGCTTTTCGC  
+HWI-EAS443:3:68:857:1796#0/1  
\_abbb`bbabbbb\_]\_bbaababa\_^aaaaaa]aaaXa`  
@HWI-EAS443:3:69:1393:1879#0/1  
AGCGAAAGCAGGCAAACCATTTGAATGGATGTCAATCCGA  
+HWI-EAS443:3:69:1393:1879#0/1  
a^¥]aa`^baa\_aaaaaaa`\_`a`\_`^a`¥XX¥``UZZ][  
@HWI-EAS443:3:70:1678:189#0/1  
GCGAAAGCAGGCAAACCATTTGAATGGATGTCAATCCGAC  
+HWI-EAS443:3:70:1678:189#0/1  
^`[ZS\_¥S¥b`\_aa`[M]`[`b\_a`¥TZX`[XWZXJJRMV  
@HWI-EAS443:3:72:280:1309#0/1  
GCGAAAGCAGGCAAACCATTTGAATGGATGTCAATCCGAC  
+HWI-EAS443:3:72:280:1309#0/1  
abb¥`b^b\_]`^^^aa]^^^\_V`Y]¥^aa`\_Z]`X`Z¥\_  
@HWI-EAS443:3:74:882:865#0/1  
GTCGGATTGACATCCATTCAAATGGTTTGCCTGCTTTTCGC  
+HWI-EAS443:3:74:882:865#0/1  
aW`]`aa¥USaa\_¥¥a\_\_\_\_XW`\_\_¥`^`\_^]`^`\_\_¥XN  
@HWI-EAS443:3:75:1488:207#0/1  
CGAAAGCAGGCAAACCATTTGAATGGATGTCAATCCGACT  
+HWI-EAS443:3:75:1488:207#0/1  
aab\_]NZbb^`abK````\_`a^aaaba\_]GY`b^a`\_]RW  
@HWI-EAS443:3:77:476:1570#0/1  
AGCGAAAGCAGGCAAACCATTTGAATGGATGTCAATCCGA  
+HWI-EAS443:3:77:476:1570#0/1  
a`b\_a`b`ab\_T\_ZW[`Z`]aZV`\_``]]\_\_X]a\_UNU^^

@HWI-EAS443:3:7:124:342#0/1  
GCGAAAGCAGGCAAACCATTTGAATGGATGTCAATCCGAC  
+HWI-EAS443:3:7:124:342#0/1  
aa`\_Z[X^ZV\_a^VZZTV]^WVRXY`\_^Y¥RX[YSUTTXB  
@HWI-EAS443:3:7:670:1387#0/1  
AGCGAAAGCAGGCAAACCATTTGAATGGATGTCAATCCGA  
+HWI-EAS443:3:7:670:1387#0/1  
``aaaaaaaa\_baa\_a\_aaaa\_aaaa\_\_aYR\_\_^YS[]  
@HWI-EAS443:3:83:1054:1266#0/1  
AGCGAAAGCAGGCAAACCATTTGAATGGATGTCAATCCGA  
+HWI-EAS443:3:83:1054:1266#0/1  
ab`aaaaa¥aa`b\_b`baaaa`aaa```\_a\_a¥a`^a^]  
@HWI-EAS443:3:87:185:385#0/1  
CGAAAGCAGGCAAACCATTTGAATGGATGTCAATCCGACT  
+HWI-EAS443:3:87:185:385#0/1  
abbbabbbbabbbVaaaa`b`aa`\_aaa\_a^\_aa\_\_`a^[]  
@HWI-EAS443:3:87:515:875#0/1  
GCGAAAGCAGGCAAACCATTTGAATGGATGTCAATCCGAC  
+HWI-EAS443:3:87:515:875#0/1  
a`^`aab^ab^`\_a`a\_a`aR`\_[]¥aW[]\_]¥]P¥  
@HWI-EAS443:3:88:1400:878#0/1  
GTCGGATTGACATCCATTCAAATGGTTTGCCTGCTTTCGC  
+HWI-EAS443:3:88:1400:878#0/1  
`LUa`]Z¥\_a^WZ¥`a^SG[]^[]VQ¥\_\_`P\_\_^`^^X^[]  
@HWI-EAS443:3:8:438:1539#0/1  
CGAAAGCAGGCAAACCATTTGAATGGATGTCAATCCGACT  
+HWI-EAS443:3:8:438:1539#0/1  
abaaa`¥ba\_aaa\_\_`a`aaaa`\_a\_a\_a]^`a^^0\_Z]^  
@HWI-EAS443:3:91:155:538#0/1  
AGCGAAAGCAGGCAAACCATTTGAATGGATGTCAATCCGA  
+HWI-EAS443:3:91:155:538#0/1  
aabbb`¥`Xaa`\_^ZZ`aba^```\_^`a`\_^V````]YQOQ  
@HWI-EAS443:3:92:805:122#0/1  
TCCATCCTCAAGAATTCCCCTTTGGCTTGTGTTGAGAATA  
+HWI-EAS443:3:92:805:122#0/1  
XHHaZU[a[]N¥W]Z[^00T][RJ¥\_\_T`Y\_\_`YR]HWYB  
@HWI-EAS443:3:94:263:973#0/1  
GCGAAAGCAGGCAAACCATTTGAATGGATGTCAATCCGAC  
+HWI-EAS443:3:94:263:973#0/1  
^b`\_Z]XaS¥Y\_\_V^aaaaa`a`\_\_b\_\_^aZ\_`\_^[]QN  
@HWI-EAS443:3:94:453:1337#0/1  
CGAAAGCAGGCAAACCATTTGAATGGATGTCAATCCGACT  
+HWI-EAS443:3:94:453:1337#0/1  
aaaaaaaa`abbaaaaaaaaaaaaaa\_a`a]\_\_a`\_\_^]^\_  
@HWI-EAS443:3:96:350:1390#0/1  
AGCGAAAGCAGGCAAACCATTTGAATGGATGTCAATCCGA  
+HWI-EAS443:3:96:350:1390#0/1  
a][``Wbaba[Z^aa\_^`a^^a`^^a\_\_[]XXU`Z^X¥B  
@HWI-EAS443:3:97:1057:1855#0/1  
CGAAAGCAGGCAAACCATTTGAATGGATGTCAATCCGACT

+HWI-EAS443:3:97:1057:1855#0/1  
abX^Xa^bab^U`\_R[MaaabaSR\_b[H^HDM\_\_[\_aFJ]  
@HWI-EAS443:3:9:1247:958#0/1  
GCGAAAGCAGGCAAACCATTTGAATGGATGTCAATCCGAC  
+HWI-EAS443:3:9:1247:958#0/1  
`aa`aaa^aa\_`a`\_``aaaa\_`a`\_`]]\_`]ZZ]^U  
@HWI-EAS443:3:74:47:1398#0/1  
GAGCATCCCAGCGCTGGGAAGACCCTAAGAAAACAGGAG  
+HWI-EAS443:3:74:47:1398#0/1  
[ZXZR\_aaaZVH`R`XaT`¥[[\_P¥0\_^^\_`^¥Y¥^  
@HWI-EAS443:3:7:1021:1503#0/1  
TGGGCGGGGAGTCTTCGAGCTCTCGGACGAAAAGGCAAGG  
+HWI-EAS443:3:7:1021:1503#0/1  
`aZXZ[^WX\_Wa[QOV]¥X`ZX¥^VVUNHV¥^`PBBBB  
@HWI-EAS443:3:52:529:432#0/1  
GTGGGCGGGGAGTCTTCGAGCTCTCGGACGAAAAGGCAAC  
+HWI-EAS443:3:52:529:432#0/1  
`NO\_`X]^]¥P[Z]Z]SZR¥SZRPXXP]YPQS]UKNPK  
@HWI-EAS443:3:6:160:1140#0/1  
TGGGCGGGGAGTCTTCGAGCTCTCGGACGAAAAGGCAACG  
+HWI-EAS443:3:6:160:1140#0/1  
\_a¥¥`^`¥\_\_\_ZM\_\_XaVR`\_aSa`\_`^`\_¥QTU[X`Z  
@HWI-EAS443:3:76:838:259#0/1  
TGGGCGGGGAGTCTTCGAGCTCTCGGACGAAAAGGCAACG  
+HWI-EAS443:3:76:838:259#0/1  
`\_Z^0^¥Xa¥[^X]TF]TPRXXXK]SWOX[K¥¥^T¥RYTW  
@HWI-EAS443:3:21:1269:817#0/1  
GTGGAATCAATGACCGAAATTTCTGGAGGGGGGAAAATGG  
+HWI-EAS443:3:21:1269:817#0/1  
`X`]IVY`^YYVTMJPP]LRRJVaWHHVLVMET^^\_NPBB  
@HWI-EAS443:3:38:709:65#0/1  
GTGGAATCAATGACCGAAATTTCTGGAGGGGGGAAAATGG  
+HWI-EAS443:3:38:709:65#0/1  
aRa`ZPZ\_`\_`]^`^¥P¥OV`VXY`\_`QMWXUOFRTVSPWXX  
@HWI-EAS443:3:60:1661:1150#0/1  
TACTCCTCTGCATTGTCTCCGAAGAAATAAGACCCCATC  
+HWI-EAS443:3:60:1661:1150#0/1  
aaaa`abaab\_`aaa^Y^a`\_`aa\_]Uaaa`\_`[^UTZ[¥a\_  
@HWI-EAS443:3:12:1559:1517#0/1  
GATCCATCATTGCCGTCTGGGAGCTGTTTAAAATTTTCC  
+HWI-EAS443:3:12:1559:1517#0/1  
abbaab]]]bU¥bVOF]V\_]aY]¥PW`aabSX\_`^aaa`VN  
@HWI-EAS443:3:84:369:476#0/1  
GCAGGGTTCAACACTTCCCAGAAGGTCTGGTGCCGCAGGT  
+HWI-EAS443:3:84:369:476#0/1  
a\_RZ[\_Haaaa`\_a\_\_a`\_`a^\_`^aa]`¥\_\_Ua^`\_a^`XE  
@HWI-EAS443:3:88:1270:1662#0/1  
GATCCATCATTGCCCTCTGGGAGCTGTTTGAAGTTTCC  
+HWI-EAS443:3:88:1270:1662#0/1  
ab`QX^`bbbab\_[bb^`bYa`[aR][^aa^^bbI`abX\_



@HWI-EAS443:3:89:1315:931#0/1  
AAAATTTCAAACAGCTGCCAGAGGGCAATGGTGGATCAA  
+HWI-EAS443:3:89:1315:931#0/1  
`^^[\_^\_\_^a`QT`\_W\_]H]¥^Za¥`YUUY[DH¥WUPP¥Z  
@HWI-EAS443:3:47:631:995#0/1  
ATTCATCATTGCCCTCTGGGCAGCTGTTTCAAATTTTCCT  
+HWI-EAS443:3:47:631:995#0/1  
Xbbb]Y`aa\_aZaYa\_[aabRN^a\_\_ZK`\_]`\_\_`PH\_  
@HWI-EAS443:3:52:832:17#0/1  
AGAGAACTCATCTTTTATGACAAAGAAGAAATAAGGAGAG  
+HWI-EAS443:3:52:832:17#0/1  
ababaa`baaaZG`aa`aa`^\_\_`a^\_a^^\_aa^a\_\_\_^`  
@HWI-EAS443:3:80:936:1153#0/1  
AGCATTGCCCTCTGGGCAGCTGTTTCAAATTTTCCTTTGG  
+HWI-EAS443:3:80:936:1153#0/1  
QT\_OQY¥N]¥\_K[OLUXYW[\_ZPTYXOXXOXa]TDX[BB  
@HWI-EAS443:3:75:1400:1361#0/1  
AAATTTCAAACAGCTGCCAGAGGGCAATGATGGATCACG  
+HWI-EAS443:3:75:1400:1361#0/1  
`[abbbaaaa`a\_¥baa^a\_aa`Y`aaaa\_aa\_^`W`  
@HWI-EAS443:3:75:879:815#0/1  
TTCCATCATTGCCCTCTGGGCAGCTGTTTCAAATTTTCCT  
+HWI-EAS443:3:75:879:815#0/1  
a``bbbbbab\_bbaaaaa`a\_aaaaba\_]``aaaaba¥\_a  
@HWI-EAS443:3:10:1202:357#0/1  
ATCCATCATTGCCCTCTGGGCAGCTGTTTCAAATTTTCCT  
+HWI-EAS443:3:10:1202:357#0/1  
aa`]aaa\_a`aUGQ\_]`\_`TP[\_]`^UX¥`^Z]\_\_\_]¥W]^  
@HWI-EAS443:3:10:266:872#0/1  
TCCATCATTGCCCTCTGGGCAGCTGTTTCAAATTTTCCT  
+HWI-EAS443:3:10:266:872#0/1  
abb¥^`\_a\_]\_\_`a\_a`\_\_`aa`aZ¥aa^`\_\_`\_]`\_`  
@HWI-EAS443:3:11:1597:1681#0/1  
GATCCATCATTGCCCTCTGGGCAGCTGTTTCAAATTTTCCT  
+HWI-EAS443:3:11:1597:1681#0/1  
a\_b`aabbb\_baa`b^aba`]`a¥a`\_aaa`ZU[`a\_XX  
@HWI-EAS443:3:12:1486:692#0/1  
GAAAATTTCAAACAGCTGCCAGAGGGCAATGATGGATCA  
+HWI-EAS443:3:12:1486:692#0/1  
X\_bbaa]abaaaa^`¥Ya]¥UZa¥aaaPY\_`^`a¥Z]]\_  
@HWI-EAS443:3:13:570:1443#0/1  
GATCCATCATTGCCCTCTGGGCAGCTGTTTCAAATTTTCCT  
+HWI-EAS443:3:13:570:1443#0/1  
a\_[`aa\_`X`¥]VZ\_XZ`Z\_a^X[`\_YG¥ZZY¥]W\_^ZUS  
@HWI-EAS443:3:15:999:897#0/1  
ACTTGATCCATCATTGCCCTCTGGGCAGCTGTTTCAAATT  
+HWI-EAS443:3:15:999:897#0/1  
aabbbbaabb`baaaaa`aaa`\_aaa[aa`a\_aaa``a  
@HWI-EAS443:3:16:1648:406#0/1  
ATCCATCATTGCCCTCTGGGCAGCTGTTTCAAATTTTCCT

+HWI-EAS443:3:16:1648:406#0/1  
aaV`a`\_a[aa``]aX[``[[[]VV\_aTaa]`¥`\_\_a`]Ua  
@HWI-EAS443:3:18:1451:1169#0/1  
GATCCATCATTGCCCTCTGGGCAGCTGTTTGAAATTTTCC  
+HWI-EAS443:3:18:1451:1169#0/1  
ab\_a]baaaa\_b`aa`a]`]^\_\_\_\_`\_aU^^\_\_^V^`\_W]Y  
@HWI-EAS443:3:19:671:423#0/1  
AAATTTCAAACAGCTGCCAGAGGGCAATGATGGATCAAG  
+HWI-EAS443:3:19:671:423#0/1  
aaaababaaa`aaa`a`^`a^^^Xa\_\_aaXZ`\_]\_^\_a  
@HWI-EAS443:3:22:784:307#0/1  
CCATCATTGCCCTCTGGGCAGCTGTTTGAAATTTTCCTTT  
+HWI-EAS443:3:22:784:307#0/1  
abaaabaabaaaa`aaaaa`a`a^Y`a`\_^`aaa¥¥a\_a  
@HWI-EAS443:3:24:549:1412#0/1  
CTCAAAGGAAAATTTCAAACAGCTGCCAGAGGGCAATGA  
+HWI-EAS443:3:24:549:1412#0/1  
¥\_\_¥\_````¥Z¥Q\_^[\_abaYa[PW[UUUVZWWWYb\_]]  
@HWI-EAS443:3:25:659:318#0/1  
ATCCATCATTGCCCTCTGGGCAGCTGTTTGAAATTTTCCT  
+HWI-EAS443:3:25:659:318#0/1  
ab\_bbabbbbaaaa`aa`a¥a`aaa\_aX\_aZYa\_\_\_a`\_\_\_\_  
@HWI-EAS443:3:27:111:1556#0/1  
ATCATTGCCCTCTGGGCAGCTGTTTGAAATTTTCCTTTGA  
+HWI-EAS443:3:27:111:1556#0/1  
`U]YJV`\_\_UPBBBBBBBBBBBBBBBBBBBBBBBBBBBBB  
@HWI-EAS443:3:27:1203:866#0/1  
ATCATTGCCCTCTGGGCAGCTGTTTGAAATTTTCCTTTGA  
+HWI-EAS443:3:27:1203:866#0/1  
aabbaaa\_baba^Z\_\_a`aR\_]Xa`XS]aaaa\_]a`a`\_  
@HWI-EAS443:3:27:452:1774#0/1  
AAAATTTCAAACAGCTGCCAGAGGGCAATGATGGATCAA  
+HWI-EAS443:3:27:452:1774#0/1  
\_b^^`\_aZ¥Q]\_W]¥^^`ZSRU[][[YZY¥YU¥]X]]¥  
@HWI-EAS443:3:33:433:234#0/1  
CATCATTGCCCTCTGGGCAGCTGTTTGAAATTTTCCTTTG  
+HWI-EAS443:3:33:433:234#0/1  
aaabZa\_aa`a\_aa`a\_\_```\_\_\_\_\_`a`\_^\_^]\_^  
@HWI-EAS443:3:34:1375:868#0/1  
ATCCATCATTGCCCTCTGGGCAGCTGTTTGAAATTTTCCT  
+HWI-EAS443:3:34:1375:868#0/1  
aaZ\_baaa`Y^P¥¥`\_]Q\_LP\_\_\_\_\_]\_]Y\_^]\_\_ZYLR^  
@HWI-EAS443:3:35:1747:1525#0/1  
ATCATTGCCCTCTGGGCAGCTGTTTGAAATTTTCCTTTGA  
+HWI-EAS443:3:35:1747:1525#0/1  
aaabaaaaa`aaa`a[\_`a`^`X^`S\_Y`aaaa]Y`\_`[\_`  
@HWI-EAS443:3:36:1098:1746#0/1  
ATCCATCATTGCCCTCTGGGCAGCTGTTTGAAATTTTCCT  
+HWI-EAS443:3:36:1098:1746#0/1  
a^aa`a\_^^]\_^\_]Z^^UXZ^^]ZXXZZ]]VRZ]ZX]ZZ

@HWI-EAS443:3:38:589:511#0/1  
CCATCATTGCCCTCTGGGCAGCTGTTTCAAATTTTCCTTT  
+HWI-EAS443:3:38:589:511#0/1  
aaa`a^^^[\_VUZZ^[\_^[\_W\_[ZWZWT¥^XOXZ¥Z  
@HWI-EAS443:3:42:433:994#0/1  
ATCCATCATTGCCCTCTGGGCAGCTGTTTCAAATTTTCCT  
+HWI-EAS443:3:42:433:994#0/1  
`ba]aaaa\_aaaa^`]¥XY`\_]\_]a`\_a\_\_`\_\_W\_  
@HWI-EAS443:3:44:526:599#0/1  
GGAAAATTTCAAACAGCTGCCAGAGGGCAATGATGGATC  
+HWI-EAS443:3:44:526:599#0/1  
aa\_aYaba\_a]aaa`]¥aaa`\_]Y`a\_\_^`¥[a`]PR  
@HWI-EAS443:3:44:767:918#0/1  
AAAATTTCAAACAGCTGCCAGAGGGCAATGATGGATCAA  
+HWI-EAS443:3:44:767:918#0/1  
`\_¥Z[aa\_Xa`\_a\_¥PMX^[W^Ua`^Y[Y[`\_\_^\_TZ]SQ  
@HWI-EAS443:3:45:1507:829#0/1  
ATCCATCATTGCCCTCTGGGCAGCTGTTTCAAATTTTCCT  
+HWI-EAS443:3:45:1507:829#0/1  
aa]]`^^^\_]^\_a`Z`[¥VUa\_^a]^W]VY^`\_\_¥XM[  
@HWI-EAS443:3:47:515:156#0/1  
AAATTTCAAACAGCTGCCAGAGGGCAATGATGGATCAAG  
+HWI-EAS443:3:47:515:156#0/1  
`Va`\_aZ]a`a^[aa¥ZN][[a¥KUX\_aU^a\_¥V0[]`  
@HWI-EAS443:3:48:1482:974#0/1  
ATCCATCATTGCCCTCTGGGCAGCTGTTTCAAATTTTCCT  
+HWI-EAS443:3:48:1482:974#0/1  
]bba\_]\_`^\_]`a`\_ZZ`^T]Z]\_\_a`^V`a\_a`WR\_  
@HWI-EAS443:3:4:337:1913#0/1  
CATCATTGCCCTCTGGGCAGCTGTTTCAAATTTTCCTTTG  
+HWI-EAS443:3:4:337:1913#0/1  
`bbabbbbbaaaaaa`aba]aa`aa`baaaaba[Xaaba  
@HWI-EAS443:3:4:628:1416#0/1  
GATCCATCATTGCCCTCTGGGCAGCTGTTTCAAATTTTC  
+HWI-EAS443:3:4:628:1416#0/1  
ababab^^ba\_a`bJ\_`^`]S`^^\_a]^\_a`\_¥`a`OX  
@HWI-EAS443:3:4:719:313#0/1  
GAAAATTTCAAACAGCTGCCAGAGGGCAATGATGGATCA  
+HWI-EAS443:3:4:719:313#0/1  
aaaaabaV`\_]\_a[¥a[^]]`\_]W\_^Z\_¥\_Z^U]V]  
@HWI-EAS443:3:50:260:1240#0/1  
AAAATTTCAAACAGCTGCCAGAGGGCAATGATGGATCAA  
+HWI-EAS443:3:50:260:1240#0/1  
aa`a[a\_FV]N`aWa\_aaG`\_aaUb\_`\_`b[\_`WaGaT]Z  
@HWI-EAS443:3:53:163:108#0/1  
GATCCATCATTGCCCTCTGGGCAGCTGTTTCAAATTTTC  
+HWI-EAS443:3:53:163:108#0/1  
a\_V\_W]\_\_a`\_`¥Y]]UT`^ZUU^S]\_NYZ]YWYU]^ZRT  
@HWI-EAS443:3:54:1482:728#0/1  
ATCATTGCCCTCTGGGCAGCTGTTTCAAATTTTCCTTTGA

+HWI-EAS443:3:54:1482:728#0/1  
`]Z`b^ba\_a]VZZb[Y[aXa\_Z^a`\_] ^aaa^Za`\_`\_`  
@HWI-EAS443:3:56:904:81#0/1  
ATCCATCATTGCCCTCTGGGCAGCTGTTTCAAATTTTCCT  
+HWI-EAS443:3:56:904:81#0/1  
ab]a\_aaaa\_aa`¥^]a\_\_V¥a]`aS\_aa[¥^a`\_`\_WX\_  
@HWI-EAS443:3:58:1662:600#0/1  
ACTTGATCCATCATTGCCCTCTGGGCAGCTGTTTCAAATT  
+HWI-EAS443:3:58:1662:600#0/1  
a\_bbabbaabb`bbaa`a\_a^aaa\_aaa[a^aaaa\_^^ba  
@HWI-EAS443:3:5:1516:1250#0/1  
CTCAAAGGAAAATTTCAAACAGCTGCCAGAGGGCAATGA  
+HWI-EAS443:3:5:1516:1250#0/1  
[ZV\_bbabbbba`\_`babbbX`abb`bYYaabbbba\_b`bb  
@HWI-EAS443:3:5:914:1689#0/1  
ATCCATCATTGCCCTCTGGGCAGCTGTTTCAAATTTTCCT  
+HWI-EAS443:3:5:914:1689#0/1  
ab``Y`aaYYb`Y`\_]`^]`a\_GWb^\_]a¥\_\_\_\_\_a¥\_¥B  
@HWI-EAS443:3:62:240:771#0/1  
GAAAATTTCAAACAGCTGCCAGAGGGCAATGATGGATCA  
+HWI-EAS443:3:62:240:771#0/1  
¥aW\_XYH\_^]b]]^a]`^`aZVW^[FF[Z][a^`XYW]^S  
@HWI-EAS443:3:64:1350:1597#0/1  
AATTTCAAACAGCTGCCAGAGGGCAATGATGGATCAAGT  
+HWI-EAS443:3:64:1350:1597#0/1  
`baa`\_`\_¥`ab]Z^a\_Y]^`\_PP]P[a\_aa`W]\_\_¥W\_\_]  
@HWI-EAS443:3:64:1367:1044#0/1  
AAAATTTCAAACAGCTGCCAGAGGGCAATGATGGATCAA  
+HWI-EAS443:3:64:1367:1044#0/1  
aabaaaaaaaa^Xa`\_a\_^Xa¥Pa]]\_\_^a\_\_\_\_`]U^]\_\_  
@HWI-EAS443:3:66:367:241#0/1  
ATCCATCATTGCCCTCTGGGCAGCTGTTTCAAATTTTCCT  
+HWI-EAS443:3:66:367:241#0/1  
`\_Y\_aa^Y^Z``]]¥W^`W]XWW¥^[WX[[PLY¥¥`\_YYZ  
@HWI-EAS443:3:69:1466:406#0/1  
ACTTGATCCATCATTGCCCTCTGGGCAGCTGTTTCAAATT  
+HWI-EAS443:3:69:1466:406#0/1  
aaaab`aaaaa\_aa`a````^`\_````aXa`\_aaa]````a  
@HWI-EAS443:3:70:115:1758#0/1  
CAAAGGAAAATTTCAAACAGCTGCCAGAGGGCAATGATG  
+HWI-EAS443:3:70:115:1758#0/1  
a`\_^YX`^^]^[a[]Va\_]\_\_]a\_a^]L¥SXU`IXZ^¥X  
@HWI-EAS443:3:71:1354:255#0/1  
GGAAAATTTCAAACAGCTGCCAGAGGGCAATGATGGATC  
+HWI-EAS443:3:71:1354:255#0/1  
````[¥^aa^`\_^W`a\_\_a^\_]\_`Z`\_[¥\_]\_`^]`\_XVG  
@HWI-EAS443:3:72:1169:1266#0/1  
GATCCATCATTGCCCTCTGGGCAGCTGTTTCAAATTTTCCT  
+HWI-EAS443:3:72:1169:1266#0/1  
ab`abbababaaa\_aaaaa\_a`aaa`\_W\_^`\_]Za`^`\_`\_`

@HWI-EAS443:3:72:140:808#0/1  
ATCCATCATTGCCCTCTGGGCAGCTGTTTCAAATTTTCCT  
+HWI-EAS443:3:72:140:808#0/1  
\_`a`^Z¥YS\_\_WXVZ¥TSRJXRJMRUJG]\_VQT]Q¥\_PL`  
@HWI-EAS443:3:72:931:1871#0/1  
ATCCATCATTGCCCTCTGGGCAGCTGTTTCAAATTTTCCT  
+HWI-EAS443:3:72:931:1871#0/1  
aX`aa`\_a^Xa```\_]^[Z\_]^[¥WU]ZO]^[YX]¥V[  
@HWI-EAS443:3:73:400:1320#0/1  
GATCCATCATTGCCCTCTGGGCAGCTGTTTCAAATTTTCCT  
+HWI-EAS443:3:73:400:1320#0/1  
^``bbba`aaabaababaaa^\_`bb`aaa^Z\_\_\_\_\_baaaa  
@HWI-EAS443:3:73:802:672#0/1  
ATCCATCATTGCCCTCTGGGCAGCTGTTTCAAATTTTCCT  
+HWI-EAS443:3:73:802:672#0/1  
aa```aaba\_a`\_a`a]a`¥``a`\_a[a`[Y[U\_aaY^^a  
@HWI-EAS443:3:76:1309:1874#0/1  
ACTTGATCCATCATTGCCCTCTGGGCAGCTGTTTCAAATT  
+HWI-EAS443:3:76:1309:1874#0/1  
aabbabaabaa\_¥`YZZaYaaa¥\_\_\_aa¥a`\_X\_\_\_\_\_^R`  
@HWI-EAS443:3:78:108:586#0/1  
ATCCATCATTGCCCTCTGGGCAGCTGTTTCAAATTTTCCT  
+HWI-EAS443:3:78:108:586#0/1  
aaaaaaY]ZYa``\_\_`^ZN[^[[¥Z^]]^^¥YV¥]\_WPT^  
@HWI-EAS443:3:81:528:982#0/1  
ATCCATCATTGCCCTCTGGGCAGCTGTTTCAAATTTTCCT  
+HWI-EAS443:3:81:528:982#0/1  
¥¥a^]\_aaaa`aa`VTZ\_a`a`]`[^`^\_V]\_]^[[^  
@HWI-EAS443:3:83:1578:1738#0/1  
CCATCATTGCCCTCTGGGCAGCTGTTTCAAATTTTCCTTT  
+HWI-EAS443:3:83:1578:1738#0/1  
¥N`a`a`aW¥[^P\_\_SZV[\_a]\_¥ZV\_X]a\_abaN\_a]`  
@HWI-EAS443:3:85:758:206#0/1  
GAAAATTTCAAACAGCTGCCAGAGGGCAATGATGGATCA  
+HWI-EAS443:3:85:758:206#0/1  
^VY]RZZ)`\_^[X]ZTV¥SV`]\_P\_]W]XR]YT[NIVLN  
@HWI-EAS443:3:88:66:89#0/1  
CTCAAAGAAAATTTCAAACAGCTGCCAGAGGGCAATGA  
+HWI-EAS443:3:88:66:89#0/1  
a`]YKWa]R\_TT^\_\_^VH]¥X\_\_X`WXSUYX\_\_]PPSW^V  
@HWI-EAS443:3:89:456:221#0/1  
ACTTGATCCATCATTGCCCTCTGGGCAGCTGTTTCAAATT  
+HWI-EAS443:3:89:456:221#0/1  
aa\_aa`\_a`\_\_aaa\_a\_\_\_\_\_^a`\_\_¥a`]^X]^XZZ¥^  
@HWI-EAS443:3:90:270:1226#0/1  
ATCCATCATTGCCCTCTGGGCAGCTGTTTCAAATTTTCCT  
+HWI-EAS443:3:90:270:1226#0/1  
aaaa\_\_a\_\_`X[Y]¥\_`^V[¥Y[^¥¥YRU]^]ZWSOLSVVY  
@HWI-EAS443:3:93:1023:1769#0/1  
AAATTTCAAACAGCTGCCAGAGGGCAATGATGGATCAAG



@HWI-EAS443:3:39:758:747#0/1  
TGCTCTTCTAGGTATTTATTTCTTCTCTCATCAAAAGCAG  
+HWI-EAS443:3:39:758:747#0/1  
aaaaaaaaab]^\_G^`aa`a\_a\_a`\_`\_\_\_\_`S`TW¥`\_a\_  
@HWI-EAS443:3:44:433:914#0/1  
GCTCTTCTAGGTATTTATTTCTTCTCTCATCAAAAGCAGA  
+HWI-EAS443:3:44:433:914#0/1  
a[aY`a`\_W^X]\_`W[[`]\_\_U\_ZXQ[[R[]]^R^¥[¥  
@HWI-EAS443:3:50:1727:236#0/1  
CTGCTTTTGATGAGAGAAGAAATAAATACCTAGAAGAGCA  
+HWI-EAS443:3:50:1727:236#0/1  
[abaaabbbbab`aabba`^babb`baba]abaaababaa  
@HWI-EAS443:3:60:28:1555#0/1  
TCTGCTTTTGATGAGAGAAGAAATAAATACCTAGAAGAGC  
+HWI-EAS443:3:60:28:1555#0/1  
aaa[a^`[^]\_]Y\_aZMQ\_^U`WY^`^\_^`V`Z¥\_\_\_Z\_  
@HWI-EAS443:3:63:478:476#0/1  
TGCTTTTGATGAGAGAAGAAATAAATACCTAGAAGAGCAT  
+HWI-EAS443:3:63:478:476#0/1  
`^aa[^bb`abab`aaaa`]aabb`a\_\_a```aaa^¥X^  
@HWI-EAS443:3:79:50:1104#0/1  
ATGGGCTTGCAGTAGCAAGTGGGCATGACTTCGAAAGGGA  
+HWI-EAS443:3:79:50:1104#0/1  
a`bbaa`b]bb````]X]P`a\_aa`\_Y^`TQLTT\_aaT  
@HWI-EAS443:3:84:747:1387#0/1  
CTTTTGATGAGAGAAGAAATAAATACCTAGAAGAGCATCC  
+HWI-EAS443:3:84:747:1387#0/1  
abbbbbbbbaabbabbbbbbbbaabbaab`bbabaaba`\_  
@HWI-EAS443:3:95:1735:445#0/1  
CTGCTTTTGATGAGAGAAGAAATAAATACCTAGAAGAGCA  
+HWI-EAS443:3:95:1735:445#0/1  
[`a]a`bb`a`]aZ`bbbaa0abbbbbb¥\_baababa\_\_a  
@HWI-EAS443:3:82:716:1355#0/1  
CCATCAGTCTCCATTTGCTCATATGATCGTTTGGTGCCTT  
+HWI-EAS443:3:82:716:1355#0/1  
ZaaV¥XQ^\_Q\_V\_RUZXMYXtb^IOVGYGVZZ¥GUXG¥a  
@HWI-EAS443:3:85:31:1875#0/1  
TCCATTTGCTCATATGATCGTTTGGTGCCTTGAGACGCCA  
+HWI-EAS443:3:85:31:1875#0/1  
¥b[\_V]`TLQUZaZab]abZFS[QP^^SW¥[^^HO]Z]aB  
@HWI-EAS443:3:18:220:1798#0/1  
AACGTGGAATCAATGACCGAAATTTCTGGAGGGATTCTGA  
+HWI-EAS443:3:18:220:1798#0/1  
aWZSOZPJ^^`^`\_`[¥a^]SXQ]U``a]HLPNUNBBBBBB  
@HWI-EAS443:3:22:56:814#0/1  
GTGGAATCAATGACCGAAATTTCTGGAGGGTGGCCTTTA  
+HWI-EAS443:3:22:56:814#0/1  
aWa]¥XX`a]b¥a`a^``aaaa`XZ`Z\_a\_^U^Z^^`\_[[`  
@HWI-EAS443:3:15:1070:1824#0/1  
AAATTTCTGGAGGGGTGAAAATGGACGAAGGACATCTACC

+HWI-EAS443:3:15:1070:1824#0/1  
abaaX\_aa`a[ab¥a0b\_\_adWa`a^a\_^`\_U\_a`W`a\_`  
@HWI-EAS443:3:35:1218:616#0/1  
CGAAATTTCTGGAGGGGTGAAAATGGACGAAGGATTAGAG  
+HWI-EAS443:3:35:1218:616#0/1  
Z^UTN]aaaba\_^aabbVa¥[aXaaaaQa\_\_b^\_X``\_U]  
@HWI-EAS443:3:60:394:751#0/1  
CAAACGTGGAATCAATGACCGAAATTTCTGGAGGCCAGGC  
+HWI-EAS443:3:60:394:751#0/1  
aaaba`^\_] ^aaaaaa]aaaa`a\_a` `` `a\_^` \_\_\_\_` [X\_  
@HWI-EAS443:3:46:1180:649#0/1  
CGAAATTTCTGGAGGGGTGAAAATGGACGAAGGACTGGGT  
+HWI-EAS443:3:46:1180:649#0/1  
`a[¥U[[\_]\_¥P[b\_\_\_U\_¥KZ\_ZZX]\_^XH¥]]UYU]\_V  
@HWI-EAS443:3:78:121:1411#0/1  
ACACCGTCCTTCGTCCATTTTCACCCCTCCAGAAATTTTCG  
+HWI-EAS443:3:78:121:1411#0/1  
a`Z`\_]X\_a`[^TVZ\_P¥\_^[^`a`\_] [^[YYSVVVS^\_¥  
@HWI-EAS443:3:78:162:724#0/1  
GCCCCCAGAAATTTTCGGTCATTGATTCCACGTTTGATC  
+HWI-EAS443:3:78:162:724#0/1  
Y` ``\_WNY¥WZTOT\_[^¥^[FWX][\_UQZP]\_aa^`][GNU  
@HWI-EAS443:3:94:154:568#0/1  
TCCCCTTCAGAAATTTTCGGTCATTGATTCCACGTTTGATC  
+HWI-EAS443:3:94:154:568#0/1  
`aaSaZ¥^W\_¥aa\_aUS]\_I`aYX\_ZX`\_\_ZFV¥aQXY^\_  
@HWI-EAS443:3:16:126:1796#0/1  
CAAACGTGGAATCAATGACCGAAATTTCTGGAGGGGCAAA  
+HWI-EAS443:3:16:126:1796#0/1  
abaa[aN\_\_`]TaUVW\_^[OUY\_^a]\_^X]P^]RU¥\_^`Y  
@HWI-EAS443:3:30:1152:708#0/1  
CAAACGTGGAATCAATGACCGAAATTTCTGGAGGGGCGAA  
+HWI-EAS443:3:30:1152:708#0/1  
a\_aXRbX`\_aa`^R\_aabaabaaaa[a]XXa^^]Ga\_\_  
@HWI-EAS443:3:36:1591:333#0/1  
TTTCTGGAGGGGTGAAAATGGACGAAGGACAAGGATCGCT  
+HWI-EAS443:3:36:1591:333#0/1  
ab```bbYb`baHa`\_aaaa\_a¥¥]``¥\_W`¥^VV[\_¥Y^  
@HWI-EAS443:3:85:160:785#0/1  
CAAACGTGGAATCAATGACCGAAATTTCTGGAGGGGAAA  
+HWI-EAS443:3:85:160:785#0/1  
aaaa`aW`a¥]aaTV[aZ\_``[\_S\_\_\_\_]\_Y\_V[[[]\_`^S¥V  
@HWI-EAS443:3:11:1072:709#0/1  
CCCTCCAGAAATTTTCGGTCATTGATTCCACGTTTGCTCAT  
+HWI-EAS443:3:11:1072:709#0/1  
a\_X\_ZVV\_YP¥b^\_K^R0` [ `¥PN][X\_`XXXaZNFQGUU  
@HWI-EAS443:3:18:736:626#0/1  
GTCCATTTTCACCCCTCCAGAGATTTTCGGTCATTGATTCC  
+HWI-EAS443:3:18:736:626#0/1  
aY\_`^aa\_aaa`aZa[``^^[ULZ\_^^`\_YVW]]]YVX^W



@HWI-EAS443:3:1:1425:1842#0/1  
CAATGACCGAAATTTCTGGTGGGGTAAAAATGGACGAAGG  
+HWI-EAS443:3:1:1425:1842#0/1  
[bbbbbb`abbaabaa\_bb[J[aa]XZW^^abbab^]]BBB  
@HWI-EAS443:3:1:1686:497#0/1  
ATCAGAATGATCAAACGTGGAATCAATGACCAAAATTTCT  
+HWI-EAS443:3:1:1686:497#0/1  
aa[`baa`ba`]a`Za^a\_`a`W`a`a^Z\_Z`^^^`BB  
@HWI-EAS443:3:20:827:2032#0/1  
CAGAATGATCAAACGTGGTATCAATGACCGAAATTTCTGG  
+HWI-EAS443:3:20:827:2032#0/1  
aW^\_aaYaW0¥[\_ba^a`P]aT`\_`^\_aa\_] [¥]a\_\_¥^^  
@HWI-EAS443:3:24:976:1022#0/1  
CAATGACCGAAATTTCTGGAGGGGAGAAAATGGACGAAGG  
+HWI-EAS443:3:24:976:1022#0/1  
\_]a[`ba^\_V]ZbbaXaa[``]aaIb`\_`[XaX`]^a`\_a  
@HWI-EAS443:3:32:1738:328#0/1  
CAATGACTGAAATTTCTGGAGGGGTAAAAATGGACGAAGG  
+HWI-EAS443:3:32:1738:328#0/1  
aab`aaa¥baaaaa]aaa\_aa\_`Ya\_`\_\_a``\_\_```aa  
@HWI-EAS443:3:38:1400:1242#0/1  
CCCTCCAGAAATTTCTGGTCATTGATTCCACTTTTGATCAT  
+HWI-EAS443:3:38:1400:1242#0/1  
ab\_Y`a^\_]`aYZ\_¥^YR`X^`]`^\_`^LFX]¥NKZH¥P  
@HWI-EAS443:3:40:520:355#0/1  
CAATGACCGAAATTTCTGGAGGGGTAAAAATGAACGAAGG  
+HWI-EAS443:3:40:520:355#0/1  
abbbbbbbb`a]bbaabaa^aaaaZ¥FWP\_BBBBBBBBBB  
@HWI-EAS443:3:47:471:135#0/1  
ATCAGAATGATCAAACGTGGAATCAATGACCGAAGTTTCT  
+HWI-EAS443:3:47:471:135#0/1  
¥^[M`^V¥\_UU]Y¥Y\_\_0]Q\_a\_\_WR]¥ZY\_]Z]F]X\_UX  
@HWI-EAS443:3:67:1374:1347#0/1  
GTCCTTCGTCCATTTTACCCCTCCAGAAATTTTCGCTCAT  
+HWI-EAS443:3:67:1374:1347#0/1  
aW\_Y]a\_YY^¥\_aa]U^\_a^¥ZWY\_\_\_\_\_X[Y^X^OW]DLYX  
@HWI-EAS443:3:67:420:1093#0/1  
CCGAAATTTCTGGAGTGGTAAAAATGGACGAAGGACAAGG  
+HWI-EAS443:3:67:420:1093#0/1  
aaTYX]a``]`^a¥a^\_Z0^^WMX[WQ^YZWWW¥^[[YUN  
@HWI-EAS443:3:6:1539:1200#0/1  
CACCCCTCCAGAAATTTCTGGTCATTGTTTCCACGTTTGAT  
+HWI-EAS443:3:6:1539:1200#0/1  
aaZa`\_]babb`[`a^UaaZU]aX\_F¥ZQJUYaWU^[]B  
@HWI-EAS443:3:75:763:384#0/1  
CTTGTCTTCGTCCCTTTTACCCCTCCAGAAATTTCTGGT  
+HWI-EAS443:3:75:763:384#0/1  
`ab[X`\_]¥Z`^M`ab`\_]V^a`aa\_bXV\_a]aaX\_V  
@HWI-EAS443:3:7:706:1747#0/1  
GTTAATCAGAATGATCAAACGTGGAATCTATGACCGAAAT

+HWI-EAS443:3:7:706:1747#0/1  
a\_aaaaaba`aa[`a`a`a`^a\_\_aa¥`Yaa`]]\_^^W`  
@HWI-EAS443:3:88:506:1348#0/1  
CAATGACCGAAATTTCTGGAGGGGTGAAAATAGACGAAGG  
+HWI-EAS443:3:88:506:1348#0/1  
a``^Y`abab¥[aa\_XZ¥ZP\_Z^SMa¥]Q\_\_`X``\_] [TN  
@HWI-EAS443:3:95:238:269#0/1  
GAATGATCAAACGTGGAATCAATGACCGAAATTCCTGGAG  
+HWI-EAS443:3:95:238:269#0/1  
aa``a`\_a[\_^`X\_^\_]UUTXXXUUXUYX]YUXYYUXU  
@HWI-EAS443:3:97:1681:1057#0/1  
AATGACCGAAATTTCTGGAGGGGTGAAGATGGACGAAGGA  
+HWI-EAS443:3:97:1681:1057#0/1  
TXSa)`¥`\_]\_b\_¥T\_bWRVab]a¥\_I\_bbUIX\_WK^Y¥  
@HWI-EAS443:3:81:631:389#0/1  
GGCATCAATGACCGAAATTTCTGGAGGGGTGAAAATGGAC  
+HWI-EAS443:3:81:631:389#0/1  
S¥TXQZQ¥\_\_VaaW¥`\_LZ\_ZZab^[bb]Gaa¥RT¥`]]¥  
@HWI-EAS443:3:9:328:363#0/1  
GTGGAATCAATGACCGAAATTTCTGGAGGGGTGAAAAGGG  
+HWI-EAS443:3:9:328:363#0/1  
\_X]U]\_S[]\_\_`\_\_\_^LX\_Z[VVX^US¥RU[Q¥PMUV¥XY  
@HWI-EAS443:3:65:1336:730#0/1  
TTTTCACCCCTCCAGAAATTTNGGTCATTGATTCCACGTT  
+HWI-EAS443:3:65:1336:730#0/1  
`aa`abbb\_a`aaa\_`[aa`ODY`S\_\_`a`^^\_ZW`W`^^  
@HWI-EAS443:3:92:1250:1906#0/1  
CAAACGTGGAATCAATGACCGAAATTTCTNGAGGGGTGAA  
+HWI-EAS443:3:92:1250:1906#0/1  
S[UbJ`WVX¥K)`¥¥¥aWX\_[a]Kb]\_H¥DT`b]^ [VbaI  
@HWI-EAS443:3:93:749:524#0/1  
GTCNATTTTCCACCCCTCCAGAAATTTTCGGTCATTGATTCC  
+HWI-EAS443:3:93:749:524#0/1  
`W¥DX`¥`aZN[W[`\_W]¥\_ZaZa`]W^\_¥WUa[^Y\_XM\_  
@HWI-EAS443:3:94:582:1351#0/1  
AATCAATGACCGNAATTTCTGGAGGGGTGAAAATGGACGA  
+HWI-EAS443:3:94:582:1351#0/1  
`]abab`abaa[D^aaaaa```aa`¥V\_\_\_\_```a\_a]]Y  
@HWI-EAS443:3:13:607:639#0/1  
ATCAAACGTGGAATCAATGACCGAAATTTCTGGAGGGGGG  
+HWI-EAS443:3:13:607:639#0/1  
\_bbabbbb\_b`\_ab`aabaaaa\_aa`aa`aa^XaaaYG¥  
@HWI-EAS443:3:20:1630:431#0/1  
ATCAAACGTGGAATCAATGACCGAAATTTCTGGAGGGGGG  
+HWI-EAS443:3:20:1630:431#0/1  
aaaa¥^\_b]]\_a\_aV`^baa^\_a`\_\_\_\_`]¥aaaXb\_\_¥F^  
@HWI-EAS443:3:28:1392:51#0/1  
ATCAGAATGATCAAACGTGGAATCAATGACCGAAATTTAT  
+HWI-EAS443:3:28:1392:51#0/1  
`\_0`aaabbaaV^¥\_¥`Wa[WY```\_a¥\_\_U\_\_\_\_[^`WG^

@HWI-EAS443:3:48:990:964#0/1  
TACCTTGCCTTCGTCCATTTTCACCCCTCCAGAAATTC  
+HWI-EAS443:3:48:990:964#0/1  
aa\_a\_aa`¥\_``a¥^U\_`aa\_^\_WQ`W]]^^^Y]WX^¥X  
@HWI-EAS443:3:77:1680:1339#0/1  
CGCCCCTCCAGAAATTTTCGGTCATTGATTCCACGTTTGAT  
+HWI-EAS443:3:77:1680:1339#0/1  
aa`b`bb^bbb`bbbbabb`abbaabba\_aaaaba``b  
@HWI-EAS443:3:82:703:433#0/1  
CCCCCTCCAGAAATTTTCGGTCATTGATTCCACGTTTGATT  
+HWI-EAS443:3:82:703:433#0/1  
aa\_`]aaa\_a`¥`ab`aba^[\_a\_]a^`a[a\_aaa\_ZG  
@HWI-EAS443:3:8:1126:160#0/1  
CGCCCCTCCAGAAATTTTCGGTCATTGATTCCACGTTTGAT  
+HWI-EAS443:3:8:1126:160#0/1  
a`OQV^[baaba]aa`¥UY`X]\_\_a\_\_RUV0^Y\_YWaa\_X  
@HWI-EAS443:3:31:599:273#0/1  
GATCAATGACCGAAATTTCTGGAGGGGTGAAAATGGACGA  
+HWI-EAS443:3:31:599:273#0/1  
abaaa\_bbbba\_]\_\_a`aaaa\_baa\_Za¥`\_``a\_\_\_\_\_`  
@HWI-EAS443:3:36:1534:2037#0/1  
CACGTGGAATCAATGACCGAAATTTCTGGAGGGGTGAAAA  
+HWI-EAS443:3:36:1534:2037#0/1  
aa]^Zaa`]aa\_a¥]Uaa[`]\_\_^\_a\_[\_a]^U\_a]X`  
@HWI-EAS443:3:38:557:565#0/1  
CGTCCTTCGTCCATTTTCACCCCTCCAGAAATTTTCGGTCA  
+HWI-EAS443:3:38:557:565#0/1  
a\_FZaaab\_W``^\_a\_[`Y]aaa`a\_[`¥\_Ya^V[U[X]Y  
@HWI-EAS443:3:43:701:539#0/1  
NAAACGTGGAATCAATGACCGAAATTTCTGGAGGGGTGAA  
+HWI-EAS443:3:43:701:539#0/1  
DKPUYXVYVYVXYXXYWUVYXXXYYYYYYYYYXYYXYY  
@HWI-EAS443:3:45:1501:1887#0/1  
GAATGATCAAACGTGGAATCAATGACCGAAATTTCTGGAT  
+HWI-EAS443:3:45:1501:1887#0/1  
aaa¥PRaaaaXWxba`\_a^a`ba\_a`aaa`aa^Wa`]^[  
@HWI-EAS443:3:51:1423:2017#0/1  
CGTCCTTCGTCCATTTTCACCCCTCCAGAAATTTTCGGTCA  
+HWI-EAS443:3:51:1423:2017#0/1  
a`\_YX¥\_\_a`RQ[aba`^S^^^¥[a¥Z]]XI\_Y^¥aaQY\_  
@HWI-EAS443:3:62:248:1288#0/1  
CCCCCTCCAGAAATTTTCGGTCATTGATTCCACGTTTGATC  
+HWI-EAS443:3:62:248:1288#0/1  
aaaaaaaaa]\_aaaaaa^\_`^aa\_\_\_\_\_``a`\_¥^¥¥[PX\_`  
@HWI-EAS443:3:68:1166:869#0/1  
AGTCCTTCGTCCATTTTCACCCCTCCAGAAATTTTCGGTCA  
+HWI-EAS443:3:68:1166:869#0/1  
^YX¥a`abb]\_aab`abYa\_¥[`]`ZRJRT\_WY\_`ZZ]N\_W  
@HWI-EAS443:3:87:1716:1052#0/1  
GGTCCTTCGTCCATTTTCACCCCTCCAGAAATTTTCGGTCA

+HWI-EAS443:3:87:1716:1052#0/1  
ab^V^baab`¥W\_baa`¥a\_]^^\_] []a^a\_\_`\_^¥\_^`  
@HWI-EAS443:3:100:1758:93#0/1  
CGTGGAATCAATGACCGAAATTTCTGGAGGGGTGAAAATG  
+HWI-EAS443:3:100:1758:93#0/1  
ab¥¥a`K]N]bbba^aba[[a`^PabbRbb\_a`Y\_^]S[b  
@HWI-EAS443:3:10:1003:669#0/1  
AATCAATGACCGAAATTTCTGGAGGGGTGAAAATGGACGA  
+HWI-EAS443:3:10:1003:669#0/1  
a^`\_^aa\_a[\_`a\_aaaa]\_`Z[`a`V^a`^`\_aaa\_\_`\_`  
@HWI-EAS443:3:10:967:1147#0/1  
AAACGTGGAATCAATGACCGAAATTTCTGGAGGGGTGAAA  
+HWI-EAS443:3:10:967:1147#0/1  
a]]]aTY`\_a^a\_```][`a\_Z^`[\_``\_aVa]V¥N^Y[X  
@HWI-EAS443:3:11:1100:317#0/1  
CAATGACCGAAATTTCTGGAGGGGTGAAAATGGACGAAGG  
+HWI-EAS443:3:11:1100:317#0/1  
aa`ba`aabYIR]aa^]ab]]aaaQ0`^[SaaS¥Y\_]\_`  
@HWI-EAS443:3:11:1648:394#0/1  
CAAACGTGGAATCAATGACCGAAATTTCTGGAGGGGTGAA  
+HWI-EAS443:3:11:1648:394#0/1  
a`]]`aa]\_aaaa¥]\_a`¥^RVX¥Z]^\_S\_a\_V``¥^Y[VS  
@HWI-EAS443:3:11:404:1467#0/1  
CAAACGTGGAATCAATGACCGAAATTTCTGGAGGGGTGAA  
+HWI-EAS443:3:11:404:1467#0/1  
a\_aaaXN^^`\_[aa\_\_\_X``aY\_¥\_Z¥T¥`^Z`^\_]Q`XZ  
@HWI-EAS443:3:12:795:308#0/1  
CACCCCTCCAGAAATTTCTGGTCATTGATTCCACGTTTGAT  
+HWI-EAS443:3:12:795:308#0/1  
a[b\_UR]``^XY[^\_a`aa]Y[]`\_]\_ZR]]aZ\_T[UYTX  
@HWI-EAS443:3:12:906:27#0/1  
GACGGAAGTGGATGAGAGA ACTCATCCTTTATGACAAAG  
+HWI-EAS443:3:12:906:27#0/1  
aa`bb`a`a^aa^aa\_aYa^^\_Y]^¥W[S^[]^[]YZ]  
@HWI-EAS443:3:13:307:1597#0/1  
ACCGAAATTTCTGGAGGGGTGAAAATGGACGAAGGACAAG  
+HWI-EAS443:3:13:307:1597#0/1  
]aa¥¥`\_¥b```\_^Z¥`Z]`aaabb```^``aaa`aaaa  
@HWI-EAS443:3:13:311:785#0/1  
TCCTTCGTCATTTTCACCCCTCCAGAAATTTCTGGTCATT  
+HWI-EAS443:3:13:311:785#0/1  
[b^XZ`b¥a^[[ab`\_bW` `b`W`]aZXY¥]]a^RJOW\_\_  
@HWI-EAS443:3:14:1191:304#0/1  
GTGGAATCAATGACCGAAATTTCTGGAGGGGTGAAAATGG  
+HWI-EAS443:3:14:1191:304#0/1  
a^b`^`\_\_`^`\_^^`a^\_]`\_]a`\_Y`^`\_Y`X¥VW^^]  
@HWI-EAS443:3:14:1407:1420#0/1  
TTTTCACCCCTCCAGAAATTTCTGGTCATTGATTCCACGTT  
+HWI-EAS443:3:14:1407:1420#0/1  
]a`ab`¥¥¥`^YZ^\_Va¥WY``¥^V¥¥V``^]\_XN¥[aW`

@HWI-EAS443:3:14:152:1028#0/1  
GTTAATCAGAATGATCAAACGTGGAATCAATGACCGAAAT  
+HWI-EAS443:3:14:152:1028#0/1  
a`aa`aaaa`aa`^`\_¥a` [ ]^^]\_\_` ]\_\_\_\_\_¥a]`\_^  
@HWI-EAS443:3:14:380:837#0/1  
CGTGAATCAATGACCGAAATTTCTGGAGGGGTGAAAATG  
+HWI-EAS443:3:14:380:837#0/1  
ab\_` `abaababaabaaa]¥^`aabba`aa`aYa]ZL\_\_a  
@HWI-EAS443:3:14:636:102#0/1  
CACCCCTCCAGAAATTTCTGGTCATTGATTCCACGTTTGAT  
+HWI-EAS443:3:14:636:102#0/1  
aaaaW] [\_ZZ^YLRT¥^] [UYTPTW]]OWZZ^R¥X]WZUX  
@HWI-EAS443:3:14:917:1969#0/1  
CAGAAATTTCTGGTCATTGATTCCACGTTTGATCATTCTGA  
+HWI-EAS443:3:14:917:1969#0/1  
aa\_a` ]\_ [X`a\_^¥\_ZT]\_]Xa]\_\_\_PU\_`^¥a¥XX^^\_  
@HWI-EAS443:3:15:1306:128#0/1  
CAAACGTGGAATCAATGACCGAAATTTCTGGAGGGGTGAA  
+HWI-EAS443:3:15:1306:128#0/1  
]`bbbbU`^`bb[abbababa]bbaba]bbb\_a`Uaab`\_  
@HWI-EAS443:3:15:760:1195#0/1  
CAAACGTGGAATCAATGACCGAAATTTCTGGAGGGGTGAA  
+HWI-EAS443:3:15:760:1195#0/1  
`Ybb`babba\_\_`¥Wabbbab[bbb`bbbbba` ``^Rbab  
@HWI-EAS443:3:15:767:546#0/1  
AATCAATGACCGAAATTTCTGGAGGGGTGAAAATGGACGA  
+HWI-EAS443:3:15:767:546#0/1  
a`abbaa\_U`abaa]aab`bab` ``^aVa`Pa]a` `a` ``  
@HWI-EAS443:3:16:1184:1608#0/1  
CAGAATGATCAAACGTGGAATCAATGACCGAAATTTCTGG  
+HWI-EAS443:3:16:1184:1608#0/1  
J¥\_WWTaZ\_Vb\_[Xa[¥`YQY\_aaaLa`a^baUZaX`\_b`  
@HWI-EAS443:3:16:1413:411#0/1  
AATCAATGACCGAAATTTCTGGAGGGGTGAAAATGGACGA  
+HWI-EAS443:3:16:1413:411#0/1  
abb]]]``\_Z`\_` `abaaaaaaaaaaaWbY]]]aaa¥OZ¥  
@HWI-EAS443:3:16:1660:705#0/1  
CGTGAATCAATGACCGAAATTTCTGGAGGGGTGAAAATG  
+HWI-EAS443:3:16:1660:705#0/1  
Va\_` `¥a^a` ``¥S\_Z`aaaa`^\_a^^[\_R\_RIU]ZaJ\_a  
@HWI-EAS443:3:16:471:630#0/1  
GAATGATCAAACGTGGAATCAATGACCGAAATTTCTGGAG  
+HWI-EAS443:3:16:471:630#0/1  
aaaaaa` `aaaaXa`¥`\_a\_]`^` `` `a`\_`\_`^^]`^^  
@HWI-EAS443:3:16:639:254#0/1  
TTGTCCTTCGTCCATTTTCACCCCTCCAGAAATTTCTGGTC  
+HWI-EAS443:3:16:639:254#0/1  
Z]aZ`a\_bb]¥YaU¥a\_ZYa\_\_aYT`]aa^[\_a^` ``\_0\_  
@HWI-EAS443:3:17:1256:555#0/1  
AATGACCGAAATTTCTGGAGGGGTGAAAATGGACGAAGGA

+HWI-EAS443:3:17:1256:555#0/1  
aaZ]\_aabb¥P¥baa^¥` [aaaaWaZ[\_Xa`\_^Za[[`\_^  
@HWI-EAS443:3:17:1644:645#0/1  
CTTGTCTTCGTCCATTTTCACCCCTCCAGAAATTTCTGGT  
+HWI-EAS443:3:17:1644:645#0/1  
abbbZ^abb`aa\_aaabbb`aaV\_\_`a`a`XU\_a\_VT]]  
@HWI-EAS443:3:17:269:1679#0/1  
GATCAAACGTGGAATCAATGACCGAAATTTCTGGAGGGGT  
+HWI-EAS443:3:17:269:1679#0/1  
]S`babb\_\_Ya`bbaaaaaabba`b\_aaaaa[]`a`Y  
@HWI-EAS443:3:17:396:216#0/1  
GATCAAACGTGGAATCAATGACCGAAATTTCTGGAGGGGT  
+HWI-EAS443:3:17:396:216#0/1  
a)`a\_\_X^aS]a\_\_\_\_[Y^`\_a^[¥¥[a\_\_Y\_a]]`\_\_\_\_0  
@HWI-EAS443:3:18:1130:1178#0/1  
TCAGAATGATCAAACGTGGAATCAATGACCGAAATTTCTG  
+HWI-EAS443:3:18:1130:1178#0/1  
aabba¥aba]aba^aa\_baaaba^aa^]aZ^aaaa`Yaa  
@HWI-EAS443:3:18:1183:1666#0/1  
GTTAATCAGAATGATCAAACGTGGAATCAATGACCGAAAT  
+HWI-EAS443:3:18:1183:1666#0/1  
`O\_¥a`TX`PF¥X0\_\_YX\_TTZ¥^ZXHHSYXYRSX[MW  
@HWI-EAS443:3:18:1459:1145#0/1  
GTGGAATCAATGACCGAAATTTCTGGAGGGGTGAAAATGG  
+HWI-EAS443:3:18:1459:1145#0/1  
a\_\_baaba]JVba^ab`XQ[aXZ]a`YaaY^HaVG[T¥\_Z  
@HWI-EAS443:3:18:38:529#0/1  
ATGACCGAAATTTCTGGAGGGGTGAAAATGGACGAAGGAC  
+HWI-EAS443:3:18:38:529#0/1  
ab\_`ba^`baabab\_VaaaaXa[]Z\_aaa`a\_\_a\_[^  
@HWI-EAS443:3:19:1325:1416#0/1  
CCTTGTCTTCGTCCATTTTCACCCCTCCAGAAATTTCTGG  
+HWI-EAS443:3:19:1325:1416#0/1  
abaaa[¥[VY^b¥ababZaaaaZ`¥aaaa`a\_\_\_\_`\_\_¥`Z  
@HWI-EAS443:3:19:258:1620#0/1  
AATGACCGAAATTTCTGGAGGGGTGAAAATGGACGAAGGA  
+HWI-EAS443:3:19:258:1620#0/1  
a`aabaaa`ba`aaaba`a\_XL[\_aaa\_\_^a\_aa\_^Za  
@HWI-EAS443:3:19:830:1553#0/1  
GTGGAATCAATGACCGAAATTTCTGGAGGGGTGAAAATGG  
+HWI-EAS443:3:19:830:1553#0/1  
aT`\_`\_a\_^`\_\_`\_`V¥X\_\_\_\_\_`T^]VZR^Y]X^]^^  
@HWI-EAS443:3:1:1386:856#0/1  
CAAACGTGGAATCAATGACCGAAATTTCTGGAGGGGTGAA  
+HWI-EAS443:3:1:1386:856#0/1  
aaaa¥]abbabbaabaaWVabaaaba\_aa`\_ba\_aV`aB  
@HWI-EAS443:3:1:1443:788#0/1  
GAATGATCAAACGTGGAATCAATGACCGAAATTTCTGGAG  
+HWI-EAS443:3:1:1443:788#0/1  
^Ya^¥¥Y\_ba][a`]T¥`aa\_\_abXU^aa]^a`]Ra`aBB

@HWI-EAS443:3:1:1723:2031#0/1  
ATTTTCCACCCCTCCAGAAATTTTCGGTCATTGATTCCACGT  
+HWI-EAS443:3:1:1723:2031#0/1  
K]¥`aL\_Y\_W]¥\_a¥a^\_a^`^¥bRHK`\_`aV^`UDTB  
@HWI-EAS443:3:1:616:714#0/1  
CAAACGTGGAATCAATGACCGAAATTTCTGGAGGGGTGAA  
+HWI-EAS443:3:1:616:714#0/1  
aaa][Vaa`\_`^¥Zaa`\_\_`Z`\_`a\_a]a`[[¥b\_a¥\_BB  
@HWI-EAS443:3:20:752:1642#0/1  
ATCAGAATGATCAAACGTGGAATCAATGACCGAAATTTCT  
+HWI-EAS443:3:20:752:1642#0/1  
\_bb¥YY`^Xa`a\_a`a¥[`¥`\_aaV\_\_a¥a¥]a`\_^`  
@HWI-EAS443:3:21:1176:1261#0/1  
CCCTCCAGAAATTTTCGGTCATTGATTCCACGTTTGATCAT  
+HWI-EAS443:3:21:1176:1261#0/1  
a`a¥baX[^`ab`Y`^bYaaa[U¥aa`\_aZ`Yaaa`aaa  
@HWI-EAS443:3:23:1016:1644#0/1  
GTGGAATCAATGACCGAAATTTCTGGAGGGGTGAAAATGG  
+HWI-EAS443:3:23:1016:1644#0/1  
`W]^`^`a\_\_`^`a`[]^¥a^\_T\_\_Y\_a]^R¥ZW^X[Z  
@HWI-EAS443:3:23:1146:1849#0/1  
CACCCCTCCAGAAATTTTCGGTCATTGATTCCACGTTTGAT  
+HWI-EAS443:3:23:1146:1849#0/1  
aaab\_aababbbaa`aaaab¥^a`aa`a`\_a```]`b\_\_\_\_  
@HWI-EAS443:3:23:714:909#0/1  
ACCGAAATTTCTGGAGGGGTGAAAATGGACGAAGGACAAG  
+HWI-EAS443:3:23:714:909#0/1  
ababa]\_aaaaaaa\_aaaa]a`\_`\_`a^aaa\_^\_\_\_\_^\_^\_  
@HWI-EAS443:3:23:798:1728#0/1  
CTTGTCTTCGTCATTTTCACCCCTCCAGAAATTTTCGGT  
+HWI-EAS443:3:23:798:1728#0/1  
``\_`\_ab`aTGYaa`aa`a^a\_UY[`a\_^]a`Z\_^\_\_\_\_Y  
@HWI-EAS443:3:24:1405:1725#0/1  
CATTTTCCACCCCTCCAGAAATTTTCGGTCATTGATTCCACG  
+HWI-EAS443:3:24:1405:1725#0/1  
aab¥baab\_M`ba`\_¥`]\_[Q]\_aa[Wb\_a`IYa^`\_a]\_  
@HWI-EAS443:3:24:184:662#0/1  
CCTTCGTCCATTTTCACCCCTCCAGAAATTTTCGGTCATTG  
+HWI-EAS443:3:24:184:662#0/1  
R\_[V¥T\_¥\_T¥`\_`^¥X¥YYZW\_X\_]\_XW¥XX\_T\_U¥V\_T^  
@HWI-EAS443:3:24:18:558#0/1  
CAATGACCGAAATTTCTGGAGGGGTGAAAATGGACGAAGG  
+HWI-EAS443:3:24:18:558#0/1  
abb`\_`abbbaa`baaabbb^aaaa\_a]``aa\_[`^`]^a\_  
@HWI-EAS443:3:24:302:800#0/1  
CAAACGTGGAATCAATGACCGAAATTTCTGGAGGGGTGAA  
+HWI-EAS443:3:24:302:800#0/1  
aa\_]`^X]]]aa]YZ`[¥`^UTQ^a`aaUTJ^UaUPUPN  
@HWI-EAS443:3:24:960:1631#0/1  
CACCCCTCCAGAAATTTTCGGTCATTGATTCCACGTTTGAT

+HWI-EAS443:3:24:960:1631#0/1  
a^`YVQ`a`\_#b#RVVX\_QZPXQ]a\_W\_aaa[ZNXa^  
@HWI-EAS443:3:25:1176:527#0/1  
CACCCCTCCAGAAATTTTCGGTCATTGATTCCACGTTTGAT  
+HWI-EAS443:3:25:1176:527#0/1  
^abbabbbb`b`^abba#`aabbabbbb`ab^b`bbbaa  
@HWI-EAS443:3:25:1498:1662#0/1  
CGTGAATCAATGACCGAAATTTCTGGAGGGGTGAAAATG  
+HWI-EAS443:3:25:1498:1662#0/1  
S\_\_`bba^a#^#babab[ba`bbaba#^a`\_aYbaa`aW`  
@HWI-EAS443:3:25:59:720#0/1  
CACCCCTCCAGAAATTTTCGGTCATTGATTCCACGTTTGAT  
+HWI-EAS443:3:25:59:720#0/1  
abbabaaab`a`aaaaa\_a]a``\_\_\_\_\_a\_`]\_^\_#  
@HWI-EAS443:3:26:1637:945#0/1  
CAGAATGATCAAACGTGAATCAATGACCGAAATTTCTGG  
+HWI-EAS443:3:26:1637:945#0/1  
a`#Zbbbabab\_bab\_baabb]aabaa^Za`baaa`abba  
@HWI-EAS443:3:27:1306:1856#0/1  
CAAACGTGAATCAATGACCGAAATTTCTGGAGGGGTGAA  
+HWI-EAS443:3:27:1306:1856#0/1  
aab]aa[\_S`bab`a`a`\_abaa^ba`^a\_a`]a``Ga`^  
@HWI-EAS443:3:27:1443:513#0/1  
CAAACGTGAATCAATGACCGAAATTTCTGGAGGGGTGAA  
+HWI-EAS443:3:27:1443:513#0/1  
aa\_bZb`bbabbaabaa]aba^Ua\_\_]bbaTabbaVb^#  
@HWI-EAS443:3:27:1615:384#0/1  
CAAACGTGAATCAATGACCGAAATTTCTGGAGGGGTGAA  
+HWI-EAS443:3:27:1615:384#0/1  
aaba`bbbabbb`bbbbbaabbbabbbabaaababa\_aab  
@HWI-EAS443:3:27:569:1339#0/1  
AAACGTGAATCAATGACCGAAATTTCTGGAGGGGTGAAA  
+HWI-EAS443:3:27:569:1339#0/1  
W#^a\_VU\_\_bab]]\_]`b\_]`Z^`^]aa]\_#^a\_T\_a^^  
@HWI-EAS443:3:28:1429:525#0/1  
AACGTGAATCAATGACCGAAATTTCTGGAGGGGTGAAAA  
+HWI-EAS443:3:28:1429:525#0/1  
aaababababaaabbaaabaabba\_bbb`bbaa\_b`````  
@HWI-EAS443:3:29:1567:1359#0/1  
GAAATTTTCGGTCATTGATTCCACGTTTGATCATTCTGATT  
+HWI-EAS443:3:29:1567:1359#0/1  
\_a[a\_aabaa^aba]`aa`\_a\_a`aaa^aa`aaa`aaaa  
@HWI-EAS443:3:2:1085:1769#0/1  
GACGAAAGTGGATGAGAGAACTCATCCTTTATGACAAAG  
+HWI-EAS443:3:2:1085:1769#0/1  
`]\_^`^`aab\_ba`ab`ab\_]OY]X`]\_W\_[[\_a\_Z\_]W\_  
@HWI-EAS443:3:2:1347:90#0/1  
GACGAAAGTGGATGAGAGAACTCATCCTTTATGACAAAG  
+HWI-EAS443:3:2:1347:90#0/1  
a^]a`]^`]^`^[\_Z\_^^UW[^^[Y[^YVZ][[Y[YB



@HWI-EAS443:3:2:396:1653#0/1  
ATCAGAATGATCAAACGTGGAATCAATGACCGAAATTTCT  
+HWI-EAS443:3:2:396:1653#0/1  
a^aaa]S[a`\_]YZ\_I0¥]¥^\_0\_^¥FFa[¥\_Y^YH[  
@HWI-EAS443:3:30:1192:1385#0/1  
ATTTTCACCCCTCCAGAAATTTTCGGTCATTGATTCCACGT  
+HWI-EAS443:3:30:1192:1385#0/1  
`abb`aaaaaaaa`aa`a`a`Z`a`\_\_a\_]`Z\_\_  
@HWI-EAS443:3:30:1496:255#0/1  
ATCAAACGTGGAATCAATGACCGAAATTTCTGGAGGGGTG  
+HWI-EAS443:3:30:1496:255#0/1  
`^[\_aaa`Uab`b`aa¥^^ab^a^][^V`aa\_a\_aaZa  
@HWI-EAS443:3:30:1745:1277#0/1  
GACGGAAAGTGGATGAGAGAACTCATCCTTTATGACAAAG  
+HWI-EAS443:3:30:1745:1277#0/1  
^Za\_[YOY][\_\_`]¥QWWZTW]UPR¥Z```¥UZTRPWZ^  
@HWI-EAS443:3:30:196:82#0/1  
ATCAGAATGATCAAACGTGGAATCAATGACCGAAATTTCT  
+HWI-EAS443:3:30:196:82#0/1  
`abaa\_aaa`aa]^\_a^aZ`\_^\_a\_]`\_`][J^Z^Y`  
@HWI-EAS443:3:30:252:44#0/1  
CCTTCGTCCATTTTCACCCCTCCAGAAATTTTCGGTCATTG  
+HWI-EAS443:3:30:252:44#0/1  
`abaaaabababbabbaaba`aaa]`aaa`aa\_^`\_\_^  
@HWI-EAS443:3:31:1131:270#0/1  
GAAATTTTCGGTCATTGATTCCACGTTTGATCATTCTGATT  
+HWI-EAS443:3:31:1131:270#0/1  
a^aaa\_\_\_\_[¥S`^[PIR[ZVRVX\_Y^`[U[¥XZ\_]`^YSY[  
@HWI-EAS443:3:31:207:1001#0/1  
ATCAGAATGATCAAACGTGGAATCAATGACCGAAATTTCT  
+HWI-EAS443:3:31:207:1001#0/1  
aa``aaa^a`[`aa`¥¥][`a`a`]Y`````^^`  
@HWI-EAS443:3:31:507:868#0/1  
CTCCAGAAATTTTCGGTCATTGATTCCACGTTTGATCATT  
+HWI-EAS443:3:31:507:868#0/1  
aa^aY``a]aaaa`\_a`¥[aY`Sa^^[\_^]\_\_\_][Y]  
@HWI-EAS443:3:32:1589:515#0/1  
GTGGAATCAATGACCGAAATTTTCGGAGGGGTGAAAATGG  
+HWI-EAS443:3:32:1589:515#0/1  
a[X`aa\_\_`a]\_W^X]]]¥U]\_]U]\_\_YN]UUX\_^\_^  
@HWI-EAS443:3:32:259:571#0/1  
AATCAATGACCGAAATTTTCGGAGGGGTGAAAATGGACGA  
+HWI-EAS443:3:32:259:571#0/1  
aaa\_aUb]^aaa`a^a]aaaa^[a`[`X\_X^^``Y]^`^  
@HWI-EAS443:3:32:577:606#0/1  
CACCCCTCCAGAAATTTTCGGTCATTGATTCCACGTTTGAT  
+HWI-EAS443:3:32:577:606#0/1  
ababbbaaaU`ba]baa`a`\_[a`\_\_\_\_a\_\_a]RT\_]S[^  
@HWI-EAS443:3:32:959:1703#0/1  
AATGACCGAAATTTTCGGAGGGGTGAAAATGGACGAAGGA

+HWI-EAS443:3:32:959:1703#0/1  
abaaaaaaaa`aaa`aa\_\_`\_X`\_^\_a`\_`\_]\_\_X^^\_  
@HWI-EAS443:3:33:1204:1632#0/1  
ATTTTCACCCCTCCAGAAATTTTCGGTCATTGATTCCACGT  
+HWI-EAS443:3:33:1204:1632#0/1  
aaaaaaaa\_]`aaaa]a`]^`W\_WX\_]`^PLVNT\_Z]N  
@HWI-EAS443:3:33:1637:928#0/1  
CAATGACCGAAATTTCTGGAGGGGTGAAAATGGACGAAGG  
+HWI-EAS443:3:33:1637:928#0/1  
a``abb`aab`bbbabb`bbaa\_bZ]^`a\_W`]a\_U^[  
@HWI-EAS443:3:33:1702:70#0/1  
CTTCGTCCATTTTCACCCCTCCAGAAATTTTCGGTCATTGA  
+HWI-EAS443:3:33:1702:70#0/1  
XabXa`aVbbbbbbK\_\_\_aabbabbbbbbaaWOTS^abV^  
@HWI-EAS443:3:33:35:1881#0/1  
CCTTCGTCCATTTTCACCCCTCCAGAAATTTTCGGTCATTG  
+HWI-EAS443:3:33:35:1881#0/1  
aba\_ba\_bbaaa`abaabaaZa\_TNZU]\_]`YSV\_]YU  
@HWI-EAS443:3:35:1239:296#0/1  
CACCCCTCCAGAAATTTTCGGTCATTGATTCCACGTTTGAT  
+HWI-EAS443:3:35:1239:296#0/1  
a`^^`a`a`¥aY[[a^[`]YZ]^`\_]^^`\_\_^\_]`RQ  
@HWI-EAS443:3:35:1622:1357#0/1  
CAATGACCGAAATTTCTGGAGGGGTGAAAATGGACGAAGG  
+HWI-EAS443:3:35:1622:1357#0/1  
ababbaababbabbaabb`\_ba\_YMV]I^abbYaYa\_\_W[  
@HWI-EAS443:3:35:37:741#0/1  
CAATGACCGAAATTTCTGGAGGGGTGAAAATGGACGAAGG  
+HWI-EAS443:3:35:37:741#0/1  
a`]aa]aab]UU¥aabaab\_aaaa[b\_^[Uaa\_Y]aZH¥\_  
@HWI-EAS443:3:35:856:1689#0/1  
AATGATCAAACGTGGAATCAATGACCGAAATTTCTGGAGG  
+HWI-EAS443:3:35:856:1689#0/1  
a\_`aa`aa^b¥\_KP¥\_`a^]`S`Y^^¥\_NW\_[\_¥0\_XX  
@HWI-EAS443:3:35:951:1582#0/1  
GTGGAATCAATGACCGAAATTTCTGGAGGGGTGAAAATGG  
+HWI-EAS443:3:35:951:1582#0/1  
a`aaaa`aaba\_]aaaa`aaaa`a\_`a\_^Z]aa```]X  
@HWI-EAS443:3:36:270:1576#0/1  
ACCCCTCCAGAAATTTTCGGTCATTGATTCCACGTTTGATC  
+HWI-EAS443:3:36:270:1576#0/1  
aaabb`baV]a\_`a\_\_a\_\_Ya\_]UW^^a\_\_X^Z^`^\_]`  
@HWI-EAS443:3:36:347:2007#0/1  
GTGGAATCAATGACCGAAATTTCTGGAGGGGTGAAAATGG  
+HWI-EAS443:3:36:347:2007#0/1  
a]¥aaW^bb\_^]abb`b\_]ba`aaaa^aYa`Y¥]Q\_a`a¥  
@HWI-EAS443:3:36:507:829#0/1  
TAATCAGAATGATCAAACGTGGAATCAATGACCGAAATTT  
+HWI-EAS443:3:36:507:829#0/1  
aababa^YW]a\_¥`aa`aYa````^aZa]Y]\_\_R]G[`Y

@HWI-EAS443:3:37:1035:536#0/1  
CAATGACCGAAATTTCTGGAGGGGTGAAAATGGACGAAGG  
+HWI-EAS443:3:37:1035:536#0/1  
abbbbaa^\_^`babbbbaab`bb\_b`]XUaba`aba\_bY  
@HWI-EAS443:3:38:1251:1249#0/1  
GTGGAATCAATGACCGAAATTTCTGGAGGGGTGAAAATGG  
+HWI-EAS443:3:38:1251:1249#0/1  
a\_\_\_\_`a^`^`^`\_\_\_\_a[\_`\_`a\_a`X[[aUTP]]^]]\_U  
@HWI-EAS443:3:38:330:1708#0/1  
CAGAAATTTTCGGTCATTGATTCCACGTTTGATCATTCTGA  
+HWI-EAS443:3:38:330:1708#0/1  
V`^`Z]RO[a^SaV\_VYVSaPYW¥VUTZ^JHU\_]¥PaW\_¥  
@HWI-EAS443:3:38:766:2035#0/1  
CAAACGTGGAATCAATGACCGAAATTTCTGGAGGGGTGAA  
+HWI-EAS443:3:38:766:2035#0/1  
^Vb`aa[aabb[baabbab]aaba\_ab\_a]a\_\_a[[\_^U  
@HWI-EAS443:3:39:1268:1964#0/1  
CCTTCGTCCATTTTCACCCCTCCAGAAATTTTCGGTCATTG  
+HWI-EAS443:3:39:1268:1964#0/1  
a\_bbbb`baaabaaba`X^\_ba`ab`aaa]X`¥TYR]\_X  
@HWI-EAS443:3:39:1495:826#0/1  
CAGAATGATCAAACGTGGAATCAATGACCGAAATTTCTGG  
+HWI-EAS443:3:39:1495:826#0/1  
aabbabb^bbbb`ab^bababababaaa`baZ`aaa^aaX  
@HWI-EAS443:3:39:704:1254#0/1  
GACGGAAAGTGGATGAGAGAACTCATCCTTTATGACAAAG  
+HWI-EAS443:3:39:704:1254#0/1  
aaaa¥]]^XP\_]U^\_YX[ZZ^\_\_^\_^]^`\_]^[`]^\_]`  
@HWI-EAS443:3:39:750:688#0/1  
CACCCCTCCAGAAATTTTCGGTCATTGATTCCACGTTTGAT  
+HWI-EAS443:3:39:750:688#0/1  
aaaa`\_\_`a`Z\_Z]]\_\_`]^]T`^`Z`[¥`\_\_¥ZZZ]U[YU  
@HWI-EAS443:3:3:1134:1382#0/1  
GTTAATCAGAATGATCAAACGTGGAATCAATGACCGAAAT  
+HWI-EAS443:3:3:1134:1382#0/1  
`0`U`\_`X¥¥Y]Z¥QL\_]VL^\_aa^^^PHGWMHSU\_PMBB  
@HWI-EAS443:3:3:1375:636#0/1  
CAATGACCGAAATTTCTGGAGGGGTGAAAATGGACGAAGG  
+HWI-EAS443:3:3:1375:636#0/1  
aab`a`aab`a\_aaaV`a`X^^a\_Ta\_a^`a`\_`a\_\_`Y  
@HWI-EAS443:3:3:517:1843#0/1  
ATCAGAATGATCAAACGTGGAATCAATGACCGAAATTTCT  
+HWI-EAS443:3:3:517:1843#0/1  
a\_^aa`a]a`a^`a`Z¥¥\_\_]a\_\_a^\_\_\_\_]W\_\_X\_`X]UB  
@HWI-EAS443:3:40:1208:594#0/1  
CTCCAGAAATTTTCGGTCATTGATTCCACGTTTGATCATTC  
+HWI-EAS443:3:40:1208:594#0/1  
ababa]`U`ba][XaTT¥a`aTU[^UQY[^W^`ZWWZZ\_]`  
@HWI-EAS443:3:40:494:661#0/1  
AATCAATGACCGAAATTTCTGGAGGGGTGAAAATGGACGA

+HWI-EAS443:3:40:494:661#0/1  
abbaabaaababaa\_aabbbba\_aba^[a`aa`a\_[a``  
@HWI-EAS443:3:40:70:1101#0/1  
CCTTCGTCCATTTTCACCCCTCCAGAAATTTTCGGTCATTG  
+HWI-EAS443:3:40:70:1101#0/1  
SaY`a[FZ`\_\_`¥Zaa¥`aa0Z¥XXPDNQW^a\_X¥YDVX¥  
@HWI-EAS443:3:44:1456:194#0/1  
ATCAGAATGATCAAACGTGGAATCAATGACCGAAATTTCT  
+HWI-EAS443:3:44:1456:194#0/1  
a^`a\_¥S`a`^`T[a\_\_X]T[\_^^^`\_`\_^Xa]¥]^^^¥\_  
@HWI-EAS443:3:44:1653:1143#0/1  
CACCCCTCCAGAAATTTTCGGTCATTGATTCCACGTTTGAT  
+HWI-EAS443:3:44:1653:1143#0/1  
a]¥aa¥aR]OLQ¥P¥`SQSDHNWWRWM]^]SOQ^YWTVUT  
@HWI-EAS443:3:44:544:346#0/1  
CGTCCATTTTCACCCCTCCAGAAATTTTCGGTCATTGATTC  
+HWI-EAS443:3:44:544:346#0/1  
aa^aaaaaaaaa\_a`\_]\_a¥a^[^`^\_]\_^X]Z^^\_^]V  
@HWI-EAS443:3:44:595:1532#0/1  
AATCAATGACCGAAATTTCTGGAGGGGTGAAAATGGACGA  
+HWI-EAS443:3:44:595:1532#0/1  
\_S`a0\_QW\_Y\_`ba`ZYa[aaZPDTJa^W\_a\_ZR`]RZ  
@HWI-EAS443:3:44:68:503#0/1  
CAATGACCGAAATTTCTGGAGGGGTGAAAATGGACGAAGG  
+HWI-EAS443:3:44:68:503#0/1  
ab]`\_abbb\_aabbbbbbb`bbba[baaaabbaa\_b`\_a^  
@HWI-EAS443:3:46:1011:801#0/1  
ATTTTCACCCCTCCAGAAATTTTCGGTCATTGATTCCACGT  
+HWI-EAS443:3:46:1011:801#0/1  
\_`abaa\_aaaaaa]¥`]Z`baaa\_\_W``]a`[aa\_[a^a\_  
@HWI-EAS443:3:46:1732:285#0/1  
GTTAATCAGAATGATCAAACGTGGAATCAATGACCGAAAT  
+HWI-EAS443:3:46:1732:285#0/1  
aaa^Za\_[`][^`\_\_`\_\_\_¥]Ya`]¥^Z^\_\_\_Z[Z^[]Y[  
@HWI-EAS443:3:47:1092:1122#0/1  
CAATGACCGAAATTTCTGGAGGGGTGAAAATGGACGAAGG  
+HWI-EAS443:3:47:1092:1122#0/1  
¥\_abbbbbbbbaabababababbba`baabaabbaabaaba  
@HWI-EAS443:3:47:252:667#0/1  
TCAGAATGATCAAACGTGGAATCAATGACCGAAATTTCTG  
+HWI-EAS443:3:47:252:667#0/1  
aaa^]aaaaaa`\_`a\_b```a^`[a`\_]a^^`a`\_^`\_  
@HWI-EAS443:3:48:246:301#0/1  
CCTTGTCCTTCGTCCATTTTCACCCCTCCAGAAATTTTCGG  
+HWI-EAS443:3:48:246:301#0/1  
abbb\_ababbaa`aS`abbbaa`X^`\_a`aa`a¥a\_a``[  
@HWI-EAS443:3:48:293:2035#0/1  
TAGACGGAAAGTGGATGAGAGAACTCATCCTTTATGACAA  
+HWI-EAS443:3:48:293:2035#0/1  
aaa\_]a\_Z¥``^KI]\_aa\_YZ¥¥\_a^W\_[\_]`\_X]W]^

@HWI-EAS443:3:48:817:232#0/1  
CAAACGTGGAATCAATGACCGAAATTTCTGGAGGGGTGAA  
+HWI-EAS443:3:48:817:232#0/1  
`baa`babaabbaabbbbaabaa`baa^bba`aaa\_^a\_]  
@HWI-EAS443:3:4:1361:738#0/1  
GACGGAAAGTGGATGAGAGAATCATCCTTTATGACAAAG  
+HWI-EAS443:3:4:1361:738#0/1  
a¥abaaabbWbb]aaaa\_b\_a\_^]\_a]X^^\_\_aa\_^`\_]a  
@HWI-EAS443:3:4:1595:1402#0/1  
AATCAATGACCGAAATTTCTGGAGGGGTGAAAATGGACGA  
+HWI-EAS443:3:4:1595:1402#0/1  
\_aa[a¥V\_aIRb`aaaa`aa^]\_aa`Za^¥G`aa\_]GY\_  
@HWI-EAS443:3:4:1740:1307#0/1  
AAACGTGGAATCAATGACCGAAATTTCTGGAGGGGTGAAA  
+HWI-EAS443:3:4:1740:1307#0/1  
[W^aaaa]aaWX`^`U^]``aZX¥\_a`\_aU\_\_Wa^Z]  
@HWI-EAS443:3:4:790:1017#0/1  
TCAAACGTGGAATCAATGACCGAAATTTCTGGAGGGGTGA  
+HWI-EAS443:3:4:790:1017#0/1  
\_\_baba\_0^[]]aa]\_`\_]\_`a]`aa[\_`aa]b\_aa]a]  
@HWI-EAS443:3:50:122:84#0/1  
CAAACGTGGAATCAATGACCGAAATTTCTGGAGGGGTGAA  
+HWI-EAS443:3:50:122:84#0/1  
Wbbbbbb]babbbbbbb``abbbbbbabbbbbbb\_]b[abb  
@HWI-EAS443:3:50:1375:409#0/1  
AACGTGGAATCAATGACCGAAATTTCTGGAGGGGTGAAAA  
+HWI-EAS443:3:50:1375:409#0/1  
abababbabbaaababbaaaaaaaaa`bbb\_abba\_b`\_`\_  
@HWI-EAS443:3:50:164:1329#0/1  
GAATGATCAAACGTGGAATCAATGACCGAAATTTCTGGAG  
+HWI-EAS443:3:50:164:1329#0/1  
ab\_`abb\_baaabaa\_^aa`a`\_Ya`¥``a¥aa`aa]QZ`  
@HWI-EAS443:3:50:227:285#0/1  
GAATGATCAAACGTGGAATCAATGACCGAAATTTCTGGAG  
+HWI-EAS443:3:50:227:285#0/1  
abbababbaababaabbaa`aabaaaaabaaaa\_bb¥`a  
@HWI-EAS443:3:50:474:1397#0/1  
GAATGATCAAACGTGGAATCAATGACCGAAATTTCTGGAG  
+HWI-EAS443:3:50:474:1397#0/1  
^^`baa`\_\_V^bRba`aa\_\_a^Yaa^`aabaa\_aa`Ya  
@HWI-EAS443:3:50:603:1687#0/1  
TGTCCTTCGTCCATTTTCACCCCTCCAGAAATTTCTGGTCA  
+HWI-EAS443:3:50:603:1687#0/1  
[YF[a¥baaX¥J^a`aab^¥¥[]TGXa]T^\_\_a`[\_`Z^\_  
@HWI-EAS443:3:51:1332:795#0/1  
GAATGATCAAACGTGGAATCAATGACCGAAATTTCTGGAG  
+HWI-EAS443:3:51:1332:795#0/1  
a`^RX\_`ZY`X`¥]^`¥`a\_`^Y\_\_b\_[]`a`[]aUPa  
@HWI-EAS443:3:51:1351:866#0/1  
GAAATTTCTGGTCAATTGATTCCACGTTTGATCATTCTGATT

+HWI-EAS443:3:51:1351:866#0/1  
aaa`aba]a`X]a^a`[``¥P^T¥S]]TTQRa\_Q`YW``  
@HWI-EAS443:3:51:1618:467#0/1  
ATCAAACGTGGAATCAATGACCGAAATTTCTGGAGGGGTG  
+HWI-EAS443:3:51:1618:467#0/1  
[ba]aaab\_aabaaR\_ab\_]Yaaaaaba\_aaa]aa`\_0a  
@HWI-EAS443:3:52:1077:136#0/1  
GAAATTTCTGGTCATTGATTCCACGTTTGATCATTCTGATT  
+HWI-EAS443:3:52:1077:136#0/1  
Y\_]X`ab`UU]¥Z`Zba\_\_`WVTaa`P]X^]XM`XW¥a`  
@HWI-EAS443:3:52:1157:490#0/1  
CTTGTCCTTCGTCCATTTTCACCCCTCCAGAAATTTCTGGT  
+HWI-EAS443:3:52:1157:490#0/1  
abbbbaabb\_b^a`bbbaaa`a`\_a\_a[a^`\_a\_a]\_\_\_\_  
@HWI-EAS443:3:52:116:61#0/1  
GAAATTTCTGGTCATTGATTCCACGTTTGATCATTCTGATT  
+HWI-EAS443:3:52:116:61#0/1  
a\_\_^aa\_\_\_\_\_ZY^a\_^]\_^^[^W\_[^\_\_[[RXVHM]^[]]  
@HWI-EAS443:3:52:243:614#0/1  
GTCCATTTTCACCCCTCCAGAAATTTCTGGTCATTGATTCC  
+HWI-EAS443:3:52:243:614#0/1  
\_W`¥[¥a`\_¥a^]YW¥¥¥UZVQ[^YXZ]WT]TV[ZUXZUZ  
@HWI-EAS443:3:53:119:1623#0/1  
AAACGTGGAATCAATGACCGAAATTTCTGGAGGGGTGAAA  
+HWI-EAS443:3:53:119:1623#0/1  
a\_b\_a\_bb`abba]a^`a``aaaa`aaa^a`aaYa``\_  
@HWI-EAS443:3:53:1226:125#0/1  
CACCCCTCCAGAAATTTCTGGTCATTGATTCCACGTTTGAT  
+HWI-EAS443:3:53:1226:125#0/1  
abaa[G\_¥X¥bbXPab]Z^H¥aZ]bb]W\_Z]YJZ[aa[XG  
@HWI-EAS443:3:53:1342:52#0/1  
GACGAAAGTGGATGAGAGA ACTCATCCTTTATGACAAAG  
+HWI-EAS443:3:53:1342:52#0/1  
aaX\_b`bbbabb`baaa^^Za]a^aa]Qaba\_aa\_\_^`]^  
@HWI-EAS443:3:53:1715:1319#0/1  
CAATGACCGAAATTTCTGGAGGGGTGAAAATGGACGAAGG  
+HWI-EAS443:3:53:1715:1319#0/1  
abbbababbbbbbabbababb^baabbba`b`baab\_  
@HWI-EAS443:3:53:366:112#0/1  
CAATGACCGAAATTTCTGGAGGGGTGAAAATGGACGAAGG  
+HWI-EAS443:3:53:366:112#0/1  
ababaababababbbabb\_bbbb^ba`aabab`\_b`ab\_  
@HWI-EAS443:3:53:391:1083#0/1  
CACCCCTCCAGAAATTTCTGGTCATTGATTCCACGTTTGAT  
+HWI-EAS443:3:53:391:1083#0/1  
abb]\_`\_baaaZ\_V]ababa^^aaa`Y]`\_``aa``^`\_^  
@HWI-EAS443:3:54:205:280#0/1  
GTGGAATCAATGACCGAAATTTCTGGAGGGGTGAAAATGG  
+HWI-EAS443:3:54:205:280#0/1  
¥Vba\_`ab][X\_[\_^a]a^Z¥^[YQR[[aa\_VaZXX\_P`^

@HWI-EAS443:3:54:244:297#0/1  
CGTGGAATCAATGACCGAAATTTCTGGAGGGGTGAAAATG  
+HWI-EAS443:3:54:244:297#0/1  
ab\_^`a\_abaaaa[\_`a^Y¥\_a^a`a`Vb^aaVa\_X]^\_a  
@HWI-EAS443:3:54:519:348#0/1  
AGAATGATCAAACGTGGAATCAATGACCGAAATTTCTGGA  
+HWI-EAS443:3:54:519:348#0/1  
R\_`^X`^`^b¥^a[RR`¥Z¥\_¥[\_`Y^`¥S]\_\_W`a]X\_\_]I  
@HWI-EAS443:3:55:1432:733#0/1  
ATCAATGACCGAAATTTCTGGAGGGGTGAAAATGGACGAA  
+HWI-EAS443:3:55:1432:733#0/1  
W\_\_¥b^Z`a`a[`bba\_bba`Wa]Z¥`baba`b[baa`a`  
@HWI-EAS443:3:55:1461:904#0/1  
GTCCATTTTCACCCCTCCAGAAATTTTCGGTCATTGATTCC  
+HWI-EAS443:3:55:1461:904#0/1  
a[`aabbaaaa`\_]`\_`a`a`\_a\_¥Z¥`][\_aa\_\_`^^Z  
@HWI-EAS443:3:55:236:709#0/1  
CACCCCTCCAGAAATTTTCGGTCATTGATTCCACGTTTGAT  
+HWI-EAS443:3:55:236:709#0/1  
abaaaa^`Uaaa`aaa`aa[aa\_aa\_aa\_]aaa`a\_```  
@HWI-EAS443:3:55:854:641#0/1  
CACCCCTCCAGAAATTTTCGGTCATTGATTCCACGTTTGAT  
+HWI-EAS443:3:55:854:641#0/1  
^a^^U\_b\_aabaabbabbb¥DW]b\_aa¥^Q[\_`a[a`Y^`  
@HWI-EAS443:3:56:1667:139#0/1  
CAAACGTGGAATCAATGACCGAAATTTCTGGAGGGGTGAA  
+HWI-EAS443:3:56:1667:139#0/1  
\_V\_aZ\_abb\_bbbabaUa````]Zab\_U^\_TUaZa]]\_\_`  
@HWI-EAS443:3:56:943:1023#0/1  
ATCAGAATGATCAAACGTGGAATCAATGACCGAAATTTCT  
+HWI-EAS443:3:56:943:1023#0/1  
aaa^Z\_aa^`aa\_aa]XVa\_`\_`\_¥aaS`a[\_\_RZa\_\_`  
@HWI-EAS443:3:57:1124:1823#0/1  
CAATGACCGAAATTTCTGGAGGGGTGAAAATGGACGAAGG  
+HWI-EAS443:3:57:1124:1823#0/1  
`a\_\_bbb[aa]ba\_`\_\_bbba^^Sa`ba`bab\_b^\_bba  
@HWI-EAS443:3:57:1643:188#0/1  
GTCCATTTTCACCCCTCCAGAAATTTTCGGTCATTGATTCC  
+HWI-EAS443:3:57:1643:188#0/1  
aa\_a]baa``[¥^[[¥^^^`\_\_^\_`]U^\_XZ¥`^\_W\_¥QQ  
@HWI-EAS443:3:57:479:1034#0/1  
CAATGACCGAAATTTCTGGAGGGGTGAAAATGGACGAAGG  
+HWI-EAS443:3:57:479:1034#0/1  
a[Za\_\_\_\_^Xa[`aa^\_\_`^¥^\_^]\_^UZXa^R[\_`XZ\_]`  
@HWI-EAS443:3:57:877:1110#0/1  
CCGAAATTTCTGGAGGGGTGAAAATGGACGAAGGACAAGG  
+HWI-EAS443:3:57:877:1110#0/1  
`\_^\_QYRQ¥J\_SR¥]XT¥a[XPYV[\_¥WNVLWQ^YSNPX¥]  
@HWI-EAS443:3:57:891:1255#0/1  
CAATGACCGAAATTTCTGGAGGGGTGAAAATGGACGAAGG





@HWI-EAS443:3:61:1051:1592#0/1  
CTTCGTCCATTTTCACCCCTCCAGAAATTTTCGGTCATTGA  
+HWI-EAS443:3:61:1051:1592#0/1  
U¥^`bba`aa`b`bbb^bbbaYaa¥`\_bb`aa^aaab`]  
@HWI-EAS443:3:61:1143:1154#0/1  
ATTTTCACCCCTCCAGAAATTTTCGGTCATTGATTCCACGT  
+HWI-EAS443:3:61:1143:1154#0/1  
abbbbbbbbaabaa\_]\_aaaba`aaa]aaaa```\_Z[\_Z¥¥  
@HWI-EAS443:3:61:1174:1276#0/1  
AATCAATGACCGAAATTTCTGGAGGGGTGAAAATGGACGA  
+HWI-EAS443:3:61:1174:1276#0/1  
abbbaabb^baba]abbaabb`S`aaaZa`^\_]`aZ¥Z^^  
@HWI-EAS443:3:61:566:244#0/1  
CCCCTCCAGAAATTTTCGGTCATTGATTCCACGTTTGATCA  
+HWI-EAS443:3:61:566:244#0/1  
a]aaa``\_aXS`aa``]aP[¥V^`Y¥]^]RYaWZOTSXSY  
@HWI-EAS443:3:61:592:939#0/1  
AATCAATGACCGAAATTTCTGGAGGGGTGAAAATGGACGA  
+HWI-EAS443:3:61:592:939#0/1  
\_aba`]a`\_abbaabaabba¥H]a``Taaa``\_^^¥\_\_^  
@HWI-EAS443:3:61:781:1847#0/1  
CACCCCTCCAGAAATTTTCGGTCATTGATTCCACGTTTGAT  
+HWI-EAS443:3:61:781:1847#0/1  
\_a]```][Zbbb^`]^[V¥ZUYa\_[Y]^W]ZJYTQG^P^XP  
@HWI-EAS443:3:61:879:1785#0/1  
CACCCCTCCAGAAATTTTCGGTCATTGATTCCACGTTTGAT  
+HWI-EAS443:3:61:879:1785#0/1  
aba¥TZaaa]a`\_a`QRaWSXa`\_[NTO\_^\_XTMU^XZZB  
@HWI-EAS443:3:61:937:1374#0/1  
GAATGATCAAACGTGGAATCAATGACCGAAATTTCTGGAG  
+HWI-EAS443:3:61:937:1374#0/1  
W]`a\_X\_`[[[MUMU\_XTR\_]Z\_\_U`PZ]a```\_`ZKLNL  
@HWI-EAS443:3:62:1335:1131#0/1  
CAATGACCGAAATTTCTGGAGGGGTGAAAATGGACGAAGG  
+HWI-EAS443:3:62:1335:1131#0/1  
^]J^SSa\_0¥WWa¥Wa¥ba`aa``¥bTb````¥¥`\_`bb\_\_`  
@HWI-EAS443:3:62:750:761#0/1  
CACCCCTCCAGAAATTTTCGGTCATTGATTCCACGTTTGAT  
+HWI-EAS443:3:62:750:761#0/1  
a`bababbbbbbb\_babbbbaababaaabbbabaaaaW`  
@HWI-EAS443:3:62:961:730#0/1  
ATTTTCACCCCTCCAGAAATTTTCGGTCATTGATTCCACGT  
+HWI-EAS443:3:62:961:730#0/1  
abbbbbbbbaabaabaa^`]aaaaba\_]\_aa`\_aaZV^\_^X  
@HWI-EAS443:3:62:998:1273#0/1  
CAGAAATTTTCGGTCATTGATTCCACGTTTGATCATTCTGA  
+HWI-EAS443:3:62:998:1273#0/1  
aab^`\_`aaaa\_]Ta^`Y\_aa`\_`[Z]^[^`¥a`a\_\_\_\_a  
@HWI-EAS443:3:63:1004:1818#0/1  
GTCCTTCGTCCATTTTCACCCCTCCAGAAATTTTCGGTCAT

+HWI-EAS443:3:63:1004:1818#0/1  
a]Za]Ua]VZ`aba\_aaba]Taaa]baaX^^a\_a`BBBB  
@HWI-EAS443:3:63:1237:1368#0/1  
CTTCGTCCATTTTCACCCCTCCAGAAATTTTCGGTCATTGA  
+HWI-EAS443:3:63:1237:1368#0/1  
Sa````YW\_b`\_\_baaba`¥¥`\_Zaba¥a\_¥YTYaU`aZ  
@HWI-EAS443:3:63:626:450#0/1  
CTTCGTCCATTTTCACCCCTCCAGAAATTTTCGGTCATTGA  
+HWI-EAS443:3:63:626:450#0/1  
abbbabbbbbbbbabbbbbbbbaZWbbbaab`aabb`  
@HWI-EAS443:3:63:724:1482#0/1  
GTTAATCAGAATGATCAAACGTGGAATCAATGACCGAAAT  
+HWI-EAS443:3:63:724:1482#0/1  
[I\_U`abbb`\_`aaaba^`^^Ya^`a``]```aa`^a\_]`^  
@HWI-EAS443:3:64:1260:606#0/1  
CAGAATGATCAAACGTGGAATCAATGACCGAAATTTCTGG  
+HWI-EAS443:3:64:1260:606#0/1  
abba]^baaaaabba]bba\_aaaabaaaa`^]\_ba]baa  
@HWI-EAS443:3:64:1510:834#0/1  
AAACGTGGAATCAATGACCGAAATTTCTGGAGGGGTGAAA  
+HWI-EAS443:3:64:1510:834#0/1  
]a\_bbR`bb`baaaa`aba`\_`aabaaYab]^`aaa\_a`\_`\_  
@HWI-EAS443:3:65:1007:776#0/1  
CCTTGTCTTCGTCCATTTTCACCCCTCCAGAAATTTTCGG  
+HWI-EAS443:3:65:1007:776#0/1  
\_baababbbbabbbbbbbbaabaaaaaba`\_`a^X^`^aa  
@HWI-EAS443:3:65:1010:835#0/1  
CTTCGTCCATTTTCACCCCTCCAGAAATTTTCGGTCATTGA  
+HWI-EAS443:3:65:1010:835#0/1  
abba`[\_¥X[[\_bba]¥````^Z^bZW`b^W`THG¥a`^a  
@HWI-EAS443:3:65:744:915#0/1  
CAGAATGATCAAACGTGGAATCAATGACCGAAATTTCTGG  
+HWI-EAS443:3:65:744:915#0/1  
ab`aabbaaaaaab^a]^aaaaa``aaa]W]aa`aaa`  
@HWI-EAS443:3:66:1332:913#0/1  
CACCCCTCCAGAAATTTTCGGTCATTGATTCCACGTTTGAT  
+HWI-EAS443:3:66:1332:913#0/1  
aaabbbab`W^aba`aaaabZ[\_aaa``aaaaa\_^`\_`^  
@HWI-EAS443:3:66:929:1665#0/1  
CCTTGTCTTCGTCCATTTTCACCCCTCCAGAAATTTTCGG  
+HWI-EAS443:3:66:929:1665#0/1  
abbb\_aababaaaaaabaabbaa`a`ba¥^aaa```Y^Z  
@HWI-EAS443:3:66:961:1427#0/1  
CATTTTCACCCCTCCAGAAATTTTCGGTCATTGATTCCACG  
+HWI-EAS443:3:66:961:1427#0/1  
`Z]a``aaaaaZ^a`\_`\_`aZU]XZW`\_`Z^Y`^`^\_[YL  
@HWI-EAS443:3:67:428:584#0/1  
GAATGATCAAACGTGGAATCAATGACCGAAATTTCTGGAG  
+HWI-EAS443:3:67:428:584#0/1  
a`a`b^]baaVaa`bbJ^`a`a`a¥aaa\_ZJ`\_`aaa\_Wa

@HWI-EAS443:3:68:1760:66#0/1  
CCTTCGTCCATTTTCACCCCTCCAGAAATTTTCGGTCATTG  
+HWI-EAS443:3:68:1760:66#0/1  
`bbbb[^`a\_bbaX`]^ [¥UaTWVS`a\_b[^]^TQ]¥¥  
@HWI-EAS443:3:68:224:441#0/1  
CTCCAGAAATTTTCGGTCATTGATTCCACGTTTGATCATTCC  
+HWI-EAS443:3:68:224:441#0/1  
aa[bV[^XLX]\_aX`S\_a\_]\_^`[^aW]^\_]TW[]\_  
@HWI-EAS443:3:69:158:223#0/1  
CAGAAATTTTCGGTCATTGATTCCACGTTTGATCATTCTGA  
+HWI-EAS443:3:69:158:223#0/1  
`aa^aNaa\_bab\_aaa^`baa\_abaa[a\_JXaY]`\_Zaaa  
@HWI-EAS443:3:69:570:299#0/1  
CAATGACCGAAATTTCTGGAGGGGTGAAAATGGACGAAGG  
+HWI-EAS443:3:69:570:299#0/1  
aabbb`abbabbaaaaaa\_aaaUa\_\_a``Y\_\_a``^\_  
@HWI-EAS443:3:6:1244:1257#0/1  
CCTTGTCTTCGTCCATTTTCACCCCTCCAGAAATTTTCGG  
+HWI-EAS443:3:6:1244:1257#0/1  
^bbaabZabb]bZ]]]¥aa\_\_Y[P¥ab¥aaaaaa^\_^UJ[  
@HWI-EAS443:3:6:1255:1118#0/1  
AATGACCGAAATTTCTGGAGGGGTGAAAATGGACGAAGGA  
+HWI-EAS443:3:6:1255:1118#0/1  
`bbbaa¥aVXbbbb^bab\_abbaZb¥`\_aabbaSbaa\_\_`  
@HWI-EAS443:3:6:424:1221#0/1  
CAAACGTGGAATCAATGACCGAAATTTCTGGAGGGGTGAA  
+HWI-EAS443:3:6:424:1221#0/1  
aa`VW\_Q\_\_¥aabV[a]aa¥VYa¥aa`\_ab]Y`aaaXb]\_  
@HWI-EAS443:3:6:607:287#0/1  
GTCCATTTTCACCCCTCCAGAAATTTTCGGTCATTGATTCC  
+HWI-EAS443:3:6:607:287#0/1  
aaaabbbba`ba\_^[aaaa`a\_`\_\_`X\_`\_\_a\_a\_Z]  
@HWI-EAS443:3:6:857:1041#0/1  
GAAATTTTCGGTCATTGATTCCACGTTTGATCATTCTGATT  
+HWI-EAS443:3:6:857:1041#0/1  
aa\_]^^a[]¥QOY`\_Z[^]^ [^ [a^\_V^^\_UW`XQ^^`\_B  
@HWI-EAS443:3:70:1012:380#0/1  
CAAACGTGGAATCAATGACCGAAATTTCTGGAGGGGTGAA  
+HWI-EAS443:3:70:1012:380#0/1  
ab\_`\_aaaaaaa\_]aZZbab]X`aaaabbb`baaaSa\_Y  
@HWI-EAS443:3:71:1117:650#0/1  
GTTAATCAGAATGATCAAACGTGGAATCAATGACCGAAAT  
+HWI-EAS443:3:71:1117:650#0/1  
]HX¥Z¥Z^aYR¥^^`]S]TYTMS^TWYZIX^VO^Y\_SNVX  
@HWI-EAS443:3:71:295:75#0/1  
GAAATTTTCGGTCATTGATTCCACGTTTGATCATTCTGATT  
+HWI-EAS443:3:71:295:75#0/1  
¥JWX^a`]¥^R`X`]¥MQ\_V[PTUM^^]Z\_XS]TQ¥XPRT  
@HWI-EAS443:3:71:794:945#0/1  
CCATTTTCACCCCTCCAGAAATTTTCGGTCATTGATTCCAC

+HWI-EAS443:3:71:794:945#0/1  
ab\_bbbbbbbbabbbbbbaaaa`aa^` `aaaaaaa`Z¥^  
@HWI-EAS443:3:72:113:1394#0/1  
CACCCCTCCAGAAATTTTCGGTCATTGATTCCACGTTTGAT  
+HWI-EAS443:3:72:113:1394#0/1  
ababbb`ba\_]\_aa^^^\_aXEL\_]X^XZSZ^`¥]XTX]T\_Z  
@HWI-EAS443:3:72:1660:1419#0/1  
CCCCTCCAGAAATTTTCGGTCATTGATTCCACGTTTGATCA  
+HWI-EAS443:3:72:1660:1419#0/1  
`]^`XZYZ`b`VOY[Y^VPLYa\_]U[aZJWQ¥OZ¥WLZJJ  
@HWI-EAS443:3:73:1033:921#0/1  
GAATCAATGACCGAAATTTCTGGAGGGGTGAAAATGGACG  
+HWI-EAS443:3:73:1033:921#0/1  
aaaaa`aaaa^ab\_`U`aa\_baa¥`aa`Z`U`^R^`Y[V\_  
@HWI-EAS443:3:73:1308:654#0/1  
CGTCCATTTTCACCCCTCCAGAAATTTTCGGTCATTGATTC  
+HWI-EAS443:3:73:1308:654#0/1  
aaW]Za^a\_]\_¥U]S`aL`^a]¥\_bb[T\_WXSV[a]¥\_`]  
@HWI-EAS443:3:73:210:1374#0/1  
ATCAGAATGATCAAACGTGGAATCAATGACCGAAATTTCT  
+HWI-EAS443:3:73:210:1374#0/1  
[`b^a\_W\_a^`a`[`aaXa]`\_[aa\_\_US`T]W^LZ]]\_`^  
@HWI-EAS443:3:73:237:1464#0/1  
CGTGAATCAATGACCGAAATTTCTGGAGGGGTGAAAATG  
+HWI-EAS443:3:73:237:1464#0/1  
Y`^QTZba`\_X[bab`\_I[Z¥XU`a\_[TZPZXJ^UZ[P[¥  
@HWI-EAS443:3:73:885:2016#0/1  
ATTTTCACCCCTCCAGAAATTTTCGGTCATTGATTCCACGT  
+HWI-EAS443:3:73:885:2016#0/1  
\_`Za^b[`abba`ZZYWa[NOYY\_WH`\_a¥P]VRN]a[TT  
@HWI-EAS443:3:73:950:1570#0/1  
CGTCCATTTTCACCCCTCCAGAAATTTTCGGTCATTGATTC  
+HWI-EAS443:3:73:950:1570#0/1  
\_bSaaababb\_\_a^a][`aa¥aXaa`aa\_\_\_^a` `` `^]Z  
@HWI-EAS443:3:74:1280:1750#0/1  
TGTCCTTCGTCCATTTTCACCCCTCCAGAAATTTTCGGTCA  
+HWI-EAS443:3:74:1280:1750#0/1  
aaaaabbaaa` `aabaabba`\_\_aaa\_\_`a` `` `¥\_\_X^^  
@HWI-EAS443:3:74:1358:947#0/1  
AATCAGAATGATCAAACGTGGAATCAATGACCGAAATTTTC  
+HWI-EAS443:3:74:1358:947#0/1  
\_bbba\_aba`^abb`aQa\_bbaaaa`^aaVa` `baaba\_  
@HWI-EAS443:3:74:1391:576#0/1  
CAAACGTGGAATCAATGACCGAAATTTCTGGAGGGGTGAA  
+HWI-EAS443:3:74:1391:576#0/1  
KabX0¥^\_a`¥\_Yba^R[TS[aba`\_bbbabU]b`babRT  
@HWI-EAS443:3:74:306:591#0/1  
ATCAGAATGATCAAACGTGGAATCAATGACCGAAATTTCT  
+HWI-EAS443:3:74:306:591#0/1  
abb^baabaaab`^aab\_a`a`aa`a`aaaa`¥` ` \_` `a

@HWI-EAS443:3:75:1568:1807#0/1  
CAGAATGATCAAACGTGGAATCAATGACCGAAATTTCTGG  
+HWI-EAS443:3:75:1568:1807#0/1  
`bbabY`a`bbbaaa\_]`^`¥aaaa`Z`aaaaaaZaa`  
@HWI-EAS443:3:75:594:964#0/1  
AAACGTGGAATCAATGACCGAAATTTCTGGAGGGGTGAAA  
+HWI-EAS443:3:75:594:964#0/1  
`bb`]bYabbbbbbbbbbaaaaaaabb\_bba\_^aa]P  
@HWI-EAS443:3:76:1510:254#0/1  
CAATGACCGAAATTTCTGGAGGGGTGAAAATGGACGAAGG  
+HWI-EAS443:3:76:1510:254#0/1  
\_Vaa`[`¥aIUbaYRa\_b]bb`ZS\_Va^Ua\_a\_HXZY`a  
@HWI-EAS443:3:76:164:1459#0/1  
GATCAAACGTGGAATCAATGACCGAAATTTCTGGAGGGGT  
+HWI-EAS443:3:76:164:1459#0/1  
a`^`a\_\_^\_W\_PGZGV`\_S^`¥TRP]SRWW\_R]^U^U]PH  
@HWI-EAS443:3:76:667:373#0/1  
ATCAGAATGATCAAACGTGGAATCAATGACCGAAATTTCT  
+HWI-EAS443:3:76:667:373#0/1  
aabbaaaaaaaaaaaaaa\_aaaaaa\_aa`a`aa`\_a`\_\_`  
@HWI-EAS443:3:77:1239:1754#0/1  
CACCCCTCCAGAAATTTCCGGTCATTGATTCCACGTTTGAT  
+HWI-EAS443:3:77:1239:1754#0/1  
aab`bbbabb`babbab\_¥\_babbabb`UUaaaaa\_\_a  
@HWI-EAS443:3:77:411:997#0/1  
CAAACGTGGAATCAATGACCGAAATTTCTGGAGGGGTGAA  
+HWI-EAS443:3:77:411:997#0/1  
a\_W`ba]a]Y`aa`a^Uaaa\_a`a`\_aaaY\_a`aaX`\_[  
@HWI-EAS443:3:77:89:544#0/1  
CAAACGTGGAATCAATGACCGAAATTTCTGGAGGGGTGAA  
+HWI-EAS443:3:77:89:544#0/1  
aaaaa`\_b`a]aa\_aa\_[a\_a`¥aaaaa¥a]aaaWKK\_\_  
@HWI-EAS443:3:78:583:1043#0/1  
CAATGACCGAAATTTCTGGAGGGGTGAAAATGGACGAAGG  
+HWI-EAS443:3:78:583:1043#0/1  
aaa```aaaaabaaaa`a\_a]`aYq]\_^\_a]S[^X``\_  
@HWI-EAS443:3:79:124:417#0/1  
AATGACCGAAATTTCTGGAGGGGTGAAAATGGACGAAGGA  
+HWI-EAS443:3:79:124:417#0/1  
^Y`abbbba[a]aa\_`baa`baaa^a\_`][aaYT]]¥`[\_  
@HWI-EAS443:3:79:823:1004#0/1  
GTGGAATCAATGACCGAAATTTCTGGAGGGGTGAAAATGG  
+HWI-EAS443:3:79:823:1004#0/1  
a`aa`\_aaa`aaabaaaaaaaaaaaa\_a]aa\_`Ya\_]\_^``\_  
@HWI-EAS443:3:7:1754:1502#0/1  
ATCAGAATGATCAAACGTGGAATCAATGACCGAAATTTCT  
+HWI-EAS443:3:7:1754:1502#0/1  
X^U¥`Z`[`a]^`ba]\_0[`]^^QW`PXUYFV]\_ZVLTYY  
@HWI-EAS443:3:7:851:674#0/1  
AATCAATGACCGAAATTTCTGGAGGGGTGAAAATGGACGA

+HWI-EAS443:3:7:851:674#0/1  
aaba\_aba`aaba``aaa`bba]\_aa`Za\_^\_\_aa¥\_`^a\_  
@HWI-EAS443:3:80:131:384#0/1  
CAGAATGATCAAACGTGGAATCAATGACCGAAATTTCTGG  
+HWI-EAS443:3:80:131:384#0/1  
abbb¥bbbababaa\_\_abaaaaaba`aaba\_]`baaaaa\_  
@HWI-EAS443:3:80:1421:939#0/1  
ATCAGAATGATCAAACGTGGAATCAATGACCGAAATTTCT  
+HWI-EAS443:3:80:1421:939#0/1  
aba\_Xbabbb`]IRaaaa]\_ab\_^\_aaa¥\_a`\_abaaZ]  
@HWI-EAS443:3:80:634:57#0/1  
TTGTCCTTCGTCCATTTTCACCCCTCCAGAAATTTTCGGTC  
+HWI-EAS443:3:80:634:57#0/1  
a\_b^\_\_aa\_a\_^`aaa`^`\_^]a¥\_\_W\_]`^`\_\_^XVUZ  
@HWI-EAS443:3:80:822:1669#0/1  
GTCCATTTTCACCCCTCCAGAAATTTTCGGTCATTGATTCC  
+HWI-EAS443:3:80:822:1669#0/1  
a]a\_]\_aaaaa¥`\_`a`^][^`\_^`[¥YS¥\_a^^^]`^`^  
@HWI-EAS443:3:80:889:1460#0/1  
CGTCCATTTTCACCCCTCCAGAAATTTTCGGTCATTGATTC  
+HWI-EAS443:3:80:889:1460#0/1  
aaaabbbbbbbaaaaaabb`aaaab```a^aaa``a`a]  
@HWI-EAS443:3:81:1323:1313#0/1  
GATCAAACGTGGAATCAATGACCGAAATTTCTGGAGGGGT  
+HWI-EAS443:3:81:1323:1313#0/1  
aaa`baababa\_aa`b\_a`\_`¥baaaaaaaba\_a\_\_`X  
@HWI-EAS443:3:81:1631:876#0/1  
CAATGACCGAAATTTCTGGAGGGGTGAAAATGGACGAAGG  
+HWI-EAS443:3:81:1631:876#0/1  
abbbbbbabbbbabbb^bbb\_bbbbWb`\_aaabba\_ba]b\_  
@HWI-EAS443:3:81:1771:618#0/1  
CTTCGTCCATTTTCACCCCTCCAGAAATTTTCGGTCATTGA  
+HWI-EAS443:3:81:1771:618#0/1  
Zbb`bb[bb\_babbba\_aaaaa`a\_aaaaaY^V\_aa`[`  
@HWI-EAS443:3:81:314:1243#0/1  
GACGGAAAGTGGATGAGAGAACTCATCCTTTATGACAAAG  
+HWI-EAS443:3:81:314:1243#0/1  
P]^¥[\_\_PRLWWS]]¥PS]MP¥S\_YY`\_]X^XWa[]XXWZ  
@HWI-EAS443:3:82:1431:1802#0/1  
CAATGACCGAAATTTCTGGAGGGGTGAAAATGGACGAAGG  
+HWI-EAS443:3:82:1431:1802#0/1  
aVbbbab`b`bVUUbW]bb\_]¥`b]a`^[babbbYbaaab  
@HWI-EAS443:3:82:1540:397#0/1  
CAGAATGATCAAACGTGGAATCAATGACCGAAATTTCTGG  
+HWI-EAS443:3:82:1540:397#0/1  
`bbbabbbbbbbaabab`bbaa`abba`bb  
@HWI-EAS443:3:82:21:1163#0/1  
CACCCCTCCAGAAATTTTCGGTCATTGATTCCACGTTTGAT  
+HWI-EAS443:3:82:21:1163#0/1  
abaaaaabaaa`aZ^\_\_`\_Uaa\_\_^`\_^]`^a`^`^`^W

@HWI-EAS443:3:82:297:1409#0/1  
CGTGGAATCAATGACCGAAATTTCTGGAGGGGTGAAAATG  
+HWI-EAS443:3:82:297:1409#0/1  
aaZZZWaaY`a\_bbaa¥K\_]\_baaa^\_]a`Yaa`^aaa  
@HWI-EAS443:3:82:312:1696#0/1  
CGTCCATTTTCACCCCTCCAGAAATTTTCGGTCATTGATTC  
+HWI-EAS443:3:82:312:1696#0/1  
ab\_bbaabaabbbab\_abaaaaa`a^W\_\_^`]^`^`  
@HWI-EAS443:3:83:62:47#0/1  
GTCCTTCGTCCATTTTCACCCCTCCAGAAATTTTCGGTCAT  
+HWI-EAS443:3:83:62:47#0/1  
a]\_^a`\_]\_^\_\_`^`\_]^^¥X]ZL\_ZZW^ZWWZ]XVWW  
@HWI-EAS443:3:83:929:17#0/1  
GTCCATTTTCACCCCTCCAGAAATTTTCGGTCATTGATTC  
+HWI-EAS443:3:83:929:17#0/1  
a¥`^`aaa`\_Y[[]`^\_V][¥¥``\_Z¥ZZ[Z[TXYYTQ  
@HWI-EAS443:3:84:510:447#0/1  
AGAATGATCAAACGTGGAATCAATGACCGAAATTTCTGGA  
+HWI-EAS443:3:84:510:447#0/1  
aba\_aaYV\_SZ`\_a[\_`\_]`\_`\_`^`\_`\_`¥`\_]T\_^\_¥  
@HWI-EAS443:3:84:971:762#0/1  
CAAACGTGGAATCAATGACCGAAATTTCTGGAGGGGTGAA  
+HWI-EAS443:3:84:971:762#0/1  
\_XS¥\_b`babbabY]ZWZ\_aa`YZbbbaaa`[a]ab`b\_[  
@HWI-EAS443:3:85:1143:174#0/1  
GTCCTTCGTCCATTTTCACCCCTCCAGAAATTTTCGGTCAT  
+HWI-EAS443:3:85:1143:174#0/1  
a``\_aaaa\_\_\_]\_aa\_]`^^\_\_\_]\_X`^\_^`^Y`]XXYX  
@HWI-EAS443:3:85:1187:73#0/1  
GTGGAATCAATGACCGAAATTTCTGGAGGGGTGAAAATGG  
+HWI-EAS443:3:85:1187:73#0/1  
a\_ba`a`\_\_\_a`\_^]a\_^`a`^`a\_Xa```Ya]^XX`Z  
@HWI-EAS443:3:85:1570:1403#0/1  
GACGAAAGTGGATGAGAGAACTCATCCTTTATGACAAAG  
+HWI-EAS443:3:85:1570:1403#0/1  
^¥\_bbabb`XU^^T^ababaa\_a\_a`YL\_^a`ba\_aa`^^  
@HWI-EAS443:3:85:1712:285#0/1  
CAATGACCGAAATTTCTGGAGGGGTGAAAATGGACGAAGG  
+HWI-EAS443:3:85:1712:285#0/1  
abbbba\_bbbbbbaabaaabab\_ba`babbbaabaab^  
@HWI-EAS443:3:85:421:1303#0/1  
ATCAGAATGATCAAACGTGGAATCAATGACCGAAATTTCT  
+HWI-EAS443:3:85:421:1303#0/1  
aaa`a`^\_VP`a\_a`aa0`\_`\_`S^a]`a^`\_\_\_\_\_^\_\_  
@HWI-EAS443:3:85:65:903#0/1  
CCTTCGTCCATTTTCACCCCTCCAGAAATTTTCGGTCATTG  
+HWI-EAS443:3:85:65:903#0/1  
abbbbababa¥aaabbaaaa\_aaaa]S^`a`\_`\_X`\_`\_`a  
@HWI-EAS443:3:86:1409:1154#0/1  
ATCAGAATGATCAAACGTGGAATCAATGACCGAAATTTCT

+HWI-EAS443:3:86:1409:1154#0/1  
aaabbaaab\_a\_aaa`bYaa\_aaa\_\_aa`¥a\_Z]a`\_`  
@HWI-EAS443:3:86:42:1201#0/1  
CACCCCTCCAGAAATTTCCGGTCATTGATTCCACGTTTGAT  
+HWI-EAS443:3:86:42:1201#0/1  
aaba`W]WTRXNY`^\_`¥WR¥U`ZU]^GX^\_XOMT[SZV  
@HWI-EAS443:3:86:552:359#0/1  
ATCAAACGTGGAATCAATGACCGAAATTTCTGGAGGGGTG  
+HWI-EAS443:3:86:552:359#0/1  
a`aaa\_abX`aa`a]¥`Z\_aaaYa[`\_aaa`\_Wa]a\_Ua  
@HWI-EAS443:3:86:747:1486#0/1  
GAAATTTCCGGTCATTGATTCCACGTTTGATCATTCTGATT  
+HWI-EAS443:3:86:747:1486#0/1  
a`]ab\_Q]^ [W]aa`\_aaa\_Z`\_aW^`a\_^R\_a\_\_`[\_][  
@HWI-EAS443:3:88:32:770#0/1  
CCCCTCCAGAAATTTCCGGTCATTGATTCCACGTTTGATCA  
+HWI-EAS443:3:88:32:770#0/1  
aaaaaa\_^aXJTZ[^`^U[Z`\_]`^`U¥]VJVZWYZYY  
@HWI-EAS443:3:8:1039:1330#0/1  
CCTTCGTCCATTTTACCCTCCAGAAATTTCCGGTCATTG  
+HWI-EAS443:3:8:1039:1330#0/1  
¥Z\_b]¥`bb`a`aa`ba]NZRH]\_a\_]\_a\_][`VZ\_^^  
@HWI-EAS443:3:8:849:317#0/1  
CAAACGTGGAATCAATGACCGAAATTTCTGGAGGGGTGAA  
+HWI-EAS443:3:8:849:317#0/1  
aa`]ab\_aaaa]N\_ab\_\_a\_]RX\_^\_X\_a`Xa\_`¥R\_Z[  
@HWI-EAS443:3:90:120:944#0/1  
GACCGAAATTTCTGGAGGGGTGAAAATGGACGAAGGACAA  
+HWI-EAS443:3:90:120:944#0/1  
[\_a`\_QTU\_[SZa¥[T\_a]a]\_XNXZ^¥ZY`Z¥`U`\_]`  
@HWI-EAS443:3:90:1261:438#0/1  
CAAACGTGGAATCAATGACCGAAATTTCTGGAGGGGTGAA  
+HWI-EAS443:3:90:1261:438#0/1  
abbbababbbbababbbbabababbb`bbaababbaa]^  
@HWI-EAS443:3:90:674:983#0/1  
GACGGAAAGTGGATGAGAGAACTCATCCTTTATGACAAAG  
+HWI-EAS443:3:90:674:983#0/1  
\_ZZaaa``\_aaaa`^Z]a¥[````]`a^\_a\_^]\_\_`V  
@HWI-EAS443:3:90:860:424#0/1  
ATCAGAATGATCAAACGTGGAATCAATGACCGAAATTTCT  
+HWI-EAS443:3:90:860:424#0/1  
aaaba[^`aab`a`a`\_ba\_`aa^`aaaaaba]]a`]\_a  
@HWI-EAS443:3:90:874:300#0/1  
GTTAATCAGAATGATCAAACGTGGAATCAATGACCGAAAT  
+HWI-EAS443:3:90:874:300#0/1  
a[\_[a\_a`\_`X`a\_\_`\_^`^a^Q]\_^UX^]`]^\_ZSX\_  
@HWI-EAS443:3:90:937:192#0/1  
CAAACGTGGAATCAATGACCGAAATTTCTGGAGGGGTGAA  
+HWI-EAS443:3:90:937:192#0/1  
aaa\_\_`bbabaaaaba`\_\_ba`aaaa\_aaa]aaa`Sa]\_



@HWI-EAS443:3:91:1185:1068#0/1  
CTTGTCTTCGTCCATTTTCACCCCTCCAGAAATTTCTGGT  
+HWI-EAS443:3:91:1185:1068#0/1  
abbbabbbbbbabb`bbbbabbbbbaaaaaaaab\_\_\_a^  
@HWI-EAS443:3:91:1206:271#0/1  
ATCAGAATGATCAAACGTGGAATCAATGACCGAAATTTCT  
+HWI-EAS443:3:91:1206:271#0/1  
ababbbbaaa¥`aa`ab\_aaaaaa`a\_a\_\_a\_^]a`aVa  
@HWI-EAS443:3:91:1240:991#0/1  
CAGAATGATCAAACGTGGAATCAATGACCGAAATTTCTGG  
+HWI-EAS443:3:91:1240:991#0/1  
a\_`[^¥TabT^aTaa`]I\_ba^a]Va\_a\_``\_\_]X\_a\_  
@HWI-EAS443:3:91:1620:376#0/1  
AATCAATGACCGAAATTTCTGGAGGGGTGAAAATGGACGA  
+HWI-EAS443:3:91:1620:376#0/1  
abb\_abbbbaabaaabbbWbbb`bbbbXb\_``aaba`]`\_  
@HWI-EAS443:3:91:818:1151#0/1  
GAATGATCAAACGTGGAATCAATGACCGAAATTTCTGGAG  
+HWI-EAS443:3:91:818:1151#0/1  
aWZR`a\_b`JS`a]a^`^Y`aab`a\_\_Y^a`SXS]a]Z`  
@HWI-EAS443:3:92:1521:73#0/1  
CGTGAATCAATGACCGAAATTTCTGGAGGGGTGAAAATG  
+HWI-EAS443:3:92:1521:73#0/1  
]babbbbabbbbaabbbbbb¥bbaabbaabbaa¥ab  
@HWI-EAS443:3:92:202:718#0/1  
GAAATTTCTGGTCAATGATTCCACGTTTGATCATTCTGATT  
+HWI-EAS443:3:92:202:718#0/1  
aaVaa\_¥a`^Sa`aa^aa\_a\_``a¥a`a``]^Y¥^\_\_[]`  
@HWI-EAS443:3:93:1448:517#0/1  
CCTTGTCTTCGTCCATTTTCACCCCTCCAGAAATTTCTGG  
+HWI-EAS443:3:93:1448:517#0/1  
ababbab\_bbaaa^¥^aabaab]¥Yaa\_¥`aaa]`aU\_a  
@HWI-EAS443:3:93:54:1706#0/1  
GAATGATCAAACGTGGAATCAATGACCGAAATTTCTGGAG  
+HWI-EAS443:3:93:54:1706#0/1  
aX^`\_]Z\_\_Z`[W]WF[T`[\_UNa[\_`\_YY\_^^`aG[\_  
@HWI-EAS443:3:94:31:1684#0/1  
CAATGACCGAAATTTCTGGAGGGGTGAAAATGGACGAAGG  
+HWI-EAS443:3:94:31:1684#0/1  
aX[^\_^][a^R[\_`\_a\_`\_]\_[^Y\_XPRU]YU\_^ZY[VT  
@HWI-EAS443:3:95:1045:364#0/1  
ATCAGAATGATCAAACGTGGAATCAATGACCGAAATTTCT  
+HWI-EAS443:3:95:1045:364#0/1  
`a[`baa`bba`aaaab\_a\_\_aaaa^aa``^aa`\_aa`S`  
@HWI-EAS443:3:95:1557:1648#0/1  
TTCACCCCTCCAGAAATTTCTGGTCAATGATTCCACGTTTG  
+HWI-EAS443:3:95:1557:1648#0/1  
XbbaUU\_b`Ub`]`bbYSFXb]R`¥ab`YZ[Ya\_a\_aa`  
@HWI-EAS443:3:95:1606:156#0/1  
GACGGAAAGTGGATGAGAGA ACTCATCCTTTATGACAAAG

+HWI-EAS443:3:95:1606:156#0/1  
]bbb`Xba`S`b[IY\_a`ba^`b^b\_\_bab`YabNa\_^a  
@HWI-EAS443:3:95:607:1046#0/1  
CAAACGTGGAATCAATGACCGAAATTTCTGGAGGGGTGAA  
+HWI-EAS443:3:95:607:1046#0/1  
a`bbbababbbbbbbabbabb\_\_aab`bbbaaab^baa  
@HWI-EAS443:3:95:623:1567#0/1  
ATCAGAATGATCAAACGTGGAATCAATGACCGAAATTTCT  
+HWI-EAS443:3:95:623:1567#0/1  
abaa`\_`abaaba\_aa]Saaaaaab`aaaaa\_\_`^aaaaa  
@HWI-EAS443:3:96:1255:984#0/1  
GAATCAATGACCGAAATTTCTGGAGGGGTGAAAATGGACG  
+HWI-EAS443:3:96:1255:984#0/1  
aa`¥`^]ZW[¥^`][`\_]Yaa`\_a[¥¥VaW[\_\_V`\_^X`  
@HWI-EAS443:3:97:1194:1282#0/1  
CAAACGTGGAATCAATGACCGAAATTTCTGGAGGGGTGAA  
+HWI-EAS443:3:97:1194:1282#0/1  
abba`b\_abb\_bab\_baab`bbb^bbb[aababba\_]baa  
@HWI-EAS443:3:97:725:1410#0/1  
AATCAATGACCGAAATTTCTGGAGGGGTGAAAATGGACGA  
+HWI-EAS443:3:97:725:1410#0/1  
\_^[YU^`b¥aaa`X\_a`a^aXUX\_YU^X][Xaa`a[\_]  
@HWI-EAS443:3:97:880:1305#0/1  
CGTGAATCAATGACCGAAATTTCTGGAGGGGTGAAAATG  
+HWI-EAS443:3:97:880:1305#0/1  
ab`aaabbabaaaaabbbaabaabab[bb`[D[\_\_\_\_aaa  
@HWI-EAS443:3:98:110:1661#0/1  
CAAACGTGGAATCAATGACCGAAATTTCTGGAGGGGTGAA  
+HWI-EAS443:3:98:110:1661#0/1  
a`aab^aaaaaaa`aa[a`a`\_`a``aaa\_Ya\_a`X\_^  
@HWI-EAS443:3:98:268:1498#0/1  
GTTAATCAGAATGATCAAACGTGGAATCAATGACCGAAAT  
+HWI-EAS443:3:98:268:1498#0/1  
a¥a^aabaaaa`aaa`\_a`a]a`\_`Y`\_\_\_`a^`\_\_^a  
@HWI-EAS443:3:98:824:1694#0/1  
GGAATCAATGACCGAAATTTCTGGAGGGGTGAAAATGGAC  
+HWI-EAS443:3:98:824:1694#0/1  
ab^bb]]\_bba`a]`aabbaabb`bU\_]`baZ`aaa\_a`  
@HWI-EAS443:3:99:1061:1650#0/1  
CGTGAATCAATGACCGAAATTTCTGGAGGGGTGAAAATG  
+HWI-EAS443:3:99:1061:1650#0/1  
abababbbbabbbbbbbbbbbbabbaababaUbb`aaab  
@HWI-EAS443:3:9:1585:62#0/1  
CAATGACCGAAATTTCTGGAGGGGTGAAAATGGACGAAGG  
+HWI-EAS443:3:9:1585:62#0/1  
abbbbaabb`bbbbbbbbbbabba\_aa`bbbab`b\_ab`  
@HWI-EAS443:3:9:742:1147#0/1  
GTTAATCAGAATGATCAAACGTGGAATCAATGACCGAAAT  
+HWI-EAS443:3:9:742:1147#0/1  
a`aaaaaaaa`aY\_aa`a`Yaa`a^\_\_\_\_`\_`S^\_`

@HWI-EAS443:3:9:761:185#0/1  
CAATGACCGAAATTTCTGGAGGGGTGAAAATGGACGAAGG  
+HWI-EAS443:3:9:761:185#0/1  
aaababbaba[aab\_\_`bbabba[M^`^^aab`Ua\_[a`  
@HWI-EAS443:3:79:1087:1458#0/1  
GAGAATGGGAGACCTTCACTACCTCCAGACCAGAAATGAA  
+HWI-EAS443:3:79:1087:1458#0/1  
]\_aU]]b`aab]baaba`]`T[aa¥]]YGRR`^V]FZW^  
@HWI-EAS443:3:89:574:1102#0/1  
AGAAACCGTGATGAGAATGGGAGACCTTCACTACCTCCAG  
+HWI-EAS443:3:89:574:1102#0/1  
]bZb]]b\_G¥aa`QPSa`aa^¥`Ya\_]\_^¥a\_`U]^`ZY^  
@HWI-EAS443:3:49:1573:1121#0/1  
ATGAGAATGGGAGACCTTCACTACCTCCAGANCAGAAATG  
+HWI-EAS443:3:49:1573:1121#0/1  
abbabababbbaaaa\_aa`a\_aa\_^a`\_aaRDR\_a\_a\_aa  
@HWI-EAS443:3:72:1455:1227#0/1  
ACCTTATTTCTCAAATTTCTGACCCAATTGCTCTCGCCN  
+HWI-EAS443:3:72:1455:1227#0/1  
[M[`^]UY`U¥JR`VRTT[V`XDTWO\_\_ZVZZZQ`H¥WPD  
@HWI-EAS443:3:39:1320:1993#0/1  
GAGACCTTCACTACCTCCAGAACAGAAATGAAAAGTGGCG  
+HWI-EAS443:3:39:1320:1993#0/1  
^a`bb]]bab\_bb[`aVXbbZb\_ZZaP`a`\_]aa^`baTK  
@HWI-EAS443:3:68:729:471#0/1  
AGCCGATCAAGGAATGGGGCATCACCCAATCCATTGTCCG  
+HWI-EAS443:3:68:729:471#0/1  
a\_aa\_a\_`\_¥Xa[Z[\_^¥^^\_\_b¥¥¥^\_¥]XVZ¥^TTRWS  
@HWI-EAS443:3:58:1345:843#0/1  
CTGCAGCAAAAGCAGGGTGACAAAAACATAATGGACTCCA  
+HWI-EAS443:3:58:1345:843#0/1  
abbbbb`b`bbbbbb`^[aaa]^a`aba`aabaa]a¥aa  
@HWI-EAS443:3:50:418:276#0/1  
GCAGCAAAAGCAGGGTGACAAAAACATAATGGACTCCAAC  
+HWI-EAS443:3:50:418:276#0/1  
a````aaaaa`\_`a^¥a\_¥aa\_\_a]a`a``a^`Y\_]V\_aU  
@HWI-EAS443:3:65:1119:1176#0/1  
CGGCAAAAGCAGGGTGACAAAAACATAATGGACTCCAACA  
+HWI-EAS443:3:65:1119:1176#0/1  
a`aaa`a````bbbb`bbbbbbbabbbbabbbabaabaab  
@HWI-EAS443:3:22:372:1129#0/1  
CGCAAAAGCAGGGTGACAAAAACATAATGGACTCCAACAC  
+HWI-EAS443:3:22:372:1129#0/1  
aa`Xaa^baa\_^aaba`\_a`ababb[ba¥aaaaaba`ab  
@HWI-EAS443:3:2:1497:1714#0/1  
GCAAAAGCAGGGTGACAAAAACATAATGGACTCCAACACA  
+HWI-EAS443:3:2:1497:1714#0/1  
```aa]]K¥SZ\_[XZWXa¥aa`^]\_`aZYRYL[KDUVNY]B  
@HWI-EAS443:3:96:1299:892#0/1  
CAGCAAAAGCAGGGTGACAAAAACATAATGGACTCCAACA

+HWI-EAS443:3:96:1299:892#0/1  
aaaaa`aa\_aa^aa\_aaaa`Y\_a^aa^`a]S`\_aYW`\_\_a  
@HWI-EAS443:3:23:569:897#0/1  
AGCAAAAGCAGGGTGACAAAAACATAATGGACTCCAACAC  
+HWI-EAS443:3:23:569:897#0/1  
\_aV\_]Z^aa][a\_¥bbaaba\_ab`aa`\_aaa\_\_`\_[\_a\_a  
@HWI-EAS443:3:35:835:742#0/1  
AGCAAAAGCAGGGTGACAAAAACATAATGGACTCCAACAC  
+HWI-EAS443:3:35:835:742#0/1  
aaba``YW]Z]aaU]a`V\_]\_]Z\_¥VHZ\_Z¥\_]aZ^^`\_a  
@HWI-EAS443:3:79:969:1091#0/1  
AGCAAAAGCAGGGTGACAAAAACATAATGGACTCCAACAC  
+HWI-EAS443:3:79:969:1091#0/1  
abbbaaa\_aa`Y[\_Ya`aaaa\_aaa[`aaa[a¥a\_aZa\_  
@HWI-EAS443:3:42:1327:1881#0/1  
ATCCATTGGAGACTTGAATGGAATGGTAACACGGTTCTCGA  
+HWI-EAS443:3:42:1327:1881#0/1  
\_b^aba\_¥W\_baaaababaaZZbb\_ba]bb\_a`\_a\_aba¥  
@HWI-EAS443:3:81:409:684#0/1  
CGGCGGACTTGAATGGAATGGTAACACGGTTCTCGAGTCTCT  
+HWI-EAS443:3:81:409:684#0/1  
a`¥G][Q`[XULZQ][U]YHTV[MSVLNQ`VQTLSSYW  
@HWI-EAS443:3:3:836:1304#0/1  
ATTTTGAGAGACTCGAACCGTGTACCATTCCATTCAAGT  
+HWI-EAS443:3:3:836:1304#0/1  
a```Y``]OX]\_OV^`\_aa]\_\_a]]aaXY¥J[aa^¥`aa]  
@HWI-EAS443:3:53:226:597#0/1  
GGTCCTCATCGGCGGACTTGAATGGAATGGTAACACGGTT  
+HWI-EAS443:3:53:226:597#0/1  
ab\_aaa¥Za`a\_FWZXVa`ZNYaa]T]Q`P¥XGU\_a[NW  
@HWI-EAS443:3:70:927:1845#0/1  
TCGGAGGAGTTGAATGGAATGGTAACACGGTTCTCGAGTCTC  
+HWI-EAS443:3:70:927:1845#0/1  
X``\_Y]]¥D^bbYb^`aX¥\_\_ZabX^a\_]PV¥S]RLN\_^  
@HWI-EAS443:3:72:766:664#0/1  
CGGAGGACTTGAATGGAATGGTAACACGGTTTGAGTCTCT  
+HWI-EAS443:3:72:766:664#0/1  
a`XY\_\_aaa\_¥¥\_W^R]¥ab`V]aa]Y^`[^MW]VTZWVX  
@HWI-EAS443:3:81:199:1995#0/1  
GAACCTTGTTACCATTCCATTCAAGTCCTCCGATGAGGAC  
+HWI-EAS443:3:81:199:1995#0/1  
^baW\_OZUQZL]^`^T¥Y`^abaa[[U`^a^]RN]]XU[P  
@HWI-EAS443:3:85:956:125#0/1  
CGGAGGACTTGAATGGAATGGTAATACGGTTCTCGAGTCTCT  
+HWI-EAS443:3:85:956:125#0/1  
abbaba\_a`b¥b^bbb\_aab]X^b¥`¥baaa\_abb\_\_a^a  
@HWI-EAS443:3:97:1558:1612#0/1  
CGAACCGTGTACCATTCCATTCAAGTCGTCGGATGAGGA  
+HWI-EAS443:3:97:1558:1612#0/1  
ab¥KXW[L[\_^U¥\_¥¥`\_aabaZ\_a[NYGXHZ`\_Wa\_^\_N

@HWI-EAS443:3:98:655:1466#0/1  
TCATCGGAGGACTTGAATGGAATGGTAACACGGCTCGAGT  
+HWI-EAS443:3:98:655:1466#0/1  
O\_X¥`V`¥`\_]Q¥Y¥b`¥\_\_J[`bZVT\_a]YPQHRJ]¥HD  
@HWI-EAS443:3:30:848:1442#0/1  
CGGGGAGGACTTGAATGGAATGGTAACACGGTTCGAGTCT  
+HWI-EAS443:3:30:848:1442#0/1  
^\_Q^¥`\_]^¥`Y\_\_Xaa`\_Za\_XXV]`\_Za\_`¥]\_[]]G\_\_  
@HWI-EAS443:3:4:519:1124#0/1  
CGGAGGACTTGAATGNAATGGTAACACGGTTCGAGTCTCT  
+HWI-EAS443:3:4:519:1124#0/1  
\_[aaa¥[Ya``]^[^DM]bbbX]aa^Ya¥MRVT\_`PP[αB  
@HWI-EAS443:3:27:1639:996#0/1  
CCGGACTTGAATGGAATGGTAACACGGTTCGAGTCTCTGA  
+HWI-EAS443:3:27:1639:996#0/1  
`\_bb¥`\_b^ab`bb``ab\_G¥`\_`\_]`b`X`Ya^V\_[a\_\_  
@HWI-EAS443:3:2:467:297#0/1  
GTTGGGGTCCTCATCGGAGGACTTGAATGGAATGGTAAAA  
+HWI-EAS443:3:2:467:297#0/1  
aaaaaaaaQ]V`\_Z\_V¥TT`Z¥Xa[¥]¥\_X\_]UZ[\_UZXNB  
@HWI-EAS443:3:5:960:1184#0/1  
CATCGGAGGACTTGAATGGAATGGTAACACGGTTCGAGCC  
+HWI-EAS443:3:5:960:1184#0/1  
aa\_Y\_aVba`a`b¥b`aa`\_aa]`b`\_a]H]L```BB  
@HWI-EAS443:3:90:468:1741#0/1  
CNGAGACTCGAACCGTGTACCATTCCATTCAAGTCCTCC  
+HWI-EAS443:3:90:468:1741#0/1  
^DYbabbbb\_ab¥baa`\_aaaba`a`aaa\_a`\_`Waaa`a  
@HWI-EAS443:3:24:656:845#0/1  
AGGGGTCCTCATCGGAGGACTTGAATGGAATGGTAACACG  
+HWI-EAS443:3:24:656:845#0/1  
a\_T¥aRYaaX[a[`[¥aXZSa`a^Ta¥VS^Z]X¥`ZZZQa  
@HWI-EAS443:3:91:1491:1725#0/1  
TCTCGAACCGTGTACCATTCCATTCAAGTCCTCCGATGA  
+HWI-EAS443:3:91:1491:1725#0/1  
]bbabaaaZaYa^baaaa`¥`aba]H^a`]aZaZTa\_Za\_  
@HWI-EAS443:3:9:1218:431#0/1  
GAACCGTGTACCATTCCATTCAAGTCCTCCGATGAGGAG  
+HWI-EAS443:3:9:1218:431#0/1  
a]ZYJU¥YRYOQL^]VY¥\_VNVRYUPRS[Z\_[¥\_TB BBB  
@HWI-EAS443:3:100:1490:783#0/1  
GTTGGGGTCCTCATCGGAGGACTTGAATGGAATGGTAACA  
+HWI-EAS443:3:100:1490:783#0/1  
a]aa\_^P¥N`S\_\_¥`\_¥a[Z¥`\_a¥Y\_¥\_¥W``YU]¥BB  
@HWI-EAS443:3:100:479:1401#0/1  
CGAACCGTGTACCATTCCATTCAAGTCCTCCGATGAGGA  
+HWI-EAS443:3:100:479:1401#0/1  
abbbbab\_baabbbbaaaa\_aaaaaa]aabaZb`a\_a`BB  
@HWI-EAS443:3:100:682:734#0/1  
CTCATCGGAGGACTTGAATGGAATGGTAACACGGTTCGAG

+HWI-EAS443:3:100:682:734#0/1  
I\_abababbbbbb[ba\_a]\_U`bbaabaaV[baba]bbB  
@HWI-EAS443:3:10:88:1498#0/1  
CATCGGAGGACTTGAATGGAATGGTAACACGGTTCGAGTC  
+HWI-EAS443:3:10:88:1498#0/1  
ab`aabaa\_abaabaaabaaaa^\_aaaa^[W\_a\_`^0a  
@HWI-EAS443:3:11:1071:1086#0/1  
TCGGAGGACTTGAATGGAATGGTAACACGGTTCGAGTCTC  
+HWI-EAS443:3:11:1071:1086#0/1  
`abNbaV]bbaT`aaa]Yaaa\_\_`]a]aWTY\_`\_`XOT^  
@HWI-EAS443:3:11:1178:1255#0/1  
CGGAGGACTTGAATGGAATGGTAACACGGTTCGAGTCTCT  
+HWI-EAS443:3:11:1178:1255#0/1  
aXaY#aT^`\_#baY`a`Raaaa#baabVaa^`[aaaZ\_`\_`a  
@HWI-EAS443:3:12:578:727#0/1  
CATCGGAGGACTTGAATGGAATGGTAACACGGTTCGAGTC  
+HWI-EAS443:3:12:578:727#0/1  
aaa\_ba]`aa\_a`a\_`aa`[a`\_Za\_\_`^^\_Z^`^#\_R]  
@HWI-EAS443:3:13:619:1046#0/1  
GTCCTCATCGGAGGACTTGAATGGAATGGTAACACGGTTC  
+HWI-EAS443:3:13:619:1046#0/1  
`X`]T]^`^`#`a^Y`W]VX^`]SY^^^GY``\_\_\_JFM\_  
@HWI-EAS443:3:14:1030:852#0/1  
GCAGTTGGGGTCCTCATCGGAGGACTTGAATGGAATGGTA  
+HWI-EAS443:3:14:1030:852#0/1  
aaabaaaa`a^aaaa^\_`]`#a\_X[a```\_aa`W\_`[\_U^  
@HWI-EAS443:3:15:1628:30#0/1  
GTCCTCATCGGAGGACTTGAATGGAATGGTAACACGGTTC  
+HWI-EAS443:3:15:1628:30#0/1  
aY]aaa^Y[[a\_]\_`M#`\_RXY\_aUW]]^G\_aN]ZBBBBB  
@HWI-EAS443:3:16:1006:55#0/1  
GGTCCTCATCGGAGGACTTGAATGGAATGGTAACACGGTT  
+HWI-EAS443:3:16:1006:55#0/1  
ab`b`bb^a\_bb`a`#\_aab\_aaab#aaaaW\_aaa\_`a#^  
@HWI-EAS443:3:16:1525:433#0/1  
ATCGGAGGACTTGAATGGAATGGTAACACGGTTCGAGTCT  
+HWI-EAS443:3:16:1525:433#0/1  
V^abbabaYVb`X^V#baYU`aa]\_a\_a`\_^R]RWZ#MZa  
@HWI-EAS443:3:16:352:70#0/1  
AACCGTGTACCATTCCATTCAAGTCCTCCGATGAGGACC  
+HWI-EAS443:3:16:352:70#0/1  
a^Y^`[`\_\_a\_\_\_\_^PW`\_#Q\_`^aVWXZ\_N`^`#YXRNV  
@HWI-EAS443:3:16:59:1537#0/1  
ATCGGAGGACTTGAATGGAATGGTAACACGGTTCGAGTCT  
+HWI-EAS443:3:16:59:1537#0/1  
a[```\_^[^`\_`\_\_\_\_^Z[]^]Y]`\_\_XX]ZZ`Y]^X^X  
@HWI-EAS443:3:17:1133:1357#0/1  
GGAGGACTTGAATGGAATGGTAACACGGTTCGAGTCTCTG  
+HWI-EAS443:3:17:1133:1357#0/1  
\_aaX^ababa#U\_ba]```a`aaaa\_a\_\_\_#\_a`\_`\_]a`

@HWI-EAS443:3:17:268:114#0/1  
GGGGTCCTCATCGGAGGACTTGAATGGAATGGTAACACCGG  
+HWI-EAS443:3:17:268:114#0/1  
a`aaW\_\_a`\_[a\_¥`^¥¥`^\_^¥N[WWWXMLNWWWUW  
@HWI-EAS443:3:17:716:304#0/1  
ATCGGAGGACTTGAATGGAATGGTAACACGGTTCGAGTCT  
+HWI-EAS443:3:17:716:304#0/1  
\_]a[^aba\_\_^]\_\_W]a][\_Y¥`U`\_]^^aXX¥W[X¥S[¥  
@HWI-EAS443:3:17:909:356#0/1  
ATCGGAGGACTTGAATGGAATGGTAACACGGTTCGAGTCT  
+HWI-EAS443:3:17:909:356#0/1  
a`aa\_\_aa][`\_`\_a\_^a`Z\_\_`\_W`\_][]\_^WZ]^0]Z]Z  
@HWI-EAS443:3:18:1028:1059#0/1  
CGAACCGTGTACCATTCCATTCAAGTCCTCCGATGAGGA  
+HWI-EAS443:3:18:1028:1059#0/1  
\_W`YZU\_R\_¥a\_X^W^R¥T[¥WYPUZQ[WSTT^HHW^ZYO  
@HWI-EAS443:3:18:1254:1163#0/1  
ATCGGAGGACTTGAATGGAATGGTAACACGGTTCGAGTCT  
+HWI-EAS443:3:18:1254:1163#0/1  
a\_aXT]a\_PP[[SRWZa]P¥[`]R]^W^\_Z]RRWWW\_0YY  
@HWI-EAS443:3:1:146:256#0/1  
CATCGGAGGACTTGAATGGAATGGTAACACGGTTCGAGTC  
+HWI-EAS443:3:1:146:256#0/1  
abaaaaabbaYbbb`abbaabbbabb\_aaba\_Xaaa`BB  
@HWI-EAS443:3:20:1153:233#0/1  
AATGCAGTTGGGGTCCTCATCGGAGGACTTGAATGGAATG  
+HWI-EAS443:3:20:1153:233#0/1  
`\_`b\_a\_P]abaa\_`^`a`\_\_ba\_aaQX\_a`\_Y[a¥V¥]\_  
@HWI-EAS443:3:21:1426:1859#0/1  
CATCGGAGGACTTGAATGGAATGGTAACACGGTTCGAGTC  
+HWI-EAS443:3:21:1426:1859#0/1  
aaY`[aYZ\_ZY]^Z`ZZWWTZ]MRX`W\_XXPTOTZWYN^  
@HWI-EAS443:3:21:1751:1451#0/1  
ATCGGAGGACTTGAATGGAATGGTAACACGGTTCGAGTCT  
+HWI-EAS443:3:21:1751:1451#0/1  
aaaaa`b``\_b`a`aa`][`\_`a\_X\_\_X\_W^]X\_]Z[ZZ^  
@HWI-EAS443:3:21:573:1340#0/1  
ATCGGAGGACTTGAATGGAATGGTAACACGGTTCGAGTCT  
+HWI-EAS443:3:21:573:1340#0/1  
a\_aa\_\_\_\_\_Sa`\_^aa¥^\_^\_TX`]]]W]SHMXW]SKKX  
@HWI-EAS443:3:23:1718:736#0/1  
AACCGTGTACCATTCCATTCAAGTCCTCCGATGAGGACC  
+HWI-EAS443:3:23:1718:736#0/1  
aa`aa]aaaa^]aa`YW\_\_^^`\_^R\_V\_NT]VX¥\_\_VYYG  
@HWI-EAS443:3:23:661:1289#0/1  
CATCGGAGGACTTGAATGGAATGGTAACACGGTTCGAGTC  
+HWI-EAS443:3:23:661:1289#0/1  
a^abbbabZXZaa\_`aa`ba`aa^[a`\_aaa`G\_a\_\_^PN  
@HWI-EAS443:3:24:1419:176#0/1  
ATCGGAGGACTTGAATGGAATGGTAACACGGTTCGAGTCT

+HWI-EAS443:3:24:1419:176#0/1  
Zb``baa`\_`aaba\_`abaabaabXaa\_aXaa¥a`\_a`W^`  
@HWI-EAS443:3:25:462:61#0/1  
CATCGGAGGACTTGAATGGAATGGTAACACGGTTCGAGTC  
+HWI-EAS443:3:25:462:61#0/1  
aaa[bbabba]bbbabab`a`bba`aaYba^a\_`aaa`a]`\_`  
@HWI-EAS443:3:27:1420:631#0/1  
CATCGGAGGACTTGAATGGAATGGTAACACGGTTCGAGTC  
+HWI-EAS443:3:27:1420:631#0/1  
abaa]`abb`abb\_abaaaaaaaa]`a\_a`aa[`aa`aZ`\_`  
@HWI-EAS443:3:27:474:886#0/1  
ATCGGAGGACTTGAATGGAATGGTAACACGGTTCGAGTCT  
+HWI-EAS443:3:27:474:886#0/1  
a`\_`aa`\_`[^a`\_\_\_aaa][\_\_\_Z\_\_\_^\_]Z]\_Y]]XXZ  
@HWI-EAS443:3:27:944:1833#0/1  
CGAACCGTGTACCATTCCATTCAAGTCCTCCGATGAGGA  
+HWI-EAS443:3:27:944:1833#0/1  
abbbbab^`aaaaabaaaabaa\_ab`QaX]\_\_a\_\_`a\_^`  
@HWI-EAS443:3:28:815:138#0/1  
GGAGGACTTGAATGGAATGGTAACACGGTTCGAGTCTCTG  
+HWI-EAS443:3:28:815:138#0/1  
a``]Waaaa`Y\_\_a`]^\_a]WZZYYL[]Y]\_]V\_WWXXW]  
@HWI-EAS443:3:28:911:29#0/1  
CATCGGAGGACTTGAATGGAATGGTAACACGGTTCGAGTC  
+HWI-EAS443:3:28:911:29#0/1  
a[[YaaSa\_\_\_aa`Y\_[W]\_`T]\_X^\_H^X^[NRS\_Y]YX  
@HWI-EAS443:3:29:325:135#0/1  
ATCGGAGGACTTGAATGGAATGGTAACACGGTTCGAGTCT  
+HWI-EAS443:3:29:325:135#0/1  
^X¥YZZ`a`aaaa`^a]a^\_``\_W\_]`\_]\_\_]]]]Z]VXB  
@HWI-EAS443:3:29:34:794#0/1  
GAGGACTTGAATGGAATGGTAACACGGTTCGAGTCTCTGA  
+HWI-EAS443:3:29:34:794#0/1  
\_Vaa\_``^`^V[a^]`[\_]Y]`a`^]Z¥`^`^]\_aZ`YBB  
@HWI-EAS443:3:2:1620:1201#0/1  
CGGAGGACTTGAATGGAATGGTAACACGGTTCGAGTCTCT  
+HWI-EAS443:3:2:1620:1201#0/1  
T`\_RM^Vaab`¥abab^bbY\_¥¥Z`V`\_``bUb[ba]]Q]  
@HWI-EAS443:3:31:1114:152#0/1  
GTCCTCATCGGAGGACTTGAATGGAATGGTAACACGGTTC  
+HWI-EAS443:3:31:1114:152#0/1  
`W```a``[^a\_a\_VZ[a]Z^a\_]Zaa\_T\_YRXT]ZRY  
@HWI-EAS443:3:31:671:948#0/1  
ATCGGAGGACTTGAATGGAATGGTAACACGGTTCGAGTCT  
+HWI-EAS443:3:31:671:948#0/1  
a\_bb`T^[R¥`ZZY]`[WTZX\_]Zaaa]]]][]X\_WVZT[W  
@HWI-EAS443:3:33:1092:983#0/1  
GAGGACTTGAATGGAATGGTAACACGGTTCGAGTCTCTGA  
+HWI-EAS443:3:33:1092:983#0/1  
a`aa\_aaaa`aa`\_aaaa¥a`\_`a\_a^^]`\_`^WZZ\_]\_\_]



@HWI-EAS443:3:33:1132:879#0/1  
CATCGGAGGACTTGAATGGAATGGTAACACGGTTCGAGTC  
+HWI-EAS443:3:33:1132:879#0/1  
aaaaababa¥abaaa\_aa`^aaaa^\_`\_\_\_\_\_W^^¥U]ZX  
@HWI-EAS443:3:35:1061:1007#0/1  
GGGGTCCTCATCGGAGGACTTGAATGGAATGGTAACACGG  
+HWI-EAS443:3:35:1061:1007#0/1  
a`[a]aaabaaaa^^a`aa`aY]`aa[^`aY[a`Y\_`\_`\_  
@HWI-EAS443:3:35:132:860#0/1  
CAGAGACTCGAACCGTGTACCATTCCATTCAAGTCCTCC  
+HWI-EAS443:3:35:132:860#0/1  
abaaa`aba`K`]aR`Z\_a\_`U[^\_a\_`¥aZZXT\_`¥[Q  
@HWI-EAS443:3:35:463:1096#0/1  
GTCCTCATCGGAGGACTTGAATGGAATGGTAACACGGTTC  
+HWI-EAS443:3:35:463:1096#0/1  
aaa`ba`¥`aaZa[GW\_a^a`aa^\_`^a^S^aGaUaXHL^  
@HWI-EAS443:3:36:1154:1845#0/1  
ATGCAGTTGGGGTCCTCATCGGAGGACTTGAATGGAATGG  
+HWI-EAS443:3:36:1154:1845#0/1  
`babba^[a^a^TNY\_a[\_`\_aYH\_`YaY\_a`\_¥`\_¥aYZ`  
@HWI-EAS443:3:36:1334:1681#0/1  
CGGAGGACTTGAATGGAATGGTAACACGGTTCGAGTCTCT  
+HWI-EAS443:3:36:1334:1681#0/1  
Q\_\_\_a`aZ\_`a^`bb\_¥^[\_bb]bb]\_Y^^W]]Nb^M¥  
@HWI-EAS443:3:36:1708:385#0/1  
ATCGGAGGACTTGAATGGAATGGTAACACGGTTCGAGTCT  
+HWI-EAS443:3:36:1708:385#0/1  
abbbb`bb`aa^R]abb[^a`a^\_aa]¥a^OLU`XaMX¥  
@HWI-EAS443:3:38:1277:1329#0/1  
CGAACCGTGTACCATTCCATTCAAGTCCTCCGATGAGGA  
+HWI-EAS443:3:38:1277:1329#0/1  
aba\_]aXT¥YUWJQZZOZO^]a\_Z^\_VR^ZKDRXPX[NNG  
@HWI-EAS443:3:38:1434:838#0/1  
CCTCATCGGAGGACTTGAATGGAATGGTAACACGGTTCGA  
+HWI-EAS443:3:38:1434:838#0/1  
abaabbabbaba`Zbbbababaaaa`b\_baZ\_Sa\_`a]`]  
@HWI-EAS443:3:38:1675:735#0/1  
AACCGTGTACCATTCCATTCAAGTCCTCCGATGAGGACC  
+HWI-EAS443:3:38:1675:735#0/1  
a][Z\_\_aa`a¥U[\_`PTa`[XZaaMFX\_Y\_UNVTTTTLQUI  
@HWI-EAS443:3:38:598:703#0/1  
CATCGGAGGACTTGAATGGAATGGTAACACGGTTCGAGTC  
+HWI-EAS443:3:38:598:703#0/1  
`baabb\_a^Taaab[aaaa\_\_`a]aU^a^Y^U\_\_a]`¥Z  
@HWI-EAS443:3:38:747:151#0/1  
CGGAGGACTTGAATGGAATGGTAACACGGTTCGAGTCTCT  
+HWI-EAS443:3:38:747:151#0/1  
`bb\_aa^ab`a¥\_aaa\_`a`Xaa\_aa`^WX]\_¥`XZWZZ  
@HWI-EAS443:3:38:813:1030#0/1  
GACTCGAACCGTGTACCATTCCATTCAAGTCCTCCGATG

+HWI-EAS443:3:38:813:1030#0/1  
aZ^QW¥Ub`[^U\_W[\_b`b[\_Z\_a`b\_a¥Z]`\_^a`^\_  
@HWI-EAS443:3:39:753:1873#0/1  
CATCGGAGGACTTGAATGGAATGGTAACACGGTTCGAGTC  
+HWI-EAS443:3:39:753:1873#0/1  
abbabaaabaaab`aaaaa`aaa]`aba^ZU0]`^^ZQ  
@HWI-EAS443:3:3:1011:30#0/1  
CATCGGAGGACTTGAATGGAATGGTAACACGGTTCGAGTC  
+HWI-EAS443:3:3:1011:30#0/1  
¥`babbabbaababa\_bbb`abb[^^\_YabW`]]a^V  
@HWI-EAS443:3:3:491:21#0/1  
CATCGGAGGACTTGAATGGAATGGTAACACGGTTCGAGTC  
+HWI-EAS443:3:3:491:21#0/1  
abaabbababbbb\_aabbbaabab\_aa`a^a`^`aUZQ]  
@HWI-EAS443:3:3:61:1133#0/1  
ATCGGAGGACTTGAATGGAATGGTAACACGGTTCGAGTCT  
+HWI-EAS443:3:3:61:1133#0/1  
[^bbb^SaaTba\_Za\_[^]abaXG\_\_N\_Y]¥W]`\_]\_KH[  
@HWI-EAS443:3:40:1455:162#0/1  
CGGAGGACTTGAATGGAATGGTAACACGGTTCGAGTCTCT  
+HWI-EAS443:3:40:1455:162#0/1  
a¥Z^XOT]W`a`]]a`W\_a\_X[¥TMZa\_[UZW]S¥Y¥T\_X  
@HWI-EAS443:3:40:820:142#0/1  
CATCGGAGGACTTGAATGGAATGGTAACACGGTTCGAGTC  
+HWI-EAS443:3:40:820:142#0/1  
abbbbbabba^`aaa^\_aaYZ`aa]`^^YZ`^WW`¥U¥V¥  
@HWI-EAS443:3:42:1717:394#0/1  
CATCGGAGGACTTGAATGGAATGGTAACACGGTTCGAGTC  
+HWI-EAS443:3:42:1717:394#0/1  
aaaU`baaabR`a`ba\_\_0]Zaa`^`aa¥a[PZ[^aST  
@HWI-EAS443:3:42:867:173#0/1  
CATCGGAGGACTTGAATGGAATGGTAACACGGTTCGAGTC  
+HWI-EAS443:3:42:867:173#0/1  
abbbbb\_ba`bbbaaaa`aaba`aa`\_aa¥^`a`aY[  
@HWI-EAS443:3:43:1365:1243#0/1  
TCCTCATCGGAGGACTTGAATGGAATGGTAACACGGTTCG  
+HWI-EAS443:3:43:1365:1243#0/1  
\_a`aaabab\_[`¥]`ba[aaaa`^^`a`a]a]\_\_a\_W  
@HWI-EAS443:3:43:426:354#0/1  
CGGAGGACTTGAATGGAATGGTAACACGGTTCGAGTCTCT  
+HWI-EAS443:3:43:426:354#0/1  
^abZbabbbbbbbabb`]abbab`aa`T`bbbbbaaaa]  
@HWI-EAS443:3:43:42:672#0/1  
CCATTCCATTCAAGTCTCCGATGAGGACCCCAACTGCAT  
+HWI-EAS443:3:43:42:672#0/1  
a`aaaa¥aaaaa\_aaa`^^`\_`a`^`\_`\_\_`^`\_`XX`  
@HWI-EAS443:3:43:438:1579#0/1  
ATCGGAGGACTTGAATGGAATGGTAACACGGTTCGAGTCT  
+HWI-EAS443:3:43:438:1579#0/1  
a]a^XP`\_X^`][\_`I[\_^`S¥YZ\_X^]\_VRUW¥UMS]¥

@HWI-EAS443:3:44:137:132#0/1  
GGGGTCCTCATCGGAGGACTTGAATGGAATGGTAACACGG  
+HWI-EAS443:3:44:137:132#0/1  
aab\_[aa`a```aa\_`\_^`a`\_¥\_aa¥\_\_\_aW\_\_TTL][  
@HWI-EAS443:3:44:229:1544#0/1  
GAACCGTGTACCATTCCATTCAAGTCCTCCGATGAGGAC  
+HWI-EAS443:3:44:229:1544#0/1  
a`ba\_a`a`\_ab\_aaaaZaa¥[`a\_Y]\_aa\_a[\_\_\_\_^VF  
@HWI-EAS443:3:46:1270:717#0/1  
CGGAGGACTTGAATGGAATGGTAACACGGTTCGAGTCTCT  
+HWI-EAS443:3:46:1270:717#0/1  
abbabbaabbbaabbba`bb`^baab^ba\_aaa`a[aa``  
@HWI-EAS443:3:46:1528:133#0/1  
CATCGGAGGACTTGAATGGAATGGTAACACGGTTCGAGTC  
+HWI-EAS443:3:46:1528:133#0/1  
abbaab]bbaabba^aaba`\_aaa\_a`]\_^a`]\_^a`]`^]  
@HWI-EAS443:3:46:182:1189#0/1  
CCTCATCGGAGGACTTGAATGGAATGGTAACACGGTTCGA  
+HWI-EAS443:3:46:182:1189#0/1  
aabNZbbbbbb[][^aUW[a`\_\_a`abJa]bZ`a`^bab`  
@HWI-EAS443:3:46:765:271#0/1  
CCGTGTTACCATTCCATTCAAGTCCTCCGATGAGGACCCC  
+HWI-EAS443:3:46:765:271#0/1  
aaaab\_bbaaabaaaaa`aaaZ`\_a``aaaa\_a\_\_^[^¥  
@HWI-EAS443:3:47:1455:288#0/1  
GGGTCCTCATCGGAGGACTTGAATGGAATGGTAACACGGT  
+HWI-EAS443:3:47:1455:288#0/1  
abaOb\_```]Va][aaX\_\_`aXZ``aJX`\_[NZ^NFW^YQ  
@HWI-EAS443:3:47:472:162#0/1  
CGGAGGACTTGAATGGAATGGTAACACGGTTCGAGTCTCT  
+HWI-EAS443:3:47:472:162#0/1  
abbabbaabbbbbbbbbbbbaabaab`ab\_a`b`b^`a`a  
@HWI-EAS443:3:47:513:333#0/1  
GGAGGACTTGAATGGAATGGTAACACGGTTCGAGTCTCTG  
+HWI-EAS443:3:47:513:333#0/1  
ab]aaaaabbaaaaa\_```^^`S`^\_\_W`^a``X]\_X^\_  
@HWI-EAS443:3:48:1356:218#0/1  
GTCCTCATCGGAGGACTTGAATGGAATGGTAACACGGTTC  
+HWI-EAS443:3:48:1356:218#0/1  
a^`\_a`a`^aa]a`^]aaa\_`\_`]]\_aUU]]V^Z]¥YYY  
@HWI-EAS443:3:49:1072:714#0/1  
CCTCATCGGAGGACTTGAATGGAATGGTAACACGGTTCGA  
+HWI-EAS443:3:49:1072:714#0/1  
`bbba`\_baaaaabab`^baba`bbb`aaYaaa]Va¥``  
@HWI-EAS443:3:49:370:121#0/1  
CATCGGAGGACTTGAATGGAATGGTAACACGGTTCGAGTC  
+HWI-EAS443:3:49:370:121#0/1  
aab\_bbabbaabbbabbbb`abbaaaa^a``a\_`\_`]a^\_  
@HWI-EAS443:3:4:1029:1592#0/1  
ATCGGAGGACTTGAATGGAATGGTAACACGGTTCGAGTCT

+HWI-EAS443:3:4:1029:1592#0/1  
aaaba\_b\_`Waaa\_a`ba`\_```\_]\_`a[[\_]]\_]¥XTPY  
@HWI-EAS443:3:4:637:126#0/1  
CGGAGGACTTGAATGGAATGGTAACACGGTTCGAGTCTCT  
+HWI-EAS443:3:4:637:126#0/1  
ab`Xaba\_Y`bbaabb^aaabX`a]``aa]^`a^aUY^V\_  
@HWI-EAS443:3:51:1520:1586#0/1  
GTCCTCATCGGAGGACTTGAATGGAATGGTAACACGGTTC  
+HWI-EAS443:3:51:1520:1586#0/1  
a`a\_aa`a\_aa\_aa^]aa`Z^a`\_^]```]\_^YWS^^V¥V  
@HWI-EAS443:3:51:348:1017#0/1  
CGGAGGACTTGAATGGAATGGTAACACGGTTCGAGTCTCT  
+HWI-EAS443:3:51:348:1017#0/1  
abb¥aa`aaaaa\_Z]aaaa``^a\_aa]\_\_`Xa\_\_\_^^  
@HWI-EAS443:3:52:1569:1488#0/1  
CAGTTGGGTCCTCATCGGAGGACTTGAATGGAATGGTAA  
+HWI-EAS443:3:52:1569:1488#0/1  
a[UbabbVaFU[aa]``ba\_ba\_Uaaa\_\_ab``\_aaZVX^  
@HWI-EAS443:3:52:214:1059#0/1  
CCGTGTTACCATTCCATTCAAGTCCTCCGATGAGGACCCC  
+HWI-EAS443:3:52:214:1059#0/1  
^XaPZF]X]WYYZ^`¥\_a^\_a\_NXP]]U¥MU]¥\_[RTX]]  
@HWI-EAS443:3:52:331:1557#0/1  
GAGGACTTGAATGGAATGGTAACACGGTTCGAGTCTCTGA  
+HWI-EAS443:3:52:331:1557#0/1  
`\_`[\_¥a\_b`\_``\_\_`ZR]\_\_Z\_]VH¥^[[]SM]]\_¥\_\_Z  
@HWI-EAS443:3:52:80:978#0/1  
ATCGGAGGACTTGAATGGAATGGTAACACGGTTCGAGTCT  
+HWI-EAS443:3:52:80:978#0/1  
aZaa`Zba^]a\_a\_\_\_aaW\_\_`\_U¥\_]\_]`¥WRV^U^YVY  
@HWI-EAS443:3:53:1009:1784#0/1  
CTCATCGGAGGACTTGAATGGAATGGTAACACGGTTCGAG  
+HWI-EAS443:3:53:1009:1784#0/1  
[abbbbbbaabbabbbbbbababbbbabb`Hab]aaa\_]`  
@HWI-EAS443:3:53:604:999#0/1  
GGTCCTCATCGGAGGACTTGAATGGAATGGTAACACGGTT  
+HWI-EAS443:3:53:604:999#0/1  
aaR\_¥aZa`aaaRaa`[\_`a\_Y]aa\_`^aaX^[\_```\_YV  
@HWI-EAS443:3:55:613:1467#0/1  
TTGGGGTCCTCATCGGAGGACTTGAATGGAATGGTAACAC  
+HWI-EAS443:3:55:613:1467#0/1  
ab\_\_a``aaaab\_^aa\_ba^\_aaaa`aa`a`a\_Z`aR\_\_  
@HWI-EAS443:3:56:1423:409#0/1  
CATCGGAGGACTTGAATGGAATGGTAACACGGTTCGAGTC  
+HWI-EAS443:3:56:1423:409#0/1  
[baabbabb\_P\_bbaaab]`aZZ`]a\_a`a`aa\_^OV[[Y  
@HWI-EAS443:3:57:152:1548#0/1  
CATCGGAGGACTTGAATGGAATGGTAACACGGTTCGAGTC  
+HWI-EAS443:3:57:152:1548#0/1  
aa\_a^\_\_\_\_]^`\_Y]\_\_\_\_[^`¥\_\_Z`^ZM¥^YW]X]YXUX

@HWI-EAS443:3:57:192:1421#0/1  
ATCGGAGGACTTGAATGGAATGGTAACACGGTTCGAGTCT  
+HWI-EAS443:3:57:192:1421#0/1  
aaaaa][^Q\_a\_]\_\_aa\_V^Y][[]V[^[^]¥Xa\_\_Y\_\_  
@HWI-EAS443:3:57:384:1956#0/1  
CTCATCGGAGGACTTGAATGGAATGGTAACACGGTTCGAG  
+HWI-EAS443:3:57:384:1956#0/1  
abbaa`baa^^¥a`a\_`a¥¥Wa\_`\_¥\_\_\_aXLY^\_\_^^  
@HWI-EAS443:3:57:603:1738#0/1  
TCAGAGACTCGAACCGTGTACCATTCCATTCAAGTCCTC  
+HWI-EAS443:3:57:603:1738#0/1  
¥`b[X¥W`\_]aRW¥DYV`PMS\_`\_Ra^U[`TYJY¥\_\_  
@HWI-EAS443:3:57:911:1639#0/1  
AACCGTGTACCATTCCATTCAAGTCCTCCGATGAGGACC  
+HWI-EAS443:3:57:911:1639#0/1  
`\_`a\_]Vaaaa\_aaba\_\_a]¥`^\_T^a\_ZY\_\_\_Y¥WQW^  
@HWI-EAS443:3:58:1571:789#0/1  
GGAGGACTTGAATGGAATGGTAACACGGTTCGAGTCTCTG  
+HWI-EAS443:3:58:1571:789#0/1  
a]¥ba\_\_bbaaaba\_`aaaX\_a^\_\_aa^[W`^^WU\_Z\_]`  
@HWI-EAS443:3:58:182:1455#0/1  
ATCGGAGGACTTGAATGGAATGGTAACACGGTTCGAGTCT  
+HWI-EAS443:3:58:182:1455#0/1  
aaba`a^Q[`[a^\_]`\_`X\_\_QU\_a`T`R^VMW]R^\_  
@HWI-EAS443:3:58:596:1732#0/1  
CATCGGAGGACTTGAATGGAATGGTAACACGGTTCGAGTC  
+HWI-EAS443:3:58:596:1732#0/1  
abbbbaa\_baabbaaaaa`\_aba]ba`aa`a`a`aa`X`  
@HWI-EAS443:3:59:1093:1052#0/1  
CGGAGGACTTGAATGGAATGGTAACACGGTTCGAGTCTCT  
+HWI-EAS443:3:59:1093:1052#0/1  
ab`[`b`^a]bbbbbaa\_bb^a\_Uabbb`¥F\_`\_WWaZ`  
@HWI-EAS443:3:5:1542:1226#0/1  
CGGAGGACTTGAATGGAATGGTAACACGGTTCGAGTCTCT  
+HWI-EAS443:3:5:1542:1226#0/1  
abbabbaabbbaabba`babb`ba\_a`ba\_`R]` `Z]\_Z`  
@HWI-EAS443:3:60:188:185#0/1  
ATCGGAGGACTTGAATGGAATGGTAACACGGTTCGAGTCT  
+HWI-EAS443:3:60:188:185#0/1  
a`bb`Z`]Xaa`U¥\_a]\_\_a[aa^`\_`a^^\_Z^]`^\_¥Y^Z  
@HWI-EAS443:3:61:1308:1947#0/1  
CATCGGAGGACTTGAATGGAATGGTAACACGGTTCGAGTC  
+HWI-EAS443:3:61:1308:1947#0/1  
aa\_`a]0\_S¥` `a` `aab¥]ab`a[`\_`[a\_^\_MRVWY^PF  
@HWI-EAS443:3:61:952:744#0/1  
ATCGGAGGACTTGAATGGAATGGTAACACGGTTCGAGTCT  
+HWI-EAS443:3:61:952:744#0/1  
aabbabb`abba`aaba`aaaaYV\_aa`a`]\_\_a\_\_YY]  
@HWI-EAS443:3:65:113:294#0/1  
CATCGGAGGACTTGAATGGAATGGTAACACGGTTCGAGTC

+HWI-EAS443:3:65:113:294#0/1  
abaaa^¥`a\_aa\_baXaa\_[a\_aYaa`a\_a^\_\_\_\_]`X\_  
@HWI-EAS443:3:65:1171:726#0/1  
CTCATCGGAGGACTTGAATGGAATGGTAACACGGTTCGAG  
+HWI-EAS443:3:65:1171:726#0/1  
aaaabbbbbaa`aabaabbaaba^aa`aaa\_¥`a`\_  
@HWI-EAS443:3:65:365:631#0/1  
GGAGGACTTGAATGGAATGGTAACACGGTTCGAGTCTCTG  
+HWI-EAS443:3:65:365:631#0/1  
[`U¥`^Y`aba\_ab`U`aa\_a`a`aa[[`a`aaaa\_a`^`  
@HWI-EAS443:3:65:746:1635#0/1  
GACTCGAACCGTGTACCATTCCATTCAAGTCCTCCGATG  
+HWI-EAS443:3:65:746:1635#0/1  
aabbbbaUbbba^`babbabbbbbaa\_abaa¥abaaabbaa  
@HWI-EAS443:3:65:822:542#0/1  
GGAGGACTTGAATGGAATGGTAACACGGTTCGAGTCTCTG  
+HWI-EAS443:3:65:822:542#0/1  
````\_`aaa^[\_aa`[]aa^W^`^^]a`V\_a\_^\_^\_\_\_\_\_  
@HWI-EAS443:3:66:1713:658#0/1  
TACCATTCCATTCAAGTCCTCCGATGAGGACCCCAACTGC  
+HWI-EAS443:3:66:1713:658#0/1  
^a¥]^aa\_¥U`¥¥^^`ZZZ¥¥M\_a]^`S\_Y\_¥WOX\_WJWM  
@HWI-EAS443:3:66:699:702#0/1  
GAACCGTGTACCATTCCATTCAAGTCCTCCGATGAGGAC  
+HWI-EAS443:3:66:699:702#0/1  
a¥bbb]a\_abbbb]\_`a\_a`a]\_Z^\_a¥aaab\_\_\_\_]PX]\_  
@HWI-EAS443:3:67:1265:1081#0/1  
ATCGGAGGACTTGAATGGAATGGTAACACGGTTCGAGTCT  
+HWI-EAS443:3:67:1265:1081#0/1  
aaab`\_ba^]a``\_\_aaa[\_a`aP``\_\_^a\_Y^W]]^Y\_^`  
@HWI-EAS443:3:67:65:1638#0/1  
AACCGTGTACCATTCCATTCAAGTCCTCCGATGAGGACC  
+HWI-EAS443:3:67:65:1638#0/1  
a^a\_]\_]\_]aaa\_]^\_a\_]Z`aa\_Y`[^a^`]\_\_^Z[^\_^`  
@HWI-EAS443:3:68:1348:1448#0/1  
CGGAGGACTTGAATGGAATGGTAACACGGTTCGAGTCTCT  
+HWI-EAS443:3:68:1348:1448#0/1  
^^aYbb`abTbbbW]bIaaab`[]\_b[aa[a]NHWR^\_\_a  
@HWI-EAS443:3:68:856:1935#0/1  
CGGAGGACTTGAATGGAATGGTAACACGGTTCGAGTCTCT  
+HWI-EAS443:3:68:856:1935#0/1  
\_\_^\_b^[]`bbbbbbbababaTbbabba`V``aa`\_`\_a`  
@HWI-EAS443:3:69:309:290#0/1  
CATCGGAGGACTTGAATGGAATGGTAACACGGTTCGAGTC  
+HWI-EAS443:3:69:309:290#0/1  
abbbbaaaa`aaab``aa\_\_`a\_]a^^``\_^[^\_a^\_Z^`  
@HWI-EAS443:3:69:595:271#0/1  
CCATTCCATTCAAGTCCTCCGATGAGGACCCCAACTGCAT  
+HWI-EAS443:3:69:595:271#0/1  
aaa`aaa\_`aa[T\_^a^`\_`a^`a][¥]`[]]U\_^]V^^

@HWI-EAS443:3:70:607:839#0/1  
GGAGGACTTGAATGGAATGGTAACACGGTTCGAGTCTCTG  
+HWI-EAS443:3:70:607:839#0/1  
YbY`aabaa``^`a`¥a^aTYb^aa`\_X\_a\_a\_^`[`¥\_  
@HWI-EAS443:3:71:106:747#0/1  
CATCGGAGGACTTGAATGGAATGGTAACACGGTTCGAGTC  
+HWI-EAS443:3:71:106:747#0/1  
a^aaaaaa``a`a`aa`\_YO¥]V[[PP^\_XZZ\_SQQZZ  
@HWI-EAS443:3:71:19:392#0/1  
CGGAGGACTTGAATGGAATGGTAACACGGTTCGAGTCTCT  
+HWI-EAS443:3:71:19:392#0/1  
abaWabaab`a^abbb`¥a``¥aaa\_aaRTXaa`YT[a]a  
@HWI-EAS443:3:71:237:1254#0/1  
ATCGGAGGACTTGAATGGAATGGTAACACGGTTCGAGTCT  
+HWI-EAS443:3:71:237:1254#0/1  
a`baa^a\_^`a`a`a`¥a`^`Waaa`a\_^ZZ`^]\_O]]  
@HWI-EAS443:3:72:1411:1641#0/1  
CGGAGGACTTGAATGGAATGGTAACACGGTTCGAGTCTCT  
+HWI-EAS443:3:72:1411:1641#0/1  
Y`ababbabbbabb`baa^]\_bbbabb]ab¥babaaabb  
@HWI-EAS443:3:72:947:807#0/1  
ATCGGAGGACTTGAATGGAATGGTAACACGGTTCGAGTCT  
+HWI-EAS443:3:72:947:807#0/1  
``abbaba]`bbaaaabb\_aa]a\_aaaa^aa]aaaZ`]-`  
@HWI-EAS443:3:73:1139:228#0/1  
ATCGGAGGACTTGAATGGAATGGTAACACGGTTCGAGTCT  
+HWI-EAS443:3:73:1139:228#0/1  
aa`aa\_bb\_\_`a\_\_aaa]a`aa^`aX\_^`\_]^^\_XaYW^  
@HWI-EAS443:3:73:1178:343#0/1  
CTCATCGGAGGACTTGAATGGAATGGTAACACGGTTCGAG  
+HWI-EAS443:3:73:1178:343#0/1  
`^ZZaabaZ¥\_XR^`b^U^bbZaaab\_[a``\_a\_TT`[Ub  
@HWI-EAS443:3:73:1225:1923#0/1  
CATCGGAGGACTTGAATGGAATGGTAACACGGTTCGAGTC  
+HWI-EAS443:3:73:1225:1923#0/1  
``¥R``ZY`P¥]Y`J]S]TYY^VZX^^`\_]Z]ZWZY^O^  
@HWI-EAS443:3:73:1632:1528#0/1  
GTTGGGGTCTCATCGGAGGACTTGAATGGAATGGTAACA  
+HWI-EAS443:3:73:1632:1528#0/1  
`^ba^b`T``\_\_a`aa\_\_¥a`a`^Ya\_]U\_``\_W`¥U[  
@HWI-EAS443:3:74:1151:1928#0/1  
GACTTGAATGGAATGGTAACACGGTTCGAGTCTCTGAAAA  
+HWI-EAS443:3:74:1151:1928#0/1  
\_\_abaaaabb`]`bb`abbbbaba`a^^aY]^aaa`\_a  
@HWI-EAS443:3:74:146:1334#0/1  
CATCGGAGGACTTGAATGGAATGGTAACACGGTTCGAGTC  
+HWI-EAS443:3:74:146:1334#0/1  
ababaaaa\_`aaaaaa\_¥^a^`XUaX]]]ZTXPTUUUXV  
@HWI-EAS443:3:74:301:47#0/1  
CATCGGAGGACTTGAATGGAATGGTAACACGGTTCGAGTC

+HWI-EAS443:3:74:301:47#0/1  
abaab`[aa`abbb^]abb\_aab`Z`a[``aa]`^]TY¥T  
@HWI-EAS443:3:74:616:468#0/1  
CATCGGAGGACTTGAATGGAATGGTAACACGGTTCGAGTC  
+HWI-EAS443:3:74:616:468#0/1  
abbabb`abbbbbbaabbbabbbb`aa`abab\_aaaaa\_\_  
@HWI-EAS443:3:75:1200:1735#0/1  
CGGAGGACTTGAATGGAATGGTAACACGGTTCGAGTCTCT  
+HWI-EAS443:3:75:1200:1735#0/1  
X`^T^]GU`YX\_W`¥\_QSa¥\_Z¥`a`\_b¥X¥aa]IX`\_]a\_  
@HWI-EAS443:3:75:631:794#0/1  
CGAACCGTGTACCATTCCATTCAAGTCCTCCGATGAGGA  
+HWI-EAS443:3:75:631:794#0/1  
\_bbbabaaa`abbbbabbaabaabba^aaa`\_babaaa^`  
@HWI-EAS443:3:76:1785:623#0/1  
ATCGGAGGACTTGAATGGAATGGTAACACGGTTCGAGTCT  
+HWI-EAS443:3:76:1785:623#0/1  
`aY`¥T^b\_\_aaaX\_aaaX``aaX`^M¥Q\_ZHYW¥Z\_NSZ  
@HWI-EAS443:3:77:372:1327#0/1  
ATCGGAGGACTTGAATGGAATGGTAACACGGTTCGAGTCT  
+HWI-EAS443:3:77:372:1327#0/1  
aaaa¥T^a`^a\_Y]Ua\_\_T]^R[Yaa`^`\_]Z]^¥Z¥W^X  
@HWI-EAS443:3:78:922:1060#0/1  
CATCGGAGGACTTGAATGGAATGGTAACACGGTTCGAGTC  
+HWI-EAS443:3:78:922:1060#0/1  
ababababb`ababaabba```b`^aa`a\_aa]a``a`\_^  
@HWI-EAS443:3:78:939:1534#0/1  
CATCGGAGGACTTGAATGGAATGGTAACACGGTTCGAGTC  
+HWI-EAS443:3:78:939:1534#0/1  
abaaab`aaaaaabaaaaa\_aaa`^aa^a]a`\_`\_`\_\_X^  
@HWI-EAS443:3:79:242:414#0/1  
TGTTACCATTCCATTCAAGTCCTCCGATGAGGACCCCAAC  
+HWI-EAS443:3:79:242:414#0/1  
a]N`¥\_[S¥a`TRO^a^BBBBBBBBBBBBBBBBBBBBBBBB  
@HWI-EAS443:3:7:1757:835#0/1  
CATCGGAGGACTTGAATGGAATGGTAACACGGTTCGAGTC  
+HWI-EAS443:3:7:1757:835#0/1  
]ab``babb`]bbaa[bbaZb`b]aa`V[\_][aaRY^`YV  
@HWI-EAS443:3:80:1042:836#0/1  
GTCCTCATCGGAGGACTTGAATGGAATGGTAACACGGTTC  
+HWI-EAS443:3:80:1042:836#0/1  
a¥aa\_aaaaaaYaa\_a`a`\_]Y[¥^a\_]a`\_\_\_\_`[¥\_]`  
@HWI-EAS443:3:81:1132:589#0/1  
GTTGGGGTCTCATCGGAGGACTTGAATGGAATGGTAACA  
+HWI-EAS443:3:81:1132:589#0/1  
a\_\_\_\_^`\_Q`\_\_\_\_\_Za`Y`[R¥`a[Z¥\_\_`U¥¥\_\_W¥[W¥  
@HWI-EAS443:3:81:177:1596#0/1  
ATCGGAGGACTTGAATGGAATGGTAACACGGTTCGAGTCT  
+HWI-EAS443:3:81:177:1596#0/1  
W\_a]¥X]¥[\_`\_\_\_\_\_`ZX¥¥ZYTV]`\_\_YYW]^VQQVZY



@HWI-EAS443:3:81:240:1358#0/1  
CCGTGTTACCATTCCATTCAAGTCCTCCGATGAGGACCCC  
+HWI-EAS443:3:81:240:1358#0/1  
a\_]YY^]`abaa]^`a\_]ba^Z^\_a^b^\_S\_\_`]]a]\_^  
@HWI-EAS443:3:81:924:872#0/1  
CATCGGAGGACTTGAATGGAATGGTAACACGGTTCGAGTC  
+HWI-EAS443:3:81:924:872#0/1  
`aZ`^][`^]aaa¥¥^`ba¥\_a`]WT\_¥[\_a\_]¥`\_YQOQ  
@HWI-EAS443:3:82:1075:352#0/1  
GTCCTCATCGGAGGACTTGAATGGAATGGTAACACGGTTC  
+HWI-EAS443:3:82:1075:352#0/1  
aaaaaaabbbb`aaa\_abba`bbaaaaba\_aa`a\_a[T``  
@HWI-EAS443:3:83:844:160#0/1  
GAGGACTTGAATGGAATGGTAACACGGTTCGAGTCTCTGA  
+HWI-EAS443:3:83:844:160#0/1  
a[a`WW^]a\_]`Z^V^\_U^aX^Y^ZX]^]RZZ[]X][F  
@HWI-EAS443:3:84:465:1955#0/1  
CGAACCGTGTACCATTCCATTCAAGTCCTCCGATGAGGA  
+HWI-EAS443:3:84:465:1955#0/1  
aaba[^RNST[ZPZQOP`\_`a\_¥[QRU`] ]^U]\_^¥`I\_\_  
@HWI-EAS443:3:84:962:2021#0/1  
ATCGGAGGACTTGAATGGAATGGTAACACGGTTCGAGTCT  
+HWI-EAS443:3:84:962:2021#0/1  
abaa`\_aa\_Wa\_`^^`\_]`\_\_`X`Z^Z\_\_G^]\_W\_ZXX  
@HWI-EAS443:3:85:417:226#0/1  
CATCGGAGGACTTGAATGGAATGGTAACACGGTTCGAGTC  
+HWI-EAS443:3:85:417:226#0/1  
abbbbabbb`aabbaabbb`abba]aa\_a`aaW\_]a`aWW  
@HWI-EAS443:3:86:1077:126#0/1  
GACTCGAACCGTGTACCATTCCATTCAAGTCCTCCGATG  
+HWI-EAS443:3:86:1077:126#0/1  
aa`]`a\_a\_^^Z¥aa\_aa]Z]`P¥¥a`\_`aLUY^HU[U¥\_  
@HWI-EAS443:3:86:246:990#0/1  
GAGGACTTGAATGGAATGGTAACACGGTTCGAGTCTCTGA  
+HWI-EAS443:3:86:246:990#0/1  
¥Za`Y`^ba]^b`] ]aaaa^aab]\_[Y`]YXY]\_]\_] ]  
@HWI-EAS443:3:86:331:1206#0/1  
ATCGGAGGACTTGAATGGAATGGTAACACGGTTCGAGTCT  
+HWI-EAS443:3:86:331:1206#0/1  
a\_a\_¥Ya`\_\_\_\_`\_\_\_\_^a[^ZFNVX\_^]\_^]XYY[W¥YXY  
@HWI-EAS443:3:87:1260:577#0/1  
CGGAGGACTTGAATGGAATGGTAACACGGTTCGAGTCTCT  
+HWI-EAS443:3:87:1260:577#0/1  
\_bbabbabbbbbb`babbbbabbb`babb\_aZbaaaYa\_b  
@HWI-EAS443:3:89:1643:1996#0/1  
GAACCGTGTACCATTCCATTCAAGTCCTCCGATGAGGAC  
+HWI-EAS443:3:89:1643:1996#0/1  
\_¥KUba\_¥PV[a[bbbababa^aaa`Ub[ab`aaa^aZaN  
@HWI-EAS443:3:8:73:412#0/1  
TCGGAGGACTTGAATGGAATGGTAACACGGTTCGAGTCTC

+HWI-EAS443:3:8:73:412#0/1  
abbbabbaabbaaaabbaaaab\_aa\_aab`¥\_aa]aTa`\_  
@HWI-EAS443:3:90:158:861#0/1  
GTTGGGGTCCTCATCGGAGGACTTGAATGGAATGGTAACA  
+HWI-EAS443:3:90:158:861#0/1  
a`baa`b]aba`aaaaYaa¥aaaa\_¥ab\_[`aa\_W```a  
@HWI-EAS443:3:90:797:1825#0/1  
ATGCAGTTGGGGTCCTCATCGGAGGACTTGAATGGAATGG  
+HWI-EAS443:3:90:797:1825#0/1  
a``baba\_^[\_^^`abb\_a`^[a^`\_aba`¥a]\_\_\_\_`aa  
@HWI-EAS443:3:90:827:524#0/1  
GTCCTCATCGGAGGACTTGAATGGAATGGTAACACGGTTC  
+HWI-EAS443:3:90:827:524#0/1  
aab^ab`aa`US]`RZb\_aW\_aa\_^Ya\_]a`^XV`N^Q  
@HWI-EAS443:3:91:1362:556#0/1  
TCCTCATCGGAGGACTTGAATGGAATGGTAACACGGTTCG  
+HWI-EAS443:3:91:1362:556#0/1  
a`Y\_a\_V`a\_]`\_]\_^a`^Y^aaY\_X^\_X`^X[S\_]XXX  
@HWI-EAS443:3:93:431:215#0/1  
ATCGGAGGACTTGAATGGAATGGTAACACGGTTCGAGTCT  
+HWI-EAS443:3:93:431:215#0/1  
aaaaa^bbUaaa]\_\_aaa]`ab`Wa`\_^`Z\_X`Z\_WS\_  
@HWI-EAS443:3:94:1761:831#0/1  
ATCGGAGGACTTGAATGGAATGGTAACACGGTTCGAGTCT  
+HWI-EAS443:3:94:1761:831#0/1  
\_ab^ZV\_`^\_baaaaab^\_`]`a]aaXa`adW`RY^aY\_\_  
@HWI-EAS443:3:95:726:745#0/1  
CATCGGAGGACTTGAATGGAATGGTAACACGGTTCGAGTC  
+HWI-EAS443:3:95:726:745#0/1  
`b[¥\_¥Xab]aaaaZ``aaabb`¥G¥YVa[a[]P\_WHYW[  
@HWI-EAS443:3:96:1235:1230#0/1  
ATCGGAGGACTTGAATGGAATGGTAACACGGTTCGAGTCT  
+HWI-EAS443:3:96:1235:1230#0/1  
aabaa¥baaaaba\_`aaa\_`aaa]a]Z`\_]\_]\_\_^]]\_Sa  
@HWI-EAS443:3:96:1261:1286#0/1  
CATCGGAGGACTTGAATGGAATGGTAACACGGTTCGAGTC  
+HWI-EAS443:3:96:1261:1286#0/1  
abbbbaab`[abbbabbb\_abaaa`aGa\_bb`a`baa^`  
@HWI-EAS443:3:96:403:1447#0/1  
CATCGGAGGACTTGAATGGAATGGTAACACGGTTCGAGTC  
+HWI-EAS443:3:96:403:1447#0/1  
a]aaaYWaa\_^]``V\_]aZW\_¥aaX]^X\_]SY^^XXMZW`  
@HWI-EAS443:3:97:859:1735#0/1  
CGAACCGTGTACCATTCCATTCAAGTCCTCCGATGAGGA  
+HWI-EAS443:3:97:859:1735#0/1  
`\_`b[a]^a¥b``^ba`bbabbabbXX]Ub\_\_aab]a]^`  
@HWI-EAS443:3:99:1147:1332#0/1  
ATCGGAGGACTTGAATGGAATGGTAACACGGTTCGAGTCT  
+HWI-EAS443:3:99:1147:1332#0/1  
`a\_] [Z`^Va]ZNZ\_aaZ\_]aU``R^Z\_aR^\_AR[TQB

@HWI-EAS443:3:99:294:753#0/1  
ACTTGAATGGAATGGTAACACGGTTCGAGTCTCTGAAAAT  
+HWI-EAS443:3:99:294:753#0/1  
aabbba`bbb\_abb]a^aaabb\_`aaaa` `a`a\_]\_` `a  
@HWI-EAS443:3:99:463:1701#0/1  
CGGAGGACTTGAATGGAATGGTAACACGGTTCGAGTCTCT  
+HWI-EAS443:3:99:463:1701#0/1  
aaa[baa[a\_aaaa`ZU¥Vaa[ba`\_a[aVaa\_aa^a\_a¥  
@HWI-EAS443:3:99:769:608#0/1  
CATTCCATTCAAGTCCTCCGATGAGGACCCCAACTGCATT  
+HWI-EAS443:3:99:769:608#0/1  
^^^ab[a`aaa]^WX\_aba[a`aaaZa¥G\_a`^aaaa`  
@HWI-EAS443:3:9:1047:656#0/1  
CATCGGAGGACTTGAATGGAATGGTAACACGGTTCGAGTC  
+HWI-EAS443:3:9:1047:656#0/1  
¥` ` \_Y¥SYab^`a^[\` `a`a^Q\_a¥` ` ]\_Y` [T` ]a]`WT  
@HWI-EAS443:3:9:725:242#0/1  
CGGAGGACTTGAATGGAATGGTAACACGGTTCGAGTCTCT  
+HWI-EAS443:3:9:725:242#0/1  
a`aY`aaababb`a`b`]abb\_aaU` `aa^\_]\_\_`VMY]`  
@HWI-EAS443:3:9:869:1299#0/1  
CGTGTACCATTCCATTCAAGTCCTCCGATGAGGACCCCA  
+HWI-EAS443:3:9:869:1299#0/1  
aaS`Q]aaa\_b¥QZ] ]aa\_Z¥P`V¥`PVZM[X¥`QWSW\_Y  
@HWI-EAS443:3:82:1429:1280#0/1  
GCCTGATTAATGATCCCTGGGTTTTGCTTAATGCGTCTTG  
+HWI-EAS443:3:82:1429:1280#0/1  
]]`b[`aa]¥Y` `[aaTbbaYFZ^aa\_aY`^aa¥LUW` [ `  
@HWI-EAS443:3:20:356:1845#0/1  
CAGCCGTCTGAGCTCTTCAATGGTGGAACAGATCTTCATG  
+HWI-EAS443:3:20:356:1845#0/1  
`^Z\_b[`bY^a\_0]b`\_aaa` ` ]\_` `aaa\_\_X\_[V¥\_GX  
@HWI-EAS443:3:29:1444:1190#0/1  
ATTTCCAGCATGGTGGAGGCCATGGTGTCTAGGGCCCGGA  
+HWI-EAS443:3:29:1444:1190#0/1  
\_\_^\_X0]¥\_Z\_\_`^` ` ]OUYW]Q¥]a`R]` ` ` ] [V` ¥` B  
@HWI-EAS443:3:84:574:869#0/1  
GTCTGAGCTCTTCAATGGTGGAACAGATCTTCATGATCTC  
+HWI-EAS443:3:84:574:869#0/1  
a]` [aa`IX¥]Y¥N\_U` `Y` ]P]V[ZNYXZ[¥YY`UOJRX  
@HWI-EAS443:3:36:308:1410#0/1  
GCAAAAGCAGGTAGATATTNAAAGATGAGTCTTCTAACCG  
+HWI-EAS443:3:36:308:1410#0/1  
aba`\_X` ` ` ` ¥a` [a^a¥D¥a[ `a`^` ` ¥aaaa\_baaa¥  
@HWI-EAS443:3:78:1452:326#0/1  
AAAGGAAGGCACGATCGGGCTCGTTGCCTTTTCGTCCGAG  
+HWI-EAS443:3:78:1452:326#0/1  
abT]aa`b`Q`^a]ST`aZKPXXT`GPGX¥]BBBBBBBBB  
@HWI-EAS443:3:39:1603:117#0/1  
TAAATGCAGCAGAGTGGCATGCCATCCACGCCAATTGACT

+HWI-EAS443:3:39:1603:117#0/1  
V\_aba`b]a`baaba`b\_Va\_aaabN`RDXG¥PVFMVQ\_  
@HWI-EAS443:3:19:1006:615#0/1  
TTCCAAGAGGAAAGCTTTCCACAAGAGGGGTCAAGATTGC  
+HWI-EAS443:3:19:1006:615#0/1  
SN^`bba\_\_\_\_\_^`\_0QSZ¥WIW\_]`Q^ZbUM]F]aZH¥]a  
@HWI-EAS443:3:68:1724:826#0/1  
GCAATCTGGACCCCTCTTGTGGAAAGCTTTTCTCTTGAA  
+HWI-EAS443:3:68:1724:826#0/1  
aa`aaaaaaZ^¥```\_`[^]a`YR]ZZ\_]JV\_¥\_]SW^Y  
@HWI-EAS443:3:70:284:1744#0/1  
CAAATGCAGCAGAGTGGCATGCCATCCACCCAATTGACT  
+HWI-EAS443:3:70:284:1744#0/1  
aaa`a`bbZab`\_a[a[\_ba¥\_ba\_aT[\_H^ZG[`YT]\_¥  
@HWI-EAS443:3:93:135:626#0/1  
CATGCCACTCTGCTGCATTTGACGATTTAAGAGTATCAAG  
+HWI-EAS443:3:93:135:626#0/1  
\_`^V`¥VaWOSTaX[\_TYX¥aaR`WSZM¥ZU¥UYPXKDIXY  
@HWI-EAS443:3:15:337:916#0/1  
GAAAGTGNTTCCAAGAGGAAAGCTTTCCACAAGAGGGGTC  
+HWI-EAS443:3:15:337:916#0/1  
abbbb`^D[bbabb`a`abaaaa`aaaa\_aaa```\_`\_V^  
@HWI-EAS443:3:40:946:1009#0/1  
GACCCCTCTTGTGGAAAGCTTTCTTCTTGAANCACTTTC  
+HWI-EAS443:3:40:946:1009#0/1  
``Z\_[\_]¥]XZZ^]^[^]Z]¥Z^ZSXZZ]UMDMWXXZXZ  
@HWI-EAS443:3:53:187:911#0/1  
AGGAAAGCTTTCCACAAGAGGGGTCCAGATTGCTTCAATG  
+HWI-EAS443:3:53:187:911#0/1  
aaXM]OU^]RV\_X`\_\_aTVYNOOYZHWULZ][R[\_ZSQV  
@HWI-EAS443:3:66:1184:671#0/1  
CAAATGCAGCAGAGTGGCATGCCATCCACACCAATTGATT  
+HWI-EAS443:3:66:1184:671#0/1  
`[¥¥YG¥]a]\_MSO`\_NZ^a\_a`R]\_¥I¥`\_]\_R^a\_]OER  
@HWI-EAS443:3:11:628:1313#0/1  
CAAATGCAGCAGAGTGGCATGCCATCCACACCAATTGACT  
+HWI-EAS443:3:11:628:1313#0/1  
¥POZbaZ\_\_aTab`^aaaa]U\_aaab`[`^S`[Zaa[[`  
@HWI-EAS443:3:16:1463:1766#0/1  
GTCAATTGGTGTGGATGGCATGCCACTCTGCTGCATTTGA  
+HWI-EAS443:3:16:1463:1766#0/1  
]a`\_a`b``^a^\_\_^`\_YF[PFVP]G`V^U\_\_[NN`^`R^  
@HWI-EAS443:3:16:1678:540#0/1  
CAAATGCAGCAGAGTGGCATGCCATCCACACCAATTGACT  
+HWI-EAS443:3:16:1678:540#0/1  
abb\_W\_bb`bbbaaTbaZaaaX]`aV¥a`\_XZaa[X`\_Qa  
@HWI-EAS443:3:17:173:1389#0/1  
AGCAATCTGGACCCCTCTTGTGGAAAGCTTTCTTCTTGGGA  
+HWI-EAS443:3:17:173:1389#0/1  
`^aaaaaba\_aa`aaa`aa`[[T``V\_\_a`^`^^`\_\_^`\_\_[^

@HWI-EAS443:3:46:780:1169#0/1  
GCAATCTGGACCCCTCTTGTGGAAAGCTTTCCTCTTGAA  
+HWI-EAS443:3:46:780:1169#0/1  
aa` `baaaaa`a`^a`aa\_\_^]\_aa`]`aa\_\_a\_aaa\_\_^  
@HWI-EAS443:3:49:704:691#0/1  
CAAGAGGAAAGCTTCCACAAGAGGGGTCCAGATTGCTTC  
+HWI-EAS443:3:49:704:691#0/1  
abbbbbbbbbbb\_bbbbbabaaabb]a`a\_aabaaaabaaba  
@HWI-EAS443:3:4:649:1074#0/1  
GTCAATTGGTGTGGATGGCATGCCACTCTGCTGCATTTGA  
+HWI-EAS443:3:4:649:1074#0/1  
\_P\_]aa]XDY]a`VZ\_¥SQZNTVYRXUXVSYQQTZBBB  
@HWI-EAS443:3:52:1102:1290#0/1  
GCAATCTGGACCCCTCTTGTGGAAAGCTTTCCTCTTGAA  
+HWI-EAS443:3:52:1102:1290#0/1  
^^a[b\_ab` []babbaaaa[\_V^a\_]bbb`ababbba`a  
@HWI-EAS443:3:52:414:172#0/1  
CAAGAGGAAAGCTTCCACAAGAGGGGTCCAGATTGCTTC  
+HWI-EAS443:3:52:414:172#0/1  
abbaaa`aa\_bZaaaa\_a]a^a^\_]`^Z[Z\_a\_\_^`¥^\_X  
@HWI-EAS443:3:52:765:807#0/1  
GTCAATTGGTGTGGATGGCATGCCACTCTGCTGCATTTGA  
+HWI-EAS443:3:52:765:807#0/1  
a\_b`abbbbababa`bb^`Y` `^[\_\_\_\_\_aa`\_a¥R\_aaX^  
@HWI-EAS443:3:54:1607:1042#0/1  
AAGAGGAAAGCTTCCACAAGAGGGGTCCAGATTGCTTCA  
+HWI-EAS443:3:54:1607:1042#0/1  
aaabaaabb`aba\_aaa`aaaa[a\_¥^^a` `aaa`^`\_`\_  
@HWI-EAS443:3:55:691:1432#0/1  
AAGAGGAAAGCTTCCACAAGAGGGGTCCAGATTGCTTCA  
+HWI-EAS443:3:55:691:1432#0/1  
ab^a^¥aa` `aaaa]a\_` `aa¥XLYY]]`a`^`\_Va^]\_  
@HWI-EAS443:3:69:832:251#0/1  
CAAATGCAGCAGAGTGGCATGCCATCCACACCAATTGACT  
+HWI-EAS443:3:69:832:251#0/1  
abbbabaaaa\_a\_aXaa\_a^¥R¥`]]` `\_\_\_\_¥`\_] ^\_XY\_  
@HWI-EAS443:3:76:218:1282#0/1  
CAAATGCAGCAGAGTGGCATGCCATCCACACCAATTGACT  
+HWI-EAS443:3:76:218:1282#0/1  
aabbabb`aab\_\_\_W`\_] ^\_\_a`^^]X¥]¥^^ZINVZZW  
@HWI-EAS443:3:78:1228:1675#0/1  
AGCAATCTGGACCCCTCTTGTGGAAAGCTTTCCTCTTGAA  
+HWI-EAS443:3:78:1228:1675#0/1  
a[^aaaa^a^aa`\_¥\_\_a`\_R^^a\_]\_^\_^^`¥\_^\_] ^  
@HWI-EAS443:3:7:1020:167#0/1  
GCAATCTGGACCCCTCTTGTGGAAAGCTTTCCTCTTGAA  
+HWI-EAS443:3:7:1020:167#0/1  
a[ `a`¥Q^\_a\_\_aY\_¥[[Y¥Y¥NZ`WLSWQGSZS¥¥`WW¥  
@HWI-EAS443:3:84:21:1044#0/1  
GCAATCTGGACCCCTCTTGTGGAAAGCTTTCCTCTTGAA

+HWI-EAS443:3:84:21:1044#0/1  
`b`\_\_aa^aaaaa`a`aS\_\_\_\_\_P]a^`^aa`\_Z^WZ\_  
@HWI-EAS443:3:84:942:1831#0/1  
AAGAGGAAAGCTTTCCACAAGAGGGGTCCAGATTGCTTCA  
+HWI-EAS443:3:84:942:1831#0/1  
abZa^`ab^\_a`aWaa¥^^^`\_]WONL]a]`\_^]¥S^\_\_  
@HWI-EAS443:3:88:1613:1388#0/1  
CAAGAGGAAAGCTTTCCACAAGAGGGGTCCAGATTGCTTC  
+HWI-EAS443:3:88:1613:1388#0/1  
aa`[aa^ab[^Saaa^a`\_Z`\_`a`\_XHXUXQ`\_^^^VX  
@HWI-EAS443:3:88:435:572#0/1  
CAAGAGGAAAGCTTTCCACAAGAGGGGTCCAGATTGCTTC  
+HWI-EAS443:3:88:435:572#0/1  
aaaaa\_\_a]aaa^`aaa`\_`¥`a^^ZR\_\_`a`\_^a`^`a  
@HWI-EAS443:3:89:1237:262#0/1  
AGAGGAAAGCTTTCCACAAGAGGGGTCCAGATTGCTTCAA  
+HWI-EAS443:3:89:1237:262#0/1  
\_[\_¥¥a]`a\_\_\_\_`U`\_¥\_Y]R]`TV[]X[````W`QVZ  
@HWI-EAS443:3:93:1716:1181#0/1  
GCAATCTGGACCCCTCTTGTGGAAAGCTTTCCCTCTTGAA  
+HWI-EAS443:3:93:1716:1181#0/1  
a`aaa\_aaaa\_\_^b`aa\_\_`a`a\_aU`a\_V\_aZ\_\_\_\_]\_^  
@HWI-EAS443:3:97:78:164#0/1  
AGCAATCTGGACCCCTCTTGTGGAAAGCTTTCCCTCTTGGA  
+HWI-EAS443:3:97:78:164#0/1  
``^aaaaa``````````a^Y\_\_[\_[\_¥[^]TT^V^^^] ^  
@HWI-EAS443:3:99:787:517#0/1  
GCAATCTGGACCCCTCTTGTGGAAAGCTTTCCCTCTTGAA  
+HWI-EAS443:3:99:787:517#0/1  
aaaaa`a`ba^^a\_aaaa]\_\_[]`a`\_a`^^`]aaa\_] ]  
@HWI-EAS443:3:80:476:471#0/1  
AGCTAAGAGAGCAATTGAGCTCAGTGTCATCATTTGAAAG  
+HWI-EAS443:3:80:476:471#0/1  
\_`¥X^`\_W¥`\_aaYG0aaa\_a^\_XRb`a][`^aa^b¥SV`  
@HWI-EAS443:3:12:1613:1452#0/1  
GAGCTAAGAGAGCAATTGAGCTCAGTGTCATCATTTGAAA  
+HWI-EAS443:3:12:1613:1452#0/1  
aaa\_aaaaaa\_a]`a`\_\_`\_]\_^`Z^Z]`^X```\_\_`\_^Z  
@HWI-EAS443:3:26:1591:955#0/1  
AGCTAAGAGAGCAATTGAGCTCAGTGTCATCATTTGAAAG  
+HWI-EAS443:3:26:1591:955#0/1  
aa]babbaa\_^\_\_a`aaa`\_\_]\_`]a^^`\_`^`\_\_¥\_^\_  
@HWI-EAS443:3:35:489:482#0/1  
GAGCTAAGAGAGCAATTGAGCTCAGTGTCATCATTTGAAA  
+HWI-EAS443:3:35:489:482#0/1  
aaabbaaaa]aaaaaaaa`a`\_aa^]M\_aaa`a`a`\_`^  
@HWI-EAS443:3:38:393:853#0/1  
AGCTAAGAGAGCAATTGAGCTCAGTGTCATCATTTGAAAG  
+HWI-EAS443:3:38:393:853#0/1  
`Y¥[\_`aa\_]Z\_]a\_\_^¥\_\_`\_Z`V`\_YFY]]ZZRZLW

@HWI-EAS443:3:43:1439:1085#0/1  
AGCTAAGAGAGCAATTGAGCTCAGTGTCATCATTTGAAAG  
+HWI-EAS443:3:43:1439:1085#0/1  
ab^aaa]aaa`X\_a`aa\_[Ya^][Ya]Y¥^W^a` ]`W\_YZ  
@HWI-EAS443:3:56:1216:1317#0/1  
AGCTAAGAGAGCAATTGAGCTCAGTGTCATCATTTGAAAG  
+HWI-EAS443:3:56:1216:1317#0/1  
``[[IX`WS`aaa\_Yaa`\_aa]b]aaaaabaaa\_^\_]  
@HWI-EAS443:3:56:1750:939#0/1  
AGCTAAGAGAGCAATTGAGCTCAGTGTCATCATTTGAAAG  
+HWI-EAS443:3:56:1750:939#0/1  
\_XJb\_bbab`b`aaaaZ`a¥b`a]`b`aaababbaY[Zaa  
@HWI-EAS443:3:66:1110:984#0/1  
GAGCTAAGAGAGCAATTGAGCTCAGTGTCATCATTTGAAA  
+HWI-EAS443:3:66:1110:984#0/1  
aa\_aaa`a`\_`a`\_`\_`^a`\_`\_`\_`Z`^a`\_`a`\_`\_`\_`^Z[  
@HWI-EAS443:3:70:404:1253#0/1  
AGCTAAGAGAGCAATTGAGCTCAGTGTCATCATTTGAAAG  
+HWI-EAS443:3:70:404:1253#0/1  
a`a`JWW`^XX`a`Y`\_`a`aaa^[X^Ya\_[XU`\_`YVNX  
@HWI-EAS443:3:71:1206:206#0/1  
AGCTAAGAGAGCAATTGAGCTCAGTGTCATCATTTGAAAG  
+HWI-EAS443:3:71:1206:206#0/1  
]babY[^]aaaVaabaa`\_QZ`\_a]aa[a`V\_ab`\_`Y^Y  
@HWI-EAS443:3:85:303:1901#0/1  
AGCTAAGAGAGCAATTGAGCTCAGTGTCATCATTTGAAAG  
+HWI-EAS443:3:85:303:1901#0/1  
\_`^¥WZY`Y`aaa]^Z^^\_a^a`ZRQ^\_a`\_`\_`Y¥`\_`^¥` [Y  
@HWI-EAS443:3:87:939:562#0/1  
GAGCTAAGAGAGCAATTGAGCTCAGTGTCATCATTTGAAA  
+HWI-EAS443:3:87:939:562#0/1  
a`\_^baaaa`\_a^aaaa`\_`a`aaaa^aa`aaXaba`a`^\_  
@HWI-EAS443:3:97:1280:409#0/1  
AGCTAAGAGAGCAATTGAGCTCAGTGTCATCATTTGAAAG  
+HWI-EAS443:3:97:1280:409#0/1  
`aZaaa`aa\_a\_abb\_aa\_^`\_a`Za^`\_a¥^aa[a^]^a  
@HWI-EAS443:3:63:901:865#0/1  
AGGGGTAGCCCCATTGCTTTTGGGTAAATGTAACATTGCT  
+HWI-EAS443:3:63:901:865#0/1  
aZVWWW`V\_UYZTW\_U^Y\_]`^¥WXX]^Y]XX¥XBBBBBB  
@HWI-EAS443:3:16:1299:1018#0/1  
CGGGTAGCCCCATTGCTTTTGGGTAAATGTAACATTGCTG  
+HWI-EAS443:3:16:1299:1018#0/1  
aaaba`bbbaaabbabbbabb¥baabbabb`aaaaaaa  
@HWI-EAS443:3:27:344:1351#0/1  
CGAGGGGTAGCCCCATTGCTTTTGGGTAAATGTAACATTG  
+HWI-EAS443:3:27:344:1351#0/1  
aa`¥XZ`Ta\_ab`¥^W]^a`\_`^Z`Ua`\_`T[Z`\_`Y^^¥[  
@HWI-EAS443:3:16:1247:106#0/1  
AGAGGGGTAGCCCCATTGCTTTTGGGTAAATGTAACATTG

+HWI-EAS443:3:16:1247:106#0/1  
]¥R^YZZTRUQH^S^UVTYXU¥[UMP\_[\_^VJ]]N]WBB  
@HWI-EAS443:3:29:1679:1654#0/1  
AGCAATGTTACATTTACCCAAATGCAATGGGGCTACCCCT  
+HWI-EAS443:3:29:1679:1654#0/1  
Q\_^RR\_WZ¥W\_[¥UUaWTWaRT]b^XTZZ^\_¥ZZN\_]BB  
@HWI-EAS443:3:30:400:1073#0/1  
TTACATTTACCCAAATGCAATGGGGCTACCCCTCTTAGTT  
+HWI-EAS443:3:30:400:1073#0/1  
a\_[b]aaaabbba[Za`baaXWaU`\_baaaa``]TXX]  
@HWI-EAS443:3:4:1176:328#0/1  
AGAGGGGTAGCCCCATTGCATTTGGGTAAATGTAACATTG  
+HWI-EAS443:3:4:1176:328#0/1  
`\_^ab¥¥J¥YT]a`aZa`aaZ^^Tb¥`\_a`Y¥`S`a\_^¥  
@HWI-EAS443:3:67:868:1448#0/1  
CTAAGAGGGGTAGCCCCATTGCATTTGGGTAAATGTAACA  
+HWI-EAS443:3:67:868:1448#0/1  
UWbb]bab`\_¥b¥]`\_]¥Zbab^baZ¥WWaX¥[UN\_b\_¥  
@HWI-EAS443:3:71:1071:332#0/1  
GGGTAGCCCCATTGCATTTGGGTAAATGTAACATTGCTGG  
+HWI-EAS443:3:71:1071:332#0/1  
aa]Ybb\_baaaaabaababaa\_\_a`a`aa`a\_aaa]\_`^  
@HWI-EAS443:3:76:928:371#0/1  
GGGTAGCCCCATTGCATTTGGGTAAATGTAACATTGCTGG  
+HWI-EAS443:3:76:928:371#0/1  
aaa\_aaa`aa`aa^a\_a\_aaaYa`^a^a`T`\_`¥\_\_\_`\_`  
@HWI-EAS443:3:81:1131:799#0/1  
CAGCAATGTTACATTTACCCAAATGCAATGGGGCTACCCC  
+HWI-EAS443:3:81:1131:799#0/1  
a`bbbbbbbabbbbbbbbaaaaabb`abaabaaabba\_aa  
@HWI-EAS443:3:91:70:1250#0/1  
AGAGGGGTAGCCCCATTGCATTTGGGTAAATGTAACATTG  
+HWI-EAS443:3:91:70:1250#0/1  
I`YX[[]YX]abbbbXTXaaba\_^ab\_^[]a\_\_]\_MUaaYX  
@HWI-EAS443:3:44:1427:665#0/1  
GGNGTAGCCCCATTGCATTTGGGTAAATGTAACATTGCTG  
+HWI-EAS443:3:44:1427:665#0/1  
aMD^Z`a\_\_a`\_a^a\_Y`a`^T¥`^^\_W\_[SZ^\_^W¥Y  
@HWI-EAS443:3:59:546:833#0/1  
CACTTGCAGCAAAAGCAGGGTAGATAATCACTCAATGAGT  
+HWI-EAS443:3:59:546:833#0/1  
ababababb`abaaabbaaa\_bbaaa]aaaa`\_a\_Qa\_Y  
@HWI-EAS443:3:38:764:1469#0/1  
CAGGGCAAAAGCAGGNTAGATAATCACTCAATGAGTGACA  
+HWI-EAS443:3:38:764:1469#0/1  
aaa`aba\_a]`\_\_[]DTb`\_`¥]WZ¥X\_\_a^¥\_]ZZR^^`\_`  
@HWI-EAS443:3:73:661:1901#0/1  
CTGGGCAAAAGCAGGGTAGATAATCNCTCAATGAGTGACA  
+HWI-EAS443:3:73:661:1901#0/1  
a`````bbbbbaaba[¥^Zbaba````[D^````a````]Z\_aaa



@HWI-EAS443:3:39:597:931#0/1  
AGCAGCAAAGCAGGGCAGATAATCACTCAATGAGTGACA  
+HWI-EAS443:3:39:597:931#0/1  
a]aba^TW`\_b]aVE^a`QaZ\_`J`aa\_\_XU`U\_¥TU  
@HWI-EAS443:3:26:1536:1461#0/1  
GCAGGGTAGATAATCACTCAATGAGNGAGATCGAAGCCAT  
+HWI-EAS443:3:26:1536:1461#0/1  
abS\_W\_Wa]`XUb]aZ\_aS`aSGV^DWNIIJ^Z^]Y`^HUQ  
@HWI-EAS443:3:100:519:204#0/1  
AGCAAAGCAAAGCAGGGTAGATAATCACTCAATGAGTG  
+HWI-EAS443:3:100:519:204#0/1  
aaa`aaaaaa\_`a]\_aaUUa`\_`a^\_X^U\_X^^^Y\_SWB  
@HWI-EAS443:3:58:555:1710#0/1  
GGGACAAGCAAAGCAGGGTAGATAATCACTCAATGAGTG  
+HWI-EAS443:3:58:555:1710#0/1  
`\_\_a\_a^S\_aaaa]aV]Z`Wa\_a`a^ZZa]`\_\_a\_\_`[V¥  
@HWI-EAS443:3:59:1780:1124#0/1  
GCAAAGCAGGGTAGATAATCACTCAATGAGTGAAATCTA  
+HWI-EAS443:3:59:1780:1124#0/1  
abbRM¥¥^¥Zb¥G\_W\_`X\_¥aa]`b^ZT¥WaBBBBBBB  
@HWI-EAS443:3:17:1493:716#0/1  
CACTCAATGAGCGACATCGAAGCCATGGCGTCTCAAGGAA  
+HWI-EAS443:3:17:1493:716#0/1  
`b\_`^U]ba\_]Y`b`aa`a^Y\_`[Z[N\_aVW^VZ[XXFV  
@HWI-EAS443:3:44:1110:996#0/1  
GCAGCAAAGCAGGGTAGATAAACACTCAATGAGTGACAT  
+HWI-EAS443:3:44:1110:996#0/1  
0[Z\_b[aW]¥`¥^a^UX\_`W`b\_ab]bbb\_`b`\_\_`¥baa  
@HWI-EAS443:3:73:1176:1776#0/1  
AAAGCAAAGCAGGGGAGATAATCACTCAATGAGTGACAT  
+HWI-EAS443:3:73:1176:1776#0/1  
^^`b``aaaa\_`a`Nb``Zaa`ab```aa¥X¥\_UaaL[^  
@HWI-EAS443:3:16:1391:1212#0/1  
GCACGGCAAAGCAGGGTAGATAATCACTCAATGAGTGAC  
+HWI-EAS443:3:16:1391:1212#0/1  
^\_a`YP[b]¥ababUVVababa[\_ba\_ab`bbaabaaa\_  
@HWI-EAS443:3:40:774:974#0/1  
TATCAAGCAAAGCAGGGTAGATAATCACTCAATGAGTGA  
+HWI-EAS443:3:40:774:974#0/1  
aaaaaaaa`aa`aa```a\_Wa`a`a\_\_\_\_\_a^^`\_]`X^\_  
@HWI-EAS443:3:92:1475:1461#0/1  
TGAAGGCAAAGCAGGGTAGATAATCACTCAATGAGTGAC  
+HWI-EAS443:3:92:1475:1461#0/1  
a`babbabbbaa]^baaWbaaaaaaaaa\_aaa`aaa\_Ua`a  
@HWI-EAS443:3:99:1092:931#0/1  
ATCCAAGCAAAGCAGGGTAGATAATCACTCAATGAGTGA  
+HWI-EAS443:3:99:1092:931#0/1  
aaZ]bbbababab\_\_[ba^baaabab`a\_aaaabaaa]``  
@HWI-EAS443:3:45:1401:1904#0/1  
GCAGCAAAGCAGGGTAGATAATCACTCAANGAGTGACAT

+HWI-EAS443:3:45:1401:1904#0/1  
`a\_\_\_a\_[\_\_Q\_a[YSa\_^R`W\_GXTU¥VODYZ\_S`\_W[I  
@HWI-EAS443:3:69:450:589#0/1  
ACCCCTCTTGTGGAAAGCTTTCCTCTTGAANCACTTTC  
+HWI-EAS443:3:69:450:589#0/1  
aaabaaabaa`\_\_aa`\_\_aa`^\_\_a\_a]`RDRZ]\_`ZX  
@HWI-EAS443:3:8:865:1517#0/1  
GAAGGGTCTTATTTCTTCGGAGNCAATGCAGAGGAGTAAA  
+HWI-EAS443:3:8:865:1517#0/1  
`bba\_¥\_abba\_aabbaab]a¥DRaa`a]a`\_a`\_\_]\_`a  
@HWI-EAS443:3:23:552:443#0/1  
CAGCAAAAGCAGAGTAGATAATCACTCAATGAGTGACATC  
+HWI-EAS443:3:23:552:443#0/1  
W[\_`\_bbabab`a`TbbbbYbabbbbbb¥abbbYabbb`b  
@HWI-EAS443:3:93:427:288#0/1  
GGCAAAAGCCGGGTAGATAATCACTCAATGAGTGACATCG  
+HWI-EAS443:3:93:427:288#0/1  
aZTZF¥[]\_NZ¥[LZ^[M\_PVRZU^ZTT¥¥T¥GWWWWWVT  
@HWI-EAS443:3:24:845:34#0/1  
ATCGAAGCCATGGCGTCTCAAGGCACCAAACGATCACATG  
+HWI-EAS443:3:24:845:34#0/1  
^^¥Z¥a^]XTO[U¥XH[UFTUUaRUZLM\_ZLZNLJ^U\_ZR  
@HWI-EAS443:3:30:1662:1999#0/1  
CCTCAGCAAAAGCAGGGTAGATAATCACTCAATGAGTGAC  
+HWI-EAS443:3:30:1662:1999#0/1  
`a\_Va\_]aW`S`]a]`ZF\_`a^S^Y^YaZYa\_``^aG\_QP  
@HWI-EAS443:3:31:935:773#0/1  
CAAAAGCAGGGTAGATAATCACTCAATGAGTGACATTGAA  
+HWI-EAS443:3:31:935:773#0/1  
ab^bbbaabb^abba\_babaaaaa`aaa^aaaa`\_a`  
@HWI-EAS443:3:38:1762:555#0/1  
AGTGCCTTGAGACGCCATGGCTTCGATGTCACTCATTTAG  
+HWI-EAS443:3:38:1762:555#0/1  
a\_]\_^bbbb\_]W`\_a\_YV]U]]R¥Q]MRFVYMYZ¥GVD  
@HWI-EAS443:3:43:631:1462#0/1  
CTGCAGCAAAAGCAGGGTAGATAATCACTCAATGAGTGAC  
+HWI-EAS443:3:43:631:1462#0/1  
\_`aa\_bbb`]\_]abba`bbba^¥abba\_bbabab\_Q]a\_  
@HWI-EAS443:3:50:1505:79#0/1  
GACCCTTCATTACTCATGTCAAAGGAAGGCACGATCCGGG  
+HWI-EAS443:3:50:1505:79#0/1  
aaY¥]bbbbabbabbbbbbaaab`bbba\_baaK¥]bG  
@HWI-EAS443:3:57:1585:2043#0/1  
AGTGCCTTGAGACGCCATGGCTTCGATGTCACTCATTTAG  
+HWI-EAS443:3:57:1585:2043#0/1  
a]P^\_aaaWab`]WaX]Y`\_]SaY^HU[ZR]]ZGXZ[BBB  
@HWI-EAS443:3:59:465:1442#0/1  
AAAGCAGGGTAGATAATCACTCAATGAGTGACATCGGAGC  
+HWI-EAS443:3:59:465:1442#0/1  
^^\_STZZLWNb`¥\_^Z`aaa\_\_\_Xa`\_`T[`X¥]\_QFJPL

@HWI-EAS443:3:76:1129:1362#0/1  
AAGACCCTTCATTACTCATGTCAAAGGAAGGCACGACCGG  
+HWI-EAS443:3:76:1129:1362#0/1  
H\_\_V\_bb]aab`\_\_abb[TTbbb^WL[b¥J`W^]]VLRW  
@HWI-EAS443:3:84:506:585#0/1  
AATCGCAAAGCAGGGTAGATAATCACTCAATGAGTGACA  
+HWI-EAS443:3:84:506:585#0/1  
]baa`]U\_a^``a]¥V`aaaTaaaa\_]\_[[]\_`\_X\_\_aa  
@HWI-EAS443:3:8:835:108#0/1  
AAGGAGGGTAGATAATCACTCAATGAGTGACATCGAAGCC  
+HWI-EAS443:3:8:835:108#0/1  
^¥\_GZb`Pb^^a^^[Ya`a\_aZ]Z`Z]^¥Pa]\_`VZ  
@HWI-EAS443:3:9:943:1528#0/1  
TGCTGTGAAAGGAGTTGGAACAATAGCAATGGAGTTAATC  
+HWI-EAS443:3:9:943:1528#0/1  
^baV`]TPI^a\_Y¥`YXZ[¥VaW¥``¥X\_^`]I^\_RZ]`Y  
@HWI-EAS443:3:46:494:963#0/1  
CAGCAAAGCAGGGTAGATAATCACTCAATGANTGACATC  
+HWI-EAS443:3:46:494:963#0/1  
aab]]]^baaa¥`W`a`\_b`a^a`S\_aaaaODFa\_Ha^Z  
@HWI-EAS443:3:85:1541:887#0/1  
AACCCTTCATTACTCNTGTCAAAGGAAGGCACGATCGGGT  
+HWI-EAS443:3:85:1541:887#0/1  
\_`^Z]ababb[a\_aPD]baaaaba^Z[\_Y]a¥\_aXW]a[G  
@HWI-EAS443:3:100:326:506#0/1  
GCAAAGCAGGGAAGATAATCACTCAATGAGTGACATCGA  
+HWI-EAS443:3:100:326:506#0/1  
^^Ua^]aa]VWaGaaab`aaa`abW`aaa`a0^b`aX[[a  
@HWI-EAS443:3:11:1592:1478#0/1  
AAGACCCTTCATTACTCATGTCAAAGGAAGGAACGATCGG  
+HWI-EAS443:3:11:1592:1478#0/1  
U`Z\_YZYbab`baaS\_\_ab]JT]Ra\_]YS^bGaG^GWG`\_  
@HWI-EAS443:3:12:1450:1020#0/1  
AGATAATCACTCAATGAGTGACATCGAAGCAATGGCGTCT  
+HWI-EAS443:3:12:1450:1020#0/1  
^`Z\_^W¥]SS`TLZRS`^``¥Y[WUZ\_\_OERVa\_[BBBB  
@HWI-EAS443:3:13:629:590#0/1  
CTCCTCTGCATTGTCTCCGAAGAAATAAGACCCTTAATTA  
+HWI-EAS443:3:13:629:590#0/1  
aYbaZXY\_XE[W]NPQ\_^URR]^a^R[YRRPGH^YH¥]]\_  
@HWI-EAS443:3:17:672:683#0/1  
GAGACGCCATGGCTTCGATGTCACCTTGTGAGTGATTATC  
+HWI-EAS443:3:17:672:683#0/1  
`[aaa\_aaKXT\_QZUVTV¥P`a\_XNJZX`\_aGWGRWU^]  
@HWI-EAS443:3:18:1435:253#0/1  
AGATAATCACTCAATGAGTGACATCGAAGCAATGGCGTCT  
+HWI-EAS443:3:18:1435:253#0/1  
aa[a\_\_¥PZS\_R]^\_WRHR[G^Y^Q¥BBBBBBBBBBBBBB  
@HWI-EAS443:3:18:67:1276#0/1  
GAAGCAATAAGACCCTTCATTACTCATGTCAAAGGAAGGC

+HWI-EAS443:3:18:67:1276#0/1  
a`RGZ^`a^T[aa\_]aaa`aaU^aaa]Y^aaZZ[Ia]Xa  
@HWI-EAS443:3:1:1383:405#0/1  
AGGGTAGATAATCACTCAATGAGTGACATCGAAGACATGG  
+HWI-EAS443:3:1:1383:405#0/1  
ab[``abbba\_bbaaaaa`baaa\_ba`a`\_UNX\_GaBBBB  
@HWI-EAS443:3:20:982:1659#0/1  
AGCAGGCTAGATAATCACTCAATGAGTGACATCGAAGCCA  
+HWI-EAS443:3:20:982:1659#0/1  
U^]IW^QU`ZS`¥ZZabb[`abaZ[UX^¥a\_LYRYX\_]H]  
@HWI-EAS443:3:21:1615:1458#0/1  
CGAAGAAATAAGACCCTTCATTACCCATGTCAAAGGAAGG  
+HWI-EAS443:3:21:1615:1458#0/1  
aba\_b`a`a\_bba`a`aSa`\_`]X[aaa\_Z\_aaa\_]\_`^  
@HWI-EAS443:3:23:778:1514#0/1  
GCAGGGCAGATAATCACTCAATGAGTGACATCGAAGCCAT  
+HWI-EAS443:3:23:778:1514#0/1  
aa]^Y]Ub¥XR\_X`aXQ]^UUa\_\_aRVVVR\_¥R[TN\_\_¥\_  
@HWI-EAS443:3:24:313:106#0/1  
GCAGGGTAGATAATCACTCAATGAGGGACATCGAAGCCAT  
+HWI-EAS443:3:24:313:106#0/1  
\_RO]RPX¥¥ZS^UVQ[XJKOHTYBBBBBBBBBBBBBBBB  
@HWI-EAS443:3:25:419:891#0/1  
AAGAAATAAGACCCTTCATTTCTCATGTCAAAGGAAGGCA  
+HWI-EAS443:3:25:419:891#0/1  
ab`^¥ab`aZaaaa`abZ^aaaaa¥a\_[`a]a[aaa[\_a`  
@HWI-EAS443:3:26:1525:2031#0/1  
AGCAAAAGCAGGGGAGATAATCACTCAATGAGTGACATCG  
+HWI-EAS443:3:26:1525:2031#0/1  
Ub`b\_aVZWZT\_VLba^UW^ZY]QY\_N¥¥¥]VP\_\_\_ZQLB  
@HWI-EAS443:3:26:1673:1637#0/1  
GATAATCACTCAATGAGCGACATCGAAGCCATGGCGTCTC  
+HWI-EAS443:3:26:1673:1637#0/1  
]Wb\_HW\_^Z^`[YaV[UXaZaa\_b\_\_aUH¥a[^aa¥]¥W  
@HWI-EAS443:3:28:1193:1012#0/1  
GAAGAAATAAGACCCTTCATTACCCATGTCAAAGGAAGGC  
+HWI-EAS443:3:28:1193:1012#0/1  
Z^^\_¥ZVZR\_¥¥Z]^`QX\_WX^^FP\_¥WO]]\_X^UVFYVX  
@HWI-EAS443:3:29:215:897#0/1  
CACTCAATGAGCGACATCGAAGCCATGGCGTCTCAAGGCA  
+HWI-EAS443:3:29:215:897#0/1  
aaa]bXZ\_Za^QNaVS¥a^^R¥^¥\_NHKRWMPW^VQ[SB  
@HWI-EAS443:3:2:401:1488#0/1  
AAAGCAGGGTAGATAATCACTCAATGAGTGACAGCGAAGC  
+HWI-EAS443:3:2:401:1488#0/1  
aU`Y]^`bbaMa]^`Sa]H]^`[^`]GaRJWZVGHX[BBBB  
@HWI-EAS443:3:2:945:345#0/1  
GCAAAAGCAGGGTAGATAATCACTCAATGAGAGACATCGA  
+HWI-EAS443:3:2:945:345#0/1  
a`WaaQaGX]VTQ\_\_\_]]`]XRWX]T]^ZR\_G]]W]UUUB

@HWI-EAS443:3:31:383:1070#0/1  
GAAGAAATAAGACCCTTCATTACTCATGTCAAAGCAAGGC  
+HWI-EAS443:3:31:383:1070#0/1  
\_U\_ZaZ\_`baVZ`ZZ^\_[a][^^[`aa]]a\_HH¥FTHWP`  
@HWI-EAS443:3:31:423:358#0/1  
GTCTCCGAAGAAATAAGACACTTCATTACTCATGTCAAAG  
+HWI-EAS443:3:31:423:358#0/1  
\_PZW¥Zaa¥¥R]]T`RLTDK¥W\_\_aXYS[T]¥[IXZWQS  
@HWI-EAS443:3:32:1515:1300#0/1  
AAGCAGGGTAGATAATCACTCAATGAGTGAGATCGAAGCC  
+HWI-EAS443:3:32:1515:1300#0/1  
aXZWH\_QQ^ZLPaa`a0Sa\_S]aMD[VQ^JSTF[YZX\_X  
@HWI-EAS443:3:36:1644:1150#0/1  
CGAAGAAATAAGACCCTTCATTACTCATGTACAGGAAGG  
+HWI-EAS443:3:36:1644:1150#0/1  
¥bbabaabbaaaa\_\_Ybbaaaaa`aZa\_`\_[TTNPHY^G`  
@HWI-EAS443:3:3:1061:231#0/1  
AGATAATCACTCAATGAGTGACATCGAAGCCATGGAGTCT  
+HWI-EAS443:3:3:1061:231#0/1  
]a]]a^aa^\_\_¥`\_aUa]a`X^^\_UZ^VY¥^`^G\_YUX  
@HWI-EAS443:3:40:638:607#0/1  
CTCCTCTACATTGTCTCCGAAGAAATAAGACCCTTCATTA  
+HWI-EAS443:3:40:638:607#0/1  
a`^bXY¥aba\_a`H`Zaaa]^\_\_X^ZHS¥\_U[S[VR^\_H]  
@HWI-EAS443:3:42:64:1273#0/1  
GAAGAAATAAGACCCTTCATTACTCATGTACAGGAAGGC  
+HWI-EAS443:3:42:64:1273#0/1  
`\_^]¥aaaba`¥¥\_\_a`aaaa`\_\_`a`\_[GX^Z\_\_`T\_  
@HWI-EAS443:3:45:1248:913#0/1  
GATAATCACTCAATGCGTGACATCGAAGCCATGGCGTCTC  
+HWI-EAS443:3:45:1248:913#0/1  
aSXX¥WY\_SY\_`aYDQSVUVL^\_SHT\_WPNV¥TU\_LYSB  
@HWI-EAS443:3:45:1487:589#0/1  
CTCCTCTGCATTGTCTCCGAATAAATAAGACCCTTCATTA  
+HWI-EAS443:3:45:1487:589#0/1  
]KaJaaab^\_ZW\_LX`abaHOPGQ\_X[aNU\_S\_\_G¥`\_\_  
@HWI-EAS443:3:46:1318:1009#0/1  
CACTCAATGATTGACATCGAAGCCATGGCGTCTCAAGGCA  
+HWI-EAS443:3:46:1318:1009#0/1  
¥¥`ab¥\_¥b¥K\_bYbba]bZYaTaa`\_`aTZa[`¥b^I]  
@HWI-EAS443:3:46:905:157#0/1  
TAAGACGCTTCATTACTCATGTCAAAGGAAGGCACGATCG  
+HWI-EAS443:3:46:905:157#0/1  
``¥`aWFRX`\_]\_[PUYZ`UbYU`RNR\_WRXPRS]RJU`  
@HWI-EAS443:3:4:1358:1870#0/1  
CAAAAGCAGGGCAGATAATCACTCAATGAGTGACATCGAA  
+HWI-EAS443:3:4:1358:1870#0/1  
\_aa`bb[aUY\_Gb\_ab\_\_`a`Zaa`aaaaYa\_aa^YN¥B  
@HWI-EAS443:3:50:1061:1867#0/1  
CAAAAGCAGGTTAGATAATCACTCAATGAGTGACATCGAA

+HWI-EAS443:3:50:1061:1867#0/1  
a\_aTa``a[\_0`aa`ab\_a^aX^`aa\_\_\_H^PU[¥\_R[W  
@HWI-EAS443:3:52:1506:429#0/1  
AGAAATAAGACGCTTCATTACTCATGTCAAAGGAAGGCAC  
+HWI-EAS443:3:52:1506:429#0/1  
[babb^¥ab`UHN\_WJY^aPPXTX`]a\_`Xa\_]YYWG` [  
@HWI-EAS443:3:54:1128:398#0/1  
GCAAAAGCAGGGGAGATAATCACTCAATGAGTGACATCGA  
+HWI-EAS443:3:54:1128:398#0/1  
a`aa\_UZ`VXbYF\_VXQS[PZ¥YZ]]a\_[WaX`[^\_YU¥¥  
@HWI-EAS443:3:56:706:2004#0/1  
CAAAAGCAGGGTAGATAATCACTCAATGAGTGACACCGAA  
+HWI-EAS443:3:56:706:2004#0/1  
a^`\_UaPvabaQbQRQQQ^a)`^aSQT¥Y[QZ]¥LD¥\_YU  
@HWI-EAS443:3:56:981:1502#0/1  
AAGCAGGGTAGATAAACCCTCAATGAGTGACATCGAAGCC  
+HWI-EAS443:3:56:981:1502#0/1  
a]b\_Yaaa^baaaaa`[a\_a\_a`aaaa\_a\_Y`\_^`\_`SV  
@HWI-EAS443:3:57:1729:1391#0/1  
TTCTGATTAACCTCATTGCTATTGTTACAACCTCCTTTCAC  
+HWI-EAS443:3:57:1729:1391#0/1  
ZSPQRX]aa\_R]`^`[aa[a`\_X]`b]T[ZMa]X]]YXPB  
@HWI-EAS443:3:59:356:666#0/1  
AGACCCTTCATTACTCATGTCAAAGGAAGGCACGAGCGGG  
+HWI-EAS443:3:59:356:666#0/1  
aTIJX\_a`[\_a^V\_^VPO[Sa`¥WY^VSV[[BBBBBBBBB  
@HWI-EAS443:3:60:1552:1477#0/1  
ATCGAAGCCATGGCGTCTCAAGGCATCAAACGATCATATG  
+HWI-EAS443:3:60:1552:1477#0/1  
aa`Z]`^`\_`ba`Za¥]a`^¥`\_`\_Z`^a\_]WYV]]^¥S  
@HWI-EAS443:3:60:295:572#0/1  
AAGCAGGGTAGATAATCACTCAATGAGTGACATCGCAGCC  
+HWI-EAS443:3:60:295:572#0/1  
]T]\_P\_\_OFW]X]¥N^]aa¥X\_¥U¥Z¥S```\_ZVRFQN]Q  
@HWI-EAS443:3:61:1383:1435#0/1  
GGTGCCTTGAGACGCCATGGCTTCGATGTCACTCCTTGAG  
+HWI-EAS443:3:61:1383:1435#0/1  
a\_G\_SV[YUKKVL]URUYQ[BBBBBBBBBBBBBBBBBBBBB  
@HWI-EAS443:3:64:327:1358#0/1  
ATAAGCCCCTTCATTACTCATGTCAAAGGAAGGCACGATC  
+HWI-EAS443:3:64:327:1358#0/1  
X^IU[MY]]^LU]]WWR[XM¥YN¥TV\_¥OV\_YVYX[VYBB  
@HWI-EAS443:3:66:668:677#0/1  
GCAGGGCAGATAATCACTCAATGAGTGACATCGAAGCCAT  
+HWI-EAS443:3:66:668:677#0/1  
a]PHNYFZRXHR¥[VBBBBBBBBBBBBBBBBBBBBBBBBB  
@HWI-EAS443:3:68:888:911#0/1  
ATCGAAGCCATGGCGTCTCACGGCACCAAACGATCATATG  
+HWI-EAS443:3:68:888:911#0/1  
aXa`a\_baaa`¥a]¥a]QQL[^`[\_`XNY\_\_[[^\_X\_¥\_

@HWI-EAS443:3:72:1048:211#0/1  
GGTGCCTTGAGACGCCATGGCTTCGATGTCAATCATTGAG  
+HWI-EAS443:3:72:1048:211#0/1  
ab¥a\_aabaaaa¥`ZU`^V[[^\_LYT[MQQRFRZ^BBB  
@HWI-EAS443:3:75:194:1201#0/1  
AAAGCACGGTAGATAATCACTCAATGAGTGACATCGAAGC  
+HWI-EAS443:3:75:194:1201#0/1  
`Z`P`UDKPM^KZXSSVYZRZ[\_LZZRLRZ[WYWXYSVPW  
@HWI-EAS443:3:75:404:554#0/1  
GAAGAAATAAGACCCTTCATTACTCATGTAAAGGAAGGC  
+HWI-EAS443:3:75:404:554#0/1  
aaaaaa`aba\_]`^a\_\_a`a\_aa\_aaa\_`aa`a]`\_\_¥\_  
@HWI-EAS443:3:75:480:305#0/1  
ATCGAAGCCATGGCGTCTCAAGGCACCAAACGTTTCATATG  
+HWI-EAS443:3:75:480:305#0/1  
a`a`a`ba\_b^a`]`a]\_`a\_\_`¥a^\_Y]V][[]]\_\_Z  
@HWI-EAS443:3:78:189:692#0/1  
CACTCAATGAGTGACATCCAAGCCATGGCGTCTCAAGGCA  
+HWI-EAS443:3:78:189:692#0/1  
a^aaaZPYa\_¥Raaa```[[`^¥¥¥Y\_^U^W\_XFVW¥¥  
@HWI-EAS443:3:7:370:1741#0/1  
GCAAAAGCAGGGCAGATAATCACTCAATGAGTGACATCGA  
+HWI-EAS443:3:7:370:1741#0/1  
aaaZZaab`a\_\_GbV^a`¥`b]\_\_Y\_\_][Y`Y\_`\_a^V[]  
@HWI-EAS443:3:82:260:1626#0/1  
AAAGCAGGGAAGATAATCACTCAATGAGTGACATCGAAGC  
+HWI-EAS443:3:82:260:1626#0/1  
]\_bKb\_W\_ODU`^^¥¥N]OX\_b\_]`^`Y^[\_bb^[aP`[\_`a  
@HWI-EAS443:3:83:1432:1721#0/1  
CAAAAGCAGGGTAGATAATCACTCGATGAGTGACATCGAA  
+HWI-EAS443:3:83:1432:1721#0/1  
`ab`aZb`a`\_G``aaaaUNY\_\_SF¥`````^\_aUa\_\_G]\_  
@HWI-EAS443:3:85:898:195#0/1  
CACTCAATGAGTGACATCGAAGCCATGGCGTGTCAAGGCA  
+HWI-EAS443:3:85:898:195#0/1  
a\_aaY^[\_`a¥a`U`b`]aaUNZ\_]a[\_a]H[Q]H\_¥^^  
@HWI-EAS443:3:87:1029:1158#0/1  
CAAAAGCAGGGCAGATAATCACTCAATGAGTGACATCGAA  
+HWI-EAS443:3:87:1029:1158#0/1  
abbaaabbbbaa\_babab`b\_a\_a`baaaaa\_aaaa`a]`\_  
@HWI-EAS443:3:88:1502:1125#0/1  
AAGCAGGGTAGACAATCACTCAATGAGTGACATCGAAGCC  
+HWI-EAS443:3:88:1502:1125#0/1  
¥X¥XUOPT]UI\_U^b^a¥ROY\_`b\_aaaaYF[b]P]G`\_a  
@HWI-EAS443:3:88:623:297#0/1  
AAGCAGGGAAGATAATCACTCAATGAGTGACATCGAAGCC  
+HWI-EAS443:3:88:623:297#0/1  
aaaT^^]NL\_Q]VWX\_[\_`\_aUZ[\_Z\_JJSMXPZTVNRO]  
@HWI-EAS443:3:88:654:1295#0/1  
GTCTCTGAAGAAATAAGACCCTTCATTACTCATGTCAAAG

+HWI-EAS443:3:88:654:1295#0/1  
GYb`^`b^Ta]a`a`bbaaaa\_aabb\_bbb¥` ``^bbbbb  
@HWI-EAS443:3:88:863:338#0/1  
TAATCACTCAATGAGCGACATCGAAGCCATGGCGTCTCAA  
+HWI-EAS443:3:88:863:338#0/1  
aaa^^a`\_`a`W\_\_\_GW^`aV\_\_^`¥¥¥\_] [U[Y\_¥RSU  
@HWI-EAS443:3:89:787:802#0/1  
CAAAAGCAGGGTAGATAGTCACTCAATGAGTGACATCGAA  
+HWI-EAS443:3:89:787:802#0/1  
aaaaa]a^aa¥¥baa\_[FRaY`a`]Xa\_`aZ`aa`a\_^]]  
@HWI-EAS443:3:90:1483:1564#0/1  
ATCGAAGCCATGGCGTCTCAAGCACCAAACGACCATATG  
+HWI-EAS443:3:90:1483:1564#0/1  
abZaaaa\_aa¥\_\_a`\_\_^^a`^\_XPIT]`aV`^OGX\_a`\_  
@HWI-EAS443:3:92:986:1032#0/1  
CACTCAATGAGTGACATCGACGCCATGGCGTCTCAAGGCA  
+HWI-EAS443:3:92:986:1032#0/1  
`ba\_Uaa`aSa]aV^a`\_FOH^`aX` `H`\_NWXVW`\_] ^\_  
@HWI-EAS443:3:95:955:1968#0/1  
AAGCAGGGGAGATAATCACTCAATGAGTGACATCGAAGCC  
+HWI-EAS443:3:95:955:1968#0/1  
aab\_a^`\_Xba]Y`aaSKT^a` `]W[FDT[U`]BBBBBBB  
@HWI-EAS443:3:95:989:711#0/1  
AAAGAAAGTGTTCCTCAAGAGGAAAGCTTCCACAAGAGGG  
+HWI-EAS443:3:95:989:711#0/1  
abab`aabRb\_a` ``\_`b^aaaa[a\_a`OZ\_a^a\_aaa]^  
@HWI-EAS443:3:97:1037:1788#0/1  
AGACACTTCATTACTCATGTCAAAGGAAGGCACGATCGGG  
+HWI-EAS443:3:97:1037:1788#0/1  
`bSPDT¥aab`\_Y`U\_\_NWVG`^XUX`\_\_[]`^J^YR\_]\_  
@HWI-EAS443:3:99:1259:1266#0/1  
CAAAAGCAGGGGAGATAATCACTCAATGAGTGACATCGAA  
+HWI-EAS443:3:99:1259:1266#0/1  
\_^\_P[\_^U^^¥T\_U¥`bab^QXa`XXZ\_[a^aZ`]aVZ`X  
@HWI-EAS443:3:17:334:565#0/1  
CGCAGCAAAAAGCAGGGTAGATAATCACTCAATGAGTGACA  
+HWI-EAS443:3:17:334:565#0/1  
abaaa`\_```aaaa`a¥baa`a[aa`aaaa` `a`]a`^a  
@HWI-EAS443:3:23:1741:152#0/1  
CGAAGCAAAAAGCAGGGTAGATAATCACTCAATGAGTGACA  
+HWI-EAS443:3:23:1741:152#0/1  
aaHXaXaa[UaYaaa`X[a`V^]]]V\_MPW]]V\_UZUGZ  
@HWI-EAS443:3:36:116:866#0/1  
GTCTCCGAAGAAATAAGACCCTTCATTACTCATGTCACAG  
+HWI-EAS443:3:36:116:866#0/1  
aU]Uba\_I¥a¥aa[aZ[Y¥[SY¥VX`a`^^`^VaPVPVPG[Z  
@HWI-EAS443:3:43:600:292#0/1  
CGCAGCAAAAAGCAGGGTAGATAATCACTCAATGAGTGACA  
+HWI-EAS443:3:43:600:292#0/1  
abbbba^` `bbaab`a\_babaaaa]]`aaaa`aa^aaaa



@HWI-EAS443:3:47:1782:1536#0/1  
CGGTGCCTTGAGACGCCATGGCTTCGATGTCACTCATTTA  
+HWI-EAS443:3:47:1782:1536#0/1  
`b[W`]a`\_bbbb¥b\_[a]OMT\_¥NR]R]VTPSODKVXBB  
@HWI-EAS443:3:64:1506:1363#0/1  
AGCAGCAAAGCAGGGTAGATAATCACTCAATGAGTGACA  
+HWI-EAS443:3:64:1506:1363#0/1  
abbb`b^bba`aab`a\_bbaababaaYa`aaab`a]aa`a  
@HWI-EAS443:3:65:571:916#0/1  
GGCGAAAGGAGTTGGAACAATAGCAATGGAGTTAATCAGA  
+HWI-EAS443:3:65:571:916#0/1  
`^H`\_^a`Z^WW^Y]```aaa`Y¥\_]aaaXW^\_¥P¥\_\_^^  
@HWI-EAS443:3:66:1174:1929#0/1  
GTAGATAATCACTCAATGAGTGACATCGAAGCCATGGGGT  
+HWI-EAS443:3:66:1174:1929#0/1  
]L`Y\_a]TO^P¥Y¥¥^^^Z]GVX\_\_[]YUUN][M]OIETN  
@HWI-EAS443:3:76:765:204#0/1  
AAGGCAAAAGCAGGGTAGATAATCACTCAATGAGTGACAT  
+HWI-EAS443:3:76:765:204#0/1  
aaaaabaa`aaaa\_Xbaaaba`\_`Xa`aaa\_\_`X\_^`^`^  
@HWI-EAS443:3:98:1253:807#0/1  
GATAATCACTCAATGAGTGACATCGAAGCCATGGCGTGTC  
+HWI-EAS443:3:98:1253:807#0/1  
a¥]¥¥YX`\_]T^]V`]XYX[XXUMDSTQNQQQ\_YL`NBBB  
@HWI-EAS443:3:12:1308:1149#0/1  
AGCAAAAGCAGGGNAGATAATCACTCAATGAGTGACATCG  
+HWI-EAS443:3:12:1308:1149#0/1  
aba^aab`\_\_\_a^D[aaaaZa¥`\_`Xa¥`\_]\_0a\_V^\_Y\_  
@HWI-EAS443:3:17:708:861#0/1  
GAAGAANTAAGACCCTTCATTACTCATGTCAAAGGAAGGC  
+HWI-EAS443:3:17:708:861#0/1  
]¥\_\_a[DZbba`\_\_\_a`a`aaa`aa`baV]\_`a\_^¥aa\_  
@HWI-EAS443:3:24:309:650#0/1  
AATCACTCAATGAGTNACATCGAAGCCATGGCGTCTCAAG  
+HWI-EAS443:3:24:309:650#0/1  
aaaaaaabaa`\_a^RD[aa`a]\_\_aa¥Y``\_\_a]\_\_\_\_¥R¥  
@HWI-EAS443:3:35:315:640#0/1  
AGCAGGGTNGATAATCACTCAATGAGTGACATCGAAGCCA  
+HWI-EAS443:3:35:315:640#0/1  
a`aaaa\_PDW`\_aa`a`a`a`a`a`\_^^GT^a\_^aRTY[`\_W  
@HWI-EAS443:3:39:1061:1243#0/1  
TAATCACTCAATGAGTGACATCGAANCCATGGCGTCTCAA  
+HWI-EAS443:3:39:1061:1243#0/1  
a`a`^aababb`¥aaYbaaaWaX`XDWa\_a\_\_\_\_\_K¥\_\_a^  
@HWI-EAS443:3:44:1389:14#0/1  
GTGCCTTGAGACGCCATGGCTTCGATGTCACTCANTGAGT  
+HWI-EAS443:3:44:1389:14#0/1  
a¥a`[^`^`¥\_\_WZV[BBBBBBBBBBBBBBBBBBBBBBB  
@HWI-EAS443:3:45:253:345#0/1  
ATCACTCAATGAGTGACATCGAAGCCNTGGCGTCTCAAGG

+HWI-EAS443:3:45:253:345#0/1  
`baaaa[aab\_\_b]\_aaa\_`\_a\_U¥ZDX]\_UaV^\_^\_QY^  
@HWI-EAS443:3:53:1072:288#0/1  
GTGAAAGGAGTTGGAACAATAGCAATGGNGTTAATCAGAA  
+HWI-EAS443:3:53:1072:288#0/1  
`H\_NWW`VVXLT]QTWNW][SOJM[`\_TDRPVPV]PSRSU  
@HWI-EAS443:3:68:1701:1072#0/1  
AAGCAGGGTAGATAATCACTCAATGANTGACATCGAAGCC  
+HWI-EAS443:3:68:1701:1072#0/1  
\_aX[`\_aaR\_Waaa\_Q^¥X\_\_\_\_aaUDRUPT`\_XXT`\_Z]  
@HWI-EAS443:3:73:1003:1200#0/1  
AAAGCAGGGTAGATAATCACTCAATGAGNGACATCGAAGC  
+HWI-EAS443:3:73:1003:1200#0/1  
T¥RW^`¥[XU¥¥Ua[]X\_OY]`WU¥]RUDU\_X\_Z``]``a  
@HWI-EAS443:3:80:93:1776#0/1  
CTCNGAAGAAATAAGACCCTTCATTACTCATGTCAAAGGA  
+HWI-EAS443:3:80:93:1776#0/1  
aa[D¥W¥]aa`X^Z¥^]NV^a`\_[X]\_a`\_[¥a`\_\_ROZ  
@HWI-EAS443:3:80:983:1412#0/1  
AATCACTCAATGAGTGACATCGAAGCCATGGCGTNTCAAG  
+HWI-EAS443:3:80:983:1412#0/1  
ababa\_bYbbbaababb`baaa^`Xa^`aa\_`aVDV``a\_  
@HWI-EAS443:3:81:223:1432#0/1  
ATCGAAGCCATGGCGTCTNAAGGCACCAAACGATCATATG  
+HWI-EAS443:3:81:223:1432#0/1  
a\_YX\_``\_]^^X^^Y^KDW[^Z\_\_]\_^[\_]VYX\_YXY^V  
@HWI-EAS443:3:82:1017:1410#0/1  
AGCAAAAGCAGGGTAGATAATCACTCNATGAGTGACATCG  
+HWI-EAS443:3:82:1017:1410#0/1  
[\_\_\_\_b\_aaab`\_\_ZaaabbabbbabUD]aa\_`Raabbaa\_  
@HWI-EAS443:3:86:721:1238#0/1  
TAATCACTCAATGAGTGANATCGAAGCCATGGCGTCTCAA  
+HWI-EAS443:3:86:721:1238#0/1  
^\_a¥`[UWba¥\_Z^\_T]ZD[\_`^aaa\_]\_¥RZ`a¥b^Z^P  
@HWI-EAS443:3:94:612:1964#0/1  
CAATGAGTGACATCGAAGCCATGGCGTCTNAAGGCACCAA  
+HWI-EAS443:3:94:612:1964#0/1  
\_¥X``Y[SPZ``]RFQQVT[X][ZUZO]RDTU[WW[\_[]Z  
@HWI-EAS443:3:9:1625:1210#0/1  
CGAAGAAATAAGACCCTTCATTACTCATGTCANAGGAAGG  
+HWI-EAS443:3:9:1625:1210#0/1  
abb^b]abbbba`aXabb\_abb`\_bSaab\_M]D]aaaaa\_  
@HWI-EAS443:3:21:1194:516#0/1  
GCGCAAAAGCAGGGTAGATAATCACTCAATGAGTGACATC  
+HWI-EAS443:3:21:1194:516#0/1  
`V`X\_a`\_\_[Qa\_UF^¥\_\_\_\_Z\_\_¥¥]¥\_¥^^¥^Y`¥T\_UV  
@HWI-EAS443:3:26:1469:182#0/1  
TAGATAATCACTCAATGAGTGACATCGAAGCCATGGCGCC  
+HWI-EAS443:3:26:1469:182#0/1  
^\_X`¥aaa¥R\_`a`UZ[¥^TZUF^aUHWaSZUUIXb]¥FF

@HWI-EAS443:3:2:697:99#0/1  
AAATCTCCCTTTTGAAGAGCAACCGTTATGGCAGCTTTT  
+HWI-EAS443:3:2:697:99#0/1  
`a¥aaa`WSa\_\_aX\_\_^H`YOYR\_\_ZaWS[TY^BBBBBB  
@HWI-EAS443:3:32:151:1272#0/1  
GCAGCAAAAGCAGGGTAGATAATCACTCAATGAGTGACAT  
+HWI-EAS443:3:32:151:1272#0/1  
abbbbabbb`bb`¥\_Ybaa`aaab`aaa`aa^S¥WZaa\_^  
@HWI-EAS443:3:32:183:1602#0/1  
GTCTCCGAAGAAATAAGACCCTTCATTACTCATGTCAANG  
+HWI-EAS443:3:32:183:1602#0/1  
aabbbba`U\_ab¥a`b`[¥[`a\_baa\_ab`a`[]][¥UPDQ  
@HWI-EAS443:3:33:423:1063#0/1  
CCGCAAAAGCAGGGTAGATAATCACTCAATGAGTGACATC  
+HWI-EAS443:3:33:423:1063#0/1  
ab]ba^^aabaaaaUbbba`aaaaa`aaa\_aW\_`a\_aaa  
@HWI-EAS443:3:34:1423:82#0/1  
CACTCAATGAGTGACATCGAAGCCATGGCGTCTCAAGGGA  
+HWI-EAS443:3:34:1423:82#0/1  
a)`bb]bababaa`aa[a[baVabba`abaaZXY^]WBBB  
@HWI-EAS443:3:36:1370:788#0/1  
GGGGTGCCTTGAGACGCCATGGCTTCGATGCTCACTCATTG  
+HWI-EAS443:3:36:1370:788#0/1  
]RX[YbaaaabaaaXZ``\_KI[X]YVVYBBBBBBBBBBBB  
@HWI-EAS443:3:37:518:263#0/1  
CCAGCAAAAGCAGGGTAGATAATCACTCAATGAGTGACAT  
+HWI-EAS443:3:37:518:263#0/1  
abbabab\_aaaaaba`babaa``abaaaa]Ya``Xaaaa`  
@HWI-EAS443:3:44:908:1886#0/1  
ATCACTCAATGAGTGACATCGAAGCCATGGCGTCTCAAAG  
+HWI-EAS443:3:44:908:1886#0/1  
`a`aHQa`b`[b[]`^W`\_bZ^¥`TG¥¥`ZVa^XYG\_YG]  
@HWI-EAS443:3:46:1548:1925#0/1  
TAAGACCCTTCATTACTCATGTCAAAGGAAGGCACGATGG  
+HWI-EAS443:3:46:1548:1925#0/1  
`ZQZXUa[[V`T\_[ZYa¥Yba[LY[LZRP[`a[ZP^XWGN  
@HWI-EAS443:3:49:238:480#0/1  
GCAGCAAAAGCAGGGTAGATAATCACTCAATGAGTGACAT  
+HWI-EAS443:3:49:238:480#0/1  
ababaaabaaab`aa`baabaab`aaaaabaaa¥aa`aa  
@HWI-EAS443:3:55:1460:206#0/1  
GCAGCAAAAGCAGGGTAGATAATCACTCAATGAGTGACAT  
+HWI-EAS443:3:55:1460:206#0/1  
a\_abaaaaaaa`a`\_¥baaaa\_a``\_\_\_\_\_`\_\_W`aW\_¥  
@HWI-EAS443:3:64:1139:618#0/1  
GCAGCAAAAGCAGGGTAGATAATCACTCAATGAGTGACAT  
+HWI-EAS443:3:64:1139:618#0/1  
aaabbaaaabaa`aa\_aaaaaa\_a\_aaaaaaYa\_`a`  
@HWI-EAS443:3:67:780:93#0/1  
CGGGTGCCTTGAGACGCCATGGCTTCGATGCTCACTCATTG

+HWI-EAS443:3:67:780:93#0/1  
aba\_Taa`a`a\_a\_\_^\_¥XS]W\_\_NZUW¥VVUPNTV[aY  
@HWI-EAS443:3:74:49:965#0/1  
CACCTTCATTACTCATGTCAAAGGAAGGCACGATCGGGTT  
+HWI-EAS443:3:74:49:965#0/1  
`[Ya[abb`a^\_]baab`b`UYbaab`baaaaaNZWaaY\_  
@HWI-EAS443:3:75:1055:1246#0/1  
ACTGGTGCCTTGAGACGCCATGGCTTCGATGTCACTCATT  
+HWI-EAS443:3:75:1055:1246#0/1  
a^YT^T\_[\_\_`b`[ba^^`WY\_aZOVXGVBBBBBBBBBB  
@HWI-EAS443:3:87:35:120#0/1  
GGGCAAAAGCAGGGTAGATAATCACTCAATGAGTGACATC  
+HWI-EAS443:3:87:35:120#0/1  
aabaa`[]`a\_a`\_]b`\_\_R)`a¥`\_^]aY\_U¥YSYW¥  
@HWI-EAS443:3:15:1417:321#0/1  
CGCAGGGTAGATAATCACTCAATGAGTGACATCGAAGCCA  
+HWI-EAS443:3:15:1417:321#0/1  
¥\_bba`a`b`bbbabab[[U[\_\_bab\_baaabbaa`b¥R\_  
@HWI-EAS443:3:17:1438:830#0/1  
CGCAAAAGCAGGGTAGATAATCACTCAATGAGTGACATCG  
+HWI-EAS443:3:17:1438:830#0/1  
^a```[aa\_ab¥][ababbbaY`[[W¥aab`bab`X\_\_S\_  
@HWI-EAS443:3:31:384:1604#0/1  
TGCAGGGTAGATAATCACTCAATGAGTGACATCGAAGCCA  
+HWI-EAS443:3:31:384:1604#0/1  
¥[bb[X[^b]baaabbbbbb\_a`aa^`ba`b`aVabba  
@HWI-EAS443:3:36:80:200#0/1  
GGCAAAAGCAGGGTAGATAATCACTCAATGAGTGACATCG  
+HWI-EAS443:3:36:80:200#0/1  
aabba[abb\_bb\_V\_P\_]aSX¥\_\_¥\_\_Z[ZNX^S]TVZ`V  
@HWI-EAS443:3:38:1380:911#0/1  
CGCAAAAGCAGGGTAGATAATCACTCAATGAGTGACATCG  
+HWI-EAS443:3:38:1380:911#0/1  
aba^K`babS``[Mbabbba^WX`a`aa][UU`^U^`S  
@HWI-EAS443:3:38:152:512#0/1  
CGCAAAAGCAGGGTAGATAATCACTCAATGAGTGACATCG  
+HWI-EAS443:3:38:152:512#0/1  
abbbabbabab`aWbaaabaaaaaaaaa`\_^`aaa`aR  
@HWI-EAS443:3:38:370:985#0/1  
GGCAAAAGCAGGGTAGATAATCACTCAATGAGTGACATCG  
+HWI-EAS443:3:38:370:985#0/1  
abaVb`\_[abba`WL[bb``aaaaaa`aa¥^`Wa`^`\_^W  
@HWI-EAS443:3:40:1617:654#0/1  
GTAATGAAGGGTCTTATTTCTTCGGAGACAATGCAGAGGG  
+HWI-EAS443:3:40:1617:654#0/1  
\_a\_[ba`\_^]\_G^Xa]]^Paa¥^`ZUUX¥¥V]BBBBBBB  
@HWI-EAS443:3:43:291:985#0/1  
GACCCTTCATTACTCATGTCAAAGGAAGGCACGATCGGGG  
+HWI-EAS443:3:43:291:985#0/1  
I¥aa`abba`\_Zaabbab]ZabXa]aa`^bb\_baaaa`T

@HWI-EAS443:3:47:1215:293#0/1  
CGCAAAGCAGGGTAGATAATCACTCAATGAGTGACATCG  
+HWI-EAS443:3:47:1215:293#0/1  
ab`^baa`abaa¥bba`aab\_b\_a\_`aab\_a¥a¥\_a` []  
@HWI-EAS443:3:52:183:31#0/1  
CGCAAAGCAGGGTAGATAATCACTCAATGAGTGACATCG  
+HWI-EAS443:3:52:183:31#0/1  
ababbbbaabbb\_bbabba`aaaaab\_b\_aaaa`aa  
@HWI-EAS443:3:56:1253:461#0/1  
CGCAAAGCAGGGTAGATAATCACTCAATGAGTGACATCG  
+HWI-EAS443:3:56:1253:461#0/1  
abYa\_^X\_a)^\_Y\_aZ`X[aa\_\_\_aT[^a`a`]\_Y]ZGR\_  
@HWI-EAS443:3:57:1374:1320#0/1  
GGCAAAGCAGGGTAGATAATCACTCAATGAGTGACATCG  
+HWI-EAS443:3:57:1374:1320#0/1  
aaaabbbbaabaaZbaaaba`a¥aaaa`b\_Z\_a¥a`XU  
@HWI-EAS443:3:57:47:1290#0/1  
AGCCTTGAGACCCATGGCTTCGATGTCACCTCATTGAGTG  
+HWI-EAS443:3:57:47:1290#0/1  
a`aa`aa^ZS`^a`aN\_`¥`\_[UT¥ZNNR[^MHW¥SHSRB  
@HWI-EAS443:3:58:1648:45#0/1  
GGCAAAGCAGGGTAGATAATCACTCAATGAGTGACATCG  
+HWI-EAS443:3:58:1648:45#0/1  
^bbbaaabaabb]b\_aaa^`\_a\_abaab\_a\_\_`\_`]  
@HWI-EAS443:3:58:866:297#0/1  
CAGCAAAGCAGGGTAGATAATCACTCAATGAGTGACATC  
+HWI-EAS443:3:58:866:297#0/1  
aab\_bbaaa\_abbaLaaaa`aaa¥^¥\_Zaa\_bVaaa\_¥\_  
@HWI-EAS443:3:61:462:1377#0/1  
CGCAAAGCAGGGTAGATAATCACTCAATGAGTGACATCG  
+HWI-EAS443:3:61:462:1377#0/1  
a`b¥Y¥YabbabaNba\_aab\_a`b[bb\_``¥^W^\_\_\_¥QV  
@HWI-EAS443:3:63:852:1320#0/1  
CGCAAAGCAGGGTAGATAATCACTCAATGAGTGACATCG  
+HWI-EAS443:3:63:852:1320#0/1  
a^a`^`]Z\_b\_^`[¥ba`\_`\_abaaaaX^aX^^`^`a\_aU  
@HWI-EAS443:3:65:1064:1376#0/1  
GGCAAAGCAGGGTAGATAATCACTCAATGAGTGACATCG  
+HWI-EAS443:3:65:1064:1376#0/1  
K¥`¥^a\_[[V\_\_a\_`\_`\_¥YZaabaaba`b]b`XU]Z\_][  
@HWI-EAS443:3:66:398:336#0/1  
CGCAAAGCAGGGTAGATAATCACTCAATGAGTGACATCG  
+HWI-EAS443:3:66:398:336#0/1  
aa^U`^`T¥ZZ\_RD0aa`a\_\_aa\_`\_\_\_\_V]QLXM^]\_`^YS  
@HWI-EAS443:3:67:102:111#0/1  
GTAGATAATCACTCAATGAGTGACATCGAAGCCATGGCGC  
+HWI-EAS443:3:67:102:111#0/1  
aXb`[MTSa[]`aaYVYaXXJ¥\_^\_ZVBBBBBBBBBBBB  
@HWI-EAS443:3:67:245:849#0/1  
CGCAAAGCAGGGTAGATAATCACTCAATGAGTGACATCG

+HWI-EAS443:3:67:245:849#0/1  
aba]a`aaaaaWbaa`]]`aa`a`\_a`\_aW`¥`a\_a¥  
@HWI-EAS443:3:68:1658:1589#0/1  
GGCAAAAGCAGGGTAGATAATCACTCAATGAGTGACATCG  
+HWI-EAS443:3:68:1658:1589#0/1  
a`UX^^ZaPGY\_YV^^[QZQ\_W\_X\_\_IW¥WU¥W\_U¥YWSU  
@HWI-EAS443:3:71:651:642#0/1  
CGCAAAAGCAGGGTAGATAATCACTCAATGAGTGACATCG  
+HWI-EAS443:3:71:651:642#0/1  
abbbbabababaa\_bbbabbaabaabaaaaa`ababaa`  
@HWI-EAS443:3:71:815:948#0/1  
CGCAAAAGCAGGGTAGATAATCACTCAATGAGTGACATCG  
+HWI-EAS443:3:71:815:948#0/1  
abaaa\_aaaaba`Xba\_abaabb`aaaaa`a^aaaa`\_  
@HWI-EAS443:3:72:407:1740#0/1  
CAGCAAAAGCAGGGTAGATAATCACTCAATGAGTGACATC  
+HWI-EAS443:3:72:407:1740#0/1  
\_SY\_]WZUU`XTTSub]`\_^L[^^`\_\_\_V¥SWUY\_[[  
@HWI-EAS443:3:77:230:390#0/1  
GGCAAAAGCAGGGTAGATAATCACTCAATGAGTGACATCG  
+HWI-EAS443:3:77:230:390#0/1  
a`baabbaaaaaYW[aaaa`\_bb`aa^aaaZ`\_U`aS  
@HWI-EAS443:3:82:1141:1210#0/1  
CTCCGAAGAAATAAGACCCTTCATTACTCATGTCAAAGGC  
+HWI-EAS443:3:82:1141:1210#0/1  
a`a\_ba¥¥ZX`a\_b]PRVQ`a]`a^T`a]¥\_a`[aZQPH  
@HWI-EAS443:3:87:194:51#0/1  
GGCAAAAGCAGGGTAGATAATCACTCAATGAGTGACATCG  
+HWI-EAS443:3:87:194:51#0/1  
aaaaa[]a\_\_aa`WaaX\_\_¥`^\_¥\_¥¥¥`\_V\_W\_¥¥¥¥¥¥  
@HWI-EAS443:3:89:876:315#0/1  
ACTCTGCATTGTCTCCGAAGAAATAAGACCCTTCATTACT  
+HWI-EAS443:3:89:876:315#0/1  
H]abbba`\_bb¥`M`^`a`aabbbbbbbbabbbabaabbb  
@HWI-EAS443:3:90:1589:1618#0/1  
CAAAAGCAGGGTAGATAATCACTCAATGAGTGACATCGAG  
+HWI-EAS443:3:90:1589:1618#0/1  
aaa\_]aaaaTVXba`babb`\_RaU[\_aaa]`\_WT\_XPUV  
@HWI-EAS443:3:91:1123:373#0/1  
AAGCAAAAGCAGGGTAGATAATCACTCAATGAGTGACATC  
+HWI-EAS443:3:91:1123:373#0/1  
aabaaa]X`Ta¥]Zaa`a\_]a\_aX`¥\_\_]UV`\_`^  
@HWI-EAS443:3:95:539:175#0/1  
CACTCAATGAGTGACATCGAAGCCATGGCGTCTCAAGGCG  
+HWI-EAS443:3:95:539:175#0/1  
ababaa^ba^bab\_]aa\_Z]`aa^`]a`\_a\_¥a]V^]¥¥^  
@HWI-EAS443:3:98:946:169#0/1  
CAGCAAAAGCAGGGTAGATAATCACTCAATGAGTGACATC  
+HWI-EAS443:3:98:946:169#0/1  
`bbbb\_]a`UZ\_bbabbbab\_a\_^`baaabbbabSaa`a[



+HWI-EAS443:3:10:897:1123#0/1  
aaab`aaaa¥]^[]¥[X^\_\_\_\_`Y\_^\_\_\_\_XV^W^TZ[[]]]  
@HWI-EAS443:3:11:1029:1127#0/1  
TAATCACTCAATGAGTGACATCGAAGCCATGGCGTCTCAA  
+HWI-EAS443:3:11:1029:1127#0/1  
aaa`¥a`ababaa¥^]`a\_a\_\_a`\_a]R```US[X][S^V  
@HWI-EAS443:3:11:1146:345#0/1  
AGACCCTTCATTACTCATGTCAAAGGAAGGCACGATCGGG  
+HWI-EAS443:3:11:1146:345#0/1  
a\_U\_\_X]R]a^YUX^`a\_a]]a\_[`YVZ\_Y¥ZTN\_Y]YV]  
@HWI-EAS443:3:11:1172:814#0/1  
GAAGAAATAAGACCCTTCATTACTCATGTCAAAGGAAGGC  
+HWI-EAS443:3:11:1172:814#0/1  
a`a\_\_\_\_aaaaY^VZ]\_\_`\_^^[`Z`\_`^X`^Z]]^]X]B  
@HWI-EAS443:3:11:1296:376#0/1  
CGAAGAAATAAGACCCTTCATTACTCATGTCAAAGGAAGG  
+HWI-EAS443:3:11:1296:376#0/1  
abb`baaaa`\_YVPV[ba`aaa`[`Raaa`^`[\_a\_V\_]\_  
@HWI-EAS443:3:11:1394:1529#0/1  
TAATCACTCAATGAGTGACATCGAAGCCATGGCGTCTCAA  
+HWI-EAS443:3:11:1394:1529#0/1  
^XQXZ]]ZR]^\_UXaT]\_]¥XJ^Z¥]Y¥```QN^NSYJYB  
@HWI-EAS443:3:11:1657:604#0/1  
AATCACTCAATGAGTGACATCGAAGCCATGGCGTCTCAAG  
+HWI-EAS443:3:11:1657:604#0/1  
[U^L[R]]``a^V[KY`\_`WQWYUR]]OSYNZSKIDWBB  
@HWI-EAS443:3:11:464:925#0/1  
CGAAGAAATAAGACCCTTCATTACTCATGTCAAAGGAAGG  
+HWI-EAS443:3:11:464:925#0/1  
¥aZ]a`]Z\_^`[`Z]]Z¥baaaS^\_Z]`^¥]]\_^^V^`Y^  
@HWI-EAS443:3:11:524:1591#0/1  
AGACCCTTCATTACTCATGTCAAAGGAAGGCACGATCGGG  
+HWI-EAS443:3:11:524:1591#0/1  
aN\_^ZY`\_\_a\_\_`]¥Z`]¥^^\_\_XWY\_Y]]]UBBBBBBB  
@HWI-EAS443:3:11:626:1568#0/1  
AAGCAGGGTAGATAATCACTCAATGAGTGACATCGAAGCC  
+HWI-EAS443:3:11:626:1568#0/1  
^`UZ^`[¥LaZ]aa]^baZ`^^`Y`Q[[]\_a\_a]\_aZVL  
@HWI-EAS443:3:11:667:93#0/1  
GAAATAAGACCCTTCATTACTCATGTCAAAGGAAGGCACG  
+HWI-EAS443:3:11:667:93#0/1  
[VbbZ```PTS^`^XTY¥a[^¥a\_¥SV`TNNZY`RUPXP`  
@HWI-EAS443:3:11:980:1186#0/1  
GAAGAAATAAGACCCTTCATTACTCATGTCAAAGGAAGGC  
+HWI-EAS443:3:11:980:1186#0/1  
aaa`aaaaY`\_]S\_`^`\_]\_\_\_\_]```YU\_^]]VX]]]V  
@HWI-EAS443:3:12:1058:1285#0/1  
CAGGGTAGATAATCACTCAATGAGTGACATCGAAGCCATG  
+HWI-EAS443:3:12:1058:1285#0/1  
a\_Q\_bZ`Z[\_bb\_Vb^bababaabWaa`a`\_J\_aaRaIaS



@HWI-EAS443:3:12:1159:472#0/1  
CTCCTCTGCATTGTCTCCGAAGAAATAAGACCCTTCATTA  
+HWI-EAS443:3:12:1159:472#0/1  
aabbababa\_abbbaaa`aaaababaabba[\_`¥aa^aa\_`  
@HWI-EAS443:3:12:1371:595#0/1  
AAGCAGGGTAGATAATCACTCAATGAGTGACATCGAAGCC  
+HWI-EAS443:3:12:1371:595#0/1  
a`a`aaa`Ybaaaa\_a\_a\_a\_`\_a\_\_X]\_^V\_\_[^^^OV  
@HWI-EAS443:3:12:266:717#0/1  
AGAAATAAGACCCTTCATTACTCATGTCAAAGGAAGGCAC  
+HWI-EAS443:3:12:266:717#0/1  
`baa^`^aT^JaUa`¥a\_`XJ^aa\_a]\_`PYaa\_a¥S`BB  
@HWI-EAS443:3:12:304:156#0/1  
TAATCACTCAATGAGTGACATCGAAGCCATGGCGTCTCAA  
+HWI-EAS443:3:12:304:156#0/1  
`a^aa`X]aWW\_ZV^P]`aa][^\_`^`]U^```]ZLPWG^]  
@HWI-EAS443:3:13:1094:741#0/1  
CAAAAGCAGGGTAGATAATCACTCAATGAGTGACATCGAA  
+HWI-EAS443:3:13:1094:741#0/1  
a\_`^b`aabb`Yababa`a`a`a\_aaaa`a\_a`\_a`aY\_`  
@HWI-EAS443:3:13:146:1183#0/1  
CGAAGAAATAAGACCCTTCATTACTCATGTCAAAGGAAGG  
+HWI-EAS443:3:13:146:1183#0/1  
a¥SWbaababba[\_`]aa`aaaa`aaaa`aa\_W\_^`a\_`  
@HWI-EAS443:3:13:172:639#0/1  
AGCAAAAGCAGGGTAGATAATCACTCAATGAGTGACATCG  
+HWI-EAS443:3:13:172:639#0/1  
abaabaa`ba`a\_\_¥X]¥[aaa`\_a`aaaa\_a^\_a[a^\_`  
@HWI-EAS443:3:13:188:1950#0/1  
AGAAATAAGACCCTTCATTACTCATGTCAAAGGAAGGCAC  
+HWI-EAS443:3:13:188:1950#0/1  
`aa[`U`\_G\_^`a\_ZaaTaa``abaaR`]U\_a```Y[aa^  
@HWI-EAS443:3:13:31:347#0/1  
GCAAAAGCAGGGTAGATAATCACTCAATGAGTGACATCGA  
+HWI-EAS443:3:13:31:347#0/1  
aXLV]YaWP[\_UK[¥¥YLHXXUY¥¥RX¥WYYU[TYYVLXB  
@HWI-EAS443:3:13:852:239#0/1  
AGATAATCACTCAATGAGTGACATCGAAGCCATGGCGTCT  
+HWI-EAS443:3:13:852:239#0/1  
aaa`^`^`[````\_a^\_`Y`\_]a^]\_^\_\_^X]VY[X\_YXY  
@HWI-EAS443:3:14:1005:805#0/1  
GGTAGATAATCACTCAATGAGTGACATCGAAGCCATGGCG  
+HWI-EAS443:3:14:1005:805#0/1  
`a\_abbab`Z`a\_]a`aaaaaa]`aaaaa\_\_¥a^Y]`a^]a  
@HWI-EAS443:3:14:1159:949#0/1  
AGCAAAAGCAGGGTAGATAATCACTCAATGAGTGACATCG  
+HWI-EAS443:3:14:1159:949#0/1  
abab\_aaaaaaaaaYb`\_aa`a^a``aa`a\_\_X\_```^^]  
@HWI-EAS443:3:14:1260:1967#0/1  
AATCACTCAATGAGTGACATCGAAGCCATGGCGTCTCAAG

+HWI-EAS443:3:14:1260:1967#0/1  
a[aa`^M¥\_a^a\_R\_\_\_a]Z`\_`[\_`\_\_\_`ZXSKT]URPT  
@HWI-EAS443:3:14:1484:1118#0/1  
GCAGGGTAGATAATCACTCAATGAGTGACATCGAAGCCAT  
+HWI-EAS443:3:14:1484:1118#0/1  
aa^`]ZD[aa^UY[\_`[\_`\_\_\_`[^`Va\_\_\_\_\_ZT^\_^UU¥Z  
@HWI-EAS443:3:14:323:1383#0/1  
AAAGCAGGGTAGATAATCACTCAATGAGTGACATCGAAGC  
+HWI-EAS443:3:14:323:1383#0/1  
¥a``babaa^b\_``baabaaa`aaa`a`\_aa\_a`a^a¥¥X  
@HWI-EAS443:3:14:432:209#0/1  
AGCAAAGCAGGGTAGATAATCACTCAATGAGTGACATCG  
+HWI-EAS443:3:14:432:209#0/1  
aabaa]a]aaYSRFa\_aZ]Z\_\_\_Q`\_a\_`\_]`Ua\_\_[]X  
@HWI-EAS443:3:14:461:1701#0/1  
AATCACTCAATGAGTGACATCGAAGCCATGGCGTCTCAAG  
+HWI-EAS443:3:14:461:1701#0/1  
`aaab\_`aabbZ`aUabaaa\_[^a]\_aa\_\_Q`aU\_\_]a\_X  
@HWI-EAS443:3:15:1123:1303#0/1  
AGATAATCACTCAATGAGTGACATCGAAGCCATGGCGTCT  
+HWI-EAS443:3:15:1123:1303#0/1  
`b`aba`aa`\_\_`\_a`^\_aaa\_\_^]`^`\_`^`XVY  
@HWI-EAS443:3:15:1223:919#0/1  
GAAGAAATAAGACCCTTCATTACTCATGTCAAAGGAAGGC  
+HWI-EAS443:3:15:1223:919#0/1  
]Z[bbaabaaaa]\_Zaaa^`JY`a]\_ab¥\_aaaVYYa^`^  
@HWI-EAS443:3:15:1630:117#0/1  
AAAGCAGGGTAGATAATCACTCAATGAGTGACATCGAAGC  
+HWI-EAS443:3:15:1630:117#0/1  
aaaaU`baWH¥\_a]\_\_`\_`^]X`¥^^¥\_U^YX^YUY^^YX  
@HWI-EAS443:3:15:1634:922#0/1  
TAATCACTCAATGAGTGACATCGAAGCCATGGCGTCTCAA  
+HWI-EAS443:3:15:1634:922#0/1  
abV^a`abaaaaa]¥[[aaa\_`^]\_X`^aa\_`[Sa[`^  
@HWI-EAS443:3:15:1668:1859#0/1  
CGAAGAAATAAGACCCTTCATTACTCATGTCAAAGGAAGG  
+HWI-EAS443:3:15:1668:1859#0/1  
¥`baabbbbbbab]]aab`bababbabbbbabb`a  
@HWI-EAS443:3:15:1683:598#0/1  
CAAAAGCAGGGTAGATAATCACTCAATGAGTGACATCGAA  
+HWI-EAS443:3:15:1683:598#0/1  
aaa]bababbb]bbbbbb^aabaabaaa`ba\_aaa`a\_  
@HWI-EAS443:3:15:237:1413#0/1  
CGAAGAAATAAGACCCTTCATTACTCATGTCAAAGGAAGG  
+HWI-EAS443:3:15:237:1413#0/1  
abb\_a`]\_babaaaUYa¥Ya`[Y]`a\_`a\_a]``Y^QWZ  
@HWI-EAS443:3:15:796:1523#0/1  
CTCCGAAGAAATAAGACCCTTCATTACTCATGTCAAAGGA  
+HWI-EAS443:3:15:796:1523#0/1  
aaa¥Z]aZOYO^`\_¥[NW]P^TPQYTFXVVR^UXPG¥]]R

@HWI-EAS443:3:15:941:1407#0/1  
AGATAACTCAATGAGTGACATCGAAGCCATGGCGTCT  
+HWI-EAS443:3:15:941:1407#0/1  
][`Ra][`[a`ZZG¥aaa¥W\_]U)`^UP[[\_\_¥^\_\_\_\_JNQ  
@HWI-EAS443:3:16:1359:1420#0/1  
GGGTAGATAACTCAATGAGTGACATCGAAGCCATGGC  
+HWI-EAS443:3:16:1359:1420#0/1  
aYGVb`][a`XVX\_¥aS¥Xa\_RaV`[G]a\_¥X`[^¥UT`¥¥  
@HWI-EAS443:3:16:1510:1939#0/1  
CAGGGTAGATAACTCAATGAGTGACATCGAAGCCATG  
+HWI-EAS443:3:16:1510:1939#0/1  
Y`a\_YM`baa\_SV]a^[Sbaaa[a¥b`\_aaa\_aba¥W`ab  
@HWI-EAS443:3:16:388:1033#0/1  
ATCACTCAATGAGTGACATCGAAGCCATGGCGTCTCAAGG  
+HWI-EAS443:3:16:388:1033#0/1  
a`aa\_]\_L`abab`aa`aaa¥aXXa[aaa\_¥`^Z^`\_`\_\_\_\_  
@HWI-EAS443:3:16:897:806#0/1  
GTGACATCGAAGCCATGGCGTCTCAAGGCACCAAACGATC  
+HWI-EAS443:3:16:897:806#0/1  
aM[`aa^`R`\_`^^WZ`[[¥QVX¥^PR][][UV^]X]YVG  
@HWI-EAS443:3:17:102:254#0/1  
GCAAAAGCAGGGTAGATAACTCAATGAGTGACATCGA  
+HWI-EAS443:3:17:102:254#0/1  
^a][`¥Ra^^Z\_Xaa\_]\_]R`Y¥]\_^\_[V\_VZX^]UZ¥X  
@HWI-EAS443:3:17:1729:554#0/1  
AAGCAGGGTAGATAACTCAATGAGTGACATCGAAGCC  
+HWI-EAS443:3:17:1729:554#0/1  
[[b]Tbaa^bbaaba\_^V]]VY]aa`aSa\_^a`^\_X\_[MR  
@HWI-EAS443:3:17:222:1072#0/1  
TCCGAAGAAATAAGACCCTTCATTACTCATGTCAAAGGAA  
+HWI-EAS443:3:17:222:1072#0/1  
abab]ababa`bba`a`aa`baa`aa`aa`a`\_`\_`[¥a  
@HWI-EAS443:3:17:424:408#0/1  
GTCTCCGAAGAAATAAGACCCTTCATTACTCATGTCAAAG  
+HWI-EAS443:3:17:424:408#0/1  
aaaaaa`[`a`aaaa`^]T\_`a`\_a\_\_a`\_a\_`Y`W`\_  
@HWI-EAS443:3:17:429:1418#0/1  
TGAAAGGAGTTGGAACAATAGCAATGGAGTTAATCAGAAT  
+HWI-EAS443:3:17:429:1418#0/1  
^^^\_aa`]V^`]Z[`aaaa`\_`a^a\_aa]``a\_`^`\_a^  
@HWI-EAS443:3:17:499:125#0/1  
AGCAAAAGCAGGGTAGATAACTCAATGAGTGACATCG  
+HWI-EAS443:3:17:499:125#0/1  
aaaa``ba[`aaXba\_aa\_\_\_\_\_^^a\_\_a`^`X`^X`Y]¥  
@HWI-EAS443:3:17:618:914#0/1  
AAGAAATAAGACCCTTCATTACTCATGTCAAAGGAAGGCA  
+HWI-EAS443:3:17:618:914#0/1  
aab^aaaa`\_\_^`aa\_aaaaaa\_\_`\_a`a\_`\_¥a^V`\_  
@HWI-EAS443:3:17:898:1204#0/1  
AGGGTAGATAACTCAATGAGTGACATCGAAGCCATGG

+HWI-EAS443:3:17:898:1204#0/1  
aaaUHbaUaa`\_]`a^`a^`a`TP`\_bb^¥\_a]XRZ\_UU`  
@HWI-EAS443:3:18:1187:1538#0/1  
AGGGTAGATAATCACTCAATGAGTGACATCGAAGCCATGG  
+HWI-EAS443:3:18:1187:1538#0/1  
aabaWa`a`b`a\_aa`\_a\_``VT`\_\_\_\_\_]-¥U\_¥  
@HWI-EAS443:3:18:1340:1493#0/1  
GAAAGGAGTTGGAACAATAGCAATGGAGTTAATCAGAAATG  
+HWI-EAS443:3:18:1340:1493#0/1  
¥\_babab`aa`abaaababababbbaaaaaabaa^a`b^  
@HWI-EAS443:3:18:1740:840#0/1  
CTCCTCTGCATTGTCTCCGAAGAAATAAGACCCTTCATTA  
+HWI-EAS443:3:18:1740:840#0/1  
a\_¥a]K`\_]U`\_WZRa`XaXWa]QX\_^\_aUMU^\_^WMS^^  
@HWI-EAS443:3:18:249:798#0/1  
AGCAAAAGCAGGGTAGATAATCACTCAATGAGTGACATCG  
+HWI-EAS443:3:18:249:798#0/1  
ab`M`baYZaaaaVb\_]U]a^a`\_`aa`¥a\_]aa\_\_\_U^  
@HWI-EAS443:3:18:417:102#0/1  
TCGAAGCCATGGCGTCTCAAGGCACCAAACGATCATATGA  
+HWI-EAS443:3:18:417:102#0/1  
aabaaba\_a]a]\_\_T^[\_`\_`a\_ZTUaV^ZaZ]¥WY[]¥¥  
@HWI-EAS443:3:18:534:1664#0/1  
AGATAATCACTCAATGAGTGACATCGAAGCCATGGCGTCT  
+HWI-EAS443:3:18:534:1664#0/1  
a]a\_`[]`a]\_]`a\_X\_[UY`\_`U¥UW^\_]WZYUUYXY  
@HWI-EAS443:3:19:1043:1664#0/1  
AAATAAGACCCTTCATTACTCATGTCAAAGGAAGGCACGA  
+HWI-EAS443:3:19:1043:1664#0/1  
ZS^YU^YIM[`b]aaa^XS`ZTYa^P\_YZGT\_WVP]NG\_B  
@HWI-EAS443:3:19:121:786#0/1  
AATCACTCAATGAGTGACATCGAAGCCATGGCGTCTCAAG  
+HWI-EAS443:3:19:121:786#0/1  
```aa`aVaaaa`\_]aaa\_^Z`\_[Z]`\_ZZ^[VW]¥\_Y  
@HWI-EAS443:3:19:1297:1666#0/1  
AAGCAGGGTAGATAATCACTCAATGAGTGACATCGAAGCC  
+HWI-EAS443:3:19:1297:1666#0/1  
aa`aaaaZba`a`¥]¥^`\_a\_\_aa]a]a`]a^\_X\_\_\_VY  
@HWI-EAS443:3:19:1348:785#0/1  
CGAAGAAATAAGACCCTTCATTACTCATGTCAAAGGAAGG  
+HWI-EAS443:3:19:1348:785#0/1  
aaaba`bbbb`bababbbbbbbabbaabaaa^b```aa  
@HWI-EAS443:3:19:1710:502#0/1  
CTGCATTGTCTCCGAAGAAATAAGACCCTTCATTACTCAT  
+HWI-EAS443:3:19:1710:502#0/1  
T`aabbbb`]b``bbbbbbbbbaaaa\_abbabbbabbbba  
@HWI-EAS443:3:19:316:1635#0/1  
TAATCACTCAATGAGTGACATCGAAGCCATGGCGTCTCAA  
+HWI-EAS443:3:19:316:1635#0/1  
[b¥bb\_a[baa`W^[b\_ba`b]]`Rbaa]\_^aa]]^`a

@HWI-EAS443:3:19:658:1335#0/1  
AAGCAGGGTAGATAATCACTCAATGAGTGACATCGAAGCC  
+HWI-EAS443:3:19:658:1335#0/1  
a`\_\_\_\_`\_Xa`a\_a^^a\_^]a\_`^X`^U\_^Y\_Y]]X]¥U¥  
@HWI-EAS443:3:1:1001:1327#0/1  
CGAAGAAATAAGACCCTTCATTACTCATGTCAAAGGAAGG  
+HWI-EAS443:3:1:1001:1327#0/1  
a¥^^bbbbbbbb]IS^\_¥abba`a`ab\_bbY[^Wb]ba`B  
@HWI-EAS443:3:1:1059:1379#0/1  
CTCCTCTGCATTGTCTCCGAAGAAATAAGACCCTTCATTA  
+HWI-EAS443:3:1:1059:1379#0/1  
`ba`b\_abaabba\_aaa\_ba`a\_aaaaa`ZKD[`\_\_aaB  
@HWI-EAS443:3:1:1190:813#0/1  
AGCAGGGTAGATAATCACTCAATGAGTGACATCGAAGCCA  
+HWI-EAS443:3:1:1190:813#0/1  
abaabbaXbabbaaa]a\_a``aabaa`a`]a`[\_a`\_BBB  
@HWI-EAS443:3:1:1225:862#0/1  
GAAATAAGACCCTTCATTACTCATGTCAAAGGAAGGCACG  
+HWI-EAS443:3:1:1225:862#0/1  
aZa^aaa\_¥XU0aa`a\_\_XaU]aa^W\_\_^`\_W[]XZ¥BB  
@HWI-EAS443:3:1:1463:1420#0/1  
GAAGAAATAAGACCCTTCATTACTCATGTCAAAGGAAGGC  
+HWI-EAS443:3:1:1463:1420#0/1  
aaWIa^`aabMKMHZ`Z`\_]XP¥¥\_aa^W`RXBBBBBBB  
@HWI-EAS443:3:1:176:1399#0/1  
CACTCAATGAGTGACATCGAAGCCATGGCGTCTCAAGGCA  
+HWI-EAS443:3:1:176:1399#0/1  
ab[a^babbaa`a`Zaa`\_aabaZab][\_^TX`Sa[Q`BB  
@HWI-EAS443:3:1:481:438#0/1  
GCAAAAGCAGGGTAGATAATCACTCAATGAGTGACATCGA  
+HWI-EAS443:3:1:481:438#0/1  
a`]SX`MDTaa\_WaY¥¥^[YH]Z`X]]¥\_R^X\_]XWXBBB  
@HWI-EAS443:3:1:771:1654#0/1  
CAAAAGCAGGGTAGATAATCACTCAATGAGTGACATCGAA  
+HWI-EAS443:3:1:771:1654#0/1  
abbabbaabb`\_bbbababab`bababaab]aaaba\_aba  
@HWI-EAS443:3:1:836:567#0/1  
CACTCAATGAGTGACATCGAAGCCATGGCGTCTCAAGGCA  
+HWI-EAS443:3:1:836:567#0/1  
a`a[aabbab`\_bb\_baab`aba\_ab^Y]b\_NaHW^aaBB  
@HWI-EAS443:3:20:1121:475#0/1  
AGCAAAAGCAGGGTAGATAATCACTCAATGAGTGACATCG  
+HWI-EAS443:3:20:1121:475#0/1  
aaa\_aa]\_¥`b\_bYaaaa^`aaaa`]a\_`aaaT¥``a\_[X  
@HWI-EAS443:3:20:1204:1218#0/1  
AAAGCAGGGTAGATAATCACTCAATGAGTGACATCGAAGC  
+HWI-EAS443:3:20:1204:1218#0/1  
aa]^aaaaa`]`ab^Raaa`\_Za`]`aXR[`a^\_T^V`¥H  
@HWI-EAS443:3:20:1269:904#0/1  
ATTCTGATTAACCTCATTGCTATTGTTCCAACCTCTTCA

+HWI-EAS443:3:20:1269:904#0/1  
`bb\_ba]baababa\_ababaa`aaa`a`\_\_a\_\_aaa`  
@HWI-EAS443:3:20:1382:1751#0/1  
TAGATAATCACTCAATGAGTGACATCGAAGCCATGGCGTC  
+HWI-EAS443:3:20:1382:1751#0/1  
abbbbbbabababaababab\_aa`ba]aaaa`aaZL[YU^  
@HWI-EAS443:3:20:300:68#0/1  
CACTCAATGAGTGACATCGAAGCCATGGCGTCTCAAGGCA  
+HWI-EAS443:3:20:300:68#0/1  
aaaa^aaaaaa¥ba\_baaaaaa]\_\_aa\_a]^^`X`^R]  
@HWI-EAS443:3:21:1060:1137#0/1  
CTCCGAAGAAATAAGACCCTTCATTACTCATGTCAAAGGA  
+HWI-EAS443:3:21:1060:1137#0/1  
`a`b`^b0J^]Kb`GUXPabX]X`^\_aN][a[Zaa``\_`  
@HWI-EAS443:3:21:1123:1104#0/1  
TGTCATACTCCTCTGCATTGTCTCCGAAGAAATAAGACCC  
+HWI-EAS443:3:21:1123:1104#0/1  
QO]baZ¥[`]V[ba`XY¥a[Y`\_YF^ZY\_WLTX\_PHZ[JF  
@HWI-EAS443:3:21:1303:870#0/1  
CACTCAATGAGTGACATCGAAGCCATGGCGTCTCAAGGCA  
+HWI-EAS443:3:21:1303:870#0/1  
aaabaabaa`aUaa\_aa`]aaaa`\_`a\_]^U^\_\_`\_^VZ¥  
@HWI-EAS443:3:21:1465:1350#0/1  
AGACCCTTCATTACTCATGTCAAAGGAAGGCACGATCGGG  
+HWI-EAS443:3:21:1465:1350#0/1  
`XTR]TW]]¥[\_`^PTZ^aVYaY[^Z[]]TQ¥^T[PV[RR  
@HWI-EAS443:3:21:1599:1931#0/1  
CTCTGCATTGTCTCCGAAGAAATAAGACCCTTCATTACTC  
+HWI-EAS443:3:21:1599:1931#0/1  
abba]0\_bbb`Y`]P^aab^`a^a`\_ZTOV]`\_\_`\_\_0\_W  
@HWI-EAS443:3:21:1716:1107#0/1  
CACTCAATGAGTGACATCGAAGCCATGGCGTCTCAAGGCA  
+HWI-EAS443:3:21:1716:1107#0/1  
R\_[[¥KW]`\_`Vab[`aa[Z\_XW[¥\_\_aY¥SGYV^]M^DZ  
@HWI-EAS443:3:21:171:1052#0/1  
TTCTGATTAACCTCATTGCTATTGTTCCAACCTCCTTTCAC  
+HWI-EAS443:3:21:171:1052#0/1  
]aa\_bbbbbbbbabababb\_W]aa\_aab`^aa\_aaaaaaa  
@HWI-EAS443:3:21:816:1523#0/1  
AATAAGACCCTTCATTACTCATGTCAAAGGAAGGCACGAT  
+HWI-EAS443:3:21:816:1523#0/1  
]baa```[`Z\_a]aaaa`\_\_aaaY[aa]\_N]a]VZa[]\_V  
@HWI-EAS443:3:21:976:1868#0/1  
AGATAATCACTCAATGAGTGACATCGAAGCCATGGCGTCT  
+HWI-EAS443:3:21:976:1868#0/1  
a\_`^`\_[]\_Y^^\_¥US]`Y^`[\_[VVUV^^XXV]]Y]YVX  
@HWI-EAS443:3:22:1070:659#0/1  
AGCAGGGTAGATAATCACTCAATGAGTGACATCGAAGCCA  
+HWI-EAS443:3:22:1070:659#0/1  
aaa`bba^bbabX`\_aa\_a``aa`\_aRa\_aa]]^[aa]U^

@HWI-EAS443:3:22:1427:1197#0/1  
CGAAGAAATAAGACCCTTCATTACTCATGTCAAAGGAAGG  
+HWI-EAS443:3:22:1427:1197#0/1  
`¥`^]`\_\_`aa]V[\_aa]a\_\_\_R^Saaa\_aa\_`^R]` []  
@HWI-EAS443:3:22:1651:1865#0/1  
AGCAGGGTAGATAATCACTCAATGAGTGACATCGAAGCCA  
+HWI-EAS443:3:22:1651:1865#0/1  
¥UY]ZF[[a]Taba`¥`Z¥][aUJY[SZ¥Z`^RX`VWNKY  
@HWI-EAS443:3:22:175:1335#0/1  
CAAAGCAGGGTAGATAATCACTCAATGAGTGACATCGAA  
+HWI-EAS443:3:22:175:1335#0/1  
a]¥¥bX\_UT[[P`\_a¥QZ\_`^¥Y]SP^\_XWGUJ^UTaVXU  
@HWI-EAS443:3:22:551:1177#0/1  
GGTAGATAATCACTCAATGAGTGACATCGAAGCCATGGCG  
+HWI-EAS443:3:22:551:1177#0/1  
aa^baaabaaba`a`aa`a[aU\_`aa^\_¥`S`[¥`\_\_U[`  
@HWI-EAS443:3:22:671:622#0/1  
CGAAGAAATAAGACCCTTCATTACTCATGTCAAAGGAAGG  
+HWI-EAS443:3:22:671:622#0/1  
abaaaaababaa`\_\_\_\_aa`aaaa\_``]\_aaa]a`Ya\_\_  
@HWI-EAS443:3:22:780:937#0/1  
TGCATTGTCTCCGAAGAAATAAGACCCTTCATTACTCATG  
+HWI-EAS443:3:22:780:937#0/1  
a`aaaaaaaa`^^Y]\_`aa`aaaYXZR¥Y]\_`\_X]ZX^`  
@HWI-EAS443:3:22:813:471#0/1  
ATCACTCAATGAGTGACATCGAAGCCATGGCGTCTCAAGG  
+HWI-EAS443:3:22:813:471#0/1  
aaaa`aa`aaaa`a`abaaV\_`\_a\_\_aaa¥a]]a]`\_a\_  
@HWI-EAS443:3:22:866:763#0/1  
GCAGGGTAGATAATCACTCAATGAGTGACATCGAAGCCAT  
+HWI-EAS443:3:22:866:763#0/1  
V\_`\_aa[bbbaabbb`baa`]`ab[`aab``Q`aaS\_aa  
@HWI-EAS443:3:23:1125:546#0/1  
TAATCACTCAATGAGTGACATCGAAGCCATGGCGTCTCAA  
+HWI-EAS443:3:23:1125:546#0/1  
[bab\_babbb`aa\_\_I`aabaKa¥]b^a\_aa`aaU`YYaY  
@HWI-EAS443:3:23:144:315#0/1  
AATCACTCAATGAGTGACATCGAAGCCATGGCGTCTCAAG  
+HWI-EAS443:3:23:144:315#0/1  
aaaaa`^a]\_`\_`\_aUa`\_a\_aX]LV^\_\_^[UVUV]Y]]¥V  
@HWI-EAS443:3:23:1674:1136#0/1  
GAGTAATGAAGGTCTTATTTCTTCGGAGACAATGCAGAG  
+HWI-EAS443:3:23:1674:1136#0/1  
`Z]]aabbaabbbY`aa`aaa`a\_G`````\_`^`\_]`U^¥WZ  
@HWI-EAS443:3:23:1749:1305#0/1  
AGCAGGGTAGATAATCACTCAATGAGTGACATCGAAGCCA  
+HWI-EAS443:3:23:1749:1305#0/1  
]^¥NM[[b`[`[a``[^a`b[aba\_WTaa`HZaa]X`Q\_  
@HWI-EAS443:3:23:180:331#0/1  
AGATAATCACTCAATGAGTGACATCGAAGCCATGGCGTCT

+HWI-EAS443:3:23:180:331#0/1  
aK`\_]bV[aI`]\_SUaZVS`a`[S^^\_\_a\_XT\_H`VaUHY  
@HWI-EAS443:3:23:214:942#0/1  
ATTGTCTCCGAAGAAATAAGACCCTTCATTACTCATGTCA  
+HWI-EAS443:3:23:214:942#0/1  
abZ`\_baaa`R`ZP^[`a`\_W\_\_`Z^\_RT\_Z[\_\_\_X[GM\_  
@HWI-EAS443:3:23:299:339#0/1  
GACCCTTCATTACTCATGTCAAAGGAAGGCACGATCGGGT  
+HWI-EAS443:3:23:299:339#0/1  
\_ababbbbabbababbaaba`ab\_`]abaabaa[V^aaU  
@HWI-EAS443:3:23:613:2013#0/1  
GAAGAAATAAGACCCTTCATTACTCATGTCAAAGGAAGGC  
+HWI-EAS443:3:23:613:2013#0/1  
aabWbbb\_bbG^YJ]baaab`\_aaaUb\_`\_baa\_```¥[]  
@HWI-EAS443:3:23:623:2002#0/1  
AGCAGGGTAGATAATCACTCAATGAGTGACATCGAAGCCA  
+HWI-EAS443:3:23:623:2002#0/1  
`aba`\_`Wb^baaaUSaa`baaa[a[PU[\_a^a`a^\_]aa  
@HWI-EAS443:3:23:703:828#0/1  
GATAATCACTCAATGAGTGACATCGAAGCCATGGCGTCTC  
+HWI-EAS443:3:23:703:828#0/1  
\_W`¥\_\_a\_WX`^]]\_¥S\_W¥`]Ta¥¥0^a\_`]Y¥^LQ¥U  
@HWI-EAS443:3:24:1057:1801#0/1  
ATCACTCAATGAGTGACATCGAAGCCATGGCGTCTCAAGG  
+HWI-EAS443:3:24:1057:1801#0/1  
\_`^`abaabba\_aSQa¥a\_X`\_a]^X\_`^`U`¥U[[\_`\_TZ  
@HWI-EAS443:3:24:1177:921#0/1  
GTGCCTTGAGACGCCATGGCTTCGATGTCACTCATTGAGT  
+HWI-EAS443:3:24:1177:921#0/1  
]aab^baa`a```a`ZZ\_T`\_S[HRXLYZQZXV[\_VN\_H  
@HWI-EAS443:3:24:1419:228#0/1  
AAAGCAGGGTAGATAATCACTCAATGAGTGACATCGAAGC  
+HWI-EAS443:3:24:1419:228#0/1  
\_aaba]aUMYba`[^P\_]XS^]aa`[QbWaS^a^Za\_\_XX  
@HWI-EAS443:3:24:1448:1611#0/1  
TAGATAATCACTCAATGAGTGACATCGAAGCCATGGCGTC  
+HWI-EAS443:3:24:1448:1611#0/1  
aXHUUVbbb`b¥bVa]^babQa[abb`bVaa\_aabbaXaXZ  
@HWI-EAS443:3:24:1451:21#0/1  
AGAAATAAGACCCTTCATTACTCATGTCAAAGGAAGGCAC  
+HWI-EAS443:3:24:1451:21#0/1  
ababbbbba]\_\_aaaabaaaaaba\_\_`a`a`aaa\_\_a^  
@HWI-EAS443:3:24:1574:15#0/1  
CAAAGCAGGGTAGATAATCACTCAATGAGTGACATCGAA  
+HWI-EAS443:3:24:1574:15#0/1  
abb]bbbbbbb`bbbbVbaaa^aZ\_bbbbb[ba``b\_aa\_  
@HWI-EAS443:3:24:1576:197#0/1  
CTCCTCTGCATTGTCTCCGAAGAAATAAGACCCTTCATTA  
+HWI-EAS443:3:24:1576:197#0/1  
]b^aa\_`b^`¥ab[V`ba^Z¥ba\_bbbb\_`ST^aaaaaaa



@HWI-EAS443:3:24:1619:319#0/1  
TAAGACCCTTCATTACTCATGTCAAAGGAAGGCACGATCG  
+HWI-EAS443:3:24:1619:319#0/1  
aaabY`[^bbSbab\_^`P\_ba]Za`aaa\_`^aUaO\_`\_R`  
@HWI-EAS443:3:24:547:642#0/1  
CACTCAATGAGTGACATCGAAGCCATGGCGTCTCAAGGCA  
+HWI-EAS443:3:24:547:642#0/1  
abbb]abbbab^a`abaaabbbbaabbb^a`bb`ba^bR^  
@HWI-EAS443:3:24:609:1189#0/1  
GGGTAGATAATCACTCAATGAGTGACATCGAAGCCATGGC  
+HWI-EAS443:3:24:609:1189#0/1  
a`^[b`aa\_R\_abZaaaa\_\_\_¥\_\_aa\_\_Q\_`^`^\_\_^ZT  
@HWI-EAS443:3:24:860:1506#0/1  
AGATAATCACTCAATGAGTGACATCGAAGCCATGGCGTCT  
+HWI-EAS443:3:24:860:1506#0/1  
aabbba\_]aaaba^]a`Za`aaa`a¥^``\_^\_aaaZZ[  
@HWI-EAS443:3:24:874:165#0/1  
AAGACCCTTCATTACTCATGTCAAAGGAAGGCACGATCGG  
+HWI-EAS443:3:24:874:165#0/1  
aaba`babbbabbaaaaaaaaYaab\_a\_aa]`\_aaY]\_\_  
@HWI-EAS443:3:24:92:792#0/1  
AGCAGGGTAGATAATCACTCAATGAGTGACATCGAAGCCA  
+HWI-EAS443:3:24:92:792#0/1  
abaTUa`Mba^^^b¥^aa`aa`aaXaa\_a`a`]`a\_^R  
@HWI-EAS443:3:25:1240:937#0/1  
AGCAAAAGCAGGGTAGATAATCACTCAATGAGTGACATCG  
+HWI-EAS443:3:25:1240:937#0/1  
abbbbbbaba`aa^b\_aaaaaaa`aaaaaa]a\_\_`\_ZY  
@HWI-EAS443:3:25:1438:1709#0/1  
CAAAAGCAGGGTAGATAATCACTCAATGAGTGACATCGAA  
+HWI-EAS443:3:25:1438:1709#0/1  
`babbb]a`bbbbbbbaaaabbaba`ba]babb`bb  
@HWI-EAS443:3:25:1595:1051#0/1  
CTCCTCTGCATTGTCTCCGAAGAAATAAGACCCTTCATTA  
+HWI-EAS443:3:25:1595:1051#0/1  
ZPW\_¥a`W¥ba^¥`b`Q`US¥W\_Vab]¥WYUD¥bY`a`X  
@HWI-EAS443:3:25:1619:1226#0/1  
AATCACTCAATGAGTGACATCGAAGCCATGGCGTCTCAAG  
+HWI-EAS443:3:25:1619:1226#0/1  
[`ab^W`abaabbaab`aba\_\_^`¥Z[\_aa]b]N`^\_\_`  
@HWI-EAS443:3:25:728:495#0/1  
CTGCATTGTCTCCGAAGAAATAAGACCCTTCATTACTCAT  
+HWI-EAS443:3:25:728:495#0/1  
aababbbbbbbbbbbbabbbbabbb\_a^`bbabbbbbbb  
@HWI-EAS443:3:25:897:86#0/1  
GAAAGGAGTTGGAACAATAGCAATGGAGTTAATCAGAATG  
+HWI-EAS443:3:25:897:86#0/1  
aLa`a\_`¥FYa`\_[0\_]\_0`\_\_S`\_]Z\_0]V^XRT\_WXU]  
@HWI-EAS443:3:26:1031:1413#0/1  
CTCCTCTGCATTGTCTCCGAAGAAATAAGACCCTTCATTA

+HWI-EAS443:3:26:1031:1413#0/1  
aabbab`Y\_a\_a^`aaaba^[aaaaaaaa\_Z\_`aa\_`aaa  
@HWI-EAS443:3:26:1483:1044#0/1  
ATCGAAGCCATGGCGTCTCAAGGCACCAAACGATCATATG  
+HWI-EAS443:3:26:1483:1044#0/1  
`aaabbba^`aa\_\_a00\_^\_\_UaZZV^^¥\_¥]^YW¥^^\_Y  
@HWI-EAS443:3:26:1550:584#0/1  
GTAGATAATCACTCAATGAGTGACATCGAAGCCATGGCGT  
+HWI-EAS443:3:26:1550:584#0/1  
`N`a¥aa^]¥\_\_a^`Xaa]XQ]^`]^`YP¥Z`]Y]^\_YV¥U  
@HWI-EAS443:3:26:280:1558#0/1  
TAATCACTCAATGAGTGACATCGAAGCCATGGCGTCTCAA  
+HWI-EAS443:3:26:280:1558#0/1  
`¥\_abbbabbbbaaa`abbbab`\_bab`a[XZaa\_a`a\_]`  
@HWI-EAS443:3:26:319:624#0/1  
CATACTCCTCTGCATTGTCTCCGAAGAAATAAGACCCTTC  
+HWI-EAS443:3:26:319:624#0/1  
aWOFQWQ]a]a]^\_VS^]aZY^¥`[^`LO^URVXW^]^WXY  
@HWI-EAS443:3:26:830:1203#0/1  
AAAGCAGGGTAGATAATCACTCAATGAGTGACATCGAAGC  
+HWI-EAS443:3:26:830:1203#0/1  
aaa`aa`a\_Va^a`\_^]a]^\_\_]^\_]^\_W^]^]^\_WXYXX  
@HWI-EAS443:3:27:1287:818#0/1  
AGCAAAAGCAGGGTAGATAATCACTCAATGAGTGACATCG  
+HWI-EAS443:3:27:1287:818#0/1  
a\_T\_`a[^a]aa]a¥``a^`\_\_^\_\_\_\_aa^`X`U`]U¥  
@HWI-EAS443:3:27:135:1740#0/1  
AGATAATCACTCAATGAGTGACATCGAAGCCATGGCGTCT  
+HWI-EAS443:3:27:135:1740#0/1  
^F]^`WUUaa\_Y[]RT\_a\_Ya^\_ZX^X\_ZV¥UVVZ]^\_V^Z  
@HWI-EAS443:3:27:402:1732#0/1  
GAAGAAATAAGACCCTTCATTACTCATGTCAAAGGAAGGC  
+HWI-EAS443:3:27:402:1732#0/1  
a\_aa[babbb`RZ``aabb^a`baabaTZ^\_a^a\_aa^[\_  
@HWI-EAS443:3:27:477:1093#0/1  
AATCACTCAATGAGTGACATCGAAGCCATGGCGTCTCAAG  
+HWI-EAS443:3:27:477:1093#0/1  
`^a``\_a\_Za]^aaV`\_aaZ`Y`]^`a`a^`\_^X[]SV\_VL  
@HWI-EAS443:3:27:889:1731#0/1  
AGCAAAAGCAGGGTAGATAATCACTCAATGAGTGACATCG  
+HWI-EAS443:3:27:889:1731#0/1  
aZ^abaa\_b]¥`\_Qb\_a`aaaW\_\_a`\_]a\_G\_`X\_]U\_  
@HWI-EAS443:3:28:1155:1296#0/1  
GCAGGGTAGATAATCACTCAATGAGTGACATCGAAGCCAT  
+HWI-EAS443:3:28:1155:1296#0/1  
aa]^`\_ZW\_Z\_`Z^X```a]Taaa¥^K]^`a\_\_\_WY]^`WXZ  
@HWI-EAS443:3:28:1178:1371#0/1  
AATCACTCAATGAGTGACATCGAAGCCATGGCGTCTCAAG  
+HWI-EAS443:3:28:1178:1371#0/1  
aaaaa\_aaaba^Ua[\_`aa\_\_^aa`\_XaZ^^^aZ\_^¥`\_\_

@HWI-EAS443:3:28:1581:782#0/1  
GCAGGGTAGATAATCACTCAATGAGTGACATCGAAGCCAT  
+HWI-EAS443:3:28:1581:782#0/1  
a]aTbbabbbba^Ta\_b^aaa`bba\_bSbaabaabRFZ^  
@HWI-EAS443:3:28:370:1858#0/1  
AAAGCAGGGTAGATAATCACTCAATGAGTGACATCGAAGC  
+HWI-EAS443:3:28:370:1858#0/1  
ab^]aa`V¥MbV\_\_a¥`aa`\_a^a^`\_]YZ`\_a]aQX`U\_  
@HWI-EAS443:3:28:573:924#0/1  
CACTCAATGAGTGACATCGAAGCCATGGCGTCTCAAGGCA  
+HWI-EAS443:3:28:573:924#0/1  
\_`bbbbbbbaabVbbaab\_aabbaY[`aaU\_abR`aa`a  
@HWI-EAS443:3:28:999:792#0/1  
CAAAAGCAGGGTAGATAATCACTCAATGAGTGACATCGAA  
+HWI-EAS443:3:28:999:792#0/1  
a`U^Z\_[YUZJGRONaaa^R¥`]V]]R`GXU¥\_\_SVZMOM  
@HWI-EAS443:3:29:1131:287#0/1  
CAAAAGCAGGGTAGATAATCACTCAATGAGTGACATCGAA  
+HWI-EAS443:3:29:1131:287#0/1  
`ba`Za\_b`a^baaaa\_a`a`````\_`\_aR\_\_¥a\_^\_\_^  
@HWI-EAS443:3:29:1573:1165#0/1  
AGCAGGGTAGATAATCACTCAATGAGTGACATCGAAGCCA  
+HWI-EAS443:3:29:1573:1165#0/1  
^`¥Q^b\_¥Z^S^\_aY`R`^`\_`\_YMaUVNR\_\_XV^VRB  
@HWI-EAS443:3:29:176:213#0/1  
TGCCTTGAGACGCCATGGCTTCGATGTCCTCATTGAGTG  
+HWI-EAS443:3:29:176:213#0/1  
aabbaaaaaab\_b¥PV`Z\_Z^T[[WZR\_]]XaUXSBBBBB  
@HWI-EAS443:3:29:180:891#0/1  
AGCAGGGTAGATAATCACTCAATGAGTGACATCGAAGCCA  
+HWI-EAS443:3:29:180:891#0/1  
aa^\_]SDZS]]`Z]aXX[`¥Y`U`¥\_^\_Z¥]VQYNZZY  
@HWI-EAS443:3:29:250:1693#0/1  
TAATCACTCAATGAGTGACATCGAAGCCATGGCGTCTCAA  
+HWI-EAS443:3:29:250:1693#0/1  
^XZ]a`a`aa^]\_baYW^ba^\_XW`a``a¥Y\_]OJS`\_W  
@HWI-EAS443:3:29:261:1193#0/1  
GAAATAAGACCCTTCATTACTCATGTCAAAGGAAGGCACG  
+HWI-EAS443:3:29:261:1193#0/1  
aY`aaabZR]Z^`\_Wa\_\_\_`\_`\_aSXU]]XWX\_]OT`BB  
@HWI-EAS443:3:29:727:1355#0/1  
CATACTCCTCTGCATTGTCTCCGAAGAAATAAGACCCTTC  
+HWI-EAS443:3:29:727:1355#0/1  
a]]`]aa^]a¥aa\_aaZa\_a`^]Z^`\_]Y[`\_Z[[[\_  
@HWI-EAS443:3:29:819:1262#0/1  
AGCAGGGTAGATAATCACTCAATGAGTGACATCGAAGCCA  
+HWI-EAS443:3:29:819:1262#0/1  
[W^b`^\_b\_baaaaa`a^aa^`\_a^`\_`\_]aSR¥¥aY`  
@HWI-EAS443:3:29:947:1310#0/1  
CAAAAGCAGGGTAGATAATCACTCAATGAGTGACATCGAA

+HWI-EAS443:3:29:947:1310#0/1  
a`b`baa¥Z\_]Sb\_`]\`X`aa``aYL¥]\`VV^aaa^`GT^  
@HWI-EAS443:3:2:1252:1022#0/1  
GGTGCCTTGAGACGCCATGGCTTCGATGTCACCTCATTGAG  
+HWI-EAS443:3:2:1252:1022#0/1  
aaU`\_Ya`aY]\_^U^T\_`¥\_S\_`Z]¥¥]KIMQWSUZ¥BBB  
@HWI-EAS443:3:2:1661:1071#0/1  
CAAAAGCAGGGTAGATAATCACTCAATGAGTGACATCGAA  
+HWI-EAS443:3:2:1661:1071#0/1  
^aab`]a[aabSaaaa\_aaaaab`a`aa`^[\_`a\_`¥\_a  
@HWI-EAS443:3:2:254:1992#0/1  
AGATAATCACTCAATGAGTGACATCGAAGCCATGGCGTCT  
+HWI-EAS443:3:2:254:1992#0/1  
`RLN`XWV¥SWGWMN^TITBBBBBBBBBBBBBBBBBBBB  
@HWI-EAS443:3:2:259:693#0/1  
GCAAAAGCAGGGTAGATAATCACTCAATGAGTGACATCGA  
+HWI-EAS443:3:2:259:693#0/1  
aT¥`\_a¥`[\_]XP^aa[\_]`[^XV\_`]VYPWW^\_]`\_YSV  
@HWI-EAS443:3:2:328:405#0/1  
AAAGCAGGGTAGATAATCACTCAATGAGTGACATCGAAGC  
+HWI-EAS443:3:2:328:405#0/1  
a`a¥K`[aQ\_`a]a^\_]aZ[¥^\_¥\_\_`Z`]]V]]RO]\_B  
@HWI-EAS443:3:2:690:1659#0/1  
CAAAAGCAGGGTAGATAATCACTCAATGAGTGACATCGAA  
+HWI-EAS443:3:2:690:1659#0/1  
^^ba¥aTV^a¥Z¥`a]aab`V\_bZYaaTa^Saa`b^¥a]]  
@HWI-EAS443:3:2:69:543#0/1  
TAGATAATCACTCAATGAGTGACATCGAAGCCATGGCGTC  
+HWI-EAS443:3:2:69:543#0/1  
abbb]bbba\_aba[a`aa``aaaa\_a\_¥ZZ¥\_\_aaa^aYR  
@HWI-EAS443:3:2:979:2004#0/1  
AAAGCAGGGTAGATAATCACTCAATGAGTGACATCGAAGC  
+HWI-EAS443:3:2:979:2004#0/1  
[Mb`\_¥a`aW[^\_YYL\_`^¥`^]`^`\_\_aVUYX^^WUZ^¥B  
@HWI-EAS443:3:30:1349:2042#0/1  
CGAAGAAATAAGACCCTTCATTACTCATGTCAAAGGAAGG  
+HWI-EAS443:3:30:1349:2042#0/1  
`\_^bbabbaabaaa^\_aaaaabaaaaa]X`aa¥N`aT\_  
@HWI-EAS443:3:30:1465:1197#0/1  
GTCTCCGAAGAAATAAGACCCTTCATTACTCATGTCAAAG  
+HWI-EAS443:3:30:1465:1197#0/1  
a\_``\_Wa`U`\_````]P[S^W^^VZUYZ^WUZ¥\_ZX^XU`  
@HWI-EAS443:3:30:250:972#0/1  
GGTAGATAATCACTCAATGAGTGACATCGAAGCCATGGCG  
+HWI-EAS443:3:30:250:972#0/1  
`\_[b]a\_aaa`\_aaaa\_`aY\_\_aa`\_Wa¥```\_YWWU¥  
@HWI-EAS443:3:30:287:48#0/1  
GCAGGGTAGATAATCACTCAATGAGTGACATCGAAGCCAT  
+HWI-EAS443:3:30:287:48#0/1  
a`¥aaVZa`¥^`¥¥^[\_Y\_\_\_`^`^\_WZ^^`\_[ZZXYXWWW¥

@HWI-EAS443:3:30:308:1105#0/1  
AGCAAAGCAGGGTAGATAATCACTCAATGAGTGACATCG  
+HWI-EAS443:3:30:308:1105#0/1  
a\_a¥Q^a\_aT]\_\_Xbaa\_\_\_`aaa^a`^`\_aV\_a\_a]]\_  
@HWI-EAS443:3:30:360:442#0/1  
AAAGCAGGGTAGATAATCACTCAATGAGTGACATCGAAGC  
+HWI-EAS443:3:30:360:442#0/1  
MababaabYVbabaabaa```aaa`ab¥^ab\_\_`\_abYaa  
@HWI-EAS443:3:31:1120:378#0/1  
CTCCTCTGCATTGTCTCCGAAGAAATAAGACCCTTCATTA  
+HWI-EAS443:3:31:1120:378#0/1  
aa^\_¥aa¥¥`aabab`¥baabaaba\_baa\_ZXa`¥a``]  
@HWI-EAS443:3:31:1399:346#0/1  
CAAAAGCAGGGTAGATAATCACTCAATGAGTGACATCGAA  
+HWI-EAS443:3:31:1399:346#0/1  
abb\_SZ`a^¥W¥\_Z[^`^`a¥ab\_]¥`aabR```a`\_a\_\_  
@HWI-EAS443:3:31:99:832#0/1  
CATCGAAGCCATGGCGTCTCAAGGCACCAAACGATCATAT  
+HWI-EAS443:3:31:99:832#0/1  
a\_abaaa`b\_a`a]`[[a``\_[Z¥^S][H\_Y`YXVZSW¥W  
@HWI-EAS443:3:32:1195:1733#0/1  
ACCCTTCATTACTCATGTCAAAGGAAGGCACGATCGGGTT  
+HWI-EAS443:3:32:1195:1733#0/1  
aa]Waa`aaa\_ba¥[ab\_a`a`a\_X\_^S¥aU¥XMTVP`N\_  
@HWI-EAS443:3:32:1227:325#0/1  
AGATAATCACTCAATGAGTGACATCGAAGCCATGGCGTCT  
+HWI-EAS443:3:32:1227:325#0/1  
`[]Y`YTPTXVNRa[\_`RYPXP^TNQPPSXT]YSOZS]V  
@HWI-EAS443:3:32:1278:679#0/1  
AAGACCCTTCATTACTCATGTCAAAGGAAGGCACGATCGG  
+HWI-EAS443:3:32:1278:679#0/1  
`XNUTG^[¥YQWTN`\_`¥aa¥¥¥QN`\_^JRHM\_a]0¥]`  
@HWI-EAS443:3:32:36:1987#0/1  
AAAGCAGGGTAGATAATCACTCAATGAGTGACATCGAAGC  
+HWI-EAS443:3:32:36:1987#0/1  
^UPQ`NQUPLYV\_¥]VZ\_]`¥YPTTTQUOR^VYV^SLST^  
@HWI-EAS443:3:32:48:96#0/1  
CAAAAGCAGGGTAGATAATCACTCAATGAGTGACATCGAA  
+HWI-EAS443:3:32:48:96#0/1  
aa`Y`aZ]``\_X]^`\_^UTaW\_\_[\_[[¥Y`U[SX[UaRUS  
@HWI-EAS443:3:32:582:880#0/1  
AGCAGGGTAGATAATCACTCAATGAGTGACATCGAAGCCA  
+HWI-EAS443:3:32:582:880#0/1  
aaaY[X\_Sa[¥]]`aa`a`aaaa`Q^Za\_¥`\_^[R¥\_aa]  
@HWI-EAS443:3:32:736:403#0/1  
TAATCACTCAATGAGTGACATCGAAGCCATGGCGTCTCAA  
+HWI-EAS443:3:32:736:403#0/1  
\_b]\_\_aaaa`]a^^]Wa`ab^\_X]Z][Xa\_YZ]XRLXa`\_  
@HWI-EAS443:3:32:804:773#0/1  
CGAAGAAATAAGACCCTTCATTACTCATGTCAAAGGAAGG

+HWI-EAS443:3:32:804:773#0/1  
ab[ab`\_]\_[a`aaa]\_aabaaaa^aaa^[\_T`a^Xa\_^  
@HWI-EAS443:3:32:908:1239#0/1  
AGCAGGGTAGATAATCACTCAATGAGTGACATCGAAGCCA  
+HWI-EAS443:3:32:908:1239#0/1  
aaa\_aaV0^\_aaa^a\_\_[a`a`a^aa¥]`Ua\_aQY\_R\_`Y  
@HWI-EAS443:3:32:982:505#0/1  
AATCACTCAATGAGTGACATCGAAGCCATGGCGTCTCAAG  
+HWI-EAS443:3:32:982:505#0/1  
aabbaaaaaaaaa`XV¥`\_aaa\_`]`WZ``\_^]`U\_X\_]X[  
@HWI-EAS443:3:33:1233:1533#0/1  
AAAGCAGGGTAGATAATCACTCAATGAGTGACATCGAAGC  
+HWI-EAS443:3:33:1233:1533#0/1  
ab\_`\_a]``Sbaaaa`aaa]\_]aa\_`]`Q\_`MMRO][U]]  
@HWI-EAS443:3:33:896:911#0/1  
GAAGAAATAAGACCCTTCATTACTCATGTCAAAGGAAGGC  
+HWI-EAS443:3:33:896:911#0/1  
aYXV]aa\_a]YJSX[R\_`^^\_[^]``ZYY\_[ZV^YSSZ]R  
@HWI-EAS443:3:34:1215:592#0/1  
ATAATCACTCAATGAGTGACATCGAAGCCATGGCGTCTCA  
+HWI-EAS443:3:34:1215:592#0/1  
aaabaaa`baa][`a\_^aa\_`aaaa\_a`a`^``Y`XS^XZ  
@HWI-EAS443:3:34:149:1593#0/1  
CGAAGAAATAAGACCCTTCATTACTCATGTCAAAGGAAGG  
+HWI-EAS443:3:34:149:1593#0/1  
a\_[[Ybaaa`bZa`a]]¥[a^^a\_]a[¥¥W\_\_\_UJSO\_UB  
@HWI-EAS443:3:34:1655:1370#0/1  
GCAGGGTAGATAATCACTCAATGAGTGACATCGAAGCCAT  
+HWI-EAS443:3:34:1655:1370#0/1  
aaX¥`\_``\_`baba\_`\_Iaa`¥`bUa`aa`VS¥Z\_T¥BB  
@HWI-EAS443:3:34:421:1026#0/1  
GAAGAAATAAGACCCTTCATTACTCATGTCAAAGGAAGGC  
+HWI-EAS443:3:34:421:1026#0/1  
aa[aaa^`b^V[\_``aaaaaaaa```]aa\_\_\_U\_^VQX  
@HWI-EAS443:3:34:532:840#0/1  
AGCAAAAAGCAGGGTAGATAATCACTCAATGAGTGACATCG  
+HWI-EAS443:3:34:532:840#0/1  
a`^Yaa¥```aaZ¥b`a]`\_`a\_\_¥¥\_¥`\_\_\_W]]]^BBB  
@HWI-EAS443:3:34:624:779#0/1  
GAAAGGAGTTGGAACAATAGCAATGGAGTTAATCAGAATG  
+HWI-EAS443:3:34:624:779#0/1  
aaaaaaaa\_a`Za``¥a\_\_a\_`a`\_\_]]`\_\_\_\_\_`\_^[^  
@HWI-EAS443:3:34:793:821#0/1  
AAAGCAGGGTAGATAATCACTCAATGAGTGACATCGAAGC  
+HWI-EAS443:3:34:793:821#0/1  
YW\_bb`aaaVbaaa[^babaaa`aaaa¥a\_`a\_W`]^`^\_  
@HWI-EAS443:3:34:797:494#0/1  
TAATCACTCAATGAGTGACATCGAAGCCATGGCGTCTCAA  
+HWI-EAS443:3:34:797:494#0/1  
a^aaaaaaaaaaaYa\_]aa`\_^]\_\_Z\_Z\_\_\_\_]]\_YVQY]Y

@HWI-EAS443:3:35:1176:1002#0/1  
GAAAGGAGTTGGAACAATAGCAATGGAGTTAATCAGAATG  
+HWI-EAS443:3:35:1176:1002#0/1  
^`bbba`bababbbba`b^^`aa``\_aa¥abaab^)`a\_`  
@HWI-EAS443:3:35:159:498#0/1  
AAGAAATAAGACCCTTCATTACTCATGTCAAAGGAAGGCA  
+HWI-EAS443:3:35:159:498#0/1  
a`a\_]a\_aZ¥W[\_]`\_`a\_a\_\_a`\_aZa\_`\_\_]Q^]Z\_^  
@HWI-EAS443:3:35:1775:577#0/1  
AAGACCCTTCATTACTCATGTCAAAGGAAGGCACGATCGG  
+HWI-EAS443:3:35:1775:577#0/1  
a\_¥LSYS`\_]aa]^URN[^^^`\_`¥\_`G\_`¥UYYYYTSUa  
@HWI-EAS443:3:35:441:1049#0/1  
ATAAGACCCTTCATTACTCATGTCAAAGGAAGGCACGATC  
+HWI-EAS443:3:35:441:1049#0/1  
`b`X`a\_aaaaba`a`aaaa[aa`a¥[X]^\_a^^`WV  
@HWI-EAS443:3:35:474:742#0/1  
ACCCTTCATTACTCATGTCAAAGGAAGGCACGATCGGGTT  
+HWI-EAS443:3:35:474:742#0/1  
`bbbb\_[ab¥bbb\_[^\_[`¥^\_¥\_aa\_[a¥¥MS[a\_XW  
@HWI-EAS443:3:35:483:957#0/1  
AAATAAGACCCTTCATTACTCATGTCAAAGGAAGGCACGA  
+HWI-EAS443:3:35:483:957#0/1  
aaaaa¥RM\_¥^a\_[aa`J`\_]V\_aW^[¥\_YWP]X[\_a][U  
@HWI-EAS443:3:35:853:870#0/1  
GAAGAAATAAGACCCTTCATTACTCATGTCAAAGGAAGGC  
+HWI-EAS443:3:35:853:870#0/1  
\_¥\_NWaaaa`[Z`>`Xa¥V^\_]`\_XYUa\_] [[¥V\_XY^  
@HWI-EAS443:3:36:1055:1851#0/1  
CGAAGAAATAAGACCCTTCATTACTCATGTCAAAGGAAGG  
+HWI-EAS443:3:36:1055:1851#0/1  
`a¥ab\_`bbbaT`\_a]`babb`baa`baa\_b\_\_a¥^¥a]V  
@HWI-EAS443:3:36:1265:1644#0/1  
AAAGCAGGGTAGATAATCACTCAATGAGTGACATCGAAGC  
+HWI-EAS443:3:36:1265:1644#0/1  
X\_a¥a\_]Z[Naaa¥a^ab`^aaaZYW[DOaa\_ZN[LQ]Za  
@HWI-EAS443:3:36:141:1368#0/1  
CAAAAGCAGGGTAGATAATCACTCAATGAGTGACATCGAA  
+HWI-EAS443:3:36:141:1368#0/1  
a\_Z]XWa\_TYVP`0]`^]`Y`^a\_\_RPWTV\_``]¥NTY  
@HWI-EAS443:3:36:1720:1743#0/1  
GAAGAAATAAGACCCTTCATTACTCATGTCAAAGGAAGGC  
+HWI-EAS443:3:36:1720:1743#0/1  
aaaaaaaaaba]`^]U`a`a```\_`Y`aXY\_a]¥Y\_^a^Xa  
@HWI-EAS443:3:37:1081:904#0/1  
AAGCAGGGTAGATAATCACTCAATGAGTGACATCGAAGCC  
+HWI-EAS443:3:37:1081:904#0/1  
aa\_^SZ\_FZSVWZ`a]¥\_^aZRVbb¥PZPa]a\_W\_ZSL  
@HWI-EAS443:3:37:1372:1576#0/1  
CAAAAGCAGGGTAGATAATCACTCAATGAGTGACATCGAA

+HWI-EAS443:3:37:1372:1576#0/1  
ababbbba` `]Vbbabbbb\_bbbbbba`bX`a`bbaa\_a\_  
@HWI-EAS443:3:37:1380:536#0/1  
GGGTAGATAATCACTCAATGAGTGACATCGAAGCCATGGC  
+HWI-EAS443:3:37:1380:536#0/1  
aba]bbaaaaaaaaa`aaaa`a^aba\_bQS[`a\_\_aa\_V  
@HWI-EAS443:3:37:1584:1096#0/1  
AGCAAAAGCAGGGTAGATAATCACTCAATGAGTGACATCG  
+HWI-EAS443:3:37:1584:1096#0/1  
`b`bb^ababaa]bbaaa[baa`bb\_aaT\_\_^^]TaaaX  
@HWI-EAS443:3:37:724:1478#0/1  
CACTCAATGAGTGACATCGAAGCCATGGCGTCTCAAGGCA  
+HWI-EAS443:3:37:724:1478#0/1  
a`aP`aa^H\_aUaa[`^aNZSFXX^UPXaUU[G^HVN¥`\_  
@HWI-EAS443:3:38:1521:753#0/1  
CAGGGTAGATAATCACTCAATGAGTGACATCGAAGCCATG  
+HWI-EAS443:3:38:1521:753#0/1  
aUbab]bbbaZW]aaaaXaaba\_bb\_b^I^a\_`V^¥¥R  
@HWI-EAS443:3:38:1585:429#0/1  
CACTCAATGAGTGACATCGAAGCCATGGCGTCTCAAGGCA  
+HWI-EAS443:3:38:1585:429#0/1  
abb\_babbaa`Rab^b\_`b^^`aa^\_baaa^^H\_\_`\_`\_aY  
@HWI-EAS443:3:38:251:1775#0/1  
GCAAAAGCAGGGTAGATAATCACTCAATGAGTGACATCGA  
+HWI-EAS443:3:38:251:1775#0/1  
aa¥a\_¥]\_YQS[SaV\_a]]ZWX`][YVX`XMMU¥U\_NFSM  
@HWI-EAS443:3:38:263:1463#0/1  
CAGGGTAGATAATCACTCAATGAGTGACATCGAAGCCATG  
+HWI-EAS443:3:38:263:1463#0/1  
aaaXUMbaabaa\_`a`aaaa`^]aY`\_aaZU\_ZXa¥\_¥\_¥  
@HWI-EAS443:3:38:263:1855#0/1  
AAAAGCAGGGTAGATAATCACTCAATGAGTGACATCGAAG  
+HWI-EAS443:3:38:263:1855#0/1  
X]W\_W^\_a\_TY\_OZ¥U¥]``aa```¥ORZZWUTT[[`Z^L  
@HWI-EAS443:3:38:426:994#0/1  
CGAAGAAATAAGACCCTTCATTACTCATGTCAAAGGAAGG  
+HWI-EAS443:3:38:426:994#0/1  
Z\_abb\_V\_bbabaY`ba]bbbaZaabbab`a[\_b`\_^`PU  
@HWI-EAS443:3:38:457:788#0/1  
ATCGAAGCCATGGCGTCTCAAGCACCAAACGATCATATG  
+HWI-EAS443:3:38:457:788#0/1  
]OaXQYU`\_OZ^`\_^]NXUQ[VTZ`\_`PPYFTP]]Y^^[J  
@HWI-EAS443:3:38:536:313#0/1  
TAATCACTCAATGAGTGACATCGAAGCCATGGCGTCTCAA  
+HWI-EAS443:3:38:536:313#0/1  
abaaa`aaa\_b\_\_\_a0a\_aa\_aaa`aa\_`\_]Xa]X^`\_`Y  
@HWI-EAS443:3:38:79:452#0/1  
AGACCCTTCATTACTCATGTCAAAGGAAGGCACGATCGGG  
+HWI-EAS443:3:38:79:452#0/1  
aUXW`Z\_\_`^¥\_Y¥\_`\_\_`¥¥ZWLWUZ\_TU¥^UBBBBBBB



@HWI-EAS443:3:39:1073:221#0/1  
AAGCAGGGTAGATAATCACTCAATGAGTGACATCGAAGCC  
+HWI-EAS443:3:39:1073:221#0/1  
a`b`abaab^aaaaX\_aVa^]\_\_aaYU``PU\_\_\_\_\_¥\_MH  
@HWI-EAS443:3:39:1131:684#0/1  
CTCCGAAGAAATAAGACCCTTCATTACTCATGTCAAAGGA  
+HWI-EAS443:3:39:1131:684#0/1  
`bbaaabbaabbabaaa\_]aa`aaaa\_a`aa]\_\_aa\_aZZ  
@HWI-EAS443:3:39:1208:1280#0/1  
GAAGAAATAAGACCCTTCATTACTCATGTCAAAGGAAGGC  
+HWI-EAS443:3:39:1208:1280#0/1  
a\_X^aaab]WV¥U[`\_]^\_^`^^^W\_Wa\_X]¥^ZXX]T  
@HWI-EAS443:3:39:1216:1372#0/1  
AAGACCCTTCATTACTCATGTCAAAGGAAGGCACGATCGG  
+HWI-EAS443:3:39:1216:1372#0/1  
a\_]`\_a`a`aa]aa`\_\_^a\_aa¥a`VW`^XFWR\_USP[Z  
@HWI-EAS443:3:39:1351:875#0/1  
ATCGAAGCCATGGCGTCTCAAGGCACCAAACGATCATATG  
+HWI-EAS443:3:39:1351:875#0/1  
]T[b]¥a[`^^[]X^PFZ^¥P^`RZBBBBBBBBBBBBBB  
@HWI-EAS443:3:39:1665:810#0/1  
ATAAGACCCTTCATTACTCATGTCAAAGGAAGGCACGATC  
+HWI-EAS443:3:39:1665:810#0/1  
aabba^\_a\_aaaaaa]\_]`^aaV`\_V\_^\_YZY`Y\_]VV  
@HWI-EAS443:3:39:1667:512#0/1  
CTCAATGAGTGACATCGAAGCCATGGCGTCTCAAGGCACC  
+HWI-EAS443:3:39:1667:512#0/1  
aV]S\_]¥`Y`]a\_aa\_`V`[V[[VZZ^UV]X^S¥[XF  
@HWI-EAS443:3:39:172:36#0/1  
CACTCAATGAGTGACATCGAAGCCATGGCGTCTCAAGGCA  
+HWI-EAS443:3:39:172:36#0/1  
a\_ab`b`baabTbbbaa`aaa`XZ`\_baR\_\_`Ua\_a\_`  
@HWI-EAS443:3:39:32:46#0/1  
AATCACTCAATGAGTGACATCGAAGCCATGGCGTCTCAAG  
+HWI-EAS443:3:39:32:46#0/1  
`[`baa`Q`a`S^X`\_`^[]^Y]U]^ZUXYYYWPU  
@HWI-EAS443:3:39:577:688#0/1  
AGCAGGGTAGATAATCACTCAATGAGTGACATCGAAGCCA  
+HWI-EAS443:3:39:577:688#0/1  
`[aW¥^\_¥^^aaS`]^`^`[a¥^^[^^V\_a`aZYR^aaQ\_^  
@HWI-EAS443:3:39:70:241#0/1  
TGCCTTGAGACGCCATGGCTTCGATGTCACTCATTGAGTG  
+HWI-EAS443:3:39:70:241#0/1  
a`abbbbaaaaaaaW\_\_^^^\_¥YVRXNXGTQMDVXRRWIP  
@HWI-EAS443:3:39:753:325#0/1  
GCAAAAAGCAGGGTAGATAATCACTCAATGAGTGACATCGA  
+HWI-EAS443:3:39:753:325#0/1  
^`XOW^`\_Z¥\_TF`^[]¥VZ^^VZVZUK[¥`U^[ZXU^UP  
@HWI-EAS443:3:39:939:54#0/1  
AGCAAAAAGCAGGGTAGATAATCACTCAATGAGTGACATCG

+HWI-EAS443:3:39:939:54#0/1  
ababaabaaaabbWbaaaaaa`aa`aaa`\_Ya`^a\_\_U  
@HWI-EAS443:3:3:1076:369#0/1  
GTGACATCGAAGCCATGGCGTCTCAAGGCACCAAACGATC  
+HWI-EAS443:3:3:1076:369#0/1  
a\_a]Ua¥]\_`¥XQUGRXV¥VNQVYSZWVTVTVVXUX]B  
@HWI-EAS443:3:3:1160:1086#0/1  
AGACCCTTCATTACTCATGTCAAAGGAAGGCACGATCGGG  
+HWI-EAS443:3:3:1160:1086#0/1  
a^QR]S^a`a`S\_Q[a`¥X`\_Z[Z^\_ZUPTW`UWWLS  
@HWI-EAS443:3:3:1160:271#0/1  
AAGACCCTTCATTACTCATGTCAAAGGAAGGCACGATCGG  
+HWI-EAS443:3:3:1160:271#0/1  
aa\_^[¥]`a^aaa\_]`]aaa\_\_a]\_a\_]Z][X^`\_WR¥V  
@HWI-EAS443:3:3:273:963#0/1  
CTTCATTACTCATGTCAAAGGAAGGCACGATCGGGTTCGT  
+HWI-EAS443:3:3:273:963#0/1  
abbbbaabbbba^bbb`a`bbabbaa^]a`bXY\_[X  
@HWI-EAS443:3:3:308:1059#0/1  
TAGATAACTCAATGAGTGACATCGAAGCCATGGCGTC  
+HWI-EAS443:3:3:308:1059#0/1  
Z`bb`W\_SXaP\_]`¥^a\_`X`aa`¥^a``\_]\_aa`X]YNZ  
@HWI-EAS443:3:3:778:1923#0/1  
AATCACTCAATGAGTGACATCGAAGCCATGGCGTCTCAAG  
+HWI-EAS443:3:3:778:1923#0/1  
aa`ba`aaaa`\_T\_Za\_[[^[R]R`^`WW^T]U\_]^T  
@HWI-EAS443:3:3:890:329#0/1  
GCAAAAGCAGGGTAGATAACTCAATGAGTGACATCGA  
+HWI-EAS443:3:3:890:329#0/1  
a[a`LXNS`¥XL¥^Y\_ZT¥\_\_a\_[[QT]T\_]`^]NXBB  
@HWI-EAS443:3:3:964:124#0/1  
CAAAAGCAGGGTAGATAACTCAATGAGTGACATCGAA  
+HWI-EAS443:3:3:964:124#0/1  
abaabb\_\_bbb¥b`aaabaa`baab\_a`bZaa^a\_[\_\_¥  
@HWI-EAS443:3:40:1155:1312#0/1  
AAGCAGGGTAGATAACTCAATGAGTGACATCGAAGCC  
+HWI-EAS443:3:40:1155:1312#0/1  
`aabaaa\_Naaa^a`a``aaaa\_\_^^`^]b^¥^aZ  
@HWI-EAS443:3:40:1165:270#0/1  
CGAAGAAATAAGACCCTTCATTACTCATGTCAAAGGAAGG  
+HWI-EAS443:3:40:1165:270#0/1  
I`aY`bbaab`bb[[`bbba`bbab[0^ba\_babbb]\_`a  
@HWI-EAS443:3:40:1358:56#0/1  
AGATAACTCAATGAGTGACATCGAAGCCATGGCGTCT  
+HWI-EAS443:3:40:1358:56#0/1  
abXYVIW^SOXX\_\_VZR\_SaZR¥VJSFNLaPQQ[^^[NGT  
@HWI-EAS443:3:40:1614:203#0/1  
TAATCACTCAATGAGTGACATCGAAGCCATGGCGTCTCAA  
+HWI-EAS443:3:40:1614:203#0/1  
aaaaa`a]\_\_aa\_\_Z\_\_Z`\_\_]^ZZ`¥N¥Z]Z\_ZYUUX

@HWI-EAS443:3:40:23:322#0/1  
GAACCCGATCGTGCCTTCCTTTGACATGAGTAATGAAGGG  
+HWI-EAS443:3:40:23:322#0/1  
aababbaaXa]]¥\_aa\_aa\_a\_WT[ `V^P`N\_ZU`U[^S`  
@HWI-EAS443:3:40:785:1961#0/1  
TAATCACTCAATGAGTGACATCGAAGCCATGGCGTCTCAA  
+HWI-EAS443:3:40:785:1961#0/1  
abaaaa`[aaa^^\_¥X]a\_a¥aY`^Va`[]¥XZ^Z\_Z¥aZ  
@HWI-EAS443:3:42:1481:1407#0/1  
GCAAAAAGCAGGGTAGATAATCACTCAATGAGTGACATCGA  
+HWI-EAS443:3:42:1481:1407#0/1  
]W¥ROP]GQb`aY\_bUR¥X]Y¥X]W\_X\_aZXF¥¥Za`]BB  
@HWI-EAS443:3:42:1598:1917#0/1  
ATCGAAGCCATGGCGTCTCAAGGCACCAAACGATCATATG  
+HWI-EAS443:3:42:1598:1917#0/1  
aa`¥`]]^^aaa\_aWU[V[]XVX\_]NZ`\_V\_UTGYU^^]  
@HWI-EAS443:3:42:1768:1308#0/1  
AAGCAGGGTAGATAATCACTCAATGAGTGACATCGAAGCC  
+HWI-EAS443:3:42:1768:1308#0/1  
ab`^b]YVb^aa^]a`\_\_\_\_aa^^`aVaa^^`ZN`^¥ZV  
@HWI-EAS443:3:42:466:495#0/1  
GCAAAAAGCAGGGTAGATAATCACTCAATGAGTGACATCGA  
+HWI-EAS443:3:42:466:495#0/1  
``aaaaaa`aaaWa`a^\_\_[^```\_\_¥`\_aY`\_¥\_W\_¥¥  
@HWI-EAS443:3:42:50:61#0/1  
ATACTCCTCTGCATTGTCTCCGAAGAAATAAGACCCTTCA  
+HWI-EAS443:3:42:50:61#0/1  
abaaaa`a`aa[ `a\_Z`a^aP^`]\_^`aXU¥]YYY\_^  
@HWI-EAS443:3:42:513:1176#0/1  
CGAAGCCATGGCGTCTCAAGGCACCAAACGATCATATGAA  
+HWI-EAS443:3:42:513:1176#0/1  
a¥Jaabaaba\_aa\_aabaaa`aa`\_ZYY¥a`\_\_a`a]X]\_  
@HWI-EAS443:3:42:625:489#0/1  
CGAAGCCATGGCGTCTCAAGGCACCAAACGATCATATGAA  
+HWI-EAS443:3:42:625:489#0/1  
aaaaa```abaaa\_\_aaa¥aaaa`¥`]aa\_\_`\_Z\_\_a`\_  
@HWI-EAS443:3:42:787:514#0/1  
CGAAGAAATAAGACCCTTCATTACTCATGTCAAAGGAAGG  
+HWI-EAS443:3:42:787:514#0/1  
aba\_b`ab`b\_[P[\_Yb\_0]aaa[a[\_a`b\_aa]a]\_aaa  
@HWI-EAS443:3:42:849:2010#0/1  
AATCACTCAATGAGTGACATCGAAGCCATGGCGTCTCAAG  
+HWI-EAS443:3:42:849:2010#0/1  
abaaa\_a`¥YaaaY\_a]b\_\_`a\_\_\_\_\_``\_^]\_YR\_]\_\_]  
@HWI-EAS443:3:42:895:177#0/1  
ACTCAATGAGTGACATCGAAGCCATGGCGTCTCAAGGCAC  
+HWI-EAS443:3:42:895:177#0/1  
`a\_aaaba``\_aaaaaaa`¥a\_\_^``^aW¥¥Z[Z]^ZZU  
@HWI-EAS443:3:43:1032:1101#0/1  
AGCAAAAAGCAGGGTAGATAATCACTCAATGAGTGACATCG

+HWI-EAS443:3:43:1032:1101#0/1  
ab`babb^aaaa]Rbbab`abaaaa\_aaaa]a`\_a[\_]  
@HWI-EAS443:3:43:214:290#0/1  
AGACCCTTCATTACTCATGTCAAAGGAAGGCACGATCGGG  
+HWI-EAS443:3:43:214:290#0/1  
a]Q¥¥\_\_aXYZN\_^]U\_\_Z¥\_\_WV[VX¥¥W¥VZWFQTSY  
@HWI-EAS443:3:43:311:36#0/1  
ATCACTCAATGAGTGACATCGAAGCCATGGCGTCTCAAGG  
+HWI-EAS443:3:43:311:36#0/1  
[b`X[¥a\_^Z^]`¥\_^[\_]^¥W``aaaab`]PJVY`a]^  
@HWI-EAS443:3:43:737:416#0/1  
GGTGCCTTGAGACGCCATGGCTTCGATGTCACTCATTGAG  
+HWI-EAS443:3:43:737:416#0/1  
aa^babbbbababa\_ba\_`XaaU[¥HYVPQYBBBBBBBBBBB  
@HWI-EAS443:3:43:74:1903#0/1  
AAAGCAGGGTAGATAATCACTCAATGAGTGACATCGAAGC  
+HWI-EAS443:3:43:74:1903#0/1  
a\_b``[[OYSWF¥a`aXa`a\_a^`[`aXW^a\_a\_^Z\_X\_  
@HWI-EAS443:3:43:771:110#0/1  
CTCCGAAGAAATAAGACCCTTCATTACTCATGTCAAAGGA  
+HWI-EAS443:3:43:771:110#0/1  
abbabbababaabba\_`^`bb^bbabbaa`babaa``ba`  
@HWI-EAS443:3:44:1433:1049#0/1  
AATCACTCAATGAGTGACATCGAAGCCATGGCGTCTCAAG  
+HWI-EAS443:3:44:1433:1049#0/1  
^\_`aaab[a^]\_Z\_L^`]X]^VHZ¥XXa\_X]\_U[PT]Y`  
@HWI-EAS443:3:44:243:81#0/1  
ATCACTCAATGAGTGACATCGAAGCCATGGCGTCTCAAGG  
+HWI-EAS443:3:44:243:81#0/1  
aabaaaa\_aaa\_a\_`^`\_`\_a\_^a[^a\_a\_Va^Y^]YW\_X  
@HWI-EAS443:3:44:281:1523#0/1  
TAATCACTCAATGAGTGACATCGAAGCCATGGCGTCTCAA  
+HWI-EAS443:3:44:281:1523#0/1  
0`bU``bbbaaZaa\_abbab\_a`]aaaa`aOW\_\_`^`Y  
@HWI-EAS443:3:44:285:1154#0/1  
AGCAAAAGCAGGGTAGATAATCACTCAATGAGTGACATCG  
+HWI-EAS443:3:44:285:1154#0/1  
Zaaa\_bbaa[aaaSbbbb`]bbaW^ab`bbababbbbaa[  
@HWI-EAS443:3:44:315:696#0/1  
ATTCTGATTA ACTCCATTGCTATTGTTCCA ACTCCTTCA  
+HWI-EAS443:3:44:315:696#0/1  
ab`^abaa\_`aaa`\_a\_a``aaaaaa\_`Y\_a`]``a\_a  
@HWI-EAS443:3:44:741:741#0/1  
CTCCTCTGCATTGTCTCCGAAGAAATAAGACCCTTCATTA  
+HWI-EAS443:3:44:741:741#0/1  
a\_ba\_`\_\_Y¥D¥a]\_\_T¥a0^\_P\_Z\_Y^VR[PLU`^[]XN  
@HWI-EAS443:3:44:767:1181#0/1  
AAGCAGGGTAGATAATCACTCAATGAGTGACATCGAAGCC  
+HWI-EAS443:3:44:767:1181#0/1  
a`b\_Y\_a¥NZXaa^G\_`^\_aaaX\_[]TMXU^]]^]]ZN

@HWI-EAS443:3:44:797:1056#0/1  
TAATCACTCAATGAGTGACATCGAAGCCATGGCGTCTCAA  
+HWI-EAS443:3:44:797:1056#0/1  
W\_\_^^`a`Y^a^`abP^`[¥]````^W^RXaaWWVOX^`^  
@HWI-EAS443:3:45:1111:964#0/1  
GAAAGGAGTTGGAACAATAGCAATGGAGTTAATCAGAATG  
+HWI-EAS443:3:45:1111:964#0/1  
a`aaaa`a\_aa`\_`WY]aa\_^]\_`\_`\_aZ``\_\_\_`^Z[]`  
@HWI-EAS443:3:45:645:1343#0/1  
GCAAAAAGCAGGGTAGATAATCACTCAATGAGTGACATCGA  
+HWI-EAS443:3:45:645:1343#0/1  
aabaaaaaaaaa¥b`aaaa\_a``\_a``a`^Ya`^``\_\_`  
@HWI-EAS443:3:45:698:859#0/1  
CGAAGAAATAAGACCCTTCATTACTCATGTCAAAGGAAGG  
+HWI-EAS443:3:45:698:859#0/1  
ab`\_baababb\_^)^^`a\_aaa``a```b\_[``]`X^^[a  
@HWI-EAS443:3:45:886:249#0/1  
GCAGGGTAGATAATCACTCAATGAGTGACATCGAAGCCAT  
+HWI-EAS443:3:45:886:249#0/1  
aaaaa`\_baaaaaaaaa\_a`\_`aaa`^aa^a`^^`\_\_\_U\_^  
@HWI-EAS443:3:46:1718:1573#0/1  
CCTCTGCATTGTCTCCGAAGAAATAAGACCCTTCATTACT  
+HWI-EAS443:3:46:1718:1573#0/1  
`bbababaaaaaaaa`a`aaa`aaaa`][\_]a\_]`a`^]`  
@HWI-EAS443:3:46:1739:1301#0/1  
GCAAAAAGCAGGGTAGATAATCACTCAATGAGTGACATCGA  
+HWI-EAS443:3:46:1739:1301#0/1  
aaaba]``aabaQbaa`a\_a`a\_a\_a`aa``¥a\_^a\_\_T\_  
@HWI-EAS443:3:46:282:1421#0/1  
ATAAGACCCTTCATTACTCATGTCAAAGGAAGGCACGATC  
+HWI-EAS443:3:46:282:1421#0/1  
aaab\_a`aZaa``baa\_aaaa`[\_a\_a\_``]VX\_T^^WW  
@HWI-EAS443:3:46:300:81#0/1  
AAGACCCTTCATTACTCATGTCAAAGGAAGGCACGATCGG  
+HWI-EAS443:3:46:300:81#0/1  
aaaa[\_`a^`\_a`\_\_`[\_`aZ^\_\_¥a`¥¥^`]¥W^^YV¥¥  
@HWI-EAS443:3:47:1049:348#0/1  
AAGACCCTTCATTACTCATGTCAAAGGAAGGCACGATCGG  
+HWI-EAS443:3:47:1049:348#0/1  
abaW]\_\_`\_aa`^aaa\_]\_`^[\_````[]\_][]X]]QOQZ  
@HWI-EAS443:3:47:1145:1332#0/1  
CGAAGAAATAAGACCCTTCATTACTCATGTCAAAGGAAGG  
+HWI-EAS443:3:47:1145:1332#0/1  
\_a``babbbbb\_\_^]\_ba`aaaa^a`\_`aaa\_\_\_`a\_\_``\_  
@HWI-EAS443:3:47:1350:500#0/1  
AAGAAATAAGACCCTTCATTACTCATGTCAAAGGAAGGCA  
+HWI-EAS443:3:47:1350:500#0/1  
¥Xa`bba`a\_¥^[\_aabaabaaba\_a`^[a]]V`X[^  
@HWI-EAS443:3:47:1662:1039#0/1  
AGCAAAAAGCAGGGTAGATAATCACTCAATGAGTGACATCG

+HWI-EAS443:3:47:1662:1039#0/1  
`baabba`aaba\_Ubaaa`\_`]^`^`\_\_\_\_`\_\_\_\_Y`^^`]¥X  
@HWI-EAS443:3:47:819:1581#0/1  
GATCGTTTGGTGCCTTGAGACGCCATGGCTTCGATGTCAC  
+HWI-EAS443:3:47:819:1581#0/1  
]aa\_a\_aaaaJa\_]aaa^a^\_a`¥\_¥\_^Za[VYMVN[YXO  
@HWI-EAS443:3:47:972:1166#0/1  
AGACCCTTCATTACTCATGTCAAAGGAAGGCACGATCGGG  
+HWI-EAS443:3:47:972:1166#0/1  
a\_[^Ya`a`a`\_U^¥\_a^a^`\_V[ZU¥Y[UWSW[SURR¥  
@HWI-EAS443:3:48:1378:115#0/1  
CTCCGAAGAAATAAGACCCTTCATTACTCATGTCAAAGGA  
+HWI-EAS443:3:48:1378:115#0/1  
aba^``bbbbbbab[YY\_bbaabbaa]b^bab\_]b^aba\_  
@HWI-EAS443:3:48:1467:988#0/1  
AGCAGGGTAGATAATCACTCAATGAGTGACATCGAAGCCA  
+HWI-EAS443:3:48:1467:988#0/1  
abaaaaa^baaaa`a^a`aa`aa`\_a^a`\_`^`\_\_aYS¥  
@HWI-EAS443:3:48:1517:1373#0/1  
ATTGTCTCCGAAGAAATAAGACCCTTCATTACTCATGTCA  
+HWI-EAS443:3:48:1517:1373#0/1  
aaaa\_aaa\_a\_aaaaaa\_R[[]W^a]aa`\_][\_\_`\_]Z]  
@HWI-EAS443:3:48:1589:1486#0/1  
AAAGCAGGGTAGATAATCACTCAATGAGTGACATCGAAGC  
+HWI-EAS443:3:48:1589:1486#0/1  
`b[[abbbUXbbbb^abab\_\_b`^aaab]b^a``aba[a\_  
@HWI-EAS443:3:48:162:99#0/1  
CAAAAGCAGGGTAGATAATCACTCAATGAGTGACATCGAA  
+HWI-EAS443:3:48:162:99#0/1  
aaabbbababaabaabb[b`bab\_bbaabb]ba\_aa\_a[a  
@HWI-EAS443:3:48:352:131#0/1  
AGCAAAAGCAGGGTAGATAATCACTCAATGAGTGACATCG  
+HWI-EAS443:3:48:352:131#0/1  
aaabaaab\_\_abb]baaba`a\_a\_b`aaaa`bXaa`aa\_\_  
@HWI-EAS443:3:48:361:1775#0/1  
AAAAGCAGGGTAGATAATCACTCAATGAGTGACATCGAAG  
+HWI-EAS443:3:48:361:1775#0/1  
]ZbaZVS^]¥^`Q^`\_]aa`\_`aaaa¥ZT`]a[TaT^`  
@HWI-EAS443:3:48:652:509#0/1  
GAAAGGAGTTGGAACAATAGCAATGGAGTTAATCAGAATG  
+HWI-EAS443:3:48:652:509#0/1  
QPUU``Ta`\_^\_\_b`\_¥Z\_\_U¥]a^¥]aUYWb¥\_Ua`\_W]  
@HWI-EAS443:3:49:1161:656#0/1  
GGGTAGATAATCACTCAATGAGTGACATCGAAGCCATGGC  
+HWI-EAS443:3:49:1161:656#0/1  
abb¥ababa\_aba`aaabaaa`\_aa\_aaaaaa¥aaaaa[  
@HWI-EAS443:3:49:156:1284#0/1  
GATAATCACTCAATGAGTGACATCGAAGCCATGGCGTCTC  
+HWI-EAS443:3:49:156:1284#0/1  
aa[a\_\_ab[^[^aaaabYXaa`a`^`¥^aa^\_Xaa\_\_GZ^\_

@HWI-EAS443:3:49:259:1367#0/1  
CAAAAGCAGGGTAGATAATCACTCAATGAGTGACATCGAA  
+HWI-EAS443:3:49:259:1367#0/1  
ab`aabb`Zba\_baaaa`a\_`a`\_\_\_\_\_a[`a¥``a[``  
@HWI-EAS443:3:49:715:657#0/1  
GTCTCCGAAGAAATAAGACCCTTCATTACTCATGTCAAAG  
+HWI-EAS443:3:49:715:657#0/1  
aaaaaa\_aaba`aaabaa`[Uaa]aaa`]a\_aaa`]\_\_a`  
@HWI-EAS443:3:49:755:369#0/1  
AATAAGACCCTTCATTACTCATGTCAAAGGAAGGCACGAT  
+HWI-EAS443:3:49:755:369#0/1  
aaabaa\_\_\_\_\_ab\_abaa`a`aab^¥``\_`a\_a\_\_¥\_\_\_\_a]  
@HWI-EAS443:3:4:1080:295#0/1  
CAAAAGCAGGGTAGATAATCACTCAATGAGTGACATCGAA  
+HWI-EAS443:3:4:1080:295#0/1  
`[aYa\_`aba]Sa]`a\_[a¥aYaU[\_a\_`\_]a\_Y[\_U[]]  
@HWI-EAS443:3:4:1273:1926#0/1  
AAAGCAGGGTAGATAATCACTCAATGAGTGACATCGAAGC  
+HWI-EAS443:3:4:1273:1926#0/1  
aaabaab\_a\_aaaaaaYa\_`]aa\_aabV\_a^a`¥Wa`]R  
@HWI-EAS443:3:4:1672:881#0/1  
GACCCTTCATTACTCATGTCAAAGGAAGGCACGATCGGGT  
+HWI-EAS443:3:4:1672:881#0/1  
a]ZR¥¥`M^aa^L¥PYX`YS¥UZ¥R[L[XVU^BBBBBBBB  
@HWI-EAS443:3:4:1726:708#0/1  
TTGTCTCCGAAGAAATAAGACCCTTCATTACTCATGTCAA  
+HWI-EAS443:3:4:1726:708#0/1  
[¥¥XZZ`XR[V¥]]QZYSYU^UXNTU[VMVZO]VSVY]BB  
@HWI-EAS443:3:4:220:1352#0/1  
TAATCACTCAATGAGTGACATCGAAGCCATGGCGTCTCAA  
+HWI-EAS443:3:4:220:1352#0/1  
a¥ZUaa`Xaabba\_]``baaab¥a\_\_a[aXZ[Z]VL\_^aZ  
@HWI-EAS443:3:4:380:1867#0/1  
GGTGCCTTGAGACCCATGGCTTCGATGTCACTCATTGAG  
+HWI-EAS443:3:4:380:1867#0/1  
abNabaa`b`^bWaaab][\_Y\_aZ`\_¥SY¥\_¥]^¥¥\_VV`  
@HWI-EAS443:3:4:458:1630#0/1  
CTGCATTGTCTCCGAAGAAATAAGACCCTTCATTACTCAT  
+HWI-EAS443:3:4:458:1630#0/1  
abbabb\_`YabaaaZ¥`aab`ab\_\_[\_]\_a`a``\_WaOa`  
@HWI-EAS443:3:4:776:1463#0/1  
AAGAAATAAGACCCTTCATTACTCATGTCAAAGGAAGGCA  
+HWI-EAS443:3:4:776:1463#0/1  
aaaUWY^aa\_`]Z]\_^Y\_^\_^\_`]\_]XPVDOWY]XXVO^  
@HWI-EAS443:3:4:966:277#0/1  
TAAGACCCTTCATTACTCATGTCAAAGGAAGGCACGATCG  
+HWI-EAS443:3:4:966:277#0/1  
`a\_\_\_\_[]aa\_SZ[aa\_aaabaQ¥Xaa`a\_`ZMM\_V[aUHa  
@HWI-EAS443:3:4:96:450#0/1  
AGATAATCACTCAATGAGTGACATCGAAGCCATGGCGTCT

+HWI-EAS443:3:4:96:450#0/1  
aaa^\_]¥\_\_\_\_`\_¥\_]`X[\_^¥Y¥U]^XU]WY]X]YYY  
@HWI-EAS443:3:50:1019:688#0/1  
CTCCTCTGCATTGTCTCCGAAGAAATAAGACCCTTCATTA  
+HWI-EAS443:3:50:1019:688#0/1  
ab`\_b`bbbbbbbab[ba`baabbabaaPVabb`baaa  
@HWI-EAS443:3:50:1021:1280#0/1  
ATTCTGATTAACTCCATTGCTATTGTTCCAACCTCTTCA  
+HWI-EAS443:3:50:1021:1280#0/1  
W[`¥`a[`\_abUbbab`\_a\_Za`]^ZR\_\_Ta``I`  
@HWI-EAS443:3:50:1253:1443#0/1  
GAAAGGAGTTGGAACAATAGCAATGGAGTTAATCAGAATG  
+HWI-EAS443:3:50:1253:1443#0/1  
a^aZa\_]b\_a]baa[a\_]aa^S`a]L]^a`Ta]aa\_\_\_\_  
@HWI-EAS443:3:50:1359:1265#0/1  
AGAAATAAGACCCTTCATTACTCATGTCAAAGGAAGGCAC  
+HWI-EAS443:3:50:1359:1265#0/1  
aaZ¥X]\_YPEH]^Ya[a\_\_\_T]^`\_`\_V\_`¥\_a^]^\_^^\_]  
@HWI-EAS443:3:50:1695:194#0/1  
GCAAAAGCAGGGTAGATAATCACTCAATGAGTGACATCGA  
+HWI-EAS443:3:50:1695:194#0/1  
abbbbbbbbabbb^baabbaaaa`aaaaba`^^baaaa]¥\_  
@HWI-EAS443:3:50:1763:430#0/1  
CAAAAGCAGGGTAGATAATCACTCAATGAGTGACATCGAA  
+HWI-EAS443:3:50:1763:430#0/1  
Z\_¥\_``baa\_\_X`aa`\_Xababa]\_aa^\_T]\_a``]Z\_¥  
@HWI-EAS443:3:50:180:49#0/1  
AGCAGGGTAGATAATCACTCAATGAGTGACATCGAAGCCA  
+HWI-EAS443:3:50:180:49#0/1  
abaabbb¥bbba`baaaa`aaa\_aa\_ababa`\_a\_`\_\_`  
@HWI-EAS443:3:50:464:327#0/1  
AAAGCAGGGTAGATAATCACTCAATGAGTGACATCGAAGC  
+HWI-EAS443:3:50:464:327#0/1  
aba````\_`W[bbbaaba^`aaaaaaaa`aaaaaa`a^V  
@HWI-EAS443:3:50:95:85#0/1  
CAAAAGCAGGGTAGATAATCACTCAATGAGTGACATCGAA  
+HWI-EAS443:3:50:95:85#0/1  
abbab`bbb``\_b[`bbaaaaaaaaa^`X^aa¥ba\_]\_a  
@HWI-EAS443:3:51:1003:204#0/1  
CGAAGAAATAAGACCCTTCATTACTCATGTCAAAGGAAGG  
+HWI-EAS443:3:51:1003:204#0/1  
ab\_aba`abbab\_\_]\_bb\_abaa\_a`baa\_aa[aa]^a\_]`  
@HWI-EAS443:3:51:1425:761#0/1  
AAGCAGGGTAGATAATCACTCAATGAGTGACATCGAAGCC  
+HWI-EAS443:3:51:1425:761#0/1  
aaaaabaa\_baaaa\_a\_a\_a¥a`aaaW`\_¥a`¥\_`\_`^T^  
@HWI-EAS443:3:51:255:1901#0/1  
GAAGAAATAAGACCCTTCATTACTCATGTCAAAGGAAGGC  
+HWI-EAS443:3:51:255:1901#0/1  
aaaaa`aaaa`^X`\_`aaa`aVa`ab`a`\_¥Xaa^]V



@HWI-EAS443:3:51:285:873#0/1  
AAGCAGGGTAGATAATCACTCAATGAGTGACATCGAAGCC  
+HWI-EAS443:3:51:285:873#0/1  
a\_\_aXabaUaRa`a]``aZ`aS``aT^¥`U¥``\_QYN\_]U  
@HWI-EAS443:3:51:291:346#0/1  
ATCGAAGCCATGGCGTCTCAAGGCACCAAACGATCATATG  
+HWI-EAS443:3:51:291:346#0/1  
[[] [PLT\_Wa\_aaab[\_¥Z¥¥ba`a\_Yaa\_]`U`XZ[aab  
@HWI-EAS443:3:52:1029:1016#0/1  
GCAGGGTAGATAATCACTCAATGAGTGACATCGAAGCCAT  
+HWI-EAS443:3:52:1029:1016#0/1  
aa]aaa[ba\_\_a\_Y¥`Va^\_a`\_`^\_\_Va`Z`\_\_aVW^\_  
@HWI-EAS443:3:52:1141:511#0/1  
AAGAAATAAGACCCTTCATTACTCATGTCAAAGGAAGGCA  
+HWI-EAS443:3:52:1141:511#0/1  
ababbbbaba`¥¥Wbb`abaa\_a`aaaa^```a^\_aaN]`  
@HWI-EAS443:3:52:1161:573#0/1  
AAGAAATAAGACCCTTCATTACTCATGTCAAAGGAAGGCA  
+HWI-EAS443:3:52:1161:573#0/1  
a[aa]a`baa\_[]`aa]aaaa¥a\_a`a^\_````\_NTa\_Y\_`  
@HWI-EAS443:3:52:1616:866#0/1  
AGATAATCACTCAATGAGTGACATCGAAGCCATGGCGTCT  
+HWI-EAS443:3:52:1616:866#0/1  
\_QQ[RL]`a^¥aaWaVZ`YX][TOXPYS¥[QQa`\_WY00W  
@HWI-EAS443:3:52:295:918#0/1  
AGCAAAAGCAGGGTAGATAATCACTCAATGAGTGACATCG  
+HWI-EAS443:3:52:295:918#0/1  
VbaaZ[]¥a\_`¥\_P`a`bZQ^aa¥^^][]aZ^^`UX^SQR  
@HWI-EAS443:3:52:365:395#0/1  
GCAGGGTAGATAATCACTCAATGAGTGACATCGAAGCCAT  
+HWI-EAS443:3:52:365:395#0/1  
aa`aaaUba\_a\_\_`^`\_a\_\_\_a\_\_a[\_\_\_]``\_\_\_]]`^X]Y  
@HWI-EAS443:3:52:457:57#0/1  
AAGACCCTTCATTACTCATGTCAAAGGAAGGCACGATCGG  
+HWI-EAS443:3:52:457:57#0/1  
aba\_\_\_\_\_aa`aba`]a\_\_aa\_Z`\_^a`][\_aN\_¥a]UU\_\_  
@HWI-EAS443:3:52:487:462#0/1  
GCCTTGAGACGCCATGGCTTCGATGTCACCTATTGAGTGA  
+HWI-EAS443:3:52:487:462#0/1  
a\_\_^a\_\_`ZS[VZO\_TTS]LYRSNTPRNPBBBBBBBBBB  
@HWI-EAS443:3:52:847:1712#0/1  
AGCAAAAGCAGGGTAGATAATCACTCAATGAGTGACATCG  
+HWI-EAS443:3:52:847:1712#0/1  
`]^\_[]^]Z\_\_baa^b`X]X]\_\_[\_aZ]aX[V¥`Wa\_\_\_\_  
@HWI-EAS443:3:53:1162:1022#0/1  
TAATCACTCAATGAGTGACATCGAAGCCATGGCGTCTCAA  
+HWI-EAS443:3:53:1162:1022#0/1  
aW`a`aa\_`baa¥^\_Xaa\_\_aaU``RRSaabXY]U\_¥PQP  
@HWI-EAS443:3:53:1375:80#0/1  
AAGAAATAAGACCCTTCATTACTCATGTCAAAGGAAGGCA

+HWI-EAS443:3:53:1375:80#0/1  
WVLUJ]]`bb^ORUS]]R^]a^SYO¥^YXZ[[K[[X[V¥BB  
@HWI-EAS443:3:53:1414:543#0/1  
AAATAAGACCCTTCATTACTCATGTCAAAGGAAGGCACGA  
+HWI-EAS443:3:53:1414:543#0/1  
abaabbaaa\_`a```baaa`a`aba\_a`\_ba\_aa`^\_^\_\_  
@HWI-EAS443:3:53:1592:700#0/1  
CGAAGAAATAAGACCCTTCATTACTCATGTCAAAGGAAGG  
+HWI-EAS443:3:53:1592:700#0/1  
\_baabbbabba^Y^a`abababbabbbababbaa\_b[\_  
@HWI-EAS443:3:53:1676:898#0/1  
AAAGCAGGGTAGATAATCACTCAATGAGTGACATCGAAGC  
+HWI-EAS443:3:53:1676:898#0/1  
abaaabab\_`aR`a^aaUaUa\_aab\_aX]`aUaa\_`^aaUQ  
@HWI-EAS443:3:53:1703:2003#0/1  
CAAAGCAGGGTAGATAATCACTCAATGAGTGACATCGAA  
+HWI-EAS443:3:53:1703:2003#0/1  
\_¥\_¥V\_^\_a`a`a]\_RVUJOY^U]\_\_\_V]LZ```]U`WL  
@HWI-EAS443:3:53:256:1151#0/1  
AGCAAAAGCAGGGTAGATAATCACTCAATGAGTGACATCG  
+HWI-EAS443:3:53:256:1151#0/1  
aaa`\_L^[]aaaYNaa`^`]aa\_\_``¥`a`SW`ZU\_\_TO  
@HWI-EAS443:3:53:327:1000#0/1  
ATCGAAGCCATGGCGTCTCAAGGCACCAAACGATCATATG  
+HWI-EAS443:3:53:327:1000#0/1  
aab^a¥baYaaaa\_a[R]^`^RWaY`]\_[\_^Z^Z¥^YYUV  
@HWI-EAS443:3:53:557:160#0/1  
CAATGAGTGACATCGAAGCCATGGCGTCTCAAGGCACCAA  
+HWI-EAS443:3:53:557:160#0/1  
abbbb``bbaaab\_\_`aaa¥`ab¥¥a\_\_a\_a]aaX`^]\_¥  
@HWI-EAS443:3:53:782:433#0/1  
AAGCAGGGTAGATAATCACTCAATGAGTGACATCGAAGCC  
+HWI-EAS443:3:53:782:433#0/1  
aaa\_aabb¥baa`aaa\_a\_a\_a`aa`b`aa\_`a\_\_a\_a\_T  
@HWI-EAS443:3:54:1035:274#0/1  
GTAGATAATCACTCAATGAGTGACATCGAAGCCATGGCGT  
+HWI-EAS443:3:54:1035:274#0/1  
aW]\_`b`Za`aXb^a``ba\_YZ[\_a[S[UaaWZ[]aVT`G  
@HWI-EAS443:3:54:1146:15#0/1  
AAAGCAGGGTAGATAATCACTCAATGAGTGACATCGAAGC  
+HWI-EAS443:3:54:1146:15#0/1  
WJ^bbaab`Uabaaab`\_`a``aab`aa]baYaaNa`]`P  
@HWI-EAS443:3:54:1211:1164#0/1  
CAAAGCAGGGTAGATAATCACTCAATGAGTGACATCGAA  
+HWI-EAS443:3:54:1211:1164#0/1  
a`[aV`ababb[bb[ab^aab^bVK\_VbabYab\_ba\_\_a`  
@HWI-EAS443:3:54:1267:892#0/1  
AATCACTCAATGAGTGACATCGAAGCCATGGCGTCTCAAG  
+HWI-EAS443:3:54:1267:892#0/1  
aaaaa\_aa^aba\_a¥a`^ba`^\_\_aZ`\_]a`Za\_\_\_\_[\_Y^

@HWI-EAS443:3:54:1271:1097#0/1  
ATAAGACCCTTCATTACTCATGTCAAAGGAAGGCACGATC  
+HWI-EAS443:3:54:1271:1097#0/1  
aa`\_\_XX[[abaaaaZ¥a`ab\_[XZ\_VIT`V^BBBBBBBB  
@HWI-EAS443:3:54:1475:1972#0/1  
ATTCTGATTAECTCATTGCTATTGTTCCAECTCCTTCA  
+HWI-EAS443:3:54:1475:1972#0/1  
aaa\_aa[aa^b¥aRN[`aZUa`a\_]\_aUUa\_Q`¥Y\_Y`U\_  
@HWI-EAS443:3:54:422:356#0/1  
AAGCAGGGTAGATAATCACTCAATGAGTGACATCGAAGCC  
+HWI-EAS443:3:54:422:356#0/1  
a^]]baaaTbb\_aa\_a`a^\_\_\_`\_`\_aW`\_\_\_^W^¥S[[  
@HWI-EAS443:3:54:508:365#0/1  
AAAAGCAGGGTAGATAATCACTCAATGAGTGACATCGAAG  
+HWI-EAS443:3:54:508:365#0/1  
aab[`aU^^\_¥\_bbab\_aaaaaaaaaaaaa¥ba\_aaa\_W\_U  
@HWI-EAS443:3:54:575:529#0/1  
CAAAAGCAGGGTAGATAATCACTCAATGAGTGACATCGAA  
+HWI-EAS443:3:54:575:529#0/1  
`a¥ZQZV]W`\_[\_[VT\_\_¥a^`a`\_]a`ZZaa\_^^`a]  
@HWI-EAS443:3:55:1681:812#0/1  
CATTCTGATTAECTCATTGCTATTGTTCCAECTCCTTTC  
+HWI-EAS443:3:55:1681:812#0/1  
U`bbbbbbbbbbabWZabbbbabababbbba``^[aaba  
@HWI-EAS443:3:55:1759:1863#0/1  
AGCAAAAGCAGGGTAGATAATCACTCAATGAGTGACATCG  
+HWI-EAS443:3:55:1759:1863#0/1  
a^N]aa`YS`P¥``\_]W[[\_]]SY\_¥¥\_PY\_a`Y[[  
@HWI-EAS443:3:55:218:925#0/1  
GACATCGAAGCCATGGCGTCTCAAGGCACCAAACGATCAT  
+HWI-EAS443:3:55:218:925#0/1  
SWS¥S^\_abaS]Z^a\_WVS¥T\_aX`aaVJ[ZULVRGYX^a  
@HWI-EAS443:3:55:286:366#0/1  
ATCACTCAATGAGTGACATCGAAGCCATGGCGTCTCAAGG  
+HWI-EAS443:3:55:286:366#0/1  
`a`[\_aa]\_a\_a`]aa\_a`aaa`a\_\_[\_a^\_aZ^\_Ra]\_\_  
@HWI-EAS443:3:55:983:340#0/1  
AGCAAAAGCAGGGTAGATAATCACTCAATGAGTGACATCG  
+HWI-EAS443:3:55:983:340#0/1  
abaaaa`aa\_aaaXbaaaaaaaaa^a`a\_aa`a\_a``a\_\_\_  
@HWI-EAS443:3:56:1390:992#0/1  
AGCAAAAGCAGGGTAGATAATCACTCAATGAGTGACATCG  
+HWI-EAS443:3:56:1390:992#0/1  
aYb`\_ZabaabW\_Ua[`aa``aa\_aaaabaaa[Z]aaa\_[  
@HWI-EAS443:3:56:1640:1546#0/1  
CAAAAGCAGGGTAGATAATCACTCAATGAGTGACATCGAA  
+HWI-EAS443:3:56:1640:1546#0/1  
`ba`a`bbb`]babbaa^bb`b^bb`baaaabbbb`aa  
@HWI-EAS443:3:56:438:542#0/1  
AAGCAGGGTAGATAATCACTCAATGAGTGACATCGAAGCC

+HWI-EAS443:3:56:438:542#0/1  
aaaaaaa]Ub`aa\_`aa`a\_a]a\_a]`^\_]\_\_^  
@HWI-EAS443:3:56:678:434#0/1  
AGATAATCACTCAATGAGTGACATCGAAGCCATGGCGTCT  
+HWI-EAS443:3:56:678:434#0/1  
aaa`\_a`^`a^`aa^a]^`^\_]X¥UZ]\_a\_]aZZ]  
@HWI-EAS443:3:56:776:936#0/1  
GCATTGTCTCCGAAGAAATAAGACCCTTCATTACTCATGT  
+HWI-EAS443:3:56:776:936#0/1  
aaabaaaaa`ba\_``[aa`a^]]XUaa\_`a`\_]aa\_]`  
@HWI-EAS443:3:56:805:52#0/1  
GAAGAAATAAGACCCTTCATTACTCATGTCAAAGGAAGGC  
+HWI-EAS443:3:56:805:52#0/1  
`¥[XRWW[X\_\_YRRKX^Z^`¥[U[R[`]VRTTTZTTQZ[U  
@HWI-EAS443:3:56:817:442#0/1  
CTCCGAAGAAATAAGACCCTTCATTACTCATGTCAAAGGA  
+HWI-EAS443:3:56:817:442#0/1  
a¥^Jaa\_aXU\_\_[`R]G[^]aH`aa[L^YYa¥¥¥¥YYYZ^  
@HWI-EAS443:3:56:840:26#0/1  
AGCAGGGTAGATAATCACTCAATGAGTGACATCGAAGCCA  
+HWI-EAS443:3:56:840:26#0/1  
aba`bba\_baaaa`a^`a\_a\_aaa\_a¥aa`^^[Z¥\_\_Z^  
@HWI-EAS443:3:56:967:1374#0/1  
GCAGGGTAGATAATCACTCAATGAGTGACATCGAAGCCAT  
+HWI-EAS443:3:56:967:1374#0/1  
aaaa`a^baaaa`\_a¥aa\_aa\_`\_[aa\_a^Z\_\_\_\_a^U¥^  
@HWI-EAS443:3:57:1007:1197#0/1  
AGCAGGGTAGATAATCACTCAATGAGTGACATCGAAGCCA  
+HWI-EAS443:3:57:1007:1197#0/1  
XX^abbaaba`a]TWa``aR^¥a`XaRZ^\_aa[a\_^\_a\_`  
@HWI-EAS443:3:57:1137:1822#0/1  
AAGACCCTTCATTACTCATGTCAAAGGAAGGCACGATCGG  
+HWI-EAS443:3:57:1137:1822#0/1  
aaaa\_a¥\_a[\_aaa^a`a\_\_a\_¥\_¥\_`\_]aS`[WTS¥  
@HWI-EAS443:3:57:38:978#0/1  
AAAGCAGGGTAGATAATCACTCAATGAGTGACATCGAAGC  
+HWI-EAS443:3:57:38:978#0/1  
a¥``aZYU][^^`¥`^]¥¥¥\_\_^Z^Y\_Ya`\_¥Z^^][]¥  
@HWI-EAS443:3:57:587:1777#0/1  
AAGACCCTTCATTACTCATGTCAAAGGAAGGCACGATCGG  
+HWI-EAS443:3:57:587:1777#0/1  
a`]ZQ]]aaaaaa\_aaa[UW`X¥\_\_^\_ZZV¥N\_[RBBB  
@HWI-EAS443:3:57:681:97#0/1  
TAATCACTCAATGAGTGACATCGAAGCCATGGCGTCTCAA  
+HWI-EAS443:3:57:681:97#0/1  
aa\_a¥¥\_a^]a\_`\_aTa\_[`Z\_^¥¥`¥WYZ¥W¥\_WYUYB  
@HWI-EAS443:3:57:704:1762#0/1  
AGAAATAAGACCCTTCATTACTCATGTCAAAGGAAGGCAC  
+HWI-EAS443:3:57:704:1762#0/1  
a\_abbba`P`^aaaabaa`a`a`a^`aaaa\_]a^Ya\_

@HWI-EAS443:3:57:974:636#0/1  
CACTCAATGAGTGACATCGAAGCCATGGCGTCTCAAGGCA  
+HWI-EAS443:3:57:974:636#0/1  
ab]a`\_`b`\_`ba`aaYa`aba\_Y`a\_\_a¥`\_¥`\_a^VZ  
@HWI-EAS443:3:58:1688:1118#0/1  
AAGCAGGGTAGATAATCACTCAATGAGTGACATCGAAGCC  
+HWI-EAS443:3:58:1688:1118#0/1  
aa\_a\_aaa^aa`a\_\_`]a]^]¥^^\_¥^X\_^Z^]RU^¥UUR  
@HWI-EAS443:3:58:247:1989#0/1  
ATAAGACCCTTCATTACTCATGTCAAAGGAAGGCACGATC  
+HWI-EAS443:3:58:247:1989#0/1  
aa`¥a[Za`ab`aaaa\_`aaa\_^\_aaa`\_`a^¥ZaW^]QV  
@HWI-EAS443:3:58:337:1261#0/1  
ATAAGACCCTTCATTACTCATGTCAAAGGAAGGCACGATC  
+HWI-EAS443:3:58:337:1261#0/1  
aabbUU]``aaaaaaaaaaa\_U`\_\_aa]\_`[\_aa\_[-¥]  
@HWI-EAS443:3:58:350:1439#0/1  
GAAGAAATAAGACCCTTCATTACTCATGTCAAAGGAAGGC  
+HWI-EAS443:3:58:350:1439#0/1  
[aba^^aba]^]¥`aa`aa`aaa]\_\_aa`\_U]^`Z¥`  
@HWI-EAS443:3:58:55:632#0/1  
GTCTCCGAAGAAATAAGACCCTTCATTACTCATGTCAAAG  
+HWI-EAS443:3:58:55:632#0/1  
a`aaaa\_SX`]Xaaa]ZU[\_Y[^^^``\_\_`\_\_^^¥^¥W¥`  
@HWI-EAS443:3:58:662:945#0/1  
GAAGAAATAAGACCCTTCATTACTCATGTCAAAGGAAGGC  
+HWI-EAS443:3:58:662:945#0/1  
a^NJQ\_V[^\_ZYGQTGX\_\_NVU]OV\_¥V^NTTPKXXYU]  
@HWI-EAS443:3:58:794:1423#0/1  
AATAAGACCCTTCATTACTCATGTCAAAGGAAGGCACGAT  
+HWI-EAS443:3:58:794:1423#0/1  
aPDRZb^aYQaabbUY``SW]]V`MT`aJ]Yaa\_\_a^Xa\_  
@HWI-EAS443:3:59:1240:152#0/1  
TAATCACTCAATGAGTGACATCGAAGCCATGGCGTCTCAA  
+HWI-EAS443:3:59:1240:152#0/1  
\_]MY`a¥`V[ ]`XUW[^]YWTX¥Za`^]YUXBBBBBBBBB  
@HWI-EAS443:3:59:1614:352#0/1  
CTTCATTACTCATGTCAAAGGAAGGCACGATCGGGTTCGT  
+HWI-EAS443:3:59:1614:352#0/1  
abbbbbbbbaababbabbbbabbbbbb\_F[a`G`ab¥  
@HWI-EAS443:3:59:36:153#0/1  
GATAATCACTCAATGAGTGACATCGAAGCCATGGCGTCTC  
+HWI-EAS443:3:59:36:153#0/1  
`bbabb`abaaa`a`aa`aaaaaaZ^\_\_a\_[-a^VZUUUU  
@HWI-EAS443:3:5:1493:1152#0/1  
GAAATAAGACCCTTCATTACTCATGTCAAAGGAAGGCACG  
+HWI-EAS443:3:5:1493:1152#0/1  
``ab```Xa]W^`a\_aaa\_]^`a`]]a\_[Q^\_\_\_\_U`¥B  
@HWI-EAS443:3:5:227:1075#0/1  
AAAGCAGGGTAGATAATCACTCAATGAGTGACATCGAAGC

+HWI-EAS443:3:5:227:1075#0/1  
Kaa\_aa[b`TbbY]H\_Y]ba\_aaaYaab^\_^`^Y]\_^BB  
@HWI-EAS443:3:5:289:1029#0/1  
GAAAGGAGTTGGAACAATAGCAATGGAGTTAATCAGAATG  
+HWI-EAS443:3:5:289:1029#0/1  
aa^\_¥XNZ¥Z`a\_]J[[^^^OP\_`^`]^`L]a]]Xa\_\_]\_B  
@HWI-EAS443:3:5:375:133#0/1  
CGAAGAAATAAGACCCTTCATTACTCATGTCAAAGGAAGG  
+HWI-EAS443:3:5:375:133#0/1  
ab`^aY\_aaaaaSO¥^¥a^a`¥]UaU[aaXO^¥]a¥\_¥ZB  
@HWI-EAS443:3:5:622:121#0/1  
CACTCAATGAGTGACATCGAAGCCATGGCGTCTCAAGGCA  
+HWI-EAS443:3:5:622:121#0/1  
ababbabbbababbababb`baa\_aab\_aaaXa[aa`a`a  
@HWI-EAS443:3:5:62:950#0/1  
CATCGAAGCCATGGCGTCTCAAGGCACCAAACGATCATAT  
+HWI-EAS443:3:5:62:950#0/1  
M\_a[[¥T^V[bWHV\_`Y\_bb\_Z¥\_SXa^¥N\_KbVa`bB  
@HWI-EAS443:3:5:771:858#0/1  
CAAAGCAGGGTAGATAATCACTCAATGAGTGACATCGAA  
+HWI-EAS443:3:5:771:858#0/1  
abbbab`aabb\_b`ababaa`aaaaabaaa]a`aa\_a]^a  
@HWI-EAS443:3:5:831:1899#0/1  
CGAAGAAATAAGACCCTTCATTACTCATGTCAAAGGAAGG  
+HWI-EAS443:3:5:831:1899#0/1  
abaab\_bb`ba`YUT`ababaab\_a`^ba]\_b`Ya^^a^Z  
@HWI-EAS443:3:5:981:987#0/1  
GAAGAAATAAGACCCTTCATTACTCATGTCAAAGGAAGGC  
+HWI-EAS443:3:5:981:987#0/1  
a\_bbaa^b`aYXYS0aa``aa\_a\_\_abH¥a\_\_`\_\_YYWB  
@HWI-EAS443:3:60:1373:1493#0/1  
GATAATCACTCAATGAGTGACATCGAAGCCATGGCGTCTC  
+HWI-EAS443:3:60:1373:1493#0/1  
abab]aaa[ba]aUaaa````a``aa\_\_`ZY^X`YU^\_  
@HWI-EAS443:3:60:1745:153#0/1  
GGTGCCTTGAGACGCCATGGCTTCGATGTCACTCATTGAG  
+HWI-EAS443:3:60:1745:153#0/1  
aa\_a`aaa`a\_\_\_\_\_Z¥][ZTTYBBBBBBBBBBBBBBBB  
@HWI-EAS443:3:60:189:878#0/1  
GAAAGGAGTTGGAACAATAGCAATGGAGTTAATCAGAATG  
+HWI-EAS443:3:60:189:878#0/1  
aaaaabaa\_aba\_a`\_a`\_\_\_\_\_`¥¥`^`\_\_W`^X\_[  
@HWI-EAS443:3:60:398:1428#0/1  
TAATCACTCAATGAGTGACATCGAAGCCATGGCGTCTCAA  
+HWI-EAS443:3:60:398:1428#0/1  
abaaaaaaaaaa\_adW`a`aW`Z[YW^]\_^¥YT\_X]]WTQ  
@HWI-EAS443:3:60:659:79#0/1  
AGCAAAAGCAGGGTAGATAATCACTCAATGAGTGACATCG  
+HWI-EAS443:3:60:659:79#0/1  
abaaaaaa`\_baaWbaaaa\_a`a^a\_\_\_\_`\_\_\_\_W`\_`\_\_¥

@HWI-EAS443:3:61:1349:970#0/1  
GACCCTTCATTACTCATGTCAAAGGAAGGCACGATCGGGT  
+HWI-EAS443:3:61:1349:970#0/1  
a¥¥IRab[¥aaWFRS^aa¥\_a`Ua\_a\_\_\_Z[]Q¥WQYWRM  
@HWI-EAS443:3:61:516:854#0/1  
ATTGTCTCCGAAGAAATAAGACCCTTCATTACTCATGTCA  
+HWI-EAS443:3:61:516:854#0/1  
\_bbb`bab^^^\_[][\`Sa`\_aa`aaaa`a\_^`^[U\_  
@HWI-EAS443:3:62:224:1219#0/1  
CAAAGCAGGGTAGATAATCACTCAATGAGTGACATCGAA  
+HWI-EAS443:3:62:224:1219#0/1  
abb\_bab\_aaa]babbbb`abaaaaa`¥`]\_a`a\_aV`¥  
@HWI-EAS443:3:62:716:1242#0/1  
CAAAGCAGGGTAGATAATCACTCAATGAGTGACATCGAA  
+HWI-EAS443:3:62:716:1242#0/1  
a[U¥L]ZHY`QN^Ua`[ZJ][T\_^^^¥YQOPY[UUS¥SRW  
@HWI-EAS443:3:62:862:632#0/1  
CGAAGAAATAAGACCCTTCATTACTCATGTCAAAGGAAGG  
+HWI-EAS443:3:62:862:632#0/1  
`S`]`ba`aQZT¥`\_`abaaa`\_`aab`aaa`aaa^[a  
@HWI-EAS443:3:63:1003:1185#0/1  
CGAAGAAATAAGACCCTTCATTACTCATGTCAAAGGAAGG  
+HWI-EAS443:3:63:1003:1185#0/1  
`Ma`]^ab¥LRTbbbbbbb`]abba]aab]bT]]baY  
@HWI-EAS443:3:63:1087:165#0/1  
ATCACTCAATGAGTGACATCGAAGCCATGGCGTCTCAAGG  
+HWI-EAS443:3:63:1087:165#0/1  
T\_a\_XOZ¥aa\_]¥X^Q\_bab`YZU\_\_Z\_Y[Z[K[`]¥OT]  
@HWI-EAS443:3:63:1096:249#0/1  
CAAAGCAGGGTAGATAATCACTCAATGAGTGACATCGAA  
+HWI-EAS443:3:63:1096:249#0/1  
a`bb\_\_`abba\_baaaa^`aa`baabba\_a\_aaaaaUa`  
@HWI-EAS443:3:63:13:1769#0/1  
AGATAATCACTCAATGAGTGACATCGAAGCCATGGCGTCT  
+HWI-EAS443:3:63:13:1769#0/1  
aZa\_]W^^\_]\_]`^\_WX¥\_\_\_U^U^YTX]^YBBBBBB  
@HWI-EAS443:3:63:1454:890#0/1  
TAATCACTCAATGAGTGACATCGAAGCCATGGCGTCTCAA  
+HWI-EAS443:3:63:1454:890#0/1  
^b`aaa`a]aaa\_\_\_Xaa]\_`a`^aaS]^`^`\_XZ`VaX  
@HWI-EAS443:3:63:1706:1791#0/1  
GTCATACTCCTCTGCATTGTCTCCGAAGAAATAAGACCCT  
+HWI-EAS443:3:63:1706:1791#0/1  
aZZaaZa`[\_aa\_¥`¥`a]\_]`[a\_]aX[U[\_`\_`^VOW\_  
@HWI-EAS443:3:63:514:531#0/1  
AGCAAAAGCAGGGTAGATAATCACTCAATGAGTGACATCG  
+HWI-EAS443:3:63:514:531#0/1  
Z¥bbbbbb\_baaab]bbb`]`a\_\_abaabbb`b`bbbbbaa  
@HWI-EAS443:3:63:550:366#0/1  
CTCCTCTGCATTGTCTCCGAAGAAATAAGACCCTTCATTA





@HWI-EAS443:3:64:795:1413#0/1  
CAAAAGCAGGGTAGATAATCACTCAATGAGTGACATCGAA  
+HWI-EAS443:3:64:795:1413#0/1  
aaa\_a[b`\_Z^Taa\_[]`^Xa`a`\_\_`Z`]Va\_]`Y][[]U  
@HWI-EAS443:3:64:853:507#0/1  
AGATAATCACTCAATGAGTGACATCGAAGCCATGGCGTCT  
+HWI-EAS443:3:64:853:507#0/1  
aaaaaaaaa`a`\_aaY`[\_`^^`^XX^`¥^``\_`[`¥^¥  
@HWI-EAS443:3:64:902:1544#0/1  
TAATCACTCAATGAGTGACATCGAAGCCATGGCGTCTCAA  
+HWI-EAS443:3:64:902:1544#0/1  
a^aa\_bUaa`]ab^aW^a^a^\_]a¥^^^a]¥\_UT]X\_X`¥  
@HWI-EAS443:3:65:150:1241#0/1  
AAGACCCTTCATTACTCATGTCAAAGGAAGGCACGATCGG  
+HWI-EAS443:3:65:150:1241#0/1  
]b[S`KTJ\_a^a\_U]^`aU\_Zaaaa^WaWZa\_\_^HZ\_]Y  
@HWI-EAS443:3:65:159:311#0/1  
AGATAATCACTCAATGAGTGACATCGAAGCCATGGCGTCT  
+HWI-EAS443:3:65:159:311#0/1  
`^`aT[aaaa`aaZ][¥G[XUW]a¥P[Z]^XXLSRRZS  
@HWI-EAS443:3:65:1673:898#0/1  
GCAAAAAGCAGGGTAGATAATCACTCAATGAGTGACATCGA  
+HWI-EAS443:3:65:1673:898#0/1  
ababbbaaaaa¥aaabbaa\_aaaaaaaaa^ba\_aa\_¥`  
@HWI-EAS443:3:65:526:486#0/1  
GCAAAAAGCAGGGTAGATAATCACTCAATGAGTGACATCGA  
+HWI-EAS443:3:65:526:486#0/1  
aa\_`^`aaa\_aa^WaZ^`ZV^]X\_`aaU]^`[Ua`\_a\_[VX  
@HWI-EAS443:3:65:586:645#0/1  
GAAGAAATAAGACCCTTCATTACTCATGTCAAAGGAAGGC  
+HWI-EAS443:3:65:586:645#0/1  
a¥\_a`aaaab\_U\_\_^`\_`a`Y`\_\_`\_`^`Z`\_^[IZ]`  
@HWI-EAS443:3:65:613:1484#0/1  
CAGGGTAGATAATCACTCAATGAGTGACATCGAAGCCATG  
+HWI-EAS443:3:65:613:1484#0/1  
\_Z\_[Sub¥¥\_baa[a`aaa\_T]^WX[`aa`¥GX]VV`\_[]  
@HWI-EAS443:3:65:636:558#0/1  
ATCACTCAATGAGTGACATCGAAGCCATGGCGTCTCAAGG  
+HWI-EAS443:3:65:636:558#0/1  
¥\_¥`\_`¥bb`aaa[Z`[a`\_\_W\_`^¥]WX`^S^`\_V]``  
@HWI-EAS443:3:66:125:2033#0/1  
AATCACTCAATGAGTGACATCGAAGCCATGGCGTCTCAAG  
+HWI-EAS443:3:66:125:2033#0/1  
]S`aaa`aaa\_`¥YT\_`aa^aN\_^[\_`\_\_YWU\_`^Y\_Y\_]\_W  
@HWI-EAS443:3:66:1267:172#0/1  
AAGAAATAAGACCCTTCATTACTCATGTCAAAGGAAGGCA  
+HWI-EAS443:3:66:1267:172#0/1  
\_]Y]`¥I\_a\_[bIaaa[[[`Y`\_^]TaZZYaa¥^¥[Y\_\_  
@HWI-EAS443:3:66:357:49#0/1  
CACTCAATGAGTGACATCGAAGCCATGGCGTCTCAAGGCA



@HWI-EAS443:3:69:235:1896#0/1  
CAAAAGCAGGGTAGATAATCACTCAATGAGTGACATCGAA  
+HWI-EAS443:3:69:235:1896#0/1  
``\_a[Y`¥S[`^bX[^]¥¥aaa\_]\_[\_X\_]U``a]\_RYV  
@HWI-EAS443:3:69:470:229#0/1  
AGCAGGGTAGATAATCACTCAATGAGTGACATCGAAGCCA  
+HWI-EAS443:3:69:470:229#0/1  
abbbbbbb^ab[baaa\_baaabbb\_aa\_ba`a`a\_\_\_\_\_a  
@HWI-EAS443:3:69:492:39#0/1  
ATCGAAGCCATGGCGTCTCAAGGCACCAAACGATCATATG  
+HWI-EAS443:3:69:492:39#0/1  
[aa`L^bbbaaaaaa`\_UVZX`VIVRP`¥ZY\_]Q SX^^Y^  
@HWI-EAS443:3:69:814:326#0/1  
AATCACTCAATGAGTGACATCGAAGCCATGGCGTCTCAAG  
+HWI-EAS443:3:69:814:326#0/1  
X[[b`aa`]`][\_] ^Vaa\_\_^a¥a\_^`\_\_\_\_\_YY\_^]UL[  
@HWI-EAS443:3:69:917:440#0/1  
TAATCACTCAATGAGTGACATCGAAGCCATGGCGTCTCAA  
+HWI-EAS443:3:69:917:440#0/1  
aaZZ`^^a`^`]]ab[baY\_aaab^a]`a\_\_\_\_\_aPS`¥aa  
@HWI-EAS443:3:6:1214:1929#0/1  
ATAAGACCCTTCATTACTCATGTCAAAGGAAGGCACGATC  
+HWI-EAS443:3:6:1214:1929#0/1  
abb\_Z¥[Rababa`ba`aaa`]V`aaa`¥a`]aU¥`BB  
@HWI-EAS443:3:6:1340:806#0/1  
CTTCATTACTCATGTCAAAGGAAGGCACGATCGGGTTCGT  
+HWI-EAS443:3:6:1340:806#0/1  
a\_VX^`b`\_¥\_babaSWa]b\_Ub`UY`R`\_G]¥LW`b^^  
@HWI-EAS443:3:6:376:471#0/1  
CTCCGAAGAAATAAGACCCTTCATTACTCATGTCAAAGGA  
+HWI-EAS443:3:6:376:471#0/1  
abab`bbaababbbbaaa^aabaabaa[babbb`aaaaa]`  
@HWI-EAS443:3:6:383:250#0/1  
GAAATAAGACCCTTCATTACTCATGTCAAAGGAAGGCACG  
+HWI-EAS443:3:6:383:250#0/1  
abababba\_\_[Raa``aaaXa\_a`aV\_a\_\_`a\_\_`\_\_Z\_  
@HWI-EAS443:3:70:495:1439#0/1  
CTCCTCTGCATTGTCTCCGAAGAAATAAGACCCTTCATTA  
+HWI-EAS443:3:70:495:1439#0/1  
a^a\_Qa`]\_X[F¥Y`\_`bYYO]ZZ`]¥^NRXXQJS[\_WYS  
@HWI-EAS443:3:70:496:699#0/1  
ACGAACCCGATCGTGCCTTCCTTTGACATGAGTAATGAAG  
+HWI-EAS443:3:70:496:699#0/1  
aaaaaaaa\_a`\_RXS]ZU[^``\_]SYV¥a[^VXYRVY[V  
@HWI-EAS443:3:70:824:2013#0/1  
AATCACTCAATGAGTGACATCGAAGCCATGGCGTCTCAAG  
+HWI-EAS443:3:70:824:2013#0/1  
ZU[aaa``aaa[aYXaba\_^Ya\_V`^¥Z\_]\_\_[\_Y]\_X^V  
@HWI-EAS443:3:71:1284:1104#0/1  
ATCGAAGCCATGGCGTCTCAAGGCACCAAACGATCATATG

+HWI-EAS443:3:71:1284:1104#0/1  
aaaaaaba`[aa\_bWU\_^]Zaa\_][\_a\_a\_¥^]¥U[Q¥  
@HWI-EAS443:3:71:35:1233#0/1  
CGAAGAAATAAGACCCTTCATTACTCATGTCAAAGGAAGG  
+HWI-EAS443:3:71:35:1233#0/1  
^aUaZWZQT^\_¥TR]a]ZW\_[\_J\_`QY`^\_XWNYVW`]Y  
@HWI-EAS443:3:71:414:387#0/1  
TAGATAATCACTCAATGAGTGACATCGAAGCCATGGCGTC  
+HWI-EAS443:3:71:414:387#0/1  
abbab`bbbbbaabab`ab[baa^`aa^aaaT^aaaaa[[  
@HWI-EAS443:3:71:435:279#0/1  
ATAAGACCCTTCATTACTCATGTCAAAGGAAGGCACGATC  
+HWI-EAS443:3:71:435:279#0/1  
`bbb\_a`ab`ababbaaba\_^aaaa\_`¥N\_aa`[\_¥  
@HWI-EAS443:3:71:535:1703#0/1  
AGAAATAAGACCCTTCATTACTCATGTCAAAGGAAGGCAC  
+HWI-EAS443:3:71:535:1703#0/1  
a`W]ZS`b\_WQGT¥\_\_aY\_a\_¥\_Z\_MLK^WUJZZ]ZZaBB  
@HWI-EAS443:3:71:674:118#0/1  
GGTGCCTTGAGACGCCATGGCTTCGATGTCACTCATTGAG  
+HWI-EAS443:3:71:674:118#0/1  
a`^a`baa]\_]\_\_`a`\_]`\_N[]\_WWSQY]W¥ZNZT  
@HWI-EAS443:3:71:878:977#0/1  
AGCAGGGTAGATAATCACTCAATGAGTGACATCGAAGCCA  
+HWI-EAS443:3:71:878:977#0/1  
aaa]ba`^b`¥a`a\_]aa\_a\_a`¥a]aaaa`\_¥\_\_`¥¥\_  
@HWI-EAS443:3:72:1158:1624#0/1  
CGAAGAAATAAGACCCTTCATTACTCATGTCAAAGGAAGG  
+HWI-EAS443:3:72:1158:1624#0/1  
`a``bbabbbbaa^SZab\_baabaaaaa`abaaa``\_^]  
@HWI-EAS443:3:72:115:403#0/1  
AGCAAAAGCAGGGTAGATAATCACTCAATGAGTGACATCG  
+HWI-EAS443:3:72:115:403#0/1  
aba^^`aa`aaa\_¥aa\_a\_a`a\_\_`^\_\_`X\_N[a^\_^\_W  
@HWI-EAS443:3:72:325:838#0/1  
GAAGAAATAAGACCCTTCATTACTCATGTCAAAGGAAGGC  
+HWI-EAS443:3:72:325:838#0/1  
aaaaaaaaabb`\_^`\_aabaaaa`a]`]]]VUa`\_`[¥^`  
@HWI-EAS443:3:72:784:256#0/1  
CATCGAAGCCATGGCGTCTCAAGGCACCAAACGATCATAT  
+HWI-EAS443:3:72:784:256#0/1  
abb`bbbb\_aW]aa`b`aa\_a``\_Ya^[`aa\_a¥`U^\_\_a  
@HWI-EAS443:3:72:908:1334#0/1  
CAAAGCAGGGTAGATAATCACTCAATGAGTGACATCGAA  
+HWI-EAS443:3:72:908:1334#0/1  
ababaabaaaaXbaa\_b]`abaaaaa`a`ZP`\_`aaa]a\_  
@HWI-EAS443:3:73:1070:1888#0/1  
GACCCTTCATTACTCATGTCAAAGGAAGGCACGATCGGGT  
+HWI-EAS443:3:73:1070:1888#0/1  
a`ba`babaaababab^`bbb`Zaa\_aaa[¥a^^\_\_N

@HWI-EAS443:3:73:1397:1215#0/1  
CACTCAATGAGTGACATCGAAGCCATGGCGTCTCAAGGCA  
+HWI-EAS443:3:73:1397:1215#0/1  
aaaZ]ba]Z]a\_a¥N¥aaa`\_``\_a\_``aTM[]¥X¥X^\_  
@HWI-EAS443:3:73:1543:824#0/1  
AGATAATCACTCAATGAGTGACATCGAAGCCATGGCGTCT  
+HWI-EAS443:3:73:1543:824#0/1  
\_`aaaaaaa`\_\_`aa`a`Va`\_`\_] [[\_`VY\_`^Y\_] ^\_  
@HWI-EAS443:3:73:1672:600#0/1  
AGCAAAAGCAGGGTAGATAATCACTCAATGAGTGACATCG  
+HWI-EAS443:3:73:1672:600#0/1  
aaabb`ab\_a\_\_aZbaaaa`a^a`a^`aaa^a\_a`^a`^^  
@HWI-EAS443:3:73:16:1531#0/1  
CTCCGAAGAAATAAGACCCTTCATTACTCATGTCAAAGGA  
+HWI-EAS443:3:73:16:1531#0/1  
aaaa^`aa`aa`^a¥HY`\_] [ `¥Q[[^X]]] ``\_^ZTW  
@HWI-EAS443:3:73:274:1077#0/1  
GAAGAAATAAGACCCTTCATTACTCATGTCAAAGGAAGGC  
+HWI-EAS443:3:73:274:1077#0/1  
a`aa`aaa]a^\_] ^\_] aaa`\_a`\_`\_```aa\_`\_^^^[]\_  
@HWI-EAS443:3:73:588:161#0/1  
AGACCCTTCATTACTCATGTCAAAGGAAGGCACGATCGGG  
+HWI-EAS443:3:73:588:161#0/1  
a¥TVJR\_\_¥` [\_] S^ZZV[U¥\_] SUYU¥ZQSYSWZLUVWX  
@HWI-EAS443:3:73:609:1233#0/1  
ATCGAAGCCATGGCGTCTCAAGGCACCAAACGATCATATG  
+HWI-EAS443:3:73:609:1233#0/1  
a\_aYa`ZaZP]\_\_\_\_\_¥\_^[^¥Y¥[Y`^THVY]TWZP^LR  
@HWI-EAS443:3:73:721:725#0/1  
ATTGTCTCCGAAGAAATAAGACCCTTCATTACTCATGTCA  
+HWI-EAS443:3:73:721:725#0/1  
X¥\_W[^abaa^V[¥^\_``\_XTV^UUZ]`^QV`Y`a]¥Q^Z  
@HWI-EAS443:3:73:766:713#0/1  
AGACCCTTCATTACTCATGTCAAAGGAAGGCACGATCGGG  
+HWI-EAS443:3:73:766:713#0/1  
aaS\_Ya`aaaX]b]\_aaaVDX^`\_``\_\_\_\_`XSW`\_UVVYP  
@HWI-EAS443:3:74:1040:756#0/1  
GCAAAAGCAGGGTAGATAATCACTCAATGAGTGACATCGA  
+HWI-EAS443:3:74:1040:756#0/1  
aMNPYa^LXU^aW]`\_\_^UZ¥NTZT[[]^WVQ]^U^WVPP  
@HWI-EAS443:3:74:1125:228#0/1  
AAAGCAGGGTAGATAATCACTCAATGAGTGACATCGAAGC  
+HWI-EAS443:3:74:1125:228#0/1  
aba\_aabaa]bbaba`a`a`a\_a`aaa\_]a\_^aa¥\_\_^\_0  
@HWI-EAS443:3:74:119:1074#0/1  
CTCCGAAGAAATAAGACCCTTCATTACTCATGTCAAAGGA  
+HWI-EAS443:3:74:119:1074#0/1  
aaa`^¥Va^^a][a`]\_]`[^\_\_\_\_[^`^`^Z^W]^VX]]  
@HWI-EAS443:3:74:1573:1023#0/1  
AGCAGGGTAGATAATCACTCAATGAGTGACATCGAAGCCA

+HWI-EAS443:3:74:1573:1023#0/1  
aab`bb\_R\_baabbbab\_babbabaa\_`ab`a[a¥L`][`  
@HWI-EAS443:3:74:1676:1350#0/1  
GACCTTCATTACTCATGTCAAAGGAAGGCACGATCGGGT  
+HWI-EAS443:3:74:1676:1350#0/1  
aaa`¥bbbabbbab`abaabbbbaaab^\_bbabbY[\_\_\_WN  
@HWI-EAS443:3:74:400:984#0/1  
ATCACTCAATGAGTGACATCGAAGCCATGGCGTCTCAAGG  
+HWI-EAS443:3:74:400:984#0/1  
XUS[`¥]T\_`aZ^^WVQaa`VI¥¥ZW\_][a[aYaaaaJSM  
@HWI-EAS443:3:74:478:440#0/1  
ATTCTGATTAACTCCATTGCTATTGTTCCAACCTTTCA  
+HWI-EAS443:3:74:478:440#0/1  
abaabbaaabbaaaabaaa`a`aaa]a\_a[`¥`a\_a`aaa  
@HWI-EAS443:3:74:629:1165#0/1  
TAATCACTCAATGAGTGACATCGAAGCCATGGCGTCTCAA  
+HWI-EAS443:3:74:629:1165#0/1  
abaa\_baaaaaaa`a\_aaaa\_a]\_\_]a\_``aX`a]`\_Y`\_  
@HWI-EAS443:3:74:671:1382#0/1  
AAAGCAGGGTAGATAATCACTCAATGAGTGACATCGAAGC  
+HWI-EAS443:3:74:671:1382#0/1  
[N\_\_Q[VOJ\_U\_]Z]`\_[^W^SY^YXXFW]ZZZ¥Y`[OF  
@HWI-EAS443:3:75:1006:1516#0/1  
ATAAGACCTTCATTACTCATGTCAAAGGAAGGCACGATC  
+HWI-EAS443:3:75:1006:1516#0/1  
abba`\_aa`aa\_a\_b`aaabba\_b`a`a`\_aaaaa\_^X\_  
@HWI-EAS443:3:75:1075:1455#0/1  
AGCAAAAGCAGGGTAGATAATCACTCAATGAGTGACATCG  
+HWI-EAS443:3:75:1075:1455#0/1  
aaabaaaabaa`aXa\_`\_a\_`aa\_^\_aa``\_\_Y```\_^¥¥  
@HWI-EAS443:3:75:1620:1209#0/1  
AAGACCTTCATTACTCATGTCAAAGGAAGGCACGATCGG  
+HWI-EAS443:3:75:1620:1209#0/1  
aaaaW\_abbaabbb`aabb\_\_aaaa\_\_a`aV`\_a\_XYaa  
@HWI-EAS443:3:75:183:1304#0/1  
GGGTAGATAATCACTCAATGAGTGACATCGAAGCCATGGC  
+HWI-EAS443:3:75:183:1304#0/1  
\_]bSa\_]bb\_]bbababaaba\_`Yab`ba]\_b\_`\_aa\_a  
@HWI-EAS443:3:75:200:673#0/1  
CAAAAGCAGGGTAGATAATCACTCAATGAGTGACATCGAA  
+HWI-EAS443:3:75:200:673#0/1  
aa\_J^]`S\_`\_Yba`a^``]`\_`a`[\_\_X\_\_^\_\_X]YN  
@HWI-EAS443:3:75:209:557#0/1  
CGAAGAAATAAGACCCTTCATTACTCATGTCAAAGGAAGG  
+HWI-EAS443:3:75:209:557#0/1  
abaab\_ba\_[b^^\_aXa^aa`aaaaaa`][a]\_a\_`a\_`  
@HWI-EAS443:3:75:213:996#0/1  
CACTCAATGAGTGACATCGAAGCCATGGCGTCTCAAGGCA  
+HWI-EAS443:3:75:213:996#0/1  
abaab\_Z`b`a^`aa`a]aa[b\_a\_\_\_aa]a\_\_\_`\_]`V

@HWI-EAS443:3:75:333:2042#0/1  
GACCCTTCATTACTCATGTCAAAGGAAGGCACGATCGGGT  
+HWI-EAS443:3:75:333:2042#0/1  
[bbbabbbbbbabb`bbaaababa\_baa\_bbbab`aa`aZ  
@HWI-EAS443:3:75:654:1267#0/1  
AGATAATCACTCAATGAGTGACATCGAAGCCATGGCGTCT  
+HWI-EAS443:3:75:654:1267#0/1  
aa]^YU[[UQQaVX\_YVWV\_\_\_^Y^XX^R^]SY^VVXXXT  
@HWI-EAS443:3:75:699:730#0/1  
ACGAACCCGATCGTGCCTTCCTTTGACATGAGTAATGAAG  
+HWI-EAS443:3:75:699:730#0/1  
aaab\_baaaaZa`Y`\_^\_X`a^[SY\_^\_X#V]^Y\_^\_  
@HWI-EAS443:3:76:1246:62#0/1  
TAGATAATCACTCAATGAGTGACATCGAAGCCATGGCGTC  
+HWI-EAS443:3:76:1246:62#0/1  
]bbbaaab]a\_aa]`aa`aaaaaaa]\_\_\_aXX^`aZWa^Z  
@HWI-EAS443:3:76:153:130#0/1  
AGACCCTTCATTACTCATGTCAAAGGAAGGCACGATCGGG  
+HWI-EAS443:3:76:153:130#0/1  
aa^^\_[`^#\_^^V^^^\_W[P[Z[]W^WV[X[RWVXW  
@HWI-EAS443:3:76:505:847#0/1  
CTCCTCTGCATTGTCTCCGAAGAAATAAGACCCTTCATTA  
+HWI-EAS443:3:76:505:847#0/1  
a\_bb`#ab`bb`\_Ta\_bbb]bbaa`a#\_]WSW\_aaa`[a  
@HWI-EAS443:3:76:530:847#0/1  
CAATGAGTGACATCGAAGCCATGGCGTCTCAAGGCACCAA  
+HWI-EAS443:3:76:530:847#0/1  
[UU\_W#\_`b^WaaaZWR\_UUEX^Y]]OO]ZTSX\_\_YRDRJ  
@HWI-EAS443:3:76:739:813#0/1  
AGCAAAAGCAGGGTAGATAATCACTCAATGAGTGACATCG  
+HWI-EAS443:3:76:739:813#0/1  
a\_^T\_a`baaba`a^^`a`aaa\_b\_`Q`aaUU`aab\_QV  
@HWI-EAS443:3:76:741:53#0/1  
AAGCAGGGTAGATAATCACTCAATGAGTGACATCGAAGCC  
+HWI-EAS443:3:76:741:53#0/1  
WW\_aabb\_`[``b\_Z\_aX]#aXZ\_]b\_a```#WQXYVfV  
@HWI-EAS443:3:76:876:956#0/1  
CAAAGCAGGGTAGATAATCACTCAATGAGTGACATCGAA  
+HWI-EAS443:3:76:876:956#0/1  
^abbbbabbbbab\_babbbb\_babbbbaa\_a``baaV``  
@HWI-EAS443:3:76:971:989#0/1  
CAGGGTAGATAATCACTCAATGAGTGACATCGAAGCCATG  
+HWI-EAS443:3:76:971:989#0/1  
aba^]ba```aaab\_\_`aaababXaaba\_``Y`aWS]\_^  
@HWI-EAS443:3:77:1062:1547#0/1  
TAATCACTCAATGAGTGACATCGAAGCCATGGCGTCTCAA  
+HWI-EAS443:3:77:1062:1547#0/1  
`\_#`baUaa`a[QWZaa`^[a^Y\_]`\_\_\_ZZ]]\_^VW\_  
@HWI-EAS443:3:77:1100:683#0/1  
GGGTAGATAATCACTCAATGAGTGACATCGAAGCCATGGC

+HWI-EAS443:3:77:1100:683#0/1  
]`aVbbZaZ[Zab\_b`baa\_aaZ\_aXaaXZFY¥T\_Z`\_\_¥  
@HWI-EAS443:3:77:1122:527#0/1  
CCTCTGCATTGTCTCCGAAGAAATAAGACCCTTCATTACT  
+HWI-EAS443:3:77:1122:527#0/1  
R^abbY[\_\_\_^Wbbb`^aSX¥bb`ba`ZbKbKa`Zb\_a\_`b  
@HWI-EAS443:3:77:1401:1939#0/1  
AGCAAAAGCAGGGTAGATAATCACTCAATGAGTGACATCG  
+HWI-EAS443:3:77:1401:1939#0/1  
aa\_aa`\_X]`VUGb^aMa[[V`Ua][`YaUZQUaaa`UU  
@HWI-EAS443:3:77:1781:39#0/1  
CAAAAGCAGGGTAGATAATCACTCAATGAGTGACATCGAA  
+HWI-EAS443:3:77:1781:39#0/1  
abb`bbbbbbbaa]aaba`^bbbabaaa`aWaa]a\_`S\_a  
@HWI-EAS443:3:77:216:497#0/1  
CGAAGAAATAAGACCCTTCATTACTCATGTCAAAGGAAG  
+HWI-EAS443:3:77:216:497#0/1  
`a[b¥QT]abba`aa\_aa^a¥`aaabaab\_Ya`\_\_]Ka[[  
@HWI-EAS443:3:77:375:537#0/1  
CAAAAGCAGGGTAGATAATCACTCAATGAGTGACATCGAA  
+HWI-EAS443:3:77:375:537#0/1  
\_`TWaabXPUaTa]\_\_T]`\_]`\_`^`aa¥]G^`]ZU¥RXU  
@HWI-EAS443:3:77:532:1368#0/1  
CTCCGAAGAAATAAGACCCTTCATTACTCATGTCAAAGGA  
+HWI-EAS443:3:77:532:1368#0/1  
aaa^aa`^TaZ^\_]T][`\_aa\_`\_]`^]]`V^^\_YZ^a  
@HWI-EAS443:3:77:639:1900#0/1  
AGACCCTTCATTACTCATGTCAAAGGAAGGCACGATCGGG  
+HWI-EAS443:3:77:639:1900#0/1  
aNXZX[[R]\_]\_]`^UY\_T^UYX^^^]`^YX¥XUNUX  
@HWI-EAS443:3:78:1010:1176#0/1  
AATCACTCAATGAGTGACATCGAAGCCATGGCGTCTCAAG  
+HWI-EAS443:3:78:1010:1176#0/1  
a`¥¥a[aaX]a[QNV¥^\_aY\_\_YLY^\_¥UZKZW[\_TYSW  
@HWI-EAS443:3:78:1147:2023#0/1  
GCAAAAGCAGGGTAGATAATCACTCAATGAGTGACATCGA  
+HWI-EAS443:3:78:1147:2023#0/1  
`aaaaaaaa`aNaa\_aaa`^a\_a\_`\_]`\_X[`\_`^U]^  
@HWI-EAS443:3:78:1240:1046#0/1  
AATCACTCAATGAGTGACATCGAAGCCATGGCGTCTCAAG  
+HWI-EAS443:3:78:1240:1046#0/1  
a[\_ba¥^aaaa`^Z^\_b`\_`\_¥¥^`R[]`a\_^`TLW\_^Z  
@HWI-EAS443:3:78:1245:1987#0/1  
ATCACTCAATGAGTGACATCGAAGCCATGGCGTCTCAAGG  
+HWI-EAS443:3:78:1245:1987#0/1  
a`aa\_aa`\_]`^`aXaa^a[\_[^\_\_QRX^\_\_][`X\_^][^¥R  
@HWI-EAS443:3:78:1369:199#0/1  
AGCAGGGTAGATAATCACTCAATGAGTGACATCGAAGCCA  
+HWI-EAS443:3:78:1369:199#0/1  
a`b\_`a\_\_b\_aaaaa`aZ`a`a\_\_Y\_^`\_`^a\_\_\_^]\_YX]



@HWI-EAS443:3:78:74:1802#0/1  
AAGAAATAAGACCCTTCATTACTCATGTCAAAGGAAGGCA  
+HWI-EAS443:3:78:74:1802#0/1  
]`abYa]\_]`^a[]\_````Waa`a`^^^a\_^\_\_¥[\_][\_\_  
@HWI-EAS443:3:78:786:1748#0/1  
GCAAAAAGCAGGGTAGATAATCACTCAATGAGTGACATCGA  
+HWI-EAS443:3:78:786:1748#0/1  
Sa``\_`[a`U`a0`U``\_`^Q\_U\_X^bbaaa[a^`aaY]LY  
@HWI-EAS443:3:78:81:534#0/1  
AATCACTCAATGAGTGACATCGAAGCCATGGCGTCTCAAG  
+HWI-EAS443:3:78:81:534#0/1  
`aaaaaaaa^`a`aZaa````V`a\_\_¥^`\_aa]\_^`a\_^  
@HWI-EAS443:3:79:1163:695#0/1  
CTGCATTGTCTCCGAAGAAATAAGACCCTTCATTACTCAT  
+HWI-EAS443:3:79:1163:695#0/1  
^a\_]`bb`¥Zbb```abbbabbbb`a`HaaL^a]aYa`bb  
@HWI-EAS443:3:79:288:1145#0/1  
CGAAGAAATAAGACCCTTCATTACTCATGTCAAAGGAAGG  
+HWI-EAS443:3:79:288:1145#0/1  
abaY`S¥aabb```a\_a¥]a`\_`aaaV]a`a¥^aZU¥a`\_`  
@HWI-EAS443:3:79:446:388#0/1  
GATAATCACTCAATGAGTGACATCGAAGCCATGGCGTCTC  
+HWI-EAS443:3:79:446:388#0/1  
^aabb`aaaaaaaaaaa]aab`aTZT\_aa\_abaaaYZ\_`  
@HWI-EAS443:3:79:489:1946#0/1  
GAAAGGAGTTGGAACAATAGCAATGGAGTTAATCAGAATG  
+HWI-EAS443:3:79:489:1946#0/1  
`ab``\_ba`aa\_bbbba^F]baaa[^a`bbaa`b\_abaa  
@HWI-EAS443:3:79:587:1159#0/1  
AAGCAGGGTAGATAATCACTCAATGAGTGACATCGAAGCC  
+HWI-EAS443:3:79:587:1159#0/1  
aa\_a\_a^aZaa^`a\_```^Y`¥\_\_\_\_]\_Z\_\_\_\_`\_^¥^^\_RZ  
@HWI-EAS443:3:79:685:387#0/1  
AGCAGGGTAGATAATCACTCAATGAGTGACATCGAAGCCA  
+HWI-EAS443:3:79:685:387#0/1  
I¥¥¥aa¥][\_U]\_W[]\_Z\_\_\_\_R[XZVR^`¥^b¥`Y[VM[\_  
@HWI-EAS443:3:79:686:512#0/1  
ATACTCCTCTGCATTGTCTCCGAAGAAATAAGACCCTTCA  
+HWI-EAS443:3:79:686:512#0/1  
a^Z^abb]aab^V\_^]a`\_]a[RX[^T[`Y^STMQRYO[  
@HWI-EAS443:3:7:1205:1251#0/1  
GCAAAAAGCAGGGTAGATAATCACTCAATGAGTGACATCGA  
+HWI-EAS443:3:7:1205:1251#0/1  
aWZ`aY[V[\_aJUa`]BBBBBBBBBBBBBBBBBBBBBBB  
@HWI-EAS443:3:7:1425:736#0/1  
GGTAGATAATCACTCAATGAGTGACATCGAAGCCATGGCG  
+HWI-EAS443:3:7:1425:736#0/1  
ab[bbabb\_b`aab`a``aaa¥ba\_aa^a`\_bUX`R^^Na  
@HWI-EAS443:3:7:220:642#0/1  
GCAAAAAGCAGGGTAGATAATCACTCAATGAGTGACATCGA



@HWI-EAS443:3:81:1585:1891#0/1  
AAAGCAGGGTAGATAATCACTCAATGAGTGACATCGAAGC  
+HWI-EAS443:3:81:1585:1891#0/1  
a`a]P\_[^aXa\_`^\_\_¥`\_] [V¥]¥QL¥SZ¥W`UXX\_¥]]  
@HWI-EAS443:3:81:21:1311#0/1  
GGTAGATAATCACTCAATGAGTGACATCGAAGCCATGGCG  
+HWI-EAS443:3:81:21:1311#0/1  
aa\_bb`abaabbbabaL]aa\_[]\_\_S]aYUY^aa`^a^a`  
@HWI-EAS443:3:81:395:437#0/1  
TACTCCTCTGCATTGTCTCCGAAGAAATAAGACCCTTCAT  
+HWI-EAS443:3:81:395:437#0/1  
aaabaaaaaba`baaa`\_aaa\_\_a\_\_`a¥`\_¥S\_\_``\_a]  
@HWI-EAS443:3:81:468:1646#0/1  
AATCACTCAATGAGTGACATCGAAGCCATGGCGTCTCAAG  
+HWI-EAS443:3:81:468:1646#0/1  
aa[aaa\_`bbROTZRFVaa\_`\_`R^\_^\_UXX]MOUY^RKI  
@HWI-EAS443:3:81:479:1041#0/1  
CTCCTCTGCATTGTCTCCGAAGAAATAAGACCCTTCATTA  
+HWI-EAS443:3:81:479:1041#0/1  
aabbaa``bba`aaaabb`aba````\_a]`\_[-`]T\_\_]`  
@HWI-EAS443:3:81:502:1352#0/1  
CTTCATTACTCATGTCAAAGGAAGGCACGATCGGGTTCGT  
+HWI-EAS443:3:81:502:1352#0/1  
a]\_\_^Tab]b\_\_NTbb]`K`[U`abaaZbSPU[a[^]Y¥  
@HWI-EAS443:3:81:537:1654#0/1  
TAATCACTCAATGAGTGACATCGAAGCCATGGCGTCTCAA  
+HWI-EAS443:3:81:537:1654#0/1  
\_abababbababbb`Xbabbab]aaabbaa`aba\_\_^aa\_  
@HWI-EAS443:3:82:1032:1219#0/1  
TAGATAATCACTCAATGAGTGACATCGAAGCCATGGCGTC  
+HWI-EAS443:3:82:1032:1219#0/1  
abbbbaabbbbababaaba``bbaaa¥`a`a`baaa\_a\_\_  
@HWI-EAS443:3:82:1065:929#0/1  
AAGCAGGGTAGATAATCACTCAATGAGTGACATCGAAGCC  
+HWI-EAS443:3:82:1065:929#0/1  
aaaaaaaa]bba\_a]`\_`^bVaaa]\_a¥`a`aa\_\_``a\_Z  
@HWI-EAS443:3:82:1082:1442#0/1  
CAAAGCAGGGTAGATAATCACTCAATGAGTGACATCGAA  
+HWI-EAS443:3:82:1082:1442#0/1  
\_W\_a\_b`U^[^XbZ\_bb\_Wa]a^`aZ^a`UG¥aa[^a]` [   
@HWI-EAS443:3:82:1371:71#0/1  
CTCCGAAGAAATAAGACCCTTCATTACTCATGTCAAAGGA  
+HWI-EAS443:3:82:1371:71#0/1  
]abU``b``ba^UaZWIH\_baabbab\_\_aaabbaa`^abR  
@HWI-EAS443:3:82:759:364#0/1  
CGAAGAAATAAGACCCTTCATTACTCATGTCAAAGGAAGG  
+HWI-EAS443:3:82:759:364#0/1  
[a`a`a¥aaa\_UY¥TU^a[baaUb`aaaa^ababaa]^aa  
@HWI-EAS443:3:82:827:511#0/1  
ACTCAATGAGTGACATCGAAGCCATGGCGTCTCAAGGCAC

+HWI-EAS443:3:82:827:511#0/1  
ab\_¥HY]b`bXb`aaaa^\_[[a`b```a`Z\_]\_TG]^Taa  
@HWI-EAS443:3:82:962:658#0/1  
AGATAATCACTCAATGAGTGACATCGAAGCCATGGCGTCT  
+HWI-EAS443:3:82:962:658#0/1  
abaa¥^a\_HZa\_a\_``^a]`\_\_a\_^]^\_YUZ`\_a\_VXWRX  
@HWI-EAS443:3:83:116:1872#0/1  
GCAAAAGCAGGGTAGATAATCACTCAATGAGTGACATCGA  
+HWI-EAS443:3:83:116:1872#0/1  
^`\_Y^[b`aYHWZaSaWTaaa]aVaaa]Y\_XZ```aZ^ZY  
@HWI-EAS443:3:83:1234:488#0/1  
CATGAGTAATGAAGGGTCTTATTTCTTCGGAGACAATGCA  
+HWI-EAS443:3:83:1234:488#0/1  
aabaabababbbabbb¥abbbbaaabaab`aba^aaaa\_`  
@HWI-EAS443:3:83:165:545#0/1  
TAAGACCCTTCATTACTCATGTCAAAGGAAGGCACGATCG  
+HWI-EAS443:3:83:165:545#0/1  
`\_`baab]a¥a][`XW]baa]Q[\_WH]¥P¥¥UXX¥a`¥\_Q  
@HWI-EAS443:3:83:1780:128#0/1  
GTCTCCGAAGAAATAAGACCCTTCATTACTCATGTCAAAG  
+HWI-EAS443:3:83:1780:128#0/1  
[^`aa\_aaabbaaabaZHK\_aaZ\_baaZ\_]\_`a\_X`[^  
@HWI-EAS443:3:83:398:1688#0/1  
AAGCAGGGTAGATAATCACTCAATGAGTGACATCGAAGCC  
+HWI-EAS443:3:83:398:1688#0/1  
aa^\_aU\_VP`\_\_\_\_\_V`a\_]^[\_^^WXRTX]^]W\_UWRU]Y  
@HWI-EAS443:3:83:434:1666#0/1  
GAAGAAATAAGACCCTTCATTACTCATGTCAAAGGAAGGC  
+HWI-EAS443:3:83:434:1666#0/1  
\_`aaaab`a^`a\_]X\_\_a``aa`\_ba`]]`aa\_^[^`\_]`  
@HWI-EAS443:3:83:673:1220#0/1  
CTCCTCTGCATTGTCTCCGAAGAAATAAGACCCTTCATTA  
+HWI-EAS443:3:83:673:1220#0/1  
`Z^¥`aZaaa]aa¥Z)`^[[[]]VUZ\_]WY[WY\_¥¥\_\_\_\_  
@HWI-EAS443:3:83:710:976#0/1  
CAAAAGCAGGGTAGATAATCACTCAATGAGTGACATCGAA  
+HWI-EAS443:3:83:710:976#0/1  
a¥\_aa`aaabaYb\_baaaaba]\_`aaa^Xa[`a`a^a][Y  
@HWI-EAS443:3:83:763:549#0/1  
AGATAATCACTCAATGAGTGACATCGAAGCCATGGCGTCT  
+HWI-EAS443:3:83:763:549#0/1  
`[^`¥aX¥\_[VXYTaZ]R\_\_`U^TMRNRU\_]YVVS[LUN  
@HWI-EAS443:3:84:1052:2000#0/1  
AGCAGGGTAGATAATCACTCAATGAGTGACATCGAAGCCA  
+HWI-EAS443:3:84:1052:2000#0/1  
WT^a]b`U`aY¥WQ^T¥T^PZaYQ]\_FY[aa`[XPTWUBB  
@HWI-EAS443:3:84:153:528#0/1  
CAAAAGCAGGGTAGATAATCACTCAATGAGTGACATCGAA  
+HWI-EAS443:3:84:153:528#0/1  
aab\_aa`¥a`\_Rb\_`a^Zaa`a`\_a`\_`\_\_Xa`\_a^\_Y^]

@HWI-EAS443:3:84:245:1784#0/1  
CATACTCCTCTGCATTGTCTCCGAAGAAATAAGACCCTTC  
+HWI-EAS443:3:84:245:1784#0/1  
¥aYYaabbab¥L¥a]^U`[\`VUQY`W^]¥[\`]¥T[]`¥  
@HWI-EAS443:3:84:464:928#0/1  
AGCAAAAGCAGGGTAGATAATCACTCAATGAGTGACATCG  
+HWI-EAS443:3:84:464:928#0/1  
Zabaa[I\_¥[\_b`\_abb`¥^abbaa]^aa^K`Zaa`aaV\_  
@HWI-EAS443:3:84:794:1967#0/1  
AATCACTCAATGAGTGACATCGAAGCCATGGCGTCTCAAG  
+HWI-EAS443:3:84:794:1967#0/1  
`^Z\_`^a\_¥`^ZYVXR\_a`P]RQVYa``a[W[]P`]\`Z¥¥  
@HWI-EAS443:3:84:853:1412#0/1  
AGGGTAGATAATCACTCAATGAGTGACATCGAAGCCATGG  
+HWI-EAS443:3:84:853:1412#0/1  
aaba\_baba`aaba`baaaaaa\_aaab\_b\_a^^a\_aa]^  
@HWI-EAS443:3:85:1515:156#0/1  
TAATCACTCAATGAGTGACATCGAAGCCATGGCGTCTCAA  
+HWI-EAS443:3:85:1515:156#0/1  
`bbbab`aab`bba\_`b`a\_aa`]\`W`^\_K[\_U\_\_^\_¥  
@HWI-EAS443:3:85:1546:699#0/1  
ATCGAAGCCATGGCGTCTCAAGCACCAAACGATCATATG  
+HWI-EAS443:3:85:1546:699#0/1  
aaS`ZaUa`\_aZaW]NPY[^YP\_[¥XUV¥NL`UQVOJ]\_¥  
@HWI-EAS443:3:85:188:979#0/1  
AGATAATCACTCAATGAGTGACATCGAAGCCATGGCGTCT  
+HWI-EAS443:3:85:188:979#0/1  
a`aa\_`^`aX\_` `\_\_\_\_[\_Y\_`a\_\_^]\_`^]¥YY^XX]YYY  
@HWI-EAS443:3:85:378:837#0/1  
ATTCTGATTAACTCCATTGCTATTGTTCCAACCTTTCA  
+HWI-EAS443:3:85:378:837#0/1  
ab¥ba]]]aabaa¥^bbabaabaaa`]^]\_aa`aaaa`bb  
@HWI-EAS443:3:85:435:309#0/1  
AACGAACCCGATCGTGCCTTCCTTTGACATGAGTAATGAA  
+HWI-EAS443:3:85:435:309#0/1  
Taa`]]`aba\_P^¥RZ][MYU[\_`VU[]O\_S]U`^VXPV  
@HWI-EAS443:3:85:761:1766#0/1  
GAGTAATGAAGGTCTTATTTCTTCGGAGACAATGCAGAG  
+HWI-EAS443:3:85:761:1766#0/1  
a\_¥XWbba]Yb\_\_Ubab\_\_a\_abab[[a[aa\_a\_a^\_[^`  
@HWI-EAS443:3:85:837:925#0/1  
CGAAGAAATAAGACCCTTCATTACTCATGTCAAAGGAAGG  
+HWI-EAS443:3:85:837:925#0/1  
aaYaaZ¥]]aa[TKVY]`aaa`^`^`^`[aa][^`\_\_^R]]\_  
@HWI-EAS443:3:86:1121:1636#0/1  
AAAGCAGGGTAGATAATCACTCAATGAGTGACATCGAAGC  
+HWI-EAS443:3:86:1121:1636#0/1  
ababYbb¥HXa^aaabba`\_\_Xaa\_`aaY[\_¥aaa\_Z\_a\_  
@HWI-EAS443:3:86:1122:964#0/1  
AACGAACCCGATCGTGCCTTCCTTTGACATGAGTAATGAA

+HWI-EAS443:3:86:1122:964#0/1  
a\_aaab`Vbaa`a\_[aaa^a`a\_a^TT]]a\_VZU\_\_]U¥]  
@HWI-EAS443:3:86:1134:332#0/1  
GAAGAAATAAGACCCTTCATTACTCATGTCAAAGGAAGGC  
+HWI-EAS443:3:86:1134:332#0/1  
aa\_a^baaaa\_Y\_]ab`b\_\_^a^aaaYX]\_\_`\_^a[ZZ  
@HWI-EAS443:3:86:1335:98#0/1  
CCTCTGCATTGTCTCCGAAGAAATAAGACCCTTCATTACT  
+HWI-EAS443:3:86:1335:98#0/1  
aabbbbabbbba`aaabaaaabaaa`ba¥[^ab]\_aa`Ya  
@HWI-EAS443:3:86:1336:737#0/1  
CAGGGTAGATAATCACTCAATGAGTGACATCGAAGCCATG  
+HWI-EAS443:3:86:1336:737#0/1  
\_\_`bbWbab`b`bbb`bbaba`^Ta]a\_ab`bbaa]\_aaa  
@HWI-EAS443:3:86:1767:1579#0/1  
AAAGCAGGGTAGATAATCACTCAATGAGTGACATCGAAGC  
+HWI-EAS443:3:86:1767:1579#0/1  
aaaaaaaaa¥baaaaa`aa\_aaa``\_¥a\_]aa\_¥Y\_]Z  
@HWI-EAS443:3:86:217:880#0/1  
CAAAGCAGGGTAGATAATCACTCAATGAGTGACATCGAA  
+HWI-EAS443:3:86:217:880#0/1  
\_ZaZ\_0\_V¥]aM`]]W¥a\_N\_\_[\_aa^LYYFUXU¥VRLTV  
@HWI-EAS443:3:86:541:1351#0/1  
TAATCACTCAATGAGTGACATCGAAGCCATGGCGTCTCAA  
+HWI-EAS443:3:86:541:1351#0/1  
abaabab`a`^ZV¥^^abaaabaa\_b\_a`\_aa\_`^a\_\_\_[  
@HWI-EAS443:3:87:1254:131#0/1  
TAATCACTCAATGAGTGACATCGAAGCCATGGCGTCTCAA  
+HWI-EAS443:3:87:1254:131#0/1  
[b`a`b¥a^a]a]]a]b`¥aaaaX¥\_SUaaZYP[\_\_\_PY\_  
@HWI-EAS443:3:87:1515:1416#0/1  
CATTGTCTCCGAAGAAATAAGACCCTTCATTACTCATGTC  
+HWI-EAS443:3:87:1515:1416#0/1  
WZ^S`aYM]S[^aaZ`bbb\_[\_]WZ[¥`ba`aa`\_Z\_b\_\_\_  
@HWI-EAS443:3:87:1588:423#0/1  
CTCCTCTGCATTGTCTCCGAAGAAATAAGACCCTTCATTA  
+HWI-EAS443:3:87:1588:423#0/1  
abb^babbbbbbab`b``bbbb\_bababaa\_¥Ybb`bbaa  
@HWI-EAS443:3:87:260:555#0/1  
GCCTTGAGACGCCATGGCTTCGATGTCACTCATTGAGTGA  
+HWI-EAS443:3:87:260:555#0/1  
aaa`a^¥]V\_[\_^\_¥¥VVVGYTVBBBBBBBBBBBBBBBB  
@HWI-EAS443:3:87:285:1726#0/1  
TCCGAAGAAATAAGACCCTTCATTACTCATGTCAAAGGAA  
+HWI-EAS443:3:87:285:1726#0/1  
aa\_`^`a`^baa^N]]R¥]\_[¥aaa`¥\_\_`\_KS¥a`\_S¥^  
@HWI-EAS443:3:87:568:1224#0/1  
AAGAAATAAGACCCTTCATTACTCATGTCAAAGGAAGGCA  
+HWI-EAS443:3:87:568:1224#0/1  
]]]``a[a\_GYbaS`[Z`a`S\_a`^¥b`aba\_RDX`[¥¥]

@HWI-EAS443:3:87:898:586#0/1  
CTCCGAAGAAATAAGACCCTTCATTACTCATGTCAAAGGA  
+HWI-EAS443:3:87:898:586#0/1  
\_ab\_aabbaaabba`aa^Xab``abbbb\_bbbbaa\_`b¥b  
@HWI-EAS443:3:88:1161:1059#0/1  
CTCTGCATTGTCTCCGAAGAAATAAGACCCTTCATTACTC  
+HWI-EAS443:3:88:1161:1059#0/1  
S\_b\_R`a[^\_T]\_a``\_[`a^^V^^`b`YaaZabbb`]\_b  
@HWI-EAS443:3:88:1214:805#0/1  
AAGACCCTTCATTACTCATGTCAAAGGAAGGCACGATCGG  
+HWI-EAS443:3:88:1214:805#0/1  
ab`\_X`Zaa`aaaa``\_ba\_aa``\_`a\_a\_]a\_\_aXU¥\_  
@HWI-EAS443:3:88:1572:777#0/1  
AGATAATCACTCAATGAGTGACATCGAAGCCATGGCGTCT  
+HWI-EAS443:3:88:1572:777#0/1  
aaaaa^^ab\_a\_a`a`aa^\_[Za]X]\_\_\_\_U]\_\_\_\_]XYOM^  
@HWI-EAS443:3:88:325:273#0/1  
CAAAAGCAGGGTAGATAATCACTCAATGAGTGACATCGAA  
+HWI-EAS443:3:88:325:273#0/1  
abaa`baa`a`Zb\_``aY[`]`a\_``\_`]`Xa\_\_\_X\_^X\_  
@HWI-EAS443:3:88:662:389#0/1  
ATGATCGTTTGGTGCCTTGAGACCCATGGCTTCGATGTC  
+HWI-EAS443:3:88:662:389#0/1  
ab\_b]ab`b`\_```^abbb[^`b```[]\_]^^aXOYY^\_\_  
@HWI-EAS443:3:88:718:496#0/1  
CCTCTGCATTGTCTCCGAAGAAATAAGACCCTTCATTACT  
+HWI-EAS443:3:88:718:496#0/1  
abaaabbbaba\_\_\_`^aaa]^Zaa`a^a`¥U`a\_aa`a\_a  
@HWI-EAS443:3:88:834:532#0/1  
CAAAAGCAGGGTAGATAATCACTCAATGAGTGACATCGAA  
+HWI-EAS443:3:88:834:532#0/1  
aaba\_abbbb`Xba[``[aaaaab`bba\_Zaaa\_a``]P  
@HWI-EAS443:3:88:930:1747#0/1  
AAGCAGGGTAGATAATCACTCAATGAGTGACATCGAAGCC  
+HWI-EAS443:3:88:930:1747#0/1  
\_a```\_TQ[``bU`^aYb```]¥`\_^ZHZT¥]¥a^P¥^`\_a  
@HWI-EAS443:3:89:1029:780#0/1  
CACTCAATGAGTGACATCGAAGCCATGGCGTCTCAAGGCA  
+HWI-EAS443:3:89:1029:780#0/1  
abbbabbbbbb`b`bbb\_bbabbbaaaaaabaaba``baa  
@HWI-EAS443:3:89:1050:449#0/1  
CTCCTCTGCATTGTCTCCGAAGAAATAAGACCCTTCATTA  
+HWI-EAS443:3:89:1050:449#0/1  
ab\_]`^aab^bbbb\_aaa]b`\_a^\_b\_¥ab^OS`a]]aa\_a  
@HWI-EAS443:3:89:1141:41#0/1  
AAGCAGGGTAGATAATCACTCAATGAGTGACATCGAAGCC  
+HWI-EAS443:3:89:1141:41#0/1  
aa`aS`a]¥Y`a]a]baa\_[aaa`¥^\_X\_N[^a\_\_^XZVT  
@HWI-EAS443:3:89:1409:873#0/1  
AGATAATCACTCAATGAGTGACATCGAAGCCATGGCGTCT

+HWI-EAS443:3:89:1409:873#0/1  
`b`aa`\_\_¥\_aY`a^a^V¥\_a^Y\_]¥U^`ZV`UU¥  
@HWI-EAS443:3:89:1566:1219#0/1  
CAAAAGCAGGGTAGATAATCACTCAATGAGTGACATCGAA  
+HWI-EAS443:3:89:1566:1219#0/1  
aba`bb[ababGb[ab\_ab`baaUbaabab\_aa`^aa`\_  
@HWI-EAS443:3:89:273:179#0/1  
CGAAGAAATAAGACCCTTCATTACTCATGTCAAAGGAAGG  
+HWI-EAS443:3:89:273:179#0/1  
aa\_[aaX`a]aa\_WWYa\_^\_^\_^\_][`a]V[^WV\_Y^  
@HWI-EAS443:3:89:480:1835#0/1  
ACTCAATGAGTGACATCGAAGCCATGGCGTCTCAAGGCAC  
+HWI-EAS443:3:89:480:1835#0/1  
Nb\_b`b]a\_THbT\_babZ]T`][`]b^\_SF\_^`^`HZ`aa  
@HWI-EAS443:3:89:614:196#0/1  
AGACCCTTCATTACTCATGTCAAAGGAAGGCACGATCGGG  
+HWI-EAS443:3:89:614:196#0/1  
``[TVT\_a`aa`[[a^a^a^`¥¥^^¥¥`^¥W^\_ZY][[  
@HWI-EAS443:3:89:792:1115#0/1  
AAGCAGGGTAGATAATCACTCAATGAGTGACATCGAAGCC  
+HWI-EAS443:3:89:792:1115#0/1  
aaaa`aa`^b``aa]aaa\_a`a\_aa\_a¥a\_\_aa`¥`\_^\_\_  
@HWI-EAS443:3:89:801:954#0/1  
ATCGAAGCCATGGCGTCTCAAGGCACCAAACGATCATATG  
+HWI-EAS443:3:89:801:954#0/1  
aaa\_a]aa\_aa`]]a¥^\_a`aa\_\_`X\_\_`SN[¥Z^\_a^`  
@HWI-EAS443:3:89:946:1788#0/1  
AATCACTCAATGAGTGACATCGAAGCCATGGCGTCTCAAG  
+HWI-EAS443:3:89:946:1788#0/1  
`]\_\_aaaaaaabaa[Z`aba\_¥^]a]T[\_`]N^[R[T\_\_`  
@HWI-EAS443:3:8:1017:1768#0/1  
AGATAATCACTCAATGAGTGACATCGAAGCCATGGCGTCT  
+HWI-EAS443:3:8:1017:1768#0/1  
]VUX\_a\_]aU\_\_a]SW\_a]]^Wa\_^a`^\_VWV]Y]G]UUY  
@HWI-EAS443:3:8:1084:1348#0/1  
CTCAATGAGTGACATCGAAGCCATGGCGTCTCAAGGCACC  
+HWI-EAS443:3:8:1084:1348#0/1  
abbbabbbbaababbaabbaababba\_ba\_a¥a`aa\_a¥a  
@HWI-EAS443:3:8:1479:1494#0/1  
GAAGAAATAAGACCCTTCATTACTCATGTCAAAGGAAGGC  
+HWI-EAS443:3:8:1479:1494#0/1  
Z[abb```bbaaY\_\_abb]ba``a``aab`\_Y[\_R]aU\_]`  
@HWI-EAS443:3:8:1742:1456#0/1  
GACCCATGGCTTCGATGTCACTCATTGAGTGATTATCTA  
+HWI-EAS443:3:8:1742:1456#0/1  
ab`\_]¥ba``[\_`\_X\_X``[X^UXZ`X`\_\_RWSV\_X[BBB  
@HWI-EAS443:3:8:360:1135#0/1  
TGAAAGGAGTTGGAACAATAGCAATGGAGTTAATCAGAAT  
+HWI-EAS443:3:8:360:1135#0/1  
`aaaaba\_a\_^a[\_a]a\_\_^`\_\_^a`^^aYa\_^^¥`\_^`^`



@HWI-EAS443:3:8:362:1631#0/1  
AGATAATCACTCAATGAGTGACATCGAAGCCATGGCGTCT  
+HWI-EAS443:3:8:362:1631#0/1  
aa`[\_¥\_\_a`Z[\_```¥aU¥\_`\_]\_]W\_Y^WQSUX]X]  
@HWI-EAS443:3:8:527:1981#0/1  
ATCGAAGCCATGGCGTCTCAAGGCACCAAACGATCATATG  
+HWI-EAS443:3:8:527:1981#0/1  
aa]^aaY\_\_\_\_^]^XY]U]Zaa\_YV`^Xaa`X]\_PL¥V\_ZG  
@HWI-EAS443:3:90:1045:125#0/1  
AGACCCTTCATTACTCATGTCAAAGGAAGGCACGATCGGG  
+HWI-EAS443:3:90:1045:125#0/1  
SIPZPYX`WWJ^]Uaaab\_[`a^0[\_XHP]QW¥`ZTV\_a]  
@HWI-EAS443:3:90:1067:1026#0/1  
ATCACTCAATGAGTGACATCGAAGCCATGGCGTCTCAAGG  
+HWI-EAS443:3:90:1067:1026#0/1  
aa]^a^ab^^aa[aRaaba`aa`\_a`\_a`aa`aYZ\_Ya\_¥`  
@HWI-EAS443:3:90:1138:1334#0/1  
GAAAGGAGTTGGAACAATAGCAATGGAGTTAATCAGAATG  
+HWI-EAS443:3:90:1138:1334#0/1  
^`^a`aa`X`b]ab\_bbba`a``aaaa\_aaab[aaaaaa  
@HWI-EAS443:3:90:1440:416#0/1  
GAAGAAATAAGACCCTTCATTACTCATGTCAAAGGAAGGC  
+HWI-EAS443:3:90:1440:416#0/1  
aXPZW\_aabb]¥YVSaaa^Z]]`\_Y`\_aa^Y]TNMW`¥PR  
@HWI-EAS443:3:90:1478:1081#0/1  
CGAAGAAATAAGACCCTTCATTACTCATGTCAAAGGAAGG  
+HWI-EAS443:3:90:1478:1081#0/1  
ab^`abb`bbb`^XHYba]`b`\_^b`abba`abaa`aaYU  
@HWI-EAS443:3:90:1651:85#0/1  
ATTCTGATTAACTCCATTGCTATTGTTCCAACCTCTTCA  
+HWI-EAS443:3:90:1651:85#0/1  
abb`ab\_aaaa]a]]abaa^baaaaZ`Y^``[aYZ`\_\_\_^  
@HWI-EAS443:3:90:1748:193#0/1  
AAGCAGGGTAGATAATCACTCAATGAGTGACATCGAAGCC  
+HWI-EAS443:3:90:1748:193#0/1  
`ba`abaa]bbaaaaaa]a[a\_a^^aUa`\_]\_aX[^[^XX  
@HWI-EAS443:3:90:240:536#0/1  
AGATAATCACTCAATGAGTGACATCGAAGCCATGGCGTCT  
+HWI-EAS443:3:90:240:536#0/1  
a`\_a\_X\_aV`\_a`^`\_]aX^a`a]ZXQGV]U^]^YXaWWY  
@HWI-EAS443:3:90:374:296#0/1  
ATACTCCTCTGCATTGTCTCCGAAGAAATAAGACCCTTCA  
+HWI-EAS443:3:90:374:296#0/1  
abbababaaaaabba`aaaaaaa`aaaaaa¥\_`^`\_`  
@HWI-EAS443:3:90:503:877#0/1  
AATCACTCAATGAGTGACATCGAAGCCATGGCGTCTCAAG  
+HWI-EAS443:3:90:503:877#0/1  
aaba]ababbbba`\_aaaaabaa`aaa``aa^aX\_``a[`  
@HWI-EAS443:3:90:637:604#0/1  
AGATAATCACTCAATGAGTGACATCGAAGCCATGGCGTCT

+HWI-EAS443:3:90:637:604#0/1  
aY¥`\_a`Y]LOXV^ab¥^H[M^ZUaa\_a`aXQX¥Va`Z\_V  
@HWI-EAS443:3:91:204:1649#0/1  
CACTCAATGAGTGACATCGAAGCCATGGCGTCTCAAGGCA  
+HWI-EAS443:3:91:204:1649#0/1  
a¥b`\_`\_[Ybbb^YaT¥]\_W\_aRb¥a¥HPXaPQZT¥00[^  
@HWI-EAS443:3:91:585:62#0/1  
TTCATATGATCGTTTGGTGCCTTGAGACGCCATGGCTTCG  
+HWI-EAS443:3:91:585:62#0/1  
¥V\_UZ[\_a`aZa`b`ZQY]\_a`X¥`VQT`^VTVMJZOMY  
@HWI-EAS443:3:91:595:231#0/1  
AGCAAAAGCAGGGTAGATAATCACTCAATGAGTGACATCG  
+HWI-EAS443:3:91:595:231#0/1  
abaaaaabaabaa^baaaa`aaa`aaa\_aa`a\_aa\_a\_^\_  
@HWI-EAS443:3:91:689:1676#0/1  
ACTCAATGAGTGACATCGAAGCCATGGCGTCTCAAGGCAC  
+HWI-EAS443:3:91:689:1676#0/1  
\_`a]b`\_¥¥\_Y`\_bbababaPaab\_\_\_aaTaaa`^]\_a]^  
@HWI-EAS443:3:91:903:673#0/1  
ATCGAAGCCATGGCGTCTCAAGGCACCAAACGATCATATG  
+HWI-EAS443:3:91:903:673#0/1  
]\_\_\_¥baZUY¥aa\_]¥]aaab`a\_\_UT\_aaaa[\_U`b]a\_  
@HWI-EAS443:3:91:90:105#0/1  
ATCGAAGCCATGGCGTCTCAAGGCACCAAACGATCATATG  
+HWI-EAS443:3:91:90:105#0/1  
aba`b`ab^RWW]H]\_RW`\_Y¥¥RVUSVVLNXXKLXZ[BB  
@HWI-EAS443:3:91:94:1218#0/1  
GACCCTTCATTACTCATGTCAAAGGAAGGCACGATCGGGT  
+HWI-EAS443:3:91:94:1218#0/1  
a]ZW\_aaa]a]XJX\_aZa¥`aV[]¥WZNPZ`U¥`WW¥FXW  
@HWI-EAS443:3:91:990:362#0/1  
CAAAAGCAGGGTAGATAATCACTCAATGAGTGACATCGAA  
+HWI-EAS443:3:91:990:362#0/1  
^ZaXS\_0]\_aaRa`R[]][aaa`]\_\_a`Va][Z\_\_]`a]]  
@HWI-EAS443:3:92:1166:759#0/1  
CACTCAATGAGTGACATCGAAGCCATGGCGTCTCAAGGCA  
+HWI-EAS443:3:92:1166:759#0/1  
aa`aaaaba\_a\_aa`aaa\_`\_a\_¥`\_`a\_a¥S\_W^¥TW`  
@HWI-EAS443:3:92:1336:812#0/1  
AATCACTCAATGAGTGACATCGAAGCCATGGCGTCTCAAG  
+HWI-EAS443:3:92:1336:812#0/1  
]X¥V\_baa`b`^`^Paaaa\_]a]b]V\_aa`X\_ZV[ZV^`  
@HWI-EAS443:3:92:1388:40#0/1  
AAGACCCTTCATTACTCATGTCAAAGGAAGGCACGATCGG  
+HWI-EAS443:3:92:1388:40#0/1  
aaaUPUGWbG^aa\_^a]\_aa]N^\_\_¥NV`aZU\_X\_] [G^]  
@HWI-EAS443:3:92:1439:281#0/1  
AGATAATCACTCAATGAGTGACATCGAAGCCATGGCGTCT  
+HWI-EAS443:3:92:1439:281#0/1  
`baaaa\_[aPa^]Y\_aa[U\_SV``]]Z\_a^VRXYVZURV

@HWI-EAS443:3:92:259:1279#0/1  
GCAAAAAGCAGGGTAGATAATCACTCAATGAGTGACATCGA  
+HWI-EAS443:3:92:259:1279#0/1  
aaabbbaaa`\_aWb`a`a`aaaaa`aaaa\_a`aaaXU\_  
@HWI-EAS443:3:92:261:1679#0/1  
CATACTCCTCTGCATTGTCTCCGAAGAAATAAGACCCTTC  
+HWI-EAS443:3:92:261:1679#0/1  
\_U`Ua\_S^aa`[`ba`a\_a]a[]T`Sab^`\_\_Y^[\`WQ  
@HWI-EAS443:3:92:569:1954#0/1  
AATCACTCAATGAGTGACATCGAAGCCATGGCGTCTCAAG  
+HWI-EAS443:3:92:569:1954#0/1  
aa`\_aa]\_aa\_Q¥RX¥`^T[NX`a]G^[RV^\_N\_^[\_^X  
@HWI-EAS443:3:92:65:395#0/1  
AAGAAATAAGACCCTTCATTACTCATGTCAAAGGAAGGCA  
+HWI-EAS443:3:92:65:395#0/1  
aWbaab`baa^]]]a\_a`aaa`\_a`aZ`\_^^¥Z]]^Z^]  
@HWI-EAS443:3:92:671:856#0/1  
AGCAAAAAGCAGGGTAGATAATCACTCAATGAGTGACATCG  
+HWI-EAS443:3:92:671:856#0/1  
a\_aabaa[aaaa`Ya[[`Va¥\_`\_`a`¥a]\_`Ra\_`Z  
@HWI-EAS443:3:92:971:1583#0/1  
ATCACTCAATGAGTGACATCGAAGCCATGGCGTCTCAAGG  
+HWI-EAS443:3:92:971:1583#0/1  
aabaabaaaaaaa^Vaaaab`\_a\_a`\_a`aWa\_^a\_a`\_\_  
@HWI-EAS443:3:93:1238:1494#0/1  
AGACCCTTCATTACTCATGTCAAAGGAAGGCACGATCGGG  
+HWI-EAS443:3:93:1238:1494#0/1  
a[Y]UXaaaa^V`Xa\_¥]aXRa\_\_[TW\_UXUa]BBBBBBB  
@HWI-EAS443:3:93:599:1210#0/1  
GGTGCCTTGAGACGCCATGGCTTCGATGTCACCTATTGAG  
+HWI-EAS443:3:93:599:1210#0/1  
aaXaS]\_aaa`\_a`\_\_`¥\_`\_]aX\_¥U[GH[MZX^TZWXB  
@HWI-EAS443:3:93:638:1924#0/1  
ATTCTGATTA ACTCCATTGCTATTGTTCCA ACTCCTTTCA  
+HWI-EAS443:3:93:638:1924#0/1  
a`\_`\_\_aaaaa`\_aa`\_`^`\_`]^]\_\_^W\_\_V\_\_^Z^a  
@HWI-EAS443:3:93:901:455#0/1  
TAGATAATCACTCAATGAGTGACATCGAAGCCATGGCGTC  
+HWI-EAS443:3:93:901:455#0/1  
GWTPY¥b`TT^abbaTTXW]ZZ\_Z\_¥I[^FI[[`WQY\_[H  
@HWI-EAS443:3:93:980:340#0/1  
CCC GATCGTGCCTTCTTTGACATGAGTAATGAAGGGTCT  
+HWI-EAS443:3:93:980:340#0/1  
aabbab`a]a`abaa`aba`a`abaWbXa\_aa\_]\_a`^¥a  
@HWI-EAS443:3:94:1246:1254#0/1  
GAAGAAATAAGACCCTTCATTACTCATGTCAAAGGAAGGC  
+HWI-EAS443:3:94:1246:1254#0/1  
a`baa`aaab`a`\_a`^aaaaa`\_aaa^`\_\_aa\_\_a`^^  
@HWI-EAS443:3:94:1509:463#0/1  
AGCAAAAAGCAGGGTAGATAATCACTCAATGAGTGACATCG

+HWI-EAS443:3:94:1509:463#0/1  
abbaaa\_a\_aaa`^baaaa\_a`a^a\_\_aaaaa\_``]a^V^  
@HWI-EAS443:3:94:1602:1081#0/1  
AGCAGGGTAGATAATCACTCAATGAGTGACATCGAAGCCA  
+HWI-EAS443:3:94:1602:1081#0/1  
aaa\_aaaXaaba[ab^a^a]`aa`]a^`a\_`aGa`\_]US`  
@HWI-EAS443:3:94:171:1230#0/1  
AGCAAAAGCAGGGTAGATAATCACTCAATGAGTGACATCG  
+HWI-EAS443:3:94:171:1230#0/1  
I\_bbb^`b]`aaUUb]Y\_VK`ab\_a`R`aa`YW\_`¥aWHZ  
@HWI-EAS443:3:94:978:371#0/1  
CACTCAATGAGTGACATCGAAGCCATGGCGTCTCAAGGCA  
+HWI-EAS443:3:94:978:371#0/1  
aa\_\_aaa\_a]\_S\_`\_aaV\_\_`YY[\_a`^^aTR\_^]]][L]  
@HWI-EAS443:3:95:164:478#0/1  
GAAGAAATAAGACCCTTCATTACTCATGTCAAAGGAAGGC  
+HWI-EAS443:3:95:164:478#0/1  
a`b^aa\_`aaU^VX\_`[Y`\_a^^]\_\_aY¥^R]^Y¥^]^  
@HWI-EAS443:3:95:234:1504#0/1  
CGAAGAAATAAGACCCTTCATTACTCATGTCAAAGGAAGG  
+HWI-EAS443:3:95:234:1504#0/1  
aaa`ab`b`bbbababa[aaababbaaaaab\_ba]ba`^a`Y  
@HWI-EAS443:3:95:276:1133#0/1  
TAGATAATCACTCAATGAGTGACATCGAAGCCATGGCGTC  
+HWI-EAS443:3:95:276:1133#0/1  
]]ab[\_b^aTa`]aabbbb[`[aaa`\_[a\_aab`a```TI  
@HWI-EAS443:3:95:81:1687#0/1  
TAATCACTCAATGAGTGACATCGAAGCCATGGCGTCTCAA  
+HWI-EAS443:3:95:81:1687#0/1  
`bbab`T`bZ¥L\_aWbaSWQZ\_]X[¥aa]`\_]\_aVZPU¥X  
@HWI-EAS443:3:95:853:1222#0/1  
GCAAAAGCAGGGTAGATAATCACTCAATGAGTGACATCGA  
+HWI-EAS443:3:95:853:1222#0/1  
\_bb`]`\_\_bbb`b^`abaa`baaba`baab\_ba`aa]Q`  
@HWI-EAS443:3:95:915:720#0/1  
AAAGCAGGGTAGATAATCACTCAATGAGTGACATCGAAGC  
+HWI-EAS443:3:95:915:720#0/1  
a]XVRH\_`T¥`ZaYY¥a[\_¥N\_a[\_YZLQ¥P]`Ua`SYG  
@HWI-EAS443:3:96:1297:972#0/1  
GAAATAAGACCCTTCATTACTCATGTCAAAGGAAGGCACG  
+HWI-EAS443:3:96:1297:972#0/1  
a\_\_^a`a\_]UU¥`a^`a\_X`\_]`\_]^^]Y\_\_]\_Y^X\_YB  
@HWI-EAS443:3:96:700:630#0/1  
ATAAGACCCTTCATTACTCATGTCAAAGGAAGGCACGATC  
+HWI-EAS443:3:96:700:630#0/1  
a\_aa`U^^`aZ`aa\_\_a```\_]]]]S\_Y]TT]X]^\_T]  
@HWI-EAS443:3:96:963:479#0/1  
GTCATACTCCTCTGCATTGTCTCCGAAGAAATAAGACCCT  
+HWI-EAS443:3:96:963:479#0/1  
[X\_ab¥aaaa]\_[b\_b\_0][[\_a\_bY^a^\_\_^aa\_\_QURa

@HWI-EAS443:3:97:1378:1118#0/1  
AAGCAGGGTAGATAATCACTCAATGAGTGACATCGAAGCC  
+HWI-EAS443:3:97:1378:1118#0/1  
aa^]]bb]T^V¥]VXaZa¥Z`^a\_a[`SJRNR\_]]]YXX  
@HWI-EAS443:3:97:43:510#0/1  
ATCGAAGCCATGGCGTCTCAAGGCACCAAACGATCATATG  
+HWI-EAS443:3:97:43:510#0/1  
^`T\_YN]]\_ZXQTZYQWRURZR¥¥VX]]^YN¥[QZ[V[V¥  
@HWI-EAS443:3:97:474:1334#0/1  
AATCACTCAATGAGTGACATCGAAGCCATGGCGTCTCAAG  
+HWI-EAS443:3:97:474:1334#0/1  
Y¥VY`\_Y\_^`a`XZZ]aYZ`S^Za\_N]^]\_Sa`^Z^N  
@HWI-EAS443:3:97:572:248#0/1  
AAGCAGGGTAGATAATCACTCAATGAGTGACATCGAAGCC  
+HWI-EAS443:3:97:572:248#0/1  
aa`a¥aaaX^R]a`\_a\_R^¥`]]a^\_X]\_U\_]`^¥]XXX]  
@HWI-EAS443:3:97:783:1595#0/1  
GCAGGGTAGATAATCACTCAATGAGTGACATCGAAGCCAT  
+HWI-EAS443:3:97:783:1595#0/1  
aa\_aa`Qbaaaaa`aab`aaa`[``\_a`^]\_Z\_\_Y\_a  
@HWI-EAS443:3:97:840:1103#0/1  
CAAAAGCAGGGTAGATAATCACTCAATGAGTGACATCGAA  
+HWI-EAS443:3:97:840:1103#0/1  
^baaaa`\_`ba`bba]a`a`\_a`a`ab`\_V`a\_aa`\_`^  
@HWI-EAS443:3:97:946:55#0/1  
ACCCTTCATTACTCATGTCAAAGGAAGGCACGATCGGGTT  
+HWI-EAS443:3:97:946:55#0/1  
aa`b`bbabbbab\_abbaab`\_ab`aab]a[`aaVa\_aZa  
@HWI-EAS443:3:98:1151:78#0/1  
ATTCTGATTAACTCCATTGCTATTGTTCCAACCTCTTCA  
+HWI-EAS443:3:98:1151:78#0/1  
`ba¥\_abbba^¥b¥a`aba\_aaa`\_`Z\_\_^V\_aR`¥`^]  
@HWI-EAS443:3:98:1246:613#0/1  
ATCGAAGCCATGGCGTCTCAAGGCACCAAACGATCATATG  
+HWI-EAS443:3:98:1246:613#0/1  
ab`\_]bb``aaaa`b¥`aa`\_`aaa]¥a\_a\_a^a]```a[  
@HWI-EAS443:3:98:1360:323#0/1  
ATCGAAGCCATGGCGTCTCAAGGCACCAAACGATCATATG  
+HWI-EAS443:3:98:1360:323#0/1  
abTb\_a¥0Vsa^a¥\_`\_]`\_a`\_`]a`]]S[L`]^G`\_a¥`  
@HWI-EAS443:3:98:1698:105#0/1  
CAAAAGCAGGGTAGATAATCACTCAATGAGTGACATCGAA  
+HWI-EAS443:3:98:1698:105#0/1  
G[ZUaaUU[aZG^[[^[[UF]¥]Y[PbY^YaY[D[WEWYU  
@HWI-EAS443:3:98:415:874#0/1  
GCAAAAGCAGGGTAGATAATCACTCAATGAGTGACATCGA  
+HWI-EAS443:3:98:415:874#0/1  
¥¥X\_^]aaaa^VKa^a`ZYZZ][]^\_]Y[YYQZ\_\_][WR][  
@HWI-EAS443:3:98:591:415#0/1  
GATCGTTTGGTGCCTTGAGACGCCATGGCTTCGATGTCAC

+HWI-EAS443:3:98:591:415#0/1  
^^XYQQ¥`RUa]¥Y¥]Sa[[J¥` [PY^\_Q¥X^UXWB BBB  
@HWI-EAS443:3:98:66:560#0/1  
AGCAAAGCAGGGTAGATAATCACTCAATGAGTGACATCG  
+HWI-EAS443:3:98:66:560#0/1  
aa]ab`baaabbbZb]aaa]`T`aa`ZFQa`a]a\_]\_a]\_  
@HWI-EAS443:3:98:719:1295#0/1  
GCAAAGCAGGGTAGATAATCACTCAATGAGTGACATCGA  
+HWI-EAS443:3:98:719:1295#0/1  
a\_`Y[X¥UXa`\_N` []^\_\_¥\_¥VT[\_V^\_¥\_S¥\_Y\_[UZ¥  
@HWI-EAS443:3:98:882:1699#0/1  
ATCACTCAATGAGTGACATCGAAGCCATGGCGTCTCAAGG  
+HWI-EAS443:3:98:882:1699#0/1  
\_I¥`^`\_aUbURYTWZ]b\_URWaa`[S\_]aYG`^aaTZ\_\_Q  
@HWI-EAS443:3:99:1248:1334#0/1  
AAAGCAGGGTAGATAATCACTCAATGAGTGACATCGAAGC  
+HWI-EAS443:3:99:1248:1334#0/1  
abaa[a` `a\_aaabb`a`aRa¥a`aaaa^aa^aa]`¥aa]  
@HWI-EAS443:3:99:142:1463#0/1  
GTGACATCGAAGCCATGGCGTCTCAAGGCACCAAACGATC  
+HWI-EAS443:3:99:142:1463#0/1  
^O]¥LYPYXa\_¥¥G^W]aU\_TVXRWZ[YVXX[] [¥WZYVR  
@HWI-EAS443:3:99:600:1657#0/1  
AATCACTCAATGAGTGACATCGAAGCCATGGCGTCTCAAG  
+HWI-EAS443:3:99:600:1657#0/1  
a\_` ``GZKa^` ``IYTRaaS^` `a\_\_YY\_\_\_\_^]G^Q¥\_X\_  
@HWI-EAS443:3:99:950:1360#0/1  
AGCAAAGCAGGGTAGATAATCACTCAATGAGTGACATCG  
+HWI-EAS443:3:99:950:1360#0/1  
abT`Xaabaa` `R¥\_TVaababba`bS` ` ``^P[b¥a\_\_a  
@HWI-EAS443:3:99:969:782#0/1  
AAGACCCTTCATTACTCATGTCAAAGGAAGGCACGATCGG  
+HWI-EAS443:3:99:969:782#0/1  
^XOX\_` `baab]aaaa\_baa\_bbaa\_baaa¥ZZ\_aa\_a`  
@HWI-EAS443:3:9:1242:657#0/1  
AAGCAGGGTAGATAATCACTCAATGAGTGACATCGAAGCC  
+HWI-EAS443:3:9:1242:657#0/1  
a`aa` `\_ORba` `\_aaa`\_a[``aa`W[``U`aZ^a]\_SZ  
@HWI-EAS443:3:9:1340:1116#0/1  
AGCAAAGCAGGGTAGATAATCACTCAATGAGTGACATCG  
+HWI-EAS443:3:9:1340:1116#0/1  
¥aab]bab\_`¥`a¥`bbbbaaaaab\_a`aa]a\_aaaaa[a  
@HWI-EAS443:3:9:1467:1307#0/1  
ACTCAATGAGTGACATCGAAGCCATGGCGTCTCAAGGCAC  
+HWI-EAS443:3:9:1467:1307#0/1  
`ab`ba` \_[``\_aa[aaaaZ]]`WY\_aaZaXWaN` ]^P^aU  
@HWI-EAS443:3:9:1488:473#0/1  
TAGATAATCACTCAATGAGTGACATCGAAGCCATGGCGTC  
+HWI-EAS443:3:9:1488:473#0/1  
aabaaaaaaa`b\_a\_ab\_b^`aZaa^\_\_`\_]`^]a` ]R\_]X

@HWI-EAS443:3:9:1547:101#0/1  
CATACTCCTCTGCATTGTCTCCGAAGAAATAAGACCCTTC  
+HWI-EAS443:3:9:1547:101#0/1  
^ba`^baaaU\_b[Ibabaab^¥ZZT]Ga[`\_a\_WZGZ\_\_U  
@HWI-EAS443:3:9:812:1860#0/1  
GGTAGATAATCACTCAATGAGTGACATCGAAGCCATGGCG  
+HWI-EAS443:3:9:812:1860#0/1  
]OG]]W[]]\_a`aZ[U]^\_YPSU\_[PKUUWTRXWWN¥WBB  
@HWI-EAS443:3:96:1591:107#0/1  
ATGGAAGCCATGGCGTCTCAAGGCAACAAACGATCATATG  
+HWI-EAS443:3:96:1591:107#0/1  
``QFM`aXa`\_VRQaSO^SYRS]NXFFX¥¥ORZZG^\_X`\_  
@HWI-EAS443:3:29:1766:1780#0/1  
ATTCCGACAGATGCTCTGATTTCTGTGGCATCCTGGGGCT  
+HWI-EAS443:3:29:1766:1780#0/1  
aa`]]\_\_Gbaa`\_N\_[[¥V^\_]S]X¥[RG]`BBBBBBBBB  
@HWI-EAS443:3:94:1372:327#0/1  
CGTCTCAAGGCACCAAACGATCATATGAACAAATGAGGAA  
+HWI-EAS443:3:94:1372:327#0/1  
UZRVXY¥¥[¥YJU¥Z`^IS\_b¥b¥STWVRDTZX¥Taj`^M  
@HWI-EAS443:3:73:582:944#0/1  
CTTCCGACAGATGCTCTGATTTCTGTGGCATCCTGGTGCT  
+HWI-EAS443:3:73:582:944#0/1  
``bbb`\_b¥baa`a`a`UZa\_\_QXYES^aaQ^aWZ]]\_^^]  
@HWI-EAS443:3:19:1060:682#0/1  
CTCCATTTGTTTCATATGATCGTTTGGTGCATTGAGACGCC  
+HWI-EAS443:3:19:1060:682#0/1  
\_V]\_^T]TZ\_QVMG[`aW]`RZV]ZRTYGYVBBBBBBBBB  
@HWI-EAS443:3:26:798:532#0/1  
CATTTGTTTCATATTATCGTTTGGTGCCTTGAGACGCCATG  
+HWI-EAS443:3:26:798:532#0/1  
a`¥XZ`\_¥^¥`¥YF[\_]\_`S[ZRHU\_]`b\_\_Y`[]\_`^\_B  
@HWI-EAS443:3:31:74:1343#0/1  
GTTTCATATGATCGTTTGGTGCCTTGAGACGCCACGGCTTC  
+HWI-EAS443:3:31:74:1343#0/1  
a^`^^Z\_ULFXaZWY^ZTR\_a`¥\_[VYWa]^ZBBBBBBBBB  
@HWI-EAS443:3:42:1267:687#0/1  
GCGTTCCCATCGAGTCTCCATTTGTTTCATATGATCGTTTG  
+HWI-EAS443:3:42:1267:687#0/1  
abaaaaababbaaa\_aa`a`a`a`a`aaaa`a\_b\_aaa  
@HWI-EAS443:3:43:938:667#0/1  
TCCATTTGTTTCATATGATCGCTTGGTGCCTTGAGACGCCA  
+HWI-EAS443:3:43:938:667#0/1  
`aa`babbaaabbaabbaaa`abba^a`aaaZ^]a\_``]\_  
@HWI-EAS443:3:62:1034:1925#0/1  
CTCCATTTGTTTCATATGATCGTTTGGGCGCTTGAGACGCC  
+HWI-EAS443:3:62:1034:1925#0/1  
a]UJ\_Wa`ab`[X\_¥\_MXa¥]`bUbG]LQTa`aaY]]`a  
@HWI-EAS443:3:62:287:889#0/1  
GGCGTCTCAAGGCACCAAACGATCATATGAACAAATGGAG

+HWI-EAS443:3:62:287:889#0/1  
aaba]aaa[aaaa^aaaaaa]``\_a^a^¥a^\_`^`a¥S`  
@HWI-EAS443:3:76:1062:1881#0/1  
GCACCAAACGATCATATGGACAAATGGAGACTGGTGGGGA  
+HWI-EAS443:3:76:1062:1881#0/1  
``Z^V^^W[`XVQ[NS¥XGUM¥\_^SZVRVBBBBBBBBBB  
@HWI-EAS443:3:16:751:437#0/1  
CTCCATTTGTTTCATATGATCGTTTGGTGCCTTGAGNCGCC  
+HWI-EAS443:3:16:751:437#0/1  
aaaaaaba`aaabaaba\_b\_aaa\_Saa\_\_aa^XDP¥\_]`  
@HWI-EAS443:3:18:1032:939#0/1  
CGTCTCCATTTGTTTCATATGATCGTTTGGTGCCTTGAGAC  
+HWI-EAS443:3:18:1032:939#0/1  
a^aaabbbabaa`aaaaa`\_\_Y]^aaa`Za\_\_a\_\_][XY  
@HWI-EAS443:3:91:929:1429#0/1  
CGCCATGGCGTCTCAAGGCACCAAACGATCATATGAACAA  
+HWI-EAS443:3:91:929:1429#0/1  
a`babbbbaaababaaabaab¥a]b`¥`aa`a`a`a`a`a`  
@HWI-EAS443:3:11:1194:41#0/1  
TCCATTTGTTTCATATGATCGTTTGGTGCCTTGAGACGCCA  
+HWI-EAS443:3:11:1194:41#0/1  
aa\_X¥a[a\_a[Q[[aa[\_V`V`^X[a\_V\_ZZV¥V¥ZUW¥  
@HWI-EAS443:3:11:95:395#0/1  
GTCTCCATTTGTTTCATATGATCGTTTGGTGCCTTGAGACG  
+HWI-EAS443:3:11:95:395#0/1  
`N\_\_a`[\_`\_[V\_\_^Y¥\_`[^]`]^`\_H\_\_[^]\_W^Z[X  
@HWI-EAS443:3:12:1090:125#0/1  
GGCGTCTCAAGGCACCAAACGATCATATGAACAAATGGAG  
+HWI-EAS443:3:12:1090:125#0/1  
abab`^[ZHaa`¥`]]aba`\_a`¥aaaa`\_Q\_\_\_\_a`]¥^  
@HWI-EAS443:3:13:1028:1180#0/1  
TCCATTTGTTTCATATGATCGTTTGGTGCCTTGAGACGCCA  
+HWI-EAS443:3:13:1028:1180#0/1  
`aaZ^]\_XT\_`]^\_]`[^`YWZ¥a\_KK¥V[]RX^`^^SZBB  
@HWI-EAS443:3:14:933:270#0/1  
CATGGCGTCTCAAGGCACCAAACGATCATATGAACAAATG  
+HWI-EAS443:3:14:933:270#0/1  
^VZaaX\_OXOT¥0¥[]¥RT^GQX¥MSQQJT¥ZUT¥VWZUS  
@HWI-EAS443:3:15:738:767#0/1  
CTCCATTTGTTTCATATGATCGTTTGGTGCCTTGAGACGCC  
+HWI-EAS443:3:15:738:767#0/1  
abaabbbbaaaaaabbaaa`YaabaYaaaaa\_aa`a^W  
@HWI-EAS443:3:15:924:743#0/1  
GTTTCATATGATCGTTTGGTGCCTTGAGACGCCATGGCTTC  
+HWI-EAS443:3:15:924:743#0/1  
aaab\_abab^aab^baba¥`\_`a\_aU\_`^`\_`W`]U^aR  
@HWI-EAS443:3:17:1614:935#0/1  
CTCCATTTGTTTCATATGATCGTTTGGTGCCTTGAGACGCC  
+HWI-EAS443:3:17:1614:935#0/1  
abaZ[`baa^RTaabb[\_N¥P\_aa`ZaZQ¥a^^X]ZQLT



@HWI-EAS443:3:17:251:305#0/1  
GTCTCAAGGCACCAAACGATCATATGAACAAATGGAGACT  
+HWI-EAS443:3:17:251:305#0/1  
^\_bba]Uaa\_aabaaaa¥^¥]a\_aa\_`\_\_` [ `a]\_a^X`  
@HWI-EAS443:3:21:1547:274#0/1  
CTCCATTTGTTTCATATGATCGTTTGGTGCCTTGAGACGCC  
+HWI-EAS443:3:21:1547:274#0/1  
]bbabbbbbabbbbbbbbaZabbbab\_aW[b`a\_ba\_a]\_  
@HWI-EAS443:3:24:559:231#0/1  
TCCATTTGTTTCATATGATCGTTTGGTGCCTTGAGACGCCA  
+HWI-EAS443:3:24:559:231#0/1  
^Q]aYVTVVWGW\_^XSXVVXQVRZXQ\_^]]^^]\_ [TVVRR  
@HWI-EAS443:3:24:702:1503#0/1  
CTCCATTTGTTTCATATGATCGTTTGGTGCCTTGAGACGCC  
+HWI-EAS443:3:24:702:1503#0/1  
a[ ` []bba]b]bbbabb]b\_^\_aba^U`abZY]\_aaa`a]  
@HWI-EAS443:3:26:1509:732#0/1  
TCCATTTGTTTCATATGATCGTTTGGTGCCTTGAGACGCCA  
+HWI-EAS443:3:26:1509:732#0/1  
^UZ]^a]]\_a[aaaa\_a^a`^`^]U\_]Y[¥]]\_Y[Z^BB  
@HWI-EAS443:3:26:550:448#0/1  
GTCTCCATTTGTTTCATATGATCGTTTGGTGCCTTGAGACG  
+HWI-EAS443:3:26:550:448#0/1  
aabaabaaab^¥a`\_aaaa`\_a^aa]]Ua` `a` [¥¥[¥Z  
@HWI-EAS443:3:27:517:1831#0/1  
CTCCATTTGTTTCATATGATCGTTTGGTGCCTTGAGACGCC  
+HWI-EAS443:3:27:517:1831#0/1  
aabbbbbbbabbbbab\_baba`abZ^[aaab`ab]`b^ab  
@HWI-EAS443:3:28:249:1651#0/1  
CATGGCGTCTCAAGGCACCAAACGATCATATGAACAAATG  
+HWI-EAS443:3:28:249:1651#0/1  
ab¥W[ `a`a^`^`^`^`aaXa¥` `¥VX]^]¥\_aZ^\_]^^\_a  
@HWI-EAS443:3:29:1667:1368#0/1  
CTCCATTTGTTTCATATGATCGTTTGGTGCCTTGAGACGCC  
+HWI-EAS443:3:29:1667:1368#0/1  
aY\_J¥]¥[¥X\_X¥^\_UUY^a^`ab]TTaOS]aa\_\_a`BBB  
@HWI-EAS443:3:31:216:279#0/1  
CTCCATTTGTTTCATATGATCGTTTGGTGCCTTGAGACGCC  
+HWI-EAS443:3:31:216:279#0/1  
a¥P` [a`a]U\_a\_\_\_`a¥a]\_Sa\_aVU\_\_\_\_\_^\_Y\_\_^U\_]`  
@HWI-EAS443:3:33:437:442#0/1  
GAAGCCATGGCGTCTCAAGGCACCAAACGATCATATGAAC  
+HWI-EAS443:3:33:437:442#0/1  
abbaabYaa]abTaaa]aaaa\_aaa\_a` `^\_¥\_\_\_\_\_^\_V  
@HWI-EAS443:3:33:85:1121#0/1  
GGCGTCTCAAGGCACCAAACGATCATATGAACAAATGGAG  
+HWI-EAS443:3:33:85:1121#0/1  
aabbababba`\_aab¥Z¥^ba\_`WZ\_aa^`ba`a\_a\_X`V  
@HWI-EAS443:3:35:309:897#0/1  
CTCCATTTGTTTCATATGATCGTTTGGTGCCTTGAGACGCC

+HWI-EAS443:3:35:309:897#0/1  
aaa`T¥`RVVUaW\_\_]YUR]RTV\_[FFNYVVGXSYUQSY  
@HWI-EAS443:3:3:1576:1116#0/1  
TCCATTTGTTTCATATGATCGTTTGGTGCCTTGAGACGCCA  
+HWI-EAS443:3:3:1576:1116#0/1  
a`abaaaab`b\_ab^aab\_bba`^][aa`]a]``]]^  
@HWI-EAS443:3:40:631:52#0/1  
GAAGCCATGGCGTCTCAAGGCACCAAACGATCATATGAAC  
+HWI-EAS443:3:40:631:52#0/1  
aaa^aa`aaaaa^a\_\_¥aaa\_^a\_¥WF[]\_ZWXY^^\_YZ  
@HWI-EAS443:3:42:938:224#0/1  
CTCCATTTGTTTCATATGATCGTTTGGTGCCTTGAGACGCC  
+HWI-EAS443:3:42:938:224#0/1  
S\_\_¥a[I\_¥^\_W]]][a[\_Y^`b\_IZab]bYbabS`ab[  
@HWI-EAS443:3:44:1536:446#0/1  
CGTCTCAAGGCACCAAACGATCATATGAACAAATGGAGAC  
+HWI-EAS443:3:44:1536:446#0/1  
abaaa`Waab\_`aaa\_a^T¥a\_\_`\_^][L]\_`^]a\_`SP  
@HWI-EAS443:3:44:340:263#0/1  
GTCTCCATTTGTTTCATATGATCGTTTGGTGCCTTGAGACG  
+HWI-EAS443:3:44:340:263#0/1  
aVa]a`YZVaZR\_ZJ]¥`ZS[Za[^¥`\_U\_R[\_X¥]TZKX  
@HWI-EAS443:3:48:818:1095#0/1  
ATTTGTTTCATATGATCGTTTGGTGCCTTGAGACGCCATGG  
+HWI-EAS443:3:48:818:1095#0/1  
\_\_`[¥W\_\_Za]¥\_V¥`[Z`aa[OZT]``\_X[YU[^Q]OX[  
@HWI-EAS443:3:49:596:733#0/1  
TCCATTTGTTTCATATGATCGTTTGGTGCCTTGAGACGCCA  
+HWI-EAS443:3:49:596:733#0/1  
aaaaaaaaaaaaaaaaa\_a^a^aa]aW`Z`a```^^\_^^]Z`  
@HWI-EAS443:3:50:1743:1344#0/1  
TCCATTTGTTTCATATGATCGTTTGGTGCCTTGAGACGCCA  
+HWI-EAS443:3:50:1743:1344#0/1  
aa]^aaabYa\_`aab\_`¥^UaaaaU]\_\_a\_a^\_\_Z^SPX  
@HWI-EAS443:3:52:221:417#0/1  
CTCCATTTGTTTCATATGATCGTTTGGTGCCTTGAGACGCC  
+HWI-EAS443:3:52:221:417#0/1  
aaa^\_\_aab````aaaa^X\_aXaa`aU`^[^¥a\_a^X^[^  
@HWI-EAS443:3:54:1230:1122#0/1  
CATTTGTTTCATATGATCGTTTGGTGCCTTGAGACGCCATG  
+HWI-EAS443:3:54:1230:1122#0/1  
aa\_bba^aa`^ba\_bab`ab\_aV`\_`abbaaa^a`¥¥X^  
@HWI-EAS443:3:55:14:1323#0/1  
GTCTCCATTTGTTTCATATGATCGTTTGGTGCCTTGAGACG  
+HWI-EAS443:3:55:14:1323#0/1  
HJ\_`b]VW[\_`aaaab^b`\_\_`[\_`b```YQ[\_aaaS\_a\_U  
@HWI-EAS443:3:55:680:1181#0/1  
CTCCATTTGTTTCATATGATCGTTTGGTGCCTTGAGACGCC  
+HWI-EAS443:3:55:680:1181#0/1  
a][HO\_b`TYVZUa¥`WLZ`ZSY^]QOa`\_a\_`^[V¥N]B

@HWI-EAS443:3:58:952:124#0/1  
CTCCATTTGTTTCATATGATCGTTTGGTGCCTTGAGACGCC  
+HWI-EAS443:3:58:952:124#0/1  
abaabbbbbbbbabbbbbab`bbbbbb`baabbbaba`a^¥  
@HWI-EAS443:3:60:1136:1054#0/1  
CTCCATTTGTTTCATATGATCGTTTGGTGCCTTGAGACGCC  
+HWI-EAS443:3:60:1136:1054#0/1  
aa``abbbbababaabba`X[aaa¥aTq]`a`W¥a`WZa^  
@HWI-EAS443:3:60:1325:786#0/1  
CATTTGTTTCATATGATCGTTTGGTGCCTTGAGACGCCATG  
+HWI-EAS443:3:60:1325:786#0/1  
`b`baaaaabbbbbbbbaabbbbYb``ba\_`a\_\_`aV¥Ya  
@HWI-EAS443:3:63:1184:961#0/1  
GAAGCCATGGCGTCTCAAGGCACCAAACGATCATATGAAC  
+HWI-EAS443:3:63:1184:961#0/1  
aab`ba`^`[bba]aa\_bbb`Zab``aaa`\_``aaa^b`]`  
@HWI-EAS443:3:65:1786:1824#0/1  
GGCGTCTCAAGGCACCAAACGATCATATGAACAAATGGAG  
+HWI-EAS443:3:65:1786:1824#0/1  
Z`bb^bbZW`a]\_]^\_TW^^aXJNP¥Z\_^XZV¥OVV[XJR  
@HWI-EAS443:3:65:575:1625#0/1  
TCCATTTGTTTCATATGATCGTTTGGTGCCTTGAGACGCCA  
+HWI-EAS443:3:65:575:1625#0/1  
\_a```b\_¥^abbbb``aa`baZZU`aaa`\_\_\_\_¥XZ`a  
@HWI-EAS443:3:65:636:1582#0/1  
GCGTCTCAAGGCACCAAACGATCATATGAACAAATGGAGA  
+HWI-EAS443:3:65:636:1582#0/1  
\_]YQRXTOVY]V\_ZYQ[[]\_]RO\_VYZRYLRQVXPRYR]Y  
@HWI-EAS443:3:66:1410:670#0/1  
CTCCATTTGTTTCATATGATCGTTTGGTGCCTTGAGACGCC  
+HWI-EAS443:3:66:1410:670#0/1  
abaa[aaaaaaaaab^baY\_`a`baa\_^a``aaa\_]`^\_^\_  
@HWI-EAS443:3:67:695:1284#0/1  
CTCCATTTGTTTCATATGATCGTTTGGTGCCTTGAGACGCC  
+HWI-EAS443:3:67:695:1284#0/1  
aaa`]a`aa`\_`\_]`aaa\_aa`Z```¥R^a\_aX\_^YTa[`\_  
@HWI-EAS443:3:67:859:127#0/1  
GTCTCCATTTGTTTCATATGATCGTTTGGTGCCTTGAGACG  
+HWI-EAS443:3:67:859:127#0/1  
aaa`a`\_`b`]`\_\_\_\_\_Z]]a]a`a\_U\_^]]\_Y\_]X  
@HWI-EAS443:3:69:1131:966#0/1  
TCCATTTGTTTCATATGATCGTTTGGTGCCTTGAGACGCCA  
+HWI-EAS443:3:69:1131:966#0/1  
`b`aab`b\_a]bbabb`aaa\_\_ba\_V`aYa\_aaaa\_\_[X\_  
@HWI-EAS443:3:6:1218:1000#0/1  
ATTTGTTTCATATGATCGTTTGGTGCCTTGAGACGCCATGG  
+HWI-EAS443:3:6:1218:1000#0/1  
aabb^`aba`^^a[bV\_`bbY`Waa\_baaaa`V^XS]^S`  
@HWI-EAS443:3:74:470:1219#0/1  
GCGTCTCAAGGCACCAAACGATCATATGAACAAATGGAGA

+HWI-EAS443:3:74:470:1219#0/1  
a¥¥`¥Z]^^\_X]`\_\_¥`^MOLY\_YRGZZZ\_]YVWQU`^Z  
@HWI-EAS443:3:75:1269:1447#0/1  
CATTTGTTTCATATGATCGTTTGGTGCCTTGAGACGCCATG  
+HWI-EAS443:3:75:1269:1447#0/1  
\_¥bbbbab\_bbbba`^`bbab[bU``bababba\_L\_PY  
@HWI-EAS443:3:76:1295:1053#0/1  
TCCATTTGTTTCATATGATCGTTTGGTGCCTTGAGACGCCA  
+HWI-EAS443:3:76:1295:1053#0/1  
\_[U[`\_T00aYaaXTV0]`SZaa^XY[¥^aWTSSX^PLSW  
@HWI-EAS443:3:77:1455:1546#0/1  
CTCCATTTGTTTCATATGATCGTTTGGTGCCTTGAGACGCC  
+HWI-EAS443:3:77:1455:1546#0/1  
`^¥bbbbabbb\_babbbab`babbbbaNa\_aaababaa\_`]  
@HWI-EAS443:3:7:1195:314#0/1  
GGCGTCTCAAGGCACCAAACGATCATATGAACAAATGGAG  
+HWI-EAS443:3:7:1195:314#0/1  
a`¥`Y¥```a\_\_\_ZWZ\_[U`Y^Q¥]\_\_¥YWXPW¥\_V¥`  
@HWI-EAS443:3:7:572:1773#0/1  
CATTTGTTTCATATGATCGTTTGGTGCCTTGAGACGCCATG  
+HWI-EAS443:3:7:572:1773#0/1  
^ZZ`^\_aab```]\_a^bbUaabSNaXXa\_\_^\_\_a\_Y[`U\_  
@HWI-EAS443:3:81:1420:1079#0/1  
GGCGTCTCAAGGCACCAAACGATCATATGAACAAATGGAG  
+HWI-EAS443:3:81:1420:1079#0/1  
Zb]b^`b¥aabaaa\_aaaaab\_^\_\_`aa^`S\_]`^`X[a  
@HWI-EAS443:3:82:504:473#0/1  
ATTTGTTTCATATGATCGTTTGGTGCCTTGAGACGCCATGG  
+HWI-EAS443:3:82:504:473#0/1  
\_]a`¥]a`\_babb\_Zaaabbb[PYT```][aIb\_aQUW`Z  
@HWI-EAS443:3:84:391:1997#0/1  
CTCCATTTGTTTCATATGATCGTTTGGTGCCTTGAGACGCC  
+HWI-EAS443:3:84:391:1997#0/1  
`bb]TZJ\_¥H¥ba`\_]`][`XXaaYUaa`YM\_a`aaX]\_  
@HWI-EAS443:3:90:459:531#0/1  
CGTCTCAAGGCACCAAACGATCATATGAACAAATGGAGAC  
+HWI-EAS443:3:90:459:531#0/1  
a^¥a```Y\_`VW`aaZaaaa[^¥]aaaa`aa\_Y\_[[XZ[W  
@HWI-EAS443:3:93:538:1997#0/1  
TCCATTTGTTTCATATGATCGTTTGGTGCCTTGAGACGCCA  
+HWI-EAS443:3:93:538:1997#0/1  
`]b\_`aab]aa``aaa[`a\_Uaa\_\_^`\_]Z^\_\_`a¥YXN`  
@HWI-EAS443:3:94:1031:623#0/1  
CTCCATTTGTTTCATATGATCGTTTGGTGCCTTGAGACGCC  
+HWI-EAS443:3:94:1031:623#0/1  
aa]YW\_ZTOL\_X\_X]]\_WV]^¥]\_YP¥^UWX`[XWPXYR  
@HWI-EAS443:3:95:1420:581#0/1  
CATTTGTTTCATATGATCGTTTGGTGCCTTGAGACGCCATG  
+HWI-EAS443:3:95:1420:581#0/1  
aab`aaXaabba\_aa[a¥aaZaIb`^b^aY`Z``GV¥\_`

@HWI-EAS443:3:96:160:375#0/1  
ATTTGTTTCATATGATCGTTTGGTGCCTTGAGACGCCATGG  
+HWI-EAS443:3:96:160:375#0/1  
\_¥aZaX^\_V\_b` `]Z\_ba\_V\_WD[XV\_`aa\_ZXTWG^[BB  
@HWI-EAS443:3:9:1048:1209#0/1  
CAAGGCACCAAACGATCATATGAACAAATGGAGACTGGTG  
+HWI-EAS443:3:9:1048:1209#0/1  
ab\_bbaa]abaaaa\_aaabaaa`aZ`\_aaaa`a\_¥`a\_¥a  
@HWI-EAS443:3:9:1281:276#0/1  
GTCTCCATTTGTTTCATATGATCGTTTGGTGCCTTGAGACG  
+HWI-EAS443:3:9:1281:276#0/1  
a]\_\_UN]^`^V\_U]\_\_]\_X^VRV^^^X]UX^\_NXYYY  
@HWI-EAS443:3:79:374:100#0/1  
GATTTGTCCTTCCAGGGCGGGGAGTCTTCGAGATTTCCG  
+HWI-EAS443:3:79:374:100#0/1  
a`S\_\_Z\_] ^¥PRY]`XP[SQ^BBBBBBBBBBBBBBBBBBB  
@HWI-EAS443:3:35:1450:1904#0/1  
CGGACATTGATTCCACGTTTGATCATTCTGATTAACCTA  
+HWI-EAS443:3:35:1450:1904#0/1  
a`TDM\_bUbY`\_Sa^aSa\_^aX^[S[G\_`\_\_a`\_]\_YL[  
@HWI-EAS443:3:84:1338:375#0/1  
CGCATTCCACGTTTATCATTCTGATTAACCTCATTGCTA  
+HWI-EAS443:3:84:1338:375#0/1  
aba]`b[a` `b\_a^DVaZaaa`bbab\_aaaaaa`baa^aa  
@HWI-EAS443:3:76:1348:919#0/1  
CCCCTCTGGTCTTATGGCCAGTATCTGCTTCTTAGTT  
+HWI-EAS443:3:76:1348:919#0/1  
`]QWbab` `a]ZOWY]Z]a`UY`]GO^X]¥JUTV\_]¥^¥  
@HWI-EAS443:3:3:703:604#0/1  
AGCCCCTGGAAGACAAATCTTCTGGCTTTGCAATTTCCA  
+HWI-EAS443:3:3:703:604#0/1  
]baWb`Wa`a`]XaY^aa\_JYya`[a\_`]W^WF¥aYWX]  
@HWI-EAS443:3:35:1511:658#0/1  
TCGCATTCCACGTTTGATCATTCTGATTAACCTCATTGCT  
+HWI-EAS443:3:35:1511:658#0/1  
¥]aaaab\_b^ab` `a\_`a\_^aaaaaa\_U\_Q]aa` `a`aO\_  
@HWI-EAS443:3:38:609:1570#0/1  
CAGAAGATTTGTCCTTCCAGGGCGGGGAGTCTTCGCGCT  
+HWI-EAS443:3:38:609:1570#0/1  
aaa`X`ZV[X^R]^Y^`\_`^VSJVBBBBBBBBBBBBBBBBBB  
@HWI-EAS443:3:48:392:1271#0/1  
TCGCATTCCACGTTTGATCATTCTGATTAACCTCATTGCT  
+HWI-EAS443:3:48:392:1271#0/1  
a^]¥aaaa`a\_baaa`a` `\_\_` `a^aa`\_V`S^]` `\_[`  
@HWI-EAS443:3:59:390:1960#0/1  
CAATCATTCTTCCGACAGATGCTCTGATTTCTGTGGAATC  
+HWI-EAS443:3:59:390:1960#0/1  
U[aa]¥\_aaW^`\_QXH^`\_RY[¥\_[¥W`aZU\_¥]VRZ\_F  
@HWI-EAS443:3:62:974:924#0/1  
CTCCTTATTTCTTCTTTGTCATAAAGGATGAGTTCTGTCA

+HWI-EAS443:3:62:974:924#0/1  
abbabbaabbabbbbbbbaaa\_ba[Y¥[]UDZ\_Z  
@HWI-EAS443:3:63:289:690#0/1  
TCGCATTCCACGTTTGATCATTCTGATTAACTCCATTGCT  
+HWI-EAS443:3:63:289:690#0/1  
^aa\_¥`a\_`\_^a`]WI^`ba]^``¥]\_`a^a`V¥]]`^  
@HWI-EAS443:3:64:318:539#0/1  
GCCGGGATGCCACAGAAATCAGAGCATCTGTCGGAAGAAT  
+HWI-EAS443:3:64:318:539#0/1  
aaa`W\_`]aa\_\_\_aa]```\_a]a][\_\_\_^¥V^^^U¥¥Z^W  
@HWI-EAS443:3:87:510:1748#0/1  
GCGCATTCCACGTTTGATCATTCTGATTAACTCCATTGCT  
+HWI-EAS443:3:87:510:1748#0/1  
]aab`^]`bbbb\_aaba\_abbbababaa```ab\_aa```a  
@HWI-EAS443:3:12:192:1542#0/1  
AATCATTCTTCCGACAGATGCTCTGATTTCTTTGGCATCC  
+HWI-EAS443:3:12:192:1542#0/1  
```aa`R\_UVZa`\_aaLP^W\_\_YP]OFM[]JNDVQTZ¥KUB  
@HWI-EAS443:3:13:940:1954#0/1  
GAAATCAGAGCATCTGTCGGAAGAATGATTGTTGGAATCG  
+HWI-EAS443:3:13:940:1954#0/1  
Y`]\_`¥¥bb\_aa¥\_```a]¥aYN\_\_NV\_]a^HY[J]\_WU^  
@HWI-EAS443:3:14:1619:310#0/1  
ATTCCACGTTTGACCATTCTGATTAACTCCATTGCTATTG  
+HWI-EAS443:3:14:1619:310#0/1  
aaa\_ZaSa[a`a\_¥Y\_\_`W\_] [\_`\_^\_\_WX^\_]`Z\_^\_Z\_  
@HWI-EAS443:3:17:1601:1787#0/1  
GAAATCAGAGCATCTGGCGGAAGAATGATTGGTGAATCG  
+HWI-EAS443:3:17:1601:1787#0/1  
]`T\_aa]bV`abI`S\_J0¥QVTZP[XVSV[U¥Y\_VUTXGS  
@HWI-EAS443:3:17:629:363#0/1  
ATCATTCTTCCGACAGATGCTCTGGTTTCTGTGGCATCCT  
+HWI-EAS443:3:17:629:363#0/1  
a]aba^a`ba^\_¥H¥Z[aT`X`aQ]\_\_¥Z`WHNYGSSYX  
@HWI-EAS443:3:18:933:535#0/1  
AGAGAACTCATCCTTTATGACAAAGAAGCAATAAGGAGAG  
+HWI-EAS443:3:18:933:535#0/1  
RZZXR)`W¥`bb`^¥a\_\_\_¥¥¥¥^`Pa\_HS^]aa]]\_a`a  
@HWI-EAS443:3:23:1278:764#0/1  
GGAACAATAGCAATGGAGTTAATCAGAGTGATCAAACGTG  
+HWI-EAS443:3:23:1278:764#0/1  
aa\_aa`abaaaa^`\_Y`\_\_a`a`U\_]a^^a\_`^^\_\_\_\_Z\_  
@HWI-EAS443:3:2:271:599#0/1  
CTTGTGTGTATGGGCTTGCAGTAGGAAGTGGGCATGACTT  
+HWI-EAS443:3:2:271:599#0/1  
^bUb\_bHa]aZXV[```aa\_LaUWXMQ`\_^SaP[\_[[NDL]  
@HWI-EAS443:3:33:863:229#0/1  
CGGTCAATTGATTCCACGTTTGATCATTCTAATTAACTCCA  
+HWI-EAS443:3:33:863:229#0/1  
\_ZWY]XW¥\_baa\_W^X¥a[X]PTTU\_XV\_W[`Ua¥RXW[S

@HWI-EAS443:3:38:470:464#0/1  
GAGAGAACTCATCCTTTATGACAAAGAAGAAAAAAGGAGA  
+HWI-EAS443:3:38:470:464#0/1  
a^a`\_aaa\_\_\_\_\_aa`a`a\_\_\_\_\_W^`ZW^]Z¥`Z^\_Z  
@HWI-EAS443:3:39:971:144#0/1  
CAATCATTCTCCGACAGATGCTCTGCTTTCTGTGGCATC  
+HWI-EAS443:3:39:971:144#0/1  
abba[`ba^aab¥aaa`Uaa`a¥aa`[`ZUUZG[SMV¥R  
@HWI-EAS443:3:40:1746:313#0/1  
CAGGATGCCACAGAAATCAGAGCATCTGGCGGAAGAATGA  
+HWI-EAS443:3:40:1746:313#0/1  
[a\_baaa^a\_^abaaaba`b\_bU^\_Za\_GRaa]\_b\_^¥aQ  
@HWI-EAS443:3:47:1228:511#0/1  
GCCACAGAAATCAGAGCATCTGTCCGGAAGAGTGATTGGTG  
+HWI-EAS443:3:47:1228:511#0/1  
S\_\_abbba`UYbbb^`aaZ]bbaWQ\_^ZU¥JX[V^a`UG\_  
@HWI-EAS443:3:53:758:498#0/1  
ATTCCACGTTTGACCATTCTGATTAACCTCCATTGCTATTG  
+HWI-EAS443:3:53:758:498#0/1  
]b\_abbaabb`]^a`aab`abab`\_a\_aa]aaba\_ba`a`  
@HWI-EAS443:3:54:1605:283#0/1  
CCGCCCCGGAAGGACAAATCTTCTGGCTTTGCAATTTCC  
+HWI-EAS443:3:54:1605:283#0/1  
`bab\_aZ¥V\_`a`a\_b\_`b`ab\_\_aa`\_a\_a`Z`G`P`\_I  
@HWI-EAS443:3:57:1702:568#0/1  
GTCCGGGAGCTCGAAGACTCCCCGCCCTGGAAGGACAAA  
+HWI-EAS443:3:57:1702:568#0/1  
\_^\_¥\_J¥a`^VQ[UZ`Y`¥U[XX^YQFU[¥PQXPZBBBBB  
@HWI-EAS443:3:59:1651:608#0/1  
GCTCGAAGACTCCCCGCCTCTGGAAGGACAAATCTTCTGG  
+HWI-EAS443:3:59:1651:608#0/1  
aaaaaaaa`\_a`aaa`a\_`a`a\_\_V`a^aaa¥`¥\_WQ[SS  
@HWI-EAS443:3:5:891:327#0/1  
CACGTCTGATCATTCTGATTAACCTCCATTGCTATTGTTCC  
+HWI-EAS443:3:5:891:327#0/1  
ab\_]aaab^¥T¥]¥`bbbababaa`TS¥a\_\_[\_`abaaaBB  
@HWI-EAS443:3:69:1617:239#0/1  
CCCTGGTAGGACAAATCTTCTGGCTTTGCACTTTCCATCA  
+HWI-EAS443:3:69:1617:239#0/1  
abbb`^K```a^]XT\_aa^]a\_```a\_aN]]`a`^R]]XT  
@HWI-EAS443:3:70:1582:258#0/1  
ATTTGTCCTCCAGGGGCGGGGAGTCTTCGAGTTCTCGGA  
+HWI-EAS443:3:70:1582:258#0/1  
^`X`W`aabb`aW`b^T]b`aZ\_WV¥]MTR\_V\_]Z]`aT  
@HWI-EAS443:3:70:926:620#0/1  
GGAGTTGGAACGATAGCAATGGAGTTAATCAGAATGATCA  
+HWI-EAS443:3:70:926:620#0/1  
ab\_XYa¥a`U]¥YX][`[^]N]W\_\_\_\_[\_a`XQX\_V[P]  
@HWI-EAS443:3:7:463:808#0/1  
CCGAGAGCTCGAAGGCTCCCCGCCCTGGAAGGACAAATC

+HWI-EAS443:3:7:463:808#0/1  
aa`Ra`aX¥]¥Za\_[]^`¥`a^ZIJT\_RW`a^Y¥\_^BB  
@HWI-EAS443:3:80:1398:1558#0/1  
CGCCCCTGGAAGGTCAAATCTTCTGGCTTTGCACTTTCCA  
+HWI-EAS443:3:80:1398:1558#0/1  
aa\_W\_ZOZba`abG`abaaW\_a`aaaV\_b\_bG`UbabaW^  
@HWI-EAS443:3:81:279:837#0/1  
GCCCCTGGAAGGGCAAATCTTCTGGCTTTGCACTTTCCAT  
+HWI-EAS443:3:81:279:837#0/1  
aaaba\_a\_`ba`¥]Z\_[]`aaaa\_VZaa`\_\_^`^`V^\_a  
@HWI-EAS443:3:84:1171:1056#0/1  
AGGAGTTGGAACAATAGCAATGGAGTTAATCAGACTGATC  
+HWI-EAS443:3:84:1171:1056#0/1  
KY\_T¥RX^XUV][¥X`b\_Ya]aTX[]^a`a`RSPDMXRIU  
@HWI-EAS443:3:87:588:1040#0/1  
CGTCCGAGAGCTCGAAGACTCCCCGCCCTGGCAGGACAA  
+HWI-EAS443:3:87:588:1040#0/1  
`[]T[a[a\_`^`\_aa¥0¥a^^`a` `[WX^`UGT\_X[]ZF  
@HWI-EAS443:3:88:1159:587#0/1  
CAGAAATCAGAGCATCTGGCGGAAGAATGATTGGTGGGAAT  
+HWI-EAS443:3:88:1159:587#0/1  
abbbbaa`baab`Ubaa\_GV[`a`][baQ[^bbRY`\_`Q  
@HWI-EAS443:3:88:1426:1072#0/1  
CTTGTGTGTATAGGCTTGCAGTAGCAAGTGGGCATGACTT  
+HWI-EAS443:3:88:1426:1072#0/1  
aabaab¥bbbbbbbbb`aa`b`ab`aaa\_a`a\_b`a\_N\_b  
@HWI-EAS443:3:95:1043:91#0/1  
TGCCTGCTTGTGTGTATGGGCTTGCAGTAGAAAGTGGGCA  
+HWI-EAS443:3:95:1043:91#0/1  
\_ab[bb\_S^a^[¥b^babab]X\_]W[aYY^F[`\_\_a\_\_X^  
@HWI-EAS443:3:99:481:638#0/1  
CGCCAGGAAGCCACAGAAATCAGAGCATCTGTCCGAAGAA  
+HWI-EAS443:3:99:481:638#0/1  
aaXJ\_Z]\_bZU]ZXba]^^^T^Z\_aa\_\_WaaLJ¥¥XT`^a  
@HWI-EAS443:3:9:1478:1682#0/1  
GCCCCTGGAAGGACAAATCTTCTGGCTTTGCAATTTCCAT  
+HWI-EAS443:3:9:1478:1682#0/1  
aaa\_\_aaaa^a^]a` `[a^X`\_`\_`\_\_ZWDW\_\_[Z`\_`  
@HWI-EAS443:3:19:197:538#0/1  
ACCAATCATTCTCCGACAGATGCTCTGATTCTGTGTCA  
+HWI-EAS443:3:19:197:538#0/1  
\_QU^ZXa`Y][`Y\_a\_XabaZ]ND0aaXXBBBBBBBBBBB  
@HWI-EAS443:3:31:1242:1520#0/1  
CGCATTCCACGTTTGATCATTCTGATTAACCTCATTGCTA  
+HWI-EAS443:3:31:1242:1520#0/1  
\_babbbabbbabbaabb`bbbabbbabb`a`aab`b`ba  
@HWI-EAS443:3:38:594:1526#0/1  
GACTCCACCAATCATTCTCCGACAGATGCTCTGATTCT  
+HWI-EAS443:3:38:594:1526#0/1  
aababbbabb\_Q`aabbaabaaa`[W^¥^KS]\_^\_^[¥¥



@HWI-EAS443:3:48:780:2018#0/1  
CGCATTCCACGTTTGATCATTCTGATTAACCTCCATTGCTA  
+HWI-EAS443:3:48:780:2018#0/1  
`a\_babb`aaa\_\_aaaaabaab\_bb`aa\_`¥H]a^a\_\_`  
@HWI-EAS443:3:55:1103:542#0/1  
CGCATTCCACGTTTGATCATTCTGATTAACCTCCATTGCTA  
+HWI-EAS443:3:55:1103:542#0/1  
ababbbabbbbaaabbabbbbaabbbbabaaaa`bba]a`  
@HWI-EAS443:3:56:1194:1310#0/1  
GGCGTTGGAACAATAGCAATGGAGTTAATCAGAATGATCA  
+HWI-EAS443:3:56:1194:1310#0/1  
\_QDXP]]]]\_ZXT[Y^Y[UZ^[RMSVY[^X^ZZ[^¥PQOU  
@HWI-EAS443:3:76:270:1195#0/1  
AGCATTCCACGTTTGATCATTCTGATTAACCTCCATTGCTA  
+HWI-EAS443:3:76:270:1195#0/1  
abb]aabbbaa\_aaa]\_\_`a\_a\_\_^^\_[aa`]]`^ZX^¥a  
@HWI-EAS443:3:84:1277:1327#0/1  
CGCATTCCACGTTTGATCATTCTGATTAACCTCCATTGCTA  
+HWI-EAS443:3:84:1277:1327#0/1  
`ab\_b`[aabababbbZabb`a\_\_abb\_ba`\_\_babaaa  
@HWI-EAS443:3:93:1310:399#0/1  
GCGCCTGGAAGGACAAATCTTCTGGCTTTGCACTTCCAT  
+HWI-EAS443:3:93:1310:399#0/1  
aUFWZaa`S[`]\_VY`V[[]`W¥TX]YW^RSZTT^BBBBB  
@HWI-EAS443:3:27:666:219#0/1  
GTCATGCCCACTTGCTACTGCAAGCCATACANACAAGCA  
+HWI-EAS443:3:27:666:219#0/1  
a\_\_aaaba`aaa`Z` `[^a\_\_¥[¥S¥\_]ZVDS¥\_\_^SS  
@HWI-EAS443:3:33:472:340#0/1  
TGGAAAGTGCAAAGCCAGAAGATTTGTCCTTCNAGGGGCG  
+HWI-EAS443:3:33:472:340#0/1  
aba`aab`baa^a\_baaaW^a^`a`^`\_]\_RDX`¥Y¥]¥  
@HWI-EAS443:3:35:1476:489#0/1  
ATTCCACGTTTGATCATTCTGATTAANTCCATTGCTATTG  
+HWI-EAS443:3:35:1476:489#0/1  
abaaabab` `abaa`aaaa`aaaa`YDYaa`aaa]`\_a[`  
@HWI-EAS443:3:3:357:1233#0/1  
CAANCATTCTCCGACAGATGCTCTGATTTCTGTGGCATC  
+HWI-EAS443:3:3:357:1233#0/1  
ab]D[bbabb\_baababa[`ba`aba`b\_Ibb\_aaYaaY  
@HWI-EAS443:3:43:1045:804#0/1  
CGCCCCTGGAAGGACAAATCTTCTGGCTTNGCACTTCCA  
+HWI-EAS443:3:43:1045:804#0/1  
`ab`R`\_a^¥\_ST]RU¥`b\_T`b\_]X`bYD00]Y^b^Wa`  
@HWI-EAS443:3:46:1451:1086#0/1  
GCTTGTGTATGGGCTTGCAGTAGCAAGTNGGCATGACT  
+HWI-EAS443:3:46:1451:1086#0/1  
a\_ba`aaab`aaaa\_a\_aa^^`\_a`\_\_\_\_\_KD¥\_¥¥\_`¥W^  
@HWI-EAS443:3:52:1432:600#0/1  
GTTGGNACAATAGCAATGGAGTTAATCAGAATGATCAAAC

+HWI-EAS443:3:52:1432:600#0/1  
\_[a\_QD[`a\_aYaa^^`aT^^\_\_\_\_]V]Z]^`a¥[[YSX^  
@HWI-EAS443:3:52:1687:796#0/1  
CTAAGAAGCAGATACTGNGCCATAAGGACCAGAAGTGGAG  
+HWI-EAS443:3:52:1687:796#0/1  
abbbb\_aa`ab\_bba`WD¥`]Zaabaaa\_\_a```a]aV`a  
@HWI-EAS443:3:63:1676:1069#0/1  
AAAGGAGTTNGAACAAATAGCAATGGAGTTAATCAGAATGA  
+HWI-EAS443:3:63:1676:1069#0/1  
aZVZ]\_`¥D^aa`a¥VY`\_aaaaa]aa\_\_`aa^NXa^  
@HWI-EAS443:3:67:1651:1198#0/1  
CGCNCCTGGAAGGACAAATCTTCTGGCTTTGCACTTTCCA  
+HWI-EAS443:3:67:1651:1198#0/1  
a`YD¥aaaaaaaa\_\_aa\_a^aaaa`^a`a`a`\_Z`a\_^\_\_  
@HWI-EAS443:3:14:656:1257#0/1  
GCATTCCACGTTTGATCATTCTGATTAACTCCATTGCTAT  
+HWI-EAS443:3:14:656:1257#0/1  
a```a`\_`XX\_]\_aZ^\_aYS]^]K^\_¥^]J]TWWYX¥^R  
@HWI-EAS443:3:30:1389:1459#0/1  
CAGAAGATTTGTCCTTCCAGGGGCGGGGAGTCTTCGAGGT  
+HWI-EAS443:3:30:1389:1459#0/1  
\_¥\_XYPYab`]Xa¥\_W]a]]\_a]`BBBBBBBBBBBBBBBB  
@HWI-EAS443:3:30:146:40#0/1  
GAGCTCGAAGACTCCCCGCCCTGGAAGGACAAATCTTTC  
+HWI-EAS443:3:30:146:40#0/1  
aT^][`\_OT[`]Z]YTYSUXVZXPBBBBBBBBBBBBBBBB  
@HWI-EAS443:3:42:837:1540#0/1  
GCTGATTCCACGTTTGATCATTCTGATTAACTCCATTGCT  
+HWI-EAS443:3:42:837:1540#0/1  
aa\_a^^aa`\_^^[\_Z[^¥^a\_]`]]]```\_\_\_\_\_^\_  
@HWI-EAS443:3:12:594:1512#0/1  
ATTTGTCCTTCCAGGGGCGGGGAGTCTTCGAGCTCTCGGG  
+HWI-EAS443:3:12:594:1512#0/1  
a```aaUaa^aaa`^YPI]BBBBBBBBBBBBBBBBBBBB  
@HWI-EAS443:3:31:928:773#0/1  
GGCCAGGATGCCACAGAAATCAGAGCATCTGTGGAAGAA  
+HWI-EAS443:3:31:928:773#0/1  
aaa`Tbbaab]]aab`\_¥b\_^a\_a\_]a```a\_GZ^^^[\_`\_`  
@HWI-EAS443:3:38:1410:605#0/1  
TGCAAAGCCAGAAGATTTGTCCTTCCAGGGGCGGGGAGTG  
+HWI-EAS443:3:38:1410:605#0/1  
abbaa\_aaa`a^]Ua\_^aaY[\_`\_`^`aaXP[^aWPGSOL  
@HWI-EAS443:3:40:1734:667#0/1  
GGGTCATTGATTCCACGTTTGATCATTCTGATTAACTCCA  
+HWI-EAS443:3:40:1734:667#0/1  
H\_b\_^babbaabYabbbabbaba^b``bb`aabbb`^Za  
@HWI-EAS443:3:45:241:363#0/1  
CGTGTGTATGGGCTTGCAAGTAGCAAGTGGGCATGACTTTG  
+HWI-EAS443:3:45:241:363#0/1  
``````YUY\_``¥¥YZ^¥^N^ZW`X`Y^^YVXX`ZYT`]^

@HWI-EAS443:3:48:731:1378#0/1  
CCCCGAGCTCGAAGACTCCCCGCCCTGGAAGGACAAAT  
+HWI-EAS443:3:48:731:1378#0/1  
`]^^[^baUaaZaaabaQa\_\_¥]a¥T[¥]H]I¥YQUY`¥]\_  
@HWI-EAS443:3:54:267:378#0/1  
TCGCCCCCTGGAAGGACAAATCTTCTGGCTTTGCACTTTCC  
+HWI-EAS443:3:54:267:378#0/1  
aaba]]`a[MWaa\_aa`Y]a`^[Y]```YQQL]\_\_¥\_  
@HWI-EAS443:3:58:1395:680#0/1  
ATCCACGTTTGATCATTCTGATTAECTCCATTGCTATTGT  
+HWI-EAS443:3:58:1395:680#0/1  
aWXVa`^`abbb`a[a\_]`\_b\_aa¥`\_a\_R^bbb^aX¥`aW  
@HWI-EAS443:3:58:54:635#0/1  
AGCCCCCTGGAAGGACAAATCTTCTGGCTTTGCACTTTCCA  
+HWI-EAS443:3:58:54:635#0/1  
a`a`\_[]\_]^\_WU]^]^^\_Z\_^\_]^^\_]S0Y^\_Z^^  
@HWI-EAS443:3:65:862:1852#0/1  
CTCCACGTTTGATCATTCTGATTAECTCCATTGCTATTGT  
+HWI-EAS443:3:65:862:1852#0/1  
a]aaabaaaa^`a`aaaa`a``aaa`\_`\_a]^`\_a`\_^  
@HWI-EAS443:3:70:1632:118#0/1  
CCCCCTGGAAGGACAAATCTTCTGGCTTTGCACTTTCCAT  
+HWI-EAS443:3:70:1632:118#0/1  
[ababbbbaabb`bbaa\_[bbbababbab`\_^bab`\_aa  
@HWI-EAS443:3:85:1250:1028#0/1  
AGGAGTTGGAACAATAGCAATGGAGTTAATCAGAATGATN  
+HWI-EAS443:3:85:1250:1028#0/1  
aaa`]^a[`]``a\_a¥a^\_[`aRX`[a``\_]^[^\_]\_[XD  
@HWI-EAS443:3:86:1551:954#0/1  
TCCCGCCCCCTGGAAGGACAAATCTTCTGGCTTTGCACTTT  
+HWI-EAS443:3:86:1551:954#0/1  
aaR\_\_ZH]\_X\_aaab`[]WW¥^[U]\_`a\_^¥\_]XYYP  
@HWI-EAS443:3:93:647:1086#0/1  
AGATCATTCTGATTAECTCCATTGCTATTGTTCCAECTCC  
+HWI-EAS443:3:93:647:1086#0/1  
ZZVSabaa^a``]a^`aaabaa^Z`\_a¥[^]a`¥[^aaZS  
@HWI-EAS443:3:100:147:1008#0/1  
CATTGATTCCACGTTTGATCATTCTGATTAECTCCATTGC  
+HWI-EAS443:3:100:147:1008#0/1  
\_b\_aa^aaaaa\_b\_abb^a`a``a`\_`\_a`^a]\_`aaa\_  
@HWI-EAS443:3:11:1018:254#0/1  
GTCATGCCCACTTGCTACTGCAAGCCCATACACACAAGCA  
+HWI-EAS443:3:11:1018:254#0/1  
`GVVT¥ZKR¥Y¥PPTRNKP^W¥WUKNN^WWWPKTUSWBBB  
@HWI-EAS443:3:11:1084:1120#0/1  
GATTCCACCAATCATTCTCCGACAGATGCTCTGATTCT  
+HWI-EAS443:3:11:1084:1120#0/1  
a``ba\_\_\_a\_a]a`a`]`aa\_`[a^Y^ZXY\_\_\_\_`\_VT[\_\_\_  
@HWI-EAS443:3:11:223:1925#0/1  
GTGTATGGGCTTGCAAGTAGCAAGTGGGCATGACTTTGAAA

+HWI-EAS443:3:11:223:1925#0/1  
a\$M[a`aab\_XR`XH]aX\_`^a¥aa\_aZQ^`\_a\_a\_\_¥  
@HWI-EAS443:3:11:379:1273#0/1  
CAATGGAGTTAATCAGAATGATCAAACGTGGAATCAATGA  
+HWI-EAS443:3:11:379:1273#0/1  
a]]\_]\_[a^`\_Z¥`VZZ^\_]^\_`¥TY\_X\_[\_]]]]XZ^  
@HWI-EAS443:3:11:511:913#0/1  
GAGTTGGAACAATAGCAATGGAGTTAATCAGAATGATCAA  
+HWI-EAS443:3:11:511:913#0/1  
a[[]b`SX]aaa]^^ba\_`aaSRW[^a`\_aa`¥`S]\_`  
@HWI-EAS443:3:11:629:1005#0/1  
CTTGTGTGTATGGGCTTGCAGTAGCAAGTGGGCATGACTT  
+HWI-EAS443:3:11:629:1005#0/1  
aaaaababaabba\_aaab]\_\_a`aa`aY`a``aaa\_\_aa  
@HWI-EAS443:3:11:704:1757#0/1  
AGTTAATCAGAATGATCAAACGTGGAATCAATGACCGAAA  
+HWI-EAS443:3:11:704:1757#0/1  
aa`^^\_JZ`X[aSXR^XZ\_[X`W[X[YV\_a\_`Y^]¥\_¥` [  
@HWI-EAS443:3:12:1621:628#0/1  
GGAGTTGGAACAATAGCAATGGAGTTAATCAGAATGATCA  
+HWI-EAS443:3:12:1621:628#0/1  
`[¥a\_aaa[a\_\_^\_U`^\_\_\_a`[\_V]`X^X^^]XV]]]U^  
@HWI-EAS443:3:12:53:578#0/1  
GATTTGTCTTCCAGGGCGGGGAGTCTTCGAGCTCTCGG  
+HWI-EAS443:3:12:53:578#0/1  
a\_aa]a^`^`][Y¥^^]\_^\_ZKXDRPJZUVMPVBBBBBBB  
@HWI-EAS443:3:13:1270:796#0/1  
TGCTTGTGTGTATGGGCTTGCAGTAGCAAGTGGGCATGAC  
+HWI-EAS443:3:13:1270:796#0/1  
aa\_`aat[S`^\_aa\_[]]¥]WU]X\_\_[]`W`N[^aU¥¥^TV  
@HWI-EAS443:3:13:1346:725#0/1  
ATTCTTCCGACAGATGCTCTGATTTCTGTGGCATCCTGGC  
+HWI-EAS443:3:13:1346:725#0/1  
aaaaa`^`a`a¥\_a\_`\_`a[aa`[a\_^\_[U\_\_][U^^Z  
@HWI-EAS443:3:13:265:1148#0/1  
CGGTCATTGATTCCACGTTTGTATCATTCTGATTAECTCA  
+HWI-EAS443:3:13:265:1148#0/1  
`ab\_aab\_OK\_a]b\_a¥\_aaV¥aa\_P]aaa\_a\_a`\_`\_]Q  
@HWI-EAS443:3:13:276:1804#0/1  
GATTTGTCTTCCAGGGCGGGGAGTCTTCGAGCTCTCGG  
+HWI-EAS443:3:13:276:1804#0/1  
aXaa^a[`baaaa``¥¥]aa^¥Y^U[^`XY¥YYTKTQU]  
@HWI-EAS443:3:13:572:804#0/1  
ATTTGTCTTCCAGGGCGGGGAGTCTTCGAGCTCTCGGA  
+HWI-EAS443:3:13:572:804#0/1  
^\_bbaaaaaab`^`a`]aaaa¥¥¥QPQ\_X¥OXKTZRQY]V  
@HWI-EAS443:3:14:235:196#0/1  
CCCCCCCCTGGAAGGACAAATCTTCTGGCTTTGCACTTTC  
+HWI-EAS443:3:14:235:196#0/1  
aa`¥`aa\_a\_\_^`\_¥R^\_[^^Z[[[[^¥S^WYSQMRWZ¥R

@HWI-EAS443:3:14:996:529#0/1  
CAATGGAGTTAATCAGAATGATCAAACGTGGAATCAATGA  
+HWI-EAS443:3:14:996:529#0/1  
aaabb`aa`baa`P\_aaaaaaaa`]a^]aa\_`a\_```¥  
@HWI-EAS443:3:15:1289:40#0/1  
AGCTCGAAGACTCCCCGCCCTGGAAGGACAAATCTTCTG  
+HWI-EAS443:3:15:1289:40#0/1  
a`ab]]R]bWUa]XQ]^]V\_\_XXU¥UU¥W`]WOQU¥WGRS  
@HWI-EAS443:3:15:1713:1049#0/1  
TGTATGGGCTTGCAGTAGCAAGTGGGCATGACTTTGAAAG  
+HWI-EAS443:3:15:1713:1049#0/1  
aYZ\_ab\_\_U]\_`N]N]P`^YZYY[^XG[¥¥TIS^]VS\_ZW  
@HWI-EAS443:3:15:461:518#0/1  
ATTCCACGTTTGTATCATTCTGATTA ACTCCATTGCTATTG  
+HWI-EAS443:3:15:461:518#0/1  
¥`Y`^baaa`[\_Z\_]`^aaaabba\_`^V`\_W`\_`a`aa]W\_  
@HWI-EAS443:3:15:710:1866#0/1  
CCACGTTTGTATCATTCTGATTA ACTCCATTGCTATTGTTC  
+HWI-EAS443:3:15:710:1866#0/1  
]`\_Y¥R`U`b`abaIXVa`\_aa]\_]Vb`aXNZ`a]\_IUH  
@HWI-EAS443:3:15:809:847#0/1  
GAGTTGGAACAATAGCAATGGAGTTAATCAGAATGATCAA  
+HWI-EAS443:3:15:809:847#0/1  
aa¥\_bb¥^^V]`a\_]`Yabaa]a`a\_a`aaaa\_aaaa`^  
@HWI-EAS443:3:16:1106:783#0/1  
GCCTGCCTGCTTGTGTGTATGGGCTTGCAGTAGCAAGTGG  
+HWI-EAS443:3:16:1106:783#0/1  
abaabaabbaaaa\_bab^aaaa```a^``¥a``¥]\_U^\_  
@HWI-EAS443:3:16:122:1882#0/1  
GGATGCCACAGAAATCAGAGCATCTGTCCGGAAGAATGATT  
+HWI-EAS443:3:16:122:1882#0/1  
``^WY\_abaa`¥\_Q]\_aV¥W`aaa`]¥`]TWa``a`XXS`  
@HWI-EAS443:3:16:1485:1214#0/1  
AAGGAGTTGGAACAATAGCAATGGAGTTAATCAGAATGAT  
+HWI-EAS443:3:16:1485:1214#0/1  
XXbba```abbb¥`\_baaba^R^aa\_abaaa`bbaaa`aa  
@HWI-EAS443:3:16:467:1751#0/1  
GGAGTTGGAACAATAGCAATGGAGTTAATCAGAATGATCA  
+HWI-EAS443:3:16:467:1751#0/1  
^Z]XYaabVabb\_aa\_`abaa`[a`abbaVbaaa`b]``a  
@HWI-EAS443:3:16:68:1434#0/1  
AAAGTGCAAAGCCAGAAGATTTGTCCTTCCAGGGGCGGGG  
+HWI-EAS443:3:16:68:1434#0/1  
aa]RTVaaa`U\_aa^¥\_X\_¥¥¥¥¥^Y^Y¥^\_Z¥X]BBBB  
@HWI-EAS443:3:17:1256:548#0/1  
GCTTGTGTGTATGGGCTTGCAGTAGCAAGTGGGCATGACT  
+HWI-EAS443:3:17:1256:548#0/1  
a\_[¥a]\_¥aaa^\_U[RP]X`[QYQQ¥GTZV^ZRURDOUU  
@HWI-EAS443:3:17:1480:250#0/1  
CCCCTGGAAGGACAAATCTTCTGGCTTTGCACTTCCATC

+HWI-EAS443:3:17:1480:250#0/1  
ab\_b`b`b`b`bbba[aabZaa]\_a`\_\_a[`\_aaaa\_`[\_aR  
@HWI-EAS443:3:17:504:1300#0/1  
GTCCGAGAGCTCGAAGACTCCCCGCCCTGGAAGGACAAA  
+HWI-EAS443:3:17:504:1300#0/1  
a[^abaaaa`X[]\_dMP^X^Z^ZSWa]R¥Y^aGU`BBBB  
@HWI-EAS443:3:17:946:1023#0/1  
TGGGTTTTCGACTTTCTCTCACTTGATCCATCATTGCCCTC  
+HWI-EAS443:3:17:946:1023#0/1  
`bbb`bba`abaaaa`\_K¥`aa`aaaa\_\_^]Z\_]W^^  
@HWI-EAS443:3:18:97:1686#0/1  
ATTGATTCCACGTTTGATCATTCTGATTAECTCATTGCT  
+HWI-EAS443:3:18:97:1686#0/1  
aab`aaaaab`a\_a`^a\_aaaa``]Y`\_`aU^\_aa`\_V`\_  
@HWI-EAS443:3:19:1023:1693#0/1  
CGCCAGGATGCCACAGAAATCAGAGCATCTGTCGGAAGAA  
+HWI-EAS443:3:19:1023:1693#0/1  
V\_]bbaabbabbbbab`bbbb`^aaabbbb[bbb^a``a  
@HWI-EAS443:3:19:1136:1851#0/1  
TCGGTCATTGATTCCACGTTTGATCATTCTGATTAECTCC  
+HWI-EAS443:3:19:1136:1851#0/1  
¥ba]DYbbaWaX`W^bR`Ra\_V[\_]^aa\_\_[Vaa\_TY`^`  
@HWI-EAS443:3:19:1554:1627#0/1  
AGTGCAAAGCCAGAAGATTTGTCCTTCCAGGGGCGGGGAG  
+HWI-EAS443:3:19:1554:1627#0/1  
`^^b]aa`a]]b\_aaaaZMY]`O]^Sxa^^\_`^`ZVRYP\_  
@HWI-EAS443:3:19:1566:435#0/1  
CAGAAATCAGAGCATCTGTCGGAAGAATGATTGGTGGAAAT  
+HWI-EAS443:3:19:1566:435#0/1  
Xa[abba`aa^abbbab\_ZXbb]`\_`b`bbabbbbaaaba  
@HWI-EAS443:3:19:730:1638#0/1  
GGAGTTGGAACAATAGCAATGGAGTTAATCAGAATGATCA  
+HWI-EAS443:3:19:730:1638#0/1  
aa`\_\_baaabaaaa`aaaaaaaa`aaa\_aaaaa`aa\_\_a  
@HWI-EAS443:3:19:932:93#0/1  
CGCCCCTGGAAGGACAAATCTTCTGGCTTTGCACTTTCCA  
+HWI-EAS443:3:19:932:93#0/1  
aba`^aaaaabbY¥baa`[baW\_\_Y0^aaZ0]Q`aa\_W[  
@HWI-EAS443:3:1:542:1168#0/1  
AGGAGTTGGAACAATAGCAATGGAGTTAATCAGAATGATC  
+HWI-EAS443:3:1:542:1168#0/1  
`b`ab`aabaaU\_`a``aaa`aa^¥``a`¥`a``a`aBB  
@HWI-EAS443:3:20:1012:1002#0/1  
AAAGTGCAAAGCCAGAAGATTTGTCCTTCCAGGGGCGGGG  
+HWI-EAS443:3:20:1012:1002#0/1  
]¥¥WI¥`¥ZXZ\_\_]X\_RR\_W]OV`a]aR¥VHT`[[U[[FO  
@HWI-EAS443:3:20:1461:1395#0/1  
GAGAGAACTCATCTTTATGACAAAGAAGAAATAAGGAGA  
+HWI-EAS443:3:20:1461:1395#0/1  
aaY]a`a\_aaaaaZaaaaaaY[^]a^^a`\_\_`\_\_`^`^`^`

@HWI-EAS443:3:20:1507:486#0/1  
ATTGATTCCACGTTTGATCATTCTGATTAAGTCCATTGCT  
+HWI-EAS443:3:20:1507:486#0/1  
aba\_`\_¥L[aabbb`YaaQ]ab[\_X]`ba^MbXR\_a`a[  
@HWI-EAS443:3:20:1577:462#0/1  
CACAGAAATCAGAGCATCTGTCCGAAGAATGATTGGTGGA  
+HWI-EAS443:3:20:1577:462#0/1  
\_V]¥Z¥a^a]\_J\_¥OX]VW]^TZQLV\_YY¥ZVZW^XSUSL  
@HWI-EAS443:3:20:385:124#0/1  
AGAACTCATCCTTTATGACAAAGAAGAAATAAGGAGAGTT  
+HWI-EAS443:3:20:385:124#0/1  
ababbbabbaabbabaab`a`ab`ab`abaabaaa`bX¥  
@HWI-EAS443:3:20:673:1404#0/1  
TGGAACAATAGCAATGGAGTTAATCAGAATGATCAAACGT  
+HWI-EAS443:3:20:673:1404#0/1  
aa`a`]ba`aa`aYaa\_\_a]]aaa`a\_\_\_\_a[X[UY^SU  
@HWI-EAS443:3:21:455:605#0/1  
AGAAGATTTGTCCTTCCAGGGCGGGGAGTCTTCGAGCTC  
+HWI-EAS443:3:21:455:605#0/1  
a`¥aaa`aabaaaa]¥]`a`\_\_`]UWTXYXMOXPJNT  
@HWI-EAS443:3:21:932:39#0/1  
GAACAATAGCAATGGAGTTAATCAGAATGATCAAACGTGG  
+HWI-EAS443:3:21:932:39#0/1  
a`^`a`a`aaa\_a^a`\_\_\_\_\_]\_]]]]X]]\_Z`^`  
@HWI-EAS443:3:22:1559:527#0/1  
CGTCCGAGAGCTCGAAGACTCCCCGCCCTGGAAGGACAA  
+HWI-EAS443:3:22:1559:527#0/1  
a`MY]aaa`]]`]]\_\_^aZ`^]¥]]^W¥¥¥^URU¥¥WSM¥  
@HWI-EAS443:3:22:1688:639#0/1  
CAATCATTCTCCGACAGATGCTCTGATTTCTGTGGCATC  
+HWI-EAS443:3:22:1688:639#0/1  
aba]VW^aa`b\_\_b[OXaW`a[\_O\_a^`^V^`PZ\_\_[R\_N  
@HWI-EAS443:3:22:692:707#0/1  
GGTCATTGATTCCACGTTTGATCATTCTGATTAAGTCCAT  
+HWI-EAS443:3:22:692:707#0/1  
aa\_bbaba\_abaaa]ba`abaaaaa`^Uaaa`\_\_`\_[aa  
@HWI-EAS443:3:22:833:778#0/1  
GTTGGAACAATAGCAATGGAGTTAATCAGAATGATCAAAC  
+HWI-EAS443:3:22:833:778#0/1  
aaa`\_a`]aa\_aaa\_aa`\_a^`a\_a^`\_a^`\_^`\_^`\_^`  
@HWI-EAS443:3:23:110:1427#0/1  
ATTGATTCCACGTTTGATCATTCTGATTAAGTCCATTGCT  
+HWI-EAS443:3:23:110:1427#0/1  
aaaaaaaa`aa^a`aa\_aaa\_\_aaa\_\_a\_\_aa^\_\_a^Y^  
@HWI-EAS443:3:23:1444:555#0/1  
CAAAGCCAGAAGATTTGTCCTTCCAGGGCGGGGAGTCTT  
+HWI-EAS443:3:23:1444:555#0/1  
abbbbaabb`bbabbaab`aaaa¥aa\_a^`\_`]^X\_YPV\_  
@HWI-EAS443:3:23:1508:2029#0/1  
CATTGATTCCACGTTTGATCATTCTGATTAAGTCCATTGC

+HWI-EAS443:3:23:1508:2029#0/1  
abP^`bb\_\_b`Z`^^babba[^\_abaa]]Vaa\_FPba]^W  
@HWI-EAS443:3:23:1722:1978#0/1  
GGAGTTGGAACAATAGCAATGGAGTTAATCAGAATGATCA  
+HWI-EAS443:3:23:1722:1978#0/1  
aa`a`aaa\_`^]¥^^U^\_\_]W^]`¥`\_Z\_\_\_\_¥ZZ\_]UV^  
@HWI-EAS443:3:23:192:1401#0/1  
GGAGTTGGAACAATAGCAATGGAGTTAATCAGAATGATCA  
+HWI-EAS443:3:23:192:1401#0/1  
aa^¥aabaabbbbababaaba`aa`aaaaaba]aaa\_`][  
@HWI-EAS443:3:23:375:665#0/1  
GAACAATAGCAATGGAGTTAATCAGAATGATCAAACGTGG  
+HWI-EAS443:3:23:375:665#0/1  
[N`¥bb^V`Y¥\_ab[^\_ab]^Vb¥bb`abb\_`^^b¥baba  
@HWI-EAS443:3:23:552:693#0/1  
CCAGGATGCCACAGAAATCAGAGCATCTGTCCGAAGAATG  
+HWI-EAS443:3:23:552:693#0/1  
ab``¥a[`]`[[b\_]^[a[US`\_a\_\_aXJPYXHU[\_V\_[  
@HWI-EAS443:3:23:887:174#0/1  
TGATTCCACGTTTGATCATTCTGATTAECTCCATTGCTAT  
+HWI-EAS443:3:23:887:174#0/1  
¥a`\_YXb\_a`P]^`]R[[aaQ^ba\_`a]¥]MF[a\_a\_[aY  
@HWI-EAS443:3:24:729:1773#0/1  
CAGAAATCAGAGCATCTGTCCGAAGAATGATTGGTGAAT  
+HWI-EAS443:3:24:729:1773#0/1  
`bba`aabb\_babbabbb`ba\_aa^^bbab`b`aS]aab\_  
@HWI-EAS443:3:25:1289:476#0/1  
AAAGTGCAAAGCCAGAAGATTTGTCCTTCCAGGGGCGGGG  
+HWI-EAS443:3:25:1289:476#0/1  
aa`b`babba\_babbaaaaaaaaa`a\_aa[\_`a`a\_`a]¥\_  
@HWI-EAS443:3:25:134:462#0/1  
GATGCCACAGAAATCAGAGCATCTGTCCGAAGAATGATTG  
+HWI-EAS443:3:25:134:462#0/1  
aa\_abaaa`^[aa^\_a^Y[^a¥a^^X[`WJXX[^\_\_YYZU  
@HWI-EAS443:3:25:1438:1201#0/1  
CGGTCATTGATTCCACGTTTGATCATTCTGATTAECTCCA  
+HWI-EAS443:3:25:1438:1201#0/1  
¥bbbbbbbbb\_bbab`aabba^ababbbbaabbbbaaaa`b  
@HWI-EAS443:3:26:1196:1763#0/1  
AAGGAGTTGGAACAATAGCAATGGAGTTAATCAGAATGAT  
+HWI-EAS443:3:26:1196:1763#0/1  
¥]`a]¥S^```b^aa]aa^aa^ZN\_a¥¥`aaaa`\_[Y``  
@HWI-EAS443:3:26:1334:142#0/1  
GCCACAGAAATCAGAGCATCTGTCCGAAGAATGATTGGTG  
+HWI-EAS443:3:26:1334:142#0/1  
`¥ba`a^`\_abaaa[X\_`]¥¥TRZT\_SZ]LHRTVUQVRBB  
@HWI-EAS443:3:26:872:1071#0/1  
GATTTGTCCTTCCAGGGGCGGGGAGTCTTCGAGCTCTCGG  
+HWI-EAS443:3:26:872:1071#0/1  
a`aab`aaa`aaa\_aZ`a^aX`^ZX¥\_\_^YYO¥SYU¥UY]









+HWI-EAS443:3:35:1431:1510#0/1  
a\_`aba`b`aaaaabaaa`baaaa`b]aaaba`\_a]`  
@HWI-EAS443:3:35:1642:742#0/1  
CGGTCATTGATTCCACGTTTGATCATTCTGATTAECTCCA  
+HWI-EAS443:3:35:1642:742#0/1  
abbZababbbbababababbaa`aab^aaaabba\_aa[a  
@HWI-EAS443:3:35:1759:1635#0/1  
GAGAACTCATCCTTTATGACAAAGAAGAAATAAGGAGAGT  
+HWI-EAS443:3:35:1759:1635#0/1  
]¥ZJ¥Xa^a`aaa¥a¥\_a\_]U¥W[Y0aa`]\_aZ[[aNU  
@HWI-EAS443:3:35:240:1430#0/1  
CGAAGACTCCCCGCCCTGGAAGGACAAATCTTCTGGCTT  
+HWI-EAS443:3:35:240:1430#0/1  
a^aa^aa\_\_a`aWa\_\_`¥USWZVWY¥[Y¥WYWY\_YYV^YU  
@HWI-EAS443:3:35:281:445#0/1  
CGCCCCTGGAAGGACAAATCTTCTGGCTTTGCACTTTCCA  
+HWI-EAS443:3:35:281:445#0/1  
a]babaY`\_a\_``\_aa\_]`a`a\_`^`^X]`V¥^]\_¥YU  
@HWI-EAS443:3:35:352:1736#0/1  
CACGTTTGATCATTCTGATTAECTCCATTGCTATTGTTCC  
+HWI-EAS443:3:35:352:1736#0/1  
aba```a][`abaaaaaa]¥`baaa\_`^`\_a`a\_``\_\_]a  
@HWI-EAS443:3:35:564:1527#0/1  
AGAGAACTCATCCTTTATGACAAAGAAGAAATAAGGAGAG  
+HWI-EAS443:3:35:564:1527#0/1  
aaa^^^a]aa\_]V¥`^X]]NSaaR[¥XP¥¥R^VRWS]]  
@HWI-EAS443:3:35:783:1023#0/1  
TCCACGTTTGATCATTCTGATTAECTCCATTGCTATTGTT  
+HWI-EAS443:3:35:783:1023#0/1  
]abb`a^bb`Za`a]a\_bbba[ZY^ba\_Z\_X\_¥\_a¥¥[V  
@HWI-EAS443:3:36:1212:137#0/1  
TGTGTATGGCTTGCAGTAGCAAGTGGGCATGACTTTGAA  
+HWI-EAS443:3:36:1212:137#0/1  
a\_XZL\_aa]aaa\_`¥aa^X`\_]`R\_\_[MX`YPL\_¥^]W¥  
@HWI-EAS443:3:36:1246:1744#0/1  
AGTTGGAACAATAGCAATGGAGTTAATCAGAATGATCAAA  
+HWI-EAS443:3:36:1246:1744#0/1  
abab`bbbababa\_aabbb\_aa\_aaab]b`baaa`aba\_a  
@HWI-EAS443:3:36:1343:987#0/1  
TCCACGTTTGATCATTCTGATTAECTCCATTGCTATTGTT  
+HWI-EAS443:3:36:1343:987#0/1  
]bbba`\_`a^a`]`\_aa\_X^a]a`aaU\_a^Y¥\_a`\_]a  
@HWI-EAS443:3:36:354:232#0/1  
CAATCATTCTCCGACAGATGCTCTGATTTCTGTGGCATC  
+HWI-EAS443:3:36:354:232#0/1  
aa`aa\_aaa`aa`^¥`\_]`[\_^¥^^N\_\_¥¥¥¥YW¥\_^Y¥  
@HWI-EAS443:3:36:575:508#0/1  
CGGTCATTGATTCCACGTTTGATCATTCTGATTAECTCCA  
+HWI-EAS443:3:36:575:508#0/1  
aba\_aaab`aa`abab`b`aa`a`a\_]a`]`aa\_\_\_a¥Z

@HWI-EAS443:3:37:1471:2018#0/1  
GGAGTTGGAACAATAGCAATGGAGTTAATCAGAATGATCA  
+HWI-EAS443:3:37:1471:2018#0/1  
[aaa`bbaab`abbbabbaabbbbababbGaaaabaaba`  
@HWI-EAS443:3:37:1625:69#0/1  
AGTTAATCAGAATGATCAAACGTGGAATCAATGACCGAAA  
+HWI-EAS443:3:37:1625:69#0/1  
[```bbbbbaabaaaa`ab\_baa`aV`a`a]\_`\_]  
@HWI-EAS443:3:37:1670:231#0/1  
CAATCATTCTCCGACAGATGCTCTGATTTCTGTGGCATC  
+HWI-EAS443:3:37:1670:231#0/1  
aba^]bbbaab^¥b]baa¥abaq]``¥YR`aa`SY`¥U  
@HWI-EAS443:3:37:1731:1259#0/1  
CGCCAGGATGCCACAGAAATCAGAGCATCTGTCCGGAAGAA  
+HWI-EAS443:3:37:1731:1259#0/1  
]H^XRX\_UWT]VWa]a[ZS\_VZaaX]P`VaRX\_`M]`MX  
@HWI-EAS443:3:37:23:1695#0/1  
CAGGATGCCACAGAAATCAGAGCATCTGTCCGGAAGAATGA  
+HWI-EAS443:3:37:23:1695#0/1  
aa`¥^^aaaa^b\_aaY¥^a\_`Z`Za\_WHMZSVTRV¥WZR  
@HWI-EAS443:3:38:1461:1306#0/1  
ATGAGAGAACTCATCCTTTATGACAAAGAAGAAATAAGGA  
+HWI-EAS443:3:38:1461:1306#0/1  
a\_Z]a`\_\_\_V]^[\_]¥\_ba\_aa`Y^`a¥TYUVY\_\_ZWY[U  
@HWI-EAS443:3:38:453:918#0/1  
AATCATTCTCCGACAGATGCTCTGATTTCTGTGGCATCC  
+HWI-EAS443:3:38:453:918#0/1  
\_bbWWW[a\_ab`a`Y¥a]XR]T`Y¥U`\_P¥MKR^X^`^R  
@HWI-EAS443:3:38:839:1046#0/1  
GATGCCACAGAAATCAGAGCATCTGTCCGGAAGAATGATTG  
+HWI-EAS443:3:38:839:1046#0/1  
a````a`baaaaabbaa\_]`aaaY^]`][V^`[[^YZN  
@HWI-EAS443:3:39:1252:1038#0/1  
GAGAGAACTCATCCTTTATGACAAAGAAGAAATAAGGAGA  
+HWI-EAS443:3:39:1252:1038#0/1  
a\_aab]^bbabaZabbab`a\_\_\_aY\_`0¥I\_[^a\_`Y  
@HWI-EAS443:3:39:1643:137#0/1  
AGTTAATCAGAATGATCAAACGTGGAATCAATGACCGAAA  
+HWI-EAS443:3:39:1643:137#0/1  
[a\_bbbaaaa`a\_a\_a[aZ^N\_P`¥X¥\_U`UYYY`U`\_\_X  
@HWI-EAS443:3:39:179:367#0/1  
TGTGTATGGGCTTGCAGTAGCAAGTGGGCATGACTTTGAA  
+HWI-EAS443:3:39:179:367#0/1  
a¥N^]\_a\_`a^^`\_][U[¥¥¥¥`LPX^ZGVUPZY`¥OJQ  
@HWI-EAS443:3:39:641:87#0/1  
CACGTTTGATCATTCTGATTAACCTCCATTGCTATTGTTCC  
+HWI-EAS443:3:39:641:87#0/1  
`abbXbaabbaabbbbaaaXaaaaba^T¥aab\_`a`a\_  
@HWI-EAS443:3:3:1357:557#0/1  
CGTCCGAGAGCTCGAAGACTCCCCGCCCTGGAAGGACAA

+HWI-EAS443:3:3:1357:557#0/1  
R)`¥XZa`\_¥Z\_ZYV[`¥aa`a`a`¥Wra¥` `` `` `\_^R¥`  
@HWI-EAS443:3:3:1633:1511#0/1  
CAGGATGCCACAGAAATCAGAGCATCTGTCCGGAAGAATGA  
+HWI-EAS443:3:3:1633:1511#0/1  
`b\_babbaa\_bbbaa`ababaaaaaaaa^Sab\_a\_\_\_\_Za]  
@HWI-EAS443:3:3:27:424#0/1  
AAAGTGCAAAGCCAGAAGATTTGTCCTTCCAGGGGCGGGG  
+HWI-EAS443:3:3:27:424#0/1  
aabbU` `` `^`SuaaaaS`a`aX^^\_U^\_Q\_\_^`\_\_aBBB  
@HWI-EAS443:3:40:1507:1199#0/1  
AGAAGATTTGTCCTTCCAGGGGCGGGGAGTCTTCGAGCTC  
+HWI-EAS443:3:40:1507:1199#0/1  
XZ]Zbabbaaaa`a`¥baZ^`aaX^]`VXXWS\_H]QPP  
@HWI-EAS443:3:40:1675:515#0/1  
TCCGAGAGCTCGAAGACTCCCCGCCCTGGAAGGACAAAT  
+HWI-EAS443:3:40:1675:515#0/1  
aaaa`aaaa`]a`a`Za¥`\_]a\_UWa\_a`¥\_]a]a^YPZ  
@HWI-EAS443:3:40:438:145#0/1  
AGGAGTTGGAACAATAGCAATGGAGTTAATCAGAATGATC  
+HWI-EAS443:3:40:438:145#0/1  
V`b^baabb^baa^aaa`Y]aa^¥aZP\_U¥aa^WP[\_[^`  
@HWI-EAS443:3:40:496:54#0/1  
TGGAGTTAATCAGAATGATCAAACGTGGAATCAATGACCG  
+HWI-EAS443:3:40:496:54#0/1  
aabbaUabaaYZbb`]baab`¥Y\_a^]aV` `` \_\_Y\_[V\_[`  
@HWI-EAS443:3:42:1229:1046#0/1  
AGAACTCATCCTTTATGACAAAGAAGAAATAAGGAGAGTT  
+HWI-EAS443:3:42:1229:1046#0/1  
^aab`\_ab^]^aabUab\_aaZG\_G`¥\_ab`¥^\_aa\_^TI  
@HWI-EAS443:3:42:1288:1927#0/1  
CGCCAGGATGCCACAGAAATCAGAGCATCTGTCCGGAAGAA  
+HWI-EAS443:3:42:1288:1927#0/1  
a`babbbb`bbaabaaba\_babba`abb`ba\_a`¥^` `b\_  
@HWI-EAS443:3:42:1786:1297#0/1  
CGCCAGGATGCCACAGAAATCAGAGCATCTGTCCGGAAGAA  
+HWI-EAS443:3:42:1786:1297#0/1  
X\_\_\_\_bbbbba\_\_\_\_aaa]`\_Z\_ba\_a`aZa\_0Y^JX\_W¥\_  
@HWI-EAS443:3:42:364:174#0/1  
GAGTTGGAACAATAGCAATGGAGTTAATCAGAATGATCAA  
+HWI-EAS443:3:42:364:174#0/1  
aaa[ab`abaa`a`a`U\_aa\_`a]\_a`a`a`\_\_\_\_` ` `\_^  
@HWI-EAS443:3:42:868:683#0/1  
CACGTTTGATCATTCTGATTAACCTCCATTGCTATTGTTCC  
+HWI-EAS443:3:42:868:683#0/1  
ab^`¥\_bb^a^abaYb\_abba\_\_a0]`\_`Y\_a^aa^Y^\_Z  
@HWI-EAS443:3:42:987:142#0/1  
GAGAGAACTCATCCTTTATGACAAAGAAGAAATAAGGAGA  
+HWI-EAS443:3:42:987:142#0/1  
aabaa^]S`aaaaaaaa`aa\_\_\_\_^\_a^^a\_^^a^\_a` `` `^

@HWI-EAS443:3:43:1584:131#0/1  
TGCAAAGCCAGAAGATTTGTCCTTCCAGGGGCGGGGAGTC  
+HWI-EAS443:3:43:1584:131#0/1  
¥WSY\_`\_ZWab]aa]`aa`ZXaaa^\_a`\_NZ^UOMQYO  
@HWI-EAS443:3:43:1701:1842#0/1  
GAAAGTGCAAAGCCAGAAGATTTGTCCTTCCAGGGGCGGG  
+HWI-EAS443:3:43:1701:1842#0/1  
\_^]ba]bbb[\_bSSb`aba\_b¥a`a`Saa`aaaH^PYa\_^  
@HWI-EAS443:3:43:1716:222#0/1  
GAGAGAACTCATCCTTTATGACAAAGAAGAAATAAGGAGA  
+HWI-EAS443:3:43:1716:222#0/1  
ababaababaab\_`bbaaaba\_a^^`]^a\_^^a\_^\_``^  
@HWI-EAS443:3:43:587:392#0/1  
ATGCCCACTTGCTACTGCAAGCCATACACACAAGCAGGC  
+HWI-EAS443:3:43:587:392#0/1  
abaa^a^aa`X`a\_\_a`a\_\_a¥\_\_Xa]^¥¥¥`\_\_`a^¥  
@HWI-EAS443:3:43:630:1304#0/1  
GAGAGAACTCATCCTTTATGACAAAGAAGAAATAAGGAGA  
+HWI-EAS443:3:43:630:1304#0/1  
\_Va]`a^aa^b`XUG¥]`a¥U]\_Ra[G¥^¥YZ`aYQ[[¥  
@HWI-EAS443:3:44:1074:1342#0/1  
GTGTATGGGCTTGCAAGTAGCAAGTGGGCATGACTTTGAAA  
+HWI-EAS443:3:44:1074:1342#0/1  
`S`¥Q¥aaV\_UZPX`\_Z[aUY]YPVFX[PPPRNP¥V[ZZ\_  
@HWI-EAS443:3:44:1245:641#0/1  
CAGAAATCAGAGCATCTGTCGGAAGAATGATTGGTGAAT  
+HWI-EAS443:3:44:1245:641#0/1  
abbaa`aabbbbabaabb`abb`aba`aa]a`]`PaaY` [  
@HWI-EAS443:3:44:1619:1788#0/1  
CGCCCCTGGAAGGACAAATCTTCTGGCTTTGCACTTTCCA  
+HWI-EAS443:3:44:1619:1788#0/1  
``^\_^]\_\_`\_\_a`]`\_^`\_\_\_\_X\_\_^Za^]VSXX^^]WSZ  
@HWI-EAS443:3:44:1750:531#0/1  
CAATCATTCTCCGACAGATGCTCTGATTTCTGTGGCATC  
+HWI-EAS443:3:44:1750:531#0/1  
\_\_JY¥]`]T\_]`W¥a`\_`\_`P^¥]IPX\_\_VSKFXXOV\_X  
@HWI-EAS443:3:44:683:1047#0/1  
AGTTGGAACAATAGCAATGGAGTTAATCAGAATGATCAAA  
+HWI-EAS443:3:44:683:1047#0/1  
``a`b\_Z\_aba`\_a\_[NZ`W``[][\_abaa``\_¥Z``a[[  
@HWI-EAS443:3:44:998:571#0/1  
CTGCTTGTGTATGGGCTTGCAAGTAGCAAGTGGGCATGA  
+HWI-EAS443:3:44:998:571#0/1  
abbabbb\_b]`X`aa`\_`aaa`Za\_``\_`^aN`aWZ^^^  
@HWI-EAS443:3:45:1186:1266#0/1  
GTCATTGATTCCACGTTTGATCATTCTGATTAECTCCATT  
+HWI-EAS443:3:45:1186:1266#0/1  
a]baaba\_aaa^b^a]aaa]`Y`aa¥`a\_a\_`]^\_]W^a\_  
@HWI-EAS443:3:45:1455:421#0/1  
AGTTGGAACAATAGCAATGGAGTTAATCAGAATGATCAAA

+HWI-EAS443:3:45:1455:421#0/1  
\_baba^]baa^ba^`a\_ab``a\_abba^a\_]Z\_ba`]\_aa  
@HWI-EAS443:3:45:1609:1329#0/1  
GATGCCACAGAAATCAGAGCATCTGTCGGAAGAATGATTG  
+HWI-EAS443:3:45:1609:1329#0/1  
`aaaa\_a^ab`a``]\_a^a^^`^`UY`\_U\_]X^YX]Y  
@HWI-EAS443:3:45:1779:1083#0/1  
CGCCAGGATGCCACAGAAATCAGAGCATCTGTCGGAAGAA  
+HWI-EAS443:3:45:1779:1083#0/1  
[`aaaa````]\_aba^\_^^aab[[]a`aaaaPW`\_YS]PW  
@HWI-EAS443:3:45:595:1910#0/1  
CAGAAATCAGAGCATCTGTCGGAAGAATGATTGGTGAAT  
+HWI-EAS443:3:45:595:1910#0/1  
abaabbb^baaa`aaabba\_Z`ab`aab]aabWaRWaa`  
@HWI-EAS443:3:45:854:1734#0/1  
CACGTTTGATCATTCTGATTAACCTCCATTGCTATTGTTCC  
+HWI-EAS443:3:45:854:1734#0/1  
`b^M¥```\_ZZX^Y]^\_WY\_aZTaaa[\_¥[H¥]`¥¥00QF  
@HWI-EAS443:3:46:107:1214#0/1  
AATGGAGTTAATCAGAATGATCAAACGTGGAATCAATGAC  
+HWI-EAS443:3:46:107:1214#0/1  
aabbbbaabbaaabbb^bbaaaaaba¥baaaabaabaa`  
@HWI-EAS443:3:46:1515:1366#0/1  
CCACGTTTGATCATTCTGATTAACCTCCATTGCTATTGTTCC  
+HWI-EAS443:3:46:1515:1366#0/1  
aba]^\_I`U\_]aa`^ba]```a\_\_\_WUWW`N^Q]^\_`0  
@HWI-EAS443:3:46:1626:247#0/1  
GAGAACTCATCCTTTATGACAAAGAAGAAATAAGGAGAGT  
+HWI-EAS443:3:46:1626:247#0/1  
HQbaZabXbbbb\_bb`\_bb`aaWa]aa`a`b^[aaaaaaS  
@HWI-EAS443:3:46:363:418#0/1  
TGGAAAGTGCAAAGCCAGAAGATTTGTCCTTCCAGGGGCG  
+HWI-EAS443:3:46:363:418#0/1  
aa\_^[aa`aaaa\_W\_\_\_ba\_a`^\_^]\_^ZaaZ^`a^¥^Sa  
@HWI-EAS443:3:47:1379:626#0/1  
CCTGCTTGTGTGTATGGGCTTGCAAGTGGGCATG  
+HWI-EAS443:3:47:1379:626#0/1  
aba^aaa\_Xa\_b```\_aa^a\_\_W\_a`ZW¥\_]a[aa^aa\_]`  
@HWI-EAS443:3:47:731:1107#0/1  
CAGAAATCAGAGCATCTGTCGGAAGAATGATTGGTGAAT  
+HWI-EAS443:3:47:731:1107#0/1  
abbbbabbbbababbabba\_aa\_aaa`aa\_\_a]`^aaS`^  
@HWI-EAS443:3:47:749:1265#0/1  
GAGAACTCATCCTTTATGACAAAGAAGAAATAAGGAGAGT  
+HWI-EAS443:3:47:749:1265#0/1  
a`baa`aaaa\_\_a``\_aaa^\_¥\_]\_\_¥Z\_`^`^^`^\_X  
@HWI-EAS443:3:47:750:653#0/1  
GAGAGAATCATCCTTTATGACAAAGAAGAAATAAGGAGA  
+HWI-EAS443:3:47:750:653#0/1  
aaa¥\_L¥ZaT^b`¥aaaaa`a^a]\_``\_a[\_a]¥]`Z\_\_¥



@HWI-EAS443:3:47:830:1985#0/1  
ATGCCCACTTGCTACTGCAAGCCCATACACACAAGCAGGC  
+HWI-EAS443:3:47:830:1985#0/1  
``[¥^ba\_`a¥a\_\_¥¥Q`\_¥WWZ`^^W¥Y¥Q¥WYW\_UVQ  
@HWI-EAS443:3:47:959:1056#0/1  
TTGGAACAATAGCAATGGAGTTAATCAGAATGATCAAACG  
+HWI-EAS443:3:47:959:1056#0/1  
abbaa`]]a`aaY^aa\_¥]`Z^^aa\_\_`a\_aaaa¥`[Z[]  
@HWI-EAS443:3:48:1701:1151#0/1  
AAAGGAGTTGGAACAATAGCAATGGAGTTAATCAGAATGA  
+HWI-EAS443:3:48:1701:1151#0/1  
ababbabaabbabaaabaaaa`baa^a\_a`a\_aa`\_aa\_  
@HWI-EAS443:3:48:320:1165#0/1  
CGCCCCTGGAAGGACAAATCTTCTGGCTTTGCACTTTCCA  
+HWI-EAS443:3:48:320:1165#0/1  
^b\_bbaab`b`\_aabbab`ba`aab`aaaaa\_^baa`\_a  
@HWI-EAS443:3:48:817:980#0/1  
GATTTGTCCTTCCAGGGCGGGGAGTCTTCGAGCTCTCGG  
+HWI-EAS443:3:48:817:980#0/1  
a¥aaaaZaaaa`aaa¥\_a`a`^]Q[PM^^YPNZTSUMS¥¥  
@HWI-EAS443:3:48:821:1623#0/1  
GGAACAATAGCAATGGAGTTAATCAGAATGATCAAACGTG  
+HWI-EAS443:3:48:821:1623#0/1  
aa\_`SQOUWW]VRONVGQOTW[OW¥^YLXWZSVTTOO[VW  
@HWI-EAS443:3:48:974:1008#0/1  
CAGAAATCAGAGCATCTGTCCGAAGAATGATTGGTGGGAAT  
+HWI-EAS443:3:48:974:1008#0/1  
aa¥aaabbaababb`aab`Z^^¥QW^YRQ¥`ZPTYa``W  
@HWI-EAS443:3:49:1217:183#0/1  
GCCCCTGGAAGGACAAATCTTCTGGCTTTGCACTTTCCAT  
+HWI-EAS443:3:49:1217:183#0/1  
Z\_¥^YYb`[b```]`^`\_aaaYab\_¥]\_a\_T¥YZaYJTZ]  
@HWI-EAS443:3:49:122:683#0/1  
TGTGTATGGGCTTGCAGTAGCAAGTGGGCATGACTTTGAA  
+HWI-EAS443:3:49:122:683#0/1  
`[Sa\_\_`b\_]aWa\_`aW`ZGa^QGUP\_MXa[\_[\_`\_\_¥  
@HWI-EAS443:3:49:362:610#0/1  
CAGGATGCCACAGAAATCAGAGCATCTGTCCGAAGAATGA  
+HWI-EAS443:3:49:362:610#0/1  
]Vbb\_`b¥VSTaa`ba`\_]`abaa`a`a¥YY]¥`]K¥Y[Q  
@HWI-EAS443:3:4:1022:340#0/1  
AATCATTCTTCCGACAGATGCTCTGATTTCTGTGGCATCC  
+HWI-EAS443:3:4:1022:340#0/1  
aaa^`\_]Y^aQ\_`XWY`¥¥`Z¥W\_YT¥[\_¥¥BBBBBBBBB  
@HWI-EAS443:3:4:1124:899#0/1  
CAATCATTCTTCCGACAGATGCTCTGATTTCTGTGGCATC  
+HWI-EAS443:3:4:1124:899#0/1  
abbbbbbbbbbaab`ababa^b\_ab¥`aaSa^]\_^`aU  
@HWI-EAS443:3:4:1419:1024#0/1  
GTGCAAAGCCAGAAGATTTGTCCTTCCAGGGCGGGGAGT

+HWI-EAS443:3:4:1419:1024#0/1  
aaa]XYXP]NTS^`Y^\_Y^MS¥\_MYM¥\_YXSYFLWUVB  
@HWI-EAS443:3:50:267:562#0/1  
AAAGTGCAAAGCCAGAAGATTTGTCCTTCCAGGGGCGGGG  
+HWI-EAS443:3:50:267:562#0/1  
aabb]`abbb`aabbabbabaabb^ab`aaabbaaba` [  
@HWI-EAS443:3:50:28:519#0/1  
CAATCATTCTTCCGACAGATGCTCTGATTTCTGTGGCATC  
+HWI-EAS443:3:50:28:519#0/1  
`baa\_bbbbb`\_W¥ba\_\_\_\_\_a^`aa``\_¥\_]¥¥a\_]`  
@HWI-EAS443:3:50:400:1169#0/1  
CGCCAGGATGCCACAGAAATCAGAGCATCTGTCCGGAAGAA  
+HWI-EAS443:3:50:400:1169#0/1  
abba\_a¥ab`a\_abbabbb`a]abZaaabb]aY`¥^`a`  
@HWI-EAS443:3:50:484:1857#0/1  
CGTCCGAGAGCTCGAAGACTCCCCGCCCTGGAAGGACAA  
+HWI-EAS443:3:50:484:1857#0/1  
abb^bbbbbba`bbabbaaba]aa\_a]¥aa`b`abVbb  
@HWI-EAS443:3:51:1280:417#0/1  
GGAGTTGGAACAATAGCAATGGAGTTAATCAGAATGATCA  
+HWI-EAS443:3:51:1280:417#0/1  
\_W\_a]^a^V[`[]\_aa^`^ZYT[\_[aaa\_\_aa`¥aa\_\_X]  
@HWI-EAS443:3:51:1485:158#0/1  
GGAGTTGGAACAATAGCAATGGAGTTAATCAGAATGATCA  
+HWI-EAS443:3:51:1485:158#0/1  
X`ab]a¥M`J`a]Tb\_a[`baX\_¥aaaa\_aaaX[bY\_[a  
@HWI-EAS443:3:52:1143:519#0/1  
GGAGTTGGAACAATAGCAATGGAGTTAATCAGAATGATCA  
+HWI-EAS443:3:52:1143:519#0/1  
^bab`bbaaaa`baaa\_a`aba`aaa`aa`\_aa`\_`\_`  
@HWI-EAS443:3:52:1233:674#0/1  
ATCATTCTTCCGACAGATGCTCTGATTTCTGTGGCATCCT  
+HWI-EAS443:3:52:1233:674#0/1  
¥X[^Y¥`b\_`P[¥`[¥]WI¥\_X\_aa¥¥]U\_U^a\_VVX  
@HWI-EAS443:3:52:193:1341#0/1  
CATTGATTCCACGTTTGTATTCTGATTAATCCATTGC  
+HWI-EAS443:3:52:193:1341#0/1  
a`baa`aaa^b\_a^`aa`aXa`\_a`a^aa`\_a^`\_`  
@HWI-EAS443:3:52:688:1396#0/1  
GTGCAAAGCCAGAAGATTTGTCCTTCCAGGGGCGGGGAGT  
+HWI-EAS443:3:52:688:1396#0/1  
^X`XZOVa^^aXIX\_^^^^[^]a¥FX¥¥VV^^YUYTVP  
@HWI-EAS443:3:52:731:37#0/1  
ACCAATCATTCTTCCGACAGATGCTCTGATTTCTGTGGCA  
+HWI-EAS443:3:52:731:37#0/1  
abbbb^^`\_a`babYb¥`aa]`¥a\_a^GZaa`aa[aa^]  
@HWI-EAS443:3:52:857:409#0/1  
AATCATTCTTCCGACAGATGCTCTGATTTCTGTGGCATCC  
+HWI-EAS443:3:52:857:409#0/1  
\_\_WZ]¥`^\_bbb`Za`¥Z¥]¥]`¥[`\_]`ZW\_]QTXXKP

@HWI-EAS443:3:53:1013:239#0/1  
GCCCCTGGAAGGACAAATCTTCTGGCTTTGCACTTTCCAT  
+HWI-EAS443:3:53:1013:239#0/1  
X` `bbbb`bbb^Ua` [b]aaYaaaa`a^XYG\_abU^¥^  
@HWI-EAS443:3:53:1512:974#0/1  
AGAAGATTTGTCCTTCCAGGGGCGGGGAGTCTTCGAGCTC  
+HWI-EAS443:3:53:1512:974#0/1  
aaaa`aab`a]aaaba^aa`aaaa`¥`TQ^UQa[EQVX^U  
@HWI-EAS443:3:53:571:1314#0/1  
AAAGTGCAAAGCCAGAAGATTTGTCCTTCCAGGGGCGGGG  
+HWI-EAS443:3:53:571:1314#0/1  
aaab^b`bbb\_aaaa^^`a``aaa\_]` `a^¥]\_a\_aa\_^V  
@HWI-EAS443:3:53:710:975#0/1  
TGTGTATGGGCTTGCAGTAGCAAGTGGGCATGACTTTGAA  
+HWI-EAS443:3:53:710:975#0/1  
a` \_bababa\_\_aaa`a`^a\_\_^P`¥aa`^aa` `^`aa`^\_  
@HWI-EAS443:3:53:798:1470#0/1  
AGTTAATCAGAATGATCAAACGTGGAATCAATGACCGAAA  
+HWI-EAS443:3:53:798:1470#0/1  
¥`^aabaab\_aa\_aabaaa`b^aaaaa` `` `a`\_a^\_^  
@HWI-EAS443:3:53:815:215#0/1  
TGTGTATGGGCTTGCAGTAGCAAGTGGGCATGACTTTGAA  
+HWI-EAS443:3:53:815:215#0/1  
XYW\_OVW\_\_WZ\_¥T\_VHM]ZWaaVa`^YM` `RMZ^^^PR  
@HWI-EAS443:3:54:1025:1529#0/1  
ACCAATCATTCTCCGACAGATGCTCTGATTTCTGTGGCA  
+HWI-EAS443:3:54:1025:1529#0/1  
ZP\_¥`babaZaba`U]^W^aaa\_Va\_a^`aaa`aa`^ZP\_  
@HWI-EAS443:3:54:106:1168#0/1  
AGAAATCAGAGCATCTGTCCGAAGAATGATTGGTGAATC  
+HWI-EAS443:3:54:106:1168#0/1  
aaaa]`a[]`aV[```\_ZZ^\_VVZVTUPNY¥[WPPMOV MH  
@HWI-EAS443:3:54:21:104#0/1  
AGGAGTTGGAACAATAGCAATGGAGTTAATCAGAATGATC  
+HWI-EAS443:3:54:21:104#0/1  
`b\_[\_]`babaZ]`P\_^Qa\_ab`b\_a^`Y[a^LSXa¥YW  
@HWI-EAS443:3:54:369:39#0/1  
AGAGAATCATCCTTTATGACAAAGAAGAAATAAGGAGAG  
+HWI-EAS443:3:54:369:39#0/1  
`aIaZXb^T0^aaaa¥W[b¥][Y[bY]aWOZ``Z`]]b`a  
@HWI-EAS443:3:54:546:349#0/1  
GTGTGTATGGGCTTGCAGTAGCAAGTGGGCATGACTTTGA  
+HWI-EAS443:3:54:546:349#0/1  
aa`]b\_a^[¥a]]`a`\_`UaaXVV^Y\_\_¥Z```^[^[¥TU  
@HWI-EAS443:3:54:55:1196#0/1  
AGTTAATCAGAATGATCAAACGTGGAATCAATGACCGAAA  
+HWI-EAS443:3:54:55:1196#0/1  
\_a[bb`ba]```aaa[a\_a\_[aa^\_a¥\_aa]W\_[PY¥`WZY  
@HWI-EAS443:3:55:1278:1231#0/1  
GCCTGCTTGTGTGTATGGGCTTGCAGTAGCAAGTGGGCAT

+HWI-EAS443:3:55:1278:1231#0/1  
a``\_]aaa^b`a¥`aaab\_\_aa[\_a\_] ^Z¥aUa]\_N]^  
@HWI-EAS443:3:55:1649:346#0/1  
CCACGTTTGATCATTCTGATTA ACTCCATTGCTATTGTTC  
+HWI-EAS443:3:55:1649:346#0/1  
aab`Rabb`ab\_`bb\_babbbaaaa^abbb\_baabb\_a`  
@HWI-EAS443:3:55:1649:827#0/1  
AAAGTGCAAAGCCAGAAGATTTGTCCTTCCAGGGGCGGGG  
+HWI-EAS443:3:55:1649:827#0/1  
abaa\_aaa`a^`¥`]^`¥aa\_aa`\_^`^^`\_]a\_`^¥aMT[  
@HWI-EAS443:3:55:445:1780#0/1  
AATCATTCTTCCGACAGATGCTCTGATTCTGTGGCATCC  
+HWI-EAS443:3:55:445:1780#0/1  
^Y`\_\_UaS]X¥¥¥aYJRTNP¥\_\_\_UL^T^UZ\_PZRBBBBB  
@HWI-EAS443:3:55:507:1254#0/1  
ATTGATTCCACGTTTGATCATTCTGATTA ACTCCATTGCT  
+HWI-EAS443:3:55:507:1254#0/1  
ab\_`aaa`\_\_baaa¥]^`^baabaaaa`¥aa^``]TZa  
@HWI-EAS443:3:55:783:278#0/1  
GAAATCAGAGCATCTGTCGGAAGAATGATTGGTGAATCG  
+HWI-EAS443:3:55:783:278#0/1  
aaabaa\_`a`a^`aXU`^OX\_V[Y]Z¥\_X]P¥`]`UO¥  
@HWI-EAS443:3:56:1239:726#0/1  
CGCCCCTGGAAGGACAAATCTTCTGGCTTTGCACTTTCCA  
+HWI-EAS443:3:56:1239:726#0/1  
aba`bbbbbbba\_`babb^ba`aaaa`baaa^abb`aa  
@HWI-EAS443:3:56:424:1515#0/1  
CGAGAGCTCGAAGACTCCCCGCCCTGGAAGGACAAATCT  
+HWI-EAS443:3:56:424:1515#0/1  
a¥Z¥]^a`a`\_V`Zaa^]\_WUUS[^NVZY[SSRU]^T\_W`  
@HWI-EAS443:3:57:1379:1142#0/1  
CAGAAATCAGAGCATCTGTCGGAAGAATGATTGGTGAAT  
+HWI-EAS443:3:57:1379:1142#0/1  
aa\_]¥`bb\_]`TZaY\_`^UQ[aUW^]Y`Y]^`aXFN¥SPV  
@HWI-EAS443:3:57:1404:39#0/1  
CAGGATGCCACAGAAATCAGAGCATCTGTCGGAAGAATGA  
+HWI-EAS443:3:57:1404:39#0/1  
``bba[b`b`\_]`¥^bba`babaaa[aaQUa`[^ba\_`¥[  
@HWI-EAS443:3:57:202:771#0/1  
CGCCAGGATGCCACAGAAATCAGAGCATCTGTCGGAAGAA  
+HWI-EAS443:3:57:202:771#0/1  
aaabaaaa]baa]aaa`]aaaa\_a^`\_``[]a][^`¥]  
@HWI-EAS443:3:57:34:452#0/1  
AGAAATCAGAGCATCTGTCGGAAGAATGATTGGTGAATC  
+HWI-EAS443:3:57:34:452#0/1  
a```]`\_\_a\_`^`^`^`^]`^\_Y¥`^¥X]WYZ]]Z^^ZWYY  
@HWI-EAS443:3:57:612:953#0/1  
CGCCCCTGGAAGGACAAATCTTCTGGCTTTGCACTTTCCA  
+HWI-EAS443:3:57:612:953#0/1  
aba`aba\_a]^`a\_aaaa^\_aaa`Ya`\_`\_aa\_a[aaa`\_a

@HWI-EAS443:3:58:591:265#0/1  
AGGAGTTGGAACAATAGCAATGGAGTTAATCAGAATGATC  
+HWI-EAS443:3:58:591:265#0/1  
aba\_a`a`\_`\_`\_`Y`\_]\_a^`\_]`^]YY]Y\_G]WWPI  
@HWI-EAS443:3:58:669:1687#0/1  
TCCACGTTTGATCATTCTGATTAACTCCATTGCTATTGTT  
+HWI-EAS443:3:58:669:1687#0/1  
]Zab^]S]]b]a^\_Zaa[X^aWaaaa`ZaaVSR¥`[`]Z^  
@HWI-EAS443:3:59:336:1318#0/1  
CGCCAGGATGCCACAGAAATCAGAGCATCTGTCCGGAAGAA  
+HWI-EAS443:3:59:336:1318#0/1  
aaab`a`]`aaaab]a¥^a`aa\_aaaaa`aN\_\_`TU¥ZW  
@HWI-EAS443:3:5:1253:423#0/1  
ATTCCACGTTTGATCATTCTGATTAACTCCATTGCTATTG  
+HWI-EAS443:3:5:1253:423#0/1  
abba¥bYbababab^`bb¥ab`aa`a`b¥`baaa\_`aa\_b  
@HWI-EAS443:3:5:1626:190#0/1  
AAAGGAGTTGGAACAATAGCAATGGAGTTAATCAGAATGA  
+HWI-EAS443:3:5:1626:190#0/1  
^a`¥b\_a\_b¥aaaZa`\_\_baY¥b`\_`a`\_a\_\_\_a[ZTa\_\_  
@HWI-EAS443:3:5:471:1560#0/1  
TTTCAAAGTCATGCCCACTTGCTACTGCAAGCCCATACAC  
+HWI-EAS443:3:5:471:1560#0/1  
a`a]aa`[]RaSaZSaaa`a]Y`N^U\_`^`Q\_^\_XUBB  
@HWI-EAS443:3:60:1228:276#0/1  
AAAGTGCAAAGCCAGAAGATTTGTCCTTCCAGGGGCGGGG  
+HWI-EAS443:3:60:1228:276#0/1  
]^Q^WYQaa`\_\_HN]Z\_^QZ`ZZ]``]RYMV\_V]G][BBB  
@HWI-EAS443:3:60:1502:268#0/1  
TGCCCACTTGCTACTGCAAGCCCATACACACAAGCAGGCA  
+HWI-EAS443:3:60:1502:268#0/1  
`P¥bTT\_b[\_b\_`]b`Raaa\_W[a\_`aTPVZS¥P]^¥KVV  
@HWI-EAS443:3:60:1545:36#0/1  
AATCATTCTTCCGACAGATGCTCTGATTTCTGTGGCATCC  
+HWI-EAS443:3:60:1545:36#0/1  
a`babb`^^a[[\_a\_TaW]aa]ZZ]OZ``a¥¥XXa\_W]BB  
@HWI-EAS443:3:60:397:1559#0/1  
AAAGTGCAAAGCCAGAAGATTTGTCCTTCCAGGGGCGGGG  
+HWI-EAS443:3:60:397:1559#0/1  
abXb[abbUaZa\_aaaaaba`aa\_ZZ]``a¥]`\_]`^ZRSZ  
@HWI-EAS443:3:60:469:560#0/1  
GCCCCTGGAAGGACAAATCTTCTGGCTTTGCACTTTCCAT  
+HWI-EAS443:3:60:469:560#0/1  
a`aaaaa\_aa¥aa\_\_aaaaaaa^a\_`a¥^`[\_]`\_`¥]`\_\_  
@HWI-EAS443:3:60:969:266#0/1  
AGATTTGTCCTTCCAGGGGCGGGGAGTCTTCGAGCTCTCG  
+HWI-EAS443:3:60:969:266#0/1  
abaa`bbaaaba`a`aaa\_a\_\_\_X^[YY\_TPQXTQS^YR  
@HWI-EAS443:3:61:1389:1686#0/1  
CGGTCATTGATTCCACGTTTGATCATTCTGATTAACTCCA

+HWI-EAS443:3:61:1389:1686#0/1  
`baaa`U\_SYa^`Qa`b^`YZYW¥\_ZVMU^U^^^RRYLO  
@HWI-EAS443:3:61:178:1735#0/1  
CAGAAATCAGAGCATCTGTCGGAAGAATGATTGGTGAAT  
+HWI-EAS443:3:61:178:1735#0/1  
aaaa`bb\_]Yaa`aa`a]\_TX[][[U[TXY\_X¥V]\_^WN  
@HWI-EAS443:3:61:272:125#0/1  
ACTTGCTACTGCAAGCCCATACACACAAGCAGGCAGGCAG  
+HWI-EAS443:3:61:272:125#0/1  
aababaab\_aaa```\_a\_¥a]H]Q\_\_\_\_\_¥[V^UW¥URUU  
@HWI-EAS443:3:61:381:1277#0/1  
CACGTTTGATCATTCTGATTAECTCCATTGCTATTGTTCC  
+HWI-EAS443:3:61:381:1277#0/1  
aaaaaba\_¥\_`Z\_```aaa`\_```aaa`\_X][[Y^]VYU]  
@HWI-EAS443:3:61:502:803#0/1  
AGGAGTTGGAACAATAGCAATGGAGTTAATCAGAATGATC  
+HWI-EAS443:3:61:502:803#0/1  
aba`aabbaabaaababaaaaa\_aa^aaaa\_aa`\_```\_¥  
@HWI-EAS443:3:62:1314:359#0/1  
ATTCCACGTTTGATCATTCTGATTAECTCCATTGCTATTG  
+HWI-EAS443:3:62:1314:359#0/1  
abbbabaaaaabaabbbbaabb\_baaa`aaaabaa^aabaa  
@HWI-EAS443:3:63:1540:1326#0/1  
CTTGTGTGTATGGGCTTGCAGTAGCAAGTGGGCATGACTT  
+HWI-EAS443:3:63:1540:1326#0/1  
a\_]a^aZb````a[a`^XTQZa]JWNZL]a\_\_\_\_\_^ZU¥^  
@HWI-EAS443:3:63:396:54#0/1  
CACTGAGTTTGAGTTCAGTGCACATTTGGATGTAGAATCT  
+HWI-EAS443:3:63:396:54#0/1  
a\_ab`Yaabb\_T]\_ba[aWbaa``aaaa¥]aaL¥\_\_Z¥X[  
@HWI-EAS443:3:64:105:1246#0/1  
TGCCTGCTTGTGTGTATGGGCTTGCAGTAGCAAGTGGGCA  
+HWI-EAS443:3:64:105:1246#0/1  
aabbaaba`^b\_a[aaa`Xa¥\_``\_WYa]X`T`U]\_a^\_  
@HWI-EAS443:3:64:1172:512#0/1  
GAGTTGGAACAATAGCAATGGAGTTAATCAGAATGATCAA  
+HWI-EAS443:3:64:1172:512#0/1  
aabaabaaaaaaaaaaaaa\_``a\_```\_`a``\_a\_`\_`\_]  
@HWI-EAS443:3:64:1398:576#0/1  
CGCCAGGATGCCACAGAAATCAGAGCATCTGTCGGAAGAA  
+HWI-EAS443:3:64:1398:576#0/1  
ab`\_`bbb\_a`aZR^W¥baa`aa``]]`Z`TZSa\_`\_\_\_\_  
@HWI-EAS443:3:64:1562:1345#0/1  
CGCCAGGATGCCACAGAAATCAGAGCATCTGTCGGAAGAA  
+HWI-EAS443:3:64:1562:1345#0/1  
a`baabbaaa\_aa`a`aba`^aa¥a\_`a¥a`VZ[¥W[\_\_\_\_]  
@HWI-EAS443:3:64:279:1878#0/1  
TGCCTGCTTGTGTGTATGGGCTTGCAGTAGCAAGTGGGCA  
+HWI-EAS443:3:64:279:1878#0/1  
W`bbbbbb\_[OY`[O[`b`¥\_^`]]]¥V\_``¥]GLZXQY¥

@HWI-EAS443:3:64:73:84#0/1  
GGAGTTGGAACAATAGCAATGGAGTTAATCAGAATGATCA  
+HWI-EAS443:3:64:73:84#0/1  
abaa\_`\_]\_SXMV[ `[V]UY¥a\_YaY`\_]\_^\_Z^]]^\_Y]^Z  
@HWI-EAS443:3:64:947:131#0/1  
CCACGTTTGATCATTCTGATTAECTCCATTGCTATTGTTC  
+HWI-EAS443:3:64:947:131#0/1  
aababaaaaa\_abaabaaaaaa`^\_aa`\_a\_a`^`^\_`^  
@HWI-EAS443:3:65:1231:1116#0/1  
CGCCCCTGGAAGGACAAATCTTCTGGCTTTGCACTTTCCA  
+HWI-EAS443:3:65:1231:1116#0/1  
^`b¥Za^SaS`a`V^ZZ]]`aab]aaa^]X]aa]aYa^]S  
@HWI-EAS443:3:65:289:182#0/1  
CGCCCCTGGAAGGACAAATCTTCTGGCTTTGCACTTTCCA  
+HWI-EAS443:3:65:289:182#0/1  
aaaaababaa]aaa`]]`a\_a`^`a\_\_\_\_\_`\_\_ZY\_`^VZ  
@HWI-EAS443:3:65:616:736#0/1  
CAGGATGCCACAGAAATCAGAGCATCTGTTCGGAAGAATGA  
+HWI-EAS443:3:65:616:736#0/1  
``aa``bbbbabaa^]ab`babaaaaab\_]\_]````\_`VY  
@HWI-EAS443:3:65:881:1279#0/1  
CCCCTTGTACTGCAAGCCCATACACACAAGCAGGCAGG  
+HWI-EAS443:3:65:881:1279#0/1  
aabaaaa`aaaa`\_baa\_\_\_aaa^a\_aaaa`\_`\_\_\_\_`\_¥  
@HWI-EAS443:3:65:967:483#0/1  
AAGGAGTTGGAACAATAGCAATGGAGTTAATCAGAATGAT  
+HWI-EAS443:3:65:967:483#0/1  
`^a`ab^b^bbaaaa`¥aaa`aa`\_aa¥baa\_[Za`a  
@HWI-EAS443:3:66:251:1012#0/1  
GAAATCAGAGCATCTGTTCGGAAGAATGATTGGTGAATCG  
+HWI-EAS443:3:66:251:1012#0/1  
a`^aabba^aa^`aaaZaaa`a`]Z[X¥\_¥]^]\_\_\_]VY^^  
@HWI-EAS443:3:66:360:1519#0/1  
AAAGTGCAAAGCCAGAAGATTTGTCCTTCCAGGGGCGGGG  
+HWI-EAS443:3:66:360:1519#0/1  
a`]^HWb`aYHY\_aa\_¥\_]\_\_\_\_¥S`a\_]Z[\_ZN[U\_^WBB  
@HWI-EAS443:3:67:1163:1498#0/1  
CACGTTTGATCATTCTGATTAECTCCATTGCTATTGTTC  
+HWI-EAS443:3:67:1163:1498#0/1  
`b\_a\_b``aaaaaa¥baaaaa`a`^a`a`^`a\_\_`\_\_\_X  
@HWI-EAS443:3:67:1213:506#0/1  
ATCATTCTCCGACAGATGCTCTGATTTCTGTGGCATCCT  
+HWI-EAS443:3:67:1213:506#0/1  
``a`^bbabaabaaab`aa\_a`^`^`aaa`^]Z`]]\_\_V\_\_  
@HWI-EAS443:3:67:1220:905#0/1  
CAGAAATCAGAGCATCTGTTCGGAAGAATGATTGGTGAAT  
+HWI-EAS443:3:67:1220:905#0/1  
abbaabaaaaabaaa\_ba\_aaa\_aaaaa\_aa^`Za\_\_\_\_  
@HWI-EAS443:3:67:136:1485#0/1  
GATGGAAAGTGCAAAGCCAGAAGATTTGTCCTTCCAGGGG

+HWI-EAS443:3:67:136:1485#0/1  
`bbb`bbbZZWabbaWbbaZaaa`¥^a``]a``Z^aZ]¥M  
@HWI-EAS443:3:67:1440:708#0/1  
TGAGAGAACTCATCCTTTATGACAAAGAAGAAATAAGGAG  
+HWI-EAS443:3:67:1440:708#0/1  
ababa`]a\_a`\_a`Zaaa`aa^\_a]]`\_`a^¥\_\_a\_a^\_]`  
@HWI-EAS443:3:67:1638:1328#0/1  
CACGTTTGATCATTCTGATTAACTCCATTGCTATTGTTCC  
+HWI-EAS443:3:67:1638:1328#0/1  
`R^^b][J^]\_\_bbabbbba`a`]baaaa\_b^\_ZWU`RU  
@HWI-EAS443:3:67:638:29#0/1  
CAGAAATCAGAGCATCTGTCGGAAGAATGATTGGTGAAT  
+HWI-EAS443:3:67:638:29#0/1  
`bb\_]\_¥¥`abaa`bb`[¥a¥T¥\_U\_^¥IR]R[NRaYYH  
@HWI-EAS443:3:67:723:1218#0/1  
ATCATTCTGATTAACTCCATTGCTATTGTTCCAACTCCTT  
+HWI-EAS443:3:67:723:1218#0/1  
¥Z[aaa^`[Q^¥b]]abRP]]aa\_VXaa]JZ\_a\_a`¥`Y]  
@HWI-EAS443:3:67:837:643#0/1  
CGGTCATTGATTCCACGTTTGATCATTCTGATTAACTCCA  
+HWI-EAS443:3:67:837:643#0/1  
abb\_ababaabbbbabab``abaa`aaa\_aaaaaa\_a`aa  
@HWI-EAS443:3:68:1204:497#0/1  
CAGGATGCCACAGAAATCAGAGCATCTGTCGGAAGAATGA  
+HWI-EAS443:3:68:1204:497#0/1  
abbbbbbbbbabbbbbbaabbbabb`bbaabbaabbb`ba  
@HWI-EAS443:3:68:1780:1174#0/1  
GGAGTTGGAACAATAGCAATGGAGTTAATCAGAATGATCA  
+HWI-EAS443:3:68:1780:1174#0/1  
^`USNX¥\_¥ZVV^^MOZIJZa`Z`[`]T]RVZTX[ZT[PW  
@HWI-EAS443:3:68:214:430#0/1  
CACAGAAATCAGAGCATCTGTCGGAAGAATGATTGGTGA  
+HWI-EAS443:3:68:214:430#0/1  
K[b^``]b`ba`Z]b`ba]abbab\_`]a\_\_OWaba]Z\_\_  
@HWI-EAS443:3:68:251:953#0/1  
CGTCCGAGAGCTCGAAGACTCCCCGCCCTGGAAGGACAA  
+HWI-EAS443:3:68:251:953#0/1  
`ZR\_¥^XQKUZ¥^PYV[¥VZ`\_`Y]`\_¥P[QOMJQVZUO  
@HWI-EAS443:3:68:473:592#0/1  
CGGTCATTGATTCCACGTTTGATCATTCTGATTAACTCCA  
+HWI-EAS443:3:68:473:592#0/1  
ab```bbb\_ba``bbbaaabaabaaaabb``\_X]aaaa  
@HWI-EAS443:3:68:574:427#0/1  
GCCCCACTTGCTACTGCAAGCCCATACACACAAGCAGGCAG  
+HWI-EAS443:3:68:574:427#0/1  
`b\_ba``bbbbZ\_ab`aaaa`a\_^`aaba`aa`]`aZ[V  
@HWI-EAS443:3:68:697:101#0/1  
CTTGTGTGTATGGGCTTGCAGTAGCAAGTGGGCATGACTT  
+HWI-EAS443:3:68:697:101#0/1  
abbbbbbabababbbbaabaababb`aaa`aaa`aaa`Sa`



@HWI-EAS443:3:68:699:1357#0/1  
GAACAATAGCAATGGAGTTAATCAGAATGATCAAACGTGG  
+HWI-EAS443:3:68:699:1357#0/1  
^abaabbbaba\_aaab^`aababbaaaaaaaaaaaaa^` [ @HWI-EAS443:3:68:900:1275#0/1  
GGAGTTGGAACAATAGCAATGGAGTTAATCAGAATGATCA  
+HWI-EAS443:3:68:900:1275#0/1  
aYMUVaKRUa`Ra\_R[\_aa`ZYa]^[\_a[`aJ^\_X^^^a  
@HWI-EAS443:3:69:1428:1162#0/1  
GTTGGAACAATAGCAATGGAGTTAATCAGAATGATCAAAC  
+HWI-EAS443:3:69:1428:1162#0/1  
Y^`abaVab`bXbbbb\_\_a\_bab`baX\_¥`ab\_]a`a`b\_ @HWI-EAS443:3:69:1571:380#0/1  
CGTCCGAGAGCTCGAAGACTCCCCGCCCTGGAAGGACAA  
+HWI-EAS443:3:69:1571:380#0/1  
aa^^bba\_W\_aa`aaaa\_]\_V]` `a\_¥^]a^]\_]`TV\_\_ @HWI-EAS443:3:69:1596:1845#0/1  
CAGGATGCCACAGAAATCAGAGCATCTGTTCGGAAGAATGA  
+HWI-EAS443:3:69:1596:1845#0/1  
\_bbabb]bbb`bbabaaaabaa\_baaaa0[a`[aa\_]\_\_ @HWI-EAS443:3:69:406:389#0/1  
TGCTTGTGTGTATGGGCTTGCAGTAGCAAGTGGGCATGAC  
+HWI-EAS443:3:69:406:389#0/1  
ab`aa¥^\_[a]`a\_]a`aaa^¥a]aa` `^TaZ`H^[\_]\_V @HWI-EAS443:3:69:487:1491#0/1  
CGTCCGAGAGCTCGAAGACTCCCCGCCCTGGAAGGACAA  
+HWI-EAS443:3:69:487:1491#0/1  
`X\_`[^¥L\_\_a`^`aa`aaa`X`aaVLNPZ]^U[Y @HWI-EAS443:3:69:709:493#0/1  
GGAGTTGGAACAATAGCAATGGAGTTAATCAGAATGATCA  
+HWI-EAS443:3:69:709:493#0/1  
aaaa\_aa\_Yaa\_`aaa^`aa\_aa\_aa` `` `a\_]\_\_\_\_] @HWI-EAS443:3:6:1008:613#0/1  
GATTTGTCTTCCAGGGCGGGGAGTCTTCGAGCTCTCGG  
+HWI-EAS443:3:6:1008:613#0/1  
aaaaaaaa`aaa\_aaaa`^a`^`Z^VOYZSVT[RPOXUBB @HWI-EAS443:3:6:1679:634#0/1  
CCCCCCCCTGGAAGGACAAATCTTCTGGCTTTGCACTTTC  
+HWI-EAS443:3:6:1679:634#0/1  
a`[b^`[aa`a\_a\_U\_\_`Ra]b`X\_`\_]a` `\_\_^^`\_`Z @HWI-EAS443:3:6:283:769#0/1  
GAGAACTCATCTTTATGACAAAGAAGAAATAAGGAGAGT  
+HWI-EAS443:3:6:283:769#0/1  
XXaZ^`[ZY\_]YaaJ\_aa¥`TY\_b\_ZRSaaa^Waa`aaa[ @HWI-EAS443:3:6:36:884#0/1  
GGAGTTGGAACAATAGCAATGGAGTTAATCAGAATGATCA  
+HWI-EAS443:3:6:36:884#0/1  
`bababbbabbbbbb`[ `abbS\_b¥`b`a\_bbababaa^^ @HWI-EAS443:3:6:427:257#0/1  
ATTCCACGTTTGTATCTTCTGATTAACCTCCATTGCTATTG

+HWI-EAS443:3:6:427:257#0/1  
abbaababaaaa\_a^a`a]ab\_aa``\_aWV\_a``^a``\_a  
@HWI-EAS443:3:70:161:301#0/1  
AGGAGTTGGAACAATAGCAATGGAGTTAATCAGAATGATC  
+HWI-EAS443:3:70:161:301#0/1  
a\_^S``a\_N`^XV]aZ¥\_XT¥\_TOX`]]W^aQUYRZ\_UY`  
@HWI-EAS443:3:70:264:791#0/1  
GATTCCACCAATCATTCTTCCGACAGATGCTCTGATTTCT  
+HWI-EAS443:3:70:264:791#0/1  
aaaaba`baaaaaaaaa`aa\_[a``\_\_\_\_`a``[\_`¥`^`\_  
@HWI-EAS443:3:70:459:1988#0/1  
AATCATTCTTCCGACAGATGCTCTGATTTCTGTGGCATCC  
+HWI-EAS443:3:70:459:1988#0/1  
a`S\_TNU^SX``^]`XY[YRWZaUPDRU]`PQBBBBBBBB  
@HWI-EAS443:3:70:518:1827#0/1  
CAGAAATCAGAGCATCTGTCCGAAGAATGATTGGTGAAT  
+HWI-EAS443:3:70:518:1827#0/1  
aaR`\_ZaaaSWPQ¥`b[]]baUV]aa]^ZJLTRXHZ\_VVT  
@HWI-EAS443:3:71:1502:1883#0/1  
CAGAAGATTTGTCTTCCAGGGCGGGGAGTCTTCGAGCT  
+HWI-EAS443:3:71:1502:1883#0/1  
aUUa`\_aa\_\_^^Z`\_a`\_V¥¥[\_`¥a^SWVBBBBBBBBBBB  
@HWI-EAS443:3:71:247:1468#0/1  
CGGTCATTGATTCCACGTTTGATCATTCTGATTAECTCCA  
+HWI-EAS443:3:71:247:1468#0/1  
aa¥P`\_^\_a[\_`\_`aa\_^`[\_^W[W][\_^X]\_]`^W^\_Z]  
@HWI-EAS443:3:71:669:1440#0/1  
AGAAATCAGAGCATCTGTCCGAAGAATGATTGGTGAATC  
+HWI-EAS443:3:71:669:1440#0/1  
^`\_`R¥````Ybaa`][DT]¥PU`]a^[[Y\_]W¥]^]P^  
@HWI-EAS443:3:72:1362:120#0/1  
CTTGTGTGTATGGGCTTGCAGTAGCAAGTGGGCATGACTT  
+HWI-EAS443:3:72:1362:120#0/1  
`abbaabaabbaab^babRaba`\_\_\_\_a`Zba\_G]a`\_`\_`\_  
@HWI-EAS443:3:72:642:79#0/1  
AATCATTCTTCCGACAGATGCTCTGATTTCTGTGGCATCC  
+HWI-EAS443:3:72:642:79#0/1  
[SV¥`\_]aaaab\_Vab¥^aa\_\_\_\_a[`^\_`\_]¥¥aa^`\_`\_U  
@HWI-EAS443:3:73:1228:1150#0/1  
GATTTGTCTTCCAGGGCGGGGAGTCTTCGAGCTCTCGG  
+HWI-EAS443:3:73:1228:1150#0/1  
a¥a`a`¥`^a¥RVU¥`\_¥X`¥]Z¥USTXXDIUYVSS¥PGY  
@HWI-EAS443:3:73:140:1479#0/1  
CCCCCCCCTGGAAGGACAAATCTTCTGGCTTTGCACTTTC  
+HWI-EAS443:3:73:140:1479#0/1  
abb`bbbb`aa]]^`ab`¥a\_\_`\_a^\_Za`\_\_\_\_`\_\_\_\_\_  
@HWI-EAS443:3:73:1712:1163#0/1  
GAGAGAACTCATCCTTTATGACAAAGAAGAAATAAGGAGA  
+HWI-EAS443:3:73:1712:1163#0/1  
`]YP`U\_VQ¥a`WP[^[R^aYOXVTUQWa]¥¥[¥0[][\_S

@HWI-EAS443:3:73:366:305#0/1  
GGAGTTGGAACAATAGCAATGGAGTTAATCAGAATGATCA  
+HWI-EAS443:3:73:366:305#0/1  
aaUTZ\_`^^a^NT]\_^[T`a]\_¥`W]ZTU[`XY¥]U^WVU  
@HWI-EAS443:3:73:476:1848#0/1  
CCCCGCCCTGGAAGGACAAATCTTCTGGCTTTGCACTTT  
+HWI-EAS443:3:73:476:1848#0/1  
abaa\_aaaa]]^^][[\_a`\_`¥\_^^`]]V`]]¥]`]WV^Z  
@HWI-EAS443:3:73:511:616#0/1  
CAGGATGCCACAGAAATCAGAGCATCTGTCCGGAAGAATGA  
+HWI-EAS443:3:73:511:616#0/1  
aaaa`aabaabaaa\_aaa\_\_\_aaa`aV```[\_a\_\_^\_\_  
@HWI-EAS443:3:73:574:1742#0/1  
GCCACAGAAATCAGAGCATCTGTCCGGAAGAATGATTGGTG  
+HWI-EAS443:3:73:574:1742#0/1  
^bbab`^\_I\_bbaa\_]`^a\_a\_Xb^Y¥a`\_[Q¥XY]\_ZV^  
@HWI-EAS443:3:73:597:1653#0/1  
CAAAGCCAGAAGATTTGTCCTTCCAGGGGCGGGGAGTCTT  
+HWI-EAS443:3:73:597:1653#0/1  
aaaaYa`a^^]`\_¥¥¥¥\_]^`\_^^¥U¥^^SUUWSMWSW  
@HWI-EAS443:3:74:1157:765#0/1  
GGAGTTGGAACAATAGCAATGGAGTTAATCAGAATGATCA  
+HWI-EAS443:3:74:1157:765#0/1  
ababbb`bbbbbbbb`aaaa`\_abbaaab`bbabab\_a  
@HWI-EAS443:3:74:586:1225#0/1  
GATTTGTCCTTCCAGGGGCGGGGAGTCTTCGAGCTCTCGG  
+HWI-EAS443:3:74:586:1225#0/1  
`^Wav\_\_b`bba¥T`W\_]aa`^]R¥L^a`aXDS¥^[ ]PX^  
@HWI-EAS443:3:74:599:1467#0/1  
CGGTCATTGATTCCACGTTTGATCATTCTGATTAECTCA  
+HWI-EAS443:3:74:599:1467#0/1  
aVUX`^^`PPOYZV[\_[THY\_ZXY¥W¥Q^R\_[QOYX^Y^[[  
@HWI-EAS443:3:74:614:949#0/1  
GATGCCACAGAAATCAGAGCATCTGTCCGGAAGAATGATTG  
+HWI-EAS443:3:74:614:949#0/1  
aaa`baa`baabaaaaa^a\_a\_\_`Q]]\_]RZaaa[U\_¥Y  
@HWI-EAS443:3:74:653:1740#0/1  
GGAGTTGGAACAATAGCAATGGAGTTAATCAGAATGATCA  
+HWI-EAS443:3:74:653:1740#0/1  
`Z`a¥^T^Yba¥\_a\_\_b\_ab\_\_`UUXaa`\_a]aV]]^^`\_`  
@HWI-EAS443:3:74:716:623#0/1  
ATGCCACAGAAATCAGAGCATCTGTCCGGAAGAATGATTGG  
+HWI-EAS443:3:74:716:623#0/1  
a`aa\_aabaaba`aaaa\_aaaaaa¥Za`]`\_\_a\_WYWZ\_¥  
@HWI-EAS443:3:74:821:1281#0/1  
GCAAAGCCAGAAGATTTGTCCTTCCAGGGGCGGGGAGTCT  
+HWI-EAS443:3:74:821:1281#0/1  
aa^aa^b`baaaa¥`aaa]aaaa^`a\_\_]`a]a¥¥\_XYVY  
@HWI-EAS443:3:75:1783:77#0/1  
GAGAGAACTCATCCTTTATGACAAAGAAGAAATAAGGAGA





+HWI-EAS443:3:7:1245:1730#0/1  
`baXa`b\_abaabbbWabaab`^abb`]b\_VNT`Sa]X`\_  
@HWI-EAS443:3:7:414:1932#0/1  
CACGTTTGATCATTCTGATTAAGTCCATTGCTATTGTTCC  
+HWI-EAS443:3:7:414:1932#0/1  
abbabbba\_a^`bbaaaba\_abbba`baaaaab^a`0bb`  
@HWI-EAS443:3:7:445:511#0/1  
GGAGTTGGAACAATAGCAATGGAGTTAATCAGAATGATCA  
+HWI-EAS443:3:7:445:511#0/1  
^UP]^X¥]\_[\_\_[^`a\_\_Y^a\_0^^ZY^\_YNXTWW¥^[GW  
@HWI-EAS443:3:7:851:1459#0/1  
CGCCCCTGGAAGGACAAATCTTCTGGCTTTGCACTTTCCA  
+HWI-EAS443:3:7:851:1459#0/1  
ab[]PTa`aaa\_aadWaa¥Y]a\_[Ua^`^]a¥\_V\_V\_\_\_GR`  
@HWI-EAS443:3:80:143:441#0/1  
CGCCCCTGGAAGGACAAATCTTCTGGCTTTGCACTTTCCA  
+HWI-EAS443:3:80:143:441#0/1  
aaa```¥]TQ^^[Y\_WTUZ\_\_\_`[¥^`^^XL^X]P[]¥XR  
@HWI-EAS443:3:80:348:379#0/1  
GTCCGAGAGCTCGAAGACTCCCCGCCCTGGAAGGACAAA  
+HWI-EAS443:3:80:348:379#0/1  
ZX\_aa`ZWa]``aa¥aa\_aaa`^[[[]NUYYSZ`Y^Z¥Y]  
@HWI-EAS443:3:80:438:1362#0/1  
GAGAGAACTCATCCTTTATGACAAAGAAGAAATAAGGAGA  
+HWI-EAS443:3:80:438:1362#0/1  
`LXaSSW`a[aaaa`a\_a`^`a[a^\_T[\_^]`^`ZXa^\_  
@HWI-EAS443:3:80:489:1053#0/1  
AAAGTGCAAAGCCAGAAGATTTGTCTTCCAGGGGCGGGG  
+HWI-EAS443:3:80:489:1053#0/1  
a]``Saa\_aa¥a^[a`¥a\_]U^¥\_U^¥`^U¥]¥^^ZXS¥  
@HWI-EAS443:3:81:1748:878#0/1  
CGGTCATTGATTCCACGTTTGATCATTCTGATTAAGTCCCA  
+HWI-EAS443:3:81:1748:878#0/1  
^¥¥V¥bbb¥\_a^¥Tbbb\_bYN]b\_b]\_`aab`\_`b`^^¥b  
@HWI-EAS443:3:81:195:1575#0/1  
GTCATTGATTCCACGTTTGATCATTCTGATTAAGTCCATT  
+HWI-EAS443:3:81:195:1575#0/1  
]H¥baXJ`NOTY[]XNTPZZIZPI`ZP[MSYVXZ\_]TJ[U  
@HWI-EAS443:3:81:281:420#0/1  
ATTCCACGTTTGATCATTCTGATTAAGTCCATTGCTATTG  
+HWI-EAS443:3:81:281:420#0/1  
aaaa\_bab`aaaa`a\_aaaaa\_aa\_a\_aa`\_`\_`^`aY`  
@HWI-EAS443:3:82:829:1038#0/1  
AATCATTCTTCCGACAGATGCTCTGATTTCTGTGGCATCC  
+HWI-EAS443:3:82:829:1038#0/1  
YY^a\_V\_\_aaaXW¥ZRRab]^aWaYG¥`^^QYVX\_\_R]Y  
@HWI-EAS443:3:82:96:1701#0/1  
AGAGAACTCATCCTTTATGACAAAGAAGAAATAAGGAGAG  
+HWI-EAS443:3:82:96:1701#0/1  
a\_K[S[``\_QTV]Y¥^[[]X[\_^]YXPYZ¥HX\_\_ZU]]¥Y

@HWI-EAS443:3:83:1523:813#0/1  
CGGTCATTGATTCCACGTTTGATCATTCTGATTAECTCCA  
+HWI-EAS443:3:83:1523:813#0/1  
[aaZabbab`\_`Z¥aS^aabb`IVab]bbb`bbb`]aa¥a  
@HWI-EAS443:3:83:254:26#0/1  
AGGAGTTGGAACAATAGCAATGGAGTTAATCAGAATGATC  
+HWI-EAS443:3:83:254:26#0/1  
abbaa`aaaa`\_a\_a¥Z``\_aaa\_a````\_a^\_``^]¥  
@HWI-EAS443:3:83:371:1928#0/1  
AAAGTGCAAAGCCAGAAGATTTGTCCTTCCAGGGGCGGGG  
+HWI-EAS443:3:83:371:1928#0/1  
QQQ\_Iaaab^RYaa^]RPW]\_TKVa\_]G]P¥QWXXYPRKS  
@HWI-EAS443:3:83:439:813#0/1  
ACAATAGCAATGGAGTTAATCAGAATGATCAAACGTGGA  
+HWI-EAS443:3:83:439:813#0/1  
aabbbaaaaba\_aa`a`aaaaaaR^aaaa\_``a]^b[\_  
@HWI-EAS443:3:83:954:966#0/1  
CACGTTTGATCATTCTGATTAECTCCATTGCTATTGTTCC  
+HWI-EAS443:3:83:954:966#0/1  
aa``\_bb]]``\_ba`\_a\_¥\_``^`\_a^]`aa\_`a`aa`a]Z  
@HWI-EAS443:3:84:1140:226#0/1  
AAAGTGCAAAGCCAGAAGATTTGTCCTTCCAGGGGCGGGG  
+HWI-EAS443:3:84:1140:226#0/1  
a]T^`b\_aaa\_`[aa][^V\_]aa¥UUa\_[Z``[``^a\_`S  
@HWI-EAS443:3:84:585:1612#0/1  
GAGAACTCATCCTTTATGACAAAGAAGAAATAAGGAGAGT  
+HWI-EAS443:3:84:585:1612#0/1  
aababbabbaabbbaba```aaa`\_]a\_aaa``\_\_a\_adW  
@HWI-EAS443:3:84:940:1139#0/1  
CAGGATGCCACAGAAATCAGAGCATCTGTCCGAAGAATGA  
+HWI-EAS443:3:84:940:1139#0/1  
abaababbbbbb`bbaabaaaaababb`aab`aa`aa\_\_  
@HWI-EAS443:3:84:954:78#0/1  
CGGTCATTGATTCCACGTTTGATCATTCTGATTAECTCCA  
+HWI-EAS443:3:84:954:78#0/1  
`bbaabbbbabba\_b`bbbb\_b`bbbabbbbbaaab\_\_a  
@HWI-EAS443:3:85:1668:663#0/1  
GAGAGAACTCATCCTTTATGACAAAGAAGAAATAAGGAGA  
+HWI-EAS443:3:85:1668:663#0/1  
a]¥]aa`a]`aXYa^F¥``]^\_YW]\_`a^\_]a\_`a\_``^  
@HWI-EAS443:3:85:277:1504#0/1  
GAAGATTTGTCCTTCCAGGGGCGGGGAGTCTTCGAGCTCT  
+HWI-EAS443:3:85:277:1504#0/1  
^I\_aW¥J[]^a^a¥a`ZTU]V^Y[PBBBBBBBBBBBBBBB  
@HWI-EAS443:3:85:734:77#0/1  
GATTTGTCCTTCCAGGGGCGGGGAGTCTTCGAGCTCTCGG  
+HWI-EAS443:3:85:734:77#0/1  
a^a`aa^`[¥¥\_`Za\_^^^a^SUS¥WWW¥W¥UWMSS¥US[  
@HWI-EAS443:3:86:1063:1172#0/1  
TCCACGTTTGATCATTCTGATTAECTCCATTGCTATTGTT

+HWI-EAS443:3:86:1063:1172#0/1  
abbbbabbbZY\_[¥\_b`abaaaa^W`a`abb^aaaaaa`a  
@HWI-EAS443:3:86:1654:274#0/1  
CACTGAGTTTTCAGTTCAGTGCACATTTGGATGTAGAATCT  
+HWI-EAS443:3:86:1654:274#0/1  
^`Sab`b`bbaab`abba0[Q^aba^abaaaa¥`a`\_]R`  
@HWI-EAS443:3:86:897:1221#0/1  
GAGAGAACTCATCCTTTATGACAAAGAAGAAATAAGGAGA  
+HWI-EAS443:3:86:897:1221#0/1  
\_\_aY¥V`abbb]bbbaabb`a`\_aa\_a^¥R\_ab`a¥^aa  
@HWI-EAS443:3:87:1275:1753#0/1  
GGAGTTGGAACAATAGCAATGGAGTTAATCAGAATGATCA  
+HWI-EAS443:3:87:1275:1753#0/1  
\_aab[abbaa`aaa`bab`aaaa`baa`ababaaaa\_a  
@HWI-EAS443:3:87:1374:344#0/1  
CGCCAGGATGCCACAGAAATCAGAGCATCTGTCGGAAGAA  
+HWI-EAS443:3:87:1374:344#0/1  
^\_b^^bba\_b[T`a\_¥bba`bbba\_U``ba^a`b\_abaa  
@HWI-EAS443:3:87:174:88#0/1  
CATTGATTCCACGTTTTCATCTGATTAACCCATTGC  
+HWI-EAS443:3:87:174:88#0/1  
ab\_bb\_\_aX[\_¥`abaT^\_ZYSOJS]SHX¥¥\_ZTXP¥\_RW  
@HWI-EAS443:3:87:375:198#0/1  
CACAGAAATCAGAGCATCTGTCGGAAGAATGATTGGTGGGA  
+HWI-EAS443:3:87:375:198#0/1  
ab`baabaabab`a`aa^aa`\_a]\_XR```\_]\_^H`X  
@HWI-EAS443:3:88:1488:640#0/1  
ATGGAGTTAATCAGAATGATCAAACGTGGAATCAATGACC  
+HWI-EAS443:3:88:1488:640#0/1  
¥^aZa^J\_bb``ba]a``b^aaa]\_\_\_\_```YaT`\_aaa`S  
@HWI-EAS443:3:89:1252:773#0/1  
GTTGGAACAATAGCAATGGAGTTAATCAGAATGATCAAAC  
+HWI-EAS443:3:89:1252:773#0/1  
a`a`aaa\_aaa`a`\_aa\_`^a```\_aa\_^\_a`\_^\_\_^Z  
@HWI-EAS443:3:89:1702:888#0/1  
GATTTGTCCTTCCAGGGCGGGGAGTCTTCGAGCTCTCGG  
+HWI-EAS443:3:89:1702:888#0/1  
[aa`\_Y¥Z`\_a`Z^`\_¥¥Y]¥¥XR`BBBBBBBBBBBBBBB  
@HWI-EAS443:3:89:32:1863#0/1  
GAAAGTGCAAAGCCAGAAGATTTGTCCTTCCAGGGCGGG  
+HWI-EAS443:3:89:32:1863#0/1  
^bbb\_ab`bb\_UaabaU^¥ba`\_]\_ababba\_]WZSMb[Ua  
@HWI-EAS443:3:89:386:1496#0/1  
CCAGGATGCCACAGAAATCAGAGCATCTGTCGGAAGAATG  
+HWI-EAS443:3:89:386:1496#0/1  
]`[a`P\_^`\_b`^`X^a[`^^\_Tzt]P]aZMZX][RX  
@HWI-EAS443:3:89:583:356#0/1  
GCTTGTGTATGGGCTTGCAGTAGCAAGTGGGCATGACT  
+HWI-EAS443:3:89:583:356#0/1  
aaabb\_b`b¥aba\_aa`baaa`\_aa]Y^¥aa`a`aa`^`



@HWI-EAS443:3:89:671:1488#0/1  
ATTGATTCCACGTTTGTATCATTCTGATTAACCTCCATTGCT  
+HWI-EAS443:3:89:671:1488#0/1  
]\_]b^^`b\_^`ZIYaa[]WX`] `U^^a`a\_^J\_]Zb\_XNX  
@HWI-EAS443:3:89:675:1617#0/1  
GATTTGTCCTTCCAGGGGCGGGGAGTCTTCGAGCTCTCGG  
+HWI-EAS443:3:89:675:1617#0/1  
]]]^^`¥` `b`aa\_ZZ\_`\_\_]]QZZYYRW\_Z^[Y^VV[]a`  
@HWI-EAS443:3:89:844:729#0/1  
CTCGAAGACTCCCCGCCCTGGAAGACAAATCTTCTGGC  
+HWI-EAS443:3:89:844:729#0/1  
`\_^bbZ`a` `b`aa^aU^\_babbaaaZ``aa\_``aZaa`\_  
@HWI-EAS443:3:8:378:1230#0/1  
AGAACTCATCCTTTATGACAAAGAAGAAATAAGGAGAGTT  
+HWI-EAS443:3:8:378:1230#0/1  
^Y]aW`aa\_aa`aaaaa\_\_`\_\_a\_\_\_¥]]` `^` ` `aW`  
@HWI-EAS443:3:90:1015:1939#0/1  
CAGAAATCAGAGCATCTGTCCGGAAGAATGATTGGTGAAT  
+HWI-EAS443:3:90:1015:1939#0/1  
ababbbb`baaaVa\_abYR\_aabb`a`^]]bb^ISa`\_^a  
@HWI-EAS443:3:90:1507:917#0/1  
CAGGATGCCACAGAAATCAGAGCATCTGTCCGGAAGAATGA  
+HWI-EAS443:3:90:1507:917#0/1  
ab` `bbbbbaaba` `ab\_ab`aa`b` `b[abbX¥` ` `a[  
@HWI-EAS443:3:90:180:520#0/1  
CACAGAAATCAGAGCATCTGTCCGGAAGAATGATTGGTGA  
+HWI-EAS443:3:90:180:520#0/1  
` `b`¥¥SabY`¥a^¥^a^¥YR\_ZXU\_I]SZ\_MZUM]DUUO  
@HWI-EAS443:3:90:56:580#0/1  
GAGTTGGAACAATAGCAATGGAGTTAATCAGAATGATCAA  
+HWI-EAS443:3:90:56:580#0/1  
¥X`Y`\_`¥a`]]` `aa`]¥Za^a^[^TZ`\_`a`\_\_PW\_¥  
@HWI-EAS443:3:91:1045:71#0/1  
CGTCCGAGAGCTCGAAGACTCCCCGCCCTGGAAGGACAA  
+HWI-EAS443:3:91:1045:71#0/1  
^aa` ` `a`\_a\_a`^`aa`¥aaa\_aa[[`¥¥aa`^\_¥]T`^  
@HWI-EAS443:3:91:1130:728#0/1  
CAGAAATCAGAGCATCTGTCCGGAAGAATGATTGGTGAAT  
+HWI-EAS443:3:91:1130:728#0/1  
H\_`bZbb`Xa` [V\_bbbbbbb^` `QPQ\_\_UUZb^Ka\_IVH  
@HWI-EAS443:3:91:1356:1789#0/1  
CCACGTTTGTATCATTCTGATTAACCTCCATTGCTATTGTTC  
+HWI-EAS443:3:91:1356:1789#0/1  
abaababbabba\_aba`bbbabb`b^aaaab`ab`ab`^`\_  
@HWI-EAS443:3:91:1754:1001#0/1  
CAATCATTCTCCGACAGATGCTCTGATTTCTGTGGCATC  
+HWI-EAS443:3:91:1754:1001#0/1  
]babbbababbbbaabbbabb]abbbbbbbaTZTa`bbR  
@HWI-EAS443:3:91:520:548#0/1  
GCCTGCTTGTGTGTATGGGCTTGCAAGTAGCAAGTGGGCAT

+HWI-EAS443:3:91:520:548#0/1  
aaaaaaaa`a^b`^¥`aa\_]`¥`a[^^^`Z`\_Y[V  
@HWI-EAS443:3:91:528:1067#0/1  
ATTCCACGTTTGATCATTCTGATTAACCTCCATTGCTATTG  
+HWI-EAS443:3:91:528:1067#0/1  
Yb\_aba`b\_aaaaaabaaaabaaa`aaaa`a]^`^\_a  
@HWI-EAS443:3:91:636:1181#0/1  
CAGAAATCAGAGCATCTGTCGGAAGAATGATTGGTGAAT  
+HWI-EAS443:3:91:636:1181#0/1  
aaY¥b¥^ba`]Z^b`a`¥P¥\_]Q¥a\_\_¥XY]\_\_`W[^Y\_S  
@HWI-EAS443:3:92:326:1948#0/1  
ATTGATTCCACGTTTGATCATTCTGATTAACCTCCATTGCT  
+HWI-EAS443:3:92:326:1948#0/1  
abb`^`\_]``aba`aababb`a`aabS^^^`aaaa\_\_aa  
@HWI-EAS443:3:92:543:1917#0/1  
TCCCCGCCCTGGAAGGACAAATCTTCTGGCTTTGCACTT  
+HWI-EAS443:3:92:543:1917#0/1  
\_bbaaa`aa`aaa\_Yaaa`\_Za\_Q\_Z][\_Y\_^\_\_\_UVK  
@HWI-EAS443:3:92:565:1709#0/1  
AGTTAATCAGAATGATCAAACGTGGAATCAATGACCGAAA  
+HWI-EAS443:3:92:565:1709#0/1  
a`Y\_aa\_[a`a`^a\_a`Z`\_a^`\_\_a\_\_\_^¥^a`\_^\_  
@HWI-EAS443:3:92:807:2025#0/1  
AGTTAATCAGAATGATCAAACGTGGAATCAATGACCGAAA  
+HWI-EAS443:3:92:807:2025#0/1  
ab]¥bbaab`aba\_ba\_baa`^\_`a^aaaa`a^`aa  
@HWI-EAS443:3:93:1777:1827#0/1  
AGTTGGAACAATAGCAATGGAGTTAATCAGAATGATCAAA  
+HWI-EAS443:3:93:1777:1827#0/1  
a`\_aa^ab`aab¥baa`a¥Vaa^ba\_aY`S\_a\_\_`W]¥B  
@HWI-EAS443:3:93:662:157#0/1  
ATCATTCTGATTAACCTCCATTGCTATTGTTCCAACCTCCTT  
+HWI-EAS443:3:93:662:157#0/1  
\_¥`a^b]^a`a`\_`^a`\_`\_\_a^`¥\_\_`[\_][\_¥]\_^WVR  
@HWI-EAS443:3:93:753:1112#0/1  
GTGTGTATGGGCTTGCAAGTGGGCATGACTTTGA  
+HWI-EAS443:3:93:753:1112#0/1  
a`\_`^aa`\_`^aa`a¥\_a`\_\_`W`a¥V^`^^W`\_\_`[  
@HWI-EAS443:3:94:242:273#0/1  
AGAAATCAGAGCATCTGTCGGAAGAATGATTGGTGAATC  
+HWI-EAS443:3:94:242:273#0/1  
a¥[WIU^¥^¥UN[TUT[¥T[`RVLOOP¥QFVBBBBBBBBB  
@HWI-EAS443:3:94:315:942#0/1  
CTGCCTGCCTGCTTGTGTGTATGGGCTTGCAAGT  
+HWI-EAS443:3:94:315:942#0/1  
aa`aaabaaa\_aab^a¥a^aaa\_aaZ\_a`\_aW\_\_Z^¥`W  
@HWI-EAS443:3:94:441:568#0/1  
GGAGTTGGAACAATAGCAATGGAGTTAATCAGAATGATCA  
+HWI-EAS443:3:94:441:568#0/1  
a\_¥a]^`Z[\_\_\_\_`\_]^^a\_]\_a^`]\_\_`^`^\_]\_^[[W

@HWI-EAS443:3:94:455:1053#0/1  
CTTGTGTGTATGGGCTTGCAGTAGCAAGTGGGCATGACTT  
+HWI-EAS443:3:94:455:1053#0/1  
aa]`[\`¥^^H^Z^`^aaaa\_R¥aWR\_\_GWYaX[¥a\_^\_  
@HWI-EAS443:3:94:491:102#0/1  
GTTGGAACAATAGCAATGGAGTTAATCAGAATGATCAAAC  
+HWI-EAS443:3:94:491:102#0/1  
a\_aa`¥\_Z\_^\_¥\_`^SP`^\_S\_\_\_ZX][U¥]W^\_W]RPVZY  
@HWI-EAS443:3:94:517:1785#0/1  
AGAGAACTCATCTTTATGACAAAGAAGAAATAAGGAGAG  
+HWI-EAS443:3:94:517:1785#0/1  
^a[a^a\_\_aaa\_U¥aa[\_aa`a`^a]\_\_]\_`aY``\_aa\_a  
@HWI-EAS443:3:95:1088:1099#0/1  
ATTGATTCCACGTTTGTATCATTCTGATTAECTCCATTGCT  
+HWI-EAS443:3:95:1088:1099#0/1  
abbaa`a`aa`baaaba\_\_aaaa\_b`a`aa^`\_`a`\_`\_]`  
@HWI-EAS443:3:95:199:123#0/1  
ATCATTCTCCGACAGATGCTCTGATTTCTGTGGCATCCT  
+HWI-EAS443:3:95:199:123#0/1  
aa\_aaaaaa\_aaa]aba\_b`\_`\_`a`\_]`a]\_^`\_`^`^UUU  
@HWI-EAS443:3:95:301:1111#0/1  
CGGTCATTGATTCCACGTTTGTATCATTCTGATTAECTCCA  
+HWI-EAS443:3:95:301:1111#0/1  
aaa[¥`\_`U]\_`aa`aa]`aa\_]J`\_`a\_\_\_`^`\_]ZV]U  
@HWI-EAS443:3:95:345:508#0/1  
CCACGTTTGTATCATTCTGATTAECTCCATTGCTATTGTTC  
+HWI-EAS443:3:95:345:508#0/1  
U\_`[[H]\_W\_b`R¥\_S]^¥ZX¥R\_]SU\_`Sa[¥[UI\_[bZ  
@HWI-EAS443:3:95:703:137#0/1  
TGGAAAGTGCAAAGCCAGAAGATTTGTCCTTCCAGGGGCG  
+HWI-EAS443:3:95:703:137#0/1  
abb`\_`aaXaa\_`\_W`\_`\_`\_`¥a¥\_¥\_¥X¥Z\_\_S¥^`^VWV\_  
@HWI-EAS443:3:95:875:86#0/1  
ACCAATCATTCTTCCGACAGATGCTCTGATTTCTGTGGCA  
+HWI-EAS443:3:95:875:86#0/1  
a\_]ba\_¥a\_TH\_\_MN`X]\_]¥\_^]aZab`\_aa\_`a[^PBB  
@HWI-EAS443:3:96:850:921#0/1  
ATCATTCTGATTAECTCCATTGCTATTGTTCCAECTCCTT  
+HWI-EAS443:3:96:850:921#0/1  
a`aaaaa`\_aa]a`aaa\_\_^^`a`¥`aaZ]XUa^Ua¥X`^  
@HWI-EAS443:3:96:892:1886#0/1  
TGCAAAGCCAGAAGATTTGTCCTTCCAGGGGCGGGGAGTC  
+HWI-EAS443:3:96:892:1886#0/1  
abbbabZabbaaaababa`^¥`\_Y`^a\_`a\_\_a`\_`^]TZM  
@HWI-EAS443:3:97:1227:1200#0/1  
CAGAAGATTTGTCCTTCCAGGGGCGGGGAGTCTTCGAGCT  
+HWI-EAS443:3:97:1227:1200#0/1  
aZ[X`a]]a`[XZ¥¥T]\_\_a`\_¥X]aBBBBBBBBBBBBBBB  
@HWI-EAS443:3:97:1560:1435#0/1  
GAAATCAGAGCATCTGTCGGAAGAATGATTGGTGAATCG

+HWI-EAS443:3:97:1560:1435#0/1  
ZbZabJaba¥^aaSbbb^ab`a`\_aZYYba^HV^aMOBB  
@HWI-EAS443:3:97:456:472#0/1  
AATCAGAGCATCTGTCGGAAGAATGATTGGTGAATCGGA  
+HWI-EAS443:3:97:456:472#0/1  
\_aba\_^\_a`babaZ^aa[^a¥][\_^^a[^H`]^\_^^BBB  
@HWI-EAS443:3:97:747:1170#0/1  
AAAGTGCAAAGCCAGAAGATTTGTCCTTCCAGGGGCGGGG  
+HWI-EAS443:3:97:747:1170#0/1  
ab]a]b\_abb\_baaa]Z`aZ]X`¥`a]a\_]aaZZaaaBBB  
@HWI-EAS443:3:98:1314:1317#0/1  
GGAGTTGGAACAATAGCAATGGAGTTAATCAGAATGATCA  
+HWI-EAS443:3:98:1314:1317#0/1  
abY¥]aaZ^`[\_\_\_\_`\_\_a`\_]\_^a^a]Za\_^\_a`¥aY`  
@HWI-EAS443:3:98:1676:794#0/1  
AGAAATCAGAGCATCTGTCGGAAGAATGATTGGTGAATC  
+HWI-EAS443:3:98:1676:794#0/1  
aaaaaaYaba`¥aa]aaWR`SY\_`^\_`WO\_\_Y\_Z`YO^]H  
@HWI-EAS443:3:98:369:1185#0/1  
CATGCCACTTGCTACTGCAAGCCATACACACAAGCAGG  
+HWI-EAS443:3:98:369:1185#0/1  
a]TRVRWT¥b]0]\_WDX]MZxaa\_aa][^\_`]M`^a]\_^  
@HWI-EAS443:3:98:932:208#0/1  
AGGAGTTGGAACAATAGCAATGGAGTTAATCAGAATGATC  
+HWI-EAS443:3:98:932:208#0/1  
^a^¥bbb`ZO\_aaYa`¥YRPbaa]b¥¥`^`[\_a`^\_¥¥¥M  
@HWI-EAS443:3:99:367:884#0/1  
CAGGATGCCACAGAAATCAGAGCATCTGTCGGAAGAATGA  
+HWI-EAS443:3:99:367:884#0/1  
Va`aa`bab`\_baabbbabbbbaab\_bbW[ab\_aaZS^`  
@HWI-EAS443:3:9:113:1799#0/1  
AATCATTCTCCGACAGATGCTCTGATTTCTGTGGCATCC  
+HWI-EAS443:3:9:113:1799#0/1  
a`aaaa]aaaaa`a]`a[X\_\_\_\_Y¥\_a\_a]`[\_U`a\_]U  
@HWI-EAS443:3:9:1262:1965#0/1  
TGGAAAGTGCAAAGCCAGAAGATTTGTCCTTCCAGGGGCG  
+HWI-EAS443:3:9:1262:1965#0/1  
Ua\_`aa]J0bbb\_`\_]`b\_aba^a\_LEVX\_\_aMaaaa]^a  
@HWI-EAS443:3:9:1486:1496#0/1  
AGGAGTTGGAACAATAGCAATGGAGTTAATCAGAATGATC  
+HWI-EAS443:3:9:1486:1496#0/1  
a`¥Z^`b^a\_aa^`abb`a]`\_a`]a\_¥Sa\_aa``b¥`W]  
@HWI-EAS443:3:9:94:148#0/1  
AAGGAGTTGGAACAATAGCAATGGAGTTAATCAGAATGAT  
+HWI-EAS443:3:9:94:148#0/1  
aba^`b`abaaaaY`aaaa`aaaa`a^`a```aa`\_`\_\_  
@HWI-EAS443:3:69:649:659#0/1  
CTCGAGGAAATGTCACGAGACTGGTTCATGCTCTGCCCAT  
+HWI-EAS443:3:69:649:659#0/1  
aabbabaa^\_aa`aaaa`a```a\_^\_\_aaa`\_`^[\_`\_\_\_\_\_

@HWI-EAS443:3:45:1376:59#0/1  
TGAGCATGAACCAGTCTCGTGACATTTCCCTCGAGGGGCAT  
+HWI-EAS443:3:45:1376:59#0/1  
]b\_b\_XU`\_aYa¥bY]a]YN¥^]Y[\_][N^J[N¥aBBBBB  
@HWI-EAS443:3:11:282:1876#0/1  
GCATGAATCAGTCTCGTGACATTTCCCTCGAGGGTCATGTC  
+HWI-EAS443:3:11:282:1876#0/1  
`bb`a\_]`a`baba`]Z`a]aWa[\_aaaaSY`\_a^^a  
@HWI-EAS443:3:13:212:850#0/1  
CGCATTTCTTCAATTAACCACCTTATTTCTTCAAATTTCT  
+HWI-EAS443:3:13:212:850#0/1  
aba\_baba`baaab`baaaaa`aaaaaaaa`a``a  
@HWI-EAS443:3:18:1493:487#0/1  
CGCATTTCTTCAATTAACCACCTTATTTCTTCAAATTTCT  
+HWI-EAS443:3:18:1493:487#0/1  
\_\_a¥^aa\_baS\_b`b`a]Zaab`XR^TX[FY`X¥WZZa^  
@HWI-EAS443:3:3:1692:1751#0/1  
GCATGAACCAGTCTCGTGACATTTCCCCGAGGGTCATGTC  
+HWI-EAS443:3:3:1692:1751#0/1  
`abbbb`bbba\_aab`baGaaab\_] [\_^UaXaWG^`a]S  
@HWI-EAS443:3:40:1461:300#0/1  
CATGAACCAGTCTCGTGACATTTCCCTCGAGGGCCATGTCA  
+HWI-EAS443:3:40:1461:300#0/1  
abbbbabb`bab^baaaaba`]ab]][\_[S¥^`¥^W  
@HWI-EAS443:3:40:608:1164#0/1  
CATGAACCAGTCTCGTGAGATTTCCCTCGAGGGTCATGTCA  
+HWI-EAS443:3:40:608:1164#0/1  
aaaY]a`ab`ba`a]]UL\_YT[ZXN`HZ`UDUZ¥]Z¥W  
@HWI-EAS443:3:56:1490:1224#0/1  
ATGAGCATGAACCAGTCTCGTGACATTTCCCTCGCGGGTCA  
+HWI-EAS443:3:56:1490:1224#0/1  
]`\_\_aa¥\_¥UaU`\_Z`ZZSaXZNFx]XSaWUBBBBBBBBB  
@HWI-EAS443:3:5:1523:1411#0/1  
AAAATGCAGTTGGGGCCTCATCGGAGGGCTTGAATGGAA  
+HWI-EAS443:3:5:1523:1411#0/1  
ab\_b[[¥`\_L`[YT^TZb`]U0¥`PbaH]babS`]bb[[  
@HWI-EAS443:3:69:1789:1957#0/1  
ATGAGCATGAACCAGTCTCGTGACATTTCCGCGAGGGTCA  
+HWI-EAS443:3:69:1789:1957#0/1  
Z¥]XTTaZJYaaa]ZS]`]HQVUXTTYYSBBBBBBBBB  
@HWI-EAS443:3:86:1334:1155#0/1  
GCCTAGGCATGAGCATGAACAAGTCTCGTGACATTTCCCTC  
+HWI-EAS443:3:86:1334:1155#0/1  
aSIXaZ\_`[bH]bUU\_aMVR`Va\_\_R[Q`aG¥Ya¥WQG\_  
@HWI-EAS443:3:88:504:268#0/1  
GCCGATTTCTTCAATTAACCACCTTATTTCTTCAAATTT  
+HWI-EAS443:3:88:504:268#0/1  
a^[QTaaa`WRPXHTa]ZaVYBBBBBBBBBBBBBBBBB  
@HWI-EAS443:3:91:1697:999#0/1  
CATGACCCTCGAGGAAATGTCACGAGACTGGGTCATGCTC

+HWI-EAS443:3:91:1697:999#0/1  
VV^\_R\_\_W\_Z\_X\_W]¥\_bb`¥QWQ]a¥MR\_[E[OYZ[¥  
@HWI-EAS443:3:75:1668:1837#0/1  
GGCATGAGCATGAACCGTCTCGTGACATTTCCCTCGAGGG  
+HWI-EAS443:3:75:1668:1837#0/1  
ababa\_bbabaa¥^`^DZaabXa`a``aaa[^]^aZb`a  
@HWI-EAS443:3:5:397:481#0/1  
GCCTAGGCATGAGCATGAACCAGTCTCGTGACATTTCCCTG  
+HWI-EAS443:3:5:397:481#0/1  
aQQNY`¥UT¥]P¥¥¥^`^¥¥YU[USGGYBBBBBBBBBBBB  
@HWI-EAS443:3:80:410:1964#0/1  
AGCATGAGCATGAACCAGTCTCGTGACATTTCCCTCGAGGG  
+HWI-EAS443:3:80:410:1964#0/1  
abbNab`[abT`J^^`a¥YM^aaSZa\_[\_RSaa\_\_`[^NL  
@HWI-EAS443:3:88:178:2047#0/1  
NATGAGCATGAACCAGTCTCGTGACATTTCCCTCGAGGGTC  
+HWI-EAS443:3:88:178:2047#0/1  
DKWYWWYWWYWWYWNMOWYWWUYYYYYWWYUWYWWYSIDN  
@HWI-EAS443:3:100:240:1683#0/1  
ATGAGCATGAACCAGTCTCGTGACATTTCCCTCGAGGGTCA  
+HWI-EAS443:3:100:240:1683#0/1  
aaaaa\_baaaaaaa^a`\_¥\_\_^a`a\_\_\_`W\_\_\_`RPM\_  
@HWI-EAS443:3:10:748:573#0/1  
AGCATGAACCAGTCTCGTGACATTTCCCTCGAGGGTCATGT  
+HWI-EAS443:3:10:748:573#0/1  
aaaa`aaaaaaa¥``a^a¥\_[\_^^¥¥¥Z[\_\_\_`URZ¥\_Y  
@HWI-EAS443:3:12:141:183#0/1  
CATGACCCTCGAGGAAATGTCACGAGACTGGTTCATGCTC  
+HWI-EAS443:3:12:141:183#0/1  
`Taa^aabUba\_S]^a^Y^Z`\_\_\_NV`\_Qa`S¥^UZY\_V\_  
@HWI-EAS443:3:14:301:364#0/1  
GCATGAGCATGAACCAGTCTCGTGACATTTCCCTCGAGGGT  
+HWI-EAS443:3:14:301:364#0/1  
a`[^a`aaaaaaa`a¥aaaaWa\_^\_U\_W¥\_¥\_\_\_[\_¥T  
@HWI-EAS443:3:14:917:1198#0/1  
ATGACCCTCGAGGAAATGTCACGAGACTGGTTCATGCTCA  
+HWI-EAS443:3:14:917:1198#0/1  
a`]Zaa`^a`^a][[^\_Z]^`a\_[XYV]\_\_ZV[T[\_\_\_TZWZ  
@HWI-EAS443:3:15:1493:15#0/1  
ATGAGCATGAACCAGTCTCGTGACATTTCCCTCGAGGGTCA  
+HWI-EAS443:3:15:1493:15#0/1  
U[aVaW\_¥a\_\_¥\_¥`a[\_`Y]TVVX¥ZR[ZS`X^aXFLX  
@HWI-EAS443:3:15:740:2012#0/1  
GGCATGAGCATGAACCAGTCTCGTGACATTTCCCTCGAGGG  
+HWI-EAS443:3:15:740:2012#0/1  
a]\_Y\_\_a]ab]^Y\_]X`ZVU^aaR`WP¥YXVPVSV[ZZ^^  
@HWI-EAS443:3:18:1647:284#0/1  
CATGACCCTCGAGGAAATGTCACGAGACTGGTTCATGCTC  
+HWI-EAS443:3:18:1647:284#0/1  
abbbabaaaababbaaa`[^\_\_`\_\_¥\_`\_aT\_Y¥\_¥WYT

@HWI-EAS443:3:20:1288:877#0/1  
GGCATGAGCATGAACCAGTCTCGTGACATTTCCCTCGAGGG  
+HWI-EAS443:3:20:1288:877#0/1  
aaX`aaaaaa`a`^Xb\_``]a^`V¥`a^^]¥`\_¥`¥¥  
@HWI-EAS443:3:21:1114:590#0/1  
CATGACCCTCGAGGAAATGTCACGAGACTGGTTCATGCTC  
+HWI-EAS443:3:21:1114:590#0/1  
aZaaaab\_a`WQ^a[`^a[`^aV`Xa\_¥`\_a^^V¥]NZ^V  
@HWI-EAS443:3:22:451:1910#0/1  
ATGAACCAGTCTCGTGACATTTCCCTCGAGGGTCATGTCAG  
+HWI-EAS443:3:22:451:1910#0/1  
aa`Ya`]]][X`a\_U¥¥a`¥\_¥a`¥ZTT\_ZUMRU[¥UZRZ  
@HWI-EAS443:3:22:888:585#0/1  
GCATGAACCAGTCTCGTGACATTTCCCTCGAGGGTCATGTC  
+HWI-EAS443:3:22:888:585#0/1  
a]XYR\_¥TXU\_[¥U`\_R^ZPT¥\_¥VQNNRX]¥WLMQXRFN  
@HWI-EAS443:3:23:634:762#0/1  
CTCGAGGAAATGTCACGAGACTGGTTCATGCTCATGCCTA  
+HWI-EAS443:3:23:634:762#0/1  
aaa`^`aaaaaa\_aaaa`````a\_^``\_`\_`\_`¥^^\_Y^^  
@HWI-EAS443:3:24:1445:879#0/1  
GAAATGTCACGAGACTGGTTCATGCTCATGCCTAGGCAAAA  
+HWI-EAS443:3:24:1445:879#0/1  
]`N[ba`a`aa[^b¥S\_\_aa`\_aabaab[SbaSb`aa[  
@HWI-EAS443:3:25:1147:564#0/1  
CATGACCCTCGAGGAAATGTCACGAGACTGGTTCATGCTC  
+HWI-EAS443:3:25:1147:564#0/1  
ab`b`babbbbabbbbab`bbba\_bbYa`aa\_U¥\_\_  
@HWI-EAS443:3:25:1346:1751#0/1  
CATGAACCAGTCTCGTGACATTTCCCTCGAGGGTCATGTCA  
+HWI-EAS443:3:25:1346:1751#0/1  
abbabbb]bbbabaabbb`bbbbaab`bbbbbaa`bb¥]T  
@HWI-EAS443:3:26:179:529#0/1  
CATGACCCTCGAGGAAATGTCACGAGACTGGTTCATGCTC  
+HWI-EAS443:3:26:179:529#0/1  
abbabbbbabab`a`bZb`a`b`baaa`\_`\_a^aaa^aaab  
@HWI-EAS443:3:26:571:1191#0/1  
GCATGAACCAGTCTCGTGACATTTCCCTCGAGGGTCATGTC  
+HWI-EAS443:3:26:571:1191#0/1  
¥bbbabbbbbb`\_abbb]a`aa^aa`a`a]``\_`Ua`\_]W\_  
@HWI-EAS443:3:26:790:777#0/1  
GGCATGAGCATGAACCAGTCTCGTGACATTTCCCTCGAGGG  
+HWI-EAS443:3:26:790:777#0/1  
]¥aWab`[a`¥bab`W[\_a`aab`aaaabaa\_aa`^`aZ]  
@HWI-EAS443:3:27:1397:1111#0/1  
CTAGGCATGAGCATGAACCAGTCTCGTGACATTTCCCTCGA  
+HWI-EAS443:3:27:1397:1111#0/1  
¥`bb`bbbbbbbbbbb`\_a]`\_`bbaa`Q`bbab[b[ba  
@HWI-EAS443:3:27:436:548#0/1  
GACATGACCCTCGAGGAAATGTCACGAGACTGGTTCATGC

+HWI-EAS443:3:27:436:548#0/1  
aaabab^b`baaaSa`Hbaa`¥a`a`aa`\_a`aW\_`^` ]\_  
@HWI-EAS443:3:27:461:296#0/1  
GGCATGAGCATGAACCAGTCTCGTGACATTTCCCTCGAGGG  
+HWI-EAS443:3:27:461:296#0/1  
`ba`aba`aaaaaaaa\_baa`¥`\_\_\_\_\_`^`\_\_aa`\_P^  
@HWI-EAS443:3:28:1709:1478#0/1  
ATGAGCATGAACCAGTCTCGTGACATTTCCCTCGAGGGTCA  
+HWI-EAS443:3:28:1709:1478#0/1  
aN\_abb]bbbb`[^YaSb\_baaZV¥a\_aSZ¥GaX`a`GQ¥  
@HWI-EAS443:3:2:164:1564#0/1  
GCATGAGCATGAACCAGTCTCGTGACATTTCCCTCGAGGGT  
+HWI-EAS443:3:2:164:1564#0/1  
`ab``]aaaaab`aa`¥baZ`\_¥`aa`\_\_[\_¥\_\_]\_\_`U  
@HWI-EAS443:3:2:224:40#0/1  
ATGAGCATGAACCAGTCTCGTGACATTTCCCTCGAGGGTCA  
+HWI-EAS443:3:2:224:40#0/1  
aaaaa\_a`aaa`\_a^a^[a\_a¥aYW^^^W^TW¥\_Ua^¥WTY  
@HWI-EAS443:3:30:1613:1734#0/1  
CATGACCCTCGAGGAAATGTCACGAGACTGGTTCATGCTC  
+HWI-EAS443:3:30:1613:1734#0/1  
a`a\_]`aa`Z\_``aaaa`WXYaV[``^K¥`^U`\_\_\_ZLY\_  
@HWI-EAS443:3:30:16:1772#0/1  
TGAGCATGAACCAGTCTCGTGACATTTCCCTCGAGGGTCAT  
+HWI-EAS443:3:30:16:1772#0/1  
``^aaaaaa`aa[`baa\_\_a`a`\_`a`\_`^YOVZW[^  
@HWI-EAS443:3:31:693:631#0/1  
GCATGAGCATGAACCAGTCTCGTGACATTTCCCTCGAGGGT  
+HWI-EAS443:3:31:693:631#0/1  
aaa\_aa`aaaa`a``]`¥a`\_`V\_[a¥\_¥^\_W¥¥\_V[V^V  
@HWI-EAS443:3:34:391:876#0/1  
GCATGAACCAGTCTCGTGACATTTCCCTCGAGGGTCATGTC  
+HWI-EAS443:3:34:391:876#0/1  
a`aa\_¥^`\_]\_X[[aSDVMJNSGS\_ZH^[TS¥TURWPBBB  
@HWI-EAS443:3:34:434:530#0/1  
TGAGCATGAACCAGTCTCGTGACATTTCCCTCGAGGGTCAT  
+HWI-EAS443:3:34:434:530#0/1  
a`^a^a\_aZaabb]aa\_aJ^bb]Xaa`\_VaZXa\_aW^V]  
@HWI-EAS443:3:35:395:1703#0/1  
GACATGACCCTCGAGGAAATGTCACGAGACTGGTTCATGC  
+HWI-EAS443:3:35:395:1703#0/1  
¥[ab[¥Zbbbaa]a)`¥bY]b[abaab]`baa\_Y^ba^L`  
@HWI-EAS443:3:36:572:270#0/1  
TGAGCATGAACCAGTCTCGTGACATTTCCCTCGAGGGTCAT  
+HWI-EAS443:3:36:572:270#0/1  
a``bbaab```[ba`a^aa`a`WQZ\_¥¥a\_a[Ra[YLYZ\_  
@HWI-EAS443:3:37:1210:513#0/1  
TGAGCATGAACCAGTCTCGTGACATTTCCCTCGAGGGTCAT  
+HWI-EAS443:3:37:1210:513#0/1  
aba]]aab^a\_`aaYaaaa[`¥^\_`^`VaTa\_V]^ZR[Z^



@HWI-EAS443:3:43:1777:962#0/1  
TGACCCTCGAGGAAATGTCACGAGACTGGTTCATGCTCAT  
+HWI-EAS443:3:43:1777:962#0/1  
XVU^OZ[¥]a`\_RW^a¥NM¥0]`¥¥a\_`ZNZKHXLFNP[L  
@HWI-EAS443:3:46:1294:368#0/1  
GGCATGAGCATGAACCAGTCTCGTGACATTTCCCTCGAGGG  
+HWI-EAS443:3:46:1294:368#0/1  
aa\_^\_a¥a^`aa^\_U\_\_a¥¥\_¥`U\_WW¥^Y¥UU¥W¥WW¥W  
@HWI-EAS443:3:47:627:967#0/1  
GCATGAACCAGTCTCGTGACATTTCCCTCGAGGGTCATGTC  
+HWI-EAS443:3:47:627:967#0/1  
]HQ[ab\_HZ[ba[YZ¥L\_¥Y^QYVT]¥[XDSXRPRZVQRJ  
@HWI-EAS443:3:48:203:1025#0/1  
GCATGAACCAGTCTCGTGACATTTCCCTCGAGGGTCATGTC  
+HWI-EAS443:3:48:203:1025#0/1  
abababbbbabababaa`aabaa`babaa`aW\_`ba\_\_  
@HWI-EAS443:3:49:1767:297#0/1  
GCATGAACCAGTCTCGTGACATTTCCCTCGAGGGTCATGTC  
+HWI-EAS443:3:49:1767:297#0/1  
`ba`a\_b\_]\_^\_b`Y^]Z\_bb¥XWX]\_]X[S^M[XYN  
@HWI-EAS443:3:50:109:685#0/1  
TAGGCATGAGCATGAACCAGTCTCGTGACATTTCCCTCGAG  
+HWI-EAS443:3:50:109:685#0/1  
abbbbababaaababbaaaba`baa[aaaaa`[Xaaa[b  
@HWI-EAS443:3:50:1576:142#0/1  
ATGAGCATGAACCAGTCTCGTGACATTTCCCTCGAGGGTCA  
+HWI-EAS443:3:50:1576:142#0/1  
^^\_I\_WVaa[a\_¥^[W\_a`aY\_]aba]]^a^^I[aXFOZ  
@HWI-EAS443:3:52:1426:1127#0/1  
GCATGAACCAGTCTCGTGACATTTCCCTCGAGGGTCATGTC  
+HWI-EAS443:3:52:1426:1127#0/1  
VH]aa]a]a¥aRa\_]aZbRQR¥`VP[NT^YSS[RTSX\_WN  
@HWI-EAS443:3:55:282:813#0/1  
AGCATGAACCAGTCTCGTGACATTTCCCTCGAGGGTCATGT  
+HWI-EAS443:3:55:282:813#0/1  
`aba\_Y^`a`a\_ababaaV]``^\_\_aaa\_a\_`S]\_\_\_Y  
@HWI-EAS443:3:55:335:2031#0/1  
GAGGAAATGTCACGAGACTGGTTCATGCTCATGCCTAGGC  
+HWI-EAS443:3:55:335:2031#0/1  
^aa\_`b`aaabaaa`aabaaa\_aaaaaaaa\_a`\_[^XX`  
@HWI-EAS443:3:57:1001:1186#0/1  
GCATGAACCAGTCTCGTGACATTTCCCTCGAGGGTCATGTC  
+HWI-EAS443:3:57:1001:1186#0/1  
^\_\_b\_^aab`aab`\_\_\_a]`aaa``]`]`a`aaV¥^`a^^  
@HWI-EAS443:3:59:291:1966#0/1  
AGCATGAACCAGTCTCGTGACATTTCCCTCGAGGGTCATGT  
+HWI-EAS443:3:59:291:1966#0/1  
a^^aa^^a`aa\_`aaa¥\_a¥\_``\_`a^\_[SSZKRWWZMU  
@HWI-EAS443:3:59:714:1041#0/1  
CCCTCGAGGAAATGTCACGAGACTGGTTCATGCTCATGCC

+HWI-EAS443:3:59:714:1041#0/1  
abaaaaabbababababab`a\_baaa¥aaaa]^a\_V¥a\_W  
@HWI-EAS443:3:5:423:632#0/1  
GGCATGAGCATGAACCAGTCTCGTGACATTTCCCTCGAGGG  
+HWI-EAS443:3:5:423:632#0/1  
a`\_¥`a^a`\_a`NGX`S\_\_¥YW^SV\_VVVSYPSSBBBB  
@HWI-EAS443:3:60:1750:1786#0/1  
GAGGAAATGTCACGAGACTGGTTCATGCTCATGCCTAGGC  
+HWI-EAS443:3:60:1750:1786#0/1  
aba``bbb\_a`aa`aabaa\_aKR¥TUS]YTRV]ZNYUN  
@HWI-EAS443:3:62:401:634#0/1  
ATGAACCAGTCTCGTGACATTTCCCTCGAGGGTCATGTCAG  
+HWI-EAS443:3:62:401:634#0/1  
aaaaaaaa`]aaaa¥a^\_\_\_^`\_`¥^[W\_\_\_W^¥¥\_W^SV  
@HWI-EAS443:3:63:1006:688#0/1  
TGACCCTCGAGGAAATGTCACGAGACTGGTTCATGCTCAT  
+HWI-EAS443:3:63:1006:688#0/1  
`]`bbaba^a\_X`a^]a\_`aaaa`a`[¥]`a\_¥^\_\_`  
@HWI-EAS443:3:64:133:1315#0/1  
CATGAACCAGTCTCGTGACATTTCCCTCGAGGGTCATGTCA  
+HWI-EAS443:3:64:133:1315#0/1  
aaa\_aa\_aaaW`\_\_^W^\_Z^\_\_Z^\_]QQQRNWYTSWT  
@HWI-EAS443:3:64:1461:1011#0/1  
GGCATGAGCATGAACCAGTCTCGTGACATTTCCCTCGAGGG  
+HWI-EAS443:3:64:1461:1011#0/1  
^bbabbbaabbbbaaaba^bab¥a`\_aaa\_aaa\_a[a`a  
@HWI-EAS443:3:65:1562:354#0/1  
TGAGCATGAACCAGTCTCGTGACATTTCCCTCGAGGGTCAT  
+HWI-EAS443:3:65:1562:354#0/1  
a``a]^ba`aV`aa^)``aZ^[UY¥[Y[^¥U^Y\_[]WWY^  
@HWI-EAS443:3:66:1667:1789#0/1  
GACATGACCCTCGAGGAAATGTCACGAGACTGGTTCATGC  
+HWI-EAS443:3:66:1667:1789#0/1  
ab\_aaaaaaaaaaa^aa\_aa^aU``^aaa\_U¥a`X^V^]]W  
@HWI-EAS443:3:67:846:616#0/1  
ATGAACCAGTCTCGTGACATTTCCCTCGAGGGTCATGTCAG  
+HWI-EAS443:3:67:846:616#0/1  
YU\_OT\_\_Y[FWVa`X¥^\_\_Q]]V^`ZZ\_\_T\_VFSNRYPXB  
@HWI-EAS443:3:69:781:400#0/1  
TGAGCATGAACCAGTCTCGTGACATTTCCCTCGAGGGTCAT  
+HWI-EAS443:3:69:781:400#0/1  
abababbbabbaab`abab\_aaaaaaaaaaa`aaaaaZ\_aa  
@HWI-EAS443:3:71:615:1862#0/1  
TGAGCATGAACCAGTCTCGTGACATTTCCCTCGAGGGTCAT  
+HWI-EAS443:3:71:615:1862#0/1  
U``Wbb\_T`]`ba]`a\_\_]]^S^XUTGTR^aZ`KHUaTU  
@HWI-EAS443:3:73:624:648#0/1  
CATGAACCAGTCTCGTGACATTTCCCTCGAGGGTCATGTCA  
+HWI-EAS443:3:73:624:648#0/1  
aba``aab\_]`]a\_Z¥L`aaabbaba`b\_\_[\_aa`a]aa

@HWI-EAS443:3:74:1608:1412#0/1  
GGCATGAGCATGAACCAGTCTCGTGACATTTCCCTCGAGGG  
+HWI-EAS443:3:74:1608:1412#0/1  
\_\_Q¥[`aWaa\_WR^¥JZ`aaa0XYQPZPa`b[U^OVX¥U`  
@HWI-EAS443:3:75:198:784#0/1  
CCTAGGCATGAGCATGAACCAGTCTCGTGACATTTCCCTCG  
+HWI-EAS443:3:75:198:784#0/1  
aba`bbbbabaaabbbbbbb]baabba^a`aaaa\_a``aa  
@HWI-EAS443:3:75:76:47#0/1  
TTTGCCTAGGCATGAGCATGAACCAGTCTCGTGACATTTCC  
+HWI-EAS443:3:75:76:47#0/1  
`^`baaaabaaa`a\_aaa``[]\_^^`ZZ`^^Z^[WTZ¥XV  
@HWI-EAS443:3:76:270:1518#0/1  
TGACCCTCGAGGAAATGTCACGAGACTGGTTCATGCTCAT  
+HWI-EAS443:3:76:270:1518#0/1  
`\_aabbabb`a``\_`aa^]Za]Z]W\_``]aaa^[`^`¥  
@HWI-EAS443:3:77:873:1027#0/1  
GACATGACCCTCGAGGAAATGTCACGAGACTGGTTCATGC  
+HWI-EAS443:3:77:873:1027#0/1  
aabbabbbbabbaabbabbab`T`aaa\_aaa¥Xa[]a¥  
@HWI-EAS443:3:78:196:1230#0/1  
GCATGAACCAGTCTCGTGACATTTCCCTCGAGGGTCATGTC  
+HWI-EAS443:3:78:196:1230#0/1  
aaaaaaaaaaaa]aaaa¥`\_```]\_^`¥`\_]\_XT^VZZ^US¥  
@HWI-EAS443:3:7:1391:823#0/1  
GGCATGAGCATGAACCAGTCTCGTGACATTTCCCTCGAGGG  
+HWI-EAS443:3:7:1391:823#0/1  
\_b`bba`¥X^b\_ba[[aa`\_b[a[`VEZa\_aZS`Ta\_[Za  
@HWI-EAS443:3:80:1299:1061#0/1  
GACATGACCCTCGAGGAAATGTCACGAGACTGGTTCATGC  
+HWI-EAS443:3:80:1299:1061#0/1  
aaaaab`a`X`]a^`¥[aa\_]`^aM¥X`\_Y]¥XY`\_]QP  
@HWI-EAS443:3:80:281:850#0/1  
ATGAGCATGAACCAGTCTCGTGACATTTCCCTCGAGGGTCA  
+HWI-EAS443:3:80:281:850#0/1  
]\_b\_a\_\_¥`W`\_`\_a¥aa\_\_[aZ`¥¥¥`X[Z\_]SYa\_U\_V  
@HWI-EAS443:3:80:698:434#0/1  
GCCTAGGCATGAGCATGAACCAGTCTCGTGACATTTCCCTC  
+HWI-EAS443:3:80:698:434#0/1  
`baaabbbbaabaabbbbaaab\_\_aaa`b\_\_aaaa^a`¥  
@HWI-EAS443:3:83:794:1297#0/1  
CATGACCCTCGAGGAAATGTCACGAGACTGGTTCATGCTC  
+HWI-EAS443:3:83:794:1297#0/1  
aaTQ]bb^¥XT\_[ZHT^W]YUXU]M]UFR`aXBBBBBBBB  
@HWI-EAS443:3:85:1017:1207#0/1  
AAATGTCACGAGACTGGTTCATGCTCATGCCTAGGCAAAA  
+HWI-EAS443:3:85:1017:1207#0/1  
T^`¥aa`¥`\_a]¥]a`aPaXSa^\_WX]XVT\_W^RR¥Q\_]W  
@HWI-EAS443:3:85:876:1950#0/1  
CATGAACCAGTCTCGTGACATTTCCCTCGAGGGTCATGTC



@HWI-EAS443:3:51:1077:1029#0/1  
ACCGGGCTCTACTAGTGTCCAGTAATAGTTCATTCTCCCT  
+HWI-EAS443:3:51:1077:1029#0/1  
`Y]YZZI]^\_YTRY]`QQUWZXS][W\_]^[NVOROW  
@HWI-EAS443:3:30:1252:1500#0/1  
GCTATAAACACCAGCCTCCCATTTCAGAATATACATCNGA  
+HWI-EAS443:3:30:1252:1500#0/1  
aabXa^aaa[[]`\_U`b`]P]a]JY\_F¥]\_XaW\_SHDTY  
@HWI-EAS443:3:24:475:1483#0/1  
TAACATTGGAAGCAACTGGAAATCTAGTGGTACCAAGATA  
+HWI-EAS443:3:24:475:1483#0/1  
¥bb`baabbbbaabaaabbYaa`abaaa^a`Zaa^J`\_`\_a  
@HWI-EAS443:3:5:209:906#0/1  
GTGCTATAAACACCAGCCTCCCATTTCAGAATATACATCC  
+HWI-EAS443:3:5:209:906#0/1  
a^aa\_\_\_b`^`^`[¥\_`^`W^^\_]XX`¥\_`^`\_]a\_]B  
@HWI-EAS443:3:49:1301:743#0/1  
ACGATTCAAAGTCTTTTCATTTTCCAATAGAACCAACAGT  
+HWI-EAS443:3:49:1301:743#0/1  
aW^][][OS^¥S]\_^`\_`[X`^`YU\_S\_Y\_]W¥^¥[^OM  
@HWI-EAS443:3:7:689:1887#0/1  
TTGGGGTAAAGCTGGAATCAACAAGGATTTACCAGAGTTT  
+HWI-EAS443:3:7:689:1887#0/1  
^U\_b¥Y[aWW^ONLQ¥HOV\_PY`a`\_^aST¥0[\_`[BBBB  
@HWI-EAS443:3:11:299:342#0/1  
CTGGAATCAACAAGGATTTACCAGATTTTGGCGATGTATT  
+HWI-EAS443:3:11:299:342#0/1  
ab¥W¥Sa`[]`\_WZYXX¥XaaX\_b`^X\_aa\_aaaBBBBBB  
@HWI-EAS443:3:23:261:1181#0/1  
ATTTTGGCGATCTATTCAACTGTCACCAGTTCATTGGTAC  
+HWI-EAS443:3:23:261:1181#0/1  
aba``[b`aaa`\_^^\_WUW`QZ^HUXYZR^BBBBBBBB  
@HWI-EAS443:3:35:1776:52#0/1  
ATCGCCAAAATCTGGTAAATGCTTGTGATTCCAGCTTTA  
+HWI-EAS443:3:35:1776:52#0/1  
S`¥`^^`¥¥VY¥WYY[YWO]GS[ZZY¥SR[]T][XXW^VZ  
@HWI-EAS443:3:37:1780:685#0/1  
AATGAACTGGCGACAGTTGAATAGATCGCAAAAATCTGGT  
+HWI-EAS443:3:37:1780:685#0/1  
aba\_aa^`a`a`\_a]\_TZa\_a`\_W\_ZDT`[]`\_^Z\_TX  
@HWI-EAS443:3:38:887:695#0/1  
GGTAAAGCTGGAATCAACAAGGATTTCCCAGATTTTGGCG  
+HWI-EAS443:3:38:887:695#0/1  
a\_\_X]^`VXaZJRVb`^^N[baUR\_VSGWXX]Y`Z]]WUR  
@HWI-EAS443:3:47:241:691#0/1  
TGCCGAACTGTTGGTTCTATTGGAAAATTAAGAAGCTTTG  
+HWI-EAS443:3:47:241:691#0/1  
`baaaaa`ab`aa`\_a`abaa`^X``aaaa`a`[Xa\_\_\_\_  
@HWI-EAS443:3:53:1471:84#0/1  
GATCGCCAAAATCTGGTAAATCCATGTTGATTCCAGCTTT

+HWI-EAS443:3:53:1471:84#0/1  
a`a¥ba\_aaaa\_\_\_\_aa\_`a`\_]`Z`aW^¥U^YNWX^T\_`]  
@HWI-EAS443:3:64:121:1103#0/1  
GGGGTAAAGCTGGAATCAACAAGGATTTACCAGCTTTTGG  
+HWI-EAS443:3:64:121:1103#0/1  
^a^]H¥UZZaV\_XRN[\_OX`\_¥¥Y]YR\_[\_¥PVH^]V¥`V  
@HWI-EAS443:3:76:237:422#0/1  
GCTGGAATCAACAAGGATTTACCAGATTTTGGCGCTCTAT  
+HWI-EAS443:3:76:237:422#0/1  
aXPW¥OV]XT]^[\_VDTOP]UPUBBBBBBBBBBBBBBBB  
@HWI-EAS443:3:82:937:1092#0/1  
ACAAGGATTTACCAGATTTTGGCGATCTATTCAACCGTCG  
+HWI-EAS443:3:82:937:1092#0/1  
\_b\_OWXL`\_b\_YU]VS^ab¥WZa`^`aBBBBBBBBBBBBB  
@HWI-EAS443:3:10:360:628#0/1  
CAGTACCAATGNACTGGCGACAGTTGAATAGATCGCCAAA  
+HWI-EAS443:3:10:360:628#0/1  
abb`b`\_aaa]DZbaabbbbaa^b\_aaa`\_aaa]`aaaaaa  
@HWI-EAS443:3:23:1138:1404#0/1  
TAAAGCTGGAATCAACAAGGATTTACCAGATNTTGGCGAT  
+HWI-EAS443:3:23:1138:1404#0/1  
a[QQXa\_aaQ¥`[\_P[¥Ybb^`YYYFLM`YZDY^OBBBBB  
@HWI-EAS443:3:54:1447:1436#0/1  
GGGTANAGCTGGAATCAACAAGGATTTACCAGATTTTGGC  
+HWI-EAS443:3:54:1447:1436#0/1  
]baPWDZbWaZ]`\_Y]`aSa\_abYa\_aa^]Ja\_a\_[Wa[P  
@HWI-EAS443:3:55:306:1925#0/1  
GGGTAAANCTGGAATCAACAAGGATTTACCAGATTTTGGC  
+HWI-EAS443:3:55:306:1925#0/1  
¥a^Z\_aYDW`bb``ba\_Z^baX¥aaa`^`aaaa`\_aa\_a\_  
@HWI-EAS443:3:56:973:1355#0/1  
AAATCTGGTAAATCCTTGTTGATTCCAGCTTTACCCNATC  
+HWI-EAS443:3:56:973:1355#0/1  
aa]``\_a`Taaa`\_\_a`a^`a`\_\_\_^^`\_\_`\_\_YWKDV^]  
@HWI-EAS443:3:26:1096:433#0/1  
CCTGCTCATTTTGGTGGATAACCGTACCATCCATCTTC  
+HWI-EAS443:3:26:1096:433#0/1  
a`a^Y[^\_a`ba]\_Z^[[b[¥ab[^[\_]¥[[Y^¥TT^X  
@HWI-EAS443:3:50:510:1018#0/1  
GGGGGGTAAAGCTGGAATCAACAAGGATTTACCAGATTTT  
+HWI-EAS443:3:50:510:1018#0/1  
`bb\_]bZY^V]Z`a^\_XYX`[MQQ]¥\_aa[^TX]aYX[^¥  
@HWI-EAS443:3:74:660:1442#0/1  
CAGGGGTAAAGCTGGAATCAACAAGGATTTACCAGATTTT  
+HWI-EAS443:3:74:660:1442#0/1  
aabaaaV^\_W]b`aaa]aa`baaaaa`\_a`a]a]a`^`\_\_`  
@HWI-EAS443:3:23:567:937#0/1  
ATGGACTTACAATGCCGAAGTGGTTCTATTGGAAAAT  
+HWI-EAS443:3:23:567:937#0/1  
aabaaaaaaaaabaaaaaaaa^aaaa[\_a`^[\_a\_aa``[[\_`[

@HWI-EAS443:3:34:479:500#0/1  
AGATTTTGGCGATCTATTCAACTGTCGCCAGTTCATTGGG  
+HWI-EAS443:3:34:479:500#0/1  
^aY^\_U]¥abba]`ab¥S`TJV¥`Y`]`^RPZ`OPOUBBB  
@HWI-EAS443:3:3:842:156#0/1  
TAGCTGGAATCAACAAGGATTTACCAGATTTTGGCGATCT  
+HWI-EAS443:3:3:842:156#0/1  
aaba\_aa\_``S\_]Z`[^a\_\_`^\_aW^aW¥]^]^ZX[ZWOB  
@HWI-EAS443:3:40:708:219#0/1  
TGATGGGGTAAAGCTGGAATCAACAAGGATTTACCAGATT  
+HWI-EAS443:3:40:708:219#0/1  
aaaaaaaa]aa`aa\_a\_`a\_^\_\_a`\_Z\_M^`^\_\_\_\_[\_\_X^  
@HWI-EAS443:3:53:159:605#0/1  
GGATGGGGTAAAGCTGGAATCAACAAGGATTTACCAGATT  
+HWI-EAS443:3:53:159:605#0/1  
aa^aaaa^R^`¥^`¥`\_]\_[ZW]\_V\_ZZ]]SRVUWZM[Z  
@HWI-EAS443:3:70:893:112#0/1  
CGGGGTAAAGCTGGAATCAACAAGGATTTACCAGATTTTG  
+HWI-EAS443:3:70:893:112#0/1  
abbbbabaababbbaaa\_a`\_abaaaa`\_]b]aa`a`  
@HWI-EAS443:3:81:1062:497#0/1  
AGGGGTAAAGCTGGAATCAACAAGGATTTACCAGATTTTG  
+HWI-EAS443:3:81:1062:497#0/1  
^VY`¥¥^TP]YZ^¥UNX¥RWX^\_Z^]]¥S^¥TYTYXY[`a  
@HWI-EAS443:3:86:1443:239#0/1  
CAGCTGGAATCAACAAGGATTTACCAGATTTTGGCGATCT  
+HWI-EAS443:3:86:1443:239#0/1  
aY`]]`aS`\_YaUH][bbaUa\_XVNOa\_^^U[`\_G]BBBB  
@HWI-EAS443:3:8:1792:1811#0/1  
CGGGGTAAAGCTGGAATCAACAAGGATTTACCAGATTTTG  
+HWI-EAS443:3:8:1792:1811#0/1  
`bbb]Y]abbaabbbaa\_b[T]bba¥Y¥b^RY[^[^¥abba  
@HWI-EAS443:3:95:1189:1011#0/1  
GGGGTAAAGCTGGAATCAACAAGGATTTACCAGATTTTG  
+HWI-EAS443:3:95:1189:1011#0/1  
¥bab` `baaba`bbaaa\_¥¥Wbbabababaa¥ab`aa`\_a  
@HWI-EAS443:3:100:1571:267#0/1  
TAAAGCTGGAATCAACAAGGATTTACCAGATTTTGGCGAT  
+HWI-EAS443:3:100:1571:267#0/1  
a¥V^a`\_a\_a¥[[¥][^¥a^`\_\_aaPPW]Ua^a]YWQ]]  
@HWI-EAS443:3:100:91:502#0/1  
GGGTAAAGCTGGAATCAACAAGGATTTACCAGATTTTGGC  
+HWI-EAS443:3:100:91:502#0/1  
^`b\_aUR^`baa]a\_``aaaabbaaba\_RW]a[a\_\_\_\_]`\_  
@HWI-EAS443:3:10:786:1924#0/1  
GGGTAAAGCTGGAATCAACAAGGATTTACCAGATTTTGGC  
+HWI-EAS443:3:10:786:1924#0/1  
a¥\_W\_aX`NZVQW¥QT¥SV¥QNQ¥WWWGWSWUUSBBBBBB  
@HWI-EAS443:3:11:299:1499#0/1  
GATGGGGTAAAGCTGGAATCAACAAGGATTTACCAGATTT

+HWI-EAS443:3:11:299:1499#0/1  
`aab¥¥`¥ZH[aaa`aabb`a\_a^aa`\_]\_a^a\_\_`^¥  
@HWI-EAS443:3:12:1180:857#0/1  
CCCTGCTCATTTTGATGGTGATAACCGTACCATCCATCTA  
+HWI-EAS443:3:12:1180:857#0/1  
aa^`TQZ\_\_a`a]\_¥¥aaNa`¥VUSV[WWY¥WZ¥VVYWY¥  
@HWI-EAS443:3:12:482:679#0/1  
GAAATAGATGGGGTAAAGCTGGAATCAACAAGGATTTACC  
+HWI-EAS443:3:12:482:679#0/1  
\_Y^aZH\_¥abaaaaaaXabaaaab\_abab^`aaaa`a`\_  
@HWI-EAS443:3:13:1389:1097#0/1  
ATGGGGTAAAGCTGGAATCAACAAGGATTTACCAGATTTT  
+HWI-EAS443:3:13:1389:1097#0/1  
abbbbb`bb\_bab`ba`a`aaaa\_ba\_aaaaa`a^`a`\_  
@HWI-EAS443:3:13:1680:107#0/1  
CTGGAATCAACAAGGATTTACCAGATTTTGGCGATCTATT  
+HWI-EAS443:3:13:1680:107#0/1  
`bbbaaa`^a\_`b[`aaaa¥a\_a^aa``a][a^\_T\_X`a  
@HWI-EAS443:3:14:1287:609#0/1  
GCTGGAATCAACAAGGATTTACCAGATTTTGGCGATCTAT  
+HWI-EAS443:3:14:1287:609#0/1  
aabbaaaX]aaaa\_aa\_a^aa`\_\_aRaa`X`\_aZRNU]^  
@HWI-EAS443:3:15:401:1965#0/1  
AGATGGGGTAAAGCTGGAATCAACAAGGATTTACCAGATT  
+HWI-EAS443:3:15:401:1965#0/1  
`aaaaaa^]a)`abaaT^aaaaaaaaaaa\_\_a`\_a`aaXY^  
@HWI-EAS443:3:16:1558:1869#0/1  
AAAGCTGGAATCAACAAGGATTTACCAGATTTTGGCGATC  
+HWI-EAS443:3:16:1558:1869#0/1  
¥SYaa¥aa\_a`\_a`Y`a`aa¥^¥WXO\_a¥`¥\_]YW¥^ZZW  
@HWI-EAS443:3:16:762:1357#0/1  
GCTGGAATCAACAAGGATTTACCAGATTTTGGCGATCTAT  
+HWI-EAS443:3:16:762:1357#0/1  
abaaa[b\_b`bZ]¥Y¥¥a)`[UY\_^[S^]\_\_¥\_¥XORPB  
@HWI-EAS443:3:18:1046:216#0/1  
GAAATAGATGGGGTAAAGCTGGAATCAACAAGGATTTACC  
+HWI-EAS443:3:18:1046:216#0/1  
aSu`ZaSaa]aaZ`^aa]`\_XZ[MYX^ZZ\_\_W]^ZS  
@HWI-EAS443:3:18:1255:1367#0/1  
GATGGGGTAAAGCTGGAATCAACAAGGATTTACCAGATTT  
+HWI-EAS443:3:18:1255:1367#0/1  
a¥`aabZ`\_Q\_``a`a\_\_\_\_\_a````\_a`^XV\_Z`^\_  
@HWI-EAS443:3:18:1289:771#0/1  
GAAATAGATGGGGTAAAGCTGGAATCAACAAGGATTTACC  
+HWI-EAS443:3:18:1289:771#0/1  
¥0[W^]¥^\_\_`\_]PZY[X[T`]^¥QZ\_^ZX¥\_[]U\_¥¥V  
@HWI-EAS443:3:18:612:843#0/1  
GGGTAAAGCTGGAATCAACAAGGATTTACCAGATTTTGGC  
+HWI-EAS443:3:18:612:843#0/1  
a¥U¥X```\_]\_^UW0`[aa\_^S\_a``]Z\_¥\_\_aZR\_]`^]¥^



@HWI-EAS443:3:18:939:1522#0/1  
AGATGGGGTAAAGCTGGAATCAACAAGGATTTACCAGATT  
+HWI-EAS443:3:18:939:1522#0/1  
\_VTTY\_b``\_`K`a\_^JaU]a\_[^TGYEMY`^TKQ\_dW^I  
@HWI-EAS443:3:1:1674:1273#0/1  
GATGGGGTAAAGCTGGAATCAACAAGGATTTACCAGATTT  
+HWI-EAS443:3:1:1674:1273#0/1  
a^`\_aa\_Z`]Z\_[[W\_^]^PV\_ZX\_]R]\_X]XXW\_BBBB  
@HWI-EAS443:3:1:1761:847#0/1  
GCTGGAATCAACAAGGATTTACCAGATTTTGGCGATCTAT  
+HWI-EAS443:3:1:1761:847#0/1  
a`a``PX^UW\_W\_\_\_\_\_Z`\_\_\_\_XV^aZ]YT`¥XW\_WZBBBB  
@HWI-EAS443:3:1:310:900#0/1  
GCTGGAATCAACAAGGATTTACCAGATTTTGGCGATCTAT  
+HWI-EAS443:3:1:310:900#0/1  
a\_a^a`b\_aaa`aaaa`aaa\_Za^\_a`¥FW\_]`\_BBBBB  
@HWI-EAS443:3:21:1659:1415#0/1  
CAAGGATTTACCAGATTTTGGCGATCTATTCAACTGTCGC  
+HWI-EAS443:3:21:1659:1415#0/1  
Q\_abbb\_bb`\_`aaaa`bbbKa`aaaaVbaaKU`baa``  
@HWI-EAS443:3:21:1716:962#0/1  
GGGTAAAGCTGGAATCAACAAGGATTTACCAGATTTTGGC  
+HWI-EAS443:3:21:1716:962#0/1  
a]ZP^\_`\_\_`\_]`¥^U^\_U]]^^Y\_^]XXW`Z]\_Z¥^]X  
@HWI-EAS443:3:21:329:1344#0/1  
AAGCTGGAATCAACAAGGATTTACCAGATTTTGGCGATCT  
+HWI-EAS443:3:21:329:1344#0/1  
`V[a`^^\_^\_aaa\_a`\_`\_a`\_`\_`\_`^`^`^]¥``^ZZX  
@HWI-EAS443:3:21:438:1069#0/1  
GATCGCCAAAATCTGGTAAATCCTTGTTGATTCCAGCTTT  
+HWI-EAS443:3:21:438:1069#0/1  
aaaa`ab\_¥]a\_aa\_¥^`aa`\_\_a\_a`^a^^`\_^`\_`^`\_  
@HWI-EAS443:3:22:1579:838#0/1  
ATCTGGTAAATCCTTGTTGATTCCAGCTTTACCCCATCTA  
+HWI-EAS443:3:22:1579:838#0/1  
aaa\_aa\_aa`a`\_aaa`a`aaa`^aa]a`\_`[Y]^`^`^`^`  
@HWI-EAS443:3:26:225:1628#0/1  
GGGTAAAGCTGGAATCAACAAGGATTTACCAGATTTTGGC  
+HWI-EAS443:3:26:225:1628#0/1  
a`[PUaY^]``\_a]aaZP]a`^Za¥¥\_`\_]P¥UV^VZ\_Wa  
@HWI-EAS443:3:26:275:423#0/1  
GTAAAGCTGGAATCAACAAGGATTTACCAGATTTTGGCGA  
+HWI-EAS443:3:26:275:423#0/1  
aaaaaaaa`a`a`a`^^``aa\_\_\_\_\_`\_[\_a]^`^^`^^`^`  
@HWI-EAS443:3:26:877:1012#0/1  
GAAATAGATGGGGTAAAGCTGGAATCAACAAGGATTTACC  
+HWI-EAS443:3:26:877:1012#0/1  
`\_`aa^b^bbb```\_baaaabaaa^`aaaa`a````\_`a¥^  
@HWI-EAS443:3:29:1486:48#0/1  
CTGGAATCAACAAGGATTTACCAGATTTTGGCGATCTATT



@HWI-EAS443:3:32:1172:421#0/1  
CTGGAATCAACAAGGATTTACCAGATTTTGGCGATCTATT  
+HWI-EAS443:3:32:1172:421#0/1  
aa^bbbbbab`baaabbaaa\_aaaaa]a\_aaZM[WZ¥  
@HWI-EAS443:3:32:1214:410#0/1  
TAGATCGCCAAAATCTGGTAAATCCTTGTTGATTCCAGCT  
+HWI-EAS443:3:32:1214:410#0/1  
aa`aa\_a`aaa`a^aa`^\_a]U`\_a^^aU`¥^S\_\_¥\_  
@HWI-EAS443:3:32:1740:578#0/1  
TAAAGCTGGAATCAACAAGGATTTACCAGATTTTGGCGAT  
+HWI-EAS443:3:32:1740:578#0/1  
a`a\_a\_\_aa]\_a]\_^]`\_¥Z`^^[Y[]^]\_^]^I\_a^  
@HWI-EAS443:3:33:352:1229#0/1  
AAGTTCTTTCAATTTCCAATAGAACCAACAGTTCGGCATT  
+HWI-EAS443:3:33:352:1229#0/1  
aaa¥aaaaaba\_aa`aab^][`aa`^`\_]XV¥]]\_^\_^  
@HWI-EAS443:3:33:424:773#0/1  
GTACCAATGAACTGGCGACAGTTGAATAGATCGCCAAAAT  
+HWI-EAS443:3:33:424:773#0/1  
aaab\_[a`^`\_aa`aaa]Sa\_aa]\_\_ZYa`Q\_]`\_a^  
@HWI-EAS443:3:34:345:1360#0/1  
GGGTAAAGCTGGAATCAACAAGGATTTACCAGATTTTGGC  
+HWI-EAS443:3:34:345:1360#0/1  
a`a]baaaba^\_aaaa\_R¥aaa\_\_a`aa\_a`^^^Z^^Z^  
@HWI-EAS443:3:35:426:301#0/1  
AAATCTGGTAAATCCTTGTTGATTCCAGCTTTACCCATC  
+HWI-EAS443:3:35:426:301#0/1  
[WUS]¥NFMXMTY]`^QR[O]^¥]MYZHUUZY^TGKV  
@HWI-EAS443:3:38:42:436#0/1  
GCTGGAATCAACAAGGATTTACCAGATTTTGGCGATCTAT  
+HWI-EAS443:3:38:42:436#0/1  
aa``\_¥[`¥X]\_\_`¥^`a^\_^[]`XX^^\_WBBBBBBBB  
@HWI-EAS443:3:39:1086:1388#0/1  
GGGGTAAAGCTGGAATCAACAAGGATTTACCAGATTTTGG  
+HWI-EAS443:3:39:1086:1388#0/1  
a^ba0L^)`[aab]P¥aaa`\_]`^^YU[Z`X]\_Q\_\_\_\_\_^V  
@HWI-EAS443:3:39:458:1692#0/1  
GGGTAAAGCTGGAATCAACAAGGATTTACCAGATTTTGGC  
+HWI-EAS443:3:39:458:1692#0/1  
`b¥Saabaaa`T\_a`b`a`\_`^J]\_\_`^a`aa\_]aa``\_^U  
@HWI-EAS443:3:3:520:1771#0/1  
AGATGGGGTAAAGCTGGAATCAACAAGGATTTACCAGATT  
+HWI-EAS443:3:3:520:1771#0/1  
aa^abbab^^aaa¥\_a`\_aa\_a\_\_a^a``a`\_a`^`YTP\_  
@HWI-EAS443:3:40:1198:1956#0/1  
GGGGTAAAGCTGGAATCAACAAGGATTTACCAGATTTTGG  
+HWI-EAS443:3:40:1198:1956#0/1  
aabaZbbaa`¥ab^aa\_\_a`aaa`^^^¥Y¥]`a\_\_`\_]\_¥  
@HWI-EAS443:3:40:638:1231#0/1  
GCTGGAATCAACAAGGATTTACCAGATTTTGGCGATCTAT

+HWI-EAS443:3:40:638:1231#0/1  
`\_a`SXR[a\_]`^a`\_]`^a`\_`¥\_\_\_YKOL\_]YNPJMVX]V  
@HWI-EAS443:3:42:1188:1299#0/1  
AATCAACAAGGATTTACCAGATTTTGGCGATCTATTCAAC  
+HWI-EAS443:3:42:1188:1299#0/1  
[aba[`aa^[a¥b\_\_\_aX`baaba¥\_]ZSZBBBBBBBBBB  
@HWI-EAS443:3:43:1083:217#0/1  
ATCAACAAGGATTTACCAGATTTTGGCGATCTATTCAACT  
+HWI-EAS443:3:43:1083:217#0/1  
aaab`^aaab^^\_aa\_\_^b^^\_a`\_a\_]\_W^Z^V]TUU^XX  
@HWI-EAS443:3:45:1696:216#0/1  
GATGGGTAAAGCTGGAATCAACAAGGATTTACCAGATTT  
+HWI-EAS443:3:45:1696:216#0/1  
WX`a`\_`W`VRUZVa[a\_ZXOVYRVP\_aa]YZ¥Q0¥a[aa`  
@HWI-EAS443:3:46:97:1164#0/1  
GAAATAGATGGGTAAAGCTGGAATCAACAAGGATTTACC  
+HWI-EAS443:3:46:97:1164#0/1  
`\_baa]`\_]\_aYb`WM`^aWaa^W\_\_[\_`a]^aT¥\_`^`U]^  
@HWI-EAS443:3:47:278:964#0/1  
GGGTAAAGCTGGAATCAACAAGGATTTACCAGATTTTGGC  
+HWI-EAS443:3:47:278:964#0/1  
aaa\_aaabaaaa`aa\_a\_a`\_a\_`^^`^\_\_\_a^`\_`\_`\_]\_  
@HWI-EAS443:3:48:420:155#0/1  
GGGTAAAGCTGGAATCAACAAGGATTTACCAGATTTTGG  
+HWI-EAS443:3:48:420:155#0/1  
a`\_¥Y`\_aa\_\_a`Z\_`¥\_\_Z^^`]V\_^^^`]Z]^ZWZ]YY  
@HWI-EAS443:3:48:947:684#0/1  
GAAATAGATGGGTAAAGCTGGAATCAACAAGGATTTACC  
+HWI-EAS443:3:48:947:684#0/1  
aaaaaaaaabbabb\_a`bbaab`aY`^aaaaa\_\_a`]]  
@HWI-EAS443:3:49:1058:327#0/1  
GGGTAAAGCTGGAATCAACAAGGATTTACCAGATTTTGGC  
+HWI-EAS443:3:49:1058:327#0/1  
aaaUa`b^aa`]\_`\_`^`[^]a^\_\_\_^YYYa[¥\_\_\_^\_Y  
@HWI-EAS443:3:49:1642:1193#0/1  
AATAGATGGGTAAAGCTGGAATCAACAAGGATTTACCAG  
+HWI-EAS443:3:49:1642:1193#0/1  
a`bab`bba]aab`\_`abb`a^^S`TIYa[^`a¥a¥QUWa  
@HWI-EAS443:3:49:608:396#0/1  
GAAATAGATGGGTAAAGCTGGAATCAACAAGGATTTACC  
+HWI-EAS443:3:49:608:396#0/1  
Z]\_aa`X\_\_^[¥`b\_VaZ]abbb¥^Ya]baab[\_ba^`]  
@HWI-EAS443:3:4:1238:984#0/1  
GGGTAAAGCTGGAATCAACAAGGATTTACCAGATTTTGG  
+HWI-EAS443:3:4:1238:984#0/1  
aaa\_S\_a]a^`a^S^`^`\_]`^]`a]\_`\_`^W[^`Z]^`\_]\_  
@HWI-EAS443:3:50:1497:268#0/1  
GGGTAAAGCTGGAATCAACAAGGATTTACCAGATTTTGGC  
+HWI-EAS443:3:50:1497:268#0/1  
^XaU`babab`ba`abb^X^aaa\_aa\_a¥STUXaaaaa[]

@HWI-EAS443:3:51:102:1030#0/1  
AGTTGAATAGATCGCCAAAATCTGGTAAATCCTTGTGGAT  
+HWI-EAS443:3:51:102:1030#0/1  
^babbaababbbbaa`bbaab`a`^aaa^a\_abaa^Z`aa  
@HWI-EAS443:3:51:80:557#0/1  
ATGGGGTAAAGCTGGAATCAACAAGGATTTACCAGATTTT  
+HWI-EAS443:3:51:80:557#0/1  
abbab\_]b`R`abbaaaaaaaaaaaaa`aaaa`\_ab\_a`aa  
@HWI-EAS443:3:52:1767:868#0/1  
ATGGGGTAAAGCTGGAATCAACAAGGATTTACCAGATTTT  
+HWI-EAS443:3:52:1767:868#0/1  
aba`X`aa`ba`a]a`aaa\_\_`\_\_\_`a`¥X[\_`^\_\_  
@HWI-EAS443:3:54:478:1482#0/1  
AAATCTGGTAAATCCTTGTGGATTCCAGCTTTACCCCATC  
+HWI-EAS443:3:54:478:1482#0/1  
a\_aaa^T^]\_aab]Zaa^abba\_a^\_Y]]XXNRT[QZS  
@HWI-EAS443:3:54:691:1285#0/1  
CTGGAATCAACAAGGATTTACCAGATTTTGGCGATCTATT  
+HWI-EAS443:3:54:691:1285#0/1  
`[ba`a`baaa`¥¥`¥`bab`\_aa\_aaa\_]\_`\_`\_U¥[`^  
@HWI-EAS443:3:55:1114:931#0/1  
GGGTAAAGCTGGAATCAACAAGGATTTACCAGATTTTGGC  
+HWI-EAS443:3:55:1114:931#0/1  
abbaabaa]abbaaab`b\_aabaaaaaaaa`ab`a\_aaaa\_  
@HWI-EAS443:3:55:1689:999#0/1  
ATCTGGTAAATCCTTGTGGATTCCAGCTTTACCCCATCTA  
+HWI-EAS443:3:55:1689:999#0/1  
ab^aaabaaab`abb`\_ba^aa`a[aWaa^^UWRGP]a^  
@HWI-EAS443:3:56:1398:950#0/1  
ATCTGGTAAATCCTTGTGGATTCCAGCTTTACCCCATCTA  
+HWI-EAS443:3:56:1398:950#0/1  
ab\_baba\_aab\_\_bab`ab\_ba`¥`\_Wbaaa\_]¥\_aYa\_  
@HWI-EAS443:3:56:203:90#0/1  
GGTAAAGCTGGAATCAACAAGGATTTACCAGATTTTGGCG  
+HWI-EAS443:3:56:203:90#0/1  
aa\_aa\_b\_aaa]\_\_\_Z\_\_`^a`\_\_\_\_\_]^]ZaZ\_\_\_^\_]\_^\_  
@HWI-EAS443:3:56:216:2039#0/1  
AAATCTGGTAAATCCTTGTGGATTCCAGCTTTACCCCATC  
+HWI-EAS443:3:56:216:2039#0/1  
aaa`a`\_a`^`]a\_\_a[\_\_\_]\_\_\_\_]\_¥¥a`\_\_^ZYX]\_¥  
@HWI-EAS443:3:56:476:609#0/1  
CCCTGCTCATTTTGTGGTATAACCGTACCATCCATCTA  
+HWI-EAS443:3:56:476:609#0/1  
aa]`b\_V^VZ¥b`\_] [Y\_^]¥X^^]]`WPU`VXX^¥a^  
@HWI-EAS443:3:56:516:363#0/1  
GGGTAAAGCTGGAATCAACAAGGATTTACCAGATTTTGGC  
+HWI-EAS443:3:56:516:363#0/1  
ab]JZ]Sb`Y`Y`¥aa[`[\_a^S`\_\_\_S^\_a]a``]¥Z[  
@HWI-EAS443:3:56:845:731#0/1  
GCTGGAATCAACAAGGATTTACCAGATTTTGGCGATCTAT

+HWI-EAS443:3:56:845:731#0/1  
a`WQ]Y\_a\_X[\_\_\_`aZY\_aa^^Z\_\_[^^``\_``a]SXRDV  
@HWI-EAS443:3:57:1060:288#0/1  
TTTGGCGATCTATTCAACTGTCGCCAGTTCATTGGTACTG  
+HWI-EAS443:3:57:1060:288#0/1  
aabaaaa\_T[XU^aZYUXT[BBBBBBBBBBBBBBBBBBB  
@HWI-EAS443:3:58:207:1304#0/1  
TGGGGTAAAGCTGGAATCAACAAGGATTTACCAGATTTTG  
+HWI-EAS443:3:58:207:1304#0/1  
aaaaa^`\_^aa`a``aaa¥`aaa```aaa\_Zaa\_\_^¥]\_  
@HWI-EAS443:3:58:611:96#0/1  
GTTGAATAGATCGCCAAAATCTGGTAAATCCTTGTTGATT  
+HWI-EAS443:3:58:611:96#0/1  
a`a`^`a\_a`Z[\_\_\_¥Z\_^\_\_¥]\_`Y^¥[^XX`^`¥¥\_Y^X  
@HWI-EAS443:3:58:887:1151#0/1  
ATGCCGAAGCTGTTGGTTCTATTGGAAAATGAAAGAACTTT  
+HWI-EAS443:3:58:887:1151#0/1  
aWVXa¥XW\_`b[W`a0]¥[MZ\_\_\_\_]]]Z\_\_\_\_]W^]^^^  
@HWI-EAS443:3:59:1465:591#0/1  
TCATTTTCCAATAGAACCAACAGTTCGGCATTGTAAGTCC  
+HWI-EAS443:3:59:1465:591#0/1  
V]Zab¥ZM]aabVaa^XXZWPb`QY]b`^¥`\_b`^BBBBB  
@HWI-EAS443:3:59:1502:767#0/1  
AAAGCTGGAATCAACAAGGATTTACCAGATTTTGGCGATC  
+HWI-EAS443:3:59:1502:767#0/1  
ab^`aaabaaaaaaaaabaaaaa``abaaa^aa`V]\_[U  
@HWI-EAS443:3:5:1405:1774#0/1  
GGGTAAAGCTGGAATCAACAAGGATTTACCAGATTTTGGC  
+HWI-EAS443:3:5:1405:1774#0/1  
abaJaaaba``¥\_a`\_`^aa`\_`\_`^\_[^\_\_]^\_Z\_^\_B  
@HWI-EAS443:3:5:680:222#0/1  
GTAAAGCTGGAATCAACAAGGATTTACCAGATTTTGGCGA  
+HWI-EAS443:3:5:680:222#0/1  
a`aaa¥^a`\_\_\_WXX¥^\_\_¥UZ]`^X`]`XXZ]Z\_]ZBB  
@HWI-EAS443:3:61:394:911#0/1  
AAGCTGGAATCAACAAGGATTTACCAGATTTTGGCGATCT  
+HWI-EAS443:3:61:394:911#0/1  
\_¥abbbaabb\_b``a^baa`a]Xaa``a`aaa][\_\_\_`SU[  
@HWI-EAS443:3:63:953:1441#0/1  
GCTGGAATCAACAAGGATTTACCAGATTTTGGCGATCTAT  
+HWI-EAS443:3:63:953:1441#0/1  
ababaaabbbabbaaaabaaaaabaaaaaaaaaaaaa^¥XSY  
@HWI-EAS443:3:64:1236:87#0/1  
GGGGTAAAGCTGGAATCAACAAGGATTTACCAGATTTTGG  
+HWI-EAS443:3:64:1236:87#0/1  
ab\_]G`[Q\_[U[¥UZS[aTOXSa\_X^¥]YSGR^URZXXZ^  
@HWI-EAS443:3:64:1594:445#0/1  
GAATCAACAAGGATTTACCAGATTTTGGCGATCTATTCAA  
+HWI-EAS443:3:64:1594:445#0/1  
]`a\_]a`aaaaaaaaab`]]\_b\_a``\_YX]``]]][BBBBBB

@HWI-EAS443:3:65:1567:123#0/1  
GATGGGGTAAAGCTGGAATCAACAAGGATTTACCAGATTT  
+HWI-EAS443:3:65:1567:123#0/1  
\_\_Q¥[\_bIb^Z`¥Z¥][\_]H^\_]^¥\_T¥^¥V]X^^aX]XV  
@HWI-EAS443:3:65:935:1071#0/1  
CTGGAATCAACAAGGATTTACCAGATTTTGGCGATCTATT  
+HWI-EAS443:3:65:935:1071#0/1  
aaS][ZX)`aZW`\_ZUZZ`WOT\_\_\_[aY]T¥\_\_TOYP¥^  
@HWI-EAS443:3:66:1317:332#0/1  
AAAGCTGGAATCAACAAGGATTTACCAGATTTTGGCGATC  
+HWI-EAS443:3:66:1317:332#0/1  
\_YL^V\_ba`]¥^]Z]VYZ\_`aa\_\_¥`]]`Q`a]W]\_ZT  
@HWI-EAS443:3:67:1476:475#0/1  
CTGGAATCAACAAGGATTTACCAGATTTTGGCGATCTATT  
+HWI-EAS443:3:67:1476:475#0/1  
SY¥[\_[Z`aXbaZ`bZa[ab^a`bba`a¥\_a[aaVXYBBB  
@HWI-EAS443:3:67:82:944#0/1  
TAAAGCTGGAATCAACAAGGATTTACCAGATTTTGGCGAT  
+HWI-EAS443:3:67:82:944#0/1  
aba]abab`Y^a\_`a¥a]a[aaaaaaaaY`````\_\_`^Z  
@HWI-EAS443:3:68:1268:1399#0/1  
AATGAAGCTGGCGACAGTTGAATAGATCGCCAAAATCTGGT  
+HWI-EAS443:3:68:1268:1399#0/1  
aa\_\_a\_a^\_Yb\_aU^Y\_]\_a^][I`X]V\_a`W\_]OY`N  
@HWI-EAS443:3:68:1346:1978#0/1  
CTGGAATCAACAAGGATTTACCAGATTTTGGCGATCTATT  
+HWI-EAS443:3:68:1346:1978#0/1  
\_a^a`bbb`bbbbbb¥aa\_Y\_]\_ba`aa```Z[\_][  
@HWI-EAS443:3:70:1678:369#0/1  
GGGTAAAGCTGGAATCAACAAGGATTTACCAGATTTTGGC  
+HWI-EAS443:3:70:1678:369#0/1  
aab\_aabaaaa\_b`aaaaba`ba\_a`aX\_aa\_`\_a\_]`  
@HWI-EAS443:3:71:415:1971#0/1  
AGATGGGGTAAAGCTGGAATCAACAAGGATTTACCAGATT  
+HWI-EAS443:3:71:415:1971#0/1  
\_babYbb`]bb\_Yba\_]\_]bbb`aaa\_aaa`abaaa`^`  
@HWI-EAS443:3:71:505:874#0/1  
GCTGGAATCAACAAGGATTTACCAGATTTTGGCGATCTAT  
+HWI-EAS443:3:71:505:874#0/1  
a\_T[DVWXZYNQ`YYVZ]`WQU^N¥N\_^¥\_URBBBBBBBB  
@HWI-EAS443:3:72:466:958#0/1  
GGTAAATCCTTGTTGATTCCAGCTTTACCCCATCTATTTC  
+HWI-EAS443:3:72:466:958#0/1  
\_b\_bbabbaabbabb¥bbaabbbabbbaaaaaabaaabaaa  
@HWI-EAS443:3:72:604:1419#0/1  
TAAAGCTGGAATCAACAAGGATTTACCAGATTTTGGCGAT  
+HWI-EAS443:3:72:604:1419#0/1  
^a`a]^\_aabaa]^S\_¥bZ`a^a\_`^Z]]`X`\_V]¥W¥  
@HWI-EAS443:3:73:1294:1600#0/1  
GCTGGAATCAACAAGGATTTACCAGATTTTGGCGATCTAT

+HWI-EAS443:3:73:1294:1600#0/1  
aaY\_a`¥bb]R^abaYYW`a\_aa\_VZaZ\_a`^[aXZT[Z  
@HWI-EAS443:3:73:1481:974#0/1  
GGGTAAAGCTGGAATCAACAAGGATTTACCAGATTTTGGC  
+HWI-EAS443:3:73:1481:974#0/1  
`baWb][a]a\_]Ua\_Uaa¥`aabX`a\_Z^aa]Y^\_\_^S]  
@HWI-EAS443:3:74:1744:1190#0/1  
GATGGGTAAAGCTGGAATCAACAAGGATTTACCAGATTT  
+HWI-EAS443:3:74:1744:1190#0/1  
a^aaaaa\_a`]`abb\_aaabU^aa\_a`\_a`\_\_`]a^`a^  
@HWI-EAS443:3:74:295:1957#0/1  
GGGTAAAGCTGGAATCAACAAGGATTTACCAGATTTTGGC  
+HWI-EAS443:3:74:295:1957#0/1  
\_`^Ta`\_`\_]Zaaaa`\_a`^^\_Y\_``aaa`\_]Z[^\_]V\_  
@HWI-EAS443:3:74:741:546#0/1  
ATTTTGGCGATCTATTCAACTGTCGCCAGTTCATTGGTAC  
+HWI-EAS443:3:74:741:546#0/1  
abbaabbbbaaaaaab^aa[] [aa\_abV]R]¥N\_a]aBBB  
@HWI-EAS443:3:75:366:1305#0/1  
CCAAAGTTCTTTTCAATAGAACCAACAGTTCGGC  
+HWI-EAS443:3:75:366:1305#0/1  
abb\_baabbbbbbababbaababbabaaaa`a\_\_a  
@HWI-EAS443:3:76:1086:445#0/1  
TAAAGCTGGAATCAACAAGGATTTACCAGATTTTGGCGAT  
+HWI-EAS443:3:76:1086:445#0/1  
aaa¥`aa`a^Y\_\_^\_\_a^\_\_`\_`Z]]`^^]`\_\_\_X^^Z  
@HWI-EAS443:3:76:420:1353#0/1  
GGGTAAAGCTGGAATCAACAAGGATTTACCAGATTTTGGC  
+HWI-EAS443:3:76:420:1353#0/1  
aa\_\_a`aa`a`\_`^`aaaS`\_a`\_\_a]\_\_a\_\_\_\_\_¥Y^  
@HWI-EAS443:3:76:556:791#0/1  
CTGGAATCAACAAGGATTTACCAGATTTTGGCGATCTATT  
+HWI-EAS443:3:76:556:791#0/1  
abbaabbbbaabbbbbbbaaa¥aabab`ba`^^`^`^a  
@HWI-EAS443:3:77:1021:596#0/1  
GGGTAAAGCTGGAATCAACAAGGATTTACCAGATTTTGGC  
+HWI-EAS443:3:77:1021:596#0/1  
abb[^WT\_aabba`aSba`]abb^a`ab]WZ`\_`aa]\_a`  
@HWI-EAS443:3:77:415:100#0/1  
AAATCTGGTAAATCCTTGTTGATTCCAGCTTTACCCATC  
+HWI-EAS443:3:77:415:100#0/1  
abaaaaab`aaaaaaab^aa\_a`^`a^`\_`\_]Y]]^Z  
@HWI-EAS443:3:78:267:1431#0/1  
GGGTAAAGCTGGAATCAACAAGGATTTACCAGATTTTGG  
+HWI-EAS443:3:78:267:1431#0/1  
^^\_HP[`b`¥Q]\_baaba\_`S`]]]`a`a`^^^^]W  
@HWI-EAS443:3:78:962:1265#0/1  
ATGGGTAAAGCTGGAATCAACAAGGATTTACCAGATTTT  
+HWI-EAS443:3:78:962:1265#0/1  
^ab`^aaaaaa`\_a`aaaa\_\_\_\_\_`aaaaaaa\_`\_]\_



@HWI-EAS443:3:79:1513:540#0/1  
GCTGGAATCAACAAGGATTTACCAGATTTTGGCGATCTAT  
+HWI-EAS443:3:79:1513:540#0/1  
a`a^]\_aa]]\_`[`aa`\_`aa\_¥]a`aaaa\_`Y`[QZ¥]  
@HWI-EAS443:3:79:743:1929#0/1  
GGGTAAAGCTGGAATCAACAAGGATTTACCAGATTTTGGC  
+HWI-EAS443:3:79:743:1929#0/1  
aaa¥aaaabaaaab`baaaaaa]```aaaa`aa```\_^]a  
@HWI-EAS443:3:80:203:648#0/1  
TAAAGCTGGAATCAACAAGGATTTACCAGATTTTGGCGAT  
+HWI-EAS443:3:80:203:648#0/1  
a]`¥`a```]`X]aa`aa[a^[G\_`a\_``^^`a]\_`YZ^`\_  
@HWI-EAS443:3:80:280:559#0/1  
GCTGGAATCAACAAGGATTTACCAGATTTTGGCGATCTAT  
+HWI-EAS443:3:80:280:559#0/1  
a``a``Xaa\_a\_a^^`[````\_]T]Z\_\_^]]\_`\_\_UUSU¥  
@HWI-EAS443:3:80:324:176#0/1  
GGTAAAGCTGGAATCAACAAGGATTTACCAGATTTTGGCG  
+HWI-EAS443:3:80:324:176#0/1  
ab`a``aaaaaaaaZU^aaaa```aa[Y^\_]`\_^^[¥¥a  
@HWI-EAS443:3:81:839:1621#0/1  
CGACAGTTGAATAGATCGCCAAAATCTGGTAAATCCTTGT  
+HWI-EAS443:3:81:839:1621#0/1  
aaabaa^aaaaaa`a\_a`aaaaa`\_\_\_\_Za`aaY\_\_`\_\_  
@HWI-EAS443:3:82:507:218#0/1  
TGGACTTACAATGCCGAAGTGTGGTTCTATTGGAAAATG  
+HWI-EAS443:3:82:507:218#0/1  
abbaabaaaaaaba\_a\_a^aa`aa\_`^a``aaa]]\_\_^`  
@HWI-EAS443:3:83:27:1882#0/1  
GGTAAAGCTGGAATCAACAAGGATTTACCAGATTTTGGCG  
+HWI-EAS443:3:83:27:1882#0/1  
a`LY\_T^b\_a^K¥\_a`b`a`^a]`\_ab]][\_^¥W^\_U` [  
@HWI-EAS443:3:84:557:453#0/1  
GGGTAAAGCTGGAATCAACAAGGATTTACCAGATTTTGGC  
+HWI-EAS443:3:84:557:453#0/1  
a¥HLTZ]a]Raa^^^]\_^X\_]a]NQU]X]]OXRSTYYVY]  
@HWI-EAS443:3:85:807:592#0/1  
ATGGGGTAAAGCTGGAATCAACAAGGATTTACCAGATTTT  
+HWI-EAS443:3:85:807:592#0/1  
abbaaa\_aa\_aaaa```aa`a`a`a\_^`````\_^]\_\_^\_  
@HWI-EAS443:3:86:316:802#0/1  
GCTGGAATCAACAAGGATTTACCAGATTTTGGCGATCTAT  
+HWI-EAS443:3:86:316:802#0/1  
aaabaa\_\_aaaa\_IY]S]aaaa`P]a`a^````]YX\_U`^X  
@HWI-EAS443:3:87:1277:606#0/1  
GGGTAAAGCTGGAATCAACAAGGATTTACCAGATTTTGGC  
+HWI-EAS443:3:87:1277:606#0/1  
ab^R[`aaRa\_a^a`^¥]R`¥\_a`aa\_^^`a\_a`\_aaZZ  
@HWI-EAS443:3:89:29:562#0/1  
GGTAAAGCTGGAATCAACAAGGATTTACCAGATTTTGGCG



@HWI-EAS443:3:96:886:1201#0/1  
GGTAAAGCTGGAATCAACAAGGATTTACCAGATTTTGGCG  
+HWI-EAS443:3:96:886:1201#0/1  
`\_[abbbaa`^a¥]aba\_]a\_aaa`^U]^S^`]aaa`a  
@HWI-EAS443:3:97:1454:1546#0/1  
GCTGGAATCAACAAGGATTTACCAGATTTTGGCGATCTAT  
+HWI-EAS443:3:97:1454:1546#0/1  
aa\_a`^a```\_0`aaa]\_a\_a^W]UYZ^\_``OZXTRXZZ  
@HWI-EAS443:3:97:149:1463#0/1  
GCCGAAGTGTGGTTCTATTGGAAAATGAAAGAACTTTGG  
+HWI-EAS443:3:97:149:1463#0/1  
`^``abba¥aa\_]^^`[a^baaa`aZ]aa^a```\_``aaY  
@HWI-EAS443:3:97:60:77#0/1  
AATAGATGGGGTAAAGCTGGAATCAACAAGGATTTACCAG  
+HWI-EAS443:3:97:60:77#0/1  
a`Z0`\_aaa[^Ua\_]\_\_\_\_\_¥]W]^XS]^Z\_\_\_\_]^XX]ZZV`  
@HWI-EAS443:3:9:1115:1145#0/1  
CTGGAATCAACAAGGATTTACCAGATTTTGGCGATCTATT  
+HWI-EAS443:3:9:1115:1145#0/1  
abbaaababbababa`ababa\_aa^aabaaa\_a`a]a\_a`  
@HWI-EAS443:3:9:1228:1084#0/1  
GGGGTAAAGCTGGAATCAACAAGGATTTACCAGATTTTGG  
+HWI-EAS443:3:9:1228:1084#0/1  
a\_bb¥aa¥aa`baX]Z][HX`^^^[¥Ya¥VN]a[a¥``aX  
@HWI-EAS443:3:9:1616:521#0/1  
GCTGGAATCAACAAGGATTTACCAGATTTTGGCGATCTAT  
+HWI-EAS443:3:9:1616:521#0/1  
aa``]UZ[``ZP][`\_\_\_\_``¥YW]`U]\_\_`YGY\_[WRWYB  
@HWI-EAS443:3:9:33:484#0/1  
GGGTAAAGCTGGAATCAACAAGGATTTACCAGATTTTGGC  
+HWI-EAS443:3:9:33:484#0/1  
`T[[aY^`a\_ba`a\_YX¥\_`a`^`\_Z`^^Ya\_]^^\_ZTZ  
@HWI-EAS443:3:9:690:802#0/1  
AATGAAGTGGCGACAGTTGAATAGATCGCCAAAATCTGGT  
+HWI-EAS443:3:9:690:802#0/1  
abbVQ^`]]`abXaYST¥]b`a]aSWX`\_`^a\_¥\_`Z¥`^  
@HWI-EAS443:3:25:1604:1134#0/1  
GCTTGGCGCCAAACTCTCGTTATTTNTTCTTTGTCATAAA  
+HWI-EAS443:3:25:1604:1134#0/1  
a\_Z^`¥QO\_] [XBBBBBBBBBBBBBBBBBBBBBBBBBBBB  
@HWI-EAS443:3:11:1045:115#0/1  
CGCCAACCTCTCCTTATTTCTTCTTTGTCATAAAGGATGA  
+HWI-EAS443:3:11:1045:115#0/1  
aaaa¥TMGaXYN¥aaXaa`]bbNbbba\_a`\_aa`a`¥[^`B  
@HWI-EAS443:3:100:709:539#0/1  
AAACTCTCCTTATTTCTTCTTTGTCATAAAGGATGAGTTC  
+HWI-EAS443:3:100:709:539#0/1  
aa\_Ia`baabb\_bbb\_bb`babba`babbb\_[Y]BBBBBB  
@HWI-EAS443:3:23:1218:1787#0/1  
CAAAGAAGAAATAAGGAGAGTTTGGCGCCAAGCAAACAAT

+HWI-EAS443:3:23:1218:1787#0/1  
ababb\_¥abbbbaaaabbabbaa`aaZ^aaaa`\_`aa  
@HWI-EAS443:3:26:928:1523#0/1  
CGCCAAACTCTCCTTATTTCTTCTTTGTCATAAAGGATGA  
+HWI-EAS443:3:26:928:1523#0/1  
aabba\_^WaYaa`abWabaX¥`\_aaa[`a`]aa\_TWW\_^B  
@HWI-EAS443:3:32:324:238#0/1  
GTTTGCTTGGCGCCAAACTCTCCTTATTTCTTCTTTGTCA  
+HWI-EAS443:3:32:324:238#0/1  
`Q`[``]\_W\_aaa]VLLLOWY[[[XRDI^ZR¥OSVYZXBBB  
@HWI-EAS443:3:36:1682:475#0/1  
GAACTCATCCTTTATGACAAAGAAGAAATAAGGAGAGTTT  
+HWI-EAS443:3:36:1682:475#0/1  
Zabbb`¥^`a`a[aa¥`^^a^]b[\_````a`a]aS^¥  
@HWI-EAS443:3:38:1184:1478#0/1  
CGCCAAACTCTCCTTATTTCTTCTTTGTCATAAAGGATGA  
+HWI-EAS443:3:38:1184:1478#0/1  
¥bbaX^[Zb¥baab\_F\_b\_J\_baaab`aba]aa\_¥ZaaaX  
@HWI-EAS443:3:58:676:639#0/1  
GGCGCCAAACTCTCCTTATTTCTTCTTTGTCATAAAGGAT  
+HWI-EAS443:3:58:676:639#0/1  
`¥Zaa`RQSL`K¥a^\_ZX¥`\_Ra\_P\_aa]¥Z]`a^QW\_YY  
@HWI-EAS443:3:66:1441:1342#0/1  
CTTGGCGCCAAACTCTCCTTATTTCTTCTTTGTCATAAAG  
+HWI-EAS443:3:66:1441:1342#0/1  
^^[V\_a^aZMMW¥W]S¥HQY¥]aY]VJ]Ya\_OTYXP[BBB  
@HWI-EAS443:3:86:724:595#0/1  
GGCGCCAAACTCTCCTTATTTCTTCTTTGTCATAAAGGAT  
+HWI-EAS443:3:86:724:595#0/1  
abaaa]]UWta[a]`aa`aa`\_a`^a`````\_\_a^^]]¥  
@HWI-EAS443:3:8:855:1093#0/1  
GGTAGATGTTTAAAGATGAGTCTTCTAACCAGGTCGAAA  
+HWI-EAS443:3:8:855:1093#0/1  
¥¥0¥\_[S[Z]aaa`a[¥aaaW\_a^X`[\_]`\_]ZSWR^B  
@HWI-EAS443:3:11:477:1772#0/1  
GAAAGAAAGAGCAGAAATGAAAAGTGGCGAGAGCAATTGG  
+HWI-EAS443:3:11:477:1772#0/1  
\_]bb\_¥bbaaba¥aaabbbbaaa^]\_b``Sa\_I^VS`Ua  
@HWI-EAS443:3:18:199:610#0/1  
CAATTGCTCTCGCCACTTTTCATTTCTGCTCTGCTAGGTT  
+HWI-EAS443:3:18:199:610#0/1  
aa¥a\_HZ\_a`\_a`\_¥]^`¥Q^¥\_WXZ`\_\_Q¥\_WW^XWW  
@HWI-EAS443:3:38:115:734#0/1  
CCGGCACGAGACCTTCACTACCTCCAGAGCAGAAATGAAA  
+HWI-EAS443:3:38:115:734#0/1  
abX`aaa\_]a`\_\_a`aaa\_a`\_\_a`^[W[X^YFX`]YY  
@HWI-EAS443:3:58:664:1666#0/1  
AGATGTTGGAGACCTTCACTACCTCCAGAGCAGAAATGAA  
+HWI-EAS443:3:58:664:1666#0/1  
U^W¥]]aZ¥R]]YYOVW¥ZY\_SY]¥USWS¥`X\_Y\_¥`U]X

@HWI-EAS443:3:5:705:1990#0/1  
AGCCACTTTTCATTTCTGCTCTGGAGGTAGTGAAAGAGTG  
+HWI-EAS443:3:5:705:1990#0/1  
^b^OVJ\_`abab^\_WXab\_\_Xaa¥aBBBBBBBBBBBBBBB  
@HWI-EAS443:3:75:1446:1234#0/1  
CGCCACTTTTCATTTCTGCTCTGGAGGAAGTGAAGGTATC  
+HWI-EAS443:3:75:1446:1234#0/1  
^aZ\_baaba[bb^ba]ab[\_abbbXa\_Gb[ZG]WWWYG¥a  
@HWI-EAS443:3:78:474:1975#0/1  
TCGCCACTTTTCATTTCTGCTCTGGAGGCAGTGAAGGGCT  
+HWI-EAS443:3:78:474:1975#0/1  
\_`a¥0[¥a¥¥`\_`\_aab\_Qab]aaTOW]YE¥YNXPBBBBBB  
@HWI-EAS443:3:16:657:45#0/1  
GAGACCTTCACTACCTNCAGAGCAGAAATGAAAAGCGGCG  
+HWI-EAS443:3:16:657:45#0/1  
^V¥`a]U^aa^\_`^VPDOZa¥a¥¥`ULVU^[U^¥YF[VW^  
@HWI-EAS443:3:38:1766:27#0/1  
GAAAAGTGGCGAGAGCAATTGGGAGAGAAATNTGAGGAAA  
+HWI-EAS443:3:38:1766:27#0/1  
a[`X][[`X`OJJ¥USS[Y[`BBBBBBBBBBBBBBBBBB  
@HWI-EAS443:3:21:360:847#0/1  
GACCTTCACTACCTCCAGAGCAGAAATGAAAGTGGCGAGA  
+HWI-EAS443:3:21:360:847#0/1  
a[¥`XVba`]X\_\_Ya¥X\_X\_`^^XQ¥`^Z\_YGUSQ[^[U  
@HWI-EAS443:3:9:200:538#0/1  
ATGAAAAGTGGCGAGAGCAATTGGGACAGAAATTTGAGGAA  
+HWI-EAS443:3:9:200:538#0/1  
aaaaa\_Ya]aa````\_`\_`a`\_`¥¥X`a`\_^```a\_a`^^  
@HWI-EAS443:3:45:322:1991#0/1  
ATTCCGCCTTATTTCTCAAATTTCTGTCCCAATTGCTCT  
+HWI-EAS443:3:45:322:1991#0/1  
aab`\_ba`aaaaa`a`aa`\_aa`X`\_\_^`]a]``^Z`¥\_  
@HWI-EAS443:3:52:729:1565#0/1  
AGCCACTTTTCATTTCTGCTCTGGAGGTAGTGAAGGGCTC  
+HWI-EAS443:3:52:729:1565#0/1  
`ab`\_[a[aaa\_aba`\_aa^^a\_^[IUNa\_Q\_^^`aMGPW  
@HWI-EAS443:3:82:198:496#0/1  
TACCGCCTTATTTCTCAAATTTCTGTCCCAATTGCTCTC  
+HWI-EAS443:3:82:198:496#0/1  
aaaabaabb^baaaaaa^aa`aabaa`^a\_\_`a\_\_a^`  
@HWI-EAS443:3:85:428:1594#0/1  
GGCCACTTTTCATTTCTGCTCTGGAGGTAGTGAAGGGCTC  
+HWI-EAS443:3:85:428:1594#0/1  
ab\_¥U\_a`\_aaa¥aabaa`\_aaa`aaSF^\_LQ]ZZXJ¥\_`  
@HWI-EAS443:3:92:417:727#0/1  
TGAGCTTTCAGGTAGACTGTTTCCTTTGGCATATCCGAAA  
+HWI-EAS443:3:92:417:727#0/1  
YUSRW`^YTQ[\_NR]¥^`XKYTN[GLGLU^TNTRN]RF[T  
@HWI-EAS443:3:97:1033:1564#0/1  
GTGCTCCACCTTATTTCTCAAATTTCTGTCCCAATTGCT

+HWI-EAS443:3:97:1033:1564#0/1  
aY^YV¥\_ [Y[aaaa`\_a¥`^`^`^`a]]^\_a^\_Z^¥^  
@HWI-EAS443:3:66:1560:1709#0/1  
AGCTTATTTCTCAAATTTCTGTCCCAANTGCTCTCGCCA  
+HWI-EAS443:3:66:1560:1709#0/1  
YM]\_aVbb`HR`ba]a^a\_\_ [Ya\_aMDZaX\_Y]G]GGX  
@HWI-EAS443:3:31:1257:336#0/1  
CTTCACTACCTCCAGAGGAGAAATGAAAAGTGGCGAGAGG  
+HWI-EAS443:3:31:1257:336#0/1  
ab¥\_a[\_]^aZSSYaX]H\_¥Vb[ba\_`bbb]`aXa`]¥^D  
@HWI-EAS443:3:47:614:1332#0/1  
TCTCGCCACTTTTCATTTCTGCTCTGTAGGTAGTGAAGGG  
+HWI-EAS443:3:47:614:1332#0/1  
¥W`Yb]WJa¥ab`WZH\_b^\_\_SXR][BBBBBBBBBBBBBB  
@HWI-EAS443:3:60:550:1348#0/1  
TGCCACTTTTCATTTCTGCTCTGGAGGTAGGGAAGGTCTC  
+HWI-EAS443:3:60:550:1348#0/1  
OH^a` [\_\_]\_a^^``aaba]QY`][a[JY`X]O\_[RRZTV  
@HWI-EAS443:3:88:484:868#0/1  
CGCCCCATTCCTTGATCGGCTCCGCCGAGATCCAAAGTCC  
+HWI-EAS443:3:88:484:868#0/1  
Za\_`\_ZVW`a^`T]]R\_ZH\_X^]Za\_TV0^W]H]M]ML¥U  
@HWI-EAS443:3:37:743:1529#0/1  
AATTA AAAAGTGGCGAGAGCAATTGGGACAGAAATTTGAGG  
+HWI-EAS443:3:37:743:1529#0/1  
aaQHMY`^VYYT`\_VRX[]]ZPY^\_\_W^YVOXQQW]]]`]  
@HWI-EAS443:3:42:1202:1213#0/1  
CGCCACTTTTCATTTCTGCTCTGGAGGTAGTGAAGGGCCC  
+HWI-EAS443:3:42:1202:1213#0/1  
[`^a`a¥TX\_bbVaaababbbaabZbaH[¥G[]][NMIU  
@HWI-EAS443:3:46:1429:2035#0/1  
GTCGCAATTGCTCTCGCCACTTTTCATTTCTGCTCTGGAG  
+HWI-EAS443:3:46:1429:2035#0/1  
aU]GP`^`\_]MP¥WW[TSY^¥[`\_QN\_^TTSUVNMMUWV  
@HWI-EAS443:3:47:1324:37#0/1  
TTCGCTACCTCCAGAGCAGAAATGAAAAGTGGCGAGAGCA  
+HWI-EAS443:3:47:1324:37#0/1  
`babbaaa`^`aaa^aZaa¥\_`^`^`\_a^a`^aY]L]RR  
@HWI-EAS443:3:55:978:156#0/1  
GAGCAATTGGGACAGAAATTTGAGGAAATAAGGTGGATCA  
+HWI-EAS443:3:55:978:156#0/1  
aaa\_S¥baaaa\_\_ab`^`a]aa`a\_V]¥a\_\_\_\_X``\_U¥\_  
@HWI-EAS443:3:70:752:599#0/1  
ACTACCTCCAGAGCAGAAATGAAAAGTGGCGAGAGCGATT  
+HWI-EAS443:3:70:752:599#0/1  
aa\_¥UbaUa`aW[\_\_VN]¥]aaaaYUU\_]a¥XNUVFSDD  
@HWI-EAS443:3:77:568:1998#0/1  
CGCCACTTTTCATTTCTGCTCTGGAGGTAGTGAAGGACCC  
+HWI-EAS443:3:77:568:1998#0/1  
Ubb]bZb`X^Zb[` [YbZVaV\_XWabb[baQQIZSJXL¥B

@HWI-EAS443:3:80:999:116#0/1  
CCCCGACCACCTTATTTCTCAAATTTCTGTCCCAATTGC  
+HWI-EAS443:3:80:999:116#0/1  
]MT`]]]PTNX]`V]^S[PX]R\_\_^VU\_\_ZNUG`Y\_[`G  
@HWI-EAS443:3:81:533:1773#0/1  
CACTCGCCACTTTTCATTTCTGCTCTGGAGGTAGTGAATG  
+HWI-EAS443:3:81:533:1773#0/1  
a]^RXVU^RR\_aa`[^U^P^XZ[^WTRZ\_U]VQLYQFO  
@HWI-EAS443:3:82:1277:969#0/1  
GGAGACCTTCACTACCTCCAGAGCAGAAATGAAAAGAGGC  
+HWI-EAS443:3:82:1277:969#0/1  
ab^UaR[a`^bYaS¥S\_SX\_TG^SS`NaaaaQYRZaG\_aW  
@HWI-EAS443:3:91:455:1662#0/1  
GTGTTGCCCCATTCCTTGATCGGCTCCGCCGAGATCAAAA  
+HWI-EAS443:3:91:455:1662#0/1  
YORGX^`ZaU]X¥[XNTURG^¥¥\_NN[TUVRNPSW¥TTSW  
@HWI-EAS443:3:98:181:199#0/1  
AGCCGCCACCTTATTTCTCAAATTTCTGTCCCAATTGCT  
+HWI-EAS443:3:98:181:199#0/1  
[b`aaaa]¥^\_\_`a\_U\_[R\_YZ^\_a`\_\_\_\_]TY]\_\_\_]]¥\_  
@HWI-EAS443:3:9:1329:1264#0/1  
GAGCATGGGAGACCTTCACTACCTCCAGAGCAGAAATGAA  
+HWI-EAS443:3:9:1329:1264#0/1  
V`bb]bb`¥P`TZX¥a`babaJ]^\_\_^aXaZ``]a^aa`¥  
@HWI-EAS443:3:40:1360:1998#0/1  
CCCACCTTATTTCTCANATTTCTGTCCCAATTGCTCTCG  
+HWI-EAS443:3:40:1360:1998#0/1  
Zb\_a\_b[`a`ab`a`[ZD[bbbWab\_b`aaa]aabaaba  
@HWI-EAS443:3:11:1484:559#0/1  
AAAAGTGGCGAGAGGAATTGGGACAGAAATTTGAGGAAAT  
+HWI-EAS443:3:11:1484:559#0/1  
aab¥bX`^^`aZXD`\_aa^]Y^]`\_^]\_\_a`YZ\_0^^^  
@HWI-EAS443:3:11:953:1412#0/1  
GCTCTCGCCACTTTTCATTTCTGCTCTGGAGGTAGGGAAG  
+HWI-EAS443:3:11:953:1412#0/1  
a`a`aa]aa`^^`aaa\_\_aa`\_\_a^\_\_`^^`[a[BBBBBBBB  
@HWI-EAS443:3:12:175:909#0/1  
GAAAAGTGGCGAGAGCAATTGGGACAGAAATCTGAGGAAA  
+HWI-EAS443:3:12:175:909#0/1  
`aaa\_]a`^^`aa\_a[V`^a`^\_]`\_^\_\_¥bYYWa^0^]  
@HWI-EAS443:3:13:1700:352#0/1  
GACCTTCACTAGCTCCAGAGCAGAAATGAAAAGTGGCGAG  
+HWI-EAS443:3:13:1700:352#0/1  
aWVR^RX]\_\_UGNUPTJYT\_]¥¥VU^`]QTUU¥U]NLVBB  
@HWI-EAS443:3:13:184:699#0/1  
GTCCCAATTGCTCTCGCCAGTTTTTCATTTCTGCTCTGGAG  
+HWI-EAS443:3:13:184:699#0/1  
[Tab\_QZZOV^R^TZb]^XL[R¥]]\_¥TX^`b`VaWX\_^B  
@HWI-EAS443:3:13:345:1843#0/1  
CAGAGCAGAAATGAAAAGTGGCGAGAGCCATTGGGACAGA

+HWI-EAS443:3:13:345:1843#0/1  
aVYTF]]LSa`[]UUL\_KN^\_]\_VV¥QGGGYORUN]O\_G]  
@HWI-EAS443:3:14:1257:401#0/1  
GCTCTCGCCACTTTTCATTTCTGCTCTGGGGTAGTGAAG  
+HWI-EAS443:3:14:1257:401#0/1  
aaa¥TQW\_\_a[¥abaH[a¥PT[`G`¥ZaZG¥`PR^Q`PWY  
@HWI-EAS443:3:17:467:421#0/1  
GGAGACCTTCACTACCTTCAGAGCAGAAATGAAAAGTGGC  
+HWI-EAS443:3:17:467:421#0/1  
aa\_aa\_aaaaa]`^\_a^\_aY\_\_^a`\_\_a\_\_\_\_\_`\_U^Y[  
@HWI-EAS443:3:19:1186:1370#0/1  
CAGAAATGAAAAGTGGCGAGAGCGATTGGGACAGAAATTT  
+HWI-EAS443:3:19:1186:1370#0/1  
abVP¥b`[bbba\_bbbabb`b\_G]]`[DRSY`baaa\_bb  
@HWI-EAS443:3:19:1227:1488#0/1  
CTTCACTACCTCCAGAGCAGAAATGAAAAGGGGCGAGAGC  
+HWI-EAS443:3:19:1227:1488#0/1  
\_UV]]RW^Sb`\_aJUXaY\_bOLO¥`UYQ¥aG\_]UYW`¥ZB  
@HWI-EAS443:3:21:1068:399#0/1  
ACCTTATTTCTCATATTTCTGTCCCAATTGCTCTCGCCA  
+HWI-EAS443:3:21:1068:399#0/1  
ZW]]aa\_baZY^\_aZYa^YUU```TO\_b`\_\_Q`X]XZba^  
@HWI-EAS443:3:22:1365:716#0/1  
AAAGTGGCGAGAGCAATTGGGAAAGAAATTTGAGGAAATA  
+HWI-EAS443:3:22:1365:716#0/1  
ab^b¥b]\_b`^aa^aa^a`ZG\_^¥`]^aaXW\_^GY`\_`  
@HWI-EAS443:3:22:154:674#0/1  
GTCCCAATTGCTCTCGCCACTTTTCATTTTGCTCTGGAG  
+HWI-EAS443:3:22:154:674#0/1  
a^aa`Z`]\_aaa```a`a`\_`\_a\_\_\_\_\_``^`\_```]]^^  
@HWI-EAS443:3:22:1622:555#0/1  
CAGAAATGAAAAGCGGCGAGAGCAATTGGGACAGAAATTT  
+HWI-EAS443:3:22:1622:555#0/1  
a)`^a^Xaa\_[D[\_Wa\_\_X`MV[]\_¥^`[OZ[]^YZ^^  
@HWI-EAS443:3:24:1315:1542#0/1  
GACCTTCACTACCTCCAGAGCAGAAATGAAAAGTGGCGAG  
+HWI-EAS443:3:24:1315:1542#0/1  
abaaaa`baabbaa^a\_aaaaa\_aaa^N^`^`a¥aa\_a`\_`  
@HWI-EAS443:3:27:1362:642#0/1  
ACCTTCACTACCTCCAGAGCAGAAATGAAACGTGGCGAGA  
+HWI-EAS443:3:27:1362:642#0/1  
]^\_b`aaVa`PPUYaaaa\_\_b]aU]aUSYWVR[OX^Y]V  
@HWI-EAS443:3:28:822:1967#0/1  
CGCCACTTTTCATTTCTGCTCTGGAGGTAGTGAAGCTCTC  
+HWI-EAS443:3:28:822:1967#0/1  
a`^b^[U\_Z`]]][[a\_a¥¥Y\_WGWX^[ZMIZU[TDFVVQ  
@HWI-EAS443:3:31:410:1873#0/1  
CTTCACTACCTCCAGAGCAGAAATGAAAAGTGGCAAGAGC  
+HWI-EAS443:3:31:410:1873#0/1  
```bab¥`a`N\_a`\_]aaZW[\_\_\_`UT]^O^¥\_GZYUVY



@HWI-EAS443:3:32:1260:246#0/1  
GTCCCAATCGCTCTCGCCACTTTTCATTTCTGCTCTGGAG  
+HWI-EAS443:3:32:1260:246#0/1  
aaaaaaaaab`aa\_a¥¥\_\_\_\_]``aaU¥```S\_[¥¥¥¥\_^¥`  
@HWI-EAS443:3:32:262:1905#0/1  
CTTCACTACCTCCAGCGCAGAAATGAAAAGTGGCGAGAGC  
+HWI-EAS443:3:32:262:1905#0/1  
a`\_a`\_]Za]^a]]XWX¥[Y[\_^W^VVTPLTLNU¥WUJZ  
@HWI-EAS443:3:32:688:1790#0/1  
GAGACCTTCACTACCTCCAGAGCAGAAATGAAAAGGGGCG  
+HWI-EAS443:3:32:688:1790#0/1  
``^abaa`aa\_\_a]ab¥WW\_\_`¥`X]`]aa`¥FZZa\_  
@HWI-EAS443:3:33:580:761#0/1  
GAGACCTTCACTACCTCCAGAGCAGAAATGAAAAGTGGCG  
+HWI-EAS443:3:33:580:761#0/1  
aY````\_a\_V\_QZ^¥Y^]N]`¥]¥ZV¥^^^]RKR¥TWUTY  
@HWI-EAS443:3:34:551:232#0/1  
GCCACTTTTCATTTCTGCTCTGGAGTTGTGAAGTCTCC  
+HWI-EAS443:3:34:551:232#0/1  
`ba``aaaaaaaa\_a\_a^\_a`a¥`^[^^UYT^]ULRQXB  
@HWI-EAS443:3:35:1702:214#0/1  
GGCGAGAGCAATTGGGACAGAAATTTGAGGAAGTAAGGTG  
+HWI-EAS443:3:35:1702:214#0/1  
aaYa\_b\_aa`aaaa`^^\_a^\_]a`b]aa\_\_a^]]`aZ`  
@HWI-EAS443:3:35:303:196#0/1  
CCTTCACTACCTCCAGAGCAGAAATGAACAGTGGCGAGAG  
+HWI-EAS443:3:35:303:196#0/1  
`\_¥^¥W¥aSU\_UYa\_\_]U`K`^OR[aZVG0¥GU]\_]UPNK  
@HWI-EAS443:3:37:605:364#0/1  
GATTGGGTGATGCCCCATTCCTTGATCGGGTCCGCCGAGA  
+HWI-EAS443:3:37:605:364#0/1  
aaaSa`\_TaaX`\_aVa`\_a\_a`\_¥HRWHUFV¥`Y`UPU[V  
@HWI-EAS443:3:37:85:1707#0/1  
TGAAAAGTGGCGAGAGCAATTGGGACAGAACTTTGAGGAA  
+HWI-EAS443:3:37:85:1707#0/1  
aaaaaa][^]a^^\_¥¥¥¥¥\_¥RYX¥¥WJLVGP\_]VS\_^Z^  
@HWI-EAS443:3:38:338:88#0/1  
GACCTTCACTACCTCCAGAGCAGAAATGAAAAGTGGCGAG  
+HWI-EAS443:3:38:338:88#0/1  
aaa`\_baa\_a¥Y[\_a^`a[aXQa^V^aTNY^^\_Va]¥SRR  
@HWI-EAS443:3:38:621:407#0/1  
GAGACCTTCACTACCTCCAGAGCAGAAATGAAAAGAGGCG  
+HWI-EAS443:3:38:621:407#0/1  
a¥\_WYaaa`aa[aSVY`a`\_W¥QZ¥F^aa[^[RY\_G]\_\_¥  
@HWI-EAS443:3:3:1101:1999#0/1  
GCAGAAATGAAAAGTGGCGAGAGCAATTGGGAGAGAAATT  
+HWI-EAS443:3:3:1101:1999#0/1  
`ZWa`ab]`\_aa\_\_Z`\_\_^\_Y]SW\_\_\_\_^[`WfV`]UR\_X  
@HWI-EAS443:3:3:519:1504#0/1  
AGACCTTCACTAACTCCAGAGCAGAAATGAAAAGTGGCGA

+HWI-EAS443:3:3:519:1504#0/1  
]¥YZWIY]¥RV\_0^ZR\_¥`0`X]\_V^O\_\_W^O]WBBBBBB  
@HWI-EAS443:3:40:1445:1994#0/1  
GAGACCTGCACTACCTCCAGAGCAGAAATGAAAAGTGGCG  
+HWI-EAS443:3:40:1445:1994#0/1  
a`aVH¥¥HX^N¥YPLYN[¥VU]ZYYNTTU\_VVQU¥N^UQU  
@HWI-EAS443:3:40:1790:1169#0/1  
CAAGCTTTCAGGTAGACTGTTCCCTTTGGCATATCCGCAA  
+HWI-EAS443:3:40:1790:1169#0/1  
abbaabbbabb`aabaabbb```[aaaab`\_baaabbbX```  
@HWI-EAS443:3:40:665:1023#0/1  
CTTCACTACCTCCAGAGCAGAAATGACAAGTGGCGAGAGC  
+HWI-EAS443:3:40:665:1023#0/1  
abbbbaaabaabaaaaaaa`a\_aaYGRN`]a`a]P\_VZX  
@HWI-EAS443:3:42:1657:350#0/1  
GGGAGACCTTCACTACCTCCAGAGCAGAACTGAAAAGTGG  
+HWI-EAS443:3:42:1657:350#0/1  
VRFPPQO`aXOTYRZ^ZXZ\_SYV[PY\_VREU^PSPS^P¥G  
@HWI-EAS443:3:45:570:14#0/1  
GACCTTCACTACCTCCAGAGCAGAAATGAAAAGGGGCGAG  
+HWI-EAS443:3:45:570:14#0/1  
aW¥\_\_b¥¥V\_\_aZVX\_\_Z\_^[^b\_K^abR¥`]G\_`\_a^`  
@HWI-EAS443:3:46:1058:680#0/1  
GCAGAAATGAAAAGGGGCGAGAGCAATTGGGACAGAAATT  
+HWI-EAS443:3:46:1058:680#0/1  
`TV[TRTTXLYOJDZOYVKXV]VRLZ`XYJJMVDDPUY  
@HWI-EAS443:3:46:48:1800#0/1  
GACCTTCACTAGCTCCAGAGCAGAAATGAAAAGTGGCGAG  
+HWI-EAS443:3:46:48:1800#0/1  
``a]aa`aabaI\_¥bbba`baa¥^]baaabba`H`ab`\_a  
@HWI-EAS443:3:47:1187:844#0/1  
ATCTCGGCGGAGCCGATCAAGGAATGGGGCATCAGCCAAT  
+HWI-EAS443:3:47:1187:844#0/1  
ab`a`[Q\_b¥¥`WOYPX[\_VZSHYFLZXK0]^\_WFQYBBB  
@HWI-EAS443:3:48:1186:172#0/1  
ACCTTATTTCTCAAATTTCTGTACCAATTGCTCTCGCCA  
+HWI-EAS443:3:48:1186:172#0/1  
\_H^T^S\_]`aaZUV\_`W^V\_[MSSIYZXWY¥X]ZYU¥^V  
@HWI-EAS443:3:50:1739:1392#0/1  
TCGCGACTTTTCATTTCTGCTCTGGAGGTAGTGAAGGTCT  
+HWI-EAS443:3:50:1739:1392#0/1  
\_bb\_HT\_abaa\_\_aabbb`Z`[a[\_^\_¥^RT\_Q]a¥PXX  
@HWI-EAS443:3:52:1610:869#0/1  
CTCCAGATCAGAAATGAAAAGTGGCGAGAGCAATTGGGAC  
+HWI-EAS443:3:52:1610:869#0/1  
aaaa^bbbab\_abba`ba^S\_aa\_\_\_\_\_a```aaa^[[X  
@HWI-EAS443:3:53:13:568#0/1  
TGATGCCCATTCCTTGATCGGCTCCGCCGAGATCCAAAG  
+HWI-EAS443:3:53:13:568#0/1  
aaaab`aa\_\_baabaaa\_aaa`a]¥``\_a[`Y¥OGYa]N

@HWI-EAS443:3:53:412:1278#0/1  
CCTTACTACTCCAGAGCAGAAATGAAAAGCGGCGAGAG  
+HWI-EAS443:3:53:412:1278#0/1  
``ab`\_TZUWWWXRHR`¥`\_Y^`¥S^a\_G\_X`aaa¥[  
@HWI-EAS443:3:58:238:901#0/1  
ATTAATAAGCTGAAATGAGAAAGCTTTATCTCTTGTTTC  
+HWI-EAS443:3:58:238:901#0/1  
^^^\_^\_¥`ba`b]F^[a\_]a`abaa`^\_\_Z\_ab^^a  
@HWI-EAS443:3:59:29:1149#0/1  
CCTTACTACTCCAGAGCAGAAATGAAAAGGGGCGAGAG  
+HWI-EAS443:3:59:29:1149#0/1  
abaaa]a]\_\_a`aa`^U\_a\_a\_\_\_`W]]][¥F[^[\_PRQR  
@HWI-EAS443:3:60:54:1685#0/1  
CACTACTCCAGAGCAGAAATGAAAAGTGGCGATAGCAAT  
+HWI-EAS443:3:60:54:1685#0/1  
a¥ZQ^`\_UY]]X]VN[^`^YZEXZ\_\_¥BBBBBBBBBBBB  
@HWI-EAS443:3:61:1321:194#0/1  
TTCCTACTACTCCAGAGCAGAAACGAAAAGTGGCGAGAGCA  
+HWI-EAS443:3:61:1321:194#0/1  
aa`b`aaa\_a\_\_\_a]`ab\_aZF]`a`\_`Z`^X`Y]S^VY  
@HWI-EAS443:3:61:494:1940#0/1  
GCAGAAATGAAAAGTGGCGAGAGCAATTGGGAGAGAAATT  
+HWI-EAS443:3:61:494:1940#0/1  
`WSVW\_\_\_]]]^¥TVPZ[VWVR[OZW¥XVLPITXPTVSO  
@HWI-EAS443:3:65:1041:1418#0/1  
CTTCACTACCCCAGAGCAGAAATGAAAAGTGGCGAGAGC  
+HWI-EAS443:3:65:1041:1418#0/1  
aababa`aaVFV^`a`a`aa^`aaaaaa`Ya\_\_a`a\_]R  
@HWI-EAS443:3:65:177:1697#0/1  
CGATCAAGGAATGGGCCATCACCCAATCCATTGTCTGCAA  
+HWI-EAS443:3:65:177:1697#0/1  
aababbba`ba\_aaWG\_a\_aabbaa`baaaa]a\_]\_Ua  
@HWI-EAS443:3:65:260:47#0/1  
GAGACCCTCACTACTCCAGAGCAGAAATGAAAAGTGGCG  
+HWI-EAS443:3:65:260:47#0/1  
``a\_\_\_\_[Z[\_\_\_Z[]¥¥¥\_Q`\_W`VUT^\_^RM[^Y¥¥WW  
@HWI-EAS443:3:68:833:190#0/1  
GGGAGACCCTCACTACTCCAGAGCAGAAATGAAAAGTGG  
+HWI-EAS443:3:68:833:190#0/1  
ab]\_`aZ[MZ`\_ab`a]X\_ORYZa^]U¥FNTaXR``¥Y\_V  
@HWI-EAS443:3:69:1769:2017#0/1  
TTCCTACTACTCCAGAGCAGAAATGAAAAGTGGCGACAGCA  
+HWI-EAS443:3:69:1769:2017#0/1  
a^]a^TX\_TXa^QZP`]NWF¥\_aa¥SQTIFYU[\_]LFO¥ZV  
@HWI-EAS443:3:6:949:839#0/1  
GTCCGAATTGCTCTCGCCACTTTTCATTTCTGCTCTGGAG  
+HWI-EAS443:3:6:949:839#0/1  
\_T\_WGUSYZXMZY`\_ZRZPZ¥T¥[[¥^^\_Z^\_YSYZ^`BB  
@HWI-EAS443:3:70:402:890#0/1  
GGCGAGAGCAATTGGGACAGAAAATTGAGGAAATAAGGTG

+HWI-EAS443:3:70:402:890#0/1  
aaaaaaaa`aaaaaa`aa`aa`^`aa\_a^^aa\_``\_Y^  
@HWI-EAS443:3:77:1176:240#0/1  
GGCGAGAGCAATTGGGACAGAAATTGGAGGAAATAAGGTG  
+HWI-EAS443:3:77:1176:240#0/1  
aR\_[^^Z^GU]0^\_¥OX¥Z^]0[OFVW^BBBBBBBBBBB  
@HWI-EAS443:3:78:911:972#0/1  
CCTTACTACTCCAGAGCAGAAATGAAAAGCGGCGAGAG  
+HWI-EAS443:3:78:911:972#0/1  
aa\_UZbaaa\_Z\_XZ]\_X[VSZXXV\_¥\_¥`\_`\_G[[\_bWXML  
@HWI-EAS443:3:79:1026:404#0/1  
GGAGACCTTCACTTCTCCAGAGCAGAAATGAAAAGTGGC  
+HWI-EAS443:3:79:1026:404#0/1  
`^G¥Y`Z¥\_\_[NPQ[\_\_\_^aUQP¥P`XZ^RZ]VSL^YGA^O^  
@HWI-EAS443:3:7:608:143#0/1  
GAGACCTTACTACTCCAGAGCAGAAATGAAAAGGGGCG  
+HWI-EAS443:3:7:608:143#0/1  
`^]`aW`[\_`a\_\_]T\_\_]UV`Y`¥Z`W^¥\_`WW¥¥¥N^¥W`  
@HWI-EAS443:3:80:283:1229#0/1  
AGACCTTCACTACTCCAGAGCAGCAATGAAAAGTGGCGA  
+HWI-EAS443:3:80:283:1229#0/1  
a^ab\_]`\_][ZZ]aaTV\_UURXVQXGLS`[FSGF[[PSQ`U  
@HWI-EAS443:3:82:769:50#0/1  
GGCGAGAGCAATTGGAACAGAAATTTGAGGAAATAAGGTG  
+HWI-EAS443:3:82:769:50#0/1  
S^``¥b\_¥ababbb^P^baaaaaabbbba\_Y\_^b^\_b`a\_  
@HWI-EAS443:3:83:678:852#0/1  
CAGAAATGAAAAGTGACGAGAGCAATTGGGACAGAAATTT  
+HWI-EAS443:3:83:678:852#0/1  
a`bYaaab`a]aaZb`ab^a`aXUa`\_aaa]]aa[¥\_aaa  
@HWI-EAS443:3:83:754:662#0/1  
CTCTCGCCACTTTTCTTTCTGCTCTGGAGGTAGGGAAGG  
+HWI-EAS443:3:83:754:662#0/1  
`bXaU\_HZR\_¥Xb`¥`ba\_^b[a^`aa\_Z¥MZ`G```RR  
@HWI-EAS443:3:87:1413:641#0/1  
GAGACCTTACTACTCCAGAGCAGAAATGAAAAGCGGCG  
+HWI-EAS443:3:87:1413:641#0/1  
]Zb`a\_[a\_babaa^WWab]VbaabU\_abbabba^J^`Hb  
@HWI-EAS443:3:90:306:26#0/1  
CACTTTTCTTTCTGCTCTGGAGGTAGTGAAGGGCTCCCA  
+HWI-EAS443:3:90:306:26#0/1  
a]^Y``TYY`aabbaabaaa^aaVI`Pa[LX]JPLN`ZM  
@HWI-EAS443:3:92:771:1379#0/1  
CTCGGCGGAGCCGATCAAGGAATGAGGCATCACCCAATCC  
+HWI-EAS443:3:92:771:1379#0/1  
ab``aba\_a`aba¥Ua\_a^TL[X]]^`^^Y^]a\_a`¥[P¥  
@HWI-EAS443:3:94:1316:921#0/1  
GAGACCTTACTACTCCAGAGCAGAAATGAAAAGAGGCG  
+HWI-EAS443:3:94:1316:921#0/1  
aPR]NMK`[VONW[^RRPWXT\_SYPYX¥][BBBBBBBBBBB

@HWI-EAS443:3:97:1077:217#0/1  
ACTACCTCCAGAGCAGAAATGAAAAGTGGCGAGAGGAATT  
+HWI-EAS443:3:97:1077:217#0/1  
WO[^OY[LVVYGTZXZ\_`abWWX]`SL¥QaZ^VBBBBBB  
@HWI-EAS443:3:97:1365:1727#0/1  
CAGAAATGAAAAGTGGCGAGAGCAATTGGGATAGAAATTT  
+HWI-EAS443:3:97:1365:1727#0/1  
`\_abXbb`a\_`Oba\_[XabaTb^^V`aabXRD]aaWaaaM  
@HWI-EAS443:3:99:1091:1832#0/1  
TGAGGATGGGAGAACTTCACTACCTCCAGAGCAGAAATGA  
+HWI-EAS443:3:99:1091:1832#0/1  
ab`¥]SabbbaaaRSa[Na^\_a\_YYaZ\_aX\_\_`^\_R\_Z[[  
@HWI-EAS443:3:28:440:797#0/1  
GAAAAGTGGCGAGAGCAATTGGGACAGAAATTTGAGGCAA  
+HWI-EAS443:3:28:440:797#0/1  
aaaaaa[a\_a¥QZT\_IWQR¥WY\_N\_a\_\_\_Z\_\_`\_X\_^FMW  
@HWI-EAS443:3:38:47:1907#0/1  
GAACTTCACTACCTCCAGAGCAGAAATGAAAAGTGGCGAG  
+HWI-EAS443:3:38:47:1907#0/1  
`]bbababbabb[bbaW¥ZbQVWMaa`U[Y]ML^R`\_[S  
@HWI-EAS443:3:43:403:1889#0/1  
GAGACCTTCACTACCTCCAGAGCAGAAATGAAAAGTGTCCG  
+HWI-EAS443:3:43:403:1889#0/1  
aaZ`JZ¥0\_¥SXV[S`]XR\_TXPNVs\_¥QYUa[YVPaHFJ  
@HWI-EAS443:3:47:1563:1577#0/1  
TTNACTACCTCCAGAGCAGAAATGAAAAGTGGCGAGAGCA  
+HWI-EAS443:3:47:1563:1577#0/1  
Z¥D]YZ¥0QX]`\_Z`^^`WVX\_\_[\_][Y¥H¥]WNUTEV  
@HWI-EAS443:3:48:1129:1574#0/1  
TGGAAAGTGGCGAGAGCAATTGGGACAGAAATTTGAGGAA  
+HWI-EAS443:3:48:1129:1574#0/1  
abaaaaaZa`a]YXPYZ¥`RV]NNZ\_`WYaa`RG¥[¥]  
@HWI-EAS443:3:49:1377:788#0/1  
TCGGCTTTCAGGTAGACTGTTTCCTTTGGCATATCCGCAA  
+HWI-EAS443:3:49:1377:788#0/1  
aaab`aaaa`aY\_\_\_`a^Z\_^P]\_`^O[U^\_]\_]ZZZT¥  
@HWI-EAS443:3:51:1139:605#0/1  
ATCGCCACTTTTCATTTCTGCTCTGGAGGTAGTGAAGGGC  
+HWI-EAS443:3:51:1139:605#0/1  
^¥`a`\_`¥bba^`bbbab^bXbbababV`aYaa]`^OJ  
@HWI-EAS443:3:51:1752:2014#0/1  
TGGCCCAATTGCTCTCGCCACTTTTCATTTCTGCTCTGGA  
+HWI-EAS443:3:51:1752:2014#0/1  
Z\_IX^\_¥Wbaaaaa`^aW]\_S\_b¥baa`b^`a`Y\_]¥`  
@HWI-EAS443:3:56:1758:1346#0/1  
TGCGAGAGCAATTGGGACAGAAATTTGAGGAAATAAGGCG  
+HWI-EAS443:3:56:1758:1346#0/1  
a`^MQaWZ\_]L\_aaa\_^`\_¥\_^\_a\_\_Z\_^X]Y]^aYLY  
@HWI-EAS443:3:64:194:1214#0/1  
CAATTGCTCTCGCCACTTTTCATTTCTGCTCTGGAGGCAG

+HWI-EAS443:3:64:194:1214#0/1  
` `]abaabbbababYbaabbbabbbbaababaaZaa]G[  
@HWI-EAS443:3:64:758:465#0/1  
GAACTCGCCACTTTTCATTTCTGCTCTGGAGGTAGTGAAG  
+HWI-EAS443:3:64:758:465#0/1  
`UVV]^aZZ^QW^TaNT]RWUSbTT`[QQQZBBBBBBBBB  
@HWI-EAS443:3:71:1226:250#0/1  
CTGCGCCACTTTTCATTTCTGCTCTGGAGGTAGTGAAGGT  
+HWI-EAS443:3:71:1226:250#0/1  
^bb^\_R\_b`¥b`a\_\_bab`ba` `aab¥abb\_a`W`XZ]aJ  
@HWI-EAS443:3:72:1256:467#0/1  
AGCCGATCAAGGAATGGGGCATCACCCAATCCATTGTGTG  
+HWI-EAS443:3:72:1256:467#0/1  
a¥HWaa\_\_` `]WUP^\_a\_\_ZWU]ZGS\_V[VT\_H]YMDNW  
@HWI-EAS443:3:83:844:1646#0/1  
ATCTTTTCAGAGACTCGAACCGTGTACCATTCCATTCAA  
+HWI-EAS443:3:83:844:1646#0/1  
¥RHYa\_aa]a¥Sab\_a`] ` \_b\_U]`¥aaZ]`a]]Y]YZH  
@HWI-EAS443:3:98:1311:1513#0/1  
GGGGACCTTCACTACCTCCAGAGCAGAAATGAAAAGTGGC  
+HWI-EAS443:3:98:1311:1513#0/1  
`]H`¥[U^aXa[ ` `H\_`ZZU\_[\_NZ[S¥Z`^\_URQXM[\_]  
@HWI-EAS443:3:14:1067:1257#0/1  
CACTACCTCCAGAGCAGAAATNAAAAGTGGCGAGAGCAAT  
+HWI-EAS443:3:14:1067:1257#0/1  
a\_`ba¥Za`Xaa\_a]Ya^Y`¥DXT¥XaUa^\_a\_]\_]XTX^  
@HWI-EAS443:3:18:1436:1754#0/1  
AGTATGTCTGGAAGAGAAGGTAATGGTGANATTTCTCCA  
+HWI-EAS443:3:18:1436:1754#0/1  
aa^a\_a]a^` `a` `a` `\_\_UU` \_^^¥Z`VDV\_^`W\_]X\_  
@HWI-EAS443:3:27:548:12#0/1  
CTTCACTACCTCCAGAGCAGAAATGAAAAGTGGNGAGAGC  
+HWI-EAS443:3:27:548:12#0/1  
abb[ba]^RMaaaa]bV¥a`a` ` ` \_`¥Q^X`UDP[UZ[W  
@HWI-EAS443:3:37:1227:1276#0/1  
CGCCACTTTTCATTNCTGCTCTGGAGGTAGTGAAGGTCTC  
+HWI-EAS443:3:37:1227:1276#0/1  
`b` [b\_bbbbb`b[D[baab`babbaa]¥V\_UR\_aaI] `X  
@HWI-EAS443:3:38:445:1256#0/1  
CGCCACTTTTCATNTCTGCTCTGGAGGTAGTGAAGGTCTC  
+HWI-EAS443:3:38:445:1256#0/1  
][`baaaaba\_^^D¥a` `aaaa^¥^`U` `PY]` [ZFRZV  
@HWI-EAS443:3:38:776:1754#0/1  
CTTCACTACCTCCAGAGCAGAAATGAAAAGTNGCGAGAGC  
+HWI-EAS443:3:38:776:1754#0/1  
aabbbbbbbb]¥a` `]]]aa\_Y^\_`a` [XVODP[aZYXTP  
@HWI-EAS443:3:4:1772:331#0/1  
GACNATGGATTGGGTGATGCCCCATTCCTTGATCGGCTCC  
+HWI-EAS443:3:4:1772:331#0/1  
aZ[DXabba`¥]¥VSa\_\_aVQYVU^\_¥¥¥Z¥^¥¥BBBBBB

@HWI-EAS443:3:4:552:454#0/1  
GGGAGACCTTCACTACCTCCAGAGCAGAAATNAAAAGTGG  
+HWI-EAS443:3:4:552:454#0/1  
aaa¥`¥\_\_`\_\_`\_\_`¥]\_\_¥\_\_¥a¥\_aW]¥WDR¥W¥`SBB  
@HWI-EAS443:3:51:1598:1804#0/1  
GGAGACCTTCACTACCTCCAGAGCAGAAATGANAAGTGGC  
+HWI-EAS443:3:51:1598:1804#0/1  
a\_abbaabb`babb\_aba`ab\_`V`baaabb¥D]aaYaa]  
@HWI-EAS443:3:54:309:1348#0/1  
GCTCTCNCCACTTTTCATTTCTGCTCTGGAGGTAGTGAAG  
+HWI-EAS443:3:54:309:1348#0/1  
aa^]\_ZD¥]W]`aa``\_] ]^``]¥]\_`]QYXUYVNULTB  
@HWI-EAS443:3:55:1197:1137#0/1  
CTTCACTACCTCCAGAGCAGAAATGAAAAGTGNCGAGAGC  
+HWI-EAS443:3:55:1197:1137#0/1  
abbaaab`bab`aab`baab`a`aaaa``a^DSb\_a\_a^  
@HWI-EAS443:3:57:1446:1076#0/1  
GCCACTTTTNTATTTCTGCTCTGGAGGTAGTGAAGGTCTCC  
+HWI-EAS443:3:57:1446:1076#0/1  
aaaa\_bbb^D¥abaaabaa^aaa\_aa]`a]`Y`YaPV[L]  
@HWI-EAS443:3:66:889:1348#0/1  
GTCCCAATTGCTCTCGCCACTTNTCATTCTGCTCTGGAG  
+HWI-EAS443:3:66:889:1348#0/1  
aaababaaabaabaa]a`\_aa[DZ`abaaa`¥aa\_\_a]`a  
@HWI-EAS443:3:69:551:546#0/1  
GAGACCTTCACTACCTCCAGAGCAGAAAANGAAAAGTGGCG  
+HWI-EAS443:3:69:551:546#0/1  
abaabaaaabaaaa``a\_aa^aa`aa\_YD[`a\_`X\_]`\_  
@HWI-EAS443:3:73:1443:1439#0/1  
CACTANCTCCAGAGCAGAAATGAAAAGTGGCGAGAGCAAT  
+HWI-EAS443:3:73:1443:1439#0/1  
abaa]D]baaab`a]aa`a`aaa^X^a\_a]N¥G`^\_^\_\_\_\_  
@HWI-EAS443:3:77:1148:657#0/1  
GCAGAAATGAAAAGTGGCGAGAGCAANTGGGACAGAAATT  
+HWI-EAS443:3:77:1148:657#0/1  
a\_URUG]\_¥\_[]X¥RZR^aXV]ZXTVDRW[`Y¥¥^¥LV¥V  
@HWI-EAS443:3:85:1329:615#0/1  
TGTCCCAATTGCTCTNGCCACTTTTCATTTCTGCTCTGGA  
+HWI-EAS443:3:85:1329:615#0/1  
a^XaY\_P¥aYYW]LWDRXYR¥YZ[\_QTa`\_ST]L[SINW¥  
@HWI-EAS443:3:89:1166:1187#0/1  
ATGGGAGACCTTCACTACCTCCAGAGCAGAAATGAAAAGT  
+HWI-EAS443:3:89:1166:1187#0/1  
X\_\_\_\_¥\_\_\_\_\_`a^\_PDTa\_^\_Z¥\_¥¥YZ`UR]ab`\_Q[]\_  
@HWI-EAS443:3:8:1311:530#0/1  
TATTTCTCAAATTTCTGTNCCAATTGCTCTCGCCACTTT  
+HWI-EAS443:3:8:1311:530#0/1  
\_Z¥aaZ[]\_a`aaaa\_^^XDP]\_\_\_\_[`U\_X\_S\_VW[V^`\_  
@HWI-EAS443:3:16:381:199#0/1  
CCTCGCCACTTTTCATTTCTGCTCTGGAGGTAGTGAAGGG

+HWI-EAS443:3:16:381:199#0/1  
aa\_aaa`S`a[````^`[aaVSU`ZZ\_ZZVUR[]QZRBBBB  
@HWI-EAS443:3:21:629:1233#0/1  
CATTCACTACCTCCAGAGCAGAAATGAAAAGTGGCGAGAG  
+HWI-EAS443:3:21:629:1233#0/1  
``aa\_bbZ^W^`ba]b]ba\_b`aaa`aa`aa[aaaa\_a\_`  
@HWI-EAS443:3:43:213:618#0/1  
GCCTGTCCCAATTGCTCTCGCCACTTTTCATTTCTGCTCT  
+HWI-EAS443:3:43:213:618#0/1  
]`a`^`\_ab`bbaaa`aaa`a`[a`aaaaaaaa````aaaa`  
@HWI-EAS443:3:47:1260:1829#0/1  
CTCGCCACTTTTCATTTCTGCTCTGGAGGTAGTGAAGGGC  
+HWI-EAS443:3:47:1260:1829#0/1  
ababaabbbbbababab[bb]baaab`]]SbYRZ]\_\_`GY  
@HWI-EAS443:3:48:1322:546#0/1  
TGAAAAGTGGCGAGAGCAATTGGGACAGAAATTTGAGGGA  
+HWI-EAS443:3:48:1322:546#0/1  
`\_[W^a\_`^aaab^YPWZUSa`\_a`LR[UY]ZZZ\_[PXYGS  
@HWI-EAS443:3:57:477:748#0/1  
TCGCCACTTTTCATTTCTGCTCTGGAGGTAGTGAAGGTGC  
+HWI-EAS443:3:57:477:748#0/1  
\_¥a]VR]^abaWQ`\_XY]VR\_PTSXZ^]BBBBBBBBBBBB  
@HWI-EAS443:3:58:81:1859#0/1  
ATCCACCTTATTTCTCAAATTTCTGTCCCAATTGCTCTC  
+HWI-EAS443:3:58:81:1859#0/1  
SS`XR\_\_]V\_[¥bYVZ¥aZZZa][]a`aba¥]^`^\_V¥\_``  
@HWI-EAS443:3:78:347:1658#0/1  
CCACCTTATTTCTCAAATTTCTGTCCCAATTGCTCTCAC  
+HWI-EAS443:3:78:347:1658#0/1  
aa\_a\_`\_a\_a\_`\_\_a`]\_^]\_^]¥\_\_\_\_¥[¥]^\_^\_]ZZU  
@HWI-EAS443:3:84:1200:1779#0/1  
GCCACCTTATTTCTCAAATTTCTGTCCCAATTGCTCTC  
+HWI-EAS443:3:84:1200:1779#0/1  
abaaba`baaba`Z`a]aa\_`a`^`a\_`aaaa````a`aa  
@HWI-EAS443:3:86:870:192#0/1  
GAGAGCAATTGGGACAGAAATTTGAGGAAATAAGGTGGGG  
+HWI-EAS443:3:86:870:192#0/1  
aUa]XQ\_N]^`XW\_J¥]UV]^`TX¥S\_`^TQYZUY`^W`\_^]  
@HWI-EAS443:3:98:362:196#0/1  
CTCCACCTTATTTCTCAAATTTCTGTCCCAATTGCTCTC  
+HWI-EAS443:3:98:362:196#0/1  
VYX]¥¥SOR\_ba¥^^^Za``aa```b^]aa```]^`^]V]Y  
@HWI-EAS443:3:99:901:412#0/1  
AATGGATTGGGTGATGCCCCATTCCTTGATCGGCTCCGAC  
+HWI-EAS443:3:99:901:412#0/1  
aa^^\_Z\_\_M\_OG¥ZHQQ]a]^`]^`¥WV^QNOT]Y\_UFXKL  
@HWI-EAS443:3:11:1149:96#0/1  
GTTCACTACCTCCAGAGCAGAAATGAAAAGTGGCGAGAGC  
+HWI-EAS443:3:11:1149:96#0/1  
H\_]bZbaabbbba`Vbaaa]bUbbWbaa`[Yb[b`^G¥L



@HWI-EAS443:3:11:1572:1400#0/1  
CTTCACTACCTCCAGAGCAGAAATGAAAAGTGGCGAGAGG  
+HWI-EAS443:3:11:1572:1400#0/1  
U¥¥`YQYb`abbaYaX\_¥]bYY[`ba``a¥G`a[\_\_\_\_aG  
@HWI-EAS443:3:21:1792:1200#0/1  
NAAAAGTGGCGAGAGCAATTGGGACAGAAATTTGAGGAAA  
+HWI-EAS443:3:21:1792:1200#0/1  
DNWWWXXVSUXYVSTVVYXWYYPFPYUWRSYUXXXUXX  
@HWI-EAS443:3:22:1546:861#0/1  
GTCGCCACTTTTCATTTCTGCTCTGGAGGTAGTGAAGGTC  
+HWI-EAS443:3:22:1546:861#0/1  
a\_\_]a\_a\_aab`¥¥aaaaaU`V^`]YW¥Y`^[VVUZ\_NO  
@HWI-EAS443:3:22:521:1838#0/1  
TGACCTTCACTACCTCCAGAGCAGAAATGAAAAGTGGCGA  
+HWI-EAS443:3:22:521:1838#0/1  
`b`ab`\_a\_b^bb\_aaaaYaab`[U`a`aa`aa]N[`a``  
@HWI-EAS443:3:2:1655:316#0/1  
CGTCCCAATTGCTCTCGCCACTTTTCATTTCTGCTCTGGA  
+HWI-EAS443:3:2:1655:316#0/1  
ab^a`aabaa`a\_`^a``a`^aaa``baa\_a`[\_^Sa\_B  
@HWI-EAS443:3:34:1328:592#0/1  
CGCCACCTTATTTCTCAAATTTCTGTCCCAATTGCTCTC  
+HWI-EAS443:3:34:1328:592#0/1  
Zba`Ma¥\_a^`aaabbWb`abb`b^^^]XWS^aa\_\_\_a`  
@HWI-EAS443:3:35:690:1807#0/1  
ACTGTCCCAATTGCTCTCGCCACTTTTCATTTCTGCTCTG  
+HWI-EAS443:3:35:690:1807#0/1  
a\_aa\_`a`aa`Ya`^^`^]X^]¥\_^\_KDV^^\_] [X¥\_BB  
@HWI-EAS443:3:38:340:1694#0/1  
AATTGCTCTCGCCACTTTTCATTTCTGCTCTGGAGGTAGG  
+HWI-EAS443:3:38:340:1694#0/1  
]\_[RD[W\_a^^HRU]\_PW]OV\_\_\_`]U]\_[NSRU`RR`RG  
@HWI-EAS443:3:3:1199:115#0/1  
ACGCCACTTTTCATTTCTGCTCTGGAGGTAGTGAAGGTCT  
+HWI-EAS443:3:3:1199:115#0/1  
aa[W¥V`abbaX\_bb\_V`]Y`[WaZ]a`Z``BBBBBBBBB  
@HWI-EAS443:3:45:1588:125#0/1  
CCCTTCACTACCTCCAGAGCAGAAATGAAAAGTGGCGAGA  
+HWI-EAS443:3:45:1588:125#0/1  
aa]bbUbaba^Xa`Xa`Sb``b`^aaa]a[]aYaaXa]\_U  
@HWI-EAS443:3:45:424:76#0/1  
CGCCGATCAAGGAATGGGCATCACCCAATCCATTGTCTG  
+HWI-EAS443:3:45:424:76#0/1  
abaabbbabab^a¥\_aaa\_a^NaMa\_`aa\_V``aaZZ``  
@HWI-EAS443:3:47:1201:277#0/1  
CCTCGCCACTTTTCATTTCTGCTCTGGAGGTAGTGAAGGT  
+HWI-EAS443:3:47:1201:277#0/1  
abbbba]^bbbaababaabaa`aa`V\_bV\_`¥]T^Z\_L  
@HWI-EAS443:3:49:1687:2026#0/1  
GCCTCCAGAGCAGAAATGAAAAGTGGCGAGAGCAATTGGG

+HWI-EAS443:3:49:1687:2026#0/1  
aZTZU]aV`\_WWNZZ\_aXTU]`WY[NTRSLVLRWLT TTTT  
@HWI-EAS443:3:52:1011:241#0/1  
CTTCACTACCTCCAGAGCAGAAATGAAAAGTGGCGAGAGT  
+HWI-EAS443:3:52:1011:241#0/1  
ab``ab[TVb\_a\_]a^XZ]X^[aa\_]QaP``X`W\_GWD  
@HWI-EAS443:3:52:1773:1203#0/1  
AGGGAGACCTTCACTACCTCCAGAGCAGAAATGAAAAGTG  
+HWI-EAS443:3:52:1773:1203#0/1  
aaa``aa`a`aab\_`a^a\_\_\_`]^a\_]a\_``\_[V\_  
@HWI-EAS443:3:54:593:1574#0/1  
CTCCAGAGCAGAAATGAAAAGTGGCGAGAGCAATTGGGAG  
+HWI-EAS443:3:54:593:1574#0/1  
`]V\_^YF]]\_[Z\_P\_aaZXPVYba\_¥V\_FQ[OFL][[aJI  
@HWI-EAS443:3:56:614:1803#0/1  
CGAAAAGTGGCGAGAGCAATTGGGACAGAAATTTGAGGAA  
+HWI-EAS443:3:56:614:1803#0/1  
J]bbbVY\_b^`baUa`aa\_`^`¥a^bbbbbbbab`^\_  
@HWI-EAS443:3:59:187:492#0/1  
AGCGGATATGCCAAAGGAAACAGTCTACCTGAAAGCTTGA  
+HWI-EAS443:3:59:187:492#0/1  
`aaba]b]a]aa\_a]^WRQ¥[ZUJ[]a^¥aaMYVZMVaXX  
@HWI-EAS443:3:63:1481:2025#0/1  
CGGAGACCTTCACTACCTCCAGAGCAGAAATGAAAAGTGG  
+HWI-EAS443:3:63:1481:2025#0/1  
H^WX`b¥`^\_ZWaTb\_`¥``b]b`¥XZ]aT``\_]\_F\_]`  
@HWI-EAS443:3:65:1721:730#0/1  
CTTCACTACCTCCAGAGCAGAAATGAAAAGTGGCGAGAGG  
+HWI-EAS443:3:65:1721:730#0/1  
]W\_JZ^a]^`b^`^bbWQ``^RXRHPZ]¥¥N\_VQWTGHOM  
@HWI-EAS443:3:66:954:493#0/1  
CCTGTCCCAATTGCTCTCGCCACTTTTTCATTTCTGCTCTG  
+HWI-EAS443:3:66:954:493#0/1  
abaa`baa`V`a`\_aaa`^`a\_a`aa\_`aaa^`[]`^\_\_  
@HWI-EAS443:3:67:36:974#0/1  
TGCGAGAGCAATTGGGACAGAAATTTGAGGAAATAAGGTG  
+HWI-EAS443:3:67:36:974#0/1  
X[bb^X[`a^babbb\_aabb]ZK^Z\_aYU`XS`aZ\_aa0a  
@HWI-EAS443:3:69:1464:1625#0/1  
ATGGGAGACCTTCACTACCTCCAGAGCAGAAATGAAAAGG  
+HWI-EAS443:3:69:1464:1625#0/1  
aaaa\_[]ZZW]U^`ZZZ]Q]\_ZVZPXPVXZ[`TVZSLH  
@HWI-EAS443:3:69:1586:1906#0/1  
CATTTCTCAAATTTCTGTCCCAATTGCTCTCGCCACTTT  
+HWI-EAS443:3:69:1586:1906#0/1  
`a^baZI¥`]¥Xb]\_\_^a^`¥QYZ\_]UY^`QUZ\_`]W¥X\_  
@HWI-EAS443:3:69:237:899#0/1  
GAGCCACCTTATTTCTCAAATTTCTGTCCCAATTGCTCT  
+HWI-EAS443:3:69:237:899#0/1  
abbbbbbaabbbbbbbbbbb`bbbbbaabbabbabaaba

@HWI-EAS443:3:72:811:484#0/1  
ATCTGTCCCAATTGCTCTCGCCACTTTTCATTTCTGCTCT  
+HWI-EAS443:3:72:811:484#0/1  
aa^`a[aa\_aa`\_`aaaa\_\_a\_\_`a`a\_[aaa\_a\_a\_]\_  
@HWI-EAS443:3:72:946:58#0/1  
GGCCCCATTCTTGATCGGCTCCGCCGAGATCAAAAGTCC  
+HWI-EAS443:3:72:946:58#0/1  
aaaa`aabaabbbaa`\_`Z`\_\_Y`^Z\_K\_UPP\_]`¥\_UUU  
@HWI-EAS443:3:77:502:2046#0/1  
NAAAAGTGGCGAGAGCAATTGGGACAGAAATTTGAGGAAA  
+HWI-EAS443:3:77:502:2046#0/1  
DNVVLRRSSULRNQUTTTVTRRTTVVVVQVXZVMTUWSWW  
@HWI-EAS443:3:82:1240:693#0/1  
CGTCCCAATTGCTCTCGCCACTTTTCATTTCTGCTCTGGA  
+HWI-EAS443:3:82:1240:693#0/1  
ababbb¥¥abbbabbababababbbbbbabbabbbbbb  
@HWI-EAS443:3:84:1484:532#0/1  
AGCCACTTTTCATTTCTGCTCTGGAGGTAGTGAAGGTCTC  
+HWI-EAS443:3:84:1484:532#0/1  
a\_abbabbbb[bbba]ba[b]bbbabaVbbabZ¥]aJL^I  
@HWI-EAS443:3:84:591:936#0/1  
TGGACTTTTGATCTCGGCGGAGCCGATCAAGGAATGGGGC  
+HWI-EAS443:3:84:591:936#0/1  
abaaaaaa`\_a`aaaa`a`\_\_\_\_`\_`\_YT\_[^¥Q[SUY¥¥S  
@HWI-EAS443:3:88:1584:1674#0/1  
CTTCACTACCTCCAGAGCAGAAATGAAAAGTGGCGAGAGT  
+HWI-EAS443:3:88:1584:1674#0/1  
`\_`¥\_baba\_IIP]Tb^ba¥¥NZ\_ab\_Wba[^\_THHZPaQD  
@HWI-EAS443:3:8:1257:1846#0/1  
GCCCAATTGCTCTCGCCACTTTTCATTTCTGCTCTGGAGG  
+HWI-EAS443:3:8:1257:1846#0/1  
Y\_\_Q\_baaa`a`aX`\_`\_`ababbabaa]ba\_WaIbaaXa`  
@HWI-EAS443:3:90:1472:1353#0/1  
ACTGTCCCAATTGCTCTCGCCACTTTTCATTTCTGCTCTG  
+HWI-EAS443:3:90:1472:1353#0/1  
`a¥[JW\_bb^[^`a\_P\_bYY^^]aab`a`aa`]]`a`a\_  
@HWI-EAS443:3:91:1444:1196#0/1  
CGTCCCAATTGCTCTCGCCACTTTTCATTTCTGCTCTGGA  
+HWI-EAS443:3:91:1444:1196#0/1  
aba[[W¥[\_][\_abb¥R^\_¥abbb¥]¥aaaWabb^X\_b`a  
@HWI-EAS443:3:93:691:188#0/1  
CTCTGTCCCAATTGCTCTCGCCACTTTTCATTTCTGCTCT  
+HWI-EAS443:3:93:691:188#0/1  
aabab`aabab`abbaaaaaaaaaaaaaa`a`a^aa¥`X\_  
@HWI-EAS443:3:9:74:123#0/1  
ATGGGAGACCTTCACTACCTCCAGAGCAGAAATGAAAAGA  
+HWI-EAS443:3:9:74:123#0/1  
aaa[a`^¥UaQTU`Z¥ZZ\_NYa[YLP^L`\_V^^\_\_^N  
@HWI-EAS443:3:100:1331:1198#0/1  
TACCTCCAGAGCAGAAATGAAAAGTGGCGAGAGCAATTGG



@HWI-EAS443:3:10:216:573#0/1  
ATGGGAGACCTTCACTACCTCCAGAGCAGAAATGAAAAGT  
+HWI-EAS443:3:10:216:573#0/1  
^bb¥H]YWU`Z¥U\_ab¥UT¥^`¥^¥\_YU^U[V\_JZYV]a[  
@HWI-EAS443:3:10:224:850#0/1  
AGCCGATCAAGGAATGGGGCATCACCCAATCCATTGTCTG  
+HWI-EAS443:3:10:224:850#0/1  
a¥\_`^WY\_^U\_b\_a\_]`aXa\_\_a\_\_aa\_\_^^`\_\_W]`\_  
@HWI-EAS443:3:10:225:1064#0/1  
GGAGACCTTCACTACCTCCAGAGCAGAAATGAAAAGTGGC  
+HWI-EAS443:3:10:225:1064#0/1  
`Z\_U]\_\_b[\_`Y`]¥QY\_aaYXRQ^Y`Xa]aa^UO¥\_Y  
@HWI-EAS443:3:10:238:298#0/1  
GTCCCAATTGCTCTCGCCACTTTTCATTTCTGCTCTGGAG  
+HWI-EAS443:3:10:238:298#0/1  
aVV]^GY]ZYGZY]^X^YRYU^]VU\_]XXYXXVYYYYVX  
@HWI-EAS443:3:10:260:1031#0/1  
CCTTCACTACCTCCAGAGCAGAAATGAAAAGTGGCGAGAG  
+HWI-EAS443:3:10:260:1031#0/1  
^`^aa]aaa¥VV[^`P]UX]N\_¥YLN[[]]GWSU]Z\_ZV  
@HWI-EAS443:3:10:701:725#0/1  
TTCCTCAAATTTCTGTCCCAATTGCTCTCGCCACTTTTCA  
+HWI-EAS443:3:10:701:725#0/1  
aaaaaaaa`baa\_aa\_\_aa`a`a\_\_a`\_`\_^a`\_\_`\_\_  
@HWI-EAS443:3:10:881:826#0/1  
CTTCACTACCTCCAGAGCAGAAATGAAAAGTGGCGAGAGC  
+HWI-EAS443:3:10:881:826#0/1  
Z`abbbba`abZ¥`b``a\_baabbb\_U[`bab^X``a]^T  
@HWI-EAS443:3:11:1098:561#0/1  
CACTACCTCCAGAGCAGAAATGAAAAGTGGCGAGAGCAAT  
+HWI-EAS443:3:11:1098:561#0/1  
ababaa`bbbbbb[baabaaaaabaaa¥aaab`a]`Z[\_\_\_  
@HWI-EAS443:3:11:1148:822#0/1  
CGCCACTTTTCATTTCTGCTCTGGAGGTAGTGAAGGTCTC  
+HWI-EAS443:3:11:1148:822#0/1  
abaa`aaaaaaaa`a`a`a`\_``[^a`W¥]W¥[^`¥TW^B  
@HWI-EAS443:3:11:1151:392#0/1  
CAGAAATGAAAAGTGGCGAGAGCAATTTGGGACAGAAATTT  
+HWI-EAS443:3:11:1151:392#0/1  
abb`aabbabbab`bbaaaa^a\_aXaa`aa\_aa^`]aa`  
@HWI-EAS443:3:11:122:1476#0/1  
CACCTTATTTCTCAAATTTCTGTCCCAATTGCTCTCGCC  
+HWI-EAS443:3:11:122:1476#0/1  
aaaZWW\_\_`\_a\_\_[aU`\_VX^\_^ZWaa`\_]SS\_X]]]]]W  
@HWI-EAS443:3:11:1445:2013#0/1  
TTTTGATCTCGCGGAGCCGATCAAGGAATGGGGCATCAC  
+HWI-EAS443:3:11:1445:2013#0/1  
aaaa`aa¥]V^`\_a\_\_ZRV[\_[Xa\_\_X[VZ[¥SQ]¥N\_B  
@HWI-EAS443:3:11:1502:942#0/1  
TGAAAAGTGGCGAGAGCAATTTGGGACAGAAATTTGAGGAA

+HWI-EAS443:3:11:1502:942#0/1  
aaaa¥`a\_aa^`^]PRNW\_`[^WXN[`]Y^^`¥\_Y\_YYY  
@HWI-EAS443:3:11:342:1102#0/1  
GAAAAGTGGCGAGAGCAATTGGGACAGAAATTTGAGGAAA  
+HWI-EAS443:3:11:342:1102#0/1  
a\_U\_aa\_bab`aWaa[aaaa`aZaab`aaaa^Ya^\_a  
@HWI-EAS443:3:11:467:179#0/1  
GCAGAAATGAAAAGTGGCGAGAGCAATTGGGACAGAAATT  
+HWI-EAS443:3:11:467:179#0/1  
¥`Vb`abbb`babb^baabaa]a\_\_[]`aaa\_¥a`Y[\_YY  
@HWI-EAS443:3:11:481:1096#0/1  
TCGCCACTTTTCATTTCTGCTCTGGAGGTAGTGAAGGTCT  
+HWI-EAS443:3:11:481:1096#0/1  
`]¥`aaaaaaa`a\_aa`\_]\_a`UZ^I^a0\_^]BBBBB  
@HWI-EAS443:3:11:575:1398#0/1  
GAGACCTTCACTACCTCCAGAGCAGAAATGAAAAGTGGCG  
+HWI-EAS443:3:11:575:1398#0/1  
]U\_\_\_\_]\_aaa`a¥VZ¥[]a^^¥^aa]a\_aaZZ^`[Y\_J\_\_  
@HWI-EAS443:3:11:581:411#0/1  
GGGAGACCTTCACTACCTCCAGAGCAGAAATGAAAAGTGG  
+HWI-EAS443:3:11:581:411#0/1  
aaa`b\_[]`aa\_\_a^`\_a\_]a^a\_a`^¥^``¥^¥¥`W\_[]  
@HWI-EAS443:3:11:863:1729#0/1  
GTATGTCCTGGAAGAGAAGGTAATGGTGAATTTCTCCAA  
+HWI-EAS443:3:11:863:1729#0/1  
\_\_]\_]`abbbaaaaa`[[Xa^¥`YGaaa`\_a]a[H`a  
@HWI-EAS443:3:11:896:1557#0/1  
CGATCAAGGAATGGGGCATCACCCAATCCATTGTCTGCAA  
+HWI-EAS443:3:11:896:1557#0/1  
aa\_a\_a^a\_\_a\_^a`¥a``\_aaaa\_\_`SZ^`^ZPXTS\_BB  
@HWI-EAS443:3:12:1017:689#0/1  
TGCGGATATGCCAAAGGAAACAGTCTACCTGAAAGCTTGA  
+HWI-EAS443:3:12:1017:689#0/1  
aab`a`aaaa`a`^aa`\_\_¥Y`]¥\_]W\_`YOV\_W^`] []  
@HWI-EAS443:3:12:1059:1612#0/1  
GGAGACCTTCACTACCTCCAGAGCAGAAATGAAAAGTGGC  
+HWI-EAS443:3:12:1059:1612#0/1  
Za]\_aababbb]ab\_I\_b[\_baaaa`a\_b\_U]aaabQ]\_Y  
@HWI-EAS443:3:12:1151:596#0/1  
GAGACCTTCACTACCTCCAGAGCAGAAATGAAAAGTGGCG  
+HWI-EAS443:3:12:1151:596#0/1  
^abaaZba`b`aX`]`TWa^a\_ab]\_W\_a^^¥aa[`]G¥  
@HWI-EAS443:3:12:1194:604#0/1  
GACCTTCACTACCTCCAGAGCAGAAATGAAAAGTGGCGAG  
+HWI-EAS443:3:12:1194:604#0/1  
[abUbb``abb``\_a\_\_WU\_]XbJa¥bbaa¥U^D[\_`] ^a  
@HWI-EAS443:3:12:1529:1052#0/1  
CCTTCACTACCTCCAGAGCAGAAATGAAAAGTGGCGAGAG  
+HWI-EAS443:3:12:1529:1052#0/1  
abb\_]a`abaaa][^b\_a\_aa`a`aaaa`^a^a\_\_a`aS`

@HWI-EAS443:3:12:1582:1068#0/1  
GTCCCAATTGCTCTGCCACTTTTCATTTCTGCTCTGGAG  
+HWI-EAS443:3:12:1582:1068#0/1  
¥N¥Y^]T\_a`aXaZb[Xa]\_`\_]V]a`a¥``V^[^¥ZW\_  
@HWI-EAS443:3:12:181:998#0/1  
ACTACCTCCAGAGCAGAAATGAAAAGTGGCGAGAGCAATT  
+HWI-EAS443:3:12:181:998#0/1  
aa]¥``\_aaa`^aa\_`\_`\_`^PL]\_Y^\_^[[^Z]^V^\_\_  
@HWI-EAS443:3:12:244:1591#0/1  
GAAAAGTGGCGAGAGCAATTGGGACAGAAATTTGAGGAAA  
+HWI-EAS443:3:12:244:1591#0/1  
abb`aa``ba\_^^¥P¥`baaa^a``aaaa`aa`\_`a`Ya  
@HWI-EAS443:3:12:270:1655#0/1  
GAAAAGTGGCGAGAGCAATTGGGACAGAAATTTGAGGAAA  
+HWI-EAS443:3:12:270:1655#0/1  
aW`aWMX\_`\_`¥\_XX]K[SS\_HPP^`NYXRBBBBBBBBB  
@HWI-EAS443:3:12:316:406#0/1  
GAGACCTTCACTACCTCCAGAGCAGAAATGAAAAGTGGCG  
+HWI-EAS443:3:12:316:406#0/1  
¥aab`b``a`aaaa`a\_\_\_a`a`b\_\_a\_]``aaa]\_a\_  
@HWI-EAS443:3:12:553:199#0/1  
ATCTCGGCGGAGCCGATCAAGGAATGGGGCATCACCCAAT  
+HWI-EAS443:3:12:553:199#0/1  
T^`\_R¥¥a][WWZT[WHU\_WV[BBBBBBBBBBBBBBBBB  
@HWI-EAS443:3:13:1227:1667#0/1  
GCTCTGCCACTTTTCATTTCTGCTCTGGAGGTAGTGAAG  
+HWI-EAS443:3:13:1227:1667#0/1  
\_`¥[LEVO¥]WT]^XX]YWXUWVNL YOY¥[BBBBBBBBB  
@HWI-EAS443:3:13:1339:208#0/1  
ATGAAAAGTGGCGAGAGCAATTGGGACAGAAATTTGAGGA  
+HWI-EAS443:3:13:1339:208#0/1  
`baaaa^b]a`\_aZ¥T``]\_aa`a`P¥\_^^YX`a``T\_\_G  
@HWI-EAS443:3:13:1570:1521#0/1  
GCTCTGCCACTTTTCATTTCTGCTCTGGAGGTAGTGAAG  
+HWI-EAS443:3:13:1570:1521#0/1  
a`a`aab`a`^¥`bZG]aaa\_a\_Z\_Za^P[a\_G\_`R]¥]\_  
@HWI-EAS443:3:13:1665:1146#0/1  
ACCTTCACTACCTCCAGAGCAGAAATGAAAAGTGGCGAGA  
+HWI-EAS443:3:13:1665:1146#0/1  
a[aa`a\_aaWR¥^]\_\_\_a]X\_¥\_`^`^^\_]`^V`¥R\_`^VY  
@HWI-EAS443:3:13:451:1781#0/1  
CAGAAATGAAAAGTGGCGAGAGCAATTGGGACAGAAATTT  
+HWI-EAS443:3:13:451:1781#0/1  
]Xa\_\_a`^^^WZ^^¥W]a\_\_IU`a^^aaa\_P]YVX]P^`a  
@HWI-EAS443:3:13:491:1426#0/1  
ATGGGAGACCTTCACTACCTCCAGAGCAGAAATGAAAAGT  
+HWI-EAS443:3:13:491:1426#0/1  
aXaba[¥`abaaa`¥QZa`aZ\_a`TaaZ\_\_VY\_T`Y\_¥UG  
@HWI-EAS443:3:13:622:600#0/1  
GGGAGACCTTCACTACCTCCAGAGCAGAAATGAAAAGTGG

+HWI-EAS443:3:13:622:600#0/1  
ab`ba]a^aaaaa`aaaa\_`a\_a`aaN\_\_`a¥SY\_^P[a  
@HWI-EAS443:3:13:692:188#0/1  
CTTCACTACCTCCAGAGCAGAAATGAAAAGTGGCGAGAGC  
+HWI-EAS443:3:13:692:188#0/1  
abbbbabbbb`aaaaabbaa`aabaaaaa]``\_a`a^aU  
@HWI-EAS443:3:13:831:272#0/1  
GACCTTCACTACCTCCAGAGCAGAAATGAAAAGTGGCGAG  
+HWI-EAS443:3:13:831:272#0/1  
``a]T\_]a`aaa`]PZ]`0`¥U]UQ^Xa]XUZXM\_]`R^  
@HWI-EAS443:3:13:945:843#0/1  
GACCTTCACTACCTCCAGAGCAGAAATGAAAAGTGGCGAG  
+HWI-EAS443:3:13:945:843#0/1  
aaaa`aaaa\_`a`a\_\_a``\_`a\_^a\_a\_\_^``Na\_¥a¥\_  
@HWI-EAS443:3:14:1028:1599#0/1  
GAAAAGTGGCGAGAGCAATTGGGACAGAAATTTGAGGAAA  
+HWI-EAS443:3:14:1028:1599#0/1  
aaaa``X]`Z]Z\_Y]TY`\_\_U\_] [S^\_^ZYX\_\_Y]Z]XY  
@HWI-EAS443:3:14:1085:409#0/1  
CAGAAATGAAAAGTGGCGAGAGCAATTGGGACAGAAATTT  
+HWI-EAS443:3:14:1085:409#0/1  
aaaa\_aaaa`aaXa¥^a\_a\_]¥Z\_`^`a\_]aa\_\_\_\_\_]a  
@HWI-EAS443:3:14:1092:1563#0/1  
GCCACTTTTCATTTCTGCTCTGGAGGTAGTGAAGGTCTCC  
+HWI-EAS443:3:14:1092:1563#0/1  
aa]^^`\_aa]````^\_`\_^\_\_\_X]\_]SZVRXNU^]NVNFR  
@HWI-EAS443:3:14:1195:1243#0/1  
GTGGCGAGAGCAATTGGGACAGAAATTTGAGGAAATAAGG  
+HWI-EAS443:3:14:1195:1243#0/1  
a`b`aa[a\_a`XU¥`^\_YQNY^U^]`¥UO¥`0¥^¥]L][  
@HWI-EAS443:3:14:1235:1983#0/1  
CTTCACTACCTCCAGAGCAGAAATGAAAAGTGGCGAGAGC  
+HWI-EAS443:3:14:1235:1983#0/1  
a\_`abaaaa`aaaa\_\_aaa\_`\_aaa\_¥`¥a]]a]`Y^]  
@HWI-EAS443:3:14:132:906#0/1  
GACCTTCACTACCTCCAGAGCAGAAATGAAAAGTGGCGAG  
+HWI-EAS443:3:14:132:906#0/1  
aaaaU`a``¥Z\_``aaaa\_]`a]`Y\_a`¥\_``Ra`^aZa  
@HWI-EAS443:3:14:1466:112#0/1  
ATTGGGTGATGCCCCATTCTTGATCGGCTCCGCCGAGAT  
+HWI-EAS443:3:14:1466:112#0/1  
a`¥a\_`Za\_a`¥Y\_a`aa^`\_aYKX[``¥¥ZV¥WTWWWUQ  
@HWI-EAS443:3:14:146:1338#0/1  
GGGAGACCTTCACTACCTCCAGAGCAGAAATGAAAAGTGG  
+HWI-EAS443:3:14:146:1338#0/1  
aa^`a\_aa\_``]a\_`\_]aa\_ZT^\_aa^SXQQ[W`\_`U\_S  
@HWI-EAS443:3:14:1485:544#0/1  
GGGAGACCTTCACTACCTCCAGAGCAGAAATGAAAAGTGG  
+HWI-EAS443:3:14:1485:544#0/1  
`¥]^Y^aU^WQRXTT^U\_ [¥[\_TaV\_`R^^`UUPP¥RTP



@HWI-EAS443:3:14:1508:1090#0/1  
GGAGACCTTCACTACCTCCAGAGCAGAAATGAAAAGTGGC  
+HWI-EAS443:3:14:1508:1090#0/1  
\_]\_\_Zaa\_``a\_TX\_[`a¥`[^a^¥[aa\_¥\_[`W\_YQ  
@HWI-EAS443:3:14:210:948#0/1  
CTTCACTACCTCCAGAGCAGAAATGAAAAGTGGCGAGAGC  
+HWI-EAS443:3:14:210:948#0/1  
aaaaaaabaa`a`aa`a`aa`¥aaaa`aa]\_Z`\_\_\_\_[W^  
@HWI-EAS443:3:14:235:145#0/1  
ATGGGAGACCTTCACTACCTCCAGAGCAGAAATGAAAAGT  
+HWI-EAS443:3:14:235:145#0/1  
aY`abZ]^\_\_a``^a]\_^a^`\_Q`G[`¥\_W^^^T[Z¥]Q  
@HWI-EAS443:3:14:249:1312#0/1  
GAAATGAAAAGTGGCGAGAGCAATTGGGACAGAAATTTGA  
+HWI-EAS443:3:14:249:1312#0/1  
^\_aabbXY^`¥a\_a`a\_ZY`aV`a]¥TZaa`a`\_`]^`^  
@HWI-EAS443:3:14:254:180#0/1  
GGAGACCTTCACTACCTCCAGAGCAGAAATGAAAAGTGGC  
+HWI-EAS443:3:14:254:180#0/1  
a\_a\_\_aa^U^UOYVT¥VW\_YVV]]Y]YXY]]XU^X]UYWB  
@HWI-EAS443:3:14:29:1307#0/1  
CGCCACTTTTCATTTCTGCTCTGGAGGTAGTGAAGGTCTC  
+HWI-EAS443:3:14:29:1307#0/1  
abbba[\_aaba]`aaa\_aa\_\_aba[abXb\_Nb[aa[GY]]  
@HWI-EAS443:3:14:32:1014#0/1  
GGAGACCTTCACTACCTCCAGAGCAGAAATGAAAAGTGGC  
+HWI-EAS443:3:14:32:1014#0/1  
`¥T`VH]a`a`a\_\_\_\_\_```][T\_`^`Z[Y`\_^`\_`^dW\_\_\_\_  
@HWI-EAS443:3:14:429:1636#0/1  
CAAATTTCTGTCCCAATTGCTCTCGCCACTTTTCATTTCT  
+HWI-EAS443:3:14:429:1636#0/1  
a```baa`aa\_aaab^a^`aaaaaaaa`a`a\_aa``\_a\_  
@HWI-EAS443:3:14:558:1303#0/1  
CTTCACTACCTCCAGAGCAGAAATGAAAAGTGGCGAGAGC  
+HWI-EAS443:3:14:558:1303#0/1  
\_WX\_`a```ba``a\_PVZRaY¥T\_a`\_¥Z\_R\_]\_] [ZTXF  
@HWI-EAS443:3:14:607:1964#0/1  
GACCTTCACTACCTCCAGAGCAGAAATGAAAAGTGGCGAG  
+HWI-EAS443:3:14:607:1964#0/1  
aaa`ababbaaTaaaab`aUa\_a\_`aaa``ba¥Ua\_`[``  
@HWI-EAS443:3:14:681:1913#0/1  
CTCTCGCCACTTTTCATTTCTGCTCTGGAGGTAGTGAAGG  
+HWI-EAS443:3:14:681:1913#0/1  
aaa¥aba\_a`b`aa\_aaaaa`a\_Q]a\_]`aQ`VX\_Y\_T\_  
@HWI-EAS443:3:14:728:1476#0/1  
GCCACTTTTCATTTCTGCTCTGGAGGTAGTGAAGGTCTCC  
+HWI-EAS443:3:14:728:1476#0/1  
W\_X[b¥¥¥bbb`^^abUaaa\_]^\_`bV¥`a]ZbUVI[[[E[  
@HWI-EAS443:3:14:806:483#0/1  
ATGGGAGACCTTCACTACCTCCAGAGCAGAAATGAAAAGT

+HWI-EAS443:3:14:806:483#0/1  
a]NZU]a`b\_T\_a`U¥XHZZa`T`X`a¥^¥VYa\_`^¥^VN  
@HWI-EAS443:3:14:983:693#0/1  
GCAGAAATGAAAAGTGGCGAGAGCAATTGGGACAGAAATT  
+HWI-EAS443:3:14:983:693#0/1  
a\_ab`\_aa\_\_a\_`^`a]a\_`^`]¥\_]\_\_`\_]X`\_\_]]\_\_  
@HWI-EAS443:3:15:1213:318#0/1  
GGGAGACCTTCACTACCTCCAGAGCAGAAATGAAAAGTGG  
+HWI-EAS443:3:15:1213:318#0/1  
aaa[a\_¥\_`X¥a\_[]UN\_NG]^]XUZaW\_Za`^¥[Y`YaX  
@HWI-EAS443:3:15:1349:377#0/1  
GGCGAGAGCAATTGGGACAGAAATTTGAGGAAATAAGGTG  
+HWI-EAS443:3:15:1349:377#0/1  
ababababa\_\_bbaab\_\_aaa`Xaaa^\_ab]Z\_a\_^aaXa  
@HWI-EAS443:3:15:1362:1412#0/1  
TTCACCTCCAGAGCAGAAATGAAAAGTGGCGAGAGCA  
+HWI-EAS443:3:15:1362:1412#0/1  
`a]aW`a`S^]\_abYa`Ya`a[ab`^\_`aVa`\_a¥^]¥OZ  
@HWI-EAS443:3:15:1439:48#0/1  
CACTACCTCCAGAGCAGAAATGAAAAGTGGCGAGAGCAAT  
+HWI-EAS443:3:15:1439:48#0/1  
ababbbbababaUbX\_\_ab\_]abb`[`aa\_^a¥a``\_¥PY[a  
@HWI-EAS443:3:15:1580:629#0/1  
CCCAATTGCTCTCGCCACTTTTCATTTCTGCTCTGGAGGT  
+HWI-EAS443:3:15:1580:629#0/1  
`b`bababbbbababaaabaabbabbababaa`a`\_aaa^  
@HWI-EAS443:3:15:1719:665#0/1  
CTGTCCCAATTGCTCTCGCCACTTTTCATTTCTGCTCTGG  
+HWI-EAS443:3:15:1719:665#0/1  
ab\_¥Uaa`\_bb`bbaa`aSX¥\_bbbaabbb]bba]abba  
@HWI-EAS443:3:15:226:276#0/1  
CTCGCCACTTTTCATTTCTGCTCTGGAGGTAGTGAAGGTC  
+HWI-EAS443:3:15:226:276#0/1  
a`bbb`[Y\_^ab`^a^`aaa^a\_\_]\_aaU]YQW`]XXDN  
@HWI-EAS443:3:15:248:1414#0/1  
CCCAATTGCTCTCGCCACTTTTCATTTCTGCTCTGGAGGT  
+HWI-EAS443:3:15:248:1414#0/1  
abb¥SZaaba`aaba`L`aaaaaa\_\_aa\_a`aa\_`]a^T  
@HWI-EAS443:3:15:48:1685#0/1  
GAAAAGTGGCGAGAGCAATTGGGACAGAAATTTGAGGAAA  
+HWI-EAS443:3:15:48:1685#0/1  
¥ab[b]Y¥]a`a]Z`PZ\_RUO`^Y]\_\_X[`[¥`XRT\_X\_\_  
@HWI-EAS443:3:15:582:1201#0/1  
TCACTACCTCCAGAGCAGAAATGAAAAGTGGCGAGAGCAA  
+HWI-EAS443:3:15:582:1201#0/1  
abbaaaaaaa`\_a\_aa`b`\_aa`a`\_a`^a\_`a\_`^`^]\_  
@HWI-EAS443:3:15:67:1334#0/1  
CACTACCTCCAGAGCAGAAATGAAAAGTGGCGAGAGCAAT  
+HWI-EAS443:3:15:67:1334#0/1  
^V\_aY[[R¥b`a``Y]`ZZQ\_¥YTQ\_\_LRW]aXXZWZ\_WH

@HWI-EAS443:3:15:839:1363#0/1  
GAGACCTTACTACCTCCAGAGCAGAAATGAAAAGTGGCG  
+HWI-EAS443:3:15:839:1363#0/1  
\_¥Z^bab[baaba`bab^\_aab[bb\_a`a]]a`\_a¥^`\_a  
@HWI-EAS443:3:15:880:1063#0/1  
CTACCTCCAGAGCAGAAATGAAAAGTGGCGAGAGCAATTG  
+HWI-EAS443:3:15:880:1063#0/1  
aabaaaaabaaaa`\_]`aaa\_a`aaZb`\_a\_aVa^]\_]`\_`  
@HWI-EAS443:3:15:992:348#0/1  
GAAAAGTGGCGAGAGCAATTGGGACAGAAATTTGAGGAAA  
+HWI-EAS443:3:15:992:348#0/1  
aaaaab^aa`aadWaU\_\_\_`¥a`]Z`aW\_\_\_`a`¥]^U]^  
@HWI-EAS443:3:16:1326:69#0/1  
CTTACTACCTCCAGAGCAGAAATGAAAAGTGGCGAGAGC  
+HWI-EAS443:3:16:1326:69#0/1  
a`[``UX¥¥`Z¥\_^ZVZ[``[LYGV\_GNZ]]V¥VBBBBBBB  
@HWI-EAS443:3:16:1446:349#0/1  
GGGAGACCTTACTACCTCCAGAGCAGAAATGAAAAGTGG  
+HWI-EAS443:3:16:1446:349#0/1  
abbab\_a`aa\_a\_aa```\_^a`a]\_aZ``aa\_\_\_]\_aW`\_`  
@HWI-EAS443:3:16:1574:1054#0/1  
GAAAAGTGGCGAGAGCAATTGGGACAGAAATTTGAGGAAA  
+HWI-EAS443:3:16:1574:1054#0/1  
aa\_\_a`]aa[a]^S`R]W\_\_\_`U\_\_a[^W^aa]X`]WXZ  
@HWI-EAS443:3:16:1626:1331#0/1  
CACCTTATTTCTCAAATTTCTGTCCCAATTGCTCTCGCC  
+HWI-EAS443:3:16:1626:1331#0/1  
I¥\_abb]bbbbbb`^aa`a\_bb]a`aaabbbab`bab^b  
@HWI-EAS443:3:16:618:1827#0/1  
GCAGAAATGAAAAGTGGCGAGAGCAATTGGGACAGAAATT  
+HWI-EAS443:3:16:618:1827#0/1  
`b``\_^aaaaaaa\_aabaa`\_^`[\_\_\_]¥[\_Q\_a^\_^\_^\_  
@HWI-EAS443:3:16:795:43#0/1  
GAAATGAAAAGTGGCGAGAGCAATTGGGACAGAAATTTGA  
+HWI-EAS443:3:16:795:43#0/1  
a`W``\_a``^`X\_]\_]UQRZLWX]]^\_]XZZ\_WUYZ¥ZZT  
@HWI-EAS443:3:16:805:1417#0/1  
CCTTACTACCTCCAGAGCAGAAATGAAAAGTGGCGAGAG  
+HWI-EAS443:3:16:805:1417#0/1  
aaa\_aaa^V[¥SZ`^X\_]Z^¥`\_^ZP^`^\_W\_UW\_[RUU  
@HWI-EAS443:3:16:882:1763#0/1  
CTTACTACCTCCAGAGCAGAAATGAAAAGTGGCGAGAGC  
+HWI-EAS443:3:16:882:1763#0/1  
abbbbabbbba``aaaabbaaab`aaba\_[`aaaaa``Z  
@HWI-EAS443:3:17:1203:1062#0/1  
GGGAGACCTTACTACCTCCAGAGCAGAAATGAAAAGTGG  
+HWI-EAS443:3:17:1203:1062#0/1  
^\_X¥`]¥a\_abX`¥V`a`]XZZ^aZ^[aa^\_\_^[W¥^  
@HWI-EAS443:3:17:1712:1626#0/1  
GTCCCAATTGCTCTCGCCACTTTTCATTTCTGCTCTGGAG

+HWI-EAS443:3:17:1712:1626#0/1  
abba`abbb`baabaab^a`aaaa`aa`a\_aaa`\_\_a\_\_\_\_  
@HWI-EAS443:3:17:175:756#0/1  
CCTTCACTACCTCCAGAGCAGAAATGAAAAGTGGCGAGAG  
+HWI-EAS443:3:17:175:756#0/1  
a`H`YXWLZ¥a^Za^a¥`SPVNNX\_`VNQ[[T¥\_\_`RPUX  
@HWI-EAS443:3:17:1782:711#0/1  
CTCCAGAGCAGAAATGAAAAGTGGCGAGAGCAATTGGGAC  
+HWI-EAS443:3:17:1782:711#0/1  
[````ba`Vaba\_b]a\_aaa`Qa[[`\_\_RRDI^\_ZP`[[H  
@HWI-EAS443:3:17:408:1705#0/1  
CCCAATTGCTCTCGCCACTTTTCATTTCTGCTCTGGAGGT  
+HWI-EAS443:3:17:408:1705#0/1  
ababaaaabbbababaaa\_bbaaabbaabaaa`aaaa`a¥  
@HWI-EAS443:3:17:603:796#0/1  
GTCCCAATTGCTCTCGCCACTTTTCATTTCTGCTCTGGAG  
+HWI-EAS443:3:17:603:796#0/1  
a\_a`b]a`aaa`\_`\_`\_a`\_`a``¥a`YZ\_\_¥¥\_¥\_¥\_  
@HWI-EAS443:3:17:701:1131#0/1  
GCCACCTTATTTCTCAAATTTCTGTCCCAATTGCTCTCG  
+HWI-EAS443:3:17:701:1131#0/1  
aa[XR\_T\_UZZZX[H[WPN`Z^W]^FYZ]YX¥R¥VSY]SO  
@HWI-EAS443:3:17:824:79#0/1  
CGCCACTTTTCATTTCTGCTCTGGAGGTAGTGAAGGTCTC  
+HWI-EAS443:3:17:824:79#0/1  
abbbb[bbbbbbbaabbab\_bbbZb^M¥aUa]\_`aW]^  
@HWI-EAS443:3:17:863:720#0/1  
GAGACCTTCACTACCTCCAGAGCAGAAATGAAAAGTGGCG  
+HWI-EAS443:3:17:863:720#0/1  
\_I\_]\_]a¥``aa][^\_Z]Z\_``^aX\_\_aa`\_\_\_\_]R[^G`  
@HWI-EAS443:3:17:887:377#0/1  
TCCCAATTGCTCTCGCCACTTTTCATTTCTGCTCTGGAGG  
+HWI-EAS443:3:17:887:377#0/1  
ab`baaa]\_`a\_a^a`]]`aaa`````a\_a\_a[\_a\_W``  
@HWI-EAS443:3:17:987:1514#0/1  
AGCCGATCAAGGAATGGGGCATCACCCAATCCATTGTCTG  
+HWI-EAS443:3:17:987:1514#0/1  
\_]`a`aab^]R^\_WV\_\_aWa^¥`Z[[a^`Ya\_¥]\_N¥¥[  
@HWI-EAS443:3:18:1055:940#0/1  
GGGAGACCTTCACTACCTCCAGAGCAGAAATGAAAAGTGG  
+HWI-EAS443:3:18:1055:940#0/1  
ab`VbS`a`a`\_a[JT\_[]^VUa\_`^\_\_\_\_`\_U]]`¥¥Y  
@HWI-EAS443:3:18:1236:847#0/1  
TCTCGCCACTTTTCATTTCTGCTCTGGAGGTAGTGAAGGT  
+HWI-EAS443:3:18:1236:847#0/1  
aabaa`a\_abab\_\_aa`\_aa\_a\_^\_a\_\_`U\_^U[¥^X^U  
@HWI-EAS443:3:18:1432:1697#0/1  
AGCAGAAATGAAAAGTGGCGAGAGCAATTGGGACAGAAAT  
+HWI-EAS443:3:18:1432:1697#0/1  
a`aa``aaa``aaa\_Waa`aZ]\_\_X`\_a\_\_X]X\_]\_]`^

@HWI-EAS443:3:18:1566:244#0/1  
GGGAGACCTTCACTACCTCCAGAGCAGAAATGAAAAGTGG  
+HWI-EAS443:3:18:1566:244#0/1  
a[Uyaa]^^¥XX^\_ZTY\_XXUUS[V¥\_V[QU]¥TW[WH^V  
@HWI-EAS443:3:18:1636:1153#0/1  
GGGAGACCTTCACTACCTCCAGAGCAGAAATGAAAAGTGG  
+HWI-EAS443:3:18:1636:1153#0/1  
`babbbaabbaa^ba`\_aaa\_b\_a\_\_a\_X\_aba`\_\_aWa\_  
@HWI-EAS443:3:18:174:206#0/1  
CAATTGCTCTCGCCACTTTTCATTTCTGCTCTGGAGGTAG  
+HWI-EAS443:3:18:174:206#0/1  
a^]N]Wa^)`a`aaaaaaaaaaaa`a¥a`[aa`\_¥`WZ¥  
@HWI-EAS443:3:18:189:1833#0/1  
TGAAAAGTGGCGAGAGCAATTGGGACAGAAATTTGAGGAA  
+HWI-EAS443:3:18:189:1833#0/1  
aZaaaaaZY`aa^[Y\_\_^`^a\_\_\_\_``aa``aa`\_YW^`\_`  
@HWI-EAS443:3:18:219:670#0/1  
TGCGGATATGCCAAAGGAAACAGTCTACCTGAAAGCTTGA  
+HWI-EAS443:3:18:219:670#0/1  
^^`]`¥aX^aX¥XaYX``baTZS[L]aUPX^\_a\_P\_[\_V\_  
@HWI-EAS443:3:18:276:608#0/1  
CTCAAATTTCTGTCCCAATTGCTCTCGCCACTTTTCATTT  
+HWI-EAS443:3:18:276:608#0/1  
abababbababb]aaabaaa\_aaaaaaaa`\_``aa`a\_\_^  
@HWI-EAS443:3:18:389:390#0/1  
GACCTTCACTACCTCCAGAGCAGAAATGAAAAGTGGCGAG  
+HWI-EAS443:3:18:389:390#0/1  
a`ab¥¥\_¥a`aa¥a`aa]]aaaa¥\_[\_\_`]^`\_Ta[]\_`\_`  
@HWI-EAS443:3:18:586:1340#0/1  
AATGGATTGGGTGATGCCCCATTCCTTGATCGGCTCCGCC  
+HWI-EAS443:3:18:586:1340#0/1  
]V`^a[a\_]¥LFV\_[\_]Wa^^a``[a`¥Z]\_Y\_Ua[[YONZ  
@HWI-EAS443:3:18:661:691#0/1  
GACCTTCACTACCTCCAGAGCAGAAATGAAAAGTGGCGAG  
+HWI-EAS443:3:18:661:691#0/1  
a¥]baa^b]ZS\_a\_^\_]b¥a\_aa^\_aaa`HaaaSa¥[`¥T  
@HWI-EAS443:3:18:688:453#0/1  
ACTACCTCCAGAGCAGAAATGAAAAGTGGCGAGAGCAATT  
+HWI-EAS443:3:18:688:453#0/1  
¥`bbaaaababZ`ZVa\_[Ya`]^`^`Va\_\_^USR^[SX\_\_  
@HWI-EAS443:3:18:80:666#0/1  
GCCACCTTATTTCTCAAATTTCTGTCCCAATTGCTCTCG  
+HWI-EAS443:3:18:80:666#0/1  
aa\_¥]`¥``aa¥T`\_^]`a]Y``]^`^YYY]\_\_\_\_\_`\_]`  
@HWI-EAS443:3:18:898:1231#0/1  
CTTCACTACCTCCAGAGCAGAAATGAAAAGTGGCGAGAGC  
+HWI-EAS443:3:18:898:1231#0/1  
aaaaaaaa`a`a\_aa^aa\_a[\_aaa```\_\_V`\_\_`\_]`^]  
@HWI-EAS443:3:18:899:686#0/1  
CAGAGCAGAAATGAAAAGTGGCGAGAGCAATTGGGACAGA

+HWI-EAS443:3:18:899:686#0/1  
]Y\_Wab^¥[T`\_ba¥\_¥]S\_ZYa^aW[SH[a\_]aa``aa\_  
@HWI-EAS443:3:19:1395:971#0/1  
GAAAAGTGGCGAGAGCAATTGGGACAGAAATTTGAGGAAA  
+HWI-EAS443:3:19:1395:971#0/1  
a`a``aYaa^a`\_Z`Y\_]a]Z]aWS[\_Z\_^\_a\_`[a]RWZ  
@HWI-EAS443:3:19:177:415#0/1  
TGAAAAGTGGCGAGAGCAATTGGGACAGAAATTTGAGGAA  
+HWI-EAS443:3:19:177:415#0/1  
aa^a`Xa^aaa`\_\_Z``][\_\_`S^`[T]`X]`\_\_`YSY\_^^  
@HWI-EAS443:3:19:18:515#0/1  
ATTGCTCTCGCCACTTTTCATTTCTGCTCTGGAGGTAGTG  
+HWI-EAS443:3:19:18:515#0/1  
aaabaaaaaaaaaaaaaaaaaaaaaa`aa````aa^a`W^^V¥  
@HWI-EAS443:3:19:238:401#0/1  
CTTCACTACCTCCAGAGCAGAAATGAAAAGTGGCGAGAGC  
+HWI-EAS443:3:19:238:401#0/1  
a\_abbbb`abaaba\_b`\_a`a`aa`^0`a]`a^a^Z]`U  
@HWI-EAS443:3:19:254:248#0/1  
AAAGTGGCGAGAGCAATTGGGACAGAAATTTGAGGAAATA  
+HWI-EAS443:3:19:254:248#0/1  
`Y`aZS``\_[^\_]XQYSQL[ZPXYQSU\_\_\_aYY¥[RQ]]W  
@HWI-EAS443:3:19:295:199#0/1  
GAGACCTTCACTACCTCCAGAGCAGAAATGAAAAGTGGCG  
+HWI-EAS443:3:19:295:199#0/1  
aaa`\_a`\_abaaa]`a\_a\_a\_a\_\_`\_\_`\_`^\_\_[\_U\_]][  
@HWI-EAS443:3:19:372:1962#0/1  
ATGGGAGACCTTCACTACCTCCAGAGCAGAAATGAAAAGT  
+HWI-EAS443:3:19:372:1962#0/1  
aaa[aa]aaaaV\_aa\_b\_[\_]a`\_T\_[\_]`\_]`a\_\_`^a`ZU  
@HWI-EAS443:3:19:658:896#0/1  
ATGGGAGACCTTCACTACCTCCAGAGCAGAAATGAAAAGT  
+HWI-EAS443:3:19:658:896#0/1  
aba``aabbba`]aa`bab]b[^aaaaaa]a`ab\_U`\_`V  
@HWI-EAS443:3:19:986:1789#0/1  
ATGAAAAGTGGCGAGAGCAATTGGGACAGAAATTTGAGGA  
+HWI-EAS443:3:19:986:1789#0/1  
`bbaba\_\_Qaaaa`ZYa`aaa```Y^Yb^a]aa`^UY^`W  
@HWI-EAS443:3:1:1041:1936#0/1  
GAGACCTTCACTACCTCCAGAGCAGAAATGAAAAGTGGCG  
+HWI-EAS443:3:1:1041:1936#0/1  
`ab[bSa\_aa¥`\_WYaa\_aa\_a]aa^a`aaaa`^TX\_BB  
@HWI-EAS443:3:1:1100:1215#0/1  
CAAATTTCTGTCCCAATTGCTCTCGCCACTTTTCATTTCT  
+HWI-EAS443:3:1:1100:1215#0/1  
]abbb``abbaabba\_bbaIa`aaaa]a]aabbaabab`a  
@HWI-EAS443:3:1:1305:877#0/1  
AGCCGATCAAGGAATGGGCATCACCCAATCCATTGTCTG  
+HWI-EAS443:3:1:1305:877#0/1  
`b[V^][[a`a`]Z`[Z\_]V\_\_¥`¥V\_`\_¥UQ¥¥\_¥YWBB

@HWI-EAS443:3:1:1405:1536#0/1  
GGCGAGAGCAATTGGGACAGAAATTTGAGGAAATAAGGTG  
+HWI-EAS443:3:1:1405:1536#0/1  
aa\_a]VIZ\_\_^^`]a`\_]aa^^^`^^aZa`WV[a]U¥BBB  
@HWI-EAS443:3:1:145:1385#0/1  
GAGACCTTCACTACCTCCAGAGCAGAAATGAAAAGTGGCG  
+HWI-EAS443:3:1:145:1385#0/1  
aa]``b`〕`\_[`bb`X[baUYb\_ab\_a\_bab`aba¥`XBB  
@HWI-EAS443:3:1:1752:551#0/1  
CCTTCACTACCTCCAGAGCAGAAATGAAAAGTGGCGAGAG  
+HWI-EAS443:3:1:1752:551#0/1  
aZJW^aSb\_aS¥\_P]S[\_]`aaa\_[Q^[Ra`R\_\_Y`BBBB  
@HWI-EAS443:3:1:541:753#0/1  
GCGAGAGCAATTGGGACAGAAATTTGAGGAAATAAGGTGG  
+HWI-EAS443:3:1:541:753#0/1  
a^^X`S`U^^S^\_]^YU``XWX]W^]Y^]VWVVPW^WBBB  
@HWI-EAS443:3:1:551:1127#0/1  
TGAAAAGTGGCGAGAGCAATTGGGACAGAAATTTGAGGAA  
+HWI-EAS443:3:1:551:1127#0/1  
\_abVXbb`a[IbaaR[\_ba\_VX`aaYb`a\_`Ya^KU``BB  
@HWI-EAS443:3:1:590:1373#0/1  
GACCTTCACTACCTCCAGAGCAGAAATGAAAAGTGGCGAG  
+HWI-EAS443:3:1:590:1373#0/1  
aa\_a`Uaaa[¥Q`\_XJ\_a¥a`a`^aa[ab`X[X``^BBB  
@HWI-EAS443:3:1:835:288#0/1  
AGCCGATCAAGGAATGGGGCATCACCCAATCCATTGTCTG  
+HWI-EAS443:3:1:835:288#0/1  
aa][a``¥a\_\_a`\_\_][\_`RU\_¥`QRQ¥^`RRY\_¥¥BBBB  
@HWI-EAS443:3:20:1057:49#0/1  
GGGAGACCTTCACTACCTCCAGAGCAGAAATGAAAAGTGG  
+HWI-EAS443:3:20:1057:49#0/1  
a`[X^a`VZW``a\_\_[aYQRUaZ]HU\_\_Z^`XWY[aWa[  
@HWI-EAS443:3:20:1133:126#0/1  
ATGGGAGACCTTCACTACCTCCAGAGCAGAAATGAAAAGT  
+HWI-EAS443:3:20:1133:126#0/1  
^bbaZY\_]`G¥b\_a\_b`X`aG\_`aSaQ[``^a\_``\_[U¥Q  
@HWI-EAS443:3:20:1257:1631#0/1  
CGATCAAGGAATGGGGCATCACCCAATCCATTGTCTGCAA  
+HWI-EAS443:3:20:1257:1631#0/1  
`aa]Y[VUXR]Xa\_VV¥\_ZYb]]Z`\_]X]]`a`¥``[SUa  
@HWI-EAS443:3:20:128:721#0/1  
GCCACTTTTCATTTCTGCTCTGGAGGTAGTGAAGGTCTCC  
+HWI-EAS443:3:20:128:721#0/1  
aa^\_a`^aaX]a^a^^`\_`a\_`^`\_U\_[PYZUZUNWVW^  
@HWI-EAS443:3:20:1343:403#0/1  
GGACTTTTGATCTCGGCGGAGCCGATCAAGGAATGGGGCA  
+HWI-EAS443:3:20:1343:403#0/1  
a]¥aaaabb`aaaa]Z`a``[YQa\_^\_a\_^`[]Y¥^¥^W]  
@HWI-EAS443:3:20:142:416#0/1  
GTGATGCCCCATTCTTGATCGGCTCCGCCGAGATCAAAA

+HWI-EAS443:3:20:142:416#0/1  
a`VRR`]'\_a[^a\_\_`\_R\_\_¥^\_¥[XNU¥XLXWTN]BBB  
@HWI-EAS443:3:20:1532:1286#0/1  
CCTTCACTACCTCCAGAGCAGAAATGAAAAGTGGCGAGAG  
+HWI-EAS443:3:20:1532:1286#0/1  
]'`b\_U\_UZ^OZ`'WW`XZVT`']]ba`[^S^]U[SX\_\_TS  
@HWI-EAS443:3:20:180:1553#0/1  
GGAGACCTTCACTACCTCCAGAGCAGAAATGAAAAGTGGC  
+HWI-EAS443:3:20:180:1553#0/1  
a]S\_`ba`b¥bbabZ]¥b^]`^aaaa]¥aaa]^a`aa\_a`  
@HWI-EAS443:3:20:24:205#0/1  
ACTACCTCCAGAGCAGAAATGAAAAGTGGCGAGAGCAATT  
+HWI-EAS443:3:20:24:205#0/1  
aa`a`^¥]'`aaY[^\_\_Y¥^\_\_\_\_`\_\_\_\_Y`\_¥\_¥VSZORXWS  
@HWI-EAS443:3:20:558:586#0/1  
GGAGACCTTCACTACCTCCAGAGCAGAAATGAAAAGTGGC  
+HWI-EAS443:3:20:558:586#0/1  
`aXWWaaaa\_b^W`X^\_a`\_aX[aaaQV`']X¥\_a\_Qa` [  
@HWI-EAS443:3:20:767:230#0/1  
TGTCCCAATTGCTCTCGCCACTTTTCATTTCTGCTCTGGA  
+HWI-EAS443:3:20:767:230#0/1  
aaZ`^aa`a`\_a]a\_a\_¥^^\_\_`¥R]^a¥^^U¥W¥\_WW  
@HWI-EAS443:3:20:860:605#0/1  
GAGACCTTCACTACCTCCAGAGCAGAAATGAAAAGTGGCG  
+HWI-EAS443:3:20:860:605#0/1  
a`]'`aa`^`aZ\_\_]\_\_`\_]^`X]^\_\_^]]X\_T]]X^  
@HWI-EAS443:3:21:1037:527#0/1  
GAAAAGTGGCGAGAGCAATTGGGACAGAAATTTGAGGAAA  
+HWI-EAS443:3:21:1037:527#0/1  
``a`^`Ra\_¥`aa^\_FT¥Y^]aa^X`Y¥^X[[\_]S[^Z]]  
@HWI-EAS443:3:21:1120:726#0/1  
GAGACCTTCACTACCTCCAGAGCAGAAATGAAAAGTGGCG  
+HWI-EAS443:3:21:1120:726#0/1  
`^`^^`aaaa\_aZ]^`^\_\_b]a¥Ya¥\_Ua\_a`^`aT\_\_Q`  
@HWI-EAS443:3:21:143:155#0/1  
CTTCACTACCTCCAGAGCAGAAATGAAAAGTGGCGAGAGC  
+HWI-EAS443:3:21:143:155#0/1  
aaaaaaaa\_aa\_a\_a^aa`^`^^`\_\_^aY`]^]]Y\_T  
@HWI-EAS443:3:21:1451:1213#0/1  
TGGATTGGGTGATGCCCCATTCCTTGATCGGCTCCGCCGA  
+HWI-EAS443:3:21:1451:1213#0/1  
ZX[]`]aXMa]\_`\_¥`a`^^`[[]^\_`\_`\_`[¥[ZY¥TTYU  
@HWI-EAS443:3:21:1540:500#0/1  
GGAGACCTTCACTACCTCCAGAGCAGAAATGAAAAGTGGC  
+HWI-EAS443:3:21:1540:500#0/1  
V\_`a\_SZ\_X`^^`a\_QS`^`S^a^a`\_a]\_X\_\_`¥\_¥a^U  
@HWI-EAS443:3:21:1780:1265#0/1  
GGGAGACCTTCACTACCTCCAGAGCAGAAATGAAAAGTGG  
+HWI-EAS443:3:21:1780:1265#0/1  
aXY\_\_aa^a`X¥U[¥TS^G¥¥\_WUSPVZS¥\_`ZYW¥¥UWP



@HWI-EAS443:3:21:185:970#0/1  
TGGGAGACCTTCACTACCTCCAGAGCAGAAATGAAAAGTG  
+HWI-EAS443:3:21:185:970#0/1  
`bba]a^\_aaababba[a¥aabab\_aaVv`aaa\_aZaZ\_  
@HWI-EAS443:3:21:254:793#0/1  
GGCGAGAGCAATTGGGACAGAAATTTGAGGAAATAAGGTG  
+HWI-EAS443:3:21:254:793#0/1  
`baaabaaaaabaaaaabbb`Wabaa^ba`aaaa`a[0¥  
@HWI-EAS443:3:21:408:2040#0/1  
GAGACCTTCACTACCTCCAGAGCAGAAATGAAAAGTGGCG  
+HWI-EAS443:3:21:408:2040#0/1  
\_W\_\_bb`abbb`aaabba]`aa`a¥TaaaaaaaaUa`aa  
@HWI-EAS443:3:21:589:1515#0/1  
GATTGGGTGATGCCCCATTCCTTGATCGGCTCCGCCGAGA  
+HWI-EAS443:3:21:589:1515#0/1  
\_b^aa\_\_Vab¥¥b`a`baa`aa\_\_a\_a^a\_¥aaXa[XRR[  
@HWI-EAS443:3:21:596:1275#0/1  
CAGAAATGAAAAGTGGCGAGAGCAATTGGGACAGAAATTT  
+HWI-EAS443:3:21:596:1275#0/1  
aaba^`\_baa]aa`aaaa\_\_a`\_]T\_a^aaaa\_`^`aa  
@HWI-EAS443:3:21:59:899#0/1  
TACCTCCAGAGCAGAAATGAAAAGTGGCGAGAGCAATTGG  
+HWI-EAS443:3:21:59:899#0/1  
abaaabaa`aa`abaR`ab`a`a`aYaa[Y[`U¥]]\_``  
@HWI-EAS443:3:21:748:342#0/1  
GAGACCTTCACTACCTCCAGAGCAGAAATGAAAAGTGGCG  
+HWI-EAS443:3:21:748:342#0/1  
aZMZYXQLX]¥XXMUF[VVX`^[^NRN]\_¥SST^T¥PLY  
@HWI-EAS443:3:21:821:720#0/1  
CAGAAATGAAAAGTGGCGAGAGCAATTGGGACAGAAATTT  
+HWI-EAS443:3:21:821:720#0/1  
`a\_aaaab\_aa`W`aab\_a]a¥Y^`^`\_TW`YV¥]\_a\_  
@HWI-EAS443:3:21:895:405#0/1  
GCTCTCGCCACTTTTCATTTCTGCTCTGGAGGTAGTGAAG  
+HWI-EAS443:3:21:895:405#0/1  
`abbbbaaZ0[abaa\_\_[\_^`a\_a`[\_^K^\_R^]GNS^B  
@HWI-EAS443:3:21:916:1681#0/1  
GTCCCAATTGCTCTCGCCACTTTTCATTTCTGCTCTGGAG  
+HWI-EAS443:3:21:916:1681#0/1  
]aaa`abaa¥aaa]¥a[a¥aa\_a¥Paa\_```\_]\_\_\_\_\_N^  
@HWI-EAS443:3:21:959:1283#0/1  
ACCTTCACTACCTCCAGAGCAGAAATGAAAAGTGGCGAGA  
+HWI-EAS443:3:21:959:1283#0/1  
Y^bbbbbbbaa^`XZ^]aaX^^\_Y`¥`^L`][a\_\_\_\_  
@HWI-EAS443:3:22:1148:405#0/1  
ACCTTCACTACCTCCAGAGCAGAAATGAAAAGTGGCGAGA  
+HWI-EAS443:3:22:1148:405#0/1  
aS\_]aaa\_a\_¥W^^^`[\_a¥]\_aa]^]^^V\_^Va¥^Y  
@HWI-EAS443:3:22:1148:908#0/1  
GCCGATCAAGGAATGGGGCATCACCCAATCCATTGTCTGC

+HWI-EAS443:3:22:1148:908#0/1  
abababaaabaaaaabaaabaaa\_[]^aa`\_`a\_a`\_\_`¥T  
@HWI-EAS443:3:22:1291:1756#0/1  
AATGGATTGGGTGATGCCCCATTCCTTGATCGGCTCCGCC  
+HWI-EAS443:3:22:1291:1756#0/1  
aa`¥`\_\_\_`\_W`^T[\_`^]^`^XV`¥ZZMTYYYQ¥YWT  
@HWI-EAS443:3:22:1343:372#0/1  
AATGGATTGGGTGATGCCCCATTCCTTGATCGGCTCCGCC  
+HWI-EAS443:3:22:1343:372#0/1  
]bbabbb\_W]aaa\_aaaa`aabb¥`baY`b`b`\_aa`[^QV  
@HWI-EAS443:3:22:1647:29#0/1  
TGAAAAGTGGCGAGAGCAATTGGGACAGAAATTTGAGGAA  
+HWI-EAS443:3:22:1647:29#0/1  
aa¥aaZZZbaX`\_`Z`X\_]`^`a\_aYM[\_X]]]`]W[\_S]  
@HWI-EAS443:3:22:1675:1039#0/1  
GAGACCTTACTACCTCCAGAGCAGAAATGAAAAGTGGCG  
+HWI-EAS443:3:22:1675:1039#0/1  
a`a`\_¥`a`\_aa]]\_]`\_a^a^]a^`]]\_`\_]`X`^X\_  
@HWI-EAS443:3:22:321:796#0/1  
GGAGACCTTACTACCTCCAGAGCAGAAATGAAAAGTGGCG  
+HWI-EAS443:3:22:321:796#0/1  
abbaabbaabaababababaaaaaaaa`aaaaa`a`Wa`\_  
@HWI-EAS443:3:22:405:1460#0/1  
CCTTACTACCTCCAGAGCAGAAATGAAAAGTGGCGAGAG  
+HWI-EAS443:3:22:405:1460#0/1  
¥a^W`RW`\_aU\_bb`TT¥^`^a]S`\_R¥T``aaVaaHT\_  
@HWI-EAS443:3:22:570:1306#0/1  
GAGACCTTACTACCTCCAGAGCAGAAATGAAAAGTGGCG  
+HWI-EAS443:3:22:570:1306#0/1  
`ababbbVbba[`baaa`Taa\_a`a\_a`aaaa`]X`^a^  
@HWI-EAS443:3:22:808:1692#0/1  
GACCTTACTACCTCCAGAGCAGAAATGAAAAGTGGCGAG  
+HWI-EAS443:3:22:808:1692#0/1  
aabaZabaQZ`]bY\_^]aa\_]aa\_a`Y`a]Y\_]a[a\_]`^  
@HWI-EAS443:3:23:1168:1767#0/1  
GGCGAGAGCAATTGGGACAGAAATTTGAGGAAATAAGGTG  
+HWI-EAS443:3:23:1168:1767#0/1  
^b\_bbbbbbbbabbaabbbabaaabaaaaaa¥L^  
@HWI-EAS443:3:23:1197:255#0/1  
CTTACTACCTCCAGAGCAGAAATGAAAAGTGGCGAGAGC  
+HWI-EAS443:3:23:1197:255#0/1  
Z`abbabbbbbbabb`bbbaabba]abbabbabaaaa[  
@HWI-EAS443:3:23:133:199#0/1  
GGCGAGAGCAATTGGGACAGAAATTTGAGGAAATAAGGTG  
+HWI-EAS443:3:23:133:199#0/1  
a`ba`a]\_a`aaaaaa\_aa`\_[aaaa\_aa^\_]\_a]a`Ya  
@HWI-EAS443:3:23:1378:944#0/1  
GAGACCTTACTACCTCCAGAGCAGAAATGAAAAGTGGCG  
+HWI-EAS443:3:23:1378:944#0/1  
`baaaaaabaaa\_[a`aa`^a\_a`\_aa`\_`\_a]a\_R`

@HWI-EAS443:3:23:215:454#0/1  
GGGAGACCTTCACTACCTCCAGAGCAGAAATGAAAAGTGG  
+HWI-EAS443:3:23:215:454#0/1  
aaa^a]`aa`aaa`\_`\_aa^`\_a[`a^\_\_a`^[[¥\_X`\_  
@HWI-EAS443:3:23:281:1643#0/1  
GGGAGACCTTCACTACCTCCAGAGCAGAAATGAAAAGTGG  
+HWI-EAS443:3:23:281:1643#0/1  
]b`abaabaabba`aab`ab\_aaaaa^T`a\_\_a^`U^U  
@HWI-EAS443:3:23:284:20#0/1  
GACCTTCACTACCTCCAGAGCAGAAATGAAAAGTGGCGAG  
+HWI-EAS443:3:23:284:20#0/1  
aaa\_`aaaa¥^`¥`\_\_a[]]\_a¥^¥\_a¥^ZT¥U\_[W\_¥\_  
@HWI-EAS443:3:23:319:1442#0/1  
GGGAGACCTTCACTACCTCCAGAGCAGAAATGAAAAGTGG  
+HWI-EAS443:3:23:319:1442#0/1  
aa]\_\_aaa¥`\_b`¥`]W]a\_[a^V`\_\_`[\_aa\_\_aa^SY^  
@HWI-EAS443:3:23:33:1627#0/1  
TTCCTTCACTACCTCCAGAGCAGAAATGAAAAGTGGCGAGAGCA  
+HWI-EAS443:3:23:33:1627#0/1  
aaaa\_ab`^b\_aa\_`a`bXa`a\_a\_a`aVaaaa`]]ZR]  
@HWI-EAS443:3:23:413:506#0/1  
GTCCCAATTGCTCTCGCCACTTTTCATTTCTGCTCTGGAG  
+HWI-EAS443:3:23:413:506#0/1  
aSaaaa]\_¥`a`a`^^`¥`^^`^¥¥\_\_^^¥YT]NR^  
@HWI-EAS443:3:23:58:334#0/1  
ACTACCTCCAGAGCAGAAATGAAAAGTGGCGAGAGCAATT  
+HWI-EAS443:3:23:58:334#0/1  
a`^^`¥]a\_Z^¥\_W]\_XP`^a`^^]UN\_\_a`XTXYXN¥Z^  
@HWI-EAS443:3:23:789:768#0/1  
GAAAAGTGGCGAGAGCAATTGGGACAGAAATTTGAGGAAA  
+HWI-EAS443:3:23:789:768#0/1  
abab^[]]baba`^`aaaba\_aa^b`bb^b`b`^ba\_\_\_\_  
@HWI-EAS443:3:24:130:1022#0/1  
CCTTCACTACCTCCAGAGCAGAAATGAAAAGTGGCGAGAG  
+HWI-EAS443:3:24:130:1022#0/1  
`bbbbbb`bbb`b`aa\_^^baaaaa^`a^aaZaa`a`[Z]  
@HWI-EAS443:3:24:1358:1166#0/1  
ATGGGAGACCTTCACTACCTCCAGAGCAGAAATGAAAAGT  
+HWI-EAS443:3:24:1358:1166#0/1  
ababaaba^ab`b`a`W\_a`[aaZ`^^`a¥Z`aa^\_¥`\_U  
@HWI-EAS443:3:24:1482:765#0/1  
GATCAAGGAATGGGCATCACCCAATCCATTGTCTGCAAA  
+HWI-EAS443:3:24:1482:765#0/1  
abbbbbbbbababZaabbabaY^aabaabba`ab\_aaa  
@HWI-EAS443:3:24:387:943#0/1  
GAAAAGTGGCGAGAGCAATTGGGACAGAAATTTGAGGAAA  
+HWI-EAS443:3:24:387:943#0/1  
\_^`a`aa`a`]]`[aQS^\_^^¥Y^\_Q^aba]`W[a\_Z`a  
@HWI-EAS443:3:24:642:1770#0/1  
CTTCACTACCTCCAGAGCAGAAATGAAAAGTGGCGAGAGC

+HWI-EAS443:3:24:642:1770#0/1  
aZ[a`a]^aa^aWVTSQ]VNNTV^VYZRYS^^a\_ZYLRN  
@HWI-EAS443:3:24:742:1058#0/1  
GGAGACCTTCACTACCTCCAGAGCAGAAATGAAAAGTGGC  
+HWI-EAS443:3:24:742:1058#0/1  
^b`\_aaaa`bbbab`a`aaaaa¥\_\_¥]``a`\_\_\_\_`Y]Q¥  
@HWI-EAS443:3:24:793:109#0/1  
GAGACCTTCACTACCTCCAGAGCAGAAATGAAAAGTGGCG  
+HWI-EAS443:3:24:793:109#0/1  
a`aaa`¥¥XRW`YRUK\_YVMOTSSNNOYTBBBBBBBBBB  
@HWI-EAS443:3:24:837:102#0/1  
CTTCACTACCTCCAGAGCAGAAATGAAAAGTGGCGAGAGC  
+HWI-EAS443:3:24:837:102#0/1  
abbbb`bbaabbaaabaab`\_`abaa`aNbaZb\_a]]G  
@HWI-EAS443:3:24:911:113#0/1  
CCAGAGCAGAAATGAAAAGTGGCGAGAGCAATTGGGACAG  
+HWI-EAS443:3:24:911:113#0/1  
aa`bb`\_`abbaab`bbab¥bb^\_\_ab`aW`\_`a[\_baWL[a  
@HWI-EAS443:3:24:917:1220#0/1  
AATTTCTGTCCAATTGCTCTCGCCACTTTTCATTTCTGC  
+HWI-EAS443:3:24:917:1220#0/1  
T]\_`a^`a]b]H]U¥b`Y\_S`\_`^]Vabbbab`0¥a[X`  
@HWI-EAS443:3:25:1031:1181#0/1  
GTCCAATTGCTCTCGCCACTTTTCATTTCTGCTCTGGAG  
+HWI-EAS443:3:25:1031:1181#0/1  
`X`a\_¥ZX[X¥]a\_a¥VYWUWZ`[[U\_\_\_\_UZ\_Y]YXJNV¥  
@HWI-EAS443:3:25:1095:974#0/1  
AATGAAAAGTGGCGAGAGCAATTGGGACAGAAATTTGAGG  
+HWI-EAS443:3:25:1095:974#0/1  
`b\_Z`abababbaba`[`aaZ`aaaa^Q^aaaaaab^aa`  
@HWI-EAS443:3:25:129:692#0/1  
GAAAAGTGGCGAGAGCAATTGGGACAGAAATTTGAGGAAA  
+HWI-EAS443:3:25:129:692#0/1  
aaa[HZLXX¥a^]S\_^^[VZ`a\_¥`^]\_]X]^WH[^FS^  
@HWI-EAS443:3:25:1575:1691#0/1  
CACTACCTCCAGAGCAGAAATGAAAAGTGGCGAGAGCAAT  
+HWI-EAS443:3:25:1575:1691#0/1  
`abbbbaa^``bbb`bbabbabbbb\_baa\_bbaa]\_TU\_a  
@HWI-EAS443:3:25:1716:1109#0/1  
TTCACTACCTCCAGAGCAGAAATGAAAAGTGGCGAGAGCA  
+HWI-EAS443:3:25:1716:1109#0/1  
a]]^¥^¥b^`abbbababaX`abbab`ab]aaaa`a^]DR  
@HWI-EAS443:3:25:322:436#0/1  
CTTCACTACCTCCAGAGCAGAAATGAAAAGTGGCGAGAGC  
+HWI-EAS443:3:25:322:436#0/1  
aaaaba]bab[`baaZ]a`b\_`aaa`a\_`a\_a\_aa^^W]X  
@HWI-EAS443:3:25:474:1186#0/1  
CTTCACTACCTCCAGAGCAGAAATGAAAAGTGGCGAGAGC  
+HWI-EAS443:3:25:474:1186#0/1  
aa`^¥ab\_`\_abbb¥OWb^Z¥\_a\_a`[a`a\_aa\_a`a`^^

@HWI-EAS443:3:25:512:479#0/1  
CGCCACTTTTCATTTCTGCTCTGGAGGTAGTGAAGGTCTC  
+HWI-EAS443:3:25:512:479#0/1  
abbbbbbbbbbbbbbbbbbaaaa`aba]`b]aa\_`Q¥]V  
@HWI-EAS443:3:25:584:887#0/1  
ACCTTCACTACCTCCAGAGCAGAAATGAAAAGTGGCGAGA  
+HWI-EAS443:3:25:584:887#0/1  
abbabaaaabbabbabaabaabaaaaaa]`a[aaab``]  
@HWI-EAS443:3:25:984:1324#0/1  
CGCCACTTTTCATTTCTGCTCTGGAGGTAGTGAAGGTCTC  
+HWI-EAS443:3:25:984:1324#0/1  
`bbb\_\_I\_abb`aabbababbbbaab^bb\_¥]]`aIa\_a  
@HWI-EAS443:3:26:1042:957#0/1  
GATTGGGTGATGCCCCATTCCTTGATCGGCTCCGCCGAGA  
+HWI-EAS443:3:26:1042:957#0/1  
abbbba\_baabbabbabaabbaaaaa^aa\_a\_\_a¥a[  
@HWI-EAS443:3:26:1211:1991#0/1  
TACCTCCAGAGCAGAAATGAAAAGTGGCGAGAGCAATTGG  
+HWI-EAS443:3:26:1211:1991#0/1  
ab^ab\_^aab\_aa`\_babb\_a`^`\_^WSYO\_¥R^^RMM^  
@HWI-EAS443:3:26:124:1340#0/1  
CAGAAATGAAAAGTGGCGAGAGCAATTGGGACAGAAATTT  
+HWI-EAS443:3:26:124:1340#0/1  
a¥aaaabaa¥`ba\_aab¥baVab`^^ba\_aaa`[aaaaba  
@HWI-EAS443:3:26:1275:1005#0/1  
GCCGATCAAGGAATGGGCATCACCCAATCCATTGTCTGC  
+HWI-EAS443:3:26:1275:1005#0/1  
aa`a`a[`\_]¥Z^[[\_a\_PZ^S[U^¥\_QSSNS¥¥PWURSK  
@HWI-EAS443:3:26:1319:814#0/1  
GAAAAGTGGCGAGAGCAATTGGGACAGAAATTTGAGGAAA  
+HWI-EAS443:3:26:1319:814#0/1  
\_S`baa`^aaaYXT¥]]^a`^a\_`U`a^]]`aa`U^a^VY  
@HWI-EAS443:3:26:1571:680#0/1  
CTTCACTACCTCCAGAGCAGAAATGAAAAGTGGCGAGAGC  
+HWI-EAS443:3:26:1571:680#0/1  
abbb`bba^\_a`a¥a^a^U[a]^abbabba\_^\_]aa\_[F  
@HWI-EAS443:3:26:1601:833#0/1  
AATTTCTGTCCAATTGCTCTCGCCACTTTTCATTTCTGC  
+HWI-EAS443:3:26:1601:833#0/1  
`bbbbba`abaa`a`aa^aSa^aa\_`^aaaa^`\_aa^\_\_U  
@HWI-EAS443:3:26:1636:369#0/1  
GAGACCTTCACTACCTCCAGAGCAGAAATGAAAAGTGGCG  
+HWI-EAS443:3:26:1636:369#0/1  
a`ba]aaa¥`¥aaY\_`\_]a\_\_S\_a\_]``aYM[[ZVa\_S\_  
@HWI-EAS443:3:26:281:105#0/1  
GGGAGACCTTCACTACCTCCAGAGCAGAAATGAAAAGTGG  
+HWI-EAS443:3:26:281:105#0/1  
\_a\_ab\_\_`[\_a^abbW\_Wa`¥\_Sb\_\_ba\_aabaaZ¥`ab\_  
@HWI-EAS443:3:26:303:414#0/1  
GAGACCTTCACTACCTCCAGAGCAGAAATGAAAAGTGGCG

+HWI-EAS443:3:26:303:414#0/1  
`[babab`bb`aaaSb`^\_a]aa\_aM[\_aa`UZXa¥a]\_a  
@HWI-EAS443:3:26:310:871#0/1  
GCGAGAGCAATTGGGACAGAAATTTGAGGAAATAAGGTGG  
+HWI-EAS443:3:26:310:871#0/1  
aab[a`abaabaa`aaabaa¥aaaab\_ba\_[\_aa\_a[I[`  
@HWI-EAS443:3:26:541:220#0/1  
GTCCCAATTGCTCTCGCCACTTTTCATTTCTGCTCTGGAG  
+HWI-EAS443:3:26:541:220#0/1  
a`abaa`a`baaab`a\_aX]a`aaa`aa`\_`\_`\_`^`^a  
@HWI-EAS443:3:26:614:52#0/1  
CTTCACTACCTCCAGAGCAGAAATGAAAAGTGGCGAGAGC  
+HWI-EAS443:3:26:614:52#0/1  
aabbaaa\_a`\_`a`X\_]`^T]¥`ZTV`\_V\_a`a^`UYM  
@HWI-EAS443:3:26:709:1097#0/1  
CCTTCACTACCTCCAGAGCAGAAATGAAAAGTGGCGAGAG  
+HWI-EAS443:3:26:709:1097#0/1  
^`bbbb`abbbbab]]`a[\_[abaaabba\_aaab\_]\_a  
@HWI-EAS443:3:26:864:675#0/1  
ACCTTATTTCTCAAATTTCTGTCCCAATTGCTCTCGCCA  
+HWI-EAS443:3:26:864:675#0/1  
aabbbbbba`baa^abaa`ba`a`aaaaaaaaa\_\_\_\_]\_  
@HWI-EAS443:3:26:958:1336#0/1  
CTTCACTACCTCCAGAGCAGAAATGAAAAGTGGCGAGAGC  
+HWI-EAS443:3:26:958:1336#0/1  
abbabbbbaababYba\_aababaab`\_aaa`a`a`a^aU  
@HWI-EAS443:3:27:1028:1525#0/1  
CCTTATTTCTCAAATTTCTGTCCCAATTGCTCTCGCCAC  
+HWI-EAS443:3:27:1028:1525#0/1  
aa[b\_baaa\_a^`\_[aaaJ`Q`\_YZ]\_[\_[a^¥]\_^\_Xa  
@HWI-EAS443:3:27:1043:1444#0/1  
CAGAAATGAAAAGTGGCGAGAGCAATTGGGACAGAAATTT  
+HWI-EAS443:3:27:1043:1444#0/1  
\_^aX`bbaa^ba`\_baaaa`Y\_PR¥`aZa`¥¥^`¥¥a\_\_`  
@HWI-EAS443:3:27:1146:1110#0/1  
TTCCTACTACCTCCAGAGCAGAAATGAAAAGTGGCGAGAGCA  
+HWI-EAS443:3:27:1146:1110#0/1  
aaabaaaa`a`aa`\_aa`\_a`^`\_`\_]a[]a^^[YM[  
@HWI-EAS443:3:27:1148:1184#0/1  
GACCTTCACTACCTCCAGAGCAGAAATGAAAAGTGGCGAG  
+HWI-EAS443:3:27:1148:1184#0/1  
ababaaabbaa]`aabaaaaa^`a`a`b`Ua^aa`\_`  
@HWI-EAS443:3:27:1176:970#0/1  
GGCGAGAGCAATTGGGACAGAAATTTGAGGAAATAAGGTG  
+HWI-EAS443:3:27:1176:970#0/1  
`bbaab\_abaabb\_a^\_abbaa`aabaabb`^`ba`a[N^  
@HWI-EAS443:3:27:1233:1059#0/1  
GTCCCAATTGCTCTCGCCACTTTTCATTTCTGCTCTGGAG  
+HWI-EAS443:3:27:1233:1059#0/1  
a`abaaabbbabaaaaaaa`abaaabaa`a`Za]`a`\_a

@HWI-EAS443:3:27:15:1715#0/1  
GAGACCTTCACTACCTCCAGAGCAGAAATGAAAAGTGGCG  
+HWI-EAS443:3:27:15:1715#0/1  
a``b\_WWb`b[^[\_a`baa]¥\_XaY\_aa``\_]`^Z\_\_\_a  
@HWI-EAS443:3:27:1700:77#0/1  
ACCTTCACTACCTCCAGAGCAGAAATGAAAAGTGGCGAGA  
+HWI-EAS443:3:27:1700:77#0/1  
aZ\_a`T`^`a¥`\_]Ya^a^\_`]````^`\_\_W\_`0a]^Z  
@HWI-EAS443:3:27:1719:1900#0/1  
ATGGGAGACCTTCACTACCTCCAGAGCAGAAATGAAAAGT  
+HWI-EAS443:3:27:1719:1900#0/1  
a``^¥baa`aa^ba`a\_Na]a\_a\_a^aa``\_\_\_\_`X\_`U  
@HWI-EAS443:3:27:1736:1612#0/1  
TACCTCCAGAGCAGAAATGAAAAGTGGCGAGAGCAATTGG  
+HWI-EAS443:3:27:1736:1612#0/1  
`b^a[PIX`ab^[a`\_`b[`\_¥^`P]a[`Y[Y\_RZIZTYQ  
@HWI-EAS443:3:27:203:1543#0/1  
CTTCACTACCTCCAGAGCAGAAATGAAAAGTGGCGAGAGC  
+HWI-EAS443:3:27:203:1543#0/1  
aabbbbbbbbabbbbabbaaaaabbbba`\_baba^\_aab  
@HWI-EAS443:3:27:234:939#0/1  
GGAGACCTTCACTACCTCCAGAGCAGAAATGAAAAGTGGC  
+HWI-EAS443:3:27:234:939#0/1  
abababaa\_aab`aabaaa`bYaa\_a]^aaa`X\_JaQaQa  
@HWI-EAS443:3:27:259:1312#0/1  
ATGAAAAGTGGCGAGAGCAATTGGGACAGAAATTTGAGGA  
+HWI-EAS443:3:27:259:1312#0/1  
¥\_b``XL[^abbaaa]\_¥V\_aabaabbaaaaaaa¥aa\_  
@HWI-EAS443:3:27:363:516#0/1  
CGCCACTTTTCTTTCTGCTCTGGAGGTAGTGAAGTCTC  
+HWI-EAS443:3:27:363:516#0/1  
aabba`bbabbbaabbbbaaa`a``]a^aaZa\_``\_MOVZ  
@HWI-EAS443:3:27:369:873#0/1  
CACTACCTCCAGAGCAGAAATGAAAAGTGGCGAGAGCAAT  
+HWI-EAS443:3:27:369:873#0/1  
ababZababbLbXUaa^aa[V]]ZVY[\_\_\_]bS\_VX[\_`J  
@HWI-EAS443:3:27:553:1280#0/1  
TGCGGATATGCCAAAGGAAACAGTCTACCTGAAAGCTTGA  
+HWI-EAS443:3:27:553:1280#0/1  
a\_b\_YWa^UW^\_ab[`\_X¥]a`TT\_X[[YQ[¥Ya\_a]\_¥`  
@HWI-EAS443:3:27:581:1131#0/1  
GGGAGACCTTCACTACCTCCAGAGCAGAAATGAAAAGTGG  
+HWI-EAS443:3:27:581:1131#0/1  
aaa`aaaaabbaaaa```aaa`^`aa\_``a`\_````^`^`  
@HWI-EAS443:3:27:838:112#0/1  
CTTCACTACCTCCAGAGCAGAAATGAAAAGTGGCGAGAGC  
+HWI-EAS443:3:27:838:112#0/1  
abbabbbbabbaabbabaaa`aabbaaabXaa\_bXaW`V  
@HWI-EAS443:3:27:926:945#0/1  
GAGACCTTCACTACCTCCAGAGCAGAAATGAAAAGTGGCG

+HWI-EAS443:3:27:926:945#0/1  
\_aa\_J`[a^aZ`X^ab`a^YaUMT\_WR¥aXV^PaLV]aa  
@HWI-EAS443:3:27:998:687#0/1  
GGAGACCTTCACTACCTCCAGAGCAGAAATGAAAAGTGGC  
+HWI-EAS443:3:27:998:687#0/1  
abababbbabbaaaabbaababababaaaba\_aaaaUaa\_  
@HWI-EAS443:3:28:1300:1235#0/1  
AAGTGGCGAGAGCAATTGGGACAGAAATTTGAGGAAATAA  
+HWI-EAS443:3:28:1300:1235#0/1  
a^a\_`aaYZ[^aYGS\_a`\_\_^]a`\_`\_\_`\_X\_Z\_U\_]Z  
@HWI-EAS443:3:28:1382:1895#0/1  
GGAGACCTTCACTACCTCCAGAGCAGAAATGAAAAGTGGC  
+HWI-EAS443:3:28:1382:1895#0/1  
]\_a\_aa`abbababbbbaab\_b^P[baababa¥YY`a  
@HWI-EAS443:3:28:1409:666#0/1  
CTCGCCACTTTTCATTTCTGCTCTGGAGGTAGTGAAGGTC  
+HWI-EAS443:3:28:1409:666#0/1  
abbabbbbabbbbbbbaab`bb¥baVa\_¥`a[]  
@HWI-EAS443:3:28:1436:200#0/1  
ATGGGAGACCTTCACTACCTCCAGAGCAGAAATGAAAAGT  
+HWI-EAS443:3:28:1436:200#0/1  
a\_a¥\_aaaa`aa[^`Z^\_U[a``WV\_Z]]`PWNZZ\_U  
@HWI-EAS443:3:28:1459:162#0/1  
ACCTTATTTCTCAAATTTCTGTCCCAATTGCTCTCGCCA  
+HWI-EAS443:3:28:1459:162#0/1  
aWF^bb`[¥Taa``aaaa¥[`a`\_W^`aa\_a]`[a^a^Z  
@HWI-EAS443:3:28:145:1368#0/1  
ATGGGAGACCTTCACTACCTCCAGAGCAGAAATGAAAAGT  
+HWI-EAS443:3:28:145:1368#0/1  
`]a¥]aaaa`a`a`aba\_\_aY¥aX`a¥WaaaV`R`]VT  
@HWI-EAS443:3:28:1628:705#0/1  
CTTCACTACCTCCAGAGCAGAAATGAAAAGTGGCGAGAGC  
+HWI-EAS443:3:28:1628:705#0/1  
U¥¥S`bbYQ¥MYWMbbZ]abWQ\_]b`[[]a\_[FLbS`Xaa  
@HWI-EAS443:3:28:1732:207#0/1  
CTTCACTACCTCCAGAGCAGAAATGAAAAGTGGCGAGAGC  
+HWI-EAS443:3:28:1732:207#0/1  
abaaa]ba`\_bbb]b`\_U^a\_aaa`a^`a\_abaR`¥\_WaG  
@HWI-EAS443:3:28:173:118#0/1  
CCTTCACTACCTCCAGAGCAGAAATGAAAAGTGGCGAGAG  
+HWI-EAS443:3:28:173:118#0/1  
ababbaabbbbaabbabZbaaaaaabaa¥aa]`Q¥a^`\_`  
@HWI-EAS443:3:28:1771:691#0/1  
GACCTTCACTACCTCCAGAGCAGAAATGAAAAGTGGCGAG  
+HWI-EAS443:3:28:1771:691#0/1  
a`[[\_]b]aba`a\_\_\_\_`b[a]VaZY]aa\_Z\_Z¥Za\_Z`^\_  
@HWI-EAS443:3:28:1785:379#0/1  
CTTCACTACCTCCAGAGCAGAAATGAAAAGTGGCGAGAGC  
+HWI-EAS443:3:28:1785:379#0/1  
abbabbbbaa`bbb`abbbabaabbaababbab]aabaab]



@HWI-EAS443:3:28:207:266#0/1  
CTTCACTACCTCCAGAGCAGAAATGAAAAGTGGCGAGAGC  
+HWI-EAS443:3:28:207:266#0/1  
ababaaaaba`bb`^^bba[KU\_abaa`abVa\_aaa`Sa[  
@HWI-EAS443:3:28:342:1594#0/1  
GGAGACCTTCACTACCTCCAGAGCAGAAATGAAAAGTGGC  
+HWI-EAS443:3:28:342:1594#0/1  
^¥`aabbaa`[^aaab`ba\_]`aaX\_\_\_aaa`\_aa`NaZ[  
@HWI-EAS443:3:28:39:918#0/1  
AGACCTTCACTACCTCCAGAGCAGAAATGAAAAGTGGCGA  
+HWI-EAS443:3:28:39:918#0/1  
aa^`X`]V[]Z^aVY[\_`¥]`X`XVT`^TY^ZS¥¥]]¥  
@HWI-EAS443:3:28:64:615#0/1  
GACCTTCACTACCTCCAGAGCAGAAATGAAAAGTGGCGAG  
+HWI-EAS443:3:28:64:615#0/1  
a`aaaaabaaa\_a\_` `[ ` ]`\_\_`^`\_\_` ` ]P][V\_`^`]ZZ  
@HWI-EAS443:3:29:1120:210#0/1  
GGAGACCTTCACTACCTCCAGAGCAGAAATGAAAAGTGGC  
+HWI-EAS443:3:29:1120:210#0/1  
aa]a`\_aaaab`aa[\_\_\_Z]\_`^aZ^a¥¥¥\_a\_\_\_`\_W\_^T  
@HWI-EAS443:3:29:1148:848#0/1  
GGGAGACCTTCACTACCTCCAGAGCAGAAATGAAAAGTGG  
+HWI-EAS443:3:29:1148:848#0/1  
aa\_aaaa\_aaaa\_aa^^a\_\_\_` `]a¥a`\_`\_`\_a\_a\_\_dW`\_`  
@HWI-EAS443:3:29:1307:1694#0/1  
GGAGACCTTCACTACCTCCAGAGCAGAAATGAAAAGTGGC  
+HWI-EAS443:3:29:1307:1694#0/1  
¥\_^Y`abb\_`b]bVa` `]`\_W¥H`\_`\_aa[WW`]N¥aZaP¥  
@HWI-EAS443:3:29:1568:1916#0/1  
ACCTCCAGAGCAGAAATGAAAAGTGGCGAGAGCAATTGGG  
+HWI-EAS443:3:29:1568:1916#0/1  
`PXVY¥]VWYX]XQ¥¥[\_Y[^YXN^\_V^UUNTNZSZ[BB  
@HWI-EAS443:3:29:1685:46#0/1  
AATGGATTGGGTGATGCCCCATTCCTTGATCGGCTCCGCC  
+HWI-EAS443:3:29:1685:46#0/1  
abab` [ab¥` `a^¥Ta[\_`\_`aaaZR¥aZH\_\_¥`BBBBBBB  
@HWI-EAS443:3:29:197:819#0/1  
CACTACCTCCAGAGCAGAAATGAAAAGTGGCGAGAGCAAT  
+HWI-EAS443:3:29:197:819#0/1  
aaaUaabaaa\_a[\_a`a^` `aaa[\_aS\_\_\_` `][TX\_^¥¥  
@HWI-EAS443:3:29:41:155#0/1  
ATGGGAGACCTTCACTACCTCCAGAGCAGAAATGAAAAGT  
+HWI-EAS443:3:29:41:155#0/1  
aaabaaaaa`\_aaa`a^\_\_a\_[ ` ` ]` [^\_^¥X][¥B  
@HWI-EAS443:3:29:513:366#0/1  
GACCTTCACTACCTCCAGAGCAGAAATGAAAAGTGGCGAG  
+HWI-EAS443:3:29:513:366#0/1  
aaaaaba`aa`\_a`\_a`\_a` ` `aa`\_` `aX`\_\_\_\_^  
@HWI-EAS443:3:29:637:1672#0/1  
AATTGCTCTCGCCACTTTTCATTTCTGCTCTGGAGGTAGT

+HWI-EAS443:3:29:637:1672#0/1  
aba\_[baaaaZ^b`\_a\_a`\_`\_a`\_\_^YU]\_^\_RBBB  
@HWI-EAS443:3:29:674:77#0/1  
GAGACCTTACTACCTCCAGAGCAGAAATGAAAAGTGGCG  
+HWI-EAS443:3:29:674:77#0/1  
aaba`aaabbaaaZZ]\_^\_a\_\_\_\_^a¥\_^^`^\_]\_\_W`^¥¥  
@HWI-EAS443:3:29:89:143#0/1  
GAAAAGTGGCGAGAGCAATTGGGACAGAAATTTGAGGAAA  
+HWI-EAS443:3:29:89:143#0/1  
^a^^^\_[ab`b[]]a\_\_\_\_]aVDS[`^WV[\_[THP\_PBB  
@HWI-EAS443:3:29:949:958#0/1  
CACTACCTCCAGAGCAGAAATGAAAAGTGGCGAGAGCAAT  
+HWI-EAS443:3:29:949:958#0/1  
`aa]SZaaba`aaaa`a`\_\_^aa`¥bZ\_a]`Wa\_^\_Q  
@HWI-EAS443:3:2:1117:1655#0/1  
GAGACCTTACTACCTCCAGAGCAGAAATGAAAAGTGGCG  
+HWI-EAS443:3:2:1117:1655#0/1  
`aaa¥]aa`a`a`W]`¥aaaaY\_aa\_\_a`aa\_\_\_\_[W¥]¥\_  
@HWI-EAS443:3:2:1181:1567#0/1  
GAAAAGTGGCGAGAGCAATTGGGACAGAAATTTGAGGAAA  
+HWI-EAS443:3:2:1181:1567#0/1  
^`aaaa`aa`ab`ZRW`^a`aa`Zaaa[\_[a`a^a\_Y\_\_  
@HWI-EAS443:3:2:1381:891#0/1  
CCAATTGCTCTCGCCACTTTTCATTTCTGCTCTGGAGGTA  
+HWI-EAS443:3:2:1381:891#0/1  
a`babbaababab\_aaabbbb`aaa\_a\_\_a^a`a\_\_`Y\_  
@HWI-EAS443:3:2:1384:599#0/1  
GAGACCTTACTACCTCCAGAGCAGAAATGAAAAGTGGCG  
+HWI-EAS443:3:2:1384:599#0/1  
WZbbabbaaaa`aaa`aaba\_b`aab`bbaaaaaa¥a^ab  
@HWI-EAS443:3:2:1436:467#0/1  
CTTCACTACCTCCAGAGCAGAAATGAAAAGTGGCGAGAGC  
+HWI-EAS443:3:2:1436:467#0/1  
^\_baaab\_¥`a`bababaaaaabbbabaa]ba`aaa\_bZ  
@HWI-EAS443:3:2:1484:27#0/1  
GAAAAGTGGCGAGAGCAATTGGGACAGAAATTTGAGGAAA  
+HWI-EAS443:3:2:1484:27#0/1  
a¥`\_a\_F]]aTZ[[NTXV^X[¥TIN`TUQNV^\_X^YYQB  
@HWI-EAS443:3:2:1527:553#0/1  
GACCTTACTACCTCCAGAGCAGAAATGAAAAGTGGCGAG  
+HWI-EAS443:3:2:1527:553#0/1  
\_aYU`^^¥\_a\_YS][^^`\_XY`^^`\_a]]^¥¥S`\_R\_U\_  
@HWI-EAS443:3:2:1734:105#0/1  
GAGACCTTACTACCTCCAGAGCAGAAATGAAAAGTGGCG  
+HWI-EAS443:3:2:1734:105#0/1  
aaa`\_\_`aaaa`aQ\_`\_\_\_\_a\_a¥V¥UN¥a[¥¥[¥\_WZVG^  
@HWI-EAS443:3:2:255:610#0/1  
CAGAAATGAAAAGTGGCGAGAGCAATTGGGACAGAAATTT  
+HWI-EAS443:3:2:255:610#0/1  
]VbaXb`bbb`b`La]`baa]aa\_ababa¥a^ba``Y¥^a

@HWI-EAS443:3:2:325:558#0/1  
CTTCACTACCTCCAGAGCAGAAATGAAAAGTGGCGAGAGC  
+HWI-EAS443:3:2:325:558#0/1  
ab\_¥` `\_ba]]^W¥¥\_]aab\_a`aa\_a` [ `PZaVa` a^[R  
@HWI-EAS443:3:2:333:1121#0/1  
GCTCTCGCCACTTTTCATTTCTGCTCTGGAGGTAGTGAAG  
+HWI-EAS443:3:2:333:1121#0/1  
` `a\_a\_aW`\_]aaaa¥`a`a\_aa^` `a\_^\_Y`ZU¥X^¥  
@HWI-EAS443:3:2:994:1682#0/1  
GAGCAGAAATGAAAAGTGGCGAGAGCAATTGGGACAGAAA  
+HWI-EAS443:3:2:994:1682#0/1  
a\_`\_aa\_\_\_aaa`\_\_aU`\_`^a\_[M\_W]R^`\_Y`^Z\_] [ ^Y  
@HWI-EAS443:3:30:1242:1707#0/1  
GAAATGAAAAGTGGCGAGAGCAATTGGGACAGAAATTTGA  
+HWI-EAS443:3:30:1242:1707#0/1  
\_U\_aW[\_` `\_\_aXWWY\_\_]QMS]]]S\_^US[Y^X¥Y^]]W  
@HWI-EAS443:3:30:131:510#0/1  
CAGAAATGAAAAGTGGCGAGAGCAATTGGGACAGAAATTT  
+HWI-EAS443:3:30:131:510#0/1  
aaaaSYaaa`a`a`ba`a`TI`XWU\_aa\_[\_a]TZ¥S[ ` \_  
@HWI-EAS443:3:30:1389:1316#0/1  
GAGACCTTCACTACCTCCAGAGCAGAAATGAAAAGTGGCG  
+HWI-EAS443:3:30:1389:1316#0/1  
aZ^Z\_aa`abbbaaaaaaa\_`Ya\_^¥`a`^`\_`\_aQ\_¥Na  
@HWI-EAS443:3:30:1397:185#0/1  
GGGAGACCTTCACTACCTCCAGAGCAGAAATGAAAAGTGG  
+HWI-EAS443:3:30:1397:185#0/1  
` ` \_Za` ` `^^^a¥VZLY^[¥SVS^YU^ZWU^\_Y¥TVRGTS  
@HWI-EAS443:3:30:1671:1328#0/1  
TGGGAGACCTTCACTACCTCCAGAGCAGAAATGAAAAGTG  
+HWI-EAS443:3:30:1671:1328#0/1  
aab`W\_\_abbaba\_\_` [ ` ]\_` `^`\_Za`^`\_aa\_¥]Z[V`  
@HWI-EAS443:3:30:1701:550#0/1  
CTTCACTACCTCCAGAGCAGAAATGAAAAGTGGCGAGAGC  
+HWI-EAS443:3:30:1701:550#0/1  
abaaaabba`aa`aa\_baab\_a`bba`aaa\_bb^a^`U]P  
@HWI-EAS443:3:30:173:247#0/1  
GAGACCTTCACTACCTCCAGAGCAGAAATGAAAAGTGGCG  
+HWI-EAS443:3:30:173:247#0/1  
\_¥\_ba\_`abbb`b`b^` `^b^aa` `aaaaa`\_ZU^¥\_TU\_  
@HWI-EAS443:3:30:187:746#0/1  
CCTTCACTACCTCCAGAGCAGAAATGAAAAGTGGCGAGAG  
+HWI-EAS443:3:30:187:746#0/1  
abaabbaabaaaaab`aa`aaaaaaaa`aUa\_aZ\_^`\_\_  
@HWI-EAS443:3:30:368:1309#0/1  
GACCTTCACTACCTCCAGAGCAGAAATGAAAAGTGGCGAG  
+HWI-EAS443:3:30:368:1309#0/1  
`bbba^aaa\_Wababb\_aaaaaa]aZaa]a` ` `S`¥¥`^]  
@HWI-EAS443:3:30:39:1175#0/1  
CTCGCCACTTTTCATTTCTGCTCTGGAGGTAGTGAAGGTC

+HWI-EAS443:3:30:39:1175#0/1  
aabaaaaaaaaaaaaabaaa`aaa[\_`^T`]N[Z[[UPW  
@HWI-EAS443:3:30:431:883#0/1  
GAAATGAAAAGTGGCGAGAGCAATTGGGACAGAAATTTGA  
+HWI-EAS443:3:30:431:883#0/1  
aaaaa`aaaa`^a\_a\_^ZWZQ\_Z`^a^SYV`^aa]]`^UM  
@HWI-EAS443:3:30:48:93#0/1  
ACCTTCACTACCTCCAGAGCAGAAATGAAAAGTGGCGAGA  
+HWI-EAS443:3:30:48:93#0/1  
aaaaaaa`aa]\_\_`a\_a¥\_^]\_Y[\_`^]]Y^\_U\_^^UXU  
@HWI-EAS443:3:30:575:226#0/1  
GGGAGACCTTCACTACCTCCAGAGCAGAAATGAAAAGTGG  
+HWI-EAS443:3:30:575:226#0/1  
\_R^`[\_`[[P[Y^UX\_N\_Q[\_`[[^TNFVFWUU\_RM[UYUWW  
@HWI-EAS443:3:30:590:1774#0/1  
CAAGCTTTCAGGTAGACTGTTTCCTTTGGCATATCCGCAA  
+HWI-EAS443:3:30:590:1774#0/1  
ab`Ua`\_`a\_`\_]`[\_`a\_`^`^`a\_WR¥^¥Z[^Y\_]`][U  
@HWI-EAS443:3:30:668:698#0/1  
CAATTGCTCTCGCCACTTTTCATTTCTGCTCTGGAGGTAG  
+HWI-EAS443:3:30:668:698#0/1  
aVW¥\_\_abb\_ab`^[^aaa``Za`aaUZZ¥Z^`\_T`VZ\_  
@HWI-EAS443:3:30:895:1914#0/1  
CCTTCACTACCTCCAGAGCAGAAATGAAAAGTGGCGAGAG  
+HWI-EAS443:3:30:895:1914#0/1  
ab\_`bbaa`a)`aa\_^[\_aWW[\_\_[V\_[a\_^G`¥¥¥\_¥TQ  
@HWI-EAS443:3:30:957:422#0/1  
ACCTTCACTACCTCCAGAGCAGAAATGAAAAGTGGCGAGA  
+HWI-EAS443:3:30:957:422#0/1  
aaa`\_aaa¥a`\_a`\_ab^aa`a^`\_aa\_\_a`\_Ta\_\_`\_Z]  
@HWI-EAS443:3:30:981:1299#0/1  
GAAATGAAAAGTGGCGAGAGCAATTGGGACAGAAATTTGA  
+HWI-EAS443:3:30:981:1299#0/1  
a¥XZY`aaa``¥KW`\_\_a[NTTTQ`[\_RGHaaT\_^X¥]SN  
@HWI-EAS443:3:31:1025:73#0/1  
ACCTTATTTCTCAAATTTCTGTCCCAATTGCTCTCGCCA  
+HWI-EAS443:3:31:1025:73#0/1  
aabbaabbb\_Zaa`aabaaba\_`\_`\_`\_aaa\_aaa^a^\_¥  
@HWI-EAS443:3:31:1283:1548#0/1  
ATGAAAAGTGGCGAGAGCAATTGGGACAGAAATTTGAGGA  
+HWI-EAS443:3:31:1283:1548#0/1  
\_`¥a`¥^aWa`b\_^WO`Z`\_Y]`¥¥[U\_ZOW\_`^`QQ¥ZX  
@HWI-EAS443:3:31:1526:1509#0/1  
ATGGGAGACCTTCACTACCTCCAGAGCAGAAATGAAAAGT  
+HWI-EAS443:3:31:1526:1509#0/1  
aa^]\_]aaa`aa^a``a[U\_T`\_\_W^S`b`[\_\_\_¥`^XI  
@HWI-EAS443:3:31:1537:620#0/1  
CTTCACTACCTCCAGAGCAGAAATGAAAAGTGGCGAGAGC  
+HWI-EAS443:3:31:1537:620#0/1  
^\_`ab`¥a\_Z\_bbbbabaab`\_abb`aabaabbbbZbYaS

@HWI-EAS443:3:31:1682:985#0/1  
ACCTTCACTACCTCCAGAGCAGAAATGAAAAGTGGCGAGA  
+HWI-EAS443:3:31:1682:985#0/1  
\_``[aW\_]`a]\_```a^`aa\_dW\_aaaa^a^`^aaVb\_`S  
@HWI-EAS443:3:31:1702:939#0/1  
CACTACCTCCAGAGCAGAAATGAAAAGTGGCGAGAGCAAT  
+HWI-EAS443:3:31:1702:939#0/1  
]\_bKUbUbW0\_b\_ab[SYbbVa`aaaZa]\_a[Z]T¥VO[a  
@HWI-EAS443:3:31:393:411#0/1  
GTCCCAATTGCTCTCGCCACTTTTCATTTCTGCTCTGGAG  
+HWI-EAS443:3:31:393:411#0/1  
a\_aa\_`Z`\_a]aa\_]T^aa\_\_aV`\_aa`````\_`\_a\_`\_[]  
@HWI-EAS443:3:31:512:1497#0/1  
CTTCACTACCTCCAGAGCAGAAATGAAAAGTGGCGAGAGC  
+HWI-EAS443:3:31:512:1497#0/1  
a`\_b`aaabaaaa]\_\_aaa\_¥`\_`\_a^V[W\_W`VZZZ^U  
@HWI-EAS443:3:31:51:1478#0/1  
GAGACCTTCACTACCTCCAGAGCAGAAATGAAAAGTGGCG  
+HWI-EAS443:3:31:51:1478#0/1  
`ba]bb`abbaaVa`abaaa\_[]`a\_aa¥\_a\_aaN\_Uaa  
@HWI-EAS443:3:31:532:353#0/1  
CCAATTGCTCTCGCCACTTTTCATTTCTGCTCTGGAGGTA  
+HWI-EAS443:3:31:532:353#0/1  
abbbaaa`bb\_a\_a\_``baaba[aaaa`]^`^`aa]Za\_U^  
@HWI-EAS443:3:31:641:1227#0/1  
CAGAGCAGAAATGAAAAGTGGCGAGAGCAATTGGGACAGA  
+HWI-EAS443:3:31:641:1227#0/1  
a`b`ab]^aaabb`]ba`[YLab`][[\_[\_]Y``\_]\_`^  
@HWI-EAS443:3:31:679:250#0/1  
GACCTTCACTACCTCCAGAGCAGAAATGAAAAGTGGCGAG  
+HWI-EAS443:3:31:679:250#0/1  
[bZ]]babaaa`Ya¥aaa[a``a`a\_a`a``\_aY\_S]\_]Z  
@HWI-EAS443:3:31:810:689#0/1  
GAGACCTTCACTACCTCCAGAGCAGAAATGAAAAGTGGCG  
+HWI-EAS443:3:31:810:689#0/1  
aZ\_baaaaaaabb`^a`a\_aaa`aa¥aaaa\_aa``^`\_[]\_  
@HWI-EAS443:3:32:1148:740#0/1  
CACTACCTCCAGAGCAGAAATGAAAAGTGGCGAGAGCAAT  
+HWI-EAS443:3:32:1148:740#0/1  
]\_b\_ab\_bbb\_ba]bbb\_[]`bb`baabHaa`baaaaa]b^  
@HWI-EAS443:3:32:1171:52#0/1  
GTCCCAATTGCTCTCGCCACTTTTCATTTCTGCTCTGGAG  
+HWI-EAS443:3:32:1171:52#0/1  
aab]bbbbbaa]bWbba]`baaaaa\_aba\_baa\_a\_ba]a  
@HWI-EAS443:3:32:1190:1336#0/1  
CTTTTGATCTCGGCGGAGCCGATCAAGGAATGGGGCATCA  
+HWI-EAS443:3:32:1190:1336#0/1  
^^aaaaaabb`b`bbaaaaa\_R¥a^a^PN\_`aa]KZ^b^  
@HWI-EAS443:3:32:308:428#0/1  
GTCCCAATTGCTCTCGCCACTTTTCATTTCTGCTCTGGAG

+HWI-EAS443:3:32:308:428#0/1  
a[aaaaaaaa`^^^a`[a`\_a`\_]\_\_\_¥\_¥\_^^^^[RNX  
@HWI-EAS443:3:32:498:1162#0/1  
GACCTTCACTACCTCCAGAGCAGAAATGAAAAGTGGCGAG  
+HWI-EAS443:3:32:498:1162#0/1  
\_Za`w`\_aaK`¥`a]]X[Z¥UZ\_\_`^`]a`[NVZa]NB  
@HWI-EAS443:3:32:609:1187#0/1  
GAGACCTTCACTACCTCCAGAGCAGAAATGAAAAGTGGCG  
+HWI-EAS443:3:32:609:1187#0/1  
\_]aaZTQX\_\_\_WW`X\_\_SV¥^]][`]¥ZW^\_^ZOZMWVY`  
@HWI-EAS443:3:32:617:384#0/1  
CTTCACTACCTCCAGAGCAGAAATGAAAAGTGGCGAGAGC  
+HWI-EAS443:3:32:617:384#0/1  
ab`aaa`bbbaaaaaa`b\_a`aaaa\_`^aa¥```N`\_  
@HWI-EAS443:3:32:864:1392#0/1  
GCCACCTTATTTCTCAAATTTCTGTCCCAATTGCTCTCG  
+HWI-EAS443:3:32:864:1392#0/1  
aa`abaaa[a``aba`^Y\_aaa\_\_\_¥aaaa`¥\_\_a^`Wa¥  
@HWI-EAS443:3:33:1093:1384#0/1  
GAAATGAAAAGTGGCGAGAGCAATTGGGACAGAAATTTGA  
+HWI-EAS443:3:33:1093:1384#0/1  
aaabaaa]Y¥\_[\_aaaa]^\_V```^]X[VP`^T^^^]\_[W  
@HWI-EAS443:3:33:1471:1702#0/1  
GAGACCTTCACTACCTCCAGAGCAGAAATGAAAAGTGGCG  
+HWI-EAS443:3:33:1471:1702#0/1  
[Ubbbb\_ba\_UbaMaaaa\_[b`a\_JR`aaa^0``VaZ¥\_  
@HWI-EAS443:3:33:1750:1798#0/1  
GGGAGACCTTCACTACCTCCAGAGCAGAAATGAAAAGTGG  
+HWI-EAS443:3:33:1750:1798#0/1  
ab`abb`aaaaUaa`a`\_\_a`aZa\_\_\_\_\_a\_VYT^\_U`Z  
@HWI-EAS443:3:33:296:581#0/1  
CCTTCACTACCTCCAGAGCAGAAATGAAAAGTGGCGAGAG  
+HWI-EAS443:3:33:296:581#0/1  
aba[bba[a`aab^]Yaaa^\_aaa\_^\_aYS^¥`Y^]^  
@HWI-EAS443:3:33:492:559#0/1  
CAGAAATGAAAAGTGGCGAGAGCAATTGGGACAGAAATTT  
+HWI-EAS443:3:33:492:559#0/1  
]\_``\_U]^`[bb`Tabbb`\_G^^^\_]\_\_aY`^ba`\_a^a  
@HWI-EAS443:3:33:546:468#0/1  
ACCTTATTTCTCAAATTTCTGTCCCAATTGCTCTCGCCA  
+HWI-EAS443:3:33:546:468#0/1  
a\_\_\_`^abaaaaaaaa^aaaaa\_aaa`a```]a\_\_aX``  
@HWI-EAS443:3:33:606:318#0/1  
GCAGAAATGAAAAGTGGCGAGAGCAATTGGGACAGAAATT  
+HWI-EAS443:3:33:606:318#0/1  
aaaa¥V\_aaaa`a\_a`^a`\_\_\_[`]W¥T`^YY\_^^^]\_  
@HWI-EAS443:3:33:625:742#0/1  
GCAGAAATGAAAAGTGGCGAGAGCAATTGGGACAGAAATT  
+HWI-EAS443:3:33:625:742#0/1  
aaa\_`¥ab`^`aa\_aaaa\_¥^Y[YV]aW\_]NFY^[^^]\_

@HWI-EAS443:3:33:814:510#0/1  
CTTCACTACTCCAGAGCAGAAATGAAAAGTGGCGAGAGC  
+HWI-EAS443:3:33:814:510#0/1  
]\_b`aa]b`a\_aabb`ba\_baa`aa`abab]`^^a¥aY¥F  
@HWI-EAS443:3:34:1237:374#0/1  
AAATGAAAAGTGGCGAGAGCAATTGGGACAGAAATTTGAG  
+HWI-EAS443:3:34:1237:374#0/1  
a\_[^a]a^^a\_bba`^aZa]¥U\_aaa`WZaaZ`\_\_\_\_Z^T\_  
@HWI-EAS443:3:34:1257:709#0/1  
ACCTTCACTACTCCAGAGCAGAAATGAAAAGTGGCGAGA  
+HWI-EAS443:3:34:1257:709#0/1  
^\_\_`ba^]aaaaaaaa\_`a`a``aaa`\_]\_aW`[Z[^]X  
@HWI-EAS443:3:34:1280:226#0/1  
TTTTGATCTCGGCGGAGCCGATCAAGGAATGGGGCATCAC  
+HWI-EAS443:3:34:1280:226#0/1  
a`aaaa`\_````\_`\_¥^`^\_¥¥¥¥Z`V¥W¥WUUVBBBB  
@HWI-EAS443:3:34:1427:1585#0/1  
GGAGACCTTCACTACTCCAGAGCAGAAATGAAAAGTGGC  
+HWI-EAS443:3:34:1427:1585#0/1  
^W]a\_]\_^``¥¥`a\_¥¥X¥\_NQRGWZVW[[VYNU¥UBBB  
@HWI-EAS443:3:34:463:805#0/1  
AATGGATTGGGTGATGCCCCATTCTTGATCGGCTCCGCC  
+HWI-EAS443:3:34:463:805#0/1  
abbZ]a\_`^X¥V\_¥\_¥^\_baa`a``[[`\_`¥\_¥¥[TNBB  
@HWI-EAS443:3:34:487:1315#0/1  
GGGAGACCTTCACTACTCCAGAGCAGAAATGAAAAGTGG  
+HWI-EAS443:3:34:487:1315#0/1  
abXI]Za^\_a\_\_\_\_Z¥TXQW^`QWR¥S]RO¥\_a[0¥BBBB  
@HWI-EAS443:3:34:531:347#0/1  
AGCCGATCAAGGAATGGGGCATCACCCAATCCATTGTCTG  
+HWI-EAS443:3:34:531:347#0/1  
a`aaaY\_a`]]]VUWZ\_X\_¥¥^^¥¥¥\_¥WRRZV[WWWBB  
@HWI-EAS443:3:34:534:1777#0/1  
CAATGGATTGGGTGATGCCCCATTCTTGATCGGCTCCGC  
+HWI-EAS443:3:34:534:1777#0/1  
abaaaa]]\_`^VaSSa`aa\_]a\_Va]\_\_`¥BBBBBBBBB  
@HWI-EAS443:3:34:590:1044#0/1  
ATGGGAGACCTTCACTACTCCAGAGCAGAAATGAAAAGT  
+HWI-EAS443:3:34:590:1044#0/1  
`IR]]X^^aa`^\_`ZZa`\_^]]UO¥Z^U¥P^V\_^Q\_[UBB  
@HWI-EAS443:3:34:641:854#0/1  
GACCTTCACTACTCCAGAGCAGAAATGAAAAGTGGCGAG  
+HWI-EAS443:3:34:641:854#0/1  
¥¥`bbbbbbbbbbaba]babbbbab\_bba`¥aa]aa\_a\_\_  
@HWI-EAS443:3:34:774:1256#0/1  
GAGACCTTCACTACTCCAGAGCAGAAATGAAAAGTGGCG  
+HWI-EAS443:3:34:774:1256#0/1  
^^^W\_bbabbbabbaabbaaab\_¥¥a^a`^a\_\_\_\_S]`S`  
@HWI-EAS443:3:34:805:419#0/1  
ACCTTATTTCTCAAATTTCTGTCCCAATTGCTCTCGCCA

+HWI-EAS443:3:34:805:419#0/1  
aaabb\_ba`aaaabaaabbaaa`a`\_a``aa\_a```¥¥]\_  
@HWI-EAS443:3:34:87:1510#0/1  
ACCTTATTTCTCAAATTTCTGTCCCAATTGCTCTCGCCA  
+HWI-EAS443:3:34:87:1510#0/1  
\_bbb\_VZ\_abb`a^[^`a\_a]Z¥aaa\_Z^`\_aaa\_a\_``^  
@HWI-EAS443:3:34:992:1184#0/1  
CTTCACTACCTCCAGAGCAGAAATGAAAAGTGGCGAGAGC  
+HWI-EAS443:3:34:992:1184#0/1  
ab`abbaaaZ^a`aa`\_a`ba`\_a`¥\_]aa^a[\_`¥UY^]  
@HWI-EAS443:3:35:1066:1620#0/1  
GAGACCTTCACTACCTCCAGAGCAGAAATGAAAAGTGGCG  
+HWI-EAS443:3:35:1066:1620#0/1  
aa]\_a]\_aaba`aYZ`\_a`X¥\_`a`[[[[[a]`aa[OZ[R\_  
@HWI-EAS443:3:35:1139:179#0/1  
GGAGACCTTCACTACCTCCAGAGCAGAAATGAAAAGTGGC  
+HWI-EAS443:3:35:1139:179#0/1  
ab\_baaaa\_b`a\_\_^`\_`\_`\_`a\_\_a[\_`a]aa`aY`¥`  
@HWI-EAS443:3:35:1202:1768#0/1  
GAGACCTTCACTACCTCCAGAGCAGAAATGAAAAGTGGCG  
+HWI-EAS443:3:35:1202:1768#0/1  
`WT]U`X]`^¥aaS[¥]]^`T]aa^PHS¥]¥ZUZ]TXRR[  
@HWI-EAS443:3:35:1513:784#0/1  
GCCACTTTTCATTTCTGCTCTGGAGGTAGTGAAGGTCTCC  
+HWI-EAS443:3:35:1513:784#0/1  
aaaa`baab`abaa\_aaaa¥aaa\_a¥YY`Xa`¥`\_NUYLX  
@HWI-EAS443:3:35:1540:1013#0/1  
CTTCACTACCTCCAGAGCAGAAATGAAAAGTGGCGAGAGC  
+HWI-EAS443:3:35:1540:1013#0/1  
a\_Q\_^YRZa]^¥`^]L]WV]ZQT¥\_XN]Y\_U`\_]LVTVU  
@HWI-EAS443:3:35:215:1341#0/1  
GAAATGAAAAGTGGCGAGAGCAATTGGGACAGAAATTTGA  
+HWI-EAS443:3:35:215:1341#0/1  
`^a\_\_^bbbaa^a^b`aPR¥a`\_a[U^[\_aa`OQ^Y\_^]¥  
@HWI-EAS443:3:35:240:1993#0/1  
CTTCACTACCTCCAGAGCAGAAATGAAAAGTGGCGAGAGC  
+HWI-EAS443:3:35:240:1993#0/1  
aa`Y`a¥JQ`¥^`\_]`\_V`\_S]Y]QZ[S]U`\_^]]XJM¥  
@HWI-EAS443:3:35:285:1675#0/1  
TGAAAAGTGGCGAGAGCAATTGGGACAGAAATTTGAGGAA  
+HWI-EAS443:3:35:285:1675#0/1  
aaab\_ba]aab`\_`\_^ZJ`\_^N[\_`\_¥¥¥W]\_\_\_¥V`]W`  
@HWI-EAS443:3:35:306:395#0/1  
GAGACCTTCACTACCTCCAGAGCAGAAATGAAAAGTGGCG  
+HWI-EAS443:3:35:306:395#0/1  
aaaaabaaabb^¥a`\_`a^]`aa`^^J¥]`ZM¥`\_T`\_\_\_\_  
@HWI-EAS443:3:35:589:84#0/1  
GAGACCTTCACTACCTCCAGAGCAGAAATGAAAAGTGGCG  
+HWI-EAS443:3:35:589:84#0/1  
aab`\_a\_aab`\_`^`\_`\_`^a`aI\_\_\_\_\_]]^^`[¥`\_]\_X\_XV\_



@HWI-EAS443:3:35:621:390#0/1  
GAGACCTTACTACCTCCAGAGCAGAAATGAAAAGTGGCG  
+HWI-EAS443:3:35:621:390#0/1  
Z¥bbbVa`b]V]abaaa`baba`a`\_``][M^a¥L¥S¥a  
@HWI-EAS443:3:35:656:48#0/1  
CTTCACTACCTCCAGAGCAGAAATGAAAAGTGGCGAGAGC  
+HWI-EAS443:3:35:656:48#0/1  
`PYY]^[^^\_T]^Y]L]ZZ¥Z]U[¥N¥ZG[W[Z^`[VQV]  
@HWI-EAS443:3:35:686:938#0/1  
GAGACCTTACTACCTCCAGAGCAGAAATGAAAAGTGGCG  
+HWI-EAS443:3:35:686:938#0/1  
YRV¥bba`aZU\_aab`\_¥¥\_\_aa[X]^`^JU¥`^V`XZ`  
@HWI-EAS443:3:35:854:609#0/1  
GGAGACCTTACTACCTCCAGAGCAGAAATGAAAAGTGGC  
+HWI-EAS443:3:35:854:609#0/1  
^\_0¥XV0\_¥¥\_TY`\_`\_a`^\_[¥U]\_QUKUY\_U\_V¥DY]a  
@HWI-EAS443:3:35:948:848#0/1  
TCGCCACTTTTCATTTCTGCTCTGGAGGTAGTGAAGGTCT  
+HWI-EAS443:3:35:948:848#0/1  
abaa\_Zaaaba^Z`aaaaa`\_a¥\_\_bYU\_aV`]Z`XJHH  
@HWI-EAS443:3:36:1036:456#0/1  
GACCTTACTACCTCCAGAGCAGAAATGAAAAGTGGCGAG  
+HWI-EAS443:3:36:1036:456#0/1  
aaaaabbbaa\_aaa`aaaaaa¥\_\_aa^a`^`Y``aa\_\_  
@HWI-EAS443:3:36:1110:1498#0/1  
TGGGAGACCTTACTACCTCCAGAGCAGAAATGAAAAGTG  
+HWI-EAS443:3:36:1110:1498#0/1  
`ba````abaa\_baaaab`\_````aaa]P\_]`\_\_aa`\_W\_  
@HWI-EAS443:3:36:1133:278#0/1  
CTTCACTACCTCCAGAGCAGAAATGAAAAGTGGCGAGAGC  
+HWI-EAS443:3:36:1133:278#0/1  
\_b^aZ`a¥`]a`b]b^bb`aa^^X]]][aY\_¥yb¥WX¥a  
@HWI-EAS443:3:36:1525:1483#0/1  
ATGGGAGACCTTACTACCTCCAGAGCAGAAATGAAAAGT  
+HWI-EAS443:3:36:1525:1483#0/1  
a]\_¥aa\_\_a^aaaa`aaa\_a^^`\_aa¥a`^\_``]^^[¥[  
@HWI-EAS443:3:36:1683:760#0/1  
CGCCACTTTTCATTTCTGCTCTGGAGGTAGTGAAGGTCTC  
+HWI-EAS443:3:36:1683:760#0/1  
a`b\_Y\_b]b[]^]]¥N\_\_X]]`\_]`¥NXBBBBBBBBBB  
@HWI-EAS443:3:36:317:1519#0/1  
ACTACCTCCAGAGCAGAAATGAAAAGTGGCGAGAGCAATT  
+HWI-EAS443:3:36:317:1519#0/1  
``]ba\_]\_b`]PX]`YR\_]`[`]^W\_Xa`ZX^]VI¥XP  
@HWI-EAS443:3:36:453:1813#0/1  
GGGAGACCTTACTACCTCCAGAGCAGAAATGAAAAGTGG  
+HWI-EAS443:3:36:453:1813#0/1  
`abU`ababbbbbbbbbbbba`aabbbbaaaaaaba]`Z  
@HWI-EAS443:3:36:486:1200#0/1  
CTTCACTACCTCCAGAGCAGAAATGAAAAGTGGCGAGAGC

+HWI-EAS443:3:36:486:1200#0/1  
aaaabbabbbaaaaa`aaaaZZ¥aaaa`a]`]aa`\_¥Wa  
@HWI-EAS443:3:36:510:699#0/1  
GGCGAGAGCAATTGGGACAGAAATTTGAGGAAATAAGGTG  
+HWI-EAS443:3:36:510:699#0/1  
]^`aZX0\_bZ\_]^^`\_¥]`bWRR^aa\_LU`[Z¥``\_aaWa  
@HWI-EAS443:3:36:754:1004#0/1  
GAAATGAAAAGTGGCGAGAGCAATTGGGACAGAAATTTGA  
+HWI-EAS443:3:36:754:1004#0/1  
aXabbbb]baa]a[`aa^\_``\_]a\_[]\_a^^a[\_\_\_\_^  
@HWI-EAS443:3:36:869:545#0/1  
CTTCACTACCTCCAGAGCAGAAATGAAAAGTGGCGAGAGC  
+HWI-EAS443:3:36:869:545#0/1  
RR`¥b]¥\_[bbbb`¥R`ba]SS\_]IO¥¥aY]Yaa^T^U\_  
@HWI-EAS443:3:36:876:1561#0/1  
TCTCGCCACTTTTCATTTCTGCTCTGGAGGTAGTGAAGGT  
+HWI-EAS443:3:36:876:1561#0/1  
`]a`^ab\_a\_`\_a]a^a^Y\_aR\_`V]]QSH]THD\_^OVO  
@HWI-EAS443:3:36:981:1336#0/1  
CCTTCACTACCTCCAGAGCAGAAATGAAAAGTGGCGAGAG  
+HWI-EAS443:3:36:981:1336#0/1  
abbbbbbbabb[``^\_aaaa\_ba`aa\_¥`ba[a\_bba^\_`  
@HWI-EAS443:3:37:1028:1034#0/1  
CAGAAATGAAAAGTGGCGAGAGCAATTGGGACAGAAATTT  
+HWI-EAS443:3:37:1028:1034#0/1  
a^\_Q^Z`aY^a`Z`^`\_]X]WORZYIVPYV¥¥RI[SZ\_  
@HWI-EAS443:3:37:1198:1025#0/1  
CGCCACTTTTCATTTCTGCTCTGGAGGTAGTGAAGGTCTC  
+HWI-EAS443:3:37:1198:1025#0/1  
abbbbaa`\_`b¥¥ab\_]¥a`a`bb\_aa[`QP[Ua\_aTa\_[  
@HWI-EAS443:3:37:1223:942#0/1  
AGTATGTCCTGGAAGAGAAGGTAATGGTGAATTTCTCCA  
+HWI-EAS443:3:37:1223:942#0/1  
¥aab``[bbbbba^\_abaaa`YabXUWYaU`]]`¥UZaa`  
@HWI-EAS443:3:37:1241:164#0/1  
GAGACCTTCACTACCTCCAGAGCAGAAATGAAAAGTGGCG  
+HWI-EAS443:3:37:1241:164#0/1  
aZ^a¥XV[¥b`]a¥V[``]`\_aa``[YWTJX`]P]^a]\_\_  
@HWI-EAS443:3:37:1447:901#0/1  
CTTCACTACCTCCAGAGCAGAAATGAAAAGTGGCGAGAGC  
+HWI-EAS443:3:37:1447:901#0/1  
`bb\_abbaaaaa\_aa^abaab\_aab`ba`b¥\_b`aaaa[a[  
@HWI-EAS443:3:37:1789:264#0/1  
GAAAAGTGGCGAGAGCAATTGGGACAGAAATTTGAGGAAA  
+HWI-EAS443:3:37:1789:264#0/1  
`aaaabYabaa`a]aaW\_\_`ZaaaWa¥^[LU[^[^\_`¥]  
@HWI-EAS443:3:37:356:1193#0/1  
CCCAATTGCTCTCGCCACTTTTCATTTCTGCTCTGGAGGT  
+HWI-EAS443:3:37:356:1193#0/1  
aba`^YWY\_Z\_a\_UaaZa`a`[\_]^[^^\_Ya^¥Y¥ZU[YP

@HWI-EAS443:3:37:589:863#0/1  
GACCTTACTACCTCCAGAGCAGAAATGAAAAGTGGCGAG  
+HWI-EAS443:3:37:589:863#0/1  
aaaaaa\_^^Ya\_a`]a\_a[\_a`a\_^X`HYZ`\_Y`\_``[a  
@HWI-EAS443:3:37:699:987#0/1  
CTTCACTACCTCCAGAGCAGAAATGAAAAGTGGCGAGAGC  
+HWI-EAS443:3:37:699:987#0/1  
aa`aba`a\_a\_\_`aa`aa\_a\_]\_`a`¥RGG\_L\_\_NTFTG  
@HWI-EAS443:3:37:755:1785#0/1  
GAGACCTTACTACCTCCAGAGCAGAAATGAAAAGTGGCG  
+HWI-EAS443:3:37:755:1785#0/1  
aa`abaaaa`b`aa`\_aa[Ra\_aaa`a`\_V]\_V¥`X]\_``  
@HWI-EAS443:3:37:818:123#0/1  
TGAAAAGTGGCGAGAGCAATTGGGACAGAAATTTGAGGAA  
+HWI-EAS443:3:37:818:123#0/1  
aa\_\_aaa^a`\_]\_X^]\_\_^^`\_Z^\_RKEW]]\_X]^WX  
@HWI-EAS443:3:38:1009:1346#0/1  
GAGACCTTACTACCTCCAGAGCAGAAATGAAAAGTGGCG  
+HWI-EAS443:3:38:1009:1346#0/1  
`Z`X`\_0[ab`Ua\_a`¥^`X[¥``\_ZS¥^]URSV[N]]X¥  
@HWI-EAS443:3:38:1114:160#0/1  
GGAGACCTTACTACCTCCAGAGCAGAAATGAAAAGTGGC  
+HWI-EAS443:3:38:1114:160#0/1  
abaaaaaaaa`a````aa`a^`\_`X¥`WPYW`¥^W^ [Q  
@HWI-EAS443:3:38:1135:488#0/1  
GGGAGACCTTACTACCTCCAGAGCAGAAATGAAAAGTGG  
+HWI-EAS443:3:38:1135:488#0/1  
abb[]R¥`[\_R]^\_aa] []JP¥P]¥\_aQVT]]]]Y^`YaW  
@HWI-EAS443:3:38:1296:1502#0/1  
GAGACCTTACTACCTCCAGAGCAGAAATGAAAAGTGGCG  
+HWI-EAS443:3:38:1296:1502#0/1  
`UXZa\_ababaa\_\_aaaa\_\_aaaa^[aa¥Y\_Y`^H\_XW]  
@HWI-EAS443:3:38:1395:1183#0/1  
GAGACCTTACTACCTCCAGAGCAGAAATGAAAAGTGGCG  
+HWI-EAS443:3:38:1395:1183#0/1  
a\_^Z]Y]]`^¥¥VUT¥NYWUN`\_ []^\_VY[HOHTNR[NUS  
@HWI-EAS443:3:38:1424:189#0/1  
CCTTCACTACCTCCAGAGCAGAAATGAAAAGTGGCGAGAG  
+HWI-EAS443:3:38:1424:189#0/1  
abbababbbbaaaa^ab\_a\_aaaaaaaaa`a]]R``^a^`]]  
@HWI-EAS443:3:38:1526:390#0/1  
CAGAAATGAAAAGTGGCGAGAGCAATTGGGACAGAAATTT  
+HWI-EAS443:3:38:1526:390#0/1  
aaababbbbab\_bbbbaa\_baaaab`b^]^`a^`a¥`^  
@HWI-EAS443:3:38:227:535#0/1  
GAGACCTTACTACCTCCAGAGCAGAAATGAAAAGTGGCG  
+HWI-EAS443:3:38:227:535#0/1  
^U]\_¥]\_] [^^a\_\_`M^[0a`Z`]^H]YZTV]] [^V`Z[P  
@HWI-EAS443:3:38:375:1273#0/1  
GAGACCTTACTACCTCCAGAGCAGAAATGAAAAGTGGCG

+HWI-EAS443:3:38:375:1273#0/1  
ab`^aabbbbababaaa`a`aaaaa`aa``aa[L`aaa  
@HWI-EAS443:3:38:662:94#0/1  
ACTACCTCCAGAGCAGAAATGAAAAGTGGCGAGAGCAATT  
+HWI-EAS443:3:38:662:94#0/1  
aaaa`\_a`a0ZP[V`a^X]`aZ\_aX[W\_]WRV^Z^LJV]V  
@HWI-EAS443:3:38:67:826#0/1  
TGAAAAGTGGCGAGAGCAATTGGGACAGAAATTTGAGGAA  
+HWI-EAS443:3:38:67:826#0/1  
YXL[PQ^XX\_aaa``WVY]\_W¥SYMH]VZY]\_¥HTY^XS  
@HWI-EAS443:3:38:779:1076#0/1  
GAGACCTTCACTACCTCCAGAGCAGAAATGAAAAGTGGCG  
+HWI-EAS443:3:38:779:1076#0/1  
aaaaabaabbaaaaaaaaaa^ababa]`aa^``\_a]a`\_a  
@HWI-EAS443:3:39:1021:549#0/1  
CTTCACTACCTCCAGAGCAGAAATGAAAAGTGGCGAGAGC  
+HWI-EAS443:3:39:1021:549#0/1  
`bbbbbbba`baaaab`baab`aabaa`adWa`\_aaa^aT  
@HWI-EAS443:3:39:1123:666#0/1  
GGAGACCTTCACTACCTCCAGAGCAGAAATGAAAAGTGGC  
+HWI-EAS443:3:39:1123:666#0/1  
`aX\_\_\_\_`bb]\_bbb`b]]\_¥\_]``\_aa\_ZUZZ`ZRa\_Z  
@HWI-EAS443:3:39:1159:252#0/1  
GTCCCAATTGCTCTCGCCACTTTTCATTTCTGCTCTGGAG  
+HWI-EAS443:3:39:1159:252#0/1  
a]`aa`[a\_a`^`^a`V\_¥\_\_\_\_\_^`V\_¥WWW¥¥\_¥¥UW  
@HWI-EAS443:3:39:1198:510#0/1  
GAGACCTTCACTACCTCCAGAGCAGAAATGAAAAGTGGCG  
+HWI-EAS443:3:39:1198:510#0/1  
\_Zabbabbbb^ba`[baaaa\_baaba\_a`a`^\_ab0a\_\_`  
@HWI-EAS443:3:39:1288:796#0/1  
CTGTCCCAATTGCTCTCGCCACTTTTCATTTCTGCTCTGG  
+HWI-EAS443:3:39:1288:796#0/1  
aaa\_bb`\_YaWabaa`baa\_aaaa\_a^`\_R```a^`\_X  
@HWI-EAS443:3:39:1450:1468#0/1  
CGCCACTTTTCATTTCTGCTCTGGAGGTAGTGAAGGTCTC  
+HWI-EAS443:3:39:1450:1468#0/1  
abbaaZZ\_]b`^a```\_`ZV]]]^ [aa¥MaaVS[YBBBBBB  
@HWI-EAS443:3:39:146:250#0/1  
GCTCTCGCCACTTTTCATTTCTGCTCTGGAGGTAGTGAAG  
+HWI-EAS443:3:39:146:250#0/1  
ab\_a\_\_\_\_`[G\_Z^`Y[[Z[[[WWW[VZBBBBBBBBBBBB  
@HWI-EAS443:3:39:1539:804#0/1  
GTCCCAATTGCTCTCGCCACTTTTCATTTCTGCTCTGGAG  
+HWI-EAS443:3:39:1539:804#0/1  
\_^^aY]]aa^V]aa¥XTZTR]\_`\_X¥^Z^\_RLNYZUVJRR  
@HWI-EAS443:3:39:1743:1753#0/1  
GCAGAAATGAAAAGTGGCGAGAGCAATTGGGACAGAAATT  
+HWI-EAS443:3:39:1743:1753#0/1  
a`a`PXX\_aa\_aYMOQWZTXWQYOFK[UZYNZU^PQQMW

@HWI-EAS443:3:39:198:1240#0/1  
GGGAGACCTTCACTACCTCCAGAGCAGAAATGAAAAGTGG  
+HWI-EAS443:3:39:198:1240#0/1  
aa^\_W\_ababbaaaaba¥]]`\_[X¥a\_]R\_^]W\_aNNZ  
@HWI-EAS443:3:39:340:1461#0/1  
CTTCACTACCTCCAGAGCAGAAATGAAAAGTGGCGAGAGC  
+HWI-EAS443:3:39:340:1461#0/1  
[`bb\_\_U\_abbbb`SZWY^SNZ\_a[a[XX]UP\_a`aZTLS  
@HWI-EAS443:3:39:436:309#0/1  
GAGACCTTCACTACCTCCAGAGCAGAAATGAAAAGTGGCG  
+HWI-EAS443:3:39:436:309#0/1  
a\_a^aa`\_\_`^^`^\_\_`\_^\_]\_Y]ZRY]]Y]^]YY^]]V  
@HWI-EAS443:3:39:485:1983#0/1  
TTCACCTACCTCCAGAGCAGAAATGAAAAGTGGCGAGAGCA  
+HWI-EAS443:3:39:485:1983#0/1  
`\_bbbbbbbbba\_aaabba\_aabbaaaa]a\_Ya`ZYY]]  
@HWI-EAS443:3:39:624:1281#0/1  
GTCCCAATTGCTCTCGCCACTTTTCATTTCTGCTCTGGAG  
+HWI-EAS443:3:39:624:1281#0/1  
¥T`a`¥¥[T\_`]]`T\_WOY[]^\_aa`^Xa\_\_`YaXPZY[  
@HWI-EAS443:3:39:674:1287#0/1  
GAAAAGTGGCGAGAGCAATTGGGACAGAAATTTGAGGAAA  
+HWI-EAS443:3:39:674:1287#0/1  
abZ^bb\_`aaa`^V[]\_WNY\_\_a\_`^^]aa¥\_\_Y^^`\_U¥  
@HWI-EAS443:3:39:76:841#0/1  
TGGGAGACCTTCACTACCTCCAGAGCAGAAATGAAAAGTG  
+HWI-EAS443:3:39:76:841#0/1  
ab`\_\_`]aaaaaba¥aaa\_`[KZ¥aa\_\_[[]^¥¥NN]\_YZ  
@HWI-EAS443:3:39:877:971#0/1  
GAGACCTTCACTACCTCCAGAGCAGAAATGAAAAGTGGCG  
+HWI-EAS443:3:39:877:971#0/1  
`abaab`]b`a^aaaa\_`]]aa`a[\_\_aa\_[-^`Y`\_`\_  
@HWI-EAS443:3:3:1025:1178#0/1  
GGGAGACCTTCACTACCTCCAGAGCAGAAATGAAAAGTGG  
+HWI-EAS443:3:3:1025:1178#0/1  
abbaaaaaaa`aaaa^a\_\_`aaa¥a`a\_]aa```\_\_\_S¥  
@HWI-EAS443:3:3:1074:96#0/1  
GTCCCAATTGCTCTCGCCACTTTTCATTTCTGCTCTGGAG  
+HWI-EAS443:3:3:1074:96#0/1  
a¥``aa]\_aa\_\_^a¥\_¥^¥Wa\_``W\_\_\_`W^\_Y¥Y^¥¥WU  
@HWI-EAS443:3:3:1150:726#0/1  
ATGAAAAGTGGCGAGAGCAATTGGGACAGAAATTTGAGGA  
+HWI-EAS443:3:3:1150:726#0/1  
aab[`abbZ^aaaTa^a\_\_a````]]]a\_`a`aS^a^`WW  
@HWI-EAS443:3:3:1222:626#0/1  
GGAGACCTTCACTACCTCCAGAGCAGAAATGAAAAGTGGC  
+HWI-EAS443:3:3:1222:626#0/1  
a`¥¥^[aab`baaaW¥aa`ab\_`\_R\_[U¥aaZ^``a¥`a[  
@HWI-EAS443:3:3:507:783#0/1  
CCTTCACTACCTCCAGAGCAGAAATGAAAAGTGGCGAGAG

+HWI-EAS443:3:3:507:783#0/1  
\_bbb\_a\_¥Wa^a]bbbabaab¥P[\_bbbaaa[baa`\_a\_]`  
@HWI-EAS443:3:3:723:525#0/1  
AATGGATTGGGTGATGCCCCATTCCCTTGATCGGCTCCGCC  
+HWI-EAS443:3:3:723:525#0/1  
]`aXb^XY^`¥`b`VUR¥\_]\_]^[X``\_T¥`aa^\_QX]BB  
@HWI-EAS443:3:3:730:1872#0/1  
ACCTTCACTACCTCCAGAGCAGAAATGAAAAGTGGCGAGA  
+HWI-EAS443:3:3:730:1872#0/1  
aa\_`\_`VaW]a]\_]\_S`\_`aY[a\_\_\_\_\_`a`\_`\_U\_UZZZBB  
@HWI-EAS443:3:3:81:2027#0/1  
GAGACCTTCACTACCTCCAGAGCAGAAATGAAAAGTGGCG  
+HWI-EAS443:3:3:81:2027#0/1  
ab`baababb`aba\_`aaba\_aaba`\_`abaaaa`aXaa\_^`  
@HWI-EAS443:3:40:1273:1246#0/1  
TGAAAAGTGGCGAGAGCAATTGGGACAGAAATTTGAGGAA  
+HWI-EAS443:3:40:1273:1246#0/1  
^a\_^YVZR`^WZY`L^YJYY]]`\_`RSO^TV]]`\_a[\_`XX  
@HWI-EAS443:3:40:1523:849#0/1  
AATGGATTGGGTGATGCCCCATTCCCTTGATCGGCTCCGCC  
+HWI-EAS443:3:40:1523:849#0/1  
aabbbbbbaa]V]\_`\_`\_abaaaa\_a`a^`^`^`aa\_Y¥X  
@HWI-EAS443:3:40:1642:785#0/1  
CTTCACTACCTCCAGAGCAGAAATGAAAAGTGGCGAGAGC  
+HWI-EAS443:3:40:1642:785#0/1  
Wa\_b`bbb`S`\_XT`b\_¥Ybaabb`\_Maaa]babbab`\_`S  
@HWI-EAS443:3:40:1782:1392#0/1  
GAGACCTTCACTACCTCCAGAGCAGAAATGAAAAGTGGCG  
+HWI-EAS443:3:40:1782:1392#0/1  
]aaZ¥ROQM`WDXY\_^^`WXTV\_V]NGY^^PRUW]G`WS[  
@HWI-EAS443:3:40:197:620#0/1  
CTTCACTACCTCCAGAGCAGAAATGAAAAGTGGCGAGAGC  
+HWI-EAS443:3:40:197:620#0/1  
aaab\_aabaaaaaaaa[a`]a\_aaaa¥HZS¥[a\_a\_[¥VTX  
@HWI-EAS443:3:40:44:1459#0/1  
TGAAAAGTGGCGAGAGCAATTGGGACAGAAATTTGAGGAA  
+HWI-EAS443:3:40:44:1459#0/1  
\_^`aaZPYU\_\_ZPOOZVG^ZYX]XTEHYN[[^^ZST¥VWV  
@HWI-EAS443:3:40:51:270#0/1  
GCTCTCGCCACTTTTCATTTCTGCTCTGGAGGTAGTGAAG  
+HWI-EAS443:3:40:51:270#0/1  
aaa`\_`\_`\_`^Y^`^`X[\_`\_`^¥^[]WYRTBBBBBBBBBB  
@HWI-EAS443:3:40:526:1416#0/1  
CAAGCTTTCAGGTAGACTGTTTCCTTTGGCATATCCGCAA  
+HWI-EAS443:3:40:526:1416#0/1  
a]aabbbbbbaa\_bb`abbababba`^`][aaaaabaa`¥a  
@HWI-EAS443:3:40:574:301#0/1  
ATTTCTCAAATTTCTGTCCCAATTGCTCTCGCCACTTTT  
+HWI-EAS443:3:40:574:301#0/1  
^aaabb`\_`abaa\_aaaa\_aa¥^Y\_VWTL¥ZYYaN[Z]^WW

@HWI-EAS443:3:40:716:1255#0/1  
AGCCACCTTATTTCTCAAATTTCTGTCCCAATTGCTCTC  
+HWI-EAS443:3:40:716:1255#0/1  
aaaaba` `aaaa`a`aa\_Y\_\_aa`a^Vaa\_a`\_\_^`^a\_`  
@HWI-EAS443:3:40:729:1436#0/1  
AGCCACCTTATTTCTCAAATTTCTGTCCCAATTGCTCTC  
+HWI-EAS443:3:40:729:1436#0/1  
a`aababaaaba`aababUaaaa\_Yaa``aa]aa\_a``  
@HWI-EAS443:3:42:1067:1520#0/1  
TGGGAGACCTTCACTACCTCCAGAGCAGAAATGAAAAGTG  
+HWI-EAS443:3:42:1067:1520#0/1  
a`ba]^^a`ba]baaa\_\_a\_a``^aaaaa`a````^aT`  
@HWI-EAS443:3:42:1108:1170#0/1  
TCTGTCCCAATTGCTCTCGCCACTTTTCATTTCTGCTCTG  
+HWI-EAS443:3:42:1108:1170#0/1  
a\_aa¥ba\_U[\_aaaa`]]^`]XZaaaaaaaa`¥0\_``a¥  
@HWI-EAS443:3:42:1204:493#0/1  
GACCTTCACTACCTCCAGAGCAGAAATGAAAAGTGGCGAG  
+HWI-EAS443:3:42:1204:493#0/1  
a`a`UaV¥Saa`a\_``aaY\_^\_b\_\_\_\_`aZ`\_NaUa\_^a^]  
@HWI-EAS443:3:42:1209:363#0/1  
CCTTCACTACCTCCAGAGCAGAAATGAAAAGTGGCGAGAG  
+HWI-EAS443:3:42:1209:363#0/1  
a``a]¥V\_Z\_^\_¥U\_`\_]\_¥`aX`abb\_SU¥a^a]]a^\_Y¥  
@HWI-EAS443:3:42:1301:1384#0/1  
CACCTTATTTCTCAAATTTCTGTCCCAATTGCTCTCGCC  
+HWI-EAS443:3:42:1301:1384#0/1  
abababb\_bbaab\_Ua]b`baba\_]a``aa`a\_^ba\_a]  
@HWI-EAS443:3:42:1384:1487#0/1  
CTTCACTACCTCCAGAGCAGAAATGAAAAGTGGCGAGAGC  
+HWI-EAS443:3:42:1384:1487#0/1  
aaa¥\_`^`a^aa^\_]Za]^^b`a]\_abaP^^Za[\_[^W  
@HWI-EAS443:3:42:1426:1659#0/1  
GAGACCTTCACTACCTCCAGAGCAGAAATGAAAAGTGGCG  
+HWI-EAS443:3:42:1426:1659#0/1  
a^`\_]\_\_a`]aZ\_a[[\_YR[aZW[^\_\_[[`\_`\_]\_X^X`]X[  
@HWI-EAS443:3:42:146:599#0/1  
GAGACCTTCACTACCTCCAGAGCAGAAATGAAAAGTGGCG  
+HWI-EAS443:3:42:146:599#0/1  
abbaabbabbaabbbaa`aa`baaa[Z\_aaa^a`aYaY`a  
@HWI-EAS443:3:42:1599:1063#0/1  
ACCTTCACTACCTCCAGAGCAGAAATGAAAAGTGGCGAGA  
+HWI-EAS443:3:42:1599:1063#0/1  
]`baa]aaabbaabaT`]\_UW`¥``bba\_Y\_] [bbaa]\_L  
@HWI-EAS443:3:42:1629:334#0/1  
GACCTTCACTACCTCCAGAGCAGAAATGAAAAGTGGCGAG  
+HWI-EAS443:3:42:1629:334#0/1  
`baaaabba\_\_aaa\_aaa\_a``a``aaba\_a`a^\_`]aa[  
@HWI-EAS443:3:42:1690:1230#0/1  
GAAATGAAAAGTGGCGAGAGCAATTGGGACAGAAATTTGA

+HWI-EAS443:3:42:1690:1230#0/1  
^RZVvaUP`a\_Q]\_V`¥VHUSFMO[\_a]JJ[WYZVZZ[[R  
@HWI-EAS443:3:42:285:424#0/1  
ATGGGAGACCTTCACTACCTCCAGAGCAGAAATGAAAAGT  
+HWI-EAS443:3:42:285:424#0/1  
aaa¥a`^^Z\_a`aaa`\_`[\_`]aa```[\_`\_a\_^)`[[S  
@HWI-EAS443:3:42:402:88#0/1  
CCTTCACTACCTCCAGAGCAGAAATGAAAAGTGGCGAGAG  
+HWI-EAS443:3:42:402:88#0/1  
abbbbbbbbaabaababbab\_\_abaaa`bZaa\_a`\_Y\_  
@HWI-EAS443:3:42:527:713#0/1  
GGAGACCTTCACTACCTCCAGAGCAGAAATGAAAAGTGGC  
+HWI-EAS443:3:42:527:713#0/1  
a\_S\_RO[U`[MWR]\_aaaZXV¥a[XZNNYX]YFQ¥[JYZ\_  
@HWI-EAS443:3:42:533:1019#0/1  
GCGAGAGCAATTGGGACAGAAATTTGAGGAAATAAGGTGG  
+HWI-EAS443:3:42:533:1019#0/1  
abbabaaaa]aa^]Z^a`ba`a`aa\_b]``\_a`\_aa0\_`  
@HWI-EAS443:3:42:540:1442#0/1  
GTCCCAATTGCTCTCGCCACTTTTCATTTCTGCTCTGGAG  
+HWI-EAS443:3:42:540:1442#0/1  
^P`a]RTRHTIQ^MQQNS]X¥URZLN]]^BBBBBBBBBB  
@HWI-EAS443:3:42:641:1707#0/1  
GAAAAGTGGCGAGAGCAATTGGGACAGAAATTTGAGGAAA  
+HWI-EAS443:3:42:641:1707#0/1  
aaaX^aX`\_[^`¥R¥`\_\_aaY^^PU^)`\_a`a`YY`aZ`\_  
@HWI-EAS443:3:42:874:285#0/1  
TGCTCTCGCCACTTTTCATTTCTGCTCTGGAGGTAGTGAA  
+HWI-EAS443:3:42:874:285#0/1  
abbbbb`\_`aaaaaab]baababaaa]]`aab]J^]S\_^Y  
@HWI-EAS443:3:43:1413:447#0/1  
CCACCTTATTTCTCAAATTTCTGTCCCAATTGCTCTCGC  
+HWI-EAS443:3:43:1413:447#0/1  
abaaabbabbbb]bb`aabbaabaaaaabbabaaaa`a  
@HWI-EAS443:3:43:1514:542#0/1  
ATGGATTGGGTGATGCCCCATTCTTGATCGGCTCCGCCG  
+HWI-EAS443:3:43:1514:542#0/1  
[\_b\_Sa``\_G\_^a][\_]aaaa^aa`\_`aY\_¥``[WUT\_  
@HWI-EAS443:3:43:1594:587#0/1  
GAGACCTTCACTACCTCCAGAGCAGAAATGAAAAGTGGCG  
+HWI-EAS443:3:43:1594:587#0/1  
abaaaabaaaaaaZ\_aa^\_a\_a\_\_a`\_^aaaa`^]]a\_^a  
@HWI-EAS443:3:43:232:579#0/1  
GAAAAGTGGCGAGAGCAATTGGGACAGAAATTTGAGGAAA  
+HWI-EAS443:3:43:232:579#0/1  
aaaa`¥aa\_b`[\_`\_`¥aZ\_a¥^a\_\_Y\_\_aa^`a]]^^  
@HWI-EAS443:3:43:259:838#0/1  
CTTCACTACCTCCAGAGCAGAAATGAAAAGTGGCGAGAGC  
+HWI-EAS443:3:43:259:838#0/1  
abbbbbbbbaa`aaabbaabbbbabab¥ba\_a`aaa]



@HWI-EAS443:3:43:263:1805#0/1  
GCGAGAGCAATTGGGACAGAAATTTGAGGAAATAAGGTGG  
+HWI-EAS443:3:43:263:1805#0/1  
`babbbbaabbba\_ababababbbbaab`aaabbbb[U]`  
@HWI-EAS443:3:43:277:704#0/1  
GGAGACCTTCACTACCTCCAGAGCAGAAATGAAAAGTGGC  
+HWI-EAS443:3:43:277:704#0/1  
¥aSa\_ba]\_aV\_\_aa[a`\_\_baa]\_¥]\_\_a`]ZZ`aGa]\_  
@HWI-EAS443:3:43:412:1721#0/1  
GAAATGAAAAGTGGCGAGAGCAATTGGGACAGAAATTTGA  
+HWI-EAS443:3:43:412:1721#0/1  
aabb]bbb\_`Y^aabb`aa\_a\_aa`aQQZaaaaX`\_`\_  
@HWI-EAS443:3:43:438:13#0/1  
AAAAGTGGCGAGAGCAATTGGGACAGAAATTTGAGGAAAT  
+HWI-EAS443:3:43:438:13#0/1  
abbbb\_bb^a¥\_Y`X¥`a\_V`[]]\_`¥X`\_a^R\_\_V[YY  
@HWI-EAS443:3:43:502:205#0/1  
GGCGAGAGCAATTGGGACAGAAATTTGAGGAAATAAGGTG  
+HWI-EAS443:3:43:502:205#0/1  
abab\_]Xa`aaa`a]a\_\_aa\_^^^a`a^aaZPZ\_YY]`Ya  
@HWI-EAS443:3:44:1200:562#0/1  
ATGGGAGACCTTCACTACCTCCAGAGCAGAAATGAAAAGT  
+HWI-EAS443:3:44:1200:562#0/1  
a\_a¥aa`\_a^`aaa`aa`\_aa\_a]a]\_`^^`\_a^\_]`Y  
@HWI-EAS443:3:44:1255:1615#0/1  
GAAAAGTGGCGAGAGCAATTGGGACAGAAATTTGAGGAAA  
+HWI-EAS443:3:44:1255:1615#0/1  
¥\_ba`\_^bb`aaaabaabb¥baa\_aabaabab`aa\_a`  
@HWI-EAS443:3:44:1290:233#0/1  
GTCCCAATTGCTCTCGCCACTTTTCATTTCTGCTCTGGAG  
+HWI-EAS443:3:44:1290:233#0/1  
`PEPX]XabZ`¥Vva\_\_`Ta[`VHT¥WLV[UTRT\_XU]  
@HWI-EAS443:3:44:1314:1514#0/1  
GAGACCTTCACTACCTCCAGAGCAGAAATGAAAAGTGGCG  
+HWI-EAS443:3:44:1314:1514#0/1  
ZZaYaQ\_\_UY[[]]SXV[SaU¥¥Za¥^S¥][\_T\_Xa[VT  
@HWI-EAS443:3:44:1339:1585#0/1  
ACCTTATTTCTCAAATTTCTGTCCCAATTGCTCTCGCCA  
+HWI-EAS443:3:44:1339:1585#0/1  
a]aabaaaaa\_a`aaa`aa`\_a`\_`aa`a\_`]WFW]Y]  
@HWI-EAS443:3:44:1384:1192#0/1  
CTTCACTACCTCCAGAGCAGAAATGAAAAGTGGCGAGAGC  
+HWI-EAS443:3:44:1384:1192#0/1  
`bb\_baaab[bbaab\_a\_aa\_a\_ba`aaaa^ba¥b`\_]`X  
@HWI-EAS443:3:44:1399:879#0/1  
GTCCCAATTGCTCTCGCCACTTTTCATTTCTGCTCTGGAG  
+HWI-EAS443:3:44:1399:879#0/1  
`YZ[¥SYY\_]¥\_NXP^KLYW[¥^YWV^VQ]YU]R`\_ZU\_  
@HWI-EAS443:3:44:1514:1844#0/1  
TCTGTCCCAATTGCTCTCGCCACTTTTCATTTCTGCTCTG

+HWI-EAS443:3:44:1514:1844#0/1  
[\_a^JZaS]ab`Z^a`XQ^W]WM[\_aSPYZa\_NYGJTSX[  
@HWI-EAS443:3:44:1609:842#0/1  
GCTCTCGCCACTTTTCATTTCTGCTCTGGAGGTAGTGAAG  
+HWI-EAS443:3:44:1609:842#0/1  
aababaaa\_aabbbba`abbbba¥[\_`aab^]aaZ`¥NXVW\_  
@HWI-EAS443:3:44:192:392#0/1  
GGACTTTTGATCTCGGCGGAGCCGATCAAGGAATGGGGCA  
+HWI-EAS443:3:44:192:392#0/1  
a\_a\_aba`aaaaaaaa`aa^\_a`a\_US\_]\_YZVRVZ¥aZ¥  
@HWI-EAS443:3:44:246:75#0/1  
AATTTCTGTCCAATTGCTCTCGCCACTTTTCATTTCTGC  
+HWI-EAS443:3:44:246:75#0/1  
a`aab^]\_[WY`[\_]`a^``\_\_`QT]Q]R¥^Z^a^\_\_]\_]\_  
@HWI-EAS443:3:44:249:1135#0/1  
CTTCACTACCTCCAGAGCAGAAATGAAAAGTGGCGAGAGC  
+HWI-EAS443:3:44:249:1135#0/1  
aa[bb`b]bababba[babbba`bbbabbaWb^aaaa``V  
@HWI-EAS443:3:44:327:981#0/1  
CTTCACTACCTCCAGAGCAGAAATGAAAAGTGGCGAGAGC  
+HWI-EAS443:3:44:327:981#0/1  
ab`aaaabaa\_bbab`aaaba\_`abaa`aa]ba`b`a\_aZ  
@HWI-EAS443:3:44:398:524#0/1  
GAAAAGTGGCGAGAGCAATTGGGACAGAAATTTGAGGAAA  
+HWI-EAS443:3:44:398:524#0/1  
aaaa\_bW`a\_]\_[W^XY\_``\_\_\_\_]^`YY¥]^`a[S\_`]YY  
@HWI-EAS443:3:44:427:1734#0/1  
GGGAGACCTTCACTACCTCCAGAGCAGAAATGAAAAGTGG  
+HWI-EAS443:3:44:427:1734#0/1  
\_UZ^a^V]ab[baabZ¥aaaa\_`\_^\_`^```\_[a]\_aU`T  
@HWI-EAS443:3:44:704:1629#0/1  
CACTACCTCCAGAGCAGAAATGAAAAGTGGCGAGAGCAAT  
+HWI-EAS443:3:44:704:1629#0/1  
abb``]^`aaaaaaaa`aaaa\_\_aadWaa^a`aY`SY¥]  
@HWI-EAS443:3:44:725:1756#0/1  
GAGACCTTCACTACCTCCAGAGCAGAAATGAAAAGTGGCG  
+HWI-EAS443:3:44:725:1756#0/1  
^WZaVv\_aa\_\_aa¥a]TV`\_\_[Q¥\_X^`ZWU`\_^YFQLMU  
@HWI-EAS443:3:44:794:1353#0/1  
CACCTTATTTCTCAAATTTCTGTCCAATTGCTCTCGCC  
+HWI-EAS443:3:44:794:1353#0/1  
S^`b`^a`b¥J¥ba^ab\_`Va]\_\_\_\_]`aaaaaa[aU[X[  
@HWI-EAS443:3:44:810:1275#0/1  
GGCGAGAGCAATTGGGACAGAAATTTGAGGAAATAAGGTG  
+HWI-EAS443:3:44:810:1275#0/1  
aa`aaa`\_\_\_\_`aaa``\_\_a`aa\_a``a\_aa]^\_`^\_a^Z`  
@HWI-EAS443:3:44:867:1337#0/1  
ATGGGAGACCTTCACTACCTCCAGAGCAGAAATGAAAAGT  
+HWI-EAS443:3:44:867:1337#0/1  
Wa`\_\_V\_``a`ba```a[`aa][`]¥UY`[```aa]\_aaT

@HWI-EAS443:3:44:881:1839#0/1  
CACTTTTCATTTCTGCTCTGGAGGTAGTGAAGTCTCCCA  
+HWI-EAS443:3:44:881:1839#0/1  
abaabbb`bbbb`abaaabba`aa]a`^`aaa\_0¥`R¥R^  
@HWI-EAS443:3:45:1130:87#0/1  
CCTTCACTACCTCCAGAGCAGAAATGAAAAGTGGCGAGAG  
+HWI-EAS443:3:45:1130:87#0/1  
aabbbbbbb`abbaabbbbbbb`babbb[bbbabbabaaab  
@HWI-EAS443:3:45:1201:1490#0/1  
TGAAAAGTGGCGAGAGCAATTGGGACAGAAATTTGAGGAA  
+HWI-EAS443:3:45:1201:1490#0/1  
^`a\_^W^aaa[Y^\_]`ZY]XT\_a`MMY`S\_\_``\_aG\_a[Y  
@HWI-EAS443:3:45:1402:1467#0/1  
GCAGACAATGGATTGGGTGATGCCCCATTCCTTGATCGGC  
+HWI-EAS443:3:45:1402:1467#0/1  
aaaaa\_a`[`a\_`\_^[VU¥\_]YYY^^`\_]SZ^\_UUZSRYS  
@HWI-EAS443:3:45:1449:963#0/1  
GGGAGACCTTCACTACCTCCAGAGCAGAAATGAAAAGTGG  
+HWI-EAS443:3:45:1449:963#0/1  
a\_QPUTQVX`RXaaN\_]a¥TW]PaUI`¥\_\_[] [UWW^U\_Z  
@HWI-EAS443:3:45:1517:642#0/1  
GAGACCTTCACTACCTCCAGAGCAGAAATGAAAAGTGGCG  
+HWI-EAS443:3:45:1517:642#0/1  
¥Za\_V\_aaaa¥V`LN^[YU^H\_]V[ZYZ\_^NQYZYNQ[\_\_\_  
@HWI-EAS443:3:45:1563:1810#0/1  
GGGAGACCTTCACTACCTCCAGAGCAGAAATGAAAAGTGGC  
+HWI-EAS443:3:45:1563:1810#0/1  
ab^\_WOZ^WQZVZZZ]^Y^`a[X]]U\_]`a\_[]S``V  
@HWI-EAS443:3:45:1665:900#0/1  
ATGGGAGACCTTCACTACCTCCAGAGCAGAAATGAAAAGT  
+HWI-EAS443:3:45:1665:900#0/1  
^`^`a^]YZa\_^¥V]a[V``Z[ST\_Z\_¥^]V\_\_]^TVR  
@HWI-EAS443:3:45:1767:1028#0/1  
CAAGCTTTCAGGTAGACTGTTTCCTTTGGCATATCCGCAA  
+HWI-EAS443:3:45:1767:1028#0/1  
aa[aaa`aaaaa`a\_`a\_\_a\_\_\_^`\_`\_]\_^]^^]^  
@HWI-EAS443:3:45:186:1301#0/1  
GACCTTCACTACCTCCAGAGCAGAAATGAAAAGTGGCGAG  
+HWI-EAS443:3:45:186:1301#0/1  
aa`a`baa`aba]a\_\_`^[aaa``\_aaaaaaaaV]R]``\_  
@HWI-EAS443:3:45:226:297#0/1  
GGGAGACCTTCACTACCTCCAGAGCAGAAATGAAAAGTGGC  
+HWI-EAS443:3:45:226:297#0/1  
ab]baaa\_]` `]`Z]\_a\_\_a\_Ya\_Y\_X\_`\_`\_¥ZYYGa\_Z  
@HWI-EAS443:3:45:631:569#0/1  
CACTACCTCCAGAGCAGAAATGAAAAGTGGCGAGAGCAAT  
+HWI-EAS443:3:45:631:569#0/1  
abbbba`baabb`b]bb^^aaba\_\_aa\_`b`a`a]aSW\_`  
@HWI-EAS443:3:45:941:181#0/1  
GACCTTCACTACCTCCAGAGCAGAAATGAAAAGTGGCGAG

+HWI-EAS443:3:45:941:181#0/1  
aaaabbababa`a`aab`a`\_a\_^`aa\_\_`\_`Va^]`\_\_  
@HWI-EAS443:3:46:1131:255#0/1  
ATGGGAGACCTTCACTACCTCCAGAGCAGAAATGAAAAGT  
+HWI-EAS443:3:46:1131:255#0/1  
aabba\_aaaaaa\_\_\_`\_W\_^]\_^\_]a]^a^^]`^]`V  
@HWI-EAS443:3:46:1476:1975#0/1  
GAAAAGTGGCGAGAGCAATTGGGACAGAAATTTGAGGAAA  
+HWI-EAS443:3:46:1476:1975#0/1  
a]a^a^^a\_a`a`^]`a\_aYa`\_Yaa\_]UL^\_]Y\_ZY\_]`  
@HWI-EAS443:3:46:1514:424#0/1  
GTCCCAATTGCTCTCGCCACTTTTCATTTCTGCTCTGGAG  
+HWI-EAS443:3:46:1514:424#0/1  
a\_`^^^a^`\_`\_]W^\_`VS¥`\_`U[\_`^¥[\_[¥¥¥\_ZUY  
@HWI-EAS443:3:46:1647:126#0/1  
CCCAATTGCTCTCGCCACTTTTCATTTCTGCTCTGGAGGT  
+HWI-EAS443:3:46:1647:126#0/1  
``aabaaaab]\_\_a`````a^b\_]aaa^`a\_^\_aaa]a\_X  
@HWI-EAS443:3:46:1666:967#0/1  
CTGTCCCAATTGCTCTCGCCACTTTTCATTTCTGCTCTGG  
+HWI-EAS443:3:46:1666:967#0/1  
abbaa`aaabbaa\_aab\_``aaaba`ba`aaZa\_`a¥  
@HWI-EAS443:3:46:1698:635#0/1  
TTCCTACTACCTCCAGAGCAGAAATGAAAAGTGGCGAGAGCA  
+HWI-EAS443:3:46:1698:635#0/1  
aaa`Xaaa\_aa`]XX^Z\_aW][`\_TY\_\_`V\_]R]X\_U[ZV  
@HWI-EAS443:3:46:234:152#0/1  
GTCCCAATTGCTCTCGCCACTTTTCATTTCTGCTCTGGAG  
+HWI-EAS443:3:46:234:152#0/1  
\_Q`\_][]\_`^`\_`\_a[^\_\_\_\_`\_`\_`\_`^\_`\_`¥^^^`^¥^  
@HWI-EAS443:3:46:273:1699#0/1  
GAGACCTTCACTACCTCCAGAGCAGAAATGAAAAGTGGCG  
+HWI-EAS443:3:46:273:1699#0/1  
a¥b`a\_^`\_]aa`\_aaa`^U\_`aaZNZ`a¥a¥\_a¥aaZa  
@HWI-EAS443:3:46:407:661#0/1  
GAGACCTTCACTACCTCCAGAGCAGAAATGAAAAGTGGCG  
+HWI-EAS443:3:46:407:661#0/1  
a`aa`aaaabab```a`aaa[a\_aa\_aaaaa`\_aUa`\_a  
@HWI-EAS443:3:46:757:132#0/1  
AAATTTCTGTCCCAATTGCTCTCGCCACTTTTCATTTCTG  
+HWI-EAS443:3:46:757:132#0/1  
a]a]``ba]YaaYa`\_]`X\_^\_^`¥R^X^\_]SV\_^^V`\_  
@HWI-EAS443:3:46:758:462#0/1  
CCTTCACTACCTCCAGAGCAGAAATGAAAAGTGGCGAGAG  
+HWI-EAS443:3:46:758:462#0/1  
abbbabab`aaaa`aabaab^aaba`aa^b^aa\_a[]¥a  
@HWI-EAS443:3:46:800:290#0/1  
GAGACCTTCACTACCTCCAGAGCAGAAATGAAAAGTGGCG  
+HWI-EAS443:3:46:800:290#0/1  
^¥a`a`\_a`a`a]\_^a`a\_a`]a]^¥\_a]S]¥\_U\_\_¥`

@HWI-EAS443:3:46:930:607#0/1  
GATCAAGGAATGGGGCATCACCCAATCCATTGTCTGCAAA  
+HWI-EAS443:3:46:930:607#0/1  
aaaa`abaa\_aaaa`\_aaaa`\_`\_a\_`\_`a\_dW^^`¥\_[-  
@HWI-EAS443:3:47:1009:652#0/1  
GAAAAGTGGCGAGAGCAATTGGGACAGAAATTTGAGGAAA  
+HWI-EAS443:3:47:1009:652#0/1  
\_W¥]Z\_X`aa\_Z]V¥VV¥a`\_a\_W¥]\_R]\_^aaWLS\_TYY  
@HWI-EAS443:3:47:1016:1035#0/1  
GGAGACCTTCACTACCTCCAGAGCAGAAATGAAAAGTGGC  
+HWI-EAS443:3:47:1016:1035#0/1  
ab`b\_aaa\_^a`a^`¥a¥aR\_¥¥\_aW\_a^\_\_\_\_Z\_Z`\_]  
@HWI-EAS443:3:47:1176:313#0/1  
GAGACCTTCACTACCTCCAGAGCAGAAATGAAAAGTGGCG  
+HWI-EAS443:3:47:1176:313#0/1  
aabaaaa`b`aa\_^a`aa^a^\_a`\_]`\_[-^`V`¥\_`  
@HWI-EAS443:3:47:1300:1525#0/1  
ATGGGAGACCTTCACTACCTCCAGAGCAGAAATGAAAAGT  
+HWI-EAS443:3:47:1300:1525#0/1  
``[aaZ`¥`aa^Z[¥aZQ\_^`\_]\_\_^`WQQ^]SY^UaW  
@HWI-EAS443:3:47:1361:933#0/1  
TGAAAAGTGGCGAGAGCAATTGGGACAGAAATTTGAGGAA  
+HWI-EAS443:3:47:1361:933#0/1  
aa`[\_\_\_¥a^\_a]XZWWZ\_\_\_^]ZZ^]Z^Z^a\_\_Z]\_XZ  
@HWI-EAS443:3:47:1558:1261#0/1  
CTCGGCGGAGCCGATCAAGGAATGGGGCATCACCCAATCC  
+HWI-EAS443:3:47:1558:1261#0/1  
abbbba]aba]^a\_\_VP\_a`¥ZVPWP]UZNJVZYZZRGUV  
@HWI-EAS443:3:47:1583:1446#0/1  
GACCTTCACTACCTCCAGAGCAGAAATGAAAAGTGGCGAG  
+HWI-EAS443:3:47:1583:1446#0/1  
ZWP]aa^^\_\_^UJXW[^`Z¥^Xa¥Y]S][YXYZR\_XR`\_`  
@HWI-EAS443:3:47:1632:1912#0/1  
CCACCTTATTTCTCAAATTTCTGTCCCAATTGCTCTCGC  
+HWI-EAS443:3:47:1632:1912#0/1  
a\_b`a`baba`^`^`aaaabaaaa`a`Yaaa`aWa`aY¥T  
@HWI-EAS443:3:47:1660:1626#0/1  
GTCAAGCTTTCAGGTAGACTGTTTCCTTTGGCATATCCGC  
+HWI-EAS443:3:47:1660:1626#0/1  
aYR]^\_¥\_ZU]]]VYY]VV]]XXUUVRXYVVUVXXXRVWR  
@HWI-EAS443:3:47:1726:33#0/1  
ATGGATTGGGTGATGCCCATTCCTTGATCGGCTCCGCCG  
+HWI-EAS443:3:47:1726:33#0/1  
aaZYbbaa]a[Xa]¥X[]][VV]\_¥^V]QVY\_]YW\_WY¥BB  
@HWI-EAS443:3:47:242:101#0/1  
TGAAAAGTGGCGAGAGCAATTGGGACAGAAATTTGAGGAA  
+HWI-EAS443:3:47:242:101#0/1  
`a[a`a`¥bbaa`^S`aS`a^Y\_\_U`\_a\_¥]\_aa[P`[KT  
@HWI-EAS443:3:47:30:1425#0/1  
GAGACCTTCACTACCTCCAGAGCAGAAATGAAAAGTGGCG

+HWI-EAS443:3:47:30:1425#0/1  
aabaaaaaZ\_]aa]a^\_a]] [YU`a^¥`^^]^^^\_R^[N^  
@HWI-EAS443:3:47:356:739#0/1  
GACCTTCACTACCTCCAGAGCAGAAATGAAAAGTGGCGAG  
+HWI-EAS443:3:47:356:739#0/1  
aaaaaaa`aa]Z¥aa]]Y\_X[a]¥[`^][XZ\_L\_\_[\_^U  
@HWI-EAS443:3:47:38:493#0/1  
GAGACCTTCACTACCTCCAGAGCAGAAATGAAAAGTGGCG  
+HWI-EAS443:3:47:38:493#0/1  
]^baaaaa`aaa`^aa\_\_\_a^^^\_aZ`\_a`\_\_`\_a[\_V¥\_  
@HWI-EAS443:3:47:407:1009#0/1  
GAGACCTTCACTACCTCCAGAGCAGAAATGAAAAGTGGCG  
+HWI-EAS443:3:47:407:1009#0/1  
a^a\_aaaaab`\_a\_a\_\_\_`a`\_`[\_`\_\_\_\_a`^a^\_V\_V¥\_  
@HWI-EAS443:3:47:444:1997#0/1  
GAAATGAAAAGTGGCGAGAGCAATTGGGACAGAAATTTGA  
+HWI-EAS443:3:47:444:1997#0/1  
aaaSaa]`aa\_X[]^Z`]P]W¥\_] [UX`X)`\_`^`^[\_¥QO  
@HWI-EAS443:3:47:481:513#0/1  
GTCCCAATTGCTCTCGCCACTTTTCATTTCTGCTCTGGAG  
+HWI-EAS443:3:47:481:513#0/1  
^^abbb¥bZ]\_^ba\_¥Z`a``baa]Z^aa\_aaa]]W^X``  
@HWI-EAS443:3:47:670:1504#0/1  
CACCTTATTTCTCAAATTTCTGTCCCAATTGCTCTCGCC  
+HWI-EAS443:3:47:670:1504#0/1  
\_`aa^```a[]`¥\_aa`bbb`ab\_a^W]`a\_PYbY¥` [Y`  
@HWI-EAS443:3:47:678:409#0/1  
ATGGGAGACCTTCACTACCTCCAGAGCAGAAATGAAAAGT  
+HWI-EAS443:3:47:678:409#0/1  
a`bbaabaa\_ba\_b`aaaYa``\_aaa\_]aZ`\_ab\_aa\_`¥  
@HWI-EAS443:3:48:1002:1141#0/1  
CAGAAATGAAAAGTGGCGAGAGCAATTGGGACAGAAATTT  
+HWI-EAS443:3:48:1002:1141#0/1  
aaa^abbbab^^a\_baab\_aaa`\_\_a]¥\_`H^ab\_X\_a^a  
@HWI-EAS443:3:48:1305:992#0/1  
CAGAAATGAAAAGTGGCGAGAGCAATTGGGACAGAAATTT  
+HWI-EAS443:3:48:1305:992#0/1  
^bbaaaba`aW\_b]ba\_a`Y`\_Z\_a`\_`a¥W`a\_\_\_a`a  
@HWI-EAS443:3:48:1619:536#0/1  
CTTCACTACCTCCAGAGCAGAAATGAAAAGTGGCGAGAGC  
+HWI-EAS443:3:48:1619:536#0/1  
abbbbbbaabbbbbbbabbabaaabbaa`\_b[baab`aZZT  
@HWI-EAS443:3:48:1700:372#0/1  
CCTTCACTACCTCCAGAGCAGAAATGAAAAGTGGCGAGAG  
+HWI-EAS443:3:48:1700:372#0/1  
ab`Y\_a]VXJXbaa``[^a]b\_\_`aa`\_`\_a]`a[XT\_¥[  
@HWI-EAS443:3:48:200:1552#0/1  
GGGAGACCTTCACTACCTCCAGAGCAGAAATGAAAAGTGG  
+HWI-EAS443:3:48:200:1552#0/1  
ab`^aaba`aab`aa^^a`a\_a^\_¥\_[TJ``\_a\_a\_]YIXX

@HWI-EAS443:3:48:300:141#0/1  
AAAAGTGGCGAGAGCAATTGGGACAGAAATTTGAGGAAAT  
+HWI-EAS443:3:48:300:141#0/1  
a\_^`[HW\_Z`]\_M¥WVUU¥NN[VQWUZ¥UU^USG[TFTVQ  
@HWI-EAS443:3:48:364:1987#0/1  
CAGAAATGAAAAGTGGCGAGAGCAATTGGGACAGAAATTT  
+HWI-EAS443:3:48:364:1987#0/1  
R``^\_b`\_a`aa]^^Zaa¥]\_ZQ\_T¥¥X`WVWaTTS]a^  
@HWI-EAS443:3:48:391:502#0/1  
GGGAGACCTTCACTACCTCCAGAGCAGAAATGAAAAGTGG  
+HWI-EAS443:3:48:391:502#0/1  
abbaa`a`aaaaaaaa\_aa`\_a\_a`aa]a`aa`\_\_aXa\_  
@HWI-EAS443:3:48:405:595#0/1  
CACCTTATTTCTCAAATTTCTGTCCCAATTGCTCTCGCC  
+HWI-EAS443:3:48:405:595#0/1  
[b`R¥babbababbabbbabbaaabaa```b`\_`aaa  
@HWI-EAS443:3:48:77:1638#0/1  
GACCTTCACTACCTCCAGAGCAGAAATGAAAAGTGGCGAG  
+HWI-EAS443:3:48:77:1638#0/1  
aY\_Y^U^^\_]^L^`[^`^U\_`]]][UUab\_^[X\_R]\_X]]Z  
@HWI-EAS443:3:48:795:1572#0/1  
ATGGGAGACCTTCACTACCTCCAGAGCAGAAATGAAAAGT  
+HWI-EAS443:3:48:795:1572#0/1  
aaabaab`\_a\_aab`aa\_a\_Z[`a[a\_^a]\_\_\_a`^^`\_T  
@HWI-EAS443:3:49:1063:724#0/1  
CTTCACTACCTCCAGAGCAGAAATGAAAAGTGGCGAGAGC  
+HWI-EAS443:3:49:1063:724#0/1  
a][`^^ZWVUZU^ba]Z`ZL^Taa\_``[aYYUR]XPR\_G  
@HWI-EAS443:3:49:1096:1835#0/1  
GCCACTTTTCATTTCTGCTCTGGAGGTAGTGAAGTCTCC  
+HWI-EAS443:3:49:1096:1835#0/1  
`Z`]I^bb^S]b`aaa`a^a\_`]\_\_\_Z`V]^`\_¥BBBBB  
@HWI-EAS443:3:49:1122:568#0/1  
CACCTTATTTCTCAAATTTCTGTCCCAATTGCTCTCGCC  
+HWI-EAS443:3:49:1122:568#0/1  
`bbabbbbbbbbbbbbbbbbbbbbbbbbbbbbabbbabaa  
@HWI-EAS443:3:49:1291:1268#0/1  
CACCTTATTTCTCAAATTTCTGTCCCAATTGCTCTCGCC  
+HWI-EAS443:3:49:1291:1268#0/1  
^Ka`a`[bbb`Y`QP\_bbbb\_aba`Z\_\_0]\_aU^[b[a[^  
@HWI-EAS443:3:49:1337:1110#0/1  
GCCACTTTTCATTTCTGCTCTGGAGGTAGTGAAGTCTCC  
+HWI-EAS443:3:49:1337:1110#0/1  
abababbbbbbbbbbbbab`aaaa\_b`a\_``^XaaSQ^R^  
@HWI-EAS443:3:49:1484:1561#0/1  
GAAATGAAAAGTGGCGAGAGCAATTGGGACAGAAATTTGA  
+HWI-EAS443:3:49:1484:1561#0/1  
aaa\_a`aa`\_\_\_a]¥\_\_\_]Y^T]\_\_^R¥]YY]^Z]Z^\_^XU  
@HWI-EAS443:3:49:1570:86#0/1  
CTTCACTACCTCCAGAGCAGAAATGAAAAGTGGCGAGAGC

+HWI-EAS443:3:49:1570:86#0/1  
abbbbabba\_bbabbbb]abab`bb\_bbbaabbaaaa\_^Y  
@HWI-EAS443:3:49:283:885#0/1  
GAGACCTTCACTACCTCCAGAGCAGAAATGAAAAGTGGCG  
+HWI-EAS443:3:49:283:885#0/1  
`\_[\_\_babaaaa`\_a^\_Z`\_X\_\_a`Y[aa`^`\_aU`[Ta  
@HWI-EAS443:3:49:318:1144#0/1  
CACTACCTCCAGAGCAGAAATGAAAAGTGGCGAGAGCAAT  
+HWI-EAS443:3:49:318:1144#0/1  
ababbaaba`baabbbbbbbbbbbbb`bbab`baa`^aa  
@HWI-EAS443:3:49:412:458#0/1  
CCTTCACTACCTCCAGAGCAGAAATGAAAAGTGGCGAGAG  
+HWI-EAS443:3:49:412:458#0/1  
I¥babaabaabb[[a[S\_bbbbbbbbb]¥\_U`aZ¥a¥¥`  
@HWI-EAS443:3:49:423:163#0/1  
GAGACCTTCACTACCTCCAGAGCAGAAATGAAAAGTGGCG  
+HWI-EAS443:3:49:423:163#0/1  
a[`R^^aa^]QY`^VU^S]\_S`RWXMTW^\_^XYYSJX¥U¥  
@HWI-EAS443:3:49:539:901#0/1  
GAGACCTTCACTACCTCCAGAGCAGAAATGAAAAGTGGCG  
+HWI-EAS443:3:49:539:901#0/1  
a`\_a^`\_a^a[`\_X\_\_`\_]`¥[\_^]]\_[]\_]\_]^\_U]]U\_  
@HWI-EAS443:3:49:68:1314#0/1  
GAGACCTTCACTACCTCCAGAGCAGAAATGAAAAGTGGCG  
+HWI-EAS443:3:49:68:1314#0/1  
`baaaababbaaaaaaaaaaaaa`b`abaaaa`a[a`\_a  
@HWI-EAS443:3:49:796:64#0/1  
GAAATGAAAAGTGGCGAGAGCAATTGGGACAGAAATTTGA  
+HWI-EAS443:3:49:796:64#0/1  
a`^abb`ab`bXaa\_bZ\_GaOU\_]a`\_WS]\_\_^^\_`^]X  
@HWI-EAS443:3:49:813:560#0/1  
TGGGAGACCTTCACTACCTCCAGAGCAGAAATGAAAAGTG  
+HWI-EAS443:3:49:813:560#0/1  
aa]Z\_bXQ^baaa`a^`\_aa\_]\_ZUVa`T^aa`]¥\_a¥`  
@HWI-EAS443:3:49:814:1661#0/1  
ATTGCTCTCGCCACTTTTCATTTCTGCTCTGGAGGTAGTG  
+HWI-EAS443:3:49:814:1661#0/1  
aM^PH`H]a`¥a\_\_PPXY]]]Y¥R^^]YHS^¥]\_\_U]^O]  
@HWI-EAS443:3:49:885:1298#0/1  
GAGACCTTCACTACCTCCAGAGCAGAAATGAAAAGTGGCG  
+HWI-EAS443:3:49:885:1298#0/1  
aYFU^W]UY`b]RUQ]X¥a`a\_]\_WZ`^X[at[^aP[^  
@HWI-EAS443:3:4:1064:743#0/1  
GTCCCAATTGCTCTCGCCACTTTTCATTTCTGCTCTGGAG  
+HWI-EAS443:3:4:1064:743#0/1  
a`\_\_aa`bbX`¥a]a^`a¥a`ba\_aaa`[aaW\_¥`a`¥a  
@HWI-EAS443:3:4:1562:587#0/1  
ACTACCTCCAGAGCAGAAATGAAAAGTGGCGAGAGCAATT  
+HWI-EAS443:3:4:1562:587#0/1  
aaba`\_\_`aaa`]ab`aaaa¥\_a`Ub`]a^\_U`ZUW^Z



@HWI-EAS443:3:4:1761:612#0/1  
CGATCAAGGAATGGGGCATCACCCAATCCATTGTCTGCAA  
+HWI-EAS443:3:4:1761:612#0/1  
Ua[GZ[\_babVaaW\_babbU`\_aabaaQN]ZZa`Z`a[^B  
@HWI-EAS443:3:4:222:934#0/1  
TGTCCCAATTGCTCTCGCCACTTTTCATTTCTGCTCTGGA  
+HWI-EAS443:3:4:222:934#0/1  
aaaaaa^aa¥^aaaa^a`\_`\_`aaa[aaaa]a````]\_Z\_\_  
@HWI-EAS443:3:4:267:335#0/1  
CTACCTCCAGAGCAGAAATGAAAAGTGGCGAGAGCAATTG  
+HWI-EAS443:3:4:267:335#0/1  
a``^Z\_U\_^a[`ab[a\_aab\_b`N¥Y`bT``aYaQT``[`  
@HWI-EAS443:3:4:403:1636#0/1  
GAGCAGAAATGAAAAGTGGCGAGAGCAATTGGGACAGAAA  
+HWI-EAS443:3:4:403:1636#0/1  
a`ab`b\_abbbaa^a]K[¥`\_aaa\_``a`aa^`]^a^Y]`  
@HWI-EAS443:3:4:464:197#0/1  
TGGCGAGAGCAATTGGGACAGAAATTTGAGGAAATAAGGT  
+HWI-EAS443:3:4:464:197#0/1  
`babX^\_b`\_`a¥a\_aY[`aa`^^aaa]aaYOUa`^a`G  
@HWI-EAS443:3:4:79:1024#0/1  
GGCGAGAGCAATTGGGACAGAAATTTGAGGAAATAAGGTG  
+HWI-EAS443:3:4:79:1024#0/1  
ab¥b\_a\_\_a`aaaa]``aa\_] [aaaa`a\_W^]a\_]aa^a  
@HWI-EAS443:3:4:889:515#0/1  
GTCCCAATTGCTCTCGCCACTTTTCATTTCTGCTCTGGAG  
+HWI-EAS443:3:4:889:515#0/1  
a`a]^\_a^\_a^U\_Y]]¥Y^LV]\_\_`Z^`\_¥^\_ZZ¥P]aUR\_  
@HWI-EAS443:3:4:925:991#0/1  
GACCTTCACTACCTCCAGAGCAGAAATGAAAAGTGGCGAG  
+HWI-EAS443:3:4:925:991#0/1  
aa`ababbaaaa\_a^`ab\_a`a`[aaaa`a`\_S`a¥a\_`  
@HWI-EAS443:3:50:109:380#0/1  
CAGAGCAGAAATGAAAAGTGGCGAGAGCAATTGGGACAGA  
+HWI-EAS443:3:50:109:380#0/1  
`bb^¥`bbabbababbab\_bbaa\_\_b]aabaUa¥a`bab  
@HWI-EAS443:3:50:1116:1018#0/1  
TGAAAAGTGGCGAGAGCAATTGGGACAGAAATTTGAGGAA  
+HWI-EAS443:3:50:1116:1018#0/1  
ababb\_aTabbba`Y`\_X``aaa]XYa``¥a]``^]aZVY  
@HWI-EAS443:3:50:1158:1523#0/1  
GGCGAGAGCAATTGGGACAGAAATTTGAGGAAATAAGGTG  
+HWI-EAS443:3:50:1158:1523#0/1  
ab\_bab`aaababbaaaNaaaaaaba`\_aa\_aaaa`baXa  
@HWI-EAS443:3:50:1381:1497#0/1  
CAGAGCAGAAATGAAAAGTGGCGAGAGCAATTGGGACAGA  
+HWI-EAS443:3:50:1381:1497#0/1  
a\_baa¥`bbabbbaabab`bbaa\_]\_^`babaaaXW¥a\_  
@HWI-EAS443:3:50:1610:113#0/1  
GAAATGAAAAGTGGCGAGAGCAATTGGGACAGAAATTTGA

+HWI-EAS443:3:50:1610:113#0/1  
abbabbbabb`bbabab\_bS\_\_ab`ab\_\_b`aa`bbb¥\_  
@HWI-EAS443:3:50:1711:1782#0/1  
GGCGAGAGCAATTGGGACAGAAATTTGAGGAAATAAGGTG  
+HWI-EAS443:3:50:1711:1782#0/1  
abab`aaaaaabaaaa\_aaaaabaaa]aa`^aaaa`¥W\_  
@HWI-EAS443:3:50:1787:849#0/1  
GAAAAGTGGCGAGAGCAATTGGGACAGAAATTTGAGGAAA  
+HWI-EAS443:3:50:1787:849#0/1  
\_`aabbZ`^`b`a¥\_]`Z^Ya`¥QZYaa`aa\_YTaaX]`  
@HWI-EAS443:3:50:24:403#0/1  
AATTTCTGTCCCAATTGCTCTCGCCACTTTTCATTTCTGC  
+HWI-EAS443:3:50:24:403#0/1  
¥\_`a`^`a`^`aa\_aabZVY]a\_aWXU][¥`¥¥\_\_a``\_]\_  
@HWI-EAS443:3:50:589:1070#0/1  
TTGGAGAAATTTACCATTACCTTCTCTTCCAGGACATAC  
+HWI-EAS443:3:50:589:1070#0/1  
a`abbbababa\_\_V]\_Ybaa`aVYa`¥aa\_\_^TR]`Va`U  
@HWI-EAS443:3:50:632:1407#0/1  
CTGTCCCAATTGCTCTCGCCACTTTTCATTTCTGCTCTGG  
+HWI-EAS443:3:50:632:1407#0/1  
KbabK^ab[b[aTabbab`[V]b`Vab`aabbabab[aa`  
@HWI-EAS443:3:50:763:1182#0/1  
GAGACCTTCACTACCTCCAGAGCAGAAATGAAAAGTGGCG  
+HWI-EAS443:3:50:763:1182#0/1  
\_\_a^\_Zaba```a¥]aa`aaUa`aa\_a\_bb`]]]aYb]`\_  
@HWI-EAS443:3:50:87:780#0/1  
GGAGACCTTCACTACCTCCAGAGCAGAAATGAAAAGTGGC  
+HWI-EAS443:3:50:87:780#0/1  
aa\_]`^a`^`a`a\_Ya`]`a`\_]a]^\_a`\_\_^a¥a\_V  
@HWI-EAS443:3:51:1099:1469#0/1  
GAGACCTTCACTACCTCCAGAGCAGAAATGAAAAGTGGCG  
+HWI-EAS443:3:51:1099:1469#0/1  
a¥bbUab]aba`a]a`b`]aU[`Ya``aab`aaaaZaa`\_  
@HWI-EAS443:3:51:1234:1021#0/1  
CCTTATTTCTCAAATTTCTGTCCCAATTGCTCTCGCCAC  
+HWI-EAS443:3:51:1234:1021#0/1  
]bb\_\_bbbbbb\_Yabbbb`bba\_a`^bbababbbb^`[^a  
@HWI-EAS443:3:51:124:705#0/1  
GAAAAGTGGCGAGAGCAATTGGGACAGAAATTTGAGGAAA  
+HWI-EAS443:3:51:124:705#0/1  
\_\_\_\_\_¥\_]a`X[YSMVTQZY¥Y\_¥SNZKRYVZZZ[RY[SQJ  
@HWI-EAS443:3:51:1271:72#0/1  
CCCAATTGCTCTCGCCACTTTTCATTTCTGCTCTGGAGGT  
+HWI-EAS443:3:51:1271:72#0/1  
ababbbbbbabbab`bbbbabbbbbbababbaaba`  
@HWI-EAS443:3:51:1338:1493#0/1  
CTTCACTACCTCCAGAGCAGAAATGAAAAGTGGCGAGAGC  
+HWI-EAS443:3:51:1338:1493#0/1  
abbabbbb`bb`bbab`bbaabbaabba\_bbabab\_^X

@HWI-EAS443:3:51:1671:11#0/1  
GAGACCTTCACTACCTCCAGAGCAGAAATGAAAAGTGGCG  
+HWI-EAS443:3:51:1671:11#0/1  
W\_`XSa`^`a`\_WabXV^S\_0Yb]b\_bbab`ZHU[F[S  
@HWI-EAS443:3:51:301:1756#0/1  
CAGAAATGAAAAGTGGCGAGAGCAATTGGGACAGAAATTT  
+HWI-EAS443:3:51:301:1756#0/1  
abaa`bbaabbaaabbbaa\_`\_`\_\_a\_`¥[ ]\_\_`]baaaab  
@HWI-EAS443:3:51:35:1517#0/1  
GAAATGAAAAGTGGCGAGAGCAATTGGGACAGAAATTTGA  
+HWI-EAS443:3:51:35:1517#0/1  
`abbbbbbbU`ab^aa]a\_a][aaaaa\_`b`aaaaaa[^  
@HWI-EAS443:3:51:538:327#0/1  
AGACCTTCACTACCTCCAGAGCAGAAATGAAAAGTGGCGA  
+HWI-EAS443:3:51:538:327#0/1  
aaaaaaaab`aa`\_`aaa`\_a`aa\_aaaa`\_a`aWa\_\_`\_`  
@HWI-EAS443:3:51:615:615#0/1  
GAGACCTTCACTACCTCCAGAGCAGAAATGAAAAGTGGCG  
+HWI-EAS443:3:51:615:615#0/1  
abU^L]bU]bT]a`aaWYaWVXa[\_QXQ`ST[¥b`O[XYZ  
@HWI-EAS443:3:51:933:34#0/1  
GGGAGACCTTCACTACCTCCAGAGCAGAAATGAAAAGTGG  
+HWI-EAS443:3:51:933:34#0/1  
abba\_aaabb\_babaaaba`ababaaba¥aaba\_\_\_b^bb  
@HWI-EAS443:3:51:99:1969#0/1  
GAGACCTTCACTACCTCCAGAGCAGAAATGAAAAGTGGCG  
+HWI-EAS443:3:51:99:1969#0/1  
Y\_^b\_¥X`bb`X^`^\_Y¥T^UP\_[a¥`a\_]TYKYXX¥  
@HWI-EAS443:3:52:1201:625#0/1  
AATTGCTCTCGCCACTTTTCATTTCTGCTCTGGAGGTAGT  
+HWI-EAS443:3:52:1201:625#0/1  
`aaaa\_aaa`a`a`\_aaaa^`a`a`\_a^a\_`aa]aa^\_]V  
@HWI-EAS443:3:52:1548:404#0/1  
CCACCTTATTTCTCAAATTTCTGTCCCAATTGCTCTCGC  
+HWI-EAS443:3:52:1548:404#0/1  
\_abaabbbbab`abababbbbabaaaa`abbbaabab\_ba  
@HWI-EAS443:3:52:1627:398#0/1  
GGGAGACCTTCACTACCTCCAGAGCAGAAATGAAAAGTGG  
+HWI-EAS443:3:52:1627:398#0/1  
\_Za`aZ\_ab`\_a\_a`\_aUZ]\_`[¥`a`\_`a\_aU\_a\_X\_^  
@HWI-EAS443:3:52:1707:578#0/1  
GAGACCTTCACTACCTCCAGAGCAGAAATGAAAAGTGGCG  
+HWI-EAS443:3:52:1707:578#0/1  
`aa]]L)`U`abQP]QV[\_\_\_a^a\_Q[```\_\_\_¥U\_VUa  
@HWI-EAS443:3:52:1758:774#0/1  
CCTTCACTACCTCCAGAGCAGAAATGAAAAGTGGCGAGAG  
+HWI-EAS443:3:52:1758:774#0/1  
J¥aba`X\_[Q\_ab¥a\_¥^aaa]ab`aaa`YRbaYa¥SOT  
@HWI-EAS443:3:52:175:378#0/1  
ATTTCTCAAATTTCTGTCCCAATTGCTCTCGCCACTTTT

+HWI-EAS443:3:52:175:378#0/1  
aabaa\_aaa`\_a`\_\_aZ^\_\_]\_^\_^^Z\_]\_^Y]]]]]^  
@HWI-EAS443:3:52:193:304#0/1  
GGGAGACCTTCACTACCTCCAGAGCAGAAATGAAAAGTGG  
+HWI-EAS443:3:52:193:304#0/1  
abaRa[ZS[T`¥`¥0YT[ZT\_W\_ST\_QLV^[YWRT]¥XN  
@HWI-EAS443:3:52:224:1312#0/1  
GAGACCTTCACTACCTCCAGAGCAGAAATGAAAAGTGGCG  
+HWI-EAS443:3:52:224:1312#0/1  
\_`^aababbbbbbbbaaab^\_bbba\_\_bb`^VabNbaab  
@HWI-EAS443:3:52:226:1705#0/1  
CTTCACTACCTCCAGAGCAGAAATGAAAAGTGGCGAGAGC  
+HWI-EAS443:3:52:226:1705#0/1  
X]b\_WIaa¥[^S[a^ab]\_RU[¥\_X^ZSaVI]WY¥UK¥Va  
@HWI-EAS443:3:52:549:620#0/1  
TGAAAAGTGGCGAGAGCAATTGGGACAGAAATTTGAGGAA  
+HWI-EAS443:3:52:549:620#0/1  
abaaa`b\_baaa^`Wa^`aa`aa\_^a`]`\_aaaa\_a\_UX  
@HWI-EAS443:3:52:778:698#0/1  
GAGACCTTCACTACCTCCAGAGCAGAAATGAAAAGTGGCG  
+HWI-EAS443:3:52:778:698#0/1  
a`aSY^aaaaaaa]^`a[a^a\_\_\_\_\_a`\_\_\_\_a¥a¥Ta  
@HWI-EAS443:3:52:803:253#0/1  
GGAGACCTTCACTACCTCCAGAGCAGAAATGAAAAGTGGC  
+HWI-EAS443:3:52:803:253#0/1  
^abbbbaab`b`bb``aaaaaa\_aa``aabaa`aa[a\_`  
@HWI-EAS443:3:52:92:1255#0/1  
CCTTCACTACCTCCAGAGCAGAAATGAAAAGTGGCGAGAG  
+HWI-EAS443:3:52:92:1255#0/1  
abaabbaaa^aaaa`a\_aa``Vaaaa]¥`aa^aa^a\_\_0]  
@HWI-EAS443:3:52:948:831#0/1  
CCTTCACTACCTCCAGAGCAGAAATGAAAAGTGGCGAGAG  
+HWI-EAS443:3:52:948:831#0/1  
\_LY¥`a]W^V`a\_a^`W`M][NVU]YR]ZP`Y\_a^aV[HY  
@HWI-EAS443:3:53:1022:515#0/1  
CTTCACTACCTCCAGAGCAGAAATGAAAAGTGGCGAGAGC  
+HWI-EAS443:3:53:1022:515#0/1  
abb]ab`bbabb]]\_aba¥¥a[bb¥HU^]aa[b`bbba[P  
@HWI-EAS443:3:53:1070:169#0/1  
GGGAGACCTTCACTACCTCCAGAGCAGAAATGAAAAGTGG  
+HWI-EAS443:3:53:1070:169#0/1  
abaaba`aaa^a¥aa\_aa\_V`a]a\_ab]]`a^^]\_aY`Z  
@HWI-EAS443:3:53:1090:1214#0/1  
ATGGGAGACCTTCACTACCTCCAGAGCAGAAATGAAAAGT  
+HWI-EAS443:3:53:1090:1214#0/1  
abaa\_^b\_bbb\_S\_bbb`bbb^`\_abbbbaaabb`b\_a^N  
@HWI-EAS443:3:53:1183:1539#0/1  
GAGACCTTCACTACCTCCAGAGCAGAAATGAAAAGTGGCG  
+HWI-EAS443:3:53:1183:1539#0/1  
a`aa\_TbaaaQ¥a\_^b[`aa`ab`aa\_]\_\_a`Y`\_U\_

@HWI-EAS443:3:53:1746:855#0/1  
GAGACCTTCACTACCTCCAGAGCAGAAATGAAAAGTGGCG  
+HWI-EAS443:3:53:1746:855#0/1  
[baabbbbbbabba^aabQ`\_`babbbbaabba\_b\_a\_  
@HWI-EAS443:3:53:326:1708#0/1  
CTTCACTACCTCCAGAGCAGAAATGAAAAGTGGCGAGAGC  
+HWI-EAS443:3:53:326:1708#0/1  
a¥`^a`^a^a^Z¥\_a`\_]a\_¥`a^`¥`\_aaa\_U]X  
@HWI-EAS443:3:53:410:1648#0/1  
GAGACCTTCACTACCTCCAGAGCAGAAATGAAAAGTGGCG  
+HWI-EAS443:3:53:410:1648#0/1  
¥`aba`ab`aaaa^\_ab^^]`\_^aa¥[`b`Y``\_Y`Z\_\_  
@HWI-EAS443:3:53:433:736#0/1  
GTCAAGCTTTCAGGTAGACTGTTTCCTTTGGCATATCCGC  
+HWI-EAS443:3:53:433:736#0/1  
a`ababaaaaaaaaVaaa\_aa``\_`^```\_¥[````]\_aY  
@HWI-EAS443:3:53:537:34#0/1  
GACCTTCACTACCTCCAGAGCAGAAATGAAAAGTGGCGAG  
+HWI-EAS443:3:53:537:34#0/1  
a\_[V\_^ZZU]ZZSY[]\_aVV]Z^W]\_`VWZU¥SW^Y]YY  
@HWI-EAS443:3:53:82:226#0/1  
ATGGGAGACCTTCACTACCTCCAGAGCAGAAATGAAAAGT  
+HWI-EAS443:3:53:82:226#0/1  
a`bbab¥`aba`^^aaaY``\_aaX`\_]a^]\_\_a^\_\_¥]V  
@HWI-EAS443:3:53:850:462#0/1  
ACCTTCACTACCTCCAGAGCAGAAATGAAAAGTGGCGAGA  
+HWI-EAS443:3:53:850:462#0/1  
abb^baZabba`aZ`a`\_babbaaaba`aaaa\_bbaaaa^  
@HWI-EAS443:3:53:961:1553#0/1  
CACTACCTCCAGAGCAGAAATGAAAAGTGGCGAGAGCAAT  
+HWI-EAS443:3:53:961:1553#0/1  
`b`ba^aba`bbbb`ab\_a\_bba\_abb]aa\_ba]W\_Wa^a  
@HWI-EAS443:3:53:978:321#0/1  
GGGAGACCTTCACTACCTCCAGAGCAGAAATGAAAAGTGG  
+HWI-EAS443:3:53:978:321#0/1  
I\_bbbbababb`bU\_bbb\_]b`aa`baabbbbaaab^b[  
@HWI-EAS443:3:54:1098:1198#0/1  
TGGGAGACCTTCACTACCTCCAGAGCAGAAATGAAAAGTG  
+HWI-EAS443:3:54:1098:1198#0/1  
``\_`bbbb`ababa`ba\_b`bba`aaaa`aabbaaaaa\_a  
@HWI-EAS443:3:54:1566:671#0/1  
CCACCTTATTTCTCAAATTTCTGTCCCAATTGCTCTCGC  
+HWI-EAS443:3:54:1566:671#0/1  
aaW^Sab¥¥¥b`\_`aRIXbb]\_a^`a¥Z\_NR^]Ybab\_^Z  
@HWI-EAS443:3:54:1663:1810#0/1  
CAGAGCAGAAATGAAAAGTGGCGAGAGCAATTGGGACAGA  
+HWI-EAS443:3:54:1663:1810#0/1  
`abab¥aaaaabbaa`\_a\_ab¥b\_a`b¥aabaa\_aaaaba  
@HWI-EAS443:3:54:487:1667#0/1  
GTCCCAATTGCTCTCGCCACTTTTCATTTCTGCTCTGGAG

+HWI-EAS443:3:54:487:1667#0/1  
aa]a]ba^WPXaH]¥a\_] ^aaa\_`¥`a]^a¥^aX[¥H¥\_  
@HWI-EAS443:3:54:55:989#0/1  
CGCCACTTTTCATTTCTGCTCTGGAGGTAGTGAAGGTCTC  
+HWI-EAS443:3:54:55:989#0/1  
ab`a``baa^a]aaaaa`aa`a[TaaU\_TLVV[¥[STWZ  
@HWI-EAS443:3:54:736:1391#0/1  
ACCTCCAGAGCAGAAATGAAAAGTGGCGAGAGCAATTGGG  
+HWI-EAS443:3:54:736:1391#0/1  
0\_V\_VTT\_S]\_W[ZQYRb]Vb^\_Q`a`W[WWYUZx¥U` [V  
@HWI-EAS443:3:54:743:1022#0/1  
CCCAATTGCTCTCGCCACTTTTCATTTCTGCTCTGGAGGT  
+HWI-EAS443:3:54:743:1022#0/1  
abb`^`bbbbabbbbbabbbbbbbbababbababbaba\_  
@HWI-EAS443:3:54:744:131#0/1  
AGACCTTCACTACCTCCAGAGCAGAAATGAAAAGTGGCGA  
+HWI-EAS443:3:54:744:131#0/1  
ab`Z`\_a]baaa\_aa[\_\_a^aVZ`\_\_WY``\_a^aUa`\_a\_  
@HWI-EAS443:3:54:800:67#0/1  
CTGTCCCAATTGCTCTCGCCACTTTTCATTTCTGCTCTGG  
+HWI-EAS443:3:54:800:67#0/1  
abbba`aaabbbbab]b\_aaabbbbaabbb`bb`b\_bbb  
@HWI-EAS443:3:54:829:479#0/1  
GGCGAGAGCAATTGGGACAGAAATTTGAGGAAATAAGGTG  
+HWI-EAS443:3:54:829:479#0/1  
aaabaaab`aaaaabbaabaaaa`aab\_bb``aa`aa`Ya  
@HWI-EAS443:3:54:98:847#0/1  
CACCTTATTTCTCAAATTTCTGTCCCAATTGCTCTCGCC  
+HWI-EAS443:3:54:98:847#0/1  
a[bbbbabbba`baa`\_bbbaab\_aaa]Y`\_aa\_\_a^aa]  
@HWI-EAS443:3:55:1056:825#0/1  
GACCTTCACTACCTCCAGAGCAGAAATGAAAAGTGGCGAG  
+HWI-EAS443:3:55:1056:825#0/1  
¥¥Zaaa``Wa]`[a`\_\_`\_a\_\_a¥`[\_`\_\_]Y`[]XX\_\_\_\_  
@HWI-EAS443:3:55:1119:489#0/1  
AAAGTGGCGAGAGCAATTGGGACAGAAATTTGAGGAAATA  
+HWI-EAS443:3:55:1119:489#0/1  
a^`a\_bbaa]a`\_¥\_WZaUabXUa\_¥^¥¥`aVZaa]^a\_  
@HWI-EAS443:3:55:1206:1232#0/1  
AATTTCTGTCCCAATTGCTCTCGCCACTTTTCATTTCTGC  
+HWI-EAS443:3:55:1206:1232#0/1  
`b\_Taa\_¥\_QS^`]V\_\_[TZU]a¥¥Y`\_I`a¥]Y`\_W`^`  
@HWI-EAS443:3:55:1387:1656#0/1  
ATGGGAGACCTTCACTACCTCCAGAGCAGAAATGAAAAGT  
+HWI-EAS443:3:55:1387:1656#0/1  
aabaa`baaaba`\_\_a\_]V`\_\_aa^\_V\_a^\_\_aa`\_^aY  
@HWI-EAS443:3:55:1413:590#0/1  
GGGAGACCTTCACTACCTCCAGAGCAGAAATGAAAAGTGG  
+HWI-EAS443:3:55:1413:590#0/1  
a`aabaaaaaa`aa`]a^\_aaZa]^a\_^aaaa`a`^a`

@HWI-EAS443:3:55:25:1161#0/1  
TGAAAAGTGGCGAGAGCAATTGGGACAGAAATTTGAGGAA  
+HWI-EAS443:3:55:25:1161#0/1  
ab^^a^\_`aaba^[X[aK`]a`\_a^U`a^^^`\_]PZ`\_UW  
@HWI-EAS443:3:55:35:1103#0/1  
GAGACCTTCACTACCTCCAGAGCAGAAATGAAAAGTGGCG  
+HWI-EAS443:3:55:35:1103#0/1  
`T\_UU¥SbbaVRV`OPY^VYa[`V`UXQQT00]IUZU¥a`  
@HWI-EAS443:3:55:427:335#0/1  
GGGAGACCTTCACTACCTCCAGAGCAGAAATGAAAAGTGG  
+HWI-EAS443:3:55:427:335#0/1  
abb`aa\_\_`a`a¥\_`^^`^X[^]\_^]a\_[\_`a]`^)`W\_`  
@HWI-EAS443:3:55:445:1075#0/1  
AGAAATGAAAAGTGGCGAGAGCAATTGGGACAGAAATTTG  
+HWI-EAS443:3:55:445:1075#0/1  
`a¥W^`¥ab¥^\_N\_b\_[\_`^0]^]¥W\_JSZON¥ZXU¥ZXaY  
@HWI-EAS443:3:55:562:152#0/1  
ACCTTCACTACCTCCAGAGCAGAAATGAAAAGTGGCGAGA  
+HWI-EAS443:3:55:562:152#0/1  
aaa`aaaa`aaaa\_`\_^¥VT^[^R¥`^`\_a]`¥T^Y^T  
@HWI-EAS443:3:55:917:1540#0/1  
GGGAGACCTTCACTACCTCCAGAGCAGAAATGAAAAGTGG  
+HWI-EAS443:3:55:917:1540#0/1  
abaZ`aa\_\_aaa[a`\_\_a]W`aR¥^]a\_\_R`a\_SQ]`Ta`  
@HWI-EAS443:3:55:989:61#0/1  
TGGGAGACCTTCACTACCTCCAGAGCAGAAATGAAAAGTG  
+HWI-EAS443:3:55:989:61#0/1  
abbbXb\_a\_aa\_\_^a`Y^a\_¥\_aX`Y^aVRUaa]^]]^Ta  
@HWI-EAS443:3:56:114:515#0/1  
GGCGAGAGCAATTGGGACAGAAATTTGAGGAAATAAGGTG  
+HWI-EAS443:3:56:114:515#0/1  
aa`a`a\_aaa`a`a`a`aaa`a\_aa`a\_ba]\_\_a\_^a`W`  
@HWI-EAS443:3:56:1264:1509#0/1  
CCACTTTTCACTTCTGCTCTGGAGGTAGTGAAGGTCTCCC  
+HWI-EAS443:3:56:1264:1509#0/1  
a^POWa\_]¥¥Z\_^ZY¥¥```aaUZ]Z¥aXWOY\_XRFRHRX  
@HWI-EAS443:3:56:1415:953#0/1  
GAGACCTTCACTACCTCCAGAGCAGAAATGAAAAGTGGCG  
+HWI-EAS443:3:56:1415:953#0/1  
abaa\_abaababb`\_aa\_aa\_a`a`\_`aaa\_a`a¥b\_^a  
@HWI-EAS443:3:56:149:321#0/1  
GGCGAGAGCAATTGGGACAGAAATTTGAGGAAATAAGGTG  
+HWI-EAS443:3:56:149:321#0/1  
YbaaK^\_bXW¥baba`^\_ab\_aaa]```abb]````aab`Ra  
@HWI-EAS443:3:56:1655:285#0/1  
GAAAAGTGGCGAGAGCAATTGGGACAGAAATTTGAGGAAA  
+HWI-EAS443:3:56:1655:285#0/1  
aa`a````bb\_a]aVSXWaa`¥`XX[\_ZV^\_aa\_VR\_\_[[Y  
@HWI-EAS443:3:56:174:621#0/1  
CAGAAATGAAAAGTGGCGAGAGCAATTGGGACAGAAATTT

+HWI-EAS443:3:56:174:621#0/1  
`abaa\_`baaaa`Y`ZaY[¥`^X^Z`\_`^X[^^^\_\_a  
@HWI-EAS443:3:56:209:1233#0/1  
GAGACCTTCACTACCTCCAGAGCAGAAATGAAAAGTGGCG  
+HWI-EAS443:3:56:209:1233#0/1  
]VVMHVURO¥ZZZ¥Ya^WNVXXL¥aYZKZXRZ[RUYBBBB  
@HWI-EAS443:3:56:26:1807#0/1  
CTTCACTACCTCCAGAGCAGAAATGAAAAGTGGCGAGAGC  
+HWI-EAS443:3:56:26:1807#0/1  
aaabbaaa\_aaa]^^XaaYTX][][]NY[^S[^¥a`\_XVD  
@HWI-EAS443:3:56:424:1319#0/1  
ATGGGAGACCTTCACTACCTCCAGAGCAGAAATGAAAAGT  
+HWI-EAS443:3:56:424:1319#0/1  
aa\_¥]Za`a`\_Y`aaaa\_\_a\_`Xa\_\_a^Z^[\_U][SYN  
@HWI-EAS443:3:56:42:601#0/1  
GGAGACCTTCACTACCTCCAGAGCAGAAATGAAAAGTGGC  
+HWI-EAS443:3:56:42:601#0/1  
aSLZV¥UUQUQ^OL[VNTYOYZSUXVQUVY^¥[ZGUUZQY  
@HWI-EAS443:3:56:564:889#0/1  
GGGAGACCTTCACTACCTCCAGAGCAGAAATGAAAAGTGG  
+HWI-EAS443:3:56:564:889#0/1  
a\_WI\_Raa`X]R]VN][¥^^SOLSYY¥WGW^^SRY^VFV¥  
@HWI-EAS443:3:56:846:618#0/1  
CTTCACTACCTCCAGAGCAGAAATGAAAAGTGGCGAGAGC  
+HWI-EAS443:3:56:846:618#0/1  
ab`\_]Z¥Z¥W¥\_`X`VZ`^ba\_H`\_¥Y]Z¥U`a[`V]R^V  
@HWI-EAS443:3:56:87:1203#0/1  
GAGACCTTCACTACCTCCAGAGCAGAAATGAAAAGTGGCG  
+HWI-EAS443:3:56:87:1203#0/1  
`]ZN\_baaaaaXa]XZXZaa\_a^¥YS^`^`^G[[`P\_`^  
@HWI-EAS443:3:56:904:442#0/1  
CGGCGGAGCCGATCAAGGAATGGGCATCACCCAATCCAT  
+HWI-EAS443:3:56:904:442#0/1  
ababbbabaa\_`^]aa)`[XDU`a`PX[0¥0¥¥][\_SZU  
@HWI-EAS443:3:57:1042:110#0/1  
TGAAAAGTGGCGAGAGCAATTGGGACAGAAATTTGAGGAA  
+HWI-EAS443:3:57:1042:110#0/1  
ab[]]¥aX]a¥aY\_L`NSYaa``ZXZVY¥]\_]`X``SG  
@HWI-EAS443:3:57:1061:1446#0/1  
TTCACTACCTCCAGAGCAGAAATGAAAAGTGGCGAGAGCA  
+HWI-EAS443:3:57:1061:1446#0/1  
aaabaaaa\_\_¥a\_a`a^\_aV`\_`^)``[Ua^\_\_¥U^]]  
@HWI-EAS443:3:57:1074:809#0/1  
CAAGCTTTCAGGTAGACTGTTTCCTTTGGCATATCCGCAA  
+HWI-EAS443:3:57:1074:809#0/1  
abbaaabaaaba]ab`aaa[aa`\_`aYV^`aa`a¥[^`\_¥  
@HWI-EAS443:3:57:1347:82#0/1  
ATGGGAGACCTTCACTACCTCCAGAGCAGAAATGAAAAGT  
+HWI-EAS443:3:57:1347:82#0/1  
a\_][ZIaJWYU^\_¥XZ[[aW[P\_b[bZ[b\_\_Yab`ZTX`a



@HWI-EAS443:3:57:1475:1458#0/1  
CCACCTTATTTCTCAAATTTCTGTCCCAATTGCTCTCGC  
+HWI-EAS443:3:57:1475:1458#0/1  
Y¥U\_¥` ``¥]RFYRQ\_\_bZ\_Y[SWMFM^]NNYF^Za]Q\_  
@HWI-EAS443:3:57:1551:337#0/1  
GGCGAGAGCAATTGGGACAGAAATTTGAGGAAATAAGGTG  
+HWI-EAS443:3:57:1551:337#0/1  
R\_^ab`b`\_V\_H¥`^ZaV`a\_]`babbXb^ZVabb` `¥N]  
@HWI-EAS443:3:57:1616:172#0/1  
GAAAAGTGGCGAGAGCAATTGGGACAGAAATTTGAGGAAA  
+HWI-EAS443:3:57:1616:172#0/1  
aa`a^b`a¥\_b]]Zb[^a\_[]`aS[\_`\_aaa`b¥^a]T\_\_  
@HWI-EAS443:3:57:1636:2013#0/1  
GCTCTCGCCACTTTTCATTTCTGCTCTGGAGGTAGTGAAG  
+HWI-EAS443:3:57:1636:2013#0/1  
aaaa]]^aXa\_]`a\_aaaaa`aaUa^aa¥\_b¥ZZ[V[BBB  
@HWI-EAS443:3:57:1721:306#0/1  
GAAAAGTGGCGAGAGCAATTGGGACAGAAATTTGAGGAAA  
+HWI-EAS443:3:57:1721:306#0/1  
a^^`\_`a^`¥^][RTZER]]][YY¥NTZ[W]]\_`]NT[YQBB  
@HWI-EAS443:3:57:338:446#0/1  
GAGACCTTCACTACCTCCAGAGCAGAAATGAAAAGTGGCG  
+HWI-EAS443:3:57:338:446#0/1  
WI\_V\_\_\_bb`a`bbaaa^Ya^TZ]]X` ``]\_\_JUbwZ` ``  
@HWI-EAS443:3:57:36:2040#0/1  
CAGAAATGAAAAGTGGCGAGAGCAATTGGGACAGAAATTT  
+HWI-EAS443:3:57:36:2040#0/1  
`¥^^Zaa¥W\_aYSW\_Z¥a[\_OY\_Q^\_]¥^YW` [YYS¥[¥]  
@HWI-EAS443:3:57:397:55#0/1  
GGGAGACCTTCACTACCTCCAGAGCAGAAATGAAAAGTGG  
+HWI-EAS443:3:57:397:55#0/1  
abb]a\_a` `aa\_a\_¥` \_\_\_¥aS` ¥^a^TWa` ¥¥¥¥aWa\_  
@HWI-EAS443:3:57:460:1201#0/1  
GAGACCTTCACTACCTCCAGAGCAGAAATGAAAAGTGGCG  
+HWI-EAS443:3:57:460:1201#0/1  
ababaaaa`baaaaa`aababa`a\_aabaa\_\_\_aTa\_^a  
@HWI-EAS443:3:57:780:105#0/1  
GCTCTCGCCACTTTTCATTTCTGCTCTGGAGGTAGTGAAG  
+HWI-EAS443:3:57:780:105#0/1  
a^` [Z[\_W[V\_\_^WS¥^¥V¥^VWVX\_¥W\_^RRYTSSWB  
@HWI-EAS443:3:57:781:514#0/1  
CTCCAGAGCAGAAATGAAAAGTGGCGAGAGCAATTGGGAC  
+HWI-EAS443:3:57:781:514#0/1  
abba^a`bbbababbab` `b\_baab`aZ`\_] ^abb^`^\_  
@HWI-EAS443:3:57:889:290#0/1  
GAGACCTTCACTACCTCCAGAGCAGAAATGAAAAGTGGCG  
+HWI-EAS443:3:57:889:290#0/1  
a]S¥`]]\_ab\_a` \_\_\_` \_\_aZ`\_¥a^^`a`^\_\_aT\_^P`  
@HWI-EAS443:3:58:1106:2021#0/1  
GAAAAGTGGCGAGAGCAATTGGGACAGAAATTTGAGGAAA

+HWI-EAS443:3:58:1106:2021#0/1  
GY`[\`¥a]QX]XXT¥Sa^`U]aaTH¥[U^aab\_[XS^[S^  
@HWI-EAS443:3:58:1209:1270#0/1  
CCCAATTGCTCTCGCCACTTTTCATTTCTGCTCTGGAGGT  
+HWI-EAS443:3:58:1209:1270#0/1  
aaaaabaaaaaaaa`\_\_`aaa]`aaa\_``[\`\_a`^`\_W  
@HWI-EAS443:3:58:1414:57#0/1  
GAGACCTTACTACTCCAGAGCAGAAATGAAAAGTGGCG  
+HWI-EAS443:3:58:1414:57#0/1  
aab\_]abaaaaaa¥]a\_\_aa\_a]\_b]^^aa^^\_¥aXa[Xa  
@HWI-EAS443:3:58:1434:1103#0/1  
GAAAAGTGGCGAGAGCAATTGGGACAGAAATTTGAGGAAA  
+HWI-EAS443:3:58:1434:1103#0/1  
a^^[ZYba`Y]¥N¥NNO[ZR[\_LRXIP]VNXaUG]VIHT  
@HWI-EAS443:3:58:1665:932#0/1  
GACCTTACTACTCCAGAGCAGAAATGAAAAGTGGCGAG  
+HWI-EAS443:3:58:1665:932#0/1  
a\_Wa]UQ[UWaXP`¥¥[ZQ¥XZ`]¥Y^VV[]Z^U\_VVZSZ  
@HWI-EAS443:3:58:27:684#0/1  
CGCCACTTTTCATTTCTGCTCTGGAGGTAGTGAAGGTCTC  
+HWI-EAS443:3:58:27:684#0/1  
a`ZRWZZa]UXVV`aaOUS\_`ZaZ[]XDIZK\_BBBBBBBB  
@HWI-EAS443:3:58:38:899#0/1  
GACCTTACTACTCCAGAGCAGAAATGAAAAGTGGCGAG  
+HWI-EAS443:3:58:38:899#0/1  
aba`abbbaabaaaaabaaaaab\_aaaa\_aa`Ya\_\_a^`  
@HWI-EAS443:3:58:416:1613#0/1  
AAATGAAAAGTGGCGAGAGCAATTGGGACAGAAATTTGAG  
+HWI-EAS443:3:58:416:1613#0/1  
aab`abaaba\_ba\_a[\`\_YJW\_`a`aa\_¥a\_aaa``a^]W  
@HWI-EAS443:3:58:483:1601#0/1  
GAGACCTTACTACTCCAGAGCAGAAATGAAAAGTGGCG  
+HWI-EAS443:3:58:483:1601#0/1  
`\_[W]aUXZaVY`V]VXW]¥PWZ\_WLU`^]UZYZ^Y\_\_[T  
@HWI-EAS443:3:58:576:311#0/1  
ATGCCCCATTTCCTTGATCGGCTCCGCCGAGATCAAAAAGTC  
+HWI-EAS443:3:58:576:311#0/1  
^]`bbb`V]`\_ba```Wa^¥\_a`^`^W0^SSY¥0¥]¥X¥  
@HWI-EAS443:3:58:673:24#0/1  
GTCCCAATTGCTCTCGCCACTTTTCATTTCTGCTCTGGAG  
+HWI-EAS443:3:58:673:24#0/1  
a^a`a\_\_aa¥\_``^¥`¥\_aV\_V^\_a\_S¥\_T¥¥Y`\_W¥  
@HWI-EAS443:3:58:692:282#0/1  
GGGAGACCTTACTACTCCAGAGCAGAAATGAAAAGTGG  
+HWI-EAS443:3:58:692:282#0/1  
aa\_]``aaa`aa`aa^`a\_``^a^\_a]`[aaZ^Z^`W]`  
@HWI-EAS443:3:58:699:1129#0/1  
ATGGGAGACCTTACTACTCCAGAGCAGAAATGAAAAGT  
+HWI-EAS443:3:58:699:1129#0/1  
aabbaa`]aaa`aaY¥aaa]^`]Taa\_aXXU`V`a][]W

@HWI-EAS443:3:58:719:844#0/1  
CAGAAATGAAAAGTGGCGAGAGCAATTGGGACAGAAATTT  
+HWI-EAS443:3:58:719:844#0/1  
a`]S^^^aaaZ][V]a\_a¥`S`YXZ[¥]\_\_[]XMY^¥Z^`  
@HWI-EAS443:3:58:798:884#0/1  
GAAAAGTGGCGAGAGCAATTGGGACAGAAATTTGAGGAAA  
+HWI-EAS443:3:58:798:884#0/1  
aa^¥^\_¥aa\_\_^^W¥RTY¥¥\_\_]UU¥]¥¥U^^]PT^\_U¥[  
@HWI-EAS443:3:58:986:791#0/1  
GACCTTCACTACCTCCAGAGCAGAAATGAAAAGTGGCGAG  
+HWI-EAS443:3:58:986:791#0/1  
K\_b`baabWbaaabaabb`bbaabb\_0^bbab[`bab  
@HWI-EAS443:3:59:1099:1907#0/1  
GAGACCTTCACTACCTCCAGAGCAGAAATGAAAAGTGGCG  
+HWI-EAS443:3:59:1099:1907#0/1  
abaa`aba`babb\_]`^a`aa\_a`aaa]bbaaV\_`SIT]0^  
@HWI-EAS443:3:59:1191:1243#0/1  
GAAATGAAAAGTGGCGAGAGCAATTGGGACAGAAATTTGA  
+HWI-EAS443:3:59:1191:1243#0/1  
a`a¥`aa¥aaa]a¥\_a]`\_Y^\_\_`aa```X]\_¥Y[[TS  
@HWI-EAS443:3:59:1367:936#0/1  
AGTATGTCCTGGAAGAGAAGGTAATGGTAAAATTTCTCCA  
+HWI-EAS443:3:59:1367:936#0/1  
aU`^^`X[V\_ba\_``]VU^][F[ZTTX]`VPR¥[\_VTSSW  
@HWI-EAS443:3:59:144:505#0/1  
GGCGAGAGCAATTGGGACAGAAATTTGAGGAAATAAGGTG  
+HWI-EAS443:3:59:144:505#0/1  
aaaa]a\_aa\_`a`a\_\_\_^`a`^W\_\_`a\_``XZ[\_^Y^]W]  
@HWI-EAS443:3:59:1468:251#0/1  
GCTCTCGCCACTTTTCATTTCTGCTCTGGAGGTAGTGAAG  
+HWI-EAS443:3:59:1468:251#0/1  
a^P\_QaaaaOSY]RZMGYRZYRQRTRX]aBBBBBBBBBBBB  
@HWI-EAS443:3:59:1598:1669#0/1  
CTGTCCCAATTGCTCTCGCCACTTTTCATTTCTGCTCTGG  
+HWI-EAS443:3:59:1598:1669#0/1  
\_abYK^U¥S\_abb`U`MZaNb`ba`]a]bba]baaaQ`Z`  
@HWI-EAS443:3:59:159:234#0/1  
GAAAAGTGGCGAGAGCAATTGGGACAGAAATTTGAGGAAA  
+HWI-EAS443:3:59:159:234#0/1  
aa``\_[Wa``a^\_^\_P¥¥¥\_]\_V]^¥^¥RMS^]XRVVXX  
@HWI-EAS443:3:59:1719:553#0/1  
CTTCACTACCTCCAGAGCAGAAATGAAAAGTGGCGAGAGC  
+HWI-EAS443:3:59:1719:553#0/1  
aabUa[ba^\_`bUababaaaab`bbabb\_bb\_b`[PO`SH  
@HWI-EAS443:3:59:1742:781#0/1  
CAGAAATGAAAAGTGGCGAGAGCAATTGGGACAGAAATTT  
+HWI-EAS443:3:59:1742:781#0/1  
abbbabbababb\_bbabbbba^X¥abaaaYT`a^]Saaa  
@HWI-EAS443:3:59:1789:1908#0/1  
GGGAGACCTTCACTACCTCCAGAGCAGAAATGAAAAGTGG

+HWI-EAS443:3:59:1789:1908#0/1  
a^[^a¥^`aa`\_aa¥aZ```Z`aab\_¥\_a`^PYOZP^X  
@HWI-EAS443:3:59:613:1343#0/1  
ATGAAAAGTGGCGAGAGCAATTGGGACAGAAATTTGAGGA  
+HWI-EAS443:3:59:613:1343#0/1  
aabaa`^b`Z`XaY]`\_a`\_V¥`]^aa`[^]\_WT`YQ  
@HWI-EAS443:3:59:902:411#0/1  
GGAGACCTTCACTACCTCCAGAGCAGAAATGAAAAGTGGC  
+HWI-EAS443:3:59:902:411#0/1  
aaaaaab`]aa`a^aaa`\_a[aa`b][aaaX`a\_YRa\_R  
@HWI-EAS443:3:5:1088:841#0/1  
GAAATGAAAAGTGGCGAGAGCAATTGGGACAGAAATTTGA  
+HWI-EAS443:3:5:1088:841#0/1  
aaaaaba`Z\_b\_ba^bab]a`\_``aaaa\_]aa\_\_a`aa`Z  
@HWI-EAS443:3:5:1223:1008#0/1  
GAGACCTTCACTACCTCCAGAGCAGAAATGAAAAGTGGCG  
+HWI-EAS443:3:5:1223:1008#0/1  
WXV\_¥FT\_Q[]XS[\_[W\_ab¥WUX¥PL``b\_XST\_K\_]]  
@HWI-EAS443:3:5:1228:646#0/1  
GAAAAGTGGCGAGAGCAATTGGGACAGAAATTTGAGGAAA  
+HWI-EAS443:3:5:1228:646#0/1  
a^bX\_TFXZV`]LQNPY^a`UNRS\_\_`¥\_TR¥BBBBBBB  
@HWI-EAS443:3:5:1509:1100#0/1  
CCTTCACTACCTCCAGAGCAGAAATGAAAAGTGGCGAGAG  
+HWI-EAS443:3:5:1509:1100#0/1  
^`a```bb`aabb`]\_\_babb]a`abaaa^aabbZb\_a[a  
@HWI-EAS443:3:5:1608:369#0/1  
CCTTCACTACCTCCAGAGCAGAAATGAAAAGTGGCGAGAG  
+HWI-EAS443:3:5:1608:369#0/1  
aYba`ba\_a[V]¥`aaab^abZ^^aa\_\_a\_[^\_]W`\_\_BB  
@HWI-EAS443:3:5:210:795#0/1  
GGGAGACCTTCACTACCTCCAGAGCAGAAATGAAAAGTGG  
+HWI-EAS443:3:5:210:795#0/1  
a`baba`aaa^ba`aa^a[aaa^a¥abRaa`a\_]`WaQa`  
@HWI-EAS443:3:5:32:367#0/1  
GGGAGACCTTCACTACCTCCAGAGCAGAAATGAAAAGTGG  
+HWI-EAS443:3:5:32:367#0/1  
abbaa``^\_a`\_a`\_[]\_`][\_\_¥]`W\_]`X]\_^\_V\_B  
@HWI-EAS443:3:5:57:1984#0/1  
ATGGGAGACCTTCACTACCTCCAGAGCAGAAATGAAAAGT  
+HWI-EAS443:3:5:57:1984#0/1  
aaaaaYaa`aa\_\_ba^`baaa\_a[\_`a^\_\_\_\_```^¥`aB  
@HWI-EAS443:3:5:704:543#0/1  
CTTCACTACCTCCAGAGCAGAAATGAAAAGTGGCGAGAGC  
+HWI-EAS443:3:5:704:543#0/1  
aabababbb`aa\_H\_bbbabaa[aba`a\_b`ba\_b`aSa]  
@HWI-EAS443:3:60:1128:1014#0/1  
TGAAAAGTGGCGAGAGCAATTGGGACAGAAATTTGAGGAA  
+HWI-EAS443:3:60:1128:1014#0/1  
¥a`\_`a]a\_]\_\_U[^\_ZW\_]`\_YV]ab¥\_WY```^^]¥T



+HWI-EAS443:3:60:944:72#0/1  
a\_TOVUP`¥a]\_\_aZTX^¥a\_\_aU¥^¥`W^YT\_Z`\_Z\_0\_  
@HWI-EAS443:3:60:977:470#0/1  
CAGAAATGAAAAGTGGCGAGAGCAATTGGGACAGAAATTT  
+HWI-EAS443:3:60:977:470#0/1  
\_\_\_\_`Zaa]¥SY`Zbaaa]YXZQN¥T\_¥`ZX`]T[X^^a  
@HWI-EAS443:3:61:1124:596#0/1  
ATGGGAGACCTTCACTACCTCCAGAGCAGAAATGAAAAGT  
+HWI-EAS443:3:61:1124:596#0/1  
a`\_a`^`^aaZY^¥aa`aaaa`aa\_Xaa\_aQ[a\_`^¥^TZW  
@HWI-EAS443:3:61:1251:994#0/1  
CCTTCACTACCTCCAGAGCAGAAATGAAAAGTGGCGAGAG  
+HWI-EAS443:3:61:1251:994#0/1  
abbbbbbbbaabaaab`bbaa^YbbbbbaaaaX`\_[a\_]Y  
@HWI-EAS443:3:61:1488:1468#0/1  
TGGGAGACCTTCACTACCTCCAGAGCAGAAATGAAAAGTG  
+HWI-EAS443:3:61:1488:1468#0/1  
aa\_]`aa`aa`\_`aaaa\_a`aaa\_a\_]`a]¥¥]¥ZQV  
@HWI-EAS443:3:61:1701:320#0/1  
ACCTTATTTCTCAAATTTCTGTCCCAATTGCTCTCGCCA  
+HWI-EAS443:3:61:1701:320#0/1  
aaV\_ba\_XbVKba\_bbaa]WbbYaaab`bab[a`^P[[H  
@HWI-EAS443:3:61:313:302#0/1  
CTTCACTACCTCCAGAGCAGAAATGAAAAGTGGCGAGAGC  
+HWI-EAS443:3:61:313:302#0/1  
abbbbbbabbbbaa\_b`babb\_¥\_a]S¥]bb^aa\_`\_]aQ  
@HWI-EAS443:3:61:452:793#0/1  
GGGAGACCTTCACTACCTCCAGAGCAGAAATGAAAAGTGG  
+HWI-EAS443:3:61:452:793#0/1  
aVS^aU\_[Ua\_\_¥U`\_]`^b^^\_VaaP^Z`\_`\_`UTUISQ¥Q  
@HWI-EAS443:3:61:668:1405#0/1  
ACCTTCACTACCTCCAGAGCAGAAATGAAAAGTGGCGAGA  
+HWI-EAS443:3:61:668:1405#0/1  
`bb`H^\_OZaV^P\_¥^]ZZ`aZRYR`[X^UWZSa]W]VLX  
@HWI-EAS443:3:61:690:208#0/1  
CTACCTCCAGAGCAGAAATGAAAAGTGGCGAGAGCAATTG  
+HWI-EAS443:3:61:690:208#0/1  
`bb`a`b`X\_Z\_\_ab`]¥aa`]YXXRaa`a^^T^VOV^ZZ  
@HWI-EAS443:3:61:716:542#0/1  
GCTCTCGCCACTTTTCATTTCTGCTCTGGAGGTAGTGAAG  
+HWI-EAS443:3:61:716:542#0/1  
a\_V]R]Z`\_]Z¥]a[]Yaa[]V¥aY^WU[V]BBBBBBBBB  
@HWI-EAS443:3:61:812:562#0/1  
GCTCTCGCCACTTTTCATTTCTGCTCTGGAGGTAGTGAAG  
+HWI-EAS443:3:61:812:562#0/1  
a\_^ZZ\_[a]SXU[¥\_WP[`\_][[\_T^WZ¥L[ZFL[GRTWP  
@HWI-EAS443:3:61:844:1571#0/1  
TGGGAGACCTTCACTACCTCCAGAGCAGAAATGAAAAGTG  
+HWI-EAS443:3:61:844:1571#0/1  
Z\_^]TT\_Z\_WW[^H¥\_a¥W\_[TORQ\_\_WSYZ¥][VZV¥RZ

@HWI-EAS443:3:61:96:1388#0/1  
CACCTTATTTCTCAAATTTCTGTCCCAATTGCTCTCGCC  
+HWI-EAS443:3:61:96:1388#0/1  
`¥\_]\_a\_\_babb^^`a^aa`b¥[Xb`¥JT[Z¥¥¥YWX¥V^  
@HWI-EAS443:3:61:997:250#0/1  
TGGGAGACCTTCACTACCTCCAGAGCAGAAATGAAAAGTG  
+HWI-EAS443:3:61:997:250#0/1  
a\_X^W^`baaUV¥a`RZa`]`XX[]`^XY]TPZ¥U]GY  
@HWI-EAS443:3:62:1026:1355#0/1  
GCCACTTTTCATTTCTGCTCTGGAGGTAGTGAAGTCTCC  
+HWI-EAS443:3:62:1026:1355#0/1  
ab`\_`abaa^]¥aaaaaaaaaaaa[a\_[a][\_^ZZUPTR^\_  
@HWI-EAS443:3:62:1098:1386#0/1  
GAGACCTTCACTACCTCCAGAGCAGAAATGAAAAGTGGCG  
+HWI-EAS443:3:62:1098:1386#0/1  
a`aa]aaabba`\_ba]baaa`a]a\_aaa`a\_^]\_]`  
@HWI-EAS443:3:62:110:1062#0/1  
GACCTTCACTACCTCCAGAGCAGAAATGAAAAGTGGCGAG  
+HWI-EAS443:3:62:110:1062#0/1  
a[]aaabaa¥`^^^aaaa¥^^\_`WZ\_[Y]^ZZ[V¥Z^YWU  
@HWI-EAS443:3:62:1361:1905#0/1  
CCTTCACTACCTCCAGAGCAGAAATGAAAAGTGGCGAGAG  
+HWI-EAS443:3:62:1361:1905#0/1  
aa^S\_`b]baaaaabT[`babaaaaabaaaQb`aaa\_a`  
@HWI-EAS443:3:62:1522:534#0/1  
GAGACCTTCACTACCTCCAGAGCAGAAATGAAAAGTGGCG  
+HWI-EAS443:3:62:1522:534#0/1  
]HU\_VaaXUY¥`¥Yaa^¥WU[]^U]\_]\_a^GX^UVN`Y¥a  
@HWI-EAS443:3:62:1535:1114#0/1  
AATTGCTCTCGCCACTTTTCATTTCTGCTCTGGAGGTAGT  
+HWI-EAS443:3:62:1535:1114#0/1  
aaaaaaaa\_a^`\_\_aaba`a`aa\_^]a`a\_a]a\_U[`\_  
@HWI-EAS443:3:62:1650:377#0/1  
GGGAGACCTTCACTACCTCCAGAGCAGAAATGAAAAGTGG  
+HWI-EAS443:3:62:1650:377#0/1  
aaaaaaaaabaaa^aa\_¥a`aaa\_a`a`\_\_`aa`\_]a]aa  
@HWI-EAS443:3:62:17:1591#0/1  
CCACCTTATTTCTCAAATTTCTGTCCCAATTGCTCTCGC  
+HWI-EAS443:3:62:17:1591#0/1  
ab`aabb[aabaaab]`^`a\_\_[Y`^\_\_\_\_^¥\_`]\_a^\_  
@HWI-EAS443:3:62:187:1566#0/1  
ACCTTCACTACCTCCAGAGCAGAAATGAAAAGTGGCGAGA  
+HWI-EAS443:3:62:187:1566#0/1  
a¥N]YHaMb]YNZ\_[VS[\_G\_]¥¥¥\_a\_^]00SGOVXPVZ  
@HWI-EAS443:3:62:250:1957#0/1  
ACCTTATTTCTCAAATTTCTGTCCCAATTGCTCTCGCCA  
+HWI-EAS443:3:62:250:1957#0/1  
ab`\_`baaab\_Zb\_Y¥`aa`¥RVa`¥YW\_^^^`¥¥]X]\_0  
@HWI-EAS443:3:62:290:953#0/1  
TGAAAAGTGGCGAGAGCAATTGGGACAGAAATTTGAGGAA

+HWI-EAS443:3:62:290:953#0/1  
aaaaaaaa]a`a`\_\_\_\_\_^VZ^VX[¥]]\_^] ^¥X\_YVX  
@HWI-EAS443:3:62:428:602#0/1  
CTTCACTACCTCCAGAGCAGAAATGAAAAGTGGCGAGAGC  
+HWI-EAS443:3:62:428:602#0/1  
aaaaaaaa\_aaaa\_aSba`a^\_\_`W]\_\_\_W`^^^^ZXW  
@HWI-EAS443:3:62:68:1065#0/1  
ATGGATTGGGTGATGCCCATTCCTTGATCGGCTCCGCCG  
+HWI-EAS443:3:62:68:1065#0/1  
abaaa`[T¥XU`^Z]baa\_a¥^^a\_ZWX[^¥\_`^`YSZZR  
@HWI-EAS443:3:62:803:1727#0/1  
CGCCACTTTTCATTTCTGCTCTGGAGGTAGTGAAGGTCTC  
+HWI-EAS443:3:62:803:1727#0/1  
\_\_a¥Z¥\_b\_`¥baaa`X\_\_Ta^[aZ]UH]Ya]aXTLOOMZ  
@HWI-EAS443:3:62:869:1682#0/1  
CACTACCTCCAGAGCAGAAATGAAAAGTGGCGAGAGCAAT  
+HWI-EAS443:3:62:869:1682#0/1  
aba`aab`abaaa\_\_aa^a`aa`\_`\_`\_YXa¥^^QLR`a¥  
@HWI-EAS443:3:62:905:1181#0/1  
GAGACCTTCACTACCTCCAGAGCAGAAATGAAAAGTGGCG  
+HWI-EAS443:3:62:905:1181#0/1  
`¥U`\_`babaaaa`aaabba[baaba`\_baa`\_]`aYaYaa  
@HWI-EAS443:3:63:1771:793#0/1  
TGAAAAGTGGCGAGAGCAATTGGGACAGAAATTTGAGGAA  
+HWI-EAS443:3:63:1771:793#0/1  
aaabaaaMaaa`^\_]`¥[\_\_\_]T\_`SVY¥[Z[V]^ [V[\_Y^  
@HWI-EAS443:3:63:1773:162#0/1  
GTCCCAATTGCTCTCGCCACTTTTCATTTCTGCTCTGGAG  
+HWI-EAS443:3:63:1773:162#0/1  
aXX`QQSX`¥LURQNTTVZKWYVVNITSSYNENUJYYUS¥  
@HWI-EAS443:3:63:193:684#0/1  
GAGACCTTCACTACCTCCAGAGCAGAAATGAAAAGTGGCG  
+HWI-EAS443:3:63:193:684#0/1  
a]\_a`[\_\_\_aaaa`a\_\_aa\_\_V\_aa`X`^]¥`\_\_`V^V\_^  
@HWI-EAS443:3:63:228:927#0/1  
GGAGACCTTCACTACCTCCAGAGCAGAAATGAAAAGTGGC  
+HWI-EAS443:3:63:228:927#0/1  
`\_U¥\_bbaaaYQaV]`¥`XY¥WaaaZGF][\_XXZXPR\_T[  
@HWI-EAS443:3:63:459:627#0/1  
TTTTGATCTCGGCGGAGCCGATCAAGGAATGGGGCATCAC  
+HWI-EAS443:3:63:459:627#0/1  
`\_a\_ba`baba`aaZU\_aba`¥\_]W]]RX[Z¥^a`^¥UQ^  
@HWI-EAS443:3:63:524:991#0/1  
GGGAGACCTTCACTACCTCCAGAGCAGAAATGAAAAGTGG  
+HWI-EAS443:3:63:524:991#0/1  
a`a^a\_baa`aaaaa`\_b\_\_a]aaaa^aaaa\_a\_\_aZ\_¥  
@HWI-EAS443:3:63:586:912#0/1  
TGCTCTCGCCACTTTTCATTTCTGCTCTGGAGGTAGTGAA  
+HWI-EAS443:3:63:586:912#0/1  
abbbbbbaabaaaabb\_[babbaaaba]`^aaWaaV`^`^



@HWI-EAS443:3:63:591:1239#0/1  
GGCGAGAGCAATTGGGACAGAAATTTGAGGAAATAAGGTG  
+HWI-EAS443:3:63:591:1239#0/1  
¥^abba¥^\_¥W\_bbb^¥a`\_aa]abba]Y^\_`\_`^abaY`  
@HWI-EAS443:3:63:824:312#0/1  
CGCCACTTTTCATTTCTGCTCTGGAGGTAGTGAAGGTCTC  
+HWI-EAS443:3:63:824:312#0/1  
V^Y¥N[[\_RXa¥\_S\_\_[WWa`\_\_^Z¥aH\_]OQR^\_YVXPV  
@HWI-EAS443:3:63:848:283#0/1  
ATGGGAGACCTTCACTACCTCCAGAGCAGAAATGAAAAGT  
+HWI-EAS443:3:63:848:283#0/1  
aabbb\_aaaaaaaaa`aaaa`a`a]a```]^\_a`\_``\_`T  
@HWI-EAS443:3:64:1013:1917#0/1  
CACCTTATTTCTCAAATTTCTGTCCCAATTGCTCTCGCC  
+HWI-EAS443:3:64:1013:1917#0/1  
`b`bbbabbbb`abaabbababaa^`a¥aaa\_a``aa\_\_`  
@HWI-EAS443:3:64:1155:213#0/1  
CTCGCCACTTTTCATTTCTGCTCTGGAGGTAGTGAAGGTC  
+HWI-EAS443:3:64:1155:213#0/1  
a\_aU\_bb`bb[WX¥\_YabSUZU^\_`¥[aaTa`N[ZX`XVY  
@HWI-EAS443:3:64:1161:887#0/1  
GCTCTCGCCACTTTTCATTTCTGCTCTGGAGGTAGTGAAG  
+HWI-EAS443:3:64:1161:887#0/1  
aaa`aaaa\_`]aaaa`aa`\_a^Y```aaXaa]¥aZ]^^[  
@HWI-EAS443:3:64:1295:1762#0/1  
CCTTCACTACCTCCAGAGCAGAAATGAAAAGTGGCGAGAG  
+HWI-EAS443:3:64:1295:1762#0/1  
aabYab`\_b]bba`V[YO\_T]Zabaa`aaaa[a`\_Y^YaY  
@HWI-EAS443:3:64:1565:267#0/1  
CCACCTTATTTCTCAAATTTCTGTCCCAATTGCTCTCGC  
+HWI-EAS443:3:64:1565:267#0/1  
``a`aab`]aa`aa^`aaa¥a^aa^a`¥a^a`YTaZa\_aW  
@HWI-EAS443:3:64:1604:1519#0/1  
GAGACCTTCACTACCTCCAGAGCAGAAATGAAAAGTGGCG  
+HWI-EAS443:3:64:1604:1519#0/1  
aaababaaabaaa``aaaa\_b\_aa`\_`aaa\_a`aZ\_\_]`  
@HWI-EAS443:3:64:172:72#0/1  
CGCCACTTTTCATTTCTGCTCTGGAGGTAGTGAAGGTCTC  
+HWI-EAS443:3:64:172:72#0/1  
abbbbbbbbbbbbbbabaaaaabaaba^aa^a[`\_aLNZX  
@HWI-EAS443:3:64:1740:506#0/1  
CTCGCCACTTTTCATTTCTGCTCTGGAGGTAGTGAAGGTC  
+HWI-EAS443:3:64:1740:506#0/1  
`baaabaaabbbbaaaaa`^`aaa`¥[a]U^`PV\_XVPNT  
@HWI-EAS443:3:64:324:1529#0/1  
GGGAGACCTTCACTACCTCCAGAGCAGAAATGAAAAGTGG  
+HWI-EAS443:3:64:324:1529#0/1  
V[\_TOT`bbbbbbaba`]a\_URY````\_J¥\_```U\_¥X]W¥W  
@HWI-EAS443:3:64:521:1783#0/1  
GACCTTCACTACCTCCAGAGCAGAAATGAAAAGTGGCGAG

+HWI-EAS443:3:64:521:1783#0/1  
¥bb\_`abbbabbab`aZ^]ab`]\_abbaaaa`b]aaaaa`  
@HWI-EAS443:3:64:874:1751#0/1  
AGCAGAAATGAAAAGTGGCGAGAGCAATTGGGACAGAAAT  
+HWI-EAS443:3:64:874:1751#0/1  
Sa`SZ¥aTa`¥¥[XVXNZ^PZ\_OVGUUFHTRGTV[U\_¥X¥  
@HWI-EAS443:3:65:1373:948#0/1  
GACCTTCACTACCTCCAGAGCAGAAATGAAAAGTGGCGAG  
+HWI-EAS443:3:65:1373:948#0/1  
`¥`\_aa¥]Zaa\_\_\_[]^a\_aZ^\_[^\_a[L¥¥¥]V]^a¥\_  
@HWI-EAS443:3:65:1509:1632#0/1  
TGAAAAGTGGCGAGAGCAATTGGGACAGAAATTTGAGGAA  
+HWI-EAS443:3:65:1509:1632#0/1  
a`a\_a^[]^\_ab^¥^`Z^`a`SU[[Vbb`^\_Za`¥Ua]Q`  
@HWI-EAS443:3:65:1541:933#0/1  
AGACCTTCACTACCTCCAGAGCAGAAATGAAAAGTGGCGA  
+HWI-EAS443:3:65:1541:933#0/1  
a``L^baaaa^P[a]ZaaaSa\_[a^¥aaa]\_abaZa^^`\_  
@HWI-EAS443:3:65:1634:671#0/1  
CCTTCACTACCTCCAGAGCAGAAATGAAAAGTGGCGAGAG  
+HWI-EAS443:3:65:1634:671#0/1  
abaa\_bab¥Y^\_\_`Xa\_aa`\_\_`aa^]a`¥^\_Y¥\_\_`][  
@HWI-EAS443:3:65:1638:498#0/1  
GAGACCTTCACTACCTCCAGAGCAGAAATGAAAAGTGGCG  
+HWI-EAS443:3:65:1638:498#0/1  
abba`bbbaa`baa`a`aababaaa`abaaa^aaZaa\_a  
@HWI-EAS443:3:65:1685:1195#0/1  
CGCCACTTTTCTTTCTGCTCTGGAGGTAGTGAAGGTCTC  
+HWI-EAS443:3:65:1685:1195#0/1  
abbbba]\_abbaZa`aab[aaaZaV¥a``aUF¥\_P\_a\_SQO  
@HWI-EAS443:3:65:170:1390#0/1  
TTGCGGATATGCCAAAGGAAACAGTCTACCTGAAAGCTTG  
+HWI-EAS443:3:65:170:1390#0/1  
aa^aabbaa`abbbba`a\_]`]W``aaaab`^^`a^`¥`  
@HWI-EAS443:3:65:1748:1914#0/1  
CCTTCACTACCTCCAGAGCAGAAATGAAAAGTGGCGAGAG  
+HWI-EAS443:3:65:1748:1914#0/1  
`^aabaZ\_ba¥bbbaabbbbaabbbbaaa^¥J]`aa¥a^X  
@HWI-EAS443:3:65:303:1615#0/1  
GACCTTCACTACCTCCAGAGCAGAAATGAAAAGTGGCGAG  
+HWI-EAS443:3:65:303:1615#0/1  
\_a^aaaa`^[X¥`UQZ^]¥a^aaZ\_a¥¥aZX¥QDST][\_V  
@HWI-EAS443:3:65:315:330#0/1  
GGAGACCTTCACTACCTCCAGAGCAGAAATGAAAAGTGGC  
+HWI-EAS443:3:65:315:330#0/1  
aaabaaaaaaaaaaaa\_\_\_`\_`aa\_a^a`aa`aaaaVa]\_  
@HWI-EAS443:3:65:504:32#0/1  
TACCTCCAGAGCAGAAATGAAAAGTGGCGAGAGCAATTGG  
+HWI-EAS443:3:65:504:32#0/1  
XW`ab[¥`^\_¥\_b`\_Z^`\_]\_]V\_a[`]`^^ULQTW¥[

@HWI-EAS443:3:65:505:1916#0/1  
CCTTACTACTCCAGAGCAGAAATGAAAAGTGGCGAGAG  
+HWI-EAS443:3:65:505:1916#0/1  
aa\_\_a\_a`aaa\_\_Y^[]\_`Y\_Y\_]\_`\_\_^\_]Y\_Y\_^]XVV  
@HWI-EAS443:3:65:722:1633#0/1  
GAGACCTTACTACTCCAGAGCAGAAATGAAAAGTGGCG  
+HWI-EAS443:3:65:722:1633#0/1  
a[^abbabbbaaa`^`aaa\_\_aaaa\_`\_`^a`^`VaXX¥  
@HWI-EAS443:3:66:1053:675#0/1  
CACTACTCCAGAGCAGAAATGAAAAGTGGCGAGAGCAAT  
+HWI-EAS443:3:66:1053:675#0/1  
abbab^^Za¥V¥ab[L^RY^a]b]XX`\_baabLTD^NNVV  
@HWI-EAS443:3:66:1207:1135#0/1  
GACCTTACTACTCCAGAGCAGAAATGAAAAGTGGCGAG  
+HWI-EAS443:3:66:1207:1135#0/1  
aa`\_]\_aabaab\_\_\_\_\_a`b[a^a`a`abba\_aaa^a`a`a\_  
@HWI-EAS443:3:66:1214:458#0/1  
CTTACTACTCCAGAGCAGAAATGAAAAGTGGCGAGAGC  
+HWI-EAS443:3:66:1214:458#0/1  
\_aY``aaSa`aU^\_¥QY^¥a¥aaa\_\_\_\_\_`I`\_abaaa\_^  
@HWI-EAS443:3:66:1291:551#0/1  
GACCTTACTACTCCAGAGCAGAAATGAAAAGTGGCGAG  
+HWI-EAS443:3:66:1291:551#0/1  
a``aa`aaa\_``aa`a`a^a\_aa^^]`a\_^V[`]a\_\_a^\_  
@HWI-EAS443:3:66:143:332#0/1  
GAAAAGTGGCGAGAGCAATTGGGACAGAAATTTGAGGAAA  
+HWI-EAS443:3:66:143:332#0/1  
Y\_`\_ab^bbbaZZ\_X]aa`^aa`YJYQ]¥aa`a\_a`\_`a  
@HWI-EAS443:3:66:1694:784#0/1  
ACCTTACTACTCCAGAGCAGAAATGAAAAGTGGCGAGA  
+HWI-EAS443:3:66:1694:784#0/1  
aUSUWwW¥W\_aaLaYQ`\_bb\_a\_Ua``a¥aQa\_aa^b^a^  
@HWI-EAS443:3:66:178:263#0/1  
CCTTACTACTCCAGAGCAGAAATGAAAAGTGGCGAGAG  
+HWI-EAS443:3:66:178:263#0/1  
abbabba``aaaaaaaaab`b^a\_`aZSYaaYaaaa\_a\_^  
@HWI-EAS443:3:66:25:1472#0/1  
CGCCACTTTTCATTTCTGCTCTGGAGGTAGTGAAGTCTC  
+HWI-EAS443:3:66:25:1472#0/1  
aaababaaabbbbaaaaa\_a`a`aV\_\_aUa[]\_`\_]\_V[UU  
@HWI-EAS443:3:66:301:363#0/1  
CAGAAATGAAAAGTGGCGAGAGCAATTGGGACAGAAATTT  
+HWI-EAS443:3:66:301:363#0/1  
a`a^`^^b```aa[``[aWHJX]R¥WX\_]^^`\_]¥¥MZW  
@HWI-EAS443:3:66:320:352#0/1  
TGAAAAGTGGCGAGAGCAATTGGGACAGAAATTTGAGGAA  
+HWI-EAS443:3:66:320:352#0/1  
ababbb`^baa`Za\_aaaa`aaaa`aaaaaaa\_aa\_\_a^\_  
@HWI-EAS443:3:66:350:779#0/1  
CTCCAGAGCAGAAATGAAAAGTGGCGAGAGCAATTGGGAC

+HWI-EAS443:3:66:350:779#0/1  
`]\`aVTJY`YZU][a\_]S]X\_Y`\_``\_WVXTV^^ZWYTVW  
@HWI-EAS443:3:66:72:1657#0/1  
GGCGAGAGCAATTGGGACAGAAATTTGAGGAAATAAGGTG  
+HWI-EAS443:3:66:72:1657#0/1  
aaaaS¥ab\_S\_b\_Y\_\_`b^a`^aaaaa^aa]aa`UM\_  
@HWI-EAS443:3:66:891:952#0/1  
CTTCACTACCTCCAGAGCAGAAATGAAAAGTGGCGAGAGC  
+HWI-EAS443:3:66:891:952#0/1  
abbbbaabbbbabbaab`^¥X[ba^aaaa\_aaaaa\_\_Y  
@HWI-EAS443:3:66:911:760#0/1  
GAGCAGAAATGAAAAGTGGCGAGAGCAATTGGGACAGAAA  
+HWI-EAS443:3:66:911:760#0/1  
[Taa\_a`aXabb^bbaba\_]\_V`ZV\_``aa[O[]`]^`  
@HWI-EAS443:3:66:965:1133#0/1  
GACCTTCACTACCTCCAGAGCAGAAATGAAAAGTGGCGAG  
+HWI-EAS443:3:66:965:1133#0/1  
aaaaa`bbab`a\_`aaa`\_a\_\_`^\_]aaaa\_a`Ya\_\_`\_`  
@HWI-EAS443:3:67:1294:1620#0/1  
CACTACCTCCAGAGCAGAAATGAAAAGTGGCGAGAGCAAT  
+HWI-EAS443:3:67:1294:1620#0/1  
Z\_`abbbbb\_SX`T^`¥`\_bbbabbb`ba[babWa[a`bb  
@HWI-EAS443:3:67:1311:824#0/1  
GAAAAGTGGCGAGAGCAATTGGGACAGAAATTTGAGGAAA  
+HWI-EAS443:3:67:1311:824#0/1  
aa`Z]^`aa`aYV[NNX¥\_]``aW[\_Y]\_Z^^ZTV\_`UP]  
@HWI-EAS443:3:67:1454:705#0/1  
GGGAGACCTTCACTACCTCCAGAGCAGAAATGAAAAGTGG  
+HWI-EAS443:3:67:1454:705#0/1  
\_`^a^abbbbbbba``aa\_aaaaaab\_ab^a\_bbaaaaa^ba  
@HWI-EAS443:3:67:167:71#0/1  
CTTCACTACCTCCAGAGCAGAAATGAAAAGTGGCGAGAGC  
+HWI-EAS443:3:67:167:71#0/1  
`U\_aVW\_`aa\_a`^`ZT¥[ ]LYWV]L¥TDXTVNRBBBBBB  
@HWI-EAS443:3:67:1766:1314#0/1  
CAGAGCAGAAATGAAAAGTGGCGAGAGCAATTGGGACAGA  
+HWI-EAS443:3:67:1766:1314#0/1  
\_`^`ZU\_\_`W`\_] ] ] ]\_`^]W\_Z\_\_TPIRVSLU^N¥[¥HWYV  
@HWI-EAS443:3:67:320:1850#0/1  
GAGACCTTCACTACCTCCAGAGCAGAAATGAAAAGTGGCG  
+HWI-EAS443:3:67:320:1850#0/1  
]¥¥aaba`bbbbbbbabababaabaaba\_aaaaa`Z\_\_a^  
@HWI-EAS443:3:67:466:1424#0/1  
CCTTCACTACCTCCAGAGCAGAAATGAAAAGTGGCGAGAG  
+HWI-EAS443:3:67:466:1424#0/1  
aaVa`a\_TY¥^`a`Z]¥VZ\_\_¥YU`R¥^YTY\_\_`^¥¥PV  
@HWI-EAS443:3:67:63:383#0/1  
GCAGAAATGAAAAGTGGCGAGAGCAATTGGGACAGAAAT  
+HWI-EAS443:3:67:63:383#0/1  
aaZ^aa]aaa``a^aaaa`\_[¥`\_`^`a`^`^`¥a\_\_\_\_\_^

@HWI-EAS443:3:67:653:713#0/1  
TGCCCCATTCTTGATCGGCTCCGCCGAGATCAAAAGTCC  
+HWI-EAS443:3:67:653:713#0/1  
ab\_H\_`XY^¥aZZORa[T^aTW\_^^S\_Z[XS[VZXRJSJO  
@HWI-EAS443:3:67:816:656#0/1  
TGGGAGACCTTCACTACCTCCAGAGCAGAAATGAAAAGTG  
+HWI-EAS443:3:67:816:656#0/1  
a^aa^a`\_`aaaa`¥a[\_\_\_\_a¥a`\_a\_\_¥a`¥¥XZ^W\_  
@HWI-EAS443:3:67:836:950#0/1  
GTCCCAATTGCTCTCGCCACTTTTCATTTCTGCTCTGGAG  
+HWI-EAS443:3:67:836:950#0/1  
VSa`\_Q¥\_¥U[¥[\_\_aa`\_\_[[ab]S¥\_]J]]b\_\_UZT`\_  
@HWI-EAS443:3:67:83:771#0/1  
ATGGGAGACCTTCACTACCTCCAGAGCAGAAATGAAAAGT  
+HWI-EAS443:3:67:83:771#0/1  
¥bba`a`aaaaaaa\_aa```\_a^a`^a`X¥aa[\_X[aW  
@HWI-EAS443:3:67:910:1627#0/1  
GAAATGAAAAGTGGCGAGAGCAATTGGGACAGAAATTTGA  
+HWI-EAS443:3:67:910:1627#0/1  
aaaa`abba^^a\_aaaa`]¥^[^^`\_]a\_`\_`\_`\_]`  
@HWI-EAS443:3:68:1038:595#0/1  
CTTCACTACCTCCAGAGCAGAAATGAAAAGTGGCGAGAGC  
+HWI-EAS443:3:68:1038:595#0/1  
abbbbbbbbbbbbababbbbbbbbbbbbabab^`aaa`a\_  
@HWI-EAS443:3:68:1086:354#0/1  
TGGGAGACCTTCACTACCTCCAGAGCAGAAATGAAAAGTG  
+HWI-EAS443:3:68:1086:354#0/1  
abbbabaabaaabaa`````\_`a\_aaaaa^\_aa^\_\_aWa  
@HWI-EAS443:3:68:1105:296#0/1  
GGACTTTTGATCTCGGCGGAGCCGATCAAGGAATGGGGCA  
+HWI-EAS443:3:68:1105:296#0/1  
aXT^RQZaa\_W]\_^a^Xa[NZV¥NHHRVY¥TSSONUVTNX  
@HWI-EAS443:3:68:1183:1160#0/1  
AATGGATTGGGTGATGCCCCATTCTTGATCGGCTCCGCC  
+HWI-EAS443:3:68:1183:1160#0/1  
abbbbaab`^`¥aaa`aaaaabaaab`aaaa]`a^YZ]`  
@HWI-EAS443:3:68:1426:935#0/1  
CCTTCACTACCTCCAGAGCAGAAATGAAAAGTGGCGAGAG  
+HWI-EAS443:3:68:1426:935#0/1  
`]abab[babbb\_b[`\_\_Uab\_babbbbaa\_abababY]  
@HWI-EAS443:3:68:1465:617#0/1  
ATTGCTCTCGCCACTTTTCATTTCTGCTCTGGAGGTAGTG  
+HWI-EAS443:3:68:1465:617#0/1  
aba`a`bbab`aa¥aaaa`aaa`b\_\_`\_aaa\_aaV`\_Y\_  
@HWI-EAS443:3:68:1473:98#0/1  
AGACCTTCACTACCTCCAGAGCAGAAATGAAAAGTGGCGA  
+HWI-EAS443:3:68:1473:98#0/1  
ab`\_abbbb\_bb`^a```b^a^ab\_\_^ab\_\_\_\_\_`^a^a^a  
@HWI-EAS443:3:68:1492:948#0/1  
GACCTTCACTACCTCCAGAGCAGAAATGAAAAGTGGCGAG

+HWI-EAS443:3:68:1492:948#0/1  
UXQP^`¥^¥` [WU¥H[YbabUbb]]a\_ZK¥XHKWVZ\_[Y^  
@HWI-EAS443:3:68:284:1907#0/1  
CGCCACTTTTCATTTCTGCTCTGGAGGTAGTGAAGGTCTC  
+HWI-EAS443:3:68:284:1907#0/1  
`X`^b`aaaab``a`\_a`a`\_`UXM¥ZRMX`]TQTXT  
@HWI-EAS443:3:68:347:964#0/1  
CGATCAAGGAATGGGCATCACCCAATCCATTGTCTGCAA  
+HWI-EAS443:3:68:347:964#0/1  
aa\_aa^^^a\_¥^a¥a]baaaaaaaaa[Z^a\_\_^Z`^]S]`  
@HWI-EAS443:3:68:351:1709#0/1  
GAGACCTTCACTACCTCCAGAGCAGAAATGAAAAGTGGCG  
+HWI-EAS443:3:68:351:1709#0/1  
M[[\_W¥X^^[^\_W¥ab[RXQV`^Taa[\_X\_aT^PFYQV^  
@HWI-EAS443:3:68:443:1188#0/1  
GCCGATCAAGGAATGGGCATCACCCAATCCATTGTCTGC  
+HWI-EAS443:3:68:443:1188#0/1  
abbbba\_W^bbabaaaaabb\_JUaBBBBBBBBBBBBBBBB  
@HWI-EAS443:3:68:475:685#0/1  
ATGGGAGACCTTCACTACCTCCAGAGCAGAAATGAAAAGT  
+HWI-EAS443:3:68:475:685#0/1  
aa``` [aaaaabaaa`aaa]a\_a[`aaa`aaZZ]X]V  
@HWI-EAS443:3:68:819:118#0/1  
GGGAGACCTTCACTACCTCCAGAGCAGAAATGAAAAGTGG  
+HWI-EAS443:3:68:819:118#0/1  
`baaba`aaaaa`a``^W`¥^Z\_a\_ZZ\_aYFV^\_Y\_\_  
@HWI-EAS443:3:68:861:64#0/1  
TGGGAGACCTTCACTACCTCCAGAGCAGAAATGAAAAGTG  
+HWI-EAS443:3:68:861:64#0/1  
abbbba\_aaa[`a`a]^WaY^\_a\_a`^a¥]^a`\_Z\_YaUa  
@HWI-EAS443:3:68:903:1680#0/1  
CACTACCTCCAGAGCAGAAATGAAAAGTGGCGAGAGCAAT  
+HWI-EAS443:3:68:903:1680#0/1  
a``aaab\_abaa^¥^aYVaY^baa``WH¥aa^[¥`OVY^Y  
@HWI-EAS443:3:68:964:385#0/1  
AAATGAAAAGTGGCGAGAGCAATTGGGACAGAAATTTGAG  
+HWI-EAS443:3:68:964:385#0/1  
\_a\_\_ba\_Y¥`¥abba]\_`[W[]^aaba[J^a```a````Z`  
@HWI-EAS443:3:69:1036:1308#0/1  
GGGAGACCTTCACTACCTCCAGAGCAGAAATGAAAAGTGG  
+HWI-EAS443:3:69:1036:1308#0/1  
`ab[bbbbbbbbabbb`bab`ba`aaabaaab[a\_a`  
@HWI-EAS443:3:69:1140:1087#0/1  
GGGAGACCTTCACTACCTCCAGAGCAGAAATGAAAAGTGG  
+HWI-EAS443:3:69:1140:1087#0/1  
`ab\_\_\_bbbabb^aaaaaa\_aa`a``a`\_aaaaaaaWaa  
@HWI-EAS443:3:69:1620:1037#0/1  
GACCTTCACTACCTCCAGAGCAGAAATGAAAAGTGGCGAG  
+HWI-EAS443:3:69:1620:1037#0/1  
RW\_`¥¥X\_Z^\_HQ\_a\_a`^\_]\_V¥`ab`\_ZMR\_V\_U¥a``

@HWI-EAS443:3:69:170:1155#0/1  
GGATTGGGTGATGCCCCATTCTTGATCGGCTCCGCCGAG  
+HWI-EAS443:3:69:170:1155#0/1  
`bba^a\_[V\_ba\_bbbbabababba\_abaa`\_baV`\_YP  
@HWI-EAS443:3:69:207:408#0/1  
CCTTCACTACCTCCAGAGCAGAAATGAAAAGTGGCGAGAG  
+HWI-EAS443:3:69:207:408#0/1  
abaaabaa`aaaaa^`a``a^[\_aa\_a`\_U``\_aZ\_Z^  
@HWI-EAS443:3:69:268:2045#0/1  
GAGACCTTCACTACCTCCAGAGCAGAAATGAAAAGTGGCG  
+HWI-EAS443:3:69:268:2045#0/1  
SaM`\_YRRY`aab`\_abaab\_a]aa¥a^``aab\_YKXYa\_  
@HWI-EAS443:3:69:813:855#0/1  
GCTCTCGCCACTTTTCATTTCTGCTCTGGAGGTAGTGAAG  
+HWI-EAS443:3:69:813:855#0/1  
ababbb`bb`\_abbbaabaa\_aaaaa`a^aa¥a¥FX`\_  
@HWI-EAS443:3:69:833:353#0/1  
TCGCCACTTTTCATTTCTGCTCTGGAGGTAGTGAAGTCT  
+HWI-EAS443:3:69:833:353#0/1  
aabaa`aaaaaaaaaaaa`a`a`\_a`V`\_U]W^]aVVZ  
@HWI-EAS443:3:69:925:402#0/1  
GAGACCTTCACTACCTCCAGAGCAGAAATGAAAAGTGGCG  
+HWI-EAS443:3:69:925:402#0/1  
aabaabb`bbaabaa\_a`a`aaaa`\_`\_`^a`a`Xa`\_`\_  
@HWI-EAS443:3:69:973:1360#0/1  
GCTCTCGCCACTTTTCATTTCTGCTCTGGAGGTAGTGAAG  
+HWI-EAS443:3:69:973:1360#0/1  
R\_baab`aabbbbbbbabbbbbbbbaabb]a\_bb`P`\_`\_  
@HWI-EAS443:3:6:1074:1789#0/1  
ATGGATTGGGTGATGCCCCATTCTTGATCGGCTCCGCCG  
+HWI-EAS443:3:6:1074:1789#0/1  
`aWab]]a¥]M\_\_[ZQZZXbaa^]W^\_X]V`U`^MPXU^B  
@HWI-EAS443:3:6:1250:824#0/1  
ATGGGAGACCTTCACTACCTCCAGAGCAGAAATGAAAAGT  
+HWI-EAS443:3:6:1250:824#0/1  
abbbbbbbba\_aaaa`a`LNxa`\_a`a^aa]]`bb`[\_`\_aR  
@HWI-EAS443:3:6:1271:205#0/1  
ATGGGAGACCTTCACTACCTCCAGAGCAGAAATGAAAAGT  
+HWI-EAS443:3:6:1271:205#0/1  
a`baa`ba\_\_a\_\_a`\_]\_aUR\_a]^X\_aZ\_^\_a^^^]U  
@HWI-EAS443:3:6:214:802#0/1  
GGGAGACCTTCACTACCTCCAGAGCAGAAATGAAAAGTGG  
+HWI-EAS443:3:6:214:802#0/1  
`baabbbbaabaabaaa^a`a\_baaa\_T\_ab``\_aa¥`a  
@HWI-EAS443:3:6:224:876#0/1  
AAAAGTGGCGAGAGCAATTGGGACAGAAATTTGAGGAAATA  
+HWI-EAS443:3:6:224:876#0/1  
a`a`aTabba`R`]PSaa\_ba¥X`^a^Uaaa`V\_]NMZ`Z  
@HWI-EAS443:3:6:303:1047#0/1  
CCACCTTATTTCTCAAATTTCTGTCCCAATTGCTCTCGC

+HWI-EAS443:3:6:303:1047#0/1  
X`^a^b[a`bababb^Xab`bbba\_a]`¥bbVb\_baaaZX  
@HWI-EAS443:3:6:332:432#0/1  
GAGACCTTACTACCTCCAGAGCAGAAATGAAAAGTGGCG  
+HWI-EAS443:3:6:332:432#0/1  
a`ba\_^W^X[\_aa\_a]\_ZYL¥bY\_a¥]Q``Q`¥ZR^^`N`  
@HWI-EAS443:3:6:36:24#0/1  
GAAAAGTGGCGAGAGCAATTGGGACAGAAATTTGAGGAAA  
+HWI-EAS443:3:6:36:24#0/1  
a\_a`aaWa`¥`\_¥OY]YXW]S^]WZ^`]WV]]]\_W^]ZBB  
@HWI-EAS443:3:6:381:1872#0/1  
GAGACCTTACTACCTCCAGAGCAGAAATGAAAAGTGGCG  
+HWI-EAS443:3:6:381:1872#0/1  
`baa[W[ZH`\_aUUV^QR^aa`\_a\_]ba^a\_YbaaN`\_Y^  
@HWI-EAS443:3:6:444:1024#0/1  
CTTACTACCTCCAGAGCAGAAATGAAAAGTGGCGAGAGC  
+HWI-EAS443:3:6:444:1024#0/1  
aZ]b\_Z]\_\_Z\_bV]aQ``ba`aaa¥S^`a`P\_\_bb^a`\_H  
@HWI-EAS443:3:6:445:1312#0/1  
ACCTCCAGAGCAGAAATGAAAAGTGGCGAGAGCAATTGGG  
+HWI-EAS443:3:6:445:1312#0/1  
T¥bab`\_ZVa`bbab``bbbaab`\_S`b\_a`[^aZaaaa  
@HWI-EAS443:3:6:56:731#0/1  
GAGACCTTACTACCTCCAGAGCAGAAATGAAAAGTGGCG  
+HWI-EAS443:3:6:56:731#0/1  
aa^[¥\_aaaaaa]^`^X[a^aXa`]^N\_\_a\_a\_aT``¥`  
@HWI-EAS443:3:6:674:946#0/1  
GAGACCTTACTACCTCCAGAGCAGAAATGAAAAGTGGCG  
+HWI-EAS443:3:6:674:946#0/1  
aaa\_a\_aaab\_a]U`T^^[^`^\_\_\_`¥`¥¥`\_[[^\_S\_\_W\_  
@HWI-EAS443:3:6:732:1451#0/1  
CAGAAATGAAAAGTGGCGAGAGCAATTGGGACAGAAATTT  
+HWI-EAS443:3:6:732:1451#0/1  
¥`a\_^a¥babZ`Z````\_a`U[¥`a¥\_a¥^[abab¥\_Va  
@HWI-EAS443:3:6:757:2001#0/1  
GACCTTACTACCTCCAGAGCAGAAATGAAAAGTGGCGAG  
+HWI-EAS443:3:6:757:2001#0/1  
aa`aUaUY[H^UaT]a^W`Qaa]\_a¥`[a\_a\_V`\_a\_B  
@HWI-EAS443:3:6:932:582#0/1  
GCCACTTTTCATTTCTGCTCTGGAGGTAGTGAAGGTCTCC  
+HWI-EAS443:3:6:932:582#0/1  
a]T¥Z`a\_a[[a^ZN¥^V¥V\_\_^WXUNY\_R]VYYVBBBB  
@HWI-EAS443:3:6:968:1068#0/1  
GTGGCGAGAGCAATTGGGACAGAAATTTGAGGAAATAAGG  
+HWI-EAS443:3:6:968:1068#0/1  
a^aa^`^`\_]XY^`\_YVPXa]^Yaa\_Za`U[[]][Z\_\_  
@HWI-EAS443:3:6:979:1660#0/1  
GCCACTTTTCATTTCTGCTCTGGAGGTAGTGAAGGTCTCC  
+HWI-EAS443:3:6:979:1660#0/1  
a\_R\_W^abUT]`ba0`¥Za[ ]`a]¥\_GaZV[\_aaTX[BBB



@HWI-EAS443:3:70:1026:409#0/1  
GGGAGACCTTCACTACCTCCAGAGCAGAAATGAAAAGTGG  
+HWI-EAS443:3:70:1026:409#0/1  
\_\_]S]^`aa`\_aaa`\_]aaa\_\_a[^]ZRWa^¥^]ZN`Z  
@HWI-EAS443:3:70:1031:125#0/1  
GAAATGAAAAGTGGCGAGAGCAATTGGGACAGAAATTTGA  
+HWI-EAS443:3:70:1031:125#0/1  
aaaabbaaab\_aa`b`\_\_`[\_aaa\_aa^aa`^^`a` [  
@HWI-EAS443:3:70:1103:1679#0/1  
AGCCGATCAAGGAATGGGCATCACCCAATCCATTGTCTG  
+HWI-EAS443:3:70:1103:1679#0/1  
a]a`\_a^\_\_¥[¥`W`^`\_¥¥\_`\_]¥Z^]Z¥]\_\_¥^WYWYU  
@HWI-EAS443:3:70:1229:1406#0/1  
GACCTTCACTACCTCCAGAGCAGAAATGAAAAGTGGCGAG  
+HWI-EAS443:3:70:1229:1406#0/1  
abaaaabbabaa\_aaaaa`aaaa`aaaaaaa]aTa\_aa\_a  
@HWI-EAS443:3:70:1255:476#0/1  
GGAGACCTTCACTACCTCCAGAGCAGAAATGAAAAGTGGC  
+HWI-EAS443:3:70:1255:476#0/1  
aa`aa\_aaaaa`\_a\_a`\_Z\_^\_\_^Z`a`¥YY\_aS\_\_W  
@HWI-EAS443:3:70:1271:667#0/1  
GTCCCAATTGCTCTCGCCACTTTTCATTTCTGCTCTGGAG  
+HWI-EAS443:3:70:1271:667#0/1  
a`\_aaaaaaa\_a`aVaa\_aaab\_^aaaaa`a\_\_aY`  
@HWI-EAS443:3:70:1476:487#0/1  
CAATGGATTGGGTGATGCCCCATTCCTTGATCGGCTCCGC  
+HWI-EAS443:3:70:1476:487#0/1  
ab]babb^^`PZ\_^WTb\_W]ZaaaVaabaX][a]¥`\_SHZ  
@HWI-EAS443:3:70:1535:812#0/1  
AATGGATTGGGTGATGCCCCATTCCTTGATCGGCTCCGCC  
+HWI-EAS443:3:70:1535:812#0/1  
`a^aa]`VZaaVaY\_^WZ^]¥\_`^S^`¥W¥WWTUTYQUN  
@HWI-EAS443:3:70:1641:1875#0/1  
GGAGACCTTCACTACCTCCAGAGCAGAAATGAAAAGTGGC  
+HWI-EAS443:3:70:1641:1875#0/1  
abaaa`baaaba`a`\_aa`aa`aa^`\_`\_aa`\_`a\_ZZ]¥  
@HWI-EAS443:3:70:1708:648#0/1  
CTTCACTACCTCCAGAGCAGAAATGAAAAGTGGCGAGAGC  
+HWI-EAS443:3:70:1708:648#0/1  
`abababbbbb\_abababbaabbaababbbbaaaba]R  
@HWI-EAS443:3:70:302:1911#0/1  
CACTACCTCCAGAGCAGAAATGAAAAGTGGCGAGAGCAAT  
+HWI-EAS443:3:70:302:1911#0/1  
aa¥[YY`[\_]^\_¥\_`\_]R¥VZ``^`RMMWL¥TVYYZQT]V  
@HWI-EAS443:3:70:381:213#0/1  
CTTCACTACCTCCAGAGCAGAAATGAAAAGTGGCGAGAGC  
+HWI-EAS443:3:70:381:213#0/1  
abaabaaa^`aaa`a`\_V`^\_Z\_aa\_^\_aU``Za^^V¥U  
@HWI-EAS443:3:70:513:866#0/1  
CGCCACTTTTCATTTCTGCTCTGGAGGTAGTGAAGTCTC

+HWI-EAS443:3:70:513:866#0/1  
a`aa`aabbb``abbb`Xaaa`aa\_aa¥a\_[^¥Y]MRPXU  
@HWI-EAS443:3:70:595:1974#0/1  
GGGAGACCTTCACTACCTCCAGAGCAGAAATGAAAAGTGG  
+HWI-EAS443:3:70:595:1974#0/1  
a¥`U]\_baSN`\_\_\_\_`a[^aa\_¥T^\_\_^ZN\_V¥¥ZZZ¥WUW  
@HWI-EAS443:3:70:961:1937#0/1  
GTCCCAATTGCTCTCGCCACTTTTCATTTCTGCTCTGGAG  
+HWI-EAS443:3:70:961:1937#0/1  
aabbbb\_\_abb`bbab\_bYb\_aaa`aaaabbaaaa^U¥a\_  
@HWI-EAS443:3:71:1226:178#0/1  
TGAAAAGTGGCGAGAGCAATTGGGACAGAAATTTGAGGAA  
+HWI-EAS443:3:71:1226:178#0/1  
a^`¥a^`^a]ZN^`\_] ^Y``baaFD[`U\_Y^``aPaVLW  
@HWI-EAS443:3:71:1278:770#0/1  
GGACTTTTGATCTCGCGGAGCCGATCAAGGAATGGGGCA  
+HWI-EAS443:3:71:1278:770#0/1  
ab\_^abbabaa\_a`aa`a\_\_\_\_`\_` [¥¥VRQ\_S\_W¥¥¥YKN  
@HWI-EAS443:3:71:1294:443#0/1  
AGACCTTCACTACCTCCAGAGCAGAAATGAAAAGTGGCGA  
+HWI-EAS443:3:71:1294:443#0/1  
aaaaabaaabba\_\_babb\_\_`\_aa`^a\_aa\_`a` [a\_``\_  
@HWI-EAS443:3:71:1311:890#0/1  
CAAGCTTTCAGGTAGACTGTTTCCTTTGGCATATCCGCAA  
+HWI-EAS443:3:71:1311:890#0/1  
a]a]\_a^`a`^[L\_`aaaa]a`^[¥^ZR\_V``a\_\_QVV\_\_  
@HWI-EAS443:3:71:1372:1584#0/1  
CTCTCGCCACTTTTCATTTCTGCTCTGGAGGTAGTGAAGG  
+HWI-EAS443:3:71:1372:1584#0/1  
a¥SW¥\_a`Va`\_b`aY`aaTa`\_b``\_abbaSb\_H]BBBB  
@HWI-EAS443:3:71:1562:1471#0/1  
GGAGACCTTCACTACCTCCAGAGCAGAAATGAAAAGTGGC  
+HWI-EAS443:3:71:1562:1471#0/1  
W\_b\_¥a\_\_Q\_S\_^R[\_¥\_\_X]WU`b\_Ta`aR]`R¥ZaXN  
@HWI-EAS443:3:71:1579:1742#0/1  
CTGTCCCAATTGCTCTCGCCACTTTTCATTTCTGCTCTGG  
+HWI-EAS443:3:71:1579:1742#0/1  
abb`Ubaabba`aaabbb`¥aabbaba`bbaabaaa``\_`  
@HWI-EAS443:3:71:200:990#0/1  
ATGAAAAGTGGCGAGAGCAATTGGGACAGAAATTTGAGGA  
+HWI-EAS443:3:71:200:990#0/1  
U^ba`Yb\_[``bZX[UXUGP¥[aa^H[a]`¥Y^a``\_W¥P  
@HWI-EAS443:3:71:226:241#0/1  
GACCTTCACTACCTCCAGAGCAGAAATGAAAAGTGGCGAG  
+HWI-EAS443:3:71:226:241#0/1  
aaaa\_aaba\_a^\_\_\_\_`[`]\_\_`\_X^\_\_\_\_^\_] ^\_U\_]¥YU  
@HWI-EAS443:3:71:348:753#0/1  
CTTCACTACCTCCAGAGCAGAAATGAAAAGTGGCGAGAGC  
+HWI-EAS443:3:71:348:753#0/1  
abbbbbbbbbbaaaabaabaa[a`baa`aa\_\_aab`a````

@HWI-EAS443:3:71:387:1648#0/1  
TGAAAAGTGGCGAGAGCAATTGGGACAGAAATTTGAGGAA  
+HWI-EAS443:3:71:387:1648#0/1  
]XU\_`¥]Y]¥\_T¥[WXYYYT[S[VWVWYZ\_]V][JO[WRZ  
@HWI-EAS443:3:71:462:524#0/1  
AGACCTTCACTACCTCCAGAGCAGAAATGAAAAGTGGCGA  
+HWI-EAS443:3:71:462:524#0/1  
\_¥^^`Q\_bb`]aa\_^bb¥`UN]^b`]Vbaa`^`^N]]]]]0  
@HWI-EAS443:3:71:53:1692#0/1  
CTTCACTACCTCCAGAGCAGAAATGAAAAGTGGCGAGAGC  
+HWI-EAS443:3:71:53:1692#0/1  
\_b[VabZbbbYbY¥V^^a\_[WT`Ya`[b\_]``YaaaIXPY  
@HWI-EAS443:3:71:564:314#0/1  
CCTTCACTACCTCCAGAGCAGAAATGAAAAGTGGCGAGAG  
+HWI-EAS443:3:71:564:314#0/1  
^b`W`ab``a¥M^b`WS¥]abab`\_bZZaa`N¥]]a\_a¥]  
@HWI-EAS443:3:71:56:1123#0/1  
CTCGCCACTTTTCATTTCTGCTCTGGAGGTAGTGAAGGTC  
+HWI-EAS443:3:71:56:1123#0/1  
aaba]¥Va¥a]a`[\_`\_aaaa\_a`\_]R]OLY[LXV¥LVIN  
@HWI-EAS443:3:71:785:773#0/1  
CCTTCACTACCTCCAGAGCAGAAATGAAAAGTGGCGAGAG  
+HWI-EAS443:3:71:785:773#0/1  
aa`\_a[ab^aa\_aabb¥`[\_`\_]a\_a[\_\_\_aY``aa\_]\_V  
@HWI-EAS443:3:71:908:417#0/1  
AGCCGATCAAGGAATGGGCGATCACCCAATCCATTGTCTG  
+HWI-EAS443:3:71:908:417#0/1  
a`aaba`aa`Z]\_`X`[\_`ZV`[\_`Z`\_]Z`[Ta^¥X¥Q¥^  
@HWI-EAS443:3:71:91:774#0/1  
CAGAAATGAAAAGTGGCGAGAGCAATTGGGACAGAAATTT  
+HWI-EAS443:3:71:91:774#0/1  
aababaaZV\_Y^aZ^`baXaWV[G\_Y\_]¥``Y]a\_W]UR¥\_  
@HWI-EAS443:3:71:943:912#0/1  
CCTTCACTACCTCCAGAGCAGAAATGAAAAGTGGCGAGAG  
+HWI-EAS443:3:71:943:912#0/1  
abbaa^`a^`^`]``]aa``]``\_aa`^a\_\_U\_]``^]WY  
@HWI-EAS443:3:71:977:134#0/1  
TCTGTCCCAATTGCTCTCGCCACTTTTCATTTCTGCTCTG  
+HWI-EAS443:3:71:977:134#0/1  
a]SXXT]a`X\_]S¥¥U[U\_^`YUY]^^UXW[ ]UZYQ[USY  
@HWI-EAS443:3:72:108:257#0/1  
ATTTCTCAAATTTCTGTCCCAATTGCTCTCGCCACTTTT  
+HWI-EAS443:3:72:108:257#0/1  
abaaa`bWRX`a`^`^Xaa`Y^\_\_a^\_a\_a`^`^][^U]Z  
@HWI-EAS443:3:72:110:1939#0/1  
GAGACCTTCACTACCTCCAGAGCAGAAATGAAAAGTGGCG  
+HWI-EAS443:3:72:110:1939#0/1  
aa[abaa`bbbbbbbabbaaaba[aa`a\_a\_UaW`]aa  
@HWI-EAS443:3:72:110:329#0/1  
CAGAAATGAAAAGTGGCGAGAGCAATTGGGACAGAAATTT

+HWI-EAS443:3:72:110:329#0/1  
aab¥R\_^aa\_aaWO[Z^a]WY\_aWX\_\_`\_OMO¥[¥^]]\_¥  
@HWI-EAS443:3:72:1336:399#0/1  
CCTTCACTACCTCCAGAGCAGAAATGAAAAGTGGCGAGAG  
+HWI-EAS443:3:72:1336:399#0/1  
\_ab\_`b¥b`U¥\_a]\_b`\_``bab\_abaaa``Y\_¥abV`X^  
@HWI-EAS443:3:72:1685:1093#0/1  
GTCCCAATTGCTCTCGCCACTTTTCATTTCTGCTCTGGAG  
+HWI-EAS443:3:72:1685:1093#0/1  
a\_\_\_aaaaaa¥a\_`\_`¥\_]X\_aaa^[a\_\_\_`\_\_\_¥`\_`Y`  
@HWI-EAS443:3:72:404:1657#0/1  
GACCTTCACTACCTCCAGAGCAGAAATGAAAAGTGGCGAG  
+HWI-EAS443:3:72:404:1657#0/1  
`bb\_[Zaa]S\_]a\_`aKP¥WaR]V\_`a[\_`]X[RRJU\_W^  
@HWI-EAS443:3:72:42:1457#0/1  
CTTCACTACCTCCAGAGCAGAAATGAAAAGTGGCGAGAGC  
+HWI-EAS443:3:72:42:1457#0/1  
aaa`\_`aaabaaa]V\_ab`]Ua^aZZ\_`]^U`¥`Z\_[TYY  
@HWI-EAS443:3:72:454:514#0/1  
AATGGATTGGGTGATGCCCCATTCTTGATCGGCTCCGCC  
+HWI-EAS443:3:72:454:514#0/1  
[bbaaaaa[\_\_\_W¥`¥`aab\_^\_aaa`a\_aa\_^W^\_]Y`a  
@HWI-EAS443:3:72:60:147#0/1  
CCTTCACTACCTCCAGAGCAGAAATGAAAAGTGGCGAGAG  
+HWI-EAS443:3:72:60:147#0/1  
abbabbaabaaa]aa`[aa\_a`\_a``\_\_\_\_^`GYVU]]^V[  
@HWI-EAS443:3:72:717:1057#0/1  
CTTATTTCTCAAATTTCTGTCCCAATTGCTCTCGCCACT  
+HWI-EAS443:3:72:717:1057#0/1  
a\_`¥a^aaba\_`\_`\_baabaaaaa]aaa]`aaaa\_]PP`]  
@HWI-EAS443:3:72:725:704#0/1  
ACCTTATTTCTCAAATTTCTGTCCCAATTGCTCTCGCCA  
+HWI-EAS443:3:72:725:704#0/1  
^¥URQ00]][]\_\_]TZ¥VX]\_ZYON[QXSUXR¥TTQYSRQ  
@HWI-EAS443:3:72:793:810#0/1  
GAGACCTTCACTACCTCCAGAGCAGAAATGAAAAGTGGCG  
+HWI-EAS443:3:72:793:810#0/1  
aaaaaaa``aaaa^aab\_a`a`\_a\_¥\_aa[]a\_a¥a\_\_a  
@HWI-EAS443:3:72:922:1477#0/1  
TTGCTCTCGCCACTTTTCATTTCTGCTCTGGAGGTAGTGA  
+HWI-EAS443:3:72:922:1477#0/1  
ababbabbabbaaababbaaaba`aa`a`ab\_`^a\_^\_`  
@HWI-EAS443:3:73:1014:1125#0/1  
CCTTCACTACCTCCAGAGCAGAAATGAAAAGTGGCGAGAG  
+HWI-EAS443:3:73:1014:1125#0/1  
a`aa`\_`aba``a\_a`\_]\_\_\_\_\_`\_\_a^``Ya````\_\_[[  
@HWI-EAS443:3:73:1023:654#0/1  
CCTTCACTACCTCCAGAGCAGAAATGAAAAGTGGCGAGAG  
+HWI-EAS443:3:73:1023:654#0/1  
`abbabbbbaaba```abaabaabbba`bbb`baabaaaa

@HWI-EAS443:3:73:1047:1050#0/1  
GGAGACCTTCACTACCTCCAGAGCAGAAATGAAAAGTGGC  
+HWI-EAS443:3:73:1047:1050#0/1  
abaaaaaaaaab\_aaaa`aaa\_aa\_a\_`aa`a`aUa\_\_  
@HWI-EAS443:3:73:1372:885#0/1  
ATTGGGTGATGCCCATTCCTTGATCGGCTCCGCCGAGAT  
+HWI-EAS443:3:73:1372:885#0/1  
a`aa¥^\_aaaa^\_^^¥aa^aa`\_`¥¥\_[`¥T[[¥^Z^UU  
@HWI-EAS443:3:73:1429:473#0/1  
CACTACCTCCAGAGCAGAAATGAAAAGTGGCGAGAGCAAT  
+HWI-EAS443:3:73:1429:473#0/1  
a`\_aW`]a]]`UW^^\_baY\_\_ba\_`Z`\_bb`aaQ`a[Z\_^  
@HWI-EAS443:3:73:1508:1913#0/1  
GCAGAAATGAAAAGTGGCGAGAGCAATTGGGACAGAAATT  
+HWI-EAS443:3:73:1508:1913#0/1  
a\_ab`abbaa\_a`¥]ZT¥`\_a\_\_P[Za\_a\_]^\_\_\_\_]¥`\_a  
@HWI-EAS443:3:73:1533:212#0/1  
CTTCACTACCTCCAGAGCAGAAATGAAAAGTGGCGAGAGC  
+HWI-EAS443:3:73:1533:212#0/1  
\_bbaaabbaab`aaba\_aab\_aabaaaaab]a`Wa\_a]¥N  
@HWI-EAS443:3:73:1661:1333#0/1  
GGGAGACCTTCACTACCTCCAGAGCAGAAATGAAAAGTGG  
+HWI-EAS443:3:73:1661:1333#0/1  
^^`baabba^bb`ab`b^aYXX[aa[baaaaaaaaa\_aYaa  
@HWI-EAS443:3:73:459:540#0/1  
CAGAAATGAAAAGTGGCGAGAGCAATTGGGACAGAAATTT  
+HWI-EAS443:3:73:459:540#0/1  
¥[bababbbbbbb\_ababb]]bb`bbb\_aa`abb`abbbb  
@HWI-EAS443:3:73:890:1790#0/1  
AGACCTTCACTACCTCCAGAGCAGAAATGAAAAGTGGCGA  
+HWI-EAS443:3:73:890:1790#0/1  
V\_^bb\_¥bZa\_b\_`\_ba\_XZI]Y`^aa`QUaaUW[^¥XX\_  
@HWI-EAS443:3:73:891:1245#0/1  
GCAGAAATGAAAAGTGGCGAGAGCAATTGGGACAGAAATT  
+HWI-EAS443:3:73:891:1245#0/1  
a`a`UZ^`a\_XX]]\_`aa\_]\_]TRW`^Y]¥`a`¥YW]\_  
@HWI-EAS443:3:73:964:873#0/1  
CTTCACTACCTCCAGAGCAGAAATGAAAAGTGGCGAGAGC  
+HWI-EAS443:3:73:964:873#0/1  
^a¥\_\_b\_W[\_¥`a[Y¥Xaa^]¥^¥aa`\_]`baba¥^`¥TUX  
@HWI-EAS443:3:73:971:585#0/1  
GTCCCAATTGCTCTCGCCACTTTTCATTTCTGCTCTGGAG  
+HWI-EAS443:3:73:971:585#0/1  
aZbaZ^)`a`T]a\_a\_XLY^¥aa`UV]a\_aa`aV`^a]\_a  
@HWI-EAS443:3:73:99:724#0/1  
TGGGAGACCTTCACTACCTCCAGAGCAGAAATGAAAAGTG  
+HWI-EAS443:3:73:99:724#0/1  
aaa\_aaa`abaaabaaaaaa`¥`\_a\_a]\_`a]N]\_\_Y\_  
@HWI-EAS443:3:74:1008:404#0/1  
GTCCCAATTGCTCTCGCCACTTTTCATTTCTGCTCTGGAG

+HWI-EAS443:3:74:1008:404#0/1  
aaa`\_a`aabaa`a`a\_aa\_aaa`^aa``aa\_¥a¥``\_¥a  
@HWI-EAS443:3:74:1138:1110#0/1  
CGCCACTTTTCATTTCTGCTCTGGAGGTAGTGAAGGTCTC  
+HWI-EAS443:3:74:1138:1110#0/1  
aaaaaaaaaaaaaaaaaaaaaaaa`\_aa]aaXa``\_]U]^Y  
@HWI-EAS443:3:74:1150:838#0/1  
ACTACCTCCAGAGCAGAAATGAAAAGTGGCGAGAGCAATT  
+HWI-EAS443:3:74:1150:838#0/1  
\_RU]\_Z`ZH]XPUZaaPZ^a`R]`¥`H^\_abVXNUQFR¥L  
@HWI-EAS443:3:74:1185:563#0/1  
CTTCACTACCTCCAGAGCAGAAATGAAAAGTGGCGAGAGC  
+HWI-EAS443:3:74:1185:563#0/1  
`b`ab\_\_ba]ba[b`[aab`a``aa`]a\_b]a`a`aa[V0  
@HWI-EAS443:3:74:1298:669#0/1  
TGATGCCCATTCCTTGATCGCTCCGCCGAGATCAAAAG  
+HWI-EAS443:3:74:1298:669#0/1  
Z^¥X¥aZa\_\_Z`UZY]]I`S^^a``]HW`ST[LUIXQZS¥  
@HWI-EAS443:3:74:1475:1413#0/1  
GGGAGACCTTCACTACCTCCAGAGCAGAAATGAAAAGTGG  
+HWI-EAS443:3:74:1475:1413#0/1  
`bab`^^^aa\_babaaaab[Ra\_a]ab`\_aaaaa`\_X`\_  
@HWI-EAS443:3:74:34:245#0/1  
CACCTTATTTCTCAAATTTCTGTCCCAATTGCTCTCGCC  
+HWI-EAS443:3:74:34:245#0/1  
aba`aaabbaabbbZb\_bbbbabaa`b\_\_\_\_\_`\_\_^`\_]`  
@HWI-EAS443:3:74:51:1103#0/1  
GAAAAGTGGCGAGAGCAATTGGGACAGAAATTTGAGGAAA  
+HWI-EAS443:3:74:51:1103#0/1  
a`a\_\_`S`aa`\_WJ[[¥¥^`\_`ZZW¥X`U[¥a[W[ZRW[  
@HWI-EAS443:3:74:539:206#0/1  
CGCCACTTTTCATTTCTGCTCTGGAGGTAGTGAAGGTCTC  
+HWI-EAS443:3:74:539:206#0/1  
aba\_aabaaaaabbb`b`baa`ba¥abZaaN][^ZaVOZZ  
@HWI-EAS443:3:74:663:1157#0/1  
GGAGACCTTCACTACCTCCAGAGCAGAAATGAAAAGTGGC  
+HWI-EAS443:3:74:663:1157#0/1  
^\_W¥\_a\_[Xbb]VP`aaa^X^X\_Y`¥GDT^`U`\_^aY``]  
@HWI-EAS443:3:74:714:1377#0/1  
GAGACCTTCACTACCTCCAGAGCAGAAATGAAAAGTGGCG  
+HWI-EAS443:3:74:714:1377#0/1  
aabbabaabbbaa`bababa\_ab`a]aa`aaa\_]aUa`\_`  
@HWI-EAS443:3:74:748:331#0/1  
CTTCACTACCTCCAGAGCAGAAATGAAAAGTGGCGAGAGC  
+HWI-EAS443:3:74:748:331#0/1  
aaa`bab^aaababa`aab^aaaa]aab^aa`\_[\_]V  
@HWI-EAS443:3:74:83:587#0/1  
GTCCCAATTGCTCTCGCCACTTTTCATTTCTGCTCTGGAG  
+HWI-EAS443:3:74:83:587#0/1  
`[ba]¥Qb[``aa\_aaaa`ZY\_a\_a`ZaZ^aaa¥^[`a\_\_

@HWI-EAS443:3:74:987:459#0/1  
CTTCACTACCTCCAGAGCAGAAATGAAAAGTGGCGAGAGC  
+HWI-EAS443:3:74:987:459#0/1  
\_¥`a[W\_aZ\_¥`b`b`a^[a`ba`^`a]\_aa`^`Z\_]`  
@HWI-EAS443:3:75:1075:1623#0/1  
AATGGATTGGGTGATGCCCCATTCTTGATCGGCTCCGCC  
+HWI-EAS443:3:75:1075:1623#0/1  
^^\_a^¥`\_b¥a^aaa\_Y\_\_`a]a`aa\_Y\_Z[\_\_\_`[VFUV  
@HWI-EAS443:3:75:1218:852#0/1  
GGGAGACCTTCACTACCTCCAGAGCAGAAATGAAAAGTGG  
+HWI-EAS443:3:75:1218:852#0/1  
aba¥ba\_\_bbabZaa`\_a`^`a]\_^aa¥[aaa^`\_\_ZRZ\_  
@HWI-EAS443:3:75:1306:780#0/1  
AAAGTGGCGAGAGCAATTGGGACAGAAATTTGAGGAAATA  
+HWI-EAS443:3:75:1306:780#0/1  
a`bbSa^bbaXHSY¥a]TUZbZX[OSa`^aYNTaa¥\_¥\_`  
@HWI-EAS443:3:75:1310:576#0/1  
GCCACTTTTCATTTCTGCTCTGGAGGTAGTGAAGTCTCC  
+HWI-EAS443:3:75:1310:576#0/1  
abb¥¥bbba`ab`]bbabbabbaab`ba\_a^aba]Z\_Xa  
@HWI-EAS443:3:75:132:1622#0/1  
GAAAAGTGGCGAGAGCAATTGGGACAGAAATTTGAGGAAA  
+HWI-EAS443:3:75:132:1622#0/1  
¥^N\_`¥X¥a`]\_J^`^a^bb[ZZ^baaa`aadU`^`\_`a  
@HWI-EAS443:3:75:1392:1869#0/1  
CTTCACTACCTCCAGAGCAGAAATGAAAAGTGGCGAGAGC  
+HWI-EAS443:3:75:1392:1869#0/1  
abbba`b`bbaUabbb`M`aaab\_aa\_b`b`babaYW`a  
@HWI-EAS443:3:75:1434:955#0/1  
CCCAATTGCTCTCGCCACTTTTCATTTCTGCTCTGGAGGT  
+HWI-EAS443:3:75:1434:955#0/1  
Zbabbbbbbabbaabb\_abbbbb`bbbaabbbbbbaabb`  
@HWI-EAS443:3:75:1576:102#0/1  
TTCACCTACCTCCAGAGCAGAAATGAAAAGTGGCGAGAGCA  
+HWI-EAS443:3:75:1576:102#0/1  
ab`b[bb`aaaabbabSab`aabbba``b\_aa\_a\_a^a¥^  
@HWI-EAS443:3:75:1643:1474#0/1  
GAGACCTTCACTACCTCCAGAGCAGAAATGAAAAGTGGCG  
+HWI-EAS443:3:75:1643:1474#0/1  
`]a\_`S\_a`0`abU^[S[V\_[]^b\_[baba`\_baUb\_X`  
@HWI-EAS443:3:75:188:947#0/1  
GCCACTTTTCATTTCTGCTCTGGAGGTAGTGAAGTCTCC  
+HWI-EAS443:3:75:188:947#0/1  
a]]IPXU¥`XWTaa]¥`aaaaa][UVNBBBBBBBBBBBBB  
@HWI-EAS443:3:75:285:406#0/1  
ACCTTCACTACCTCCAGAGCAGAAATGAAAAGTGGCGAGA  
+HWI-EAS443:3:75:285:406#0/1  
ab]¥\_]`[aa^aa`\_]`\_`a]`\_\_V\_\_\_\_\_`^`V\_]`\_UY]  
@HWI-EAS443:3:75:316:1406#0/1  
CCTTCACTACCTCCAGAGCAGAAATGAAAAGTGGCGAGAG

+HWI-EAS443:3:75:316:1406#0/1  
\_bbbbbb`baaV]aababa[baabbbabbM¥aaba^ba[X  
@HWI-EAS443:3:75:447:1307#0/1  
CCTTCACTACCTCCAGAGCAGAAATGAAAAGTGGCGAGAG  
+HWI-EAS443:3:75:447:1307#0/1  
`\_a\_`b`baaa`\_\_aa`aaaa\_```aa`a\_^`[\_\_\_]X¥¥  
@HWI-EAS443:3:75:478:1998#0/1  
CAGAAATGAAAAGTGGCGAGAGCAATTGGGACAGAAATTT  
+HWI-EAS443:3:75:478:1998#0/1  
abaabaaabaaba[babaa\_Y`aa^ab¥\_aaab\_babaaa  
@HWI-EAS443:3:75:619:199#0/1  
AGCCGATCAAGGAATGGGCATCACCCAATCCATTGTCTG  
+HWI-EAS443:3:75:619:199#0/1  
a`aba`aaaa]^`\_\_\_\_a[a¥\_\_RK[aZ`Z[¥\_]\_¥X\_W  
@HWI-EAS443:3:75:624:909#0/1  
ATGGGAGACCTTCACTACCTCCAGAGCAGAAATGAAAAGT  
+HWI-EAS443:3:75:624:909#0/1  
a]a\_WZZ^^aYaaa`\_a]\_[`][\_ZQ\_] [XS¥U``¥U¥aW  
@HWI-EAS443:3:75:627:523#0/1  
CAAATTTCTGTCCCAATTGCTCTCGCCACTTTTCATTTCT  
+HWI-EAS443:3:75:627:523#0/1  
UZXQ\_^\_aa\_]Z¥RHZZ¥W\_]T^Z][\_``]a\_\_]¥U\_\_aP  
@HWI-EAS443:3:75:885:1024#0/1  
CACCTTATTTCTCAAATTTCTGTCCCAATTGCTCTCGCC  
+HWI-EAS443:3:75:885:1024#0/1  
`\_]\_bb\_¥`b\_``aa\_¥`aa`\_]¥]``aa^```a`\_`aa  
@HWI-EAS443:3:76:1175:106#0/1  
CTTCACTACCTCCAGAGCAGAAATGAAAAGTGGCGAGAGC  
+HWI-EAS443:3:76:1175:106#0/1  
abbbbbbb`aba`baabaabababbaa`ab\_bbab`a^a[  
@HWI-EAS443:3:76:1419:969#0/1  
GCCACTTTTCATTTCTGCTCTGGAGGTAGTGAAGGTCTCC  
+HWI-EAS443:3:76:1419:969#0/1  
a\_^RZaaaaY[\_a`^`]\_\_[\_a\_V]\_W][RSSV\_SHTWLW  
@HWI-EAS443:3:76:180:1486#0/1  
CACTACCTCCAGAGCAGAAATGAAAAGTGGCGAGAGCAAT  
+HWI-EAS443:3:76:180:1486#0/1  
ababbbb`babaa^abaa`ba`b`\_XL¥Ya`\_\_\_\_S\_\_\_\_  
@HWI-EAS443:3:76:202:160#0/1  
TTCCTACTACCTCCAGAGCAGAAATGAAAAGTGGCGAGAGCA  
+HWI-EAS443:3:76:202:160#0/1  
W]aWUZ\_X`aa]¥^NOR[\_XKF¥]ZRGRTDVY[U¥RRQLQ  
@HWI-EAS443:3:76:400:1412#0/1  
CCTTCACTACCTCCAGAGCAGAAATGAAAAGTGGCGAGAG  
+HWI-EAS443:3:76:400:1412#0/1  
a\_YY^a\_XM`a]^ [¥WNV]VXTXZ\_\_^\_]VPPPXW[BBB  
@HWI-EAS443:3:76:593:1984#0/1  
ATGGGAGACCTTCACTACCTCCAGAGCAGAAATGAAAAGT  
+HWI-EAS443:3:76:593:1984#0/1  
aaa]\_aa`aa`Vaa`\_a\_a¥aaa\_XY[[\_`^a\_^\_\_\_\_T



@HWI-EAS443:3:76:690:1559#0/1  
AATTGCTCTCGCCACTTTTCATTTCTGCTCTGGAGGTAGT  
+HWI-EAS443:3:76:690:1559#0/1  
\_`^R\_bb[^\_]Y¥Zaaa`Za^]a]b]V\_[\_^Z^G`]S  
@HWI-EAS443:3:76:970:1714#0/1  
GGGAGACCTTCACTACCTCCAGAGCAGAAATGAAAAGTGG  
+HWI-EAS443:3:76:970:1714#0/1  
a^[Q\_^\_Y`a¥a`a\_\_\_VU^M^\_¥\_\_¥]^Z]¥^[\_NTW  
@HWI-EAS443:3:77:1097:1266#0/1  
GTCCCAATTGCTCTCGCCACTTTTCATTTCTGCTCTGGAG  
+HWI-EAS443:3:77:1097:1266#0/1  
]W`aaaab`aaaaaaaa[\_aaaaa\_a`a```aa`aa¥a  
@HWI-EAS443:3:77:1215:1485#0/1  
GACCTTCACTACCTCCAGAGCAGAAATGAAAAGTGGCGAG  
+HWI-EAS443:3:77:1215:1485#0/1  
ab`]aaaa`aa]S`]ab`\_]\_a\_Y^aa\_a]\_`Va\_V\_Z\_  
@HWI-EAS443:3:77:1255:1104#0/1  
CTCCAGAGCAGAAATGAAAAGTGGCGAGAGCAATTGGGAC  
+HWI-EAS443:3:77:1255:1104#0/1  
abaa```aaaba\_abbbabab]ba\_aaaXa\_\_`aaa\_a\_¥  
@HWI-EAS443:3:77:143:296#0/1  
AATGGATTGGGTGATGCCCCATTCCTTGATCGGCTCCGCC  
+HWI-EAS443:3:77:143:296#0/1  
a`aaa\_]\_\_\_aQa^Ua\_aaa[^`\_a`\_]\_\_\_\_Z¥^¥S¥  
@HWI-EAS443:3:77:1560:634#0/1  
AGACCTTCACTACCTCCAGAGCAGAAATGAAAAGTGGCGA  
+HWI-EAS443:3:77:1560:634#0/1  
`aa\_aaa`aaaa]Z[^YaaYaabY`\_aba¥\_aa]aaQa`  
@HWI-EAS443:3:77:1699:826#0/1  
CTTCACTACCTCCAGAGCAGAAATGAAAAGTGGCGAGAGC  
+HWI-EAS443:3:77:1699:826#0/1  
`¥YbbaaZ¥[abbbb]Zb]abba]b`\_0¥a]ba]TVI  
@HWI-EAS443:3:77:238:1589#0/1  
CTTCACTACCTCCAGAGCAGAAATGAAAAGTGGCGAGAGC  
+HWI-EAS443:3:77:238:1589#0/1  
ab`bbaba`\_\_a\_¥^`]`]W^baa`U\_\_YaG^Ta\_\_\_X¥U  
@HWI-EAS443:3:77:248:723#0/1  
GGGAGACCTTCACTACCTCCAGAGCAGAAATGAAAAGTGG  
+HWI-EAS443:3:77:248:723#0/1  
`a¥QTY^¥^`\_aa`¥^U^``[[P^^UVMWV[\_VYNN^Ra[  
@HWI-EAS443:3:77:272:128#0/1  
CTCCAGAGCAGAAATGAAAAGTGGCGAGAGCAATTGGGAC  
+HWI-EAS443:3:77:272:128#0/1  
`ba^aa\_bb`a\_\_\_aa\_a]aa^b^aa`\_H\_XZ]IYaa\_[G  
@HWI-EAS443:3:77:484:753#0/1  
CCTTCACTACCTCCAGAGCAGAAATGAAAAGTGGCGAGAG  
+HWI-EAS443:3:77:484:753#0/1  
abba\_b```aaab`]baaa^`a]¥aaaa\_^]aaa\_\_^P\_  
@HWI-EAS443:3:77:575:1646#0/1  
GACCTTCACTACCTCCAGAGCAGAAATGAAAAGTGGCGAG

+HWI-EAS443:3:77:575:1646#0/1  
abbaabbbbbbababbaaa`aaaa`aaa]aa`Ya`a\_a`  
@HWI-EAS443:3:77:678:1277#0/1  
ATGAAAAGTGGCGAGAGCAATTGGGACAGAAATTTGAGGA  
+HWI-EAS443:3:77:678:1277#0/1  
aa``Y¥¥^a^baa\_¥)`¥aaa`[`aaaa]aaaa[]\_\_  
@HWI-EAS443:3:77:725:413#0/1  
CTTCACTACCTCCAGAGCAGAAATGAAAAGTGGCGAGAGC  
+HWI-EAS443:3:77:725:413#0/1  
`b^aa`aa`aaa`a][^`aZ\_]aa^[^YaS\_`\_\_^\_V`Z  
@HWI-EAS443:3:77:799:110#0/1  
TACCTCCAGAGCAGAAATGAAAAGTGGCGAGAGCAATTGG  
+HWI-EAS443:3:77:799:110#0/1  
aa]aabbab`ba`baa`bb\_\_a`a^a\_aa¥a[a]a^`\_a  
@HWI-EAS443:3:77:885:1241#0/1  
CAAATTTCTGTCCCAATTGCTCTCGCCACTTTTCATTTCT  
+HWI-EAS443:3:77:885:1241#0/1  
¥X]V\_aa`a\_¥baa^Y[¥aaaaaa][V\_\_[]\_NU`\_aa\_  
@HWI-EAS443:3:78:1104:15#0/1  
GACCTTCACTACCTCCAGAGCAGAAATGAAAAGTGGCGAG  
+HWI-EAS443:3:78:1104:15#0/1  
¥P]UQ¥\_a^YX\_\_X\_[aY¥UYa¥VZ¥aYZ]^aU]`WaV^  
@HWI-EAS443:3:78:1111:896#0/1  
TCCCAATTGCTCTCGCCACTTTTCATTTCTGCTCTGGAGG  
+HWI-EAS443:3:78:1111:896#0/1  
aXaVU[UX`]^Q^Z[Z[UX\_`\_¥U`^¥QV]\_W^WUU^]W  
@HWI-EAS443:3:78:1333:363#0/1  
CGATCAAGGAATGGGGCATCACCCAATCCATTGTCTGCAA  
+HWI-EAS443:3:78:1333:363#0/1  
`bbbaabbbbabbb`bb`a\_]\_aabQ¥ab\_a\_Y\_bNaa  
@HWI-EAS443:3:78:1724:1517#0/1  
ATTGGGTGATGCCCCATTTCCTTGATCGGCTCCGCCGAGAT  
+HWI-EAS443:3:78:1724:1517#0/1  
a\_a¥V\_UaaaaY]^`a`[]\_]\_`¥\_\_T¥¥Q¥¥W]SYQU  
@HWI-EAS443:3:78:1725:742#0/1  
CTTCACTACCTCCAGAGCAGAAATGAAAAGTGGCGAGAGC  
+HWI-EAS443:3:78:1725:742#0/1  
\_[¥\_WXOXYHV\_P\_¥U\_X^¥)`\_`Z]\_`\_`XW\_\_Y[TL  
@HWI-EAS443:3:78:199:1914#0/1  
ATGGGAGACCTTCACTACCTCCAGAGCAGAAATGAAAAGT  
+HWI-EAS443:3:78:199:1914#0/1  
abbbZaabab`aaa]R][^a``X\_\_`^U¥`\_\_X¥¥]W  
@HWI-EAS443:3:78:240:1148#0/1  
AAATGAAAAGTGGCGAGAGCAATTGGGACAGAAATTTGAG  
+HWI-EAS443:3:78:240:1148#0/1  
^Y¥a]baa`¥¥`a\_aa\_\_a\_a]a`aa\_]a^]Z]a\_aXZ`  
@HWI-EAS443:3:78:84:999#0/1  
GAGACCTTCACTACCTCCAGAGCAGAAATGAAAAGTGGCG  
+HWI-EAS443:3:78:84:999#0/1  
¥U\_X\_ba]aZ`]a\_`\_a`¥][aaaa\_V]``[``\_aRX[[[

@HWI-EAS443:3:78:913:85#0/1  
CTCGCCACTTTTCATTTCTGCTCTGGAGGTAGTGAAGGTC  
+HWI-EAS443:3:78:913:85#0/1  
ababaaaabbab\_abababb^a^aba`ab0`a[a]¥`aHW  
@HWI-EAS443:3:78:960:1380#0/1  
GCCACTTTTCATTTCTGCTCTGGAGGTAGTGAAGGTCTCC  
+HWI-EAS443:3:78:960:1380#0/1  
abababbbaabbaaaba\_aaaa\_aa^a`M¥[`VZGU^U]  
@HWI-EAS443:3:79:1035:1343#0/1  
CAAGCTTTCAGGTAGACTGTTTCCTTTGGCATATCCGCAA  
+HWI-EAS443:3:79:1035:1343#0/1  
^ababbbbab`¥`bbbbababbabbbba`babb  
@HWI-EAS443:3:79:1048:36#0/1  
ACCTTCACTACCTCCAGAGCAGAAATGAAAAGTGGCGAGA  
+HWI-EAS443:3:79:1048:36#0/1  
aaa\_]S\_aaS]S]Y[^ZYUU[]Z\_^`\_]\_Y\_`QX¥]^]\_R  
@HWI-EAS443:3:79:1205:2038#0/1  
CAGAAATGAAAAGTGGCGAGAGCAATTGGGACAGAAATTT  
+HWI-EAS443:3:79:1205:2038#0/1  
^X`a¥`baaaba]a^`]a`Z\_aX[\_aaNLaQa\_\_\_a\_  
@HWI-EAS443:3:79:163:1361#0/1  
GAGACCTTCACTACCTCCAGAGCAGAAATGAAAAGTGGCG  
+HWI-EAS443:3:79:163:1361#0/1  
]Za[ab¥Yaaba\_\_a\_\_aa\_`aa]X¥S]\_^^^S\_[L[\_\_\_[  
@HWI-EAS443:3:79:21:723#0/1  
ATGGGAGACCTTCACTACCTCCAGAGCAGAAATGAAAAGT  
+HWI-EAS443:3:79:21:723#0/1  
aabaaaaH]¥`aa\_\_\_\_\_`[a\_^Y^a\_\_\_^\_]a^`^`U  
@HWI-EAS443:3:79:297:634#0/1  
ACCTTCACTACCTCCAGAGCAGAAATGAAAAGTGGCGAGA  
+HWI-EAS443:3:79:297:634#0/1  
aab`aa[^`R¥`\_`\_\_][J][P\_SSZ``¥P[\_`X\_\_]a\_^R  
@HWI-EAS443:3:79:394:1695#0/1  
GAGACCTTCACTACCTCCAGAGCAGAAATGAAAAGTGGCG  
+HWI-EAS443:3:79:394:1695#0/1  
]Z`bbaaaabbabababa]UR]\_aa[¥^]aa¥]ZZ[]OX\_  
@HWI-EAS443:3:79:596:1929#0/1  
GCAGAAATGAAAAGTGGCGAGAGCAATTGGGACAGAAATT  
+HWI-EAS443:3:79:596:1929#0/1  
^ba^a`^a¥abbbW\_ZaZaS]]\_XZ]aYZPY^a``[a`a  
@HWI-EAS443:3:79:602:1398#0/1  
GAAAAGTGGCGAGAGCAATTGGGACAGAAATTTGAGGAAA  
+HWI-EAS443:3:79:602:1398#0/1  
aaa^^]R\_]a^¥^^Z]Ta\_`[]`\_aaa^\_`\_\_[ZX^]^]  
@HWI-EAS443:3:79:657:644#0/1  
CCACCTTATTTCTCAAATTTCTGTCCCAATTGCTCTCGC  
+HWI-EAS443:3:79:657:644#0/1  
abaabbaabbaaabbbabbbab`[\_aaaa`\_a`babaaa  
@HWI-EAS443:3:79:667:1557#0/1  
GGGAGACCTTCACTACCTCCAGAGCAGAAATGAAAAGTGG

+HWI-EAS443:3:79:667:1557#0/1  
aa¥ba[bb`abbab`aaaa\_aa`\_aa`^aaaa`aa]\_`  
@HWI-EAS443:3:79:703:1236#0/1  
GACCTTCACTACCTCCAGAGCAGAAATGAAAAGTGGCGAG  
+HWI-EAS443:3:79:703:1236#0/1  
aaabaabaaabaaaaaaaaa``\_aaaaa``]`^`a\_`  
@HWI-EAS443:3:7:1018:1853#0/1  
CTCGGCGGAGCCGATCAAGGAATGGGGCATCACCCAATCC  
+HWI-EAS443:3:7:1018:1853#0/1  
^b`bbabbaa\_X`b¥X¥bab]aa]a]aZ`]0\_ZS^bb]]U  
@HWI-EAS443:3:7:149:763#0/1  
CCTTCACTACCTCCAGAGCAGAAATGAAAAGTGGCGAGAG  
+HWI-EAS443:3:7:149:763#0/1  
Nab¥Y\_aa\_b]aababab]`[\_`\_M\_bb\_^\_aaababa`¥b  
@HWI-EAS443:3:7:1707:1833#0/1  
CAGAAATGAAAAGTGGCGAGAGCAATTGGGACAGAAATTT  
+HWI-EAS443:3:7:1707:1833#0/1  
XXb\_\_`^V[a¥^a0bb^ba\_[NHS`Z[a[bS¥\_`¥\_\_¥\_a  
@HWI-EAS443:3:7:1717:428#0/1  
AGAAATGAAAAGTGGCGAGAGCAATTGGGACAGAAATTTG  
+HWI-EAS443:3:7:1717:428#0/1  
a`¥ab``aaa`b`ba\_a\_a^aS`^a`a\_RVa\_\_Z[a\_\_a  
@HWI-EAS443:3:7:231:176#0/1  
GCAGAAATGAAAAGTGGCGAGAGCAATTGGGACAGAAATT  
+HWI-EAS443:3:7:231:176#0/1  
aa^¥\_\_\_aa\_Y^X`V\_`[^W¥L[KN[YUY^]VUTWV]VSB  
@HWI-EAS443:3:7:350:124#0/1  
GCAGAAATGAAAAGTGGCGAGAGCAATTGGGACAGAAATT  
+HWI-EAS443:3:7:350:124#0/1  
a`b\_]\_b\_a\_]`^`a^aZa^\_ZZW]\_\_\_`YY¥\_R^X]]  
@HWI-EAS443:3:7:611:93#0/1  
GGAGACCTTCACTACCTCCAGAGCAGAAATGAAAAGTGGC  
+HWI-EAS443:3:7:611:93#0/1  
ab¥a`[]a`\_`Y]\_V[\_^YT¥RPUU`NUUV¥S^URUPRYU  
@HWI-EAS443:3:7:62:1309#0/1  
CACCTTATTTCTCAAATTTCTGTCCCAATTGCTCTCGCC  
+HWI-EAS443:3:7:62:1309#0/1  
ababaabbaaabba^bbaabaabaaaaaabbaa`\_a  
@HWI-EAS443:3:7:655:771#0/1  
CACTACCTCCAGAGCAGAAATGAAAAGTGGCGAGAGCAAT  
+HWI-EAS443:3:7:655:771#0/1  
\_abb¥Z]bb\_^\_ab`b\_aabaab]b[bbab`a¥a][a\_  
@HWI-EAS443:3:7:67:638#0/1  
GGATTGGGTGATGCCCCATTCTTGATCGGCTCCGCCGAG  
+HWI-EAS443:3:7:67:638#0/1  
``[\_Z\_Y\_^`R]ZUWUZx^`]^`a^Xa^aXY`YWBBBBB  
@HWI-EAS443:3:7:756:1992#0/1  
CCAGAGCAGAAATGAAAAGTGGCGAGAGCAATTGGGACAG  
+HWI-EAS443:3:7:756:1992#0/1  
`ba[0aLTVG`a^Yaa^\_aSbUQa^[\_MFYZX\_G\_\_^]a^

@HWI-EAS443:3:7:966:1925#0/1  
GACCTTACTACCTCCAGAGCAGAAATGAAAAGTGGCGAG  
+HWI-EAS443:3:7:966:1925#0/1  
aa\_a00Za]`a][\_\_[]`^^]\_XW^Y^]]^\_U\_U^XBBBB  
@HWI-EAS443:3:7:981:389#0/1  
CCTTACTACCTCCAGAGCAGAAATGAAAAGTGGCGAGAG  
+HWI-EAS443:3:7:981:389#0/1  
aaaba^]b[`Z`P\_aaQ\_aa]]`^aa^\_[ZaNaa]a\_[Ya  
@HWI-EAS443:3:80:1026:160#0/1  
GAGACCTTACTACCTCCAGAGCAGAAATGAAAAGTGGCG  
+HWI-EAS443:3:80:1026:160#0/1  
^^\_W0\_abbPbaXR`a\_^X¥b\_Y^R\_\_`¥\_¥ZUaNa[Va  
@HWI-EAS443:3:80:1089:1114#0/1  
GAGACCTTACTACCTCCAGAGCAGAAATGAAAAGTGGCG  
+HWI-EAS443:3:80:1089:1114#0/1  
a¥baaaaaab\_\_\_a\_\_\_`a^`a\_aa``[Q\_a`\_^]\_`U`]X^  
@HWI-EAS443:3:80:1140:1239#0/1  
TCTCGCCACTTTTCATTTCTGCTCTGGAGGTAGTGAAGGT  
+HWI-EAS443:3:80:1140:1239#0/1  
`abaaaa`abbba\_bbba\_aaaaZ\_aY\_aa]a\_Z`\_]T^M  
@HWI-EAS443:3:80:1161:555#0/1  
ATTGCTCTCGCCACTTTTCATTTCTGCTCTGGAGGTAGTG  
+HWI-EAS443:3:80:1161:555#0/1  
a\_S¥UaX^`\_[¥VPaba`]a]baJ\_`X^aaa`P\_VZJ\_G^  
@HWI-EAS443:3:80:1210:491#0/1  
AGACAATGGATTGGGTGATGCCCCATTCCTTGATCGGCTC  
+HWI-EAS443:3:80:1210:491#0/1  
Zbb`bbZK`a`\_¥S¥MR¥XG¥\_a\_Xa```^¥aXT]\_\_\_V¥  
@HWI-EAS443:3:80:1414:865#0/1  
CTTACTACCTCCAGAGCAGAAATGAAAAGTGGCGAGAGC  
+HWI-EAS443:3:80:1414:865#0/1  
aaaab`aa`aaa`ab\_a]]a¥a`aaa]\_\_aXaa]bW`^`M  
@HWI-EAS443:3:80:1424:1409#0/1  
GTCCCAATTGCTCTCGCCACTTTTCATTTCTGCTCTGGAG  
+HWI-EAS443:3:80:1424:1409#0/1  
`X]^^[WU`UTTP[Va\_NZ\_`\_UYXUV[ZW[\_V\_U[]\_W\_  
@HWI-EAS443:3:80:1531:824#0/1  
CAGAAATGAAAAGTGGCGAGAGCAATTGGGACAGAAATTT  
+HWI-EAS443:3:80:1531:824#0/1  
a]`U\_bbbaa]]b`bb`b\_[T\_[]`YN¥a``S^`Y`\_\_\_a]  
@HWI-EAS443:3:80:1740:892#0/1  
CTTACTACCTCCAGAGCAGAAATGAAAAGTGGCGAGAGC  
+HWI-EAS443:3:80:1740:892#0/1  
abbab`bbaaba`abaaaaaa`abaaaaaa\_[`aba\_\_\_[  
@HWI-EAS443:3:80:20:1558#0/1  
GAGACCTTACTACCTCCAGAGCAGAAATGAAAAGTGGCG  
+HWI-EAS443:3:80:20:1558#0/1  
\_ZY^^¥^b``aa¥¥¥Z`]QVTabaV``\_aaa\_]`aUa^`\_  
@HWI-EAS443:3:80:444:15#0/1  
GTCCCAATTGCTCTCGCCACTTTTCATTTCTGCTCTGGAG

+HWI-EAS443:3:80:444:15#0/1  
a\_a\_`\_`\_`a`\_\_\_\_[`^[]Z^\_\_\_\_U^¥¥\_¥\_`¥^Z^\_¥W]  
@HWI-EAS443:3:80:731:215#0/1  
GAGACCTTCACTACCTCCAGAGCAGAAATGAAAAGTGGCG  
+HWI-EAS443:3:80:731:215#0/1  
\_[\_a[]``aaa\_aW¥a]\_a¥[a\_`a\_]\_a`\_\_\_\_\_`Va[[^  
@HWI-EAS443:3:80:736:77#0/1  
GGGAGACCTTCACTACCTCCAGAGCAGAAATGAAAAGTGG  
+HWI-EAS443:3:80:736:77#0/1  
aa¥G`¥\_\_aaaa`\_`¥\_\_\_S\_a\_\_V[\_a¥a`U[\_Z^Wa[  
@HWI-EAS443:3:80:762:1170#0/1  
AATGGATTGGGTGATGCCCCATTCCTTGATCGGCTCCGCC  
+HWI-EAS443:3:80:762:1170#0/1  
aabaaaa^TYVY[\_^\_aab\_^`aaaab[\_`a\_]^^ZO[R  
@HWI-EAS443:3:80:932:1481#0/1  
GAAAAGTGGCGAGAGCAATTGGGACAGAAATTTGAGGAAA  
+HWI-EAS443:3:80:932:1481#0/1  
G]`aba\_`\_`\_^`ZS\_¥abb`\_`¥`a]aa^a`a`b` `[a]`¥  
@HWI-EAS443:3:80:966:964#0/1  
CTCCAGAGCAGAAATGAAAAGTGGCGAGAGCAATTGGGAC  
+HWI-EAS443:3:80:966:964#0/1  
aba[a]Va`\_`\_`Z]\_\_bMY`Y]]TT¥VaYYJYRY`V]\_^  
@HWI-EAS443:3:80:968:1244#0/1  
TGGGAGACCTTCACTACCTCCAGAGCAGAAATGAAAAGTG  
+HWI-EAS443:3:80:968:1244#0/1  
a\_`a\_a^a\_`\_`a^\_aa\_a`^]`\_a^\_a]V¥a`\_`^^[T\_  
@HWI-EAS443:3:81:1125:1137#0/1  
ATGAAAAGTGGCGAGAGCAATTGGGACAGAAATTTGAGGA  
+HWI-EAS443:3:81:1125:1137#0/1  
\_ba¥aaa`\_aab`\_b\_^¥[^Y`YaaY[[\_\_^¥aa`aZ]a^  
@HWI-EAS443:3:81:1308:751#0/1  
GAGACCTTCACTACCTCCAGAGCAGAAATGAAAAGTGGCG  
+HWI-EAS443:3:81:1308:751#0/1  
aZ`\_`\_`aaa\_^ab\_\_^aI`\_a\_a\_aa\_a`aba\_a`a`a¥U`  
@HWI-EAS443:3:81:1454:855#0/1  
GAAAAGTGGCGAGAGCAATTGGGACAGAAATTTGAGGAAA  
+HWI-EAS443:3:81:1454:855#0/1  
a\_`\_]a\_a`\_W[\_W\_YSQ\_\_\_\_\_]GX^\_`\_`¥^aSS¥`ZOW  
@HWI-EAS443:3:81:1465:466#0/1  
GAGACCTTCACTACCTCCAGAGCAGAAATGAAAAGTGGCG  
+HWI-EAS443:3:81:1465:466#0/1  
aUUVZGQ`\_b^VaUOSHLZZO\_NS\_`GU]J[\_S\_aYPNTU  
@HWI-EAS443:3:81:1506:1951#0/1  
GAGACCTTCACTACCTCCAGAGCAGAAATGAAAAGTGGCG  
+HWI-EAS443:3:81:1506:1951#0/1  
a^`\_[\_U\_`aQa\_G\_`YWN^Wa\_] ^US¥Z\_\_¥\_BBBBBB  
@HWI-EAS443:3:81:1650:235#0/1  
GTGGCGAGAGCAATTGGGACAGAAATTTGAGGAAATAAGG  
+HWI-EAS443:3:81:1650:235#0/1  
```b\_\_\_bZa[\_aaabbb^\_ab`\_`\_baba^aa\_]`a\_\_aa

@HWI-EAS443:3:81:239:700#0/1  
GGAGACCTTCACTACCTCCAGAGCAGAAATGAAAAGTGGC  
+HWI-EAS443:3:81:239:700#0/1  
a^[aZ^X]]¥a\_\_`\_`\_[VFU`XX[TZ]^^[JYNJQ]  
@HWI-EAS443:3:81:308:192#0/1  
ACCTTCACTACCTCCAGAGCAGAAATGAAAAGTGGCGAGA  
+HWI-EAS443:3:81:308:192#0/1  
aa¥ZZa^aba]\_Z```a]Z\_X`^¥`a^`^`V`Z^^[aZFR  
@HWI-EAS443:3:81:312:681#0/1  
GGGAGACCTTCACTACCTCCAGAGCAGAAATGAAAAGTGG  
+HWI-EAS443:3:81:312:681#0/1  
¥N]^^[\_`\_]^[^[\_ZZY\_a]ZQ\_Z¥^W¥¥^¥UYZRRU¥U  
@HWI-EAS443:3:81:417:1290#0/1  
CTTCACTACCTCCAGAGCAGAAATGAAAAGTGGCGAGAGC  
+HWI-EAS443:3:81:417:1290#0/1  
ababaaa¥aaabbabVaa`b)`aa`aaaa]^a^aa``[\_V  
@HWI-EAS443:3:81:471:706#0/1  
GTCCCAATTGCTCTCGCCACTTTTCATTTCTGCTCTGGAG  
+HWI-EAS443:3:81:471:706#0/1  
]Zaa`ZXZ`]\_\_`\_bba`¥`\_`aaba\_\_\_a\_¥VZ``)`N¥R  
@HWI-EAS443:3:81:49:201#0/1  
AGCCACCTTATTTCTCAAATTTCTGTCCCAATTGCTCTC  
+HWI-EAS443:3:81:49:201#0/1  
aa`aaaaaaaaab`aaa`aaaaaaaa\_\_a\_\_R\_^`\_\_\_^\_  
@HWI-EAS443:3:81:714:312#0/1  
CTCCAGAGCAGAAATGAAAAGTGGCGAGAGCAATTGGGAC  
+HWI-EAS443:3:81:714:312#0/1  
`bababaabbbababa[baab]baabaa¥b``aaaa\_^`  
@HWI-EAS443:3:81:786:623#0/1  
CAGAAATGAAAAGTGGCGAGAGCAATTGGGACAGAAATTT  
+HWI-EAS443:3:81:786:623#0/1  
a`¥Q¥\_`^a]^¥P¥[``^`¥V\_N`a]T¥WU`^¥Waa\_^Z]Y\_  
@HWI-EAS443:3:82:1000:89#0/1  
CTTCACTACCTCCAGAGCAGAAATGAAAAGTGGCGAGAGC  
+HWI-EAS443:3:82:1000:89#0/1  
abbbbbbaabbaab][[aa^0Yabbaa^^^Q]bab`[I[Y  
@HWI-EAS443:3:82:1141:563#0/1  
AGCCGATCAAGGAATGGGGCATCACCCAATCCATTGTCTG  
+HWI-EAS443:3:82:1141:563#0/1  
`\_`[a`¥\_`^]b``^VRZZZ^¥Xa^]aYV\_LUWVPYJMSX  
@HWI-EAS443:3:82:1171:444#0/1  
CCTTCACTACCTCCAGAGCAGAAATGAAAAGTGGCGAGAG  
+HWI-EAS443:3:82:1171:444#0/1  
`ababaaaaaab``a]\_a``aaaaaa]aa`a\_aa\_a`]]a  
@HWI-EAS443:3:82:1347:1571#0/1  
GGCGAGAGCAATTGGGACAGAAATTTGAGGAAATAAGGTG  
+HWI-EAS443:3:82:1347:1571#0/1  
a¥]^\_T^HYZV¥¥N\_Z[\_VZ]OZVX`Q`[`T]^GHZUM]  
@HWI-EAS443:3:82:1382:899#0/1  
GAGACCTTCACTACCTCCAGAGCAGAAATGAAAAGTGGCG

+HWI-EAS443:3:82:1382:899#0/1  
abba^Xabab\_Zba`baYaa`baabababbbaaab^a\_\_a  
@HWI-EAS443:3:82:1423:20#0/1  
TGAAAAGTGGCGAGAGCAATTGGGACAGAAATTTGAGGAA  
+HWI-EAS443:3:82:1423:20#0/1  
abaaaaaab\_]\_\_\_W[HVPYabaaRLZ\_\_^`a\_\_Z`\_OV  
@HWI-EAS443:3:82:1776:1186#0/1  
ATGGGAGACCTTCACTACCTCCAGAGCAGAAATGAAAAGT  
+HWI-EAS443:3:82:1776:1186#0/1  
ab[\_^aaaa\_b^P\_^aaa]a\_[^\_N]¥V`\_ZY^]¥a`\_\_L  
@HWI-EAS443:3:82:232:321#0/1  
GAGACCTTCACTACCTCCAGAGCAGAAATGAAAAGTGGCG  
+HWI-EAS443:3:82:232:321#0/1  
a`aZ^¥a\_a`Ta`U¥MJR[[^\_]a^^¥]NSJM[V\_YY¥  
@HWI-EAS443:3:82:307:970#0/1  
CAGAAATGAAAAGTGGCGAGAGCAATTGGGACAGAAATTT  
+HWI-EAS443:3:82:307:970#0/1  
]X]\_X\_W`^a\_P\_Ta^Z`¥[LZ[IX][T\_^\_XX¥ZEP\_\_  
@HWI-EAS443:3:82:313:1328#0/1  
ACCTTCACTACCTCCAGAGCAGAAATGAAAAGTGGCGAGA  
+HWI-EAS443:3:82:313:1328#0/1  
aabaab]aaTa\_`^a^a\_`^`\_]`\_\_\_\_\_VU^U`^^[V]  
@HWI-EAS443:3:82:342:127#0/1  
CGCCACTTTTCATTTCTGCTCTGGAGGTAGTGAAGGTCTC  
+HWI-EAS443:3:82:342:127#0/1  
abaaa`babbbabbbabab`bbaabaQa`\_\_¥^a]HHTR  
@HWI-EAS443:3:82:410:1331#0/1  
GACCTTCACTACCTCCAGAGCAGAAATGAAAAGTGGCGAG  
+HWI-EAS443:3:82:410:1331#0/1  
abaaaaa`aab\_aaaba`aaaa`aaaa¥a\_a\_]\_aaa`^  
@HWI-EAS443:3:82:508:1429#0/1  
ATGAAAAGTGGCGAGAGCAATTGGGACAGAAATTTGAGGA  
+HWI-EAS443:3:82:508:1429#0/1  
a`a¥¥¥YJ[¥W`\_]\_\_WU¥]Z\_\_V)`\_Z[\_]`a^^`¥  
@HWI-EAS443:3:82:544:1546#0/1  
AATGGATTGGGTGATGCCCCATTCCTTGATCGGCTCCGCC  
+HWI-EAS443:3:82:544:1546#0/1  
^\_bb`a\_W\_\_aRZ^aa`^b`Z`aa]a`a[ ]^aaaaVTY¥  
@HWI-EAS443:3:82:557:112#0/1  
CCTTCACTACCTCCAGAGCAGAAATGAAAAGTGGCGAGAG  
+HWI-EAS443:3:82:557:112#0/1  
`aa`]aaaa`aaa\_a[baaaaa\_aaa`aaa]aa\_aZ^)^  
@HWI-EAS443:3:82:601:1634#0/1  
GAAATGAAAAGTGGCGAGAGCAATTGGGACAGAAATTTGA  
+HWI-EAS443:3:82:601:1634#0/1  
a^YY¥Z\_U^a[RaaYa\_[Z`MN[a[X``\_`aa`[^[a\_UR  
@HWI-EAS443:3:82:629:1239#0/1  
CAAATTTCTGTCCCAATTGCTCTCGCCACTTTTCATTTCT  
+HWI-EAS443:3:82:629:1239#0/1  
a[RQU]aa\_`VP][U\_^P[SSa¥a]^a^\_^\_^SaaTSUY]



@HWI-EAS443:3:82:664:198#0/1  
CACCTTATTTCTCAAATTTCTGTCCCAATTGCTCTCGCC  
+HWI-EAS443:3:82:664:198#0/1  
`¥Y`ba`b\_b]\_`^`U```a`aba`b``aabbaa`ba\_aa  
@HWI-EAS443:3:82:702:1228#0/1  
GACCTTCACTACCTCCAGAGCAGAAATGAAAAGTGGCGAG  
+HWI-EAS443:3:82:702:1228#0/1  
aaabbaabba`\_^a\_]\_b``]a^¥^¥a`aaaa\_a\_]a\_a  
@HWI-EAS443:3:82:734:1624#0/1  
CACTACCTCCAGAGCAGAAATGAAAAGTGGCGAGAGCAAT  
+HWI-EAS443:3:82:734:1624#0/1  
ab^`bb`babab```\_a¥abaaa\_\_bWIWaa\_R\_]`TVRU  
@HWI-EAS443:3:82:883:1886#0/1  
GAAATGAAAAGTGGCGAGAGCAATTGGGACAGAAATTTGA  
+HWI-EAS443:3:82:883:1886#0/1  
`^babbb\_\_`¥R`bbabaa^^]aab^>[]bba`baaba^a  
@HWI-EAS443:3:83:1206:763#0/1  
GGGAGACCTTCACTACCTCCAGAGCAGAAATGAAAAGTGG  
+HWI-EAS443:3:83:1206:763#0/1  
a`]aaaaabaaa`a`aa\_\_a\_a\_]\_\_`aa]\_\_\_\_`[a\_  
@HWI-EAS443:3:83:124:1295#0/1  
CAGAAATGAAAAGTGGCGAGAGCAATTGGGACAGAAATTT  
+HWI-EAS443:3:83:124:1295#0/1  
abb`abb\_a`aa^Za\_a^a`\_\_Xa\_`WY\_]\_]\_PaZ]^`  
@HWI-EAS443:3:83:127:675#0/1  
GAGACCTTCACTACCTCCAGAGCAGAAATGAAAAGTGGCG  
+HWI-EAS443:3:83:127:675#0/1  
¥^WW\_b¥R\_\_`¥X^aa`\_Z\_I\_a\_]\_] [FZW^¥XX¥YY`X^  
@HWI-EAS443:3:83:1296:1394#0/1  
CTGTCCCAATTGCTCTCGCCACTTTTCATTTCTGCTCTGG  
+HWI-EAS443:3:83:1296:1394#0/1  
SXWZa[`aaZ[]S\_^b\_`W¥\_bbb`bab`]abbaa^aX^a  
@HWI-EAS443:3:83:1667:186#0/1  
GGGAGACCTTCACTACCTCCAGAGCAGAAATGAAAAGTGG  
+HWI-EAS443:3:83:1667:186#0/1  
`^a\_aV¥Yba\_a[[a`\_`LRXa¥a¥^`^N¥[\_][T¥Y`V\_V  
@HWI-EAS443:3:83:224:449#0/1  
GCCACTTTTCATTTCTGCTCTGGAGGTAGTGAAGGTCTCC  
+HWI-EAS443:3:83:224:449#0/1  
ab`ababbbbabbbaabbbbaaab^bbWaa]aa]aa0¥YT`  
@HWI-EAS443:3:83:231:665#0/1  
GCAGAAATGAAAAGTGGCGAGAGCAATTGGGACAGAAATT  
+HWI-EAS443:3:83:231:665#0/1  
aaa\_TVZaa\_¥aa\_Xa\_`a\_`^^YV¥^\_``¥ZXaa^^^^\_  
@HWI-EAS443:3:83:248:1787#0/1  
GACCTTCACTACCTCCAGAGCAGAAATGAAAAGTGGCGAG  
+HWI-EAS443:3:83:248:1787#0/1  
Q\_\_b\_S\_`a\_ZabXW`[¥ababb\_bbb\_abb]¥a]baba  
@HWI-EAS443:3:83:524:1268#0/1  
CTTCACTACCTCCAGAGCAGAAATGAAAAGTGGCGAGAGC

+HWI-EAS443:3:83:524:1268#0/1  
a\_`bbb``abaaa\_QT^\_TZVZaaa¥^`\_`\_]`^¥a[¥WWI  
@HWI-EAS443:3:83:773:1879#0/1  
CCTTCACTACCTCCAGAGCAGAAATGAAAAGTGGCGAGAG  
+HWI-EAS443:3:83:773:1879#0/1  
aa`bbbbbb`aba\_aaaaaaaaaaaaaaaaa]a`^`^`^`\_  
@HWI-EAS443:3:83:798:1884#0/1  
CACTACCTCCAGAGCAGAAATGAAAAGTGGCGAGAGCAAT  
+HWI-EAS443:3:83:798:1884#0/1  
`X\_P¥\_`\_]`\_`Y`YMW^OMY)`X\_N\_Y[T[NWXZWL PDK[L  
@HWI-EAS443:3:83:866:546#0/1  
ATGGGAGACCTTCACTACCTCCAGAGCAGAAATGAAAAGT  
+HWI-EAS443:3:83:866:546#0/1  
aa]aa`b\_a`a``aaaa\_`\_`\_a[a`aa]\_\_aa\_Y\_\_aX  
@HWI-EAS443:3:83:890:1983#0/1  
TGAAAAGTGGCGAGAGCAATTGGGACAGAAATTTGAGGAA  
+HWI-EAS443:3:83:890:1983#0/1  
aYaabaa[a\_aa`\_\_\_\_\_^`W][\_]a`a`^^`^`¥\_`[Z  
@HWI-EAS443:3:83:947:1106#0/1  
CAGAAATGAAAAGTGGCGAGAGCAATTGGGACAGAAATTT  
+HWI-EAS443:3:83:947:1106#0/1  
a`baaaabaa```¥a`\_b\_\_W`^]\_aa`\_\_W`^`¥\_\_```  
@HWI-EAS443:3:84:1027:1631#0/1  
GAAAAGTGGCGAGAGCAATTGGGACAGAAATTTGAGGAAA  
+HWI-EAS443:3:84:1027:1631#0/1  
aabbbb\_ba¥bba\_`^aaaa]a`\_aba`aaaa`\_aa\_aa  
@HWI-EAS443:3:84:1121:786#0/1  
ATGGGAGACCTTCACTACCTCCAGAGCAGAAATGAAAAGT  
+HWI-EAS443:3:84:1121:786#0/1  
aaa¥a^¥aa¥X¥bbaaaaaSa`\_¥aabaaa`aa`a^Z`WaV  
@HWI-EAS443:3:84:1649:1160#0/1  
GAGACCTTCACTACCTCCAGAGCAGAAATGAAAAGTGGCG  
+HWI-EAS443:3:84:1649:1160#0/1  
\_^bb¥b`babbbba¥\_abaaaaba\_\_abbbaabab\_bbY]  
@HWI-EAS443:3:84:1759:182#0/1  
AGACCTTCACTACCTCCAGAGCAGAAATGAAAAGTGGCGA  
+HWI-EAS443:3:84:1759:182#0/1  
abaaabbaa`aba\_a\_a`a`a^`\_`\_`\_aaa`\_`\_`a^a^]a^  
@HWI-EAS443:3:84:299:417#0/1  
AGACCTTCACTACCTCCAGAGCAGAAATGAAAAGTGGCGA  
+HWI-EAS443:3:84:299:417#0/1  
Va\_abb`ab`aba\_abbbaa\_\_aa`¥aaa\_]¥`aQ`\_\_\_\_  
@HWI-EAS443:3:84:458:113#0/1  
GGGAGACCTTCACTACCTCCAGAGCAGAAATGAAAAGTGG  
+HWI-EAS443:3:84:458:113#0/1  
^baU`¥H\_\_U¥YZaYH[\_\_\_¥\_a`aaaa\_Y¥\_¥ZZ^WN\_¥  
@HWI-EAS443:3:84:650:1439#0/1  
CACTACCTCCAGAGCAGAAATGAAAAGTGGCGAGAGCAAT  
+HWI-EAS443:3:84:650:1439#0/1  
abbaaaaaab`\_`\_aaaaaa\_aaaa\_X]^`^`\_`\_`aa\_\_a`\_`\_`^

@HWI-EAS443:3:84:915:1011#0/1  
GAGACCTTCACTACCTCCAGAGCAGAAATGAAAAGTGGCG  
+HWI-EAS443:3:84:915:1011#0/1  
^S`T[`\_] ^UZa`\_S]b^X\_YU`a`V\_\_\_\_`^`^]a¥aa[a  
@HWI-EAS443:3:85:1032:1644#0/1  
CGCCACTTTTCATTTCTGCTCTGGAGGTAGTGAAGGTCTC  
+HWI-EAS443:3:85:1032:1644#0/1  
abaa\_a`aa\_aa^^ZZ^\_aa`^^aU]aNY]YZW`R\_GRUX  
@HWI-EAS443:3:85:1227:34#0/1  
TTCACCTTCCAGAGCAGAAATGAAAAGTGGCGAGAGCA  
+HWI-EAS443:3:85:1227:34#0/1  
aa\_a\_a\_^[¥\_\_^\_a^^a]^\_`a]^^]`Xa[T`^`W[UY  
@HWI-EAS443:3:85:1669:191#0/1  
CAGAGCAGAAATGAAAAGTGGCGAGAGCAATTGGGACAGA  
+HWI-EAS443:3:85:1669:191#0/1  
abbbb`abbaaaaaabb\_babbaa``]aaaa`abRZ``^  
@HWI-EAS443:3:85:1716:464#0/1  
GAGACCTTCACTACCTCCAGAGCAGAAATGAAAAGTGGCG  
+HWI-EAS443:3:85:1716:464#0/1  
\_R¥ZR\_aaQZGYXS]Y\_aTHU]J¥bGYTaaGUa^`SW\_`Y  
@HWI-EAS443:3:85:34:895#0/1  
CCTTCACTACCTCCAGAGCAGAAATGAAAAGTGGCGAGAG  
+HWI-EAS443:3:85:34:895#0/1  
ab[(`^\_)¥bb`b``\_Pa]\_\_[HIXaa`¥\_aUa\_a\_VT¥¥  
@HWI-EAS443:3:85:428:1708#0/1  
GAGACCTTCACTACCTCCAGAGCAGAAATGAAAAGTGGCG  
+HWI-EAS443:3:85:428:1708#0/1  
aaaaaa`abbbaaa\_\_aaaaZabaa\_aa`aa^¥^\_U`^`  
@HWI-EAS443:3:85:607:251#0/1  
CCCAATTGCTCTCGCCACTTTTCATTTCTGCTCTGGAGGT  
+HWI-EAS443:3:85:607:251#0/1  
aabbbaaaaaabaaa`aaaaaa`a``]a``\_\_aa\_¥``Y  
@HWI-EAS443:3:85:670:224#0/1  
GAGACCTTCACTACCTCCAGAGCAGAAATGAAAAGTGGCG  
+HWI-EAS443:3:85:670:224#0/1  
a\_a`\_a`\_a\_\_\_\_]\_\_\_\_^\_] ^W[`] ^``] ^^\_U^]]  
@HWI-EAS443:3:86:1015:253#0/1  
GAAAAGTGGCGAGAGCAATTGGGACAGAAATTTGAGGAAA  
+HWI-EAS443:3:86:1015:253#0/1  
^`b\_W` [bbab^aa`ZV\_\_ab`bR`] ^`W`abaa]a`Y\_`  
@HWI-EAS443:3:86:1052:297#0/1  
CGCCACTTTTCATTTCTGCTCTGGAGGTAGTGAAGGTCTC  
+HWI-EAS443:3:86:1052:297#0/1  
]baababbbbabbbbabbaa`a`a\_a`UaaVYa`a`OR¥R  
@HWI-EAS443:3:86:1154:414#0/1  
GGCGAGAGCAATTGGGACAGAAATTTGAGGAAATAAGGTG  
+HWI-EAS443:3:86:1154:414#0/1  
`U\_¥]]]ba^`\_aaaa\_\_aa`^^`aaa^aa]¥\_a`\_aXa  
@HWI-EAS443:3:86:1292:406#0/1  
CGCCACTTTTCATTTCTGCTCTGGAGGTAGTGAAGGTCTC



@HWI-EAS443:3:87:472:384#0/1  
GCAGAAATGAAAAGTGGCGAGAGCAATTGGGACAGAAATT  
+HWI-EAS443:3:87:472:384#0/1  
a\_P]UZL[VS^YJ]L¥[]\_[^Q^ST]S]^\_\_HQV^]UU¥S  
@HWI-EAS443:3:87:645:100#0/1  
CTCGCCACTTTTCATTTCTGCTCTGGAGGTAGTGAAGGTC  
+HWI-EAS443:3:87:645:100#0/1  
aaaaaaaaabaa\_aaaaaaaa\_aaa]a\_[]`Q^[¥\_\_PV  
@HWI-EAS443:3:87:728:1012#0/1  
GAGCAGAAATGAAAAGTGGCGAGAGCAATTGGGACAGAAA  
+HWI-EAS443:3:87:728:1012#0/1  
]OT¥\_]^^]¥\_W¥XXUTZX^aZYYZSOP¥RY¥]X[a`\_XR  
@HWI-EAS443:3:87:872:1494#0/1  
TGAAAAGTGGCGAGAGCAATTGGGACAGAAATTTGAGGAA  
+HWI-EAS443:3:87:872:1494#0/1  
ZS¥XS^[aa¥]P\_R]a[ `[XVX`^XYV` `a^Za`WO^a]\_  
@HWI-EAS443:3:87:925:218#0/1  
CTTCACTACCTCCAGAGCAGAAATGAAAAGTGGCGAGAGC  
+HWI-EAS443:3:87:925:218#0/1  
abbbbabbab`abbabaabaabbaaab`aab`a\_a\_  
@HWI-EAS443:3:88:1002:1370#0/1  
ACCTTCACTACCTCCAGAGCAGAAATGAAAAGTGGCGAGA  
+HWI-EAS443:3:88:1002:1370#0/1  
aaabaa`baaa`aabbbaa`b`\_aaa`aaaa^b\_aba`a  
@HWI-EAS443:3:88:1285:813#0/1  
GCCACTTTTCATTTCTGCTCTGGAGGTAGTGAAGGTCTCC  
+HWI-EAS443:3:88:1285:813#0/1  
ab`\_Ub` `ba`b^a^aaaa]` ` `aa]\_] ^TG¥b^RWTLJ  
@HWI-EAS443:3:88:1467:1585#0/1  
ATTGCTCTCGCCACTTTTCATTTCTGCTCTGGAGGTAGTG  
+HWI-EAS443:3:88:1467:1585#0/1  
aa`a]\_bb`a[a`X` `bb`aabaaaaH`]aaa^baQ\_aZa  
@HWI-EAS443:3:88:1539:347#0/1  
GAAAAGTGGCGAGAGCAATTGGGACAGAAATTTGAGGAAA  
+HWI-EAS443:3:88:1539:347#0/1  
aaaaaa^`aab`a^a^\_a`a\_a`¥\_a`\_\_a`\_a`Zaa]^`  
@HWI-EAS443:3:88:1666:1491#0/1  
GGCGAGAGCAATTGGGACAGAAATTTGAGGAAATAAGGTG  
+HWI-EAS443:3:88:1666:1491#0/1  
\_]YPO]Y^ZQNYa[\_LY^R^`[SZabVI[BBBBBBBBBBB  
@HWI-EAS443:3:88:1747:1097#0/1  
GGATTGGGTGATGCCCATTCCTTGATCGGCTCCGCCGAG  
+HWI-EAS443:3:88:1747:1097#0/1  
V\_[S\_bb\_aUbaYU0]b` `]`\_[bb\_^YZ^\_U\_]L[\_]T^  
@HWI-EAS443:3:88:196:967#0/1  
AAAAGTGGCGAGAGCAATTGGGACAGAAATTTGAGGAAAT  
+HWI-EAS443:3:88:196:967#0/1  
aaa\_]RY` ` \_ZLO^W[]^QX¥XX\_\_XMZ[[^]Y¥\_URZZ  
@HWI-EAS443:3:88:352:564#0/1  
CTTCACTACCTCCAGAGCAGAAATGAAAAGTGGCGAGAGC

+HWI-EAS443:3:88:352:564#0/1  
aabbabb`^a`abbT\_G[b¥aX`]S]\_a[MQabb^a`a^  
@HWI-EAS443:3:88:364:766#0/1  
ACCTTCACTACCTCCAGAGCAGAAATGAAAAGTGGCGAGA  
+HWI-EAS443:3:88:364:766#0/1  
`\_ZQ`bba`a[]\_QQ¥¥b[aL`aaaYXH]R^aa`TV[X  
@HWI-EAS443:3:88:446:1096#0/1  
CAGAGCAGAAATGAAAAGTGGCGAGAGCAATTGGGACAGA  
+HWI-EAS443:3:88:446:1096#0/1  
a\_OZaaS[¥^\_YWWbYU[^b`b`aSWTW]]a\_]Z`[\_\_aa  
@HWI-EAS443:3:88:452:701#0/1  
ATGGGAGACCTTCACTACCTCCAGAGCAGAAATGAAAAGT  
+HWI-EAS443:3:88:452:701#0/1  
aabaa^ba\_a[`ab`aZa\_\_]`\_a\_a\_\_aRVZ\_a`¥Q][F  
@HWI-EAS443:3:88:561:605#0/1  
ACTACCTCCAGAGCAGAAATGAAAAGTGGCGAGAGCAATT  
+HWI-EAS443:3:88:561:605#0/1  
a`aa`a`\_`aZa`aYV]aa^\_\_aX`\_\_`\_]`][^][SU^  
@HWI-EAS443:3:88:607:340#0/1  
GCAGAAATGAAAAGTGGCGAGAGCAATTGGGACAGAAATT  
+HWI-EAS443:3:88:607:340#0/1  
`ba\_^abbaa¥^^a\_aabaaa`^`\_a^aaa`^¥aaX`]`  
@HWI-EAS443:3:88:946:422#0/1  
GACCTTCACTACCTCCAGAGCAGAAATGAAAAGTGGCGAG  
+HWI-EAS443:3:88:946:422#0/1  
a`aaaababa\_`^aabYbaaa\_aaab\_^`ab^a`\_a`  
@HWI-EAS443:3:89:1460:868#0/1  
GGGAGACCTTCACTACCTCCAGAGCAGAAATGAAAAGTGG  
+HWI-EAS443:3:89:1460:868#0/1  
`bbaaa\_aaba`X`a`]`PFY`^¥`aaaaTq]UX]]`SGV  
@HWI-EAS443:3:89:1483:801#0/1  
GACCTTCACTACCTCCAGAGCAGAAATGAAAAGTGGCGAG  
+HWI-EAS443:3:89:1483:801#0/1  
^`Y`aaab^bbU[bb\_ab`b]ab]`bb\_[a`a\_aa\_a`a  
@HWI-EAS443:3:89:169:47#0/1  
GAAAAGTGGCGAGAGCAATTGGGACAGAAATTTGAGGAAA  
+HWI-EAS443:3:89:169:47#0/1  
a`U]aXa`\_a`ZY]Z]^`\_\_XZXa^]^[^]X`^VZZ  
@HWI-EAS443:3:89:367:1530#0/1  
GAGACCTTCACTACCTCCAGAGCAGAAATGAAAAGTGGCG  
+HWI-EAS443:3:89:367:1530#0/1  
a`¥`^`[\_ab\_Y\_a^`^`\_]L`[W\_VZ¥`¥^Y¥[TU\_UZZ  
@HWI-EAS443:3:89:495:1552#0/1  
ACCTTCACTACCTCCAGAGCAGAAATGAAAAGTGGCGAGA  
+HWI-EAS443:3:89:495:1552#0/1  
`bbbaa\_a^^aaaaabaaaaabaaaaaa`a`\_Ya`aa`\_^  
@HWI-EAS443:3:89:550:376#0/1  
CTTCACTACCTCCAGAGCAGAAATGAAAAGTGGCGAGAGC  
+HWI-EAS443:3:89:550:376#0/1  
J^aba¥`\_`¥a`U¥b`bba\_Zaab[]ZS\_aabbbba]ba

@HWI-EAS443:3:89:820:639#0/1  
GGGAGACCTTCACTACCTCCAGAGCAGAAATGAAAAGTGG  
+HWI-EAS443:3:89:820:639#0/1  
abbbbaabbababbaabba`bab`abaa`ba`aaaa]ba  
@HWI-EAS443:3:89:850:1535#0/1  
GAGACCTTCACTACCTCCAGAGCAGAAATGAAAAGTGGCG  
+HWI-EAS443:3:89:850:1535#0/1  
[YUV\_\_`\_X[bbb`¥\_aaa`a¥a\_`X`a\_]RV]¥V`>`a  
@HWI-EAS443:3:8:1177:702#0/1  
GACCTTCACTACCTCCAGAGCAGAAATGAAAAGTGGCGAG  
+HWI-EAS443:3:8:1177:702#0/1  
aa^\_aa\_a^aa\_S`¥^`\_¥\_]\_aW]¥\_\_Y^¥W\_W\_^Z¥W\_  
@HWI-EAS443:3:8:1356:262#0/1  
ATGGATTGGGTGATGCCCATTCCTTGATCGGCTCCGCCG  
+HWI-EAS443:3:8:1356:262#0/1  
``^babaR^`¥b^`XL`a]\_a\_S¥a\_WP`\_\_aP^SQZQVa  
@HWI-EAS443:3:8:151:1555#0/1  
CAATTGCTCTCGCCACTTTTCATTTCTGCTCTGGAGGTAG  
+HWI-EAS443:3:8:151:1555#0/1  
`¥`[¥]S\_aaab`\_`a]aa`a]``a`\_a`\_XW`TM^BBBB  
@HWI-EAS443:3:8:1690:392#0/1  
CCAGAGCAGAAATGAAAAGTGGCGAGAGCAATTGGGACAG  
+HWI-EAS443:3:8:1690:392#0/1  
abaaaa\_aaaaabbaaab^bb\_ba][a\_^\_\_`^aa^Xaa  
@HWI-EAS443:3:8:299:140#0/1  
GAGACCTTCACTACCTCCAGAGCAGAAATGAAAAGTGGCG  
+HWI-EAS443:3:8:299:140#0/1  
\_W\_[Ubb]\_WJ[ ]UQ]aaJ]T]]ab\_\_Wab^^[aaR\_]\_  
@HWI-EAS443:3:8:305:1064#0/1  
GCCACTTTTCATTTCTGCTCTGGAGGTAGTGAAGGTCTCC  
+HWI-EAS443:3:8:305:1064#0/1  
aaYaaaaaa]Tba`^V`aaa]\_^¥SbWW]N][VYZYPSUB  
@HWI-EAS443:3:8:510:653#0/1  
GGAGACCTTCACTACCTCCAGAGCAGAAATGAAAAGTGGC  
+HWI-EAS443:3:8:510:653#0/1  
aZP\_Xa^`[Z^a^a]X`\_\_`^]U[a[[¥^\_ZZVY\_¥`Z^  
@HWI-EAS443:3:8:805:731#0/1  
ACTACCTCCAGAGCAGAAATGAAAAGTGGCGAGAGCAATT  
+HWI-EAS443:3:8:805:731#0/1  
`b``a`Z^]`Ja¥\_aZ`\_aa[\_`\_]`Ya[Z`V[T\_Z¥^\_\_  
@HWI-EAS443:3:90:110:1044#0/1  
AATTTCTGTCCCAATTGCTCTCGCCACTTTTCATTTCTGC  
+HWI-EAS443:3:90:110:1044#0/1  
`Vaaab]]Uaa`¥Ya\_aa\_a\_a`aa]`\_\_a\_`¥`^`\_`\_\_  
@HWI-EAS443:3:90:1142:476#0/1  
TGGGAGACCTTCACTACCTCCAGAGCAGAAATGAAAAGTG  
+HWI-EAS443:3:90:1142:476#0/1  
`ba`SXRU[aU`aaX`ZVZW\_aZUa\_V¥JVaa`Z¥`ZZRa  
@HWI-EAS443:3:90:1221:1017#0/1  
CTCGCCACTTTTCATTTCTGCTCTGGAGGTAGTGAAGGTC

+HWI-EAS443:3:90:1221:1017#0/1  
abba\_b]bbbabaabbbbbbbaabbaaab\_bb`baaaaI\_  
@HWI-EAS443:3:90:1353:1353#0/1  
ACCTTCACTACCTCCAGAGCAGAAATGAAAAGTGGCGAGA  
+HWI-EAS443:3:90:1353:1353#0/1  
^`aaa^a`aa^]a^Y\_aa^^aaa\_\_aa`aa`a\_\_\_\_a`\_V  
@HWI-EAS443:3:90:1462:2011#0/1  
CACTACCTCCAGAGCAGAAATGAAAAGTGGCGAGAGCAAT  
+HWI-EAS443:3:90:1462:2011#0/1  
aaa]`\_baaY\_T^a^bbZaababa\_ab\_ababb^¥\_JTaa  
@HWI-EAS443:3:90:1554:294#0/1  
GGCGAGAGCAATTGGGACAGAAATTTGAGGAAATAAGGTG  
+HWI-EAS443:3:90:1554:294#0/1  
ab¥b\_SL`S]`aaaa\_`bbbaba^^aaVX`baaaa¥ab]b  
@HWI-EAS443:3:90:279:456#0/1  
ACTACCTCCAGAGCAGAAATGAAAAGTGGCGAGAGCAATT  
+HWI-EAS443:3:90:279:456#0/1  
aaa`a`a`¥a\_`\_aa^`aa`a`W\_\_`a\_\_Z\_^X^\_Z  
@HWI-EAS443:3:90:30:405#0/1  
GGCGGAGCCGATCAAGGAATGGGGCATCACCCAATCCATT  
+HWI-EAS443:3:90:30:405#0/1  
abbaX[^bb`a]\_a]¥ZT^`^Z]]ZZ^UYZ`a¥\_`\_`a\_^  
@HWI-EAS443:3:90:535:1363#0/1  
CTTCACTACCTCCAGAGCAGAAATGAAAAGTGGCGAGAGC  
+HWI-EAS443:3:90:535:1363#0/1  
Y\_a\_b`\_V\_abba\_¥Q^\_\_\_\_aW\_b\_b]\_Sa\_`^`\_Z]X`  
@HWI-EAS443:3:90:650:1547#0/1  
GAAAAGTGGCGAGAGCAATTGGGACAGAAATTTGAGGAAA  
+HWI-EAS443:3:90:650:1547#0/1  
aa^a\_\_N`\_]W]WYXU`[T[^ZRT^]\_`\_]W¥¥NWW  
@HWI-EAS443:3:90:990:564#0/1  
TTCACCTACCTCCAGAGCAGAAATGAAAAGTGGCGAGAGCA  
+HWI-EAS443:3:90:990:564#0/1  
¥¥a[PY\_\_O\_WW\_UU`^¥V[\_`YYHWH¥DY]]aZ]X`VF  
@HWI-EAS443:3:91:1103:54#0/1  
TCACTACCTCCAGAGCAGAAATGAAAAGTGGCGAGAGCAA  
+HWI-EAS443:3:91:1103:54#0/1  
aaa\_aa\_Zaa`a`\_a\_\_a\_^`aa\_\_^\_a]`a]a^^Y`VVY  
@HWI-EAS443:3:91:1181:1231#0/1  
TGGGAGACCTTCACTACCTCCAGAGCAGAAATGAAAAGTG  
+HWI-EAS443:3:91:1181:1231#0/1  
]Z[^X^YQZURU¥¥¥ZQ^Y\_UZ]`XZH`\_UZ\_a\_¥V^WMX  
@HWI-EAS443:3:91:1218:672#0/1  
ACCTTCACTACCTCCAGAGCAGAAATGAAAAGTGGCGAGA  
+HWI-EAS443:3:91:1218:672#0/1  
a\_a\_aabaab^YaYRQ\_^a`a[\_]a`[\_^\_U^PVa\_\_N  
@HWI-EAS443:3:91:1303:318#0/1  
CCAATTGCTCTCGCCACTTTTCATTTCTGCTCTGGAGGTA  
+HWI-EAS443:3:91:1303:318#0/1  
ababbbbabbbbbbZbabbbbbbababba\_aa`babaVa



@HWI-EAS443:3:91:395:306#0/1  
AGCAGAAATGAAAAGTGGCGAGAGCAATTGGGACAGAAAT  
+HWI-EAS443:3:91:395:306#0/1  
aaa\_\_U[X\_^Z^\_^SJW]WZRPYWXNNU^ZYRKT`XXPYW  
@HWI-EAS443:3:91:422:788#0/1  
CCTTCACTACCTCCAGAGCAGAAATGAAAAGTGGCGAGAG  
+HWI-EAS443:3:91:422:788#0/1  
abbbbbbabbbbaaYaabbb\_Za`abbbbbbabbb\_bab^X  
@HWI-EAS443:3:91:601:929#0/1  
TGAAAAGTGGCGAGAGCAATTGGGACAGAAATTTGAGGAA  
+HWI-EAS443:3:91:601:929#0/1  
``b`^`^^babb`a[`ZW\_aaaa`^W````]``aa`\_`^WY  
@HWI-EAS443:3:92:1006:886#0/1  
CTTCACTACCTCCAGAGCAGAAATGAAAAGTGGCGAGAGC  
+HWI-EAS443:3:92:1006:886#0/1  
ab^abZXaabab\_aabb`aa`¥aa`b^aaa]a\_`a\_b\_`W  
@HWI-EAS443:3:92:1335:632#0/1  
GACCTTCACTACCTCCAGAGCAGAAATGAAAAGTGGCGAG  
+HWI-EAS443:3:92:1335:632#0/1  
aaZ`aUG``¥a\_Z^GaR\_UYQ^^¥Q¥\_\_¥KMRaWa`T]\_B  
@HWI-EAS443:3:92:1347:1776#0/1  
GACCTTCACTACCTCCAGAGCAGAAATGAAAAGTGGCGAG  
+HWI-EAS443:3:92:1347:1776#0/1  
abaabaa`Zab`\_a[abaaa¥aaaaaaaa`aaUa`\_`\_\_  
@HWI-EAS443:3:92:1649:533#0/1  
AGCCGATCAAGGAATGGGGCATCACCCAATCCATTGTCTG  
+HWI-EAS443:3:92:1649:533#0/1  
aQ]`\_ZGS`R]SPSTNUGRV[NZVRVMV\_GX`¥VV¥VX¥  
@HWI-EAS443:3:92:175:458#0/1  
CGCCACTTTTCTTTCTGCTCTGGAGGTAGTGAAGGTCTC  
+HWI-EAS443:3:92:175:458#0/1  
aab`[abbbbb]baabaaaaaaaaaaaaZaa[a[^\_\_NNZR  
@HWI-EAS443:3:92:215:47#0/1  
ATGGGAGACCTTCACTACCTCCAGAGCAGAAATGAAAAGT  
+HWI-EAS443:3:92:215:47#0/1  
aa¥aa`b[MPFU^ZR¥VPXYZ`\_\_Y\_M^`RNUV]]SYYBB  
@HWI-EAS443:3:92:303:957#0/1  
CCTTCACTACCTCCAGAGCAGAAATGAAAAGTGGCGAGAG  
+HWI-EAS443:3:92:303:957#0/1  
\_]URa^LFX[]^¥[\_\_VNR\_UYOX[Y\_¥`]QUPPBBBBBB  
@HWI-EAS443:3:92:318:474#0/1  
GGCGAGAGCAATTGGGACAGAAATTTGAGGAAATAAGGTG  
+HWI-EAS443:3:92:318:474#0/1  
aabbab\_ba^aaaaaaaa\_abaa`aaaa\_aa`[`a^\_`a]`  
@HWI-EAS443:3:92:369:1501#0/1  
GGGAGACCTTCACTACCTCCAGAGCAGAAATGAAAAGTGG  
+HWI-EAS443:3:92:369:1501#0/1  
aa^`\_`\_`\_`ab`^`aa`a`\_`[`\_\_^`^^`^`\_`L¥\_RLUW  
@HWI-EAS443:3:92:600:301#0/1  
ATGAAAAGTGGCGAGAGCAATTGGGACAGAAATTTGAGGA

+HWI-EAS443:3:92:600:301#0/1  
ab^`bba`\_aaaa\_\_^`^`a]aaa\_¥Zaa\_\_^`\_aaa^\_\_W  
@HWI-EAS443:3:92:867:683#0/1  
GCCACTTTTCATTTCTGCTCTGGAGGTAGTGAAGGTCTCC  
+HWI-EAS443:3:92:867:683#0/1  
aa`a`\_`bbaaabaab\_abaaaa^baXaaZ¥\_`a`WSZPK  
@HWI-EAS443:3:92:938:89#0/1  
CCTTACTACCTCCAGAGCAGAAATGAAAAGTGGCGAGAG  
+HWI-EAS443:3:92:938:89#0/1  
aaaabY\_WaabW]b`b\_ab\_\_[]`\_YV\_a\_b`\_bS\_V\_  
@HWI-EAS443:3:93:1029:1668#0/1  
TATTTCTCAAATTTCTGTCCCAATTGCTCTCGCCACTTT  
+HWI-EAS443:3:93:1029:1668#0/1  
a\_a`[VZa\_a\_\_`ab^\_¥¥XXa`\_\_^`V\_`^X^\_XX^a  
@HWI-EAS443:3:93:1042:184#0/1  
GAGACCTTACTACCTCCAGAGCAGAAATGAAAAGTGGCG  
+HWI-EAS443:3:93:1042:184#0/1  
a`ba^`aa`b^`^^aaa¥a`\_a\_aa`\_\_a\_^`\_]aZ`\_Qa  
@HWI-EAS443:3:93:1060:437#0/1  
GAGACCTTACTACCTCCAGAGCAGAAATGAAAAGTGGCG  
+HWI-EAS443:3:93:1060:437#0/1  
aaaa\_a^`aa`a¥\_`^`\_]\_\_`aa\_¥V¥]a`U^]\_\_¥`YW\_  
@HWI-EAS443:3:93:1563:1668#0/1  
CACTACCTCCAGAGCAGAAATGAAAAGTGGCGAGAGCAAT  
+HWI-EAS443:3:93:1563:1668#0/1  
abab\_U\_bY¥a[SZS`Zaab`b^aaN`[]a`¥aQ^¥]  
@HWI-EAS443:3:93:1709:1024#0/1  
GGGAGACCTTACTACCTCCAGAGCAGAAATGAAAAGTGG  
+HWI-EAS443:3:93:1709:1024#0/1  
`abZYV[\_`a]Za]\_XQLX\_a\_^U¥UZ^`\_a\_^[\_W¥B  
@HWI-EAS443:3:93:1758:317#0/1  
CCACCTTATTTCTCAAATTTCTGTCCCAATTGCTCTCGC  
+HWI-EAS443:3:93:1758:317#0/1  
`aaWO\_a`a`^`^`Za\_`b]`W``[OHZ`^aba\_aa]GYZ  
@HWI-EAS443:3:93:180:1777#0/1  
GTCCCAATTGCTCTCGCCACTTTTCATTTCTGCTCTGGAG  
+HWI-EAS443:3:93:180:1777#0/1  
a\_bbaaaa\_`aaa\_a`aa`^`a`aa`\_`^`¥\_`[[`^UZ^\_  
@HWI-EAS443:3:93:301:126#0/1  
GGAGACCTTACTACCTCCAGAGCAGAAATGAAAAGTGGC  
+HWI-EAS443:3:93:301:126#0/1  
ab]b]¥]aaaba`a\_`]VRZa^a\_[a\_¥\_`a\_^`^`W`^\_  
@HWI-EAS443:3:93:345:1727#0/1  
GCCACTTTTCATTTCTGCTCTGGAGGTAGTGAAGGTCTCC  
+HWI-EAS443:3:93:345:1727#0/1  
aabbabbaabbaaaaa`\_]\_aaaa`\_aXb`Y`\_]\_\_RG[U[  
@HWI-EAS443:3:93:608:651#0/1  
ATGAAAAGTGGCGAGAGCAATTGGGACAGAAATTTGAGGA  
+HWI-EAS443:3:93:608:651#0/1  
aZab^P¥ZSa^\_b¥a\_N]]HQ`^a¥WR]aS\_`ZbYIa[N



+HWI-EAS443:3:94:314:1869#0/1  
aa`[`abb\_aaa\_aaab`ab[\_ZZ¥¥^¥^^¥¥¥\_S¥¥U¥U  
@HWI-EAS443:3:94:367:663#0/1  
GACCTTCACTACCTCCAGAGCAGAAATGAAAAGTGGCGAG  
+HWI-EAS443:3:94:367:663#0/1  
aaaaaaaa`aaaa\_`b\_aaab^`aa```\_aWa`\_a^`  
@HWI-EAS443:3:94:409:1730#0/1  
GAAAAGTGGCGAGAGCAATTGGGACAGAAATTTGAGGAAA  
+HWI-EAS443:3:94:409:1730#0/1  
abaaba]aaa^a`^`aaaa\_a\_aaa`a`a`a\_\_aa^`\_  
@HWI-EAS443:3:94:708:971#0/1  
GGAGACCTTCACTACCTCCAGAGCAGAAATGAAAAGTGGC  
+HWI-EAS443:3:94:708:971#0/1  
aa`a\_aaba\_baabaaa`aa`b\_aaa^`a``\_\_`a^a\_U  
@HWI-EAS443:3:94:736:1145#0/1  
CACTACCTCCAGAGCAGAAATGAAAAGTGGCGAGAGCAAT  
+HWI-EAS443:3:94:736:1145#0/1  
aaaa¥`aaa\_ab```aa`]aaaa\_aZaa\_aa\_^`\_^\_^  
@HWI-EAS443:3:94:808:568#0/1  
CCTTCACTACCTCCAGAGCAGAAATGAAAAGTGGCGAGAG  
+HWI-EAS443:3:94:808:568#0/1  
^a^\_\_a¥ab^bb`aab]baa\_[Y`ab`a`aaYba[a\_^Z`  
@HWI-EAS443:3:94:828:1609#0/1  
CCTTCACTACCTCCAGAGCAGAAATGAAAAGTGGCGAGAG  
+HWI-EAS443:3:94:828:1609#0/1  
`ababbaababaa`aaaaaaaa\_a`b`a`aa[¥a`aaa\_]`  
@HWI-EAS443:3:94:850:1354#0/1  
GAGACCTTCACTACCTCCAGAGCAGAAATGAAAAGTGGCG  
+HWI-EAS443:3:94:850:1354#0/1  
a^a``aa\_abbaa^aaa`a`]aa`a¥`\_`aaaR¥aTa\_¥`  
@HWI-EAS443:3:94:867:827#0/1  
CTTCACTACCTCCAGAGCAGAAATGAAAAGTGGCGAGAGC  
+HWI-EAS443:3:94:867:827#0/1  
abbaabbaabbbabababb`bbbbbabbYT^b`baaaaY  
@HWI-EAS443:3:95:1109:949#0/1  
GGGAGACCTTCACTACCTCCAGAGCAGAAATGAAAAGTGG  
+HWI-EAS443:3:95:1109:949#0/1  
^a[¥VN\_\_^`a`aba`a\_]a\_^][`````^]¥XYH¥`  
@HWI-EAS443:3:95:1409:831#0/1  
GACCTTCACTACCTCCAGAGCAGAAATGAAAAGTGGCGAG  
+HWI-EAS443:3:95:1409:831#0/1  
aa^[U`aa`b\_[a`¥a^`QZZVZ`\_¥¥`^^Z\_a^a`Q\_Y¥  
@HWI-EAS443:3:95:210:1258#0/1  
GAGACCTTCACTACCTCCAGAGCAGAAATGAAAAGTGGCG  
+HWI-EAS443:3:95:210:1258#0/1  
aa]UbbbaQ¥\_aVT`Tb\_Sa\_Sa]^RSX^ROUX[GNXJ\_V  
@HWI-EAS443:3:95:38:1974#0/1  
CACCTTATTTCTCAAATTTCTGTCCCAATTGCTCTCGCC  
+HWI-EAS443:3:95:38:1974#0/1  
aa`[MVVVYWT^RUa[^`S^X]G\_`W[Y]MV\_UYQ\_\_WW

@HWI-EAS443:3:95:427:1044#0/1  
GGGAGACCTTCACTACCTCCAGAGCAGAAATGAAAAGTGG  
+HWI-EAS443:3:95:427:1044#0/1  
aba\_b`\_\_aaabaaaaa`\_\_a\_a\_ab``aa`a\_a\_aTq]  
@HWI-EAS443:3:95:507:1109#0/1  
CACCTTATTTCTCAAATTTCTGTCCCAATTGCTCTCGCC  
+HWI-EAS443:3:95:507:1109#0/1  
aabbbb`bbbbbbbbbaabaab`baabab```aaaaa\_  
@HWI-EAS443:3:95:527:868#0/1  
GACCTTCACTACCTCCAGAGCAGAAATGAAAAGTGGCGAG  
+HWI-EAS443:3:95:527:868#0/1  
`aa`bb`aaaa`aaa`a\_\_aa`\_\_aa\_]¥`a[bQ\_aY`  
@HWI-EAS443:3:95:638:570#0/1  
GAGACCTTCACTACCTCCAGAGCAGAAATGAAAAGTGGCG  
+HWI-EAS443:3:95:638:570#0/1  
[`abaabb`ba\_ba`\_Z\_bab`a\_bbbbab\_\_ab\_baUa  
@HWI-EAS443:3:95:897:611#0/1  
CACTACCTCCAGAGCAGAAATGAAAAGTGGCGAGAGCAAT  
+HWI-EAS443:3:95:897:611#0/1  
`bbbabbbbbbbbaaba`abba`aabab`abaaaa\_a`a  
@HWI-EAS443:3:96:1008:549#0/1  
CAGAAATGAAAAGTGGCGAGAGCAATTGGGACAGAAATTT  
+HWI-EAS443:3:96:1008:549#0/1  
a\_`^\_aba]\_\_\_\_Y\_V¥^]`YbaX^`aaaa¥Zbb`^Ya]a  
@HWI-EAS443:3:96:1394:1500#0/1  
GCAGAAATGAAAAGTGGCGAGAGCAATTGGGACAGAAATT  
+HWI-EAS443:3:96:1394:1500#0/1  
aabb\_a]abba`]`I^]`a^bQa^XT`aabb]T`¥JY^`  
@HWI-EAS443:3:96:340:298#0/1  
GGGAGACCTTCACTACCTCCAGAGCAGAAATGAAAAGTGG  
+HWI-EAS443:3:96:340:298#0/1  
aaa\_b`\_`a\_a^a`^`[¥\_`\_`VZ`¥¥¥^`\_¥¥¥\_W\_^  
@HWI-EAS443:3:96:354:592#0/1  
GACCTTCACTACCTCCAGAGCAGAAATGAAAAGTGGCGAG  
+HWI-EAS443:3:96:354:592#0/1  
````]`\_aa`]`N]a`a]U^\_`\_`a¥`[^`W`\_`a\_\_  
@HWI-EAS443:3:96:362:335#0/1  
TGAAAAGTGGCGAGAGCAATTGGGACAGAAATTTGAGGAA  
+HWI-EAS443:3:96:362:335#0/1  
a`aaabb`]\_]\_a^]PUY^]WYS]TVa]^¥^`Y¥^Q[Z  
@HWI-EAS443:3:96:614:856#0/1  
GCAGAAATGAAAAGTGGCGAGAGCAATTGGGACAGAAATT  
+HWI-EAS443:3:96:614:856#0/1  
a`aa`a`abaaaa`aaaa]a\_`^\_\_aa[Z¥^`a``]^aa  
@HWI-EAS443:3:96:746:426#0/1  
ATGGGAGACCTTCACTACCTCCAGAGCAGAAATGAAAAGT  
+HWI-EAS443:3:96:746:426#0/1  
\_¥\_ba¥a`]a^b\_baa``]\_\_a]\_`[Za\_W[a`WP^`aX  
@HWI-EAS443:3:96:800:1002#0/1  
CCTTCACTACCTCCAGAGCAGAAATGAAAAGTGGCGAGAG

+HWI-EAS443:3:96:800:1002#0/1  
`^baYa^bb`\_]\_]ba\_b^bbZ^`aX]X`aaN`P^a\_\_¥Y  
@HWI-EAS443:3:96:900:541#0/1  
CTTCACTACCTCCAGAGCAGAAATGAAAAGTGGCGAGAGC  
+HWI-EAS443:3:96:900:541#0/1  
a`[\_`ba\_]`b¥IU¥\_]^U\_0]]¥a\_[[aaZ]Z\_``]UaT  
@HWI-EAS443:3:96:923:751#0/1  
GACCTTCACTACCTCCAGAGCAGAAATGAAAAGTGGCGAG  
+HWI-EAS443:3:96:923:751#0/1  
\_`bbbb]aaba¥\_aaaab\_a`ab\_aabbaaab^baab\_b  
@HWI-EAS443:3:97:1093:295#0/1  
CTCGCGGAGCCGATCAAGGAATGGGGCATCACCCAATCC  
+HWI-EAS443:3:97:1093:295#0/1  
`bb`]\_abbaa`ba\_¥ab^bSaaba`aX\_aUaQ`G`\_WEL  
@HWI-EAS443:3:97:1147:367#0/1  
TCTCGCCACTTTTCATTTCTGCTCTGGAGGTAGTGAAGGT  
+HWI-EAS443:3:97:1147:367#0/1  
aaa^`W\_\_\_a\_aa]aaba]a`X`^aa`]\_aU¥]Y\_U\_¥]X  
@HWI-EAS443:3:97:1239:1389#0/1  
CAGAAATGAAAAGTGGCGAGAGCAATTGGGACAGAAATTT  
+HWI-EAS443:3:97:1239:1389#0/1  
abaMaTbb\_J``\_X\_R`a\_PZ¥YJYWbXR\_aO]\_aTaa^\_  
@HWI-EAS443:3:97:1488:568#0/1  
GAAAAGTGGCGAGAGCAATTGGGACAGAAATTTGAGGAAA  
+HWI-EAS443:3:97:1488:568#0/1  
`ba\_\_baba\_aaaY`\_a\_Z\_`aa^Xa\_aaaa`a[Q^a^\_\_  
@HWI-EAS443:3:97:1599:176#0/1  
GGGAGACCTTCACTACCTCCAGAGCAGAAATGAAAAGTGG  
+HWI-EAS443:3:97:1599:176#0/1  
\_a[`^]Q`\_ZHVW`^SH]SW^RTWST`BBBBBBBBBBBBB  
@HWI-EAS443:3:97:340:1611#0/1  
GACTTTTGATCTCGCGGAGCCGATCAAGGAATGGGGCAT  
+HWI-EAS443:3:97:340:1611#0/1  
aaabaaabaaa\_aaaaaa`\_`a\_\_^`a^aY\_¥XN]YU[[  
@HWI-EAS443:3:97:455:940#0/1  
CACTACCTCCAGAGCAGAAATGAAAAGTGGCGAGAGCAAT  
+HWI-EAS443:3:97:455:940#0/1  
abaabaaa`aaaab\_aa^X\_bb`\_W^a`\_a\_b`aV`[^Z  
@HWI-EAS443:3:97:651:925#0/1  
GGGAGACCTTCACTACCTCCAGAGCAGAAATGAAAAGTGG  
+HWI-EAS443:3:97:651:925#0/1  
aba`a\_\_aaa¥aaaa¥\_`\_`aa\_a\_\_a\_\_a`^[\_^\_Y\_\_  
@HWI-EAS443:3:97:729:1286#0/1  
GCCACTTTTCATTTCTGCTCTGGAGGTAGTGAAGGTCTCC  
+HWI-EAS443:3:97:729:1286#0/1  
a\_`a\_aaaaaa`a`^`^`Va`aX\_a]a\_XZ^\_`NWZWX  
@HWI-EAS443:3:97:75:1707#0/1  
ATGAAAAGTGGCGAGAGCAATTGGGACAGAAATTTGAGGA  
+HWI-EAS443:3:97:75:1707#0/1  
\_aaaZX¥bX[aa\_`¥QOR]^aaUUY\_¥`¥`a^Z¥X^YSZ^

@HWI-EAS443:3:97:797:1699#0/1  
GGAGACCTTCACTACCTCCAGAGCAGAAATGAAAAGTGGC  
+HWI-EAS443:3:97:797:1699#0/1  
abbbaabba\_\_\_\_]ba`aVb`\_ba`\_aa`ba`a\_a¥aYJ  
@HWI-EAS443:3:97:841:735#0/1  
GACCTTCACTACCTCCAGAGCAGAAATGAAAAGTGGCGAG  
+HWI-EAS443:3:97:841:735#0/1  
^\_^X\_b]¥]]^ZS\_ZZ`\_a^Y^`Ua\_b\_\_X\_]`]b\_Qa\_  
@HWI-EAS443:3:97:843:984#0/1  
CACTACCTCCAGAGCAGAAATGAAAAGTGGCGAGAGCAAT  
+HWI-EAS443:3:97:843:984#0/1  
`a`aU`aaJabbaabba`^bbbaWHXa]bVaabaZSZbb  
@HWI-EAS443:3:98:1035:455#0/1  
GAGACCTTCACTACCTCCAGAGCAGAAATGAAAAGTGGCG  
+HWI-EAS443:3:98:1035:455#0/1  
]aa¥V\_aaaa\_aaY^`V\_aa`a`Sb^`aaa`\_`\_aX`]Za  
@HWI-EAS443:3:98:1201:1079#0/1  
AGCCGATCAAGGAATGGGCATCACCCAATCCATTGTCTG  
+HWI-EAS443:3:98:1201:1079#0/1  
a^aaaa^aaaa```a]`¥\_\_\_`U`¥`^`WU\_\_`]¥W\_`  
@HWI-EAS443:3:98:1384:458#0/1  
GGGAGACCTTCACTACCTCCAGAGCAGAAATGAAAAGTGG  
+HWI-EAS443:3:98:1384:458#0/1  
aaaa`a^a\_0[]aa\_[X[U`\_b\_aaG`aYL[¥\_`U`^  
@HWI-EAS443:3:98:1624:286#0/1  
TTCACCTCCAGAGCAGAAATGAAAAGTGGCGAGAGCA  
+HWI-EAS443:3:98:1624:286#0/1  
a`¥aUaXMR\_LXZV¥[N`\_T\_]`[`\_\_\_^X]¥NSQTRQBB  
@HWI-EAS443:3:98:289:1499#0/1  
GGGAGACCTTCACTACCTCCAGAGCAGAAATGAAAAGTGG  
+HWI-EAS443:3:98:289:1499#0/1  
``¥S`baa^a¥ba`a\_¥a\_a\_a\_a\_aa`\_``a\_`^^SS¥Z  
@HWI-EAS443:3:98:373:352#0/1  
CAGAAATGAAAAGTGGCGAGAGCAATTGGGACAGAAATTT  
+HWI-EAS443:3:98:373:352#0/1  
a`^WY¥aZXDU]a\_^][b^YUW]VN[¥a^¥XP]ZDUJX¥¥  
@HWI-EAS443:3:98:520:1206#0/1  
GACCTTCACTACCTCCAGAGCAGAAATGAAAAGTGGCGAG  
+HWI-EAS443:3:98:520:1206#0/1  
aba`aaba\_ab`aa\_\_\_a\_aaaa\_\_`aa`\_\_`a\_aR[``a  
@HWI-EAS443:3:98:797:1410#0/1  
GCCACCTTATTTCTCAAATTTCTGTCCCAATTGCTCTCG  
+HWI-EAS443:3:98:797:1410#0/1  
abXX[X^`Z`^`^`^`aS¥aa`a\_b`\_\_^0`[^\_UG\_Y\_\_`  
@HWI-EAS443:3:98:839:744#0/1  
GCGAGAGCAATTGGGACAGAAATTTGAGGAAATAAGGTGG  
+HWI-EAS443:3:98:839:744#0/1  
`a`^a\_a\_\_\_aab`\_``ab`\_Yaaa`Vaa\_[^a^\_a\_Z`a  
@HWI-EAS443:3:99:1025:132#0/1  
CCCAATTGCTCTCGCCACTTTTCATTTCTGCTCTGGAGGT

+HWI-EAS443:3:99:1025:132#0/1  
^`J¥abbbaaa]`Ua``bbab\_bbab¥bb^babbb^b`\_  
@HWI-EAS443:3:99:1047:39#0/1  
GACCTTCACTACCTCCAGAGCAGAAATGAAAAGTGGCGAG  
+HWI-EAS443:3:99:1047:39#0/1  
a\_abba\_babb`ab`ab\_aa`b`aab`a\_\_a¥ba\_a\_a  
@HWI-EAS443:3:99:127:1506#0/1  
GAGACCTTCACTACCTCCAGAGCAGAAATGAAAAGTGGCG  
+HWI-EAS443:3:99:127:1506#0/1  
[aW[^KS[Wa\_abZY^\_SSZPbbabZ`aaa`a^a`G]P¥a  
@HWI-EAS443:3:99:150:1439#0/1  
GGAGACCTTCACTACCTCCAGAGCAGAAATGAAAAGTGGC  
+HWI-EAS443:3:99:150:1439#0/1  
aabbb\_aa`abbabaaaaa`aaaa`aaaabaaaa`U`\_  
@HWI-EAS443:3:99:1598:1695#0/1  
CTTCACTACCTCCAGAGCAGAAATGAAAAGTGGCGAGAGC  
+HWI-EAS443:3:99:1598:1695#0/1  
UbbY\_[a\_Z]`M\_Wbbb[bb]aabb\_aUa[Y]aYabaaa^  
@HWI-EAS443:3:99:170:1637#0/1  
CACTACCTCCAGAGCAGAAATGAAAAGTGGCGAGAGCAAT  
+HWI-EAS443:3:99:170:1637#0/1  
]`RI\_\_[\_\_aZZWbaaaaa[b^UI\_aU[a`\_^\_YVTSYa`  
@HWI-EAS443:3:99:234:1906#0/1  
ACCTTCACTACCTCCAGAGCAGAAATGAAAAGTGGCGAGA  
+HWI-EAS443:3:99:234:1906#0/1  
`\_aa^`\_^a]```aaa`U\_aa`]`a\_Xa]aaa`]`¥a`[[  
@HWI-EAS443:3:99:287:1290#0/1  
GAGACCTTCACTACCTCCAGAGCAGAAATGAAAAGTGGCG  
+HWI-EAS443:3:99:287:1290#0/1  
`aa`\_^aa`b\_\_aa`aaa`a`a`a`¥``aa\_\_a\_UOU\_Ta  
@HWI-EAS443:3:99:579:416#0/1  
ATGGGAGACCTTCACTACCTCCAGAGCAGAAATGAAAAGT  
+HWI-EAS443:3:99:579:416#0/1  
abbab\_a]^abbaba`aaaa`^ab\_aa\_a\_\_`a`a\_\_aX  
@HWI-EAS443:3:99:751:324#0/1  
TGAAAAGTGGCGAGAGCAATTGGGACAGAAATTTGAGGAA  
+HWI-EAS443:3:99:751:324#0/1  
abbbbbbZ\_aTb\_bY^Q\_aa]a`\_P]`aa`\_`aaa¥`a^\_  
@HWI-EAS443:3:99:907:1222#0/1  
ATGGGAGACCTTCACTACCTCCAGAGCAGAAATGAAAAGT  
+HWI-EAS443:3:99:907:1222#0/1  
¥[\_aaa¥Za\_\_`]`b\_YROXX^]ZT`\_`aZS`^a¥^OY^  
@HWI-EAS443:3:99:986:251#0/1  
GAGACCTTCACTACCTCCAGAGCAGAAATGAAAAGTGGCG  
+HWI-EAS443:3:99:986:251#0/1  
aaa`]``aa`aa¥¥\_\_a`a^`^`a[\_\_\_`^^^aWa¥V\_  
@HWI-EAS443:3:9:1082:1003#0/1  
GAAAAGTGGCGAGAGCAATTGGGACAGAAATTTGAGGAAA  
+HWI-EAS443:3:9:1082:1003#0/1  
aab``aWaaab]a¥a\_\_\_`a`^a\_Z\_aa```aaa^`X\_\_



@HWI-EAS443:3:9:455:1584#0/1  
AATGGATTGGGTGATGCCCCATTCCTTGATCGGCTCCGCC  
+HWI-EAS443:3:9:455:1584#0/1  
aaaa\_a^`V\_ZNQ`]^`aaa\_Z\_`\_¥^S^]\_¥\_\_UZUGU[  
@HWI-EAS443:3:9:655:704#0/1  
TGAAAAGTGGCGAGAGCAATTGGGACAGAAATTTGAGGAA  
+HWI-EAS443:3:9:655:704#0/1  
a^L[aa^Mz]a¥aT¥0VU^aabb[XH\_^\_\_\_^aaKa^GU  
@HWI-EAS443:3:9:88:1089#0/1  
GACCTTCACTACCTCCAGAGCAGAAATGAAAAGTGGCGAG  
+HWI-EAS443:3:9:88:1089#0/1  
aW\_aabbbbaabbababU]aaaI\_\_aaaZaaaPa\_ab^¥  
@HWI-EAS443:3:46:262:1325#0/1  
GGTCCTCATCGGTGGACTTGAATGGAATGATAACACGGTT  
+HWI-EAS443:3:46:262:1325#0/1  
¥a`bZ`b`\_\_Rb\_\_[baabb\_]\_S¥ab\_bbaabb`\_`  
@HWI-EAS443:3:72:908:196#0/1  
CCTTGAACAATGGAAGTCGTTCAACAAACAAGGGGAGAT  
+HWI-EAS443:3:72:908:196#0/1  
aab^a`Zb`a``]aa\_`¥\_b^UEP\_Y\_aULQNZ¥HW\_]W  
@HWI-EAS443:3:77:883:1075#0/1  
CCTTGAACAATGGAAGTCGTTCAACAAACAAGGGGAGAT  
+HWI-EAS443:3:77:883:1075#0/1  
ababbabbabb^a\_b`a\_Z]\_VXZSabaJ¥\_W]`GY`\_T  
@HWI-EAS443:3:42:603:308#0/1  
TTCATGCCTTAAAACAATGGAAGTCGTTCAACAAACAAGG  
+HWI-EAS443:3:42:603:308#0/1  
¥R\_PPMTXW¥FL]SY[\_VXPT\_[YVBBBBBBBBBBBBBBB  
@HWI-EAS443:3:82:611:1638#0/1  
GAATTCATGCCTTGAACAATGGAAGTCGTTCAACAAACA  
+HWI-EAS443:3:82:611:1638#0/1  
abbbaaaabbaababbbbbbabbbaaaa\_aaaa\_bba`a  
@HWI-EAS443:3:87:384:709#0/1  
GAATTCATGCCTTGAACAATGGAAGTCGTTCAACAAACA  
+HWI-EAS443:3:87:384:709#0/1  
aaa]ZP\_`¥^T¥¥`R[\_[aHWa\_`X[TVVHRWY¥YQRVHM  
@HWI-EAS443:3:13:1598:194#0/1  
TGAGAATTCATGCCTTGAACAATGGAAGTCGTTCAACAA  
+HWI-EAS443:3:13:1598:194#0/1  
aaaaaaaa`a`b\_]Xaa``\_a^b^a\_\_\_\_\_XZ]Z^UZ]V]^  
@HWI-EAS443:3:24:685:1459#0/1  
TTTGAAGAATTCATGCCTTGAACAATGGAAGTCGTTCAAC  
+HWI-EAS443:3:24:685:1459#0/1  
¥¥R\_Z¥\_`^`W[aZ]`bbb`¥¥Z^^^aa`aaaLb\_S¥MYaK  
@HWI-EAS443:3:30:745:1631#0/1  
TGAGAATTCATGCCTTGAACAATGGAAGTCGTTCAACAA  
+HWI-EAS443:3:30:745:1631#0/1  
a^aJT`a]\_T¥R^X`PWP^]0^]BBBBBBBBBBBBBBBBBB  
@HWI-EAS443:3:32:1420:1877#0/1  
TGAGAATTCATGCCTTGAACAATGGAAGTCGTTCAACAA

+HWI-EAS443:3:32:1420:1877#0/1  
¥abab`^L^b]¥\_a`Y¥Gb\_]b]^aZ`aNDUW^OJTYGaa  
@HWI-EAS443:3:33:672:730#0/1  
GAGAATTCATGCCTTGAAACAATGGAAGTCGTTCAACAAA  
+HWI-EAS443:3:33:672:730#0/1  
aaaa\_aa`^aaa`aa`a`^`b¥`a`^`Q\_\_P[[Y\_P[^  
@HWI-EAS443:3:36:104:1536#0/1  
TTTGAGAATTCATGCCTTGAAACAATGGAAGTCGTTCAAC  
+HWI-EAS443:3:36:104:1536#0/1  
abb`bbabbabaaabbaababbbbaa]ab^Ta\_]`^`a  
@HWI-EAS443:3:3:1620:359#0/1  
AGAATTCATGCCTTGAAACAATGGAAGTCGTTCAACAAAC  
+HWI-EAS443:3:3:1620:359#0/1  
`aX]aWQ`^\_\_V\_\_`XU\_GaS^\_^]a¥ZSXZSXWXXXZZ  
@HWI-EAS443:3:3:608:1781#0/1  
GAGAATTCATGCCTTGAAACAATGGAAGTCGTTCAACAAA  
+HWI-EAS443:3:3:608:1781#0/1  
abbbba¥baa`a\_baabbbabaaaaab\_S^[¥\_^[DXa`  
@HWI-EAS443:3:40:126:1569#0/1  
TGTTGAACGACTTCCATTGTTTCAAGGCATGAATTCTCAA  
+HWI-EAS443:3:40:126:1569#0/1  
\_`IaYabb\_W]`bb\_¥]`bYa]¥a]\_¥aY\_¥`X\_]¥`\_Q  
@HWI-EAS443:3:56:1473:1429#0/1  
TGAGAATTCATGCCTTGAAACAATGGAAGTCGTTCAACAA  
+HWI-EAS443:3:56:1473:1429#0/1  
abba`¥aaaa^a]`b`bZ`]V\_ZabaaaaSRW^a`^aGW\_  
@HWI-EAS443:3:60:10:888#0/1  
GAGAATTCATGCCTTGAAACAATGGAAGTCGTTCAACAAA  
+HWI-EAS443:3:60:10:888#0/1  
^bbaab`a¥aabaaa^b^baaa[ba`a`J\_a^\_S\_¥PX[`  
@HWI-EAS443:3:61:343:114#0/1  
TTTGAGAATTCATGCCTTGAAACAATGGAAGTCGTTCAAC  
+HWI-EAS443:3:61:343:114#0/1  
aabbabaabaaaaa`a`aa`\_\_aM^aaaZaU[\_X][[ZZ  
@HWI-EAS443:3:64:194:320#0/1  
ATACTTTGTTGAACCTTTAGCTAGGAGCATTTGCGAAAAG  
+HWI-EAS443:3:64:194:320#0/1  
\_^ab^RX`T¥^QJDZa\_TTY`V]\_ZRXXWWTZY[ZRY\_^]  
@HWI-EAS443:3:64:887:143#0/1  
TTTGAGAATTCATGCCTTGAAACAATGGAAGTCGTTCAAC  
+HWI-EAS443:3:64:887:143#0/1  
aaaa^`^aaa¥aa^]Waabaa`abaa[\_[\_]¥WVX\_  
@HWI-EAS443:3:65:521:131#0/1  
GTTGAACGACTTCCATTGTTTCAAGGCATGAATTCTCAAA  
+HWI-EAS443:3:65:521:131#0/1  
Q\_Y`^`a¥ZSVVRUWWZaR^[XWOYM]aWQOHXTHUYSQU  
@HWI-EAS443:3:66:703:269#0/1  
TTGAGAATTCATGCCTTGAAACAATGGAAGTCGTTCAACA  
+HWI-EAS443:3:66:703:269#0/1  
^[W^baa\_aa\_XV[P¥Z`WU`\_baa^WZOVP]]F[WOQZX

@HWI-EAS443:3:69:207:1412#0/1  
TTTGAGAATTCATGCCTTGAAACAATGGAAGTCGTTCAAC  
+HWI-EAS443:3:69:207:1412#0/1  
[V`Y[¥`^]ab\_Z¥]\_YY¥bbb¥Va[[]]\_LX\_K[a\_^S  
@HWI-EAS443:3:70:406:694#0/1  
TGAGAATTCATGCCTTGAAACAATGGAAGTCGTTCAACAA  
+HWI-EAS443:3:70:406:694#0/1  
`^`aaa]aaa\_aaaaaaV`aaT]a^UX`Z^aV\_VO[S\_  
@HWI-EAS443:3:72:989:1983#0/1  
GAGAATTCATGCCTTGAAACAATGGAAGTCGTTCAACAAA  
+HWI-EAS443:3:72:989:1983#0/1  
a`JYZab`aa``]aaZ\_^aN``aaaa¥P^\_]^^\_aYYa]  
@HWI-EAS443:3:76:158:747#0/1  
TTGAGAATTCATGCCTTGAAACAATGGAAGTCGTTCAACA  
+HWI-EAS443:3:76:158:747#0/1  
a`\_]\_]Y\_\_`][`^`\_`^^`\_bZ^\_¥V]¥PT\_V[V[YP[  
@HWI-EAS443:3:83:1672:1370#0/1  
AGAATTCATGCCTTGAAACAATGGAAGTCGTTCAACAAAC  
+HWI-EAS443:3:83:1672:1370#0/1  
^¥ZY^¥abbab`a]V\_aa`aabbabb^abS¥WYaP\_^a]  
@HWI-EAS443:3:83:782:423#0/1  
GAGAATTCATGCCTTGAAACAATGGAAGTCGTTCAACAAA  
+HWI-EAS443:3:83:782:423#0/1  
a`VS\_aba`^\_V]\_^\_P`\_\_`aaa]V\_QLZFWLW]RU\_W  
@HWI-EAS443:3:86:391:1214#0/1  
TTGAGAATTCATGCCTTGAAACAATGGAAGTCGTTCAACA  
+HWI-EAS443:3:86:391:1214#0/1  
`^\_a`¥Y`abbaabaaaa^bbb]\_\_bbaU¥\_^\_¥Z`Y`  
@HWI-EAS443:3:90:252:1931#0/1  
TTTGAGAATTCATGCCTTGAAACAATGGAAGTCGTTCAAC  
+HWI-EAS443:3:90:252:1931#0/1  
¥X\_baa\_Va`^`WL]¥Y¥`bb[Q`b`^^bbaV`][LW^`Z  
@HWI-EAS443:3:96:1425:1689#0/1  
TGTTGAACGACTTCCATTGTTTCAAGGCATGAATTCTCAA  
+HWI-EAS443:3:96:1425:1689#0/1  
abaaaaaba0baa]a`aWUY`\_\_aU[QYaTYX\_W]XDU\_  
@HWI-EAS443:3:97:1190:861#0/1  
TGAGAATTCATGCCTTGAAACAATGGAAGTCGTTCAACAA  
+HWI-EAS443:3:97:1190:861#0/1  
aba\_\_aa\_\_`aa\_^a`a`a`\_¥aa`^`a¥]¥]^YYYH\_Z  
@HWI-EAS443:3:99:412:990#0/1  
GTTGAACGACTTCCATTGTTTCAAGGCATGAATTCTCAA  
+HWI-EAS443:3:99:412:990#0/1  
a`\_\_Qaaa\_U\_¥``\_aaaV^`aU`\_\_XQa^^`\_]\_]`\_R  
@HWI-EAS443:3:9:546:880#0/1  
TGAGAATTCATGCCTTGAAACAATGGAAGTCGTTCAACAA  
+HWI-EAS443:3:9:546:880#0/1  
ab\_a\_a]`[W]\_^`abaaaa`a\_aa`a``OQ`[ZN¥Y\_]\_  
@HWI-EAS443:3:23:1153:218#0/1  
CTTCCCTTGTGTTGTTGAACGACTTCCATTGTTTCAAGGCA

+HWI-EAS443:3:23:1153:218#0/1  
abbb\_babbbbb]ba\_Xa[b^\_bb\_`aaa`¥\_^T]`ab`a  
@HWI-EAS443:3:23:978:1341#0/1  
GTTCCCTTGTGGTTGAACGACTTCCATTGTTTCAAGGCA  
+HWI-EAS443:3:23:978:1341#0/1  
a^a^a\_S^S`aa^^^YVS`S\_\_`^Ga\_^\_`^YWWZW`NW\_  
@HWI-EAS443:3:38:152:1168#0/1  
CACCCCTTGTGGTTGAACGACTTCCATTGTTTCAAGGCA  
+HWI-EAS443:3:38:152:1168#0/1  
aaaaaaaaa``a``]aaa`aa`a\_`[^X[]]a\_\_\_\_\_^  
@HWI-EAS443:3:65:1329:1543#0/1  
CACCCCTTGTGGTTGAACGACTTCCATTGTTTCAAGGAAT  
+HWI-EAS443:3:65:1329:1543#0/1  
aaa`¥P\_\_]aOIU`[RWaVJ\_`a[a\_a\_¥P`[Z`XXNG\_U  
@HWI-EAS443:3:6:1420:313#0/1  
AATTCATGCCTTGAACAATGGAAGTCGTTCAACAAACAA  
+HWI-EAS443:3:6:1420:313#0/1  
^b\_bb^bb\_aX`a`]a\_¥aba[\_¥XYa[]]Zaa\_`]ZWa\_  
@HWI-EAS443:3:91:496:1952#0/1  
AATTCATGCCTTGAACAATGGAAGTCGTTCAACAAACAA  
+HWI-EAS443:3:91:496:1952#0/1  
aa``aba^aaaa\_a`b`b`\_a\_aa\_X`W```\_^`^\_]\_]  
@HWI-EAS443:3:9:1527:1023#0/1  
CAGCCCTTGTGGTTGAACGACTTCCATTGTTTCAAGGCA  
+HWI-EAS443:3:9:1527:1023#0/1  
aba^^bbbbbabbababab`Wab\_Saaba`a`]W]aa\_^  
@HWI-EAS443:3:13:1469:192#0/1  
CTTGTTTGTGGTTGAACGACTTCCATTGTTTCAAGGCATGAAT  
+HWI-EAS443:3:13:1469:192#0/1  
aabb\_aaaaba`a\_a``aaa``aaa`aa\_a\_a`a````^\_  
@HWI-EAS443:3:21:531:1450#0/1  
AGCCCTTGTGGTTGAACGACTTCCATTGTTTCAAGGCAT  
+HWI-EAS443:3:21:531:1450#0/1  
XX\_^\_a`Z\_\_ORWaaMb[]Vb^aaZ]^I\_Q`Y`a`^aYa[  
@HWI-EAS443:3:39:1516:2009#0/1  
ATTCATGCCTTGAACAATGGAAGTCGTTCAACAAACAAG  
+HWI-EAS443:3:39:1516:2009#0/1  
^```aabbaaaaaaab`a]a\_¥T¥[S¥¥WUSZa¥MXYT  
@HWI-EAS443:3:42:1305:827#0/1  
CTTGTTTGTGGTTGAACGACTTCCATTGTTTCAAGGCATGAAT  
+HWI-EAS443:3:42:1305:827#0/1  
abab`bb`[ababaaaaaaaa`ab`aaaa`b\_`aa^[a  
@HWI-EAS443:3:43:1317:2037#0/1  
CGCCCTTGTGGTTGAACGACTTCCATTGTTTCAAGGCAT  
+HWI-EAS443:3:43:1317:2037#0/1  
a`a``ab``bba`bb\_^b]^`^^a`^`b`ba`Y¥`aa`aa\_  
@HWI-EAS443:3:46:74:226#0/1  
AATTCATGCCTTGAACAATGGAAGTCGTTCAACAAACAAG  
+HWI-EAS443:3:46:74:226#0/1  
aaaaaaaaaabaababaaaaaaaa¥\_a^YUU[GM\_]LZ¥[

@HWI-EAS443:3:71:527:527#0/1  
ATTCATGCCTTGAAACAATGGAAGTCGTTCAACAAACAAG  
+HWI-EAS443:3:71:527:527#0/1  
¥baaa\_aaaabbbaaba\_aYa]aU¥`ZLY[`]^]aM`\_\_  
@HWI-EAS443:3:72:123:262#0/1  
ATTCATGCCTTGAAACAATGGAAGTCGTTCAACAAACAAG  
+HWI-EAS443:3:72:123:262#0/1  
aa\_\_\_\_¥]``^aa`[aa`Y¥^a```V]^QX[VVY^\_¥[^¥[  
@HWI-EAS443:3:73:838:1738#0/1  
CTTGTGTTGTTGAACGACTTCCATTGTTTCAAGGCATGAAT  
+HWI-EAS443:3:73:838:1738#0/1  
a\_ba^ab¥ababb^aaab`aa`aaaPaa`\_`^aaaZaaY\_  
@HWI-EAS443:3:22:1105:1146#0/1  
CCTTGTGTTGTTGAACGACTTCCATTGTTTCAAGGCATGAA  
+HWI-EAS443:3:22:1105:1146#0/1  
¥a```U`¥bb`\_]`^aa`b`\_S]aab`a¥U`a`aa\_bba`  
@HWI-EAS443:3:28:611:265#0/1  
TTCATGCCTTGAAACAATGGAAGTCGTTCAACAAACAAGG  
+HWI-EAS443:3:28:611:265#0/1  
abb\_[``^a^^a^^]\_aaa`][RX[U]WX¥^¥VYR¥^[X  
@HWI-EAS443:3:45:431:1095#0/1  
CCTTGTGTTGTTGAACGACTTCCATTGTTTCAAGGCATGAA  
+HWI-EAS443:3:45:431:1095#0/1  
[aaVbaba`R[TbXZT[¥]aa```abG`VLT¥JJRT\_]\_S  
@HWI-EAS443:3:59:845:1242#0/1  
TTCATGCCTTGAAACAATGGAAGTCGTTCAACAAACAAGG  
+HWI-EAS443:3:59:845:1242#0/1  
`b][Ya\_¥a]a[Qa^\_VZb[[]`a`RVO¥XS]SaZFDHPW[  
@HWI-EAS443:3:88:1372:720#0/1  
CCTTGTGTTGTTGAACGACTTCCATTGTTTCAAGGCATGAA  
+HWI-EAS443:3:88:1372:720#0/1  
¥b^^bbVbbba^bXbb]bb]`bb]bYbVZ\_a\_`a\_aa]Z  
@HWI-EAS443:3:100:1233:566#0/1  
TTCGTATACTTTGTTGAAACTTTAGCTAGGAGCATTGCGG  
+HWI-EAS443:3:100:1233:566#0/1  
^bb`U\_abV`aab\_`^]`^QaaaY[NZ\_]aZXU]`]X\_Yb  
@HWI-EAS443:3:11:439:417#0/1  
CATGCCTTGAAACAATGGAAGTCGTTCAACAAACAAGGGT  
+HWI-EAS443:3:11:439:417#0/1  
a¥a`^[aa]`^b\_baaaaaaaaLWYG[QZYNS\_^HP]\_[aG  
@HWI-EAS443:3:12:1570:1593#0/1  
GTATACTTTGTTGAAACTTTAGCTAGGAGCATTGCGAAA  
+HWI-EAS443:3:12:1570:1593#0/1  
^DXVYUXYZYX`aY^U\_`\_]`\_Y\_N¥a[[Y]O[]][Y\_[BB  
@HWI-EAS443:3:12:604:1540#0/1  
CGTATACTTTGTTGAAACTTTAGCTAGGAGCATTGCGAA  
+HWI-EAS443:3:12:604:1540#0/1  
aa`b`aba`a\_abbbaaaa`baa`a`ba``aa``a\_aa\_  
@HWI-EAS443:3:13:1434:317#0/1  
CCCTTGTGTTGTTGAACGACTTCCATTGTTTCAAGGCATGA

+HWI-EAS443:3:13:1434:317#0/1  
`baba` `aaa\_b`]a\_aW\_`a^\_Xa]^¥Q`S[S`\_M^^^  
@HWI-EAS443:3:13:879:383#0/1  
CATGCCTTGAAACAATGGAAGTCGTTCAACAAACAAGGGT  
+HWI-EAS443:3:13:879:383#0/1  
abbaabaabbbbaabaab`a\_\_b\_a`aa\_aaaYa`\_aaU  
@HWI-EAS443:3:23:1116:226#0/1  
ATACTTTGTTGAACTTTAGCTAGGAGCATTGCGAAAAG  
+HWI-EAS443:3:23:1116:226#0/1  
abbabaababaaaa\_abaaaYaa\_a^a\_a`a`aYa]\_]^[^  
@HWI-EAS443:3:28:1408:142#0/1  
CACCTTGTTTGTGAACGACTTCCATTGTTCAAGGCAT  
+HWI-EAS443:3:28:1408:142#0/1  
¥`a\_\_`aZ`\_ba` ``VYa¥RY`[\_Y]\_\_Z]a]aa]¥H¥X  
@HWI-EAS443:3:32:680:822#0/1  
CTTTTCGCAAATGCTCCTAGCTAAAGTTTCAACAAAGTAT  
+HWI-EAS443:3:32:680:822#0/1  
aa`bb\_bbb` `[aba`bb\_b`a` `[b\_aa¥a`aa\_`^Taa  
@HWI-EAS443:3:44:861:1606#0/1  
CGTATACTTTGTTGAACTTTAGCTAGGAGCATTGCGAA  
+HWI-EAS443:3:44:861:1606#0/1  
a^V\_^`]aaa]\_aa` `^¥`\_`a\_Y^`][W[¥\_] ^ZX]ZZ  
@HWI-EAS443:3:44:953:969#0/1  
CATGCCTTGAAACAATGGAAGTCGTTCAACAAACAAGGGT  
+HWI-EAS443:3:44:953:969#0/1  
aababbbbaabbbbaabaa\_`a[a\_¥`Taaa^a`\_aaT  
@HWI-EAS443:3:48:475:267#0/1  
CGCAAATGCTCCTAGCTAAAGTTTCAACAAAGTATACGAA  
+HWI-EAS443:3:48:475:267#0/1  
`baabbbbaa`abbbaba`ab\_abaaa`aaabWaab`aa`  
@HWI-EAS443:3:57:1224:86#0/1  
CATGCCTTGAAACAATGGAAGTCGTTCAACAAACAAGGGT  
+HWI-EAS443:3:57:1224:86#0/1  
aba` `abbbbbb`babbbba`¥` `X\_V]^L[a`M\_`\_a`0  
@HWI-EAS443:3:57:345:1571#0/1  
CGTATACTTTGTTGAACTTTAGCTAGGAGCATTGCGAA  
+HWI-EAS443:3:57:345:1571#0/1  
aaYaa` `Y^ab\_a\_Ua`\_a`aY^W^`\_`Y\_X^`S\_PSaU^  
@HWI-EAS443:3:61:1507:265#0/1  
TTCGTATACTTTGTTGAACTTTAGCTAGGAGCATTGCG  
+HWI-EAS443:3:61:1507:265#0/1  
aaab`aaa[ `aaa\_aa`Ya\_a` `]a`a\_a\_]aU¥^]Z]X]  
@HWI-EAS443:3:62:756:1224#0/1  
TATACTTTGTTGAACTTTAGCTAGGAGCATTGCGAAAA  
+HWI-EAS443:3:62:756:1224#0/1  
aaaaaaaaaabaaaaaaaaa`ab]X]`aa`\_a^`\_`^^`W  
@HWI-EAS443:3:64:506:1655#0/1  
CACCTTGTTTGTGAACGACTTCCATTGTTTCAAGGCAT  
+HWI-EAS443:3:64:506:1655#0/1  
a\_^aaa\_`aa`a\_`\_\_a[[^`\_a`\_`[aY¥Y^^a`[U¥]^V

@HWI-EAS443:3:68:582:540#0/1  
CCCTTGTTTGTGAACGACTTCCATTGTTTCAAGGCATGA  
+HWI-EAS443:3:68:582:540#0/1  
abbaabaabbabaaaa`aaaaabab`\_`a\_Waaa`a]  
@HWI-EAS443:3:70:1665:1879#0/1  
CGTATACTTTGTTGAACTTTAGCTAGGAGCATTGCGAA  
+HWI-EAS443:3:70:1665:1879#0/1  
abaaab`Waa\_abaaa\_bbaaaaaa¥\_a`aaa¥^`\_Yaa[  
@HWI-EAS443:3:76:1565:348#0/1  
CATGCCTTGAAACAATGGAAGTCGTTCAACAAACAAGGGT  
+HWI-EAS443:3:76:1565:348#0/1  
¥b``\_bbababbLaabbbbb]^RaWW¥\_`I`a[``a\_]aU  
@HWI-EAS443:3:92:1166:348#0/1  
CATGCCTTGAAACAATGGAAGTCGTTCAACAAACAAGGGT  
+HWI-EAS443:3:92:1166:348#0/1  
aaba\_aaababbaababbabY\_a\_aV`\_M\_aaY`a`a`W  
@HWI-EAS443:3:95:270:252#0/1  
CCCTTGTTTGTGAACGACTTCCATTGTTTCAAGGCATGA  
+HWI-EAS443:3:95:270:252#0/1  
abbaabaa\_baaaaaaa\_aaaaaab``a``a\_\_`\_[^  
@HWI-EAS443:3:86:1181:183#0/1  
GAAAAGAAGGCCAAACTGGCAAATGTTGTGAGAAAGGTGA  
+HWI-EAS443:3:86:1181:183#0/1  
a\_``aa\_\_\_\_\_¥¥```Ya\_^WY¥¥a`]```]]\_]Z]GU^¥  
@HWI-EAS443:3:88:1590:1713#0/1  
AAAATTCCAGTGCAAATGCCATAAGCACACATTCCCTT  
+HWI-EAS443:3:88:1590:1713#0/1  
ab\_b``\_a\_LLTGba]baaS``abS¥M¥GWQ]a^¥XY`\_a  
@HWI-EAS443:3:96:523:507#0/1  
ATGGAAGAAGGCCAAACTGGCAAATGTTGTGAGAAAGAT  
+HWI-EAS443:3:96:523:507#0/1  
`b^H\_]`^¥I[¥YY^b`ba[`^U^[\_\_]X\_bX`^aZ`X\_\_\_\_  
@HWI-EAS443:3:10:1262:1226#0/1  
CATCTTCTCACAACATTTGCGAGTTTGGCCTTCTTTTCA  
+HWI-EAS443:3:10:1262:1226#0/1  
``a\_b]bb¥V]]\_¥P\_[`[\_`R][N[a`\_]Qa^Pa[X^F¥  
@HWI-EAS443:3:1:811:14#0/1  
GAAAAGAAGGCCAAACTGGGAAATGTTGTGAGAAAGATGA  
+HWI-EAS443:3:1:811:14#0/1  
aYZN]^]\_^YR¥]VGTV\_YGYXS]^ZS^X^WZXWVBBBBB  
@HWI-EAS443:3:45:1439:1142#0/1  
GAAAAGAAGGCCAAACTGGCAAATGTTGTGAGCAAGATGA  
+HWI-EAS443:3:45:1439:1142#0/1  
aaa``b\_a\_a``a``\_aaa[^^\_aa\_aa\_a\_abLWYV[¥¥  
@HWI-EAS443:3:49:864:1441#0/1  
CTTGTGAATTAGTTATCATCTTCTCACAACATTTGCCAG  
+HWI-EAS443:3:49:864:1441#0/1  
abba`bbabbbabbbbabbbbab`babbabbabb`ba  
@HWI-EAS443:3:67:528:973#0/1  
GGCCAAACTGGCAAATGTTGTGAGAAAGATGATGACTTTG

+HWI-EAS443:3:67:528:973#0/1  
`bbbb\_L`\_W`b`)\_`\_\_aa\_abaa\_T]a¥` `` `U^a` [[  
@HWI-EAS443:3:89:250:1124#0/1  
GAAAAGAAGGCCAAACTGGCAAATGTTGTGAGAAAGAGAG  
+HWI-EAS443:3:89:250:1124#0/1  
`ab` `aab][aaaaaaaa` `aa` ab^aaa[a` a` a\_a  
@HWI-EAS443:3:35:1161:445#0/1  
TTCATCTTTCTCACAACATTTGCCAGTTTGGCCTTCTTTT  
+HWI-EAS443:3:35:1161:445#0/1  
aaaabbaab` aaaGaaaa` \_\_aU\_\_\_^` aa` a\_aaaa\_\_\_  
@HWI-EAS443:3:100:539:570#0/1  
ATGAAAAGAAGGCCAAACTGGCAAATGTTGTGAGAAAGAT  
+HWI-EAS443:3:100:539:570#0/1  
`^bba` aaaaa[\_Ya` \_IaaaYZN]\_a¥aa^a` a^` ^` \_a  
@HWI-EAS443:3:11:1183:1793#0/1  
GAAAAGAAGGCCAAACTGGCAAATGTTGTGAGAAAGATGA  
+HWI-EAS443:3:11:1183:1793#0/1  
abb^^` \_\_X\_\_` abaaaa¥aaaa^[a\_U[\_a\_\_` aa[aa  
@HWI-EAS443:3:11:316:258#0/1  
TGTGAATTAGTCATCATCTTTCTCACAACATTTGCCAGTT  
+HWI-EAS443:3:11:316:258#0/1  
aa` b\_\_aa^a` aaa` aaaaa` \_aa` \_` a` ^` ^a` ^Z\_Z^  
@HWI-EAS443:3:16:1630:699#0/1  
CTTGTGAATTAGTCATCATCTTTCTCACAACATTTGCCAG  
+HWI-EAS443:3:16:1630:699#0/1  
\_a\_abbabbbba` bbbbbbabbababb\_abaabbb\_¥ab  
@HWI-EAS443:3:20:648:1861#0/1  
TGAAAAGAAGGCCAAACTGGCAAATGTTGTGAGAAAGATG  
+HWI-EAS443:3:20:648:1861#0/1  
`b\_abb` ` [[]` ababaWaaba\_b` a\_a^\_aaa\_a\_` a\_Z  
@HWI-EAS443:3:21:1198:1166#0/1  
AAAGAAGGCCAAACTGGCAAATGTTGTGAGAAAGATGATG  
+HWI-EAS443:3:21:1198:1166#0/1  
`[¥^\_\_T` a\_a¥]Xaa` `^¥` a` ]\_\_¥` ]\_^\_W^^^\_X^^  
@HWI-EAS443:3:22:1596:1555#0/1  
AAAAGAAGGCCAAACTGGCAAATGTTGTGAGAAAGATGAT  
+HWI-EAS443:3:22:1596:1555#0/1  
`\_aa` aaaabababaaab[a\_aaa]` a[a^a\_\_\_b\_` b` a  
@HWI-EAS443:3:22:434:1633#0/1  
GAAAAGAAGGCCAAACTGGCAAATGTTGTGAGAAAGATGA  
+HWI-EAS443:3:22:434:1633#0/1  
]b]\_R\_\_b` Ya` abb[[[(` \_Z^b]\_b¥)` ]^^` ¥^` a¥a  
@HWI-EAS443:3:22:83:1474#0/1  
GAAAAGAAGGCCAAACTGGCAAATGTTGTGAGAAAGATGA  
+HWI-EAS443:3:22:83:1474#0/1  
\_XSaZ0\_\_OTYa]\_X` Q[R]\_VSSV` \_Q[\_PSLGXN[TX  
@HWI-EAS443:3:23:1565:1097#0/1  
TGTGAATTAGTCATCATCTTTCTCACAACATTTGCCAGTT  
+HWI-EAS443:3:23:1565:1097#0/1  
abZ^Y` `aY\_OS` bZ\_b^\_b` \_a¥^^` \_^` `` ^^` \_¥` \_\_` Y\_



@HWI-EAS443:3:25:826:1877#0/1  
TTGTGAATTAGTCATCATCTTTCTCACAACTTTGCCAGT  
+HWI-EAS443:3:25:826:1877#0/1  
aaa\_a`aaa]\_]a`a^abaaa\_a^b`\_`a`a\_X^\_\_\_\_^Z  
@HWI-EAS443:3:27:1243:1135#0/1  
CATCTTTCTCACAACTTTGCCAGTTTGGCCTTCTTTTCA  
+HWI-EAS443:3:27:1243:1135#0/1  
^Ta^Ubbba]\_ab`ab\_a¥bZVQ[URaa[Y[aaaaaa`\_a  
@HWI-EAS443:3:28:285:931#0/1  
GTGAATTAGTCATCATCTTTCTCACAACTTTGCCAGTTT  
+HWI-EAS443:3:28:285:931#0/1  
Y^`XXV\_ZZUZ¥Y\_ZL`a]^Y^[\_aa]\_`ZTVS][`\_X`¥  
@HWI-EAS443:3:29:1046:214#0/1  
CTTGTGAATTAGTCATCATCTTTCTCACAACTTTGCCAG  
+HWI-EAS443:3:29:1046:214#0/1  
abb`abbababbaa^aZ\_\_Y```Yaaa\_aaaaaaab¥W]a  
@HWI-EAS443:3:2:824:292#0/1  
ATGAAAAGAAGGCCAAACTGGCAAATGTTGTGAGAAAGAT  
+HWI-EAS443:3:2:824:292#0/1  
ab`Vbaaab]ba^\_a`¥^VaaU\_aaab¥`]Wa\_a]]Va¥\_  
@HWI-EAS443:3:30:1150:1537#0/1  
ATGAAAAGAAGGCCAAACTGGCAAATGTTGTGAGAAAGAT  
+HWI-EAS443:3:30:1150:1537#0/1  
]abaa^aa`b`aaa\_¥\_aa]]aaaa`[\_a]aaa¥[]¥`\_  
@HWI-EAS443:3:30:119:76#0/1  
CATCATCTTTCTCACAACTTTGCCAGTTTGGCCTTCTTT  
+HWI-EAS443:3:30:119:76#0/1  
abaaaaaa``aaa\_\_\_aaa`^`\_`a\_]aZ`\_\_\_\_^`\_]`^`\_\_  
@HWI-EAS443:3:31:1672:1174#0/1  
AAAAGAAGGCCAAACTGGCAAATGTTGTGAGAAAGATGAT  
+HWI-EAS443:3:31:1672:1174#0/1  
abbaXa``abab\_`ab]`aaa`a\_ab^aab^`\_\_^aa\_a  
@HWI-EAS443:3:31:48:1736#0/1  
CATCATCTTTCTCACAACTTTGCCAGTTTGGCCTTCTTT  
+HWI-EAS443:3:31:48:1736#0/1  
a`Ra[`aa`aa`aaaaaa]\_[¥a^VZ^\_\_^`\_`^`^`\_`\_]  
@HWI-EAS443:3:32:397:505#0/1  
ATCATCTTTCTCACAACTTTGCCAGTTTGGCCTTCTTTT  
+HWI-EAS443:3:32:397:505#0/1  
[aba``\_aa`aaZ`aa]a\_\_aaY`[]`V`Va[ZSSYX¥Y  
@HWI-EAS443:3:33:558:468#0/1  
GAAAAGAAGGCCAAACTGGCAAATGTTGTGAGAAAGATGA  
+HWI-EAS443:3:33:558:468#0/1  
aa`aa^]`^a^a`\_a\_\_^a`\_`a`a\_\_\_\_a^a]TMP]`^¥`^`^  
@HWI-EAS443:3:36:144:705#0/1  
CTGGCAAATGTTGTGAGAAAGATGATGACTAATTCACAAG  
+HWI-EAS443:3:36:144:705#0/1  
aab`a^aaaa\_ab`a^b\_aaaa\_a\_aaba]]`a\_baaaa\_  
@HWI-EAS443:3:36:1549:1272#0/1  
GCCAAACTGGCAAATGTTGTGAGAAAGATGATGACTAATT

+HWI-EAS443:3:36:1549:1272#0/1  
` `aa`¥QQWJU¥WYZJR^¥UUT[¥L[\_ROQ¥W^[]00IZNY  
@HWI-EAS443:3:37:1136:1557#0/1  
CATCATCTTTCTCACAACTTTGCCAGTTTGGCCTTCTTT  
+HWI-EAS443:3:37:1136:1557#0/1  
abbaababbbbababbabaaaba`bbaa\_` `bbaabbaa  
@HWI-EAS443:3:37:1367:983#0/1  
GAAAAGAAGGCCAAACTGGCAAATGTTGTGAGAAAGATGA  
+HWI-EAS443:3:37:1367:983#0/1  
¥`YR`bb]\_U` `¥`abaa¥T\_`^¥^b[aa]U^b\_]Va`]a[  
@HWI-EAS443:3:37:1701:1125#0/1  
GAAAAGAAGGCCAAACTGGCAAATGTTGTGAGAAAGATGA  
+HWI-EAS443:3:37:1701:1125#0/1  
aaRPWbWO^`[^[]^Z]GQXaYOYPZ¥QY¥¥YQSYW]\_V  
@HWI-EAS443:3:39:307:687#0/1  
GAAAAGAAGGCCAAACTGGCAAATGTTGTGAGAAAGATGA  
+HWI-EAS443:3:39:307:687#0/1  
aa^`^`a[WQ¥\_\_a^X\_aaY`^QX]W\_`^`¥PW[SY]`\_X  
@HWI-EAS443:3:3:1289:1586#0/1  
ATCATCTTTCTCACAACTTTGCCAGTTTGGCCTTCTTTT  
+HWI-EAS443:3:3:1289:1586#0/1  
`aYaVX`bb`^TZSaa`ba\_Y`[Z^aX`aaZ`]aS^^a\_\_  
@HWI-EAS443:3:40:535:1842#0/1  
AAGAAGGCCAAACTGGCAAATGTTGTGAGAAAGATGATGA  
+HWI-EAS443:3:40:535:1842#0/1  
a^^\_RGV`a¥¥`[YP\_a`ZZWW[YWL[VJWTYZZR]^`\_a  
@HWI-EAS443:3:44:881:1820#0/1  
GAAAAGAAGGCCAAACTGGCAAATGTTGTGAGAAAGATGA  
+HWI-EAS443:3:44:881:1820#0/1  
aa^¥aV\_\_^I[VUYTX[Xa\_Ua`ZaZGVN]¥QV^W\_UUYP  
@HWI-EAS443:3:47:1701:1057#0/1  
TTGTGAATTAGTCATCATCTTTCTCACAACTTTGCCAGT  
+HWI-EAS443:3:47:1701:1057#0/1  
abb\_ba\_aa\_a\_`baaa\_aaa`a^`\_a[Za` `^`a^]a^  
@HWI-EAS443:3:49:637:1872#0/1  
ATGAAAAGAAGGCCAAACTGGCAAATGTTGTGAGAAAGAT  
+HWI-EAS443:3:49:637:1872#0/1  
a^¥\_baaaa^[\_a\_`aa`aaaa]aaa]aa^a`\_\_a¥a`a  
@HWI-EAS443:3:4:1125:209#0/1  
TTGTGAATTAGTCATCATCTTTCTCACAACTTTGCCAGT  
+HWI-EAS443:3:4:1125:209#0/1  
`\_`Ta[\_\_XNQNX^¥V^`[aRT\_¥GYMQ`V\_^TX\_XXT¥H  
@HWI-EAS443:3:51:1285:1347#0/1  
ATCATCTTTCTCACAACTTTGCCAGTTTGGCCTTCTTTT  
+HWI-EAS443:3:51:1285:1347#0/1  
]a¥S\_¥\_` `aa¥b`aab` `a`abbaaabbbbbbba  
@HWI-EAS443:3:51:704:1069#0/1  
GAAAAGAAGGCCAAACTGGCAAATGTTGTGAGAAAGATGA  
+HWI-EAS443:3:51:704:1069#0/1  
a\_XTV]\_[\_`^]a^^¥^a\_aa\_]VYM]aZXZ`\_XZ]^X^X[

@HWI-EAS443:3:51:859:1264#0/1  
CTTGTGAATTAGTCATCATCTTTCTCACAAACATTTGCCAG  
+HWI-EAS443:3:51:859:1264#0/1  
abbbbaabbbaabaaababbabbbbaa[a`aaabb^ab]¥aa  
@HWI-EAS443:3:52:1086:1173#0/1  
TTGTGAATTAGTCATCATCTTTCTCACAAACATTTGCCAGT  
+HWI-EAS443:3:52:1086:1173#0/1  
a`a\_`]\_a`Xa^^^[\_aWa\_\_^\_\_^[\_^X`\_\_^`]Y]\_Z  
@HWI-EAS443:3:54:1489:496#0/1  
GAAGGCCAAACTGGCAAATGTTGTGAGAAAGATGATGACT  
+HWI-EAS443:3:54:1489:496#0/1  
aa\_`]\_]\_a`^a]^Y```[\_aa^``\_]`^`\_aa\_\_VZ]`  
@HWI-EAS443:3:54:349:314#0/1  
AAAGAAGGCCAAACTGGCAAATGTTGTGAGAAAGATGATG  
+HWI-EAS443:3:54:349:314#0/1  
a^^`aY\_`a`b\_^[aa\_¥baaa^V`a`b`^^¥Za\_[b]]\_  
@HWI-EAS443:3:54:539:747#0/1  
GAAAAGAAGGCCAAACTGGCAAATGTTGTGAGAAAGATGA  
+HWI-EAS443:3:54:539:747#0/1  
aaaaa`]^Z]a`a`aaaa\_aaa`a`\_a\_a\_a`^^`^`a^  
@HWI-EAS443:3:55:357:857#0/1  
GAAAAGAAGGCCAAACTGGCAAATGTTGTGAGAAAGATGA  
+HWI-EAS443:3:55:357:857#0/1  
aa^\_`aaa`^`^aaa]aaa^XV]`a]\_aYa\_aZ¥Y]]^a\_  
@HWI-EAS443:3:55:536:95#0/1  
TGTGAATTAGTCATCATCTTTCTCACAAACATTTGCCAGTT  
+HWI-EAS443:3:55:536:95#0/1  
aa\_aW`\_`\_ZaRZ¥aK\_^Y]aa`a\_a\_\_^`\_`\_`\_a]QLa]\_  
@HWI-EAS443:3:55:620:719#0/1  
CTTGTGAATTAGTCATCATCTTTCTCACAAACATTTGCCAG  
+HWI-EAS443:3:55:620:719#0/1  
aab`Yaaabb`a`\_abaabaaaaaaaaaba`baaaaa\_aa  
@HWI-EAS443:3:56:194:1180#0/1  
GAAAAGAAGGCCAAACTGGCAAATGTTGTGAGAAAGATGA  
+HWI-EAS443:3:56:194:1180#0/1  
``a]aa¥aa\_\_^a¥\_\_^Z¥a[\_][S^`Wa\_^ZPTNX\_a\_  
@HWI-EAS443:3:58:538:1158#0/1  
CTGGCAAATGTTGTGAGAAAGATGATGACTAATTCACAAG  
+HWI-EAS443:3:58:538:1158#0/1  
\_bb`ab¥¥bb\_bb\_aaba`ab\_baabab`baaaWbabaZ^  
@HWI-EAS443:3:5:262:743#0/1  
CATCATCTTTCTCACAAACATTTGCCAGTTTGGCCTTCTTT  
+HWI-EAS443:3:5:262:743#0/1  
abbabbabaaaaaa`baaa`aaa```b`aaa\_``aa^a`a  
@HWI-EAS443:3:60:1270:77#0/1  
ATGAAAAGAAGGCCAAACTGGCAAATGTTGTGAGAAAGAT  
+HWI-EAS443:3:60:1270:77#0/1  
abbaaaaaaaaaa]aa\_\_aba`a\_\_ab^`b^a^a]^`^a\_^  
@HWI-EAS443:3:61:1324:108#0/1  
ATCATCTTTCTCACAAACATTTGCCAGTTTGGCCTTCTTT

+HWI-EAS443:3:61:1324:108#0/1  
abbbbabbabaaaa`aaaabbaaaababaUaa^aa`^  
@HWI-EAS443:3:61:169:409#0/1  
AAGAAGGCCAAACTGGCAAATGTTGTGAGAAAGATGATGA  
+HWI-EAS443:3:61:169:409#0/1  
^^`\_Y\_\_a^\_Y`Z\_aba`X``N\_¥X`WYT¥]Y¥]]WV]\_  
@HWI-EAS443:3:62:987:1568#0/1  
AGTCATCATCTTTCTCACAACATTTGCCAGTTTGGCCTTC  
+HWI-EAS443:3:62:987:1568#0/1  
aaaabbaabbbbabbbbbbbbab`babababbb\_^abbb  
@HWI-EAS443:3:64:352:949#0/1  
AAAAGAAGGCCAAACTGGCAAATGTTGTGAGAAAGATGAT  
+HWI-EAS443:3:64:352:949#0/1  
aaaaa]S¥]aa^a^`a\_``aaa``\_]\_a^aZ[[¥]``^\_^`  
@HWI-EAS443:3:65:1158:1786#0/1  
ATGAAAAGAAGGCCAAACTGGCAAATGTTGTGAGAAAGAT  
+HWI-EAS443:3:65:1158:1786#0/1  
abaaaabaabaaaaabaaa`\_baaaa\_aa^aa\_\_a`a\_\_  
@HWI-EAS443:3:66:865:808#0/1  
GAAAAGAAGGCCAAACTGGCAAATGTTGTGAGAAAGATGA  
+HWI-EAS443:3:66:865:808#0/1  
aa]U]¥Z¥^X`]YS\_aa``¥W]``]Yaa¥¥¥¥[¥`^\_\_]`  
@HWI-EAS443:3:69:1720:893#0/1  
AAAAGAAGGCCAAACTGGCAAATGTTGTGAGAAAGATGAT  
+HWI-EAS443:3:69:1720:893#0/1  
]`^`^^UHS\_a`b\_Z\_]^YaaYJQPVNG`ZOZYPHX^GWY  
@HWI-EAS443:3:6:1613:1445#0/1  
AAAGAAGGCCAAACTGGCAAATGTTGTGAGAAAGATGATG  
+HWI-EAS443:3:6:1613:1445#0/1  
aaTbb`ba^VYa\_]^aZF]\_\_\_`¥W^]a\_^]`]aXX^^\_B  
@HWI-EAS443:3:70:1377:664#0/1  
GAAAAGAAGGCCAAACTGGCAAATGTTGTGAGAAAGATGA  
+HWI-EAS443:3:70:1377:664#0/1  
T^\_a^Vbb``bbbb¥ab\_abbbZ¥\_baaXJbaa`baab`  
@HWI-EAS443:3:70:582:1889#0/1  
CATCTTTCTCACAACATTTGCCAGTTTGGCCTTCTTTTCA  
+HWI-EAS443:3:70:582:1889#0/1  
SK¥bVaaaVbb\_aaa[a^Yabaabbab`\_aaa[aaabaab  
@HWI-EAS443:3:71:676:1730#0/1  
GAATTAGTCATCATCTTTCTCACAACATTTGCCAGTTTGG  
+HWI-EAS443:3:71:676:1730#0/1  
^bbba`b``baaababbbb`bbbabbba``bbaaa^aaaa  
@HWI-EAS443:3:72:55:519#0/1  
GCCAAACTGGCAAATGTTGTGAGAAAGATGATGACTAATT  
+HWI-EAS443:3:72:55:519#0/1  
\_V¥X\_]Z¥W[[YW[^TN\_P[VWX][¥QXWIWZY¥\_¥[TW  
@HWI-EAS443:3:74:1274:167#0/1  
AAGAAGGCCAAACTGGCAAATGTTGTGAGAAAGATGATGA  
+HWI-EAS443:3:74:1274:167#0/1  
abababa`\_bba^bba\_aaaab`ab`b`\_a`\_aaaa\_\_aa

@HWI-EAS443:3:75:27:264#0/1  
TGTGAATTAGTCATCATCTTTCTCACAACTTTGCCAGTT  
+HWI-EAS443:3:75:27:264#0/1  
Y\_YUPLYa]RN[a`ON\_a]`b]]Z`aZaaRR[J¥[^[]^  
@HWI-EAS443:3:75:672:97#0/1  
GAAAAGAAGGCCAAACTGGCAAATGTTGTGAGAAAGATGA  
+HWI-EAS443:3:75:672:97#0/1  
[\_XT¥`]QXZU¥][[¥\_ZWXY^`0`]L]PLPXS\_ZQYX  
@HWI-EAS443:3:76:1019:1393#0/1  
ATGAAAAGAAGGCCAAACTGGCAAATGTTGTGAGAAAGAT  
+HWI-EAS443:3:76:1019:1393#0/1  
a`]a¥^baab¥¥[`aab^aa`aa`a`aZaaY`\_\_\_\_aa\_^\_  
@HWI-EAS443:3:76:493:875#0/1  
GAAAAGAAGGCCAAACTGGCAAATGTTGTGAGAAAGATGA  
+HWI-EAS443:3:76:493:875#0/1  
aaaaa\_^a`aa^`^`\_\_`\_aa`\_^`[\_¥]a^`^]X\_[^]\_  
@HWI-EAS443:3:77:1431:1389#0/1  
ATGAAAAGAAGGCCAAACTGGCAAATGTTGTGAGAAAGAT  
+HWI-EAS443:3:77:1431:1389#0/1  
aa``aaaZ`a^]¥\_aaa\_aaa[aaaa`]abXa\_^`^a`a  
@HWI-EAS443:3:77:638:1078#0/1  
CTTGTGAATTAGTCATCATCTTTCTCACAACTTTGCCAG  
+HWI-EAS443:3:77:638:1078#0/1  
\_V¥^\_a][ZZ[[T^]]]\_\_\_\_^\_Y\_SWU¥YTY^]W]\_^]¥Z  
@HWI-EAS443:3:78:905:1281#0/1  
AAAAGAAGGCCAAACTGGCAAATGTTGTGAGAAAGATGAT  
+HWI-EAS443:3:78:905:1281#0/1  
\_M\_]aaYR]^[\_aaa^aaaU``]`a]\_\_aa¥Sa\_a\_\_\_\_  
@HWI-EAS443:3:79:1236:1465#0/1  
GAAAAGAAGGCCAAACTGGCAAATGTTGTGAGAAAGATGA  
+HWI-EAS443:3:79:1236:1465#0/1  
a[aaa]a\_XZ]]]\_a`a¥`]a`aa\_aW\_\_Y`]Wa]\_^Z^  
@HWI-EAS443:3:7:1575:878#0/1  
ATGAAAAGAAGGCCAAACTGGCAAATGTTGTGAGAAAGAT  
+HWI-EAS443:3:7:1575:878#0/1  
aa`]aaaba`aaaY`\_[\_aaa^a`^aa^aa^a\_a\_W`aa`  
@HWI-EAS443:3:81:284:1539#0/1  
AGAAGGCCAAACTGGCAAATGTTGTGAGAAAGATGATGAC  
+HWI-EAS443:3:81:284:1539#0/1  
`V\_]a¥Y¥aY^]ba`a`R¥¥[Z\_I`\_W\_P¥\_W^`^`\_Y  
@HWI-EAS443:3:83:1209:972#0/1  
GTGAATTAGTCATCATCTTTCTCACAACTTTGCCAGTTT  
+HWI-EAS443:3:83:1209:972#0/1  
aR\_W¥`a[aTa`X`][a`\_]`\_^`\_\_\_\_]YV\_S[¥\_S\_^  
@HWI-EAS443:3:84:812:1886#0/1  
ATCATCTTTCTCACAACTTTGCCAGTTTGGCCTTCTTTT  
+HWI-EAS443:3:84:812:1886#0/1  
aaa^aa¥U¥]\_Yaa`a\_\_`]\_^a\_\_V\_a``]a`Ya\_^]  
@HWI-EAS443:3:84:916:587#0/1  
AATTAGTCATCATCTTTCTCACAACTTTGCCAGTTTGGC

+HWI-EAS443:3:84:916:587#0/1  
aabb\_a^abb`bbabbb\_bababaabbaabaaaa\_abba`  
@HWI-EAS443:3:89:927:873#0/1  
TGTGAATTAGTCATCATCTTTCTCACAACATTTGCCAGTT  
+HWI-EAS443:3:89:927:873#0/1  
`aababbba`\_TT^aa`baa`]`\_`\_aa\_a```aZV¥a\_a  
@HWI-EAS443:3:90:1391:690#0/1  
GAAAAGAAGGCCAAACTGGCAAATGTTGTGAGAAAGATGA  
+HWI-EAS443:3:90:1391:690#0/1  
aaaaaaaaa]R]aaaaa`\_aa\_aa]`a]a\_a\_RU`^`a^  
@HWI-EAS443:3:90:297:711#0/1  
ATGAAAAGAAGGCCAAACTGGCAAATGTTGTGAGAAAGAT  
+HWI-EAS443:3:90:297:711#0/1  
¥bb^¥`bb^[[bbba^TS`YSb[S`abUbbaa¥aY`a\_b`  
@HWI-EAS443:3:93:76:1514#0/1  
GAATTAGTCATCATCTTTCTCACAACATTTGCCAGTTTGG  
+HWI-EAS443:3:93:76:1514#0/1  
a`aZSaXT^`ba\_Uab]Zb`a`baaaaX¥IaTa`¥P`]HX  
@HWI-EAS443:3:94:125:604#0/1  
GTGAATTAGTCATCATCTTTCTCACAACATTTGCCAGTTT  
+HWI-EAS443:3:94:125:604#0/1  
a[]^`a`X[]``\_`^Z`\_a`^`\_`\_Z^`\_Z^^^]]]^Z^^  
@HWI-EAS443:3:94:1331:456#0/1  
CATCTTTCTCACAACATTTGCCAGTTTGGCCTTCTTTTCA  
+HWI-EAS443:3:94:1331:456#0/1  
aababbbabaaa`aaaaaaaa`ab\_aaab`\_`ab\_aaaa`\_`  
@HWI-EAS443:3:95:1450:1435#0/1  
AAGAAGGCCAAACTGGCAAATGTTGTGAGAAAGATGATGA  
+HWI-EAS443:3:95:1450:1435#0/1  
abbbbaa`\_`bba^bba`\_`aabaa]a`aaaa^a`aaa`aaa  
@HWI-EAS443:3:97:876:55#0/1  
GAAAAGAAGGCCAAACTGGCAAATGTTGTGAGAAAGATGA  
+HWI-EAS443:3:97:876:55#0/1  
a\_\_\_\_\_a`\_`\_¥^`\_]\_W`a`Z^^`\_a]XaZ`Z\_Z]Z\_Z]^Z  
@HWI-EAS443:3:17:1767:1486#0/1  
TGCTCATGTTGATTCCCACCAACTTGCAGGTCCTGTAGAA  
+HWI-EAS443:3:17:1767:1486#0/1  
a\_aaZL`aU````]TJY[aXSR[YZ¥\_¥X[ZN¥STSNN¥YW  
@HWI-EAS443:3:28:681:701#0/1  
ATAGGACTTCTTTTTGCTCATGTTGATTCCCACCAACTTG  
+HWI-EAS443:3:28:681:701#0/1  
a`a``[aaa`\_`aaa`\_`a\_¥`\_`\_`[\_`\_`^`\_`^^`\_]`[\_\_\_\_^^`  
@HWI-EAS443:3:21:1612:440#0/1  
TGTTGATTCCCCTAACTTGCAGGTCCTGTAGAGTATGTC  
+HWI-EAS443:3:21:1612:440#0/1  
QVVba\_ZS^abZVXQYW^`\_ZZaaPSBBBBBBBBBBBBBB  
@HWI-EAS443:3:74:1626:32#0/1  
AGTAAACAGACCGTTGGAATTTCTAGCATGGTGGAGGCC  
+HWI-EAS443:3:74:1626:32#0/1  
T^\_aab`\_]`\_`T¥\_ZXV^W]]a]XHQ^YR^\_]Va^VaBBB

@HWI-EAS443:3:97:1466:1785#0/1  
CAACGGCATCATATTCCATGCTTTTGGCTGGACGAAGGGG  
+HWI-EAS443:3:97:1466:1785#0/1  
aV`UabZ¥aaPU[Xa`G^SX[VZa`UBBBBBBBBBBBBBB  
@HWI-EAS443:3:1:522:1576#0/1  
GGGGACAACACTAAGTGAATGAAAATCAAANTCCTGGAA  
+HWI-EAS443:3:1:522:1576#0/1  
`ba`XJZb[bJaa`bX`a`babbbbaaaaYDF¥]VI`aB  
@HWI-EAS443:3:8:164:1807#0/1  
AAATAAGACAGGGACATTTGAATCACAACCTTTTTTATC  
+HWI-EAS443:3:8:164:1807#0/1  
`a`aX`]a`a^`\_aa^¥aXa`\_`\_`\_aa[V¥Z^ZU^]]  
@HWI-EAS443:3:38:1031:1188#0/1  
GGGGACAACACGAAGTGAATGAAAATCAANATCCTCGAA  
+HWI-EAS443:3:38:1031:1188#0/1  
aa¥XXZ`a\_aZ[RT[Xa`a`\_a^][YX^\_QDZZ\_`¥ZWW  
@HWI-EAS443:3:47:1247:277#0/1  
CAACACTAAGNGGAATGAAAATCAAATCCTCGGATGTTC  
+HWI-EAS443:3:47:1247:277#0/1  
]ZZ\_aZ`V]^D]a\_]ab^UV^a\_a^\_a]ZPX\_\_aUX[PNB  
@HWI-EAS443:3:68:1428:649#0/1  
ATTTCTAGCATGGTGGAGGCCATGGTGCCTAGNGCCCGGA  
+HWI-EAS443:3:68:1428:649#0/1  
aaaa]^aabaW¥\_V^Z¥Y`a^^]SSK^EVTYZDX^TY^XY  
@HWI-EAS443:3:13:565:29#0/1  
GGACTTCTTTTCTCATGTTGATTCCCACTAACTGCAGG  
+HWI-EAS443:3:13:565:29#0/1  
`a`a\_a^aabb\_aaaaa\_abaa`\_`\_`\_aa`\_aaZ^a[  
@HWI-EAS443:3:40:461:154#0/1  
GAGGATTTTGATTTTCATTCCACTAGTGTGCCCCAGTG  
+HWI-EAS443:3:40:461:154#0/1  
`RVYX[``]X]UWWZ\_¥YWQRYQVXGZTQTQY[BBBBB  
@HWI-EAS443:3:94:788:1462#0/1  
CTCCAGTATAAGGGAATGTGTGCTTATGGCATTGTGCGCT  
+HWI-EAS443:3:94:788:1462#0/1  
¥RaY`\_S\_\_aa\_]\_^H\_^[Q^aaa`\_`[Z¥]\_]R][S^`\_  
@HWI-EAS443:3:95:488:878#0/1  
TTGAATCACAAGCTTTTTTATCGCTATGGATTTGTGGCT  
+HWI-EAS443:3:95:488:878#0/1  
\_^ab\_]EYaSa\_\_aa\_aaab`\_SXTa[a[[S``aV[\_T^`  
@HWI-EAS443:3:22:549:457#0/1  
ACGGCATCATATTCCATGCTTTTGGCTGGACCATACAGAA  
+HWI-EAS443:3:22:549:457#0/1  
\_^XYYa`V`^[^a\_]Ya¥Zaabaaba]XZ`X[^`]Y`\_¥a  
@HWI-EAS443:3:27:1454:473#0/1  
ACGGCATCATATTCCATGCTTTTGGCTGGACCATACAGAA  
+HWI-EAS443:3:27:1454:473#0/1  
aab`\_ab[`baaa`[aab[aaaaaa[aa`XY[\_`¥R^^`^  
@HWI-EAS443:3:54:955:211#0/1  
GGTCCAGCCAAAAGCATGGAATATGATGCCGTTGAAAGTA

+HWI-EAS443:3:54:955:211#0/1  
abU\_IW\_V][W`¥]L]¥aYV[\_^X[¥^a]S]U^BBBBBBBB  
@HWI-EAS443:3:94:467:1603#0/1  
TGGCTATAGTATCAGATGGAGGACCAAATTATACAATAT  
+HWI-EAS443:3:94:467:1603#0/1  
aa]a`aYYYYV[XY[^XWX`Xa]RVSYS`]GVVYUVNT]P[M  
@HWI-EAS443:3:97:363:523#0/1  
GGGGGAGTCGCCAGACTTATGATTGGACATTAACAGAAA  
+HWI-EAS443:3:97:363:523#0/1  
abaa`^^[\_a`^\_a\_\_\_a]\_a]\_\_`^\_U]`\_\_\_]X`]^\_`  
@HWI-EAS443:3:12:1651:659#0/1  
TTCCTGTTCCCTGTTCCATGGCTGTATGGAGGATATCCAGG  
+HWI-EAS443:3:12:1651:659#0/1  
aaa[aaa`^]aa`\_VFRaba]a`PPU\_UL`\_NRGXRBBBB  
@HWI-EAS443:3:48:1534:1224#0/1  
GTTTCATCCTCAAGAATCCCTTTGGCTTGTGTTGTGTAT  
+HWI-EAS443:3:48:1534:1224#0/1  
aPV¥^L^X[^XPaYLP[]NUPW`URNVYV[BBBBBBBBBBBB  
@HWI-EAS443:3:54:1211:96#0/1  
TGGGTCTTCTTTTTGCTCATGTTGATTCCCACTAACTTGC  
+HWI-EAS443:3:54:1211:96#0/1  
`a[VXaa¥`ab\_\_\_X[]¥aa^XaaZSa\_^\_\_\_]a\_Z[^]a]  
@HWI-EAS443:3:9:379:1084#0/1  
GTATCCTGTTCCCTGTTCCATGGCTGTATGGAGGATGCTCA  
+HWI-EAS443:3:9:379:1084#0/1  
a]T\_[\_[UUY`^[[P¥a^L^]¥UBBBBBBBBBBBBBBBBB  
@HWI-EAS443:3:63:434:1699#0/1  
GCGTCTTCAATGGTGGAACAGATCTTCATGANCTCAGAG  
+HWI-EAS443:3:63:434:1699#0/1  
\_K]Saaab¥a`aXZM`¥Yaaba`\_\_`]aa[NYD¥\_\_\_Za^  
@HWI-EAS443:3:16:922:985#0/1  
GGAATTTCTAGCATGGTGGAGCCATGGGGTCTAGGGCCT  
+HWI-EAS443:3:16:922:985#0/1  
]¥XRTZ\_a[WK\_Q[ZZQXbQ`b[J]a¥a¥KXM[RaQ\_P¥YM  
@HWI-EAS443:3:1:717:323#0/1  
GGGGAGTCTCGATACTGAATCTTGGTCAAAGAAATACAC  
+HWI-EAS443:3:1:717:323#0/1  
\_baT^U^SILPMSOR]WWZYQ`SGGSS\_\_XO¥WBBBBB  
@HWI-EAS443:3:22:60:1120#0/1  
ATCCTGTTCCCTGTTCCATGGCTGTATGGAGGAACTCCAGG  
+HWI-EAS443:3:22:60:1120#0/1  
X`abaaababaaaa\_aaa``aaa¥]R\_BBBBBBBBBBBBBB  
@HWI-EAS443:3:64:360:1426#0/1  
ACATGGTGGAGCCATGGGGTCTAGGGCCCGGATTGATGC  
+HWI-EAS443:3:64:360:1426#0/1  
``aUa\_U\_]VV¥a¥`QU¥FPKWRXP]PXVRIMXXXVMBBB  
@HWI-EAS443:3:87:1141:1706#0/1  
GGGGACATTTGAATTCAGAAGCTTTTTTTTATCGCTATGGA  
+HWI-EAS443:3:87:1141:1706#0/1  
a\_VTS^^[\_^¥X`VYTaH[^][^]`aa``a`QY`a¥`\_Z^



@HWI-EAS443:3:93:1726:628#0/1  
TTCCTGTTCCCTGTTCCATGGCTGTATGGAGGATGTCCAGT  
+HWI-EAS443:3:93:1726:628#0/1  
¥]`aaZX^U^\_RY`[Y^aa^BBBBBBBBBBBBBBBB  
@HWI-EAS443:3:97:1549:782#0/1  
GGTCTGGATACTGAATCTTGGACAAAAGAAATACACCAAG  
+HWI-EAS443:3:97:1549:782#0/1  
ab]`aIaK`aJZXZb^a`XbbYUb¥aaaaa^R`IYWWaYW  
@HWI-EAS443:3:11:1105:496#0/1  
ATTTGAGGATTTTGTATTTTCATTCCACTTAGTGTTGTCCC  
+HWI-EAS443:3:11:1105:496#0/1  
aabababb\_a`^abaaaa`aaa`\_\_\_aaa`Ya^\_a^Z¥¥  
@HWI-EAS443:3:17:628:1802#0/1  
CAGCAACATTCCGAGGATTTTGTATTTTCATTCCACTTAGTG  
+HWI-EAS443:3:17:628:1802#0/1  
\_a¥XY`a`[WS]]PY`¥`[a\_VXS`aaa`\_a]`\_`\_W\_  
@HWI-EAS443:3:19:144:1260#0/1  
GCACCGGCATCATATTCCATGCTTTTGGCTGGACCATGGG  
+HWI-EAS443:3:19:144:1260#0/1  
a`]]`NOZX0¥`]ZUW[ZWWSMT¥UXXBBBBBBBBBBBB  
@HWI-EAS443:3:21:1771:809#0/1  
GCGGAAAATGCCATAAGCACCATTCCTTATACTGGAG  
+HWI-EAS443:3:21:1771:809#0/1  
aZUDOU[U¥XTIU^WZLHRPJWS[ZUQJORVTTQVWUBB  
@HWI-EAS443:3:28:1475:571#0/1  
AATTTCTAGCATGGTGGAGCCATGGTGTCTAGGGCGCGG  
+HWI-EAS443:3:28:1475:571#0/1  
\_\_\_b`^`[\_T]a[[[U¥XYZ^\_WQWRXWTRP\_aaTELa\_  
@HWI-EAS443:3:30:1333:1633#0/1  
CAAAGGGATTACAGGGATTACAAAGTCTTCCCGATGATC  
+HWI-EAS443:3:30:1333:1633#0/1  
\_aI]TWTY\_`baW[\_a]`^¥`\_aaTU`a`a^T]aIXYP  
@HWI-EAS443:3:30:915:1198#0/1  
GTTGCAACGGCATCATATTCCATGCTTTTGGCTGGAGCAT  
+HWI-EAS443:3:30:915:1198#0/1  
a[\_YP\_^ab`^^Zaaab^¥]]^^][RX\_[RBBBBBBBBBB  
@HWI-EAS443:3:3:1765:1234#0/1  
ATCTTCACATTCCTGAAGTCTGCTTAAAATGGGAGCGCTA  
+HWI-EAS443:3:3:1765:1234#0/1  
\_aabbaa\_aaaa\_\_[\_Ua`N`aVaaa\_]\_aa`\_^aR`]^B  
@HWI-EAS443:3:59:719:135#0/1  
CTTCACATTCCTGAAGTCTGCTTAAAATGGGAGCTAGTGG  
+HWI-EAS443:3:59:719:135#0/1  
abbaab[bba`abaaaN]`baaaa\_Q`aaaa]b\_\_YV^\_\_  
@HWI-EAS443:3:60:553:986#0/1  
CGGGCTTCTTTTGTCTCATGTTGATTCCCACTAACTTGCA  
+HWI-EAS443:3:60:553:986#0/1  
``bbbbbbbabababbbbaaaaaaaa`aaaaa]]`a  
@HWI-EAS443:3:62:98:1905#0/1  
GACAACACTAAGTGAATGAAAATCAAATCCTCGACTGT

+HWI-EAS443:3:62:98:1905#0/1  
¥Z`¥QRYa[\_V[LS¥baaaaa]a`aa`QYaS^a\_WDW`Y  
@HWI-EAS443:3:7:1447:1730#0/1  
CTGGGGACAACACTAAGTGGAAATGAAAATCAAATCATCG  
+HWI-EAS443:3:7:1447:1730#0/1  
ab\_^Xbb^\_XN\_UPUU¥S`ab\_\_bba]Z\_S\_`^Z\_ZH^`a  
@HWI-EAS443:3:84:183:1007#0/1  
CAACATGCCATAAGCACCACATTCCCTTATACTGGAGATC  
+HWI-EAS443:3:84:183:1007#0/1  
a]\_MbaUPZ``\_00Ub`[\_a^X^`\_aTXZL^Q\_]`\_\_VE  
@HWI-EAS443:3:89:140:1610#0/1  
ATCTGTTCATCCTCAAGAATCCCCTTTGGCTTGTGGTGA  
+HWI-EAS443:3:89:140:1610#0/1  
Y`aZ]SZZ^ba]\_````]W\_a]\_[¥aXKW¥^ZRTWFZ^^  
@HWI-EAS443:3:93:1111:945#0/1  
GGGAGTCTCGATACTGAATCTTGGACAAAAGAAATAGACC  
+HWI-EAS443:3:93:1111:945#0/1  
`aY]]ab``\_]a\_b`aXa¥aa¥NL]aZ]YZ\_aaSNFXXV  
@HWI-EAS443:3:96:348:378#0/1  
AGATTCTACAGGACCTGCAAGTTAGTGGGAATCAACTGAG  
+HWI-EAS443:3:96:348:378#0/1  
aaaa`a`a\_a¥a``a[``aa^a`Y`a]\_\_\_\_\_^Z^\_]a  
@HWI-EAS443:3:9:534:1870#0/1  
GAGAATTGGAGTAACAGTGATAAAGAACAACATGATAAAC  
+HWI-EAS443:3:9:534:1870#0/1  
aa`Obba`ba\_\_a`a`¥K[aaaabaaa[aaGa\_aaTaaby  
@HWI-EAS443:3:100:1566:972#0/1  
GCTGCCGGTTGATTTCTGTTAATGTCCAATAATAAGTCT  
+HWI-EAS443:3:100:1566:972#0/1  
aY^a`]UZR^U\_]¥QZa[Wa\_\_\_\_`YKR]^XHQ]`\_[WBB  
@HWI-EAS443:3:100:1662:434#0/1  
GGGAATACAAGCAGGAGTGGAGAGATTCTACAGGACCTGC  
+HWI-EAS443:3:100:1662:434#0/1  
\_\_aXX`\_X`\_aZ`\_YY`Y`aTDWXY]^QWXQP\_a\_YLLTBB  
@HWI-EAS443:3:100:1702:216#0/1  
GATAAACTAACTCAAGGTCGCCAGACTTATGATTGAACAT  
+HWI-EAS443:3:100:1702:216#0/1  
aaa\_YbaaaaSV^aa\_¥Q\_]Q`\_YaH\_a\_aaUa\_[J][P\_B  
@HWI-EAS443:3:100:1790:407#0/1  
AAATGCCATAAGCACCACATTGCCTTATACTGGAGATCCT  
+HWI-EAS443:3:100:1790:407#0/1  
^`\_OWX]VZ[b`a]b]aa`\_[DS[\_SX\_]S¥V¥X`Y]\_BB  
@HWI-EAS443:3:100:444:42#0/1  
GCATGGTGGAGGCCATGGTGTCTAGGGTCCGGATTGATGC  
+HWI-EAS443:3:100:444:42#0/1  
a¥HRa¥0\_¥N¥]NVTU¥¥PVNRSTZTVBBBBBBBBBBBBB  
@HWI-EAS443:3:12:57:812#0/1  
GACTTATGATTGGACATTATACAGAAATCAACCGGCAGCA  
+HWI-EAS443:3:12:57:812#0/1  
TT[\_\_\_^¥aZ`aa]\_\_\_^X^a]UZ\_]`\_]`^`]FY^Y¥^`]B

@HWI-EAS443:3:17:1529:1193#0/1  
TTATACTGGAGATCCTCCATACAGCTATGGAACAGGAACA  
+HWI-EAS443:3:17:1529:1193#0/1  
a``Ya[aba`U`\_\_WX^\_adWY`^PGWYX^\_Z¥5]Y`OBB  
@HWI-EAS443:3:17:1538:1162#0/1  
GTTGGAATTTCTAGCATGGTGGAGGCCATGGGGTCTAGGG  
+HWI-EAS443:3:17:1538:1162#0/1  
^Rab^a^ab`aZaaV[`^\_\_]¥^Y[UX]]\_YGRUQENUSB  
@HWI-EAS443:3:18:1009:906#0/1  
TAGCTCCCATTTTAAGCAGACTTCAGGAATGCGAAGATTC  
+HWI-EAS443:3:18:1009:906#0/1  
UZa`\_^ab^```aa¥J[aaZW¥`V[]\_JV\_VFVP^a[X\_P  
@HWI-EAS443:3:1:1561:1395#0/1  
ATTGGAGTAACAGAGATAAAGAACAACATGATAAACAATG  
+HWI-EAS443:3:1:1561:1395#0/1  
¥VX`\_^U`a[U¥I^R^aaU^[^¥\_aTLb\_\_`aa\_a¥a\_B  
@HWI-EAS443:3:20:1262:1409#0/1  
TTTTTTATCGCTATGGATTTGTGGCTAATTTTAGCGTGGA  
+HWI-EAS443:3:20:1262:1409#0/1  
`a`[\_ZaX`KaQUZ]]TTPWSVOPV\_¥WXVU\_WFO[]W  
@HWI-EAS443:3:20:364:1098#0/1  
TGCCGGTTGATTTCTGTTTAATGTCCAATCATAAGACTGG  
+HWI-EAS443:3:20:364:1098#0/1  
]a\_baM`b`Z[aXT¥a`ba[[bONZ`\_babbb``Gb\_NX  
@HWI-EAS443:3:20:977:736#0/1  
AATTTCTAGCATGGTGGAGGCCATGGGGTCTAGGGCCCGG  
+HWI-EAS443:3:20:977:736#0/1  
]Q^b¥V\_b^Z^`^\_P^^^ba\_aaW^^EZX`YVUZ¥¥S^`]  
@HWI-EAS443:3:21:381:927#0/1  
TAAGCACCACATTCCTTATACTGGAGATCGTCCATACAG  
+HWI-EAS443:3:21:381:927#0/1  
^`baUZWYWT^abUOH0a`U[¥]\_QaS[`ZFZ]Ma\_\_^aa  
@HWI-EAS443:3:21:847:990#0/1  
ATAAGCACCACATTCCTTATACTCGAGATCCTCCATACA  
+HWI-EAS443:3:21:847:990#0/1  
aaa]]abaaaaa`aa`a\_a`T\_R]^\_[\_]`^\_X]Y\_Y\_  
@HWI-EAS443:3:22:800:1758#0/1  
ATCAAAATCCTCGAATGTTCTGACGATGATTACATATAT  
+HWI-EAS443:3:22:800:1758#0/1  
^UWY\_¥WDORN RV^PPS^P¥^PQLR[ZXY]ZV[¥^[ZY^P  
@HWI-EAS443:3:22:916:1944#0/1  
ATCAAAATCCTCGAATGTTCTGCGATTATTACATATAT  
+HWI-EAS443:3:22:916:1944#0/1  
`bbaa^Ya`^b]GXa¥][aaY[YVYZY[FVa`XXQ^SV`\_  
@HWI-EAS443:3:23:1206:1237#0/1  
GACCGTTGGAATTTCTAGCATGGTGGATGCCATGGTGTC  
+HWI-EAS443:3:23:1206:1237#0/1  
`aQ`aZab\_bb\_aa]]a\_RHYaa]Ga¥`G^`]ZNVXKOB  
@HWI-EAS443:3:24:232:153#0/1  
ATTTCTAGCACGGTGGAGGCCATGGTGTCTAGGGCCCGGA

+HWI-EAS443:3:24:232:153#0/1  
` `aaaaa\_aaaaZ`a`^¥`\_¥U`¥F¥U`T¥^XX^¥^¥ZN  
@HWI-EAS443:3:24:872:609#0/1  
CTAAGTCAAGGTCGCCAGACTTATGATTGGACATTAAACA  
+HWI-EAS443:3:24:872:609#0/1  
a`¥]ITY]P[¥VYS`R[¥T` `]]b¥UX`]aaaY]Y¥a\_a  
@HWI-EAS443:3:24:945:882#0/1  
GCCGGATGATTTCTGTTTAATGTCCAATCATAAGTCTGGC  
+HWI-EAS443:3:24:945:882#0/1  
a][`SD[S]YYY`^`VXaWVXaMV[ `LJB BBBB BBBB  
@HWI-EAS443:3:27:1738:1703#0/1  
CGCCAGACTTATGATTGGACCTTAAACAGAAATCAACCGG  
+HWI-EAS443:3:27:1738:1703#0/1  
aba^RaW`^\_a^[]\_a[^\_]G`W[^\_Waa^\_]`Za¥HT\_^  
@HWI-EAS443:3:2:1715:1191#0/1  
AATCAGTGGGACAACACTAAGTGAATGAAAATCAAAT  
+HWI-EAS443:3:2:1715:1191#0/1  
^^a[TH\_Z]\_¥RS[aIS[ ` ` ]\_]VU^]YZa`aa`\_^aBB  
@HWI-EAS443:3:2:416:2003#0/1  
GAACATTCGAGGATTTTGATTTTCATTCAACTTAGTGTTG  
+HWI-EAS443:3:2:416:2003#0/1  
abaMa[¥VW^`aa]¥aW\_a\_[^^\_bUa[H`Y\_]bUHYSWN  
@HWI-EAS443:3:2:876:1070#0/1  
TTCAGGTCAGTCTGCTTAGCATTCTGCTGGTATTTGTG  
+HWI-EAS443:3:2:876:1070#0/1  
^ZY`^ZS`^MW^Z[aa\_` `[H]aa\_T\_^PYaa\_YZ\_\_aZ]  
@HWI-EAS443:3:30:1393:82#0/1  
CAAATGCCATAAGCACCACATTCGGTTATACTGGAGATC  
+HWI-EAS443:3:30:1393:82#0/1  
¥ababV\_bbbb[ `Y`TGT\_VRbY]UG[ `ab¥TYbaabaYO  
@HWI-EAS443:3:31:498:1181#0/1  
AACATTCGAGGATTTTGATTTTCATTCCACTCAGTGTTGT  
+HWI-EAS443:3:31:498:1181#0/1  
]N\_RXHZ[O^XOZWUJ¥VR\_[]WLWR\_ZOXVDTLNTPVXT  
@HWI-EAS443:3:32:1191:179#0/1  
GGCTCCAATCATCCGACGATTTTGCCCTCATAGTGAATGC  
+HWI-EAS443:3:32:1191:179#0/1  
abaaabVb`V`b\_Qa\_U\_aaaa^UVF[a\_\_` `bZa\_a¥[Z  
@HWI-EAS443:3:32:1784:1548#0/1  
GCCGGTTGATTTCTGTTTAATGTCCAATCATAAGTGTGGC  
+HWI-EAS443:3:32:1784:1548#0/1  
aaa`\_NUUWUVS]Y`R`^Y^S`Y^]]MUMW`LNVMDR¥¥T  
@HWI-EAS443:3:32:941:1551#0/1  
TTCTAGCATGGTGGAGGCCATGGTGTCTAGGGCGCGGATT  
+HWI-EAS443:3:32:941:1551#0/1  
]ab`^Wa`Ua`PaaXaa¥bR\_aS^PYXKX¥Z¥VHU¥GHFT  
@HWI-EAS443:3:33:1704:1028#0/1  
TAAGCACCACATTCCTTATACTGGAGATCCTGCATACAG  
+HWI-EAS443:3:33:1704:1028#0/1  
aa^a`baaa^aa^]a0`\_a`a] ` ]\_\_^\_VFVYFQWWZRZ]

@HWI-EAS443:3:33:363:142#0/1  
CGCAACATGCCATAAGCACCACATTCCCTTATACTGGAGA  
+HWI-EAS443:3:33:363:142#0/1  
X\_`¥^I¥UX`ab`ab^a^\_]aaaa`bW\_[`\_]Z\_\_XU[Z  
@HWI-EAS443:3:34:1618:690#0/1  
GTGTAGTTGCAACGGCATTATATTCCATGCTTTTGGCTGG  
+HWI-EAS443:3:34:1618:690#0/1  
Z¥\_W\_aaba`aa]a`\_\_^W]`]`aa^\_aaaaa^^]QMSBB  
@HWI-EAS443:3:34:26:724#0/1  
GTCCATGGTGTATCCTGTTCCCTGTTCCATGGCTGGATGGA  
+HWI-EAS443:3:34:26:724#0/1  
aaa[0^aa¥aYW`aa`a`]a``a\_Z^`¥[^BBBBBBBBBB  
@HWI-EAS443:3:36:1562:578#0/1  
ATCCTGTTCCCTGTTCCATGGCTGTATGGAGGATTTCCAGT  
+HWI-EAS443:3:36:1562:578#0/1  
Q\_\_[\_W^W[¥]aZ]ZR\_[\_\_^\_VMF^VX¥\_[FUKYP\_HSH  
@HWI-EAS443:3:37:1177:251#0/1  
ATTTCTAGCATGGTGGAGGCCATGGTGTGAGGGCCCGGA  
+HWI-EAS443:3:37:1177:251#0/1  
aabaaaaa^b]aa`^a[a`^]a\_aaU^UXER`^^[U[]`U  
@HWI-EAS443:3:37:1461:1491#0/1  
GCCATCTATTAGAAGAGGCCTTATTTTCTGAATTTCTTC  
+HWI-EAS443:3:37:1461:1491#0/1  
aba`]ababaaa[\_aT\_a¥¥aaaaaaa\_\_MSYaaaa`a^  
@HWI-EAS443:3:37:686:240#0/1  
CATGGCTGTATGGAGGATCTCCCGTATAAGGGAATGTGGT  
+HWI-EAS443:3:37:686:240#0/1  
aabbabb`GVQT^[W]PRXZW¥UVTFZTHF`]MQVHJT]J  
@HWI-EAS443:3:38:1333:1538#0/1  
ACCGTTGGAATTTCTAGCATGGTGGAGGACATGGTGTCT  
+HWI-EAS443:3:38:1333:1538#0/1  
a]bab[`bbba]b`]`aa]``¥¥Va\_`[aGSYYMYPXTTS  
@HWI-EAS443:3:38:503:1458#0/1  
GTTCTTCAATGGTGAACAGATCTTCATGATGTCAGAGAA  
+HWI-EAS443:3:38:503:1458#0/1  
aI\_`aMYV`S`]TXY\_`[aVQY``\_aa0^^FFRZ]Z^XVN  
@HWI-EAS443:3:39:1442:1449#0/1  
CTGCCGGTTGATTTCTCTTTAATGTCCAATCATAAGTCTG  
+HWI-EAS443:3:39:1442:1449#0/1  
aabaabb]aa`aaa`aYaaa\_aaaZa]``a^^\_¥V`¥[X¥  
@HWI-EAS443:3:40:1428:259#0/1  
TGGCTGTATGGAGGATCTCCAGGATAAGGGAATGTGGTGC  
+HWI-EAS443:3:40:1428:259#0/1  
\_`Za^aa^a\_Y^b\_UXZ\_a^X¥JT¥LIYZaS`QMT]XPVH  
@HWI-EAS443:3:40:1642:969#0/1  
GCCGGTTGATTTCTGTTAATGTCCACTCATAAGTCTGGC  
+HWI-EAS443:3:40:1642:969#0/1  
a\_^`aWa]Y¥a`Z``¥aa[```YYVLFXa\_^^YVS]^XXT  
@HWI-EAS443:3:40:585:1427#0/1  
ATGGAGGAACAGATCTTCATGATCTCAGAGAACTCTTCTT

+HWI-EAS443:3:40:585:1427#0/1  
\_Z[RFUT\_^`U¥U\_Z[abb\_ab`^`RHXH^T`]b\_¥Y`a  
@HWI-EAS443:3:43:131:293#0/1  
CTTATTTATCTAGGACTTCTTTTTGCTCATGTTGATTCCC  
+HWI-EAS443:3:43:131:293#0/1  
abaabbbbbbab\_babbbbbbbbbbbbabbbabababa`  
@HWI-EAS443:3:43:230:337#0/1  
AACTACCTCAAGGTCGCCAGACTTATGATTGGACATTA  
+HWI-EAS443:3:43:230:337#0/1  
\_a\_N¥H]]ab\_ZP`TR¥]]MYa]\_^]WYWZDRJRX¥`\_Y  
@HWI-EAS443:3:43:670:824#0/1  
TGGAATTTCTAGCATGGTGGAGGCCATGGGGTCTAGGGCC  
+HWI-EAS443:3:43:670:824#0/1  
abbaa\_[\_\_aaa]a^a]QSUOV^¥¥BBBBBBBBBBBBBB  
@HWI-EAS443:3:44:1605:1723#0/1  
GATAAAAAAGCCTGTGAATTCAAATGCCCTGTCTTATT  
+HWI-EAS443:3:44:1605:1723#0/1  
aaaaaaaaa\_a]\_^Zaaa```a\_\_\_HVQX\_`¥Sa\_\_a^  
@HWI-EAS443:3:45:1044:1985#0/1  
CACTAAGCGGAATGAAAATCAAATCCTCGAATGTTCCCTG  
+HWI-EAS443:3:45:1044:1985#0/1  
aaab\_a^Q\_\_aabbbbbbb^bbab\_¥\_a[ba\_aa¥\_\_^`b  
@HWI-EAS443:3:45:502:511#0/1  
GGAGATCCTCCATACAGCCATGGAACAGGAACAGGCTACA  
+HWI-EAS443:3:45:502:511#0/1  
]W¥\_¥aXX^\_W[ ]\_¥b]Y¥bbba\_SXabaaaabZOT^T[  
@HWI-EAS443:3:46:684:1397#0/1  
TTGCTGCCGTTGATTTCTGTTAATGGCCAATCATAAGT  
+HWI-EAS443:3:46:684:1397#0/1  
`ab]WWa`ZYJVR[NX]ZSJM\_VH]OIL]ZTNUSBBBBBB  
@HWI-EAS443:3:49:1121:462#0/1  
TGCAACGGCATCATATCCATGCTTTTTGGCTGGACGATGG  
+HWI-EAS443:3:49:1121:462#0/1  
\_bbabab\_\_\_^^ba\_abb``aa`bb]a^\_Z\_aaZHHRQ]`  
@HWI-EAS443:3:49:148:983#0/1  
GGTGTATCCTGTTCCCTGTTCCATGGCTGGATGGAGGATCT  
+HWI-EAS443:3:49:148:983#0/1  
abZ`\_aaa`baaa`\_aaa`\_`\_a`a^\_a^GUYJURV[MUL¥  
@HWI-EAS443:3:4:1525:58#0/1  
CAAAGGGATTACGGGATTACAAAGTCTTCCCCGATAATC  
+HWI-EAS443:3:4:1525:58#0/1  
]\_bbbbbab`a`R¥a`\_aa^^^]a]S`[LTRTa^^]W^B  
@HWI-EAS443:3:4:202:501#0/1  
GACCGTTGGAATTTTTAGCATGGTGGAGGCCATGGTGTC  
+HWI-EAS443:3:4:202:501#0/1  
a^`aaaYa`a^^YUQ^^¥aRYY`\_U`YS^^¥U¥^UUMUBB  
@HWI-EAS443:3:51:1265:1068#0/1  
CTTTAGCTAGGAGCATTGCGAAAAGCTTGAACAGCCTGG  
+HWI-EAS443:3:51:1265:1068#0/1  
^^a\_SZ^¥¥`\_S[HY`W¥`]aXSaRLUI¥X^XJ]^G]ZW`

@HWI-EAS443:3:54:1470:2030#0/1  
GAGTAACAGTGATAAAGAACAACATAATAAACAATGACCT  
+HWI-EAS443:3:54:1470:2030#0/1  
a]]¥`\_TF`Xa\_\_\_\_]P][`U^\_X]^V\_Z^Z^U¥0^\_ZZZZ  
@HWI-EAS443:3:54:203:852#0/1  
AATTTCTAGCATGGTGGAGGCCATGGTGTCTAGGCCCCCGG  
+HWI-EAS443:3:54:203:852#0/1  
`]b`TZP[T¥H]aZX``T\_^SVPO^]GYKFP¥BBBBBBBB  
@HWI-EAS443:3:54:625:405#0/1  
CATCTGTTTCATCCTCAAGAATCCCTTTGGCTTTTGTG  
+HWI-EAS443:3:54:625:405#0/1  
^WQZ\_`[XR`¥ZZV`]^bYVYV\_]\_W\_Z\_^¥XY[NZ¥]]Y  
@HWI-EAS443:3:55:1515:2032#0/1  
CACAAATACCAGCAGAAATGCTAGCAAGCATTGAGCTGAA  
+HWI-EAS443:3:55:1515:2032#0/1  
aYS^^[I¥a\_[\_abbb^^^`aaaaYV]^I\_Ua`]FXX`\_a  
@HWI-EAS443:3:56:1587:766#0/1  
CGAGGATTTTGATTTTCATTCCACTTAGTTTTGTCCCCAG  
+HWI-EAS443:3:56:1587:766#0/1  
aaaa^aabbb``baaa\_aaaa\_\_\_\_aa\_a\_aaaa`^]^[\_a  
@HWI-EAS443:3:56:1620:1938#0/1  
TGAGGATTGGAGTAACAGTGATAAAGAACAACATGATAAA  
+HWI-EAS443:3:56:1620:1938#0/1  
abR¥H¥bWb\_¥b¥`][\_a\_Y[¥US]]T^]aa[\_\_\_`P[UY]  
@HWI-EAS443:3:58:594:1260#0/1  
CTCCAGTATAAGGGAATGTGGTGTGGCATTGTGGC  
+HWI-EAS443:3:58:594:1260#0/1  
ab]b\_\_JU]b¥[]\_NV`][[aWV^a\_aN]``W]`XZ`\_a\_  
@HWI-EAS443:3:59:1506:1385#0/1  
GTCCATGGTGTATCCTGTTCCCTGTTCCATGGCTGTGTGGA  
+HWI-EAS443:3:59:1506:1385#0/1  
aaa]aabb```baaZbba]`aababaa\_b^\_Ua`JFQ`BB  
@HWI-EAS443:3:59:965:460#0/1  
GCATCATATTCCATGCTTTTGGCTGGACCATGGGGTGGCA  
+HWI-EAS443:3:59:965:460#0/1  
ZLYTL^b]WJW¥]`YY]a`V¥aBBBBBBBBBBBBBBBBBB  
@HWI-EAS443:3:5:1099:387#0/1  
TCACTGGGACAACACTAAGTGAATGAATATCAAAATCC  
+HWI-EAS443:3:5:1099:387#0/1  
aaa\_aaabZa``a\_a]`a`^a`\_aaaa\_``\_`aa``ZYB  
@HWI-EAS443:3:62:1654:314#0/1  
TCCAGCGAAAATGCCATAAGCACCAAATCCCTTATACT  
+HWI-EAS443:3:62:1654:314#0/1  
TYaab`\_WVS^aX[X\_^aW^T¥WLZFRRPZ¥Z`US[a¥[  
@HWI-EAS443:3:63:529:1796#0/1  
GTTGGAATTTCTAGCATGGTGGAGGCCATGGTGTGAGGG  
+HWI-EAS443:3:63:529:1796#0/1  
aG`a¥]Z`^Y]`^U^[^]QZ[Z\_¥¥`WV¥BBBBBBBBBB  
@HWI-EAS443:3:65:797:1729#0/1  
ACTAGGTGAATGAAAATCAAAATCCTCGAATGTTCTGG

+HWI-EAS443:3:65:797:1729#0/1  
ab\_\_G]Xaa]a`^aaaa`aa^a¥aaaa\_\_aaa^`\_`\_`]  
@HWI-EAS443:3:67:852:553#0/1  
ATCCTGTTCCCTGTTCCATGGCTGTATGGAGCATCTCCAGT  
+HWI-EAS443:3:67:852:553#0/1  
R[^PZ[^XZ\_¥\_RNRa¥Q]BBBBBBBBBBBBBBBBBBBB  
@HWI-EAS443:3:69:1559:1037#0/1  
GTTGGAATTTCTAGCATGGTGGAGGCCATGGAGTCTAGGG  
+HWI-EAS443:3:69:1559:1037#0/1  
a`ZOXa^`aa`\_VZ¥` [ZXP¥^\_X¥BBBBBBBBBBBBBBBB  
@HWI-EAS443:3:6:316:1794#0/1  
ATGTAATCATCGCCATGAACATTCGAGGATTTTGATTTTC  
+HWI-EAS443:3:6:316:1794#0/1  
`bbabbaaaaT`^aaUabaa`aV` ]\_a^[^a\_a\_\_`a\_\_a  
@HWI-EAS443:3:6:965:415#0/1  
GTTCTGTTCCATGGCTGGATGGAGGATCTCCAGTATAAG  
+HWI-EAS443:3:6:965:415#0/1  
aXaaaab`a¥aaba\_a`GP[[ZW^VG[ZRXU¥`QPUBBB  
@HWI-EAS443:3:71:1407:884#0/1  
CTTTCAAAGAAAAGGAGAGTAAGAGACAACATGAGCAAG  
+HWI-EAS443:3:71:1407:884#0/1  
`baaaaa`[X`S^ab\_Rb\_`\_^\_a`ba\_aa\_`^b^IZ¥\_\_  
@HWI-EAS443:3:72:59:844#0/1  
GAAAATCAAATCCTCCAATGTTCTGCGGATGATTACAT  
+HWI-EAS443:3:72:59:844#0/1  
`\_V^^¥XTZYUU\_aa]WVLW]PQ`ZJZUY]UVF[KWY]TJ  
@HWI-EAS443:3:73:542:1374#0/1  
GAGTTCTTCAATGGAGGAACAGATCTTCATGATCTCAGAG  
+HWI-EAS443:3:73:542:1374#0/1  
Za¥¥babba`^¥[D^a`bbb^`]aa\_bba`ZYa\_]^[a\_  
@HWI-EAS443:3:76:81:69#0/1  
GAAAATCAAATCCTCGAATGTTCTGCGGAGGATTACAT  
+HWI-EAS443:3:76:81:69#0/1  
a`aXR[UZUMS\_[aU`PTZ¥\_I[\_BBBBBBBBBBBBBBBB  
@HWI-EAS443:3:78:624:1260#0/1  
AAGCACCACATTGCCTTATACTGGAGATCCTCCATACAGC  
+HWI-EAS443:3:78:624:1260#0/1  
aa[BBBBBBBBBBBBBBBBBBBBBBBBBBBBBBBBBBBB  
@HWI-EAS443:3:7:1281:1001#0/1  
ATCCTGTTCCCTGTTCCATGGCTGTATGGAGGATCTACAGT  
+HWI-EAS443:3:7:1281:1001#0/1  
^Z^MaYMZ]¥bb\_] [a`\_^Y\_^¥^ZS¥0`aZUESF[BBB  
@HWI-EAS443:3:7:1501:297#0/1  
TCTCGATAATGAATCTTGGACAAAAGAAATACACCAAGAC  
+HWI-EAS443:3:7:1501:297#0/1  
a\_YL\_abaNZ`RG]U`^^\_NQ` [[YW\_\_a¥OS[[[]]¥VJ  
@HWI-EAS443:3:81:1423:1187#0/1  
TGGAGGATCTCCAGTATAAGGGGATGTGGTGCTTATGGCA  
+HWI-EAS443:3:81:1423:1187#0/1  
\_a[MbV^NYb]USbU[\_¥[`a^PNb^HKK`XXb`X^`\_S\_



@HWI-EAS443:3:81:971:930#0/1  
GGGCCCCAGACACCATGGCCTCCACCATGCTAGAAATTCC  
+HWI-EAS443:3:81:971:930#0/1  
[``^WQPYaT]]^]GRa`XZRZ\_`\_`aVOM¥ZQGQ[PXT  
@HWI-EAS443:3:83:1244:986#0/1  
ACATGGGCAAAAAGAAGTCCTATATAAATAAGACAGGGAC  
+HWI-EAS443:3:83:1244:986#0/1  
^\_US¥HY¥¥YTZaa[Ua[^V¥X\_WX\_[\_aXP\_] ^ZZWSNG  
@HWI-EAS443:3:83:1675:278#0/1  
AATCAAAATCCTCGAATGTTCTGGCGATGATTAATATA  
+HWI-EAS443:3:83:1675:278#0/1  
]]baaa`^a^`\_YSVb``\_aa````[WZ[ab\_\_^WDQR``a  
@HWI-EAS443:3:83:1699:382#0/1  
ATTTCTAGCATGGTGGAGGCCATGGTGTCTAGGGCGCGGA  
+HWI-EAS443:3:83:1699:382#0/1  
^a]RRb¥\_R¥````\_ba`^]G]babaS[LMRHZ\_U^HWO¥N  
@HWI-EAS443:3:83:976:836#0/1  
TGTTTCATCCTCAAGAATCCCATTGGCTTGTGTTGAGAA  
+HWI-EAS443:3:83:976:836#0/1  
Xbaaa\_baabT^`aabbb`XK`]aa¥Raaa\_a\_b¥R`[^  
@HWI-EAS443:3:85:1458:823#0/1  
AACTAACTCAAGGTCGCCAGACTTATGCTTGGACATTA  
+HWI-EAS443:3:85:1458:823#0/1  
ababbbaaaaaba^`a^\_aa\_`aa\_a`G\_aa\_`]`aaa^`  
@HWI-EAS443:3:86:1652:1593#0/1  
CGAGGATTTTGATTTTCATTCCAATTAGTGTGTTGCCAG  
+HWI-EAS443:3:86:1652:1593#0/1  
ab[¥`aZ`¥``S^[a¥Xa`aa\_XHXbb\_T\_¥X`Z¥IYGT^  
@HWI-EAS443:3:86:959:453#0/1  
CAACACTAAGCGGAATGAAAATCAAAATCCTCGAATGTTC  
+HWI-EAS443:3:86:959:453#0/1  
a\_Y\_^\_`bb^Ra`0¥\_a`aW`ababa`a[V]b`a[b]a`  
@HWI-EAS443:3:87:364:1246#0/1  
AGGATCTCCAGTATAAGGGAATGTGGTGCTTATGGTATTT  
+HWI-EAS443:3:87:364:1246#0/1  
¥]]aab`aaY^`aa\_IZY¥[aaa[a`\_]a\_`^`^]Z]a`  
@HWI-EAS443:3:87:63:141#0/1  
AATTTCTAGCATGGTGCAGGCCATGGTGTCTAGGGCCCGG  
+HWI-EAS443:3:87:63:141#0/1  
a[bbba]Uaba\_ab]b^bbaa`a^`]M¥MUYV\_UU[a^¥^  
@HWI-EAS443:3:87:817:773#0/1  
ACCGGTTGGAATTTCTAGCATGGTGGAGGCCATTGTGTCT  
+HWI-EAS443:3:87:817:773#0/1  
a¥]\_b]aa`\_\_aaa`\_\_\_\_ZT``\_V]VIZ[\_a[WDZNX]^ [  
@HWI-EAS443:3:88:1261:1283#0/1  
ATTTATATAGGACTTATTTTTGCTCATGTTGATTCCCCT  
+HWI-EAS443:3:88:1261:1283#0/1  
a\_]\_a¥Va^R¥^a`WD¥]aV\_aVa^^aaW\_aL^aa¥\_]a  
@HWI-EAS443:3:88:698:1032#0/1  
TGGAATTTCTAGCATGGTGGAGGCCATGGGGTCTAGGGCC

+HWI-EAS443:3:88:698:1032#0/1  
a`]baabaaaaabaa`]a]a]aS```aYLYS`]¥]^^]^^  
@HWI-EAS443:3:89:1209:623#0/1  
CATGCTCCAGCCAAAAGCATGGAATATGATGCCGTTGCAA  
+HWI-EAS443:3:89:1209:623#0/1  
T^W^GM^aa\_Z\_a`¥TQ\_\_W^^a[\_\_bba\_`bb¥K^¥DU`  
@HWI-EAS443:3:8:1056:635#0/1  
TGCCGTTGATTTCTGTTTAATGTCCAATAATAAGTCTGG  
+HWI-EAS443:3:8:1056:635#0/1  
``\_S\_aZ^[\`a\_^Y^\_]``a\_aa[T\_\_`XG¥\_aRaYW\_¥[  
@HWI-EAS443:3:90:148:712#0/1  
GTCTTGGTGGATTTCTTTTGTCCAAGATTCAGTATCGAGA  
+HWI-EAS443:3:90:148:712#0/1  
`[]¥]^NTEX^a[VZ[ZX`Raa` `[¥[\_\_^[V¥ZWZ^W]  
@HWI-EAS443:3:90:1591:1016#0/1  
GAGTTCTACAATGGTGAACAGATCTTCATGATCTCAGAG  
+HWI-EAS443:3:90:1591:1016#0/1  
^abbbbbbabaabbbbabab^b`bb`bb`bb`ab¥b^bbaa  
@HWI-EAS443:3:91:1412:1189#0/1  
ACTTTGTTGAACCTTTAGCTAGGAGCATTTGCGAAAAGCT  
+HWI-EAS443:3:91:1412:1189#0/1  
aabbabbbbbbb\_babbb`abbaaa`a`aab\_b\_aaaa¥a  
@HWI-EAS443:3:91:162:1071#0/1  
ATCCTGTTCCCTGTTCCATGGCTGTATGGAGGATGTCCAGT  
+HWI-EAS443:3:91:162:1071#0/1  
^]a`ba[ab[\_S]aaaa^W]]aODS[``\_¥\_[BBBBBBBBB  
@HWI-EAS443:3:92:137:700#0/1  
CGCAAAATGCCATAAGCACCACATACCCTTATACTGGAGA  
+HWI-EAS443:3:92:137:700#0/1  
a`X[RNQ[YR\_¥X¥`\_X\_VGO[^OHPXTOLTNVRY\_U[BB  
@HWI-EAS443:3:92:628:730#0/1  
AACAGTGATGAAGAACAACATGATAAACAATGACCTTGGA  
+HWI-EAS443:3:92:628:730#0/1  
[ZQ\_\_T][]Iaa\_Ya]``\_WWaa\_WW`XZX]aS^¥¥H\_aW  
@HWI-EAS443:3:92:940:1237#0/1  
ACTGGGACAACACTAAGTGAATGATAATCAAAATCCTC  
+HWI-EAS443:3:92:940:1237#0/1  
`\_aV[^ZaWaa^XX^]P\_W\_^`][MT\_]\_aa]aa\_]ZP  
@HWI-EAS443:3:93:1771:1919#0/1  
ATGGTGTATCCTGTTCCCTATTCCATGGCTGTATGGAGGAT  
+HWI-EAS443:3:93:1771:1919#0/1  
¥^\_¥N``a^a`a\_ZUZFU`]¥]¥W[BBBBBBBBBBBBB  
@HWI-EAS443:3:93:426:1691#0/1  
GTTCTTCAATGGCGGAACAGATCTTCATGATCTCAGAGAA  
+HWI-EAS443:3:93:426:1691#0/1  
\_U]\_^\_a`Z\_NDW]SZZ``]^¥¥[\_\_V^¥\_\_X^`]\_[VP  
@HWI-EAS443:3:94:1019:616#0/1  
CTCTGTGTCTTGTGAATTAGCCATCATCTTTCTCACAACA  
+HWI-EAS443:3:94:1019:616#0/1  
`aabaa`\_Z^b^`a\_^\_]`]]`aa\_¥[^bb\_¥a\_FZa[a

@HWI-EAS443:3:94:427:632#0/1  
AATTTCTAGCATGGTGGAGGCCATGGCGTCTAGGGCCCCGG  
+HWI-EAS443:3:94:427:632#0/1  
`¥¥\_a`¥XaU[IUU\_`¥¥XVQXWJWDVFTQQSX]¥¥RU]  
@HWI-EAS443:3:94:762:820#0/1  
AATTTCTAGCATGGTGGAGCCCATGGTGTCTAGGGCCCCGG  
+HWI-EAS443:3:94:762:820#0/1  
^`aZR`a`^¥¥`[[H`V`NEXR`YYP]XaUXNRP]`\_^R  
@HWI-EAS443:3:95:1172:941#0/1  
GCCATAAGCAGCACATTCCCTTATACTGGAGATCCTCCAT  
+HWI-EAS443:3:95:1172:941#0/1  
^ZbU`WQZa\_HOYRb`a]]ZWbZ`\_]^WZbaW[¥`a¥Xab  
@HWI-EAS443:3:96:1510:1610#0/1  
AATCTTCACATTCCCTGAAGTCTGCTGAAAATGGGAGCTAA  
+HWI-EAS443:3:96:1510:1610#0/1  
aa`\_\_aY`aY\_YP[^]JYaXTaaZ[FYa¥¥S`TIXaUS^]  
@HWI-EAS443:3:96:823:1685#0/1  
ATTTCTAGCATGGTGGAGGGCATGGTGTCTAGGGCCCCGGA  
+HWI-EAS443:3:96:823:1685#0/1  
]V^]G]aa^b^^aG¥UaaKGY^YQVLXS¥G^PZUU`W¥¥B  
@HWI-EAS443:3:97:1485:976#0/1  
CGGTTGATTTCTGTTTAAATGTCCAATAATAAGTCTGGCGA  
+HWI-EAS443:3:97:1485:976#0/1  
abaZ`bbb¥bTbabbb\_bb\_\_aWxa¥GZbaaa¥[ba]Uaa  
@HWI-EAS443:3:97:757:389#0/1  
ATTCGAGGATTTTGATTTTCATTCCACTTAGCGTTGTCCC  
+HWI-EAS443:3:97:757:389#0/1  
`abba`]babaaaaabbaa\_abab\_a\_baaaZaaaa[\_U  
@HWI-EAS443:3:97:957:1811#0/1  
GTCCCTGTCTTATTTATATAGGACTTATTTTTGCTCATGT  
+HWI-EAS443:3:97:957:1811#0/1  
aS[YZ\_a[Wa`a`Wa^a¥\_aW\_X`]I\_S]WZ`^QX]Y[]  
@HWI-EAS443:3:98:1781:1412#0/1  
ATCAAAATCCTCGAATGTTCCCTGGCGATGATTACAAATAT  
+HWI-EAS443:3:98:1781:1412#0/1  
^X]bb`Z`^[M[\_QOU¥[UFSU^]`a\_]QNTPMKZUVRY[  
@HWI-EAS443:3:99:1251:1897#0/1  
CAAAGGGATTACAGGGGATTACAAAGTCTTCGCCGATAATC  
+HWI-EAS443:3:99:1251:1897#0/1  
Wb[b]ab\_b`U`]Y¥a\_ba`bW\_\_\_VL]^QIS[b`bbbaS  
@HWI-EAS443:3:99:1472:1565#0/1  
AATTTCTAGCATGGTGGAGGCCATGGTGTCTAGGGACCGG  
+HWI-EAS443:3:99:1472:1565#0/1  
ab`aaa`bNb^ba\_aaaaa`Gaa¥^WX\_¥^^\_^\_GQS¥L  
@HWI-EAS443:3:17:208:459#0/1  
ATCCTGTTCCCTGTTCCATGGCTGTATGGAGGATCTCCCGT  
+HWI-EAS443:3:17:208:459#0/1  
aaaa]aZ`aaa¥^a`\_`a^U¥]HRU¥^V^^PWU¥¥TGTB  
@HWI-EAS443:3:23:1197:1542#0/1  
GCAACGGCATCATATTCCATGCTTTTGGCTGGACCATTGG

+HWI-EAS443:3:23:1197:1542#0/1  
ab\_\_`b¥¥b\_U[aaaaS¥\_]`aaaaa^[``U]¥¥Z[OGZ]  
@HWI-EAS443:3:23:239:1655#0/1  
CATTCCTGGGGACAACACTAAGTGGAAATGAAAATCAAAA  
+HWI-EAS443:3:23:239:1655#0/1  
aYF[abba``Y^baa`aa\_`V`V`a``a\_`aaa``aaa]  
@HWI-EAS443:3:28:1445:1138#0/1  
AGCCGGCATCATATCCATGCTTTTGGCTGGACCATGGGC  
+HWI-EAS443:3:28:1445:1138#0/1  
```aaabaaabaaaa`\_`aaaaa`a¥^aa`XTV\_\_]M\_U  
@HWI-EAS443:3:28:232:831#0/1  
ATCCTGTTCCCTGTTCCATGGCTGTATGGAGGATCTCCCGT  
+HWI-EAS443:3:28:232:831#0/1  
\_\_abab\_aaaa\_aaa]`^^\_aaXZ¥¥RJ[[LTXUPRETS  
@HWI-EAS443:3:40:1407:1757#0/1  
CTTTTCGCAAATGCTCCTAGCTAAAGTTTCAACAAAGAAT  
+HWI-EAS443:3:40:1407:1757#0/1  
abbb\_`\_aabb\_TGY¥^^a]`[^\_`^]`\_][aX¥]MGFJS  
@HWI-EAS443:3:53:1116:1577#0/1  
TAAGCACCACATTCCCTTATACTGGAGATCCTCCATAAAG  
+HWI-EAS443:3:53:1116:1577#0/1  
]b\_b]`XbbaYU¥¥aaba`\_bS`Ta\_b^RZ^\_YP[``GT^  
@HWI-EAS443:3:59:1309:1558#0/1  
AGGTCCATGCTAAAATTAGCCACAAATCCATAGCGATAAA  
+HWI-EAS443:3:59:1309:1558#0/1  
aVI]]aaVa^aaa^`\_abaZZ`aa`aa¥J`^S`R¥S[UVV  
@HWI-EAS443:3:61:890:1817#0/1  
GGGCAACACTAAGTGGAAATGAAAATCAAAATCCTCGAATG  
+HWI-EAS443:3:61:890:1817#0/1  
\_QJSNTZ¥S¥Z]QFU^]\_¥`Y[U[V^^TZ[PZLTQXUXXW  
@HWI-EAS443:3:65:1455:1986#0/1  
GTATTTCTTTTGTCCAAGATTCAGTATCGAGACTCCCNAG  
+HWI-EAS443:3:65:1455:1986#0/1  
`[[^]\_`aa`^R^\_^`a`a\_ZP\_PGZ¥TLMVa\_`XPFDOV  
@HWI-EAS443:3:69:1439:253#0/1  
ACGGCATCATATCCATGCTTTTGGCTGGACCATGGGGTG  
+HWI-EAS443:3:69:1439:253#0/1  
aa\_\_aa\_`\_aa^^`Zb`[a[``]^`a`]^X]^Yaa[DXa  
@HWI-EAS443:3:70:349:1825#0/1  
TGTCGGTTGATTTCTGTTTAATGTCCAATCATAAGTCTGG  
+HWI-EAS443:3:70:349:1825#0/1  
aaabX]IYXUW¥\_ZXV]V`]aON]aaZUVaXY]`ZX`RDT  
@HWI-EAS443:3:77:1590:1281#0/1  
TANGACTTCTTTTTGCTCATGTTGATCCCACTAACTTGC  
+HWI-EAS443:3:77:1590:1281#0/1  
a[D¥a\_baabbaaaaaabaaaaaaa`a`a`aa]a\_a\_\_``^  
@HWI-EAS443:3:79:1211:1415#0/1  
GCGGCCGTTGATTTCTGTTTAATGTCCAATCATAAGTCT  
+HWI-EAS443:3:79:1211:1415#0/1  
abYITaXaR¥` `[aXYU¥``YWa\_\_X`a`]\_XXZa\_`S^^



+HWI-EAS443:3:25:1227:1261#0/1  
aaaabZJD[a\_a` `\_\_¥¥` [Z]\_a]a`\_]\_^]]¥]¥\_a\_]X  
@HWI-EAS443:3:27:1202:2024#0/1  
AAAGCTTGTGAATTCAAATGTCCTGTCTTATTTATNTAG  
+HWI-EAS443:3:27:1202:2024#0/1  
^^]Y\_[[VL[aSVN[`ZPYWS\_]X^[VQ¥V]]Y]^TDJ¥W  
@HWI-EAS443:3:2:820:1108#0/1  
ATTTCTAGCATGGTGGAGGCCATGGTGTCTAGGGCNCGGA  
+HWI-EAS443:3:2:820:1108#0/1  
a`baababaaaaZEZ\_T]aaa^` `aUWX¥S^^S]WDS[]W  
@HWI-EAS443:3:31:1333:514#0/1  
TGTCCATGNTGTATCCTGTTCCCTGTTCCATGGCTGTATGG  
+HWI-EAS443:3:31:1333:514#0/1  
]`]S^b`ZDwa`\_` [aa[^a` `a\_aaa` ¥abaVZBBBBBB  
@HWI-EAS443:3:32:1450:1524#0/1  
CAATGGTGAACAGATCTTCNTGATCTCAGAGAACTCTTC  
+HWI-EAS443:3:32:1450:1524#0/1  
ab]XVS¥a[at^YXP]b]aYD¥RTS` [ `WRLVP¥Ya]¥X^  
@HWI-EAS443:3:34:1092:270#0/1  
GGACTTCTTTNTGCTCATGTTGATTCCCACTAACTTGCGAG  
+HWI-EAS443:3:34:1092:270#0/1  
`aNTW` `` \_[DW`Z^V^aa` `a\_]\_a`\_a\_\_[\_^^[HWV]  
@HWI-EAS443:3:35:650:1066#0/1  
GCCAGNCTTATGATTGGACATTAACAGAAATCAACCGGC  
+HWI-EAS443:3:35:650:1066#0/1  
aaba¥D^bbaaaaabaaaaaaaaaab` ¥VS]a]a` ^^` a  
@HWI-EAS443:3:44:495:1216#0/1  
TGCCGGTTGATTTCTGTTTAATGTNCAATCATAAGTCTGG  
+HWI-EAS443:3:44:495:1216#0/1  
aaaabb`aaaabbaba`baaabaXD[a` ` \_aaa` a\_]` a\_  
@HWI-EAS443:3:47:227:1203#0/1  
ACTGGAGATCCTCCATACAGCCNTGGAACAGGAACAGGAT  
+HWI-EAS443:3:47:227:1203#0/1  
a` \_\_\_\_aZ` ^¥\_Z\_]a^`\_]PDR]Z]^R^^U^\_X]U]YY  
@HWI-EAS443:3:48:204:1775#0/1  
AATTTCTAGCATGGTGGAGGCCATGGTGTNTAGGGCCCGG  
+HWI-EAS443:3:48:204:1775#0/1  
UZ¥¥[MVU^WRPQYSBBBBBBBBBBBBBBBBBBBBBBBBBBB  
@HWI-EAS443:3:4:686:1409#0/1  
CAAAATGCCATAAGCACACNTTCCCTTATACTGGAGATC  
+HWI-EAS443:3:4:686:1409#0/1  
]b`Z` ` [¥Y\_]bbY` `Z`\_YD^\_I^^¥I` `]T[a\_`aaaB  
@HWI-EAS443:3:52:65:1384#0/1  
GGGGACAACACTAAGTGAATGAAAATCAANATCCTCGAA  
+HWI-EAS443:3:52:65:1384#0/1  
ab^RZ^\_`aZa\_JaY0a\_`\_`a`\_]Q\_\_¥TDW\_`W` a^OX  
@HWI-EAS443:3:55:262:998#0/1  
GAGTTCTTCNATGGTGAACAGATCTTCATGATCTCAGAG  
+HWI-EAS443:3:55:262:998#0/1  
aaa`aaaaXDU` a^W¥WW`WaaYa^a` `\_^]^¥¥][[^\_\_

@HWI-EAS443:3:57:836:1279#0/1  
GTCCCNGTCTTATTTATATAGGACTTCTTTTTGCTCATGT  
+HWI-EAS443:3:57:836:1279#0/1  
abab¥DZaab`\_babaaaaa`a`aa`aabaa`\_a^\_a`\_  
@HWI-EAS443:3:60:462:208#0/1  
CATCAATCCGGCCCTAGACACCATGGCCTNCACCATGCT  
+HWI-EAS443:3:60:462:208#0/1  
`abb`\_`a`Z¥¥[U[\_]Y]TV[^UX]ZQRDWPTPET\_XU  
@HWI-EAS443:3:64:1104:776#0/1  
CAAGGTCATTGTTTATNATGTTGTTCTTTATCACTGTTAC  
+HWI-EAS443:3:64:1104:776#0/1  
`[Ua¥T¥`bbaY`[]]DRY\_\_`\_]Y¥\_\_aa¥¥VH¥`\_]¥Z  
@HWI-EAS443:3:71:1646:183#0/1  
TGCTGCCGGTTGATTTCTNTTTAATGTCCAATCATAAGTC  
+HWI-EAS443:3:71:1646:183#0/1  
abaYW^\_aa`\_`Y`a\_VXDxa^X\_aa\_X^ZW[Y]`TYFYG  
@HWI-EAS443:3:72:346:1554#0/1  
CAAAGGGATTGAGGGATTACAAAGTCTTCCCNATAATC  
+HWI-EAS443:3:72:346:1554#0/1  
abbaY`\_a`aa`\_`\_a`aaa¥R[W`\_`a`\_YDX^\_^]Q  
@HWI-EAS443:3:73:1231:1592#0/1  
CAAGGTCATTGTTTATCATGTTGTTCTTTATCANTGTTAC  
+HWI-EAS443:3:73:1231:1592#0/1  
abbba\_bbbabaaabbaabaaa`aabaaaaa[D¥aa\_aa  
@HWI-EAS443:3:73:577:1623#0/1  
CACAATCACTGGNACAACACTAAGTGAATGAAAATCAA  
+HWI-EAS443:3:73:577:1623#0/1  
aa]`¥`aaaaaaYDXaaa`\_`aa\_aXa`^`\_a[a[\_\_\_\_`[  
@HWI-EAS443:3:82:1769:1025#0/1  
CTAGCATGGTGGAGGCCATNGTGTCTAGGGCCCGGATTGA  
+HWI-EAS443:3:82:1769:1025#0/1  
abbabbabaUa\_U\_`b[`YDYXZ^]\_a]^a``\_]T^\_]\_  
@HWI-EAS443:3:82:934:804#0/1  
TCTGNTCATCCTCAAGAATTCCCCTTTGGCTTGTGTTGAG  
+HWI-EAS443:3:82:934:804#0/1  
abaZD[abb`ba`aaa^ba`aaaaab`^aaZ^Y\_a¥W`  
@HWI-EAS443:3:85:1104:1217#0/1  
GTTCTTCAATGGTGAACAGATCTTCANGATCTCAGAGAA  
+HWI-EAS443:3:85:1104:1217#0/1  
aXaaaaaba\_^¥a`^`\_a\_\_a\_aaYWD^`\_Zaaa\_aa`\_`  
@HWI-EAS443:3:89:1747:1054#0/1  
GCACCACATTCCCTTANACTGGAGATCCTCCATACAGCCA  
+HWI-EAS443:3:89:1747:1054#0/1  
¥a`QUYOaW[Xa\_]a[D[]`\_TZ`U]\_P^^]\_LZ[aba`]  
@HWI-EAS443:3:8:806:775#0/1  
AACTTTAGCTAGGAGCATTTGCGAAAAGCNTGAACAGTCT  
+HWI-EAS443:3:8:806:775#0/1  
aa`\_`bbaaa`ba\_a`aaaaaaaZa`ZaZDZa][U^\_¥^\_  
@HWI-EAS443:3:90:1169:1401#0/1  
CTGGGGACAACACTAAGTNGAATGAAAATCAAAATCCTCG

+HWI-EAS443:3:90:1169:1401#0/1  
abbaabbbb]baaababRD]bbbbabbbbaa`bbbabbab  
@HWI-EAS443:3:96:1565:528#0/1  
GTTCTTCAATGGTGGACAGATCTTCATGATCNCAGAGAA  
+HWI-EAS443:3:96:1565:528#0/1  
aaa`\_a¥`aabaUaa\_^`S^`]Y\_W\_¥\_\_UKDO^\_\_X]`  
@HWI-EAS443:3:10:711:1600#0/1  
CAGAGTCTCGATACTGAATCTTGGACAAAAGAAATACACC  
+HWI-EAS443:3:10:711:1600#0/1  
ab\_aa¥baa\_`\_]R\_V\_^]Z\_[P]YT]\_\_]^¥^^W^Z\_^U  
@HWI-EAS443:3:14:106:1100#0/1  
CACCAGCCAAAAGCATGGAATATGATGCCGTTGCAACTAC  
+HWI-EAS443:3:14:106:1100#0/1  
\_¥`\_Z]ba]aa[\_`aaaaY`a`a\_aa\_^\_]\_\_\_\_]^  
@HWI-EAS443:3:14:1625:910#0/1  
GTTGATTTCTGTTAATGTCCAATCATAAGTCTGGCGAGC  
+HWI-EAS443:3:14:1625:910#0/1  
aYT^^[\_`a\_¥[\_]\_]W\_S¥[WG¥^\_a[Z\_WV¥\_VLWLFJ  
@HWI-EAS443:3:15:1285:316#0/1  
GTGCCAGACTTATGATTGGACATTAACAGAAATCAACCG  
+HWI-EAS443:3:15:1285:316#0/1  
a```0Ya`aba`aa^aaaa^¥`aa[\_`^a\_Y[\_`\_`a`USV  
@HWI-EAS443:3:15:312:662#0/1  
GCCTGCCGGTTGATTTCTGTTAATGTCCAATCATAAGTC  
+HWI-EAS443:3:15:312:662#0/1  
`ba[ZbbaaQaa\_¥``VYYV[¥`aa\_FY\_V[Y]¥R¥`]W\_  
@HWI-EAS443:3:1:1770:235#0/1  
GGTGTATCCTGTTCCCTGTTCCATGGCTGTATGGAGGATTT  
+HWI-EAS443:3:1:1770:235#0/1  
`b```a`\_]aaaa\_\_`\_\_aUU\_aa\_^a\_RUTRBBBBBBBB  
@HWI-EAS443:3:22:754:1664#0/1  
CACCAGACTTATGATTGGACATTAACAGAAATCAACCGG  
+HWI-EAS443:3:22:754:1664#0/1  
^TYY`TTH]R[bb`[^`\_`aaba¥Z[Xab[\_Qa\_``^^`[R  
@HWI-EAS443:3:27:391:1585#0/1  
AACGGCATCATATTCCATGCTTTTGGCTGGACCATGGGGT  
+HWI-EAS443:3:27:391:1585#0/1  
Zb`¥`bbabbaa^a^Ra\_Y[\_`\_Y]X[aP¥XPX`ZTZPGG  
@HWI-EAS443:3:29:1559:1354#0/1  
ANAAAAAGGAGAGTAAGAGACAACATGACCAAGAAGATGG  
+HWI-EAS443:3:29:1559:1354#0/1  
YDYaaabbbb]aa\_aaaaaaaaa^a`\_a^\_a]aaaa\_a\_  
@HWI-EAS443:3:29:939:1783#0/1  
GNTCCAAGGTCATTGTTTATCATGTTGTTCTTTATCACTG  
+HWI-EAS443:3:29:939:1783#0/1  
[D[bbbb`a]aaabb`babbbaaa`a`abababba\_a`^[  
@HWI-EAS443:3:35:1033:1081#0/1  
CAGAGTCTCGATACTGAATCTTGGACAAAAGAAATACACC  
+HWI-EAS443:3:35:1033:1081#0/1  
a`bbaabbaaabaab\_aaaaaa\_]a`Y`aa]\_\_\_\_^Sa



@HWI-EAS443:3:35:360:1979#0/1  
CATGGGAGTCTCGATACTGAATCTTGGACAAAAGAAATAC  
+HWI-EAS443:3:35:360:1979#0/1  
a`aaX`a^¥b`W]^\_\_^\_\_[W`¥]¥VXa^\_\_aU]]^W]\_  
@HWI-EAS443:3:36:735:319#0/1  
TACTGGAGATCCTCCATACAGCCATGGAACAGGAACAGAT  
+HWI-EAS443:3:36:735:319#0/1  
aa`babba`aaaaa^a`a^a\_[aa``\_^¥`\_`XW\_V^\_\_Z  
@HWI-EAS443:3:38:1557:208#0/1  
ACACTTTGTTGAAACTTTAGCTAGGAGCATTGCGAAAAG  
+HWI-EAS443:3:38:1557:208#0/1  
SOWVV\_H¥R\_bSaUaaZ\_]\_QYaaaK[]¥ZBBBBBBBBBB  
@HWI-EAS443:3:46:1460:1640#0/1  
CACGCCAGGAACATTCGAGGATTTTGATTTTCATTCCACT  
+HWI-EAS443:3:46:1460:1640#0/1  
aabbabbbbbb`aaa`bbaa`aba]^baaa\_aaa\_``]a  
@HWI-EAS443:3:48:516:411#0/1  
ATTGGAGATCCTCCATACAGCCATGGAACAGGAACAGGAT  
+HWI-EAS443:3:48:516:411#0/1  
]I^baab`aaaaaaaaaaaa\_\_Y]]XT]P[\_`¥VT\_a\_YU  
@HWI-EAS443:3:49:1621:221#0/1  
GGGGAACAGATCTTCATGATCTCAGAGAACTTCTTTCT  
+HWI-EAS443:3:49:1621:221#0/1  
^SR¥]UYN]UPKVUWXKZTPVRFXTS\_VPU[UTTDMQ¥YU  
@HWI-EAS443:3:51:1130:661#0/1  
GNAAAAGGAGAGTAAGAGACAACATGACCAAGAAGATGGT  
+HWI-EAS443:3:51:1130:661#0/1  
[DY`abbaab\_b]^`ababa\_b`a`a]a[aa\_aa^`a\_aa¥  
@HWI-EAS443:3:51:1183:1153#0/1  
CACCGGGCCCTAGACACCATGGCCTCCACCATGCTAGAAA  
+HWI-EAS443:3:51:1183:1153#0/1  
abbbabbbb`baabaabb`bb[aa\_`aaaa`b¥abbaaa  
@HWI-EAS443:3:63:1596:1504#0/1  
CACGCCAGGAACATTCGAGGATTTTGATTTTCATTCCACT  
+HWI-EAS443:3:63:1596:1504#0/1  
abba``\_`abbaYab``baabaabb`baaa\_Taa`Ya\_`a  
@HWI-EAS443:3:6:1547:622#0/1  
GCCTTGGTGTATTTCTTTTGTCCAAGATTCAGTATCGAGA  
+HWI-EAS443:3:6:1547:622#0/1  
¥LN]\_aaHaHR\_\_[Z\_\_\_Z\_ZXZVZYZGZZXWBBBBBBBB  
@HWI-EAS443:3:72:1298:1082#0/1  
CATCCGGGCCCTAGACACCATGGCCTCCACCATGCTAGAT  
+HWI-EAS443:3:72:1298:1082#0/1  
\_`X¥]VO¥T\_aaaa`aaX\_````XXVOV]^\_H¥^¥Q``¥  
@HWI-EAS443:3:9:366:1382#0/1  
TCCTGTTCTGTTCCATGGCTGTATGGAGGATCTCCAGGA  
+HWI-EAS443:3:9:366:1382#0/1  
aaaaa\_a\_]aa\_\_[a\_aa^\_\_`NX¥[Y^\_\_NNTWUYI¥HQ  
@HWI-EAS443:3:100:936:1325#0/1  
ACTGTGCCATGGTGTATCCTGTTCCATGGCTGG

+HWI-EAS443:3:100:936:1325#0/1  
W\$^\_[baWY`¥Z¥a\_TQ]`PZ¥]b`a`XKZNW`¥M[BBBB  
@HWI-EAS443:3:10:331:141#0/1  
ACTCGATACTGAATCTTGGACAAAAGAAATACACCAAGAC  
+HWI-EAS443:3:10:331:141#0/1  
aaaaa\_a``a`]\_]\_\_Y^^Z]]^^^¥\_^]]Y^YWZ]]YX  
@HWI-EAS443:3:11:25:131#0/1  
TGCCAGACTTATGATTGGACATTAACAGAAATCAACCGG  
+HWI-EAS443:3:11:25:131#0/1  
`aa\_Y`\_abbaabaabbaa`^aaa`aba`aaaa\_a^`a`  
@HWI-EAS443:3:11:841:948#0/1  
ACCCTGTCTTATTTATATAGGACTTCTTTTTGCTCATGTT  
+HWI-EAS443:3:11:841:948#0/1  
``aa`b]bbaabbaaaa^^^\_^^`a\_a`aaa\_\_a¥^a`[`  
@HWI-EAS443:3:11:946:1673#0/1  
GTCCGGGCCCTAGACACCATGGCCTCCACCATGCTAGAAA  
+HWI-EAS443:3:11:946:1673#0/1  
`abaab]`a`aaZ]Zaaa^R^VVMWY]`[T`UXPS\_\_`a¥  
@HWI-EAS443:3:15:708:325#0/1  
AAAAATGCCATAAGCACCACATTCCTTATACTGGAGATC  
+HWI-EAS443:3:15:708:325#0/1  
^`¥0QS`\_]a^¥`\_]aQY¥S^YZ^WY\_]TUZ[W¥]Y\_PYY  
@HWI-EAS443:3:17:509:343#0/1  
ATCCTGTTCCCTGTTCCATGGCTGTATGGAGGATCTCCAGG  
+HWI-EAS443:3:17:509:343#0/1  
^¥abab^]``ab]aa`aaa`]a¥FQPZZ00`XRXSJVSZG  
@HWI-EAS443:3:18:381:1245#0/1  
CCTGGGACAACACTAAGTGAATGAAAATCAAAATCCTC  
+HWI-EAS443:3:18:381:1245#0/1  
abab\_`a[\_a]aba\_abaJ\_a`^abaa\_aaYaaa`a\_Yaa  
@HWI-EAS443:3:28:1579:2046#0/1  
NTTCTTCAATGGTGAACAGATCTTCATGATCTCAGAGAA  
+HWI-EAS443:3:28:1579:2046#0/1  
DNZZUZXXZZZXZXVXZZXZUZZZZZZZZWUZXZZZW  
@HWI-EAS443:3:30:331:689#0/1  
ATTGGAGTAACAGTGATAAAGAACAACATGATAAACAATA  
+HWI-EAS443:3:30:331:689#0/1  
¥abbbbabba^`bbb\_bbbbabbabbbbabbb\_bba[M  
@HWI-EAS443:3:31:837:1988#0/1  
CGGGGACAACACTAAGTGAATGAAAATCAAAATCCTCGA  
+HWI-EAS443:3:31:837:1988#0/1  
abbaaa\_abbabababW`abaaababaa]bab`b`a`\_`a  
@HWI-EAS443:3:32:699:916#0/1  
CCGCCAGGAACATTCGAGGATTTTGATTTTCATTCCACTT  
+HWI-EAS443:3:32:699:916#0/1  
aba¥S¥a`]W]a`^^\_T¥`RWYS\_a\_`a\_¥Y[X`[LWYZY  
@HWI-EAS443:3:33:1576:646#0/1  
ATGGGGACAACACTAAGTGAATGAAAATCAAAATCCTCG  
+HWI-EAS443:3:33:1576:646#0/1  
aaaba\_aaba`\_^ba`aZaa`aaa\_a`\_`^aTKZ]X^^^

@HWI-EAS443:3:34:1194:506#0/1  
ACCTGTTCTGTTCCATGGCTGTATGGAGGATCTCCAGTA  
+HWI-EAS443:3:34:1194:506#0/1  
a`abb\_aaaaaaaaaaaaa`aJ\_``¥JY\_YZZ\_Y^TRNX  
@HWI-EAS443:3:38:1577:777#0/1  
AATAAGACAGGGACATTTGAATTCACAAGCTTTTTTTATA  
+HWI-EAS443:3:38:1577:777#0/1  
aabaabaaabaa\_`aaa^Z]`aaa\_\_a\_aGZ]\_\_\_\_^`X\_G  
@HWI-EAS443:3:40:434:1910#0/1  
NCTTTGTTGAAACTTTAGCTAGGAGCATTTCGCGAAAAGCT  
+HWI-EAS443:3:40:434:1910#0/1  
DMZZZWZRLTZZZZWWWXYVYWSKDOVWSYPSWUOTWU  
@HWI-EAS443:3:42:1615:1819#0/1  
TGTTCTTCAATGGTGAACAGATCTTCATGATCTCAGAGA  
+HWI-EAS443:3:42:1615:1819#0/1  
Y`[S\_\_\_\_H[]XZ^\_[0¥Y[Zaa^R]TS]``XXXWJYLX`a  
@HWI-EAS443:3:44:1594:420#0/1  
GCTGGGGACAACACTAAGTGAATGAAAATCAAATCCTC  
+HWI-EAS443:3:44:1594:420#0/1  
aa]¥¥aa^`\_^\_\_\_\_`\_^a¥`a^]`a^^\_\_^]\_]\_]\_VP¥X  
@HWI-EAS443:3:46:1650:1095#0/1  
CCTTGGTGTATTTCTTTTGTCCAAGATTCAAGTATCGAGAC  
+HWI-EAS443:3:46:1650:1095#0/1  
^`bb`W]bbaab\_0¥bbb``[``U^Y¥`S^\_Ya^ab\_aZa  
@HWI-EAS443:3:46:73:1421#0/1  
CAAATGCCATAAGCACCATTCCTTATACTGGAGATN  
+HWI-EAS443:3:46:73:1421#0/1  
abbbbabaabbaaabWab`bb`[a`aabbabaaaa`\_XD  
@HWI-EAS443:3:4:790:924#0/1  
GATTGGAGTAACAGTGATAAAGAACAACATGATAACAAT  
+HWI-EAS443:3:4:790:924#0/1  
a[[^S[YZJ¥`^^\_V]Za\_a^MY^¥`^[[^YTRY[WS^U  
@HWI-EAS443:3:50:1154:1174#0/1  
CGGTGGAACAGATCTTCATGATCTCAGAGAACTTTCTTT  
+HWI-EAS443:3:50:1154:1174#0/1  
abbabbbbbbbbb\_bbbbbbaaaabaabaab`bbaaba  
@HWI-EAS443:3:52:972:874#0/1  
TGCGCAAATGCCATAAGCACCATTCCTTATACTGGA  
+HWI-EAS443:3:52:972:874#0/1  
abaa\_aa\_b`\_`aaa[a`aV^a^aa¥[Z\_a`aaa^]S``  
@HWI-EAS443:3:54:323:1958#0/1  
GCTGGGGACAACACTAAGTGAATGAAAATCAAATCCTC  
+HWI-EAS443:3:54:323:1958#0/1  
abbab\_bbbbbbab`bbbb\_babbaabbbbababbaa\_aa  
@HWI-EAS443:3:55:635:664#0/1  
CTCCGGGCCCTAGACACCATGGCCTCCACCATGCTAGAAA  
+HWI-EAS443:3:55:635:664#0/1  
¥^a\_¥¥\_\_¥a¥¥`¥]^`a`a^\_Z\_b\_\_]\_W\_`¥\_abaXa^  
@HWI-EAS443:3:57:332:1055#0/1  
GGCCGGTTGATTTCTGTTTAATGTCCAATCATAAGTCTGG



@HWI-EAS443:3:82:1190:99#0/1  
GGGGACAACACTAAGTGAATGAAAATCAAATCCTCGA  
+HWI-EAS443:3:82:1190:99#0/1  
\_bbaa¥\_a`\_\_¥aa\_bIbb`^`ba\_a``Yaaaaa¥Wa\_a\_  
@HWI-EAS443:3:87:1039:680#0/1  
GACGGCATCATATTCCATGCTTTTGGCTGGACCATGGGCT  
+HWI-EAS443:3:87:1039:680#0/1  
`T\_``Raba`a¥U`TRTSaabaa`X``¥ZZIMYV\_S\_`UY  
@HWI-EAS443:3:8:383:568#0/1  
GGCCAGACTTATGATTGGACATTAACAGAAATCAACCGG  
+HWI-EAS443:3:8:383:568#0/1  
abaabbbabbbaaaabaaaaaaaaaaaa^baaaaa`a\_^a`  
@HWI-EAS443:3:8:574:636#0/1  
CGGGGACAACACTAAGTGAATGAAAATCAAATCCTCGA  
+HWI-EAS443:3:8:574:636#0/1  
`bbaba`a`aba`bb\_abaabb`Z`ba`babaa`\_baba  
@HWI-EAS443:3:92:1780:1811#0/1  
GAAGGTCATTGTTTATCATGTTGTTCTTTATCACTGTTAC  
+HWI-EAS443:3:92:1780:1811#0/1  
G]bbba`bbaa^S\_`a`^¥aba``aba`baab\_a`Z¥^Y  
@HWI-EAS443:3:92:653:603#0/1  
CAAAGGGATTGAGGGATTACAAAGTCTTCCCGATAATA  
+HWI-EAS443:3:92:653:603#0/1  
`\_bbbbb^Ya``Za¥a\_aaaba¥b\_aa`a^\_aba`a[^F  
@HWI-EAS443:3:96:366:457#0/1  
ACACATTCCTTATACTGGAGATCCTCCATACAGCCATGG  
+HWI-EAS443:3:96:366:457#0/1  
[aaa`b¥a`\_`a`aaZ^`\_a]\_\_[[VW\_¥a¥`\_WYWSSY  
@HWI-EAS443:3:98:1033:950#0/1  
AGAGTCTCGATACTGAATCTTGGACAAAAGAAATACACCA  
+HWI-EAS443:3:98:1033:950#0/1  
aa`b`aaaa]`\_]a\_\_a\_\_`a`a\_\_\_\_\_`^`^`]^`^¥\_  
@HWI-EAS443:3:98:1310:859#0/1  
CGGGGACAACACTAAGTGAATGAAAATCAAATCCTCGA  
+HWI-EAS443:3:98:1310:859#0/1  
ab]XQXW\_^R^ab]RZ\_bb`¥\_aaabaaSaab¥]TQ[R``  
@HWI-EAS443:3:9:863:1274#0/1  
TTCCTGTTCTGTTCCATGGCTGTATGGAGGATCTCCAGT  
+HWI-EAS443:3:9:863:1274#0/1  
a[baWb\_abaab^^bbb\_aXabZFN¥a[RSaV[PVP]XTD  
@HWI-EAS443:3:100:1039:593#0/1  
GGACAACACTAAGTGAATGAAAATCAAATCCTCGAATG  
+HWI-EAS443:3:100:1039:593#0/1  
aa¥`\_¥`a\_aa^Uaa`aa```\_aa^a`\_aaZ\_`\_a\_\_`a  
@HWI-EAS443:3:100:114:821#0/1  
GAGTTCTTCAATGGTGAACAGATCTTCATGATCTCAGAG  
+HWI-EAS443:3:100:114:821#0/1  
aa`\_a\_abaaa`]^aaaa^[```\_aa\_aXa``\_`Z\_]`a  
@HWI-EAS443:3:100:1167:636#0/1  
CAAATGCCATAAGCACCACATTCCTTATACTGGAGATC

+HWI-EAS443:3:100:1167:636#0/1  
a`bbbbY¥`Y``\_`bbZT\_ba^VV`bbbb``baabaa^  
@HWI-EAS443:3:100:1178:874#0/1  
GATCTCCAGTATAAGGGAATGTGGTGCTTATGGCATTTTG  
+HWI-EAS443:3:100:1178:874#0/1  
`Xa\_ZH¥\_b^W`¥T^aaU``aX]aVaVa`[\_[UPRBBBBB  
@HWI-EAS443:3:100:1441:537#0/1  
GATTGGACATTAACAGAAATCAACCGGCAGCAACTGCAT  
+HWI-EAS443:3:100:1441:537#0/1  
a`baaa`^aabX\_]Y\_a`^`Va`ZYT\_U\_`X^^U]Z0^B  
@HWI-EAS443:3:100:1596:1400#0/1  
CAAGCTTTTCGCAAATGCTCCTAGCTAAAGTTTCAACAAA  
+HWI-EAS443:3:100:1596:1400#0/1  
abbaU`\_¥a`JSaa¥ba\_b[G`aaSb`a`TL^a^¥ZBBBB  
@HWI-EAS443:3:100:321:1469#0/1  
ACTTCTTTTTGCTCATGTTGATTCCCACTAACTTGCAGGT  
+HWI-EAS443:3:100:321:1469#0/1  
^W\_b\_ababb\_¥`X^aT`a`a]a\_S\_`\_aa\_^a\_]\_`\_R¥  
@HWI-EAS443:3:100:360:786#0/1  
GTGGGAATCAACATGAGCAAAAAGAAGTCCTATATAAATA  
+HWI-EAS443:3:100:360:786#0/1  
a\_aa`\_`Z`aaW[``¥^\_¥^¥\_\_\_^\_\_YUU^^\_]^[ ]QB  
@HWI-EAS443:3:100:584:1456#0/1  
CAAAATGCCATAAGCACCATTCCTTATACTGGAGATC  
+HWI-EAS443:3:100:584:1456#0/1  
]bba`a^aaaba`ab]\_b`aaaa`aXaba][aX\_b``[  
@HWI-EAS443:3:100:648:364#0/1  
GAAAAAGGAGAGTAAGAGACAACATGACCAAGAAGATGGT  
+HWI-EAS443:3:100:648:364#0/1  
aaaa`aaaaW[R`\_`a`U`a`^ZX^^]\_^\_¥Z^XW]\_B  
@HWI-EAS443:3:100:685:469#0/1  
CATTCGAGGATTTTGATTTTCATTCCACTTAGTGTGTCC  
+HWI-EAS443:3:100:685:469#0/1  
aabaabab`W¥abababaabbaba]\_aaaa^Z¥a^aa`^`^  
@HWI-EAS443:3:100:839:400#0/1  
AGGACCTGCAAGTTAGTGGGAATCAACATGAGCAAAAAGA  
+HWI-EAS443:3:100:839:400#0/1  
ab\_abb^ba`aX\_bab]babaab`aaabbbab^baabb¥¥  
@HWI-EAS443:3:10:1016:531#0/1  
AATTTCTAGCATGGTGGAGCCATGGTGTCTAGGGCCCGG  
+HWI-EAS443:3:10:1016:531#0/1  
]\_`WZX]Q\_^]`K`[\_`aZR]`\_MF^YKW]MY¥BBBBB  
@HWI-EAS443:3:10:1067:1086#0/1  
ATTTCTAGCATGGTGGAGCCATGGTGTCTAGGGCCCGGA  
+HWI-EAS443:3:10:1067:1086#0/1  
abbaabbaaaaba^a\_`\_`\_`a`\_`\_W\_¥W¥]^^¥¥¥¥^`¥  
@HWI-EAS443:3:10:1117:114#0/1  
CTCATGTTGATTCCCACTAACTTGCAGTCCCTGTAGAATC  
+HWI-EAS443:3:10:1117:114#0/1  
`babbbbbb`babbbabbbabba`bb\_aba`a\_

@HWI-EAS443:3:10:1205:1360#0/1  
TCCAGCGCAAATGCCATAAGCACCACATTCCCTTATACT  
+HWI-EAS443:3:10:1205:1360#0/1  
W^X¥\_V\_0¥^b`]Z[RUaaa`N^\_Vaa^]VQ[R\_T[\_^NX  
@HWI-EAS443:3:10:1295:1516#0/1  
AAGCACCACATTCCCTTATACTGGAGATCCTCCATACAGC  
+HWI-EAS443:3:10:1295:1516#0/1  
aaa`a\_aa`aaa^]^aaaa`\_^\_]\_\_\_\_^¥X^YV^^\_X^^X  
@HWI-EAS443:3:10:1397:356#0/1  
GCCGGTTGATTTCTGTTTAAATGTCCAATCATAAGTCTGGC  
+HWI-EAS443:3:10:1397:356#0/1  
aS^a`Z`aXZaa]¥YZ`XW\_^YGUXX^S^\_^S]XU]V]Z  
@HWI-EAS443:3:10:1475:1875#0/1  
CAGTGATAAAGAACAACATGATAAACAATGACCTTGGACC  
+HWI-EAS443:3:10:1475:1875#0/1  
aaa[babbab[b\_bb^baaaaaa`a`a^Y`H[a^^aZ^G  
@HWI-EAS443:3:10:1516:1695#0/1  
ATCCTGTTCTGTTCCATGGCTGTATGGAGGATCTCCAGT  
+HWI-EAS443:3:10:1516:1695#0/1  
ab`\_ab^`\_aaa`\_Z`a`\_`aSVY\_\_Q¥\_VQQQVVYWW  
@HWI-EAS443:3:10:1620:785#0/1  
GAAGAAAATTGAGAAAATAAGGCCTCTTCTAATAGATGGC  
+HWI-EAS443:3:10:1620:785#0/1  
a`a`aaa`ab¥`aa\_a`a^[aZ]X0`^X^^Z`XVTZ\_0  
@HWI-EAS443:3:10:1680:984#0/1  
ATCAAAATCCTCGAATGTTCTGGCGATGATTACATATAT  
+HWI-EAS443:3:10:1680:984#0/1  
XXZabba\_aba^]^aaP^[`^aa`a`\_X0^a^Y¥`]^Z]  
@HWI-EAS443:3:10:339:730#0/1  
ATTTATATAGGACTTCTTTTTGCTCATGTTGATTCCCCT  
+HWI-EAS443:3:10:339:730#0/1  
abba`aaa`a`^`abbbabbabab^aaaba`aa\_aa`¥`a`a  
@HWI-EAS443:3:10:418:632#0/1  
CAATCACTGGGACAACACTAAGTGAATGAAAATCAAAA  
+HWI-EAS443:3:10:418:632#0/1  
abbbabbbabababaaaaaaaaa]aaa\_aaaaa`aaaa  
@HWI-EAS443:3:10:439:1009#0/1  
CAAAATGCCATAAGCACCACATTCCCTTATACTGGAGATC  
+HWI-EAS443:3:10:439:1009#0/1  
a`\_XW\_ab\_\_ab\_]baa`aaaaaY]^abaa\_a\_T^`\_\_^  
@HWI-EAS443:3:10:517:1001#0/1  
CGCAAAATGCCATAAGCACCACATTCCCTTATACTGGAGA  
+HWI-EAS443:3:10:517:1001#0/1  
abb`bbababbbabaabbbbaa`a\_aa`\_aaaab`\_aa`a`a  
@HWI-EAS443:3:10:595:307#0/1  
ATTTCTAGCATGGTGGAGGCCATGGTGTCTAGGGCCCGGA  
+HWI-EAS443:3:10:595:307#0/1  
abbaaaaaaaba¥aaa`a`\_a`\_UYV]X^¥\_UUY]T`T  
@HWI-EAS443:3:10:641:479#0/1  
ATTTATATAGGACTTCTTTTTGCTCATGTTGATTCCCCT





@HWI-EAS443:3:11:1283:1011#0/1  
GGTGTATCCTGTTCCCTGTTCCATGGCTGTATGGAGGATCT  
+HWI-EAS443:3:11:1283:1011#0/1  
a`¥]]¥`a`a\_a]\_`^^a\_\_`\_\_VU^]QXSXULQZBBBB  
@HWI-EAS443:3:11:1533:148#0/1  
ATTCGAGGATTTTGATTTTCATTCCACTTAGTGTGTTGCC  
+HWI-EAS443:3:11:1533:148#0/1  
aaa^a\_ba\_a`aaaa`a`¥`a\_TXY^a`^`Z^\_YX^]XX  
@HWI-EAS443:3:11:1644:822#0/1  
GTCCAGCCAAAAGCATGGAATATGATGCCGTTGCAACTAC  
+HWI-EAS443:3:11:1644:822#0/1  
a\_a\_aa\_\_aaa`[\_\_\_\_`aa`a`a]Y\_^^X^XZ^W  
@HWI-EAS443:3:11:218:1769#0/1  
GCCGGTTGATTTCTGTTAATGTCCAATCATAAGTCTGGC  
+HWI-EAS443:3:11:218:1769#0/1  
aba\_\_abaaaa`aa\_a`aaa]aaaa^aaaa`X`]`  
@HWI-EAS443:3:11:415:601#0/1  
CAATCCGGGCCCTAGACACCATGGCCTCCACCATGCTAGA  
+HWI-EAS443:3:11:415:601#0/1  
abbbabbaababaaa`baaaaaZa[a`^`^Y`^aUaaa\_  
@HWI-EAS443:3:11:437:398#0/1  
TTCGAGGATTTTGATTTTCATTCCACTTAGTGTGTTGCC  
+HWI-EAS443:3:11:437:398#0/1  
a\_abaab`aa`a\_aa`aaa`a\_\_\_\_`Za]`\_^\_ZZ^  
@HWI-EAS443:3:11:465:1089#0/1  
AATTTCTAGCATGGTGGAGGCCATGGTGTCTAGGGCCCGG  
+HWI-EAS443:3:11:465:1089#0/1  
abZa¥`Z\_aaaaaUa\_`^`\_\_W[\_\_\_Q¥¥¥S\_V¥W\_RVZ¥  
@HWI-EAS443:3:11:476:651#0/1  
GAAAAAGGAGAGTAAGAGACAACATGACCAAGAAGATGGT  
+HWI-EAS443:3:11:476:651#0/1  
UMOG¥\_WUS^PYRZ\_]`^`U`a]XX``¥¥a`¥`]Y`]S  
@HWI-EAS443:3:11:477:1027#0/1  
TTCTGGTACATCTGTTTCATCCTCAAGAATCCCCCTTTGGC  
+HWI-EAS443:3:11:477:1027#0/1  
aab\_[\_`^bba\_\_\_\_a`\_]UW]a^Wa`\_a`[\_]U^\_¥\_Y^  
@HWI-EAS443:3:11:50:1492#0/1  
AGCACTTCTGGTACATCTGTTTCATCCTCAAGAATCCCCCT  
+HWI-EAS443:3:11:50:1492#0/1  
`\_baaaaba\_a]`a\_a`\_]`a`a\_\_\_\_X`\_^\_\_\_\_^\_\_  
@HWI-EAS443:3:11:61:1310#0/1  
ATTCGAGGATTTTGATTTTCATTCCACTTAGTGTGTTGCC  
+HWI-EAS443:3:11:61:1310#0/1  
a\_\_aaX`ZU]\_\_`^SWX`]Y`\_\_VNS[\_^\_Y\_\_\_\_^¥aZ  
@HWI-EAS443:3:11:635:1209#0/1  
ATGGTGGAGCCATGGTGTCTAGGGCCCGGATTGATGCCA  
+HWI-EAS443:3:11:635:1209#0/1  
^\_]\_M\_\_\_\_`[``Z\_W]VZX`MVUYRR]aWYPU¥V¥XYXX¥  
@HWI-EAS443:3:11:805:1536#0/1  
ATTTCTAGCATGGTGGAGGCCATGGTGTCTAGGGCCCGGA

+HWI-EAS443:3:11:805:1536#0/1  
X^^\_\_¥]RXZXa¥F\_¥TZ[¥]^X`¥SVU^R¥SXZONY\_BB  
@HWI-EAS443:3:11:870:407#0/1  
AACTTTAGCTAGGAGCATTGCGAAAAGCTTGAACAGTCT  
+HWI-EAS443:3:11:870:407#0/1  
`b\_b`aababbaa]aaaa`aV]````b\_aaa\_\_a`WQ^  
@HWI-EAS443:3:11:91:911#0/1  
GGAGGATCTCCAGTATAAGGGAATGTGGTGCTTATGGCAT  
+HWI-EAS443:3:11:91:911#0/1  
aaaaa`\_aaaaa]a\_^aaaYW]a¥`\_Y[\_`¥VX^X¥]  
@HWI-EAS443:3:11:96:1557#0/1  
ATCACTGGGACAACACTAAGTGAATGAAAATCAAAATC  
+HWI-EAS443:3:11:96:1557#0/1  
a`\_`baaaaSaba`Y¥aa¥^aH¥`\_aa^a`Wa`a[a[\_\_\_^  
@HWI-EAS443:3:11:971:55#0/1  
CACATTCCCTTATACTGGAGATCCTCCATACAGCCATGGA  
+HWI-EAS443:3:11:971:55#0/1  
`\_ba`\_`bbabbbbKabbb\_bb`SbbSabbaVab`\_aaa`a  
@HWI-EAS443:3:11:990:1931#0/1  
ATCAAAATCCTCGAATGTTCTGGCGATGATTACATATAT  
+HWI-EAS443:3:11:990:1931#0/1  
aa]b^baY\_WGT^U]\_[Wa^\_^]0`a\_\_WUW[\_aSP`Y`Q  
@HWI-EAS443:3:11:999:885#0/1  
AATTTCTAGCATGGTGGAGGCCATGGTGTCTAGGGCCCGG  
+HWI-EAS443:3:11:999:885#0/1  
]W^[aab\_]`^aa\_`P¥¥0¥``Q]¥WYNXSZSY[\_[R[Za`  
@HWI-EAS443:3:12:1060:1041#0/1  
CAGTGATAAAGAACAACATGATAAACAATGACCTTGGACC  
+HWI-EAS443:3:12:1060:1041#0/1  
a`XJXa`[^^b[XT\_a`aU`Z]aaYUZ`\_`^MZ]P\_WUQ]  
@HWI-EAS443:3:12:1068:1175#0/1  
CAAAATGCCATAAGCACCATTCCTTATACTGGAGATC  
+HWI-EAS443:3:12:1068:1175#0/1  
ab\_a^aaaabbaa][aaaaT\_`aa^a`aYa\_]\_W\_a`\_Z  
@HWI-EAS443:3:12:1071:1001#0/1  
AAAATGCCATAAGCACCATTCCTTATACTGGAGATCC  
+HWI-EAS443:3:12:1071:1001#0/1  
`Y^ba¥[``aa\_^b`]aaa¥aWR\_aaa\_a\_]¥\_[WXMZ  
@HWI-EAS443:3:12:1140:1777#0/1  
GGTCCAGCCAAAAGCATGGAATATGATGCCGTTGCAACTA  
+HWI-EAS443:3:12:1140:1777#0/1  
X\_\_¥ZWZU¥V`¥S\_a]bba[aabbbUaR`R^b`a¥S^a  
@HWI-EAS443:3:12:1176:544#0/1  
TGCCGTTGATTTCTGTTTAATGTCCAATCATAAGTCTGG  
+HWI-EAS443:3:12:1176:544#0/1  
^bb[^`NX``abbba\_[aa`aab\_\_\_PJ^``aa^^V]aYX  
@HWI-EAS443:3:12:1293:1686#0/1  
GTTTAATGTCCAATCATAAGTCTGGCGACCTTGAGTTAGT  
+HWI-EAS443:3:12:1293:1686#0/1  
aZ`[^`]XY[`¥]\_\_aa]QY]^RQTSLLX`\_¥\_YW\_]V

@HWI-EAS443:3:12:1329:766#0/1  
GCCGGTTGATTTCTGTTTAATGTCCAATCATAAGTCTGGC  
+HWI-EAS443:3:12:1329:766#0/1  
a`a\_SJ¥\_]Y¥]S¥\_Z\_\_\_U]a[VSMVX]\_[U[]U^WBB  
@HWI-EAS443:3:12:1333:1189#0/1  
ATTTATATAGGACTTCTTTTTGCTCATGTTGATTCCCCT  
+HWI-EAS443:3:12:1333:1189#0/1  
aabbbbbbbba`baabbbbaa`b`aba`aa`aa`\_^``a  
@HWI-EAS443:3:12:1368:868#0/1  
GGGACAACACTAAGTGAATGAAAATCAAAATCCTCGAA  
+HWI-EAS443:3:12:1368:868#0/1  
`b`aaa`aaa`aaaa\_aa`\_aaaaab^a\_a`a[X`^a``  
@HWI-EAS443:3:12:136:1553#0/1  
CAGTGATAAAGAACAACATGATAAACAATGACCTTGGACC  
+HWI-EAS443:3:12:136:1553#0/1  
a`a\_bb\_baa`^aaaa`a``\_\_[\_a^aa`\_a^^\_\_\_Y\_X\_  
@HWI-EAS443:3:12:1380:1189#0/1  
ATTTCTAGCATGGTGGAGGCCATGGTGTCTAGGGCCCGGA  
+HWI-EAS443:3:12:1380:1189#0/1  
X\_aaaa¥`¥`abZJa]\_bURRX^a^N\_W^Z[^Y¥HZBBBB  
@HWI-EAS443:3:12:1573:902#0/1  
ATTAGCCACAAATCCATAGCGATAAAAAAGCTTGTGAAT  
+HWI-EAS443:3:12:1573:902#0/1  
abaa]\_aa`b`\_a\_\_aa\_a\_a`aa`a`\_`\_`W`aa^a`^a  
@HWI-EAS443:3:12:1772:992#0/1  
TCTTTTTGCTCATGTTGATTCCCCTAACTTGCAGGTCCT  
+HWI-EAS443:3:12:1772:992#0/1  
X\_a\_ab``aaaa[`[R`¥a`VNP¥F[aa\_\_XYZR]XU]^\_  
@HWI-EAS443:3:12:343:744#0/1  
AAATGCCATAAGCACCACATTCCTTATACTGGAGATCCT  
+HWI-EAS443:3:12:343:744#0/1  
aa`^`aaaa`]aa[\_a``\_\_\_\_``a`]]\_\_[^a^\_^^  
@HWI-EAS443:3:12:376:1266#0/1  
GGACAACACTAAGTGAATGAAAATCAAAATCCTCGAATG  
+HWI-EAS443:3:12:376:1266#0/1  
Z¥¥S¥I¥`]KaaUU`QPQ]XZa`]\_b^YWIZ¥QXTaRYaB  
@HWI-EAS443:3:12:511:1718#0/1  
CAACGGCATCATATTCCATGCTTTTTGGCTGGACCATGGGC  
+HWI-EAS443:3:12:511:1718#0/1  
aba^U\_aaa\_]\_]\_]`a``\_Z\_¥ZZW\_^a\_^¥Z[TWY¥B  
@HWI-EAS443:3:12:583:1800#0/1  
CAGTGATAAAGAACAACATGATAAACAATGACCTTGGACC  
+HWI-EAS443:3:12:583:1800#0/1  
aba\_baabbbbbbba`aaaaa^a`a`\_a\_  
@HWI-EAS443:3:12:597:553#0/1  
GAGCAAAAAGAAGTCCTATATAAATAAGACAGGGACATTT  
+HWI-EAS443:3:12:597:553#0/1  
\_bbaabbb^\_abXb]aaaaabaaa\_aa]`a]``a\_\_`^  
@HWI-EAS443:3:12:608:1921#0/1  
TCCAGCGCAAAATGCCATAAGCACCACATTCCTTATACT

+HWI-EAS443:3:12:608:1921#0/1  
aa\_W\_¥\$^Z]]`a]Z`Zaa`Ya\_Jaaa\_WT[RZM`0a\_B  
@HWI-EAS443:3:12:617:115#0/1  
AATGGTGGAACAGATCTTCATGATCTCAGAGAACTCTTCT  
+HWI-EAS443:3:12:617:115#0/1  
`¥aT\_Z`aJ^V¥V`W¥aa\_`ZYSaPZT`][[`ZN`Y\_]S`  
@HWI-EAS443:3:12:618:1747#0/1  
CGGTTGATTTCTGTTTAATGTCCAATCATAAGTCTGGCGA  
+HWI-EAS443:3:12:618:1747#0/1  
abb`aaaaaaaa\_bbabbbYaaaaa¥aaaa`\_^aa]\_\_^  
@HWI-EAS443:3:12:622:1056#0/1  
GAGTTCTTCAATGGTGGAACAGATCTTCATGATCTCAGAG  
+HWI-EAS443:3:12:622:1056#0/1  
aabUaabaa]a\_aaX¥Vaaa`aa\_[a`P\_\_`\_\_^\_X\_Z\_`  
@HWI-EAS443:3:12:791:651#0/1  
CAAATACCAGCAGAAATGCTAGCAAGCATTGACCTGAAGT  
+HWI-EAS443:3:12:791:651#0/1  
\_b\_a``¥\_U`a¥a^`^Vaa`aaUaa^\_\_\_\_]]]]Z[XaU`0  
@HWI-EAS443:3:12:888:543#0/1  
GCGCAAATGCCATAAGCACCACATTCCTTATACTGGAG  
+HWI-EAS443:3:12:888:543#0/1  
\_UUT\_a````aY[`\_a^[bU\_YLZ]\_\_[UYV`^\_ZP`¥[  
@HWI-EAS443:3:12:904:1476#0/1  
ATCAAATCCTCGAATGTTCTGCGGATGATTACATATAT  
+HWI-EAS443:3:12:904:1476#0/1  
a¥]¥aabba`]]^aaaX^a^````]`a`^MY`\_^¥]¥^a`  
@HWI-EAS443:3:12:919:936#0/1  
GCCGGTTGATTTCTGTTTAATGTCCAATCATAAGTCTGGC  
+HWI-EAS443:3:12:919:936#0/1  
aa\_bb\_[^`Y`][TTaaaaT[\_`]a``a¥\_]`[\_\_\_\_[W  
@HWI-EAS443:3:12:986:1195#0/1  
GCTTTTTTATCGCTATGGATTTGTGGCTAATTTTAGCAT  
+HWI-EAS443:3:12:986:1195#0/1  
aW^`a```^`a\_\_^¥^`\_`W^^\_[W\_[V¥\_¥ZU\_] [BBBB  
@HWI-EAS443:3:13:1051:1595#0/1  
GACAACACTAAGTGGAAATGAAAATCAAATCCTCGAATGT  
+HWI-EAS443:3:13:1051:1595#0/1  
S\_PX^\_a^`]\_T\_]S\_`aZ¥^¥`^¥a\_¥\_TP^Y¥aaa`Z  
@HWI-EAS443:3:13:1159:1159#0/1  
TTTGAATTCACAAGCTTTTTTATCGCTATGGATTTGTGG  
+HWI-EAS443:3:13:1159:1159#0/1  
VVWYJWS¥aV`WMXTS`aabab`\_^Y^W]Za\_`aa`aa`  
@HWI-EAS443:3:13:1181:1279#0/1  
ATTGGAGTAACAGTGATAAAGAACAACATGATAAACAATG  
+HWI-EAS443:3:13:1181:1279#0/1  
[^WS`¥YD]`¥¥`[^`^[Y^\_¥aa`Y`^¥a]`¥\_a``X]`  
@HWI-EAS443:3:13:1264:867#0/1  
CACTGGGGACAACACTAAGTGGAAATGAAAATCAAATCCT  
+HWI-EAS443:3:13:1264:867#0/1  
aa`\_aba`aaW\_a\_^\_aaaYa\_^`b`\_`^`\_`[\_\_\_\_`Z\_

@HWI-EAS443:3:13:1366:1159#0/1  
GTCCCTGTCTTATTTATATAGGACTTCTTTTTGCTCATGT  
+HWI-EAS443:3:13:1366:1159#0/1  
\_¥ZRX¥¥SYXY]abaPP`TU[OFJJaZLZ^\_]¥WU^¥`aBB  
@HWI-EAS443:3:13:1377:1702#0/1  
GGACAACACTAAGTGAATGAAAATCAAATCCTCGAATG  
+HWI-EAS443:3:13:1377:1702#0/1  
`bbaa`a`a`¥bbaaaaa^aa`\_b\_aaa[N`Ya¥a\_a  
@HWI-EAS443:3:13:1497:1997#0/1  
GACAAAGGGATTACAGGGGATTACAAAGTCTTCCCCGATAA  
+HWI-EAS443:3:13:1497:1997#0/1  
ababbbaabbbabbb\_abaaaaabab\_\_aaYV``aa`a`  
@HWI-EAS443:3:13:1507:1455#0/1  
CAAATGCCATAAGCACCACATTCCCTTATACTGGAGATC  
+HWI-EAS443:3:13:1507:1455#0/1  
L\_b]]b]b`aV[¥bbaZbaaaa``a`[bb^aab`b[`^  
@HWI-EAS443:3:13:1547:672#0/1  
AAAATGCCATAAGCACCACATTCCCTTATACTGGAGATCC  
+HWI-EAS443:3:13:1547:672#0/1  
aa\_^aaa¥aaa`a`¥Za`a`\_^]`aa\_`]]-[\_^\_R¥  
@HWI-EAS443:3:13:1654:990#0/1  
TGCCGGTTGATTTCTGTTTAAATGTCCAATCATAAGTCTGG  
+HWI-EAS443:3:13:1654:990#0/1  
aa`¥aa\_ba]aaa]a[\_aba\_ba`\_]a`aaaa\_`XZa\_\_  
@HWI-EAS443:3:13:1713:1901#0/1  
AGAAAAAGGAGAGTAAGAGACAACATGACCAAGAAGATGG  
+HWI-EAS443:3:13:1713:1901#0/1  
aaaaaaabb`a\_a]a\_a`aa^aaa\_aaa^\_a^`aa\_]`a^  
@HWI-EAS443:3:13:220:1235#0/1  
GACCGTTGGAATTTCTAGCATGGTGGAGGCCATGGTGTC  
+HWI-EAS443:3:13:220:1235#0/1  
abUab`Zbabaaaa`a`\_`YXZ^Xa\_Z¥¥`¥¥¥^^S\_¥W  
@HWI-EAS443:3:13:267:898#0/1  
AATCACTGGGACAACACTAAGTGAATGAAAATCAAAT  
+HWI-EAS443:3:13:267:898#0/1  
a¥b\_U\_aaaa^Ua^`\_a[ZRK`Uaa`[\_\_\_\_Q¥\_\_a`[`a\_  
@HWI-EAS443:3:13:451:679#0/1  
TGAAAATCAAATCCTCGAATGTTCCCTGGCGATGATTACA  
+HWI-EAS443:3:13:451:679#0/1  
\_\_\_\_YaX]V¥]TZ``]^\_`^`a`ZZ]]\_aa`]]`\_Y^X]V]X  
@HWI-EAS443:3:13:508:638#0/1  
ATCCTGTTCCCTGTTCCATGGCTGTATGGAGGATCTCCAGT  
+HWI-EAS443:3:13:508:638#0/1  
aaaaab\_X`a`[`T`\_\_a[X`aLYFMPG\_a[PPRRTVZB  
@HWI-EAS443:3:13:562:1900#0/1  
CAAGGTCATTGTTTATCATGTTGTTCTTTATCACTGTTAC  
+HWI-EAS443:3:13:562:1900#0/1  
abaaaYaaaaa\_aaa`\_a`a^\_a^\_aa`a`a^`a^\_[^^]  
@HWI-EAS443:3:13:731:436#0/1  
GCTCATGTTGATTTCCACTAACTTGCAGGTCCTGTAGAAT

+HWI-EAS443:3:13:731:436#0/1  
aaaaaaa\_baaaa\_\_`a``\_a`\_`````aV[Z^U¥\_\_^\_^  
@HWI-EAS443:3:13:84:783#0/1  
TGCCGGTTGATTTCTGTTTAATGTCCAATCATAAGTCTGG  
+HWI-EAS443:3:13:84:783#0/1  
^T`b\_aW^^`b`bba^0ab^UU¥`¥L¥\_\_\_\_]PH]Z`a\_¥  
@HWI-EAS443:3:13:973:610#0/1  
TGCCGGTTGATTTCTGTTTAATGTCCAATCATAAGTCTGG  
+HWI-EAS443:3:13:973:610#0/1  
aa`\_`YDYbZX[\_¥abaTaa`\_a]\_aa]\_\_\_\_^\_[a00¥\_[  
@HWI-EAS443:3:14:1086:1155#0/1  
TATAGGACTTCTTTTTGCTCATGTTGATTCCTCACTAACTT  
+HWI-EAS443:3:14:1086:1155#0/1  
aa`a`a`\_`aaaa`a`\_a`\_`\_a]`a¥^\_^[\_^\_^^^  
@HWI-EAS443:3:14:1086:1354#0/1  
GTTCTTCAATGGTGAACAGATCTTCATGATCTCAGAGAA  
+HWI-EAS443:3:14:1086:1354#0/1  
a]``\_\_`]\_\_\_\_]W^ZZ^Z\_\_V^^[\_X\_][]ZXZU^Z]V]^  
@HWI-EAS443:3:14:1227:911#0/1  
GGACAACACTAAGTGAATGAAAATCAAAATCCTCGAATG  
+HWI-EAS443:3:14:1227:911#0/1  
aaZ\_`aaa`abaaa¥ba`abaaaa`aa`a`aZa^a\_`aaa  
@HWI-EAS443:3:14:1245:1655#0/1  
TAAGCACCACATTCCCTTATACTGGAGATCCTCCATACAG  
+HWI-EAS443:3:14:1245:1655#0/1  
[a`abb\_aa\_bb`b`¥K¥I\_\_\_\_`¥a^^S\_\_V`\_`N]Y^^  
@HWI-EAS443:3:14:1260:166#0/1  
ATAGGACTTCTTTTTGCTCATGTTGATTCCTCACTAACTTG  
+HWI-EAS443:3:14:1260:166#0/1  
abbbYHQ^a`baaaa]aaa\_bZ[]aW`\_YVF]]`¥]G]]\_  
@HWI-EAS443:3:14:1284:1633#0/1  
TGCTGCCGGTTGATTTCTGTTTAATGTCCAATCATAAGTC  
+HWI-EAS443:3:14:1284:1633#0/1  
QZQ]aZZa]G[\_OYS\_``^\_ZZQ\_P^`ZW¥aaa\_`^]FZ  
@HWI-EAS443:3:14:1364:264#0/1  
ATAAATAAGACAGGGACATTTGAATCACAAGCTTTTTTTT  
+HWI-EAS443:3:14:1364:264#0/1  
aaabWaZG`^a^\_\_RU^][]a^[\_U\_¥]`Y]Y]`^^^`^  
@HWI-EAS443:3:14:1469:1794#0/1  
CATCTGTTTCATCCTCAAGAATTCCTTTGGCTTGTGTTG  
+HWI-EAS443:3:14:1469:1794#0/1  
¥X^¥a¥`YV^]a``Zaabbab]T¥TWab\_`WV[[VU[\_Wa  
@HWI-EAS443:3:14:151:1116#0/1  
GTTCTTCAATGGTGAACAGATCTTCATGATCTCAGAGAA  
+HWI-EAS443:3:14:151:1116#0/1  
``aaaaaaaa`Xa`a\_]`````aa`a\_``\_]\_\_^^^`  
@HWI-EAS443:3:14:1548:676#0/1  
AACTAACTCAAGGTCGCCAGACTTATGATTGGACATTAAA  
+HWI-EAS443:3:14:1548:676#0/1  
aaaTY]VY¥`¥X]T^^][^^XRW^[¥UYWT^VQPVXX^][

@HWI-EAS443:3:14:1681:1987#0/1  
GGGGACAACACTAAGTGAATGAAAATCAAAATCCTCGAA  
+HWI-EAS443:3:14:1681:1987#0/1  
a¥\_[aZZ\_a`aaIaR`\_`a]V\_[[G\_a`\_`PFQY[U]  
@HWI-EAS443:3:14:169:1123#0/1  
GATTTTCATTCCACTTAGTGTTCCTCCAGTGATTGTGAA  
+HWI-EAS443:3:14:169:1123#0/1  
]Xabbaab^ab`aaaaab[a`aaab`\_[¥`\_`aaaa]aaa  
@HWI-EAS443:3:14:170:691#0/1  
AGAGTTCTCTGAGATCATGAAGATCTGTTCCACCATTGAA  
+HWI-EAS443:3:14:170:691#0/1  
XW¥aaaa`ba]\_aba`aaa[aaa\_^^a^`aaa\_aa\_\_`\_`\_  
@HWI-EAS443:3:14:1716:1943#0/1  
TGCCGGTTGATTTCTGTTTAATGTCCAATCATAAGTCTGG  
+HWI-EAS443:3:14:1716:1943#0/1  
abW\_baYabZ`\_a]aaaaaaaaa[[\_a\_^a^`a\_a^]aa`  
@HWI-EAS443:3:14:385:1849#0/1  
CAGTGATAAAGAACAACATGATAAACAATGACCTTGACC  
+HWI-EAS443:3:14:385:1849#0/1  
^Y[NZaa` [¥Jabab`a\_[]ba[`aX`\_]`YaV¥¥G^P]UX  
@HWI-EAS443:3:14:392:1808#0/1  
GAGTTCTTCAATGGTGAACAGATCTTCATGATCTCAGAG  
+HWI-EAS443:3:14:392:1808#0/1  
aaaaaba`bbaa`a\_a^ababa\_`aaaabaaaaaaXa¥`a  
@HWI-EAS443:3:14:394:1651#0/1  
GACCGGTTGGAATTTCTAGCATGGTGGAGCCATGGTGTC  
+HWI-EAS443:3:14:394:1651#0/1  
a^bbaa`bababbbbababbbba`aab]a]`b\_]ZPT`\_  
@HWI-EAS443:3:14:464:790#0/1  
AGCACTTCTGGTACATCTGTTTCATCCTCAAGAATCCCCT  
+HWI-EAS443:3:14:464:790#0/1  
^^\_`abaaaa¥P\_a]`X`a[`\_`[\_`\_]`T`HX^\_[Z¥\_`^  
@HWI-EAS443:3:14:482:1618#0/1  
GTATGGAGGATCTCCAGTATAAGGGAATGTGGTGCTTATG  
+HWI-EAS443:3:14:482:1618#0/1  
\_YRTa\_WRYTUZ^`\_N]V¥]OJV¥\_YXVZJ[NT¥W¥^^TB  
@HWI-EAS443:3:14:529:1800#0/1  
CATGGTCCAGCCAAAAGCATGGAATATGATGCCGTTGCAA  
+HWI-EAS443:3:14:529:1800#0/1  
a`]R]T]RY^^¥]^^]NTYH[][\_^`]^`¥^[UUMP^]Y¥  
@HWI-EAS443:3:14:52:2029#0/1  
AACACTAAGTGAATGAAAATCAAAATCCTCGAATGTTCC  
+HWI-EAS443:3:14:52:2029#0/1  
a`aa`aa`\_[a]aa`aaa`\_`aa\_aa\_\_Z¥a\_\_`\_`\_]\_]  
@HWI-EAS443:3:14:53:1905#0/1  
ATAGGACTTCTTTTTGCTCATGTTGATTCCCACTAACTTG  
+HWI-EAS443:3:14:53:1905#0/1  
`VX¥P^`\_`\_`\_`¥Va^a`¥US]]`\_`[\_`Y¥\_]`^]UP  
@HWI-EAS443:3:14:562:570#0/1  
GAAAATCAAAATCCTCGAATGTTCCCTGGCGATGATTACAT

+HWI-EAS443:3:14:562:570#0/1  
a^aa\_aaaaYa`\_`^`X^^`Y^\_P]\_\_[^Y\_[\_¥^[]Y  
@HWI-EAS443:3:14:586:1492#0/1  
CTCATGTTGATTCCCCTAACTTGCAGGTCCTGTAGAATC  
+HWI-EAS443:3:14:586:1492#0/1  
aaaaaaaa[\_a`aaaa\_^\_¥a`\_`U]`a`\_`\_]QX`\_`\_  
@HWI-EAS443:3:14:718:414#0/1  
CAAAATGCCATAAGCACCACATTCCCTTATACTGGAGATC  
+HWI-EAS443:3:14:718:414#0/1  
Uaba`\_`bZK]aZ\_ba`b\_]YU]baY`\_`aY[Vaa`ab`a¥  
@HWI-EAS443:3:14:754:273#0/1  
CAATGGTGAACAGATCTTCATGATCTCAGAGAACTCTTC  
+HWI-EAS443:3:14:754:273#0/1  
abaa`¥^`a\_`aaa`\_`aaaa]`\_`a\_a\_X^`\_X^]\_Z^¥U  
@HWI-EAS443:3:14:927:978#0/1  
AAAATGCCATAAGCACCACATTCCCTTATACTGGAGATCC  
+HWI-EAS443:3:14:927:978#0/1  
\_Z¥JTYTTZa]Y[aYYSY^[^¥]^UZTRX]UVUHT^TWSV  
@HWI-EAS443:3:14:957:277#0/1  
GGGACAACACTAAGTGAATGAAAATCAAAATCCTCGAAT  
+HWI-EAS443:3:14:957:277#0/1  
aabaaaaaaaa`aZaa`a`aaaaaaaaZ`a\_\_`\_a\_\_`  
@HWI-EAS443:3:14:961:836#0/1  
CACTAAGTGAATGAAAATCAAAATCCTCGAATGTTCCCTG  
+HWI-EAS443:3:14:961:836#0/1  
a`\_`^]a]bb`\_`ba`\_`aaaa`a`\_`\_\_aa\_\_`\_`^^`\_`^\_  
@HWI-EAS443:3:15:1152:1177#0/1  
GGGACAACACTAAGTGAATGAAAATCAAAATCCTCGAA  
+HWI-EAS443:3:15:1152:1177#0/1  
^`^`\_`aba]\_]\_PP^Ta¥a`aa]`^`\_a[]a\_a`\_`aaa`\_`\_  
@HWI-EAS443:3:15:1188:497#0/1  
AACTTTAGCTAGGAGCATTTGCGAAAAGCTTGAACAGTCT  
+HWI-EAS443:3:15:1188:497#0/1  
aaaaababaa`ba\_a¥aaa`a`a\_\_`\_`a[a`\_`\_¥¥\_aYU\_  
@HWI-EAS443:3:15:1221:1127#0/1  
CATGGTGTATCCTGTTCCCTGTTCCATGGCTGTATGGAGGA  
+HWI-EAS443:3:15:1221:1127#0/1  
abbbbababb`\_ababa`b^abbbabab\_b^I^^a`a`b\_  
@HWI-EAS443:3:15:1267:1599#0/1  
CTTATTTATATAGGACTTCTTTTTGCTCATGTTGATTCCC  
+HWI-EAS443:3:15:1267:1599#0/1  
abaYaa\_aa`^`^`aa\_`^`aa`\_`aaaa`\_`aa`\_`aaYaa^`  
@HWI-EAS443:3:15:1640:867#0/1  
GTTCAAGCTTTTCGCAAATGCTCCTAGCTAAAGTTTCAAC  
+HWI-EAS443:3:15:1640:867#0/1  
aababab`\_`baaaa\_aaaa`\_a]`\_`a\_[\_aZ\_a¥aa\_a^]  
@HWI-EAS443:3:15:1652:549#0/1  
TGCCGTTGATTTCTGTTTAATGTCCAATCATAAGTCTGG  
+HWI-EAS443:3:15:1652:549#0/1  
a\_]a]^X[aa`b¥Pa\_Yaa[a`aX[TO¥QT¥a\_¥^¥N\_[Q



@HWI-EAS443:3:15:1655:369#0/1  
AAATGTCCCTGTCTTATTTATATAGGACTTCTTTTTGCTC  
+HWI-EAS443:3:15:1655:369#0/1  
abbaa\_`aaba\_\_aa`bb`aa````¥`\_\_a\_aaaa\_]\_Y  
@HWI-EAS443:3:15:1746:1205#0/1  
CCAGACTGTTCAAGCTTTTCGCAAATGCTCCTAGCTAAAG  
+HWI-EAS443:3:15:1746:1205#0/1  
abbba[`aSabb`aXabab\_XZ]bbbbaa\_`aa[aa``Y\_  
@HWI-EAS443:3:15:318:1406#0/1  
AAATGCCATAAGCACCACATTCCCTTATACTGGAGATCCT  
+HWI-EAS443:3:15:318:1406#0/1  
\_¥``abbba^abbbbab]aaaaaabaaaa`abaa\_a``  
@HWI-EAS443:3:15:376:616#0/1  
GAAAAAGGAGAGTAAGAGACAACATGACCAAGAAGATGGT  
+HWI-EAS443:3:15:376:616#0/1  
aXaa^Vba\_a[a[aab\_\_aaaa`\_``a`^^\_a\_\_a`Za\_Z  
@HWI-EAS443:3:15:438:916#0/1  
TGGTGGAACAGATCTTCATGATCTCAGAGAACTCTTCTTT  
+HWI-EAS443:3:15:438:916#0/1  
aa`F\_aaa`^a`abaa`Y``aaaaa\_a`\_\_\_a]a\_```a  
@HWI-EAS443:3:15:686:63#0/1  
CAGCCAAAAGCATGGAATATGATGCCGTTGCAACTACACA  
+HWI-EAS443:3:15:686:63#0/1  
a\_b`¥`b`ab\_a]aa\_b`bbaaaaa`aG\_aY`\_Xaa\_\_X\_  
@HWI-EAS443:3:15:727:74#0/1  
GCCGGTTGATTTCTGTTAATGTCCAATCATAAGTCTGGC  
+HWI-EAS443:3:15:727:74#0/1  
[[bab\_[b]aba]`[`aaaa]ZN¥\_][a\_``^UQ^a`]  
@HWI-EAS443:3:15:796:2005#0/1  
CCATGGTCCAGCCAAAAGCATGGAATATGATGCCGTTGCA  
+HWI-EAS443:3:15:796:2005#0/1  
abb\_]¥P`\_¥^`bb\_\_`aba]X[\_¥ab\_[a`abaa`a[J]  
@HWI-EAS443:3:16:1060:337#0/1  
GGCTGTATGGAGGATCTCCAGTATAAGGGAATGTGGTGCT  
+HWI-EAS443:3:16:1060:337#0/1  
^^abaR`Q¥`a¥`[T¥TR`^¥P`\_PP`aaR^XaU]^UVQV  
@HWI-EAS443:3:16:1275:2021#0/1  
CTTGTGAATTCAAATGTCCCTGTCTTATTTATATAGGACT  
+HWI-EAS443:3:16:1275:2021#0/1  
ab^aZX¥```aaa^]V^]X]W]a\_\_a`\_```\_]X¥^^]  
@HWI-EAS443:3:16:1305:795#0/1  
CCTGTTCCCTGTTCCATGGCTGTATGGAGGATCTCCAGTAT  
+HWI-EAS443:3:16:1305:795#0/1  
abababbabbaaab\_aabaa`Y¥VUWY\_\_N]Q[QFO`GV\_  
@HWI-EAS443:3:16:1373:789#0/1  
GCATCATATTCCATGCTTTTGGCTGGACCATGGGCTGGCA  
+HWI-EAS443:3:16:1373:789#0/1  
a`^`\_`aaaa\_\_a\_[```\_\_\_[\_\_\_[^^¥ZZZ^\_VW[\_W[  
@HWI-EAS443:3:16:1456:444#0/1  
GCACCACATTCCCTTATACTGGAGATCCTCCATACAGCCA

+HWI-EAS443:3:16:1456:444#0/1  
a\_\_`W]aa`a`Ya\_aa`\_`¥Q¥[[Q[^`URX[YR]]SQ^  
@HWI-EAS443:3:16:1578:510#0/1  
GACTTCTTTTTGCTCATGTTGATTCCCCTAACTTGCAGG  
+HWI-EAS443:3:16:1578:510#0/1  
a`V`babaabab¥a\_\_aa\_``a`XTX`[`a\_]\_]`ZYa^  
@HWI-EAS443:3:16:161:181#0/1  
AGAAAAAGGAGAGTAAGAGACAACATGACCAAGAAGATGG  
+HWI-EAS443:3:16:161:181#0/1  
ab\_]a`aba\_`^a\_a`aaa`aa`\_\_a`\_]\_\_\_\_`T]\_^^\_  
@HWI-EAS443:3:16:166:333#0/1  
AGCGCAAATGCCATAAGCACCACATTCCTTATACTGGA  
+HWI-EAS443:3:16:166:333#0/1  
Vabaaa`aaa`a\_`a\_aaaa\_a\_``a`\_\_\_\_`\_YaZ\_\_W\_  
@HWI-EAS443:3:16:410:210#0/1  
GTCTTATTTATATAGGACTTCTTTTTGCTCATGTTGATTC  
+HWI-EAS443:3:16:410:210#0/1  
a\_aaa`aaa`a`a`a`Yaa\_a`aa\_``\_\_\_\_`\_[\_\_]^]\_  
@HWI-EAS443:3:16:443:1093#0/1  
GCCGGTTGATTTCTGTTAATGTCCAATCATAAGTCTGGC  
+HWI-EAS443:3:16:443:1093#0/1  
aaa]a^`a^[aa\_^][`aa`a\_X]``\_]Z^^a\_[UY\_\_[\_  
@HWI-EAS443:3:16:46:39#0/1  
CAACACTAAGTGAATGAAAATCAAATCCTCGAATGTTC  
+HWI-EAS443:3:16:46:39#0/1  
aa\_¥]\_`^[]V^^^a\_a^QZ\_\_^[^Y^\_\_^`^^]]^Z]\_  
@HWI-EAS443:3:17:1072:628#0/1  
ATTTCTAGCATGGTGGAGGCCATGGTGTCTAGGGCCCGGA  
+HWI-EAS443:3:17:1072:628#0/1  
a`X`aabbbaaba^aa\_aaa\_`a`^Y`^`^`\_\_a`Z^]a`Y  
@HWI-EAS443:3:17:1112:486#0/1  
CAAGGTCATTGTTTATCATGTTGTTCTTTATCACTGTTAC  
+HWI-EAS443:3:17:1112:486#0/1  
a`abbaa`bbb[aa\_aaab`abaa`baaaa\_a`ab`a`]  
@HWI-EAS443:3:17:1243:37#0/1  
GGACAACACTAAGTGAATGAAAATCAAATCCTCGAATG  
+HWI-EAS443:3:17:1243:37#0/1  
ab]a\_`]Y]`ZYa¥aaZ`aa¥V]W\_\_aXPU^]\_^]aZZ^Y  
@HWI-EAS443:3:17:1442:1159#0/1  
TAAGCACCACATTCCTTATACTGGAGATCCTCCATACAG  
+HWI-EAS443:3:17:1442:1159#0/1  
aaa\_YaaaaYa¥Z\_]¥baZ\_\_\_\_a`a`^XXVR^]0¥``\_]\_^  
@HWI-EAS443:3:17:150:598#0/1  
CTTCTTTTTGCTCATGTTGATTCCCCTAACTTGCAGGTC  
+HWI-EAS443:3:17:150:598#0/1  
`bbbbbbba^bbabbbaaab\_`aaaaabaa`a`\_aaaa\_Ya  
@HWI-EAS443:3:17:1585:1685#0/1  
CAGACTTATGATTGGACATTAACAGAAATCAACCGGCAG  
+HWI-EAS443:3:17:1585:1685#0/1  
X¥bbbaa¥¥a````¥U`aa`b`aaaa`a^¥^b]Y\_]Vbb

@HWI-EAS443:3:17:198:584#0/1  
GTTCTTCAATGGTGAACAGATCTTCATGATCTCAGAGAA  
+HWI-EAS443:3:17:198:584#0/1  
`aab`aa\_a`a`^b\_aa¥a\_```a\_aa^aa`aaaa\_^[\_a\_`  
@HWI-EAS443:3:17:260:1449#0/1  
ACTTTGTTGAACTTTAGCTAGGAGCATTTGCGAAAAGCT  
+HWI-EAS443:3:17:260:1449#0/1  
abaa^¥`aa`¥^`aa``\_aa`¥^[Y[¥\_\_\_\_`\_\_\_\_^`\_\_^`  
@HWI-EAS443:3:17:30:152#0/1  
TGTATCCTGTTCTGTTCCATGGCTGTATGGAGGATCTCC  
+HWI-EAS443:3:17:30:152#0/1  
ab\_]baabaa`aab\_aa`\_[a``^ZGZTP^R\_`SPYQ[B  
@HWI-EAS443:3:17:442:391#0/1  
GAAAATCAAAATCCTCGAATGTTCTGGCGATGATTACAT  
+HWI-EAS443:3:17:442:391#0/1  
`^`a``^a`aaaa\_a`aaa^`]\_`a\_\_\_\_\_`]Z^]Y\_^  
@HWI-EAS443:3:17:493:214#0/1  
GGACTTCTTTTTGCTCATGTTGATTCCCCTAACTTGCAG  
+HWI-EAS443:3:17:493:214#0/1  
a`RXa``\_aaaaa\_¥``a^`a^\_\_a`]`^a]^X`a^^\_  
@HWI-EAS443:3:17:621:1684#0/1  
GGGGACAACACTAAGTGAATGAAAATCAAAATCCTCGAA  
+HWI-EAS443:3:17:621:1684#0/1  
`a\_aa¥T`a\_a\_L\_VRY`]a\_``aUb\_U[aaaT\_¥[GX`\_  
@HWI-EAS443:3:17:666:1091#0/1  
TGCCGTTGATTTCTGTTAATGTCCAATCATAAGTCTGG  
+HWI-EAS443:3:17:666:1091#0/1  
aababb^abaaaaaaa\_aaaaaa\_aaaaa`a\_a``Z^]\_^  
@HWI-EAS443:3:17:881:151#0/1  
AAAAAGGAGAGTAAGAGACAACATGACCAAGAAGATGGTC  
+HWI-EAS443:3:17:881:151#0/1  
ab]`\_bbba]bYYabaaaa\_`^`]aaa``\_\_[`a^``^0¥  
@HWI-EAS443:3:17:921:721#0/1  
GTCCCTGTCTTATTTATATAGGACTTCTTTTTGCTCATGT  
+HWI-EAS443:3:17:921:721#0/1  
a]¥]`aa`\_aa\_aaa\_a\_a\_\_¥\_]\_a^a`a`a\_¥`\_\_\_\_`]  
@HWI-EAS443:3:17:92:786#0/1  
TGTGAATTCAAATGTCCCTGTCTTATTTATATAGGACTTC  
+HWI-EAS443:3:17:92:786#0/1  
aa\_abb\_b`b`]aa[b`aa`abbb`a`baa\_aaa  
@HWI-EAS443:3:17:981:771#0/1  
CAAAGGGATTGAGGGATTACAAAGTCTTCCCGATAATC  
+HWI-EAS443:3:17:981:771#0/1  
a\_Ybbbb\_aaaba`\_a`ba`aaaa¥``a`\_\_`a^a\_^Z  
@HWI-EAS443:3:17:988:346#0/1  
CACCATGGCCTCCACCATGCTAGAAATCCAACCGGTCTC  
+HWI-EAS443:3:17:988:346#0/1  
ab`aa`\_\_a`aa`R]]a\_a````\_]a\_\_\_\_\_`^Y`\_Q¥^\_  
@HWI-EAS443:3:18:1009:1879#0/1  
CACATTCCTGAAGTCTGCTTAAAATGGGAGCTAATGGATG

+HWI-EAS443:3:18:1009:1879#0/1  
U^b\_aabab\_b\_\_¥baa`bUX`bb`aab\_b\_aa\_ab\_aaa  
@HWI-EAS443:3:18:142:1590#0/1  
CAAGGTCATTGTTTATCATGTTGTTCTTTATCACTGTTAC  
+HWI-EAS443:3:18:142:1590#0/1  
ababZF\_a`aaVW¥)``a\_¥``a[`a\_a\_a`a`a`aX\_\_`  
@HWI-EAS443:3:18:1563:1525#0/1  
CAAAATGCCATAAGCACCACATTCCTTATACTGGAGATC  
+HWI-EAS443:3:18:1563:1525#0/1  
`^^`PX\_a`¥S^Vaab`Y[KP]ZH\_[`]¥`ZJOV`^`L^T  
@HWI-EAS443:3:18:162:1098#0/1  
GTTGGAATTTCTAGCATGGTGGAGGCCATGGTGTCTAGGG  
+HWI-EAS443:3:18:162:1098#0/1  
aaXa^a`^`¥a``Xa`¥ZRY^`XYP]]^RTXPSSZUOTPW  
@HWI-EAS443:3:18:166:413#0/1  
GGTTGGAATTTCTAGCATGGTGGAGGCCATGGTGTCTAGG  
+HWI-EAS443:3:18:166:413#0/1  
\_b^ba`a`aaaaaa\_aab`¥aY`a\_``\_aa]W¥¥¥S¥¥^  
@HWI-EAS443:3:18:211:1762#0/1  
CAAAATGCCATAAGCACCACATTCCTTATACTGGAGATC  
+HWI-EAS443:3:18:211:1762#0/1  
X`\_bb]]b`bbabaaabbaaba`Y`^b¥baaba\_`a]aaa  
@HWI-EAS443:3:18:313:1527#0/1  
CGCCAGACTTATGATTGGACATTAACAGAAATCAACCGG  
+HWI-EAS443:3:18:313:1527#0/1  
aa`aaa`a`aaaa`\_`\_`^`a`a\_a\_\_a\_`^``^¥]X  
@HWI-EAS443:3:18:519:445#0/1  
GTCGCCAGACTTATGATTGGACATTAACAGAAATCAACC  
+HWI-EAS443:3:18:519:445#0/1  
a^^a\_`S\_]V\_`[^Z]aYOUR]Y\_`]]`\_`X¥\_`ZM^`¥[  
@HWI-EAS443:3:18:556:1229#0/1  
CGGCATCATATTCCATGCTTTTGGCTGGACCATGGGCTGG  
+HWI-EAS443:3:18:556:1229#0/1  
aaaaaabba\_aaaa`a\_aa`\_`\_`^`\_`^ZU^\_¥UVV^VUY\_  
@HWI-EAS443:3:18:628:1543#0/1  
CACTAAGTGAATGAAAATCAAATCCTCGAATGTTCCCTG  
+HWI-EAS443:3:18:628:1543#0/1  
aaa^\_QX\_V\_Y\_bb\_a\_`\_`^`b`ba^aa`]aab^aZaY]`  
@HWI-EAS443:3:18:682:1245#0/1  
AAATAAGACAGGGACATTTGAATTCACAAGCTTTTTTTAT  
+HWI-EAS443:3:18:682:1245#0/1  
QZ\_]`[aabYbUUP^[¥a^a`Y\_WRWa¥Vb]Sa^aa`¥b[  
@HWI-EAS443:3:18:831:258#0/1  
GAAAAAGGAGAGTAAGAGACAACATGACCAAGAAGATGGT  
+HWI-EAS443:3:18:831:258#0/1  
a\_\_`^Z`\_]`^`\_Z\_^\_\_`\_X^^`\_Z^]¥X¥X\_ZZ]^XXWV  
@HWI-EAS443:3:19:1086:1108#0/1  
TGCCAGCCCATGGTCCAGCCAAAAGCATGGAATATGATGC  
+HWI-EAS443:3:19:1086:1108#0/1  
`]b\_PWaa`abba\_a\_a`aaa`^]`^¥\_`^`\_\_a`^a\_\_`\_\_

@HWI-EAS443:3:19:1125:1752#0/1  
GTTCTGTTCCATGGCTGTATGGAGGATCTCCAGTATAAG  
+HWI-EAS443:3:19:1125:1752#0/1  
^aaba\_U\_`abaZ^^`a\_FRX^`F¥`YXXQ]RU¥FO]^XU  
@HWI-EAS443:3:19:1143:375#0/1  
ACGGCATCATATTCCATGCTTTTGGCTGGACCATGGGCTG  
+HWI-EAS443:3:19:1143:375#0/1  
a`X`^a\_]`^aa^aY`^a`YX^Z[\_\_\_`MUTPSWUVZIBB  
@HWI-EAS443:3:19:1178:625#0/1  
AGGATCTCCAGTATAAGGGAATGTGGTGTATGGCATT  
+HWI-EAS443:3:19:1178:625#0/1  
aba^`aaa\_]`^[[a`a¥]¥\_aaZa`X`Z\_\_\_\_\_aaTZ\_^\_  
@HWI-EAS443:3:19:1482:1231#0/1  
ATGGTGAACAGATCTTCATGATCTCAGAGAACTCTTCTT  
+HWI-EAS443:3:19:1482:1231#0/1  
[]\_WVPUZa[[\_[¥[]`\_a`a]JL^^a¥\_¥a\_Sa^a^Sa^  
@HWI-EAS443:3:19:1598:50#0/1  
AGGACTTCTTTTGTCTCATGTTGATCCCACTAACTTGCA  
+HWI-EAS443:3:19:1598:50#0/1  
`Y¥a`babab`abaaaa`aV]Xa\_`\_Z`]]¥\_]a`[XaY`  
@HWI-EAS443:3:19:1610:373#0/1  
CGGGCCCTAGACACCATGGCCTCCACCATGCTAGAAATTC  
+HWI-EAS443:3:19:1610:373#0/1  
a`]WZ\_[aab[N^a^[X`\_\_^a[Y[^`^`]aXaa`^]UX[Q  
@HWI-EAS443:3:19:1699:332#0/1  
CTGGGGACAACACTAAGTGAATGAAAATCAAAATCCTCG  
+HWI-EAS443:3:19:1699:332#0/1  
abba`bb`\_¥aa`ab^baaaa`baaaaa`a``aaVX\_Xa  
@HWI-EAS443:3:19:207:901#0/1  
CGGTTGATTTCTGTTAATGTCCAATCATAAGTCTGGCGA  
+HWI-EAS443:3:19:207:901#0/1  
aba^`b`aa`aab`abbbbT\_``aaaba\_X`V^`aa`[\_  
@HWI-EAS443:3:19:226:980#0/1  
CAATGGTGAACAGATCTTCATGATCTCAGAGAACTCTTC  
+HWI-EAS443:3:19:226:980#0/1  
[\_S\_^\_Z[Z`\_S\_SabbZb[Y[`a`abbZbS]\_Z]``Vb\_  
@HWI-EAS443:3:19:278:584#0/1  
GTCTTATTTATATAGGACTTCTTTTGTCTCATGTTGATTC  
+HWI-EAS443:3:19:278:584#0/1  
¥I\_bYU`¥aba]b````T]a]`a\_aa^a\_aa^`^`\_\_\_\_^  
@HWI-EAS443:3:19:362:156#0/1  
TTCAAATGTCCCTGTCTTATTTATATAGGACTTCTTTTGT  
+HWI-EAS443:3:19:362:156#0/1  
a\_aa\_``a^`\_a\_a]^a\_`^`\_\_\_\_^[¥]^\_¥XX^^][[]Y  
@HWI-EAS443:3:19:38:1312#0/1  
GCCGGTTGATTTCTGTTAATGTCCAATCATAAGTCTGGC  
+HWI-EAS443:3:19:38:1312#0/1  
a`ab`\_a``aaaa`\_ba`]ba]\_]\_aaaaaaaa^^\_a[^^  
@HWI-EAS443:3:19:453:235#0/1  
TCCTGTTCTGTTCCATGGCTGTATGGAGGATCTCCAGTA

+HWI-EAS443:3:19:453:235#0/1  
aaaaaY\_a\_a`Y^a\_\_aa\_\_^`NQZ[WQ[^VLJRUXUURB  
@HWI-EAS443:3:19:766:536#0/1  
CAAAGGGATTGAGGGATTACAAAGTCTTCCCCGATAATC  
+HWI-EAS443:3:19:766:536#0/1  
a`]¥]aa`a`a`\_`a\_a`\_`\_]\_`a\_]\_]\_\_\_\_XV\_]`  
@HWI-EAS443:3:19:829:388#0/1  
CAACACTAAGTGAATGAAAATCAAATCCTCGAATGTTC  
+HWI-EAS443:3:19:829:388#0/1  
\_Y^bbY[\_[ZTSaUa^¥Yb^a^X`]abaTYa\_¥a]ba¥`Q  
@HWI-EAS443:3:19:883:784#0/1  
GTTCTTCAATGGTGAACAGATCTTCATGATCTCAGAGAA  
+HWI-EAS443:3:19:883:784#0/1  
aa[\_aaa`^\_[aI\_]\_[\_¥N`^`\_^]\_X`^UT¥]\_WX  
@HWI-EAS443:3:19:927:981#0/1  
AGGATCTCCAGTATAAGGGAATGTGGTGCTTATGGCATT  
+HWI-EAS443:3:19:927:981#0/1  
aaaX`a]a^bX\_aa`aab\_ab\_^¥UaGaa`b^\_AY]aZ^  
@HWI-EAS443:3:19:997:875#0/1  
GTTGGAATTTCTAGCATGGTGGAGGCCATGGTGTCTAGGG  
+HWI-EAS443:3:19:997:875#0/1  
aabbabbbbaaaaa`aabU`\_aa`a`aaa^¥\_T^¥^^^Y  
@HWI-EAS443:3:1:1100:1769#0/1  
ATAGGACTTCTTTTTGCTCATGTTGATTCCCCTAACTTG  
+HWI-EAS443:3:1:1100:1769#0/1  
aab`aa^a\_^b`aa\_X`]\_\_`a`aa`¥NPXYM[\_\_\_Z`BB  
@HWI-EAS443:3:1:1143:446#0/1  
TGGGACAACACTAAGTGAATGAAAATCAAATCCTCGA  
+HWI-EAS443:3:1:1143:446#0/1  
`]aaaa^`^`^`\_`\_`Y\_a[\_aa`\_^`¥`^`\_`VXW¥BB  
@HWI-EAS443:3:1:1694:535#0/1  
GCTGCCGTTGATTTCTGTTTAAATGTCCAATCATAAGTCT  
+HWI-EAS443:3:1:1694:535#0/1  
aaXTXTW[R[TZ\_^[FR[``[`]\_a[QT[X`YR`BBBBBB  
@HWI-EAS443:3:1:266:1469#0/1  
CACAATCACTGGGACAACACTAAGTGAATGAAAATCAA  
+HWI-EAS443:3:1:266:1469#0/1  
ab\_bbb`bVbbaba^\_^aaaWaabYa`a\_aaaaa`aSbB  
@HWI-EAS443:3:1:268:757#0/1  
TCCAGCGAAAATGCCATAAGCACCATTCCTTATACT  
+HWI-EAS443:3:1:268:757#0/1  
\_¥QY¥Q\_^ab]a`]aZ`]^JaT¥MRWGZ^UUUI[aaaBBB  
@HWI-EAS443:3:1:601:1106#0/1  
GCGAAAATGCCATAAGCACCATTCCTTATACTGGAG  
+HWI-EAS443:3:1:601:1106#0/1  
\_S¥KV]SSXXUV¥VUZZ^\_UNaTZ¥UUN\_¥¥U¥YBBBBBB  
@HWI-EAS443:3:1:639:201#0/1  
TAAGCACCATTCCTTATACTGGAGATCCTCCATACAG  
+HWI-EAS443:3:1:639:201#0/1  
aaRX`ZP¥^W]`]¥Z\_aa\_Wa¥Wa\_KX[PWSNLWQZBBBB



+HWI-EAS443:3:20:632:1330#0/1  
aa`baabbb¥baa^]aa]aaaaaaaa\_a`\_]\_\_`\_a^`XU\_  
@HWI-EAS443:3:20:903:1567#0/1  
AGCGCAAAATGCCATAAGCACCACATTCCCTTATACTGGA  
+HWI-EAS443:3:20:903:1567#0/1  
Y¥[P^baaa`Ubaaab\_Y\_a[P[\_`[Z`]¥\_`a^b0\_`Y]  
@HWI-EAS443:3:21:1008:1115#0/1  
CAATGGTGGAACAGATCTTCATGATCTCAGAGAACTCTTC  
+HWI-EAS443:3:21:1008:1115#0/1  
^[¥]baYaaa`aba\_aabaaaa`aa`a`^``a\_``\_`a\_^  
@HWI-EAS443:3:21:1036:968#0/1  
TAGGACTTCTTTTTGCTCATGTTGATTCCCCTAACTTGC  
+HWI-EAS443:3:21:1036:968#0/1  
abbb\_\_bbaaab¥a]baaaaaZaa``aa^WaY`\_a`[\_`\_\_  
@HWI-EAS443:3:21:1051:1213#0/1  
CAAAATGCCATAAGCACCACATTCCCTTATACTGGAGATC  
+HWI-EAS443:3:21:1051:1213#0/1  
`abaaa[`bbba`bbabbabbaaab`aaaa`aaa\_\_\_\_  
@HWI-EAS443:3:21:1125:464#0/1  
CTTTGTTGAAACTTTAGCTAGGAGCATTTCGAAAAGCTT  
+HWI-EAS443:3:21:1125:464#0/1  
abbababbb]baabaaaabb`a`aa`aaaa`aaaa`a\_``  
@HWI-EAS443:3:21:1177:812#0/1  
AGCACTTCTGGTACATCTGTTTCATCCTCAAGAATCCCT  
+HWI-EAS443:3:21:1177:812#0/1  
aa\_aaaaaaaaaa\_aa``^`\_aa\_\_\_\_`\_aa`\_`\_^]Z\_  
@HWI-EAS443:3:21:1225:22#0/1  
AATCAAAATCCTCGAATGTTCCCTGGCGATGATTACATATA  
+HWI-EAS443:3:21:1225:22#0/1  
ab\_T`^a\_a\_Z^XZ\_`aa`\_¥Z]a¥K\_^ZS¥\_`W^¥]Z^^  
@HWI-EAS443:3:21:1380:18#0/1  
GGTGTATCCTGTTCCCTGTTCCATGGCTGTATGGAGGATCT  
+HWI-EAS443:3:21:1380:18#0/1  
ab]b^`b\_aaa\_\_W\_ba\_a[¥¥a`ZS\_]GQRPYNV\_NTGW  
@HWI-EAS443:3:21:1440:1947#0/1  
TCCCTGTCTTATTTATATAGGACTTCTTTTTGCTCATGTT  
+HWI-EAS443:3:21:1440:1947#0/1  
a[^\_a\_aaaaaaaaa`a\_a\_Y\_^\_\_\_\_`\_\_`\_\_^^Z`]`Y¥  
@HWI-EAS443:3:21:1514:1329#0/1  
CTGGGGACAACACTAAGTGAATGAAAATCAAAATCCTCG  
+HWI-EAS443:3:21:1514:1329#0/1  
aS```ZW\_`XX^VZYITNaZR]`Y`aVP^`YM¥T]RH]W¥  
@HWI-EAS443:3:21:1525:575#0/1  
CTCGATACTGAATCTTGGACAAAAGAAATACACCAAGACA  
+HWI-EAS443:3:21:1525:575#0/1  
ababaaaabaaaa`abab\_^a`a`a\_\_a\_a]\_\_X``a`W]  
@HWI-EAS443:3:21:1616:485#0/1  
TTTGAATTCACAAGCTTTTTTATCGCTATGGATTTGTGG  
+HWI-EAS443:3:21:1616:485#0/1  
¥R`a]`^U^¥U\_¥^a]¥[aa^a``U¥Y[¥THHY[^ZFRSB



@HWI-EAS443:3:21:1648:1056#0/1  
TTCCAGCGCAAATGCCATAAGCACCACATTCCCTTATAC  
+HWI-EAS443:3:21:1648:1056#0/1  
aa`a\_\_^a^`a`\_a]]\_\_`^`[\`Y]`Y^\_AYW\_^]^^X  
@HWI-EAS443:3:21:1702:465#0/1  
ATTCGAGGATTTTGATTTTCATTCCACTTAGTGTTGTC  
+HWI-EAS443:3:21:1702:465#0/1  
ab\_^`bb`\_baaa\_aaa`¥a`a]^^Zaa]a]`[a\_¥]X]  
@HWI-EAS443:3:21:370:1860#0/1  
GTGGGAATCAACATGAGCAAAAAGAAGTCCTATATAAATA  
+HWI-EAS443:3:21:370:1860#0/1  
`\_aYWU\_aaaba]L^]]ab`\_]`Zaa^[\_a^a^`b\_a^`  
@HWI-EAS443:3:21:435:1010#0/1  
GGAACATTTCGAGGATTTTGATTTTCATTCCACTTAGTGTT  
+HWI-EAS443:3:21:435:1010#0/1  
aaab\_a¥[X\_YbWKaaaa^abaaZL^b\_\_W¥UaX[aS]]Z  
@HWI-EAS443:3:21:470:1053#0/1  
CAAAATGCCATAAGCACCACATTCCCTTATACTGGAGATC  
+HWI-EAS443:3:21:470:1053#0/1  
a`M`¥\_Saaa`Y]a`\_a\_W\_\_\_\_S]\_[\_^\_\_\_\_V]]Z`ZX\_  
@HWI-EAS443:3:21:563:1568#0/1  
TGTTTCATCTCAAGAATTCCCCTTTGGCTTGTGTTGAGAA  
+HWI-EAS443:3:21:563:1568#0/1  
^[0\_b¥W`\_]ba^`^`X^Zaba`aZT\_]\_\_Y\_R^^OQT^  
@HWI-EAS443:3:21:642:275#0/1  
CTGGGGACAACACTAAGTGAATGAAAATCAAAATCCTCG  
+HWI-EAS443:3:21:642:275#0/1  
ab\_a0JOS^a`aaab]\_LX¥S^aaY[Z[`\_b^Z\_]`\_a\_\_  
@HWI-EAS443:3:21:651:154#0/1  
TCCTGTTCCATGGCTGTATGGAGGATCTCCAGTATAAGGG  
+HWI-EAS443:3:21:651:154#0/1  
^aaba\_a`aaab`\_abZ[QW`Pa^NUQXWWT`SQ\_]Y^[\_  
@HWI-EAS443:3:21:661:245#0/1  
CAAAATGCCATAAGCACCACATTCCCTTATACTGGAGATC  
+HWI-EAS443:3:21:661:245#0/1  
a`a`aaabbaa]aaaa\_aaa`a`\_\_`aaab`\_\_\_\_\_]]  
@HWI-EAS443:3:21:752:574#0/1  
CTGGGGACAACACTAAGTGAATGAAAATCAAAATCCTCG  
+HWI-EAS443:3:21:752:574#0/1  
a`^`[¥V`\_]aaa\_\_\_\_`Wa\_¥Q¥a\_\_\_\_^\_a\_\_\_\_^`]^  
@HWI-EAS443:3:21:766:246#0/1  
GAAATCTATTAGCCTTCCTGACTCATTAGCTGTTAGACCA  
+HWI-EAS443:3:21:766:246#0/1  
a^\_¥a`abaaa`^`\_\_\_\_aa^Z\_]^]`\_W\_\_TUITYPGW  
@HWI-EAS443:3:21:824:1275#0/1  
TTCTAGCATGGTGGAGGCCATGGTGTCTAGGGCCCGGATT  
+HWI-EAS443:3:21:824:1275#0/1  
a`aaa\_aa\_\_TY`^¥^a`^`^]`P]R¥T[[^¥^XX¥`VS]  
@HWI-EAS443:3:22:1035:374#0/1  
CTTTTTTTATCGCTATGGATTTGTGGCTAATTTTAGCATG

+HWI-EAS443:3:22:1035:374#0/1  
aa^ab^`\_b`aaaaab\_`a`\_]\_a``[¥`\_a\_¥^\_]N  
@HWI-EAS443:3:22:1067:1664#0/1  
GGACAACACTAAGTGAATGAAAATCAAATCCTCGAATG  
+HWI-EAS443:3:22:1067:1664#0/1  
¥VJT¥ZZXaZZXY^^aX^Z]Z\_Z\_Z¥X\_a`VVT\_Ta\_a  
@HWI-EAS443:3:22:1076:1949#0/1  
CAGTGATAAAGAACAACATGATAAACAATGACCTTGGACC  
+HWI-EAS443:3:22:1076:1949#0/1  
\_\_\_¥R\_`^aYS\_a\_\_VTWa`[¥][[P`WY]¥YVFYZ`WV  
@HWI-EAS443:3:22:117:688#0/1  
CATGGTCCAGCCAAAAGCATGGAATATGATGCCGTTGCAA  
+HWI-EAS443:3:22:117:688#0/1  
^`U\_PO[aa^¥aaaa```WGLR]`a`¥a`aaa^PU^\_aa  
@HWI-EAS443:3:22:1220:1054#0/1  
CAATCACTGGGACAACACTAAGTGAATGAAAATCAA  
+HWI-EAS443:3:22:1220:1054#0/1  
abb`¥^aab`bbba^a`babaab^bbbaaaaaab\_aaba  
@HWI-EAS443:3:22:1264:1061#0/1  
GTAATCATCGCCAGGAACATTCGAGGATTTTGTTCAT  
+HWI-EAS443:3:22:1264:1061#0/1  
^]`^`aa`aaa`aaa^^aa`a\_\_a\_a`^`aa`a`a`\_`X\_\_  
@HWI-EAS443:3:22:1275:546#0/1  
GGACAACACTAAGTGAATGAAAATCAAATCCTCGAATG  
+HWI-EAS443:3:22:1275:546#0/1  
aaa\_``\_a\_aa`aX`a`aaa`aaaa^\_``\_aYX^[]^\_^\_  
@HWI-EAS443:3:22:1492:193#0/1  
GACCGTTGGAATTTCTAGCATGGTGGAGCCATGGTGTC  
+HWI-EAS443:3:22:1492:193#0/1  
[^ZZ^]ab]^]X¥aZVTYQVBBBBBBBBBBBBBBBB  
@HWI-EAS443:3:22:16:1386#0/1  
GGTGTATCCTGTTCCCTGTTCCATGGCTGTATGGAGGATCT  
+HWI-EAS443:3:22:16:1386#0/1  
aa\_a^`Z]`ZXY]¥]``\_a[LU`TY\_YMKLKTJV]BBBB  
@HWI-EAS443:3:22:19:529#0/1  
GTCCAGCCAAAAGCATGGAATATGATGCCGTTGCAACTAC  
+HWI-EAS443:3:22:19:529#0/1  
`Mb¥XT`bb]b^XaXabaUabb`b`\_b\_S¥a`\_^¥LMaaZ  
@HWI-EAS443:3:22:259:1237#0/1  
ATTGGAGTAACAGTGATAAAGAACAACATGATAAACAATG  
+HWI-EAS443:3:22:259:1237#0/1  
^aa`a`a]aa``\_[a\_aa\_¥\_\_`aa^`¥`\_a`\_Sa\_\_\_\_^  
@HWI-EAS443:3:22:274:466#0/1  
CTCTGTGTCTTGTGAATTAGTCATCATCTTTCTCACAACA  
+HWI-EAS443:3:22:274:466#0/1  
a`babab`aab`¥^X]aaZ^`b`b`[aabbb\_aabab\_[a  
@HWI-EAS443:3:22:282:1189#0/1  
TGTCCTGTCTTATTTATATAGGACTTCTTTTGTCTCATG  
+HWI-EAS443:3:22:282:1189#0/1  
ab`a`abaabbbZbbabbbaaaa`baaaaaaaaaaaa`aaa

@HWI-EAS443:3:22:314:46#0/1  
GCTCATGTTGATTCCCACTAACTTGCAGGTCCTGTAGAAT  
+HWI-EAS443:3:22:314:46#0/1  
aUXYGYRX\_¥]^aZ`Za]ZYUWZVSR¥[TZV[[W^]XV^  
@HWI-EAS443:3:22:454:1619#0/1  
TCTCGATACTGAATCTTGGACAAAAGAAATACACCAAGAC  
+HWI-EAS443:3:22:454:1619#0/1  
^a`b`bb^`b¥¥abaa\_^baaT```ab`aabb]a\_b¥[Z  
@HWI-EAS443:3:22:577:1314#0/1  
AATTTCTAGCATGGTGGAGGCCATGGTGTCTAGGGCCCCGG  
+HWI-EAS443:3:22:577:1314#0/1  
\_ZXQX\_aa\_[a^`S^¥UX^^¥`¥^¥NXNPKY^SZZ`TBB  
@HWI-EAS443:3:22:677:1751#0/1  
ACCGGTTGGAATTTCTAGCATGGTGGAGGCCATGGTGTCT  
+HWI-EAS443:3:22:677:1751#0/1  
aa^R]^aa¥aaaa]^]¥]a]¥WSYV`¥[Y]VSUSGYVUN  
@HWI-EAS443:3:22:705:1756#0/1  
GTTCTTCAATGGTGAACAGATCTTCATGATCTCAGAGAA  
+HWI-EAS443:3:22:705:1756#0/1  
a]W\_\_Z^aVTVPJRT\_XZa\_^X[HQ[[TO[[PT\_]DPP\_¥  
@HWI-EAS443:3:22:709:2002#0/1  
GCGCAAATGCCATAAGCACCATTCCTTATACTGGAG  
+HWI-EAS443:3:22:709:2002#0/1  
a`]]`\_bb`b]babaabaa\_baaaa\_]`aab\_aa]W]^  
@HWI-EAS443:3:22:855:1852#0/1  
ACTGTTCAAGCTTTTCGCAAATGCTCCTAGCTAAAGTTTC  
+HWI-EAS443:3:22:855:1852#0/1  
aa\_a]`aa`aa\_^\_¥aaa`\_^]\_^\_\_`\_]^a\_`W]^  
@HWI-EAS443:3:23:1063:102#0/1  
AATTTCTAGCATGGTGGAGGCCATGGTGTCTAGGGCCCCGG  
+HWI-EAS443:3:23:1063:102#0/1  
`abbbabbbbaaaba\_aaaaaUZa\_`aSaXZ¥W¥\_\_¥UU\_X  
@HWI-EAS443:3:23:1079:1163#0/1  
TATACTGGAGATCCTCCATACAGCCATGGAACAGGAACAG  
+HWI-EAS443:3:23:1079:1163#0/1  
aa`aa[¥¥`b`]`aa]abWaaaXa]a]S[^YX¥U`\_\_`  
@HWI-EAS443:3:23:1193:428#0/1  
CTGCCGTTGATTTCTGTTAATGTCCAATCATAAGTCTG  
+HWI-EAS443:3:23:1193:428#0/1  
aaa`]`a¥``]`aa[`a]a\_S]\_a]^]¥¥\_\_`]^`WWZ¥  
@HWI-EAS443:3:23:1358:636#0/1  
AGCGCAAATGCCATAAGCACCATTCCTTATACTGGGA  
+HWI-EAS443:3:23:1358:636#0/1  
]KZ`abaa]bb`babaab]Y\_\_[a]YLYa\_`\_`aaaU[  
@HWI-EAS443:3:23:1376:1783#0/1  
CTCATGTTGATTCCCACTAACTTGCAGGTCCTGTAGAATC  
+HWI-EAS443:3:23:1376:1783#0/1  
[`a¥aa^Vb^VY``[LZab^`a\_VVaab^¥baaa¥YZ^BB  
@HWI-EAS443:3:23:1586:742#0/1  
CTCAACACAAGCCAAAGGGGAATTCTTGAGGATGAACAGA

+HWI-EAS443:3:23:1586:742#0/1  
aaaba]a^`aaaa`aaaa`¥a]]aaaaa` `\_\_a\_\_aY  
@HWI-EAS443:3:23:1716:180#0/1  
GAAAAAGGAGAGTAAGAGACAACATGACCAAGAAGATGGT  
+HWI-EAS443:3:23:1716:180#0/1  
¥Xa`X`ab^aZ`\_]\_Ta`QU\_[YS[\_¥J]V¥`Z`[UU]X  
@HWI-EAS443:3:23:301:250#0/1  
CATGGTCCAGCCAAAAGCATGGAATATGATGCCGTTGCAA  
+HWI-EAS443:3:23:301:250#0/1  
ab` `a^bX[^[\_a]`^SaaYa`^`]a\_a\_Y\_\_\_`0FVX]^  
@HWI-EAS443:3:23:51:1545#0/1  
CTGTTTAATGTCCAATCATAAGTCTGGCGACCTTGAGTTA  
+HWI-EAS443:3:23:51:1545#0/1  
aaa\_aaaaa`^aaaaaaaaaaa^` `\_\_a`a]a^\_\_\_`Z^\_  
@HWI-EAS443:3:23:571:854#0/1  
TATTTATATAGGACTTCTTTTTGCTCATGTTGATTCCCAC  
+HWI-EAS443:3:23:571:854#0/1  
[^[b\_\_QY]]ab`YYbabbbbaK[KVRWaNa\_b` `S\_SWa`  
@HWI-EAS443:3:23:63:164#0/1  
AAAAAGCTTGTGAATTCAAATGTCCCTGTCTTATTTATAT  
+HWI-EAS443:3:23:63:164#0/1  
`¥¥\_¥abaa`R\_`^`a\_R]` `a]` [[^` [a`\_^¥\_`^`]^\_  
@HWI-EAS443:3:23:712:1959#0/1  
CAAAGGGATTGAGGGATTACAAAGTCTTCCCCGATAATC  
+HWI-EAS443:3:23:712:1959#0/1  
abb^R]Sa`\_b\_[]`\_\_[\_^Waa\_YOa`\_aa`aa^a]\_\_^  
@HWI-EAS443:3:23:770:1962#0/1  
AAGAAGAGTTCTCTGAGATCATGAAGATCTGTTCCACCAT  
+HWI-EAS443:3:23:770:1962#0/1  
\_\_^`aaa[Vaba¥^Y\_VNZaa¥X\_PZa\_\_]aZPWW`\_^¥¥  
@HWI-EAS443:3:23:995:556#0/1  
TGCCGGTTGATTTCTGTTTAATGTCCAATCATAAGTCTGG  
+HWI-EAS443:3:23:995:556#0/1  
a`\_^\_ab[a\_[\_a\_]`a\_aa¥Y^a]Y^VV]^\_]Z\_WYY\_]  
@HWI-EAS443:3:24:1164:1760#0/1  
AATTTCTAGCATGGTGGAGCCATGGTGTCTAGGGCCCGG  
+HWI-EAS443:3:24:1164:1760#0/1  
]abXaaaa[ `XaYMSa\_a` [VaVZHQOEXSUVOR¥`BBBB  
@HWI-EAS443:3:24:1187:270#0/1  
GGTTGGAATTTCTAGCATGGTGGAGCCATGGTGTCTAGG  
+HWI-EAS443:3:24:1187:270#0/1  
\_^aaaa\_]^[a\_RJK¥Xa`Xa\_^a^W¥^YaYGTH[GW]Q  
@HWI-EAS443:3:24:1209:1078#0/1  
GCCGGTTGATTTCTGTTTAATGTCCAATCATAAGTCTGGC  
+HWI-EAS443:3:24:1209:1078#0/1  
XZ\_\_Z¥`b\_bab[Ubabbbba^Y^a`V^]bbaba^` `ba^  
@HWI-EAS443:3:24:131:52#0/1  
CTTTAGCTAGGAGCATTGCGAAAAGCTTGAACAGTCTGG  
+HWI-EAS443:3:24:131:52#0/1  
aba\_[\_b`\_`aQ¥¥a`P\_aabaa` `]`aZ`\_]`¥` `Z`\_^Q

@HWI-EAS443:3:24:1423:473#0/1  
AGCACTTCTGGTACATCTGTTTCATCCTCAAGAATCCCCT  
+HWI-EAS443:3:24:1423:473#0/1  
ab`b\_\_a`bba]baaaaaaaaa[aa\_\_a`aaaaaa`a]YUa  
@HWI-EAS443:3:24:146:380#0/1  
CTTTAGCTAGGAGCATTTGCGAAAAGCTTGAACAGTCTGG  
+HWI-EAS443:3:24:146:380#0/1  
abbb\_abbbaabaabaabaab`ab`abaaaaaaaa^aa`\_  
@HWI-EAS443:3:24:1496:65#0/1  
AGCCCATGGTCCAGCCAAAAGCATGGAATATGATGCCGTT  
+HWI-EAS443:3:24:1496:65#0/1  
`aaaababaaZaaaQ\_`a\_^ZX`ba\_\_`^`\_\_\_¥^Y`YU  
@HWI-EAS443:3:24:1563:1973#0/1  
ATCCTGTTCTGTTCCATGGCTGTATGGAGGATCTCCAGT  
+HWI-EAS443:3:24:1563:1973#0/1  
\_aa\_]`^\_aaa¥baa^P[a\_¥\_]FFYNQR¥YZPPT[SR]¥  
@HWI-EAS443:3:24:1654:1311#0/1  
TGCCGGTTGATTTCTGTTTAATGTCCAATCATAAGTCTGG  
+HWI-EAS443:3:24:1654:1311#0/1  
VaSYbaY^\_R¥\_[]U¥Ma]YP^aX^`Wa`\_Vab`Zbaba`  
@HWI-EAS443:3:24:169:512#0/1  
ATTAGCCACAAATCCATAGCGATAAAAAAAGCTTGTGAAT  
+HWI-EAS443:3:24:169:512#0/1  
aaa`Tabaa^^a`a`a`aa```aaa\_aa``\_[]a[aa`a  
@HWI-EAS443:3:24:16:205#0/1  
CTTCAATGGTGAACAGATCTTCATGATCTCAGAGAACTC  
+HWI-EAS443:3:24:16:205#0/1  
abbabbbb\_bbbbbbb`abbbabba`aa\_aaaa`a`aa  
@HWI-EAS443:3:24:181:174#0/1  
ACGGCATCATATCCATGCTTTTGGCTGGACCATGGGCTG  
+HWI-EAS443:3:24:181:174#0/1  
aaa`a^[\_a\_a[ZZ`\_^`¥¥^`¥\_¥¥SWTTWYUS  
@HWI-EAS443:3:24:266:1426#0/1  
GATCTCCAGTATAAGGGAATGTGGTGCTTATGGCATTTTG  
+HWI-EAS443:3:24:266:1426#0/1  
a`[a`\_`\_XY[V0]JTTZVUYPUa]TN]\_`^`^`[\_`YX\_]`]]  
@HWI-EAS443:3:24:311:1018#0/1  
ATCCTGTTCTGTTCCATGGCTGTATGGAGGATCTCCAGT  
+HWI-EAS443:3:24:311:1018#0/1  
aabbaaababaa`a`aa\_aaaN^ZU^\_]aU\_X¥^]Y]U  
@HWI-EAS443:3:24:335:1985#0/1  
ATTTCTAGCATGGTGGAGGCCATGGTGTCTAGGGCCCGGA  
+HWI-EAS443:3:24:335:1985#0/1  
a`aaa`aaaa\_a`P`T]a¥XY\_^^ZP¥M\_T¥VSUZ\_W¥¥S  
@HWI-EAS443:3:24:338:1752#0/1  
ATCAACATGAGCAAAAAGAAGTCTATATAAATAAGACAG  
+HWI-EAS443:3:24:338:1752#0/1  
`\_\_Kb`\_\_^Iaaaa^¥[\_aFK¥`Ya^a`\_]`\_¥\_\_ZB  
@HWI-EAS443:3:24:418:1342#0/1  
GTTGGAATTTCTAGCATGGTGGAGGCCATGGTGTCTAGGG

+HWI-EAS443:3:24:418:1342#0/1  
a^a`a¥MY^][^¥V]\_Z`XUVPU[¥^¥]UYPFQP¥PUSTU  
@HWI-EAS443:3:24:610:440#0/1  
TTTCTAGCATGGTGGAGCCATGGTGTCTAGGGCCCCGGAT  
+HWI-EAS443:3:24:610:440#0/1  
abbbabaaaaab]a``]a\_`a]a]S¥TaW¥^U¥]Y^\_`W¥  
@HWI-EAS443:3:24:707:79#0/1  
CAAAATGCCATAAGCACCACATTCCTTATACTGGAGATC  
+HWI-EAS443:3:24:707:79#0/1  
Xbabbbbbb\_bbbababbababaaabaabab`^a\_\_`a\_G  
@HWI-EAS443:3:24:752:519#0/1  
GCCGGTTGATTTCTGTTAATGTCCAATCATAAGTCTGGC  
+HWI-EAS443:3:24:752:519#0/1  
a`abbabb`abbabbabaaab`\_`a`aaaa`aa^``a\_\_  
@HWI-EAS443:3:24:765:1011#0/1  
GGTGTATCCTGTTCTGTTCCATGGCTGTATGGAGGATCT  
+HWI-EAS443:3:24:765:1011#0/1  
J^S\_¥W\_b`\_¥¥¥b\_bba¥a\_\_¥b\_\_¥[M\_UTMFUYUUTZ  
@HWI-EAS443:3:24:766:630#0/1  
TTGAATTCACAAGCTTTTTTATCGCTATGGATTTGTGGC  
+HWI-EAS443:3:24:766:630#0/1  
`a¥ba¥\_aY^¥W]`]a]X`\_`a\_aaT¥]S[H¥J]`[WFUJN  
@HWI-EAS443:3:24:791:470#0/1  
GAGTTCTCAATGGTGGAACAGATCTTCATGATCTCAGAG  
+HWI-EAS443:3:24:791:470#0/1  
`a¥W]]`Z¥aZ`UZVaaaaWV[^P]`V^RT]]^Z^\_]^\_^  
@HWI-EAS443:3:24:927:1435#0/1  
GTATCCTGTTCCCTGTTCCATGGCTGTATGGAGGATCTCCA  
+HWI-EAS443:3:24:927:1435#0/1  
aX^)`\_`a]V\_]a`SZaW\_]`VRR]YGOOWVFN¥PVUNN[B  
@HWI-EAS443:3:24:94:1248#0/1  
AGGATCTCCAGTATAAGGGAATGTGGTGTCTTATGGCATTT  
+HWI-EAS443:3:24:94:1248#0/1  
aa\_]abab\_N]¥X\_\_aa``[¥]\_\_a`Ya`a`aa`]W\_`\_^  
@HWI-EAS443:3:25:1001:1005#0/1  
ATTAGCTCCCATTTTAAAGCAGACTTCAGGAATGTGAAGAT  
+HWI-EAS443:3:25:1001:1005#0/1  
abbbabababaaaaaaaaaaaaa\_\_````a\_\_````[\_``\_\_^  
@HWI-EAS443:3:25:1025:219#0/1  
TGCCGGTTGATTTCTGTTAATGTCCAATCATAAGTCTGG  
+HWI-EAS443:3:25:1025:219#0/1  
¥b\_U\_b`^b``\_b`````aaaabZ]S]\_aX`a^]`Z^`\_^  
@HWI-EAS443:3:25:1061:15#0/1  
GGGACATTTGAATTCACAAGCTTTTTTATCGCTATGGAT  
+HWI-EAS443:3:25:1061:15#0/1  
a]W\_X`^TPSP]``[SNUXH`\_[U\_XXX]]\_WYXQU]NV  
@HWI-EAS443:3:25:1140:1103#0/1  
AATTTCTAGCATGGTGGAGCCATGGTGTCTAGGGCCCCGG  
+HWI-EAS443:3:25:1140:1103#0/1  
abbbbaaaaaaab`^a`aa`aY^^Z`[^Y^^^]\_YZ\_¥\_`



+HWI-EAS443:3:25:198:1377#0/1  
\_Ta`ZXbb¥Q\_K\_U¥`Z¥aa\_\_^b`Z`aba`^a[YI\_a^a  
@HWI-EAS443:3:25:258:1245#0/1  
CGCAAAATGCCATAAGCACACATTCCCTTATACTGGAGA  
+HWI-EAS443:3:25:258:1245#0/1  
aabb]abbbaababbaba\_abaaa`\_\_aaaaaaaa¥aa\_  
@HWI-EAS443:3:25:282:1191#0/1  
CAGACTTATGATTGGACATTAACAGAAATCAACCGGCAG  
+HWI-EAS443:3:25:282:1191#0/1  
abaaabbaabaabaa`aaaaaaaa`aaaaa`^``````\_aa\_  
@HWI-EAS443:3:25:383:796#0/1  
TTTGAATTCACAAGCTTTTTTTATCGCTATGGATTTGTGG  
+HWI-EAS443:3:25:383:796#0/1  
aaabbbbaabba¥Xaaaaaaaaabaaba` `a`a`a`a`^\_a  
@HWI-EAS443:3:25:392:1210#0/1  
AAGCACACATTCCCTTATACTGGAGATCCTCCATACAGC  
+HWI-EAS443:3:25:392:1210#0/1  
`TZ`bbbbbb`aaa`[aaa^` `\_\_\_\_X^\_a^`\_¥` `][  
@HWI-EAS443:3:25:498:1872#0/1  
TAGGACTTCTTTTTGCTCATGTTGATTCCCCTAACTTGC  
+HWI-EAS443:3:25:498:1872#0/1  
a^^` `babaaaa`aa`^aa^N]` `aaa]¥`Y]]a¥¥\_a  
@HWI-EAS443:3:25:557:53#0/1  
CAAAATGCCATAAGCACACATTCCCTTATACTGGAGATC  
+HWI-EAS443:3:25:557:53#0/1  
\_` `Vbbbbbbbab`babaaaaaaaa`aaaaaaaa`^aa`\_  
@HWI-EAS443:3:25:596:1193#0/1  
TGATTTTCATTCCACTTAGTGTGTCCCCAGTGATTGTGA  
+HWI-EAS443:3:25:596:1193#0/1  
aba^b`bababbaaba\_b]b`aa`b`baaaY\_aa`a¥`\_  
@HWI-EAS443:3:25:669:463#0/1  
GGTCGCCAGACTTATGATTGGACATTAACAGAAATCAAC  
+HWI-EAS443:3:25:669:463#0/1  
aa0Z\_\_a`^]\_a`\_`\_aaa\_X`^`a`^\_W^^` `^¥`\_`[  
@HWI-EAS443:3:25:697:164#0/1  
GCCAGACTTATGATTGGACATTAACAGAAATCAACCGGC  
+HWI-EAS443:3:25:697:164#0/1  
aa`a¥^W^^S^[X`\_¥VVG[¥VU¥XY^U^U^YXXYXV  
@HWI-EAS443:3:25:804:1522#0/1  
CAACACTAAGTGAATGAAAATCAAAATCCTCGAATGTTC  
+HWI-EAS443:3:25:804:1522#0/1  
`Y¥Z`XJ]\_`aaaaa[a\_Z\_a`b` `V\_MNb\_baaa`¥F  
@HWI-EAS443:3:25:975:1253#0/1  
ATTATCGGGGAAGACTTTGTAATCCCCTGAATCCCTTTGT  
+HWI-EAS443:3:25:975:1253#0/1  
abbbbaaaaa` `]^aaa]^aa` ` ` ` ` `a`\_]`^]X  
@HWI-EAS443:3:26:1159:563#0/1  
ACTAACTCAAGTCCGACTTATGATTGGACATTAAC  
+HWI-EAS443:3:26:1159:563#0/1  
a`baXab`]^bXaaa\_aa\_\_a`\_aa\_[a` `Z]`S`\_`a0



@HWI-EAS443:3:26:1195:1220#0/1  
CAAAATGCCATAAGCACCACATTCCTTATACTGGAGATC  
+HWI-EAS443:3:26:1195:1220#0/1  
abab`bbbbbb\_b]`babbabbaa\_\_a`bab`aaaaaaa`  
@HWI-EAS443:3:26:1234:603#0/1  
GAAAATCAAATCCTCGAATGTTCTGGCGATGATTACAT  
+HWI-EAS443:3:26:1234:603#0/1  
\_R\_QVOR\_\_WFGYRU`^MQ^]R^SJJ\_UT]]X¥UUGRFJV  
@HWI-EAS443:3:26:150:985#0/1  
CACTGGGGACAACACTAAGTGAATGAAAATCAAATCCT  
+HWI-EAS443:3:26:150:985#0/1  
abbaaaaa`aba```aa[a^aa`aaaaaaa`aaa\_``^  
@HWI-EAS443:3:26:1636:880#0/1  
GTACATCTGTTTCATCCTCAAGAATCCCCTTTGGCTTGTG  
+HWI-EAS443:3:26:1636:880#0/1  
aababbbaaaabaaaa\_aaaaaaaaa\_]`aaaa]aa`]  
@HWI-EAS443:3:26:1660:1229#0/1  
GGGACATTTGAATTCACAAGCTTTTTTATCGCTATGGAT  
+HWI-EAS443:3:26:1660:1229#0/1  
L`V\_¥bb\_\_b¥V`\_SY^aa^`bbabb`\_a¥a¥W¥`aXVN^  
@HWI-EAS443:3:26:1700:617#0/1  
CGGTTGATTTCTGTTAATGTCCAATCATAAGTCTGGCGA  
+HWI-EAS443:3:26:1700:617#0/1  
`bb\_]ab]bbbabbbabbaba^`babYbb``b\_^a^a\_aa  
@HWI-EAS443:3:26:1782:1768#0/1  
TGCTCATGTTGATTCCCCTAAGTGCAGGTCCTGTAGAA  
+HWI-EAS443:3:26:1782:1768#0/1  
aaaZ¥¥`a`aa`R`\_aYaQVa]G^FNPXaGU¥MU]NUNBB  
@HWI-EAS443:3:26:326:1289#0/1  
GAAAAAGGAGAGTAAGAGACAACATGACCAAGAAGATGGT  
+HWI-EAS443:3:26:326:1289#0/1  
a]aaaaaaaa]aa\_aaaaaa\_\_\_\_a\_¥``Y\_]\_]\_XY  
@HWI-EAS443:3:26:512:693#0/1  
GCAAAATGCCATAAGCACCACATTCCTTATACTGGAGAT  
+HWI-EAS443:3:26:512:693#0/1  
aaaaa]aaaaa^aaaaa`aaa`\_\_a`a```\_\_^`\_`\_\_  
@HWI-EAS443:3:26:552:1545#0/1  
AAAAAGGAGAGTAAGAGACAACATGACCAAGAAGATGGTC  
+HWI-EAS443:3:26:552:1545#0/1  
``^aaa`abaa\_aba``baaaa``\_a`aaaaa^a^\_^X\_  
@HWI-EAS443:3:26:632:407#0/1  
AGTTCTTCAATGGTGAACAGATCTTCATGATCTCAGAGA  
+HWI-EAS443:3:26:632:407#0/1  
XWF[Z¥]^ZZ¥^^`Z¥]\_\_Q`W]]Vba^a^¥¥^`ZZ\_¥]a  
@HWI-EAS443:3:26:716:1370#0/1  
TGTTTCATCCTCAAGAATCCCCTTTGGCTTGTGTTGAGAA  
+HWI-EAS443:3:26:716:1370#0/1  
`b`abaaaa^`^^`aaaaa¥]a\_a\_a\_a[\_¥][`Y[\_Z\_  
@HWI-EAS443:3:26:749:1066#0/1  
TGCCAGCCCATGGTCCAGCCAAAAGCATGGAATATGATGC

+HWI-EAS443:3:26:749:1066#0/1  
[\_\_TWTb\_^`\_]P^T`a```ab\_a¥aUGH¥bab`[`a^a  
@HWI-EAS443:3:26:916:1961#0/1  
AAATAAGACAGGGACATTTGAATTCACAAGCTTTTTTTAT  
+HWI-EAS443:3:26:916:1961#0/1  
aabbaa`aa`^^`a\_^\_^\_]`^`a\_a`ZUZW^^^^^\_^  
@HWI-EAS443:3:26:981:614#0/1  
TCTGTGTCTTGTGAATTAGTCATCATCTTTCTCACAAACAT  
+HWI-EAS443:3:26:981:614#0/1  
aabaUbY]^aa^YZZ\_aW`[]^`\_]P`a`\_a^`\_`aV`\_  
@HWI-EAS443:3:27:1015:436#0/1  
GCCATAAGCACCACATTCCTTATACTGGAGATCCTCCAT  
+HWI-EAS443:3:27:1015:436#0/1  
ab`bbbaabaaa`aaa\_\_aaa\_a\_a\_\_aa`^Z\_\_`¥\_\_  
@HWI-EAS443:3:27:1169:178#0/1  
CTCTGTGTCTTGTGAATTAGTCATCATCTTTCTCACAAACA  
+HWI-EAS443:3:27:1169:178#0/1  
\_b¥bb`¥\_aaaaXVH\_\_^OY^U[^a\_^U[\_\_\_ZaV`Z`\_V\_  
@HWI-EAS443:3:27:116:1180#0/1  
TCCAGCGAAAATGCCATAAGCACCACATTCCTTATACT  
+HWI-EAS443:3:27:116:1180#0/1  
aa`W]aX\_a`Wa^[]aaa¥P]aa\_\_a`a\_¥ZY^\_\_W¥`Z^  
@HWI-EAS443:3:27:1467:939#0/1  
ATCCTGTTCCCTGTTCCATGGCTGTATGGAGGATCTCCAGT  
+HWI-EAS443:3:27:1467:939#0/1  
abYbbbaababb`a^`^aab`\_ZHP`\_`Y^]R¥^]GS¥WU  
@HWI-EAS443:3:27:1613:1765#0/1  
CAATCCGGGCCCTAGACACCATGGCCTCCACCATGCTAGA  
+HWI-EAS443:3:27:1613:1765#0/1  
aaa`¥a\_\_a\_a^aaa`YaUa^`\_`[^\_YZZTP^¥`Ga^^Z  
@HWI-EAS443:3:27:1651:872#0/1  
ACTTTAGCTAGGAGCATTGCGAAAAGCTTGAACAGTCTG  
+HWI-EAS443:3:27:1651:872#0/1  
a`ababbabaaaa\_a`a\_a^aZ\_a`\_a^^[\_\_\_\_W¥¥\_  
@HWI-EAS443:3:27:1699:1113#0/1  
GGGGACAACACTAAGTGAATGAAAATCAAAATCCTCGAA  
+HWI-EAS443:3:27:1699:1113#0/1  
abaabbbbabbbbababbabbbbab\_bbabba`a\_bba  
@HWI-EAS443:3:27:169:194#0/1  
TGACAAAGGGATTGAGGGATTACAAAGTCTCCCCGATA  
+HWI-EAS443:3:27:169:194#0/1  
]a\_^a¥^¥WVTZH¥aa^[H^a[Z]`JMTUWXKXOQY[FRV  
@HWI-EAS443:3:27:1708:1308#0/1  
CTTCAATGGTGAACAGATCTTCATGATCTCAGAGAACTC  
+HWI-EAS443:3:27:1708:1308#0/1  
abbbbbbabb[^^b^F[ba[W^`]``aaa]]F^\_S`¥a]a\_  
@HWI-EAS443:3:27:1788:1107#0/1  
CTGGGGACAACACTAAGTGAATGAAAATCAAAATCCTCG  
+HWI-EAS443:3:27:1788:1107#0/1  
aa``bba``^bZ[`aa¥^ba`aaba\_aaaaaa^aaY[]S`

@HWI-EAS443:3:27:179:1435#0/1  
TCCAGCGCAAATGCCATAAGCACCACATTCCTTATACT  
+HWI-EAS443:3:27:179:1435#0/1  
ab\_U[\_Zab]X]aaaa]abb]aaaaaaa`\_a`a`aa`aaY  
@HWI-EAS443:3:27:201:922#0/1  
CCAGCGCAAATGCCATAAGCACCACATTCCTTATACTG  
+HWI-EAS443:3:27:201:922#0/1  
aaTUXa[¥\_\_IX` `a\_aWUQXTRTX\_\_ZGRZ]Z¥YT`PP\_  
@HWI-EAS443:3:27:299:491#0/1  
GGCTGTATGGAGGATCTCCAGTATAAGGGAATGTGGTGCT  
+HWI-EAS443:3:27:299:491#0/1  
aaaaa]a¥[]¥]^^^\_\_^P`W[\_[S¥\_aW]\_`T\_\_SZ[^  
@HWI-EAS443:3:27:399:1483#0/1  
GAATTCAAATGTCCCTGTCTTATTTATATAGGACTTCTTT  
+HWI-EAS443:3:27:399:1483#0/1  
`USYaaaZOU`UabP^`H[^ZX]`¥\_YX]adW]¥\_\_^`\_ [  
@HWI-EAS443:3:27:435:1261#0/1  
GAAAATCAAATCCTCGAATGTCCTGGCGATGATTACAT  
+HWI-EAS443:3:27:435:1261#0/1  
abbbaba`Zaab\_\_aa^`ab`\_`\_]\_aa\_\_W]^[]a]a\_  
@HWI-EAS443:3:27:481:1279#0/1  
ATTCAAATGTCCCTGTCTTATTTATATAGGACTTCTTTTT  
+HWI-EAS443:3:27:481:1279#0/1  
aaabb[U¥` `abaaaa`a\_a\_[\_aaaa\_\_\_S]\_^\_a`\_]`  
@HWI-EAS443:3:27:481:1868#0/1  
GACAACACTAAGTGGAATGAAAATCAAATCCTCGAATGT  
+HWI-EAS443:3:27:481:1868#0/1  
abb\_]bb`WSb\_\_YX\_aa]]baab¥`Ya`aYYY\_aa^]Z  
@HWI-EAS443:3:27:502:1205#0/1  
GATCTCCAGTATAAGGGAATGTGGTGCTTATGGCATTTTG  
+HWI-EAS443:3:27:502:1205#0/1  
``\_]`\_Y\_[XXaa\_V]`\_^`[^]H[^¥[\_```Z]YY[T\_  
@HWI-EAS443:3:27:572:1704#0/1  
AGGACCTGCAAGTTAGTGGGAATCAACATGAGCAAAAAGA  
+HWI-EAS443:3:27:572:1704#0/1  
a^^\_ba\_\_aa]a]`aa]`[]`a^abaa^^`\_`\_a\_aaa^`  
@HWI-EAS443:3:27:608:1412#0/1  
ATCGGGGAAGACTTTGTAATCCCCTGAATCCCCTTTGTCAG  
+HWI-EAS443:3:27:608:1412#0/1  
a`a`\_`¥Y\_\_Y`\_\_`]Za^^`\_]¥^\_]Z]]RZZ^\_X^]]  
@HWI-EAS443:3:27:614:225#0/1  
CATTGAGGATTTTGATTTTCATTCCACTTAGTGTTGTCC  
+HWI-EAS443:3:27:614:225#0/1  
aba`abaaaY`aaaa`aaa`aaaaa\_``aa`\_¥a[``\_]`  
@HWI-EAS443:3:27:714:478#0/1  
ATTTATATAGGACTTCTTTTTGCTCATGTTGATTCCCCT  
+HWI-EAS443:3:27:714:478#0/1  
ababbaabaaa`aaaabababaaaaaaaaaaaaa``a`a  
@HWI-EAS443:3:27:722:633#0/1  
CTTCTTTTTGCTCATGTTGATTCCCCTAACTTGCAAGGTC

+HWI-EAS443:3:27:722:633#0/1  
abbbbbabaabaaaa`aaa`a\_a`aaaa`\_`aaaaaZ`  
@HWI-EAS443:3:27:750:533#0/1  
GTTCTGTTCATGGCTGTATGGAGGATCTCCAGTATAAG  
+HWI-EAS443:3:27:750:533#0/1  
a]a`````\_]a`a`\_a]HVTZ¥P]XSUXWG[QRHPUXVV  
@HWI-EAS443:3:27:782:245#0/1  
GAGTTCTTCAATGGTGGAACAGATCTTCATGATCTCAGAG  
+HWI-EAS443:3:27:782:245#0/1  
a`a^aa`aaa^aaYa`a```a]\_\_`\_a\_a`^^^`^^`\_`  
@HWI-EAS443:3:27:784:1588#0/1  
GTCTTATTTATATAGGACTTCTTTTTGCTCATGTTGATTC  
+HWI-EAS443:3:27:784:1588#0/1  
a\_bbbababaabaa`aaaaaaaaaaaaa`aa\_\_`aa`\_`  
@HWI-EAS443:3:27:912:1522#0/1  
CTTGGTGTATTTCTTTTGTCCAAGATTCAGTATCGAGACT  
+HWI-EAS443:3:27:912:1522#0/1  
UaaZaa^a\_bbabbbXa`a`b`aba[ba[baa`b`\_]  
@HWI-EAS443:3:27:987:1322#0/1  
ACTTTGTTGAACTTTAGCTAGGAGCATTTCGAAAAGCT  
+HWI-EAS443:3:27:987:1322#0/1  
`ba^b`aba]¥S\_a\_]a`Y\_a`a`^`\_`W^`\_`^`¥  
@HWI-EAS443:3:28:1005:701#0/1  
ACCGTTGGAATTTCTAGCATGGTGGAGGCCATGGTGTCT  
+HWI-EAS443:3:28:1005:701#0/1  
a¥`a`aabb^S]aa¥`a]\_a`¥N]WU^X¥^^`V¥^\_P[  
@HWI-EAS443:3:28:1006:1204#0/1  
CCAGTATAAGGGAATGTGGTGTATGGCATTTCGCGCTG  
+HWI-EAS443:3:28:1006:1204#0/1  
\_]R]W\_a\_0¥Z\_YX¥YR[¥W[Y^OZ^WPFJYWQ[]¥WDX  
@HWI-EAS443:3:28:108:495#0/1  
GTTGCAACGGCATCATATCCATGCTTTTGGCTGGACCAT  
+HWI-EAS443:3:28:108:495#0/1  
a\_aaabaa]a^^aaa`aaa^]]¥a```\_`a\_a¥Y¥[V[  
@HWI-EAS443:3:28:1140:830#0/1  
ATCGGGGAAGACTTTGTAATCCCCTGAATCCCCTTGTCAG  
+HWI-EAS443:3:28:1140:830#0/1  
a`¥I`aa\_aa\_Waa`\_¥^\_aY\_XX`Z`^`[W^^\_]U\_\_  
@HWI-EAS443:3:28:1189:809#0/1  
GAGTTCTTCAATGGTGGAACAGATCTTCATGATCTCAGAG  
+HWI-EAS443:3:28:1189:809#0/1  
\_NZW¥V\_a¥a`Y[[]XOTU[X\_[Z`¥X\_UYYWW^U^\_ZZ  
@HWI-EAS443:3:28:1234:1444#0/1  
AGTGAATGAAAATCAAATCCTCGAATGTTCTGCGGAT  
+HWI-EAS443:3:28:1234:1444#0/1  
a`a¥aabaaaa`\_babaaa¥baab¥ba\_N[X`[Y^`\_`\_`  
@HWI-EAS443:3:28:1323:1120#0/1  
GCCGGTTGATTTCTGTTAATGTCCAATCATAAGTCTGGC  
+HWI-EAS443:3:28:1323:1120#0/1  
`PY`^ba¥aaa\_aa\_aaaa\_a^^Z^`^`^^`^`\_]`\_`]]

@HWI-EAS443:3:28:132:1331#0/1  
CGCAAAATGCCATAAGCACCACATTCCTTATACTGGAGA  
+HWI-EAS443:3:28:132:1331#0/1  
a`a[¥TWYR]a`]R]X[`\_]X`^X``¥PY\_\_a\_\_\_RLX\_[V  
@HWI-EAS443:3:28:1340:1582#0/1  
TGTTTCATCCTCAAGAATTCCTTTGGCTTGTGTTGAGAA  
+HWI-EAS443:3:28:1340:1582#0/1  
aaV\_G\_a¥\_a]^abXXWQ[Q\_YaX00XP][\_GWFOYIYQT  
@HWI-EAS443:3:28:1368:632#0/1  
GGACAACACTAAGTGAATGAAAATCAAAATCCTCGAATG  
+HWI-EAS443:3:28:1368:632#0/1  
a¥YXV[WNY\_`[\_M^\_\_\_\_]\_^]\_\_\_\_SMZZ¥R¥^V^\_YSYW  
@HWI-EAS443:3:28:1432:658#0/1  
CACTAAGTGAATGAAAATCAAAATCCTCGAATGTTCTG  
+HWI-EAS443:3:28:1432:658#0/1  
ab¥a`b\_G\_bbb``\_b^^¥```¥Y\_X\_[^`\_¥`\_YWXQ]  
@HWI-EAS443:3:28:1639:27#0/1  
AATTTCTAGCATGGTGGAGCCATGGTGTCTAGGGCCCGG  
+HWI-EAS443:3:28:1639:27#0/1  
aUb^aaaabXa`b^T\_a]`\_¥UQ¥¥^¥W¥SQXYWZGNKWS  
@HWI-EAS443:3:28:1699:285#0/1  
GAGTTCCTCAATGGTGAACAGATCTTCATGATCTCAGAG  
+HWI-EAS443:3:28:1699:285#0/1  
aa`[a]\_a\_\_Z¥aa[``^`a\_\_\_\_\_U```^`\_[U`GW^\_^  
@HWI-EAS443:3:28:195:898#0/1  
GAGTTCCTCAATGGTGAACAGATCTTCATGATCTCAGAG  
+HWI-EAS443:3:28:195:898#0/1  
¥^^^bbbbbbaa]GbaZ`babaa`ba\_aa¥a\_a^b`]¥a  
@HWI-EAS443:3:28:300:652#0/1  
GTGGGAATCAACATGAGCAAAAAGAAGTCCTATATAAATA  
+HWI-EAS443:3:28:300:652#0/1  
aaa^aaaabbbbaa``aaaaaa¥`a^W`a\_]`\_\_aZ`\_`  
@HWI-EAS443:3:28:318:369#0/1  
GCCGGTTGATTTCTGTTAATGTCCAATCATAAGTCTGGC  
+HWI-EAS443:3:28:318:369#0/1  
aaaab^aaaaaa\_\_`\_aaa``a^`^````\_`\_a\_WZ\_^`^X  
@HWI-EAS443:3:28:416:322#0/1  
GTCTCGATACTGAATCTTGGACAAAAGAAATACACCAAGA  
+HWI-EAS443:3:28:416:322#0/1  
a\_aaaa`aa`a\_\_\_a`aaaa\_\_\_`\_```Xa\_¥¥\_`]\_\_\_¥  
@HWI-EAS443:3:28:460:819#0/1  
GTCCTATATAAATAAGACAGGGACATTTGAATTCACAAGC  
+HWI-EAS443:3:28:460:819#0/1  
a`aaaaaa`aaaa\_\_`aa\_a\_]```^`^`^`^`\_\_\_\_^  
@HWI-EAS443:3:28:563:1039#0/1  
GAGTTCCTCAATGGTGAACAGATCTTCATGATCTCAGAG  
+HWI-EAS443:3:28:563:1039#0/1  
aabS]^aaba`^Za`aabaaaa`\_`aa¥[``\_`\_`a`a`  
@HWI-EAS443:3:28:610:743#0/1  
ATCCTGTTCTGTTCCATGGCTGTATGGAGGATCTCCAGT

+HWI-EAS443:3:28:610:743#0/1  
]a^)\_bXT`a`^`a`a`aaaa`aTY¥[ZOXZZTMIPVNVN  
@HWI-EAS443:3:28:675:1555#0/1  
TCCTGTTCCCTGTTCCATGGCTGTATGGAGGATCTCCAGTA  
+HWI-EAS443:3:28:675:1555#0/1  
aabaa\_abaaa\_aaa`aa\_aaaV\_UU^UUUGRR[[¥WWNT  
@HWI-EAS443:3:28:677:490#0/1  
CAAAATGCCATAAGCACCACATTCCCTTATACTGGAGATC  
+HWI-EAS443:3:28:677:490#0/1  
T[PY\_\_X\_Wa`¥\_[]¥ZW`ba]¥`V\_]babba`a\_bbbaa  
@HWI-EAS443:3:28:726:1141#0/1  
GCGCAAAATGCCATAAGCACCACATTCCCTTATACTGGAG  
+HWI-EAS443:3:28:726:1141#0/1  
aaaaaa\_a`aa`aa`]`a`]aa`\_\_\_\_\_]^`\_`\_Y^X]¥  
@HWI-EAS443:3:28:980:1840#0/1  
GGACAACACTAAGTGAATGAAAATCAAAATCCTCGAATG  
+HWI-EAS443:3:28:980:1840#0/1  
a^`a\_a^`ab¥]Z^`aaaa\_a\_\_\_Z]a[R]XX`[\_a  
@HWI-EAS443:3:29:1112:1293#0/1  
GGACAACACTAAGTGAATGAAAATCAAAATCCTCGAATG  
+HWI-EAS443:3:29:1112:1293#0/1  
abbabbbbbbba^aaababaaaaa`baaaaa`\_a`aa\_  
@HWI-EAS443:3:29:1133:357#0/1  
CAAAATGCCATAAGCACCACATTCCCTTATACTGGAGATC  
+HWI-EAS443:3:29:1133:357#0/1  
a¥bbabbbbabbb`ababbaa\_abbabbaab\_aaa`]`  
@HWI-EAS443:3:29:1141:1120#0/1  
GTCCAGCCAAAAGCATGGAATATGATGCCGTTGCAACTAC  
+HWI-EAS443:3:29:1141:1120#0/1  
`\_b\_X^`aaaaa]\_]`^`\_a`\_`\_`\_`\_`^]\_^`^^[B  
@HWI-EAS443:3:29:1142:512#0/1  
GTGGAACAGATCTTCATGATCTCAGAGAACTCTTCTTTCT  
+HWI-EAS443:3:29:1142:512#0/1  
a\_a`^`\_`\_`\_`aYaaa\_\_\_^`\_^`\_^`\_]^^\_]a^`\_\_\_^^`  
@HWI-EAS443:3:29:1418:1282#0/1  
CCAGCGCAAAATGCCATAAGCACCACATTCCCTTATACTG  
+HWI-EAS443:3:29:1418:1282#0/1  
abbb`abbbbbbba`bbba\_bbabbbbaabbbbbbaba  
@HWI-EAS443:3:29:14:875#0/1  
TCCAGCGCAAAATGCCATAAGCACCACATTCCCTTATACT  
+HWI-EAS443:3:29:14:875#0/1  
ab`P`aaaab]aaaa`¥a`a]a¥\_a]U]\_\_^`\_\_\_\_\_`\_^Z  
@HWI-EAS443:3:29:1539:145#0/1  
ATGTAATCATCGCCAGGAACATTCGAGGATTTTGTATTTTC  
+HWI-EAS443:3:29:1539:145#0/1  
aaa`aaaabaaa[]`a`\_`0¥\_\_^`\_^`\_0`\_a`Taa`]Z  
@HWI-EAS443:3:29:1658:1461#0/1  
AGAAAAAGGAGAGTAAGAGACAACATGACCAAGAAGATGG  
+HWI-EAS443:3:29:1658:1461#0/1  
^b\_aa`abbabaa[aaaaaaZ`a\_a`\_`\_ZZ`aaaaaa¥`\_`

@HWI-EAS443:3:29:1690:689#0/1  
GGAACATTTCGAGGATTTTGATTTTCATTCCACTTAGTGTT  
+HWI-EAS443:3:29:1690:689#0/1  
abaaSabaab`ba^aaaab\_aaaa¥`a\_YW\_Zaa`a^a\_B  
@HWI-EAS443:3:29:1777:870#0/1  
GTTCTTCAATGGTGAACAGATCTTCATGATCTCAGAGAA  
+HWI-EAS443:3:29:1777:870#0/1  
a`a\_aaaaaaa`X`\_`\_]\_^\_^]``Z\_^`\_]a]\_]\_^\_]`  
@HWI-EAS443:3:29:1784:547#0/1  
ATTTGAATTCACAAGCTTTTTTATCGCTATGGATTTGTG  
+HWI-EAS443:3:29:1784:547#0/1  
abaabaabbab\_aaa]aaaa`a``\_a^``aa[¥a\_a\_^¥  
@HWI-EAS443:3:29:205:1045#0/1  
CTCTGTGTCTTGTGAATTAGTCATCATCTTTCTCACAACA  
+HWI-EAS443:3:29:205:1045#0/1  
aaba^^a`aaa\_[]X^a\_]\_W]Z``[\_a`````\_a```Y``  
@HWI-EAS443:3:29:215:280#0/1  
AGGACTTCTTTTTGCTCATGTTGATTCCCACTAACTTGCA  
+HWI-EAS443:3:29:215:280#0/1  
^b]\_`abaab`aa`aaa[]Vaa\_`a`aa```\_\_a\_\_`\_]Y  
@HWI-EAS443:3:29:219:1261#0/1  
CAAAATGCCATAAGCACCACATTCCCTTATACTGGAGATC  
+HWI-EAS443:3:29:219:1261#0/1  
a`ba`a\_aba\_]a\_abaaa`a`aa\_`\_`a`aa\_^^\_]^`  
@HWI-EAS443:3:29:253:666#0/1  
TGGAATTTCTAGCATGGTGGAGGCCATGGTGTCTAGGGCC  
+HWI-EAS443:3:29:253:666#0/1  
a```]`bbabaa]aa\_a`^Za`[X`^^^]]¥a¥a[¥^`]`Y  
@HWI-EAS443:3:29:264:1400#0/1  
GGCTGTATGGAGGATCTCCAGTATAAGGGAATGTGGTGCT  
+HWI-EAS443:3:29:264:1400#0/1  
aaaaaX`\_\_a^a\_\_a\_a\_P]N^`\_[]`\_^]]U00¥0]YS  
@HWI-EAS443:3:29:556:595#0/1  
GGACAACACTAAGTGAATGAAAATCAAAATCCTCGAATG  
+HWI-EAS443:3:29:556:595#0/1  
a``^Z^`a``Z`^^aaaaaaa`\_`a`aa\_``\_a`Z\_V^  
@HWI-EAS443:3:29:599:1930#0/1  
ATGTAATCATCGCCAGGAACATTCGAGGATTTTGATTTTC  
+HWI-EAS443:3:29:599:1930#0/1  
aa`\_ababb\_``ba\_[]¥aX`]]^TV]a¥W]]Z`\_^\_Z\_¥  
@HWI-EAS443:3:29:888:819#0/1  
CAGCGAAAATGCCATAAGCACCACATTCCCTTATACTGG  
+HWI-EAS443:3:29:888:819#0/1  
ZTQ¥b\_``baX]]``W`TYZUaaZ`¥``a\_a[]¥````\_[]  
@HWI-EAS443:3:2:1062:612#0/1  
AATTTCTAGCATGGTGGAGGCCATGGTGTCTAGGGCCCGG  
+HWI-EAS443:3:2:1062:612#0/1  
a¥ba`\_a`a`aa`S\_\_a\_]\_\_`\_¥\_G\_SSN¥V¥ZWUU¥¥  
@HWI-EAS443:3:2:118:576#0/1  
CTGCCGGTTGATTTCTGTTAATGTCCAATCATAAGTCTG

+HWI-EAS443:3:2:118:576#0/1  
aaaaYbbaaa\_aaa]abbbbbaaaa\_V¥aaa`aaa\_a\_`a`  
@HWI-EAS443:3:2:1280:1865#0/1  
AAGCCAAAGGGGAATTCTTGAGGATGAACAGATGTACCAG  
+HWI-EAS443:3:2:1280:1865#0/1  
`baY`aWa[b`aaaaIY`bba`aa^`\_aXX`a]`0^`X\_a  
@HWI-EAS443:3:2:1280:514#0/1  
CTTTGTTGAACTTTAGCTAGGAGCATTTCGCGAAAAGCTT  
+HWI-EAS443:3:2:1280:514#0/1  
aabbaab]YZ\_aaa\_a\_a`a\_Zb\_]a`\_aWa\_]^^\_V^a  
@HWI-EAS443:3:2:157:196#0/1  
GCCAGACTTATGATTGGACATTAACAGAAATCAACCGGC  
+HWI-EAS443:3:2:157:196#0/1  
a\_\_¥]^`\_a\_]Z[]^`\_\_\_\_^]]]T¥`^\_\_]]]¥^W]^WB  
@HWI-EAS443:3:2:1716:705#0/1  
AGGATTTTGATTTTCATTCCACTTAGTGTTGTCCCCAGTG  
+HWI-EAS443:3:2:1716:705#0/1  
`bb\_a`aab\_a\_\_[\_`\_a\_]\_a^\_\_Za^`^\_XU[Y^\_Z\_  
@HWI-EAS443:3:2:512:743#0/1  
GTCTTATTTATATAGGACTTCTTTTTGCTCATGTTGATTC  
+HWI-EAS443:3:2:512:743#0/1  
`[\_`\_a\_aaa`\_\_`\_aZ\_^a^[\_`\_a\_\_\_\_¥^]`\_^`^^ZS  
@HWI-EAS443:3:2:543:172#0/1  
ATTCTACAGGACCTGCAAGTTAGTGGGAATCAACATGAGC  
+HWI-EAS443:3:2:543:172#0/1  
`PNFZ[QVa\_VZ\_\_`UWY]L¥U[Y]\_^^^XRY^T¥W^Y¥B  
@HWI-EAS443:3:2:575:1296#0/1  
TGTAGTTGCAACGGCATCATATCCATGCTTTTGGCTGGA  
+HWI-EAS443:3:2:575:1296#0/1  
a`R\_a[`¥`¥V^aS`a`\_W]`¥\_¥\_^[¥Y¥\_[WZ\_¥B  
@HWI-EAS443:3:2:876:945#0/1  
TGCCGGTTGATTTCTGTTTAATGTCCAATCATAAGTCTGG  
+HWI-EAS443:3:2:876:945#0/1  
abaaba`abaa^b\_a`[`aa`aa]S\_\_`]^a^`[`PN`W  
@HWI-EAS443:3:2:889:301#0/1  
GAGTTCTTCAATGGTGAACAGATCTTCATGATCTCAGAG  
+HWI-EAS443:3:2:889:301#0/1  
aab\_a\_aaa`aaaaZ^^\_¥X^a^^^a\_\_\_\_]\_^\_X\_ZX`^]  
@HWI-EAS443:3:2:949:318#0/1  
AGTTCTTCAATGGTGAACAGATCTTCATGATCTCAGAGA  
+HWI-EAS443:3:2:949:318#0/1  
P\_\_U^`UbaZ\_RU\_`bZ]^a\_Q[`¥`^`abaY^¥aab`aa  
@HWI-EAS443:3:30:100:561#0/1  
CAAATGTCCCTGTCTTATTTATATAGGACTTCTTTTGCT  
+HWI-EAS443:3:30:100:561#0/1  
aaa^\_aRaaa\_aUb\_`[\_\_\_\_]WZZ^`a]]`\_^a\_^[^][YW  
@HWI-EAS443:3:30:1047:1232#0/1  
TCCTGTTCCATGGCTGTATGGAGGATCTCCAGTATAAGGG  
+HWI-EAS443:3:30:1047:1232#0/1  
abaa`\_`aab`aa`N]Z\_\_V\_`¥TUXW[Q\_PUUTZZ[^



@HWI-EAS443:3:30:1238:756#0/1  
CAATGGTGAACAGATCTTCATGATCTCAGAGAACTCTTC  
+HWI-EAS443:3:30:1238:756#0/1  
aaba^`bb^W\_bbXaabbba^Y`a`a`\_S`aaa]\_\_\_]X\_X  
@HWI-EAS443:3:30:1286:430#0/1  
AGTTCTTCAATGGTGAACAGATCTTCATGATCTCAGAGA  
+HWI-EAS443:3:30:1286:430#0/1  
ab\_a¥aaaaabaVa\_aa[aa^`\_a`\_`\_`a`U`Z^^\_]`  
@HWI-EAS443:3:30:1386:475#0/1  
GCTGCCGTTGATTTCTGTTTAATGTCCAATCATAAGTCT  
+HWI-EAS443:3:30:1386:475#0/1  
ZT\_b]aab\_bUH\_aa`aZXaaaa]`\_\_aa]PZ[aYa\_N\_  
@HWI-EAS443:3:30:1481:700#0/1  
GATAAACTAACTCAAGGTCGCCAGACTTATGATTGGACAT  
+HWI-EAS443:3:30:1481:700#0/1  
^¥W\_aba`\_¥aa\_b^[]`S^¥baaa`\_`\_aba\_UaP]a  
@HWI-EAS443:3:30:1489:937#0/1  
GCCATAAGCACCACATTCCTTATACTGGAGATCCTCCAT  
+HWI-EAS443:3:30:1489:937#0/1  
aa\_baaabaaa\_a`aaaa`\_aa`a^`\_`\_]`^]X^UXX\_  
@HWI-EAS443:3:30:1502:354#0/1  
GGGAATTCTTGAGGATGAACAGATGTACCAGAAGTGCTGC  
+HWI-EAS443:3:30:1502:354#0/1  
aaaXPVZaZ[Z`X¥a[a`ZRT`^`aWa¥H¥Z[]aZ[VX\_X  
@HWI-EAS443:3:30:1547:611#0/1  
AGACTGTTCAAGCTTTTCGCAAATGCTCCTAGCTAAAGTT  
+HWI-EAS443:3:30:1547:611#0/1  
a`Vabb^]LUL[\_`\_`\_¥`\_ba¥XLSOS¥P]X^\_\_]aS[  
@HWI-EAS443:3:30:250:1079#0/1  
CAATGGTGAACAGATCTTCATGATCTCAGAGAACTCTTC  
+HWI-EAS443:3:30:250:1079#0/1  
aZSY^]S¥WWZ\_Z`RSYV[[\_¥TTS[W\_XGOYL[V[^[]\_  
@HWI-EAS443:3:30:307:770#0/1  
ATGAAAATCAAAATCCTCGAATGTTCTGCGGATGATTAC  
+HWI-EAS443:3:30:307:770#0/1  
\_¥aa^\_WW`^ZWW\_Zaaa¥XaYVR[^a]`^`Y`VSVSBB  
@HWI-EAS443:3:30:457:176#0/1  
ATAGGACTTCTTTTTGCTCATGTTGATTCCCCTAACTTG  
+HWI-EAS443:3:30:457:176#0/1  
aabb`a``aaaa`aa\_a^aa`^^^¥]\_\_\_]U\_^`\_XZZ^  
@HWI-EAS443:3:30:611:71#0/1  
GTTGGAATTTCTAGCATGGTGGAGGCCATGGTGTCTAGGG  
+HWI-EAS443:3:30:611:71#0/1  
a[^¥PXN\_VRLY`RRSU¥N\_XUUUVWUMZUPQBBBBBBB  
@HWI-EAS443:3:30:622:896#0/1  
TTCTAGCATGGTGGAGGCCATGGTGTCTAGGGCCCGGATT  
+HWI-EAS443:3:30:622:896#0/1  
\_^]\_a`\_a\_\_¥`[[Z]Xa`a¥X¥PXW¥T]¥ZZ`]^]^ZNS  
@HWI-EAS443:3:30:833:74#0/1  
CCAGCGCAAAATGCCATAAGCACCACATTCCTTATACTG

+HWI-EAS443:3:30:833:74#0/1  
aaaa`abbabbbb`aaa`^a``\_a`a`[\_a`aaa^[a  
@HWI-EAS443:3:30:959:446#0/1  
TGAGAAAATAAGGCCTCTTCTAATAGATGGCACAGCATCA  
+HWI-EAS443:3:30:959:446#0/1  
`baa\_aa`a]]`aa]XN^aa`a`aa`\_`\_\_\_`aa`]\_^\_Ya  
@HWI-EAS443:3:31:1024:623#0/1  
CAATCACTGGGACAACACTAAGTGGAAATGAAAATCAAAA  
+HWI-EAS443:3:31:1024:623#0/1  
]ZY`aZ`\_a`^UJTX\_Y\_0Z`\_]`P`a``abQR^]\_ZW[\_Z  
@HWI-EAS443:3:31:1065:75#0/1  
CATCCATTAGCTCCCATTTTAAGCAGACTTCAGGAATGTG  
+HWI-EAS443:3:31:1065:75#0/1  
aab^^bbbbaab\_\_b\_bbbb\_abbabbaaaa`bb`aba`  
@HWI-EAS443:3:31:1101:189#0/1  
GACCGTTGGAATTTCTAGCATGGTGGAGGCCATGGTGTC  
+HWI-EAS443:3:31:1101:189#0/1  
aZ```ZK\_]XWV[^]`^V[^Z`^^ZU^[^` [UVUUYYUYQR  
@HWI-EAS443:3:31:1133:1361#0/1  
CAGCGAAAATGCCATAAGCACCACATTCCCTTATACTGG  
+HWI-EAS443:3:31:1133:1361#0/1  
ZZ\_bb\_^^`]Z]U`Z`^WYaS[^a[^YWZ`Y^\_WNaZ^\_U  
@HWI-EAS443:3:31:127:1479#0/1  
CAAAATGCCATAAGCACCACATTCCCTTATACTGGAGATC  
+HWI-EAS443:3:31:127:1479#0/1  
`Z`W`Waa^\_`\_`Z`\_]V\_a]W`\_a^YU[O^YZUWYTQ[  
@HWI-EAS443:3:31:1506:1904#0/1  
CAAAATGCCATAAGCACCACATTCCCTTATACTGGAGATC  
+HWI-EAS443:3:31:1506:1904#0/1  
abbb`\_`bbaabaa\_aa\_baaaa`aaaab`a`[a\_\_`a\_T  
@HWI-EAS443:3:31:1523:1293#0/1  
CTTTAGCTAGGAGCATTTGCGAAAAGCTTGAACAGTCTGG  
+HWI-EAS443:3:31:1523:1293#0/1  
abba`^`ba`\_`Z`\_`b`]bb\_Z]aX\_abaa\_aa\_abbZ  
@HWI-EAS443:3:31:1588:1282#0/1  
GATAAACTAACTCAAGGTCGCCAGACTTATGATTGGACAT  
+HWI-EAS443:3:31:1588:1282#0/1  
aaaaaaaaaba`a\_aa`\_Z\_a]\_\_a`Z`]Z`[^\_WZM]\_`  
@HWI-EAS443:3:31:363:146#0/1  
CCTGTTCTGTTCCATGGCTGTATGGAGGATCTCCAGTAT  
+HWI-EAS443:3:31:363:146#0/1  
abbbabbbbbaaaa^bababb[VXZ]Z`^U`ROV[TSXQTN  
@HWI-EAS443:3:31:366:1625#0/1  
CACTGGGACAACACTAAGTGGAAATGAAAATCAAAATCCT  
+HWI-EAS443:3:31:366:1625#0/1  
^`aaa]\_aabbba`baa`aaQ`Z`ba`^aa`^a`a`a`\_`  
@HWI-EAS443:3:31:436:1439#0/1  
ATTTCTAGCATGGTGGAGGCCATGGTGTCTAGGGCCCGGA  
+HWI-EAS443:3:31:436:1439#0/1  
aaa`a`]\_aaa`^T`^`]a`^SU^SXU`S`YUYUW^WXU

@HWI-EAS443:3:31:582:279#0/1  
ATTTCTAGCATGGTGGAGGCCATGGTGTCTAGGGCCCGGA  
+HWI-EAS443:3:31:582:279#0/1  
aba`bababbaa`Uaabaaaa\_\_Z[]¥aW\_SX^^¥^^]S  
@HWI-EAS443:3:31:631:1008#0/1  
GGTTGATTTCTGTTTAATGTCCAATCATAAGTCTGGCGAC  
+HWI-EAS443:3:31:631:1008#0/1  
ab`ab¥babbabaabaaab\_baaaa`bab¥a`aaaaa\_[  
@HWI-EAS443:3:31:697:697#0/1  
ATCAAATCCTCGAATGTTCTGGCGATGATTACATATAT  
+HWI-EAS443:3:31:697:697#0/1  
aaa`\_aab`baaaa]\_a`]`aa`\_``Z¥¥¥¥¥]^^`\_  
@HWI-EAS443:3:31:722:1722#0/1  
GACCGTTGGAATTTCTAGCATGGTGGAGGCCATGGTGTC  
+HWI-EAS443:3:31:722:1722#0/1  
aaabaXZaa]^^a```a`aa\_\_`U¥Z^¥U\_]¥VY^GVSU  
@HWI-EAS443:3:31:821:1443#0/1  
GACTTCTTTTTGCTCATGTTGATTCCCCTAACTTGCAGG  
+HWI-EAS443:3:31:821:1443#0/1  
\_Y^^^`QXVRUV\_[a]V\_PFYXV¥\_`¥`^U[`Y[]]XI  
@HWI-EAS443:3:31:967:152#0/1  
CAAAATGCCATAAGCACCACATTCCCTTATACTGGAGATC  
+HWI-EAS443:3:31:967:152#0/1  
`¥WZa]\_PU\_a`aab]aba`a¥a[``^\_]\_`\_]aRQL  
@HWI-EAS443:3:32:1117:1291#0/1  
GCAAAATGCCATAAGCACCACATTCCCTTATACTGGAGAT  
+HWI-EAS443:3:32:1117:1291#0/1  
`b`a[V¥^`][``¥^aa\_aR¥aa\_^\_``\_\_`N¥\_\_^  
@HWI-EAS443:3:32:1206:296#0/1  
GCCGGTTGATTTCTGTTTAATGTCCAATCATAAGTCTGGC  
+HWI-EAS443:3:32:1206:296#0/1  
aa^aa`ab]0[a`aa`a`aa]^`^^`^^`^Z]X\_\_\_\_  
@HWI-EAS443:3:32:1304:1227#0/1  
CCATGGTCCAGCCAAAAGCATGGAATATGATGCCGTTGCA  
+HWI-EAS443:3:32:1304:1227#0/1  
aababa`abaaaaba\_aZ\_baaa`aaaba`a`^a^\_\_aa  
@HWI-EAS443:3:32:1379:1388#0/1  
GAAGAAAATTGAGAAAATAAGGCCTTCTAATAGATGGC  
+HWI-EAS443:3:32:1379:1388#0/1  
a]\_a`a`a`aa\_a\_a\_Y^aUa\_^\_]\_`\_\_\_\_\_`\_a]^`^`  
@HWI-EAS443:3:32:1420:721#0/1  
GTCTCGATACTGAATCTTGGACAAAAGAAATACACCAAGA  
+HWI-EAS443:3:32:1420:721#0/1  
]aaWV¥Ta\_\_\_\_¥R`[L]`aI[[PX]YUY`]]XPY^TNQ¥B  
@HWI-EAS443:3:32:146:1557#0/1  
GAGTTCTTCAATGGTGAACAGATCTTCATGATCTCAGAG  
+HWI-EAS443:3:32:146:1557#0/1  
]YQ\_¥aWS\_\_H\_YQ\_0¥X`^a`^[b`a`^`¥¥`[\_JISZ]  
@HWI-EAS443:3:32:1608:832#0/1  
GCGATAAAAAAAGCTTGTGAATTCAAATGTCCCTGTCTTA

+HWI-EAS443:3:32:1608:832#0/1  
aabaaaaaaaa`a`a`^aa`a`\_a`\_a`WWOZ^a[aa`a`  
@HWI-EAS443:3:32:233:1213#0/1  
TGGAGGATCTCCAGTATAAGGGAATGTGGTGCTTATGGCA  
+HWI-EAS443:3:32:233:1213#0/1  
aaaabab\_b¥`baa]Yab`aa`Uaa\_YXZU\_a`\_aa`^a]  
@HWI-EAS443:3:32:253:754#0/1  
TAAGCACCACATTCCCTTATACTGGAGATCCTCCATACAG  
+HWI-EAS443:3:32:253:754#0/1  
ab\_abbaab\_aaaba\_a`a`aa\_^¥\_¥\_]U\_^`]SY]ZNZ  
@HWI-EAS443:3:32:392:362#0/1  
GAGTTCTTCAATGGTGAACAGATCTTCATGATCTCAGAG  
+HWI-EAS443:3:32:392:362#0/1  
`\_\_GZ`]¥¥`^^^NTYZa^¥¥T[¥\_aaa`a]Y[[JT^]T  
@HWI-EAS443:3:32:430:293#0/1  
CAAAGGGATTGAGGGATTACAAAGTCTTCCCCGATAATC  
+HWI-EAS443:3:32:430:293#0/1  
a\_aaaaaa^Ya`a`^`^^^aa^\_W^^^`\_]XXV][  
@HWI-EAS443:3:32:625:1362#0/1  
ATGGTCCAGCCAAAAGCATGGAATATGATGCCGTTGCAAC  
+HWI-EAS443:3:32:625:1362#0/1  
`¥\_Z\_\_TV¥Z][U`¥\_¥^[P]¥S]a\_NTZ\_]^YO^UQ\_  
@HWI-EAS443:3:32:665:122#0/1  
CAACACTAAGTGAATGAAAATCAAATCCTCGAATGTTC  
+HWI-EAS443:3:32:665:122#0/1  
abbababbab`bbabbbbabba`baabaa`^`^`aaaa`a  
@HWI-EAS443:3:32:688:364#0/1  
GAAAAAGGAGAGTAAGAGACAACATGACCAAGAAGATGGT  
+HWI-EAS443:3:32:688:364#0/1  
aaa\_aaaaa`^^^a`a\_aa`^^`^^`\_`\_`\_`^`^`\_¥Z  
@HWI-EAS443:3:32:72:111#0/1  
CCAGCGCAAAATGCCATAAGCACCACATTCCCTTATACTG  
+HWI-EAS443:3:32:72:111#0/1  
¥\_[a`^¥\_Y[LZb¥\_]¥0\_ab\_aa]`^X`^^¥NYTZW[  
@HWI-EAS443:3:32:824:483#0/1  
TGCCGTTGATTTCTGTTTAAATGTCCAATCATAAGTCTGG  
+HWI-EAS443:3:32:824:483#0/1  
abb^`b`a`]abbbab`bbU`\_aa`]XW`\_aa[]a0baa[  
@HWI-EAS443:3:32:851:1942#0/1  
CGAGGATTTGATTTTATTCCACTTAGTGTTGCCCCAG  
+HWI-EAS443:3:32:851:1942#0/1  
]`^^Z`]`^¥Z^`Z\_a\_Ua^^`¥W^R]TY`\_]\_L]aa[  
@HWI-EAS443:3:32:898:148#0/1  
GTTCTTCAATGGTGAACAGATCTTCATGATCTCAGAGAA  
+HWI-EAS443:3:32:898:148#0/1  
Y¥`a]b\_bb¥bbabbb^¥b]R`aaa^[Za`a\_a^^aaaa  
@HWI-EAS443:3:32:918:1648#0/1  
CTTTGTTGAAACTTTAGCTAGGAGCATTGCGAAAAGCTT  
+HWI-EAS443:3:32:918:1648#0/1  
a`a`\_[VY\_Y]a^Q]^aa]aaaT]a`\_`ZPaR\_W`N\_\_XU

@HWI-EAS443:3:33:1033:1014#0/1  
GGAATTCTTGAGGATGAACAGATGTACCAGAAGTGCTGCA  
+HWI-EAS443:3:33:1033:1014#0/1  
]FILXZRY^^LTNLPVVQVW\_WNQRPMWYWTQVT[WPT  
@HWI-EAS443:3:33:1075:1817#0/1  
GAATTCAAATGTCCCTGTCTTATTTATATAGGACTTCTTT  
+HWI-EAS443:3:33:1075:1817#0/1  
a¥a\_^bbbaaaa^a[^^¥b\_RQa\_bb¥HZ[[ZT[\_^`TVR  
@HWI-EAS443:3:33:112:1765#0/1  
ATCTGTTCATCCTCAAGAATCCCCTTTGGCTTGTGTTGA  
+HWI-EAS443:3:33:112:1765#0/1  
a[a^[Z^`PaaS`[^\_¥UXV`\_^RWWTU^UTSGQGNW  
@HWI-EAS443:3:33:1162:351#0/1  
TTCCAGCGCAAAATGCCATAAGCACCACATTCCTTATAC  
+HWI-EAS443:3:33:1162:351#0/1  
aba`b`[a`aaaaa^aabaaa\_ba^[]\_`\_MHM`\_\_\_aY  
@HWI-EAS443:3:33:1229:1523#0/1  
AACTTTAGCTAGGAGCATTGCGAAAAGCTTGAACAGTCT  
+HWI-EAS443:3:33:1229:1523#0/1  
`baaab`Z\_bbbbaa`aaR\_b`a¥a`\_YKVU¥\_]\_a  
@HWI-EAS443:3:33:1468:770#0/1  
CTGCCGGTTGATTTCTGTTAATGTCCAATCATAAGTCTG  
+HWI-EAS443:3:33:1468:770#0/1  
abba`bb`b`abbbabbabbbaa]a`baa]\_^a]]aa  
@HWI-EAS443:3:33:1619:1989#0/1  
ATGAAAATCAAAATCCTCGAATGTTCTGGCGATGATTAC  
+HWI-EAS443:3:33:1619:1989#0/1  
¥bab`¥[^a`bb`a^^^\_¥babbM^^T¥aaY\_ZY\_XY`^P  
@HWI-EAS443:3:33:1638:1196#0/1  
GTTCTTCAATGGTGAACAGATCTTCATGATCTCAGAGAA  
+HWI-EAS443:3:33:1638:1196#0/1  
^]\_T\_a\_¥][`ZZVMFX`¥^¥L[^^YX[[WUWUUS]¥X  
@HWI-EAS443:3:33:1639:948#0/1  
CAAAGGGATTGAGGGATTACAAAGTCTTCCCGATAATC  
+HWI-EAS443:3:33:1639:948#0/1  
abbbbbbbbbbaa`abbaaaaab`¥a`\_aRIX^`\_¥aV  
@HWI-EAS443:3:33:1718:1442#0/1  
ATTTGAATTCACAAGCTTTTTTATCGCTATGGATTTGTG  
+HWI-EAS443:3:33:1718:1442#0/1  
`a`ba`]ba¥\_] [M]\_aaaW\_\_aa`aXYV¥T[Y^Z^P[[  
@HWI-EAS443:3:33:1730:1385#0/1  
CAACACTAAGTGAATGAAAATCAAAATCCTCGAATGTTC  
+HWI-EAS443:3:33:1730:1385#0/1  
¥babb\_bb`^`b¥b`X`]bb`b\_ab`\_```UU\_LW`bWaV  
@HWI-EAS443:3:33:227:1462#0/1  
AGGAGACCGTTGGAATTTCTAGCATGGTGGAGCCATGG  
+HWI-EAS443:3:33:227:1462#0/1  
aba`^`aaaa¥aaaa\_aaa\_a`aaa\_SW^¥^UU[\_¥UY  
@HWI-EAS443:3:33:237:679#0/1  
GCTCCATGCTAAAATTAGCCACAAATCCATAGCGATAAAA

+HWI-EAS443:3:33:237:679#0/1  
]abb`Z``abbbab`a^^aa^ababbabba^bWbaabaab  
@HWI-EAS443:3:33:462:445#0/1  
GATAAAAAAAGCTTGTGAATTCAAATGTCCCTGTCTTATT  
+HWI-EAS443:3:33:462:445#0/1  
abb]\_b^bW`bbaab\_aaab`^ba\_a^[a\_`\_\_]\_a\_\_\_\_  
@HWI-EAS443:3:33:540:1631#0/1  
CATTGAGGATTTTGTATTTTCATTCCACTTAGTGTTGTCC  
+HWI-EAS443:3:33:540:1631#0/1  
a]aabaaaaaaba\_\_aaa`aaa\_aaaaaa^Z[\_^]``  
@HWI-EAS443:3:33:566:402#0/1  
GAATTCAAATGTCCCTGTCTTATTTATATAGGACTTCTTT  
+HWI-EAS443:3:33:566:402#0/1  
aaaaa`aa\_\_\_\_^aa`a\_[`aa^a\_\_``\_`\_`\_Z]^^[^^]  
@HWI-EAS443:3:33:655:70#0/1  
ATCCTGTTCTGTTCCATGGCTGTATGGAGGATCTCCAGT  
+HWI-EAS443:3:33:655:70#0/1  
`bbbaaaaaaab\_a`]V¥ba\_^]HLTBBBBBBBBBBBBBB  
@HWI-EAS443:3:33:748:1115#0/1  
ACTAAGTGAATGAAAATCAAATCCTCGAATGTTCCCTGG  
+HWI-EAS443:3:33:748:1115#0/1  
¥N¥b[`]bb``ababXb^[`aab\_]Yaa`^Y^\_Y`RU[TP  
@HWI-EAS443:3:33:785:1029#0/1  
CGAGGATTTTGTATTTTCATTCCACTTAGTGTTGTCCCCAG  
+HWI-EAS443:3:33:785:1029#0/1  
^VWY¥]`\_[^]ZX¥Ya`]`¥YZO]\_[¥LZ]`YWJYZ¥\_\_  
@HWI-EAS443:3:34:1057:554#0/1  
TGGAATTTCTAGCATGGTGGAGGCCATGGTGTCTAGGGCC  
+HWI-EAS443:3:34:1057:554#0/1  
\_bb\_aaaaab`^`aabbU\_]``]````\_`\_Y\_YWV^ZUUNB  
@HWI-EAS443:3:34:1219:965#0/1  
GCCAGACTTATGATTGGACATTAACAGAAATCAACCGGC  
+HWI-EAS443:3:34:1219:965#0/1  
¥¥ZTWRZ[^\_V\_b^S`ZRabb`\_a^^b`N¥K\_T^^BBBBB  
@HWI-EAS443:3:34:1262:362#0/1  
CAGCACTTCTGGTACATCTGTTTCATCCTCAAGAATTCCCC  
+HWI-EAS443:3:34:1262:362#0/1  
ab`aa`bbaa`aaa`aa\_a^]aaaa¥Y\_a`]a¥[Z`QTTW  
@HWI-EAS443:3:34:1292:37#0/1  
GAGGATTTTGTATTTTCATTCCACTTAGTGTTGTCCCCAGT  
+HWI-EAS443:3:34:1292:37#0/1  
aa\_aaaaabaa\_R\_aa`b`a`^aa\_aZa\_``¥]Z]U]]Z  
@HWI-EAS443:3:34:134:1606#0/1  
GTGGAATGAAAATCAAATCCTCGAATGTTCCCTGGCGATG  
+HWI-EAS443:3:34:134:1606#0/1  
a]ZUP[SX\_aaWP]Z¥[PTY`Y`NNYK[VYX[BBBBBBBB  
@HWI-EAS443:3:34:1373:1412#0/1  
GACAAAGGGATTACAGGGATTACAAAGTCTTCCCCGATAA  
+HWI-EAS443:3:34:1373:1412#0/1  
a\_abbY`b\_[`ababa`b`abbbab`aX`b`\_\_^[aZ`[]

@HWI-EAS443:3:34:1552:173#0/1  
GTATCCTGTTCCCTGTTCCATGGCTGTATGGAGGATCTCCA  
+HWI-EAS443:3:34:1552:173#0/1  
aZYaa`abaaaaa`\_`\_\_aa\_^]`^LMBBBBBBBBBBBBB  
@HWI-EAS443:3:34:245:1225#0/1  
GAGTAACAGTGATAAAGAACAACATGATAAACAATGACCT  
+HWI-EAS443:3:34:245:1225#0/1  
ab`bZba\_\_aaaaaa`a\_aa\_``\_`\_a\_aUX\_\_[\_\_W^  
@HWI-EAS443:3:34:259:1361#0/1  
GAAAAAGGAGAGTAAGAGACAACATGACCAAGAAGATGGT  
+HWI-EAS443:3:34:259:1361#0/1  
aJ^[a^a`\_¥]WYaa^aaaa^aaa^\_aa`¥¥`Z^^\_X^]Q  
@HWI-EAS443:3:34:40:451#0/1  
ATCTGTTTCATCCTCAAGAATCCCCTTTGGCTTGTGTTGA  
+HWI-EAS443:3:34:40:451#0/1  
aaba`[]ba\_a`]aaaaaa`aa\_a\_\_^\_\_`\_]`^S\_]`WX  
@HWI-EAS443:3:34:503:1611#0/1  
AATAAGACAGGGACATTTGAATTCACAAGCTTTTTTATC  
+HWI-EAS443:3:34:503:1611#0/1  
¥]I\_]WX[S]TOWZ\_a¥WY\_V]^a\_a¥LPPF[a\_]V]BBB  
@HWI-EAS443:3:34:514:815#0/1  
TGCCGGTTGATTTCTGTTTAAATGTCCAATCATAAGTCTGG  
+HWI-EAS443:3:34:514:815#0/1  
a`bba\_\_aa`aaa`a`a`aaaa^`\_`\_aa`a`\_ZX^]Z  
@HWI-EAS443:3:34:541:1417#0/1  
TGGAATTTCTAGCATGGTGGAGGCCATGGTGTCTAGGGCC  
+HWI-EAS443:3:34:541:1417#0/1  
aaabbaaaaaabaabaa`[\_`\_`\_\_aaa\_\_[UXU\_W[WY[WZ  
@HWI-EAS443:3:34:730:652#0/1  
CTCGATACTGAATCTTGGACAAAAGAAATACACCAAGACA  
+HWI-EAS443:3:34:730:652#0/1  
aaa^`baaa`Zaaaaa`aaa\_a\_aa`a\_a¥\_]`^X^  
@HWI-EAS443:3:34:771:1426#0/1  
GCCGGTTGATTTCTGTTTAAATGTCCAATCATAAGTCTGGC  
+HWI-EAS443:3:34:771:1426#0/1  
aba```a^Zaaaaab\_ab\_bba\_baba^abaa`ZR¥]\_¥\_  
@HWI-EAS443:3:34:776:763#0/1  
GACAAAGGGATTACAGGGATTACAAAGTCTTCCCCGATAA  
+HWI-EAS443:3:34:776:763#0/1  
aaa`b`aaaa`aaaaaa\_ab^`a`^NX\_\_¥]`¥`[ULO  
@HWI-EAS443:3:34:913:877#0/1  
GCTTTTCGCAAATGCTCCTAGCTAAAGTTTCAACAAAGTA  
+HWI-EAS443:3:34:913:877#0/1  
aaaaa`aaba`Z^\_aaaaaa`a`¥`a[`a`^`^`\_]`U`  
@HWI-EAS443:3:34:995:1988#0/1  
CTTTGTTGAACTTTAGCTAGGAGCATTGCGAAAAGCTT  
+HWI-EAS443:3:34:995:1988#0/1  
abbababaaabbbbb`aaaaaa`aaa`a`^`\_a\_X^\_]`  
@HWI-EAS443:3:35:1138:487#0/1  
ATAAGACAGGGACATTTGAATTCACAAGCTTTTTTATCG

+HWI-EAS443:3:35:1138:487#0/1  
X`XXa^a^R]\_bbba`baa]\_P`VZZ\_aZ]^b```aa]V  
@HWI-EAS443:3:35:114:1505#0/1  
GAACATTCGAGGATTTTGGATTTTCATTCCACTTAGTGTTG  
+HWI-EAS443:3:35:114:1505#0/1  
ab`bbaaa^aa\_¥\_aaaa`a\_a`¥`^`b`a^a`WZ`X`^  
@HWI-EAS443:3:35:124:1664#0/1  
CTGGTACATCTGTTTCATCCTCAAGAATTCCCCTTGGCTT  
+HWI-EAS443:3:35:124:1664#0/1  
K`b\_a¥ab\_b]¥[]bbXbbabZb^^\_[LYbbabaV`b^X  
@HWI-EAS443:3:35:1266:54#0/1  
AGACTGTTCAAGCTTTTCGCAAATGCTCCTAGCTAAAGTT  
+HWI-EAS443:3:35:1266:54#0/1  
a\_Zab`X`\_`[a`aaaaYG\_ZTT^^YZ\_SZa[]T]\_WV\_  
@HWI-EAS443:3:35:1273:1776#0/1  
ATCAAAATCCTCGAATGTTCTGGCGATGATTACATATAT  
+HWI-EAS443:3:35:1273:1776#0/1  
`babbabab`abaaabaXa^`\_^\_]`aPZ]\_\_\_`a\_^`\_\_\_  
@HWI-EAS443:3:35:1275:552#0/1  
CAACACTAAGTGAATGAAAATCAAAATCCTCGAATGTTC  
+HWI-EAS443:3:35:1275:552#0/1  
a\_aaaaaa]a\_ba\_[aaaa\_`a`\_aa`aa`aa[\_`\_^]`  
@HWI-EAS443:3:35:157:303#0/1  
GGTTGATTTCTGTTTAATGTCCAATCATAAGTCTGGCGAC  
+HWI-EAS443:3:35:157:303#0/1  
`a\_aa\_aa`aaa\_`a\_\_`a\_[V\_[\_\_a`V^XU`V^^\_^]`  
@HWI-EAS443:3:35:1584:1360#0/1  
CTTTTTGCTCATGTTGATTCCCACTAACTTGCAGGTCCTG  
+HWI-EAS443:3:35:1584:1360#0/1  
a]a]Z]]a`GV]`\_\_QX`]WOL]\_Z^¥R¥^UWXX[ST\_U^  
@HWI-EAS443:3:35:160:1711#0/1  
GTTGGAATTTCTAGCATGGTGGAGGCCATGGTGTCTAGGG  
+HWI-EAS443:3:35:160:1711#0/1  
aa^Z¥\_¥^`\_Z]]a``]¥F¥[XT^a]VEQRMWN¥PHJSN  
@HWI-EAS443:3:35:1781:841#0/1  
GAGTTCCTCAATGGTGAACAGATCTTCATGATCTCAGAG  
+HWI-EAS443:3:35:1781:841#0/1  
aaa]a[aaa`aaaa¥`aa`]`\_]`VaaUaaaa`a]]¥`X`  
@HWI-EAS443:3:35:263:1099#0/1  
CCAGCGCAAAATGCCATAAGCACACATTCCCTTATACTG  
+HWI-EAS443:3:35:263:1099#0/1  
aaZV^Z¥TH¥\_YNQ]aU]\_P[^a¥ZU^^U^V^^W^Z[^ZW  
@HWI-EAS443:3:35:277:530#0/1  
ATTTATATAGGACTTCTTTTTGCTCATGTTGATTCCCACT  
+HWI-EAS443:3:35:277:530#0/1  
abaaaa`QYaZHa`aa`aa\_a\_a`aa\_a[]`\_\_U\_a`\_\_]  
@HWI-EAS443:3:35:335:432#0/1  
ATTTGAATTCACAAGCTTTTTTATCGCTATGGATTTGTG  
+HWI-EAS443:3:35:335:432#0/1  
aaa`aaa```aaa^Va`\_`a`\_`\_`\_]`^U¥^[Y[]^]U]



@HWI-EAS443:3:35:398:480#0/1  
TTCTAGCATGGTGGAGGCCATGGTGTCTAGGGCCCCGGATT  
+HWI-EAS443:3:35:398:480#0/1  
aab`Q\_aa^a¥T\_]Y]a]Y^`\_W¥U`P¥[¥Y`^Y¥¥TNQ  
@HWI-EAS443:3:35:548:98#0/1  
GAAAAAGGAGAGTAAGAGACAACATGACCAAGAAGATGGT  
+HWI-EAS443:3:35:548:98#0/1  
aaaa\_¥aaaa^a]`aaaa\_`\_a```]^\_\_`^Z]\_^`\_`\_Z  
@HWI-EAS443:3:35:592:1760#0/1  
TGACAAAGGGATTACAGGGGATTACAAAGTCTTCCCCGATA  
+HWI-EAS443:3:35:592:1760#0/1  
aY]a[b^Y``[``aba\_\_a¥\_aa]aa\_\_Z`]X\_aaa\_¥`\_`  
@HWI-EAS443:3:35:616:397#0/1  
CTTCTTTTTGCTCATGTTGATTCCCCTAACTTGCAGGTC  
+HWI-EAS443:3:35:616:397#0/1  
abS^[^\_[GXa]]RU\_YLXTV]\_YUU]^XTVVU[]S]VPY  
@HWI-EAS443:3:35:716:1637#0/1  
AGGTCGCCAGACTTATGATTGGACATTAACAGAAATCAA  
+HWI-EAS443:3:35:716:1637#0/1  
]])a¥`\_Z¥\_a^Z^b¥\_\_Y`Yaba`a^[Z^a¥V^b`XaUW  
@HWI-EAS443:3:35:747:1024#0/1  
GAGTTCTTCAATGGTGGAAACAGATCTTCATGATCTCAGAG  
+HWI-EAS443:3:35:747:1024#0/1  
\_X^]aabbbZV\_]WS[a\_\_^aa^^a``\_a`a`\_a`aZ``  
@HWI-EAS443:3:35:891:230#0/1  
GGGACATTTGAATTCACAAGCTTTTTTATCGCTATGGAT  
+HWI-EAS443:3:35:891:230#0/1  
abaabababbb`abaabb`baaaaabaaaaaa`aaa\_\_\_\_  
@HWI-EAS443:3:35:905:1260#0/1  
GGGACAACACTAAGTGAATGAAAATCAAAATCCTCGAA  
+HWI-EAS443:3:35:905:1260#0/1  
¥¥H¥Ma``a[YYY¥\_[bb``abZaaaa\_Z`]\_ba\_a]¥Q  
@HWI-EAS443:3:35:97:1261#0/1  
CTTCTTTTTGCTCATGTTGATTCCCCTAACTTGCAGGTC  
+HWI-EAS443:3:35:97:1261#0/1  
aaababbbbbbabbba]aabaabbbaba`aaaa`bba\_]b  
@HWI-EAS443:3:36:1011:902#0/1  
ATGCCATAAGCACCACATTCCCTTATACTGGAGATCCTCC  
+HWI-EAS443:3:36:1011:902#0/1  
aabba`a`^`b`aaa`aaaaaaaaaab`\_a`^````aa`\_a  
@HWI-EAS443:3:36:1067:1477#0/1  
CAAAATGCCATAAGCACCACATTCCCTTATACTGGAGATC  
+HWI-EAS443:3:36:1067:1477#0/1  
ZZXQV\_a`\_a^¥W^[¥aa\_a\_a^Y\_aY\_\_WS[] [¥Z¥Z\_  
@HWI-EAS443:3:36:1384:431#0/1  
ACTGGGACAACACTAAGTGAATGAAAATCAAAATCCTC  
+HWI-EAS443:3:36:1384:431#0/1  
abbbbaab^aa\_aaa`^b\_b`a`abaa\_]`baaaa`a\_aa  
@HWI-EAS443:3:36:143:1322#0/1  
GGTTGATTTCTGTTAATGTCCAATCATAAGTCTGGCGAC

+HWI-EAS443:3:36:143:1322#0/1  
[\_Y\_abaa^`ab\_a^`[^b^babaa`]]WHWT`\_]]\_``  
@HWI-EAS443:3:36:1442:1203#0/1  
GAGGATTTTGTATTTTCATTCCACTTAGTGTTGTCCCCAGT  
+HWI-EAS443:3:36:1442:1203#0/1  
\_VO\_a[`a[[WLSY¥Y`V[\_Ta^[P]\_Z\_Y[]]YSX^]TN  
@HWI-EAS443:3:36:1728:482#0/1  
CAGTGATAAAGAACAACATGATAAACAATGACCTTGGACC  
+HWI-EAS443:3:36:1728:482#0/1  
abaabbbbbbbbab\_bbabbbbbbbbaab]b`¥V[aabbaZa  
@HWI-EAS443:3:36:1783:1883#0/1  
CACTAAGTGAATGAAAATCAAAATCCTCGAATGTTCTG  
+HWI-EAS443:3:36:1783:1883#0/1  
X`baa\_bbb¥bbbb\_^`JUVbb``X¥^b]^^¥^bbb\_bb  
@HWI-EAS443:3:36:229:1358#0/1  
GGCTGTATGGAGGATCTCCAGTATAAGGGAATGTGGTGCT  
+HWI-EAS443:3:36:229:1358#0/1  
`bbb`¥^`a^aa¥aa\_aa`]^aa^aWX`TQ^\_Q¥^VY^\_  
@HWI-EAS443:3:36:326:755#0/1  
TTCTAGCATGGTGGAGGCCATGGTGTCTAGGGCCCGGATT  
+HWI-EAS443:3:36:326:755#0/1  
aabbbbbbaaa^^`aaaaaaa`aaU`^a[¥¥^`^^aa\_¥¥¥  
@HWI-EAS443:3:36:364:344#0/1  
CAAATGTCCCTGTCTTATTTATATAGGACTTCTTTTTGCT  
+HWI-EAS443:3:36:364:344#0/1  
abaa`a\_aaaaa\_aaa`aaaaaa\_\_\_\_\_`a\_^\_```a[`\_]  
@HWI-EAS443:3:36:406:1256#0/1  
ATTTCTAGCATGGTGGAGGCCATGGTGTCTAGGGCCCGGA  
+HWI-EAS443:3:36:406:1256#0/1  
aabaa\_YZba¥a\_W`]a¥^`aa^\_WXU`VXY\_¥``a^W  
@HWI-EAS443:3:36:50:488#0/1  
CTTTAGCTAGGAGCATTGCGAAAAGCTTGAACAGTCTGG  
+HWI-EAS443:3:36:50:488#0/1  
aabbbbaU`b`bbaaabbb]YS\_aa`]a]\_```a¥a^`¥  
@HWI-EAS443:3:36:741:132#0/1  
AAGCACCACATTCCTTATACTGGAGATCCTCCATACAGC  
+HWI-EAS443:3:36:741:132#0/1  
^aabba`aa]\_\_^\_]\_`^VY[[YXYZVSUTUV]Y^W^  
@HWI-EAS443:3:36:797:1116#0/1  
TGTTCCCTGTTCCATGGCTGTATGGAGGATCTCCAGTATAA  
+HWI-EAS443:3:36:797:1116#0/1  
\_b\_abbZ¥[aa`¥`]aaa\_P]]YH¥`GWXNV\_H¥KDXQY  
@HWI-EAS443:3:36:902:349#0/1  
GACCGTTGGAATTTCTAGCATGGTGGAGGCCATGGTGTC  
+HWI-EAS443:3:36:902:349#0/1  
`a`ba`Q^\_aa`a`a^]ZaX\_```]Ta^[[[\_`[[U^¥QYKZ  
@HWI-EAS443:3:37:1040:82#0/1  
GACAACACTAAGTGAATGAAAATCAAAATCCTCGAATGT  
+HWI-EAS443:3:37:1040:82#0/1  
a`a\_aaaaaaab`bb`aab\_]a`a`a\_^a[a\_\_aa¥`a`^

@HWI-EAS443:3:37:1086:1097#0/1  
GTGGAACAGATCTTCATGATCTCAGAGAACTCTTCTTTCT  
+HWI-EAS443:3:37:1086:1097#0/1  
a\_]`ababaa\_ba^baabaaa`a`a\_]TIY`\_`a`\_`a`  
@HWI-EAS443:3:37:1180:454#0/1  
CCTGTTCTGTTCCATGGCTGTATGGAGGATCTCCAGTAT  
+HWI-EAS443:3:37:1180:454#0/1  
aaaaabbbbaabbb\_babaaaWYa]WHZaKRJPS^[`VTU  
@HWI-EAS443:3:37:1182:2000#0/1  
TTCGAGGATTTTGATTTTCATTCCACTTAGTGTGCCCC  
+HWI-EAS443:3:37:1182:2000#0/1  
a[X[aWaaXba\_\_`\_]`a]`aaaa\_a\_\_[`TV]^`\_`¥a]Z  
@HWI-EAS443:3:37:1289:964#0/1  
GTCCAAGGTCATTGTTTATCATGTTGTTCTTTATCACTGT  
+HWI-EAS443:3:37:1289:964#0/1  
`\_b¥babb[\_aaaa`bbaa`abb`aaaaWa\_X\_[^]`a`  
@HWI-EAS443:3:37:1316:218#0/1  
GGGGACAACACTAAGTGGAATGAAAATCAAATCCTCGAA  
+HWI-EAS443:3:37:1316:218#0/1  
abaaaaaaaaab`\_a\_baaaab`aaaa¥\_Va`\_`a`\_`aa\_\_  
@HWI-EAS443:3:37:1447:346#0/1  
GAGTTCTTCAATGGTGGAAACAGATCTTCATGATCTCAGAG  
+HWI-EAS443:3:37:1447:346#0/1  
^Z`Ua`\_`aabaaba0a`[\_`\_`a`\_`\_a]VaZ`XX)a^\_\_\_\_  
@HWI-EAS443:3:37:146:1317#0/1  
CAGTGATAAAGAACAACATGATAAACAATGACCTTGGACC  
+HWI-EAS443:3:37:146:1317#0/1  
a\_a\_aaaaaa^¥a`]a`^`a¥]¥P\_aaR[Ja\_^`\_`\_`\_`]  
@HWI-EAS443:3:37:1554:1978#0/1  
GGACTTCTTTTTGCTCATGTTGATCCCACTAACTTGACAG  
+HWI-EAS443:3:37:1554:1978#0/1  
aba^abbabba\_ba`abba\_a`a`aa^XbVaaaaa\_\_aaZ  
@HWI-EAS443:3:37:1698:1329#0/1  
AACTAACTCAAGGTCGCCAGACTTATGATTGGACATTA  
+HWI-EAS443:3:37:1698:1329#0/1  
abaabbaa\_\_aaa\_[`aa`\_`aaababa\_bUaV`aa`aa\_X  
@HWI-EAS443:3:37:260:1222#0/1  
CATAAGCACCACATTCCCTTATACTGGAGATCCTCCATAC  
+HWI-EAS443:3:37:260:1222#0/1  
a]a`aaabaaa]\_\_aaaa`\_`^`a\_\_]VPVH\_]T\_\_SJQ  
@HWI-EAS443:3:37:351:1608#0/1  
ACTTTAGCTAGGAGCATTGCGAAAAGCTTGAACAGTCTG  
+HWI-EAS443:3:37:351:1608#0/1  
aa`aaaXa`aV``[[Y¥a¥^a[]X`ORTSQNYJ¥ZVU`WR  
@HWI-EAS443:3:37:361:1443#0/1  
GTTGGAATTTCTAGCATGGTGGAGGCCATGGTGTCTAGGG  
+HWI-EAS443:3:37:361:1443#0/1  
a`abaabaaa^`]aa^a`U`^\_]`^`[`WPUUUU`S¥YM^  
@HWI-EAS443:3:37:386:735#0/1  
ATGAAAATCAAATCCTCGAATGTTCTGCGGATGATTAC

+HWI-EAS443:3:37:386:735#0/1  
a`^^aa^a`\_\_baaaaa`\_`\_a`U[a\_`Y0YaY¥ZPZVMV  
@HWI-EAS443:3:37:422:1665#0/1  
GCGCAAAATGCCATAAGCACCATTCCTTATACTGGAG  
+HWI-EAS443:3:37:422:1665#0/1  
ab^a[X[0]`bbbb\_K\_a\_`abbb\_H\_baXTbQb\_\_aVa`  
@HWI-EAS443:3:37:431:772#0/1  
CTTCTTTTTGCTCATGTTGATTCCCCTAACTTGCAGGTC  
+HWI-EAS443:3:37:431:772#0/1  
a\_``aaa`babX\_a¥WX^`aaa`a\_T\_`JPb]RX`aa`R]  
@HWI-EAS443:3:37:449:248#0/1  
ATTTATATAGGACTTCTTTTTGCTCATGTTGATTCCCCT  
+HWI-EAS443:3:37:449:248#0/1  
abbbabaaaaaabaabbaaaaaabaY\_\_a``aaa``\_  
@HWI-EAS443:3:37:495:2040#0/1  
GAGTTCTTCAATGGTGAACAGATCTTCATGATCTCAGAG  
+HWI-EAS443:3:37:495:2040#0/1  
aZZ]aaaa\_a`aSOXJ\_ZG`XPQa^`\_WL\_[]a]]^]`^S  
@HWI-EAS443:3:37:511:1804#0/1  
CAAAATGCCATAAGCACCATTCCTTATACTGGAGATC  
+HWI-EAS443:3:37:511:1804#0/1  
aa`MaWbabbbaWbab\_`\_\_`a[aabZ`VP\_\_abaaTa\_]  
@HWI-EAS443:3:37:604:1014#0/1  
GGACTTCTTTTTGCTCATGTTGATTCCCCTAACTTGCAG  
+HWI-EAS443:3:37:604:1014#0/1  
aaaa`abbaaa`\_`a``\_\_]`¥`\_a`ZSN¥`X`\_^\_a\_\_  
@HWI-EAS443:3:37:833:1097#0/1  
ACACTAAGTGAATGAAAATCAAAATCCTCGAATGTTTCCT  
+HWI-EAS443:3:37:833:1097#0/1  
`b¥^aa\_]0^a]a^a`aa^`\_W]PZY`^UP¥¥K\_a[^`]W  
@HWI-EAS443:3:37:853:111#0/1  
GTTCTTCAATGGTGAACAGATCTTCATGATCTCAGAGAA  
+HWI-EAS443:3:37:853:111#0/1  
a`a\_aaaa`aa^a`\_]\_¥\_a\_\_\_\_\_`^`\_Z]^Z^]]^]Y  
@HWI-EAS443:3:37:95:100#0/1  
GGACAACACTAAGTGAATGAAAATCAAAATCCTCGAATG  
+HWI-EAS443:3:37:95:100#0/1  
aba\_RT[X`^[]\_W`¥]UP^ZT[Y]^QSTPNY^U^¥[¥¥[  
@HWI-EAS443:3:38:1157:886#0/1  
GAGTTCTTCAATGGTGAACAGATCTTCATGATCTCAGAG  
+HWI-EAS443:3:38:1157:886#0/1  
^X`]babb`\_]a`\_]aaa\_R\_b\_a\_`a\_]\_^Z\_^a\_\_a``\_  
@HWI-EAS443:3:38:1259:965#0/1  
ATTTATATAGGACTTCTTTTTGCTCATGTTGATTCCCCT  
+HWI-EAS443:3:38:1259:965#0/1  
`aa¥^aZ\_^]b¥XZ`a`a`¥]`aaaa\_^\_]MU\_\_]\_\_\_\_[R  
@HWI-EAS443:3:38:1283:721#0/1  
CTTCAATGGTGAACAGATCTTCATGATCTCAGAGAATC  
+HWI-EAS443:3:38:1283:721#0/1  
abbbbaabb\_aa``aabaa\_baabaaaa\_W\_\_^^``ZaZ

@HWI-EAS443:3:38:12:1292#0/1  
AGACTGTTCAAGCTTTTCGCAAATGCTCCTAGCTAAAGTT  
+HWI-EAS443:3:38:12:1292#0/1  
¥^Z[\`baa\_U¥a]¥]\_aa\_RZ\_Y^¥Xa`WOZSRZa\_XFQ  
@HWI-EAS443:3:38:1344:1086#0/1  
GCACTTCTGGTACATCTGTTTCATCCTCAAGAATCCCCCTT  
+HWI-EAS443:3:38:1344:1086#0/1  
U`Tabb```aZabaa`]baaabb¥``bb`S\_\_]\_^][a^X  
@HWI-EAS443:3:38:1492:1596#0/1  
TGAAAATCAAAAATCCTCGAATGTTCTGCGGATGATTACA  
+HWI-EAS443:3:38:1492:1596#0/1  
aaa¥aaa`aa`W^V^a\_W¥\_`XZY]\_^ZUX]TXTVZRQV  
@HWI-EAS443:3:38:1533:89#0/1  
GACCGGTTGGAATTTCTAGCATGGTGGAGCCATGGTGTC  
+HWI-EAS443:3:38:1533:89#0/1  
aa\_`abUaa`Y^\_^Z^^]U¥¥\_¥S¥WUTQPPWUWUSSMV  
@HWI-EAS443:3:38:1575:233#0/1  
GTTTCATCCTCAAGAATCCCCCTTTGGCTTGTGTTGAGAAT  
+HWI-EAS443:3:38:1575:233#0/1  
a`[Z``^S^]\_a]LWaaTXPZ^^¥``^`WDKSSUTQZWWT  
@HWI-EAS443:3:38:1591:380#0/1  
ACTTTGTTGAAACTTTAGCTAGGAGCATTTGCGAAAAGCT  
+HWI-EAS443:3:38:1591:380#0/1  
]P¥Y¥bWbbbb\_W\_aaa`aa\_`a`a\_\_\_YOSPSU^]S]QO  
@HWI-EAS443:3:38:1606:219#0/1  
AGCGCAAAATGCCATAAGCACCATTCCTTATACTGGA  
+HWI-EAS443:3:38:1606:219#0/1  
\_a]^¥\_a`^OX[V[\_aP¥`\_U\_`\_]\_\_XTLKXU]URUXXN  
@HWI-EAS443:3:38:1636:576#0/1  
CCCTGTCTTATTTATATAGGACTTCTTTTTGCTCATGTTG  
+HWI-EAS443:3:38:1636:576#0/1  
abbbbbbbbbbbbbbbabbabbbbbbbba`aa`abbaa\_  
@HWI-EAS443:3:38:1688:411#0/1  
GAGTCTTCAATGGTGAACAGATCTTCATGATCTCAGAG  
+HWI-EAS443:3:38:1688:411#0/1  
\_Z\_GWab^^```XW]UY^]\_\_ZXN``¥[OFMMR¥Z^`¥Q  
@HWI-EAS443:3:38:1721:617#0/1  
GGGACATTTGAATTCACAAGCTTTTTTTATCGCTATGGAT  
+HWI-EAS443:3:38:1721:617#0/1  
`ab\_aUbX¥bXXTZWLSIY]`¥YX¥a\_]OVPPRRY\_IXN  
@HWI-EAS443:3:38:402:250#0/1  
TGTGTCTTGTGAATTAGTCATCATCTTTCTCACAACATTT  
+HWI-EAS443:3:38:402:250#0/1  
aaaa`baa^¥a]\_aa0ZR`^^`\_Y\_`a\_a\_\_Y]^`\_`\_\_^`\_  
@HWI-EAS443:3:38:414:1454#0/1  
GCCGGTTGATTTCTGTTAATGTCCAATCATAAGTCTGGC  
+HWI-EAS443:3:38:414:1454#0/1  
``¥^^[a]a`R`aa[\_^[\_a`H\_V\_RT]\_T`[[PYY[NF  
@HWI-EAS443:3:38:41:31#0/1  
ATTTCTAGCATGGTGGAGGCCATGGTGTCTAGGGCCCGGA

+HWI-EAS443:3:38:41:31#0/1  
aa]aa`Za`Za`Wa\_`a[^ZOSYYQQUUUU#WZU[¥VTS  
@HWI-EAS443:3:38:544:102#0/1  
GCCATAAGCACCACATTCCCTTATACTGGAGATCCTCCAT  
+HWI-EAS443:3:38:544:102#0/1  
a]X^`^aa`[¥^[V^)]\_¥Y\_\_\_\_\_¥^^W¥WTVZ¥¥SRU  
@HWI-EAS443:3:38:819:1540#0/1  
TTCCAGCGCAAAATGCCATAAGCACCACATTCCCTTATAC  
+HWI-EAS443:3:38:819:1540#0/1  
a`bb[abbb[ba`bababaabbaaa`]aa^\_\_]\_`^a\_aY  
@HWI-EAS443:3:38:875:626#0/1  
CTGGAGATCCTCCATACAGCCATGGAACAGGAACAGGATA  
+HWI-EAS443:3:38:875:626#0/1  
abbaaaaaaaaa`aaaa`aa\_aaaaa\_\_a\_^`\_`aa``\_]`  
@HWI-EAS443:3:38:905:952#0/1  
ATTTCTAGCATGGTGGAGGCCATGGTGTCTAGGGCCCGGA  
+HWI-EAS443:3:38:905:952#0/1  
\_aaaaa¥¥\_aba`Vaaa^^]`^^¥[Z[[`UUVV^¥W^[^W  
@HWI-EAS443:3:38:950:462#0/1  
GCTGTATGGAGATCTCCAGTATAAGGGAATGTGGTGCTT  
+HWI-EAS443:3:38:950:462#0/1  
a`ab\_aaaaaaa\_`^``a\_]\_a\_\_`\_`XT]\_X]ZX`Y]]  
@HWI-EAS443:3:39:1085:1039#0/1  
CATGGTCCAGCCAAAAGCATGGAATATGATGCCGTTGCAA  
+HWI-EAS443:3:39:1085:1039#0/1  
aaabbUbbaaaaa¥^¥^aaR¥aa`aa`a\_`\_N^[NY`\_\_Q  
@HWI-EAS443:3:39:1099:1494#0/1  
GAGTTCTTCAATGGTGAACAGATCTTCATGATCTCAGAG  
+HWI-EAS443:3:39:1099:1494#0/1  
a``¥abaaaaaaaa\_baaaaa\_`\_a¥`a``Z[\_`\_a¥`Z  
@HWI-EAS443:3:39:1249:543#0/1  
AATTTCTAGCATGGTGGAGGCCATGGTGTCTAGGGCCCGG  
+HWI-EAS443:3:39:1249:543#0/1  
a`a`a`\_aba`baXaa`^\_¥`¥]^\_S¥W\_¥U¥¥U^^U^U  
@HWI-EAS443:3:39:1257:416#0/1  
GCACCACATTCCCTTATACTGGAGATCCTCCATACAGCCA  
+HWI-EAS443:3:39:1257:416#0/1  
a`aa[R[V]^`^Y`aa]\_^\_^`¥\_XYNVZZZVV[^^\_URU  
@HWI-EAS443:3:39:1288:1831#0/1  
TGCTCATGTTGATTCCCCTAACTTGCAGGTCCTGTAGAA  
+HWI-EAS443:3:39:1288:1831#0/1  
`abaaaa``aZ`[¥VTV^a¥a^a^^Z\_\_^YGV\_`0¥UT¥  
@HWI-EAS443:3:39:1504:1570#0/1  
TGCTGCCGGTTGATTTCTGTTTAATGTCCAATCATAAGTC  
+HWI-EAS443:3:39:1504:1570#0/1  
¥X\_XUU\_a¥^ba^Za¥\_V\_Y]YX\_]\_HU\_ZRS[X[VZPP[  
@HWI-EAS443:3:39:1556:1761#0/1  
ATGGTGTATCCTGTTCCCTGTTCCATGGCTGTATGGAGGAT  
+HWI-EAS443:3:39:1556:1761#0/1  
\_Sa¥HUU`\_b`a^^`aaaPNZYX]`YP]BBBBBBBBBBBB

@HWI-EAS443:3:39:156:1759#0/1  
GTGGGAATCAACATGAGCAAAAAGAAGTCCTATATAAATA  
+HWI-EAS443:3:39:156:1759#0/1  
\_R\_`^GNZ]VaQLU`^V`\_]V¥TXQSL`\_]`^T`\_`UW¥  
@HWI-EAS443:3:39:1617:697#0/1  
AAAGGAGAGTAAGAGACAACATGACCAAGAAGATGGTCAC  
+HWI-EAS443:3:39:1617:697#0/1  
aaaa`b\_b`aababa¥`\_`\_`a][aX^^a]Q]`a[YW^X  
@HWI-EAS443:3:39:161:641#0/1  
ACTGGAGATCCTCCATACAGCCATGGAACAGGAACAGGAT  
+HWI-EAS443:3:39:161:641#0/1  
aaV`UT¥R[`X[\_aXU`^`^`[`^`[SP¥[^]SY¥^Z^ZTW  
@HWI-EAS443:3:39:475:964#0/1  
TATTCTCAACACAAGCCAAAGGGGAATTCTTGAGGATGAA  
+HWI-EAS443:3:39:475:964#0/1  
a`aababaVa aa^aab\_Y`a`\_`ZW`\_\_\_`\_`\_[a`\_]`\_]  
@HWI-EAS443:3:39:577:1557#0/1  
ACTTTAGCTAGGAGCATTTCGAAAAGCTTGAACAGTCTG  
+HWI-EAS443:3:39:577:1557#0/1  
`aa^]\_abTFNaaa`T^bZ`NXa`\_`\_`a`]¥]U`¥YaZN  
@HWI-EAS443:3:39:608:1267#0/1  
AGGAACATTCGAGGATTTTGATTTTCATTCCACTTAGTGT  
+HWI-EAS443:3:39:608:1267#0/1  
`aaa¥Zaaaaaaa`a`^`a]aa`aaaaa][a`\_`Z`X  
@HWI-EAS443:3:39:616:1507#0/1  
CGGTTGATTTCTGTTTAATGTCCAATCATAAGTCTGGCGA  
+HWI-EAS443:3:39:616:1507#0/1  
aabaabaababab`bbab^Z]bb]aabab`SR¥aa`aa]  
@HWI-EAS443:3:39:663:409#0/1  
GTCCAGCCAAAAGCATGGAATATGATGCCGTTGCAACTAC  
+HWI-EAS443:3:39:663:409#0/1  
aaba^aabaaaa¥aaaa^aaa`aaa`a`\_`Y\_\_`\_\_`X  
@HWI-EAS443:3:39:790:1936#0/1  
TGCCGTTGATTTCTGTTTAATGTCCAATCATAAGTCTGG  
+HWI-EAS443:3:39:790:1936#0/1  
\_a`\_a^[\_`\_`aaaab]`aa`aa^`\_`aaaa]a`\_X`\_¥W  
@HWI-EAS443:3:39:961:411#0/1  
GAGTTCTTCAATGGTGAACAGATCTTCATGATCTCAGAG  
+HWI-EAS443:3:39:961:411#0/1  
aa`Z^baY]aaaa`\_`Taa[a\_\_aaaa]a¥[¥Z¥``YW  
@HWI-EAS443:3:39:980:1322#0/1  
ACTAAGTGAATGAAAATCAAATCCTCGAATGTTCCCTGG  
+HWI-EAS443:3:39:980:1322#0/1  
aaaa`aXaaa`baa\_aba\_b¥a^\_a`^`a`a]\_]\_a[Z\_W  
@HWI-EAS443:3:3:1014:609#0/1  
TCCAGCCAAAAGCATGGAATATGATGCCGTTGCAACTACA  
+HWI-EAS443:3:3:1014:609#0/1  
`aaabaaaa\_aa[a`b`]aaaa\_aa\_\_a]aaR`^`\_`U\_  
@HWI-EAS443:3:3:1070:823#0/1  
AACTTTAGCTAGGAGCATTTCGAAAAGCTTGAACAGTCT

+HWI-EAS443:3:3:1070:823#0/1  
aa`abaabaaaa`b\_aaaa\_a\_a`^a^\_aa\_]`aW¥^  
@HWI-EAS443:3:3:1102:421#0/1  
AGAAAAAGGAGAGTAAGAGACAACATGACCAAGAAGATGG  
+HWI-EAS443:3:3:1102:421#0/1  
\_\_S\_\_Y\_a\_¥¥Vb]Z¥aaaaT[`a^U^¥GY` `b`\_a\_a`B  
@HWI-EAS443:3:3:1161:1339#0/1  
CAATGGTGGAAACAGATCTTCATGATCTCAGAGAACTCTTC  
+HWI-EAS443:3:3:1161:1339#0/1  
]\_\_`a`^`^`^aab\_b\_baaaab`a\_aaa\_aa``\_a`aaS  
@HWI-EAS443:3:3:1197:1768#0/1  
CAAGCTTTTCGCAAATGCTCCTAGCTAAAGTTTCAACAAA  
+HWI-EAS443:3:3:1197:1768#0/1  
\_\_aabbbba¥babbbababba\_bbabbaaa\_bababYbaa  
@HWI-EAS443:3:3:1297:1542#0/1  
CAGCACTTCTGGTACATCTGTTTCATCCTCAAGAATTCCCC  
+HWI-EAS443:3:3:1297:1542#0/1  
abbabbaaaabb``aabb[b[a]aa\_]\_a`abaaaaZZHL  
@HWI-EAS443:3:3:1323:518#0/1  
GTATCCTGTTCTGTTCCATGGCTGTATGGAGGATCTCCA  
+HWI-EAS443:3:3:1323:518#0/1  
a\_aa\_[a`\_`^a\_\_\_\_]]\_`^]\_\_TTMRPWZUTTXUXB  
@HWI-EAS443:3:3:1384:1175#0/1  
ATTTGAATTCACAAGCTTTTTTTATCGCTATGGATTTGTG  
+HWI-EAS443:3:3:1384:1175#0/1  
abb`aaaa\_a\_`\_\_¥^aaaa\_\_`^a^`]a`]Z\_[]PMX  
@HWI-EAS443:3:3:1434:1129#0/1  
ATCAAAATCCTCGAATGTTCTGCGATGATTACATATAT  
+HWI-EAS443:3:3:1434:1129#0/1  
a` `b\_]a\_aWYaaXVJ¥U`^X` `aSaM^¥QXPYY`]N\_`^`  
@HWI-EAS443:3:3:152:859#0/1  
CTGGGGACAACACTAAGTGGAAATGAAAATCAAAATCCTCG  
+HWI-EAS443:3:3:152:859#0/1  
a\_b[[\_` `baaaabb¥¥N^X\_aa]]a]a`Ua¥b`aaa¥R\_  
@HWI-EAS443:3:3:1757:375#0/1  
AGGACTTCTTTTTGCTCATGTTGATTCCCCTAACTTGCA  
+HWI-EAS443:3:3:1757:375#0/1  
\_\_b`a\_a`aa\_a`¥`Ya\_W¥`aa`\_^O\_TQW\_X\_\_WBB  
@HWI-EAS443:3:3:1772:1806#0/1  
CAAAGGGATTGAGGGATTACAAAGTCTTCCCCGATAATC  
+HWI-EAS443:3:3:1772:1806#0/1  
LYa`^abX`X`\_aZ\_XVZbba\_b^\_\_X[[[Yaaw`bIaI  
@HWI-EAS443:3:3:25:71#0/1  
CGAGGATTTTGATTTTCATTCCACTTAGTGTTGTCCCCAG  
+HWI-EAS443:3:3:25:71#0/1  
\_b^b`\_aaabbaaaaa`aaa^\_\_aa\_a]a````\_a`\_`\_`  
@HWI-EAS443:3:3:321:705#0/1  
GAGTTCTTCAATGGTGGAAACAGATCTTCATGATCTCAGAG  
+HWI-EAS443:3:3:321:705#0/1  
aa`Maaaa\_]` `aa[aaaaZ`a\_a\_a\_\_`^`a\_[\_U^\_\_a



@HWI-EAS443:3:3:349:975#0/1  
GGATTTTGGATTTTCATTCCACTTAGTGTTGCCCCAGTGA  
+HWI-EAS443:3:3:349:975#0/1  
a^]`bbZb`\_aaaaaa^`\_Z`a`\_WaU`a^¥\_^[\_aG`^  
@HWI-EAS443:3:3:367:1140#0/1  
GAGTTCTTCAATGGTGAACAGATCTTCATGATCTCAGAG  
+HWI-EAS443:3:3:367:1140#0/1  
a]a`aabbbaaaa\_Ya\_aa^a`\_a]aa\_aaa``T\_\_\_\_\_a  
@HWI-EAS443:3:3:441:1123#0/1  
TATAGACTTCTTTTTGCTCATGTTGATTCCCACTAACTT  
+HWI-EAS443:3:3:441:1123#0/1  
ababbaaab\_\_abaabaab`\_ab¥abaa\_^^)`ZaaaU\_a  
@HWI-EAS443:3:3:485:326#0/1  
AGCCCATGGTCCAGCCAAAAGCATGGAATATGATGCCGTT  
+HWI-EAS443:3:3:485:326#0/1  
aa]baabaa\_a\_\_aa[¥aaX])`R\_a`\_a\_aa`\_\_Y\_\_¥\_  
@HWI-EAS443:3:3:565:312#0/1  
GTCCAGCCAAAAGCATGGAATATGATGCCGTTGCAACTAC  
+HWI-EAS443:3:3:565:312#0/1  
aabaa`a`aaaa`a`a`aaaaa`\_`[\_`XV`¥`\_`V^`X  
@HWI-EAS443:3:3:648:70#0/1  
CAAAATGCCATAAGCACCACATTCCTTATACTGGAGATC  
+HWI-EAS443:3:3:648:70#0/1  
aX\_bb]Tb¥ab¥\_a¥\_FYaU^J\_]FS¥YYU[BBBBBBBBB  
@HWI-EAS443:3:3:696:136#0/1  
TTCTGGTACATCTGTTTCATCCTCAAGAATCCCCCTTGGC  
+HWI-EAS443:3:3:696:136#0/1  
aa¥a`^`Ya]\_\_[\_ZZ\_X\_^U[^Z^^YTT^^ZMIL^^]]BB  
@HWI-EAS443:3:3:820:811#0/1  
GGACCTGCAAGTTAGTGGGAATCAACATGAGCAAAAAGAA  
+HWI-EAS443:3:3:820:811#0/1  
aa\_NZaZV`^`\_`aUa`\_`a\_Y¥\_W[``U¥^ZY¥\_\_^Z  
@HWI-EAS443:3:3:846:549#0/1  
CTTTTTGCTCATGTTGATTCCCACTAACTTGCAGGCCTG  
+HWI-EAS443:3:3:846:549#0/1  
]babbbb`abbbaababbbabaaabbbbbaaaaaba\_\_abb  
@HWI-EAS443:3:3:878:1614#0/1  
GTTGATTTCTGTTAATGTCCAATCATAAGTCTGGCGACC  
+HWI-EAS443:3:3:878:1614#0/1  
aX\_a]^`a^]a^a`aZ\_a^N¥\_\_`Iaa\_WUXSZ]X¥^]YS  
@HWI-EAS443:3:40:1188:493#0/1  
AGCTTTTTTATCGCTATGGATTTGTGGCTAATTTTAGCA  
+HWI-EAS443:3:40:1188:493#0/1  
abVbaaaaaa\_``aa\_\_aaa^`\_aa]Z\_]`^[[[]`YZ[^]  
@HWI-EAS443:3:40:1211:54#0/1  
CCAGACTGTTCAAGCTTTTCGCAAATGCTCCTAGCTAAAG  
+HWI-EAS443:3:40:1211:54#0/1  
``a`baab¥a[a`b`¥bbaa`^a]¥Z[RWV`Y\_]XW¥`a  
@HWI-EAS443:3:40:1285:71#0/1  
TCTGTTTCATCCTCAAGAATTCCTTTGGCTTGTGTTGAG

+HWI-EAS443:3:40:1285:71#0/1  
`b¥`^aa¥aaa`\_\_a¥0^Ya`^]Z\_Za\_]`^]\_U^0X\_X\_  
@HWI-EAS443:3:40:1376:592#0/1  
AATGCCATAAGCACACATTCCCTTATACTGGAGATCCTC  
+HWI-EAS443:3:40:1376:592#0/1  
aaabb`babaaabaaaaaa]`aa`a^aa`a`Va``a]^W  
@HWI-EAS443:3:40:1461:659#0/1  
GAGTTCTTCAATGGTGGAACAGATCTTCATGATCTCAGAG  
+HWI-EAS443:3:40:1461:659#0/1  
`ZaaaZa]Z^K[¥[O[RXTUYWN[G¥U]ZTKT^`U]Z¥XY  
@HWI-EAS443:3:40:1489:150#0/1  
TGCCGGTTGATTTCTGTTTAATGTCCAATCATAAGTCTGG  
+HWI-EAS443:3:40:1489:150#0/1  
aY`\_]¥¥PUP\_PRLYSMTU^G^`SYRGV]WT][ZXXXNXQ  
@HWI-EAS443:3:40:1489:400#0/1  
ATTTCTAGCATGGTGGAGGCCATGGTGTCTAGGGCCCGGA  
+HWI-EAS443:3:40:1489:400#0/1  
abbbababaaa`aUaa\_`aa^^¥^¥UW¥\_UU¥\_¥Z`W`^T  
@HWI-EAS443:3:40:1742:1772#0/1  
TCCAGCCAAAAGCATGGAATATGATGCCGTTGCAACTACA  
+HWI-EAS443:3:40:1742:1772#0/1  
a^ab^^aa^MVYIa`][P]b^W^``]aN]\_^Y[^a[Z``a  
@HWI-EAS443:3:40:1749:1414#0/1  
CAAAATGCCATAAGCACACATTCCCTTATACTGGAGATC  
+HWI-EAS443:3:40:1749:1414#0/1  
ab\_bbb¥^W`bba]¥aaaabaaaa]Z\_a`a`\_\_a\_aa\_\_V  
@HWI-EAS443:3:40:215:1029#0/1  
GCATCATATTCATGCTTTTGGCTGGACCATGGGCTGGCA  
+HWI-EAS443:3:40:215:1029#0/1  
aaX]¥YVIZ`\_¥YU[\_[S[GY\_^\_ZQN^RHP]YVGT]^]  
@HWI-EAS443:3:40:245:1936#0/1  
GAGTTCTTCAATGGTGGAACAGATCTTCATGATCTCAGAG  
+HWI-EAS443:3:40:245:1936#0/1  
aaa[`ba`aaa[`a[a]aabaaa^\_^]aZ`^aab^ba^a\_  
@HWI-EAS443:3:40:381:1181#0/1  
TGTATTTCTTTTGTCCAAGATTGAGTATCGAGACTCCCAA  
+HWI-EAS443:3:40:381:1181#0/1  
ab``ababaaaa]baaa`aaaaaYT]aWJ¥`a\_adWJ]  
@HWI-EAS443:3:40:386:237#0/1  
CAGCCAAAAGCATGGAATATGATGCCGTTGCAACTACACA  
+HWI-EAS443:3:40:386:237#0/1  
abab`bb\_Y]`aabb\_aaaa`]^aa`X^[`[\_`\_VSa\_\_\_\_  
@HWI-EAS443:3:40:406:53#0/1  
AATTTCTAGCATGGTGGAGGCCATGGTGTCTAGGGCCCGG  
+HWI-EAS443:3:40:406:53#0/1  
¥V¥\_aaa^`aa¥aaY`aX`X^`UTZ]G¥PXNX¥YTSZ[[T  
@HWI-EAS443:3:40:417:1424#0/1  
GACTTCTTTTGTCTCATGTTGATTCCCCTAACTTGCAAGG  
+HWI-EAS443:3:40:417:1424#0/1  
`bbabbbabaaab```aa`a^Z`\_a`\_aaa¥aa\_\_`ba`¥

@HWI-EAS443:3:40:480:1404#0/1  
ATCCTGTTCCCTGTTCCATGGCTGTATGGAGGATCTCCAGT  
+HWI-EAS443:3:40:480:1404#0/1  
]aaaaa\_[a^`][\_X\_aa`aaa]HVUXBBBBBBBBBBBB  
@HWI-EAS443:3:40:602:1277#0/1  
GCTGTATGGAGGATCTCCAGTATAAGGGAATGTGGTGCTT  
+HWI-EAS443:3:40:602:1277#0/1  
a¥PIKRRWHVXUZSZ[SalLRNLTW[BBBBBBBBBBBBBB  
@HWI-EAS443:3:40:640:260#0/1  
ATTTCTAGCATGGTGGAGGCCATGGTGTCTAGGGCCCGGA  
+HWI-EAS443:3:40:640:260#0/1  
[bbbbbb`\_ababa\_ba`aaa`^]\_\_¥¥¥`UW\_]^\_``\_^Y  
@HWI-EAS443:3:40:704:727#0/1  
CGCCAGACTTATGATTGGACATTAACAGAAATCAACCGG  
+HWI-EAS443:3:40:704:727#0/1  
]ab`a`Z`aba`a]a^X\_¥]¥b\_W`aa^\_`\_\_¥a]V]Xa[  
@HWI-EAS443:3:40:809:1410#0/1  
ATTGGAGTAACAGTGATAAAGAACAACATGATAAACAATG  
+HWI-EAS443:3:40:809:1410#0/1  
a``a¥¥\_\_]aaaaY¥^aaaaaaaa`aa^aaa^S\_a^`\_\_  
@HWI-EAS443:3:42:1075:1661#0/1  
CACTTCTGGTACATCTGTTTCATCCTCAAGAATCCCCTTT  
+HWI-EAS443:3:42:1075:1661#0/1  
TV`¥¥`a^TZ\_R[^¥aa`\_W\_`[¥\_`\_\_\_\_]X\_`^V\_`baa  
@HWI-EAS443:3:42:1102:1231#0/1  
CCAGCGCAAAATGCCATAAGCACCATTCCTTATACTG  
+HWI-EAS443:3:42:1102:1231#0/1  
abaabb\_abb`bbbaabbababbababbba`abbbbbbbaa  
@HWI-EAS443:3:42:1154:244#0/1  
AATTTCTAGCATGGTGGAGGCCATGGTGTCTAGGGCCCGG  
+HWI-EAS443:3:42:1154:244#0/1  
`W`WV¥\_[¥a]^WVa[Z]^XVRY¥XEMX\_P[aUY]T^R  
@HWI-EAS443:3:42:1176:599#0/1  
GAGTTCTTCAATGGTGAACAGATCTTCATGATCTCAGAG  
+HWI-EAS443:3:42:1176:599#0/1  
a``Va`aa\_a\_aaaXaa`a\_aa\_\_\_\_`a\_aaa]``a`a\_a  
@HWI-EAS443:3:42:1359:1616#0/1  
CCAGACTTATGATTGGACATTAACAGAAATCAACCGGCA  
+HWI-EAS443:3:42:1359:1616#0/1  
\_aVH]aaa\_]Z]a]GQ]G\_`^]Y\_]`a``\_\_^V]XRWU\_]  
@HWI-EAS443:3:42:1440:781#0/1  
CTCCAGTATAAGGGAATGTGGTGCTTATGGCATTGCGC  
+HWI-EAS443:3:42:1440:781#0/1  
abbbbbbbbabbb`abbbbabababbbba]`bbbbbaa`  
@HWI-EAS443:3:42:1462:1805#0/1  
AATTTCTAGCATGGTGGAGGCCATGGTGTCTAGGGCCCGG  
+HWI-EAS443:3:42:1462:1805#0/1  
aaaaa\_]a[^b`aZWa\_^X]PKYM`aJUJYZVMGX`]]]T  
@HWI-EAS443:3:42:155:1848#0/1  
CACTGGGGACAACACTAAGTGAATGAAAATCAAAATCCT

+HWI-EAS443:3:42:155:1848#0/1  
aaaaabaabaaaa`aaaa`Z]Zaaa\_abaa`[aaaba\_``  
@HWI-EAS443:3:42:1628:894#0/1  
CTGGGGACAACACTAAGTGGGAATGAAAATCAAATCCTCG  
+HWI-EAS443:3:42:1628:894#0/1  
aa¥X`\_abbbababa]b[]`\_aba`\_`aabaaaa`aa`  
@HWI-EAS443:3:42:1673:863#0/1  
CCAGCGCAAAATGCCATAAGCACCACATTCCCTTATACTG  
+HWI-EAS443:3:42:1673:863#0/1  
aab¥bbbbbbbababbbbbbabb\_babbbba`ababbaa  
@HWI-EAS443:3:42:1675:226#0/1  
CGGGCCCTAGACACCATGGCCTCCACCATGCTAGAAATTC  
+HWI-EAS443:3:42:1675:226#0/1  
aabbabab^ba`a]Yaaa]``a`]\_\_aabU``a`a]^  
@HWI-EAS443:3:42:206:403#0/1  
GGAATTTCTAGCATGGTGGAGGCCATGGTGTCTAGGGCCC  
+HWI-EAS443:3:42:206:403#0/1  
abaaaaaba\_a`aba`Vb^WZ]a\_`\_]UYZ^Y^]]^^\_Z  
@HWI-EAS443:3:42:263:1300#0/1  
GGACTTCTTTTTGCTCATGTTGATTCCCACTAECTTGCGAG  
+HWI-EAS443:3:42:263:1300#0/1  
a`[``aa``]Za]X\_`a^aaZ¥]S[¥`\_][[R^^Z\_^^]\_  
@HWI-EAS443:3:42:481:1141#0/1  
CAGCACTTCTGGTACATCTGTTTCATCCTCAAGAATTCCCC  
+HWI-EAS443:3:42:481:1141#0/1  
a[aaaaba\_``b\_baabaaabb`a`\_aab````b\_a`a`^^  
@HWI-EAS443:3:42:651:1354#0/1  
GACAACACTAAGTGGGAATGAAAATCAAATCCTCGAATGT  
+HWI-EAS443:3:42:651:1354#0/1  
abaaa^``aaa`]ababbaabbaaaaaabaaaa\_a\_`a`^  
@HWI-EAS443:3:42:704:1169#0/1  
GGGAATTCTTGAGGATGAACAGATGTACCAGAAGTGCTGC  
+HWI-EAS443:3:42:704:1169#0/1  
aaaaaab`abaaaaabaa`a\_aaa[aa`a\_aaaWaa`a^  
@HWI-EAS443:3:42:809:834#0/1  
ATTTATATAGGACTTCTTTTTGCTCATGTTGATTCCCACT  
+HWI-EAS443:3:42:809:834#0/1  
``aa\_bbbaaaaabbbbabbabbba`baa]b`baa^aab  
@HWI-EAS443:3:42:821:193#0/1  
GGGGACAACACTAAGTGGGAATGAAAATCAAATCCTCGAA  
+HWI-EAS443:3:42:821:193#0/1  
ab\_Q[\_Z`aaaaXa\_aa\_`aa`\_`\_a¥]^Y\_\_ZX]`a]R  
@HWI-EAS443:3:42:846:808#0/1  
CTTTAGCTAGGAGCATTGCGAAAAGCTTGAACAGTCTGG  
+HWI-EAS443:3:42:846:808#0/1  
aaabbbba`\_]`a]aaa`a[Y``\_aa¥``X¥[][^aa^a\_^W  
@HWI-EAS443:3:42:949:516#0/1  
CTAGCATGGTGGAGGCCATGGTGTCTAGGGCCCGGATTGA  
+HWI-EAS443:3:42:949:516#0/1  
Z\_Z\_Z\_¥aa````\_a`\_`\_]ZZKZYZVXVY¥¥`[a\_Z\_[\_V

@HWI-EAS443:3:42:968:1943#0/1  
GTTCAAGCTTTTCGCAAATGCTCCTAGCTAAAGTTTCAAC  
+HWI-EAS443:3:42:968:1943#0/1  
`bb`bbbaabbbabaabaaaa`a\_abb\_aba``W`a\_ba\_  
@HWI-EAS443:3:42:990:647#0/1  
CGCCAGACTTATGATTGGACATTAACAGAAATCAACCGG  
+HWI-EAS443:3:42:990:647#0/1  
abbabbaabaaaa`aabba`abaaaaaaa`]a¥aaaa\_  
@HWI-EAS443:3:43:1046:320#0/1  
CATGGTGTATCCTGTTCCCTGTTCCATGGCTGTATGGAGGA  
+HWI-EAS443:3:43:1046:320#0/1  
ab`¥`¥bbba`bbbab\_Za]^`Raaba`]aBBBBBBBBB  
@HWI-EAS443:3:43:1106:169#0/1  
CAACACTAAGTGAATGAAAATCAAATCCTCGAATGTTC  
+HWI-EAS443:3:43:1106:169#0/1  
ababaabaab^aa\_abbaaa```a¥aaa````^a`\_aa]a[  
@HWI-EAS443:3:43:12:480#0/1  
CATCTGTTTCATCCTCAAGAATTCCCCTTTGGCTTGTGTTG  
+HWI-EAS443:3:43:12:480#0/1  
``Y`\_^^`b`aaaX`¥\_Z¥`]W\_\_`a`aaa]\_[PPVNSR  
@HWI-EAS443:3:43:1430:34#0/1  
CCGGTTGGAATTTCTAGCATGGTGGAGCCATGGTGTCTA  
+HWI-EAS443:3:43:1430:34#0/1  
aaab^bbbabbaababaa`ba]`a`aa\_\_\_\_\_a`XaUW¥¥  
@HWI-EAS443:3:43:1442:461#0/1  
TCCTGTTCCCTGTTCCATGGCTGTATGGAGGATCTCCAGTA  
+HWI-EAS443:3:43:1442:461#0/1  
ababaabaaabaaa`aba`aaaP^\_aaQ`aXS[SRZ¥`VT  
@HWI-EAS443:3:43:1442:741#0/1  
GGGACATTTGAATTCACAAGCTTTTTTTATCGCTATGGAT  
+HWI-EAS443:3:43:1442:741#0/1  
^`U\_]`^`ba]S\_¥``aa¥H\_¥]PQ`a]a^^]Y]^]¥ab[^  
@HWI-EAS443:3:43:1448:692#0/1  
AGACCGTTGGAATTTCTAGCATGGTGGAGCCATGGTGT  
+HWI-EAS443:3:43:1448:692#0/1  
\_aaaaab`bbb`aaabaaaaS`aaaU``^aXTY¥¥Y[U\_¥  
@HWI-EAS443:3:43:1587:513#0/1  
TTTGAATTCACAAGCTTTTTTTATCGCTATGGATTTGTGG  
+HWI-EAS443:3:43:1587:513#0/1  
aba`[\_a^]`\_\_WZ[a`a`\_a`\_]PZS]¥¥XZS`\_^]Y`U  
@HWI-EAS443:3:43:1622:146#0/1  
CAATGGTGAACAGATCTTCATGATCTCAGAGAACTCTTC  
+HWI-EAS443:3:43:1622:146#0/1  
ababababaaa`ab\_aabaa`aaaaaa\_a`\_aa`[a[\_\_\_\_]  
@HWI-EAS443:3:43:1728:1353#0/1  
TCGATACTGAATCTTGGACAAAAGAAATACACCAAGACAA  
+HWI-EAS443:3:43:1728:1353#0/1  
]aaS^^a¥\_\_S]RX`UW¥`¥Z`^^^^R`]¥[PGaTKZLa`  
@HWI-EAS443:3:43:257:411#0/1  
TCACATTCCTGAAGTCTGCTTAAAATGGGAGCTAATGGAT

+HWI-EAS443:3:43:257:411#0/1  
aa`\_aaaaaaa`a^`a\_a\_a`a`a`\_\_`\_]`\_]`\_`\_\_\_\_  
@HWI-EAS443:3:43:294:734#0/1  
ATTCGAGGATTTTGGATTTCATTCCACTTAGTGTGTTGCC  
+HWI-EAS443:3:43:294:734#0/1  
aa`a`\_ba¥aaaa`a`a`\_\_`aa`\_]aa`\_`[`\_`^^^  
@HWI-EAS443:3:43:296:1001#0/1  
ATCAAAATCCTCGAATGTTCTGCGATGATTACATATAT  
+HWI-EAS443:3:43:296:1001#0/1  
aabb`bbaaaa`aaaa[aa`aa`aaa^`\_`\_\_`a`a`  
@HWI-EAS443:3:43:35:1564#0/1  
CAAGGTCATTGTTTATCATGTTGTTCTTTATCACTGTTAC  
+HWI-EAS443:3:43:35:1564#0/1  
abbbbabbbbbaabbb`ba`aaaaabbbbbaaaaa^aa]  
@HWI-EAS443:3:43:430:1287#0/1  
CCGTTGGAATTTCTAGCATGGTGGAGCCATGGTGTCTA  
+HWI-EAS443:3:43:430:1287#0/1  
aa\_b]abZ]Zbab\_b`aaa`]a`a]aSXaYZ]`a\_RZ¥`\_  
@HWI-EAS443:3:43:497:1593#0/1  
GGACATTTGAATTCACAAGCTTTTTTATCGCTATGGATT  
+HWI-EAS443:3:43:497:1593#0/1  
]abbbbbbbbab`bbbabababbbbba^ababY`ab  
@HWI-EAS443:3:43:522:1706#0/1  
TATAGACTTCTTTTGGTTCATGTTGATCCCCACTAACT  
+HWI-EAS443:3:43:522:1706#0/1  
abUb\_a[`ababaaaaY`\_\_aaa`aaaa`\_^`a`\_]`\_  
@HWI-EAS443:3:43:543:1332#0/1  
TTCTGGTACATCTGTTTCATCCTCAAGAATCCCCCTTGGC  
+HWI-EAS443:3:43:543:1332#0/1  
aa¥]VRR[bbaa\_WHQ]Z¥[aXa\_aa]aa`WPTHHPYYZR  
@HWI-EAS443:3:43:562:276#0/1  
ACCGTTGGAATTTCTAGCATGGTGGAGCCATGGTGTCT  
+HWI-EAS443:3:43:562:276#0/1  
abbbbaab\_¥¥aab]aa`aabb]Ya]]aaaa^`a\_FYYYN  
@HWI-EAS443:3:43:608:1558#0/1  
GGACCTGCAAGTTAGTGGGAATCAACATGAGCAAAAAGAA  
+HWI-EAS443:3:43:608:1558#0/1  
aaba`\_]abaaYaab`\_`aabaabbababba`aaab`\_`a  
@HWI-EAS443:3:43:615:543#0/1  
CGCCGACTTATGATTGGACATTAACAGAAATCAACCGG  
+HWI-EAS443:3:43:615:543#0/1  
aabbabbabbababaa`aaaa`\_]baaaaa\_aa^`\_\_  
@HWI-EAS443:3:43:620:1595#0/1  
CTGCCGTTGATTTCTGTTAATGTCCAATCATAAGTCTG  
+HWI-EAS443:3:43:620:1595#0/1  
aa[aaaaTa\_¥aa^S¥YY`a^a`a`[[R`aaaaaa`R0^Y]  
@HWI-EAS443:3:43:641:1819#0/1  
TAGCTCCATTTTAAGCAGACTTCAGGAATGTGAAGATTC  
+HWI-EAS443:3:43:641:1819#0/1  
aab`a`a`\_aaaaa`Zbaa^\_aaaa^`a`aW`a`\_\_\_\_T

@HWI-EAS443:3:43:650:177#0/1  
CACTAAGTGAATGAAAATCAAATCCTCGAATGTTCTCTG  
+HWI-EAS443:3:43:650:177#0/1  
ab`bba``bbbababbbbab^^aaaaa``a`aU^````  
@HWI-EAS443:3:43:869:993#0/1  
ATGAAAATCAAATCCTCGAATGTTCTCTGGCGATGATTAC  
+HWI-EAS443:3:43:869:993#0/1  
aabaa\_Z^abbabaaa`a\_aabaa^aa\_a]`a[¥`Za\_¥0  
@HWI-EAS443:3:43:886:1235#0/1  
ATGAAAATCAAATCCTCGAATGTTCTCTGGCGATGATTAC  
+HWI-EAS443:3:43:886:1235#0/1  
abbaabbbabaaaa\_aa\_b\_aaa\_aaaaa¥`\_\_VZ\_`W0  
@HWI-EAS443:3:43:901:24#0/1  
GTTCTTCAATGGTGAACAGATCTTCATGATCTCAGAGAA  
+HWI-EAS443:3:43:901:24#0/1  
`Y^`a`a`\_aaXa\_]\_]Qa]^X\_\_\_Z¥^Z]X\_WT[¥]]S  
@HWI-EAS443:3:43:914:1206#0/1  
CAAATCCATAGCGATAAAAAAGCTTGTGAATCAAATGT  
+HWI-EAS443:3:43:914:1206#0/1  
`^¥^`bbbb`b^aa`]a`aa``a¥`a`]a`abb\_`^`^bT  
@HWI-EAS443:3:44:1104:289#0/1  
CAATGGTGAACAGATCTTCATGATCTCAGAGAACTCTTC  
+HWI-EAS443:3:44:1104:289#0/1  
aababb^bbaaaab^b\_ab\_aaa`a\_a^aaa`Y]]a[aa]  
@HWI-EAS443:3:44:1134:858#0/1  
ATTCAAATGTCCCTGTCTTATTTATATAGGACTTCTTTTT  
+HWI-EAS443:3:44:1134:858#0/1  
]aa]S\_`a`a`\_`^`\_a\_`^baba``¥`\_VT`a`\_aaaa]  
@HWI-EAS443:3:44:1237:214#0/1  
CAGCACTTCTGGTACATCTGTTTCATCCTCAAGAATTCCCC  
+HWI-EAS443:3:44:1237:214#0/1  
aaa]V]baa¥^[W^a]]\_a`aWV¥\_^[Z¥`^aYX]UX[Z¥  
@HWI-EAS443:3:44:1418:527#0/1  
CACTGGGGACAACACTAAGTGAATGAAAATCAAATCCT  
+HWI-EAS443:3:44:1418:527#0/1  
aa\_babaa\_aaa`aabaaaabb``bb^^\_aa`\_aa`aX[\_  
@HWI-EAS443:3:44:1419:1037#0/1  
GTTGCTGCCGTTGATTTCTGTTTAATGTCCAATCATAAG  
+HWI-EAS443:3:44:1419:1037#0/1  
a]a^[aa^\_aaR\_]U^`ZXQY^^ZT^XWXYLV][^XX]X  
@HWI-EAS443:3:44:1466:104#0/1  
GCTGCCGTTGATTTCTGTTTAATGTCCAATCATAAGTCT  
+HWI-EAS443:3:44:1466:104#0/1  
a\_ab`\_aa]`\_Y\_`a]^`^aa]]^]X]]Z^ZX]]^\_SPQ  
@HWI-EAS443:3:44:1736:544#0/1  
GTGGAATGAAAATCAAATCCTCGAATGTTCTCTGGCGATG  
+HWI-EAS443:3:44:1736:544#0/1  
a^ba`abaaa`aa\_aa``\_a\_a``]\_]a`\_^[]`]^a^^]  
@HWI-EAS443:3:44:1744:1583#0/1  
GGTTGATTTCTGTTTAATGTCCAATCATAAGTCTGGCGAC

+HWI-EAS443:3:44:1744:1583#0/1  
[\_Ha\_P`^X\_`[^`aZ`aP[[YW`W\_a`YaTW\_\_[R\_ZU  
@HWI-EAS443:3:44:1785:277#0/1  
GGGCCCTAGACACCATGGCCTCCACCATGCTAGAAATTCC  
+HWI-EAS443:3:44:1785:277#0/1  
abaaaaaaaa¥aa^a\_`V`¥`^¥\_WV¥\_\_V¥[\_^^¥¥[QW  
@HWI-EAS443:3:44:237:929#0/1  
GGAGGATCTCCAGTATAAGGGAATGTGGTGCTTATGGCAT  
+HWI-EAS443:3:44:237:929#0/1  
aaaaa`a`a`^a\_`a^^a\_a^^`\_Y`\_X`^a\_`\_\_\_\_X\_  
@HWI-EAS443:3:44:247:945#0/1  
CTGGGGACAACACTAAGTGGAAATGAAAATCAAAATCCTCG  
+HWI-EAS443:3:44:247:945#0/1  
abbab`aab¥a`aaa^a\_a^aa\_aaaa^`aaaa]`\_`\_  
@HWI-EAS443:3:44:404:422#0/1  
GGAATTTCTAGCATGGTGGAGGCCATGGTGTCTAGGGCCC  
+HWI-EAS443:3:44:404:422#0/1  
[aT[a[b\_ZV¥T¥[`XPX¥b\_TURZU¥UGLLJGUZHQ]MR  
@HWI-EAS443:3:44:43:1559#0/1  
ATTTATATAGGACTTCTTTTTGCTCATGTTGATTCCCACT  
+HWI-EAS443:3:44:43:1559#0/1  
abbbabaab^\_aaaa\_aaaaaZ````a```\_`a\_a\_\_^`]  
@HWI-EAS443:3:44:599:583#0/1  
CCAGCGCAAAATGCCATAAGCACCATTCCTTATACTG  
+HWI-EAS443:3:44:599:583#0/1  
``[aaaaaa`^`]\_aaabbaa`[^\_¥a¥\_a[VaV]¥Y]^`  
@HWI-EAS443:3:44:754:526#0/1  
GACAACACTAAGTGGAAATGAAAATCAAAATCCTCGAATGT  
+HWI-EAS443:3:44:754:526#0/1  
aabaa^a`aab\_bbaaab`aa`a`aa`aaaa\_a``aa\_  
@HWI-EAS443:3:44:834:731#0/1  
CGGTTGATTTCTGTTAATGTCCAATCATAAGTCTGGCGA  
+HWI-EAS443:3:44:834:731#0/1  
aab`bbabbbabbabbbbabbaab`abaab`^aaa\_a\_  
@HWI-EAS443:3:44:906:1169#0/1  
ATCTGTTCATCCTCAAGAATCCCCCTTGGCTTGTGTTGA  
+HWI-EAS443:3:44:906:1169#0/1  
aaaa\_\_aaba`aaaaa^aaaa`\_`aaa`\_aa\_\_^\_a`]  
@HWI-EAS443:3:45:1028:768#0/1  
ATACAGCCATGGAACAGGAACAGGATACACCATGGACACA  
+HWI-EAS443:3:45:1028:768#0/1  
``ab`bb]\_aba]a`aba]`\_]a^^a``a\_]Z\_``\_`¥]`  
@HWI-EAS443:3:45:1143:1019#0/1  
GTCTTATTTATATAGGACTTCTTTTTGCTCATGTTGATTC  
+HWI-EAS443:3:45:1143:1019#0/1  
aaabbabbbabaaa`a\_aba\_aabaab`\_a`aaaa\_a\_a  
@HWI-EAS443:3:45:1365:763#0/1  
TGCCGTTGATTTCTGTTAATGTCCAATCATAAGTCTGG  
+HWI-EAS443:3:45:1365:763#0/1  
^b¥`aa`]ZY]\_aZ^b\_`^`a`aa¥[```aa```]\_ZR``Z



@HWI-EAS443:3:45:1380:796#0/1  
GACCGTTGGAATTTCTAGCATGGTGGAGGCCATGGTGTC  
+HWI-EAS443:3:45:1380:796#0/1  
aaaaab]bbbaZaaa]a\_]^\_aaWaY[¥¥S^YYV`S^WU  
@HWI-EAS443:3:45:1446:1153#0/1  
GGTTGATTTCTGTTTAATGTCCAATCATAAGTCTGGCGAC  
+HWI-EAS443:3:45:1446:1153#0/1  
aa\_aa]aaa\_`a\_aa^aa^ZZ`\_`[``Y`Z\_aa]^`][  
@HWI-EAS443:3:45:1517:583#0/1  
GCTTTTTTATCGCTATGGATTTGTGGCTAATTTTAGCAT  
+HWI-EAS443:3:45:1517:583#0/1  
aaaaaabbbaa\_b\_a\_a\_a\_a`\_]`aa¥^`\_\_a``USQNY  
@HWI-EAS443:3:45:1655:622#0/1  
CGCCAGGAACATTCGAGGATTTTGATTTTCATCCACTTA  
+HWI-EAS443:3:45:1655:622#0/1  
`a`\_`bbaaZaaaa`\_baWaabaa`aaaa`aaaa^``aa\_  
@HWI-EAS443:3:45:220:503#0/1  
GGTCGCCAGACTTATGATTGGACATTAACAGAAATCAAC  
+HWI-EAS443:3:45:220:503#0/1  
`b^abbabb`abbabbbbaa`aabaaaabbabaa\_ab`  
@HWI-EAS443:3:45:316:225#0/1  
CTGACAAAGGGATTACAGGGATTACAAAGTCTTCCCGAT  
+HWI-EAS443:3:45:316:225#0/1  
`]\_]aabb`U`aba``bbaa``[aSaa`bY^`\_\_\_\_\_Xa`]  
@HWI-EAS443:3:45:339:1942#0/1  
ACTTCTTTTTGCTCATGTTGATTCCCACTAACTTGCAGGT  
+HWI-EAS443:3:45:339:1942#0/1  
a\_a`W[aa\_a\_WX¥aaaZ\_aa\_`[R]\_¥`aUfK\_¥]^LI  
@HWI-EAS443:3:45:404:539#0/1  
AATTTCTAGCATGGTGGAGGCCATGGTGTCTAGGGCCCGG  
+HWI-EAS443:3:45:404:539#0/1  
aaba]^aaaa`a`Ua^¥aZ\_^^`^RU[^S¥^]¥¥WXV^  
@HWI-EAS443:3:45:434:913#0/1  
TGCCGTTGATTTCTGTTTAATGTCCAATCATAAGTCTGG  
+HWI-EAS443:3:45:434:913#0/1  
aba\_bb]ba``bb`ababa`aa``¥T\_a`\_¥baa`\_\_aa\_  
@HWI-EAS443:3:45:619:239#0/1  
GTGTCCATGGTGTATCCTGTTCCCTGTTCCATGGCTGTATG  
+HWI-EAS443:3:45:619:239#0/1  
a\_a¥\_a``]a^a\_``¥`a`\_a`\_a]^\_\_U^^Y¥^BBBBBB  
@HWI-EAS443:3:45:669:433#0/1  
GGACAACACTAAGTGAATGAAAATCAAAATCCTCGAATG  
+HWI-EAS443:3:45:669:433#0/1  
abaaab\_babaab\_bbaabbaaaaa\_aaa```¥a`aa\_aa  
@HWI-EAS443:3:45:730:471#0/1  
CCGGTTGATTTCTGTTTAATGTCCAATCATAAGTCTGGCG  
+HWI-EAS443:3:45:730:471#0/1  
`〕``[\_\_L^aYTR\_W`YZ¥`YT\_[N^W[\_P¥Y¥^X\_[MY  
@HWI-EAS443:3:46:1140:1626#0/1  
ACTTCTTTTTGCTCATGTTGATTCCCACTAACTTGCAGGT



@HWI-EAS443:3:46:574:41#0/1  
TCTCGATACTGAATCTTGGACAAAAGAAATACACCAAGAC  
+HWI-EAS443:3:46:574:41#0/1  
a`aab```]aa`Wa\_\_\_`a\_\_`^]`a]`\_\_\_]`\_^]]`^X  
@HWI-EAS443:3:46:635:708#0/1  
GCGCAAATGCCATAAGCACCACATTCCCTTATACTGGAG  
+HWI-EAS443:3:46:635:708#0/1  
a[^a`b]ab`]\_`abba^Xa`a```¥¥`\_`\_aaa¥^`\_\_a  
@HWI-EAS443:3:46:844:69#0/1  
GGAGGATCTCCAGTATAAGGGAATGTGGTGCTTATGGCAT  
+HWI-EAS443:3:46:844:69#0/1  
abaabaaaa`\_\_b^\_a`\_bba^\_aa[a\_Za]\_\_\_^`\_`[[^  
@HWI-EAS443:3:47:100:89#0/1  
GTCCATGGTGTATCCTGTTCCCTGTTCCATGGCTGTATGGA  
+HWI-EAS443:3:47:100:89#0/1  
a\_UQ\_```VaS\_\_QXV\_[¥QY^`Y¥VWVX[VSBTTTTTTTT  
@HWI-EAS443:3:47:1275:277#0/1  
GAATTCACAAGCTTTTTTATCGCTATGGATTTGTGGCTA  
+HWI-EAS443:3:47:1275:277#0/1  
aa\_`aa`]^a^\_a^aaaa\_][aXa]^\_Y]\_\_\_\_]^ZW[¥  
@HWI-EAS443:3:47:1325:163#0/1  
AGACTGTTCAAGCTTTTTTCGCAAATGCTCCTAGCTAAAGTT  
+HWI-EAS443:3:47:1325:163#0/1  
¥Y^[abaa`Z]aaa`^`\_T[Ya]TU¥¥S]QTQTUOX\_QV  
@HWI-EAS443:3:47:1369:1798#0/1  
CACTTCTGGTACATCTGTTTCATCCTCAAGAATCCCCTTT  
+HWI-EAS443:3:47:1369:1798#0/1  
ababbb`abab\_a`a\_\_ab`a`a\_\_`a`\_`^\_\_X^^\_a`^  
@HWI-EAS443:3:47:1394:436#0/1  
CAAGGTCATTGTTTATCATGTTGTTCTTTATCACTGTTAC  
+HWI-EAS443:3:47:1394:436#0/1  
¥abaaa`bbbaabb¥^aab`b^aabbaaa`^a\_Z]`]Z  
@HWI-EAS443:3:47:1551:1739#0/1  
GCCGGTTGATTTCTGTTAATGTCCAATCATAAGTCTGGC  
+HWI-EAS443:3:47:1551:1739#0/1  
aaaaa\_bbaaaa[`b`ba\_\_aa]YX`\_\_\_]\_aaa\_]\_\_^]  
@HWI-EAS443:3:47:1553:656#0/1  
TGCCGGTTGATTTCTGTTAATGTCCAATCATAAGTCTGG  
+HWI-EAS443:3:47:1553:656#0/1  
abaabbabbaaba]aa]aa`\_`a\_`]\_\_`a`a`]Y[^]\_`  
@HWI-EAS443:3:47:1658:434#0/1  
ATTTGAATTCACAAGCTTTTTTATCGCTATGGATTTGTG  
+HWI-EAS443:3:47:1658:434#0/1  
abbbbbabbab`aab\_aabbbaaaaaXa^`\_`^aaY\_`a\_Z¥  
@HWI-EAS443:3:47:1746:1739#0/1  
GACAACACTAAGTGAATGAAAATCAAATCCTCGAATGT  
+HWI-EAS443:3:47:1746:1739#0/1  
ab¥YQW`Ya`T]X`\_N[R\_aSIZ]X]^`[WJFT[RL^`WZ  
@HWI-EAS443:3:47:1786:1074#0/1  
ATTTCTAGCATGGTGGAGGCCATGGTGTCTAGGCCCGGA

+HWI-EAS443:3:47:1786:1074#0/1  
abbaab^bbaaba[aaa\_a`\_^¥`]W`^¥U^[^¥S¥¥^¥S  
@HWI-EAS443:3:47:203:500#0/1  
GTGGGAATCAACATGAGCAAAAAGAAGTCCTATATAAATA  
+HWI-EAS443:3:47:203:500#0/1  
a`bba\_a`ab`aaa`aaa````\_a\_`]a^a\_`aa`a^a`  
@HWI-EAS443:3:47:206:340#0/1  
CAATGGTGGAACAGATCTTCATGATCTCAGAGAACTCTTC  
+HWI-EAS443:3:47:206:340#0/1  
aab\_aaXb`bb`bb`]b`b`WaaYRba\_`T^]aWaYa^Q  
@HWI-EAS443:3:47:441:1857#0/1  
ATGCCAGCCCATGGTCCAGCCAAAAGCATGGAATATGATG  
+HWI-EAS443:3:47:441:1857#0/1  
`b]Z^aaaa^a`PLM\_a``]a\_\_TQ`^][\_\_¥\_`RWPS  
@HWI-EAS443:3:47:45:314#0/1  
GCCGGTTGATTTCTGTTAATGTCCAATCATAAGTCTGGC  
+HWI-EAS443:3:47:45:314#0/1  
aaaa`VZ¥IV^`]Z[Q^`]WTYQMY¥XNLVWXYXBBBBBB  
@HWI-EAS443:3:47:585:1086#0/1  
TGGGAGTCTCGATACTGAATCTTGGACAAAAGAAATACAC  
+HWI-EAS443:3:47:585:1086#0/1  
aa]¥``]\_]S]Y[T]`\_Y[]\_]RNUZ^a^XQ¥U^WUT[Z  
@HWI-EAS443:3:47:623:1940#0/1  
AAAAGCTTGTGAATTCAAATGTCCCTGTCTTATTTATATA  
+HWI-EAS443:3:47:623:1940#0/1  
abb^aaab\_UWaaa`0\_a`a¥]YZXaaXX\_]a\_a\_a^a\_  
@HWI-EAS443:3:47:634:1566#0/1  
GAGTTCTTCAATGGTGGAACAGATCTTCATGATCTCAGAG  
+HWI-EAS443:3:47:634:1566#0/1  
`VXYTRW^`¥a\_\_RR[`]RLUYV]\_[¥QW[TQROV]VR[Y  
@HWI-EAS443:3:47:699:1532#0/1  
AGCACTTCTGGTACATCTGTTTCATCCTCAAGAATCCCCT  
+HWI-EAS443:3:47:699:1532#0/1  
[`]aaba\_abb`aababa`\_``aaa`a\_`\_aZ\_aa`]]\_`  
@HWI-EAS443:3:47:700:970#0/1  
AGGACTTCTTTTTGCTCATGTTGATTCCCCTAACTTGCA  
+HWI-EAS443:3:47:700:970#0/1  
`bba`b`a]ba`aa`a]aab\_a`W^TX[LZ]``^\_Y^¥[  
@HWI-EAS443:3:47:907:1509#0/1  
ACTGGGACAACACTAAGTGGAAATGAAAATCAAATCCTC  
+HWI-EAS443:3:47:907:1509#0/1  
```a^V^`^S\_GZY¥V]¥X]SVba\_Q`aa]J]]b`YT]F  
@HWI-EAS443:3:47:907:167#0/1  
GGTGTATTTCTTTTGTCCAAGATTGAGTATCGAGACTCCC  
+HWI-EAS443:3:47:907:167#0/1  
`^Ya^aaa`]aaaa\_`\_^`a^\_\_U[\_]\_`]`^WZ^]]X  
@HWI-EAS443:3:47:956:507#0/1  
GCTGCCGGTTGATTTCTGTTAATGTCCAATCATAAGTCT  
+HWI-EAS443:3:47:956:507#0/1  
aabb\_b\_b\_T`ba\_aaaaa`aaY`]a`\_\_a`aaW[`

@HWI-EAS443:3:47:986:991#0/1  
GAAAAAGGAGAGTAAGAGACAACATGACCAAGAAGATGGT  
+HWI-EAS443:3:47:986:991#0/1  
aa`Uaba\_b`aU`aaaa^aa`\_`a\_]Z\_\_`\_^\_\_\_\_\_X  
@HWI-EAS443:3:48:1119:1470#0/1  
TCTCGATACTGAATCTTGGACAAAAGAAATACACCAAGAC  
+HWI-EAS443:3:48:1119:1470#0/1  
aa`\_aZ^\_Za`a]a\_aa`[^\_a`\_]a\_\_\_\_`][\_^\_]  
@HWI-EAS443:3:48:1188:647#0/1  
GGAGTCTCGATACTGAATCTTGGACAAAAGAAATACACCA  
+HWI-EAS443:3:48:1188:647#0/1  
aa¥¥H\_a]\_\_[\_`\_PY\_\_`[\_`\_NX\_]S¥`][ZZYT[RWW  
@HWI-EAS443:3:48:1205:1073#0/1  
CAAAGGGATTGAGGGATTACAAAGTCTTCCCGATAATC  
+HWI-EAS443:3:48:1205:1073#0/1  
aaZXaZ`YYaW¥YZa`bab^^aaaaPJ¥]RWZP`X[[`¥Y  
@HWI-EAS443:3:48:1223:1429#0/1  
GTGGGAATCAACATGAGCAAAAAGAAGTCCTATATAAATA  
+HWI-EAS443:3:48:1223:1429#0/1  
a`¥`[T^bNbb`ab`\_a`a`ba\_aaa\_^\_a\_a`ba\_\_a\_  
@HWI-EAS443:3:48:1278:1084#0/1  
GAGTTCTTCAATGGTGGAACAGATCTTCATGATCTCAGAG  
+HWI-EAS443:3:48:1278:1084#0/1  
aS^]\_\_ZXZ\_^\_^]^QLWX^]PTT\_]WW^\_YYYYTY]Z]  
@HWI-EAS443:3:48:1393:1570#0/1  
TCCCTGTCTTATTTATATAGGACTTCTTTTTGCTCATGTT  
+HWI-EAS443:3:48:1393:1570#0/1  
]ba^a^]a`\_^a^¥`a`a`\_^¥\_a]]\_a`Y`\_\_`a]¥  
@HWI-EAS443:3:48:1549:1563#0/1  
CACCACATCCCTTATACTGGAGATCCTCCATACAGCCAT  
+HWI-EAS443:3:48:1549:1563#0/1  
abaVaaWa]a^````bbb]T]Za`a[]]\_¥[^`ZX\_[X^¥  
@HWI-EAS443:3:48:1597:1187#0/1  
CGCCAGACTTATGATTGGACATTAACAGAAATCAACCGG  
+HWI-EAS443:3:48:1597:1187#0/1  
a`]b^[^ab[bbaaba`TWaa]\_\_a^aa`^[^`\_`SZ\_P  
@HWI-EAS443:3:48:1652:1517#0/1  
AAAAAGCTTGTGAATTCAAATGTCCCTGTCTTATTTATA  
+HWI-EAS443:3:48:1652:1517#0/1  
aba^^b\_b\_aa¥b\_\_aa`aYRZXZ^]]a\_Y^a\_W\_\_\_\_^`\_  
@HWI-EAS443:3:48:1719:212#0/1  
GGACAACACTAAGTGAATGAAAATCAAAATCCTCGAATG  
+HWI-EAS443:3:48:1719:212#0/1  
`H]¥QWW^¥WUMaW`[Z^\_a^Y[]]\_\_^^]]YZ][\_Y[^\_  
@HWI-EAS443:3:48:1772:754#0/1  
GCCATAAGCACCACATTCCTTATACTGGAGATCCTCCAT  
+HWI-EAS443:3:48:1772:754#0/1  
aa\_aaaab\_b`\_a[`a`\_^aaa\_a\_\_¥[^`^ZVZ[UWY[  
@HWI-EAS443:3:48:196:1437#0/1  
ATCCTGTTCTGTTCCATGGCTGTATGGAGGATCTCCAGT

+HWI-EAS443:3:48:196:1437#0/1  
a^\_``\_b`b`\_aa`]a`\_\_\_BBBBBBBBBBBBBBBBBBB  
@HWI-EAS443:3:48:233:769#0/1  
GGGGAATTCTTGAGGATGAACAGATGTACCAGAAGTGCTG  
+HWI-EAS443:3:48:233:769#0/1  
\_L]XMUZ`Haa\_¥Z\_\_`][\_\_V][^^][^X^\_^]]^QYXX¥  
@HWI-EAS443:3:48:464:1257#0/1  
GTGTCCATGGTGTATCCTGTTCCCTGTTCCATGGCTGTATG  
+HWI-EAS443:3:48:464:1257#0/1  
a¥\_XVZX`\_\_R`[\_`[¥]a^a¥[`a^\_[X]¥\_T]X¥KRXX  
@HWI-EAS443:3:48:617:1021#0/1  
GTGGGAATCAACATGAGCAAAAAGAAGTCCTATATAAATA  
+HWI-EAS443:3:48:617:1021#0/1  
``aa]Z`¥`ab\_\_``[aaa[U`a[a\_`^^]`\_`¥`\_`\_`]  
@HWI-EAS443:3:48:668:1044#0/1  
AATGCAGTTGCTGCCGTTGATTTCTGTTTAATGTCCAAT  
+HWI-EAS443:3:48:668:1044#0/1  
aaaa¥¥a```\_\_a\_^X`Za[PY\_\_`^`^`aZ`X`Y]X]^S  
@HWI-EAS443:3:48:726:361#0/1  
CTTTGTTGAAACTTTAGCTAGGAGCATTTCGAAAAGCTT  
+HWI-EAS443:3:48:726:361#0/1  
a`)]`][`¥]\_]\_^aY][¥Va¥`]R[]WS^a]SZ\_¥aTXZ  
@HWI-EAS443:3:48:991:707#0/1  
CGGCATCATATTCCATGCTTTTGGCTGGACCATGGGCTGG  
+HWI-EAS443:3:48:991:707#0/1  
abbbaaa`abbbaabbbabbbabbaabaa`\_]aa\_X¥\_a  
@HWI-EAS443:3:49:1102:1844#0/1  
TAAAATTAGCCACAAATCCATAGCGATAAAAAAAGCTTGT  
+HWI-EAS443:3:49:1102:1844#0/1  
abaaaaaaaaaa^`aaa`\_aa`a¥a```a`a`a`\_`[^`^`^`  
@HWI-EAS443:3:49:1123:1784#0/1  
CTGCCGTTGATTTCTGTTTAATGTCCAATCATAAGTCTG  
+HWI-EAS443:3:49:1123:1784#0/1  
aabbaba`bbabbbabaaabaabb`aaaaaaaaaaa`\_aa  
@HWI-EAS443:3:49:1252:1640#0/1  
ACCACATTCCCTTATACTGGAGATCCTCCATACAGCCATG  
+HWI-EAS443:3:49:1252:1640#0/1  
aa\_R`\_`^]\_]`aa\_aWZ``]¥]N[U[XS^V[V\_[UVZ\_[  
@HWI-EAS443:3:49:1264:407#0/1  
GTCATGTTGATTCCCACTAATTGCAGTCTCTGAGAAT  
+HWI-EAS443:3:49:1264:407#0/1  
a\_a`aaaaab¥aa\_\_\_`\_aa`]``a\_\_aaX^^a\_[^`\_\_\_  
@HWI-EAS443:3:49:138:203#0/1  
ATACAGCCATGGAACAGGAACAGGATACACCATGGACACA  
+HWI-EAS443:3:49:138:203#0/1  
a`bab`baa\_ZT`a`\_aa\_a[aaaa\_\_[\_]^`\_`ZZV`Y¥  
@HWI-EAS443:3:49:1526:44#0/1  
TGCCGTTGATTTCTGTTTAATGTCCAATCATAAGTCTGG  
+HWI-EAS443:3:49:1526:44#0/1  
^bVJb¥ZbabbabI¥bba\_a\_a]Y\_FTX`\_aa^a]\_a^aa

@HWI-EAS443:3:49:1773:945#0/1  
GTTCTTCAATGGTGAACAGATCTTCATGATCTCAGAGAA  
+HWI-EAS443:3:49:1773:945#0/1  
aa`b`\_a\_aa]`a]]\_a^\_Y\_`^\_[aX^[Y^Z^Z^Z  
@HWI-EAS443:3:49:210:1025#0/1  
ATCAAAATCCTCGAATGTTCTGCGATGATTACATATAT  
+HWI-EAS443:3:49:210:1025#0/1  
aa`bbbbbaabbabbb]aaa\_aaab``aa`aZa`aaaa  
@HWI-EAS443:3:49:234:184#0/1  
GTCCAAGGTCATTGTTTATCATGTTGTTCTTTATCACTGT  
+HWI-EAS443:3:49:234:184#0/1  
aaa\_\_aaaYU]aaaZaa^Y]``^\_a\_\_\_`a`\_`^^¥`]^  
@HWI-EAS443:3:49:291:1566#0/1  
CGAGGATTTTGATTTTCATTCCACTTAGTGTTGTCCCCAG  
+HWI-EAS443:3:49:291:1566#0/1  
aaabbbbbbbabab^bbaaaaabaaaa\_aaa  
@HWI-EAS443:3:49:31:1056#0/1  
ATCTGTTCATCCTCAAGAATCCCCCTTTGGCTTGTGTTGA  
+HWI-EAS443:3:49:31:1056#0/1  
aaaaa``]]\_a`abaaaa\_`\_`a[aZ[Y\_\_SYZ[^]V  
@HWI-EAS443:3:49:531:728#0/1  
TAGCATGGTGGAGCCATGGTGTCTAGGGCCCGATTGAT  
+HWI-EAS443:3:49:531:728#0/1  
\_[a`ba`^W^aaXQ`[X\_^\_Qa^aZL\_a`]Wa]WMTa[XQ  
@HWI-EAS443:3:49:615:1432#0/1  
GTCATTGTTTATCATGTTGTTCTTTATCACTGTTACTCCA  
+HWI-EAS443:3:49:615:1432#0/1  
aR^a\_VRX\_]W[RQ[ZW\_a[]P[[a]^]UOZ`[^SHVGQZ  
@HWI-EAS443:3:49:617:1382#0/1  
TCCATGGTGTATCCTGTTCCCTGTTCCATGGCTGTATGGAG  
+HWI-EAS443:3:49:617:1382#0/1  
aaabaab^a]`aaa`b`a\_`aaU\_[\_¥aa¥`aa[[UUMNY  
@HWI-EAS443:3:49:917:1041#0/1  
CTTTTTGCTCATGTTGATTCCCACTAATTGCAGGCCTG  
+HWI-EAS443:3:49:917:1041#0/1  
abbabbbbbabbbbbbbba`ababbbabba`babaabb  
@HWI-EAS443:3:49:976:387#0/1  
GTTGGAATTTCTAGCATGGTGGAGCCATGGTGTCTAGGG  
+HWI-EAS443:3:49:976:387#0/1  
aaab\_```a^X`a`\_`a^W\_Z^\_¥U]¥¥¥YPYUSUW¥WU  
@HWI-EAS443:3:4:1043:309#0/1  
GCTGTATGGAGGATCTCCAGTATAAGGGAATGTGGTGCTT  
+HWI-EAS443:3:4:1043:309#0/1  
\_¥]]Y[]ZWTP¥GPY`NLIXUZXTY[¥FSUUN¥ZNB  
@HWI-EAS443:3:4:1145:40#0/1  
TAGCATGGTGGAGCCATGGTGTCTAGGGCCCGATTGAT  
+HWI-EAS443:3:4:1145:40#0/1  
a¥a\_a^\_a]`a]aX]¥`YT¥ULWPPW^[YFPFZXSK]BBB  
@HWI-EAS443:3:4:1182:189#0/1  
GTTGCAACGGCATCATATCCATGCTTTTGGCTGGACCAT

+HWI-EAS443:3:4:1182:189#0/1  
aaa\_a`^`a[\_^\_\_`]Y`[U^`U¥`¥¥¥^Y¥\_ZUVVBB  
@HWI-EAS443:3:4:122:1641#0/1  
CAAAATGCCATAAGCACCATTCCTTATACTGGAGATC  
+HWI-EAS443:3:4:122:1641#0/1  
a`aaaaa`\_a\_b\_a^a`\_`^a\_^[¥\_a\_a\_a\_]^^`\_\_B  
@HWI-EAS443:3:4:1325:1094#0/1  
CATGGTGGAGGCCATGGTGTCTAGGGCCCGGATTGATGCC  
+HWI-EAS443:3:4:1325:1094#0/1  
aaaaa`aa\_\_\_\_\_`[^`[a]¥Z^^aX¥¥`aVV¥¥UT`VX  
@HWI-EAS443:3:4:1411:1221#0/1  
GGACAACACTAAGTGAATGAAAATCAAAATCCTCGAATG  
+HWI-EAS443:3:4:1411:1221#0/1  
aa`\_`^a`\_\_aZ`^`aa\_\_`^`^`^^`^`X^¥\_]^^  
@HWI-EAS443:3:4:1419:1429#0/1  
ACCGTTGGAATTTCTAGCATGGTGGAGGCCATGGTGTCT  
+HWI-EAS443:3:4:1419:1429#0/1  
aaZab]abaaaV`a]^\_baZa`b¥a\_¥]]VS¥XU`MaWUY  
@HWI-EAS443:3:4:1433:653#0/1  
GAAAAAGGAGAGTAAGAGACAACATGACCAAGAAGATGGT  
+HWI-EAS443:3:4:1433:653#0/1  
aXNW[ZRNP[^\_]`^`QQa^0\_¥MU]]WPM]W¥XYNX¥^B  
@HWI-EAS443:3:4:155:1249#0/1  
CATCCTCAAGAATTCCCCTTTGGCTTGTGTTGAGAATAGA  
+HWI-EAS443:3:4:155:1249#0/1  
aabbbbb\_]]][\_ba`\_`abaa^^abba]aa]YKSO^R¥BB  
@HWI-EAS443:3:4:1599:2008#0/1  
CATTGAGGATTTTGATTTTCATTCCACTTAGTGTGTCC  
+HWI-EAS443:3:4:1599:2008#0/1  
Sabb\_babbbbab`bbabbbbaaba\_b¥babb\_b`\_b]ba  
@HWI-EAS443:3:4:1636:1886#0/1  
CAACACTAAGTGAATGAAAATCAAAATCCTCGAATGTTC  
+HWI-EAS443:3:4:1636:1886#0/1  
`^a\_a`\_`\_a¥W\_\_Zaaaab^b^`b¥aa]URZ][aP`\_UXL  
@HWI-EAS443:3:4:1684:1128#0/1  
GTTCTTCAATGGTGAACAGATCTTCATGATCTCAGAGAA  
+HWI-EAS443:3:4:1684:1128#0/1  
a[a`\_a]^`^`\_\_V¥WX\_\_\_\_`]RJZ¥]]^`\_XXXYW]\_Z]^Z  
@HWI-EAS443:3:4:1756:1233#0/1  
TTTGAATTCACAAGCTTTTTTTATCGCTATGGATTTGTGG  
+HWI-EAS443:3:4:1756:1233#0/1  
\_`aa]a`\_`]a]^`\_a`baa`aab`\_`\_a`aaaW`\_aa\_a[  
@HWI-EAS443:3:4:185:1281#0/1  
TGGGGACAACACTAAGTGAATGAAAATCAAAATCCTCGA  
+HWI-EAS443:3:4:185:1281#0/1  
ab`\_baab`ababa`\_^a]^`a\_a`a\_aa\_bbabbb^\_a¥`a  
@HWI-EAS443:3:4:497:759#0/1  
AGCGATAAAAAAGCTTGTGAATTCAAATGTCCCTGTCTT  
+HWI-EAS443:3:4:497:759#0/1  
`bV\_]¥\_Z`\_a]\_TaYbMb`\_a]P]X[T]W^Z]]`V^a¥



@HWI-EAS443:3:4:505:1000#0/1  
GAGACCGTTGGAATTTCTAGCATGGTGGAGGCCATGGTG  
+HWI-EAS443:3:4:505:1000#0/1  
``a`aba¥]ZZaaaaXa`X`S\_aaVP\_\_SZVS^^^^M\_  
@HWI-EAS443:3:4:663:1093#0/1  
ACTTCTGGTACATCTGTTTCATCCTCAAGAATCCCCCTTTG  
+HWI-EAS443:3:4:663:1093#0/1  
aWaaab`aXa\_aaa`\_a`a]^^`a]a\_¥¥`0^^Ya^`\_  
@HWI-EAS443:3:4:665:709#0/1  
ACCACATTCCCTTATACTGGAGATCCTCCATACAGCCATG  
+HWI-EAS443:3:4:665:709#0/1  
aaaaaaaaa^\_aaaaa^`aa`a\_\_Zaa\_]``¥`^V^\_\_  
@HWI-EAS443:3:4:775:1923#0/1  
AAGCACCATTCCTTATACTGGAGATCCTCCATACAGC  
+HWI-EAS443:3:4:775:1923#0/1  
[¥XaaSab\_]¥Z¥[TaZ\_¥a[L^Y¥^]\_X\_[`FVZV[\_]U  
@HWI-EAS443:3:4:826:927#0/1  
TGTTTCATCCTCAAGAATCCCCCTTTGGCTTGTGTTGAGAA  
+HWI-EAS443:3:4:826:927#0/1  
abYa`\_a`\_bab\_bababa^b\_bbbbb[aaa^`Ta`]]Ua  
@HWI-EAS443:3:4:925:1376#0/1  
CAACACTAAGTGAATGAAAATCAAATCCTCGAATGTTC  
+HWI-EAS443:3:4:925:1376#0/1  
a\_aZb`\_`\_aa]aaaa`aa\_\_aaa`a`a]Z`\_`\_Zaa^^X  
@HWI-EAS443:3:4:949:609#0/1  
GGTCCAGCCAAAAGCATGGAATATGATGCCGTTGCAACTA  
+HWI-EAS443:3:4:949:609#0/1  
aaXaS`\_`WV\_XT[VJ0Za¥`W]\_`Ta\_ZHRWZZ[RGBBBB  
@HWI-EAS443:3:50:1008:1379#0/1  
ATTGGACATTAACAGAAATCAACCGGCAGCAACTGCATT  
+HWI-EAS443:3:50:1008:1379#0/1  
aaaY`abbbaa`bZabYX]TQa`TGRaH[\_]YXSXF0^Z  
@HWI-EAS443:3:50:1017:1125#0/1  
GCATCATATTCCATGCTTTTGGCTGGACCATGGGCTGGCA  
+HWI-EAS443:3:50:1017:1125#0/1  
abbbbbbbbbbbbbbbbabababba]\_]a[`ZW`\_`\_V^  
@HWI-EAS443:3:50:1158:1269#0/1  
ATTTATATAGGACTTCTTTTTGCTCATGTTGATTCCCCT  
+HWI-EAS443:3:50:1158:1269#0/1  
abbbbbbbbabbbabbba`a`aabaababaaaa\_a\_a  
@HWI-EAS443:3:50:1176:1553#0/1  
GCCATAAGCACCATTCCTTATACTGGAGATCCTCCAT  
+HWI-EAS443:3:50:1176:1553#0/1  
a\_H[ab^Q\_aX^a^^`\_¥X`a\_]¥\_V^aa`aXRYRY¥][  
@HWI-EAS443:3:50:1264:1889#0/1  
GGAGTAACAGTGATAAAGAACAACATGATAAACAATGACC  
+HWI-EAS443:3:50:1264:1889#0/1  
aabbYa`aaa^aaa[bba\_a]a\_\_aV]aaa`a][```\_OX  
@HWI-EAS443:3:50:1371:253#0/1  
CTCTGTGTCTTGTGAATTAGTCATCATCTTTCTCACAACA

+HWI-EAS443:3:50:1371:253#0/1  
`babbbba`bbbbabbbabb\_bb\_bbabbbababUbb`a  
@HWI-EAS443:3:50:1504:232#0/1  
CAACGGCATCATATCCATGCTTTTGGCTGGACCATGGGC  
+HWI-EAS443:3:50:1504:232#0/1  
aa\_W\_aV]a^¥`abab^¥Y\_¥`baaaaaabaZV\_Y\_ZVX[  
@HWI-EAS443:3:50:267:1008#0/1  
GTTCTTCAATGGTGGAACAGATCTTCATGATCTCAGAGAA  
+HWI-EAS443:3:50:267:1008#0/1  
aaZ]X]ZQ[]ZZR^^^RXZ`Y\_\_¥¥¥U¥aYUOVUZ^ZZ[]  
@HWI-EAS443:3:50:279:480#0/1  
TTCAAATGTCCCTGTCTTATTTATATAGGACTTCTTTTTG  
+HWI-EAS443:3:50:279:480#0/1  
]a\_]QZa\_IS\_[ZWV]\_¥\_¥`\_]\_Z\_\_`^[]YZa\_a`^  
@HWI-EAS443:3:50:283:68#0/1  
GACCGTTGGAATTTCTAGCATGGTGGAGCCATGGTGTC  
+HWI-EAS443:3:50:283:68#0/1  
aa¥\_aa¥`aaaa\_a``````a]a¥`a¥`^¥^^`\_[FV¥X  
@HWI-EAS443:3:50:292:1148#0/1  
CCAGCGCAAATGCCATAAGCACCATTCCTTATACTG  
+HWI-EAS443:3:50:292:1148#0/1  
aab^\_\_aaa`bbbaabbbbaab`aaaa`a\_a`a\_aaa`X^  
@HWI-EAS443:3:50:363:374#0/1  
GAATTCAAATGTCCCTGTCTTATTTATATAGGACTTCTTT  
+HWI-EAS443:3:50:363:374#0/1  
a`\_aaa`^a`^ZU¥aa]a\_]aa`\_^^``\_]Y`\_¥\_]\_  
@HWI-EAS443:3:50:365:1848#0/1  
GTTTAATGTCCAATCATAAGTCTGGCGACCTTGAGTTAGT  
+HWI-EAS443:3:50:365:1848#0/1  
]^`abaab^]\_\_aa\_a`a`W\_¥aa[```[^a[a\_\_W\_X  
@HWI-EAS443:3:50:556:595#0/1  
AATTTCTAGCATGGTGGAGCCATGGTGTCTAGGGCCCGG  
+HWI-EAS443:3:50:556:595#0/1  
a]^b^bbb`^baaa\_bbaab\_T^\_]YVYaY`X[T\_]Y[]  
@HWI-EAS443:3:50:632:1633#0/1  
CAAAATGCCATAAGCACCATTCCTTATACTGGAGATC  
+HWI-EAS443:3:50:632:1633#0/1  
\_baabbaaaaaa\_abaa``abaaa`bbaabaaa¥`aa`\_  
@HWI-EAS443:3:50:632:920#0/1  
ACTTTGTTGAACTTTAGCTAGGAGCATTTCGAAAAGCT  
+HWI-EAS443:3:50:632:920#0/1  
a]abbbabbaaababbaa^baba`a]aaba`Zb``a\_a\_a  
@HWI-EAS443:3:50:703:1779#0/1  
GAAAAAGGAGAGTAAGAGACAACATGACCAAGAAGATGGT  
+HWI-EAS443:3:50:703:1779#0/1  
`aa`abbbaaYb^`aa`ba\_\_a\_]\_aU\_]\_\_a```\_¥¥W  
@HWI-EAS443:3:50:769:456#0/1  
CTCCAGTATAAGGGAATGTGGTGCTTATGGCATTTCGCGC  
+HWI-EAS443:3:50:769:456#0/1  
aaa``\_abb`^bbb^\_¥b^[]W`ababa`^]Vabaaba\_^

@HWI-EAS443:3:50:910:887#0/1  
GGATCTCCAGTATAAGGGAATGTGGTGCTTATGGCATT  
+HWI-EAS443:3:50:910:887#0/1  
a\_`baab¥^b\_Xa¥]\_\_b^aaa^`a¥`Xa\_^a^^a``Vaa  
@HWI-EAS443:3:51:100:1762#0/1  
TGCCAGCCCATGGTCCAGCCAAAAGCATGGAATATGATGC  
+HWI-EAS443:3:51:100:1762#0/1  
]X\_^¥\_ab`\_\_`]U]\_\_\_^\_\_\_YZ\_]a`a^[X^X^¥YX`X  
@HWI-EAS443:3:51:1205:1510#0/1  
TTTCTAGCATGGTGGAGGCCATGGTGTCTAGGGCCCGGAT  
+HWI-EAS443:3:51:1205:1510#0/1  
ab\_]aa``ba``¥\_V]ZLZ`Yaa¥¥]^\_]X``]SY[a\_TT  
@HWI-EAS443:3:51:1251:663#0/1  
TGCTCATGTTGATTCCCCTAACTTGCAGGTCCTGTAGAA  
+HWI-EAS443:3:51:1251:663#0/1  
abbaU[aba^baaaa`\_a`a``Zaa^abaUW^a^X¥T`a  
@HWI-EAS443:3:51:1412:1889#0/1  
ATTTCTAGCATGGTGGAGGCCATGGTGTCTAGGGCCCGGA  
+HWI-EAS443:3:51:1412:1889#0/1  
\_bbb`bbbaa```\_a\_aaa`]a`a`Ua\_^^`\_a^SY¥^\_^  
@HWI-EAS443:3:51:1588:529#0/1  
AGCACTTCTGGTACATCTGTTTCATCCTCAAGAATCCCCT  
+HWI-EAS443:3:51:1588:529#0/1  
a[]`Sab¥a]aaa`aaa`W]a````\_\_^^[a````\_QXY\_  
@HWI-EAS443:3:51:1763:1922#0/1  
GAATTCAAATGTCCCTGTCTTATTTATATAGGACTTCTTT  
+HWI-EAS443:3:51:1763:1922#0/1  
`[O]Y¥a]]WSX¥RZZ]^VXa[`\_]\_a`\_] [aZ`a`\_`^]  
@HWI-EAS443:3:51:297:1253#0/1  
GAAAATCAAATCCTCGAATGTTCCCTGGCGATGATTACAT  
+HWI-EAS443:3:51:297:1253#0/1  
^a\_QU[a^bb\_W¥ba]aaaaaa]\_aa\_\_`¥``R[`ZZJ`  
@HWI-EAS443:3:51:342:1066#0/1  
GCCGGTTGATTTCTGTTAATGTCCAATCATAAGTCTGGC  
+HWI-EAS443:3:51:342:1066#0/1  
aabbbaa```abbaababba`bb\_aaaabaabaaaa`aaaa  
@HWI-EAS443:3:51:40:1973#0/1  
CAAATGCCATAAGCACCACATTCCTTATACTGGAGATC  
+HWI-EAS443:3:51:40:1973#0/1  
abbbbbbaababbbabbaaaaba\_[^aaaa\_aa\_a\_a\_¥  
@HWI-EAS443:3:51:534:1044#0/1  
ACCGTTGGAATTTCTAGCATGGTGGAGGCCATGGTGTCT  
+HWI-EAS443:3:51:534:1044#0/1  
abaa`\_bbbb``ba]b^W`]b`a]ba¥]^]a^[`aPZ^\_\_  
@HWI-EAS443:3:51:541:589#0/1  
GTTGGAATTTCTAGCATGGTGGAGGCCATGGTGTCTAGGG  
+HWI-EAS443:3:51:541:589#0/1  
aZabaaYaa^ba\_\_^Ua`¥GaYU¥WT[QSSSMXUSPPUWU  
@HWI-EAS443:3:51:574:1124#0/1  
GAGTCTTCAATGGTGAACAGATCTTCATGATCTCAGAG

+HWI-EAS443:3:51:574:1124#0/1  
aa[YabaaaaaZZ`\_aaa\_\_aa[\_aaaaaa\_a\_a`[¥``  
@HWI-EAS443:3:52:1022:703#0/1  
GAGTTCTTCAATGGTGGAACAGATCTTCATGATCTCAGAG  
+HWI-EAS443:3:52:1022:703#0/1  
`\_]\_¥a`bbaaaaba^aaa`\_`b[\_aaa^`a\_a]a`a]^a  
@HWI-EAS443:3:52:1038:1355#0/1  
CACTTCTGGTACATCTGTTTCATCCTCAAGAATCCCCTTT  
+HWI-EAS443:3:52:1038:1355#0/1  
ababbabaa\_aaaa`baaa`aaaaaab`aaaaa^``aa\_  
@HWI-EAS443:3:52:1094:224#0/1  
GCATCATATTCCATGCTTTTGGCTGGACCATGGGCTGGCA  
+HWI-EAS443:3:52:1094:224#0/1  
[¥`¥W\_bb\_ZUTWaaa]b^¥WZ\_aa^T]]^¥UQ[QBBBBB  
@HWI-EAS443:3:52:1110:405#0/1  
TTCCTGTTCCATGGCTGTATGGAGGATCTCCAGTATAAGG  
+HWI-EAS443:3:52:1110:405#0/1  
aaa^a]```\_\_a`a\_a\_R]\_PYZV[LNQMS¥SY[U^SWV]  
@HWI-EAS443:3:52:1218:1691#0/1  
CGGAATCTTCACATTCCTGAAGTCTGCTTAAAATGGGAGC  
+HWI-EAS443:3:52:1218:1691#0/1  
aabbabb`aaUabb`aaabb`b\_Y`b\_baaa`ababa`a  
@HWI-EAS443:3:52:127:1494#0/1  
ATGCCAGCCCATGGTCCAGCCAAAAGCATGGAATATGATG  
+HWI-EAS443:3:52:127:1494#0/1  
aaaa``\_aa\_\_`\_V¥`\_¥^¥Z`\_\_Q`W^\_W¥[^^^Y^N  
@HWI-EAS443:3:52:1299:1880#0/1  
GAGTCTCGATACTGAATCTTGGACAAAAGAAATACACCAA  
+HWI-EAS443:3:52:1299:1880#0/1  
V\_\_¥\_a`bZa^\_^\_\_0\_\_a[\_VT\_]¥^^\_b^`^\_a`Ja\_  
@HWI-EAS443:3:52:1305:872#0/1  
GGGGAATTCTTGAGGATGAACAGATGTACCAGAAGTGCTG  
+HWI-EAS443:3:52:1305:872#0/1  
abaa`aba`aaa`¥`¥ba`\_\_a\_`^V`^]\_a\_[aX\_]\_a  
@HWI-EAS443:3:52:1367:1999#0/1  
CAAAGGGATTACAGGGATTACAAAGTCTTCCCCGATAATC  
+HWI-EAS443:3:52:1367:1999#0/1  
\_bbaa[aX^\_\_aabab\_a`aa`]a^ZYa^`[\_`a\_a\_]\_¥  
@HWI-EAS443:3:52:1467:631#0/1  
GCCGGTTGATTTCTGTTTAATGTCCAATCATAAGTCTGGC  
+HWI-EAS443:3:52:1467:631#0/1  
`a`^aaa^\_aaaa`X[aaaabYZa`a`]`aaa]¥\_a\_[¥  
@HWI-EAS443:3:52:1521:347#0/1  
ATTTCTAGCATGGTGGAGGCCATGGTGTCTAGGGCCCGGA  
+HWI-EAS443:3:52:1521:347#0/1  
abba^aa`aaba`Y^¥]a]^Q`¥¥]UV^S^^Q^YU[VUVU  
@HWI-EAS443:3:52:1577:169#0/1  
CAAATGCCATAAGCACCACATTCCTTATACTGGAGATC  
+HWI-EAS443:3:52:1577:169#0/1  
abababb\_]`bb`baaa[a^aaaaS`a``aa[a¥R¥a\_] [

@HWI-EAS443:3:52:1603:26#0/1  
AGAAAAAGGAGAGTAAGAGACAACATGACCAAGAAGATGG  
+HWI-EAS443:3:52:1603:26#0/1  
abab\_aabbaa[a`a^\_`a^aa\_a^`^YX^`a^`a\_\_a`  
@HWI-EAS443:3:52:262:2004#0/1  
CGAGGATTTTGATTTTCATTCCACTTAGTGTTGTCCCCAG  
+HWI-EAS443:3:52:262:2004#0/1  
a`^a```aaa^aaaaabaaaa`a`\_[Ya]`\_`````^\_\_  
@HWI-EAS443:3:52:383:1324#0/1  
AGTTCTTCAATGGTGAACAGATCTTCATGATCTCAGAGA  
+HWI-EAS443:3:52:383:1324#0/1  
``Xab\_ba\_^`\_`¥ab^X\_\_aaa^aaaa\_¥\_aa\_\_a`^`^  
@HWI-EAS443:3:52:558:701#0/1  
GTTGCAACGGCATCATATCCATGCTTTTGGCTGGACCAT  
+HWI-EAS443:3:52:558:701#0/1  
a\_`aZ`aa`\_\_\_`X[a\_`¥\_[`^`\_`\_`\_]V^`\_`[[UWY  
@HWI-EAS443:3:52:627:348#0/1  
GTTCTGTCCATGGCTGTATGGAGGATCTCCAGTATAAG  
+HWI-EAS443:3:52:627:348#0/1  
a\_`a`ab`a^a\_aa`^`TTTUQFY]LONSX[^UTT WVY  
@HWI-EAS443:3:52:712:1909#0/1  
ACGGCATCATATCCATGCTTTTGGCTGGACCATGGGCTG  
+HWI-EAS443:3:52:712:1909#0/1  
`aS]]`YVaZa^\_\_\_\_TU\_[\_a\_R¥W¥ZUUSZU¥\_]SS¥  
@HWI-EAS443:3:52:806:1655#0/1  
AAAATGCCATAAGCACCACATTCCTTATACTGGAGATCC  
+HWI-EAS443:3:52:806:1655#0/1  
abaa^¥aa`aa\_\_WaY\_a¥\_\_^\_]^^^\_`^a]]]W]]\_WV]  
@HWI-EAS443:3:52:815:555#0/1  
AATTTCTAGCATGGTGGAGCCATGGTGTCTAGGGCCCGG  
+HWI-EAS443:3:52:815:555#0/1  
a^bbbababababa¥a]\_a\_aa\_`aaZ`^¥¥^^Y^[[Ua]  
@HWI-EAS443:3:52:907:1123#0/1  
GCAACGGCATCATATCCATGCTTTTGGCTGGACCATGGG  
+HWI-EAS443:3:52:907:1123#0/1  
`^]\_a`a\_`aaa`aa`aaa`¥aaa\_[`\_`\_XXWWU¥\_\_a  
@HWI-EAS443:3:52:970:917#0/1  
CCAGCGCAAATGCCATAAGCACCACATTCCTTATACTG  
+HWI-EAS443:3:52:970:917#0/1  
abab`bbbbbbbababbaabaaaabbaa\_aabab\_aa  
@HWI-EAS443:3:53:1028:1068#0/1  
ATCAAAATCCTCGAATGTTCTGGCGATGATTACATATAT  
+HWI-EAS443:3:53:1028:1068#0/1  
abaa[`bbbaaab\_abb`a\_aaaa`b`\_a`U`R]a```a  
@HWI-EAS443:3:53:1131:896#0/1  
GTGGAACAGATCTTCATGATCTCAGAGA ACTCTTCTTCT  
+HWI-EAS443:3:53:1131:896#0/1  
\_]`^I¥\_V]aaaa`Uaba\_`^`a\_a`\_Z]baa`Xaa\_  
@HWI-EAS443:3:53:1397:447#0/1  
CAAAGGGATT CAGGGATTACAAAGTCTTCCCCGATAATC

+HWI-EAS443:3:53:1397:447#0/1  
abbbbbbbab`bbbabbbbabababaabbbbaZ^aaba\_b]  
@HWI-EAS443:3:53:1435:91#0/1  
ATAAAAAAGCTTGTGAATTCAAATGTCCCTGTCTTATTT  
+HWI-EAS443:3:53:1435:91#0/1  
abaabaaaababaaabaabaaaaabbaa¥\_a\_a\_ab^aa\_  
@HWI-EAS443:3:53:211:936#0/1  
GAAAATCAAATCCTCGAATGTTCCCTGGCGATGATTACAT  
+HWI-EAS443:3:53:211:936#0/1  
a`Z]X^^^a]^^]Y`YaVa`aZXO]UaU\_OHQTKX[PN[^  
@HWI-EAS443:3:53:254:96#0/1  
GGACAACACTAAGTGAATGAAAATCAAATCCTCGAATG  
+HWI-EAS443:3:53:254:96#0/1  
aaRa`¥N¥\_]`¥b\_ab]a`¥YZ^[`W^\_¥\_¥WOZP^\_\_a^  
@HWI-EAS443:3:53:398:463#0/1  
TGCCAGCCCATGGTCCAGCCAAAAGCATGGAATATGATGC  
+HWI-EAS443:3:53:398:463#0/1  
ababbaaaabbbbaZa\_aaa^a^¥a`\_a`a`a\_aaa\_\_aa¥  
@HWI-EAS443:3:53:419:373#0/1  
GCCAGCCCATGGTCCAGCCAAAAGCATGGAATATGATGCC  
+HWI-EAS443:3:53:419:373#0/1  
a]aaa^`aa\_abY]X]`aa^`]Q]`¥a``Z``]a\_\_a¥¥  
@HWI-EAS443:3:53:522:1128#0/1  
AGGATTTTGTATTTTTCATTCCACTTAGTGTGTCCTCCAGTG  
+HWI-EAS443:3:53:522:1128#0/1  
\_a]]^bbbaa`¥\_`\_`^a^a`aa[ba^aaa¥T¥Xb]X\_aV[\_  
@HWI-EAS443:3:53:612:938#0/1  
ATGCCAGCCCATGGTCCAGCCAAAAGCATGGAATATGATG  
+HWI-EAS443:3:53:612:938#0/1  
ab]abaaaaaaa\_a[aa`a^``¥a`aaa[a^`\_`aaaaaa\_  
@HWI-EAS443:3:53:662:468#0/1  
CTTATACTGGAGATCCTCCATACAGCCATGGAACAGGAAC  
+HWI-EAS443:3:53:662:468#0/1  
aaabbbbbbbbaaaabaabaabaaaaa]^a[aa`[\_`\_  
@HWI-EAS443:3:53:803:361#0/1  
AGCTTTTTTTATCGCTATGGATTTGTGGCTAATTTTAGCA  
+HWI-EAS443:3:53:803:361#0/1  
ab\_bbbbbbb`babaab\_\_bbba\_aa`aaaaaaXYZ^  
@HWI-EAS443:3:53:808:1903#0/1  
GTTCTTCAATGGTGAACAGATCTTCATGATCTCAGAGAA  
+HWI-EAS443:3:53:808:1903#0/1  
`bbZ]XbXbb¥SLW\_bX¥SHP]b`]^abaa`U[Ya¥\_K]¥  
@HWI-EAS443:3:53:866:783#0/1  
CGCAAATGCCATAAGCACCATTCCTTATACTGGAGA  
+HWI-EAS443:3:53:866:783#0/1  
ab`bbbbbbabbbbbabbb\_bbbba\_`bbaaaabaa`a  
@HWI-EAS443:3:53:894:1075#0/1  
CACTAAGTGAATGAAAATCAAATCCTCGAATGTTCCCTG  
+HWI-EAS443:3:53:894:1075#0/1  
a`J`]Z[bba^ba`¥`¥\_\_a]abba^b`bZ[ab```\_^\_^

@HWI-EAS443:3:53:89:562#0/1  
TGGGGACAACACTAAGTGAATGAAAATCAAATCCTCGA  
+HWI-EAS443:3:53:89:562#0/1  
abbaa]\_Q\_`a`aab^aa```aaaa\_`\_a`\_W]a^\_aa^  
@HWI-EAS443:3:54:1141:440#0/1  
GCCGGTTGATTTCTGTTAATGTCCAATCATAAGTCTGGC  
+HWI-EAS443:3:54:1141:440#0/1  
aaaabab\_aabbaababbbabba`aaaaababaa`aaaa\_  
@HWI-EAS443:3:54:117:1543#0/1  
ATTTGAATTCACAAGCTTTTTTATCGCTATGGATTTGTG  
+HWI-EAS443:3:54:117:1543#0/1  
a`aaabaaaabaaaa`aaaa`a`a\_a\_\_^aa`U[\_aZX[  
@HWI-EAS443:3:54:1282:1109#0/1  
ATACTGGAGATCCTCCATACAGCCATGGAACAGGAACAGG  
+HWI-EAS443:3:54:1282:1109#0/1  
aabababba`b][aa``aa\_ab[^`aaaYaZ\_a\_]a]`a\_  
@HWI-EAS443:3:54:1294:656#0/1  
AAGCACCATTCCTTATACTGGAGATCCTCCATACAGC  
+HWI-EAS443:3:54:1294:656#0/1  
a]R^b]aa¥ab`^¥W\_aaaba\_a]\_`S][Y[\_`Za]`aU  
@HWI-EAS443:3:54:1302:1070#0/1  
CACTTCTGGTACATCTGTTTCATCCTCAAGAATCCCCTTT  
+HWI-EAS443:3:54:1302:1070#0/1  
\_\_¥ba`baaYaabaYaaaaaabRU]ab``aa\_`XQXU^a\_  
@HWI-EAS443:3:54:1330:902#0/1  
CATCAATCCGGGCCCTAGACACCATGGCCTCCACCATGCT  
+HWI-EAS443:3:54:1330:902#0/1  
a\_S\_UZZ\_V\_]W)`X^V[^QXY]\_\_^\_^]\_Y\_GRTJMV[  
@HWI-EAS443:3:54:1395:1368#0/1  
GCCAAAGGGGAATTCTTGAGGATGAACAGATGTACCAGAA  
+HWI-EAS443:3:54:1395:1368#0/1  
aR`\_^Sa`aaW]\_aWaaaa\_a\_\_aa\_\_`\_][`]ZTZ^a¥]  
@HWI-EAS443:3:54:1520:1295#0/1  
GACAACACTAAGTGAATGAAAATCAAATCCTCGAATGT  
+HWI-EAS443:3:54:1520:1295#0/1  
a]Ta^Zaa]\_a`````\_aaa^^[a`aaaaa\_`[\_`^¥\_\_^  
@HWI-EAS443:3:54:1537:1662#0/1  
ATCAAATCCTCGAATGTTCTGGCGATGATTACATATAT  
+HWI-EAS443:3:54:1537:1662#0/1  
aba¥¥bba^XY]\_]Z]aaaYM¥`XT`\_[\_R``¥H]`]a[Z  
@HWI-EAS443:3:54:1600:555#0/1  
TAAGCACCATTCCTTATACTGGAGATCCTCCATACAG  
+HWI-EAS443:3:54:1600:555#0/1  
[¥b¥\_ZZT`a\_`ZZUabbaaaaaMXRZ^UGT`]Fabb¥`\_  
@HWI-EAS443:3:54:1619:1722#0/1  
CACATTCCTGAAGTCTGCTTAAAATGGGAGCTAATGGATG  
+HWI-EAS443:3:54:1619:1722#0/1  
ababbbba¥aabaaa`b^\_bbaaaabaaa`abaaabaaaa  
@HWI-EAS443:3:54:166:1461#0/1  
AATTTCTAGCATGGTGGAGCCATGGTGTCTAGGGCCCGG

+HWI-EAS443:3:54:166:1461#0/1  
^Y\_abbbb[[aaXPT[X`Z`¥W[YYVS`¥`]VF\_YYY]  
@HWI-EAS443:3:54:171:635#0/1  
ATTTCTAGCATGGTGGAGGCCATGGTGTCTAGGGCCCGGA  
+HWI-EAS443:3:54:171:635#0/1  
abaab\_¥baaabbM`a`aa¥`\_aaaQ[¥Y¥`V¥`\_`\_aaY  
@HWI-EAS443:3:54:201:534#0/1  
GGAGGATCTCCAGTATAAGGGAATGTGGTGCTTATGGCAT  
+HWI-EAS443:3:54:201:534#0/1  
abaab¥abaaaab]`a`\_\_^a\_`\_a\_aa^a\_aa``a]\_\_`  
@HWI-EAS443:3:54:515:183#0/1  
GGGAATTCTTGAGGATGAACAGATGTACCAGAAGTGCTGC  
+HWI-EAS443:3:54:515:183#0/1  
a\_a¥Ra^¥a``]`¥Y\_\_]`\_]\_]XU\_YY]\_W]]X]ZX^Y  
@HWI-EAS443:3:54:860:122#0/1  
ATCCTGTTCTGTTCCATGGCTGTATGGAGGATCTCCAGT  
+HWI-EAS443:3:54:860:122#0/1  
aaa\_abaa\_\_ba\_`\_a^aba^`aRTUa]V\_aNVQVPUN¥P  
@HWI-EAS443:3:54:865:1864#0/1  
TGTTCTGTTCCATGGCTGTATGGAGGATCTCCAGTATAA  
+HWI-EAS443:3:54:865:1864#0/1  
abaa[a``^aa^bbbV[aa[aa[YTUa`aY\_W^[`a]`YY  
@HWI-EAS443:3:54:989:1463#0/1  
GAATTCAAATGTCCCTGTCTTATTTATATAGGACTTCTTT  
+HWI-EAS443:3:54:989:1463#0/1  
ababbabbabaaaaaba`\_`aaabab\_aaaaaa`^aa\_aaa  
@HWI-EAS443:3:54:990:1537#0/1  
GAGTTCTTCAATGGTGGAACAGATCTTCATGATCTCAGAG  
+HWI-EAS443:3:54:990:1537#0/1  
ZY\_G^\_\_`XWa¥TUM^WX^SZ\_YXZX]GZa`ZSHX\_]a\_a  
@HWI-EAS443:3:55:1202:1262#0/1  
AATTTCTAGCATGGTGGAGGCCATGGTGTCTAGGGCCCGG  
+HWI-EAS443:3:55:1202:1262#0/1  
aaW^`]a`aa``]]V`\_`a\_\_\_\_\_`]]QZSWU\_\_\_ZU`TaX  
@HWI-EAS443:3:55:1222:836#0/1  
AATTTCTAGCATGGTGGAGGCCATGGTGTCTAGGGCCCGG  
+HWI-EAS443:3:55:1222:836#0/1  
aabbaab\_aa`a]\_S`]aa^\_a]`^WYS]¥PZ¥^¥X\_W]\_  
@HWI-EAS443:3:55:1403:325#0/1  
GCAACGGCATCATATTCCATGCTTTTGGCTGGACCATGGG  
+HWI-EAS443:3:55:1403:325#0/1  
\_aab`a`aba^`a`^`a`Z\_]`^ZY¥¥]``UN][YZ\_Y  
@HWI-EAS443:3:55:1461:1447#0/1  
GTCCAGCCAAAAGCATGGAATATGATGCCGTTGCAACTAC  
+HWI-EAS443:3:55:1461:1447#0/1  
a]¥a]\_]``b`TLX`^]aa\_b`baaaa`\_a[^aU\_]a`W  
@HWI-EAS443:3:55:1502:1095#0/1  
AATCAAAATCCTCGAATGTTCTGCGGATGATTACATATA  
+HWI-EAS443:3:55:1502:1095#0/1  
aab`a``aaa\_a^a^`\_]¥a\_\_a``¥a\_a`U^aXX\_`[\_`\_



@HWI-EAS443:3:55:1586:1041#0/1  
TCCCTGTCTTATTTATATAGGACTTCTTTTTGCTCATGTT  
+HWI-EAS443:3:55:1586:1041#0/1  
aa`aab`abbabbbababaaaa\_aa`abbaaaaa\_aaa`a  
@HWI-EAS443:3:55:1608:483#0/1  
GGTGTATCCTGTTCCCTGTTCCATGGCTGTATGGAGGATCT  
+HWI-EAS443:3:55:1608:483#0/1  
aa`[^ba\_aab`aYXbb`a]\_`baa^ba]^XJ]LVa\_¥X[  
@HWI-EAS443:3:55:1627:710#0/1  
CCGTTGATTTCTGTTTAATGTCCAATCATAAGTCTGGCG  
+HWI-EAS443:3:55:1627:710#0/1  
`^^¥Sa¥UY`aU`babbbabbbXabbbabbbb`\_``abbb  
@HWI-EAS443:3:55:308:972#0/1  
GCGCAAATGCCATAAGCACCATTCCTTATACTGGAG  
+HWI-EAS443:3:55:308:972#0/1  
\_\_Y]UW]Xaa[]¥`R`\_a]U]`[\_`\_]\_\_\_\_\_`¥[[LL\_  
@HWI-EAS443:3:55:326:994#0/1  
GTTCTCAATGGTGAACAGATCTTCATGATCTCAGAGAA  
+HWI-EAS443:3:55:326:994#0/1  
^S]¥NXTYWQ¥OM¥WRV¥XXZ¥[XR][[KXQZZWXKTXS  
@HWI-EAS443:3:55:370:543#0/1  
CCTGTTCCCTGTTCCATGGCTGTATGGAGGATCTCCAGTAT  
+HWI-EAS443:3:55:370:543#0/1  
ab¥WV^¥Xaa]aZ]S`]T`BBBBBBBBBBBBBBBBBBBB  
@HWI-EAS443:3:55:415:1644#0/1  
ATCAAATCCTCGAATGTTCCCTGGCGATGATTACATATAT  
+HWI-EAS443:3:55:415:1644#0/1  
aaaaabb`^¥`a`\_\_a``Y`WW`^[a`\_aX^¥`^^^\_```  
@HWI-EAS443:3:55:429:1507#0/1  
TTCCAGCGCAAATGCCATAAGCACCATTCCTTATACTGGA  
+HWI-EAS443:3:55:429:1507#0/1  
ab`a`^a`baa`aaa]`aaa]\_a`\_a^`a`\_] [a\_aaa\_  
@HWI-EAS443:3:55:42:1767#0/1  
ATTTCTAGCATGGTGGAGGCCATGGTGTCTAGGGCCCGGA  
+HWI-EAS443:3:55:42:1767#0/1  
`R\_a]`^`V`WVaPa`\_KHX¥¥U¥UPO¥PQPMSUUO0^¥S  
@HWI-EAS443:3:55:448:778#0/1  
AGCGCAAATGCCATAAGCACCATTCCTTATACTGGA  
+HWI-EAS443:3:55:448:778#0/1  
abababbbaaabaaba^babbaaaaaaaaa\_aaaaa`a`  
@HWI-EAS443:3:55:459:1366#0/1  
AGAAAAAGGAGAGTAAGAGACAACATGACCAAGAAGATGG  
+HWI-EAS443:3:55:459:1366#0/1  
`b]ab¥YZabbIUZaaa¥aba`]aa\_^J]`[`WbX¥baaa\_  
@HWI-EAS443:3:55:480:1385#0/1  
CATGGTCCAGCCAAAAGCATGGAATATGATGCCGTTGCAA  
+HWI-EAS443:3:55:480:1385#0/1  
^X[S¥`bb^\_Q`\_aR]ZUQQH]Z`X`[a\_[]ZX[\_`W`]  
@HWI-EAS443:3:55:502:20#0/1  
ATTTCTAGCATGGTGGAGGCCATGGTGTCTAGGGCCCGGA

+HWI-EAS443:3:55:502:20#0/1  
\_¥`\_a]\_\_Z¥`b\_Z] ^T\_YU^a\_a^W^^¥Q[^^^]VYX^`X  
@HWI-EAS443:3:55:532:237#0/1  
AATTTCTAGCATGGTGGAGGCCATGGTGTCTAGGGCCCCGG  
+HWI-EAS443:3:55:532:237#0/1  
aaabaa`aa```a]Va`\_^\_\_`¥^^\_P¥¥^W^¥^[SUS^¥  
@HWI-EAS443:3:55:594:125#0/1  
GAATTCTTGAGGATGAACAGATGTACCAGAAGTGCTGCAA  
+HWI-EAS443:3:55:594:125#0/1  
aa\_aa`baaaba]\_a`\_]`a\_\_aX`] ]^a^^aZ`] ]a]^P  
@HWI-EAS443:3:55:616:664#0/1  
GCAACGGCATCATATTCCATGCTTTTGGCTGGACCATGGG  
+HWI-EAS443:3:55:616:664#0/1  
aaa¥\_baWXaaaaa`\_\_`^¥^`aaa][\_` [XP¥\_URT]^  
@HWI-EAS443:3:55:697:1614#0/1  
CATTCGAGGATTTTGATTTTCATTCCACTTAGTGTGTCC  
+HWI-EAS443:3:55:697:1614#0/1  
abbb`abbbabbbbbabbbbbbbbababbbb\_aabbaba  
@HWI-EAS443:3:55:803:499#0/1  
CGCCAGACTTATGATTGGACATTAACAGAAATCAACCGG  
+HWI-EAS443:3:55:803:499#0/1  
X\_Z[a`¥^abb^` [¥b\_W¥^babY¥¥Va`] \_`bb` ¥YRY]  
@HWI-EAS443:3:55:827:1123#0/1  
TGCCGTTGATTTCTGTTTAATGTCCAATCATAAGTCTGG  
+HWI-EAS443:3:55:827:1123#0/1  
\_[aabbXaaIaaaaTZS\_]aaaL [SWWUUY]`^^\_ ^O]¥  
@HWI-EAS443:3:55:830:180#0/1  
GAGTTCTTCAATGGTGAACAGATCTTCATGATCTCAGAG  
+HWI-EAS443:3:55:830:180#0/1  
a\_b^a`\_^a`\_a^Xa\_\_\_¥`\_]\_Za`^^\_\_^^]\_X]]^  
@HWI-EAS443:3:55:873:1668#0/1  
GTTCTTCAATGGTGAACAGATCTTCATGATCTCAGAGAA  
+HWI-EAS443:3:55:873:1668#0/1  
`aa`baa`aaaa\_\_`\_aaa^`^aa^a`aaa^`\_a^`\_aa  
@HWI-EAS443:3:55:98:882#0/1  
GACTGTTCAAGCTTTTCGCAAATGCTCCTAGCTAAAGTTT  
+HWI-EAS443:3:55:98:882#0/1  
^`b```bbabaabbbbaa^^X]a`Waa\_¥]\_\_Y\_a\_\_V]^  
@HWI-EAS443:3:56:1009:458#0/1  
GAGTTCTTCAATGGTGAACAGATCTTCATGATCTCAGAG  
+HWI-EAS443:3:56:1009:458#0/1  
^W^V`aaa]]^X\_a``]Y]YZa]UT^[^ZQ`[^U^X\_TZ¥  
@HWI-EAS443:3:56:1044:405#0/1  
TGCCAGCCCATGGTCCAGCCAAAAGCATGGAATATGATGC  
+HWI-EAS443:3:56:1044:405#0/1  
¥`ba`^aaabab`VX````U]aaa\_``Z`aaa`a`^]aaV  
@HWI-EAS443:3:56:1052:1060#0/1  
CTGGGGACAACACTAAGTGAATGAAAATCAAAATCCTCG  
+HWI-EAS443:3:56:1052:1060#0/1  
\_``a`^aa\_¥`\_a`a^ZX`^aa\_]\_ba\_a\_b\_bb\_V\_a]^

@HWI-EAS443:3:56:129:2023#0/1  
GCCGGTTGATTTCTGTTAATGTCCAATCATAAGTCTGGC  
+HWI-EAS443:3:56:129:2023#0/1  
`^XabY^b]`\_^]¥\_HYaa¥`XTSaaT^a¥XaT`Xa\_aZZ  
@HWI-EAS443:3:56:1370:942#0/1  
AATTTCTAGCATGGTGGAGGCCATGGTGTCTAGGGCCCCGG  
+HWI-EAS443:3:56:1370:942#0/1  
a\_``\_V\_a`aZ`^^[¥aS\_¥Z¥^Z^\_`MYYY^XMNTVUTBB  
@HWI-EAS443:3:56:1478:242#0/1  
ATGGTGAACAGATCTTCATGATCTCAGAGAACTCTTCTT  
+HWI-EAS443:3:56:1478:242#0/1  
abb``b`baY^ba[\_aaS`a`Waa\_W^a\_aYVL^Q\_aYa`  
@HWI-EAS443:3:56:156:773#0/1  
TGGGGACAACACTAAGTGAATGAAAATCAAAATCCTCGA  
+HWI-EAS443:3:56:156:773#0/1  
^aS`a0\_`¥`bbb^R\_M]baR`a]¥RVaaXIVW¥^WYX]`  
@HWI-EAS443:3:56:1675:1207#0/1  
GCCGGTTGATTTCTGTTAATGTCCAATCATAAGTCTGGC  
+HWI-EAS443:3:56:1675:1207#0/1  
aa\_\_abbbabbbabbaabb\_bb\_a`a`b\_aaaaa\_`baa\_  
@HWI-EAS443:3:56:1786:364#0/1  
CTTTGTTGAAACTTTAGCTAGGAGCATTTCGAAAAGCTT  
+HWI-EAS443:3:56:1786:364#0/1  
abbb`\_bbaaa`babb\_\_aa^]`^a^^aaa``aaa`[a^``  
@HWI-EAS443:3:56:367:284#0/1  
CACTGGGGACAACACTAAGTGAATGAAAATCAAAATCCT  
+HWI-EAS443:3:56:367:284#0/1  
`babbbbbbbaa``baaaXabaabbab\_aaaaaaab`a  
@HWI-EAS443:3:56:396:591#0/1  
CAAAGGGATTACAGGGATTACAAAGTCTTCCCCGATAATC  
+HWI-EAS443:3:56:396:591#0/1  
Z¥bU\_bbb¥\_baa`bb\_Zbbaa`\_]¥aaaaa]^b[a`Y`U  
@HWI-EAS443:3:56:518:422#0/1  
CTGGGGACAACACTAAGTGAATGAAAATCAAAATCCTCG  
+HWI-EAS443:3:56:518:422#0/1  
abbbbbb^V`bbbabb¥baaabbababbab`aaba\_aaa  
@HWI-EAS443:3:56:533:1118#0/1  
GACTTCTTTTTGCTCATGTTGATTCCCACTAACTTGCAGG  
+HWI-EAS443:3:56:533:1118#0/1  
aaaaaaba`aaaaWZ\_aaaaaa\_`^a\_aa`\_`a]`\_]`\_`  
@HWI-EAS443:3:56:579:796#0/1  
AAAAAGGAGAGTAAGAGACAACATGACCAAGAAGATGGTC  
+HWI-EAS443:3:56:579:796#0/1  
\_ZQYV`^^`\_a[\_Z]`a\_baa\_`^¥\_]\_Y`^``]VU¥\_]`  
@HWI-EAS443:3:56:589:931#0/1  
ATTTCTAGCATGGTGGAGGCCATGGTGTCTAGGGCCCCGA  
+HWI-EAS443:3:56:589:931#0/1  
aa`a`aabab¥baWaa\_aa\_[`a¥XMU\_S]^XYZY`\_`T  
@HWI-EAS443:3:56:645:1233#0/1  
ACTTCTTTTTGCTCATGTTGATTCCCACTAACTTGCAGGT

+HWI-EAS443:3:56:645:1233#0/1  
aaababbbbbbbaaaba^aaaaa\_`aa```aaaaa\_\_¥`^  
@HWI-EAS443:3:56:730:1314#0/1  
ACTAAGTGAATGAAAATCAAATCCTCGAATGTTCCCTGG  
+HWI-EAS443:3:56:730:1314#0/1  
`aa\_SaZ¥XabXR¥]]X\_`aa]\_[`Z¥[\_Ia`¥0¥\_`¥¥V  
@HWI-EAS443:3:56:735:345#0/1  
AAGCACCACATTCCCTTATACTGGAGATCCTCCATACAGC  
+HWI-EAS443:3:56:735:345#0/1  
aa`\_aa\_a\_\_aaa^`aaaa`¥]\_¥^`^\_¥Y`^^\_\_^]\_]W  
@HWI-EAS443:3:56:768:268#0/1  
AAAATCAAATCCTCGAATGTTCCCTGGCGATGATTACATA  
+HWI-EAS443:3:56:768:268#0/1  
abaaaabaabaaaaaa\_aa`[^`^\_aa`\_a^a]]^ZW\_^^  
@HWI-EAS443:3:56:787:1551#0/1  
AATGCAGTTGCTGCCGTTGATTTCTGTTTAATGTCCAAT  
+HWI-EAS443:3:56:787:1551#0/1  
`a`b`aabab\_bb^\_ba^a^\_bbaSb```ba[a`]Z``aa  
@HWI-EAS443:3:56:822:610#0/1  
TCTGTGCTTGTGAATTAGTCATCATCTTTCTCACAACAT  
+HWI-EAS443:3:56:822:610#0/1  
abaa\_`]abbaQaa`\_a\_b^\_aa\_\_a]aaa`baa`^`[\_\_  
@HWI-EAS443:3:56:897:1142#0/1  
GTCTCGATACTGAATCTTGGACAAAAGAAATACACCAAGA  
+HWI-EAS443:3:56:897:1142#0/1  
RXX\_VaZ`WW¥U\_Q\_\_\_\_`a\_X]ZZXZ\_NWZWT\_]aX\_ab`  
@HWI-EAS443:3:56:977:766#0/1  
ATTTATATAGGACTTCTTTTTGCTCATGTTGATTCCCCT  
+HWI-EAS443:3:56:977:766#0/1  
a``ZabZ\_¥a^\_a\_aa`[a^`])`XM\_bVa`]¥ba`\_^Ya  
@HWI-EAS443:3:56:984:375#0/1  
AGGTCGCCAGACTTATGATTGGACATTAACAGAAATCAA  
+HWI-EAS443:3:56:984:375#0/1  
a^`\_Ybaaba`aa`baababaa\_`aaa]``bb`aaa^aa  
@HWI-EAS443:3:56:990:1949#0/1  
GGACTTCTTTTTGCTCATGTTGATTCCCCTAACTTGCAG  
+HWI-EAS443:3:56:990:1949#0/1  
aa]aaba¥\_]`[bT^JVbaRLa¥b\_TNL]^a`]GSX\_\_\_a  
@HWI-EAS443:3:57:1157:385#0/1  
GGAGATCCTCCATACAGCCATGGAACAGGAACAGGATACA  
+HWI-EAS443:3:57:1157:385#0/1  
ab`bbaaabaaaab`aba\_abba]aZ`baaa]aaa`^`[a  
@HWI-EAS443:3:57:1312:288#0/1  
TCCTGTTCTGTTCCATGGCTGTATGGAGGATCTCCAGTA  
+HWI-EAS443:3:57:1312:288#0/1  
aaaaa`baabbaaaaabbb]aaXV^^¥L\_\_L[ZZ[ZU^BB  
@HWI-EAS443:3:57:1421:1168#0/1  
CGCAAATGCCATAAGCACCACATTCCTTATACTGGAGA  
+HWI-EAS443:3:57:1421:1168#0/1  
`\_Sa`\_`bba\_aa^][a]N]```a¥^[T]`])`[^^[\_\_^

@HWI-EAS443:3:57:1462:125#0/1  
GCACCACATTCCCTTATACTGGAGATCCTCCATACAGCCA  
+HWI-EAS443:3:57:1462:125#0/1  
aab\_\_a^aba`¥Vaaa\_a\_aaaW`¥[VU^\_AZ\_^]^¥QTU  
@HWI-EAS443:3:57:1499:1042#0/1  
TGCCGGTTGATTTCTGTTTAATGTCCAATCATAAGTCTGG  
+HWI-EAS443:3:57:1499:1042#0/1  
abaabb\_ababbbab``baaaba\_a\_a``aaaa`]\_\_a`\_  
@HWI-EAS443:3:57:1643:1793#0/1  
AAATAAGACAGGGACATTTGAATTCACAAGCTTTTTTTAT  
+HWI-EAS443:3:57:1643:1793#0/1  
ab\_aaaa`aa`a```aaaa[\_aa\_^]`\_a¥`\_`a`aa`a  
@HWI-EAS443:3:57:170:590#0/1  
GTTCTTCAATGGTGAACAGATCTTCATGATCTCAGAGAA  
+HWI-EAS443:3:57:170:590#0/1  
`Y`a\_ba`a\_aaN`aaa`a``^¥`a`\_`^`^`[\_^¥[XU  
@HWI-EAS443:3:57:263:2020#0/1  
ACATTCCTGAAGTCTGCTTAAAATGGGAGCTAATGGATGA  
+HWI-EAS443:3:57:263:2020#0/1  
aabaabaa\_ba^]aa¥`aa`aa`WXU`]aa\_``a]U\_\_^  
@HWI-EAS443:3:57:280:1739#0/1  
ATTTATATAGGACTTCTTTTTGCTCATGTTGATTCCCACT  
+HWI-EAS443:3:57:280:1739#0/1  
abbbbaV``aa`baaaabaaa\_`aa\_aYa\_aa`aWSa]a  
@HWI-EAS443:3:57:291:707#0/1  
CGAGGATTTTGATTTTCATTCCACTTAGTGTTGCCCCAG  
+HWI-EAS443:3:57:291:707#0/1  
aaXab^ababbabaaaaabaaaa\_aaaa\_a\_aa\_a\_\_\_^`  
@HWI-EAS443:3:57:366:1288#0/1  
CTTTCACAATCACTGGGACAACACTAAGTGAATGAAAA  
+HWI-EAS443:3:57:366:1288#0/1  
``bbbbbabbbbaaaababbababbabababaabbaab  
@HWI-EAS443:3:57:49:840#0/1  
ATTTATATAGGACTTCTTTTTGCTCATGTTGATTCCCACT  
+HWI-EAS443:3:57:49:840#0/1  
¥^`\_\_[YN^`ZXZ`¥T`aaaX\_baZ^\_baa\_VY^YYW¥`W  
@HWI-EAS443:3:57:686:154#0/1  
GGGCCCTAGACACCATGGCCTCCACCATGCTAGAAATTCC  
+HWI-EAS443:3:57:686:154#0/1  
aaaVW]ZW]QYaY\_XXPULRX[[RRVSQNPT[¥XRLTBBB  
@HWI-EAS443:3:57:706:1182#0/1  
CTGGAGATCCTCCATACAGCCATGGAACAGGAACAGGATA  
+HWI-EAS443:3:57:706:1182#0/1  
ab^^`^^^]ba]``aabaSW^a¥S\_a\_a````a`aa^Z\_`  
@HWI-EAS443:3:57:734:1823#0/1  
ATTTCTAGCATGGTGGAGGCCATGGTGTCTAGGGCCCGGA  
+HWI-EAS443:3:57:734:1823#0/1  
¥¥abaabba^^\_XZ``a¥`^]`WUXFNZPZ\_\_V¥XTS¥¥B  
@HWI-EAS443:3:57:776:1016#0/1  
ATTTCTAGCATGGTGGAGGCCATGGTGTCTAGGGCCCGGA

+HWI-EAS443:3:57:776:1016#0/1  
aaa`abaa`aa`XVaaaaZ\_aa]X]UZUSX^]Z¥^`¥^aY  
@HWI-EAS443:3:57:876:1223#0/1  
CTGACAAAGGGATTACAGGGATTACAAAGTCTTCCCCGAT  
+HWI-EAS443:3:57:876:1223#0/1  
abbbab`abbbbba`ba[^aababaabaa`abb^a\_\_aaa  
@HWI-EAS443:3:57:949:724#0/1  
GTAGTTGCAACGGCATCATATTCCATGCTTTTGGCTGGAC  
+HWI-EAS443:3:57:949:724#0/1  
]Uaa\_a\_XWa\_XNXDXU]^`aaXQU`Q^`X¥\_YXS\_`BBB  
@HWI-EAS443:3:57:950:189#0/1  
GAGTCTTCAATGGTGAACAGATCTTCATGATCTCAGAG  
+HWI-EAS443:3:57:950:189#0/1  
a^aY`Zaaa``aaaT`\_^XTZ`W[¥`¥[^`\_^U^YTW[\_  
@HWI-EAS443:3:58:1198:407#0/1  
GGACTTCTTTTTGCTCATGTTGATTCCCACTAACTTGACAG  
+HWI-EAS443:3:58:1198:407#0/1  
a`VU^]W]^`¥[`[[NVYXY\_]Y[NTNYTQUV¥NN¥SP\_  
@HWI-EAS443:3:58:1519:825#0/1  
AAATGCCATAAGCACCACATTCCCTTATACTGGAGATCCT  
+HWI-EAS443:3:58:1519:825#0/1  
abbaaaaaaaaa`aa\_a`aa`\_\_\_aaaaa``aY^\_\_\_^V\_  
@HWI-EAS443:3:58:1590:1082#0/1  
GCACCACATTCCCTTATACTGGAGATCCTCCATACAGCCA  
+HWI-EAS443:3:58:1590:1082#0/1  
a`aaZaaabaa`\_aa`aa\_a````¥`\_\_\_Y¥\_a\_¥\_`WQU  
@HWI-EAS443:3:58:356:542#0/1  
GAATTCAAATGTCCCTGTCTTATTTATATAGGACTTCTTT  
+HWI-EAS443:3:58:356:542#0/1  
Va¥]V¥SS\_Zb\_\_\_]^¥¥`a`X`aaaZ]]`Q`[W^`T``¥  
@HWI-EAS443:3:58:394:1072#0/1  
GGGGACAACACTAAGTGAATGAAAATCAAAATCCTCGAA  
+HWI-EAS443:3:58:394:1072#0/1  
a¥QY^XWXX]^`[^¥a`[Y]^`^[\_][\_WRT^XX\_]`^X  
@HWI-EAS443:3:58:397:1203#0/1  
ATTTATATAGGACTTCTTTTTGCTCATGTTGATTCCCACT  
+HWI-EAS443:3:58:397:1203#0/1  
abbbbaabbb\_\_bbabbbbbaaaaaabaaaaaa\_``a¥a  
@HWI-EAS443:3:58:446:80#0/1  
ATGGTGGAGGCCATGGTGTCTAGGGCCCGATTGATGCCA  
+HWI-EAS443:3:58:446:80#0/1  
\_`aaTa`X\_`^`^``[P^]TQ]\_¥R¥T`]NX^¥SR¥SSP  
@HWI-EAS443:3:58:476:1746#0/1  
ATTTCTAGCATGGTGGAGGCCATGGTGTCTAGGGCCCGGA  
+HWI-EAS443:3:58:476:1746#0/1  
a\_a^a\_`^ba\_QVX^\_`¥ZVPM^TTV^SVS`W¥NWU[GNQ  
@HWI-EAS443:3:58:645:48#0/1  
CAGTGATAAAGAACAACATGATAAACAATGACCTTGGACC  
+HWI-EAS443:3:58:645:48#0/1  
aabaaaabaaa\_`aba^aaaaaa\_a`a``a``\_\_`aa]`]

@HWI-EAS443:3:58:838:315#0/1  
GAGTTCTTCAATGGTGGAACAGATCTTCATGATCTCAGAG  
+HWI-EAS443:3:58:838:315#0/1  
a^`W`a`a`]YabaZ^¥^a]a`¥a\_a\_`¥a]J[U]\_`\_\_`  
@HWI-EAS443:3:58:863:823#0/1  
ATTTATATAGGACTTCTTTTTGCTCATGTTGATTCCCACT  
+HWI-EAS443:3:58:863:823#0/1  
aaaa`aaaaaaaaabaaaaaaaaaaaa`aaa``baaa`^aaaa  
@HWI-EAS443:3:58:92:1764#0/1  
ACGGCATCATATTCCATGCTTTTTGGCTGGACCATGGGCTG  
+HWI-EAS443:3:58:92:1764#0/1  
]YQV^\_X]a`Z``[]^`Z^\_]XTT^¥¥]BBBBBBBBBBB  
@HWI-EAS443:3:59:1094:1507#0/1  
CTTCAATGGTGGAACAGATCTTCATGATCTCAGAGAACTC  
+HWI-EAS443:3:59:1094:1507#0/1  
abbbbbbbbabbbbbbbbabbbbbbbbbb`aaaWW^aZ  
@HWI-EAS443:3:59:1144:1214#0/1  
AGCGCAAAATGCCATAAGCACCATTCCTTATACTGGA  
+HWI-EAS443:3:59:1144:1214#0/1  
ab^^Ya```bbbababab`]`aabaaaa^`aaW[`VW  
@HWI-EAS443:3:59:1379:577#0/1  
CAGCGCAAAATGCCATAAGCACCATTCCTTATACTGG  
+HWI-EAS443:3:59:1379:577#0/1  
abb^aabbbbbbbabbaa^`baabbbbbbaaababZHaaa  
@HWI-EAS443:3:59:1465:1378#0/1  
AAGCCAAAGGGGAATTCTTGAGGATGAACAGATGTACCAG  
+HWI-EAS443:3:59:1465:1378#0/1  
`\_P¥\_`aaa¥\_baabbabbba^baabbbabb]aa\_]TY]\_  
@HWI-EAS443:3:59:1653:1951#0/1  
CACAAGCCAAAGGGGAATTCTTGAGGATGAACAGATGTAC  
+HWI-EAS443:3:59:1653:1951#0/1  
[^\_Y\_abb\_X¥]RW\_aZ¥W[¥\_``bba``a`U]\_WX^VTD  
@HWI-EAS443:3:59:1703:407#0/1  
GACAAAGGGATTGAGGGATTACAAAGTCTTCCCCGATAA  
+HWI-EAS443:3:59:1703:407#0/1  
`W\_[\_`\_\_^Zaa\_a^Z¥``[a`XZZ``XYX¥NVZZWTVXX  
@HWI-EAS443:3:59:1721:1788#0/1  
TAATCATCGCCAGGAACATTGAGGATTTTGATTTTCATT  
+HWI-EAS443:3:59:1721:1788#0/1  
^a`\_T\_a\_aaaaZ`\_]^`\_¥Z\_`^bbba\_F]aaXO[X[  
@HWI-EAS443:3:59:203:1009#0/1  
AACTTTAGCTAGGAGCATTGCGAAAAGCTTGAACAGTCT  
+HWI-EAS443:3:59:203:1009#0/1  
\_aaaaa^`aa`aaa^\_a`aa\_baa`[^a\_a``\_aW\_URS  
@HWI-EAS443:3:59:327:836#0/1  
GGGAATTCTTGAGGATGAACAGATGTACCAGAAGTGCTGC  
+HWI-EAS443:3:59:327:836#0/1  
abbXabaaab^a`a`Zb`aa¥aaaaX`aaaa¥V^VXYaaW  
@HWI-EAS443:3:59:571:950#0/1  
CTCTGTGCTTGTGAATTAGTCATCATCTTTCTCACAACA

+HWI-EAS443:3:59:571:950#0/1  
`babbababa`U^¥TZaa[a[\_[a\_a`aaaa^aYaU^]\_a  
@HWI-EAS443:3:5:1031:1624#0/1  
GATAAACTAACTCAAGGTCGCCAGACTTATGATTGGACAT  
+HWI-EAS443:3:5:1031:1624#0/1  
ab`aabababXT`a`abZ]b`\_aaa\_baaaaaab`a¥aa  
@HWI-EAS443:3:5:1072:153#0/1  
ATTTTGATTTTCATTCCACTTAGTGTTGTCCCCAGTGATT  
+HWI-EAS443:3:5:1072:153#0/1  
``\_bb`bbb`Xabb¥J`Zbbaa^aaabb[S^`ab`baaa  
@HWI-EAS443:3:5:1110:955#0/1  
ATTTGAATTCACAAGCTTTTTTATCGCTATGGATTTGTG  
+HWI-EAS443:3:5:1110:955#0/1  
aabaaa]b`¥a\_aaa^\_a`baba\_a\_a^a`baa\_a\_a\_Za  
@HWI-EAS443:3:5:131:836#0/1  
AGGATTTTGATTTTCATTCCACTTAGTGTTGTCCCCAGTG  
+HWI-EAS443:3:5:131:836#0/1  
]ba¥`a``aabbba`b`a`a\_aab^¥D[[aaaa][\_ab^b  
@HWI-EAS443:3:5:1445:1779#0/1  
AACGGCATCATATTCCATGCTTTTGGCTGGACCATGGGCT  
+HWI-EAS443:3:5:1445:1779#0/1  
a\_b\_\_\_aaSbbbabP[`aaab\_\_\_\_\_U`a¥^`Y¥\_a^ZS]]  
@HWI-EAS443:3:5:1472:977#0/1  
AAATTGAGAAAATAAGGCCTCTTCTAATAGATGGCACAGC  
+HWI-EAS443:3:5:1472:977#0/1  
IPY]aaab^XP[``a`\_[\_X[VPVaa`P\_\_^\_]]SWZYB  
@HWI-EAS443:3:5:155:747#0/1  
ACAACACTAAGTGAATGAAAATCAAATCCTCGAATGTT  
+HWI-EAS443:3:5:155:747#0/1  
``aaa`aaaaa[aa`bb`aaaa\_aa^aa[\_a\_a`aa\_¥B  
@HWI-EAS443:3:5:1588:993#0/1  
GCAAAATGCCATAAGCACCACATTCCCTTATACTGGAGAT  
+HWI-EAS443:3:5:1588:993#0/1  
aaa`a`aa[Xa`\_`\_¥`^RZY^\_`VYY\_^^`X\_\_]]\_BB  
@HWI-EAS443:3:5:1607:565#0/1  
GTGGGAATCAACATGAGCAAAAAGAAGTCCTATATAAATA  
+HWI-EAS443:3:5:1607:565#0/1  
aS\_ba\_ZXU\_\_FOYZ]\_\_`\_W\_\_XYSGUTX]^[[¥\_BBB  
@HWI-EAS443:3:5:1637:742#0/1  
CAAAATGCCATAAGCACCACATTCCCTTATACTGGAGATC  
+HWI-EAS443:3:5:1637:742#0/1  
]abb\_b\_aa¥abb\_Tba0aa\_\_aIaabababaaaaaab\_a  
@HWI-EAS443:3:5:1692:241#0/1  
CAAAATGCCATAAGCACCACATTCCCTTATACTGGAGATC  
+HWI-EAS443:3:5:1692:241#0/1  
S[baZV\_VY\_a]ZZ^`b\_bbb`¥[a¥bbaaa``ba[aa\_B  
@HWI-EAS443:3:5:1781:713#0/1  
TTGGAGTAACAGTGATAAAGAACAACATGATAAACAATGA  
+HWI-EAS443:3:5:1781:713#0/1  
Y¥`WW\_a\_¥]b`[aYa^`\_b\_aUaW`a^^^a\_a]]a\_aba



@HWI-EAS443:3:5:313:691#0/1  
TTGGGAGTCTCGATACTGAATCTTGGACAAAAGAAATACA  
+HWI-EAS443:3:5:313:691#0/1  
a]baa`b`a`ab`WaWabaa````a`\_]\_`aaa^[a]aXB  
@HWI-EAS443:3:5:336:1106#0/1  
ACGGCATCATATTCCATGCTTTTGGCTGGACCATGGGCTG  
+HWI-EAS443:3:5:336:1106#0/1  
aaXH]aa]a^¥`baXba^V[a¥`^R\_]aaWPVMOXS`UBB  
@HWI-EAS443:3:5:437:273#0/1  
ACCGGTTGGAATTTCTAGCATGGTGGAGGCCATGGTGTCT  
+HWI-EAS443:3:5:437:273#0/1  
a`bbb^ab`aaa`a^`aYa`]aW\_`¥\_^SNS¥^\_P\_BBB  
@HWI-EAS443:3:5:440:817#0/1  
GCTGCCGGTTGATTTCTGTTTAATGTCCAATCATAAGTCT  
+HWI-EAS443:3:5:440:817#0/1  
aabaabbXa`Z`aaa\_aU`a^`\_^[\_`\_`¥a^aV\_^^\_  
@HWI-EAS443:3:5:447:810#0/1  
GCGCAAAATGCCATAAGCACCATTCCTTATACTGGAG  
+HWI-EAS443:3:5:447:810#0/1  
`¥aa\_X^M¥aaaTaOF]\_`BBBBBBBBBBBBBBBBBBB  
@HWI-EAS443:3:5:48:661#0/1  
CAGACTTATGATTGGACATTAACAGAAATCAACCGGCAG  
+HWI-EAS443:3:5:48:661#0/1  
abbababbbbabbb\_bbbbabababbbbbbbaabbab  
@HWI-EAS443:3:5:530:1257#0/1  
ATCGGGGAAGACTTTGTAATCCCCTGAATCCCCTTTGTCAG  
+HWI-EAS443:3:5:530:1257#0/1  
a^aaa`a`a`\_aaa]`aaa\_\_a\_]\_a``¥\_]aS\_aYLB  
@HWI-EAS443:3:5:547:1567#0/1  
TGAATTCACAAGCTTTTTTATCGCTATGGATTTGTGGCT  
+HWI-EAS443:3:5:547:1567#0/1  
ab`W[]`bab]WWaaaa\_`ZZ^aZ¥\_aab]Z`\_\_SZ^^¥  
@HWI-EAS443:3:5:615:964#0/1  
GAGTTCTTCAATGGTGAACAGATCTTCATGATCTCAGAG  
+HWI-EAS443:3:5:615:964#0/1  
a\_bY[^a\_aaaaa^0a^[\_`\_a[^\_\_\_\_`\_`^`¥\_¥\_^^B  
@HWI-EAS443:3:5:709:696#0/1  
GTCCAGCCAAAAGCATGGAATATGATGCCGTTGCAACTAC  
+HWI-EAS443:3:5:709:696#0/1  
abbabbabbbbab`babbaabbababaa`aa\_a]`a\_\_aY  
@HWI-EAS443:3:5:747:703#0/1  
ATTTCTAGCATGGTGGAGGCCATGGTGTCTAGGGCCCGGA  
+HWI-EAS443:3:5:747:703#0/1  
`aaa`bbb^ababX^^a`T¥]`aUaYQaXUaY^^]\_¥`aB  
@HWI-EAS443:3:5:75:1029#0/1  
TGCTCATGTTGATTCCCCTAACTTGCAGGTCCTGTAGAA  
+HWI-EAS443:3:5:75:1029#0/1  
abb`b`b\_UOYMWa]`W^Z`\_`\_a[`Xa¥^W`S^a[\_aBB  
@HWI-EAS443:3:5:991:131#0/1  
AACACTAAGTGAATGAAAATCAAATCCTCGAATGTTCC

+HWI-EAS443:3:5:991:131#0/1  
aabaaa`aa`ab`aab¥aa`aW¥a\_a`[\_`¥VR\_a^\_^]  
@HWI-EAS443:3:5:99:1563#0/1  
CGAGGATTTTGATTTTCATTCCACTTAGTGTTGCCCCAG  
+HWI-EAS443:3:5:99:1563#0/1  
[aXVW\_]`^aX`bb¥b`\_`\_`[a^^OY^Ta]baa[T^P`][`  
@HWI-EAS443:3:60:1085:1242#0/1  
TCTGTTTCATCCTCAAGAATTCCCCTTTGGCTTGTGTTGAG  
+HWI-EAS443:3:60:1085:1242#0/1  
aa^aYa`a`aa`a\_a[[aa`]^`^`\_`\_`\_`\_`¥ZZ\_X]^[]  
@HWI-EAS443:3:60:1108:550#0/1  
AACGGCATCATATTCCATGCTTTTGGCTGGACCATGGGCT  
+HWI-EAS443:3:60:1108:550#0/1  
abaaaaaaaaabaaaaaaaa`aaaaa[\_a``[ZYV\_X]Z[[  
@HWI-EAS443:3:60:1165:1589#0/1  
TCTGTTTCATCCTCAAGAATTCCCCTTTGGCTTGTGTTGAG  
+HWI-EAS443:3:60:1165:1589#0/1  
^`Z¥Zab`b¥X``bbb`babaabYbbbba¥a`a]a\_a\_\_^  
@HWI-EAS443:3:60:1180:668#0/1  
ATGTAATCATCGCCAGGAACATTTCGAGGATTTTGATTTTC  
+HWI-EAS443:3:60:1180:668#0/1  
aabX[\_ZX¥`]ZXYTU¥a`¥`[^a\_^aY[¥`]]PW`^ON  
@HWI-EAS443:3:60:1261:1131#0/1  
ATCCTGTTCTGTTCCATGGCTGTATGGAGGATCTCCAGT  
+HWI-EAS443:3:60:1261:1131#0/1  
\_`abba]aaabbaaaaab\_]`a\_FVVYUQ¥`[UPYZQL]S  
@HWI-EAS443:3:60:1305:1223#0/1  
GCTGCCGTTGATTTCTGTTTAAATGTCCAATCATAAGTCT  
+HWI-EAS443:3:60:1305:1223#0/1  
a`a`^ZY^[^a¥`\_]RZ¥^]Z``\_aWW¥W\_\_\_\_\_^\_]XTVW  
@HWI-EAS443:3:60:1370:1101#0/1  
AACTAACTCAAGGTCGCCAGACTTATGATTGGACATTA  
+HWI-EAS443:3:60:1370:1101#0/1  
abX¥V`abb^b\_aPa`aa]XW`aaaZ]][a`¥OLZaXS\_a  
@HWI-EAS443:3:60:147:1547#0/1  
GCCAGCCCATGGTCCAGCCAAAAGCATGGAATATGATGCC  
+HWI-EAS443:3:60:147:1547#0/1  
abbb`bb]Wa^\_]`\_^`\_baaab\_a]aU`\_aa\_a\_\_\_\_\_Ya^  
@HWI-EAS443:3:60:1497:1129#0/1  
ACCGGTTGGAATTTCTAGCATGGTGGAGGCCATGGTGTCT  
+HWI-EAS443:3:60:1497:1129#0/1  
a`ab`\_babaaaa`a`a^a`aaW`\_¥`¥a¥]¥`\_WSWUW  
@HWI-EAS443:3:60:1519:1147#0/1  
GAAAAAGGAGAGTAAGAGACAACATGACCAAGAAGATGGT  
+HWI-EAS443:3:60:1519:1147#0/1  
[QW[¥WZa^aX`S]\_a]Y^¥Z^ZZVZ\_NW^] []^¥YZUU  
@HWI-EAS443:3:60:15:96#0/1  
GAGTTCTTCAATGGTGAACAGATCTTCATGATCTCAGAG  
+HWI-EAS443:3:60:15:96#0/1  
aaaV`\_aa```\_`\_`Wa[X\_]`\_U^]`\_Z^]`^UUX¥XRYX]

@HWI-EAS443:3:60:1609:1617#0/1  
GGACTTCTTTTTGCTCATGTTGATTCCCCTAACTTGCGAG  
+HWI-EAS443:3:60:1609:1617#0/1  
\_WWa` `]a^ab`Y]` `¥ab`\_Y` `XPXUV^W^]`\_¥]^Y  
@HWI-EAS443:3:60:1654:813#0/1  
TGATTGGACATTAACAGAAATCAACCGGCAGCAACTGCA  
+HWI-EAS443:3:60:1654:813#0/1  
Za¥`bba^Zaa`\_]`aaSaabbbb`ab` `ab[]¥QU]]¥  
@HWI-EAS443:3:60:1667:1526#0/1  
AGGATCTCCAGTATAAGGGAATGTGGTCTTATGGCATT  
+HWI-EAS443:3:60:1667:1526#0/1  
aU]aa]\_RV]¥T]]`aa` `[\_aa]a¥^^N\_\_WYXXZa\_X  
@HWI-EAS443:3:60:1697:1322#0/1  
GAAAATCAAAATCCTCGAATGTTCTGGCGATGATTACAT  
+HWI-EAS443:3:60:1697:1322#0/1  
aa`aa^aaaa`a` `aaa\_aa\_a^^`\_X`^^\_W^^TTZ^  
@HWI-EAS443:3:60:438:1552#0/1  
GCCGGTTGATTTCTGTTTAATGTCCAATCATAAGTCTGGC  
+HWI-EAS443:3:60:438:1552#0/1  
`aab^aaaaabaa`aaaaaa\_aaaaa\_a`aa\_]`\_\_X]  
@HWI-EAS443:3:60:475:1391#0/1  
TAAGCACCACATTCCTTATACTGGAGATCCTCCATACAG  
+HWI-EAS443:3:60:475:1391#0/1  
aaa` `baaaaaa\_\_`a\_a`a`^[^`\_`^\_\_\_\_]\_`^` `R  
@HWI-EAS443:3:60:524:479#0/1  
GAGTCTTCAATGGTGAACAGATCTTCATGATCTCAGAG  
+HWI-EAS443:3:60:524:479#0/1  
a\_b`abbaaaaa`Zaa]a` `a\_aaaaaaa\_^]a\_` `^a  
@HWI-EAS443:3:60:607:1101#0/1  
GGTTGATTTCTGTTTAATGTCCAATCATAAGTCTGGCGAC  
+HWI-EAS443:3:60:607:1101#0/1  
XX[ `baa^`abaWZ¥babb\_aa`Yaa`a^aa]` ` `a\_]a^  
@HWI-EAS443:3:60:678:107#0/1  
CCGTTGATTTCTGTTTAATGTCCAATCATAAGTCTGGCG  
+HWI-EAS443:3:60:678:107#0/1  
abbaabbabbaabb`bbabbbbaaaabaab\_RYY]XaWOU  
@HWI-EAS443:3:60:76:661#0/1  
ATTTATATAGGACTTCTTTTTGCTCATGTTGATTCCCCT  
+HWI-EAS443:3:60:76:661#0/1  
ababaa` `Zaaa`aaaaaaaaaaaa\_a]]` `^\_[Z^\_^\_  
@HWI-EAS443:3:60:823:231#0/1  
TAAGTGAATGAAAATCAAAATCCTCGAATGTTCTGGCG  
+HWI-EAS443:3:60:823:231#0/1  
aaaaSbb\_a`\_` `a`a]Y`aaaa\_\_a\_^\_aY[U^[\_[]]  
@HWI-EAS443:3:60:851:477#0/1  
GGGAGTCTCGATACTGAATCTTGGACAAAAGAAATACACC  
+HWI-EAS443:3:60:851:477#0/1  
aTOHYJQ^[Z`VXRV`YWROPZXWTZ]ZYYZTTTTLPPXOO  
@HWI-EAS443:3:60:888:1605#0/1  
TTTCTAGCATGGTGGAGCCATGGTGTCTAGGGCCCGGAT

+HWI-EAS443:3:60:888:1605#0/1  
aaa`\_YFY`a¥Y¥`a`aa`\_[YU^Z^S[Y^^Y^Y^][SU  
@HWI-EAS443:3:61:1126:218#0/1  
ATATAGGACTTCTTTTTGCTCATGTTGATTCCCACTAACT  
+HWI-EAS443:3:61:1126:218#0/1  
abaa`^baaab`baa`a`aaa`a^ab^\_a[SN¥X\_¥]WX  
@HWI-EAS443:3:61:1143:155#0/1  
CCCTGTCTTATTTATATAGGACTTCTTTTTGCTCATGTTG  
+HWI-EAS443:3:61:1143:155#0/1  
`^b\_b`aabbbbabbbZbb^bbbbbbbaaa``b\_`  
@HWI-EAS443:3:61:1181:1323#0/1  
CACATTCCCTTATACTGGAGATCCTCCATACAGCCATGGA  
+HWI-EAS443:3:61:1181:1323#0/1  
`¥b\_baa\_V\_T\_Yaba¥^\_U[`bbaab\_¥aT\_SZ[\_ZNF`  
@HWI-EAS443:3:61:1301:1948#0/1  
CGAGGATTTTGATTTTCATTCCACTTAGTGTTGCCCCAG  
+HWI-EAS443:3:61:1301:1948#0/1  
\_`bba]aabbabbbababb\_`^`a¥]babb`]`W]\_`  
@HWI-EAS443:3:61:1332:1394#0/1  
TCCAGCGAAAATGCCATAAGCACCATTCCTTATACT  
+HWI-EAS443:3:61:1332:1394#0/1  
aa\_a\_a\_aaaa`a`\_baba`baaa`aaa\_¥¥U¥^^¥^SW  
@HWI-EAS443:3:61:1364:579#0/1  
AAAATGCCATAAGCACCATTCCTTATACTGGAGATCC  
+HWI-EAS443:3:61:1364:579#0/1  
aabbaaaaabba]¥baaabbb\_baaaaaaa\_]a[a]^GM  
@HWI-EAS443:3:61:1381:238#0/1  
CACAAATACCAGCAGAAATGCTAGCAAGCATTGACCTGAA  
+HWI-EAS443:3:61:1381:238#0/1  
R`a¥[Y`¥Y¥\_a`Z`b`^`^a]W\_\_[\_^SS^aa\_YZ`IU  
@HWI-EAS443:3:61:1441:1567#0/1  
CGCCAGACTTATGATTGGACATTAACAGAAATCAACCGG  
+HWI-EAS443:3:61:1441:1567#0/1  
abbbbababbbbabbbabbbbbb\_aabbbba^baWW\_\_  
@HWI-EAS443:3:61:1456:1358#0/1  
CTTTTTGCTCATGTTGATTCCCACTAACTTGCAGGTCCTG  
+HWI-EAS443:3:61:1456:1358#0/1  
aaba`ab`abbaaabaaaa`aa`b\_¥¥aaaa^a`XU\_\_\_\_  
@HWI-EAS443:3:61:1493:516#0/1  
GTTCTGTCCATGGCTGTATGGAGGATCTCCAGTATAAG  
+HWI-EAS443:3:61:1493:516#0/1  
a[[]WJYaW`S¥[XRZ]\_STZ\_^S[YBBBBBBBBBBBB  
@HWI-EAS443:3:61:1511:1098#0/1  
GCTGTATGGAGGATCTCCAGTATAAGGGAATGTGGTGCTT  
+HWI-EAS443:3:61:1511:1098#0/1  
a\_\_¥T]][]Na]TQJV^ZOWUY[PLZ\_`SVVJFXZUTRTP  
@HWI-EAS443:3:61:151:284#0/1  
GGTACATCTGTTTCATCCTCAAGAATTCCTTTGGCTTGT  
+HWI-EAS443:3:61:151:284#0/1  
`^¥a]LW[OVNN[^XP¥M\_¥QTWYROZ^U¥U]¥\_YTWUXP

@HWI-EAS443:3:61:1550:1090#0/1  
CCGGGCCCTAGACACCATGGCCTCCACCATGCTAGAAATT  
+HWI-EAS443:3:61:1550:1090#0/1  
aa[VUR^`^^`P\_¥V]^¥`\_\_\_aa]]HU]YY¥]VNYUUT  
@HWI-EAS443:3:61:1600:1715#0/1  
TTGGAATTTCTAGCATGGTGGAGGCCATGGTGTCTAGGGC  
+HWI-EAS443:3:61:1600:1715#0/1  
aaaaa``aaaa]`\_^`a]¥a`]^\_aaZ¥]]W\_SUTTVUUS  
@HWI-EAS443:3:61:1627:1253#0/1  
AAACTAACTCAAGGTCGCCAGACTTATGATTGGACATTAA  
+HWI-EAS443:3:61:1627:1253#0/1  
aab\_b]]`a]aa\_a\_Z`^aabab`aaa^`aaZW]^\_]\_UY  
@HWI-EAS443:3:61:220:1097#0/1  
CTGGGGACAACACTAAGTGAATGAAAATCAAAATCCTCG  
+HWI-EAS443:3:61:220:1097#0/1  
abbbbaabbbbbbbbaabbbbab^bb¥babbbaaaaa`a  
@HWI-EAS443:3:61:233:1495#0/1  
GACTTCTTTTTGCTCATGTTGATTCCCCTAACTTGCAGG  
+HWI-EAS443:3:61:233:1495#0/1  
`aaaaaa\_aa¥``a\_a^`]\_\_\_\_\_a`\_U[`\_`X]YWVV^R  
@HWI-EAS443:3:61:250:2010#0/1  
CACATTCCTGAAGTCTGCTTAAAATGGGAGCTAATGGATG  
+HWI-EAS443:3:61:250:2010#0/1  
ababbbbbbb`\_bbabaaba`aaaa``aa]`\_a][^XV  
@HWI-EAS443:3:61:312:326#0/1  
GTTTCATCCTCAAGAATCCCCTTTGGCTTGTGTTGAGAAT  
+HWI-EAS443:3:61:312:326#0/1  
aaaaaabaaaaU`aaaaaaaa\_\_a\_\_aa^`Z¥X^[XSTV^  
@HWI-EAS443:3:61:414:118#0/1  
GATTTTGATTTTCATTCCACTTAGTGTGCCCCAGTGAT  
+HWI-EAS443:3:61:414:118#0/1  
a\_aaaaaSaa\_`^\_\_a\_YX\_\_YY]Z\_[^][YWY][^Z[[[  
@HWI-EAS443:3:61:434:1561#0/1  
GGTTGATTTCTGTTAATGTCCAATCATAAGTCTGGCGAC  
+HWI-EAS443:3:61:434:1561#0/1  
``\_a^aaaa``a\_\_aaa^]Xa`U\_]aa`a``YUX^YV¥W  
@HWI-EAS443:3:61:445:1064#0/1  
GGGACAACACTAAGTGAATGAAAATCAAAATCCTCGAA  
+HWI-EAS443:3:61:445:1064#0/1  
aaa¥^^\_X¥^]`\_\_^V\_`a\_\_¥[RR`[SV`ZX¥¥\_]^^Z]  
@HWI-EAS443:3:61:590:879#0/1  
CAAAGGGATTGAGGGATTACAAAGTCTTCCCCGATAATC  
+HWI-EAS443:3:61:590:879#0/1  
`babbbb]b\_`aaabaabba`L¥]a^baabaa`aa^\_\_\_\_[  
@HWI-EAS443:3:61:612:319#0/1  
GAGTCTTCAATGGTGAACAGATCTTCATGATCTCAGAG  
+HWI-EAS443:3:61:612:319#0/1  
\_Z\_X¥Y[a\_¥`b¥R¥\_]^[^XF]]^¥¥X¥ZRRZZXTW[  
@HWI-EAS443:3:61:62:1751#0/1  
TATTTATATAGGACTTCTTTTTGCTCATGTTGATCCCAC

+HWI-EAS443:3:61:62:1751#0/1  
aaaaaaaa`a`a\_`^`\_a`^`aa\_`^`^aa`^`^^^[]^V#Z  
@HWI-EAS443:3:61:712:728#0/1  
CCAGCGCAAAATGCCATAAGCACCACATTCCTTATACTG  
+HWI-EAS443:3:61:712:728#0/1  
abbabbbbaa^ababbaba\_b`bb[bbaaa\_aaaa`WZ\_  
@HWI-EAS443:3:61:721:432#0/1  
GCTTTTTTTATCGCTATGGATTTGTGGCTAATTTTAGCAT  
+HWI-EAS443:3:61:721:432#0/1  
a\_\_`\_`aa`a`\_\_^`Z``¥QZUYZW]^ZZ[[RX^¥WSSXX  
@HWI-EAS443:3:61:79:430#0/1  
ACCATCTTCTGGTCATGTTGTCTCTTACTCTCCTTTTTC  
+HWI-EAS443:3:61:79:430#0/1  
aabaabaababaa\_a`aa`Za`aa`]¥aa\_^[`a\_a^Z  
@HWI-EAS443:3:61:814:1908#0/1  
CTAAGTGAATGAAAATCAAATCCTCGAATGTTCTGGC  
+HWI-EAS443:3:61:814:1908#0/1  
ababbabbbbbbbbabbbb`^bbbbbb`bbb`Y`\_^`\_¥Y  
@HWI-EAS443:3:61:897:1977#0/1  
CAACACTAAGTGAATGAAAATCAAATCCTCGAATGTTC  
+HWI-EAS443:3:61:897:1977#0/1  
abaabbbbbbb^b`bbabbbbbbbbbba`a\_\_aa^\_] [W  
@HWI-EAS443:3:62:1027:171#0/1  
ATCAAATCCTCGAATGTTCTGGCGATGATTACATATAT  
+HWI-EAS443:3:62:1027:171#0/1  
^bbbbbaa`baaa\_aab`^\_aXaa`^X`^`^]Y\_Q\_X\_] [W  
@HWI-EAS443:3:62:1072:229#0/1  
CAACACTAAGTGAATGAAAATCAAATCCTCGAATGTTC  
+HWI-EAS443:3:62:1072:229#0/1  
a¥¥¥abaa`b^baa`bbaaVaabaaaaaaaaaaaa`aaa\_\_`  
@HWI-EAS443:3:62:1392:806#0/1  
CTTTCACAATCACTGGGACAACACTAAGTGAATGAAAA  
+HWI-EAS443:3:62:1392:806#0/1  
aSS^Y]XXbZ]]a]Yb]aY`R]LMFZTRZI`Vaaa\_[]][  
@HWI-EAS443:3:62:152:994#0/1  
GCCATAAGCACCACATTCCTTATACTGGAGATCCTCCAT  
+HWI-EAS443:3:62:152:994#0/1  
aaab`RH[]aaa[`V]aa^U]\_P[`\_^]Z^\_\_ [U\_TZ\_] [R  
@HWI-EAS443:3:62:257:99#0/1  
CACATTCCTTATACTGGAGATCCTCCATACAGCCATGGA  
+HWI-EAS443:3:62:257:99#0/1  
abaabbbbaabb`ababbaaaaaaaaa`aa`^]\_\_\_\_ [V  
@HWI-EAS443:3:62:43:281#0/1  
ATTCGAGGATTTTGATTTTCATTCCACTTAGTGTTGTCCC  
+HWI-EAS443:3:62:43:281#0/1  
Xa` `babaX]`aa`P`aaaaa`a` ` ` [X[]\_\_\_\_\_ `^]  
@HWI-EAS443:3:62:486:944#0/1  
TGGGAATCAACATGAGCAAAAAGAAGTCCTATATAAATAA  
+HWI-EAS443:3:62:486:944#0/1  
abba¥baaabaaaaTa]aa`aaa¥`\_Xa\_\_`a`\_`a`\_`aU

@HWI-EAS443:3:62:521:287#0/1  
CACCACATTCCTTATACTGGAGATCCTCCATACAGCCAT  
+HWI-EAS443:3:62:521:287#0/1  
ab`a`bUb][`]\_\_`\_\_a\_a^V[MDLZPUaZ\_\_SI[^[WT  
@HWI-EAS443:3:62:539:1604#0/1  
TCTCGATACTGAATCTTGGACAAAAGAAATACACCAAGAC  
+HWI-EAS443:3:62:539:1604#0/1  
ababaaaba``abaaaaa¥`aa^a`aaaa^\_]`^¥aaaaa  
@HWI-EAS443:3:62:616:383#0/1  
AACTTTAGCTAGGAGCATTGCGAAAAGCTTGAACAGTCT  
+HWI-EAS443:3:62:616:383#0/1  
TW\_Ya\_\_a¥`\_ba\_\_^\_\_^abaa`^aa^aa^\_TWYUZQ\_¥  
@HWI-EAS443:3:62:639:794#0/1  
ACTGGGACAACACTAAGTGAATGAAAATCAAATCCTC  
+HWI-EAS443:3:62:639:794#0/1  
\_]\_a`aaXYOU]`T]XV^P`a^]a^¥T]YYa`\_`YVZ¥WY  
@HWI-EAS443:3:62:677:855#0/1  
ATCAAAATCCTCGAATGTTCTGGCGATGATTACATATAT  
+HWI-EAS443:3:62:677:855#0/1  
aaaa`¥^\_]``\_a¥YaaZ\_aa\_`^`\_YQOVY[XTQYW[^Z  
@HWI-EAS443:3:62:812:1467#0/1  
CGCAAAATGCCATAAGCACCACATTCCTTATACTGGAGA  
+HWI-EAS443:3:62:812:1467#0/1  
aa\_K\_V^00a]Z]`^a\_\_`\_[]^`¥¥[`X`^`USPKURU  
@HWI-EAS443:3:62:873:339#0/1  
ACCGGTTGGAATTTCTAGCATGGTGGAGCCATGGTGTCT  
+HWI-EAS443:3:62:873:339#0/1  
a`abb`bbba^aaaaaaa\_^[Za]¥]¥]`^¥ZUQ[TZS  
@HWI-EAS443:3:63:1069:2020#0/1  
GAAAAAGGAGAGTAAGAGACAACATGACCAAGAAGATGGT  
+HWI-EAS443:3:63:1069:2020#0/1  
\_¥```\_`U`abbaX`^b^`bbbbQ0a[[a`\_aaa`]YTO  
@HWI-EAS443:3:63:1088:1947#0/1  
AAATGCCATAAGCACCACATTCCTTATACTGGAGATCCT  
+HWI-EAS443:3:63:1088:1947#0/1  
aa`[]aa]RaaW\_L¥a`a`Wa`\_\_^a`\_]\_W\_\_\_]\_]Z\_\_\_  
@HWI-EAS443:3:63:1161:590#0/1  
AATTTCTAGCATGGTGGAGGCCATGGTGTCTAGGGCCCGG  
+HWI-EAS443:3:63:1161:590#0/1  
aaba``aaaa`aaS`a]a\_\_^a`PXU^¥¥U¥^``]W¥`a  
@HWI-EAS443:3:63:1178:678#0/1  
GCCGGTTGATTTCTGTTAATGTCCAATCATAAGTCTGGC  
+HWI-EAS443:3:63:1178:678#0/1  
ab^[\_XU\_a\_]Z^a[a^][aXa¥¥V¥PZaY^ZZ]^aR]  
@HWI-EAS443:3:63:1283:1001#0/1  
ATCTGTTTCATCCTCAAGAATTCCTTTGGCTTGTGTTGA  
+HWI-EAS443:3:63:1283:1001#0/1  
aaaa`a`aa\_aaaaabaaaa\_aa`aba`a^aaa`\_[a\_^  
@HWI-EAS443:3:63:135:50#0/1  
AAATGCCATAAGCACCACATTCCTTATACTGGAGATCCT

+HWI-EAS443:3:63:135:50#0/1  
aa`aaaaaba`a`a\_`Z\_^`^`\_]\_a\_\_\_¥^`^]\_\_VXW]X  
@HWI-EAS443:3:63:1396:1253#0/1  
TCGAGGATTTTGATTTTCATTCCACTTAGTGTGCCCA  
+HWI-EAS443:3:63:1396:1253#0/1  
aa``aaababbba`bbbbbaabaaba`^a\_aaa\_a\_aa  
@HWI-EAS443:3:63:1593:284#0/1  
GACTTCTTTTTGCTCATGTTGATTCCCACTAACTTGCAGG  
+HWI-EAS443:3:63:1593:284#0/1  
^aabbbbbbb`[aa\_bb``baabbaaaa`a\_a]a\_aa^aa  
@HWI-EAS443:3:63:1601:781#0/1  
ATCAAAATCCTCGAATGTTCTGGCGATGATTACATATAT  
+HWI-EAS443:3:63:1601:781#0/1  
aabba`b\_aYW`a\_abaa\_]`^¥H^ba`[]\_¥a^^¥a`¥¥  
@HWI-EAS443:3:63:1659:369#0/1  
GGAGATCCTCCATACAGCCATGGAACAGGAACAGGATACA  
+HWI-EAS443:3:63:1659:369#0/1  
XaT`XZ`b`bU[¥[baa\_I¥`aaaaa\_[S¥Q`BBBBBB  
@HWI-EAS443:3:63:1676:168#0/1  
CAAAATGCCATAAGCACCACATTCCCTTATACTGGAGATC  
+HWI-EAS443:3:63:1676:168#0/1  
abbbbbbaabbbbababaaaaabaa``aaaa\_aaa\_a]`a  
@HWI-EAS443:3:63:1714:1244#0/1  
AATGGTGAACAGATCTTCATGATCTCAGAGAACTCTTCT  
+HWI-EAS443:3:63:1714:1244#0/1  
aa\_Q\_XRPP¥UXS\_bXa`^aabba\_``]NYU^XaU^^`b  
@HWI-EAS443:3:63:326:1079#0/1  
CAGTGATAAAGAACAACATGATAAACAATGACCTTGGACC  
+HWI-EAS443:3:63:326:1079#0/1  
aab`babbaaabaaaaaaa``\_[^`a```a`\_``a`  
@HWI-EAS443:3:63:358:1847#0/1  
TGTTCTGTTCATGGCTGTATGGAGGATCTCCAGTATAA  
+HWI-EAS443:3:63:358:1847#0/1  
aa\_aabaa\_bba`aaa][JURGRSQWUGVW`BBBBBB  
@HWI-EAS443:3:63:49:863#0/1  
ATCCTGTTCTGTTCATGGCTGTATGGAGGATCTCCAGT  
+HWI-EAS443:3:63:49:863#0/1  
aabaaa`aaa\_^\_aa```^`^a`ZMV][YRYXQSY¥¥BBB  
@HWI-EAS443:3:63:541:967#0/1  
GGACAACACTAAGTGAATGAAAATCAAAATCCTCGAATG  
+HWI-EAS443:3:63:541:967#0/1  
aa`a\_baaaabb`^aaa\_aaaa`abaaaaaaa^^`aa  
@HWI-EAS443:3:63:58:277#0/1  
GGGACAACACTAAGTGAATGAAAATCAAAATCCTCGAAT  
+HWI-EAS443:3:63:58:277#0/1  
abaaa^^a`aaa`a^ba[`aaa^V]``aa\_\_\_]`^]\_¥[Y  
@HWI-EAS443:3:63:617:1335#0/1  
TTCCAGCGCAAAATGCCATAAGCACCACATTCCCTTATAC  
+HWI-EAS443:3:63:617:1335#0/1  
^¥\_¥S`\_VZ^aa^RTZ\_``a`aa^a\_X`a[`aa\_]U¥aba



@HWI-EAS443:3:63:672:329#0/1  
ACCGTTGGAATTTCTAGCATGGTGGAGGCCATGGTGTCT  
+HWI-EAS443:3:63:672:329#0/1  
a`aaaYaa^^a`a``^¥Y^¥a¥`¥PY[[UY¥YPUU¥W  
@HWI-EAS443:3:63:683:474#0/1  
TTTGAATTCACAAGCTTTTTTTATCGCTATGGATTTGTGG  
+HWI-EAS443:3:63:683:474#0/1  
``^bb`aabb`^^Zababaaab¥``^\_]``¥V\_`]PWa`  
@HWI-EAS443:3:63:798:890#0/1  
CTGGGACAACACTAAGTGAATGAAAATCAAAATCCTCG  
+HWI-EAS443:3:63:798:890#0/1  
aababb\_ab``abbaaa`b\_`\_bbabb]aa``[``aa`ab  
@HWI-EAS443:3:63:814:507#0/1  
GAAAATCAAAATCCTCGAATGTTCTGGCGATGATTACAT  
+HWI-EAS443:3:63:814:507#0/1  
aaaa`aaaabaaaa`aa[aaa\_aa\_aa`\_b\_\_a\_``\_X\_]`  
@HWI-EAS443:3:63:873:591#0/1  
ACTGGAGATCCTCCATACAGCCATGGAACAGGAACAGGAT  
+HWI-EAS443:3:63:873:591#0/1  
aba`aXaXbaaa\_`^]aaa^\_`a]UT\_^V\_\_TY\_`\_^\_W  
@HWI-EAS443:3:63:895:462#0/1  
GATAAAAAAAGCTTGTGAATTCAAATGTCCCTGTCTTATT  
+HWI-EAS443:3:63:895:462#0/1  
\_ab^^bbababbbbbbbaaaaa\_a`aaa^ab`aaa  
@HWI-EAS443:3:63:942:357#0/1  
GGACATTTGAATTCACAAGCTTTTTTATCGCTATGGATT  
+HWI-EAS443:3:63:942:357#0/1  
^bbbbbbbbbbbbbb¥aababbbbbbbb`babba\_aa  
@HWI-EAS443:3:63:95:1652#0/1  
CAAATGTCCCTGTCTTATTTATATAGGACTTCTTTTGCT  
+HWI-EAS443:3:63:95:1652#0/1  
a\_[\_¥XXaba`^a`aaa]a`Y¥T^¥\_`a\_`[^\_Ya]  
@HWI-EAS443:3:63:98:1358#0/1  
TCCAGCGAAAATGCCATAAGCACCACATTCCCTTATACT  
+HWI-EAS443:3:63:98:1358#0/1  
aba^]b``UV¥``b`L]aaP^^aaS[\_]\_a\_`\_\_\_\_[W^]  
@HWI-EAS443:3:64:1054:1585#0/1  
CTTCTGGTACATCTGTTTCATCCTCAAGAATCCCCCTTTGG  
+HWI-EAS443:3:64:1054:1585#0/1  
abbabbbabbbbaababbbbaababbbbabba`aabba  
@HWI-EAS443:3:64:1146:682#0/1  
GGTTGATTTCTGTTAATGTCCAATCATAAGTCTGGCGAC  
+HWI-EAS443:3:64:1146:682#0/1  
aa\_aa\_aaaa`a[``\_`aa]\_Z``\_\_\_`\_``]^\_\_WY\_]`  
@HWI-EAS443:3:64:1155:30#0/1  
GTAACAGTGATAAAGAACAACATGATAAACAATGACCTTG  
+HWI-EAS443:3:64:1155:30#0/1  
a]¥\_^`a\_a\_aaa\_`]^`]]^\_a]\_^^\_Z`Y\_^]XW\_]`  
@HWI-EAS443:3:64:1213:452#0/1  
ATTTCTAGCATGGTGGAGGCCATGGTGTCTAGGGCCCGGA

+HWI-EAS443:3:64:1213:452#0/1  
`bba]bbaaaaaa¥baa`¥a`\_`¥¥^^¥¥`a¥^U]^a¥  
@HWI-EAS443:3:64:1294:1634#0/1  
GAAAAAGGAGAGTAAGAGACAACATGACCAAGAAGATGGT  
+HWI-EAS443:3:64:1294:1634#0/1  
Zaba\_`baa\_^b]^`aaa\_b\_bbbaaaa`baaaaaaba^  
@HWI-EAS443:3:64:1460:237#0/1  
CAGGGACATTTGAATTCACAAGCTTTTTTTATCGCTATGG  
+HWI-EAS443:3:64:1460:237#0/1  
a`baaaaabb`abaaaa`a\_]^aaaaaba^`\_a\_a\_]`  
@HWI-EAS443:3:64:1484:778#0/1  
TGACCATCTTCTGGTCATGTTGTCTCTTACTCTCCTTTT  
+HWI-EAS443:3:64:1484:778#0/1  
aab¥Xababb^^bbaSa`aa^`b]W`\_baa¥a\_a\_\_a`ba  
@HWI-EAS443:3:64:1581:253#0/1  
CGAGGATTTTGATTTTCATTCCACTTAGTGTTGCCCCAG  
+HWI-EAS443:3:64:1581:253#0/1  
aabbaaabbbbababbabaaa`babbab`ba`aaa[aaba  
@HWI-EAS443:3:64:1693:933#0/1  
TCTTTTTGCTCATGTTGATTCCCCTAACTTGCAGGCCT  
+HWI-EAS443:3:64:1693:933#0/1  
aabaaaabaaaaa^\_a\_``^`\_`]^`\_\_^\_]¥^`\_TTU]  
@HWI-EAS443:3:64:1789:111#0/1  
TGCCGGTTGATTTCTGTTTAATGTCCAATCATAAGTCTGG  
+HWI-EAS443:3:64:1789:111#0/1  
aaaaab]aa^aaa]a`aa`\_aa`¥\_^[]`a\_^¥¥^`[\_  
@HWI-EAS443:3:64:270:1184#0/1  
CATGGTGTATCCTGTTCCCTGTTCCATGGCTGTATGGAGGA  
+HWI-EAS443:3:64:270:1184#0/1  
a^¥a\_SXN]aaa```aa]`ZV`^ZZ]YX]BBBBBBBBB  
@HWI-EAS443:3:64:274:1067#0/1  
AATTTCTAGCATGGTGGAGCCATGGTGTCTAGGGCCCGG  
+HWI-EAS443:3:64:274:1067#0/1  
a]aa^b`K`aaaaaW]]¥^]^`^^^]WZ¥^¥^UWW^¥¥U¥  
@HWI-EAS443:3:64:367:564#0/1  
TGGGGACAACACTAAGTGAATGAAAATCAAATCCTCGA  
+HWI-EAS443:3:64:367:564#0/1  
`bbb¥]b`Xabba]a]aaaaa`aaaaaaaaaaaa`aaa  
@HWI-EAS443:3:64:37:983#0/1  
GTTTCATCCTCAAGAATCCCCCTTTGGCTTGTGTTGAGAAT  
+HWI-EAS443:3:64:37:983#0/1  
a`^a`a\_]`^a\_WZ`aa]¥[a^¥\_]`\_]ZRQU^]UV¥\_Z  
@HWI-EAS443:3:64:413:923#0/1  
AATTCAAATGTCCCTGTCTTATTTATATAGGACTTCTTTT  
+HWI-EAS443:3:64:413:923#0/1  
aaaaba^Zba\_aaaaa\_aaa\_aaa`aa```\_`aa``a`a`  
@HWI-EAS443:3:64:440:474#0/1  
AGTTCTTCAATGGTGAACAGATCTTCATGATCTCAGAGA  
+HWI-EAS443:3:64:440:474#0/1  
ab\_aaabaa\_aaa]\_\_\_a[`a```\_a\_`\_`]^`¥\_`X^^^`^`

@HWI-EAS443:3:64:665:958#0/1  
AATTTCTAGCATGGTGGAGGCCATGGTGTCTAGGGCCCCGG  
+HWI-EAS443:3:64:665:958#0/1  
a`aaa`a\_a]]`^Za^^¥Ua¥`^U[UQU\_S]YW¥¥¥U^¥  
@HWI-EAS443:3:65:1035:2015#0/1  
TTTAATGTCCAATCATAAGTCTGGCGACCTTGAGTTAGTT  
+HWI-EAS443:3:65:1035:2015#0/1  
aaaa]aaaaaa`^`\_aaaZ`\_`P^¥`Xa\_\_\_\_Z\_]\_]W]a  
@HWI-EAS443:3:65:1053:746#0/1  
ACTTTAGCTAGGAGCATTTCGCGAAAAGCTTGAACAGTCTG  
+HWI-EAS443:3:65:1053:746#0/1  
aabb`aaaa¥aa`aaaaaaaZa`aaa`\_a`a`\_`a\_\_`a`  
@HWI-EAS443:3:65:110:279#0/1  
TTTGAATTCACAAGCTTTTTTATCGCTATGGATTTGTGG  
+HWI-EAS443:3:65:110:279#0/1  
ab\_ZZa^¥bbaa`abaaaaaa`Za`aaa]aZa`a`a^`]a  
@HWI-EAS443:3:65:127:299#0/1  
CTCGATACTGAATCTTGGACAAAAGAAATACACCAAGACA  
+HWI-EAS443:3:65:127:299#0/1  
aabbaaZaaa^`a]aaaa`a]]aaaa^`\_aaaa`\_``\_\_`  
@HWI-EAS443:3:65:1331:650#0/1  
GACTGTTCAAGCTTTTCGCAAATGCTCCTAGCTAAAGTTT  
+HWI-EAS443:3:65:1331:650#0/1  
\_[^UUHX]]]¥KTYZPVW^]W¥]WZ`U^^XXTSMRLYTTW  
@HWI-EAS443:3:65:1340:1368#0/1  
CATGGTCCAGCCAAAAGCATGGAATATGATGCCGTTGCAA  
+HWI-EAS443:3:65:1340:1368#0/1  
VS`a^`\_`bbba\_`^^`¥`baaba]babaabaaZZaa`\_a`  
@HWI-EAS443:3:65:1439:190#0/1  
CTTTAGCTAGGAGCATTTCGCGAAAAGCTTGAACAGTCTGG  
+HWI-EAS443:3:65:1439:190#0/1  
abbaaabab[G\_`bbbab`^]`^aabaaba]\_a`\_\_`\_`\_`  
@HWI-EAS443:3:65:1463:82#0/1  
GAGTCTTCAATGGTGGAAACAGATCTTCATGATCTCAGAG  
+HWI-EAS443:3:65:1463:82#0/1  
Z¥baaY\_aV^`[ababaXZ[]][aTYabTY]b^aP\_Z¥a`a`  
@HWI-EAS443:3:65:1641:1135#0/1  
AATTTCTAGCATGGTGGAGGCCATGGTGTCTAGGGCCCCGG  
+HWI-EAS443:3:65:1641:1135#0/1  
a^aa`aaa\_\_]baUaa`\_`]\_UXS]WS¥US^¥¥UZU¥¥¥  
@HWI-EAS443:3:65:1650:267#0/1  
TTCAAATGTCCCTGTCTTATTTATATAGGACTTCTTTTTG  
+HWI-EAS443:3:65:1650:267#0/1  
ababababaa[^bb\_\_bbabaaaaaaaaa`^aa\_aaa`aa`  
@HWI-EAS443:3:65:1706:1116#0/1  
TTTCTAGCATGGTGGAGGCCATGGTGTCTAGGGCCCCGGAT  
+HWI-EAS443:3:65:1706:1116#0/1  
aaaabRZ`b`Xa`^`\_¥][a]YTWVYY]SXTZYY\_]X^  
@HWI-EAS443:3:65:1755:1100#0/1  
GTTGGAATTTCTAGCATGGTGGAGGCCATGGTGTCTAGGG

+HWI-EAS443:3:65:1755:1100#0/1  
aZ¥\_ZZU¥¥^U`WWVS`][¥ZVYSTSKP¥VRBBBBBBBB  
@HWI-EAS443:3:65:17:2039#0/1  
ATTCAAATGTCCCTGTCTTATTTATATAGGACTTCTTTTT  
+HWI-EAS443:3:65:17:2039#0/1  
aSaaaaaa¥Z\_]U`]a\_\_\_\_\_^`a`[`[QY\_^ZW¥\_YQS  
@HWI-EAS443:3:65:290:1812#0/1  
AGCACTTCTGGTACATCTGTTCATCCTCAAGAATCCCCCT  
+HWI-EAS443:3:65:290:1812#0/1  
a^aa`\_`a\_^]b`a\_\_][^]aa^`a)``\_\_\_\_\_^¥`]]]]  
@HWI-EAS443:3:65:388:1891#0/1  
AACTTTAGCTAGGAGCATTTGCGAAAAGCTTGAACAGTCT  
+HWI-EAS443:3:65:388:1891#0/1  
a]]OZ`\_`a)`]][]aa^^`]^`^]\_]\_]\_]S¥\_\_\_\_¥Z` [  
@HWI-EAS443:3:65:434:401#0/1  
GGTGTATCCTGTTCCCTGTTCCATGGCTGTATGGAGGATCT  
+HWI-EAS443:3:65:434:401#0/1  
abYa^`aaaa`\_\_`\_aa\_`\_\_`\_[^`aQZZ¥¥MYTSPV  
@HWI-EAS443:3:65:450:1555#0/1  
AATTTCTAGCATGGTGGAGGCCATGGTGTCTAGGGCCCCG  
+HWI-EAS443:3:65:450:1555#0/1  
aaaa`babZaaa^\_T`]\_¥]]]a\_^]PVS^S¥¥WU`¥^Y  
@HWI-EAS443:3:65:456:366#0/1  
GGGAGTCTCGATACTGAATCTTGGACAAAAGAAATACACC  
+HWI-EAS443:3:65:456:366#0/1  
aaa\_a`aaaaa\_\_aa\_`^`\_`aa\_\_aa\_^`\_\_]\_]\_]\_]Z  
@HWI-EAS443:3:65:643:1510#0/1  
CGGGCCCTAGACACCATGGCCTCCACCATGCTAGAAATTC  
+HWI-EAS443:3:65:643:1510#0/1  
aa]`b`a`\_`aaaa`a`\_`\_aa\_aa`a^a`\_`¥a`T]a]¥¥  
@HWI-EAS443:3:65:771:1432#0/1  
AGGAGACCGTTGGAATTTCTAGCATGGTGGAGGCCATGG  
+HWI-EAS443:3:65:771:1432#0/1  
a`\_a]`abbb^aaaa\_`aaaaa]`aaa]^a`aa¥`^a^\_]`  
@HWI-EAS443:3:65:778:608#0/1  
GAAAAAGGAGAGTAAGAGACAACATGACCAAGAAGATGGT  
+HWI-EAS443:3:65:778:608#0/1  
aa¥`b`\_`bab\_a`aababbbbaa\_\_aaabbaab`a`\_`aY  
@HWI-EAS443:3:65:833:929#0/1  
CAACGGCATCATATTCCATGCTTTTGGCTGGACCATGGGC  
+HWI-EAS443:3:65:833:929#0/1  
a^`a\_\_aaabbaa`a`\_\_`\_]`\_\_\_\_`a`\_]\_]¥¥^YZW  
@HWI-EAS443:3:65:900:1803#0/1  
CTGGTACATCTGTTCATCCTCAAGAATCCCCCTTTGGCTT  
+HWI-EAS443:3:65:900:1803#0/1  
]`W`]b]]bb\_\_Na¥\_a`ab]bb\_`b`]aaa`ba\_Za\_Y¥  
@HWI-EAS443:3:65:926:302#0/1  
CCAAGTCCATTGTTTATCATGTTGTTCTTTTACTGTTA  
+HWI-EAS443:3:65:926:302#0/1  
aa^]PI\_`^Yaa[]\_`R\_Q]a[a`T`V`\_a`aPOWS[Y¥]

@HWI-EAS443:3:65:958:509#0/1  
GAAAATCAAATCCTCGAATGTTCTGGCGATGATTACAT  
+HWI-EAS443:3:65:958:509#0/1  
aaaaaaaa`bab`aaaaaaaa`aa``aaaa`\_a\_a``¥^\_  
@HWI-EAS443:3:66:1171:190#0/1  
AGTGAATGAAAATCAAATCCTCGAATGTTCTGGCGAT  
+HWI-EAS443:3:66:1171:190#0/1  
`^Q`\_S`XZU[`a^ZOT`]¥[^]\_`a\_a]]¥][[[U]^`^  
@HWI-EAS443:3:66:1253:1236#0/1  
AAAGGAGAGTAAGAGACAACATGACCAAGAAGATGGTCAC  
+HWI-EAS443:3:66:1253:1236#0/1  
\_`a`b¥\_Za\_```bbbababaabaababbabba`ab¥aaa  
@HWI-EAS443:3:66:1358:1087#0/1  
CAACACTAAGTGAATGAAAATCAAATCCTCGAATGTTCT  
+HWI-EAS443:3:66:1358:1087#0/1  
aaaa[Ua^T^aaa^a`a¥Y\_Z]\_`][`Y[\_a¥\_Z][[^\_  
@HWI-EAS443:3:66:1446:246#0/1  
CAGACTTATGATTGGACATTAACAGAAATCAACCGGCAG  
+HWI-EAS443:3:66:1446:246#0/1  
aabbabbbb`bab``\_Tab\_aa\_baaa\_a`ab``aa\_aa  
@HWI-EAS443:3:66:1604:1057#0/1  
GCTCATGTTGATTCCCACTAACTTGCAGGTCCTGTAGAAT  
+HWI-EAS443:3:66:1604:1057#0/1  
aaa`aa¥^aa`aa[`^a`a``¥`¥`\_`\_]`^`^Y¥`\_`Z[a  
@HWI-EAS443:3:66:1662:928#0/1  
TAGGACTTCTTTTTGCTCATGTTGATTCCCACTAACTTGC  
+HWI-EAS443:3:66:1662:928#0/1  
abb`aabbabbbbabaaabababaaabaaaaabaaa]a¥  
@HWI-EAS443:3:66:1697:1742#0/1  
GGACAACACTAAGTGAATGAAAATCAAATCCTCGAATG  
+HWI-EAS443:3:66:1697:1742#0/1  
]a\_\_U^\_\_aZW]\_X¥V\_ab]aa]a^`^`]^`\_`a]U]W]]  
@HWI-EAS443:3:66:1733:1435#0/1  
ACTGTGTCCATGGTGTATCCTGTTCTGTTCCATGGCTGT  
+HWI-EAS443:3:66:1733:1435#0/1  
aa`Yaa`^^`X\_Ya`aa`\_`\_`^^`\_\_aZ`\_`\_]UTBBB  
@HWI-EAS443:3:66:1777:427#0/1  
CAGGTCAATGCTTGCTAGCATTCTGCTGGTATTTGTGTT  
+HWI-EAS443:3:66:1777:427#0/1  
aaaa`aaa`]```a\_`aaa`a`a]aa`\_aaZ`\_`\_`Ya^\_  
@HWI-EAS443:3:66:241:1550#0/1  
TTCAAAGAAAAAGGAGAGTAAGAGACAACATGACCAAGAA  
+HWI-EAS443:3:66:241:1550#0/1  
aaaaa`aaa`\_a``^a\_aS`a`aaaaa\_aZ\_```^`^a\_  
@HWI-EAS443:3:66:266:1530#0/1  
CACATTCCTGAAGTCTGCTTAAAATGGGAGCTAATGGATG  
+HWI-EAS443:3:66:266:1530#0/1  
[¥WYY]aaa`aYZUTVab^`S`a¥]\_[\_a`Y]YZU]Y^]]  
@HWI-EAS443:3:66:379:1405#0/1  
GTGGAATGAAAATCAAATCCTCGAATGTTCTGGCGATG

+HWI-EAS443:3:66:379:1405#0/1  
a`aa`b`bbab`^`b\_b`b``aaaa\_^\_RZ^]aY¥¥ZW\_  
@HWI-EAS443:3:66:380:233#0/1  
GCACCACATTCCCTTATACTGGAGATCCTCCATACAGCCA  
+HWI-EAS443:3:66:380:233#0/1  
a` `` `^YLX^`\_U\_W]XR¥`a^NXSMYVRR¥¥[VLJRM  
@HWI-EAS443:3:66:471:224#0/1  
GAAACTTTAGCTAGGAGCATTTCGCGAAAAGCTTGAACAGT  
+HWI-EAS443:3:66:471:224#0/1  
\_[VTX`\_]^^¥]^`^\_^ZZ\_U¥TYUY[PPUWSUWW[V  
@HWI-EAS443:3:66:474:163#0/1  
GCCGGTTGATTTCTGTTAATGTCCAATCATAAGTCTGGC  
+HWI-EAS443:3:66:474:163#0/1  
aaaa^H` `ZQa¥a[`V`a^`]RY]UYZ\_\_\_\_\_]ZTV]VZT  
@HWI-EAS443:3:66:511:276#0/1  
ATTCGAGGATTTTGATTTTCATTCCACTTAGTGTTGTCCTC  
+HWI-EAS443:3:66:511:276#0/1  
abR`a]aaR\_¥` `a^` `a`]W\_^]Y)`\_Sa[a^`a¥Y¥^  
@HWI-EAS443:3:66:563:1310#0/1  
TATTTATATAGGACTTCTTTTTGCTCATGTTGATTCCCAC  
+HWI-EAS443:3:66:563:1310#0/1  
\_^`Y`b^Ua¥a^Zab`abaaaab`\_aaaa\_aaaa`aaaa`  
@HWI-EAS443:3:66:604:1439#0/1  
CCATGGTCCAGCCAAAAGCATGGAATATGATGCCGTTGCA  
+HWI-EAS443:3:66:604:1439#0/1  
aaa`a\_Raaa\_aa`\_\_\_\_[aa]\_]\_[\_\_\_\_\_^`¥`YUU^^  
@HWI-EAS443:3:66:668:315#0/1  
CAAAATGCCATAAGCACCACATTCCCTTATACTGGAGATC  
+HWI-EAS443:3:66:668:315#0/1  
`a` `aaa`bbbUbbbbbbbbbbabb`bbaab`baaaaaaaa  
@HWI-EAS443:3:66:710:930#0/1  
TCAACACAAGCCAAAGGGAATTCTTGAGGATGAACAGAT  
+HWI-EAS443:3:66:710:930#0/1  
aa¥¥P\_a\_VZaa]ZY[\_`¥^^¥^¥`][`ZY]\_ZRW` `ZT  
@HWI-EAS443:3:66:742:1987#0/1  
CAAAATGCCATAAGCACCACATTCCCTTATACTGGAGATC  
+HWI-EAS443:3:66:742:1987#0/1  
^RYSLFW]]QY¥XXS` `YSWYNX^Y]FUJR` `WVOQLRST  
@HWI-EAS443:3:66:744:1140#0/1  
ATTCAAATGTCCCTGTCTTATTTATATAGGACTTCTTTTT  
+HWI-EAS443:3:66:744:1140#0/1  
ab]bbb^baaba`aa`abaaaaaaa`a¥aa\_a`^aaaaa\_  
@HWI-EAS443:3:66:904:1527#0/1  
CTTTAGCTAGGAGCATTTCGCGAAAAGCTTGAACAGTCTGG  
+HWI-EAS443:3:66:904:1527#0/1  
aaa\_U]baaa`¥\_aaa`\_`aa[]\_Ya`aa`\_`\_`\_U`¥\_W  
@HWI-EAS443:3:66:975:634#0/1  
GTGGAATGAAAATCAAAATCCTCGAATGTTCCCTGGCGATG  
+HWI-EAS443:3:66:975:634#0/1  
aWa` `a`^`a`^`\_` `` `` `^\_^]`^`\_[]^^[^Y^\_YZ^







@HWI-EAS443:3:68:1192:235#0/1  
ATCAACATGAGCAAAAAGAAGTCCTATATAAATAAGACAG  
+HWI-EAS443:3:68:1192:235#0/1  
a`[baUabaa^`aaab`aaa\_a\_a`aaa`\_\_\_\_a^^\_a  
@HWI-EAS443:3:68:1196:953#0/1  
ATTTCTAGCATGGTGGAGGCCATGGTGTCTAGGGCCCGGA  
+HWI-EAS443:3:68:1196:953#0/1  
X[``\_`^TWbb`XZU`aa]ONaZTRYEZJGSaaWR^^FP^B  
@HWI-EAS443:3:68:1245:412#0/1  
TCCTGTTCTGTTCCATGGCTGTATGGAGGATCTCCAGTA  
+HWI-EAS443:3:68:1245:412#0/1  
aaaabaaaaaaaa`a¥`aa¥a\_UJY]`]]`Z]S¥[YVXLQ  
@HWI-EAS443:3:68:1252:17#0/1  
GAGTTCCTCAATGGTGAACAGATCTTCATGATCTCAGAG  
+HWI-EAS443:3:68:1252:17#0/1  
aaa`aab\_\_[\_`b]X`]^[Z¥a^\_Yaa\_\_`a^\_]`]]\_`^`  
@HWI-EAS443:3:68:1276:986#0/1  
GACAACACTAAGTGGAATGAAAATCAAATCCTCGAATGT  
+HWI-EAS443:3:68:1276:986#0/1  
aaaaaa`\_aaaaWaa\_aa````aa`a`a`a^\_\_^a`\_`\_Y  
@HWI-EAS443:3:68:1540:887#0/1  
GTCTTATTTATATAGGACTTCTTTTTGCTCATGTTGATTC  
+HWI-EAS443:3:68:1540:887#0/1  
aaaabZaaa\_a\_a`a`^^a`^aaaa`a\_[[\_`^^]`^^\_W  
@HWI-EAS443:3:68:1651:1083#0/1  
GAGTTCCTCAATGGTGAACAGATCTTCATGATCTCAGAG  
+HWI-EAS443:3:68:1651:1083#0/1  
¥¥`IZ^bbb`b`abJ^`a\_Pabb]^ababYba`aa\_\_ba`  
@HWI-EAS443:3:68:1751:1510#0/1  
ACCGTTGGAATTTCTAGCATGGTGGAGGCCATGGTGTCT  
+HWI-EAS443:3:68:1751:1510#0/1  
]¥]Z][\_`]W\_a]VY]Y[U``UJW[\_`^UQRNOYJVNXQ  
@HWI-EAS443:3:68:218:151#0/1  
TAGGACTTCTTTTTGCTCATGTTGATTCCTACTAATTGC  
+HWI-EAS443:3:68:218:151#0/1  
a[aaaaaaaaab\_a¥aaa`aa```^^^a`\_```\_\_\_\_\_  
@HWI-EAS443:3:68:241:1750#0/1  
CGGTTGATTTCTGTTAATGTCCAATCATAAGTCTGGCGA  
+HWI-EAS443:3:68:241:1750#0/1  
a\_\_Sa`a`\_a`¥[a`\_`¥a`aa`\_a\_aa\_Y\_\_^[\_`^[[  
@HWI-EAS443:3:68:324:402#0/1  
GTCTTATTTATATAGGACTTCTTTTTGCTCATGTTGATTC  
+HWI-EAS443:3:68:324:402#0/1  
a¥UQ¥OP^VRQORONPJPQTQQTZ^Z]UUQ¥YOOXWMXXM  
@HWI-EAS443:3:68:42:1077#0/1  
ACTGGGACAACACTAAGTGGAATGAAAATCAAATCCTC  
+HWI-EAS443:3:68:42:1077#0/1  
aa`a\_]aaaa^`\_a\_a^X`]Z\_^]Y\_]^^^\_a\_]^^U  
@HWI-EAS443:3:68:658:420#0/1  
GGGGACAACACTAAGTGGAATGAAAATCAAATCCTCGAA

+HWI-EAS443:3:68:658:420#0/1  
aa^X`a\_]`aba¥aWb`\_`\_a\_aaaaX^aaaa`\_`a`  
@HWI-EAS443:3:68:706:731#0/1  
GAGTTCTTCAATGGTGAACAGATCTTCATGATCTCAGAG  
+HWI-EAS443:3:68:706:731#0/1  
a[``\_`aaa^^^`X`Z¥Z[a\_\_a`\_\_\_\_a\_\_\_\_]]^``\_`  
@HWI-EAS443:3:68:749:1309#0/1  
CAGCACTTCTGGTACATCTGTTTCATCCTCAAGAATTCCCC  
+HWI-EAS443:3:68:749:1309#0/1  
ababbbaa\_aa]Wba`aa`[]abbaab`aa^Y]a``\_`a`  
@HWI-EAS443:3:68:770:342#0/1  
AGTTCTTCAATGGTGAACAGATCTTCATGATCTCAGAGA  
+HWI-EAS443:3:68:770:342#0/1  
aZYa[aSXNZ¥`\_XVNPX¥Y\_ZZ¥\_]T^\_]XQY\_]^[)]Z  
@HWI-EAS443:3:68:889:229#0/1  
CAACGGCATCATATTCATGCTTTTTGGCTGGACCATGGGC  
+HWI-EAS443:3:68:889:229#0/1  
¥]`aaaaaa\_Z\_aaaaa`\_`¥]ZX¥`\_aXRL[YZ^YQ  
@HWI-EAS443:3:68:996:1868#0/1  
GGCATCATATTCATGCTTTTTGGCTGGACCATGGGCTGGC  
+HWI-EAS443:3:68:996:1868#0/1  
aa\_\_¥ba[b]^^[`\_Zaaa^Z]Q`a¥\_¥\_Z]XOZT[]`T]  
@HWI-EAS443:3:69:1002:1221#0/1  
AATTTCTAGCATGGTGGAGCCATGGTGTCTAGGGCCCGG  
+HWI-EAS443:3:69:1002:1221#0/1  
]bZbaba`]]aa]Jaa]aa\_Ya[U[¥[[\_^^PSY^QUXV  
@HWI-EAS443:3:69:1309:778#0/1  
ACTAAGTGAATGAAAATCAAATCCTCGAATGTTCTGG  
+HWI-EAS443:3:69:1309:778#0/1  
`abbaa[]OW¥]X\_aba\_0`b^baa\_aa^^`^`^\_ZZ¥]¥  
@HWI-EAS443:3:69:1376:1558#0/1  
CAACACTAAGTGAATGAAAATCAAATCCTCGAATGTTCT  
+HWI-EAS443:3:69:1376:1558#0/1  
a`a`MaTRab^aKa\_]\_V^Ya[ab]]]\_`¥`W\_V[^]H\_U  
@HWI-EAS443:3:69:1392:1195#0/1  
ACTGGGACAACACTAAGTGAATGAAAATCAAATCCTC  
+HWI-EAS443:3:69:1392:1195#0/1  
\_¥]XZZb`Sab`bb`¥[YU`^]T`\_`¥[a¥aa]\_`a¥  
@HWI-EAS443:3:69:1407:1860#0/1  
AGGACCTGCAAGTTAGTGGGAATCAACATGAGCAAAAAGA  
+HWI-EAS443:3:69:1407:1860#0/1  
abaaaaaab`a\_aaa]aaa\_a`\_ab^a^`^`^`a`\_`a`\_`  
@HWI-EAS443:3:69:1418:410#0/1  
GGTGTATCCTGTTCTGTTCCATGGCTGTATGGAGGATCT  
+HWI-EAS443:3:69:1418:410#0/1  
ab`babbb\_bbabbbbaaa¥\_baaaab¥[`[^P`\_`S\_V`  
@HWI-EAS443:3:69:1494:2030#0/1  
CGCCAGACTTATGATTGGACATTAACAGAAATCAACCGG  
+HWI-EAS443:3:69:1494:2030#0/1  
ab[a`]abbabaaaa\_bbb`a`abbaaa^aba\_^ab0`^`

@HWI-EAS443:3:69:1595:60#0/1  
CAAAATGCCATAAGCACCACATTCCTTATACTGGAGATC  
+HWI-EAS443:3:69:1595:60#0/1  
^Ta]]¥\_\_a]^`¥L\_]V]V[`XGVY]aa`\_\_\_\_NVaW[K  
@HWI-EAS443:3:69:1602:449#0/1  
TTTCACAATCACTGGGACAACACTAAGTGGAATGAAAAT  
+HWI-EAS443:3:69:1602:449#0/1  
`¥aW`a\_UaUa\_ZOW`aTW[`\_\_Q\_aVSM[aX[\_\_^\_`¥a  
@HWI-EAS443:3:69:1700:1760#0/1  
AAATGTCCCTGTCTTATTTATATAGGACTTCTTTTTGCTC  
+HWI-EAS443:3:69:1700:1760#0/1  
abbbbabaabbaab]abbbabaaa`a`aaa\_aaa`aa\_a\_  
@HWI-EAS443:3:69:1778:1384#0/1  
TGCCGGTTGATTTCTGTTTAATGTCCAATCATAAGTCTGG  
+HWI-EAS443:3:69:1778:1384#0/1  
a\_aabb\_ba\_aaaabaaa`¥¥ab\_`¥^[^`a`a`¥TW\_\_W  
@HWI-EAS443:3:69:197:977#0/1  
CACAAAGCCAAAGGGGAATTCTTGAGGATGAACAGATGTAC  
+HWI-EAS443:3:69:197:977#0/1  
`bba^`bb`Saa`Z]^`\_aaaa`a[]\_aa`a```\_\_Ya`  
@HWI-EAS443:3:69:28:1745#0/1  
AGAAAAAGGAGAGTAAGAGACAACATGACCAAGAAGATGG  
+HWI-EAS443:3:69:28:1745#0/1  
Xa]]YaYY]\_YQ¥R[\_`^`bababaW]Ya`¥^aa¥¥]]\_]  
@HWI-EAS443:3:69:389:739#0/1  
CAAAATGCCATAAGCACCACATTCCTTATACTGGAGATC  
+HWI-EAS443:3:69:389:739#0/1  
abaa\_`abba\_a`^aaaaaaaa`a`\_`\_`a\_]`\_\_ZP^\_  
@HWI-EAS443:3:69:420:1665#0/1  
AGTTCTTCAATGGTGAACAGATCTTCATGATCTCAGAGA  
+HWI-EAS443:3:69:420:1665#0/1  
]SVY`^^a\_S^\_X]¥RYaa][\_aaaab\_¥ab[a``ZT`^`  
@HWI-EAS443:3:69:442:20#0/1  
ACTAAGTGGAATGAAAATCAAATCCTCGAATGTTCTGG  
+HWI-EAS443:3:69:442:20#0/1  
aaba]``ba`aaaaaaaa`a[aa``\_\_a\_`\_`\_]`\_Y¥\_]`  
@HWI-EAS443:3:69:517:862#0/1  
GGGACAACACTAAGTGGAATGAAAATCAAATCCTCGAA  
+HWI-EAS443:3:69:517:862#0/1  
aabaaba]aaabb]b\_ba`aa[`a\_aa\_a[N\_aaa`a`]a  
@HWI-EAS443:3:69:773:1478#0/1  
CAAAATGCCATAAGCACCACATTCCTTATACTGGAGATC  
+HWI-EAS443:3:69:773:1478#0/1  
^PZY[Ua\_¥TYZ\_aa\_`X`aa^\_VORX[aab]aYH^aaX¥  
@HWI-EAS443:3:69:915:603#0/1  
CTGTTCACTCAAGAATTCCTTTGGCTTGTGTTGAGA  
+HWI-EAS443:3:69:915:603#0/1  
\_`a]\_^^`U\_Z¥`aaa¥[\_[\_Z\_aa\_YY\_]`^0^YZZTXL  
@HWI-EAS443:3:69:961:993#0/1  
TGTTCACTCAAGAATTCCTTTGGCTTGTGTTGAGAA

+HWI-EAS443:3:69:961:993#0/1  
a`a`bbaaaaabaa\_`ba^aa\_aaaa\_]aa\_^^`Y]``\_`  
@HWI-EAS443:3:6:1014:505#0/1  
CTCTGTGCTTGTAATTAGTCATCATCTTTCTCACAACA  
+HWI-EAS443:3:6:1014:505#0/1  
a`aa`U\_`bbb`^`J]aba`UNZ\_a`Z`b^G¥a]\_`Q`  
@HWI-EAS443:3:6:1127:1696#0/1  
AGCACTTCTGGTACATCTGTTTCATCCTCAAGAATCCCCT  
+HWI-EAS443:3:6:1127:1696#0/1  
a\_`aaa`ZaaX]baaa\_[\_`\_a`aa][\_`^`\_`X¥Ya^S^RT`  
@HWI-EAS443:3:6:1184:365#0/1  
ACTGGGACAACACTAAGTGGAATGAAAATCAAAATCCTC  
+HWI-EAS443:3:6:1184:365#0/1  
aS\_bba]``\_a`\_]`\_]\_^Q`a`\_\_a`\_a`\_]```\_\_^X\_¥  
@HWI-EAS443:3:6:1193:1127#0/1  
TGGGACAACACTAAGTGGAATGAAAATCAAAATCCTCGA  
+HWI-EAS443:3:6:1193:1127#0/1  
abaabbaY^[T^a]L\_\_b^¥¥aaa\_^^a\_a^^]¥]V^a\_`  
@HWI-EAS443:3:6:1246:572#0/1  
GCCGGTTGATTTCTGTTAATGTCCAATCATAAGTCTGGC  
+HWI-EAS443:3:6:1246:572#0/1  
a]Z` `[a[DT^[[aa[[\_U]¥aTSY]WWWZM`^\_PS`BB  
@HWI-EAS443:3:6:1264:870#0/1  
CACATTCCCTTATACTGGAGATCCTCCATACAGCCATGGA  
+HWI-EAS443:3:6:1264:870#0/1  
a[U\_ab]\_a`\_Yabaaa]S\_a\_SVZ^[`aaaa`U¥aa[\_  
@HWI-EAS443:3:6:127:77#0/1  
GGTGAACAGATCTTCATGATCTCAGAGAACTCTTCTTTC  
+HWI-EAS443:3:6:127:77#0/1  
ab¥bb`a^`\_Ya\_a``aaa\_a\_a\_^\_\_a\_\_]a^`a^a\_\_U  
@HWI-EAS443:3:6:1648:1227#0/1  
GGGAGTCTCGATACTGAATCTTGACAAAAGAAATACACC  
+HWI-EAS443:3:6:1648:1227#0/1  
aaa```\_a`aaaa\_aa]\_a]`aaa\_]\_\_`\_a^`^\_\_]\_VX  
@HWI-EAS443:3:6:1666:733#0/1  
GGTTGATTTCTGTTAATGTCCAATCATAAGTCTGGCGAC  
+HWI-EAS443:3:6:1666:733#0/1  
aa`bb`aaa\_abaaaa`ab`Y\_\_a`Zaaa^¥¥R`\_^]a\_V  
@HWI-EAS443:3:6:219:813#0/1  
CAAGCTTTTCGCAAATGCTCCTAGCTAAAGTTTCAACAAA  
+HWI-EAS443:3:6:219:813#0/1  
Y`aa^aaaa\_```abbXb\_abb^a`\_]`a[aaaa]aab`  
@HWI-EAS443:3:6:242:174#0/1  
ATTCAAATGTCCCTGTCTTATTTATATAGGACTTCTTTTT  
+HWI-EAS443:3:6:242:174#0/1  
abbaababb\_`a`bbaa`bababaWaaa[a`\_`\_^aaaa\_  
@HWI-EAS443:3:6:437:853#0/1  
CATTCGAGGATTTTGATTTTCATTCCACTTAGTGTGTCC  
+HWI-EAS443:3:6:437:853#0/1  
aY]^a^Z[]^a\_]baa`\_X]`a]]¥0\_\_aaRZY[]LW\_

@HWI-EAS443:3:6:531:1982#0/1  
CAAATGCCATAAGCACCACATTCCTTATACTGGAGATC  
+HWI-EAS443:3:6:531:1982#0/1  
VVba¥[¥`bbbbbbbaabbbaaa\_bYaaaabaaa^aab`  
@HWI-EAS443:3:6:555:1546#0/1  
CTGCCGGTTGATTTCTGTTTAATGTCCAATCATAAGTCTG  
+HWI-EAS443:3:6:555:1546#0/1  
aaU]^`\_\_\_a`baba\_]Vaaaa¥Y^U]`b`N¥abY[FX`a  
@HWI-EAS443:3:6:570:907#0/1  
CTTGGTGTATTTCTTTTGTCCAAGATTCAGTATCGAGACT  
+HWI-EAS443:3:6:570:907#0/1  
abbaaaaaabbabbbbbbabbbbbbbaabbaa`a  
@HWI-EAS443:3:6:618:1182#0/1  
CTTTGTTGAAACTTTAGCTAGGAGCATTTGCGAAAAGCTT  
+HWI-EAS443:3:6:618:1182#0/1  
abbbbbbbbbbbbbbb`bbabababb`bb\_baaaa`\_aa  
@HWI-EAS443:3:6:815:1078#0/1  
AATTTCTAGCATGGTGGAGCCATGGTGTCTAGGGCCCGG  
+HWI-EAS443:3:6:815:1078#0/1  
\_QT`\_WW\_R]ZW]Z\_¥`^ZX]a\_PPYOVSRHQWS[B  
@HWI-EAS443:3:6:82:1453#0/1  
GTATCCTGTTCCCTGTTCCATGGCTGTATGGAGGATCTCCA  
+HWI-EAS443:3:6:82:1453#0/1  
aUaa`X`a^`\_aaZ`aRVX\_¥][UBBBBBBBBBBBBBB  
@HWI-EAS443:3:6:871:278#0/1  
GGTCCAGCCAAAAGCATGGAATATGATGCCGTTGCAACTA  
+HWI-EAS443:3:6:871:278#0/1  
aa]a\_`Y`]Za\_Y[\_]`\_a^`^`\_WUQY^]V^XVXB  
@HWI-EAS443:3:6:910:766#0/1  
CAAATGCCATAAGCACCACATTCCTTATACTGGAGATC  
+HWI-EAS443:3:6:910:766#0/1  
abb\_bbbb`babaa`bb\_babbb``\_abbaba`bbaaa`]  
@HWI-EAS443:3:6:982:1985#0/1  
CGGTTGATTTCTGTTTAATGTCCAATCATAAGTCTGGCGA  
+HWI-EAS443:3:6:982:1985#0/1  
aba¥a`0bbbbbb`bbabab`¥bbabTb`ba`¥aaaZPba  
@HWI-EAS443:3:70:1066:849#0/1  
GAGTTCTTCAATGGTGAACAGATCTTCATGATCTCAGAG  
+HWI-EAS443:3:70:1066:849#0/1  
¥J¥¥aaa`abaaaaWa`\_a\_aaaa`\_\_\_a]a\_\_^a`\_^a  
@HWI-EAS443:3:70:115:455#0/1  
GGACAACACTAAGTGAATGAAAATCAAAATCCTCGAATG  
+HWI-EAS443:3:70:115:455#0/1  
a[Y\_^]aaa`abaXa^`aaaa``aa\_aa\_P\_b`aaa`aa\_  
@HWI-EAS443:3:70:1366:978#0/1  
CAGGGACATTTGAATTCACAAGCTTTTTTTATCGCTATGG  
+HWI-EAS443:3:70:1366:978#0/1  
`bbabbbbbbb`bbabbbbababbabbaaa^``aaa  
@HWI-EAS443:3:70:1497:466#0/1  
ATCAAAATCCTCGAATGTTCTGGCGATGATTACATATAT

+HWI-EAS443:3:70:1497:466#0/1  
¥abab¥V`\_a\_ba^^baY^aX]```baab^Z`YST\_aaa\_  
@HWI-EAS443:3:70:1578:1088#0/1  
ATTCGAGGATTTTGATTTTCATTCCACTTAGTGTTGTCCC  
+HWI-EAS443:3:70:1578:1088#0/1  
abbab\_bbabbbabababbaabaa\_a\_aaaa\_a\_a`a\_\_`  
@HWI-EAS443:3:70:170:1811#0/1  
CAAATGTCCCTGTCTTATTTATATAGGACTTCTTTTTGCT  
+HWI-EAS443:3:70:170:1811#0/1  
aba¥aa^baa]a[aa`\_`\_\_`\_¥^`\_]\_\_^^\_\_^]^^]]  
@HWI-EAS443:3:70:266:401#0/1  
GTCCATGGTGTATCCTGTTCCCTGTTCCATGGCTGTATGGA  
+HWI-EAS443:3:70:266:401#0/1  
a^b`^^aa[a^aabaaa`^aa`^Xaaa`aa\_a^]RNVUXI  
@HWI-EAS443:3:70:311:1941#0/1  
CGCCAGACTTATGATTGGACATTAACAGAAATCAACCGG  
+HWI-EAS443:3:70:311:1941#0/1  
WQa`[a¥¥a^aaa^T`a\_abU`]a[W`b`]SZ^aba^^V^  
@HWI-EAS443:3:70:348:631#0/1  
CTAGCATGGTGGAGGCCATGGTGTCTAGGGCCCGGATTGA  
+HWI-EAS443:3:70:348:631#0/1  
`[[a¥[XaZF\_R]YL¥]WVPTP^UXSVR^[XX`X]ZVQFX  
@HWI-EAS443:3:70:37:815#0/1  
CATACAGCCATGGAACAGGAACAGGATACACCATGGACAC  
+HWI-EAS443:3:70:37:815#0/1  
abba`^abaZ\_] [aaa^^aa]b`a\_\_aa]R]a\_\_`]]U\_]  
@HWI-EAS443:3:70:432:506#0/1  
CGCAAAATGCCATAAGCACCACATTCCTTATACTGGAGA  
+HWI-EAS443:3:70:432:506#0/1  
abbb`bbabb`b`^\_aabbbaaaaaa\_aaababa¥]```aa  
@HWI-EAS443:3:70:545:346#0/1  
CAAAGAAAAAGGAGAGTAAGAGACAACATGACCAAGAAGA  
+HWI-EAS443:3:70:545:346#0/1  
a]MS\_W^WNXYVY^^\_G^U¥^TX¥][X`ZaaX][X¥XY`X  
@HWI-EAS443:3:70:547:676#0/1  
CGAGGATTTTGATTTTCATTCCACTTAGTGTTGTCCCCAG  
+HWI-EAS443:3:70:547:676#0/1  
ab¥a^Z^\_a\_a]a`^aaa^a`aa]a`\_a]`]\_\_^`\_`\_ [W¥  
@HWI-EAS443:3:70:565:552#0/1  
GGTGAACAGATCTTCATGATCTCAGAGAACTCTTCTTTC  
+HWI-EAS443:3:70:565:552#0/1  
aa0[¥PST^YT\_Y[¥a`\_`\_\_\_U`\_Z`\_XHR```ZT[\_\_\_N  
@HWI-EAS443:3:70:668:1502#0/1  
TCTTCACATTCCTGAAGTCTGCTTAAAATGGGAGCTAATG  
+HWI-EAS443:3:70:668:1502#0/1  
]aa[baaaYXYb\_`^Q]Ia][aZ]YJX`aIU¥GNWI`````]  
@HWI-EAS443:3:70:742:411#0/1  
CAACACTAAGTGAATGAAAATCAAAATCCTCGAATGTTC  
+HWI-EAS443:3:70:742:411#0/1  
aaaaaaaa\_¥a\_baaaaaaaa`^aaaaaaaa`\_\_a\_\_`a[^\_`

@HWI-EAS443:3:70:930:899#0/1  
CAATGGTGAACAGATCTTCATGATCTCAGAGAACTCTTC  
+HWI-EAS443:3:70:930:899#0/1  
`YUb\_b`abbabbW[ba`T`]Y`\_baabba`aaWbbaa`U  
@HWI-EAS443:3:71:1042:1771#0/1  
AGCGATAAAAAAGCTTGTGAATTCAAATGTCCCTGTCTT  
+HWI-EAS443:3:71:1042:1771#0/1  
a\_baa`aa^a\_\_[¥a`Sa`\_]KPZ`^^\_S\_^`]TNK\_^  
@HWI-EAS443:3:71:1072:571#0/1  
GCCGGTTGATTTCTGTTAATGTCCAATCATAAGTCTGGC  
+HWI-EAS443:3:71:1072:571#0/1  
a\_abbZaaYaaaa\_a^aa\_a`a\_\_`a^^a\_aV`X¥]\_¥X  
@HWI-EAS443:3:71:1083:270#0/1  
CTGGGGACAACACTAAGTGAATGAAAATCAAAATCCTCG  
+HWI-EAS443:3:71:1083:270#0/1  
ab``]R]bb]][`ab]aZb\_a¥^`a^a\_aa`aa\_aY^]\_`  
@HWI-EAS443:3:71:1101:1317#0/1  
GGAACATTCGAGGATTTTGATTTTCATTCCACTTAGTGTT  
+HWI-EAS443:3:71:1101:1317#0/1  
P]O]\_Y\_Y\_ab^NTZ\_Y[PU¥\_U`\_U^¥¥Z[¥][\_R^VWF  
@HWI-EAS443:3:71:1279:1050#0/1  
ACGGCATCATATCCATGCTTTTGGCTGGACCATGGGCTG  
+HWI-EAS443:3:71:1279:1050#0/1  
`ab`aa``aaa\_`¥`aaa^\_baa`\_\_a\_SZZ\_¥\_XZ[NY`  
@HWI-EAS443:3:71:1300:1025#0/1  
GTTCTGTTCCATGGCTGTATGGAGGATCTCCAGTATAAG  
+HWI-EAS443:3:71:1300:1025#0/1  
[`Y^abaaabZ\_\_ab\_^aH]X[`^\_]¥¥`]Y\_N¥XY[G[\_  
@HWI-EAS443:3:71:1352:700#0/1  
GAGTTCTTCAATGGTGAACAGATCTTCATGATCTCAGAG  
+HWI-EAS443:3:71:1352:700#0/1  
a\_b`aaa\_aababb\_a^baaaba\_abaab`aaaa`^b`aa  
@HWI-EAS443:3:71:1706:1625#0/1  
TTTGAATTCACAAGCTTTTTTATCGCTATGGATTTGTGG  
+HWI-EAS443:3:71:1706:1625#0/1  
aaaa``aaa^[a`\_Z``\_`^a`^^Y\_[^^]^^Z\_^\_Y[WZ  
@HWI-EAS443:3:71:19:440#0/1  
CATTGAGGATTTTGATTTTCATTCCACTTAGTGTTGTCC  
+HWI-EAS443:3:71:19:440#0/1  
aabbbaababaaaaabaaaaabaaaaa¥^aaaa]a\_a``a^  
@HWI-EAS443:3:71:240:451#0/1  
CGCCAGACTTATGATTGGACATTAACAGAAATCAACCGG  
+HWI-EAS443:3:71:240:451#0/1  
``a\_Q`X`a]THG¥\_aU¥¥NXY\_¥J¥\_^Z^VX\_``[]Y]  
@HWI-EAS443:3:71:279:292#0/1  
AATTTCTAGCATGGTGGAGCCATGGTGTCTAGGGCCCGG  
+HWI-EAS443:3:71:279:292#0/1  
^]`^aa^aa¥Xa]`¥F¥]^VU`^VPUYU[S[UVOPYPYUUU  
@HWI-EAS443:3:71:327:1381#0/1  
GTTGATTTCTGTTAATGTCCAATCATAAGTCTGGCGACC

+HWI-EAS443:3:71:327:1381#0/1  
a\_a^^\_aaa`a\_`^\_P\_`V`a`a\_`^`X`^T`\_`^^`\_`[^Y  
@HWI-EAS443:3:71:348:1749#0/1  
CTGGAGATCCTCCATACAGCCATGGAACAGGAACAGGATA  
+HWI-EAS443:3:71:348:1749#0/1  
a`\_`^`[Zaaa`aaaaab```a\_[Z\_a`a\_]`\_a\_`¥]¥¥  
@HWI-EAS443:3:71:39:768#0/1  
GATTTTCATTCCACTTAGTGTTGTCCCCAGTGATTGTGAA  
+HWI-EAS443:3:71:39:768#0/1  
]L\_a`bb¥bbaaaaa]`Ya`aa`aabaa\_`UVa\_Ha^a  
@HWI-EAS443:3:71:48:899#0/1  
TGCCGGTTGATTTCTGTTTAATGTCCAATCATAAGTCTGG  
+HWI-EAS443:3:71:48:899#0/1  
abbbbb`b`a`aabababa\_\_bb`bb`aaaaabaa]a`Z\_  
@HWI-EAS443:3:71:548:813#0/1  
CAAAGAAAAAGGAGAGTAAGAGACAACATGACCAAGAAGA  
+HWI-EAS443:3:71:548:813#0/1  
abbabaZZ¥aab\_aaaX[aaaab`abba^aaa^a[^`Z\_a`  
@HWI-EAS443:3:71:593:259#0/1  
TGAATTCACAAGCTTTTTTTATCGCTATGGATTTGTGGCT  
+HWI-EAS443:3:71:593:259#0/1  
ababbaa]aaa```aaaaaaa\_aaa\_aa]X``a`]^`\_^¥  
@HWI-EAS443:3:71:640:1640#0/1  
AAAATGCCATAAGCACCATTCCTTATACTGGAGATCC  
+HWI-EAS443:3:71:640:1640#0/1  
aZ]¥a]ababa]a\_]`[Y^a]Zaa[\_\_baaXYT[]][RP^\_  
@HWI-EAS443:3:72:1066:426#0/1  
AACACTAAGTGAATGAAAATCAAAATCCTCGAATGTTCC  
+HWI-EAS443:3:72:1066:426#0/1  
aaaa^baK\_Jbaaba^aa`bab`b`adWa`aa^aa`\_\_]  
@HWI-EAS443:3:72:1105:634#0/1  
CGGTTGATTTCTGTTTAATGTCCAATCATAAGTCTGGCGA  
+HWI-EAS443:3:72:1105:634#0/1  
abb`b`]^`bbaababbbbaa`aaaa`aaaa`]aaa^^\_  
@HWI-EAS443:3:72:1119:515#0/1  
ATTTCTAGCATGGTGGAGGCCATGGTGTCTAGGGCCCGGA  
+HWI-EAS443:3:72:1119:515#0/1  
aabb`aab¥aab`F`aaa\_\_`a`^W`^¥^\_^]\_¥\_V]\_]\_  
@HWI-EAS443:3:72:1225:356#0/1  
GGGGACAACACTAAGTGAATGAAAATCAAAATCCTCGAA  
+HWI-EAS443:3:72:1225:356#0/1  
aa^aW`]H\_a]`NRa\_aaY\_\_a[Z¥`\_`T\_a^WHPa¥^YM  
@HWI-EAS443:3:72:1244:13#0/1  
ATTTCTAGCATGGTGGAGGCCATGGTGTCTAGGGCCCGGA  
+HWI-EAS443:3:72:1244:13#0/1  
abba`aZ\_Z\_aba[``^`\_\_NU\_TU^P`YQESZYQMPPYXQ  
@HWI-EAS443:3:72:1260:1125#0/1  
GTTCTTCAATGGTGAACAGATCTTCATGATCTCAGAGAA  
+HWI-EAS443:3:72:1260:1125#0/1  
a]abaa\_a\_ba^[a^`a``a^a^^`\_a`\_a`\_a]^Za`]



@HWI-EAS443:3:72:153:1349#0/1  
CTGCCGGTTGATTTCTGTTTAATGTCCAATCATAAGTCTG  
+HWI-EAS443:3:72:153:1349#0/1  
a\_Q\_aa¥^]`Z[aa\_\_\_HVZZ`\_YX`a]Z]][[[]TR^YS  
@HWI-EAS443:3:72:1605:1530#0/1  
GGACTTCTTTTTGCTCATGTTGATTCCCCTAACTTGCGAG  
+HWI-EAS443:3:72:1605:1530#0/1  
[^`ab`)]`\_aaa[aa`\_NX`WW]XZPPW¥^aaa^Z]W\_V^  
@HWI-EAS443:3:72:1607:1511#0/1  
CAAGCTTTTCGCAAATGCTCCTAGCTAAAGTTTCAACAAA  
+HWI-EAS443:3:72:1607:1511#0/1  
abbb]^`aa]a^abaUT]b\_a\_aa¥^\_]^^X)`S`]W``a  
@HWI-EAS443:3:72:1616:838#0/1  
ACTAAGTGAATGAAAATCAAATCCTCGAATGTTCTGG  
+HWI-EAS443:3:72:1616:838#0/1  
aabaab`baabbbbaaab\_aaaaa\_a`aaaa\_a\_\_`aa  
@HWI-EAS443:3:72:1649:1540#0/1  
ACTAAGTGAATGAAAATCAAATCCTCGAATGTTCTGG  
+HWI-EAS443:3:72:1649:1540#0/1  
aaa`\_¥[baabbaa``ab\_aaaaa^^`¥^`aa]aUV\_\_¥  
@HWI-EAS443:3:72:1698:1882#0/1  
GAGTCTTCAATGGTGAACAGATCTTCATGATCTCAGAG  
+HWI-EAS443:3:72:1698:1882#0/1  
aa\_\_Z[b[0\_RW^aI]¥aa`]V\_YP`¥Q\_^\_]^Z`Ua`aY  
@HWI-EAS443:3:72:241:255#0/1  
GAGTCTTCAATGGTGAACAGATCTTCATGATCTCAGAG  
+HWI-EAS443:3:72:241:255#0/1  
`a`^a\_aaaaaa`Waaa^^aa[Zaa`\_\_\_aa^Y^]^Z`\_  
@HWI-EAS443:3:72:428:905#0/1  
ATCAAATCCTCGAATGTTCTGGCGATGATTACATATAT  
+HWI-EAS443:3:72:428:905#0/1  
YaaS]XIPZ¥Z¥¥YU`b\_a`]XZ]¥VYWSHZXQZ¥]W]W[  
@HWI-EAS443:3:72:464:459#0/1  
GTCCAGCCAAAAGCATGGAATATGATGCCGTTGCAACTAC  
+HWI-EAS443:3:72:464:459#0/1  
`ababa`aa]a\_¥aa^\_a^aa`aa``a]\_aY]\_\_\_\_\_X^`\_  
@HWI-EAS443:3:72:465:28#0/1  
GTTCTTCAATGGTGAACAGATCTTCATGATCTCAGAGAA  
+HWI-EAS443:3:72:465:28#0/1  
a\_````¥`\_`a`¥a`YT[^\_YS¥[^¥YY\_Y^[¥]]Z¥^U¥  
@HWI-EAS443:3:72:522:1352#0/1  
ACTTTGTTGAACTTTAGCTAGGAGCATTTGCGAAAAGCT  
+HWI-EAS443:3:72:522:1352#0/1  
]]baaba[]`^Ua][a^bZ[\_\_\_YY^)``[]HZa`aV^\_  
@HWI-EAS443:3:72:562:1246#0/1  
ATTTATATAGGACTTCTTTTTGCTCATGTTGATTCCCCT  
+HWI-EAS443:3:72:562:1246#0/1  
¥a\_[]`a¥^¥Yabbaa^^\_aYaa`^`aT[\_^\_a\_aa`aa  
@HWI-EAS443:3:72:606:73#0/1  
GCTCATGTTGATTCCCCTAACTTGCGAGTCTGTAGAAT

+HWI-EAS443:3:72:606:73#0/1  
aaa^[a^ab[`a][`\_a^a[^YP^`\_[^U\_`YV]Z[[  
@HWI-EAS443:3:72:711:1717#0/1  
TTCAAATGTCCCTGTCTTATTTATATAGGACTTCTTTTTG  
+HWI-EAS443:3:72:711:1717#0/1  
abbabaaa\_aaaa`\_aaa`aaaaa`a\_¥^`aaa`a\_\_`  
@HWI-EAS443:3:72:770:1097#0/1  
CGAGGATTTTGATTTTCATTCCACTTAGTGTTGCCCCAG  
+HWI-EAS443:3:72:770:1097#0/1  
\_] [YT[aaaaaXaaa\_aa`aa\_\_aa\_\_\_Sa^`\_^`\_a` [  
@HWI-EAS443:3:72:818:1318#0/1  
ATTTCTAGCATGGTGGAGGCCATGGTGTCTAGGGCCCGGA  
+HWI-EAS443:3:72:818:1318#0/1  
\_¥^`\_baab`\_\_aaV]]`¥^`\_aZWY][^Y`\_Z]a^ZY  
@HWI-EAS443:3:72:853:834#0/1  
CCAGCGCAAAATGCCATAAGCACCACATTCCTTATACTG  
+HWI-EAS443:3:72:853:834#0/1  
aZ[`[¥^aa¥[\_`aYa\_U\_a\_Q[U]Y¥^TRQ¥`\_]\_\_]  
@HWI-EAS443:3:72:906:1677#0/1  
GAGTCTTCAATGGTGGAACAGATCTTCATGATCTCAGAG  
+HWI-EAS443:3:72:906:1677#0/1  
`a^`aYa`ba]^VHLa^^a`a\_¥S\_^\_U¥RLK\_SXWa^  
@HWI-EAS443:3:72:944:775#0/1  
GTCTCGATACTGAATCTTGGACAAAAGAAATACACCAAGA  
+HWI-EAS443:3:72:944:775#0/1  
aaaa`a`aa\_aaaaa\_aaa`\_a\_a\_a\_\_a`a`\_`\_`  
@HWI-EAS443:3:73:1007:1929#0/1  
GTTGATTTCTGTTAATGTCCAATCATAAGTCTGGCGACC  
+HWI-EAS443:3:73:1007:1929#0/1  
a``]¥aaa`^aWaaaaaTH\_Yaa`]]`aaaZU^\_W[^\_^]  
@HWI-EAS443:3:73:1127:337#0/1  
CATCAATCCGGGCCCTAGACACCATGGCCTCCACCATGCT  
+HWI-EAS443:3:73:1127:337#0/1  
ab`aaaababaa\_X^ab\_\_Saaa`\_]a]¥¥aI[\_\_\_W]  
@HWI-EAS443:3:73:117:705#0/1  
GTTGGAATTTCTAGCATGGTGGAGGCCATGGTGTCTAGGG  
+HWI-EAS443:3:73:117:705#0/1  
aWaabaaaaa`^`\_a\_aZSa]^^^`\_U[XSRU[NQZ^W  
@HWI-EAS443:3:73:1200:1583#0/1  
CGAGGATTTTGATTTTCATTCCACTTAGTGTTGCCCCAG  
+HWI-EAS443:3:73:1200:1583#0/1  
`a¥aa\_aaaaa¥a^aaba`aaaaa`aaX`[a`\_a`][a`  
@HWI-EAS443:3:73:127:971#0/1  
CAGTGATAAAGAACAACATGATAAACAATGACCTTGGACC  
+HWI-EAS443:3:73:127:971#0/1  
\_W\_] [R[]^W¥Z¥^¥IZ`\_a^^^b`^^`Waa``]XZ`aa  
@HWI-EAS443:3:73:1660:875#0/1  
TTGAATTCACAAGCTTTTTTATCGCTATGGATTTGTGGC  
+HWI-EAS443:3:73:1660:875#0/1  
JRa^K`[¥Yaab`\_`\_a\_] ]^V]¥`bYXMPP`W``YVVI

@HWI-EAS443:3:73:1696:1218#0/1  
ACCGGTTGGAATTTCTAGCATGGTGGAGGCCATGGTGTCT  
+HWI-EAS443:3:73:1696:1218#0/1  
`]abbab`[`aaaa`aabY`ab^\_a^`]\_]\_TaXaTMZ[Y  
@HWI-EAS443:3:73:1699:849#0/1  
CTATATAAATAAGACAGGGACATTTGAATTCACAAGCTTT  
+HWI-EAS443:3:73:1699:849#0/1  
abbbbbbbbbbaabbbbaabbbbbbbbbbaabba\_abb  
@HWI-EAS443:3:73:174:1503#0/1  
GTGGGAATCAACATGAGCAAAAAGAAGTCCTATATAAATA  
+HWI-EAS443:3:73:174:1503#0/1  
]bab¥S[ab\_babbaabaa^baaaVa`babbaba`baaa  
@HWI-EAS443:3:73:1754:110#0/1  
TGGTGTATCCTGTTCCATGGCTGTATGGAGGATC  
+HWI-EAS443:3:73:1754:110#0/1  
abaR`^`a^¥]a\_^XV]a^^NRT[a]U[BBBBBBBBBBB  
@HWI-EAS443:3:73:230:2031#0/1  
AAAATCAAAATCCTCGAATGTTCCCTGGCGATGATTACATA  
+HWI-EAS443:3:73:230:2031#0/1  
`]a]\_ba\_^`\_aa^aUaa\_]V^\_\_[Y[a]\_XX][[]][^  
@HWI-EAS443:3:73:40:211#0/1  
ATGGAGGATCTCCAGTATAAGGGAATGTGGTGCTTATGGC  
+HWI-EAS443:3:73:40:211#0/1  
aa`\_^]\_LZbaaa`bS]`Z¥Z¥Y0^¥ST[]UZX\_\_\_\_]\_\_\_\_  
@HWI-EAS443:3:73:428:1957#0/1  
TGCCGGTTGATTTCTGTTAATGTCCAATCATAAGTCTGG  
+HWI-EAS443:3:73:428:1957#0/1  
[^`\_W]a\_RYb\_bbXP[aababa\_bb\_\_ab`a¥`\_H]aaV  
@HWI-EAS443:3:73:663:1679#0/1  
GGAATTTCTAGCATGGTGGAGGCCATGGTGTCTAGGGCCC  
+HWI-EAS443:3:73:663:1679#0/1  
a`V]\_`aaabaaaZa`Ma^aWX^aa¥Y¥UG[YSRV¥U^S]  
@HWI-EAS443:3:73:834:1491#0/1  
GTTCTTCAATGGTGAACAGATCTTCATGATCTCAGAGAA  
+HWI-EAS443:3:73:834:1491#0/1  
^`abaab\_^\_aaXaaaa`\_aaaaaaaa`^````aa\_`\_\_[  
@HWI-EAS443:3:73:911:1495#0/1  
CAAAATGCCATAAGCACCACATTCCTTATACTGGAGATC  
+HWI-EAS443:3:73:911:1495#0/1  
aZ`[]^]baabaa]ababb`a`a^`\_a\_a[a\_\_`¥`aa\_`  
@HWI-EAS443:3:74:1061:371#0/1  
GGCTGTATGGAGGATCTCCAGTATAAGGGAATGTGGTGCT  
+HWI-EAS443:3:74:1061:371#0/1  
\_`\_a`¥]¥a\_^\_¥[Z[X]¥V[SSVRQ][VTUWWLV[NXPT  
@HWI-EAS443:3:74:1079:1209#0/1  
ATGGTGAACAGATCTTCATGATCTCAGAGAACTCTTCTT  
+HWI-EAS443:3:74:1079:1209#0/1  
aaab]abbb\_\_babaaaabaaaaaaaa`aaaaaa`aa\_aa  
@HWI-EAS443:3:74:1097:1169#0/1  
ATCCTGTTCCCTGTTCCATGGCTGTATGGAGGATCTCCAGT

+HWI-EAS443:3:74:1097:1169#0/1  
\_aaaa`baaa`ababba^aaaSY[TTZ\_\_[T]¥]UR\_Q  
@HWI-EAS443:3:74:1142:1512#0/1  
CTTCTGGTACATCTGTTTCATCCTCAAGAATCCCCTTTGG  
+HWI-EAS443:3:74:1142:1512#0/1  
`aZ`\_^PM[V`^`^aHW]XZ\_^UY^]]¥W\_]Y`GV]`\_`  
@HWI-EAS443:3:74:1463:1888#0/1  
GACTGTTCAAGCTTTTCGCAAATGCTCCTAGCTAAAGTTT  
+HWI-EAS443:3:74:1463:1888#0/1  
\_\_^bbabbbbaabaababbabaabab^abbaabbbby`\_  
@HWI-EAS443:3:74:150:568#0/1  
AATTTCTAGCATGGTGGAGGCCATGGTGTCTAGGGCCCGG  
+HWI-EAS443:3:74:150:568#0/1  
`U]`^V`[]ZX`YP`UXZa]YUUXGTUUTS¥¥UUMSTT  
@HWI-EAS443:3:74:1542:1700#0/1  
ATTCAAATGTCCCTGTCTTATTTATATAGGACTTCTTTTT  
+HWI-EAS443:3:74:1542:1700#0/1  
W`¥bZb\_bba]\_bab¥b`baaab^[`aaa`aabb\_a]ab^  
@HWI-EAS443:3:74:1604:255#0/1  
GGGAGTCTCGATACTGAATCTTGGACAAAAGAAATACACC  
+HWI-EAS443:3:74:1604:255#0/1  
ab`^`\_a\_Q\_Z^aR^a¥[]S¥U\_]S¥¥0`^`^¥\_U`]]RH  
@HWI-EAS443:3:74:163:569#0/1  
TGCCGGTTGATTTCTGTTTAATGTCCAATCATAAGTCTGG  
+HWI-EAS443:3:74:163:569#0/1  
ab\_^^^bY]`ZWZ]`RYRab\_a]\_`VH]`\_\_^[XW\_]UU  
@HWI-EAS443:3:74:1703:408#0/1  
GCTGTATGGAGGATCTCCAGTATAAGGGAATGTGGTGCTT  
+HWI-EAS443:3:74:1703:408#0/1  
^\_[^¥¥^`^`^`a^a]]VVV[\_\_\_aYZ]a`H`]ZY`XN^W^Z  
@HWI-EAS443:3:74:280:806#0/1  
GAGTCTTCAATGGTGGAAACAGATCTTCATGATCTCAGAG  
+HWI-EAS443:3:74:280:806#0/1  
a^]a^\_a`a¥Va]\_S`a^a`aa\_]`\_\_aa^a`^`\_`\_`a\_\_  
@HWI-EAS443:3:74:456:192#0/1  
GGAACATTCGAGGATTTTGATTTTCATTCCACTTAGTGTT  
+HWI-EAS443:3:74:456:192#0/1  
\_Zabaa`aa¥Vaa\_b]aa\_SW`\_TW`a`\_a`^a^V^Xa^]  
@HWI-EAS443:3:74:553:1209#0/1  
ATGCCAGCCCATGGTCCAGCCAAAAGCATGGAATATGATG  
+HWI-EAS443:3:74:553:1209#0/1  
^WZ`¥`¥\_a]HP`OKUZXXZaZ\_X]^YZP`\_U[Za[\_\_\_`^Z  
@HWI-EAS443:3:74:558:721#0/1  
ATTTATATAGGACTTCTTTTTGCTCATGTTGATTCCCCT  
+HWI-EAS443:3:74:558:721#0/1  
aabbaa¥aa`a`abbaaaaaaaaaaaa`a]aa`a`````\_`a  
@HWI-EAS443:3:74:590:816#0/1  
CTTCAATGGTGGAAACAGATCTTCATGATCTCAGAGAACTC  
+HWI-EAS443:3:74:590:816#0/1  
aaa`a]aaa\_aa]aaa]```aaaa\_a```\_a^^\_\_\_\_```\_`

@HWI-EAS443:3:74:592:206#0/1  
CTTTGTTGAACTTTAGCTAGGAGCATTTCGCGAAAAGCTT  
+HWI-EAS443:3:74:592:206#0/1  
abbabbbbabbbbabbabbbbbaaa`abaaaa]aa^\_  
@HWI-EAS443:3:74:677:702#0/1  
CTTTAGCTAGGAGCATTTCGCGAAAAGCTTGAACAGTCTGG  
+HWI-EAS443:3:74:677:702#0/1  
aa`b]aaaaaa`baa`aaa\_a\_`aa`]]]\_VY`YT]a[  
@HWI-EAS443:3:74:796:1830#0/1  
CTTTGTTGAACTTTAGCTAGGAGCATTTCGCGAAAAGCTT  
+HWI-EAS443:3:74:796:1830#0/1  
ababa\_`a`aaabbabbbbbaa]aaa\_aaa`aa`]]\_a  
@HWI-EAS443:3:74:804:1343#0/1  
CCAGACTGTTCAAGCTTTTCGCAAATGCTCCTAGCTAAAG  
+HWI-EAS443:3:74:804:1343#0/1  
aaaaabaU`^\_a]U[b^]\_]a`bb¥[Y`\_]a]YXa\_PT]  
@HWI-EAS443:3:74:811:1253#0/1  
GCATCATATTCATGCTTTTGGCTGGACCATGGGCTGGCA  
+HWI-EAS443:3:74:811:1253#0/1  
aMHVvaaba` `[` []aaZUYZV`\_MHIFQWXL[TTUX[X  
@HWI-EAS443:3:75:1035:820#0/1  
GGGGACAACACTAAGTGAATGAAAATCAAAATCCTCGAA  
+HWI-EAS443:3:75:1035:820#0/1  
\_a\_b`a`aaa^a\_U\_bbbbb\_V]`aabbaa`]aa\_a``  
@HWI-EAS443:3:75:1134:1005#0/1  
GAGTCTTCAATGGTGAACAGATCTTCATGATCTCAGAG  
+HWI-EAS443:3:75:1134:1005#0/1  
abb[aabaabbaaaSba`ba`a`Z`\_Y]`aa\_``]a`a\_  
@HWI-EAS443:3:75:1186:1290#0/1  
GCCGGTTGATTTCTGTTAATGTCCAATCATAAGTCTGGC  
+HWI-EAS443:3:75:1186:1290#0/1  
aa`aa`a]a`\_`^`\_`a]^^^\_¥\_``W^]\_^]\_  
@HWI-EAS443:3:75:1212:1954#0/1  
ATTTATATAGGACTTCTTTTGTCTCATGTTGATCCCACT  
+HWI-EAS443:3:75:1212:1954#0/1  
abbb`b\_a`\_ba`a`abbaaaaa`^`a`\_\_a`a`\_\_ba\_  
@HWI-EAS443:3:75:1216:1728#0/1  
CAATGGTGAACAGATCTTCATGATCTCAGAGAACTCTTC  
+HWI-EAS443:3:75:1216:1728#0/1  
`babbbbbbababbaabba`abbbabb`bbbabbbba`ab  
@HWI-EAS443:3:75:1464:885#0/1  
CGGTTGATTTCTGTTAATGTCCAATCATAAGTCTGGCGA  
+HWI-EAS443:3:75:1464:885#0/1  
aababbaabbabb`bbbbbab`bbbbbbbbbabbaabb  
@HWI-EAS443:3:75:154:945#0/1  
ATTCAAATGTCCCTGTCTTATTTATATAGGACTTCTTTT  
+HWI-EAS443:3:75:154:945#0/1  
aaZ`bbaaa¥Y\_a[a^`¥b`baaa`a`\_a\_]NWaZ\_\_a¥\_  
@HWI-EAS443:3:75:1656:1618#0/1  
AACAGTGATAAAGAACAACATGATAAACAATGACCTTGGA

+HWI-EAS443:3:75:1656:1618#0/1  
aabb\_\_b` `[baaaaaa`aaaYa` ]`aaR`^aa\_aQa  
@HWI-EAS443:3:75:412:307#0/1  
GAAAATCAAATCCTCGAATGTTCTGGCGATGATTACAT  
+HWI-EAS443:3:75:412:307#0/1  
`[[[¥U]TXXY[V]UN[VQ¥QMJVXOQ[BBBBBBBBBBBB  
@HWI-EAS443:3:75:454:413#0/1  
TTCAATGGTGAACAGATCTTCATGATCTCAGAGAACTCT  
+HWI-EAS443:3:75:454:413#0/1  
aa`¥`aba^a`^a^aa^`a`a\_`\_] ^\_\_\_\_^`\_]`^`  
@HWI-EAS443:3:75:57:776#0/1  
GGACTTCTTTTTGCTCATGTTGATTCCCACTAACTTGACAG  
+HWI-EAS443:3:75:57:776#0/1  
^^^`\_bbbabaaaaa\_]\_a`\_`^`^Y]\_\_aa`] ^`\_Z\_Z  
@HWI-EAS443:3:75:659:472#0/1  
TGCCGTTGATTTCTGTTTAATGTCCAATCATAAGTCTGG  
+HWI-EAS443:3:75:659:472#0/1  
aabbababaabbaabaabb`bb`aa`aaaaaba`\_aaa  
@HWI-EAS443:3:75:69:907#0/1  
GAGTTCTTCAATGGTGAACAGATCTTCATGATCTCAGAG  
+HWI-EAS443:3:75:69:907#0/1  
aaa\_aaaaa`]¥aaZa`]a\_a`\_]`a^^`a\_`^`[^\_`  
@HWI-EAS443:3:75:92:207#0/1  
GTGTCTTGTGAATTAGTCATCATCTTTCTCACAACATTTG  
+HWI-EAS443:3:75:92:207#0/1  
\_`\_`\_aabaababbbbaaaaaaaa`aaaaa^`]aa\_aa`\_`  
@HWI-EAS443:3:75:93:1050#0/1  
CAGTGATAAAGAACAACATGATAAACAATGACCTTGGACC  
+HWI-EAS443:3:75:93:1050#0/1  
aaaV`]aXZaUaaa\_W^`][\_\_\_\_`\_\_a\_V`\_^^\_]¥^\_  
@HWI-EAS443:3:76:1071:1117#0/1  
CTTCTTTTTGCTCATGTTGATTCCCACTAACTTGACGGTC  
+HWI-EAS443:3:76:1071:1117#0/1  
abbbbbbbbbbaabb`baabbbbbbabbb`abba`aaZa  
@HWI-EAS443:3:76:1242:1479#0/1  
ACACCATGGCCTCCACCATGCTAGAAATCCAACCGGTCT  
+HWI-EAS443:3:76:1242:1479#0/1  
aaaa`bYNYaa`\_`\_]\_`^`\_`\_`\_`^a`\_`^`^ZZ[Q¥¥  
@HWI-EAS443:3:76:1292:1681#0/1  
ATTTCTAGCATGGTGGAGGCCATGGTGTCTAGGGCCCGGA  
+HWI-EAS443:3:76:1292:1681#0/1  
aabb`abZaaa]¥\_]aaa]a\_a\_XPX`]VNR^] ^XX\_^P  
@HWI-EAS443:3:76:1332:1823#0/1  
AATTTCTAGCATGGTGGAGGCCATGGTGTCTAGGGCCCGG  
+HWI-EAS443:3:76:1332:1823#0/1  
ababa]abba^\_baPba`a¥a`a¥\_`^¥]¥¥U^aa`^¥Wa`  
@HWI-EAS443:3:76:1384:1471#0/1  
ATCCTGTTCTGTTCCATGGCTGTATGGAGGATCTCCAGT  
+HWI-EAS443:3:76:1384:1471#0/1  
ab[baa\_aaa`V]aaa\_baa`abGY`Q\_\_a]NQUQJQRLL

@HWI-EAS443:3:76:1450:529#0/1  
ACTGGGGACAACACTAAGTGAATGAAAATCAAATCCTC  
+HWI-EAS443:3:76:1450:529#0/1  
aabb`bbb``aaaJaaabXbb`aab\_aa`bY`aaaa[Y[\_  
@HWI-EAS443:3:76:1450:607#0/1  
TGCCAGCCCATGGTCCAGCCAAAAGCATGGAATATGATGC  
+HWI-EAS443:3:76:1450:607#0/1  
^\_aa¥a\_\_Z\_\_YXGX¥`\_]Z[\_\_\_¥W\_WU\_]¥¥¥\_\_¥WWW  
@HWI-EAS443:3:76:1503:1678#0/1  
CTGGGGACAACACTAAGTGAATGAAAATCAAATCCTCG  
+HWI-EAS443:3:76:1503:1678#0/1  
abbba`babb`baaaaa]bbbbbbbbbb]bbbbb^a¥a`  
@HWI-EAS443:3:76:1558:1930#0/1  
CTGTCTTATTTATATAGGACTTCTTTTTGCTCATGTTGAT  
+HWI-EAS443:3:76:1558:1930#0/1  
abb¥abbbbbbbb\_bbbabbbbbbbbbbaabbbbbabb  
@HWI-EAS443:3:76:1666:248#0/1  
AATTTCTAGCATGGTGGAGCCATGGTGTCTAGGGCCCGG  
+HWI-EAS443:3:76:1666:248#0/1  
aabba\_b`a]aaaaUaa\_a[[^\_] [YV\_¥UWU¥¥YUUU¥\_  
@HWI-EAS443:3:76:1677:128#0/1  
AGCATGGTGGAGCCATGGTGTCTAGGGCCCGGATTGATG  
+HWI-EAS443:3:76:1677:128#0/1  
```a`aaWaa\_a`TY¥]a`R`ZUYT^^¥NRO^\_K¥¥VKPR  
@HWI-EAS443:3:76:1678:1589#0/1  
ATGGTCCAGCCAAAAGCATGGAATATGATGCCGTTGCAAC  
+HWI-EAS443:3:76:1678:1589#0/1  
aa`aX^abb^aa`aaa[aa][\_a`aa]aa`[U`¥``\_`\_Z  
@HWI-EAS443:3:76:237:403#0/1  
TGAAAATCAAATCCTCGAATGTTCTGGCGATGATTACA  
+HWI-EAS443:3:76:237:403#0/1  
a`\_`[\_aa\_``a^V[¥[\_\_\_\_`\_]\_^]\_^ZXX[X]XVP[  
@HWI-EAS443:3:76:253:51#0/1  
TATAGGACTTCTTTTTGCTCATGTTGATTCCCACTAACTT  
+HWI-EAS443:3:76:253:51#0/1  
aba]bbaaaaabaaa`a\_`a`a`\_a`Zaa`\_S^\_\_\_\_VX\_  
@HWI-EAS443:3:76:270:1301#0/1  
ATAGGACTTCTTTTTGCTCATGTTGATTCCCACTAACTTG  
+HWI-EAS443:3:76:270:1301#0/1  
XO[PZQ\_T\_\_]PVNMKYV`[]\_Q[ST[P\_OLHLNI\_TB  
@HWI-EAS443:3:76:447:715#0/1  
CTTCTGGTACATCTGTTTCATCCTCAAGAATCCCCCTTGG  
+HWI-EAS443:3:76:447:715#0/1  
^bbbabba^abbaab`bbbaaaa`a\_abbbbaaa`aaaa`  
@HWI-EAS443:3:76:548:1138#0/1  
TAGCATGGTGGAGCCATGGTGTCTAGGGCCCGGATTGAT  
+HWI-EAS443:3:76:548:1138#0/1  
`a^aaaaZV^\_aa``a``¥ZX]`^`[ZPX¥]`^]¥¥[¥Z  
@HWI-EAS443:3:76:680:1965#0/1  
TGCCGGTTGATTTCTGTTTAATGTCCAATCATAAGTCTGG

+HWI-EAS443:3:76:680:1965#0/1  
a`ab^a^aaaa`a\_`¥aaa`]XWa`^a`aaa`a^XW\_ZU  
@HWI-EAS443:3:76:725:718#0/1  
CGCCAGACTTATGATTGGACATTAACAGAAATCAACCGG  
+HWI-EAS443:3:76:725:718#0/1  
]T\_`Za`bb`b]\_aab`^¥\_b`baaa\_b]Z\_aa¥aa[Y``  
@HWI-EAS443:3:76:891:972#0/1  
TTTCTAGCATGGTGGAGCCATGGTGTCTAGGGCCCGGAT  
+HWI-EAS443:3:76:891:972#0/1  
ab`ba^a`baa^X`a`a`aa\_]¥P¥T`WR^X¥]`]]XY^  
@HWI-EAS443:3:76:956:1011#0/1  
GAGTTCTTCAATGGTGAACAGATCTTCATGATCTCAGAG  
+HWI-EAS443:3:76:956:1011#0/1  
aXUX\_^]\_\_Y¥\_[]QZ^^]\_^VYXX^]^^WZ[]W^]\_]Z]  
@HWI-EAS443:3:76:962:93#0/1  
CTCCAGTATAAGGGAATGTGGTGCTTATGGCATTGCGC  
+HWI-EAS443:3:76:962:93#0/1  
`b¥aa\_L¥Y]¥bba\_\_ab\_ba^\_R[\_\_\_\_aXQ\_`^a`Sa[  
@HWI-EAS443:3:76:974:1015#0/1  
CTGCCGGTTGATTTCTGTTAATGTCCAATCATAAGTCTG  
+HWI-EAS443:3:76:974:1015#0/1  
aaaaa`]Za`^Zaa`aa`aa`^aa]Z\_\_`^`\_\_\_\_YV^^  
@HWI-EAS443:3:76:987:1865#0/1  
CTCATGTTGATTCCCACTAACTTGCAGGTCCTGTAGAATC  
+HWI-EAS443:3:76:987:1865#0/1  
abaZIIQaRUUQZ]a`¥`aZLTMVa¥MYS\_P¥GFTVP[PJ  
@HWI-EAS443:3:76:988:1315#0/1  
AGACTGTTCAAGCTTTTCGCAAATGCTCCTAGCTAAAGTT  
+HWI-EAS443:3:76:988:1315#0/1  
aa\_a`¥^aaaa`a^aa`¥]`Ua^Y\_`\_]aa`]\_\_\_\_YU^  
@HWI-EAS443:3:77:1019:1622#0/1  
CTTCTGGTACATCTGTTTCATCCTCAAGAATCCCCCTTTGG  
+HWI-EAS443:3:77:1019:1622#0/1  
^\_U¥b`b^b]baa`a\_a`\_aa``\_Xa`aa\_\_\_\_`V^`a\_a\_  
@HWI-EAS443:3:77:1167:196#0/1  
ATGTAATCATCGCCAGGAACATTCGAGGATTTTGATTTTC  
+HWI-EAS443:3:77:1167:196#0/1  
abbaaab¥baaaa\_aaa\_a¥`a`[a\_aa\_`a`aa```\_^U  
@HWI-EAS443:3:77:1345:1613#0/1  
GTTGCAACGGCATCATATTCATGCTTTTGGCTGGACCAT  
+HWI-EAS443:3:77:1345:1613#0/1  
¥EQ\_TZ]Z¥Wa\_SVZ]RKOQXRJWVWGJXWYNSBBBBBBB  
@HWI-EAS443:3:77:1348:919#0/1  
GCTGTATGGAGGATCTCCAGTATAAGGGAATGTGGTGCTT  
+HWI-EAS443:3:77:1348:919#0/1  
a]a`]`a`]`Y`\_\_a^Z`\_^Y`a[P[a\_Uaa`\_a`Y\_U\_\_  
@HWI-EAS443:3:77:1366:988#0/1  
CAAATGTCCTGTCTTATTTATATAGGACTTCTTTTGCT  
+HWI-EAS443:3:77:1366:988#0/1  
aabbbbbbba\_`a`babbbbaabb\_`baabbaabba`b`a



@HWI-EAS443:3:77:1445:1489#0/1  
CAAAATGCCATAAGCACCACATTCCTTATACTGGAGATC  
+HWI-EAS443:3:77:1445:1489#0/1  
¥¥b]b`VZ]bb\_\_\_ba]]T[[]`YRa]baa`abYaba^^  
@HWI-EAS443:3:77:1530:826#0/1  
CTTCTTTTTGCTCATGTTGATTCCCCTAACTTGCAGGTC  
+HWI-EAS443:3:77:1530:826#0/1  
`bbbbbbba`bbaabb`\_babaaa`\_a`b`bbabbba``  
@HWI-EAS443:3:77:206:1488#0/1  
CAGTGATAAAGAACAACATGATAAACAATGACCTTGGACC  
+HWI-EAS443:3:77:206:1488#0/1  
aba`baabbaaabbbbaaa`b`]aa\_ba\_\_aa^a\_a`a^a  
@HWI-EAS443:3:77:320:452#0/1  
GGGGACAACACTAAGTGAATGAAAATCAAAATCCTCGAA  
+HWI-EAS443:3:77:320:452#0/1  
aaa\_abaaaa`aa\_bZa`aa`aaaa\_]`^aa\_¥^`\_a`W  
@HWI-EAS443:3:77:357:1356#0/1  
ACGGCATCATATCCATGCTTTTGGCTGGACCATGGGCTG  
+HWI-EAS443:3:77:357:1356#0/1  
ab^a`\_aaa\_baaaa\_aYK]`[[N\_¥TSP`X¥X¥Z]¥¥  
@HWI-EAS443:3:77:496:291#0/1  
ATAGGACTTCTTTTTGCTCATGTTGATTCCCCTAACTTG  
+HWI-EAS443:3:77:496:291#0/1  
a]aa`aa`aaaaaaaa`a¥`\_`\_`^a^```[\_\_`\_\_  
@HWI-EAS443:3:77:536:282#0/1  
CGGTTGATTTCTGTTTAATGTCCAATCATAAGTCTGGCGA  
+HWI-EAS443:3:77:536:282#0/1  
abaabbabbbbb`bbbbbaabaabba]aa`aba`a\_  
@HWI-EAS443:3:77:597:1776#0/1  
CAATGGTGAACAGATCTTCATGATCTCAGAGAACTCTTC  
+HWI-EAS443:3:77:597:1776#0/1  
abab`[[`\_`a`¥PZ]aX]]a]Q^ZZ¥^V¥Z¥\_^[]ZZZ  
@HWI-EAS443:3:77:643:348#0/1  
CATCCTCAAGAATTCCCCTTTGGCTTGTGTTGAGAATAGA  
+HWI-EAS443:3:77:643:348#0/1  
ab``aaa^V\_U`aaa\_aaa`aaaa`]^\_`\_\_\_a]^`a`\_  
@HWI-EAS443:3:77:676:1481#0/1  
CTGGGACAACACTAAGTGAATGAAAATCAAAATCCTCG  
+HWI-EAS443:3:77:676:1481#0/1  
ab```abba`\_bb`abaQaabbabbba`\_a^Z`a^aaba  
@HWI-EAS443:3:77:698:1945#0/1  
CATCTGTTTCATCCTCAAGAATTCCCCTTTGGCTTGTGTTG  
+HWI-EAS443:3:77:698:1945#0/1  
`bbb\_W`^ba\_bbabba`\_`a`a]a\_aaba[a`aaW\_\_\_`  
@HWI-EAS443:3:77:710:779#0/1  
GTCTTATTTATATAGGACTTCTTTTTGCTCATGTTGATTC  
+HWI-EAS443:3:77:710:779#0/1  
a\_aaaRaaa[¥`\_aTa[aa`^a`aaa`\_`^a^a\_\_¥`^a`\_  
@HWI-EAS443:3:77:836:146#0/1  
ATCCTGTTCTGTTCCATGGCTGTATGGAGGATCTCCAGT

+HWI-EAS443:3:77:836:146#0/1  
]]`abZQUab\_^`ZV\_b]aS`YDT¥\_aQ\_^SULNU[WVR  
@HWI-EAS443:3:77:841:225#0/1  
CGAGGATTTTGATTTTCATTCCACTTAGTGTTGTCCCCAG  
+HWI-EAS443:3:77:841:225#0/1  
abbb`ababb]bbb`abaababa`\_ba\_b`ba\_a^[^aa  
@HWI-EAS443:3:77:912:69#0/1  
AATTTCTAGCATGGTGGAGGCCATGGTGTCTAGGGCCCGG  
+HWI-EAS443:3:77:912:69#0/1  
aZaZ]YaXb0aW`Pba¥^\_YZ\_¥NYM^UPGUUV\_BBBBB  
@HWI-EAS443:3:78:1002:1068#0/1  
CAAAGGGATTGAGGGATTACAAAGTCTTCCCCGATAATC  
+HWI-EAS443:3:78:1002:1068#0/1  
ababababbaba`\_bbbaab`aaab^\_aaa\_\_aaaa\_a^  
@HWI-EAS443:3:78:1033:39#0/1  
GAGTTCTTCAATGGTGGAACAGATCTTCATGATCTCAGAG  
+HWI-EAS443:3:78:1033:39#0/1  
a^\_U]`Ya^a\_aaaS^\_a\_\_aZa\_a^Y\_]a\_WP\_[X`¥a  
@HWI-EAS443:3:78:1075:271#0/1  
AATCACTGGGACAACACTAAGTGAATGAAAATCAAAT  
+HWI-EAS443:3:78:1075:271#0/1  
`aa]\_a`a`a`[^\_\_]\_^`]\_\_Z\_\_^`a`\_\_`^¥a\_\_Z  
@HWI-EAS443:3:78:1167:149#0/1  
GGGACAACACTAAGTGAATGAAAATCAAATCCTCGAA  
+HWI-EAS443:3:78:1167:149#0/1  
aaba\_aaa^aaaaab\_ba\_aab\_^`\_a^`a``[0¥[a\_\_  
@HWI-EAS443:3:78:1397:855#0/1  
CATTGAGGATTTTGATTTTCATTCCACTTAGTGTTGTCC  
+HWI-EAS443:3:78:1397:855#0/1  
`bbb\_aab`\_ab`\_baba`a]^a`a\_\_]aaaa^b¥\_¥\_¥  
@HWI-EAS443:3:78:1710:451#0/1  
ATTTCTAGCATGGTGGAGGCCATGGTGTCTAGGGCCCGGA  
+HWI-EAS443:3:78:1710:451#0/1  
aaa\_U[`a^X`aaFaaa`\_[F^T]`P\_PPP[a^BBBBBB  
@HWI-EAS443:3:78:1785:1024#0/1  
GACTGTTCAAGCTTTTCGCAAATGCTCCTAGCTAAAGTTT  
+HWI-EAS443:3:78:1785:1024#0/1  
aa`a`\_\_aaa¥^^aa`RVa\_\_]Z¥^^[^\_\_^`\_^]^WY\_  
@HWI-EAS443:3:78:194:1410#0/1  
GCACCACATTCCCTTATACTGGAGATCCTCCATACAGCCA  
+HWI-EAS443:3:78:194:1410#0/1  
\_aaabbaaa`aaaaaa`aaaaaa`\_¥a^Qa\_[\_a``\_ZZ¥  
@HWI-EAS443:3:78:267:79#0/1  
GTTTCATCCTCAAGAATCCCCCTTTGGCTTGTGTTGAGAAT  
+HWI-EAS443:3:78:267:79#0/1  
aabbbb`^``baaa`baaaaaaaaa`aaa]a\_a`]a^¥]  
@HWI-EAS443:3:78:292:1412#0/1  
GACTTCTTTTGTCTCATGTTGATTCCCCTAACTTGACAGG  
+HWI-EAS443:3:78:292:1412#0/1  
\_]`\_\_\_\_¥V`\_Yaaa`a`a``aZ`aaa[[YZ`\_¥¥[[\_`^



+HWI-EAS443:3:79:1447:284#0/1  
ababb\_aWa\_a`b]`ba\_ba`\_\_aaYaaXaXaa\_`]\_0]a  
@HWI-EAS443:3:79:1496:1233#0/1  
GGTCGCCAGACTTATGATTGGACATTAACAGAAATCAAC  
+HWI-EAS443:3:79:1496:1233#0/1  
ab^aaa`bbbabababaaa`aaaababaa0^baaaV`\_a\_  
@HWI-EAS443:3:79:1520:1498#0/1  
GTGGGAATCAACATGAGCAAAAAGAAGTCCTATATAAATA  
+HWI-EAS443:3:79:1520:1498#0/1  
aa`QYHX]S\_^XOZNNWW\_QSRaZPWSDDZOPS\_Y\_TMU^R  
@HWI-EAS443:3:79:1548:1169#0/1  
CAAAATGCCATAAGCACCACATTCCTTATACTGGAGATC  
+HWI-EAS443:3:79:1548:1169#0/1  
aba`[b`^`aaaaZb\_a``aaa¥¥]a`a`a[a^`VXVUU  
@HWI-EAS443:3:79:1555:36#0/1  
CAGTGATAAAGAACAACATGATAAACAATGACCTTGGACC  
+HWI-EAS443:3:79:1555:36#0/1  
Q¥¥\_]\_bbabbabb`bbbb`bbbbbbbaaa`aabbb``UW  
@HWI-EAS443:3:79:1631:637#0/1  
AGACACCATGGCCTCCACCATGCTAGAAATCCAACCGGT  
+HWI-EAS443:3:79:1631:637#0/1  
a``aa]a`\_ZXa¥aZ`ab\_]Z]W```Y[]`VMT`a^YZOX  
@HWI-EAS443:3:79:18:1577#0/1  
CTGGGGACAACACTAAGTGAATGAAAATCAAAATCCTCG  
+HWI-EAS443:3:79:18:1577#0/1  
aWNX¥¥N¥[\_¥\_a`\_[SOZ]WWWsUXGS¥]Y¥^LYTVW¥  
@HWI-EAS443:3:79:28:1517#0/1  
GGGGACAACACTAAGTGAATGAAAATCAAAATCCTCGAA  
+HWI-EAS443:3:79:28:1517#0/1  
aY¥N¥Za[¥¥a\_\_NZY^Z`Z``[]VZU`[XW[V]]PTVWX  
@HWI-EAS443:3:79:419:1764#0/1  
ATCAAAATCCTCGAATGTTCTTGGCGATGATTACATATAT  
+HWI-EAS443:3:79:419:1764#0/1  
aa`^]]Z\_bbabaa``]YYaaZRYa``XX[YY]YPWXQ[Z  
@HWI-EAS443:3:79:582:1736#0/1  
CAATGGTGAACAGATCTTCATGATCTCAGAGAACTCTTC  
+HWI-EAS443:3:79:582:1736#0/1  
abbb``\_a^`aaa`\_`\_a`ab`W`\_a\_aa^a\_\_`\_`^a  
@HWI-EAS443:3:79:610:1529#0/1  
TCATTGTTTATCATGTTGTTCTTTATCACTGTTACTCCAA  
+HWI-EAS443:3:79:610:1529#0/1  
\_ba]a`a[¥Y¥ba`[Xaaaa¥baZU^aba^][[¥[[WS[Y  
@HWI-EAS443:3:79:752:1907#0/1  
GCGCAAAATGCCATAAGCACCACATTCCTTATACTGGAG  
+HWI-EAS443:3:79:752:1907#0/1  
X\_bbba`aa`babbbbabbaabaaaababa`babbaa^a\_  
@HWI-EAS443:3:79:782:1298#0/1  
ATTTGAATTCACAAGCTTTTTTATCGCTATGGATTTGTG  
+HWI-EAS443:3:79:782:1298#0/1  
a`aa`aaaaabaa]Zaaaaabaaaaa\_aW\_^X[a`\_\_]\_

@HWI-EAS443:3:79:809:310#0/1  
CAATGGTGAACAGATCTTCATGATCTCAGAGAACTCTTC  
+HWI-EAS443:3:79:809:310#0/1  
ababb\_a`¥]¥\_bba]bb^\_]a]aabaa`X`a\_\_X\_^`a\_  
@HWI-EAS443:3:79:826:1083#0/1  
GATTATCGGGGAAGACTTTGTAATCCCCTGAATCCCCTTTG  
+HWI-EAS443:3:79:826:1083#0/1  
`a`\_\_aa`^a\_Xa^`a\_aZJ`aaaaaaaa`^^^`^`^V\_  
@HWI-EAS443:3:79:857:420#0/1  
TTCCAGCGCAAATGCCATAAGCACCACATTCCTTATAC  
+HWI-EAS443:3:79:857:420#0/1  
Y¥`b`bbaaaaaa]`ab`baa\_T``aaaaa`aa^baaaaa  
@HWI-EAS443:3:79:929:683#0/1  
GAGTTCTCAATGGTGAACAGATCTTCATGATCTCAGAG  
+HWI-EAS443:3:79:929:683#0/1  
aa\_^aaaaaaaaZZW`a^]¥Wa^a`^a\_\_`a\_`^`\_a`  
@HWI-EAS443:3:79:948:365#0/1  
CACTTTCAAAGAAAAAGGAGAGTAAGAGACAACATGACCA  
+HWI-EAS443:3:79:948:365#0/1  
ababbbbbbbaaaaa`bbabab`ababbbabbaaba`\_a  
@HWI-EAS443:3:7:1090:1731#0/1  
GTTGATTTCTGTTAATGTCCAATCATAAGTCTGGCGACC  
+HWI-EAS443:3:7:1090:1731#0/1  
aabbabbbabaabbbaba```a`a[`aaa]\_```¥aa[R  
@HWI-EAS443:3:7:1150:502#0/1  
CAAAATGCCATAAGCACCACATTCCTTATACTGGAGATC  
+HWI-EAS443:3:7:1150:502#0/1  
`babbaaWL\_`b]\_\_a^Wb\_a]YY^Za`aaaS`a[aaa]B  
@HWI-EAS443:3:7:1204:1174#0/1  
CAGCCCATGGTCCAGCCAAAAGCATGGAATATGATGCCGT  
+HWI-EAS443:3:7:1204:1174#0/1  
ababbab`bbabba\_[^aaaa\_aaaaaaaaab`a\_a\_a¥  
@HWI-EAS443:3:7:1309:418#0/1  
GCACCACATTCCTTATACTGGAGATCCTCCATACAGCCA  
+HWI-EAS443:3:7:1309:418#0/1  
a]b]R¥\_Yb^HT^aa[U`U[\_¥^\_[¥ZX[¥U¥\_]UVaWBB  
@HWI-EAS443:3:7:1438:1137#0/1  
CTTTTTGCTCATGTTGATTCCCCTAACTTGCAGGTCCTG  
+HWI-EAS443:3:7:1438:1137#0/1  
abbbbbb\_baabbbbabbaaababab`abb\_bba^a`bb  
@HWI-EAS443:3:7:1776:563#0/1  
TCCAGCGCAAATGCCATAAGCACCACATTCCTTATACT  
+HWI-EAS443:3:7:1776:563#0/1  
aa`\_a]aa`aa`a\_QZ\_aa`]^\_X[]\_a`^UXX\_X]X]X]  
@HWI-EAS443:3:7:1784:1518#0/1  
TAAGTGAATGAAAATCAAATCCTCGAATGTTCTGCGG  
+HWI-EAS443:3:7:1784:1518#0/1  
aa``]aaaaa`aaaaXa`aaa[Va]a\_^^`^\_WW^^[W\_  
@HWI-EAS443:3:7:188:556#0/1  
TGAAAATCAAATCCTCGAATGTTCTGCGGATGATTACA

+HWI-EAS443:3:7:188:556#0/1  
abbb\_`aaaabb`a¥aaa`aaa]aa\_`aa\_a`\_a^`\_`X`  
@HWI-EAS443:3:7:189:1750#0/1  
AGAAAAAGGAGAGTAAGAGACAACATGACCAAGAAGATGG  
+HWI-EAS443:3:7:189:1750#0/1  
aa\_WaaaX`aa^aYaa^baaaa\_`a\_aa\_[aaa`a^a¥\_\_  
@HWI-EAS443:3:7:196:197#0/1  
TGCCGGTTGATTTCTGTTTAATGTCCAATCATAAGTCTGG  
+HWI-EAS443:3:7:196:197#0/1  
`V\_abaS`aV\_aaaab`a`\_`a]¥`\_\_`\_`a`\_`S[SV`  
@HWI-EAS443:3:7:230:1453#0/1  
TTCTTTTTGCTCATGTTGATTCCCCTAACTTGCAGGTCC  
+HWI-EAS443:3:7:230:1453#0/1  
aY¥abaa\_a^`aV`a\_\_U]a\_[a`\_V\_\_`[¥Z\_[¥[^G\_\_  
@HWI-EAS443:3:7:277:520#0/1  
ATGGTGTATCCTGTTCCCTGTTCCATGGCTGTATGGAGGAT  
+HWI-EAS443:3:7:277:520#0/1  
abba\_a`bbaba`aaaaaa^a\_¥aa\_aaaH¥¥Z\_G\_BBB  
@HWI-EAS443:3:7:398:797#0/1  
CAGCACTTCTGGTACATCTGTTTCATCCTCAAGAATTCCCC  
+HWI-EAS443:3:7:398:797#0/1  
aaaab^a]Y\_aa^b^aaa\_`[\_]a`\_[R``aa\_Ya^Y\_]V  
@HWI-EAS443:3:7:444:961#0/1  
ATGGTCCAGCCAAAAGCATGGAATATGATGCCGTTGCAAC  
+HWI-EAS443:3:7:444:961#0/1  
aaaa¥aaaaa\_aaa^`a`\_\_a\_```\_\_\_\_^`\_\_Y^\_^\_`¥  
@HWI-EAS443:3:7:650:69#0/1  
AAAAAGCTTGTGAATTCAAATGTCCCTGTCTTATTATAT  
+HWI-EAS443:3:7:650:69#0/1  
aVa\_\_`N^a^ba`aa]\_`WVM^W^^aVW^^]\_`[^Y\_  
@HWI-EAS443:3:7:782:807#0/1  
AGTCTCGATACTGAATCTTGGACAAAAGAAATACACCAAG  
+HWI-EAS443:3:7:782:807#0/1  
abaaa\_baaa`aa`a^`a`a\_`a`a¥[\_a^\_]`]X\_\_\_\_  
@HWI-EAS443:3:7:788:127#0/1  
TGTAGTTGCAACGGCATCATATTCCATGCTTTTGGCTGGA  
+HWI-EAS443:3:7:788:127#0/1  
ab\_aa¥`a\_\_^¥`]¥¥\_Z¥¥\_`¥¥TSWW\_YU^W^YTYWBBB  
@HWI-EAS443:3:7:791:460#0/1  
ATTTCTAGCATGGTGGAGGCCATGGTGTCTAGGGCCCGGA  
+HWI-EAS443:3:7:791:460#0/1  
\_babababaaab]E¥`abaZV`^^aM`¥]¥V¥U¥QPY`HG  
@HWI-EAS443:3:7:853:922#0/1  
GGGGACAACACTAAGTGAATGAAAATCAAAATCCTCGAA  
+HWI-EAS443:3:7:853:922#0/1  
aaa`a`aaa````a`[aa]aaaa\_`\_`\_a`\_`a¥]^`a^\_  
@HWI-EAS443:3:7:968:1810#0/1  
TGTTTCATCCTCAAGAATTCCCCTTTGGCTTGTGTTGAGAA  
+HWI-EAS443:3:7:968:1810#0/1  
abbZ\_Xb`b```abab`^a`\_\_babb\_[ba\_Y`S`a\_a`a

@HWI-EAS443:3:80:1005:882#0/1  
GGTCGCCAGACTTATGATTGGACATTAACAGAAATCAAC  
+HWI-EAS443:3:80:1005:882#0/1  
ab\_^X]baaXZa[`¥^W`ab[`a[[`SNQTa`W^a^`\_ZT  
@HWI-EAS443:3:80:1023:1969#0/1  
ATTCAAATGTCCCTGTCTTATTTATATAGGACTTCTTTTT  
+HWI-EAS443:3:80:1023:1969#0/1  
aab`aab^aba` `a\_abaaaa\_J\_`aaa\_a\_`a`aaa`a  
@HWI-EAS443:3:80:131:1150#0/1  
GGGACATTTGAATTCACAAGCTTTTTTTATCGCTATGGAT  
+HWI-EAS443:3:80:131:1150#0/1  
aba`bbaaaaWUa\_aaaaYa`^aaaaaaaaaaaa\_\_\_aa`\_  
@HWI-EAS443:3:80:1369:306#0/1  
CACATTCCTGAAGTCTGCTTAAAATGGGAGCTAATGGATG  
+HWI-EAS443:3:80:1369:306#0/1  
R\_abba\_^`bb`b`a\_`Tab\_a¥bbbbbbba\_aaabb`¥ba  
@HWI-EAS443:3:80:1380:1575#0/1  
TGTTCCCTGTTCCATGGCTGTATGGAGGATCTCCAGTATAA  
+HWI-EAS443:3:80:1380:1575#0/1  
aaaa\_`bb`a^^`aaa`a`^Z]V]W¥`P¥QYLQW`UR¥ZU  
@HWI-EAS443:3:80:1405:858#0/1  
CATGGTCCAGCCAAAAGCATGGAATATGATGCCGTTGCAA  
+HWI-EAS443:3:80:1405:858#0/1  
[aQT\_Taa`\_XQ[[`Z\_Y[TW\_bbbY¥ZZbXH\_WZUa\_b]  
@HWI-EAS443:3:80:1466:433#0/1  
CTTATTTATATAGGACTTCTTTTTGCTCATGTTGATTCCC  
+HWI-EAS443:3:80:1466:433#0/1  
`abbbb^b`aabZa\_ba`baab` `I^^`aaYab`ba¥OM  
@HWI-EAS443:3:80:157:552#0/1  
GTCCAGCCAAAAGCATGGAATATGATGCCGTTGCAACTAC  
+HWI-EAS443:3:80:157:552#0/1  
]M\_aaaa`[UY]`]]`¥`a` `¥`V\_\_\_\_\_`UQTXXY¥VY^  
@HWI-EAS443:3:80:1623:1669#0/1  
GATCTCCAGTATAAGGGAATGTGGTGCTTATGGCATTTTG  
+HWI-EAS443:3:80:1623:1669#0/1  
a)`NY\_TY^¥`a`]YV^W]aZT]\_QXR¥¥[\_][[^W\_^\_S  
@HWI-EAS443:3:80:1669:197#0/1  
CTTCTTTTTGCTCATGTTGATTCCCCTAACTTGCAGGTC  
+HWI-EAS443:3:80:1669:197#0/1  
PQ\_a`aaaababbb`\_abababa\_]¥OZY`^^`ba¥aaTX  
@HWI-EAS443:3:80:1720:412#0/1  
TGGAGATCCTCCATACAGCCATGGAACAGGAACAGGATAC  
+HWI-EAS443:3:80:1720:412#0/1  
Xa` `^`\_`[YYR0^a` `]\_N\_^`\_ZZ`^aaZ]` `ab[a\_]Q  
@HWI-EAS443:3:80:1737:1894#0/1  
GATAAAAAAAGCTTGTGAATTCAAATGTCCCTGTCTTATT  
+HWI-EAS443:3:80:1737:1894#0/1  
]aY`SZaZb\_a\_VY`¥`S]¥ba` `PJ\_YVP`aPQabXaa  
@HWI-EAS443:3:80:173:450#0/1  
CCAGCGCAAAAATGCCATAAGCACCATTCCTTATACTG

+HWI-EAS443:3:80:173:450#0/1  
abaaaaa\_`^aa`^aaaaaa\_a`a\_\_\_^\_a\_¥\_a\_Z`  
@HWI-EAS443:3:80:203:1115#0/1  
AATTCAAATGTCCCTGTCTTATTTATATAGGACTTCTTTT  
+HWI-EAS443:3:80:203:1115#0/1  
aaaa\_X¥a`\_a`aaa\_a`\_a`\_a`\_`\_^^`\_`\_\_\_\_\_  
@HWI-EAS443:3:80:208:1161#0/1  
CAAAATGCCATAAGCACCACATTCCTTATACTGGAGATC  
+HWI-EAS443:3:80:208:1161#0/1  
aaa^`aaabb^X`¥a`aYaa]\_^]^`\_a]^`^Z\_\_^YV  
@HWI-EAS443:3:80:257:1556#0/1  
GGACTTCTTTTTGCTCATGTTGATTCCTTAECTTGAGCAG  
+HWI-EAS443:3:80:257:1556#0/1  
a¥Zaa`aab`a]a\_b`a][Zaaa`aa^[\_`a\_aa\_Y`¥]`Z  
@HWI-EAS443:3:80:268:1769#0/1  
GAACATTCGAGGATTTTGATTTTCATTCCTTAGTGTTG  
+HWI-EAS443:3:80:268:1769#0/1  
ab`babbbbbbbbabbbabbbbbbbbbbbbababa`b\_ba  
@HWI-EAS443:3:80:388:1562#0/1  
GAGTTCTTCAATGGTGAACAGATCTTCATGATCTCAGAG  
+HWI-EAS443:3:80:388:1562#0/1  
]¥\_\_bbaaa\_ZaZ[R][F^\_aY\_aa^aa^a`^`\_aY`W  
@HWI-EAS443:3:80:530:1124#0/1  
CTGGGGACAACACTAAGTGAATGAAAATCAAAATCCTCG  
+HWI-EAS443:3:80:530:1124#0/1  
aaab`\_`baaababaab¥a\_aba`aaaaa^Yaaaa`aa  
@HWI-EAS443:3:80:85:146#0/1  
CTTTAGCTAGGAGCATTTGCGAAAAGCTTGAACAGTCTGG  
+HWI-EAS443:3:80:85:146#0/1  
abbbbbbbbaabaabaa`aaaa`aa`\_a`\_`\_\_\_\_[\_\_\_\_V  
@HWI-EAS443:3:80:896:983#0/1  
TGGAGATCCTCCATACAGCCATGGAACAGGAACAGGATAC  
+HWI-EAS443:3:80:896:983#0/1  
abbbbaa\_V¥abaab¥W\_a`aa\_[aa\_a`][ ]`[¥¥WU  
@HWI-EAS443:3:80:904:1711#0/1  
AGTCTCGATACTGAATCTTGACAAAAGAAATACACCAAG  
+HWI-EAS443:3:80:904:1711#0/1  
`¥¥^a\_Y\_\_Z\_YFU)`[aa¥S¥[\_a`\_]a\_Z\_^a\_Y]¥¥  
@HWI-EAS443:3:80:986:573#0/1  
AACAGTGATAAAGAACAACATGATAAACAATGACCTTGGA  
+HWI-EAS443:3:80:986:573#0/1  
aaaaa`baaaaaa`\_a`\_`^aa`\_`\_a`\_`\_^a^`Z\_  
@HWI-EAS443:3:81:1043:365#0/1  
GAAAATCAAAATCCTCGAATGTTCTGGCGATGATTACAT  
+HWI-EAS443:3:81:1043:365#0/1  
aaaaaa\_a\_aaa`\_`aaaaa^a^\_aa]a^^`¥`^S]\_  
@HWI-EAS443:3:81:1114:88#0/1  
GCATCATATTCATGCTTTTGGCTGGACCATGGGCTGGCA  
+HWI-EAS443:3:81:1114:88#0/1  
ab]`aabb`baabbabb\_aa[[]b`^aU]`\_aUaaa`]^a



@HWI-EAS443:3:81:1129:484#0/1  
ACGGCATCATATTCCATGCTTTTGGCTGGACCATGGGCTG  
+HWI-EAS443:3:81:1129:484#0/1  
a\_]a\_a\_Xabaaa\_`a``\_aaa`]\_[aa`XG`[[\_Y]U^Y  
@HWI-EAS443:3:81:1213:1199#0/1  
CTTTTTGCTCATGTTGATTCCCCTAACTTGCAGGTCCTG  
+HWI-EAS443:3:81:1213:1199#0/1  
\_]babX¥]VSa\_]Yaab^aa[Ra\_bb^QW`XP¥aa\_]aa  
@HWI-EAS443:3:81:1281:1180#0/1  
TTTTTCATTCCACTTAGTGTGTCCCCAGTGATTGTGAAAG  
+HWI-EAS443:3:81:1281:1180#0/1  
I\_Z\_Z^`\_Z^aYX[\_ZUa^¥\_U¥a``¥YZ`a[[\_TYYW\_[  
@HWI-EAS443:3:81:1415:419#0/1  
CGAGGATTTTGATTTTCATTCCACTTAGTGTGTCCCCAG  
+HWI-EAS443:3:81:1415:419#0/1  
aa[a]\_aabb`Zaaababaaa\_`^aa`bSaaa`\_`\_`S`¥  
@HWI-EAS443:3:81:1465:925#0/1  
CTTTGTTGAAACTTTAGCTAGGAGCATTTCGAAAAGCTT  
+HWI-EAS443:3:81:1465:925#0/1  
abbbb^a`baaaaa`baaabbaaTaabaa\_a`ab`^Paa  
@HWI-EAS443:3:81:1580:951#0/1  
AGACTGTTCAAGCTTTTCGCAAATGCTCCTAGCTAAAGTT  
+HWI-EAS443:3:81:1580:951#0/1  
]a`Zba^\_Za\_`\_`b^W]^aaaa`X`¥SY`a^aaZOXDZ  
@HWI-EAS443:3:81:204:1470#0/1  
CAAAATGCCATAAGCACCACATTCCCTTATACTGGAGATC  
+HWI-EAS443:3:81:204:1470#0/1  
a``^W`abaaaa`aabaa`a]`\_`a`\_\_`\_\_a^\_^]\_^]\_  
@HWI-EAS443:3:81:226:218#0/1  
TGCCAGCCCATGGTCCAGCCAAAAGCATGGAATATGATGC  
+HWI-EAS443:3:81:226:218#0/1  
a\_aaaa`a`a\_aaV\_\_\_\_\_`\_`^^`¥¥\_WY¥]¥^¥¥\_¥^W  
@HWI-EAS443:3:81:238:1728#0/1  
ATGCCATAAGCACCACATTCCCTTATACTGGAGATCCTCC  
+HWI-EAS443:3:81:238:1728#0/1  
a[^`^a¥]ZU]^`\_\_\_\_^]Y\_`\_^]aV\_\_[Y]]X^WVZVVT  
@HWI-EAS443:3:81:314:1381#0/1  
CCGTTTGAATTTCTAGCATGGTGGAGGCCATGGTGTCTA  
+HWI-EAS443:3:81:314:1381#0/1  
aba^WZ\_baba`bab``aaabVTS^XV``\_U¥¥¥HUBBBB  
@HWI-EAS443:3:81:382:789#0/1  
ATCCTGTTCCCTGTTCCATGGCTGTATGGAGGATCTCCAGT  
+HWI-EAS443:3:81:382:789#0/1  
a¥bbaa^^baaa\_aaaa\_`[aaZTTTQ`Q[¥VJW]\_`Y\_S  
@HWI-EAS443:3:81:575:1196#0/1  
AGACAGGGACATTTGAATTCACAAGCTTTTTTATCGCTA  
+HWI-EAS443:3:81:575:1196#0/1  
a\_`aU\_aa^`Ya``\_¥``a`\_a\_\_YZ\_¥aa]a^`\_¥^\_^  
@HWI-EAS443:3:81:640:1382#0/1  
AGAAAAAGGAGAGTAAGAGACAACATGACCAAGAAGATGG

+HWI-EAS443:3:81:640:1382#0/1  
abaaaa`bbaaab\_aaa\_abbaaaa^aa`aaaa\_`aa`\_`  
@HWI-EAS443:3:81:723:723#0/1  
GTTCTTCAATGGTGAACAGATCTTCATGATCTCAGAGAA  
+HWI-EAS443:3:81:723:723#0/1  
`^a`aa\_a`\_`\_]Ya][[\_``^`]^`^`¥]Y^\_\_^\_Y]\_\_Z  
@HWI-EAS443:3:81:749:1020#0/1  
GCATCATATTCCATGCTTTTGGCTGGACCATGGGCTGGCA  
+HWI-EAS443:3:81:749:1020#0/1  
a`ab^bbVbbbbbb`baa``aaabaaa\_UYabaaa`  
@HWI-EAS443:3:81:804:1823#0/1  
GTGGGAATCAACATGAGCAAAAAGAAGTCCTATATAAATA  
+HWI-EAS443:3:81:804:1823#0/1  
a\_`aa`bababaaa\_abaaaa\_\_a`^```aa]aa\_`aa  
@HWI-EAS443:3:82:1009:571#0/1  
TGGAATTTCTAGCATGGTGGAGGCCATGGTGTCTAGGGCC  
+HWI-EAS443:3:82:1009:571#0/1  
aab¥abbbababaabaa`b``a\_a`\_a`¥a^a¥``\_^]`^  
@HWI-EAS443:3:82:1035:1276#0/1  
ATGGTCCAGCCAAAAGCATGGAATATGATGCCGTTGCAAC  
+HWI-EAS443:3:82:1035:1276#0/1  
]Z]aa`abU^b`W`[\_`abaa`bbaaaa`¥baa\_`a```¥  
@HWI-EAS443:3:82:1084:1817#0/1  
GGACAACACTAAGTGAATGAAAATCAAAATCCTCGAATG  
+HWI-EAS443:3:82:1084:1817#0/1  
ab`ba`\_`^\_ba\_Ra]\_aaa^\_a`\_Yaaaa\_`a`\_\_\_\_`\_a  
@HWI-EAS443:3:82:1358:1897#0/1  
ATCCTGTTCCCTGTTCCATGGCTGTATGGAGGATCTCCAGT  
+HWI-EAS443:3:82:1358:1897#0/1  
`a[aaa^aaaaa^`a[aaaa^aaYX¥¥\_S[\_`N\_Q¥WTUYT  
@HWI-EAS443:3:82:1410:871#0/1  
ATCAAAATCCTCGAATGTTCCCTGGCGATGATTACATATAT  
+HWI-EAS443:3:82:1410:871#0/1  
abbaabaaaab`b\_\_ab\_aa^aa\_\_aaaaZab\_\_\_b`a`a  
@HWI-EAS443:3:82:1421:258#0/1  
CGCCAGACTTATGATTGGACATTAACAGAAATCAACCGG  
+HWI-EAS443:3:82:1421:258#0/1  
^ababbbabbbbaabbbba\_abbbbb`babbabaab^Sb`  
@HWI-EAS443:3:82:1529:876#0/1  
GACTTCTTTTGTCTCATGTTGATTCCCACTAACTTGCAGG  
+HWI-EAS443:3:82:1529:876#0/1  
¥\_b`^WVba¥¥V]ba^^\_\_`ZQ`a]X^aX\_a```aa]`^W  
@HWI-EAS443:3:82:152:1279#0/1  
TGTCCATGGTGTATCCTGTTCCCTGTTCCATGGCTGTATGG  
+HWI-EAS443:3:82:152:1279#0/1  
T^¥a[[baWXZ^T[\_W`WRX\_b][M]V\_RRaW\_BBBBBBB  
@HWI-EAS443:3:82:1717:1237#0/1  
CTCTGTGTCTTGTGAATTAGTCATCATCTTTCTCACAACA  
+HWI-EAS443:3:82:1717:1237#0/1  
X^a`^`aV`aa`Tab`J`a\_QUZa¥^aHaab]`T`^¥aVb

@HWI-EAS443:3:82:1766:268#0/1  
CGCAAAATGCCATAAGCACCACATTCCCTTATACTGGAGA  
+HWI-EAS443:3:82:1766:268#0/1  
^¥aabb]\_\_S^ab\_[\_¥Z`bbbaY^\_abbbba\_\_N\_¥\_  
@HWI-EAS443:3:82:309:240#0/1  
AACAGTGATAAAGAACAACATGATAAACAATGACCTTGGA  
+HWI-EAS443:3:82:309:240#0/1  
aaaab\_baaaa`\_aa`a`\_aa\_a^`\_aa\_`¥^\_^]^^\_\_  
@HWI-EAS443:3:82:330:1490#0/1  
CTTTTTGCTCATGTTGATTCCCACTAACTTGCAGGTCCTG  
+HWI-EAS443:3:82:330:1490#0/1  
abaabbababb^`bbaababaaaa\_\_aa`\_a`[Wa\_aa  
@HWI-EAS443:3:82:366:1441#0/1  
GGTCCAGCCAAAAGCATGGAATATGATGCCGTTGCAACTA  
+HWI-EAS443:3:82:366:1441#0/1  
aa^bbbabbb`[`aaa`\_aabba`\_aaa`a`a`aa`]`a  
@HWI-EAS443:3:82:382:447#0/1  
CAATGGTGAACAGATCTTCATGATCTCAGAGAACTCTTC  
+HWI-EAS443:3:82:382:447#0/1  
abb`bb\_bbab]abaabaabaaaaaa`a`a`aa\_`^  
@HWI-EAS443:3:82:388:1858#0/1  
TGAAAATCAAAATCCTCGAATGTTCTGGCGATGATTACA  
+HWI-EAS443:3:82:388:1858#0/1  
aSNZ\_a¥^¥^b^`Y\_`a¥^^S]aa[^X[^UKZXTSQXZ  
@HWI-EAS443:3:82:40:1542#0/1  
CAATGGTGAACAGATCTTCATGATCTCAGAGAACTCTTC  
+HWI-EAS443:3:82:40:1542#0/1  
a^^^a^[aa`¥baaY`aa\_ab^^^^a`\_a¥\_]VZa\_\_^]a  
@HWI-EAS443:3:82:425:640#0/1  
ATGCCATAAGCACCACATTCCCTTATACTGGAGATCCTCC  
+HWI-EAS443:3:82:425:640#0/1  
aaaa\_aaaaaa`\_aa`\_`a\_\_a\_a\_\_[\_^\_a\_VY]¥\_R  
@HWI-EAS443:3:82:434:388#0/1  
TGAGTTCTTCAATGGTGAACAGATCTTCATGATCTCAGA  
+HWI-EAS443:3:82:434:388#0/1  
\_Z\_Z¥Ybaa^SXZb\_R\_`X^]a`¥`^a]]`\_a\_¥a[[[  
@HWI-EAS443:3:82:537:1355#0/1  
TGCCGTTGATTTCTGTTTAATGTCCAATCATAAGTCTGG  
+HWI-EAS443:3:82:537:1355#0/1  
aaabb\_ba`¥aabbba]bbbbbaabbbababa^SaZ`aaa  
@HWI-EAS443:3:82:542:614#0/1  
GATAAAAAAAGCTTGTGAATTCAAATGTCCCTGTCTTATT  
+HWI-EAS443:3:82:542:614#0/1  
aaaaaabaaa`aaab\_aa\_aaa`\_\_aa^`\_]aa^\_aa\_a`  
@HWI-EAS443:3:82:545:1872#0/1  
CTTTGTTGAACTTTAGCTAGGAGCATTTGCGAAAAGCTT  
+HWI-EAS443:3:82:545:1872#0/1  
ab]`aaaab`Yaba`a^ba`aaaa`aa`\_a\_\_aa^`\_^\_  
@HWI-EAS443:3:82:555:92#0/1  
GTCATTGTTTATCATGTTGTTCTTTATCACTGTTACTCCA

+HWI-EAS443:3:82:555:92#0/1  
a^`aaaa\_aa`a\_aaa]aa\_a\_aaa`a¥^^`a[\_\_\_]\_[]]  
@HWI-EAS443:3:82:556:1499#0/1  
GTGGAATGAAAATCAAATCCTCGAATGTTCTGCGATG  
+HWI-EAS443:3:82:556:1499#0/1  
\_I`aaaa\_`^ba`\_]bbab\_aa`¥`aa\_a\_a`aa`^^]a  
@HWI-EAS443:3:82:73:571#0/1  
GTTCTTCAATGGTGAACAGATCTTCATGATCTCAGAGAA  
+HWI-EAS443:3:82:73:571#0/1  
^QUX\_T]RJX][O\_`YX[[WIO`[[¥OG^YYWT¥YWZ¥Z  
@HWI-EAS443:3:82:760:916#0/1  
CAAAGGGATTGAGGGATTACAAAGTCTTCCCGATAATC  
+HWI-EAS443:3:82:760:916#0/1  
abb`abbbbbbba`bababbaabbaaaaaaaaa`aaaaa^b`  
@HWI-EAS443:3:82:794:296#0/1  
TTCCAGCGCAAATGCCATAAGCACCACATTCCTTATAC  
+HWI-EAS443:3:82:794:296#0/1  
abbbbaabaaaaaaaaHaaaaaaaa`a`aaa`aaa`a`a\_  
@HWI-EAS443:3:82:899:1952#0/1  
GGGCCCTAGACACCATGGCCTCCACCATGCTAGAAATTCC  
+HWI-EAS443:3:82:899:1952#0/1  
V[b¥¥^baaa`X`\_Q¥b\_b`^`aba`Ubbab][TZX\_¥S]  
@HWI-EAS443:3:82:938:153#0/1  
GAGTTCTTCAATGGTGAACAGATCTTCATGATCTCAGAG  
+HWI-EAS443:3:82:938:153#0/1  
ab\_`a`abaa`abaXaa^a^\_a`a\_aa^aab``[^^\_^`a  
@HWI-EAS443:3:82:949:532#0/1  
CCTCCATACAGCCATGGAACAGGAACAGGATACACCATGG  
+HWI-EAS443:3:82:949:532#0/1  
aabbabbbbbbbbbbbbaabbbbabbbaabba]`abba  
@HWI-EAS443:3:83:1001:1456#0/1  
CGGTTGATTTCTGTTAATGTCCAATCATAAGTCTGGCGA  
+HWI-EAS443:3:83:1001:1456#0/1  
\_\_MU`¥\_]¥`Z[Y\_a]^`¥S^S[``Y¥^a[ZZZ\_Z]]X]  
@HWI-EAS443:3:83:1210:829#0/1  
TCCCTGTCTTATTTATATAGGACTTCTTTTTGCTCATGTT  
+HWI-EAS443:3:83:1210:829#0/1  
aaa`aaaaab]baa`aaa`\_`\_\_aa\_aaa\_a`\_`a\_\_`]]  
@HWI-EAS443:3:83:1310:57#0/1  
GTCTTATTTATATAGGACTTCTTTTTGCTCATGTTGATTC  
+HWI-EAS443:3:83:1310:57#0/1  
aX¥^]RUUN¥a^[]a[OSZUU¥^X]ZTSWZG]\_V[[[XWU  
@HWI-EAS443:3:83:1433:836#0/1  
CAGTGATAAAGAACAACATGATAAACAATGACCTTGGACC  
+HWI-EAS443:3:83:1433:836#0/1  
abb`^aba`baY`ab^`aa`aa`Z]X\_\_aa\_^]aa\_a\_ZO  
@HWI-EAS443:3:83:1485:359#0/1  
TCCTGTTCTGTTCCATGGCTGTATGGAGGATCTCCAGTA  
+HWI-EAS443:3:83:1485:359#0/1  
a\_^a`aa¥^bba\_¥\_`ba\_Waa¥T\_\_¥VV\_WZTVSWU[TM

@HWI-EAS443:3:83:1543:1229#0/1  
GACCGTTGGAATTTCTAGCATGGTGGAGGCCATGGTGTC  
+HWI-EAS443:3:83:1543:1229#0/1  
aaaVbbababb`aa`aba¥YaaaX¥a\_`U¥¥S¥YSYS¥X[  
@HWI-EAS443:3:83:1545:70#0/1  
ACTTTGTTGAACTTTAGCTAGGAGCATTTCGAAAAGCT  
+HWI-EAS443:3:83:1545:70#0/1  
aabaaaabb\_aa]babab]a`a\_\_a]]a`aaZa]^^`\_U\_  
@HWI-EAS443:3:83:1563:1787#0/1  
ATAAGCACACATTCCCTTATACTGGAGATCCTCCATACA  
+HWI-EAS443:3:83:1563:1787#0/1  
¥aa]¥W`HU`W^a^[OU^`¥^aW[a[R^W\_LQROFX\_`O]  
@HWI-EAS443:3:83:1765:879#0/1  
GCACCACATTCCCTTATACTGGAGATCCTCCATACAGCCA  
+HWI-EAS443:3:83:1765:879#0/1  
\_ab]ababaaa`a`ab`a\_`\_WU^a\_[\_\_][M¥^SZPWXWU  
@HWI-EAS443:3:83:1779:1907#0/1  
ATTTCTAGCATGGTGGAGGCCATGGTGTCTAGGGCCCGGA  
+HWI-EAS443:3:83:1779:1907#0/1  
XR[T`aXP\_V\_IUN^a]X¥V`]Q^]GVJRSR^\_ZXUSSN  
@HWI-EAS443:3:83:253:1376#0/1  
GCGAAAATGCCATAAGCACACATTCCCTTATACTGGAG  
+HWI-EAS443:3:83:253:1376#0/1  
Y¥Z^]\_^\_UZ`bbabbXabaaba]a[abbaXY`aaP`[[¥  
@HWI-EAS443:3:83:454:607#0/1  
TTCGAGGATTTTGATTTTCATTCCACTTAGTGTGTC  
+HWI-EAS443:3:83:454:607#0/1  
aaaaaba[`aaaaaaa```aaaa\_\_\_`\_\_\_]`\_a\_]\_\_`\_  
@HWI-EAS443:3:83:642:1314#0/1  
GGGAGTCTCGATACTGAATCTTGGACAAAAGAAATACACC  
+HWI-EAS443:3:83:642:1314#0/1  
a^Z]V\_\_J[PZZb^Z¥]¥\_Q^Za]P]¥]`][¥aa^Yaa`\_  
@HWI-EAS443:3:83:645:1744#0/1  
ACTAAGTGAATGAAAATCAAATCCTCGAATGTTCCCTGG  
+HWI-EAS443:3:83:645:1744#0/1  
aa`aaaU\_a`a\_\_`\_a\_a]`\_a```]\_\_`]^`^`\_Y^][^W\_  
@HWI-EAS443:3:83:658:1260#0/1  
ATTTCTAGCATGGTGGAGGCCATGGTGTCTAGGGCCCGGA  
+HWI-EAS443:3:83:658:1260#0/1  
aaa`aaaa\_]`^VS]^¥X`a`a]X^XUVWW^TU¥¥W^[ZY  
@HWI-EAS443:3:83:685:1072#0/1  
ATCCTGTTCCCTGTTCCATGGCTGTATGGAGGATCTCCAGT  
+HWI-EAS443:3:83:685:1072#0/1  
Zaaaaaa`aaaY^aaa`b`\_\_a]VLS\_XY`XOS¥YL]UUT  
@HWI-EAS443:3:83:703:133#0/1  
GCCGGTTGATTTCTGTTAATGTCCAATCATAAGTCTGGC  
+HWI-EAS443:3:83:703:133#0/1  
aaaabYab\_¥baaa`aabaa`a]I\_Y`\_`a[a\_[^\_]`^W  
@HWI-EAS443:3:83:91:1607#0/1  
CAAGCTTTTTTTATCGCTATGGATTTGTGGCTAATTTTAG

+HWI-EAS443:3:83:91:1607#0/1  
aYYS`T[^`YX\_\_a[\_\_\_]]SRP¥^¥NUORW[WPV¥^YU  
@HWI-EAS443:3:84:1163:730#0/1  
ATTGGACATTAACAGAAATCAACCGCAGCAACTGCATT  
+HWI-EAS443:3:84:1163:730#0/1  
aabab`\_aabaaa0aaaaa`\_`aaa`\_\_R¥\_GU[VO[]  
@HWI-EAS443:3:84:1224:870#0/1  
CGCCAGACTTATGATTGGACATTAACAGAAATCAACCGG  
+HWI-EAS443:3:84:1224:870#0/1  
abbabbbabbabbaaaaa`abbaa^bbaa`b\_baa`a`  
@HWI-EAS443:3:84:1362:292#0/1  
ATTTCTAGCATGGTGGAGGCCATGGTGTCTAGGGCCCGGA  
+HWI-EAS443:3:84:1362:292#0/1  
aaaaabaa]\_aba]aa\_`^^\_`]`W`¥S¥¥¥\_`^¥SS]`U  
@HWI-EAS443:3:84:1408:106#0/1  
GCCGGTTGATTTCTGTTAATGTCCAATCATAAGTCTGGC  
+HWI-EAS443:3:84:1408:106#0/1  
aTRab^ab\_aaa[aa`aa^aa^X[\_^X`a`a^X\_a\_W  
@HWI-EAS443:3:84:1420:365#0/1  
TCTAGCATGGTGGAGGCCATGGTGTCTAGGGCCCGGATTG  
+HWI-EAS443:3:84:1420:365#0/1  
]\_ZWbTa`\_a\_\_aQ\_¥Z\_ZV¥\_QRYaW[\_a¥PMF[aXQU^  
@HWI-EAS443:3:84:1525:1250#0/1  
GTCGCCAGACTTATGATTGGACATTAACAGAAATCAACC  
+HWI-EAS443:3:84:1525:1250#0/1  
aU\_\_NV^a\_RY`YWa^`Y``US\_^^V^[G]]W\_V\_V¥\_TV  
@HWI-EAS443:3:84:157:1895#0/1  
ATTTCTAGCATGGTGGAGGCCATGGTGTCTAGGGCCCGGA  
+HWI-EAS443:3:84:157:1895#0/1  
\_Zba^a`]W\_\_W\_RZY]M[a^¥PJJQMK^NIPYSY^^^SQ  
@HWI-EAS443:3:84:1589:1596#0/1  
GTTGGAATTTCTAGCATGGTGGAGGCCATGGTGTCTAGGG  
+HWI-EAS443:3:84:1589:1596#0/1  
`NUMZZ^\_\_¥P]\_aM\_UUPU`U¥]WSGSP¥SWWGUPU^WW  
@HWI-EAS443:3:84:193:531#0/1  
TGACAAAGGGATTACAGGGGATTACAAAGTCTTCCCCGATA  
+HWI-EAS443:3:84:193:531#0/1  
abaabaT`aaa`\_ab\_aa¥[a`a`\_```]a`a`\_`aa\_\_`  
@HWI-EAS443:3:84:292:1516#0/1  
CAAAATGCCATAAGCACCATTCCTTATACTGGAGATC  
+HWI-EAS443:3:84:292:1516#0/1  
^[YTR¥\_aa\_^]ZV]W][^\_^]\_V\_]\_Ya\_WVTVZX]  
@HWI-EAS443:3:84:349:687#0/1  
GTCTCGATACTGAATCTTGGACAAAAGAAATACACCAAGA  
+HWI-EAS443:3:84:349:687#0/1  
``babbaabaaa\_aaaaa`]`aaaaZ`aaa`aabaaa^`a  
@HWI-EAS443:3:84:498:263#0/1  
CAACACTAAGTGAATGAAAATCAAAATCCTCGAATGTTC  
+HWI-EAS443:3:84:498:263#0/1  
a^^^\_aaaabYaa`aaa\_a\_aaa\_Z\_a`a`a`\_``[\_\_\_

@HWI-EAS443:3:84:556:1653#0/1  
AGTCTCGATACTGAATCTTGGACAAAAGAAATACACCAAG  
+HWI-EAS443:3:84:556:1653#0/1  
\_] ^baaa`Y]P\_[\_a\_] ]a\_\_\_Wa¥aa\_\_`\_`a¥aZ\_a` ]  
@HWI-EAS443:3:84:578:1911#0/1  
CACCACATTCCTTATACTGGAGATCCTCCATACAGCCAT  
+HWI-EAS443:3:84:578:1911#0/1  
abbbb` [M]baa^R\_[aWXTZV¥a¥Z\_]UZWXZUWSY\_\_U  
@HWI-EAS443:3:84:819:1299#0/1  
CTTCTGGTACATCTGTTTCATCCTCAAGAATCCCCCTTTGG  
+HWI-EAS443:3:84:819:1299#0/1  
abbbbbbb`aababa\_aaaaaababb^\_aabaaaaa`\_a\_  
@HWI-EAS443:3:84:892:865#0/1  
CCAGCGCAAAATGCCATAAGCACCACATTCCTTATACTG  
+HWI-EAS443:3:84:892:865#0/1  
a` ``bbba`abbbbababababa\_aabaabaaaa`abaa`  
@HWI-EAS443:3:84:930:1621#0/1  
GGTTGATTTCTGTTTAATGTCCAATCATAAGTCTGGCGAC  
+HWI-EAS443:3:84:930:1621#0/1  
\_bIbbaabbbaaa¥bbbbbaabbaaababaaZaaa\_baa`  
@HWI-EAS443:3:84:952:1857#0/1  
AGTTGCAACGGCATCATATTCCATGCTTTTGGCTGGACCA  
+HWI-EAS443:3:84:952:1857#0/1  
aaZ]W\_aaa¥XX` [Uaa¥]ZV¥`¥`aT]¥\_RV[V`VPU¥¥  
@HWI-EAS443:3:85:1119:976#0/1  
GAGTTCTTCAATGGTGAACAGATCTTCATGATCTCAGAG  
+HWI-EAS443:3:85:1119:976#0/1  
a\_a`abbabaaaa`^aa\_a`aa`\_a` ``aaa`\_a`aa[\_\_\_  
@HWI-EAS443:3:85:1242:1808#0/1  
GAGGATCTCCAGTATAAGGGAATGTGGTGCTTATGGCATT  
+HWI-EAS443:3:85:1242:1808#0/1  
TQ[a[Z¥^ZUS\_IZ`\_Q` `PG\_b^S`ZaaVaV]ab^`\_` ]\_  
@HWI-EAS443:3:85:1318:431#0/1  
CAATCACTGGGACAACACTAAGTGAATGAAAATCAAAA  
+HWI-EAS443:3:85:1318:431#0/1  
a`bbbabbbbbbbabb^`^bbbbabaaabba`baa]aaaa  
@HWI-EAS443:3:85:1545:1086#0/1  
GCCAGACTTATGATTGGACATTAACAGAAATCAACCGGC  
+HWI-EAS443:3:85:1545:1086#0/1  
aa\_aa\_\_aa^bb`aaaa`^abaaaWaa`a`\_\_` `]X\_\_Z  
@HWI-EAS443:3:85:1741:989#0/1  
ATAAATAAGACAGGGACATTTGAATTCACAAGCTTTTTTTT  
+HWI-EAS443:3:85:1741:989#0/1  
\_]YaUb`¥R^a` ]JHPY\_]ZL^` [^^ZY[a¥QS[YZ]ZZX  
@HWI-EAS443:3:85:1742:1859#0/1  
CAAAATGCCATAAGCACCACATTCCTTATACTGGAGATC  
+HWI-EAS443:3:85:1742:1859#0/1  
`WSWX`\_U\_abZ\_aZ` ``\_aab¥SXUG`Ya[WGXaa`aPWX  
@HWI-EAS443:3:85:1745:1380#0/1  
AGCACTTCTGGTACATCTGTTTCATCCTCAAGAATCCCCCT

+HWI-EAS443:3:85:1745:1380#0/1  
U^¥Z`¥Xaa\_R]DYa¥T`\_X¥Y\_ZU\_a`Z`V^aa``\_\_^  
@HWI-EAS443:3:85:186:311#0/1  
CTGTGTCCATGGTGTATCCTGTTCCCTGTTCCATGGCTGTA  
+HWI-EAS443:3:85:186:311#0/1  
a\_\_[a¥`X`Y`\_Y`^\_¥`^¥\_W^^W¥^Y¥¥^RW¥ZUUTMS  
@HWI-EAS443:3:85:199:105#0/1  
TGCCGTTGATTTCTGTTTAAATGTCCAATCATAAGTCTGG  
+HWI-EAS443:3:85:199:105#0/1  
aabab`PY¥G\_bba`babbaa`b`aa¥YbaZababY^a`^  
@HWI-EAS443:3:85:291:164#0/1  
AGTTCTTCAATGGTGAACAGATCTTCATGATCTCAGAGA  
+HWI-EAS443:3:85:291:164#0/1  
ababa`^`a[\_aa[aaTaaaa^]`\_`a`[\_`\_`\_`a`\_`\_]`  
@HWI-EAS443:3:85:307:90#0/1  
ATCCTGTTCTGTTCCATGGCTGTATGGAGGATCTCCAGT  
+HWI-EAS443:3:85:307:90#0/1  
a`aaaa\_a`aaa`\_\_^`\_`\_`¥\_QVYQ[U[YSUWWWWWP  
@HWI-EAS443:3:85:312:1558#0/1  
CTTGTGAATTCAAATGTCCCTGTCTTATTTATATAGGACT  
+HWI-EAS443:3:85:312:1558#0/1  
aaaa\_ababaaaaaa`\_baa`a^`\_`\_`aaaa`a`\_`^`  
@HWI-EAS443:3:85:367:201#0/1  
GAGTCTTCAATGGTGAACAGATCTTCATGATCTCAGAG  
+HWI-EAS443:3:85:367:201#0/1  
aabW^`^`aQVQ\_ZZZVU`XP\_R¥W`^`a¥[\_W[\_`\_^PX  
@HWI-EAS443:3:85:382:113#0/1  
CAAAATGCCATAAGCACCATCCCTTATACTGGAGATC  
+HWI-EAS443:3:85:382:113#0/1  
aaa`^P¥\_[\_a]a\_a^^`)]`^Z[^]\_[\_]`^`^UZZ^^  
@HWI-EAS443:3:85:550:1731#0/1  
ATCAAAATCCTCGAATGTTCTCGCGATGATTACATATAT  
+HWI-EAS443:3:85:550:1731#0/1  
a`abbabaa\_\_\_a\_aaa]\_a`^`[^`\_`\_`^`\_`\_`^`\_`\_`\_`\_`\_`  
@HWI-EAS443:3:85:561:102#0/1  
CCGTTGGAATTTCTAGCATGGTGGAGCCATGGTGTCTA  
+HWI-EAS443:3:85:561:102#0/1  
abbbabbbababbabaa^bbbbb`ba`aa^`^]abVb`UY¥  
@HWI-EAS443:3:85:634:1246#0/1  
GTGGGAATCAACATGAGCAAAAAGAAGTCCTATATAAATA  
+HWI-EAS443:3:85:634:1246#0/1  
a`a`b`babbbbaabaabbaa¥a`aaa^a\_aaaaaaaaaa  
@HWI-EAS443:3:85:65:1153#0/1  
TTCCAGCGCAAAATGCCATAAGCACCATCCCTTATAC  
+HWI-EAS443:3:85:65:1153#0/1  
aaaa\_¥`\_]`aaaX\_X\_a`^WXaa`[aXU¥`]W^]W`\_`  
@HWI-EAS443:3:85:77:685#0/1  
TTCTGGTACATCTGTTATCCTCAAGAATCCCTTTGGC  
+HWI-EAS443:3:85:77:685#0/1  
a¥a[P\_][O^`\_][QaTY¥UOZY]¥SVEHMKO^¥SRVFOWRW



@HWI-EAS443:3:85:900:482#0/1  
CTCATGTTGATTCCCCTAACTTGCAGGTCCTGTAGAATC  
+HWI-EAS443:3:85:900:482#0/1  
\_WU][`]H\_baW`a]Z\_aUI\_U[]`\_b]UW]`b[``]]V  
@HWI-EAS443:3:85:92:270#0/1  
GCGCAAATGCCATAAGCACCACATTCCCTTATACTGGAG  
+HWI-EAS443:3:85:92:270#0/1  
aabb`a]`a`aaa`^]a`a\_a`^`\_\_^\_\_]a^\_]X^  
@HWI-EAS443:3:85:965:1057#0/1  
GAGTCTTCAATGGTGAACAGATCTTCATGATCTCAGAG  
+HWI-EAS443:3:85:965:1057#0/1  
aab`abaab`a`a\_a`\_aa`\_]`^`\_`\_`\_a^`\_`\_`  
@HWI-EAS443:3:86:1034:729#0/1  
CGAGGATTTTGTATTTTTCATTCCACTTAGTGTGCCCCAG  
+HWI-EAS443:3:86:1034:729#0/1  
a`bbb^abbabY`bbaabbabababbbbaa``bbaVV¥[ba  
@HWI-EAS443:3:86:1062:761#0/1  
CAGCGCAAATGCCATAAGCACCACATTCCCTTATACTGG  
+HWI-EAS443:3:86:1062:761#0/1  
`babbabbabbbabbabaaaa\_a`abaaaaabaa`\_aa  
@HWI-EAS443:3:86:1119:841#0/1  
TGCTCATGTTGATTCCCCTAACTTGCAGGTCCTGTAGAA  
+HWI-EAS443:3:86:1119:841#0/1  
aa`aa`a`^`aa\_aa`^`\_\_\_aaa`\_`\_\_\_aaV¥`\_`\_WW`\_¥  
@HWI-EAS443:3:86:1158:1297#0/1  
CCGGTTGATTTCTGTTTAATGTCCAATCATAAGTCTGGCG  
+HWI-EAS443:3:86:1158:1297#0/1  
ab¥SRZ\_Z¥a[¥UVa¥¥`aa\_aa`a]a```¥ZY`\_`\_W`  
@HWI-EAS443:3:86:1205:1210#0/1  
CAATGGTGAACAGATCTTCATGATCTCAGAGAACTCTTC  
+HWI-EAS443:3:86:1205:1210#0/1  
I[``bb¥a\_abb¥b\_aab\_]ba\_\_Lab`\_HR\_bbbZb\_^  
@HWI-EAS443:3:86:1216:298#0/1  
GGAGATCCTCCATACAGCCATGGAACAGGAACAGGATACA  
+HWI-EAS443:3:86:1216:298#0/1  
aba`aa`b`\_`bb\_aa`W`aba\_a]aa`\_`¥aa`\_`\_]`^  
@HWI-EAS443:3:86:1281:1774#0/1  
GGTCCAGCCAAAAGCATGGAATATGATGCCGTTGCAACTA  
+HWI-EAS443:3:86:1281:1774#0/1  
abUb`\_]`Uab`aaY[bba]abbbbaab\_ba`abZa`]]a  
@HWI-EAS443:3:86:1369:315#0/1  
GGAACATTGAGGATTTTGTATTTTTCATTCCACTTAGTGTT  
+HWI-EAS443:3:86:1369:315#0/1  
`ZZ`^V`^\_a][aQaa^aa^\_a`a]aa`^^^Zaa]\_W\_Z^  
@HWI-EAS443:3:86:161:40#0/1  
AGACTGTTCAAGCTTTTCGCAAATGCTCCTAGCTAAAGTT  
+HWI-EAS443:3:86:161:40#0/1  
aba`aa`a\_a`\_`\_`\_`\_¥^`[\_]^\_]`]]^Z]WHZ]V[  
@HWI-EAS443:3:86:1759:1407#0/1  
ATCCTGTTCTGTTCCATGGCTGTATGGAGGATCTCCAGT

+HWI-EAS443:3:86:1759:1407#0/1  
`aY\_aa^ba[aa\_a`ab`\_¥a\_\_R]`IG\_\_Q\_Z\_NU^UX  
@HWI-EAS443:3:86:259:1455#0/1  
ATGCCAGCCCATGGTCCAGCCAAAAGCATGGAATATGATG  
+HWI-EAS443:3:86:259:1455#0/1  
a]YZ`¥ZQ^S\_\_Y]]\_\_URTXZOTVY¥[ZYPTX\_XYMUU  
@HWI-EAS443:3:86:331:1066#0/1  
GTTCTGTTCATGGCTGTATGGAGGATCTCCAGTATAAG  
+HWI-EAS443:3:86:331:1066#0/1  
aY\_aa`aaa\_Oa`\_a\_VJWURUL[\_TUZ¥^THRUS¥Y¥^  
@HWI-EAS443:3:86:381:829#0/1  
GTTGCAACGGCATCATATCCATGCTTTTGGCTGGACCAT  
+HWI-EAS443:3:86:381:829#0/1  
`]Q`RSR[]^aa¥YZ]a¥XY]PY]SPYZSZRZ\_YKT¥PSQ  
@HWI-EAS443:3:86:634:340#0/1  
GCTTTTCGCAAATGCTCCTAGCTAAAGTTTCAACAAAGTA  
+HWI-EAS443:3:86:634:340#0/1  
]MX^^\_W\_Y^b`U[S`¥a[V]V]aSYSL[R]``][`¥ZHZ  
@HWI-EAS443:3:86:850:1135#0/1  
AGACTTATGATTGGACATTAACAGAAATCAACCGGCAGC  
+HWI-EAS443:3:86:850:1135#0/1  
\_\_bT¥SMaYa\_YU\_UW`]bba][[¥a]b]Z`b\_QX`]¥\_  
@HWI-EAS443:3:86:861:1071#0/1  
GCTGTATGGAGGATCTCCAGTATAAGGGAATGTGGTGCTT  
+HWI-EAS443:3:86:861:1071#0/1  
`\_aa\_aa^`aaa\_`¥\_`^a^`a`[``a[`]¥Y\_ZP[Z\_^  
@HWI-EAS443:3:86:965:832#0/1  
GCTGTATGGAGGATCTCCAGTATAAGGGAATGTGGTGCTT  
+HWI-EAS443:3:86:965:832#0/1  
aabaXaaa`\_a^]]`\_\_\_\_\_]]`[\_]X`[X\_\_X]X^^  
@HWI-EAS443:3:86:966:704#0/1  
CTTCTTTTTGCTCATGTTGATTCCCCTAACTTGCAGGTC  
+HWI-EAS443:3:86:966:704#0/1  
ab\_bbaa\_bbbbabbbbaaa\_aZNaabba\_bbbT^a]aX  
@HWI-EAS443:3:86:980:1149#0/1  
GATTTTCATTCCACTTAGTGTGTCCCCAGTGATTGTGAA  
+HWI-EAS443:3:86:980:1149#0/1  
]Sbb^bbbbb]b\_bbbbb¥\_\_baY\_aabaa^`Y`Ra¥ba\_  
@HWI-EAS443:3:87:1037:1230#0/1  
CATCTGTTTCATCCTCAAGAATCCCCTTTGGCTTGTGTTG  
+HWI-EAS443:3:87:1037:1230#0/1  
abbaabababbaaaababa`baaa`\_abab`\_aa`\_b`\_a  
@HWI-EAS443:3:87:1198:1182#0/1  
AAATGCCATAAGCACCATTCCTTATACTGGAGATCCT  
+HWI-EAS443:3:87:1198:1182#0/1  
abaaP]Zbbaaaa\_Y^aaaba`aaa`\_b]a`aaa^\_HNa  
@HWI-EAS443:3:87:1294:1005#0/1  
ACGGCATCATATCCATGCTTTTGGCTGGACCATGGGCTG  
+HWI-EAS443:3:87:1294:1005#0/1  
abbaaab`abaabaaaa¥aabaa`\_ba\_\_¥[`a`\_T^a

@HWI-EAS443:3:87:1507:1334#0/1  
GAGTTCCTCAATGGTGAACAGATCTTCATGATCTCAGAG  
+HWI-EAS443:3:87:1507:1334#0/1  
abb`bba`¥^bbaZ\_aaabXba¥b]abaaaaabX\_Qaaaa  
@HWI-EAS443:3:87:1665:1302#0/1  
AATCAAAATCCTCGAATGTTCTGCGGATGATTACATATA  
+HWI-EAS443:3:87:1665:1302#0/1  
aabaaa\_aa^Za]``]bb\_a\_¥`aa\_`\_ab\_[aVUaa\_a¥  
@HWI-EAS443:3:87:267:1287#0/1  
GCCGGTTGATTTCTGTTAATGTCCAATCATAAGTCTGGC  
+HWI-EAS443:3:87:267:1287#0/1  
aaa`a¥`aY]aaaa^aaa`aaY`\_\_`\_aa\_a\_\_]]\_[]\_  
@HWI-EAS443:3:87:304:289#0/1  
CAACACTAAGTGAATGAAAATCAAAATCCTCGAATGTTC  
+HWI-EAS443:3:87:304:289#0/1  
a`baaaba`b¥`aaabaa`aaaa`aaaa`\_aaa``aa``a  
@HWI-EAS443:3:87:328:1102#0/1  
GAGGATTTTGATTTTCATTCCACTTAGTGTGCCCCAGT  
+HWI-EAS443:3:87:328:1102#0/1  
^^`aabbbbbbbbaabaaa]ababa`aab`aaaaaa\_  
@HWI-EAS443:3:87:452:1657#0/1  
GCGCAAAATGCCATAAGCACCACATTCCCTTATACTGGAG  
+HWI-EAS443:3:87:452:1657#0/1  
a`\_`aaa\_aa¥`aYaa`]`\_\_a\_a`UXX`[^a]]]U\_]`  
@HWI-EAS443:3:87:473:193#0/1  
CTCCAGTATAAGGGAATGTGGTGCTTATGGCATTGCGC  
+HWI-EAS443:3:87:473:193#0/1  
`baa^TU\_a^X^a`S]aa[[]Xa[``[Y\_YRX^^^^\_¥Y\_  
@HWI-EAS443:3:87:544:598#0/1  
TTGAATTCACAAGCTTTTTTTATCGCTATGGATTTGTGGC  
+HWI-EAS443:3:87:544:598#0/1  
^\_YS^\_]\_ZUa^X\_]Y`Z]\_R^a^a]T^^aa¥a]]¥XVX`  
@HWI-EAS443:3:87:646:1090#0/1  
TGAAAATCAAAATCCTCGAATGTTCTGCGGATGATTACA  
+HWI-EAS443:3:87:646:1090#0/1  
aa^aaaa\_aaa`\_`Y^`\_]`\_`aY``\_]`\_`^]`\_`^[]Y\_  
@HWI-EAS443:3:87:820:104#0/1  
TAAGCACCACATTCCCTTATACTGGAGATCCTCCATACAG  
+HWI-EAS443:3:87:820:104#0/1  
a¥Y\_[[X]STY\_a`a\_aR^]V^`aa^^^^[ZVEPY¥]RS¥  
@HWI-EAS443:3:88:1004:1873#0/1  
GGAGGATCTCCAGTATAAGGGAATGTGGTGCTTATGGCAT  
+HWI-EAS443:3:88:1004:1873#0/1  
aaaaabaaaaa`^`^aaaabab\_aa`Y`\_Ua^aaa\_aY`¥a  
@HWI-EAS443:3:88:1009:418#0/1  
GAAAAAGGAGAGTAAGAGACAACATGACCAAGAAGATGGT  
+HWI-EAS443:3:88:1009:418#0/1  
aaaa`aa\_babYaaaaaa]a\_\_\_\_^`aY\_]\_\_^`a¥a\_X  
@HWI-EAS443:3:88:1059:1305#0/1  
CTTCTTTTTGCTCATGTTGATTCCCACTAACTTGCAGGTC

+HWI-EAS443:3:88:1059:1305#0/1  
^`^Y\_aab` `a\_] `b^] `bbaba` ^bab\_aS\_ab\_ `ba¥^  
@HWI-EAS443:3:88:1136:1741#0/1  
CAATGGTGGAAACAGATCTTCATGATCTCAGAGAACTCTTC  
+HWI-EAS443:3:88:1136:1741#0/1  
aaKabbWbaaa\_ `^¥bI` bbba` b[^a` a\_a[a` a^\_[^`  
@HWI-EAS443:3:88:1170:896#0/1  
CAAAATGCCATAAGCACCATTCCTTATACTGGAGATC  
+HWI-EAS443:3:88:1170:896#0/1  
`V^ab` a` aa` XZ\_aa\_\_ ^abbaWV[a^^` b]\_ `Y]aaa^  
@HWI-EAS443:3:88:1480:1112#0/1  
CAGCCAAAAGCATGGAATATGATGCCGTTGCAACTACACA  
+HWI-EAS443:3:88:1480:1112#0/1  
abbZabbaabbbabbabaabbbbb] ababb` bbaba^b\_b  
@HWI-EAS443:3:88:1540:1612#0/1  
CATGGTCCAGCCAAAAGCATGGAATATGATGCCGTTGCAA  
+HWI-EAS443:3:88:1540:1612#0/1  
UaV\_b` bbbb\_aaaaabbbbbbaaba\_baaaabb[abaab  
@HWI-EAS443:3:88:1642:36#0/1  
ATCTGTTCATCCTCAAGAATTCCTTTGGCTTGTGTTGA  
+HWI-EAS443:3:88:1642:36#0/1  
ab` bbabXba^\_a` a` `aaaa\_ ^\_a\_a^a\_aaaZa\_aZX  
@HWI-EAS443:3:88:164:2032#0/1  
CACAAGCCAAAGGGGAATTCTTGAGGATGAACAGATGTAC  
+HWI-EAS443:3:88:164:2032#0/1  
`bab` \_aba\_b` [aa^aaa\_ `a\_aaa¥XYb` Ga` ``WK[Z  
@HWI-EAS443:3:88:271:1026#0/1  
AATTTCTAGCATGGTGGAGGCCATGGTGTCTAGGGCCCGG  
+HWI-EAS443:3:88:271:1026#0/1  
^\_a\_` `^^ba^ [ `N]aa^adWRY]^PT¥^PHT` ^^U^YY  
@HWI-EAS443:3:88:330:483#0/1  
GTCCAGCCAAAAGCATGGAATATGATGCCGTTGCAACTAC  
+HWI-EAS443:3:88:330:483#0/1  
aX] `aaab]\_WXUaa\_a\_a\_aa\_ ` ` `a` ¥R] ` `X^] `]  
@HWI-EAS443:3:88:415:1350#0/1  
ATTATCGGGGAAGACTTTGTAATCCCCTGAATCCCTTTGT  
+HWI-EAS443:3:88:415:1350#0/1  
`aab` aaaaa` a\_\_ `aaa` ^aaa\_a` \_ ` \_\_\_\_\_^\_\_X\_ `Z  
@HWI-EAS443:3:88:448:541#0/1  
TTTGAATTCACAAGCTTTTTTATCGCTATGGATTTGTGG  
+HWI-EAS443:3:88:448:541#0/1  
`bbbbbbabbabbaa` aabaaaaaa\_aaaaa\_a\_aaZa`  
@HWI-EAS443:3:88:525:293#0/1  
TCCTGTTCTGTTCCATGGCTGTATGGAGGATCTCCAGTA  
+HWI-EAS443:3:88:525:293#0/1  
^bba` \_b` ``aaa\_\_ `a` ``]a¥[W¥]SXYMU¥W¥XLONQ  
@HWI-EAS443:3:88:548:829#0/1  
ACTTTAGCTAGGAGCATTTCGAAAAGCTTGAACAGTCTG  
+HWI-EAS443:3:88:548:829#0/1  
abab` \_\_aaabaaaaZ^] `a` `^` ^` ^` a\_aa¥Z]Y¥¥a` \_

@HWI-EAS443:3:88:557:629#0/1  
CGCCAGACTTATGATTGGACATTAACAGAAATCAACCGG  
+HWI-EAS443:3:88:557:629#0/1  
aa¥a]aXZzb`ba[aaaa`a\_aa¥a`a\_¥]`aa`a]^^  
@HWI-EAS443:3:88:672:712#0/1  
ACTAAGTGAATGAAAATCAAATCCTCGAATGTTCTGG  
+HWI-EAS443:3:88:672:712#0/1  
aaab`a\_baaabbabbababaaabaa`abaaaa\_aa\_a`\_  
@HWI-EAS443:3:88:700:391#0/1  
GTTCTTCAATGGTGAACAGATCTTCATGATCTCAGAGAA  
+HWI-EAS443:3:88:700:391#0/1  
^]]\_aaZ^aaXa¥`a\_[]^`]]`aa\_a\_]\_\_\_Z\_\_`[W  
@HWI-EAS443:3:89:1019:2024#0/1  
GGAGGATCTCCAGTATAAGGGAATGTGGTCTTATGGCAT  
+HWI-EAS443:3:89:1019:2024#0/1  
a`[\_S]\_`aab¥Saa`aa`]]`Yaaa`a`Z¥aa`^YXZP]\_  
@HWI-EAS443:3:89:1029:140#0/1  
CTAGCATGGTGGAGGCCATGGTGTCTAGGGCCCGGATTGA  
+HWI-EAS443:3:89:1029:140#0/1  
aT`baa`bbXb]]]ba`aaab`RaU\_WX`a`J`a^VaaZ^  
@HWI-EAS443:3:89:112:1521#0/1  
CAAAATGCCATAAGCACCACATTCCTTATACTGGAGATC  
+HWI-EAS443:3:89:112:1521#0/1  
a`bbb`aa`aabb\_a\_aaa`\_`\_\_\_\_^\_\_\_\_`^[]]^VYU  
@HWI-EAS443:3:89:1132:1059#0/1  
GCAAAATGCCATAAGCACCACATTCCTTATACTGGAGAT  
+HWI-EAS443:3:89:1132:1059#0/1  
]\_¥\_]¥\_a^^a`^¥UZ\_b`^Z^\_ZSRR\_baab`^\_R\_[]N  
@HWI-EAS443:3:89:1139:85#0/1  
CATTCGAGGATTTTGATTTTCATTCACCTAGTGTGTC  
+HWI-EAS443:3:89:1139:85#0/1  
abbabbababbbbbbbbbbbbbbbbbabbbbababbb`^  
@HWI-EAS443:3:89:1170:1234#0/1  
GAGTCTTCAATGGTGAACAGATCTTCATGATCTCAGAG  
+HWI-EAS443:3:89:1170:1234#0/1  
^\_LSaVb`S[aa^b\_bb[]]a`a\_aa`aZa`aa`\_`[\_^aa  
@HWI-EAS443:3:89:1559:1132#0/1  
CAACACTAAGTGAATGAAAATCAAATCCTCGAATGTTCT  
+HWI-EAS443:3:89:1559:1132#0/1  
]\_\_Z\_\_`aaaV`^abb`bb``\_^bbab\_aa[\_`\_Ya``ZJ  
@HWI-EAS443:3:89:182:884#0/1  
AATTTCTAGCATGGTGGAGGCCATGGTGTCTAGGGCCCGG  
+HWI-EAS443:3:89:182:884#0/1  
`[\_`^a\_`\_`\_a`a`T¥`^`][`¥¥]^YZSXZ]¥R¥Z[WZY  
@HWI-EAS443:3:89:213:1104#0/1  
ATTTATATAGGACTTCTTTTGTCTCATGTTGATCCCCT  
+HWI-EAS443:3:89:213:1104#0/1  
a]aWbaa\_SR\_TUW]¥aX\_\_¥¥]JZT[\_^\_a^\_¥a^aX^\_  
@HWI-EAS443:3:89:218:861#0/1  
GGTCGCCAGACTTATGATTGGACATTAACAGAAATCAAC

+HWI-EAS443:3:89:218:861#0/1  
a]MTT]a[JXUa\_^\_a\_]a[aZ\_^\_[XU]`a\_]^^ZU[^X  
@HWI-EAS443:3:89:364:903#0/1  
TGGAATTTCTAGCATGGTGGAGGCCATGGTGTCTAGGGCC  
+HWI-EAS443:3:89:364:903#0/1  
aa\_]\_]a]a`aaaa^^]UXT^]\_]^¥\_YPVM^SQPUYZU  
@HWI-EAS443:3:89:379:1163#0/1  
GCTGCCGGTTGATTTCTGTTTAATGTCCAATCATAAGTCT  
+HWI-EAS443:3:89:379:1163#0/1  
`baabbaaYaa[Z`aaa`R\_aZ``aa`^]a`]S`Y`aU[a  
@HWI-EAS443:3:89:420:483#0/1  
ACCGGTTGGAATTTCTAGCATGGTGGAGGCCATGGTGTCT  
+HWI-EAS443:3:89:420:483#0/1  
aabbaabbbbaababaaa`a`aaa\_aa¥`X^Y[\_`VT¥^WW  
@HWI-EAS443:3:89:423:597#0/1  
GCCGGTTGATTTCTGTTTAATGTCCAATCATAAGTCTGGC  
+HWI-EAS443:3:89:423:597#0/1  
abbbbabbabbbbabababb``aabababaa^aaaa`  
@HWI-EAS443:3:89:465:829#0/1  
AACACTAAGTGAATGAAAATCAAAATCCTCGAATGTTCC  
+HWI-EAS443:3:89:465:829#0/1  
abaaaab^b¥aaa^ab`a^aaa`aaa```a`aa[a`^]a]  
@HWI-EAS443:3:89:484:203#0/1  
CTTTGTTGAAACTTTAGCTAGGAGCATTTCGCGAAAAGCTT  
+HWI-EAS443:3:89:484:203#0/1  
^b`X\_¥ab¥S`a¥aa\_abaa^V\_`^a`aaaaa^Q[`a¥¥]  
@HWI-EAS443:3:89:554:523#0/1  
GAAAAAGGAGAGTAAGAGACAACATGACCAAGAAGATGGT  
+HWI-EAS443:3:89:554:523#0/1  
a^)``]aa`a`a]aaaaaaaa`aa\_`a`\_R]\_]\_aa^\_]X  
@HWI-EAS443:3:89:598:551#0/1  
AATTTCTAGCATGGTGGAGGCCATGGTGTCTAGGGCCCGG  
+HWI-EAS443:3:89:598:551#0/1  
a^aaaaa^aWa``]¥aP`]V^a`]VMJ]^S`VXYa[UY[  
@HWI-EAS443:3:89:625:120#0/1  
GAGTCTTCAATGGTGGAACAGATCTTCATGATCTCAGAG  
+HWI-EAS443:3:89:625:120#0/1  
aa`\_a\_a`a`a`^`a^`]`a]\_^a`\_\_\_\_`^\_\_\_\_^Z]]\_  
@HWI-EAS443:3:89:735:373#0/1  
GAAAATCAAAATCCTCGAATGTTCTGGCGATGATTACAT  
+HWI-EAS443:3:89:735:373#0/1  
aaababab``aa``¥aa\_\_aaa`\_\_aa\_a\_\_^XX]`VJU  
@HWI-EAS443:3:89:772:846#0/1  
CAGCGAAAATGCCATAAGCACCATTCCTTATACTGG  
+HWI-EAS443:3:89:772:846#0/1  
aababbb`\_`b``\_bbbababbbababaa`baab\_a`ba  
@HWI-EAS443:3:89:93:418#0/1  
GGTCGCCAGACTTATGATTGGACATTAACAGAAATCAAC  
+HWI-EAS443:3:89:93:418#0/1  
aa¥bbbaa`aaaaab[aaaa`aa`aa`ba`a\_\_`a^\_

@HWI-EAS443:3:89:94:1935#0/1  
TGCCGGTTGATTTCTGTTTAATGTCCAATCATAAGTCTGG  
+HWI-EAS443:3:89:94:1935#0/1  
\_]`a]¥]a¥`]]`aa`Y^aaaa\_\_aaaaaaaa^¥Waa\_`  
@HWI-EAS443:3:89:960:627#0/1  
GTTTAATGTCCAATCATAAGTCTGGCGACCTTGAGTTAGT  
+HWI-EAS443:3:89:960:627#0/1  
aaa`aaa]YR]\_\_a`a\_aaaZ\_a\_\_P\_a^`aa\_\_\_\_^]`W  
@HWI-EAS443:3:8:1073:95#0/1  
CTCGATACTGAATCTTGACAAAAGAAATACACCAAGACA  
+HWI-EAS443:3:8:1073:95#0/1  
abbbbabYbba`b\_bbbba\_X¥aab`a\_a`¥\_[U``ba^`  
@HWI-EAS443:3:8:1264:1833#0/1  
CAACACTAAGTGAATGAAAATCAAATCCTCGAATGTTC  
+HWI-EAS443:3:8:1264:1833#0/1  
a`b\_b`b`ab[a`a`a`abaaa¥`aa``Y[`^`\_`]^`\_^  
@HWI-EAS443:3:8:1630:197#0/1  
CATTCGAGGATTTTGATTTTCATTCCACTTAGTGTGTCC  
+HWI-EAS443:3:8:1630:197#0/1  
\_a^\_Xaa`aaaa\_`bZa`bbVba[^Y`Gb]a¥F\_]aa[a\_  
@HWI-EAS443:3:8:1702:852#0/1  
GTTCTTCAATGGTGAACAGATCTTCATGATCTCAGAGAA  
+HWI-EAS443:3:8:1702:852#0/1  
aY^[¥aY\_``aaX\_\_^\_[^]\_]X\_^S^]a¥^U¥OXVZXXZ  
@HWI-EAS443:3:8:1712:1203#0/1  
AGACTGTTCAAGCTTTTCGCAAATGCTCCTAGCTAAAGTT  
+HWI-EAS443:3:8:1712:1203#0/1  
ab`abbba\_b\_b^\_bab`bYabaaaW¥]Uaa`[\_`¥`a0`  
@HWI-EAS443:3:8:186:930#0/1  
GGTTGGAATTTCTAGCATGGTGGAGCCATGGTGTCTAGG  
+HWI-EAS443:3:8:186:930#0/1  
aaY^`aaaa\_``\_a```\_YU]¥^S^¥^¥¥XWW¥WWWUW  
@HWI-EAS443:3:8:305:389#0/1  
CTCATGTTGATTCCCACTAAGTGCAGGTCCTGTAGAATC  
+HWI-EAS443:3:8:305:389#0/1  
`a`\_U¥Y\_\_b\_Z\_T\_aab\_X]a`a]a^WG\_^ab\_X\_`a^a  
@HWI-EAS443:3:8:316:440#0/1  
GTTCTTCAATGGTGAACAGATCTTCATGATCTCAGAGAA  
+HWI-EAS443:3:8:316:440#0/1  
a`a[aaa¥\_`a^^a\_]Xaaa[^S`\_W`]\_]\_]\_^\_^]a  
@HWI-EAS443:3:8:471:306#0/1  
CACCACATTCCTTATACTGGAGATCCTCCATACAGCCAT  
+HWI-EAS443:3:8:471:306#0/1  
aa]RZYU^\_\_U[`\_\_^\_[Z\_\_^^ZRUPGX]U]XUWUTZ  
@HWI-EAS443:3:8:508:1238#0/1  
CAATGGTGAACAGATCTTCATGATCTCAGAGAACTCTTC  
+HWI-EAS443:3:8:508:1238#0/1  
a\_Y]¥`¥Z¥¥\_a^a\_a`a`^a\_aaQT]V`Y]\_¥``]\_^W  
@HWI-EAS443:3:8:526:347#0/1  
TCTGTTTCATCTCAAGAATTCCTTTGGCTTGTGTGAG

+HWI-EAS443:3:8:526:347#0/1  
Xa]Ya)`baaaa`bb`^\_ba¥PZaa)`aa[\_^][a]a`Wa  
@HWI-EAS443:3:8:551:175#0/1  
GAAAAAGGAGAGTAAGAGACAACATGACCAAGAAGATGGT  
+HWI-EAS443:3:8:551:175#0/1  
a`^\_`a\_]`]aZ^^\_`^^^Z^Z^^YWYX^ZZ]XZZXW  
@HWI-EAS443:3:8:579:742#0/1  
ATCAAAATCCTCGAATGTTCTGCGCATGATTACATATAT  
+HWI-EAS443:3:8:579:742#0/1  
aaa`Y^aab\_`a`[Y^GUUYX\_\_X[^\_P^W¥X¥]Y\_\_¥  
@HWI-EAS443:3:8:593:107#0/1  
ATTTATATAGGACTTCTTTTTGCTCATGTTGATTCCCACT  
+HWI-EAS443:3:8:593:107#0/1  
abaaa`aaaab\_¥^`aaa`aa\_`a\_a^\_\_Z`\_\_IG^]  
@HWI-EAS443:3:8:81:1905#0/1  
GGTCCAGCCAAAAGCATGGAATATGATGCCGTTGCAACTA  
+HWI-EAS443:3:8:81:1905#0/1  
aTQaab^bb^[[YbbaTX`a`aZ]^`a\_\_U[a]RZF¥`  
@HWI-EAS443:3:8:834:152#0/1  
GCCGGTTGATTTCTGTTAATGTCCAATCATAAGTCTGGC  
+HWI-EAS443:3:8:834:152#0/1  
Y`^¥[UH]]bRWRXV¥YWWW^^XOJVPJZUPQ[URT\_\_BB  
@HWI-EAS443:3:8:976:154#0/1  
GCACCACATTCCCTTATACTGGAGATCCTCCATACAGCCA  
+HWI-EAS443:3:8:976:154#0/1  
a)`XXQ\_\_[\_NFNV`Y`¥^¥\_¥RSQMLQLPRTTWBBBBB  
@HWI-EAS443:3:90:1077:1289#0/1  
TGTGTCTTGTGAATTAGTCATCATCTTTCTCACAACTTT  
+HWI-EAS443:3:90:1077:1289#0/1  
aa[a]\_babS`W[¥`X\_W[`X]X\_`aa]a^\_a\_\_G]`[W  
@HWI-EAS443:3:90:107:65#0/1  
CAGCGCAAAATGCCATAAGCACCATTCCTTATACTGG  
+HWI-EAS443:3:90:107:65#0/1  
I[bb\_XZbaUZabbbb`abb`b]a]HTa)`aaa\_\_S¥]a\_  
@HWI-EAS443:3:90:1132:985#0/1  
AACTTTAGCTAGGAGCATTTGCGAAAAGCTTGAACAGTCT  
+HWI-EAS443:3:90:1132:985#0/1  
a]b`\_Zb^b\_baa¥`\_bQ^]Ua[[a\_`Iaab^Z[\_`]aR  
@HWI-EAS443:3:90:1194:859#0/1  
TTCAAATGTCCCTGTCTTATTTATATAGGACTTCTTTTTG  
+HWI-EAS443:3:90:1194:859#0/1  
`^^RVba`Y`\_aTUUaWQ\_QWQT\_UQ]]RYWV¥[¥U^Pa  
@HWI-EAS443:3:90:1407:528#0/1  
ACCGGTTGGAATTTCTAGCATGGTGGAGGCCATGGTGTCT  
+HWI-EAS443:3:90:1407:528#0/1  
aZN\_a`bbaaa]WZ¥OU\_]a`aNvZ^]YPRY^¥`PPY^K  
@HWI-EAS443:3:90:1411:711#0/1  
GGGGACAACACTAAGTGAATGAAAATCAAAATCCTCGAA  
+HWI-EAS443:3:90:1411:711#0/1  
abbba`a^`baaaab\_ababbbabbaabbab¥Ya`aaa



@HWI-EAS443:3:90:1554:329#0/1  
GACCGTTGGAATTTCTAGCATGGTGGAGGCCATGGTGTC  
+HWI-EAS443:3:90:1554:329#0/1  
\_aaaa^`¥[[aaabaa` `` `` `b^N\_a]\_`VQUM]`Y`XE  
@HWI-EAS443:3:90:1614:618#0/1  
CGCCAGGAACATTCGAGGATTTTGATTTTCATTCCACTTA  
+HWI-EAS443:3:90:1614:618#0/1  
abbbbbbbbabbbbbbbbabbbbbbabbbbabbb\_aaabaa  
@HWI-EAS443:3:90:1642:1876#0/1  
AGGAGACCGTTGGAATTTCTAGCATGGTGGAGGCCATGG  
+HWI-EAS443:3:90:1642:1876#0/1  
\_TaX]\_TQ[aZZaaTTaaZ\_\_W]U`ZXZJTPaBBBBBBBB  
@HWI-EAS443:3:90:1649:1421#0/1  
ATTTCTAGCATGGTGGAGGCCATGGTGTCTAGGGCCCGGA  
+HWI-EAS443:3:90:1649:1421#0/1  
ab]]¥aa` []aaa^`X\_a\_aVaVQQPaW¥U¥[[[VS[M`^M  
@HWI-EAS443:3:90:1707:1695#0/1  
CGGTTGATTTCTGTTAATGTCCAATCATAAGTCTGGCGA  
+HWI-EAS443:3:90:1707:1695#0/1  
ZYa¥¥S\_\_b¥`]`a`\_a`^¥S`\_`¥\_aaab^]YYaaba`a  
@HWI-EAS443:3:90:230:310#0/1  
TCTTTTTGCTCATGTTGATTCCCACTAACTTGCAGGTCCT  
+HWI-EAS443:3:90:230:310#0/1  
abaabbbba`aaaa`aa`aaaa\_aa`aa\_\_`\_`\_a\_X^W`  
@HWI-EAS443:3:90:328:265#0/1  
ACTTTAGCTAGGAGCATTGCGAAAAGCTTGAACAGTCTG  
+HWI-EAS443:3:90:328:265#0/1  
aabababab\_aa`^aaaaa\_aa`aaa\_a\_a\_\_\_\_\_aT\_¥`  
@HWI-EAS443:3:90:514:1749#0/1  
ACCGTTGGAATTTCTAGCATGGTGGAGGCCATGGTGTCT  
+HWI-EAS443:3:90:514:1749#0/1  
aa`\_]RR[\_a`aaa\_V\_aaZWPZWV^aaaXTUY^U]S  
@HWI-EAS443:3:90:596:133#0/1  
CAAAATGCCATAAGCACCACATTCCCTTATACTGGAGATC  
+HWI-EAS443:3:90:596:133#0/1  
a\_aXZ`baababa[a`]aa`ab^ZI¥aaaa\_aa`a^a¥P  
@HWI-EAS443:3:90:818:1885#0/1  
ACGGCATCATATTCCATGCTTTTGGCTGGACCATGGGCTG  
+HWI-EAS443:3:90:818:1885#0/1  
\_` `aaaaababa^a[a`aa` `` `¥Z]\_^NS^PUXGTS`QT[  
@HWI-EAS443:3:90:940:666#0/1  
ACCGTTGGAATTTCTAGCATGGTGGAGGCCATGGTGTCT  
+HWI-EAS443:3:90:940:666#0/1  
`aaaa¥aba`aaaa`T^G[WaaS`YM\_\_VKKYPUPVUVS  
@HWI-EAS443:3:91:1015:1840#0/1  
AAATCAAAATCCTCGAATGTTCTGGCGATGATTACATAT  
+HWI-EAS443:3:91:1015:1840#0/1  
abaaabbaaba`a`aaa`\_a`\_`a\_\_aaZ\_^`]]M\_^`\_`  
@HWI-EAS443:3:91:1297:1775#0/1  
ACTTTAGCTAGGAGCATTGCGAAAAGCTTGAACAGTCTG

+HWI-EAS443:3:91:1297:1775#0/1  
ab`¥Zaa\_^¥bbX^^a^^T\_^\_YZ[^X[\_`aa`¥\_\_T^\_Z  
@HWI-EAS443:3:91:1373:179#0/1  
TTGAATTCACAAGCTTTTTTATCGCTATGGATTTGTGGC  
+HWI-EAS443:3:91:1373:179#0/1  
abba``^b\_S[Y`Y¥b`YXTaZ^aZ\_]^VY\_X```XN]\_^  
@HWI-EAS443:3:91:1384:842#0/1  
AAAAAGGAGAGTAAGAGACAACATGACCAAGAAGATGGTC  
+HWI-EAS443:3:91:1384:842#0/1  
abbaabbabaa`aabbabaabaaaaa\_]aabaaaa\_ba^\_  
@HWI-EAS443:3:91:1419:328#0/1  
AGTTCTTCAATGGTGGAACAGATCTTCATGATCTCAGAGA  
+HWI-EAS443:3:91:1419:328#0/1  
aaT]`aXa^W]a\_Taa\_YHY]]^\_\_\_\_[\_]SX¥VWW^R]¥  
@HWI-EAS443:3:91:1466:1326#0/1  
CAATGGTGGAACAGATCTTCATGATCTCAGAGAACTCTTC  
+HWI-EAS443:3:91:1466:1326#0/1  
WabW\_a¥\_bba^bbab\_abba`ba[N¥`ba\_b]WWbY[¥H  
@HWI-EAS443:3:91:324:1529#0/1  
AAAATGCCATAAGCACCACATTCCCTTATACTGGAGATCC  
+HWI-EAS443:3:91:324:1529#0/1  
a`[\_`b`baba\_]Zbbb```aab\_aaa`a`aa`]a]\_`\_¥\_P  
@HWI-EAS443:3:91:378:449#0/1  
TGCCAGCCCATGGTCCAGCCAAAAGCATGGAATATGATGC  
+HWI-EAS443:3:91:378:449#0/1  
aUb`bXb`aaaa`[aa`a\_``\_a]¥[¥`\_\_X\_aZ\_\_[\_W  
@HWI-EAS443:3:91:607:1153#0/1  
TGGAACAGATCTTCATGATCTCAGAGAACTCTTCTTTCTT  
+HWI-EAS443:3:91:607:1153#0/1  
`baababbabbbbbbababbaaaaaa]¥aaaaaaaa`\_aa  
@HWI-EAS443:3:91:634:1194#0/1  
CAAATGTCCCTGTCTTATTTATATAGGACTTCTTTTTGCT  
+HWI-EAS443:3:91:634:1194#0/1  
^a\_¥aa^bbb^baab`bbabba`a`]U`bba]babbbbaa  
@HWI-EAS443:3:91:649:1043#0/1  
CTTTAGCTAGGAGCATTTGCGAAAAGCTTGAACAGTCTGG  
+HWI-EAS443:3:91:649:1043#0/1  
abbaabbb\_bbababbbabab]\_baabaaba\_aaa¥```\_X  
@HWI-EAS443:3:91:856:154#0/1  
CTGGGGACAACACTAAGTGAATGAAAATCAAAATCCTCG  
+HWI-EAS443:3:91:856:154#0/1  
abbbbabbbabbaabb`bbbbbbbbbbabbbbb]`baa  
@HWI-EAS443:3:91:85:510#0/1  
ACTAAGTGAATGAAAATCAAAATCCTCGAATGTTCTGG  
+HWI-EAS443:3:91:85:510#0/1  
`bab^`Rab]¥bbb`Y\_a][\_X`a^Y`\_baY]a^^^][¥]  
@HWI-EAS443:3:91:871:288#0/1  
ATGCCATAAGCACCACATTCCCTTATACTGGAGATCCTCC  
+HWI-EAS443:3:91:871:288#0/1  
`^^`\_aaababbaaa```[\_V]abUaa\_`b[`a\_\_X`^]V

@HWI-EAS443:3:91:878:1141#0/1  
TCCAGCGCAAATGCCATAAGCACCACATTCCTTATACT  
+HWI-EAS443:3:91:878:1141#0/1  
abaabbbbbbbaa`baaab`a`aba`aab\_a\_a``aaa`a  
@HWI-EAS443:3:91:923:882#0/1  
GAGTTCTTCAATGGTGGAACAGATCTTCATGATCTCAGAG  
+HWI-EAS443:3:91:923:882#0/1  
aaaWaabaa\_\_a`\_[aaa\_a\_aaa`a`[^aaaYaZ\_a^`  
@HWI-EAS443:3:92:1043:113#0/1  
AATTTCTAGCATGGTGGAGGCCATGGTGTCTAGGGCCCGG  
+HWI-EAS443:3:92:1043:113#0/1  
aaaaaaaaa¥`V`aXb`\_a¥FP^`a]S\_¥^MU¥`UUWS\_`  
@HWI-EAS443:3:92:1333:1023#0/1  
GAGTTCTTCAATGGTGGAACAGATCTTCATGATCTCAGAG  
+HWI-EAS443:3:92:1333:1023#0/1  
a``[\_Yaa`S`ab`Z`\_[¥aabaa`baabab`aaaaa\_\_`  
@HWI-EAS443:3:92:1548:485#0/1  
CTTCTTTTTGCTCATGTTGATTCCCCTAACTTGCAGGTC  
+HWI-EAS443:3:92:1548:485#0/1  
abbabbbbbb`bJ`abaaabaa\_a`b`bbb¥aa`Uab¥X`  
@HWI-EAS443:3:92:1664:395#0/1  
GAGTTCTTCAATGGTGGAACAGATCTTCATGATCTCAGAG  
+HWI-EAS443:3:92:1664:395#0/1  
^aaRT```Y¥aa\_[J[]P¥VW[0aU`\_\_```][ITIPZSM  
@HWI-EAS443:3:92:1764:1069#0/1  
CAAATGCCATAAGCACCACATTCCTTATACTGGAGATC  
+HWI-EAS443:3:92:1764:1069#0/1  
`b``aba\_\_abb\_ab``aaaaaa]a`bb`a^^a`a`¥  
@HWI-EAS443:3:92:23:1278#0/1  
ATCAAATCCTCGAATGTTCTGGCGATGATTACATATAT  
+HWI-EAS443:3:92:23:1278#0/1  
aa\_^^^[]aaaaZK]`a\_^^a]aa[`\_^\_\_\_\_R¥¥^YR]Y  
@HWI-EAS443:3:92:320:885#0/1  
CAACACTAAGTGAATGAAAATCAAATCCTCGAATGTTC  
+HWI-EAS443:3:92:320:885#0/1  
`L\_`aaaa[bZba\_abaaaa`a\_a^aaaa\_aaa\_\_aa\_`\_  
@HWI-EAS443:3:92:328:196#0/1  
ACCACATTCCTTATACTGGAGATCCTCCATACAGCCATG  
+HWI-EAS443:3:92:328:196#0/1  
aaaaab`aa`aaa`]\_\_`Y\_a``\_a\_]\_\_\_\_¥N]^M^^WX  
@HWI-EAS443:3:92:542:539#0/1  
GGGACAACACTAAGTGAATGAAAATCAAATCCTCGAA  
+HWI-EAS443:3:92:542:539#0/1  
abaa`aaaaaba`a^baaabaaaaa\_aaaa`]`a\_^a\_  
@HWI-EAS443:3:92:613:231#0/1  
GATTATCGGGGAAGACTTTGTAATCCCCTGAATCCCTTTG  
+HWI-EAS443:3:92:613:231#0/1  
aa`Z]\_\_a\_¥\_^^`W^\_^^\_XY]\_^ZOW]\_^W^ZZZ^XY^  
@HWI-EAS443:3:92:689:1814#0/1  
GGACAACACTAAGTGAATGAAAATCAAATCCTCGAATG

+HWI-EAS443:3:92:689:1814#0/1  
aaaaaaaa]aaa]a^aaaaaaaa\_aab`[````\_aaaa\_  
@HWI-EAS443:3:92:701:61#0/1  
CTGCCGGTTGATTTCTGTTAATGTCCAATCATAAGTCTG  
+HWI-EAS443:3:92:701:61#0/1  
a]babbbabbabbba`babb`aaaWQVa\_b\_aaaa`\_aa  
@HWI-EAS443:3:92:72:19#0/1  
CAAAATGCCATAAGCACCACATTCCCTTATACTGGAGATC  
+HWI-EAS443:3:92:72:19#0/1  
`^`¥`bb\_[ab`bbbb[^aaaa\_Z¥``]b^R``\_^T[[L  
@HWI-EAS443:3:92:85:1600#0/1  
TGGAATTTCTAGCATGGTGGAGGCCATGGTGTCTAGGGCC  
+HWI-EAS443:3:92:85:1600#0/1  
`\_R^``]a]]R^\_¥`aPU]a[[a`QVVYU]K]NTW`YS[  
@HWI-EAS443:3:92:886:113#0/1  
CGGTTGATTTCTGTTAATGTCCAATCATAAGTCTGGCGA  
+HWI-EAS443:3:92:886:113#0/1  
abbbbbbbbabbbbbbbbab`bbbabbabbabb`bb  
@HWI-EAS443:3:93:1064:523#0/1  
TGCCAGCCCATGGTCCAGCCAAAAGCATGGAATATGATGC  
+HWI-EAS443:3:93:1064:523#0/1  
aaa`\_`]¥a\_aaa¥Ya¥^[R[^^VU\_`\_\_\_¥`a^\_\_\_\_^  
@HWI-EAS443:3:93:1256:1146#0/1  
TTCTTTTTGCTCATGTTGATTCCCCTAACTTGCAGGTCC  
+HWI-EAS443:3:93:1256:1146#0/1  
aa\_a¥T`^][T[\_¥Wba\_\_Y``\_^^^\_X¥`\_^a\_X[UZ  
@HWI-EAS443:3:93:1329:1039#0/1  
TAGACACCATGGCCTCCACCATGCTAGAAATCCAACCGG  
+HWI-EAS443:3:93:1329:1039#0/1  
¥^bUZ\_\_T\_\_^\_ZaZU^`aaaaa`\_V]YU[XDVaZ  
@HWI-EAS443:3:93:1397:1601#0/1  
CTTGGTCATGTTGTCTTACTCTCCTTTTTCTTTGAAAG  
+HWI-EAS443:3:93:1397:1601#0/1  
`Xba¥SaU\_`¥b\_[bbaaab`a\_bb\_baaa\_ab`aa^Y^b  
@HWI-EAS443:3:93:149:1703#0/1  
AAGAAAAAGGAGAGTAAGAGACAACATGACCAAGAAGATG  
+HWI-EAS443:3:93:149:1703#0/1  
```aa`]YX[\_Y]`Xa`a`a`a`^\_`^^`^^`\_\_\_\_]¥^  
@HWI-EAS443:3:93:1514:1606#0/1  
GGAGTCTCGATACTGAATCTTGGACAAAAGAAATACACCA  
+HWI-EAS443:3:93:1514:1606#0/1  
aa[aZZaaa`\_Uab[[\_S\_a\_S\_Ua\_¥\_YYa`Z`U\_[S¥  
@HWI-EAS443:3:93:250:905#0/1  
TATAAATAAGACAGGGACATTTGAATTCACAAGCTTTTTT  
+HWI-EAS443:3:93:250:905#0/1  
¥\_¥[[YaVZ¥Yaa]TVSV]`XZa¥PaY[\_¥SLU]Y¥[¥]Y  
@HWI-EAS443:3:93:499:130#0/1  
TGCCAGCCCATGGTCCAGCCAAAAGCATGGAATATGATGC  
+HWI-EAS443:3:93:499:130#0/1  
abaaaa`a`b\_VXQ``\_Z¥¥`\_`Z[¥^`\_U^VW^¥¥¥W

@HWI-EAS443:3:93:545:647#0/1  
CTTTAGCTAGGAGCATTTGCGAAAAGCTTGAACAGTCTGG  
+HWI-EAS443:3:93:545:647#0/1  
ab``bbbabab`]\`aba\_Z`baa]aa\_aaa^^`aa`\_a\_\_  
@HWI-EAS443:3:93:57:521#0/1  
TTATTTATATAGGACTTCTTTTTGCTCATGTTGATTCCCA  
+HWI-EAS443:3:93:57:521#0/1  
X`a^]b`]\`H¥a\_S^ab`ba`a\_a[\_`a\_`a`^`a`^`[[ZS^  
@HWI-EAS443:3:93:654:500#0/1  
AACTTTAGCTAGGAGCATTTGCGAAAAGCTTGAACAGTCT  
+HWI-EAS443:3:93:654:500#0/1  
^]aUY¥UT¥Uba]WX[\_b]\`RPMLZaY¥YaabQW¥\_\_BBB  
@HWI-EAS443:3:93:688:818#0/1  
GAGTTCTTCAATGGTGAACAGATCTTCATGATCTCAGAG  
+HWI-EAS443:3:93:688:818#0/1  
a`^¥a`b^aaaaa\_a`a`\_aa]\_\_\_\_]\`\_`aa]\_\_\_\_^`  
@HWI-EAS443:3:93:774:1093#0/1  
GAGTTCTTCAATGGTGAACAGATCTTCATGATCTCAGAG  
+HWI-EAS443:3:93:774:1093#0/1  
aV\_Wa`\_`aaa`aa\_a^`a[\_`¥\_a¥aaZaaa\_a¥`\_`\_\_\_\_  
@HWI-EAS443:3:93:83:1028#0/1  
CAGCACTTCTGGTACATCTGTTTCATCCTCAAGAATTCCCC  
+HWI-EAS443:3:93:83:1028#0/1  
a`aa`\_`aaab`a\_\_a\_^\_a`a`aaYa`\_`a`[^`^`\_`\_WUN\_  
@HWI-EAS443:3:93:840:865#0/1  
CAAAGGGATTGAGGGATTACAAAGTCTTCCCCGATAATC  
+HWI-EAS443:3:93:840:865#0/1  
a]aQ[WOWXZT[HSZSXT[¥Y`¥[¥STU¥V^UM[Y\_RNWB  
@HWI-EAS443:3:93:850:1448#0/1  
GGGGAATTCTTGAGGATGAACAGATGTACCAGAAGTGCTG  
+HWI-EAS443:3:93:850:1448#0/1  
aaba^`aaaaaaa\_\_\_\_aa`aa`a`\_]\`\_R^a¥^`Y\_W\_a  
@HWI-EAS443:3:94:1054:1128#0/1  
ATACTGGAGATCCTCCATACAGCCATGGAACAGGAACAGG  
+HWI-EAS443:3:94:1054:1128#0/1  
`\_a\_`aa`\_`\_]\`a`¥`\_`Y\_\_\_\_^^\_]\`\_aY^`\_X^W^]U  
@HWI-EAS443:3:94:1062:1650#0/1  
CAACACTAAGTGAATGAAAATCAAATCCTCGAATGTTC  
+HWI-EAS443:3:94:1062:1650#0/1  
aaaaa\_baabXaaaa`aaa\_aaba`aa`a\_aaa\_\_\_\_a]¥S  
@HWI-EAS443:3:94:1459:216#0/1  
GTCCAGCCAAAAGCATGGAATATGATGCCGTTGCAACTAC  
+HWI-EAS443:3:94:1459:216#0/1  
a^a^U`\_\_\_\_\_]\`^`\_`^`a^a`\_`^^VX\_X^\_UY]XX\_X  
@HWI-EAS443:3:94:1649:547#0/1  
GGAATTTCTAGCATGGTGGAGCCATGGTGTCTAGGGCCC  
+HWI-EAS443:3:94:1649:547#0/1  
`abaabaabba\_ba\_aUab]^aba`\_aZ`aaV\_aa^a^V^  
@HWI-EAS443:3:94:214:900#0/1  
CAGACTTATGATTGGACATTAACAGAAATCAACCGGCAG

+HWI-EAS443:3:94:214:900#0/1  
a`abbab]ab`baaa`aa``aaa`\_`aYaa`aa\_\_\_\_\_`  
@HWI-EAS443:3:94:275:479#0/1  
CTTTCACAATCACTGGGACAACACTAAGTGAATGAAAA  
+HWI-EAS443:3:94:275:479#0/1  
^[\_`\_aZ`RX`aaaa\_¥[¥Y```a^^\_a`Va\_U[`a\_`^\_  
@HWI-EAS443:3:94:350:823#0/1  
CTGCCGGTTGATTTCTGTTTAATGTCCAATCATAAGTCTG  
+HWI-EAS443:3:94:350:823#0/1  
ab`abba\_aa`baa`aaaa`aa`^^a\_\_aaaaaaa]¥aa  
@HWI-EAS443:3:94:502:416#0/1  
TACATCTGTTTCATCCTCAAGAATCCCCTTTGGCTTGTGT  
+HWI-EAS443:3:94:502:416#0/1  
\_baa`\_N¥\_aaaa]]^^^]OZX¥^[Z\_\_`[V¥RYa\_\_Q\_^  
@HWI-EAS443:3:94:507:971#0/1  
GGAGGATCTCCAGTATAAGGGAATGTGGTGCTTATGGCAT  
+HWI-EAS443:3:94:507:971#0/1  
\_babaab``ab¥b`aaa[a`a\_\_aaY`\_^a^a\_\_aa^¥¥\_  
@HWI-EAS443:3:94:548:1876#0/1  
CCCATGGTCCAGCCAAAAGCATGGAATATGATGCCGTTGC  
+HWI-EAS443:3:94:548:1876#0/1  
`¥b`ZVVDTZ`\_b[OW^]Xb\_WYO\_a`X[^a[LQ¥\_PPOU  
@HWI-EAS443:3:94:54:1321#0/1  
GAAAAAGGAGAGTAAGAGACAACATGACCAAGAAGATGGT  
+HWI-EAS443:3:94:54:1321#0/1  
[aa¥YT\_\_aX`aY^ab¥`^Zb^¥`\_a]\_V\_a[a]Y\_``RP  
@HWI-EAS443:3:94:92:1355#0/1  
GCTTTTCGCAAATGCTCCTAGCTAAAGTTTCAACAAAGTA  
+HWI-EAS443:3:94:92:1355#0/1  
a`\_aa^aaaaaaaYaa`a`aa[`a`Z`])`\_``a]\_\_[]X`  
@HWI-EAS443:3:95:1036:113#0/1  
TTTCTAGCATGGTGGAGCCATGGTGTCTAGGGCCCGGAT  
+HWI-EAS443:3:95:1036:113#0/1  
aaa^a`\_^\_bbaYb]`aa[S[^]`U\_¥¥^Y^^¥YTY[`¥U  
@HWI-EAS443:3:95:1049:1832#0/1  
CAAAATGCCATAAGCACCATTCCTTATACTGGAGATC  
+HWI-EAS443:3:95:1049:1832#0/1  
\_V[`a^`ab^¥¥bba`a`¥`¥[\_V^^a`a¥`a``abaT  
@HWI-EAS443:3:95:1062:107#0/1  
CTCGATACTGAATCTTGACAAAAGAAATACACCAAGACA  
+HWI-EAS443:3:95:1062:107#0/1  
\_bbbbbb`bbabbabbbba¥ababbbababab\_ababa\_a  
@HWI-EAS443:3:95:1099:1599#0/1  
CAGACTTATGATTGGACATTAACAGAAATCAACCGGCAG  
+HWI-EAS443:3:95:1099:1599#0/1  
\_`a^¥^ba``bbbabbbbbb`ba[babbbbaabaabaabaa^  
@HWI-EAS443:3:95:1153:622#0/1  
GCAAAATGCCATAAGCACCATTCCTTATACTGGAGAT  
+HWI-EAS443:3:95:1153:622#0/1  
aaaababbbbaYbbaabaaaaa`bab`abaaaa`aa`aa`\_`

@HWI-EAS443:3:95:121:1411#0/1  
GGAGTAACAGTGATAAAGAACAACATGATAAACAATGACC  
+HWI-EAS443:3:95:121:1411#0/1  
``\_`\_aaa`a^a\_a`\_\_\_\_a`aa\_a`aaaa\_`\_`a`\_aZV  
@HWI-EAS443:3:95:1220:419#0/1  
CCGGTTGATTTCTGTTTAATGTCCAATCATAAGTCTGGCG  
+HWI-EAS443:3:95:1220:419#0/1  
abbbZ\_baZ`babaabbaaab\_a\_aababab\_ba\_\_aa¥a  
@HWI-EAS443:3:95:1277:812#0/1  
CAAAATGCCATAAGCACACATTCCCTTATACTGGAGATC  
+HWI-EAS443:3:95:1277:812#0/1  
abbbbbbaabbbabbabaXa\_bbb`^abbbab`abb`baa\_  
@HWI-EAS443:3:95:1359:1304#0/1  
CACTTCTGGTACATCTGTTTCATCCTCAAGAATCCCCTTT  
+HWI-EAS443:3:95:1359:1304#0/1  
Wb`b¥b\_bbb[ababbbbbbba\_b`bbabbbbaYabba  
@HWI-EAS443:3:95:1380:722#0/1  
CAAAATGCCATAAGCACACATTCCCTTATACTGGAGATC  
+HWI-EAS443:3:95:1380:722#0/1  
ababbbbabbb`bbbbbbabba^bbbb`abbb^]^D  
@HWI-EAS443:3:95:144:720#0/1  
CAAAATGCCATAAGCACACATTCCCTTATACTGGAGATC  
+HWI-EAS443:3:95:144:720#0/1  
abbbbbbbbaababbbababbaabaaa`aab`aaa\_a`\_Z  
@HWI-EAS443:3:95:227:56#0/1  
GAAAAAGGAGAGTAAGAGACAACATGACCAAGAAGATGGT  
+HWI-EAS443:3:95:227:56#0/1  
a]X\_\_\_a\_^a]aU\_\_a¥a^]\_^]^[\_XZU¥a^Z^ZX]YY  
@HWI-EAS443:3:95:262:1351#0/1  
AGAAAAAGGAGAGTAAGAGACAACATGACCAAGAAGATGG  
+HWI-EAS443:3:95:262:1351#0/1  
^\_\_LWT^`b^ZY\_N\_`Z`bababaaa]a\_a`]aaT¥aXZY  
@HWI-EAS443:3:95:823:1700#0/1  
TGATTTCTGTTTAATGTCCAATCATAAGTCTGGCGACCTT  
+HWI-EAS443:3:95:823:1700#0/1  
Xba^IO[XXT\_R\_`\_ba¥^\_ZZ^\_¥\_V\_R¥]VW^]SNI[S  
@HWI-EAS443:3:95:84:503#0/1  
GTAGTTGCAACGGCATCATATTCCATGCTTTTGGCTGGAC  
+HWI-EAS443:3:95:84:503#0/1  
aIaaPaaa^aa\_¥[\_a\_X`\_\_a`¥^[\_`¥^^X¥\_^][]^U  
@HWI-EAS443:3:95:893:175#0/1  
AATTTCTAGCATGGTGGAGCCATGGTGTCTAGGGCCCGG  
+HWI-EAS443:3:95:893:175#0/1  
aabbbbaa^aaba][Yba`aaZ^`]a`M^^¥S\_`a`QSU\_]`  
@HWI-EAS443:3:96:1267:1501#0/1  
GAGTTCTTCAATGGTGAACAGATCTTCATGATCTCAGAG  
+HWI-EAS443:3:96:1267:1501#0/1  
aZ`^`aaa^\_\_a]]X`a`a\_aa\_`\_`UH`\_\_\_\_][[]\_`a  
@HWI-EAS443:3:96:1565:496#0/1  
GAGTTCTTCAATGGTGAACAGATCTTCATGATCTCAGAG

+HWI-EAS443:3:96:1565:496#0/1  
aMGOR)`XWa\_\_[aX`KWXQ^SxLP`U^Z`HZMIO^\_[^  
@HWI-EAS443:3:96:1644:1094#0/1  
AAATGCCATAAGCACCATTCCTTATACTGGAGATCCT  
+HWI-EAS443:3:96:1644:1094#0/1  
aa\_bba^baaa`baaa[ab^^Vb`aaaa`aa`Ya^X¥`  
@HWI-EAS443:3:96:297:261#0/1  
CTTTGTTGAAACTTTAGCTAGGAGCATTTGCGAAAAGCTT  
+HWI-EAS443:3:96:297:261#0/1  
^abb¥ab`bababbbbababb`a`aaaaaaaa`aa\_\_a  
@HWI-EAS443:3:96:411:173#0/1  
ATTTATATAGGACTTCTTTTTGCTCATGTTGATTCCCACT  
+HWI-EAS443:3:96:411:173#0/1  
a[XV\_`^XX¥¥`V¥FVa\_VZ`X`V]aaZ[^[\_YKKKXN]  
@HWI-EAS443:3:96:46:962#0/1  
GTTCTGTTCCATGGCTGTATGGAGGATCTCCAGTATAAG  
+HWI-EAS443:3:96:46:962#0/1  
a^``\_aaaa``aa\_`YZNT\_RY`UURUQVRSNSNQBB  
@HWI-EAS443:3:96:597:762#0/1  
ACCGTTGGAATTTCTAGCATGGTGGAGGCCATGGTGTCT  
+HWI-EAS443:3:96:597:762#0/1  
a[aba\_aaa`aa]aa]``G`W`UY^ZW¥^¥WT]MWU  
@HWI-EAS443:3:96:622:1544#0/1  
CTGGGGACAACACTAAGTGAATGAAAATCAAAATCCTCG  
+HWI-EAS443:3:96:622:1544#0/1  
abbbabbbbbbbabbbb`baabbbabbbbabbbbbaaab  
@HWI-EAS443:3:96:93:120#0/1  
CTTATACTGGAGATCCTCCATACAGCCATGGAACAGGAAC  
+HWI-EAS443:3:96:93:120#0/1  
abbbbaabaab^\_]U\_aa```^^SV[][[SUTRPQV¥]  
@HWI-EAS443:3:96:968:1820#0/1  
GAAAAAGGAGAGTAAGAGACAACATGACCAAGAAGATGGT  
+HWI-EAS443:3:96:968:1820#0/1  
`\_aa`a`]]^^P`\_a`XXa`\_¥^^^\_^[\_ZO\_]¥\_^W  
@HWI-EAS443:3:96:992:1584#0/1  
CAGCGAAAATGCCATAAGCACCATTCCTTATACTGG  
+HWI-EAS443:3:96:992:1584#0/1  
\_`ab]aaVIabZabbbb`[Xa`a`T¥`[Y`a[baba\_`¥  
@HWI-EAS443:3:97:1005:531#0/1  
GGCATCAATCCGGGCCCTAGACACCATGGCCTCCACCATG  
+HWI-EAS443:3:97:1005:531#0/1  
a`WX`aaW^`[PZaQ¥\_U\_] [X`V`V¥WQLQVITXU]XX`  
@HWI-EAS443:3:97:1166:1545#0/1  
GCGAAAATGCCATAAGCACCATTCCTTATACTGGAG  
+HWI-EAS443:3:97:1166:1545#0/1  
¥S\_Kbab[bbZ[`b[ab\_\_b[a\_baaaVaa^baaba`baa  
@HWI-EAS443:3:97:1419:1071#0/1  
GAGTTCTTCAATGGTGAACAGATCTTCATGATCTCAGAG  
+HWI-EAS443:3:97:1419:1071#0/1  
a\_a^]ab`aaabbaZa`aa\_\_`a`¥aaVaa``a\_Yaa^\_\_



@HWI-EAS443:3:97:151:196#0/1  
GAGTTCTTCAATGGTGAACAGATCTTCATGATCTCAGAG  
+HWI-EAS443:3:97:151:196#0/1  
\_XZQU[]UUP¥aKS\_QVOSOUN^\_T\_]RVaT[[YZ]`\_`Y  
@HWI-EAS443:3:97:1626:1001#0/1  
ACCACATTCCCTTATACTGGAGATCCTCCATACAGCCATG  
+HWI-EAS443:3:97:1626:1001#0/1  
aaQ\_Ia[a¥HNbbaTa`Y]^`^]\_\_YVa[Oaa^G\_SVV`BB  
@HWI-EAS443:3:97:1643:122#0/1  
GTCTTATTTATATAGGACTTCTTTTTGCTCATGTTGATTC  
+HWI-EAS443:3:97:1643:122#0/1  
a\_Y`a]aaa\_]``\_a]]Y^`S^a\_\_\_\_\_U]W^\_\_Y]]S^[S  
@HWI-EAS443:3:97:1759:1501#0/1  
GAAAATCAAAATCCTCGAATGTTCTGCGATGATTACAT  
+HWI-EAS443:3:97:1759:1501#0/1  
aaaaaaaa]¥aaa\_\_N\_`aa\_`^PX[M[abaT[SX`SR][  
@HWI-EAS443:3:97:357:1994#0/1  
CGCCAGACTTATGATTGGACATTAACAGAAATCAACCGG  
+HWI-EAS443:3:97:357:1994#0/1  
XT^bbab`^`abbaSab`]¥^\_b[aZabaa[\_a`aWGX]  
@HWI-EAS443:3:97:423:1851#0/1  
GTCTTGGTGTATTTCTTTTGTCCAAGATTGATCGAGA  
+HWI-EAS443:3:97:423:1851#0/1  
`R``^\_V`\_¥¥`[^`a\_`N¥N[\_`\_¥N¥^Z]YT[Y\_`  
@HWI-EAS443:3:97:529:74#0/1  
GCCGGTTGATTTCTGTTTAATGTCCAATCATAAGTCTGGC  
+HWI-EAS443:3:97:529:74#0/1  
aa^bb`ab`aba\_abaaaaab\_^]`\_aV`a``\_^^a`\_W  
@HWI-EAS443:3:97:569:1783#0/1  
AATTTCTAGCATGGTGGAGGCCATGGTGTCTAGGGCCCGG  
+HWI-EAS443:3:97:569:1783#0/1  
^`aaaaaa`Yaaa`¥``\_¥^`\_\_Z\_¥M`W^U^^¥]¥WU\_¥  
@HWI-EAS443:3:97:663:941#0/1  
TTGGAATTTCTAGCATGGTGGAGGCCATGGTGTCTAGGGC  
+HWI-EAS443:3:97:663:941#0/1  
\_a^aaaa\_``[S\_]\_Z][E]a[^VVP[J][YMKYYQQ^YU  
@HWI-EAS443:3:97:686:209#0/1  
TCCAGCGAAAATGCCATAAGCACCATTCCTTATACT  
+HWI-EAS443:3:97:686:209#0/1  
U^a\_`Za`RPN]S\_]RJ[`¥XU^V[[Uaa`TVUa[]`¥TW  
@HWI-EAS443:3:97:846:205#0/1  
CAGTGATAAAGAACAACATGATAAACAATGACCTTGGACC  
+HWI-EAS443:3:97:846:205#0/1  
aba`bbbbaba`a^b]aabaZaa`a[b`ab`Q[a`baaSX  
@HWI-EAS443:3:98:1096:1328#0/1  
CTTTGTTGAAACTTTAGCTAGGAGCATTGCGAAAAGCTT  
+HWI-EAS443:3:98:1096:1328#0/1  
aaba`\_aaab`\_b]]^^]]`\_\_\_\_a``aab`aa\_a\_\_^\_]`^  
@HWI-EAS443:3:98:1169:85#0/1  
ATTTATATAGGACTTCTTTTTGCTCATGTTGATTCCT

+HWI-EAS443:3:98:1169:85#0/1  
Yabbab^babaTU`a]b`bbb\_0[]aab\_ab^bb^GX¥M]  
@HWI-EAS443:3:98:1202:1219#0/1  
CAGACTGTTCAAGCTTTTCGCAAATGCTCCTAGCTAAAGT  
+HWI-EAS443:3:98:1202:1219#0/1  
abab`bbab\_b`b`abbaababbabb\_bRaaab\_\_a`ab\_  
@HWI-EAS443:3:98:124:1015#0/1  
GCTTTTCGCAAATGCTCCTAGCTAAAGTTTCAACAAAGTA  
+HWI-EAS443:3:98:124:1015#0/1  
ababbbababa`abaaaaabaaaX\_b[\_aaaa\_aaaaYa  
@HWI-EAS443:3:98:1370:1277#0/1  
CACTAAGTGAATGAAAATCAAATCCTCGAATGTTCTG  
+HWI-EAS443:3:98:1370:1277#0/1  
X`\_bZ[SNaUMab\_\_¥` `bTVaaV`VN\_Y\_bbbabb^\_a^  
@HWI-EAS443:3:98:1698:255#0/1  
CAAATGCCATAAGCACCACATTCCTTATACTGGAGATC  
+HWI-EAS443:3:98:1698:255#0/1  
`babbbbaYWbbb`YZ]Z`¥b^`WaIaaTaa]\_a\_]\_`\_\_  
@HWI-EAS443:3:98:1722:1164#0/1  
ATGAAAATCAAATCCTCGAATGTTCTGCGATGATTAC  
+HWI-EAS443:3:98:1722:1164#0/1  
U`\_J¥aX`T`ab\_ZRQ\_XJ[^\_XZ`WL]a]G^Z]UMIaTN  
@HWI-EAS443:3:98:335:651#0/1  
AATTTCTAGCATGGTGGAGGCCATGGTGTCTAGGGCCCGG  
+HWI-EAS443:3:98:335:651#0/1  
aTaa`a\_\_a^a` `Xa\_[¥S] [\_YY]HZPZHUUSX¥W¥]V  
@HWI-EAS443:3:98:353:878#0/1  
CACTTCTGGTACATCTGTTTCATCCTCAAGAATCCCCCTT  
+HWI-EAS443:3:98:353:878#0/1  
abbbbbbbbbbbbbbbbbbbabbaabbbbbbbbbbbba`bba  
@HWI-EAS443:3:98:380:182#0/1  
GAACATTCGAGGATTTTGATTTTCATTCCACTTAGTGTTG  
+HWI-EAS443:3:98:380:182#0/1  
aaa`aaa`b`aa\_aaaaa` `a`a^` ` `]^Za\_]\_S\_X]\_  
@HWI-EAS443:3:98:451:677#0/1  
GTTCTGTTCCATGGCTGTATGGAGGATCTCCAGTATAAG  
+HWI-EAS443:3:98:451:677#0/1  
` `aaaa`Xa\_a\_a`a\_a`PRZXYJ¥YPMOVJWT¥PTZTSZ  
@HWI-EAS443:3:98:613:1843#0/1  
CAATGGTGAACAGATCTTCATGATCTCAGAGAACTCTTC  
+HWI-EAS443:3:98:613:1843#0/1  
aa\_aabaabab`ababbab`bbaaa^aaa\_b`bbab\_aa\_  
@HWI-EAS443:3:98:689:191#0/1  
CAGTGATAAAGAACAACATGATAAACAATGACCTTGGACC  
+HWI-EAS443:3:98:689:191#0/1  
¥` `T`^abbbb`bba\_]aba`b` `aaaaab\_XZ\_`a¥a^\_  
@HWI-EAS443:3:98:71:75#0/1  
ATTTCTAGCATGGTGGAGGCCATGGTGTCTAGGGCCCGGA  
+HWI-EAS443:3:98:71:75#0/1  
TbbUbaZbbaa`aSa^aa` `a]V`YVYYSUP\_P`SU¥Z]T

@HWI-EAS443:3:98:757:83#0/1  
TTATTTTTGCCGTCTGAGTTCTTCAATGGTGGAACAGATC  
+HWI-EAS443:3:98:757:83#0/1  
aaaa^baaaZD]`\_aa¥a`\_`a\_YUaa¥P]aW\_T¥ZR[W  
@HWI-EAS443:3:98:81:1082#0/1  
CTCGATACTGAATCTTGGACAAAAGAAATACACCAAGACA  
+HWI-EAS443:3:98:81:1082#0/1  
a^]a¥^¥a^aSM^aaaa\_WW`\_\_`a`^¥[`a`]\_^X\_  
@HWI-EAS443:3:98:915:1626#0/1  
TCCAGCGCAAATGCCATAAGCACCATTCCTTATACT  
+HWI-EAS443:3:98:915:1626#0/1  
aaaabaa]a\_a]ab]X\_baa[`b]TZ\_`a`]\_Va`b\_a`  
@HWI-EAS443:3:99:1008:223#0/1  
TGGAGATCCTCCATACAGCCATGGAACAGGAACAGGATAC  
+HWI-EAS443:3:99:1008:223#0/1  
aab`baa\_ab\_\_`aa\_aa`Y`a`^`T`^`T`^`¥\_¥^¥  
@HWI-EAS443:3:99:1011:1216#0/1  
GCCAGACTTATGATTGGACATTAACAGAAATCAACCGGC  
+HWI-EAS443:3:99:1011:1216#0/1  
a`aaaaabbbababbbbaaaabbaa\_bba\_^a\_a`]^`\_  
@HWI-EAS443:3:99:1200:1925#0/1  
GGTTGGAATTTCTAGCATGGTGGAGCCATGGTGTCTAGG  
+HWI-EAS443:3:99:1200:1925#0/1  
UTYWb]aaa]bUabbUabbWIWb\_ba`U^RY^GZTFHRab  
@HWI-EAS443:3:99:146:219#0/1  
GGAATTTCTAGCATGGTGGAGCCATGGTGTCTAGGGCCC  
+HWI-EAS443:3:99:146:219#0/1  
abaaaa`^a\_aaaaU`\_¥\_¥¥¥^W\_\_U^WWU¥¥WUTPU  
@HWI-EAS443:3:99:1489:1826#0/1  
CATGAGCAAAAAGAAGTCCTATATAAATAAGACAGGGACA  
+HWI-EAS443:3:99:1489:1826#0/1  
`bbabaabbbbbbb`baabbb`abbb`bbbaabba]a  
@HWI-EAS443:3:99:1497:1195#0/1  
GAAAAAGGAGAGTAAGAGACAACATGACCAAGAAGATGGT  
+HWI-EAS443:3:99:1497:1195#0/1  
`aaa`bba\_\_ab\_aabaaaVaa¥a[a`UZaaXVX[SX\_\_]  
@HWI-EAS443:3:99:245:258#0/1  
CAAAGGGATTACAGGGATTACAAAGTCTTCCCCGATAATC  
+HWI-EAS443:3:99:245:258#0/1  
]b`abbbba`aa[Vabaaaaab`aa`aabaa\_RWbaaa^\_^  
@HWI-EAS443:3:99:319:1955#0/1  
GCCGGTTGATTTCTGTTAATGTCCAATCATAAGTCTGGC  
+HWI-EAS443:3:99:319:1955#0/1  
`a`^U¥a`^Y]^`KY¥`^`ab¥¥`^`baX¥aUa`S[aa[a  
@HWI-EAS443:3:99:352:1400#0/1  
CTGGAGATCCTCCATACAGCCATGGAACAGGAACAGGATA  
+HWI-EAS443:3:99:352:1400#0/1  
U\_b[[\_YWa]a]^aX`K[\_bb`bba[XV^^a`^`bbaaV`  
@HWI-EAS443:3:99:50:1002#0/1  
GTCATTGTTTATCATGTTGTTCTTTATCACTGTTACTCCA

+HWI-EAS443:3:99:50:1002#0/1  
a`abaa\_\_aY`\_^a`a`\_]\_a\_\_\_\_\_````^[\`-]\_`  
@HWI-EAS443:3:99:738:1466#0/1  
ATTCAAATGTCCCTGTCTTATTTATATAGGACTTCTTTTT  
+HWI-EAS443:3:99:738:1466#0/1  
abaa`]`aa\_Z`^aa`^ba\_aaaaaaa`a\_\_a`^a`a`]  
@HWI-EAS443:3:99:793:1413#0/1  
GACCGTTGGAATTTCTAGCATGGTGGAGCCATGGTGTC  
+HWI-EAS443:3:99:793:1413#0/1  
a]bbbbbabbbbbbaabbababb`bbaa``a`aaU][a  
@HWI-EAS443:3:99:800:1931#0/1  
ACGGCATCATATCCATGCTTTTGGCTGGACCATGGGCTG  
+HWI-EAS443:3:99:800:1931#0/1  
ab``abaabbaab\_ab`]aabaaa`^aY`\_VP^\_]S\_WSZ  
@HWI-EAS443:3:99:904:1484#0/1  
GACAACACTAAGTGAATGAAAATCAAATCCTCGAATGT  
+HWI-EAS443:3:99:904:1484#0/1  
aaY¥aababbabababbabb``ab`b`bababa¥abb`  
@HWI-EAS443:3:99:966:1618#0/1  
CACAAATCCATAGCGATAAAAAAAGCTTGTGAATTCAAAT  
+HWI-EAS443:3:99:966:1618#0/1  
`baabbb\_aab`babb`abababb`ba`aababb\_b`ba  
@HWI-EAS443:3:9:1044:1256#0/1  
ATCCTGTTCCCTGTCCATGGCTGTATGGAGGATCTCCAGT  
+HWI-EAS443:3:9:1044:1256#0/1  
a`W`aa\_aaSaa`aY`]`aa\_bVV]U[]]`0]V\_Y]Y]V  
@HWI-EAS443:3:9:128:839#0/1  
AGCCCATGGTCCAGCCAAAAGCATGGAATATGATGCCGTT  
+HWI-EAS443:3:9:128:839#0/1  
a\_baaaaaa\_aaaaaaa`]``\_]`a`````\_^\_\_\_\_\_`Y^  
@HWI-EAS443:3:9:1290:1110#0/1  
GAAAATCAAATCCTCGAATGTTCCCTGGCGATGATTACAT  
+HWI-EAS443:3:9:1290:1110#0/1  
`abbbabaabba`bbb`abbaa`\_a`a\_a]aW[aaP]aa  
@HWI-EAS443:3:9:1328:1549#0/1  
TTCAAATGTCCCTGTCTTATTTATATAGGACTTCTTTTTG  
+HWI-EAS443:3:9:1328:1549#0/1  
abaaa`a``TU`^\_aa^a`^\_a`\_a`Q\_^H]a\_\_a`  
@HWI-EAS443:3:9:1330:1125#0/1  
GCCGGTTGATTTCTGTTAATGTCCAATCATAAGTCTGGC  
+HWI-EAS443:3:9:1330:1125#0/1  
aa\_\_a¥aa^abaaa]abbaabb^¥\_a\_a^`aa`\_Y`\_\_U  
@HWI-EAS443:3:9:1417:496#0/1  
GTTCTTCAATGGTGAACAGATCTTCATGATCTCAGAGAA  
+HWI-EAS443:3:9:1417:496#0/1  
aUTJW^V¥U^\_YPYVUQZQ]WZXRVKUR[XZNVPSRTYVV  
@HWI-EAS443:3:9:1460:1251#0/1  
TGGGAGTCTCGATACTGAATCTTGGACAAAAGAAATACAC  
+HWI-EAS443:3:9:1460:1251#0/1  
aa^\_\_a¥R`Zb\_\_\_¥`a`Y`[`[]`¥X^`[\_a\_Z\_\_^Y^R

@HWI-EAS443:3:9:1498:179#0/1  
GAGTTCTTCAATGGTGAACAGATCTTCATGATCTCAGAG  
+HWI-EAS443:3:9:1498:179#0/1  
^abWaab^aaaa`]Xa]\_`[\_] ^X\_^[^\_X^]Z]U]Z]S  
@HWI-EAS443:3:9:1518:587#0/1  
TGGAGATCCTCCATACAGCCATGGAACAGGAACAGGATAC  
+HWI-EAS443:3:9:1518:587#0/1  
QQWZ[aaS^bb]aabaab` `aaba\_\_\_a][Ta\_`\_aV^\_\_  
@HWI-EAS443:3:9:194:410#0/1  
CAAAATGCCATAAGCACCACATTCCCTTATACTGGAGATC  
+HWI-EAS443:3:9:194:410#0/1  
`bab^Wa^Y]aY[ ` \_bYaaSa\_a\_\_^^\_ `^a\_\_Y\_ `a`VU  
@HWI-EAS443:3:9:230:655#0/1  
AAAATGCCATAAGCACCACATTCCCTTATACTGGAGATCC  
+HWI-EAS443:3:9:230:655#0/1  
abaa^ `aaba\_ `b`aaaaaaaa `aaaaa^^a]\_\_^\_\_W  
@HWI-EAS443:3:9:242:1512#0/1  
CAACGGCATCATATTCCATGCTTTTGGCTGGACCATGGGC  
+HWI-EAS443:3:9:242:1512#0/1  
a\_b\_a `a`a\_aa^a^a¥\_\_^\_\_\_\_¥[\_¥`\_]XW\_VZ¥T]¥  
@HWI-EAS443:3:9:254:2025#0/1  
TGAAAATCAAAATCCTCGAATGTTCTGGCGATGATTACA  
+HWI-EAS443:3:9:254:2025#0/1  
Yab\_ `b¥baa `a\_aa[baabbb] `a] `a][¥aa^\_¥^ `UT  
@HWI-EAS443:3:9:269:1687#0/1  
ATTTATATAGGACTTCTTTTTGCTCATGTTGATTCCCACT  
+HWI-EAS443:3:9:269:1687#0/1  
`] ` `^aa\_¥`aa `a `¥`a ` `^`\_\_^^[ ` `YV[\_\_^\_  
@HWI-EAS443:3:9:430:1122#0/1  
ATTTATATAGGACTTCTTTTTGCTCATGTTGATTCCCACT  
+HWI-EAS443:3:9:430:1122#0/1  
abbbabaa\_abaaa `ab\_ba`aaaaaaaa] `aaaa `a] `aa  
@HWI-EAS443:3:9:589:1854#0/1  
GTTGCAACGGCATCATATTCCATGCTTTTGGCTGGACCAT  
+HWI-EAS443:3:9:589:1854#0/1  
a¥`aa ` `a `aaZa ` `a\_a ` ` ` [aa\_\_\_\_W] `¥UUS[Z  
@HWI-EAS443:3:9:610:772#0/1  
GCCATAAGCACCACATTCCCTTATACTGGAGATCCTCCAT  
+HWI-EAS443:3:9:610:772#0/1  
aa]T]aa\_aa `aWSYa ` `\_]S]\_a\_] `^] `Q[W]]TYW  
@HWI-EAS443:3:9:617:818#0/1  
CAAAATGCCATAAGCACCACATTCCCTTATACTGGAGATC  
+HWI-EAS443:3:9:617:818#0/1  
aba\_aaa `aaaba]X\_a `aaaaaXa] `abaa¥^a\_\_\_\_ `]  
@HWI-EAS443:3:9:658:378#0/1  
ATTCGAGGATTTTGATTTTCATTCCCACTTAGTGTTGTCCC  
+HWI-EAS443:3:9:658:378#0/1  
aaaaa `aa\_ `aaaa\_aaaa ` ` `\_] ]] `a `\_]a\_] `^] ¥¥  
@HWI-EAS443:3:9:73:909#0/1  
ACCGGTTGGAATTTCTAGCATGGTGGAGGCCATGGTGTCT

+HWI-EAS443:3:9:73:909#0/1  
aa`aa^`aaa`aa^]^^`¥`W¥TX\_¥ZW¥U¥^WWUWW  
@HWI-EAS443:3:9:847:1108#0/1  
GTCCAGCCAAAAGCATGGAATATGATGCCGTTGCAACTAC  
+HWI-EAS443:3:9:847:1108#0/1  
^[[\_a]aWY\_Y]ZN¥¥`[S\_[a]``\_\_¥I^QV]\_]ZP^^]  
@HWI-EAS443:3:9:855:1968#0/1  
AAGCACCACATTCCCTTATACTGGAGATCCTCCATACAGC  
+HWI-EAS443:3:9:855:1968#0/1  
ab\_¥a[\_b^b`^]AY]\_a`b\_¥`SY\_X^VFV``a\_a^a`N  
@HWI-EAS443:3:12:104:1048#0/1  
AAATTTTTCTTCAATTGTCTCTTCGCCTCTTTCGGACTGA  
+HWI-EAS443:3:12:104:1048#0/1  
^Tabbbbaaa`bba``aababa\_a^a``aaa\_``\_\_a`\_a  
@HWI-EAS443:3:15:1537:1650#0/1  
AATTTTTCTTCAATTGTCTCTTCGCCTCTTTCGGACTGAC  
+HWI-EAS443:3:15:1537:1650#0/1  
\_^bb`abb``bbaba[`b`aa``XK[aaaaY`a\_V\_a`\_  
@HWI-EAS443:3:21:844:1270#0/1  
CAAATTTTTCTTCAATTGTCTCTTCGCCTCTTTCGGACTG  
+HWI-EAS443:3:21:844:1270#0/1  
aZT[WYa^VU`]PXZQQ\_LSQU^[V[OU^W`QTEILRVXO  
@HWI-EAS443:3:30:21:50#0/1  
AAATTTTTCTTCAATTGTCTCTTCGCCTCTTTCGGACTGA  
+HWI-EAS443:3:30:21:50#0/1  
a[U\_bba`a^abaaaa`abaaaa`][`a\_aa]a\_``aY  
@HWI-EAS443:3:33:555:1767#0/1  
AAATTTTTCTTCAATTGTCTCTTCGCCTCTTTCGGACTGA  
+HWI-EAS443:3:33:555:1767#0/1  
^^^aababa\_a`S`a^``aaa`\_a\_a\_]Z`^VFMS[][[`  
@HWI-EAS443:3:39:1389:1101#0/1  
CAAATTTTTCTTCAATTGTCTCTTCGCCTCTTTCGGACTG  
+HWI-EAS443:3:39:1389:1101#0/1  
\_Z¥^\_bbaabb`b^\_bab`\_abaaa`¥aaaa`aba``\_T  
@HWI-EAS443:3:46:526:1595#0/1  
CAAATTTTTCTTCAATTGTCTCTTCGCCTCTTTCGGACTG  
+HWI-EAS443:3:46:526:1595#0/1  
aababbbbabbbaaaaaa`baaaa¥aaaaaa`a\_aVaa  
@HWI-EAS443:3:47:366:1319#0/1  
AAATTTTTCTTCAATTGTCTCTTCGCCTCTTTCGGACTGA  
+HWI-EAS443:3:47:366:1319#0/1  
ababaabbbbaaabb``ab\_aaaaY\_aaaa`Ya\_\_aaa  
@HWI-EAS443:3:52:1477:1892#0/1  
CGTCAGTCCGAAAGAGGCGAAGAGACAATTGAAGAAAAAT  
+HWI-EAS443:3:52:1477:1892#0/1  
aaaY``ba]]ba]bbbbbb^Xbaaaaab\_aba[`b`aa  
@HWI-EAS443:3:57:733:1062#0/1  
CAAATTTTTCTTCAATTGTCTCTTCGCCTCTTTCGGACTG  
+HWI-EAS443:3:57:733:1062#0/1  
aaaaababaaaaaa^`a`aaaa``\_\_aaa`\_\_`\_\_^``

@HWI-EAS443:3:58:40:1237#0/1  
AATTTTTCTTCAATTGTCTCTTCGCCTCTTTCGGACTGAC  
+HWI-EAS443:3:58:40:1237#0/1  
a`bba\_bbaabaaaab`aaaaa`]`aa^aa\_aa`X`a\_`  
@HWI-EAS443:3:65:346:977#0/1  
TCAGTCCGAAAGAGGCGAAGAGACAATTGAAGAAAAATTT  
+HWI-EAS443:3:65:346:977#0/1  
ab\_^]aaa`aa`]a^aa]`a[\_Y][`a^\_^]`\_\_R]\_\_  
@HWI-EAS443:3:68:424:542#0/1  
CAAATTTTTCTTCAATTGTCTCTTCGCCTCTTTCGGACTG  
+HWI-EAS443:3:68:424:542#0/1  
a¥¥¥`bbbbbbbababaaabababaabbaaaa`aaaa\_\_a  
@HWI-EAS443:3:69:131:634#0/1  
ATTTTTCTTCAATTGTCTCTTCGCCTCTTTCGGACTGACG  
+HWI-EAS443:3:69:131:634#0/1  
aabab`b`\_]T]a`a\_a`aaaa]`````]^^`]¥```\_`^  
@HWI-EAS443:3:75:365:781#0/1  
AAATTTTTCTTCAATTGTCTCTTCGCCTCTTTCGGACTGA  
+HWI-EAS443:3:75:365:781#0/1  
`a\_aaaaaaaaaaba\_`a0aaaa`]a`a`\_`aa`\_\_^^`  
@HWI-EAS443:3:79:792:349#0/1  
ATTTTTCTTCAATTGTCTCTTCGCCTCTTTCGGACTGACG  
+HWI-EAS443:3:79:792:349#0/1  
abbbabababa`aaa\_aaa`a`a`aa`\_`a^^`\_\_`a  
@HWI-EAS443:3:82:573:291#0/1  
CAAATTTTTCTTCAATTGTCTCTTCGCCTCTTTCGGACTG  
+HWI-EAS443:3:82:573:291#0/1  
a`b¥bbbbbbbbba`b`\_bbaaaaa^aa`aaaa¥Q]a  
@HWI-EAS443:3:83:1075:1388#0/1  
AATTTTTCTTCAATTGTCTCTTCGCCTCTTTCGGACTGAC  
+HWI-EAS443:3:83:1075:1388#0/1  
^aUaY¥a^S\_]aX^a¥ZR^[b¥I¥``]VXUZ¥KZW^`WRQ  
@HWI-EAS443:3:87:62:1089#0/1  
TTCGTCCGAAAGAGGCGAAGAGACAATTGAAGAAAA  
+HWI-EAS443:3:87:62:1089#0/1  
aaabZ]PUWZ]\_]aa``````aXJ[\_`\_¥¥¥Z¥[Y]\_¥P  
@HWI-EAS443:3:88:1385:1184#0/1  
CAAATTTTTCTTCAATTGTCTCTTCGCCTCTTTCGGACTG  
+HWI-EAS443:3:88:1385:1184#0/1  
aabU`bbbbbbb]babab`abaaaaa^\_baaaa\_aaa^aa  
@HWI-EAS443:3:93:680:1164#0/1  
TTCGTCCGAAAGAGGCGAAGAGACAATTGAAGAAAA  
+HWI-EAS443:3:93:680:1164#0/1  
aaaa[a`^¥aaa`aa`a`\_`aaaa^\_\_^\_^`\_]\_\_^]\_\_  
@HWI-EAS443:3:26:1119:1472#0/1  
ATAAATACTGCCTTGCTCAATGCATCCTGTGCAGCAATGG  
+HWI-EAS443:3:26:1119:1472#0/1  
W¥XbbZV[GS\_XS¥¥^bY[]¥\_XV[FF\_JQZ¥]TWDZOF¥  
@HWI-EAS443:3:12:1155:232#0/1  
GTTCTTTCATTTTCCAATAGAACCAACAGTTCGGCATTGT

+HWI-EAS443:3:12:1155:232#0/1  
a[¥[]\_\_\_\_`aa`\_`¥a\_]`^\_]¥JU\_[X\_[Y[YW¥]^]Y[  
@HWI-EAS443:3:19:105:1171#0/1  
CAATGCCGAAGTGTGGTTCTATTGGAAAATGAAAGAACT  
+HWI-EAS443:3:19:105:1171#0/1  
abbbbaaaababaaaaa\_aaa¥`aaaa`a`aaa`^`\_a^`  
@HWI-EAS443:3:74:1442:368#0/1  
GACCCATTAGAGCACATCCAGAACTGATTGACCCCAGGG  
+HWI-EAS443:3:74:1442:368#0/1  
a`0L^\_AW^^YYS\_U¥`X\_]aa\_\_^[a\_^\_]GVFQ`]a\_X  
@HWI-EAS443:3:94:1205:1287#0/1  
CTCCCTGGGGCAATCAGTTTCTGGATGTGCGCTAATGGG  
+HWI-EAS443:3:94:1205:1287#0/1  
aZ]\_]`ab`a\_R^VRRP`0J]Ta``WaaG\_KG[`X^¥OR\_  
@HWI-EAS443:3:77:197:249#0/1  
ACCCATTAGAGCACATCCAGAACTGATTGCCCCCNGGGA  
+HWI-EAS443:3:77:197:249#0/1  
T^\_U¥^aaa\_]`a\_b[[[Ya`¥¥Y00ZNFsV`SERDX¥YV  
@HWI-EAS443:3:10:949:765#0/1  
GACCCATTAGAGCACATCCAGAACTGATTGCCCCCAGGG  
+HWI-EAS443:3:10:949:765#0/1  
a[WZ\_`\_\_¥\_]¥T^¥S¥¥^^W^Y¥WY¥¥¥W]UYYSQW^¥¥  
@HWI-EAS443:3:13:1791:1702#0/1  
CATTAGAGCACATCCAGAACTGATTGCCCCCAGGGAGAC  
+HWI-EAS443:3:13:1791:1702#0/1  
¥\_a¥ZbaWYa\_a^WGZbaa\_R`aaZ[aR[]PTYOSa\_`\_]`  
@HWI-EAS443:3:13:819:951#0/1  
CCATTAGAGCACATCCAGAACTGATTGCCCCCAGGGAGA  
+HWI-EAS443:3:13:819:951#0/1  
a¥0[¥]`a`V^a]XZTPXX`\_\_^XXTFQ`ZNQLS``Z^VB  
@HWI-EAS443:3:18:612:768#0/1  
GACCCATTAGAGCACATCCAGAACTGATTGCCCCCAGGG  
+HWI-EAS443:3:18:612:768#0/1  
aabbbbabbbbaaab`aabbbbaaaaaa`aaa\_``aa^\_  
@HWI-EAS443:3:20:414:846#0/1  
GACCCATTAGAGCACATCCAGAACTGATTGCCCCCAGGG  
+HWI-EAS443:3:20:414:846#0/1  
aabaa^a\_a`aabaaaaaaa\_baaaaa¥`\_a`\_\_a\_¥¥  
@HWI-EAS443:3:21:560:1058#0/1  
GACCCATTAGAGCACATCCAGAACTGATTGCCCCCAGGG  
+HWI-EAS443:3:21:560:1058#0/1  
a`aabbbbabababaa`ba`Zaaab`aaa]^`^aaa``  
@HWI-EAS443:3:22:1235:1725#0/1  
ACCCATTAGAGCACATCCAGAACTGATTGCCCCCAGGGA  
+HWI-EAS443:3:22:1235:1725#0/1  
aaaabaaaaaaa`a\_`a`a\_`\_\_a`\_\_\_\_Z[W^`[^\_  
@HWI-EAS443:3:27:53:515#0/1  
ACCCATTAGAGCACATCCAGAACTGATTGCCCCCAGGGA  
+HWI-EAS443:3:27:53:515#0/1  
Ua\_^[U]QNUH¥¥a^^V[\_¥\_aU¥a\_\_\_\_¥`TQT[]^¥`^U



@HWI-EAS443:3:32:1044:1268#0/1  
CATTAGAGCACATCCAGAACTGATTGCCCCCAGGGAGAC  
+HWI-EAS443:3:32:1044:1268#0/1  
a¥HNWYaS`\_aa^]V[Y\_V¥`^¥\_¥RX[H¥¥SRTP¥WV^  
@HWI-EAS443:3:33:444:323#0/1  
CATTAGAGCACATCCAGAACTGATTGCCCCCAGGGAGAC  
+HWI-EAS443:3:33:444:323#0/1  
abbab`aaaaaaaaabaaaaaaaa`a`a`]^`^]`^`Y  
@HWI-EAS443:3:34:121:471#0/1  
CCCATTAGAGCACATCCAGAACTGATTGCCCCCAGGGAG  
+HWI-EAS443:3:34:121:471#0/1  
aaa`Z^a\_`a¥`a\_^\_a`¥XZ\_¥\_^\_¥^`[^¥\_¥[[W¥¥  
@HWI-EAS443:3:35:1301:577#0/1  
CCCATTAGAGCACATCCAGAACTGATTGCCCCCAGGGAG  
+HWI-EAS443:3:35:1301:577#0/1  
`aUWaVTZ^^^]`^b``\_^\_X\_XGP[YV`a^^^`UUOJJL  
@HWI-EAS443:3:35:21:173#0/1  
CATTAGAGCACATCCAGAACTGATTGCCCCCAGGGAGAC  
+HWI-EAS443:3:35:21:173#0/1  
a^aaW^`aa[`a`a^J` `[`\_\_\_V[^`\_\_[^`^Z^`^^^W  
@HWI-EAS443:3:37:352:975#0/1  
GACCCATTAGAGCACATCCAGAACTGATTGCCCCCAGGG  
+HWI-EAS443:3:37:352:975#0/1  
aa\_\_\_baabaaaab^\_aa`aaba[aa\_\_U¥^\_a`a\_[-`Y  
@HWI-EAS443:3:44:275:1412#0/1  
GACCCATTAGAGCACATCCAGAACTGATTGCCCCCAGGG  
+HWI-EAS443:3:44:275:1412#0/1  
T\_`baaab\_\_^bX[Xbb`bba`bbbaabbbabaZabb`^`  
@HWI-EAS443:3:46:1129:878#0/1  
ACCCATTAGAGCACATCCAGAACTGATTGCCCCCAGGGA  
+HWI-EAS443:3:46:1129:878#0/1  
^FORHT`S\_^\_Q¥[^\_VUN\_YWT^Q\_WXVa¥HPVS¥¥¥`W  
@HWI-EAS443:3:51:833:1826#0/1  
CATTAGAGCACATCCAGAACTGATTGCCCCCAGGGAGAC  
+HWI-EAS443:3:51:833:1826#0/1  
ab`abbba` `ab`aba`^aaaa\_aa\_`^`ba^aa` `Y  
@HWI-EAS443:3:53:164:562#0/1  
GACCCATTAGAGCACATCCAGAACTGATTGCCCCCAGGG  
+HWI-EAS443:3:53:164:562#0/1  
ababb¥bbbbbbbaabb`aabaq]`abaaab` `aaaaaa  
@HWI-EAS443:3:53:616:1553#0/1  
CCATTAGAGCACATCCAGAACTGATTGCCCCCAGGGAGA  
+HWI-EAS443:3:53:616:1553#0/1  
`abbbbaaa`abb\_\_aababaaabaabbaa¥aa^aaaa  
@HWI-EAS443:3:56:984:824#0/1  
CCCATTAGAGCACATCCAGAACTGATTGCCCCCAGGGAG  
+HWI-EAS443:3:56:984:824#0/1  
a`bbbbbababbbbaabbbbaaabababb`aaaab`a`a  
@HWI-EAS443:3:61:385:1378#0/1  
ACCCATTAGAGCACATCCAGAACTGATTGCCCCCAGGGA

+HWI-EAS443:3:61:385:1378#0/1  
a`bbbaaaaaaaaaab`ab\_]UP\_]^a`[¥^ZZ¥^^PUUU  
@HWI-EAS443:3:66:266:788#0/1  
CATTAGAGCACATCCAGAACTGATTGCCCCAGGGAGAC  
+HWI-EAS443:3:66:266:788#0/1  
abaabbbaba^`\_aababa`\_`a\_\_`a\_\_a```\_aa¥\_`^a  
@HWI-EAS443:3:66:643:1448#0/1  
GACCCATTAGAGCACATCCAGAACTGATTGCCCCAGGG  
+HWI-EAS443:3:66:643:1448#0/1  
abbbbabbba\_bbbbbbbb\_]baababbaaa[aabb^a\_  
@HWI-EAS443:3:70:298:1920#0/1  
CATTAGAGCACATCCAGAACTGATTGCCCCAGGGAGAC  
+HWI-EAS443:3:70:298:1920#0/1  
`b`]X\_b^a`ab\_baa\_b`\_a\_\_a\_\_WaWaa`\_]W¥¥¥\_S  
@HWI-EAS443:3:72:243:2041#0/1  
CATTAGAGCACATCCAGAACTGATTGCCCCAGGGAGAC  
+HWI-EAS443:3:72:243:2041#0/1  
[T[QZHS]UPYa[¥U\_USX]]a`a\_LFYGV^U[ZURPQ`\_  
@HWI-EAS443:3:78:1495:50#0/1  
ACCCATTAGAGCACATCCAGAACTGATTGCCCCAGGGGA  
+HWI-EAS443:3:78:1495:50#0/1  
a\_\_U]`\_a`¥`¥`¥¥]\_^T^`¥¥YU[^¥`\_^RYUZUW\_W\_W  
@HWI-EAS443:3:89:618:2015#0/1  
GACCCATTAGAGCACATCCAGAACTGATTGCCCCAGGG  
+HWI-EAS443:3:89:618:2015#0/1  
ab^bbb\_b¥RXZ\_^aababb`baaa]]aa\_aaa^`]\_U\_^  
@HWI-EAS443:3:92:112:844#0/1  
GACCCATTAGAGCACATCCAGAACTGATTGCCCCAGGG  
+HWI-EAS443:3:92:112:844#0/1  
abbbb`\_a`abaaaabaa`baaYa`aaaa`a`\_Z`\_\_`\_\_  
@HWI-EAS443:3:92:255:337#0/1  
ACCCATTAGAGCACATCCAGAACTGATTGCCCCAGGGGA  
+HWI-EAS443:3:92:255:337#0/1  
a`b`a\_X\_a``aa\_b`^`[Z]a\_^\_^\_[¥\_\_[^Z^\_\_\_\_[\_  
@HWI-EAS443:3:95:1253:1606#0/1  
ACCCATTAGAGCACATCCAGAACTGATTGCCCCAGGGGA  
+HWI-EAS443:3:95:1253:1606#0/1  
aXaHaaabaaX¥a`aX`\_aUaaaQaab^aS`¥a¥`\_\_[Z  
@HWI-EAS443:3:21:1647:691#0/1  
AAAGAATGTAACGGTAACACTCTGTTAACCTTCTAGAA  
+HWI-EAS443:3:21:1647:691#0/1  
aaaa\_aaa¥bb]aa]`\_`Y\_]`\_\_\_X\_^\_]T]XV[[¥¥[  
@HWI-EAS443:3:47:94:500#0/1  
TAGAAGGTTAACAGAGTGTGTTACCGTTACATTCTTTTCT  
+HWI-EAS443:3:47:94:500#0/1  
abbbbbaabbaa`bab¥b]aaab`ab`b`¥^ba`babaaa  
@HWI-EAS443:3:68:1019:1477#0/1  
GAAAAGAATGTAACGGTAACACTCTGTTAACCTTCTAG  
+HWI-EAS443:3:68:1019:1477#0/1  
^Za^`Z^XbbYbQSYa\_a^`a\_^¥a`^`\_^abPFY¥]a\_\_

@HWI-EAS443:3:40:1759:127#0/1  
CAAGCAGTAGTTGTAAGGCTTGCATAAATGTTATTTGTTC  
+HWI-EAS443:3:40:1759:127#0/1  
`abbbbabbbababbababaabYG^ab`aaaaab`a^  
@HWI-EAS443:3:84:1491:239#0/1  
TTCAAGCAGTAGTTGTAAGGCTTGCATAAATGTTATTTGT  
+HWI-EAS443:3:84:1491:239#0/1  
aaaa^T^`a]SXY\_a^\_]\_^N\_a`X`a\_^`a\_\_\_a`\_`Y  
@HWI-EAS443:3:86:657:804#0/1  
CAAGCAGTAGTTGTAAGGCTTGCATAAATGTTATTTGTTC  
+HWI-EAS443:3:86:657:804#0/1  
\_¥Y^a^`V^ZPU`J¥U\_aabbbbaa\_YQ]aXZ^a\_a`]a]  
@HWI-EAS443:3:39:522:1205#0/1  
CTTCAAGCAGTAGTTGTAAGGCTTGCATAAATGTTATTTT  
+HWI-EAS443:3:39:522:1205#0/1  
aba`Ya`\_`a`\_`a\_a`\_`a\_a`\_\_a\_RFQI^GNaaPI  
@HWI-EAS443:3:53:1268:1434#0/1  
CTTCAAGCAGTAGTTGTAAGGCTTACATAAATGTTATTTG  
+HWI-EAS443:3:53:1268:1434#0/1  
ab^UX\_QX`\_ab\_Rb`^a]X¥P^bb^Ta\_J]a`b`bbaba  
@HWI-EAS443:3:60:410:863#0/1  
ACTTCAAGCAGTTGTTGTAAGGCTTGCATAAATGTTATTT  
+HWI-EAS443:3:60:410:863#0/1  
aa\_a\_baa\_\_a\_aa]`\_]T[[¥]^`\_]\_]¥[\_^`^`\_¥  
@HWI-EAS443:3:20:692:1544#0/1  
CTTCAAGCAGTAGTTGTAAGGCTTGCATAAATGTTATTTG  
+HWI-EAS443:3:20:692:1544#0/1  
a¥¥^VOY¥]YW]U¥a`[[\_\_[YVYR¥`\_a`YY]PXN]SY  
@HWI-EAS443:3:34:1472:547#0/1  
ACTTCAAGCAGTAGTTGTAAGGCTTGCATAAATGTTATTT  
+HWI-EAS443:3:34:1472:547#0/1  
¥^`bYbbb¥`bY¥S\_abaa\_`]U^aa\_\_aaa¥aaT`S`Y\_  
@HWI-EAS443:3:63:1529:636#0/1  
CTTCAAGCAGTAGTTGTAAGGCTTGCATAAATGTTATTTG  
+HWI-EAS443:3:63:1529:636#0/1  
abbbbab\_ab^aa`b^\_aa`^`ba`aaaa\_aa`\_`b`aa  
@HWI-EAS443:3:64:151:601#0/1  
CTTCAAGCAGTAGTTGTAAGGCTTGCATAAATGTTATTTG  
+HWI-EAS443:3:64:151:601#0/1  
```aaJ`a`[\_WU`]aWY`^V¥b`\_\_T\_KZ`\_S`a`aaa  
@HWI-EAS443:3:64:36:1332#0/1  
ACTTCAAGCAGTAGTTGTAAGGCTTGCATAAATGTTATTT  
+HWI-EAS443:3:64:36:1332#0/1  
ababaababa`U[``a[\_a^`[aa\_`\_a¥[YSa`W^aa¥`  
@HWI-EAS443:3:87:1534:1573#0/1  
ACTTCAAGCAGTAGTTGTAAGGCTTGCATAAATGTTATTT  
+HWI-EAS443:3:87:1534:1573#0/1  
]^WX¥aa`T^a¥a]\_b`Zb\_XUHAY`W]\_````bN]`aa\_  
@HWI-EAS443:3:87:772:1662#0/1  
CTTCAAGCAGTAGTTGTAAGGCTTGCATAAATGTTATTTG

+HWI-EAS443:3:87:772:1662#0/1  
SU\_b^aQW]H\_¥\_T\_ababbbY^`b^`bXab^b\_La`abaK  
@HWI-EAS443:3:90:1465:771#0/1  
CTTCAAGCAGTAGTTGTAAGCCTGCATAAATGTTATTTG  
+HWI-EAS443:3:90:1465:771#0/1  
`bb^[RVa¥^¥^a]ab\_`\_Uaaa`bab`bb\_baUabb`¥[  
@HWI-EAS443:3:68:1220:1920#0/1  
ACGGAAAGTGGATGAGAGGACTCATNCTTTATGACAAAGA  
+HWI-EAS443:3:68:1220:1920#0/1  
¥]]HXS\_bY`a`UT\_W][U\_\_[VaUDTOXXaa]YRZN\_\_\_\_  
@HWI-EAS443:3:45:1234:1874#0/1  
GTGGATGAGAGAACTCATCCTTTATGACAAAGAAAGA  
+HWI-EAS443:3:45:1234:1874#0/1  
aT`^S^¥NFM[X\_RXNNT¥T`¥WNSFQX^]V\_OYUXRTTV  
@HWI-EAS443:3:37:354:236#0/1  
AAAGTGGATGAGAGAACTCATCCTTTATGACAAAGACGAA  
+HWI-EAS443:3:37:354:236#0/1  
\_\_Y`]U]RP\_Y\_YaVY^\_\_Y\_a[PY^P¥\_Ga[GQ^VDT¥U  
@HWI-EAS443:3:72:529:1017#0/1  
GTGGATGAGAGAACTCATCCTTTATGACAAAGAAAGACAGG  
+HWI-EAS443:3:72:529:1017#0/1  
a`¥\_VZZ`¥Z¥W\_YZ]ZVZ^^¥^`]¥a¥]TYRWUY¥¥¥^U  
@HWI-EAS443:3:87:1123:855#0/1  
GGATGAGAGAACTCATCCTTTATGACAAAGAAAAAAG  
+HWI-EAS443:3:87:1123:855#0/1  
a`^a[Z\_`Va^abbab¥bbbb`^a``bab`]ab\_bb``ab  
@HWI-EAS443:3:24:1511:424#0/1  
CGGAAAGTGGATGAGAGAACTCATCCTTTATGAGAAAGAA  
+HWI-EAS443:3:24:1511:424#0/1  
abbbabb`bbbbbbbbbb]`\_ab`abbbbbbababaa\_a  
@HWI-EAS443:3:3:159:1958#0/1  
CGGAAAGTGGATGAGAGCACTCATCCTTTATGACAAAGAA  
+HWI-EAS443:3:3:159:1958#0/1  
aWS\_`a\_JR]J]`^]]b\_RUR`\_ZaBBBBBBBBBBBBBB  
@HWI-EAS443:3:3:411:1430#0/1  
GGATGAGAGAACTCATCCTTTATGACAAAGAAAGTAAG  
+HWI-EAS443:3:3:411:1430#0/1  
``\_ab]^TYaV[ZaSRZ]Y^`YX^\_Y\_^P\_W^`^¥GLXZ`  
@HWI-EAS443:3:61:263:426#0/1  
ATTTCTTCTTTGTCATAAAGGATGAGTTATCTCATCCACT  
+HWI-EAS443:3:61:263:426#0/1  
Jab`¥bbbb]\_baab\_\_`bUX¥ab^QLa`^V^b]^a^MIb  
@HWI-EAS443:3:6:115:642#0/1  
ACGGAAAGCGGATGAGAGAACTCATCCTTTATGACAAAGA  
+HWI-EAS443:3:6:115:642#0/1  
ababa\_aaGb`Yba\_b`aaWN[a^`^\_\_baa`aTHWaYa¥  
@HWI-EAS443:3:83:1518:1516#0/1  
GGATGAGAGAACTCATCCTTTATGAGAAAGAAATAAG  
+HWI-EAS443:3:83:1518:1516#0/1  
ab[SS¥¥T]^ZX]aaaPV` `[RZaVF\_\_P]T`a[[[TYWY

@HWI-EAS443:3:87:612:347#0/1  
GGAAAGTGGATGAGAGAACTCATCCTTTATGACAGAGAAG  
+HWI-EAS443:3:87:612:347#0/1  
ababaa¥baaa`a`a`\_a^aaaa``aa`a`a`\_¥F^a\_aa  
@HWI-EAS443:3:93:241:761#0/1  
CGGAAAGAGGATGAGAGAACTCATCCTTTATGACAAAGAA  
+HWI-EAS443:3:93:241:761#0/1  
abb]a¥YFT]]]``^aaaa\_a``a^aa¥aWW^aSM  
@HWI-EAS443:3:34:414:523#0/1  
CGGTCTTCTTTGTCATAAAGGATGAGTTCTCTCATCCACT  
+HWI-EAS443:3:34:414:523#0/1  
abaS]baab`a^^a`a`X`¥^\_^][WZR^XW^UWMKOLBB  
@HWI-EAS443:3:83:1429:1197#0/1  
CTGAAAGTGGATGAGAGAACTCATCCTTTATGACAAAGAA  
+HWI-EAS443:3:83:1429:1197#0/1  
]HSN]]`S]T^\_TaZ^aYMZUVXP[Y`¥\_\_\_`SY\_`]ZV  
@HWI-EAS443:3:4:538:1511#0/1  
GATGAGAGAACTCATCCTTTATGACAAAGAAGAAATAAGC  
+HWI-EAS443:3:4:538:1511#0/1  
¥ZbbZ^`b`Xa¥ab\_VH\_babba¥`\_I\_a¥\_``a`K\_bYB  
@HWI-EAS443:3:16:327:1482#0/1  
GTGGATGAGAGAACTCATCCTTTATGACAAAGAAGAAATA  
+HWI-EAS443:3:16:327:1482#0/1  
a\_aUW^¥[QXVUUYYZ0Y\_\_`\_YZ^\_P``]R^RHX[XZY[  
@HWI-EAS443:3:19:1663:886#0/1  
GAAAGTGGATGAGAGAACTCATCCTTTATGACAAAGAAGA  
+HWI-EAS443:3:19:1663:886#0/1  
a`[YTWPVNX\_UZX\_\_a[\_[ZWX¥WTWX\_\_URX]W[ZZ]T  
@HWI-EAS443:3:19:311:619#0/1  
AAAGTGGATGAGAGAACTCATCCTTTATGACAAAGAAGAA  
+HWI-EAS443:3:19:311:619#0/1  
aab][^a`\_`aa^\_\_`[`a]¥```\_\_\_\_`]\_\_]^aWY\_¥\_  
@HWI-EAS443:3:1:678:148#0/1  
GAAAGTGGATGAGAGAACTCATCCTTTATGACAAAGAAGA  
+HWI-EAS443:3:1:678:148#0/1  
X\_]\_bXRa``^a\_aWJ^aW\_X^X`a^]\_`SZ^\_]aZ]BB  
@HWI-EAS443:3:22:1491:1478#0/1  
GTGGATGAGAGAACTCATCCTTTATGACAAAGAAGAAATA  
+HWI-EAS443:3:22:1491:1478#0/1  
a\_a\_\_```^¥^\_¥]^`^`[[``\_\_`\_¥V¥XT]Y¥^¥Z^]]  
@HWI-EAS443:3:23:275:1325#0/1  
AGTGGATGAGAGAACTCATCCTTTATGACAAAGAAGAAAT  
+HWI-EAS443:3:23:275:1325#0/1  
`Z]\_^a¥^a^]Z`a`[``]\_\_``\_Z`\_a]WR\_\_Y]\_^\_\_]  
@HWI-EAS443:3:25:1098:1583#0/1  
AGTGGATGAGAGAACTCATCCTTTATGACAAAGAAGAAAT  
+HWI-EAS443:3:25:1098:1583#0/1  
aaYababaa`aa\_aaaa`a`aaaaa`a^`a`\_\_\_^`^\_\_  
@HWI-EAS443:3:25:984:1391#0/1  
CGGAAAGTGGATGAGAGAACTCATCCTTTATGACAAAGAA

+HWI-EAS443:3:25:984:1391#0/1  
aba^^`¥a\_\_[ba¥WZabaaa`aaa\_aa]`\_aa`]W\_]`^  
@HWI-EAS443:3:26:1249:551#0/1  
CGGAAAGTGGATGAGAGAACTCATCCTTTATGACAAAGAA  
+HWI-EAS443:3:26:1249:551#0/1  
^a`aabb`babbaabab¥aababbaabbbab`aaaaab\_a  
@HWI-EAS443:3:26:398:775#0/1  
GAAAGTGGATGAGAGAACTCATCCTTTATGACAAAGAAGA  
+HWI-EAS443:3:26:398:775#0/1  
aaa\_a```aaa\_aa\_a¥a`¥Q]`\_aa\_\_`aa`Ya\_`]-`]  
@HWI-EAS443:3:28:1015:1163#0/1  
CGGAAAGTGGATGAGAGAACTCATCCTTTATGACAAAGAA  
+HWI-EAS443:3:28:1015:1163#0/1  
`\_aa`¥a^bbaaa¥a\_aa`aaaa\_aab\_\_``\_Za`a`a\_  
@HWI-EAS443:3:28:1467:999#0/1  
AAGTGGATGAGAGAACTCATCCTTTATGACAAAGAAGAAA  
+HWI-EAS443:3:28:1467:999#0/1  
a`¥a`Ybb`aaaa^aa^a\_¥Y`^`^`a[¥\_`a`^[a^\_]`  
@HWI-EAS443:3:2:105:932#0/1  
CGGAAAGTGGATGAGAGAACTCATCCTTTATGACAAAGAA  
+HWI-EAS443:3:2:105:932#0/1  
aabbab`^bbbabab`aababab`b``abaaaaaaa^a`a  
@HWI-EAS443:3:31:130:73#0/1  
GAAAGTGGATGAGAGAACTCATCCTTTATGACAAAGAAGA  
+HWI-EAS443:3:31:130:73#0/1  
a^[a^\_baZ]\_\_`V\_YNWP[]`UP\_\_¥]^\_Y¥SU]TX¥P  
@HWI-EAS443:3:33:1651:37#0/1  
CGGAAAGTGGATGAGAGAACTCATCCTTTATGACAAAGAA  
+HWI-EAS443:3:33:1651:37#0/1  
`bbabab^ab\_abaa¥`a\_Sa\_\_`a]a`>`XKK^[V\_\_Z  
@HWI-EAS443:3:33:988:1835#0/1  
CGGAAAGTGGATGAGAGAACTCATCCTTTATGACAAAGAA  
+HWI-EAS443:3:33:988:1835#0/1  
`X]W]ZYZZ[[S[YQTUMS[]`¥UYOWUZVWYNXXVVTWY  
@HWI-EAS443:3:37:1485:1279#0/1  
AGTGGATGAGAGAACTCATCCTTTATGACAAAGAAGAAAT  
+HWI-EAS443:3:37:1485:1279#0/1  
`a\_ababbbb\_]aTa^^a`¥`\_aaaa`bHY]\_JX\_Z`[¥  
@HWI-EAS443:3:37:185:449#0/1  
ACGAAAGTGGATGAGAGAACTCATCCTTTATGACAAAGA  
+HWI-EAS443:3:37:185:449#0/1  
aaa`\_a`\_]\_a^`\_`\_\_\_\_^`^`^[0¥]]^`^X\_]¥\_Y]S^S  
@HWI-EAS443:3:37:943:699#0/1  
CGGAAAGTGGATGAGAGAACTCATCCTTTATGACAAAGAA  
+HWI-EAS443:3:37:943:699#0/1  
aab\_¥a^^aa\_aa]VZ`X`Wa`aa\_\_`a\_W\_VV`X[\_\_¥Y  
@HWI-EAS443:3:45:1369:271#0/1  
CGGAAAGTGGATGAGAGAACTCATCCTTTATGACAAAGAA  
+HWI-EAS443:3:45:1369:271#0/1  
ab^\_\_bbbbbabab`a``aabbI]bbbM`a``\_UabaZ

@HWI-EAS443:3:48:1029:182#0/1  
GGATGAGAGAACTCATCCTTTATGACAAAGAAGAAATAAG  
+HWI-EAS443:3:48:1029:182#0/1  
^aa\_b`b¥^aaaa`a[`aaa\_ba\_\_\_\_\_a\_]a\_\_\_aa\_a  
@HWI-EAS443:3:4:1610:1432#0/1  
CGGAAAGTGGATGAGAGAACTCATCCTTTATGACAAAGAA  
+HWI-EAS443:3:4:1610:1432#0/1  
aa`\_V¥Y[\_]IV^Z]TS\_R\_b]¥WWW`Z]Q]a[FVUXa[B  
@HWI-EAS443:3:51:1587:146#0/1  
AAGTGGATGAGAGAACTCATCCTTTATGACAAAGAAGAAA  
+HWI-EAS443:3:51:1587:146#0/1  
`aaWGZab¥aba]b`0a`aaaa\_aa\_ab^\_`^\_Y\_aa`^^  
@HWI-EAS443:3:51:1718:939#0/1  
GATGAGAGAACTCATCCTTTATGACAAAGAAGAAATAAGG  
+HWI-EAS443:3:51:1718:939#0/1  
aaab`\_]b\_aabaa\_T\_a\_aaba\_\_\_`^^]]]\_\_\_`¥¥Y  
@HWI-EAS443:3:51:692:602#0/1  
TGGATGAGAGAACTCATCCTTTATGACAAAGAAGAAATAA  
+HWI-EAS443:3:51:692:602#0/1  
^a\_QZaaba`a`aaab`ab^aa^`aaaa`b\_`b`a`a`a  
@HWI-EAS443:3:52:183:524#0/1  
CGGAAAGTGGATGAGAGAACTCATCCTTTATGACAAAGAA  
+HWI-EAS443:3:52:183:524#0/1  
ab`^YaaTbb¥[b]a)`J)`]U^`aZZaa`aaa\_WaZaa\_  
@HWI-EAS443:3:53:1601:1367#0/1  
GTGGATGAGAGAACTCATCCTTTATGACAAAGAAGAAATA  
+HWI-EAS443:3:53:1601:1367#0/1  
\_\_aa`a]Z\_Va`[XZ`[XXN`Ya[`Z\_X\_]MSQY`YU`^  
@HWI-EAS443:3:54:1215:1504#0/1  
GATGAGAGAACTCATCCTTTATGACAAAGAAGAAATAAGG  
+HWI-EAS443:3:54:1215:1504#0/1  
a\_aaaa`a`\_]`^aa`\_\_aa`aaa`\_]`^Z[^¥^a\_^\_]`  
@HWI-EAS443:3:54:1494:21#0/1  
AGTGGATGAGAGAACTCATCCTTTATGACAAAGAAGAAAT  
+HWI-EAS443:3:54:1494:21#0/1  
\_b¥[`Va[\_]^\_S[`¥U¥aUU\_baaa0]]a\_]RY¥aU^`a  
@HWI-EAS443:3:56:1086:1551#0/1  
AGTGGATGAGAGAACTCATCCTTTATGACAAAGAAGAAAT  
+HWI-EAS443:3:56:1086:1551#0/1  
a`[`VUbaaYV[a`[]U`R]aaaY`\_I\_\_\_\_`\_`a\_\_W`  
@HWI-EAS443:3:62:1304:982#0/1  
GAAAGTGGATGAGAGAACTCATCCTTTATGACAAAGAAGA  
+HWI-EAS443:3:62:1304:982#0/1  
aaaba¥`^a\_^aY`\_\_`\_`\_`¥^aa\_aa`aZ`\_\_\_\_^`a]  
@HWI-EAS443:3:62:969:1084#0/1  
AGTGGATGAGAGAACTCATCCTTTATGACAAAGAAGAAAT  
+HWI-EAS443:3:62:969:1084#0/1  
aa]`aaa`\_aU`L]]a`a`\_a\_aa]\_^a\_^\_^^S\_¥]`^  
@HWI-EAS443:3:64:1147:625#0/1  
GGATGAGAGAACTCATCCTTTATGACAAAGAAGAAATAAG

+HWI-EAS443:3:64:1147:625#0/1  
abaabbbbbbabaabaaabbabbaaaaa`aab`a\_aa`\_  
@HWI-EAS443:3:67:1709:563#0/1  
AAAGTGGATGAGAGAACTCATCCTTTATGACAAAGAAGAA  
+HWI-EAS443:3:67:1709:563#0/1  
^^^W[\_^[\_`aa\_`]¥a\_a`\_`\_aa^a`a^`^]\_^\_a[[a][  
@HWI-EAS443:3:67:543:550#0/1  
GGATGAGAGAACTCATCCTTTATGACAAAGAAGAAATAAG  
+HWI-EAS443:3:67:543:550#0/1  
a`^RZMUU^RWX\_ZV]]`ZXX\_TVWVWY^LWX^UW¥\_OW  
@HWI-EAS443:3:68:713:2038#0/1  
GTGGATGAGAGAACTCATCCTTTATGACAAAGAAGAAATA  
+HWI-EAS443:3:68:713:2038#0/1  
a``a`ab\_\_]] [baaababaaa`baaaaa`Y`aa^a``a  
@HWI-EAS443:3:73:1576:1155#0/1  
GAAAGTGGATGAGAGAACTCATCCTTTATGACAAAGAAGA  
+HWI-EAS443:3:73:1576:1155#0/1  
`^`VO¥^ZR`\_¥UN[\_]a]LTa`^`\_Y]`a[Y\_[]\_[Y]Z  
@HWI-EAS443:3:75:1362:900#0/1  
CGGAAAGTGGATGAGAGAACTCATCCTTTATGACAAAGAA  
+HWI-EAS443:3:75:1362:900#0/1  
ababbbabb`ababbbabababbbbbbbaabaa  
@HWI-EAS443:3:76:290:704#0/1  
AGTGGATGAGAGAACTCATCCTTTATGACAAAGAAGAAAT  
+HWI-EAS443:3:76:290:704#0/1  
aa` [Vaa]Za]aUZ]aa¥a\_\_aa`a\_\_\_\_\_Y¥T^`]RX^  
@HWI-EAS443:3:76:346:681#0/1  
AGTGGATGAGAGAACTCATCCTTTATGACAAAGAAGAAAT  
+HWI-EAS443:3:76:346:681#0/1  
ab\_a`abba^R\_`aaaaaaaaa`a``^]`a[Y`\_\_\_\_^  
@HWI-EAS443:3:76:57:1707#0/1  
CGGAAAGTGGATGAGAGAACTCATCCTTTATGACAAAGAA  
+HWI-EAS443:3:76:57:1707#0/1  
¥[\_\_\_\_ZTR^¥\_\_\_\_YZV]N]bab\_R¥W[T\_ZX[\_]]`^`XV  
@HWI-EAS443:3:77:1670:519#0/1  
CGGAAAGTGGATGAGAGAACTCATCCTTTATGACAAAGAA  
+HWI-EAS443:3:77:1670:519#0/1  
I\_aababa^babaab`b`bbbaabbbabb`babbbba  
@HWI-EAS443:3:77:549:374#0/1  
GGATGAGAGAACTCATCCTTTATGACAAAGAAGAAATAAG  
+HWI-EAS443:3:77:549:374#0/1  
\_a``bab\_ba^`aaaa\_a`aaba`\_````aa`\_```\_`a  
@HWI-EAS443:3:79:1274:739#0/1  
GGATGAGAGAACTCATCCTTTATGACAAAGAAGAAATAAG  
+HWI-EAS443:3:79:1274:739#0/1  
aaaa``baaaa\_aaaa\_aa` [aaa]Z``\_`Y`\_`a]\_^Wa  
@HWI-EAS443:3:79:127:1259#0/1  
CGGAAAGTGGATGAGAGAACTCATCCTTTATGACAAAGAA  
+HWI-EAS443:3:79:127:1259#0/1  
QXaaa¥¥aa\_XZbaXabaab\_bZa]]\_ba\_a\_aaa\_]bb



@HWI-EAS443:3:81:419:1224#0/1  
ACGGAAGTGGATGAGAGAACTCATCCTTTATGACAAAGA  
+HWI-EAS443:3:81:419:1224#0/1  
aaa^[aa\_[`aX`\_a`\_\_Waa``Z\_\_\_\_\_^\_\_\_\_\_]]^]  
@HWI-EAS443:3:82:1120:1851#0/1  
GAAAGTGGATGAGAGAACTCATCCTTTATGACAAAGAAGA  
+HWI-EAS443:3:82:1120:1851#0/1  
abbbba`b`a\_\_^`aaaaaa`aaabab`^¥^`aa\_a\_^a^  
@HWI-EAS443:3:83:1052:595#0/1  
GGATGAGAGAACTCATCCTTTATGACAAAGAAGAAATAAG  
+HWI-EAS443:3:83:1052:595#0/1  
aaaabababab[\_Z\_aaaaaaaaa`aaa]]a\_`a^`\_a`]a  
@HWI-EAS443:3:83:1713:1654#0/1  
CGGAAAGTGGATGAGAGAACTCATCCTTTATGACAAAGAA  
+HWI-EAS443:3:83:1713:1654#0/1  
`b]MT\_bJbb\_bbbbbbab^a`aabb[```abaaX`a¥b]a  
@HWI-EAS443:3:88:1397:1341#0/1  
AGTGGATGAGAGAACTCATCCTTTATGACAAAGAAGAAAT  
+HWI-EAS443:3:88:1397:1341#0/1  
a¥b¥`¥DOX`YSaaUV`T][a\_aa\_\_[X]X\_b¥[[XT\_\_  
@HWI-EAS443:3:88:477:54#0/1  
AAAGTGGATGAGAGAACTCATCCTTTATGACAAAGAAGAA  
+HWI-EAS443:3:88:477:54#0/1  
aaabXaba`b¥aUa\_\_¥a]^aY]\_``^`\_`Z]^`\_V^`XS  
@HWI-EAS443:3:88:849:1717#0/1  
CGGAAAGTGGATGAGAGAACTCATCCTTTATGACAAAGAA  
+HWI-EAS443:3:88:849:1717#0/1  
^^aaabWF¥^]a`\_0\_`]\_^`^a\_Y`^^`aa\_a]`a\_\_]  
@HWI-EAS443:3:89:838:658#0/1  
GGATGAGAGAACTCATCCTTTATGACAAAGAAGAAATAAG  
+HWI-EAS443:3:89:838:658#0/1  
H\_b\_b¥XZa`X[[YbbU]abaabbbba^b]IaTα¥b¥U[  
@HWI-EAS443:3:90:466:432#0/1  
ACGGAAGTGGATGAGAGAACTCATCCTTTATGACAAAGA  
+HWI-EAS443:3:90:466:432#0/1  
aabbbbbbTbbaab[Y¥\_L]a]a\_]aXa\_^]a[\_]`Z`Z  
@HWI-EAS443:3:90:772:665#0/1  
CGGAAAGTGGATGAGAGAACTCATCCTTTATGACAAAGAA  
+HWI-EAS443:3:90:772:665#0/1  
`aba\_babX¥^bab¥¥b\_^ZbabbV`aba`aba\_`aZb`a  
@HWI-EAS443:3:91:299:1640#0/1  
CGGAAAGTGGATGAGAGAACTCATCCTTTATGACAAAGAA  
+HWI-EAS443:3:91:299:1640#0/1  
\_```b``\_bbb`\_`b`\_aaaabbb`baaabaYb`aa`a\_a  
@HWI-EAS443:3:93:1064:429#0/1  
GTGGATGAGAGAACTCATCCTTTATGACAAAGAAGAAATA  
+HWI-EAS443:3:93:1064:429#0/1  
a\_aa^`a\_a\_a]\_Y\_``[\_W`a``\_`¥Z]]V\_X^`[[]]\_`  
@HWI-EAS443:3:93:724:1144#0/1  
GATGAGAGAACTCATCCTTTATGACAAAGAAGAAATAAGG

+HWI-EAS443:3:93:724:1144#0/1  
aa[^Vaa\_R^J]` `URS¥^UY`Y^^X^¥^U][X]WY^^PH  
@HWI-EAS443:3:98:171:1660#0/1  
ACGGAAAGTGGATGAGAGAACTCATCCTTTATGACAAAGA  
+HWI-EAS443:3:98:171:1660#0/1  
aaab`^^a]aa`aba`¥aXa^\_aaa^` `aa^`a`\_a\_\_\_^  
@HWI-EAS443:3:99:1147:71#0/1  
CGGAAAGTGGATGAGAGAACTCATCCTTTATGACAAAGAA  
+HWI-EAS443:3:99:1147:71#0/1  
abbbbbbbabbaba`baa` `Wa]bb]\_bababaaa\_]ab^a  
@HWI-EAS443:3:99:1191:590#0/1  
CGGAAAGTGGATGAGAGAACTCATCCTTTATGACAAAGAA  
+HWI-EAS443:3:99:1191:590#0/1  
abb\_abb\_abbbb`aabab^baba\_]baaaba\_`a`a^ZV  
@HWI-EAS443:3:55:928:1334#0/1  
GAAGTTCGGCGGAGACTTTGGTCGGCAAGCTTGCGCATA  
+HWI-EAS443:3:55:928:1334#0/1  
\_b]babbbbaT` `X[a[VaaaT]a¥PR\_`^`N[\_\_\_]Z[^¥aY  
@HWI-EAS443:3:17:1411:695#0/1  
CTTTTTTGGACAGTATGGATAGCAAATAGTAGCACTGCCA  
+HWI-EAS443:3:17:1411:695#0/1  
abbbbbbbabbbbaa`abbaa`\_R^`a\_aaZa^`\_Z^\_X]\_  
@HWI-EAS443:3:78:1418:1246#0/1  
TACTTTTTTGGACAGTATGGATAGCAAATAGTAGCACTGC  
+HWI-EAS443:3:78:1418:1246#0/1  
ababaaaabbaa\_aa^aaab\_` `[N]aa`\_a^¥TTYF¥^Y  
@HWI-EAS443:3:73:849:776#0/1  
TTGCGAAAGGAGAGAAAGCTAATGTGCTAATTGGGCAAGG  
+HWI-EAS443:3:73:849:776#0/1  
aa])V\_WWZPV` `a` `¥]^ZRa^aa`aa]`a`a\_\_[a`a¥  
@HWI-EAS443:3:79:1230:1305#0/1  
AAACCATTGACACTAATTGATGGCCATCCGAATCCTTTT  
+HWI-EAS443:3:79:1230:1305#0/1  
aba]I[``a\_aaa`aaab\_\_aa`]Z^a\_\_]``a\_a]a\_aa  
@HWI-EAS443:3:46:428:2043#0/1  
CCAATGATATTTGCTGCAATGACGAGAGGATAACTTGAAT  
+HWI-EAS443:3:46:428:2043#0/1  
`aaV^`aZY\_` `a¥0¥^a¥[a\_VVT\_VTT^^VP`][VRYN  
@HWI-EAS443:3:19:1222:1664#0/1  
ATTCAAGTGATCCTCTCGTCATTGCAGCAAATATCATTGG  
+HWI-EAS443:3:19:1222:1664#0/1  
])\_aaa`Y`a\_a`^b\_a\_]`a`\_^^`a]`\_]\_[\_Z]\_XXZ  
@HWI-EAS443:3:1:94:309#0/1  
ATTCAAGTGATCCTCTCGTCATTGCAGCAAATATCATTGG  
+HWI-EAS443:3:1:94:309#0/1  
`aaa`a\_Zb`]`\_\_\_\_\_¥a^\_\_\_\_\_]a\_^\_\_^`\_^\_]^^WBB  
@HWI-EAS443:3:22:1598:1702#0/1  
CAATGATATTTGCTGCAATGACGAGAGGATCACTTGAATC  
+HWI-EAS443:3:22:1598:1702#0/1  
abaa`babbbba`^bababbaa`aaaa`¥\_a\_aa`\_abY

@HWI-EAS443:3:27:70:1298#0/1  
CAATGATATTTGCTGCAATGACGAGAGGATCACTTGAATC  
+HWI-EAS443:3:27:70:1298#0/1  
aaabaaa`aaaaaa`aaTaaaa`aaa`a`]\_\_\_\_\_Z^a\_\_  
@HWI-EAS443:3:73:384:1762#0/1  
CGATTCAAGTGATCCTCTCGTCATTGCAGCAAATATCATT  
+HWI-EAS443:3:73:384:1762#0/1  
aaaabbabb]ababaaba\_`^aa\_\_`aa\_b\_``¥\_\_[\_SL  
@HWI-EAS443:3:77:116:1441#0/1  
CAATGATATTTGCTGCAATGACGAGAGGATCACTTGAATC  
+HWI-EAS443:3:77:116:1441#0/1  
ab`ab\_abaaaaabaabbaaaaaaa\_[]`¥\_\_`¥0^\_\_  
@HWI-EAS443:3:83:737:456#0/1  
GATCGTCTTTTTTTCAAATGGATTTATCGTCGCTTTAAAT  
+HWI-EAS443:3:83:737:456#0/1  
SS]¥[Z`b`\_W\_¥^V]¥\_N]F¥a``YPXQSI]]\_[]GIR¥  
@HWI-EAS443:3:25:673:1498#0/1  
TACGGTTTAAAAAGAGGGCCTTCTACGGAAGGAGTGCCAG  
+HWI-EAS443:3:25:673:1498#0/1  
[bb[Z[aVW[`a^]VTZ`Z]\_T]\_``V\_VTXBBBBBBB  
@HWI-EAS443:3:76:235:144#0/1  
ATTGGGACTCATCCTAGATCCAGTGCTGGTCTGAAAGATG  
+HWI-EAS443:3:76:235:144#0/1  
ab]^abaa\_Y\_aa`¥\_ZTW]W]`Y¥XY^ZTZ[]QR[^\_TZ  
@HWI-EAS443:3:80:63:331#0/1  
TGGCGCTCCTTCCGTAGAAGGCCCTTTTTCACACCGTAT  
+HWI-EAS443:3:80:63:331#0/1  
WSU\_P¥SL^J\_] [OLWWTYXVNY¥LZ\_Z^¥JNFMVTQP[R  
@HWI-EAS443:3:66:353:825#0/1  
TAGTTTTTTACTCTAGCTCTATGTTGACAAAATGAACATC  
+HWI-EAS443:3:66:353:825#0/1  
SY^aZSW^0]Y\_`]HPaUNX\_T`XYTZI``[\_OH`BBBBB  
@HWI-EAS443:3:58:871:555#0/1  
TATTCAACTGGTGCACCTTGCCAGTTGCATGGGCCTCATTT  
+HWI-EAS443:3:58:871:555#0/1  
aaaa`a`^aa\_N\_`]U]\_a\_¥Z`¥`aa\_aa\_`a[a\_\_a``  
@HWI-EAS443:3:59:1452:942#0/1  
CGGTTTAAAAAGAGGGCCTTCTACGGAAGGAGCGCCTGGG  
+HWI-EAS443:3:59:1452:942#0/1  
[\_^`aaa[`V¥¥aa```Xa\_\_ [a^aPMBBBBBBBBBBBBBB  
@HWI-EAS443:3:39:731:19#0/1  
ATTCAACTGGTGCACCTTGCCAGTTGCATGGGCCTCATATA  
+HWI-EAS443:3:39:731:19#0/1  
`baaaaaaba¥aa```\_`\_\_^\_W\_``Q\_\_\_\_`WT^^¥¥¥^¥  
@HWI-EAS443:3:90:1259:1090#0/1  
TTCAACTGGTGCACCTTGCCAGTTGCATGGGCCTCATATAC  
+HWI-EAS443:3:90:1259:1090#0/1  
aaabaaaa`Ua\_a\_a\_aa\_\_`Y^`^^\_aT`¥^aS`\_\_`¥¥  
@HWI-EAS443:3:90:339:699#0/1  
AGGGGACGCAGTGTTGGTAATGAAACGAAAACGGGACCCT

+HWI-EAS443:3:90:339:699#0/1  
`ZX¥aaXQ^b\_bZ[aaFN¥RZYa]JUX\_^H][BBBBBBB  
@HWI-EAS443:3:9:567:467#0/1  
CACTAATNGATGGCCATCCGAATTCTTTTGGTGGCTGTCT  
+HWI-EAS443:3:9:567:467#0/1  
]\_bbZb¥D^b`\_`abbbbVb]b]b\_b`baabQGVJ^`PH\_  
@HWI-EAS443:3:44:796:1134#0/1  
TGGCCCGTTTTCGTTTCATTACCAACTACNTCCCCTTG  
+HWI-EAS443:3:44:796:1134#0/1  
abba][a]aaa]\_^aa])a`a`X`a\_a`a\_YDT\_]Z[WUZ  
@HWI-EAS443:3:15:1143:113#0/1  
GCGGGGACGTAGTGTGGTAATGAAAAGAAAACGGGACTC  
+HWI-EAS443:3:15:1143:113#0/1  
aabba`^]aZzZa\_`a`I]\_\_[^¥ZGZX^^^R^\_]VXXV  
@HWI-EAS443:3:16:1243:894#0/1  
AGGGGACGTAGTGTGGTAATGAAACGAAAAAGGGACTGT  
+HWI-EAS443:3:16:1243:894#0/1  
ab¥`bbbabba`b]`S¥ab^a^aG`\_aa]HSa\_]G]GP  
@HWI-EAS443:3:97:1673:1644#0/1  
AGGGGACGTAGTGTGGTAATGAAACAAAAACGGGACTGT  
+HWI-EAS443:3:97:1673:1644#0/1  
`^baaaab\_\_[Rb\_ab`0¥``\_KY`^HXUW\_0\_X\_HSVRZ  
@HWI-EAS443:3:32:818:1500#0/1  
AGGGGACGTAGTGTGGTAATGAAACGAAAACGGGGCGCT  
+HWI-EAS443:3:32:818:1500#0/1  
UY]X]\_aaWWQVH`^YXP`Z]a[ ]FDQ¥]\_IDRHHWL]W  
@HWI-EAS443:3:40:165:1087#0/1  
GGGGGAGGGGACGTAGTGTGGTAATGAAACGAAAACGGG  
+HWI-EAS443:3:40:165:1087#0/1  
^`^ZWaaaa¥^aG]WP¥\_a\_\_FO^XNOU¥N]QHWZ^¥]`  
@HWI-EAS443:3:58:15:169#0/1  
GGCGTGGGGACGTAGTGTGGTAATGAAACGAAAACGGGA  
+HWI-EAS443:3:58:15:169#0/1  
a]`aZaa`aM[ ]OR`Q`W]a[FS[\_^XYYSXRU^[WUBBB  
@HWI-EAS443:3:70:76:1795#0/1  
AGGGGACGTAGTGTGGTAATGAAACGAAAACGGGGGCTC  
+HWI-EAS443:3:70:76:1795#0/1  
a^`¥¥Q`a[`ZHV¥\_VXQYZXRM[aVMU``\_TRVP^XLTU  
@HWI-EAS443:3:1:1204:1666#0/1  
CGTCCCGTTTTAGTTTTATTACCAACTACGTCCCCTTG  
+HWI-EAS443:3:1:1204:1666#0/1  
abT[[ab`a\_YGY^\_^`\_aab]Qa]\_b\_a^a]T`aBBBBB  
@HWI-EAS443:3:77:463:907#0/1  
AGGGGACGTAGTGTGGGAATGAAACGAAAACGGGACTCA  
+HWI-EAS443:3:77:463:907#0/1  
`]¥\_^^aaVUY^HZ`aV[LVRP¥¥XK[[[\_X\_aTLQMI  
@HWI-EAS443:3:84:1359:1622#0/1  
ACCCGTTTTCGTTTCATTACCAACTACGTCCCATTGTC  
+HWI-EAS443:3:84:1359:1622#0/1  
aaTGWaS^Y[aT]a][\_`XW`WW[Q\_^\_]\_\_^LGUZPFM

@HWI-EAS443:3:44:449:488#0/1  
CAGAGGACGTAGTGTGGTAATGAAACGAAAACGGGACTC  
+HWI-EAS443:3:44:449:488#0/1  
aababb\_ab\_`aYaaaaSX\_^]W]`Y\_S[\_^T\_a`ZV]]  
@HWI-EAS443:3:45:1378:1539#0/1  
AGGGGACGTAGTGTGGTAATGAAACGAAAACGGGAATCT  
+HWI-EAS443:3:45:1378:1539#0/1  
Ja``aab]`a¥aa`b\_NT\_^XZaaU[V¥\_^F[^aWFRZ^  
@HWI-EAS443:3:46:157:1854#0/1  
ATTCGACACTAATTGATGGCCATCCGAATTCTTTTGTTCG  
+HWI-EAS443:3:46:157:1854#0/1  
a````]abYaaaZ¥Y]VGUZ^`\_a]a````Vaa^aRDK¥S  
@HWI-EAS443:3:59:78:451#0/1  
AGGGGACGTAGTGTGGTAATGAAACGAAAACGGGAGTCT  
+HWI-EAS443:3:59:78:451#0/1  
aaba]^`\_TXa]^`UbabY[[`RT¥`a\_VY^ZLX]aNFLQO  
@HWI-EAS443:3:62:596:1011#0/1  
GGGGAAGGGGACGTAGTGTGGTAATGAAACGAAAACGGG  
+HWI-EAS443:3:62:596:1011#0/1  
^]\_YR]aa``[\_a^]a^a^aYaT^a[ZU]a¥XY¥\_aUW[W  
@HWI-EAS443:3:78:1005:157#0/1  
TGCCGTCCCGTTTTCGTTTTATTACCAACTACGTCCCC  
+HWI-EAS443:3:78:1005:157#0/1  
abaVa\_\_a[b]a`\_b]\_`Z¥aa^XU\_^WZY`\_VZVVTWX  
@HWI-EAS443:3:78:1184:1340#0/1  
AGGGGACGTAGTGTGGTAATGAAACGAAAACGGGAGTCT  
+HWI-EAS443:3:78:1184:1340#0/1  
a`a¥Z\_\_aR[]U^V]¥QOV]^`[^\_T^V]\_¥UUGUWWBBB  
@HWI-EAS443:3:86:404:203#0/1  
TCCCGTTTTCGTTTTATTACCAACTACGTCCCCTCGCC  
+HWI-EAS443:3:86:404:203#0/1  
O\_a^[XX\_aaa¥UWX¥¥\_\_a\_¥¥[YMY]]`UVR\_SS¥SYK  
@HWI-EAS443:3:93:1765:253#0/1  
AGGGGACGTAGTGTGGTAATGAAACGAAAACGGGAATCT  
+HWI-EAS443:3:93:1765:253#0/1  
aba[[\_]a]abX^X\_¥\_R¥]^Z]a\_N^[a]YUZW¥IITBB  
@HWI-EAS443:3:19:1062:1168#0/1  
CTAATTGATGTCCATCCGAATTCTTTTGGTCGCTGTCTGG  
+HWI-EAS443:3:19:1062:1168#0/1  
abZa`\_¥0^aG`Y\_aa`]T]WaaVsa^`Y\_MVYP[[\_\_BB  
@HWI-EAS443:3:1:221:1120#0/1  
CACTAATTGAGGGCCATCCGAATTCTTTTGGTCGCTGTCT  
+HWI-EAS443:3:1:221:1120#0/1  
Ubbaaabab\_Iba\_Z`abI]ZbbXaUbUaba[^\_BBBBBB  
@HWI-EAS443:3:38:704:1434#0/1  
CACTAATTGATGGCCATCCGAATTCTTTTGGTGGCTGTCT  
+HWI-EAS443:3:38:704:1434#0/1  
aaaa]^VW¥^[[P[\_]Q[\_]S[[¥RUVZ]RXRFWSGSUVX  
@HWI-EAS443:3:59:1386:61#0/1  
CGACACTAATTGATGGTCATCCGAATTCTTTTGGTCGCTG

+HWI-EAS443:3:59:1386:61#0/1  
aabb[U¥X¥a^bb`UYDYaaX`[a]¥`a`ba`V`¥DDTQS  
@HWI-EAS443:3:91:1153:290#0/1  
ATTCGACACTAATTGATGGCCATCCGAATTGTTTTGGTTCG  
+HWI-EAS443:3:91:1153:290#0/1  
U\_V\_`W¥S]¥Q[Z^\_\_M\_ZW¥J[N[\_]^a\_`^]Y[a^ZZb  
@HWI-EAS443:3:98:1133:1262#0/1  
ATTCGACACTAATCGATGGCCATCCGAATTCTTTTGGTTCG  
+HWI-EAS443:3:98:1133:1262#0/1  
]b\_aa]a\_aabaZ^\_]Ua`[[b^JU\_`]I``\_[]`GZa  
@HWI-EAS443:3:32:46:1039#0/1  
GTCCCGTTTTCGTTTCATTACCAACTACGTCCCCTCGC  
+HWI-EAS443:3:32:46:1039#0/1  
a¥`a]\_¥U¥T¥]XTRU`aX¥X]¥OYY[¥XXHE¥^[BBBBB  
@HWI-EAS443:3:49:336:1804#0/1  
GTCCCGTTTTCGTTTCATTACCAACTACGTCCCCTCGC  
+HWI-EAS443:3:49:336:1804#0/1  
a\_\_`aaX\_aa`bUaa`aa`a\_Ya\_Ua\_\_a^]YY\_V¥ZGZ^  
@HWI-EAS443:3:54:981:583#0/1  
GTCCCGTTTTCGTTTCATTACCAACTACGTCCCCTAGC  
+HWI-EAS443:3:54:981:583#0/1  
aa]`^^¥^[Y`a]aaLEY`ZY¥YZU`WaZ\_BBBBBBBBBB  
@HWI-EAS443:3:64:872:403#0/1  
GCCGTCCTTTTCGTTTCATTACCAACTACGTCCCCT  
+HWI-EAS443:3:64:872:403#0/1  
aaaaabb^b¥aaa`[^aa\_[a\_a``aa\_a\_a\_\_NV\_¥X¥¥  
@HWI-EAS443:3:66:1644:783#0/1  
GGCCCCGTTTTCGTTTCATTACCAACTACGTCCCCTTG  
+HWI-EAS443:3:66:1644:783#0/1  
aaa\_]`^^aa\_[Z^`^`^\_a`^Z\_YY]W`a[\_WT]]]]\_[]  
@HWI-EAS443:3:90:806:1113#0/1  
TGAGGGACGTAGTGTGGTAATGAAACGAAAACGGGACTC  
+HWI-EAS443:3:90:806:1113#0/1  
aaTab¥^aba]aSb\_baYDX]aaVaaaa\_¥aVX\_`¥Y\_VD  
@HWI-EAS443:3:29:1473:1159#0/1  
ATTCNACACTAATTGATGGCCATCCGAATTCTTTTGGTTCG  
+HWI-EAS443:3:29:1473:1159#0/1  
aaa¥DWabaaa]a`a`a`Z\_\_aa\_\_`\_\_`^`^`^`a\_\_X]^  
@HWI-EAS443:3:35:382:1574#0/1  
CGACACTAATTNATGGCCATCCGAATTCTTTTGGTTCGCTG  
+HWI-EAS443:3:35:382:1574#0/1  
aaaaaaaaa\_[DT[[]aaa`a`\_a\_]Y`Y]\_]\_W]]\_]\_]  
@HWI-EAS443:3:60:1746:983#0/1  
CAAGGGGACGNAGTGTGGTAATGAAACGAAAACGGGACT  
+HWI-EAS443:3:60:1746:983#0/1  
a\_b\_bbaabZD^b`babbb\_aababbaJZZabbHab\_J¥a  
@HWI-EAS443:3:61:80:151#0/1  
CACTAATTGATGGCCATCCGAATTCTTTTGGTCNCTGTCT  
+HWI-EAS443:3:61:80:151#0/1  
`bbbaabbbabbaa`bbbb`Y\_abaabaa\_[RD[\_`^]`

@HWI-EAS443:3:95:209:1743#0/1  
ATTTCGACACTAATTGATGGCCATNCGAATTCTTTTGGTCCG  
+HWI-EAS443:3:95:209:1743#0/1  
a^baU`aba\_aa^\_ab\_\_ZV\_aWDYa\_`\_a^\_\_\_\_S\_W^^  
@HWI-EAS443:3:20:1107:586#0/1  
CGGTCCCCTTTTCGTTTCATTACCAACTACGTCCCCTT  
+HWI-EAS443:3:20:1107:586#0/1  
^[\`b^[a\_¥ZaWW¥G[W[Z]Z\_]^aaa\_YZ\_ba^0¥LMY`  
@HWI-EAS443:3:55:771:1520#0/1  
CGGTCCCCTTTTCGTTTCATTACCAACTACGTCCCCTT  
+HWI-EAS443:3:55:771:1520#0/1  
a\_0ZH^a[Y[Z]]\_0ab[\_ba`ba`[\`aa¥a`a^]RaW\_X  
@HWI-EAS443:3:58:721:696#0/1  
GCGGGGACGTAGTGTGGTAATGAAACGAAAACGGGACTC  
+HWI-EAS443:3:58:721:696#0/1  
aa]\_`b`\_a¥`\_N¥[aaaV\_\_^\_\_`a^\_¥`\_`^\_\_`QVSY  
@HWI-EAS443:3:60:1598:1154#0/1  
CGGTCCCCTTTTCGTTTCATTACCAACTACGTCCCCTT  
+HWI-EAS443:3:60:1598:1154#0/1  
Zb[[YZa`Q[\`^\_]aa[\`^]a`¥Z]]a\_[a^\_W]^SU  
@HWI-EAS443:3:68:1376:1108#0/1  
CGGTCCCCTTTTCGTTTCATTACCAACTACGTCCCCTT  
+HWI-EAS443:3:68:1376:1108#0/1  
a`b`\_abababbbbaa`abaababa^b`aaa`aaa\_a\_\_\_a\_  
@HWI-EAS443:3:6:1115:1040#0/1  
GCGGGGACGTAGTGTGGTAATGAAACGAAAACGGGACTC  
+HWI-EAS443:3:6:1115:1040#0/1  
aaa`¥^Z^aWQ\_]a]`a\_Y][ ]`RU^M¥V\_^]UWW^WQZY  
@HWI-EAS443:3:70:738:2047#0/1  
NGGTCCCCTTTTCGTTTCATTACCAACTACGTCCCCTT  
+HWI-EAS443:3:70:738:2047#0/1  
DNQVVVVSXUUWVVVVVVVSQPTTUYYVWWTVTTVQWUXN  
@HWI-EAS443:3:73:552:1658#0/1  
GTCCCCTTTTCGTTTCATTACCAACTACGTCCCCTTAA  
+HWI-EAS443:3:73:552:1658#0/1  
Kaabbb`[ba`¥H¥\_^STU`bb`\_abYJZaZG`Zaa^XaZ  
@HWI-EAS443:3:93:1207:2041#0/1  
ATCCCCTTTTCGTTTCATTACCAACTACGTCCCCTTGG  
+HWI-EAS443:3:93:1207:2041#0/1  
`IaaTb\_[WW^abU\_XVWSaSWa`Ib`^b^ba]\_LD[BBB  
@HWI-EAS443:3:99:916:407#0/1  
CGGTCCCCTTTTCGTTTCATTACCAACTACGTCCCCTT  
+HWI-EAS443:3:99:916:407#0/1  
abaX^`ab\_aaaab`aaaaa`a`¥`a`a\_aa\_a\_^¥¥^`W  
@HWI-EAS443:3:16:640:813#0/1  
CGTCCCGTTTTTCGTTTCATTACCAACTACGTCCCCTTG  
+HWI-EAS443:3:16:640:813#0/1  
abbbb`a^bbabb¥b`¥`aabaaaa`aaaaa[W^]`\_^\_\_  
@HWI-EAS443:3:24:1188:1406#0/1  
TGTCCCCTTTTCGTTTCATTACCAACTACGTCCCCTTG

+HWI-EAS443:3:24:1188:1406#0/1  
ababaaa`bbabaabbabaab\_aa`]ba`^¥`]^a]\_Ya  
@HWI-EAS443:3:25:1240:1328#0/1  
CGTCCCGTTTTCGTTTCATTACCAACTACGTCCCCTTG  
+HWI-EAS443:3:25:1240:1328#0/1  
aa`abb`\_abba`\_b`bbab`[abb^baabbb]Hab`a]  
@HWI-EAS443:3:32:833:570#0/1  
CGTCCCGTTTTCGTTTCATTACCAACTACGTCCCCTTG  
+HWI-EAS443:3:32:833:570#0/1  
^\_L\_]aaPW^^bb0`^^X\_]a^WSaaa\_W^UH\_FZZV^  
@HWI-EAS443:3:3:499:1276#0/1  
CGTCCCGTTTTCGTTTCATTACCAACTACGTCCCCTTG  
+HWI-EAS443:3:3:499:1276#0/1  
abZaaabaaa^^a¥`baaaaa`\_a`\_a]^aVb][Q]U`\_  
@HWI-EAS443:3:3:817:496#0/1  
GTCCCGTTTTCGTTTCATTACCAACTACGTCCCCTTGA  
+HWI-EAS443:3:3:817:496#0/1  
`YVSO^QXaaaaZXNOJU\_a`\_\_^Z`U`]PXKRQ[WVBBB  
@HWI-EAS443:3:44:1655:1668#0/1  
TGTCCCGTTTTCGTTTCATTACCAACTACGTCCCCTTG  
+HWI-EAS443:3:44:1655:1668#0/1  
^baaY]¥]ab^Z`\_]`\_aba^`^a`[[a`^V^\_^ZQ^VZ  
@HWI-EAS443:3:45:777:1879#0/1  
ACCCGTTTTCGTTTCATTACCAACTACGTCCCCTTGTC  
+HWI-EAS443:3:45:777:1879#0/1  
a¥a`b¥a`aaa^\_\_^a`^`¥RaaXaW^XKPOKZZXZYWBB  
@HWI-EAS443:3:48:1410:76#0/1  
CAGGGGACGTAGTGTGGTAATGAAACGAAAACGGGACTC  
+HWI-EAS443:3:48:1410:76#0/1  
abbb`aaaba`babaabb\_\_\_a`[\_a]`\_`aaHaaVMU^X  
@HWI-EAS443:3:48:1599:1936#0/1  
TGTCCCGTTTTCGTTTCATTACCAACTACGTCCCCTTG  
+HWI-EAS443:3:48:1599:1936#0/1  
`a¥YabTabbab`\_`a][¥MW^Y]`\_Y[[`R^¥^YRQS  
@HWI-EAS443:3:56:1065:2023#0/1  
TGTCCCGTTTTCGTTTCATTACCAACTACGTCCCCTTG  
+HWI-EAS443:3:56:1065:2023#0/1  
a`Y]]`bY`\_`Y`a]NaaYaQ^aX\_aUZ]X`VGTU\_^ZV  
@HWI-EAS443:3:64:1298:1263#0/1  
CGTCCCGTTTTCGTTTCATTACCAACTACGTCCCCTTG  
+HWI-EAS443:3:64:1298:1263#0/1  
aa`^Yabaa^a\_S]\_]ba\_MV]R\_^Yb¥`aaa\_YXXTZJY  
@HWI-EAS443:3:69:1482:1072#0/1  
CAGTCCCGTTTTCGTTTCATTACCAACTACGTCCCCTT  
+HWI-EAS443:3:69:1482:1072#0/1  
a`¥^bbbaabaa`aaaababaa`aaa`\_aa^a\_YPZUa\_  
@HWI-EAS443:3:69:318:645#0/1  
CGTCCCGTTTTCGTTTCATTACCAACTACGTCCCCTTG  
+HWI-EAS443:3:69:318:645#0/1  
a\_\_baab¥``aaa\_aaaa``aabb¥a`\_`\_a^W\_\_^\_¥^`



@HWI-EAS443:3:71:362:77#0/1  
CGTCCCGTTTTCGTTTCATTACCAACTACGTCCCCTTG  
+HWI-EAS443:3:71:362:77#0/1  
abaa`ab\_aabaa^a`aa`a\_``Y`^aa^\_U\_\_^XW^  
@HWI-EAS443:3:72:120:762#0/1  
CGTCCCGTTTTCGTTTCATTACCAACTACGTCCCCTTG  
+HWI-EAS443:3:72:120:762#0/1  
aa]aU^`[^aa`QaXW]MZaa\_U[X]NKXYR^\_]LXG  
@HWI-EAS443:3:77:1167:1098#0/1  
CGTCCCGTTTTCGTTTCATTACCAACTACGTCCCCTTG  
+HWI-EAS443:3:77:1167:1098#0/1  
abab`\_\_bbbbababbaabbbbbba`babbba`a\_baaaa  
@HWI-EAS443:3:85:379:1078#0/1  
CGTCCCGTTTTCGTTTCATTACCAACTACGTCCCCTTG  
+HWI-EAS443:3:85:379:1078#0/1  
`\_Y\_abba`\_]\_]Q^\_\_b`V`^\_b][aab`^UZ^^¥TY  
@HWI-EAS443:3:90:859:86#0/1  
CGTCCCGTTTTCGTTTCATTACCAACTACGTCCCCTTG  
+HWI-EAS443:3:90:859:86#0/1  
ab]\_^ab[aaba`X]aaaaa`aa`Ra\_a`a\_RVV^\_\_`  
@HWI-EAS443:3:10:1168:310#0/1  
CACTAATTGATGGCCATCCGAATTCTTTTGGTCGCTGTCT  
+HWI-EAS443:3:10:1168:310#0/1  
a`abaabbbbbbaY^b`aba\_\_a^Rabbbbb\_]a[aa`\_a  
@HWI-EAS443:3:10:1466:549#0/1  
CACTAATTGATGGCCATCCGAATTCTTTTGGTCGCTGTCT  
+HWI-EAS443:3:10:1466:549#0/1  
abbbbbbbbbbb`\_]bbaaab`ab]bbbbba][[b]¥\_\_a  
@HWI-EAS443:3:10:437:2007#0/1  
ATTCGACACTAATTGATGGCCATCCGAATTCTTTTGGTCG  
+HWI-EAS443:3:10:437:2007#0/1  
\_`¥¥\_ba`a\_b\_TV^aX\_0[]`Z`b\_ZY]``]¥^a\_YWaU  
@HWI-EAS443:3:11:1241:387#0/1  
CACTAATTGATGGCCATCCGAATTCTTTTGGTCGCTGTCT  
+HWI-EAS443:3:11:1241:387#0/1  
^b`b`b`bbbbbb`a`abb]bbabbbabab`baab\_ab  
@HWI-EAS443:3:11:1278:723#0/1  
ATTCGACACTAATTGATGGCCATCCGAATTCTTTTGGTCG  
+HWI-EAS443:3:11:1278:723#0/1  
`XWta^a]\_a\_a]¥X^aaa]\_]¥\_\_Y\_a¥^^\_]P[U[a  
@HWI-EAS443:3:11:219:609#0/1  
CACTAATTGATGGCCATCCGAATTCTTTTGGTCGCTGTCT  
+HWI-EAS443:3:11:219:609#0/1  
abb`a`aa]a`\_]abaaaaa\_`\_`a`X\_]```\_aX^¥  
@HWI-EAS443:3:11:735:1167#0/1  
CGACACTAATTGATGGCCATCCGAATTCTTTTGGTCGCTG  
+HWI-EAS443:3:11:735:1167#0/1  
`^N¥`[\_]W¥U¥]ZZ]YUZX[\_X\_`\_ZZ^X^]UZTTXVBB  
@HWI-EAS443:3:12:129:696#0/1  
CAAGGGGACGTAGTGTGGTAATGAAACGAAAACGGGACT

+HWI-EAS443:3:12:129:696#0/1  
aaYb\_[\_a]]\_aRa[`a\_V¥\_X]]]aXNXLr`NPVNQBB  
@HWI-EAS443:3:12:1424:385#0/1  
CACTAATTGATGGCCATCCGAATTCTTTTGGTCGCTGTCT  
+HWI-EAS443:3:12:1424:385#0/1  
ababbbabbbbab`¥bbbabbbababbbba``\_aba¥^`  
@HWI-EAS443:3:12:729:1255#0/1  
CAAGGGGACGTAGTGTGGTAATGAAACGAAAACGGGACT  
+HWI-EAS443:3:12:729:1255#0/1  
abbbbababa`b`b`bba^aa^^aaaa^aaaY^^\_^^a  
@HWI-EAS443:3:14:1752:274#0/1  
CAGACAGCGACCAAAGAATTCGGATGGCCATCAATTAGT  
+HWI-EAS443:3:14:1752:274#0/1  
abaababababXaaa]b\_aaba`[]aa]a¥^XZaaaa`aZ  
@HWI-EAS443:3:14:707:1689#0/1  
CACTAATTGATGGCCATCCGAATTCTTTTGGTCGCTGTCT  
+HWI-EAS443:3:14:707:1689#0/1  
¥abbaa\_]M`aUX[QW^UW`ab``]]aa[`a]¥a¥X`VBB  
@HWI-EAS443:3:15:1370:794#0/1  
AAGGGGACGTAGTGTGGTAATGAAACGAAAACGGGACTC  
+HWI-EAS443:3:15:1370:794#0/1  
``a^aa`¥abaaSaabb\_QU[``\_]a^Y^[]a`S``aTV]\_  
@HWI-EAS443:3:15:1634:512#0/1  
CACTAATTGATGGCCATCCGAATTCTTTTGGTCGCTGTCT  
+HWI-EAS443:3:15:1634:512#0/1  
Zbbbbbb\_babbaaV[babZbbbaaabab¥¥b0J``bbYQ^  
@HWI-EAS443:3:15:702:371#0/1  
CACTAATTGATGGCCATCCGAATTCTTTTGGTCGCTGTCT  
+HWI-EAS443:3:15:702:371#0/1  
abbbbbbbbbb`b`baaa]aabaaaaabbbab[\_Xa^ab]]a  
@HWI-EAS443:3:16:1524:2022#0/1  
CACTAATTGATGGCCATCCGAATTCTTTTGGTCGCTGTCT  
+HWI-EAS443:3:16:1524:2022#0/1  
abbbbababb`aa]\_ba\_\_abba``ababa\_\_F^Xb]RVa  
@HWI-EAS443:3:17:328:1522#0/1  
CACTAATTGATGGCCATCCGAATTCTTTTGGTCGCTGTCT  
+HWI-EAS443:3:17:328:1522#0/1  
aa]¥abY`\_[Ua\_b``aaaaQ\_aaS\_a\_]a\_]\_`X^Q  
@HWI-EAS443:3:17:450:1692#0/1  
CTAATTGATGGCCATCCGAATTCTTTTGGTCGCTGTCTGG  
+HWI-EAS443:3:17:450:1692#0/1  
]a`¥a^`^a]a¥\_¥]a¥]a`a]aaaa¥R]b`VYaUXOQ]  
@HWI-EAS443:3:18:825:1227#0/1  
ATTCGACACTAATTGATGGCCATCCGAATTCTTTTGGTCG  
+HWI-EAS443:3:18:825:1227#0/1  
`OZb^]X[\_]Y\_[a`a\_a\_a\_a`\_]\_`]¥a]\_`\_`\_]T¥¥  
@HWI-EAS443:3:19:1516:752#0/1  
GACACTAATTGATGGCCATCCGAATTCTTTTGGTCGCTGT  
+HWI-EAS443:3:19:1516:752#0/1  
aaaaW]]]``\_]Z¥U\_aa¥^[^^`\_`\_U^\_\_`a`VU^^¥^W

@HWI-EAS443:3:21:1123:1952#0/1  
ATTCGACACTAATTGATGGCCATCCGAATTCTTTTGGTTCG  
+HWI-EAS443:3:21:1123:1952#0/1  
aabaaaa`a\_a`\_\_a^`[\_aa^Y\_\_\_^\_\_]`^`]]\_YV\_  
@HWI-EAS443:3:21:915:483#0/1  
CACTAATTGATGGCCATCCGAATTCTTTTGGTCGCTGTCT  
+HWI-EAS443:3:21:915:483#0/1  
aTWYO¥RQ\_a[Z\_VXX¥TTXURX`[[V^`¥[UXRU¥SBBB  
@HWI-EAS443:3:22:138:1951#0/1  
ATTCGACACTAATTGATGGCCATCCGAATTCTTTTGGTTCG  
+HWI-EAS443:3:22:138:1951#0/1  
a`\_\_[Za`^`^`¥YV\_V]Va[X\_]`XXY]^XX]]YWWY  
@HWI-EAS443:3:22:1609:1042#0/1  
CACTAATTGATGGCCATCCGAATTCTTTTGGTCGCTGTCT  
+HWI-EAS443:3:22:1609:1042#0/1  
\_`\_ZQW`abZX\_VV[V\_¥NYS\_a^V]W[YW`^SMQX\_BBB  
@HWI-EAS443:3:23:682:1556#0/1  
ATTCGACACTAATTGATGGCCATCCGAATTCTTTTGGTTCG  
+HWI-EAS443:3:23:682:1556#0/1  
aa`]FY]^Y[^aaYP]M00a[`aaXL¥UTaOVZ^XZZVFU  
@HWI-EAS443:3:23:758:1624#0/1  
ATTCGACACTAATTGATGGCCATCCGAATTCTTTTGGTTCG  
+HWI-EAS443:3:23:758:1624#0/1  
abab\_`abaaa`a\_\_a`\_\_bV`W]\_\_Z¥¥[\_\_\_\_Z^ZKMK]  
@HWI-EAS443:3:24:1355:66#0/1  
AAGGGGACGTAGTGTGGTAATGAAACGAAAACGGGACTC  
+HWI-EAS443:3:24:1355:66#0/1  
aaa`bbaab`\_bab`bb`]`\_aa`\_a0a`\_`G`\_dWX^]  
@HWI-EAS443:3:24:761:612#0/1  
ATTCGACACTAATTGATGGCCATCCGAATTCTTTTGGTTCG  
+HWI-EAS443:3:24:761:612#0/1  
aabaab\_bab`aaaa^a^aaa^\_a\_a\_\_\_\_`a`\_`WZ`  
@HWI-EAS443:3:26:1441:1786#0/1  
TCGACACTAATTGATGGCCATCCGAATTCTTTTGGTCGCT  
+HWI-EAS443:3:26:1441:1786#0/1  
a\_^b\_baaaa\_\_Ya`^`[Ra`U\_\_a`\_dWaa\_]U¥¥Y[  
@HWI-EAS443:3:26:212:781#0/1  
CGACACTAATTGATGGCCATCCGAATTCTTTTGGTCGCTG  
+HWI-EAS443:3:26:212:781#0/1  
abVaa^abb\_aa`a]abaabbababbaba`a`[\_a]a`  
@HWI-EAS443:3:27:1347:1414#0/1  
CACTAATTGATGGCCATCCGAATTCTTTTGGTCGCTGTCT  
+HWI-EAS443:3:27:1347:1414#0/1  
aa`bbbb¥bb\_XUOUVYXba^`¥]]^`\_NNX`¥aU]Q  
@HWI-EAS443:3:28:1709:774#0/1  
ATTCGACACTAATTGATGGCCATCCGAATTCTTTTGGTTCG  
+HWI-EAS443:3:28:1709:774#0/1  
abba^a`b`bab`\_]`ab`\_`a]a^`^`^aU\_a\_a\_a[Y[  
@HWI-EAS443:3:29:1291:276#0/1  
GACACTAATTGATGGCCATCCGAATTCTTTTGGTCGCTGT

+HWI-EAS443:3:29:1291:276#0/1  
a`\_a\_a`^`aW]`\_ZS]]SZ]\_Z\_^V^^aa^[XX]V[[B  
@HWI-EAS443:3:29:530:220#0/1  
ATTCGACACTAATTGATGGCCATCCGAATTCTTTTGGTTCG  
+HWI-EAS443:3:29:530:220#0/1  
\_\_a`ba^W`^^\_¥¥]¥Y]\_\_a```[`ZVV]R]^¥` `^V^\_  
@HWI-EAS443:3:29:782:1300#0/1  
CACTAATTGATGGCCATCCGAATTCTTTTGGTTCGCTGTCT  
+HWI-EAS443:3:29:782:1300#0/1  
a`a`¥W¥aa`YT]\_^]V][\_]W\_[Y^`\_\_UZ00G`]Y]BB  
@HWI-EAS443:3:2:1196:149#0/1  
ATTCGACACTAATTGATGGCCATCCGAATTCTTTTGGTTCG  
+HWI-EAS443:3:2:1196:149#0/1  
abZS\_]aaaaYY^¥\_Z]aa]^`[X\_aWSa]^`[\_a`XVB  
@HWI-EAS443:3:31:1593:1564#0/1  
CACTAATTGATGGCCATCCGAATTCTTTTGGTTCGCTGTCT  
+HWI-EAS443:3:31:1593:1564#0/1  
^T]Q]Z\_\_ZXNYZ\_Y¥X0¥OPPUYR]¥[SUSQXBBBBBBB  
@HWI-EAS443:3:31:455:1773#0/1  
CACTAATTGATGGCCATCCGAATTCTTTTGGTTCGCTGTCT  
+HWI-EAS443:3:31:455:1773#0/1  
a`\_YSS\_Za^ZU]`abaa\_] [`]aa\_\_^`\_]\_^\_aaaX^¥  
@HWI-EAS443:3:31:707:692#0/1  
CACTAATTGATGGCCATCCGAATTCTTTTGGTTCGCTGTCT  
+HWI-EAS443:3:31:707:692#0/1  
aaaaa^aabb]\_UR^\_M\_T[V¥`^^bX]aYZYa\_``aZa`  
@HWI-EAS443:3:31:828:1013#0/1  
CACTAATTGATGGCCATCCGAATTCTTTTGGTTCGCTGTCT  
+HWI-EAS443:3:31:828:1013#0/1  
\_`\_`Z`a`aa`\_]a`X`^]]][^`a[[XR¥Z]¥¥Z[[  
@HWI-EAS443:3:32:1217:260#0/1  
ATTCGACACTAATTGATGGCCATCCGAATTCTTTTGGTTCG  
+HWI-EAS443:3:32:1217:260#0/1  
^`bab]ab`bbba\_¥W\_YZ]P\_]`¥^`aa`Q` `[\_]Z^`  
@HWI-EAS443:3:32:1492:664#0/1  
ATTCGACACTAATTGATGGCCATCCGAATTCTTTTGGTTCG  
+HWI-EAS443:3:32:1492:664#0/1  
a`\_^aa\_a`\_]aZ¥ZW]]^^]a^Y]]^Y]^XX\_]^M`XX^  
@HWI-EAS443:3:33:808:1088#0/1  
TTCGACACTAATTGATGGCCATCCGAATTCTTTTGGTTCG  
+HWI-EAS443:3:33:808:1088#0/1  
`ZZaababaaba\_\_a`\_T]aa^Y]aaa]^a`\_`^T]^P  
@HWI-EAS443:3:34:1029:1112#0/1  
CAAGGGGACGTAGTGTGGTAATGAAACGAAAACGGGACT  
+HWI-EAS443:3:34:1029:1112#0/1  
a` `¥\_` `baXUXI\_\_^`^LN^¥UQ]\_]UT] `VZ]YIDO  
@HWI-EAS443:3:34:1256:923#0/1  
AAGGGGACGTAGTGTGGTAATGAAACGAAAACGGGACTC  
+HWI-EAS443:3:34:1256:923#0/1  
aabbb\_^\_b`\_b`b^aaH`a`a`\_aZa\_\_`a]\_]\_Z]ZY

@HWI-EAS443:3:34:1399:463#0/1  
CGACACTAATTGATGGCCATCCGAATTCTTTTGGTCGCTG  
+HWI-EAS443:3:34:1399:463#0/1  
U[Z¥Z^\_a`b]\_\_W\_\_`Zab```]^Ta^b[a^aZYV\_U\_B  
@HWI-EAS443:3:36:47:886#0/1  
CACTAATTGATGGCCATCCGAATTCTTTTGGTCGCTGTCT  
+HWI-EAS443:3:36:47:886#0/1  
abaa\_Z`^aW¥NNb]RW]`[\_[\_X[ZX[^\_XF¥```BBBBB  
@HWI-EAS443:3:36:57:167#0/1  
CACTAATTGATGGCCATCCGAATTCTTTTGGTCGCTGTCT  
+HWI-EAS443:3:36:57:167#0/1  
¥\_\_\_VIQ\_[TO\_W`aZ`b[[QX^\_\_WY^T^^QX¥¥RWNYP  
@HWI-EAS443:3:36:854:163#0/1  
CACTAATTGATGGCCATCCGAATTCTTTTGGTCGCTGTCT  
+HWI-EAS443:3:36:854:163#0/1  
`bba]a\_aaa`aaa\_a`a``aa\_`^\_\_\_\_\_^V]^^^`\_UWV  
@HWI-EAS443:3:37:1056:1125#0/1  
AAGGGGACGTAGTGTGGTAATGAAACGAAAACGGGACTC  
+HWI-EAS443:3:37:1056:1125#0/1  
a\_ababWab`[\_ababb]DTa]U]aa\_]WQI]a¥TZ\_`¥\_  
@HWI-EAS443:3:37:1581:665#0/1  
CTAATTGATGGCCATCCGAATTCTTTTGGTCGCTGTCTGG  
+HWI-EAS443:3:37:1581:665#0/1  
a¥S]`Z¥ZW^aaaaT]aa]^]aW]^]a]VGB^\_S^VQY`Y  
@HWI-EAS443:3:37:655:893#0/1  
CACTAATTGATGGCCATCCGAATTCTTTTGGTCGCTGTCT  
+HWI-EAS443:3:37:655:893#0/1  
^`a]¥¥a`\_\_TV\_X¥T^`\_]\_]`Z`\_¥^]XR\_``]^T]¥  
@HWI-EAS443:3:38:1129:1656#0/1  
AAGGGGACGTAGTGTGGTAATGAAACGAAAACGGGACTC  
+HWI-EAS443:3:38:1129:1656#0/1  
aabaaa`ab`ab]bab`a[¥a\_`aaaa\_a\_^\_W\_^^^¥\_X  
@HWI-EAS443:3:39:952:300#0/1  
CGACACTAATTGATGGCCATCCGAATTCTTTTGGTCGCTG  
+HWI-EAS443:3:39:952:300#0/1  
ab`baaab\_aaaa`a``]aXQ`a\_a```a\_`^[\_PS\_^Z]  
@HWI-EAS443:3:3:960:693#0/1  
TTCCGACACTAATTGATGGCCATCCGAATTCTTTTGGTCGC  
+HWI-EAS443:3:3:960:693#0/1  
aa]\_TR¥[`X`\_`aaZa¥¥0Xa\_]`\_^\_`N^a\_\_\_\_\_]]`V  
@HWI-EAS443:3:40:662:29#0/1  
AAGGGGACGTAGTGTGGTAATGAAACGAAAACGGGACTC  
+HWI-EAS443:3:40:662:29#0/1  
`Tb```\_\_\_\_`]Va[\_^\_b\_L^`]ZZ\_\_a\_V¥Z¥P[aZUX[X  
@HWI-EAS443:3:45:150:1596#0/1  
ATTCGACACTAATTGATGGCCATCCGAATTCTTTTGGTCG  
+HWI-EAS443:3:45:150:1596#0/1  
^ZZaa^aaaZ^XY[OXaab]X`XZaa]X]ZT\_aaXP]YWP  
@HWI-EAS443:3:45:53:1240#0/1  
CACTAATTGATGGCCATCCGAATTCTTTTGGTCGCTGTCT

+HWI-EAS443:3:45:53:1240#0/1  
abbbbbbbba`ab\_bbab\_babb[abba```aba]a\_\_`  
@HWI-EAS443:3:46:1274:367#0/1  
ATTCGACACTAATTGATGGCCATCCGAATTCTTTTGGTTCG  
+HWI-EAS443:3:46:1274:367#0/1  
`bbaaab`aaaa`\_aaa\_`a`^\_a]\_`aU\_a\_\_^\_]Ya  
@HWI-EAS443:3:46:627:651#0/1  
ATTCGACACTAATTGATGGCCATCCGAATTCTTTTGGTTCG  
+HWI-EAS443:3:46:627:651#0/1  
Uababaaaa\_```aaa\_]\_a]````aa\_¥`aaaa^QX[  
@HWI-EAS443:3:47:172:1499#0/1  
ATTCGACACTAATTGATGGCCATCCGAATTCTTTTGGTTCG  
+HWI-EAS443:3:47:172:1499#0/1  
]Zab]baba\_PVaa`X\_¥^¥V[VNTUXX¥XFxaa^\_¥[YW  
@HWI-EAS443:3:47:1789:1396#0/1  
CACTAATTGATGGCCATCCGAATTCTTTTGGTCGCTGTCT  
+HWI-EAS443:3:47:1789:1396#0/1  
R\_aZ\_¥a`b`¥]\_```baaa\_aa\_]b\_0\_aa]U¥X]`Z``  
@HWI-EAS443:3:48:499:682#0/1  
CACTAATTGATGGCCATCCGAATTCTTTTGGTCGCTGTCT  
+HWI-EAS443:3:48:499:682#0/1  
ababaaabaaa`]]]a```a`baaaaabba^^a\_aa¥X]  
@HWI-EAS443:3:49:1243:330#0/1  
ATTCGACACTAATTGATGGCCATCCGAATTCTTTTGGTTCG  
+HWI-EAS443:3:49:1243:330#0/1  
\_b¥aZaV^baTa¥`]WTbZ¥Z[aXaaa^`aa¥`aa[\_]^`  
@HWI-EAS443:3:49:707:38#0/1  
CACTAATTGATGGCCATCCGAATTCTTTTGGTCGCTGTCT  
+HWI-EAS443:3:49:707:38#0/1  
abba`bZbbbababba\_[bb\_bbbbaaab`\_aa\_`  
@HWI-EAS443:3:49:752:1411#0/1  
CACTAATTGATGGCCATCCGAATTCTTTTGGTCGCTGTCT  
+HWI-EAS443:3:49:752:1411#0/1  
`YRX`¥¥bbaWQYQ[bS]baQZaa¥TY[`aZQ[a^BBBBB  
@HWI-EAS443:3:4:634:962#0/1  
CACTAATTGATGGCCATCCGAATTCTTTTGGTCGCTGTCT  
+HWI-EAS443:3:4:634:962#0/1  
]b`\_bbb`^`ab^babb\_aba]a]Iaab`aa\_Ya]]a¥[\_  
@HWI-EAS443:3:4:765:232#0/1  
CACTAATTGATGGCCATCCGAATTCTTTTGGTCGCTGTCT  
+HWI-EAS443:3:4:765:232#0/1  
aaabbaaaaa`Zb\_b\_a`aaaa^aaa\_`\_\_XaZ\_]VUB  
@HWI-EAS443:3:51:21:463#0/1  
CACTAATTGATGGCCATCCGAATTCTTTTGGTCGCTGTCT  
+HWI-EAS443:3:51:21:463#0/1  
aaab^\_bab`aa[\_aa\_]aba`aaVaaaa]^`a\_a`TR^  
@HWI-EAS443:3:51:649:1985#0/1  
CTAATTGATGGCCATCCGAATTCTTTTGGTCGCTGTCTGG  
+HWI-EAS443:3:51:649:1985#0/1  
aa^baU``^a^`aa^\_`\_aab\_aaa^^\_[aaa]b[^aa

@HWI-EAS443:3:53:1146:1407#0/1  
TTCGACACTAATTGATGGCCATCCGAATTCTTTTGGTCGC  
+HWI-EAS443:3:53:1146:1407#0/1  
\_aY[`abaaY]aa`a`WJZ`][S^bbJXaab`\_Y^`XR[  
@HWI-EAS443:3:53:30:842#0/1  
CAAGGGGACGTAGTGTGGTAATGAAACGAAAACGGGACT  
+HWI-EAS443:3:53:30:842#0/1  
aV\_babb]`ba\_b\_b`ba`\_Saa]\_a^`^^^\_aZa]Z]]  
@HWI-EAS443:3:53:831:477#0/1  
ACTAATTGATGGCCATCCGAATTCTTTTGGTCGCTGTCTG  
+HWI-EAS443:3:53:831:477#0/1  
¥ZS¥\_aY[`aaYUGK\_\_\_Z¥]X[¥a[aa]WXYaYIX`UXU  
@HWI-EAS443:3:54:371:500#0/1  
CAAGGGGACGTAGTGTGGTAATGAAACGAAAACGGGACT  
+HWI-EAS443:3:54:371:500#0/1  
aZaaaaaaaa`a\_Y`abbaZ¥[\_\_\_]^`^]Z`[H^`YFRX  
@HWI-EAS443:3:54:937:1996#0/1  
CACTAATTGATGGCCATCCGAATTCTTTTGGTCGCTGTCT  
+HWI-EAS443:3:54:937:1996#0/1  
Wb\_\_bZb^)`aZYU\_a`]U¥¥`KZV`YKU]OF^`XadWa\_  
@HWI-EAS443:3:55:1058:179#0/1  
CACTAATTGATGGCCATCCGAATTCTTTTGGTCGCTGTCT  
+HWI-EAS443:3:55:1058:179#0/1  
abaaabbabb`aaZ\_aa`aa]aaa`aaa`G¥^`a``aY]\_  
@HWI-EAS443:3:55:799:1471#0/1  
AAGGGGACGTAGTGTGGTAATGAAACGAAAACGGGACTC  
+HWI-EAS443:3:55:799:1471#0/1  
`¥]SQ\_a\_a\_a`[`a\_b`J[`V[V[V[^`\_`YR[\_\_\_RTVL  
@HWI-EAS443:3:57:200:831#0/1  
CACTAATTGATGGCCATCCGAATTCTTTTGGTCGCTGTCT  
+HWI-EAS443:3:57:200:831#0/1  
abaaaUabaa\_a^a\_`\_\_a`\_aa\_aaaaY`X\_]\_^\_]`^  
@HWI-EAS443:3:58:1491:1714#0/1  
CACTAATTGATGGCCATCCGAATTCTTTTGGTCGCTGTCT  
+HWI-EAS443:3:58:1491:1714#0/1  
[^QQ`]bbab`a¥\_W\_¥]a``ab\_N¥aab]\_\_\_```aaVL\_  
@HWI-EAS443:3:58:1658:701#0/1  
TTCGACACTAATTGATGGCCATCCGAATTCTTTTGGTCGC  
+HWI-EAS443:3:58:1658:701#0/1  
``aa[(``a`b`aa`a]\_`^Z\_\_aa^]Q`ab`^`W^``  
@HWI-EAS443:3:59:1348:1161#0/1  
CACTAATTGATGGCCATCCGAATTCTTTTGGTCGCTGTCT  
+HWI-EAS443:3:59:1348:1161#0/1  
Za`¥\_\_`a¥^ab\_H0abbab¥aaa\_\_`bbba[`V]]\_XU[  
@HWI-EAS443:3:59:173:251#0/1  
CGACACTAATTGATGGCCATCCGAATTCTTTTGGTCGCTG  
+HWI-EAS443:3:59:173:251#0/1  
abbababbbbbbbab`abbaaaaaa`aaaaaaV]\_]``  
@HWI-EAS443:3:59:946:450#0/1  
GTCCCCTTTTCGTTTCATTACCAACACTACGCCCCCTGT

+HWI-EAS443:3:59:946:450#0/1  
aKa¥W\_TRU\_¥bR\_aY]a]WZPUQ[N\_a¥adW[Z¥TPR[W  
@HWI-EAS443:3:5:1592:290#0/1  
CACTAATTGATGGCCATCCGAATTCTTTTGGTCGCTGTCT  
+HWI-EAS443:3:5:1592:290#0/1  
a`X`^ababb[bR\_U\_aa\_abH`aIbbbbbaabab]\_BB  
@HWI-EAS443:3:60:409:776#0/1  
ATTCGACACTAATTGATGGCCATCCGAATTCTTTTGGTCG  
+HWI-EAS443:3:60:409:776#0/1  
``^ [U[HZa¥`Y]\_TUYUa¥¥I¥\_X^]a`a[YS^[^W^  
@HWI-EAS443:3:62:793:1007#0/1  
CACTAATTGATGGCCATCCGAATTCTTTTGGTCGCTGTCT  
+HWI-EAS443:3:62:793:1007#0/1  
a`WRWZWUFZ`XTa\_¥]a\_¥Z[Ua\_`]`J`]U¥]Y`R^X  
@HWI-EAS443:3:62:869:1317#0/1  
ACTAATTGATGGCCATCCGAATTCTTTTGGTCGCTGTCTG  
+HWI-EAS443:3:62:869:1317#0/1  
aa`a]aaaa`\_\_`\_a\_ab\_Xaaa`]``aadU]`\_Z^U`Y]  
@HWI-EAS443:3:63:1215:789#0/1  
CTAATTGATGGCCATCCGAATTCTTTTGGTCGCTGTCTGG  
+HWI-EAS443:3:63:1215:789#0/1  
ab[`aab]`ba```aaabaaaa]\_b`^[[^a\_aa[]a`a  
@HWI-EAS443:3:63:423:780#0/1  
CAAGGGGACGTAGTGTGGTAATGAAACGAAAACGGGACT  
+HWI-EAS443:3:63:423:780#0/1  
ZaZbbbb]¥\_VUUZb^\_bb]a`bba`\_I¥`ba]WR^\_S[R  
@HWI-EAS443:3:63:614:526#0/1  
CGACACTAATTGATGGCCATCCGAATTCTTTTGGTCGCTG  
+HWI-EAS443:3:63:614:526#0/1  
aa`bbaaababa`aaababaaabZ\_aaa`a`^`¥`aZ\_a  
@HWI-EAS443:3:64:1400:1144#0/1  
ATTCGACACTAATTGATGGCCATCCGAATTCTTTTGGTCG  
+HWI-EAS443:3:64:1400:1144#0/1  
`bbaaa\_b`b`````]`aa\_Za`a^`\_\_a\_^^`\_`\_\_W\_a  
@HWI-EAS443:3:64:366:702#0/1  
CACTAATTGATGGCCATCCGAATTCTTTTGGTCGCTGTCT  
+HWI-EAS443:3:64:366:702#0/1  
abaaaa`a`a`^`\_`a```\_\_U\_\_`\_`\_XY\_]\_]\_Z^^  
@HWI-EAS443:3:65:1346:1948#0/1  
GACACTAATTGATGGCCATCCGAATTCTTTTGGTCGCTGT  
+HWI-EAS443:3:65:1346:1948#0/1  
a¥YaXT`ZSLX\_a[TZ¥a¥RR^\_\_YMEX]PXXRLV[BBBB  
@HWI-EAS443:3:65:1585:24#0/1  
CGACACTAATTGATGGCCATCCGAATTCTTTTGGTCGCTG  
+HWI-EAS443:3:65:1585:24#0/1  
ababbbbbbbabbabaabba[abbabbabbabb]\_[b`Qa  
@HWI-EAS443:3:65:740:1297#0/1  
ATTCGACACTAATTGATGGCCATCCGAATTCTTTTGGTCG  
+HWI-EAS443:3:65:740:1297#0/1  
a\_`Y`````\_`a^V^^YPZa^`Z^\_ZY\_]^^^\_UZV^]



@HWI-EAS443:3:65:828:871#0/1  
AGCGACAAAAGAATTCCGATGGCCATCAATTAGTGTCGA  
+HWI-EAS443:3:65:828:871#0/1  
^ab]P^b^QS]¥¥\_Z]\_T` `` `[\_N¥Z]UHSSZHTZNWY\_  
@HWI-EAS443:3:66:57:856#0/1  
CACTAATTGATGGCCATCCGAATTCTTTTGGTCGCTGTCT  
+HWI-EAS443:3:66:57:856#0/1  
a\_abb]aaa`a`Waaa\_aaa¥L]````a`\_]a\_\_\_\_V\_]`  
@HWI-EAS443:3:68:792:1338#0/1  
ACTAATTGATGGCCATCCGAATTCTTTTGGTCGCTGTCTG  
+HWI-EAS443:3:68:792:1338#0/1  
aa`bba\_aaa`\_a\_a\_aa`a` `` `aa`\_\_\_\_]`¥[\_^Z]\_\_`  
@HWI-EAS443:3:6:1488:519#0/1  
ATTCGACACTAATTGATGGCCATCCGAATTCTTTTGGTCG  
+HWI-EAS443:3:6:1488:519#0/1  
abaaa`aaaa\_aaaaaa[XWaaP[ ` \_ [ ` ^ ` [aa`¥USU  
@HWI-EAS443:3:6:162:808#0/1  
CGACACTAATTGATGGCCATCCGAATTCTTTTGGTCGCTG  
+HWI-EAS443:3:6:162:808#0/1  
aZZW\_U]¥ZZ`WXZ]TQ\_WUYa\_Sa[\_\_\_\_aaXZXW¥BB  
@HWI-EAS443:3:71:369:506#0/1  
AGTCCCGTTTTCGTTTTATTACCAACTACGTCCTTG  
+HWI-EAS443:3:71:369:506#0/1  
ababa`a0^aaab]¥Zbaa`aaa[aaaa\_a`\_^`ZNX]ZV  
@HWI-EAS443:3:72:806:55#0/1  
TCGACACTAATTGATGGCCATCCGAATTCTTTTGGTCGCT  
+HWI-EAS443:3:72:806:55#0/1  
abbaaaa`a`a`\_\_a`\_]`\_Y\_` `\_\_V\_\_` `\_\_Y]`V\_  
@HWI-EAS443:3:73:1165:262#0/1  
TTCGACACTAATTGATGGCCATCCGAATTCTTTTGGTCGC  
+HWI-EAS443:3:73:1165:262#0/1  
a`\_aaaa`aa` `` `^`\_[\_UN\_^]S¥\_`^aU¥^\_` `VWYX  
@HWI-EAS443:3:73:1384:770#0/1  
CACTAATTGATGGCCATCCGAATTCTTTTGGTCGCTGTCT  
+HWI-EAS443:3:73:1384:770#0/1  
ab\_aaaaaba\_\_` `aa`]a`aba\_aaaaa¥\_a\_\_a^X^  
@HWI-EAS443:3:73:261:141#0/1  
CTAATTGATGGCCATCCGAATTCTTTTGGTCGCTGTCTGG  
+HWI-EAS443:3:73:261:141#0/1  
a`V]aa^^`a][[\_Y]`a¥T`a]^^`\_ [ZWY][X`TTZTX  
@HWI-EAS443:3:73:383:1796#0/1  
ACTAATTGATGGCCATCCGAATTCTTTTGGTCGCTGTCTG  
+HWI-EAS443:3:73:383:1796#0/1  
aa`a^\_] [ ]S]T^W]X` `^Y^`¥a\_] ^]Z[V\_Z^SUTQVB  
@HWI-EAS443:3:74:1555:1886#0/1  
CACTAATTGATGGCCATCCGAATTCTTTTGGTCGCTGTCT  
+HWI-EAS443:3:74:1555:1886#0/1  
\_b]abb¥^X^` `^^Z`^^aaaa^^`aaaa\_WY]]a\_\_]]  
@HWI-EAS443:3:74:198:223#0/1  
ATTCGACACTAATTGATGGCCATCCGAATTCTTTTGGTCG

+HWI-EAS443:3:74:198:223#0/1  
aaa)`aaa\_a`[a`a\_\_\_\_\_a\_a\_\_\_]^U`\_]\_]\_\_Y`YT]  
@HWI-EAS443:3:75:1061:1392#0/1  
CAAGGGGACGTAGTGTGGTAATGAAACGAAAACGGGACT  
+HWI-EAS443:3:75:1061:1392#0/1  
^]bbaaZZ`I]a¥b`ab`PX¥a]U¥b¥)`aa`\_a`^UDO  
@HWI-EAS443:3:75:1521:333#0/1  
CAAGGGGACGTAGTGTGGTAATGAAACGAAAACGGGACT  
+HWI-EAS443:3:75:1521:333#0/1  
abbbbbbbbbbbbababbb`bbbaab¥bbbabTbaa^R`  
@HWI-EAS443:3:75:741:1404#0/1  
CACTAATTGATGGCCATCCGAATTCTTTTGGTCGCTGTCT  
+HWI-EAS443:3:75:741:1404#0/1  
a^b`a^a```a]Yaab¥aaa¥a\_]¥`\_¥[UT¥a`a^[UU[  
@HWI-EAS443:3:76:1459:1816#0/1  
CAAGGGGACGTAGTGTGGTAATGAAACGAAAACGGGACT  
+HWI-EAS443:3:76:1459:1816#0/1  
ababbbabba\_bb]PF[aa]aaaa`bb]bb\_ab¥TaXU`a  
@HWI-EAS443:3:76:720:343#0/1  
ATTCGACACTAATTGATGGCCATCCGAATTCTTTTGGTCG  
+HWI-EAS443:3:76:720:343#0/1  
`bab`ab\_a]`a`aa\_a`aa\_^\_\_a`a]````\_`\_SS`  
@HWI-EAS443:3:78:1197:2031#0/1  
ATTCGACACTAATTGATGGCCATCCGAATTCTTTTGGTCG  
+HWI-EAS443:3:78:1197:2031#0/1  
aa\_Y\_`abaaaa\_\_a^^`Ua\_a[]Y¥^¥^\_^\_a]\_Z^VVV  
@HWI-EAS443:3:78:1248:1103#0/1  
CGACACTAATTGATGGCCATCCGAATTCTTTTGGTCGCTG  
+HWI-EAS443:3:78:1248:1103#0/1  
``]``ab`aabb`aaa\_aa]`a\_\_`¥aaaaa\_\_^\_S`\_  
@HWI-EAS443:3:78:662:296#0/1  
ATTCGACACTAATTGATGGCCATCCGAATTCTTTTGGTCG  
+HWI-EAS443:3:78:662:296#0/1  
¥IWbb]abaaUZ`R¥[T`V^¥R[``][QaZ\_aa[TaVW`  
@HWI-EAS443:3:79:267:708#0/1  
CGACACTAATTGATGGCCATCCGAATTCTTTTGGTCGCTG  
+HWI-EAS443:3:79:267:708#0/1  
aaa`WZ`JX[Xa\_¥TP\_Y[`W]]ZVW\_P\_] [\_XW]P[^SJ  
@HWI-EAS443:3:80:1358:440#0/1  
CACTAATTGATGGCCATCCGAATTCTTTTGGTCGCTGTCT  
+HWI-EAS443:3:80:1358:440#0/1  
abbbbbbbbabba\_abbbbbbabbbabbabb`babb\_\_`  
@HWI-EAS443:3:80:696:860#0/1  
CACTAATTGATGGCCATCCGAATTCTTTTGGTCGCTGTCT  
+HWI-EAS443:3:80:696:860#0/1  
ababaaaaaaaa\_a\_baa`aa`a\_a`aa^a`\_a\_a`\_\_`  
@HWI-EAS443:3:81:427:1323#0/1  
CACTAATTGATGGCCATCCGAATTCTTTTGGTCGCTGTCT  
+HWI-EAS443:3:81:427:1323#0/1  
aaaabb`Y`a\_¥aababaa```]`aaa`aaY\_a\_\_\_\_^]`

@HWI-EAS443:3:81:609:1429#0/1  
CACTAATTGATGGCCATCCGAATTCTTTTGGTCGCTGTCT  
+HWI-EAS443:3:81:609:1429#0/1  
aaY`a]^`ab^[^`aaa]`a`\_`\_a\_]XY¥¥ZY]UTZW  
@HWI-EAS443:3:81:98:1462#0/1  
ACTAATTGATGGCCATCCGAATTCTTTTGGTCGCTGTCTG  
+HWI-EAS443:3:81:98:1462#0/1  
ab`]``aaaa\_aaa\_`aaRY\_¥`Z^a^\_[¥a^\_¥]ZRS\_  
@HWI-EAS443:3:82:1364:1687#0/1  
CACTAATTGATGGCCATCCGAATTCTTTTGGTCGCTGTCT  
+HWI-EAS443:3:82:1364:1687#0/1  
R]Y[bVWW]WSa¥[aSW[\_W[aVa[HX`bb^```bWPZa  
@HWI-EAS443:3:83:418:458#0/1  
CAAGGGGACGTAGTGTGGTAATGAAACGAAAACGGGACT  
+HWI-EAS443:3:83:418:458#0/1  
ab`baba`bb`b\_babba]aa`X`a^b^\_a\_\_`a¥W[\_  
@HWI-EAS443:3:84:722:1412#0/1  
CGACACTAATTGATGGCCATCCGAATTCTTTTGGTCGCTG  
+HWI-EAS443:3:84:722:1412#0/1  
`[aab`W^\_]ZW\_WRU¥`a]\_XU\_^\_]a]\_Y]\_Z`aa^\_  
@HWI-EAS443:3:84:756:1369#0/1  
ATTCGACACTAATTGATGGCCATCCGAATTCTTTTGGTCG  
+HWI-EAS443:3:84:756:1369#0/1  
Zabb`\_abbab`\_`¥`^`\_a^a]\_]a]]^`aa`\_Ua`  
@HWI-EAS443:3:87:1049:505#0/1  
ATTCGACACTAATTGATGGCCATCCGAATTCTTTTGGTCG  
+HWI-EAS443:3:87:1049:505#0/1  
a`a`\_`¥\_]aa`aXW]aWSX`¥X[^YY¥a\_V\_`^`X¥^X]  
@HWI-EAS443:3:87:1516:1839#0/1  
CACTAATTGATGGCCATCCGAATTCTTTTGGTCGCTGTCT  
+HWI-EAS443:3:87:1516:1839#0/1  
`]H^bb`bb[babaaabbSbabaaabbbaa]J¥[Q\_baXb  
@HWI-EAS443:3:87:1721:185#0/1  
ATTCGACACTAATTGATGGCCATCCGAATTCTTTTGGTCG  
+HWI-EAS443:3:87:1721:185#0/1  
abZ^U¥a`a]RH]]^[¥[`]\_\_ZUFU[ZXYFLa^[QY]G[  
@HWI-EAS443:3:87:952:1028#0/1  
ATTCGACACTAATTGATGGCCATCCGAATTCTTTTGGTCG  
+HWI-EAS443:3:87:952:1028#0/1  
\_W\_\_a\_]bb\_W]a\_\_T^UR^Za`W]a]ZWaXaa`a]aT\_^  
@HWI-EAS443:3:88:118:986#0/1  
CACTAATTGATGGCCATCCGAATTCTTTTGGTCGCTGTCT  
+HWI-EAS443:3:88:118:986#0/1  
a`^`^`aba\_a\_]babab\_a\_Ka````aaaa¥baa`b¥`¥  
@HWI-EAS443:3:88:382:1723#0/1  
CACTAATTGATGGCCATCCGAATTCTTTTGGTCGCTGTCT  
+HWI-EAS443:3:88:382:1723#0/1  
abaaabaaa`Yb\_[ba`[\_ab`a`Sbaaaaa0`aaabX]Y  
@HWI-EAS443:3:89:1319:960#0/1  
TCGACACTAATTGATGGCCATCCGAATTCTTTTGGTCGCT

+HWI-EAS443:3:89:1319:960#0/1  
a^a`\_aa`\_`\_^\_^\_^^\_a\_\_^X]X^^]\_\_^\_]KOR[^  
@HWI-EAS443:3:89:1513:1879#0/1  
CACTAATTGATGGCCATCCGAATTCTTTTGGTCGCTGTCT  
+HWI-EAS443:3:89:1513:1879#0/1  
W^Vbbaba`bb\_b\_`baVZYbbab^aaabbba^b[a`aTb  
@HWI-EAS443:3:89:425:657#0/1  
GACACTAATTGATGGCCATCCGAATTCTTTTGGTCGCTGT  
+HWI-EAS443:3:89:425:657#0/1  
a^bbab^bb`aaa^^aa]\_\_\_`U\_````a``[\_`^`\_\_`]  
@HWI-EAS443:3:89:557:1198#0/1  
CGACACTAATTGATGGCCATCCGAATTCTTTTGGTCGCTG  
+HWI-EAS443:3:89:557:1198#0/1  
\_a¥\_\_\_\_\_aX^P[¥`aaIIVW\_`^P¥V]abb\_a[[Z[a^0  
@HWI-EAS443:3:89:742:1183#0/1  
ATTCGACACTAATTGATGGCCATCCGAATTCTTTTGGTCG  
+HWI-EAS443:3:89:742:1183#0/1  
VaaW¥Xa`^b^P\_Y\_VU`^a`aUWS¥U]¥]¥a`a`]^`^YP  
@HWI-EAS443:3:89:789:1690#0/1  
AAGGGGACGTAGTGTGGTAATGAAACGAAAACGGGACTC  
+HWI-EAS443:3:89:789:1690#0/1  
aaa]aaa\_``aa\_`a`aaU`\_aaaaa^a`]\_`\_`Y^TV[Y  
@HWI-EAS443:3:8:102:625#0/1  
ATTCGACACTAATTGATGGCCATCCGAATTCTTTTGGTCG  
+HWI-EAS443:3:8:102:625#0/1  
aaaaaaaba`\_a`\_`a`\_¥aaa`]\_\_`]^`\_`\_`\_`\_`]]]  
@HWI-EAS443:3:90:575:672#0/1  
CTAATTGATGGCCATCCGAATTCTTTTGGTCGCTGTCTGG  
+HWI-EAS443:3:90:575:672#0/1  
\_`^`\_X`\_`]^`\_Sa`^S`^a`[^`XT`XY^a\_Qa[^M^GZY[¥  
@HWI-EAS443:3:91:559:904#0/1  
CACTAATTGATGGCCATCCGAATTCTTTTGGTCGCTGTCT  
+HWI-EAS443:3:91:559:904#0/1  
`abbbba¥abb``bbbbbbbabbb`bbbaba`ababaab  
@HWI-EAS443:3:91:82:697#0/1  
CAAGGGGACGTAGTGTGGTAATGAAACGAAAACGGGACT  
+HWI-EAS443:3:91:82:697#0/1  
abbbbbbbaab`aabab^b]^Zaab¥`\_`a^\_a`X]]  
@HWI-EAS443:3:92:268:567#0/1  
CACTAATTGATGGCCATCCGAATTCTTTTGGTCGCTGTCT  
+HWI-EAS443:3:92:268:567#0/1  
abab\_`a[XX¥aaaaa]]ab]]^¥Z``aaaaV\_aX\_aVZ^  
@HWI-EAS443:3:92:403:971#0/1  
CACTAATTGATGGCCATCCGAATTCTTTTGGTCGCTGTCT  
+HWI-EAS443:3:92:403:971#0/1  
aaaYUa`\_`]\_\_aTa\_a\_a`a\_]a\_\_\_`a^]\_U^\_``[PZB  
@HWI-EAS443:3:92:413:1878#0/1  
GACACTAATTGATGGCCATCCGAATTCTTTTGGTCGCTGT  
+HWI-EAS443:3:92:413:1878#0/1  
aa`\_Y]^`\_a\_]]]TJX]XW`¥^V`\_`WGX¥¥`Z¥MOQNX\_B

@HWI-EAS443:3:92:958:993#0/1  
ATTCGACACTAATTGATGGCCATCCGAATTCTTTTGGTCCG  
+HWI-EAS443:3:92:958:993#0/1  
a\_a`a^aa^`aa\_aa\_aY`\_a[`a\_\_Xaa^aaa`\_`VZY  
@HWI-EAS443:3:94:1228:331#0/1  
ATTCGACACTAATTGATGGCCATCCGAATTCTTTTGGTCCG  
+HWI-EAS443:3:94:1228:331#0/1  
aaaaaa`a\_\_XW[`aa\_aa\_\_¥\_\_[]YT\_^W^\_\_\_N^RRU  
@HWI-EAS443:3:94:1466:835#0/1  
CACTAATTGATGGCCATCCGAATTCTTTTGGTCGCTGTCT  
+HWI-EAS443:3:94:1466:835#0/1  
Vbbbbbbbbbbbaabbabbb^bbYbbab`[[aa\_ab`]]`  
@HWI-EAS443:3:94:542:773#0/1  
CACTAATTGATGGCCATCCGAATTCTTTTGGTCGCTGTCT  
+HWI-EAS443:3:94:542:773#0/1  
aaaaaaa`aa^\_\_a`aaaaa[aa`aaaa`Z`\_^`a]X^  
@HWI-EAS443:3:98:259:962#0/1  
ACACTAATTGATGGCCATCCGAATTCTTTTGGTCGCTGTC  
+HWI-EAS443:3:98:259:962#0/1  
\_aaaaaa`aaa`a^V`a`aa^a^a^a`\_\_V``Yaa]]  
@HWI-EAS443:3:98:753:1573#0/1  
CGACACTAATTGATGGCCATCCGAATTCTTTTGGTCGCTG  
+HWI-EAS443:3:98:753:1573#0/1  
S\_\_babbbbb\_bbabababab\_babb`b^abba`]bbbb  
@HWI-EAS443:3:98:870:1288#0/1  
CTAATTGATGGCCATCCGAATTCTTTTGGTCGCTGTCTGG  
+HWI-EAS443:3:98:870:1288#0/1  
aabbabbb`aabbabb`b\_\_`babbbabb`aa`ab[^ab`  
@HWI-EAS443:3:99:115:569#0/1  
ATTCGACACTAATTGATGGCCATCCGAATTCTTTTGGTCCG  
+HWI-EAS443:3:99:115:569#0/1  
\_a`a``aaaa``aaa`\_a``aa`\_[a`\_a^a`\_]`\_Y^\_  
@HWI-EAS443:3:99:1181:693#0/1  
ACTAATTGATGGCCATCCGAATTCTTTTGGTCGCTGTCTG  
+HWI-EAS443:3:99:1181:693#0/1  
`aaaa`\_a`\_`^¥Xaa^\_ZU¥aa\_aa^a`\_[X\_W\_^]S`a  
@HWI-EAS443:3:99:487:1288#0/1  
CACTAATTGATGGCCATCCGAATTCTTTTGGTCGCTGTCT  
+HWI-EAS443:3:99:487:1288#0/1  
a]aX\_bbaVZZbU`abaaWMXa`ab`M\_aba[H\_]H]]a`  
@HWI-EAS443:3:99:558:1905#0/1  
CACTAATTGATGGCCATCCGAATTCTTTTGGTCGCTGTCT  
+HWI-EAS443:3:99:558:1905#0/1  
T\_a``b[\_Z\_\_\_HYY\_bb\_¥¥T\_XT\_T^``ZGM\_WBBBBB  
@HWI-EAS443:3:99:871:1804#0/1  
ATTCGACACTAATTGATGGCCATCCGAATTCTTTTGGTCCG  
+HWI-EAS443:3:99:871:1804#0/1  
a¥\_^\_[a`aa0]a\_PY\_Y[YVaXXV^P¥^a¥\_]\_SUBBBB  
@HWI-EAS443:3:9:1018:1697#0/1  
CACTAATTGATGGCCATCCGAATTCTTTTGGTCGCTGTCT

+HWI-EAS443:3:9:1018:1697#0/1  
aaY^aba]aa`aWGVb\_^V\_a\_\_\_\_]`a^VUYS`YZUZ]¥  
@HWI-EAS443:3:9:544:260#0/1  
CACTAATTGATGGCCATCCGAATTCTTTTGGTCGCTGTCT  
+HWI-EAS443:3:9:544:260#0/1  
`babab`bb`aaaaab\_`aba\_`a\_a`a\_`a]\_a\_`a^]\_  
@HWI-EAS443:3:9:62:572#0/1  
ATTCGACACTAATTGATGGCCATCCGAATTCTTTTGGTCG  
+HWI-EAS443:3:9:62:572#0/1  
^aa\_Z\_]\_]\_^aa`aa\_ZY\_^]\_\_¥¥S^^¥¥\_\_`\_a¥\_`  
@HWI-EAS443:3:59:174:1894#0/1  
AAAGTTTTCAAGGCTGGAGAAGTTCGGTGGGAGACATTTG  
+HWI-EAS443:3:59:174:1894#0/1  
a^]\_N[baaa`TZa]a\_VXUY¥YWZQWG]SBBBBBBBBBB  
@HWI-EAS443:3:23:495:495#0/1  
TGCGACAATGCTTCCATCCAATGATCGTCGAGCTTGCGGA  
+HWI-EAS443:3:23:495:495#0/1  
^KY\_Ya`]X]\_YR\_[P\_\_aY]QS¥NG]G]NU[[GXZ]\_ZG  
@HWI-EAS443:3:33:165:1044#0/1  
CAATCAAATGCATGAAGACATTCTTTGGCTGGANAGAGCC  
+HWI-EAS443:3:33:165:1044#0/1  
^WW^\_U¥a`a`XYZ\_Z]ba\_`aZZZUHW¥ZLVDW[[Y[Y  
@HWI-EAS443:3:72:1077:293#0/1  
TTTCCGCAAGCTCGACGATCATTGGATTGAAGCATTGTGG  
+HWI-EAS443:3:72:1077:293#0/1  
aaa¥¥^¥a][V^]VPT\_GTTXU[SMJOLYWJUURPVUVQR  
@HWI-EAS443:3:77:190:1720#0/1  
GGGCTCTAAAGTTTTCAAGGCTGGAGAAGTTCGGTGGGAG  
+HWI-EAS443:3:77:190:1720#0/1  
^`a\_b¥HZ\_Y\_OVa^\_O]¥QXRZZOQH[SRZ\_]YXWGXVW  
@HWI-EAS443:3:100:1737:1178#0/1  
GACAATGCTTCAATCCAATGATCGTCGAGCTTGCGGAAAA  
+HWI-EAS443:3:100:1737:1178#0/1  
a]\_`aaa\_Za\_`^UW`^^`\_R\_]\_]UV¥\_Y\_V[V^B  
@HWI-EAS443:3:10:1424:1034#0/1  
CACCGAACTTCTCCAGCCTTGAAAACCTTAGAGCCTATGT  
+HWI-EAS443:3:10:1424:1034#0/1  
¥b`^[^b]\_bbaba\_]a`\_WZZ^¥]bbbaa\_\_RSbaab\_  
@HWI-EAS443:3:12:523:514#0/1  
GTGCGACAATGCTTCAATCCAATGATCGTCGAGCTTGCGG  
+HWI-EAS443:3:12:523:514#0/1  
a\_aa\_a^\_S]a`ZZT`[^¥]\_Z\_\_U^ZXU¥\_W^TZU]X\_^  
@HWI-EAS443:3:13:271:1989#0/1  
AGGCTCTAAAGTTTTCAAGGCTGGAGAAGTTCGGTGGGAG  
+HWI-EAS443:3:13:271:1989#0/1  
W¥U\_S^aa^\_^[a^X]^M^^X¥^WW[YZBBBBBBBBBBBB  
@HWI-EAS443:3:14:1166:1747#0/1  
AGTCTCCCACCGAACTTCTCCAGCCTTGAAAACCTTAGAG  
+HWI-EAS443:3:14:1166:1747#0/1  
a^aaa[] [a\_a`ZV[\_\_\_`a`a`]a\_a^`\_W^X^\_\_`\_R\_

@HWI-EAS443:3:16:1508:986#0/1  
GTGCGACAATGCTTCAATCCAATGATCGTCGAGCTTGCGG  
+HWI-EAS443:3:16:1508:986#0/1  
a`aaaaaaaa`a^\_a\_a`\_\_\_a\_^\_aV`] ^Y]]X\_]`  
@HWI-EAS443:3:18:1082:1643#0/1  
TGTGCGACAATGCTTCAATCCAATGATCGTCGAGCTTGCGG  
+HWI-EAS443:3:18:1082:1643#0/1  
¥U`YWISb¥[``Y¥aabU\_W\_aZV[aQRS[`aa^P`aa  
@HWI-EAS443:3:18:864:1284#0/1  
CTAAAGTTTTCAAGGCTGGAGAAGTTCGGTGGGAGACTTT  
+HWI-EAS443:3:18:864:1284#0/1  
abbbab`]`bbbaa]`aba`YU\_`R¥a\_\_NY^]X[NMU\_Y\_`  
@HWI-EAS443:3:22:481:947#0/1  
CGACAATGCTTCAATCCAATGATCGTCGAGCTTGCGGAAA  
+HWI-EAS443:3:22:481:947#0/1  
abbbbbbbbabbbbb`bbbbbb`b\_baba`a`aaa`\_aa  
@HWI-EAS443:3:27:102:1582#0/1  
GTGCGACAATGCTTCAATCCAATGATCGTCGAGCTTGCGG  
+HWI-EAS443:3:27:102:1582#0/1  
^RSa¥aa\_[]`¥¥]XY¥]S`\_S^¥¥[^\_T]^V[T][S^^PI  
@HWI-EAS443:3:28:849:798#0/1  
GATGCAATCAAATGCATGAAGACATTCTTTGGCTGGAAAG  
+HWI-EAS443:3:28:849:798#0/1  
ZXH[``ab^Z¥`S¥[a`a``VT^Z^]ZV\_[\_PW`abaabT  
@HWI-EAS443:3:29:929:1810#0/1  
CTCTAAAGTTTTCAAGGCTGGAGAAGTTCGGTGGGAGACT  
+HWI-EAS443:3:29:929:1810#0/1  
aa`bba\_U]\_\_aa\_[]X]\_\_Sa^YZH]]\_\_V\_^BBBBBB  
@HWI-EAS443:3:30:1072:1260#0/1  
GCGACAATGCTTCAATCCAATGATCGTCGAGCTTGCGGAA  
+HWI-EAS443:3:30:1072:1260#0/1  
`a``Yaaa`aaa`]a^aaa\_^`]a^`]¥¥^\_]VY^Y\_WMT  
@HWI-EAS443:3:30:616:457#0/1  
CTCCCACCGAATTCTCCAGCCTTGAAAACCTTAGAGCCT  
+HWI-EAS443:3:30:616:457#0/1  
]]bbbb]bb`[`bZ]a\_PRM\_`aab`b`]¥`b\_`b\_a\_a]  
@HWI-EAS443:3:32:713:255#0/1  
ATGCAATCAAATGCATGAAGACATTCTTTGGCTGGAAAGA  
+HWI-EAS443:3:32:713:255#0/1  
aaaabaaaaaaaa`a`aa`a`\_aa`]a\_`^^^a`\_]`a\_\_  
@HWI-EAS443:3:34:105:1171#0/1  
TGTGCGACAATGCTTCAATCCAATGATCGTCGAGCTTGCGG  
+HWI-EAS443:3:34:105:1171#0/1  
]aaa\_a\_\_\_\_\_^ba`T`ZW¥a\_a¥NY]]XWLYV[XXSRXV[  
@HWI-EAS443:3:34:1769:1346#0/1  
CACCGAATTCTCCAGCCTTGAAAACCTTAGAGCCTATGT  
+HWI-EAS443:3:34:1769:1346#0/1  
ab`bab\_abb^baa`Z\_`aab`a`a[\_aa`\_^QZG[]]^X  
@HWI-EAS443:3:36:256:317#0/1  
GTGCGACAATGCTTCAATCCAATGATCGTCGAGCTTGCGG

+HWI-EAS443:3:36:256:317#0/1  
a\_^`Y\_aW^`aa\_^```\_aa`^^^`Ya\_Za^\_\_\_\_[Z[\_^U  
@HWI-EAS443:3:38:359:245#0/1  
CGACAATGCTTCAATCCAATGATCGTCGAGCTTGCGGAAA  
+HWI-EAS443:3:38:359:245#0/1  
^^bbbXbbbbbbbaabbbbaabbaa^Ya¥a`aaba```  
@HWI-EAS443:3:39:321:140#0/1  
AGGCTCTAAAGTTTTCAAGGCTGGAGAAGTTCGGTGGGAG  
+HWI-EAS443:3:39:321:140#0/1  
W\_Zabb\_W¥Ya[\_ab\_Z\_^`^`[a¥GURG^YXPS[N`][KL  
@HWI-EAS443:3:3:1699:1859#0/1  
AAAGTCTCCCACCGAACTTCTCCAGCCTTGAAAACCTTAG  
+HWI-EAS443:3:3:1699:1859#0/1  
YUb[]\_\_RXHUVVQaVTX`a`a\_^S¥^a\_Y^aVa[[a\_  
@HWI-EAS443:3:40:1092:763#0/1  
TGTGCGACAATGCTTCAATCCAATGATCGTCGAGCTTGCG  
+HWI-EAS443:3:40:1092:763#0/1  
\_b`baba]a`ba¥\_aaa]`baa]aa\_Wa^[Wa]^a`\_^`a  
@HWI-EAS443:3:40:1176:834#0/1  
AAAGTCTCCCACCGAACTTCTCCAGCCTTGAAAACCTTAG  
+HWI-EAS443:3:40:1176:834#0/1  
aba`\_aa`aaa`aa\_¥\_a``aaa\_\_Z\_\_Z\_^]U[\_\_\_]^`\_  
@HWI-EAS443:3:42:470:367#0/1  
CAAAGTCTCCCACCGAACTTCTCCAGCCTTGAAAACCTTA  
+HWI-EAS443:3:42:470:367#0/1  
a`a`a\_bbaab`^^]`a``XY`a^[`a`a\_^`\_PYaa]U  
@HWI-EAS443:3:43:105:69#0/1  
CTCCCACCGAACTTCTCCAGCCTTGAAAACCTTAGAGCCT  
+HWI-EAS443:3:43:105:69#0/1  
aa¥\_a\_aa`^b`\_`a`\_aa\_Z]``aY]\_X]```\_¥V\_¥]\_  
@HWI-EAS443:3:46:618:815#0/1  
GTGCGACAATGCTTCAATCCAATGATCGTCGAGCTTGCGG  
+HWI-EAS443:3:46:618:815#0/1  
^GSX\_TNN[V¥a`\_YS\_PU[U]^RU`NGRM[\_YUSX^\_  
@HWI-EAS443:3:4:767:64#0/1  
GTGCGACAATGCTTCAATCCAATGATCGTCGAGCTTGCGG  
+HWI-EAS443:3:4:767:64#0/1  
^Ua¥aRV^YN]SSZ[QTWN]RY[^SRGZGS]R]WXW`BBB  
@HWI-EAS443:3:50:719:150#0/1  
CTCCCACCGAACTTCTCCAGCCTTGAAAACCTTAGAGCCT  
+HWI-EAS443:3:50:719:150#0/1  
abaabbbbbbb[abb[abaab``abbbbbabbbab[\_b  
@HWI-EAS443:3:51:862:143#0/1  
GCGACAATGCTTCAATCCAATGATCGTCGAGCTTGCGGAA  
+HWI-EAS443:3:51:862:143#0/1  
¥\_\_[\_L[``R]¥ZXa^\_¥a`aabaWa[a`¥b¥`\_aZ\_X¥U  
@HWI-EAS443:3:58:1169:343#0/1  
TCCGCAAGCTCGACGATCATTGGATTGAAGCATTGTCGCA  
+HWI-EAS443:3:58:1169:343#0/1  
a]^`\_bb`\_^`\_`\_a\_[VW^^YZTY\_LFJMHTS¥YVUBBB



@HWI-EAS443:3:5:1282:967#0/1  
GTGCGACAATGCTTCAATCCAATGATCGTCGAGCTTGCGG  
+HWI-EAS443:3:5:1282:967#0/1  
aababaababa`aa\_b\_b]aaaa`^a`\_\_a\_\_\_\_\_`¥aa  
@HWI-EAS443:3:62:1063:1017#0/1  
GTGCGACAATGCTTCAATCCAATGATCGTCGAGCTTGCGG  
+HWI-EAS443:3:62:1063:1017#0/1  
¥S\_aaZabababaaabaaaaaaaa`a`aaYaZ`^^^\_[  
@HWI-EAS443:3:62:190:890#0/1  
TGTGCGACAATGCTTCAATCCAATGATCGTCGAGCTTGCG  
+HWI-EAS443:3:62:190:890#0/1  
`bSaa[\_baabb`aab`¥`aaaaaaaa`\_aa\_aa\_^]`a  
@HWI-EAS443:3:64:1138:179#0/1  
GTGCGACAATGCTTCAATCCAATGATCGTCGAGCTTGCGG  
+HWI-EAS443:3:64:1138:179#0/1  
aYQZ``aaaa¥V`U^¥\_\_]a`Z`[\_`aUU]¥]SU¥^S\_¥  
@HWI-EAS443:3:66:80:138#0/1  
GTGCGACAATGCTTCAATCCAATGATCGTCGAGCTTGCGG  
+HWI-EAS443:3:66:80:138#0/1  
a^¥]aa^)^[a\_^U`YP[^Z[Z[Z[ZNETRV[]YVTWUU  
@HWI-EAS443:3:67:1486:1357#0/1  
CAAAGTCTCCCACCGAATTCTCCAGCCTTGAAAATTTA  
+HWI-EAS443:3:67:1486:1357#0/1  
ababbabba`aa`^`a`a`a`aa`a\_\_\_\_`aa`\_\_a]aaa`  
@HWI-EAS443:3:69:1600:1557#0/1  
TTGTGCGACAATGCTTCAATCCAATGATCGTCGAGCTTGC  
+HWI-EAS443:3:69:1600:1557#0/1  
a`bYZ]Q\_\_b]b`]]a^`aaVQ`a\_Q]]QTYQV`^DW\_PP  
@HWI-EAS443:3:69:743:1498#0/1  
GTGCGACAATGCTTCAATCCAATGATCGTCGAGCTTGCGG  
+HWI-EAS443:3:69:743:1498#0/1  
¥L[a`aa]^a^a]V`[S^[`a`\_`a^aYG]]]]^\_V\_\_\_\_]  
@HWI-EAS443:3:6:588:481#0/1  
CAAAGTCTCCCACCGAATTCTCCAGCCTTGAAAATTTA  
+HWI-EAS443:3:6:588:481#0/1  
abaaaa\_bba\_bZ[a`a\_ab`\_]aa¥¥`aaaa\_]baV¥  
@HWI-EAS443:3:70:1662:987#0/1  
CAAAGTCTCCCACCGAATTCTCCAGCCTTGAAAATTTA  
+HWI-EAS443:3:70:1662:987#0/1  
abbb`bbbbaababbbaabbaaba[aaabbbabaaaaaaaa  
@HWI-EAS443:3:72:1059:786#0/1  
GTGCGACAATGCTTCAATCCAATGATCGTCGAGCTTGCGG  
+HWI-EAS443:3:72:1059:786#0/1  
a]baaaaa`baaaaaaaaa`aaaaa]\_]aa\_a[\_\_\_\_`\_a\_  
@HWI-EAS443:3:72:1511:1256#0/1  
GTGCGACAATGCTTCAATCCAATGATCGTCGAGCTTGCGG  
+HWI-EAS443:3:72:1511:1256#0/1  
aZ]\_baabaabaaaaaaaa`aaaa``\_a\_^a`a¥a^`\_a\_  
@HWI-EAS443:3:72:195:248#0/1  
TGTGCGACAATGCTTCAATCCAATGATCGTCGAGCTTGCG

+HWI-EAS443:3:72:195:248#0/1  
aa\_aa`babb`a`\_aa^U`Waa^`\_^]aaX`\_`^^[^^^  
@HWI-EAS443:3:72:208:1862#0/1  
CATAGGCTCTAAAGTTTTCAAGGCTGGAGAAGTTCGGTGG  
+HWI-EAS443:3:72:208:1862#0/1  
a\_a`\_abaaY]aaRNTa^]XXUY`]RYNZTYJNVWVTBBB  
@HWI-EAS443:3:73:890:537#0/1  
CACCGAACTTCTCCAGCCTTGAAAACCTTAGAGCCTATGT  
+HWI-EAS443:3:73:890:537#0/1  
^Z`abaaaa^aa]Z`aaab\_]\_a\_a`aaa`b\_aba`\_X  
@HWI-EAS443:3:76:1381:1818#0/1  
TTGTGCGACAATGCTTCAATCCAATGATCGTCGAGCTTGC  
+HWI-EAS443:3:76:1381:1818#0/1  
aa\_```ba`aaaaYaa¥aaaa`a\_``a`\_¥¥\_\_^`Y¥]\_^  
@HWI-EAS443:3:76:604:886#0/1  
TAAAGTTTTCAAGGCTGGAGAAGTTCGGTGGGAGACTTTG  
+HWI-EAS443:3:76:604:886#0/1  
abaaa\_``a`aaaa`a^U`\_a\_T`[]\_T\_Z`¥[WST^ZG  
@HWI-EAS443:3:77:504:1315#0/1  
GTGCGACAATGCTTCAATCCAATGATCGTCGAGCTTGC GG  
+HWI-EAS443:3:77:504:1315#0/1  
^aabbbbbbbbababa¥ab`a^aa`aa^abaa\_\_\_a`````  
@HWI-EAS443:3:79:841:1293#0/1  
GCGACAATGCTTCAATCCAATGATCGTCGAGCTTGC GGAA  
+HWI-EAS443:3:79:841:1293#0/1  
^\_¥a^W\_S^`\_`¥^]N[^WQM[Ya`XN\_YW¥]ZVOXMXZV  
@HWI-EAS443:3:82:1345:388#0/1  
TGCGACAATGCTTCAATCCAATGATCGTCGAGCTTGC GGGA  
+HWI-EAS443:3:82:1345:388#0/1  
]aabbababbaabbbbb]`aabbbaab\_^bab\_a^a^b\_a  
@HWI-EAS443:3:85:853:1199#0/1  
GACAATGCTTCAATCCAATGATCGTCGAGCTTGC GGAAAA  
+HWI-EAS443:3:85:853:1199#0/1  
\_``\_abbbbb`bbbaba]bababaa`aabaababa\_aba  
@HWI-EAS443:3:86:353:457#0/1  
GCGACAATGCTTCAATCCAATGATCGTCGAGCTTGC GGAA  
+HWI-EAS443:3:86:353:457#0/1  
]^ZZa`V`bb`V\_\_LX\_b]`^^Z^`]^`^`¥]Z]W\_]X\_  
@HWI-EAS443:3:89:577:102#0/1  
GCGACAATGCTTCAATCCAATGATCGTCGAGCTTGC GGAA  
+HWI-EAS443:3:89:577:102#0/1  
aa`^`^ab`\_`\_`a`a^a\_¥\_\_a^[]V[^^M¥W¥W[^`^Z  
@HWI-EAS443:3:8:1414:847#0/1  
CTTTTCCGCAAGCTCGACGATCATTGGATTGAAGCATTGT  
+HWI-EAS443:3:8:1414:847#0/1  
U]Y\_VR¥[abbbb`aa^Q[[FWZ`a]aQ[T[Y[¥SWaZBB  
@HWI-EAS443:3:90:354:653#0/1  
GTGCGACAATGCTTCAATCCAATGATCGTCGAGCTTGC GG  
+HWI-EAS443:3:90:354:653#0/1  
aXS]a]^]\_a\_\_[]JUX]^a\_UX`\_\_`Y`^X`\_¥U^\_\_

@HWI-EAS443:3:91:1077:1393#0/1  
GCGACAATGCTTCAATCCAATGATCGTCGAGCTTGCGGAA  
+HWI-EAS443:3:91:1077:1393#0/1  
aaaW\_aa\_\_\_\_\_]\`\_`\_^\_\_`[S[X\_]Z\_^¥U]Y[U^^^]  
@HWI-EAS443:3:91:979:1366#0/1  
TGCGACAATGCTTCAATCCAATGATCGTCGAGCTTGCGGA  
+HWI-EAS443:3:91:979:1366#0/1  
aa`\_VHT\_\_Z`aa^)\`Ya¥VW¥¥[\_[P`\_Y]a\_\_¥Q¥SY  
@HWI-EAS443:3:93:739:1181#0/1  
GTGCGACAATGCTTCAATCCAATGATCGTCGAGCTTGCGG  
+HWI-EAS443:3:93:739:1181#0/1  
aUaba\_aa\_]aa]]`a^a\_U^Uaa\_`V`\_^a`\_W\_¥\_¥\_\_  
@HWI-EAS443:3:94:1088:161#0/1  
GTGCGACAATGCTTCAATCCAATGATCGTCGAGCTTGCGG  
+HWI-EAS443:3:94:1088:161#0/1  
a]\`\_`\_^aaa`^`^^`\_]\`X\_]\_\_]\`W^YX^Y\_XYY^Y\_^  
@HWI-EAS443:3:94:230:711#0/1  
CACCGAACTTCTCCAGCCTTGAAAACCTTAGAGCCTATGT  
+HWI-EAS443:3:94:230:711#0/1  
ab`ababaaaa`a]aaa\_aaa`a`\_`\_`\_a\_a\_a\_^`\_aa^  
@HWI-EAS443:3:96:292:282#0/1  
GTGCGACAATGCTTCAATCCAATGATCGTCGAGCTTGCGG  
+HWI-EAS443:3:96:292:282#0/1  
aP[QWLSLXKtaYWRNQQRYZZSJ[ULKPRRVRXPLW[RUB  
@HWI-EAS443:3:96:396:1410#0/1  
GCGACAATGCTTCAATCCAATGATCGTCGAGCTTGCGGAA  
+HWI-EAS443:3:96:396:1410#0/1  
a`\_`\_`\_abaaaa`aa`aa`\_`\_`\_a[`] ^a\_\_[]]\`^[\_^\_  
@HWI-EAS443:3:97:1199:304#0/1  
CTAAAGTTTTCAAGGCTGGAGAAGTTCGGTGGGAGACTTT  
+HWI-EAS443:3:97:1199:304#0/1  
`^aaab\_abb`U`abaaab[\_`\_`\_a]\_TaOG]\`XEUQV¥^B  
@HWI-EAS443:3:97:1385:800#0/1  
GTGCGACAATGCTTCAATCCAATGATCGTCGAGCTTGCGG  
+HWI-EAS443:3:97:1385:800#0/1  
^U^\_a¥¥`¥a\_^]WHXY^NYOF^]¥TS`ZLP^[UYN]Q\_U  
@HWI-EAS443:3:99:1031:479#0/1  
GTGCGACAATGCTTCAATCCAATGATCGTCGAGCTTGCGG  
+HWI-EAS443:3:99:1031:479#0/1  
a\_baaaabbbbabbababa`babbaaXb\_\_aaa\_aaa]aa  
@HWI-EAS443:3:99:542:780#0/1  
CAAAGTCTCCCACCGAATTCTCCAGCCTTGAAAACCTTA  
+HWI-EAS443:3:99:542:780#0/1  
abaabaaabaaa`b`a`^aaaab\_b\_\_`a\_aa^\_S`aaa`  
@HWI-EAS443:3:79:1685:1557#0/1  
CTGGGTTTTGCTTAATGCATCTTGGTTCAACTCATTCGTC  
+HWI-EAS443:3:79:1685:1557#0/1  
aba^\_`^bbb\_babaa¥a]babbaaab\_a]RbbGb\_[F`\_  
@HWI-EAS443:3:27:1613:1431#0/1  
GTGGGTTTTGCTTAATGCATCTTGGTTCAACTCCTTCGTC

+HWI-EAS443:3:27:1613:1431#0/1  
HX^`Y\_a¥R¥aTU¥b\_¥ZT^`\_b^\_ba`YQTU\_\_¥¥SGUG  
@HWI-EAS443:3:65:1115:1807#0/1  
GCCGCCTGGGTTTTGCTTAATGCATCTTGGTTCAACTCCT  
+HWI-EAS443:3:65:1115:1807#0/1  
`a\_^\_aa\_\_XN[`XXWaaaa\_``[\_a]`^`^¥¥X]YZTXX  
@HWI-EAS443:3:84:290:1983#0/1  
CTGAGTTTTGCTTAATGCATCTTGGTTCAACTCCTTCCTC  
+HWI-EAS443:3:84:290:1983#0/1  
`aaVZaa\_aaaa\_aa`aa`aa`\_a^`\_aaaa]`a\_\_a^\_a  
@HWI-EAS443:3:11:1162:1733#0/1  
ATCGAAGGTTCCAGGTTCCAGGTTGCCCTAAGAGCCTGA  
+HWI-EAS443:3:11:1162:1733#0/1  
aa`]a`\_^LTSUXUVMTT^^Z^NRRTV]VWZ¥GLUNTBBB  
@HWI-EAS443:3:17:432:1669#0/1  
ATCGAAGGTTCCAGGTTCCAGGTTGCCCTAAGAGCCTGA  
+HWI-EAS443:3:17:432:1669#0/1  
a`a`]a`]L¥V[OVSRVY\_OVXTUWFYQ^TNZNFQVZUWB  
@HWI-EAS443:3:27:1409:260#0/1  
CTGGGTTTTGCTTAATGCATCTTGGCTCAACTCCTTCCTC  
+HWI-EAS443:3:27:1409:260#0/1  
abbbba`bbbbbbbbbbbaaab\_baaa\_aab`\_aaaaa\_^aa  
@HWI-EAS443:3:31:1300:1819#0/1  
CCCTGGTTTTGCTTAATGCATCTTGGTTCAACTCCTTCC  
+HWI-EAS443:3:31:1300:1819#0/1  
abbb`[G]b`bab`^a^aaUYb]abWRR^U\_^a^a`XaX  
@HWI-EAS443:3:39:1320:1661#0/1  
CTGGGTTTTGCTTAATGCATCTTGGTACAACCTCCTTCCTC  
+HWI-EAS443:3:39:1320:1661#0/1  
``b`b`bbbaaababaaaaa`baa\_`Ra````\_\_`baX\_`]  
@HWI-EAS443:3:49:839:553#0/1  
CCCTGGTTTTGGCTTAATGCATCTTGGTTCAACTCCTTCC  
+HWI-EAS443:3:49:839:553#0/1  
aa`abbaab\_V^]bbbaab`aaabbaa[`^`\_[a¥^aa\_\_  
@HWI-EAS443:3:4:629:1258#0/1  
CTGGGTTTTGCTTAATGCATCTTGGTTCAACTCCTACCTC  
+HWI-EAS443:3:4:629:1258#0/1  
ab`\_a\_bbab`bbbbababbbbbbbaaabbaaabN``a`  
@HWI-EAS443:3:57:1516:591#0/1  
CCTGGGTTTTGCTTAATGCATCTTGGCTCAACTCCTTCCT  
+HWI-EAS443:3:57:1516:591#0/1  
]bbbb`bbabbabbababbbb^]a[a`bb`bXa`aaab  
@HWI-EAS443:3:82:512:902#0/1  
CCTGGGTTTTGCTTAATGCATCTTGGTTCAACTCCTTCCT  
+HWI-EAS443:3:82:512:902#0/1  
Sa[bbba^T¥R¥`¥Ya`][KZaa[YZZ\_aaabb`a]a\_Y[  
@HWI-EAS443:3:85:329:1142#0/1  
GGGTTTTGCTTAATGCATCTTAGTTCAACTCCTTCCTCAC  
+HWI-EAS443:3:85:329:1142#0/1  
^abVa\_aa\_^]a^`aaaabba^J^`]`aab`aaaaaaaa

@HWI-EAS443:3:85:838:1885#0/1  
CTGGGTTTTGCTTAATGCACCTTGGTTCAACTCCTTCCTC  
+HWI-EAS443:3:85:838:1885#0/1  
`¥`\_M¥X\_W\_Z¥¥Q\_ba]T\_VVDTU\_]\_U]\_Y][YWY  
@HWI-EAS443:3:85:994:316#0/1  
GATCCCGGGTTTTGCTTAATGCATCTTGGTTCAACTCCT  
+HWI-EAS443:3:85:994:316#0/1  
^^Yb¥bbbb`aabaabab`[b\_a]^baaa\_aaaa^a\_a`  
@HWI-EAS443:3:98:902:966#0/1  
CTGGGTTTTGCTTAATGCATCTTGGTTGAACTCCTTCCTC  
+HWI-EAS443:3:98:902:966#0/1  
a¥^\_WP[[L¥PWZSaab`^aaa¥Z[LUGZZW¥QN^aYWX\_  
@HWI-EAS443:3:99:1652:791#0/1  
CCTGGGTTTTGGTTAATGCATCTTGGTTCAACTCCTTCCT  
+HWI-EAS443:3:99:1652:791#0/1  
\_]a¥[\_Wbaa\_H¥]U`]a^a`[babbX\_[]^a\_aGaXG¥^  
@HWI-EAS443:3:9:1216:84#0/1  
CTGGGTTTTGCTTAATGCATCTTGGTTCAAGTCCTTCCTC  
+HWI-EAS443:3:9:1216:84#0/1  
¥T`aaa¥\_b\_`^`a^`bba^`^[]X¥[G\_PZ^^ROYS  
@HWI-EAS443:3:11:1737:1321#0/1  
CTAGGTTTTGCTTAATGCATCTTGGTTCAACTCCTTCCTC  
+HWI-EAS443:3:11:1737:1321#0/1  
a\_J\_b`bbbbbbabbbbbbbabbbbaZa`b`a]Qa^Wa`  
@HWI-EAS443:3:16:145:1002#0/1  
GCACTGGGTTTTGCTTAATGCATCTTGGTTCAACTCCTTC  
+HWI-EAS443:3:16:145:1002#0/1  
aaaab`aa[]aa`a^aa`aa^\_\_`\_`¥\_aa\_^`^`\_a`\_  
@HWI-EAS443:3:49:290:98#0/1  
CTAGGTTTTGCTTAATGCATCTTGGTTCAACTCCTTCCTC  
+HWI-EAS443:3:49:290:98#0/1  
`bbabbbbaabbbbbbbbabbbbab¥bbab`bbaaba  
@HWI-EAS443:3:55:66:349#0/1  
CCCGGTTTTGCTTAATGCATCTTGGTTCAACTCCTTCCT  
+HWI-EAS443:3:55:66:349#0/1  
aba^a``Z¥^^\_[TW[aa`^```\_U]`[W]\_a`a\_¥]]  
@HWI-EAS443:3:69:479:1075#0/1  
GCGTCCCTGGGTTTTGCTTAATGCATCTTGGTTCAACTCC  
+HWI-EAS443:3:69:479:1075#0/1  
`bbab`babbab`b`[b`^^aabaaba\_^`aa\_^X`aa  
@HWI-EAS443:3:81:492:1076#0/1  
CCGCTGGGTTTTGCTTAATGCATCTTGGTTCAACTCCTT  
+HWI-EAS443:3:81:492:1076#0/1  
T\_b\_]¥]\_\_\_\_\_[][\_X\_^\_ba¥a^aa`\_^Xa\_\_a`\_a  
@HWI-EAS443:3:18:1276:1428#0/1  
CCCTGGGTTTTGCTTAATNCATCTTGGTTCAACTCCTTCC  
+HWI-EAS443:3:18:1276:1428#0/1  
`a``]]`¥^b]\_Z`\_Y]^DYab\_aaaa\_^Z^`\_`[\_^\_ZZ  
@HWI-EAS443:3:39:1528:1298#0/1  
CCCTGGGTTTTGCTTAATGCATCTTGGTTCAACTCNTTCC

+HWI-EAS443:3:39:1528:1298#0/1  
aaabbbb\_baaaaabbaa`\_\_a\_aaa\_`aaaZZ`¥DY\_]Z  
@HWI-EAS443:3:52:488:1087#0/1  
CCTGGGTTTTGCTTAATGCATCTTGNTTCAACTCCTTCCT  
+HWI-EAS443:3:52:488:1087#0/1  
abbb\_Z\_bba`abbaaa\_aa\_aa¥D¥`^aa`a\_`a`\_`a  
@HWI-EAS443:3:52:520:1562#0/1  
CCTGGGTTTTNCTTAATGCATCTTGGTTCAACTCCTTCCT  
+HWI-EAS443:3:52:520:1562#0/1  
abaaaa¥ab[D[bbab`aaaaaaaa[````\_`aa`a\_\_^a  
@HWI-EAS443:3:62:1397:623#0/1  
CTGGGTTTTGCTTAATNCATCTTGGTTCAACTCCTTCCTC  
+HWI-EAS443:3:62:1397:623#0/1  
abbbbabbbbbbb]D]bbababbaabbbba\_bababb  
@HWI-EAS443:3:65:1350:413#0/1  
CCCTGGGTTTTGCTTAATGCATCTTGGTTCNACTCCTTCCTC  
+HWI-EAS443:3:65:1350:413#0/1  
a`ab`bVba\_a`aaaa\_aa`aaabba\_`WDY\_a\_^a\_U[  
@HWI-EAS443:3:66:1527:1054#0/1  
GAAGNAGTTGAACCAAGATGCATTAAGCAAAACCCAGGGA  
+HWI-EAS443:3:66:1527:1054#0/1  
^\_`]DUY00[\_YYPUY¥```]Z^Z¥W\_XQGWRYL[ ]YT¥  
@HWI-EAS443:3:72:1467:888#0/1  
CTGGGTTTTGCTTAATGCATCTTGGTTCAANTCCTTCCTC  
+HWI-EAS443:3:72:1467:888#0/1  
]aa¥\_abbbbbbbbbbbbbbb`b]D^aaab]bbb  
@HWI-EAS443:3:79:1287:946#0/1  
CTGGGTTTTGCTTAATGCANCTTGGTTCAACTCCTTCCTC  
+HWI-EAS443:3:79:1287:946#0/1  
V\_aa\_R\_a^a^`a^¥\_\_[D¥aa\_`^a`a\_\_b\_R\_a\_]`a  
@HWI-EAS443:3:15:23:981#0/1  
CGTCCCTGGGTTTTGCTTAATGCATCTTGGTTCAACTCCT  
+HWI-EAS443:3:15:23:981#0/1  
a`\_`\_\_bba`U^`]^`^`aaaa[a]^¥`b]\_Y]a[`aaZ  
@HWI-EAS443:3:42:1240:674#0/1  
CGCCCTGGGTTTTGCTTAATGCATCTTGGTTCAACTCCT  
+HWI-EAS443:3:42:1240:674#0/1  
a^aa^WU\_`I]a`a``Y`Y`^`aaaba[`[Z]^\_a`a\_  
@HWI-EAS443:3:53:331:1135#0/1  
GGTCCCTGGGTTTTGCTTAATGCATCTTGGTTCAACTCCT  
+HWI-EAS443:3:53:331:1135#0/1  
aa]```aaa^Ra\_\_a\_`^Y^\_\_Z^^V```]`¥VZ^\_]`^  
@HWI-EAS443:3:54:1527:162#0/1  
GTGCCTGATTAATGATCCCTGGGTTTTGCTTAATGCATGT  
+HWI-EAS443:3:54:1527:162#0/1  
\_ab`VIZVVZ¥\_\_R]^`¥^`^^Y^FSZZYSST[X[^TGWKR  
@HWI-EAS443:3:60:764:985#0/1  
TGGCCTGATTAATGATCCCTGGGTTTTGCTTAATGCATCT  
+HWI-EAS443:3:60:764:985#0/1  
abb\_YW\_P`ZVTGaZ¥^```a¥XU¥¥]^`XYY\_\_YY\_]W]]

@HWI-EAS443:3:64:211:514#0/1  
CGCCTGGGTTTTGCTTAATGCATCTTGGTTCAACTCCTTC  
+HWI-EAS443:3:64:211:514#0/1  
abbbabba\_`abaaaaXabbaaaaaaaabaaaa``aaa  
@HWI-EAS443:3:70:679:1404#0/1  
CTCTGGGTTTTGCTTAATGCATCTTGGTTCAACTCCTTCC  
+HWI-EAS443:3:70:679:1404#0/1  
^a^\_H\_Y\_]Z]¥W[Z\_\_Z]\_¥aW\_^QWG[¥Z^¥`Z[¥XV]  
@HWI-EAS443:3:74:1705:380#0/1  
CGTCCCTGGGTTTTGCTTAATGCATCTTGGTTCAACTCCT  
+HWI-EAS443:3:74:1705:380#0/1  
abb`aab]abbabbbabbbabbR[b^bba\_b`Iaa]`MD^  
@HWI-EAS443:3:96:1567:1168#0/1  
GCGCCTGATTAATGATCCCTGGGTTTTGCTTAATGCATCT  
+HWI-EAS443:3:96:1567:1168#0/1  
NFG¥ab¥[ab]a^¥¥ab]aU]ba[b`M\_V`^]ab`Ya^b  
@HWI-EAS443:3:10:1415:391#0/1  
CGGGTTTTGCTTAATGCATCTTGGTTCAACTCCTTCCTCA  
+HWI-EAS443:3:10:1415:391#0/1  
``\_baba¥a¥bb`abbaabbbb``]\_aab\_a\_`ba]Ya^a  
@HWI-EAS443:3:11:840:584#0/1  
TGTGCCTGATTAATGATCCCTGGGTTTTGCTTAATGCATC  
+HWI-EAS443:3:11:840:584#0/1  
a`\_`a`\_`[baa^a[¥^\_\_^\_a`aW`\_`a]``\_]\_¥]^R  
@HWI-EAS443:3:18:1579:1216#0/1  
GCCTGGGTTTTGCTTAATGCATCTTGGTTCAACTCCTTCC  
+HWI-EAS443:3:18:1579:1216#0/1  
a[^`aaa]ba\_`^aa]\_Ua\_]`\_]\_¥VW¥^\_^]`SQR  
@HWI-EAS443:3:20:225:612#0/1  
GTCCCTGGGTTTTGCTTAATGCATCTTGGTTCAACTCCTT  
+HWI-EAS443:3:20:225:612#0/1  
a`baababb\_aabaababa`aaa\_aaaa\_\_\_\_\_a`aaa\_\_  
@HWI-EAS443:3:30:353:1860#0/1  
AGCCTGATTAATGATCCCTGGGTTTTGCTTAATGCATCTT  
+HWI-EAS443:3:30:353:1860#0/1  
aXba\_a`\_\_`¥[¥]aaa\_^[]X\_\_\_\_]a\_Za^¥Y`[\_^^Z  
@HWI-EAS443:3:33:237:546#0/1  
AGGGTTTTGCTTAATGCATCTTGGTTCAACTCCTTCCTCA  
+HWI-EAS443:3:33:237:546#0/1  
Zbaa]abbabaaba\_aaaaaaaaa\_a\_a`a\_aW````]\_`  
@HWI-EAS443:3:35:1057:60#0/1  
CGCCTGATTAATGATCCCTGGGTTTTGCTTAATGCATCTT  
+HWI-EAS443:3:35:1057:60#0/1  
abaabb\_bbbbbbaaaaabbab]babb]abb¥aaaaaaaa  
@HWI-EAS443:3:3:109:1834#0/1  
AGCCTGATTAATGATCCCTGGGTTTTGCTTAATGCATCTT  
+HWI-EAS443:3:3:109:1834#0/1  
¥bbaX[]abbbabbW0`a\_\_V\_`b^YTaWba`bGX\_YX[  
@HWI-EAS443:3:45:1039:631#0/1  
CGCATGTGTGAGGAAGGAGTTGAACCAAGATGCATTAAGC

+HWI-EAS443:3:45:1039:631#0/1  
W`ba[^N[`¥`a)`bb\_aS\_b^b`Z]\_`Z^a`bba\_]\_a  
@HWI-EAS443:3:45:604:1908#0/1  
NGATCCCTGGGTTTTGCTTAATGCATCTTGGTTCAACTCC  
+HWI-EAS443:3:45:604:1908#0/1  
DLYXXZUWYWYZZZZZZWZZZUXZUZZWHWXRZZZWV  
@HWI-EAS443:3:45:839:1568#0/1  
ACCTGGGTTTTGCTTAATGCATCTTGGTTCAACTCCTCC  
+HWI-EAS443:3:45:839:1568#0/1  
abaabbb\_aaba\_baaaaaaaa`aaa``\_\_aaZa\_^aaV  
@HWI-EAS443:3:48:1339:768#0/1  
CGCCTGATTAATGATCCCTGGGTTTTGCTTAATGCATCTT  
+HWI-EAS443:3:48:1339:768#0/1  
^`aaaa]^bbb`a`aaa\_\_WY^\_ab`aa]aab]```a\_  
@HWI-EAS443:3:55:1054:1370#0/1  
GCTGGGTTTTGCTTAATGCATCTTGGTTCAACTCCTCCT  
+HWI-EAS443:3:55:1054:1370#0/1  
I\_¥PT\_\_\_QRY\_]\_T¥OZW\_R\_W\_L]TWONQZJ^\_RFZ  
@HWI-EAS443:3:56:290:1280#0/1  
GTCCCTGGGTTTTGCTTAATGCATCTTGGTTCAACTCCTT  
+HWI-EAS443:3:56:290:1280#0/1  
aaabababb`aaaaaaaaab`a\_aaaaab`aaaaa\_aa`aa  
@HWI-EAS443:3:56:417:904#0/1  
GGCCTGATTAATGATCCCTGGGTTTTGCTTAATGCATCTT  
+HWI-EAS443:3:56:417:904#0/1  
aaaaaa¥aa`````^`\_V```^a`[\_`¥`\_]`a  
@HWI-EAS443:3:61:1592:185#0/1  
GCTGGGTTTTGCTTAATGCATCTTGGTTCAACTCCTCCT  
+HWI-EAS443:3:61:1592:185#0/1  
L`TZabbaZU^a^`bbba`¥bb`a\_]baa]FYY¥b^KPX  
@HWI-EAS443:3:62:787:1020#0/1  
GCCTGGGTTTTGCTTAATGCATCTTGGTTCAACTCCTCC  
+HWI-EAS443:3:62:787:1020#0/1  
`abb]`b`bbbbabb`b`]bbb`bbba\_abab]T]aaaa  
@HWI-EAS443:3:6:1311:163#0/1  
GTCCCTGGGTTTTGCTTAATGCATCTTGGTTCAACTCCTT  
+HWI-EAS443:3:6:1311:163#0/1  
`^^[U`a`aW`\_^W¥\_\_Z[¥S[YV\_]`^Y^¥^RV\_ZU[B  
@HWI-EAS443:3:71:296:273#0/1  
GCCCTGGGTTTTGCTTAATGCATCTTGGTTCAACTCCTTC  
+HWI-EAS443:3:71:296:273#0/1  
abaab`aaW\_aaaaaabaaaa`a`a`¥`\_`a`````\_`\_^  
@HWI-EAS443:3:74:1392:1025#0/1  
AGCCTGATTAATGATCCCTGGGTTTTGCTTAATGCATCTT  
+HWI-EAS443:3:74:1392:1025#0/1  
`ab\_[\_aa`a¥aa]Ybaabbb`Zbb`\_]bbba``T`aab`  
@HWI-EAS443:3:78:228:1895#0/1  
GCTGGGTTTTGCTTAATGCATCTTGGTTCAACTCCTCCT  
+HWI-EAS443:3:78:228:1895#0/1  
a``]PFXba`aaYZaaa\_aVa`a\_¥]\_aa\_aaa^¥\_\_a`



@HWI-EAS443:3:8:478:262#0/1  
GCCCTGGGTTTTGCTTAATGCATCTTGGTTCAACTCCTTC  
+HWI-EAS443:3:8:478:262#0/1  
`\_\_PZbb¥L`a^`a]^¥aaaYaH\_aa\_X¥T^][`\_J\_`^  
@HWI-EAS443:3:91:190:1573#0/1  
GCTGGGTTTTGCTTAATGCATCTTGGTTCAACTCCTTCCT  
+HWI-EAS443:3:91:190:1573#0/1  
Q\_^a`bb\_b¥^abbab\_abbabb\_abb`bYbbab[a  
@HWI-EAS443:3:98:1292:172#0/1  
AGGGTTTTGCTTAATGCATCTTGGTTCAACTCCTTCCTCA  
+HWI-EAS443:3:98:1292:172#0/1  
abbaabbbb\_bbbabb\_ab\_bbbaab\_aa`b^]bb^Xb]a  
@HWI-EAS443:3:100:1455:979#0/1  
CTGGGTTTTGCTTAATGCATCTTGGTTCAACTCCTTCCTC  
+HWI-EAS443:3:100:1455:979#0/1  
^X^a\_Haa`YXUaaa`a\_`a[]aaa\_VHY\_\_]0^\_S^W^¥  
@HWI-EAS443:3:100:343:383#0/1  
GTGCCTGATTAATGATCCCTGGGTTTTGCTTAATGCATCT  
+HWI-EAS443:3:100:343:383#0/1  
a`ba\_ab\_aaaa`aa`\_a[aaaa\_aaaaZaa`\_`\_¥\_aXa  
@HWI-EAS443:3:100:959:561#0/1  
GCCTGATTAATGATCCCTGGGTTTTGCTTAATGCATCTTG  
+HWI-EAS443:3:100:959:561#0/1  
aaSaa^a`[\_a\_TZUJ0¥b\_aU[a\_\_Ga\_a`\_\_H]^ZaBB  
@HWI-EAS443:3:10:1090:1375#0/1  
GCCTGATTAATGATCCCTGGGTTTTGCTTAATGCATCTTG  
+HWI-EAS443:3:10:1090:1375#0/1  
aYHSSSS]\_^WY^XRV[`[^Y¥YX^Y^X\_QUUYXVV^R^  
@HWI-EAS443:3:10:1289:142#0/1  
CTGGGTTTTGCTTAATGCATCTTGGTTCAACTCCTTCCTC  
+HWI-EAS443:3:10:1289:142#0/1  
¥b\_]\_\_\_aa`abbbb`\_``abbbbabVaa¥\_aa``QP\_a\_  
@HWI-EAS443:3:10:134:523#0/1  
CCCTGGGTTTTGCTTAATGCATCTTGGTTCAACTCCTTC  
+HWI-EAS443:3:10:134:523#0/1  
abbbb\_bbbabaabababaaaab\_`a`aa``aa``  
@HWI-EAS443:3:10:1594:165#0/1  
TGCATGTGTGAGGAAGGAGTTGAACCAAGATGCATTAAGC  
+HWI-EAS443:3:10:1594:165#0/1  
```^^^`b^aaaa`]aa\_a[[\_VT[\_]]][SY\_Z^W[G  
@HWI-EAS443:3:10:365:566#0/1  
CCTGGGTTTTGCTTAATGCATCTTGGTTCAACTCCTTCCT  
+HWI-EAS443:3:10:365:566#0/1  
aababb\_bbbabbbbabbba`bbba\_aaaaaaa¥a\_`\_a  
@HWI-EAS443:3:10:96:100#0/1  
CTGGGTTTTGCTTAATGCATCTTGGTTCAACTCCTTCCTC  
+HWI-EAS443:3:10:96:100#0/1  
]bbbbabbbbabbbbbaabababbaaaaaaa  
@HWI-EAS443:3:11:1406:1234#0/1  
GAGGAAGGAGTTGAACCAAGATGCATTAAGCAAACCCAG

+HWI-EAS443:3:11:1406:1234#0/1  
a[aaWaaaZbY]ab[R^a]a0\_`J^b\_a\_a`^a\_[¥TG`\_  
@HWI-EAS443:3:11:1703:603#0/1  
GCCTGATTAATGATCCCTGGGTTTTGCTTAATGCATCTTG  
+HWI-EAS443:3:11:1703:603#0/1  
a[Qaa`\_a`\_a]\_WWY¥a]¥X¥)`X\_] ^VUZ]ZWZ]^\_  
@HWI-EAS443:3:11:345:150#0/1  
CCCTGGGTTTTGCTTAATGCATCTTGGTTCAACTCCTTCC  
+HWI-EAS443:3:11:345:150#0/1  
aa\_\_aZWJXa`^Y^`\_^YY]\_\_SaZ`a¥`^`^)^\_Y[[]]V  
@HWI-EAS443:3:11:535:111#0/1  
CCTGGGTTTTGCTTAATGCATCTTGGTTCAACTCCTTCC  
+HWI-EAS443:3:11:535:111#0/1  
`^a^`\_V]^aaa\_Y\_SZa[\_a]^`¥]YUZ\_Z^YZZ]VWSW  
@HWI-EAS443:3:12:1021:143#0/1  
CCCTGGGTTTTGCTTAATGCATCTTGGTTCAACTCCTTCC  
+HWI-EAS443:3:12:1021:143#0/1  
W[``b`ZZ\_\_\_aZ¥a^)`b[Vaa`[\_`baa[T\_TU`]^]Y¥  
@HWI-EAS443:3:12:1133:244#0/1  
GCCTGATTAATGATCCCTGGGTTTTGCTTAATGCATCTTG  
+HWI-EAS443:3:12:1133:244#0/1  
Y\_\_\_abb`Z`b`b`^^VS\_bba]bb\_b`````bbbaaaabaa  
@HWI-EAS443:3:12:1209:1225#0/1  
CCTGGGTTTTGCTTAATGCATCTTGGTTCAACTCCTTCC  
+HWI-EAS443:3:12:1209:1225#0/1  
abbabbabbbbabbbbabbbbabbbbabbbbabbaabababaab  
@HWI-EAS443:3:12:1386:878#0/1  
CCCTGGGTTTTGCTTAATGCATCTTGGTTCAACTCCTTCC  
+HWI-EAS443:3:12:1386:878#0/1  
``\_bbb``bbbbbbbbbbbb`abbbabbSb]ab`^aaa`  
@HWI-EAS443:3:12:1450:1125#0/1  
GGAAGGAGTTGAACCAAGATGCATTAAGCAAACCCAGGG  
+HWI-EAS443:3:12:1450:1125#0/1  
a]aa`ZR`^aa\_\_[L¥U]`a\_R\_\_a`\_\_Z\_]`]X[PW\_X^  
@HWI-EAS443:3:12:487:1371#0/1  
CTGGGTTTTGCTTAATGCATCTTGGTTCAACTCCTTCC  
+HWI-EAS443:3:12:487:1371#0/1  
abZ¥WDU`\_`aaa]a`^`a]a\_aa```\_IY¥¥ZV\_a`\_^  
@HWI-EAS443:3:12:758:1278#0/1  
ATCCCTGGGTTTTGCTTAATGCATCTTGGTTCAACTCCTT  
+HWI-EAS443:3:12:758:1278#0/1  
LRZa[a`abIa`b`b`bb`]ab`\_`b[aaaa`\_`\_`aa`^]a`  
@HWI-EAS443:3:12:892:1098#0/1  
GCCTGATTAATGATCCCTGGGTTTTGCTTAATGCATCTTG  
+HWI-EAS443:3:12:892:1098#0/1  
aa`\_a^a`[aaa\_\_`\_\_aaaa]``aaaa\_aa\_\_\_\_a`\_^a  
@HWI-EAS443:3:12:925:142#0/1  
CTGGGTTTTGCTTAATGCATCTTGGTTCAACTCCTTCC  
+HWI-EAS443:3:12:925:142#0/1  
aaabb`aa`b\_aa`a`a`aa\_aaaaU`aa`\_```[a\_^V\_\_

@HWI-EAS443:3:13:398:82#0/1  
CCCTGGGTTTTGCTTAATGCATCTTGGTTCAACTCCTTCC  
+HWI-EAS443:3:13:398:82#0/1  
abba`a]b^aaaabbaab^aa`\_aaZ¥aa\_a`aaaa\_\_\_\_  
@HWI-EAS443:3:13:533:1406#0/1  
CTGGGTTTTGCTTAATGCATCTTGGTTCAACTCCTTCCCTC  
+HWI-EAS443:3:13:533:1406#0/1  
a`aaa[a]a^`aa`\_`a`\_`aa\_\_^a]aa`\_a\_\_\_\_^`\_\_  
@HWI-EAS443:3:14:1131:659#0/1  
CTGGGTTTTGCTTAATGCATCTTGGTTCAACTCCTTCCCTC  
+HWI-EAS443:3:14:1131:659#0/1  
abaab]a`aa\_bbaa`aa`a\_aaa]Za`a\_^`\_\_a[^`a^  
@HWI-EAS443:3:14:1296:351#0/1  
CTGGGTTTTGCTTAATGCATCTTGGTTCAACTCCTTCCCTC  
+HWI-EAS443:3:14:1296:351#0/1  
a`a¥aV`\_`ba`^\_aaaaa\_a`\_`V¥aZ]^^`[Z`[UZ^Z  
@HWI-EAS443:3:14:1382:842#0/1  
AAGGAGTTGAACCAAGATGCATTAAGCAAACCCAGGGAT  
+HWI-EAS443:3:14:1382:842#0/1  
Saa[Ja¥aba¥U`a^bbbb¥b`\_`aaaVL^MJWa`\_`a`]  
@HWI-EAS443:3:14:1586:490#0/1  
GGAAGGAGTTGAACCAAGATGCATTAAGCAAACCCAGGG  
+HWI-EAS443:3:14:1586:490#0/1  
a`aaba`aabaaa^]`\_a\_aa^\_a\_a\_`\_]`\_]\_\_WYP¥a]\_  
@HWI-EAS443:3:14:1620:1451#0/1  
AACCAAGATGCATTAAGCAAACCCAGGGATCATTAAATCA  
+HWI-EAS443:3:14:1620:1451#0/1  
a`aa`aaa\_bY`\_`a^a\_a\_`a\_YZ\_^\_\_^\_U^¥^\_Z\_G\_  
@HWI-EAS443:3:14:1621:556#0/1  
CCTGGGTTTTGCTTAATGCATCTTGGTTCAACTCCTTCCCT  
+HWI-EAS443:3:14:1621:556#0/1  
abbbbbZYT^`^^a]b\_¥OU¥]YY`aTTLI`S\_¥S^aMFP  
@HWI-EAS443:3:14:188:73#0/1  
CCCTGGGTTTTGCTTAATGCATCTTGGTTCAACTCCTTCC  
+HWI-EAS443:3:14:188:73#0/1  
a`\_`\_`¥Pbb`\_`^aaaa\_aa\_^L^aa`Y\_\_\_\_] [[XX¥[`¥  
@HWI-EAS443:3:14:362:405#0/1  
CCTGGGTTTTGCTTAATGCATCTTGGTTCAACTCCTTCCCT  
+HWI-EAS443:3:14:362:405#0/1  
ab`bbbJ¥U\_[YaaVb[aV]`\_`baYa^aaa\_`¥Y^a¥[]S  
@HWI-EAS443:3:14:500:430#0/1  
TGAGGAAGGAGTTGAACCAAGATGCATTAAGCAAACCCA  
+HWI-EAS443:3:14:500:430#0/1  
]^PXa`X`\_]`\_U`\_`\_]NZTV]L]\_¥T¥WLR`R[\_\_RWZQW  
@HWI-EAS443:3:14:608:1231#0/1  
CCCTGGGTTTTGCTTAATGCATCTTGGTTCAACTCCTTCC  
+HWI-EAS443:3:14:608:1231#0/1  
ababbbbSaaaaaaaaaabaabaaaaa`a`a`\_aa\_a`^\_  
@HWI-EAS443:3:15:1000:419#0/1  
AGGAGTTGAACCAAGATGCATTAAGCAAACCCAGGGATC

+HWI-EAS443:3:15:1000:419#0/1  
`bbab\_bba`K]bbbbabaaaaaab`babWq]baab` `^  
@HWI-EAS443:3:15:1076:1916#0/1  
GTTTTGCTTAATGCATCTTGGTTCAACTCCTTCACAC  
+HWI-EAS443:3:15:1076:1916#0/1  
a\_aba` `aaaa`\_a`\_Zaaa\_\_\_aaa^\_]\_\_\_\_]^^^`\_a`  
@HWI-EAS443:3:15:1218:1831#0/1  
CCTGGGTTTTGCTTAATGCATCTTGGTTCAACTCCTTCCT  
+HWI-EAS443:3:15:1218:1831#0/1  
N[aaa[^]a` `aa`aab`\_Ub`bbab`a`b`b`bb\_baba  
@HWI-EAS443:3:15:1457:955#0/1  
CTGGGTTTTGCTTAATGCATCTTGGTTCAACTCCTTCCTC  
+HWI-EAS443:3:15:1457:955#0/1  
Xa¥\_YSb`U`^a`Z`¥aaba`]ba]I`a`^ab`\_¥b^^`\_`  
@HWI-EAS443:3:15:1570:959#0/1  
CCCTGGGTTTTGCTTAATGCATCTTGGTTCAACTCCTTCC  
+HWI-EAS443:3:15:1570:959#0/1  
^abaaaaW`a`aabbbb\_babbabba¥aaaaaaaaaba]`  
@HWI-EAS443:3:15:1598:1557#0/1  
AGGAGTTGAACCAAGATGCATTAAGCAAAACCCAGGGATC  
+HWI-EAS443:3:15:1598:1557#0/1  
S\_[Ya` `` `b`Y]aaaVa`^ab\_aa\_¥`a`[R]\_`a` `` `a  
@HWI-EAS443:3:15:248:1205#0/1  
AAGGAGTTGAACCAAGATGCATTAAGCAAAACCCAGGGAT  
+HWI-EAS443:3:15:248:1205#0/1  
YY\_bYb¥`a\_a[ `^^`a¥^baab`\_[W`Z]\_ ^Y¥ba^¥X]  
@HWI-EAS443:3:15:662:1611#0/1  
CCCTGGGTTTTGCTTAATGCATCTTGGTTCAACTCCTTCC  
+HWI-EAS443:3:15:662:1611#0/1  
Z\_bbbbaZZVX\_\_a¥\_Z¥¥W]\_W`[a`Wbabb]` `^a`W`  
@HWI-EAS443:3:15:953:1139#0/1  
CCCTGGGTTTTGCTTAATGCATCTTGGTTCAACTCCTTCC  
+HWI-EAS443:3:15:953:1139#0/1  
Ybbaab\_J\_ba`aba[ `aaabbab` `` ¥VZ`^^ab`]aZ[  
@HWI-EAS443:3:15:991:1581#0/1  
GCCTGATTAATGATCCCTGGGTTTTGCTTAATGCATCTTG  
+HWI-EAS443:3:15:991:1581#0/1  
ab`ZWN`\_a¥\_a^` `[G^a`\_] ^`\_`^`^`\_] [\_^^[W^] ^  
@HWI-EAS443:3:16:1278:1491#0/1  
CCTGATTAATGATCCCTGGGTTTTGCTTAATGCATCTTGG  
+HWI-EAS443:3:16:1278:1491#0/1  
a\_R]Ybbbaba\_a` ¥Ybabb^b\_a]X\_a¥]\_ZV\_aa`aRW  
@HWI-EAS443:3:16:133:770#0/1  
GAAGGAGTTGAACCAAGATGCATTAAGCAAAACCCAGGGA  
+HWI-EAS443:3:16:133:770#0/1  
ababaababbababaabaababbab`abaaaa\_a`ba`aa  
@HWI-EAS443:3:16:1547:215#0/1  
TGGGTTTTGCTTAATGCATCTTGGTTCAACTCCTTCCTCA  
+HWI-EAS443:3:16:1547:215#0/1  
X[]^Y`X¥]^ [^RMU\_ ^a^[]]ZFY`\_QJYOSBBBBBBB

@HWI-EAS443:3:16:1675:35#0/1  
GCCTGATTAATGATCCCTGGGTTTTGCTTAATGCATCTTG  
+HWI-EAS443:3:16:1675:35#0/1  
aaaPYJ¥`^]V^\_a^[\_`aa`\_[a`\_`\_a`¥^^R`Za\_^  
@HWI-EAS443:3:16:221:1562#0/1  
CTGGGTTTTGCTTAATGCATCTTGGTTCAACTCCTTCCTC  
+HWI-EAS443:3:16:221:1562#0/1  
`aaXbJ\_baa\_Vabba\_ab\_]`bZ]`\_b``ababaab``  
@HWI-EAS443:3:16:296:91#0/1  
TTTGCTTAATGCATCTTGGTTCAACTCCTTCCTCACACAT  
+HWI-EAS443:3:16:296:91#0/1  
a`¥Z`a^\_\_^V`\_V`\_\_`[^]\_[S]R]W^U`Z^Z^ZZX]Z  
@HWI-EAS443:3:16:353:604#0/1  
CTGGGTTTTGCTTAATGCATCTTGGTTCAACTCCTTCCTC  
+HWI-EAS443:3:16:353:604#0/1  
a\_aab]aaaaaa`a]`aa\_a`aaa^^\_a`\_\_\_\_``\_^\_]`  
@HWI-EAS443:3:17:1570:1887#0/1  
CTGGGTTTTGCTTAATGCATCTTGGTTCAACTCCTTCCTC  
+HWI-EAS443:3:17:1570:1887#0/1  
]bbbb[b``abbbab[ba]b\_bb`baZaabaaaYaa``\_a  
@HWI-EAS443:3:17:1695:1059#0/1  
CCTGGGTTTTGCTTAATGCATCTTGGTTCAACTCCTTCCT  
+HWI-EAS443:3:17:1695:1059#0/1  
aaabaaXaaa\_XW\_YU`\_U\_a^aa]\_]^\_a`X`¥Ra`]V\_  
@HWI-EAS443:3:17:192:1354#0/1  
CTGGGTTTTGCTTAATGCATCTTGGTTCAACTCCTTCCTC  
+HWI-EAS443:3:17:192:1354#0/1  
K\_W¥¥^\_``^`bbbb\_abbaaX`bba`aaabb\_b\_\_`b  
@HWI-EAS443:3:17:304:1478#0/1  
GGTTTTGCTTAATGCATCTTGGTTCAACTCCTTCCTCACA  
+HWI-EAS443:3:17:304:1478#0/1  
`\_]aaaaaaaa`aa\_aaa`\_^^`\_S]`\_a`^\_]aa^a  
@HWI-EAS443:3:17:757:1133#0/1  
CCCTGGGTTTTGCTTAATGCATCTTGGTTCAACTCCTTCCTC  
+HWI-EAS443:3:17:757:1133#0/1  
]XIW¥ba[Vb`\_^YZ`[[`]]]ba[`]Xab¥VP`\_``^`T  
@HWI-EAS443:3:18:1281:1250#0/1  
CCCTGGGTTTTGCTTAATGCATCTTGGTTCAACTCCTTCCTC  
+HWI-EAS443:3:18:1281:1250#0/1  
a`aaab\_U\_\_`a[^aaaa`a¥a]aa`aVZW[UY^`\_`\_]Z  
@HWI-EAS443:3:18:1497:1375#0/1  
AGGAGTTGAACCAAGATGCATTAAGCAAAACCCAGGGATC  
+HWI-EAS443:3:18:1497:1375#0/1  
aaaab\_ababa\_b\_```aaa`aa]`\_\_a``Za]^`\_^^^G  
@HWI-EAS443:3:18:1534:1589#0/1  
CCCTGGGTTTTGCTTAATGCATCTTGGTTCAACTCCTTCCTC  
+HWI-EAS443:3:18:1534:1589#0/1  
Za`aa]\_X\_Xaaaaaaaaab`abaaaaa[^W`a\_a\_\_`\_]S  
@HWI-EAS443:3:18:1558:1473#0/1  
CCTGGGTTTTGCTTAATGCATCTTGGTTCAACTCCTTCCT

+HWI-EAS443:3:18:1558:1473#0/1  
]W\_[\_\_T`baa\_\_\_\_`aV`baSab`a`\_¥\_¥\_¥aWSXa  
@HWI-EAS443:3:18:1769:1311#0/1  
GAAGGAGTTGAACCAAGATGCATTAAGCAAACCCAGGGA  
+HWI-EAS443:3:18:1769:1311#0/1  
aaaa\_aa]a`a]`\_^`\_]\_^`\_^`\_]¥\_]¥Y^WYWX  
@HWI-EAS443:3:18:416:491#0/1  
GTGCCTGATTAATGATCCCTGGGTTTTGCTTAATGCATCT  
+HWI-EAS443:3:18:416:491#0/1  
a`ba`bbaaaa`aa`aaaaaaZaaa`a`a`\_\_a`a`a  
@HWI-EAS443:3:19:1408:509#0/1  
AGGAGTTGAACCAAGATGCATTAAGCAAACCCAGGGATC  
+HWI-EAS443:3:19:1408:509#0/1  
a`^b\_bba`[X^`QX]WW`b`¥EP\_aWSOOBBBBBBBBB  
@HWI-EAS443:3:19:1488:703#0/1  
CTGGGTTTTGCTTAATGCATCTTGGTTCAACTCCTTCCTC  
+HWI-EAS443:3:19:1488:703#0/1  
a`bbaUab`\_X\_^`b¥b]b]Z\_bba`Y^bb\_\_aabba`U  
@HWI-EAS443:3:19:501:1905#0/1  
CTGGGTTTTGCTTAATGCATCTTGGTTCAACTCCTTCCTC  
+HWI-EAS443:3:19:501:1905#0/1  
`^`Y`aabaaaa`aaaaa`\_^`\_aa`\_aa`\_\_`\_a  
@HWI-EAS443:3:19:718:1536#0/1  
CTGGGTTTTGCTTAATGCATCTTGGTTCAACTCCTTCCTC  
+HWI-EAS443:3:19:718:1536#0/1  
Vb^HZ\_a^aaa`bb`Y`bab]a^b\_US^a]aa]b`]\_a\_\_  
@HWI-EAS443:3:1:1242:749#0/1  
AGTTGAACCAAGATGCATTAAGCAAACCCAGGGATCATT  
+HWI-EAS443:3:1:1242:749#0/1  
a]aaaa\_W`aaaa\_[abaaa\_aaa`¥UZa`a`\_`\_aB  
@HWI-EAS443:3:1:920:498#0/1  
CTGGGTTTTGCTTAATGCATCTTGGTTCAACTCCTTCCTC  
+HWI-EAS443:3:1:920:498#0/1  
`babaT`bababbbba`baaabbbabb`aaabaabba\_ba  
@HWI-EAS443:3:20:602:466#0/1  
TGGGTTTTGCTTAATGCATCTTGGTTCAACTCCTTCCTCA  
+HWI-EAS443:3:20:602:466#0/1  
aaaaWa\_\_`Xa\_a`\_`\_^`\_`\_^`\_]\_^`\_X]X]XZ^X¥  
@HWI-EAS443:3:20:690:1267#0/1  
CCTGGGTTTTGCTTAATGCATCTTGGTTCAACTCCTTCCT  
+HWI-EAS443:3:20:690:1267#0/1  
abbbba^^a`[a^\_aY`^^`[^`\_`^U`aa^`]X\_SV¥V^  
@HWI-EAS443:3:21:1014:118#0/1  
CTGGGTTTTGCTTAATGCATCTTGGTTCAACTCCTTCCTC  
+HWI-EAS443:3:21:1014:118#0/1  
^^TabX[aab\_bb`TZbaV\_R^¥W`^`U]aZ`a\_a\_[¥[O  
@HWI-EAS443:3:21:1295:712#0/1  
CTGGGTTTTGCTTAATGCATCTTGGTTCAACTCCTTCCTC  
+HWI-EAS443:3:21:1295:712#0/1  
abb`\_`abbbbbbba`abbbbaaab`abbbabbabba

@HWI-EAS443:3:21:82:1533#0/1  
CATGTGTGAGGAAGGAGTTGAACCAAGATGCATTAAGCAA  
+HWI-EAS443:3:21:82:1533#0/1  
aa`aZZT\_aa\_]Y`Z[Z`^^aa^[XXY¥`a¥¥\_T¥a`\_  
@HWI-EAS443:3:22:1129:393#0/1  
CTGGGTTTTGCTTAATGCATCTTGGTTCAACTCCTTCCTC  
+HWI-EAS443:3:22:1129:393#0/1  
abbbb`bbbbabbbbbaaaaa\_bbaa`aa`\_b]aaaa\_a\_  
@HWI-EAS443:3:22:120:117#0/1  
CCCTGGGTTTTGCTTAATGCATCTTGGTTCAACTCCTTCC  
+HWI-EAS443:3:22:120:117#0/1  
aaaabaa[babaaaaa`\_]\_aa`a\_[`\_^`¥^\_aYa^`\_  
@HWI-EAS443:3:22:211:1501#0/1  
CCCTGGGTTTTGCTTAATGCATCTTGGTTCAACTCCTTCC  
+HWI-EAS443:3:22:211:1501#0/1  
abb`\_Y¥\_abZ¥aaabaaaba`baaa\_a`baaaaa`aaa  
@HWI-EAS443:3:22:487:1609#0/1  
CCTGGGTTTTGCTTAATGCATCTTGGTTCAACTCCTTCCT  
+HWI-EAS443:3:22:487:1609#0/1  
`a]a¥aGa]T`b]OY]]`\_Xbb]T][X\_\_\_a`b`^Wa\_]`  
@HWI-EAS443:3:22:575:321#0/1  
CTGGGTTTTGCTTAATGCATCTTGGTTCAACTCCTTCCTC  
+HWI-EAS443:3:22:575:321#0/1  
abaaa¥aa`aaaaaaaa`a]aaaa\_\_\_\_\_`\_]^\_\_`\_]`Z  
@HWI-EAS443:3:22:686:1281#0/1  
CTGGGTTTTGCTTAATGCATCTTGGTTCAACTCCTTCCTC  
+HWI-EAS443:3:22:686:1281#0/1  
ab`ba^bba`baabbbabbaaaaaa`abaaaaa  
@HWI-EAS443:3:23:651:1562#0/1  
GGAAGGAGTTGAACCAAGATGCATTAAGCAAACCCAGGG  
+HWI-EAS443:3:23:651:1562#0/1  
abbbbaabbabbbbaabbaa`abbbbaabaaX]¥ab\_\_a  
@HWI-EAS443:3:23:681:92#0/1  
CTGGGTTTTGCTTAATGCATCTTGGTTCAACTCCTTCCTC  
+HWI-EAS443:3:23:681:92#0/1  
abbbbbbbabbabbbabbabbbbb`abbbbbbbbbbbbb  
@HWI-EAS443:3:23:897:1642#0/1  
CTGGGTTTTGCTTAATGCATCTTGGTTCAACTCCTTCCTC  
+HWI-EAS443:3:23:897:1642#0/1  
]^¥¥aKTT`abba`VSZS^a]aa][Xbb`b^aab^a`  
@HWI-EAS443:3:24:122:1083#0/1  
CTGGGTTTTGCTTAATGCATCTTGGTTCAACTCCTTCCTC  
+HWI-EAS443:3:24:122:1083#0/1  
abb`\_`\_ababaaabaaa`aaaaa\_`aaaaaaa`a\_`a  
@HWI-EAS443:3:24:1398:1525#0/1  
CTGGGTTTTGCTTAATGCATCTTGGTTCAACTCCTTCCTC  
+HWI-EAS443:3:24:1398:1525#0/1  
ab^[\_aa^L^abbb`ababb`bbbaaabbaa]Y`a`a`  
@HWI-EAS443:3:24:1469:296#0/1  
TGCATGTGTGAGGAAGGAGTTGAACCAAGATGCATTAAGC

+HWI-EAS443:3:24:1469:296#0/1  
aba` `` `a`\_Qbbb`ba]\_aaaa][`abaa` [`abaab]  
@HWI-EAS443:3:24:490:1245#0/1  
GCCTGATTAATGATCCCTGGGTTTTGCTTAATGCATCTTG  
+HWI-EAS443:3:24:490:1245#0/1  
abaaa`aabb`aaaa\_aba`¥a`a`a`aab`aaba`aY`a  
@HWI-EAS443:3:25:1071:27#0/1  
CCCTGGGTTTTGCTTAATGCATCTTGGTTCAACTCCTTCC  
+HWI-EAS443:3:25:1071:27#0/1  
ababbba\_]aaaa`baa]b`aaaaaaaa^` `a`\_`\_]\_\_`^U  
@HWI-EAS443:3:25:1456:704#0/1  
CTGGGTTTTGCTTAATGCATCTTGGTTCAACTCCTTCCTC  
+HWI-EAS443:3:25:1456:704#0/1  
H\_bababbbbbbbbbabbbbbbbbbababababababb  
@HWI-EAS443:3:25:1510:172#0/1  
CTGGGTTTTGCTTAATGCATCTTGGTTCAACTCCTTCCTC  
+HWI-EAS443:3:25:1510:172#0/1  
abbbba]bbbbbbbb`ba]bb`bbba`abbbbaabb]bb  
@HWI-EAS443:3:25:169:361#0/1  
AGGAGTTGAACCAAGATGCATTAAGCAAAACCCAGGGATC  
+HWI-EAS443:3:25:169:361#0/1  
abaab`aaabaaaa`aaa\_aaaaaa`aaaa`a\_a\_`\_`\_^  
@HWI-EAS443:3:25:520:1114#0/1  
TCCCTGGGTTTTGCTTAATGCATCTTGGTTCAACTCCTTC  
+HWI-EAS443:3:25:520:1114#0/1  
Vb^Y`a`VV\_a^Wa` `a]^YZ^aa`a[ ` \_aaaa[a\_\_\_\_[  
@HWI-EAS443:3:25:898:746#0/1  
CCTGGGTTTTGCTTAATGCATCTTGGTTCAACTCCTTCCT  
+HWI-EAS443:3:25:898:746#0/1  
abba¥\_abbbbbabbbbbbababbbbaaaabaa]Zaaa\_a  
@HWI-EAS443:3:26:1274:894#0/1  
CCCTGGGTTTTGCTTAATGCATCTTGGTTCAACTCCTTCC  
+HWI-EAS443:3:26:1274:894#0/1  
`\_0¥Za¥M¥aa¥S^baa¥aY¥^aaaa`\_\_W\_aa^aX`a\_Z  
@HWI-EAS443:3:26:1382:1666#0/1  
CCCTGGGTTTTGCTTAATGCATCTTGGTTCAACTCCTTCC  
+HWI-EAS443:3:26:1382:1666#0/1  
a\_` `b^a]\_ab`Y` `bbaaaa` [ `aaa\_`\_aa\_a]a\_`]V  
@HWI-EAS443:3:26:444:1779#0/1  
TGCCTGATTAATGATCCCTGGGTTTTGCTTAATGCATCTT  
+HWI-EAS443:3:26:444:1779#0/1  
Ob` `^aa^[T^` `aPXaaZIbaQ^a`Wa\_a¥QY^`XaJW`  
@HWI-EAS443:3:26:513:59#0/1  
GATCCCTGGGTTTTGCTTAATGCATCTTGGTTCAACTCCT  
+HWI-EAS443:3:26:513:59#0/1  
aaaa\_\_\_\_aabY`aaa\_\_a\_\_^a\_\_\_\_^`\_a]]^\_X]\_^Y^  
@HWI-EAS443:3:26:679:1933#0/1  
CCCTGGGTTTTGCTTAATGCATCTTGGTTCAACTCCTTCC  
+HWI-EAS443:3:26:679:1933#0/1  
X¥]b[W¥VJQbV[bbaa`\_ [ `Na`\_bZbN[b[abbb`aaV



@HWI-EAS443:3:26:868:53#0/1  
CTGGGTTTTGCTTAATGCATCTTGGTTCAACTCCTTCCTC  
+HWI-EAS443:3:26:868:53#0/1  
`bbbb^bbababaaaaaaaa\_baaa`\_a`\_a^^a`aUa^  
@HWI-EAS443:3:27:1253:1326#0/1  
CTGGGTTTTGCTTAATGCATCTTGGTTCAACTCCTTCCTC  
+HWI-EAS443:3:27:1253:1326#0/1  
`^a`^^`b\_VZa\_aaXT`\_`^a``]S^`aaZ`\_aa^\_]`  
@HWI-EAS443:3:27:1555:1881#0/1  
CTGGGTTTTGCTTAATGCATCTTGGTTCAACTCCTTCCTC  
+HWI-EAS443:3:27:1555:1881#0/1  
`bbb`M`¥`aa`abaaaaa`aa^a\_`^`aa^¥]\_aa\_^`\_  
@HWI-EAS443:3:27:298:597#0/1  
CCCTGGGTTTTGCTTAATGCATCTTGGTTCAACTCCTTCC  
+HWI-EAS443:3:27:298:597#0/1  
aaaaaaaaUa\_aa\_a\_a\_U[\_\_\_aa\_\_\_]\_\_\_`\_\_\_[^^\_\_\_]  
@HWI-EAS443:3:27:524:1313#0/1  
CAAGATGCATTAAGCAAAACCCAGGGATCATTAATCAGGC  
+HWI-EAS443:3:27:524:1313#0/1  
abbaa`abbbbb]\_baaa`aaa`^ba`ba`aa`a^¥a  
@HWI-EAS443:3:27:674:112#0/1  
CCCTGGGTTTTGCTTAATGCATCTTGGTTCAACTCCTTCC  
+HWI-EAS443:3:27:674:112#0/1  
aaabbbb^bbbbbbbaaaaaa\_aaaa\_a`\_a\_aa^a\_\_\_\_  
@HWI-EAS443:3:27:788:1565#0/1  
CCTGGGTTTTGCTTAATGCATCTTGGTTCAACTCCTTCCT  
+HWI-EAS443:3:27:788:1565#0/1  
abbbab]baaababba``aaaabaa\_]a`aaaabaaa``a  
@HWI-EAS443:3:27:795:493#0/1  
CCCTGGGTTTTGCTTAATGCATCTTGGTTCAACTCCTTCC  
+HWI-EAS443:3:27:795:493#0/1  
abababbYbabb\_babaaaaa\_aaaaaaa[aaa\_aa\_`  
@HWI-EAS443:3:27:834:846#0/1  
CCCTGGGTTTTGCTTAATGCATCTTGGTTCAACTCCTTCC  
+HWI-EAS443:3:27:834:846#0/1  
abaaabaabbbbabbbbaabbb`Raba\_``baaaaaa`[  
@HWI-EAS443:3:27:892:775#0/1  
GCCTGATTAATGATCCCTGGGTTTTGCTTAATGCATCTTG  
+HWI-EAS443:3:27:892:775#0/1  
aaaaba\_G^abaa`\_`aaaa\_aaa`aaaa\_a\_\_a\_a\_a  
@HWI-EAS443:3:27:898:1599#0/1  
CCTGGGTTTTGCTTAATGCATCTTGGTTCAACTCCTTCCT  
+HWI-EAS443:3:27:898:1599#0/1  
aaa\_\_a]aaaa`aaaaX`\_aaa`T^`aaa`\_a\_a\_a\_\_  
@HWI-EAS443:3:28:275:213#0/1  
CTGGGTTTTGCTTAATGCATCTTGGTTCAACTCCTTCCTC  
+HWI-EAS443:3:28:275:213#0/1  
aabbb^aaaaabaaaaaaa`aaaa`aa]\_``aaaa`a^  
@HWI-EAS443:3:28:818:948#0/1  
TGCATGTGTGAGGAAGGAGTTGAACCAAGATGCATTAAGC

+HWI-EAS443:3:28:818:948#0/1  
]b\_\_bbSaQ\_U`baa]a`b]aaba` `aaaaa`aa\_]a  
@HWI-EAS443:3:28:832:922#0/1  
GATCCCTGGGTTTTGCTTAATGCATCTTGGTTCAACTCCT  
+HWI-EAS443:3:28:832:922#0/1  
aa[ZW¥XUO\_NZ`aa¥]^a`\_aV[[R\_Ya`W\_]Z\_TY¥\_Z  
@HWI-EAS443:3:29:1008:1265#0/1  
CTGGGTTTTGCTTAATGCATCTTGGTTCAACTCCTTCCTC  
+HWI-EAS443:3:29:1008:1265#0/1  
ab^ab`aRO\_aaaa\_aa[aaU\_\_`\_UYZ[\_a^Y^a^\_\_^  
@HWI-EAS443:3:29:147:1848#0/1  
CCTGGGTTTTGCTTAATGCATCTTGGTTCAACTCCTTCCT  
+HWI-EAS443:3:29:147:1848#0/1  
aaY[XYGVZY]^ZX[[[N\_^Y\_\_^ZQYU\_[P[JYa]Y^[W  
@HWI-EAS443:3:29:1707:1619#0/1  
CCTGGGTTTTGCTTAATGCATCTTGGTTCAACTCCTTCCT  
+HWI-EAS443:3:29:1707:1619#0/1  
a\_VW]ZP]WW^^¥¥\_¥¥a`^`L¥\_[SYUR]UXW^¥ZUBBB  
@HWI-EAS443:3:29:1756:1324#0/1  
TGGGTTTTGCTTAATGCATCTTGGTTCAACTCCTTCCTCA  
+HWI-EAS443:3:29:1756:1324#0/1  
abbb\_abaaaa`a``¥`a[aaaa^`\_`^^a`\_` `X¥^Z\_  
@HWI-EAS443:3:29:499:744#0/1  
TGATTAATGATCCCTGGGTTTTGCTTAATGCATCTTGGTT  
+HWI-EAS443:3:29:499:744#0/1  
\_¥`aabbaab^b`\_aa\_]\_a^\_\_\_\_`aa`\_[\_V¥\_```\_]  
@HWI-EAS443:3:29:542:1490#0/1  
CCTGGGTTTTGCTTAATGCATCTTGGTTCAACTCCTTCCT  
+HWI-EAS443:3:29:542:1490#0/1  
aba]^a^`^WUaaa`]^a``aaaa\_\_a`]a\_aa`\_`\_`  
@HWI-EAS443:3:29:785:1342#0/1  
CCCTGGGTTTTGCTTAATGCATCTTGGTTCAACTCCTTCC  
+HWI-EAS443:3:29:785:1342#0/1  
a^aZ`¥L]X^`YY`[`XNQ`\_\_`VZ[\_[]YY]W¥Z[Z  
@HWI-EAS443:3:29:945:702#0/1  
CCCTGGGTTTTGCTTAATGCATCTTGGTTCAACTCCTTCC  
+HWI-EAS443:3:29:945:702#0/1  
abbbbbbbUaaa`\_bbaaba`aaba`b]a\_\_aaaa\_[ab\_  
@HWI-EAS443:3:2:1214:1873#0/1  
CCCTGGGTTTTGCTTAATGCATCTTGGTTCAACTCCTTCC  
+HWI-EAS443:3:2:1214:1873#0/1  
S\_bb^^^bb\_bbababbbb[ababa`[a\_T¥\_H^bL[b]JS  
@HWI-EAS443:3:30:1355:637#0/1  
CCCTGGGTTTTGCTTAATGCATCTTGGTTCAACTCCTTCC  
+HWI-EAS443:3:30:1355:637#0/1  
aabbabbabbbbbbbbbbbbbbbabbbabbbabb\_bb\_a  
@HWI-EAS443:3:30:1496:466#0/1  
CTGGGTTTTGCTTAATGCATCTTGGTTCAACTCCTTCCTC  
+HWI-EAS443:3:30:1496:466#0/1  
`a¥TaVabbbabbbbaab]ba^^]ba]]]aa`baZVaY]Ua

@HWI-EAS443:3:30:157:576#0/1  
GCATGTGTGAGGAAGGAGTTGAACCAAGATGCATTAAGCA  
+HWI-EAS443:3:30:157:576#0/1  
aaaba\_a\_a\_a^a`aa\_a\_aa\_aaaa\_\_a`aaa\_``^`  
@HWI-EAS443:3:30:1731:524#0/1  
CCTGGGTTTTGCTTAATGCATCTTGGTTCAACTCCTTCCT  
+HWI-EAS443:3:30:1731:524#0/1  
````b\_¥bba`^bbbbb\_ba[aba]Zbaaabb]Zaa]Ra  
@HWI-EAS443:3:30:339:327#0/1  
CTGGGTTTTGCTTAATGCATCTTGGTTCAACTCCTTCCTC  
+HWI-EAS443:3:30:339:327#0/1  
a^`bb¥¥`\_baaaa]^abaaaaa`¥`aaa`a`a`[``\_a  
@HWI-EAS443:3:30:955:882#0/1  
CTGGGTTTTGCTTAATGCATCTTGGTTCAACTCCTTCCTC  
+HWI-EAS443:3:30:955:882#0/1  
a\_¥^¥abbbbbbbbaabbbabbbaabbbabb`baaa`b  
@HWI-EAS443:3:31:1144:162#0/1  
CCTGGGTTTTGCTTAATGCATCTTGGTTCAACTCCTTCCT  
+HWI-EAS443:3:31:1144:162#0/1  
]¥babb^ba\_^a]aabbb^a^ababbbW\_aaba`\_a\_aY  
@HWI-EAS443:3:31:1245:660#0/1  
CTGGGTTTTGCTTAATGCATCTTGGTTCAACTCCTTCCTC  
+HWI-EAS443:3:31:1245:660#0/1  
ababbbbbbbbbbbbbbbbbbbbbbbbabbbbaabbbba  
@HWI-EAS443:3:31:132:1725#0/1  
CTGGGTTTTGCTTAATGCATCTTGGTTCAACTCCTTCCTC  
+HWI-EAS443:3:31:132:1725#0/1  
a^`Ya]aaa¥b`\_\_`\_\_\_aa`a`\_ZU^b`Z`\_aa^\_aaY`  
@HWI-EAS443:3:31:1784:1732#0/1  
GCCTGATTAATGATCCCTGGGTTTTGCTTAATGCATCTTG  
+HWI-EAS443:3:31:1784:1732#0/1  
aS`^`\_Z`^ST`^VW]YTX[\_V^]^RV]^\_UW]QY]W^ZW  
@HWI-EAS443:3:31:611:978#0/1  
CCTGGGTTTTGCTTAATGCATCTTGGTTCAACTCCTTCCT  
+HWI-EAS443:3:31:611:978#0/1  
ab`bbb¥baaaabbbb\_abbbaaa^``abbaaba`baa  
@HWI-EAS443:3:31:636:1458#0/1  
ATCCCTGGGTTTTGCTTAATGCATCTTGGTTCAACTCCTT  
+HWI-EAS443:3:31:636:1458#0/1  
aaaaa]V]a]aa`\_aaaab`a\_a\_\_\_`a\_\_\_\_aaa\_a\_`¥  
@HWI-EAS443:3:31:733:1851#0/1  
CCTGGGTTTTGCTTAATGCATCTTGGTTCAACTCCTTCCT  
+HWI-EAS443:3:31:733:1851#0/1  
aba^]]¥aaa`baabb^\_aa\_aaa\_^]\_ab^^`a`\_]``\_  
@HWI-EAS443:3:31:906:1698#0/1  
CCCTGGGTTTTGCTTAATGCATCTTGGTTCAACTCCTTCC  
+HWI-EAS443:3:31:906:1698#0/1  
`b^^Z`^J^a\_\_b^aaaY`\_^[aa\_a^W\_`]X[\_a[^Za`  
@HWI-EAS443:3:32:1439:887#0/1  
GCCTGATTAATGATCCCTGGGTTTTGCTTAATGCATCTTG

+HWI-EAS443:3:32:1439:887#0/1  
`a`bbaaa\_abb¥\_[V^aaab[aaa\_Z\_a¥^aaS\_``bab  
@HWI-EAS443:3:32:211:480#0/1  
GTTGAACCAAGATGCATTAAGCAAACCCAGGGATCATTA  
+HWI-EAS443:3:32:211:480#0/1  
a`aa`aaaaaaaaaaaaa`a^)`[^`^`a^^`]S0]¥S  
@HWI-EAS443:3:32:400:273#0/1  
ATCCCTGGGTTTTGCTTAATGCATCTTGGTTCAACTCCTT  
+HWI-EAS443:3:32:400:273#0/1  
a\_a`Y\_a\_XJU`a\_a`[\_YVY]W`^`¥[RT]\_]`^`[[[]YY  
@HWI-EAS443:3:32:58:1534#0/1  
CCCTGGGTTTTGCTTAATGCATCTTGGTTCAACTCCTTCC  
+HWI-EAS443:3:32:58:1534#0/1  
abbaaa`Uaa[aaaa\_]`[a`\_aa`^^^\_`]Ya\_a\_]`^aa  
@HWI-EAS443:3:33:1087:2028#0/1  
TGCCTGATTAATGATCCCTGGGTTTTGCTTAATGCATCTT  
+HWI-EAS443:3:33:1087:2028#0/1  
aaaba]¥T]aa¥]Uaaa\_\_a^R`Y]]\_]aYR]U^^R^^  
@HWI-EAS443:3:33:118:1193#0/1  
CCTGGGTTTTGCTTAATGCATCTTGGTTCAACTCCTTCCT  
+HWI-EAS443:3:33:118:1193#0/1  
aa\_aa¥L\_`Y`^[\_WXVSW][`][\_]QVaV`]Y\_[XY¥aS  
@HWI-EAS443:3:33:830:1722#0/1  
CTGGGTTTTGCTTAATGCATCTTGGTTCAACTCCTTCCTC  
+HWI-EAS443:3:33:830:1722#0/1  
ab\_aaN```abaaaaa]aaa``\_`]\_a\_aaaY^]``^\_`  
@HWI-EAS443:3:34:1705:201#0/1  
AGTTGAACCAAGATGCATTAAGCAAACCCAGGGATCATT  
+HWI-EAS443:3:34:1705:201#0/1  
a`Y`ba^aaa^`Zab`\_aa`¥`^`\_S[\_^`V^a\_`QTGVXU  
@HWI-EAS443:3:34:294:746#0/1  
GATTAATGATCCCTGGGTTTTGCTTAATGCATCTTGGTTC  
+HWI-EAS443:3:34:294:746#0/1  
^aaaaabab\_abbbaab\_`aaabbaaab`abbb¥aab\_aa^  
@HWI-EAS443:3:34:411:453#0/1  
CCTGGGTTTTGCTTAATGCATCTTGGTTCAACTCCTTCCT  
+HWI-EAS443:3:34:411:453#0/1  
aa\_aaaRa\_a\_a`Yaa`aaaaa\_`¥^\_a``\_`a\_``U^\_  
@HWI-EAS443:3:34:943:707#0/1  
TGCATGTGTGAGGAAGGAGTTGAACCAAGATGCATTAAGC  
+HWI-EAS443:3:34:943:707#0/1  
VZ]VZ]OTTMUZ¥WWZ[YUM[[WTVJSSWPZZ[¥Y`LLBB  
@HWI-EAS443:3:35:1764:1126#0/1  
CCCTGGGTTTTGCTTAATGCATCTTGGTTCAACTCCTTCC  
+HWI-EAS443:3:35:1764:1126#0/1  
a``ab`b`bbbbbbba`^aabbb`b`bbbbbb¥^bbQb  
@HWI-EAS443:3:35:184:130#0/1  
CCTGGGTTTTGCTTAATGCATCTTGGTTCAACTCCTTCCT  
+HWI-EAS443:3:35:184:130#0/1  
abaaa`[a\_`aa`\_`aa\_aaa\_\_\_\_`]TS\_a]Z¥\_a\_Z^]SV

@HWI-EAS443:3:35:577:1946#0/1  
GGTTTTGCTTAATGCATCTTGGTTCAACTCCTTCCTCACA  
+HWI-EAS443:3:35:577:1946#0/1  
\_YJV`aaaZZaU`abaab\_aa`^]]^]U\_aaZT`a\_`a\_a  
@HWI-EAS443:3:35:838:1601#0/1  
CTGGGTTTTGCTTAATGCATCTTGGTTCAACTCCTTCCTC  
+HWI-EAS443:3:35:838:1601#0/1  
a\_¥WVX[XY^a`]\_a¥Y`\_`\_`IX\_RLQZYa\_\_a]WX`Wa  
@HWI-EAS443:3:36:1179:245#0/1  
AGGAGTTGAACCAAGATGCATTAAGCAAAACCCAGGGATC  
+HWI-EAS443:3:36:1179:245#0/1  
^^\_Z]Ybb`[¥``¥¥\_]¥]^`ZZaa¥[[ba[DT¥^T`a`a  
@HWI-EAS443:3:36:1670:287#0/1  
TGCCTGATTAATGATCCCTGGGTTTTGCTTAATGCATCTT  
+HWI-EAS443:3:36:1670:287#0/1  
aababbbbbbbaaaaa\_a\_abaa^aaab¥aaa^`a]\_a\_aa  
@HWI-EAS443:3:36:491:444#0/1  
CTGATTAATGATCCCTGGGTTTTGCTTAATGCATCTTGGT  
+HWI-EAS443:3:36:491:444#0/1  
^b[L^a¥\_aba[``aabab[abaaab^aaaa`aba\_]WX  
@HWI-EAS443:3:36:563:380#0/1  
TGCATGTGTGAGGAAGGAGTTGAACCAAGATGCATTAAGC  
+HWI-EAS443:3:36:563:380#0/1  
aababb\_]`babaaaa\_a\_`a`aaa\_`a`aa^aa`L^`a  
@HWI-EAS443:3:37:1295:1655#0/1  
CTGGGTTTTGCTTAATGCATCTTGGTTCAACTCCTTCCTC  
+HWI-EAS443:3:37:1295:1655#0/1  
¥`b¥^VYH\_ba`^ZU\_^^`\_]R\_V]¥\_Ta]\_`aaaba`  
@HWI-EAS443:3:37:1531:444#0/1  
CCCTGGGTTTTGCTTAATGCATCTTGGTTCAACTCCTTCC  
+HWI-EAS443:3:37:1531:444#0/1  
aaaabb\_`ba`a\_aabaaa\_aa`aab¥`aYa\_aaaZa\_¥W  
@HWI-EAS443:3:37:436:1667#0/1  
AAGGAGTTGAACCAAGATGCATTAAGCAAAACCCAGGGAT  
+HWI-EAS443:3:37:436:1667#0/1  
[¥XZ`ZU\_ab`^`^`\_] [V^a\_`aaZa\_YUQ^a\_`W\_¥aW  
@HWI-EAS443:3:37:719:495#0/1  
CCCTGGGTTTTGCTTAATGCATCTTGGTTCAACTCCTTCC  
+HWI-EAS443:3:37:719:495#0/1  
abb\_Za`Rbaa\_] ^a` [ `aaaa] ` ` ]RXIJ\_a`a\_] ^^¥  
@HWI-EAS443:3:37:767:1101#0/1  
CCCTGGGTTTTGCTTAATGCATCTTGGTTCAACTCCTTCC  
+HWI-EAS443:3:37:767:1101#0/1  
abbbbbbbbabbbbbbbbababbbababH^abbb`baaa  
@HWI-EAS443:3:38:1640:1286#0/1  
TGCATGTGTGAGGAAGGAGTTGAACCAAGATGCATTAAGC  
+HWI-EAS443:3:38:1640:1286#0/1  
\_b¥\_bbb]aaaaZUbbbLb\_a`a` `` `abWM`H`aV`G\_G  
@HWI-EAS443:3:38:581:1744#0/1  
TCCTGGGTTTTGCTTAATGCATCTTGGTTCAACTCCTTC

+HWI-EAS443:3:38:581:1744#0/1  
abbba`a¥aa]aaaaaba`baaaa`VR[aYa\_``aa\_\_Z  
@HWI-EAS443:3:38:617:1517#0/1  
CTGGGTTTTGCTTAATGCATCTTGGTTCAACTCCTTCCTC  
+HWI-EAS443:3:38:617:1517#0/1  
a`ab`^aab`aa`bbaaaaaa`a`\_]aaZ`a^\_a]\_U  
@HWI-EAS443:3:38:763:1047#0/1  
GCCTGATTAATGATCCCTGGGTTTTGCTTAATGCATCTTG  
+HWI-EAS443:3:38:763:1047#0/1  
abbbbba\_bbaa`abaaaa\_a\_aaaaaaa\_a^V```a`^  
@HWI-EAS443:3:39:1092:1753#0/1  
GCCTGATTAATGATCCCTGGGTTTTGCTTAATGCATCTTG  
+HWI-EAS443:3:39:1092:1753#0/1  
`abbbabbbaabb`bbbaaY[aaaa\_abba^a`baaab`  
@HWI-EAS443:3:39:1293:1290#0/1  
GCCTGATTAATGATCCCTGGGTTTTGCTTAATGCATCTTG  
+HWI-EAS443:3:39:1293:1290#0/1  
ababaaabbaa\_T[a```a^]`aa]XTa\_a[W^UW]^aXQ  
@HWI-EAS443:3:39:1295:23#0/1  
CCTGGGTTTTGCTTAATGCATCTTGGTTCAACTCCTTCCT  
+HWI-EAS443:3:39:1295:23#0/1  
abbbbb\_bbabbbabbbaa`aaaba\_``¥^X^`^\_\_^Z  
@HWI-EAS443:3:39:1323:928#0/1  
CTGGGTTTTGCTTAATGCATCTTGGTTCAACTCCTTCCTC  
+HWI-EAS443:3:39:1323:928#0/1  
abba\_`aaaaaaaaaaa`aX`aaaa]¥`¥^]YY```S^V  
@HWI-EAS443:3:39:1416:217#0/1  
TGCCTGATTAATGATCCCTGGGTTTTGCTTAATGCATCTT  
+HWI-EAS443:3:39:1416:217#0/1  
aa¥\_a\_V\_^\_\_^]a`^[Z```Za^`¥`]^ZMX\_a¥T^]Y  
@HWI-EAS443:3:39:150:1233#0/1  
CTGGGTTTTGCTTAATGCATCTTGGTTCAACTCCTTCCTC  
+HWI-EAS443:3:39:150:1233#0/1  
ab``]N¥\_aaaa^^Z]aa```aa\_`^`\_Z\_`\_aaa``a\_\_  
@HWI-EAS443:3:39:283:1410#0/1  
TGCCTGATTAATGATCCCTGGGTTTTGCTTAATGCATCTT  
+HWI-EAS443:3:39:283:1410#0/1  
abbbbbabb`\_aaaabaaaa\_]aa`¥`a`a\_`aaaa`\_  
@HWI-EAS443:3:39:338:914#0/1  
CTGGGTTTTGCTTAATGCATCTTGGTTCAACTCCTTCCTC  
+HWI-EAS443:3:39:338:914#0/1  
abbbb`bbba`bbbab\_ab`aaaZ`\_a]a^\_aa^a``^  
@HWI-EAS443:3:3:1126:152#0/1  
CCTGGGTTTTGCTTAATGCATCTTGGTTCAACTCCTTCCT  
+HWI-EAS443:3:3:1126:152#0/1  
``bbbaH]babaaaa[\_bYaa^a\_aa\_\_^`\_]`\_^`]¥V[  
@HWI-EAS443:3:3:1153:32#0/1  
CCTGGGTTTTGCTTAATGCATCTTGGTTCAACTCCTTCCT  
+HWI-EAS443:3:3:1153:32#0/1  
`abbb`¥aabb^``aab`aa\_aaaa\_a\_``]``\_`Y]`

@HWI-EAS443:3:3:243:831#0/1  
ATTAATGATCCCTGGGTTTTGCTTAATGCATCTTGGTTCA  
+HWI-EAS443:3:3:243:831#0/1  
abbababaa`aabaaa]aababaa`aa`\_a\_a`a`^\_]a  
@HWI-EAS443:3:3:699:296#0/1  
GTTGAACCAAGATGCATTAAGCAAAACCCAGGGATCATT  
+HWI-EAS443:3:3:699:296#0/1  
\_W]aaaa[[aaUY`Q^\_\_\_\_[X`^YVR^PZ\_\_]Y\_0\_`\_B  
@HWI-EAS443:3:3:845:848#0/1  
GTGCCTGATTAATGATCCCTGGGTTTTGCTTAATGCATCT  
+HWI-EAS443:3:3:845:848#0/1  
aX`\_aab\_a`a\_^aY¥X\_\_`aa]^\_^\_`\_`\_]X`^]Z\_  
@HWI-EAS443:3:40:1144:663#0/1  
CCTGATTAATGATCCCTGGGTTTTGCTTAATGCATCTTGG  
+HWI-EAS443:3:40:1144:663#0/1  
aaa`^bba]ababa`\_`abba\_abaa`]X\_`\_`^aaaa^`¥  
@HWI-EAS443:3:40:1335:658#0/1  
CTGGGTTTTGCTTAATGCATCTTGGTTCAACTCCTTCCTC  
+HWI-EAS443:3:40:1335:658#0/1  
abbab\_bbbbbbb\_bababbabbaa\_b\_babbbb`bbaa  
@HWI-EAS443:3:40:186:321#0/1  
CCCTGGGTTTTGCTTAATGCATCTTGGTTCAACTCCTTCC  
+HWI-EAS443:3:40:186:321#0/1  
aba`aaa^abaa`a`aa\_\_0^\_\_a`\_Z]W¥^\_\_]a\_Z^\_]`  
@HWI-EAS443:3:40:26:1542#0/1  
CCTGGGTTTTGCTTAATGCATCTTGGTTCAACTCCTTCCT  
+HWI-EAS443:3:40:26:1542#0/1  
aa^Z`^RY^]Z¥\_¥`\_`¥a\_]\_aa]VRT¥\_]\_]\_^aa^[\_`^  
@HWI-EAS443:3:40:554:1767#0/1  
TGCCTGATTAATGATCCCTGGGTTTTGCTTAATGCATCTT  
+HWI-EAS443:3:40:554:1767#0/1  
a\_aabaaaaaaaa`\_`aaaa`¥aa`\_a^a`\_]`\_a]`\_`^a  
@HWI-EAS443:3:40:833:1371#0/1  
CCCTGGGTTTTGCTTAATGCATCTTGGTTCAACTCCTTCC  
+HWI-EAS443:3:40:833:1371#0/1  
aaaabb`Qbbbabbaa`\_`\_`baaabaa]\_\_aaababaa`a\_  
@HWI-EAS443:3:42:1111:92#0/1  
GCCTGATTAATGATCCCTGGGTTTTGCTTAATGCATCTTG  
+HWI-EAS443:3:42:1111:92#0/1  
aaaab`bbaabbaaa`\_aabb\_aaab`aaa^aa^`a\_a`a`  
@HWI-EAS443:3:42:1241:946#0/1  
CTGGGTTTTGCTTAATGCATCTTGGTTCAACTCCTTCCTC  
+HWI-EAS443:3:42:1241:946#0/1  
ab`¥XZ`^ab\_bb^^\_a[^Zbabba`]Z]\_`b]ZZ`\_`^`\_`  
@HWI-EAS443:3:42:1587:308#0/1  
TGCCTGATTAATGATCCCTGGGTTTTGCTTAATGCATCTT  
+HWI-EAS443:3:42:1587:308#0/1  
\_bbb\_\_W¥b]ba^¥Q0^\_b[^ZQ`a^aY`baXX\_aaa`a`  
@HWI-EAS443:3:42:1791:437#0/1  
CTGGGTTTTGCTTAATGCATCTTGGTTCAACTCCTTCCTC

+HWI-EAS443:3:42:1791:437#0/1  
abbbb`abbaabaabaaaaabbbbbaaaaaaa`aa`aaa  
@HWI-EAS443:3:42:493:633#0/1  
GCCTGATTAATGATCCCTGGGTTTTGCTTAATGCATCTTG  
+HWI-EAS443:3:42:493:633#0/1  
aaaab\_aaaaa\_a^a``aaaYa^a`aa`]]`^`a`a  
@HWI-EAS443:3:42:680:1543#0/1  
GCCTGATTAATGATCCCTGGGTTTTGCTTAATGCATCTTG  
+HWI-EAS443:3:42:680:1543#0/1  
`^\_X^X`W¥GYXTPW`OVPM¥¥¥RLa¥^]TLT]UPBBB  
@HWI-EAS443:3:42:864:240#0/1  
GTGCCTGATTAATGATCCCTGGGTTTTGCTTAATGCATCT  
+HWI-EAS443:3:42:864:240#0/1  
aaaaaba`aaaa`a\_aaa^ababVaaaaa\_a`\_\_[\_`a`\_`  
@HWI-EAS443:3:42:961:1957#0/1  
CCTGGGTTTTGCTTAATGCATCTTGGTTCAACTCCTTCCT  
+HWI-EAS443:3:42:961:1957#0/1  
ababbb^abbaabbbbbb[bb`abbaababaaa`abaaaa  
@HWI-EAS443:3:43:1098:119#0/1  
CCCTGGGTTTTGCTTAATGCATCTTGGTTCAACTCCTTCC  
+HWI-EAS443:3:43:1098:119#0/1  
ab`abbbabaab`bbbbba\_aaababb`a\_aaa`\_`aaa\_  
@HWI-EAS443:3:43:616:1009#0/1  
CCCTGGGTTTTGCTTAATGCATCTTGGTTCAACTCCTTCC  
+HWI-EAS443:3:43:616:1009#0/1  
``b\_XWWW`[W\_[M^a]¥[TZ^\_aX\_RZa\_¥R¥SZY``YZ  
@HWI-EAS443:3:43:765:712#0/1  
CCCTGGGTTTTGCTTAATGCATCTTGGTTCAACTCCTTCC  
+HWI-EAS443:3:43:765:712#0/1  
abbbbbbabbb`abbb`a^`\_aaaa\_a]a^``baaaaa\_  
@HWI-EAS443:3:44:1217:269#0/1  
CCTGGGTTTTGCTTAATGCATCTTGGTTCAACTCCTTCCT  
+HWI-EAS443:3:44:1217:269#0/1  
aaaVZ]0]WL`IXT`Za`P]W`\_aaYaT[\_`VRa[OF\_  
@HWI-EAS443:3:44:1380:657#0/1  
CTGGGTTTTGCTTAATGCATCTTGGTTCAACTCCTTCCTC  
+HWI-EAS443:3:44:1380:657#0/1  
abbbb\_aaa\_\_abbaaabb[`aa^]aaaaYa`\_aa^[\_`\_  
@HWI-EAS443:3:44:1725:2044#0/1  
AGTGCCTGATTAATGATCCCTGGGTTTTGCTTAATGCATC  
+HWI-EAS443:3:44:1725:2044#0/1  
`b`\_`a`aaaa`bb`b\_a^bZbba`Zaaba\_aaa`\_a^aaX  
@HWI-EAS443:3:44:1772:892#0/1  
TGCCTGATTAATGATCCCTGGGTTTTGCTTAATGCATCTT  
+HWI-EAS443:3:44:1772:892#0/1  
ab`aaa]ab\_aaaYa\_\_\_\_aa`[aaa`\_a`a``\_\_\_\_`^`^`  
@HWI-EAS443:3:44:772:652#0/1  
CCTGGGTTTTGCTTAATGCATCTTGGTTCAACTCCTTCCT  
+HWI-EAS443:3:44:772:652#0/1  
a`X^`\_`\_¥Y`¥`^`[XWVa^Y`]baaa`]]ZYT^[[\_Q[U^



@HWI-EAS443:3:45:1144:1105#0/1  
CTGGGTTTTGCTTAATGCATCTTGGTTCAACTCCTTCCTC  
+HWI-EAS443:3:45:1144:1105#0/1  
aa`¥^¥babbabbbb`aa`baab``aaaa]abaaba`````  
@HWI-EAS443:3:45:1536:295#0/1  
CTGGGTTTTGCTTAATGCATCTTGGTTCAACTCCTTCCTC  
+HWI-EAS443:3:45:1536:295#0/1  
abbb`b``¥\_bbYZa\_UZ]]ab\_]S`aa`\_N¥]aTOMTU  
@HWI-EAS443:3:45:1605:581#0/1  
CCCTGGGTTTTGCTTAATGCATCTTGGTTCAACTCCTTCC  
+HWI-EAS443:3:45:1605:581#0/1  
a\_¥P\_ZHMVPW`\_]`a\_[Y`X]YSNRZ]R[¥Y^[SLY¥0^L  
@HWI-EAS443:3:45:169:1069#0/1  
GATTAATGATCCCTGGGTTTTGCTTAATGCATCTTGGTTC  
+HWI-EAS443:3:45:169:1069#0/1  
aa`^^^`baa]Y]a`^]Wa^`aYa[``[]aX`^`^Y]^Z  
@HWI-EAS443:3:45:1718:136#0/1  
TGCCTGATTAATGATCCCTGGGTTTTGCTTAATGCATCTT  
+HWI-EAS443:3:45:1718:136#0/1  
a`aZ]a¥a^Za`a\_\_NT`b``]Z`a\_a[]aZP`\_LT¥X`Y  
@HWI-EAS443:3:45:43:271#0/1  
GTTTTGCTTAATGCATCTTGGTTCAACTCCTTCCTCACAC  
+HWI-EAS443:3:45:43:271#0/1  
aaaaabababbaaaaaaaa`¥\_`a`a^aaa`aaaaaaaa  
@HWI-EAS443:3:45:731:458#0/1  
CCCTGGGTTTTGCTTAATGCATCTTGGTTCAACTCCTTCC  
+HWI-EAS443:3:45:731:458#0/1  
aa]abbb\_bab\_Z\_aaaab]a`¥bab`T\_Waa]\_`aaaa^  
@HWI-EAS443:3:46:107:309#0/1  
CCCTGGGTTTTGCTTAATGCATCTTGGTTCAACTCCTTCC  
+HWI-EAS443:3:46:107:309#0/1  
a\_bbb\_]\_aaab`\_abbab^\_aaaabaa`]]W\_`a`]`\_\_  
@HWI-EAS443:3:46:1431:893#0/1  
GCCTGATTAATGATCCCTGGGTTTTGCTTAATGCATCTTG  
+HWI-EAS443:3:46:1431:893#0/1  
aaV^^^VWWW^`bZ¥``¥``\_\_WX`ZVYPWOT[X¥X[^Z]^  
@HWI-EAS443:3:46:1545:1310#0/1  
GAAGGAGTTGAACCAAGATGCATTAAGCAAAACCCAGGGA  
+HWI-EAS443:3:46:1545:1310#0/1  
WI`WW\_aZa`Z]W¥Z\_]^[^]\_aa¥a`UWNUYYaTN¥[`Y[]  
@HWI-EAS443:3:46:1722:137#0/1  
CTGGGTTTTGCTTAATGCATCTTGGTTCAACTCCTTCCTC  
+HWI-EAS443:3:46:1722:137#0/1  
`bbbb^`a``Z^ba\_bbRQWTbbbaa`Y`^Wa`Jb`aW\_Z  
@HWI-EAS443:3:47:1143:1161#0/1  
CCCTGGGTTTTGCTTAATGCATCTTGGTTCAACTCCTTCC  
+HWI-EAS443:3:47:1143:1161#0/1  
`aab`^``\_abbbabb]``\_Yb]babb]`\_^abaaabaaa  
@HWI-EAS443:3:47:1318:932#0/1  
CTGGGTTTTGCTTAATGCATCTTGGTTCAACTCCTTCCTC

+HWI-EAS443:3:47:1318:932#0/1  
ababaabbbbabba\_bbabbabbbbaaa`a`aaa^ba`aa¥  
@HWI-EAS443:3:47:415:1137#0/1  
AGTTGAACCAAGATGCATTAAGCAAACCCAGGGATCATT  
+HWI-EAS443:3:47:415:1137#0/1  
aa`abaaaaa\_]`a\_aaaaa\_]X`\_]a`a]^\_\_\_\_`\_  
@HWI-EAS443:3:47:515:609#0/1  
AGGAGTTGAACCAAGATGCATTAAGCAAACCCAGGGATC  
+HWI-EAS443:3:47:515:609#0/1  
aba`ba]G\_a`abaaaabaaaabaa\_aaa`a\_\_aa\_a`a^  
@HWI-EAS443:3:48:1334:1611#0/1  
GAAGGAGTTGAACCAAGATGCATTAAGCAAACCCAGGGA  
+HWI-EAS443:3:48:1334:1611#0/1  
aa`\_^ZaW\_a]¥WM]a]aa\_^aa^`\_]`\_Y]V``a]V  
@HWI-EAS443:3:48:1609:177#0/1  
CTGGGTTTTGCTTAATGCATCTTGGTTCAACTCCTTCCTC  
+HWI-EAS443:3:48:1609:177#0/1  
¥\_a`\_ababbbbbbabbabab`a`a^`\_ab`¥aa^`aa  
@HWI-EAS443:3:48:252:307#0/1  
CCTGGGTTTTGCTTAATGCATCTTGGTTCAACTCCTTCCT  
+HWI-EAS443:3:48:252:307#0/1  
a^aa^`abb`babaabaabaabaaaaa]^aaaaXaa\_\_a  
@HWI-EAS443:3:48:945:633#0/1  
CCTGGGTTTTGCTTAATGCATCTTGGTTCAACTCCTTCCT  
+HWI-EAS443:3:48:945:633#0/1  
a`aXV`\_abb`aaaa`aaaa[ba``aaaa`a\_¥^a`\_Ya  
@HWI-EAS443:3:49:557:1734#0/1  
CCCTGGGTTTTGCTTAATGCATCTTGGTTCAACTCCTTCCT  
+HWI-EAS443:3:49:557:1734#0/1  
aba`¥¥Z¥bbbaabbaabaaaaaa]^a\_a`V`aY`  
@HWI-EAS443:3:49:635:617#0/1  
TCCCTGGGTTTTGCTTAATGCATCTTGGTTCAACTCCTTC  
+HWI-EAS443:3:49:635:617#0/1  
`b`^ab`bS\_a`\_aaaa[aI¥`aa^aWY[\_\_\_Y^`]\_\_a\_  
@HWI-EAS443:3:49:798:909#0/1  
CCTGGGTTTTGCTTAATGCATCTTGGTTCAACTCCTTCCT  
+HWI-EAS443:3:49:798:909#0/1  
abbb\_b\_bbbbbbaaba]ab\_bab`\_`\_a\_\_aa]a``Za  
@HWI-EAS443:3:4:1448:175#0/1  
GAGTGCCTGATTAATGATCCCTGGGTTTTGCTTAATGCAT  
+HWI-EAS443:3:4:1448:175#0/1  
a\_aTVTW^[UWS^TUZ`\_ZUUX^VQMYVPQOW]]WYSQXS  
@HWI-EAS443:3:4:1664:1803#0/1  
GCCTGATTAATGATCCCTGGGTTTTGCTTAATGCATCTTG  
+HWI-EAS443:3:4:1664:1803#0/1  
aXS¥aY^`]`X`aXXMPXa\_\_^XUG]RG¥\_R¥\_SZXXVBB  
@HWI-EAS443:3:4:343:1300#0/1  
CCTGGGTTTTGCTTAATGCATCTTGGTTCAACTCCTTCCT  
+HWI-EAS443:3:4:343:1300#0/1  
K`abb\_HQabb]bbbb`bWbabbbbab`\_aba[aaa^G^

@HWI-EAS443:3:4:520:1545#0/1  
AAGGAGTTGAACCAAGATGCATTAAGCAAACCCAGGGAT  
+HWI-EAS443:3:4:520:1545#0/1  
a]a`Z`[ab`aa\_`\_\_[\_b\_a`^aU`[[Z^\_\_R^`\_\_^\_B  
@HWI-EAS443:3:50:1545:608#0/1  
GATTAATGATCCCTGGGTTTTGCTTAATGCATCTTGGTTC  
+HWI-EAS443:3:50:1545:608#0/1  
a^aba]bbaa``Z^^aa]aaaa\_aaa``^]`^a`a`]]V]W  
@HWI-EAS443:3:50:1557:955#0/1  
CCCTGGGTTTTGCTTAATGCATCTTGGTTCAACTCCTTCC  
+HWI-EAS443:3:50:1557:955#0/1  
aaabbbbabbbbbbbbbbabababba¥aa``bbb`^ab`b  
@HWI-EAS443:3:50:461:1524#0/1  
CCCTGGGTTTTGCTTAATGCATCTTGGTTCAACTCCTTCC  
+HWI-EAS443:3:50:461:1524#0/1  
a`\_¥¥[UQ`^^`^]aaUW¥¥Zaa]a`T`aU\_\_Z¥PSaUOM  
@HWI-EAS443:3:50:537:1071#0/1  
CTGGGTTTTGCTTAATGCATCTTGGTTCAACTCCTTCCTC  
+HWI-EAS443:3:50:537:1071#0/1  
abbbYa`baba`bbb`abV[`abab`\_\_\_baaa\_aa`\_`a\_  
@HWI-EAS443:3:50:936:399#0/1  
CTGGGTTTTGCTTAATGCATCTTGGTTCAACTCCTTCCTC  
+HWI-EAS443:3:50:936:399#0/1  
abaaabbbbabbabbbbaabbbbbbbbbabbabbbaabb  
@HWI-EAS443:3:51:153:1471#0/1  
CTGGGTTTTGCTTAATGCATCTTGGTTCAACTCCTTCCTC  
+HWI-EAS443:3:51:153:1471#0/1  
abaaa\_bbbbbbb`\_b`ababb\_Y`a\_aaabaabba`aa  
@HWI-EAS443:3:51:1772:495#0/1  
TCCCTGGGTTTTGCTTAATGCATCTTGGTTCAACTCCTTC  
+HWI-EAS443:3:51:1772:495#0/1  
aaaababZaab`Z^aabba``aa\_aa`¥``aaa`\_a`a`¥  
@HWI-EAS443:3:51:421:875#0/1  
CTGGGTTTTGCTTAATGCATCTTGGTTCAACTCCTTCCTC  
+HWI-EAS443:3:51:421:875#0/1  
¥\_b`\_Q[abb^`ab]`b][\_¥bab^W\_SYZ`a``ZTTWa`  
@HWI-EAS443:3:51:458:590#0/1  
CTGGGTTTTGCTTAATGCATCTTGGTTCAACTCCTTCCTC  
+HWI-EAS443:3:51:458:590#0/1  
abbbbbbbbbbbbbbbbbabbbba`ab`a]abbbbb``ba  
@HWI-EAS443:3:51:636:1726#0/1  
CCTGGGTTTTGCTTAATGCATCTTGGTTCAACTCCTTCCT  
+HWI-EAS443:3:51:636:1726#0/1  
aba`SaZbabbabbbbbabbb\_bb\_aaaaaabaabb[a`  
@HWI-EAS443:3:51:675:1340#0/1  
TTAATGATCCCTGGGTTTTGCTTAATGCATCTTGGTTCAA  
+HWI-EAS443:3:51:675:1340#0/1  
a`baaaaaa]\_a^\_a\_b``a`aaa\_a`^a`^aa\_a\_a\_\_\_  
@HWI-EAS443:3:51:776:216#0/1  
AAGGAGTTGAACCAAGATGCATTAAGCAAACCCAGGGAT

+HWI-EAS443:3:51:776:216#0/1  
X¥^\_\_`^`a^a]\_^a`T`\_UX`b\_]\_^]^Ya`¥^`b¥Z\_a  
@HWI-EAS443:3:51:855:1212#0/1  
CCCTGGGTTTTGCTTAATGCATCTTGGTTCAACTCCTTCC  
+HWI-EAS443:3:51:855:1212#0/1  
`bbabababbaabbbabbbbbbabbbaababaabaaa  
@HWI-EAS443:3:51:931:464#0/1  
CCTGGGTTTTGCTTAATGCATCTTGGTTCAACTCCTTCC  
+HWI-EAS443:3:51:931:464#0/1  
aababbabbbb\_bbbbbabbb`bbbabbbbaba`bb\_ab  
@HWI-EAS443:3:52:1001:1339#0/1  
AAGGAGTTGAACCAAGATGCATTAAGCAAACCCAGGGAT  
+HWI-EAS443:3:52:1001:1339#0/1  
KJ`b¥XZ]]Y[`VaJa`V¥X\_ba`W^\_Ra[a^¥b[X\_a`  
@HWI-EAS443:3:52:1497:226#0/1  
CCCTGGGTTTTGCTTAATGCATCTTGGTTCAACTCCTTCC  
+HWI-EAS443:3:52:1497:226#0/1  
a\_aaZ¥b^babaaba`ab\_\_aa\_aaa[a`^`a\_`^`a\_]`^  
@HWI-EAS443:3:52:168:844#0/1  
CCTGATTAATGATCCCTGGGTTTTGCTTAATGCATCTTGG  
+HWI-EAS443:3:52:168:844#0/1  
aabababbbbabaaaabbbb\_abbaabaaaab`aaaaaaa  
@HWI-EAS443:3:53:1110:878#0/1  
CCCTGGGTTTTGCTTAATGCATCTTGGTTCAACTCCTTCC  
+HWI-EAS443:3:53:1110:878#0/1  
aabbbb\_bbbbbbbbbbbb`ababbbbab\_baababba`  
@HWI-EAS443:3:53:404:1035#0/1  
CTGGGTTTTGCTTAATGCATCTTGGTTCAACTCCTTCC  
+HWI-EAS443:3:53:404:1035#0/1  
abbaababbbbbbababbbbab`baaababbaaa`  
@HWI-EAS443:3:53:968:1063#0/1  
CCTGGGTTTTGCTTAATGCATCTTGGTTCAACTCCTTCC  
+HWI-EAS443:3:53:968:1063#0/1  
abbabaabbbbaabbbb\_ab\_bbb]baaba\_aa^aba¥a  
@HWI-EAS443:3:54:1050:672#0/1  
GCCTGATTAATGATCCCTGGGTTTTGCTTAATGCATCTTG  
+HWI-EAS443:3:54:1050:672#0/1  
abbab`Yba^WX]aaa^W`aZxb`^[\_`aaX^aaa`a`^  
@HWI-EAS443:3:54:1429:1641#0/1  
AGTTGAACCAAGATGCATTAAGCAAACCCAGGGATCATT  
+HWI-EAS443:3:54:1429:1641#0/1  
UZ^aZ^`¥\_Obbbb`bab`\_``abaaS`]`\_a[Z`Za`a`  
@HWI-EAS443:3:54:516:490#0/1  
AGGAGTTGAACCAAGATGCATTAAGCAAACCCAGGGATC  
+HWI-EAS443:3:54:516:490#0/1  
aa\_]aabbaa`aa`a`ab`aaba`a`\_\_¥`a\_Yaa^`^a\_  
@HWI-EAS443:3:54:598:147#0/1  
GCCTGATTAATGATCCCTGGGTTTTGCTTAATGCATCTTG  
+HWI-EAS443:3:54:598:147#0/1  
aa\_]b\_aa`^a\_¥a]`\_abaaW`````]\_a`\_`\_W`a\_a`\_`

@HWI-EAS443:3:55:1085:1116#0/1  
AAGGAGTTGAACCAAGATGCATTAAGCAAACCCAGGGAT  
+HWI-EAS443:3:55:1085:1116#0/1  
ababa\_abbba\_aababbabba`baaaaaab^aaa`aa  
@HWI-EAS443:3:55:1160:631#0/1  
CTGGGTTTTGCTTAATGCATCTTGGTTCAACTCCTTCCTC  
+HWI-EAS443:3:55:1160:631#0/1  
abaa^Zb^ababbaabaabab`abaa`^XXbb`ba]X`a  
@HWI-EAS443:3:55:577:1174#0/1  
CTGGGTTTTGCTTAATGCATCTTGGTTCAACTCCTTCCTC  
+HWI-EAS443:3:55:577:1174#0/1  
aab`a``abbaba^abababbbbabab`a`^bbaabbbaaa  
@HWI-EAS443:3:55:733:1605#0/1  
GCCTGATTAATGATCCCTGGGTTTTGCTTAATGCATCTTG  
+HWI-EAS443:3:55:733:1605#0/1  
a`^`baaaab``\_a`\_`aa[\_]`aa[^```a\_\_]\_a\_`\_`  
@HWI-EAS443:3:55:918:827#0/1  
CCCTGGGTTTTGCTTAATGCATCTTGGTTCAACTCCTTCC  
+HWI-EAS443:3:55:918:827#0/1  
ab]bbbb[bbbbbbbbbb`bbbbbaa`bbbbaa^`ba^`  
@HWI-EAS443:3:56:1403:1807#0/1  
GGAAGGAGTTGAACCAAGATGCATTAAGCAAACCCAGGG  
+HWI-EAS443:3:56:1403:1807#0/1  
abbabbbb``aaba\_bababb]abaa`b]b`aa`YYba[Y  
@HWI-EAS443:3:56:491:1767#0/1  
GGAAGGAGTTGAACCAAGATGCATTAAGCAAACCCAGGG  
+HWI-EAS443:3:56:491:1767#0/1  
\_Z]aZaT`NHXURY]TZ\_\_\_\_N\_``\_a\_QRL¥YGH[ZU^  
@HWI-EAS443:3:57:1539:1597#0/1  
TGCCTGATTAATGATCCCTGGGTTTTGCTTAATGCATCTT  
+HWI-EAS443:3:57:1539:1597#0/1  
a]^`^Xbaa`aaa\_^R¥X\_aaUaaa\_Xab]]a^W`\_Waa  
@HWI-EAS443:3:57:1781:1223#0/1  
CTGGGTTTTGCTTAATGCATCTTGGTTCAACTCCTTCCTC  
+HWI-EAS443:3:57:1781:1223#0/1  
R\_XLa^`b`a`a`a`abb^bbbbbb`````[a\_``^W`b\_Za`  
@HWI-EAS443:3:57:529:616#0/1  
CTGGGTTTTGCTTAATGCATCTTGGTTCAACTCCTTCCTC  
+HWI-EAS443:3:57:529:616#0/1  
abbb\_`baaa`aaba¥\_aa\_baaaa``a\_````aa^¥a\_  
@HWI-EAS443:3:57:86:128#0/1  
GGAAGGAGTTGAACCAAGATGCATTAAGCAAACCCAGGG  
+HWI-EAS443:3:57:86:128#0/1  
ab\_^aa\_^`\_]\_\_^[[[R[¥XY^YWY^QJJNVTWT¥¥XX  
@HWI-EAS443:3:58:1063:2032#0/1  
CCTGGGTTTTGCTTAATGCATCTTGGTTCAACTCCTTCCT  
+HWI-EAS443:3:58:1063:2032#0/1  
\_ab`\_b]a``\_`^aaa`a\_\_`\_¥a^`\_\_`¥a`W`YR``^UR  
@HWI-EAS443:3:58:1160:1698#0/1  
CCTGGGTTTTGCTTAATGCATCTTGGTTCAACTCCTTCCT

+HWI-EAS443:3:58:1160:1698#0/1  
aaabbbabbababbaabaaaa`aa`Y^b\_ba`a\_aaa`Xa  
@HWI-EAS443:3:58:1368:898#0/1  
CTGGGTTTTGCTTAATGCATCTTGGTTCAACTCCTTCCTC  
+HWI-EAS443:3:58:1368:898#0/1  
```ab\_bbbbabab`abb`babab\_\_aaaaa]Ybb[aa\_  
@HWI-EAS443:3:58:1465:966#0/1  
CCCTGGGTTTTGCTTAATGCATCTTGGTTCAACTCCTTCC  
+HWI-EAS443:3:58:1465:966#0/1  
a^^```babbbbbbbbaa`]ZaXbbb^aa`\_aaaa]ba\_\_  
@HWI-EAS443:3:58:1784:924#0/1  
GTGTGAGGAAGGAGTTGAACCAAGATGCATTAAGCAAAC  
+HWI-EAS443:3:58:1784:924#0/1  
\_Z\_T\_[\_]`^\_a`[Y]U\_V\_XR[^][`^¥\_`\_]¥VZ^[[YT  
@HWI-EAS443:3:58:48:516#0/1  
CCTGATTAATGATCCCTGGGTTTTGCTTAATGCATCTTGG  
+HWI-EAS443:3:58:48:516#0/1  
\_aY\_R]`^Y`ba]`a\_W\_ab^aaaa`\_`Z]``]]\_aa\_¥¥  
@HWI-EAS443:3:58:581:903#0/1  
CTGGGTTTTGCTTAATGCATCTTGGTTCAACTCCTTCCTC  
+HWI-EAS443:3:58:581:903#0/1  
a^bb\_\_abaabbbbbbaaa`aaaa`a```]aaa\_aaa`aa  
@HWI-EAS443:3:59:115:559#0/1  
CCCTGGGTTTTGCTTAATGCATCTTGGTTCAACTCCTTCC  
+HWI-EAS443:3:59:115:559#0/1  
a]` `b]b]]]aaaTaaa`aT¥\_aa\_a^V[`X^¥]`XZ\_]Y  
@HWI-EAS443:3:59:1340:1388#0/1  
ATGCATTAAGCAAACCCAGGATCATTAAATCAGGCACTC  
+HWI-EAS443:3:59:1340:1388#0/1  
aabaabaa^baabaaabaaba]\_aabbbba0a]¥SW\_\_]  
@HWI-EAS443:3:59:1623:1158#0/1  
CTGGGTTTTGCTTAATGCATCTTGGTTCAACTCCTTCCTC  
+HWI-EAS443:3:59:1623:1158#0/1  
`bbab\_bbabababbabbabbbbbbbabb`\_`bXX\_aX  
@HWI-EAS443:3:59:1693:871#0/1  
GTGTGAGGAAGGAGTTGAACCAAGATGCATTAAGCAAAC  
+HWI-EAS443:3:59:1693:871#0/1  
`\_UZ]Xb]H^`[`][X¥RUZP`YR\_\_a[Xa\_[\_]SNJ[[R  
@HWI-EAS443:3:59:31:2033#0/1  
CTGGGTTTTGCTTAATGCATCTTGGTTCAACTCCTTCCTC  
+HWI-EAS443:3:59:31:2033#0/1  
a`SY¥]abbaaabbbabaaaabbaaabba`\_a]`X^]`X  
@HWI-EAS443:3:59:348:853#0/1  
CATGTGTGAGGAAGGAGTTGAACCAAGATGCATTAAGCAA  
+HWI-EAS443:3:59:348:853#0/1  
`aab\_[^aa^¥`aa`^a^aa[a\_`\_a¥[\_a\_¥`\_`WXY]^  
@HWI-EAS443:3:59:541:904#0/1  
CCTGGGTTTTGCTTAATGCATCTTGGTTCAACTCCTTCCT  
+HWI-EAS443:3:59:541:904#0/1  
abb\_ab]ababababbabaaabbb`W\_abbaXaaa^^aZ`

@HWI-EAS443:3:59:571:1592#0/1  
CTGGGTTTTGCTTAATGCATCTTGGTTCAACTCCTTCCTC  
+HWI-EAS443:3:59:571:1592#0/1  
`\_a^]T\_b\_Y]``a\_`a\_]`aa`¥¥aaa`Ta]¥[T[XO  
@HWI-EAS443:3:59:76:782#0/1  
CCTGGGTTTTGCTTAATGCATCTTGGTTCAACTCCTTCCT  
+HWI-EAS443:3:59:76:782#0/1  
abaa^`Zaa`aaaaa`a`a\_`aa`^`aa`^a\_]`[^\_  
@HWI-EAS443:3:5:1719:964#0/1  
AGGAGTTGAACCAAGATGCATTAAGCAAAACCCAGGGATC  
+HWI-EAS443:3:5:1719:964#0/1  
aaaabVaaaa^a¥bbababbaba`\_\_a\_aY\_V\_aa\_`\_¥  
@HWI-EAS443:3:5:611:472#0/1  
CCCTGGGTTTTGCTTAATGCATCTTGGTTCAACTCCTTCCTC  
+HWI-EAS443:3:5:611:472#0/1  
aabbb`babbbb]bbbbababb`bbbbab`bbaa`ba\_`  
@HWI-EAS443:3:60:1102:1383#0/1  
CTGGGTTTTGCTTAATGCATCTTGGTTCAACTCCTTCCTC  
+HWI-EAS443:3:60:1102:1383#0/1  
abUb¥La[WVTVQaZ\_ZWKaY¥PV]]¥]`V]W]H[`]GZM  
@HWI-EAS443:3:60:1165:538#0/1  
CCCTGGGTTTTGCTTAATGCATCTTGGTTCAACTCCTTCCTC  
+HWI-EAS443:3:60:1165:538#0/1  
aaabbababbbbbabbbbbabbbb]`bbbab`a]bbaba  
@HWI-EAS443:3:60:1583:972#0/1  
GCCTGATTAATGATCCCTGGGTTTTGCTTAATGCATCTTG  
+HWI-EAS443:3:60:1583:972#0/1  
a\_^aa`aaaa`a\_`\_`a^¥\_\_a\_]a\_a\_\_^¥^aX\_]`  
@HWI-EAS443:3:60:477:1417#0/1  
CTGGGTTTTGCTTAATGCATCTTGGTTCAACTCCTTCCTC  
+HWI-EAS443:3:60:477:1417#0/1  
Y]]TTO\_TYbbb¥¥¥\_\_`¥X`^^`]aS]a]aa`]]]YP  
@HWI-EAS443:3:60:905:109#0/1  
GTGCCTGATTAATGATCCCTGGGTTTTGCTTAATGCATCT  
+HWI-EAS443:3:60:905:109#0/1  
a`a\_]\_aaX\_^aRaW^WWO\_\_\_XTNX^\_\_0\_]`^ZUKK]U^  
@HWI-EAS443:3:61:1525:1002#0/1  
CCTGGGTTTTGCTTAATGCATCTTGGTTCAACTCCTTCCTC  
+HWI-EAS443:3:61:1525:1002#0/1  
\_]abbb`bba`a`\_\_bbbb`ba````bb``bb``b`aUa  
@HWI-EAS443:3:61:220:899#0/1  
CCTGGGTTTTGCTTAATGCATCTTGGTTCAACTCCTTCCTC  
+HWI-EAS443:3:61:220:899#0/1  
aaWabb^b`]\_aaaZV\_a]a`\_\_^\_Z]^W\_Y\_]\_^Z  
@HWI-EAS443:3:62:1493:233#0/1  
AAGGAGTTGAACCAAGATGCATTAAGCAAAACCCAGGGAT  
+HWI-EAS443:3:62:1493:233#0/1  
abbaaabbaab`]aabaaaab`aa`\_`aa`^`a`^`aaa\_a  
@HWI-EAS443:3:62:1688:977#0/1  
GCCTGATTAATGATCCCTGGGTTTTGCTTAATGCATCTTG

+HWI-EAS443:3:62:1688:977#0/1  
]ZY`¥[`Y^]b\_]Ya]a[ZZWaba¥V\_Va`RZN]]G`a\_  
@HWI-EAS443:3:62:169:1902#0/1  
CTGGGTTTTGCTTAATGCATCTTGGTTCAACTCCTTCCTC  
+HWI-EAS443:3:62:169:1902#0/1  
a^U^]R^Saaa`aT^NQXa¥`^ISX\_ba```aRa^Za``  
@HWI-EAS443:3:62:597:433#0/1  
TGGGTTTTGCTTAATGCATCTTGGTTCAACTCCTTCCTCA  
+HWI-EAS443:3:62:597:433#0/1  
`a`aS\_`a`\_¥a]W]U^^^\_aa]XY^aa`a```^[WUZ]`  
@HWI-EAS443:3:62:825:1599#0/1  
CCCTGGGTTTTGCTTAATGCATCTTGGTTCAACTCCTTCC  
+HWI-EAS443:3:62:825:1599#0/1  
`¥ZQZV0^XYUUX^R^Q`WUQZ`S]TOWZ^YU\_ZZSV¥a\_  
@HWI-EAS443:3:63:1087:1170#0/1  
AAGGAGTTGAACCAAGATGCATTAAGCAAACCCAGGGAT  
+HWI-EAS443:3:63:1087:1170#0/1  
a\_``ab`bbbaaaabbbababbbba`bbaaa`aabaaba  
@HWI-EAS443:3:63:1243:1570#0/1  
TGCCTGATTAATGATCCCTGGGTTTTGCTTAATGCATCTT  
+HWI-EAS443:3:63:1243:1570#0/1  
aY\_`\_YWaJa¥G\_bab¥T[UZaS]`Y^\_]aa¥a\_U^^^\_  
@HWI-EAS443:3:63:1294:1507#0/1  
GTGCCTGATTAATGATCCCTGGGTTTTGCTTAATGCATCT  
+HWI-EAS443:3:63:1294:1507#0/1  
a^bbaabaabaaaaabbbaa\_a`aaaa`a`aa`\_]a`\_a  
@HWI-EAS443:3:63:1347:299#0/1  
CCAAGATGCATTAAGCAAACCCAGGGATCATTAAATCAGG  
+HWI-EAS443:3:63:1347:299#0/1  
aa\_Xbaababbbaabaa\_aaaa`aaaa\_`aa`\_\_a`]^  
@HWI-EAS443:3:63:217:903#0/1  
CCTGGGTTTTGCTTAATGCATCTTGGTTCAACTCCTTCCT  
+HWI-EAS443:3:63:217:903#0/1  
a\_\_a``¥`a`a`\_\_\_\_`a\_``\_\_\_\_]¥`^[Z^\_``]YY^]  
@HWI-EAS443:3:63:308:1507#0/1  
CCCTGGGTTTTGCTTAATGCATCTTGGTTCAACTCCTTCC  
+HWI-EAS443:3:63:308:1507#0/1  
abba[`]OY``aaaab\_a`a¥`a`aaZ^aa\_`\_^a\_¥a]  
@HWI-EAS443:3:63:541:1047#0/1  
CTGGGTTTTGCTTAATGCATCTTGGTTCAACTCCTTCCTC  
+HWI-EAS443:3:63:541:1047#0/1  
abbab¥baaabaabbaaba`aa\_`a^^aa¥a¥ba`\_^a\_a  
@HWI-EAS443:3:64:1141:708#0/1  
CCCTGGGTTTTGCTTAATGCATCTTGGTTCAACTCCTTCC  
+HWI-EAS443:3:64:1141:708#0/1  
`a`bbaa\_aaaa`aaa`a\_aa`a^aZ^`a\_```a\_^\_  
@HWI-EAS443:3:64:1393:855#0/1  
AGTTGAACCAAGATGCATTAAGCAAACCCAGGGATCATT  
+HWI-EAS443:3:64:1393:855#0/1  
^UQaba¥ZYT^K¥`RI\_ab`aTaba¥0\_^M^0`a\_[\_\_H]



@HWI-EAS443:3:64:1770:449#0/1  
CCCTGGGTTTTGCTTAATGCATCTTGGTTCAACTCCTTCC  
+HWI-EAS443:3:64:1770:449#0/1  
V\_X\_\_¥\_aa¥\_¥VY^¥¥VW]`a¥\_^Z`X[\_]Z^¥]V¥a\_  
@HWI-EAS443:3:64:1783:27#0/1  
CCCTGGGTTTTGCTTAATGCATCTTGGTTCAACTCCTTCC  
+HWI-EAS443:3:64:1783:27#0/1  
`babbbb`bbba`abbbaaaaaaaaa^\_`aaaa\_aa`^¥\_  
@HWI-EAS443:3:64:540:442#0/1  
GTGCCTGATTAATGATCCCTGGGTTTTGCTTAATGCATCT  
+HWI-EAS443:3:64:540:442#0/1  
`I]aaba`aaaa`aaa`\_`aaa\_¥a`^`X`a\_^a`a\_a  
@HWI-EAS443:3:64:567:322#0/1  
GAAGGAGTTGAACCAAGATGCATTAAGCAAAACCCAGGGA  
+HWI-EAS443:3:64:567:322#0/1  
^Y^\_aaWRVaaa`¥`a\_\_`a`a^`Z¥\_\_\_\_`¥Z^`\_\_]]  
@HWI-EAS443:3:64:891:284#0/1  
GGAGTGCCTGATTAATGATCCCTGGGTTTTGCTTAATGCA  
+HWI-EAS443:3:64:891:284#0/1  
ab\_a\_aaabbaa`a`aaa`\_a`aaaa^a`aa^a\_`\_^a^\_  
@HWI-EAS443:3:64:966:226#0/1  
CCTGGGTTTTGCTTAATGCATCTTGGTTCAACTCCTTCCT  
+HWI-EAS443:3:64:966:226#0/1  
aaaabbaabbaabbaa`a\_a\_a`aa\_\_aa`¥\_a^^^\_  
@HWI-EAS443:3:64:970:204#0/1  
CTGGGTTTTGCTTAATGCATCTTGGTTCAACTCCTTCCTC  
+HWI-EAS443:3:64:970:204#0/1  
Z\_a`a``bab]bababbaab`bba^ab`baaa^Uab^``X  
@HWI-EAS443:3:65:1038:1359#0/1  
CTGGGTTTTGCTTAATGCATCTTGGTTCAACTCCTTCCTC  
+HWI-EAS443:3:65:1038:1359#0/1  
aa`aa\_aaabaaaaaaaaaaaaaaaa^aaaa`aaa\_`\_\_`\_  
@HWI-EAS443:3:65:1130:397#0/1  
CCCTGGGTTTTGCTTAATGCATCTTGGTTCAACTCCTTCC  
+HWI-EAS443:3:65:1130:397#0/1  
aabbab\_bbbbabbbabb`aaababba`aaaaa`aaa\_  
@HWI-EAS443:3:65:877:1906#0/1  
AGGAGTTGAACCAAGATGCATTAAGCAAAACCCAGGGATC  
+HWI-EAS443:3:65:877:1906#0/1  
Z\_\_ZQX]N]QR\_[R\_Z]```[^¥UVR¥\_]V¥`bZS]aUS  
@HWI-EAS443:3:65:987:762#0/1  
CCCTGGGTTTTGCTTAATGCATCTTGGTTCAACTCCTTCC  
+HWI-EAS443:3:65:987:762#0/1  
abab\_aaU`babbbbbbbabaabaabaaaaa`aaaa\_aa  
@HWI-EAS443:3:66:1056:1219#0/1  
TGCCTGATTAATGATCCCTGGGTTTTGCTTAATGCATCTT  
+HWI-EAS443:3:66:1056:1219#0/1  
¥\_a¥]`X¥]a\_Z`aaa^`]a^\_TY\_\_^]a^a^V\_Y^T^a  
@HWI-EAS443:3:66:1284:609#0/1  
GGAAGGAGTTGAACCAAGATGCATTAAGCAAAACCCAGGG

+HWI-EAS443:3:66:1284:609#0/1  
aa`aaaa\_\_`a\_a\_\_`a\_aa]\_aaa\_a`\_\_a]`]`\_\_^  
@HWI-EAS443:3:66:1716:1975#0/1  
CTGGGTTTTGCTTAATGCATCTTGGTTCAACTCCTTCCTC  
+HWI-EAS443:3:66:1716:1975#0/1  
aba``]bbbbaabaa\_\_aaabbabaaabaY`aaba`]aa  
@HWI-EAS443:3:66:30:1267#0/1  
CCTGGGTTTTGCTTAATGCATCTTGGTTCAACTCCTTCCT  
+HWI-EAS443:3:66:30:1267#0/1  
abbba`J`]aaTZS^`]baa`a\_Y^^Ya^aa`ab`Z\_\_]  
@HWI-EAS443:3:66:387:1489#0/1  
CCTGGGTTTTGCTTAATGCATCTTGGTTCAACTCCTTCCT  
+HWI-EAS443:3:66:387:1489#0/1  
aaWZO[T¥WKX^¥YRXS[] [T¥¥\_¥XOYY\_\_ZZ¥ZXZVZ  
@HWI-EAS443:3:66:697:22#0/1  
CCTGGGTTTTGCTTAATGCATCTTGGTTCAACTCCTTCCT  
+HWI-EAS443:3:66:697:22#0/1  
a`bbb`bbbabb\_[¥baaa[`aaa\_\_aa`aa^`^XT^  
@HWI-EAS443:3:66:712:1594#0/1  
CTGATTAATGATCCCTGGGTTTTGCTTAATGCATCTTGGT  
+HWI-EAS443:3:66:712:1594#0/1  
`[YW]ba^ba`aab`aaV^P`a^]\_aa^`QX`aaaa¥Ya  
@HWI-EAS443:3:66:795:53#0/1  
GAAGGAGTTGAACCAAGATGCATTAAGCAAAAACCCAGGGA  
+HWI-EAS443:3:66:795:53#0/1  
a`aaa\_Y[\_a`a`]`Zaa``¥`a\_\_]aa\_`^\_\_]\_]\_^\_^  
@HWI-EAS443:3:67:1021:559#0/1  
CCTGGGTTTTGCTTAATGCATCTTGGTTCAACTCCTTCCT  
+HWI-EAS443:3:67:1021:559#0/1  
`\_`b`a`]`aabaa`\_\_Y^\_]a^`aa`^a``a`a][][]\_[]\_  
@HWI-EAS443:3:67:1074:592#0/1  
GTGCCTGATTAATGATCCCTGGGTTTTGCTTAATGCATCT  
+HWI-EAS443:3:67:1074:592#0/1  
a\_aaaaaaaaaa`^`^`aaa]`aa`\_aaa\_`\_\_\_`]\_  
@HWI-EAS443:3:67:1138:1622#0/1  
GGAAGGAGTTGAACCAAGATGCATTAAGCAAAAACCCAGGG  
+HWI-EAS443:3:67:1138:1622#0/1  
aaa`W`\_\_[aab`Y\_aaa```aa\_a```aa\_a¥\_\_\_\_]]\_  
@HWI-EAS443:3:67:1287:1771#0/1  
CTGGGTTTTGCTTAATGCATCTTGGTTCAACTCCTTCCTC  
+HWI-EAS443:3:67:1287:1771#0/1  
ab`^`Pa`ba\_bbbb]a¥aba`\_`\_aaaa`a`Xaa`a^aa  
@HWI-EAS443:3:67:1494:619#0/1  
CCCTGGGTTTTGCTTAATGCATCTTGGTTCAACTCCTTCCTC  
+HWI-EAS443:3:67:1494:619#0/1  
ab`a]Ybab]\_bbab\_bb```a`ba^Y`\_`a]\_Y]\_`a\_]\_  
@HWI-EAS443:3:67:1626:1099#0/1  
GATTAATGATCCCTGGGTTTTGCTTAATGCATCTTGGTTC  
+HWI-EAS443:3:67:1626:1099#0/1  
aZ`]R`^^^ZGUX`WY^X\_aa\_`\_`¥^]RX¥\_Y\_^]TS\_Y

@HWI-EAS443:3:67:1671:1867#0/1  
GGTTTTGCTTAATGCATCTTGGTTCAACTCCTTCCTCACA  
+HWI-EAS443:3:67:1671:1867#0/1  
a]QMO\_S\_TSV` `[OVP]¥^U]ZTOTXXLM¥VZ^UU¥SV¥  
@HWI-EAS443:3:67:1722:1277#0/1  
GGAGTGCCTGATTAATGATCCCTGGGTTTTGCTTAATGCA  
+HWI-EAS443:3:67:1722:1277#0/1  
abbVbaZYb\_[]V`]a]¥TZZa`a`WRaaY^aaaaaa¥a\_  
@HWI-EAS443:3:67:176:943#0/1  
CTGGGTTTTGCTTAATGCATCTTGGTTCAACTCCTTCCTC  
+HWI-EAS443:3:67:176:943#0/1  
aa\_]`^aa`^^aaa^a`]¥\_`^^`[]^^]\_`\_¥]a^`\_^  
@HWI-EAS443:3:67:531:1763#0/1  
CCCTGGGTTTTGCTTAATGCATCTTGGTTCAACTCCTTCC  
+HWI-EAS443:3:67:531:1763#0/1  
[abY`bb`¥^V\_`^\_a\_\_ZSVa[a¥LV]]baaa`^a]X  
@HWI-EAS443:3:67:912:1683#0/1  
GTTGAACCAAGATGCATTAAGCAAAACCCAGGGATCATTA  
+HWI-EAS443:3:67:912:1683#0/1  
`YY^^`b`^¥]`aa]\_a\_Ya\_bba`ab``]S[X\_\_`\_\_[]  
@HWI-EAS443:3:68:1125:713#0/1  
GCCTGATTAATGATCCCTGGGTTTTGCTTAATGCATCTTG  
+HWI-EAS443:3:68:1125:713#0/1  
ab^T^TX`ZW[V^aY¥N\_]\_LV[PXZX\_WDKXLSXU[^[  
@HWI-EAS443:3:68:1142:1046#0/1  
CTGGGTTTTGCTTAATGCATCTTGGTTCAACTCCTTCCTC  
+HWI-EAS443:3:68:1142:1046#0/1  
ababbaabbbbbbbbabbbbbabbbbaaaabbaaaabaa`ba  
@HWI-EAS443:3:69:1138:1302#0/1  
GCCTGATTAATGATCCCTGGGTTTTGCTTAATGCATCTTG  
+HWI-EAS443:3:69:1138:1302#0/1  
aa\_OTDSST\_Z]RSZP\_UXS]WYY]\_V\_^T\_a¥`MUWZ[a  
@HWI-EAS443:3:69:1533:1729#0/1  
CTGGGTTTTGCTTAATGCATCTTGGTTCAACTCCTTCCTC  
+HWI-EAS443:3:69:1533:1729#0/1  
Y\_\_[\_bba\_\_`aa`aa¥b``a\_\_¥^^\_]Z¥a```a^`^a  
@HWI-EAS443:3:69:1691:1410#0/1  
TGCCTGATTAATGATCCCTGGGTTTTGCTTAATGCATCTT  
+HWI-EAS443:3:69:1691:1410#0/1  
abbbbaab`\_[¥aa`aaaaaa\_aaaa`b`L`ZZ`[a`  
@HWI-EAS443:3:69:183:1626#0/1  
CTGGGTTTTGCTTAATGCATCTTGGTTCAACTCCTTCCTC  
+HWI-EAS443:3:69:183:1626#0/1  
aaa[`W`\_`\_a\_\_Y\_`^a`^\_`\_^OX^^a[^^^\_]]\_  
@HWI-EAS443:3:69:379:237#0/1  
TCCCTGGGTTTTGCTTAATGCATCTTGGTTCAACTCCTTC  
+HWI-EAS443:3:69:379:237#0/1  
aa^^]bab^`a``\_aaYRQ`a¥a`a`a[^^\_\_`\_`\_`^`]]  
@HWI-EAS443:3:69:66:77#0/1  
CTGGGTTTTGCTTAATGCATCTTGGTTCAACTCCTTCCTC

+HWI-EAS443:3:69:66:77#0/1  
abbbb^bbbaabbaaaaaaababa^a\_aa\_a`Za`\_\_\_\_  
@HWI-EAS443:3:6:1571:1255#0/1  
CCTGGGTTTTGCTTAATGCATCTTGGTTCAACTCCTTCCT  
+HWI-EAS443:3:6:1571:1255#0/1  
Ob[ `[S[Z\_\_^aba\_^`b` `\_[`bbUabZbabYJL\_` [ab  
@HWI-EAS443:3:6:465:928#0/1  
CTGGGTTTTGCTTAATGCATCTTGGTTCAACTCCTTCCTC  
+HWI-EAS443:3:6:465:928#0/1  
]b¥J\_Y]\_abbba\_bba[aa]`a]bYYU¥aa^[aaaa`^\_  
@HWI-EAS443:3:70:1127:1586#0/1  
CTGGGTTTTGCTTAATGCATCTTGGTTCAACTCCTTCCTC  
+HWI-EAS443:3:70:1127:1586#0/1  
aaaa`\_^^[`a`b`aaa¥aa`aaa^¥\_aba\_`\_`a\_^\_  
@HWI-EAS443:3:70:1197:718#0/1  
CTGGGTTTTGCTTAATGCATCTTGGTTCAACTCCTTCCTC  
+HWI-EAS443:3:70:1197:718#0/1  
aaZxa`baRRN\_¥YXWIZV]bb`]M^`b¥W^]`U^T`T\_\_  
@HWI-EAS443:3:70:177:1822#0/1  
CCCTGGGTTTTGCTTAATGCATCTTGGTTCAACTCCTTCCTC  
+HWI-EAS443:3:70:177:1822#0/1  
abaaa`aZ^]a^a\_a]a\_\_aa\_aa`\_]¥Xaa\_a\_b^X^a`  
@HWI-EAS443:3:70:209:1334#0/1  
CCCTGGGTTTTGCTTAATGCATCTTGGTTCAACTCCTTCCTC  
+HWI-EAS443:3:70:209:1334#0/1  
abaaa\_a[ `\_a`a` `a\_^\_aa\_a\_\_\_Z^]a\_a\_\_\_a¥^]`  
@HWI-EAS443:3:70:457:255#0/1  
GCCTGATTAATGATCCCTGGGTTTTGCTTAATGCATCTTG  
+HWI-EAS443:3:70:457:255#0/1  
aaaaa\_aaa`aa`a` `aaY^Ua` ` `aaa` `a[^a\_\_\_`  
@HWI-EAS443:3:70:490:108#0/1  
TCCCTGGGTTTTGCTTAATGCATCTTGGTTCAACTCCTTCCTC  
+HWI-EAS443:3:70:490:108#0/1  
aa`aba` [aaaaaaaaaaaa\_XY` \_\_\_\_]\_`^`\_Y\_\_\_]]Y  
@HWI-EAS443:3:70:881:518#0/1  
CCCTGGGTTTTGCTTAATGCATCTTGGTTCAACTCCTTCCTC  
+HWI-EAS443:3:70:881:518#0/1  
abb`¥a`IZbUU¥baaa]` `b]^^` ` `]\_baa`a`P[Ya  
@HWI-EAS443:3:70:958:876#0/1  
CCTGGGTTTTGCTTAATGCATCTTGGTTCAACTCCTTCCTC  
+HWI-EAS443:3:70:958:876#0/1  
aaabbbabbbbaaaabbabbbbbbaa¥aabbbbb`bba`aa  
@HWI-EAS443:3:71:1100:1660#0/1  
CTGGGTTTTGCTTAATGCATCTTGGTTCAACTCCTTCCTC  
+HWI-EAS443:3:71:1100:1660#0/1  
aWT]aR^\_\_\_\_^aaaWW¥\_]aa` [ ]X`¥baXa`¥` \_` [ ]¥  
@HWI-EAS443:3:71:1561:697#0/1  
CCCTGGGTTTTGCTTAATGCATCTTGGTTCAACTCCTTCCTC  
+HWI-EAS443:3:71:1561:697#0/1  
aabbb\_aababbabbbbaa`bb^babbaabbaaaa\_ba¥]

@HWI-EAS443:3:71:1648:1069#0/1  
CTGGGTTTTGCTTAATGCATCTTGGTTCAACTCCTTCCTC  
+HWI-EAS443:3:71:1648:1069#0/1  
\_^^a]JPYRY[WW\_[^`UQ]Q^aaZZ^\_\_`TY`\_`^IF[W  
@HWI-EAS443:3:71:302:332#0/1  
CTGGGTTTTGCTTAATGCATCTTGGTTCAACTCCTTCCTC  
+HWI-EAS443:3:71:302:332#0/1  
aa¥Z][ ]`[\_`¥```a[]\_`^^¥[Y¥¥¥^^^¥¥^^ZZZ\_  
@HWI-EAS443:3:71:318:1051#0/1  
CCCTGGGTTTTGCTTAATGCATCTTGGTTCAACTCCTTCC  
+HWI-EAS443:3:71:318:1051#0/1  
aaZW\_¥X\_¥¥¥¥\_\_Z\_K\_¥UZ\_¥\_W\_TZS]\_Za`\_T¥[]`  
@HWI-EAS443:3:72:1059:367#0/1  
CCCTGGGTTTTGCTTAATGCATCTTGGTTCAACTCCTTCC  
+HWI-EAS443:3:72:1059:367#0/1  
abbbbbbb`bbbbbbbbbaabbbbbbaabbbbaaa^`aaa  
@HWI-EAS443:3:72:1313:132#0/1  
TGCATGTGTGAGGAAGGAGTTGAACCAAGATGCATTAAGC  
+HWI-EAS443:3:72:1313:132#0/1  
ababbbab`babbaabbabaaaaaWa`baab`abaa`a¥  
@HWI-EAS443:3:72:1324:809#0/1  
CCCTGGGTTTTGCTTAATGCATCTTGGTTCAACTCCTTCC  
+HWI-EAS443:3:72:1324:809#0/1  
[bbababTabb\_`bbbb^a`abbbab¥aabbbbb]X``[^  
@HWI-EAS443:3:72:225:616#0/1  
CCTGGGTTTTGCTTAATGCATCTTGGTTCAACTCCTTCCT  
+HWI-EAS443:3:72:225:616#0/1  
a`abaa\_aaaaabaaaaaa`aaa`a```aa`\_\_```\_a\_^  
@HWI-EAS443:3:73:114:237#0/1  
GCTTAATGCATCTTGGTTCAACTCCTTCCTCACACATGCA  
+HWI-EAS443:3:73:114:237#0/1  
aaaaaa\_a\_a\_\_aaa`\_`\_\_`^`]\_``]`^`\_`\_`Z\_^]W^  
@HWI-EAS443:3:73:1252:236#0/1  
CTGGGTTTTGCTTAATGCATCTTGGTTCAACTCCTTCCTC  
+HWI-EAS443:3:73:1252:236#0/1  
abbbbbbbbbbbbbbb`\_bb`bbb`bbaab`bbabbaaaa  
@HWI-EAS443:3:73:1355:1679#0/1  
CTGGGTTTTGCTTAATGCATCTTGGTTCAACTCCTTCCTC  
+HWI-EAS443:3:73:1355:1679#0/1  
aabb\_`S¥\_[aU`aa¥b`a¥a`OOMS]R`aZ^VLa\_^R\_¥  
@HWI-EAS443:3:73:216:531#0/1  
CCTGGGTTTTGCTTAATGCATCTTGGTTCAACTCCTTCCT  
+HWI-EAS443:3:73:216:531#0/1  
abbbbb\_abaaaaaa`aaaaaaab``a`aaaa`aaa```  
@HWI-EAS443:3:73:409:492#0/1  
CCTGGGTTTTGCTTAATGCATCTTGGTTCAACTCCTTCCT  
+HWI-EAS443:3:73:409:492#0/1  
abb`ab]aaaabaabaaaaaaa```aa``aa`a^`\_`  
@HWI-EAS443:3:73:554:248#0/1  
GCCTGATTAATGATCCCTGGGTTTTGCTTAATGCATCTTG

+HWI-EAS443:3:73:554:248#0/1  
`abbbababb\_]ababbbbbb[babaaaabaaaa`aYa``  
@HWI-EAS443:3:73:758:1571#0/1  
CTGGGTTTTGCTTAATGCATCTTGGTTCAACTCCTTCCTC  
+HWI-EAS443:3:73:758:1571#0/1  
a`baaTHT[a]Ya[X[LXRTa¥Y`VZ`S¥QW¥Y`Y^\_\_]  
@HWI-EAS443:3:73:985:1109#0/1  
CCCTGGGTTTTGCTTAATGCATCTTGGTTCAACTCCTTCC  
+HWI-EAS443:3:73:985:1109#0/1  
ababbab`babaabbbbaaaaa`aaa[`aaaaaa`abaa  
@HWI-EAS443:3:74:1408:1171#0/1  
CTGGGTTTTGCTTAATGCATCTTGGTTCAACTCCTTCCTC  
+HWI-EAS443:3:74:1408:1171#0/1  
abbbbaabbbbabababbabbabb`aaaa\_abaaaa\_a\_  
@HWI-EAS443:3:74:1704:1694#0/1  
AAGGAGTTGAACCAAGATGCATTAAGCAAAACCCAGGGAT  
+HWI-EAS443:3:74:1704:1694#0/1  
abba\_]a\_ab^]aabaababaa\_]`a`\_W¥`aaa^`\_  
@HWI-EAS443:3:74:198:497#0/1  
GAAGGAGTTGAACCAAGATGCATTAAGCAAAACCCAGGGA  
+HWI-EAS443:3:74:198:497#0/1  
Z`bb\_`a`bb`aa]^bbbabbbbaa[\_ab[b`````baaaa  
@HWI-EAS443:3:74:340:584#0/1  
AGGAGTTGAACCAAGATGCATTAAGCAAAACCCAGGGATC  
+HWI-EAS443:3:74:340:584#0/1  
abbabaabbbbabaaaaabbabaaaa\_]a`\_aa[a`\_^  
@HWI-EAS443:3:74:82:1000#0/1  
AAGGAGTTGAACCAAGATGCATTAAGCAAAACCCAGGGAT  
+HWI-EAS443:3:74:82:1000#0/1  
ZO]ZTY[HT\_ZX`Ya]SVaa[[\_Y¥W]UUY^VY]ZVSO[X  
@HWI-EAS443:3:75:1290:1389#0/1  
CCTGGGTTTTGCTTAATGCATCTTGGTTCAACTCCTTCCT  
+HWI-EAS443:3:75:1290:1389#0/1  
abb[b\_bba`W¥b\_KaVb`]bSbaW^aa`]b^ba^a`^aY  
@HWI-EAS443:3:75:539:572#0/1  
CCCTGGGTTTTGCTTAATGCATCTTGGTTCAACTCCTTCC  
+HWI-EAS443:3:75:539:572#0/1  
`ba[V\_]bb¥0^`Za^R0]Sba\_W¥Taab^`a`a]a]T`  
@HWI-EAS443:3:75:607:1430#0/1  
CCCTGGGTTTTGCTTAATGCATCTTGGTTCAACTCCTTCC  
+HWI-EAS443:3:75:607:1430#0/1  
^`bbba\_H[Zbb`[b\_ba`Zbbba`a`\_bbbbbabbabb  
@HWI-EAS443:3:75:827:1026#0/1  
CCCTGGGTTTTGCTTAATGCATCTTGGTTCAACTCCTTCC  
+HWI-EAS443:3:75:827:1026#0/1  
abaaba\_T\_\_`aa\_Y\_a\_aa`a`a\_]\_a`a^\_a```^`  
@HWI-EAS443:3:76:1217:295#0/1  
TGCCTGATTAATGATCCCTGGGTTTTGCTTAATGCATCTT  
+HWI-EAS443:3:76:1217:295#0/1  
`b`\_ab[a\_a`a]M[\_`ba]M]``YZ^`Y\_\_a]^`Wa^

@HWI-EAS443:3:76:649:1024#0/1  
GGAGTTGAACCAAGATGCATTAAGCAAAACCCAGGGATCA  
+HWI-EAS443:3:76:649:1024#0/1  
a¥YUY[\_aa¥W[]WX`¥^`\_a\_^]`^\_^[[U^^XKT]]\_  
@HWI-EAS443:3:76:844:772#0/1  
GCCTGATTAATGATCCCTGGGTTTTGCTTAATGCATCTTG  
+HWI-EAS443:3:76:844:772#0/1  
a`\_VZ]`RUVZP¥TVVS\_\_¥0]Y^]^^X]Y]]UY^Y]  
@HWI-EAS443:3:77:1264:941#0/1  
CCTGATTAATGATCCCTGGGTTTTGCTTAATGCATCTTG  
+HWI-EAS443:3:77:1264:941#0/1  
abbbbbbaabbbbbbbbaabbaabbbba`ababaaa  
@HWI-EAS443:3:77:1307:718#0/1  
CCTGGGTTTTGCTTAATGCATCTTGGTTCAACTCCTCCT  
+HWI-EAS443:3:77:1307:718#0/1  
]abba\_bbabaaababb\_aabbab\_aaa`\_aYaaaa`b  
@HWI-EAS443:3:77:308:399#0/1  
CCCTGGGTTTTGCTTAATGCATCTTGGTTCAACTCCTCC  
+HWI-EAS443:3:77:308:399#0/1  
J¥a`\_aM¥ba¥a^^^`¥`\_]a]aaabaKVbbZ^SW`a[ab  
@HWI-EAS443:3:77:525:601#0/1  
CCTGGGTTTTGCTTAATGCATCTTGGTTCAACTCCTCCT  
+HWI-EAS443:3:77:525:601#0/1  
abbbba[aa^Y^\_aaa\_Za`a^^aa]¥^aaaYaa`\_\_¥a`  
@HWI-EAS443:3:77:547:1631#0/1  
GCCTGATTAATGATCCCTGGGTTTTGCTTAATGCATCTTG  
+HWI-EAS443:3:77:547:1631#0/1  
abbbabbbb`abaaababa\_]`aaa`aaaaaa]\_aaa  
@HWI-EAS443:3:77:636:1769#0/1  
CCCTGGGTTTTGCTTAATGCATCTTGGTTCAACTCCTCC  
+HWI-EAS443:3:77:636:1769#0/1  
abb`a`aVbabbbbbba\_aaaaaaa\_abaaaab`a``]  
@HWI-EAS443:3:77:728:1582#0/1  
GCCTGATTAATGATCCCTGGGTTTTGCTTAATGCATCTTG  
+HWI-EAS443:3:77:728:1582#0/1  
a^Y\_\_YZ^VWZ]^a]W^\_^`SX\_TPT^`\_a^^Y\_\_`\_aa  
@HWI-EAS443:3:78:211:1135#0/1  
TGGGTTTTGCTTAATGCATCTTGGTTCAACTCCTCCTCA  
+HWI-EAS443:3:78:211:1135#0/1  
aaaa[a\_\_^^\_a]^\_\_a¥]¥`^`\_]\_]\_a\_\_^W`^^\_W]^  
@HWI-EAS443:3:78:41:380#0/1  
TGCATGTGTGAGGAAGGAGTTGAACCAAGATGCATTAAGC  
+HWI-EAS443:3:78:41:380#0/1  
\_bb]bb]¥[aV\_`]bbab¥aab\_aaaa`aba]aaaaa  
@HWI-EAS443:3:78:54:515#0/1  
GGAAGGAGTTGAACCAAGATGCATTAAGCAAAACCCAGGG  
+HWI-EAS443:3:78:54:515#0/1  
`YFX`¥VUYVY¥]Q^`ZWU\_NZ[¥[\_[[[]]WYV¥RWTT]B  
@HWI-EAS443:3:78:563:1920#0/1  
CCCTGGGTTTTGCTTAATGCATCTTGGTTCAACTCCTCC

+HWI-EAS443:3:78:563:1920#0/1  
abbaaaa]aa`\_aaabb\_Z`a\_a\_a¥\_\_\_`aaa`]`\_[]\_  
@HWI-EAS443:3:78:902:1322#0/1  
CCTGGGTTTTGCTTAATGCATCTTGGTTCAACTCCTTCCT  
+HWI-EAS443:3:78:902:1322#0/1  
`aY`\_a\_a`aaa\_aaa`\_`a\_^a^¥Z`\_\_^^\_a\_a\_]\_]\_  
@HWI-EAS443:3:79:1050:1285#0/1  
CCCTGGGTTTTGCTTAATGCATCTTGGTTCAACTCCTTCC  
+HWI-EAS443:3:79:1050:1285#0/1  
aa]]baaT[\_`bb`aaa[]\_]baaaaa`aaaaaa\_`¥`a  
@HWI-EAS443:3:79:1437:130#0/1  
CCCTGGGTTTTGCTTAATGCATCTTGGTTCAACTCCTTCC  
+HWI-EAS443:3:79:1437:130#0/1  
aabbb\_babaab`bV]bbbIbbTbbbaaaaa[bbZJZ\_H]  
@HWI-EAS443:3:79:496:1627#0/1  
CCCTGGGTTTTGCTTAATGCATCTTGGTTCAACTCCTTCC  
+HWI-EAS443:3:79:496:1627#0/1  
aba`]`aZ\_aa^`\_ba]Z`\_`\_]`a^V`a]^]\_`^^`\_  
@HWI-EAS443:3:7:1434:1261#0/1  
ATCCCTGGGTTTTGCTTAATGCATCTTGGTTCAACTCCTT  
+HWI-EAS443:3:7:1434:1261#0/1  
abaaabbbb`baba\_aabbab\_aa^baaa^aX`]`]aa  
@HWI-EAS443:3:7:1550:585#0/1  
CCTGGGTTTTGCTTAATGCATCTTGGTTCAACTCCTTCCT  
+HWI-EAS443:3:7:1550:585#0/1  
aa`\_a\_Pb`[aQ\_aaabaa\_^R^aaVaaaa\_a^PHXaPS`  
@HWI-EAS443:3:7:210:1012#0/1  
AAGGAGTTGAACCAAGATGCATTAAGCAAAACCCAGGGAT  
+HWI-EAS443:3:7:210:1012#0/1  
aa\_a¥`\_aaa]aa`\_a`\_`aaaa`\_\_\_\_\_`]`\_`Vaa`\_^U  
@HWI-EAS443:3:7:554:1612#0/1  
AGTTGAACCAAGATGCATTAAGCAAAACCCAGGGATCATT  
+HWI-EAS443:3:7:554:1612#0/1  
abI`abababababb`ababbaab¥Y\_aa^`aa^a\_aaaa  
@HWI-EAS443:3:7:711:449#0/1  
GCCTGATTAATGATCCCTGGGTTTTGCTTAATGCATCTTG  
+HWI-EAS443:3:7:711:449#0/1  
a`a¥^`a]a`^aYQ\_^\_a\_aY¥[`\_\_^`\_\_`X0¥R`Z\_  
@HWI-EAS443:3:7:784:1231#0/1  
CTGGGTTTTGCTTAATGCATCTTGGTTCAACTCCTTCCTC  
+HWI-EAS443:3:7:784:1231#0/1  
aabbbbaaabbbbbbabba\_abbabab`[]a`aaba`]a]  
@HWI-EAS443:3:80:1063:1503#0/1  
CTGGGTTTTGCTTAATGCATCTTGGTTCAACTCCTTCCTC  
+HWI-EAS443:3:80:1063:1503#0/1  
a`^\_]FOZZOa`]aaW\_T\_\_¥^Yaa^aaaVPaa^`RXUQS  
@HWI-EAS443:3:80:1074:1131#0/1  
GGGTTTTGCTTAATGCATCTTGGTTCAACTCCTTCCTCAC  
+HWI-EAS443:3:80:1074:1131#0/1  
aaa[`aa`[aaaa¥¥a\_b\_aaa\_\_\_W`a\_\_\_]]`\_Q^\_^\_`^`



@HWI-EAS443:3:80:1628:1447#0/1  
CCTGGGTTTTGCTTAATGCATCTTGGTTCAACTCCTTCCT  
+HWI-EAS443:3:80:1628:1447#0/1  
a``SZ\_S]a`bY\_a```baba`ba]Ka`^S`aZ^ba]`a  
@HWI-EAS443:3:81:329:1868#0/1  
CCCTGGGTTTTGCTTAATGCATCTTGGTTCAACTCCTTCC  
+HWI-EAS443:3:81:329:1868#0/1  
ababaa[[a]]T\_\_U\_\_Z]\_^`ba`XXU`baaa]\_a[[Y\_  
@HWI-EAS443:3:81:396:1389#0/1  
TCCCTGGGTTTTGCTTAATGCATCTTGGTTCAACTCCTTC  
+HWI-EAS443:3:81:396:1389#0/1  
abaaa]¥`G`\_\_`a`\_``[\_\_a`aa`W[¥\_a^aa`a`\_[a  
@HWI-EAS443:3:81:513:1323#0/1  
AAGGAGTTGAACCAAGATGCATTAAGCAAAACCCAGGGAT  
+HWI-EAS443:3:81:513:1323#0/1  
a\_a```^aabaaaa\_¥W`\_aaa\_a\_\_\_a\_aa\_`¥^Z]^`^`  
@HWI-EAS443:3:81:971:785#0/1  
CCTGGGTTTTGCTTAATGCATCTTGGTTCAACTCCTTCCT  
+HWI-EAS443:3:81:971:785#0/1  
abbbab`bbababaaaab`ab\_baba`a`a][a^`a\_`\_a  
@HWI-EAS443:3:82:1012:749#0/1  
CTGGGTTTTGCTTAATGCATCTTGGTTCAACTCCTTCCTC  
+HWI-EAS443:3:82:1012:749#0/1  
abbbabbabbbbbb`bbbbbbbbbabababba\_abbabb  
@HWI-EAS443:3:82:1107:1306#0/1  
GAGGAAGGAGTTGAACCAAGATGCATTAAGCAAAACCCAG  
+HWI-EAS443:3:82:1107:1306#0/1  
aa`[aaaaa]\_\_a`[^a\_a^`aaaa`\_a]\_Z]\_`]W\_^  
@HWI-EAS443:3:82:361:248#0/1  
GCCTGATTAATGATCCCTGGGTTTTGCTTAATGCATCTTG  
+HWI-EAS443:3:82:361:248#0/1  
abaa`XR\_M]``LR\_U^Z^]YX\_^IQ`\_NTTNW]]]^`Y\_  
@HWI-EAS443:3:82:461:1354#0/1  
CTGGGTTTTGCTTAATGCATCTTGGTTCAACTCCTTCCTC  
+HWI-EAS443:3:82:461:1354#0/1  
ababaabbbbbbbbbbbbababbaabbbabbbbbbb`ba  
@HWI-EAS443:3:82:520:1481#0/1  
GTGAGGAAGGAGTTGAACCAAGATGCATTAAGCAAAACCC  
+HWI-EAS443:3:82:520:1481#0/1  
aY^Y\_]Z`a¥\_\_U[[^`^Z]aa[]¥aa]aWX\_]¥]¥\_YW  
@HWI-EAS443:3:82:534:497#0/1  
CCTGGGTTTTGCTTAATGCATCTTGGTTCAACTCCTTCCT  
+HWI-EAS443:3:82:534:497#0/1  
abbbbbbabbbbabba[ZYSZZ[\_`b``WU`KZ¥\_Q\_a`VY  
@HWI-EAS443:3:82:884:1610#0/1  
GCCTGATTAATGATCCCTGGGTTTTGCTTAATGCATCTTG  
+HWI-EAS443:3:82:884:1610#0/1  
abaa\_\_aab`a`\_aaa^aaaa\_abaa`aaaa^aa`aaa`a  
@HWI-EAS443:3:82:952:1838#0/1  
CTGGGTTTTGCTTAATGCATCTTGGTTCAACTCCTTCCTC

+HWI-EAS443:3:82:952:1838#0/1  
`X`aZ]S]Z00Z[\_UZaa\_]aWWR^`¥`a`¥^M[VV[`a  
@HWI-EAS443:3:83:434:155#0/1  
GATCCCTGGGTTTTGCTTAATGCATCTTGGTTCAACTCCT  
+HWI-EAS443:3:83:434:155#0/1  
ab`bbbbbb`bbababbbabbabbababbaa`bbaaaaa  
@HWI-EAS443:3:84:277:1759#0/1  
GCCTGATTAATGATCCCTGGGTTTTGCTTAATGCATCTTG  
+HWI-EAS443:3:84:277:1759#0/1  
\_bbaVSa`Ta\_`aa``aaaaZab`^`Ybaaaaa[a`X]  
@HWI-EAS443:3:84:515:386#0/1  
CCCTGGGTTTTGCTTAATGCATCTTGGTTCAACTCCTTCC  
+HWI-EAS443:3:84:515:386#0/1  
`baabb¥aabbbbaaaaa^ababbbbaa\_abbaba]Y\_aaa  
@HWI-EAS443:3:84:62:1222#0/1  
GGGTTTTGCTTAATGCATCTTGGTTCAACTCCTTCCTCAC  
+HWI-EAS443:3:84:62:1222#0/1  
abbSbababbabaaabbbbbbbbaabbabaabaabaaaa  
@HWI-EAS443:3:84:712:1220#0/1  
GTGCCTGATTAATGATCCCTGGGTTTTGCTTAATGCATCT  
+HWI-EAS443:3:84:712:1220#0/1  
^R`a`¥^¥\_`]]][`Z¥`\_`a\_a\_V\_\_`\_a]\_a[[^]]a\_\_  
@HWI-EAS443:3:84:737:909#0/1  
GTTTTGCTTAATGCATCTTGGTTCAACTCCTTCCTCACAC  
+HWI-EAS443:3:84:737:909#0/1  
a¥aTQR¥\_`aa¥WY\_aaaa]\_HYa\_\_a`a¥\_aa\_\_a``[0  
@HWI-EAS443:3:84:910:531#0/1  
CCTGGGTTTTGCTTAATGCATCTTGGTTCAACTCCTTCCT  
+HWI-EAS443:3:84:910:531#0/1  
abbbb`]abaa\_abaabaab`b``]``abbaa``abb¥¥  
@HWI-EAS443:3:85:121:485#0/1  
TGCCTGATTAATGATCCCTGGGTTTTGCTTAATGCATCTT  
+HWI-EAS443:3:85:121:485#0/1  
aaaaaa\_aa\_T\_aa`\_aaaa\_a]```a\_a`a^``aa`\_`\_`  
@HWI-EAS443:3:85:1277:1070#0/1  
CTGGGTTTTGCTTAATGCATCTTGGTTCAACTCCTTCCTC  
+HWI-EAS443:3:85:1277:1070#0/1  
abbb`\_abbaabbbabaababab`aa\_ba\_aa`aa`Xa\_  
@HWI-EAS443:3:85:142:1173#0/1  
CTGGGTTTTGCTTAATGCATCTTGGTTCAACTCCTTCCTC  
+HWI-EAS443:3:85:142:1173#0/1  
ab^]]¥baaabaabbaa]\_baaaa¥Y\_^`]a`^[\`aaa`a  
@HWI-EAS443:3:85:759:931#0/1  
CCTGGGTTTTGCTTAATGCATCTTGGTTCAACTCCTTCCT  
+HWI-EAS443:3:85:759:931#0/1  
abbb^b^bbbbabbbbbbbabbbbbbaaba\_`b`aaaaab  
@HWI-EAS443:3:85:84:842#0/1  
CCTGGGTTTTGCTTAATGCATCTTGGTTCAACTCCTTCCT  
+HWI-EAS443:3:85:84:842#0/1  
a`X]]Ma\_]^\_\_\_`a]Z¥`^`\_`V¥]^ZXW]\_Z]W^V¥

@HWI-EAS443:3:85:990:1562#0/1  
CCCTGGGTTTTGCTTAATGCATCTTGGTTCAACTCCTTCC  
+HWI-EAS443:3:85:990:1562#0/1  
`ababaaaba``baba\_bbbbbbbb`\_bba`bababbba  
@HWI-EAS443:3:86:1130:130#0/1  
CCTGGGTTTTGCTTAATGCATCTTGGTTCAACTCCTTCCCT  
+HWI-EAS443:3:86:1130:130#0/1  
a`Ya^TM\_``aUabbbba]a``V\_X^[]^a¥^]LYTPX\_  
@HWI-EAS443:3:86:265:903#0/1  
CCTGGGTTTTGCTTAATGCATCTTGGTTCAACTCCTTCCCT  
+HWI-EAS443:3:86:265:903#0/1  
ab``aaZ]W]a]aaaa`aY``\_``\_]`aa\_`aa`]¥\_\_`  
@HWI-EAS443:3:86:346:1533#0/1  
CTGATTAATGATCCCTGGGTTTTGCTTAATGCATCTTGGT  
+HWI-EAS443:3:86:346:1533#0/1  
abaaabbbbab`abbaaba^baaaaaaba`abbaa`aa¥^  
@HWI-EAS443:3:86:401:1397#0/1  
CTGGGTTTTGCTTAATGCATCTTGGTTCAACTCCTTCCCTC  
+HWI-EAS443:3:86:401:1397#0/1  
Ta\_Nbba`b[b[babab`Zaa]V[RI[`b]a\_b\_aaa`a]  
@HWI-EAS443:3:86:487:80#0/1  
GCCTGATTAATGATCCCTGGGTTTTGCTTAATGCATCTTG  
+HWI-EAS443:3:86:487:80#0/1  
aa^]b[a`]V]``]X\_]\_^`Y\_]\_\_Y^\_\_Y^\_]\_]UU^T  
@HWI-EAS443:3:86:548:318#0/1  
TGGGTTTTGCTTAATGCATCTTGGTTCAACTCCTTCCCTCA  
+HWI-EAS443:3:86:548:318#0/1  
a`\_`Vaaa^aa`aa^[aaaaa`Z^\_\_a\_\_a^^`\_\_\_^]\_  
@HWI-EAS443:3:86:798:1824#0/1  
TGATTAATGATCCCTGGGTTTTGCTTAATGCATCTTGGTT  
+HWI-EAS443:3:86:798:1824#0/1  
aaaaaaaaaaaa\_aaabba\_baaa`aaaa\_a\_aa\_aaa]`\_  
@HWI-EAS443:3:87:105:1573#0/1  
TGCCTGATTAATGATCCCTGGGTTTTGCTTAATGCATCTT  
+HWI-EAS443:3:87:105:1573#0/1  
aabba^aaabYaaaabaaa`\_a^aaaaa`ba`a`aa`a`  
@HWI-EAS443:3:87:1283:83#0/1  
GAAGGAGTTGAACCAAGATGCATTAAGCAAACCCAGGGA  
+HWI-EAS443:3:87:1283:83#0/1  
I[bbbbaaaa¥a[]Wabbaab`bbba`baa^^a\_a]ba`aa  
@HWI-EAS443:3:87:1514:843#0/1  
CTGGGTTTTGCTTAATGCATCTTGGTTCAACTCCTTCCCTC  
+HWI-EAS443:3:87:1514:843#0/1  
[abbbabbbabbababb\_bbababbab\_abb\_aabb^ab^  
@HWI-EAS443:3:87:1617:673#0/1  
CTGGGTTTTGCTTAATGCATCTTGGTTCAACTCCTTCCCTC  
+HWI-EAS443:3:87:1617:673#0/1  
`a`ababbb`bbbbabbbb`bbb¥babbbabaabb`Ub]  
@HWI-EAS443:3:87:236:882#0/1  
GTGCCTGATTAATGATCCCTGGGTTTTGCTTAATGCATCT

+HWI-EAS443:3:87:236:882#0/1  
a\_ababbaabbaaaaaaabbba[aaaaab`aaaa]aaa  
@HWI-EAS443:3:87:372:1936#0/1  
GAAGGAGTTGAACCAAGATGCATTAAGCAAACCCAGGGA  
+HWI-EAS443:3:87:372:1936#0/1  
\_W^Z¥]TXWRXa¥^¥RMOPa^aYa\_SZaaaa`[W`S\_XH  
@HWI-EAS443:3:87:913:1428#0/1  
GATCCCTGGGTTTTGCTTAATGCATCTTGGTTCAACTCCT  
+HWI-EAS443:3:87:913:1428#0/1  
abaaa`aabb^bbbababbbabb`bbaaaaba\_a[ab  
@HWI-EAS443:3:88:672:1005#0/1  
CCCTGGGTTTTGCTTAATGCATCTTGGTTCAACTCCTTCC  
+HWI-EAS443:3:88:672:1005#0/1  
[`[a\_Y[UaOZT[a`ab`V¥]VbUQ¥`SWaYM]abb\_`O¥  
@HWI-EAS443:3:88:707:111#0/1  
CTGGGTTTTGCTTAATGCATCTTGGTTCAACTCCTTCCCTC  
+HWI-EAS443:3:88:707:111#0/1  
abbba^bbbabaaabbabbabbbaabbab]`bb\_\_ba  
@HWI-EAS443:3:88:987:1394#0/1  
CTGGGTTTTGCTTAATGCATCTTGGTTCAACTCCTTCCCTC  
+HWI-EAS443:3:88:987:1394#0/1  
a`]¥YX]Y^`V]\_ZZUW¥SVZ][\_Z]Z^`¥QX]\_\_`a`\_]  
@HWI-EAS443:3:89:133:1838#0/1  
CTGGGTTTTGCTTAATGCATCTTGGTTCAACTCCTTCCCTC  
+HWI-EAS443:3:89:133:1838#0/1  
abaa\_^aaaa\_aaaa\_aaaaaa\_\_]`aaa\_`aa\_\_``\_\_  
@HWI-EAS443:3:89:141:938#0/1  
CCCTGGGTTTTGCTTAATGCATCTTGGTTCAACTCCTTCC  
+HWI-EAS443:3:89:141:938#0/1  
ab\_`\_\_[N\_W\_S]ba``YWZ`[aS¥baZY\_]`\_`Y^X^\_Z  
@HWI-EAS443:3:89:284:650#0/1  
CTGGGTTTTGCTTAATGCATCTTGGTTCAACTCCTTCCCTC  
+HWI-EAS443:3:89:284:650#0/1  
aY\_b\_P¥^\_a][ZX^b]aa`a`a\_W]\_^T[^`a`\_]\_^\_  
@HWI-EAS443:3:89:481:557#0/1  
GTTGAACCAAGATGCATTAAGCAAACCCAGGGATCATT  
+HWI-EAS443:3:89:481:557#0/1  
a`XaTa\_aaW¥^\_aa`\_a`\_`\_\_\_\_\_^¥`\_`\_X]\_\_^¥  
@HWI-EAS443:3:89:538:1153#0/1  
CCCTGGGTTTTGCTTAATGCATCTTGGTTCAACTCCTTCC  
+HWI-EAS443:3:89:538:1153#0/1  
aaababb\_bbbaababbabbabbaab\_abbaabaaaa\_  
@HWI-EAS443:3:89:564:1340#0/1  
CCCTGGGTTTTGCTTAATGCATCTTGGTTCAACTCCTTCC  
+HWI-EAS443:3:89:564:1340#0/1  
abaS]a¥V]U\_Z\_T¥¥XTR¥¥\_`a^L¥V¥U\_a^`ZXQVPQ  
@HWI-EAS443:3:89:71:764#0/1  
CCTGGGTTTTGCTTAATGCATCTTGGTTCAACTCCTTCCCT  
+HWI-EAS443:3:89:71:764#0/1  
ababbb\_aabbb`a\_\_aaaaaaaaba]aaaaaaaaa\_``



+HWI-EAS443:3:93:1250:307#0/1  
a[\_aa]a`^^]VSP]a[aU^¥]aaaaM^`PO\_¥MG[Q]PX  
@HWI-EAS443:3:93:129:1416#0/1  
CTGGGTTTTGCTTAATGCATCTTGGTTCAACTCCTTCCTC  
+HWI-EAS443:3:93:129:1416#0/1  
a`aaaQaaaaaa`aa\_aa¥a`a\_`^\_aaa`a\_a^a\_`]^\_  
@HWI-EAS443:3:93:1669:680#0/1  
CCCTGGGTTTTGCTTAATGCATCTTGGTTCAACTCCTTCC  
+HWI-EAS443:3:93:1669:680#0/1  
a¥¥¥a\_`X`^``ab`a`¥aaba]``aUab¥`U^a[`  
@HWI-EAS443:3:93:236:615#0/1  
CCCTGGGTTTTGCTTAATGCATCTTGGTTCAACTCCTTCC  
+HWI-EAS443:3:93:236:615#0/1  
aW]a]aa^\_a`a\_a``a\_`VZ^```]^\_]\_\_]T^`\_\_\_Y]^  
@HWI-EAS443:3:93:853:1847#0/1  
GTTGAACCAAGATGCATTAAGCAAAACCCAGGGATCATT  
+HWI-EAS443:3:93:853:1847#0/1  
aSRGTa\_`PT¥U^P¥T\_Wa^a\_aXT¥^`\_`[[^\_Z^ZPX]  
@HWI-EAS443:3:93:88:876#0/1  
TGTGTGAGGAAGGAGTTGAACCAAGATGCATTAAGCAAAA  
+HWI-EAS443:3:93:88:876#0/1  
`a[b^bab^aab`L````a[aa``aaaa]`a`a`[`a\_`a  
@HWI-EAS443:3:94:284:231#0/1  
CTGGGTTTTGCTTAATGCATCTTGGTTCAACTCCTTCCTC  
+HWI-EAS443:3:94:284:231#0/1  
a`aaaT]YYaaaa]`[a`aa`abaaP`[[[a`[``¥XXX  
@HWI-EAS443:3:94:503:297#0/1  
GGGTTTTGCTTAATGCATCTTGGTTCAACTCCTTCCTCAC  
+HWI-EAS443:3:94:503:297#0/1  
aaaU^aaa`a\_a`]aZZ`]a\_`a¥^U¥a¥`Z¥\_\_[V¥\_]`  
@HWI-EAS443:3:94:553:694#0/1  
CTGGGTTTTGCTTAATGCATCTTGGTTCAACTCCTTCCTC  
+HWI-EAS443:3:94:553:694#0/1  
abbab\_aaaaa`a\_aabaaaaaaaa`^aa^aa`a`a`a[  
@HWI-EAS443:3:94:740:555#0/1  
CCTGGGTTTTGCTTAATGCATCTTGGTTCAACTCCTTCCT  
+HWI-EAS443:3:94:740:555#0/1  
abbbaZbabbbbabbbababbbbbZba\_aba\_]baaa`  
@HWI-EAS443:3:94:75:1037#0/1  
CTGGGTTTTGCTTAATGCATCTTGGTTCAACTCCTTCCTC  
+HWI-EAS443:3:94:75:1037#0/1  
abbba\_aaaabaaaba`aaaaaa¥\_a`\_`^`a\_`a````\_  
@HWI-EAS443:3:94:808:1389#0/1  
AGGAGTTGAACCAAGATGCATTAAGCAAAACCCAGGGATC  
+HWI-EAS443:3:94:808:1389#0/1  
`abaa`^`[]SZP\_]YRb`a`]T\_]\_aTV^Z^PY`Z^^WG  
@HWI-EAS443:3:94:880:1890#0/1  
GGAGTGCCTGATTAATGATCCCTGGGTTTTGCTTAATGCA  
+HWI-EAS443:3:94:880:1890#0/1  
]abb^bb`ba`bb\_baaaa^\_abba]\_]\_baaababaaa^a

@HWI-EAS443:3:95:1005:988#0/1  
CTGGGTTTTGCTTAATGCATCTTGGTTCAACTCCTTCCTC  
+HWI-EAS443:3:95:1005:988#0/1  
`WZZ[Ra\_b`^`aaZUb¥I`aab\_V0aa``abaXaT[a``  
@HWI-EAS443:3:95:720:1347#0/1  
CTGGGTTTTGCTTAATGCATCTTGGTTCAACTCCTTCCTC  
+HWI-EAS443:3:95:720:1347#0/1  
abbababbabbbbbbbabbbbbbbababbbbbbabba\_ba  
@HWI-EAS443:3:95:795:1694#0/1  
GGGTTTTGCTTAATGCATCTTGGTTCAACTCCTTCCTCAC  
+HWI-EAS443:3:95:795:1694#0/1  
\_¥Z]`b^\_\_abbba^aaaabaaa`a`aa`aa]aa`aa`a`  
@HWI-EAS443:3:95:990:2004#0/1  
CTGGGTTTTGCTTAATGCATCTTGGTTCAACTCCTTCCTC  
+HWI-EAS443:3:95:990:2004#0/1  
aabb[GV`ba]`abaaa\_ab`aa^¥¥aaa^LX`aaa\_\_a\_  
@HWI-EAS443:3:96:314:933#0/1  
CCCTGGGTTTTGCTTAATGCATCTTGGTTCAACTCCTTCC  
+HWI-EAS443:3:96:314:933#0/1  
^U`\_`ba]aYbVUb`WaZ[]Xb¥abb\_`aaa]aUVSWWa[  
@HWI-EAS443:3:96:969:241#0/1  
CCTGGGTTTTGCTTAATGCATCTTGGTTCAACTCCTTCCT  
+HWI-EAS443:3:96:969:241#0/1  
aa^``\_LZabaY¥`aYaaaUa[aaX^¥\_Z\_^]aRX¥]QR[  
@HWI-EAS443:3:97:240:812#0/1  
GAGTGCCTGATTAATGATCCCTGGGTTTTGCTTAATGCAT  
+HWI-EAS443:3:97:240:812#0/1  
aa^)``\_aa¥Y\_]aaaX]WU`b`aGaP^a^`^`\_``¥`\_  
@HWI-EAS443:3:97:77:71#0/1  
AAGGAGTTGAACCAAGATGCATTAAGCAAACCCAGGGAT  
+HWI-EAS443:3:97:77:71#0/1  
aaaa^a[]]^¥\_Z¥\_\_Z^¥^\_\_X^\_Z^]XMKOUZUZOTN  
@HWI-EAS443:3:97:956:555#0/1  
CTGGGTTTTGCTTAATGCATCTTGGTTCAACTCCTTCCTC  
+HWI-EAS443:3:97:956:555#0/1  
`bab`abbaa`bababbaaaababaaa`aa\_a\_aaa]\_a`  
@HWI-EAS443:3:98:1011:1792#0/1  
GGTTTTGCTTAATGCATCTTGGTTCAACTCCTTCCTCACA  
+HWI-EAS443:3:98:1011:1792#0/1  
abS^R\_`Y]\_aa`aT\_a]]`\_^`\_\_`^^``]]\_^^^`  
@HWI-EAS443:3:98:1395:860#0/1  
GAGGAAGGAGTTGAACCAAGATGCATTAAGCAAACCCAG  
+HWI-EAS443:3:98:1395:860#0/1  
a`ba\_bb``a[`aa\_\_^aaa^``a\_a`]a\_\_^\_YLMOW`  
@HWI-EAS443:3:98:1530:757#0/1  
AAGGAGTTGAACCAAGATGCATTAAGCAAACCCAGGGAT  
+HWI-EAS443:3:98:1530:757#0/1  
abbb\_b]aaaa[]bb]aa^YbabbZaN`a`\_QZ^aXZ`a`  
@HWI-EAS443:3:98:524:1417#0/1  
GCTTAATGCATCTTGGTTCAACTCCTTCCTCACACATGCA

+HWI-EAS443:3:98:524:1417#0/1  
`a\_aZY\_RTW]Va^UKabZ[]R]NaaY`aaa`a`\_\_R\_a]  
@HWI-EAS443:3:98:681:1355#0/1  
AATGATCCCTGGGTTTTGCTTAATGCATCTTGGTTCAACT  
+HWI-EAS443:3:98:681:1355#0/1  
[aYaabZ^abb]`S`\_V^J^aa^`b`bbYabba[[Z^aaa  
@HWI-EAS443:3:98:872:53#0/1  
TGCTTAATGCATCTTGGTTCAACTCCTTCCTCACACATGC  
+HWI-EAS443:3:98:872:53#0/1  
Y\_H\_T\_¥[baaa[bbbbR`a`bY^abXH[OH^[Z`[]U  
@HWI-EAS443:3:99:1055:156#0/1  
CTGGGTTTTGCTTAATGCATCTTGGTTCAACTCCTTCCTC  
+HWI-EAS443:3:99:1055:156#0/1  
abbbb^bbbabbbbabababba`aaaaab`aaaa`aa  
@HWI-EAS443:3:99:1606:917#0/1  
AGGAGTTGAACCAAGATGCATTAAGCAAAACCCAGGGATC  
+HWI-EAS443:3:99:1606:917#0/1  
aa````babaYV\_`abaa^abaaa``ZX¥]¥Uaa\_WWX]  
@HWI-EAS443:3:99:205:1458#0/1  
AGGAGTTGAACCAAGATGCATTAAGCAAAACCCAGGGATC  
+HWI-EAS443:3:99:205:1458#0/1  
[ZMUZYaaaa^^^a^]aa\_aaa\_aa^¥Z`\_¥S`[a`\_a  
@HWI-EAS443:3:99:28:1464#0/1  
CCTGGGTTTTGCTTAATGCATCTTGGTTCAACTCCTTCCT  
+HWI-EAS443:3:99:28:1464#0/1  
S``bbbU\_TY¥bb`ab]b`b[bbbb``bba[baabaaab  
@HWI-EAS443:3:99:503:346#0/1  
CCCTGGGTTTTGCTTAATGCATCTTGGTTCAACTCCTTCCTC  
+HWI-EAS443:3:99:503:346#0/1  
ababbbb`bbbaabababbaaaaaaba\_aaaa]aa\_aa`  
@HWI-EAS443:3:99:698:246#0/1  
CTGGGTTTTGCTTAATGCATCTTGGTTCAACTCCTTCCTC  
+HWI-EAS443:3:99:698:246#0/1  
`¥\_W\_Y`\_\_[`¥YaZ\_USZX`[^`^TSXZRGX[RZ^U[`Z  
@HWI-EAS443:3:99:780:120#0/1  
GAACCAAGATGCATTAAGCAAAACCCAGGGATCATTAAATC  
+HWI-EAS443:3:99:780:120#0/1  
abba`aababb¥`bbaaa`aaaa¥YZ`aaa`\_`aaa\_¥\_^  
@HWI-EAS443:3:9:1113:1633#0/1  
CTGGGTTTTGCTTAATGCATCTTGGTTCAACTCCTTCCTC  
+HWI-EAS443:3:9:1113:1633#0/1  
ababbabbabaabbb`bbabaababba^bb\_aabaaaba  
@HWI-EAS443:3:9:1555:1540#0/1  
GATCCCTGGGTTTTGCTTAATGCATCTTGGTTCAACTCCT  
+HWI-EAS443:3:9:1555:1540#0/1  
aab¥`abaab]aaab\_aaaaaaa`\_aaba^a]a`^ZRUA  
@HWI-EAS443:3:9:1617:1267#0/1  
TGCCTGATTAATGATCCCTGGGTTTTGCTTAATGCATCTT  
+HWI-EAS443:3:9:1617:1267#0/1  
aba`ab^\_a\_a]a`^\_^`aa`V`\_^\_Z`\_\_^`ZX^X\_\_



@HWI-EAS443:3:9:569:871#0/1  
GTTTTGCTTAATGCATCTTGGTTCAACTCCTTCCTCACAC  
+HWI-EAS443:3:9:569:871#0/1  
`SQUPGYa`TORVPUR]PUYS¥QSUMTWYFVV]ZXWPVZZ  
@HWI-EAS443:3:9:67:1871#0/1  
AAGGAGTTGAACCAAGATGCATTAAGCAAAACCCAGGGAT  
+HWI-EAS443:3:9:67:1871#0/1  
\_^bbaaaaabaa`aba[UYa`ba\_a¥T`aa¥aa`aab]  
@HWI-EAS443:3:9:759:280#0/1  
CCCTGGGTTTTGCTTAATGCATCTTGGTTCAACTCCTTCC  
+HWI-EAS443:3:9:759:280#0/1  
a`abbbb^aaabaabaabb\_aaaaa`aa`a`\_\_a`\_`  
@HWI-EAS443:3:9:932:1427#0/1  
CCCTGGGTTTTGCTTAATGCATCTTGGTTCAACTCCTTCC  
+HWI-EAS443:3:9:932:1427#0/1  
``[JVQOQUSWOZW¥UO[PYQSZY¥[[ZY\_YRV^WRRT[S  
@HWI-EAS443:3:9:990:1066#0/1  
CCTGGGTTTTGCTTAATGCATCTTGGTTCAACTCCTTCCT  
+HWI-EAS443:3:9:990:1066#0/1  
`¥[a]R\_SW]HX]XIO`\_\_R]Y`Z¥^\_U¥MYSR¥^YLW  
@HWI-EAS443:3:92:1397:312#0/1  
AGCAAATAGTAGCATTGCCACAACACTACNTCAATGCATGTG  
+HWI-EAS443:3:92:1397:312#0/1  
[¥\_babbV\_b]abbb\_aa`¥a\_abLDZ\_a`bSa]\_]b  
@HWI-EAS443:3:34:444:427#0/1  
TGGATAGCAAATAGTAGCATTGCCACAACACTACCTCAATGC  
+HWI-EAS443:3:34:444:427#0/1  
V\_¥Y]PYabb\_a¥VT`a]XXaabbaa`Z[aUa\_\_a[¥aZ  
@HWI-EAS443:3:51:606:95#0/1  
GCTATATGAAGCAATGGAGGAGTGCCTGATTAATGATCCC  
+HWI-EAS443:3:51:606:95#0/1  
P\_\_\_\_\_H\_ab]bZ`b\_T\_\_Y\_^ZK`^¥ba[¥b¥H`R¥\_QH  
@HWI-EAS443:3:99:240:1052#0/1  
GGATGAGCGAACTCATCCTTTATGACAAAGAAGAAATAAG  
+HWI-EAS443:3:99:240:1052#0/1  
¥ab^b`\_IU\_0]`¥`^[^a`Z]baa]WT\_a]HF]V]^P\_  
@HWI-EAS443:3:33:995:244#0/1  
GCTTTTTACTCTAGCTCTATGTTGACAAAATGACAATCGT  
+HWI-EAS443:3:33:995:244#0/1  
OFQUZWb^¥`a`aa\_\_RX\_`VUaUa[^\_]\_T[R]GYYSQV  
@HWI-EAS443:3:13:1250:1310#0/1  
GTAGTTTTTTACTCTAGCTCTATGTTGACAAAATGAGCAT  
+HWI-EAS443:3:13:1250:1310#0/1  
`¥J]RTaSXW[R¥UY\_`SWNTVWUO¥^XW[¥\_M[LBBBBB  
@HWI-EAS443:3:43:296:603#0/1  
TAGTTTTTTACTCTAGCTCTATGTTGACAAAATGACTATC  
+HWI-EAS443:3:43:296:603#0/1  
Y^RLPW\_aa^¥]\_S0\_^a]^Z]^Z\_W`VaV]UV¥[WHP``  
@HWI-EAS443:3:58:300:1374#0/1  
CAAGGTAGTTTTTTACTCTAGCTCTATGTTGACAAAATGA

+HWI-EAS443:3:58:300:1374#0/1  
aabb\_bbaaaaaaabaa\_Z^a`aa\_Ya^aaaa]a`a  
@HWI-EAS443:3:70:584:807#0/1  
CAAGGTAGTTTTTACTCTAGCTCTATGTTGACAAAATGA  
+HWI-EAS443:3:70:584:807#0/1  
ababb]bb\_aaaaaaabaa`aaaa`aa`a\_\_a`a\_\_a  
@HWI-EAS443:3:30:938:1140#0/1  
GGATTTGCTGAGCTTTGGGTATGAATCTCCTTTTTTAACT  
+HWI-EAS443:3:30:938:1140#0/1  
a`\_aaa\_aU[ ]\_\_`aa`\_^\_aaU^\_]`a\_]`a`a`\_^S\_  
@HWI-EAS443:3:65:702:1978#0/1  
GACCCATTAGAGCACATCCAGAACTGATTGCCCCAGGGA  
+HWI-EAS443:3:65:702:1978#0/1  
`b]bb¥XP^`Vaaaabababababababababab`]Q¥[b  
@HWI-EAS443:3:79:1614:330#0/1  
GACCCATTAGAGCACATCCAGAACTGATTGCCCCGCAGG  
+HWI-EAS443:3:79:1614:330#0/1  
ab\_a\_baabbaaaa`^aaa`\_^aZzb`aa`]Ua\_P[[\_  
@HWI-EAS443:3:77:1640:728#0/1  
TGGTGCACCTGCCAGTTGCATGGGCCTCATGTACAACAGG  
+HWI-EAS443:3:77:1640:728#0/1  
abaab\_bbbbbb`aab`bbbbbbbaa`^aaba\_b\_bb`aa`  
@HWI-EAS443:3:59:717:259#0/1  
CGTCTGTGTATATGAGGCCCATGCAACTGGCAAGTGCA  
+HWI-EAS443:3:59:717:259#0/1  
`baaabb\_ab`abaaaa¥\_\_`a`aa\_a\_\_`W]\_\_YQ`TY  
@HWI-EAS443:3:76:1075:1713#0/1  
TTCCTGTTGTATATGAGGCCCATGCAACTGGCAAGTGAC  
+HWI-EAS443:3:76:1075:1713#0/1  
U\_T^[¥`VbV`bU\_`^S`a`[^U`Ka\_UV`XVG¥`a  
@HWI-EAS443:3:14:1751:938#0/1  
TCCTGTTGTATATGAGGCCCATGCAACTGGCAAGTGACC  
+HWI-EAS443:3:14:1751:938#0/1  
a`TT^¥``[^`[^WSW^ZV^\_\_TU]Y]\_]T]WWT^NTTV  
@HWI-EAS443:3:29:264:1236#0/1  
TGCCTTGCCAGTTGCATGGGCCTCATATACAACAGGATG  
+HWI-EAS443:3:29:264:1236#0/1  
`bbbaababbb\_aabbT^^]aa\_aa`\_`a`aa`\_\_VY\_  
@HWI-EAS443:3:35:600:1893#0/1  
ATCCTGTTGTATATGAGGCCCATGCAACTGGCAAGTGAC  
+HWI-EAS443:3:35:600:1893#0/1  
`a`TT^aaaab\_¥N`HZ^]\_Ta¥a\_aGR][¥]`¥0\_a^\_  
@HWI-EAS443:3:42:274:41#0/1  
CCATCCTGTTGTATATGAGGCCCATGCAACTGGCAAGTGC  
+HWI-EAS443:3:42:274:41#0/1  
aa`\_aabbaab`\_aab`a\_aaaaaa\_W]^`\_]X¥V`]  
@HWI-EAS443:3:54:252:1512#0/1  
ATCCTGTTGTATATGAGGCCCATGCAACTGGCAAGTGAC  
+HWI-EAS443:3:54:252:1512#0/1  
aabaababb`bbaaaaa^a^aaaaa\_a^YU]\_\_`\_X\_\_`\_

@HWI-EAS443:3:62:102:101#0/1  
ATCCTGTTGTATATGAGGCCCATGCAACTGGCAAGTGCAC  
+HWI-EAS443:3:62:102:101#0/1  
abaaaaabb\_aaabb`a\_a`a^`a]R\_^]]]]\_ ^YY]ZU  
@HWI-EAS443:3:70:1403:625#0/1  
GGTGCCTTGGCAGTTGCATGGGCCTCATATACAACAGGA  
+HWI-EAS443:3:70:1403:625#0/1  
ab[a]bbaabba^a^aaabaaaba`b\_aaaba\_aa^a\_a\_  
@HWI-EAS443:3:71:552:77#0/1  
CATCCTGTTGTATATGAGGCCCATGCAACTGGCAAGTGCAC  
+HWI-EAS443:3:71:552:77#0/1  
`bbaabbabbaaaaaa\_]aa`^a`^a`^^W^a\_] ^TWV]  
@HWI-EAS443:3:72:233:1757#0/1  
CATCCTGTTGTATATGAGGCCCATGCAACTGGCAAGTGCAC  
+HWI-EAS443:3:72:233:1757#0/1  
a`aab[`U\_bSa^a\_Q^S]ba`U\_\_b\_a\_YUUa`^TNRa\_  
@HWI-EAS443:3:73:92:1968#0/1  
TCCTGTTGTATATGAGGCCCATGCAACTGGCAAGTGCACC  
+HWI-EAS443:3:73:92:1968#0/1  
abbb`b\_abbbb`a]YbbbaabaYba`\_``\_a[]ab``V  
@HWI-EAS443:3:77:313:1227#0/1  
ATCCTGTTGTATATGAGGCCCATGCAACTGGCAAGTGCAC  
+HWI-EAS443:3:77:313:1227#0/1  
\_WV`] `J\_UN` aP¥aXLWaa[a¥^[\`SFV^SINUWT\_\_^  
@HWI-EAS443:3:7:869:1855#0/1  
CACTTGCCAGTTGCATGGGCCTCATATACAACAGGATGGG  
+HWI-EAS443:3:7:869:1855#0/1  
[ba`]aabaaHX[Wa][`a`\_a[Saa`aY^aU`aYSP]]\_  
@HWI-EAS443:3:85:188:1484#0/1  
CCATCCTGTTGTATATGAGGCCCATGCAACTGGCAAGTGC  
+HWI-EAS443:3:85:188:1484#0/1  
abaabbaZ\_aaaaaaab[Z`a\_X^a`\_`^\_WX[`Q¥V]a  
@HWI-EAS443:3:8:353:1170#0/1  
ATCCTGTTGTATATGAGGCCCATGCAACTGGCAAGTGCAC  
+HWI-EAS443:3:8:353:1170#0/1  
`a\_``b[`b^^b^aaa`GbNRa[a]\_\_^U^H\_a\_NHVG\_B  
@HWI-EAS443:3:36:1081:1384#0/1  
CTCTAAAGTTTTCAAGGCTGGAGAAGTTCGGNGGGGAGACT  
+HWI-EAS443:3:36:1081:1384#0/1  
aaaab`aa\_`aaa`aaa\_a`X\_`ZSS\_`TDN¥[N[TSU  
@HWI-EAS443:3:25:1509:80#0/1  
CGTCTCTTCGCCTCTTTCGGACTGACGAAAGGAATCCCAT  
+HWI-EAS443:3:25:1509:80#0/1  
`bbbbbabbba\_bbab]`a\_a¥\_ba``\_`a^`T\_aa  
@HWI-EAS443:3:100:1063:532#0/1  
TGTCTCTTCGCCTCTTTCGGACTGACGAAAGGAATCCCAT  
+HWI-EAS443:3:100:1063:532#0/1  
aZ\_\_baa¥\_`^`\_aa`¥a^Z¥a\_Z^Z\_\_`a\_\_a`QXN]B  
@HWI-EAS443:3:16:1599:822#0/1  
ATTCCTTTCGTGACTCCGAAAGAGGCGAAGAGACAATTGA

+HWI-EAS443:3:16:1599:822#0/1  
aaYZ[]baYbUR^^YWaa^^Y^FTZ¥\_Z^¥¥^Q]Y]^[]X  
@HWI-EAS443:3:25:694:577#0/1  
ATTCTTTTCGTCAGTCCGAAAGAGGCGAAGAGACAATTGA  
+HWI-EAS443:3:25:694:577#0/1  
aaabaaababaaaa^]aa\_a\_a`aa]a`\_a\_\_\_\_]\_`^\_\_  
@HWI-EAS443:3:29:548:878#0/1  
TATGGGATTCTTTTCGTCAGTCCGAAAGAGGCGAAGAGAC  
+HWI-EAS443:3:29:548:878#0/1  
aaba\_QR]aa^aaa`\_R[\_\_\_S^a\_\_\_\_`^a\_[\_\_\_\_MPR\_[  
@HWI-EAS443:3:30:1323:108#0/1  
GATTCCTTTTCGTCAGTCCGAAAGAGGCGAAGAGACAATTG  
+HWI-EAS443:3:30:1323:108#0/1  
a`a`¥¥^ba[¥\_`]^VR^a^[\_^¥XaY`]]]Y\_VPWX¥XY  
@HWI-EAS443:3:35:1177:1090#0/1  
ATGGGATTCTTTTCGTCAGTCCGAAAGAGGCGAAGAGACA  
+HWI-EAS443:3:35:1177:1090#0/1  
`¥\_`^babbabaab^ab\_Q`aaaZ]a^a\_`a]]`¥]OU  
@HWI-EAS443:3:40:1047:1097#0/1  
GGATTCTTTTCGTCAGTCCGAAAGAGGCGAAGAGACAATT  
+HWI-EAS443:3:40:1047:1097#0/1  
a^`\_^`[¥Z[[a^[S[S```Z]¥^]¥Y^¥]]\_] [Y¥ZYQZ  
@HWI-EAS443:3:43:98:1802#0/1  
GATTCCTTTTCGTCAGTCCGAAAGAGGCGAAGAGACAATTG  
+HWI-EAS443:3:43:98:1802#0/1  
abab`abbabba`b[\_ab`])`aa¥aa`b\_baa¥[N^aab]  
@HWI-EAS443:3:48:911:1469#0/1  
GGGATTCTTTTCGTCAGTCCGAAAGAGGCGAAGAGACAAT  
+HWI-EAS443:3:48:911:1469#0/1  
aa``aaababaa`\_\_aa^^`\_`\_`\_`a`a\_`a`YZ\_\_\_\_  
@HWI-EAS443:3:52:576:132#0/1  
ATTGTCTCTTCGCCTCTTTTCGACTGACGAAAGGAATCCC  
+HWI-EAS443:3:52:576:132#0/1  
abab^aaa\_`]R¥aZ\_aaaU[`YW¥]]W\_^^\_\_`V[]VVX  
@HWI-EAS443:3:54:258:505#0/1  
CAATTGTCTCTTCGCCTCTTTTCGACTGACGAAAGGAATC  
+HWI-EAS443:3:54:258:505#0/1  
ab\_abbabbbbaab`ababbb`baa`aaaaaa`]a`aa^  
@HWI-EAS443:3:54:431:1052#0/1  
ATGGGATTCTTTTCGTCAGTCCGAAAGAGGCGAAGAGACA  
+HWI-EAS443:3:54:431:1052#0/1  
aaaab^bb`^aaa^aV]]]aY`Z`\_`\_`\_`[Y]`¥¥`]^XQR  
@HWI-EAS443:3:55:16:532#0/1  
TGGGATTCTTTTCGTCAGTCCGAAAGAGGCGAAGAGACAA  
+HWI-EAS443:3:55:16:532#0/1  
^aab`aaa`ab\_ab\_aaa[aaa\_[``^^\_\_a\_¥`^aUUZU  
@HWI-EAS443:3:56:1174:683#0/1  
ATTGTCTCTTCGCCTCTTTTCGACTGACGAAAGGAATCCC  
+HWI-EAS443:3:56:1174:683#0/1  
aaaa\_a\_```\_a^]a\_``^Va\_U¥\_\_¥^\_\_^`^UZ¥¥¥S

@HWI-EAS443:3:57:950:329#0/1  
ATTGTCTCTTCGCCTCTTTCGGACTGACGAAAGGAATCCC  
+HWI-EAS443:3:57:950:329#0/1  
abbbabbaba]b^aa`abbabaa^a``aaaabaa`a\_]`  
@HWI-EAS443:3:60:828:144#0/1  
GGATTCTTTTCGTCAGTCCGAAAGAGGCGAAGAGACAATT  
+HWI-EAS443:3:60:828:144#0/1  
a`a\_\_[\_aa0]SJR]PSMZU[U]SUZY^]XRTNDMUWVW  
@HWI-EAS443:3:61:1477:754#0/1  
AATTGTCTCTTCGCCTCTTTCGGACTGACGAAAGGAATCC  
+HWI-EAS443:3:61:1477:754#0/1  
aab^`^`\_a`¥a[\_aba``\_a[aaaaab]][]`ZXZNN  
@HWI-EAS443:3:63:247:945#0/1  
ATTGTCTCTTCGCCTCTTTCGGACTGACGAAAGGAATCCC  
+HWI-EAS443:3:63:247:945#0/1  
aa\_\_\_\_a`a`\_\_[\_]`\_]^[^ZZ¥TY^VU[\_]]]Z`]UV\_  
@HWI-EAS443:3:6:1246:736#0/1  
TCAATTGTCTCTTCGCCTCTTTCGGACTGACGAAAGGAAT  
+HWI-EAS443:3:6:1246:736#0/1  
a`baaab\_\_a`aaa`\_¥a^a``\_]`^X`a\_^\_^]\_a]\_\_\_\_  
@HWI-EAS443:3:72:1309:83#0/1  
GGATTCTTTTCGTCAGTCCGAAAGAGGCGAAGAGACAATT  
+HWI-EAS443:3:72:1309:83#0/1  
a``aaWPYJa^^YR]¥Q¥Ya`a`^Y^\_WXVZZOVMRVZWW  
@HWI-EAS443:3:78:290:225#0/1  
CAATTGTCTCTTCGCCTCTTTCGGACTGACGAAAGGAATC  
+HWI-EAS443:3:78:290:225#0/1  
a\_QWZaN^aaa`[¥WX¥XZP]VTORV]UZNXXHMBBBBBB  
@HWI-EAS443:3:78:810:1317#0/1  
ATGGGATTCTTTTCGTCAGTCCGAAAGAGGCGAAGAGACA  
+HWI-EAS443:3:78:810:1317#0/1  
a`a`\_a`aaaaaa`a\_aa\_^`^a^\_a]\_]aa¥^`\_`^Z[  
@HWI-EAS443:3:79:798:955#0/1  
AATTGTCTCTTCGCCTCTTTCGGACTGACGAAAGGAATCC  
+HWI-EAS443:3:79:798:955#0/1  
ab\_aaaabbaaa`b\_a`aaaaa\_\_`a¥^\_a`\_\_\_\_\_YR]  
@HWI-EAS443:3:85:389:354#0/1  
TGGGATTCTTTTCGTCAGTCCGAAAGAGGCGAAGAGACAA  
+HWI-EAS443:3:85:389:354#0/1  
``\_aaab`a```ab^ba`\_\_a]^\_\_\_\_\_X¥^^a\_^]\_  
@HWI-EAS443:3:88:448:189#0/1  
GGGATTCTTTTCGTCAGTCCGAAAGAGGCGAAGAGACAAT  
+HWI-EAS443:3:88:448:189#0/1  
aaa`\_`\_\_\_\_a\_\_a]\_^]VZ^`\_`^]Y]\_]\_^]`UV[Y¥  
@HWI-EAS443:3:94:907:1588#0/1  
CAATTGTCTCTTCGCCTCTTTCGGACTGACGAAAGGAATC  
+HWI-EAS443:3:94:907:1588#0/1  
abaabaaabbaaa^`a`baaa`a\_Uaaaaabaaaaa\_[  
@HWI-EAS443:3:63:623:1832#0/1  
GTCTTCTGATGTGTACTTTTTAATTATGGCCATATGGTC

+HWI-EAS443:3:63:623:1832#0/1  
a\_aaa`\_a\_aa`X\_\_a`aaaa^GYa\_\_`X]¥^[WBBBBBB  
@HWI-EAS443:3:39:902:699#0/1  
CTGTCAGTAAGTATGCTAGAGTCCCGTTTTTCGTCTCAACA  
+HWI-EAS443:3:39:902:699#0/1  
aaa`\_^a^a````bbba¥Z\_aaaab\_aba`[ `aaaaa\_  
@HWI-EAS443:3:4:246:1013#0/1  
GGGCAGGGGTGTTGGTAATGAAACGAAAACGGGACTCTAG  
+HWI-EAS443:3:4:246:1013#0/1  
aa\_`^`a\_aHb` `aa^HY`a^`\_]Z\_\_Xa^UaV[V`Y^\_B  
@HWI-EAS443:3:85:1308:199#0/1  
GTCGCTGTCTGGCTGTCAGTAAGTATGCTAGAGNCCGTT  
+HWI-EAS443:3:85:1308:199#0/1  
a\_\_]\_`]WRYR[WUZWVTXDMWNFOSQNUW¥RVDDMWULN  
@HWI-EAS443:3:59:827:535#0/1  
ATNCGAATTCTTTTGGTCGCTGTCTGGCTGGCAGTAAGTA  
+HWI-EAS443:3:59:827:535#0/1  
`]D]`[ `^¥\_U` `` `V¥XY]`^a`\_`[a]DMY`XMS\_PS  
@HWI-EAS443:3:65:1561:1311#0/1  
CAGTAATTGATTGCCATCCGAATTCTTTTGGTCGCTGTCT  
+HWI-EAS443:3:65:1561:1311#0/1  
a\_UY¥a¥M\_XZJWbaab]XX^`Tab\_]a]UZVbSHQaBBB  
@HWI-EAS443:3:70:57:1414#0/1  
TGGCCATCCGAATTCTTTTGGTCGCTGACTGGCTGTCCGT  
+HWI-EAS443:3:70:57:1414#0/1  
RYZZZNM\_¥]]TMVOORQZT^SZWYMYH^XFX\_BBBBBBB  
@HWI-EAS443:3:85:1084:906#0/1  
CTTTTGGTCGCTGTCTGGCTGTCAGTAATTATGCTNGAGT  
+HWI-EAS443:3:85:1084:906#0/1  
aaab`¥a^b`Y¥b`bb`\_\_bba^`bY\_QHPYW]UYDR[\_W  
@HWI-EAS443:3:13:529:526#0/1  
GGCCATCCGAATTCTTTTGGTCGCTGTCTGGCTGGCAGGA  
+HWI-EAS443:3:13:529:526#0/1  
aabb`]aa^a`aa\_aaaa` `aaa]Y^`^`]X^F[N¥EE  
@HWI-EAS443:3:17:1742:156#0/1  
TGGCTGGTCAGTAAGTATGCTAGAGTCCCGTTTTTCGTTTC  
+HWI-EAS443:3:17:1742:156#0/1  
abaaY` `¥a`\_N^`Y[\_XaY]\_`Sa¥^X\_aR¥\_\_Q\_Y\_`S  
@HWI-EAS443:3:3:961:249#0/1  
GGCCATCCGAATTCTTTTGGTCGCTGTCTGGCTGGTAGGA  
+HWI-EAS443:3:3:961:249#0/1  
`Y^\_TF[S¥WPU\_\_\_\_]`^\_X^]ZXY\_R]BBBBBBBBBBBB  
@HWI-EAS443:3:84:1458:678#0/1  
CAGAATTCTTTTGGTCGCTGTCTGGCTGTCAGTAAGGATG  
+HWI-EAS443:3:84:1458:678#0/1  
abb]bbb\_ab`a]FYS`]abTa\_a\_\_¥a\_VZ[LPaUH\_¥V  
@HWI-EAS443:3:14:1619:600#0/1  
GGGACGTGTTGGTAATGAAACGAAAACGGGACTCTAGCAT  
+HWI-EAS443:3:14:1619:600#0/1  
aabYX^^\_a\_a\_VVS¥`\_`[ `VaX[]XNT]UVX\_] ^VMDNY

@HWI-EAS443:3:9:1474:852#0/1  
CGGGGTGGCTGTCAGTAAGTATGCTAGAGTCCCGTTTTTCG  
+HWI-EAS443:3:9:1474:852#0/1  
abbba\_ba[aba`a^a\_[`a^LJTa\_QZQaZ]aa\_a  
@HWI-EAS443:3:19:1014:1594#0/1  
CGGCTGTCAGTAAGGATGCTAGAGTCCCGTTTTTCGTTTCA  
+HWI-EAS443:3:19:1014:1594#0/1  
^`a^URTP00¥ZH[RW\_WMY^VOLYa^NTaaPYQ[[BB  
@HWI-EAS443:3:3:778:980#0/1  
TGCTGTGTGGCTGTCAGTAAGTATGCTAGAGTCCCGTTTT  
+HWI-EAS443:3:3:778:980#0/1  
^`YYFWOXaXTWa\_]a`HG`NSVUWTR[Y\_HDDJWY\_BB  
@HWI-EAS443:3:51:460:1895#0/1  
TGCCATCCGAATTCTTTTGGTCGCTGTCTGGCTGGCAGTA  
+HWI-EAS443:3:51:460:1895#0/1  
aaabbbab\_[^bbaaabU`UbI\_aM`[`ba\_KJ¥U]Ra  
@HWI-EAS443:3:71:480:1899#0/1  
TGCTGTCTGGCTGCCAGTAAGTATGCTAGAGTCCCGTTTT  
+HWI-EAS443:3:71:480:1899#0/1  
^¥ba¥Ta`aa^[F[RZRZ¥^Ta`^^W¥\_]YO`\_a]LZ\_]  
@HWI-EAS443:3:97:752:1179#0/1  
TTGATGGCCATCCGAATTCTTTTGGCCGCTGTCTGGCTGC  
+HWI-EAS443:3:97:752:1179#0/1  
^a\_W^aaZ`\_]Z\_b]aa]H^`Xa`FZbJ¥[DU¥a]^ZBB  
@HWI-EAS443:3:15:433:532#0/1  
CAGCAAGTATGCTAGAGTCCCGTTTTTCGTTTCATTACCAA  
+HWI-EAS443:3:15:433:532#0/1  
aaaa[ ]`aaZa`^`¥`aP^aLPa`[`U\_]YZa`X\_\_^\_  
@HWI-EAS443:3:18:272:1724#0/1  
TGCCGTGTTGGTAATGAAACGAAAACGGGACTCTAGCATA  
+HWI-EAS443:3:18:272:1724#0/1  
aaaaa`baaa`X`b\_aaab\_\_a`ba`a]a\_\_]a]a[a\_a  
@HWI-EAS443:3:25:182:1399#0/1  
GGCCATCCGAATTCTTTTGGTCGCTGTCTGGCTGTCGTA  
+HWI-EAS443:3:25:182:1399#0/1  
a`ba¥aba\_\_`\_bbaaaaabaab`a\_b]Y^a\_aV[DUP]  
@HWI-EAS443:3:30:326:465#0/1  
TGTTAGTAAGTATGCTAGAGTCCCGTTTTTCGTTTCATTAC  
+HWI-EAS443:3:30:326:465#0/1  
\_aa`¥a`aa\_T\_\_Z`aaaa^aaa\_\_`a`aaZa\_a\_[O[¥  
@HWI-EAS443:3:31:801:160#0/1  
TGGGAATGAAACGAAAACGGGACTCTAGCATACTTACTGA  
+HWI-EAS443:3:31:801:160#0/1  
^X]G[[YZKUPT¥S[aa¥Y]\_\_\_YNUWUHU^]]RVNTQTN  
@HWI-EAS443:3:37:1487:1546#0/1  
TGGGAATGAAACGAAAACGGGACTCTAGCATACTTACTGA  
+HWI-EAS443:3:37:1487:1546#0/1  
^\_\_H[bbabaabaaSab^]\_abaaaa]\_aF`ba\_a^aa`  
@HWI-EAS443:3:40:151:1398#0/1  
CTGGCTGTCAGTAAGTATGCTAGAGTCCCGTTTTTCGCTTC

+HWI-EAS443:3:40:151:1398#0/1  
abba`\_XRTPXG^¥J¥Z^T[XRWYN]aa]LV¥[BBBBBB  
@HWI-EAS443:3:44:1346:442#0/1  
GTTGGTAATGAAACGAAAACGGGACTCTAGCATACTACTG  
+HWI-EAS443:3:44:1346:442#0/1  
a\_SWZRaa`\_`a\_bX\_ZVQaa\_T]Q\_UX][XZ]\_XSYSS  
@HWI-EAS443:3:51:243:418#0/1  
GGACTCTAGCATACTTACTGACAGCCAGACAGCGACAAAA  
+HWI-EAS443:3:51:243:418#0/1  
`R\_T`]][^`WVaXaYTWJTJY]P`YUWX]]ZOB BBB  
@HWI-EAS443:3:52:129:32#0/1  
TGGGAATGAAACGAAAACGGGACTCTAGCATACTTACTGA  
+HWI-EAS443:3:52:129:32#0/1  
ab¥NYZ`b¥`YX^[QZ\_^`\_VXLUYXW]Z[^¥P]ZZR^^Z  
@HWI-EAS443:3:63:1162:1249#0/1  
GTCCGTGTTGGTAATGAAACGAAAACGGGACTCTAGCATA  
+HWI-EAS443:3:63:1162:1249#0/1  
\_Y`a[^`^W[WZYW¥]]`a¥]^JYTVYQWXR[\_`[VWZX¥  
@HWI-EAS443:3:68:492:1342#0/1  
TGGAATGAAACGAAAACGGGACTCTAGCATACTTACTGA  
+HWI-EAS443:3:68:492:1342#0/1  
]¥YDUY^a`a`\_\_UQ¥Y]NZOUT¥\_Z]a]ZZ`[V`T``^  
@HWI-EAS443:3:80:1412:897#0/1  
GTCTGGCTGTCAGTAAGTATGCTAGAGTCCCGTTTTTGT  
+HWI-EAS443:3:80:1412:897#0/1  
a^^`b`\_\_aY[¥\_NG][U\_¥RQ[]LW[WVWO\_Y^\_YDQW]  
@HWI-EAS443:3:95:1436:1770#0/1  
ATGGCCATCCGAATTCTTTTGGTCGCTGTCTGGCTGGCAG  
+HWI-EAS443:3:95:1436:1770#0/1  
a\_aaaab[HZ]\_\_I\_]babaH\_RN¥Ub`ZSZUBBBBBBBB  
@HWI-EAS443:3:25:1740:1750#0/1  
CGTTGGTAANGAAACGAAAACGGGACTCTAGCATACTTAC  
+HWI-EAS443:3:25:1740:1750#0/1  
`b`bbbbb^D[bbbb`bbbb[a``bbbabba[bbbabbb]  
@HWI-EAS443:3:100:558:775#0/1  
GAATTCTTTTGGTCGCTGTCTGGCTGTCAGGAAGTATGCT  
+HWI-EAS443:3:100:558:775#0/1  
^^a\_VT`b`b\_aPQYX^^`R\_U]]]WB BBBBBBBBBBBBBB  
@HWI-EAS443:3:10:600:1124#0/1  
AGTAAGTATGCTAGAGTCCCGTTATCGTTTCATTACCAAC  
+HWI-EAS443:3:10:600:1124#0/1  
`a]ab`ab`ab]aaaaaba¥b`abbR]Y\_\_\_a``a[Xaa¥  
@HWI-EAS443:3:12:1286:839#0/1  
CCGAATTCTTTTGGTCGCTGTCTGGCTGTCAGAAAGTATG  
+HWI-EAS443:3:12:1286:839#0/1  
``\_HRZWX\_[Wa`^YO¥]\_``\_`^¥FUBBBBBBBBBBBBBB  
@HWI-EAS443:3:12:901:1616#0/1  
GAAAACGGGACTCTAGCATACTTACTGAGAGCCAGACAGC  
+HWI-EAS443:3:12:901:1616#0/1  
]ZR[\_ZT\_¥\_ZWTRT`W^Z]YYZZ\_Z^\_G^XT^^aXGNXQ



@HWI-EAS443:3:13:784:128#0/1  
GTGTTGGTAATGAAACGAAAACGGGACGCTAGCATACTTA  
+HWI-EAS443:3:13:784:128#0/1  
a^aU¥]\_OGRZa^^¥\_V]U]X^XVMRKGWVWORX^YUYVR  
@HWI-EAS443:3:13:905:966#0/1  
CTGGCTGTCAGGAAGTATGCTAGAGTCCCGTTTTCGTTTC  
+HWI-EAS443:3:13:905:966#0/1  
ab``¥`[\_¥¥GZ\_YVTY¥][VTY[S[Y\_^RZ]a[XOW¥X  
@HWI-EAS443:3:17:940:1036#0/1  
ATTGATGGCCATCAGAATTCTTTTGGTCGCTGTCTGGCTG  
+HWI-EAS443:3:17:940:1036#0/1  
aaZa`aa`aaa\_XF[a`[a\_aaaaT`NPWY\_]\_^`^ZV]`  
@HWI-EAS443:3:19:1012:964#0/1  
GGCCATCCGAATTCTTTTGGTCGCTGTCTGGCTGTTAGTA  
+HWI-EAS443:3:19:1012:964#0/1  
ZZMwa`[aaXbb^WabbbbaRU^\_]\_ZOZa`]Z^TMLMYS  
@HWI-EAS443:3:1:902:1420#0/1  
CTGGCTGTCAGTAAGTATGCTAGAGTCCCGTTTCGTTTC  
+HWI-EAS443:3:1:902:1420#0/1  
]a`¥ZbS`^R¥[RJS``]a`^^aKWW\_FW`MEYYaBB  
@HWI-EAS443:3:20:24:1087#0/1  
GGCTGTCAGTAAGTGTGCTAGAGTCCCGTTTTCGTTTCAT  
+HWI-EAS443:3:20:24:1087#0/1  
^Xab¥JOT^UTXUUZGX[¥`a\_Y[¥\_a\_LY\_[LRHMVWT  
@HWI-EAS443:3:20:299:940#0/1  
TGGTCGCTGTCTGGCTGTCCGTAAGTATGCTAGAGTCCCG  
+HWI-EAS443:3:20:299:940#0/1  
aaa\_a\_a`^\_baa¥^`aNWI[U¥^SDTVRUYXTR^WUY¥¥  
@HWI-EAS443:3:20:452:1154#0/1  
ATCCGAATTCTTTTGGTCGCTGTCTGGCTGTCAGAAAGTA  
+HWI-EAS443:3:20:452:1154#0/1  
]Zbb`[`baaaZaVTS^]aa`ZN¥YOS]a^BBBBBBBBBB  
@HWI-EAS443:3:20:928:95#0/1  
GAAACGAAAACGGGACTCTAGCATACTTGCTGACAGCCAG  
+HWI-EAS443:3:20:928:95#0/1  
a\_\_a`aWUV¥P¥[\_NY\_Z¥¥^W[¥¥I^VRRR^UWU\_WWRN  
@HWI-EAS443:3:22:1054:1494#0/1  
CAGTAAGTATGCTAGAGACCCGTTTTCGTTTCATTACCAA  
+HWI-EAS443:3:22:1054:1494#0/1  
^^\_Q[¥¥SaWTZ^ZZYWF[X[aUVa`^\_L^a`V¥a¥aaZT  
@HWI-EAS443:3:22:1757:120#0/1  
GGCCATCCGAATTCTTTTGTTCGCTGTCTGGCTGTCAGTA  
+HWI-EAS443:3:22:1757:120#0/1  
\_PZ]\_aZRYs\_a\_Q\_U][XFSW^V^BBBBBBBBBBBBBB  
@HWI-EAS443:3:23:631:1129#0/1  
GTAAGTATGCTACAGTCCCGTTTTCGTTTCATTACCAACA  
+HWI-EAS443:3:23:631:1129#0/1  
```aa¥bb`^a¥HTNN^`aN¥\_^\_]F¥\_\_\_ZU`\_YY\_YZ  
@HWI-EAS443:3:23:804:1907#0/1  
CATCCGAATTCTTTTGGTCGCTGTCTGGCTGTGAGTAAGT

+HWI-EAS443:3:23:804:1907#0/1  
aa`aabbaaab]\_aaY^^`a\_WNa\_\_[\_aNMFRRX`ZBB  
@HWI-EAS443:3:24:1741:799#0/1  
ATCCGAATTCTTTTGGTCGCTGTCTGGCTGTGAGTAAGTA  
+HWI-EAS443:3:24:1741:799#0/1  
abaa`b`ababbaaaaa^aaVYLQaa]a]¥XQ^`VH¥NDM  
@HWI-EAS443:3:24:702:695#0/1  
GTCGCCGTCTGGCTGTCAGTAAGTATGCTAGAGTCCCGTT  
+HWI-EAS443:3:24:702:695#0/1  
aaab^Haaaabaaa[\_[\_`YX¥\_TZZa`\_\_\_T\_W¥\_`^GW  
@HWI-EAS443:3:25:1285:78#0/1  
CATCCGAATTCTTTTGGTCGCTGTCTGGCTGTGAGTAAGT  
+HWI-EAS443:3:25:1285:78#0/1  
abb`\_`baba`^`abbaaab]bb]U`^`Z\_aNG`\_GXZZ^  
@HWI-EAS443:3:25:228:24#0/1  
TCTGGCTGTCAGTAAGTATGCTAGAGTCCCGTTTTTGT  
+HWI-EAS443:3:25:228:24#0/1  
aaaaa`aaX[Z^PYYUR\_^PQ[ZXU[R^¥^YOSYZKSZYZ  
@HWI-EAS443:3:27:1428:789#0/1  
AATGAAACGAAAACGGGAATCTAGCATACTTACTGACAGC  
+HWI-EAS443:3:27:1428:789#0/1  
`]bbaba¥Z¥b]\_]JU`G`¥`a]`aab\_aaaa`ba`b^  
@HWI-EAS443:3:27:663:216#0/1  
TGGCTGTCAGTAAGTATGCTAGAGTCCCGTTTTTGGTTCA  
+HWI-EAS443:3:27:663:216#0/1  
a^a`abZ\_^`Z¥^PQ][a`\_] ^X\_X[\_`^GV^][ZM^]YV  
@HWI-EAS443:3:28:654:552#0/1  
ATCCGAATTCTTTTGGTCGCTGTCTGGCTGTCAGTCAGTA  
+HWI-EAS443:3:28:654:552#0/1  
a`ababaaaaabaaa¥M[```^a\_a]^\_aNX\_^KDSMDN  
@HWI-EAS443:3:30:497:333#0/1  
GGTCGCTGTCTGGCTGTCAGTAAGTATGCTAGAGGCCCGT  
+HWI-EAS443:3:30:497:333#0/1  
ab[aaa`a[¥¥]aa\_\_\_`^VXYPNZ[]PZ^^ZXKMV[RL  
@HWI-EAS443:3:31:905:63#0/1  
CGCTGTCTGGCTGTCAGTAAGTATGCTAGAGGCCCGTTTT  
+HWI-EAS443:3:31:905:63#0/1  
^baaba\_baa\_ab`[\_S]aaba\_aa\_[```a^GX`[\_[aa`  
@HWI-EAS443:3:32:1058:791#0/1  
CAGTAAGTATGCTAGAGTCCCGTTTTTCGTTTCCTTACCAA  
+HWI-EAS443:3:32:1058:791#0/1  
[ba\_Va\_b\_ba]aISVb]aV`ba^abbaaa\_U]ba`b`Y`  
@HWI-EAS443:3:32:1421:667#0/1  
TCTGGCTGTCAGTAAGTATGCTAGAGTCCCGTTTTTGT  
+HWI-EAS443:3:32:1421:667#0/1  
aaaaa]a]`UX`UXZSSW[¥S^¥[X]RPPU¥OY\_\_GaP^`  
@HWI-EAS443:3:32:754:516#0/1  
GTCGCTGCCTGGCTGTCAGTAAGTATGCTAGAGTCCCGTT  
+HWI-EAS443:3:32:754:516#0/1  
aaaaaaaaaaaaa\_a`\_\_\_¥Y`\_N¥V\_\_`V`\_^U\_S\_\_R¥

@HWI-EAS443:3:32:972:735#0/1  
CTGGCTGTCAGTAAGGATGCTAGAGTCCCGTTTTCGTTTC  
+HWI-EAS443:3:32:972:735#0/1  
aaaab`Y]]`TXa]GU¥a\_\_[a[\_UTY^`VRa\_[`X]\_^  
@HWI-EAS443:3:35:1344:297#0/1  
GCTAATTGGGCAAGGGGACGTTGTGTTGGTAATGAAACGA  
+HWI-EAS443:3:35:1344:297#0/1  
a`a\_`a`aa`\_\_][^\_Y]a]\_\_U\_V`]\_Y[VQV[Y\_TPK  
@HWI-EAS443:3:36:626:2026#0/1  
GCTGTCAGTAAGTATGCTAGAGTCCCGTTTTCGTTTCATT  
+HWI-EAS443:3:36:626:2026#0/1  
a]aZM]¥`PS`WNX\_a]`]\_RZZ\_U`aGFP\_W\_QSY]RNT  
@HWI-EAS443:3:39:1039:241#0/1  
CTGGCTGTCAGGAAGTATGCTAGAGTCCCGTTTTCGTTTC  
+HWI-EAS443:3:39:1039:241#0/1  
a`bba`b\_^SUJZ\_a[SZa]aaaa^PM]a\_GR[\_X[\_]P  
@HWI-EAS443:3:39:689:1981#0/1  
CAGTAAGTATGCTAGAGTCCCGTTTTCGTTTGATTACCAA  
+HWI-EAS443:3:39:689:1981#0/1  
aa^¥baXXaaba`^R\_TZ¥\_aN¥``]`abWG^aaba`aa  
@HWI-EAS443:3:3:1358:345#0/1  
TGGCCATCCGAATTCTTTTGGTCGTTGTCTGGCTGTCAGT  
+HWI-EAS443:3:3:1358:345#0/1  
a\_a\_^[^][¥XW\_\_¥^`b```VU^DM¥[H¥bb\_\_OGVY\_B  
@HWI-EAS443:3:42:48:2006#0/1  
GCCATCCGAATTCTTTTGGTCGCTGTCTGGCTGGCAGTAA  
+HWI-EAS443:3:42:48:2006#0/1  
R\_`[[`bb`ab^[\_abb\_¥ababbbbbbbbb\_Ia^[S\_a  
@HWI-EAS443:3:43:746:954#0/1  
ATCCGAATTCTTTTGGTCGCTGTCTGGCTGGCAGTAAGTA  
+HWI-EAS443:3:43:746:954#0/1  
a`Z¥`^aaa]a`[\_P\_VYT]a^Z\_``\_T[GSVYGQTXGS  
@HWI-EAS443:3:48:769:1861#0/1  
GGCCATCCGAATTGTTTTGGTCGCTGTCTGGCTGTCAGTA  
+HWI-EAS443:3:48:769:1861#0/1  
a[DLPVP]\_a]\_MLR¥YOUXQVORBBBBBBBBBBBBBBBB  
@HWI-EAS443:3:48:852:875#0/1  
ATCCGAATTCTTTTGGTCGCTGTCTGCCTGTCAGTAAGTA  
+HWI-EAS443:3:48:852:875#0/1  
aa^aba\_baaaa`aaa\_aa```^`\_\_VT^`RWGXRZZZZV  
@HWI-EAS443:3:4:60:1160#0/1  
GAATTCTTTTGGTCGCTGTCTGGCTGTCAGGAAGTATGCT  
+HWI-EAS443:3:4:60:1160#0/1  
T\_Ya^`aa\_\_b`Ua]ab\_I\_aa\_\_[]]bTLI\_SIJ¥ZZ\_b  
@HWI-EAS443:3:50:1581:1029#0/1  
CTGGCTGTCAGTAAGTATGCTAGAGTCCCGTTTTCGTTTC  
+HWI-EAS443:3:50:1581:1029#0/1  
]\_VV`b`Z\_]`TK\_RRX^¥^Y^0]`N\_\_aaIS¥b]bY\_XH  
@HWI-EAS443:3:51:1537:1636#0/1  
GGTCGCTGTCTGGCTGTCAGTAAGGATGCTAGAGTCCCGT

+HWI-EAS443:3:51:1537:1636#0/1  
abb\_b\_bbabbbaa¥bb`YUa\_Q\_[G]aaa\_`Va¥^[\_G  
@HWI-EAS443:3:53:1145:405#0/1  
GGCCATCCGAATTCTTTTGGTCGCTTTCTGGCTGTCAGTA  
+HWI-EAS443:3:53:1145:405#0/1  
]a\_¥I\_aa\_Y\_abYaabbb\_\_Zb\_aaa¥b`a`abOKK[UX  
@HWI-EAS443:3:54:1244:1577#0/1  
ATCCGAATTCTTTTGGTCGCTGTCTGGCTGTGAGTAAGTA  
+HWI-EAS443:3:54:1244:1577#0/1  
aZWW\_\_a¥`\_]`^aX¥¥¥Y\_KO]XYZaBBBBBBBBBBBBBBB  
@HWI-EAS443:3:55:611:1440#0/1  
GTCGCTGTCTGGCTGTCAGTAAGTATGCTAGAGGCCCGTT  
+HWI-EAS443:3:55:611:1440#0/1  
a[aa`\_[Q\_]¥aXXTUL[a[U]NGV[YSVLRGYLQY^VfV  
@HWI-EAS443:3:56:1475:213#0/1  
GGCCATCTGAATTCTTTTGGTCGCTGTCTGGCTGTCAGTA  
+HWI-EAS443:3:56:1475:213#0/1  
abaa\_SZ[a\_KaU]]¥U[b\_a`^aaaa`][aa`b\_RRVNV  
@HWI-EAS443:3:56:636:549#0/1  
GTCGCTGTCTGGCTGTCAATAAGTATGCTAGAGTCCCGTT  
+HWI-EAS443:3:56:636:549#0/1  
a\_a¥\_a¥SWZQ]YUa¥\_¥P¥\_\_\_Y\_V\_]UYRR\_TV¥¥V  
@HWI-EAS443:3:58:1054:1962#0/1  
TCTGGCTGTCAGTAAGTATGCTAGAGTCCCGTTTTTGT  
+HWI-EAS443:3:58:1054:1962#0/1  
a\_b`a`aaLG`aZ\_`^W\_^\_VXNV]¥G]VV[]]¥^FSV^Z  
@HWI-EAS443:3:58:1649:31#0/1  
ACGGGACTCTAGCATACTTACTGAGAGCCAGACAGCGACC  
+HWI-EAS443:3:58:1649:31#0/1  
¥Sabb`^ZV`bUa`\_\_¥[[Z[aYFR¥NNOa\_N\_aY\_[TP  
@HWI-EAS443:3:58:465:500#0/1  
CTGGTTGTCAGTAAGTATGCTAGAGTCCCGTTTTTCGTTTC  
+HWI-EAS443:3:58:465:500#0/1  
ab]`aabba\_baababab`aaaab]aa`bbaabababa`  
@HWI-EAS443:3:5:354:1285#0/1  
TGTCTGGCTGTCAGTAAGGATGCTAGAGTCCCGTTTTTCGT  
+HWI-EAS443:3:5:354:1285#0/1  
abaa\_aaaaa[\_`a]\_a¥F]\_\_aYVaYa^a^\_a]\_\_`\_BB  
@HWI-EAS443:3:5:407:1128#0/1  
TGGTAATGAAACGAAAACGGGACTCTAGCACACTTACTGA  
+HWI-EAS443:3:5:407:1128#0/1  
^`[H\_b\_\_SR\_¥W[XUaaaa]\_a]]\_`^M^aa^``\_aaBB  
@HWI-EAS443:3:5:479:635#0/1  
GTCGCTGTCTGGCTGTCAGGAAGTATGCTAGAGTCCCGTT  
+HWI-EAS443:3:5:479:635#0/1  
[a¥aaZ[DY`aa\_]`^QN¥XNPP\_TPHUU[V`IRBBBBBBBB  
@HWI-EAS443:3:60:1222:142#0/1  
GTCTGGCTGTCAGTAAGTATGCTAGAGTCCCGTTTTTCGTT  
+HWI-EAS443:3:60:1222:142#0/1  
a¥U\_aa`aQYU¥OZZZR XU[TUPZT\_RURZVBBBBBBBB

@HWI-EAS443:3:61:1169:995#0/1  
GGTCGCTGTCTGGCTGTCAGTAAGTATGCTAGAGACCCGT  
+HWI-EAS443:3:61:1169:995#0/1  
aVHTQ\_[ZTaa\_\_\_\_J]P]M`\_P\_UTP^[ZOWGPGRUU  
@HWI-EAS443:3:61:1428:104#0/1  
TGGTCATGAAACGAAAACGGGACTCTAGCATACTTACTGA  
+HWI-EAS443:3:61:1428:104#0/1  
\_bbQHQa`a`bS`\_\_Sa\_bS^HRZ`aS\_`^Z]NY^aHZ^^  
@HWI-EAS443:3:61:1673:1993#0/1  
CCGAATTCTTTTGGTCGCTGTCTGGCTGTCAGGAAGTATG  
+HWI-EAS443:3:61:1673:1993#0/1  
aa`aZ¥a`^aaaba\_babab\_babba`ZHUXTGV[UJVSX  
@HWI-EAS443:3:61:415:951#0/1  
GGCCATCCGAATTCTTTTGGTCGCTGTCTGGCGGTCAGTA  
+HWI-EAS443:3:61:415:951#0/1  
aaaaaa`aX`a`aaaaX[baa`a`\_aaa\_\_aWWS^QB  
@HWI-EAS443:3:62:871:172#0/1  
ATCCGAATTCTTTTGGTCGCTGTCTGGCTGTGAGTAAGTA  
+HWI-EAS443:3:62:871:172#0/1  
U[\_OTWRVUQYVZ``]Z\_^R^¥`\_\_ZZ^IDJZQBBBBB  
@HWI-EAS443:3:63:1093:136#0/1  
GCTGTCAGTAAGTATGCTAGAGTCCCGTTTCGTTTCATT  
+HWI-EAS443:3:63:1093:136#0/1  
a\_^JZa¥NZ¥`NSTY¥]\_\_0ON[UURFO][RRPUWNTQU  
@HWI-EAS443:3:63:1491:900#0/1  
AAACGAAAACGGGACTCTAGCATACTTACTGACAACCAGA  
+HWI-EAS443:3:63:1491:900#0/1  
\_^Z`b]ZZ\_X]RTW^¥Z^[[¥VaZWbb]L\_^`¥\_\_^aBBB  
@HWI-EAS443:3:64:1123:1082#0/1  
CCGAATTCTTTTGGTCGCTGTCTGGCTGTTAGTAAGTATG  
+HWI-EAS443:3:64:1123:1082#0/1  
¥``\_bb`bbbb¥\_Saba\_\_^aabZYa`UEQRPRY^M[Y[  
@HWI-EAS443:3:64:1237:746#0/1  
GTCGCTGTCTGGCTGTCAGTAAGTATGCTAGAGGCCCGTT  
+HWI-EAS443:3:64:1237:746#0/1  
a`aba`baaa\_[a^LJUN]Ua\_YPSJOHY]PS^GV\_¥UL¥  
@HWI-EAS443:3:65:1430:527#0/1  
TGTTGGCAATGAAACGAAAACGGGACTCTAGCATACTTAC  
+HWI-EAS443:3:65:1430:527#0/1  
a`]aa¥D[aaa`a]Z\_`\_`M^]ZQ^\_``\_\_W\_\_\_U^^\_^  
@HWI-EAS443:3:65:161:1118#0/1  
AAACGAAAACGGTACTCTAGCATACTTACTGACAGCCAGA  
+HWI-EAS443:3:65:161:1118#0/1  
abba¥T\_^`a\_K¥^^a]Y¥\_`]`^¥¥`\_\_\_\_``]^`^Z^^  
@HWI-EAS443:3:71:1630:1408#0/1  
TGGCCATCCGAATTCTTTTGGTCGCTGTCTGGCTGGCAGT  
+HWI-EAS443:3:71:1630:1408#0/1  
V\_HZQYW`¥ZZZba`[aaba\_Z`aaTMVYaZZ]\_ZH[Ib¥  
@HWI-EAS443:3:76:1048:2042#0/1  
GGCTGTCAGTAAGTATGCTAGAGTCCCGTTTTCGGTTTCAT

+HWI-EAS443:3:76:1048:2042#0/1  
aba`ZW\_[]^T¥ZF[\_Z]\_]U]NUV^]TV\_`Q[PL\_V[¥  
@HWI-EAS443:3:76:577:65#0/1  
GGTCGCTGTCTGGCTGTCAGTAAGTATGCTAGAGGCCCGT  
+HWI-EAS443:3:76:577:65#0/1  
a`Saa\_Wa^W[\_[[WZNVLWBBBBBBBBBBBBBBBBBB  
@HWI-EAS443:3:78:764:1709#0/1  
TGTTGGTAATGAAACGAAAACGGGACCCTAGCATACTTAC  
+HWI-EAS443:3:78:764:1709#0/1  
aa[aab\_\_aababb]a]bT`a`b`a¥]ab¥aaa\_b]a]^\_  
@HWI-EAS443:3:79:1450:610#0/1  
GGCCATCCGAATTCTTTTGGTCGCTGTCTGGCTGTAAGTA  
+HWI-EAS443:3:79:1450:610#0/1  
]G[¥]Z]WW\_`]T\_^Z\_[QZX][`Z[^¥aBBBBBBBBBB  
@HWI-EAS443:3:7:1284:963#0/1  
TGGTAATGAAATGAAAACGGGACTCTAGCATACTTACTGA  
+HWI-EAS443:3:7:1284:963#0/1  
aaa^\_`aa`a`aa\_`\_\_`^^`^^`\_Y\_\_Y`]^X\_\_\_\_  
@HWI-EAS443:3:81:1227:1524#0/1  
GTCGCTGTCTGGCTGTCAGGAAGTATGCTAGAGTCCCGTT  
+HWI-EAS443:3:81:1227:1524#0/1  
[RVbabba`a`b[a^[]UXF]aV]X\_X[^[VZYMY\_T\_R\_  
@HWI-EAS443:3:81:43:428#0/1  
GCCATCCGAATTCTTTTGGTCGCTGTCTGGCTGTTAGTAA  
+HWI-EAS443:3:81:43:428#0/1  
a\_LU`]\_YST^\_\_aVa\_a`][¥]`aNW¥`\_`T`BBBBBBB  
@HWI-EAS443:3:82:912:509#0/1  
GTCGCTGTCTGGCTGTCAGTAAGTATGGTAGAGTCCCGTT  
+HWI-EAS443:3:82:912:509#0/1  
a`ab\_a`^\_aaa[`aU\_W`QV`\_SS^QDTT^X¥LTZS¥P^  
@HWI-EAS443:3:85:1165:820#0/1  
ATTGATGGCCATCCGAATTCTTTTGGTGGCTGTCTGGCTG  
+HWI-EAS443:3:85:1165:820#0/1  
]babaaaaJa`^]\_`XVY^X)`WLUHG[^[]N\_BBBBBB  
@HWI-EAS443:3:85:573:456#0/1  
CTGGCTGTCAGTAAATATGCTAGAGTCCCGTTTTCGTTTC  
+HWI-EAS443:3:85:573:456#0/1  
aaaba`]X\_Z\_WWX\_Z])^`ZZa^\_Y[QY`Y[`\_U]T]ZM  
@HWI-EAS443:3:86:1147:1106#0/1  
GGTCGCTGTCTGGCTGTCAGTAAGTATGATAGAGTCCCGT  
+HWI-EAS443:3:86:1147:1106#0/1  
aaGV¥¥ab[X\_]ZYVa[]^a[¥TZNWZMH[WXNZPXRU`V  
@HWI-EAS443:3:86:845:522#0/1  
CGAATTCTTTTGGTCGCTGTCTGGCTGTCAGTAAGGATGC  
+HWI-EAS443:3:86:845:522#0/1  
Vb\_Zab`bbbbbbSbb`bbaaabaZa^[[\_\_Y])`[H`aWI  
@HWI-EAS443:3:87:1407:477#0/1  
GGCTGTCAGTAAGTATGCTAGAGTCCCGTTTTCGGTTTCAT  
+HWI-EAS443:3:87:1407:477#0/1  
aa^W\_\_ZV¥^Za\_Q\_]\_WQRWJU[MWaaWJaoFMI]a`U^

@HWI-EAS443:3:87:77:544#0/1  
ATCCGAATTCTTTTGGTCGCTGTCTGGCTGTCAGTGAGTA  
+HWI-EAS443:3:87:77:544#0/1  
a`abbaaabaa\_aa\_¥Naaa^a¥\_^¥`^\_aPUU\_FMR[PX  
@HWI-EAS443:3:88:632:316#0/1  
CCGAATTCTTTTGGTCGCTGTCTGGCTGTCAGGAAGTATG  
+HWI-EAS443:3:88:632:316#0/1  
`ba)`a`¥0Ta`\_aZXU[a]QV[Z\_[XaSVK¥HSPUGZRX  
@HWI-EAS443:3:90:319:1548#0/1  
CATCCGAATTCTTTTGGTCGCTGTCTGGCTGTCAGGAAGT  
+HWI-EAS443:3:90:319:1548#0/1  
abaaaaaaaa`^¥``¥`[[a`a`¥RZ^`\_\_\_\_^PZ^SG¥^¥P  
@HWI-EAS443:3:90:498:1381#0/1  
CGCTGTCTGGCTGTCAGTAAGCATGCTAGAGTCCCGTTTT  
+HWI-EAS443:3:90:498:1381#0/1  
\_W¥\_a`a]¥¥ab^^aa`U¥\_U\_¥QTRW¥¥a¥[``[^`abT  
@HWI-EAS443:3:90:508:1828#0/1  
CTGGCTGTCAGTAAGTATGCTAGAGGCCCGTTTTCGTTTC  
+HWI-EAS443:3:90:508:1828#0/1  
`baaab\_HU0¥Ubb\_^b]¥`a]W\_UGS\_¥]W\_a\_¥YQ)`Y  
@HWI-EAS443:3:90:672:1970#0/1  
TCTGGCTGTCAGTAAGTATGCTAGAATCCCGTTTTCGTTT  
+HWI-EAS443:3:90:672:1970#0/1  
aaabab`\_HZ^¥P]]^G`^Z[W]\_WGY^aaaG\_W^G^J\_¥  
@HWI-EAS443:3:92:888:1620#0/1  
GGCCATCCGAATTCTTTTGGTCGCTGTCTGGCTGGCAGTA  
+HWI-EAS443:3:92:888:1620#0/1  
[X¥)`ZTX`W]X¥\_W\_\_TXT`Y¥¥[`T^^BBBBBBBBB  
@HWI-EAS443:3:93:1124:1149#0/1  
TCCGAATTCTTTTGGTCGCTGTCTGGCTGGCAGTAAGTAT  
+HWI-EAS443:3:93:1124:1149#0/1  
\_XUaaZ\_`]ba`aa\_Hab[aaaa`a¥RUaHS^aR\_\_BBBB  
@HWI-EAS443:3:93:112:302#0/1  
GCTGTCTGGCTGTCAGTAAGTATGGTAGAGTCCCGTTTTAGTTTCATT  
+HWI-EAS443:3:93:112:302#0/1  
aa\_a\_¥¥aW\_P\_L¥X[ZM¥ZW\_XZTNXS[WVFQXXXUWZ  
@HWI-EAS443:3:93:269:861#0/1  
CATCCGAATTCTTTTGGTCGCTGTCTGGCTGTCAGGAAGT  
+HWI-EAS443:3:93:269:861#0/1  
aa^a^ba`a[a`aaZa`a`a\_¥\_\_`^`^\_QNVXFSTBB  
@HWI-EAS443:3:94:901:102#0/1  
GCTGTCTGGCTGTCAGTAAGTATGGTAGAGTCCCGTTTTTC  
+HWI-EAS443:3:94:901:102#0/1  
a^`Y^]a`[]]WWWVLR^VO^SQFQVXR\_VUVY\_UXYYY  
@HWI-EAS443:3:95:757:1318#0/1  
GGCCATCCGAATTCTTTTGGTCACTGTCTGGCTGTCAGTA  
+HWI-EAS443:3:95:757:1318#0/1  
abbbbbbbbbbb`bbbab\_a^babbabbaabbU`aa[a  
@HWI-EAS443:3:99:250:784#0/1  
CGAAAACAGGACTCTAGCATACTTACTGACAGCCAGACAG

+HWI-EAS443:3:99:250:784#0/1  
aaa[``a\_0^a`\_Zaaabbaaaaba`bbaabb\_^^`Xaa  
@HWI-EAS443:3:99:922:838#0/1  
ACGGGACTCTAGCATACCTACTGACAGCCAGACAGCGACC  
+HWI-EAS443:3:99:922:838#0/1  
`a`¥Z]abH\_[^b]abYLb[bab¥^\_]aU^`WHa`Ra`\_V  
@HWI-EAS443:3:9:685:692#0/1  
GGTCGCTGTCTGGCTGTCAGTAAGTATGCTAGAGGCCCGT  
+HWI-EAS443:3:9:685:692#0/1  
aaV[`]a`\_`¥[``^][G^V\_SVX\_LPP]Z^Z\_NYFRRUVQ  
@HWI-EAS443:3:10:286:1205#0/1  
AGGGGCCATCCGAATTCTTTTGGTCGCTGTCTGGCTGTCA  
+HWI-EAS443:3:10:286:1205#0/1  
¥W^a\_bbba\_aaaa\_aa`\_\_\_\_\_aWaa`\_`Va^[Z\_VULXU  
@HWI-EAS443:3:25:823:434#0/1  
CCCGTGTGGTAATGAAACGAAAACGGGACTCTAGCATAC  
+HWI-EAS443:3:25:823:434#0/1  
abab]bababZbabaababbaaaa¥^ab`\_`\_`a`\_aa\_¥  
@HWI-EAS443:3:27:522:1690#0/1  
CGCGCCATCCGAATTCTTTTGGTCGCTGTCTGGCTGTCA  
+HWI-EAS443:3:27:522:1690#0/1  
aab\_aaaaab`aa`ab^^\_U\_¥a\_aaa\_a\_`^`\_`SU¥Z  
@HWI-EAS443:3:2:1023:100#0/1  
GCCATCCGAATTCTTTTGGTCGCTGTCTGGCTGTCAGGAG  
+HWI-EAS443:3:2:1023:100#0/1  
^¥aWTV¥`XW]^`^TW^Z^XX¥`abYKWZTZBBBBBBBB  
@HWI-EAS443:3:2:1187:763#0/1  
TCCGAATTCTTTTGGTCGCTGTCTGGCTGTCAGTAAGGAT  
+HWI-EAS443:3:2:1187:763#0/1  
Sa`b\_XV[abbb`bb\_]b\_a[Xa]abVaaWWX^SQY¥DX[  
@HWI-EAS443:3:31:432:1953#0/1  
GCTGTCAGTAAGTATGCTAGAGTCCCGTTTTTCGTTTCTTT  
+HWI-EAS443:3:31:432:1953#0/1  
``]Y\_a¥\_\_\_]Waa\_aa\_]¥RU`^aSOZ]\_\_[V\_]U¥]-  
@HWI-EAS443:3:40:970:1103#0/1  
CCCGTGTGGTAATGAAACGAAAACGGGACTCTAGCATAC  
+HWI-EAS443:3:40:970:1103#0/1  
abbbabbbba¥bababbbabaabb`a\_a\_a\_``aaaa`b]  
@HWI-EAS443:3:49:216:862#0/1  
GAATTCTTTTGGTCGCTGTCTGGCTGTCAGTAAGTATTTT  
+HWI-EAS443:3:49:216:862#0/1  
`a\_`^Zabba[[aabXa]Y]\_¥YZ¥^GJTXHXWOYBBBB  
@HWI-EAS443:3:58:1641:404#0/1  
NCCGTGTGGTAATGAAACGAAAACGGGACTCTAGCATAC  
+HWI-EAS443:3:58:1641:404#0/1  
DNVYVWVWYVYYYWPWYQYUYYYYYXYWWWYUYXWU  
@HWI-EAS443:3:60:582:542#0/1  
GGCCATCCGAATTCTTTTGGTCGCTGTCTGGCTGTCAATA  
+HWI-EAS443:3:60:582:542#0/1  
aabbaaab^\_]\_`^a`a^¥aaaab`aaba\_]\_N[¥\_¥



@HWI-EAS443:3:72:934:1624#0/1  
TCCGAATTCTTTTGGTCGCTGTCTGGCTGTCAGTAAGGAT  
+HWI-EAS443:3:72:934:1624#0/1  
^¥WR^bb`\_^\_a\_\_XG]`Y`aU]\_VRNY¥TWFVYZ¥DTV  
@HWI-EAS443:3:80:620:106#0/1  
CCCGTGTGGTAATGAAACGAAAACGGGACTCTAGCATAAC  
+HWI-EAS443:3:80:620:106#0/1  
abbbabaabbabbabbabaaaa`b`baa`\_aaaab`aaa\_  
@HWI-EAS443:3:8:1064:733#0/1  
TCCGAATTCTTTTGGTCGCTGTCTGGCTGTCAGTAAGGAT  
+HWI-EAS443:3:8:1064:733#0/1  
aa\_bbbbaababbba[``a]`aaa\_\_ab\_T[XGN`BBBB  
@HWI-EAS443:3:99:550:64#0/1  
TCCGAATTCTTTTGGTCGCTGTCTGGCTGTCAGTAAGGAT  
+HWI-EAS443:3:99:550:64#0/1  
Q[\_VX^aZa¥a`\_¥TF[\_]Z\_R[]a]\_aaZZ\_`BBBBBBB  
@HWI-EAS443:3:100:1098:462#0/1  
ATTGATGGCCATCCGAATTCTTTTGGTCGCTGTCNGGCTG  
+HWI-EAS443:3:100:1098:462#0/1  
ab``a]¥]\_ZaZ^HV\_a`aUaaaa[ZNR]Zaa¥TDW`BBB  
@HWI-EAS443:3:11:802:1458#0/1  
ACGGGACTCTAGCATACTTACTGACNGCCAGACAGCGACC  
+HWI-EAS443:3:11:802:1458#0/1  
a[R]Y¥b\_a^a\_\_a\_\_Ia[\_U[Y\_VDM]V¥V\_Z\_Z\_ZNWQ  
@HWI-EAS443:3:15:85:1647#0/1  
TCCGAATTCTTTTGGTCGCTGTCTGGCTGNCAGTAAGTAT  
+HWI-EAS443:3:15:85:1647#0/1  
aba^a`aa`a]aa\_\_Ya`aa]¥`\_`W¥SDWXZ^[]H]S  
@HWI-EAS443:3:15:86:1041#0/1  
TGTTGGT NATGAAACGAAAACGGGACTCTAGCATACTTAC  
+HWI-EAS443:3:15:86:1041#0/1  
abaab^SD]`aaaaab`aaa`]`\_\_aa`\_`]aaa]`a`a`  
@HWI-EAS443:3:20:689:1544#0/1  
GGCTGTCAGTAAGTATNCTAGAGTCCCCTTTTCGTTTCAT  
+HWI-EAS443:3:20:689:1544#0/1  
`bbab\_baa\_b`\_PaWDYa\_Z\_`T\_\_aaY^\_`]\_W\_¥W^\_  
@HWI-EAS443:3:22:1391:1108#0/1  
AATTGATGGCCATCCGAATTCTTTTGGTCGCTGCTGGCT  
+HWI-EAS443:3:22:1391:1108#0/1  
`\_a^``aaaYW]\_\_`a]`]`aaa`[XUUaXDWZ^\_]¥BB  
@HWI-EAS443:3:25:910:222#0/1  
TCCGAATTCTTTTGGTCGCTGTCTGNCTGTCAGTAAGTAT  
+HWI-EAS443:3:25:910:222#0/1  
^¥¥\_^S\_abbabaa\_OZ`a```]¥YDXXaWUWYVS]ZQBB  
@HWI-EAS443:3:30:113:1068#0/1  
GGCCATCCGAATTCTTNTGGTCGCTGTCTGGCTGTCAGTA  
+HWI-EAS443:3:30:113:1068#0/1  
¥]aaW\_ab[`Yabb`^D¥`]\_baaa]]baa`ba]0¥]\_F]  
@HWI-EAS443:3:34:720:1298#0/1  
CTGTCAGTNAGTATGCTAGAGTCCCCTTTTCGTTTCATTA

+HWI-EAS443:3:34:720:1298#0/1  
a`Z`]aVD[[KY^a^`X`VXT```[]]^\_Y\_IUSW]^W^  
@HWI-EAS443:3:37:1706:823#0/1  
GGCCATCCGAATTNTTTTGGTCGCTGTCTGGCTGTCAGTA  
+HWI-EAS443:3:37:1706:823#0/1  
`]`]aaa`b`]`\_[DZaaa]¥¥aa`aa]Y\_G¥Z^^KDNYP  
@HWI-EAS443:3:39:1714:992#0/1  
CATCCGAATTCTTTTGGTCGCTGTCTGNCTGTCAGTAAGT  
+HWI-EAS443:3:39:1714:992#0/1  
^bba`aa`¥\_babb``aZ^aR`ba^a[DYa]QRR\_U]]`G  
@HWI-EAS443:3:42:1224:746#0/1  
GATGGCCATCCGAATTCTNTTGGTCGCTGTCTGGCTGTCA  
+HWI-EAS443:3:42:1224:746#0/1  
`^`Taa\_a]bbbab`bRD¥abaQ`b\_S^ZG\_\_a]`aN]V  
@HWI-EAS443:3:43:338:1325#0/1  
GCTGTCAGTAAGTATGCTAGAGTCCCGTTTTTCGTTNCATT  
+HWI-EAS443:3:43:338:1325#0/1  
abbbabbb[abbaba`aba``a`aaaa\_abbZa`¥DL\_aa  
@HWI-EAS443:3:43:856:1825#0/1  
GGCCATCCGAATTCTTTTNGTCGCTGTCTGGCTGTCAGTA  
+HWI-EAS443:3:43:856:1825#0/1  
aa`bbbbbbabb\_\_bab[D[\_bbabba`ba`¥`aK]a\_Za  
@HWI-EAS443:3:48:1645:405#0/1  
CTGGNTGTCAGTAAGTATGCTAGAGTCCCGTTTTTCGTTTC  
+HWI-EAS443:3:48:1645:405#0/1  
aab[D¥a\_Y0][^`a[\_^X][[^Z\_[]][¥W^`¥KYPXYL  
@HWI-EAS443:3:57:1042:1423#0/1  
CTGTCAGTAAGTATGNTAGAGTCCCGTTTTTCGTTTCATTA  
+HWI-EAS443:3:57:1042:1423#0/1  
`bbaab`bbbbaba]D^aa`aaa``b^aaaa``aaX`aaa  
@HWI-EAS443:3:61:696:282#0/1  
CGGACTCTAGCATACTTACTGACAGCCANACAGCGACCA  
+HWI-EAS443:3:61:696:282#0/1  
aabb]ab`bba`bb\_abbbaa]bbba^D[`\_`Za¥T¥¥  
@HWI-EAS443:3:66:1100:1253#0/1  
GGCTGTCAGTAAGTATGCTAGAGTCCCGTTTTNGTTTCAT  
+HWI-EAS443:3:66:1100:1253#0/1  
aabab[bb`abab¥a^¥T]H^`bP`aa\_YUa¥DU\_aaTa^  
@HWI-EAS443:3:67:838:1421#0/1  
AACGAAAACNGACTCTAGCATACTTACTGACAGCCAGAC  
+HWI-EAS443:3:67:838:1421#0/1  
`a\_¥`^¥[`XD[`TT\_`a[`aX^^aab]aY\_NX\_```a\_N  
@HWI-EAS443:3:6:844:388#0/1  
CTGNCTGTCAGTAAGTATGCTAGAGTCCCGTTTTTCGTTTC  
+HWI-EAS443:3:6:844:388#0/1  
ab]D]baUabbabbb``a^abba^b^YY`b¥`bb\_b^ab\_  
@HWI-EAS443:3:73:1372:1132#0/1  
GGCCATCCGAATTCTTTTGGTCGCTGTNTGGCTGTCAGTA  
+HWI-EAS443:3:73:1372:1132#0/1  
aIU[`aY\_¥\_\_aaZ]`aa`\_U¥a¥`\_RDU\_\_S¥¥VPGPTR

@HWI-EAS443:3:76:1049:810#0/1  
TCGCTGTCTGGCTGTCAGTAAGTATGCTAGAGTCNCGTTT  
+HWI-EAS443:3:76:1049:810#0/1  
aaaaaaaaabaaaaaa]TTa^^^W][[R\_V\_^\_ZXDZ\_V¥^  
@HWI-EAS443:3:76:716:53#0/1  
AAACNGGACTCTAGCATACTTACTGACAGCCAGACAGCGA  
+HWI-EAS443:3:76:716:53#0/1  
^^\_[D[\_¥RZaZ¥R\_a¥UPa`aa]a[L[Z]^`aaa\_`V`X  
@HWI-EAS443:3:79:1342:674#0/1  
ATCCGAATTCTTTTGGTCGCTGTCTGNCTGTCAGTAAGTA  
+HWI-EAS443:3:79:1342:674#0/1  
\_[\_^aZZaa^abaa\_]aaY`aa[a¥D[``X[Y¥UUXXR^  
@HWI-EAS443:3:87:20:1320#0/1  
GTCGCTGTNTGGCTGTCAGTAAGTATGCTAGAGTCCCGTT  
+HWI-EAS443:3:87:20:1320#0/1  
`\_aaaa]ODL]\_^¥YP]Q¥S^]]R\_ZU^[PU]]HYY^¥GT  
@HWI-EAS443:3:8:432:1583#0/1  
CTGGCTNTCAGTAAGTATGCTAGAGTCCCGTTTTTCGTTTC  
+HWI-EAS443:3:8:432:1583#0/1  
ab[`bYDZbba^`a^Xb`¥XUbabaJV^aa^aaaa¥aa^  
@HWI-EAS443:3:8:856:1007#0/1  
CAGTAAGTATGCNAGAGTCCCGTTTTTCGTTTCATTACCAA  
+HWI-EAS443:3:8:856:1007#0/1  
aab\_bab^b`a[DU^\_a^\_``aYaaa^aV^\_`\_`\_`[]``  
@HWI-EAS443:3:100:1037:526#0/1  
GAATTCTTTTGGTCGCTGTCTGGCTGTCAGTAAGTATGGT  
+HWI-EAS443:3:100:1037:526#0/1  
a`\_`\_^`\_a\_\_[UWa]^¥WT¥WZV\_¥ULRTPSO^BBBBBB  
@HWI-EAS443:3:100:910:540#0/1  
GCGCTGTCAGTAAGTATGCTAGAGTCCCGTTTTTCGTTTCA  
+HWI-EAS443:3:100:910:540#0/1  
a\_aYaa]^`a]^`Za`\_\_\_\_`]^]ZYW`Z\_]S\_W\_]ZB  
@HWI-EAS443:3:10:433:655#0/1  
ATCCGAATTCTTTTGGTCGCTGTCTGGCTGTCAGTAAGGA  
+HWI-EAS443:3:10:433:655#0/1  
]\_a]b`\_bb]b`aa^U^b`aa`GYaaZ\_\_`P^WWLN[PGL  
@HWI-EAS443:3:11:834:356#0/1  
ACGGGACTCTAGCATACTTACTGACAGCCAGACAGCGAGC  
+HWI-EAS443:3:11:834:356#0/1  
a[`aZV^]T[¥YTVU[^bb^UaZ\_G^\_``aaXZa`a\_PFM  
@HWI-EAS443:3:13:761:262#0/1  
GCCATCCGAATTCTTTTGGTCGCTGTCTGGCTGTCAGTTA  
+HWI-EAS443:3:13:761:262#0/1  
a]U]\_a^a\_`^[]¥]^`^X¥]V\_YVV\_\_`MZ¥IGO¥GGG  
@HWI-EAS443:3:18:1415:65#0/1  
GGCCATCCGAATTCTTTTGGTCGCTGTCTGGCTGTCAGGA  
+HWI-EAS443:3:18:1415:65#0/1  
T\_[RZXT0Y\_Z¥^W]]N\_VQLP]^`XZGOVTJX^[BBBBBB  
@HWI-EAS443:3:20:602:76#0/1  
GAATTCTTTTGGTCGCTGTCTGGCTGTCAGTAAGTATGGT

+HWI-EAS443:3:20:602:76#0/1  
aa`\_aQX`\_`^R[¥`STXW^Q`V^^XXORGVWHTGY]NB  
@HWI-EAS443:3:23:1063:1615#0/1  
GGCCATCCGAATTCTTTTGGTCGCTGTCTGGCTGTCAGA  
+HWI-EAS443:3:23:1063:1615#0/1  
^Y^`^aabb`)\_bb]\_ba[\_[]b`\_abY\_bb\_Ka`¥`]¥D  
@HWI-EAS443:3:24:19:872#0/1  
GGCCATCCGAATTCTTTTGGTCGCTGTCTGGCTGTCAGGA  
+HWI-EAS443:3:24:19:872#0/1  
a]`\_`aaabba^^baaab^Za\_```aa¥`^aaaa^R[XXDW  
@HWI-EAS443:3:35:387:219#0/1  
GAATTCTTTTGGTCGCTGTCTGGCTGTCAGTAAGTATGGC  
+HWI-EAS443:3:35:387:219#0/1  
¥[I[[]Q]\_\_R^Y[\_`\_U¥[IRXVXYBBBBBBBBBBBBBBB  
@HWI-EAS443:3:42:1342:680#0/1  
GGCCATCCGAATTCTTTTGGTCGCTGTCTGGCTGTCAGGA  
+HWI-EAS443:3:42:1342:680#0/1  
I\_\_aUbZWab[\_[[]Wb^Z\_b`bUb\_aK\_]aaYa[U\_ZZGZ  
@HWI-EAS443:3:43:21:184#0/1  
GCGCCATCCGAATTCTTTTGGTCGCTGTCTGGCTGTCAGT  
+HWI-EAS443:3:43:21:184#0/1  
ab`\_`aa^`¥W0[]Z\_^\_Z\_[ZY¥Z]^R¥BBBBBBBBBBBBB  
@HWI-EAS443:3:48:930:1447#0/1  
ATCCGAATTCTTTTGGTCGCTGTCTGGCTGTCAGTAAGGA  
+HWI-EAS443:3:48:930:1447#0/1  
aa[aaab^b`\_`\_b`aa[V¥¥¥YW`^UYZX[WHN\_¥Y^BBB  
@HWI-EAS443:3:4:1235:1408#0/1  
TGGCTGTCAGTAAGTATGCTAGAGTCCCGTTTTCGTTTTA  
+HWI-EAS443:3:4:1235:1408#0/1  
abbaa`PZ`aU`\_]V`^`[]Y^\_`^Z\_`\_`P^a^W[[¥]FR  
@HWI-EAS443:3:52:1505:668#0/1  
CGCCATCCGAATTCTTTTGGTCGCTGTCTGGCTGTCAGTG  
+HWI-EAS443:3:52:1505:668#0/1  
GUab`ab[b\_bbbbbbbVabbabbababaaba`USJQH  
@HWI-EAS443:3:52:369:362#0/1  
GCGCCATCCGAATTCTTTTGGTCGCTGTCTGGCTGTCAGT  
+HWI-EAS443:3:52:369:362#0/1  
`aaa`\_`a]a]`\_`a\_`aaa`aa[[a\_`a^Z`]^¥aaVVUXH  
@HWI-EAS443:3:55:666:1119#0/1  
GGTCGCTGTCTGGCTGTCAGTAAGTATGCTAGAGTCCCNT  
+HWI-EAS443:3:55:666:1119#0/1  
¥baabbbbaabb^)\_baaa]`aZZ[a0¥T`R]¥`S¥]NDP  
@HWI-EAS443:3:60:1032:1341#0/1  
GCTGTCAGTAAGTATGCTAGAGTCCCGTTTTCGTTTCAAC  
+HWI-EAS443:3:60:1032:1341#0/1  
`S]UP`]]`abaP¥¥`Z¥`X`][NH]XNY¥`\_`Q\_\_R]JS  
@HWI-EAS443:3:65:461:1978#0/1  
ACCATACTTACTGACAGCCAGACAGCGACCAAAGAATTC  
+HWI-EAS443:3:65:461:1978#0/1  
[FVbaaaXYb`aabb]aaX¥[U`\_`\_H`a]aaa`\_]`\_`bMGS

@HWI-EAS443:3:71:720:490#0/1  
GGCCATCCGAATTCTTTTGGTCGCTGTCTGGCTGTCAGGA  
+HWI-EAS443:3:71:720:490#0/1  
a\_bab\_bb`bab^abbb\_\_b]ababaZabbb`abXRO[MW  
@HWI-EAS443:3:72:1452:1600#0/1  
GCCTGGCTGTCAGTAAGTATGCTAGAGTCCCGTTTTTCGTT  
+HWI-EAS443:3:72:1452:1600#0/1  
]GYZ`]]R[X`T[[\_NZZ[[UFSTYOVVU^MP[^T`NX  
@HWI-EAS443:3:73:715:45#0/1  
GTTGAAACGAAAACGGGACTCTAGCATACTTACTGACAGC  
+HWI-EAS443:3:73:715:45#0/1  
a[[aZS^`a\_]\_U`S¥WMUUYUZX]XX^YXYY[SY]VY  
@HWI-EAS443:3:74:430:1297#0/1  
GCTGTCAGTAAGTATGCTAGAGTCCCGTTTTTCGTTTCAAC  
+HWI-EAS443:3:74:430:1297#0/1  
abaa`baa[[¥b[ba`babb¥`\_aba¥`aa`a[a\_`aa\_  
@HWI-EAS443:3:76:578:735#0/1  
GGCCATCCGAATTCTTTTGGTCGCTGTCTGGCTGTCAGGA  
+HWI-EAS443:3:76:578:735#0/1  
a^]QWUY^UYPY`J`^\_[^aV[XUXKUZ^SQ[TBBBBBBB  
@HWI-EAS443:3:77:833:276#0/1  
CTGCTGTCAGTAAGTATGCTAGAGTCCCGTTTTTCGTTTCA  
+HWI-EAS443:3:77:833:276#0/1  
abbbbaabbaaa``abbbabbba`aaab\_`a`¥a\_`aaa  
@HWI-EAS443:3:80:1255:1052#0/1  
GCTGTCAGTAAGTATGCTAGAGTCCCGTTTTTCGTTTCAAC  
+HWI-EAS443:3:80:1255:1052#0/1  
aYaaw]¥]RZ]XZ^Ua\_[NY¥GWVUPT^¥]R^VV¥WW¥N  
@HWI-EAS443:3:83:816:343#0/1  
GGGGCTGTCAGTAAGTATGCTAGAGTCCCGTTTTTCGTTTC  
+HWI-EAS443:3:83:816:343#0/1  
W^`b`bb`^a`]`bbY`U¥\_`^¥`Y^V`¥\_`TZa^W^Z\_\_V  
@HWI-EAS443:3:94:477:149#0/1  
GGCCATCCGAATTCTTTTGGTCGCTGTCTGGCTGTCAGCA  
+HWI-EAS443:3:94:477:149#0/1  
]`¥]]¥Z\_ba\_a`]aaa\_ba¥aa``aT]]a\_^BBBBBBB  
@HWI-EAS443:3:96:772:49#0/1  
ATCCGAATTCTTTTGGTCGCTGTCTGGCTGTCAGTAAGGA  
+HWI-EAS443:3:96:772:49#0/1  
aaX]baaaaa`\_`a\_VL^\_L\_aTUXXXUXXZQN\_BBBBBB  
@HWI-EAS443:3:100:1224:1530#0/1  
ACGGGACTCTAGCATACTTACTGACAGCCAGACAGCGACG  
+HWI-EAS443:3:100:1224:1530#0/1  
a\_Pa]`S`[baaa`bb\_\_a`\_Tb[YabLU^aaWabNaBBB  
@HWI-EAS443:3:14:447:91#0/1  
CGTGTGGTAATGAAACGAAAACGGGACTCTAGCATACTT  
+HWI-EAS443:3:14:447:91#0/1  
a\_^b`abb\_aa`\_Wba^baaTaa\_aX^\_¥\_^\_a``\_\_aa^  
@HWI-EAS443:3:18:1561:393#0/1  
GTCAGTAAGTATGCTAGAGTCCCGTTTTTCGTTTCATTACA

+HWI-EAS443:3:18:1561:393#0/1  
a`^\_]¥a^a^aa\_X\_^`^[YY^a]^a`Y\_\_VZ^^^UD  
@HWI-EAS443:3:21:785:1964#0/1  
CATGGCCATCCGAATTCTTTTGGTCGCTGTCTGGCTGTCA  
+HWI-EAS443:3:21:785:1964#0/1  
a`\_a^`abZaa`aa`a\_]\_\_Z]Y^\_^]]U^ZU¥UBBBBB  
@HWI-EAS443:3:24:707:1277#0/1  
GGGCCATCCGAATTCTTTTGGTCGCTGTCTGGCTGTCACT  
+HWI-EAS443:3:24:707:1277#0/1  
abbaba`baaYbaa[a\_aab\_\_[ba^bS[\_aZQX^QaN[N  
@HWI-EAS443:3:24:934:1861#0/1  
TGTAAGTATGCTAGAGTCCCGTTTTTCGTTTCATTACCAAC  
+HWI-EAS443:3:24:934:1861#0/1  
ab]`b¥`UZ[]bbaS`]^TJ]Ga^^^`YWW``\_\_aa¥aaG  
@HWI-EAS443:3:29:566:938#0/1  
CGGCTGTCTAGTAAGTATGCTAGAGTCCCGTTTTTCGTTTCA  
+HWI-EAS443:3:29:566:938#0/1  
aaab\_WT\_[RG¥Z¥T\_YW¥[YOWVS[\_\_\_YNZ\_ZZZN[VBB  
@HWI-EAS443:3:30:931:1291#0/1  
CATCCGAATTCTTTTGGTCGCTGTCTGGCTGTCTAGTAAGG  
+HWI-EAS443:3:30:931:1291#0/1  
a`aaaY[T^]QZ^aa`SZaaa^aZ\_^`^]a\_SUXRGVUBB  
@HWI-EAS443:3:31:1290:814#0/1  
GGGCTGTCTAGTAAGTATGCTAGAGTCCCGTTTTTCGTTTCA  
+HWI-EAS443:3:31:1290:814#0/1  
^`bbbbbbbbbbabb¥ba^abbbbbaaaaa\_aba`\_`bba\_  
@HWI-EAS443:3:35:853:1245#0/1  
AGGCTGTCTAGTAAGTATGCTAGAGTCCCGTTTTTCGTTTCA  
+HWI-EAS443:3:35:853:1245#0/1  
a^abb`]a\_aW\_^\_N\_X\_a`\_`^[ZzXZX\_a`aaW\_ZWW  
@HWI-EAS443:3:36:590:981#0/1  
TGGCCATCCGAATTCTTTTGGTCGCTGTCTGGCTGTCTCAGG  
+HWI-EAS443:3:36:590:981#0/1  
aaUbb`^bbb\_V\_abbaba]`Ubabaa\_b`a\_a]]\_a[[G  
@HWI-EAS443:3:40:1539:607#0/1  
CGATGGCCATCCGAATTCTTTTGGTCGCTGTCTGGCTGTCTC  
+HWI-EAS443:3:40:1539:607#0/1  
`bbbbbbabbabb]]bbbbbbbbb\_\_abaa`\_aaaa]aFF  
@HWI-EAS443:3:43:1341:1041#0/1  
CGCCATCCGAATTCTTTTGGTCGCTGTCTGGCTGTCTCAGTA  
+HWI-EAS443:3:43:1341:1041#0/1  
aba`\_`aaa`aaaaabaa¥a^`a`\_][a\_a`\_][UU^¥TZ  
@HWI-EAS443:3:48:909:530#0/1  
CGCCATCCGAATTCTTTTGGTCGCTGTCTGGCTGTCTCAGTA  
+HWI-EAS443:3:48:909:530#0/1  
G¥``bab\_¥]`bbabb``b[baabbabbbabababS]SaW\_  
@HWI-EAS443:3:52:613:1198#0/1  
TGGCTGTCTAGTAAGTATGCTAGAGTCCCGTTTTTCGTTTCT  
+HWI-EAS443:3:52:613:1198#0/1  
aaa`a]XNQYFSa\_TVRHUYP[VLY[YRV\_]UR[a`GF

@HWI-EAS443:3:57:1761:1426#0/1  
CGCCATCCGAATTCTTTTGGTCGCTGTCTGGCTGTCAGTA  
+HWI-EAS443:3:57:1761:1426#0/1  
`a\_¥`a`]^`a\_\_`^a`\_[[W[¥\_aVZ\_`]W^\_OMMXBB  
@HWI-EAS443:3:59:471:941#0/1  
CGTGTGGTAATGAAACGAAAACGGGACTCTAGCATACTT  
+HWI-EAS443:3:59:471:941#0/1  
ababab]]XZaba`]X]ba``a\_[`\_\_\_a\_\_a\_\_]X\_\_U  
@HWI-EAS443:3:5:187:516#0/1  
ATGAAACGAAAACGGGACTCTAGCATACTTACTGACAGCA  
+HWI-EAS443:3:5:187:516#0/1  
a``abb`b`a\_]aaa\_`aa^]Y[`aa\_a\_a^`a`^aa\_F  
@HWI-EAS443:3:60:703:1508#0/1  
CATGGCCATCCGAATTCTTTTGGTCGCTGTCTGGCTGTCA  
+HWI-EAS443:3:60:703:1508#0/1  
aaa^^`ab``a````aaaaa][[``]^a\_Z\_^\_X¥USUW  
@HWI-EAS443:3:61:1012:1934#0/1  
CTGGCTGTCAGTAAGTATGCTAGAGTCCCGTTTTCGTTTG  
+HWI-EAS443:3:61:1012:1934#0/1  
[[XU¥a¥NP][ZS`\_I`\_]\_ZW\_``^^[`ba`]`a\_MOQ]ZD  
@HWI-EAS443:3:61:862:1189#0/1  
GTGGTAATGAAACGAAAACGGGACTCTAGCATACTTACTG  
+HWI-EAS443:3:61:862:1189#0/1  
aN\_¥Q[XWZ^]V]\_Y\_[T]Z[TF¥R^UVWVXVUVXXYVVX  
@HWI-EAS443:3:63:1023:1515#0/1  
CGTTGGTAATGAAACGAAAACGGGACTCTAGCATACTTAC  
+HWI-EAS443:3:63:1023:1515#0/1  
`a[b[a\_a[a]Iab\_ab`\_]¥ba`[\_^[[aaU`\_[`aS`a  
@HWI-EAS443:3:63:1349:1201#0/1  
TGGCTGTCAGTAAGTATGCTAGAGTCCCGTTTTCGTTTCG  
+HWI-EAS443:3:63:1349:1201#0/1  
a`````Z[\_\_\_Y\_\_^W]]¥ZZ]^\_^V^^¥VS[\_`NZZ^]WN  
@HWI-EAS443:3:64:517:138#0/1  
TGCTGTCAGTAAGTATGCTAGAGTCCCGTTTTCGTTTCAT  
+HWI-EAS443:3:64:517:138#0/1  
````\_H^^aa``]P¥^^^W]aa^¥Y`[[JT\_\_Z^TZ[[[\_^  
@HWI-EAS443:3:65:1528:1336#0/1  
GGGACTCTAGCATACTTACTGACAGCCAGACAGCGACCA  
+HWI-EAS443:3:65:1528:1336#0/1  
a^¥aa`baaaaaa\_aa`a\_aaaV`a\_`````\_``[^`VZ[  
@HWI-EAS443:3:65:822:885#0/1  
CATGGCCATCCGAATTCTTTTGGTCGCTGTCTGGCTGTCA  
+HWI-EAS443:3:65:822:885#0/1  
aaabababbbab^aab]bbbbaaaYaa¥]a^a[``¥\_aWLX  
@HWI-EAS443:3:68:47:1643#0/1  
CCGCTGTCTGGCTGTCAGTAAGTATGCTAGAGTCCCGTTT  
+HWI-EAS443:3:68:47:1643#0/1  
`b]a\_]\_b\_a¥][`V^S[T]\_UNUWITPXNUZUZa][PXW  
@HWI-EAS443:3:69:1375:94#0/1  
GGGCTGTCAGTAAGTATGCTAGAGTCCCGTTTTCGTTTCA

+HWI-EAS443:3:69:1375:94#0/1  
`baabaaa`¥aab\_a¥U^aaaa]Wa\_YaVWaaNaX\_aV[  
@HWI-EAS443:3:72:1089:1926#0/1  
GGGCCATCCGAATTCTTTTGGTCGCTGTCTGGCTGTCAGT  
+HWI-EAS443:3:72:1089:1926#0/1  
`V^[aWGS]aUH]\_W]Z`¥U\_VR\_X\_SNU\_[QZUaQGUUQ  
@HWI-EAS443:3:76:991:1200#0/1  
GGGCCATCCGAATTCTTTTGGTCGCTGTCTGGCTGTCAGT  
+HWI-EAS443:3:76:991:1200#0/1  
H\_bab`\_`baa]\_`\_bbbb`\_Zbabbbb]aXbX\_X`b\_[M  
@HWI-EAS443:3:7:936:1951#0/1  
CATCCGAATTCTTTTGGTCGCTGTCTGGCTGTCAGTAAGC  
+HWI-EAS443:3:7:936:1951#0/1  
U`\_a]abb¥W\_b`]bbb^abbaaaa`bab]\_SQ`ZD¥a\_H  
@HWI-EAS443:3:84:1256:1915#0/1  
CTGGCTGTCAGTAAGTATGCTAGAGTCCCGTTTTCGTTTA  
+HWI-EAS443:3:84:1256:1915#0/1  
aba`b[`U\_`TXWYZG[¥QZ¥aa]] [XZZ`Ta¥aI]S\_[D  
@HWI-EAS443:3:86:1113:1749#0/1  
GGCCATCCGAATTCTTTTGGTCGCTGTCTGGCTGTCAGTT  
+HWI-EAS443:3:86:1113:1749#0/1  
ab[baaba]b`aa`ababba^ab`^b^`ba`bbQZ]` [G  
@HWI-EAS443:3:90:1737:795#0/1  
TGCTGTCTGGCTGTCAGTAAGTATGCTAGAGTCCCGTTTT  
+HWI-EAS443:3:90:1737:795#0/1  
`a`abaaabba]aaa`SXaa\_a\_\_\_`a\_\_Y`VY`\_`a`  
@HWI-EAS443:3:92:953:1314#0/1  
GGGCCATCCGAATTCTTTTGGTCGCTGTCTGGCTGTCAGT  
+HWI-EAS443:3:92:953:1314#0/1  
`aaab]aaba¥aaaT^Z]\_a]Paaaa`aaab``\_¥HSU]H  
@HWI-EAS443:3:94:877:269#0/1  
GGCCATCCGAATTCTTTTGGTCGCTGTCTGGCTGTCAGTG  
+HWI-EAS443:3:94:877:269#0/1  
aT`aXR]a]XaWwa\_\_\_`]]`Ta[QVZ\_a`]MW\_PPTRBB  
@HWI-EAS443:3:94:937:1338#0/1  
TGGCCATCCGAATTCTTTTGGTCGCTGTCTGGCTGTCAGG  
+HWI-EAS443:3:94:937:1338#0/1  
OV^H¥YU[\_\_\_¥Y\_\_\_`Z\_W¥QR\_aa\_RU[MFN^^ZFKZ]B  
@HWI-EAS443:3:97:476:1390#0/1  
TGGCCATCCGAATTCTTTTGGTCGCTGTCTGGCTGTCAGG  
+HWI-EAS443:3:97:476:1390#0/1  
\_\_W`ab]bb^^T`]^bZbaaZ\_\_U\_`b`aa]ZT¥a`aSBB  
@HWI-EAS443:3:100:105:984#0/1  
TGGTAATGAAACGAAAACGGGACTCTAGCATACTTACTGA  
+HWI-EAS443:3:100:105:984#0/1  
abb]`]^aaaa\_a`\_\_\_`^^ZRV`\_\_\_\_]Y\_`] `]`^^`  
@HWI-EAS443:3:100:1315:396#0/1  
GGTCGCTGTCTGGCTGTCAGTAAGTATGCTAGAGTCCCGT  
+HWI-EAS443:3:100:1315:396#0/1  
`\_aa\_^bb^`b`b[aa]\_Z\_Y[a]\_a`¥a`¥`THRYaB



@HWI-EAS443:3:100:1782:379#0/1  
TGGTAATGAAACGAAAACGGGACTCTAGCATACTTACTGA  
+HWI-EAS443:3:100:1782:379#0/1  
abbYWbaaa^`Qab^`a^V`\_\_`aaX\_a¥`\_a\_^VaZ¥BB  
@HWI-EAS443:3:100:278:367#0/1  
TGTCAGTAAGTATGCTAGAGTCCCGTTTTTCGTTTCATTAC  
+HWI-EAS443:3:100:278:367#0/1  
ab\_aab\_V`ba^ab\_a]a^a[¥\_aaX``\_[b\_^\_0a`aaZ  
@HWI-EAS443:3:100:328:177#0/1  
TTGATGGCCATCCGAATTCTTTTGGTCGCTGTCTGGCTGT  
+HWI-EAS443:3:100:328:177#0/1  
a¥^a[ ]`]]a\_\_aaZY¥^P[`X^a\_ZQ]V[XGLZ\_YBBBB  
@HWI-EAS443:3:100:38:513#0/1  
CGCTGTCTGGCTGTCAGTAAGTATGCTAGAGTCCCGTTTT  
+HWI-EAS443:3:100:38:513#0/1  
abb[bW]bb[`bbJS\_`W0^aa\_aa`ZNWQbW0[G^H`BB  
@HWI-EAS443:3:100:537:1398#0/1  
CAGTAAGTATGCTAGAGTCCCGTTTTTCGTTTCATTACCAA  
+HWI-EAS443:3:100:537:1398#0/1  
``[IS\_PXb`]¥WUY]^]YQZaR\_]\_\_`R\_]V`^R^S^\_B  
@HWI-EAS443:3:100:55:922#0/1  
GTCGCTGTCTGGCTGTCAGTAAGTATGCTAGAGTCCCGTT  
+HWI-EAS443:3:100:55:922#0/1  
aWZ`Y\_aVXY\_¥¥QZULEXNQ^VUZRULQNQPQBBB  
@HWI-EAS443:3:100:597:182#0/1  
GAATTCTTTTGGTCGCTGTCTGGCTGTCAGTAAGTATGCT  
+HWI-EAS443:3:100:597:182#0/1  
aa^`U`baaaabXU`aU][\_\_`XGXTSSV[VGYYBBBBBB  
@HWI-EAS443:3:100:603:987#0/1  
GGCTGTCAGTAAGTATGCTAGAGTCCCGTTTTTCGTTTCAT  
+HWI-EAS443:3:100:603:987#0/1  
\_babaTaa^X¥`a\_aa¥Q\_\_a]\_]\_\_^^)`aa[aQ`^SBB  
@HWI-EAS443:3:100:82:622#0/1  
CAGTAAGTATGCTAGAGTCCCGTTTTTCGTTTCATTACCAA  
+HWI-EAS443:3:100:82:622#0/1  
^\_a]\_Z\_a\_\_a\_\_Za¥ZLYUTaWW]ZJZX]TX]aZZTUBB  
@HWI-EAS443:3:100:856:95#0/1  
GGCCATCCGAATTCTTTTGGTCGCTGTCTGGCTGTCAGTA  
+HWI-EAS443:3:100:856:95#0/1  
aaa\_`aa\_aa`ab¥aaabaa^\_`W\_aYZaaa¥``NSWTUB  
@HWI-EAS443:3:10:1079:100#0/1  
TCGCTGTCTGGCTGTCAGTAAGTATGCTAGAGTCCCGTTT  
+HWI-EAS443:3:10:1079:100#0/1  
aaa\_aa\_\_aab\_\_b^][`UV]\_USSVTXZWT\_USWV^^]^  
@HWI-EAS443:3:10:1113:550#0/1  
TGTCTGGCTGTCAGTAAGTATGCTAGAGTCCCGTTTTTCGT  
+HWI-EAS443:3:10:1113:550#0/1  
¥Z\_aa``Xa¥NXZa[X[`SVYNNVQZ¥^PNJO]TW¥YLP  
@HWI-EAS443:3:10:1360:222#0/1  
ATCCGAATTCTTTTGGTCGCTGTCTGGCTGTCAGTAAGTA

+HWI-EAS443:3:10:1360:222#0/1  
aaaUaVWY^U\_U\_\_TPSX\_^V`VZBBBBBBBBBBBBBBBB  
@HWI-EAS443:3:10:157:1912#0/1  
CTGTCAGTAAGTATGCTAGAGTCCCGTTTTTCGTTTCATTA  
+HWI-EAS443:3:10:157:1912#0/1  
ab`abbb\_bbb¥b`aaabaaa\_`aaa\_aaa\_^\_aa\_aa^a  
@HWI-EAS443:3:10:1616:418#0/1  
ATCCGAATTCTTTTGGTCGCTGTCTGGCTGTCAGTAAGTA  
+HWI-EAS443:3:10:1616:418#0/1  
aa[[b\_aaa\_aa`\_aa\_^a]aa]^aa\_]\_aXTRRFXYZQU  
@HWI-EAS443:3:10:1686:1446#0/1  
TGGCTGTCAGTAAGTATGCTAGAGTCCCGTTTTTCGTTTCA  
+HWI-EAS443:3:10:1686:1446#0/1  
```\_a\_]P]Z`][QTX[VVY[NSNNVVYYTY\_XLSY]¥QS  
@HWI-EAS443:3:10:215:848#0/1  
TGGCCATCCGAATTCTTTTGGTCGCTGTCTGGCTGTCAGT  
+HWI-EAS443:3:10:215:848#0/1  
aa¥bab`abb`]aaaa`aaaa^`Z`\_`a\_a\_]R]^\_Z^V\_R  
@HWI-EAS443:3:10:294:1380#0/1  
GGGACTCTAGCATACTTACTGACAGCCAGACAGCGACCAA  
+HWI-EAS443:3:10:294:1380#0/1  
¥a\_P\_a`a¥``babaaaba^^]\_^YW`\_`^^`\_a`\_YM]X  
@HWI-EAS443:3:10:400:471#0/1  
AATTGATGGCCATCCGAATTCTTTTGGTCGCTGTCTGGCT  
+HWI-EAS443:3:10:400:471#0/1  
^¥aabaaa]]ba`]`\_YWZ\_a`\_aa^a[]¥Y`^VV¥`TZ[  
@HWI-EAS443:3:10:771:876#0/1  
AGTAAGTATGCTAGAGTCCCGTTTTTCGTTTCATTACCAAC  
+HWI-EAS443:3:10:771:876#0/1  
a`abab`aababaaaa\_aa^b]aaa^a\_`a^aa``\_W]a^  
@HWI-EAS443:3:10:80:999#0/1  
TGTCTGGCTGTCAGTAAGTATGCTAGAGTCCCGTTTTTCGT  
+HWI-EAS443:3:10:80:999#0/1  
\_`^aa]Q]XYDY^]PX\_a^\_XWRW\_] [[RT[`YVY]aXQV  
@HWI-EAS443:3:10:854:938#0/1  
GTCTGGCTGTCAGTAAGTATGCTAGAGTCCCGTTTTTCGTT  
+HWI-EAS443:3:10:854:938#0/1  
a[\_`aXa^`]VG]XVX^GWVTVYY]X]UYVY^XYVYXURV  
@HWI-EAS443:3:10:889:439#0/1  
TGTCAGTAAGTATGCTAGAGTCCCGTTTTTCGTTTCATTAC  
+HWI-EAS443:3:10:889:439#0/1  
abRWZa\_^[\_`[^aW^M`\_ [[]R]aX\_^W^W^^RY]Z^V  
@HWI-EAS443:3:11:100:1130#0/1  
GACTCTAGCATACTTACTGACAGCCAGACAGCGACCAAAA  
+HWI-EAS443:3:11:100:1130#0/1  
aaaababbbaabaabbabbaaaabaaaaa\_aaaa^  
@HWI-EAS443:3:11:1191:394#0/1  
CGGGACTCTAGCATACTTACTGACAGCCAGACAGCGACCA  
+HWI-EAS443:3:11:1191:394#0/1  
]bbb`aaabb\_bbbbbba¥bbba``[aa\_^]]`¥b`¥\_`

@HWI-EAS443:3:11:1214:716#0/1  
AGTAAGTATGCTAGAGTCCCGTTTTTCGTTTCATTACCAAC  
+HWI-EAS443:3:11:1214:716#0/1  
abaa^b^bbaaa^`a]a\_\_`X`a`\_a`\_a`\_a`\_a`\_V[^\_W  
@HWI-EAS443:3:11:1599:1170#0/1  
GCTGTCAGTAAGTATGCTAGAGTCCCGTTTTTCGTTTCATT  
+HWI-EAS443:3:11:1599:1170#0/1  
abbbaaab\_abaab\_aababaa\_a\_\_baaab]aaaa]\_aa  
@HWI-EAS443:3:11:225:1675#0/1  
CATCCGAATTCTTTTGGTCGCTGTCTGGCTGTCAGTAAGT  
+HWI-EAS443:3:11:225:1675#0/1  
Tab\_`aa]\_Y^ba]^XMR\_aa]b\_QZ[I]aaXJ¥PK`YRB  
@HWI-EAS443:3:11:314:447#0/1  
CATCCGAATTCTTTTGGTCGCTGTCTGGCTGTCAGTAAGT  
+HWI-EAS443:3:11:314:447#0/1  
`\_`\_X[TW¥^^ba\_aa`Taa¥^b`aaa`^ [aV\_[UHW][V  
@HWI-EAS443:3:11:31:1508#0/1  
GCCATCCGAATTCTTTTGGTCGCTGTCTGGCTGTCAGTAA  
+HWI-EAS443:3:11:31:1508#0/1  
a\_^¥HYTO[]\_aY`Y¥VUYT[] [Q¥QUVQO¥BBBBBBBBB  
@HWI-EAS443:3:11:366:1120#0/1  
AATTGATGGCCATCCGAATTCTTTTGGTCGCTGTCTGGCT  
+HWI-EAS443:3:11:366:1120#0/1  
abaaa^^^Tb\_a\_a]aa[aaa`a^I]^`^`\_^a]^`\_MUY  
@HWI-EAS443:3:11:539:642#0/1  
GGTCGCTGTCTGGCTGTCAGTAAGTATGCTAGAGTCCCGT  
+HWI-EAS443:3:11:539:642#0/1  
a\_OaaY^`\_a``\_\_\_\_] ]]¥S^\_ZVZU¥] ]]YVRVSSY]U  
@HWI-EAS443:3:11:669:203#0/1  
GGCTGTCAGTAAGTATGCTAGAGTCCCGTTTTTCGTTTCAT  
+HWI-EAS443:3:11:669:203#0/1  
aaa^¥Z[PPFSZSVY\_Za\_¥X[NNT]^]W]^Z]JW\_BBB  
@HWI-EAS443:3:11:748:1885#0/1  
GCTGTCAGTAAGTATGCTAGAGTCCCGTTTTTCGTTTCATT  
+HWI-EAS443:3:11:748:1885#0/1  
aaab\_`aa\_a`a[aaa\_a`Va^Z`\_`aX¥`\_V\_X`\_^\_\_^  
@HWI-EAS443:3:12:1563:417#0/1  
CTGGCTGTCAGTAAGTATGCTAGAGTCCCGTTTTTCGTTTC  
+HWI-EAS443:3:12:1563:417#0/1  
a`bbab`¥``b¥bbaaab]b]^ [bZ\_¥ZWJ^aa[a`a\_T  
@HWI-EAS443:3:12:221:401#0/1  
GCTGTCAGTAAGTATGCTAGAGTCCCGTTTTTCGTTTCATT  
+HWI-EAS443:3:12:221:401#0/1  
^`ab]aS`XbbRR```YSa\_V]¥OZab\_¥V]^ZFZ¥G¥]a  
@HWI-EAS443:3:12:225:1915#0/1  
CGGGACTCTAGCATACTTACTGACAGCCAGACAGCGACCA  
+HWI-EAS443:3:12:225:1915#0/1  
abKa]^`ab``]b]Wa`RZ\_Za\_a¥`]]a`^`Y\_\_`ZPYUS  
@HWI-EAS443:3:12:256:16#0/1  
ATGAAACGAAAACGGGACTCTAGCATACTTACTGACAGCC

+HWI-EAS443:3:12:256:16#0/1  
`\_]`^aVa\_\_^Z]YY\_[^\_\_[X]`\_\_[UW^`[¥¥[U¥\_VD  
@HWI-EAS443:3:12:677:792#0/1  
ATGAAACGAAAACGGGACTCTAGCATACTTACTGACAGCC  
+HWI-EAS443:3:12:677:792#0/1  
a^`abababa]ba`TN^a`][¥ZXaa`^^aa^^\_a\_``¥\_  
@HWI-EAS443:3:12:694:708#0/1  
CTGGCTGTCAGTAAGTATGCTAGAGTCCCGTTTTCGTTTC  
+HWI-EAS443:3:12:694:708#0/1  
abbb\_ab`aa`Xabaa^b^X\_`a¥b`^^ba\_abb]Vbaaa  
@HWI-EAS443:3:12:78:106#0/1  
TGGCCATCCGAATTCTTTTGGTCGCTGTCTGGCTGTCAGT  
+HWI-EAS443:3:12:78:106#0/1  
a\_`b\_a```a\_^`Y\_[\_`¥\_Y^`Z¥aW¥\_`\_WBBBBBBB  
@HWI-EAS443:3:12:80:368#0/1  
GTCGCTGTCTGGCTGTCAGTAAGTATGCTAGAGTCCCGTT  
+HWI-EAS443:3:12:80:368#0/1  
a^aaa`a¥a\_`\_a\_^R^^YM¥\_¥VYZV^]YVY]X^XX^U]  
@HWI-EAS443:3:12:811:1594#0/1  
TGGTCGCTGTCTGGCTGTCAGTAAGTATGCTAGAGTCCCG  
+HWI-EAS443:3:12:811:1594#0/1  
ab]a\_\_`^bab`¥S^^^H\_`^J]a^HRY]FM[¥V`GUHaR  
@HWI-EAS443:3:12:917:1877#0/1  
CATCCGAATTCTTTTGGTCGCTGTCTGGCTGTCAGTAAGT  
+HWI-EAS443:3:12:917:1877#0/1  
ab`X\_a\_S]\_a^]YS][Ra]\_^\_VN]aZX[¥JFRYBBBBB  
@HWI-EAS443:3:13:1059:418#0/1  
CTGGCTGTCAGTAAGTATGCTAGAGTCCCGTTTTCGTTTC  
+HWI-EAS443:3:13:1059:418#0/1  
aa]````\_VSa`]]^VZa¥]a[Y`aY\_a¥\_R``^Q^NZ\_Z  
@HWI-EAS443:3:13:126:240#0/1  
CGGGACTCTAGCATACTTACTGACAGCCAGACAGCGACCA  
+HWI-EAS443:3:13:126:240#0/1  
aaa`\_`a`aaa\_aa\_aaa`aa\_a`\_\_\_\_\_Ya\_`\_\_\_\_^\_  
@HWI-EAS443:3:13:1359:541#0/1  
CTGTCAGTAAGTATGCTAGAGTCCCGTTTTCGTTTCATTA  
+HWI-EAS443:3:13:1359:541#0/1  
abbbabb\_bba`baaaaaaab\_a\_`ba\_`b^a^aa^aaaa  
@HWI-EAS443:3:13:1426:669#0/1  
ATCCGAATTCTTTTGGTCGCTGTCTGGCTGTCAGTAAGTA  
+HWI-EAS443:3:13:1426:669#0/1  
aaaabaaaa\_aa`a\_]\_a\_`a]\_]\_^\_\_YVY^X]X]U]  
@HWI-EAS443:3:13:1537:480#0/1  
GCTGTCAGTAAGTATGCTAGAGTCCCGTTTTCGTTTCATT  
+HWI-EAS443:3:13:1537:480#0/1  
aaab^¥\_a`aaaU`^^[`]\_\_\_\_]]Y^a\_^\_X]Y^^XX]W  
@HWI-EAS443:3:13:337:1888#0/1  
TGAAACGAAAACGGGACTCTAGCATACTTACTGACAGCCA  
+HWI-EAS443:3:13:337:1888#0/1  
aababaZa``a\_]`\_[\_`\_`a\_`a`aa`bY``a`a\_[U\_

@HWI-EAS443:3:13:375:934#0/1  
GTCGCTGTCTGGCTGTCAGTAAGTATGCTAGAGTCCCGTT  
+HWI-EAS443:3:13:375:934#0/1  
a^¥a\_\_a^`]aT]\_`S]\_`GZ\_\_Y[^\_¥V]VTZY[X\_YSR  
@HWI-EAS443:3:13:421:1861#0/1  
TTGGTAATGAAACGAAAACGGGACTCTAGCATACTTACTG  
+HWI-EAS443:3:13:421:1861#0/1  
UY¥Xab`P^b^[aVY]bbY``OHOPaS\_H``aZ`^`a[J]  
@HWI-EAS443:3:13:436:888#0/1  
GCCATCCGAATTCTTTTGGTCGCTGTCTGGCTGTCAGTAA  
+HWI-EAS443:3:13:436:888#0/1  
aabbbbbbbZbabbbbabab\_bbaab`aaa\_aa`W\_[a¥a\_  
@HWI-EAS443:3:13:717:778#0/1  
GTGTTGGTAATGAAACGAAAACGGGACTCTAGCATACTTA  
+HWI-EAS443:3:13:717:778#0/1  
a]aY\_]HWU\_Y^Y]¥a)`\_Q]^QRFWRS]WVDP\_]XT\_  
@HWI-EAS443:3:14:1013:1846#0/1  
GCTGTCAGTAAGTATGCTAGAGTCCCGTTTTTCGTTTCATT  
+HWI-EAS443:3:14:1013:1846#0/1  
aaZaZ]\_Z`]a^TZ¥M^a[a\_^U\_]¥¥M^ZXPW^\_Na\_B  
@HWI-EAS443:3:14:1246:1133#0/1  
TGGTCGCTGTCTGGCTGTCAGTAAGTATGCTAGAGTCCCG  
+HWI-EAS443:3:14:1246:1133#0/1  
aaa]]a\_`a\_^aa\_\_\_^U\_^V]¥UU^^[T]]]Z\_NPPX\_  
@HWI-EAS443:3:14:1521:1141#0/1  
TCTGGCTGTCAGTAAGTATGCTAGAGTCCCGTTTTTCGTTT  
+HWI-EAS443:3:14:1521:1141#0/1  
a`a\_\_\_aaZYU\_^Z[URXKZU[VYV¥UTV[ZSY`YF[Q^¥  
@HWI-EAS443:3:14:1768:852#0/1  
GTCTGGCTGTCAGTAAGTATGCTAGAGTCCCGTTTTTCGTT  
+HWI-EAS443:3:14:1768:852#0/1  
a\_aaaa]`a[ZZ]Y^\_[\_\_^[OY¥VS¥QQWS^U¥\_WJ[Z^  
@HWI-EAS443:3:14:230:760#0/1  
GGCCATCCGAATTCTTTTGGTCGCTGTCTGGCTGTCAGTA  
+HWI-EAS443:3:14:230:760#0/1  
[^^b`aaaababbabbbbaaa[aaaa^^aaa``^QNY`]Y  
@HWI-EAS443:3:14:246:1128#0/1  
CGCTGTCTGGCTGTCAGTAAGTATGCTAGAGTCCCGTTTT  
+HWI-EAS443:3:14:246:1128#0/1  
`abaaaaa`b``a^\_V\_U^aaRa`Z[Z\_\_ZYW]]a`LV\_\_  
@HWI-EAS443:3:14:641:860#0/1  
CTGGCTGTCAGTAAGTATGCTAGAGTCCCGTTTTTCGTTTC  
+HWI-EAS443:3:14:641:860#0/1  
aaa\_`ab^\_\_\_Za`]X]aaa^\_^UXLZ``\_TYa`^\_R]]N  
@HWI-EAS443:3:14:647:491#0/1  
ATCCGAATTCTTTTGGTCGCTGTCTGGCTGTCAGTAAGTA  
+HWI-EAS443:3:14:647:491#0/1  
\_Xa]]aaa`]`aa`\_a]`a`\_aX`\_a\_Z`\_WVZWLRL]^RY  
@HWI-EAS443:3:14:828:138#0/1  
GAAAACGGGACTCTAGCATACTTACTGACAGCCAGACAGC

+HWI-EAS443:3:14:828:138#0/1  
aaaaa[^`^^\_]\_^X\_`\_^`\_^\_YYRX^\_XYX^VYYYY  
@HWI-EAS443:3:15:1135:1197#0/1  
GCCATCCGAATTCTTTTGGTCGCTGTCTGGCTGTCAGTAA  
+HWI-EAS443:3:15:1135:1197#0/1  
X``\_TRX\_R¥V^Z[[TY\_b]IZ\_ZaWXY[^LS\_BBBBBBB  
@HWI-EAS443:3:15:1157:160#0/1  
CAGTAAGTATGCTAGAGTCCCGTTTTTCGTTTCATTACCAA  
+HWI-EAS443:3:15:1157:160#0/1  
^bbabba`a\_b`b\_Z^babaaa[`bb`b]aaUZaaa\_T\_a  
@HWI-EAS443:3:15:131:1338#0/1  
GGTCGCTGTCTGGCTGTCAGTAAGTATGCTAGAGTCCCGT  
+HWI-EAS443:3:15:131:1338#0/1  
VV]b\_abb\_bbbaaa\_XYaZa`bbYb^\_aZ\_^]\_aabb`^  
@HWI-EAS443:3:15:1610:1291#0/1  
CTGTCTGGCTGTCAGTAAGTATGCTAGAGTCCCGTTTTCG  
+HWI-EAS443:3:15:1610:1291#0/1  
\_\_¥bbabbbb\_J`bb\_a`Y\_a``\_aba]YaYUb\_\_ba\_b  
@HWI-EAS443:3:15:335:354#0/1  
TGGCTGTCAGTAAGTATGCTAGAGTCCCGTTTTTCGTTTCA  
+HWI-EAS443:3:15:335:354#0/1  
aaY[a\_SXY[SV`¥NQN[^¥^VUSPYX[GFT\_TRUSS]BB  
@HWI-EAS443:3:15:340:1143#0/1  
ATCCGAATTCTTTTGGTCGCTGTCTGGCTGTCAGTAAGTA  
+HWI-EAS443:3:15:340:1143#0/1  
aaaaba``abbaaaaa\_a[]¥¥Za^XTU`QNXUW[YVNX  
@HWI-EAS443:3:15:451:623#0/1  
GAATTCTTTTGGTCGCTGTCTGGCTGTCAGTAAGTATGCT  
+HWI-EAS443:3:15:451:623#0/1  
abbaabaaaa`^ab`aa]``a\_a`a^\_\_\_T[Z\_T[]XSU  
@HWI-EAS443:3:15:477:274#0/1  
GGCCATCCGAATTCTTTTGGTCGCTGTCTGGCTGTCAGTA  
+HWI-EAS443:3:15:477:274#0/1  
Zbabb\_a`^aUS``abba][^baL^`UaL`a`LZGFX  
@HWI-EAS443:3:15:802:867#0/1  
GGCCATCCGAATTCTTTTGGTCGCTGTCTGGCTGTCAGTA  
+HWI-EAS443:3:15:802:867#0/1  
a^a`b`]aa[``abababaaaa`b[\_¥^a^`aLJGYQ]  
@HWI-EAS443:3:15:822:1851#0/1  
GGTAATGAAACGAAAACGGGACTCTAGCATACTTACTGAC  
+HWI-EAS443:3:15:822:1851#0/1  
a`Yaaaaabb^`aaaaZ`a\_]``[a\_S\_\_a^`\_aX[\_\_^  
@HWI-EAS443:3:16:1202:1676#0/1  
CTGTCTGGCTGTCAGTAAGTATGCTAGAGTCCCGTTTTTCGTTTCA  
+HWI-EAS443:3:16:1202:1676#0/1  
`a`Yba`Xaaa^aaaaa`a[XXS\_a\_a\_]\_W^a\_¥a`]  
@HWI-EAS443:3:16:1581:1164#0/1  
AATTGATGGCCATCCGAATTCTTTTGGTCGCTGTCTGGCT  
+HWI-EAS443:3:16:1581:1164#0/1  
`bbababaX^X^V\_U^]aa`Vaa``V¥SUa`ZRLR\_X[BB

@HWI-EAS443:3:16:1677:1647#0/1  
CTCTAGCATACTTACTGACAGCCAGACAGCGACCAAAAAGA  
+HWI-EAS443:3:16:1677:1647#0/1  
a`]b[`a[b^Y\_a\_K\_ba¥aaa\_a^]\_aa]aWRX¥`ZXa]  
@HWI-EAS443:3:16:521:389#0/1  
GGCCATCCGAATTCTTTTGGTCGCTGTCTGGCTGTCAGTA  
+HWI-EAS443:3:16:521:389#0/1  
aaabb`abaabaaaaabaa\_aaaaa`\_aa^\_a]¥\_[N]  
@HWI-EAS443:3:16:67:1462#0/1  
CCGAATTCTTTTGGTCGCTGTCTGGCTGTCAGTAAGTATG  
+HWI-EAS443:3:16:67:1462#0/1  
abaaababaaaa`^aaaa\_``\_aa^\_S^^¥RZ]ZFZTV  
@HWI-EAS443:3:16:719:179#0/1  
GTCAGTAAGTATGCTAGAGTCCCGTTTTCGTTTCATTACC  
+HWI-EAS443:3:16:719:179#0/1  
aQa`a¥`XQV\_Ya\_¥\_^ORJ^UR[YWZW[\_XRRURSY¥Z]  
@HWI-EAS443:3:16:732:1720#0/1  
GAATTCTTTTGGTCGCTGTCTGGCTGTCAGTAAGTATGCT  
+HWI-EAS443:3:16:732:1720#0/1  
]bbbbbbbababab[`b^b\_\_bbaa\_aaa^\_a^\_^\_MOU^S]\_  
@HWI-EAS443:3:16:916:319#0/1  
GTCTGGCTGTCAGTAAGTATGCTAGAGTCCCGTTTTCGTT  
+HWI-EAS443:3:16:916:319#0/1  
`U]a]^`\_X\_`V^[¥WZZ^WU[R\_]Y]\_V^^[NSY^  
@HWI-EAS443:3:16:92:1112#0/1  
CTGGCTGTCAGTAAGTATGCTAGAGTCCCGTTTTCGTTTC  
+HWI-EAS443:3:16:92:1112#0/1  
abaaaab]a¥aXa\_]a]V][a`\_`Z[J]^OY`]XXN\_`¥  
@HWI-EAS443:3:17:1016:636#0/1  
GTTGGTAATGAAACGAAAACGGGACTCTAGCATACTTACT  
+HWI-EAS443:3:17:1016:636#0/1  
aa\_a\_]`\_a]a^\_]X^]¥^YX^]\_¥WU^^^Z]]^U]  
@HWI-EAS443:3:17:1102:1993#0/1  
ATCCGAATTCTTTTGGTCGCTGTCTGGCTGTCAGTAAGTA  
+HWI-EAS443:3:17:1102:1993#0/1  
a[^`\_a^\_\_\_\_^Z\_U¥NZ`X]\_YYYX\_YW^XXYGUXXNU  
@HWI-EAS443:3:17:1124:334#0/1  
TCCGAATTCTTTTGGTCGCTGTCTGGCTGTCAGTAAGTAT  
+HWI-EAS443:3:17:1124:334#0/1  
abbba^aaaaabaaa^aaaaa¥¥[a`X\_GQ[¥NX^YFSU  
@HWI-EAS443:3:17:115:830#0/1  
CTGGCTGTCAGTAAGTATGCTAGAGTCCCGTTTTCGTTTC  
+HWI-EAS443:3:17:115:830#0/1  
a\_QPT[VHSR¥RVU[MXSUVMTMKDZVVXDMWSOROBB  
@HWI-EAS443:3:17:1241:1929#0/1  
CTGGCTGTCAGTAAGTATGCTAGAGTCCCGTTTTCGTTTC  
+HWI-EAS443:3:17:1241:1929#0/1  
a`^`]aWU[\_TFV¥YKZOXZQ`X`ZL^\_`YFV[YTZR\_YR  
@HWI-EAS443:3:17:135:1872#0/1  
ATCCGAATTCTTTTGGTCGCTGTCTGGCTGTCAGTAAGTA

+HWI-EAS443:3:17:135:1872#0/1  
`Uabaa``\_aaaa`]Ua^aa`¥aYY`\_U\_N^]QN\_[PUZ  
@HWI-EAS443:3:17:1663:740#0/1  
CGCTGTCTGGCTGTCAGTAAGTATGCTAGAGTCCCGTTTT  
+HWI-EAS443:3:17:1663:740#0/1  
ab\_aa`aaa`a\_\_\_\_\_]aa^`\_`[Wa\_]Z\_YRVYa]X^`  
@HWI-EAS443:3:17:391:938#0/1  
ATCCGAATTCTTTTGGTCGCTGTCTGGCTGTCAGTAAGTA  
+HWI-EAS443:3:17:391:938#0/1  
^\_aba^¥baaaaaaba\_aaa`a^]\_\_aa¥¥YZ^aU\_^^T\_  
@HWI-EAS443:3:17:67:614#0/1  
CAGTAAGTATGCTAGAGTCCCGTTTTCGTTTCATTACCAA  
+HWI-EAS443:3:17:67:614#0/1  
OH[Ubab[bb`b`bb]b`b`]aSY[UR`]aSaU```aQ[]  
@HWI-EAS443:3:17:972:1682#0/1  
CTGTCAGTAAGTATGCTAGAGTCCCGTTTTCGTTTCATTA  
+HWI-EAS443:3:17:972:1682#0/1  
aab`b^]`^bba\_a\_aaa¥^a^W\_]\_\_\_\_\_aaX]\_UZ]]\_  
@HWI-EAS443:3:18:1031:568#0/1  
TGGCCATCCGAATTCTTTTGGTCGCTGTCTGGCTGTCAGT  
+HWI-EAS443:3:18:1031:568#0/1  
[Vbb^`]a^^Zab[[^baaaa¥a`abZa\_ab\_a`^TRXT  
@HWI-EAS443:3:18:1087:989#0/1  
GGCCATCCGAATTCTTTTGGTCGCTGTCTGGCTGTCAGTA  
+HWI-EAS443:3:18:1087:989#0/1  
abbbbbbbba^`bbbbabbaabbaaa\_abbaaaa`]¥ZYX  
@HWI-EAS443:3:18:1288:1831#0/1  
TTGGTAATGAAACGAAAACGGGACTCTAGCATACTTACTG  
+HWI-EAS443:3:18:1288:1831#0/1  
]¥\_¥Sbbbb`bab\_baa`a[aa`X[]¥\_Va```]aa`Va`  
@HWI-EAS443:3:18:1672:1661#0/1  
GCTGTCAGTAAGTATGCTAGAGTCCCGTTTTCGTTTCATT  
+HWI-EAS443:3:18:1672:1661#0/1  
a`aa^`]aZY``¥a[\_^\_]\_WaYNUJ`W^^^Y`W]\_UW[^  
@HWI-EAS443:3:18:1725:1572#0/1  
CTGGCTGTCAGTAAGTATGCTAGAGTCCCGTTTTCGTTTC  
+HWI-EAS443:3:18:1725:1572#0/1  
\_\_bbb`b¥^^b^V\_bS`b\_]\_\_aadW^Xaa`]b\_P\_TabS  
@HWI-EAS443:3:18:227:1513#0/1  
GGCCATCCGAATTCTTTTGGTCGCTGTCTGGCTGTCAGTA  
+HWI-EAS443:3:18:227:1513#0/1  
`\_bbb\_ab\_b\_]b\_bab[b\_\_bbZ]aaba[abTYI`UF  
@HWI-EAS443:3:18:330:1315#0/1  
AATTGATGGCCATCCGAATTCTTTTGGTCGCTGTCTGGCT  
+HWI-EAS443:3:18:330:1315#0/1  
aa\_a\_a`ZU^aa`a`\_R`\_a\_``\_aa\_Y\_a¥\_\_^]]Z\_] [  
@HWI-EAS443:3:18:554:764#0/1  
CATCCGAATTCTTTTGGTCGCTGTCTGGCTGTCAGTAAGT  
+HWI-EAS443:3:18:554:764#0/1  
[[b¥`bbaab^bbba\_aa^\_]aa]a\_bRa^a\_\_LYVGT¥G



@HWI-EAS443:3:18:673:787#0/1  
GGTCGCTGTCTGGCTGTCAGTAAGTATGCTAGAGTCCCCT  
+HWI-EAS443:3:18:673:787#0/1  
^a`babbbaba\_baabW[]aTX`a\_a]aa\_a\_aYY]\_a]  
@HWI-EAS443:3:19:1078:432#0/1  
TTGGTAATGAAACGAAAACGGGACTCTAGCATACTTACTG  
+HWI-EAS443:3:19:1078:432#0/1  
^a¥`Y`a]a¥aaTa`aa^UX^`¥Y¥Z\_\_\_\_\_^`\_YY]X\_\_  
@HWI-EAS443:3:19:1118:59#0/1  
GCTGTCAGTAAGTATGCTAGAGTCCCCTTTTCGTTTCATT  
+HWI-EAS443:3:19:1118:59#0/1  
aaab\_aab]Y¥a¥¥`b`\_\_aYa[][\_aZYZ\_N\_V``¥U\_\_  
@HWI-EAS443:3:19:1129:291#0/1  
GGCTGTCAGTAAGTATGCTAGAGTCCCCTTTTCGTTTCAT  
+HWI-EAS443:3:19:1129:291#0/1  
ababbaaW[U`\_¥^`¥\_XW\_a¥a[W`[aY[``R`P]^V]\_  
@HWI-EAS443:3:19:153:858#0/1  
ATTCTTTTGGTCGCTGTCTGGCTGTCAGTAAGTATGCTAG  
+HWI-EAS443:3:19:153:858#0/1  
aaaaaaaaaZaa\_aa[`aaa`]]LVOZNYT^R[]YZZZX  
@HWI-EAS443:3:19:1627:857#0/1  
CTGGCTGTCAGTAAGTATGCTAGAGTCCCCTTTTCGTTTC  
+HWI-EAS443:3:19:1627:857#0/1  
aabbaa`¥W\_¥S]`¥P]aXT[\_a\_aT[^^\_W\_a`PYP`\_0  
@HWI-EAS443:3:19:1686:1176#0/1  
CGCTGTCTGGCTGTCAGTAAGTATGCTAGAGTCCCCTTTT  
+HWI-EAS443:3:19:1686:1176#0/1  
```abaa`bbaabaa\_\_b`a\_] [aa`^a\_a\_a¥W[Ya]`aa  
@HWI-EAS443:3:19:1714:1619#0/1  
CGGGACTCTAGCATACTTACTGACAGCCAGACAGCGACCA  
+HWI-EAS443:3:19:1714:1619#0/1  
```[\_aaXRZ\_a¥aIO[a\_¥`a\_[[``\_U[F^[\_Y¥NRJFO  
@HWI-EAS443:3:19:179:455#0/1  
CTGGCTGTCAGTAAGTATGCTAGAGTCCCCTTTTCGTTTC  
+HWI-EAS443:3:19:179:455#0/1  
abbabab¥`¥Q¥aa\_a`VX\_`]aU][``\_U^`XY^`ZN  
@HWI-EAS443:3:19:196:1222#0/1  
GGCCATCCGAATTCTTTTGGTCGCTGTCTGGCTGTCAGTA  
+HWI-EAS443:3:19:196:1222#0/1  
aabbbbabbbabbabbabaa`baab`\_bb`aaa\_P\_¥^V\_  
@HWI-EAS443:3:19:327:216#0/1  
GTCGCTGTCTGGCTGTCAGTAAGTATGCTAGAGTCCCCTT  
+HWI-EAS443:3:19:327:216#0/1  
a]`a\_\_a^\_]\_\_\_\_\_ZNVZ[V[]¥Y]]YSTYWTTTVU]]VY  
@HWI-EAS443:3:19:608:113#0/1  
GGCCATCCGAATTCTTTTGGTCGCTGTCTGGCTGTCAGTA  
+HWI-EAS443:3:19:608:113#0/1  
`Jbabababaa`baa`aaa[]¥`\_`^[\_aa`¥`^RVXQR\_  
@HWI-EAS443:3:19:611:633#0/1  
GGTAATGAAACGAAAACGGGACTCTAGCATACTTACTGAC

+HWI-EAS443:3:19:611:633#0/1  
ab[aaababb`aaaaaaa`a`\_a`a\_aa`aa`aaa```\_¥  
@HWI-EAS443:3:19:736:882#0/1  
ACGGGACTCTAGCATACTTACTGACAGCCAGACAGCGACC  
+HWI-EAS443:3:19:736:882#0/1  
^`\_WbYa`¥\_Ua`[X]\_`^\_Qa`SR\_a` `[`^` ]`a^SRK  
@HWI-EAS443:3:19:738:862#0/1  
AGTAAGTATGCTAGAGTCCCGTTTTTCGTTTCATTACCAAC  
+HWI-EAS443:3:19:738:862#0/1  
¥]Saab^a\_]a``aba¥¥` `aW^^a[a]\_\_T]]\_\_GQ]^]  
@HWI-EAS443:3:19:744:406#0/1  
GCTGTCAGTAAGTATGCTAGAGTCCCGTTTTTCGTTTCATT  
+HWI-EAS443:3:19:744:406#0/1  
a`\_b^aaa`\_¥]Ya`]¥^¥¥\_aY^` `R^\_a[\_[\_Y^\_^  
@HWI-EAS443:3:19:988:1020#0/1  
AATTGATGGCCATCCGAATTCCTTTTGGTCGCTGTCTGGCT  
+HWI-EAS443:3:19:988:1020#0/1  
]^aTb¥U` `Z^a` `a^a[RV^a]^aQ[SZ`NRZ^\_^X` ¥B  
@HWI-EAS443:3:1:1173:1049#0/1  
CAGTAAGTATGCTAGAGTCCCGTTTTTCGTTTCATTACCAA  
+HWI-EAS443:3:1:1173:1049#0/1  
^ab`bbbabbbaababaaaa`b`bbbWa`bba`bbb`Yab  
@HWI-EAS443:3:1:1382:216#0/1  
CTAGCATACTTACTGACAGCCAGACAGCGACCAAAAAGAAT  
+HWI-EAS443:3:1:1382:216#0/1  
\_`\_XXZ^aa`^b[^aX[`TTPXWa`VZTYVPN[aX[BBBB  
@HWI-EAS443:3:1:1419:331#0/1  
GTCTGGCTGTCAGTAAGTATGCTAGAGTCCCGTTTTTCGTT  
+HWI-EAS443:3:1:1419:331#0/1  
a¥`\_`a[\_aXYV\_V^]ZN^`ZR]Z\_W^XYSW^ZZ\_YNBBB  
@HWI-EAS443:3:1:391:747#0/1  
CTCTAGCATACTTACTGACAGCCAGACAGCGACCAAAAAGA  
+HWI-EAS443:3:1:391:747#0/1  
abaabaabbbabbbabbbabba`abbabaaba^`aaaab`  
@HWI-EAS443:3:1:842:1360#0/1  
CATACTTACTGACAGCCAGACAGCGACCAAAAAGAATTCGG  
+HWI-EAS443:3:1:842:1360#0/1  
aa`aabaa`aba\_bb¥^aabab`RaaYa\_a]]a` `[S[BB  
@HWI-EAS443:3:1:896:711#0/1  
GGTCGCTGTCTGGCTGTCAGTAAGTATGCTAGAGTCCCGT  
+HWI-EAS443:3:1:896:711#0/1  
a` `[a`\_a\_\_\_X¥[`\_ [YYaX^[`V\_ZXG]\_ZUVSBBBBB  
@HWI-EAS443:3:20:1162:857#0/1  
TGGTAATGAAACGAAAACGGGACTCTAGCATACTTACTGA  
+HWI-EAS443:3:20:1162:857#0/1  
aaaZ\_Za`a\_a^a^`\_`\_a\_^]]^^]\_]a\_]\_^`Z^\_^  
@HWI-EAS443:3:20:1580:690#0/1  
AGTAAGTATGCTAGAGTCCCGTTTTTCGTTTCATTACCAAC  
+HWI-EAS443:3:20:1580:690#0/1  
a`] ^aa]aa]\_`\_`aa^W[\_aN¥]\_W\_V^\_Y\_\_R]MW¥¥0

@HWI-EAS443:3:20:306:1459#0/1  
GTCGCTGTCTGGCTGTCAGTAAGTATGCTAGAGTCCCGTT  
+HWI-EAS443:3:20:306:1459#0/1  
abbabb^aabbbbbbba\_Z\_Sab`]b]`ba`aba`a`\_`N`  
@HWI-EAS443:3:20:581:1003#0/1  
GGTCGCTGTCTGGCTGTCAGTAAGTATGCTAGAGTCCCGT  
+HWI-EAS443:3:20:581:1003#0/1  
V]Z]\_\_[VN¥V\_`[]a]¥PZL[U¥Y[RP\_TVHPZLUN¥TO  
@HWI-EAS443:3:20:691:334#0/1  
AATTGATGGCCATCCGAATTCTTTTGGTCGCTGTCTGGCT  
+HWI-EAS443:3:20:691:334#0/1  
aaaa^LUa[a]]aV\_WT]U[^`^[\_YRS`W\_¥\_WWN¥[U¥  
@HWI-EAS443:3:20:905:323#0/1  
GTCAGTAAGTATGCTAGAGTCCCGTTTTCGTTTCATTACC  
+HWI-EAS443:3:20:905:323#0/1  
aX^\_a\_a[`L`[Z\_^U[Z[N^Q¥\_SUUZT\_W^URS¥^¥QT  
@HWI-EAS443:3:20:970:1242#0/1  
AGCATACTTACTGACAGCCAGACAGCGACCAAAGAATTC  
+HWI-EAS443:3:20:970:1242#0/1  
`^aaaa`a\_a`aaabaa¥aaa\_a][]a\_`a\_`^¥`^\_¥  
@HWI-EAS443:3:21:1185:542#0/1  
GTCAGTAAGTATGCTAGAGTCCCGTTTTCGTTTCATTACC  
+HWI-EAS443:3:21:1185:542#0/1  
a[aa\_L\_aa]a\_a^`\_`\_`^\_`\_`U\_\_\_¥\_W^[U\_`Z^WW  
@HWI-EAS443:3:21:125:300#0/1  
CTGGCTGTCAGTAAGTATGCTAGAGTCCCGTTTTCGTTTC  
+HWI-EAS443:3:21:125:300#0/1  
aabaabbZ`a\_a`]Z\_¥^aaa\_[`¥`\_`aW\_a`V`\_\_a[  
@HWI-EAS443:3:21:1281:671#0/1  
AGCATACTTACTGACAGCCAGACAGCGACCAAAGAATTC  
+HWI-EAS443:3:21:1281:671#0/1  
aa]^X`bab`]`a`aaa\_Z\_\_a`\_a\_a\_\_Z\_a\_a¥a][[  
@HWI-EAS443:3:21:1359:637#0/1  
CTGGCTGTCAGTAAGTATGCTAGAGTCCCGTTTTCGTTTC  
+HWI-EAS443:3:21:1359:637#0/1  
aaba`ab^]]aZa^XQ¥[PX¥ZR]Y¥WZ¥\_SX`¥P[U\_\_N  
@HWI-EAS443:3:21:207:1712#0/1  
ATCCGAATTCTTTTGGTCGCTGTCTGGCTGTCAGTAAGTA  
+HWI-EAS443:3:21:207:1712#0/1  
a^a`^\_\_\_\_]a[\_]]NRNW]^¥]XY¥URXZYXBBBBBBBB  
@HWI-EAS443:3:21:708:414#0/1  
GGGACTCTAGCATACTTACTGACAGCCAGACAGCGACCAA  
+HWI-EAS443:3:21:708:414#0/1  
aa\_aabaabaaabb\_bbb\_abb\_ab¥\_aa`aaaaY\_\_`  
@HWI-EAS443:3:21:866:445#0/1  
AACGAAAACGGGACTCTAGCATACTTACTGACAGCCAGAC  
+HWI-EAS443:3:21:866:445#0/1  
ab\_ba`a`aa`\_^W\_\_\_\_`\_]\_^a^a``]`a\_W\_\_[UZ\_\_]  
@HWI-EAS443:3:21:995:1472#0/1  
TAATTGATGGCCATCCGAATTCTTTTGGTCGCTGTCTGGC

+HWI-EAS443:3:21:995:1472#0/1  
aaa\_a\_a`\_\_aaaa`¥P]]a`U`a\_a[[XXYR\_ZZWY[VU  
@HWI-EAS443:3:22:1025:1026#0/1  
GTTGGTAATGAAACGAAAACGGGACTCTAGCATACTTACT  
+HWI-EAS443:3:22:1025:1026#0/1  
a\_abaU[\_aa¥^aa`a`^\_[\_]`^`\_`^V[\_¥^`XZ¥`X^  
@HWI-EAS443:3:22:1430:284#0/1  
ATGGCCATCCGAATTCTTTTGGTCGCTGTCTGGCTGTCAG  
+HWI-EAS443:3:22:1430:284#0/1  
a`¥DMM[ZYM^Z^aa¥Z^`\_aaZZ^^^aLWBBBBBBBBBB  
@HWI-EAS443:3:22:1455:1107#0/1  
ATCCGAATTCTTTTGGTCGCTGTCTGGCTGTCAGTAAGTA  
+HWI-EAS443:3:22:1455:1107#0/1  
a\_Y^b`[\_a\_baaaaWaa^aa\_`^\_]Z\_`WZW¥NN[ZUR  
@HWI-EAS443:3:22:1520:2026#0/1  
AATGAAACGAAAACGGGACTCTAGCATACTTACTGACAGC  
+HWI-EAS443:3:22:1520:2026#0/1  
a)`ZRZ[\_]`^`[ZYV^RGW^LO¥W\_]WVS[\_`^^¥N^`T  
@HWI-EAS443:3:22:1541:873#0/1  
CTGTCAGTAAGTATGCTAGAGTCCCCTTTTCGTTTCATTA  
+HWI-EAS443:3:22:1541:873#0/1  
`aaZUaaa\_W¥Z\_\_`Y\_\_W`aZ]]\_a¥[a]RMV\_XP]¥`^  
@HWI-EAS443:3:22:166:595#0/1  
CTGGCTGTCAGTAAGTATGCTAGAGTCCCCTTTTCGTTTC  
+HWI-EAS443:3:22:166:595#0/1  
aaa^aaaYaaa¥[a]U\_\_`^¥\_`^¥Z¥`^`a¥^a`]YN\_`^  
@HWI-EAS443:3:22:179:444#0/1  
GACTCTAGCATACTTACTGACAGCCAGACAGCGACCAAAA  
+HWI-EAS443:3:22:179:444#0/1  
a`[YYa[aY`X``bb^`aa^Z]a`PaUWY]a[V^\_aaZ¥[  
@HWI-EAS443:3:22:505:1289#0/1  
GTCGCTGTCTGGCTGTCAGTAAGTATGCTAGAGTCCCCTT  
+HWI-EAS443:3:22:505:1289#0/1  
\_\_aaaabab\_`a\_]W`\_ZV`XZ\_]`[\_[O[\_U¥`\_\_^^  
@HWI-EAS443:3:22:606:1662#0/1  
AACGGGACTCTAGCATACTTACTGACAGCCAGACAGCGAC  
+HWI-EAS443:3:22:606:1662#0/1  
aa`¥U^aa`a\_a^a¥^aaa\_aa`Ua\_a\_Y\_\_¥`\_\_¥`Y\_\_  
@HWI-EAS443:3:22:652:1057#0/1  
GCTGTCAGTAAGTATGCTAGAGTCCCCTTTTCGTTTCATT  
+HWI-EAS443:3:22:652:1057#0/1  
abaa¥[\_`JR`¥Y¥a]¥S¥```[SY\_`^`W^`VX¥ZV]UP^W  
@HWI-EAS443:3:22:82:1107#0/1  
CGGGACTCTAGCATACTTACTGACAGCCAGACAGCGACCA  
+HWI-EAS443:3:22:82:1107#0/1  
aWaR`b`bX\_\_aW[[ba[\_`a`baaaaaa``\_\_`ba\_[\_\_  
@HWI-EAS443:3:22:830:741#0/1  
CGCTGTCTGGCTGTCAGTAAGTATGCTAGAGTCCCCTTTT  
+HWI-EAS443:3:22:830:741#0/1  
^baabaabaaaab\_¥aaV```^a\_`^a`Z\_a\_W`\_aW¥a`

@HWI-EAS443:3:22:854:1208#0/1  
GGCCATCCGAATTCTTTTGGTCGCTGTCTGGCTGTCAGTA  
+HWI-EAS443:3:22:854:1208#0/1  
`abbbabbb`abaaaabaaa`aaaa\_aaaaa`RY][JS  
@HWI-EAS443:3:22:890:1986#0/1  
ACGAAAACGGGACTCTAGCATACTTACTGACAGCCAGACA  
+HWI-EAS443:3:22:890:1986#0/1  
a`a¥XR^XX[R¥Z]^T]\_a\_Z¥YVW]PMV^U\_]U^^]N¥  
@HWI-EAS443:3:22:947:321#0/1  
CTGGCTGTCAGTAAGTATGCTAGAGTCCCGTTTTCGTTTC  
+HWI-EAS443:3:22:947:321#0/1  
aaaaabb`abaYab^Sa¥^`aa\_]bWYZ``[a^aZ\_Zaa\_  
@HWI-EAS443:3:23:106:1022#0/1  
AACGAAAACGGGACTCTAGCATACTTACTGACAGCCAGAC  
+HWI-EAS443:3:23:106:1022#0/1  
a]aa\_¥aaa`\_\_`[a\_aa`aZ\_\_Y`\_\_`\_X]\_[\_Y\_\_]  
@HWI-EAS443:3:23:1331:1043#0/1  
TTGGTCGCTGTCTGGCTGTCAGTAAGTATGCTAGAGTCCC  
+HWI-EAS443:3:23:1331:1043#0/1  
aaaa^¥aaaa]\_^a`\_\_XHXTNLR[NNXZUQVZRQYQRTV  
@HWI-EAS443:3:23:1496:1245#0/1  
CTGGCTGTCAGTAAGTATGCTAGAGTCCCGTTTTCGTTTC  
+HWI-EAS443:3:23:1496:1245#0/1  
W\_aaa\_[¥]\_\_\_`\_W^`^\_]W]Y\_¥QX]\_Q¥a]X\_] [TR  
@HWI-EAS443:3:23:149:659#0/1  
GGCCATCCGAATTCTTTTGGTCGCTGTCTGGCTGTCAGTA  
+HWI-EAS443:3:23:149:659#0/1  
abbbbaababbbbabbbba`ba`aaabbb`aabZ\_XaQa  
@HWI-EAS443:3:23:1672:1059#0/1  
GCCATCCGAATTCTTTTGGTCGCTGTCTGGCTGTCAGTAA  
+HWI-EAS443:3:23:1672:1059#0/1  
a\_[a`^a`\_`aa^`^\_a`^Z[a]^`V¥X`[Y^¥FNV]ULZ  
@HWI-EAS443:3:23:180:1087#0/1  
TGGTAATGAAACGAAAACGGGACTCTAGCATACTTACTGA  
+HWI-EAS443:3:23:180:1087#0/1  
aba`\_Y`abb`ba\_aaaa^`\_`a`a```aa\_a```a`a`a  
@HWI-EAS443:3:23:346:764#0/1  
ATTGATGGCCATCCGAATTCTTTTGGTCGCTGTCTGGCTG  
+HWI-EAS443:3:23:346:764#0/1  
`^`^`^`\_aa`\_`\_aY`\_`V[``]S^W]]^^ZZ^¥ZW¥U  
@HWI-EAS443:3:23:40:1697#0/1  
CTGGCTGTCAGTAAGTATGCTAGAGTCCCGTTTTCGTTTC  
+HWI-EAS443:3:23:40:1697#0/1  
a^^`b]^aaZa^NS\_`Y`\_`T¥`V`[\_¥Q]a\_\_ZR\_`^  
@HWI-EAS443:3:23:48:1529#0/1  
TGGTAATGAAACGAAAACGGGACTCTAGCATACTTACTGA  
+HWI-EAS443:3:23:48:1529#0/1  
XaaJ^aaSba`\_]`a][^R\_WSU\_\_S`W]Z^b^`\_¥YJ^  
@HWI-EAS443:3:23:534:813#0/1  
GCCATCCGAATTCTTTTGGTCGCTGTCTGGCTGTCAGTAA

+HWI-EAS443:3:23:534:813#0/1  
ababbabb`^a`bba[aaa^\_aba¥b[^Va\_¥NRJPMY[  
@HWI-EAS443:3:23:552:397#0/1  
CGCTGTCTGGCTGTCAGTAAGTATGCTAGAGTCCCGTTTT  
+HWI-EAS443:3:23:552:397#0/1  
abbbb\_bbbbbbaV\_abWa`b\_aaa][a`[aZ\_^\_aU[a]  
@HWI-EAS443:3:23:700:1744#0/1  
CGCTGTCTGGCTGTCAGTAAGTATGCTAGAGTCCCGTTTT  
+HWI-EAS443:3:23:700:1744#0/1  
`aab\_abaaabba`babUbb``ba^[a\_[aa]aaabYP[b  
@HWI-EAS443:3:24:1037:1533#0/1  
GTCTGGCTGTCAGTAAGTATGCTAGAGTCCCGTTTTCGTT  
+HWI-EAS443:3:24:1037:1533#0/1  
aaaaabbab`aa[[`aa]`]aYaaaUa[\_\_\_a]a\_a^`]a  
@HWI-EAS443:3:24:1091:200#0/1  
TGGTAATGAAACGAAAACGGGACTCTAGCATACTTACTGA  
+HWI-EAS443:3:24:1091:200#0/1  
\_a¥T[QXRZW\_^a]\_^P`] ^NFT\_YL]VW[QR[^XLZ[W  
@HWI-EAS443:3:24:1184:402#0/1  
GTTGGTAATGAAACGAAAACGGGACTCTAGCATACTTACT  
+HWI-EAS443:3:24:1184:402#0/1  
[Pa\_WL]\_aa]a^\_\_H\_X^U]\_] [[XY]V]a]]Y¥[XV\_  
@HWI-EAS443:3:24:1197:214#0/1  
TGGTAATGAAACGAAAACGGGACTCTAGCATACTTACTGA  
+HWI-EAS443:3:24:1197:214#0/1  
aaa^aaaaaaaab\_\_a`\_ZZ\_^]`\_\_\_\_V`\_\_]\_^aY^\_\_  
@HWI-EAS443:3:24:1361:73#0/1  
TCTGGCTGTCAGTAAGTATGCTAGAGTCCCGTTTTCGTTT  
+HWI-EAS443:3:24:1361:73#0/1  
a¥baa`aaRPV^U[\_¥UZY^TZ¥WPX000Y`U^`]LZTZ\_  
@HWI-EAS443:3:24:1411:599#0/1  
GGTCGCTGTCTGGCTGTCAGTAAGTATGCTAGAGTCCCGT  
+HWI-EAS443:3:24:1411:599#0/1  
abaNbaa`¥aa\_a\_abQ\_[ZLR`YGW\_`Y^R\_]aPLQT`H  
@HWI-EAS443:3:24:17:1957#0/1  
TCTGGCTGTCAGTAAGTATGCTAGAGTCCCGTTTTCGTTT  
+HWI-EAS443:3:24:17:1957#0/1  
ab^aaaa[N¥\_[V^^ZM]W]\_]` `WXZ`a^PU`aW][¥]  
@HWI-EAS443:3:24:238:993#0/1  
GGCCATCCGAATTCTTTTGGTCGCTGTCTGGCTGTCAGTA  
+HWI-EAS443:3:24:238:993#0/1  
Vabbbbab]bbbbbbb[a[Y[b`bbZY\_ababa[G]S\_Sb  
@HWI-EAS443:3:24:557:1858#0/1  
AATTGATGGCCATCCGAATTCTTTTGGTCGCTGTCTGGCT  
+HWI-EAS443:3:24:557:1858#0/1  
aba^a`\_a\_ab^a`a`aa\_aaaaaZZa\_a\_`U^^`[V\_  
@HWI-EAS443:3:24:624:26#0/1  
CTGGCTGTCAGTAAGTATGCTAGAGTCCCGTTTTCGTTTC  
+HWI-EAS443:3:24:624:26#0/1  
S\_bbb`a^^`bV¥\_b\_aab\_aZa¥QababJaaaZa]baY

@HWI-EAS443:3:25:1148:827#0/1  
TTGGAATGAAACGAAAACGGGACTCTAGCATACTTACTG  
+HWI-EAS443:3:25:1148:827#0/1  
abaa\_aaaaaaa^a`\_\_[\_`\_^]\_^\_\_\_\_aa\_\_\_\_`a]\_]`  
@HWI-EAS443:3:25:1226:298#0/1  
GGCCATCCGAATTCTTTTGGTCGCTGTCTGGCTGTCAGTA  
+HWI-EAS443:3:25:1226:298#0/1  
aV`\_a¥a¥a^\_]S[^Y]]VYVSYY\_\_UNNZ[BBBBBBBBB  
@HWI-EAS443:3:25:1318:1527#0/1  
CCGAATTCTTTTGGTCGCTGTCTGGCTGTCAGTAAGTATG  
+HWI-EAS443:3:25:1318:1527#0/1  
a¥\_\_^\_a`^`b\_Q\_TZ]``\_]WZ\_`\_SQMZW[OWTRDPZ[  
@HWI-EAS443:3:25:1447:687#0/1  
CGCTGTCTGGCTGTCAGTAAGTATGCTAGAGTCCCGTTTT  
+HWI-EAS443:3:25:1447:687#0/1  
ab`babbabaabbabbb\_bbaabba\_aaba\_`aabaabb  
@HWI-EAS443:3:25:1496:286#0/1  
CAGTAAGTATGCTAGAGTCCCGTTTTCGTTTCATTACCAA  
+HWI-EAS443:3:25:1496:286#0/1  
`bbbbbbbbbb\_bbbbbbbbabbbbbbbbbbaabbb]Yaa  
@HWI-EAS443:3:25:152:1472#0/1  
CTGTCAGTAAGTATGCTAGAGTCCCGTTTTCGTTTCATTA  
+HWI-EAS443:3:25:152:1472#0/1  
a`[`aUUbbbaZ`b`\_b`abaaaba`Tabbb`aaabbb\_  
@HWI-EAS443:3:25:526:1556#0/1  
TTGATGGCCATCCGAATTCTTTTGGTCGCTGTCTGGCTGT  
+HWI-EAS443:3:25:526:1556#0/1  
aaW\_a^^`ba`]`Y`¥^`aUaaa]SX`a\_\_¥`[XaaT[T  
@HWI-EAS443:3:25:615:610#0/1  
TTGATGGCCATCCGAATTCTTTTGGTCGCTGTCTGGCTGT  
+HWI-EAS443:3:25:615:610#0/1  
aZYU[`aaab`a¥aU`a]``X]¥a\_a[`a[NO\_\_`BBBB  
@HWI-EAS443:3:25:641:223#0/1  
AAACGAAAACGGGACTCTAGCATACTTACTGACAGCCAGA  
+HWI-EAS443:3:25:641:223#0/1  
abbab`SZ\_a`b`\_ab\_a]baaa\_aaa`a`aabab]a\_\_  
@HWI-EAS443:3:25:777:241#0/1  
TGGCTGTCAGTAAGTATGCTAGAGTCCCGTTTTCGTTTCA  
+HWI-EAS443:3:25:777:241#0/1  
^``aa[O[ZXLZ]ZN¥ZTT[OX]LPX¥UDQ\_YJOG[BBB  
@HWI-EAS443:3:25:844:513#0/1  
TTGGAATGAAACGAAAACGGGACTCTAGCATACTTACTG  
+HWI-EAS443:3:25:844:513#0/1  
aaaa]`^`a`aa\_a\_\_\_\_\_`^^]\_\_^\_\_^\_\_^Y^\_`^\_\_  
@HWI-EAS443:3:25:93:1767#0/1  
CTGGCTGTCAGTAAGTATGCTAGAGTCCCGTTTTCGTTTC  
+HWI-EAS443:3:25:93:1767#0/1  
abbbbabaa`¥abb¥X`ab\_b][\_\_ba`aYabaY]\_a`a  
@HWI-EAS443:3:26:1374:1563#0/1  
ATCCGAATTCTTTTGGTCGCTGTCTGGCTGTCAGTAAGTA

+HWI-EAS443:3:26:1374:1563#0/1  
a\_\_Z^\_aa\_`a\_a`¥a]^a]aaT]\_¥\_]\_\_GZQTNW]UXY  
@HWI-EAS443:3:26:252:373#0/1  
GCTGTCTGGCTGTCAGTAAGTATGCTAGAGTCCCGTTTTTC  
+HWI-EAS443:3:26:252:373#0/1  
aa`\_JYX¥^aYa^\_UMO^WLP[U\_XU\_^[ZV]\_\_\_0]Y^N  
@HWI-EAS443:3:26:33:210#0/1  
CTGTCAGTAAGTATGCTAGAGTCCCGTTTTTCGTTTCATTA  
+HWI-EAS443:3:26:33:210#0/1  
^`¥J\_X\_a^`^a^^ZV`¥a`a[\_W]\_XX¥ZZWQTR¥V\_XZ  
@HWI-EAS443:3:26:421:431#0/1  
GTCGCTGTCTGGCTGTCAGTAAGTATGCTAGAGTCCCGTT  
+HWI-EAS443:3:26:421:431#0/1  
a\_aa`aa)`\_\_aa`)\_^\_U^^\_V^^¥[^ZZ^[YY]\_\_Y]  
@HWI-EAS443:3:26:474:1551#0/1  
ATCCGAATTCTTTTGGTCGCTGTCTGGCTGTCAGTAAGTA  
+HWI-EAS443:3:26:474:1551#0/1  
¥Zaa`VH^)]`]aaaa`\_^¥aa\_```W[^[\`PVTXTT\_PBB  
@HWI-EAS443:3:26:519:1372#0/1  
GCCATCCGAATTCTTTTGGTCGCTGTCTGGCTGTCAGTAA  
+HWI-EAS443:3:26:519:1372#0/1  
^Z\_SS\_T\_XZ]`a\_[ba\_^Wa`^]a[a¥\_ab^aP\_]aS¥\_  
@HWI-EAS443:3:26:528:1721#0/1  
CATCCGAATTCTTTTGGTCGCTGTCTGGCTGTCAGTAAGT  
+HWI-EAS443:3:26:528:1721#0/1  
abbbbaabaabbbabba`b\_bb^abaaabaaaa\_`SaaZS  
@HWI-EAS443:3:26:641:1073#0/1  
GGCCATCCGAATTCTTTTGGTCGCTGTCTGGCTGTCAGTA  
+HWI-EAS443:3:26:641:1073#0/1  
`U`b\_a`bb`^^^\_`aa\_a^S]¥^[RUaaa\_YT`UYQQW¥  
@HWI-EAS443:3:26:785:184#0/1  
GTTGGTAATGAAACGAAAACGGGACTCTAGCATACTTACT  
+HWI-EAS443:3:26:785:184#0/1  
aabbaYaaababa^aa`a\_`\_\_`\_`a`[\_`\_`Z^\_`^\_  
@HWI-EAS443:3:27:1111:1704#0/1  
GCCATCCGAATTCTTTTGGTCGCTGTCTGGCTGTCAGTAA  
+HWI-EAS443:3:27:1111:1704#0/1  
a`T`\_`bb`T\_ZVWZU¥VXVIa¥Z\_P^XZ]P]BBBBBBBBB  
@HWI-EAS443:3:27:1191:1529#0/1  
CAGTAAGTATGCTAGAGTCCCGTTTTTCGTTTCATTACCAA  
+HWI-EAS443:3:27:1191:1529#0/1  
a]WTa^[\_^YaU`¥b`[V¥a\_bR¥aaYZ]`YS]a\_aVJ[[  
@HWI-EAS443:3:27:1329:543#0/1  
TGTCAGTAAGTATGCTAGAGTCCCGTTTTTCGTTTCATTAC  
+HWI-EAS443:3:27:1329:543#0/1  
aa`\_aa\_aaa]a`a\_a`a`a^\_`^WaW`a`^aX`\_]¥`]]^  
@HWI-EAS443:3:27:1474:340#0/1  
ATCCGAATTCTTTTGGTCGCTGTCTGGCTGTCAGTAAGTA  
+HWI-EAS443:3:27:1474:340#0/1  
`baababbbabbbabb[\_a`\_`b\_]aaa\_a^Z[]`Y\_ZUYZ



@HWI-EAS443:3:27:454:1402#0/1  
AATTGATGGCCATCCGAATTCTTTTGGTCGCTGTCTGGCT  
+HWI-EAS443:3:27:454:1402#0/1  
\_`\_\_`]^Xabbaaa[````]``a\_]XRa]\_a\_X`\_`VV]  
@HWI-EAS443:3:27:955:1874#0/1  
AGTAAGTATGCTAGAGTCCCGTTTTTCGTTTCATTACCAAC  
+HWI-EAS443:3:27:955:1874#0/1  
aa[a``]aaaa`a\_aa\_a\_aaZ^``\_]\_\_^`]¥`^\_a]]  
@HWI-EAS443:3:27:976:192#0/1  
CAGTAAGTATGCTAGAGTCCCGTTTTTCGTTTCATTACCAA  
+HWI-EAS443:3:27:976:192#0/1  
a`^abab\_bbbaaaaab\_\_^\_b^aaa\_b\_aaY¥aaa^Wa`  
@HWI-EAS443:3:27:998:282#0/1  
TGGCCATCCGAATTCTTTTGGTCGCTGTCTGGCTGTCAGT  
+HWI-EAS443:3:27:998:282#0/1  
`ba^^a`aabbabaZbaaaba^\_\_aaa\_\_aa^^`aVXXXG  
@HWI-EAS443:3:28:1401:1523#0/1  
AAAACGGGACTCTAGCATACTTACTGACAGCCAGACAGCG  
+HWI-EAS443:3:28:1401:1523#0/1  
aa\_]abaaaaXa`aT\_a[\_`\_]`^aaGaa`\_`a`0``^\_  
@HWI-EAS443:3:28:1418:618#0/1  
ACGAAAACGGGACTCTAGCATACTTACTGACAGCCAGACA  
+HWI-EAS443:3:28:1418:618#0/1  
aSa`\_baZa]S\_`\_`Z\_aR^a[``^Z]W`[Sa\_NS[a\_TB  
@HWI-EAS443:3:28:1549:403#0/1  
GCTGTCTAGTAAGTATGCTAGAGTCCCGTTTTTCGTTTCATT  
+HWI-EAS443:3:28:1549:403#0/1  
Q\_`b\_]\_[¥`aa\_S\_\_W¥a[[]OXWta]bb]FZG\_aJYZR  
@HWI-EAS443:3:28:1552:659#0/1  
GGCCATCCGAATTCTTTTGGTCGCTGTCTGGCTGTCAGTA  
+HWI-EAS443:3:28:1552:659#0/1  
^`babbbbabbb\_bbabbbabbb`\_abaaaa]U`^J`  
@HWI-EAS443:3:28:1597:1435#0/1  
GCCATCCGAATTCTTTTGGTCGCTGTCTGGCTGTCAGTAA  
+HWI-EAS443:3:28:1597:1435#0/1  
a``UZJ¥]RSLZNYR\_\_`YKQ`Z¥BBBBBBBBBBBBBBBB  
@HWI-EAS443:3:28:1628:230#0/1  
GGCCATCCGAATTCTTTTGGTCGCTGTCTGGCTGTCAGTA  
+HWI-EAS443:3:28:1628:230#0/1  
`b^`baa\_baabVbaab\_a\_\_b\_`b\_W`\_a^^aVNW\_W¥  
@HWI-EAS443:3:28:335:1249#0/1  
TGGCCATCCGAATTCTTTTGGTCGCTGTCTGGCTGTCAGT  
+HWI-EAS443:3:28:335:1249#0/1  
aWQ\_abaababbaaaaaaaaaa¥aa`aa^aa`a\_aa¥ZLRQ  
@HWI-EAS443:3:28:464:1043#0/1  
GTCTGGCTGTCAGTAAGTATGCTAGAGTCCCGTTTTTCGTT  
+HWI-EAS443:3:28:464:1043#0/1  
a]a``bb`\_]`U]Za``Y`^``^^\_]\_\_aaa]S]a^a^[^  
@HWI-EAS443:3:28:558:1628#0/1  
GAATTCTTTTGGTCGCTGTCTGGCTGTCAGTAAGTATGCT



@HWI-EAS443:3:2:1748:1306#0/1  
GGTCGCTGTCTGGCTGTCAGTAAGTATGCTAGAGTCCCCT  
+HWI-EAS443:3:2:1748:1306#0/1  
aaW]a\_a`\_^\_aa^^`]]][U^^ZRXUWUX¥X]URSVXXN  
@HWI-EAS443:3:2:290:1812#0/1  
AATTGATGGCCATCCGAATTCTTTTGGTCGCTGTCTGGCT  
+HWI-EAS443:3:2:290:1812#0/1  
`\_^¥^^`\_\_^VP[GWaY`[`]Raa\_R`UPR[RYYTS¥BBBB  
@HWI-EAS443:3:2:39:442#0/1  
TTGGTAATGAAACGAAAACGGGACTCTAGCATACTTACTG  
+HWI-EAS443:3:2:39:442#0/1  
a0`a^^aZWG`\_`aa[^aUZ[]Z\_Ya\_`\_\_\_\_[[YU`SZ^`  
@HWI-EAS443:3:2:657:463#0/1  
GGCCATCCGAATTCTTTTGGTCGCTGTCTGGCTGTCAGTA  
+HWI-EAS443:3:2:657:463#0/1  
LW\_^^^X^Xa`]a]bbbb^`b`abXa]bbaaa]¥\_bG]  
@HWI-EAS443:3:2:692:137#0/1  
AAACGGGACTCTAGCATACTTACTGACAGCCAGACAGCGA  
+HWI-EAS443:3:2:692:137#0/1  
aaa\_aa]a^aaa\_`\_]aa¥\_aa¥`a`\_]`aUY\_\_\_U^\_S]¥  
@HWI-EAS443:3:2:696:1664#0/1  
TGGCCATCCGAATTCTTTTGGTCGCTGTCTGGCTGTCAGT  
+HWI-EAS443:3:2:696:1664#0/1  
abaa^`a``aaaaaaaaabaa^`\_Yaa`[^`T¥\_]RUVBB  
@HWI-EAS443:3:2:726:495#0/1  
TGGCCATCCGAATTCTTTTGGTCGCTGTCTGGCTGTCAGT  
+HWI-EAS443:3:2:726:495#0/1  
^\_NZ\_baGRX[Ra^^[^aYTX¥`a¥aQ[¥\_Z^HaVSBBBB  
@HWI-EAS443:3:2:998:212#0/1  
AATTCTTTTGGTCGCTGTCTGGCTGTCAGTAAGTATGCTA  
+HWI-EAS443:3:2:998:212#0/1  
aabb`aa`\_aa^\_a^`a^X]\_\_]\_^OGX¥YXV^XV]VXBB  
@HWI-EAS443:3:30:1231:247#0/1  
CGCTGTCTGGCTGTCAGTAAGTATGCTAGAGTCCCCTTTT  
+HWI-EAS443:3:30:1231:247#0/1  
abbbb`b`bbbbbb[a\_b[`aa`aaa\_aaa\_a]]a\_aR^`a  
@HWI-EAS443:3:30:1243:1663#0/1  
GGTCGCTGTCTGGCTGTCAGTAAGTATGCTAGAGTCCCCT  
+HWI-EAS443:3:30:1243:1663#0/1  
^[a]\_b`XZW`T[a¥I[a\_TQ\_aUSbXZ]\_¥¥\_QVaX]XO  
@HWI-EAS443:3:30:1445:67#0/1  
ATCCGAATTCTTTTGGTCGCTGTCTGGCTGTCAGTAAGTA  
+HWI-EAS443:3:30:1445:67#0/1  
a]`WaXS\_a[`\_^b¥^¥`\_Y]`ZQ\_[]VBBBBBBBBBBBB  
@HWI-EAS443:3:30:1464:1834#0/1  
CTGGCTGTCAGTAAGTATGCTAGAGTCCCCTTTTCGTTTC  
+HWI-EAS443:3:30:1464:1834#0/1  
ab]aaab\_a]a\_abb\_a^a`aaaaa[\_\_\_b]aaaZa]`\_P  
@HWI-EAS443:3:30:1479:722#0/1  
TGTCAGTAAGTATGCTAGAGTCCCCTTTTCGTTTCATTAC

+HWI-EAS443:3:30:1479:722#0/1  
]¥Va`b^bab`a`aaaa^YW``a\_`aaY[^a\_^^\_\_]]  
@HWI-EAS443:3:30:1584:963#0/1  
TGGTAATGAAACGAAAACGGGACTCTAGCATACTTACTGA  
+HWI-EAS443:3:30:1584:963#0/1  
XS¥Ua^baa^SS`]ba^Y\_a\_N¥bSa]`Z`^`a\_`\_`a`\_  
@HWI-EAS443:3:30:1670:1389#0/1  
TAATTGATGGCCATCCGAATTCTTTTGGTCGCTGTCTGGC  
+HWI-EAS443:3:30:1670:1389#0/1  
aaaa`]````^`¥aXU^`\_\_`[a`aUW\_[^^¥UXY]]B  
@HWI-EAS443:3:30:1769:457#0/1  
GTCAGTAAGTATGCTAGAGTCCCGTTTTCGTTTCATTACC  
+HWI-EAS443:3:30:1769:457#0/1  
aY]]a]aa]M`b`aa\_a[VUUaXV`Y`S`WX¥\_XRX  
@HWI-EAS443:3:30:19:565#0/1  
GGCCATCCGAATTCTTTTGGTCGCTGTCTGGCTGTCAGTA  
+HWI-EAS443:3:30:19:565#0/1  
aaaa^aaaa^`aaaa`a`^aa`a\_`\_`^`\_aUZT[NS  
@HWI-EAS443:3:30:382:381#0/1  
ACGAAAACGGGACTCTAGCATACTTACTGACAGCCAGACA  
+HWI-EAS443:3:30:382:381#0/1  
]`\_ZZaaaT^WaaZ`Q\_]^\_SZ[`aaV¥¥`]\_W\_X]^`PR  
@HWI-EAS443:3:30:642:100#0/1  
ATGAAACGAAAACGGGACTCTAGCATACTTACTGACAGCC  
+HWI-EAS443:3:30:642:100#0/1  
ababXba`aa\_aXaa^¥¥]aa]¥[``\_`a\_`\_]Z`^¥  
@HWI-EAS443:3:30:851:1810#0/1  
TAATTGATGGCCATCCGAATTCTTTTGGTCGCTGTCTGGC  
+HWI-EAS443:3:30:851:1810#0/1  
Ubbb]ab`a^`bb\_ba`¥`¥`aaa^a^^[Z]`aaX`^Y¥\_  
@HWI-EAS443:3:30:948:534#0/1  
GTTGGTAATGAAACGAAAACGGGACTCTAGCATACTTACT  
+HWI-EAS443:3:30:948:534#0/1  
`\_b`^aaabbabbaa\_```aabaaaaaaaa`ab]^aa`Sa  
@HWI-EAS443:3:31:1277:989#0/1  
GTCGCTGTCTGGCTGTCTAGTAAGTATGCTAGAGTCCCGTT  
+HWI-EAS443:3:31:1277:989#0/1  
a`a`]Y[¥W]^Y]OMJWOVYVOJVVOJVYXFXGUVUUQS  
@HWI-EAS443:3:31:1330:1482#0/1  
ATCCGAATTCTTTTGGTCGCTGTCTGGCTGTCTAGTAAGTA  
+HWI-EAS443:3:31:1330:1482#0/1  
a^]`\_^]]Xa`¥`aa]```¥ZNXX[[VQ\_BBBBBBBBBB  
@HWI-EAS443:3:31:1609:48#0/1  
CTGGCTGTCTAGTAAGTATGCTAGAGTCCCGTTTTCGTTTC  
+HWI-EAS443:3:31:1609:48#0/1  
[VbbbbbbbaSbbU]b[aNa^^H`¥`a`\_aJ\_abSbSX`]  
@HWI-EAS443:3:31:171:1156#0/1  
TGGTAATGAAACGAAAACGGGACTCTAGCATACTTACTGA  
+HWI-EAS443:3:31:171:1156#0/1  
aba]aaaababaa\_`¥`\_\_^`a`a\_\_\_a]\_``\_`aa\_`

@HWI-EAS443:3:31:336:767#0/1  
GCTGTCAGTAAGTATGCTAGAGTCCCGTTTTTCGTTTCATT  
+HWI-EAS443:3:31:336:767#0/1  
aa¥\_N]UZRaa[RYU][a¥WVJ^ZY]PV\_] [[U¥ZYXN^  
@HWI-EAS443:3:31:341:1374#0/1  
ATCCGAATTCTTTTGGTCGCTGTCTGGCTGTCAGTAAGTA  
+HWI-EAS443:3:31:341:1374#0/1  
a\_aa]`Y\_\_\_\_[\_\_X^VPa\_`^ZV`Z^¥`] \_UVV¥VSMNTW  
@HWI-EAS443:3:31:349:759#0/1  
CATCCGAATTCTTTTGGTCGCTGTCTGGCTGTCAGTAAGT  
+HWI-EAS443:3:31:349:759#0/1  
^`^a\_`Taba```¥¥aa^baab\_a`\_aaa^\_XZNRDR¥YU  
@HWI-EAS443:3:31:427:879#0/1  
TTGGTAATGAAACGAAAACGGGACTCTAGCATACTTACTG  
+HWI-EAS443:3:31:427:879#0/1  
`b`b`aaba`bbba\_`]a]aYa``a\_a`aaaaaaaa\_a^a  
@HWI-EAS443:3:31:430:759#0/1  
CGGGACTCTAGCATACTTACTGACAGCCAGACAGCGACCA  
+HWI-EAS443:3:31:430:759#0/1  
V\_\_\_Z\_ab\_[Y¥\_`^```\_¥\_¥aW``\_abaa^]]^]\_`aa`  
@HWI-EAS443:3:31:549:1558#0/1  
ATCCGAATTCTTTTGGTCGCTGTCTGGCTGTCAGTAAGTA  
+HWI-EAS443:3:31:549:1558#0/1  
aaa`a\_`^`aaS]^ [¥Y[aaa^VVa`XRaBBBBBBBBBBBB  
@HWI-EAS443:3:31:763:1293#0/1  
CTGGCTGTCAGTAAGTATGCTAGAGTCCCGTTTTTCGTTTC  
+HWI-EAS443:3:31:763:1293#0/1  
a``^aab\_^Z]Za[LO]ZY^ZSVYUW^^`\_¥¥\_]X]V\_]T  
@HWI-EAS443:3:31:795:454#0/1  
GTCGCTGTCTGGCTGTCAGTAAGTATGCTAGAGTCCCGTT  
+HWI-EAS443:3:31:795:454#0/1  
aaaabab`aa]¥aa\_¥XW`U]\_WHTWY^^¥]XQLOS^]SW  
@HWI-EAS443:3:31:878:635#0/1  
GTCGCTGTCTGGCTGTCAGTAAGTATGCTAGAGTCCCGTT  
+HWI-EAS443:3:31:878:635#0/1  
¥OWQ^\_a]¥YUZZUXNTKOY]WYSUT[SBBBBBBBBBBBB  
@HWI-EAS443:3:31:88:1437#0/1  
GTCGCTGTCTGGCTGTCAGTAAGTATGCTAGAGTCCCGTT  
+HWI-EAS443:3:31:88:1437#0/1  
a¥aaa`a^a[^]a^ZR[GYSYVJXUZYUUYTSJ[¥\_SKT  
@HWI-EAS443:3:31:915:815#0/1  
ATCCGAATTCTTTTGGTCGCTGTCTGGCTGTCAGTAAGTA  
+HWI-EAS443:3:31:915:815#0/1  
aaa`^aaaaaaaaa]^Zaa\_``^]`a¥[``UWL[Z[[SLU  
@HWI-EAS443:3:32:1003:1979#0/1  
GTTGGTAATGAAACGAAAACGGGACTCTAGCATACTTACT  
+HWI-EAS443:3:32:1003:1979#0/1  
a]ZabYZ\_`U\_b\_[\_[a`aVZSWUG[XTaY]a\_^[]`]Y  
@HWI-EAS443:3:32:1108:1382#0/1  
GGCCATCCGAATTCTTTTGGTCGCTGTCTGGCTGTCAGTA

+HWI-EAS443:3:32:1108:1382#0/1  
a\_aabbabbbbaabbabba`aaa`^`aa]]\_a\_UTQ¥R`  
@HWI-EAS443:3:32:1289:831#0/1  
CAGTAAGTATGCTAGAGTCCCGTTTTTCGTTTCATTACCAA  
+HWI-EAS443:3:32:1289:831#0/1  
ab\_aaba`bbabbaaaa`\_`ab\_`aa\_b\_`a`a\_a\_b`aa  
@HWI-EAS443:3:32:1313:1405#0/1  
AATGAAACGAAAACGGGACTCTAGCATACTTACTGACAGC  
+HWI-EAS443:3:32:1313:1405#0/1  
aaaa]a`¥aa\_aa`Y`aa\_a`aa\_]\_``````a`\_\_\_aa\_a  
@HWI-EAS443:3:32:1642:573#0/1  
GTTGGTAATGAAACGAAAACGGGACTCTAGCATACTTACT  
+HWI-EAS443:3:32:1642:573#0/1  
`a`¥a[aaaa`aaY^Ua`a`¥a`a^X]]X\_]Z[^\_]aa`a  
@HWI-EAS443:3:32:1699:1600#0/1  
GGCCATCCGAATTCTTTTGGTCGCTGTCTGGCTGTCAGTA  
+HWI-EAS443:3:32:1699:1600#0/1  
a`¥SZa`aba]aa]^aaaa\_\_a[aaW\_\_`\_Za\_OF TZY[  
@HWI-EAS443:3:32:1738:884#0/1  
TGGCCATCCGAATTCTTTTGGTCGCTGTCTGGCTGTCAGT  
+HWI-EAS443:3:32:1738:884#0/1  
¥¥bZa^Z\_¥]^b]Y¥¥a]aR]\_] [YSYJSa\_UR\_R]^\_B  
@HWI-EAS443:3:32:245:436#0/1  
TGGCTGTCAGTAAGTATGCTAGAGTCCCGTTTTTCGTTTCA  
+HWI-EAS443:3:32:245:436#0/1  
¥aaa`^U\_IYY¥`¥¥¥¥a^R[[Q\_Paa¥OGQ\_ZUWGWZ^]  
@HWI-EAS443:3:32:377:1821#0/1  
TAATTGATGGCCATCCGAATTCTTTTGGTCGCTGTCTGGC  
+HWI-EAS443:3:32:377:1821#0/1  
[ba`^`aaaaabb\_Vba\_S\_a]aa¥¥a]SU]¥a^]W[X]]a  
@HWI-EAS443:3:32:468:545#0/1  
GCCATCCGAATTCTTTTGGTCGCTGTCTGGCTGTCAGTAA  
+HWI-EAS443:3:32:468:545#0/1  
`bbbbbbbaa`bbbbbbb\_aababba`bbb`bbb]Z\_¥Yb\_  
@HWI-EAS443:3:32:566:1341#0/1  
GCTGTCAGTAAGTATGCTAGAGTCCCGTTTTTCGTTTCATT  
+HWI-EAS443:3:32:566:1341#0/1  
^ba````[`Ya`^¥aWO]\_^`\_W`^`a`¥\_a\_[WY^\_aa]]  
@HWI-EAS443:3:32:637:1091#0/1  
TGTCTGGCTGTCAGTAAGTATGCTAGAGTCCCGTTTTTCGT  
+HWI-EAS443:3:32:637:1091#0/1  
ababaaa`aa^a`\_[aa\_Va]\_[[\_`X^a`R\_¥¥¥U  
@HWI-EAS443:3:32:769:207#0/1  
ATGGCCATCCGAATTCTTTTGGTCGCTGTCTGGCTGTCAG  
+HWI-EAS443:3:32:769:207#0/1  
a\_¥[¥aa`^aa^`^Waaaa`[^]Z\_aRXVT[BBBBBBBB  
@HWI-EAS443:3:32:785:1699#0/1  
GTTGGTAATGAAACGAAAACGGGACTCTAGCATACTTACT  
+HWI-EAS443:3:32:785:1699#0/1  
a`baaW^baaaaaba`aa`aa\_]\_\_^\_\_`^`a`\_S]aa\_

@HWI-EAS443:3:32:864:1739#0/1  
GTGTTGGTAATGAAACGAAAACGGGACTCTAGCATACTTA  
+HWI-EAS443:3:32:864:1739#0/1  
Y[`Y[QX\_\_aaaaa\_\_\_ZaaaY^^Za`\_^a`a\_^``\_^`  
@HWI-EAS443:3:33:1180:1144#0/1  
CATCCGAATTCTTTTGGTCGCTGTCTGGCTGTCAGTAAGT  
+HWI-EAS443:3:33:1180:1144#0/1  
`bbb`baababbbbbbba\_`aaabaaa`¥`VQZ]T\_¥`P  
@HWI-EAS443:3:33:124:879#0/1  
CTGGCTGTCAGTAAGTATGCTAGAGTCCCGTTTTCGTTTC  
+HWI-EAS443:3:33:124:879#0/1  
aa`\_a\_a^^J¥V`¥¥U\_ZY\_SUUQYQY\_[QQTYYVTSSYTN  
@HWI-EAS443:3:33:283:2012#0/1  
AATTGATGGCCATCCGAATTCTTTTGGTCGCTGTCTGGCT  
+HWI-EAS443:3:33:283:2012#0/1  
a```T]\_Hab`Z`a¥¥`\_\_a`aaa[QLa]a`SR\_`¥W\_Y  
@HWI-EAS443:3:33:479:1074#0/1  
CTGGCTGTCAGTAAGTATGCTAGAGTCCCGTTTTCGTTTC  
+HWI-EAS443:3:33:479:1074#0/1  
a]TX`W¥P^¥`W[XOJUPP^¥TNVVPNV[QFWYXHNQYW  
@HWI-EAS443:3:33:709:1208#0/1  
CGCTGTCTGGCTGTCAGTAAGTATGCTAGAGTCCCGTTTT  
+HWI-EAS443:3:33:709:1208#0/1  
aabaaabbaaab`^a\_\_Z]\_ZZ][]a`Z¥RWR^]Z[]^\_  
@HWI-EAS443:3:33:752:1701#0/1  
TGGCTGTCAGTAAGTATGCTAGAGTCCCGTTTTCGTTTCA  
+HWI-EAS443:3:33:752:1701#0/1  
`\_\_baaXa`aR^a\_Ha`Y`\_ZZXZXP\_[FZ^YNVTY]W¥  
@HWI-EAS443:3:33:939:1337#0/1  
TGGTCGCTGTCTGGCTGTCAGTAAGTATGCTAGAGTCCCG  
+HWI-EAS443:3:33:939:1337#0/1  
aaa`baa`¥b`a\_a`Z`Y\_Saa`T\_[]^ZXU[^UVYZ[  
@HWI-EAS443:3:34:1064:1720#0/1  
TGGCTGTCAGTAAGTATGCTAGAGTCCCGTTTTCGTTTCA  
+HWI-EAS443:3:34:1064:1720#0/1  
aabbaa^^^aaa\_a\_Q]¥`[\_¥^aaaaSaaaUNRZ¥PW  
@HWI-EAS443:3:34:1095:1291#0/1  
CTGTCAGTAAGTATGCTAGAGTCCCGTTTTCGTTTCATTA  
+HWI-EAS443:3:34:1095:1291#0/1  
aaaSa`¥]a[a`\_]aa`a`Y^a¥a\_]`^`\_]`^^^]\_  
@HWI-EAS443:3:34:1211:450#0/1  
GTCGCTGTCTGGCTGTCAGTAAGTATGCTAGAGTCCCGTT  
+HWI-EAS443:3:34:1211:450#0/1  
\_V]a]XVLWUZBBBBBBBBBBBBBBBBBBBBBBBBBBBBB  
@HWI-EAS443:3:34:1242:1967#0/1  
CATCCGAATTCTTTTGGTCGCTGTCTGGCTGTCAGTAAGT  
+HWI-EAS443:3:34:1242:1967#0/1  
abbbabbbbaabbbba`]aba\_a\_¥`a[aaaTN`ZGRa^B  
@HWI-EAS443:3:34:1361:242#0/1  
CGAATTCTTTTGGTCGCTGTCTGGCTGTCAGTAAGTATGC

+HWI-EAS443:3:34:1361:242#0/1  
aaabbbabbbb^`ababaa[b`\_`a^U^`]R]NGUBBB  
@HWI-EAS443:3:34:163:455#0/1  
GCTGTCAGTAAGTATGCTAGAGTCCCGTTTTTCGTTTCATT  
+HWI-EAS443:3:34:163:455#0/1  
ab`b^a^aPaaa[aaaaaa¥`Z`a`a]^\_`^`]^`^`¥]\_^  
@HWI-EAS443:3:34:167:1071#0/1  
CGCTGTCTGGCTGTCAGTAAGTATGCTAGAGTCCCGTTTT  
+HWI-EAS443:3:34:167:1071#0/1  
aabaa\_baaaaa\_ba\_U\_a`UaZX¥¥\_\_`¥U^[¥¥V^\_¥  
@HWI-EAS443:3:34:236:1032#0/1  
GGCCATCCGAATTCTTTTGGTCGCTGTCTGGCTGTCAGTA  
+HWI-EAS443:3:34:236:1032#0/1  
a^[ababbbWS[`a`aaaaSaa`\_]YX[ ]`\_\_\_Y`YYWU  
@HWI-EAS443:3:34:497:296#0/1  
GTCGCTGTCTGGCTGTCAGTAAGTATGCTAGAGTCCCGTT  
+HWI-EAS443:3:34:497:296#0/1  
a¥aaa^`[\_]`^Z^VVPYKRUYPZSQVPWQURJJQBBBB  
@HWI-EAS443:3:34:551:1669#0/1  
CAGTAAGTATGCTAGAGTCCCGTTTTTCGTTTCATTACCAA  
+HWI-EAS443:3:34:551:1669#0/1  
aa`^aaa^a`aaa\_]`]a`a\_]`\_`^`\_\_\_¥`\_\_\_`Z^Z`  
@HWI-EAS443:3:34:650:1850#0/1  
AGCATACTTACTGACAGCCAGACAGCGACCAAAAAGAATTC  
+HWI-EAS443:3:34:650:1850#0/1  
`]\_a`Y`]^^a^^X[\_]]``[¥aYQ]YZ`ZVNYVVBBBB  
@HWI-EAS443:3:34:811:396#0/1  
GGTCGCTGTCTGGCTGTCAGTAAGTATGCTAGAGTCCCGT  
+HWI-EAS443:3:34:811:396#0/1  
a`Vaa]aa\_X^^RYaa¥\_\_`Q[[\_WZ^VR]QUQYURRXVW  
@HWI-EAS443:3:34:881:1324#0/1  
CTGGCTGTCAGTAAGTATGCTAGAGTCCCGTTTTTCGTTTC  
+HWI-EAS443:3:34:881:1324#0/1  
`ba\_baaSaW\_\_`\_¥Ra\_]aTQYQRW`\_a\_U\_W\_Z]WZ^B  
@HWI-EAS443:3:34:934:1349#0/1  
CGCTGTCTGGCTGTCAGTAAGTATGCTAGAGTCCCGTTTT  
+HWI-EAS443:3:34:934:1349#0/1  
\_bbb`abbbaba^abaa]bb\_\_aaa\_aa`a\_¥¥aa`Q\_`\_  
@HWI-EAS443:3:34:997:618#0/1  
GGTCGCTGTCTGGCTGTCAGTAAGTATGCTAGAGTCCCGT  
+HWI-EAS443:3:34:997:618#0/1  
^a\_bbabb`a`bZaaaW¥X]R¥Z[Y[\_Z\_Y^VU[Z¥WUBB  
@HWI-EAS443:3:35:112:298#0/1  
TGGCCATCCGAATTCTTTTGGTCGCTGTCTGGCTGTCAGT  
+HWI-EAS443:3:35:112:298#0/1  
WW`aaWQ\_`a\_ZZ``a¥^bbb\_a[aa]X\_ZU[a]YJXH[T  
@HWI-EAS443:3:35:1466:1046#0/1  
AGTAAGTATGCTAGAGTCCCGTTTTTCGTTTCATTACCAAC  
+HWI-EAS443:3:35:1466:1046#0/1  
^¥X\_T\_W]]`\_`\_¥¥aZZ`\_OZ][Y[DH\_ba^a\_]V]N`



@HWI-EAS443:3:35:1473:880#0/1  
TCGCTGTCTGGCTGTCAGTAAGTATGCTAGAGTCCCGTTTT  
+HWI-EAS443:3:35:1473:880#0/1  
abaaaaaa]`^b`YN]]a[\_^]ZZRP`YYZT`^`V[XTV^  
@HWI-EAS443:3:35:1496:895#0/1  
TGGCCATCCGAATTCTTTTGGTCGCTGTCTGGCTGTCAGT  
+HWI-EAS443:3:35:1496:895#0/1  
ZWS[b¥\_¥`[^\_\_aX```aa`]`\_N^\_¥ab`¥Z\_¥BBBBB  
@HWI-EAS443:3:35:1529:366#0/1  
GGCCATCCGAATTCTTTTGGTCGCTGTCTGGCTGTCAGTA  
+HWI-EAS443:3:35:1529:366#0/1  
a\_Z¥b^aaaaaa¥``aaaaZ\_`\_\_[ZZaa\_ [[]NTR]L¥  
@HWI-EAS443:3:35:1614:389#0/1  
ATCCGAATTCTTTTGGTCGCTGTCTGGCTGTCAGTAAGTA  
+HWI-EAS443:3:35:1614:389#0/1  
abb]b```babbbbbb¥UZa`aaaa`\_]\_QW^Q[V]TVWZT]  
@HWI-EAS443:3:35:1635:1157#0/1  
GAATTCTTTTGGTCGCTGTCTGGCTGTCAGTAAGTATGCT  
+HWI-EAS443:3:35:1635:1157#0/1  
``^``abbba`b`[^aa`\_¥a]U\_\_^FDL]H^Y^¥` `aV[  
@HWI-EAS443:3:35:1660:352#0/1  
AACGAAAACGGGACTCTAGCATACTTACTGACAGCCAGAC  
+HWI-EAS443:3:35:1660:352#0/1  
``\_a\_aaaaaaa`¥\_\_\_`\_V\_\_`^\_¥`Uaaaaaa^V^`R^  
@HWI-EAS443:3:35:50:949#0/1  
TGGTAATGAAACGAAAACGGGACTCTAGCATACTTACTGA  
+HWI-EAS443:3:35:50:949#0/1  
abaQS\_`a`aaaa`Y^a\_\_`Ra`a[S]a\_Zaa\_`^a`]``  
@HWI-EAS443:3:35:807:1011#0/1  
TGGCCATCCGAATTCTTTTGGTCGCTGTCTGGCTGTCAGT  
+HWI-EAS443:3:35:807:1011#0/1  
a\_¥bbaaab^aaaa]`aaa^a¥`a\_\_\_Ua]]]a\_\_¥YPSU  
@HWI-EAS443:3:35:922:588#0/1  
CTGTCTGGCTGTCAGTAAGTATGCTAGAGTCCCGTTTTTCG  
+HWI-EAS443:3:35:922:588#0/1  
abaaabbbbbbb\_a]bR¥`a¥`Waaa\_]a]aa` `[`a`Z¥  
@HWI-EAS443:3:36:1182:173#0/1  
CATCCGAATTCTTTTGGTCGCTGTCTGGCTGTCAGTAAGT  
+HWI-EAS443:3:36:1182:173#0/1  
ababbbbbbaabaaba`¥aaaaa\_`^a`^`^`U[WWMY\_VW  
@HWI-EAS443:3:36:1421:1465#0/1  
CTGGCTGTCAGTAAGTATGCTAGAGTCCCGTTTTTCGTTTC  
+HWI-EAS443:3:36:1421:1465#0/1  
a]\_`baaN\_TaU`¥`aaa]^a`][`[aUa`[[[\_][aU[\_Y  
@HWI-EAS443:3:36:1455:747#0/1  
TGGTAATGAAACGAAAACGGGACTCTAGCATACTTACTGA  
+HWI-EAS443:3:36:1455:747#0/1  
abb\_`\_a``aa```\_`a`a`a`\_a[a`\_`aa^]``aa`a¥  
@HWI-EAS443:3:36:1483:786#0/1  
CGCTGTCTGGCTGTCAGTAAGTATGCTAGAGTCCCGTTTT

+HWI-EAS443:3:36:1483:786#0/1  
`babbbbbabbba\_`b]aab¥`aaaa\_baaZ^Saa¥^aa  
@HWI-EAS443:3:36:342:1318#0/1  
GGTCGCTGTCTGGCTGTCAGTAAGTATGCTAGAGTCCCGT  
+HWI-EAS443:3:36:342:1318#0/1  
WQYbbaUaabaabb`a`a[`]XUa\_¥]^a`¥UZ^aa¥T  
@HWI-EAS443:3:36:491:504#0/1  
GTTGGTAATGAAACGAAAACGGGACTCTAGCATACTTACT  
+HWI-EAS443:3:36:491:504#0/1  
a]\_a`VT¥aaZ`\_a^]Q`\_^`\_\_\_^`Y[\_\_\_^Y^]\_Ya]V  
@HWI-EAS443:3:36:714:1110#0/1  
TGGTAATGAAACGAAAACGGGACTCTAGCATACTTACTGA  
+HWI-EAS443:3:36:714:1110#0/1  
abaZa^\_ba`baa`^a\_aaX]^`a]^a\_\_a\_\_\_\_\_aa\_^a  
@HWI-EAS443:3:36:822:1287#0/1  
CAGTAAGTATGCTAGAGTCCCGTTTTTCGTTTCATTACCAA  
+HWI-EAS443:3:36:822:1287#0/1  
aa]J]^`aYaa`a\_\_]\_a]^`\_aaT\_^`\_\_\_X^YW`\_Y\_[Z^[  
@HWI-EAS443:3:36:869:1086#0/1  
CATCCGAATTCTTTTGGTCGCTGTCTGGCTGTCTAGTAAGT  
+HWI-EAS443:3:36:869:1086#0/1  
`X`b`\_[baababaa]a\_\_aaa`Z`^`\_\_\_¥^[¥]VU\_YR  
@HWI-EAS443:3:36:969:723#0/1  
TTGTAATGAAACGAAAACGGGACTCTAGCATACTTACTG  
+HWI-EAS443:3:36:969:723#0/1  
aaba`]^abaaba`^aXa`aaa\_aaaa\_a\_aa`]aaa^a`  
@HWI-EAS443:3:37:1026:346#0/1  
TTGTAATGAAACGAAAACGGGACTCTAGCATACTTACTG  
+HWI-EAS443:3:37:1026:346#0/1  
abaXYa\_]`\_a\_\_\_^`\_^^a\_^^Z\_\_\_^^]Y[][\_]`^^Z  
@HWI-EAS443:3:37:132:1702#0/1  
CTGGCTGTCAGTAAGTATGCTAGAGTCCCGTTTTTCGTTTC  
+HWI-EAS443:3:37:132:1702#0/1  
a`]^`XZUZ^a]RIVUXZMYRVOX^\_LLTJTXENLVY  
@HWI-EAS443:3:37:1386:243#0/1  
TGGCCATCCGAATTCTTTTGGTCGCTGTCTGGCTGTCTAGT  
+HWI-EAS443:3:37:1386:243#0/1  
aa`Z`[J^[baaaaaa\_\_`aa[aY`aH\_H[aaZ\_ZMSVG  
@HWI-EAS443:3:37:1576:1419#0/1  
GCTGTCAGTAAGTATGCTAGAGTCCCGTTTTTCGTTTCATT  
+HWI-EAS443:3:37:1576:1419#0/1  
Z\_¥aSS¥a`bb^`[¥^^]`X`aa\_^Z[H[W`]Y\_\_V  
@HWI-EAS443:3:37:213:2038#0/1  
CTGTCAGTAAGTATGCTAGAGTCCCGTTTTTCGTTTCATTA  
+HWI-EAS443:3:37:213:2038#0/1  
aa`^aba`aba\_b`aaaa]UVTaaaa^\_[Wa]S^[]Z¥\_a  
@HWI-EAS443:3:37:237:1932#0/1  
CGGGACTCTAGCATACTTACTGACAGCCAGACAGCGACCA  
+HWI-EAS443:3:37:237:1932#0/1  
a^^`^a`a[`\_`\_Y`\_`\_a\_^`\_\_\_`¥VV]TP\_^V¥VY\_\_\_\_

@HWI-EAS443:3:37:31:59#0/1  
ATCCGAATTCTTTTGGTCGCTGTCTGGCTGTCAGTAAGTA  
+HWI-EAS443:3:37:31:59#0/1  
[aaaaa\_aaaaaa\_a^`aa`a^a\_`^`^]ZU[U[Y[UXLX  
@HWI-EAS443:3:37:336:1644#0/1  
TCGCTGTCTGGCTGTCAGTAAGTATGCTAGAGTCCCGTTT  
+HWI-EAS443:3:37:336:1644#0/1  
aba`a\_RZZ\_¥a¥FL^ZaGX\_[O`PJ¥YUQNHDV\_[RVV^  
@HWI-EAS443:3:37:421:1568#0/1  
GGCCATCCGAATTCTTTTGGTCGCTGTCTGGCTGTCAGTA  
+HWI-EAS443:3:37:421:1568#0/1  
X¥bbbbbbbbbbbabbbba]ababbbbbb]`bba[b\_a]b  
@HWI-EAS443:3:37:481:1056#0/1  
TGGTAATGAAACGAAAACGGGACTCTAGCATACTTACTGA  
+HWI-EAS443:3:37:481:1056#0/1  
`bW¥Wab\_aa``aaa^a`][ab`a\_Y¥b][aa¥`a`\_aa  
@HWI-EAS443:3:37:606:752#0/1  
ATCCGAATTCTTTTGGTCGCTGTCTGGCTGTCAGTAAGTA  
+HWI-EAS443:3:37:606:752#0/1  
aab``aa\_\_\_\_`a[]\_`^\_]V¥`^^¥^YUUKLRDVSVWVNV  
@HWI-EAS443:3:37:682:1401#0/1  
CTGGCTGTCAGTAAGTATGCTAGAGTCCCGTTTTCGTTTC  
+HWI-EAS443:3:37:682:1401#0/1  
aa`aabYRZ`^Ha`HG\_¥UV]\_[[JNVa]H^^^WJMVUG  
@HWI-EAS443:3:37:731:544#0/1  
CGCTGTCTGGCTGTCAGTAAGTATGCTAGAGTCCCGTTTT  
+HWI-EAS443:3:37:731:544#0/1  
abb]`ab^b]aa¥DV¥[Q`ZYSa]``[]^Y¥U\_a]YIR`a  
@HWI-EAS443:3:38:1000:963#0/1  
GTGTTGGTAATGAAACGAAAACGGGACTCTAGCATACTTA  
+HWI-EAS443:3:38:1000:963#0/1  
aa`[a]ZLZWPW]\_UQ\_Q`OVPZ\_¥SSZ[RQQQXRYTWZS  
@HWI-EAS443:3:38:1113:1190#0/1  
TGGCCATCCGAATTCTTTTGGTCGCTGTCTGGCTGTCAGT  
+HWI-EAS443:3:38:1113:1190#0/1  
[abaabbbbbbbabbaa`ab\_babbbbab\_`^Za`W`\_aG  
@HWI-EAS443:3:38:1252:923#0/1  
GGCTGTCAGTAAGTATGCTAGAGTCCCGTTTTCGTTTCAT  
+HWI-EAS443:3:38:1252:923#0/1  
aaba\_UZ^^\_a`^V``\_a`^]`V]¥^`Z]^]NXT`^LXV  
@HWI-EAS443:3:38:131:534#0/1  
AATTGATGGCCATCCGAATTCTTTTGGTCGCTGTCTGGCT  
+HWI-EAS443:3:38:131:534#0/1  
abaa``\_`\_`aa\_aaa`a`\_\_aaaaS]¥\_UU[VY`\_^]^]  
@HWI-EAS443:3:38:1630:53#0/1  
CGGGACTCTAGCATACTTACTGACAGCCAGACAGCGACCA  
+HWI-EAS443:3:38:1630:53#0/1  
\_bbaUZ\_bb`\_^abZbU]aQbba`X``^`RNVPS]`WXL  
@HWI-EAS443:3:38:263:52#0/1  
GTCGCTGTCTGGCTGTCAGTAAGTATGCTAGAGTCCCGTT

+HWI-EAS443:3:38:263:52#0/1  
aZ^aaUa\_\`Za\_[VZS¥HYRVRLTXXVSGSVUWGWYVNRW  
@HWI-EAS443:3:38:278:1718#0/1  
TGGCCATCCGAATTCTTTTGGTCGCTGTCTGGCTGTCAGT  
+HWI-EAS443:3:38:278:1718#0/1  
^\_Zaa¥^bbb\_\_aaba\_\`^\_b]`[\`^`Xb^[Q`]]Q\_[OF  
@HWI-EAS443:3:38:289:71#0/1  
GGCCATCCGAATTCTTTTGGTCGCTGTCTGGCTGTCAGTA  
+HWI-EAS443:3:38:289:71#0/1  
a`bab\_babaaab\_aaaaaZaa\_\`¥¥\_\_¥\_\`VUN\_W¥  
@HWI-EAS443:3:38:403:390#0/1  
GCCATCCGAATTCTTTTGGTCGCTGTCTGGCTGTCAGTAA  
+HWI-EAS443:3:38:403:390#0/1  
ab```bbbbbba`aaaabaWbaaab\_aab^[\_aWV]\_Z`¥  
@HWI-EAS443:3:38:417:255#0/1  
ATCCGAATTCTTTTGGTCGCTGTCTGGCTGTCAGTAAGTA  
+HWI-EAS443:3:38:417:255#0/1  
aa\_aa`Vaa`\_]^^`]V^a^^`Y^]^[^]VYOVYYXTPR  
@HWI-EAS443:3:38:560:1037#0/1  
CTGGCTGTCAGTAAGTATGCTAGAGTCCCGTTTTTCGTTTC  
+HWI-EAS443:3:38:560:1037#0/1  
`abaabb]a]a¥S\_YF^aT``¥X^\_Zaa`RY[aUD¥^\_XD  
@HWI-EAS443:3:38:59:306#0/1  
TGGCTGTCAGTAAGTATGCTAGAGTCCCGTTTTTCGTTTCA  
+HWI-EAS443:3:38:59:306#0/1  
ababa`X`X][```Y`¥¥^W\_``¥UZ]^YU]\_\_XYG[`[L  
@HWI-EAS443:3:38:647:526#0/1  
GGTCGCTGTCTGGCTGTCAGTAAGTATGCTAGAGTCCCGT  
+HWI-EAS443:3:38:647:526#0/1  
aa\_]aa[ba`\_\_aa\_L]UaZY[`X]]Y`SLYN]V]^T^Q  
@HWI-EAS443:3:38:783:1336#0/1  
GGCCATCCGAATTCTTTTGGTCGCTGTCTGGCTGTCAGTA  
+HWI-EAS443:3:38:783:1336#0/1  
O\_bbbbbabbbbYbb]bab`bb¥`ba^bb\_\`ab`Zaa^GW  
@HWI-EAS443:3:38:868:316#0/1  
GCTGTCTGGCTGTCAGTAAGTATGCTAGAGTCCCGTTTTTC  
+HWI-EAS443:3:38:868:316#0/1  
aaab```aaa\_\`[TX]PY[YZ¥Y[¥VQXSSTTTZ¥R¥\_XG  
@HWI-EAS443:3:38:946:842#0/1  
ATCCGAATTCTTTTGGTCGCTGTCTGGCTGTCAGTAAGTA  
+HWI-EAS443:3:38:946:842#0/1  
`a]\_aa\_a`aba\_ab\_\_aa\_\`^a`a¥]`aUQMYMXUFPU  
@HWI-EAS443:3:39:1067:1163#0/1  
GTCGCTGTCTGGCTGTCAGTAAGTATGCTAGAGTCCCGT  
+HWI-EAS443:3:39:1067:1163#0/1  
UG`\_b`¥P¥[V¥]`b[aY]KLOWMRZZYGQYV`QaQ\_YNS  
@HWI-EAS443:3:39:1129:1337#0/1  
TGTCAGTAAGTATGCTAGAGTCCCGTTTTTCGTTTCATTAC  
+HWI-EAS443:3:39:1129:1337#0/1  
ababbbabb\_ababaaaaa^aaaba`bab`]aaa`aaaX

@HWI-EAS443:3:39:1228:717#0/1  
GTTGGTAATGAAACGAAAACGGGACTCTAGCATACTTACT  
+HWI-EAS443:3:39:1228:717#0/1  
aYaaaVa\_a\_a\_a^`\_a\_^^^a^^X^YY^]XYW^]V^XW  
@HWI-EAS443:3:39:1229:221#0/1  
AATGAAACGAAAACGGGACTCTAGCATACTTACTGACAGC  
+HWI-EAS443:3:39:1229:221#0/1  
[Ubb`\_`aT[^b^\_] ]ZZQZ¥a\_YaZ\_[]U¥\_VZa¥`0  
@HWI-EAS443:3:39:1274:1591#0/1  
TGGTAATGAAACGAAAACGGGACTCTAGCATACTTACTGA  
+HWI-EAS443:3:39:1274:1591#0/1  
a^\_Z`[X\_aaa`Z\_a\_\_[\_^`\_^^`\_[\_a]YX)``\_ ]^]  
@HWI-EAS443:3:39:1329:1105#0/1  
CCGAATTCTTTTGGTCGCTGTCTGGCTGTCAGTAAGTATG  
+HWI-EAS443:3:39:1329:1105#0/1  
a` `` ` bbbbabaaa`bb\_aa`a`^aa^a¥^QSR[]]V¥[V  
@HWI-EAS443:3:39:1702:627#0/1  
TGGTAATGAAACGAAAACGGGACTCTAGCATACTTACTGA  
+HWI-EAS443:3:39:1702:627#0/1  
abbZ]`abaa\_^b`aa`\_`^RXYVX]H[X[VUN^Q]HUZW  
@HWI-EAS443:3:39:570:237#0/1  
CATCCGAATTCTTTTGGTCGCTGTCTGGCTGTCAGTAAGT  
+HWI-EAS443:3:39:570:237#0/1  
abaabb][` ` ` ababa[]a\_]`^a\_a\_a^\_PQQ[TY]TF  
@HWI-EAS443:3:3:1109:1463#0/1  
TCCGAATTCTTTTGGTCGCTGTCTGGCTGTCAGTAAGTAT  
+HWI-EAS443:3:3:1109:1463#0/1  
a` [\_`ab¥a]b[\_a]aQ\_a\_` \_\_\_\_\_^ [OVU[VY[¥OBB  
@HWI-EAS443:3:3:1375:319#0/1  
GTCAGTAAGTATGCTAGAGTCCCGTTTTTCGTTTCATTACC  
+HWI-EAS443:3:3:1375:319#0/1  
a^PL\_W[[[Y\_^X\_YP¥\_YRUW\_W^ZLLGUXVR]VWSB  
@HWI-EAS443:3:3:1474:790#0/1  
CTGGCTGTCAGTAAGTATGCTAGAGTCCCGTTTTTCGTTTC  
+HWI-EAS443:3:3:1474:790#0/1  
Nabbaba¥Z¥aaX\_b`^`a`\_a^\_bX`baaabbbabTaZD  
@HWI-EAS443:3:3:1696:911#0/1  
GGCCATCCGAATTCTTTTGGTCGCTGTCTGGCTGTCAGTA  
+HWI-EAS443:3:3:1696:911#0/1  
a]aabaaaa\_aaa[aa`baaY]a\_`\_]Y^^\_X\_]VNV^UB  
@HWI-EAS443:3:3:1699:1048#0/1  
CTGTCTGGCTGTCAGTAAGTATGCTAGAGTCCCGTTTTTCG  
+HWI-EAS443:3:3:1699:1048#0/1  
aaba`aaV`ab[Y]aY\_\_aU\_` [ZY`¥\_VZZ]aWO\_^WZ  
@HWI-EAS443:3:3:1724:524#0/1  
TGGTAATGAAACGAAAACGGGACTCTAGCATACTTACTGA  
+HWI-EAS443:3:3:1724:524#0/1  
abaW^^` [ ` ]Z[¥R` ]`XITS¥\_\_^a^]]S`ZGZR\_^]¥]  
@HWI-EAS443:3:3:1749:232#0/1  
GCTGTCAGTAAGTATGCTAGAGTCCCGTTTTTCGTTTCATT

+HWI-EAS443:3:3:1749:232#0/1  
aa¥`WXY^W[\_\_\_]WYQR]TXW[OTU][NWSTKOMWVBBBB  
@HWI-EAS443:3:3:343:967#0/1  
TGTCAGTAAGTATGCTAGAGTCCCGTTTTTCGTTTCATTAC  
+HWI-EAS443:3:3:343:967#0/1  
a^HVbb¥QWaR\_ab¥¥\_\_V\_QWXYaVX\_[^`M`]VZ\_`^S  
@HWI-EAS443:3:3:361:1092#0/1  
TGGTAATGAAACGAAAACGGGACTCTAGCATACTTACTGA  
+HWI-EAS443:3:3:361:1092#0/1  
a^bRa^b]babab`a\_a\_a`\_\_aa¥aaa`aa[P[aa^`aa  
@HWI-EAS443:3:3:670:982#0/1  
GTGTTGGTAATGAAACGAAAACGGGACTCTAGCATACTTA  
+HWI-EAS443:3:3:670:982#0/1  
`^a¥abaZ`[`¥¥]`R^][XZVR\_\_VZ^OU]^Z^WZZ]BB  
@HWI-EAS443:3:3:812:1664#0/1  
AGCATACTTACTGACAGCCAGACAGCGACCAAAGAATTC  
+HWI-EAS443:3:3:812:1664#0/1  
ababaaa\_abaaa\_]a\_^`\_`a`\_^`\_NUa\_\_`\_`W¥W  
@HWI-EAS443:3:3:854:1966#0/1  
TGGTAATGAAACGAAAACGGGACTCTAGCATACTTACTGA  
+HWI-EAS443:3:3:854:1966#0/1  
aaaQbbabbbb`baaa`aaa\_a[a^aaa`a^aR^^a]]\_`  
@HWI-EAS443:3:40:1015:665#0/1  
CTGTCAGTAAGTATGCTAGAGTCCCGTTTTTCGTTTCATTA  
+HWI-EAS443:3:40:1015:665#0/1  
]bbbbU\_U`aaabbbabaa]`aa`^\_Ta\_aab``aaaa\_a  
@HWI-EAS443:3:40:1253:1073#0/1  
TCTGGCTGTCAGTAAGTATGCTAGAGTCCCGTTTTTCGTTT  
+HWI-EAS443:3:40:1253:1073#0/1  
aaaaaaaaUV¥XUZ\_VL\_^T¥^ZYTZN\_a\_\_Q\_\_]Y]U]^  
@HWI-EAS443:3:40:1346:1011#0/1  
GCTGTCTGGCTGTCAGTAAGTATGCTAGAGTCCCGTTTTTC  
+HWI-EAS443:3:40:1346:1011#0/1  
aaaa[`]¥¥LVXTWU]QX]ZSYXWJSTXTZUZWa[NQRXU  
@HWI-EAS443:3:40:666:427#0/1  
CCGAATTCTTTTGGTCGCTGTCTGGCTGTCAGTAAGTATG  
+HWI-EAS443:3:40:666:427#0/1  
abb]bbbababbbb`bbaaa`a`a`XaN¥XaLXa\_X`]^  
@HWI-EAS443:3:40:684:300#0/1  
TGGCCATCCGAATTCTTTTGGTCGCTGTCTGGCTGTCAGT  
+HWI-EAS443:3:40:684:300#0/1  
V\_OZa\_\_aUa^\_b`a`ab\_[\_^bbaa¥[^U`a`X`QWHYD  
@HWI-EAS443:3:40:872:1938#0/1  
ATTGATGGCCATCCGAATTCTTTTGGTCGCTGTCTGGCTG  
+HWI-EAS443:3:40:872:1938#0/1  
aaa\_b`b\_R`aa¥G¥Iaba\_a\_ba]]U`]X`\_W]X]^XY`  
@HWI-EAS443:3:42:1018:675#0/1  
GGCCATCCGAATTCTTTTGGTCGCTGTCTGGCTGTCAGTA  
+HWI-EAS443:3:42:1018:675#0/1  
\_`bbba`abbbba`abbbbaW\_\_aba[\_aabab`XZW]OV

@HWI-EAS443:3:42:1045:862#0/1  
GGCCATCCGAATTCTTTTGGTCGCTGTCTGGCTGTCAGTA  
+HWI-EAS443:3:42:1045:862#0/1  
`¥`VMWF¥[QRX¥Z`aaZ`[¥ab¥T[G]G\_a¥R[UXWRBB  
@HWI-EAS443:3:42:1068:794#0/1  
TTGATGGCCATCCGAATTCTTTTGGTCGCTGTCTGGCTGT  
+HWI-EAS443:3:42:1068:794#0/1  
``a`a`a`¥baa`ZX¥\_a`bbbaa`X`¥\_\_¥Y\_\_¥\_]\_aT  
@HWI-EAS443:3:42:1273:162#0/1  
GTCGCTGTCTGGCTGTCAGTAAGTATGCTAGAGTCCCGTT  
+HWI-EAS443:3:42:1273:162#0/1  
`^aaaaa[¥¥`a[¥XJS]`WZ]]U[UWXKK¥GXJROVUVV  
@HWI-EAS443:3:42:1300:744#0/1  
ATCCGAATTCTTTTGGTCGCTGTCTGGCTGTCAGTAAGTA  
+HWI-EAS443:3:42:1300:744#0/1  
abb`a`aba`baaaaa^`a\_`a^^`a`a¥[¥[Z^^ZSY  
@HWI-EAS443:3:42:1442:581#0/1  
GTTGGTAATGAAACGAAAACGGGACTCTAGCATACTTACT  
+HWI-EAS443:3:42:1442:581#0/1  
a[``a]]aaa\_aa¥¥ZP]`W]XRW\_\_^\_^[^]][]a\_\_]]  
@HWI-EAS443:3:42:1569:220#0/1  
CGGGACTCTAGCATACTTACTGACAGCCAGACAGCGACCA  
+HWI-EAS443:3:42:1569:220#0/1  
\_bab^bbababbbba\_bbb^bba^ab`aab\_\_aa\_a`\_a\_  
@HWI-EAS443:3:42:200:1191#0/1  
CAGTAAGTATGCTAGAGTCCCGTTTTTCGTTTCATTACCAA  
+HWI-EAS443:3:42:200:1191#0/1  
a[aHbaaaa^b`¥]Za`[aaaa]aa\_a\_\_`\_\_`aa\_\_\_aQ  
@HWI-EAS443:3:42:691:615#0/1  
CGCTGTCTGGCTGTCAGTAAGTATGCTAGAGTCCCGTTTT  
+HWI-EAS443:3:42:691:615#0/1  
abbbbabbbbab¥`aaZaaaRa`aaa`]`aY``aa[`a`  
@HWI-EAS443:3:42:806:1268#0/1  
GGCCATCCGAATTCTTTTGGTCGCTGTCTGGCTGTCAGTA  
+HWI-EAS443:3:42:806:1268#0/1  
a\_a`aabbaaaaaa\_aaaaY`a`a\_^aa\_\_`\_\_N\_RTDT  
@HWI-EAS443:3:42:812:1308#0/1  
GCTGTGCTAGTAAGTATGCTAGAGTCCCGTTTTTCGTTTCATT  
+HWI-EAS443:3:42:812:1308#0/1  
\_babaaaba`aa¥aaaaaaa^^SW\_^`[\_aaaa[`P]]XY  
@HWI-EAS443:3:42:892:84#0/1  
TCCGAATTCTTTTGGTCGCTGTCTGGCTGTCAGTAAGTAT  
+HWI-EAS443:3:42:892:84#0/1  
aa`ba`ba`baaaaa\_`a\_`^`^`^`\_]`TTTTLYVXUVU  
@HWI-EAS443:3:43:1019:226#0/1  
CGCTGTCTGGCTGTCAGTAAGTATGCTAGAGTCCCGTTTT  
+HWI-EAS443:3:43:1019:226#0/1  
ababbabbbbabba¥Z\_aaa]X\_]S]\_b\_a[[[Ua^P[`^  
@HWI-EAS443:3:43:1099:633#0/1  
CTGGCTGTCAGTAAGTATGCTAGAGTCCCGTTTTTCGTTTC

+HWI-EAS443:3:43:1099:633#0/1  
a`a``aa\_[L^PJYaUXaYQJSX[^RRXX¥RY^ZVR0`]G  
@HWI-EAS443:3:43:1273:154#0/1  
ACGAAAACGGGACTCTAGCATACTTACTGACAGCCAGACA  
+HWI-EAS443:3:43:1273:154#0/1  
`aa¥`aa\_b\_a\_\_^W]aa^``][\_`a^`a\_^\_a]]^a^W[  
@HWI-EAS443:3:43:1625:150#0/1  
GTTGGTAATGAAACGAAAACGGGACTCTAGCATACTTACT  
+HWI-EAS443:3:43:1625:150#0/1  
a[\_aaX[S¥\_`^[S[S]RTUOTYXYVYWUXTUSTTSTZNB  
@HWI-EAS443:3:43:1715:604#0/1  
TGGCTGTCAGTAAGTATGCTAGAGTCCCGTTTTTCGTTTCA  
+HWI-EAS443:3:43:1715:604#0/1  
aa`[aaZ`^aQ\_]XP][a\_`^`^ZW]]¥US`\_]\_HVM\_`NU  
@HWI-EAS443:3:43:269:1329#0/1  
GTCGCTGTCTGGCTGTCAGTAAGTATGCTAGAGTCCCGTT  
+HWI-EAS443:3:43:269:1329#0/1  
aabaaa`aaaa`X^]VNX`V\_`^R\_¥XR^\_aYTUZV\_\_GZ  
@HWI-EAS443:3:43:386:357#0/1  
GGCCATCCGAATTCTTTTGGTCGCTGTCTGGCTGTCAGTA  
+HWI-EAS443:3:43:386:357#0/1  
aababa`baaaaaaaaaaaaaTa``aa\_`aa`^ZaNNX[LY  
@HWI-EAS443:3:43:487:1097#0/1  
TGGCCATCCGAATTCTTTTGGTCGCTGTCTGGCTGTCAGT  
+HWI-EAS443:3:43:487:1097#0/1  
ababbbbaabbabb`baaa``\_abaaa\_a`aaa`]Z``aV  
@HWI-EAS443:3:43:610:1709#0/1  
AATTGATGGCCATCCGAATTCTTTTGGTCGCTGTCTGGCT  
+HWI-EAS443:3:43:610:1709#0/1  
aab\_^a`])`b\_b\_````aa\_`\_\_a\_\_ZW^a¥\_`[¥V¥\_\_¥^  
@HWI-EAS443:3:43:783:1523#0/1  
GGCCATCCGAATTCTTTTGGTCGCTGTCTGGCTGTCAGTA  
+HWI-EAS443:3:43:783:1523#0/1  
ab^`^bbaaaaabUbab``Z\_`b\_aa¥\_aa]Y``LP[[S[  
@HWI-EAS443:3:43:973:754#0/1  
AAACGAAAACGGGACTCTAGCATACTTACTGACAGCCAGA  
+HWI-EAS443:3:43:973:754#0/1  
ab[`]\_UaaP]ab`U]a\_^a^a^`aaaa\_a`Z]a`^aZ^\_  
@HWI-EAS443:3:44:1131:228#0/1  
GTCGCTGTCTGGCTGTCAGTAAGTATGCTAGAGTCCCGTT  
+HWI-EAS443:3:44:1131:228#0/1  
a\_aa\_`aYZ]\_`[[`RNT][[¥NRUUYPYU^SMOQXUBBB  
@HWI-EAS443:3:44:114:1663#0/1  
AATTGATGGCCATCCGAATTCTTTTGGTCGCTGTCTGGCT  
+HWI-EAS443:3:44:114:1663#0/1  
`a\_V^baXM\_aa[`^LW\_a`]]QQXYPR]UXV[Z]]GDPZ  
@HWI-EAS443:3:44:1513:219#0/1  
GCCATCCGAATTCTTTTGGTCGCTGTCTGGCTGTCAGTAA  
+HWI-EAS443:3:44:1513:219#0/1  
aaa`aaaaaaaaaaaaaaaaa¥\_a¥\_`W¥\_\_\_W^`TURZGQW



@HWI-EAS443:3:44:1552:1834#0/1  
TGGCTGTCAGTAAGTATGCTAGAGTCCCGTTTTTCGTTTCA  
+HWI-EAS443:3:44:1552:1834#0/1  
abbbbbb\_]b¥a¥WXa]aaaaa^`P[^aaY\_a^PXU^\_NN  
@HWI-EAS443:3:44:1738:1290#0/1  
GAATTCTTTTGGTCGCTGTCTGGCTGTCAGTAAGTATGCT  
+HWI-EAS443:3:44:1738:1290#0/1  
^OZba`aaa^aYV¥W]WSY^`W]Y^ZZRZGV[]W]\_YUV  
@HWI-EAS443:3:44:220:409#0/1  
CAGTAAGTATGCTAGAGTCCCGTTTTTCGTTTCATTACCAA  
+HWI-EAS443:3:44:220:409#0/1  
\_ba\_bab^baabbabb`\_a\_ab]aaa\_a\_aa`aaaa]¥\_`  
@HWI-EAS443:3:44:395:1035#0/1  
TGTCAGTAAGTATGCTAGAGTCCCGTTTTTCGTTTCATTAC  
+HWI-EAS443:3:44:395:1035#0/1  
X¥]]`\_MT`\_T^`aa`Y\_]^^a]\_aJ\_a[U]Y`ZX¥¥`XV  
@HWI-EAS443:3:44:399:1294#0/1  
TGGTAATGAAACGAAAACGGGACTCTAGCATACTTACTGA  
+HWI-EAS443:3:44:399:1294#0/1  
a¥ZX]bb]aaa\_a`aa^^a`\_^Wa\_]^a¥``\_^a`a[\_\_\_^  
@HWI-EAS443:3:44:457:1026#0/1  
CAGTAAGTATGCTAGAGTCCCGTTTTTCGTTTCATTACCAA  
+HWI-EAS443:3:44:457:1026#0/1  
a]^WW^ZY\_]aa`ZSNU\_W^[¥]\_N\_SZ^`ZU¥[TRX^  
@HWI-EAS443:3:44:663:989#0/1  
ATCCGAATTCTTTTGGTCGCTGTCTGGCTGTCAGTAAGTA  
+HWI-EAS443:3:44:663:989#0/1  
aabbbbaabbaaaaaaba¥`a]aa``¥[a]N]XUZQW]^RZ  
@HWI-EAS443:3:44:825:1972#0/1  
GTCGCTGTCTGGCTGTCAGTAAGTATGCTAGAGTCCCGTT  
+HWI-EAS443:3:44:825:1972#0/1  
a]a`a`a[``\_a\_\_`RYZ^Z`XRU[U]Y^U]ZWYYY^RX  
@HWI-EAS443:3:45:1080:1496#0/1  
GTCAGTAAGTATGCTAGAGTCCCGTTTTTCGTTTCATTACC  
+HWI-EAS443:3:45:1080:1496#0/1  
¥X\_Y¥Z[¥\_YUX¥V^YV[OTTPX]MS]¥RZR\_`^^TXTOF  
@HWI-EAS443:3:45:1298:1239#0/1  
CGCTGTCTGGCTGTCAGTAAGTATGCTAGAGTCCCGTTTT  
+HWI-EAS443:3:45:1298:1239#0/1  
abbabaabbaaab\_Z\_a[``a^^a`\_``a^`V[¥`a]`a\_  
@HWI-EAS443:3:45:1377:1808#0/1  
ATCCGAATTCTTTTGGTCGCTGTCTGGCTGTCAGTAAGTA  
+HWI-EAS443:3:45:1377:1808#0/1  
`b`\_b`\_bb\_a^aaaa\_\_aa`^WS`\_\_\_\_[aX[]YHYZWUZ  
@HWI-EAS443:3:45:1660:418#0/1  
GTAAGTATGCTAGAGTCCCGTTTTTCGTTTCATTACCAACA  
+HWI-EAS443:3:45:1660:418#0/1  
^SY\_¥F¥\_\_UT`]¥a¥\_R[\_NZ\_\_WaYZ]YRV^YY]]\_X\_  
@HWI-EAS443:3:45:309:1184#0/1  
CATCCGAATTCTTTTGGTCGCTGTCTGGCTGTCAGTAAGT

+HWI-EAS443:3:45:309:1184#0/1  
aaa]\_\_`aTa`^`\_¥^`aa`a\_\_a`¥YZ`XZ]a]XV[L  
@HWI-EAS443:3:45:389:201#0/1  
AATTGATGGCCATCCGAATTCTTTTGGTCGCTGTCTGGCT  
+HWI-EAS443:3:45:389:201#0/1  
`^T[b^a[T\_baXSab`YY`XR\_bbaZWQYV[W[Y¥RZ¥V  
@HWI-EAS443:3:45:477:1496#0/1  
CAGTAAGTATGCTAGAGTCCCGTTTTCGTTTCATTACCAA  
+HWI-EAS443:3:45:477:1496#0/1  
aW¥ZU`¥R`a`]a\_V`]¥`[L^QY^^0\_T\_Y¥QY[[QUWL  
@HWI-EAS443:3:45:559:379#0/1  
AAAACGGGACTCTAGCATACTTACTGACAGCCAGACAGCG  
+HWI-EAS443:3:45:559:379#0/1  
aaaa^aa^]Xaa\_\_a^`a\_\_aY\_]`\_`]Z`\_¥^\_X  
@HWI-EAS443:3:45:567:1684#0/1  
AATTGATGGCCATCCGAATTCTTTTGGTCGCTGTCTGGCT  
+HWI-EAS443:3:45:567:1684#0/1  
aabb`a`aa]ba][\_aaabZabaa`^`\_a]a^]U`Y^]  
@HWI-EAS443:3:45:651:1934#0/1  
CTGTCAGTAAGTATGCTAGAGTCCCGTTTTCGTTTCATTA  
+HWI-EAS443:3:45:651:1934#0/1  
aba`b`bb`\_aa`a[¥aZV\_aa]^`Za[^`\_\_`U`  
@HWI-EAS443:3:45:734:445#0/1  
GTTGGTAATGAAACGAAAACGGGACTCTAGCATACTTACT  
+HWI-EAS443:3:45:734:445#0/1  
`^bbb^aabbaaaa\_abaaa`b`^a\_aaa^`a\_aa`a  
@HWI-EAS443:3:46:1002:1086#0/1  
CTGGCTGTCAGTAAGTATGCTAGAGTCCCGTTTTCGTTTC  
+HWI-EAS443:3:46:1002:1086#0/1  
abbbaab]¥\_b\_aaa]aab]a`aa`U^¥aa¥aaaV\_^a\_G  
@HWI-EAS443:3:46:1219:1523#0/1  
CATCCGAATTCTTTTGGTCGCTGTCTGGCTGTCAGTAAGT  
+HWI-EAS443:3:46:1219:1523#0/1  
abb`abaabbaababb\_`a`aaa\_aaa\_aa\_XV`R\_\_V  
@HWI-EAS443:3:46:1282:1881#0/1  
GTCGCTGTCTGGCTGTCAGTAAGTATGCTAGAGTCCCGTT  
+HWI-EAS443:3:46:1282:1881#0/1  
`]\_\_aaa\_]`X^]\_WYR[¥U[[ZUU^\_V[UVVQVVVYVYVX  
@HWI-EAS443:3:46:1360:950#0/1  
CGGGACTCTAGCATACTTACTGACAGCCAGACAGCGACCA  
+HWI-EAS443:3:46:1360:950#0/1  
`bZQa`Y`\_\_[aY`[aa\_a¥`RT¥\_\_]¥US^¥\_aN^[HU¥  
@HWI-EAS443:3:46:1412:1098#0/1  
GTCGCTGTCTGGCTGTCAGTAAGTATGCTAGAGTCCCGTT  
+HWI-EAS443:3:46:1412:1098#0/1  
a`\_\_`\_a\_U]a`\_¥Y\_GY[[ZV\_\_UYRPS]QWV]GQTTXFW  
@HWI-EAS443:3:46:1581:1567#0/1  
ACGAAAACGGGACTCTAGCATACTTACTGACAGCCAGACA  
+HWI-EAS443:3:46:1581:1567#0/1  
a^OR`\_a\_X`XTUU\_]QGY¥\_VP]`\_S^ZU[\_XSSFOSR

@HWI-EAS443:3:46:1716:590#0/1  
GCTGTCTAGTAAGTATGCTAGAGTCCCGTTTTTCGTTTCATT  
+HWI-EAS443:3:46:1716:590#0/1  
a`]XK¥]aZ\_a`]U\_`[[ZTLWYSU^¥G[\_]BBBBBBBBB  
@HWI-EAS443:3:46:285:331#0/1  
AGCATACTTACTGACAGCCAGACAGCGACCAAAGAATTC  
+HWI-EAS443:3:46:285:331#0/1  
aabaa^¥aabaaba`aaa`\_\_[\_`X\_^`]``\_]\_^aVVY  
@HWI-EAS443:3:46:331:1599#0/1  
ATGAAACGAAAACGGGACTCTAGCATACTTACTGACAGCC  
+HWI-EAS443:3:46:331:1599#0/1  
a\_aS`¥Q\_¥ba`[`]W\_]W`a\_`[]]S^`[Z[`a\_a\_[]  
@HWI-EAS443:3:46:380:300#0/1  
CGCTGTCTGGCTGTCTAGTAAGTATGCTAGAGTCCCGTTTT  
+HWI-EAS443:3:46:380:300#0/1  
abbbbbbbbab`bb\_aVa[]aa\_``aaa^^¥[Y¥]\_a^``\_  
@HWI-EAS443:3:46:520:716#0/1  
GTTGGTAATGAAACGAAAACGGGACTCTAGCATACTTACT  
+HWI-EAS443:3:46:520:716#0/1  
¥QU]`PYa[RWY^X]V^aXSXZTNRWLS¥T¥ZNZS¥\_[ZS  
@HWI-EAS443:3:46:59:2041#0/1  
TGGCCATCCGAATTCTTTTGGTCGCTGTCTGGCTGTCTAGT  
+HWI-EAS443:3:46:59:2041#0/1  
]bba`\_^`b`aabb`b¥bb\_^a]abX]Y^Saa]TU]BBB  
@HWI-EAS443:3:46:717:793#0/1  
GTCTGGCTGTCTAGTAAGTATGCTAGAGTCCCGTTTTTCGTT  
+HWI-EAS443:3:46:717:793#0/1  
```]`[ZX`WZ`ZYXHYLUVXYZUQEUZZVU`JSYV[¥UU  
@HWI-EAS443:3:47:1142:1165#0/1  
TGGTAATGAAACGAAAACGGGACTCTAGCATACTTACTGA  
+HWI-EAS443:3:47:1142:1165#0/1  
aaaVa`baaabaa\_a^``\_a`]\_`\_\_\_\_\_`a[Za\_\_\_\_`a¥  
@HWI-EAS443:3:47:126:332#0/1  
CTGTCTGGCTGTCTAGTAAGTATGCTAGAGTCCCGTTTTTCG  
+HWI-EAS443:3:47:126:332#0/1  
aabbbbbbbbbbZ\_`\_^bbb¥¥abaabaabZ]¥b`Ya`^E[  
@HWI-EAS443:3:47:1391:678#0/1  
TTGTAATGAAACGAAAACGGGACTCTAGCATACTTACTG  
+HWI-EAS443:3:47:1391:678#0/1  
abba[^aab`aa\_\_a`Y\_]`\_¥^V]R]X\_Y[`\_V^`^Y\_\_  
@HWI-EAS443:3:47:302:582#0/1  
GTCTGGCTGTCTAGTAAGTATGCTAGAGTCCCGTTTTTCGTT  
+HWI-EAS443:3:47:302:582#0/1  
aa`aab^ab`[^a¥\_\_aW\_^XX]^`^¥SY¥\_aZ^`^YVU\_  
@HWI-EAS443:3:47:336:1193#0/1  
TGTTGGTAATGAAACGAAAACGGGACTCTAGCATACTTAC  
+HWI-EAS443:3:47:336:1193#0/1  
\_aabaa`ZaXZbb\_`````\_a\_aW]\_\_¥a\_[a\_\_\_\_a\_a^  
@HWI-EAS443:3:47:48:174#0/1  
GGCCATCCGAATTCTTTTGGTCGCTGTCTGGCTGTCTAGTA

+HWI-EAS443:3:47:48:174#0/1  
`WHTa¥SU\_abb^^Tabbb]MRaOVUaZWPVYBBBBBBBB  
@HWI-EAS443:3:47:51:92#0/1  
CTGGCTGTCAGTAAGTATGCTAGAGTCCCGTTTTCGTTTC  
+HWI-EAS443:3:47:51:92#0/1  
abbbabb\_`^`bb¥ab^^`¥Z\_]`a`VaaaORW`K  
@HWI-EAS443:3:47:66:609#0/1  
GGCTGTCAGTAAGTATGCTAGAGTCCCGTTTTCGTTTCAT  
+HWI-EAS443:3:47:66:609#0/1  
`aa[^0QY\_]aWRL[`Z¥U¥]S]ZYW`¥DJ^[GOX]VXVO  
@HWI-EAS443:3:47:685:1245#0/1  
GCTGTCTGGCTGTCAGTAAGTATGCTAGAGTCCCGTTTTTC  
+HWI-EAS443:3:47:685:1245#0/1  
aabb\_bbbb`Z]`aaU`a^a^a`Y`\_a][\_`M\_\_F  
@HWI-EAS443:3:47:801:1307#0/1  
GAAACGAAAACGGGACTCTAGCATACTTACTGACAGCCAG  
+HWI-EAS443:3:47:801:1307#0/1  
aaab`ba\_ab`a`^¥¥a`a`a`a`]Z`\_^a\_]T`^Z`Z  
@HWI-EAS443:3:47:838:1689#0/1  
CAGTAAGTATGCTAGAGTCCCGTTTTCGTTTCATTACCAA  
+HWI-EAS443:3:47:838:1689#0/1  
abbYbbbababbabaaaaa^`\_aab``]aa\_baa`^aaa  
@HWI-EAS443:3:48:1237:1383#0/1  
AATTGATGGCCATCCGAATTCTTTTGGTCGCTGTCTGGCT  
+HWI-EAS443:3:48:1237:1383#0/1  
ZXZW¥UZ`[]^a]¥\_NX]Y\_`aXUYW[`[RTI^^YXS  
@HWI-EAS443:3:48:1281:1380#0/1  
GCTGTCAGTAAGTATGCTAGAGTCCCGTTTTCGTTTCATT  
+HWI-EAS443:3:48:1281:1380#0/1  
a`aR\_\_\_\_VZO^V]a^Z^`¥aZYWU^X]]`^a¥[¥ZW]^  
@HWI-EAS443:3:48:1393:1752#0/1  
TGGCCATCCGAATTCTTTTGGTCGCTGTCTGGCTGTCAGT  
+HWI-EAS443:3:48:1393:1752#0/1  
`[`b^bbaabaaaaaaaaabba\_aaa`RWX\_`Za\_NY]ZO  
@HWI-EAS443:3:48:1562:502#0/1  
TCCGAATTCTTTTGGTCGCTGTCTGGCTGTCAGTAAGTAT  
+HWI-EAS443:3:48:1562:502#0/1  
Vaa¥a[a`Za`a`a^Sba^aa¥RZ¥R`^^Q[RIJTU]OJL  
@HWI-EAS443:3:48:1712:797#0/1  
GTCGCTGTCTGGCTGTCAGTAAGTATGCTAGAGTCCCGTT  
+HWI-EAS443:3:48:1712:797#0/1  
a\_`a^`^¥R¥]]^]GQJ[Q\$¥ZOQVQNRYSMBBBBBBB  
@HWI-EAS443:3:48:742:1435#0/1  
ATCCGAATTCTTTTGGTCGCTGTCTGGCTGTCAGTAAGTA  
+HWI-EAS443:3:48:742:1435#0/1  
aaa`]\_aaa`aa`aa\_`aa\_`^^a\_Y\_aa^[]^GJXYLR  
@HWI-EAS443:3:48:863:310#0/1  
GTCAGTAAGTATGCTAGAGTCCCGTTTTCGTTTCATTACC  
+HWI-EAS443:3:48:863:310#0/1  
a\_T^aV`X[[]^YMaZaZ[MRNN`ISYRU\_OSUGNUUVGY

@HWI-EAS443:3:49:1059:1343#0/1  
GCTGTCAGTAAGTATGCTAGAGTCCCGTTTTTCGTTTCATT  
+HWI-EAS443:3:49:1059:1343#0/1  
abbb^`\_]R`a[]`\_a\_\_aaY^^\_Y\_`]``a]a^\_\_^\_a`  
@HWI-EAS443:3:49:1259:371#0/1  
CTGGCTGTCAGTAAGTATGCTAGAGTCCCGTTTTTCGTTTC  
+HWI-EAS443:3:49:1259:371#0/1  
ab`¥I\_aZR^W\_aab`S``aaYaXbWL]``TXb\_PUUa]U  
@HWI-EAS443:3:49:1504:84#0/1  
CTTTTGGTCGCTGTCTGGCTGTCAGTAAGTATGCTAGAGT  
+HWI-EAS443:3:49:1504:84#0/1  
\_bbbbbbbbbbbababbbbbbaaab\_\_\_b^abb`aaba\_\_  
@HWI-EAS443:3:49:1643:1918#0/1  
GGTCGCTGTCTGGCTGTCAGTAAGTATGCTAGAGTCCCGT  
+HWI-EAS443:3:49:1643:1918#0/1  
aa^`aaaa`\_`\_a^aa^PY¥VY^ZW[UUVU]]^[^RVQY^N  
@HWI-EAS443:3:49:1780:2030#0/1  
GGCCATCCGAATTCTTTTGGTCGCTGTCTGGCTGTCAGTA  
+HWI-EAS443:3:49:1780:2030#0/1  
a\_UI¥a^UX\_]X^\_T\_ba`YZ0[a`UT\_]ZUZUVZ[ZBB  
@HWI-EAS443:3:49:327:175#0/1  
GTCGCTGTCTGGCTGTCAGTAAGTATGCTAGAGTCCCGTT  
+HWI-EAS443:3:49:327:175#0/1  
aa\_\_aab``^\_a\_`^N¥ZaR\_`YFYQY000[¥YFQTTXT¥  
@HWI-EAS443:3:49:866:749#0/1  
GTCGCTGTCTGGCTGTCAGTAAGTATGCTAGAGTCCCGTT  
+HWI-EAS443:3:49:866:749#0/1  
aaab^bbaab[]a`^a`b``aa]\_a`[aXUZ^NYV^`R]  
@HWI-EAS443:3:4:1423:1003#0/1  
TGTCTGGCTGTCAGTAAGTATGCTAGAGTCCCGTTTTTCGT  
+HWI-EAS443:3:4:1423:1003#0/1  
abaaaba]`b`] [ ]MVN\_M]\_Z\_] [WW\_¥SGPa] [^aVBB  
@HWI-EAS443:3:4:1475:607#0/1  
ACGAAAACGGGACTCTAGCATACTTACTGACAGCCAGACA  
+HWI-EAS443:3:4:1475:607#0/1  
a`b^a`^Z````^`^^`aT¥\_[Z`Z\_[¥`YJW\_XSS^[W\_  
@HWI-EAS443:3:4:1553:470#0/1  
CGCTGTCTGGCTGTCAGTAAGTATGCTAGAGTCCCGTTTT  
+HWI-EAS443:3:4:1553:470#0/1  
\_\_ZQ\_`a`WY\_aXV^\_R[\_SFU[¥MZ\_¥XXYPUY^U[[B  
@HWI-EAS443:3:4:380:1524#0/1  
TCCGAATTCTTTTGGTCGCTGTCTGGCTGTCAGTAAGTAT  
+HWI-EAS443:3:4:380:1524#0/1  
``ba]aaa`aaaaa]\_b`a\_\_\_a`a\_aaZ]^\_VU\_]NUX  
@HWI-EAS443:3:4:420:560#0/1  
AATTGATGGCCATCCGAATTCTTTTGGTCGCTGTCTGGCT  
+HWI-EAS443:3:4:420:560#0/1  
a\_]ab\_ab`aa`aa\_aaaa][[a\_aaa]\_\_\_\_]`N]^\_^^Z  
@HWI-EAS443:3:4:653:1838#0/1  
ATCCGAATTCTTTTGGTCGCTGTCTGGCTGTCAGTAAGTA

+HWI-EAS443:3:4:653:1838#0/1  
a\_a`bba`[baa`a^aa`a]a`\_]`aI\_\_`U^¥]V^  
@HWI-EAS443:3:4:687:808#0/1  
TGGCCATCCGAATTCTTTTGGTCGCTGTCTGGCTGTCAGT  
+HWI-EAS443:3:4:687:808#0/1  
a`babb\_aab\_aa`]aaa`aa]^b^abZ]]a^U\_aPMUBB  
@HWI-EAS443:3:50:1035:1157#0/1  
GGCCATCCGAATTCTTTTGGTCGCTGTCTGGCTGTCAGTA  
+HWI-EAS443:3:50:1035:1157#0/1  
^`\_`^`^`^`Xb\_Q\_\_\_\_\_ZTZ]^`\_S\_YX\_``\_QFK]TX  
@HWI-EAS443:3:50:1035:560#0/1  
GGTCGCTGTCTGGCTGTCAGTAAGTATGCTAGAGTCCCGT  
+HWI-EAS443:3:50:1035:560#0/1  
abababbb\_bbabbbb[\_Va^a\_a\_a\_a`aaa¥`^`¥Z  
@HWI-EAS443:3:50:129:803#0/1  
ATCCGAATTCTTTTGGTCGCTGTCTGGCTGTCAGTAAGTA  
+HWI-EAS443:3:50:129:803#0/1  
\_]ab`a`a`a`aa`\_V\_[¥a`\_]`^aY\_]W^¥XT¥WBBB  
@HWI-EAS443:3:50:1573:1358#0/1  
GTCGCTGTCTGGCTGTCAGTAAGTATGCTAGAGTCCCGTT  
+HWI-EAS443:3:50:1573:1358#0/1  
aa]`\_aa[Y[a\_^`\_]`PYG[\_YV^RTUW¥SYYUX¥¥[O^  
@HWI-EAS443:3:50:1597:30#0/1  
GTTGGTAATGAAACGAAAACGGGACTCTAGCATACTTACT  
+HWI-EAS443:3:50:1597:30#0/1  
^\_bbaXa`a`a`aab^\_^`a]¥`a¥PZ]S]bY`aa]a\_\_\_\_a  
@HWI-EAS443:3:50:227:831#0/1  
GGTCGCTGTCTGGCTGTCAGTAAGTATGCTAGAGTCCCGT  
+HWI-EAS443:3:50:227:831#0/1  
abaababbaabbabb\_VXba\_aa`aaVT[\_aaa¥X^aba  
@HWI-EAS443:3:50:238:1169#0/1  
GCCATCCGAATTCTTTTGGTCGCTGTCTGGCTGTCAGTAA  
+HWI-EAS443:3:50:238:1169#0/1  
aabbbba`bba`bbbba`babaab`bbb`aaa]`a0[a  
@HWI-EAS443:3:50:554:379#0/1  
CTGGCTGTCAGTAAGTATGCTAGAGTCCCGTTTTTCGTTTC  
+HWI-EAS443:3:50:554:379#0/1  
a`baab]bZ\_U\_a\_V\_LQYZa^^]¥¥U]\_U]bb¥]V`\_^  
@HWI-EAS443:3:50:745:1419#0/1  
ATCCGAATTCTTTTGGTCGCTGTCTGGCTGTCAGTAAGTA  
+HWI-EAS443:3:50:745:1419#0/1  
¥¥a\_^¥]b\_¥\_X]`\_`IZ`Qb]Ra^PWa[[NP[ZPTZNNB  
@HWI-EAS443:3:50:985:529#0/1  
GTTGGTAATGAAACGAAAACGGGACTCTAGCATACTTACT  
+HWI-EAS443:3:50:985:529#0/1  
aababaaaaaaaaaaaa¥a\_aaaa\_Va\_`aa\_\_a^`aa\_]a  
@HWI-EAS443:3:51:1073:582#0/1  
TGTCAGTAAGTATGCTAGAGTCCCGTTTTTCGTTTCATTAC  
+HWI-EAS443:3:51:1073:582#0/1  
aa`^\_aa[Y¥]aba`aU`aa]S\_Y^Zaa¥QZ^aXQX```]

@HWI-EAS443:3:51:1140:191#0/1  
ATCCGAATTCTTTTGGTCGCTGTCTGGCTGTCAGTAAGTA  
+HWI-EAS443:3:51:1140:191#0/1  
]ab]aabbabbbaa`aaa`aa^¥`a`b\_XY\_\_\_N[a^PZ  
@HWI-EAS443:3:51:1245:666#0/1  
GCTGTCAGTAAGTATGCTAGAGTCCCGTTTTTCGTTTCATT  
+HWI-EAS443:3:51:1245:666#0/1  
aaab`babaaab\_aaaa`a\_a\_`Yq]aaa^`Vaa]\_`\_  
@HWI-EAS443:3:51:1293:626#0/1  
GCTGTCAGTAAGTATGCTAGAGTCCCGTTTTTCGTTTCATT  
+HWI-EAS443:3:51:1293:626#0/1  
`a`[ab`baaX\_NX¥`aaVa[\_RQ`UaZ¥\_^[PF`\_Y]^Z  
@HWI-EAS443:3:51:1409:840#0/1  
GTCTGGCTGTCAGTAAGTATGCTAGAGTCCCGTTTTTCGTT  
+HWI-EAS443:3:51:1409:840#0/1  
a\_`\_]a]\_baY\_]W[V]S^XVZX\_\_\_¥[[[Ya[\_`aZVW\_  
@HWI-EAS443:3:51:1478:1887#0/1  
GGCCATCCGAATTCTTTTGGTCGCTGTCTGGCTGTCAGTA  
+HWI-EAS443:3:51:1478:1887#0/1  
abY\_aa]\_aaaa`¥`aa`aV[¥\_\_a\_\_a\_`¥aaSUWQUW  
@HWI-EAS443:3:51:1774:1213#0/1  
GGTCGCTGTCTGGCTGTCAGTAAGTATGCTAGAGTCCCGT  
+HWI-EAS443:3:51:1774:1213#0/1  
abVa^aabaaaa`[a¥YT^J¥`]T]P`[YVZPZLVV^¥R  
@HWI-EAS443:3:51:26:998#0/1  
GCTGTCAGTAAGTATGCTAGAGTCCCGTTTTTCGTTTCATT  
+HWI-EAS443:3:51:26:998#0/1  
a`aa^a^aR\_`aY\_]\_\_`¥\_\_ZU\_X^\_R[\_\_\_Y^Y]\_WW[^  
@HWI-EAS443:3:51:570:1004#0/1  
GGTCGCTGTCTGGCTGTCAGTAAGTATGCTAGAGTCCCGT  
+HWI-EAS443:3:51:570:1004#0/1  
ab\_aaabba`aaa`aa`a`a[\_\_\_`^`Za^`ZVZ`[^Z[^X  
@HWI-EAS443:3:52:1074:415#0/1  
AATTGATGGCCATCCGAATTCTTTTGGTCGCTGTCTGGCT  
+HWI-EAS443:3:52:1074:415#0/1  
^TX\_`^`^bbaabb]b\_Uaaab`aaaa`YST[b^Qa`Xab  
@HWI-EAS443:3:52:114:1662#0/1  
CAGTAAGTATGCTAGAGTCCCGTTTTTCGTTTCATTACCAA  
+HWI-EAS443:3:52:114:1662#0/1  
`ba]`]b\_\_ababa0Waaa^ab^W]a`a]abZ\_a]a\_\_a\_  
@HWI-EAS443:3:52:1158:1756#0/1  
GTCGCTGTCTGGCTGTCAGTAAGTATGCTAGAGTCCCGTT  
+HWI-EAS443:3:52:1158:1756#0/1  
`\_^¥aa\_`]Yaa^a`ZP\_]VYWYZSY¥¥RZF¥PQ SXZU[  
@HWI-EAS443:3:52:1237:1220#0/1  
GGCCATCCGAATTCTTTTGGTCGCTGTCTGGCTGTCAGTA  
+HWI-EAS443:3:52:1237:1220#0/1  
\_\_bb^aZ\_bbbb`a`ab`H`\_JYa`T¥\_b`XW[SVLZ  
@HWI-EAS443:3:52:1464:1345#0/1  
CATCCGAATTCTTTTGGTCGCTGTCTGGCTGTCAGTAAGT

+HWI-EAS443:3:52:1464:1345#0/1  
aba`abaa`bTba`bbab]bWab\_aa\_a^]b^]T^G[¥\_Y  
@HWI-EAS443:3:52:1540:1727#0/1  
GGTAATGAAACGAAAACGGGACTCTAGCATACTTACTGAC  
+HWI-EAS443:3:52:1540:1727#0/1  
a\_b\_\_bb^aa\_ba`bbabb[[^aa\_bRU]bbaab^[]ZZV  
@HWI-EAS443:3:52:1552:770#0/1  
ACGGGACTCTAGCATACTTACTGACAGCCAGACAGCGACC  
+HWI-EAS443:3:52:1552:770#0/1  
aa]XNX\_`\_aa`ab`WQ¥[\_U`a`^^`¥Z[[]\_\_Z^[YZ^  
@HWI-EAS443:3:52:184:1460#0/1  
GACTCTAGCATACTTACTGACAGCCAGACAGCGACCAAAA  
+HWI-EAS443:3:52:184:1460#0/1  
W\_a¥b`aaYH\_VXQ\_W¥\_Q\_[]b¥PW`b]a¥a`YU¥UZa\_  
@HWI-EAS443:3:52:298:1609#0/1  
TCGCTGTCTGGCTGTCAGTAAGTATGCTAGAGTCCCGTTT  
+HWI-EAS443:3:52:298:1609#0/1  
abaaaaa\_a`^aa\_\_\_\_aUV][S\_^Z[]PTTYS¥\_^[R\_`  
@HWI-EAS443:3:52:312:1642#0/1  
CGGGACTCTAGCATACTTACTGACAGCCAGACAGCGACCA  
+HWI-EAS443:3:52:312:1642#0/1  
abb`\_aababaa`aaaaabaaaa^a[[]\_aaaa`[]`a  
@HWI-EAS443:3:52:422:1726#0/1  
GTTGGTAATGAAACGAAAACGGGACTCTAGCATACTTACT  
+HWI-EAS443:3:52:422:1726#0/1  
a\_ab\_Zaaaa¥\_baa`a``aaa\_\_\_\_`a`^`\_\_\_\_aaa^^  
@HWI-EAS443:3:52:706:319#0/1  
ATGGCCATCCGAATTCTTTTGGTCGCTGTCTGGCTGTCTAG  
+HWI-EAS443:3:52:706:319#0/1  
\_P\_¥aX]a`^Y]^aa]bb\_UTN^\_P[UTMTBBBBBBBBB  
@HWI-EAS443:3:52:860:1272#0/1  
AACGAAAACGGGACTCTAGCATACTTACTGACAGCCAGAC  
+HWI-EAS443:3:52:860:1272#0/1  
ab[aaab`ba\_a\_`Yaa`a`\_\_Wa[][^aa^aa\_X\_]W[  
@HWI-EAS443:3:52:94:1000#0/1  
CCGAATTCTTTTGGTCGCTGTCTGGCTGTCTAGTAAGTATG  
+HWI-EAS443:3:52:94:1000#0/1  
aabaabbaaaaa^¥abaaa\_aaa]`a`UZZ[SX]ZJTXQ  
@HWI-EAS443:3:53:1073:1717#0/1  
AAACGGGACTCTAGCATACTTACTGACAGCCAGACAGCGA  
+HWI-EAS443:3:53:1073:1717#0/1  
a`b`aaa`a`aaa\_aaa[```Tba\_``a\_\_\_\_`aN¥a¥a`  
@HWI-EAS443:3:53:123:1403#0/1  
GCTGTCTAGTAAGTATGCTAGAGTCCCGTTTTTCGTTTCATT  
+HWI-EAS443:3:53:123:1403#0/1  
`\_U\_Z\_\_WR]^aUWWXX[T]R[N\_^]aVV^ZPYOZ[YY[U  
@HWI-EAS443:3:53:176:1058#0/1  
CAGTAAGTATGCTAGAGTCCCGTTTTTCGTTTCATTACCAA  
+HWI-EAS443:3:53:176:1058#0/1  
aaY^`a\_baa¥`b`a`Saaaaabbbb`ba¥b^ba`^`b



@HWI-EAS443:3:53:45:195#0/1  
CTGGCTGTCAGTAAGTATGCTAGAGTCCCGTTTTCGTTTC  
+HWI-EAS443:3:53:45:195#0/1  
aa\_[`aaV`Za\_]¥`\_]`¥^¥^\_Z[W[[W\_N]\_]N]UX\_M  
@HWI-EAS443:3:53:485:679#0/1  
ATCCGAATTCTTTTGGTCGCTGTCTGGCTGTCAGTAAGTA  
+HWI-EAS443:3:53:485:679#0/1  
aa[abaaaaabaaba^aa\_a`\_\_`a\_\_aaSS¥G]\_[U]  
@HWI-EAS443:3:53:492:1605#0/1  
CTGGCTGTCAGTAAGTATGCTAGAGTCCCGTTTTCGTTTC  
+HWI-EAS443:3:53:492:1605#0/1  
aa`abV¥R`KaH\_¥XV^ZaQZ^\_Q[XaX\_\_G]\_`X[X^N  
@HWI-EAS443:3:53:676:1740#0/1  
TGAAACGAAAACGGGACTCTAGCATACTTACTGACAGCCA  
+HWI-EAS443:3:53:676:1740#0/1  
aa]b`aa\_abbaaa\_a\_ba`a`a`\_]``baa\_`aa]aa[\_\_\_  
@HWI-EAS443:3:53:815:369#0/1  
GTCGCTGTCTGGCTGTCAGTAAGTATGCTAGAGTCCCGTT  
+HWI-EAS443:3:53:815:369#0/1  
`W[^[XZW]\_a`¥S]T[VKDJWYVSBBBBBBBBBBBBBBB  
@HWI-EAS443:3:53:819:168#0/1  
CGCTGTCTGGCTGTCAGTAAGTATGCTAGAGTCCCGTTTT  
+HWI-EAS443:3:53:819:168#0/1  
abaaa]\_\_baab\_0Ya^J]\_\_Q^]`aYWa¥\_YV¥[¥N\_a`  
@HWI-EAS443:3:54:1004:565#0/1  
CTGGCTGTCAGTAAGTATGCTAGAGTCCCGTTTTCGTTTC  
+HWI-EAS443:3:54:1004:565#0/1  
aab`abb`\_\_baaaaaabaa`aa[a¥\_\_\_b¥aab\_b\_aaU  
@HWI-EAS443:3:54:1549:457#0/1  
CAGTAAGTATGCTAGAGTCCCGTTTTCGTTTCATTACCAA  
+HWI-EAS443:3:54:1549:457#0/1  
a`^`aa`a¥¥a^ba`^a]¥\_a`abb`\_\_bb^\_aa\_XY^`  
@HWI-EAS443:3:54:329:718#0/1  
CGAATTCTTTTGGTCGCTGTCTGGCTGTCAGTAAGTATGC  
+HWI-EAS443:3:54:329:718#0/1  
aa`\_abaa^abbZ`b\_aa\_`aaa`aa[WUaN[I[G^PV]  
@HWI-EAS443:3:54:533:434#0/1  
GAAACGAAAACGGGACTCTAGCATACTTACTGACAGCCAG  
+HWI-EAS443:3:54:533:434#0/1  
aaZS\_b\_] [U]^¥HV`baZ`VUa¥Z`\_\_^a`^[]][TZ\_  
@HWI-EAS443:3:54:562:749#0/1  
TGGTAATGAAACGAAAACGGGACTCTAGCATACTTACTGA  
+HWI-EAS443:3:54:562:749#0/1  
ab`¥aabb`aa\_a`aa``aaa^`\_`a\_a\_`a`^`aa^`a^  
@HWI-EAS443:3:54:655:950#0/1  
GCTGTCAGTAAGTATGCTAGAGTCCCGTTTTCGTTTCATT  
+HWI-EAS443:3:54:655:950#0/1  
a`aaa`\_aX\_a`V[`a\_XZ\_Ya¥a]`\_V]``S`0^\_]YV]  
@HWI-EAS443:3:54:895:408#0/1  
GGCCATCCGAATTCTTTTGGTCGCTGTCTGGCTGTCAGTA

+HWI-EAS443:3:54:895:408#0/1  
^^aaaabbaabaZ\_aa`a`Z\_`a`^V\_aaaa`X]Z[LS  
@HWI-EAS443:3:54:903:344#0/1  
CGAAAACGGGACTCTAGCATACTTACTGACAGCCAGACAG  
+HWI-EAS443:3:54:903:344#0/1  
abaaabbbbaaaabbabbabbb\_bbbabbbabba]bbaZab  
@HWI-EAS443:3:54:939:1451#0/1  
GGCTGTCAGTAAGTATGCTAGAGTCCCGTTTTCGTTTCAT  
+HWI-EAS443:3:54:939:1451#0/1  
aa`a\_UV[\_H^\_Z¥a\_[U¥ZYZRUV`\_V^b\_^`Ra]WZ^  
@HWI-EAS443:3:55:104:1953#0/1  
AGCATACTTACTGACAGCCAGACAGCGACCAAAGAATTC  
+HWI-EAS443:3:55:104:1953#0/1  
YMUUaa`abZDWHZI¥0ZUVHRW^I¥QUKWaSMXBBBBBB  
@HWI-EAS443:3:55:1113:605#0/1  
CTGGCTGTCAGTAAGTATGCTAGAGTCCCGTTTTCGTTTC  
+HWI-EAS443:3:55:1113:605#0/1  
ab]baab]I`b^^`V0¥`\_YPTXXHHR`\_a^`a\_^¥G\_ZX  
@HWI-EAS443:3:55:366:1430#0/1  
GCCATCCGAATTCTTTTGGTCGCTGTCTGGCTGTCAGTAA  
+HWI-EAS443:3:55:366:1430#0/1  
^a¥Q`\_a\_TX\_b`b`^`\_ZL\_a^[^[[[]]X\_a[DMP^FVY  
@HWI-EAS443:3:55:539:1086#0/1  
ATCCGAATTCTTTTGGTCGCTGTCTGGCTGTCAGTAAGTA  
+HWI-EAS443:3:55:539:1086#0/1  
aaaab^Uaa\_a`aa`\_]`\_`^\_aX]]a]\_\_\_\_TRW]WX]¥X]  
@HWI-EAS443:3:55:68:345#0/1  
GGCCATCCGAATTCTTTTGGTCGCTGTCTGGCTGTCAGTA  
+HWI-EAS443:3:55:68:345#0/1  
abb`babbba\_bbaaababa¥a`aab\_aaaa`\_]`U`\_aX`  
@HWI-EAS443:3:56:109:1105#0/1  
TGGTAATGAAACGAAAACGGGACTCTAGCATACTTACTGA  
+HWI-EAS443:3:56:109:1105#0/1  
abb^aa\_a`^^aa`a`\_]`aa\_]`aa\_a`aa`XYa`a`````  
@HWI-EAS443:3:56:1181:644#0/1  
CTGTCAGTAAGTATGCTAGAGTCCCGTTTTCGTTTCATTA  
+HWI-EAS443:3:56:1181:644#0/1  
abbaabbabbb\_bababbbab`]`abbaabb`a`baa`a`a  
@HWI-EAS443:3:56:1234:215#0/1  
CTTTTGGTCGCTGTCTGGCTGTCAGTAAGTATGCTAGAGT  
+HWI-EAS443:3:56:1234:215#0/1  
`abbbbababa`bbaaabab\_Q]]`RT`ba]a\_U\_]`YXG  
@HWI-EAS443:3:56:279:840#0/1  
ATGGCCATCCGAATTCTTTTGGTCGCTGTCTGGCTGTCAG  
+HWI-EAS443:3:56:279:840#0/1  
aa¥`aa^aaaaabaaaaaaZ\_\_````a¥\_]`\_`\_KRVV  
@HWI-EAS443:3:56:415:1128#0/1  
ATCCGAATTCTTTTGGTCGCTGTCTGGCTGTCAGTAAGTA  
+HWI-EAS443:3:56:415:1128#0/1  
aaa`^¥U`aaaa\_]\_\_a\_ZW]^`\_`^\_\_\_\_NRYZQW[XNY



+HWI-EAS443:3:57:751:941#0/1  
` `abbaabbb`ababaaaaaaaa\_a\_aaa`a`aa`aaaaaa  
@HWI-EAS443:3:58:102:318#0/1  
TCTGGCTGTCAGTAAGTATGCTAGAGTCCCGTTTTTCGTTT  
+HWI-EAS443:3:58:102:318#0/1  
aaaa\_aaaT` `aY` `¥\_\_YRZ`¥` `U[Z\_aT\_\_aU[Q]`  
@HWI-EAS443:3:58:1527:334#0/1  
GGCTGTCAGTAAGTATGCTAGAGTCCCGTTTTTCGTTTCAT  
+HWI-EAS443:3:58:1527:334#0/1  
aaaab]a`a`\_`\_]¥`\_]`[\_[\_aWZ^]aQ[aZTTR^a]Y`  
@HWI-EAS443:3:58:1535:2026#0/1  
ATCCGAATTCTTTTGGTCGCTGTCTGGCTGTCAGTAAGTA  
+HWI-EAS443:3:58:1535:2026#0/1  
a\_ZZa`aaa0a`aa\_\_¥]YW]¥]Z^XY]^\_UW]SH]\_ROR  
@HWI-EAS443:3:58:312:238#0/1  
GTCTGGCTGTCAGTAAGTATGCTAGAGTCCCGTTTTTCGTT  
+HWI-EAS443:3:58:312:238#0/1  
aUa\_`aa\_a\_¥R`V\_\_\_\_[^¥]\_VNZN¥QZWW^TU¥[V¥UU  
@HWI-EAS443:3:58:439:1292#0/1  
CTGGCTGTCAGTAAGTATGCTAGAGTCCCGTTTTTCGTTTC  
+HWI-EAS443:3:58:439:1292#0/1  
aabaaa`a`\_]\_a`^\_\_^`¥\_[Y\_YY]^\_a[^\_\_Z^Z\_¥U  
@HWI-EAS443:3:58:440:1806#0/1  
TGGTAATGAAACGAAAACGGGACTCTAGCATACTTACTGA  
+HWI-EAS443:3:58:440:1806#0/1  
`aaRTW^¥ba\_¥¥]\_]a`WY¥\_^^]^^H^\_^^\_Y`W[]^  
@HWI-EAS443:3:58:468:686#0/1  
GTCGCTGTCTGGCTGTCAGTAAGTATGCTAGAGTCCCGTT  
+HWI-EAS443:3:58:468:686#0/1  
\_abba\_a¥`aaa[^][¥H`0[XaV¥X\_¥^¥^VaP^\_XNDZ  
@HWI-EAS443:3:58:573:381#0/1  
TCCGAATTCTTTTGGTCGCTGTCTGGCTGTCAGTAAGTAT  
+HWI-EAS443:3:58:573:381#0/1  
aab`¥`bbbbbbbaaab`bbaaaa`aa`^]a[a`aYZX  
@HWI-EAS443:3:58:583:404#0/1  
GTTGGTAATGAAACGAAAACGGGACTCTAGCATACTTACT  
+HWI-EAS443:3:58:583:404#0/1  
a\_a`¥V`[X[`a]V\_[aa[^aU\_\_Y]\_a\_\_\_\_^]\_\_^^\_  
@HWI-EAS443:3:58:833:353#0/1  
CAGTAAGTATGCTAGAGTCCCGTTTTTCGTTTCATTACCAA  
+HWI-EAS443:3:58:833:353#0/1  
abbYabbaaab\_a`[a`aa\_aG]ab`a]b\_]¥` `a\_^^^  
@HWI-EAS443:3:58:997:1223#0/1  
AGCATACTTACTGACAGCCAGACAGCGACCAAAGAATTC  
+HWI-EAS443:3:58:997:1223#0/1  
VaVaa`bbaZa`^]a¥Y` `]`a\_ab`[X]R`Z][Y`^aY\_]`  
@HWI-EAS443:3:59:1435:1743#0/1  
CTGGCTGTCAGTAAGTATGCTAGAGTCCCGTTTTTCGTTTC  
+HWI-EAS443:3:59:1435:1743#0/1  
aVb[S`a\_0¥`QZ]SUXQ^U\_¥]`\_TVX`a[UaUBBBBBB

@HWI-EAS443:3:59:1546:517#0/1  
GGCCATCCGAATTCTTTTGGTCGCTGTCTGGCTGTCAGTA  
+HWI-EAS443:3:59:1546:517#0/1  
`aaabba`a`\_ababbbbaa`abaaaa`aa`aS`WKV\_QT  
@HWI-EAS443:3:59:206:244#0/1  
GGCCATCCGAATTCTTTTGGTCGCTGTCTGGCTGTCAGTA  
+HWI-EAS443:3:59:206:244#0/1  
a`\_aabbbbaabbaaa`aba[^a`\_bZ`\_a¥Y¥`JJQ^QN  
@HWI-EAS443:3:59:593:1063#0/1  
GTCTGCTGTCTGGCTGTCAGTAAGTATGCTAGAGTCCCGTT  
+HWI-EAS443:3:59:593:1063#0/1  
a\_a^aa`[]a^a`][^]¥\_]R¥U\_]WRTQTMYYTTZNV  
@HWI-EAS443:3:59:819:1287#0/1  
TAAGTATGCTAGAGTCCCGTTTTTCGTTTCATTACCAACAC  
+HWI-EAS443:3:59:819:1287#0/1  
aa`a]aa]aaaa\_\_^a`b]\_\_aaa^a`a]`^YWW\_\_W  
@HWI-EAS443:3:59:823:882#0/1  
TGGCTGTCAGTAAGTATGCTAGAGTCCCGTTTTTCGTTTCA  
+HWI-EAS443:3:59:823:882#0/1  
abaaab`X`PDZ\_[```\_]\_[^]P]ab]J^^a[XUU\_RV  
@HWI-EAS443:3:5:1363:313#0/1  
CTGGCTGTCAGTAAGTATGCTAGAGTCCCGTTTTTCGTTTC  
+HWI-EAS443:3:5:1363:313#0/1  
\_a`\_bbbb]a\_T]ababa[^a^aa]SGXXaaabZLGZBBB  
@HWI-EAS443:3:5:1529:1621#0/1  
AATTGATGGCCATCCGAATTCTTTTGGTCGCTGTCTGGCT  
+HWI-EAS443:3:5:1529:1621#0/1  
a`aa`aaa`\_aY`¥ba`\_`S`a`aaa\_0a^`a\_X\_Y\_BB  
@HWI-EAS443:3:5:299:213#0/1  
GGCTGTCAGTAAGTATGCTAGAGTCCCGTTTTTCGTTTCAT  
+HWI-EAS443:3:5:299:213#0/1  
ab`]bJ^`a[^aaX\_[¥`¥SZ][[[Z`\_R¥`\_W`U]BBBB  
@HWI-EAS443:3:5:300:1050#0/1  
TGGTCGCTGTCTGGCTGTCAGTAAGTATGCTAGAGTCCCG  
+HWI-EAS443:3:5:300:1050#0/1  
ab\_Sa^aab\_^abaaabaZ`bJa\_a^^ZaXV¥`J¥WQBBB  
@HWI-EAS443:3:5:319:1377#0/1  
TGGTAATGAAACGAAAACGGGACTCTAGCATACTTACTGA  
+HWI-EAS443:3:5:319:1377#0/1  
aab[aba`\_bbbaaababaab``\_baaaaaa^a`aa`aa  
@HWI-EAS443:3:5:931:385#0/1  
CTGTCAGTAAGTATGCTAGAGTCCCGTTTTTCGTTTCATTA  
+HWI-EAS443:3:5:931:385#0/1  
abbbbbbbbbbbbabbbabbbbaaba`aabbbbaa`bb\_bbba  
@HWI-EAS443:3:60:1517:1295#0/1  
GGCTGTCAGTAAGTATGCTAGAGTCCCGTTTTTCGTTTCAT  
+HWI-EAS443:3:60:1517:1295#0/1  
a]aaa\_\_VYFZ\_¥N]`[X\_N¥V^S[]]PL^\_^RZU[WRV]  
@HWI-EAS443:3:60:1643:659#0/1  
TCGCTGTCTGGCTGTCAGTAAGTATGCTAGAGTCCCGTTT

+HWI-EAS443:3:60:1643:659#0/1  
ZY`aZY`aa[^]a`Y\_\_^SSUXFWVOYX[axORKV[TEV[  
@HWI-EAS443:3:60:251:1427#0/1  
ATCCGAATTCTTTTGGTCGCTGTCTGGCTGTCAGTAAGTA  
+HWI-EAS443:3:60:251:1427#0/1  
Z)`^a\_]ab`a¥a`Y][Z\_`aaVZ^aa\_[`VWZYQ[¥PSQ  
@HWI-EAS443:3:60:352:2024#0/1  
AAACGGGACTCTAGCATACTTACTGACAGCCAGACAGCGA  
+HWI-EAS443:3:60:352:2024#0/1  
\_abbYaaY\_]aZa]Ga\_aY`\_`¥X\_aU\_X^R[HU\_\_¥WZZ  
@HWI-EAS443:3:60:463:1237#0/1  
TGGCCATCCGAATTCTTTTGGTCGCTGTCTGGCTGTCAGT  
+HWI-EAS443:3:60:463:1237#0/1  
`baaababab`\_`\_ababbbba]a\_baa[`\_a^^X\_X^Y¥X  
@HWI-EAS443:3:60:50:1570#0/1  
TCCGAATTCTTTTGGTCGCTGTCTGGCTGTCAGTAAGTAT  
+HWI-EAS443:3:60:50:1570#0/1  
aabbQT\_\_`ababaaZa\_abb^Y]`X[aaOWQ]YH\_PDY[  
@HWI-EAS443:3:60:767:1288#0/1  
GGTCGCTGTCTGGCTGTCAGTAAGTATGCTAGAGTCCCGT  
+HWI-EAS443:3:60:767:1288#0/1  
aa\_bbaaa\_aa\_a]a\_^\_a\_]`\_\_U\_^\_W^ZTZV]S]\_X  
@HWI-EAS443:3:60:86:517#0/1  
CGGGACTCTAGCATACTTACTGACAGCCAGACAGCGACCA  
+HWI-EAS443:3:60:86:517#0/1  
abbbabbaabbbbbbaabbaaba`aa`aaa`^¥a`\_\_\_\_\_`  
@HWI-EAS443:3:61:1173:818#0/1  
GTTGGTAATGAAACGAAAACGGGACTCTAGCATACTTACT  
+HWI-EAS443:3:61:1173:818#0/1  
aRXW`\_^a[^NPRI\_^QZ[VFZ[Z\_G¥SIDJZHWRVYRP  
@HWI-EAS443:3:61:132:1920#0/1  
TCCGAATTCTTTTGGTCGCTGTCTGGCTGTCAGTAAGTAT  
+HWI-EAS443:3:61:132:1920#0/1  
aaab]\_`Y^]]a\_Z^]¥`\_`\_Va`^¥]YTNTVUQQSLTNS  
@HWI-EAS443:3:61:1427:419#0/1  
AATTGATGGCCATCCGAATTCTTTTGGTCGCTGTCTGGCT  
+HWI-EAS443:3:61:1427:419#0/1  
`aabaabU]Z¥aa`Z`a[a``¥`\_`\_bb¥a`Y``X[Y[YRW  
@HWI-EAS443:3:61:1508:1248#0/1  
GGTCGCTGTCTGGCTGTCAGTAAGTATGCTAGAGTCCCGT  
+HWI-EAS443:3:61:1508:1248#0/1  
aa[Z^a\_aX\_a]Z^`a¥\_S]0`)\_RX\_\_L[Y^Y]RUWYU  
@HWI-EAS443:3:61:1588:1449#0/1  
TAATTGATGGCCATCCGAATTCTTTTGGTCGCTGTCTGGC  
+HWI-EAS443:3:61:1588:1449#0/1  
a`\_\_a\_^aT`^\_^\_a`\_\_`aaa`a`^XY\_YY^^XY]YY  
@HWI-EAS443:3:61:167:1970#0/1  
AATTGATGGCCATCCGAATTCTTTTGGTCGCTGTCTGGCT  
+HWI-EAS443:3:61:167:1970#0/1  
`abb`aaaababa`\_`XTaaba`a\_¥^\_a\_`\_`XY\_]¥]YX

@HWI-EAS443:3:61:372:1995#0/1  
CTGGCTGTCAGTAAGTATGCTAGAGTCCCGTTTTCGTTTC  
+HWI-EAS443:3:61:372:1995#0/1  
aa`bbba`aaa^aa]T`[\_\_ZSXaXVaa^\_VV\_ZNQRVYN  
@HWI-EAS443:3:61:48:1351#0/1  
TTGGTCGCTGTCTGGCTGTCAGTAAGTATGCTAGAGTCCC  
+HWI-EAS443:3:61:48:1351#0/1  
aaba`aaba``a`]^a\_\_N[S[IMFYRQ[ZTXUZTRGRSW  
@HWI-EAS443:3:61:777:774#0/1  
GTTGGTAATGAAACGAAAACGGGACTCTAGCATACTTACT  
+HWI-EAS443:3:61:777:774#0/1  
a[aa\_Q`\_XM¥Z`U[V[\_\_\_[R[W[¥YX]YY]Y]ZZZZ  
@HWI-EAS443:3:61:997:427#0/1  
GGCCATCCGAATTCTTTTGGTCGCTGTCTGGCTGTCAGTA  
+HWI-EAS443:3:61:997:427#0/1  
`\_baaS``b`b`[^aaZa^^aa]X`¥`^a^^a[VMMRP  
@HWI-EAS443:3:62:1384:1342#0/1  
TGAAACGAAAACGGGACTCTAGCATACTTACTGACAGCCA  
+HWI-EAS443:3:62:1384:1342#0/1  
aaaababaabba``a[\_a¥`baaaa`\_aaaa`aa\_aaa\_a  
@HWI-EAS443:3:62:1475:1048#0/1  
AATTGATGGCCATCCGAATTCTTTTGGTCGCTGTCTGGCT  
+HWI-EAS443:3:62:1475:1048#0/1  
aa]a]Za^Q¥aa`ab¥`aa¥a`a``X^^^`^]Z[\_]X]  
@HWI-EAS443:3:62:1528:1559#0/1  
GCCATCCGAATTCTTTTGGTCGCTGTCTGGCTGTCAGTAA  
+HWI-EAS443:3:62:1528:1559#0/1  
aa]`aaabaab`a\_^bab]\_aaa`a[Za```UWY^VVEZW  
@HWI-EAS443:3:62:1734:832#0/1  
AATTGATGGCCATCCGAATTCTTTTGGTCGCTGTCTGGCT  
+HWI-EAS443:3:62:1734:832#0/1  
aa^`^a^]`Z^Y[\_]\_\_\_Z¥aa\_[¥YY]\_`][ZXUBBB  
@HWI-EAS443:3:62:541:516#0/1  
CGCTGTCTGGCTGTCAGTAAGTATGCTAGAGTCCCGTTTT  
+HWI-EAS443:3:62:541:516#0/1  
abb`babbabaaba`XaY`baTa`Q¥¥`\_\_\_]`\_X```  
@HWI-EAS443:3:62:573:869#0/1  
GTCTGGCTGTCAGTAAGTATGCTAGAGTCCCGTTTTCGTT  
+HWI-EAS443:3:62:573:869#0/1  
a`a``aa\_¥]``a]X\_aM^[\_]UVVZTa\_`ZNZ`]X¥[]  
@HWI-EAS443:3:62:760:718#0/1  
GGCCATCCGAATTCTTTTGGTCGCTGTCTGGCTGTCAGTA  
+HWI-EAS443:3:62:760:718#0/1  
]G]W`Y]`WQUT[¥UX]¥]b[TaXZaT[Z]`BBBBBBBBB  
@HWI-EAS443:3:62:773:229#0/1  
ATCCGAATTCTTTTGGTCGCTGTCTGGCTGTCAGTAAGTA  
+HWI-EAS443:3:62:773:229#0/1  
aaaaaaaa`aaaa`Zaa\_`a^a```\_adW]^ZVY\_TW¥  
@HWI-EAS443:3:62:778:1173#0/1  
GTCGCTGTCTGGCTGTCAGTAAGTATGCTAGAGTCCCGTT

+HWI-EAS443:3:62:778:1173#0/1  
a`ab\_aa[^`¥`^aaVYYZPZZQIIIO\_[XVZ[PM¥S[NLV  
@HWI-EAS443:3:62:831:73#0/1  
AACGGGACTCTAGCATACTTACTGACAGCCAGACAGCGAC  
+HWI-EAS443:3:62:831:73#0/1  
ab]baba\_aaa^aaaaaaaa`aa[ZaaZ^`aa¥¥\_Va\_\_\_  
@HWI-EAS443:3:63:1060:264#0/1  
CATCCGAATTCTTTTGGTCGCTGTCTGGCTGTCAGTAAGT  
+HWI-EAS443:3:63:1060:264#0/1  
aaaa\_baaaaabaaaaa\_aa\_ab]aaa\_\_a`\_]aS\_Z]U  
@HWI-EAS443:3:63:1652:756#0/1  
TCTGGCTGTCAGTAAGTATGCTAGAGTCCCGTTTTTCGTTT  
+HWI-EAS443:3:63:1652:756#0/1  
aabbbabb`\_^G[a`W^]]Y[\_]\_aGX`XM\_a`TOV`^  
@HWI-EAS443:3:63:652:1134#0/1  
CTGGCTGTCAGTAAGTATGCTAGAGTCCCGTTTTTCGTTTC  
+HWI-EAS443:3:63:652:1134#0/1  
abbabbb^`ZYZ\_]^[a^¥^]]][S`^aaY\_a\_Y\_Va]Z  
@HWI-EAS443:3:63:76:303#0/1  
AATTGATGGCCATCCGAATTCTTTTGGTCGCTGTCTGGCT  
+HWI-EAS443:3:63:76:303#0/1  
¥ZW`W]aabbaaa`¥QUY]]`aaZR]\_a`[R\_``QL  
@HWI-EAS443:3:63:805:330#0/1  
CATCCGAATTCTTTTGGTCGCTGTCTGGCTGTCAGTAAGT  
+HWI-EAS443:3:63:805:330#0/1  
abbbaba^aa`ababbb\_aaabb\_aab`aaa^OXFW\_[M  
@HWI-EAS443:3:63:892:1213#0/1  
CTGGCTGTCAGTAAGTATGCTAGAGTCCCGTTTTTCGTTTC  
+HWI-EAS443:3:63:892:1213#0/1  
a\_¥¥`\_¥VZ]][^][Z]VY]T^]V]Z[[RX\_]UWBBBB  
@HWI-EAS443:3:63:991:1371#0/1  
GCCATCCGAATTCTTTTGGTCGCTGTCTGGCTGTCAGTAA  
+HWI-EAS443:3:63:991:1371#0/1  
abbbbbbbbbbbbababaaa\_abbaba`\_aaaa\_a`T¥a  
@HWI-EAS443:3:64:1255:708#0/1  
GCTGTCAGTAAGTATGCTAGAGTCCCGTTTTTCGTTTCATT  
+HWI-EAS443:3:64:1255:708#0/1  
Q\_¥`[¥¥\_V]a¥^QZ\_U^`\_WU\_aa`]GVW]PS\_b`]aab  
@HWI-EAS443:3:64:1510:1397#0/1  
GGCCATCCGAATTCTTTTGGTCGCTGTCTGGCTGTCAGTA  
+HWI-EAS443:3:64:1510:1397#0/1  
V\_T]\_Q\_¥¥XZ\_\_`\_bb`¥]^XQ]WTb`WIZ`\_YXR`XX  
@HWI-EAS443:3:64:1580:977#0/1  
TCTGGCTGTCAGTAAGTATGCTAGAGTCCCGTTTTTCGTTT  
+HWI-EAS443:3:64:1580:977#0/1  
aaa`bbabRUPZ[[^PY\_N¥XU`XaV¥[\_¥MY\_\_VZY^Y  
@HWI-EAS443:3:64:1581:1087#0/1  
GCTGTCAGTAAGTATGCTAGAGTCCCGTTTTTCGTTTCATT  
+HWI-EAS443:3:64:1581:1087#0/1  
`ab[K¥`]a`aX`^VU`\_`a^aY][aWV]a]]``ZHba



@HWI-EAS443:3:64:1601:68#0/1  
GGCCATCCGAATTCTTTTGGTCGCTGTCTGGCTGTCAGTA  
+HWI-EAS443:3:64:1601:68#0/1  
ab]\_aaa]ba`aa\_a`aaaa^Wa\_`a[[a\_]^^`SPZYNT  
@HWI-EAS443:3:64:1639:735#0/1  
AACGGGACTCTAGCATACTTACTGACAGCCAGACAGCGAC  
+HWI-EAS443:3:64:1639:735#0/1  
^a^`ab\_ba`aa]aaba``ababbaaaa`¥aabWab¥a`^  
@HWI-EAS443:3:64:1657:790#0/1  
ACGAAAACGGGACTCTAGCATACTTACTGACAGCCAGACA  
+HWI-EAS443:3:64:1657:790#0/1  
aabaaba\_aaa`\_`\_]\_``^a\_\_a^`^\_a]^`aR\_^[[[]\_  
@HWI-EAS443:3:64:1729:71#0/1  
GTCTGGCTGTCAGTAAGTATGCTAGAGTCCCGTTTTCGTT  
+HWI-EAS443:3:64:1729:71#0/1  
aa\_`aa`aa[\_\_\_a\_`\_aY\_¥[[^\_`YQRNV[`Z[`\_TUT\_  
@HWI-EAS443:3:64:311:553#0/1  
AAACGGGACTCTAGCATACTTACTGACAGCCAGACAGCGA  
+HWI-EAS443:3:64:311:553#0/1  
aaaa^ba\_\_aa]baaaaaaaaa`aXXY[aYT¥`YX^M^\_  
@HWI-EAS443:3:64:375:1981#0/1  
CGAATTCTTTTGGTCGCTGTCTGGCTGTCAGTAAGTATGC  
+HWI-EAS443:3:64:375:1981#0/1  
a`\_`aaa[aZYPYU^W`\_YG]]U¥BBBBBBBBBBBBBBBBB  
@HWI-EAS443:3:64:444:788#0/1  
GTCGCTGTCTGGCTGTCAGTAAGTATGCTAGAGTCCCGTT  
+HWI-EAS443:3:64:444:788#0/1  
a\_\_`a\_a\_^\_¥]\_¥ZZT¥X¥SYURN¥WUJOSUT[] [MSU  
@HWI-EAS443:3:64:494:469#0/1  
TTTGGTCGCTGTCTGGCTGTCAGTAAGTATGCTAGAGTCC  
+HWI-EAS443:3:64:494:469#0/1  
`bbaa¥abbaaW\_`aaaa]MU[\_X\_\_`Q^Y¥ZYR¥Z]GW[  
@HWI-EAS443:3:64:521:477#0/1  
GTCGCTGTCTGGCTGTCAGTAAGTATGCTAGAGTCCCGTT  
+HWI-EAS443:3:64:521:477#0/1  
a\_aaaabYa\_a^`\_]PY\_\_T[XNUVR\_VSVX¥GT^\_TDL  
@HWI-EAS443:3:64:551:1574#0/1  
GGTCGCTGTCTGGCTGTCAGTAAGTATGCTAGAGTCCCGT  
+HWI-EAS443:3:64:551:1574#0/1  
aaZbab`a\_a`aab[R0aaT^`baY[\_Uaa¥¥^ [¥`a\_a]  
@HWI-EAS443:3:64:716:117#0/1  
ATGAAACGAAAACGGGACTCTAGCATACTTACTGACAGCC  
+HWI-EAS443:3:64:716:117#0/1  
aaba^aaaaa`a`[\_`^`^a[\_`a[aa\_aaa\_^a\_\_]  
@HWI-EAS443:3:64:890:557#0/1  
GGCCATCCGAATTCTTTTGGTCGCTGTCTGGCTGTCAGTA  
+HWI-EAS443:3:64:890:557#0/1  
aaababbabbbbaababaaXabaa\_`aaa\_`aaQ`Z\_S\_  
@HWI-EAS443:3:65:1025:1553#0/1  
CTGGCTGTCAGTAAGTATGCTAGAGTCCCGTTTTCGTTTC

+HWI-EAS443:3:65:1025:1553#0/1  
a\_¥\_a`\_HY[UDS¥WV[M[[ZZ[P[SJZ\_XDT^VQUV[VJ  
@HWI-EAS443:3:65:1095:1024#0/1  
TCTGGCTGTCAGTAAGTATGCTAGAGTCCCGTTTTTCGTTT  
+HWI-EAS443:3:65:1095:1024#0/1  
aaabaaaaIZR¥S¥]YY`Z¥\_\_¥V¥YO]`\_[W^\_\_RPS^  
@HWI-EAS443:3:65:1375:1112#0/1  
AATTGATGGCCATCCGAATTCTTTTGGTCGCTGTCTGGCT  
+HWI-EAS443:3:65:1375:1112#0/1  
abaaa`aa]`baa`aaa`a\_aa`aa`¥\_a\_a`¥^`\_\_W¥  
@HWI-EAS443:3:65:1573:881#0/1  
GTGTTGGTAATGAAACGAAAACGGGACTCTAGCATACTTA  
+HWI-EAS443:3:65:1573:881#0/1  
a`a\_bb]V]^aa`\_`a`\_\_\_Ua`\_^W^^]^\_W`][^^]  
@HWI-EAS443:3:65:683:339#0/1  
TGGCCATCCGAATTCTTTTGGTCGCTGTCTGGCTGTCAGT  
+HWI-EAS443:3:65:683:339#0/1  
abaaabbbaba]aaabbaaba¥a`aaa\_a`a`\_aP^[¥J  
@HWI-EAS443:3:65:845:462#0/1  
TGGCCATCCGAATTCTTTTGGTCGCTGTCTGGCTGTCAGT  
+HWI-EAS443:3:65:845:462#0/1  
aabbaabaabababaabbaaa¥aaaabaaaaa\_aaXZU][  
@HWI-EAS443:3:65:895:1625#0/1  
GGCCATCCGAATTCTTTTGGTCGCTGTCTGGCTGTCAGTA  
+HWI-EAS443:3:65:895:1625#0/1  
a`a]a\_bab`b`bab`baaaa[aab]]¥aaaaaa^ZSV^[0  
@HWI-EAS443:3:66:1106:875#0/1  
GTTGGTAATGAAACGAAAACGGGACTCTAGCATACTTACT  
+HWI-EAS443:3:66:1106:875#0/1  
a\_aaa`a`a`\_b[``[\_][S``^[\_`\_\_`\_]``\_Yaa`X`  
@HWI-EAS443:3:66:1131:1420#0/1  
CTGGCTGTCAGTAAGTATGCTAGAGTCCCGTTTTTCGTTTC  
+HWI-EAS443:3:66:1131:1420#0/1  
aaa`abY\_\_a[a`XXa^[a`X[a¥`^a]FZa\_Z\_ZX[K  
@HWI-EAS443:3:66:1248:1383#0/1  
GGCCATCCGAATTCTTTTGGTCGCTGTCTGGCTGTCAGTA  
+HWI-EAS443:3:66:1248:1383#0/1  
^D¥WZ\_]\_¥]\_PW\_V[Z]S\_ZYX][UBBBBBBBBBBBBB  
@HWI-EAS443:3:66:1288:984#0/1  
GCCATCCGAATTCTTTTGGTCGCTGTCTGGCTGTCAGTAA  
+HWI-EAS443:3:66:1288:984#0/1  
\_ba`a`^a]^`baa\_aaaa]aaaaaaaa`aXSYTT¥Y  
@HWI-EAS443:3:66:1313:273#0/1  
GTTGGTAATGAAACGAAAACGGGACTCTAGCATACTTACT  
+HWI-EAS443:3:66:1313:273#0/1  
`\_aaaQa\_aaaaa`a`UU]]`\_\_\_Y`\_\_][\_]\_¥\_\_^X^  
@HWI-EAS443:3:66:1323:362#0/1  
GGTCGCTGTCTGGCTGTCAGTAAGTATGCTAGAGTCCCGT  
+HWI-EAS443:3:66:1323:362#0/1  
aa`aaab`aaaab`aa`[a]\_a¥¥a\_a]a\_a\_a]XU\_a^

@HWI-EAS443:3:66:298:271#0/1  
CGCTGTCTGGCTGTCAGTAAGTATGCTAGAGTCCCGTTTT  
+HWI-EAS443:3:66:298:271#0/1  
aaaa`a`aaa`a^^^]V[^U`V^\_^\_] [Q[]^^UW^]  
@HWI-EAS443:3:66:344:622#0/1  
GGCTGTCAGTAAGTATGCTAGAGTCCCGTTTTCGTTTCAT  
+HWI-EAS443:3:66:344:622#0/1  
`bb\_b`\_¥¥J`Z\_[Y¥^^Z]¥`U```XFVa^GWW` [NX^  
@HWI-EAS443:3:66:360:686#0/1  
TGTCTGGCTGTCAGTAAGTATGCTAGAGTCCCGTTTTCGT  
+HWI-EAS443:3:66:360:686#0/1  
aa`abaaabXa`]Ra\_ZP`\_\_\_^XVX\_U\_`^^T]\_\_XXP  
@HWI-EAS443:3:66:630:650#0/1  
ATCCGAATTCTTTTGGTCGCTGTCTGGCTGTCAGTAAGTA  
+HWI-EAS443:3:66:630:650#0/1  
aaaa```aa``aaaaX`]`aaZ````\_]HWUWY]\_\_N^  
@HWI-EAS443:3:66:822:1090#0/1  
CATCCGAATTCTTTTGGTCGCTGTCTGGCTGTCAGTAAGT  
+HWI-EAS443:3:66:822:1090#0/1  
a\_Ya]\_ZZaa`baaa`` [aaaa`a^aa``aX\_T¥R[^TR  
@HWI-EAS443:3:66:990:1273#0/1  
TCTGGCTGTCAGTAAGTATGCTAGAGTCCCGTTTTCGTTT  
+HWI-EAS443:3:66:990:1273#0/1  
abbbabb`Y\_W\_Z`a^]\_T\_]a`]^`P]^a]¥`a`NYZa`  
@HWI-EAS443:3:66:991:909#0/1  
CAGTAAGTATGCTAGAGTCCCGTTTTCGTTTCATTACCAA  
+HWI-EAS443:3:66:991:909#0/1  
abbaaaa\_baaaaaaa\_`¥S¥\_\_a¥` `]\_Y\_ [ `W] [L^W  
@HWI-EAS443:3:67:1008:883#0/1  
GTAAGTATGCTAGAGTCCCGTTTTCGTTTCATTACCAACA  
+HWI-EAS443:3:67:1008:883#0/1  
a`aaa^baaaaaaaaa\_aa`aV^`a]a\_a\_^`W`a^Z`\_\_a  
@HWI-EAS443:3:67:1019:621#0/1  
GCTGTCAGTAAGTATGCTAGAGTCCCGTTTTCGTTTCATT  
+HWI-EAS443:3:67:1019:621#0/1  
aba^aa^\_Y\_aa`aaa`aaa\_a\_a^`aZ` `a^a^` ` [^a\_  
@HWI-EAS443:3:67:102:386#0/1  
GGCCATCCGAATTCTTTTGGTCGCTGTCTGGCTGTCAGTA  
+HWI-EAS443:3:67:102:386#0/1  
abbbbab¥b`¥a`abbaaababbabbabbaaaaa¥TVZU`  
@HWI-EAS443:3:67:1096:1248#0/1  
TCCGAATTCTTTTGGTCGCTGTCTGGCTGTCAGTAAGTAT  
+HWI-EAS443:3:67:1096:1248#0/1  
\_abbaX^b^aba` `a^aa`\_]b`] ]^a]W^Q^NY¥XDXT  
@HWI-EAS443:3:67:1269:1510#0/1  
TAATTGATGGCCATCCGAATTCTTTTGGTCGCTGTCTGGC  
+HWI-EAS443:3:67:1269:1510#0/1  
aaaba^a\_\_Yaa\_\_a`aaVaa^a`baa\_^Ua^^\_PO[S\_^  
@HWI-EAS443:3:67:1289:1514#0/1  
CGCTGTCTGGCTGTCAGTAAGTATGCTAGAGTCCCGTTTT

+HWI-EAS443:3:67:1289:1514#0/1  
aaa`a`]]a¥\_]00VSU[WXP]N]¥Z^]]GWSFQVWGU][  
@HWI-EAS443:3:67:1431:1075#0/1  
CTGTCAGTAAGTATGCTAGAGTCCCGTTTTTCGTTTCATTA  
+HWI-EAS443:3:67:1431:1075#0/1  
a^)^`^\_a[Zb\_aa\_X\_a\_\_\_\_a^`aa^)`a`U`a\_a  
@HWI-EAS443:3:67:1469:1084#0/1  
CGAATTCTTTTGGTCGCTGTCTGGCTGTCAGTAAGTATGC  
+HWI-EAS443:3:67:1469:1084#0/1  
`\_\_¥MUU[`¥\_Z\_X[^¥]TUK^YYBBBBBBBBBBBBBBBB  
@HWI-EAS443:3:67:1518:864#0/1  
GTCGCTGTCTGGCTGTCAGTAAGTATGCTAGAGTCCCGTT  
+HWI-EAS443:3:67:1518:864#0/1  
aaaba`aX`a`][\_[YVV]W¥]YPR]UY]VVVZOXUX]RW  
@HWI-EAS443:3:67:1671:1837#0/1  
GAAACGAAAACGGGACTCTAGCATACTTACTGACAGCCAG  
+HWI-EAS443:3:67:1671:1837#0/1  
^`abbababb\_aa]`ab[a]a^b]`baTab`ab^b`a]aa  
@HWI-EAS443:3:67:1692:730#0/1  
GTTGGTAATGAAACGAAAACGGGACTCTAGCATACTTACT  
+HWI-EAS443:3:67:1692:730#0/1  
a)`\_Y[\_\_\_`]¥aaX]Z\_^V`¥¥¥^\_XZ][P\_Z¥Z`W`V[  
@HWI-EAS443:3:67:268:1390#0/1  
CTGTCAGTAAGTATGCTAGAGTCCCGTTTTTCGTTTCATTA  
+HWI-EAS443:3:67:268:1390#0/1  
aa^\_aabZ`\_][`\_abaaaa`\_aaaa]\_\_\_`^aN`\_a\_^¥`  
@HWI-EAS443:3:67:657:594#0/1  
TGGCCATCCGAATTCTTTTGGTCGCTGTCTGGCTGTCAGT  
+HWI-EAS443:3:67:657:594#0/1  
a`\_babbbbb^bbbabbaaaa\_aab``\_`aa]¥`aQ¥BBB  
@HWI-EAS443:3:67:698:1852#0/1  
GGACTCTAGCATACTTACTGACAGCCAGACAGCGACCAAA  
+HWI-EAS443:3:67:698:1852#0/1  
0\_Z\_ZaZ]aaU`a[b[\_`Vb[ab`bbabba]aaab^]bb  
@HWI-EAS443:3:67:703:1830#0/1  
ATCCGAATTCTTTTGGTCGCTGTCTGGCTGTCAGTAAGTA  
+HWI-EAS443:3:67:703:1830#0/1  
a[a``WTTY`\_\_ZXXZ]^`ZYR¥]YY¥¥ZNZTYU[YLQZ  
@HWI-EAS443:3:67:801:349#0/1  
ATCCGAATTCTTTTGGTCGCTGTCTGGCTGTCAGTAAGTA  
+HWI-EAS443:3:67:801:349#0/1  
`aaabbaaa`a`a`a^\_\_\_\_\_]\_`Z`\_XVV¥V]Y^Y[  
@HWI-EAS443:3:67:827:226#0/1  
ATGAAACGAAAACGGGACTCTAGCATACTTACTGACAGCC  
+HWI-EAS443:3:67:827:226#0/1  
abbaaa`a`\_`a¥`a`^\_aY[\_\_\_Ta`\_`\_a\_a^aa`^a`^`  
@HWI-EAS443:3:67:910:1872#0/1  
GTTGGTAATGAAACGAAAACGGGACTCTAGCATACTTACT  
+HWI-EAS443:3:67:910:1872#0/1  
a¥aba]aaaaabaaaaa\_a`aa^`\_\_aa\_aaa\_\_\_\_a\_a

@HWI-EAS443:3:68:116:183#0/1  
GTCTGTCTGGCTGTCAGTAAGTATGCTAGAGTCCCGTT  
+HWI-EAS443:3:68:116:183#0/1  
^S]S`X^]RG]]T\_XKPQZPW]UTXFJVMQVLXBBBBBBB  
@HWI-EAS443:3:68:1224:1687#0/1  
AAAACGGGACTCTAGCATACTTACTGACAGCCAGACAGCG  
+HWI-EAS443:3:68:1224:1687#0/1  
]Ja``[SaaW\_aaaV`\_a\_\_[a\_aaaZa\_^`a\_^`\_Ya¥  
@HWI-EAS443:3:68:1369:1069#0/1  
GTCTGTCTGGCTGTCAGTAAGTATGCTAGAGTCCCGTT  
+HWI-EAS443:3:68:1369:1069#0/1  
a[aa]b][^aaa[]aUV^`V\_¥NU\_¥GQZP[^T]V]VV¥  
@HWI-EAS443:3:68:1489:218#0/1  
CTGGCTGTCAGTAAGTATGCTAGAGTCCCGTTTTCGTTTC  
+HWI-EAS443:3:68:1489:218#0/1  
a[^ab]\_UXX[¥S¥a[^WZKWRb\_XIWWZ\_SVaVDUS^P  
@HWI-EAS443:3:68:1681:752#0/1  
GTGTTGGTAATGAAACGAAAACGGGACTCTAGCATACTTA  
+HWI-EAS443:3:68:1681:752#0/1  
a\_bJaab¥\_aaa`aa[SY``\_T``\_``^`\_``^`Z^^]\_\_  
@HWI-EAS443:3:68:191:1806#0/1  
GTGTTGGTAATGAAACGAAAACGGGACTCTAGCATACTTA  
+HWI-EAS443:3:68:191:1806#0/1  
a]b][`\_^\_b¥]\_bbba\_abab`^[\`a`a\_a\_aa`a[^`a  
@HWI-EAS443:3:68:339:606#0/1  
TGTTGGTAATGAAACGAAAACGGGACTCTAGCATACTTAC  
+HWI-EAS443:3:68:339:606#0/1  
ab^aaa]^a\_a`aaaa`\_``\_\_Y\_\_\_\_\_a`\_]\_^\_\_  
@HWI-EAS443:3:68:719:1139#0/1  
GGCCATCCGAATTCTTTTGGTCGCTGTCTGGCTGTCAGTA  
+HWI-EAS443:3:68:719:1139#0/1  
Zba`^bbb\_bbbbbbb`bbba\_aababbaaaab[a]J\_VW  
@HWI-EAS443:3:68:775:1547#0/1  
TAATTGATGGCCATCCGAATTCTTTTGGTCGCTGTCTGGC  
+HWI-EAS443:3:68:775:1547#0/1  
¥YX`]W\_Z`¥b\_ba^\_\_^`b\_]aba^^`aaZ`\_`aaVU]  
@HWI-EAS443:3:68:871:293#0/1  
CTGGCTGTCAGTAAGTATGCTAGAGTCCCGTTTTCGTTTC  
+HWI-EAS443:3:68:871:293#0/1  
```a`¥I^aa\_Z]W^UZ^\_\_Z\_¥LUSZ[TX\_^YXG¥ZT  
@HWI-EAS443:3:68:981:1059#0/1  
CGCTGTCTGGCTGTCAGTAAGTATGCTAGAGTCCCGTTTT  
+HWI-EAS443:3:68:981:1059#0/1  
]````\_bbZ\_\_`a^`\_``\_`a]a^`]Z^a^dWWS`a]aaa  
@HWI-EAS443:3:69:1007:1306#0/1  
CGCTGTCTGGCTGTCAGTAAGTATGCTAGAGTCCCGTTTT  
+HWI-EAS443:3:69:1007:1306#0/1  
YM\_aa`a\_aaaaa^a``]aa\_Ua]\_aa`a\_\_T\_\_``]]\_[  
@HWI-EAS443:3:69:1087:1228#0/1  
CATCCGAATTCTTTTGGTCGCTGTCTGGCTGTCAGTAAGT

+HWI-EAS443:3:69:1087:1228#0/1  
aa\_aaa]T^\_\_a\_aa`\_Y`aX]a¥\_\_^[W[]YSPSSVBB  
@HWI-EAS443:3:69:1129:208#0/1  
GCCATCCGAATTCTTTTGGTCGCTGTCTGGCTGTCAGTAA  
+HWI-EAS443:3:69:1129:208#0/1  
a`bbbaaaa\_aaa\_bbbbb`a`aabaaba\_a`TV^YT¥\_  
@HWI-EAS443:3:69:141:373#0/1  
GCTGTCAGTAAGTATGCTAGAGTCCCGTTTTTCGTTTCATT  
+HWI-EAS443:3:69:141:373#0/1  
aaaa\_`Za]a\_aZ`\_a\_`^[]X`\_`P]^UVZ]]^^^  
@HWI-EAS443:3:69:1544:1896#0/1  
GGCCATCCGAATTCTTTTGGTCGCTGTCTGGCTGTCAGTA  
+HWI-EAS443:3:69:1544:1896#0/1  
`\_aabbabbbbbbaaabb\_\_aaaba`^a\_\_\_\_`ZZ^[N\_  
@HWI-EAS443:3:69:25:685#0/1  
CTGTCAGTAAGTATGCTAGAGTCCCGTTTTTCGTTTCATTA  
+HWI-EAS443:3:69:25:685#0/1  
a]YT^MZ[POZNV\_ZXPXTWQKYU]`WZT[RHTLRTLY[Z  
@HWI-EAS443:3:69:299:1526#0/1  
AATGAAACGAAAACGGGACTCTAGCATACTTACTGACAGC  
+HWI-EAS443:3:69:299:1526#0/1  
ab\_`bbbaaaaaa\_\_^`a\_`\_a`a`\_\_`\_\_`^`\_`\_¥\_  
@HWI-EAS443:3:69:340:1665#0/1  
GTTGGTAATGAAACGAAAACGGGACTCTAGCATACTTACT  
+HWI-EAS443:3:69:340:1665#0/1  
^aab¥M]ba`aabbabaabbYa`aab\_`]\_a\_`\_\_`aab\_  
@HWI-EAS443:3:69:505:854#0/1  
TGGCTGTCAGTAAGTATGCTAGAGTCCCGTTTTTCGTTTCA  
+HWI-EAS443:3:69:505:854#0/1  
ababaa[a`a\_aa`X`ZV¥][[\_YN[```Z\_^aZXX\_]¥Y  
@HWI-EAS443:3:69:548:1553#0/1  
AATGAAACGAAAACGGGACTCTAGCATACTTACTGACAGC  
+HWI-EAS443:3:69:548:1553#0/1  
a`a\_aaaa`aa`aa`]RY```\_a¥```\_\_``a\_\_`\_\_`^\_  
@HWI-EAS443:3:69:574:784#0/1  
GGCCATCCGAATTCTTTTGGTCGCTGTCTGGCTGTCAGTA  
+HWI-EAS443:3:69:574:784#0/1  
\_Na`a[a]WS`\_`^`]\_\_P¥W[[a[YP[\_a\_\_\_\_]\_¥YVKP  
@HWI-EAS443:3:69:587:1750#0/1  
CAGTAAGTATGCTAGAGTCCCGTTTTTCGTTTACCAA  
+HWI-EAS443:3:69:587:1750#0/1  
a\_a^baa`baaab`\_`Yaa`a]\_`\_a^^`aa\_\_a^aa  
@HWI-EAS443:3:69:664:1507#0/1  
CTGTCAGTAAGTATGCTAGAGTCCCGTTTTTCGTTTACCAA  
+HWI-EAS443:3:69:664:1507#0/1  
a`b`b`]Y¥\_R]^W]a^`ZaXaaa`[`[[\_^^\_]`XL]  
@HWI-EAS443:3:6:134:988#0/1  
GCTGTCAGTAAGTATGCTAGAGTCCCGTTTTTCGTTTACCAA  
+HWI-EAS443:3:6:134:988#0/1  
a`^a^\_a]V^¥X\_Y]OZ¥ZY]VUWPST¥^\_Z]T¥XBBBB

@HWI-EAS443:3:6:1365:272#0/1  
CTGGCTGTCAGTAAGTATGCTAGAGTCCCGTTTTCGTTTC  
+HWI-EAS443:3:6:1365:272#0/1  
aa^aaaa^\_bbb^ab\_ab`]baaWbY[\_aaTabaVa`a[Q  
@HWI-EAS443:3:6:1488:596#0/1  
GGCCATCCGAATTCTTTTGGTCGCTGTCTGGCTGTCAGTA  
+HWI-EAS443:3:6:1488:596#0/1  
^GMaa^[^b[[^¥^Ua`ZbV¥U`NY\_[U¥`¥VZ`[WBBBB  
@HWI-EAS443:3:6:149:1657#0/1  
GCTGTCAGTAAGTATGCTAGAGTCCCGTTTTCGTTTCATT  
+HWI-EAS443:3:6:149:1657#0/1  
ababa^a^`a`a`Z]\_`^`[¥^\_\_YY``]^\_aa]]a`  
@HWI-EAS443:3:6:1534:169#0/1  
CAGTAAGTATGCTAGAGTCCCGTTTTCGTTTCATTACCAA  
+HWI-EAS443:3:6:1534:169#0/1  
ab\_`bbbabbb[bbaba\_\_\_ab]a`a\_b\_aa\_abaa`¥aa  
@HWI-EAS443:3:6:290:770#0/1  
CTGGCTGTCAGTAAGTATGCTAGAGTCCCGTTTTCGTTTC  
+HWI-EAS443:3:6:290:770#0/1  
aa`^ab`SZ\_¥Ya[a^`a^\_\_aS`YG[`[ZMZ\_ZFUGaa]  
@HWI-EAS443:3:6:32:1516#0/1  
AATTGATGGCCATCCGAATTCTTTTGGTCGCTGTCTGGCT  
+HWI-EAS443:3:6:32:1516#0/1  
aa]SZb\_U\_\_V\_XY`[`]aa`aa`]TUX`aa0SSU^aBBB  
@HWI-EAS443:3:6:34:993#0/1  
AATGAAACGAAAACGGGACTCTAGCATACTTACTGACAGC  
+HWI-EAS443:3:6:34:993#0/1  
abbbbbbbbababa`aaa`aa\_a`aaaa`a`aaaa`aa^  
@HWI-EAS443:3:6:357:844#0/1  
TGTTGGTAATGAAACGAAAACGGGACTCTAGCATACTTAC  
+HWI-EAS443:3:6:357:844#0/1  
ab`aa\_Za]`]aa`TY`aa`[a`][^]Z]]][X¥^¥V`T`^  
@HWI-EAS443:3:6:562:1774#0/1  
TAATTGATGGCCATCCGAATTCTTTTGGTCGCTGTCTGGC  
+HWI-EAS443:3:6:562:1774#0/1  
a^\_a`aaaa\_\_aaZ`\_````\_]a`^`[\_Y\_^\_\_\_Y^]U\_B  
@HWI-EAS443:3:6:662:377#0/1  
AATTGATGGCCATCCGAATTCTTTTGGTCGCTGTCTGGCT  
+HWI-EAS443:3:6:662:377#0/1  
abba`b`a^`\_aa\_aaabb`V^a`aaa[\_]\_VPTaaBB  
@HWI-EAS443:3:6:705:928#0/1  
TGTTGGTAATGAAACGAAAACGGGACTCTAGCATACTTAC  
+HWI-EAS443:3:6:705:928#0/1  
aa]aa[S\_aaa`aZa\_a\_\_Y`^^WZ`[^`\_Y\_\_^^Z`[  
@HWI-EAS443:3:6:978:1553#0/1  
GCCATCCGAATTCTTTTGGTCGCTGTCTGGCTGTCAGTAA  
+HWI-EAS443:3:6:978:1553#0/1  
aa`baa[`aaaa\_a`a\_a\_¥]aZaa¥¥^`X\_\_TUV[MBB  
@HWI-EAS443:3:70:1218:329#0/1  
GGCCATCCGAATTCTTTTGGTCGCTGTCTGGCTGTCAGTA

+HWI-EAS443:3:70:1218:329#0/1  
aaaabbbabbbbbaabaabb`ab`aa` `` `¥` aRQ[]RW  
@HWI-EAS443:3:70:1411:455#0/1  
CATCCGAATTCTTTTGGTCGCTGTCTGGCTGTCAGTAAGT  
+HWI-EAS443:3:70:1411:455#0/1  
` `V`bbb[b`\_K\_Za`I¥`bbba\_J`\_V¥b[b\_¥]`VZ[G  
@HWI-EAS443:3:70:57:1869#0/1  
TGGTAATGAAACGAAAACGGGACTCTAGCATACTTACTGA  
+HWI-EAS443:3:70:57:1869#0/1  
a\_aZ`aaaaabb`[ `a\_aV\_^\_] ` `]¥` \_\_a^^aa]^\_  
@HWI-EAS443:3:70:77:1479#0/1  
TGGCTGTCAGTAAGTATGCTAGAGTCCCCTTTTCGTTTCA  
+HWI-EAS443:3:70:77:1479#0/1  
ab`ba`V`]aV`a[Z`[[a^`[^`[aaa]V^` `¥` [[[]UW  
@HWI-EAS443:3:70:894:1236#0/1  
GGTCGCTGTCTGGCTGTCAGTAAGTATGCTAGAGTCCCCT  
+HWI-EAS443:3:70:894:1236#0/1  
ab\_bbaaaaba`aaabIYZUN`UYa][^\_a[\_`TW^N]U  
@HWI-EAS443:3:70:982:1743#0/1  
CGCTGTCTGGCTGTCAGTAAGTATGCTAGAGTCCCCTTTT  
+HWI-EAS443:3:70:982:1743#0/1  
abab` `baa`baa¥[ ` \_`a`\_Ta\_TZ\_\_LZX`]a`V^a`  
@HWI-EAS443:3:71:1344:738#0/1  
CGCTGTCTGGCTGTCAGTAAGTATGCTAGAGTCCCCTTTT  
+HWI-EAS443:3:71:1344:738#0/1  
\_bbbaabbbbaaab\_a\_a`ba\_`aa` `a\_X`a\_aa`a¥aa`  
@HWI-EAS443:3:71:1377:160#0/1  
ATCCGAATTCTTTTGGTCGCTGTCTGGCTGTCAGTAAGTA  
+HWI-EAS443:3:71:1377:160#0/1  
^\_] `aaba[a]\_\_aaa^^Zaa[Ua` [[a`SDXXY\_] [^U  
@HWI-EAS443:3:71:1405:855#0/1  
TGGTAATGAAACGAAAACGGGACTCTAGCATACTTACTGA  
+HWI-EAS443:3:71:1405:855#0/1  
]aaSPU¥¥` `¥]b^Yb¥Qa`baaaY` `ba`ab^aa`\_Z]Z  
@HWI-EAS443:3:71:160:443#0/1  
AATTGATGGCCATCCGAATTCTTTTGGTCGCTGTCTGGCT  
+HWI-EAS443:3:71:160:443#0/1  
]\_aa¥¥^V\_ab\_\_`[\_]abaa^a]^¥Za` `a^U]T]¥N[  
@HWI-EAS443:3:71:1622:1917#0/1  
GGCCATCCGAATTCTTTTGGTCGCTGTCTGGCTGTCAGTA  
+HWI-EAS443:3:71:1622:1917#0/1  
`aaaa`bb\_\_bbbabbbb`bbZbaaab`Z`bbZ]bb\_a  
@HWI-EAS443:3:71:183:386#0/1  
TGGCCATCCGAATTCTTTTGGTCGCTGTCTGGCTGTCAGT  
+HWI-EAS443:3:71:183:386#0/1  
¥\_0\_`a` `baaa\_\_`^b\_^\_X\_] `aa\_a]Z]a^aSZ][F  
@HWI-EAS443:3:71:323:2002#0/1  
ATTGATGGCCATCCGAATTCTTTTGGTCGCTGTCTGGCTG  
+HWI-EAS443:3:71:323:2002#0/1  
`\_[P[ `^¥\_a` [] `¥ZX^^W]\_\_^Z¥Z]WZ^X[\_^UPWYY



@HWI-EAS443:3:71:330:1056#0/1  
GCTGTCAGTAAGTATGCTAGAGTCCCGTTTTTCGTTTCATT  
+HWI-EAS443:3:71:330:1056#0/1  
abbbab`babaa\_b][\_a^`Ua^a`aa\_`aaa]^`a\_a`  
@HWI-EAS443:3:71:468:956#0/1  
CTGTCAGTAAGTATGCTAGAGTCCCGTTTTTCGTTTCATTA  
+HWI-EAS443:3:71:468:956#0/1  
a\_WVY]`N¥ZaPXZ^`ZGQT`P¥U\_]OY[R[aS[RRXTM[  
@HWI-EAS443:3:71:484:972#0/1  
CGCTGTCTGGCTGTCAGTAAGTATGCTAGAGTCCCGTTTT  
+HWI-EAS443:3:71:484:972#0/1  
aaa`a^aa`aaaaY`Y`U```W\_Z\_`\_ZZ^]S]Ya`0\_\_\_  
@HWI-EAS443:3:71:754:746#0/1  
GAATTCCTTTGGTCGCTGTCTGGCTGTCAGTAAGTATGCT  
+HWI-EAS443:3:71:754:746#0/1  
\_¥[Za`][V¥¥[GP\_SY^[^]BBBBBBBBBBBBBBBBBB  
@HWI-EAS443:3:71:829:814#0/1  
GGCCATCCGAATTCCTTTGGTCGCTGTCTGGCTGTCAGTA  
+HWI-EAS443:3:71:829:814#0/1  
aabbbbbb\_b`bbbbbbbaa`a`\_¥\_`T\_`bb¥QNUa]  
@HWI-EAS443:3:71:955:1470#0/1  
GTCTGGCTGTCAGTAAGTATGCTAGAGTCCCGTTTTCGTT  
+HWI-EAS443:3:71:955:1470#0/1  
a¥b`^^a¥[\_X^T]\_a[`Z\_\_`¥[¥\_\_a^a`^`\_`\_¥S¥  
@HWI-EAS443:3:72:1056:1747#0/1  
TGGCCATCCGAATTCCTTTGGTCGCTGTCTGGCTGTCAGT  
+HWI-EAS443:3:72:1056:1747#0/1  
abaaaaabaZ^\_Z\_aPYZa``[a`a\_a[^`Y]TSJUXRS  
@HWI-EAS443:3:72:1159:1979#0/1  
CAGTAAGTATGCTAGAGTCCCGTTTTTCGTTTCATTACCAA  
+HWI-EAS443:3:72:1159:1979#0/1  
aaa\_bbaabaaaabaaa\_a\_aa\_aaaaa\_``aaa`a\_\_aa  
@HWI-EAS443:3:72:1504:1484#0/1  
GTCGCTGTCTGGCTGTCAGTAAGTATGCTAGAGTCCCGTT  
+HWI-EAS443:3:72:1504:1484#0/1  
aa`a`aaa\_aa¥`a¥\_^]GRa`YZW\_]\_^\_UXVYRF¥V`  
@HWI-EAS443:3:72:194:1568#0/1  
TTGGTCGCTGTCTGGCTGTCAGTAAGTATGCTAGAGTCCC  
+HWI-EAS443:3:72:194:1568#0/1  
aaaa]baaaa``a\_a`\_¥]X^Z]\_[WYX]]Z]XZTN^^\_  
@HWI-EAS443:3:72:352:1168#0/1  
CGGGACTCTAGCATACTTACTGACAGCCAGACAGCGACCA  
+HWI-EAS443:3:72:352:1168#0/1  
ababab]bVZ\_`^`WaabaabaaaaaaaRZaaaa[S^S[`  
@HWI-EAS443:3:72:370:596#0/1  
GGCCATCCGAATTCCTTTGGTCGCTGTCTGGCTGTCAGTA  
+HWI-EAS443:3:72:370:596#0/1  
`b\_bbbbbbbbbbbabbabb\_aabab^a`aaaaT[U]L`  
@HWI-EAS443:3:72:506:749#0/1  
GCTGTCAGTAAGTATGCTAGAGTCCCGTTTTTCGTTTCATT

+HWI-EAS443:3:72:506:749#0/1  
aba\_`^a¥aS\_`a`aa`]a[\_`aa\_aaa`^U\_a^a\_  
@HWI-EAS443:3:72:567:469#0/1  
GCTGTCAGTAAGTATGCTAGAGTCCCGTTTTTCGTTTCATT  
+HWI-EAS443:3:72:567:469#0/1  
a[\_`a]X\_a]NPNPTVV`XGUU^PQU\_]XPPLSNYTN]TS  
@HWI-EAS443:3:73:1019:353#0/1  
GGCCATCCGAATTCTTTTGGTCGCTGTCTGGCTGTCAGTA  
+HWI-EAS443:3:73:1019:353#0/1  
\_babbbbbbabb^abb`bbaaaa]bb\_aa`La  
@HWI-EAS443:3:73:1121:1000#0/1  
GTCGCTGTCTGGCTGTCAGTAAGTATGCTAGAGTCCCGTT  
+HWI-EAS443:3:73:1121:1000#0/1  
`V]\_^`\_N\_aa^Y¥PROVQV]XIROPDQ][VZHKM^VQB  
@HWI-EAS443:3:73:1327:778#0/1  
GCCATCCGAATTCTTTTGGTCGCTGTCTGGCTGTCAGTAA  
+HWI-EAS443:3:73:1327:778#0/1  
abbababb\_bbbbbbbbbb`bbbaaabbaaaa¥`YR\_a  
@HWI-EAS443:3:73:1683:74#0/1  
TGGCCATCCGAATTCTTTTGGTCGCTGTCTGGCTGTCAGT  
+HWI-EAS443:3:73:1683:74#0/1  
a^a^abb\_]b^\_bb¥bbbb]a]]a\_ab`[a]\_Ta\_RDR`U  
@HWI-EAS443:3:73:173:934#0/1  
CAGTAAGTATGCTAGAGTCCCGTTTTTCGTTTCATTACCAA  
+HWI-EAS443:3:73:173:934#0/1  
aaa[Y`aYa\_aa^Y`\_X`^^aY^^^\_Y]^`\_^]\_[U^]  
@HWI-EAS443:3:73:35:1757#0/1  
ATCCGAATTCTTTTGGTCGCTGTCTGGCTGTCAGTAAGTA  
+HWI-EAS443:3:73:35:1757#0/1  
a`a\_`aaa`aaa\_\_\_\_]Xa\_`]X\_]Q\_] ^OYPVRZSNNY  
@HWI-EAS443:3:73:518:178#0/1  
AGTAAGTATGCTAGAGTCCCGTTTTTCGTTTCATTACCAAC  
+HWI-EAS443:3:73:518:178#0/1  
`^`aab]\_`b`aaZa`\_`Vb\_\_a`\_a^`[Y]`a\_Z^`\_^  
@HWI-EAS443:3:73:912:1433#0/1  
TGTTGGTAATGAAACGAAACGGGACTCTAGCATACTTAC  
+HWI-EAS443:3:73:912:1433#0/1  
\_^G^X`T`\_`^`XR^T0\_YV\_]VVVT]ZUO[\_a[LV`U`  
@HWI-EAS443:3:74:1054:792#0/1  
TCCGAATTCTTTTGGTCGCTGTCTGGCTGTCAGTAAGTAT  
+HWI-EAS443:3:74:1054:792#0/1  
aaa`\_`[`baa^a`¥¥[a`YZ^`[[¥^SY\_^][WJ¥TFY¥GNZ  
@HWI-EAS443:3:74:1298:1386#0/1  
ACGGGACTCTAGCATACTTACTGACAGCCAGACAGCGACC  
+HWI-EAS443:3:74:1298:1386#0/1  
[ORZa^YZ¥\_ZZLVa`^^`aaaa[RZ`PX``[[a¥¥X^V[  
@HWI-EAS443:3:74:144:1737#0/1  
TCGCTGTCTGGCTGTCAGTAAGTATGCTAGAGTCCCGTTT  
+HWI-EAS443:3:74:144:1737#0/1  
ab^aaa\_baa¥a\_\_ZaY^X^YU¥\_ZG^^TTY\_W\_`aZR]^

@HWI-EAS443:3:74:175:1033#0/1  
TAAGTATGCTAGAGTCCCGTTTTTCGTTTCATTACCAACAC  
+HWI-EAS443:3:74:175:1033#0/1  
aaa\_YaYXaaaaa`^aaab[V\_\_^\_¥^\_\_`a^`XQZN¥a`  
@HWI-EAS443:3:74:244:1303#0/1  
GTTGGTAATGAAACGAAAACGGGACTCTAGCATACTTACT  
+HWI-EAS443:3:74:244:1303#0/1  
a\_\_a[Z\_¥aaaa`a\_\_`\_a[\_[[^`^\_W`^`\_`^]\_`]^  
@HWI-EAS443:3:74:285:1391#0/1  
CGCTGTCTGGCTGTCAGTAAGTATGCTAGAGTCCCGTTTT  
+HWI-EAS443:3:74:285:1391#0/1  
abbbb^baaabab]a[[Xa]ZZa[[^^\_]`^`X`\_`\_Z\_``  
@HWI-EAS443:3:74:505:1245#0/1  
CAGTAAGTATGCTAGAGTCCCGTTTTTCGTTTCATTACCAA  
+HWI-EAS443:3:74:505:1245#0/1  
aabaabb``abbbaaaa`baaa\_aaaaa\_`a`aaabaaaa  
@HWI-EAS443:3:74:547:393#0/1  
ACGGGACTCTAGCATACTTACTGACAGCCAGACAGCGACC  
+HWI-EAS443:3:74:547:393#0/1  
Z¥Z`\_\_bbaZ¥Y^a[a]aa[`abaaaa]¥aa`Z]¥\_a[ZN  
@HWI-EAS443:3:75:1166:849#0/1  
GTTGGTAATGAAACGAAAACGGGACTCTAGCATACTTACT  
+HWI-EAS443:3:75:1166:849#0/1  
O\_aba[\_`bbabbbba¥Wab\_]\_aabbbba`abbaabb`b  
@HWI-EAS443:3:75:1430:1674#0/1  
CATCCGAATTCTTTTGGTCGCTGTCTGGCTGTCAGTAAGT  
+HWI-EAS443:3:75:1430:1674#0/1  
\_``aa`abababaW¥\_aZZ^^aa`^]`^`¥¥¥HTW`JP[XQ  
@HWI-EAS443:3:75:1471:1270#0/1  
TGTTGGTAATGAAACGAAAACGGGACTCTAGCATACTTAC  
+HWI-EAS443:3:75:1471:1270#0/1  
`babab]babbbbb\_ba\_aa\_\_a`^a\_\_aaaU\_`[X`\_a]  
@HWI-EAS443:3:75:1688:649#0/1  
CATCCGAATTCTTTTGGTCGCTGTCTGGCTGTCAGTAAGT  
+HWI-EAS443:3:75:1688:649#0/1  
abbb`abbbbbbbaaaabbbabbbbbb```aa`aab  
@HWI-EAS443:3:75:239:949#0/1  
GCTGTCTGGCTGTCAGTAAGTATGCTAGAGTCCCGTTTTTC  
+HWI-EAS443:3:75:239:949#0/1  
aa^bYaWaab[][\_H\_ZUWWL[WXWXUV^^P^¥\_YP[^ZP  
@HWI-EAS443:3:75:30:944#0/1  
GGCCATCCGAATTCTTTTGGTCGCTGTCTGGCTGTCAGTA  
+HWI-EAS443:3:75:30:944#0/1  
aabbbab``^`baaaaa`aa¥aaa`a^a`a\_`^`TXW]U¥  
@HWI-EAS443:3:75:514:1510#0/1  
GGCCATCCGAATTCTTTTGGTCGCTGTCTGGCTGTCAGTA  
+HWI-EAS443:3:75:514:1510#0/1  
aaabbaaabaabbbbbbabb\_Uaaaa`aaaaa\_aQ]\_aU`  
@HWI-EAS443:3:75:692:1461#0/1  
CGGGACTCTAGCATACTTACTGACAGCCAGACAGCGACCA

+HWI-EAS443:3:75:692:1461#0/1  
\_b\_ZKXVba][b[^¥^bbbabab][WX¥bab^\_Z\_`aba`  
@HWI-EAS443:3:75:835:272#0/1  
TGGTAATGAAACGAAAACGGGACTCTAGCATACTTACTGA  
+HWI-EAS443:3:75:835:272#0/1  
abaJaY\_aaX``[a^YWbb^\_\_aa`[\_\_\_]`a[`^]Za\_a  
@HWI-EAS443:3:75:906:411#0/1  
GCTGTCTGGCTGTCAGTAAGTATGCTAGAGTCCCGTTTTTC  
+HWI-EAS443:3:75:906:411#0/1  
a`aZ[W^^¥RY¥XWKJKZ¥JDSXXX[SS¥ZLN[`ZNSZ]X  
@HWI-EAS443:3:75:936:116#0/1  
TCCGAATTCTTTTGGTCGCTGTCTGGCTGTCAGTAAGTAT  
+HWI-EAS443:3:75:936:116#0/1  
aaabaabb`bbabbaa\_b`ab``aaa\_aa`X[[V[\_\_V^]  
@HWI-EAS443:3:75:97:1543#0/1  
GTTGGTAATGAAACGAAAACGGGACTCTAGCATACTTACT  
+HWI-EAS443:3:75:97:1543#0/1  
]WV\_\_Z]a`\_`\_`V[RX]\_\_^^\_VZ]¥\_^\_]X\_^Z\_^Z  
@HWI-EAS443:3:76:1212:443#0/1  
TGGTCGCTGTCTGGCTGTCAGTAAGTATGCTAGAGTCCCG  
+HWI-EAS443:3:76:1212:443#0/1  
aa[^^b]``U`Z¥R\_a\_Z]]X^YVRZ\_[X[R\_Y[JJPY[  
@HWI-EAS443:3:76:1345:703#0/1  
GTCTGGCTGTCAGTAAGTATGCTAGAGTCCCGTTTTTCGTT  
+HWI-EAS443:3:76:1345:703#0/1  
a[^Y\_\_Y¥[JUS^U¥^^U^YWWRVQMNLU\$YHVZVMQYR  
@HWI-EAS443:3:76:138:1167#0/1  
CTGGCTGTCAGTAAGTATGCTAGAGTCCCGTTTTTCGTTTC  
+HWI-EAS443:3:76:138:1167#0/1  
aa`aZa^PZTUTVaSFZUXYTHOYWT¥Z`ZPP\_\_¥ULZSQ  
@HWI-EAS443:3:76:139:845#0/1  
CTGGCTGTCAGTAAGTATGCTAGAGTCCCGTTTTTCGTTTC  
+HWI-EAS443:3:76:139:845#0/1  
aabbbbb\_bbb`^^Ua¥a\_[b``aIaaa`I]aaaa^\_aa  
@HWI-EAS443:3:76:1462:175#0/1  
GGTGTGGTAATGAAACGAAAACGGGACTCTAGCATACTT  
+HWI-EAS443:3:76:1462:175#0/1  
aa¥a¥\_aaU^\_\_`[¥`P`^[^`¥^¥Z¥W¥VWV¥T¥¥UUWW  
@HWI-EAS443:3:76:1662:229#0/1  
TGTCTGGCTGTCAGTAAGTATGCTAGAGTCCCGTTTTTCGT  
+HWI-EAS443:3:76:1662:229#0/1  
``¥\_`aaaaa]SX`VS^`Y\_]WN[WUZ^RWUVZPW\_YOVV  
@HWI-EAS443:3:76:302:1347#0/1  
GTCGCTGTCTGGCTGTCAGTAAGTATGCTAGAGTCCCGTT  
+HWI-EAS443:3:76:302:1347#0/1  
aX`¥[UJMXUTQWBBBBBBBBBBBBBBBBBBBBBBBBBBB  
@HWI-EAS443:3:76:415:864#0/1  
TCGCTGTCTGGCTGTCAGTAAGTATGCTAGAGTCCCGTTT  
+HWI-EAS443:3:76:415:864#0/1  
abbbabababaaa`[\_X[Y^a]S\_Y]`]]`[U]]a\_T]^

@HWI-EAS443:3:76:619:1115#0/1  
AAACGAAAACGGGACTCTAGCATACTTACTGACAGCCAGA  
+HWI-EAS443:3:76:619:1115#0/1  
abba^]bb`\_WMR\_`N\_`aaa\_ba`aa`a]`a```\_Y^  
@HWI-EAS443:3:76:623:1955#0/1  
AATTGATGGCCATCCGAATTCTTTTGGTCGCTGTCTGGCT  
+HWI-EAS443:3:76:623:1955#0/1  
V\_\_`\_WR[ZS\_baa^TWJZ[`a`aXFWH\_R\_XTOaJFTaZ  
@HWI-EAS443:3:76:624:37#0/1  
TAATTGATGGCCATCCGAATTCTTTTGGTCGCTGTCTGGC  
+HWI-EAS443:3:76:624:37#0/1  
YFWU\_XZ[\_T\_]\_]PTQUX^SQU]\_]UYRZURZBBBBBBB  
@HWI-EAS443:3:76:672:309#0/1  
GTTGGTAATGAAAACGAAAACGGGACTCTAGCATACTTACT  
+HWI-EAS443:3:76:672:309#0/1  
aW`\_`RPFZ\_\_\_`Y\_^]XYRP[^ZWY]WMSWZYWLOO¥VZ  
@HWI-EAS443:3:76:702:730#0/1  
CTGGCTGTCAGTAAGTATGCTAGAGTCCCGTTTTTCGTTTC  
+HWI-EAS443:3:76:702:730#0/1  
aaW[a`\_S\_¥^IT\_`T]XS\_W¥\_Za]ba\_aX¥a¥]aR`aQ  
@HWI-EAS443:3:76:888:151#0/1  
TTGATGGCCATCCGAATTCTTTTGGTCGCTGTCTGGCTGT  
+HWI-EAS443:3:76:888:151#0/1  
aaaa`\_Z\_¥a\_]`[\_`\_`¥`a]]Z][[¥UZW¥[SQV^S  
@HWI-EAS443:3:76:914:1303#0/1  
AAACGAAAACGGGACTCTAGCATACTTACTGACAGCCAGA  
+HWI-EAS443:3:76:914:1303#0/1  
a`b^ab¥b`aaaa`aa\_`¥`a\_\_aa`aa\_\_a`\_Y`a\_  
@HWI-EAS443:3:76:939:1920#0/1  
ACGGGACTCTAGCATACTTACTGACAGCCAGACAGCGACC  
+HWI-EAS443:3:76:939:1920#0/1  
a\_[SJ\_a]b`\_0¥abbbb`\_Qa[\_¥\_0¥`\_`a^P`a`¥  
@HWI-EAS443:3:77:1354:1294#0/1  
GCTGTCAGTAAGTATGCTAGAGTCCCGTTTTTCGTTTCATT  
+HWI-EAS443:3:77:1354:1294#0/1  
abbb`\_V`\_]a`Z]`[\_¥Q\_QZQZ¥P`\_]`aZLZOZ\_`^`aa  
@HWI-EAS443:3:77:252:1054#0/1  
GGCCATCCGAATTCTTTTGGTCGCTGTCTGGCTGTCTAGTA  
+HWI-EAS443:3:77:252:1054#0/1  
a\_abbabaaXaaaaaaaaa\_\_aaaa^^\_a]`a`YZNYV\_  
@HWI-EAS443:3:77:267:115#0/1  
AAAACGGGACTCTAGCATACTTACTGACAGCCAGACAGCG  
+HWI-EAS443:3:77:267:115#0/1  
ababa`a`\_`aa`aa`aa\_a`\_`a`\_`aaZ^^^W]^]^  
@HWI-EAS443:3:77:293:1050#0/1  
GTTGGTAATGAAAACGAAAACGGGACTCTAGCATACTTACT  
+HWI-EAS443:3:77:293:1050#0/1  
`VbbbTbVb`\_`aa]\_M`\_`\_]T\_aa[a]b\_\_a`aa`\_`  
@HWI-EAS443:3:77:308:1852#0/1  
CAGTAAGTATGCTAGAGTCCCGTTTTTCGTTTCATTACCAA

+HWI-EAS443:3:77:308:1852#0/1  
aba`bb`\_ba`bab^aa^baa`^\_a\_aa^^`a\_a^a``a`  
@HWI-EAS443:3:77:350:119#0/1  
GGTCGCTGTCTGGCTGTCAGTAAGTATGCTAGAGTCCCGT  
+HWI-EAS443:3:77:350:119#0/1  
ab\_`a\_\_]ZW^\_`]]a¥]V[ZZ]^VZW^UZVZRZZWZZ  
@HWI-EAS443:3:77:411:1582#0/1  
GGCCATCCGAATTCTTTTGGTCGCTGTCTGGCTGTCAGTA  
+HWI-EAS443:3:77:411:1582#0/1  
[abaa`bb[`Ya`aa`aa]^aaaYa¥a```^^YRUZVU[  
@HWI-EAS443:3:77:511:138#0/1  
ACGGGACTCTAGCATACTTACTGACAGCCAGACAGCGACC  
+HWI-EAS443:3:77:511:138#0/1  
aaaa```aa`a`^^a`aa`\_`a``\_\_\_[\_\_¥^\_T\_¥[T  
@HWI-EAS443:3:77:580:1112#0/1  
CAGTAAGTATGCTAGAGTCCCGTTTTTCGTTTCATTACCAA  
+HWI-EAS443:3:77:580:1112#0/1  
a``^^`\_YaZaa¥L[[a]a\_^aR\_a`a[RZ¥]`\_Za\_^Y^  
@HWI-EAS443:3:77:674:1279#0/1  
CCGAATTCTTTTGGTCGCTGTCTGGCTGTCAGTAAGTATG  
+HWI-EAS443:3:77:674:1279#0/1  
aaS\_¥Wab`aa\_¥`V¥\_aR]Za`^X[\_`YTSYMZ]YNVSK  
@HWI-EAS443:3:77:903:171#0/1  
GGCCATCCGAATTCTTTTGGTCGCTGTCTGGCTGTCAGTA  
+HWI-EAS443:3:77:903:171#0/1  
aYZ¥a]`\_\_\_`\_U^Z``\_[UW¥¥¥Y¥SWWU^W¥XGUTWQW  
@HWI-EAS443:3:77:964:566#0/1  
GTCGCTGTCTGGCTGTCAGTAAGTATGCTAGAGTCCCGTT  
+HWI-EAS443:3:77:964:566#0/1  
a``baab`aaa`^`Y]¥\_X¥]`Y^\_]^^[]Y`W]^P^  
@HWI-EAS443:3:78:156:664#0/1  
GCTGTCTGGCTGTCAGTAAGTATGCTAGAGTCCCGTTTTC  
+HWI-EAS443:3:78:156:664#0/1  
``b]]a`ba`a``\_[aTZ^aW[KV^]`\_] [R^Za`XX\_^V  
@HWI-EAS443:3:78:1580:1846#0/1  
CGCTGTCTGGCTGTCAGTAAGTATGCTAGAGTCCCGTTTT  
+HWI-EAS443:3:78:1580:1846#0/1  
abVaa``aa`ab^V¥¥a0`a\_T\_[UY\_[\_Z^NU]Z`UZ\_^  
@HWI-EAS443:3:78:1660:1583#0/1  
AAACGAAAACGGGACTCTAGCATACTTACTGACAGCCAGA  
+HWI-EAS443:3:78:1660:1583#0/1  
aaa\_\_a\_aa\_aa^ZTY\_a\_¥MUX^U`WXM¥`ZMZ\_UWUUT  
@HWI-EAS443:3:78:167:1847#0/1  
ATCCGAATTCTTTTGGTCGCTGTCTGGCTGTCAGTAAGTA  
+HWI-EAS443:3:78:167:1847#0/1  
aaaZ^aaa\_]¥\_\_`[a¥a\_\_[[Z^] [[[¥UPUTQNUXNLY  
@HWI-EAS443:3:78:170:1112#0/1  
GTCGCTGTCTGGCTGTCAGTAAGTATGCTAGAGTCCCGTT  
+HWI-EAS443:3:78:170:1112#0/1  
`ababab\_aa`aaa]H0¥]0\_\_^0^XX]V^V]^G]UXVVX

@HWI-EAS443:3:78:1751:1599#0/1  
ATGAAACGAAAACGGGACTCTAGCATACTTACTGACAGCC  
+HWI-EAS443:3:78:1751:1599#0/1  
aa^^]aa]`\_TbYa`a][a`¥Yaa\_VQ¥\_a]aa\_X\_[Y\_  
@HWI-EAS443:3:78:211:1375#0/1  
GTCGCTGTCTGGCTGTCAGTAAGTATGCTAGAGTCCCGTT  
+HWI-EAS443:3:78:211:1375#0/1  
aaa`aa`a`a`a`¥¥`\_WW^][U`VOQOTUVRUZ[`^R]  
@HWI-EAS443:3:78:441:619#0/1  
CGGACTCTAGCATACTTACTGACAGCCAGACAGCGACCA  
+HWI-EAS443:3:78:441:619#0/1  
abaaababaabbaa`aaabaaaaaa`aaaa\_\_a`a`\_\_`  
@HWI-EAS443:3:78:480:193#0/1  
TGGTAATGAAACGAAAACGGGACTCTAGCATACTTACTGA  
+HWI-EAS443:3:78:480:193#0/1  
aaaY\_^aa\_\_a`\_]a\_a^`\_\_Y^^]V]V\_]ZVYP[^^W^  
@HWI-EAS443:3:78:501:1331#0/1  
AATGAAACGAAAACGGGACTCTAGCATACTTACTGACAGC  
+HWI-EAS443:3:78:501:1331#0/1  
SX[b]aa`^\_a`[ba][^aa`a`a`aaaa\_baY¥aa^`]  
@HWI-EAS443:3:78:534:1009#0/1  
GCTGTCAGTAAGTATGCTAGAGTCCCGTTTTTCGTTTCATT  
+HWI-EAS443:3:78:534:1009#0/1  
a^[WR`aa\_\_aXFXU[a¥X0Za[P^S^^^a\_PW]YWYZ^\_  
@HWI-EAS443:3:78:591:1664#0/1  
GGTAATGAAACGAAAACGGGACTCTAGCATACTTACTGAC  
+HWI-EAS443:3:78:591:1664#0/1  
a\_G]^^`bbb]¥^a^a^[T¥\_a[a]a\_aaXU`\_a`ZX¥U  
@HWI-EAS443:3:78:649:989#0/1  
AATGAAACGAAAACGGGACTCTAGCATACTTACTGACAGC  
+HWI-EAS443:3:78:649:989#0/1  
]bXR`\_^`^]a^^a`]V`Vb[]aaa[]\_a``aaaa¥a^X  
@HWI-EAS443:3:78:669:546#0/1  
GTCGCTGTCTGGCTGTCAGTAAGTATGCTAGAGTCCCGTT  
+HWI-EAS443:3:78:669:546#0/1  
a¥[a\_ab]Y]a]V][IR^XIOIVLV¥YUYYYQTRLT¥VNP  
@HWI-EAS443:3:78:680:1310#0/1  
AATTGATGGCCATCCGAATTCTTTTGGTCGCTGTCTGGCT  
+HWI-EAS443:3:78:680:1310#0/1  
OIO``\_]^^]aW^\_\_`¥`baa^Y]a\_OTVWa¥NZHY`Z\_T  
@HWI-EAS443:3:78:955:944#0/1  
GTTGGTAATGAAACGAAAACGGGACTCTAGCATACTTACT  
+HWI-EAS443:3:78:955:944#0/1  
a`aaa\_aaaaaaab\_a`aa`]\_\_a\_\_a`\_aaa]a``^`  
@HWI-EAS443:3:79:1660:457#0/1  
ATCCGAATTCTTTTGGTCGCTGTCTGGCTGTCAGTAAGTA  
+HWI-EAS443:3:79:1660:457#0/1  
aa[\_b`baaZ`a`b`a]ab]aa]aaaa[aaZN^¥ZZ]RU\_  
@HWI-EAS443:3:79:267:915#0/1  
TCCGAATTCTTTTGGTCGCTGTCTGGCTGTCAGTAAGTAT

+HWI-EAS443:3:79:267:915#0/1  
abaabaaaaaaaaaaaa^`aa^`\_aPUQVZ^\_YY]Y  
@HWI-EAS443:3:79:309:1972#0/1  
CTGGCTGTCAGTAAGTATGCTAGAGTCCCGTTTTCGTTTC  
+HWI-EAS443:3:79:309:1972#0/1  
aaa`a``¥a`Z`¥XT`Z^^UYYY]W`\_a]VV^^¥V\_^\_  
@HWI-EAS443:3:79:456:189#0/1  
TCTGGCTGTCAGTAAGTATGCTAGAGTCCCGTTTTCGTTT  
+HWI-EAS443:3:79:456:189#0/1  
ab`\_^`\_WRY]¥OTZ¥T^WX\_ZVYZUNHU[WLV]XDRPYP  
@HWI-EAS443:3:79:496:1356#0/1  
AATTGATGGCCATCCGAATTCTTTTGGTCGCTGTCTGGCT  
+HWI-EAS443:3:79:496:1356#0/1  
¥¥Z\_^`\_baabba\_Za`^¥a\_aaa`[[T¥Z^`]Z`X`¥\_Z  
@HWI-EAS443:3:79:512:127#0/1  
TGGTAATGAAACGAAAACGGGACTCTAGCATACTTACTGA  
+HWI-EAS443:3:79:512:127#0/1  
aaa]aabb`aa`aaa^`aa`^\_a\_\_aa\_a``aa\_`Y``\_  
@HWI-EAS443:3:79:620:719#0/1  
AAACGGGACTCTAGCATACTTACTGACAGCCAGACAGCGA  
+HWI-EAS443:3:79:620:719#0/1  
OPZa\_\_`R\_\_\_ZV\_\_WW[V[R\_¥aa^ab\_]YX]^¥Y¥NQZ  
@HWI-EAS443:3:79:73:269#0/1  
TGGCTGTCAGTAAGTATGCTAGAGTCCCGTTTTCGTTTCA  
+HWI-EAS443:3:79:73:269#0/1  
[U¥a`¥JZWZ¥Y]\_R^`\_b¥¥^¥THaaZXV`YWPXZ\_XGQ  
@HWI-EAS443:3:79:751:792#0/1  
AAACGAAAACGGGACTCTAGCATACTTACTGACAGCCAGA  
+HWI-EAS443:3:79:751:792#0/1  
abbaba^Y`bbaaabaaaabaaba`abaaa`abaaab`  
@HWI-EAS443:3:79:841:757#0/1  
AAACGGGACTCTAGCATACTTACTGACAGCCAGACAGCGA  
+HWI-EAS443:3:79:841:757#0/1  
aaZbba\_`[bbaZ\_abaZZbbbabbaaab`Saaaa`Z[`  
@HWI-EAS443:3:79:863:1732#0/1  
CTGTCAGTAAGTATGCTAGAGTCCCGTTTTCGTTTCATTA  
+HWI-EAS443:3:79:863:1732#0/1  
ababab`Z`bb\_bb`bbbaa\_`abaaab\_[^aaa¥aaab  
@HWI-EAS443:3:79:988:926#0/1  
CTGGCTGTCAGTAAGTATGCTAGAGTCCCGTTTTCGTTTC  
+HWI-EAS443:3:79:988:926#0/1  
^aa¥\_bbU\_\_a\_ba]S[\_``[XX[a\_\_b]\_``aa\_aUaaZ  
@HWI-EAS443:3:7:129:405#0/1  
AATTGATGGCCATCCGAATTCTTTTGGTCGCTGTCTGGCT  
+HWI-EAS443:3:7:129:405#0/1  
]R`]a`Z\_\_VOUROaaVUXVa[``^YaZ^^VW[VMS¥BBB  
@HWI-EAS443:3:7:1464:1846#0/1  
TGGTAATGAAACGAAAACGGGACTCTAGCATACTTACTGA  
+HWI-EAS443:3:7:1464:1846#0/1  
^a^Wa\_aa¥a`Qa^\_\_[\_R^]]Z¥\_\_\_\_\_]\_^\_`^`



@HWI-EAS443:3:7:208:527#0/1  
CTGGCTGTCAGTAAGTATGCTAGAGTCCCGTTTTCGTTTC  
+HWI-EAS443:3:7:208:527#0/1  
aZ`a`\_[LXXQS`U[Y[JWY[^]^[UW\_`aSV]\_^^P]]X  
@HWI-EAS443:3:7:47:657#0/1  
GTCGCTGTCTGGCTGTCAGTAAGTATGCTAGAGTCCCGTT  
+HWI-EAS443:3:7:47:657#0/1  
`Z[¥¥¥UKR[VWYWSGLT¥RSSXSPUXLMP^U^NBBBBBB  
@HWI-EAS443:3:7:83:491#0/1  
TAATTGATGGCCATCCGAATTCTTTTGGTCGCTGTCTGGC  
+HWI-EAS443:3:7:83:491#0/1  
aaaaaaaaa\_\_\_a¥`aa\_Ya\_\_^`\_aaaX\_a`^\_VY\_\_\_Y  
@HWI-EAS443:3:80:1080:281#0/1  
TGGCCATCCGAATTCTTTTGGTCGCTGTCTGGCTGTCAGT  
+HWI-EAS443:3:80:1080:281#0/1  
a`baaa`ababaaaabba` ``aab\_ab[¥aab`\_bX^YaT  
@HWI-EAS443:3:80:1086:1116#0/1  
ACTTACTGACAGCCAGACAGCGACCAAAAAGAATTCCGGATG  
+HWI-EAS443:3:80:1086:1116#0/1  
ab`\_¥QS`[abb\_[[\_^ZXI]`P]QURIUOGWZ^]`P]MJ  
@HWI-EAS443:3:80:1356:930#0/1  
TCGCTGTCTGGCTGTCAGTAAGTATGCTAGAGTCCCGTTT  
+HWI-EAS443:3:80:1356:930#0/1  
a`bWaa\_]bbZa\_U]]^JZYXR[R\_N^^[T¥OX[VYS]^  
@HWI-EAS443:3:80:358:746#0/1  
ATCCGAATTCTTTTGGTCGCTGTCTGGCTGTCAGTAAGTA  
+HWI-EAS443:3:80:358:746#0/1  
aab^b\_X\_^a`aaab\_R^aa¥Y[a\_aa`]a¥YT]V^`^R¥  
@HWI-EAS443:3:80:529:619#0/1  
GGCCATCCGAATTCTTTTGGTCGCTGTCTGGCTGTCAGTA  
+HWI-EAS443:3:80:529:619#0/1  
abbabbbbbbbbabbbbbabababa^aabbaa`PVT[FX  
@HWI-EAS443:3:80:625:617#0/1  
GCTGTCAGTAAGTATGCTAGAGTCCCGTTTTCGTTTCATT  
+HWI-EAS443:3:80:625:617#0/1  
a[ZU]aT]UaTNL[Xa^UTPVT[\_]`]]]a\_¥a]Z^`¥Y¥  
@HWI-EAS443:3:80:742:132#0/1  
ATCCGAATTCTTTTGGTCGCTGTCTGGCTGTCAGTAAGTA  
+HWI-EAS443:3:80:742:132#0/1  
`]\_aabV`ZLbb]^`P]¥`a^V]Z\_UUSZQTKX¥BBBBB  
@HWI-EAS443:3:80:762:1161#0/1  
CTGGCTGTCAGTAAGTATGCTAGAGTCCCGTTTTCGTTTC  
+HWI-EAS443:3:80:762:1161#0/1  
ab\_Wabb\_`HYZ]aaPaaa\_\_a\_¥`US]a¥JL\_\_Z\_Q`^Q  
@HWI-EAS443:3:80:808:1362#0/1  
GGTCGCTGTCTGGCTGTCAGTAAGTATGCTAGAGTCCCGT  
+HWI-EAS443:3:80:808:1362#0/1  
a\_[`a^`a`]a^\_YXaMVY\_VX\_VGRQMPZV]]XU^W¥^O  
@HWI-EAS443:3:81:120:36#0/1  
GGCCATCCGAATTCTTTTGGTCGCTGTCTGGCTGTCAGTA

+HWI-EAS443:3:81:120:36#0/1  
aaaabaa`aaaaaaaaba[b\_aa[``a`a`SXX¥LX  
@HWI-EAS443:3:81:1442:491#0/1  
CATCCGAATTCTTTTGGTCGCTGTCTGGCTGTCAGTAAGT  
+HWI-EAS443:3:81:1442:491#0/1  
abba]babba`bbaabb\_ababba]aaa\_baYX`b[`\_^  
@HWI-EAS443:3:81:348:1052#0/1  
CAGTAAGTATGCTAGAGTCCCGTTTTCGTTTCATTACCAA  
+HWI-EAS443:3:81:348:1052#0/1  
abaab`baaabbaaba\_\_b`abP\_aaaa\_aaaa`aaaa  
@HWI-EAS443:3:81:501:1086#0/1  
GTGTTGGTAATGAAACGAAAACGGGACTCTAGCATACTTA  
+HWI-EAS443:3:81:501:1086#0/1  
aY`V`^R^a]\_a]]Y¥¥YYS]UXUT]V`XT[¥`\_`¥^\_^  
@HWI-EAS443:3:81:657:810#0/1  
GGTCGCTGTCTGGCTGTCAGTAAGTATGCTAGAGTCCCGT  
+HWI-EAS443:3:81:657:810#0/1  
ab^babaaaa``a`X¥LZYNUaXT[T^]]UOXUZ^^[N  
@HWI-EAS443:3:81:714:44#0/1  
GTCTGGCTGTCAGTAAGTATGCTAGAGTCCCGTTTTCGTT  
+HWI-EAS443:3:81:714:44#0/1  
aN\_``\_\_\_aZW[[GWZZS]]YTT¥^U^UWZYZTW]ZLUUT  
@HWI-EAS443:3:81:752:611#0/1  
CGAATTCTTTTGGTCGCTGTCTGGCTGTCAGTAAGTATGC  
+HWI-EAS443:3:81:752:611#0/1  
a^`aaaabbaa\_a\_aaaa]]aaaa\_aaPX^]N¥]]V¥QOL  
@HWI-EAS443:3:81:851:1683#0/1  
GGCCATCCGAATTCTTTTGGTCGCTGTCTGGCTGTCAGTA  
+HWI-EAS443:3:81:851:1683#0/1  
aaabbab\_]aZ\_bbbbbbb```abaaaXaaa\_]a]JT^NDW  
@HWI-EAS443:3:82:1230:1077#0/1  
TGTCAGTAAGTATGCTAGAGTCCCGTTTTCGTTTCATTAC  
+HWI-EAS443:3:82:1230:1077#0/1  
ab`aaa\_abb]\_\_a`a`a\_^a\_a`^`aa`a]a`¥aa`a]  
@HWI-EAS443:3:82:1234:743#0/1  
GCCATCCGAATTCTTTTGGTCGCTGTCTGGCTGTCAGTAA  
+HWI-EAS443:3:82:1234:743#0/1  
`abbbbbbb`abbbbbbbb^\_¥baba`bbbbbbba[TZaGab  
@HWI-EAS443:3:82:1254:1619#0/1  
CGCTGTCTGGCTGTCAGTAAGTATGCTAGAGTCCCGTTTT  
+HWI-EAS443:3:82:1254:1619#0/1  
ab\_aaabb]\_b^aaba]\_UV\_a]Q\_Qaa^F]YRb`Iaa  
@HWI-EAS443:3:82:1345:890#0/1  
CTGTCAGTAAGTATGCTAGAGTCCCGTTTTCGTTTCATTA  
+HWI-EAS443:3:82:1345:890#0/1  
`bbbabbbbaa^abbbbb```abbabbabbbbbbbbabbb  
@HWI-EAS443:3:82:1367:1471#0/1  
ATCCGAATTCTTTTGGTCGCTGTCTGGCTGTCAGTAAGTA  
+HWI-EAS443:3:82:1367:1471#0/1  
aa\_\_a``aa`aaaa`a^a\_\_¥^Z\_^`a¥YaY^`¥Y\_ZUU]

@HWI-EAS443:3:82:1427:797#0/1  
GGACTCTAGCATACTTACTGACAGCCAGACAGCGACCAAA  
+HWI-EAS443:3:82:1427:797#0/1  
`babb]b`\_`b[a¥bb`\_bbaaba]N\_aa[\_baa\_^^aa`  
@HWI-EAS443:3:82:1658:1964#0/1  
CGCTGTCTGGCTGTCAGTAAGTATGCTAGAGTCCCGTTTT  
+HWI-EAS443:3:82:1658:1964#0/1  
aaTVaaaaUbaa`\_[J\_a¥[`^`XaIb`a`ZP[¥^OFFWa  
@HWI-EAS443:3:82:288:958#0/1  
GTCGCTGTCTGGCTGTCAGTAAGTATGCTAGAGTCCCGTT  
+HWI-EAS443:3:82:288:958#0/1  
\_¥^`abaZa^]Ya\_aVZPX0]^^H`PR¥]WTUXJX¥\_`TU  
@HWI-EAS443:3:82:406:185#0/1  
TCCGAATTCTTTTGGTCGCTGTCTGGCTGTCAGTAAGTAT  
+HWI-EAS443:3:82:406:185#0/1  
aaW^UZ[aabb^T\_\_L\_b¥[]]a`a`\_aBBBBBBBBBBBB  
@HWI-EAS443:3:82:472:1169#0/1  
ATCCGAATTCTTTTGGTCGCTGTCTGGCTGTCAGTAAGTA  
+HWI-EAS443:3:82:472:1169#0/1  
aaaaaa```aaa`\_``]a`\_\_aU`\_\_]¥\_\_YZU^VYV^V¥  
@HWI-EAS443:3:82:479:2022#0/1  
TGTCTGGCTGTCAGTAAGTATGCTAGAGTCCCGTTTTTCGT  
+HWI-EAS443:3:82:479:2022#0/1  
ab`b^^^baa\_a¥¥N\_a`Xa\_ab`]V^¥[aab[QX\_a^\_W  
@HWI-EAS443:3:82:565:618#0/1  
GCTGTCAGTAAGTATGCTAGAGTCCCGTTTTTCGTTTCATT  
+HWI-EAS443:3:82:565:618#0/1  
aabb\_baZ`^[Z[aa^¥Z]ZO[^^^[THU[\_[¥GU`YTX\_  
@HWI-EAS443:3:82:593:377#0/1  
ATCCGAATTCTTTTGGTCGCTGTCTGGCTGTCAGTAAGTA  
+HWI-EAS443:3:82:593:377#0/1  
]aba\_¥¥`a¥b`Yab\_a`[aaa0^`\_`\_]a\_[¥0`0¥V^YV  
@HWI-EAS443:3:82:60:1859#0/1  
TGGCCATCCGAATTCTTTTGGTCGCTGTCTGGCTGTCAGT  
+HWI-EAS443:3:82:60:1859#0/1  
\_]Sbba\_bbb`]a\_b`aa`aU\_baa`Ra``]\_``G\_^TN  
@HWI-EAS443:3:82:736:160#0/1  
CGAAAACGGGACTCTAGCATACTTACTGACAGCCAGACAG  
+HWI-EAS443:3:82:736:160#0/1  
aabaabbbbbb\_aabbbbbbabaabbabbabb\_\_aaaYba  
@HWI-EAS443:3:82:765:1720#0/1  
CTGGCTGTCAGTAAGTATGCTAGAGTCCCGTTTTTCGTTTC  
+HWI-EAS443:3:82:765:1720#0/1  
aYb]b[¥S[U^¥aPHXVbZ^¥X]Wb^W`aaab`baa^Xa\_  
@HWI-EAS443:3:82:860:1629#0/1  
GCTGTCTGGCTGTCAGTAAGTATGCTAGAGTCCCGTTTTTC  
+HWI-EAS443:3:82:860:1629#0/1  
a\_SZSa[RY\_Z\_X¥\_XMP[¥FXSSU[\_U^WHZ\_ZZW¥Y]X  
@HWI-EAS443:3:82:962:1045#0/1  
GGCCATCCGAATTCTTTTGGTCGCTGTCTGGCTGTCAGTA

+HWI-EAS443:3:82:962:1045#0/1  
abbbbabbbabababbabaabbbabbbbaababbb`a\_a`\_  
@HWI-EAS443:3:83:1140:1888#0/1  
ACGAAAACGGGACTCTAGCATACTTACTGACAGCCAGACA  
+HWI-EAS443:3:83:1140:1888#0/1  
`\_b`V[^[^Z\_OUWY\_Taa^¥\_a\_¥PS¥`ZWW\_YTSR^\_FZ  
@HWI-EAS443:3:83:1183:1507#0/1  
GCCATCCGAATTCTTTTGGTCGCTGTCTGGCTGTCAGTAA  
+HWI-EAS443:3:83:1183:1507#0/1  
]¥bZabbbbbbaabbaa^bba]b]bb\_]aab\_[Wa]^`  
@HWI-EAS443:3:83:1346:1068#0/1  
TGGCCATCCGAATTCTTTTGGTCGCTGTCTGGCTGTCAGT  
+HWI-EAS443:3:83:1346:1068#0/1  
aab``bbaaba`baaaaa\_a\_\_a`aaX\_a\_`\_\_aRRSTH  
@HWI-EAS443:3:83:1418:502#0/1  
GGTCGCTGTCTGGCTGTCAGTAAGTATGCTAGAGTCCCGT  
+HWI-EAS443:3:83:1418:502#0/1  
a]]Xa^a¥ZYa`¥^]aY\_U^VXTTSUR\_X[VVYVLLYV¥H  
@HWI-EAS443:3:83:1630:896#0/1  
GGCCATCCGAATTCTTTTGGTCGCTGTCTGGCTGTCAGTA  
+HWI-EAS443:3:83:1630:896#0/1  
a¥]Xbbb`b`bba\_abaaa`\_aa[baa\_\_\_\_\_Y`\_\_W\_`¥^  
@HWI-EAS443:3:83:1718:1295#0/1  
GCTGTCTAGTAAGTATGCTAGAGTCCCGTTTTTCGTTTCATT  
+HWI-EAS443:3:83:1718:1295#0/1  
`aba`abb\_aab^¥`\_¥[a`\_a0\_a^b[^a`\_`0a\_^]`a  
@HWI-EAS443:3:83:298:380#0/1  
TGTTGGTAATGAAACGAAAACGGGACTCTAGCATACTTAC  
+HWI-EAS443:3:83:298:380#0/1  
a\_YX[^[aaa]^\_aaaZ]^[^XV\_UXVa^ZW\_[\_a[\_]\_]`  
@HWI-EAS443:3:83:447:268#0/1  
ACGGGACTCTAGCATACTTACTGACAGCCAGACAGCGACC  
+HWI-EAS443:3:83:447:268#0/1  
\_`a]`a]baaaaabaa\_a\_b\_ab\_\_a`Y[¥`a\_\_]\_\_\_XX  
@HWI-EAS443:3:83:735:1975#0/1  
ACGAAAACGGGACTCTAGCATACTTACTGACAGCCAGACA  
+HWI-EAS443:3:83:735:1975#0/1  
aRa[]a^aa\_a\_VaZ[H¥`S^Y]`Z\_Q`XFV[]][`W[\_\_\_  
@HWI-EAS443:3:83:884:885#0/1  
CCGAATTCTTTTGGTCGCTGTCTGGCTGTCAGTAAGTATG  
+HWI-EAS443:3:83:884:885#0/1  
abaaaaaabaaab\_L¥aba`M^aaa`a`Z\_N[JS]]QX^^  
@HWI-EAS443:3:84:1034:235#0/1  
GTCTGGCTGTCAGTAAGTATGCTAGAGTCCCGTTTTTCGTT  
+HWI-EAS443:3:84:1034:235#0/1  
aR]S\_aW`¥PYMUJN`]TKY^TLQZRJJJOQNLRWVWMLT  
@HWI-EAS443:3:84:106:1133#0/1  
GCTGTCTGGCTGTCAGTAAGTATGCTAGAGTCCCGTTTTTC  
+HWI-EAS443:3:84:106:1133#0/1  
aba`Paaa`¥a\_W^M[NQ[WNUS[X[^¥Y]GT[¥[TP^WV

@HWI-EAS443:3:84:1281:1568#0/1  
AATTGATGGCCATCCGAATTCTTTTGGTCGCTGTCTGGCT  
+HWI-EAS443:3:84:1281:1568#0/1  
`¥]\_^\_aaZWU`¥S0¥`\_a]U\_W\_X¥\_[G¥VW]XWXa\_PB  
@HWI-EAS443:3:84:1338:1985#0/1  
CGCTGTCTGGCTGTCAGTAAGTATGCTAGAGTCCCGTTTT  
+HWI-EAS443:3:84:1338:1985#0/1  
a`a`a]a``\_[a^SQ\_]FWTOMTXR`[\_\_^TUZ\_]JZ]`  
@HWI-EAS443:3:84:1354:371#0/1  
CCGAATTCTTTTGGTCGCTGTCTGGCTGTCAGTAAGTATG  
+HWI-EAS443:3:84:1354:371#0/1  
`aaabbbbbbb`[\_b\_ab`aab`^aaYUZaXU^]RV¥U  
@HWI-EAS443:3:84:1441:31#0/1  
AAAACGGGACTCTAGCATACTTACTGACAGCCAGACAGCG  
+HWI-EAS443:3:84:1441:31#0/1  
a^a\_aa\_a`]a``a\_SWaa`b\_Xaa\_]a]USSU[UT\_0[  
@HWI-EAS443:3:84:1709:1593#0/1  
GTCGCTGTCTGGCTGTCAGTAAGTATGCTAGAGTCCCGTT  
+HWI-EAS443:3:84:1709:1593#0/1  
a[\_aZ\_\_YZ^Q[W¥YWZZOWTP[XV]XUWZ[WZXYVO]WZ  
@HWI-EAS443:3:84:1760:325#0/1  
AATTGATGGCCATCCGAATTCTTTTGGTCGCTGTCTGGCT  
+HWI-EAS443:3:84:1760:325#0/1  
aba]^`b`\_U```]^ba[\_WXaba`[^`]^`\_ASTU¥ZQQY  
@HWI-EAS443:3:84:293:1033#0/1  
CGGGACTCTAGCATACTTACTGACAGCCAGACAGCGACCA  
+HWI-EAS443:3:84:293:1033#0/1  
aaa`Z`ab```aaa]aaaa`aaaaa^]a\_a`\_\_a`V^¥W  
@HWI-EAS443:3:84:512:474#0/1  
GGCCATCCGAATTCTTTTGGTCGCTGTCTGGCTGTCAGTA  
+HWI-EAS443:3:84:512:474#0/1  
a`¥a]aa^]X[a\_¥`\_```\_[^a]a`[U`0¥]X\_UPWSLV  
@HWI-EAS443:3:84:576:834#0/1  
CGAATTCTTTTGGTCGCTGTCTGGCTGTCAGTAAGTATGC  
+HWI-EAS443:3:84:576:834#0/1  
aaU^`ababba\_aXXZ¥\_aaa\_aa``XXSX[FV[PNXNRK  
@HWI-EAS443:3:84:578:1567#0/1  
GAATTCTTTTGGTCGCTGTCTGGCTGTCAGTAAGTATGCT  
+HWI-EAS443:3:84:578:1567#0/1  
Z^^`ba`[`]P[b`b`^\_a¥XY\_^a]¥R¥Z\_^[W\_QY[^  
@HWI-EAS443:3:84:798:1273#0/1  
GACTCTAGCATACTTACTGACAGCCAGACAGCGACCAAAA  
+HWI-EAS443:3:84:798:1273#0/1  
aZb¥bba¥¥bbab[``aa[^ababa][¥^]aa`bZQRXT  
@HWI-EAS443:3:84:984:339#0/1  
TGGTAATGAAACGAAAACGGGACTCTAGCATACTTACTGA  
+HWI-EAS443:3:84:984:339#0/1  
aaaGabaaaabaaa\_aa\_a\_aa`aa`a`aa\_a`a^a`\_  
@HWI-EAS443:3:85:1053:1499#0/1  
CCGAATTCTTTTGGTCGCTGTCTGGCTGTCAGTAAGTATG

+HWI-EAS443:3:85:1053:1499#0/1  
ab`bbbbbbbbbaababb\_aa\_a\_a\_VOUYWa]VHZYU  
@HWI-EAS443:3:85:1331:383#0/1  
TCCGAATTCTTTTGGTCGCTGTCTGGCTGTCAGTAAGTAT  
+HWI-EAS443:3:85:1331:383#0/1  
abaaUabb`a\_\_¥\_a\_aa[aa`\_`]]aaTZ\_\_QWQZLVZ  
@HWI-EAS443:3:85:1631:1109#0/1  
CAGTAAGTATGCTAGAGTCCCGTTTTCGTTTCATTACCAA  
+HWI-EAS443:3:85:1631:1109#0/1  
a`a`aa\_Y\_bbaa`a[bbT¥`bbbab`Wab]abb`U``a  
@HWI-EAS443:3:85:305:477#0/1  
ATCCGAATTCTTTTGGTCGCTGTCTGGCTGTCAGTAAGTA  
+HWI-EAS443:3:85:305:477#0/1  
]]¥Z¥a]aa\_a`b]ZT\_a]\_`aVZ`[X\_a`BBBBBBBBBB  
@HWI-EAS443:3:85:376:963#0/1  
GGCCATCCGAATTCTTTTGGTCGCTGTCTGGCTGTCAGTA  
+HWI-EAS443:3:85:376:963#0/1  
a`a^T0\_b`¥`Y0[\_P\_U][[¥[`[^JMDXYNY\_UBBBBB  
@HWI-EAS443:3:85:465:739#0/1  
CTGGCTGTCAGTAAGTATGCTAGAGTCCCGTTTTCGTTTC  
+HWI-EAS443:3:85:465:739#0/1  
aaabbab\_]\_^a^]¥b^Q\_\_¥aaa[[Ua`ZZa]X\_[aa]  
@HWI-EAS443:3:85:615:1420#0/1  
CGGGACTCTAGCATACTTACTGACAGCCAGACAGCGACCA  
+HWI-EAS443:3:85:615:1420#0/1  
`b`ba\_]\_Z[^bVbaba`\_a\_\_[^`Yb]abba\_^ZZKQ¥U  
@HWI-EAS443:3:85:710:1303#0/1  
ATCCGAATTCTTTTGGTCGCTGTCTGGCTGTCAGTAAGTA  
+HWI-EAS443:3:85:710:1303#0/1  
`^]\_aaa\_]¥\_\_`aa^\_]`^`Y^]`[^][NZXTIXZXBB  
@HWI-EAS443:3:85:844:1179#0/1  
AATTGATGGCCATCCGAATTCTTTTGGTCGCTGTCTGGCT  
+HWI-EAS443:3:85:844:1179#0/1  
abaaabaa\_aabbaaa`aababbbb`a]baaba\_abaa\_a  
@HWI-EAS443:3:85:907:1654#0/1  
ATCCGAATTCTTTTGGTCGCTGTCTGGCTGTCAGTAAGTA  
+HWI-EAS443:3:85:907:1654#0/1  
aaaaabaaa`a\_a`a\_\_`Ya\_a]^\_]\_`\_WSQVN\_\_^T^  
@HWI-EAS443:3:85:971:557#0/1  
ATCCGAATTCTTTTGGTCGCTGTCTGGCTGTCAGTAAGTA  
+HWI-EAS443:3:85:971:557#0/1  
aa`aa\_\_a\_\_aa```]^`\_`\_]Y\_^]`aXWV^VXXTMN  
@HWI-EAS443:3:86:1011:1850#0/1  
TCCGAATTCTTTTGGTCGCTGTCTGGCTGTCAGTAAGTAT  
+HWI-EAS443:3:86:1011:1850#0/1  
[\_\_\_\_`]^¥¥¥aX\_b]^Z\_a^Waaaa^b\_SJRaY``TN`J  
@HWI-EAS443:3:86:669:911#0/1  
CGCTGTCTGGCTGTCAGTAAGTATGCTAGAGTCCCGTTTT  
+HWI-EAS443:3:86:669:911#0/1  
aa`^\_abbbYbabYVV`Zb¥V]aYF¥^X`XFRX^^[Q^a¥

@HWI-EAS443:3:86:842:1057#0/1  
CATCCGAATTCTTTTGGTCGCTGTCTGGCTGTCAGTAAGT  
+HWI-EAS443:3:86:842:1057#0/1  
abbbbabbbbabbba\_a\_ba`baaabbb`abQ` `a\_`a]W  
@HWI-EAS443:3:86:880:1361#0/1  
CTGGCTGTCAGTAAGTATGCTAGAGTCCCGTTTTTCGTTTC  
+HWI-EAS443:3:86:880:1361#0/1  
aaa`Z^\_Z¥N^SX`aS^aXXS`\_`TL[XSZT`a\_Z[0¥^S  
@HWI-EAS443:3:86:984:1655#0/1  
GCTGTCTGGCTGTCAGTAAGTATGCTAGAGTCCCGTTTTTC  
+HWI-EAS443:3:86:984:1655#0/1  
aaaa^aaaaa\_ZX^`V]`\_T][Y^^YZR^]XX^\_XX^XW  
@HWI-EAS443:3:87:1264:870#0/1  
GTCTGGCTGTCAGTAAGTATGCTAGAGTCCCGTTTTTCGTT  
+HWI-EAS443:3:87:1264:870#0/1  
¥\_`NX\_ZabYLRWV`^YHWTX`\_YXVX\_]S^JIF]`\_a¥`  
@HWI-EAS443:3:87:132:1487#0/1  
GGCCATCCGAATTCTTTTGGTCGCTGTCTGGCTGTCAGTA  
+HWI-EAS443:3:87:132:1487#0/1  
a` `aaa\_` `]U[XU`aaZ]XZ\_aa^SM`X\_]YX[UXVVBB  
@HWI-EAS443:3:87:1338:1437#0/1  
TTGGTAATGAAACGAAAACGGGACTCTAGCATACTTACTG  
+HWI-EAS443:3:87:1338:1437#0/1  
aUU`XUVa[bT¥[Y\_\_\_aU^XYUS\_UVa]VaW[TW\_\_GP\_  
@HWI-EAS443:3:87:1451:257#0/1  
GGTCGCTGTCTGGCTGTCAGTAAGTATGCTAGAGTCCCGT  
+HWI-EAS443:3:87:1451:257#0/1  
`\_U`¥bba¥Y\_a\_bbb]a0^Xaa`U]` `[a]YT¥GSST\_[  
@HWI-EAS443:3:87:154:769#0/1  
AAAACGGGACTCTAGCATACTTACTGACAGCCAGACAGCG  
+HWI-EAS443:3:87:154:769#0/1  
aa` `a^]a]aaa\_a`\_aZa\_`a` ` `Y^aaa`aY`^a\_\_\_\_  
@HWI-EAS443:3:87:167:898#0/1  
AATTGATGGCCATCCGAATTCTTTTGGTCGCTGTCTGGCT  
+HWI-EAS443:3:87:167:898#0/1  
`T`ab]]aabbba`aaa` `aa\_baaa`U`aa¥a\_` `VZ`]  
@HWI-EAS443:3:87:1697:184#0/1  
GTCTGGCTGTCAGTAAGTATGCTAGAGTCCCGTTTTTCGTT  
+HWI-EAS443:3:87:1697:184#0/1  
a¥^aa`\_a^a]]aS\_]a]X[ZR`]URZURV\_Y^^¥V¥Y^  
@HWI-EAS443:3:87:231:1460#0/1  
CTGTCTGGCTGTCAGTAAGTATGCTAGAGTCCCGTTTTTCG  
+HWI-EAS443:3:87:231:1460#0/1  
aaa]bbababb\_aa^W^[S^a`aaa]aa`Ua`aa^aaa]\_  
@HWI-EAS443:3:87:233:1132#0/1  
GGCCATCCGAATTCTTTTGGTCGCTGTCTGGCTGTCAGTA  
+HWI-EAS443:3:87:233:1132#0/1  
aX]TaXaZJ\_T^SN\_\_[YS` [^^¥ZaYW`]T^Y[ZVUUM\_  
@HWI-EAS443:3:87:552:1519#0/1  
AGCCAGACAGCGACAAAAGAATTCCGATGGCCATCAATT

+HWI-EAS443:3:87:552:1519#0/1  
abaa\_^aa[¥`]a\_aaaa`a]b\_]aXY`]Twa\_^]XS^^  
@HWI-EAS443:3:87:656:255#0/1  
TGGTAATGAAACGAAAACGGGACTCTAGCATACTTACTGA  
+HWI-EAS443:3:87:656:255#0/1  
]aa[aaabaaa^aaaa\_aa^\_^\_]TYV``\_-[\_^^`\_-`  
@HWI-EAS443:3:87:811:81#0/1  
CTGTCTGGCTGTCAGTAAGTATGCTAGAGTCCCGTTTTTCG  
+HWI-EAS443:3:87:811:81#0/1  
Zabbaabb`b`a`\_ZW^aba`aba]babaZabb]a`a`]  
@HWI-EAS443:3:88:1046:714#0/1  
GGTCGCTGTCTGGCTGTCAGTAAGTATGCTAGAGTCCCGT  
+HWI-EAS443:3:88:1046:714#0/1  
¥\_T\_[^\_ba^`\_aba]]P\_T\_aa[Z¥\_N\_[P\_RLVY`J  
@HWI-EAS443:3:88:1230:912#0/1  
GCTGTCTAGTAAGTATGCTAGAGTCCCGTTTTTCGTTTCATT  
+HWI-EAS443:3:88:1230:912#0/1  
¥b\_bZa`X0^`]ZTQ\_b]a\_aa\_aaaa^\_b]¥ZU\_aQ\_]a  
@HWI-EAS443:3:88:1501:222#0/1  
GGCCATCCGAATTCTTTTGGTCGCTGTCTGGCTGTCAGTA  
+HWI-EAS443:3:88:1501:222#0/1  
ab`\_`abaababb^babbbb`b^bb`^bbbXbaNV\_\_YY  
@HWI-EAS443:3:88:1628:756#0/1  
TGGTAATGAAACGAAAACGGGACTCTAGCATACTTACTGA  
+HWI-EAS443:3:88:1628:756#0/1  
aaa^aaaaaa]aaa`a\_\_[T¥]^¥]\_aZ\_\_^^a\_\_Z`\_`  
@HWI-EAS443:3:88:423:1455#0/1  
CATCCGAATTCTTTTGGTCGCTGTCTGGCTGTCAGTAAGT  
+HWI-EAS443:3:88:423:1455#0/1  
ababba¥^^`baaa`\_`^^`aa`a]Z¥aX\_^\_ZYQY]YN  
@HWI-EAS443:3:88:492:599#0/1  
GGCCATCCGAATTCTTTTGGTCGCTGTCTGGCTGTCAGTA  
+HWI-EAS443:3:88:492:599#0/1  
aaabbbabbbbaabbbbbbaa]abb`a`a`\_aaXUQ][  
@HWI-EAS443:3:88:553:792#0/1  
CGGGACTCTAGCATACTTACTGACAGCCAGACAGCGACCA  
+HWI-EAS443:3:88:553:792#0/1  
\_]XZ[OT`abaZW`RH[T`]a\_\_W\_^a¥J]^S[``ZI[MS  
@HWI-EAS443:3:88:616:330#0/1  
GTGTTGGTAATGAAACGAAAACGGGACTCTAGCATACTTA  
+HWI-EAS443:3:88:616:330#0/1  
a`a\_ab\_U^a`\_`ab\_aaa\_a`a\_]`^`\_`\_\_\_\_a]\_\_  
@HWI-EAS443:3:88:803:329#0/1  
TGGTAATGAAACGAAAACGGGACTCTAGCATACTTACTGA  
+HWI-EAS443:3:88:803:329#0/1  
aba\_aaaa^aaZaa`\_`\_]\_a\_a`\_`\_V`\_`\_^\_[a¥`\_`\_`\_`  
@HWI-EAS443:3:89:1012:1546#0/1  
GTCTGCTGTCTGGCTGTCAGTAAGTATGCTAGAGTCCCGTT  
+HWI-EAS443:3:89:1012:1546#0/1  
aaab^bb\_aaa`a\_a\_\_`aXbaZS`\_XZ¥aa\_XPL¥`\_P\_



@HWI-EAS443:3:89:1072:1563#0/1  
AATTGATGGCCATCCGAATTCTTTTGGTCGCTGTCTGGCT  
+HWI-EAS443:3:89:1072:1563#0/1  
VT^ab`V[aaa`ba`b`\_`\_Yaaba``Sa\_a`aU\_Q\_a]a  
@HWI-EAS443:3:89:1216:1625#0/1  
CGCTGTCTGGCTGTCAGTAAGTATGCTAGAGTCCCGTTTT  
+HWI-EAS443:3:89:1216:1625#0/1  
`bbbbbbabbabaaU\_ab]\_a\_a\_U^[abaabTa¥abU\_[^  
@HWI-EAS443:3:89:1310:395#0/1  
TGGCTGTCAGTAAGTATGCTAGAGTCCCGTTTTCGTTTCA  
+HWI-EAS443:3:89:1310:395#0/1  
aaaaa`SXR¥LU^]X]U[R^^`]ZY\_X^`U]]aP[L\_ZKX  
@HWI-EAS443:3:89:134:415#0/1  
AAACGAAAACGGGACTCTAGCATACTTACTGACAGCCAGA  
+HWI-EAS443:3:89:134:415#0/1  
abbbb)``aaa`¥\_a`a`]a`a`^a`\_a`\_a\_\_``¥V¥`\_`  
@HWI-EAS443:3:89:239:1372#0/1  
GCCATCCGAATTCTTTTGGTCGCTGTCTGGCTGTCAGTAA  
+HWI-EAS443:3:89:239:1372#0/1  
^b\_V\_bb`XQZbabaaaa]a`aaa^a]ZY\_``Z\_`[S[¥  
@HWI-EAS443:3:89:246:1575#0/1  
GGCCATCCGAATTCTTTTGGTCGCTGTCTGGCTGTCAGTA  
+HWI-EAS443:3:89:246:1575#0/1  
Z[bbaaa`baW\_b]]\_a``aabbbabaa][R`adWF[]PY  
@HWI-EAS443:3:89:362:1132#0/1  
GCTGTCTGGCTGTCAGTAAGTATGCTAGAGTCCCGTTTTC  
+HWI-EAS443:3:89:362:1132#0/1  
aaaa\_aa`aaaaY^¥`S[V\_S^\_`[Z[¥R¥R`^^^ZV\_[R  
@HWI-EAS443:3:89:473:674#0/1  
TGGCCATCCGAATTCTTTTGGTCGCTGTCTGGCTGTCAGT  
+HWI-EAS443:3:89:473:674#0/1  
]abba^X^bbb`a\_bbabaab[baab`]\_`aba`\_H¥P`K  
@HWI-EAS443:3:89:660:1605#0/1  
TGGTAATGAAAACGAAAACGGGACTCTAGCATACTTACTGA  
+HWI-EAS443:3:89:660:1605#0/1  
`b^R`^aba`aaaa^aa\_aXa`\_\_`a`aaa``a`a`\_`aa  
@HWI-EAS443:3:89:732:81#0/1  
ACGAAAACGGGACTCTAGCATACTTACTGACAGCCAGACA  
+HWI-EAS443:3:89:732:81#0/1  
aabaaa`\_a\_a^^`\_`^`^^`a^`aaXa`\_`^\_a]Y]]Y\_  
@HWI-EAS443:3:89:845:834#0/1  
GTCGCTGTCTGGCTGTCAGTAAGTATGCTAGAGTCCCGTT  
+HWI-EAS443:3:89:845:834#0/1  
a\_abaaa^^`[a\_\_aXNT\_RUV\_GXUS\_TIT]a0[L¥\_U\_  
@HWI-EAS443:3:8:1049:1045#0/1  
GCTGTCTGGCTGTCAGTAAGTATGCTAGAGTCCCGTTTTCGTTTCA  
+HWI-EAS443:3:8:1049:1045#0/1  
aa`\_`\_a`]`aa\_a`aaa`\_a]]\_``V¥\_\_`[`Y\_\_]\_\_\_\_  
@HWI-EAS443:3:8:155:688#0/1  
AATGAAAACGAAAACGGGACTCTAGCATACTTACTGACAGC

+HWI-EAS443:3:8:155:688#0/1  
a[]bYJb`WbaP¥JPNSaUY[Z[ZaaV]^R\_]a`U[^a  
@HWI-EAS443:3:8:1565:655#0/1  
TGGTCGCTGTCTGGCTGTCAGTAAGTATGCTAGAGTCCCG  
+HWI-EAS443:3:8:1565:655#0/1  
S]\_Z\_\_W^\_[a¥¥\_¥a¥Q[RYVKXZRY[XUV\_aS\_TB BBB  
@HWI-EAS443:3:8:1786:1175#0/1  
GTCGCTGTCTGGCTGTCAGTAAGTATGCTAGAGTCCCGTT  
+HWI-EAS443:3:8:1786:1175#0/1  
a¥W\_`^a\_`aa^QZaVLV^PLT[YRVYNZUUUVQSSPNDR  
@HWI-EAS443:3:8:573:751#0/1  
CTGTCAGTAAGTATGCTAGAGTCCCGTTTTTCGTTTCATTA  
+HWI-EAS443:3:8:573:751#0/1  
abbaaab`b^b`\_JabbbbbbaaVbbaaaab`aa¥aa`a  
@HWI-EAS443:3:8:624:1503#0/1  
AGTAAGTATGCTAGAGTCCCGTTTTTCGTTTCATTACCAAC  
+HWI-EAS443:3:8:624:1503#0/1  
OF^b¥bJ`a[b`bUaZNY]^a[^aT\_ZV\_U`\_]VG\_aU  
@HWI-EAS443:3:8:837:1487#0/1  
ATCCGAATTCTTTTGGTCGCTGTCTGGCTGTCAGTAAGTA  
+HWI-EAS443:3:8:837:1487#0/1  
aba\_bb\_aaa\_`aaaa[Ya\_\_a¥]\_\_W\_a^QUY\_R\_\_BBB  
@HWI-EAS443:3:90:1240:475#0/1  
TGGCCATCCGAATTCTTTTGGTCGCTGTCTGGCTGTCAGT  
+HWI-EAS443:3:90:1240:475#0/1  
ab\_WV\_UQ¥b]W\_¥W`a`aaa^[[¥\_bXV`^OTRSPVaL  
@HWI-EAS443:3:90:1288:210#0/1  
TACTTACTGACAGCCAGACAGCGACCAAAAGAATTCGGAT  
+HWI-EAS443:3:90:1288:210#0/1  
ababbbbaaYLaa``abaaaa\_b^^Y]`a\_a`aZ^]``R\_  
@HWI-EAS443:3:90:137:1208#0/1  
GTTGGTAATGAAACGAAAACGGGACTCTAGCATACTTACT  
+HWI-EAS443:3:90:137:1208#0/1  
a¥WO]ZS]`U]]W^¥PSMH^a\_^TN¥S^\_X[¥WRV[PXFV  
@HWI-EAS443:3:90:1657:144#0/1  
AACGGGACTCTAGCATACTTACTGACAGCCAGACAGCGAC  
+HWI-EAS443:3:90:1657:144#0/1  
a`bb]OX`bab\_\_Uab`\_abaabaa`aa[aaaa\_\_a^``V  
@HWI-EAS443:3:90:367:480#0/1  
GTCGCTGTCTGGCTGTCAGTAAGTATGCTAGAGTCCCGTT  
+HWI-EAS443:3:90:367:480#0/1  
^^aab`b\_aaaa`^aVa¥RMXZ[F\_\_`]X\_a\_[FV\_a]M[  
@HWI-EAS443:3:90:63:277#0/1  
GAATTCTTTTGGTCGCTGTCTGGCTGTCAGTAAGTATGCT  
+HWI-EAS443:3:90:63:277#0/1  
`UU^`[U`V`Z^`a`YJXB BBBB BBBB BBBB BBBB  
@HWI-EAS443:3:90:723:333#0/1  
CTGTCTGGCTGTCAGTAAGTATGCTAGAGTCCCGTTTTTCG  
+HWI-EAS443:3:90:723:333#0/1  
aaaa[S^`a`]LTT\_N[¥][`MY¥\_]a^\_V]W^^]¥a`YX

@HWI-EAS443:3:91:1023:626#0/1  
GTCAGTAAGTATGCTAGAGTCCCGTTTTTCGTTTCATTACC  
+HWI-EAS443:3:91:1023:626#0/1  
a`[\_¥F¥X`QQU^a]`ZUZ[]Y YNUZ^^V^Y]ZQY^Z\_VO  
@HWI-EAS443:3:91:1074:612#0/1  
GGCCATCCGAATTCTTTTGGTCGCTGTCTGGCTGTCAGTA  
+HWI-EAS443:3:91:1074:612#0/1  
aZ¥¥`b`SS\_¥`b\_a¥`aaaQab\_`aPTVaa``\_N[H\_UV  
@HWI-EAS443:3:91:1105:801#0/1  
TGGCTGTCAGTAAGTATGCTAGAGTCCCGTTTTTCGTTTCA  
+HWI-EAS443:3:91:1105:801#0/1  
ab\_aaba\_W\_SU`]QZZ`^]`^W]]U```U\_aa¥[``a¥Y  
@HWI-EAS443:3:91:1130:50#0/1  
GCTGTCTGGCTGTCAGTAAGTATGCTAGAGTCCCGTTTTTC  
+HWI-EAS443:3:91:1130:50#0/1  
a]``XU]``Y¥`UUX`WVW^X]SOKWUJUY^QVSX^YWWZP  
@HWI-EAS443:3:91:1542:1119#0/1  
ACGGGACTCTAGCATACTTACTGACAGCCAGACAGCGACC  
+HWI-EAS443:3:91:1542:1119#0/1  
aa^Y\_Z^b\_aa\_]b]]b`b]bbaP`a\_aabba`aUaaSU  
@HWI-EAS443:3:91:1600:431#0/1  
ATCCGAATTCTTTTGGTCGCTGTCTGGCTGTCAGTAAGTA  
+HWI-EAS443:3:91:1600:431#0/1  
ab[Ybbaaaaba\_ba]aaa[bba`baaTa`\_¥[\_VZa`U`  
@HWI-EAS443:3:91:568:375#0/1  
GGCCATCCGAATTCTTTTGGTCGCTGTCTGGCTGTCAGTA  
+HWI-EAS443:3:91:568:375#0/1  
aUa`\_Za^a`^a`a]`[X[X\_]¥`\_W¥\_[¥VZWWWVNUW  
@HWI-EAS443:3:91:614:1084#0/1  
GCTGTCAGTAAGTATGCTAGAGTCCCGTTTTTCGTTTCATT  
+HWI-EAS443:3:91:614:1084#0/1  
aa``Z^Y^R¥a`X¥X[\_\_\_a[\_WVZZ[`U\_`^¥aU^¥UU^¥  
@HWI-EAS443:3:91:728:1324#0/1  
CTGGCTGTCAGTAAGTATGCTAGAGTCCCGTTTTTCGTTTC  
+HWI-EAS443:3:91:728:1324#0/1  
aa\_abbau```Vab\_ab`\_\_a\_\_b`Ka`b`¥`b`W`]abW  
@HWI-EAS443:3:91:816:2029#0/1  
CTGGCTGTCAGTAAGTATGCTAGAGTCCCGTTTTTCGTTTC  
+HWI-EAS443:3:91:816:2029#0/1  
aabab`bUaaZTa\_]Sb\_\_aa]L\_YRaa]\_U\_aa\_aZ`a\_  
@HWI-EAS443:3:91:906:1702#0/1  
ATCCGAATTCTTTTGGTCGCTGTCTGGCTGTCAGTAAGTA  
+HWI-EAS443:3:91:906:1702#0/1  
aaaaaaaba`aaaa[]a`a`aaYa]Z\_\_\_\_¥KK]¥QQ^ZP^  
@HWI-EAS443:3:92:1058:1365#0/1  
ATTGATGGCCATCCGAATTCTTTTGGTCGCTGTCTGGCTG  
+HWI-EAS443:3:92:1058:1365#0/1  
a\_^aa\_aa`[aa`aa\_a``aaa\_a\_Z^aa\_`V]`V\_\_  
@HWI-EAS443:3:92:1547:306#0/1  
CGAAAACGGGACTCTAGCATACTTACTGACAGCCAGACAG

+HWI-EAS443:3:92:1547:306#0/1  
ababab]bb[aab]bba^`ab^bbbabba`ba]^ba\_Yaa  
@HWI-EAS443:3:92:241:650#0/1  
TGGTAATGAAACGAAAACGGGACTCTAGCATACTTACTGA  
+HWI-EAS443:3:92:241:650#0/1  
aab^[babb`[\_baa`a[baa`a`\_b[\_a`[a`\_\_a\_a^  
@HWI-EAS443:3:92:24:559#0/1  
GTCAGTAAGTATGCTAGAGTCCCGTTTTCGTTTCATTACC  
+HWI-EAS443:3:92:24:559#0/1  
a^a^a`\_\_Wa\_a\_\_\_\_`\_]^[^]aZ^`\_]aZ^^^[\_][ZV  
@HWI-EAS443:3:92:27:1529#0/1  
AATTGATGGCCATCCGAATTCTTTTGGTCGCTGTCTGGCT  
+HWI-EAS443:3:92:27:1529#0/1  
HYTZ`a¥¥I[\_¥ZW`^`W\_S`YSY^YFW`Ya^WU\_WTVBB  
@HWI-EAS443:3:92:363:744#0/1  
TCCGAATTCTTTTGGTCGCTGTCTGGCTGTCAGTAAGTAT  
+HWI-EAS443:3:92:363:744#0/1  
`bbbbbbbaabbaabb`ba\_bb`aaabaWaY¥`aV`XXNX^  
@HWI-EAS443:3:92:370:451#0/1  
GTAAGTATGCTAGAGTCCCGTTTTCGTTTCATTACCAACA  
+HWI-EAS443:3:92:370:451#0/1  
a^VW¥aab\_T]a`ab^]T[^UXS¥\_XVY`\_`a\_WT]]W]X  
@HWI-EAS443:3:92:463:1600#0/1  
GTCGCTGTCTGGCTGTCAGTAAGTATGCTAGAGTCCCGTT  
+HWI-EAS443:3:92:463:1600#0/1  
\_\_aWbaa`aaa^\_[\_\_\_\_`Y\_a`N[OP^Z`[Q^N\_\_\_\_]GR  
@HWI-EAS443:3:92:565:995#0/1  
TGGCCATCCGAATTCTTTTGGTCGCTGTCTGGCTGTCAGT  
+HWI-EAS443:3:92:565:995#0/1  
aaaaabaaaaa\_aa`aaa`aa`a\_a`X`\_\_`]]\_SPY[N  
@HWI-EAS443:3:92:733:511#0/1  
GCTGTCAGTAAGTATGCTAGAGTCCCGTTTTCGTTTCATT  
+HWI-EAS443:3:92:733:511#0/1  
aaaa\_a`b\_aab\_aaa\_a\_a[a^^]aa`aa^a]a¥QY\_a  
@HWI-EAS443:3:92:939:1126#0/1  
CTGGCTGTCAGTAAGTATGCTAGAGTCCCGTTTTCGTTTC  
+HWI-EAS443:3:92:939:1126#0/1  
abbbbbbaa`a`a`a`\_PX`\_a]a]\_\_aa^`aa`\_]`^aW  
@HWI-EAS443:3:93:1200:202#0/1  
GTCGCTGTCTGGCTGTCAGTAAGTATGCTAGAGTCCCGTT  
+HWI-EAS443:3:93:1200:202#0/1  
aX^\_V\_a^`\_`W`\_V]]\_UV]]XU]VQYVX^VMDMVYVB  
@HWI-EAS443:3:93:1316:914#0/1  
TGTCTGGCTGTCAGTAAGTATGCTAGAGTCCCGTTTTCGT  
+HWI-EAS443:3:93:1316:914#0/1  
a[Z¥a\_]\_aaQHMOQZ¥^X]\_Z]WLWV]XUWZ`Z^\_]Q[Z  
@HWI-EAS443:3:93:642:1823#0/1  
AATTGATGGCCATCCGAATTCTTTTGGTCGCTGTCTGGCT  
+HWI-EAS443:3:93:642:1823#0/1  
`¥\_b````\_[abba¥a`aa`ab\_ab\_¥Sa][b`R`\_a^`¥

@HWI-EAS443:3:93:676:572#0/1  
CTGGCTGTCAGTAAGTATGCTAGAGTCCCGTTTTCGTTTC  
+HWI-EAS443:3:93:676:572#0/1  
``\_abbaXWX¥M]aa^\_[Y\_RTaW`VN¥b\_]`¥Z¥R`\_a  
@HWI-EAS443:3:93:975:518#0/1  
GGCCATCCGAATTCTTTTGGTCGCTGTCTGGCTGTCAGTA  
+HWI-EAS443:3:93:975:518#0/1  
a\_a¥\_[\_[aa\_a^R[\_a`a¥T\_a¥]\_YU`\_]^^\_VMR[VT  
@HWI-EAS443:3:93:998:1925#0/1  
GGCCATCCGAATTCTTTTGGTCGCTGTCTGGCTGTCAGTA  
+HWI-EAS443:3:93:998:1925#0/1  
`abababb``a`a`abaa[\_aaaa\_\_aa[aaa\_¥SZU]  
@HWI-EAS443:3:94:1241:818#0/1  
TTGGTAATGAAACGAAAACGGGACTCTAGCATACTTACTG  
+HWI-EAS443:3:94:1241:818#0/1  
a^^a^a]bbQaY`YZaa¥\_\_TaaU``Saa\_^a`R^a\_R`  
@HWI-EAS443:3:94:1415:1135#0/1  
GCCATCCGAATTCTTTTGGTCGCTGTCTGGCTGTCAGTAA  
+HWI-EAS443:3:94:1415:1135#0/1  
a¥ab`\_abaabbYa`ab`a`\_a[\_[WU`a`W`aZ¥U\_SW^  
@HWI-EAS443:3:94:1771:800#0/1  
CTCTAGCATACTTACTGACAGCCAGACAGCGACCAAAAAGA  
+HWI-EAS443:3:94:1771:800#0/1  
a\_Z`^`\_]ULL[`^]a]a^`]] [¥^U[¥]`ZVTZW^YU^  
@HWI-EAS443:3:94:212:236#0/1  
GGTCGCTGTCTGGCTGTCAGTAAGTATGCTAGAGTCCCGT  
+HWI-EAS443:3:94:212:236#0/1  
ab[a`a`Z\_\_a\_\_\_\_`VYNYQX¥YV[UVTQV^RZNUUU[G  
@HWI-EAS443:3:94:235:667#0/1  
CGCTGTCTGGCTGTCAGTAAGTATGCTAGAGTCCCGTTTT  
+HWI-EAS443:3:94:235:667#0/1  
\_a`aa]ab\_^^`\_`ZRVY`¥GYXWX¥X¥[`[SW[¥SVa\_  
@HWI-EAS443:3:94:303:17#0/1  
AGGGGACGTGGTGTGGTAATGAAACGAAAACGGGACTCT  
+HWI-EAS443:3:94:303:17#0/1  
`W^`\_Iab[F^Z`\_b`aS[¥bbaa]R`T\_]`Y\_¥]YSWTY  
@HWI-EAS443:3:94:309:33#0/1  
TCCGAATTCTTTTGGTCGCTGTCTGGCTGTCAGTAAGTAT  
+HWI-EAS443:3:94:309:33#0/1  
aaaaa`aa^`a`a\_a\_aa\_`a\_]^^^[\_^SVS]VPYVKXX  
@HWI-EAS443:3:94:742:1214#0/1  
GTCGCTGTCTGGCTGTCAGTAAGTATGCTAGAGTCCCGTT  
+HWI-EAS443:3:94:742:1214#0/1  
a]¥Z`ba\_`\_a)`abT¥[a\_`aVX\_NZRJZ`[aVZW^aU`  
@HWI-EAS443:3:94:982:107#0/1  
CTGTCAGTAAGTATGCTAGAGTCCCGTTTTCGTTTCATTA  
+HWI-EAS443:3:94:982:107#0/1  
`babbabababaabbabababaa`\_b\_`bb]aaab\_aaaa  
@HWI-EAS443:3:95:1050:1628#0/1  
GGCTGTCAGTAAGTATGCTAGAGTCCCGTTTTCGTTTCAT

+HWI-EAS443:3:95:1050:1628#0/1  
ab`ab`^aZQ¥aa\_¥ZS[`W^`U¥H¥^Pa\_aX[N¥aWY^  
@HWI-EAS443:3:95:1181:230#0/1  
CCGAATTCTTTTGGTCGCTGTCTGGCTGTCAGTAAGTATG  
+HWI-EAS443:3:95:1181:230#0/1  
abb\_Q\_a\_W`b¥`XXW\_WSMVa`abU]aRHXbV\_ZQZVBB  
@HWI-EAS443:3:95:1321:1164#0/1  
GCCATCCGAATTCTTTTGGTCGCTGTCTGGCTGTCAGTAA  
+HWI-EAS443:3:95:1321:1164#0/1  
a`bbbb^b`bbbbbbabbaV`bbbbbbb`\_b]a]\_Z]a  
@HWI-EAS443:3:95:380:1211#0/1  
GTCGCTGTCTGGCTGTCAGTAAGTATGCTAGAGTCCCGTT  
+HWI-EAS443:3:95:380:1211#0/1  
a\_b`a`\_`aX^`a^IXUYV\_\_\_U\_¥\_a[UN]YO\_^\_XHX  
@HWI-EAS443:3:95:489:641#0/1  
CTGGCTGTCAGTAAGTATGCTAGAGTCCCGTTTTTCGTTTC  
+HWI-EAS443:3:95:489:641#0/1  
`babbbb\_ba\_[ba^V`aa\_a`a\_a\_aaabGaabW`^a]N  
@HWI-EAS443:3:95:664:1242#0/1  
TGGCTGTCAGTAAGTATGCTAGAGTCCCGTTTTTCGTTTCA  
+HWI-EAS443:3:95:664:1242#0/1  
¥abbb\_P]U\_OYaVR[]UG[\_¥^`\_`aa^H]a`a`S]]]T  
@HWI-EAS443:3:95:797:388#0/1  
GGCCATCCGAATTCTTTTGGTCGCTGTCTGGCTGTCAGTA  
+HWI-EAS443:3:95:797:388#0/1  
a¥abbb[\_a][abZbbbbba[H\_abb`baab`baJP`a\_\_  
@HWI-EAS443:3:95:865:1248#0/1  
GTCGCTGTCTGGCTGTCAGTAAGTATGCTAGAGTCCCGTT  
+HWI-EAS443:3:95:865:1248#0/1  
aY^aaaa[`aaa\_`^Y^^[RYaaVX]¥Z\_YZ^[[[U\_\_Y^  
@HWI-EAS443:3:95:954:1730#0/1  
ATTGATGGCCATCCGAATTCTTTTGGTCGCTGTCTGGCTG  
+HWI-EAS443:3:95:954:1730#0/1  
aa\_`Y`\_`bbbbba[a[`aa[abbbab\_\_`a`bJaa^\_\_\_[  
@HWI-EAS443:3:96:1061:1506#0/1  
AGTAAGTATGCTAGAGTCCCGTTTTTCGTTTCATTACCAAC  
+HWI-EAS443:3:96:1061:1506#0/1  
ab]Saaabb^DY\_b`a[aaYbaaaa[a\_aa`]aaa\_aa``  
@HWI-EAS443:3:96:1302:1627#0/1  
AATTGATGGCCATCCGAATTCTTTTGGTCGCTGTCTGGCT  
+HWI-EAS443:3:96:1302:1627#0/1  
Vb]aaa^ab^S\_a^[b`a`^aaaa\_]¥NXR\_a\_Xa^aX\_  
@HWI-EAS443:3:96:156:1610#0/1  
CAGTAAGTATGCTAGAGTCCCGTTTTTCGTTTCATTACCAA  
+HWI-EAS443:3:96:156:1610#0/1  
aaa]aa[aaaaaaaa`a\_`\_`aa`a^``aaa\_`^aa]  
@HWI-EAS443:3:96:231:1970#0/1  
AATTGATGGCCATCCGAATTCTTTTGGTCGCTGTCTGGCT  
+HWI-EAS443:3:96:231:1970#0/1  
\_¥a^\_TU^aabbabba^¥`aaa\_b`IaH^a]\_^S\_X`BBB

@HWI-EAS443:3:96:254:1315#0/1  
TGTCAGTAAGTATGCTAGAGTCCCGTTTTTCGTTTCATTAC  
+HWI-EAS443:3:96:254:1315#0/1  
a``aaa^[a]\_`a`abaaaa\_a`\_a]^aa[a]`\_U\_`)]`  
@HWI-EAS443:3:96:348:609#0/1  
CTGGCTGTCAGTAAGTATGCTAGAGTCCCGTTTTTCGTTTC  
+HWI-EAS443:3:96:348:609#0/1  
abbbabb^aaaaaab\_aaa\_a`)]G]]Z\_V\_`¥Q\_V`aY  
@HWI-EAS443:3:96:403:1142#0/1  
GTTGGTAATGAAACGAAAACGGGACTCTAGCATACTTACT  
+HWI-EAS443:3:96:403:1142#0/1  
YUa`Y`\_aa`a^bWUU0]]Z\_aa^\_a`T][`YJX^a\_aZ\_  
@HWI-EAS443:3:96:681:169#0/1  
GCTGTCAGTAAGTATGCTAGAGTCCCGTTTTTCGTTTCATT  
+HWI-EAS443:3:96:681:169#0/1  
a`aa```aXa\_\_Y`\_`[]\_¥`WW]X`RZ]^U`X^^WZ]]  
@HWI-EAS443:3:97:1630:1044#0/1  
TAATTGATGGCCATCCGAATTCTTTTGGTCGCTGTCTGGC  
+HWI-EAS443:3:97:1630:1044#0/1  
aabaaaaa\_\_Ra^\_Y``\_aa\_aa`aaaXVaV``XUa]\_B  
@HWI-EAS443:3:97:381:1082#0/1  
GGCCATCCGAATTCTTTTGGTCGCTGTCTGGCTGTCAGTA  
+HWI-EAS443:3:97:381:1082#0/1  
aab[a`bUY`a[]Ub\_ba`a^`\_]`aY[`aa]a^NRUaBB  
@HWI-EAS443:3:97:401:495#0/1  
TGTCAGTAAGTATGCTAGAGTCCCGTTTTTCGTTTCATTAC  
+HWI-EAS443:3:97:401:495#0/1  
a`\_`\_b]a^`\_a``\_a`a\_aZ`^\_a^^`\_\_\_\_]``¥\_\_`\_^  
@HWI-EAS443:3:97:420:233#0/1  
GGCCATCCGAATTCTTTTGGTCGCTGTCTGGCTGTCAGTA  
+HWI-EAS443:3:97:420:233#0/1  
Yb]^`^Tba¥^Z\_bbabaabaaYa\_`aU`^]VJ]a¥RXTGT  
@HWI-EAS443:3:97:450:1122#0/1  
GATGGCCATCCGAATTCTTTTGGTCGCTGTCTGGCTGTCA  
+HWI-EAS443:3:97:450:1122#0/1  
abba[bbbb`aababaaaaaaa^ab\_a`^`a`^aaTT]  
@HWI-EAS443:3:97:786:784#0/1  
CTGGCTGTCAGTAAGTATGCTAGAGTCCCGTTTTTCGTTTC  
+HWI-EAS443:3:97:786:784#0/1  
aabbabb[\_b]JR\_¥]aa`baZ^^Z[\_[a\_aabRb\_a\_S  
@HWI-EAS443:3:98:1008:90#0/1  
AATTGATGGCCATCCGAATTCTTTTGGTCGCTGTCTGGCT  
+HWI-EAS443:3:98:1008:90#0/1  
a```\_]R¥]YNW¥0¥a]]bVaZ¥\_a]ZOM[G[\_XY[UWBB  
@HWI-EAS443:3:98:1075:296#0/1  
CTTTTGGTCGCTGTCTGGCTGTCAGTAAGTATGCTAGAGT  
+HWI-EAS443:3:98:1075:296#0/1  
ababbbabb`bbbabbbb`[Raa]\_baUaa]Yaaa\_a[  
@HWI-EAS443:3:98:1094:1075#0/1  
ATCCGAATTCTTTTGGTCGCTGTCTGGCTGTCAGTAAGTA

+HWI-EAS443:3:98:1094:1075#0/1  
aa¥Z`aaa`\_`a`a`a`\_a`Wa`¥`\_`\_]`\_`YY[\_VX][RW  
@HWI-EAS443:3:98:308:1202#0/1  
CAGTAAGTATGCTAGAGTCCCGTTTTCGTTTCATTACCAA  
+HWI-EAS443:3:98:308:1202#0/1  
`YQT^^`R``\_`aaab`¥]aaabZa`ZY`¥``[[X¥`^N\_  
@HWI-EAS443:3:98:325:2019#0/1  
ATCCGAATTCTTTTGGTCGCTGTCTGGCTGTCAGTAAGTA  
+HWI-EAS443:3:98:325:2019#0/1  
aa]aaa`a`]\_\_a\_\_\_\_]`^]\_\_X]^^^][\_RY]TDO^NTB  
@HWI-EAS443:3:98:381:818#0/1  
GTTGGTAATGAAACGAAAACGGGACTCTAGCATACTTACT  
+HWI-EAS443:3:98:381:818#0/1  
a`baa`^`ab`a`aaa``¥Z`]W]`^`\_Z^`\_\_\_\_^W`]\_Z\_  
@HWI-EAS443:3:98:456:1121#0/1  
CTGTCAGTAAGTATGCTAGAGTCCCGTTTTCGTTTCATTA  
+HWI-EAS443:3:98:456:1121#0/1  
aabb^¥`a`bb\_aaabaabab`\_¥^b]aaaabaaa``baa  
@HWI-EAS443:3:98:519:903#0/1  
CTGTCAGTAAGTATGCTAGAGTCCCGTTTTCGTTTCATTA  
+HWI-EAS443:3:98:519:903#0/1  
I\_`^¥^`aaVTY\_``\_`abZ`¥V¥¥`¥^V\_\_TF]]ZZ]¥`¥W  
@HWI-EAS443:3:98:622:1015#0/1  
GTCAGTAAGTATGCTAGAGTCCCGTTTTCGTTTCATTACC  
+HWI-EAS443:3:98:622:1015#0/1  
YH¥`a^`\_\_\_\_`]0]U¥\_\_¥]WZSW`Z^a`WSY`]TNW`FQ  
@HWI-EAS443:3:98:637:1418#0/1  
CTGGCTGTCAGTAAGTATGCTAGAGTCCCGTTTTCGTTTC  
+HWI-EAS443:3:98:637:1418#0/1  
ab`b`ab``\_b^`aaQa`a]a`[\_a\_]ZZa[^aa\_aYaaV  
@HWI-EAS443:3:98:715:1420#0/1  
GGACTCTAGCATACTTACTGACAGCCAGACAGCGACCAAAA  
+HWI-EAS443:3:98:715:1420#0/1  
aaZU^[`aaaa[``\_`a`¥[a\_[aa`Y]`\_``]a\_R]]\_\_  
@HWI-EAS443:3:98:716:970#0/1  
CTGGCTGTCAGTAAGTATGCTAGAGTCCCGTTTTCGTTTC  
+HWI-EAS443:3:98:716:970#0/1  
ab`aba`UWO]¥^aZL]VZ]\_ZT]ZW]¥`a¥Ta^]]NYUP  
@HWI-EAS443:3:98:868:1911#0/1  
TCCGAATTCTTTTGGTCGCTGTCTGGCTGTCAGTAAGTAT  
+HWI-EAS443:3:98:868:1911#0/1  
aaXb\_aaaaaaaaa`a`a`\_a^\_a`aYZ`ZZ\_`]a]X\_^  
@HWI-EAS443:3:98:940:770#0/1  
CTGGCTGTCAGTAAGTATGCTAGAGTCCCGTTTTCGTTTC  
+HWI-EAS443:3:98:940:770#0/1  
ab`a`b`V\_X`WZ``[ZQ¥Y``]`aT^aab\_\_aaY`^^^F  
@HWI-EAS443:3:99:1026:642#0/1  
CATCCGAATTCTTTTGGTCGCTGTCTGGCTGTCAGTAAGT  
+HWI-EAS443:3:99:1026:642#0/1  
aabaa\_aZ^baba``aaaab\_abaaba][\_ZPPWYX\_W]V



@HWI-EAS443:3:99:1216:304#0/1  
ATCCGAATTCTTTTGGTCGCTGTCTGGCTGTCAGTAAGTA  
+HWI-EAS443:3:99:1216:304#0/1  
ab^`aaabb\_bbbbab\_\_\_Yaa\_\_aa\_U\_aRPWaUU][W^  
@HWI-EAS443:3:99:1219:1474#0/1  
GCTGTCTGGCTGTCAGTAAGTATGCTAGAGTCCCGTTTTTC  
+HWI-EAS443:3:99:1219:1474#0/1  
`aaa\_\_aYa\_aa¥^Ua^`\_\_U]a\_X`\_`N\_\_]^\_aR^`\_^  
@HWI-EAS443:3:99:1455:1211#0/1  
GAAACGAAAACGGGACTCTAGCATACTTACTGACAGCCAG  
+HWI-EAS443:3:99:1455:1211#0/1  
aaaa\_aaaaaZ\_a`\_\_a\_a\_a[a^aXa``¥aa\_^a`[Y\_X  
@HWI-EAS443:3:99:1585:896#0/1  
ATTGATGGCCATCCGAATTCTTTTGGTCGCTGTCTGGCTG  
+HWI-EAS443:3:99:1585:896#0/1  
aa`baaba``ba\_\_b\_aaW``aaaa\_`aU`a`N\_`\_UaB  
@HWI-EAS443:3:99:216:494#0/1  
GTGTTGGTAATGAAACGAAAACGGGACTCTAGCATACTTA  
+HWI-EAS443:3:99:216:494#0/1  
a^a\_aaaUY¥a\_\_`a\_`\_\_^\_^\_^X]\_^\_^`QFZ^VZ^\_  
@HWI-EAS443:3:99:306:224#0/1  
ATCCGAATTCTTTTGGTCGCTGTCTGGCTGTCAGTAAGTA  
+HWI-EAS443:3:99:306:224#0/1  
aaaabaaaa`aaaaa\_`a\_`a]\_^``]\_\_TSV¥PWVVUV  
@HWI-EAS443:3:99:396:1356#0/1  
GCTGTCAGTAAGTATGCTAGAGTCCCGTTTTTCGTTTCATT  
+HWI-EAS443:3:99:396:1356#0/1  
aa`]XG[\_U]TZRW[\_NVR]U`NQUOZMX\_\_Y¥U`]X^`]  
@HWI-EAS443:3:99:59:155#0/1  
AATGAAACGAAAACGGGACTCTAGCATACTTACTGACAGC  
+HWI-EAS443:3:99:59:155#0/1  
[abbabbabVaa`Rbaa\_^`\_`\_`X\_a\_^``\_Y``]Y\_`X  
@HWI-EAS443:3:99:629:559#0/1  
AATGAAACGAAAACGGGACTCTAGCATACTTACTGACAGC  
+HWI-EAS443:3:99:629:559#0/1  
[^]`a\_\_[\_b]bbabbb`[aaabaa`aa[^Saaaa`a\_U  
@HWI-EAS443:3:99:912:1642#0/1  
CGCTGTCTGGCTGTCAGTAAGTATGCTAGAGTCCCGTTTT  
+HWI-EAS443:3:99:912:1642#0/1  
\_babba`a\_`bba\_bab`a^b^ba^\_aaSaZSYFL[RZba  
@HWI-EAS443:3:9:139:806#0/1  
ATTCTTTTGGTCGCTGTCTGGCTGTCAGTAAGTATGCTAG  
+HWI-EAS443:3:9:139:806#0/1  
a```a¥aaa`a`b\_\_`ZH]WZ¥`RRMFSFF¥\_]`^`^YBBB  
@HWI-EAS443:3:9:170:679#0/1  
CTGTCAGTAAGTATGCTAGAGTCCCGTTTTTCGTTTCATTA  
+HWI-EAS443:3:9:170:679#0/1  
¥\_\_a\_V\_TV\_YM\_a^\_\_aa`aUT[[aVPa`Y]V[ZW\_a`^  
@HWI-EAS443:3:9:1724:336#0/1  
GTCTGGCTGTCAGTAAGTATGCTAGAGTCCCGTTTTTCGTT

+HWI-EAS443:3:9:1724:336#0/1  
aRYW`VOX¥NURYUVSRWBBBBBBBBBBBBBBBBBBBB  
@HWI-EAS443:3:9:182:1156#0/1  
GTCGCTGTCTGGCTGTCAGTAAGTATGCTAGAGTCCCGTT  
+HWI-EAS443:3:9:182:1156#0/1  
a\_aa`Ya````a`^M[\_aW^^XTYRZ]W[FLWPVX^XGW  
@HWI-EAS443:3:9:303:139#0/1  
CCGAATTCTTTGGTCGCTGTCTGGCTGTCAGTAAGTATG  
+HWI-EAS443:3:9:303:139#0/1  
abbbabb\_babaa\_\_aaaa\_\_`\_a¥\_\_¥¥¥]PY¥UU^¥Z  
@HWI-EAS443:3:9:414:1839#0/1  
GCCAGACAGCGACCAAAGAATTCGGATGGCCATCAATTA  
+HWI-EAS443:3:9:414:1839#0/1  
`HT``\_aY^TRXWN\_¥]b[ZZXKTV\_^VVY]Z]]\_U  
@HWI-EAS443:3:9:646:1927#0/1  
GGTCGCTGTCTGGCTGTCAGTAAGTATGCTAGAGTCCCGT  
+HWI-EAS443:3:9:646:1927#0/1  
a^^aZ]^a\_\_\_`^[RaRUPX¥[`YXUNUGUPWPGURLLXR  
@HWI-EAS443:3:9:909:370#0/1  
GGCTGTCAGTAAGTATGCTAGAGTCCCGTTTTCGTTTCAT  
+HWI-EAS443:3:9:909:370#0/1  
a`a]R]Y`TM^a0a\_\_¥\_U\_]\_WXZ]\_R^`^R\_W\_^O\_]`  
@HWI-EAS443:3:34:1506:1491#0/1  
AAAGCAGGCAAACCATTTGAATGGATGTCAATCCGAGTCT  
+HWI-EAS443:3:34:1506:1491#0/1  
^]TT^\_a`YZ¥aaa\_b^]``]¥W]]aPH`aUJSSOFRTZ  
@HWI-EAS443:3:48:419:1691#0/1  
GTCTGAGTTCTTCAATGGTGAACAGATCTTATGATCTCA  
+HWI-EAS443:3:48:419:1691#0/1  
a`a\_ZR^]]aaaU````^U¥Q\_]N]]HVZ``a¥[¥U\_^]]  
@HWI-EAS443:3:75:1344:1478#0/1  
CGTCTGAGTTCTTCAATGGTGAACAGATCTTATGATCTC  
+HWI-EAS443:3:75:1344:1478#0/1  
a`a¥`[¥^b`aab¥^a`bW]¥bbbab\_\_I`abbaa\_WWa  
@HWI-EAS443:3:76:1755:187#0/1  
GCTGTGTGAGTTCTTCAATGGTGAACAGATCTTCATGAT  
+HWI-EAS443:3:76:1755:187#0/1  
a^aaSFYaX]XYX^]SZUPXXX^^WOUZRXXW]^XZYXY  
@HWI-EAS443:3:79:1399:1432#0/1  
GCCGTTTCTGAGTTCTTCAATGGTGAACAGATCTTCATG  
+HWI-EAS443:3:79:1399:1432#0/1  
\_ab[Z¥]aab\_^J^Qaab`Y`^]¥aaaXW`a\_aN`^Z]aa  
@HWI-EAS443:3:38:894:84#0/1  
AGCCGTCTGAGTTCTTCAATGGTGAACAGATCTTCCTTT  
+HWI-EAS443:3:38:894:84#0/1  
aba`aabbbaa\_aYabaa`abaZba`a¥a`W\_Wa¥]\_``¥  
@HWI-EAS443:3:87:1774:576#0/1  
AGCCCGTCTGAGTTCTTCAATGGTGAACAGATCTTCAGG  
+HWI-EAS443:3:87:1774:576#0/1  
``ZXY[RTVZMUXVZU\_a]Z¥^YJYVNYVSYTOLBBBBBB

@HWI-EAS443:3:33:1260:1943#0/1  
AGCCGTCTGAGTTCTTCAATGGTGGAACAGATATTCATGA  
+HWI-EAS443:3:33:1260:1943#0/1  
^0[aa]]Y\_`Q\_aa\_aa`\_`\_V\_\_`a]\_`\_WZ[QL]TU^  
@HWI-EAS443:3:34:1275:502#0/1  
TGCCGTCTGAGTTCTTCAATGGTGGAACAGATCTTCTTGA  
+HWI-EAS443:3:34:1275:502#0/1  
`bbba¥\_ba^[T¥a`\_a]¥XaaU```[]a\_]¥Z\_`¥FX`\_  
@HWI-EAS443:3:6:229:1248#0/1  
TGCTGTCTGAGTTCTTCAATGGTGGAACAGATCTTCATGA  
+HWI-EAS443:3:6:229:1248#0/1  
aaa`aW`a`WPZ`]a\_\_]\_aaaOP[^\_¥¥\_W\_]\_X\_¥BB  
@HWI-EAS443:3:11:1356:1617#0/1  
CGTCTGAGTTCTTCAATGGGGAACAGATCTTCATGATCT  
+HWI-EAS443:3:11:1356:1617#0/1  
aba[\_a^^a`]b`b¥W`b\_N\_ba\_Zba\_XL]`Wa`\_\_]Y\_  
@HWI-EAS443:3:12:1655:940#0/1  
GCCGTCTGAGTTCTTCAATGGTGGAAAAGATCTTCATGAT  
+HWI-EAS443:3:12:1655:940#0/1  
]QFLV^RYR[NRW[QV¥BBBBBBBBBBBBBBBBBBBBBBB  
@HWI-EAS443:3:12:1693:486#0/1  
TTGCCGTCTGAGTTCTTCAATGGTGGAAAAGATCTTCATG  
+HWI-EAS443:3:12:1693:486#0/1  
¥ZXSMaa`\_bY\_RaSZU]Y^\_a^aaYVGT`WWMa`YaBB  
@HWI-EAS443:3:15:453:957#0/1  
GCCGTCTGAGTTCTTCAATGGTGGAACAGAACTTCATGAT  
+HWI-EAS443:3:15:453:957#0/1  
abb`]\_\_a`[Xaa[]\_a\_a`0a\_ZNUXXQFQ^[]\_Y\_¥W  
@HWI-EAS443:3:37:1542:229#0/1  
CGTCTGAGTTCTTCAATGGTGGAACAGATATTCATGATCT  
+HWI-EAS443:3:37:1542:229#0/1  
ab^R\_`^\_SOH]S][baaYNaaa`aa^S]Za`a\_`\_`a]\_  
@HWI-EAS443:3:39:1625:1243#0/1  
GCCGTCTGAGTTCTTCAATGGTGGAACAGATGTTTCATGAT  
+HWI-EAS443:3:39:1625:1243#0/1  
abab[ZSUUYX[Y^\_]SQTYYV\_a[^I^WNVFQXTX[^WQ  
@HWI-EAS443:3:49:370:1683#0/1  
CGTCTGAGTTCTTAAATGGTGGAACAGATCTTCATGATCT  
+HWI-EAS443:3:49:370:1683#0/1  
Y¥ZJ`bQX\_T[]aM¥bXa\_\_X¥\_aI`bK`JTY]Z¥\_bV]R  
@HWI-EAS443:3:57:537:62#0/1  
GTCTGAGTTCTTCAATGGTGGATCAGATCTTCATGATCTC  
+HWI-EAS443:3:57:537:62#0/1  
aaa`bab^a`a`]\_a\_aaZa`TDR`aZ`^^\_\_]^a^\_]^\_  
@HWI-EAS443:3:58:1681:1963#0/1  
GCCGTCTGAGTTCTTCAATGGTGGAACAGCTTCATGAT  
+HWI-EAS443:3:58:1681:1963#0/1  
aG]aXK0^[YU¥aUTS¥]^UPZ]]]O\_TGPM¥YUX]`[Y  
@HWI-EAS443:3:88:1054:1802#0/1  
CTGAGTTCTTCAATGGTGGAACAGATATTCATGATCTCAG

+HWI-EAS443:3:88:1054:1802#0/1  
X`b`b¥bbbb¥XbbbX^`[¥bba`Y\_KbbV¥baaa¥`\_bb  
@HWI-EAS443:3:89:997:93#0/1  
TGCCGTCTGAGTTCTTCAATGGTGAATAGATCTTCATGA  
+HWI-EAS443:3:89:997:93#0/1  
aaa¥a`Zb`a^a\_bb\_a¥aaaTa`\_¥P]aWaVa][``\_^  
@HWI-EAS443:3:97:1441:992#0/1  
GCCGTCTGAGTTCTTCAATGGTGAACAGATATTCATGAT  
+HWI-EAS443:3:97:1441:992#0/1  
`RN¥]PVaa\_]Y^a^]\_[WP[`S\_^W^IO^FOTHXW^\_\_  
@HWI-EAS443:3:15:866:417#0/1  
GCTGTCTGAGTTCTTCAATGGTGAACAGATCTTCATGAT  
+HWI-EAS443:3:15:866:417#0/1  
aaaa\_aaaa`U`aaa`\_aaaa]aa``\_`a`^a`^`\_a`\_  
@HWI-EAS443:3:30:1234:2019#0/1  
GCCGTCTGAGNTCTTCAATGGTGAACAGATCTTCATGAT  
+HWI-EAS443:3:30:1234:2019#0/1  
``a`Z\_Za`YDZa\_\_\_ab\_Z¥U]^a]]aX^a`aaa\_Z[[^  
@HWI-EAS443:3:32:1255:1020#0/1  
TTGCCGTCTGAGTTCTTCAATGGTGAACANATCTTCATG  
+HWI-EAS443:3:32:1255:1020#0/1  
Z^bZ^\_VabXW`a¥a]]ab^YYa¥]^`\_^PDJ]^Z`b^Ya  
@HWI-EAS443:3:15:738:732#0/1  
CAGCCGTCTGAGTTCTTCAATGGTGAACAGATCTTCATG  
+HWI-EAS443:3:15:738:732#0/1  
^bba\_^^`U`bb]\_]¥X^babb^I\_aV`\_aaababb]a`a  
@HWI-EAS443:3:22:1234:933#0/1  
AAGCCGTCTGAGTTCTTCAATGGTGAACAGATCTTCATG  
+HWI-EAS443:3:22:1234:933#0/1  
aaa`a`aaa``]a`aaaa\_aa¥Xa\_\_`\_\_a`¥a\_Z`\_`  
@HWI-EAS443:3:29:530:756#0/1  
GNCTGAGTTCTTCAATGGTGAACAGATCTTCATGATCTC  
+HWI-EAS443:3:29:530:756#0/1  
¥D¥]VLY^aaYY]^\_ZWXN`\_]¥Z[Z]^`\_\_^\_^XT¥Y  
@HWI-EAS443:3:33:1240:729#0/1  
CAGCCGTCTGAGTTCTTCAATGGTGAACAGATCTTCATG  
+HWI-EAS443:3:33:1240:729#0/1  
]a^a\_¥Wa\_\_¥b^aa`Z`\_a[¥[Q```]`\_`]TU[]^ZY]V  
@HWI-EAS443:3:45:106:1989#0/1  
CAGCCGTCTGAGTTCTTCAATGGTGAACAGATCTTCATG  
+HWI-EAS443:3:45:106:1989#0/1  
ab\_a`\_`aaa`\_[``a`\_\_ba`dWaY`\_Ya\_a\_]`\_^a`\_  
@HWI-EAS443:3:78:248:891#0/1  
GCCTGAGTTCTTCAATGGTGAACAGATCTTCATGATCTC  
+HWI-EAS443:3:78:248:891#0/1  
]L^ZTQ`IV`\_^`YVY`\_^a\_]W`\_\_`\_^X¥\_UZ^XXW^  
@HWI-EAS443:3:18:690:1542#0/1  
AGCCGTCTGAGTTCTTCAATGGTGAACAGATCTTCATGA  
+HWI-EAS443:3:18:690:1542#0/1  
Z]`b¥0^\_¥Z`H]ba`]\_\_\_]]TQ\_]^[^a\_Z^ZW[]\_\_S¥`

@HWI-EAS443:3:20:152:332#0/1  
AGCCGTCTGAGTTCTTCAATGGTGGAACAGATCTTCATGA  
+HWI-EAS443:3:20:152:332#0/1  
a\_a`aV`\_\_W`Z`\_\_^^UV^[^Z[\_¥\_\_`U^]Y]]][ZXZ  
@HWI-EAS443:3:20:1578:772#0/1  
GTGCCGTCTGAGTTCTTCAATGGTGGAACAGATCTTCATG  
+HWI-EAS443:3:20:1578:772#0/1  
[]bbaaT`bbab\_¥¥QS`aVW]YEXZX`]^WUZY\_\_]U^`  
@HWI-EAS443:3:27:562:609#0/1  
AGCCGTCTGAGTTCTTCAATGGTGGAACAGATCTTCATGA  
+HWI-EAS443:3:27:562:609#0/1  
`[abWSa\_`\_bab^aba¥a`aaWaaTV\_]\_X¥\_aaZaaa^  
@HWI-EAS443:3:2:1501:287#0/1  
AGCCGTCTGAGTTCTTCAATGGTGGAACAGATCTTCATGA  
+HWI-EAS443:3:2:1501:287#0/1  
aa`\_aW`aa\_a[aZaa^\_\_\_a^Wa\_\_\_U^a]`Z\_^]\_^\_^  
@HWI-EAS443:3:32:248:813#0/1  
AGCCGTCTGAGTTCTTCAATGGTGGAACAGATCTTCATGA  
+HWI-EAS443:3:32:248:813#0/1  
aaaba`aaaa\_\_aaaaZa\_a\_]`0\_[^`^]`^\_^```]]\_`  
@HWI-EAS443:3:39:930:870#0/1  
AGCCGTCTGAGTTCTTCAATGGTGGAACAGATCTTCATGA  
+HWI-EAS443:3:39:930:870#0/1  
`aaaaU`^aaa[`\_a\_\_a```\_X`\_\_¥¥TUZ]\_`]¥\_X  
@HWI-EAS443:3:47:801:1275#0/1  
AGCCGTCTGAGTTCTTCAATGGTGGAACAGATCTTCATGA  
+HWI-EAS443:3:47:801:1275#0/1  
aab\_aa`a`[`\_\_aa`a`\_aa`P```\_\_^``¥W[\_^Y`^^[  
@HWI-EAS443:3:55:954:154#0/1  
AGCCGTCTGAGTTCTTCAATGGTGGAACAGATCTTCATGA  
+HWI-EAS443:3:55:954:154#0/1  
¥Z\_¥`aPa\_ZXJ\_PZZ[¥\_]`bWaaZWKW]a`WYZQLWaT  
@HWI-EAS443:3:66:1579:236#0/1  
AGCCGTCTGAGTTCTTCAATGGTGGAACAGATCTTCATGA  
+HWI-EAS443:3:66:1579:236#0/1  
aX]aa`Yaaaa`b]aa¥a\_\_`V\_^a`Ua`^\_Xa`X\_]`X  
@HWI-EAS443:3:68:990:1249#0/1  
AGCCGTCTGAGTTCTTCAATGGTGGAACAGATCTTCATGA  
+HWI-EAS443:3:68:990:1249#0/1  
^a¥\_]Y^]]Z\_]\_aZ\_\_¥UY]ZL¥\_Y\_]\_\_\_\_][]¥^\_[\_]  
@HWI-EAS443:3:69:1521:2046#0/1  
NGCCGTCTGAGTTCTTCAATGGTGGAACAGATCTTCATGA  
+HWI-EAS443:3:69:1521:2046#0/1  
DKYXZZZXWZXVZZZXWZZXYWVXZZXZZXOZZXWXZX  
@HWI-EAS443:3:6:391:1116#0/1  
AGCCGTCTGAGTTCTTCAATGGTGGAACAGATCTTCATGA  
+HWI-EAS443:3:6:391:1116#0/1  
[b\_bba\_abbbaZbaa`\_a\_bba\_ab`aab`\_\_`a\_`a]`a  
@HWI-EAS443:3:79:1038:136#0/1  
AGCCGTCTGAGTTCTTCAATGGTGGAACAGATCTTCATGA



@HWI-EAS443:3:11:893:1257#0/1  
GCCGTCTGAGTTCTTCAATGGTGAACAGATCTTCATGAT  
+HWI-EAS443:3:11:893:1257#0/1  
\_a^]PU^\_R`SWZW]a`^`^GYZ^a[]]\_[V¥WOY[U[X  
@HWI-EAS443:3:12:643:1002#0/1  
TTGCCGTCTGAGTTCTTCAATGGTGAACAGATCTTCATG  
+HWI-EAS443:3:12:643:1002#0/1  
aa]a\_T^aaa\_\_\_aaaa`aaaa\_X\_\_a\_\_a`\_\_\_a`^```  
@HWI-EAS443:3:13:273:138#0/1  
GCCGTCTGAGTTCTTCAATGGTGAACAGATCTTCATGAT  
+HWI-EAS443:3:13:273:138#0/1  
aa`a^\_\_aZ`^\_\_\_\_^]`][X]]^\_]`^WXX^^^]X]XY  
@HWI-EAS443:3:13:42:1554#0/1  
GCCGTCTGAGTTCTTCAATGGTGAACAGATCTTCATGAT  
+HWI-EAS443:3:13:42:1554#0/1  
ab\_Z^^ZZZV^R^aa^\_`¥][W[``¥QYaXZ``a]Y^¥^  
@HWI-EAS443:3:13:55:369#0/1  
TGCCGTCTGAGTTCTTCAATGGTGAACAGATCTTCATGA  
+HWI-EAS443:3:13:55:369#0/1  
``aab`b^[^b\_aaaaa^aaa^a`\_a¥a`T^aaaZ]]`¥  
@HWI-EAS443:3:16:1260:515#0/1  
GCCGTCTGAGTTCTTCAATGGTGAACAGATCTTCATGAT  
+HWI-EAS443:3:16:1260:515#0/1  
ab`baaaaab^b`aa`\_aaaa^aa^aaaa\_a\_aa^a\_``  
@HWI-EAS443:3:16:1458:754#0/1  
GCCGTCTGAGTTCTTCAATGGTGAACAGATCTTCATGAT  
+HWI-EAS443:3:16:1458:754#0/1  
aaaaZVab\_baa`bb\_ZaaaaP``\_VT\_aU^Ua]L[aa`¥  
@HWI-EAS443:3:16:1629:684#0/1  
GCCGTCTGAGTTCTTCAATGGTGAACAGATCTTCATGAT  
+HWI-EAS443:3:16:1629:684#0/1  
aa``^aa`a¥`¥a\_Y\_\_a]¥Y\_Y]XZ^\_[[Y^]Q]¥\_] [  
@HWI-EAS443:3:16:578:668#0/1  
TTGCCGTCTGAGTTCTTCAATGGTGAACAGATCTTCATG  
+HWI-EAS443:3:16:578:668#0/1  
aaaba`^\_\_aaa]a\_a^\_\_Z[\_^Y\_^`^^`YY^^^\_]^^  
@HWI-EAS443:3:17:240:1447#0/1  
TGCCGTCTGAGTTCTTCAATGGTGAACAGATCTTCATGA  
+HWI-EAS443:3:17:240:1447#0/1  
`b``bU]ababY\_`¥¥b`Ra^]T\_XV\_`a`a[aaY¥a``  
@HWI-EAS443:3:17:915:772#0/1  
GTCTGAGTTCTTCAATGGTGAACAGATCTTCATGATCTC  
+HWI-EAS443:3:17:915:772#0/1  
aabbabb`bbbbabbbb]\_`a`babb^aababaaaaaaa  
@HWI-EAS443:3:18:963:1720#0/1  
CGTCTGAGTTCTTCAATGGTGAACAGATCTTCATGATCT  
+HWI-EAS443:3:18:963:1720#0/1  
`X[]`a`^P\_^`a]a`\_^URW]T[ZYZ]RUJ¥XYW¥[Z¥W  
@HWI-EAS443:3:19:570:713#0/1  
CGTCTGAGTTCTTCAATGGTGAACAGATCTTCATGATCT

+HWI-EAS443:3:19:570:713#0/1  
aa]aa[Z`¥aaa`a[]`a`X\_\_¥TM\_\_0^^` `]]\_¥YYU  
@HWI-EAS443:3:19:710:1342#0/1  
CGTCTGAGTTCTTCAATGGTGGAACAGATCTTCATGATCT  
+HWI-EAS443:3:19:710:1342#0/1  
aaU`\_`SRFSaa[\_ba]P¥]a]\_W\_`^`YU]¥a^^]W¥M^  
@HWI-EAS443:3:1:1214:412#0/1  
GCCGTCTGAGTTCTTCAATGGTGGAACAGATCTTCATGAT  
+HWI-EAS443:3:1:1214:412#0/1  
^`]^HU^ZbUSbJV]P\_`Ya^Pa\_T]`W`^a]]]a\_\_`^B  
@HWI-EAS443:3:21:1164:303#0/1  
TTGCCGTCTGAGTTCTTCAATGGTGGAACAGATCTTCATG  
+HWI-EAS443:3:21:1164:303#0/1  
aab`\_`S]ba[aP`Y`a[aW\_^Z¥a^^\_X¥aSSW[ZYWW\_  
@HWI-EAS443:3:21:1306:939#0/1  
CTGAGTTCTTCAATGGTGGAACAGATCTTCATGATCTCAG  
+HWI-EAS443:3:21:1306:939#0/1  
^b^`a`^abb\_]`abb^aa`aa`\_aZaY^aa`\_a¥a`^\_  
@HWI-EAS443:3:21:327:308#0/1  
TGCCGTCTGAGTTCTTCAATGGTGGAACAGATCTTCATGA  
+HWI-EAS443:3:21:327:308#0/1  
[`b¥¥`ab\_¥^HZaaZW¥¥T]MX\_TP\_`aaaYL\_\_`aSa]  
@HWI-EAS443:3:22:1030:1613#0/1  
GCCGTCTGAGTTCTTCAATGGTGGAACAGATCTTCATGAT  
+HWI-EAS443:3:22:1030:1613#0/1  
`ba`[\_`a`¥¥`a\_]a`\_^^[G\_[\_Wfy]]UT^U\_VLQ]Z  
@HWI-EAS443:3:22:1760:1331#0/1  
CGTCTGAGTTCTTCAATGGTGGAACAGATCTTCATGATCT  
+HWI-EAS443:3:22:1760:1331#0/1  
I]Y\_`^^`^`b`]bbbb^`a`\_a`\_Lbaa[Y^b`IXVT  
@HWI-EAS443:3:22:871:908#0/1  
ATTTTTGCCGTCTGAGTTCTTCAATGGTGGAACAGATCTT  
+HWI-EAS443:3:22:871:908#0/1  
]a^aaaaabaaaa`a^`aa`^\_a`aZQ¥\_`^]a^aa`\_`a`  
@HWI-EAS443:3:23:181:564#0/1  
GCCGTCTGAGTTCTTCAATGGTGGAACAGATCTTCATGAT  
+HWI-EAS443:3:23:181:564#0/1  
`bbaZaabaa^`aaaab`aaa[\_`a`^a` `]¥a\_\_a`a`\_  
@HWI-EAS443:3:23:235:486#0/1  
TGCCGTCTGAGTTCTTCAATGGTGGAACAGATCTTCATGA  
+HWI-EAS443:3:23:235:486#0/1  
Obbb`]a`b]aN`b`aa`¥\_\_baaaaa\_`]aaaa^`^  
@HWI-EAS443:3:25:474:1174#0/1  
GCCGTCTGAGTTCTTCAATGGTGGAACAGATCTTCATGAT  
+HWI-EAS443:3:25:474:1174#0/1  
a^`W\_`TIYD0¥YZXU`X[\_PZZZVPYMLXUFGWTTSL  
@HWI-EAS443:3:25:791:156#0/1  
GCCGTCTGAGTTCTTCAATGGTGGAACAGATCTTCATGAT  
+HWI-EAS443:3:25:791:156#0/1  
a\_`R]a`aa]aaa\_^\_\_`X\_V\_`\_]X^^]VX^]U¥Z]XZ



@HWI-EAS443:3:26:1052:1015#0/1  
TGCCGTCTGAGTTCTTCAATGGTGG AACAGATCTTCATGA  
+HWI-EAS443:3:26:1052:1015#0/1  
ababa^aabaa\_aa\_ba`a\_aa\_`a\_a\_\_`X]¥^a\_\_^`\_  
@HWI-EAS443:3:26:296:1627#0/1  
TGCCGTCTGAGTTCTTCAATGGTGG AACAGATCTTCATGA  
+HWI-EAS443:3:26:296:1627#0/1  
UbbYQQ\_¥U`¥HQaaab]a]bK\_a\_ababb]\_`\_]`aa\_\_a  
@HWI-EAS443:3:27:1604:1113#0/1  
TTGCCGTCTGAGTTCTTCAATGGTGG AACAGATCTTCATG  
+HWI-EAS443:3:27:1604:1113#0/1  
a``a^V\_`bb```a^aa]Yaaa`]a`]^U^a^`^a^^`\_\_  
@HWI-EAS443:3:27:903:1338#0/1  
GCCGTCTGAGTTCTTCAATGGTGG AACAGATCTTCATGAT  
+HWI-EAS443:3:27:903:1338#0/1  
`aba`a\_aaa]a\_aaa[a\_```^]Y`aa`\_\_]`\_a\_[-`\_\_  
@HWI-EAS443:3:30:1303:329#0/1  
CGTCTGAGTTCTTCAATGGTGG AACAGATCTTCATGATCT  
+HWI-EAS443:3:30:1303:329#0/1  
abbbba\_baaaaabb^`aba]babbbb```bbab\_babUa  
@HWI-EAS443:3:30:1677:1475#0/1  
GCCGTCTGAGTTCTTCAATGGTGG AACAGATCTTCATGAT  
+HWI-EAS443:3:30:1677:1475#0/1  
aYL\_¥Z\_Z^b¥aSaa^¥\_aa^X]`\_¥`\_¥[RVaaUYY\_U\_  
@HWI-EAS443:3:30:260:312#0/1  
CTGAGTTCTTCAATGGTGG AACAGATCTTCATGATCTCAG  
+HWI-EAS443:3:30:260:312#0/1  
ab\_Q[\_aaab`aaaaa^R\_a`a`]Ta\_`a``[\_a`\_\_\_\_  
@HWI-EAS443:3:31:1050:1481#0/1  
TTGCCGTCTGAGTTCTTCAATGGTGG AACAGATCTTCATG  
+HWI-EAS443:3:31:1050:1481#0/1  
]```b¥aaY\_^\_a\_^aaa[\_^]]WP\_ab```^a`]a]abZa  
@HWI-EAS443:3:32:1388:833#0/1  
CATGAAGATCTGTTCCACCATTGAAGAACTCAGACGGCAA  
+HWI-EAS443:3:32:1388:833#0/1  
```bbbbbbbaababa`baaaabba`aaaaaabaa\_b`bb  
@HWI-EAS443:3:32:142:179#0/1  
TGCCGTCTGAGTTCTTCAATGGTGG AACAGATCTTCATGA  
+HWI-EAS443:3:32:142:179#0/1  
Xab````\_WWX[¥Yb`Xaa\_```UZ]¥U\_\_^ZZ\_¥][OYPZ  
@HWI-EAS443:3:32:711:935#0/1  
CGTCTGAGTTCTTCAATGGTGG AACAGATCTTCATGATCT  
+HWI-EAS443:3:32:711:935#0/1  
aa`aa^a^`a\_aa¥`aZa`\_`\_]``^^^\_\_`\_\_\_Y^^^  
@HWI-EAS443:3:32:929:437#0/1  
TTGCCGTCTGAGTTCTTCAATGGTGG AACAGATCTTCATG  
+HWI-EAS443:3:32:929:437#0/1  
\_Za]a`¥\_\_ba^`]a`T¥]YL[XY¥\_^X¥]P]Y]\_\_aX`  
@HWI-EAS443:3:33:1394:1285#0/1  
GCCGTCTGAGTTCTTCAATGGTGG AACAGATCTTCATGAT

+HWI-EAS443:3:33:1394:1285#0/1  
ab\_UZa`\_\_b]aaaa`a)`aa\_aaaaYa`\_[JQ\_]`X\_`\_  
@HWI-EAS443:3:34:395:760#0/1  
CGTCTGAGTTCTTCAATGGTGG AACAGATCTTCATGATCT  
+HWI-EAS443:3:34:395:760#0/1  
aZQ\_^`\_Y`\_\_a¥[\_\_^^]P`^^^Z^]\_\_^]]U]  
@HWI-EAS443:3:35:1562:880#0/1  
GCCGTCTGAGTTCTTCAATGGTGG AACAGATCTTCATGAT  
+HWI-EAS443:3:35:1562:880#0/1  
aaa`aa`\_a\_a]aa^`aaa`[aa^^]¥\_Y]]a`]]^a¥^  
@HWI-EAS443:3:35:689:576#0/1  
TGCCGTCTGAGTTCTTCAATGGTGG AACAGATCTTCATGA  
+HWI-EAS443:3:35:689:576#0/1  
\_Z`^aSa`X0^`\_T`aa`\_] ^aY¥`\_`aa\_]¥¥\_\_]a\_Y^  
@HWI-EAS443:3:35:850:390#0/1  
GCCGTCTGAGTTCTTCAATGGTGG AACAGATCTTCATGAT  
+HWI-EAS443:3:35:850:390#0/1  
abbbbabbbb\_`abbabaaa]aa`ab`a]\_aaaa`a\_]`  
@HWI-EAS443:3:37:576:392#0/1  
GCCGTCTGAGTTCTTCAATGGTGG AACAGATCTTCATGAT  
+HWI-EAS443:3:37:576:392#0/1  
aa[]P¥`\_Q\_[¥Za`\_[`^X]S\_[\_RRRLPP¥]^`^WZ^Z  
@HWI-EAS443:3:38:844:151#0/1  
GCCGTCTGAGTTCTTCAATGGTGG AACAGATCTTCATGAT  
+HWI-EAS443:3:38:844:151#0/1  
`a¥^M\_0[[[XY]`\_YY`\_Z`SZY[]\_VVLPSWWXZ\_ZQ  
@HWI-EAS443:3:39:126:2045#0/1  
TGCCGTCTGAGTTCTTCAATGGTGG AACAGATCTTCATGA  
+HWI-EAS443:3:39:126:2045#0/1  
N`bb\_T`a`¥¥\_abbbbbbbba\_R^`]^`bba\_¥ababaa\_X  
@HWI-EAS443:3:39:1576:338#0/1  
GCCGTCTGAGTTCTTCAATGGTGG AACAGATCTTCATGAT  
+HWI-EAS443:3:39:1576:338#0/1  
a`^babbbab]b\_a^baaa`[X]`^WT`a\_\_X\_```\_a\_]`  
@HWI-EAS443:3:3:427:167#0/1  
TTGCCGTCTGAGTTCTTCAATGGTGG AACAGATCTTCATG  
+HWI-EAS443:3:3:427:167#0/1  
aaa`^a\_\_aa`b\_TYa\_X\_[`aaZF\_]\_GZ\_[XJ¥`XZ]\_`  
@HWI-EAS443:3:40:1210:1895#0/1  
TGCCGTCTGAGTTCTTCAATGGTGG AACAGATCTTCATGA  
+HWI-EAS443:3:40:1210:1895#0/1  
^X[aaab`aaa]baaa\_aaa`\_Yaa[V¥[`] `Z`aaa]a\_  
@HWI-EAS443:3:40:1518:254#0/1  
TGCCGTCTGAGTTCTTCAATGGTGG AACAGATCTTCATGA  
+HWI-EAS443:3:40:1518:254#0/1  
\_X¥¥\_]\_^\_Y^\_]X]UU\_]`\_U^Z[RZU\_[TR[Z YVX\_Z  
@HWI-EAS443:3:40:978:730#0/1  
GCCGTCTGAGTTCTTCAATGGTGG AACAGATCTTCATGAT  
+HWI-EAS443:3:40:978:730#0/1  
a¥^]¥```[aY^[]^V[ \_` `[Va^T¥\_\_]^ [Y[Y¥WY^^^

@HWI-EAS443:3:42:317:1456#0/1  
CGTCTGAGTTCTTCAATGGTGAACAGATCTTCATGATCT  
+HWI-EAS443:3:42:317:1456#0/1  
`abbb^\_bbbabaababba^aba`a`bbabbbababb``\_  
@HWI-EAS443:3:44:1080:1559#0/1  
GTCTGAGTTCTTCAATGGTGAACAGATCTTCATGATCTC  
+HWI-EAS443:3:44:1080:1559#0/1  
aaba\_]a\_aaba``aaaa^]`a\_a`a`a\_a\_a```a^]\_W  
@HWI-EAS443:3:44:316:1059#0/1  
GCCGTCTGAGTTCTTCAATGGTGAACAGATCTTCATGAT  
+HWI-EAS443:3:44:316:1059#0/1  
a\_aa[¥]X[`Waa¥\_YYZa`XQWW^ZZ^]T¥W]ZZ\_]`^`T  
@HWI-EAS443:3:45:1123:43#0/1  
CGTCTGAGTTCTTCAATGGTGAACAGATCTTCATGATCT  
+HWI-EAS443:3:45:1123:43#0/1  
\_baaab`b`bbabbbbbb`ababaabaa`baaa`ba\_\_`  
@HWI-EAS443:3:45:1750:1642#0/1  
CGTCTGAGTTCTTCAATGGTGAACAGATCTTCATGATCT  
+HWI-EAS443:3:45:1750:1642#0/1  
\_\_¥``baa^`TaS]WQ\_b¥\_bbbaaa`aaa`aabbaaZX  
@HWI-EAS443:3:46:1412:239#0/1  
GCCGTCTGAGTTCTTCAATGGTGAACAGATCTTCATGAT  
+HWI-EAS443:3:46:1412:239#0/1  
a`aa`aabbb¥aaaaaaa`aa]aaaa\_aa\_a`aaaa``[`  
@HWI-EAS443:3:47:1211:1383#0/1  
GCCGTCTGAGTTCTTCAATGGTGAACAGATCTTCATGAT  
+HWI-EAS443:3:47:1211:1383#0/1  
aaa`Qab`Xaa``aaaaaaa`ba\_`Yaaaa[a\_Xaa`\_a  
@HWI-EAS443:3:47:1711:1185#0/1  
CGTCTGAGTTCTTCAATGGTGAACAGATCTTCATGATCT  
+HWI-EAS443:3:47:1711:1185#0/1  
ab^``\_]a[R`a`]Yba`[ba]¥a`\_ZSV`^a]SZ¥\_\_X  
@HWI-EAS443:3:47:594:1189#0/1  
CTGAGTTCTTCAATGGTGAACAGATCTTCATGATCTCAG  
+HWI-EAS443:3:47:594:1189#0/1  
\_bb\_babaabababbb[\_Z]bbbbTaabb`bVbbaab\_IZ  
@HWI-EAS443:3:47:739:737#0/1  
CGTCTGAGTTCTTCAATGGTGAACAGATCTTCATGATCT  
+HWI-EAS443:3:47:739:737#0/1  
¥ZaX^``aTZbbZ`WZYaT]J``\_b`[\_]abaa]`¥[Y^  
@HWI-EAS443:3:48:1328:765#0/1  
CGTCTGAGTTCTTCAATGGTGAACAGATCTTCATGATCT  
+HWI-EAS443:3:48:1328:765#0/1  
aaaaabbbbababaaaabaa`aaaaabbaaaba`aaaa`a  
@HWI-EAS443:3:48:1416:979#0/1  
CGTCTGAGTTCTTCAATGGTGAACAGATCTTCATGATCT  
+HWI-EAS443:3:48:1416:979#0/1  
aababb[babaabaaaabaabaab``b\_a`aa\_\_aa``^  
@HWI-EAS443:3:48:533:382#0/1  
CGTCTGAGTTCTTCAATGGTGAACAGATCTTCATGATCT

+HWI-EAS443:3:48:533:382#0/1  
Y\_¥`\_]P\_Ka¥Zaba^a`Ya`a`^^ab`aab^¥Z`\_``S\_  
@HWI-EAS443:3:48:795:614#0/1  
GCCGTCTGAGTTCTTCAATGGTGGAACAGATCTTCATGAT  
+HWI-EAS443:3:48:795:614#0/1  
aaaaY`aa\_aZ``\_``\_]a]`\_^]]^\_]^Z`\_[^\_]Y  
@HWI-EAS443:3:49:1788:2020#0/1  
TGCCGTCTGAGTTCTTCAATGGTGGAACAGATCTTCATGA  
+HWI-EAS443:3:49:1788:2020#0/1  
¥\_WNSbabb\_¥XaZbaba`bba\_ba\_aa][\_a`b]XWWaa  
@HWI-EAS443:3:49:390:59#0/1  
CGTCTGAGTTCTTCAATGGTGGAACAGATCTTCATGATCT  
+HWI-EAS443:3:49:390:59#0/1  
Z^`[Zb]\_\_Ta``\_ba`¥b\_b\_bb^a\_XaIX¥¥Z``a^[^  
@HWI-EAS443:3:49:420:591#0/1  
GCCGTCTGAGTTCTTCAATGGTGGAACAGATCTTCATGAT  
+HWI-EAS443:3:49:420:591#0/1  
a`]aba```baaaaa]`abba^H`b\_ba```aa\_aaaaa  
@HWI-EAS443:3:4:1235:941#0/1  
CGTCTGAGTTCTTCAATGGTGGAACAGATCTTCATGATCT  
+HWI-EAS443:3:4:1235:941#0/1  
`babbbbaaabb^baabb\_aaab\_b`aa\_ab\_a\_aaa^`  
@HWI-EAS443:3:4:131:1350#0/1  
TGCCGTCTGAGTTCTTCAATGGTGGAACAGATCTTCATGA  
+HWI-EAS443:3:4:131:1350#0/1  
OaaZ\_JZ¥`XaX^R^]]Z`UYT\_\_R]¥aaa``^]WPa\_a`  
@HWI-EAS443:3:50:1582:1276#0/1  
CGTCTGAGTTCTTCAATGGTGGAACAGATCTTCATGATCT  
+HWI-EAS443:3:50:1582:1276#0/1  
aa^]bb\_^babb¥a^\_ab[aaab\_bbWaU\_b`b`aaaa\_  
@HWI-EAS443:3:50:389:453#0/1  
GCCGTCTGAGTTCTTCAATGGTGGAACAGATCTTCATGAT  
+HWI-EAS443:3:50:389:453#0/1  
abbaaaa\_\_`[`Waaaa\_aaXYaa[]V\_a\_\_\_\_`\_\_a```]  
@HWI-EAS443:3:50:687:2013#0/1  
GCCGTCTGAGTTCTTCAATGGTGGAACAGATCTTCATGAT  
+HWI-EAS443:3:50:687:2013#0/1  
aa\_baabbbbaaaba`aaaaYaaa`Yaa`a]aa[a\_a\_`  
@HWI-EAS443:3:51:1152:921#0/1  
GTCTGAGTTCTTCAATGGTGGAACAGATCTTCATGATCTC  
+HWI-EAS443:3:51:1152:921#0/1  
`WR``U`aa]aaaa\_]`]S`X`\_\_aYU`]¥\_T¥T`^ZZZN  
@HWI-EAS443:3:51:1203:890#0/1  
TGCCGTCTGAGTTCTTCAATGGTGGAACAGATCTTCATGA  
+HWI-EAS443:3:51:1203:890#0/1  
`b[bbWbbaVa``aa`W^\_aaSZ\_\_Xa^aa\_\_aU\_`[Y`\_  
@HWI-EAS443:3:51:184:602#0/1  
GCCGTCTGAGTTCTTCAATGGTGGAACAGATCTTCATGAT  
+HWI-EAS443:3:51:184:602#0/1  
aaaa`aaaa\_a¥`a`^a`a`W`a`a`\_a^\_Ya\_[[\_\_\_\_^

@HWI-EAS443:3:52:938:1097#0/1  
GCCGTCTGAGTTCTTCAATGGTGAACAGATCTTCATGAT  
+HWI-EAS443:3:52:938:1097#0/1  
abbbaabaaa` `abaa]` `baZaa` `[a` `a¥aa]aaa` ^  
@HWI-EAS443:3:53:149:971#0/1  
TGCCGTCTGAGTTCTTCAATGGTGAACAGATCTTCATGA  
+HWI-EAS443:3:53:149:971#0/1  
ababbaaab^b\_aaaa\_Z\_baaZaaaaaaaa^` \_aaaaa`  
@HWI-EAS443:3:53:176:462#0/1  
CGTCTGAGTTCTTCAATGGTGAACAGATCTTCATGATCT  
+HWI-EAS443:3:53:176:462#0/1  
\_a` bbaaaaababba\_a` ^¥aa\_V\_\_b` aaaaaa\_baa¥]  
@HWI-EAS443:3:53:315:1198#0/1  
CGTCTGAGTTCTTCAATGGTGAACAGATCTTCATGATCT  
+HWI-EAS443:3:53:315:1198#0/1  
a\_` aabab^\_babaa\_a` ^¥bbabb` b` ab\_a\_aaaabaa  
@HWI-EAS443:3:54:1238:198#0/1  
GCCGTCTGAGTTCTTCAATGGTGAACAGATCTTCATGAT  
+HWI-EAS443:3:54:1238:198#0/1  
a][a^^]^\_a[`] \_a\_^¥aa\_]` ^U\_Z^\_Z]X\_¥PZ¥\_] [  
@HWI-EAS443:3:55:305:1301#0/1  
GCCGTCTGAGTTCTTCAATGGTGAACAGATCTTCATGAT  
+HWI-EAS443:3:55:305:1301#0/1  
abbaaa` `b` `baaaaaa\_Z¥` `aaaab\_aaaaa` aaa  
@HWI-EAS443:3:56:111:1546#0/1  
TGCCGTCTGAGTTCTTCAATGGTGAACAGATCTTCATGA  
+HWI-EAS443:3:56:111:1546#0/1  
`aa` a]aa\_¥a\_a]\_aa\_Zaaa\_a` aaaaa` aaaa^a\_aa  
@HWI-EAS443:3:56:120:1839#0/1  
CGTCTGAGTTCTTCAATGGTGAACAGATCTTCATGATCT  
+HWI-EAS443:3:56:120:1839#0/1  
\_b\_a` a\_aVbba[aaa[Ta\_bb]aaaaa^` ]]\_aVW` aa¥  
@HWI-EAS443:3:56:487:1816#0/1  
TGCCGTCTGAGTTCTTCAATGGTGAACAGATCTTCATGA  
+HWI-EAS443:3:56:487:1816#0/1  
`b\_WY\_]` aQS^]F]aG\_a^WW[b]` ¥P\_a]aUaaG^a]\_  
@HWI-EAS443:3:56:734:496#0/1  
GCCGTCTGAGTTCTTCAATGGTGAACAGATCTTCATGAT  
+HWI-EAS443:3:56:734:496#0/1  
aaaa\_bXa]` T]a]` ]TZ¥^]]^XPYRW[ITYaYZZ[X` S  
@HWI-EAS443:3:57:1057:902#0/1  
GCCGTCTGAGTTCTTCAATGGTGAACAGATCTTCATGAT  
+HWI-EAS443:3:57:1057:902#0/1  
aa^a\_aaa` a^` ]a` ¥\_Y` Y` ^a¥Y]TY]^` [\_ZXY]\_\_\_\_  
@HWI-EAS443:3:57:482:128#0/1  
CGTCTGAGTTCTTCAATGGTGAACAGATCTTCATGATCT  
+HWI-EAS443:3:57:482:128#0/1  
ab]aabababaa^aaaabaW` ]` a\_` a` ````^` a` \_` ]^  
@HWI-EAS443:3:58:1102:650#0/1  
GCCGTCTGAGTTCTTCAATGGTGAACAGATCTTCATGAT

+HWI-EAS443:3:58:1102:650#0/1  
a`ZYNRYa[T¥ZY]^\_`^Y¥]V[YW\_\_]]Y¥^Z^^^W\_  
@HWI-EAS443:3:58:1759:1765#0/1  
GTCTGAGTTCTTCAATGGTGGAACAGATCTTCATGATCTC  
+HWI-EAS443:3:58:1759:1765#0/1  
a\_\_`aTa^a\_a¥aWaaa`\_[a^\_\_\_Y\_^W`XX\_\_`]^ZZR  
@HWI-EAS443:3:58:981:89#0/1  
CGTCTGAGTTCTTCAATGGTGGAACAGATCTTCATGATCT  
+HWI-EAS443:3:58:981:89#0/1  
ab[aabbbaa\_baaa`aaa[b\_\_\_^¥a^^¥aa\_a[a]^]^  
@HWI-EAS443:3:59:1095:323#0/1  
CGTCTGAGTTCTTCAATGGTGGAACAGATCTTCATGATCT  
+HWI-EAS443:3:59:1095:323#0/1  
aaVabaab^baba`babbb\_baaba`bXbab`aa\_]Xa¥\_  
@HWI-EAS443:3:59:1210:1310#0/1  
GCCGTCTGAGTTCTTCAATGGTGGAACAGATCTTCATGAT  
+HWI-EAS443:3:59:1210:1310#0/1  
aa`\_W\_\_ba]V\_`aa`]aaa`Zaa`aaaaW¥R[\_¥ZW`¥X  
@HWI-EAS443:3:59:58:1752#0/1  
GTCTGAGTTCTTCAATGGTGGAACAGATCTTCATGATCTC  
+HWI-EAS443:3:59:58:1752#0/1  
a\_a\_\_aa`a]a]aaa```][\_`]]]¥\_\_``]S\_\_\_ZY]]S  
@HWI-EAS443:3:60:1385:280#0/1  
GCCGTCTGAGTTCTTCAATGGTGGAACAGATCTTCATGAT  
+HWI-EAS443:3:60:1385:280#0/1  
a\_aa^]aa[a\_`\_a`\_W`aa\_]aZ^^Q\_\_]^¥\_¥V¥]`\_]\_  
@HWI-EAS443:3:60:194:1460#0/1  
CTGAGTTCTTCAATGGTGGAACAGATCTTCATGATCTCAG  
+HWI-EAS443:3:60:194:1460#0/1  
`aaa\_[aaa`a]\_aaaUa``a`aa\_`a\_`a\_\_`^^^^\_]\_  
@HWI-EAS443:3:62:1436:1165#0/1  
GTCTGAGTTCTTCAATGGTGGAACAGATCTTCATGATCTC  
+HWI-EAS443:3:62:1436:1165#0/1  
]P^[\_`^XZ^XWQ¥Z^ZY^^[YWZ]U[X^XN¥[]]^`¥  
@HWI-EAS443:3:62:199:1980#0/1  
TGCCGTCTGAGTTCTTCAATGGTGGAACAGATCTTCATGA  
+HWI-EAS443:3:62:199:1980#0/1  
¥\_\_aSLa\_`^¥Ubbb^\_\_^aOXYQ[¥bba```b]\_\_^Z]a  
@HWI-EAS443:3:62:82:1724#0/1  
TGCCGTCTGAGTTCTTCAATGGTGGAACAGATCTTCATGA  
+HWI-EAS443:3:62:82:1724#0/1  
aabbb`a`aaZW\_`[aaa]\_PT)`[¥\_]`XZZU`\_^VXP  
@HWI-EAS443:3:62:986:2034#0/1  
TTGCCGTCTGAGTTCTTCAATGGTGGAACAGATCTTCATG  
+HWI-EAS443:3:62:986:2034#0/1  
XVa`\_¥R\_aaaaX```Z^S^aaaN\_Xaa`a¥^]L][T¥```  
@HWI-EAS443:3:63:1336:727#0/1  
TGCCGTCTGAGTTCTTCAATGGTGGAACAGATCTTCATGA  
+HWI-EAS443:3:63:1336:727#0/1  
aabb`[`bb\_baabbb¥¥\_`a]a`aa````\_]aa]\_Xba

@HWI-EAS443:3:64:1423:401#0/1  
TGCCGTCTGAGTTCTTCAATGGTGG AACAGATCTTCATGA  
+HWI-EAS443:3:64:1423:401#0/1  
aaaaaaabbab\_baba\_aaaba\_aa\_a^`a\_aaaa\_`aa`  
@HWI-EAS443:3:64:405:1275#0/1  
CTGAGTTCTTCAATGGTGG AACAGATCTTCATGATCTCAG  
+HWI-EAS443:3:64:405:1275#0/1  
aaaZZZ`a]a`W[QGR^]V[a`\_ZRU^\_\_WYU^`XTY¥  
@HWI-EAS443:3:64:638:290#0/1  
CGTCTGAGTTCTTCAATGGTGG AACAGATCTTCATGATCT  
+HWI-EAS443:3:64:638:290#0/1  
ab^aaa\_bNa`a^aaaa`aZ`\_`¥aaZ``a\_a\_\_aa\_^`  
@HWI-EAS443:3:65:1724:667#0/1  
GCCGTCTGAGTTCTTCAATGGTGG AACAGATCTTCATGAT  
+HWI-EAS443:3:65:1724:667#0/1  
`a`^SSY`^ZUQLTZVMV^ba^¥]]VTU\_[T]`WRTQZWW  
@HWI-EAS443:3:65:1729:525#0/1  
CTGAGTTCTTCAATGGTGG AACAGATCTTCATGATCTCAG  
+HWI-EAS443:3:65:1729:525#0/1  
abbababbbbbbbbaabbbbbbbbababbbbbbbb`b^bb  
@HWI-EAS443:3:66:1056:683#0/1  
GCCGTCTGAGTTCTTCAATGGTGG AACAGATCTTCATGAT  
+HWI-EAS443:3:66:1056:683#0/1  
aaa`aaaaaa`baabaaaaaa]aa¥a[a^¥a`aaaa`\_``  
@HWI-EAS443:3:66:248:956#0/1  
TGCCGTCTGAGTTCTTCAATGGTGG AACAGATCTTCATGA  
+HWI-EAS443:3:66:248:956#0/1  
``baa`a\_Y\_a`aaaaabaaa`^a\_\_¥\_aa\_\_aa`a`aa\_  
@HWI-EAS443:3:66:366:1214#0/1  
TTGCCGTCTGAGTTCTTCAATGGTGG AACAGATCTTCATG  
+HWI-EAS443:3:66:366:1214#0/1  
]O]b\_GRaaOX\_[XX^VPVVZ¥XPXNX\_YV¥`\_`TX[Y¥Z  
@HWI-EAS443:3:67:668:807#0/1  
CGTCTGAGTTCTTCAATGGTGG AACAGATCTTCATGATCT  
+HWI-EAS443:3:67:668:807#0/1  
aUUa`\_R]]\_\_\_\_\_aU][S]S\_]\_\_\_\_`^W^``\_\_^]\_¥T¥¥  
@HWI-EAS443:3:67:945:1503#0/1  
GTCTGAGTTCTTCAATGGTGG AACAGATCTTCATGATCTC  
+HWI-EAS443:3:67:945:1503#0/1  
a¥a\_^\_aN\_aaaabaab¥Yaa^a^ab`^^a]aa]aaaa`a  
@HWI-EAS443:3:68:100:1825#0/1  
TGCCGTCTGAGTTCTTCAATGGTGG AACAGATCTTCATGA  
+HWI-EAS443:3:68:100:1825#0/1  
abbb`^b]Q¥W[abaababa]TT]aa^``a\_`a\_¥]]]^a  
@HWI-EAS443:3:68:86:621#0/1  
CGTCTGAGTTCTTCAATGGTGG AACAGATCTTCATGATCT  
+HWI-EAS443:3:68:86:621#0/1  
\_`abaaab\_aaaa]]\_aabY]¥`a`^UT¥aaaaa\_aaa\_`  
@HWI-EAS443:3:69:1141:603#0/1  
GCCGTCTGAGTTCTTCAATGGTGG AACAGATCTTCATGAT

+HWI-EAS443:3:69:1141:603#0/1  
abaaP]]aZ`Xaa\_a]TQX]¥U`\_]`V`\_TZY`a^\_]aU[  
@HWI-EAS443:3:69:133:93#0/1  
GCCGTCTGAGTTCTTCAATGGTGGAACAGATCTTCATGAT  
+HWI-EAS443:3:69:133:93#0/1  
ab]aV]YZHV`¥a\_^XPXZQUYa]XRVRZ¥SS[YYVYSYW  
@HWI-EAS443:3:69:575:1869#0/1  
GCCGTCTGAGTTCTTCAATGGTGGAACAGATCTTCATGAT  
+HWI-EAS443:3:69:575:1869#0/1  
a\_Z¥P`SZK]\_aaZ[aZ^]a\_\_`\_\_[\_aY\_^]W[a`][^¥  
@HWI-EAS443:3:69:851:185#0/1  
TGCCGTCTGAGTTCTTCAATGGTGGAACAGATCTTCATGA  
+HWI-EAS443:3:69:851:185#0/1  
aaaab`b`\_b^aab\_a^^`aXaaaa]V]^```\_`^`  
@HWI-EAS443:3:6:337:990#0/1  
GCCGTCTGAGTTCTTCAATGGTGGAACAGATCTTCATGAT  
+HWI-EAS443:3:6:337:990#0/1  
a`\_`\_a`]Y\_LUUX[XM[W¥XN\_WN¥R\_ZX^U\_XHVI\_]U  
@HWI-EAS443:3:70:1207:912#0/1  
TGCCGTCTGAGTTCTTCAATGGTGGAACAGATCTTCATGA  
+HWI-EAS443:3:70:1207:912#0/1  
aba0a]]Ya\_\_][Y\_^H`^T`¥\_a\_\_GK`VXGW`[¥[V[  
@HWI-EAS443:3:70:1464:1619#0/1  
TGCCGTCTGAGTTCTTCAATGGTGGAACAGATCTTCATGA  
+HWI-EAS443:3:70:1464:1619#0/1  
¥bb]]`b^b^baabababaaaaX`^a`a`aaa\_a`]aXa\_  
@HWI-EAS443:3:70:81:355#0/1  
GCCGTCTGAGTTCTTCAATGGTGGAACAGATCTTCATGAT  
+HWI-EAS443:3:70:81:355#0/1  
aaa`\_a\_aaaW\_aaaa`¥`^Z\_\_\_\_\_`]T]^)]^\_^  
@HWI-EAS443:3:72:264:1590#0/1  
GTCTGAGTTCTTCAATGGTGGAACAGATCTTCATGATCTC  
+HWI-EAS443:3:72:264:1590#0/1  
aYaT\_YS\_Y^^]Za]IX[P]RWYa`RYY`^`^\_S\_^IUH^  
@HWI-EAS443:3:72:763:1514#0/1  
GCCGTCTGAGTTCTTCAATGGTGGAACAGATCTTCATGAT  
+HWI-EAS443:3:72:763:1514#0/1  
aaaaZb^`\_]`^`\_XRZ\_U\_\_\_\_\_]^\_X\_W^^^^  
@HWI-EAS443:3:73:404:369#0/1  
GCCGTCTGAGTTCTTCAATGGTGGAACAGATCTTCATGAT  
+HWI-EAS443:3:73:404:369#0/1  
aaaa`aaaa^aaaa\_a`¥aX`¥^¥\_\_Y`]]`¥^\_\_^]  
@HWI-EAS443:3:73:970:801#0/1  
GTCTGAGTTCTTCAATGGTGGAACAGATCTTCATGATCTC  
+HWI-EAS443:3:73:970:801#0/1  
aaab]XR]Z]a^¥N[a`bTY`\_^¥0`\_a`\_`\_a\_^\_]][  
@HWI-EAS443:3:74:127:1241#0/1  
GCCGTCTGAGTTCTTCAATGGTGGAACAGATCTTCATGAT  
+HWI-EAS443:3:74:127:1241#0/1  
aabb`aa`[b^abaaaaS`a`Ua\_]`aa`Y`\_aaa`\_``



@HWI-EAS443:3:74:935:1688#0/1  
GCCGTCTGAGTTCTTCAATGGTGAACAGATCTTCATGAT  
+HWI-EAS443:3:74:935:1688#0/1  
¥\_a` ]`aX\_^`a`a`\_`\_`\_a^V¥a^ab`a`aa`baaaa  
@HWI-EAS443:3:75:427:1223#0/1  
GCCGTCTGAGTTCTTCAATGGTGAACAGATCTTCATGAT  
+HWI-EAS443:3:75:427:1223#0/1  
abba\_ba\_` `^aaaa`W^a`a[a¥`aaa[[]`aaa]¥\_a\_  
@HWI-EAS443:3:75:793:186#0/1  
GTCTGAGTTCTTCAATGGTGAACAGATCTTCATGATCTC  
+HWI-EAS443:3:75:793:186#0/1  
a[abbaba` `baa`aaaaSa`aa\_aa\_a¥aa\_aaaa`^\_\_  
@HWI-EAS443:3:75:807:1576#0/1  
CGTCTGAGTTCTTCAATGGTGAACAGATCTTCATGATCT  
+HWI-EAS443:3:75:807:1576#0/1  
YYZaS^YSZVY`bb¥b\_T\_Ib]\_aUab`a\_bXZ[XHZ]b]  
@HWI-EAS443:3:76:1069:215#0/1  
CGTCTGAGTTCTTCAATGGTGAACAGATCTTCATGATCT  
+HWI-EAS443:3:76:1069:215#0/1  
`aab` `aabbab`\_`abb`abbaa[ `\_a` `ab`baaaaGa  
@HWI-EAS443:3:76:1242:939#0/1  
TTGCCGTCTGAGTTCTTCAATGGTGAACAGATCTTCATG  
+HWI-EAS443:3:76:1242:939#0/1  
Y\_`bZ¥`abbbb`aaaa^` `ba]` ` `]¥a`\_aYa\_Q\_\_`  
@HWI-EAS443:3:76:1583:550#0/1  
GCCGTCTGAGTTCTTCAATGGTGAACAGATCTTCATGAT  
+HWI-EAS443:3:76:1583:550#0/1  
aab]X[aaabT\_TZa\_\_\_\_\_^Y\_[ZRU^`\_\_SaaU\_ZSW^  
@HWI-EAS443:3:76:929:145#0/1  
CGTCTGAGTTCTTCAATGGTGAACAGATCTTCATGATCT  
+HWI-EAS443:3:76:929:145#0/1  
ab[a[ba\_¥babb`bbbb]Zabaaa`a]aYa\_`^` `a^^0^  
@HWI-EAS443:3:78:1113:108#0/1  
GCCGTCTGAGTTCTTCAATGGTGAACAGATCTTCATGAT  
+HWI-EAS443:3:78:1113:108#0/1  
aX\_aZ]X][`YZX^]UZV^\_]T[TTZLU\_WY[^ZWZZ[UY  
@HWI-EAS443:3:78:1406:835#0/1  
GCCGTCTGAGTTCTTCAATGGTGAACAGATCTTCATGAT  
+HWI-EAS443:3:78:1406:835#0/1  
aaabaaababab\_bb\_baaba^aaaa]aa\_a`ba¥a`a\_a  
@HWI-EAS443:3:78:876:1760#0/1  
GCCGTCTGAGTTCTTCAATGGTGAACAGATCTTCATGAT  
+HWI-EAS443:3:78:876:1760#0/1  
^ab\_aa\_a^¥Wa]`\_¥ba`Zaa`a]^Wq]XZa]`b\_Z\_¥¥  
@HWI-EAS443:3:80:1119:258#0/1  
GCCGTCTGAGTTCTTCAATGGTGAACAGATCTTCATGAT  
+HWI-EAS443:3:80:1119:258#0/1  
¥[U\_QNYT¥¥RYGYQQZ[Z^TT`YV^W^a^VL` `a^YXTW  
@HWI-EAS443:3:80:265:1053#0/1  
GCCGTCTGAGTTCTTCAATGGTGAACAGATCTTCATGAT



@HWI-EAS443:3:88:1185:489#0/1  
CGTCTGAGTTCTTCAATGGTGAACAGATCTTCATGATCT  
+HWI-EAS443:3:88:1185:489#0/1  
abbbabbb\_babbbbbbbbababababaabbabbbbaTb  
@HWI-EAS443:3:89:1106:1025#0/1  
GTCTGAGTTCTTCAATGGTGAACAGATCTTCATGATCTC  
+HWI-EAS443:3:89:1106:1025#0/1  
aabb```abbbbababbaXa`a^`aaaaaaaaaaaa\_a`  
@HWI-EAS443:3:89:665:1153#0/1  
TTGCCGTCTGAGTTCTTCAATGGTGAACAGATCTTCATG  
+HWI-EAS443:3:89:665:1153#0/1  
aZa`ab`a\_`^bZa`a`Z^a]]a]a\_```]^`\_a\_`\_Z`  
@HWI-EAS443:3:89:881:1793#0/1  
CGTCTGAGTTCTTCAATGGTGAACAGATCTTCATGATCT  
+HWI-EAS443:3:89:881:1793#0/1  
abbbbbbaabbbbb`abbaababb`babbbbaababab\_b  
@HWI-EAS443:3:89:945:649#0/1  
TTGCCGTCTGAGTTCTTCAATGGTGAACAGATCTTCATG  
+HWI-EAS443:3:89:945:649#0/1  
a`\_UHYSYY[QTW\_]W]SNSZ\_NPS]TMLWXQS]RU¥UV  
@HWI-EAS443:3:8:306:454#0/1  
CGTCTGAGTTCTTCAATGGTGAACAGATCTTCATGATCT  
+HWI-EAS443:3:8:306:454#0/1  
^¥abb\_bb`a``¥abab\_ZXb\_XWabaa]\_`]bb\_ba\_``  
@HWI-EAS443:3:8:590:1110#0/1  
TGCCGTCTGAGTTCTTCAATGGTGAACAGATCTTCATGA  
+HWI-EAS443:3:8:590:1110#0/1  
aaa\_a`aaZ]a\_`\_aaa\_\_\_a\_Xa^`\_`^`\_`^`\_V`X¥\_  
@HWI-EAS443:3:90:1303:1426#0/1  
TGCCGTCTGAGTTCTTCAATGGTGAACAGATCTTCATGA  
+HWI-EAS443:3:90:1303:1426#0/1  
abaaaabbbba`ab\_bbaabaa`a``a\_aaaa`a\_aaa`  
@HWI-EAS443:3:90:569:1076#0/1  
TTGCCGTCTGAGTTCTTCAATGGTGAACAGATCTTCATG  
+HWI-EAS443:3:90:569:1076#0/1  
a`^ba`]a\_b`]`aaaa\_aa`]]]`^\_VU^`^`^a\_`\_  
@HWI-EAS443:3:90:815:569#0/1  
CGTCTGAGTTCTTCAATGGTGAACAGATCTTCATGATCT  
+HWI-EAS443:3:90:815:569#0/1  
ababbb\_babbbbbabbbb\_aaabaaaaabaaaaaaa\_a  
@HWI-EAS443:3:91:1161:1796#0/1  
TGCCGTCTGAGTTCTTCAATGGTGAACAGATCTTCATGA  
+HWI-EAS443:3:91:1161:1796#0/1  
]^a]abaaabb\_bbbab`abbb]ab^aab`a``aa^a\_[a  
@HWI-EAS443:3:91:798:1819#0/1  
TTGCCGTCTGAGTTCTTCAATGGTGAACAGATCTTCATG  
+HWI-EAS443:3:91:798:1819#0/1  
`Y``aa^\_Xa`\_\_`^aaa``aa\_Qaa\_\_Ya]\_aZa^a`\_\_  
@HWI-EAS443:3:91:949:255#0/1  
CGTCTGAGTTCTTCAATGGTGAACAGATCTTCATGATCT

+HWI-EAS443:3:91:949:255#0/1  
G]a#b`a`bb`ba\_#bb`bbb`\_V\_bbbabb\_aabbaaa  
@HWI-EAS443:3:92:1156:632#0/1  
CTGAGTTCTTCAATGGTGGAACAGATCTTCATGATCTCAG  
+HWI-EAS443:3:92:1156:632#0/1  
abb\_#a\_ba\_babbbYb`ababbab`bbba]aaa\_`^aa  
@HWI-EAS443:3:92:1432:434#0/1  
GCCGTCTGAGTTCTTCAATGGTGGAACAGATCTTCATGAT  
+HWI-EAS443:3:92:1432:434#0/1  
`Za`\_aa^\_a]aa^`\_`^V^^\_0\_a^X^^\_Y#\_]  
@HWI-EAS443:3:92:223:511#0/1  
GCCGTCTGAGTTCTTCAATGGTGGAACAGATCTTCATGAT  
+HWI-EAS443:3:92:223:511#0/1  
a`Z`XVT`Y`UZUZU^Y[X#QPQV#[TU\_[YLYSRVVZTT  
@HWI-EAS443:3:93:220:1976#0/1  
TTGCCGTCTGAGTTCTTCAATGGTGGAACAGATCTTCATG  
+HWI-EAS443:3:93:220:1976#0/1  
^]Xa[bWbb]aaR]\_X[\_b^]`a]bYa``\_]#\_b`\_W[R`  
@HWI-EAS443:3:93:676:1350#0/1  
TGCCGTCTGAGTTCTTCAATGGTGGAACAGATCTTCATGA  
+HWI-EAS443:3:93:676:1350#0/1  
aaaab#a`a`#aaaaaaaa\_#a\_`^^aa\_a\_a\_]`a`  
@HWI-EAS443:3:94:1161:1176#0/1  
TGCCGTCTGAGTTCTTCAATGGTGGAACAGATCTTCATGA  
+HWI-EAS443:3:94:1161:1176#0/1  
aaaabaabaabababb`abbaa`aa`b\_aaaaaa\_a`aa  
@HWI-EAS443:3:94:372:751#0/1  
GCCGTCTGAGTTCTTCAATGGTGGAACAGATCTTCATGAT  
+HWI-EAS443:3:94:372:751#0/1  
aa`a`^#a#aZa\_W`Y\_Xaaa0\_ZR`\_`[^#\_`]\_\_\_\_\_W  
@HWI-EAS443:3:95:1024:749#0/1  
CTGAGTTCTTCAATGGTGGAACAGATCTTCATGATCTCAG  
+HWI-EAS443:3:95:1024:749#0/1  
abbbbabbbbaabbab\_bbaaabbba`baa`bbab`a]\_a  
@HWI-EAS443:3:95:1455:267#0/1  
GCCGTCTGAGTTCTTCAATGGTGGAACAGATCTTCATGAT  
+HWI-EAS443:3:95:1455:267#0/1  
\_`^bb\_aabaabbbabaab^a^\_ab[RbabaRab`aaaaZ  
@HWI-EAS443:3:95:670:280#0/1  
TGCCGTCTGAGTTCTTCAATGGTGGAACAGATCTTCATGA  
+HWI-EAS443:3:95:670:280#0/1  
#\_Q\_\_[Q\_]`bab\_`#]a#`Z0#\_`R\_\_\_\_\_T[RL]a]R  
@HWI-EAS443:3:96:290:1099#0/1  
GCCGTCTGAGTTCTTCAATGGTGGAACAGATCTTCATGAT  
+HWI-EAS443:3:96:290:1099#0/1  
`a`\_]\_\_aZa`[WTWaa#^]UZ[VZ]#VY^X][[Y[^UZV^  
@HWI-EAS443:3:96:637:461#0/1  
CGTCTGAGTTCTTCAATGGTGGAACAGATCTTCATGATCT  
+HWI-EAS443:3:96:637:461#0/1  
\_\_Za`Z^#`U\_a\_aZaa]#b`bbbaaZ`]a[]aaaS\_

@HWI-EAS443:3:96:807:176#0/1  
GTCTGAGTTCTTCAATGGTGAACAGATCTTCATGATCTC  
+HWI-EAS443:3:96:807:176#0/1  
aZ^`a^a]a\_a`]a\_\_^aYZ][¥XZ]XWZ`]X`^]]VUUR  
@HWI-EAS443:3:96:985:1247#0/1  
GCCGTCTGAGTTCTTCAATGGTGAACAGATCTTCATGAT  
+HWI-EAS443:3:96:985:1247#0/1  
\_baaVabb]\_aaaaba[baba\_aa`\_`aa]]`a\_¥aaaa`  
@HWI-EAS443:3:97:958:535#0/1  
CGTCTGAGTTCTTCAATGGTGAACAGATCTTCATGATCT  
+HWI-EAS443:3:97:958:535#0/1  
``a\_ab\_baa\_aaaZa\_bZaaY]^¥bbaaaba^\_abaa^`  
@HWI-EAS443:3:98:1004:595#0/1  
CGTCTGAGTTCTTCAATGGTGAACAGATCTTCATGATCT  
+HWI-EAS443:3:98:1004:595#0/1  
abbab\_bbab[bbabaaababa`baa]ababb^bba`a\_a  
@HWI-EAS443:3:98:192:978#0/1  
CGTCTGAGTTCTTCAATGGTGAACAGATCTTCATGATCT  
+HWI-EAS443:3:98:192:978#0/1  
aba]bbZb[ba`a```aba\_baaaaab^a\_`a`aaa\_\_Z`  
@HWI-EAS443:3:98:79:1760#0/1  
GCCGTCTGAGTTCTTCAATGGTGAACAGATCTTCATGAT  
+HWI-EAS443:3:98:79:1760#0/1  
aaab]^```\_[\_`aa]aa`aa[Z]\_a\_a^```a\_`a\_Za\_  
@HWI-EAS443:3:9:590:219#0/1  
TGCCGTCTGAGTTCTTCAATGGTGAACAGATCTTCATGA  
+HWI-EAS443:3:9:590:219#0/1  
aba`b^`aba¥U`Yaaaa]a\_W``\_\_[[a]\_X^\_¥\_\_\_^  
@HWI-EAS443:3:55:462:421#0/1  
ACTTTTGTGGACAGTATGGATAGCAAATAGTAGCATTTC  
+HWI-EAS443:3:55:462:421#0/1  
aabb\_H]bba``aT]\_aa`\_[QRQT`SNWQRWNLXBBB  
@HWI-EAS443:3:51:1244:694#0/1  
AAGGTACTTTTTTGGACAGTATGGATAGCAAAAAGTAGAA  
+HWI-EAS443:3:51:1244:694#0/1  
aa`]Raaabaaaa`¥a`^Y^^aXXN\_Ua]\_\_ZGTG[SPFQ  
@HWI-EAS443:3:69:63:212#0/1  
GGACTTTTTTGGACAGTATGGATAGCAAAAAGTAGCATTG  
+HWI-EAS443:3:69:63:212#0/1  
^LW^WL\_^[T¥`Q\_^[BBBBBBBBBBBBBBBBBBBBBBBB  
@HWI-EAS443:3:36:672:1895#0/1  
GTACTTTTTTGGACAGTATGGATAGCAAATAGTAGCCTTG  
+HWI-EAS443:3:36:672:1895#0/1  
`\_`aVQ\_¥]Z^X[^]GWL^aYWJ[[a[^BBBBBBBBBBBB  
@HWI-EAS443:3:51:1043:1021#0/1  
GCTCAGGAGTGCCTGATTAATGATCCCTGGGTTTTGCTTA  
+HWI-EAS443:3:51:1043:1021#0/1  
aaa^^^^[^X^`]\_W^ab]]][Y[\_¥TZa]W^¥`Y]WU\_[^  
@HWI-EAS443:3:9:1104:1553#0/1  
CTTTTTTGGACAGTATGGATAGCAAATAGTAGCATTTC

+HWI-EAS443:3:9:1104:1553#0/1  
\_ [VJ\_S\_bb\_TZ^RUY`\_P¥Q\_HU[U¥[I\_OWJ][JULYBB  
@HWI-EAS443:3:100:474:1201#0/1  
GTACTTTTTGGACAGTATGGATAGCAAATAGGAGCATTG  
+HWI-EAS443:3:100:474:1201#0/1  
^P`WM]a[QWa`]P^`Zaa¥[TBBBBBBBBBBBBBBBB  
@HWI-EAS443:3:12:908:625#0/1  
ACTTTTTGGACAGTATGGATAGCAAATAGGAGCATTGCC  
+HWI-EAS443:3:12:908:625#0/1  
JaZXPQ^aabaabaY¥abaaX\_]\_[`]X^ZJ[X[¥`\_`V[  
@HWI-EAS443:3:17:1612:2038#0/1  
CTTTTTGGACAGTATGGATAGCAAATAGGAGCATTGCCA  
+HWI-EAS443:3:17:1612:2038#0/1  
\_¥\_]XRV]a\_`aY]^ZV^\_¥XZ\_``[WWOKXVLJQ[RDIT  
@HWI-EAS443:3:19:352:1873#0/1  
CTTTTTGGACAGTATGGATAGCAAATAGGAGCATTGCCA  
+HWI-EAS443:3:19:352:1873#0/1  
aaaaaa\_`\_aaaaWaY\_^\_ZRHTa\_\_K¥YG\_¥RZ[TNZ\_P  
@HWI-EAS443:3:20:794:1383#0/1  
TTTTTTGGACAGTATGGATAGCAAATAGAAGCATTGCCAC  
+HWI-EAS443:3:20:794:1383#0/1  
[^a`aaUP[ZZ\_U`VZ]G0[`¥`ZV¥[BBBBBBBBBBBBBB  
@HWI-EAS443:3:22:875:1239#0/1  
ACTTTTTGGACAGTATGGATAGCAAATAGAAGCATTGCC  
+HWI-EAS443:3:22:875:1239#0/1  
aa]\_`a^^\_ZZV`]V¥\_`Y\_UX]\_^ZMNJFZ¥PDM[ZTV  
@HWI-EAS443:3:25:1779:462#0/1  
GTACTTTTTGGACAGTATGGATAGGAAATAGTAGCATTG  
+HWI-EAS443:3:25:1779:462#0/1  
^JP[¥^`a¥\_]UYU`XX\_\_[SM¥YGT¥VWWBBBBBBBBBB  
@HWI-EAS443:3:28:1521:1183#0/1  
ACTTTTTGGACAGTATGGATAGCAAATAGTAGCTTTGCC  
+HWI-EAS443:3:28:1521:1183#0/1  
aabbabbbbaaabb\_aabb`aaa¥aa\_W`]Ya\_UaaaROS  
@HWI-EAS443:3:29:266:1234#0/1  
GTACTTTTTGGACAGTCTGGATAGCAAATAGTAGCATTG  
+HWI-EAS443:3:29:266:1234#0/1  
`¥bbbababaabaaaX¥^`Y^ZTT\_`\_¥¥YOZ¥\_^]]Y  
@HWI-EAS443:3:33:206:1404#0/1  
GTACTTTTTGGACAGTATGGATAGCAAATAGGAGCATTG  
+HWI-EAS443:3:33:206:1404#0/1  
a\_`aaaab`a\_U\_aa^]XaZYa¥[V]X]`WYVG¥ZTXZ¥X  
@HWI-EAS443:3:36:1267:576#0/1  
ACTTTTTGGACAGTATGGATAGCAAATAGTAGTATTGCC  
+HWI-EAS443:3:36:1267:576#0/1  
aabbabbb`bb\_¥\_aa\_a^aa`^Z]^a\_^]`¥YUDZ¥\_\_[\_  
@HWI-EAS443:3:36:689:466#0/1  
CCCTGGGTTTTGCTTAATGCCTCTTGGTTCAACTCCTTCC  
+HWI-EAS443:3:36:689:466#0/1  
aba`\_`\_¥`^abaY]a]Z]UD[WZaaa^]^]V]aa¥[¥[a

@HWI-EAS443:3:3:1499:377#0/1  
GTACTTTTTGGACAGTATGGATAGGAAATAGTAGCATTG  
+HWI-EAS443:3:3:1499:377#0/1  
`XZ¥US\_\_^[¥SR0aX\_V^\_YN]XDO[YVXRMSZBBBBB  
@HWI-EAS443:3:3:1670:1226#0/1  
CTTTTTTGGACAGTATGGATAGGAAATAGTAGCATTGCCA  
+HWI-EAS443:3:3:1670:1226#0/1  
\_b^b\_b\_\_\_\_]abaab`aab¥aI^`\_b\_N¥aPR\_aa¥Sa  
@HWI-EAS443:3:3:558:701#0/1  
AAGGTACTTTTTGGTCAGTATGGATAGCAAATAGTAGCA  
+HWI-EAS443:3:3:558:701#0/1  
a^a^`b`ababbaa^aa\_aaa`a\_`aWa\_a\_`YS]`][  
@HWI-EAS443:3:40:35:1999#0/1  
GTACTTTTTGGACAGTATGGATAGCAAAAAGTAGCATTG  
+HWI-EAS443:3:40:35:1999#0/1  
]X`aaaa^aa]W\_]aaXa^¥W\_]ZVLOXXZZSS¥¥[W[QV  
@HWI-EAS443:3:48:363:1438#0/1  
ACTTTTTTGGACAGTATGGATAGCAAATAGGAGCATTGCC  
+HWI-EAS443:3:48:363:1438#0/1  
a^abababaabaaa`aa`aa`\_a]`\_`a\_ZFYa\_\_]a`\_]  
@HWI-EAS443:3:49:682:1977#0/1  
ACTTTTTTGGACAGTATGGATAGGAAATAGTAGCATTGCC  
+HWI-EAS443:3:49:682:1977#0/1  
^Y`^[0^`]MXZZ[KTSQW\_a\_[DZa`XXZSYZHT`OOTP  
@HWI-EAS443:3:4:725:595#0/1  
TACTTTTTTGGACAGTATGGATAGCAAATAGTAGCATTGC  
+HWI-EAS443:3:4:725:595#0/1  
a]aaaaaab\_\_[\`a^\_a\_^^^`\`\_\_][\_\_]X¥^VX^)]  
@HWI-EAS443:3:52:148:1516#0/1  
GTACTTTTTGGACAGTATGGATAGCAAATAATAGCATTG  
+HWI-EAS443:3:52:148:1516#0/1  
QJ¥\_\_SU\_Y]¥\_`Z`aW`]W¥OZXSMXXMQXIHZ[BBBBB  
@HWI-EAS443:3:5:415:256#0/1  
GTACTTTTTGGACAGTATGGATAGCAAATAGGAGCATTG  
+HWI-EAS443:3:5:415:256#0/1  
aaVXZb`^aa`b`\_\_a`\_Yba]\_\_ZZa\_XZX\_GM]FT`BB  
@HWI-EAS443:3:67:1414:1746#0/1  
GTACTTTTTGGACAGTATGGATAGCAAATAATAGCATTG  
+HWI-EAS443:3:67:1414:1746#0/1  
a]a¥`a\_`aa^\_^\_`]\`\_`\_\_^\_¥G]\_`Va`Z]\_V[¥\_W  
@HWI-EAS443:3:69:700:992#0/1  
TGGACAGTATGGATAGCAAATAGTAGCATTGCCAAAATA  
+HWI-EAS443:3:69:700:992#0/1  
`]\`]aabaY\_a`aaYYR¥aa`a^PG`a^`\_¥MZ]PI¥a`^`  
@HWI-EAS443:3:72:186:602#0/1  
GTACTTTTTGGACAGTATGGATAGGAAATAGTAGCATTG  
+HWI-EAS443:3:72:186:602#0/1  
YFN^aaa^Z\_a`]aSVVW]`YYVPDPUUQZ[JUY¥WWYU  
@HWI-EAS443:3:77:1322:1335#0/1  
CAAGGTACTTTTTGGACAGTATGGATAGAAAATAGTAGC

+HWI-EAS443:3:77:1322:1335#0/1  
a`a\_[Wa^bbb\_baa[aaa¥Ya^`b\_b[FW^aU\_ZP\_SO  
@HWI-EAS443:3:7:1443:1330#0/1  
GTACTTTTTTGGACAGTATGGATAGGAAATAGTAGCATTG  
+HWI-EAS443:3:7:1443:1330#0/1  
aXZ[a`]¥¥[YTTY^TY\_^YLSaWYFV[XWSWLL[OXBBB  
@HWI-EAS443:3:80:1068:538#0/1  
GTACTTTTTTGGACAGTATGGATAGGAAATAGTAGCATTG  
+HWI-EAS443:3:80:1068:538#0/1  
aa^a]Z`Z[¥`^ZZZ¥`a^[RHSFWZ^\_\_^UXTHT^^X  
@HWI-EAS443:3:84:1121:1755#0/1  
GGTACTTTTTTGGACAGTATGGATAGCAAATAGGAGCATT  
+HWI-EAS443:3:84:1121:1755#0/1  
ab\_bbbaaa`aYZZO][Z`V`aaaZWX\_^P]YDW[Q[^P  
@HWI-EAS443:3:86:698:51#0/1  
CTTTTTTGGACAGTATGGATAGCAAATAGTGGCATTGCCA  
+HWI-EAS443:3:86:698:51#0/1  
aa^ab`\_]Z`b¥`\_baaaRSG]]VNYUYUG]OY¥[UMMY  
@HWI-EAS443:3:90:1246:1930#0/1  
GTACTTTTTTGGACAGTATGGATAGAAAATAGTAGCATTG  
+HWI-EAS443:3:90:1246:1930#0/1  
a[WS\_[`TPYa[^\_HaS]Ya]`^P^H¥S]^\_UVSUY]YZP  
@HWI-EAS443:3:92:192:328#0/1  
CCCTGGGTTTTGCTTAATGCCTCTTGGTTCAACTCCTTCC  
+HWI-EAS443:3:92:192:328#0/1  
`bb^^`baUbaa\_S^`XXaTH\_``a\_XF\_W]``Kaa`Z^  
@HWI-EAS443:3:94:577:1779#0/1  
TTTGGACAGTATGGATAGCAAATAGGAGCATTGCCACAAC  
+HWI-EAS443:3:94:577:1779#0/1  
\_a`\_XZ¥bY^]V^a^`¥ZW`¥SRTGZPMXMXNPVXSTZG  
@HWI-EAS443:3:97:1211:600#0/1  
GTACTTTTTTGGACAGTATGGATAGCAAATAGTAGAATTG  
+HWI-EAS443:3:97:1211:600#0/1  
Uaaabbabbbba``bbaa```aa¥ZUa`¥WZa¥`[DWa^P  
@HWI-EAS443:3:9:890:920#0/1  
ACTTTTTTGGACAGTATGGATAGGAAATAGTAGCATTGCC  
+HWI-EAS443:3:9:890:920#0/1  
[aa\_S`[a^YR¥¥^Z]Z^[UQV^H^V`¥]¥EFYY]T¥TY¥  
@HWI-EAS443:3:71:470:1501#0/1  
GGCACTTTTTTGGACAGTATGGATAGCAAATAGTAGCATT  
+HWI-EAS443:3:71:470:1501#0/1  
\_PDLXa]`Y¥¥¥\_[¥ZV`\_XV[^V SX]R[P[ZU[Q]GT]  
@HWI-EAS443:3:80:136:2032#0/1  
ATCCTTTTTTGGACAGTATGGATAGCAAATAGTAGCATTG  
+HWI-EAS443:3:80:136:2032#0/1  
PXS`]^`J`aabaVb^P^]b¥Y`aaR`^aa]YGaXaaSW^  
@HWI-EAS443:3:81:1617:1601#0/1  
CTTTTTTGGACAGTATGGATAGCAAATAGTAGCATTGACA  
+HWI-EAS443:3:81:1617:1601#0/1  
U¥``U`bbV`U`a````b`U`\_baabJSW]GO]XZFJRV



@HWI-EAS443:3:98:1740:576#0/1  
CTTTTTTGGACAGTATGGATAGCAAATAGTAGCATTGGCA  
+HWI-EAS443:3:98:1740:576#0/1  
SSSZ`¥aaZ¥H`V`¥]\_¥[`SLQVXaaaaWbTWaaPD[\_  
@HWI-EAS443:3:10:544:279#0/1  
GTACTTTTTTGGACAGTATNGATAGCAAATAGTAGCATTG  
+HWI-EAS443:3:10:544:279#0/1  
aWQWW¥^^\_^`^BBBBBBBBBBBBBBBBBBBBBBBBBBBBB  
@HWI-EAS443:3:19:828:580#0/1  
CTTTTTTGGANAGTATGGATAGCAAATAGTAGCATTGCCA  
+HWI-EAS443:3:19:828:580#0/1  
abbabbbbb]D[a\_abbab]a^bbaa]^a^Yaaaa``[  
@HWI-EAS443:3:21:286:1381#0/1  
GTACTTTTTTGGACAGTATNGATAGCAAATAGTAGCATTG  
+HWI-EAS443:3:21:286:1381#0/1  
a`aaabbaaaa`aa`a[D[a\_a`a\_]`YX`\_\_`\_^]  
@HWI-EAS443:3:23:1503:1584#0/1  
TTTTTGGACAGTNTGGATAGCAAATAGTAGCATTGCCACA  
+HWI-EAS443:3:23:1503:1584#0/1  
aaaaaaaaaaaaTD[``]`\_^`a¥\_Y[MR]UW^[T[ZWO]  
@HWI-EAS443:3:24:376:733#0/1  
ACTTNTTTGGACAGTATGGATAGCAAATAGTAGCATTGCC  
+HWI-EAS443:3:24:376:733#0/1  
aaa[D¥aaaaa`aaX`aa`\_^\_]`^`^N\_¥Z¥\_\_Y¥V  
@HWI-EAS443:3:58:1327:1444#0/1  
TTTTGGACAGTATGGATAGCAANTAGTAGCATTGCCACAA  
+HWI-EAS443:3:58:1327:1444#0/1  
a`b`bXZ`\_`Q]a]Z\_¥PQ^\_RDWY\_XX¥NY[WLFY\_Z^V  
@HWI-EAS443:3:66:1637:952#0/1  
ACTTTTTTGGACAGTATGGNTAGCAAATAGTAGCATTGCC  
+HWI-EAS443:3:66:1637:952#0/1  
^`bbbbbbbaZabb¥bab^D]``\_b`b\_aU\_aaabbV\_]`  
@HWI-EAS443:3:95:1229:1634#0/1  
CTTTTTTGGACAGTATGGATANCAAATAGTAGCATTGCCA  
+HWI-EAS443:3:95:1229:1634#0/1  
aaabbabbbb\_Y`bbbab`[DX\_bbabb\_bUXaa^aa`\_  
@HWI-EAS443:3:34:1421:1642#0/1  
CTTTTTTGGACAGTATGGATAGCAAATAGTAGCATTGCAA  
+HWI-EAS443:3:34:1421:1642#0/1  
`\_`aba^aaW\_aW^\_YaV`[¥\_\_aa¥Y]NO`\_VRQYQTGB  
@HWI-EAS443:3:39:387:1859#0/1  
GCACTTTTTTGGACAGTATGGATAGCAAATAGTAGCATTG  
+HWI-EAS443:3:39:387:1859#0/1  
]OT\_RaaaaaZQVa]``\_W`W\_QYZaa`YX¥¥VaU]RXOZ  
@HWI-EAS443:3:71:1289:1884#0/1  
CAAGGTACTTTTTTGGACAGTATGGATAGCAAATAGTAGA  
+HWI-EAS443:3:71:1289:1884#0/1  
aYUXSO¥`^]H]]^PP¥aV\_bRPZ^RWDEXaWL¥ITSPD  
@HWI-EAS443:3:97:221:242#0/1  
GGACAGTATGGATAGCAAATAGTAGCATTGCCACAATAA

+HWI-EAS443:3:97:221:242#0/1  
`[U[Y`OW¥¥¥JLYVYaY\_QUP`^XWSU\_NLVZ\_^ZZYG  
@HWI-EAS443:3:100:492:647#0/1  
GTACTTTTTGGACAGTATGGATAGCAAATAGTAGCATTG  
+HWI-EAS443:3:100:492:647#0/1  
aX0^aab`aaa\_XN\_aS^¥aa`a\_^S\_a\_^[ZR[¥NY\_XB  
@HWI-EAS443:3:10:474:691#0/1  
ACTTTTTGGACAGTATGGATAGCAAATAGTAGCATTGCC  
+HWI-EAS443:3:10:474:691#0/1  
abbbbbbbbababb\_abbaaaaaaaaa\_a\_]a``\_`a^``  
@HWI-EAS443:3:10:711:875#0/1  
TTTTTGGACAGTATGGATAGCAAATAGTAGCATTGCCACA  
+HWI-EAS443:3:10:711:875#0/1  
aa`aaa`\_\_¥a\_\_`a`^\_]`\_\_\_\_^`\_W\_\_UY^^WZW¥Z^  
@HWI-EAS443:3:11:1629:803#0/1  
GTACTTTTTGGACAGTATGGATAGCAAATAGTAGCATTG  
+HWI-EAS443:3:11:1629:803#0/1  
a^a\_aabaaaaa\_^\_a]`aaa`\_`Y`\_\_^¥]X`Y¥Z\_U  
@HWI-EAS443:3:11:227:600#0/1  
CTTTTTTGGACAGTATGGATAGCAAATAGTAGCATTGCCA  
+HWI-EAS443:3:11:227:600#0/1  
ababbbbbbb\_aba\_aa`aaa`][`aa¥a\_Y``¥Q]`¥\_`¥  
@HWI-EAS443:3:11:605:1658#0/1  
GTACTTTTTGGACAGTATGGATAGCAAATAGTAGCATTG  
+HWI-EAS443:3:11:605:1658#0/1  
`WZ]VXZ`Z`]]\_]RLV[YS^QTVGZ`¥OYOQ[[[ZVUS  
@HWI-EAS443:3:12:1672:1262#0/1  
GTACTTTTTGGACAGTATGGATAGCAAATAGTAGCATTG  
+HWI-EAS443:3:12:1672:1262#0/1  
\_N¥NY\_TWa\_^ZPNQa¥\_]MVLPRRMV[PSYUVPYBBBBB  
@HWI-EAS443:3:12:1714:1698#0/1  
TTTTTGGACAGTATGGATAGCAAATAGTAGCATTGCCACA  
+HWI-EAS443:3:12:1714:1698#0/1  
aaba\_`a\_\_aa¥\_\_a`\_\_\_\_`S^^^X\_\_T[SRY]ZNTPW[Z  
@HWI-EAS443:3:13:131:621#0/1  
CTTTTTTGGACAGTATGGATAGCAAATAGTAGCATTGCCA  
+HWI-EAS443:3:13:131:621#0/1  
YT`^aV[\_aaaa\_\_[]X]`[RLXWQ\_OQaXY\_BBBBBBBB  
@HWI-EAS443:3:13:19:1056#0/1  
GTACTTTTTGGACAGTATGGATAGCAAATAGTAGCATTG  
+HWI-EAS443:3:13:19:1056#0/1  
`PRY^`\_W\_S\_^]¥UV^]]`Y``¥X[^`¥^[Q¥a[W^YX  
@HWI-EAS443:3:13:635:950#0/1  
GTACTTTTTGGACAGTATGGATAGCAAATAGTAGCATTG  
+HWI-EAS443:3:13:635:950#0/1  
aX¥V¥`V]aaaa`\_`SM[\_`^Z\_\_`X[^`^Z^WNSYZV¥VS  
@HWI-EAS443:3:13:754:1982#0/1  
GTACTTTTTGGACAGTATGGATAGCAAATAGTAGCATTG  
+HWI-EAS443:3:13:754:1982#0/1  
aY]]Za^^aZ]\_]`b`a`YZY\_aZ`^`¥Q^ZG]¥TXOYU

@HWI-EAS443:3:13:938:1219#0/1  
ACTTTTTTGGACAGTATGGATAGCAAATAGTAGCATTGCC  
+HWI-EAS443:3:13:938:1219#0/1  
abaaaaaaaa\_aa^`a^\_[Z\_`a\_]\_ZW\_Z[^\_¥X[]  
@HWI-EAS443:3:14:1185:793#0/1  
TACTTTTTTGGACAGTATGGATAGCAAATAGTAGCATTGC  
+HWI-EAS443:3:14:1185:793#0/1  
a]`babaabbaaab]aaaa\_`a^Wa`a`\_Y`a`\_a[]  
@HWI-EAS443:3:14:1193:647#0/1  
CTTTTTTGGACAGTATGGATAGCAAATAGTAGCATTGCCA  
+HWI-EAS443:3:14:1193:647#0/1  
a`b\_aaaaaa`\_a]\_aaa\_\_\_\_\_][[[\_W\_[YW\_^X¥^¥  
@HWI-EAS443:3:14:1628:1280#0/1  
GTACTTTTTTGGACAGTATGGATAGCAAATAGTAGCATTG  
+HWI-EAS443:3:14:1628:1280#0/1  
\_]`babaaa\_¥¥\_`b`aaa```\_Y```\_`X^`PP]\_Y  
@HWI-EAS443:3:14:1699:228#0/1  
TACTTTTTTGGACAGTATGGATAGCAAATAGTAGCATTGC  
+HWI-EAS443:3:14:1699:228#0/1  
aaaaaaaa\_`a`OXaaS`aaa^]`T\_a]\_]U^\_T[V\_0Q  
@HWI-EAS443:3:14:374:89#0/1  
GTACTTTTTTGGACAGTATGGATAGCAAATAGTAGCATTG  
+HWI-EAS443:3:14:374:89#0/1  
a\_aaaaaaabaa\_`aa]\_`a`\_\_^Z[^`^\_\_\_^Y]a]]^^[  
@HWI-EAS443:3:14:783:567#0/1  
GTACTTTTTTGGACAGTATGGATAGCAAATAGTAGCATTG  
+HWI-EAS443:3:14:783:567#0/1  
a[\_`a\_aaa\_a^W^`X^a``][¥Y[^^^]]TLU\_]]]VT  
@HWI-EAS443:3:14:839:1333#0/1  
ACTTTTTTGGACAGTATGGATAGCAAATAGTAGCATTGCC  
+HWI-EAS443:3:14:839:1333#0/1  
`[^`aaa`Q\_]aaa\_Y\_`a``aa\_``aaa^¥U\_\_Y¥\_Y\_]`  
@HWI-EAS443:3:15:1086:1491#0/1  
GTACTTTTTTGGACAGTATGGATAGCAAATAGTAGCATTG  
+HWI-EAS443:3:15:1086:1491#0/1  
aaaa]``\_a^aaa^`aZa\_aa^\_aa[a\_YPOUU\_\_X^^Z]  
@HWI-EAS443:3:15:114:740#0/1  
GTACTTTTTTGGACAGTATGGATAGCAAATAGTAGCATTG  
+HWI-EAS443:3:15:114:740#0/1  
aYV\_aY\_`a\_NVMO¥¥RN¥V¥Y[¥ROZaUS¥MK[UODVPO  
@HWI-EAS443:3:15:234:424#0/1  
GTACTTTTTTGGACAGTATGGATAGCAAATAGTAGCATTG  
+HWI-EAS443:3:15:234:424#0/1  
a^a\_\_\_`\_\_`\_\_`\_`^`a[\_\_\_`^^^]W\_]\_]\_[WY^]Y[^W  
@HWI-EAS443:3:15:681:226#0/1  
GTACTTTTTTGGACAGTATGGATAGCAAATAGTAGCATTG  
+HWI-EAS443:3:15:681:226#0/1  
aZY\_RLL¥¥P¥```]¥VPUY]XBBBBBBBBBBBBBBBBBB  
@HWI-EAS443:3:16:1527:39#0/1  
ACTTTTTTGGACAGTATGGATAGCAAATAGTAGCATTGCC

+HWI-EAS443:3:16:1527:39#0/1  
\_`\_YZabbbb¥a^Y)aaaa\_Y\_FS`^^V`T¥ZP]Z[[PZ  
@HWI-EAS443:3:16:1644:1616#0/1  
ACTTTTTTTGGACAGTATGGATAGCAAATAGTAGCATTGCC  
+HWI-EAS443:3:16:1644:1616#0/1  
abaa\_aba`b\_aa\_`[\_a\_\_W`S``aY\_`G``P]\_`XVU  
@HWI-EAS443:3:16:230:1582#0/1  
ACTTTTTTTGGACAGTATGGATAGCAAATAGTAGCATTGCC  
+HWI-EAS443:3:16:230:1582#0/1  
abaaaaa`aaaa^a^a\_a^`\_Xaa^Za^X¥Y\_]\_^\_[[\_  
@HWI-EAS443:3:16:550:229#0/1  
GTACTTTTTTTGGACAGTATGGATAGCAAATAGTAGCATTG  
+HWI-EAS443:3:16:550:229#0/1  
a[\_\_\_\_aaaaa`]`a\_\_`a`^\_\_\_\_Y\_\_\_\_\_]U[[^[[¥K  
@HWI-EAS443:3:16:859:1520#0/1  
ACTTTTTTTGGACAGTATGGATAGCAAATAGTAGCATTGCC  
+HWI-EAS443:3:16:859:1520#0/1  
Za`]¥ab`Y^\_a¥b^ZaaYa\_\_¥SY\_¥UWVD[YW^SY]O]  
@HWI-EAS443:3:16:950:1071#0/1  
TTTTTTGGACAGTATGGATAGCAAATAGTAGCATTGCCACA  
+HWI-EAS443:3:16:950:1071#0/1  
ab``a`^^\_aa^^`][a`]W\_`[¥¥ZR\_^FU¥^\_\_^\_^  
@HWI-EAS443:3:17:1148:956#0/1  
GGTACTTTTTTTGGACAGTATGGATAGCAAATAGTAGCATT  
+HWI-EAS443:3:17:1148:956#0/1  
`[Q\_¥]abb\_`\_a`\_\_¥L\_RS]]KWRGT0`]Z\_X[^XWRJ  
@HWI-EAS443:3:17:1418:797#0/1  
GTACTTTTTTTGGACAGTATGGATAGCAAATAGTAGCATTG  
+HWI-EAS443:3:17:1418:797#0/1  
a``^`aaaa\_aa\_`^`Z^aa\_[]^¥VU\_]Z^Y[`SYW]Y  
@HWI-EAS443:3:17:1602:808#0/1  
ACTTTTTTTGGACAGTATGGATAGCAAATAGTAGCATTGCC  
+HWI-EAS443:3:17:1602:808#0/1  
`abbabbbba`aa^`bab\_`^\_F¥\_W[\_aO\_\_GX\_aWR]  
@HWI-EAS443:3:17:1662:427#0/1  
ACTTTTTTTGGACAGTATGGATAGCAAATAGTAGCATTGCC  
+HWI-EAS443:3:17:1662:427#0/1  
aaababbaba`a`a`aaaba\_\_\_W\_\_\_\_\_^¥[`aY^\_\_\_[[[  
@HWI-EAS443:3:17:227:1659#0/1  
CTTTTTTTGGACAGTATGGATAGCAAATAGTAGCATTGCCA  
+HWI-EAS443:3:17:227:1659#0/1  
aaababbbbaabaa\_aaaa\_aa[aa`aa`XUa``\_``]^a\_  
@HWI-EAS443:3:17:255:362#0/1  
GTACTTTTTTTGGACAGTATGGATAGCAAATAGTAGCATTG  
+HWI-EAS443:3:17:255:362#0/1  
a\_a`aabaaaba\_`aa[a`a\_a\_`^\_[a^\_\_^SP`\_[¥^¥S  
@HWI-EAS443:3:17:260:558#0/1  
ACTTTTTTTGGACAGTATGGATAGCAAATAGTAGCATTGCC  
+HWI-EAS443:3:17:260:558#0/1  
[a]¥Z`]^\_`K\_ZaUW``YW\_^QWU[QR^^OSRQLXW¥¥X

@HWI-EAS443:3:17:626:1559#0/1  
GTACTTTTTGGACAGTATGGATAGCAAATAGTAGCATTG  
+HWI-EAS443:3:17:626:1559#0/1  
a^aba\_aaaa`\_aba\_aaaa`\_a`aaa\_a^[\`^`\_`a]  
@HWI-EAS443:3:17:875:1170#0/1  
ACTTTTTGGACAGTATGGATAGCAAATAGTAGCATTGCC  
+HWI-EAS443:3:17:875:1170#0/1  
a¥^Y]RSYYW\_a`^TPT`VTWWR¥`¥[N\_PFVVM[U[YPR  
@HWI-EAS443:3:18:107:273#0/1  
GTACTTTTTGGACAGTATGGATAGCAAATAGTAGCATTG  
+HWI-EAS443:3:18:107:273#0/1  
a\_aaaaaaaaaaaaaa^a`aa\_`\_\_\_a``Z¥^X\_]W¥^\_\_  
@HWI-EAS443:3:18:99:1733#0/1  
TTTTTTGGACAGTATGGATAGCAAATAGTAGCATTGCCAC  
+HWI-EAS443:3:18:99:1733#0/1  
aaaa\_a\_a`aa`]a`\_a^`U[\`a`YYTT¥`\_¥Z^[[[][\_  
@HWI-EAS443:3:19:1579:181#0/1  
GTACTTTTTGGACAGTATGGATAGCAAATAGTAGCATTG  
+HWI-EAS443:3:19:1579:181#0/1  
`P]`^^]a]] [MILYWFO^^YPVLRWYUBBBBBBBBBBB  
@HWI-EAS443:3:19:1690:1360#0/1  
GTACTTTTTGGACAGTATGGATAGCAAATAGTAGCATTG  
+HWI-EAS443:3:19:1690:1360#0/1  
\_a^^`\_abaa`bV`\_]¥aba\_a^¥T[[[\_]\_NY^QX` `[  
@HWI-EAS443:3:19:856:131#0/1  
ACTTTTTGGACAGTATGGATAGCAAATAGTAGCATTGCC  
+HWI-EAS443:3:19:856:131#0/1  
ab¥^`¥ZM¥`aVaaYaaPJa^`]`\_a`aN¥YHXX`Y\_¥  
@HWI-EAS443:3:19:914:24#0/1  
GGTACTTTTTGGACAGTATGGATAGCAAATAGTAGCATT  
+HWI-EAS443:3:19:914:24#0/1  
aa\_a\_aaaaaaa`\_]`a[\`^a`^^]ZL¥\_`^V]]V]^X[[[]  
@HWI-EAS443:3:1:1137:1174#0/1  
ACTTTTTGGACAGTATGGATAGCAAATAGTAGCATTGCC  
+HWI-EAS443:3:1:1137:1174#0/1  
^^aa`^M`b^]bbaaa`\_\_\_YLR\_\_a\_aa[[OKP`BBBB  
@HWI-EAS443:3:1:1227:396#0/1  
ACTTTTTGGACAGTATGGATAGCAAATAGTAGCATTGCC  
+HWI-EAS443:3:1:1227:396#0/1  
[Z\_aa`^a^`]T¥a`abba\_aa^Y[a`]`\_WY]W[\_`]ZX  
@HWI-EAS443:3:1:1237:1386#0/1  
ACTTTTTGGACAGTATGGATAGCAAATAGTAGCATTGCC  
+HWI-EAS443:3:1:1237:1386#0/1  
a^YS` `b`^`Y]ab^aa`Y[NZ¥P\_T`\_`[aXX^Y^a\_[BB  
@HWI-EAS443:3:1:1284:656#0/1  
ACTTTTTGGACAGTATGGATAGCAAATAGTAGCATTGCC  
+HWI-EAS443:3:1:1284:656#0/1  
a`babbab`]Zab^WYabaa`]] [aa`Y[\_\_\_`UNN]\_YBB  
@HWI-EAS443:3:1:897:531#0/1  
TGGACAGTATGGATAGCAAATAGTAGCATTGCCACAATA

+HWI-EAS443:3:1:897:531#0/1  
aaaa`a`\_aaaaW\_ZRU¥]\_Q^WL^a^^X^HG]X]BBBBB  
@HWI-EAS443:3:20:1192:1845#0/1  
GTACTTTTTTGGACAGTATGGATAGCAAATAGTAGCATTG  
+HWI-EAS443:3:20:1192:1845#0/1  
`\_b`abaaaa^a` `[aSX]]^^¥^U]aa]`VV[]Q[^\_Z  
@HWI-EAS443:3:20:145:256#0/1  
TACTTTTTTGGACAGTATGGATAGCAAATAGTAGCATTGC  
+HWI-EAS443:3:20:145:256#0/1  
`baba^^¥¥bV^baaY^a` `aT¥N\_a`¥]WHTZ\_H¥U]WJ  
@HWI-EAS443:3:20:419:510#0/1  
GTACTTTTTTGGACAGTATGGATAGCAAATAGTAGCATTG  
+HWI-EAS443:3:20:419:510#0/1  
^JTR\_aaaa`a\_\_\_\_\_a¥a]^`]U\_GS¥`\_UWXOY^VSU¥Z  
@HWI-EAS443:3:20:545:1328#0/1  
GTACTTTTTTGGACAGTATGGATAGCAAATAGTAGCATTG  
+HWI-EAS443:3:20:545:1328#0/1  
aYa^aa\_a`aa[¥[a\_[aa^Z\_V\_¥WZ¥\_W]XG`\_WZ\_[U  
@HWI-EAS443:3:20:79:1407#0/1  
TTTTTGGACAGTATGGATAGCAAATAGTAGCATTGCCACA  
+HWI-EAS443:3:20:79:1407#0/1  
aaa`^`^aaa`aU\_`^`]^`^XTYa`\_U[XX\_Z¥^]^U]]^^  
@HWI-EAS443:3:21:1318:1721#0/1  
TTTTTGGACAGTATGGATAGCAAATAGTAGCATTGCCACA  
+HWI-EAS443:3:21:1318:1721#0/1  
aaa\_aaa^¥]^N^` `[\_a¥]^a`YaXVL[¥Q\_]W¥GZG[  
@HWI-EAS443:3:21:1445:535#0/1  
CTTTTTTGGACAGTATGGATAGCAAATAGTAGCATTGCCA  
+HWI-EAS443:3:21:1445:535#0/1  
abbbbbbbbaaaba`bbbaa`a]aa`aa`\_]\_a^Waa`\_P\_  
@HWI-EAS443:3:21:306:1710#0/1  
TTTTTGGACAGTATGGATAGCAAATAGTAGCATTGCCACA  
+HWI-EAS443:3:21:306:1710#0/1  
aaaaaaaa`\_Za^a\_a^][aa`\_\_\_YY¥W]V¥Z[\_`\_Z`  
@HWI-EAS443:3:21:467:727#0/1  
TTTTTGGACAGTATGGATAGCAAATAGTAGCATTGCCACA  
+HWI-EAS443:3:21:467:727#0/1  
a`ba` `aaaab^`aa]a\_Z¥]\_aa^^aW^^Z^\_V¥[^`H`  
@HWI-EAS443:3:21:633:1453#0/1  
GTACTTTTTTGGACAGTATGGATAGCAAATAGTAGCATTG  
+HWI-EAS443:3:21:633:1453#0/1  
a\_aaaabaaaa¥`aa^baa` ` `WWa^^\_aZY]]G^]`^]  
@HWI-EAS443:3:21:69:473#0/1  
GGTACTTTTTTGGACAGTATGGATAGCAAATAGTAGCATT  
+HWI-EAS443:3:21:69:473#0/1  
`b`baaabbbbaaaaa\_\_aaa`a`a^\_aaaa¥¥\_aa¥\_`  
@HWI-EAS443:3:21:837:1456#0/1  
GTACTTTTTTGGACAGTATGGATAGCAAATAGTAGCATTG  
+HWI-EAS443:3:21:837:1456#0/1  
`]b`\_a]]`¥VJaQN]Ua`SVUS¥V¥[XUXUNYLRRL\_`B

@HWI-EAS443:3:22:1497:1910#0/1  
TTTTTGGACAGTATGGATAGCAAATAGTAGCATTGCCACA  
+HWI-EAS443:3:22:1497:1910#0/1  
abaaabaa`aa`aaa]`[^Waa`\_`ZKY^¥[\_^YZWZM\_  
@HWI-EAS443:3:22:1522:1414#0/1  
GTACTTTTTTGGACAGTATGGATAGCAAATAGTAGCATTG  
+HWI-EAS443:3:22:1522:1414#0/1  
aaYWaaaaaY`W]a¥aaaaZ`]aX\_ZYY\_]W^`[\_Z^  
@HWI-EAS443:3:22:1612:901#0/1  
TTTGGACAGTATGGATAGCAAATAGTAGCATTGCCACAAC  
+HWI-EAS443:3:22:1612:901#0/1  
`b]abaab`P\_b\_`I\_[^Rba`b^]NP]X\_a\_XPY]Y`\_^  
@HWI-EAS443:3:22:1645:218#0/1  
ACTTTTTTGGACAGTATGGATAGCAAATAGTAGCATTGCC  
+HWI-EAS443:3:22:1645:218#0/1  
a`aaaaaa`aaZ`\_\_\_\_\_aa`\_`¥M¥^`^`]Y]ZR^\_^ZTV  
@HWI-EAS443:3:22:653:833#0/1  
GTACTTTTTTGGACAGTATGGATAGCAAATAGTAGCATTG  
+HWI-EAS443:3:22:653:833#0/1  
a`Y\_`aa^\_aaa]`aa¥a`\_\_\_\_[WWYZ¥^ZZZV^UO¥[[R  
@HWI-EAS443:3:22:680:553#0/1  
TTTTTGGACAGTATGGATAGCAAATAGTAGCATTGCCACAA  
+HWI-EAS443:3:22:680:553#0/1  
abbbbaaa¥¥]aabaaaa`^aaaa]Ya`T]^[\_`RM`a  
@HWI-EAS443:3:22:981:762#0/1  
GTACTTTTTTGGACAGTATGGATAGCAAATAGTAGCATTG  
+HWI-EAS443:3:22:981:762#0/1  
aaa\_abaaaab`]`b]aaa\_\_^^\_S^`^^^][V]^YSY^  
@HWI-EAS443:3:23:1313:97#0/1  
ACTTTTTTGGACAGTATGGATAGCAAATAGTAGCATTGCC  
+HWI-EAS443:3:23:1313:97#0/1  
`\_`ba^aba`\_ab`\_`\_`[aX`¥a`\_`Y\_PZ¥L]`a\_YU  
@HWI-EAS443:3:23:1320:188#0/1  
TTTTTGGACAGTATGGATAGCAAATAGTAGCATTGCCACA  
+HWI-EAS443:3:23:1320:188#0/1  
ab\_aa`b\_\_\_\_`¥aaaa]`¥T\_`[^YYRY¥VV¥]ZXX[K¥  
@HWI-EAS443:3:23:1467:164#0/1  
TACTTTTTTGGACAGTATGGATAGCAAATAGTAGCATTGC  
+HWI-EAS443:3:23:1467:164#0/1  
X¥G\_a\_]¥aaX^`\_`Waa\_aXa`^G[\_\_\_\_`S`]NY\_\_SO  
@HWI-EAS443:3:23:280:1333#0/1  
GTACTTTTTTGGACAGTATGGATAGCAAATAGTAGCATTG  
+HWI-EAS443:3:23:280:1333#0/1  
a]X\_OW\_Z^`\_`^`^ULTaY]VWV[`\_WYQGVWNVSR  
@HWI-EAS443:3:23:526:468#0/1  
GTACTTTTTTGGACAGTATGGATAGCAAATAGTAGCATTG  
+HWI-EAS443:3:23:526:468#0/1  
a`aaa`babaaaaaba\_a`]a]\_\_\_\_¥\_a\_¥XU^`¥W[^W  
@HWI-EAS443:3:23:742:855#0/1  
TACTTTTTTGGACAGTATGGATAGCAAATAGTAGCATTGC

+HWI-EAS443:3:23:742:855#0/1  
\_\_b^a^abbaZa^L^\_ZaWQWaXQ\_^]V¥QTI¥Y\_WZV`¥  
@HWI-EAS443:3:23:757:275#0/1  
TTTTTGGACAGTATGGATAGCAAATAGTAGCATTGCCACA  
+HWI-EAS443:3:23:757:275#0/1  
aa`aaaa`\_]\_\_a`aa\_^THX``[\_UFV\_XXS[SP\_]Y\_  
@HWI-EAS443:3:24:1328:939#0/1  
GTACTTTTTGGACAGTATGGATAGCAAATAGTAGCATTG  
+HWI-EAS443:3:24:1328:939#0/1  
`baabbbbbbbbaabaaaaa`a``aaaa`a^aaa\_``]  
@HWI-EAS443:3:24:1380:1347#0/1  
CTTTTTGGACAGTATGGATAGCAAATAGTAGCATTGCCA  
+HWI-EAS443:3:24:1380:1347#0/1  
abbbbbbbba`bb``bbaaaa[[aabaZUbaaaaa``Ya  
@HWI-EAS443:3:24:197:932#0/1  
ACTTTTTGGACAGTATGGATAGCAAATAGTAGCATTGCC  
+HWI-EAS443:3:24:197:932#0/1  
abbaaaaaa\_baa^aaa``\_^Z]aa\_`\_Y\_^¥]\_`[^`  
@HWI-EAS443:3:24:833:1355#0/1  
TTTTTGGACAGTATGGATAGCAAATAGTAGCATTGCCACA  
+HWI-EAS443:3:24:833:1355#0/1  
ab\_^Y`\_`[\_]`\_aaaa`]X¥X¥^`]YVP¥¥TS\_]U^[X¥\_  
@HWI-EAS443:3:25:341:146#0/1  
TTTGGACAGTATGGATAGCAAATAGTAGCATTGCCACAAC  
+HWI-EAS443:3:25:341:146#0/1  
abbbbbaaaa^aaaa\_```\_aa\_\_\_\_\_Y`][X\_`\_^¥WZ\_\_W  
@HWI-EAS443:3:25:81:656#0/1  
GTACTTTTTGGACAGTATGGATAGCAAATAGTAGCATTG  
+HWI-EAS443:3:25:81:656#0/1  
aW^^````][Z[^]^\_\_\_\_]¥VVQ[ZYZ^YOZYTRWP  
@HWI-EAS443:3:26:1216:1428#0/1  
GTACTTTTTGGACAGTATGGATAGCAAATAGTAGCATTG  
+HWI-EAS443:3:26:1216:1428#0/1  
aXSU\_``a]\_\_¥`U`a¥P¥YY\_QZ``^¥QR[XLX^XP¥¥P  
@HWI-EAS443:3:26:1609:1159#0/1  
GTACTTTTTGGACAGTATGGATAGCAAATAGTAGCATTG  
+HWI-EAS443:3:26:1609:1159#0/1  
a[\_¥aaaaaaaa`^aa`aaa`\_`\_^¥```Y[XV^YJVY[S  
@HWI-EAS443:3:26:500:149#0/1  
GTACTTTTTGGACAGTATGGATAGCAAATAGTAGCATTG  
+HWI-EAS443:3:26:500:149#0/1  
aX^\_aaaa`]a^\_^\_]\_^\_]^^^```\_Y^[X^YWPYX  
@HWI-EAS443:3:26:618:572#0/1  
GTACTTTTTGGACAGTATGGATAGCAAATAGTAGCATTG  
+HWI-EAS443:3:26:618:572#0/1  
a`aaabbaaa\_a\_aaa[\_`aa`¥[[S\_a\_\_\_\_ZT\_]X\_]\_W  
@HWI-EAS443:3:26:73:128#0/1  
CTTTTTGGACAGTATGGATAGCAAATAGTAGCATTGCCA  
+HWI-EAS443:3:26:73:128#0/1  
aaaabaaa\_`\_a^`\_\_`^^[^``¥UUTXN^^¥SV[PW¥X



@HWI-EAS443:3:26:945:974#0/1  
CTTTTTGGACAGTATGGATAGCAAATAGTAGCATTGCCA  
+HWI-EAS443:3:26:945:974#0/1  
aaabbaabaa`a`N\_aa^`a\_^Y^aa[a^T[`]W\_\_^X^^  
@HWI-EAS443:3:26:961:1363#0/1  
GTACTTTTTGGACAGTATGGATAGCAAATAGTAGCATTG  
+HWI-EAS443:3:26:961:1363#0/1  
]FOT\_]a\_\_a]YZZ¥Y¥a`aa\_XUKMZ`XRUMOZRGVUGF  
@HWI-EAS443:3:27:1040:952#0/1  
TTTTGGACAGTATGGATAGCAAATAGTAGCATTGCCACA  
+HWI-EAS443:3:27:1040:952#0/1  
aba`abaaaab]aaa`\_a^]V]``\_\_^X\_`VY^`YY\_\_[`  
@HWI-EAS443:3:27:52:521#0/1  
TTGGACAGTATGGATAGCAAATAGTAGCATTGCCACA  
+HWI-EAS443:3:27:52:521#0/1  
abaaaaaa^aaaaa\_a`a\_a[^¥¥P]^R`V^¥`YDU\_a\_X  
@HWI-EAS443:3:27:633:1134#0/1  
TTTGGACAGTATGGATAGCAAATAGTAGCATTGCCACA  
+HWI-EAS443:3:27:633:1134#0/1  
abba`abab\_bbaaa`\_Y^aaa^\_ZUa`\_VYaY`a\_\_a\_  
@HWI-EAS443:3:27:838:237#0/1  
GTACTTTTTGGACAGTATGGATAGCAAATAGTAGCATTG  
+HWI-EAS443:3:27:838:237#0/1  
a]\_aaaa^`\_]\_RT^\_\_S`\_\_\_X^YST¥\_\_VWSU^YLVYZV  
@HWI-EAS443:3:28:1086:928#0/1  
GTACTTTTTGGACAGTATGGATAGCAAATAGTAGCATTG  
+HWI-EAS443:3:28:1086:928#0/1  
a[^^^`aaaa^`\_`Z`a]`^a`^^^¥R^`\_Y^XU¥]PYW\_  
@HWI-EAS443:3:28:1359:1134#0/1  
GTACTTTTTGGACAGTATGGATAGCAAATAGTAGCATTG  
+HWI-EAS443:3:28:1359:1134#0/1  
Ya¥S¥```a\_X\_\_¥`\_S]`\_`\_Z\_YWZ\_YXXV]W¥XT^Y^V  
@HWI-EAS443:3:28:1453:1605#0/1  
GGTACTTTTTGGACAGTATGGATAGCAAATAGTAGCATT  
+HWI-EAS443:3:28:1453:1605#0/1  
aa]aabababaaa\_\_aa^`aa`\_`\_`Y\_\_\_Z]]W``¥X¥^  
@HWI-EAS443:3:29:1371:189#0/1  
GTACTTTTTGGACAGTATGGATAGCAAATAGTAGCATTG  
+HWI-EAS443:3:29:1371:189#0/1  
a\_SU\_]a]\_`UUOYU^[^][US[QOOXPVTRFX¥BBBBB  
@HWI-EAS443:3:29:758:492#0/1  
ACTTTTTGGACAGTATGGATAGCAAATAGTAGCATTGCC  
+HWI-EAS443:3:29:758:492#0/1  
\_¥bbabbb\_baa`b`babb`aaa]aaaa^a^aa^a\_``[]  
@HWI-EAS443:3:2:1231:1780#0/1  
TTTTGGACAGTATGGATAGCAAATAGTAGCATTGCCACA  
+HWI-EAS443:3:2:1231:1780#0/1  
abaaaaa[\_aa]a^a`\_`\_`\_Z\_\_\_\_]`YG\_MDOYXTLGWXV  
@HWI-EAS443:3:2:1379:1409#0/1  
TTTTGGACAGTATGGATAGCAAATAGTAGCATTGCCACA

+HWI-EAS443:3:2:1379:1409#0/1  
abaabab`aab\_aaaa\_a¥¥Xa``a¥OU\_\_Y[^`\_TO\_PY  
@HWI-EAS443:3:2:1442:397#0/1  
GTACTTTTTTGGACAGTATGGATAGCAAATAGTAGCATTG  
+HWI-EAS443:3:2:1442:397#0/1  
a`a^aaaaaaaa\_`a`aaa\_\_^^¥¥^\_]\_X^]WY]^P  
@HWI-EAS443:3:2:1636:656#0/1  
CTTTTTTGGACAGTATGGATAGCAAATAGTAGCATTGCCA  
+HWI-EAS443:3:2:1636:656#0/1  
abaaabbbba`aa[aaaa\_\_a\_U`aa]\_\_ZaaW\_\_a]YX]  
@HWI-EAS443:3:2:898:332#0/1  
ACTTTTTTGGACAGTATGGATAGCAAATAGTAGCATTGCC  
+HWI-EAS443:3:2:898:332#0/1  
a`bbb`bbbaa\_aa^\_abb^`\_aV\_\_a]¥V¥aX^`\_XSU  
@HWI-EAS443:3:30:1112:117#0/1  
TACTTTTTTGGACAGTATGGATAGCAAATAGTAGCATTGC  
+HWI-EAS443:3:30:1112:117#0/1  
`b`b`ab[V\_bZ[\_bTb`bb[a\_\_\_\_`\_a\_]¥W`[NX^`VQ  
@HWI-EAS443:3:30:368:255#0/1  
CAAGGTACTTTTTTGGACAGTATGGATAGCAAATAGTAGC  
+HWI-EAS443:3:30:368:255#0/1  
aaba^D]b\_`bbbbbaaaaa\_aaaaa\_`a]aaa\_a\_[`\_`a  
@HWI-EAS443:3:30:414:1225#0/1  
GTACTTTTTTGGACAGTATGGATAGCAAATAGTAGCATTG  
+HWI-EAS443:3:30:414:1225#0/1  
¥¥bba^aaab`Y`abaR`^a`^^`]^a^[QXVSYV]RZ\_\_  
@HWI-EAS443:3:30:490:1485#0/1  
GTACTTTTTTGGACAGTATGGATAGCAAATAGTAGCATTG  
+HWI-EAS443:3:30:490:1485#0/1  
P\_\_¥`a^¥]\_a]L\_\_\_\_^[\_\_\_\_]^a`\_`¥]Z¥WXVX``ZQQ  
@HWI-EAS443:3:30:743:1727#0/1  
GTACTTTTTTGGACAGTATGGATAGCAAATAGTAGCATTG  
+HWI-EAS443:3:30:743:1727#0/1  
a[\_Y¥^[^ba`aaaba]aaa^\_YVN][a`X]ZS`XN\_W`X  
@HWI-EAS443:3:31:1194:347#0/1  
GGTACTTTTTTGGACAGTATGGATAGCAAATAGTAGCATT  
+HWI-EAS443:3:31:1194:347#0/1  
aa[a`a\_\_aabaa\_`aa]a\_\_\_\_[^]ZR¥a¥Y[\_J`XTZ\_\_  
@HWI-EAS443:3:31:1447:1744#0/1  
TACTTTTTTGGACAGTATGGATAGCAAATAGTAGCATTGC  
+HWI-EAS443:3:31:1447:1744#0/1  
T¥^b^b\_a^```ba\_ZZW\_^]¥Z¥a^X\_YD¥]\_Zaa]`  
@HWI-EAS443:3:31:1496:1153#0/1  
GGTACTTTTTTGGACAGTATGGATAGCAAATAGTAGCATT  
+HWI-EAS443:3:31:1496:1153#0/1  
]¥Ja^\_Y\_bb`^^^Y`\_Z\_a`a¥\_`a`\_X\_XOO[]X^\_T  
@HWI-EAS443:3:31:397:717#0/1  
TTTTTGGACAGTATGGATAGCAAATAGTAGCATTGCCACA  
+HWI-EAS443:3:31:397:717#0/1  
aaaaaaaa`¥Z\_aa\_]PV¥aa`VVTT]YVUS]R¥\_J[^

@HWI-EAS443:3:31:466:2011#0/1  
CTTTTTTGGACAGTATGGATAGCAAATAGTAGCATTGCCA  
+HWI-EAS443:3:31:466:2011#0/1  
a`W` [¥\_X^^a^[LQY\_\_\_^¥Q¥¥`\_Z`POWKW[W]G` `Y  
@HWI-EAS443:3:32:1571:1185#0/1  
GTACTTTTTTGGACAGTATGGATAGCAAATAGTAGCATTG  
+HWI-EAS443:3:32:1571:1185#0/1  
a]WQa^Q\_a\_X\_[a\_¥N[Y[]BBBBBBBBBBBBBBBBBBB  
@HWI-EAS443:3:32:233:933#0/1  
TTTGGACAGTATGGATAGCAAATAGTAGCATTGCCACAAC  
+HWI-EAS443:3:32:233:933#0/1  
ab`\_¥`Z[]^¥a\_Z` `]]]¥aa[]GY^F¥^TUOZa]\_SK]  
@HWI-EAS443:3:32:370:711#0/1  
GTACTTTTTTGGACAGTATGGATAGCAAATAGTAGCATTG  
+HWI-EAS443:3:32:370:711#0/1  
XZabbbabb` `babb¥V^a`aaa\_Y\_aaa\_RJYZMGW\_]`  
@HWI-EAS443:3:32:859:870#0/1  
CTTTTTTGGACAGTATGGATAGCAAATAGTAGCATTGCCA  
+HWI-EAS443:3:32:859:870#0/1  
abaabbbabaaab¥` `b`XM[\_aa[a^`\_Q`aa¥Y^Taaa  
@HWI-EAS443:3:32:908:72#0/1  
GTACTTTTTTGGACAGTATGGATAGCAAATAGTAGCATTG  
+HWI-EAS443:3:32:908:72#0/1  
a` ` `aaaaa^\_YY^\_Y^` `YW[SYMP^]¥][SXRELX^U  
@HWI-EAS443:3:33:1596:403#0/1  
GTACTTTTTTGGACAGTATGGATAGCAAATAGTAGCATTG  
+HWI-EAS443:3:33:1596:403#0/1  
aVU^a¥OZ\_R^a]R¥aW`a]Y[]¥[SQ\_YW¥YQUOMNWYL  
@HWI-EAS443:3:33:1603:1391#0/1  
GTACTTTTTTGGACAGTATGGATAGCAAATAGTAGCATTG  
+HWI-EAS443:3:33:1603:1391#0/1  
` []`\_aaaaa`^^`a^` `a`Y\_Y[VX\_¥][QG]SQTUZQ  
@HWI-EAS443:3:33:57:1843#0/1  
GTACTTTTTTGGACAGTATGGATAGCAAATAGTAGCATTG  
+HWI-EAS443:3:33:57:1843#0/1  
a`ab`aabbb`Uaaba^`a[^a\_[O\_\_O\_[`LT^Y[\_]¥U  
@HWI-EAS443:3:33:745:1808#0/1  
TTTGGACAGTATGGATAGCAAATAGTAGCATTGCCACAAC  
+HWI-EAS443:3:33:745:1808#0/1  
¥]b[ `ba^^[b^UU` [SHS\_b`K\_ZIWQWU\_YFM]^]^\_Q  
@HWI-EAS443:3:34:1007:739#0/1  
GTACTTTTTTGGACAGTATGGATAGCAAATAGTAGCATTG  
+HWI-EAS443:3:34:1007:739#0/1  
aWUVYX]Ya[]PDH^P^aBBBBBBBBBBBBBBBBBBBBB  
@HWI-EAS443:3:34:130:868#0/1  
ACTTTTTTGGACAGTATGGATAGCAAATAGTAGCATTGCC  
+HWI-EAS443:3:34:130:868#0/1  
`baaa`^aba^aaa\_a`aY^\_AY[]Q[S]XKT[VPZ]¥YO  
@HWI-EAS443:3:34:1470:879#0/1  
GTACTTTTTTGGACAGTATGGATAGCAAATAGTAGCATTG

+HWI-EAS443:3:34:1470:879#0/1  
a)aaaaabaaa`aaaa\_a`aa^Y^[SY^`¥XZXMRR[[B  
@HWI-EAS443:3:34:1624:1354#0/1  
GTACTTTTTGGACAGTATGGATAGCAAATAGTAGCATTG  
+HWI-EAS443:3:34:1624:1354#0/1  
X^^abaSYbV]ba`][abaabaZITQ]^`R^XBBBBBBBB  
@HWI-EAS443:3:34:463:1313#0/1  
TACTTTTTGGACAGTATGGATAGCAAATAGTAGCATTGC  
+HWI-EAS443:3:34:463:1313#0/1  
a\_baaaaaaaa`^]aa`[\_`¥W\_aa]O]UV`Z^^U[VW  
@HWI-EAS443:3:34:92:167#0/1  
ACTTTTTGGACAGTATGGATAGCAAATAGTAGCATTGCC  
+HWI-EAS443:3:34:92:167#0/1  
aaaaaabaa`aa\_aZa^aa^\_]\_^`\_N[WQZ^\_XX[ZQ\_  
@HWI-EAS443:3:35:1090:26#0/1  
ACTTTTTGGACAGTATGGATAGCAAATAGTAGCATTGCC  
+HWI-EAS443:3:35:1090:26#0/1  
a\_0[a]bZY[Y`^`Y[[Y]\_aU\_W[\_`X]]W[\_YYPYD  
@HWI-EAS443:3:35:1131:915#0/1  
GTACTTTTTGGACAGTATGGATAGCAAATAGTAGCATTG  
+HWI-EAS443:3:35:1131:915#0/1  
a`aabaa`aa]`\_`\_S]`a\_a`XUTaXQR[[P[YYZWWW  
@HWI-EAS443:3:35:122:2029#0/1  
TTTTGGACAGTATGGATAGCAAATAGTAGCATTGCCACA  
+HWI-EAS443:3:35:122:2029#0/1  
\_¥¥`^`]^aZWZWZ`[[Z]YW^a\_V¥WNY^\_UY¥U^UOP\_  
@HWI-EAS443:3:35:1737:1058#0/1  
CTTTTTGGACAGTATGGATAGCAAATAGTAGCATTGCCA  
+HWI-EAS443:3:35:1737:1058#0/1  
P\_bb\_b\_b\_`a¥ba\_Iaa^^Y^b^`^^V¥G\_V\_¥aaYOP¥  
@HWI-EAS443:3:36:118:1536#0/1  
GTACTTTTTGGACAGTATGGATAGCAAATAGTAGCATTG  
+HWI-EAS443:3:36:118:1536#0/1  
\_Rb`]aa¥a]^`]ba\_`^^^VZKPP\_JWSTDMY[MQM[¥  
@HWI-EAS443:3:36:1315:1899#0/1  
ACTTTTTGGACAGTATGGATAGCAAATAGTAGCATTGCC  
+HWI-EAS443:3:36:1315:1899#0/1  
aababaaaaaa\_aa`aaa\_\_a^Z^aaaY`][\_[U\_^aWYa  
@HWI-EAS443:3:36:899:201#0/1  
TTTGGACAGTATGGATAGCAAATAGTAGCATTGCCACAAC  
+HWI-EAS443:3:36:899:201#0/1  
aaaa\_\_\_W\_^`^^`^^]ZX]a^^¥YV¥WZOSTVTXZ¥WZT  
@HWI-EAS443:3:37:1538:918#0/1  
TTTTGGACAGTATGGATAGCAAATAGTAGCATTGCCACA  
+HWI-EAS443:3:37:1538:918#0/1  
abab^b`aaba\_`aaa\_¥WZaa`aaaYYW`^aa\_\_`\_\_^  
@HWI-EAS443:3:37:819:1689#0/1  
GTACTTTTTGGACAGTATGGATAGCAAATAGTAGCATTG  
+HWI-EAS443:3:37:819:1689#0/1  
a\_a\_0\_bb\_aXPVa\_YV\_[Yaa]`X`\_]KGDmXKUN\_^M

@HWI-EAS443:3:38:1108:1401#0/1  
CTTTTTTGGACAGTATGGATAGCAAATAGTAGCATTGCCA  
+HWI-EAS443:3:38:1108:1401#0/1  
aaaaa^a¥U[[[]]XYWZWT¥VX]SV[YQORR[[¥YV[Q  
@HWI-EAS443:3:38:1392:322#0/1  
GTACTTTTTTGGACAGTATGGATAGCAAATAGTAGCATTG  
+HWI-EAS443:3:38:1392:322#0/1  
a`¥\_aaaaa\_\_[]\_a]`a\_a^^\_ZEU[WURZQQPZ¥¥R  
@HWI-EAS443:3:38:1452:1412#0/1  
GTACTTTTTTGGACAGTATGGATAGCAAATAGTAGCATTG  
+HWI-EAS443:3:38:1452:1412#0/1  
`¥[aaa`^aaa^\_]\_aVMY¥[X¥¥WYa^`VTNQYUPV[]]Q  
@HWI-EAS443:3:38:347:1904#0/1  
GTACTTTTTTGGACAGTATGGATAGCAAATAGTAGCATTG  
+HWI-EAS443:3:38:347:1904#0/1  
aabbaaaabaa¥Ra\_\_V^^a`[W^Z^ab^]OG`YP\_¥\_W  
@HWI-EAS443:3:38:595:641#0/1  
GGTACTTTTTTGGACAGTATGGATAGCAAATAGTAGCATT  
+HWI-EAS443:3:38:595:641#0/1  
aaUY`a\_a\_\_`\_\_a¥aTT¥`aY^\_¥Z`^¥X¥XWZ]]XXW  
@HWI-EAS443:3:39:1116:1113#0/1  
GTACTTTTTTGGACAGTATGGATAGCAAATAGTAGCATTG  
+HWI-EAS443:3:39:1116:1113#0/1  
a\_b`aaaaaaaa^`\_]`\_a\_^]]V\_^`R\_JXZ`UO[`P  
@HWI-EAS443:3:39:233:1030#0/1  
GGTACTTTTTTGGACAGTATGGATAGCAAATAGTAGCATT  
+HWI-EAS443:3:39:233:1030#0/1  
[]D¥XXS\_YU`¥`]QY^R`QW¥TU[VSW\_HLZ[L\_`^[[X  
@HWI-EAS443:3:39:800:501#0/1  
GTACTTTTTTGGACAGTATGGATAGCAAATAGTAGCATTG  
+HWI-EAS443:3:39:800:501#0/1  
a\_aaaaaaabaa`\_`aZ`\_`\_¥^[[[^\_][¥XY^`YYY^T  
@HWI-EAS443:3:3:1010:787#0/1  
GTACTTTTTTGGACAGTATGGATAGCAAATAGTAGCATTG  
+HWI-EAS443:3:3:1010:787#0/1  
aa]^bbbbbbbaaa`aa`aabbaa\_a\_a`a\_\_a\_]ZU\_`]  
@HWI-EAS443:3:3:1065:585#0/1  
ACTTTTTTGGACAGTATGGATAGCAAATAGTAGCATTGCC  
+HWI-EAS443:3:3:1065:585#0/1  
aabbabbbba`aa`aaa`\_\_[V\_`¥]`[F[]UV^^YW¥  
@HWI-EAS443:3:3:1270:1030#0/1  
ACTTTTTTGGACAGTATGGATAGCAAATAGTAGCATTGCC  
+HWI-EAS443:3:3:1270:1030#0/1  
`b^[aVb`aa¥bb¥babaV`aa`aa\_^`aT\_]¥NYWWB  
@HWI-EAS443:3:40:1195:1716#0/1  
TTTTTGGACAGTATGGATAGCAAATAGTAGCATTGCCACA  
+HWI-EAS443:3:40:1195:1716#0/1  
aaa`a`X[^]YU^\_Y[Y\_VTX\_a¥VSPSWOJYY[X``\_\_\_\_  
@HWI-EAS443:3:40:1296:1449#0/1  
TTTTTGGACAGTATGGATAGCAAATAGTAGCATTGCCACA

+HWI-EAS443:3:40:1296:1449#0/1  
aaa`a\_a^`^^`[[^`[X¥`a^X¥ZT^ZX^]^]\_a]^`^  
@HWI-EAS443:3:42:1125:119#0/1  
GTACTTTTTTGGACAGTATGGATAGCAAATAGTAGCATTG  
+HWI-EAS443:3:42:1125:119#0/1  
aaa\_bbababba\_\_ab^`aa\_a\_\_^`\_\_a\_]^[^]]\_`^U  
@HWI-EAS443:3:42:1135:1220#0/1  
GGTACTTTTTTGGACAGTATGGATAGCAAATAGTAGCATT  
+HWI-EAS443:3:42:1135:1220#0/1  
ab\_^Y^`b`[XXTa[[\_`Z^`a¥\_VXX]WWaP`^R`KQ``  
@HWI-EAS443:3:42:113:1965#0/1  
ACTTTTTTGGACAGTATGGATAGCAAATAGTAGCATTGCC  
+HWI-EAS443:3:42:113:1965#0/1  
aa]a]ab`a^^a\_V\_aa]^`ZQ^[WXaa\_VKO^WPWX^U\_\_  
@HWI-EAS443:3:42:1501:1148#0/1  
TTTGGACAGTATGGATAGCAAATAGTAGCATTGCCACAAC  
+HWI-EAS443:3:42:1501:1148#0/1  
V``[[`¥\_]ba\_^`a^^]a`[```VYW¥UaZUW\_\_[¥TU  
@HWI-EAS443:3:42:1783:1748#0/1  
GTACTTTTTTGGACAGTATGGATAGCAAATAGTAGCATTG  
+HWI-EAS443:3:42:1783:1748#0/1  
`]^`a`b\_^YW\_^[aa`]\_`a^Z¥PUZ`]¥¥OMSWRTN¥G  
@HWI-EAS443:3:42:466:197#0/1  
GTACTTTTTTGGACAGTATGGATAGCAAATAGTAGCATTG  
+HWI-EAS443:3:42:466:197#0/1  
¥D¥`bba`aa`^^a\_b^a`a`a`^`\_aa\_W]YN`Z[Z`^  
@HWI-EAS443:3:43:1246:1109#0/1  
TTTTTGGACAGTATGGATAGCAAATAGTAGCATTGCCACA  
+HWI-EAS443:3:43:1246:1109#0/1  
abbbabbbbab¥aab`ba`ab\_aa`^XaaPXabY\_`¥^`  
@HWI-EAS443:3:43:1268:565#0/1  
CTTTTTTGGACAGTATGGATAGCAAATAGTAGCATTGCCA  
+HWI-EAS443:3:43:1268:565#0/1  
ababbbbbbaabb`abbbaa`a]^`\_\_¥[V^^V[``\_]W  
@HWI-EAS443:3:43:212:91#0/1  
TACTTTTTTGGACAGTATGGATAGCAAATAGTAGCATTGC  
+HWI-EAS443:3:43:212:91#0/1  
aaaa\_aaaabb\_]a`]\_`aa`X`Y[```¥aSQN`ZU[¥]^R  
@HWI-EAS443:3:43:30:1979#0/1  
TTTTTGGACAGTATGGATAGCAAATAGTAGCATTGCCACA  
+HWI-EAS443:3:43:30:1979#0/1  
aabaaa^a`b`[aa¥a^aUQ\_aaT]VYSOPT]\_NVXLU[  
@HWI-EAS443:3:44:1350:1278#0/1  
CTTTTTTGGACAGTATGGATAGCAAATAGTAGCATTGCCA  
+HWI-EAS443:3:44:1350:1278#0/1  
abbbbbbbaa`abb`ba\_]MR^^SYa¥I¥\_R]YHQ]\_WWZ[  
@HWI-EAS443:3:44:1441:1015#0/1  
GTACTTTTTTGGACAGTATGGATAGCAAATAGTAGCATTG  
+HWI-EAS443:3:44:1441:1015#0/1  
a\_`^aaaaaaaaaa\_aa^`a\_\_^^[[\_\_\_\_Z[TU¥\_ZWZVS

@HWI-EAS443:3:44:1751:897#0/1  
ACTTTTTTGGACAGTATGGATAGCAAATAGTAGCATTGCC  
+HWI-EAS443:3:44:1751:897#0/1  
UW\_a`b\_Z\_Z`^a][^aR`Z\_XX¥`]]XJYZZZ^XWRQ  
@HWI-EAS443:3:44:380:476#0/1  
ACTTTTTTGGACAGTATGGATAGCAAATAGTAGCATTGCC  
+HWI-EAS443:3:44:380:476#0/1  
\_abbbababaaabb\_a`aa`\_\_`a`a]`\_Q\_a]]^a]^Z  
@HWI-EAS443:3:44:439:656#0/1  
TACTTTTTTGGACAGTATGGATAGCAAATAGTAGCATTGC  
+HWI-EAS443:3:44:439:656#0/1  
aa^aaaaaaa\_a\_\_`\_]aaa]Y\_]\_]\_a\_]\_]\_0^VMT^`WT  
@HWI-EAS443:3:44:940:492#0/1  
ACTTTTTTGGACAGTATGGATAGCAAATAGTAGCATTGCC  
+HWI-EAS443:3:44:940:492#0/1  
UY^^[^`aZ\_]¥]QU^VT^[NZY[S\_N^L]`P¥aaa¥S  
@HWI-EAS443:3:44:994:2042#0/1  
CTTTTTTGGACAGTATGGATAGCAAATAGTAGCATTGCCA  
+HWI-EAS443:3:44:994:2042#0/1  
abbbbbbb`baababbaaaa\_baaab`^aa^aaa^SYa  
@HWI-EAS443:3:45:1324:407#0/1  
TGGACAGTATGGATAGCAAATAGTAGCATTGCCACAATA  
+HWI-EAS443:3:45:1324:407#0/1  
[b\_`b]b]aaa`]`¥YW[a]YZYJY\_PUW``\_`aY^0S`]  
@HWI-EAS443:3:45:1723:1248#0/1  
GGTACTTTTTTGGACAGTATGGATAGCAAATAGTAGCATT  
+HWI-EAS443:3:45:1723:1248#0/1  
aa]a`abaaaa`^^`a]\_\_aa^\_¥¥T\_\_^^¥¥X¥YVS^]  
@HWI-EAS443:3:45:827:1685#0/1  
GTACTTTTTTGGACAGTATGGATAGCAAATAGTAGCATTG  
+HWI-EAS443:3:45:827:1685#0/1  
T\_\_`bbbbbb]W\_S¥¥GZ\_0^^^]NF]bb¥SYE[WLLW]^  
@HWI-EAS443:3:46:1627:1671#0/1  
GTACTTTTTTGGACAGTATGGATAGCAAATAGTAGCATTG  
+HWI-EAS443:3:46:1627:1671#0/1  
¥VXJX\_aaZaXTQOP]QZ]aaWVOJV[YKKNWJYBBBBB  
@HWI-EAS443:3:46:270:1548#0/1  
TTTTGGACAGTATGGATAGCAAATAGTAGCATTGCCACAA  
+HWI-EAS443:3:46:270:1548#0/1  
ababaaa]`¥\_\_`a`\_``[¥`\_\_`\_\_WW¥TYY^]^XU\_V\_\_  
@HWI-EAS443:3:47:1265:48#0/1  
GTACTTTTTTGGACAGTATGGATAGCAAATAGTAGCATTG  
+HWI-EAS443:3:47:1265:48#0/1  
a\_`^aaaaaaa`]^`a¥]\_\_\_\_]^X[T¥]YTX[TU¥UV¥]X  
@HWI-EAS443:3:47:172:297#0/1  
CTTTTTTGGACAGTATGGATAGCAAATAGTAGCATTGCCA  
+HWI-EAS443:3:47:172:297#0/1  
ab]\_\_b]^bbbb`Ia¥¥SRa\_a`aa`¥UIa[ZZ¥^XHH[  
@HWI-EAS443:3:47:53:438#0/1  
ACTTTTTTGGACAGTATGGATAGCAAATAGTAGCATTGCC

+HWI-EAS443:3:47:53:438#0/1  
aababbbba\_aaaa`aaaa`a[Vaa\_\_XSO]`X¥^aWU[  
@HWI-EAS443:3:47:70:67#0/1  
GTACTTTTTGGACAGTATGGATAGCAAATAGTAGCATTG  
+HWI-EAS443:3:47:70:67#0/1  
a^)`baaaaaa^¥`]¥\_`^\_¥]OTIX\_¥NSMOPYVXTL  
@HWI-EAS443:3:47:861:1929#0/1  
ACTTTTTGGACAGTATGGATAGCAAATAGTAGCATTGCC  
+HWI-EAS443:3:47:861:1929#0/1  
`ab^^a`]¥R[a`RR`\_]\_[[¥¥T^`\_]`ZU[ZNSWXYLU  
@HWI-EAS443:3:48:1230:254#0/1  
ACTTTTTGGACAGTATGGATAGCAAATAGTAGCATTGCC  
+HWI-EAS443:3:48:1230:254#0/1  
abbaabbbabaabaa\_aaa\_`][[aaa\_^¥Y¥^T[\_a\_¥¥  
@HWI-EAS443:3:48:1315:871#0/1  
CTTTTTGGACAGTATGGATAGCAAATAGTAGCATTGCCA  
+HWI-EAS443:3:48:1315:871#0/1  
abbbbbbbba`aa\_aabba`a`\_aaaa\_\_Za`P¥\_a[^a]  
@HWI-EAS443:3:48:1552:638#0/1  
TTTTGGACAGTATGGATAGCAAATAGTAGCATTGCCACA  
+HWI-EAS443:3:48:1552:638#0/1  
aaaaaaaa`\_ab\_a`a[]`\_\_Y\_\_^W`^X\_[UUZ\_WUYXS¥  
@HWI-EAS443:3:48:44:1486#0/1  
TTTGGACAGTATGGATAGCAAATAGTAGCATTGCCACAAC  
+HWI-EAS443:3:48:44:1486#0/1  
\_\_][Z]`¥^TZ¥`\_[U[XY^a`TRSO]Z]V^]VO]YLU¥Z  
@HWI-EAS443:3:48:474:1567#0/1  
GTACTTTTTGGACAGTATGGATAGCAAATAGTAGCATTG  
+HWI-EAS443:3:48:474:1567#0/1  
a^`aaaaaaaa`\_aa^`^^\_\_¥¥Q]`\_[¥WM^[ZZZ¥P  
@HWI-EAS443:3:48:500:121#0/1  
CTTTTTGGACAGTATGGATAGCAAATAGTAGCATTGCCA  
+HWI-EAS443:3:48:500:121#0/1  
abbbabbbb`aaa^aabba`^]a`a\_\_U`\_Z\_¥^\_^\_`  
@HWI-EAS443:3:49:1558:92#0/1  
GTACTTTTTGGACAGTATGGATAGCAAATAGTAGCATTG  
+HWI-EAS443:3:49:1558:92#0/1  
a)^\_aaaaaaaa^\_a`¥`\_`\_RS\_\_[OV¥^^X[GQYJQZ\_V  
@HWI-EAS443:3:49:1595:1171#0/1  
TACTTTTTGGACAGTATGGATAGCAAATAGTAGCATTGC  
+HWI-EAS443:3:49:1595:1171#0/1  
ab`aaaaa`a\_\_a`aa\_]\_\_aa]`a`U^]UXa\_YS  
@HWI-EAS443:3:49:1605:359#0/1  
CTTTTTGGACAGTATGGATAGCAAATAGTAGCATTGCCA  
+HWI-EAS443:3:49:1605:359#0/1  
[a¥^\_bb^b¥Z`babb`aS\_\_a\_a`][^`\_`^^SSaa  
@HWI-EAS443:3:49:232:1363#0/1  
GGTACTTTTTGGACAGTATGGATAGCAAATAGTAGCATT  
+HWI-EAS443:3:49:232:1363#0/1  
ab\_aaaabbbbaZ`a``¥aaaa`^]Xa\_a][TO`[U\_[X



@HWI-EAS443:3:49:414:218#0/1  
TTTTTGGACAGTATGGATAGCAAATAGTAGCATTGCCACA  
+HWI-EAS443:3:49:414:218#0/1  
`PGNWX\_a`TYYa`]P[\_\_WUS][F]\_QFZROGO[R[  
@HWI-EAS443:3:49:708:1295#0/1  
ACTTTTTGGACAGTATGGATAGCAAATAGTAGCATTGCC  
+HWI-EAS443:3:49:708:1295#0/1  
\_abbbbbbbabbbbaYabbbba^`Xaaba`ZOa¥¥`aa^a\_  
@HWI-EAS443:3:4:1520:1447#0/1  
ACTTTTTGGACAGTATGGATAGCAAATAGTAGCATTGCC  
+HWI-EAS443:3:4:1520:1447#0/1  
a[a^\_^¥YW\_[a\_\_T\_`ba^aXZ]^`aYNFONIL^¥VBB  
@HWI-EAS443:3:4:352:193#0/1  
GGTACTTTTTGGACAGTATGGATAGCAAATAGTAGCATT  
+HWI-EAS443:3:4:352:193#0/1  
a\_G`\_`aba]]\_`a`\_`[aa[\_Q\_\_aX^\_\_\_WPQ]`XW[^  
@HWI-EAS443:3:4:513:1228#0/1  
TTTTTGGACAGTATGGATAGCAAATAGTAGCATTGCCACA  
+HWI-EAS443:3:4:513:1228#0/1  
`\_`a`\_W\_^b^[\_aaa`¥¥PT¥a\_`\_`H]aYYT]]]]]Y\_  
@HWI-EAS443:3:4:809:313#0/1  
GTACTTTTTGGACAGTATGGATAGCAAATAGTAGCATTG  
+HWI-EAS443:3:4:809:313#0/1  
\_V]¥`a`\_]`a`\_`a^0¥aa]¥`^]T[^`\_Z¥0^]GZ]¥Z  
@HWI-EAS443:3:50:1646:1346#0/1  
GTACTTTTTGGACAGTATGGATAGCAAATAGTAGCATTG  
+HWI-EAS443:3:50:1646:1346#0/1  
a¥aabbabbbab`a\_baaaba`\_`\_`aaaa^Z^`\_`¥¥^`\_  
@HWI-EAS443:3:50:1661:171#0/1  
GTACTTTTTGGACAGTATGGATAGCAAATAGTAGCATTG  
+HWI-EAS443:3:50:1661:171#0/1  
a¥]¥aaabbaa]]S\_bUT]`SW¥ZV`\_`\_`^XZ[LQUZV  
@HWI-EAS443:3:50:270:1364#0/1  
GTACTTTTTGGACAGTATGGATAGCAAATAGTAGCATTG  
+HWI-EAS443:3:50:270:1364#0/1  
aaa^aaaaa`a`^¥\_]`\_\_``[WWDW\_`Y[XN[XQRV¥T  
@HWI-EAS443:3:50:686:1089#0/1  
ACTTTTTGGACAGTATGGATAGCAAATAGTAGCATTGCC  
+HWI-EAS443:3:50:686:1089#0/1  
aaabbbbbbaabbb`bbbbaaaaa\_`^^^U\_]G]aaZ¥^  
@HWI-EAS443:3:50:983:1125#0/1  
CTTTTTGGACAGTATGGATAGCAAATAGTAGCATTGCCA  
+HWI-EAS443:3:50:983:1125#0/1  
\_b¥aabbbb¥abb¥`b^bbbababab\_`TV]¥V\_] [HXZa  
@HWI-EAS443:3:51:1255:1237#0/1  
GTACTTTTTGGACAGTATGGATAGCAAATAGTAGCATTG  
+HWI-EAS443:3:51:1255:1237#0/1  
`X``]Zaaa]aa^OT[W]S^TVNGZY]Y]¥UKBBBBBBBB  
@HWI-EAS443:3:51:1318:1456#0/1  
TTTTTGGACAGTATGGATAGCAAATAGTAGCATTGCCACA

+HWI-EAS443:3:51:1318:1456#0/1  
`abaaa\_a\_]b\_abaaa`^N]aa^VZ]a[JZaa^[^^S\_  
@HWI-EAS443:3:51:1551:789#0/1  
GTACTTTTTTGGACAGTATGGATAGCAAATAGTAGCATTG  
+HWI-EAS443:3:51:1551:789#0/1  
\_]aabbbbaabaabaabaaaaaa\_Xaaa\_¥G`a\_¥a``  
@HWI-EAS443:3:51:217:1797#0/1  
GTACTTTTTTGGACAGTATGGATAGCAAATAGTAGCATTG  
+HWI-EAS443:3:51:217:1797#0/1  
aa`abaaaaaaa`ab\_aa`\_``¥¥aa`^^[W][¥¥\_^[  
@HWI-EAS443:3:51:421:842#0/1  
GTACTTTTTTGGACAGTATGGATAGCAAATAGTAGCATTG  
+HWI-EAS443:3:51:421:842#0/1  
aWZ¥a``aaaa\_Z^`XT¥a\_Y\_^¥PTY¥NV[SZ¥OTXXW  
@HWI-EAS443:3:51:817:552#0/1  
CTTTTTTGGACAGTATGGATAGCAAATAGTAGCATTGCCA  
+HWI-EAS443:3:51:817:552#0/1  
`^`^bbbbb]R^^ab\_\_\_]VT]b^`^TS^ZZVZ\_ZFR^  
@HWI-EAS443:3:51:864:950#0/1  
GTACTTTTTTGGACAGTATGGATAGCAAATAGTAGCATTG  
+HWI-EAS443:3:51:864:950#0/1  
a\_aaabbbbabaa`a`aa\_a\_^\_YW^aa\_[UV[ZXYaZG  
@HWI-EAS443:3:52:1147:453#0/1  
GTACTTTTTTGGACAGTATGGATAGCAAATAGTAGCATTG  
+HWI-EAS443:3:52:1147:453#0/1  
a]W`aaaaa``aaaaa^\_`^`^\_W[W[\_^T^X[^\_Y¥[VJ  
@HWI-EAS443:3:52:1162:755#0/1  
GTACTTTTTTGGACAGTATGGATAGCAAATAGTAGCATTG  
+HWI-EAS443:3:52:1162:755#0/1  
a`aaaabbbbaa`\_`\_a]a`X`]]^U````\_¥Z\_\_\_]W^¥U  
@HWI-EAS443:3:52:307:1119#0/1  
ACTTTTTTGGACAGTATGGATAGCAAATAGTAGCATTGCC  
+HWI-EAS443:3:52:307:1119#0/1  
S\_^`a]b\_¥R\_ZaaU`\_^¥aa]^]V]^]SX^[WX`ZOMP  
@HWI-EAS443:3:52:426:324#0/1  
ACTTTTTTGGACAGTATGGATAGCAAATAGTAGCATTGCC  
+HWI-EAS443:3:52:426:324#0/1  
`\_aaaabaaa`]^`a^aaa`\_\_\_[P^\_X^]UW\_¥^]¥VVY  
@HWI-EAS443:3:53:1128:1650#0/1  
GTACTTTTTTGGACAGTATGGATAGCAAATAGTAGCATTG  
+HWI-EAS443:3:53:1128:1650#0/1  
`^[¥aaaaaaba^¥aa]a\_^a\_\_\_`S`\_]`^¥U^¥¥U¥^U  
@HWI-EAS443:3:53:1785:1742#0/1  
GTACTTTTTTGGACAGTATGGATAGCAAATAGTAGCATTG  
+HWI-EAS443:3:53:1785:1742#0/1  
a¥¥`aaa```\_a`Z¥WY[]]YORIS]XW]OLPRYBBBBBB  
@HWI-EAS443:3:54:1464:1969#0/1  
AGGAGTGCCTGATTAATGATCCCTGGGTTTTGCTTAATGC  
+HWI-EAS443:3:54:1464:1969#0/1  
`a`^¥aaaYbb^bbaaaYX\_Y\_aaaVO¥baaUa`aa\_ZN

@HWI-EAS443:3:54:293:1995#0/1  
CTTTTTTGGACAGTATGGATAGCAAATAGTAGCATTGCCA  
+HWI-EAS443:3:54:293:1995#0/1  
aabbabbbaaa`]^abaaaaa[\_a\_aa`Ya¥QX]\_TQYZ  
@HWI-EAS443:3:55:774:1963#0/1  
GTACTTTTTTGGACAGTATGGATAGCAAATAGTAGCATTG  
+HWI-EAS443:3:55:774:1963#0/1  
a^aa^aa\_a[Z]XTaa^`\_X\_^[SV\_\_\_\_`WTG^NFZS\_U  
@HWI-EAS443:3:56:1033:1708#0/1  
TTGGACAGTATGGATAGCAAATAGTAGCATTGCCACA  
+HWI-EAS443:3:56:1033:1708#0/1  
aba`a`ab\_baab\_\_¥UV`¥a\_`]R[[X\_`T¥\_^Wa^M[  
@HWI-EAS443:3:56:1705:1289#0/1  
TACTTTTTTGGACAGTATGGATAGCAAATAGTAGCATTGC  
+HWI-EAS443:3:56:1705:1289#0/1  
`\_`aa`aaaa`G\_WFUaa\_]\_^XS\_^P^XXSMTY\_\_VY  
@HWI-EAS443:3:57:1123:1051#0/1  
TTTTTGGACAGTATGGATAGCAAATAGTAGCATTGCCACA  
+HWI-EAS443:3:57:1123:1051#0/1  
aaaaaaa`aaa]^aa\_a^ZV]^`\_¥[V\_a¥^`^[XXXS]  
@HWI-EAS443:3:57:1411:511#0/1  
GTACTTTTTTGGACAGTATGGATAGCAAATAGTAGCATTG  
+HWI-EAS443:3:57:1411:511#0/1  
\_baabbbbbbbbaa`baa`ab\_a^[]a`aaa^PR[DHZ[`  
@HWI-EAS443:3:57:1718:908#0/1  
GTACTTTTTTGGACAGTATGGATAGCAAATAGTAGCATTG  
+HWI-EAS443:3:57:1718:908#0/1  
`Z¥N^``bbbbbaa``\_aa`a`\_YZTa\_aaXORY`XZ\_a¥  
@HWI-EAS443:3:57:317:1202#0/1  
ACTTTTTTGGACAGTATGGATAGCAAATAGTAGCATTGCC  
+HWI-EAS443:3:57:317:1202#0/1  
^`a^^¥XaN`a`]^\_a^^`¥T[U]aZ^`\_^[^^X]XYQB  
@HWI-EAS443:3:57:840:667#0/1  
ACTTTTTTGGACAGTATGGATAGCAAATAGTAGCATTGCC  
+HWI-EAS443:3:57:840:667#0/1  
a`baabbbbbbaaab`ab`b\_a`^R\_`^[]X¥¥TY``]^  
@HWI-EAS443:3:58:1020:961#0/1  
CTTTTTTGGACAGTATGGATAGCAAATAGTAGCATTGCCA  
+HWI-EAS443:3:58:1020:961#0/1  
a`\_¥aaa^a\_aaaV^^`[^`^XLZaZZ\_\_¥TTXZUYLLRY  
@HWI-EAS443:3:58:1177:222#0/1  
TACTTTTTTGGACAGTATGGATAGCAAATAGTAGCATTGC  
+HWI-EAS443:3:58:1177:222#0/1  
aaaabbbbbbaa`ab^`baa\_`^`X\_`a\_¥]X\_¥W^``[]  
@HWI-EAS443:3:58:1601:689#0/1  
GTACTTTTTTGGACAGTATGGATAGCAAATAGTAGCATTG  
+HWI-EAS443:3:58:1601:689#0/1  
aV¥¥a¥`aa`aa`[X`Y\_\_¥¥]YYTW^ZVYWQQYSRT^Y  
@HWI-EAS443:3:58:472:1917#0/1  
GTACTTTTTTGGACAGTATGGATAGCAAATAGTAGCATTG

+HWI-EAS443:3:58:472:1917#0/1  
`^aaaaabaaa¥a\_a\_\_aaa\_\_]^)]a`\_^`¥U\_[U\_^ZU  
@HWI-EAS443:3:58:503:630#0/1  
GTACTTTTTGGACAGTATGGATAGCAAATAGTAGCATTG  
+HWI-EAS443:3:58:503:630#0/1  
a\_^[a[[`a`\_^J^`P^\_¥XSYZUP[`YR]YPUYPNY^]  
@HWI-EAS443:3:59:1007:518#0/1  
GTACTTTTTGGACAGTATGGATAGCAAATAGTAGCATTG  
+HWI-EAS443:3:59:1007:518#0/1  
a`\_`aaaaaaa`^¥\_a]\_\_\_\_^\_]YS)`\_\_[SV^]WY^XO  
@HWI-EAS443:3:59:1042:1295#0/1  
TTTTGGACAGTATGGATAGCAAATAGTAGCATTGCCACAA  
+HWI-EAS443:3:59:1042:1295#0/1  
aa`\_]`a¥]b^\_aa`\_]`\_Xa`a\_ZX¥\_]ZZU\_YVGZU[Z  
@HWI-EAS443:3:59:727:1890#0/1  
GTACTTTTTGGACAGTATGGATAGCAAATAGTAGCATTG  
+HWI-EAS443:3:59:727:1890#0/1  
aaa¥a`a^aaa¥`¥`Z)`¥`\_a¥[WWZ]\_VaZPU[RMXRS  
@HWI-EAS443:3:59:752:864#0/1  
TTTTGGACAGTATGGATAGCAAATAGTAGCATTGCCACA  
+HWI-EAS443:3:59:752:864#0/1  
`aaaaba`aaa[\_aba`\_\_WZ¥a\_YTYP]aaZ`[RTU^W]  
@HWI-EAS443:3:59:96:1439#0/1  
CTTTTTGGACAGTATGGATAGCAAATAGTAGCATTGCCA  
+HWI-EAS443:3:59:96:1439#0/1  
aaabbb\_[¥`a`^W\_babaa¥^¥`a\_]`\_U¥X`)]`Z[^^Z  
@HWI-EAS443:3:5:1142:1315#0/1  
GTACTTTTTGGACAGTATGGATAGCAAATAGTAGCATTG  
+HWI-EAS443:3:5:1142:1315#0/1  
YQ`^Z]]¥]XZ`\_`[bXZ[^][^Z\_TZXTXaVVBBBBBBB  
@HWI-EAS443:3:5:1482:121#0/1  
CTTTTTGGACAGTATGGATAGCAAATAGTAGCATTGCCA  
+HWI-EAS443:3:5:1482:121#0/1  
X\_W\_UV^`J\_H^\_aYU\_Y^babUba`RYa]a¥V¥BBBBBBB  
@HWI-EAS443:3:5:821:1503#0/1  
GTACTTTTTGGACAGTATGGATAGCAAATAGTAGCATTG  
+HWI-EAS443:3:5:821:1503#0/1  
a`abbabba`bba`abaaaa`a^a`\_`aaaa¥U`a]`^¥\_  
@HWI-EAS443:3:60:1046:610#0/1  
ACTTTTTGGACAGTATGGATAGCAAATAGTAGCATTGCC  
+HWI-EAS443:3:60:1046:610#0/1  
aabbbbbbbbaaab`abbbbaa\_Y`aaaaZ`aXYaaX^¥  
@HWI-EAS443:3:60:122:1470#0/1  
GTACTTTTTGGACAGTATGGATAGCAAATAGTAGCATTG  
+HWI-EAS443:3:60:122:1470#0/1  
[`bbb`bbbb`^`aba`bbaaa`\_^aaaa`ZM``[¥`^T  
@HWI-EAS443:3:60:1471:687#0/1  
CTTTTTGGACAGTATGGATAGCAAATAGTAGCATTGCCA  
+HWI-EAS443:3:60:1471:687#0/1  
abbbbbbbbaaab\_abaaaa^)]\_aa¥aZT`Z¥`¥¥¥)`

@HWI-EAS443:3:60:1506:765#0/1  
TTTTGGACAGTATGGATAGCAAATAGTAGCATTGCCACAA  
+HWI-EAS443:3:60:1506:765#0/1  
Xb`[X`¥T[]]VWTZ\_ZYVR\_]\_Y¥SFZa^\_VPR\_PNW[\_  
@HWI-EAS443:3:60:1578:1256#0/1  
GGTACTTTTTGGACAGTATGGATAGCAAATAGTAGCATT  
+HWI-EAS443:3:60:1578:1256#0/1  
aa0YVaaaba``]Y]\_a^a`a\_Y]Z[R]] [YUWO]`TZWY  
@HWI-EAS443:3:61:1151:834#0/1  
CTTTTTGGACAGTATGGATAGCAAATAGTAGCATTGCCA  
+HWI-EAS443:3:61:1151:834#0/1  
abbbbbbbbbbbbbbbbabbbbbbbba\_ba^aaaYa\_`  
@HWI-EAS443:3:61:1436:757#0/1  
GTACTTTTTGGACAGTATGGATAGCAAATAGTAGCATTG  
+HWI-EAS443:3:61:1436:757#0/1  
aLNTZZ[``Y[RUWW^TQ\_a\_WUTZSXZ]]X]XWPFQPPM  
@HWI-EAS443:3:61:1441:1018#0/1  
CTTTTTGGACAGTATGGATAGCAAATAGTAGCATTGCCA  
+HWI-EAS443:3:61:1441:1018#0/1  
abbbbbbbbbbbbabbbab¥bbbbabb]`b[^`a[\_X\_  
@HWI-EAS443:3:61:1676:1929#0/1  
GTACTTTTTGGACAGTATGGATAGCAAATAGTAGCATTG  
+HWI-EAS443:3:61:1676:1929#0/1  
`^]0`\_`aW\_^a]X]a¥^]\_¥]\_]^]\_]X]YG¥SGRZWZ  
@HWI-EAS443:3:61:1782:234#0/1  
GTACTTTTTGGACAGTATGGATAGCAAATAGTAGCATTG  
+HWI-EAS443:3:61:1782:234#0/1  
a\_ZX`````a`\_]][X[[\_YSPSSOS¥^KRPXXVQQWUV  
@HWI-EAS443:3:61:309:935#0/1  
CTTTTTGGACAGTATGGATAGCAAATAGTAGCATTGCCA  
+HWI-EAS443:3:61:309:935#0/1  
\_aabb`¥abbaabbabbaabb^QV¥\_aWb¥¥S[aa`\_a  
@HWI-EAS443:3:61:683:1268#0/1  
TTTTGGACAGTATGGATAGCAAATAGTAGCATTGCCACAA  
+HWI-EAS443:3:61:683:1268#0/1  
]b¥¥V^`\_]ORaaa[Y][¥\_aX[WOQY[VVUXU\_^[[Y  
@HWI-EAS443:3:62:1459:62#0/1  
ACTTTTTGGACAGTATGGATAGCAAATAGTAGCATTGCC  
+HWI-EAS443:3:62:1459:62#0/1  
`0`babbabb^[aa\_aabaa`[X[```\_]\_a^]]a\_WX  
@HWI-EAS443:3:62:303:669#0/1  
GTACTTTTTGGACAGTATGGATAGCAAATAGTAGCATTG  
+HWI-EAS443:3:62:303:669#0/1  
a\_a`aaaaaaa`\_\_^a^\_aa\_\_\_\_[¥T\_\_\_\_WSUT^^UY[XW  
@HWI-EAS443:3:62:512:175#0/1  
CTTTTTGGACAGTATGGATAGCAAATAGTAGCATTGCCA  
+HWI-EAS443:3:62:512:175#0/1  
aabbabba\_aba]aaba`aaaaaaa\_a`S\_]`a`]^`^\_  
@HWI-EAS443:3:62:53:457#0/1  
CTTTTTGGACAGTATGGATAGCAAATAGTAGCATTGCCA

+HWI-EAS443:3:62:53:457#0/1  
aabaaaaba^a\_`^aaa`W`[]`a\_`^WOMY[[[¥]TY¥^  
@HWI-EAS443:3:62:666:1406#0/1  
ACTTTTTTGGACAGTATGGATAGCAAATAGTAGCATTGCC  
+HWI-EAS443:3:62:666:1406#0/1  
^a]Zaaaa\_Z^`a\_]aa[`¥][ZW```W¥S\_X][Y]Y]Z  
@HWI-EAS443:3:62:699:20#0/1  
TACTTTTTTGGACAGTATGGATAGCAAATAGTAGCATTGC  
+HWI-EAS443:3:62:699:20#0/1  
YY\_abbbbb`^a\_W\_\_aabb\_aa\_Z^`a\_W¥U^[SX^\_¥¥  
@HWI-EAS443:3:63:1140:1415#0/1  
TTTTTGGACAGTATGGATAGCAAATAGTAGCATTGCCACA  
+HWI-EAS443:3:63:1140:1415#0/1  
aaaaaaaa`\_aa\_\_a`\_^aa\_a\_\_Z\_\_Z``\_]\_^\_a  
@HWI-EAS443:3:63:1463:319#0/1  
CTTTTTTGGACAGTATGGATAGCAAATAGTAGCATTGCCA  
+HWI-EAS443:3:63:1463:319#0/1  
abbbbbbbba`abaabbbba`abaaa¥`]Y¥]¥^a`YS^^  
@HWI-EAS443:3:63:1560:557#0/1  
TTTTTGGACAGTATGGATAGCAAATAGTAGCATTGCCACA  
+HWI-EAS443:3:63:1560:557#0/1  
aabaa````\_aT¥`aa\_\_`]P`a`\_`\_T\_\_V[\_¥XTWX^\_  
@HWI-EAS443:3:63:537:338#0/1  
CAAGGTACTTTTTTGGACAGTATGGATAGCAAATAGTAGC  
+HWI-EAS443:3:63:537:338#0/1  
a]0\_aU\_`^\_]\_TZZ`^Za`]Y\_X]\_¥]`^\_¥[`Y\_[P\_[Z  
@HWI-EAS443:3:63:781:231#0/1  
TTTTTGGACAGTATGGATAGCAAATAGTAGCATTGCCACA  
+HWI-EAS443:3:63:781:231#0/1  
]ababaaYbb`Z¥Y¥aa[T\_QX`a\_ZPPY]YBBBBBBBB  
@HWI-EAS443:3:63:970:702#0/1  
CTTTTTTGGACAGTATGGATAGCAAATAGTAGCATTGCCA  
+HWI-EAS443:3:63:970:702#0/1  
abbbbbbbbaabbaabbbaaa\_\_abb`bVPaaaaab`^`V  
@HWI-EAS443:3:64:237:581#0/1  
GTACTTTTTTGGACAGTATGGATAGCAAATAGTAGCATTG  
+HWI-EAS443:3:64:237:581#0/1  
a[`\_[aa`^^\_Y^^\_[[\_][[]][S\_]UYYNXYYZWZS  
@HWI-EAS443:3:64:290:419#0/1  
ACTTTTTTGGACAGTATGGATAGCAAATAGTAGCATTGCC  
+HWI-EAS443:3:64:290:419#0/1  
abaaaaaba\_aaaa^[`aa`\_a```aa^a¥RZ]¥^^]TU^  
@HWI-EAS443:3:64:593:334#0/1  
GGTACTTTTTTGGACAGTATGGATAGCAAATAGTAGCATT  
+HWI-EAS443:3:64:593:334#0/1  
ab]aaabbbbbaaaaa`aaabaaa`[aaa^a]¥]^^\_``  
@HWI-EAS443:3:65:1284:604#0/1  
GTACTTTTTTGGACAGTATGGATAGCAAATAGTAGCATTG  
+HWI-EAS443:3:65:1284:604#0/1  
^SZ^Z]^a^^aTX\_\_P][`[QS[VVQ[^¥QWXTZYWR

@HWI-EAS443:3:65:18:949#0/1  
ACTTTTTGGACAGTATGGATAGCAAATAGTAGCATTGCC  
+HWI-EAS443:3:65:18:949#0/1  
aaa`\_aaaa]\_`a\_X`aa\_\_ZaX¥\_^`Z]QJ[WY]YVLT  
@HWI-EAS443:3:65:223:1377#0/1  
CTTTTTGGACAGTATGGATAGCAAATAGTAGCATTGCCA  
+HWI-EAS443:3:65:223:1377#0/1  
abbbbabab`aa`````aa`aaaaaa]WVbaaaa\_J^a`  
@HWI-EAS443:3:66:108:382#0/1  
TTTTTTGGACAGTATGGATAGCAAATAGTAGCATTGCCAC  
+HWI-EAS443:3:66:108:382#0/1  
abbbabb`\_abb\_^aa\_aaa`Z^a^¥ZZU\_\_ZQ[^V¥` []  
@HWI-EAS443:3:66:1353:755#0/1  
GTACTTTTTGGACAGTATGGATAGCAAATAGTAGCATTG  
+HWI-EAS443:3:66:1353:755#0/1  
aaaa`ababaaaY^`a[^`^`\_`\_^\_\_Y\_a\_YJQ[^QTW^W  
@HWI-EAS443:3:66:585:995#0/1  
TTTTTTGGACAGTATGGATAGCAAATAGTAGCATTGCCAC  
+HWI-EAS443:3:66:585:995#0/1  
abbbbbba`ab`\_aa\_aa\_a`^bba¥¥WW`^aX`a[^`^]  
@HWI-EAS443:3:66:682:890#0/1  
CTTTTTGGACAGTATGGATAGCAAATAGTAGCATTGCCA  
+HWI-EAS443:3:66:682:890#0/1  
abaaaaaaaa`aaYa\_\_\_\_¥V`\_\_SY\_\_S\_\_]R` `VV^\_  
@HWI-EAS443:3:66:802:1970#0/1  
TTTTTTGGACAGTATGGATAGCAAATAGTAGCATTGCCACA  
+HWI-EAS443:3:66:802:1970#0/1  
abbaa`^abaa^^Y¥T\_[[ZV\_aa\_a[Qa`^]¥a¥aa^¥]  
@HWI-EAS443:3:67:1328:124#0/1  
TTTGGACAGTATGGATAGCAAATAGTAGCATTGCCACAAC  
+HWI-EAS443:3:67:1328:124#0/1  
aaaba`\_`a]\_`aaZ\_[`S\_\_^[]^U^]GR^W]X[ZZZ^Z  
@HWI-EAS443:3:67:1757:588#0/1  
TTTTTTGGACAGTATGGATAGCAAATAGTAGCATTGCCACA  
+HWI-EAS443:3:67:1757:588#0/1  
abbbbaa¥abab`aba^aa`W\_\_`Y^`Z]]\_aa^OTWa`\_  
@HWI-EAS443:3:67:50:1307#0/1  
GTACTTTTTGGACAGTATGGATAGCAAATAGTAGCATTG  
+HWI-EAS443:3:67:50:1307#0/1  
aaa^abbaba\_R`b^a\_a^^\_`a\_aaa\_¥¥^Xa[[¥`\_Z  
@HWI-EAS443:3:68:317:1918#0/1  
ACTTTTTGGACAGTATGGATAGCAAATAGTAGCATTGCC  
+HWI-EAS443:3:68:317:1918#0/1  
VZ^]aba\_Y^`\_\_¥Q]\_[Z`\_¥YY`\_ZF¥UNT[^Z[XHR]  
@HWI-EAS443:3:68:385:1706#0/1  
GTACTTTTTGGACAGTATGGATAGCAAATAGTAGCATTG  
+HWI-EAS443:3:68:385:1706#0/1  
¥PZ\_^`\_X\_\_YOYaY¥Xa]Za]ZRRW`a`[YXG¥¥SJ[¥T  
@HWI-EAS443:3:68:791:1573#0/1  
CTTTTTGGACAGTATGGATAGCAAATAGTAGCATTGCCA

+HWI-EAS443:3:68:791:1573#0/1  
abbbbaa\_a¥bba`abb\_a`aba]a^`]X\_`[TU]`a``  
@HWI-EAS443:3:69:1066:369#0/1  
TTTTTGGACAGTATGGATAGCAAATAGTAGCATTGCCACA  
+HWI-EAS443:3:69:1066:369#0/1  
aabbab\_[\_aaWX\_aa`¥[[W]a]T\_[U\_\_YY¥^]\_^ZZ^  
@HWI-EAS443:3:69:1218:499#0/1  
CTTTTTTGGACAGTATGGATAGCAAATAGTAGCATTGCCA  
+HWI-EAS443:3:69:1218:499#0/1  
a¥]aba[\_b`^^Y\_a[a\_W\_`^[\`]ZTDM`]¥¥\_ZLNQ  
@HWI-EAS443:3:69:1248:249#0/1  
ACTTTTTTGGACAGTATGGATAGCAAATAGTAGCATTGCC  
+HWI-EAS443:3:69:1248:249#0/1  
aabbbbbbbba`bb`abaaaaa^aaaa\_`\_X]aa\_]T  
@HWI-EAS443:3:69:376:1073#0/1  
ACTTTTTTGGACAGTATGGATAGCAAATAGTAGCATTGCC  
+HWI-EAS443:3:69:376:1073#0/1  
^]\_L`a\_T]`\_abaUaaa]PU]W``]¥¥^UH[^XX¥\_YUY  
@HWI-EAS443:3:69:425:1807#0/1  
CTTTTTTGGACAGTATGGATAGCAAATAGTAGCATTGCCA  
+HWI-EAS443:3:69:425:1807#0/1  
aaa`aaa]]aa`[Wa\_X[[YY¥`\_]VQLVQ[T[[U[UZR  
@HWI-EAS443:3:69:793:1200#0/1  
GGTACTTTTTTGGACAGTATGGATAGCAAATAGTAGCATT  
+HWI-EAS443:3:69:793:1200#0/1  
\_b\_``babbbbababaaaaa\_a¥¥¥aa^aaaaS`^¥aaa  
@HWI-EAS443:3:69:962:1063#0/1  
GTACTTTTTTGGACAGTATGGATAGCAAATAGTAGCATTG  
+HWI-EAS443:3:69:962:1063#0/1  
a^Q^aaaa`ab¥aaaa`\_aa\_a`aa\_\_[^\_\_YN]UXKQ`U  
@HWI-EAS443:3:6:1199:1543#0/1  
TTTTTGGACAGTATGGATAGCAAATAGTAGCATTGCCACA  
+HWI-EAS443:3:6:1199:1543#0/1  
^^Z¥]¥\_aSS¥ZaY\_T\_aZVMYa`R\_[GQUFQ]]NGM^PB  
@HWI-EAS443:3:6:414:1995#0/1  
CAAGGTACTTTTTTGGACAGTATGGATAGCAAATAGTAGC  
+HWI-EAS443:3:6:414:1995#0/1  
a^a\_WHaba\_TZ[a`^`aaa^a¥a\_\_\_\_\_]¥\_\_\_\_[\_YM]\_^  
@HWI-EAS443:3:70:1567:1826#0/1  
TTTTTGGACAGTATGGATAGCAAATAGTAGCATTGCCACA  
+HWI-EAS443:3:70:1567:1826#0/1  
aaaaa^\_a`ba\_a¥\_a`\_]VVaaa[\_^X[\_\_\_\_S\_\_ZX^  
@HWI-EAS443:3:70:402:1807#0/1  
GTACTTTTTTGGACAGTATGGATAGCAAATAGTAGCATTG  
+HWI-EAS443:3:70:402:1807#0/1  
a]^baabaaa^`ab^`^]`]`aYZX¥`S`[^`XTa[X]YZU  
@HWI-EAS443:3:70:461:1259#0/1  
TTTTTGGACAGTATGGATAGCAAATAGTAGCATTGCCACA  
+HWI-EAS443:3:70:461:1259#0/1  
]ab^¥\_`\_ab¥\_¥X]`a\_JW]a]`P\_YS^\_]`^¥QPaaaa



@HWI-EAS443:3:70:668:573#0/1  
CTTTTTGGACAGTATGGATAGCAAATAGTAGCATTGCCA  
+HWI-EAS443:3:70:668:573#0/1  
abbbbbbbbbbbba` `abbaa`aaabaaaYYaaa\_`a[\_`S  
@HWI-EAS443:3:70:981:1728#0/1  
TTTTGGACAGTATGGATAGCAAATAGTAGCATTGCCACA  
+HWI-EAS443:3:70:981:1728#0/1  
`aabbaZa\_aa]aaaa`\_a\_\_aba^\_\_0a¥ZY¥^[Y^\_]\_  
@HWI-EAS443:3:71:1539:345#0/1  
GTACTTTTTGGACAGTATGGATAGCAAATAGTAGCATTG  
+HWI-EAS443:3:71:1539:345#0/1  
a]b\_bbbbbbbba\_\_abaaaaaaaa\_`Y`ab\_aaY\_^G]\_\_U  
@HWI-EAS443:3:71:565:1361#0/1  
TTTGGACAGTATGGATAGCAAATAGTAGCATTGCCACAAC  
+HWI-EAS443:3:71:565:1361#0/1  
aaabaabab\_baaa` `Z\_U\_aa` `[Y`\_]QZ\_]aa\_`` `\_  
@HWI-EAS443:3:71:802:1388#0/1  
GTACTTTTTGGACAGTATGGATAGCAAATAGTAGCATTG  
+HWI-EAS443:3:71:802:1388#0/1  
`XS\_aa]aaZ[V]T\_a¥YX` `ZL[V LX[^UTPR[YT]¥TV  
@HWI-EAS443:3:71:990:812#0/1  
GTACTTTTTGGACAGTATGGATAGCAAATAGTAGCATTG  
+HWI-EAS443:3:71:990:812#0/1  
a`^aba` `aaa]T[a`^\_`b^a^U^T^a` a¥^N`\_X`^WW  
@HWI-EAS443:3:72:1106:312#0/1  
CTTTTTGGACAGTATGGATAGCAAATAGTAGCATTGCCA  
+HWI-EAS443:3:72:1106:312#0/1  
\_\_abbb\_a^`bbb^ba^`\_`]XTaaa^\_]Zba]`a^]a]`  
@HWI-EAS443:3:72:172:1322#0/1  
ACTTTTTGGACAGTATGGATAGCAAATAGTAGCATTGCC  
+HWI-EAS443:3:72:172:1322#0/1  
^aY^aaa`Z^^`XU]]\_Z^]\_VX\_]ZXYXTU¥¥NV]O]¥  
@HWI-EAS443:3:72:252:120#0/1  
CTTTTTGGACAGTATGGATAGCAAATAGTAGCATTGCCA  
+HWI-EAS443:3:72:252:120#0/1  
aa]¥a^aaa\_^b`SaN\_\_[WSV^][QZ\_YUX XV^X[J^\_]`  
@HWI-EAS443:3:72:571:143#0/1  
GTACTTTTTGGACAGTATGGATAGCAAATAGTAGCATTG  
+HWI-EAS443:3:72:571:143#0/1  
a`aaaabbaa`^` `a\_aaaa\_\_ZU`\_\_\_\_\_Y^]SY¥^¥  
@HWI-EAS443:3:72:695:1748#0/1  
ACTTTTTGGACAGTATGGATAGCAAATAGTAGCATTGCC  
+HWI-EAS443:3:72:695:1748#0/1  
¥\_Y¥` `[S^\_` `[J[\_`\_`¥¥Z]^`\_[VXR¥SSW¥ZOX]  
@HWI-EAS443:3:72:807:952#0/1  
GTACTTTTTGGACAGTATGGATAGCAAATAGTAGCATTG  
+HWI-EAS443:3:72:807:952#0/1  
aa^baaaaaaaaaaab]aaaa^U][aaa\_]R¥`]YZ^^  
@HWI-EAS443:3:73:1149:1299#0/1  
CTTTTTGGACAGTATGGATAGCAAATAGTAGCATTGCCA



@HWI-EAS443:3:78:1185:390#0/1  
GTACTTTTTGGACAGTATGGATAGCAAATAGTAGCATTG  
+HWI-EAS443:3:78:1185:390#0/1  
aZTN[aa]¥¥\_]YS^a\_]`¥YL]ZSFQ]] [X¥UZPNOPTM  
@HWI-EAS443:3:78:158:1704#0/1  
GGTACTTTTTGGACAGTATGGATAGCAAATAGTAGCATT  
+HWI-EAS443:3:78:158:1704#0/1  
`^OT\_abbbb\_\_aa`ab\_^aaaa^YT\_a` `a`¥Ua`\_]a`  
@HWI-EAS443:3:78:237:546#0/1  
TACTTTTTGGACAGTATGGATAGCAAATAGTAGCATTGC  
+HWI-EAS443:3:78:237:546#0/1  
aV]a`abb^`b\_aaaWaab`a\_\_`][U`H^WOVYXTa\_U^  
@HWI-EAS443:3:78:372:1453#0/1  
TTTTGGACAGTATGGATAGCAAATAGTAGCATTGCCACA  
+HWI-EAS443:3:78:372:1453#0/1  
abbbb`^`aba^aaaaa` `]aaaa\_a^T`^`X`YP\_a`\_`  
@HWI-EAS443:3:78:677:1272#0/1  
GGTACTTTTTGGACAGTATGGATAGCAAATAGTAGCATT  
+HWI-EAS443:3:78:677:1272#0/1  
aXDU¥Y¥Y¥Y\_YYWVR]XWWRY\_RSJPWXST¥SSOSOUTV  
@HWI-EAS443:3:78:804:1549#0/1  
ACTTTTTGGACAGTATGGATAGCAAATAGTAGCATTGCC  
+HWI-EAS443:3:78:804:1549#0/1  
a¥XYaSKLWQX[¥a¥Y^^`\_HXXV]USIUXOMON¥]YJVB  
@HWI-EAS443:3:79:301:74#0/1  
CTTTTTGGACAGTATGGATAGCAAATAGTAGCATTGCCA  
+HWI-EAS443:3:79:301:74#0/1  
ababbbbbbbabbaaabbbaa[aa`[aba`]aa]`aa]Y^`  
@HWI-EAS443:3:79:662:466#0/1  
ACTTTTTGGACAGTATGGATAGCAAATAGTAGCATTGCC  
+HWI-EAS443:3:79:662:466#0/1  
`[^[a`^¥\_^^KTYL]aa`U\_`a\_]\_`]]`Ha\_Z¥\_[Z[]  
@HWI-EAS443:3:7:167:24#0/1  
GTACTTTTTGGACAGTATGGATAGCAAATAGTAGCATTG  
+HWI-EAS443:3:7:167:24#0/1  
`Z[\_a`aa` ``\_\_^\_aZ\_\_\_\_¥][^^]^^^Y¥TS[UXXYYR  
@HWI-EAS443:3:7:1740:717#0/1  
TTTTGGACAGTATGGATAGCAAATAGTAGCATTGCCACA  
+HWI-EAS443:3:7:1740:717#0/1  
aba`\_[NQX\_\_]a\_\_\_\_ZZ¥XV¥^ZWWZXY]V[]WYMWUWW  
@HWI-EAS443:3:7:338:289#0/1  
GTACTTTTTGGACAGTATGGATAGCAAATAGTAGCATTG  
+HWI-EAS443:3:7:338:289#0/1  
a^`X`\_a\_a\_^`a¥`aVZ[¥[¥XXSOY^\_W^¥GQNFSTRN  
@HWI-EAS443:3:80:479:115#0/1  
ACTTTTTGGACAGTATGGATAGCAAATAGTAGCATTGCC  
+HWI-EAS443:3:80:479:115#0/1  
ab^bb`bbb\_¥a` `` `aQ¥Xa\_YT\_]PY^Y^]Z]\_`]YQ\_  
@HWI-EAS443:3:80:932:721#0/1  
ACTTTTTGGACAGTATGGATAGCAAATAGTAGCATTGCC

+HWI-EAS443:3:80:932:721#0/1  
aabbbbbbbbaabaab`^`a`^Y]aaaa`\_`a\_\_a`[``  
@HWI-EAS443:3:81:1054:1513#0/1  
GTACTTTTTGGACAGTATGGATAGCAAATAGTAGCATTG  
+HWI-EAS443:3:81:1054:1513#0/1  
a\_aaaaabaa`[a`aa\_aaaaaa`Zaaaa\_YX\_aW\_\_]]  
@HWI-EAS443:3:81:1357:801#0/1  
CTTTTTGGACAGTATGGATAGCAAATAGTAGCATTGCCA  
+HWI-EAS443:3:81:1357:801#0/1  
aa`aa\_]\_\_a`^`]abbba`\_^[^a`^`^\_N\_]YY^¥QHRZ  
@HWI-EAS443:3:81:1671:434#0/1  
GTACTTTTTGGACAGTATGGATAGCAAATAGTAGCATTG  
+HWI-EAS443:3:81:1671:434#0/1  
a`YX¥`\_`aa^WRYPW`\_]`^X`¥`\_ZWFS¥PZ¥^[U]FT]¥H  
@HWI-EAS443:3:81:448:1891#0/1  
GTACTTTTTGGACAGTATGGATAGCAAATAGTAGCATTG  
+HWI-EAS443:3:81:448:1891#0/1  
a^`aaaaabb]aaba^aa]]\_`ZYZaaa\_a[T`^]]\_¥R  
@HWI-EAS443:3:81:890:982#0/1  
GTACTTTTTGGACAGTATGGATAGCAAATAGTAGCATTG  
+HWI-EAS443:3:81:890:982#0/1  
aYN\_W^X\_] [XJZNZPY[UVYTT^BBBBBBBBBBBBBBB  
@HWI-EAS443:3:82:1735:242#0/1  
GTACTTTTTGGACAGTATGGATAGCAAATAGTAGCATTG  
+HWI-EAS443:3:82:1735:242#0/1  
]`^YJWWaa` `b\_a¥^¥HV^b0\_¥QUT]`\_^\_GRaYPS[aY  
@HWI-EAS443:3:82:711:96#0/1  
GTACTTTTTGGACAGTATGGATAGCAAATAGTAGCATTG  
+HWI-EAS443:3:82:711:96#0/1  
\_\_S\_abbY\_¥]aa]\_a0[] [Za\_ZZGYU`WI\_SXLRUN`W  
@HWI-EAS443:3:82:734:1376#0/1  
TTTGGACAGTATGGATAGCAAATAGTAGCATTGCCACAAC  
+HWI-EAS443:3:82:734:1376#0/1  
a`a`^aaba]a\_`\_aUa`^a^a¥`M[^`^]\_`^`\_¥^]X]\_]  
@HWI-EAS443:3:82:743:488#0/1  
CTTTTTGGACAGTATGGATAGCAAATAGTAGCATTGCCA  
+HWI-EAS443:3:82:743:488#0/1  
abbbbbbbbbbbbabbbbabbbbaaba`baaab` `aa  
@HWI-EAS443:3:82:820:158#0/1  
GTACTTTTTGGACAGTATGGATAGCAAATAGTAGCATTG  
+HWI-EAS443:3:82:820:158#0/1  
aaa`aa[[aab^a\_\_b^a\_a`W`\_]W^¥QT\_\_GX`\_^\_[R  
@HWI-EAS443:3:83:1201:72#0/1  
GTACTTTTTGGACAGTATGGATAGCAAATAGTAGCATTG  
+HWI-EAS443:3:83:1201:72#0/1  
a^`^aaaaaaa][^\_]\_\_\_\_]]^]`^Z[] []TVSM[S[]]V  
@HWI-EAS443:3:83:1311:939#0/1  
TGGACAGTATGGATAGCAAATAGTAGCATTGCCACAATA  
+HWI-EAS443:3:83:1311:939#0/1  
`U\_KZ`^PaaZR\_\_`^`\_`X^SOVWWWVNXSRUVJR[W`]YX

@HWI-EAS443:3:83:1543:427#0/1  
GAGGAGTGCCTGATTAATGATCCCTGGGTTTTGCTTAATG  
+HWI-EAS443:3:83:1543:427#0/1  
aaaaabSaY¥`a``aaaa^Z\_GNb\_Z]W]¥aaWa[\_``^  
@HWI-EAS443:3:83:157:1111#0/1  
GTACTTTTTTGGACAGTATGGATAGCAAATAGTAGCATTG  
+HWI-EAS443:3:83:157:1111#0/1  
VXU\_¥`^]¥[^\_Z`Y`RV¥\_[O[ZZ¥\_Y[S[XIX\_YXWWU  
@HWI-EAS443:3:83:1706:1851#0/1  
TTTGGACAGTATGGATAGCAAATAGTAGCATTGCCACAAC  
+HWI-EAS443:3:83:1706:1851#0/1  
a`\_a`aa\_a\_\_`aa`\_\_Sxa``Z]XU]]OZ\_\_^S]WUU^S  
@HWI-EAS443:3:83:1730:1381#0/1  
GTACTTTTTTGGACAGTATGGATAGCAAATAGTAGCATTG  
+HWI-EAS443:3:83:1730:1381#0/1  
a`a`aaabaaaa][a`X[aa\_X^][JW\_[X^U¥`SN[[V  
@HWI-EAS443:3:83:277:1171#0/1  
TGGACAGTATGGATAGCAAATAGTAGCATTGCCACAAC  
+HWI-EAS443:3:83:277:1171#0/1  
¥\_babb^\_b]]a`b`YZ\_^ZZ[\_\_\_\_\_]XX^```a¥\_V[`  
@HWI-EAS443:3:83:452:1122#0/1  
GTACTTTTTTGGACAGTATGGATAGCAAATAGTAGCATTG  
+HWI-EAS443:3:83:452:1122#0/1  
```\_\_abaa[a`\_`a]YY^a\_S\_\_¥Ya`V^`MS\_\_\_\_[^Z  
@HWI-EAS443:3:84:1070:364#0/1  
CTTTTTTGGACAGTATGGATAGCAAATAGTAGCATTGCCA  
+HWI-EAS443:3:84:1070:364#0/1  
abbabbabaaab\_^bb`\_a`ab`aaa^]ZY^a`baa`Z^a  
@HWI-EAS443:3:84:1419:277#0/1  
TACTTTTTTGGACAGTATGGATAGCAAATAGTAGCATTGC  
+HWI-EAS443:3:84:1419:277#0/1  
aa\_bbbbbbbbaa`aa`aaaa\_aaa]aaa`aY\_`\_^`\_SY  
@HWI-EAS443:3:84:680:1602#0/1  
TTTTTGGACAGTATGGATAGCAAATAGTAGCATTGCCACA  
+HWI-EAS443:3:84:680:1602#0/1  
aa`ababaaaa^baa`a\_a\_abaa\_a]X\_a\_`\_]XZ]`X`  
@HWI-EAS443:3:84:836:732#0/1  
ACTTTTTTGGACAGTATGGATAGCAAATAGTAGCATTGCC  
+HWI-EAS443:3:84:836:732#0/1  
aaaababbb`\_`aaa^aaaa`^]¥]a`\_\_[W\_\_XZ¥\_\_¥  
@HWI-EAS443:3:85:1253:874#0/1  
ACTTTTTTGGACAGTATGGATAGCAAATAGTAGCATTGCC  
+HWI-EAS443:3:85:1253:874#0/1  
aaababaaaa\_\_aa\_aaa`aSa\_a`^\_¥][S\_`U\_Z\_S[S  
@HWI-EAS443:3:85:184:1602#0/1  
CAAGGTACTTTTTTGGACAGTATGGATAGCAAATAGTAGC  
+HWI-EAS443:3:85:184:1602#0/1  
abbaa\_baaa`aaaaabaa`\_a`\_a`¥`\_a^^^`YU^[\_  
@HWI-EAS443:3:85:226:119#0/1  
GGTACTTTTTTGGACAGTATGGATAGCAAATAGTAGCATT

+HWI-EAS443:3:85:226:119#0/1  
abZ¥`aa`¥`\_a`\_aY\_^a^^¥`^¥Y[XW^[SYZNFQX  
@HWI-EAS443:3:85:275:2009#0/1  
GGTACTTTTTGGACAGTATGGATAGCAAATAGTAGCATT  
+HWI-EAS443:3:85:275:2009#0/1  
[`Qa`Zaa\_]¥UP`ba`Pa\_ZPW[[L[aa\_PWFDXSPX^`  
@HWI-EAS443:3:85:277:78#0/1  
TTTTTGGACAGTATGGATAGCAAATAGTAGCATTGCCACA  
+HWI-EAS443:3:85:277:78#0/1  
aaaabaaaaa]\_`ab^\_`\_]`\_`\_]Z^\_^Y^]\_^ZU]  
@HWI-EAS443:3:85:564:223#0/1  
ACTTTTTGGACAGTATGGATAGCAAATAGTAGCATTGCC  
+HWI-EAS443:3:85:564:223#0/1  
aa`ba]baba\_`aa[aaa`\_\_\_XQ[\_\_\_XS[`ZYW\_¥UZ  
@HWI-EAS443:3:85:655:191#0/1  
CTTTTTGGACAGTATGGATAGCAAATAGTAGCATTGCCA  
+HWI-EAS443:3:85:655:191#0/1  
aa^aa`aaX]\_a\_T\_aa`\_`\_]`\_`\_`\_a\_Y\_\_U^YU]YWSRY  
@HWI-EAS443:3:85:734:374#0/1  
GTACTTTTTGGACAGTATGGATAGCAAATAGTAGCATTG  
+HWI-EAS443:3:85:734:374#0/1  
^La^`\_a`\_`\_a\_\_^[a`\_`\_aZW`ZXMR[^^^UKX^]`^YV  
@HWI-EAS443:3:86:244:1427#0/1  
TTTTTGGACAGTATGGATAGCAAATAGTAGCATTGCCACA  
+HWI-EAS443:3:86:244:1427#0/1  
`aaaa¥aaaaab^[]V^[^\_[Saa\_Z]RZS]]^X\_X\_\_\_^T  
@HWI-EAS443:3:86:259:1794#0/1  
GTACTTTTTGGACAGTATGGATAGCAAATAGTAGCATTG  
+HWI-EAS443:3:86:259:1794#0/1  
a]YI]Q¥[\_\_\_Z\_\_\_`^[G[[\_YHRPPO¥\_YWYRFSFOPUYV  
@HWI-EAS443:3:86:688:110#0/1  
GTACTTTTTGGACAGTATGGATAGCAAATAGTAGCATTG  
+HWI-EAS443:3:86:688:110#0/1  
a^\_¥aY^\_aa\_] []bY\_`a¥^PZ^MY\_¥XVSVYRIK]YV  
@HWI-EAS443:3:86:85:1014#0/1  
TTTTTGGACAGTATGGATAGCAAATAGTAGCATTGCCACA  
+HWI-EAS443:3:86:85:1014#0/1  
abaaa^a`\_^a^a\_]aa`\_]a\_a`\_\_Xaa¥]^\_UZ¥^\_^  
@HWI-EAS443:3:87:299:859#0/1  
AGGAGTGCCTGATTAATGATCCCTGGGTTTTGCTTAATGC  
+HWI-EAS443:3:87:299:859#0/1  
a`¥^`^`aaa`\_`a`a`\_\_\_^\_\_a\_[aR^]^^`\_]`\_\_\_¥  
@HWI-EAS443:3:87:382:1372#0/1  
GTACTTTTTGGACAGTATGGATAGCAAATAGTAGCATTG  
+HWI-EAS443:3:87:382:1372#0/1  
a¥\_^\_aaa\_`\_`\_aa¥\_Y`^U]`]^`]]`\_WQTW\_^XV^^]  
@HWI-EAS443:3:87:422:885#0/1  
CTTTTTGGACAGTATGGATAGCAAATAGTAGCATTGCCA  
+HWI-EAS443:3:87:422:885#0/1  
`aa`a^a`]^a`\_]W\_aX^a\_^]aa`\_`¥S\_\_¥R[YY^¥[

@HWI-EAS443:3:87:840:1420#0/1  
ACTTTTTTGGACAGTATGGATAGCAAATAGTAGCATTGCC  
+HWI-EAS443:3:87:840:1420#0/1  
aaaabaaa`a`aaa\_abb`a`a]a` `][X\_`¥Y`\_\_]  
@HWI-EAS443:3:87:84:1967#0/1  
GTACTTTTTTGGACAGTATGGATAGCAAATAGTAGCATTG  
+HWI-EAS443:3:87:84:1967#0/1  
\_[\_`^` `aUaa[]`bYYWZ[QYXLFT` `[TYUX[XMQHVN  
@HWI-EAS443:3:87:902:385#0/1  
GTACTTTTTTGGACAGTATGGATAGCAAATAGTAGCATTG  
+HWI-EAS443:3:87:902:385#0/1  
]^Yb^^¥aa\_\_Q\_aa¥KZa\_OV¥`YQT\_a]XKXSQQZSHB  
@HWI-EAS443:3:88:1212:1235#0/1  
TTTTGGACAGTATGGATAGCAAATAGTAGCATTGCCACAA  
+HWI-EAS443:3:88:1212:1235#0/1  
`baababab` `a`a\_Y`a[aaa` `]N[\_[[[ `ZK^\_]a`  
@HWI-EAS443:3:89:1161:936#0/1  
ACTTTTTTGGACAGTATGGATAGCAAATAGTAGCATTGCC  
+HWI-EAS443:3:89:1161:936#0/1  
ababbbbbb`aabaabaaa`a\_aaaaa^aa]\_a` `]`¥  
@HWI-EAS443:3:89:1185:1546#0/1  
GTACTTTTTTGGACAGTATGGATAGCAAATAGTAGCATTG  
+HWI-EAS443:3:89:1185:1546#0/1  
`Ya` `bbbbaaaa`aa\_aaaaa\_]Z`aaa`S¥\_XW^]\_X  
@HWI-EAS443:3:89:1767:591#0/1  
GTACTTTTTTGGACAGTATGGATAGCAAATAGTAGCATTG  
+HWI-EAS443:3:89:1767:591#0/1  
a^\_]ab`aa][T]`aI\_\_\_\_\_X]MEL\_^SOKM]UPVTX^  
@HWI-EAS443:3:89:416:961#0/1  
ACTTTTTTGGACAGTATGGATAGCAAATAGTAGCATTGCC  
+HWI-EAS443:3:89:416:961#0/1  
abbbbbbbaa`abbabbabaaa]`aa`aaa\_aaa` `a^^a  
@HWI-EAS443:3:89:658:1660#0/1  
ACTTTTTTGGACAGTATGGATAGCAAATAGTAGCATTGCC  
+HWI-EAS443:3:89:658:1660#0/1  
abbbbabbbabababaaa` `^a]aa\_X`^[\_Y^\_^]^X  
@HWI-EAS443:3:8:1291:945#0/1  
TGGACAGTATGGATAGCAAATAGTAGCATTGCCACAAC  
+HWI-EAS443:3:8:1291:945#0/1  
abb][\_baaba` `a`[ `aaa` `]a`Y¥` ` `^U^]a^L\_`  
@HWI-EAS443:3:90:1164:965#0/1  
GTACTTTTTTGGACAGTATGGATAGCAAATAGTAGCATTG  
+HWI-EAS443:3:90:1164:965#0/1  
aZ\_`ababba[\_aa`^a`aa`a` `¥aaY\_\_UZW]Z^\_\_¥  
@HWI-EAS443:3:90:1288:2016#0/1  
ACTTTTTTGGACAGTATGGATAGCAAATAGTAGCATTGCC  
+HWI-EAS443:3:90:1288:2016#0/1  
a\_a\_\_`\_¥`G^\_^aS`aa`\_OQ]T`a\_\_¥YG^VF^¥`YZ]  
@HWI-EAS443:3:90:129:514#0/1  
ACAAGGTACTTTTTTGGACAGTATGGATAGCAAATAGTAG

+HWI-EAS443:3:90:129:514#0/1  
^\_[¥aaY[`Vbba\_a`\_\_aaa\_]aaaa`Y`T[\_a]\_¥T]]  
@HWI-EAS443:3:90:388:1156#0/1  
GTACTTTTTGGACAGTATGGATAGCAAATAGTAGCATTG  
+HWI-EAS443:3:90:388:1156#0/1  
a]\_^a\_ba`a^U^`a]a\_a\_]V\_YRY\_]OZZSVWQJS[V  
@HWI-EAS443:3:90:864:1102#0/1  
ACTTTTTGGACAGTATGGATAGCAAATAGTAGCATTGCC  
+HWI-EAS443:3:90:864:1102#0/1  
aaabbababa`aaa¥a`baaaaa`\_^`\_]Pa^¥``\_XQ]  
@HWI-EAS443:3:91:106:922#0/1  
TTTTTGGACAGTATGGATAGCAAATAGTAGCATTGCCACA  
+HWI-EAS443:3:91:106:922#0/1  
`bVb`Yba¥T[MZYV]OTSJZ]W¥aY[NZYLYYTSZYXYY  
@HWI-EAS443:3:91:1370:997#0/1  
TGGACAGTATGGATAGCAAATAGTAGCATTGCCACA  
+HWI-EAS443:3:91:1370:997#0/1  
aa`^a]`H[S^``TY\_MW[^Ya¥Xa¥GSUXI]ZZU\_]¥a  
@HWI-EAS443:3:91:276:1194#0/1  
CTTTTTGGACAGTATGGATAGCAAATAGTAGCATTGCCA  
+HWI-EAS443:3:91:276:1194#0/1  
abbbbbbbbbbbbbbbbbbbbababb`aaUaaaaaaaa`a  
@HWI-EAS443:3:91:933:1398#0/1  
GTACTTTTTGGACAGTATGGATAGCAAATAGTAGCATTG  
+HWI-EAS443:3:91:933:1398#0/1  
\_T\_[abaaaa`]^aa\_`a`]V`\_YF^`X\_TP]OW]]X]  
@HWI-EAS443:3:92:1043:1993#0/1  
GTACTTTTTGGACAGTATGGATAGCAAATAGTAGCATTG  
+HWI-EAS443:3:92:1043:1993#0/1  
a]aVJ]aZKX[a¥^\_Q¥^`X]\_\_PY^^^^\_W]]UQ^YS  
@HWI-EAS443:3:92:1358:636#0/1  
ACTTTTTGGACAGTATGGATAGCAAATAGTAGCATTGCC  
+HWI-EAS443:3:92:1358:636#0/1  
aabbbb`a`\_aaba\_aa^a`a]a\_ab`\_aa]aa^aa\_\_Z\_  
@HWI-EAS443:3:92:1549:1903#0/1  
TTTTTGGACAGTATGGATAGCAAATAGTAGCATTGCCACA  
+HWI-EAS443:3:92:1549:1903#0/1  
ababa^^]\_ab]\_ab\_a`UOG`\_\_UaWHa\_G^\_TVUS`Z¥  
@HWI-EAS443:3:92:1578:502#0/1  
TTTTTGGACAGTATGGATAGCAAATAGTAGCATTGCCACA  
+HWI-EAS443:3:92:1578:502#0/1  
``\_]bbaa`aa¥`a`XPTa`[a^^K`]UabP[aaXFFHwa  
@HWI-EAS443:3:92:1617:583#0/1  
TTTTTGGACAGTATGGATAGCAAATAGTAGCATTGCCACA  
+HWI-EAS443:3:92:1617:583#0/1  
\_`Ua\_b^aVa^\_¥aa`a[]aX]aaa`[S^YZX\_¥Z]UTP]  
@HWI-EAS443:3:92:209:1490#0/1  
GTACTTTTTGGACAGTATGGATAGCAAATAGTAGCATTG  
+HWI-EAS443:3:92:209:1490#0/1  
aY¥abb`abbba`XbXR`]aY^[\_UN[\_YW]NGUTT\_P[M



@HWI-EAS443:3:92:418:301#0/1  
ACTTTTTTGGACAGTATGGATAGCAAATAGTAGCATTGCC  
+HWI-EAS443:3:92:418:301#0/1  
U^`bbbbbbba`]a]aaaa`\_¥[`a\_a`\_W]^TV¥\_Y\_Y  
@HWI-EAS443:3:92:626:1307#0/1  
TTTTTGGACAGTATGGATAGCAAATAGTAGCATTGCCACA  
+HWI-EAS443:3:92:626:1307#0/1  
aabaa```aaa¥aaa]\_\_a]``a```YP\_`^^^[]YZX[\_  
@HWI-EAS443:3:92:823:843#0/1  
ACTTTTTTGGACAGTATGGATAGCAAATAGTAGCATTGCC  
+HWI-EAS443:3:92:823:843#0/1  
\_\_`bbaabaaa`\_^aa`a¥a^Ua\_\_\_a¥V`[\_`\_XY]  
@HWI-EAS443:3:93:1017:484#0/1  
GTACTTTTTTGGACAGTATGGATAGCAAATAGTAGCATTG  
+HWI-EAS443:3:93:1017:484#0/1  
¥NVWZI\_WWa`¥YL]a^Z^`]Z^^WSZ[R^¥UX`Z¥NQZN  
@HWI-EAS443:3:93:1341:1390#0/1  
TTTTTGGACAGTATGGATAGCAAATAGTAGCATTGCCACA  
+HWI-EAS443:3:93:1341:1390#0/1  
`baa\_aZ[TS¥MP``¥0]]SW]Ua\_TZNQLMRLBBBBBBB  
@HWI-EAS443:3:93:1382:358#0/1  
ACTTTTTTGGACAGTATGGATAGCAAATAGTAGCATTGCC  
+HWI-EAS443:3:93:1382:358#0/1  
a`bbbbbaaba\_ab\_aabaaaa\_a`\_\_]]^aU```\_U¥  
@HWI-EAS443:3:93:1439:1420#0/1  
TTTTTGGACAGTATGGATAGCAAATAGTAGCATTGCCACA  
+HWI-EAS443:3:93:1439:1420#0/1  
aaabaaaa`a`\_a]aa\_ZI¥¥a```^P]¥S`X]]U¥Ha  
@HWI-EAS443:3:93:1575:1724#0/1  
ACTTTTTTGGACAGTATGGATAGCAAATAGTAGCATTGCC  
+HWI-EAS443:3:93:1575:1724#0/1  
a`bbabbaa`\_aa]aaaa`\_a`\_`\_a^Ya\_U]]U[Y  
@HWI-EAS443:3:93:1633:1526#0/1  
GGTACTTTTTTGGACAGTATGGATAGCAAATAGTAGCATT  
+HWI-EAS443:3:93:1633:1526#0/1  
`aSHU^aa`a]UQN`aaL]\_a`\_U\_PX^[^^RYQ¥¥W[Z^  
@HWI-EAS443:3:93:171:904#0/1  
ACTTTTTTGGACAGTATGGATAGCAAATAGTAGCATTGCC  
+HWI-EAS443:3:93:171:904#0/1  
aaaaaab^a`\_`aaYY`a`^`a\_aa``Ya^N[`[\_`^Z]  
@HWI-EAS443:3:93:301:324#0/1  
GTACTTTTTTGGACAGTATGGATAGCAAATAGTAGCATTG  
+HWI-EAS443:3:93:301:324#0/1  
`YP`Y\_Y[PX¥\_¥V]YTX]W¥W]XW[]YZZ^XJWVOVRBB  
@HWI-EAS443:3:93:947:1469#0/1  
CTTTTTTGGACAGTATGGATAGCAAATAGTAGCATTGCCA  
+HWI-EAS443:3:93:947:1469#0/1  
\_[[a``¥^`a\_]aW¥aa\_VY]\_X`\_`Z^a¥aWFT]0^PZa  
@HWI-EAS443:3:94:1480:1894#0/1  
TTTTTGGACAGTATGGATAGCAAATAGTAGCATTGCCACA

+HWI-EAS443:3:94:1480:1894#0/1  
a`^^^aa`¥^a\_aaaa[RWRI¥a\_U\_]NY\_OYX`XLN]O¥  
@HWI-EAS443:3:94:417:1222#0/1  
GTACTTTTTGGACAGTATGGATAGCAAATAGTAGCATTG  
+HWI-EAS443:3:94:417:1222#0/1  
a¥\_`aaaaa`a`¥]^`^`[\_¥]¥WZ^]SU\_YLV[[S  
@HWI-EAS443:3:94:597:246#0/1  
ACTTTTTGGACAGTATGGATAGCAAATAGTAGCATTGCC  
+HWI-EAS443:3:94:597:246#0/1  
¥\_bbbaabbbbaab]aaba\_aa`R\_Y\_a\_ZV]b^Y`a^Z¥  
@HWI-EAS443:3:95:1239:242#0/1  
ACTTTTTGGACAGTATGGATAGCAAATAGTAGCATTGCC  
+HWI-EAS443:3:95:1239:242#0/1  
ababbbbbbaaaaaWabaa`aaaRa\_a\_`aYWa]\_\_aZSP  
@HWI-EAS443:3:95:189:1410#0/1  
GTACTTTTTGGACAGTATGGATAGCAAATAGTAGCATTG  
+HWI-EAS443:3:95:189:1410#0/1  
a`^aba\_\_`abaa\_\_]\_¥^\_]\_U]V\_a\_X\_\_Q[[YT¥¥[  
@HWI-EAS443:3:95:298:88#0/1  
GTACTTTTTGGACAGTATGGATAGCAAATAGTAGCATTG  
+HWI-EAS443:3:95:298:88#0/1  
aaaababbabaa\_\_a`Y`a`\_`\_\_`[\_\_\_^^`R¥\_SY¥]P  
@HWI-EAS443:3:95:325:1065#0/1  
TTTTGGACAGTATGGATAGCAAATAGTAGCATTGCCACA  
+HWI-EAS443:3:95:325:1065#0/1  
abaabbaaabb\_aaaaa````]``^¥]M`aRT\_\_USW¥UY  
@HWI-EAS443:3:95:794:264#0/1  
GTACTTTTTGGACAGTATGGATAGCAAATAGTAGCATTG  
+HWI-EAS443:3:95:794:264#0/1  
a\_SK```]Xa^Ya\_\_a\_PMOWTUUGSDTY[NLTBBBBBBBB  
@HWI-EAS443:3:96:1303:1433#0/1  
TACTTTTTGGACAGTATGGATAGCAAATAGTAGCATTGC  
+HWI-EAS443:3:96:1303:1433#0/1  
a\_¥bbabb``[\_`ab\_abaaaa^[URaa^¥XG^`R¥]a[[  
@HWI-EAS443:3:96:33:1033#0/1  
GTACTTTTTGGACAGTATGGATAGCAAATAGTAGCATTG  
+HWI-EAS443:3:96:33:1033#0/1  
a¥\_\_\_`a`\_\_¥RY\_\_]XW]WP[VPRRV^]SURTYUQVW[B  
@HWI-EAS443:3:96:88:806#0/1  
GTACTTTTTGGACAGTATGGATAGCAAATAGTAGCATTG  
+HWI-EAS443:3:96:88:806#0/1  
^SP^aaaYY`aXW¥\_a]a\_`a]]UZ¥X¥RV\_WY^VP¥XB  
@HWI-EAS443:3:97:1109:748#0/1  
GTACTTTTTGGACAGTATGGATAGCAAATAGTAGCATTG  
+HWI-EAS443:3:97:1109:748#0/1  
a\_^]`\_aa\_a\_]\_\_Y]\_^^^¥Y\_W^]]Z]^UXZX[U[B  
@HWI-EAS443:3:97:262:725#0/1  
CTTTTTGGACAGTATGGATAGCAAATAGTAGCATTGCCA  
+HWI-EAS443:3:97:262:725#0/1  
abbbbbbb]I``bbbabaa^`a\_``¥Ia`^`a``]]¥

@HWI-EAS443:3:97:27:1899#0/1  
GTACTTTTTGGACAGTATGGATAGCAAATAGTAGCATTG  
+HWI-EAS443:3:97:27:1899#0/1  
`Ya^¥a`a]a\_Z\_^\_[X`\_W¥^]\_[V^\_^Y^UT\_SXUQ[Y  
@HWI-EAS443:3:98:1227:1746#0/1  
TTTGGACAGTATGGATAGCAAATAGTAGCATTGCCACAAC  
+HWI-EAS443:3:98:1227:1746#0/1  
``bb\_^aab^aa`a\_`MF^`\_\_Y`[^]GT^^\_W^`Y]\_I  
@HWI-EAS443:3:98:1296:974#0/1  
TACTTTTTTTGGACAGTATGGATAGCAAATAGTAGCATTGC  
+HWI-EAS443:3:98:1296:974#0/1  
aa¥aab\_abbaaaaZ^aaba\_``\_^[\_G`U¥Z\_]0  
@HWI-EAS443:3:98:1323:1614#0/1  
GTACTTTTTTTGGACAGTATGGATAGCAAATAGTAGCATTG  
+HWI-EAS443:3:98:1323:1614#0/1  
`T¥\_aa`YZ`W\_XaaM¥[a\_]RTR¥\_^^\_GPYYSZ^\_G  
@HWI-EAS443:3:98:377:480#0/1  
GGTACTTTTTTTGGACAGTATGGATAGCAAATAGTAGCATT  
+HWI-EAS443:3:98:377:480#0/1  
a[V]TaaUa\_Y\_Y`]UWYaaa]aIMG[[`Y¥][JQM¥M^  
@HWI-EAS443:3:98:445:1617#0/1  
ACTTTTTTTGGACAGTATGGATAGCAAATAGTAGCATTGCC  
+HWI-EAS443:3:98:445:1617#0/1  
[`aa`abb`J`aaa[aaaa¥\_\_\_aaa\_`P`XY`\_]0[[  
@HWI-EAS443:3:98:903:762#0/1  
GTACTTTTTTTGGACAGTATGGATAGCAAATAGTAGCATTG  
+HWI-EAS443:3:98:903:762#0/1  
a\_`[aaaa`a`a^]a\_]\_\_`aX\_^\_W\_\_\_^\_\_V\_\_V]]`]  
@HWI-EAS443:3:99:1180:1323#0/1  
ACTTTTTTTGGACAGTATGGATAGCAAATAGTAGCATTGCC  
+HWI-EAS443:3:99:1180:1323#0/1  
\_aabbbba¥bbb`b`^`babYaababbaaa[P]bUaabW\_\_  
@HWI-EAS443:3:99:514:1062#0/1  
CTTTTTTTGGACAGTATGGATAGCAAATAGTAGCATTGCCA  
+HWI-EAS443:3:99:514:1062#0/1  
aaabbbbaa^^aab[`ab`\_a`a^b`aaaW`aa\_``\_¥V[  
@HWI-EAS443:3:9:1045:605#0/1  
TTTTTTGGACAGTATGGATAGCAAATAGTAGCATTGCCACA  
+HWI-EAS443:3:9:1045:605#0/1  
abbaabaaaab\_abbaYa\_a\_a\_\_a\_]¥Za¥\_a\_`[]\_^a  
@HWI-EAS443:3:9:817:1596#0/1  
GTACTTTTTTTGGACAGTATGGATAGCAAATAGTAGCATTG  
+HWI-EAS443:3:9:817:1596#0/1  
a¥`I`^a]aaaa`\_a`[^aaa^\_ROF]`\_\_U]P[`^\_^S  
@HWI-EAS443:3:97:313:199#0/1  
CAAAAATGCAGTTGGGGTCCTCATCGGAGGACTAACCCAA  
+HWI-EAS443:3:97:313:199#0/1  
a`Xaaaaa\_ab\_aa\_`aV\_\_a^`\_¥\_\_\_a^^]^^\_UUOYX  
@HWI-EAS443:3:55:711:1263#0/1  
CAAAAATGCAGTTGGGGTCCTCATCGGAGGACTTGAGTGG

+HWI-EAS443:3:55:711:1263#0/1  
aa]TZ^[\`NVbRT¥ZWZ¥JX¥S]¥XXa[XJVPX[\_NQ]`^  
@HWI-EAS443:3:12:1565:1820#0/1  
CAAAAATGCAGTTGGGGTCCTCATCGGAGGAGTTGAATGG  
+HWI-EAS443:3:12:1565:1820#0/1  
Wb\_aaY^Y[bba`a][ZSU[HYU\_^TZZ`UURbaaaaa¥  
@HWI-EAS443:3:38:1725:794#0/1  
AAAAATGCAGTTGGGGTCCTCATCGGAGGAGTTGAATGGA  
+HWI-EAS443:3:38:1725:794#0/1  
K\_b]b`aY\_bXS`bb\_^)]aaa\_a][^aFF[\_\_\_VN[T[Q  
@HWI-EAS443:3:4:1505:1011#0/1  
AAAATGCAGTTGGGGTCCTCATCGGAGGACTTGAGTGGAA  
+HWI-EAS443:3:4:1505:1011#0/1  
Y^R[[\_Z\_¥[[\_O\_^XOZ\_H]Z]\_^Z\_`\_U^WWUPPV\_``  
@HWI-EAS443:3:50:9:1151#0/1  
GAGGATGTCAAAAATGCAGTTGGGGTACTCATCGGAGGAC  
+HWI-EAS443:3:50:9:1151#0/1  
V`]a^aaX\_QZ\_`¥P[VRSTWW\_V]ED[]¥U¥^R[G]ZGW  
@HWI-EAS443:3:63:1451:514#0/1  
CAAAAATGCAGTTGGGGTCCTCATCGGAGGACTTGATGG  
+HWI-EAS443:3:63:1451:514#0/1  
\_Y\_WUGX\_WPW]`b]abP¥a\_bZW^¥a]W^PPb\_UDP¥a`  
@HWI-EAS443:3:68:1448:714#0/1  
CAAAAATGCGGTTGGGGTCCTCATCGGAGGACTTGAATGG  
+HWI-EAS443:3:68:1448:714#0/1  
¥WV[]¥\_aV¥\_V[^VPSYOS[X[TY]bZW¥]G¥T\_^JUTZ  
@HWI-EAS443:3:71:1043:735#0/1  
CAAGTCTCCGATGAGGACCCCAACCGCATTTTTGACATC  
+HWI-EAS443:3:71:1043:735#0/1  
a`b\_^baaa\_`a\_aab`^`[^`aaa`aa`X`aaaaa\_]a\_  
@HWI-EAS443:3:100:1126:503#0/1  
GAGGATGTCAAAAATGCAGTTGGGGTCCTCANCGGAGGAC  
+HWI-EAS443:3:100:1126:503#0/1  
a[aa\_¥`SX``[^`a]a^¥a\_\_a^T¥WVWTDKNZW\_¥BB  
@HWI-EAS443:3:36:1332:1670#0/1  
CAAAAATGCAGTNGGGTCCTCATCGGAGGACTTGAATGG  
+HWI-EAS443:3:36:1332:1670#0/1  
¥baZ[Wa^b`]YDR]\_Y`a\_aaaaZ^[Vb]\_RaR`^``[X  
@HWI-EAS443:3:40:1305:1832#0/1  
CNAAAAATGCAGTTGGGGTCCTCATCGGAGGACTTGAATGG  
+HWI-EAS443:3:40:1305:1832#0/1  
^D¥bbbbbb`[abbbab\_aX^aba]\_a^aa¥\_]aaa]`a\_  
@HWI-EAS443:3:10:1063:1903#0/1  
CAAAAATGCAGTTGGGGTCCTCATCGGAGGACTTGAATGG  
+HWI-EAS443:3:10:1063:1903#0/1  
a`]bb¥Sabbba^`\_P]^NUWaaaaaaa\_aa^U]aa\_a\_\_`  
@HWI-EAS443:3:10:502:859#0/1  
CAAAAATGCAGTTGGGGTCCTCATCGGAGGACTTGAATGG  
+HWI-EAS443:3:10:502:859#0/1  
abbbbabbbbabababaaZbaaaaaaba\_ba^\_aaa\_\_aa`

@HWI-EAS443:3:11:196:1052#0/1  
CAAAAATGCAGTTGGGGTCCTCATCGGAGGACTTGAATGG  
+HWI-EAS443:3:11:196:1052#0/1  
`bba]bb`abZ]^Z`aT`abaa`ab\_Ub\_a]a`b[`aa\_  
@HWI-EAS443:3:11:268:290#0/1  
AAAATGCAGTTGGGGTCCTCATCGGAGGACTTGAATGGAA  
+HWI-EAS443:3:11:268:290#0/1  
aa``ba``aa]ZF]`¥a`¥``]Y\_\_]VZ[]^LU]`XZ  
@HWI-EAS443:3:11:949:325#0/1  
AAAATGCAGTTGGGGTCCTCATCGGAGGACTTGAATGGAA  
+HWI-EAS443:3:11:949:325#0/1  
aababb]aa\_bbaaaW]\_a\_aa`aa^a^]U`\_a]]aa`XZ  
@HWI-EAS443:3:13:1099:1193#0/1  
CCTCCGATGAGGACCCCAACTGCATTTTTGACATCCTCAT  
+HWI-EAS443:3:13:1099:1193#0/1  
abb^N`PP`aa\_^X]]^¥NV0]¥\_`\_]\_a^^`U^\_Q]`  
@HWI-EAS443:3:14:1339:1052#0/1  
CATTCAAGTCTCCGATGAGGACCCCAACTGCATTTTTGA  
+HWI-EAS443:3:14:1339:1052#0/1  
a\_`ba`a[]`R\_\_\_\_`Y]`aP]VLTYY`¥``[Z`\_\_]\_] ]  
@HWI-EAS443:3:14:1732:518#0/1  
CAAAAATGCAGTTGGGGTCCTCATCGGAGGACTTGAATGG  
+HWI-EAS443:3:14:1732:518#0/1  
aaabbbbbbb^ba\_a`^a`a`aa^b^]ba`]aaa\_`aa`  
@HWI-EAS443:3:15:119:973#0/1  
CAAAAATGCAGTTGGGGTCCTCATCGGAGGACTTGAATGG  
+HWI-EAS443:3:15:119:973#0/1  
aab\_[GX]ZY\_^Y\_aT]Qa\_\_\_YUY\_]aYUU\_]Y^^^`  
@HWI-EAS443:3:15:1482:1944#0/1  
GAGGATGTCAAAAATGCAGTTGGGGTCCTCATCGGAGGAC  
+HWI-EAS443:3:15:1482:1944#0/1  
a``¥SZbW]Z[]\_\_a`UU¥¥Q]U]VHZWV^UX]^W¥ZV]  
@HWI-EAS443:3:16:1027:850#0/1  
CAAAAATGCAGTTGGGGTCCTCATCGGAGGACTTGAATGG  
+HWI-EAS443:3:16:1027:850#0/1  
aY```aa`aababbaaaZaaaa\_aaaa`aa[\_\_\_aa¥\_aaa  
@HWI-EAS443:3:17:865:1010#0/1  
CAAGTCTCCGATGAGGACCCCAACTGCATTTTTGACATC  
+HWI-EAS443:3:17:865:1010#0/1  
aaa]`]a]`abTa\_T\_a\_\_RV\_aaVa``\_a`\_\_`^`\_a\_\_  
@HWI-EAS443:3:18:1181:300#0/1  
CATTCAAGTCTCCGATGAGGACCCCAACTGCATTTTTGA  
+HWI-EAS443:3:18:1181:300#0/1  
[bbbbbbbaaabbaaaabb^baa`〕`\_a\_\_\_\_b\_`aaaa\_]\_  
@HWI-EAS443:3:21:1145:600#0/1  
CAAAAATGCAGTTGGGGTCCTCATCGGAGGACTTGAATGG  
+HWI-EAS443:3:21:1145:600#0/1  
aaaaaaaaa^b\_a`\_a`X\_\_`\_`^]``]`¥]Xa`a\_^\_\_^  
@HWI-EAS443:3:23:1450:1272#0/1  
CAAAAATGCAGTTGGGGTCCTCATCGGAGGACTTGAATGG

+HWI-EAS443:3:23:1450:1272#0/1  
aabbbbbbaababbaaa\_a`\_`aa`bb`aa\_]aaaa`aaa  
@HWI-EAS443:3:23:1628:1009#0/1  
CAAAAATGCAGTTGGGGTCCTCATCGGAGGACTTGAATGG  
+HWI-EAS443:3:23:1628:1009#0/1  
\_bbbb`ba[abbbbbbb\_b\_b\_ab^`a[bba\_bab^Uaba  
@HWI-EAS443:3:24:1156:442#0/1  
CAAAAATGCAGTTGGGGTCCTCATCGGAGGACTTGAATGG  
+HWI-EAS443:3:24:1156:442#0/1  
`bbbbbbbbbbbbbb^baba`bbbbabbb\_bbb]bbb  
@HWI-EAS443:3:24:1624:996#0/1  
CAAAAATGCAGTTGGGGTCCTCATCGGAGGACTTGAATGG  
+HWI-EAS443:3:24:1624:996#0/1  
`a¥\_aUa^[Tb]bba[[PHV¥ab¥aa\_S\_aYS\_\_PS^a]`  
@HWI-EAS443:3:24:282:1945#0/1  
CAAAAATGCAGTTGGGGTCCTCATCGGAGGACTTGAATGG  
+HWI-EAS443:3:24:282:1945#0/1  
[Z\_¥PY¥`\_Y]X0a\_GXZWT\_aZV]\_YZOL`\_V`SUWX]  
@HWI-EAS443:3:25:1084:409#0/1  
TCAAGTCCTCCGATGAGGACCCCAACTGCATTTTTGACAT  
+HWI-EAS443:3:25:1084:409#0/1  
abbb``baaaabaabaaaa\_`\_`aa`aa\_\_\_\_]\_\_]a\_  
@HWI-EAS443:3:25:1280:685#0/1  
AAAAATGCAGTTGGGGTCCTCATCGGAGGACTTGAATGGA  
+HWI-EAS443:3:25:1280:685#0/1  
[`\_SWYb\_W[X¥WWZ``b¥aaaR[aVL¥[LY\_aa\_^[[P]  
@HWI-EAS443:3:27:1130:230#0/1  
GGATGTCAAAAATGCAGTTGGGGTCCTCATCGGAGGACTT  
+HWI-EAS443:3:27:1130:230#0/1  
^^¥baY`bbbbaa`\_`\_abb`]¥VaY]Z`a^`^`\_`a^T`\_`  
@HWI-EAS443:3:27:358:678#0/1  
CAAAAATGCAGTTGGGGTCCTCATCGGAGGACTTGAATGG  
+HWI-EAS443:3:27:358:678#0/1  
abaaaa¥a\_aa]¥^0S[Zaa[^Z`\_Y\_Y\_ZUQ^`aV^a\_¥  
@HWI-EAS443:3:27:708:855#0/1  
CAAAAATGCAGTTGGGGTCCTCATCGGAGGACTTGAATGG  
+HWI-EAS443:3:27:708:855#0/1  
abbbbbbb`abba^bbb[abbbbbbb\_ababbbbaabbb  
@HWI-EAS443:3:28:1294:1605#0/1  
AAAATGCAGTTGGGGTCCTCATCGGAGGACTTGAATGGAA  
+HWI-EAS443:3:28:1294:1605#0/1  
ab\_baab\_b`a`[`]R^aa\_a`a`]^`\_XL]N]¥a`\_\_\_\_  
@HWI-EAS443:3:28:586:1291#0/1  
GTCAAAAATGCAGTTGGGGTCCTCATCGGAGGACTTGAAT  
+HWI-EAS443:3:28:586:1291#0/1  
a]aaa\_bb`aba`\_aa`\_Yaaaa`[aa\_U``[\_\_^\_]Y\_  
@HWI-EAS443:3:2:1196:178#0/1  
ATTCAAGTCCTCCGATGAGGACCCCAACTGCATTTTTGAC  
+HWI-EAS443:3:2:1196:178#0/1  
`aaa`U`aaaa\_\_a\_^a^aSU\_WUPaURJa]U]^VSRXTB

@HWI-EAS443:3:2:1235:986#0/1  
CAAAAATGCAGTTGGGGTCCTCATCGGAGGACTTGAATGG  
+HWI-EAS443:3:2:1235:986#0/1  
\_UU^]`Xa`\_b``]YZ]]Z^`\_\_R\_¥¥X]ON¥\_]NV`a[  
@HWI-EAS443:3:30:977:187#0/1  
CAAAAATGCAGTTGGGGTCCTCATCGGAGGACTTGAATGG  
+HWI-EAS443:3:30:977:187#0/1  
aba^``babbbbbbba^b\_aabbaaabNb`\_abbb`aaa`  
@HWI-EAS443:3:31:151:46#0/1  
GTCAAAAATGCAGTTGGGGTCCTCATCGGAGGACTTGAAT  
+HWI-EAS443:3:31:151:46#0/1  
\_VaaaQKVZwa``\_]V¥]^X`^^[Y^\_XVW\_WNQU\_]VZ  
@HWI-EAS443:3:32:1483:1383#0/1  
CAAAAATGCAGTTGGGGTCCTCATCGGAGGACTTGAATGG  
+HWI-EAS443:3:32:1483:1383#0/1  
aab^aababaaa\_a\_a[a\_bbaaaa`aa]aYb`¥ZVbbb  
@HWI-EAS443:3:32:518:1602#0/1  
CAAAAATGCAGTTGGGGTCCTCATCGGAGGACTTGAATGG  
+HWI-EAS443:3:32:518:1602#0/1  
aa`¥baa\_baa¥a\_X¥^Qa``aa^`\_T\_]SY\_¥¥¥¥\_¥¥¥  
@HWI-EAS443:3:33:392:414#0/1  
CAAAAATGCAGTTGGGGTCCTCATCGGAGGACTTGAATGG  
+HWI-EAS443:3:33:392:414#0/1  
a¥JW`P`aaQa]`a\_^Z¥Wa^\_¥¥`^W][UUW^]U¥W^¥  
@HWI-EAS443:3:34:244:348#0/1  
ATTCCATTCAAGTCTCCGATGAGGACCCCAACTGCATTT  
+HWI-EAS443:3:34:244:348#0/1  
aaaaa[a\_aa]a]`\_\_`\_^\_]`]`\_U¥`[Z\_Y]Y^ZWZ]V  
@HWI-EAS443:3:35:178:328#0/1  
AAATGCAGTTGGGGTCCTCATCGGAGGACTTGAATGGAAT  
+HWI-EAS443:3:35:178:328#0/1  
a\_aaa``b\_[]`aaaZaa^]`\_``UP``¥aZ[ZX`\_`[\_^  
@HWI-EAS443:3:37:1530:1093#0/1  
AAAATGCAGTTGGGGTCCTCATCGGAGGACTTGAATGGAA  
+HWI-EAS443:3:37:1530:1093#0/1  
ZaUaY\_XMZbZ]^KbaW^`W[¥WQKWQ[K][^]`a]UNN  
@HWI-EAS443:3:37:329:35#0/1  
ATTCCATTCAAGTCTCCGATGAGGACCCCAACTGCATTT  
+HWI-EAS443:3:37:329:35#0/1  
aa\_ba`b`abaa]aa\_aaa\_\_a`\_]\_\_\_\_ZZS^]\_^X^]  
@HWI-EAS443:3:37:378:168#0/1  
ATTCCATTCAAGTCTCCGATGAGGACCCCAACTGCATTT  
+HWI-EAS443:3:37:378:168#0/1  
abaaa```aaaa\_aaaaaa\_\_`[a^]`]SU^^]\_¥PYY^  
@HWI-EAS443:3:38:691:1211#0/1  
CAAAAATGCAGTTGGGGTCCTCATCGGAGGACTTGAATGG  
+HWI-EAS443:3:38:691:1211#0/1  
a\_aSX]aa^`aTa]^aZUa\_\_aaY\_\_aX`\_UN¥ZV]]\_\_U  
@HWI-EAS443:3:39:978:573#0/1  
TCCTCCGATGAGGACCCCAACTGCATTTTTGACATCCTCA

+HWI-EAS443:3:39:978:573#0/1  
abbaabaYaa\_a]`ba\_a`\_\_a]X]```\_\_X^`\_]`^`\_\_^  
@HWI-EAS443:3:40:692:1649#0/1  
TCAAGTCCTCCGATGAGGACCCCAACTGCATTTTTGACAT  
+HWI-EAS443:3:40:692:1649#0/1  
aabb`a\_aaaaaa^]\_]aaaa``]Y\_aZ]`\_]`^]`^a\_  
@HWI-EAS443:3:42:743:549#0/1  
TTCCATTCAAGTCCTCCGATGAGGACCCCAACTGCATTTT  
+HWI-EAS443:3:42:743:549#0/1  
]ab¥W`a]\_a¥TZba]a^`\_aYa\_H`S\_\_\_a`Z`^`aUaJ  
@HWI-EAS443:3:43:1222:1933#0/1  
CAAGTCCTCCGATGAGGACCCCAACTGCATTTTTGACATC  
+HWI-EAS443:3:43:1222:1933#0/1  
¥b``XV\_b[\_a`aaa]aa`[\_X`a[a`aa¥]X[]`V\_a^Z  
@HWI-EAS443:3:43:193:138#0/1  
CAAAAATGCAGTTGGGGTCCTCATCGGAGGACTTGAATGG  
+HWI-EAS443:3:43:193:138#0/1  
aa\_]`Z\_baaa`aaa`\_RZ[\_X^¥\_a`^a\_^[\_`\_a[^\_]Z  
@HWI-EAS443:3:43:54:398#0/1  
CAAAAATGCAGTTGGGGTCCTCATCGGAGGACTTGAATGG  
+HWI-EAS443:3:43:54:398#0/1  
abbaaabbab`aaaab¥aaabaaba^ba\_\_a`b\_\_aaa  
@HWI-EAS443:3:44:129:37#0/1  
CAAAAATGCAGTTGGGGTCCTCATCGGAGGACTTGAATGG  
+HWI-EAS443:3:44:129:37#0/1  
aaa^a[aaa\_a\_aa\_a\_¥\_``[[`]a`Ta\_WY\_\_\_WV`\_\_  
@HWI-EAS443:3:46:1094:404#0/1  
CAAGTCCTCCGATGAGGACCCCAACTGCATTTTTGACATC  
+HWI-EAS443:3:46:1094:404#0/1  
aaa`b`b`ab`^a¥^IZ^\_\_Z]`^``[V]\_aaaa^S\_\_\_  
@HWI-EAS443:3:46:47:875#0/1  
ATTCCATTCAAGTCCTCCGATGAGGACCCCAACTGCATTT  
+HWI-EAS443:3:46:47:875#0/1  
\_bb`baaWaab\_V`ab`]W]\_]Y\_aaa^\_a`a``]¥]^`  
@HWI-EAS443:3:46:51:803#0/1  
CAAGTCCTCCGATGAGGACCCCAACTGCATTTTTGACATC  
+HWI-EAS443:3:46:51:803#0/1  
a`bb[babaZ`Z`^aX[\_W]¥[[\_N¥]RIX¥]TX][[]¥P  
@HWI-EAS443:3:48:1317:1813#0/1  
CAAAAATGCAGTTGGGGTCCTCATCGGAGGACTTGAATGG  
+HWI-EAS443:3:48:1317:1813#0/1  
^aba`aaa`ababa`a[VW]a`a]\_a^R^[WK\_aaTW[`X  
@HWI-EAS443:3:48:1552:1978#0/1  
GTCAAAAATGCAGTTGGGGTCCTCATCGGAGGACTTGAAT  
+HWI-EAS443:3:48:1552:1978#0/1  
\_R[]]¥Z\_\_^]`^aU]¥a`aT[]^SXZ¥a\_UW[]LVYZPW^  
@HWI-EAS443:3:49:1162:910#0/1  
CAAAAATGCAGTTGGGGTCCTCATCGGAGGACTTGAATGG  
+HWI-EAS443:3:49:1162:910#0/1  
Q[ba]```\_ZZ`\_aT^a\_^a`baVbababb][bbbaa]ab



@HWI-EAS443:3:49:1658:1960#0/1  
GGATGTCAAAAATGCAGTTGGGGTCCTCATCGGAGGACTT  
+HWI-EAS443:3:49:1658:1960#0/1  
ab¥[`a`\_aZaa`aa\_`a\_¥aaG]X\_Y\_\_\_]\_^Y\_^VR^]  
@HWI-EAS443:3:4:1193:163#0/1  
TGAGGATGTCAAAAATGCAGTTGGGGTCCTCATCGGAGGA  
+HWI-EAS443:3:4:1193:163#0/1  
ab\_baSab[Y\_a[`a`[]Wa[[`^^`R^JV]Z\_\_\_\_]S^^T  
@HWI-EAS443:3:4:321:1497#0/1  
ATTCCATTCAAGTCTCCGATGAGGACCCCAACTGCATTT  
+HWI-EAS443:3:4:321:1497#0/1  
`\_^]]`X`Vba\_S```aaba\_`\_^\_Ua^]\_V\_\_H]¥^]  
@HWI-EAS443:3:50:837:898#0/1  
AAAATGCAGTTGGGGTCCTCATCGGAGGACTTGAATGGAA  
+HWI-EAS443:3:50:837:898#0/1  
^TZYZb]\_b[`¥Za`Qa\_aaaab^bVaa¥\_aab\_\_abbJV  
@HWI-EAS443:3:51:321:77#0/1  
TCCATTCAAGTCTCCGATGAGGACCCCAACTGCATTTTT  
+HWI-EAS443:3:51:321:77#0/1  
a`aaabaaaa`\_aaa`b`abaaa\_^[`aaa^`aX`\_`\_\_  
@HWI-EAS443:3:51:743:1807#0/1  
GAGGATGTCAAAAATGCAGTTGGGGTCCTCATCGGAGGAC  
+HWI-EAS443:3:51:743:1807#0/1  
aab\_abbZ``bbaa`b^a`\_`Xaa`UaX`[^a``NR`aUY  
@HWI-EAS443:3:52:1054:785#0/1  
CAAAAATGCAGTTGGGGTCCTCATCGGAGGACTTGAATGG  
+HWI-EAS443:3:52:1054:785#0/1  
aba^\_`bbbababbbb`\_bababba[``bba^bbbaaaba  
@HWI-EAS443:3:52:314:865#0/1  
AAAATGCAGTTGGGGTCCTCATCGGAGGACTTGAATGGA  
+HWI-EAS443:3:52:314:865#0/1  
aabbb]^`¥a]^ba``Va\_a^\_¥X\_]\_\_\_¥`\_]`¥^a\_L[  
@HWI-EAS443:3:52:947:236#0/1  
AAAATGCAGTTGGGGTCCTCATCGGAGGACTTGAATGGAA  
+HWI-EAS443:3:52:947:236#0/1  
aaaaaaaaab]aaaba^\_a\_\_a^a`Xa`XYaaaW^``XW^  
@HWI-EAS443:3:53:1078:1257#0/1  
CAAAAATGCAGTTGGGGTCCTCATCGGAGGACTTGAATGG  
+HWI-EAS443:3:53:1078:1257#0/1  
aa`bbba\_[^baa`a]bQT\_b\_]aaabYbaY\_abba^b`a  
@HWI-EAS443:3:53:128:1658#0/1  
CAAAAATGCAGTTGGGGTCCTCATCGGAGGACTTGAATGG  
+HWI-EAS443:3:53:128:1658#0/1  
abab`aababb`aa```\_a[a¥a``^`^a[MQaa^MV`\_Y  
@HWI-EAS443:3:54:223:1132#0/1  
ATTCAAGTCTCCGATGAGGACCCCAACTGCATTTTTGAC  
+HWI-EAS443:3:54:223:1132#0/1  
abaa`aa^aaa¥Va`aZU`W]`\_\_Z\_\_\_\_\_^a]\_\_Z]]^  
@HWI-EAS443:3:55:17:110#0/1  
ATTCCATTCAAGTCTCCGATGAGGACCCCAACTGCATTT

+HWI-EAS443:3:55:17:110#0/1  
^`a`a]aba\_ab^aU]\_[b¥a\_0a`ZH`W[¥\_`^\_a^Z]^a  
@HWI-EAS443:3:55:812:1605#0/1  
CAAAAATGCAGTTGGGGTCCTCATCGGAGGACTTGAATGG  
+HWI-EAS443:3:55:812:1605#0/1  
W\_U^Y^aaa\_ZL^¥`¥b¥aZ]Xbb¥RZU]^Va`[^``^a`  
@HWI-EAS443:3:56:147:1034#0/1  
ATTCAAGTCCTCCGATGAGGACCCCACTGCATTTTTGAC  
+HWI-EAS443:3:56:147:1034#0/1  
a`¥a]Y[^aaaaa\_Q¥^`^R^`¥\_]^\_\_`^`^Y^]]^  
@HWI-EAS443:3:58:524:1786#0/1  
AAAAATGCAGTTGGGGTCCTCATCGGAGGACTTGAATGGA  
+HWI-EAS443:3:58:524:1786#0/1  
a`HXZ`\_\_UNT^N[^R XR]\_\_\_a][^^S]\_¥ZZWR[[Y  
@HWI-EAS443:3:58:99:1209#0/1  
CAAAAATGCAGTTGGGGTCCTCATCGGAGGACTTGAATGG  
+HWI-EAS443:3:58:99:1209#0/1  
aaa`bbabaaaab`aa¥V`aaaa\_`a`\_`\_\_a\_\_^`\_`\_`  
@HWI-EAS443:3:61:1327:1914#0/1  
AAATGCAGTTGGGGTCCTCATCGGAGGACTTGAATGGAAT  
+HWI-EAS443:3:61:1327:1914#0/1  
]b]a[^`a^bbaa]Gba`bbbbbaabb\_Qba\_\_[[\_a¥YR  
@HWI-EAS443:3:66:1492:1082#0/1  
ATTCCATTCAAGTCCTCCGATGAGGACCCCACTGCATTT  
+HWI-EAS443:3:66:1492:1082#0/1  
YYa```aa^Zb¥abbbbaa\_`¥0YWaZG]^bb]ab\_`\_¥^  
@HWI-EAS443:3:67:1292:1055#0/1  
ATGAGGATGTCAAAAATGCAGTTGGGGTCCTCATCGGAGG  
+HWI-EAS443:3:67:1292:1055#0/1  
aaa\_\_a`a`\_]a`a^`a`\_`\_\_`\_`¥^X^\_\_Y^Y\_^R^]  
@HWI-EAS443:3:67:1405:1120#0/1  
CAAAAATGCAGTTGGGGTCCTCATCGGAGGACTTGAATGG  
+HWI-EAS443:3:67:1405:1120#0/1  
abaSaab`])`bbbaabaYaaa`baaba\_aaZ[a\_a`\_ab`  
@HWI-EAS443:3:67:30:1465#0/1  
AAATGCAGTTGGGGTCCTCATCGGAGGACTTGAATGGAAT  
+HWI-EAS443:3:67:30:1465#0/1  
aaS\_Q\_`\_Y\_`UYBBBBBBBBBBBBBBBBBBBBBBBBBBB  
@HWI-EAS443:3:67:50:15#0/1  
CAAAAATGCAGTTGGGGTCCTCATCGGAGGACTTGAATGG  
+HWI-EAS443:3:67:50:15#0/1  
aa\_^[V\_`]]]Y]X]\_ZKZNQZY[¥YT¥QJORUZTNR[U  
@HWI-EAS443:3:69:1177:1727#0/1  
AAATGCAGTTGGGGTCCTCATCGGAGGACTTGAATGGAAT  
+HWI-EAS443:3:69:1177:1727#0/1  
abbb\_bababaa\_a¥aaaa`aa`aaa`¥aa``aaaa\_a\_  
@HWI-EAS443:3:69:1580:163#0/1  
CATTCAAGTCCTCCGATGAGGACCCCACTGCATTTTTGA  
+HWI-EAS443:3:69:1580:163#0/1  
`abaabb`aaba`b`baa\_^a\_]a`a¥aa[\_\_\_\_aaaaa[

@HWI-EAS443:3:6:710:128#0/1  
CAAAAATGCAGTTGGGGTCCTCATCGGAGGACTTGAATGG  
+HWI-EAS443:3:6:710:128#0/1  
\_`aabbW`X¥abbabbbNa`\_U`]Ha`Sbba\_^b`aaaaY  
@HWI-EAS443:3:6:79:1787#0/1  
AGTCCTCCGATGAGGACCCCAACTGCATTTTTGACATCCT  
+HWI-EAS443:3:6:79:1787#0/1  
aa]aa`a\_`a]YZZ\_`U^[\_]^[^]]`^\_]^^]`a\_]B  
@HWI-EAS443:3:70:1226:1228#0/1  
AAAATGCAGTTGGGGTCCTCATCGGAGGACTTGAATGGAA  
+HWI-EAS443:3:70:1226:1228#0/1  
aabaa`a`a`ba`aaVaaa`a`aa`a\_\_`a`a`a`[Y\_  
@HWI-EAS443:3:70:94:1165#0/1  
CAAAAATGCAGTTGGGGTCCTCATCGGAGGACTTGAATGG  
+HWI-EAS443:3:70:94:1165#0/1  
a`¥][a\_a\_`]]`^[]Y`^a\_^\_¥ZV¥^V[^\_^ZQ[^U  
@HWI-EAS443:3:71:872:1503#0/1  
CAAAAATGCAGTTGGGGTCCTCATCGGAGGACTTGAATGG  
+HWI-EAS443:3:71:872:1503#0/1  
¥W\_bb`a¥¥I¥a`aY^\_PbabaabaM^aaa]abZaa`b][  
@HWI-EAS443:3:73:1565:1927#0/1  
CAAAAATGCAGTTGGGGTCCTCATCGGAGGACTTGAATGG  
+HWI-EAS443:3:73:1565:1927#0/1  
a`a`^a`^b^`aaba[^WRW`a`\_aa\_]][\_aZ^`¥a\_  
@HWI-EAS443:3:73:1624:379#0/1  
CAAAAATGCAGTTGGGGTCCTCATCGGAGGACTTGAATGG  
+HWI-EAS443:3:73:1624:379#0/1  
`bbbabbbbab`baabaa`aabb`ba\_ab\_]bba`\_ba^  
@HWI-EAS443:3:73:804:1067#0/1  
CAAAAATGCAGTTGGGGTCCTCATCGGAGGACTTGAATGG  
+HWI-EAS443:3:73:804:1067#0/1  
aaU````aa\_b`\_a^\_]`\_````a`\_^`]\_\_aa\_]\_T^  
@HWI-EAS443:3:76:1532:1213#0/1  
TCAAAAATGCAGTTGGGGTCCTCATCGGAGGACTTGAATG  
+HWI-EAS443:3:76:1532:1213#0/1  
`ZY^X]\_^YD[^aaaVQS[XGS`¥]NZV¥^Wa\_\_TYQ¥  
@HWI-EAS443:3:77:1435:831#0/1  
CAAAAATGCAGTTGGGGTCCTCATCGGAGGACTTGAATGG  
+HWI-EAS443:3:77:1435:831#0/1  
abb\_`bbbbabVb\_^¥¥`^Ua]bb]ababba`abb[`aaa  
@HWI-EAS443:3:77:1696:714#0/1  
GTCAAAAATGCAGTTGGGGTCCTCATCGGAGGACTTGAAT  
+HWI-EAS443:3:77:1696:714#0/1  
a]¥]a`babba\_b]aaaaYa`a`a`\_X]a[[^aaa]^a  
@HWI-EAS443:3:78:1581:1792#0/1  
TGAGGATGTCAAAAATGCAGTTGGGGTCCTCATCGGAGGA  
+HWI-EAS443:3:78:1581:1792#0/1  
aa\_`\_\_a^[\_a^\_a\_]^X\_Y`^V]^VWY]Y^^X\_\_Y]YU  
@HWI-EAS443:3:79:1269:1050#0/1  
CAAAAATGCAGTTGGGGTCCTCATCGGAGGACTTGAATGG

+HWI-EAS443:3:79:1269:1050#0/1  
a`Z]b\_Zaab`aba`ba\_b[]bb^Ybaab¥\_`baa¥\_aba  
@HWI-EAS443:3:79:587:1526#0/1  
CAAAAATGCAGTTGGGGTCCTCATCGGAGGACTTGAATGG  
+HWI-EAS443:3:79:587:1526#0/1  
a`^aabaaba\_aaa`Ta`\_`a¥```¥aX\_aa```\_\_\_\_  
@HWI-EAS443:3:7:1227:891#0/1  
CAAAAATGCAGTTGGGGTCCTCATCGGAGGACTTGAATGG  
+HWI-EAS443:3:7:1227:891#0/1  
a\_]\_\_XWa\_] [Vaa`\_]\_Z`\_]\_\_`UV``XX\_\_U]\_`^  
@HWI-EAS443:3:7:1510:837#0/1  
CAAAAATGCAGTTGGGGTCCTCATCGGAGGACTTGAATGG  
+HWI-EAS443:3:7:1510:837#0/1  
aaba]aa^ababba]U\_GZ`aZYa`\_YHa`^]aaWX`\_Z[  
@HWI-EAS443:3:82:1505:1614#0/1  
CAAAAATGCAGTTGGGGTCCTCATCGGAGGACTTGAATGG  
+HWI-EAS443:3:82:1505:1614#0/1  
a`bbbabbbbabbbaaabbbbb\_ababba^bbbabab  
@HWI-EAS443:3:82:797:287#0/1  
CAAAAATGCAGTTGGGGTCCTCATCGGAGGACTTGAATGG  
+HWI-EAS443:3:82:797:287#0/1  
abbbbbbbabbababaa\_aabbbbaab`b``abba\_abba  
@HWI-EAS443:3:83:56:826#0/1  
AAAATGCAGTTGGGGTCCTCATCGGAGGACTTGAATGGAA  
+HWI-EAS443:3:83:56:826#0/1  
`Y\_¥aaa]\_¥aa\_]\_\_aaa` [ `aaaX[ `\_\_aaa^^aZUL [  
@HWI-EAS443:3:84:943:370#0/1  
CAAAAATGCAGTTGGGGTCCTCATCGGAGGACTTGAATGG  
+HWI-EAS443:3:84:943:370#0/1  
abbbbbbbbaaab`abbZ]bbbbabba`bb\_\_bbbaaaba  
@HWI-EAS443:3:85:873:462#0/1  
AAAAATGCAGTTGGGGTCCTCATCGGAGGACTTGAATGGA  
+HWI-EAS443:3:85:873:462#0/1  
`a`]aabaZaQ`a`a`Raaa\_XZaa^W`¥]\_^¥a\_]a]a\_  
@HWI-EAS443:3:88:635:1422#0/1  
CAAAAATGCAGTTGGGGTCCTCATCGGAGGACTTGAATGG  
+HWI-EAS443:3:88:635:1422#0/1  
ababaaa`baaaaa`ZL]\_]WZ¥^^¥^`VX^a\_\_¥^]``  
@HWI-EAS443:3:89:402:634#0/1  
ATTCAAGTCCTCCGATGAGGACCCCAACTGCATTTTTGAC  
+HWI-EAS443:3:89:402:634#0/1  
]a`ab¥\_¥baaaaa]aaa^^`aaa\_\_a`^`X^a\_\_^``\_`  
@HWI-EAS443:3:89:542:777#0/1  
CAAAAATGCAGTTGGGGTCCTCATCGGAGGACTTGAATGG  
+HWI-EAS443:3:89:542:777#0/1  
`]\_^\_X`a]\_a\_aaa^`Y\_X```\_\_a\_[`]¥\_`YaZW[ZW  
@HWI-EAS443:3:89:758:1510#0/1  
CAAAAATGCAGTTGGGGTCCTCATCGGAGGACTTGAATGG  
+HWI-EAS443:3:89:758:1510#0/1  
aaa]a\_bbaab`aa`aa]\_¥aaa`aaa`\_a^aaa`aa\_

@HWI-EAS443:3:8:330:1777#0/1  
AAGTCCTCCGATGAGGACCCCAACTGCATTTTTGACATCC  
+HWI-EAS443:3:8:330:1777#0/1  
a`]Ibb[`Z`RY`\_\_`\_a`^X`ZS¥`\_\_^¥YQY^U\_`^`¥WO  
@HWI-EAS443:3:8:470:728#0/1  
ATGAGGATGTCAAAAATGCAGTTGGGGTCCTCATCGGAGG  
+HWI-EAS443:3:8:470:728#0/1  
a`b`aa]abSaa`¥`aaa`Qb\_aa]aaN`\_`a\_\_`]a[SS`  
@HWI-EAS443:3:8:958:673#0/1  
CAAAAATGCAGTTGGGGTCCTCATCGGAGGACTTGAATGG  
+HWI-EAS443:3:8:958:673#0/1  
Z[¥W¥Za\_TQ\_Xabb`UVW¥I\_bb\_Z^bbXG\_`aTB BBB  
@HWI-EAS443:3:90:1015:1765#0/1  
CCTCCGATGAGGACCCCAACTGCATTTTTGACATCCTCAT  
+HWI-EAS443:3:90:1015:1765#0/1  
abbabbaababaaaaaaabaaaaaa\_a^aa[\_a`a`  
@HWI-EAS443:3:90:24:763#0/1  
CAAAAATGCAGTTGGGGTCCTCATCGGAGGACTTGAATGG  
+HWI-EAS443:3:90:24:763#0/1  
Y[\_XV[`]WF[]^]Sa``aT\_a¥]U^a\_[a`aa]\_a`  
@HWI-EAS443:3:92:1592:1743#0/1  
CAAAAATGCAGTTGGGGTCCTCATCGGAGGACTTGAATGG  
+HWI-EAS443:3:92:1592:1743#0/1  
aaa`a]`baX`]^`^aaW\_a\_[`a\_\_YYaa\_]a`a\_]\_`[  
@HWI-EAS443:3:93:298:216#0/1  
CAAAAATGCAGTTGGGGTCCTCATCGGAGGACTTGAATGG  
+HWI-EAS443:3:93:298:216#0/1  
abbZ^abbbbaa`a`¥`^aaaaaaV`W]`a`\_YY`aa  
@HWI-EAS443:3:95:1259:1363#0/1  
CAAAAATGCAGTTGGGGTCCTCATCGGAGGACTTGAATGG  
+HWI-EAS443:3:95:1259:1363#0/1  
a\_a`a[baaababbabb]a[baa\_aaaXbb`\_baaaaaV  
@HWI-EAS443:3:95:1657:1961#0/1  
CAAAAATGCAGTTGGGGTCCTCATCGGAGGACTTGAATGG  
+HWI-EAS443:3:95:1657:1961#0/1  
`aa[OXbbaaWWb^b[[aabba\_a``baabU`abb\_a^bb  
@HWI-EAS443:3:95:799:1732#0/1  
CAAAAATGCAGTTGGGGTCCTCATCGGAGGACTTGAATGG  
+HWI-EAS443:3:95:799:1732#0/1  
abaa\_abbbbbaba[`]P^^aabbbbb[`]\_^`abb^^baY  
@HWI-EAS443:3:96:317:1383#0/1  
CAAAAATGCAGTTGGGGTCCTCATCGGAGGACTTGAATGG  
+HWI-EAS443:3:96:317:1383#0/1  
abbbabbabab\_b`a`a¥a`aaaa`\_a\_a`a^aa`\_`aa\_  
@HWI-EAS443:3:97:1030:1785#0/1  
AAAATGCAGTTGGGGTCCTCATCGGAGGACTTGAATGGAA  
+HWI-EAS443:3:97:1030:1785#0/1  
ab`b[ba\_SY[\_b]bWaa]aba[```b``aa\_aY^^ba\_a  
@HWI-EAS443:3:97:1349:410#0/1  
AAAATGCAGTTGGGGTCCTCATCGGAGGACTTGAATGGAA

+HWI-EAS443:3:97:1349:410#0/1  
a`ab\_aa\_b]aX¥a` `¥a^\_\_Za^]aa¥Z\_^`X]a^ZU[  
@HWI-EAS443:3:9:762:877#0/1  
CAAAAATGCAGTTGGGGTCCTCATCGGAGACTTGAATGG  
+HWI-EAS443:3:9:762:877#0/1  
a]b]aab]a\_bZa[[`bYaaaa`a`aa\_aa\_Ya`a]^aa`  
@HWI-EAS443:3:22:115:902#0/1  
ATTCCCTTATACTGGAGATCCTCCATACAGCCAGAGAAAC  
+HWI-EAS443:3:22:115:902#0/1  
a¥a\_a¥0¥]]aa]\_PXaNJ¥[WP`V[\_YX[aYZ]ZTOGY  
@HWI-EAS443:3:3:1331:1451#0/1  
GGCTATGGCTTTCCTTGAAGAATCCCACCCAGGGATATTT  
+HWI-EAS443:3:3:1331:1451#0/1  
ab]ab[``Y[^YGOTR¥aBBBBBBBBBBBBBBBBBBBB  
@HWI-EAS443:3:12:513:1941#0/1  
ATTCCCTTATACTGGAGATCCTCCATACAGCCATGGAATG  
+HWI-EAS443:3:12:513:1941#0/1  
\_]aSVaa`]¥^`X]\_a\_a[Gaa\_]aX`ZRV\_]^[Z]  
@HWI-EAS443:3:27:1692:1253#0/1  
ATTCCCTTATACTGGAGATCCTCCATACAGCCATGGAATG  
+HWI-EAS443:3:27:1692:1253#0/1  
R\_`¥I¥baXZVU\_`VW[¥S\_`aSRYa`¥aGIO¥\_`VL^^  
@HWI-EAS443:3:76:1078:2012#0/1  
CTTCCATGGCTGTATGGAGGATCTCCAGTATAAGGGAAATG  
+HWI-EAS443:3:76:1078:2012#0/1  
Zaa¥a¥¥`b]bZN¥R¥ZS\_`¥RZ¥^^V]DPVU]\_\_aYX[V  
@HWI-EAS443:3:16:245:425#0/1  
ATTCCCTTATACTGGAGATCCTCCATACAGCCATGGAACA  
+HWI-EAS443:3:16:245:425#0/1  
aba`baabbaS`ab\_aaaa¥a`\_\_aZ`a`a`\_\_a\_\_a]a  
@HWI-EAS443:3:21:288:1016#0/1  
ATTCCCTTATACTGGAGATCCTCCATACAGCCATGGAACA  
+HWI-EAS443:3:21:288:1016#0/1  
a\_aababbabaa`aaaa`aaaaa\_a\_\_\_a^`\_^^^\_X^  
@HWI-EAS443:3:27:1519:477#0/1  
CTGTTCCATGGCTGTATGGAGGATCTCCAGTATAAGGGAA  
+HWI-EAS443:3:27:1519:477#0/1  
aabaaaaabbbabaV¥KW`[^`GZ[UQRX¥GPU[¥XBBBB  
@HWI-EAS443:3:29:167:940#0/1  
CATTCCCTTATACTGGAGATCCTCCATACAGCCATGGAAC  
+HWI-EAS443:3:29:167:940#0/1  
aa`]aab`a`\_\_]a]^\_a\_Ya\_\_[^`^`\_\_^^U]UB  
@HWI-EAS443:3:30:947:153#0/1  
ATTCCCTTATACTGGAGATCCTCCATACAGCCATGGAACA  
+HWI-EAS443:3:30:947:153#0/1  
aaaa^`\_`aaa`\_`a^```\_]\_Y^^\_]^^X]VUVXOY  
@HWI-EAS443:3:32:1422:781#0/1  
TTCCCTTATACTGGAGATCCTCCATACAGCCATGGAACAG  
+HWI-EAS443:3:32:1422:781#0/1  
aaa\_aaaaaZWJ[`XPST]YVT[ZUY]]WTVUWWW^SQV

@HWI-EAS443:3:33:1680:86#0/1  
ATTCCCTTATACTGGAGATCCTCCATACAGCCATGGAACA  
+HWI-EAS443:3:33:1680:86#0/1  
\_WXUVaabb\_RGT¥`R\_aTRURRY[[VYU`\_KMHN[SQFQ  
@HWI-EAS443:3:46:1383:1256#0/1  
CATTCCCTTATACTGGAGATCCTCCATACAGCCATGGAAC  
+HWI-EAS443:3:46:1383:1256#0/1  
`bbba\_`bbbbbabbb``aaaaaa¥`a\_baaaa]Yaba^\_¥  
@HWI-EAS443:3:61:482:906#0/1  
GTTCCATGGCTGTATGGAGGATCTCCAGTATAAGGGAATG  
+HWI-EAS443:3:61:482:906#0/1  
\_aaaa¥aaa`a`LXUW\_[YYYU¥J¥ZFRN[UUV]YXMWRQ  
@HWI-EAS443:3:69:233:1346#0/1  
GTTCCATGGCTGTATGGAGGATCTCCAGTATAAGGGAATG  
+HWI-EAS443:3:69:233:1346#0/1  
aa`baL\_aaaa`SNTJYYRUVS]NVZFJP^UVV¥OXG¥]Q  
@HWI-EAS443:3:6:80:1467#0/1  
GTTCCATGGCTGTATGGAGGATCTCCAGTATAAGGGAATG  
+HWI-EAS443:3:6:80:1467#0/1  
aaa\_S[`^]\_`U]\_\_[L^[NN[¥^\_Y¥YUY¥¥TXBBBBB  
@HWI-EAS443:3:71:1433:1026#0/1  
GTTCCATGGCTGTATGGAGGATCTCCAGTATAAGGGAATG  
+HWI-EAS443:3:71:1433:1026#0/1  
a`aa\_\_aa`\_a¥Z]¥¥[^`\_]ZVZX\_¥^MR^V\_U\_^OVRL  
@HWI-EAS443:3:61:1520:1070#0/1  
TATTTATCGTCGCTTTAAATACGGTTTGAAAAGAGGTCTT  
+HWI-EAS443:3:61:1520:1070#0/1  
`babbb]a][Za]Yba`aa`b\_a\_b``\_aWO\_YOV^PGOGL  
@HWI-EAS443:3:1:1344:878#0/1  
TTTAAATACGGTTTGAAAAGAGGGCCTTGTACGGAAGGAG  
+HWI-EAS443:3:1:1344:878#0/1  
^¥``a¥XXTa`]]`b^¥UYWJ^\_[IXPSFWUGVZ^BBBBB  
@HWI-EAS443:3:34:386:1501#0/1  
ATTTATCGTCGCTTTAAATACGGTTTTAAAAGAGGGCCTT  
+HWI-EAS443:3:34:386:1501#0/1  
^^^[baa^ZZ^`\_`\_[¥¥\_[YZYMX]HYY^`BBBBBBBBB  
@HWI-EAS443:3:36:1477:848#0/1  
CGTCGCTTTAAATACGGTTTGAAAAGAGGGCATTCTACGG  
+HWI-EAS443:3:36:1477:848#0/1  
^bababbbbbb`b^aaabababaaabbbZbbbG`aaaa`ab  
@HWI-EAS443:3:50:573:186#0/1  
CGTATTTAAAGCGACGATAAATACATTTGAACAAAAGACG  
+HWI-EAS443:3:50:573:186#0/1  
`b¥`a`¥`b^bbbbababa``¥a]ba`abb\_N^bbb`ba`  
@HWI-EAS443:3:77:1778:1873#0/1  
CTCTTTTCAAACCGTATTCAAAGCGACGATAAATACATTT  
+HWI-EAS443:3:77:1778:1873#0/1  
aaa^aaa\_\_a`a\_SY^a[`a`¥[Z]a`¥^^¥\_\_`\_\_\_\_  
@HWI-EAS443:3:7:1467:559#0/1  
TATTTATCGTCGCTTTAAATACGGTTTCAAAGAGGGCCT

+HWI-EAS443:3:7:1467:559#0/1  
abbaaX`aa`aba)`a`aa^aTY¥^`N^MJ[00BBBB  
@HWI-EAS443:3:86:1428:1446#0/1  
GTCGCTTTAAATACGGTTTAAAAAGAGGCCTTGTACGGA  
+HWI-EAS443:3:86:1428:1446#0/1  
aP\_a^aaa`¥\_^\_aa¥a`¥R\_^RW¥\_\_¥V¥WQUT¥ZS  
@HWI-EAS443:3:99:1125:1583#0/1  
CGTCGCTTTAGATACGGTTTAAAAAGAGGCCTTCTACGG  
+HWI-EAS443:3:99:1125:1583#0/1  
abZaaabbaY]babb\_U]bba`aabbb`aa\_aa`Qb]bb  
@HWI-EAS443:3:17:459:576#0/1  
CGTCGCTTTAAATACGGTTTAAAAAGAGGCCTTCTAGGG  
+HWI-EAS443:3:17:459:576#0/1  
aaXaaaa\_a`\_]\_]aN\_aa]U^X`]U`[QYWRUNKX\_  
@HWI-EAS443:3:58:1211:1655#0/1  
CGTCGCTTTAAATACGGTTTAAAAAGAGGCCTTCTAGGG  
+HWI-EAS443:3:58:1211:1655#0/1  
`\_]`^ab`[¥R\_^RI]WZYV^`\_PMQ`\_OYM]ZZWTGZ`  
@HWI-EAS443:3:7:586:783#0/1  
CGTCGCTTTAAATACGGTTTAAAAAGAGGCCTTCTACGG  
+HWI-EAS443:3:7:586:783#0/1  
abaaa`aba^¥a`^\_ba\_aaa[`a\_\_a``¥DX\_¥W\_^\_  
@HWI-EAS443:3:96:1051:96#0/1  
CTTTTCAAACNGTATTTAAAGCGACGATAAATACATTTGA  
+HWI-EAS443:3:96:1051:96#0/1  
aabbbbaab[D^[bbbbabbabaababaaabb\_abbba  
@HWI-EAS443:3:81:338:129#0/1  
GCCGCTTTAAATACGGTTTAAAAAGAGGCCTTCTACGGA  
+HWI-EAS443:3:81:338:129#0/1  
^\_aa\_aaa`^^^\_aaa^`a]T`][X[\_^a¥\_\_^X[¥¥]XQ  
@HWI-EAS443:3:23:430:745#0/1  
GGTCGCTTTAAATACGGTTTAAAAAGAGGCCTTCTACGG  
+HWI-EAS443:3:23:430:745#0/1  
abVbbbaaa\_aUaa\_aa`aa^`\_aa^\_\_`a`\_\_\_\_[\_¥¥a]  
@HWI-EAS443:3:73:975:617#0/1  
GCGTCGCTTTAAATACGGTTTAAAAAGAGGCCTTCTACG  
+HWI-EAS443:3:73:975:617#0/1  
aa`Lbbaaba\_\_\_a`Z]]^^TI]\_Y`^a\_a¥LLXUU[`QQ  
@HWI-EAS443:3:81:1405:1345#0/1  
AGTCGCTTTAAATACGGTTTAAAAAGAGGCCTTCTACGG  
+HWI-EAS443:3:81:1405:1345#0/1  
aa¥]W`aaa\_a`a`\_aaZaaaP`\_`[VZXa\_N\_Z¥\_ZQ]^  
@HWI-EAS443:3:86:759:744#0/1  
CTCGTCGCTTTAAATACGGTTTAAAAAGAGGCCTTCTAC  
+HWI-EAS443:3:86:759:744#0/1  
abbb`bb\_abb`aabbab``aab`\_aaaa`aaa\_aa\_a`W  
@HWI-EAS443:3:88:34:40#0/1  
GGTCGCTTTAAATACGGTTTAAAAAGAGGCCTTCTACGG  
+HWI-EAS443:3:88:34:40#0/1  
a`Wa\_\_\_\_\_XVTYW^\_¥UV^¥QQVGVVW[WWWVWVUXWW



@HWI-EAS443:3:91:373:1348#0/1  
GAAATGTATTTATCGTCGCTTTAAATACGGTTTGAAAAGA  
+HWI-EAS443:3:91:373:1348#0/1  
J\_[[b\_W\_a\_a\_`b\_Q\_a`[YY[HUQ¥Yba\_bbb]`TuwQ  
@HWI-EAS443:3:100:1461:910#0/1  
ATTTATCGTCGCTTTAAATACGGTTTGAAAAGAGGGCCTT  
+HWI-EAS443:3:100:1461:910#0/1  
`a`¥¥a\_abW`bWb\_^a^YaY[`aRT]`]QWY^GWY[B  
@HWI-EAS443:3:10:1536:772#0/1  
AAATGTATTTATCGTCGCTTTAAATACGGTTTGAAAAGAG  
+HWI-EAS443:3:10:1536:772#0/1  
aabbaababbab\_ba`a`aaa```aaab\_^aa`]\_`\_`]  
@HWI-EAS443:3:10:672:1421#0/1  
TATTTATCGTCGCTTTAAATACGGTTTGAAAAGAGGGCCTT  
+HWI-EAS443:3:10:672:1421#0/1  
X`\_HYaWaS\_`b^X^`]a`baYb¥T`T\_YT]^XE[\_NUY  
@HWI-EAS443:3:11:1395:800#0/1  
ATTTATCGTCGCTTTAAATACGGTTTGAAAAGAGGGCCTT  
+HWI-EAS443:3:11:1395:800#0/1  
aaaa`aaa^Xaaab\_\_`a\_Z`\_^a]YT]UR[]GXZXW^^  
@HWI-EAS443:3:13:1057:710#0/1  
CTTCCGTAGAAGGCCCTTTTTCAAACCGTATTTAAAGCG  
+HWI-EAS443:3:13:1057:710#0/1  
\_Z¥`^Ya\_JX\_Y\_YV`]Saaa`a`ba`aNIZ]`]Z^]]b  
@HWI-EAS443:3:13:1573:328#0/1  
ATCGTCGCTTTAAATACGGTTTGAAAAGAGGGCCTTCTAC  
+HWI-EAS443:3:13:1573:328#0/1  
aabbTIa\_aba]Z`a^\_\_TNT`[[]`\_NRVQVQ[PRM\_^U  
@HWI-EAS443:3:14:401:816#0/1  
ATTTATCGTCGCTTTAAATACGGTTTGAAAAGAGGGCCTT  
+HWI-EAS443:3:14:401:816#0/1  
Ya]^^YZaTaaaab\_aaSSKVZa¥\_a\_KZX¥]JXaaGXLN  
@HWI-EAS443:3:15:342:871#0/1  
CAAATGTATTTATCGTCGCTTTAAATACGGTTTGAAAAGA  
+HWI-EAS443:3:15:342:871#0/1  
¥V]TT`VX\_\_\_W¥Z]T¥WX`a[^[`a\_a¥\_UN¥\_[TWZUX  
@HWI-EAS443:3:17:1456:759#0/1  
GTATTTATCGTCGCTTTAAATACGGTTTGAAAAGAGGGCC  
+HWI-EAS443:3:17:1456:759#0/1  
¥`aaaa^a\_a\_^[[`a]¥¥`ZZ`[Wq]WZZXTZU\_Z¥SZ  
@HWI-EAS443:3:17:245:212#0/1  
AAGGCCCTTTTTCAAACCGTATTTAAAGCGACGATAAAT  
+HWI-EAS443:3:17:245:212#0/1  
a\_`aa\_`\_\_aaa]¥[aa\_]aZ\_`a\_`\_^UZ\_\_]\_\_^]]^  
@HWI-EAS443:3:19:1307:1915#0/1  
ATTTATCGTCGCTTTAAATACGGTTTGAAAAGAGGGCCTT  
+HWI-EAS443:3:19:1307:1915#0/1  
\_¥aaaab^LYa\_^`\_`aaa```Z`^aa`^`\_`\_`[VZ^`  
@HWI-EAS443:3:19:1385:438#0/1  
GTCGCTTTAAATACGGTTTGAAAAGAGGGCCTTCTACGGA

+HWI-EAS443:3:19:1385:438#0/1  
a]`b^`]U]\_\_^¥Qa\_Z\_\_YWT¥U\_W^\_\_VTU\_W¥WSXWS  
@HWI-EAS443:3:19:889:490#0/1  
GTCGCTTTAAATACGGTTTAAAAAGAGGGCCTTCTACGGA  
+HWI-EAS443:3:19:889:490#0/1  
aZ]\_X`a\_X]^Z]`^]¥^Z¥]XV¥^^`[]T]^ZS[MLY^B  
@HWI-EAS443:3:1:822:487#0/1  
TGTATTTATCGTCGCTTTAAATACGGTTTAAAAAGAGGGC  
+HWI-EAS443:3:1:822:487#0/1  
``^`b``b\_[bbb]aaab`a`aa^aa]bbVXRaa\_WT]BB  
@HWI-EAS443:3:20:1460:785#0/1  
CGTCGCTTTAAATACGGTTTAAAAAGAGGGCCTTCTACGG  
+HWI-EAS443:3:20:1460:785#0/1  
`abbbbbbbbabbaaab`babaaaabababZ\_aa`a\_Taa  
@HWI-EAS443:3:20:86:1562#0/1  
ATTTATCGTCGCTTTAAATACGGTTTAAAAAGAGGGCCTT  
+HWI-EAS443:3:20:86:1562#0/1  
abbbb^\_aaa`aaabaabaaaa\_aa¥`aaaa\_^R`\_^\_  
@HWI-EAS443:3:21:1326:1547#0/1  
GTAGAAGGCCCTTTTTCAAACCGTATTTAAAGCGACGAT  
+HWI-EAS443:3:21:1326:1547#0/1  
a^VaXTT\_aXOUZ]¥X`V\_]`W¥[P[\_\_\_BBBBBBBBBBBB  
@HWI-EAS443:3:21:163:1254#0/1  
ATGTATTTATCGTCGCTTTAAATACGGTTTAAAAAGAGGG  
+HWI-EAS443:3:21:163:1254#0/1  
ab\_[\_Zaa¥Ua\_aa\_WYaS^`\_`ROT¥M\_\_\_X\_^YHPXBB  
@HWI-EAS443:3:21:599:1132#0/1  
CGTCGCTTTAAATACGGTTTAAAAAGAGGGCCTTCTACGG  
+HWI-EAS443:3:21:599:1132#0/1  
ab`babaaa^U^aaaba¥ab```aaa\_\_a`]`¥`^\_\_`a\_  
@HWI-EAS443:3:22:1206:226#0/1  
CGTCGCTTTAAATACGGTTTAAAAAGAGGGCCTTCTACGG  
+HWI-EAS443:3:22:1206:226#0/1  
a\_¥\_aHaaa]W]\_UL¥POb\_X¥YPYU¥UXZLQ^¥SVNJQ`  
@HWI-EAS443:3:23:1407:1877#0/1  
ATTTATCGTCGCTTTAAATACGGTTTAAAAAGAGGGCCTT  
+HWI-EAS443:3:23:1407:1877#0/1  
[a`^bb\_[^`babbaaa]aa\_\_a`a]a\_`aa]aa`a[F^U  
@HWI-EAS443:3:23:555:1812#0/1  
GTCGCTTTAAATACGGTTTAAAAAGAGGGCCTTCTACGGA  
+HWI-EAS443:3:23:555:1812#0/1  
aU]\_]a\_aaY¥a\_a\_Y]aaU]^`]X[¥^U]^[^Y^]YU]]  
@HWI-EAS443:3:24:1658:996#0/1  
CGTCGCTTTAAATACGGTTTAAAAAGAGGGCCTTCTACGG  
+HWI-EAS443:3:24:1658:996#0/1  
ab\_``b\_^b]¥\_bb¥ba]aaa\_`ab``aa`LPY`[\_`\_P^^  
@HWI-EAS443:3:26:313:518#0/1  
GTCGCTTTAAATACGGTTTAAAAAGAGGGCCTTCTACGGA  
+HWI-EAS443:3:26:313:518#0/1  
`S`\_[\_Z`]`[\_V\_aZZ¥]YV[]]UPV[Y]Z¥^V[\_T[T



+HWI-EAS443:3:31:1508:1153#0/1  
abba`aa`a`ab[X`babaaa\_a^Sa`a^V]`a]`a\_aa\_  
@HWI-EAS443:3:31:533:764#0/1  
ATTTATCGTCGCTTTAAATACGGTTTGAAAAGAGGGCCTT  
+HWI-EAS443:3:31:533:764#0/1  
Z\_b`]Z\_bIW^]aa`][``XW]X¥TL^\_W\_¥ZVU]¥XV  
@HWI-EAS443:3:31:88:629#0/1  
TCGTCGCTTTAAATACGGTTTGAAAAGAGGGCCTTCTACG  
+HWI-EAS443:3:31:88:629#0/1  
\_a[]a\_^a`]0^`]`a`X`]\_\_[R[\_^0Z¥Z\_ZX\_a[]VV  
@HWI-EAS443:3:33:1354:1797#0/1  
CGTCGCTTTAAATACGGTTTGAAAAGAGGGCCTTCTACGG  
+HWI-EAS443:3:33:1354:1797#0/1  
abbabbbbbbb`bba`baba`bbab¥¥[aa[HNVIz[KUa  
@HWI-EAS443:3:34:396:1867#0/1  
GTCGCTTTAAATACGGTTTGAAAAGAGGGCCTTCTACGGA  
+HWI-EAS443:3:34:396:1867#0/1  
]Ubbaaba]aa`\_bYYXa`Y`\_aX^Z^\_\_a^]`^\_\_\_YGLW  
@HWI-EAS443:3:35:1358:1172#0/1  
TGTATTTATCGTCGCTTTAAATACGGTTTGAAAAGAGGGC  
+HWI-EAS443:3:35:1358:1172#0/1  
¥b[b`a`^b`\_W\_\_^`a`]¥\_S^a\_SWa`0a[^`^^`\_Z  
@HWI-EAS443:3:37:1158:1590#0/1  
ATTTATCGTCGCTTTAAATACGGTTTGAAAAGAGGGCCTT  
+HWI-EAS443:3:37:1158:1590#0/1  
abaa`a]\_Xa`V`¥aa\_aaa^]Z`\_]XS[YT¥\_Z[a\_\_  
@HWI-EAS443:3:37:188:831#0/1  
CGTCGCTTTAAATACGGTTTGAAAAGAGGGCCTTCTACGG  
+HWI-EAS443:3:37:188:831#0/1  
ab^abbabb¥]a¥P`b\_U`\_WQX`PDU[R[`aQ¥^^`\_^W  
@HWI-EAS443:3:38:1510:1447#0/1  
ATTTATCGTCGCTTTAAATACGGTTTGAAAAGAGGGCCTT  
+HWI-EAS443:3:38:1510:1447#0/1  
abbabbab\_\_a]aab`\_aa\_\_aa^aa\_XZY]]]]]^\_R^0  
@HWI-EAS443:3:39:130:593#0/1  
CAAATGTATTTATCGTCGCTTTAAATACGGTTTGAAAAGA  
+HWI-EAS443:3:39:130:593#0/1  
aaa^`a^aaaaaaa]```\_]¥^VZ\_\_`\_Y^\_YY¥Y^YU  
@HWI-EAS443:3:39:897:2006#0/1  
CGCTTTAAATACGGTTTGAAAAGAGGGCCTTCTACGGAAG  
+HWI-EAS443:3:39:897:2006#0/1  
aabbbbbbbbb`^ba`aaabaaaa\_aa\_Y\_aa\_[\_a^  
@HWI-EAS443:3:3:1644:272#0/1  
CGTCGCTTTAAATACGGTTTGAAAAGAGGGCCTTCTACGG  
+HWI-EAS443:3:3:1644:272#0/1  
Vxb`[\_`b`bbaaa[[aaabbbbabbb`\_`\_L^a¥^aaPbX  
@HWI-EAS443:3:3:573:1609#0/1  
CGTCGCTTTAAATACGGTTTGAAAAGAGGGCCTTCTACGG  
+HWI-EAS443:3:3:573:1609#0/1  
`Vaa`Raa]a¥a[]^ab\_ZaaXR`\_aWa\_aaUWY\_a^\_\_a

@HWI-EAS443:3:40:247:694#0/1  
ATTTATCGTCGCTTTAAATACGGTTTAAAAAGAGGGCCTT  
+HWI-EAS443:3:40:247:694#0/1  
^bbbabba\_aaabaaaaaaba\_a`^T` `]`\_`aa]\_  
@HWI-EAS443:3:40:262:1437#0/1  
CGTCGCTTTAAATACGGTTTAAAAAGAGGGCCTTCTACGG  
+HWI-EAS443:3:40:262:1437#0/1  
a`aaaaabaaa^\_]Z`]Xa\_Y\_¥][RDPZ\_\_[YU`Z^V^Y  
@HWI-EAS443:3:42:763:125#0/1  
GTGCGCTTTAAATACGGTTTAAAAAGAGGGCCTTCTACGGA  
+HWI-EAS443:3:42:763:125#0/1  
a`\_a\_aaa\_aaa\_`aa¥`aY^\_\_\_^\_\_\_[XYYY¥¥Y^¥W  
@HWI-EAS443:3:43:1011:1638#0/1  
ATTTATCGTCGCTTTAAATACGGTTTAAAAAGAGGGCCTT  
+HWI-EAS443:3:43:1011:1638#0/1  
`abbbab\_bbb`bababa\_bbb`ba^Ybbb¥aa\_`^\_aa  
@HWI-EAS443:3:43:843:368#0/1  
CTTTTCAAACCGTATTTAAAGCGACGATAAATACATTTGA  
+HWI-EAS443:3:43:843:368#0/1  
abbb^babb`babba`¥]bZb]bba[`]¥ab[abbaa  
@HWI-EAS443:3:44:1461:1005#0/1  
GTGCGCTTTAAATACGGTTTAAAAAGAGGGCCTTCTACGGA  
+HWI-EAS443:3:44:1461:1005#0/1  
a¥ZY\_aaa]WV]`[`XS`YP]\_][XL[RYNRYV]T[FZ^S  
@HWI-EAS443:3:45:46:1234#0/1  
GTGCGCTTTAAATACGGTTTAAAAAGAGGGCCTTCTACGGA  
+HWI-EAS443:3:45:46:1234#0/1  
aaab\_babaa\_aa`baUaaa\_aa`a¥a\_a^¥¥aaa\_V`a¥  
@HWI-EAS443:3:45:769:1524#0/1  
AGAAGGCCCTTTTTCAAACCGTATTTAAAGCGACGATAA  
+HWI-EAS443:3:45:769:1524#0/1  
```aaW`baa][aaa¥`aa^Y\_]\_a`a`\_`^`\_Za[`\_¥  
@HWI-EAS443:3:47:136:1265#0/1  
ATGTATTTATCGTCGCTTTAAATACGGTTTAAAAAGAGGG  
+HWI-EAS443:3:47:136:1265#0/1  
aa]^abaaba`bY`a`a¥a\_^aa\_\_a`¥a\_\_^\_\_Y¥^]\_\_  
@HWI-EAS443:3:47:875:478#0/1  
CTTTTCAAACCGTATTTAAAGCGACGATAAATACATTTGA  
+HWI-EAS443:3:47:875:478#0/1  
abbbbbbbbababbbbababaaaabbbabaaa`abbbba  
@HWI-EAS443:3:48:1271:2035#0/1  
GTGCGCTTTAAATACGGTTTAAAAAGAGGGCCTTCTACGGA  
+HWI-EAS443:3:48:1271:2035#0/1  
a[SULZ`a^XU]¥T]VP[^XRL\_N\_ZZQYMLPRZSZRW¥U  
@HWI-EAS443:3:48:138:121#0/1  
TGTATTTATCGTCGCTTTAAATACGGTTTAAAAAGAGGGC  
+HWI-EAS443:3:48:138:121#0/1  
`Xa^bb`babaaa`\_ab^¥` `` `[a^a^b]^]\_[VN\_\_\_  
@HWI-EAS443:3:48:246:1110#0/1  
CGTCGCTTTAAATACGGTTTAAAAAGAGGGCCTTCTACGG

+HWI-EAS443:3:48:246:1110#0/1  
`\_UXU]T\_]NX`QYOX\_NHX\_XRNWOLS\_[XPQ]ZBBBBB  
@HWI-EAS443:3:4:1449:298#0/1  
CTTTTCAAACCGTATTTAAAGCGACGATAAATACATTTGA  
+HWI-EAS443:3:4:1449:298#0/1  
aY][[]][\_]Va[a\_`a]`P`[a`aaV]¥Y^S[a^a\_T  
@HWI-EAS443:3:50:1377:516#0/1  
CGCTTTAAATACGGTTTGAAAAGAGGGCCTTCTACGGAAG  
+HWI-EAS443:3:50:1377:516#0/1  
ababbbb`bbbabbabb`aaaaabaaaa`b\_¥ba`aa  
@HWI-EAS443:3:51:1225:1365#0/1  
ATTTATCGTCGCTTTAAATACGGTTTGAAAAGAGGGCCTT  
+HWI-EAS443:3:51:1225:1365#0/1  
JY\_¥`^ab]a^ab]bUbaaa`aa\_b¥^Z¥XY^^bY`OL[]  
@HWI-EAS443:3:51:265:114#0/1  
GTCGCTTTAAATACGGTTTGAAAAGAGGGCCTTCTACGGA  
+HWI-EAS443:3:51:265:114#0/1  
a¥^`Waaa\_\_^`¥W``¥a``UY^¥a¥`a\_WW^YU\_¥W¥¥W  
@HWI-EAS443:3:52:487:1505#0/1  
CTTTTCAAACCGTATTTAAAGCGACGATAAATACATTTGA  
+HWI-EAS443:3:52:487:1505#0/1  
aa`\_a\_W^a[]¥^`\_^\_aa]`aa¥[``¥`\_a`a`a[`\_Y  
@HWI-EAS443:3:52:873:1180#0/1  
ATGTATTTATCGTCGCTTTAAATACGGTTTGAAAAGAGGG  
+HWI-EAS443:3:52:873:1180#0/1  
U]ba^aab`¥¥[\_¥`\_La\_RXXZ^^ab\_^bb^[TIQYV^]  
@HWI-EAS443:3:54:762:583#0/1  
TGTATTTATCGTCGCTTTAAATACGGTTTGAAAAGAGGGC  
+HWI-EAS443:3:54:762:583#0/1  
\_Z\_abbbbbbaa[abaaaba`aa`aa\_abb\_`\_`a\_aa`\_  
@HWI-EAS443:3:55:1242:691#0/1  
CTTTTCAAACCGTATTTAAAGCGACGATAAATACATTTGA  
+HWI-EAS443:3:55:1242:691#0/1  
`aa]W^a)`Y`TQSa)`a\_W^N\_[\_¥[¥QaY\_\_a`a`  
@HWI-EAS443:3:55:1769:795#0/1  
GTATTTATCGTCGCTTTAAATACGGTTTGAAAAGAGGGCC  
+HWI-EAS443:3:55:1769:795#0/1  
a\_baaabaa`aZ^S]aa)`a`\_Z[`]\_`VPY`¥LYXZULX  
@HWI-EAS443:3:56:1240:549#0/1  
CGTCGCTTTAAATACGGTTTGAAAAGAGGGCCTTCTACGG  
+HWI-EAS443:3:56:1240:549#0/1  
aaaababbba`aa``abb`^aa`a\_baa¥T\_a¥a]Z^`  
@HWI-EAS443:3:56:15:29#0/1  
ATTTATCGTCGCTTTAAATACGGTTTGAAAAGAGGGCCTT  
+HWI-EAS443:3:56:15:29#0/1  
Zbbbaabb\_abaaaa`U`aaaaXaa]^\_^R[T\_\_a¥YYW  
@HWI-EAS443:3:57:1688:1717#0/1  
ATGTATTTATCGTCGCTTTAAATACGGTTTGAAAAGAGGG  
+HWI-EAS443:3:57:1688:1717#0/1  
aaa^aaaa^a\_aaa\_\_^ba^`\_^\_a`¥aa`¥\_Yaa`\_¥U

@HWI-EAS443:3:57:311:1203#0/1  
GTATTTATCGTCGCTTTAAATACGGTTTGAAAAGAGGGCC  
+HWI-EAS443:3:57:311:1203#0/1  
\_[Ybbbaa`^`\_aa\_aaa`Z]\_[a\_[a\_RY\_Z^SXQ^`[^  
@HWI-EAS443:3:57:394:1664#0/1  
CGTCGCTTTAAATACGGTTTGAAAAGAGGGCCTTCTACGG  
+HWI-EAS443:3:57:394:1664#0/1  
ab`aabbbbbbaaaabaaa¥`aa`Xa`^]]\_`\_\_`a^`\_  
@HWI-EAS443:3:57:946:1172#0/1  
CGTCGCTTTAAATACGGTTTGAAAAGAGGGCCTTCTACGG  
+HWI-EAS443:3:57:946:1172#0/1  
aaa``]abb`aa\_V¥aa\_ba`^^[a^[a[[^^]ZZ[^¥``  
@HWI-EAS443:3:58:1292:566#0/1  
GTCTGCTTTAAATACGGTTTGAAAAGAGGGCCTTCTACGGA  
+HWI-EAS443:3:58:1292:566#0/1  
a[a`\_^aYQTY`\_`Sa[Q\_^[WU¥¥ZZUU\_¥U^]TWTQZSS  
@HWI-EAS443:3:58:290:1919#0/1  
GCCCTCTTTCAAACCGTATTTAAAGCGACGATAAATACA  
+HWI-EAS443:3:58:290:1919#0/1  
aab[U`aaaa¥aab\_ab^a\_\_aa\_Ya\_^\_\_\_^^^U]^`Sa  
@HWI-EAS443:3:60:1303:1068#0/1  
CGTCGCTTTAAATACGGTTTGAAAAGAGGGCCTTCTACGG  
+HWI-EAS443:3:60:1303:1068#0/1  
ab``aaaaaaa\_aaaaaWaba`a`a`aV`\_\_`\_[a\_]W  
@HWI-EAS443:3:60:138:1121#0/1  
ATTTATCGTCGCTTTAAATACGGTTTGAAAAGAGGGCCTT  
+HWI-EAS443:3:60:138:1121#0/1  
`abYabbbYa`\_a`aa`S`aaaa\_aa`a]a\_a\_S\_\_V\_^\_  
@HWI-EAS443:3:61:1229:857#0/1  
ATTTATCGTCGCTTTAAATACGGTTTGAAAAGAGGGCCTT  
+HWI-EAS443:3:61:1229:857#0/1  
abbbbbbbbaabaabaa^abaaa`aaa]aaaa^`]aT^]Z  
@HWI-EAS443:3:61:959:792#0/1  
CGTCGCTTTAAATACGGTTTGAAAAGAGGGCCTTCTACGG  
+HWI-EAS443:3:61:959:792#0/1  
abbbabbbbaa`b`ababbbba\_aZababb]baaab\_^a`  
@HWI-EAS443:3:62:105:184#0/1  
CGTCGCTTTAAATACGGTTTGAAAAGAGGGCCTTCTACGG  
+HWI-EAS443:3:62:105:184#0/1  
\_``bbba[aa`]]`aa[aa\_¥\_W]Z\_YR]SURXYWTVQQ  
@HWI-EAS443:3:62:1110:160#0/1  
TGTATTTATCGTCGCTTTAAATACGGTTTGAAAAGAGGGC  
+HWI-EAS443:3:62:1110:160#0/1  
a`^`bbababb^]b`^baaXa```a]¥`a]¥[^`^\_¥\_\_\_\_  
@HWI-EAS443:3:63:135:1207#0/1  
ATTTATCGTCGCTTTAAATACGGTTTGAAAAGAGGGCCTT  
+HWI-EAS443:3:63:135:1207#0/1  
``^Z^^\_Y[S]¥YTRZZ\_]R]¥Y`PUW]¥]BBBBBBBBB  
@HWI-EAS443:3:63:1496:1687#0/1  
ATTTATCGTCGCTTTAAATACGGTTTGAAAAGAGGGCCTT

+HWI-EAS443:3:63:1496:1687#0/1  
[``b`bb]bab`bba]bbb[``b`a^U\_a]XWa\_¥ZZUa  
@HWI-EAS443:3:63:631:707#0/1  
GTCGCTTTAAATACGGTTTAAAAAGAGGGCCTTCTACGGA  
+HWI-EAS443:3:63:631:707#0/1  
aaaaaaaa`aa`\_aa[aa\_QT`\_```a\_`¥¥`\_^\_] [¥X  
@HWI-EAS443:3:64:1420:237#0/1  
CGTCGCTTTAAATACGGTTTAAAAAGAGGGCCTTCTACGG  
+HWI-EAS443:3:64:1420:237#0/1  
aabbbababaabbaabbabbb\_```a\_aaa\_]a`\_aa¥aa  
@HWI-EAS443:3:64:1441:501#0/1  
GTCGCTTTAAATACGGTTTAAAAAGAGGGCCTTCTACGGA  
+HWI-EAS443:3:64:1441:501#0/1  
`aababbb`aaaa\_bb`aba]\_aaa\_\_`aWUaaW`\_¥aa¥  
@HWI-EAS443:3:64:233:263#0/1  
ATTTATCGTCGCTTTAAATACGGTTTAAAAAGAGGGCCTT  
+HWI-EAS443:3:64:233:263#0/1  
Va¥¥¥Z`^`^][^\_Z`^`^ [Z^¥SZ\_RNWX][VXX]VOOS  
@HWI-EAS443:3:64:474:269#0/1  
CGTCGCTTTAAATACGGTTTAAAAAGAGGGCCTTCTACGG  
+HWI-EAS443:3:64:474:269#0/1  
a¥[\_ba\_abaaa`a]\_`\_`\_]\_\_aa\_^]```\_^¥`\_SXY`\_  
@HWI-EAS443:3:64:565:1222#0/1  
CGTCGCTTTAAATACGGTTTAAAAAGAGGGCCTTCTACGG  
+HWI-EAS443:3:64:565:1222#0/1  
abaaabababbaba`aa`aa`\_\_aa````\_^\_¥`\_a\_\_^]`  
@HWI-EAS443:3:66:1195:760#0/1  
CGTCGCTTTAAATACGGTTTAAAAAGAGGGCCTTCTACGG  
+HWI-EAS443:3:66:1195:760#0/1  
ab\_aaaaaa)`aaS\_a`^aaXP`¥^SZVPV\_Z[^^^TNUW  
@HWI-EAS443:3:66:382:1366#0/1  
CGTCGCTTTAAATACGGTTTAAAAAGAGGGCCTTCTACGG  
+HWI-EAS443:3:66:382:1366#0/1  
a`]a\_a`aaa\_W\_X`a`¥`^]TXY^[Z^^\_¥^Z^^[[  
@HWI-EAS443:3:67:1548:904#0/1  
TCGCTTTAAATACGGTTTAAAAAGAGGGCCTTCTACGGAA  
+HWI-EAS443:3:67:1548:904#0/1  
\_`\_\_^`aZ\_\_a\_^Z\_Ya\_¥Y\_]```\_ZaaZ¥X\_Ya^]\_`¥W  
@HWI-EAS443:3:68:1001:1233#0/1  
TTCAAATGTATTTATCGTCGCTTTAAATACGGTTTAAAA  
+HWI-EAS443:3:68:1001:1233#0/1  
a^\_Y[^a¥][`^aZ`a\_N[]`a]^P^XYX¥`¥[R`\_[VWX  
@HWI-EAS443:3:68:707:2022#0/1  
CGTCGCTTTAAATACGGTTTAAAAAGAGGGCCTTCTACGG  
+HWI-EAS443:3:68:707:2022#0/1  
aWxa```\_Z\_¥^`Y]\_\_YVa\_a\_\_`U¥Z\_¥`\_[[¥X^¥[RY¥  
@HWI-EAS443:3:6:1538:1482#0/1  
CGTCGCTTTAAATACGGTTTAAAAAGAGGGCCTTCTACGG  
+HWI-EAS443:3:6:1538:1482#0/1  
aT\_bbJaa]\_]SbaTbb^T¥ba`UZ]b`^a]\_V`XbZZ^B



@HWI-EAS443:3:6:409:1741#0/1  
CGTCGCTTTAAATACGGTTTGAAAAGAGGGCCTTCTACGG  
+HWI-EAS443:3:6:409:1741#0/1  
abJWYW^ZaaXaa^[\_SJ]\_`aP]V\_\_^] ^FFMRX¥BBBB  
@HWI-EAS443:3:6:74:522#0/1  
GTCGCTTTAAATACGGTTTGAAAAGAGGGCCTTCTACGGA  
+HWI-EAS443:3:6:74:522#0/1  
a^`aaa`a\_a]a\_\_a^Va`SW^^]\_^[\_`]]\_^]^^^] ^B  
@HWI-EAS443:3:6:943:1725#0/1  
GTCGCTTTAAATACGGTTTGAAAAGAGGGCCTTCTACGGA  
+HWI-EAS443:3:6:943:1725#0/1  
`]Z]aaaaa][ ]aQbaZaa`[\_\_\_\_PGV`]V\_\_U]0^\_BB  
@HWI-EAS443:3:70:1220:1776#0/1  
CAAATGTATTTATCGTCGCTTTAAATACGGTTTGAAAAGA  
+HWI-EAS443:3:70:1220:1776#0/1  
a^^b\_`Zaaaa`a`a[aa`aa[`^aV`¥aYQ¥^[^WZ`VX  
@HWI-EAS443:3:70:413:1345#0/1  
CGCTTTAAATACGGTTTGAAAAGAGGGCCTTCTACGGAAG  
+HWI-EAS443:3:70:413:1345#0/1  
^ab`\_¥^U¥[[a`]¥\_W\_VI[^a\_a^\_\_Q]\_aaa`\_` `aU  
@HWI-EAS443:3:71:1685:545#0/1  
GTCGCTTTAAATACGGTTTGAAAAGAGGGCCTTCTACGGA  
+HWI-EAS443:3:71:1685:545#0/1  
\_F¥aPPXa¥\_¥[PRY\_MTS^WT`^aPZ\_\_ZNSZ¥TTSYQQ  
@HWI-EAS443:3:71:885:1614#0/1  
CTCTTTTCAAACCGTATTTAAAGCGACGATAAATACATTT  
+HWI-EAS443:3:71:885:1614#0/1  
`bbaab^baa\_MTa`abba`\_\_a^RVabaa\_a^a` `a\_\_a  
@HWI-EAS443:3:71:922:454#0/1  
GTCGCTTTAAATACGGTTTGAAAAGAGGGCCTTCTACGGA  
+HWI-EAS443:3:71:922:454#0/1  
aXa\_VX\_`^`a`QY]a\_` `XDTWVZ¥¥\_a^YZY¥Y]U]^Z  
@HWI-EAS443:3:73:356:1570#0/1  
CTTTTCAAACCGTATTTAAAGCGACGATAAATACATTTGA  
+HWI-EAS443:3:73:356:1570#0/1  
aa^`X\_¥¥aa¥aQ\_¥`\_aY[[a\_W\_\_0¥¥Y\_^\_¥UZ]]^Z  
@HWI-EAS443:3:73:876:973#0/1  
CTTTTCAAACCGTATTTAAAGCGACGATAAATACATTTGA  
+HWI-EAS443:3:73:876:973#0/1  
abababbbbb`b^abbbb`a`aa`aaaaaaaaaaaaaaaa  
@HWI-EAS443:3:74:108:805#0/1  
CGTCGCTTTAAATACGGTTTGAAAAGAGGGCCTTCTACGG  
+HWI-EAS443:3:74:108:805#0/1  
aaXaaaa`aRR]a\_`a`^a`\_]^[^]\_X\_\_XU\_]UVQ]U[V  
@HWI-EAS443:3:75:1091:1756#0/1  
GGGCCTCATATACAACAGGATGGGAACGGTGACCACAGAA  
+HWI-EAS443:3:75:1091:1756#0/1  
abaa\_bbb`bb`aa^^`VHS]Z¥]aaUD[T\_b`W`a\_\_a  
@HWI-EAS443:3:75:1507:335#0/1  
ATGTATTTATCGTCGCTTTAAATACGGTTTGAAAAGAGGG

+HWI-EAS443:3:75:1507:335#0/1  
^¥aababbbbaaaa\_]aabb`\_aa`]aaX`b^]\_a\_`]^\_`  
@HWI-EAS443:3:75:678:1596#0/1  
GTCGCTTTAAATACGGTTTGAAAAGAGGGCCTTCTACGGA  
+HWI-EAS443:3:75:678:1596#0/1  
aZa`a\_U¥UZ`YQ\_^Y[]U[[]WZ\_NS`^VSZ¥VVS¥Z  
@HWI-EAS443:3:77:1058:1607#0/1  
ATTTATCGTCGCTTTAAATACGGTTTGAAAAGAGGGCCTT  
+HWI-EAS443:3:77:1058:1607#0/1  
abbbbb]b\_aaa`aaaaab\_\_aa`]`\_\_\_^a`]`\_^`a^^`  
@HWI-EAS443:3:77:1764:1099#0/1  
ATTTATCGTCGCTTTAAATACGGTTTGAAAAGAGGGCCTT  
+HWI-EAS443:3:77:1764:1099#0/1  
a`¥[`b\_TTaba\_I\_]\_¥aaaa^]W^]XaTJT]`KWW]  
@HWI-EAS443:3:78:724:791#0/1  
TCGCTTTAAATACGGTTTGAAAAGAGGGCCTTCTACGGAA  
+HWI-EAS443:3:78:724:791#0/1  
a\_\_]\_`\_W^a`[a`^a`^UV\_\_\_\_aaa\_\_\_\_aaZ\_^U]  
@HWI-EAS443:3:79:1662:253#0/1  
CGTCGCTTTAAATACGGTTTGAAAAGAGGGCCTTCTACGG  
+HWI-EAS443:3:79:1662:253#0/1  
\_[]`bbabbbbabba\_bbbbbbaab`b`\_`bbaab`¥\_aXYb  
@HWI-EAS443:3:79:1732:640#0/1  
AGAAGGCCCTCTTTTCAAACCGTATTTAAAGCGACGATAA  
+HWI-EAS443:3:79:1732:640#0/1  
ab`ab^`aababbaaba`^b\_abbaa`XY]b]^`aa`  
@HWI-EAS443:3:7:1059:751#0/1  
CGTCGCTTTAAATACGGTTTGAAAAGAGGGCCTTCTACGG  
+HWI-EAS443:3:7:1059:751#0/1  
aba`a]aa\_a`aaXaaPaaa[\_\_\_`^\_a`¥¥`\_W\_^Q\_¥  
@HWI-EAS443:3:7:1581:133#0/1  
GCTTTAAATACGGTTTGAAAAGAGGGCCTTCTACGGAAGG  
+HWI-EAS443:3:7:1581:133#0/1  
a\_a\_YXPP[VURaXY`BBBBBBBBBBBBBBBBBBBBBBB  
@HWI-EAS443:3:7:1600:615#0/1  
GTCGCTTTAAATACGGTTTGAAAAGAGGGCCTTCTACGGA  
+HWI-EAS443:3:7:1600:615#0/1  
a^¥b\_abb`\_aa¥aa]aaa¥\_\_¥\_UR^¥WWW¥\_WYW¥¥¥B  
@HWI-EAS443:3:7:446:1491#0/1  
ATGTATTTATCGTCGCTTTAAATACGGTTTGAAAAGAGGG  
+HWI-EAS443:3:7:446:1491#0/1  
a\_aX[\_b`R`ZW¥^Y[\_`]¥\_]`O[[\_^\_VY¥YY¥`PBB  
@HWI-EAS443:3:80:1209:669#0/1  
CGTCGCTTTAAATACGGTTTGAAAAGAGGGCCTTCTACGG  
+HWI-EAS443:3:80:1209:669#0/1  
\_Z^`abbabba[baab\_Ua`aab\_P\_^a^^¥\_b`V\_\_RXa  
@HWI-EAS443:3:80:1483:819#0/1  
CGTCGCTTTAAATACGGTTTGAAAAGAGGGCCTTCTACGG  
+HWI-EAS443:3:80:1483:819#0/1  
\_bb^a^bbbaabba^b[`bb``^baa`bba\_[aa`b\_\_a`

@HWI-EAS443:3:80:161:568#0/1  
TTATCGTCGCTTTAAATACGGTTTAAAAAGAGGGCCTTCT  
+HWI-EAS443:3:80:161:568#0/1  
aaaaa`^aa`a\_a\_\_\_`X`¥PV`\_¥¥\_][^\_^\_YWRYYY  
@HWI-EAS443:3:80:342:1264#0/1  
CGTCGCTTTAAATACGGTTTAAAAAGAGGGCCTTCTACGG  
+HWI-EAS443:3:80:342:1264#0/1  
aa\_aaaaaa\_``\_\_aa¥a\_^¥^`\_\_`U¥¥^¥\_^^``Z^U  
@HWI-EAS443:3:80:868:1169#0/1  
TCGTCGCTTTAAATACGGTTTAAAAAGAGGGCCTTCTACG  
+HWI-EAS443:3:80:868:1169#0/1  
abb`abaaab\_aaa`aa`bba]a`aa`^a``a\_\_\_^\_  
@HWI-EAS443:3:80:93:1811#0/1  
ATTTATCGTCGCTTTAAATACGGTTTAAAAAGAGGGCCTT  
+HWI-EAS443:3:80:93:1811#0/1  
`aa`^S\_SaZWU^baRaRa`aRMF\_[[QaYRR^XRSQKKV  
@HWI-EAS443:3:81:1561:341#0/1  
CGTCGCTTTAAATACGGTTTAAAAAGAGGGCCTTCTACGG  
+HWI-EAS443:3:81:1561:341#0/1  
[\_^QRa\_[ab\_Y\_\_I[bb`a\_X]Y]baaa\_UW\_S¥`Q`a  
@HWI-EAS443:3:81:1676:1712#0/1  
CGCTTTAAATACGGTTTAAAAAGAGGGCCTTCTACGGAAG  
+HWI-EAS443:3:81:1676:1712#0/1  
`b`b`^UaZa`bbba`baQ`aab`aaa`Yaa\_aaa`bZ\_a  
@HWI-EAS443:3:81:171:996#0/1  
CGTCGCTTTAAATACGGTTTAAAAAGAGGGCCTTCTACGG  
+HWI-EAS443:3:81:171:996#0/1  
`b`bbaabaaa`^P\_a^Z`^`X`¥U]S]X¥[]^YWRXR  
@HWI-EAS443:3:81:786:1933#0/1  
ATTTATCGTCGCTTTAAATACGGTTTAAAAAGAGGGCCTT  
+HWI-EAS443:3:81:786:1933#0/1  
U\_b]¥¥\_^]^Z¥bbUR¥a`[¥^PW^SZ¥T\_OZTW]`a``  
@HWI-EAS443:3:82:1043:1104#0/1  
CGTCGCTTTAAATACGGTTTAAAAAGAGGGCCTTCTACGG  
+HWI-EAS443:3:82:1043:1104#0/1  
a]Saa`bab]Zab`\_\_KX`b¥`]\_aa¥[aaaVaaaa`G`\_  
@HWI-EAS443:3:82:1170:1489#0/1  
TGTATTTATCGTCGCTTTAAATACGGTTTAAAAAGAGGGC  
+HWI-EAS443:3:82:1170:1489#0/1  
`b`Y`aaa`]`¥baaaa\_U^W]Y]aa\_`a¥T\_aa[Y][aY  
@HWI-EAS443:3:82:1326:1051#0/1  
TTTATCGTCGCTTTAAATACGGTTTAAAAAGAGGGCCTTC  
+HWI-EAS443:3:82:1326:1051#0/1  
a`]baZ`¥\_ab`ab¥^Z^`]aa^a\_]`^`a`^¥YZ`U]¥¥]  
@HWI-EAS443:3:82:265:1473#0/1  
CGTCGCTTTAAATACGGTTTAAAAAGAGGGCCTTCTACGG  
+HWI-EAS443:3:82:265:1473#0/1  
a\_\_a^aaaa\_aa`a\_a`¥``\_Z\_a\_]¥¥¥^`^U¥]¥¥WU¥  
@HWI-EAS443:3:82:460:1308#0/1  
GTATTTATCGTCGCTTTAAATACGGTTTAAAAAGAGGGCC

+HWI-EAS443:3:82:460:1308#0/1  
^Y¥\_aaaa\_Z\_``aaYaa[Uaa\_P[`Y^YVTZU[^W^]  
@HWI-EAS443:3:82:800:142#0/1  
CGCTTTAAATACGGTTTAAAAAGAGGGCCTTCTACGGAAG  
+HWI-EAS443:3:82:800:142#0/1  
]bbb\_\_a`bbbabbbbR[\_aba\_bbb^bbbaba\_baaab  
@HWI-EAS443:3:83:1528:1321#0/1  
GTATTTATCGTCGCTTTAAATACGGTTTAAAAAGAGGGCC  
+HWI-EAS443:3:83:1528:1321#0/1  
`R¥Q]¥`\_aWU\_LKY\_[SV\_ZP¥\_XaZZVYVXSWS¥]WR  
@HWI-EAS443:3:84:167:1353#0/1  
GTATTTATCGTCGCTTTAAATACGGTTTAAAAAGAGGGCC  
+HWI-EAS443:3:84:167:1353#0/1  
aa^aaaabaa\_baaaaaaaaaaaa¥aY`U)`aY\_\_^\_^\_]  
@HWI-EAS443:3:85:663:1795#0/1  
TCTTTTCAAACCGTATTTAAAGCGACGATAAATACATTTG  
+HWI-EAS443:3:85:663:1795#0/1  
\_W\_`ba`\_ba[\_`[^a^\_aaa^aaa\_^a]]``a^b\_a`\_  
@HWI-EAS443:3:85:675:495#0/1  
GTATTTATCGTCGCTTTAAATACGGTTTAAAAAGAGGGCC  
+HWI-EAS443:3:85:675:495#0/1  
`¥aaaaaaba`aa`aa`¥SXS[a`Z\_aa\_[Za`a`X\_^]  
@HWI-EAS443:3:86:1652:1155#0/1  
TTTATCGTCGCTTTAAATACGGTTTAAAAAGAGGGCCTTC  
+HWI-EAS443:3:86:1652:1155#0/1  
abbab`\_^`b]aba]]`\_¥Yaa`aa`U]^`\_Z\_``YV[ZN  
@HWI-EAS443:3:86:698:381#0/1  
CGCTTTAAATACGGTTTAAAAAGAGGGCCTTCTACGGAAG  
+HWI-EAS443:3:86:698:381#0/1  
aba`bbaa`aaabb\_baa\_`a`¥\_¥a\_]aa^`^`[]\_\_  
@HWI-EAS443:3:88:1242:774#0/1  
TTTATCGTCGCTTTAAATACGGTTTAAAAAGAGGGCCTTC  
+HWI-EAS443:3:88:1242:774#0/1  
ab^Z[`\_\_V`P^a`ZKX[`V`a^`aTWYU^`Wa\_`ZLQVV  
@HWI-EAS443:3:88:1419:1114#0/1  
GTCGCTTTAAATACGGTTTAAAAAGAGGGCCTTCTACGGA  
+HWI-EAS443:3:88:1419:1114#0/1  
aa\_a\_bbbbaabaaaa\_baa\_`a\_\_\_\_`aa]]`aXa^W\_`^  
@HWI-EAS443:3:89:1560:879#0/1  
CGTCGCTTTAAATACGGTTTAAAAAGAGGGCCTTCTACGG  
+HWI-EAS443:3:89:1560:879#0/1  
S\_ba\_abbbbb`bbaaa\_bbaba`aabbbb\_`bb^b\_V\_b  
@HWI-EAS443:3:89:51:843#0/1  
CGTCGCTTTAAATACGGTTTAAAAAGAGGGCCTTCTACGG  
+HWI-EAS443:3:89:51:843#0/1  
aaRO^^ZaaLOSXUZ`aOWZZ`\_^[aTVOSP]NNZQUZRQ  
@HWI-EAS443:3:8:1275:592#0/1  
GCTTTAAATACGGTTTAAAAAGAGGGCCTTCTACGGAAG  
+HWI-EAS443:3:8:1275:592#0/1  
aaaaa`^`[^`^ba^`aa^[\_`[\_X\_\_VV\_ZV^¥U[VZU^V

@HWI-EAS443:3:8:834:548#0/1  
GTATTTATCGTCGCTTTAAATACGGTTTGAAAAGAGGGCC  
+HWI-EAS443:3:8:834:548#0/1  
a\_aaaaa\_`^\_a[\_a\_`]a\_]Z^`Z`¥\_^^[^^ZZX[UZ  
@HWI-EAS443:3:90:1030:1221#0/1  
CGTCGCTTTAAATACGGTTTGAAAAGAGGGCCTTCTACGG  
+HWI-EAS443:3:90:1030:1221#0/1  
Y`baabb`a¥V[]bbaaa`[^aW\_Laaa`b¥[\_a]aa  
@HWI-EAS443:3:90:1163:307#0/1  
TCGTCGCTTTAAATACGGTTTGAAAAGAGGGCCTTCTACG  
+HWI-EAS443:3:90:1163:307#0/1  
abbaabbabbaaaa`\_bbZb]b`]]aaaa\_aZWX\_[`[R`  
@HWI-EAS443:3:91:1068:2031#0/1  
ATTTATCGTCGCTTTAAATACGGTTTGAAAAGAGGGCCTT  
+HWI-EAS443:3:91:1068:2031#0/1  
ab`aabaa^aa\_\_aaa`a)`a\_^\_\_a\_aaaa`^¥]`W[^  
@HWI-EAS443:3:91:1111:660#0/1  
ATTTATCGTCGCTTTAAATACGGTTTGAAAAGAGGGCCTT  
+HWI-EAS443:3:91:1111:660#0/1  
abbbababbaa`b¥]abb`ba^¥Waa`]aa`\_`\_I  
@HWI-EAS443:3:91:444:1904#0/1  
ATTTATCGTCGCTTTAAATACGGTTTGAAAAGAGGGCCTT  
+HWI-EAS443:3:91:444:1904#0/1  
^Z\_bb\_¥\_TX\_ba`[\_¥¥Y]^\_WS¥¥]]Y^¥VY¥X^LW[V  
@HWI-EAS443:3:92:1061:1707#0/1  
GAAGGCCCTCTTTCAAACCGTATTTAAAGCGACGATAAA  
+HWI-EAS443:3:92:1061:1707#0/1  
`bababbabbbabbaabaabb^ababbbbaaa`aabaab  
@HWI-EAS443:3:92:911:148#0/1  
TTCAAATGTATTTATCGTCGCTTTAAATACGGTTTGAAAA  
+HWI-EAS443:3:92:911:148#0/1  
]\_[^]VZ^babb\_[T`]¥¥Yb`\_aa\_a[SW¥\_]SaBBBBBB  
@HWI-EAS443:3:92:942:78#0/1  
CCCTCTTTCAAACCGTATTTAAAGCGACGATAAATACAT  
+HWI-EAS443:3:92:942:78#0/1  
abbbabbbb^bb\_ST¥aabbbbaaaYaY\_aaaaYaaaQaa  
@HWI-EAS443:3:93:100:149#0/1  
CGTCGCTTTAAATACGGTTTGAAAAGAGGGCCTTCTACGG  
+HWI-EAS443:3:93:100:149#0/1  
aa\_ab\_\_aa`\_`\_¥a`U`a`\_]^[)]¥¥\_UU]YXYXXB  
@HWI-EAS443:3:93:1063:1735#0/1  
ATTTATCGTCGCTTTAAATACGGTTTGAAAAGAGGGCCTT  
+HWI-EAS443:3:93:1063:1735#0/1  
a\_b]aaa`S\_`^Y\_`[\_^a\_]a`¥]\_Z]^^[¥XXGZ\_  
@HWI-EAS443:3:93:638:66#0/1  
AGGCCCTCTTTCAAACCGTATTTAAAGCGACGATAAATA  
+HWI-EAS443:3:93:638:66#0/1  
^^^][¥a^^aa`\_`\_a]SaT\_a`\_`^[^U`^`]^`^¥^YY\_  
@HWI-EAS443:3:94:213:1704#0/1  
CAAATGTATTTATCGTCGCTTTAAATACGGTTTGAAAAGA

+HWI-EAS443:3:94:213:1704#0/1  
a^Y\_\_^T\_`\_^`\_a^X`\_`^¥]^`^[\_^\_[`X^^TYXY[ZZ  
@HWI-EAS443:3:95:1375:2017#0/1  
CGTCGCTTTAAATACGGTTTAAAAGAGGGCCTTCTACGG  
+HWI-EAS443:3:95:1375:2017#0/1  
[b`bb^`bbb]bbbRbba\_bbb`bba\_a\_a[\_`aa``YUa  
@HWI-EAS443:3:96:330:1453#0/1  
GTATTTATCGTCGCTTTAAATACGGTTTAAAAGAGGGCC  
+HWI-EAS443:3:96:330:1453#0/1  
a¥a`]^aa`[\_`a`]baa\_PW])aab[\_`a\_YZ]P[\_`\_¥VB  
@HWI-EAS443:3:98:463:1843#0/1  
CGTCGCTTTAAATACGGTTTAAAAGAGGGCCTTCTACGG  
+HWI-EAS443:3:98:463:1843#0/1  
aa\_```aa`Z\_aaa])OVaa`^[X]UZ]V]\_`\_XSR¥Z\_\_  
@HWI-EAS443:3:99:319:107#0/1  
TATTTATCGTCGCTTTAAATACGGTTTAAAAGAGGGCCT  
+HWI-EAS443:3:99:319:107#0/1  
`aabbbbb`a`bYaba\_¥\_Y`]a`W\_baVVYZUZZ\_OJX  
@HWI-EAS443:3:99:797:147#0/1  
TTATCGTCGCTTTAAATACGGTTTAAAAGAGGGCCTTCT  
+HWI-EAS443:3:99:797:147#0/1  
aaaa^¥W\_`Yaaa`\_`^^`RY`Y\_X^`^^\_V¥TNSYYY  
@HWI-EAS443:3:99:907:491#0/1  
GTATTTATCGTCGCTTTAAATACGGTTTAAAAGAGGGCC  
+HWI-EAS443:3:99:907:491#0/1  
a]aaaa\_aa\_^\_]a\_\_`^\_\_\_\_adW^\_Z])\_Z\_^^]^XW  
@HWI-EAS443:3:9:1146:725#0/1  
ATTTATCGTCGCTTTAAATACGGTTTAAAAGAGGGCCTT  
+HWI-EAS443:3:9:1146:725#0/1  
abba`aaaa\_a`aaa`a\_aa^a`]aa`^Q^`\_¥\_`^]X^\_  
@HWI-EAS443:3:85:1457:184#0/1  
GCCTGAGTCCATGAGGGAAGAATATCAAAAGGAACAGGAG  
+HWI-EAS443:3:85:1457:184#0/1  
abaZb\_arX^YZa[[WPUPaZa[^UYaEDH`[GGX¥YKX¥  
@HWI-EAS443:3:76:1787:1833#0/1  
CACTCTGCNGTTCCCTGTTGATATTATCCCTCATGGACTC  
+HWI-EAS443:3:76:1787:1833#0/1  
¥WQ[^ab¥DV`^^^]U[[a\_W\_\_SZXVTY[VaZ`UUKPR  
@HWI-EAS443:3:17:67:207#0/1  
AGAATATCAACAGGAACAGCAGAGTGCTGTGGATGGTGAA  
+HWI-EAS443:3:17:67:207#0/1  
aaaaaaaa`[\_aaa\_^Y\_aaa\_a]`Ya\_`aV\_BBBBBBBBB  
@HWI-EAS443:3:18:356:593#0/1  
AGAATATCAACAGGAACAGCAGAGTGCTGTGGATGGTGGA  
+HWI-EAS443:3:18:356:593#0/1  
TJYb``aaZ[^aa])aa`aYYZ\_\_Wa^)`BBBBBBBBBB  
@HWI-EAS443:3:42:64:1576#0/1  
AGAATATCAACAGGAACAGCAGAGTGCTGTGGANGTTGGC  
+HWI-EAS443:3:42:64:1576#0/1  
aaaaababa``aaaXS]a`aaa]WL^b\_\_BBBBBBBBBB

@HWI-EAS443:3:26:547:178#0/1  
AGCCTGAGTCCATGAGGTAAGAATATCAACAGGAACAGCA  
+HWI-EAS443:3:26:547:178#0/1  
a`ab`baa`\_a`aa`aaU`aa`Z\_a\_```\_`a\_``]\_\_U]  
@HWI-EAS443:3:55:1468:1834#0/1  
TGTGCCTGAGTCCATGAGGGAAGAATATCAAAAGGAACAG  
+HWI-EAS443:3:55:1468:1834#0/1  
\_ba``\_\_bab]\_^^[bbabbaa^abaaaaYa]Gaa]a`Nab  
@HWI-EAS443:3:9:945:248#0/1  
ACCATCGTCAACATCCACAGCACTCTGCTGTTCCAGTTGT  
+HWI-EAS443:3:9:945:248#0/1  
X\_¥K\_^TMU]aX\_`VSWaa]]YN]MBBBBBBBBBBBBBBB  
@HWI-EAS443:3:34:337:1454#0/1  
CATCCACAGCACTCTGCTGTTCCCTGTTGATATTCTTACCT  
+HWI-EAS443:3:34:337:1454#0/1  
^abaZa\_`a`b\_\_[ba¥aa`aS[¥aaaaba]Y¥N^YBBBB  
@HWI-EAS443:3:50:1177:94#0/1  
CTGCTGCCTGAGTCCATGAGGGAAGAATATCAACAGGAAC  
+HWI-EAS443:3:50:1177:94#0/1  
W`\_ZQ¥\_VVXL¥WW\_[^`R\_`^\_\_\_Z\_aa¥TVZTWa```ab  
@HWI-EAS443:3:65:1552:1980#0/1  
AATATCAACAGGAACAGCAGAGTGCTGTGGATGTTGTAGA  
+HWI-EAS443:3:65:1552:1980#0/1  
`bbbbaa]ab^aaa^aZP^a\_aW[\_a`\_ab\_BBBBBBBBBB  
@HWI-EAS443:3:78:1565:601#0/1  
GTGCCTGAGTCCATGAGGGAAGAATATCAACAGGAAGAGC  
+HWI-EAS443:3:78:1565:601#0/1  
`NOTRUXSQ¥`YXOJ\_PDROZPBBBBBBBBBBBBBBBBBB  
@HWI-EAS443:3:29:483:671#0/1  
AGCCTGAGTCCNTGAGGGAAGAATATCAACAGGAACAGCA  
+HWI-EAS443:3:29:483:671#0/1  
``aaaaa`a[D[b\_aaaa`a`aa```aXWaa\_`^^aa\_\_  
@HWI-EAS443:3:18:1464:1243#0/1  
GTGCCTGAGTCCATGAGGGAAGAATATCTACAGGAACAGC  
+HWI-EAS443:3:18:1464:1243#0/1  
a^\_[U^Yab^¥[\_`a^a`[[¥`¥¥\_\_\_^¥¥H¥\_[S\_Y¥[W  
@HWI-EAS443:3:1:793:950#0/1  
GCCTGAGCCATGAGGGAAGAATATCAACAGGAACAGCAG  
+HWI-EAS443:3:1:793:950#0/1  
aaaaba\_MVVR`a[a]aQY`XXa\_\_RR\_Q\_`¥¥YWZ\_QBB  
@HWI-EAS443:3:33:1493:1452#0/1  
TGTTGATATTCTCCCTCATGGACTCAGGGACTCCTTCCG  
+HWI-EAS443:3:33:1493:1452#0/1  
aa¥`aaaa`aZaaa``aa\_\_a\_\_^\_a¥\_¥¥\_WUUY\_[WZ\_  
@HWI-EAS443:3:34:472:1958#0/1  
GCCTGAGTCCATGAGGGAAGAATATCAACAGGAATAGCAG  
+HWI-EAS443:3:34:472:1958#0/1  
abbbaaa\_abaaaa`^\_a[baab`aab`a\_`aa\_\_Z\_`¥  
@HWI-EAS443:3:38:169:618#0/1  
GCCTCTGCTGTTCCCTGTTGATATTCTTCCCTCACGGACT

+HWI-EAS443:3:38:169:618#0/1  
`^^b`XZ]\_¥\_SXW`R]JVPWXX¥ZXMY]VXV^SGY]TKR  
@HWI-EAS443:3:39:382:1873#0/1  
AGCACTCTGCTGTTCCCTGTTGATATTCTCCGTCATGGAC  
+HWI-EAS443:3:39:382:1873#0/1  
`\_V][MWQZ¥VVND^¥KTTLJS^VQVVQNaZBBBBBBBBB  
@HWI-EAS443:3:39:96:397#0/1  
ATCCACAGCACTCTGCTGTCCCTGTTGATATTCTCCCTC  
+HWI-EAS443:3:39:96:397#0/1  
a`aaa`P[aa\_\_`^\_\_¥XU\_¥\_YYW[[NZW¥ZTVT¥^^W¥  
@HWI-EAS443:3:40:205:598#0/1  
TGTTGATATTCTCCCTCATGGACTCCGGCACTCCTCCG  
+HWI-EAS443:3:40:205:598#0/1  
ab\_``\_`\_`aa\_\_\_\_\_`[Z^]S]\_TFRS`[\_¥a\_WW\_]X  
@HWI-EAS443:3:40:618:1840#0/1  
AGAATATCAACAGGAACAGCAGAGTGCTGTGGATGGTGAC  
+HWI-EAS443:3:40:618:1840#0/1  
^`aSabaa\_V¥NNU^Z]T]¥¥ZOWN\_]U^`BBBBBBBBB  
@HWI-EAS443:3:42:584:1058#0/1  
GTGCCTGAGTCCATGAGGGAAGCATATCAACAGGAACAGC  
+HWI-EAS443:3:42:584:1058#0/1  
a\_babbbbbb^aa`aa`baa\_a\_[¥`\_a^aaYa]^]PV`\_Z  
@HWI-EAS443:3:43:983:1532#0/1  
ATCCACAGCACTCTGCTGTTCCCTGTTGATATTTTTCCCTC  
+HWI-EAS443:3:43:983:1532#0/1  
a[\_b¥Xaabaaa`\_]\_aH^a`¥a]aa`^\_]`G\_a\_Z\_[Q\_  
@HWI-EAS443:3:46:1299:179#0/1  
GCCTGAGGCCATGAGGGAAGAATATCAACAGGAACAGCAG  
+HWI-EAS443:3:46:1299:179#0/1  
Z\_TX\_]GXZVNYW^^[Z^^S¥XY¥ZXTOYY`Y¥OMYPY  
@HWI-EAS443:3:53:1438:1660#0/1  
CAGCACTCTGCTGTACCTGTTGATATTCTCCCTCATGGA  
+HWI-EAS443:3:53:1438:1660#0/1  
`bb`abbbbabbaUbab`bbbabbbSbbaVab\_ab[\_`  
@HWI-EAS443:3:5:212:2033#0/1  
ATCCACAGCACGCTGCTGTTCCCTGTTGATATTCTCCCTC  
+HWI-EAS443:3:5:212:2033#0/1  
aaaU\_\_baY^¥ZW¥^a`PRR[``XP]`]W¥[GXSR\_`¥\_  
@HWI-EAS443:3:66:373:1519#0/1  
GTTGATATTCTCCACATGGACTCAGGCACTCCTCCGT  
+HWI-EAS443:3:66:373:1519#0/1  
`a`\_`aaaabaaaaaaa`\_\_aa\_aa¥¥a``\_a^\_a\_\_V  
@HWI-EAS443:3:69:1534:1361#0/1  
CACTCTGCTGTTCCCTGTTGATATTCTTCGCTCATGGACTC  
+HWI-EAS443:3:69:1534:1361#0/1  
``abV`^\_¥UW\_[[a]Mbbau^`aYT]WG]`YN[PS]^`V  
@HWI-EAS443:3:75:451:1018#0/1  
CCATGGGGGAAGAATATCAACAGGAACAGCAGAGTGCTGT  
+HWI-EAS443:3:75:451:1018#0/1  
ababbaaaa¥`aaaaabba`aa¥`aaaa`aa\_¥a`\_a\_



@HWI-EAS443:3:86:559:1926#0/1  
ATCGTCGACATCCACAGCACTCTGCTGTTCCCTGTTGATAT  
+HWI-EAS443:3:86:559:1926#0/1  
\_Z\_YVba¥¥a`Z`aZT^] ^MZ¥] ¥XTYG[WU[SQ\_¥^^Z^  
@HWI-EAS443:3:9:1194:326#0/1  
ACATCCACAGCACTCTGCTGTTCCCTGTTGATATACTTCCC  
+HWI-EAS443:3:9:1194:326#0/1  
aabba`a\_abaaaa^aaaaaaaa\_\_`]]`¥`\_`^\_R\_\_YY\_  
@HWI-EAS443:3:16:1536:1882#0/1  
GAAGAATATCAACAGGAACAGCAGAGTGCTGTGGATGGTG  
+HWI-EAS443:3:16:1536:1882#0/1  
`bbaaababaa^baaaaaa\_baa\_`a[a]\_`BBBBBBB  
@HWI-EAS443:3:29:1207:724#0/1  
GAAGAATATCAACAGGAACAGCAGAGTGCTGTGGATGGTT  
+HWI-EAS443:3:29:1207:724#0/1  
^a^^`aa`aaa\_`a^`[\_`^aaZ^Y\_X\_`]BBBBBBB  
@HWI-EAS443:3:3:681:953#0/1  
TCAACATCCACAGCACTCTGCTGTTCCCTGTTGATATTGTT  
+HWI-EAS443:3:3:681:953#0/1  
aab\_]U[W^P\_G¥bW`aaa\_a]^aVFZMb`a\_U\_ZQ\_BBB  
@HWI-EAS443:3:69:660:548#0/1  
GAAGAATATCAACAGGAACAGCAGAGTGCTGTGGATGGTG  
+HWI-EAS443:3:69:660:548#0/1  
a`aa`aaaaa\_]a\_`^`\_]\_`^`\_]\_X`\_]BBBBBBB  
@HWI-EAS443:3:18:356:467#0/1  
CCTGAGTCCATGAGGGAAGAANATCAACAGGAACAGCAGA  
+HWI-EAS443:3:18:356:467#0/1  
abbbbaaabababb`ab`a^D¥aaaa`bbaaa`aa\_aaa  
@HWI-EAS443:3:1:1210:484#0/1  
GTTGATATTCTTCCCTCATGGACTCAGGCACTCCNTCCGT  
+HWI-EAS443:3:1:1210:484#0/1  
a^aa`\_\_`V\_aNZSaN`¥^TVRaN\_X`U^U\_SMDVWBBB  
@HWI-EAS443:3:23:429:1635#0/1  
GCCTNAGTCCATGAGGGAAGAATATCAACAGGAACAGCAG  
+HWI-EAS443:3:23:429:1635#0/1  
abb¥DU[]baabUX¥^`aaaaaaaa`aaa``[a[\_a\_a\_a  
@HWI-EAS443:3:30:1676:1538#0/1  
GCCTGAGTCCATGAGGGAAGAATATCAACAGNAACAGCAG  
+HWI-EAS443:3:30:1676:1538#0/1  
aa\_a¥\_a[\_`^]X`¥]W`\_^Z]\_\_\_¥\_¥ZDP[TZXVW¥  
@HWI-EAS443:3:30:516:1505#0/1  
GCACTCTGCTGTTCCCTNTTGATATTCTTCCCTCATGGACT  
+HWI-EAS443:3:30:516:1505#0/1  
ab`babb`babW]abYDUa`[[aaaaa``a\_aZ]a^`R^  
@HWI-EAS443:3:31:1441:1625#0/1  
TCCTGTTGATANTCTTCCCTCATGGACTCAGGCACTCCTT  
+HWI-EAS443:3:31:1441:1625#0/1  
aaa`baabaa[D^\_aaaa`aTa`a¥\_\_a`aa`^`^`a`\_\_  
@HWI-EAS443:3:35:743:789#0/1  
CCTGAGTCCATGAGGGAAGAATATCAACAGGAACANCAGA

+HWI-EAS443:3:35:743:789#0/1  
Z¥[b]b^aaa¥¥Q\_bb`a]`\_W\_IQ^¥T\_V\_Z]NDT^`  
@HWI-EAS443:3:45:1122:614#0/1  
GTCAACATCCACAGCANTCTGCTGTTCCCTGTTGATATTCT  
+HWI-EAS443:3:45:1122:614#0/1  
`\_a\_a¥^aaaa\_\_a]SDZ\_\_a¥a^^\_Z^]Z`Z¥W^`W`  
@HWI-EAS443:3:83:1564:802#0/1  
GCCTGAGTCCANGAGGGAAGAATATCAACAGGAACAGCAG  
+HWI-EAS443:3:83:1564:802#0/1  
]\_^¥Z¥`\_P\_RDUYbaa\_`a`bU`a¥^a\_\_QJSaZUa  
@HWI-EAS443:3:86:1368:1091#0/1  
TCCTGTTGATATTCTTCCCTCATGGANTCAGGCACTCCTT  
+HWI-EAS443:3:86:1368:1091#0/1  
`Xaa]^aaaaaXJ\_^Z][aZa^]]UDTYa\_\_[\_¥¥¥Q\_^  
@HWI-EAS443:3:92:355:57#0/1  
TTCCTGTTGATATTCTTCCCTCANGGACTCAGGCACTCCT  
+HWI-EAS443:3:92:355:57#0/1  
a`VY\_a^[X^\_XaUP¥`[TYU[MDJ\_[N]RSYNFVUMWWB  
@HWI-EAS443:3:10:1723:2041#0/1  
TGCCTGAGTCCATGAGGGAAGAATATCAACAGGAACAGAA  
+HWI-EAS443:3:10:1723:2041#0/1  
a`^¥aa`\_XV\_^`^`\_\_^\_\_\_^`\_V]]X\_]`¥X]TKT  
@HWI-EAS443:3:23:663:618#0/1  
AACAGGAACAGCAGAGTGCTGTGGATGTTGACGATGGTTA  
+HWI-EAS443:3:23:663:618#0/1  
ababaaaba\_aaa`a]aaaa`a`\_aI\_ZST[XZ^¥PJP  
@HWI-EAS443:3:26:1244:790#0/1  
GCCCTGAGTCCATGAGGGAAGAATATCAACAGGAACAGCA  
+HWI-EAS443:3:26:1244:790#0/1  
^MQV\_a]W¥^¥^`R^)`Y¥X]\_]OZ¥R^\_\_ZNLVYUW  
@HWI-EAS443:3:36:1005:116#0/1  
GGAAGAATATCAACAGGAACAGCAGAGTGCTGTGGATGGT  
+HWI-EAS443:3:36:1005:116#0/1  
a[X[`\_Z\_a\_a`[aa\_Z[^a^a`\_]`X`]]\_WU^XBBBB  
@HWI-EAS443:3:3:1586:397#0/1  
GTCAACATCCACAGCACTCTGCTGTTCCCTGTTGATATTAT  
+HWI-EAS443:3:3:1586:397#0/1  
aaa`JLTV]V[\_`J``\_[VaZ]\_G¥U¥¥ZS¥]PYBBBBB  
@HWI-EAS443:3:15:527:713#0/1  
CGCCTGAGTCCATGAGGGAAGAATATCAACAGGAACAGCA  
+HWI-EAS443:3:15:527:713#0/1  
abab`aaababba]`abaaaaaba¥aab`a\_aabb^`  
@HWI-EAS443:3:18:1506:1373#0/1  
GGCCTGAGTCCATGAGGGAAGAATATCAACAGGAACAGCA  
+HWI-EAS443:3:18:1506:1373#0/1  
a`a`\_\_b]`aaa`^`aa\_a\_a`\_a`a`Z\_\_`\_`^\_\_]¥  
@HWI-EAS443:3:22:1612:824#0/1  
AGCCTGAGTCCATGAGGGAAGAATATCAACAGGAACAGCA  
+HWI-EAS443:3:22:1612:824#0/1  
`Z[\_V\_b]XS¥a\_S`a¥```\_a`]Paa]a¥S¥\_Y]U¥\_

@HWI-EAS443:3:25:1409:244#0/1  
TGTGCCTGAGTCCATGAGGGAAGAATATCAACAGGAACAG  
+HWI-EAS443:3:25:1409:244#0/1  
ababa`bbabaaaabbabaa\_aa`aa`a\_aa[`a\_`W`a  
@HWI-EAS443:3:25:1766:1358#0/1  
CGCCTGAGTCCATGAGGGAAGAATATCAACAGGAACAGCA  
+HWI-EAS443:3:25:1766:1358#0/1  
aba`ab\_X\_R[a`aaa`¥b\_WZbabb`bb``ZY[aabb[a  
@HWI-EAS443:3:27:1734:645#0/1  
ACCTGTTGATATTCTTCCCTCATGGACTCAGGCACTCCTT  
+HWI-EAS443:3:27:1734:645#0/1  
``\_bbabbbbaaaa`aa``\_a`\_aa]¥`\_a`U¥^^\_W¥\_  
@HWI-EAS443:3:27:717:1693#0/1  
CGCTGTTCTGTTGATATTCTTCCCTCATGGACTCAGGCA  
+HWI-EAS443:3:27:717:1693#0/1  
[`X`ZQZabb\_`^0VT\_\_`[^aa[`R`aSaa`a\_b`aZ`b  
@HWI-EAS443:3:32:690:1604#0/1  
CGCCTGAGTCCATGAGGGAAGAATATCAACAGGAACAGCA  
+HWI-EAS443:3:32:690:1604#0/1  
aabaa`aa`aaaa``]V¥`a\_aa\_a\_aaaTa\_[]`R¥^a]  
@HWI-EAS443:3:35:1608:1005#0/1  
CGCCTGAGTCCATGAGGGAAGAATATCAACAGGAACAGCA  
+HWI-EAS443:3:35:1608:1005#0/1  
^WO¥\_\_R[T\_[][\_Y\_¥`WWbaa^\_\_Q]H[X[¥R[TX`RN  
@HWI-EAS443:3:39:704:846#0/1  
CGCCTGAGTCCATGAGGGAAGAATATCAACAGGAACAGCA  
+HWI-EAS443:3:39:704:846#0/1  
a``aa`ab^ba]bbabba^bab``aaabbbba`Saaaa\_  
@HWI-EAS443:3:39:781:92#0/1  
CGCCTGAGTCCATGAGGGAAGAATATCAACAGGAACAGCA  
+HWI-EAS443:3:39:781:92#0/1  
G^aZba\_a^baZa`abbb^bb]abb`X\_WXabab\_abb\_X  
@HWI-EAS443:3:42:1076:470#0/1  
AGAGGGAAGAATATCAACAGGAACAGCAGAGTGCTGTGGA  
+HWI-EAS443:3:42:1076:470#0/1  
ab`bbbaab^baab`abababaa^aaa`bX`^a^aaaaaB  
@HWI-EAS443:3:42:346:783#0/1  
CGCCTGAGTCCATGAGGGAAGAATATCAACAGGAACAGCA  
+HWI-EAS443:3:42:346:783#0/1  
abbbbaXa[bbab\_^\_b`\_bb`baaaXZ`Z`]`^aa`a  
@HWI-EAS443:3:49:1242:1085#0/1  
CGCCTGAGTCCATGAGGGAAGAATATCAACAGGAACAGCA  
+HWI-EAS443:3:49:1242:1085#0/1  
`aaabbab`a`aba`aba\_aa``aaaaaYaaaaa]a`a`  
@HWI-EAS443:3:49:298:1603#0/1  
GAAGAATATCAACAGGAACAGCAGAGTGCTGTGGATGTTT  
+HWI-EAS443:3:49:298:1603#0/1  
]aaaabbbba\_`babbbababaababa\_babaaa\_`a[HUH  
@HWI-EAS443:3:50:20:1501#0/1  
AGCCTGAGTCCATGAGGGAAGAATATCAACAGGAACAGCA

+HWI-EAS443:3:50:20:1501#0/1  
aaaa`Zaa^^`¥aa^`a`a`a]]`¥^a^a\_\_^ZR]]G¥  
@HWI-EAS443:3:51:1678:466#0/1  
TCCTGAGTCCATGAGGGAAGAATATCAACAGGAACAGCAG  
+HWI-EAS443:3:51:1678:466#0/1  
Sab¥M`\_bbb]\_b^\_a\_abbabbb`W¥bba`T`ba\_V\_ab  
@HWI-EAS443:3:58:309:1287#0/1  
AGCCTGAGTCCATGAGGGAAGAATATCAACAGGAACAGCA  
+HWI-EAS443:3:58:309:1287#0/1  
aa`¥]b\_a\_\_`a]a`\_aaTX¥TUZ`a``aa\_¥\_`[\_`\_\_\_\_  
@HWI-EAS443:3:59:842:847#0/1  
CGCCTGAGTCCATGAGGGAAGAATATCAACAGGAACAGCA  
+HWI-EAS443:3:59:842:847#0/1  
`aabbbaaaab]aaaa^`^baZaaa`b`ba\_[¥¥TPN^QT  
@HWI-EAS443:3:61:1738:862#0/1  
CCCTGTTGATATTCTTCCCTCATGGACTCAGGCACTCCTT  
+HWI-EAS443:3:61:1738:862#0/1  
``abb\_bbaaabaSabbababbaaaa`aa``UU`[^SRYY  
@HWI-EAS443:3:6:738:1580#0/1  
GGCCTGAGTCCATGAGGGAAGAATATCAACAGGAACAGCA  
+HWI-EAS443:3:6:738:1580#0/1  
a``b][ZRLJWVYXUV]¥]RU]`[P[U`\_V`Y`T`Z`\_`^B  
@HWI-EAS443:3:72:820:1409#0/1  
AACAGGAACAGCAGAGTGCTGTGGATGTTGACGATGGTCC  
+HWI-EAS443:3:72:820:1409#0/1  
`a]VN]aaa¥aaa\_\_^R`T[¥\_\_`BBBBBBBBBBBBBBBB  
@HWI-EAS443:3:74:1044:101#0/1  
CGCCTGAGTCCATGAGGGAAGAATATCAACAGGAACAGCA  
+HWI-EAS443:3:74:1044:101#0/1  
ab^abbabaabbbbabbbbabbabb`baababa`^abXa  
@HWI-EAS443:3:74:1675:843#0/1  
ACTGAGTCCATGAGGGAAGAATATCAACAGGAACAGCAGA  
+HWI-EAS443:3:74:1675:843#0/1  
aaaaQ]\_ababbR`\_a`\_^\_aba^U¥aJ`ba`^WR^U\_aZ  
@HWI-EAS443:3:74:625:31#0/1  
AGCCTGAGTCCATGAGGGAAGAATATCAACAGGAACAGCA  
+HWI-EAS443:3:74:625:31#0/1  
abaaaaXb^`aaaa\_baa\_aa\_aaa[`a^]U]\_]S^`¥W  
@HWI-EAS443:3:75:529:1144#0/1  
CGCCTGAGTCCATGAGGGAAGAATATCAACAGGAACAGCA  
+HWI-EAS443:3:75:529:1144#0/1  
]\_¥\_b\_R\_X`\_\_\_\_W¥¥W\_aa¥X^bab\_Saa\_a``[\_Z]`  
@HWI-EAS443:3:77:1300:400#0/1  
GTCGTCAACATCCACAGCACTCTGCTGTTCTGTTGATAT  
+HWI-EAS443:3:77:1300:400#0/1  
VW¥\_baa[Q[bWTMYMZaY`bVbb`Nb]``a`MU[\_¥a`R  
@HWI-EAS443:3:79:1654:531#0/1  
AGCCTGAGTCCATGAGGGAAGAATATCAACAGGAACAGCA  
+HWI-EAS443:3:79:1654:531#0/1  
abaa`baab`^abaVbbaaabaaaa^ab\_aab`Q``Za

@HWI-EAS443:3:86:341:765#0/1  
GGCCTGAGTCCATGAGGGAAGAATATCAACAGGAACAGCA  
+HWI-EAS443:3:86:341:765#0/1  
¥¥`a`a\_W\_^\_Z[¥Z¥Z[\_[^Z¥Z\_`\_Z^^\_RW]\_baSK]  
@HWI-EAS443:3:96:1210:1228#0/1  
GCCATGAGGGAAGAATATCAACAGGAACAGCAGAGTGCTG  
+HWI-EAS443:3:96:1210:1228#0/1  
a^a¥aa^^`Z`a\_]T\_`W\_¥V\_^Z^^¥a]¥\_`^ZU^P^B  
@HWI-EAS443:3:100:839:231#0/1  
GCCTGAGTCCATGAGGGAAGAATATCAACAGGAACAGCAG  
+HWI-EAS443:3:100:839:231#0/1  
aY`^bZaY^X]`a¥`aa^aa\_S\_`¥T\_\_U``\_Y¥WY\_BBB  
@HWI-EAS443:3:100:97:2023#0/1  
TGTTGATATTCTCCCTCATGGACTCAGGCACTCCTCCG  
+HWI-EAS443:3:100:97:2023#0/1  
abaaaa`ba[bb`a`aa\_a`\_a\_\_`\_\_`^aU\_¥\_^^UUB  
@HWI-EAS443:3:10:1041:1294#0/1  
CCTGAGTCCATGAGGGAAGAATATCAACAGGAACAGCAGA  
+HWI-EAS443:3:10:1041:1294#0/1  
aabbbabbaba`aababbbbbbbbaaaaba\_ba^aba  
@HWI-EAS443:3:10:1176:52#0/1  
TGCCTGAGTCCATGAGGGAAGAATATCAACAGGAACAGCA  
+HWI-EAS443:3:10:1176:52#0/1  
a`a^^`Za\_Va\_a`ZZV\_^[\_`\_Za\_¥U`YR[ZVXUUUV[ZY  
@HWI-EAS443:3:10:179:719#0/1  
CATGAGGGAAGAATATCAACAGGAACAGCAGAGTGCTGTG  
+HWI-EAS443:3:10:179:719#0/1  
abaZX\_WZ¥`aS\_aa`^^]^\_ZSYZR^`aaa`aVa``]BB  
@HWI-EAS443:3:10:236:1271#0/1  
GCCTGAGTCCATGAGGGAAGAATATCAACAGGAACAGCAG  
+HWI-EAS443:3:10:236:1271#0/1  
`aa`a^a¥aaZ`Z`^\_¥``\_a\_^\_\_\_\_\_]\_\_¥`\_V\_\_  
@HWI-EAS443:3:10:738:1698#0/1  
TGAGTCCATGAGGGAAGAATATCAACAGGAACAGCAGAGT  
+HWI-EAS443:3:10:738:1698#0/1  
abba[aa\_\_ba^\_\_\_aa``[¥\_[W[[`aX`\_]`]X¥^\_TU  
@HWI-EAS443:3:10:833:861#0/1  
GCCTGAGTCCATGAGGGAAGAATATCAACAGGAACAGCAG  
+HWI-EAS443:3:10:833:861#0/1  
a\_]^^`a^\_\_^\_^[\_`YX\_\_Z\_\_\_SDV\_V`\_W¥¥Q^VQV¥  
@HWI-EAS443:3:11:1241:694#0/1  
GACCATCGTCAACATCCACAGCACTCTGCTGTTCCCTGTTG  
+HWI-EAS443:3:11:1241:694#0/1  
aa`aaa`aZSbaX\_\_`\_V\_\_^Y`Y¥\_a^X¥V[`XNU\_X\_]`  
@HWI-EAS443:3:11:1513:202#0/1  
CCTGAGTCCATGAGGGAAGAATATCAACAGGAACAGCAGA  
+HWI-EAS443:3:11:1513:202#0/1  
`bba^^`babbbaa`ab`aaa```a^a\_a`\_\_`\_Y¥`¥  
@HWI-EAS443:3:12:336:228#0/1  
TGTTGATATTCTCCCTCATGGACTCAGGCACTCCTCCG

+HWI-EAS443:3:12:336:228#0/1  
abYF\_a\_aaa\_`baaaaa\_aa\_`^\_````\_`[¥¥W¥¥W¥U  
@HWI-EAS443:3:12:947:153#0/1  
GTTCTGTTGATATTCTTCCCTCATGGACTCAGGCACTCC  
+HWI-EAS443:3:12:947:153#0/1  
\_`^\_`^`[`aaaba¥aa^R\_`aaa¥TY]aa\_`[\_`\_QVZ[\_WZZ  
@HWI-EAS443:3:13:1092:818#0/1  
CCTGAGTCCATGAGGGAAGAATATCAACAGGAACAGCAGA  
+HWI-EAS443:3:13:1092:818#0/1  
aaaaaa`aaaa`U`aa`aa`aa`aaa`^aa`\_`^¥`a]¥`\_`  
@HWI-EAS443:3:13:1762:2022#0/1  
CACTCTGCTGTTCTGTTGATATTCTTCCCTCATGGACTC  
+HWI-EAS443:3:13:1762:2022#0/1  
aaaa\_`[\_`aaaSY[]`\_]\_a\_aaT[KV]Y]NJOV`¥`\_BBBB  
@HWI-EAS443:3:13:452:1549#0/1  
AACATCCACAGCACTCTGCTGTTCTGTTGATATTCTTCC  
+HWI-EAS443:3:13:452:1549#0/1  
M^`Q`a`a¥]ZWZ]^J[aWZPIP`^`^`TTWa\_BBBBBB  
@HWI-EAS443:3:13:547:165#0/1  
GTGCCTGAGTCCATGAGGGAAGAATATCAACAGGAACAGC  
+HWI-EAS443:3:13:547:165#0/1  
a\_a`\_`a`\_¥`[\_`\_Z^``¥]`\_\_\_\_¥W¥^¥W\_¥¥U¥W^¥S  
@HWI-EAS443:3:13:625:159#0/1  
GCCTGAGTCCATGAGGGAAGAATATCAACAGGAACAGCAG  
+HWI-EAS443:3:13:625:159#0/1  
`Z[^]`OH`]`aYV]`[¥Y¥TOX^]URKVU¥UVVZZGZ^  
@HWI-EAS443:3:13:694:168#0/1  
CAGCACTCTGCTGTTCTGTTGATATTCTTCCCTCATGGA  
+HWI-EAS443:3:13:694:168#0/1  
\_Yaaa[[a\_``[a]][[Z\_V^]¥¥X^¥ZSXNRU^W]WUBB  
@HWI-EAS443:3:13:866:1346#0/1  
CCTGAGTCCATGAGGGAAGAATATCAACAGGAACAGCAGA  
+HWI-EAS443:3:13:866:1346#0/1  
a^a`\_`W^a\_\_^S`^Wa`\_`^¥`\_¥Z`WS\_S¥¥W^]N^]B  
@HWI-EAS443:3:14:1159:1874#0/1  
GAGGGAAGAATATCAACAGGAACAGCAGAGTGCTGTGGAT  
+HWI-EAS443:3:14:1159:1874#0/1  
aZ\_XR^aa`^X[]`^^b`W]]V\_NKZ^\_XR\_ZV`BBBBB  
@HWI-EAS443:3:14:203:1096#0/1  
ATCGTCAACATCCACAGCACTCTGCTGTTCTGTTGATAT  
+HWI-EAS443:3:14:203:1096#0/1  
aaa`[aaaaa`a\_\_aa^\_`a^^]`\_`^Z\_\_Z^]WV\_]`^]  
@HWI-EAS443:3:14:236:214#0/1  
CCTGAGTCCATGAGGGAAGAATATCAACAGGAACAGCAGA  
+HWI-EAS443:3:14:236:214#0/1  
aX]]J\_¥¥a`\_`\_\_aYU\_`[Z\_\_X`^TU^a¥^¥Y^\_`^ZU  
@HWI-EAS443:3:14:476:98#0/1  
GCCTGAGTCCATGAGGGAAGAATATCAACAGGAACAGCAG  
+HWI-EAS443:3:14:476:98#0/1  
aa`aa\_a\_a]\_`b\_aa`^`\_\_¥\_]`^U^\_`^`\_]`^`\_]WX\_

@HWI-EAS443:3:15:1034:480#0/1  
CAACATCCACAGCACTCTGCTGTTCCCTGTTGATATTCTTC  
+HWI-EAS443:3:15:1034:480#0/1  
abbaabaaaabaaa\_aaba\_bbaa\_\_bb`ab`baba]aa]  
@HWI-EAS443:3:15:1309:1579#0/1  
GTGCCTGAGTCCATGAGGGAAGAATATCAACAGGAACAGC  
+HWI-EAS443:3:15:1309:1579#0/1  
a\_a`abaaaa^`a`a`ba`\_`baaa`a\_aa\_aaa\_^^aa]  
@HWI-EAS443:3:15:1384:1258#0/1  
CACAGCACTCTGCTGTTCCCTGTTGATATTCTTCCCTCATG  
+HWI-EAS443:3:15:1384:1258#0/1  
IZbbbb\_`WYb```bb\_\_^]a`a[¥baaWR^¥^¥^`aba\_  
@HWI-EAS443:3:15:266:615#0/1  
GTGCCTGAGTCCATGAGGGAAGAATATCAACAGGAACAGC  
+HWI-EAS443:3:15:266:615#0/1  
a\_a``SWOQGX¥`XXVQT`WV¥]a^[Z`XHV[VaUaZ¥^¥  
@HWI-EAS443:3:15:314:1468#0/1  
GCCTGAGTCCATGAGGGAAGAATATCAACAGGAACAGCAG  
+HWI-EAS443:3:15:314:1468#0/1  
aaa¥PR]]aa`]aZW\_a^\_VXHT```a`X`]YZW¥^¥Y^^  
@HWI-EAS443:3:16:1214:1027#0/1  
GCCTGAGTCCATGAGGGAAGAATATCAACAGGAACAGCAG  
+HWI-EAS443:3:16:1214:1027#0/1  
aaa[bab^aZ]bbabaaa`a`Vaa``aaaaa\_\_W`a^``  
@HWI-EAS443:3:16:70:1749#0/1  
AGTGCCTGAGTCCATGAGGGAAGAATATCAACAGGAACAG  
+HWI-EAS443:3:16:70:1749#0/1  
^OXZ[]^ZVRV^^ZW^W]a¥X^aa`¥]`[`¥X]PMYXU\_T  
@HWI-EAS443:3:16:819:227#0/1  
GCCTGAGTCCATGAGGGAAGAATATCAACAGGAACAGCAG  
+HWI-EAS443:3:16:819:227#0/1  
aaY`a]^[\_`\_\_`a^^^Y\_`^\_]¥^U\_[UWZ¥¥WSMVTUW  
@HWI-EAS443:3:16:942:60#0/1  
TGTGATATTCTTCCCTCATGGACTCAGGCACTCCTTCCG  
+HWI-EAS443:3:16:942:60#0/1  
`baaaa`abb`aaaa`a\_`b^aU\_a^\_a\_U`T^¥Y\_VUVB  
@HWI-EAS443:3:17:1635:564#0/1  
GTTGATATTCTTCCCTCATGGACTCAGGCACTCCTTCCGT  
+HWI-EAS443:3:17:1635:564#0/1  
aaaaa\_\_`a\_`\_]\_^¥¥¥\_`ZX¥¥^¥¥^\_W¥VS[VTWWW  
@HWI-EAS443:3:17:64:1474#0/1  
TGCCTGAGTCCATGAGGGAAGAATATCAACAGGAACAGCA  
+HWI-EAS443:3:17:64:1474#0/1  
aba¥\_Zb]aaa[[\_abababbaa[``\_ababba^aaab\_a  
@HWI-EAS443:3:17:946:731#0/1  
ATCGTCAACATCCACAGCACTCTGCTGTTCCCTGTTGATAT  
+HWI-EAS443:3:17:946:731#0/1  
aaaa\_aaa¥aa```^`W\_]\_^`^aa[aSLXa]\_\_]Y]\_  
@HWI-EAS443:3:17:960:88#0/1  
GTTGATATTCTTCCCTCATGGACTCAGGCACTCCTTCCGT

+HWI-EAS443:3:17:960:88#0/1  
aQZU]GXaaR\_MTU^]Z\_\_aRFS[ZS\_RZ[P^VSVN[BBB  
@HWI-EAS443:3:18:1067:1202#0/1  
GTGCCTGAGTCCATGAGGGAAGAATATCAACAGGAACAGC  
+HWI-EAS443:3:18:1067:1202#0/1  
a````aaa``^¥\_aa¥aa`U¥\_\_`[`YW\_a^``\_\_^\_\_Z  
@HWI-EAS443:3:18:1211:1561#0/1  
GTTGATATTCTTCCCTCATGGACTCAGGCACTCCTTCCGT  
+HWI-EAS443:3:18:1211:1561#0/1  
a`aba^\_a`a``^Wa`\_`a`Z^`\_`^`^`^`XR¥`W  
@HWI-EAS443:3:18:181:1237#0/1  
GTGCCTGAGTCCATGAGGGAAGAATATCAACAGGAACAGC  
+HWI-EAS443:3:18:181:1237#0/1  
a\_aaaa`ab`aaa\_a\_aaa\_a`aaaa\_aa`aa``a\_a\_a  
@HWI-EAS443:3:18:638:296#0/1  
GTCAACATCCACAGCACTCTGCTGTTCCCTGTTGATATTCT  
+HWI-EAS443:3:18:638:296#0/1  
a\_``aaa^`\_aaa^\_¥[[¥]]\_W\_Y¥]YZZWWWYUWYWQ¥  
@HWI-EAS443:3:19:1053:1085#0/1  
CTGAGTCCATGAGGGAAGAATATCAACAGGAACAGCAGAG  
+HWI-EAS443:3:19:1053:1085#0/1  
aaUY]a\_`Kbb\_``¥aX)`aa\_L¥aW`bU\_``^XV`\_a  
@HWI-EAS443:3:19:1138:189#0/1  
CTGAGTCCATGAGGGAAGAATATCAACAGGAACAGCAGAG  
+HWI-EAS443:3:19:1138:189#0/1  
ab\_babVbaab`Y]MabbaUb`\_I]]]Jb][baU``^¥`G^  
@HWI-EAS443:3:19:115:392#0/1  
TACGGAAGGAGTGCCTGAGTCCATGAGGGAAGAATATCAA  
+HWI-EAS443:3:19:115:392#0/1  
aaa^aaaa^a\_W^`a````^Z`\_X`^`X`\_a^QYPZa``  
@HWI-EAS443:3:1:114:964#0/1  
GCCTGAGTCCATGAGGGAAGAATATCAACAGGAACAGCAG  
+HWI-EAS443:3:1:114:964#0/1  
a)`aa¥aNaa¥\_\_S[aRa`)`¥Z]a\_N^\_¥¥VSW`¥¥\_BBB  
@HWI-EAS443:3:1:1283:1206#0/1  
GTTCCCTGTTGATATTCTTCCCTCATGGACTCAGGCACTCC  
+HWI-EAS443:3:1:1283:1206#0/1  
a`aY¥a`\_aa^\_^\_`\_]`¥^W^\_\_XYS]V¥X]YZYBBB  
@HWI-EAS443:3:1:1729:757#0/1  
AGTGCCTGAGTCCATGAGGGAAGAATATCAACAGGAACAG  
+HWI-EAS443:3:1:1729:757#0/1  
aa^`H¥aU`a\_a``¥X]a\_Ua`T^a)]`UaaG\_aa¥BBBB  
@HWI-EAS443:3:1:584:1155#0/1  
GAGGGAAGAATATCAACAGGAACAGCAGAGTGCTGTGGAT  
+HWI-EAS443:3:1:584:1155#0/1  
a``XWR\_]`\_Ua[[¥UY`Z¥`¥WY^¥\_\_^T\_Q¥]WBBBB  
@HWI-EAS443:3:20:240:236#0/1  
GTGCCTGAGTCCATGAGGGAAGAATATCAACAGGAACAGC  
+HWI-EAS443:3:20:240:236#0/1  
aVa\_]X`^]Qa^\_\_`¥`aWS\_^\_^^^[]¥]¥^W¥¥]W¥¥U



@HWI-EAS443:3:20:597:121#0/1  
GTGCCTGAGTCCATGAGGGAAGAATATCAACAGGAACAGC  
+HWI-EAS443:3:20:597:121#0/1  
a\_a^^`aWa\_`^` [Z`\_^Y\_\_¥¥¥^¥\_^YY^UT[WU¥W]  
@HWI-EAS443:3:20:624:1795#0/1  
CATCCACAGCACTCTGCTGTTCCCTGTTGATATTCTTCCCT  
+HWI-EAS443:3:20:624:1795#0/1  
aa] []Ybb\_¥` ` \_`QbaX¥[ ` \_¥¥a¥LQQG^[US¥W¥ZNP  
@HWI-EAS443:3:21:1284:450#0/1  
GCCTGAGTCCATGAGGGAAGAATATCAACAGGAACAGCAG  
+HWI-EAS443:3:21:1284:450#0/1  
aaaaa\_XP\_^^`][ ` `¥\_]` \_\_[]R]aZ\_^Y[WV\_]MM^  
@HWI-EAS443:3:21:496:350#0/1  
GCCTGAGTCCATGAGGGAAGAATATCAACAGGAACAGCAG  
+HWI-EAS443:3:21:496:350#0/1  
a]NNXU\_]RRNSVQ`¥^YXZUVN¥X¥R[TSXYSZNRSVVW  
@HWI-EAS443:3:22:1339:58#0/1  
TGCCTGAGTCCATGAGGGAAGAATATCAACAGGAACAGCA  
+HWI-EAS443:3:22:1339:58#0/1  
aa\_¥ab`b`\_\_aa¥a`a`a`^\_\_\_S\_^Y\_`¥^¥Y¥\_U¥  
@HWI-EAS443:3:22:1644:924#0/1  
CCTGAGTCCATGAGGGAAGAATATCAACAGGAACAGCAGA  
+HWI-EAS443:3:22:1644:924#0/1  
`¥I\_bbbaaZ`bTZaaZaaa^ab^aSa]U^` `VRDSZIdW[  
@HWI-EAS443:3:22:1764:1135#0/1  
GGGAAGAATATCAACAGGAACAGCAGAGTGCTGTGGATGT  
+HWI-EAS443:3:22:1764:1135#0/1  
X¥XW^b] `]Z^^\_]V\_a\_XXDT\_PZaU]SZXW\_BBBBBBB  
@HWI-EAS443:3:22:231:710#0/1  
ATCGTCAACATCCACAGCACTCTGCTGTTCCCTGTTGATAT  
+HWI-EAS443:3:22:231:710#0/1  
aaba\_`baaaaa\_a\_a\_aaa^a[\_`\_^U`\_]\_\_\_\_]\_^  
@HWI-EAS443:3:22:359:452#0/1  
ACAGCACTCTGCTGTTCCCTGTTGATATTCTTCCCTCATGG  
+HWI-EAS443:3:22:359:452#0/1  
abaaaaaaaa`a\_X^Xa\_`[a¥` ` `¥\_\_X`^`¥¥¥\_`^`^\_  
@HWI-EAS443:3:23:1203:120#0/1  
TGCTGTTCCCTGTTGATATTCTTCCCTCATGGACTCAGGCA  
+HWI-EAS443:3:23:1203:120#0/1  
abaab\_a[ `ab`aa^aZaaT`a¥WW]aW\_` ]¥Y¥Y¥^YT¥  
@HWI-EAS443:3:23:1520:2012#0/1  
CTGAGTCCATGAGGGAAGAATATCAACAGGAACAGCAGAG  
+HWI-EAS443:3:23:1520:2012#0/1  
a\_Q\_aaa]\_^`\_[Z[Y`a`ab`ZUWb¥b\_]\_[Q^aX\_\_\_U  
@HWI-EAS443:3:23:713:389#0/1  
TGTTGATATTCTTCCCTCATGGACTCAGGCACTCCTCCG  
+HWI-EAS443:3:23:713:389#0/1  
abWY¥abTb]V`\_R\_Ra`Z]^QW¥\_`¥\_¥a^V^HS\_`[YQ  
@HWI-EAS443:3:24:769:937#0/1  
CATCGTCAACATCCACAGCACTCTGCTGTTCCCTGTTGATA

+HWI-EAS443:3:24:769:937#0/1  
aba¥[\_bba\_abba`aaaY`\_\_aabaaaYa^[a\_NTX¥[X  
@HWI-EAS443:3:25:160:948#0/1  
GTGCCTGAGTCCATGAGGGAAGAATATCAACAGGAACAGC  
+HWI-EAS443:3:25:160:948#0/1  
\_Uaa`a`\_¥aaa`a[a¥^\_a`^¥^^^a]\_\_`\_`\_`\_\_^U  
@HWI-EAS443:3:25:1686:1681#0/1  
CCTGAGTCCATGAGGGAAGAATATCAACAGGAACAGCAGA  
+HWI-EAS443:3:25:1686:1681#0/1  
U\_bbbaaabbbabbbaabbabbabaabbbbbbb^bbbbba  
@HWI-EAS443:3:25:393:1147#0/1  
TGACCATCGTCAACATCCACAGCACTCTGCTGTTCTGTT  
+HWI-EAS443:3:25:393:1147#0/1  
abbb`baa^\_b[aaaa`W`aa\_a\_aaa¥a\_\_]\_^a\_\_\_\_  
@HWI-EAS443:3:25:818:668#0/1  
CACAGCACTCTGCTGTTCTGTTGATATTCTTCCCTCATG  
+HWI-EAS443:3:25:818:668#0/1  
HVabbaZ`b``abbbbaaPTbaY`YYa^[[ab`ba\_[a\_^  
@HWI-EAS443:3:26:105:133#0/1  
GTGCCTGAGTCCATGAGGGAAGAATATCAACAGGAACAGC  
+HWI-EAS443:3:26:105:133#0/1  
¥Zb`[b`Ta\_b`\_`aabbba`bbba]^a^a``aaaa\_aa  
@HWI-EAS443:3:26:217:1370#0/1  
TGACCATCGTCAACATCCACAGCACTCTGCTGTTCTGTT  
+HWI-EAS443:3:26:217:1370#0/1  
aT`bb\_ba]Saa\_Z[T`ba`]ZY\_a¥a[^\_VSV]aXNTQW  
@HWI-EAS443:3:26:848:201#0/1  
CGTCAACATCCACAGCACTCTGCTGTTCTGTTGATATTC  
+HWI-EAS443:3:26:848:201#0/1  
ababbaabab^aabb^`aaaa`\_aa]a^`\_aaaa\_]`^T  
@HWI-EAS443:3:26:893:1249#0/1  
CTGAGTCCATGAGGGAAGAATATCAACAGGAACAGCAGAG  
+HWI-EAS443:3:26:893:1249#0/1  
abb^^`bbabaaa]aaaabaaaaaa\_baa``aa^G^a\_`  
@HWI-EAS443:3:27:1033:1914#0/1  
GTTCTGTTGATATTCTTCCCTCATGGACTCAGGCACTCC  
+HWI-EAS443:3:27:1033:1914#0/1  
WV`Y`aZb¥a\_b`^WZb\_WW¥aabb]b`[`]a^`\_a[`a  
@HWI-EAS443:3:27:1214:461#0/1  
GCCTGAGTCCATGAGGGAAGAATATCAACAGGAACAGCAG  
+HWI-EAS443:3:27:1214:461#0/1  
a`ababba`aabb`aba`\_aaaaa`aa\_aa`\_`\_aa¥^\_  
@HWI-EAS443:3:27:324:1010#0/1  
CCTGAGTCCATGAGGGAAGAATATCAACAGGAACAGCAGA  
+HWI-EAS443:3:27:324:1010#0/1  
abbaZb`bb^bb\_]a`aa`¥aaaabaa`a^[\_`\_a\_\_\_a\_  
@HWI-EAS443:3:27:412:609#0/1  
TTGATATTCTTCCCTCATGGACTCAGGCACTCCTTCCGTA  
+HWI-EAS443:3:27:412:609#0/1  
abaaa`aa]aaa`^a`\_a`aaa\_a`\_¥a`\_\_a`\_¥`\_\_G\_

@HWI-EAS443:3:27:606:1455#0/1  
CTGAGTCCATGAGGGAAGAATATCAACAGGAACAGCAGAG  
+HWI-EAS443:3:27:606:1455#0/1  
\_`abY]bab`bZTQ\_b\_`bbbb]babaa\_a`\_^`Y`aa  
@HWI-EAS443:3:27:79:1931#0/1  
GCCTGAGTCCATGAGGGAAGAATATCAACAGGAACAGCAG  
+HWI-EAS443:3:27:79:1931#0/1  
abb\_R\_aZbbb^aa]]^`aabb\_`abbabbaa\_`]a\_aa`  
@HWI-EAS443:3:28:1640:215#0/1  
CCTGAGTCCATGAGGGAAGAATATCAACAGGAACAGCAGA  
+HWI-EAS443:3:28:1640:215#0/1  
a`a`baZ\_a`a^bbbabbbbbbVaaSa`aa`Zaaa\_aa  
@HWI-EAS443:3:28:1692:1756#0/1  
ATCCACAGCACTCTGCTGTTCCCTGTTGATATTCTCCCTC  
+HWI-EAS443:3:28:1692:1756#0/1  
a[X`¥\_]a`[\_TV\_U¥ZVFX\_T¥SXNV\_NLY`VUBBB  
@HWI-EAS443:3:29:1005:1976#0/1  
ATCCACAGCACTCTGCTGTTCCCTGTTGATATTCTCCCTC  
+HWI-EAS443:3:29:1005:1976#0/1  
aa`¥`U`a^¥]ZLW^XSY`\_]`\_U\_\_ZNZ[¥STZN\_[WB  
@HWI-EAS443:3:29:1082:308#0/1  
TGCCTGAGTCCATGAGGGAAGAATATCAACAGGAACAGCA  
+HWI-EAS443:3:29:1082:308#0/1  
K[[^WUT^\_WT\_[^SUUW]a[Q]a¥aaJ¥UK¥a\_QM[\_P\_  
@HWI-EAS443:3:29:412:578#0/1  
ATCGTCAACATCCACAGCACTCTGCTGTTCCCTGTTGATAT  
+HWI-EAS443:3:29:412:578#0/1  
`\_bb]``]abbbbaaaaaaaaaaaaa`a^^\_``aT]RZ][  
@HWI-EAS443:3:29:847:1481#0/1  
GTCCATGAGGGAAGAATATCAACAGGAACAGCAGAGTGCT  
+HWI-EAS443:3:29:847:1481#0/1  
a`a`\_XT00X]aa^¥\_a[a`¥aa`ZYV¥][¥X^\_¥FYBB  
@HWI-EAS443:3:30:1324:1045#0/1  
ACATCCACAGCACTCTGCTGTTCCCTGTTGATATTCTCCC  
+HWI-EAS443:3:30:1324:1045#0/1  
`b\_ba^W\_ba^^a]ZaZaa`X\_``aaa]\_PXXZ¥SZ[VU]  
@HWI-EAS443:3:30:367:270#0/1  
CATCCACAGCACTCTGCTGTTCCCTGTTGATATTCTCCCT  
+HWI-EAS443:3:30:367:270#0/1  
aabbabbbabbaabbabaa`aa`baaaa\_`aaaa``[RY\_  
@HWI-EAS443:3:30:971:899#0/1  
GCCTGAGTCCATGAGGGAAGAATATCAACAGGAACAGCAG  
+HWI-EAS443:3:30:971:899#0/1  
^]WXOZaN]``XLZS^`ZZ\_W¥VTG¥NTT\_YTUZGUXGU¥  
@HWI-EAS443:3:31:1076:923#0/1  
TTCCTGTTGATATTCTCCCTCATGGACTCAGGCACTCCT  
+HWI-EAS443:3:31:1076:923#0/1  
ababbbabbbabb`baaaaaaaaaaaa`aaa`\_a`\_````  
@HWI-EAS443:3:32:1590:1079#0/1  
GTGCCTGAGTCCATGAGGGAAGAATATCAACAGGAACAGC

+HWI-EAS443:3:32:1590:1079#0/1  
a\_bVa`a\_b[\_`]aa^`[`a`\_\_`\_\_\_`¥\_`^a\_¥aaa^  
@HWI-EAS443:3:32:191:526#0/1  
GCCTGAGTCCATGAGGGAAGAATATCAACAGGAACAGCAG  
+HWI-EAS443:3:32:191:526#0/1  
`bbaaaaabbaa\_X^U^a)`aa`a`aaaa` `[aaaa`Q`  
@HWI-EAS443:3:33:1202:163#0/1  
TGCCTGAGTCCATGAGGGAAGAATATCAACAGGAACAGCA  
+HWI-EAS443:3:33:1202:163#0/1  
aaaabbaba`aaba`bbb` `aaaaaUa`\_a`VW¥Y\_\_¥^  
@HWI-EAS443:3:33:309:290#0/1  
CCTGTTGATATTCTTCCCTCATGGACTCAGGCACTCCTTC  
+HWI-EAS443:3:33:309:290#0/1  
aa^`^`\_^^`\_\_`¥`\_`\_`V`\_\_`[[N]W[\_`^¥¥VVWZ[WTW  
@HWI-EAS443:3:33:563:689#0/1  
CTGCTGTTCTGTTGATATTCTTCCCTCATGGACTCAGGC  
+HWI-EAS443:3:33:563:689#0/1  
a^`[^`]VT`^`R\_` `[\_\_`[ZVZSZ` `[`[UUZVQUUUWWS  
@HWI-EAS443:3:34:1245:204#0/1  
CCTGAGTCCATGAGGGAAGAATATCAACAGGAACAGCAGA  
+HWI-EAS443:3:34:1245:204#0/1  
`bbbbbbab`bbbaab`abbbababaaaabaaaa`\_aS\_¥^  
@HWI-EAS443:3:35:1002:1245#0/1  
TTCCTGTTGATATTCTTCCCTCATGGACTCAGGCACTCCT  
+HWI-EAS443:3:35:1002:1245#0/1  
Ua¥` `[`a`[\_`¥W\_¥a^TZX\_`aUQWIQRTX]RL[\_`W]HY  
@HWI-EAS443:3:35:125:1212#0/1  
ATGAGGGAAGAATATCAACAGGAACAGCAGAGTGCTGTGG  
+HWI-EAS443:3:35:125:1212#0/1  
aaaaaaaaabaa[aaaa`¥^aaa]aaaa[\_`\_`X`a\_\_Y\_^  
@HWI-EAS443:3:35:1286:1066#0/1  
TCCTGTTGATATTCTTCCCTCATGGACTCAGGCACTCCTT  
+HWI-EAS443:3:35:1286:1066#0/1  
ab\_]aababa`aaaaaaaaa\_\_a`aa\_`a` `aa\_`\_\_Y`  
@HWI-EAS443:3:35:930:111#0/1  
GCCTGAGTCCATGAGGGAAGAATATCAACAGGAACAGCAG  
+HWI-EAS443:3:35:930:111#0/1  
[WUQQ\_WPOP\_\_¥`ba]LGRUR`QXZYaVV`\_IOGSYVYQ  
@HWI-EAS443:3:35:979:421#0/1  
CATCGTCAACATCCACAGCACTCTGCTGTTCTGTTGATA  
+HWI-EAS443:3:35:979:421#0/1  
abbbbaaba\_baaaa`aa[\_`Za`¥a[^a`\_`^^`X`]  
@HWI-EAS443:3:36:1458:641#0/1  
CAGCACTCTGCTGTTCTGTTGATATTCTTCCCTCATGGA  
+HWI-EAS443:3:36:1458:641#0/1  
abbabbbbaa]aaaa^baa\_aa`^aaaPaaa^[[a]X[^  
@HWI-EAS443:3:36:178:535#0/1  
CCACAGCACTCTGCTGTTCTGTTGATATTCTTCCCTCAT  
+HWI-EAS443:3:36:178:535#0/1  
aa^aaaaaaaaabaa\_\_a^a`aa`^^V`][`\_`\_`XaaW` `W

@HWI-EAS443:3:36:53:750#0/1  
GACCATCGTCAACATCCACAGCACTCTGCTGTTCCCTGTTG  
+HWI-EAS443:3:36:53:750#0/1  
aaaba`b`\_a\_\_a^X\_a`a`\_a¥aY^\_\_`W\_¥\_] ^U\_  
@HWI-EAS443:3:36:767:93#0/1  
GTGCCTGAGTCCATGAGGGAAGAATATCAACAGGAACAGC  
+HWI-EAS443:3:36:767:93#0/1  
aabaaa````a`aab`baa¥`a```^`S]^\_\_\_\_`\_`\_\_\_\_  
@HWI-EAS443:3:37:1547:591#0/1  
CTGAGTCCATGAGGGAAGAATATCAACAGGAACAGCAGAG  
+HWI-EAS443:3:37:1547:591#0/1  
a`\_W\_Uaba¥aY\_¥XH\_S`\_W\_W[YQ`aJO]a`aOR\_b\_  
@HWI-EAS443:3:38:1149:918#0/1  
GCCTGAGTCCATGAGGGAAGAATATCAACAGGAACAGCAG  
+HWI-EAS443:3:38:1149:918#0/1  
aabaabbbba`aaSbaaa\_aa`aaaaa`\_U\_ZaU`aS`\_  
@HWI-EAS443:3:38:1157:1820#0/1  
GTGCCTGAGTCCATGAGGGAAGAATATCAACAGGAACAGC  
+HWI-EAS443:3:38:1157:1820#0/1  
aWI]a`[]bYa\_[¥^[[aaWOS\_aa\_QWTSUW[ZW[]][UF  
@HWI-EAS443:3:38:347:1481#0/1  
GCCTGAGTCCATGAGGGAAGAATATCAACAGGAACAGCAG  
+HWI-EAS443:3:38:347:1481#0/1  
aab^aaaab^`[Z]`YZY`\_T^¥`aa]aa`[Ga]`aXI`\_  
@HWI-EAS443:3:38:407:1138#0/1  
CCTGAGTCCATGAGGGAAGAATATCAACAGGAACAGCAGA  
+HWI-EAS443:3:38:407:1138#0/1  
a`Z]^VU][Q]SZTOWH^ZVPV]V`XNXNZS[R[ZZ^SSQ  
@HWI-EAS443:3:38:823:1521#0/1  
CCACAGCACTCTGCTGTTCCCTGTTGATATTCTTCCCTCAT  
+HWI-EAS443:3:38:823:1521#0/1  
ababaaaaaaaa`aa^a`a`^aZ¥`Q\_\_T^¥¥\_Y¥¥\_Y  
@HWI-EAS443:3:39:1083:540#0/1  
TCCTGTTGATATTCTTCCCTCATGGACTCAGGCACTCCTT  
+HWI-EAS443:3:39:1083:540#0/1  
a`babaabaa\_aa\_aaa`^a¥a`a`¥Z`\_a`W\_aa\_\_¥^¥  
@HWI-EAS443:3:39:1159:1126#0/1  
GCCTGAGTCCATGAGGGAAGAATATCAACAGGAACAGCAG  
+HWI-EAS443:3:39:1159:1126#0/1  
abab\_`^^]`\_aSaaaVa\_WW\_[`aZZ^`\_TWS\_XW¥TR  
@HWI-EAS443:3:39:1372:366#0/1  
CCTGAGTCCATGAGGGAAGAATATCAACAGGAACAGCAGA  
+HWI-EAS443:3:39:1372:366#0/1  
a`bb]]¥]`aaa¥a`b`aaa`aa`\_a`\_a\_¥Va[¥a^^aU  
@HWI-EAS443:3:39:1538:1317#0/1  
GACCATCGTCAACATCCACAGCACTCTGCTGTTCCCTGTTG  
+HWI-EAS443:3:39:1538:1317#0/1  
abbbbbbba`aa¥Raaaa]^\_\_a`^aa]XYa[QXT^\_\_¥a¥  
@HWI-EAS443:3:39:1602:54#0/1  
CACTCTGCTGTTCCCTGTTGATATTCTTCCCTCATGGACTC

+HWI-EAS443:3:39:1602:54#0/1  
abbbbbbbbaabb`b^¥`abaaba`^baT\_`V¥^N  
@HWI-EAS443:3:39:1747:737#0/1  
GCCTGAGTCCATGAGGGAAGAATATCAACAGGAACAGCAG  
+HWI-EAS443:3:39:1747:737#0/1  
`aaba]YD¥\_¥aa]Za\_W^`U\_\_U¥SX\_\_a`GM¥Y[]SUU  
@HWI-EAS443:3:39:324:927#0/1  
TGCCTGAGTCCATGAGGGAAGAATATCAACAGGAACAGCA  
+HWI-EAS443:3:39:324:927#0/1  
abbba`^`[`a]]a\_]a\_`YV\_\_a\_a\_P\_`[]V]`\_]¥Y  
@HWI-EAS443:3:39:388:1874#0/1  
GCCTGAGTCCATGAGGGAAGAATATCAACAGGAACAGCAG  
+HWI-EAS443:3:39:388:1874#0/1  
aaab\_a`\_abaa`a```aaaab`aaaa`a¥T```a\_`W  
@HWI-EAS443:3:39:412:1688#0/1  
CTGAGTCCATGAGGGAAGAATATCAACAGGAACAGCAGAG  
+HWI-EAS443:3:39:412:1688#0/1  
ab]a`W]H¥a^¥VVTT`XX\_^Qaa[^BBBBBBBBBBBB  
@HWI-EAS443:3:39:737:659#0/1  
GCCTGAGTCCATGAGGGAAGAATATCAACAGGAACAGCAG  
+HWI-EAS443:3:39:737:659#0/1  
abbbbbbaaaabba`bbaaaa`aaaaaaaa`¥\_`aaa`a]  
@HWI-EAS443:3:3:1055:565#0/1  
ACCATCGTCAACATCCACAGCACTCTGCTGTTCTGTTGA  
+HWI-EAS443:3:3:1055:565#0/1  
^a\_^b`a[`a\_[aa`V\_a]a[a^a]a]FX]V]W]\_a\_ZX^  
@HWI-EAS443:3:40:603:235#0/1  
GTCCATGAGGGAAGAATATCAACAGGAACAGCAGAGTGCT  
+HWI-EAS443:3:40:603:235#0/1  
`R^X¥X]Y^^¥W¥[[[^ZU¥SUUU¥RNY¥YRRRRWWWYBB  
@HWI-EAS443:3:40:773:753#0/1  
GCCTGAGTCCATGAGGGAAGAATATCAACAGGAACAGCAG  
+HWI-EAS443:3:40:773:753#0/1  
aaZa\_U^W\_\_^¥ZM`\_^TUXYP¥`VNEW¥\_\_\_XMV[YUZY  
@HWI-EAS443:3:42:1057:214#0/1  
GCCTGAGTCCATGAGGGAAGAATATCAACAGGAACAGCAG  
+HWI-EAS443:3:42:1057:214#0/1  
abaa`\_b`^`^\_aa^aaa`\_a^`¥L¥`aa¥`a`^]S]a¥X]  
@HWI-EAS443:3:42:1329:299#0/1  
GCCTGAGTCCATGAGGGAAGAATATCAACAGGAACAGCAG  
+HWI-EAS443:3:42:1329:299#0/1  
a`\_`a`b^aZ^aa^aaaZ^`\_`a\_a[[WZ^\_\_^[[\_a\_^\_  
@HWI-EAS443:3:42:508:691#0/1  
TGTTGATATTCTTCCCTCATGGACTCAGGCACTCCTTCCG  
+HWI-EAS443:3:42:508:691#0/1  
ab`bb\_aZaaaaa\_```a\_a¥``aaZa`a`a`a\_\_\_a^a  
@HWI-EAS443:3:42:906:735#0/1  
CATGAGGGAAGAATATCAACAGGAACAGCAGAGTGCTGTG  
+HWI-EAS443:3:42:906:735#0/1  
abbbba`bbbbbbabbaabababa[bbbbaaab`baaaab

@HWI-EAS443:3:43:1083:831#0/1  
ATCGTCAACATCCACAGCACTCTGCTGTTCCCTGTTGATAT  
+HWI-EAS443:3:43:1083:831#0/1  
ab`bb^a\_]b¥YaYabPZ^XV¥ba\_XR¥INWq]`YX`Pa  
@HWI-EAS443:3:43:1108:698#0/1  
CTGCTGTTCCCTGTTGATATTCTTCCCTCATGGACTCAGGC  
+HWI-EAS443:3:43:1108:698#0/1  
`Za^`a`VU¥]b`W¥WPW¥Y``]^aaOT¥QZ\_a^¥^]U^  
@HWI-EAS443:3:43:1345:837#0/1  
GTGCCTGAGTCCATGAGGGAAGAATATCAACAGGAACAGC  
+HWI-EAS443:3:43:1345:837#0/1  
aaaaaab\_b]a``aaaab`a`a`\_`a\_aa``aa\_`^\_a\_  
@HWI-EAS443:3:43:184:1691#0/1  
GTGCCTGAGTCCATGAGGGAAGAATATCAACAGGAACAGC  
+HWI-EAS443:3:43:184:1691#0/1  
a`bbab]aa\_abbaaa`a`^baaaa\_abaa`\_aQabaU  
@HWI-EAS443:3:43:33:528#0/1  
GCCTGAGTCCATGAGGGAAGAATATCAACAGGAACAGCAG  
+HWI-EAS443:3:43:33:528#0/1  
aa`baaa¥\_a`aa\_`b\_`^`aa`aa\_]`aa¥VT]`Y^a  
@HWI-EAS443:3:43:379:1100#0/1  
GTGCCTGAGTCCATGAGGGAAGAATATCAACAGGAACAGC  
+HWI-EAS443:3:43:379:1100#0/1  
\_R^Z`baaaa¥aa]R`b\_^Q\_SZWQ0]WLVa]ZW¥V¥\_R  
@HWI-EAS443:3:43:437:196#0/1  
GTGCCTGAGTCCATGAGGGAAGAATATCAACAGGAACAGC  
+HWI-EAS443:3:43:437:196#0/1  
aabaaab`\_aaaZa`Xba^Xaa````a`\_`[\_a\_\_\_\_\_^  
@HWI-EAS443:3:43:523:496#0/1  
GTGCCTGAGTCCATGAGGGAAGAATATCAACAGGAACAGC  
+HWI-EAS443:3:43:523:496#0/1  
a^\_WFR\_R\_T^RaZa[W¥aXURT`aX\_MN`TUVGMPW¥¥  
@HWI-EAS443:3:44:1567:537#0/1  
GTCCATGAGGGAAGAATATCAACAGGAACAGCAGAGTGCT  
+HWI-EAS443:3:44:1567:537#0/1  
a\_\_`\_bb\_baa^¥aa\_\_`a``¥`a`¥`[\_`¥¥`]aW\_W^  
@HWI-EAS443:3:44:996:228#0/1  
CTCTGCTGTTCCCTGTTGATATTCTTCCCTCATGGACTCAG  
+HWI-EAS443:3:44:996:228#0/1  
aaabaabZP]S]]\_HV^PRQW`VVZY`^W^NM`YQVZNNY  
@HWI-EAS443:3:45:432:869#0/1  
TCCTGTTGATATTCTTCCCTCATGGACTCAGGCACTCCTT  
+HWI-EAS443:3:45:432:869#0/1  
a\_abb\_bbbaaaa\_aaaaa\_`aaa\_\_`a`\_\_a`^`\_a\_  
@HWI-EAS443:3:45:616:1267#0/1  
GACCATCGTCAACATCCACAGCACTCTGCTGTTCCCTGTTG  
+HWI-EAS443:3:45:616:1267#0/1  
aaaaaaa\_`a]`]`\_`\_\_\_aY``\_\_\_]`^aaZ][W\_a¥`^  
@HWI-EAS443:3:45:830:1944#0/1  
CCTGAGTCCATGAGGGAAGAATATCAACAGGAACAGCAGA

+HWI-EAS443:3:45:830:1944#0/1  
\_ab\_W\_[\_PZV^LYR`P\_ZY^Y[LWV^P^T¥Y]G][NLU]  
@HWI-EAS443:3:46:1169:319#0/1  
GCCTGAGTCCATGAGGGAAGAATATCAACAGGAACAGCAG  
+HWI-EAS443:3:46:1169:319#0/1  
aaa]aa^X`UX¥^J[`X^a¥Z^\_¥Y[\_Z`a^W^Z[`R[\_  
@HWI-EAS443:3:46:1267:234#0/1  
ATCGTCAACATCCACAGCACTCTGCTGTTCCCTGTTGATAT  
+HWI-EAS443:3:46:1267:234#0/1  
aaaa\_\_a\_Y]a`\_^]`a`\_^`a¥`\_\_^^V^^V^R[^^\_  
@HWI-EAS443:3:46:694:430#0/1  
AGTCCATGAGGGAAGAATATCAACAGGAACAGCAGAGTGC  
+HWI-EAS443:3:46:694:430#0/1  
a`^\_aabb\_bbb\_aaaaa\_a`a`[\_aa\_a]`aY[a\_^N^]  
@HWI-EAS443:3:46:918:1721#0/1  
CATGAGGGAAGAATATCAACAGGAACAGCAGAGTGCTGTG  
+HWI-EAS443:3:46:918:1721#0/1  
abbbabababababbb`S^\_aaaa`aa\_aa^`YYF[\_]\_  
@HWI-EAS443:3:47:483:1139#0/1  
ACAGCACTCTGCTGTTCCCTGTTGATATTCTTCCCTCATGG  
+HWI-EAS443:3:47:483:1139#0/1  
¥]QZaW]¥\_^Q¥\_^Z`[Z\_ZV\_X`^T¥[[VZ`QYYWV^a  
@HWI-EAS443:3:47:537:903#0/1  
GACCATCGTCAACATCCACAGCACTCTGCTGTTCCCTGTTG  
+HWI-EAS443:3:47:537:903#0/1  
ab\_a`aababa`\_aaa`a\_a`\_aa\_a^a`aaZ`\_\_`^^a  
@HWI-EAS443:3:48:1139:649#0/1  
ATCCACAGCACTCTGCTGTTCCCTGTTGATATTCTTCCCTC  
+HWI-EAS443:3:48:1139:649#0/1  
`a`b`]]`VUX¥`a^V\_aQaX\_a^W\_NPQP[]TY\_¥XVnQ  
@HWI-EAS443:3:48:1284:128#0/1  
CTCTGCTGTTCCCTGTTGATATTCTTCCCTCATGGACTCAG  
+HWI-EAS443:3:48:1284:128#0/1  
ab]`\_0]\_W`^UXbU`^`]Raa¥¥\_SVSX¥RTZ\_\_\_\_`P¥Z  
@HWI-EAS443:3:48:1451:355#0/1  
AGTGCCTGAGTCCATGAGGGAAGAATATCAACAGGAACAG  
+HWI-EAS443:3:48:1451:355#0/1  
ab\_aaabbabaaa`bbabbb^`b`aaaa``\_`a`^^¥a`  
@HWI-EAS443:3:48:1640:733#0/1  
CCTGAGTCCATGAGGGAAGAATATCAACAGGAACAGCAGA  
+HWI-EAS443:3:48:1640:733#0/1  
a`\_b`^[\_¥]bbabbbabbaaaaaTba\_bba`a\_ab^Z`\_  
@HWI-EAS443:3:48:325:2017#0/1  
GCCTGAGTCCATGAGGGAAGAATATCAACAGGAACAGCAG  
+HWI-EAS443:3:48:325:2017#0/1  
aaZZG\_`S\_Ybb\_a``]a[]\_\_a`\_^\_]a`HGQN[ZR[X  
@HWI-EAS443:3:49:1150:1192#0/1  
CATGAGGGAAGAATATCAACAGGAACAGCAGAGTGCTGTG  
+HWI-EAS443:3:49:1150:1192#0/1  
abbbbbbbbbbbbababbbbabaaa`a^bbab\_a\_bbaa



@HWI-EAS443:3:49:1219:1606#0/1  
TGCCTGAGTCCATGAGGGAAGAATATCAACAGGAACAGCA  
+HWI-EAS443:3:49:1219:1606#0/1  
aa^`ab^¥`a^^a`R\_\_Z]\_a^`Z\_\_\_\_\_^W^Z\_¥\_] [\_Q¥  
@HWI-EAS443:3:49:388:976#0/1  
TCCTGTTGATATTCTTCCCTCATGGACTCAGGCACTCCTT  
+HWI-EAS443:3:49:388:976#0/1  
aa`ab\_aaaaaa[¥a¥\_\_`\_aa`a`\_\_a\_\_XaY\_\_[\`  
@HWI-EAS443:3:49:952:620#0/1  
GCACTCTGCTGTTCTGTTGATATTCTTCCCTCATGGACT  
+HWI-EAS443:3:49:952:620#0/1  
abbaaabbb`\_Uaabaaaa^a`G^`RX\_^^\_¥X`ZG\_  
@HWI-EAS443:3:4:144:1854#0/1  
GCCTGAGTCCATGAGGGAAGAATATCAACAGGAACAGCAG  
+HWI-EAS443:3:4:144:1854#0/1  
Z\_¥[]`Zb^^aba\_aS¥abaaaa`a^aaa`^a\_a\_X]a  
@HWI-EAS443:3:4:958:1806#0/1  
GTGCCTGAGTCCATGAGGGAAGAATATCAACAGGAACAGC  
+HWI-EAS443:3:4:958:1806#0/1  
a\_`ZaaaaaZ\_aaaa`aa\_`a````a[a^¥^`\_\_`¥aaW  
@HWI-EAS443:3:50:1285:275#0/1  
TGCTGTTCTGTTGATATTCTTCCCTCATGGACTCAGGCA  
+HWI-EAS443:3:50:1285:275#0/1  
abbbbababbbbaababa`aaaa`b`ab`^^aa`a^¥`a  
@HWI-EAS443:3:50:1428:566#0/1  
AGTGCCTGAGTCCATGAGGGAAGAATATCAACAGGAACAG  
+HWI-EAS443:3:50:1428:566#0/1  
ab``aaba]b\_aaabb^baa\_aa`\_aaa]aa\_a\_``a`aa  
@HWI-EAS443:3:50:1695:159#0/1  
AGTGCCTGAGTCCATGAGGGAAGAATATCAACAGGAACAG  
+HWI-EAS443:3:50:1695:159#0/1  
ab`b`abbabaaa[bba^X\_aaa\_aaaa```]a^a`a^aa  
@HWI-EAS443:3:50:207:711#0/1  
GCCTGAGTCCATGAGGGAAGAATATCAACAGGAACAGCAG  
+HWI-EAS443:3:50:207:711#0/1  
Yaabbbb\_b`aaa\_baa\_aa`aa`aa]aba``ZaaPaa  
@HWI-EAS443:3:51:1745:889#0/1  
GCACTCTGCTGTTCTGTTGATATTCTTCCCTCATGGACT  
+HWI-EAS443:3:51:1745:889#0/1  
aabaaaba`aa`a¥^a\_`[]^U¥^TZa¥V[^^]\_YL[[[  
@HWI-EAS443:3:51:557:852#0/1  
GCCTGAGTCCATGAGGGAAGAATATCAACAGGAACAGCAG  
+HWI-EAS443:3:51:557:852#0/1  
a]^aXQXOV\_Q`X¥Z¥[N[[¥aX]WYJ^SR[ZV\_SZZLU`  
@HWI-EAS443:3:52:1395:1297#0/1  
GCCTGAGTCCATGAGGGAAGAATATCAACAGGAACAGCAG  
+HWI-EAS443:3:52:1395:1297#0/1  
aaaa`b^a`aaa`aa`\_aa\_aa`a\_aa¥a\_`\_\_W`]U^\_  
@HWI-EAS443:3:53:1066:1086#0/1  
TCCTGTTGATATTCTTCCCTCATGGACTCAGGCACTCCTT

+HWI-EAS443:3:53:1066:1086#0/1  
a\_\_^a]b`aa`aa]aaU]\_`a^a`aa^\_]aa\_\_a\_\_¥]\_X  
@HWI-EAS443:3:53:1428:1308#0/1  
CAGCACTCTGCTGTTCCCTGTTGATATTCTTCCCTCATGGA  
+HWI-EAS443:3:53:1428:1308#0/1  
ab^b^I\_bb\_Ybaaa`abbab`a``bbWab]U`aZa`\_]\_Y  
@HWI-EAS443:3:53:168:332#0/1  
AAGAATATCAACAGGAACAGCAGAGTGCTGTGGATGTTGA  
+HWI-EAS443:3:53:168:332#0/1  
aaaabaaaaa\_^\_aa`a\_a`aa`aX`^^a\_aa]\_`UZ^S  
@HWI-EAS443:3:53:72:928#0/1  
TCCTGTTGATATTCTTCCCTCATGGACTCAGGCACTCCTT  
+HWI-EAS443:3:53:72:928#0/1  
aaaab`aba`aba^a\_a\_aa\_\_aa[^\_\_a`\_]a`\_`^^^  
@HWI-EAS443:3:53:748:1604#0/1  
AGTGCCTGAGTCCATGAGGGAAGAATATCAACAGGAACAG  
+HWI-EAS443:3:53:748:1604#0/1  
aaW[\_`bb`aa``abbabb^\_aa`babaaaaVaaaa`Za`  
@HWI-EAS443:3:54:122:1865#0/1  
TGCTGTTCCCTGTTGATATTCTTCCCTCATGGACTCAGGCA  
+HWI-EAS443:3:54:122:1865#0/1  
[a\_N]ab``\_aab]a¥UXa[ba`a]aaaa]X`\_aa¥¥^]  
@HWI-EAS443:3:54:1343:1265#0/1  
CCTGAGTCCATGAGGGAAGAATATCAACAGGAACAGCAGA  
+HWI-EAS443:3:54:1343:1265#0/1  
aa^a¥\_YW``\_]\_W\_Xa`\_`X]]\_\_[^`VX\_``]¥a\_  
@HWI-EAS443:3:54:222:501#0/1  
ATCCACAGCACTCTGCTGTTCCCTGTTGATATTCTTCCCTC  
+HWI-EAS443:3:54:222:501#0/1  
aaaaaabb^\_a``aa\_ab```^\_`a¥\_`¥WT¥¥TY`U^W[U  
@HWI-EAS443:3:54:256:1156#0/1  
CTCTGCTGTTCCCTGTTGATATTCTTCCCTCATGGACTCAG  
+HWI-EAS443:3:54:256:1156#0/1  
aa``baaaZa`^]a`a^\_\_aa¥aaVZ^^YY\_`T¥¥]ZZS  
@HWI-EAS443:3:55:1486:539#0/1  
GTTCCCTGTTGATATTCTTCCCTCATGGACTCAGGCACTCC  
+HWI-EAS443:3:55:1486:539#0/1  
`[^`a^ab`aa^aW`¥W`aU¥Z^[^`V[S`Z^aWP[VYW¥  
@HWI-EAS443:3:55:1585:1114#0/1  
CTGAGTCCATGAGGGAAGAATATCAACAGGAACAGCAGAG  
+HWI-EAS443:3:55:1585:1114#0/1  
^bK^bba[Vbbaaab\_a\_bbab[\_a\_`bbZZaaab\_baab  
@HWI-EAS443:3:55:260:658#0/1  
GCCTGAGTCCATGAGGGAAGAATATCAACAGGAACAGCAG  
+HWI-EAS443:3:55:260:658#0/1  
``bab\_¥^\_`Y]FZ¥¥`¥abVYabaa¥I^W[aaaT`[L]a  
@HWI-EAS443:3:55:986:1646#0/1  
CTGAGTCCATGAGGGAAGAATATCAACAGGAACAGCAGAG  
+HWI-EAS443:3:55:986:1646#0/1  
]bbbbbbabbbbbababbbbbbbabbabbbbaabbabbab

@HWI-EAS443:3:56:1037:593#0/1  
TGAGTCCATGAGGGAAGAATATCAACAGGAACAGCAGAGT  
+HWI-EAS443:3:56:1037:593#0/1  
a```aaaabb\_babaaaa`aaaaa`\_`aa`\_\_aaZZa\_a¥  
@HWI-EAS443:3:56:758:140#0/1  
AGTGCCTGAGTCCATGAGGGAAGAATATCAACAGGAACAG  
+HWI-EAS443:3:56:758:140#0/1  
[`^a^bababa\_aaab¥baaZaaaa`a``a\_a``\_a[`a  
@HWI-EAS443:3:57:1128:273#0/1  
TGACCATCGTCAACATCCACAGCACTCTGCTGTTCCCTGTT  
+HWI-EAS443:3:57:1128:273#0/1  
a^``^aaaa\_aa`\_aa`\_[¥`a[`]`^\_\_\_\_a]^¥[Y¥V\_  
@HWI-EAS443:3:57:212:1875#0/1  
GCACTCTGCTGTTCCCTGTTGATATTCTCCCTCATGGACT  
+HWI-EAS443:3:57:212:1875#0/1  
Ub^[baaUa[UI[aa¥UZ`[XZ`a[JZ`a[b¥QZ[\_`VZ[  
@HWI-EAS443:3:57:235:1686#0/1  
GCCTGAGTCCATGAGGGAAGAATATCAACAGGAACAGCAG  
+HWI-EAS443:3:57:235:1686#0/1  
\_Y`a]]¥`¥^VWFZXRTX\_]^^Ya\_a\_\_a^^^W\_\_\_SZ\_  
@HWI-EAS443:3:57:418:241#0/1  
GCCTGAGTCCATGAGGGAAGAATATCAACAGGAACAGCAG  
+HWI-EAS443:3:57:418:241#0/1  
aaaaaabaaaaabaaba`aaaa`^`a`aa`\_[U\_a\_^a  
@HWI-EAS443:3:58:1074:1502#0/1  
CATGAGGGAAGAATATCAACAGGAACAGCAGAGTGCTGTG  
+HWI-EAS443:3:58:1074:1502#0/1  
[S]F)`]]SS^a¥SS]¥V\_YZ[Y^ab¥^¥`\_O\_[]`^b  
@HWI-EAS443:3:58:1090:1911#0/1  
TGACCATCGTCAACATCCACAGCACTCTGCTGTTCCCTGTT  
+HWI-EAS443:3:58:1090:1911#0/1  
abbaaa`^\_V\_aV]`¥\_\_`S^[\_VU\_[Q[a\_WTGN]^\_N^  
@HWI-EAS443:3:58:1106:379#0/1  
ATCGTCAACATCCACAGCACTCTGCTGTTCCCTGTTGATAT  
+HWI-EAS443:3:58:1106:379#0/1  
`aaaS\_aa`aa`U`\_[Y`^`a`]\_a`aW[[`\_\_\_\_Y^U`  
@HWI-EAS443:3:58:117:1632#0/1  
AGGGAAGAATATCAACAGGAACAGCAGAGTGCTGTGGATG  
+HWI-EAS443:3:58:117:1632#0/1  
a¥a`aaa]aa`aa`^a`Wq]aY^`\_]Z\_\_aa\_a]]BB  
@HWI-EAS443:3:58:1189:1781#0/1  
GACCATCGTCAACATCCACAGCACTCTGCTGTTCCCTGTTG  
+HWI-EAS443:3:58:1189:1781#0/1  
a`HIaYZLV¥b\_aZLRLaV\_V\_^Z¥[\_¥Q]\_\_TQWQ\_UV¥  
@HWI-EAS443:3:58:1732:393#0/1  
GAGGGAAGAATATCAACAGGAACAGCAGAGTGCTGTGGAT  
+HWI-EAS443:3:58:1732:393#0/1  
aaaab`aaa`baa`aa\_aa\_^\_]`\_^\_a¥aZ`]]`aaa`]  
@HWI-EAS443:3:58:430:536#0/1  
GCCTGAGTCCATGAGGGAAGAATATCAACAGGAACAGCAG

+HWI-EAS443:3:58:430:536#0/1  
aaaa\_Q`^a[`\_\_Y\_aa\_aaa`a`\_aaa^aa\_\_^¥``¥^\_  
@HWI-EAS443:3:58:862:294#0/1  
GTGCCTGAGTCCATGAGGGAAGAATATCAACAGGAACAGC  
+HWI-EAS443:3:58:862:294#0/1  
aZa\_[`¥Wa\_`0[`aR^aaN]KWPRU^Z[YKVYXS¥WW^Y  
@HWI-EAS443:3:59:109:939#0/1  
GTTCTGTTGATATTCTTCCCTCATGGACTCAGGCACTCC  
+HWI-EAS443:3:59:109:939#0/1  
aa\_a\_aa`aa`\_aaa\_[][Z^^`X¥\_\_U[U`ZYUSUU^ZT  
@HWI-EAS443:3:59:52:1305#0/1  
GACCATCGTCAACATCCACAGCACTCTGCTGTTCCCTGTTG  
+HWI-EAS443:3:59:52:1305#0/1  
aaaaabaa\_a\_`aaaaa```\_a````[b`^Z\_^^UU[¥U  
@HWI-EAS443:3:5:1243:807#0/1  
GGAGTGCCTGAGTCCATGAGGGAAGAATATCAACAGGAAC  
+HWI-EAS443:3:5:1243:807#0/1  
]\_`b]bYW[`¥Z[RZZZ]¥ab^K^[Y`¥^Z`Z^W\_¥ORBB  
@HWI-EAS443:3:5:1605:1596#0/1  
CCATCGTCAACATCCACAGCACTCTGCTGTTCCCTGTTGAT  
+HWI-EAS443:3:5:1605:1596#0/1  
aabbbbbabbabbabbbbaa\_b`aaaba\_b`\_bbaabaa  
@HWI-EAS443:3:5:212:1125#0/1  
GTGCCTGAGTCCATGAGGGAAGAATATCAACAGGAACAGC  
+HWI-EAS443:3:5:212:1125#0/1  
a^a\_aaaaa^aaaaaaaaa`a`aaa\_]a`X````\_\_¥[XW  
@HWI-EAS443:3:5:59:265#0/1  
AGCACTCTGCTGTTCCCTGTTGATATTCTTCCCTCATGGAC  
+HWI-EAS443:3:5:59:265#0/1  
a``aaa\_]\_]aZU]Q^¥`\_a`^`[\_a\_\_a^^¥`\_¥¥`]BB  
@HWI-EAS443:3:60:1154:415#0/1  
GCCTGAGTCCATGAGGGAAGAATATCAACAGGAACAGCAG  
+HWI-EAS443:3:60:1154:415#0/1  
aZYaaY¥FPaaZaXa]aZTXP]\_¥aZ^a][0[QU¥X`XX^  
@HWI-EAS443:3:60:1335:1037#0/1  
TGTTGATATTCTTCCCTCATGGACTCAGGCACTCCTTCCG  
+HWI-EAS443:3:60:1335:1037#0/1  
aa]abaaaa\_]a¥\_\_a^aa`\_]^\_aaZ``\_a¥^]^^[[  
@HWI-EAS443:3:60:498:1667#0/1  
AGTGCCTGAGTCCATGAGGGAAGAATATCAACAGGAACAG  
+HWI-EAS443:3:60:498:1667#0/1  
`\_QU]b`bZ^Q^Z`aaaWV\_\_a`P`X¥]a^aa^ZVR¥[\_V  
@HWI-EAS443:3:60:855:1252#0/1  
GTTGATATTCTTCCCTCATGGACTCAGGCACTCCTTCCGT  
+HWI-EAS443:3:60:855:1252#0/1  
a\_aQDTS`aX\_\_``[VW\_U[WU^^ZLWZ\_VWUW¥¥WZWWWS  
@HWI-EAS443:3:60:937:34#0/1  
GCCTGAGTCCATGAGGGAAGAATATCAACAGGAACAGCAG  
+HWI-EAS443:3:60:937:34#0/1  
a^\_XPISUTRJPZN\_XSS^]PR[L^^UZNQ[SQUQQVQJV

@HWI-EAS443:3:61:157:1733#0/1  
AATATCAACAGGAACAGCAGAGTGCTGTGGATGTTGACGA  
+HWI-EAS443:3:61:157:1733#0/1  
ababbbbaabaP]`a`Z^baaZ¥`baaaaBBBBBBBBBBBB  
@HWI-EAS443:3:61:1780:1814#0/1  
TCCACAGCACTCTGCTGTTCCCTGTTGATATTCTTCCCTCA  
+HWI-EAS443:3:61:1780:1814#0/1  
aWNU\_¥]Xb\_bS¥[IYa\_a`\_a^Ua][UPVUG^X]PP\_BB  
@HWI-EAS443:3:61:988:1058#0/1  
ACAGCACTCTGCTGTTCCCTGTTGATATTCTTCCCTCATGG  
+HWI-EAS443:3:61:988:1058#0/1  
\_`a^abaa\_a\_`bbaabaaaT`Z]U^\_X\_a¥QX^Y[]WR  
@HWI-EAS443:3:62:325:1798#0/1  
GAAGAATATCAACAGGAACAGCAGAGTGCTGTGGATGTTG  
+HWI-EAS443:3:62:325:1798#0/1  
`aaaaabababbaV]^aaa^ab[`^WX\_``BBBBBBBBBB  
@HWI-EAS443:3:62:643:1558#0/1  
CAGCACTCTGCTGTTCCCTGTTGATATTCTTCCCTCATGGA  
+HWI-EAS443:3:62:643:1558#0/1  
a```aaaa¥Z]\_Z]aa`¥`Z]]^[T\_^V^^^[`¥^W[UYY  
@HWI-EAS443:3:63:899:302#0/1  
CAGCACTCTGCTGTTCCCTGTTGATATTCTTCCCTCATGGA  
+HWI-EAS443:3:63:899:302#0/1  
abbbbbbbbbbbbabbbb`bba]aaa]aa\_`aaa`a```  
@HWI-EAS443:3:64:1195:476#0/1  
ACAGCACTCTGCTGTTCCCTGTTGATATTCTTCCCTCATGG  
+HWI-EAS443:3:64:1195:476#0/1  
aabbabababaa\_b`X^ba`aa\_\_[X\_Uaa\_bT\_`\_`\_a  
@HWI-EAS443:3:64:1357:1624#0/1  
GCACTCTGCTGTTCCCTGTTGATATTCTTCCCTCATGGACT  
+HWI-EAS443:3:64:1357:1624#0/1  
a`a^aba¥`]^^[`TT`¥^VZ^[^^VFU^T\_YFY¥V¥¥¥WW  
@HWI-EAS443:3:65:394:1586#0/1  
TGTTGATATTCTTCCCTCATGGACTCAGGCACTCCTTCCG  
+HWI-EAS443:3:65:394:1586#0/1  
aa`^abaabaaaaaaa\_ba\_\_\_aa`ab\_Y`\_\_^a`\_¥a\_¥  
@HWI-EAS443:3:65:574:1870#0/1  
AGCACTCTGCTGTTCCCTGTTGATATTCTTCCCTCATGGAC  
+HWI-EAS443:3:65:574:1870#0/1  
\_0\_aabba\_b`aa[\_T^QY\_]Z^][`a`¥^`aZ]X¥Z[\_¥  
@HWI-EAS443:3:65:813:850#0/1  
GTTGATATTCTTCCCTCATGGACTCAGGCACTCCTTCCGT  
+HWI-EAS443:3:65:813:850#0/1  
aXaaa¥^a`Xa`\_`a\_Q¥¥^a`\_]\_\_¥a\_aSN]¥\_[Q`V  
@HWI-EAS443:3:65:872:378#0/1  
TCAACATCCACAGCACTCTGCTGTTCCCTGTTGATATTCTT  
+HWI-EAS443:3:65:872:378#0/1  
a`\_Z¥S]^W\_a]aXX¥ZY`aaaW\_\_aa`[NZTZLTPXT^  
@HWI-EAS443:3:65:90:1040#0/1  
GTTGATATTCTTCCCTCATGGACTCAGGCACTCCTTCCGT

+HWI-EAS443:3:65:90:1040#0/1  
`]a\_¥WUTU[a`a`b`a`a\_aa\_]UZ^`T^\_b`¥Yaa]0  
@HWI-EAS443:3:65:992:1158#0/1  
CACAGCACTCTGCTGTTCCCTGTTGATATTCTTCCCTCATG  
+HWI-EAS443:3:65:992:1158#0/1  
]`a`abbb[`baaab`abbb\_abaa`abaYab^\_a`aaa`  
@HWI-EAS443:3:66:1306:1090#0/1  
CTCTGCTGTTCCCTGTTGATATTCTTCCCTCATGGACTCAG  
+HWI-EAS443:3:66:1306:1090#0/1  
a]SabaaZ`¥`\_XaNXTF\_HXY¥a^^aaV\_[XTNX¥¥V\_\_  
@HWI-EAS443:3:66:506:1340#0/1  
CTGAGTCCATGAGGGAAGAATATCAACAGGAACAGCAGAG  
+HWI-EAS443:3:66:506:1340#0/1  
a^\_a`bbb¥]Ya^X\_^^a`^abbb]\_`T`ab``^Z`a`  
@HWI-EAS443:3:67:1633:547#0/1  
CGTCAACATCCACAGCACTCTGCTGTTCCCTGTTGATATTC  
+HWI-EAS443:3:67:1633:547#0/1  
abaabaabbaaaabaaa\_a\_aaaaa`a``b``a`````[  
@HWI-EAS443:3:67:238:674#0/1  
GAGTCCATGAGGGAAGAATATCAACAGGAACAGCAGAGTG  
+HWI-EAS443:3:67:238:674#0/1  
`aa\_abaaaa`\_]`\_]a`a\_aaaaa`aa\_\_`\_`\_`\_¥`]\_U`  
@HWI-EAS443:3:67:503:1915#0/1  
GCCTGAGTCCATGAGGGAAGAATATCAACAGGAACAGCAG  
+HWI-EAS443:3:67:503:1915#0/1  
Z¥\_¥bbY]\_a¥\_\_aa¥¥babYbaab`b`bbb]bb]\_`\_bY  
@HWI-EAS443:3:69:1198:42#0/1  
CCTGAGTCCATGAGGGAAGAATATCAACAGGAACAGCAGA  
+HWI-EAS443:3:69:1198:42#0/1  
abbbbbbbbabbbbbbbbbbbbbbbbbbbabbaaab`aba  
@HWI-EAS443:3:69:1306:202#0/1  
GAGTCCATGAGGGAAGAATATCAACAGGAACAGCAGAGTG  
+HWI-EAS443:3:69:1306:202#0/1  
¥XZSZUZa`\_UUYZaa`^`\_\_U^\_```¥Y^P]^Y[]LNQ[  
@HWI-EAS443:3:69:1559:1723#0/1  
TGCCTGAGTCCATGAGGGAAGAATATCAACAGGAACAGCA  
+HWI-EAS443:3:69:1559:1723#0/1  
TQ\_\_`aWOX\_\_\_]ba`T¥aa]]]T`a]\_a`^X`TX`a\_V  
@HWI-EAS443:3:69:456:1726#0/1  
GCCTGAGTCCATGAGGGAAGAATATCAACAGGAACAGCAG  
+HWI-EAS443:3:69:456:1726#0/1  
aaa`^]]]aa`^[^]Yaa]WZ\_X¥0`aa\_a[YVR¥`[XVX  
@HWI-EAS443:3:6:117:1301#0/1  
TGCCTGAGTCCATGAGGGAAGAATATCAACAGGAACAGCA  
+HWI-EAS443:3:6:117:1301#0/1  
ab`a`bba\_aaaab\_a\_b`baaaaaaaaa`aaaa`\_aa\_]`  
@HWI-EAS443:3:6:178:420#0/1  
GACCATCGTCAACATCCACAGCACTCTGCTGTTCCCTGTTG  
+HWI-EAS443:3:6:178:420#0/1  
aaa¥aaaa][aa^]`¥a^`\_a¥[Z`\_[\_U¥a¥¥ZW^`U¥Y

@HWI-EAS443:3:6:522:1032#0/1  
GTTGATATTCTTCCCTCATGGACTCAGGCACTCCTTCCGT  
+HWI-EAS443:3:6:522:1032#0/1  
a`\_aaa`aaW`\_a\_\_¥\_^^a`¥\_]`\_]`¥`\_ZW\_¥\_B  
@HWI-EAS443:3:6:563:214#0/1  
GTTGATATTCTTCCCTCATGGACTCAGGCACTCCTTCCGT  
+HWI-EAS443:3:6:563:214#0/1  
a`abaa\_ba`aa`\_a\_a`a\_a¥`¥\_a`^`^`¥¥¥¥]T\_W  
@HWI-EAS443:3:6:600:1270#0/1  
GCCTGAGTCCATGAGGGAAGAATATCAACAGGAACAGCAG  
+HWI-EAS443:3:6:600:1270#0/1  
aa`aaaa\_a\_aa`aaa`]aaa`^`\_`Z`\_`^`\_W\_Ua`UV¥  
@HWI-EAS443:3:70:363:2012#0/1  
GCCTGAGTCCATGAGGGAAGAATATCAACAGGAACAGCAG  
+HWI-EAS443:3:70:363:2012#0/1  
ab]b¥WZQ\_aa`JaaP]VWaabTaXSVa`MHP[\_Y¥¥RHU  
@HWI-EAS443:3:71:1062:308#0/1  
GCCTGAGTCCATGAGGGAAGAATATCAACAGGAACAGCAG  
+HWI-EAS443:3:71:1062:308#0/1  
^\_b`\_`\_XR\_\_`aaT\_X¥`\_a`aaaa\_aabaaZ`]^\_KP^  
@HWI-EAS443:3:71:288:1330#0/1  
TGCCTGAGTCCATGAGGGAAGAATATCAACAGGAACAGCA  
+HWI-EAS443:3:71:288:1330#0/1  
[bb`b`bbb`bbbaa\_baabbb]aaaaababba^baaaaY  
@HWI-EAS443:3:71:823:1534#0/1  
GGGAAGAATATCAACAGGAACAGCAGAGTGCTGTGGATGT  
+HWI-EAS443:3:71:823:1534#0/1  
`^b[aa`bb^aabbbabY`\_aaaa]VT]a\_abYaa\_BBB  
@HWI-EAS443:3:72:1039:81#0/1  
TGAGGGAAGAATATCAACAGGAACAGCAGAGTGCTGTGGA  
+HWI-EAS443:3:72:1039:81#0/1  
ab\_aaa[\_a`\_a`a^`^Y[a]\_Y`^UZ`]\_R]SY`]`\_B  
@HWI-EAS443:3:72:577:710#0/1  
GCCTGAGTCCATGAGGGAAGAATATCAACAGGAACAGCAG  
+HWI-EAS443:3:72:577:710#0/1  
aa`TRVXO^XV^]V¥[UVVMVH[Q]¥]¥¥]]PW^`\_[ZNX  
@HWI-EAS443:3:73:1077:91#0/1  
TACGGAAGGAGTGCCTGAGTCCATGAGGGAAGAATATCAA  
+HWI-EAS443:3:73:1077:91#0/1  
a`\_ba[\_b\_VXsaUYYZJYUVXR`WJ[X\_SM¥^MP[RJPT  
@HWI-EAS443:3:73:1086:1046#0/1  
ATCCACAGCACTCTGCTGTTCTGTTGATATTCTTCCCTC  
+HWI-EAS443:3:73:1086:1046#0/1  
a\_]`[\_R[]aQ]\_a[`\_`[a`^]`^X\_JQaR\_UH]a¥`TYY  
@HWI-EAS443:3:73:131:1150#0/1  
GCCTGAGTCCATGAGGGAAGAATATCAACAGGAACAGCAG  
+HWI-EAS443:3:73:131:1150#0/1  
aaaYVH\_LX`a]WR[^WT[ZVV`^YRU\_ZHX]¥VSXTS¥W  
@HWI-EAS443:3:74:1651:758#0/1  
GCCTGAGTCCATGAGGGAAGAATATCAACAGGAACAGCAG

+HWI-EAS443:3:74:1651:758#0/1  
aa\_a\_\_b`\_a`ba]b)`abbbaa`a¥]¥Mbaaaa\_bb\_VV  
@HWI-EAS443:3:74:440:898#0/1  
CAGCACTCTGCTGTTCCCTGTTGATATTCTCCCTCATGGA  
+HWI-EAS443:3:74:440:898#0/1  
abbbbbbbbbbbbaaabab]baabab`^aaaaaaaa\_\_a  
@HWI-EAS443:3:74:798:1166#0/1  
GTGCCTGAGTCCATGAGGGAAGAATATCAACAGGAACAGC  
+HWI-EAS443:3:74:798:1166#0/1  
aaab^abXa`aaaabaa`]aaa\_aaaaaa`aaa\_a\_a`\_  
@HWI-EAS443:3:75:1281:1286#0/1  
GTGCCTGAGTCCATGAGGGAAGAATATCAACAGGAACAGC  
+HWI-EAS443:3:75:1281:1286#0/1  
a`aaabaa`¥\_a`aaabab\_aba`a`a[a\_¥a\_aaa¥aa[  
@HWI-EAS443:3:75:268:1671#0/1  
GCCTGAGTCCATGAGGGAAGAATATCAACAGGAACAGCAG  
+HWI-EAS443:3:75:268:1671#0/1  
aab\_abaUaabaaYZa`WbSV]b\_\_^¥ab`\_Q\_\_`b``a`  
@HWI-EAS443:3:76:1308:2004#0/1  
TCCTGTTGATATTCTCCCTCATGGACTCAGGCACTCCTT  
+HWI-EAS443:3:76:1308:2004#0/1  
aaabb`abbaaba\_aa`aaaabaa```a`aa`ba]\_W`]  
@HWI-EAS443:3:76:281:1145#0/1  
TCAACATCCACAGCACTCTGCTGTTCCCTGTTGATATTCTT  
+HWI-EAS443:3:76:281:1145#0/1  
abbb`babaab`\_aa`abaa```\_a¥MZ]]\_\_\_\_\_X`\_  
@HWI-EAS443:3:76:31:1900#0/1  
ATGAGGGAAGAATATCAACAGGAACAGCAGAGTGCTGTGG  
+HWI-EAS443:3:76:31:1900#0/1  
aXSZ¥^`¥\_UZ¥Y^[]W]^`KVZYW`Ya[W\_XXW]BBBBB  
@HWI-EAS443:3:76:441:1457#0/1  
TCCTGTTGATATTCTCCCTCATGGACTCAGGCACTCCTT  
+HWI-EAS443:3:76:441:1457#0/1  
\_aaa`abbba^\_aaaabba`baaa``aaaa`U`aa\_a`¥  
@HWI-EAS443:3:76:607:642#0/1  
TCCTGTTGATATTCTCCCTCATGGACTCAGGCACTCCTT  
+HWI-EAS443:3:76:607:642#0/1  
aabaa¥WO]a`^¥Wba^PY^aaa[LY`\_`XW`\_`ZYP^YSV  
@HWI-EAS443:3:76:862:725#0/1  
CATCGTCAACATCCACAGCACTCTGCTGTTCCCTGTTGATA  
+HWI-EAS443:3:76:862:725#0/1  
V¥\_\_VZ`[ZTbb^]V\_a`^[aa`bb¥]b`aa\_aa`a]`^`  
@HWI-EAS443:3:77:339:1402#0/1  
GCCTGAGTCCATGAGGGAAGAATATCAACAGGAACAGCAG  
+HWI-EAS443:3:77:339:1402#0/1  
abba[RXYbba^¥M¥a`Xa]^\_\_`T`XZX`YNZa`\_`[^¥  
@HWI-EAS443:3:78:1606:592#0/1  
GGAAGAATATCAACAGGAACAGCAGAGTGCTGTGGATGTT  
+HWI-EAS443:3:78:1606:592#0/1  
aba`baab^babaabbb\_aaaa\_abaaX\_¥bb`ba`a`L^



@HWI-EAS443:3:78:706:1240#0/1  
GCTGTTCTGTTGATATTCTTCCCTCATGGACTCAGGCAC  
+HWI-EAS443:3:78:706:1240#0/1  
^\_`¥¥`^`¥ba¥]\_`\_`^`aa]a`Z]``[PW`[`a`]¥a\_  
@HWI-EAS443:3:79:1007:1260#0/1  
GACCATCGTCAACATCCACAGCACTCTGCTGTTCTGTTG  
+HWI-EAS443:3:79:1007:1260#0/1  
aa\_Z]X`^PXa\_U^S`\_`a¥``a[ZWURVUVWXP[S[VWX  
@HWI-EAS443:3:79:1634:1119#0/1  
CAGCACTCTGCTGTTCTGTTGATATTCTTCCCTCATGGA  
+HWI-EAS443:3:79:1634:1119#0/1  
Uab^abbbbabababab`bbabbbb`b`]aa`\_bbaba  
@HWI-EAS443:3:7:1294:1478#0/1  
CAGCACTCTGCTGTTCTGTTGATATTCTTCCCTCATGGA  
+HWI-EAS443:3:7:1294:1478#0/1  
a^NXbab`babaaX^a^aaabbXVQ`b[`a[^]]N¥¥]S¥  
@HWI-EAS443:3:7:78:1905#0/1  
GTGCCTGAGTCCATGAGGGAAGAATATCAACAGGAACAGC  
+HWI-EAS443:3:7:78:1905#0/1  
`^aaaa`Z`Z`aaa]^`\_`¥`a\_a\_`a`Z`a¥a\_\_\_\_\_^`\_\_  
@HWI-EAS443:3:80:1267:1073#0/1  
GTCAACATCCACAGCACTCTGCTGTTCTGTTGATATTCT  
+HWI-EAS443:3:80:1267:1073#0/1  
aPa`ZUSZG[`\_¥OX[`[NV\_UXVW\_VGUa¥¥VVQZ¥US¥  
@HWI-EAS443:3:80:201:1132#0/1  
CTGCTGTTCTGTTGATATTCTTCCCTCATGGACTCAGGC  
+HWI-EAS443:3:80:201:1132#0/1  
a[`aaa[`a`¥a¥¥UR[\_`\_`\_\_a`]N[V]]O¥NP[MSV¥  
@HWI-EAS443:3:81:1509:1754#0/1  
CATGAGGGAAGAATATCAACAGGAACAGCAGAGTGCTGTG  
+HWI-EAS443:3:81:1509:1754#0/1  
`a\_b^babbababab]baab\_¥Za\_baZbaa`abPbb`a  
@HWI-EAS443:3:81:263:1041#0/1  
TGCCTGAGTCCATGAGGGAAGAATATCAACAGGAACAGCA  
+HWI-EAS443:3:81:263:1041#0/1  
\_`ba^QZaUQTWa\_]\_WZ`[aX]Xb¥[`ZZPO`[aZZRWX  
@HWI-EAS443:3:82:1522:468#0/1  
CAACATCCACAGCACTCTGCTGTTCTGTTGATATTCTTC  
+HWI-EAS443:3:82:1522:468#0/1  
a`babbbb`abbbbbaabababQabaabb`bbbbYab^  
@HWI-EAS443:3:83:134:1066#0/1  
CCTGAGTCCATGAGGGAAGAATATCAACAGGAACAGCAGA  
+HWI-EAS443:3:83:134:1066#0/1  
aaaa`^`aaaaaaaa`X`aa^[aaaa^^\_V`\_``\_``\_  
@HWI-EAS443:3:83:716:1673#0/1  
GTGCCTGAGTCCATGAGGGAAGAATATCAACAGGAACAGC  
+HWI-EAS443:3:83:716:1673#0/1  
^¥]`aaa```b`aaa^G^\_\_aaaa[a^a`aaaa[``\_\_a\_\_  
@HWI-EAS443:3:83:768:1007#0/1  
GTCCATGAGGGAAGAATATCAACAGGAACAGCAGAGTGCT

+HWI-EAS443:3:83:768:1007#0/1  
^¥baabb`baa`b`bbb[abbbabb\_a`aaaaa`aYa\_a  
@HWI-EAS443:3:83:983:1205#0/1  
GCCTGAGTCCATGAGGGAAGAATATCAACAGGAACAGCAG  
+HWI-EAS443:3:83:983:1205#0/1  
aabaaabaa`abaaa^aa`aaaa`[\_aa`]S\_\_a^\_[^]  
@HWI-EAS443:3:84:685:2011#0/1  
GCCTGAGTCCATGAGGGAAGAATATCAACAGGAACAGCAG  
+HWI-EAS443:3:84:685:2011#0/1  
ab\_a`Z^`b[Q[a\_W\_]W0¥V]T\_bZa`^^X¥``QY`\_\_  
@HWI-EAS443:3:84:802:1490#0/1  
TCCTGTTGATATTCTTCCCTCATGGACTCAGGCACTCCTT  
+HWI-EAS443:3:84:802:1490#0/1  
aaaaa`ba`a`\_a`a`aa`a`Z`^`¥a^\_\_aa`a`\_¥  
@HWI-EAS443:3:84:817:768#0/1  
GCCTGAGTCCATGAGGGAAGAATATCAACAGGAACAGCAG  
+HWI-EAS443:3:84:817:768#0/1  
aa`Q¥\_b¥XV]¥^V]aa`aXZ^a`Z¥[¥aa`a\_^[¥a`W\_  
@HWI-EAS443:3:84:946:1767#0/1  
TGCCTGAGTCCATGAGGGAAGAATATCAACAGGAACAGCA  
+HWI-EAS443:3:84:946:1767#0/1  
\_\_ab^bb^U]``a`^a\_Z¥a\_babb\_aaab^aaaaa^`  
@HWI-EAS443:3:85:1419:944#0/1  
GCCTGAGTCCATGAGGGAAGAATATCAACAGGAACAGCAG  
+HWI-EAS443:3:85:1419:944#0/1  
a`abb[b````b\_\_bb`\_\_aaaa\_b`\_]aaa\_\_Xa\_Y` [  
@HWI-EAS443:3:85:1699:988#0/1  
CATCGTCAACATCCACAGCACTCTGCTGTTCCCTGTTGATA  
+HWI-EAS443:3:85:1699:988#0/1  
`abab^X`a`\_a\_aY\_V^aZEUHaa`[]\_V¥a[a`]`\_\_U  
@HWI-EAS443:3:85:257:1612#0/1  
CGTCAACATCCACAGCACTCTGCTGTTCCCTGTTGATATTC  
+HWI-EAS443:3:85:257:1612#0/1  
aa¥aa¥bbaaab`aab]a`a^a\_\_\_\_Y\_][] [a`] `a\_Y  
@HWI-EAS443:3:85:695:143#0/1  
GTCAACATCCACAGCACTCTGCTGTTCCCTGTTGATATTCT  
+HWI-EAS443:3:85:695:143#0/1  
a`aa^\_aa`\_a]a]\_\_^`^`\_a\_]^[^^]\_\_]\_]\_W^  
@HWI-EAS443:3:86:426:583#0/1  
CATGAGGGAAGAATATCAACAGGAACAGCAGAGTGCTGTG  
+HWI-EAS443:3:86:426:583#0/1  
aaaaY\_^]Va^¥` `^ZaX`ZT\_aa^Z`X[\_a^\_a`Z^[\_  
@HWI-EAS443:3:87:1146:334#0/1  
TCAACATCCACAGCACTCTGCTGTTCCCTGTTGATATTCTT  
+HWI-EAS443:3:87:1146:334#0/1  
abaaaab`Z\_aab\_a\_baa`[aaaa\_\_aaS`a^`U\_dUa]  
@HWI-EAS443:3:88:1664:551#0/1  
ACCATCGTCAACATCCACAGCACTCTGCTGTTCCCTGTTGA  
+HWI-EAS443:3:88:1664:551#0/1  
aaabb\_^\_aba¥ba¥T\_\_ba[ `^aa\_aX]¥U`W^aa`aa`

@HWI-EAS443:3:88:409:520#0/1  
CTGAGTCCATGAGGGAAGAATATCAACAGGAACAGCAGAG  
+HWI-EAS443:3:88:409:520#0/1  
a\_`Z\_¥\_^abaaaa]aa[^aaaa`^¥` `\_\_a`Z\_` `a  
@HWI-EAS443:3:88:437:695#0/1  
CCTGAGTCCATGAGGGAAGAATATCAACAGGAACAGCAGA  
+HWI-EAS443:3:88:437:695#0/1  
abbbab\_a\_]ab`abbaZbaaaaabaa`a`aaa^aa\_\_a\_  
@HWI-EAS443:3:88:919:1144#0/1  
CGTCAACATCCACAGCACTCTGCTGTTCTGTTGATATTC  
+HWI-EAS443:3:88:919:1144#0/1  
[aaa]\_a\_b^KZb`b[\_bbbXRS[b\_\_a]baababaa[^S  
@HWI-EAS443:3:89:1243:537#0/1  
GCCTGAGTCCATGAGGGAAGAATATCAACAGGAACAGCAG  
+HWI-EAS443:3:89:1243:537#0/1  
][MV]a`T\_WZ]b]a\_a¥ba`Zb\_a`a\_]ab`^`\_ab`aa  
@HWI-EAS443:3:89:1624:895#0/1  
TGCCTGAGTCCATGAGGGAAGAATATCAACAGGAACAGCA  
+HWI-EAS443:3:89:1624:895#0/1  
aa`[\_`aaaa`\_Zaa\_bba\_aaa`a` `Za`]a`a]\_U\_\_U\_  
@HWI-EAS443:3:89:811:1293#0/1  
ATCGTCAACATCCACAGCACTCTGCTGTTCTGTTGATAT  
+HWI-EAS443:3:89:811:1293#0/1  
]ab[\_`¥Uaaaa\_a` `]Ta\_`[\_`\_`\_`\_`aa`¥aY`[\_][^  
@HWI-EAS443:3:89:956:1258#0/1  
TGCTGTTCTGTTGATATTCTCCCTCATGGACTCAGGCA  
+HWI-EAS443:3:89:956:1258#0/1  
a`baa` `` `aab\_bbb`aaa\_aaa\_aaa`aa`\_` `a`^`a  
@HWI-EAS443:3:8:607:1129#0/1  
CCTGAGTCCATGAGGGAAGAATATCAACAGGAACAGCAGA  
+HWI-EAS443:3:8:607:1129#0/1  
abb]abaaa`ab`babaaa\_abaa]\_]\_aa` `aWaaaa\_  
@HWI-EAS443:3:8:737:1352#0/1  
GCCTGAGTCCATGAGGGAAGAATATCAACAGGAACAGCAG  
+HWI-EAS443:3:8:737:1352#0/1  
aaaV^^XJV[[\_¥OX\_UXR^¥¥UR^ZP¥]UX`V^VEP^MBB  
@HWI-EAS443:3:8:914:147#0/1  
TGAGGGAAGAATATCAACAGGAACAGCAGAGTGCTGTGGA  
+HWI-EAS443:3:8:914:147#0/1  
]a¥\_a`T]aa\_bWVU\_\_L[\_a\_OMV[FG`¥\_UZT\_¥BBBB  
@HWI-EAS443:3:90:1270:888#0/1  
GCCTGAGTCCATGAGGGAAGAATATCAACAGGAACAGCAG  
+HWI-EAS443:3:90:1270:888#0/1  
ab^Za[aJ¥\_\_baSaaaa` `` `]`]]]\_\_ab` ` \_Q^`^Ha  
@HWI-EAS443:3:90:159:170#0/1  
GCCTGAGTCCATGAGGGAAGAATATCAACAGGAACAGCAG  
+HWI-EAS443:3:90:159:170#0/1  
a\_`\_`[\_`U^¥Z[\_`¥`\_`V^¥^YZV^]¥WVZVVSTWW^VV¥  
@HWI-EAS443:3:90:234:1748#0/1  
TCCTGTTGATATTCTCCCTCATGGACTCAGGCACTCCTT

+HWI-EAS443:3:90:234:1748#0/1  
ab^\_a\_abb`ab`¥]aaaaaab`aZ\_\_\_aa\_]aa``a`\_\_  
@HWI-EAS443:3:90:716:590#0/1  
GTGCCTGAGTCCATGAGGGAAGAATATCAACAGGAACAGC  
+HWI-EAS443:3:90:716:590#0/1  
aUWMM[XV\_`Z[R¥`U^b¥YU`¥YZ`\_`^`^YV[\_VSU`^  
@HWI-EAS443:3:91:217:1797#0/1  
ATGAGGGAAGAATATCAACAGGAACAGCAGAGTGCTGTGG  
+HWI-EAS443:3:91:217:1797#0/1  
W¥R\_Y]bbba^^)`aabb]`^]abbbbaa]`WaaaaZU\_  
@HWI-EAS443:3:91:22:816#0/1  
TGAGGGAAGAATATCAACAGGAACAGCAGAGTGCTGTGGA  
+HWI-EAS443:3:91:22:816#0/1  
aa\_aaaabaaa`a¥aa`aa\_`a`^`^`Y`]`a]]]Y  
@HWI-EAS443:3:91:29:987#0/1  
CTGAGTCCATGAGGGAAGAATATCAACAGGAACAGCAGAG  
+HWI-EAS443:3:91:29:987#0/1  
N^WPa\_W\_a`a``]Wabbb]Sabbb\_\_`aIaa]aa]ba`  
@HWI-EAS443:3:92:1749:1121#0/1  
GACCATCGTCAACATCCACAGCACTCTGCTGTTCCCTGTTG  
+HWI-EAS443:3:92:1749:1121#0/1  
¥Va`b`^`aa¥`[`aW`aa\_b`a]b\_a`]`a`\_`¥[\_0¥M  
@HWI-EAS443:3:93:1239:542#0/1  
GCCTGAGTCCATGAGGGAAGAATATCAACAGGAACAGCAG  
+HWI-EAS443:3:93:1239:542#0/1  
^\_aabb``^¥YXaa`\_baaZ^a`¥a``]a]\_¥a\_N\_a  
@HWI-EAS443:3:93:326:1270#0/1  
CCATGAGGGAAGAATATCAACAGGAACAGCAGAGTGCTGT  
+HWI-EAS443:3:93:326:1270#0/1  
aa`a`\_`\_`^\_a\_\_\_``\_]X`\_`\_U`¥\_\_W¥\_`^¥W\_W¥BB  
@HWI-EAS443:3:93:342:1673#0/1  
GTTGATATTCTCCCTCATGGACTCAGGCACTCCTTCCGT  
+HWI-EAS443:3:93:342:1673#0/1  
VXbaababbaabbb`bbbba`bbaabaabbb`baaa`aaa  
@HWI-EAS443:3:93:465:225#0/1  
GTTGATATTCTCCCTCATGGACTCAGGCACTCCTTCCGT  
+HWI-EAS443:3:93:465:225#0/1  
a\_aa\_a]`aX\_a\_Y[^[\_\_\_\_^[^¥\_\_WZ^¥¥XWWWWS¥B  
@HWI-EAS443:3:94:1267:300#0/1  
GGAGTGCCTGAGTCCATGAGGGAAGAATATCAACAGGAAC  
+HWI-EAS443:3:94:1267:300#0/1  
a\_aa^b^`bbba`¥a`baaaaa`a``aaa`^aU`\_a]\_S  
@HWI-EAS443:3:94:278:484#0/1  
TGCCTGAGTCCATGAGGGAAGAATATCAACAGGAACAGCA  
+HWI-EAS443:3:94:278:484#0/1  
aabbaaaaVaaa\_^Wbaa`abaaa`^aZ`]aaTZ`Z\_a][  
@HWI-EAS443:3:94:39:333#0/1  
GTCCATGAGGGAAGAATATCAACAGGAACAGCAGAGTGCT  
+HWI-EAS443:3:94:39:333#0/1  
aQ`[\_ZaZ¥PXU\_`T^¥UXM`^SPPNL[¥T^]\_BBBBBB

@HWI-EAS443:3:94:845:136#0/1  
TTCCTGTTGATATTCTTCCCTCATGGACTCAGGCACTCCT  
+HWI-EAS443:3:94:845:136#0/1  
aKTU`[\_[VS[RRZZ¥UZUVTT]¥ZRPSVGS]UH]WXSBB  
@HWI-EAS443:3:95:1408:1398#0/1  
AGTCCATGAGGGAAGAATATCAACAGGAACAGCAGAGTGC  
+HWI-EAS443:3:95:1408:1398#0/1  
a\_^\_a`ab\_aab[`¥^a^aa\_`W`\_\_\_UY\_aR`W`Y`V  
@HWI-EAS443:3:96:583:1613#0/1  
TGCCTGAGTCCATGAGGGAAGAATATCAACAGGAACAGCA  
+HWI-EAS443:3:96:583:1613#0/1  
`b¥`¥aR`Jbaaaba\_bbYa`\_Ua\_aa]V[[aaRT]T^NS  
@HWI-EAS443:3:97:1116:887#0/1  
CATGAGGGAAGAATATCAACAGGAACAGCAGAGTGCTGTG  
+HWI-EAS443:3:97:1116:887#0/1  
aabbaba`bbbbababbaaaabaaa`bb^aaaa\_b[baab  
@HWI-EAS443:3:98:52:1396#0/1  
CATGAGGGAAGAATATCAACAGGAACAGCAGAGTGCTGTG  
+HWI-EAS443:3:98:52:1396#0/1  
aaab^aaaabaab\_]`^`aab`X`aaa\_a\_^`[aW¥]UB  
@HWI-EAS443:3:98:777:693#0/1  
GTGCCTGAGTCCATGAGGGAAGAATATCAACAGGAACAGC  
+HWI-EAS443:3:98:777:693#0/1  
a^ZXW¥\_Y^OUFZ]]VXN¥^`T`\_\_`a[\_X\_`ZK]Q\_a\_  
@HWI-EAS443:3:99:518:356#0/1  
GTTGATATTCTTCCCTCATGGACTCAGGCACTCCTCCGT  
+HWI-EAS443:3:99:518:356#0/1  
a[^`^`XX^WU¥]XV\_X[UZ^[ZZ[¥¥PSWV¥UWTTXNRV  
@HWI-EAS443:3:99:527:16#0/1  
AGTCCATGAGGGAAGAATATCAACAGGAACAGCAGAGTGC  
+HWI-EAS443:3:99:527:16#0/1  
abab\_b`[\_bb\_Vbb]a]¥\_a`b[¥aa\_aPab\_[aaaQaH  
@HWI-EAS443:3:9:1030:440#0/1  
CGGAAGGAGTGCCTGAGTCCATGAGGGAAGAATATCAACA  
+HWI-EAS443:3:9:1030:440#0/1  
abbaZb`ab]aa\_abQb\_M]]\_a^^a\_aaa\_\_\_\_\_RR\_^\_  
@HWI-EAS443:3:9:250:534#0/1  
GTTCTGTTGATATTCTTCCCTCATGGACTCAGGCACTCC  
+HWI-EAS443:3:9:250:534#0/1  
aaaa]a`\_aaa\_]\_¥Ya¥Ya^\_]`¥\_]`^¥T]\_SUU`WY¥V  
@HWI-EAS443:3:9:75:638#0/1  
GCCTGAGTCCATGAGGGAAGAATATCAACAGGAACAGCAG  
+HWI-EAS443:3:9:75:638#0/1  
abaa`]]`a[]a\_aa^^aa\_a`^^aa`^\_¥Z^`\_\_`¥a\_  
@HWI-EAS443:3:9:786:509#0/1  
AGTGCCTGAGTCCATGAGGGAAGAATATCAACAGGAACAG  
+HWI-EAS443:3:9:786:509#0/1  
^R¥¥U]¥babJa]P¥aV`][P\_aWVaZ]QXXQaVIUWQZ^  
@HWI-EAS443:3:22:880:83#0/1  
GATCGAGTGAACAGGCAGCAGAGGCCATGGAGGGTGGTAA

+HWI-EAS443:3:22:880:83#0/1  
aaa\_aa\_Vb`a`ab`\_aa]U\_Y`aYY[^¥[P^BBBBBBBB  
@HWI-EAS443:3:5:592:546#0/1  
GAACAGATGGCTGGATCGAGTGAACAGGCAGCATAGGACA  
+HWI-EAS443:3:5:592:546#0/1  
aaYKZ`X`Q` `[]\_KQSZ`XPXV¥KT¥^KPPXTNT]BBBB  
@HWI-EAS443:3:14:781:716#0/1  
GCTGGATCGAGTGAACAGGCAGCAGAGGGCATGGAGGGTG  
+HWI-EAS443:3:14:781:716#0/1  
a`X\_a[\_[a\_]Z¥`\_ZZ`^\_ZaZ¥]PTWNS^¥BBBBBBBB  
@HWI-EAS443:3:28:156:238#0/1  
GCTGGATCGAGTGAACAGGCAGCAGAGGCCCTGGAGGGTG  
+HWI-EAS443:3:28:156:238#0/1  
aa\_`b`Ka^[^UaaZYaa]¥a`Ta`]WYBBBBBBBBBBBB  
@HWI-EAS443:3:82:907:1035#0/1  
GCTGGATCGAGTGAACAGGCAGCAGAGGCCACGGAGGGTG  
+HWI-EAS443:3:82:907:1035#0/1  
V]]VVP¥]¥]XZTPTX\_\_V¥X^]I[F[¥VXMFZFZGPRNQ  
@HWI-EAS443:3:21:118:700#0/1  
GCTGGATCGAGTGAACAGGCAGCAGAGGCCATGGGGGGTG  
+HWI-EAS443:3:21:118:700#0/1  
aaaaa`^aa`W`\_[YZ^a\_`\_aZ]PY¥^\_XBBBBBBBB  
@HWI-EAS443:3:31:947:131#0/1  
GCTGGATCGAGTGAACAGGCAGCAGAGGCCATGGGGGGTG  
+HWI-EAS443:3:31:947:131#0/1  
a`aaaV]¥\_aXVa^[TX¥XTT]FKXN[`BBBBBBBBBBBB  
@HWI-EAS443:3:65:105:700#0/1  
GCTGGATCGAGTGAACAGGCAGCAGAGGCCATGGGGGGTG  
+HWI-EAS443:3:65:105:700#0/1  
aaab]aaba¥aaa^¥` `a`a`¥^]] [U^XVBBBBBBBB  
@HWI-EAS443:3:73:1461:1266#0/1  
GCTAATCAGATGGCTGGATCGAGTGAACAGGCAGCAGAGG  
+HWI-EAS443:3:73:1461:1266#0/1  
a`aa]a]^`¥`\_]^\_a`Q¥K\_¥aX^SVNV]ZNTBBBBBBBB  
@HWI-EAS443:3:45:1398:1086#0/1  
GCCTTCTAACCGAGGACGAAACGTACGTTCTTTCTATCAT  
+HWI-EAS443:3:45:1398:1086#0/1  
TF]]a\_aa`^^aXT`KV^a^aSbI]WSLa`aab`YP¥GQM  
@HWI-EAS443:3:84:211:761#0/1  
GGCTGGATCGAGTGAACAGGCAGCAGAGGCCATGGGGGGT  
+HWI-EAS443:3:84:211:761#0/1  
aa\_]^^¥[^`^`¥S¥W[XRO]` `]¥]QET]V[BBBBBBBB  
@HWI-EAS443:3:33:1517:393#0/1  
GTTCTAACCGAGGTCGAAACGTACGTTCTTTCAATCATCC  
+HWI-EAS443:3:33:1517:393#0/1  
I¥` `Q` `aabba^]V\_`^aTa`¥RQX`a\_SGZ` `]HZG  
@HWI-EAS443:3:89:1269:170#0/1  
AGGGGCCTGACGGGATGATAGAAAGAACGTAAGTTTCGAC  
+HWI-EAS443:3:89:1269:170#0/1  
]` `bbb\_\_^]VX\_`¥b` `aYPX[¥]aYM¥REJ\_QOWHNUN

@HWI-EAS443:3:88:515:455#0/1  
CGAGTGAACAGGCAGCAGAGGCCATGGAGGTTGCCAATCA  
+HWI-EAS443:3:88:515:455#0/1  
`bbaabab`baaW\_ZP\_`¥a\_¥P^a]T^aIZ`HDU`YY¥  
@HWI-EAS443:3:89:729:664#0/1  
CTGGATCGAGTGAACAGGCAGCAGAGGCCATGGAGGGTGG  
+HWI-EAS443:3:89:729:664#0/1  
abb`a\_¥W`]a^[]]b¥Z`XaZJU`a\_^\_aW^¥`TDQWG  
@HWI-EAS443:3:95:1306:219#0/1  
GATCGAGTGAACAGGCAGCAGAGGCCATGGAGGTTGGTAA  
+HWI-EAS443:3:95:1306:219#0/1  
Q\_\_ab\_\_¥a`K`¥`]`WN\_Vaa^^SZ¥0[P]SZaMM¥BB  
@HWI-EAS443:3:14:1128:130#0/1  
CAACCTCCATGGCCTCTGCTGCCTATTCACCTCGATCCAGC  
+HWI-EAS443:3:14:1128:130#0/1  
`Z`aaa\_`^`aa`aa^aYUZSUVY^`RXTTLV¥RNUPBB  
@HWI-EAS443:3:14:1183:502#0/1  
ATTTAAAGATGAGTCTTCTAACCAGGTTCGAAAAGTACGT  
+HWI-EAS443:3:14:1183:502#0/1  
`ba^ZYZaV^aa]ZP\_Y^\_\_a\_\_[a`U]\_OZ^FVX^Z]S  
@HWI-EAS443:3:28:481:1494#0/1  
GAACAGATGGCTGGATCGAGTGAAGAGGCAGCAGAGGCCA  
+HWI-EAS443:3:28:481:1494#0/1  
\_[]`baX[b]bbaU¥W`¥`bXaa[F]P^a`Wa]]X]aa`  
@HWI-EAS443:3:30:982:1389#0/1  
GCTGGATCGAGTGAACAGGCAGCAGAGGCCACGGAGGTTG  
+HWI-EAS443:3:30:982:1389#0/1  
a\_\_`^[¥]Y\_NVP]^ZTRQ\_BBBBBBBBBBBBBBBBBBBB  
@HWI-EAS443:3:36:1234:1933#0/1  
GCCATTTGTCTGGGAGACCGATGCTGTGAATCAGCAATCT  
+HWI-EAS443:3:36:1234:1933#0/1  
`V`\_`¥^PTX\_M\_[T]a`Y[N^^RZTT]\_WU\_RUVXYWZ  
@HWI-EAS443:3:5:1727:1573#0/1  
ATTTAAAGATGAGTCTTCTAACCAGGTTCGAAAGGTACGT  
+HWI-EAS443:3:5:1727:1573#0/1  
]X^abbba\_abKaPSab¥bbbRRbUK`G\_`a^\_GaUSBBB  
@HWI-EAS443:3:66:1747:1052#0/1  
GCCATTTGTCTGTGAGACCGATGCTGTGAATAAGCAATCT  
+HWI-EAS443:3:66:1747:1052#0/1  
a\_WRW`aSYW]¥NRTRW\_]\_\_]`[¥V¥a\_XFSVQSVTZT  
@HWI-EAS443:3:67:521:1331#0/1  
CTCGGCTTTGCGGGGCCTGACGGGATGATAGAAAGAACG  
+HWI-EAS443:3:67:521:1331#0/1  
a^a^aa¥W[XTY^XYZ¥T^XS^\_[¥STGPMORNSYP[SQP  
@HWI-EAS443:3:76:260:2032#0/1  
ATTTAAAAATGAGTCTTCTAACCAGGTTCGAAACGTACGT  
+HWI-EAS443:3:76:260:2032#0/1  
Y\_`aa`\_Za]P\_`^\_aaa\_S`ab]`¥]^\_TTWa\_]Q]Q\_U  
@HWI-EAS443:3:82:1570:1940#0/1  
GTACGTTCTTTCTATCATCCAGTCAGGCCCCCTCAAAGCC

+HWI-EAS443:3:82:1570:1940#0/1  
a¥^Xb¥[``]]S`]¥R^]^MEYWP^`]]WWY¥\_T¥^¥^UG  
@HWI-EAS443:3:11:179:1361#0/1  
GCTGGATCGAGTGAACAGGCAGCAGAGGCCATGGAGGGTG  
+HWI-EAS443:3:11:179:1361#0/1  
a`aaZaaabab`^aaaa`aa\_`\_RaZaRU^ZNP`BBBBBB  
@HWI-EAS443:3:28:978:1979#0/1  
GCTGGATCGAGTGAACAGGCAGCAGAGGCCATGGAGGGTG  
+HWI-EAS443:3:28:978:1979#0/1  
abb[``\_abbbb]a\_ba``aaaaaZ`¥]¥X`XQ^VU[EZR  
@HWI-EAS443:3:5:831:786#0/1  
GCTGGATCGAGTGAACAGGCAGCAGAGGCCATGGAGGGTG  
+HWI-EAS443:3:5:831:786#0/1  
aababa\_`^aa[a]a\_````\_`a0^]P¥]UYYYT]BBBBBB  
@HWI-EAS443:3:63:491:1085#0/1  
GTTCTTTCTATCATCCCGTCAGGCCCTCAAAGCCGCGA  
+HWI-EAS443:3:63:491:1085#0/1  
^^^`][Z`aX]¥OT``P\_WOTPL]``\_XYBBBBBBBBBBBB  
@HWI-EAS443:3:76:1092:1192#0/1  
GCTGGATCGAGTGAACAGGCAGCAGAGGCCATGGAGGATT  
+HWI-EAS443:3:76:1092:1192#0/1  
^UR\_USMY\_]¥XUVVOXZ]BBBBBBBBBBBBBBBBBBBB  
@HWI-EAS443:3:77:590:784#0/1  
GCTGGATCGAGTGAACAGGCAGCAGAGGCCATGGAGGGTG  
+HWI-EAS443:3:77:590:784#0/1  
aaaaaa`aaba[a`Z`\_``\_a^[]]SY^Z^[^`ZBBBBBB  
@HWI-EAS443:3:80:713:1018#0/1  
GCTGGATCGAGTGAACAGGCAGCAGAGGCCATGGAGGGTG  
+HWI-EAS443:3:80:713:1018#0/1  
a``a\_]Zabba^`aa]`a^`YXZYXZ]Z]]BBBBBBBB  
@HWI-EAS443:3:82:1242:527#0/1  
GCTGGATCGAGTGAACAGGCAGCAGAGGCCATGGAGGGTG  
+HWI-EAS443:3:82:1242:527#0/1  
aa\_`^`aaabab^aaa`aa`^\_Y\_a^a\_PEVZBBBBBBBB  
@HWI-EAS443:3:83:787:1937#0/1  
GCTGGATCGAGTGAACAGGCAGCAGAGGCCATGGAGGGTG  
+HWI-EAS443:3:83:787:1937#0/1  
`^V]WXU]OR\_Q`]`Z¥TZ\_Z]`V]Y]YLW]BBBBBBBB  
@HWI-EAS443:3:89:460:873#0/1  
GCTGGATCGAGTGAACAGGCAGCAGAGGCCATGGAGGGTG  
+HWI-EAS443:3:89:460:873#0/1  
abaaa`a`a`aU¥``X`ZP[\_^^UYR^^¥BBBBBBBB  
@HWI-EAS443:3:92:212:1839#0/1  
GCTGGATCGAGTGAACAGGCAGCAGAGGCCATGGAGGGTG  
+HWI-EAS443:3:92:212:1839#0/1  
abbbaba^bbbXababaa``]V]\_`\_P`¥a^UX[¥XBBBB  
@HWI-EAS443:3:96:1214:1377#0/1  
GCTGGATCGAGTGAACAGGCAGCAGAGGCCATGGAGGGTG  
+HWI-EAS443:3:96:1214:1377#0/1  
a`aRaXaRa`]V¥[¥Y¥a]PX^KO\_U^^BBBBBBBBBBBB



@HWI-EAS443:3:23:1108:1385#0/1  
CGTACGTTCTTTCTATCATCCCNTCAGGCCCCCTCAAAGC  
+HWI-EAS443:3:23:1108:1385#0/1  
aa]abbbZabbbbZa^bb]aWDM\_bbaZa`\_aaRa]aa\_  
@HWI-EAS443:3:45:1034:1992#0/1  
GGAACAGATGGCTGGATCGAGTGAANAGGCAGCAGAGGCC  
+HWI-EAS443:3:45:1034:1992#0/1  
Tb]aZ`b`aT`aaa^T`a[¥U¥¥TUDRaa^a\_]\_\_Ma`M\_  
@HWI-EAS443:3:5:1534:1003#0/1  
GCCATTTGTCTGTGAGACCGATGCTGTGANTCAGCAATCT  
+HWI-EAS443:3:5:1534:1003#0/1  
a\_babbaaaaaZWa`\_\_\_\_\_baaaP^aUb^D[¥Qa\_`\_¥U\_  
@HWI-EAS443:3:65:209:1042#0/1  
AACCGAGGTCNAAACGTACGTTCTTTCTATCATCCCGTCA  
+HWI-EAS443:3:65:209:1042#0/1  
a`a^a`a]¥DZ^aabZa\_aS]\_\_]`\_\_a\_U\_]\_¥[\_W^¥  
@HWI-EAS443:3:33:1066:547#0/1  
GAACAGATGGCTGGATCGAGTGAACAGGCAGCAGAGGCCG  
+HWI-EAS443:3:33:1066:547#0/1  
`]PW[b^W^`XZVRMXQ¥[VFVBBBBBBBBBBBBBBBBBB  
@HWI-EAS443:3:74:403:380#0/1  
GGCTGGATCGAGTGAACAGGCAGCAGAGGCCATGGAGGGG  
+HWI-EAS443:3:74:403:380#0/1  
aaaaab]U\_aaaVaa]`````\_[\_`¥^QTWS^BBBBBBBBBB  
@HWI-EAS443:3:79:749:95#0/1  
GATGGCTGGATCGAGTGAACAGGCAGCAGAGGCCATGGGG  
+HWI-EAS443:3:79:749:95#0/1  
aaaaaaaba]\_¥`\_aSa\_[S^[a¥^`PRSV^BBBBBBBBBB  
@HWI-EAS443:3:82:719:999#0/1  
ANTTAAAGATGAGTCTTCTAACCAGGTCGAAACGTACGT  
+HWI-EAS443:3:82:719:999#0/1  
[D^aaaabbaaa`\_ab`baaaaaaaaa\_`a`¥VV]ZS¥^a]  
@HWI-EAS443:3:36:201:456#0/1  
TTCTCGGCTTTGAGGGGGCCTGACGGGATGATAGAAAGAA  
+HWI-EAS443:3:36:201:456#0/1  
aaaaaaabaaa]S\_Vaaa\_\_\_a^T¥^\_N\_\_Ua[\_`¥JUYZ  
@HWI-EAS443:3:47:400:694#0/1  
GTCTCGGCTTTGAGGGGGCCTGACGGGATGATAGAAAGAA  
+HWI-EAS443:3:47:400:694#0/1  
a^R\_ab`V]^aPNV`^`^`[M[QNQQY^UU^UVYYBBBBBB  
@HWI-EAS443:3:71:1360:1701#0/1  
AGCCTCTGCTGCCTGTTCACTCGATCCAGCCATCTGTTCC  
+HWI-EAS443:3:71:1360:1701#0/1  
aaaaab`Z\_aa``]UZa^`M\_Z\_XU^a]ZVXZ\_V\_¥¥UUQ  
@HWI-EAS443:3:75:222:946#0/1  
CCTGCTGCCTGTTCACTCGATCCAGCCATCTGTTCCATAG  
+HWI-EAS443:3:75:222:946#0/1  
]\_]bba`ba]Z\_^^aa`¥]`a\_^^b`]0]\_UIU]`[Q¥T  
@HWI-EAS443:3:80:942:1211#0/1  
CCGGCTTTGAGGGGGCCTGACGGGATGATAGAAAGAACGT

+HWI-EAS443:3:80:942:1211#0/1  
aaaa`b\_¥\_^^^aa\_ZY\_aaa]`^Y¥¥`a`\_]\_`R]]XWW  
@HWI-EAS443:3:89:401:551#0/1  
TGGCTGGATCGAGTGAACAGGCAGCAGAGGCCATGGAGGG  
+HWI-EAS443:3:89:401:551#0/1  
abbbbb`aaa^b`^a¥^`\_a\_]`^0^Y¥\_¥`\_U\_YMZaV  
@HWI-EAS443:3:100:127:457#0/1  
GCTGGATCGAGTGAACAGGCAGCAGAGGCCATGGAGGTTG  
+HWI-EAS443:3:100:127:457#0/1  
aababaa[babUa`aSaaa\_a`R¥^¥Z\_US¥QX^BBBBBB  
@HWI-EAS443:3:100:193:58#0/1  
GTCTTCTAACCGAGGTCAAACGTACGTTCTTTCTATCAT  
+HWI-EAS443:3:100:193:58#0/1  
aU¥`\_^`\_`¥`Ya`UU[RVTG[UUV[RRY]YYTWSBBBB  
@HWI-EAS443:3:13:1535:1384#0/1  
GCTGGATCGAGTGAACAGGCAGCAGAGGCCATGGAGGTTG  
+HWI-EAS443:3:13:1535:1384#0/1  
a\_aa`\_`^a`aW`^a^U]aU^`SPPQXU¥]BBBBBBBBBB  
@HWI-EAS443:3:13:298:423#0/1  
GGCCTCTGCTGCCTGTTCACTCGATCCAGCCATCTGTTCC  
+HWI-EAS443:3:13:298:423#0/1  
K`aba\_babZ¥¥bbaa]`^`baaba`bb]aaaaaab]Y]`  
@HWI-EAS443:3:14:1508:688#0/1  
CGTTCTTTCTATCATCCCGTCAGGCCCCCTCAAAGCCGAG  
+HWI-EAS443:3:14:1508:688#0/1  
a]V^`]`a^`a]¥]WNK¥^T^\_]UZSXPTYQUYV¥QKZSY  
@HWI-EAS443:3:14:629:254#0/1  
CTTCTAACCGAGGTCAAACGTACGTTCTTTCTATCATCC  
+HWI-EAS443:3:14:629:254#0/1  
abbbbbbbbaaaWaaaa`ab[a`a\_a^`aaT\_a\_\_`\_ZZ  
@HWI-EAS443:3:15:33:856#0/1  
CGTTCTTTCTATCATCCCGTCAGGCCCCCTCAAAGCCGAG  
+HWI-EAS443:3:15:33:856#0/1  
ababbbbbbbbaabbaaba]a`Waaaa`aa]a`¥^Y^a  
@HWI-EAS443:3:15:730:1073#0/1  
GATGGCTGGATCGAGTGAACAGGCAGCAGAGGCCATGGAG  
+HWI-EAS443:3:15:730:1073#0/1  
`WaT\_ba^ZT^ZZ`¥Y`\_a\_BBBBBBBBBBBBBBBBBBBB  
@HWI-EAS443:3:16:341:707#0/1  
TAAAGATGAGTCTTCTAACCGAGGTCAAACGTACGTTCT  
+HWI-EAS443:3:16:341:707#0/1  
^a^Ua¥`````]`Y`aZ[^aa\_[aaG[][\_Y`]FZZaWSYW  
@HWI-EAS443:3:17:1016:548#0/1  
GCCATTTGTCTGTGAGACCGATGCTGTGAATCAGCAATCT  
+HWI-EAS443:3:17:1016:548#0/1  
aa]`a`a\_LX`a]aYa\_U]a[P[``]V``\_]Y[\_U`]YW^  
@HWI-EAS443:3:18:1060:819#0/1  
GTCTTCTAACCGAGGTCAAACGTACGTTCTTTCTATCAT  
+HWI-EAS443:3:18:1060:819#0/1  
a¥baba`a]\_YY`W````\_]`W`\_a^\_\_\_a`[^\_]¥W¥

@HWI-EAS443:3:18:1597:1221#0/1  
GCTGGATCGAGTGAACAGGCAGCAGAGGCCATGGAGGTTG  
+HWI-EAS443:3:18:1597:1221#0/1  
abbbbababbb\_aaaZbba`ab^]a[aV]^\_a`[\_`]BB  
@HWI-EAS443:3:1:1055:950#0/1  
CGTTCTTTCTATCATCCCGTCAGGCCCCCTCAAAGCCGAG  
+HWI-EAS443:3:1:1055:950#0/1  
T]TT`ZX¥`^[aa^¥ZJ]^a` `a[TVQR\_a^V\_aaQXaaB  
@HWI-EAS443:3:20:506:2031#0/1  
GGTAGATATTTAAAGATGAGTCTTCTAACCGAGGTCGAAA  
+HWI-EAS443:3:20:506:2031#0/1  
]a^abb0^ab^`]S]^`^a\_`Qbaa^Maa`aa`^MKNS` `a  
@HWI-EAS443:3:21:1357:1509#0/1  
GTCAAACGTACGTTCTTTCTATCATCCCGTCAGGCCCC  
+HWI-EAS443:3:21:1357:1509#0/1  
aab^\_bbab`babZa^abaXaaa¥aaV¥][WTaa\_Z¥¥W¥  
@HWI-EAS443:3:21:808:1293#0/1  
TTCTAACCGAGGTCGAAACGTACGTTCTTTCTATCATCCC  
+HWI-EAS443:3:21:808:1293#0/1  
^USPZTa¥^`^YJ]RYa]XTG¥^L`VH`OZG¥^XBBBBBB  
@HWI-EAS443:3:21:973:555#0/1  
CTAACCGAGGTCGAAACGTACGTTCTTTCTATCATCCCGT  
+HWI-EAS443:3:21:973:555#0/1  
`b\_\_`\_^W¥`H\_W]aZVWY`UZRYR\_¥\_H¥\_\_]BBBBBBB  
@HWI-EAS443:3:22:1206:1337#0/1  
CCGAGGTCGAAACGTACGTTCTTTCTATCATCCCGTCAGG  
+HWI-EAS443:3:22:1206:1337#0/1  
a`\_W\_^P¥aaaa`Y]]`\_Y`[a`Z¥¥^\_S]`WJT]Q^[YO  
@HWI-EAS443:3:22:579:1838#0/1  
GTTCTTTCTATCATCCCGTCAGGCCCCCTCAAAGCCGAGA  
+HWI-EAS443:3:22:579:1838#0/1  
aZaa]S¥aZa`a` `a\_aXLX\_]WZ\_^SW¥¥¥¥^SYMWVTJ  
@HWI-EAS443:3:23:631:1535#0/1  
GATATTTAAAGATGAGTCTTCTAACCGAGGTCGAAACGTA  
+HWI-EAS443:3:23:631:1535#0/1  
`b]bbbabba`aaaabaaa`aaaa¥`\_\_`[KNY[\_¥aaUa  
@HWI-EAS443:3:24:478:1370#0/1  
TTTAAAGATGAGTCTTCTAACCGAGGTCGAAACGTACGTT  
+HWI-EAS443:3:24:478:1370#0/1  
abbb]aaa]aaa¥bbYaa\_aaa]^`\_\_\_aPQR`ZZNY¥`NW  
@HWI-EAS443:3:25:584:151#0/1  
AACGTACGTTCTTTCTATCATCCCGTCAGGCCCCCTCAA  
+HWI-EAS443:3:25:584:151#0/1  
aa\_]a\_aSa`aaa\_`\_`[\_`X[Z¥]W¥W^VRMUJWVT\_VUJ  
@HWI-EAS443:3:26:1707:271#0/1  
AACCGAGGTCGAAACGTACGTTCTTTCTATCATCCCGTCA  
+HWI-EAS443:3:26:1707:271#0/1  
aba\_aa`a¥a\_`\_`\_ba`\_\_^`VaaWa`\_U` `VSV]XWX  
@HWI-EAS443:3:27:1080:805#0/1  
GGCCTCTGCTGCCTGTTCACTCGATCCAGCCATCTGTCC

+HWI-EAS443:3:27:1080:805#0/1  
R]\_HO`X\_]SZX\_ZbRV`b]T¥b¥QOX\_WTZ]YRRaa^XH  
@HWI-EAS443:3:28:163:1127#0/1  
CTCGGCTTTGAGGGGGCCTGACGGGATGATAGAAAGAACG  
+HWI-EAS443:3:28:163:1127#0/1  
a`^[Z[]][QFWZ]¥NO[JQSZ^PJRVQRY[Y¥BBBBB  
@HWI-EAS443:3:28:845:721#0/1  
CATGGCCTCTGCTGCCTGTTCACTCGATCCAGCCATCTGT  
+HWI-EAS443:3:28:845:721#0/1  
abb[QX]abb]TZ¥ba`S]a]a][YXa^W]MZ\_]XY[P  
@HWI-EAS443:3:29:1005:1275#0/1  
GAACAGATGGCTGGATCGAGTGAACAGGCAGCAGAGGCCA  
+HWI-EAS443:3:29:1005:1275#0/1  
aabaaaa``aaba]`J\_`a^Y]`a¥]``\_a`TV[Y^^^BB  
@HWI-EAS443:3:29:781:403#0/1  
GGCTGGATCGAGTGAACAGGCAGCAGAGGCCATGGAGGTT  
+HWI-EAS443:3:29:781:403#0/1  
^b`X¥a\_¥abba`aa]V^Xb]a¥F\_`[a\_M¥]`SSPOBBB  
@HWI-EAS443:3:2:630:949#0/1  
CCGAGGTCGAAACGTACGTTCTTTCTATCATCCCGTCAGG  
+HWI-EAS443:3:2:630:949#0/1  
]PK]VaPYXUVQLLUW^aU¥UPXUSUXPQW¥OQESUUSTB  
@HWI-EAS443:3:31:146:52#0/1  
AAAGATGAGTCTTCTAACCAGGTCGAAACGTACGTTCTT  
+HWI-EAS443:3:31:146:52#0/1  
^abb``\_`^Xa\_aa`aaa\_WW``YWLOWDV\_PX`aXZ\_Z\_  
@HWI-EAS443:3:31:1735:884#0/1  
ATGGCCTCTGCTGCCTGTTCACTCGATCCAGCCATCTGTT  
+HWI-EAS443:3:31:1735:884#0/1  
``ZYW`aaa`^]SZaV]^WaaT\_\_\_\_]^\_\_aSY\_`YM^ZPU  
@HWI-EAS443:3:32:647:735#0/1  
CAGCAATCTGCTCACAAGTGGCACACACTAGACCAAAGC  
+HWI-EAS443:3:32:647:735#0/1  
abba\_`abaaaa`\_`a`\_¥a\_aaa`aa\_\_aa``[\_^X^`  
@HWI-EAS443:3:32:738:69#0/1  
GCCATTTGTCTGTGAGACCGATGCTGTGAATCAGCAATCT  
+HWI-EAS443:3:32:738:69#0/1  
ab`aaaaa^Xaa¥a`a`a`\_`\_][¥`^¥¥S^XY¥VV`^  
@HWI-EAS443:3:33:15:760#0/1  
CAGATGGCTGGATCGAGTGAACAGGCAGCAGAGGCCATGG  
+HWI-EAS443:3:33:15:760#0/1  
aa]I¥a```^`a`]T[ZR¥`T`T`ZU[[BBBBBBBBBBBB  
@HWI-EAS443:3:33:274:983#0/1  
GCTGGATCGAGTGAACAGGCAGCAGAGGCCATGGAGGTTG  
+HWI-EAS443:3:33:274:983#0/1  
aba\_Za`baba[`aba`\_aaa`a¥V][\_^^^VQ¥U]ZBBB  
@HWI-EAS443:3:34:1249:1036#0/1  
ACGGGATGATAGAAAGAACGTACGTTTCGACCTCGGTTAG  
+HWI-EAS443:3:34:1249:1036#0/1  
`ba`][¥]^`Y¥`UY`SP¥H`aWSUa]BBBBBBBBBBBB

@HWI-EAS443:3:34:130:1936#0/1  
AACCGAGGTCGAAACGTACGTTCTTTCTATCATCCCGTCA  
+HWI-EAS443:3:34:130:1936#0/1  
`bb`^`[\_Sa\_XaaaKTZa`WW\_\_¥¥V^^]WW¥\_¥\_VUWZ  
@HWI-EAS443:3:35:385:1583#0/1  
GCTGGATCGAGTGAACAGGCAGCAGAGGCCATGGAGGTTG  
+HWI-EAS443:3:35:385:1583#0/1  
^^`^`\_`XXT]¥^\_T¥\_Z^Z[TOKNZa¥BBBBBBBBBB  
@HWI-EAS443:3:35:885:653#0/1  
GCCATTTGTCTGTGAGACCGATGCTGTGAATCAGCAATCT  
+HWI-EAS443:3:35:885:653#0/1  
Ubb`bba`[\_aaaabaa`aa`S`a\_aa[a\_`^baa`aaaR\_  
@HWI-EAS443:3:36:104:851#0/1  
GGGGCCTGACGGGATGATAGAAAGAACGTACGTTTCGAC  
+HWI-EAS443:3:36:104:851#0/1  
aaaaabbaa`aaaZU`aaaaa\_UQ¥RZaaPZ]a¥\_`]Y¥`  
@HWI-EAS443:3:36:572:1058#0/1  
GCTGGATCGAGTGAACAGGCAGCAGAGGCCATGGAGGTTG  
+HWI-EAS443:3:36:572:1058#0/1  
ababZ`ba`^Ybaa\_ba¥^aabR¥M]^¥[BBBBBBBBBB  
@HWI-EAS443:3:37:1538:823#0/1  
AGATGGCTGGATCGAGTGAACAGGCAGCAGAGGCCATGGA  
+HWI-EAS443:3:37:1538:823#0/1  
`a`bb^abba`X^abaa`aab`^`[]aPQFZX`UZBBBBBB  
@HWI-EAS443:3:37:691:327#0/1  
TAACCGAGGTCGAAACGTACGTTCTTTCTATCATCCCGTC  
+HWI-EAS443:3:37:691:327#0/1  
`bba`^`aa¥`P\_aab`a]a0a`a`aX`GLMH[a^\_\_Q^  
@HWI-EAS443:3:38:229:966#0/1  
GGCCTGACGGGATGATAGAAAGAACGTACGTTTCGACCTC  
+HWI-EAS443:3:38:229:966#0/1  
abba[\_U\_aaa^a^[YQSaR`¥a\_Xa`\_Q[UXBBBBBB  
@HWI-EAS443:3:39:1337:859#0/1  
CTCGGCTTTGAGGGGCTGACGGGATGATAGAAAGAACG  
+HWI-EAS443:3:39:1337:859#0/1  
\_WZ^]VX]ZOO`\_`\_VZYNLDER^RXHN][]UBBBBBBBBB  
@HWI-EAS443:3:39:827:1402#0/1  
CTTCTAACCGAGGTCGAAACGTACGTTCTTTCTATCATCC  
+HWI-EAS443:3:39:827:1402#0/1  
aba`W¥\_bba^aa]baW`\_`a¥`\_aZ^a`\_XN`\_`¥\_[YQ  
@HWI-EAS443:3:39:838:739#0/1  
GGCCTCTGCTGCCTGTTCACTCGATCCAGCCATCTGTTCC  
+HWI-EAS443:3:39:838:739#0/1  
aaabbbaba\_\_baab`aa`\_aaaa^a]]a^a^`aaa¥`ZY  
@HWI-EAS443:3:40:1625:390#0/1  
AAACGTACGTTCTTTCTATCATCCCGTCAGGCCCTCAA  
+HWI-EAS443:3:40:1625:390#0/1  
a^^abaT^^aaPaZaY]\_aVa]]S]aT\_V\_SSTa\_S^SRS  
@HWI-EAS443:3:40:659:1680#0/1  
GTCTTCTAACCGAGGTCGAAACGTACGTTCTTTCTATCAT

+HWI-EAS443:3:40:659:1680#0/1  
aNQZY0XX^\_YXTLWD[YLRX^[MPY¥HUUV^U^W[LX\_S  
@HWI-EAS443:3:42:1369:412#0/1  
TATGGAACAGATGGCTGGATCGAGTGAACAGGCAGCAGAG  
+HWI-EAS443:3:42:1369:412#0/1  
aabbbabaaaa`aa`¥`a`a`aaa\_aaa`a`a\_aa``a^\_  
@HWI-EAS443:3:42:571:1187#0/1  
GATATTTAAAGATGAGTCTTCTAACCGAGGTCGAAACGTA  
+HWI-EAS443:3:42:571:1187#0/1  
aa```aa\_Y`aX]```^`a`\_]aa`^X`^Z¥^ZQX\_^W^  
@HWI-EAS443:3:43:121:1448#0/1  
ATTTAAAGATGAGTCTTCTAACCGAGGTCGAAACGTACGT  
+HWI-EAS443:3:43:121:1448#0/1  
`¥¥W\_^\_OWa`RTN¥[X]X^`^WXYWX¥ZQTY^VOX[]Q  
@HWI-EAS443:3:44:1125:1317#0/1  
GTTCTTTCTATCATCCCGTCAGGCCCTCAAAGCCGAGA  
+HWI-EAS443:3:44:1125:1317#0/1  
aZa`^`a`X`aaaa`^Z]a]`^`\_^¥W¥^S¥¥¥¥S¥`¥^W  
@HWI-EAS443:3:44:1181:506#0/1  
TAGATATTTAAAGATGAGTCTTCTAACCGAGGTCGAAACG  
+HWI-EAS443:3:44:1181:506#0/1  
a`aa[]Va^a\_bMUWWY[HYaXRZWPRRVUMHTSKOVMRZ  
@HWI-EAS443:3:44:252:432#0/1  
TTTAAAGATGAGTCTTCTAACCGAGGTCGAAACGTACGTT  
+HWI-EAS443:3:44:252:432#0/1  
`]S¥a[`QX^`^aa`\_]`^`\_`¥`[N[^]]RS\_ZNN¥KN  
@HWI-EAS443:3:44:914:1161#0/1  
GCTATGGAACAGATGGCTGGATCGAGTGAACAGGCAGCAG  
+HWI-EAS443:3:44:914:1161#0/1  
a\_a`a`a`a`a`a`\_¥a\_a[`Z`\_`^SZZ`¥¥¥\_V\_BBBB  
@HWI-EAS443:3:44:965:1298#0/1  
CAACCTCCATGGCCTCTGCTGCCTGTTCACTCGATCCAGC  
+HWI-EAS443:3:44:965:1298#0/1  
a`b[aaa`a`aa^¥aYYa``]^Y`a]\_¥\_¥^[a^UY^^XQ  
@HWI-EAS443:3:45:396:396#0/1  
CGAGGTCGAAACGTACGTTCTTTCTATCATCCCGTCAGGC  
+HWI-EAS443:3:45:396:396#0/1  
abbbb\_bb\_bTbbbbabbbbbbabab`abbZbb`aabba  
@HWI-EAS443:3:45:426:806#0/1  
AACCTCCATGGCCTCTGCTGCCTGTTCACTCGATCCAGCC  
+HWI-EAS443:3:45:426:806#0/1  
aaa¥a`]`a]a]a]U``a[V¥\_`a^V^aYZYPZS\_]¥Y]Y  
@HWI-EAS443:3:46:1163:1258#0/1  
TTTAAAGATGAGTCTTCTAACCGAGGTCGAAACGTACGTT  
+HWI-EAS443:3:46:1163:1258#0/1  
```bb^bbaSaaVZ^aaaa`^a¥^\_LMOOQ^¥]]TV[VT  
@HWI-EAS443:3:46:1561:789#0/1  
GGAACAGATGGCTGGATCGAGTGAACAGGCAGCAGAGGCC  
+HWI-EAS443:3:46:1561:789#0/1  
a]Za``b\_aba\_`a`\_`Z`]\_Ta\_`Q¥`^U[\_WX\_QV¥BB

@HWI-EAS443:3:47:123:153#0/1  
GTCGAAACGTACGTTCTTTCTATCATCCCGTCAGGCCCCC  
+HWI-EAS443:3:47:123:153#0/1  
ab`UWW\_R\_[aab[]^aaa\_\_a[MS^NV]]YVVUEVXR`V  
@HWI-EAS443:3:47:913:1080#0/1  
CCGAGGTCGAAACGTACGTTCTTTCTATCATCCCGTCAGG  
+HWI-EAS443:3:47:913:1080#0/1  
^a¥\_\_aU[W^\_] ]^\_a][^Z\_`a`aba]]aa]V[[WTR\_  
@HWI-EAS443:3:48:1314:248#0/1  
GAGGTCGAAACGTACGTTCTTTCTATCATCCCGTCAGGCC  
+HWI-EAS443:3:48:1314:248#0/1  
a`aa^abZa¥ab]aab`a^baa^aaa\_^a][Ua\_¥^Z^¥S  
@HWI-EAS443:3:49:10:349#0/1  
AGATATTTAAAGATGAGTCTTCTAACCGAGGTCGAAACGT  
+HWI-EAS443:3:49:10:349#0/1  
`Y^aaaaaaaVY`^a\_`^`\_]a`[``\_\_V]G]]W\_^UYR  
@HWI-EAS443:3:4:1343:295#0/1  
GTCGAAACGTACGTTCTTTCTATCATCCCGTCAGGCCCCC  
+HWI-EAS443:3:4:1343:295#0/1  
a`aZ^\_[\_aaa¥a\_\_\_`b`^\_\_\_^^a[MUYUWBBBBBBB  
@HWI-EAS443:3:4:787:528#0/1  
GGCCTCTGCTGCCTGTTCACTCGATCCAGCCATCTGTTCC  
+HWI-EAS443:3:4:787:528#0/1  
\_\_bbb[babbb\_a`b]abb`baa^`aaab\_P\_``[a`[[X  
@HWI-EAS443:3:50:1298:819#0/1  
GGCTATGGAACAGATGGCTGGATCGAGTGAACAGGCAGCA  
+HWI-EAS443:3:50:1298:819#0/1  
aa¥]W\_]WV¥¥ZZV[a`X¥]YKQS^YQUVNWTQ[\_ZBBBB  
@HWI-EAS443:3:50:283:439#0/1  
GCTGGATCGAGTGAACAGGCAGCAGAGGCCATGGAGGTTG  
+HWI-EAS443:3:50:283:439#0/1  
a]Vaa\_`^[\_Z^\_Z¥[Q¥MX\_M]TWUYL¥^X][UBBBBB  
@HWI-EAS443:3:51:724:692#0/1  
GATCTCGGCTTTGAGGGGCCTGACGGGATGATAGAAAGA  
+HWI-EAS443:3:51:724:692#0/1  
Z]a`X)`\_R[a]RK`\_^\_V¥^\_aRabbI`ba\_LTaa[`[  
@HWI-EAS443:3:51:8:559#0/1  
TTTAAAGATGAGTCTTCTAACCGAGGTCGAAACGTACGTT  
+HWI-EAS443:3:51:8:559#0/1  
aaba^W^````\_U\_aa`a`aV[[]a]NU¥NR]^aYYT\_WV  
@HWI-EAS443:3:52:1432:807#0/1  
GCCATTTGTCTGTGAGACCGATGCTGTGAATCAGCAATCT  
+HWI-EAS443:3:52:1432:807#0/1  
abaabbb`aabaabaab`\_`aa]aa\_\_``a]aa\_a`a\_a  
@HWI-EAS443:3:52:339:842#0/1  
GCCATTTGTCTGTGAGACCGATGCTGTGAATCAGCAATCT  
+HWI-EAS443:3:52:339:842#0/1  
a\_a[`]\_]\_[\_\_^\_\_`]^\_aW]^`^]YX\_¥XYZ^UXUXR]  
@HWI-EAS443:3:53:690:671#0/1  
CTCGGCTTTGAGGGGCCTGACGGGATGATAGAAAGAACG

+HWI-EAS443:3:53:690:671#0/1  
a\_bbbbbbbbababab`aaa`abaa\_ab\_Y\_Xaaa`\_`U\_  
@HWI-EAS443:3:54:1510:1500#0/1  
ACCGAGGTCGAAACGTACGTTCTTTCTATCATCCCGTCAG  
+HWI-EAS443:3:54:1510:1500#0/1  
aa]a^aaa`]W\_`]a^a]a`\_R`]a`^\_aa^\_^YUaYY[`  
@HWI-EAS443:3:54:185:1023#0/1  
GATGAGTCTTCTAACCGAGGTCGAAACGTACGTTCTTTCT  
+HWI-EAS443:3:54:185:1023#0/1  
aJ\_`\_`Z^aaY[\_`\_`WO[RW¥SQ\_RZS^¥ZWULZW¥VV  
@HWI-EAS443:3:54:806:238#0/1  
GGGCCTGACGGGATGATAGAAAGAACGTACGTTTCGACCT  
+HWI-EAS443:3:54:806:238#0/1  
a`a]`aa\_]\_¥¥`^V[^`^a`^¥UaY\_V[V]PWZKHNT  
@HWI-EAS443:3:55:1605:1915#0/1  
GCCATTTGTCTGTGAGACCGATGCTGTGAATCAGCAATCT  
+HWI-EAS443:3:55:1605:1915#0/1  
aaaa```babbbVaab`b`ababbbb`bbbb`b\_ba[]b  
@HWI-EAS443:3:55:717:1329#0/1  
ACGTACGTTCTTTCTATCATCCCGTCAGGCCCTCAAAG  
+HWI-EAS443:3:55:717:1329#0/1  
`ba\_\_a]R`X`baYV]^`aa[]`]S]¥^¥X^\_^]]Z¥^T  
@HWI-EAS443:3:56:707:1262#0/1  
CTTTCTATCATCCCGTCAGGCCCTCAAAGCCGAGATCG  
+HWI-EAS443:3:56:707:1262#0/1  
abbbbbbbbbbaabba`babaaaa````a\_aaabaaaa  
@HWI-EAS443:3:57:478:136#0/1  
CTCGGCTTTGAGGGGCTGACGGGATGATAGAAAGAACG  
+HWI-EAS443:3:57:478:136#0/1  
abababaaaZP¥aa`Z\_\_¥UY`Z[W¥]U^VS[]¥UU¥TW  
@HWI-EAS443:3:58:685:356#0/1  
GTCGAAACGTACGTTCTTTCTATCATCCCGTCAGGCCCT  
+HWI-EAS443:3:58:685:356#0/1  
aaaba`aab\_aab`aaaabaaaaYaa`aaa^¥aa^^`\_]\_  
@HWI-EAS443:3:59:263:858#0/1  
GGGGCCTGACGGGATGATAGAAAGAACGTACGTTTCGAC  
+HWI-EAS443:3:59:263:858#0/1  
¥\_^\_b`b`\_ab`b`a^^Y`X`¥¥\_¥L`^V`¥^XXUDTXU  
@HWI-EAS443:3:59:704:902#0/1  
GCCATTTGTCTGTGAGACCGATGCTGTGAATCAGCAATCT  
+HWI-EAS443:3:59:704:902#0/1  
\_a^W\_aa\_]¥^^¥`¥¥\_\_\_¥ZXa[ZX\_\_UUR\_X^U^US  
@HWI-EAS443:3:60:1111:1768#0/1  
GGCTGGATCGAGTGAACAGGCAGCAGAGGCCATGGAGGTT  
+HWI-EAS443:3:60:1111:1768#0/1  
^`T`^`a\_a]RY`^aabX`QU\_[^X¥VV[YBBBBBBBBBB  
@HWI-EAS443:3:60:146:246#0/1  
GTGAAACGTACGTTCTTTCTATCATCCCGTCAGGCCCT  
+HWI-EAS443:3:60:146:246#0/1  
a]a¥TMTZ`Y¥^aUZT¥\_^[Z`YSZ^[ZV^UTTTSSQSSUT



@HWI-EAS443:3:60:1721:1736#0/1  
AGGGGGCCTGACGGGATGATAGAAAGAACGTACGTTTCGA  
+HWI-EAS443:3:60:1721:1736#0/1  
`Y\_\_X\_\_T¥¥T`\_\_`Xa\_T\_PZ\_¥[OX[HWE^[]]WJMTZ  
@HWI-EAS443:3:61:271:1960#0/1  
TAACCGAGGTCAAACGTACGTTCTTTCTATCATCCCGTC  
+HWI-EAS443:3:61:271:1960#0/1  
abba\_`YYJ0`QT¥¥`]U\_`\_W[aYU[ `[a`[^WNUTYQU  
@HWI-EAS443:3:61:675:1016#0/1  
CTCGGCTTTGAGGGGGCCTGACGGGATGATAGAAAGAACG  
+HWI-EAS443:3:61:675:1016#0/1  
aba^abbbb^]ab\_`\_\_b]R]^Y^a\_Za\_^YXK¥¥YVXRU  
@HWI-EAS443:3:62:1338:1574#0/1  
ACCGAGGTCAAACGTACGTTCTTTCTATCATCCCGTCAG  
+HWI-EAS443:3:62:1338:1574#0/1  
\_XX`RZPGR`]^]0]Taa¥NZLNZ¥TU]XXa^XGKM[X` `^  
@HWI-EAS443:3:62:1360:1686#0/1  
AGATTGCTGATTCACAGCATCGGTCTCACAGACAAATGGC  
+HWI-EAS443:3:62:1360:1686#0/1  
^N¥W[WEW`a\_^V\_\_]]Y[]XYYUVYVRW[UVY]XYY^B  
@HWI-EAS443:3:62:730:1045#0/1  
GCTGGATCGAGTGAACAGGCAGCAGAGGCCATGGAGGTTG  
+HWI-EAS443:3:62:730:1045#0/1  
aaaa\_\_^^`\_aU`^aa¥a^^`]¥TZYY\_YBBBBBBBBBBBB  
@HWI-EAS443:3:62:855:53#0/1  
GGCTGGATCGAGTGAACAGGCAGCAGAGGCCATGGAGGTT  
+HWI-EAS443:3:62:855:53#0/1  
aa^a\_a`\_]aaaUa\_^Z\_aaY`\_NR¥¥^^UYBBBBBBBBBB  
@HWI-EAS443:3:63:201:1255#0/1  
GTTCTTTCTATCATCCCGTCAGGCCCTCAAAGCCGAGA  
+HWI-EAS443:3:63:201:1255#0/1  
\_G\_]`^`]^a¥ZSY^`\_ZQ^[VQ¥\_^]RR`ZBBBBBBBBBB  
@HWI-EAS443:3:64:1143:58#0/1  
AGATTGCTGATTCACAGCATCGGTCTCACAGACAAATGGC  
+HWI-EAS443:3:64:1143:58#0/1  
aaa]aba`a`aa\_a\_`\_^`aaaY^`][¥`]Y]X]^VYW  
@HWI-EAS443:3:64:955:433#0/1  
GGCAACCTCCATGGCCTCTGCTGCCTGTTCACTCGATCCA  
+HWI-EAS443:3:64:955:433#0/1  
aa[OR¥ZJ[a\_YRQULQRYXSP¥¥G\_R¥QKXX¥BBBBBBBB  
@HWI-EAS443:3:65:224:1320#0/1  
TGGCTGGATCGAGTGAACAGGCAGCAGAGGCCATGGAGGT  
+HWI-EAS443:3:65:224:1320#0/1  
aaabaaba¥aaa\_[X`Xa`]a[^]^^[[ `^`WYNZKYBB  
@HWI-EAS443:3:65:256:555#0/1  
GCCTCTGCTGCCTGTTCACTCGATCCAGCCATCTGTTCCA  
+HWI-EAS443:3:65:256:555#0/1  
aaaaaaaaa]aaa`^]aba`aaaY`aWU`aY`\_^X[YXYU  
@HWI-EAS443:3:65:863:970#0/1  
AGATATTTAAAGATGAGTCTTCTAACCGAGGTCAAACGT

+HWI-EAS443:3:65:863:970#0/1  
ab¥XZY^`\_QZV\_RZYP¥Y`ZP^a\_a[\_¥XI`\_I\_W[VU  
@HWI-EAS443:3:66:965:1107#0/1  
ATTTAAAGATGAGTCTTCTAACCGAGGTCGAAACGTACGT  
+HWI-EAS443:3:66:965:1107#0/1  
aaaabb`a`aa\_a\_aaa`aaa`a`^a\_Za\_[`a\_^Y\_X\_Z  
@HWI-EAS443:3:67:190:317#0/1  
TGGAACAGATGGCTGGATCGAGTGAACAGGCAGCAGAGGC  
+HWI-EAS443:3:67:190:317#0/1  
aba\_Tbbbaa`abbaaa^aaaa\_a]W`a`a]^\_PZ][[]]B  
@HWI-EAS443:3:67:693:734#0/1  
CTAACCGAGGTCGAAACGTACGTTCTTTCTATCATCCCGT  
+HWI-EAS443:3:67:693:734#0/1  
X^T^a\_[TYRQ`WVZP`XY\_T\_Y[a\_H]a\_¥OZ[]`\_PXT  
@HWI-EAS443:3:68:1504:933#0/1  
TTAAAGATGAGTCTTCTAACCGAGGTCGAAACGTACGTTC  
+HWI-EAS443:3:68:1504:933#0/1  
aabb]\_M\_babYbbb`\_b`a`b\_N]X]]Y`VZ]]L^J  
@HWI-EAS443:3:69:401:1469#0/1  
GGCCTGACGGGATGATAGAAAGAACGTACGTTTCGACCTC  
+HWI-EAS443:3:69:401:1469#0/1  
\_abba]bbb`b`b\_bab^bbbaaaaa\_bb\_\_aaaa`aaaa  
@HWI-EAS443:3:69:935:425#0/1  
ATTTAAAGATGAGTCTTCTAACCGAGGTCGAAACGTACGT  
+HWI-EAS443:3:69:935:425#0/1  
abaaba`b]aa`b`aaa[aab`aaa]a]^^^a\_\_a]\_\_`T  
@HWI-EAS443:3:71:1468:399#0/1  
CCATGGCCTCTGCTGCCTGTTCACTCGATCCAGCCATCTG  
+HWI-EAS443:3:71:1468:399#0/1  
\_`KPKR]a`a[\_SbY]0]Z`¥Z`V^VT]GRQXGY^HQP¥Y  
@HWI-EAS443:3:72:1507:1257#0/1  
GAACAGATGGCTGGATCGAGTGAACAGGCAGCAGAGGCCA  
+HWI-EAS443:3:72:1507:1257#0/1  
a]a`a]aa¥aa`W`\_`a^¥]Yaaa`YOWR^aYXXY^VQMT  
@HWI-EAS443:3:72:187:702#0/1  
CTCGGCTTTGAGGGGGCCTGACGGGATGATAGAAAGAACG  
+HWI-EAS443:3:72:187:702#0/1  
aaaa`aaaa^¥[a\_\_¥^^UVVY^^^¥¥^^RVT]`\_¥YONZ  
@HWI-EAS443:3:72:998:1188#0/1  
GCCATTTGTCTGTGAGACCGATGCTGTGAATCAGCAATCT  
+HWI-EAS443:3:72:998:1188#0/1  
^bbb`\_X¥X¥]^Z\_¥babaaYWaZ\_]V`WU\_¥X`]^`^¥^  
@HWI-EAS443:3:73:1364:1082#0/1  
GCTGGATCGAGTGAACAGGCAGCAGAGGCCATGGAGGTTG  
+HWI-EAS443:3:73:1364:1082#0/1  
aa`]]`\_¥a`Z`\_`[`\_\_\_\_^Z^\_[^^U¥WWWZBBBBBB  
@HWI-EAS443:3:73:751:612#0/1  
TAAAGATGAGTCTTCTAACCGAGGTCGAAACGTACGTTCT  
+HWI-EAS443:3:73:751:612#0/1  
aababa\_aaa^aaa`aaaaaaa`Za]^\_[]aZ\_\_a]^]]

@HWI-EAS443:3:73:901:1008#0/1  
CGAGGTGCAAACGTACGTTCTTTCTATCATCCCGTCAGGC  
+HWI-EAS443:3:73:901:1008#0/1  
aa^Z\_P\_aaaa`]Za\_aXaaa`aa`aaa\_a¥R]\_S]S\_  
@HWI-EAS443:3:76:790:1816#0/1  
TCTTTCTATCATCCCGTCAGGCCCTCAAAGCCGAGATC  
+HWI-EAS443:3:76:790:1816#0/1  
abaaa`abaaba```]¥aa^^a\_`Z\_a\_`^^a\_`^]W\_  
@HWI-EAS443:3:79:1083:39#0/1  
GATATTTAAAGATGAGTCTTCTAACCGAGGTCGAAACGTA  
+HWI-EAS443:3:79:1083:39#0/1  
a]^`aba^^`¥aa\_`X^a\_[a^`Z\_a`a^ZTWT¥VP]WX  
@HWI-EAS443:3:79:1382:1041#0/1  
GATATTTAAAGATGAGTCTTCTAACCGAGGTCGAAACGTA  
+HWI-EAS443:3:79:1382:1041#0/1  
aaaaaaba`\_a`\_aab`aba\_aaaa\_b^aaYO\_\_aWWaW`  
@HWI-EAS443:3:7:729:116#0/1  
GGAACAGATGGCTGGATCGAGTGAACAGGCAGCAGAGGCC  
+HWI-EAS443:3:7:729:116#0/1  
a`]^Y`a`]a\_MM]VU¥¥^¥^USSUW^^MQ¥WBBBBBBB  
@HWI-EAS443:3:80:288:995#0/1  
TCTAACCGAGGTCGAAACGTACGTTCTTTCTATCATCCCG  
+HWI-EAS443:3:80:288:995#0/1  
`babbba`a]a¥aa]ZRaaYaaa^`a`a^`X]][^`\_\_`  
@HWI-EAS443:3:81:527:1518#0/1  
AGATATTTAAAGATGAGTCTTCTAACCGAGGTCGAAACGT  
+HWI-EAS443:3:81:527:1518#0/1  
```[Y]`aa]Z]¥]W]][^`\_\_a`a]`[¥[\_]X[VXX¥W[S  
@HWI-EAS443:3:82:1028:764#0/1  
GGGGCCTGACGGGATGATAGAAAGAACGTACGTTTCGACC  
+HWI-EAS443:3:82:1028:764#0/1  
Q\_OTab`aWabbababb\_b`bbb`\_bba[S\_\_b^Z]Xaa  
@HWI-EAS443:3:82:1607:668#0/1  
GGCTATGGAACAGATGGCTGGATCGAGTGAACAGGCAGCA  
+HWI-EAS443:3:82:1607:668#0/1  
Zbabbbbb\_aaaa`bbbaabaabT`bbXaab^b`bQ^U`]  
@HWI-EAS443:3:82:424:254#0/1  
ATGGAACAGATGGCTGGATCGAGTGAACAGGCAGCAGAGG  
+HWI-EAS443:3:82:424:254#0/1  
`baaab`\_aba`aaaa```aab^baaZ^`a]`¥¥¥W]^  
@HWI-EAS443:3:82:805:642#0/1  
AACCGAGGTCGAAACGTACGTTCTTTCTATCATCCCGTCA  
+HWI-EAS443:3:82:805:642#0/1  
aa`aa`aa¥aa¥a`\_a]a¥a¥^]\_``\_\_a`]]^¥¥\_\_W^\_  
@HWI-EAS443:3:83:1152:627#0/1  
ATTTAAAGATGAGTCTTCTAACCGAGGTCGAAACGTACGT  
+HWI-EAS443:3:83:1152:627#0/1  
abbbbabbaaaaaabbbaab`\_aaaa^aa¥^`Xa^\_X]]  
@HWI-EAS443:3:83:1280:824#0/1  
CGTTCTTTCTATCATCCCGTCAGGCCCTCAAAGCCGAG

+HWI-EAS443:3:83:1280:824#0/1  
ab¥]aa`abaa¥aaaZ^\_\_\_\_`ZT¥]a^^Z¥Z`RNES^^Q  
@HWI-EAS443:3:83:392:1274#0/1  
GCTGGATCGAGTGAACAGGCAGCAGAGGCCATGGAGGTTG  
+HWI-EAS443:3:83:392:1274#0/1  
abbaaa\_`b]aZaaaaaaaa`a¥JX\_[a\_\_VZ\_aBBBBBB  
@HWI-EAS443:3:84:1331:1760#0/1  
ATTTAAAGATGAGTCTTCTAACCGAGGTCGAAACGTACGT  
+HWI-EAS443:3:84:1331:1760#0/1  
a\_`]aba\_aa\_ba\_ab`V`aaa\_]aaa]aaa\_a0aGa^YT  
@HWI-EAS443:3:84:683:1377#0/1  
TCCATGGCCTCTGCTGCCTGTTCACTCGATCCAGCCATCT  
+HWI-EAS443:3:84:683:1377#0/1  
abbaaaabbaa^\_`a`ba`\_Z``baZaa^]aa`^`\_`a^Z  
@HWI-EAS443:3:89:1150:368#0/1  
ACCTCCATGGCCTCTGCTGCCTGTTCACTCGATCCAGCCA  
+HWI-EAS443:3:89:1150:368#0/1  
`b``a^ab`]]`a^^¥Z]aaaZ]]^`¥`a^¥^a]¥^X  
@HWI-EAS443:3:8:904:1863#0/1  
ATTTAAAGATGAGTCTTCTAACCGAGGTCGAAACGTACGT  
+HWI-EAS443:3:8:904:1863#0/1  
a\_\_^Yba\_]`aa\_]U`JVZ^a]]][Y¥UGW\_`\_`Z`H^P]N  
@HWI-EAS443:3:90:1652:1631#0/1  
CATGGCCTCTGCTGCCTGTTCACTCGATCCAGCCATCTGT  
+HWI-EAS443:3:90:1652:1631#0/1  
ab^Z^¥X^\_a\_V\_] [b^`Zbb`U`XL\_aQ`R\_ZT¥Z¥XXV  
@HWI-EAS443:3:90:613:1116#0/1  
GAACAGATGGCTGGATCGAGTGAACAGGCAGCAGAGGCCA  
+HWI-EAS443:3:90:613:1116#0/1  
a```ab]ZQU^`W`S¥`¥`a^Z\_aV^]¥ZZ\_Z¥0aa^^[B  
@HWI-EAS443:3:91:1104:1785#0/1  
TGACGGGATGATAGAAAGAACGTACGTTTCGACCTCGGTT  
+HWI-EAS443:3:91:1104:1785#0/1  
KXVXV¥aV0\_] [a\_aa\_b`a]¥T]^XO¥Z\_Y¥\_N\_a` [FR  
@HWI-EAS443:3:91:1259:883#0/1  
CGATCTCGGCTTTGAGGGGGCCTGACGGGATGATAGAAAG  
+HWI-EAS443:3:91:1259:883#0/1  
abaa\_] ] [a^\_ba\_Q`ba``J]^]OY]aaZ][YUYZa]^¥  
@HWI-EAS443:3:9:193:969#0/1  
GGCCTCTGCTGCCTGTTCACTCGATCCAGCCATCTGTTCC  
+HWI-EAS443:3:9:193:969#0/1  
abbbbaaba`aaaa`abbaaaaa]a`aaa`aa]aaZ`a[  
@HWI-EAS443:3:1:272:1047#0/1  
GTCCGCTTTAGCCATTCCATGAGAGCCTCAAGATCTGTG  
+HWI-EAS443:3:1:272:1047#0/1  
aYR[]LUDU¥\_aXLXZ^^`Y\_Z[\_Z\_XTNR¥V[TVPBBBB  
@HWI-EAS443:3:14:239:244#0/1  
ACAGATCTTGAGGCTCTCATGGAATGGCTAAAAACAAGAC  
+HWI-EAS443:3:14:239:244#0/1  
`aZ^`\_ZS\_`a¥a^WTR^YLLSFSUPRW[[BBBBBBBBBB

@HWI-EAS443:3:64:128:1429#0/1  
CATGATTGGTCTTGTCTTTAGCCATTCCATGAGAGCCTCA  
+HWI-EAS443:3:64:128:1429#0/1  
abb\_aa]¥aY^aab`b`^[`a]^]aa`\_aRU`a¥a`  
@HWI-EAS443:3:70:105:1414#0/1  
GACTGGTCTTGTCTTTAGCCATTCCATGAGAGCCTCAAGA  
+HWI-EAS443:3:70:105:1414#0/1  
\_OGY[ZQ\_Z\_\_\_baZ\_¥UaX`T`\_]U¥GW[\_V]LTNFOP  
@HWI-EAS443:3:77:72:185#0/1  
ACTACCATCGTCAACATCCACAGCACTCTGCTGTTCCCTGT  
+HWI-EAS443:3:77:72:185#0/1  
abWW`a^[`aX\_JVV^R`^[^a]U]XV^Z\_U[[LSW[[[R  
@HWI-EAS443:3:39:794:906#0/1  
GATTGGTCTTGTCTTTAGCNATTCCATGAGAGCCTCAAGA  
+HWI-EAS443:3:39:794:906#0/1  
aaaaaa^`baa\_aab\_a]VDT`a`V][\_aWUZV^\_YXSP  
@HWI-EAS443:3:87:1528:535#0/1  
CAGCTCTATGTTGACAAATGACCATCGTCAACATCCACA  
+HWI-EAS443:3:87:1528:535#0/1  
`SX\_Y`b¥a¥ab`\_]`DUbb`]bba\_]MVbaU\_bZP\_\_b  
@HWI-EAS443:3:37:1143:1426#0/1  
TGTGGTCTTGTCTTTAGCCATTCCATGAGAGCCTCAAGAT  
+HWI-EAS443:3:37:1143:1426#0/1  
]`U`a`[^aaba\_a`X`\_a`ab`^S]YaVaaaa¥\_a\_[S  
@HWI-EAS443:3:100:682:1360#0/1  
ATTGGTCTTGTCTTTAGCCATTCCATGAGAGCCTCAAGAT  
+HWI-EAS443:3:100:682:1360#0/1  
J¥`b\_Z\_\_bb^¥aS`bbaX\_Xab\_\_baaba`WGaaaRbaB  
@HWI-EAS443:3:13:99:2006#0/1  
GATTGGTCTTGTCTTTAGCCATTCCATGAGAGCCTCAAGA  
+HWI-EAS443:3:13:99:2006#0/1  
aaaa`[O[a\_¥W^`a\_\_`aaa^^\_UXMR[¥a]]Ya`^^^  
@HWI-EAS443:3:14:1514:863#0/1  
GCTCTATGTTGACAAAATGACCATCGTCAACATCCACAGC  
+HWI-EAS443:3:14:1514:863#0/1  
a`a\_aaaaaa^`[```aa^Z\_a^[¥TX^¥MY]UU[V¥UT  
@HWI-EAS443:3:15:1287:132#0/1  
GATTGGTCTTGTCTTTAGCCATTCCATGAGAGCCTCAAGA  
+HWI-EAS443:3:15:1287:132#0/1  
aaa`a^Ya`bbZRa\_a¥a\_]^[^`^^UMMZ\_]U¥RLOWYB  
@HWI-EAS443:3:15:1665:621#0/1  
CTCTATGTTGACAAAATGACCATCGTCAACATCCACAGCA  
+HWI-EAS443:3:15:1665:621#0/1  
\_Uaa`bbJ¥[Waba`a\_b`Z`abbaa`a\_\_aaY]YD^a^`  
@HWI-EAS443:3:19:119:335#0/1  
GTAGTTTTTTACTCCAGCTCTATGTTGACAAAATGACCAT  
+HWI-EAS443:3:19:119:335#0/1  
a¥ab[^aa`¥\_b`a]ZZa`a\_]a^`U¥\_`[\_]UZW[\_O  
@HWI-EAS443:3:19:1247:1444#0/1  
GATTGGTCTTGTCTTTAGCCATTCCATGAGAGCCTCAAGA

+HWI-EAS443:3:19:1247:1444#0/1  
a`a`ab\_abaa\_aaaaaa`aaaa\_a`\_\_\_a^\_\_\_`\_\_\_  
@HWI-EAS443:3:19:889:620#0/1  
CTTGTCTTTAGCCATTCCATGAGAGCCTCAAGATCTGTGT  
+HWI-EAS443:3:19:889:620#0/1  
`baa\_\_abaaaba`b`aa`a[aa`aaa\_\_]]a^a]`a^bZ  
@HWI-EAS443:3:23:1028:1616#0/1  
GATTGGTCTTGTCTTTAGCCATTCCATGAGAGCCTCAAGA  
+HWI-EAS443:3:23:1028:1616#0/1  
`]VXQOY`\_\_^V[`¥]a¥\_X\_\_\_NZ`\_NW\_WKNN`\_`XZ]  
@HWI-EAS443:3:24:1118:769#0/1  
CAGATTGCTGATTCACAGCATCGGTCTCACAGACAAATGG  
+HWI-EAS443:3:24:1118:769#0/1  
abbabbbbbbbbabbbbabbbWaaaaabbbba`a]`a  
@HWI-EAS443:3:26:63:1613#0/1  
GCTCTATGTTGACAAAATGACCATCGTCAACATCCACAGC  
+HWI-EAS443:3:26:63:1613#0/1  
\_a\_bbbbaU]`b`\_ab]b`Y`[bba¥]]a¥a\_YZ\_aa^^\_  
@HWI-EAS443:3:26:880:1388#0/1  
GCTCTATGTTGACAAAATGACCATCGTCAACATCCACAGC  
+HWI-EAS443:3:26:880:1388#0/1  
ababb]``\_a`aabbbbaa\_aa\_aa\_aZ`aaU``\_[a`\_Y¥  
@HWI-EAS443:3:28:679:499#0/1  
GTCTTTAGCCATTCCATGAGAGCCTCAAGATCTGTGTTCT  
+HWI-EAS443:3:28:679:499#0/1  
a\_aaa¥a`aY`^`\_`Z]^USTX`^[]X]]YW^^aZaZ\_]]  
@HWI-EAS443:3:33:190:1444#0/1  
CAGATCTTGAGGCTCTCATGGAATGGCTAAAGACAAGACC  
+HWI-EAS443:3:33:190:1444#0/1  
]TZa[a`\_\_a\_a\_\_V`S^Y\_ZTYPU]X]`YTXSU]R[]^  
@HWI-EAS443:3:34:954:65#0/1  
GATTGGTCTTGTCTTTAGCCATTCCATGAGAGCCTCAAGA  
+HWI-EAS443:3:34:954:65#0/1  
^T`]a`0^a^`aaba`YZ^`aa]W`[¥][Z]]^Y^^XYXX  
@HWI-EAS443:3:35:453:1415#0/1  
ATTGGTCTTGTCTTTAGCCATTCCATGAGAGCCTCAAGAT  
+HWI-EAS443:3:35:453:1415#0/1  
U`ZX[[]``ZS`a`\_]aba\_\_aa`TZU¥^`\_`aQaYOXXT  
@HWI-EAS443:3:37:1706:1565#0/1  
TTGGTCTTGTCTTTAGCCATTCCATGAGAGCCTCAAGATC  
+HWI-EAS443:3:37:1706:1565#0/1  
^ab¥]^\_Y¥Y``\_^\_^^]`aa`^`\_¥^^Ra`\_aa\_a`^P  
@HWI-EAS443:3:37:740:127#0/1  
GCTCTATGTTGACAAAATGACCATCGTCAACATCCACAGC  
+HWI-EAS443:3:37:740:127#0/1  
`baaabbb`baabaabaa\_a`\_aa`X[SK[^Taa^`\_`^Y  
@HWI-EAS443:3:38:1117:638#0/1  
CACAGATCTTGAGGCTCTCATGGAATGGCTAAAGACAAGA  
+HWI-EAS443:3:38:1117:638#0/1  
aabbabbbbabab`baaQaaaab¥a¥Z`\_\_Y\_aY]U`\_\_W

@HWI-EAS443:3:42:465:371#0/1  
ATGACCATCGTCAACATCCACAGCACTCTGCTGTTCCCTGT  
+HWI-EAS443:3:42:465:371#0/1  
]```]Z¥]]aYU][`a`\_V]][[R[\_]IZ`PXRFL\_Z  
@HWI-EAS443:3:47:1591:501#0/1  
CTCTATGTTGACAAAATGACCATCGTCAACATCCACAGCA  
+HWI-EAS443:3:47:1591:501#0/1  
abbbababbbb`aab\_baaaabb\_aa^aaYa``aa`aaWa  
@HWI-EAS443:3:47:1741:1669#0/1  
AGCTCTATGTTGACAAAATGACCATCGTCAACATCCACAG  
+HWI-EAS443:3:47:1741:1669#0/1  
abab`aabb`aaa]aa^^]aa\_a\_a\_aYX]^W\_[YJWR^Z  
@HWI-EAS443:3:48:282:269#0/1  
CTCTATGTTGACAAAATGACCATCGTCAACATCCACAGCA  
+HWI-EAS443:3:48:282:269#0/1  
aab\_ba``babbbbbbbaabbaaVZ`a`a\_Z¥`PaaY`  
@HWI-EAS443:3:49:1316:1756#0/1  
GATTGGTCTTGTCTTTAGCCATTCCATGAGAGCCTCAAGA  
+HWI-EAS443:3:49:1316:1756#0/1  
`bbbb`bbbab`abaab\_bb^babbb`bbaba`^aa`aa  
@HWI-EAS443:3:50:689:394#0/1  
GCTCTATGTTGACAAAATGACCATCGTCAACATCCACAGC  
+HWI-EAS443:3:50:689:394#0/1  
``b\_[abbbb\_Y\_\_\_Y`ba`^aa\_a[]^Y`a`a]YW¥Y  
@HWI-EAS443:3:54:1241:297#0/1  
ATTGGTCTTGTCTTTAGCCATTCCATGAGAGCCTCAAGAT  
+HWI-EAS443:3:54:1241:297#0/1  
abbbb`bbbaabbbbbbaaaa\_aaaa^b`a`aa`\_]a`  
@HWI-EAS443:3:63:780:1335#0/1  
GCTCTATGTTGACAAAATGACCATCGTCAACATCCACAGC  
+HWI-EAS443:3:63:780:1335#0/1  
abWbYb]a`bSY]`WRY¥Ta`\_W^MR^a[TLY`BBBBBB  
@HWI-EAS443:3:65:574:25#0/1  
GCTCTATGTTGACAAAATGACCATCGTCAACATCCACAGC  
+HWI-EAS443:3:65:574:25#0/1  
aa`¥¥Y`a¥[aZ^`Z]]`aYWTL\_\_Y]^RRY][BBBBBB  
@HWI-EAS443:3:66:815:1464#0/1  
GATTGGTCTTGTCTTTAGCCATTCCATGAGAGCCTCAAGA  
+HWI-EAS443:3:66:815:1464#0/1  
`]Z]¥\_[]VT¥W]`a^]S\_[]XVQVSZ¥SOXTXU[SPQ  
@HWI-EAS443:3:68:858:719#0/1  
GATTGGTCTTGTCTTTAGCCATTCCATGAGAGCCTCAAGA  
+HWI-EAS443:3:68:858:719#0/1  
`aba`a[bbbaaabba`aaaaa`aba``^aa\_aa\_^^^  
@HWI-EAS443:3:69:1156:1018#0/1  
CTTGTCTTTAGCCATTCCATGAGAGCCTCAAGATCTGTGT  
+HWI-EAS443:3:69:1156:1018#0/1  
\_]UQNa]bbXP]]XaROU^JR¥NOLWWQUQKNWPTN`[]M  
@HWI-EAS443:3:70:232:246#0/1  
ATTGGTCTTGTCTTTAGCCATTCCATGAGAGCCTCAAGAT





@HWI-EAS443:3:91:221:1252#0/1  
TTGGTCTTGTCTTTAGCCATTCCATGAGAGCCTCAAGATC  
+HWI-EAS443:3:91:221:1252#0/1  
a\_UaIb[¥\_UX[aaaa`¥U[\_\_\_ULVYZ`X^\_\_UZQHaX\_\_  
@HWI-EAS443:3:96:1304:804#0/1  
ATGACCATCGTCAACATCCACAGCACTCTGCTGTTCCCTGT  
+HWI-EAS443:3:96:1304:804#0/1  
^aXUQQ¥WWW¥`X]WFFb^YW]WZU]]aG]^P`\_H¥BBBBB  
@HWI-EAS443:3:29:320:1084#0/1  
GTGTTTTTTATCATTAAATAAGCTGAAACGAGATGACTCA  
+HWI-EAS443:3:29:320:1084#0/1  
[]¥]\_`a`VQVT[]`aYW¥IS^YWV`UJ]LWXJY]\_¥Y`  
@HWI-EAS443:3:64:895:1292#0/1  
CAAGGGTGTTTTTTATCATTAAATAAGCTGAAACGAGAAA  
+HWI-EAS443:3:64:895:1292#0/1  
aaaaaa[b`aaaaaaaaaaaa`aaaa`a`aa^a`a\_\_]  
@HWI-EAS443:3:6:176:991#0/1  
CAAGGGTGTTTTTTATCATTAAATAAGCTGAAACGAGAAA  
+HWI-EAS443:3:6:176:991#0/1  
aa`bbbMbaabbbb`aaabbaaaaaaaaaaaaa\_baaa`\_  
@HWI-EAS443:3:72:429:1670#0/1  
CAAGGGTGTTTTTTATCATTAAATAAGCTGAAACGAGAAA  
+HWI-EAS443:3:72:429:1670#0/1  
a^aaa`S[[^`\_`\_`\_`aa`^\_a`\_`\_`a[[`\_`\_`^`\_`^`  
@HWI-EAS443:3:97:1467:687#0/1  
CAAGGGTGTTTTTTATCATTAAATAAGCTGAAACGAGAAA  
+HWI-EAS443:3:97:1467:687#0/1  
ababbb¥baabbbbbb`bbbbbbbbbb`abbbbaaaba`a  
@HWI-EAS443:3:75:773:1422#0/1  
CAGGGCTGGATGCTGAACAAAACCTCCCGCTATATCCTGAC  
+HWI-EAS443:3:75:773:1422#0/1  
a`[\_`\_`¥XV`\_U¥`Uab`babbba]^aaa\_ab\_aaa`ZW^]  
@HWI-EAS443:3:98:163:99#0/1  
CGTNGTCAGGATATAGCGGGAGTTTTGTTTCAGCATCCAGA  
+HWI-EAS443:3:98:163:99#0/1  
ab]D]Xabbb`baababbbaRbRbabaZa\_YaY\_\_[\_Xa]  
@HWI-EAS443:3:4:1567:719#0/1  
CGCTTCTGGGTTGAACTAATCANAGGGCGACCCAAAGAGA  
+HWI-EAS443:3:4:1567:719#0/1  
abbbb`bbbbbabaaaaabbba¥D[a`a`b`^`\_`¥`¥^`a[\_  
@HWI-EAS443:3:10:331:60#0/1  
TCCAGAGTGTGTTCTCTTTGGGTCGCCCTCTGATTAGTTC  
+HWI-EAS443:3:10:331:60#0/1  
aaa`a`b¥a\_a^a`\_\_`\_`\_a\_Y^`¥[U^^`\_¥`\_`\_Y¥U  
@HWI-EAS443:3:12:1440:1700#0/1  
CAACTCAGCAGCGTCTGGCCAAGACCAACCCACAGTGTCA  
+HWI-EAS443:3:12:1440:1700#0/1  
]bab`baa`aGF\_^Zaba[``b`]ZVaa`¥\_aQb\_Ua\_Q^  
@HWI-EAS443:3:44:718:310#0/1  
ATTGCGTTCTCTTTGGGTCGCCCTCTGATTAGTTCAACCC

+HWI-EAS443:3:44:718:310#0/1  
`ba]`\_T]ZY]`ab¥^^\_a`\_a^a\_Ya\_]`YR]a\_]W^  
@HWI-EAS443:3:57:956:229#0/1  
ATGGCAACTCAGCACCGCCTGGCCAAGACCAACCCACAGT  
+HWI-EAS443:3:57:956:229#0/1  
aa`[abaaa¥^ZZaXa\_IaaX^\_\_QLVZRaUVXUaMSO]B  
@HWI-EAS443:3:77:1450:1588#0/1  
GATTGTGTTCTCTTTGGGTCGCCCTGTGATTAGTTCAACC  
+HWI-EAS443:3:77:1450:1588#0/1  
a``a`\_ab[bb]`YJ]aSTWbW\_XG\_Waab]]TJX`^U\_  
@HWI-EAS443:3:47:455:601#0/1  
GCCGGGTTGAACTAATCAGAGGGCGACCCAAAGAGAACAC  
+HWI-EAS443:3:47:455:601#0/1  
`Z¥ZZ\_W\_abb]aaa^Xab`aa`a]NY^a\_]a\_aY]Y\_G  
@HWI-EAS443:3:49:42:1656#0/1  
CGCTTCTGGGTTGAACTAATCAGAGGGCGACCCAAAGANA  
+HWI-EAS443:3:49:42:1656#0/1  
`bX]Tbabba^babbabb`a`aba\_X`\_X^a\_a\_aS[WD¥  
@HWI-EAS443:3:54:570:1461#0/1  
CTGGGTTGAACTAATCAGAGGGCGNCCCAAAGAGAACACA  
+HWI-EAS443:3:54:570:1461#0/1  
abbbbaa\_abbbbababb``^\_VDXa\_a]abaaab`b\_a  
@HWI-EAS443:3:17:1495:1014#0/1  
CGCTTCTGGGTTGAACTAATCAGAGGGCGACCCAAAGAGA  
+HWI-EAS443:3:17:1495:1014#0/1  
]bb`a¥¥WZ\_abbabV\_bbaJU]\_b]ZZbX]`ab^H^ab`  
@HWI-EAS443:3:32:875:1479#0/1  
GTTCTGGATGCTGAACAAAACCTCCCGCTATATCCTGACCN  
+HWI-EAS443:3:32:875:1479#0/1  
a`aaa]]^a`a`]`a`\_`\_a\_]`a[^^^`\_a\_]¥][`YD  
@HWI-EAS443:3:43:1349:716#0/1  
GTGTTCTCTTTGGGTCGCCCTCTGATTAGTTCAACCCAGT  
+HWI-EAS443:3:43:1349:716#0/1  
a¥]]aab`aaaa`[Y^a`]\_a`\_a\_\_aZSVaZ]\_Z]T[`Y  
@HWI-EAS443:3:9:683:569#0/1  
GCTGTGGGTTGGTCTTGGCCAGACGGTGCTGAGTTGCCAT  
+HWI-EAS443:3:9:683:569#0/1  
aaaaW`aa`a]OR]aaa`¥]WZ`\_QaZ[\_[aW¥`WRZZ  
@HWI-EAS443:3:10:1031:651#0/1  
TTCTGGGTTGAACTAATCAGAGGGCGACCCAAAGAGAACA  
+HWI-EAS443:3:10:1031:651#0/1  
a`¥`aaU`a\_a¥`¥^\_X`\_¥\_\_¥U^¥WUSVWW¥X¥WWWV  
@HWI-EAS443:3:10:551:938#0/1  
ACTGTGGGTTGGTCTTGGCCAGACGGTGCTGAGTTGCCAT  
+HWI-EAS443:3:10:551:938#0/1  
aabbabbbaab^a`¥^aaaa`aaaaVa\_\_ZN\_Z^\_]`^\_\_  
@HWI-EAS443:3:11:1077:98#0/1  
AGATTGTGTTCTCTTTGGGTCGCCCTCTGATTAGTTCAAC  
+HWI-EAS443:3:11:1077:98#0/1  
aa[\_¥\_¥][00^a``YNOMJ[TGT^[^`W]XWTS\_]Z\_B

@HWI-EAS443:3:11:175:1262#0/1  
GTTCTCTTTGGGTCGCCCTCTGATTAGTTCAACCCAGAAG  
+HWI-EAS443:3:11:175:1262#0/1  
a\_abaa^a\_U\_¥\_^¥^aaaaa`a`aa^`]``aa`a¥VV]  
@HWI-EAS443:3:14:1511:1410#0/1  
GGTCAGGATATAGCGGGAGTTTTGTTTCAGCATCCAGAACT  
+HWI-EAS443:3:14:1511:1410#0/1  
aa^```]¥`^a\_]Y`\_\_¥\_Q^\_\_TW¥¥WWWWWN¥¥YY¥QY  
@HWI-EAS443:3:16:1244:1768#0/1  
CCTTGCTTCTGGGTTGAACTAATCAGAGGGCGACCCAAAG  
+HWI-EAS443:3:16:1244:1768#0/1  
aaaaaaabaaaaa]aaaba```a\_a`\_a\_]a\_a`V\_a^\_\_  
@HWI-EAS443:3:17:1174:610#0/1  
AACTCAGCACCGTCTGGCCAAGACCAACCCACAGTGTCAC  
+HWI-EAS443:3:17:1174:610#0/1  
aZa`]ababaab\_aaba``\_V]U^YX\_\_\_a\_\_\_aWa¥¥\_¥  
@HWI-EAS443:3:18:652:168#0/1  
GTTGAACTAATCAGAGGGCGACCCAAAGAGAACAATCT  
+HWI-EAS443:3:18:652:168#0/1  
aaaabbaaaa`aa`a`aaaa^\_a^aaaa\_\_\_a¥a\_^¥X  
@HWI-EAS443:3:19:333:646#0/1  
ACTGTGGGTTGGTCTTGGCCAGACGGTGCTGAGTTGCCAT  
+HWI-EAS443:3:19:333:646#0/1  
aa`UJT\_a^)`aP`[a\_aaa^¥`aaS]RTX[at`XU^`Y  
@HWI-EAS443:3:21:1341:1925#0/1  
GGTTGAACTAATCAGAGGGCGACCCAAAGAGAACAATC  
+HWI-EAS443:3:21:1341:1925#0/1  
Y\_a\_R^bb\_b`Zaa^¥YT\_QXa\_¥S`\_\_X`aV\_W``\_]N  
@HWI-EAS443:3:21:1499:322#0/1  
GGCAACTCAGCACCGTCTGGCCAAGACCAACCCACAGTGT  
+HWI-EAS443:3:21:1499:322#0/1  
¥baZ`Z\_ba^abZZaa`^)]\_a`[\_^\_\_`P`[S\_`\_W]W  
@HWI-EAS443:3:21:522:811#0/1  
GGCAACTCAGCACCGTCTGGCCAAGACCAACCCACAGTGT  
+HWI-EAS443:3:21:522:811#0/1  
ababbaUb]]Y`aabSa]a]aa``\_aP\_a`^ZaS\_`QNRM  
@HWI-EAS443:3:22:1650:339#0/1  
GTTCTCTTTGGGTCGCCCTCTGATTAGTTCAACCCAGAAG  
+HWI-EAS443:3:22:1650:339#0/1  
a`a]a]^`\_\_a]X]\_X]\_]\_a\_`\_\_a]^Va^Y]S¥\_^X^  
@HWI-EAS443:3:22:230:1373#0/1  
TCTGGGTTGAACTAATCAGAGGGCGACCCAAAGAGAACAC  
+HWI-EAS443:3:22:230:1373#0/1  
abba^a^`\_Z\_a]]aT``Z[]¥R]¥]]`\_URMY\_`XM¥``  
@HWI-EAS443:3:22:413:1534#0/1  
AGATTGTGTTCTCTTTGGGTCGCCCTCTGATTAGTTCAAC  
+HWI-EAS443:3:22:413:1534#0/1  
¥Z¥a`aabUZ^ZO¥ZZ`U]Iab\_]`aa`WSVWTVHZa`VO  
@HWI-EAS443:3:23:776:742#0/1  
GTGTTCTCTTTGGGTCGCCCTCTGATTAGTTCAACCCAGA



@HWI-EAS443:3:34:945:332#0/1  
GGTTGAACTAATCAGAGGGCGACCCAAAGAGAACAATC  
+HWI-EAS443:3:34:945:332#0/1  
`a\_`aaaa`a`a`[a\_aaa\_\_\_¥`\_\_`\_^¥¥¥^¥¥YU  
@HWI-EAS443:3:35:1080:961#0/1  
GTTCTCTTTGGGTCGCCCTCTGATTAGTTCAACCCAGAAG  
+HWI-EAS443:3:35:1080:961#0/1  
^^`b`bb`[a`¥[baabbb`a\_^aa^\_\_]b\_bba\_Z]]\_¥  
@HWI-EAS443:3:35:174:1051#0/1  
GTTCTGGATGCTGAACAAAACCTCCCGCTATATCCTGACCA  
+HWI-EAS443:3:35:174:1051#0/1  
abbbabaaa^V`a\_bb¥`bY``abaaa^¥[K]ba\_]aaY¥  
@HWI-EAS443:3:37:463:566#0/1  
GTCCAGATTGTGTTCTCTTTGGGTCGCCCTCTGATTAGTT  
+HWI-EAS443:3:37:463:566#0/1  
a\_aa\_a`aaa\_`a\_`a\_`a\_`¥`\_]`a¥\_a`aaaa]\_  
@HWI-EAS443:3:37:70:41#0/1  
TGTTCTCTTTGGGTCGCCCTCTGATTAGTTCAACCCAGAA  
+HWI-EAS443:3:37:70:41#0/1  
aa`aaaa`aa`Va`a`a\_]T]Z¥ZMOZ¥I[`^^^W¥  
@HWI-EAS443:3:37:85:1910#0/1  
TTCTCTTTGGGTCGCCCTCTGATTAGTTCAACCCAGAAGC  
+HWI-EAS443:3:37:85:1910#0/1  
`a]ZYa]UJLHG[aaaa\_\_\_[QR^aYRX\_QTXa`SU[OS\_  
@HWI-EAS443:3:38:284:1758#0/1  
AGATTGTGTTCTCTTTGGGTCGCCCTCTGATTAGTTCAAC  
+HWI-EAS443:3:38:284:1758#0/1  
aabaaZ]b^aaaaa`VJY¥G\_]aa^\_a``Z`\_ZZ)`a\_]`  
@HWI-EAS443:3:38:292:608#0/1  
GTTGAACTAATCAGAGGGCGACCCAAAGAGAACAATCT  
+HWI-EAS443:3:38:292:608#0/1  
\_R¥a`bba\_\_a`\_]U`R`\_Z]Z\_`^TGX¥VS¥¥¥¥VYFN[W  
@HWI-EAS443:3:38:583:773#0/1  
GGTCAGGATATAGCGGGAGTTTTGTTTCAGCATCCAGAACT  
+HWI-EAS443:3:38:583:773#0/1  
aU\_¥a[[[`\_XY\_]`a\_\_aTTR[^R¥]NQGVVYR]YYYYO  
@HWI-EAS443:3:39:1101:184#0/1  
GCTTCTGGGTTGAACTAATCAGAGGGCGACCCAAAGAGAA  
+HWI-EAS443:3:39:1101:184#0/1  
a\_`\_Z\_a[^G¥^\_aYY¥YU¥W^WTZ¥YZWWWUGWWWUWWWU  
@HWI-EAS443:3:42:1273:297#0/1  
AGATTGTGTTCTCTTTGGGTCGCCCTCTGATTAGTTCAAC  
+HWI-EAS443:3:42:1273:297#0/1  
[ababbbbaabbaaa`aaaU`ba\_aaa`babaaba`\_aa`  
@HWI-EAS443:3:42:1767:838#0/1  
CTGGGTTGAACTAATCAGAGGGCGACCCAAAGAGAACA  
+HWI-EAS443:3:42:1767:838#0/1  
aabbaabbbabbababbabbababa`aa`b``a`aaa  
@HWI-EAS443:3:45:1142:1230#0/1  
GATTGTGTTCTCTTTGGGTCGCCCTCTGATTAGTTCAACC

+HWI-EAS443:3:45:1142:1230#0/1  
¥¥¥X^\_SV^\_XMR[VY[\_Z¥`X^a¥bb\_\_\_\_]`[`T¥Z`a  
@HWI-EAS443:3:45:1384:354#0/1  
GGTCAGGATATAGCGGGAGTTTTGTTTCAGCATCCAGAACT  
+HWI-EAS443:3:45:1384:354#0/1  
aa\_^[ba\_\_`a\_a¥aaa^a]^`^`WaYZZ¥¥ZWbU]YYNY  
@HWI-EAS443:3:46:1112:170#0/1  
GTCCAGATTGTGTTCTCTTTGGGTCGCCCTCTGATTAGTT  
+HWI-EAS443:3:46:1112:170#0/1  
a[`¥Q[^]a]U[^YR[T]\_^^[`UXXR[YXW^[Q]]RT[N  
@HWI-EAS443:3:47:133:1065#0/1  
TGACACTGTGGGTTGGTCTTGGCCAGACGGTGCTGAGTTG  
+HWI-EAS443:3:47:133:1065#0/1  
¥aaabbb`ab\_¥]¥^]ab`¥\_RZ`]\_a`S¥DXWP\_XWW  
@HWI-EAS443:3:49:1368:457#0/1  
TTCTCTTTGGGTCGCCCTCTGATTAGTTCAACCCAGAAGC  
+HWI-EAS443:3:49:1368:457#0/1  
abaa\_a\_aaaa\_\_`\_aa\_aa`aa`a¥a\_aaZ[[`\_a``aQ  
@HWI-EAS443:3:51:868:1650#0/1  
CAACTCAGCACCGTCTGGCCAAGACCAACCCACAGTGTCA  
+HWI-EAS443:3:51:868:1650#0/1  
\_[]bb`bZ`a`baY^bb\_Y^`aa^S`baS]ZVbbX^Y^X  
@HWI-EAS443:3:52:347:976#0/1  
ATTGTGTTCTCTTTGGGTCGCCCTCTGATTAGTTCAACCC  
+HWI-EAS443:3:52:347:976#0/1  
abbaYaaabaaaa`aa\_aba\_\_a\_aa]`a¥a]\_\_aaW[\_  
@HWI-EAS443:3:52:88:1534#0/1  
TGGTCAGGATATAGCGGGAGTTTTGTTTCAGCATCCAGAAC  
+HWI-EAS443:3:52:88:1534#0/1  
a`U[abbba`¥\_aa\_\_U`aNIV`]^WWZ\_Z`\_UO]^`^W  
@HWI-EAS443:3:54:1102:1600#0/1  
GGTCAGGATATAGCGGGAGTTTTGTTTCAGCATCCAGAACT  
+HWI-EAS443:3:54:1102:1600#0/1  
a`\_`aaaaaaaa`Y`a^a`aa]\_a^[U][^W¥^`^aV^  
@HWI-EAS443:3:54:985:734#0/1  
TTCTCTTTGGGTCGCCCTCTGATTAGTTCAACCCAGAAGC  
+HWI-EAS443:3:54:985:734#0/1  
a`PWZXa[^0[KUYG[`][]`T`\_Y]Y[LPZVN[[`XF[J  
@HWI-EAS443:3:55:252:1162#0/1  
AGATTGTGTTCTCTTTGGGTCGCCCTCTGATTAGTTCAAC  
+HWI-EAS443:3:55:252:1162#0/1  
``aabb^babaaaaaaaa^]aaa`ababbaaab``aaa\_  
@HWI-EAS443:3:55:29:248#0/1  
CTGGGTTGAACATAATCAGAGGGCGACCCAAAGAGAACACA  
+HWI-EAS443:3:55:29:248#0/1  
^^b`\_[a¥¥\_S\_\_¥aaaaaaaa``Z[[`^Z[`\_a[YYVXY  
@HWI-EAS443:3:55:625:406#0/1  
GGGTTGAACATAATCAGAGGGCGACCCAAAGAGAACAAT  
+HWI-EAS443:3:55:625:406#0/1  
aba¥`bababaaaaaaaa\_ba\_aaa\_\_``\_aaaa`\_\_a``\_\_

@HWI-EAS443:3:56:362:1160#0/1  
GTCCAGATTGTGTTCTCTTTGGGTCGCCCTCTGATTAGTT  
+HWI-EAS443:3:56:362:1160#0/1  
aaa`aa\_aaa\_aaa`a`a\_\_a\_\_Y`a^\_\_a`aa\_aa\_\_¥\_  
@HWI-EAS443:3:56:385:164#0/1  
GTTGAACATAATCAGAGGGCGACCCAAAGAGAACAATCT  
+HWI-EAS443:3:56:385:164#0/1  
a`YWM\_SU¥ZaUXXT]^aaa[TRS^]O^LVNLU^¥U¥UN]  
@HWI-EAS443:3:58:523:387#0/1  
AACTAATCAGAGGGCGACCCAAAGAGAACAATCTGGAC  
+HWI-EAS443:3:58:523:387#0/1  
[baaa^baa`\_aa^aa`\_\_aaa`a\_a\_\_\_\_a\_aaaa``\_`\_  
@HWI-EAS443:3:58:821:772#0/1  
TGGCAACTCAGCACCGTCTGGCCAAGACCAACCCACAGTG  
+HWI-EAS443:3:58:821:772#0/1  
aabaabbaab\_aaa\_b¥b\_¥[`a^a\_\_[VW]SWZ^\_`\_QZ  
@HWI-EAS443:3:59:1686:1328#0/1  
CAACTCAGCACCGTCTGGCCAAGACCAACCCACAGTGTC  
+HWI-EAS443:3:59:1686:1328#0/1  
`\_\_a`^^aa]a\_\_¥`ab^^```Qaa` `[`aU\_¥¥NRRRR  
@HWI-EAS443:3:60:854:376#0/1  
GGTTGAACATAATCAGAGGGCGACCCAAAGAGAACAATC  
+HWI-EAS443:3:60:854:376#0/1  
ab`aa`b`aaaa\_aaaa`\_\_aa\_``aaaaaa\_`a`\_^^]  
@HWI-EAS443:3:61:1119:96#0/1  
CTGTGGGTTGGTCTTGGCCAGACGGTGCTGAGTTGCCATT  
+HWI-EAS443:3:61:1119:96#0/1  
ababbbbbbbba`bbbbbaba[`bb¥b`bb\_b[aaUVa`^  
@HWI-EAS443:3:62:1579:1616#0/1  
GTTCTGGATGCTGAACAAAACCTCCCGCTATATCCTGACCA  
+HWI-EAS443:3:62:1579:1616#0/1  
aWa¥^Y`Zba`aXW^Y`a¥a\_aa¥`¥¥\_Y]a^OJTXY`XX  
@HWI-EAS443:3:66:262:617#0/1  
ACTCAGCACCGTCTGGCCAAGACCAACCCACAGTGCTACT  
+HWI-EAS443:3:66:262:617#0/1  
aaaa¥ZXZ\_aa\_\_YWXa`\_UTX^]N\_X¥[PZ¥JVUVJNS  
@HWI-EAS443:3:68:1268:368#0/1  
GAACATAATCAGAGGGCGACCCAAAGAGAACAATCTGGA  
+HWI-EAS443:3:68:1268:368#0/1  
aabab]aba`babaa`a\_]a```aaa`a\_a\_a\_aV`aaa  
@HWI-EAS443:3:6:123:549#0/1  
CTCTTTGGGTCGCCCTCTGATTAGTTCAACCCAGAAGCAA  
+HWI-EAS443:3:6:123:549#0/1  
aa`a`\_WT\_¥aa\_¥U^\_aa`a`\_bZR¥aa\_\_Va\_a\_\_\_\_\_  
@HWI-EAS443:3:6:238:1333#0/1  
GGCAACTCAGCACCGTCTGGCCAAGACCAACCCACAGTG  
+HWI-EAS443:3:6:238:1333#0/1  
a`aa\_aR` ]`a]M^\_MZY¥`X]WZYYSUU^^¥UQ¥BBBBB  
@HWI-EAS443:3:70:1638:476#0/1  
TGGCAACTCAGCACCGTCTGGCCAAGACCAACCCACAGTG

+HWI-EAS443:3:70:1638:476#0/1  
[`babaZ`\_]b¥`a]bXb]baaaaZ¥)`\_a`QPWW`\_R]  
@HWI-EAS443:3:70:18:1004#0/1  
TCTGGGTTGAACTAATCAGAGGGCGACCCAAAGAGAACAC  
+HWI-EAS443:3:70:18:1004#0/1  
a`ab]`)]aabaaT]a`\_UL^¥a¥H[`\_¥R¥\_[aXF[\_¥  
@HWI-EAS443:3:71:252:1747#0/1  
CCTTGCTTCTGGGTTGAACTAATCAGAGGGCGACCCAAAG  
+HWI-EAS443:3:71:252:1747#0/1  
ab^¥X\_¥`a][a`[\_`aba\_aa\_`\_][P[XU`[Z\_\_\_\_\_¥^W  
@HWI-EAS443:3:71:50:570#0/1  
GATTGTGTTCTCTTTGGGTCGCCCTCTGATTAGTTCAACC  
+HWI-EAS443:3:71:50:570#0/1  
aaa`b`\_`aaa`\_`a`\_Y`\_`a`\_`\_a`\_a¥^^`\_`\_`^  
@HWI-EAS443:3:72:1041:695#0/1  
AGATTGTGTTCTCTTTGGGTCGCCCTCTGATTAGTTCAAC  
+HWI-EAS443:3:72:1041:695#0/1  
aaabbbba`abbbabbbbbb`abaaababbabbbbaa`abba  
@HWI-EAS443:3:73:1071:432#0/1  
CAACTCAGCACCGTCTGGCCAAGACCAACCCACAGTGTCA  
+HWI-EAS443:3:73:1071:432#0/1  
abba]`\_`^aa\_]^[Z]a^VX\_\_¥TXT\_a^^YZ`\_[G]V¥\_  
@HWI-EAS443:3:75:227:910#0/1  
TTGAACTAATCAGAGGGCGACCCAAAGAGAACACAATCTG  
+HWI-EAS443:3:75:227:910#0/1  
ababbbbaa\_aaaaabaaaa^aaaaaZaa`Yaaaaa¥aa\_a  
@HWI-EAS443:3:75:407:1529#0/1  
GATTGTGTTCTCTTTGGGTCGCCCTCTGATTAGTTCAACC  
+HWI-EAS443:3:75:407:1529#0/1  
T\_\_[Z\_\_WXX[baa\_aaaR`\_`b\_V¥aaa`a`\_`\_X\_a\_a\_^  
@HWI-EAS443:3:75:542:1165#0/1  
GACACTGTGGGTTGGTCTTGGCCAGACGGTGCTGAGTTGC  
+HWI-EAS443:3:75:542:1165#0/1  
aaaaaab¥`aa\_^a`]aa[X`a`\_`\_`]a\_S]¥\_`U\_QZ\_]`  
@HWI-EAS443:3:82:1027:347#0/1  
CAACTCAGCACCGTCTGGCCAAGACCAACCCACAGTGTCA  
+HWI-EAS443:3:82:1027:347#0/1  
abbbbbbbaabb`baabbaa`\_`aaa`a`\_a\_baaaaa¥\_\_aa  
@HWI-EAS443:3:83:1202:601#0/1  
GTGTTCTCTTTGGGTCGCCCTCTGATTAGTTCAACCCAGA  
+HWI-EAS443:3:83:1202:601#0/1  
a\_a^aZKTa\_aa`\_]aaXWa`a`\_`a`\_a\_a\_a\_\_^`\_`\_`^  
@HWI-EAS443:3:84:1267:1246#0/1  
ATTGTGTTCTCTTTGGGTCGCCCTCTGATTAGTTCAACCC  
+HWI-EAS443:3:84:1267:1246#0/1  
`a]X`baaba`a^baXXYX`\_`\_`Ta`aaaa`\_`\_`^`aSba^N  
@HWI-EAS443:3:86:1006:1278#0/1  
GGTCAGGATATAGCGGGAGTTTTGTTTCAGCATCCAGA  
+HWI-EAS443:3:86:1006:1278#0/1  
a`\_aaaa\_aaaaa`aaa`aY`\_`a]X`\_`^^^\_`^T]\_\_^\_X\_



@HWI-EAS443:3:86:325:601#0/1  
TCTTTGGGTCGCCCTCTGATTAGTTCAACCCAGAAGCAAG  
+HWI-EAS443:3:86:325:601#0/1  
Y\_X\_U¥\_aZ`baa^)]`\_[`Z`b[ab^`[^]`b¥X\_^``\_  
@HWI-EAS443:3:86:505:426#0/1  
GGCAACTCAGCACCGTCTGGCCAAGACCAACCCACAGTGT  
+HWI-EAS443:3:86:505:426#0/1  
]a\_¥\_^`abaTa^b¥b`ba^YWaaa`a`a^`a^aZaSdU  
@HWI-EAS443:3:86:729:788#0/1  
GTTCTCTTTGGGTCGCCCTCTGATTAGTTCAACCCAGAAG  
+HWI-EAS443:3:86:729:788#0/1  
^Taaaa`^`b[W]¥b`YT`a`]^`baaX¥`\_¥\_SZ`^¥ZZ  
@HWI-EAS443:3:88:174:1079#0/1  
GATTGTGTTCTCTTTGGGTCGCCCTCTGATTAGTTCAACC  
+HWI-EAS443:3:88:174:1079#0/1  
`aa\_X]a`aa`\_aa`\_[]aaa`a`aa`\_`[[`\_¥a`\_  
@HWI-EAS443:3:88:796:1313#0/1  
GAACTAATCAGAGGGCGACCCAAAGAGAACAATCTGGA  
+HWI-EAS443:3:88:796:1313#0/1  
aababbaababbbaabab\_aabbaaababb\_baaaaaab  
@HWI-EAS443:3:89:1408:907#0/1  
CCAGATTGTGTTCTCTTTGGGTCGCCCTCTGATTAGTTCA  
+HWI-EAS443:3:89:1408:907#0/1  
a`[b`a`a]ababbabba`ab`aaUH^abbbbabbb\_[a  
@HWI-EAS443:3:89:552:1425#0/1  
CACTGTGGGTTGGTCTTGGCCAGACGGTGCTGAGTTGCCA  
+HWI-EAS443:3:89:552:1425#0/1  
aV]^`aVb¥a\_ab^U\_ba[`abb\_]a^TRaU\_\_^]Hab][\_  
@HWI-EAS443:3:92:1325:176#0/1  
TCTGGGTTGAACTAATCAGAGGGCGACCCAAAGAGAACAC  
+HWI-EAS443:3:92:1325:176#0/1  
aba`ab^ababaa\_aa`aaa\_[\_aa]]\_\_^`^a\_\_X`]  
@HWI-EAS443:3:92:974:1162#0/1  
ATTGTGTTCTCTTTGGGTCGCCCTCTGATTAGTTCAACCC  
+HWI-EAS443:3:92:974:1162#0/1  
abbb\_\_a^[^b]aabb^a[``\_aabbaaa]bNa\_aVYSa  
@HWI-EAS443:3:92:976:1022#0/1  
CTGGGTTGAACTAATCAGAGGGCGACCCAAAGAGAACACA  
+HWI-EAS443:3:92:976:1022#0/1  
[[a\_\_Q\_Z\_aKQ[a[[`U[¥K[JWTaS\_bbUbabbaXb]\_  
@HWI-EAS443:3:98:328:1363#0/1  
GTTCTGGATGCTGAACAAAACCTCCCGCTATATCCTGACCA  
+HWI-EAS443:3:98:328:1363#0/1  
a\_aaaaa\_aa`a`a`aa^aa\_]\_aa^`\_a\_a^\_\_\_^Y¥\_  
@HWI-EAS443:3:99:736:228#0/1  
GATTGTGTTCTCTTTGGGTCGCCCTCTGATTAGTTCAACC  
+HWI-EAS443:3:99:736:228#0/1  
a\_Zab\_a[aaa`a\_\_ba]SX\_\_\_`a^\_a`a\_\_\_W[X\_\_¥]  
@HWI-EAS443:3:9:252:1435#0/1  
GTTCTCTTTGGGTCGCCCTCTGATTAGTTCAACCCAGAAG

+HWI-EAS443:3:9:252:1435#0/1  
`Uba\_H¥bb`bUXUaaa`a`a\_a`X\_]\_]`a^a`a`[]a  
@HWI-EAS443:3:78:1337:1422#0/1  
AGAAGGTTAACAGAGTGTGTTACCGTTACATTCTTTTCTA  
+HWI-EAS443:3:78:1337:1422#0/1  
`]baaa]`aa^aaaP`[a]^`[[a`a\_¥¥`P`\_`^P\_X  
@HWI-EAS443:3:89:1495:848#0/1  
CGCGGAGTCTTGGAGCTCTCGGACGAAAAGGCAACGAACC  
+HWI-EAS443:3:89:1495:848#0/1  
a^R¥bTTWaa\_0¥Q¥\_RVS]TKXP\_H]aBBBBBBBBBBBB  
@HWI-EAS443:3:63:979:1380#0/1  
CGATCGGGTTCGTTGCCTTTTCGTCCGAGAGCTCCTCCAA  
+HWI-EAS443:3:63:979:1380#0/1  
abba`^ab¥a\_a\_aa`a`a`]aa]aa]\_\_^`S`]¥`Za`  
@HWI-EAS443:3:84:1447:870#0/1  
GGGGTCGGGAGTCTTCGAGCTCTCGGACGAAAAGGCAACG  
+HWI-EAS443:3:84:1447:870#0/1  
aaa^Z]XW¥¥^]V^`WXZ\_\_X^Z^`]`R\_¥^¥X^YSM`P^  
@HWI-EAS443:3:11:1520:845#0/1  
GGTGGGGAGTCTTCGAGCTCNCGGACGAAAAGGCAACGAA  
+HWI-EAS443:3:11:1520:845#0/1  
`SITW][NMYBBBBBBBBBBBBBBBBBBBBBBBBBBBBBB  
@HWI-EAS443:3:36:675:416#0/1  
GCTCGGGTTCGTTGCCTTTTCGTCCGAGAGCTCGATGACT  
+HWI-EAS443:3:36:675:416#0/1  
aaaa^a[¥[\_X`\_V¥^a`Z]\_0¥¥`XTXaUNR^^]R]KU  
@HWI-EAS443:3:71:1583:211#0/1  
TGGCGGGGAGTCTTCGAGCTCTCGGACGAAAAGGAAACGA  
+HWI-EAS443:3:71:1583:211#0/1  
a^VRa^\_]U]¥P¥]¥`¥WDRU¥QPTPU[UUVYUBBBBBBB  
@HWI-EAS443:3:2:1246:419#0/1  
ACTCATGTCAAAGGAAGGCACGATCGGGTTCGTTGCGTTT  
+HWI-EAS443:3:2:1246:419#0/1  
aX]^`^S\_a]Y\_\_`YNU`]N¥[`W`OVR\_Z\_VYU\_ZUG^]B  
@HWI-EAS443:3:44:210:1858#0/1  
GAGCTCTCGGACGAAAAGGCAACGAACCCGATCGTGGCTT  
+HWI-EAS443:3:44:210:1858#0/1  
a\_Qa\_Q\_\_¥\_WZ\_SaYQ¥I^aaYV\_Y¥\_¥UVWSBBBBBBB  
@HWI-EAS443:3:64:325:1312#0/1  
GGGTGGGGAGTCTTCGAGCTCTCGGACGAAAAGGCAACGA  
+HWI-EAS443:3:64:325:1312#0/1  
aa]R[X`^]X0¥¥¥`¥^X^Y[YXWXV[Y¥ZRVUVS]¥BBB  
@HWI-EAS443:3:7:1270:596#0/1  
GCGTGGAGTCTTCGAGCTCTCGGACGAAAAGGCAACGAAC  
+HWI-EAS443:3:7:1270:596#0/1  
a]]¥b`ab`aabaa`aa^]aZaba`aaaaaaa][aPa`aZ  
@HWI-EAS443:3:8:141:189#0/1  
GGCGGGGGAGTCTTCGAGCTCTCGGACGAAAAGGCAACGA  
+HWI-EAS443:3:8:141:189#0/1  
aaaa`a`\_0¥][¥^a]X¥¥Z[Z]¥`ZU[P]`¥¥]U[^PSZ

@HWI-EAS443:3:15:832:889#0/1  
GGGGTGGGAGTCTTCGAGCTCTCGGACGAAAAGGCAACG  
+HWI-EAS443:3:15:832:889#0/1  
\_aa\_¥aaaa`\_^`a`\_¥\_[`^`]^¥^¥` `]`XX^^`aP¥  
@HWI-EAS443:3:1:1163:68#0/1  
GGCGTGGAGTCTTCGAGCTCTCGGACGAAAAGGCAACGAA  
+HWI-EAS443:3:1:1163:68#0/1  
\_WVWKaPJX[FWXK\_¥`P]KXNX¥PT¥ZRRZBBBBBBBBB  
@HWI-EAS443:3:20:1204:953#0/1  
GGCGGGGAGTCTTCGAACTCTCGGACGAAAAGGCAACGAA  
+HWI-EAS443:3:20:1204:953#0/1  
`babb`b[`abbb\_a^H¥baa]^aa` `a`a`aYaa^^`a  
@HWI-EAS443:3:21:968:453#0/1  
GGAGTCTTCGAGCTCTCGGACGAAAAGTCAACGAACCCGA  
+HWI-EAS443:3:21:968:453#0/1  
a¥]¥WY\_a]PT^VRFSY]^QP]^UU[HGNY`U^[YSPVVB  
@HWI-EAS443:3:29:277:1318#0/1  
ATCGGGTTCGTTGCCTTTTCGCCCAGAGCTCGAAGACTC  
+HWI-EAS443:3:29:277:1318#0/1  
`^aZ\_ZVKQ]X]Q`¥^`S¥¥SEY]SZXXZ¥ZXRVSNUBB  
@HWI-EAS443:3:29:532:627#0/1  
GGGGAGTCTTCGAGCCCTCGGACGAAAAGGCAACGAACCC  
+HWI-EAS443:3:29:532:627#0/1  
a¥]` `UFXUMR]BBBBBBBBBBBBBBBBBBBBBBBBBBB  
@HWI-EAS443:3:2:26:238#0/1  
GCACGATCGGGTTCGTTGCCTTTTCGTCGAGAGCTCGAA  
+HWI-EAS443:3:2:26:238#0/1  
`` ` `S¥[ `F¥R[SZRMU¥P^]OFPSRTPUPZBBBBBB  
@HWI-EAS443:3:33:259:1496#0/1  
GTCTTCGAGCTCTCGGACGAAAAGGCAACGAACCCAGATCG  
+HWI-EAS443:3:33:259:1496#0/1  
aUbaaa\_]S¥Maab¥`ZJT\_aaTG\_aX^BBBBBBBBBBBBB  
@HWI-EAS443:3:34:1207:1034#0/1  
GAGCTCTCGGACGAAAAGGCAACGAACCCGATCGGGCCTT  
+HWI-EAS443:3:34:1207:1034#0/1  
aYI\_YWa^aa`a\_\_ZNQ¥RXW]¥GRUTLY^BBBBBBBBBBB  
@HWI-EAS443:3:36:728:2009#0/1  
AAGGAAGGCACGATCGGGTTCGTTGCCTTTTGTCCGAGA  
+HWI-EAS443:3:36:728:2009#0/1  
a]^¥ab¥Gaa]X¥PBBBBBBBBBBBBBBBBBBBBBBBBBBB  
@HWI-EAS443:3:39:1202:1625#0/1  
TCTCGGACGAAAAGGCAACGAACCCGATCGCGCCTTCCTT  
+HWI-EAS443:3:39:1202:1625#0/1  
`baaba]^\_]^aaQ\_ab`¥` `¥¥\_\_` [[\_ZDMHX[]\_^QS  
@HWI-EAS443:3:40:26:531#0/1  
GGGCGGGGAGTCTTCGAGCTCTCGGACGAAAAGGCAACGA  
+HWI-EAS443:3:40:26:531#0/1  
`aaa` `¥¥V\_¥` `^^` ]`^]X¥]`^¥YWDTY¥¥¥[GY¥]¥  
@HWI-EAS443:3:42:1135:940#0/1  
TTCTCTGATATGTGGCACCATTTCAGGTTGGAATGCCAAAT

+HWI-EAS443:3:42:1135:940#0/1  
]bb`b¥T[YS`QW[SMVDURZ[a`\_MX^UP]^\_N]`¥LZa  
@HWI-EAS443:3:50:1673:1206#0/1  
CTCGGACGAAATGGCAACGAACCCGATCGTGCCTTCCTTT  
+HWI-EAS443:3:50:1673:1206#0/1  
abba\_\_bb`a^\_\_`aab]^`^a\_a^`T[T\_Z`UXVXLO[a^  
@HWI-EAS443:3:53:672:1698#0/1  
GCAACGAACCCGATCGTGCCTTTGACATGAGTAATG  
+HWI-EAS443:3:53:672:1698#0/1  
^`babbbbbb``Z`a\_Z¥Ya[[[``\_XXaa\_aba\_aa]a  
@HWI-EAS443:3:5:532:1915#0/1  
GGCGGGGAGTCTTCGAGGTCTCGGACGAAAAGGCAACGAA  
+HWI-EAS443:3:5:532:1915#0/1  
`\_^aa`^SS¥OFS]RPJHWNKRXQ¥KRSNKXUU¥BBBBBB  
@HWI-EAS443:3:67:90:655#0/1  
GGCGGGGAGTCTTCGAGCTCTCGGACGAAAACGCAACGAA  
+HWI-EAS443:3:67:90:655#0/1  
\_]Z¥XXSNN¥OG¥X]RYQ[XRS¥`¥QTXUZDQUHUPUUV  
@HWI-EAS443:3:68:1011:1227#0/1  
GGAGTCTTCAAGCTCTCGGACGAAAAGGCAACGAACCCGA  
+HWI-EAS443:3:68:1011:1227#0/1  
a``aPa`a`a``]¥]a[V^\_\_a]TWZRZXZT[WUUS¥ZP  
@HWI-EAS443:3:69:1233:1997#0/1  
GGGAGTCTTCAAGCTCTCGGACGAAAAGGCAACGAACCC  
+HWI-EAS443:3:69:1233:1997#0/1  
aa\_W]aabba`^\_Z``abb^`baaaaaaaaaYab^`aa`a`  
@HWI-EAS443:3:77:1035:1246#0/1  
CATTACTCATGTCAAAGGAAGGCACGATCAGGTTCTGTTGC  
+HWI-EAS443:3:77:1035:1246#0/1  
abbaabababbbaabbbaabbbbabbaXG^`ab\_a^`XU  
@HWI-EAS443:3:7:1690:817#0/1  
AAGGAAGGCACGATCGGGGTCGTTGCCTTTTCGTCGAGA  
+HWI-EAS443:3:7:1690:817#0/1  
a`b`Xa\_`\_\_Za\_^¥`baG¥Z\_Z\_aSH\_\_WBBBBBBBB  
@HWI-EAS443:3:80:602:710#0/1  
CACGATCGGGTTCGATGCCTTTTCGTCGAGAGCTCGAAG  
+HWI-EAS443:3:80:602:710#0/1  
`a\_\_\_\_\_^¥aU^`YDT`¥`a\_`\_^X^^aZaW¥`^¥`TN]  
@HWI-EAS443:3:83:1373:737#0/1  
GCGGGGAGTCTTCGAGCTCTCGGACGAAAAGGCAAGGAAC  
+HWI-EAS443:3:83:1373:737#0/1  
a^aaaa`Saa\_^a\_aWUDTWa[V]aZ^\_\_\_\_^QV^EY]^T  
@HWI-EAS443:3:89:386:724#0/1  
CGGGGAGTCTTCGAGCTCTCGGACGAAAAGCCAACGAACC  
+HWI-EAS443:3:89:386:724#0/1  
^]TYVL`^\_``XZ]a]`\_aa``abba¥PVbO\_a0^¥¥YM  
@HWI-EAS443:3:8:373:1539#0/1  
GCGGGGAGTCTTCGAGCTCTCGGACGAAAAGGCAAGGAAC  
+HWI-EAS443:3:8:373:1539#0/1  
a\_YGQ]IUXXR``a[Q¥`^\_I¥aZ[a¥K[ZPR`¥`FXZBB

@HWI-EAS443:3:97:866:122#0/1  
ATCGGGTTCGTTGCCTTTTCGTCCGAGAGCTCGGAGACTC  
+HWI-EAS443:3:97:866:122#0/1  
OOQ]aaX\_P]QXUNT`¥a^0af`KaK`BBBBBBBBBBBBB  
@HWI-EAS443:3:23:374:270#0/1  
TGTCAAAGGAAGGCACGATCGGGTTCGTTGCCTTTCTTC  
+HWI-EAS443:3:23:374:270#0/1  
a`]aaaa`b¥a`Za```\_¥VZ\_]GYNKR]XRRU^BBBBBB  
@HWI-EAS443:3:47:1082:397#0/1  
GGCCGGGAGTCTTCGAGCTCTCGACGAAAAGGCAACGA  
+HWI-EAS443:3:47:1082:397#0/1  
aaa¥\_^\_RU`Za]Q]^WaUVNNR`^RS¥NRSR¥¥SYVPZZ  
@HWI-EAS443:3:56:479:1676#0/1  
TCTTCGAGCTCTCGACGAAAAGGCAACGAACCCGATAGT  
+HWI-EAS443:3:56:479:1676#0/1  
aaaWKW¥Z¥aV`NX]¥W[\_aYWV¥aa`Z]ZR[U[YYFBB  
@HWI-EAS443:3:31:613:1263#0/1  
GAGTCTTCGAGCTCTCGACGAAAAGGCNACGAACCCGAT  
+HWI-EAS443:3:31:613:1263#0/1  
^b¥]bbbb`b^bbbb]bbbbbb\_baaZD¥\_ab^]aaaaR  
@HWI-EAS443:3:33:1643:1162#0/1  
GGGGAGTCNTCGAGCTCTCGACGAAAAGGCAACGAACCC  
+HWI-EAS443:3:33:1643:1162#0/1  
aa])ZUWZD[X`Ua]V[a]a\_`^TVRS¥]\_¥VWTW¥^UWS  
@HWI-EAS443:3:43:1217:1906#0/1  
GGGGAGTCTTCGAGCTCTCGACGANAAGGCAACGAACCC  
+HWI-EAS443:3:43:1217:1906#0/1  
abX]bbbb\_a`b]aTa\_aabba^`ZDZa¥aXaaa]`a`]Z  
@HWI-EAS443:3:48:1199:1020#0/1  
GGCGGGGAGTCTTCGAGCTCTCGACGAAAAGGCNACGAA  
+HWI-EAS443:3:48:1199:1020#0/1  
[``¥XW]UZ`^¥ZZaW¥YSR^^`[BBBBBBBBBBBBBBB  
@HWI-EAS443:3:4:1763:1600#0/1  
ATCGGGTTCGTTGCCTTTTCGTCCGAGAGCTCGNAGACTC  
+HWI-EAS443:3:4:1763:1600#0/1  
\_[¥\_aa]`````^R^a`YE\_P¥WXX]EMSBBBBBBBBB  
@HWI-EAS443:3:54:202:1079#0/1  
TACTCATGTNAAAGGAAGGCACGATCGGGTTCGTTGCCTT  
+HWI-EAS443:3:54:202:1079#0/1  
Va])baaaWD¥Q[¥]baa]Za`ONSWK¥QHJBBBBBBBBB  
@HWI-EAS443:3:55:1303:711#0/1  
GAGTCTTCGAGCTCTNGGACGAAAAGGCAACGAACCCGAT  
+HWI-EAS443:3:55:1303:711#0/1  
\_\_\_[`Xba\_W\_Z¥b^^D¥bb`babbabbaa`````^W\_`b`  
@HWI-EAS443:3:61:1245:476#0/1  
GGAGTCTTCGAGCTCTCGACGAAAAGGCAACGAANCCGA  
+HWI-EAS443:3:61:1245:476#0/1  
aa`a\_`aa`a\_^^a\_`aaa\_aa\_a\_a`YU^a¥W^TDKWVX  
@HWI-EAS443:3:81:527:1500#0/1  
CACGATCGGGTTCGTTGCCTTTTCGTCCGAGAGCNCGAAG

+HWI-EAS443:3:81:527:1500#0/1  
aaa`^a¥[Z^V]][T`ZV[TV`[XRXQURVNXVDZVTQU  
@HWI-EAS443:3:88:1692:1100#0/1  
CTCTTGTCTCTGATANGTGGCATCATTGAGTTGGAATG  
+HWI-EAS443:3:88:1692:1100#0/1  
¥bbb\_¥baababbba]D]bbbVbbabab\_\_aaabbaaa`^  
@HWI-EAS443:3:93:1484:667#0/1  
GCGGNGAGTCTTCGAGCTCTCGGACGAAAAGGCAACGAAC  
+HWI-EAS443:3:93:1484:667#0/1  
aR\_ZDSXaXZ^¥Ya^`[LJMW¥^`U]F]X¥U]UQ]KPZBB  
@HWI-EAS443:3:15:356:1384#0/1  
GGGGAGTCTTCGAGCTCTCGGACGAAAAGGCAACGAACTA  
+HWI-EAS443:3:15:356:1384#0/1  
UaabUOVb]aaa^`b`abb`^a¥`a\_\_`b\_]bb¥aaaaWG  
@HWI-EAS443:3:24:1657:534#0/1  
TGGGGGAGTCTTCGAGCTCTCGGACGAAAAGGCAACGAAC  
+HWI-EAS443:3:24:1657:534#0/1  
aaaa^a`\_a`\_]\_IaVZRXR[`W``] ^Y\_X]N¥`TY¥]R  
@HWI-EAS443:3:31:1146:1240#0/1  
GTGGGGAGTCTTCGAGCTCTCGGACGAAAAGGCAACGAAC  
+HWI-EAS443:3:31:1146:1240#0/1  
TJTbbT^[]aZa^Q\_b]a\_\_ab\_]\_b`a`aaY¥aaZ^a]O  
@HWI-EAS443:3:71:773:909#0/1  
CGGACGAAAAGGCAACGAACCCGATCGTGCCTTCCTTTCA  
+HWI-EAS443:3:71:773:909#0/1  
a`bbb`Vaabaaabbaaaaa`aa`\_a[¥N[ZPb`Sb^[KX  
@HWI-EAS443:3:80:170:1739#0/1  
GTGGGGAGTCTTCGAGCTCTCGGACGAAAAGGCAACGAAC  
+HWI-EAS443:3:80:170:1739#0/1  
`]aZa\_b¥`baab`\_abaaabaaa^a\_baaa\_a`a^`ba  
@HWI-EAS443:3:93:427:1028#0/1  
GAAGTCTTCGAGCTCTCGGACGAAAAGGCAACGAACCCGA  
+HWI-EAS443:3:93:427:1028#0/1  
^a```ab`\_ZOZ^baa\_V`^¥¥YZba\_YZ^baZ`W]EZ]^  
@HWI-EAS443:3:10:50:165#0/1  
TGCGGGGAGTCTTCGAGCTCTCGGACGAAAAGGCAACGAA  
+HWI-EAS443:3:10:50:165#0/1  
Z\_]bb`T`aabbbbaaR^\_a\_abbXbbbaa^a^¥¥Vaa`  
@HWI-EAS443:3:18:1186:1432#0/1  
CGGGCGGGGAGTCTTCGAGCTCTCGGACGAAAAGGCAACG  
+HWI-EAS443:3:18:1186:1432#0/1  
\_\_IV[V`^[¥S`\_aa`````Za^a`^aUN]]a^R\_a`  
@HWI-EAS443:3:33:461:1854#0/1  
TGCGGGGAGTCTTCGAGCTCTCGGACGAAAAGGCAACGAA  
+HWI-EAS443:3:33:461:1854#0/1  
aab`aX`a``baaa`a`a]`\_]`aaP¥]a`US`]a\_M`  
@HWI-EAS443:3:38:495:494#0/1  
ATTCCAACCTGAATGATGCCACATATCAGAGAACAAGAGA  
+HWI-EAS443:3:38:495:494#0/1  
aabX]XT^S`TQPX`[U^X^OQaRYY^aHLL\_^\_T`MNRG

@HWI-EAS443:3:42:819:1650#0/1  
ACGAGCTCTCGACGAAAAGGCAACGAACCCGATCGTGCC  
+HWI-EAS443:3:42:819:1650#0/1  
`bba\_a`aa`a\_a`a`aa¥[`a`\_[a``\_¥^]YTTU¥¥W  
@HWI-EAS443:3:60:1209:38#0/1  
AGCGGGGAGTCTTCGAGCTCTCGACGAAAAGGCAACGAA  
+HWI-EAS443:3:60:1209:38#0/1  
aaaaaba]a\_a]]^b^\_Ya^`\_[aWSa¥WZU[ZU`^WXEV  
@HWI-EAS443:3:61:736:972#0/1  
GGGGGAGTCTTCGAGCTCTCGACGAAAAGGCAACGAACC  
+HWI-EAS443:3:61:736:972#0/1  
HYT```TQ¥]¥]W\_^[T\_a^a`ab\_^]QVXO`]W¥aa¥MO  
@HWI-EAS443:3:67:416:1004#0/1  
TGGGGAGTCTTCGAGCTCTCGACGAAAAGGCAACGAACC  
+HWI-EAS443:3:67:416:1004#0/1  
`]ZHxV^\_aaa\_^`U[\_`aa¥Yb`]a`][Y^`aa^a`^^  
@HWI-EAS443:3:69:669:1166#0/1  
CGCGGGGAGTCTTCGAGCTCTCGACGAAAAGGCAACGAA  
+HWI-EAS443:3:69:669:1166#0/1  
a\_a`[ZV¥aa`\_`a`a\_a`````\_¥a`````^`X^¥aa`]^¥  
@HWI-EAS443:3:72:1293:266#0/1  
CGGGCGGGGAGTCTTCGAGCTCTCGACGAAAAGGCAACG  
+HWI-EAS443:3:72:1293:266#0/1  
aaa\_[a`aaaaaa\_[a`a]a¥``aa`¥a`a`\_``Z`a^a  
@HWI-EAS443:3:72:893:1133#0/1  
CGGCGGGGAGTCTTCGAGCTCTCGACGAAAAGGCAACGA  
+HWI-EAS443:3:72:893:1133#0/1  
aaa`\_\_`\_XU¥YU[]\_M¥PQVT`T[WRTD[a`V[SS\_NWS  
@HWI-EAS443:3:85:1352:870#0/1  
AGCGGGGAGTCTTCGAGCTCTCGACGAAAAGGCAACGAA  
+HWI-EAS443:3:85:1352:870#0/1  
a]JZ`bXRaPN\_Z[aVaXQ¥]QW`aS`¥Z`\_WYZ¥\_¥P]B  
@HWI-EAS443:3:88:1391:676#0/1  
ACGAGCTCTCGACGAAAAGGCAACGAACCCGATCGTGCC  
+HWI-EAS443:3:88:1391:676#0/1  
ab^`^a\_\_aZb`]WU`aa]^`Wa`]a¥aWaHa^¥V\_XUWU  
@HWI-EAS443:3:88:1601:285#0/1  
TGGGGAGTCTTCGAGCTCTCGACGAAAAGGCAACGAACC  
+HWI-EAS443:3:88:1601:285#0/1  
abbb`ba``¥`]babW]V`0\_b`\_a[]a^¥^Xa`0aa`RT  
@HWI-EAS443:3:89:203:1167#0/1  
GGCTCTCGACGAAAAGGCAACGAACCCGATCGTGCCCTTC  
+HWI-EAS443:3:89:203:1167#0/1  
`]a`a\_a``a]SWaa[U^a`aXV^MDVaZ¥[`MEU\_`V^Z  
@HWI-EAS443:3:94:206:1442#0/1  
CGGGCGGGGAGTCTTCGAGCTCTCGACGAAAAGGCAACG  
+HWI-EAS443:3:94:206:1442#0/1  
`YYLU`¥¥VW]]¥`¥`]Q[^¥¥ZR`]Z[^¥¥PURZPZZTZ  
@HWI-EAS443:3:100:482:1465#0/1  
CAACGAACCCGATCGTGCCCTTCCTTTGACATGAGTAATGA

+HWI-EAS443:3:100:482:1465#0/1  
`ba`aaa\_\_`aa^`aU`\_\_\_\_Y¥\_a``YVW\_`¥^T¥]`\_B  
@HWI-EAS443:3:100:986:1231#0/1  
GAGTCTTCGAGCTCTCGACGAAAAGGCAACGAACCCGAT  
+HWI-EAS443:3:100:986:1231#0/1  
JRaK\_^bab^X[ababb`aa]b]\_a]` `ab`aab`RF¥bb  
@HWI-EAS443:3:10:1739:659#0/1  
TGATTTGGCATTCCAACCTGAATGATGCCACATATCAGAG  
+HWI-EAS443:3:10:1739:659#0/1  
Z]aaba[]a]`\_PQ^¥MXYRZ¥X[[ZYMJR¥^V^[R[UY¥  
@HWI-EAS443:3:10:299:763#0/1  
ATTTGGCATTCCAACCTGAATGATGCCACATATCAGAGAA  
+HWI-EAS443:3:10:299:763#0/1  
H¥X¥[[\_WYbaa[U¥b`aaWba` `bb` ` `aab\_`\_]`^a\_  
@HWI-EAS443:3:10:487:390#0/1  
CGGGTTGCTTGCCTTTTCGTCCGAGAGCTCGAAGACTCCC  
+HWI-EAS443:3:10:487:390#0/1  
abbb¥`\_`a^b¥¥ba¥ZT` ` `]baa^^a`X`X`aX¥^SP[  
@HWI-EAS443:3:10:831:532#0/1  
GGGGAGTCTTCGAGCTCTCGACGAAAAGGCAACGAACCC  
+HWI-EAS443:3:10:831:532#0/1  
a` `XX^PQ¥a^aU^¥¥\_]\_aa\_]\_]`¥`]T\_a]M`\_U¥¥  
@HWI-EAS443:3:11:1551:1127#0/1  
GGGGAGTCTTCGAGCTCTCGACGAAAAGGCAACGAACCC  
+HWI-EAS443:3:11:1551:1127#0/1  
aa]VZ^QU\_WO¥PZQORVSZ¥SNRYV^YUTMTSHYBBBBB  
@HWI-EAS443:3:11:1717:323#0/1  
ATTCCAACCTGAATGATGCCACATATCAGAGAACAAGAGC  
+HWI-EAS443:3:11:1717:323#0/1  
aaa`aaaaaa`aa`\_^]a¥ZaW` ` `Za^\_\_^\_^\_^^\_B  
@HWI-EAS443:3:11:187:480#0/1  
GAGTCTTCGAGCTCTCGACGAAAAGGCAACGAACCCGAT  
+HWI-EAS443:3:11:187:480#0/1  
aa\_bbbbbbbbbbbbabbbaba[¥aaabaaWabaXb\_aaa  
@HWI-EAS443:3:11:422:842#0/1  
CGGGGAGTCTTCGAGCTCTCGACGAAAAGGCAACGAACC  
+HWI-EAS443:3:11:422:842#0/1  
aaaa`aaYba`^aS\_`a`^aaa\_aa\_¥Z^^\_^]^[^`\_^¥  
@HWI-EAS443:3:11:58:1704#0/1  
CTCGACGAAAAGGCAACGAACCCGATCGTGCCTTCCTTT  
+HWI-EAS443:3:11:58:1704#0/1  
aa\_\_X¥]`aaa`\_]aaa^L^a\_\_U¥¥YFMV]^JNTW[Z¥  
@HWI-EAS443:3:12:1404:158#0/1  
GGCGGGGAGTCTTCGAGCTCTCGACGAAAAGGCAACGAA  
+HWI-EAS443:3:12:1404:158#0/1  
aa` ` `Z[¥`]X¥`X[PXRRSXXX]PS¥SRWRBBBBBBBBB  
@HWI-EAS443:3:12:932:1017#0/1  
GGGGAGTCTTCGAGCTCTCGACGAAAAGGCAACGAACCC  
+HWI-EAS443:3:12:932:1017#0/1  
\_aa[UUU¥YTX`ZUZZ¥V` `XVZYKR¥ZTRVNWBBBBBBBB



@HWI-EAS443:3:13:397:1419#0/1  
CTCGGACGAAAAGGCAACGAACCCGATCGTGCCTTCCTTT  
+HWI-EAS443:3:13:397:1419#0/1  
a\_YOP¥`\_\_PU\_[MVJ\_^¥aa¥U]U]ZUMSYYPNTLUSB  
@HWI-EAS443:3:14:1090:1247#0/1  
CTCGGACGAAAAGGCAACGAACCCGATCGTGCCTTCCTTT  
+HWI-EAS443:3:14:1090:1247#0/1  
aabba`aa\_a\_¥^`aa\_]`\_aZY`aaVX`W\_¥RFX¥¥\_W\_  
@HWI-EAS443:3:14:1157:107#0/1  
GGGCGGGGAGTCTTCGAGCTCTCGGACGAAAAGGCAACGA  
+HWI-EAS443:3:14:1157:107#0/1  
`a`\_aa^`K`¥W^[\_`N¥RXP`Z]ZT^TPSXSRTTZSRS  
@HWI-EAS443:3:14:1593:1258#0/1  
TGTTCTCTGATATGTGGCATCATTAGGTTGGAATGCCAA  
+HWI-EAS443:3:14:1593:1258#0/1  
a^^aaYU^bV]\_`\_`\_`\_a[\_`a\_\_]a\_Ya`a^^`]]Z]  
@HWI-EAS443:3:15:104:735#0/1  
GCGGGGAGTCTTCGAGCTCTCGGACGAAAAGGCAACGAAC  
+HWI-EAS443:3:15:104:735#0/1  
````Z¥¥`\_]`\_`^`]`XX^^[]¥a^¥]a^[X`¥^^Z[]O]  
@HWI-EAS443:3:15:1058:1833#0/1  
CACGATCGGGTTCGTTGCCTTTTCGTCGAGAGCTCGAAG  
+HWI-EAS443:3:15:1058:1833#0/1  
\_]\_X\_\_aaa\_\_Z¥ZaaU^JVX`¥a[¥R`XXRXU`WR[``  
@HWI-EAS443:3:15:114:1838#0/1  
ATCGGGTTCGTTGCCTTTTCGTCGAGAGCTCGAAGACTC  
+HWI-EAS443:3:15:114:1838#0/1  
a`[ZZST¥¥K¥S^U\_\_`¥a^]]Z¥YQ`¥`¥\_W]¥Q^WW¥  
@HWI-EAS443:3:15:1359:1118#0/1  
CGGGGAGTCTTCGAGCTCTCGGACGAAAAGGCAACGAACC  
+HWI-EAS443:3:15:1359:1118#0/1  
abbbbaa^\_bb]babaaaa\_b^a\_ba`a`a[`aaY^aaP¥  
@HWI-EAS443:3:16:1444:1735#0/1  
TCGAGCTCTCGGACGAAAAGGCAACGAACCCGATCGTGCC  
+HWI-EAS443:3:16:1444:1735#0/1  
^¥¥bb`b^\_Y`\_`\_a^`^`b\_¥a\_a]^`\_`a`\_a\_\_Y`\_]ST  
@HWI-EAS443:3:16:383:71#0/1  
GGCGGGGAGTCTTCGAGCTCTCGGACGAAAAGGCAACGAA  
+HWI-EAS443:3:16:383:71#0/1  
aaU^ZU\_0\_`\_`[\_VZ^`U¥V¥`a`X¥\_`^]YJOX¥a[[T`  
@HWI-EAS443:3:16:43:489#0/1  
GGGCGGGGAGTCTTCGAGCTCTCGGACGAAAAGGCAACGA  
+HWI-EAS443:3:16:43:489#0/1  
^`[\_`\_]GUP\_]TZa\_X`\_a[¥aZR\_ZRX``[\_`X¥T¥\_WXa  
@HWI-EAS443:3:16:667:1067#0/1  
GCGGGGAGTCTTCGAGCTCTCGGACGAAAAGGCAACGAAC  
+HWI-EAS443:3:16:667:1067#0/1  
ab``^WMYVa[V0¥¥```]^SX^`^¥[`[[URU^]¥YY[U  
@HWI-EAS443:3:17:118:1644#0/1  
GGGCGGGGAGTCTTCGAGCTCTCGGACGAAAAGGCAACG

+HWI-EAS443:3:17:118:1644#0/1  
aaa^Z^X[[]aa^\_Z]¥^`¥^`XL[H¥YZ^`\_ZZ  
@HWI-EAS443:3:17:232:403#0/1  
GAGCTCTCGGACGAAAAGGCAACGAACCCGATCGTGCCTT  
+HWI-EAS443:3:17:232:403#0/1  
aaaa`aaaaaa`^`Xa\_[a\_aR``aa`^^[Z[^Va\_SWY  
@HWI-EAS443:3:17:521:547#0/1  
GGCGGGGAGTCTTCGAGCTCTCGGACGAAAAGGCAACGAA  
+HWI-EAS443:3:17:521:547#0/1  
``\_a^a`\_Z`````¥^`Z¥[``^`Z`X^¥\_K^W]ZW[[B  
@HWI-EAS443:3:17:898:643#0/1  
CTCTCGGACGAAAAGGCAACGAACCCGATCGTGCCTTCCT  
+HWI-EAS443:3:17:898:643#0/1  
abba\_\_\_Z^b`a\_Z`^aX^^a\_V]MG^`VMWXSKZSXUZY  
@HWI-EAS443:3:1:215:818#0/1  
ATTCCAACCTGAATGATGCCACATATCAGAGAACAAGAGC  
+HWI-EAS443:3:1:215:818#0/1  
abb^ab`\_aaaaa`\_`a\_¥a^aaaa^a\_\_aZXX`\_X[BB  
@HWI-EAS443:3:20:1105:742#0/1  
GGGAGTCTTCGAGCTCTCGGACGAAAAGGCAACGAACCCG  
+HWI-EAS443:3:20:1105:742#0/1  
a`a`\_Ta]bbbaaa\_a``bba`baaaaa`^baZZ^U^aZ`  
@HWI-EAS443:3:20:1173:644#0/1  
GGGAGTCTTCGAGCTCTCGGACGAAAAGGCAACGAACCC  
+HWI-EAS443:3:20:1173:644#0/1  
a^Y`a]X\_aa^a^\_V[N¥XW^]VY\_`Y]YSN^^^ZRS[SM  
@HWI-EAS443:3:20:28:499#0/1  
GAGTCTTCGAGCTCTCGGACGAAAAGGCAACGAACCCGAT  
+HWI-EAS443:3:20:28:499#0/1  
`bbabbabbabb````bbbabaa^`a``baaaabbaaaa[  
@HWI-EAS443:3:20:455:1512#0/1  
CTCTTGTCTCTGATATGTGGCATCATTAGGTTGGAATG  
+HWI-EAS443:3:20:455:1512#0/1  
abbbba`aaabaaaabb`\_abaabbaaaaX]aa^\_aa`  
@HWI-EAS443:3:21:1045:409#0/1  
CTCTCGGACGAAAAGGCAACGAACCCGATCGTGCCTTCCT  
+HWI-EAS443:3:21:1045:409#0/1  
aba`aab\_bb`bbbababbaaaa`\_Zb```\_`Va\_\_`]¥¥¥  
@HWI-EAS443:3:21:1077:1484#0/1  
CATTACTCATGTCAAAGGAAGGCACGATCGGGTTCGTTGC  
+HWI-EAS443:3:21:1077:1484#0/1  
`\_[`bbbbbbbaYUbb`ab¥ba`a`ZY[¥KVT]HWFVHXJV  
@HWI-EAS443:3:21:1183:201#0/1  
GGGAGTCTTCGAGCTCTCGGACGAAAAGGCAACGAACCC  
+HWI-EAS443:3:21:1183:201#0/1  
a]YQ¥`¥]\_\_^aW¥U^S^W\_]\_W¥ST¥^W¥SW^SW¥YMMW  
@HWI-EAS443:3:21:377:589#0/1  
GGGCGGGGAGTCTTCGAGCTCTCGGACGAAAAGGCAACGA  
+HWI-EAS443:3:21:377:589#0/1  
\_V^\_\_`¥¥a`[``\_`Xa`\_````^a`¥^^`[]Yaa`¥¥M

@HWI-EAS443:3:21:400:1632#0/1  
CACGATCGGGTTCGTTGCCTTTTCGTCGAGAGCTCGAAG  
+HWI-EAS443:3:21:400:1632#0/1  
`a`T`¥\_0[[Z`[PV`[¥^X``aVEP]`[ZQFNY¥ZRZBB  
@HWI-EAS443:3:21:793:1022#0/1  
CGGGGAGTCTTCGAGCTCTCGGACGAAAAGGCAACGAACC  
+HWI-EAS443:3:21:793:1022#0/1  
\_`^S\_T\_¥X``a`aTXV[^\_\_Z\_^T[XZUZ[P\_]¥¥^Z[¥[  
@HWI-EAS443:3:22:327:128#0/1  
GGGGCGGGGAGTCTTCGAGCTCTCGGACGAAAAGGCAACG  
+HWI-EAS443:3:22:327:128#0/1  
`\_``a¥YONFZ`^`¥TNX¥Z¥¥ZX^RNKFSZBBBBBBBB  
@HWI-EAS443:3:22:420:491#0/1  
CACGATCGGGTTCGTTGCCTTTTCGTCGAGAGCTCGAAG  
+HWI-EAS443:3:22:420:491#0/1  
a]ab`a`b\_ba`a`\_SX\_]`^a]RU^V\_aX]Y]]\_`XV^^  
@HWI-EAS443:3:23:1122:473#0/1  
GGCGGGGAGTCTTCGAGCTCTCGGACGAAAAGGCAACGAA  
+HWI-EAS443:3:23:1122:473#0/1  
\_R`aa``\_\_a\_a`\_\_a`\_`^a^`a`R`¥^^`SYTTaV^¥]  
@HWI-EAS443:3:23:1305:908#0/1  
GAGCTCTCGGACGAAAAGGCAACGAACCCGATCGTGCCTT  
+HWI-EAS443:3:23:1305:908#0/1  
aabba`aabaaabaaa`a`\_a`a`a`¥Z]`^`\_Wa][U`  
@HWI-EAS443:3:23:433:396#0/1  
GGCGGGGAGTCTTCGAGCTCTCGGACGAAAAGGCAACGAA  
+HWI-EAS443:3:23:433:396#0/1  
a`[]W¥¥R¥[¥U^¥XX`MKWRFY[BBBBBBBBBBBBBBBB  
@HWI-EAS443:3:24:456:318#0/1  
CTCATGTCAAAGGAAGGCACGATCGGGTTCGTTGCCTTTT  
+HWI-EAS443:3:24:456:318#0/1  
abbbbbbbbbbb^bbbaaba`a`X`]`X\_\_Xa`aa¥  
@HWI-EAS443:3:24:69:1262#0/1  
GACGAAAAGGCAACGAACCCGATCGTGCCTTCCTTTGACA  
+HWI-EAS443:3:24:69:1262#0/1  
aa¥`XVQLU^`XS]SZ¥bYS¥^Z\_[T`WVGV\_NVXYU]¥  
@HWI-EAS443:3:25:840:409#0/1  
GGAGTCTTCGAGCTCTCGGACGAAAAGGCAACGAACCCGA  
+HWI-EAS443:3:25:840:409#0/1  
a^\_^\_\_\_\_VT[]Y¥Z[\_P¥[^Z\_^\_XSRSZ\_X\_¥^SNTSY  
@HWI-EAS443:3:25:857:935#0/1  
AAGGCAACGAACCCGATCGTGCCTTCCTTTGACATGAGTA  
+HWI-EAS443:3:25:857:935#0/1  
`^ab`bb`\_`b^^^]a¥aZa[UP]`[]^[\_]PXSMN^TX  
@HWI-EAS443:3:26:1415:1335#0/1  
GACGAAAAGGCAACGAACCCGATCGTGCCTTCCTTTGACA  
+HWI-EAS443:3:26:1415:1335#0/1  
Xa\_aab\_[YRV\_[`\_^`a]`^USU`[GZP¥a¥XOLNN  
@HWI-EAS443:3:26:471:1218#0/1  
GTCTTCGAGCTCTCGGACGAAAAGGCAACGAACCCGATCG

+HWI-EAS443:3:26:471:1218#0/1  
]J¥^V¥`V`\_T¥WZbabaZ`\_X[Qaa]a]P^^]^^]BBBBB  
@HWI-EAS443:3:26:634:1125#0/1  
GGCGGGGAGTCTTCGAGCTCTCGGACGAAAAGGCAACGAA  
+HWI-EAS443:3:26:634:1125#0/1  
`¥X¥\_T]QI¥ZZV¥]¥YY¥a¥XT¥R[] [Z¥¥^Z]YYBBBB  
@HWI-EAS443:3:26:798:1160#0/1  
CATTACTCATGTCAAAGGAAGGCACGATCGGGTTCGTTGC  
+HWI-EAS443:3:26:798:1160#0/1  
a`\_`aZa\_a^^abbbb]\_^Ya^^a`X[[\_]UZT¥R[^  
@HWI-EAS443:3:26:922:408#0/1  
TCTCGGACGAAAAGGCAACGAACCCGATCGTGCCTTCCTT  
+HWI-EAS443:3:26:922:408#0/1  
a`[Y¥\_\_bbaaa`YK\_^]Y`\_[\_`aa\_XULY`^N¥YMH¥  
@HWI-EAS443:3:27:1459:1285#0/1  
GAGTCTTCGAGCTCTCGGACGAAAAGGCAACGAACCCGAT  
+HWI-EAS443:3:27:1459:1285#0/1  
`]^Xa`b^aZ\_`a\_YZa`¥aa`a]]¥\_aXY]¥a^Y^`^U  
@HWI-EAS443:3:27:1595:259#0/1  
ATCGGGTTCGTTGCCTTTTCGTCGAGAGCTCGAAGACTC  
+HWI-EAS443:3:27:1595:259#0/1  
J^Q\_]\_TPVa^¥¥[XaTaTa` [ZQa¥aQaXTSa^[\_VP¥K  
@HWI-EAS443:3:27:411:415#0/1  
GGGGCGGGGAGTCTTCGAGCTCTCGGACGAAAAGGCAACG  
+HWI-EAS443:3:27:411:415#0/1  
``\_a\_`XUUExx^^^aOVZ]ZZUXT¥XGU^^¥]KZ^BBBB  
@HWI-EAS443:3:27:613:524#0/1  
GAGCTCTCGGACGAAAAGGCAACGAACCCGATCGTGCCTT  
+HWI-EAS443:3:27:613:524#0/1  
\_\_][NOaTb`abaaaaYTVV]]TTa`a\_^RXPaMWYWNP  
@HWI-EAS443:3:27:930:1225#0/1  
GGGGCGGGGAGTCTTCGAGCTCTCGGACGAAAAGGCAACG  
+HWI-EAS443:3:27:930:1225#0/1  
`aa¥^aa`a`X\_`a`^R`[a\_`^Z\_a^^`a^a`[PYa¥¥  
@HWI-EAS443:3:27:935:1116#0/1  
TGGCATTCCAACCTGAATGATGCCACATATCAGAGAACAA  
+HWI-EAS443:3:27:935:1116#0/1  
[\_`YUYabbbb¥\_ab¥I\_a]a\_RTaaY\_\_aba]R¥Za]Y¥  
@HWI-EAS443:3:28:1143:388#0/1  
CTCGGACGAAAAGGCAACGAACCCGATCGTGCCTTCCTT  
+HWI-EAS443:3:28:1143:388#0/1  
ab\_\_\_bbZT¥`bb`[ba]ab`Z¥P`¥aZTG]`[\_XIUT`a  
@HWI-EAS443:3:28:1655:189#0/1  
GGGGAGTCTTCGAGCTCTCGGACGAAAAGGCAACGAACCC  
+HWI-EAS443:3:28:1655:189#0/1  
¥]abb]¥a]bbbaabM]aZbb]V¥[\_aaTWa`aQa]]X]S  
@HWI-EAS443:3:29:1118:1251#0/1  
CTCTCGGACGAAAAGGCAACGAACCCGATCGTGCCTTCCT  
+HWI-EAS443:3:29:1118:1251#0/1  
^\_b`]`\_]ba```b`\_\_ba¥`ab]]¥ab]\_]Y\_TPZYT]B

@HWI-EAS443:3:29:25:883#0/1  
GGCGGGGAGTCTTCGAGCTCTCGGACGAAAAGGCAACGAA  
+HWI-EAS443:3:29:25:883#0/1  
`aaa\_YW[]`¥\_U`¥[^[^a]`¥PU`]Z¥¥X¥]¥BB  
@HWI-EAS443:3:2:1269:589#0/1  
CGGGGAGTCTTCGAGCTCTCGGACGAAAAGGCAACGAACC  
+HWI-EAS443:3:2:1269:589#0/1  
`aa`a\_[^aaa[a]aaaa¥`aa`\_\_]\_a]`Z\_\_Z``\_TX  
@HWI-EAS443:3:2:1304:1355#0/1  
CGAGCTCTCGGACGAAAAGGCAACGAACCCGATCGTGCCT  
+HWI-EAS443:3:2:1304:1355#0/1  
ababbbbabbbab`bbbb^bba¥^aaa`]a\_`aY^\_N\_  
@HWI-EAS443:3:2:943:1255#0/1  
GGGGAGTCTTCGAGCTCTCGGACGAAAAGGCAACGAACCC  
+HWI-EAS443:3:2:943:1255#0/1  
aQ¥KUXPQVFNXTXNKXX^¥PS¥XUXRYQKUPLPBBBBB  
@HWI-EAS443:3:30:269:475#0/1  
GGCGGGGAGTCTTCGAGCTCTCGGACGAAAAGGCAACGAA  
+HWI-EAS443:3:30:269:475#0/1  
\_`aaa¥\_aa\_a`aaa`a```\_\_\_¥`^[^``\_¥¥¥¥`U^^a  
@HWI-EAS443:3:30:353:74#0/1  
GGGGGAGTCTTCGAGCTCTCGGACGAAAAGGCAACGAAC  
+HWI-EAS443:3:30:353:74#0/1  
``^`]ZXX¥VVYXXSS¥Z^TRRQXXYRRVRKUVSTKRTTT  
@HWI-EAS443:3:31:129:1102#0/1  
CTCTTGTCTCTGATATGTGGCATCATTAGGTTGGAATG  
+HWI-EAS443:3:31:129:1102#0/1  
aab`¥`^`]W\_ba\_[¥N`\_VIL\_`^^[^^ZVUWYVVTY`VY  
@HWI-EAS443:3:31:614:1299#0/1  
CGATCGGGTTCGTTGCCTTTTCGTCCGAGAGCTCGAAGAC  
+HWI-EAS443:3:31:614:1299#0/1  
a\_a^`X[¥`aZ`\_`¥```^`]R`^^¥^]Z^Z^Z¥^¥\_R  
@HWI-EAS443:3:31:637:344#0/1  
GGGGCGGGGAGTCTTCGAGCTCTCGGACGAAAAGGCAACG  
+HWI-EAS443:3:31:637:344#0/1  
a``X`]¥]¥Z``\_`a`^`]^^`^^`^^`¥^^]ZZ]`^YY  
@HWI-EAS443:3:31:775:486#0/1  
GGGGGAGTCTTCGAGCTCTCGGACGAAAAGGCAACGAAC  
+HWI-EAS443:3:31:775:486#0/1  
`abU\_ZI`aaaW`aX`Xa^^`a`RU]S^]¥U¥^aYaZaE  
@HWI-EAS443:3:32:430:1708#0/1  
GGGGCGGGGAGTCTTCGAGCTCTCGGACGAAAAGGCAACG  
+HWI-EAS443:3:32:430:1708#0/1  
¥aZ[\_a\_aaa¥^```\_`¥`]a^a]^`a¥\_Z\_ZTQUJP¥Q  
@HWI-EAS443:3:32:645:1792#0/1  
GGGGAGTCTTCGAGCTCTCGGACGAAAAGGCAACGAACCC  
+HWI-EAS443:3:32:645:1792#0/1  
\_`¥¥]`aa\_aa`\_`aa^a^Xa`a``a¥`¥\_`R¥\_J`\_`  
@HWI-EAS443:3:33:1228:522#0/1  
GGCGGGGAGTCTTCGAGCTCTCGGACGAAAAGGCAACGAA

+HWI-EAS443:3:33:1228:522#0/1  
\_aaaa`a`¥aa`a¥a`¥`Z``]^[]a]YRRY`TS]^  
@HWI-EAS443:3:33:680:1908#0/1  
CGGGGAGTCTTCGAGCTCTCGACGAAAAGGCAACGAACC  
+HWI-EAS443:3:33:680:1908#0/1  
`X¥aabQWaaaaYFYab^a¥``U]ZIP[YPP^`Qq a¥¥  
@HWI-EAS443:3:33:949:818#0/1  
ATTTGGCATTCCAACCTGAATGATGCCACATATCAGAGAA  
+HWI-EAS443:3:33:949:818#0/1  
ababaabaaaaaa`aaaa`aa`a^Z`^a`\_W[`W\_^\_¥  
@HWI-EAS443:3:34:895:652#0/1  
AAAAGGCAACGAACCCGATCGTGCCTTCCTTTGACATGAG  
+HWI-EAS443:3:34:895:652#0/1  
ababbaaa]a\_^aaa[ba\_`YY\_\_`\_\_\_`\_\_`XVX^^¥Y^  
@HWI-EAS443:3:35:37:596#0/1  
GGCGGGGAGTCTTCGAGCTCTCGACGAAAAGGCAACGAA  
+HWI-EAS443:3:35:37:596#0/1  
aaa^`¥`¥[¥][`]WEVQRX]]MVXU][WGRPv^]YLM]B  
@HWI-EAS443:3:35:67:380#0/1  
GAGTCTTCGAGCTCTCGACGAAAAGGCAACGAACCCGAT  
+HWI-EAS443:3:35:67:380#0/1  
abbabbbbbbbbbbbabbabb`Tabb\_\_baW^``\_]`a``S  
@HWI-EAS443:3:35:791:1227#0/1  
GAGTCTTCGAGCTCTCGACGAAAAGGCAACGAACCCGATCGTGCCTT  
+HWI-EAS443:3:35:791:1227#0/1  
ababababaabbbba^W^aabb\_baab\_baa``^^````^  
@HWI-EAS443:3:36:1274:450#0/1  
GGGGAGTCTTCGAGCTCTCGACGAAAAGGCAACGAACCC  
+HWI-EAS443:3:36:1274:450#0/1  
a^]RY¥T\_b^`[U¥\_Z[a¥Y^aRZVYZZ\_YXPWQSYRYN[  
@HWI-EAS443:3:37:1439:403#0/1  
ACTCATGTCAAAGGAAGGCACGATCGGGTTCGTTGCCTTT  
+HWI-EAS443:3:37:1439:403#0/1  
aab\_aabaaaaa]`]aa`]^aa[[aa`TSYZU\_ZKT^]\_  
@HWI-EAS443:3:37:844:1134#0/1  
GGGGCGGGGAGTCTTCGAGCTCTCGACGAAAAGGCAACG  
+HWI-EAS443:3:37:844:1134#0/1  
`a``a\_\_a¥`^^```¥S¥^`[^¥^¥XZFU`RO^XX¥VS  
@HWI-EAS443:3:38:318:597#0/1  
AAGGCAACGAACCCGATCGTGCCTTCCTTTGACATGAGTA  
+HWI-EAS443:3:38:318:597#0/1  
aaaaabbaaZ`^`a\_]`\_ZXa\_YZUZ]]^RUSUNTQ[XR  
@HWI-EAS443:3:38:447:464#0/1  
ATCGGGTTCGTTGCCTTTTCGTCGAGAGCTCGAAGACTC  
+HWI-EAS443:3:38:447:464#0/1  
[¥\_a\_\_Z``^`aZ\_a`^`¥`Z¥[`¥`T]TUTZWXTTZZT  
@HWI-EAS443:3:39:1082:883#0/1  
GGGCGGGGAGTCTTCGAGCTCTCGACGAAAAGGCAACGA  
+HWI-EAS443:3:39:1082:883#0/1  
`\_`a`¥^XR¥Y\_^``a^`Z^Z^]`[UZZNWZRZ]^XaYRR

@HWI-EAS443:3:39:1133:925#0/1  
GGGGAGTCTTCGAGCTCTCGGACGAAAAGGCAACGAACCC  
+HWI-EAS443:3:39:1133:925#0/1  
^bba]bbbbba^Xaaa]Xaaab]aaaa^W`Z``^YM  
@HWI-EAS443:3:39:519:295#0/1  
GCGGGGAGTCTTCGAGCTCTCGGACGAAAAGGCAACGAAC  
+HWI-EAS443:3:39:519:295#0/1  
``^X]W`[\_`\_a^^`a]\_^^`VYY^YRXMQTS[\_¥[V`P  
@HWI-EAS443:3:39:826:126#0/1  
GGGGCGGGGAGTCTTCGAGCTCTCGGACGAAAAGGCAACG  
+HWI-EAS443:3:39:826:126#0/1  
`a^\_``\_Z`[K¥KZaKRRS¥T¥¥Y¥ZGPLPBBBBBBBBBB  
@HWI-EAS443:3:3:184:1886#0/1  
GAGTCTTCGAGCTCTCGGACGAAAAGGCAACGAACCCGAT  
+HWI-EAS443:3:3:184:1886#0/1  
abaa\_bb]]aaaUabSabaaa`abbb``\_b]abUH¥\_a\_B  
@HWI-EAS443:3:3:512:720#0/1  
CGGGGAGTCTTCGAGCTCTCGGACGAAAAGGCAACGAACC  
+HWI-EAS443:3:3:512:720#0/1  
\_aa`a`X[\_a`[aaa`[\_a\_aaa\_`\_a\_^^\_aZ``^`Z  
@HWI-EAS443:3:40:1033:155#0/1  
CACGATCGGGTTCGTTGCCTTTTCGTCGAGAGCTCGAAG  
+HWI-EAS443:3:40:1033:155#0/1  
ab\_baa]aa`¥aa`\_Y``]`aaaYa¥W¥YWSWWW¥WM^T  
@HWI-EAS443:3:40:1205:137#0/1  
GCGGGGAGTCTTCGAGCTCTCGGACGAAAAGGCAACGAAC  
+HWI-EAS443:3:40:1205:137#0/1  
a\_X^TVVV¥PVV\_¥UUM¥UY]]R¥ZHVHLPPTZBBBBBB  
@HWI-EAS443:3:40:572:503#0/1  
CGAGCTCTCGGACGAAAAGGCAACGAACCCGATCGTGCCT  
+HWI-EAS443:3:40:572:503#0/1  
`aYaS`¥TZaa^V\_]U]aa^`aa\_UNVUX^¥W\_\_KNR^V  
@HWI-EAS443:3:42:1454:1096#0/1  
GGGCGGGGAGTCTTCGAGCTCTCGGACGAAAAGGCAACGA  
+HWI-EAS443:3:42:1454:1096#0/1  
a¥^VP\_[[a¥]^^[T`0`T`]Z¥¥XXX`]WVZXWKMVXBB  
@HWI-EAS443:3:42:1760:172#0/1  
CTCTCGGACGAAAAGGCAACGAACCCGATCGTGCCTTCCT  
+HWI-EAS443:3:42:1760:172#0/1  
abaa^ab\_b\_Z^¥\_ba]``Xaa^XX\_]V¥^M¥RRPZ¥¥[  
@HWI-EAS443:3:42:1772:721#0/1  
GGCGGGGAGTCTTCGAGCTCTCGGACGAAAAGGCAACGAA  
+HWI-EAS443:3:42:1772:721#0/1  
a\_\_XZYJOVFX`X]¥T[XNPXS]RZXZT\_RZSZNX]BBBB  
@HWI-EAS443:3:42:786:107#0/1  
GGGCGGGGAGTCTTCGAGCTCTCGGACGAAAAGGCAACGA  
+HWI-EAS443:3:42:786:107#0/1  
\_a`aaaa^¥a[¥``a]\_¥]]``Za¥¥¥¥ZZ¥]T¥Z  
@HWI-EAS443:3:43:307:1009#0/1  
GAGTCTTCGAGCTCTCGGACGAAAAGGCAACGAACCCGAT





@HWI-EAS443:3:48:111:1811#0/1  
GGGGCGGGGAGTCTTCGAGCTCTCGGACGAAAAGGCAACG  
+HWI-EAS443:3:48:111:1811#0/1  
\_a¥YZMTUXZXPY`^]¥`^U¥¥]XVa`RSF[`TJWXBBBB  
@HWI-EAS443:3:48:1257:990#0/1  
ATTCCAACCTGAATGATGCCACATATCAGAGAACAAGAGC  
+HWI-EAS443:3:48:1257:990#0/1  
aaa[\_aa`^aa\_a\_aaaaaa^aa`aa\_\_`¥\_W¥¥^`\_`\_`  
@HWI-EAS443:3:48:459:1290#0/1  
ATTCCAACCTGAATGATGCCACATATCAGAGAACAAGAGC  
+HWI-EAS443:3:48:459:1290#0/1  
aa`ZMO^`aa\_SYU¥`aa¥aa]\_RSPZaaW¥`\_`^\_\_T[^  
@HWI-EAS443:3:48:675:257#0/1  
GCGGGGAGTCTTCGAGCTCTCGGACGAAAAGGCAACGAAC  
+HWI-EAS443:3:48:675:257#0/1  
a^VWU`¥¥]Z`\_WV^]¥Y¥P¥¥UTFVWUW¥W¥MWUW¥U¥W  
@HWI-EAS443:3:48:833:1280#0/1  
TCTCGGACGAAAAGGCAACGAACCCGATCGTGCCTTCCTT  
+HWI-EAS443:3:48:833:1280#0/1  
aaabab\_ab`\_`a\_]\_\_U¥\_]`^[]]XZY]YVP[VUUU¥  
@HWI-EAS443:3:49:1214:1481#0/1  
GAGCTCTCGGACGAAAAGGCAACGAACCCGATCGTGCCTT  
+HWI-EAS443:3:49:1214:1481#0/1  
abZab[aUb\_ba`a]abab]aaVQ]baYa`\_`\_[^[Z\_\_M  
@HWI-EAS443:3:49:1547:837#0/1  
GGGGAGTCTTCGAGCTCTCGGACGAAAAGGCAACGAACCC  
+HWI-EAS443:3:49:1547:837#0/1  
aa]Sbaba]ab^aaWN^a^a]SX`^H`^¥^XYZVFX¥^BB  
@HWI-EAS443:3:49:257:1993#0/1  
CGGGGAGTCTTCGAGCTCTCGGACGAAAAGGCAACGAACC  
+HWI-EAS443:3:49:257:1993#0/1  
abbb]bbbab\_`^`baaaa¥V)`¥]Saa`Z``ba]aZ`[a  
@HWI-EAS443:3:4:637:792#0/1  
GAGTCTTCGAGCTCTCGGACGAAAAGGCAACGAACCCGAT  
+HWI-EAS443:3:4:637:792#0/1  
aab`bababab\_a`aaaa`baaaaa\_Za^```¥PY`a¥  
@HWI-EAS443:3:50:353:912#0/1  
CGGGGAGTCTTCGAGCTCTCGGACGAAAAGGCAACGAACC  
+HWI-EAS443:3:50:353:912#0/1  
T]XRPW¥V`aa^`XW]`¥[]\_Z]WW`W¥UZ¥0]]X\_a^ZX  
@HWI-EAS443:3:50:613:584#0/1  
GAGTCTTCGAGCTCTCGGACGAAAAGGCAACGAACCCGAT  
+HWI-EAS443:3:50:613:584#0/1  
aaY]baaa]ab`¥`aa`\_`a`\_W^¥`\_a\_[aaY¥¥Qa`¥  
@HWI-EAS443:3:50:785:1535#0/1  
CTCTTGTTCTCTGATATGTGGCATCATTAGGTTGGAATG  
+HWI-EAS443:3:50:785:1535#0/1  
abbbbbbbbaabbbbbbbb`bbbbbbbaabaabbbbbba  
@HWI-EAS443:3:51:1177:1557#0/1  
CACGATCGGGTTCGTTGCCTTTTCGTCCGAGAGCTCGAAG

+HWI-EAS443:3:51:1177:1557#0/1  
abb`baabb`]`\_\_`b^^a^ab\_V¥]aba`]¥\_`^\_X[a\_  
@HWI-EAS443:3:53:223:396#0/1  
GTTCGTTGCCTTTTCGTCCGAGAGCTCGAAGACTCCCCGC  
+HWI-EAS443:3:53:223:396#0/1  
a¥a`a\_^a`\_a``aUaU]¥`¥`S`U^Z^¥¥^WW¥YU¥W¥U  
@HWI-EAS443:3:53:228:936#0/1  
CTCGGACGAAAAGGCAACGAACCCGATCGTGCCTTCCTTT  
+HWI-EAS443:3:53:228:936#0/1  
abbbbbbbbabaaabb```a]\_bba\_\_a^a[\_a^```a^a  
@HWI-EAS443:3:53:630:176#0/1  
CTTCGAGCTCTCGGACGAAAAGGCAACGAACCCGATCGTG  
+HWI-EAS443:3:53:630:176#0/1  
a¥Wb`U\_b``a^¥ZW\_]VW[¥¥`U^¥`a`¥YSSaTZ[YPM  
@HWI-EAS443:3:54:1469:920#0/1  
GGGGAGTCTTCGAGCTCTCGGACGAAAAGGCAACGAACCC  
+HWI-EAS443:3:54:1469:920#0/1  
[[^\_aabaab```aa`b`ba`bb`a`abaaaaabaaaaXa`  
@HWI-EAS443:3:54:362:753#0/1  
TCTCGGACGAAAAGGCAACGAACCCGATCGTGCCTTCCTT  
+HWI-EAS443:3:54:362:753#0/1  
aba]a^W\_`Y\_S]\_aaa`a¥R]\_^aa]Y]LT]\_QV^^Ua\_  
@HWI-EAS443:3:54:497:410#0/1  
GGGGAGTCTTCGAGCTCTCGGACGAAAAGGCAACGAACCC  
+HWI-EAS443:3:54:497:410#0/1  
aaaa`aaaaa¥¥[a]a^a^aa`¥`^^`YY^^^`^]]\_UYU  
@HWI-EAS443:3:55:1322:1249#0/1  
GGGGAGTCTTCGAGCTCTCGGACGAAAAGGCAACGAACCC  
+HWI-EAS443:3:55:1322:1249#0/1  
abaaZ]a^ab```Z`ZaUa\_\_a\_W\_¥^^`¥¥¥Y\_GX\_`G^V  
@HWI-EAS443:3:55:1326:894#0/1  
GGGCGGGGAGTCTTCGAGCTCTCGGACGAAAAGGCAACGA  
+HWI-EAS443:3:55:1326:894#0/1  
ab\_a^bba`a```aa`a`a^a`^\_aaa¥a`a^aa`X^aWa\_  
@HWI-EAS443:3:55:135:1647#0/1  
TCTCGGACGAAAAGGCAACGAACCCGATCGTGCCTTCCTT  
+HWI-EAS443:3:55:135:1647#0/1  
aaa```a`a`aaa`\_aaa\_¥a]^\_¥[YV\_YUSXSSV[VUY  
@HWI-EAS443:3:55:538:1156#0/1  
GGCGGGGAGTCTTCGAGCTCTCGGACGAAAAGGCAACGAA  
+HWI-EAS443:3:55:538:1156#0/1  
aaaaaa`^`a`\_[^`^\_[U`V]\_`^U`[\_\_\_`^\_Q^^VU^^  
@HWI-EAS443:3:55:739:716#0/1  
GGGGAGTCTTCGAGCTCTCGGACGAAAAGGCAACGAACCC  
+HWI-EAS443:3:55:739:716#0/1  
a`a\_ab`abbab\_\_]aaa`^`^]^[aaaa\_UX\_X^```QP[  
@HWI-EAS443:3:55:802:1367#0/1  
GGGGCGGGGAGTCTTCGAGCTCTCGGACGAAAAGGCAACG  
+HWI-EAS443:3:55:802:1367#0/1  
aa`\_`\_¥`^```[`a``]^^]^[^X^a]V^[^¥^X]¥]^X[

@HWI-EAS443:3:55:889:402#0/1  
GGCGGGGAGTCTTCGAGCTCTCGGACGAAAAGGCAACGAA  
+HWI-EAS443:3:55:889:402#0/1  
`baa`a`\_aaaab\_a¥aa`^a`Za`^RY]``\_UW\_V[`a  
@HWI-EAS443:3:56:1391:1217#0/1  
GAAGGCACGATCGGGTTCGTTGCCTTTTCGTCCGAGAGCT  
+HWI-EAS443:3:56:1391:1217#0/1  
a]¥`Sa]Y^¥XUMVUV`UXTU]ZS]]BBBBBBBBBBBBBB  
@HWI-EAS443:3:56:155:309#0/1  
GGCGGGGAGTCTTCGAGCTCTCGGACGAAAAGGCAACGAA  
+HWI-EAS443:3:56:155:309#0/1  
`¥`a`\_`^`\_`a`]`¥]``^¥¥`]^P]]Q^[X¥[Z]X^¥^  
@HWI-EAS443:3:56:543:893#0/1  
ATTCCAACCTGAATGATGCCACATATCAGAGAACAAGAGC  
+HWI-EAS443:3:56:543:893#0/1  
abaabaaaa`a`a`a`aa\_\_\_aaa¥``¥`¥a¥[`\_\_\_^^  
@HWI-EAS443:3:57:1286:266#0/1  
GGGGAGTCTTCGAGCTCTCGGACGAAAAGGCAACGAACCC  
+HWI-EAS443:3:57:1286:266#0/1  
a`^`^a^`^`[^`^aY]P]V^`RY^Y¥^Y[]OW`Q]YSBBB  
@HWI-EAS443:3:57:1447:441#0/1  
CTCGGACGAAAAGGCAACGAACCCGATCGTGCCTTCCTTT  
+HWI-EAS443:3:57:1447:441#0/1  
`b`bbUbbb`^]Zzb^¥^`\_aa``YYZR]Z[T]WS[\_B  
@HWI-EAS443:3:57:213:1220#0/1  
TTGGCATTCCAACCTGAATGATGCCACATATCAGAGAACA  
+HWI-EAS443:3:57:213:1220#0/1  
aba`\_Wab`aa`aaaa]a\_aaa^`a]`\_[\_\_aXa^`^Y\_  
@HWI-EAS443:3:57:316:1737#0/1  
ATCGGGTTCGTTGCCTTTTCGTCCGAGAGCTCGAAGACTC  
+HWI-EAS443:3:57:316:1737#0/1  
a`\_NOX¥\_¥R[¥T[IY^aVTVZVXOUXX]R¥YQPXQXS[¥  
@HWI-EAS443:3:57:691:1300#0/1  
GGGGAGTCTTCGAGCTCTCGGACGAAAAGGCAACGAACCC  
+HWI-EAS443:3:57:691:1300#0/1  
`¥`V]a\_aaaaa]Y^][``]Ya^a`^`[^`\_^`U^V]`VY  
@HWI-EAS443:3:58:1117:147#0/1  
GGGAGTCTTCGAGCTCTCGGACGAAAAGGCAACGAACCCG  
+HWI-EAS443:3:58:1117:147#0/1  
abaR^`aaa^a`\_a`^`\_`a`\_¥a^a`\_¥`[\_a¥¥]\_WSU¥  
@HWI-EAS443:3:58:1127:1497#0/1  
GAGTCTTCGAGCTCTCGGACGAAAAGGCAACGAACCCGAT  
+HWI-EAS443:3:58:1127:1497#0/1  
\_``aabb\_baaabba\_bbaZa^``baaaaaaaaa`aaTG  
@HWI-EAS443:3:58:1730:229#0/1  
CGATCGGGTTCGTTGCCTTTTCGTCCGAGAGCTCGAAGAC  
+HWI-EAS443:3:58:1730:229#0/1  
^```¥^baU\_ZT]`ZZ^aa``TX^[Y\_^^^PYY^URPY[  
@HWI-EAS443:3:59:192:308#0/1  
GTCTTCGAGCTCTCGGACGAAAAGGCAACGAACCCGATCG

+HWI-EAS443:3:59:192:308#0/1  
a\_`\_a\_b```a`aaaa\_Wa^^\_]WV[Z\_\_Z\_YTUVWWWQV  
@HWI-EAS443:3:59:199:120#0/1  
CGAAAAGGCAACGAACCCGATCGTGCCTTCCTTTGACATG  
+HWI-EAS443:3:59:199:120#0/1  
abbbbabbabbaabba`aba`\_a^a]`^]``\_¥URVVY  
@HWI-EAS443:3:59:391:192#0/1  
GGGCGGGGAGTCTTCGAGCTCTCGGACGAAAAGGCAACGA  
+HWI-EAS443:3:59:391:192#0/1  
aaaaaaaa`aa\_a`^a\_a¥``aaa]^]a^`^[U`¥W¥¥UW  
@HWI-EAS443:3:59:598:1904#0/1  
GGGGAGTCTTCGAGCTCTCGGACGAAAAGGCAACGAACCC  
+HWI-EAS443:3:59:598:1904#0/1  
aaa]aaabbabbaababaYaa`baaba`a`b\_a]`]ZYYG  
@HWI-EAS443:3:59:977:707#0/1  
GCGGGGAGTCTTCGAGCTCTCGGACGAAAAGGCAACGAAC  
+HWI-EAS443:3:59:977:707#0/1  
a`^]¥\_[a`]aa^`W]a^^¥X`]^`[[TYWNT]TDLTQQ  
@HWI-EAS443:3:5:1237:728#0/1  
GGGCGGGGAGTCTTCGAGCTCTCGGACGAAAAGGCAACGA  
+HWI-EAS443:3:5:1237:728#0/1  
`[NEQ^PUOX\_UKML[X[M¥MSOOTJDWVS[¥PPBBBBBB  
@HWI-EAS443:3:5:938:210#0/1  
TACTCATGTCAAAGGAAGGCACGATCGGGTTCGTTGCCTT  
+HWI-EAS443:3:5:938:210#0/1  
`WP\_¥b``aI`^abbXTaaZQF[[PNWF^ZTHXT]BBBBB  
@HWI-EAS443:3:60:1041:777#0/1  
GCGGGGAGTCTTCGAGCTCTCGGACGAAAAGGCAACGAAC  
+HWI-EAS443:3:60:1041:777#0/1  
aa```VX¥^a`a[`¥`^`¥^]`^`¥Z]ZPZX¥[T¥ZNS¥]P  
@HWI-EAS443:3:60:1340:1092#0/1  
CACGATCGGGTTCGTTGCCTTTTCGTCGAGAGCTCGAAG  
+HWI-EAS443:3:60:1340:1092#0/1  
aW¥b`T`¥^a]a^HY\_]\_¥`aa\_RSZ`¥TT^NXPTXWU]¥  
@HWI-EAS443:3:60:762:1445#0/1  
CTTCGAGCTCTCGGACGAAAAGGCAACGAACCCGATCGTG  
+HWI-EAS443:3:60:762:1445#0/1  
`¥``]^`^`^NZ\_ZK¥]U^X]RVXS]UZZRZXV\_UPUBBB  
@HWI-EAS443:3:61:1412:1647#0/1  
CACGATCGGGTTCGTTGCCTTTTCGTCGAGAGCTCGAAG  
+HWI-EAS443:3:61:1412:1647#0/1  
aa\_aa^aa`a[`^U\_`¥`a\_aa\_\_`U¥Ya¥]¥¥RZTTRSR  
@HWI-EAS443:3:61:1559:1286#0/1  
AGCTCTCGGACGAAAAGGCAACGAACCCGATCGTGCCTTC  
+HWI-EAS443:3:61:1559:1286#0/1  
U[\_`^]XaX¥¥a]aVZ\_bba^a^MU\_b\_ZXOSRITFVXGR  
@HWI-EAS443:3:61:325:1124#0/1  
CGGGGAGTCTTCGAGCTCTCGGACGAAAAGGCAACGAACC  
+HWI-EAS443:3:61:325:1124#0/1  
ab\_bbaabbbba]babbbbbbabababaX\_abaa^]a¥^

@HWI-EAS443:3:61:331:462#0/1  
GGCGGGGAGTCTTCGAGCTCTCGGACGAAAAGGCAACGAA  
+HWI-EAS443:3:61:331:462#0/1  
a]XV^ROVYY^^^]ZV]U[PSTSJQ[QV[[USSSTPPTT  
@HWI-EAS443:3:61:364:415#0/1  
ATTACTCATGTCAAAGGAAGGCACGATCGGGTTCGTTGCC  
+HWI-EAS443:3:61:364:415#0/1  
abb]abbbb`abbabaabaa\_S`a`aaVX^]Z`SQR  
@HWI-EAS443:3:61:730:1980#0/1  
ACGATCGGGTTCGTTGCCTTTTCGTCGAGAGCTCGAAGA  
+HWI-EAS443:3:61:730:1980#0/1  
\_a`X^]VF[XZX¥`]aY``aXYaa`]^ZZPX]XTWFS  
@HWI-EAS443:3:62:1281:129#0/1  
GGAGTCTTCGAGCTCTCGGACGAAAAGGCAACGAACCCGA  
+HWI-EAS443:3:62:1281:129#0/1  
aaaa`R^a¥`G\_¥¥¥\_\_aa\_\_¥\_¥¥¥`^\_\_W^^¥WWW¥¥  
@HWI-EAS443:3:62:657:394#0/1  
GGGGAGTCTTCGAGCTCTCGGACGAAAAGGCAACGAACCC  
+HWI-EAS443:3:62:657:394#0/1  
`^`a`abbbbbaaaaaaaaaabaaa^a\_aa^]aa^a`  
@HWI-EAS443:3:62:734:1890#0/1  
GGGAGTCTTCGAGCTCTCGGACGAAAAGGCAACGAACCCG  
+HWI-EAS443:3:62:734:1890#0/1  
a[]W]Za`a^Z¥]\_a\_aU^aH[a[^]X`aZ^V`^¥\_¥W  
@HWI-EAS443:3:63:382:533#0/1  
CTCATGTCAAAGGAAGGCACGATCGGGTTCGTTGCCTTTT  
+HWI-EAS443:3:63:382:533#0/1  
aab\_b`[`ba\_\_aaaaaba[M¥]¥\_N]^¥QZ^]Z[^BB  
@HWI-EAS443:3:63:608:1788#0/1  
GAGCTCTCGGACGAAAAGGCAACGAACCCGATCGTGCCTT  
+HWI-EAS443:3:63:608:1788#0/1  
a`aabaaaaa\_S`aaa]`\_`aa\_aa\_Va\_Y¥^VU^\_ZP¥  
@HWI-EAS443:3:63:717:1371#0/1  
GTTCGTTGCCTTTTCGTCGAGAGCTCGAAGACTCCCCGC  
+HWI-EAS443:3:63:717:1371#0/1  
^^aba`aaaaaaaa]`ba`^`\_`a`\_¥a]aa`\_\_a^¥`  
@HWI-EAS443:3:63:778:393#0/1  
GGCGGGGAGTCTTCGAGCTCTCGGACGAAAAGGCAACGAA  
+HWI-EAS443:3:63:778:393#0/1  
a\_aaaaa^`S`aaa]\_[^¥¥`a]L]¥a\_\_`¥^`ZMY`B  
@HWI-EAS443:3:64:1336:301#0/1  
GCGGGGAGTCTTCGAGCTCTCGGACGAAAAGGCAACGAAC  
+HWI-EAS443:3:64:1336:301#0/1  
T\_bbbb\_]\_abb`bb`ababbaaa^baa^b`aa`XZ`a^  
@HWI-EAS443:3:64:1513:649#0/1  
CTCGGACGAAAAGGCAACGAACCCGATCGTGCCTTCCTTT  
+HWI-EAS443:3:64:1513:649#0/1  
ababbbbbbZ\_ab¥ab\_baa`T[a`\_VWP[[[]\_^^\_W  
@HWI-EAS443:3:64:370:1036#0/1  
CATGTCAAAGGAAGGCACGATCGGGTTCGTTGCCTTTTCG

+HWI-EAS443:3:64:370:1036#0/1  
a`\_\_V`b[aaa][ ]a]X`aSNRMX^NXLKHHWZNQQ^¥BB  
@HWI-EAS443:3:64:982:439#0/1  
TACTCATGTCAAAGGAAGGCACGATCGGGTTCGTTGCCTT  
+HWI-EAS443:3:64:982:439#0/1  
aZQ`aaabUabZS]]¥a`a\_aaaa^VMZ^MVSZSXURQ¥¥  
@HWI-EAS443:3:65:1303:791#0/1  
GCGGGGAGTCTTCGAGCTCTCGGACGAAAAGGCAACGAAC  
+HWI-EAS443:3:65:1303:791#0/1  
a`aaa^U¥¥GU` ]\_UYU`\_YSVYPZ\_TQZYUVVM[EJNUM  
@HWI-EAS443:3:65:1498:429#0/1  
TCTCGGACGAAAAGGCAACGAACCCGATCGTGCCTTCCTT  
+HWI-EAS443:3:65:1498:429#0/1  
aab\_baaaaaaaa`ab\_aaa`¥`a`\_^`^aZ[W\_¥¥`\_  
@HWI-EAS443:3:65:874:1117#0/1  
GAGTCTTCGAGCTCTCGGACGAAAAGGCAACGAACCCGAT  
+HWI-EAS443:3:65:874:1117#0/1  
¥¥`bbabbaX]]a`bb`aa¥[ ]\_`^a`^aaZbba^Y`baa  
@HWI-EAS443:3:66:138:1450#0/1  
GGGCGGGGAGTCTTCGAGCTCTCGGACGAAAAGGCAACGA  
+HWI-EAS443:3:66:138:1450#0/1  
a``a`^U¥a```a```^`a``a``` ]`a`\_S\_PW¥\_`a`U]  
@HWI-EAS443:3:66:1440:1383#0/1  
GGGGCGGGGAGTCTTCGAGCTCTCGGACGAAAAGGCAACG  
+HWI-EAS443:3:66:1440:1383#0/1  
```a``````^ZZ```Z¥U]Z¥]]Z^` ]T^X¥` ]S]T]^T¥  
@HWI-EAS443:3:66:1702:1161#0/1  
CGGGGAGTCTTCGAGCTCTCGGACGAAAAGGCAACGAACC  
+HWI-EAS443:3:66:1702:1161#0/1  
¥ab`P`b`T`a[aabX]bb]Tbbab`T\_RXbaXaQ]]a]Q  
@HWI-EAS443:3:66:631:1205#0/1  
GAGTCTTCGAGCTCTCGGACGAAAAGGCAACGAACCCGAT  
+HWI-EAS443:3:66:631:1205#0/1  
aa¥`aba\_\_¥bb`ba\_^\_¥`¥¥X]^`a]X]\_`ZJ]aa\_X^  
@HWI-EAS443:3:67:1432:1501#0/1  
GGGGCGGGGAGTCTTCGAGCTCTCGGACGAAAAGGCAACG  
+HWI-EAS443:3:67:1432:1501#0/1  
¥¥`^`¥Z\_¥ZVZ]\_a\_\_[W`¥^[`\_]\_]a`a¥]V]a``  
@HWI-EAS443:3:67:1572:281#0/1  
CGATCGGGTTCGTTGCCTTTTCGTCCGAGAGCTCGAAGAC  
+HWI-EAS443:3:67:1572:281#0/1  
X`P\_Z`\_aaaXaaXa¥X\_aa\_`V^X]¥aaa\_X\_Z\_\_`¥`Z  
@HWI-EAS443:3:67:419:729#0/1  
GGGGCGGGGAGTCTTCGAGCTCTCGGACGAAAAGGCAACG  
+HWI-EAS443:3:67:419:729#0/1  
^``aaa`\_Z]^`````\_UUS]]``^`aa`^^aa¥V\_`¥a]X  
@HWI-EAS443:3:67:667:1330#0/1  
CTTCGAGCTCTCGGACGAAAAGGCAACGAACCCGATCGTG  
+HWI-EAS443:3:67:667:1330#0/1  
\_aab\_^a]b``````\_aaa\_`]]`^]aa^X]`aZ]]\_`ZPZ

@HWI-EAS443:3:68:1026:1172#0/1  
GGGGAGTCTTCGAGCTCTCGGACGAAAAGGCAACGAACCC  
+HWI-EAS443:3:68:1026:1172#0/1  
aa][`aaabaabaa`aba^`\_aaaaaaXXaaa]\_a`Va\_  
@HWI-EAS443:3:68:1233:2006#0/1  
GCGGGGAGTCTTCGAGCTCTCGGACGAAAAGGCAACGAAC  
+HWI-EAS443:3:68:1233:2006#0/1  
`aa¥]KVTMRaaa^^aZZLX`^a^^^]\_\_`^]`aVZ^]U  
@HWI-EAS443:3:69:1254:70#0/1  
TCTCGGACGAAAAGGCAACGAACCCGATCGTGCCTTCCTT  
+HWI-EAS443:3:69:1254:70#0/1  
a\_`\_ba\_`a\_`[a]`]a`[Q[ZVS\_^]¥\_¥^PLRNHR[\_  
@HWI-EAS443:3:69:1280:132#0/1  
GCGGGGAGTCTTCGAGCTCTCGGACGAAAAGGCAACGAAC  
+HWI-EAS443:3:69:1280:132#0/1  
a^`[\_GX]Y^¥]]SNWT[VYQ[^TU^X]YK]NM RTPXYQF  
@HWI-EAS443:3:69:446:491#0/1  
GGCGGGGAGTCTTCGAGCTCTCGGACGAAAAGGCAACGAA  
+HWI-EAS443:3:69:446:491#0/1  
`\_¥a¥]X\_a]^`\_ZGwa^]¥[¥]¥`]VW^¥X`]^\_S``[  
@HWI-EAS443:3:69:527:633#0/1  
CACGATCGGGTTCGTTGCCTTTTCGTCGAGAGCTCGAAG  
+HWI-EAS443:3:69:527:633#0/1  
abbbb]aba\_Qbb\_ab[\_T]b`\_]a`^`aa`XWR^a`]¥]  
@HWI-EAS443:3:69:84:513#0/1  
CTCATGTCAAAGGAAGGCACGATCGGGTTCGTTGCCTTTT  
+HWI-EAS443:3:69:84:513#0/1  
aa^]^a\_a`a]aa^^W`aa`^UUUU^]PUUUUPS¥WW¥^¥  
@HWI-EAS443:3:6:111:1780#0/1  
CTCGGACGAAAAGGCAACGAACCCGATCGTGCCTTCCTTT  
+HWI-EAS443:3:6:111:1780#0/1  
a\_¥¥\_bbbbba]aabbay^`X``\_\_`a`\_`X¥WYaB  
@HWI-EAS443:3:6:1404:877#0/1  
CTCTTGTCTCTGATATGTGGCATCATTAGGTTGGAATG  
+HWI-EAS443:3:6:1404:877#0/1  
]a\_ab`a`bb`¥`XbbbZabbT]aTab]`abbabaa`bab  
@HWI-EAS443:3:6:781:1065#0/1  
AAGGCAACGAACCCGATCGTGCCTTCCTTTGACATGAGTA  
+HWI-EAS443:3:6:781:1065#0/1  
a`\_]`a\_\_\_\_\_ZQX`^\_¥^Q[S¥\_¥^¥U]]ZXV[^^W\_WB  
@HWI-EAS443:3:6:833:155#0/1  
CTCTGATATGTGGCATCATTAGGTTGGAATGCCAAATCA  
+HWI-EAS443:3:6:833:155#0/1  
]^b¥¥^\_XYUab]¥abaa[b[a¥aY]W`aYaVYDP\_aY[^  
@HWI-EAS443:3:70:1127:1825#0/1  
TCTCGGACGAAAAGGCAACGAACCCGATCGTGCCTTCCTT  
+HWI-EAS443:3:70:1127:1825#0/1  
abaaabaaaaaaY[aabaaaa`\_`a^Y[R[¥^^^][^^  
@HWI-EAS443:3:70:1256:472#0/1  
GGCGGGGAGTCTTCGAGCTCTCGGACGAAAAGGCAACGAA

+HWI-EAS443:3:70:1256:472#0/1  
\_`bbab^`]`ababa`\_aaaaaa]`a`baa\_P\_aR¥^a  
@HWI-EAS443:3:70:177:47#0/1  
GCGGGGAGTCTTCGAGCTCTCGGACGAAAAGGCAACGAAC  
+HWI-EAS443:3:70:177:47#0/1  
`]a\_ZMISRWX¥]\_U\_Z^^ZR^`¥W]PPPY¥RYRSPTRSN  
@HWI-EAS443:3:70:333:616#0/1  
GGGGCGGGGAGTCTTCGAGCTCTCGGACGAAAAGGCAACG  
+HWI-EAS443:3:70:333:616#0/1  
`XaT[IVR[PUQO]ZTXUNRQ[T]¥\_VV¥X^[XVQPMWQK  
@HWI-EAS443:3:70:370:1912#0/1  
CTCGGACGAAAAGGCAACGAACCCGATCGTGCCTTCCTTT  
+HWI-EAS443:3:70:370:1912#0/1  
a]a`Xa``]X\_\_Z`aaa^^`\_aaa\_Q¥PJTQWWW[[¥V^  
@HWI-EAS443:3:70:896:201#0/1  
ATTCCAACCTGAATGATGCCACATATCAGAGAACAAGAGC  
+HWI-EAS443:3:70:896:201#0/1  
ab`ab`a[b`baa`babaa`a[]\_a\_^a\_aa``0a\_``^]  
@HWI-EAS443:3:71:1193:1622#0/1  
CGGGGAGTCTTCGAGCTCTCGGACGAAAAGGCAACGAACC  
+HWI-EAS443:3:71:1193:1622#0/1  
`a¥Q\_a\_``^a`a^```\_^`aa`aYa¥X\_¥¥a````¥a]\_  
@HWI-EAS443:3:71:387:1607#0/1  
CGGGGAGTCTTCGAGCTCTCGGACGAAAAGGCAACGAACC  
+HWI-EAS443:3:71:387:1607#0/1  
aa¥\_Y\_RV^¥aa`Xa\_`X`¥¥`Y]]W]VUY[X¥UYZ^U  
@HWI-EAS443:3:71:571:156#0/1  
GGCGGGGAGTCTTCGAGCTCTCGGACGAAAAGGCAACGAA  
+HWI-EAS443:3:71:571:156#0/1  
¥]aaa[Z¥][`^a^\_U\_\_R)`\_\_\_\_[[\_]a^a^`¥`aWZ\_`  
@HWI-EAS443:3:72:317:1183#0/1  
GAGCTCTCGGACGAAAAGGCAACGAACCCGATCGTGCCTT  
+HWI-EAS443:3:72:317:1183#0/1  
W`\_R\_¥`¥`¥a]^]Z0Q`ab`X`[XT`[\_LRMX^¥X  
@HWI-EAS443:3:72:439:914#0/1  
GGGGCGGGGAGTCTTCGAGCTCTCGGACGAAAAGGCAACG  
+HWI-EAS443:3:72:439:914#0/1  
^`VT¥`^[]SKT`^[P\_¥XV¥¥`^`]¥¥`¥^¥QVRS¥\_OP  
@HWI-EAS443:3:73:1233:398#0/1  
GGAGTCTTCGAGCTCTCGGACGAAAAGGCAACGAACCCGA  
+HWI-EAS443:3:73:1233:398#0/1  
\_XXVT`R\_TOT[\_`\_YWU¥J00`\_^\_[S¥^U\_Z^BBBBB  
@HWI-EAS443:3:73:240:862#0/1  
GGAGTCTTCGAGCTCTCGGACGAAAAGGCAACGAACCCGA  
+HWI-EAS443:3:73:240:862#0/1  
aaaaab^^baaaaab`abaaaa]a`QY[\_W\_aaa^a`a`Z  
@HWI-EAS443:3:73:283:1275#0/1  
AGCTCTCGGACGAAAAGGCAACGAACCCGATCGTGCCTTC  
+HWI-EAS443:3:73:283:1275#0/1  
aXa\_a\_]\_]\_^]]XY^`^Uaaaa^¥^a\_`\_[W^ZU\_[VRYU



@HWI-EAS443:3:74:1518:297#0/1  
GGCGGGGAGTCTTCGAGCTCTCGGACGAAAAGGCAACGAA  
+HWI-EAS443:3:74:1518:297#0/1  
Z`]a¥T¥X\_ZJ]]X^YαXP^]P^^PU`Y^αW]\_UQ`VBBB  
@HWI-EAS443:3:74:711:1460#0/1  
GCGGGGAGTCTTCGAGCTCTCGGACGAAAAGGCAACGAAC  
+HWI-EAS443:3:74:711:1460#0/1  
`aa[\_¥¥\_Xaaaa^`\_`Xa\_a`¥``\_X¥`[aa`aaa¥[`]  
@HWI-EAS443:3:74:805:1472#0/1  
CTTCGAGCTCTCGGACGAAAAGGCAACGAACCCGATCGTG  
+HWI-EAS443:3:74:805:1472#0/1  
aa\_``[¥\_\_^`[^\_a`¥\_]^X^¥¥\_aa^PPP`^\_Y¥¥^S^  
@HWI-EAS443:3:75:428:27#0/1  
GCTCTCGGACGAAAAGGCAACGAACCCGATCGTGCCTTCC  
+HWI-EAS443:3:75:428:27#0/1  
]YO]¥`[\_QS[YR[[\_`X\_`^Y00ZKVT]LJV¥[YJWYNEH  
@HWI-EAS443:3:75:658:974#0/1  
GCGGGGAGTCTTCGAGCTCTCGGACGAAAAGGCAACGAAC  
+HWI-EAS443:3:75:658:974#0/1  
\_Z¥YMLMZ\_Z]ZR¥LMXT¥αXUV¥PRJTRWQPOQVE¥¥XB  
@HWI-EAS443:3:75:698:457#0/1  
GGGAGTCTTCGAGCTCTCGGACGAAAAGGCAACGAACCCG  
+HWI-EAS443:3:75:698:457#0/1  
aaa`a`aabbaa``ZbbabaXN`a]Saaa\_`aa`a``\_Z`  
@HWI-EAS443:3:75:79:501#0/1  
TACTCATGTCAAAGGAAGGCACGATCGGGTTCGTTGCCTT  
+HWI-EAS443:3:75:79:501#0/1  
aa`X\_b`b`b^¥R`\_]a\_\_aaaaZ\_`\_^`SYU\_G¥\_N[^\_  
@HWI-EAS443:3:76:1118:1399#0/1  
GCGGGGAGTCTTCGAGCTCTCGGACGAAAAGGCAACGAAC  
+HWI-EAS443:3:76:1118:1399#0/1  
aa\_]Y¥αYZ```^UQUYP`UP^¥^¥Y¥TOXPUP¥^WUU^W  
@HWI-EAS443:3:76:1360:1609#0/1  
GAGTCTTCGAGCTCTCGGACGAAAAGGCAACGAACCCGAT  
+HWI-EAS443:3:76:1360:1609#0/1  
`[LY`a^`ba][¥¥¥Zaaa\_a\_\_\_\_`UV\_`^`S^\_```VSXRS  
@HWI-EAS443:3:77:204:195#0/1  
GGCGGGGAGTCTTCGAGCTCTCGGACGAAAAGGCAACGAA  
+HWI-EAS443:3:77:204:195#0/1  
α`^`^`SPRZRUZTTZRXTTRSRYTRRRTRRSRRTTURTTT  
@HWI-EAS443:3:77:223:1693#0/1  
GTTCGTTGCCTTTTCGTCCGAGAGCTCGAAGACTCCCCGC  
+HWI-EAS443:3:77:223:1693#0/1  
\_T\_^ZQQ¥baT]W[bWG\_b^]aa`\_T¥\_¥[U[aYa\_``¥`  
@HWI-EAS443:3:77:362:288#0/1  
ATTCCAACCTGAATGATGCCACATATCAGAGAACAAGAGC  
+HWI-EAS443:3:77:362:288#0/1  
^[¥aa)``baaab``aa\_\_aa]`a\_`[Z\_\_`^^`]]^\_\_  
@HWI-EAS443:3:77:421:439#0/1  
GGGGCGGGGAGTCTTCGAGCTCTCGGACGAAAAGGCAACG

+HWI-EAS443:3:77:421:439#0/1  
`[Z`a`Q¥¥X^RR^]aXZ^¥`N¥T]RS^0`¥¥KYSYZRN  
@HWI-EAS443:3:77:653:1257#0/1  
CTTGTCTCTGATATGTGGCATCATTGAGTTGGAATGCC  
+HWI-EAS443:3:77:653:1257#0/1  
abaa`abaaabaaaa¥Y[aa`b`a`aaa\_]`a\_`\_\_[aa  
@HWI-EAS443:3:77:693:814#0/1  
CACGATCGGGTTCGTTGCCTTTTCGTCGAGAGCTCGAAG  
+HWI-EAS443:3:77:693:814#0/1  
a`aaaa\_\_a\_V¥]¥\_a\_a`aVa`¥^)``a^¥]XX[\_XPU  
@HWI-EAS443:3:78:470:533#0/1  
TACTCATGTCAAAGGAAGGCACGATCGGGTTCGTTGCCTT  
+HWI-EAS443:3:78:470:533#0/1  
aabbabbbbaabbb^Y¥b`aa\_aaaYZ`a\_Z[\_aZ```\_Xa  
@HWI-EAS443:3:78:987:2031#0/1  
CGGGGAGTCTTCGAGCTCTCGGACGAAAAGGCAACGAACC  
+HWI-EAS443:3:78:987:2031#0/1  
`aaJ^aa`aaaaaa\_`\_aa`a\_aVa`a^`a`aa[a`¥\_  
@HWI-EAS443:3:79:1050:354#0/1  
ATTTGGCATTCCAACCTGAATGATGCCACATATCAGAGAA  
+HWI-EAS443:3:79:1050:354#0/1  
`b`Z¥Ta^`a`a¥¥N```^aa\_Z]b\_abVYa`VU^Ka\_`a  
@HWI-EAS443:3:80:1564:753#0/1  
CTCGGACGAAAAGGCAACGAACCCGATCGTGCCTTCCTTT  
+HWI-EAS443:3:80:1564:753#0/1  
aaabbbbbbbaabbb`aaaba]babaa`b\_¥aab  
@HWI-EAS443:3:80:406:542#0/1  
AGCTCTCGGACGAAAAGGCAACGAACCCGATCGTGCCTTC  
+HWI-EAS443:3:80:406:542#0/1  
abbaab``aaaa```]aaaa¥\_T^[\`a``^aaV]T[U^^  
@HWI-EAS443:3:80:741:1207#0/1  
GGGGCGGGGAGTCTTCGAGCTCTCGGACGAAAAGGCAACG  
+HWI-EAS443:3:80:741:1207#0/1  
a`a\_\_\_\_a`a¥``[\`¥`a`^¥`^^]]Z¥¥¥`N¥Z¥\_X^  
@HWI-EAS443:3:80:752:23#0/1  
AAGGCAACGAACCCGATCGTGCCTTCCTTTGACATGAGTA  
+HWI-EAS443:3:80:752:23#0/1  
^`a\_\_[\_ZaaaZ]T\_`a^`J\_[]QOGF`a^VHDDZ¥DZKU  
@HWI-EAS443:3:81:334:364#0/1  
AGCTCTCGGACGAAAAGGCAACGAACCCGATCGTGCCTTC  
+HWI-EAS443:3:81:334:364#0/1  
aaa``]aaa```^VSWL[\_`aa\_¥`^YN[YRZVR[WWWVU  
@HWI-EAS443:3:82:363:746#0/1  
CACGATCGGGTTCGTTGCCTTTTCGTCGAGAGCTCGAAG  
+HWI-EAS443:3:82:363:746#0/1  
a¥\_TT\_`¥a`]``VX^``\_¥a`a``[\`\_0\_````^^`VU\_  
@HWI-EAS443:3:82:896:167#0/1  
AAGGAAGGCACGATCGGGTTCGTTGCCTTTTCGTCGAGA  
+HWI-EAS443:3:82:896:167#0/1  
¥aa`]YZV¥Z\_\_¥[U¥Q¥OTRQ¥Z\_aJ¥`¥`UIXMO\_PQK

@HWI-EAS443:3:83:1163:283#0/1  
GATCGGGTTCGTTGCCTTTTCGTCGAGAGCTCGAAGACT  
+HWI-EAS443:3:83:1163:283#0/1  
aa\_UaaaZaaaZaa\_U`a\_a`aX^^`¥`T`ZY]a`]^`^Z¥  
@HWI-EAS443:3:83:860:1145#0/1  
CATTACTCATGTCAAAGGAAGGCACGATCGGGTTCGTTGC  
+HWI-EAS443:3:83:860:1145#0/1  
a\_aZZ^^aaa\_Q]``^a[a]\_\_aa]U]`\_\_XX`\_`\_\_\_\_  
@HWI-EAS443:3:83:880:1932#0/1  
CTCGGACGAAAAGGCAACGAACCCGATCGTGCCTTCCTTT  
+HWI-EAS443:3:83:880:1932#0/1  
abYI\_aZZ`abbaa`]bb]b\_¥TRRV\_a][XaaPQXa`\_a  
@HWI-EAS443:3:84:1337:679#0/1  
GGCGGGGAGTCTTCGAGCTCTCGGACGAAAAGGCAACGAA  
+HWI-EAS443:3:84:1337:679#0/1  
\_QXXa^¥T]GPZ`][YX]RX¥Z`^^¥[¥¥^^¥R¥T]¥RRXT  
@HWI-EAS443:3:84:326:1384#0/1  
GTCTTCGAGCTCTCGGACGAAAAGGCAACGAACCCGATCG  
+HWI-EAS443:3:84:326:1384#0/1  
`bababbbababbb]bab`b¥ba\_bba`^aZaaa`\_\_`\_  
@HWI-EAS443:3:84:846:849#0/1  
CACGATCGGGTTCGTTGCCTTTTCGTCGAGAGCTCGAAG  
+HWI-EAS443:3:84:846:849#0/1  
``\_W\_V]SYZZa¥`¥¥W^]Z\_^]\_VWX^]¥YS¥Q¥R]`¥X  
@HWI-EAS443:3:85:355:1405#0/1  
CTCATGTCAAAGGAAGGCACGATCGGGTTCGTTGCCTTTT  
+HWI-EAS443:3:85:355:1405#0/1  
aa¥¥]XU[\_W\_ZO``[SSX]``]\_J^^Ua^[[UXY^[Y^Z  
@HWI-EAS443:3:86:1623:235#0/1  
CTCTTGTTCCTGATATGTGGCATTTCAGGTTGGAATG  
+HWI-EAS443:3:86:1623:235#0/1  
abXbbbbbaa^aZ`babbbZO\_bb`bbb`babbb¥^a¥b\_  
@HWI-EAS443:3:86:207:872#0/1  
CTCGGACGAAAAGGCAACGAACCCGATCGTGCCTTCCTTT  
+HWI-EAS443:3:86:207:872#0/1  
aZb\_[]a``¥U`aa\_ab]]aZ¥]YWY^`^SXZUVP]SSTZ  
@HWI-EAS443:3:86:548:565#0/1  
GGCGGGGAGTCTTCGAGCTCTCGGACGAAAAGGCAACGAA  
+HWI-EAS443:3:86:548:565#0/1  
ZZ]V]\_Z\_``a`aaZRW\_]aaaa\_\_^^`\_^`aa`a0`a^  
@HWI-EAS443:3:86:748:674#0/1  
TCTCGGACGAAAAGGCAACGAACCCGATCGTGCCTTCCTT  
+HWI-EAS443:3:86:748:674#0/1  
aa`abbbbaa^aaa\_¥Z`bXV[]¥`^`V]\_`X`a^\_YF[^  
@HWI-EAS443:3:87:593:1356#0/1  
GGGGAGTCTTCGAGCTCTCGGACGAAAAGGCAACGAACCC  
+HWI-EAS443:3:87:593:1356#0/1  
``\_`a`aaaaaaaaaaaaaaaaaaaa`aaa`a`a`aaaa¥^  
@HWI-EAS443:3:87:681:528#0/1  
GAGCTCTCGGACGAAAAGGCAACGAACCCGATCGTGCCTT

+HWI-EAS443:3:87:681:528#0/1  
`bbbbba`^ababababaaabbaa\_baaabaaaa\_a`Z[a  
@HWI-EAS443:3:88:420:1328#0/1  
GGCGGGGAGTCTTCGAGCTCTCGACGAAAAGGCAACGAA  
+HWI-EAS443:3:88:420:1328#0/1  
ZVW¥VXHPZ`]¥W^Z]ZZ¥aUVRKY[`NR[¥RXO``RNZB  
@HWI-EAS443:3:89:144:1188#0/1  
CGAAAAGGCAACGAACCCGATCGTGCCTTCCTTTGACATG  
+HWI-EAS443:3:89:144:1188#0/1  
aaaab``]aabaaaa`a`]`\_\_T^]¥^`\_W¥[`^XY]\_^  
@HWI-EAS443:3:89:64:1293#0/1  
CTCTCGGACGAAAAGGCAACGAACCCGATCGTGCCTTCCT  
+HWI-EAS443:3:89:64:1293#0/1  
aaa]a`\_X\_aXSX]¥[\_`]¥`T[O^]PTV[ZWZSUSTTYU  
@HWI-EAS443:3:8:1268:266#0/1  
TTCGAGCTCTCGACGAAAAGGCAACGAACCCGATCGTGC  
+HWI-EAS443:3:8:1268:266#0/1  
aa\_a\_a\_a\_a¥`a`^a\_\_[\_]^`\_WXZ\_VUXWUWUWS]W  
@HWI-EAS443:3:8:298:423#0/1  
GGGGAGTCTTCGAGCTCTCGACGAAAAGGCAACGAACCC  
+HWI-EAS443:3:8:298:423#0/1  
`^`¥`\_X[\_`a¥Z]RUZY]^Z¥^RZPZWZ¥`¥¥Z]XRNZ  
@HWI-EAS443:3:8:458:1648#0/1  
GAGCTCTCGACGAAAAGGCAACGAACCCGATCGTGCCTT  
+HWI-EAS443:3:8:458:1648#0/1  
¥¥Tb^bba^][a[\_\_\_baaR`W^`\_U[aZY`^]UI¥LZPYXB  
@HWI-EAS443:3:8:801:992#0/1  
GGCGGGGAGTCTTCGAGCTCTCGACGAAAAGGCAACGAA  
+HWI-EAS443:3:8:801:992#0/1  
`^^`¥]^`PVV¥XURX¥Z¥Z^]]VEXU¥W¥WPR[ZRRBB  
@HWI-EAS443:3:8:864:1409#0/1  
CACGATCGGGTTCGTTGCCTTTTCGTCGAGAGCTCGAAG  
+HWI-EAS443:3:8:864:1409#0/1  
abab`b^^`\_Ya`^[a```aaa]¥aY^`^^a^\_¥\_]a``V  
@HWI-EAS443:3:90:1066:912#0/1  
GGCGGGGAGTCTTCGAGCTCTCGACGAAAAGGCAACGAA  
+HWI-EAS443:3:90:1066:912#0/1  
\_¥^a`]YSLU¥KXP]KUJMXK¥]¥KS¥XX]]Z]BBBBBBB  
@HWI-EAS443:3:90:1193:1076#0/1  
GTCAAAGGAAGGCACGATCGGGTTCGTTGCCTTTTCGTC  
+HWI-EAS443:3:90:1193:1076#0/1  
a\_aaabba^aa`b\_aaY^XZ][\_P]¥^^YS`a^aU^¥WU  
@HWI-EAS443:3:90:1494:1059#0/1  
CGAGCTCTCGACGAAAAGGCAACGAACCCGATCGTGCCT  
+HWI-EAS443:3:90:1494:1059#0/1  
abbbbbbaaaabaabaabbabbbbaaaba^`aabTaZ`¥U\_  
@HWI-EAS443:3:90:1523:810#0/1  
GGGAGTCTTCGAGCTCTCGACGAAAAGGCAACGAACCCG  
+HWI-EAS443:3:90:1523:810#0/1  
XQW]]HWWWZZ^`[\_]J¥^bbbMbaaaabaa^`]ba[UJT`



+HWI-EAS443:3:95:1147:867#0/1  
a`¥Saaa]b`Wl¥Vaba`\_^]b¥X]aa`]X]a\_]QOZX]Z  
@HWI-EAS443:3:95:1191:1547#0/1  
ATGATTTGGCATTCCAACCTGAATGATGCCACATATCAGA  
+HWI-EAS443:3:95:1191:1547#0/1  
ab`XUTbbaKaa^^0`TU^¥]a][`^VaQQTR`\_Xaaaa`  
@HWI-EAS443:3:95:1578:1558#0/1  
GGACGAAAAGGCAACGAACCCGATCGTGCCTTCCTTTGAC  
+HWI-EAS443:3:95:1578:1558#0/1  
aaXTa`\_\_\_\_[`U]¥]a`\_¥]Ha[^\_[U]VT`^X\_\_\_\_R\_U]  
@HWI-EAS443:3:96:999:828#0/1  
GGCAACGAACCCGATCGTGCCTTCCTTTGACATGAGTAAT  
+HWI-EAS443:3:96:999:828#0/1  
a^bbb`bb`bb^`b]PaZ\_[W^a¥]abbb\_\_\_\_ab\_aNaaa  
@HWI-EAS443:3:97:659:1808#0/1  
CGATCGGGTTCGTTGCCTTTTCGTCGAGAGCTCGAAGAC  
+HWI-EAS443:3:97:659:1808#0/1  
`\_bb^]`baTabbaaabbaabbb\_b]b``abaaabaaab`  
@HWI-EAS443:3:98:888:179#0/1  
GGCGGGGAGTCTTCGAGCTCTCGACGAAAAGGCAACGAA  
+HWI-EAS443:3:98:888:179#0/1  
\_a]\_a^^`¥^¥^\_G¥Ua]^^^Q¥`WSNNP¥¥NTRTZBBBB  
@HWI-EAS443:3:9:182:1258#0/1  
GGAGTCTTCGAGCTCTCGACGAAAAGGCAACGAACCCGA  
+HWI-EAS443:3:9:182:1258#0/1  
]bbaaabbbababaaabba`b`ab`aaa`bb`aaaa`a`a  
@HWI-EAS443:3:9:223:125#0/1  
GATCGGGTTCGTTGCCTTTTCGTCGAGAGCTCGAAGACT  
+HWI-EAS443:3:9:223:125#0/1  
`ZRRRZZRZ^RTRTUPPPPTXFTRTRTTUSSPTTTTBBB  
@HWI-EAS443:3:34:452:1009#0/1  
ACGGTTTGAAAAGAGGGCCTTCTACGGAAGGAGAGCATT  
+HWI-EAS443:3:34:452:1009#0/1  
[¥Z\_T`\_\_a\_0][MVUZXWVQa\_]¥YZ¥X`]ZSLV^BBBB  
@HWI-EAS443:3:52:1022:1323#0/1  
TGCAAATTTTCAAGAAGGTCATCTTTCAGACCAACATTAT  
+HWI-EAS443:3:52:1022:1323#0/1  
`baa\_abbbaaaaa`ab^`aa`a`a`a`\_\_`a`aaa`  
@HWI-EAS443:3:78:1226:1702#0/1  
GACAAAATGACCATCGTCAACATCCAAAGCACTCTGCNTT  
+HWI-EAS443:3:78:1226:1702#0/1  
ZXbbb`Sab¥H^a]Vb\_¥b¥`ab^^YH`UF`a]b`XTDJU  
@HWI-EAS443:3:87:232:2006#0/1  
CAGGAACAGCAGAGTGCTGTGGATGGTGACGATGGTCCTT  
+HWI-EAS443:3:87:232:2006#0/1  
`Y\_a[\_\_\_baaa[]ZFT\_]a[aT`BBBBBBBBBBBBBBBB  
@HWI-EAS443:3:93:687:502#0/1  
GAGGGCCTTCTACGGAAGGAGTGCCTGAGCCCATGAGTTT  
+HWI-EAS443:3:93:687:502#0/1  
a`aaa^aaa^aa`a]^`a¥^]U`\_[\_Y[`U¥^`\_aZ`W^`

@HWI-EAS443:3:77:75:1841#0/1  
TTTTTCAAATGTATTTATCGTCGCTTAAATACGGTTTGA  
+HWI-EAS443:3:77:75:1841#0/1  
aaa`a\_aaaa¥ZU`\_aaa\_aa]aaa]\_``¥Z]]V\_YL^  
@HWI-EAS443:3:49:381:766#0/1  
CAGGGGGCCTGCAAATTTCAAGAAGGTCATCTTTCAGA  
+HWI-EAS443:3:49:381:766#0/1  
abbbbaabbaababaabbbbabaaaaaaaaababb^abbb  
@HWI-EAS443:3:38:1063:1601#0/1  
CGTGCCAGTGAGCGAGGACTGCAGCGGAGACGCTTTGAC  
+HWI-EAS443:3:38:1063:1601#0/1  
aa]Z^a`^`QbaRR\_`]Ka¥`¥X\_QH\_FWEVPQ[USGUGQ  
@HWI-EAS443:3:7:1123:2019#0/1  
CACCTCATGGACTGAGGCACTCCTTCCGTAGAAGGCCCT  
+HWI-EAS443:3:7:1123:2019#0/1  
``T\_]\_a^^`a^ZPG^NUW`\_]¥S\_^YKVN]\_V¥Q[BBBB  
@HWI-EAS443:3:29:1303:951#0/1  
CAAAGCGTCTACGCTGCAGTCCTCGCTCACTGGGCTGTAA  
+HWI-EAS443:3:29:1303:951#0/1  
a`Jbabaaba\_a`^a¥¥a]R]U`]LVKKV¥]\_UNRDR\_B  
@HWI-EAS443:3:30:1787:518#0/1  
AATCAGGCATGAAAACAGAATGGTGCTGGCTAGCAATAAG  
+HWI-EAS443:3:30:1787:518#0/1  
aa`L^`W`[aaaa\_`^`aaaYa^]\_]``ZWS\_\_GWGZKHO  
@HWI-EAS443:3:31:1610:1723#0/1  
GAAAGATGACCTTCTTAAAAATTTGCAGGCCTACCCGCCG  
+HWI-EAS443:3:31:1610:1723#0/1  
`aa`aa`aa\_\_aa`aa\_aaa^\_aa`aa`^^\_aa\_VWa\_]B  
@HWI-EAS443:3:63:1674:268#0/1  
CTGATGGGAATTTTAGGATTTGTGTTACGCTCACCGTGC  
+HWI-EAS443:3:63:1674:268#0/1  
a¥`ZX¥`¥X^^\_a^]a```ZZ`T`]]VWGWWBBBBBBBBB  
@HWI-EAS443:3:7:1191:956#0/1  
GAAAAGAGGGCCTTCTACGGANGGAGTGCCTGAGTCCACT  
+HWI-EAS443:3:7:1191:956#0/1  
\_¥aabbbabba`\_]aaVaaKD¥\_^]\_P¥P`W`XUUM]S  
@HWI-EAS443:3:18:397:451#0/1  
GCAGAGTGCTGTGGATGGTGACGATGGTCATTTTGTCAA  
+HWI-EAS443:3:18:397:451#0/1  
aabbbba\_bbbb`baa`]FZPRSWJO[aXOFV\_\_\_FQUY\_0  
@HWI-EAS443:3:27:1531:92#0/1  
CTAAGGGAATTTTAGGATTTGTGTTACGCTGACCGTGCG  
+HWI-EAS443:3:27:1531:92#0/1  
UbbU\_a[[a`bbba]JZUab`a^^SaZ`^HHPH^\_ZaQN  
@HWI-EAS443:3:39:682:427#0/1  
GGGAATTTTAGGATTTGGGTTACGCTCACCGTGCCAGG  
+HWI-EAS443:3:39:682:427#0/1  
a][NU]aaT`a`QXPUZGSNKY^YVZQTGSSUM^\_UQFWG  
@HWI-EAS443:3:59:43:1736#0/1  
GACAAAATGACCATCGTCAACATCCACAGCAGTCTGCTGG

+HWI-EAS443:3:59:43:1736#0/1  
GZ\_\_abbaabb`¥`b]^X¥ab` `abbXT¥a\_Gbb`WR\_aG  
@HWI-EAS443:3:20:804:1817#0/1  
AATTTTAGGATTTGTGTTACGCTCACCGTGCCAGGGAG  
+HWI-EAS443:3:20:804:1817#0/1  
Zb`\_]\_^`]`¥`aTZY¥¥`aYP\_SPUBBBBBBBBBBBB  
@HWI-EAS443:3:24:1063:1385#0/1  
CTCCCTCATGGACTCAGGCACTCCTTCCGTAGAAGACCC  
+HWI-EAS443:3:24:1063:1385#0/1  
Zbbb\_\_bbba\_Y` `bbba`aa[ba\_baaabab\_ab`^0`X  
@HWI-EAS443:3:2:1509:765#0/1  
AAAGAGGGCCTTCTACGGAAGGAGTGCCTGAGTCCACAAG  
+HWI-EAS443:3:2:1509:765#0/1  
a^\_UU[^¥VKQ\_Z[^X^WN]\_V\_RYQ^XQBBBBBBBBBB  
@HWI-EAS443:3:33:1450:848#0/1  
CCCCTCATGGACTCAGGCACTCCTTCCGTAGAAGGCCGTC  
+HWI-EAS443:3:33:1450:848#0/1  
Q\_\_U\_`W\_\_WYY\_\_¥V^W\_Z^XWUBBBBBBBBBBBBBBB  
@HWI-EAS443:3:35:483:1304#0/1  
CCTTCTGCCTGTTCACCTCGATCCAGCCATCTGTTCCATAG  
+HWI-EAS443:3:35:483:1304#0/1  
ab`aa\_`baa`V`aba`ba`Wa\_X[\_a^^¥S\_W¥a` `SPH  
@HWI-EAS443:3:40:335:601#0/1  
TGGACTCAGGCACTCCTTCCGTAGAAGGCCCTCTTTCCAA  
+HWI-EAS443:3:40:335:601#0/1  
Z[]^¥Uaaaa¥X\_X[```a`YLR^`^S[^XWBBBBBBBBBB  
@HWI-EAS443:3:59:1236:1422#0/1  
CAGGCACTCCTTCCGTAGAAGGCCCTCTTTCAAAGTGT  
+HWI-EAS443:3:59:1236:1422#0/1  
aa\_Z¥babaaba^\_b]a`aaa\_\_Y\_aabbbba]aaWFR` ]\_  
@HWI-EAS443:3:63:838:174#0/1  
CGGGCCTTCTACGGAAGGAGTGCCTGAGTCCATGAGGNAA  
+HWI-EAS443:3:63:838:174#0/1  
abbbba`aaa`aa`^^\_aa`a¥a[```¥X\_V\_¥¥\_ZT][DP^  
@HWI-EAS443:3:76:501:246#0/1  
AGATGGGCCTTCTACGGAAGGAGTGCCTGAGTCCATGAGG  
+HWI-EAS443:3:76:501:246#0/1  
abaababaaaa\_aaaaa`a`\_`^WZ[Y^\_^\_]^^^`W`\_  
@HWI-EAS443:3:79:602:1624#0/1  
CTAAGGGAATTTTAGGATTTGTGTTACGCTCACCGCGCC  
+HWI-EAS443:3:79:602:1624#0/1  
ab¥I¥¥\_`\_`aXXa`^aa`TZS¥S\_`0[¥]GY]]Q]G[PP  
@HWI-EAS443:3:90:546:1254#0/1  
AAAGAGGGCCTTCTACGGAAGGAGTGCCTGAGTCCAGAGG  
+HWI-EAS443:3:90:546:1254#0/1  
```b\_baaabaaa`]a\_a¥]\_a`a[baa^`\_a¥[^Y`\_`a  
@HWI-EAS443:3:91:978:469#0/1  
TTAGGATTTGTGTTACGCTCACCGTGCCAGTGAGGGAG  
+HWI-EAS443:3:91:978:469#0/1  
[a\_Tab\_`b`\_V`a¥b]^W`Ka^RZSb\_`VT\_R]YWEUVa



@HWI-EAS443:3:20:656:13#0/1  
TGGGCCTTCTACGGAAGGAGTGCCTGAGTCCATGAGNGAA  
+HWI-EAS443:3:20:656:13#0/1  
¥¥Y\_¥[aa\_^¥`b^TSYX¥T¥¥VRQYIYUTSXPXRDDL  
@HWI-EAS443:3:100:29:1239#0/1  
AAATGACCATCGTCAACATCCAGAGCACTCTGCTGTTCCCT  
+HWI-EAS443:3:100:29:1239#0/1  
aaa`a^Z¥Z]a\_Y¥\_]Y]``HPG^\_R][¥]BBBBBBBBBB  
@HWI-EAS443:3:12:585:1127#0/1  
GATTTGTGTTACGCTCACCGCGCCAGTGAGCGAGGACT  
+HWI-EAS443:3:12:585:1127#0/1  
aR^^``]aVT\_a\_a`][U`XXF`ZP\_`¥X^aPIZ[\_ZBBB  
@HWI-EAS443:3:14:639:134#0/1  
GGCCTGCAACTTTTCAAGAAGGTCATCTTTCAGACCAGCA  
+HWI-EAS443:3:14:639:134#0/1  
`^VZR¥^XZDQV]RN¥P\_[¥U`UUTPWY\_¥SYR[WRZXLV  
@HWI-EAS443:3:14:846:1418#0/1  
AATCCACAATATCAGGTGCAAGCTCCCAATGATATTTGCT  
+HWI-EAS443:3:14:846:1418#0/1  
^[\_b```^^\_a[`aa`TUVZZ¥HY\_\_a]\_^V[UY[UNRKT  
@HWI-EAS443:3:15:411:531#0/1  
GGACTGCAGCGTAGACGCTTTGTCCAAAATGACCTAAATG  
+HWI-EAS443:3:15:411:531#0/1  
^R[\_U`W¥ROY\_\_NT0^XYa¥RHZa¥F]JFRJNZV[VUZP  
@HWI-EAS443:3:16:1124:1248#0/1  
GCCTTCTACGGAAGGACTGCCTGAGTCCATGAGGGAAGAA  
+HWI-EAS443:3:16:1124:1248#0/1  
aaaabaa\_\_aa`^a`Y¥MTTU^UW]WWTY¥¥TW¥WS¥TW^  
@HWI-EAS443:3:16:1596:597#0/1  
GCCTTCTACGGAAGGAGTGCCTGAGTCCATGAGGGGAGAA  
+HWI-EAS443:3:16:1596:597#0/1  
`I¥X[PYVT][MN`\_Y\_K\_[W\_\_K[MY\_SYODRXVFQ¥BB  
@HWI-EAS443:3:18:1141:548#0/1  
GGCCTTCTACGGAAGGAGTGCCTGAGTCCATGAGGTAAGA  
+HWI-EAS443:3:18:1141:548#0/1  
aba\_aaaa\_\_ba\_aa`\_`W\_¥`aa``VV\_^\_^¥\_aY¥`\_W  
@HWI-EAS443:3:21:824:267#0/1  
ATTTTCAAGAAGGTCATCTTTCAGACCAGCACTGCAGCTA  
+HWI-EAS443:3:21:824:267#0/1  
¥RR¥a^NYOX¥]S]¥LP]\_[UZ[UTO^SNX\_UVTDQSSR  
@HWI-EAS443:3:23:1776:1153#0/1  
TGCAAATTTTCAAGAAGGTCATCTTTCAGACGAGCACTGG  
+HWI-EAS443:3:23:1776:1153#0/1  
]\_HVXGWa`aXa\_a\_]aba\_\_\_0\_[aZa¥aTG]YLZQ```^  
@HWI-EAS443:3:27:721:997#0/1  
TCACGCTCACCGCGCCAGTGAGCGAGGACTGCAGCGTAG  
+HWI-EAS443:3:27:721:997#0/1  
Z^Z\_T\_PY\_aaXLHZ[¥`[L[]UQVT[`YWMWS[ZRTBBB  
@HWI-EAS443:3:28:1317:524#0/1  
TGTTGACAAAATGACCATCGTAAACATCCACAGCACTCTG

+HWI-EAS443:3:28:1317:524#0/1  
`VY¥YZabbb`[a`[a\_]aTH\_aR\_ZS[¥U`U`W\_Q`^  
@HWI-EAS443:3:28:810:1921#0/1  
GGGAATTTTAGGATTTGTGTTACGCTCACCTGCCAGT  
+HWI-EAS443:3:28:810:1921#0/1  
`aa`b`]`aaba¥[`aa\_Qa\_\_abaSaM\_a^ODN¥]]\_XQR  
@HWI-EAS443:3:30:1509:1696#0/1  
GTAGGGCTAGCCAGCACCATTCTGTTTTCATGCCTGATTA  
+HWI-EAS443:3:30:1509:1696#0/1  
aZWRD[\_a[L]aYPUVWXR^¥Y`W]¥\_WZ¥TV^W¥¥WYV  
@HWI-EAS443:3:30:67:1827#0/1  
CTTCCCCATGGACTCAGGCACTCCTTCCGTAGAAGGCC  
+HWI-EAS443:3:30:67:1827#0/1  
ababa¥Q`]]ba\_`a`WQ\_`bb`a\_RZ``]]T[Y]XZ¥Y`a  
@HWI-EAS443:3:31:1502:932#0/1  
GCTGGTATGAAAGATGACCTTCTTGAAAATTTGCAGGCCT  
+HWI-EAS443:3:31:1502:932#0/1  
S`R`^F^O[\_X\_ZS¥\_Z\_[WW`\_NM]¥Za\_ZXaa]]ZW[  
@HWI-EAS443:3:31:1589:220#0/1  
TAAGGGAATTTTAGGATTTGTGTTACGCTCAACGTGCC  
+HWI-EAS443:3:31:1589:220#0/1  
aU¥WSa`Y\_bb`¥b]Q]]b\_FYXa``¥\_aa]ZDU[P\_QQQ  
@HWI-EAS443:3:31:360:1042#0/1  
TGCAAATTTTCAAGAAGGTCATCTTTCAGACCCGCACTGG  
+HWI-EAS443:3:31:360:1042#0/1  
W`¥YQQ\_b`¥¥QV\_¥aa`¥\_baa`\_bba\_¥Z\_J^]¥\_^R[  
@HWI-EAS443:3:33:511:482#0/1  
GAAAAGAGCGCCTTCTACGGAAGGAGTGCCTGAGTCCATG  
+HWI-EAS443:3:33:511:482#0/1  
a`baab\_ZTWa\_\_^UY`¥\_\_X¥^WUTINGWUSW¥WUUPWU  
@HWI-EAS443:3:36:41:404#0/1  
CTCTGACTAAGGGAATTTTGGATTTGTGTTACGCTCAC  
+HWI-EAS443:3:36:41:404#0/1  
abbaabbbbbbb`abbbbaaaaabaa`a\_`aaa`aU\_[¥  
@HWI-EAS443:3:37:467:1637#0/1  
GGAATTTTAGGATTTGTGTTACGCTCACGGTGCCAGTG  
+HWI-EAS443:3:37:467:1637#0/1  
`aabbaaaa`a`aa[^aV`aaXa¥^`¥DNRVa^`VTQ]  
@HWI-EAS443:3:37:749:1700#0/1  
GTTGACAAAATGACCATCGTCAACATCCAAAGCACTCTGC  
+HWI-EAS443:3:37:749:1700#0/1  
aaXN]`[`ab]a¥a]^W^]Z`VVWTY`YPFSZ`[`QTU\_^  
@HWI-EAS443:3:3:228:170#0/1  
ATTTGTGTTACGCTCACCGTGCCAGAGAGCGAGGACTG  
+HWI-EAS443:3:3:228:170#0/1  
`baabaaaZZ\_WLYY[ZRT[XSXRG[MQUVBBBBBBBBBBB  
@HWI-EAS443:3:3:880:444#0/1  
ACAATATCAGGTGCAAGATCACAATGATATTTGCTGCAAT  
+HWI-EAS443:3:3:880:444#0/1  
]UWZ]]a[Y[aZ]PY]MYZQFV¥W\_`NS¥`W][EW\_] [YV

@HWI-EAS443:3:43:646:1101#0/1  
TTTTAGGATTTGTGTTACGCTCAGCGTGCCCGAGTGAGCG  
+HWI-EAS443:3:43:646:1101#0/1  
Zb¥]\_ZZST\_aYT^R\_ZT^`^RS]PFXaSXIHKYXH^TNSB  
@HWI-EAS443:3:46:1347:1137#0/1  
AGAAGGTCATCTTTCAGACCAGCACTGGGGCTAGGATGAG  
+HWI-EAS443:3:46:1347:1137#0/1  
^b[bb]\_¥¥bb[Y\_`a]ITSba\_[J\_abb`\_a[a¥HVaz[  
@HWI-EAS443:3:49:1041:1161#0/1  
GACTAAGGGAATTTTAGGATTTGTGTTCCCGCTCACCGTG  
+HWI-EAS443:3:49:1041:1161#0/1  
a\$¥\_`]b\_`[G`ZSV`\_]\_]a]W^¥MQHPWNLTUWSUBB  
@HWI-EAS443:3:4:107:1667#0/1  
GACAAAATGACCATCGGCAACATCCACAGCACTCTGCTGT  
+HWI-EAS443:3:4:107:1667#0/1  
aa¥\_XZ`Xaab^FTZN`T[[¥0]QU¥]b[]`S]U\_aaBB  
@HWI-EAS443:3:4:1511:449#0/1  
GACAAAATGACCATCGTCAACATCGACAGCACTCTGCTGT  
+HWI-EAS443:3:4:1511:449#0/1  
V¥Y]ababa`UV\_aHUM[a\_```UYTH`VTXYaS`NHV[P  
@HWI-EAS443:3:4:775:1296#0/1  
AGAGGGCCTTCTACGGAAGGAGCGCCTGAGTCCATGAGGG  
+HWI-EAS443:3:4:775:1296#0/1  
ab]][`ZV[^S]``\_TX^\_Y^SDRKT^PP^URHDP¥M\_BB  
@HWI-EAS443:3:53:1280:515#0/1  
AAATGACCATCGACAACATCCACAGCACTCTGCTGTTCCCT  
+HWI-EAS443:3:53:1280:515#0/1  
U[SZbb[`]RWDSZYQY[^K`\_`V\_^HaGaa]\_aa]XP]  
@HWI-EAS443:3:53:1303:520#0/1  
CTTCCCTCATGGACTCAGACACTCCTTCCGTAGAAGGCCC  
+HWI-EAS443:3:53:1303:520#0/1  
`bbb`\_abab]`babbb`[^abab^bba^`\_bb`bbb\_b`  
@HWI-EAS443:3:55:1791:1466#0/1  
ATTTGTGTTACGCTCACCGTGCCCCGTGAGCGAGGACTG  
+HWI-EAS443:3:55:1791:1466#0/1  
a`aa`X¥]``aa]^BBBBBBBBBBBBBBBBBBBBBBBBBBB  
@HWI-EAS443:3:56:12:391#0/1  
CAAGAAGTCCTCTTTCAGACCAGCACTGGAGCTAGGATG  
+HWI-EAS443:3:56:12:391#0/1  
a`]aa[abZ^FZ`a]V\_a^`R^¥[\_[S]QV\_]QXRY\_QV  
@HWI-EAS443:3:56:1617:267#0/1  
CAAAATGACCATCGTCAACATCCACAGCACTCTCCTGTTC  
+HWI-EAS443:3:56:1617:267#0/1  
Wa`baba`U[a¥TUH^a`NZ]YX¥K[XSZ^\_[UDK^[ZHJ  
@HWI-EAS443:3:59:1521:394#0/1  
GTTGACAAAATGACCATCGTCAACATCCACAGCACACTGC  
+HWI-EAS443:3:59:1521:394#0/1  
a\_\_a¥``aa\_`U^`\_Y\_MS¥^G`W\_`¥S¥VBBBBBBBBB  
@HWI-EAS443:3:61:795:1005#0/1  
ATCCTAGCTCCAGTGCTGGTCTGAAAGATCACCTTCTTGA

+HWI-EAS443:3:61:795:1005#0/1  
aV\_W\_ZZ`¥` ]aXZYI¥]QQYMRQ[ZYXDDQYFSRVVWW]  
@HWI-EAS443:3:63:1765:1947#0/1  
GGCCTTCTACGGAAGGAGTGCCTGTGCCATGAGGGAAGA  
+HWI-EAS443:3:63:1765:1947#0/1  
`a`^\_¥¥¥` `ab\_a`^U\_S]Y^\_X`MTZQWYP\_aSHNaU  
@HWI-EAS443:3:69:1486:935#0/1  
GTGCCCAGTGAGCGAGGACTGCAGCGTAGTCGCTTTGTCC  
+HWI-EAS443:3:69:1486:935#0/1  
a^a^aba]\_baaaaaZaaYab¥` [¥b¥` a^¥]a^]\_a¥^W  
@HWI-EAS443:3:69:1721:901#0/1  
CCAGTGCTGGTCTGAAACATGACCTTCTTGAAAATTTGCA  
+HWI-EAS443:3:69:1721:901#0/1  
aaaaabbbbaabbbbbb\_P]` `aaaaabaaaaaaaa\_`` `a  
@HWI-EAS443:3:69:466:462#0/1  
CTGACTAAGGGAATTTTAGGATTTGGGTTCCACGCTCACCG  
+HWI-EAS443:3:69:466:462#0/1  
`\_U[`\_]¥a¥IY[Y]b]a^[`MYaZG\_[\_YVL]`U]SR[]  
@HWI-EAS443:3:73:1421:1403#0/1  
GAAAAGAGGGCCTTCTACGGAAGGAGGGCCTGAGTCCATG  
+HWI-EAS443:3:73:1421:1403#0/1  
a\_a]X` `[L[Z[\_]UHRJNOR[YYSNPSHSR]XRKXVTV  
@HWI-EAS443:3:73:1513:1350#0/1  
TAGGATTTGTGTTACGCTCACCGCGCCCAGTGAGCGAGG  
+HWI-EAS443:3:73:1513:1350#0/1  
a\_R`^a`\_aSV]`¥`^a[LQX¥W[DIYUXX`BBBBBBBBB  
@HWI-EAS443:3:77:1310:984#0/1  
CAAAATGACCATCGTCAACATCCACAGGACTCTGCTGTTC  
+HWI-EAS443:3:77:1310:984#0/1  
a`a\_P`\_`^`\_a]a[M¥ZNZ`\_`UOM¥LRZ]ZBBBBBBBB  
@HWI-EAS443:3:7:503:336#0/1  
AAAATGACCATCGTCAACATCCAAAGCACTCTGCTGTTC  
+HWI-EAS443:3:7:503:336#0/1  
^QXXO\_W\_aaaaUPN]]Y¥NXBBBBBBBBBBBBBBBBBBB  
@HWI-EAS443:3:81:306:555#0/1  
CCCTCATGGACTCAGGCACTCCTTCCGTAGCAGGCCCTCT  
+HWI-EAS443:3:81:306:555#0/1  
`NMU¥U\_]OMS\_Z`^00^aTX^L[¥L¥PRZHMXYBBBBBB  
@HWI-EAS443:3:81:389:50#0/1  
GACTAAGGGAATTTTAGGATTTGTGTTCCGCGCTCACCGTG  
+HWI-EAS443:3:81:389:50#0/1  
aa\_a^¥aaa^\_a`^Y`\_W`\_]`W`WUU^W^¥U¥UUUY¥  
@HWI-EAS443:3:83:1303:1066#0/1  
GGCATTGACAAAGCGTCTACACTGCAGTCCTCGCTCA  
+HWI-EAS443:3:83:1303:1066#0/1  
\_b`\_`\_W¥`X`]aa`a`V\_YT^ZQKU\_aTVZTJWYRX¥^P¥  
@HWI-EAS443:3:84:1584:598#0/1  
GAGGGCCTTCTACGGAAGGAGTGCCTGAGTCCACGAGGGA  
+HWI-EAS443:3:84:1584:598#0/1  
a\_aaaa\_aa^aaaa\_a`TOZZaXTI` [``Z¥¥P¥TZ¥^Q

@HWI-EAS443:3:85:244:1368#0/1  
CCCTCATGGCCTCAGGCACTCCTTCCGTAGAAGGCCCTCT  
+HWI-EAS443:3:85:244:1368#0/1  
abb`^``VI^a`\_[aaa\_aa`Z`\_W^Z\_\_QP[`V^W  
@HWI-EAS443:3:87:1690:500#0/1  
GATTTGTGTTACGCTCACCGTGCCAGGGAGCGAGGACT  
+HWI-EAS443:3:87:1690:500#0/1  
]GR¥YV]UVUVN00T¥]^REYU^[RZKEDVU¥T`R¥^\_BB  
@HWI-EAS443:3:89:1285:1104#0/1  
AAAATGACCATCGTCAACATCCACAGCACTCTGGTGTCC  
+HWI-EAS443:3:89:1285:1104#0/1  
`bZ`[^b`¥aU`\_]\_UW\_]^[`[D^b\_aa\_¥\_`G^aVXLK  
@HWI-EAS443:3:89:1361:246#0/1  
AATACATTTGAAAAAAGACGATCAGGAATCCACAATATC  
+HWI-EAS443:3:89:1361:246#0/1  
XX¥Y\_¥`XbbLUXXUIY^)`b``\_\_\_I\_abFD[¥^`]b^V  
@HWI-EAS443:3:90:1267:1592#0/1  
ATACATTTGAAAAAAGACGATCAGGAATCCACAATATCA  
+HWI-EAS443:3:90:1267:1592#0/1  
a`X`baLY^aba^\_aa]\_J`^`\_[QIaaPZ^^V`Ra`[`  
@HWI-EAS443:3:90:326:202#0/1  
TAGGCCTGCAAATTTCAAGAAGGCATCTTTCAGACCAG  
+HWI-EAS443:3:90:326:202#0/1  
U\_X0\_¥\_S\_\_ZX\_[aZPHYaZW\_SS¥¥YU\_¥X\_]aOHT^`  
@HWI-EAS443:3:91:1743:1556#0/1  
ATCCCCTCAGGCCCTCAAAGCCGAGATGGCGCAGAGAC  
+HWI-EAS443:3:91:1743:1556#0/1  
V[MM]ZVR[ZTMNQVWV]^WOWQW`U`[RDZQODFV]^QL  
@HWI-EAS443:3:91:429:54#0/1  
GGGAATTTTAGGATTTGTGTTACGCGCACCGTGCCCACT  
+HWI-EAS443:3:91:429:54#0/1  
`baTX¥Y^Z[aaW^\_\_a¥`U]UTT^PKNFTWWSUWUUSWG  
@HWI-EAS443:3:93:1398:1357#0/1  
AGGGCCTTCTACGGAAGGAGTGCCTGAGACCATGAGGGAA  
+HWI-EAS443:3:93:1398:1357#0/1  
``abYaaaaaaaaaaaa^\_S`¥```GP^\_\_a\_\_]RPa  
@HWI-EAS443:3:94:1045:1109#0/1  
TGTCACCTCTGACTAAGGAATTATAGGATTTGTGTTAC  
+HWI-EAS443:3:94:1045:1109#0/1  
Saa\_Z\_QX]ZXV^Y^^`a\_RQ[aab]b\_Za¥Xa`bZPV\_a  
@HWI-EAS443:3:97:1382:887#0/1  
TGCAAATTTTCAAGTAGGTCATCTTTCAGACCAGCACTGG  
+HWI-EAS443:3:97:1382:887#0/1  
aa¥a`b`¥`]`\_aGUa\_ZN\_[\_aa`U^¥\_NNZMR\_]`a^  
@HWI-EAS443:3:97:1465:156#0/1  
GACAAAATGACCATCGTCAACATCCACAGCAATCTGCTGT  
+HWI-EAS443:3:97:1465:156#0/1  
abNbaa]aaaQZaa[bR`\_`\_Va\_]W¥WY`O\_G\_R\_]\_XZ^  
@HWI-EAS443:3:98:785:1941#0/1  
GAGGACTGCAGCGTAGACGCTGTGTCCAAAATGCCCTAAA

+HWI-EAS443:3:98:785:1941#0/1  
`\_Z^Z]aVaQRXUaa]a\_NHGZ[^U[a^^\_U\_Q[[BBBB  
@HWI-EAS443:3:21:236:241#0/1  
GATGACCTTCTTGAAAATTTGCAGGCCTACCAGAAACAAG  
+HWI-EAS443:3:21:236:241#0/1  
a`[^a^a`a`V¥\_`]]`\_[[Z[[\_\_\_\_`^\_\_^]]^]S\_  
@HWI-EAS443:3:44:19:680#0/1  
ATACTTCCCTCATGGACTCAGGCACTCCTTCCGTAGAAGG  
+HWI-EAS443:3:44:19:680#0/1  
a`QZbba`bba`b`aaaa¥[a`\_`aaa`]^]¥`[V\_X^  
@HWI-EAS443:3:46:1137:1603#0/1  
GGGCCTTCTACGGAAGGAGTGCCTGAGTCCATGAGGGNAG  
+HWI-EAS443:3:46:1137:1603#0/1  
aaaXabba]a`ab`\_aba\_\_^\_\_a^aa^U^Za`\_`aYD¥\_  
@HWI-EAS443:3:4:1388:950#0/1  
GANAAAATGACCATCGTCAACATCCACAGCACTCTGCTGT  
+HWI-EAS443:3:4:1388:950#0/1  
aTD¥\_a\_aa`[Y\_^[aH]VW^Z\_^]PX`Z]WV`¥\_]O]YY  
@HWI-EAS443:3:50:1096:1702#0/1  
TGGGCCTTCTACGGAAGGAGTGCCTGAGTCCATGAGGGGA  
+HWI-EAS443:3:50:1096:1702#0/1  
aba^OVU`WWTINZXRZVF\_ROLXTWFXGYZP^WZXZVGO  
@HWI-EAS443:3:52:1234:1253#0/1  
GGNAATTTTAGGATTTGTGTTACGCTCACCGTGCCCGAGT  
+HWI-EAS443:3:52:1234:1253#0/1  
a^DX`abaaaa`aaaa^a\_aa]Y]\_^PTUUX[¥[[SSVS  
@HWI-EAS443:3:59:1196:454#0/1  
GAGAGGATCACTTGAATCGCTGTATCTGCACTCCCATGAT  
+HWI-EAS443:3:59:1196:454#0/1  
\_`baabaaabaab`aaba\_aaa\_aaaabaWY¥^¥^NSaZ\_  
@HWI-EAS443:3:78:1385:1310#0/1  
AGGGAATTTTAGGATTTGTGTTACGCTCACCGTGCCGAG  
+HWI-EAS443:3:78:1385:1310#0/1  
a`[Zaa]aa`^[UY\_Xa`RZS[\_aUHaa¥VX`PQ[\_VPDPX  
@HWI-EAS443:3:90:143:1195#0/1  
GCAGAGTGCTGTGGATGTTGACGATGGTCATTTTGTCCAC  
+HWI-EAS443:3:90:143:1195#0/1  
aa¥Z\_`W¥\_bb^a`R¥aURK]\_¥LW[YEEOT`BBBBBBBB  
@HWI-EAS443:3:100:1318:1276#0/1  
AAAGAGNGCCTTCTACGGAAGGAGTGCCTGAGTCCATGAG  
+HWI-EAS443:3:100:1318:1276#0/1  
aaaa[[D¥aaaa`aaaaZ`aaQ\_¥]GR\_\_^`QUWZ[[Q^  
@HWI-EAS443:3:12:1678:1738#0/1  
AAATGACCATCGTCAACATCCACAGCACTCTGCTNTTCCT  
+HWI-EAS443:3:12:1678:1738#0/1  
`aaabb^¥aaY\_\_\_\_]YUaaXY^^^QFVZ^^^0^XSDTXW]X  
@HWI-EAS443:3:28:1338:1285#0/1  
GGACTCAGGCACTCCTTCNGTAGAAGGCCCTCTTTTCAAA  
+HWI-EAS443:3:28:1338:1285#0/1  
\_`aaaa\_aaab`a^`aa^DX]`aa`\_\_`\_[-T\_`^^`\_\_`[

@HWI-EAS443:3:32:1028:208#0/1  
TTGACAAAATGACCATCGTCNACATCCACAGCACTCTGCT  
+HWI-EAS443:3:32:1028:208#0/1  
\_abaa]a]Y^¥]] [[`\_]JPDZZSYQVXT[VLWLXQW[RR  
@HWI-EAS443:3:34:127:171#0/1  
AAAATGACCATCGTCAACATCCACAGCACTCTGNTGTTCC  
+HWI-EAS443:3:34:127:171#0/1  
`aa]`\_`aaa¥\_aXa\_\_^\_a^]\_a¥\_] ^Z^]PDTXZZXZ  
@HWI-EAS443:3:34:512:164#0/1  
CTTCTACGGAAGGAGTGCCTGAGTCCATNAGGGAAGAATA  
+HWI-EAS443:3:34:512:164#0/1  
aZb`UUbbaRSb`[\_L^W^a\_Wa\_aIXWDUT\_\_]a^WVZ\_  
@HWI-EAS443:3:47:889:1165#0/1  
GATTTGTGTNCACGCTCACCGTGCCAGTGAGCGAGGACT  
+HWI-EAS443:3:47:889:1165#0/1  
TTW\_X^]bYDWb\_Z\_RWJRR]VRQLV¥MLYBBBBBBBBBB  
@HWI-EAS443:3:54:668:645#0/1  
GGGCCTTCTNCGGAAGGAGTGCCTGAGTCCATGAGGGAAG  
+HWI-EAS443:3:54:668:645#0/1  
aaaa\_`bbYDVba\_ab`a[aX`]`a`X]a\_a\_V\_a`^] ^  
@HWI-EAS443:3:69:800:159#0/1  
ATTCTTCCCTNATGGACTCAGGCACTCCTTCCGTAGAAGG  
+HWI-EAS443:3:69:800:159#0/1  
]]\_¥¥aa^WYD]Z¥W[a\_`]`Yaaaaaa^ [^U[\_¥U\_Y  
@HWI-EAS443:3:72:806:1104#0/1  
GAATTTTGNATTTGTGTTCCAGCTCACCGTGCCAGTGA  
+HWI-EAS443:3:72:806:1104#0/1  
\_\_\_`¥`a`¥D^ab\_`a\_a`aaaa¥`\_a\_[[a\_]^^\_UZ^  
@HWI-EAS443:3:75:1095:862#0/1  
CGCTCACCGTGNCCAGTGAGCGAGGACTGCAGCGTAGACG  
+HWI-EAS443:3:75:1095:862#0/1  
`ab^Q¥aaa\_RD^a`bYab\_aaab`\_^ab^aa`b^aa`Mb  
@HWI-EAS443:3:76:1146:1110#0/1  
GTCAACATCCACAGCACTCTGCTGTTCCCTGNTGATATTCT  
+HWI-EAS443:3:76:1146:1110#0/1  
a\_a`\_X\_\_\_\_^`^`Z`Z^[^\_\_\_\_[W\_W¥`ZDU\_^^W\_¥UY  
@HWI-EAS443:3:92:1301:1292#0/1  
TGCAAANTTTCAAGAAGGTCATCTTTTCAGACCAGCACTGG  
+HWI-EAS443:3:92:1301:1292#0/1  
aaaabWD^aa]aaa`\_`a\_aaa\_aaa¥a`YVa^`\_V\_`]  
@HWI-EAS443:3:97:699:1642#0/1  
GAATTTTAGGATTTGTGTTCCAGCTNACCGTGCCAGTGA  
+HWI-EAS443:3:97:699:1642#0/1  
``aaab\_a]aaaaaM¥\_[\_`]NZNDU¥]\_¥^[R[V\_V`¥  
@HWI-EAS443:3:13:1092:946#0/1  
CTATGTTGACAAAATGACCATCGTCAACATCCACAGCAAT  
+HWI-EAS443:3:13:1092:946#0/1  
a][[WQ][[WSbSI^S]SXX¥aTaP`a\_BBBBBBBBBBBBB  
@HWI-EAS443:3:21:1222:38#0/1  
TGTCCTCATGGACTCAGGCACTCCTTCCGTAGAAGGCC

+HWI-EAS443:3:21:1222:38#0/1  
abW[^^XLVWO[Z[a^[P[^]W¥ZZNWPbMV^G¥]^BBB  
@HWI-EAS443:3:21:840:1811#0/1  
TGCAAATTTTCAAGAAGGTCATCTTTCAGACCAGCACTTA  
+HWI-EAS443:3:21:840:1811#0/1  
^`aS^aa[]^a^YH[PL[WS\_[Y]^TX¥¥`¥a`[\_TX  
@HWI-EAS443:3:22:1780:1108#0/1  
TNGGATTTGTGTTACGCTCACCGTGCCAGTGAGCGAGG  
+HWI-EAS443:3:22:1780:1108#0/1  
VD¥a`\_ab\_`Za`\_]`Z]]XQXUW`X`XSMMXUWVSP^¥]B  
@HWI-EAS443:3:33:413:564#0/1  
ATGGACTCATCCTAGCTCCAGTGCTGGTCTGAAAGATGAC  
+HWI-EAS443:3:33:413:564#0/1  
aM`U[aaaa\_aa``a¥a`aa0a\_`Y`¥\_\_`\_]`^YUVS¥\_  
@HWI-EAS443:3:39:1280:152#0/1  
GTCGGTCTCCATTCCCATTAGGGCATTGACAAAGA  
+HWI-EAS443:3:39:1280:152#0/1  
aQVG[aYRY¥X]RU¥URZNRIMRQWQX^BBBBBBBBBBB  
@HWI-EAS443:3:3:766:68#0/1  
GATTTGTGTTACGCTCACCGTGCCAGTGAGCGAGGAGC  
+HWI-EAS443:3:3:766:68#0/1  
\_`R]`\_0]`¥¥]ZULPPTPK`RXPBBBBBBBBBBBBBBB  
@HWI-EAS443:3:40:1357:1130#0/1  
ANAATGACCATCGTCAACATCCACAGCACTCTGCTGTCC  
+HWI-EAS443:3:40:1357:1130#0/1  
UD]\_`bbaaaaab`^^aba^\_\_]^\_\_`a^[\_U`a\_TZ[K  
@HWI-EAS443:3:46:763:192#0/1  
GTTTGAAGAGGGCCTTCTACGGAAGGAGTGCCCTGAGGC  
+HWI-EAS443:3:46:763:192#0/1  
\_U]`XQ¥[S`¥^a\_W\_NV[RVV[\_WU^BBBBBBBBBBBBB  
@HWI-EAS443:3:52:326:1702#0/1  
ACGGCCTGCAAATTTTCAAGAAGGTCATCTTTCAGACCAG  
+HWI-EAS443:3:52:326:1702#0/1  
`a\_aa¥\_XZ\_W]\_aaaZ¥¥^`a¥XNY`aW^X`Z[\_RFYY  
@HWI-EAS443:3:56:998:1024#0/1  
GGAATTTTAGGATTTGTGTTACGCTCACCGTGCCAGAG  
+HWI-EAS443:3:56:998:1024#0/1  
aa`]abab\_a^T^aaa¥``\_a`¥\_\_TUPPZZR[NBBBBBB  
@HWI-EAS443:3:6:1402:339#0/1  
CTCAGGCACTCCTTCCGTAGAAGGCCCTTTTCAAACAG  
+HWI-EAS443:3:6:1402:339#0/1  
`babb\_bbbbaabb``ababbab`a`abababbaababGa  
@HWI-EAS443:3:6:273:342#0/1  
ACGGCCCTTCTACGGAAGGAGTGCCCTGAGTCCATGAGGGA  
+HWI-EAS443:3:6:273:342#0/1  
a[\_a\_V\_^\_Q\_Z[\_^T¥\_]U¥U[WQU¥W\_HUWU¥¥WB BBB  
@HWI-EAS443:3:70:1277:114#0/1  
AGGCTATGGAACAGATGGCTGGATCGAGTGAACAGGCAAC  
+HWI-EAS443:3:70:1277:114#0/1  
`\_a\_aaabba``aaaa`aQ]`aIYHXP\_]aaZ]YS\_]aG



@HWI-EAS443:3:79:509:1902#0/1  
GGCTCAGGCACTCCTTCCGTAGAAGGCCCTCTTTTCAAAC  
+HWI-EAS443:3:79:509:1902#0/1  
aZ]]`\_Z^aa]U`a]Ya]WJGWS[ULU\_¥N¥]T^MXG^YP  
@HWI-EAS443:3:85:846:1533#0/1  
ATTTGTGTTACGCTCACCGTGCCAGTGAGCGAGGACAG  
+HWI-EAS443:3:85:846:1533#0/1  
aaa`]]`\_]T]baVaM¥^V[^]a[[ZXVXY^¥[^^]WZRDR  
@HWI-EAS443:3:89:1277:1490#0/1  
GTATCCACAATATCAGGTGCAAGATCCCAATGATATTTGC  
+HWI-EAS443:3:89:1277:1490#0/1  
a^aY`ab^^¥aaa`a\_bZ``aaa`a[RX\_a\_aa\_``aZ`N  
@HWI-EAS443:3:95:1399:1724#0/1  
CATGGTAGGCCTGCAAATTTTCAAGAAGGTCATCTTTCAG  
+HWI-EAS443:3:95:1399:1724#0/1  
ab]b`Wbbb``ab`abbbbbbabbbbab`aaabba\_a^  
@HWI-EAS443:3:13:796:957#0/1  
TGGCCTTCTACGGAAGGAGTGCCTGAGTCCATGAGGGAA  
+HWI-EAS443:3:13:796:957#0/1  
]aL^¥]]``b`abbaabaX`V`[VX[V\_YS`\_[XY][X^\_  
@HWI-EAS443:3:17:875:296#0/1  
CGGCCTGCAAATTTTCAAGAAGGTCATCTTTCAGACCAGC  
+HWI-EAS443:3:17:875:296#0/1  
abaaaaaaaaaaaa`aaaa\_a`[a`\_`a`a¥a``^]\_\_Z  
@HWI-EAS443:3:18:215:50#0/1  
CAGGGCCTTCTACGGAAGGAGTGCCTGAGTCCATGAGGGGA  
+HWI-EAS443:3:18:215:50#0/1  
abbababbbUa^bbabbbbab`bba``XZ\_aaaa`abaa  
@HWI-EAS443:3:19:899:1012#0/1  
GTTCTTCCCTCATGGACTCAGGCACTCCTTCCGTAGAAGG  
+HWI-EAS443:3:19:899:1012#0/1  
a¥W]^¥X`]ZPPQ`YMGS]]`\_[X[[ZWUPUSSQTRUYUV  
@HWI-EAS443:3:21:419:1045#0/1  
AGGCTATGGAACAGATGGCTGGATCGAGTGAACAGGCAGA  
+HWI-EAS443:3:21:419:1045#0/1  
¥Xaa0S\_VTX[ZHVTaaWXTVVOP¥JFW]]`X[HXaZWB  
@HWI-EAS443:3:24:1148:1154#0/1  
GGGACTCATCCTAGCTCCAGTGCTGGTCTGAAAGATGAC  
+HWI-EAS443:3:24:1148:1154#0/1  
`^`aa]bbbb`abbaaa`Xa][ab¥[X[Ua`Y]]Z^^\_]X  
@HWI-EAS443:3:25:1214:1564#0/1  
GAAAATGACCATCGTCAACATCCACAGCACTCTGCTGTTC  
+HWI-EAS443:3:25:1214:1564#0/1  
L\_Zaba]a]bbbab]]`¥¥N\_¥]¥aZbaaV`¥GXbaa^PaX  
@HWI-EAS443:3:33:796:912#0/1  
CGAGGGCCTTCTACGGAAGGAGTGCCTGAGTCCATGAGGG  
+HWI-EAS443:3:33:796:912#0/1  
aaaaaaaaaaaa`aaaa\_a`¥`\_\_`\_¥\_W¥S¥\_`¥[\_]  
@HWI-EAS443:3:35:186:1538#0/1  
TGGACTCAGGCACTCCTTCCGTAGAAGGCCCTCTTTTCAC

+HWI-EAS443:3:35:186:1538#0/1  
aaabba\_[]`abbbbbbaaba^\_ZX^^`\_bbb\_b¥`aabXJ  
@HWI-EAS443:3:38:1261:275#0/1  
CTAAGGGAATTTTAGGATTTGTGTTACGCTCACCGTGCG  
+HWI-EAS443:3:38:1261:275#0/1  
^Z¥b``Z]\_\_`aa`b`^Wa^X¥ZU`WWPYS`¥QPS¥aSD  
@HWI-EAS443:3:3:1306:1952#0/1  
CGGGCCTTCTACGGAAGGAGTGCCTGAGTCCATGAGGGAA  
+HWI-EAS443:3:3:1306:1952#0/1  
^bbaa`a`aaa[bba``\_a^`Xa`b[aRKT\_``¥aaaZ^  
@HWI-EAS443:3:40:688:1085#0/1  
TTCCAGTCTCTGCGGATCTCGGCTTTGAGGGGCCTGAG  
+HWI-EAS443:3:40:688:1085#0/1  
^a¥Z`^X^TMZ^^\_T]WT][`^ZLTBBBBBBBBBBBBBBB  
@HWI-EAS443:3:42:202:369#0/1  
CGGGCCTTCTACGGAAGGAGTGCCTGAGTCCATGAGGGAA  
+HWI-EAS443:3:42:202:369#0/1  
abaaaaabaabaaaa`^a^X^¥a`^\_`[\_W`W^^[aa\_YY  
@HWI-EAS443:3:42:442:1891#0/1  
GGGGCCTTCTACGGAAGGAGTGCCTGAGTCCATGAGGGAA  
+HWI-EAS443:3:42:442:1891#0/1  
`\_] [aabaa`baa`b`KW\_`aT`a`\_¥]V``\_`FZZa  
@HWI-EAS443:3:46:72:358#0/1  
TGCGTCTACGCTGCAGTCCCTCGCTCACTGGGCACGGTGAG  
+HWI-EAS443:3:46:72:358#0/1  
a`a``aaa¥]\_\_\_[]a`^Z\_aa\_]¥V\_]\_\_\_]U[\_W\_[]  
@HWI-EAS443:3:47:1240:1687#0/1  
ACTTCCCTCATGGACTCAGGCACTCCTTCCGTAGAAGGCC  
+HWI-EAS443:3:47:1240:1687#0/1  
]]bb``W]a\_\_XN\_^^`XTOZ]Z¥S\_^]\_]\_]R^a]00  
@HWI-EAS443:3:48:1669:170#0/1  
GGGGCCTTCTACGGAAGGAGTGCCTGAGTCCATGAGGGAA  
+HWI-EAS443:3:48:1669:170#0/1  
aaaa^^a^¥\_^^a`W¥a`W\_V\_TTW[RZWWWTWZS¥U^UU  
@HWI-EAS443:3:49:1615:265#0/1  
TTCCCCTCAGGCCCCCTCAAAGCCGAGATCGCGCAGAGAC  
+HWI-EAS443:3:49:1615:265#0/1  
Zba`W^Waa`^XXR¥ZXV\_aVVRVW]¥NYKYQLUSBBBBB  
@HWI-EAS443:3:50:93:1224#0/1  
TGGCCTTCTACGGAAGGAGTGCCTGAGTCCATGAGGGAAG  
+HWI-EAS443:3:50:93:1224#0/1  
a\_Zaaaa\_]`ab\_\_b`Z¥¥\_WW`a[\_\_\_T¥\_aa[aaaQ[\_  
@HWI-EAS443:3:52:1743:442#0/1  
GGATTTGTGTTACGCTCACCGTGCCCAGTGAGCGAGGAG  
+HWI-EAS443:3:52:1743:442#0/1  
X]`¥¥b^aQH\_aa[]BBBBBBBBBBBBBBBBBBBBBBBBB  
@HWI-EAS443:3:54:1193:1089#0/1  
GCACCTCTGACTAAGGGAATTTTAGGATTTGTGTTACGCG  
+HWI-EAS443:3:54:1193:1089#0/1  
Y¥Tabba]b``\_bb\_b\_]a^\_¥^b`^Zb]]Wababa¥X`S

@HWI-EAS443:3:63:1060:404#0/1  
CGGGCCTTCTACGGAAGGAGTGCCTGAGTCCATGAGGGAA  
+HWI-EAS443:3:63:1060:404#0/1  
aabbZ]baa^[^ba^a\_¥]HaaaZ[\_aXK¥`a`VM`WM]  
@HWI-EAS443:3:63:1280:1279#0/1  
GGGAATTTTAGGATTTGTGTTACGCTCACCGTGCCCAGC  
+HWI-EAS443:3:63:1280:1279#0/1  
`ZUV`ZXZ`Z]UNVN[dW^S¥¥a\_Y^STUXP[UXPUUPVT  
@HWI-EAS443:3:63:1417:1926#0/1  
GAGGCACTCCTTCCGTAGAAGGCCCTCTTTTCAAACCGTA  
+HWI-EAS443:3:63:1417:1926#0/1  
IV^]¥¥^\_QQWX\_] [PYbb^[^`W\_^UVZaQ`baPUaL`  
@HWI-EAS443:3:63:1705:761#0/1  
GGGGCCTTCTACGGAAGGAGTGCCTGAGTCCATGAGGGAA  
+HWI-EAS443:3:63:1705:761#0/1  
a`\_a\_¥aa^aa¥a``\_aa`\_Wa`Z`\_`\_¥¥X¥`\_¥`\_`\_Y`  
@HWI-EAS443:3:65:1054:637#0/1  
GGGGCCTTCTACGGAAGGAGTGCCTGAGTCCATGAGGGAA  
+HWI-EAS443:3:65:1054:637#0/1  
ab`UZTQYW\_¥Z^T[X^XPVXTOMZXFUF¥^JNZP[X^^0  
@HWI-EAS443:3:71:328:587#0/1  
GACCTCTGACTAAGGGAATTTTAGGATTTGTGTTACGCT  
+HWI-EAS443:3:71:328:587#0/1  
I[]W\_b`\_¥Z`Q¥\_ZV\_0\_\_\_\_\_¥`\_`\_^ZT`a^`aa^bb  
@HWI-EAS443:3:72:1422:458#0/1  
CGGGCCTTCTACGGAAGGAGTGCCTGAGTCCATGAGGGAA  
+HWI-EAS443:3:72:1422:458#0/1  
abaaaabaabbaba`ba`a¥a¥\_aa\_a`\_]`a`\_aa`X`  
@HWI-EAS443:3:73:1652:1790#0/1  
TGCCTTCTACGGAAGGAGTGCCTGAGTCCATGAGGGAAGA  
+HWI-EAS443:3:73:1652:1790#0/1  
^aabab\_abaaa\_a\_\_`¥MZ\_\_a\_aa^`^a^^]a`¥`a\_  
@HWI-EAS443:3:77:931:220#0/1  
CCTTCCCTCATGGACTCAGGCACTCCTTCCGTAGAAGGCC  
+HWI-EAS443:3:77:931:220#0/1  
abab^Jb^abbT]`a`ab^\_a]\_aa[aa`W` [¥H^Xa\_¥Y  
@HWI-EAS443:3:83:763:370#0/1  
GGGAATTTTAGGATTTGTGTTACGCTCACCGTGCCCAGC  
+HWI-EAS443:3:83:763:370#0/1  
\_VNYab¥X0]aaXYabaTZTPXa^a`Q¥]]Y^GZ¥F¥X[G  
@HWI-EAS443:3:84:1773:919#0/1  
TGGGCCTTCTACGGAAGGAGTGCCTGAGTCCATGAGGGAA  
+HWI-EAS443:3:84:1773:919#0/1  
aaaaa`\_aaaa\_a\_^`ZP]\_¥\_\_\_\_`^\_a¥\_¥¥aX¥^T^V¥  
@HWI-EAS443:3:87:789:62#0/1  
CCTTCCCTCATGGACTCAGGCACTCCTTCCGTAGAAGGCC  
+HWI-EAS443:3:87:789:62#0/1  
a¥¥\_\_U`b`\_bbbbbabbbb`ZbaV[ab`^[[aa^HT`W[  
@HWI-EAS443:3:8:1461:906#0/1  
CTTCCCTCATGGACTCAGGCACTCCTTCCGTAGAAGGCCG

+HWI-EAS443:3:8:1461:906#0/1  
]¥`\_X`a\_\_\_HO^\_bb\_¥]bba¥]Wb¥UZ\_a[[\_RWPDG  
@HWI-EAS443:3:92:299:1279#0/1  
GGGGCCTTCTACGGAAGGAGTGCCTGAGTCCATGAGGGAA  
+HWI-EAS443:3:92:299:1279#0/1  
aa]abaa`a^aba`\_`b\_aa^`a\_a^\_¥aZ\_aa^`Z^`  
@HWI-EAS443:3:97:236:277#0/1  
GACAAAATGACCATCGTCAACATCCACAGCACTCTGCTGG  
+HWI-EAS443:3:97:236:277#0/1  
a^J]\_a`^abSa]UXTOX^`¥`\_\_YNJ\_]X]YBBBBBBBB  
@HWI-EAS443:3:100:1050:1117#0/1  
CACCTCTGACTAAGGGAATTTTAGGATTTGTGTTACGCT  
+HWI-EAS443:3:100:1050:1117#0/1  
abbbbabbbab^abbbabb`bbbbabbbb`^a``a^]aa  
@HWI-EAS443:3:100:1143:148#0/1  
TGACAAAATGACCATCGTCAACATCCACAGCACTCTGCTG  
+HWI-EAS443:3:100:1143:148#0/1  
a`aVaaaaaa^^^`\_]\_Y\_\_Y^^¥0^X]^V^U]VY^R^B  
@HWI-EAS443:3:100:1280:164#0/1  
ATCCCGTCAGGCCCTCAAAGCCGAGATCGCGCAGAGAC  
+HWI-EAS443:3:100:1280:164#0/1  
a]PFP]PN¥`\_FRNX¥]TVS¥PFWZSSXRBBBBBBBBBB  
@HWI-EAS443:3:100:142:1605#0/1  
GGACTGCAGCGTAGACGCTTTGTCCAAAATGCCCTAAATG  
+HWI-EAS443:3:100:142:1605#0/1  
`ba`a`aba`baba\_aa\_a\_Z]\_aaa\_`a\_aPV`\_``\_\_a  
@HWI-EAS443:3:100:1692:1035#0/1  
GACAAAATGACCATCGTCAACATCCACAGCACTCTGCTGT  
+HWI-EAS443:3:100:1692:1035#0/1  
a^``aaa\_b\_RNaRaV\_a^\_\_^] ^WN]ZY`0^MZVY]^B  
@HWI-EAS443:3:100:249:935#0/1  
TTTGAAAAGAGGGCCTTCTACGGAAGGAGTGCCTGAGTCC  
+HWI-EAS443:3:100:249:935#0/1  
a\_aa\_]`VV^]¥\_¥Z\_¥[\_Z^Z^VP`VVQWVPQSVS\_BBB  
@HWI-EAS443:3:100:315:1576#0/1  
GCCTGCAAATTTTCAAGAAGGTCATCTTTCAGACCAGCAC  
+HWI-EAS443:3:100:315:1576#0/1  
a`]UOUZSZ\_\_a`aT^[^\_ ^VZZUMWY¥UX^[RVBBBBB  
@HWI-EAS443:3:100:33:1152#0/1  
ATCCTAGCTCCAGTGCTGGTCTGAAAGATGACCTTCTTGA  
+HWI-EAS443:3:100:33:1152#0/1  
^^`Xa`S]X`a^aZM]\_a^UWaaY`[^a``Y^S[¥T^``^  
@HWI-EAS443:3:100:990:1154#0/1  
ATTGGGACTCATCCTAGCTCCAGTGCTGGTCTGAAAGATG  
+HWI-EAS443:3:100:990:1154#0/1  
abaaa\_a]W]\_aT`\_a\_R\_\_a\_`Za¥^^ZV[\_a]Y[\_^¥B  
@HWI-EAS443:3:10:1775:607#0/1  
ATTGGGACTCATCCTAGCTCCAGTGCTGGTCTGAAAGATG  
+HWI-EAS443:3:10:1775:607#0/1  
a`b^^]a[^Qa`U[]`P\_PX`YPYU¥^aRO\_\_RW\_\_NHY

@HWI-EAS443:3:10:229:1058#0/1  
TTGGGACTCATCCTAGCTCCAGTGCTGGTCTGAAAGATGA  
+HWI-EAS443:3:10:229:1058#0/1  
]aaaaababba\_`aaaa\_\_a`V`a`\_X\_\_aXIS\_\_WWP  
@HWI-EAS443:3:10:482:720#0/1  
GACAAAATGACCATCGTCAACATCCACAGCACTCTGCTGT  
+HWI-EAS443:3:10:482:720#0/1  
aRS^WaNDV]`WQXZY0^ZZSVZZZZUXZZWXXRUZORV  
@HWI-EAS443:3:10:701:1132#0/1  
CTCTGACTAAGGGAATTTTAGGATTTGTGTTACGCTCAC  
+HWI-EAS443:3:10:701:1132#0/1  
\_Q`¥\_[`]^Z^\_YR\_`]^^`\_\_YW]X`XaUGT^XQUUSVP  
@HWI-EAS443:3:10:870:612#0/1  
GACTAAGGGAATTTTAGGATTTGTGTTACGCTCACCGTG  
+HWI-EAS443:3:10:870:612#0/1  
a¥Z\_\_¥`^a¥¥¥\_`^¥¥\_\_QV\_¥^WWXWVSWWUWWYUYWY  
@HWI-EAS443:3:11:1036:433#0/1  
CTGAAAGATGACCTTCTTGAAAATTTGCAGGCCTACCAGA  
+HWI-EAS443:3:11:1036:433#0/1  
abZU¥a`Y[a[]UaaXaaa]X``aaaa]\_a\_]U]\_YY^a\_  
@HWI-EAS443:3:11:1233:198#0/1  
GGGCCTTCTACGGAAGGAGTGCCTGAGTCCATGAGGGAAG  
+HWI-EAS443:3:11:1233:198#0/1  
aa^U[]\_\_^aWa\_UV\_aNZQYVUUMU[NJQGUVG¥WWBBB  
@HWI-EAS443:3:11:1239:201#0/1  
GACTCAGGCACTCCTTCCGTAGAAGGCCCTCTTTCAAAC  
+HWI-EAS443:3:11:1239:201#0/1  
a^\_\_`^[]]a^`]^`^[\_]YZ[]NZTRRRVU]UVNVM[U  
@HWI-EAS443:3:11:1292:156#0/1  
GGATTTGTGTTACGCTCACCGTGCCAGTGAGCGAGGAC  
+HWI-EAS443:3:11:1292:156#0/1  
\_aX``aaZa`U`\_`¥Z]¥URPWS^QQPRKSZBBBBBBBBB  
@HWI-EAS443:3:11:188:559#0/1  
AAATGACCATCGTCAACATCCACAGCACTCTGCTGTTCCCT  
+HWI-EAS443:3:11:188:559#0/1  
aa\_baaaababbaaab`aaaaabaaa`\_aa`aa````\_a`\_  
@HWI-EAS443:3:11:224:675#0/1  
GATTTGTGTTACGCTCACCGTGCCAGTGAGCGAGGACT  
+HWI-EAS443:3:11:224:675#0/1  
\_]`]Y]W\_^Z`^¥Z^U¥ZZ\_^[`Z¥RXZN^K^X¥XNOZRB  
@HWI-EAS443:3:11:728:1423#0/1  
ATTGGGACTCATCCTAGCTCCAGTGCTGGTCTGAAAGATG  
+HWI-EAS443:3:11:728:1423#0/1  
``baa`\_aaba`aa`\_`aaaa`W^NZ]YVa\_aa\_¥\_\_UV  
@HWI-EAS443:3:12:1093:1194#0/1  
GACTAAGGGAATTTTAGGATTTGTGTTACGCTCACCGTG  
+HWI-EAS443:3:12:1093:1194#0/1  
[W`^aababb`a``]¥`\_0¥`\_a\_a\_a¥\_\_a\_\_\_\_\_X\_N\_  
@HWI-EAS443:3:12:223:1300#0/1  
GTTGACAAAATGACCATCGTCAACATCCACAGCACTCTGC

+HWI-EAS443:3:12:223:1300#0/1  
`Sa^Za^aXZRRPX]\_P¥RG`^YVT`[Y[¥ZT]`\_]Z][  
@HWI-EAS443:3:12:322:1898#0/1  
GACAAAATGACCATCGTCAACATCCACAGCACTCTGCTGT  
+HWI-EAS443:3:12:322:1898#0/1  
a`babab``abbbb``\_]aaaba^`\_]Uaa]W\_aMS][B  
@HWI-EAS443:3:12:325:1521#0/1  
GACTCATCTAGCTCCAGTGCTGGTCTGAAAGATGACCTT  
+HWI-EAS443:3:12:325:1521#0/1  
a`aabbabbaaaa`a`aa\_aa\_\_\_¥a```aa\_a^`\_`^`\_`  
@HWI-EAS443:3:12:342:66#0/1  
GAAAAGAGGGCCTTCTACGGAAGGAGTGCCTGAGTCCATG  
+HWI-EAS443:3:12:342:66#0/1  
aa`a`\_`\_a\_aa\_\_\_\_\_^^\_a`WW`\_W\_W¥W¥¥¥W^WVWWW¥  
@HWI-EAS443:3:12:77:334#0/1  
GACAAAATGACCATCGTCAACATCCACAGCACTCTGCTGT  
+HWI-EAS443:3:12:77:334#0/1  
ab`aaZ]a`ba`]`\_ZXa\_\_¥`\_]`\_`^a`^X\_Y^V¥`X  
@HWI-EAS443:3:12:824:303#0/1  
ACCGTGCCAGTGAGCGAGGACTGCAGCGTAGACGCTTTG  
+HWI-EAS443:3:12:824:303#0/1  
\_]Z\_T^b\_MW`V[``]Q¥a`XY[XS]^¥UY]^¥U¥U^  
@HWI-EAS443:3:12:880:818#0/1  
AATTTTCAAGAAGGTCATCTTTTCAGACCAGCACTGGAGCT  
+HWI-EAS443:3:12:880:818#0/1  
a\_ba]ZV^[aa`^`[a`aaa`YYa\_aa\_a]]`0)`YS`WY  
@HWI-EAS443:3:13:1765:761#0/1  
CTCAGGCACTCCTTCCGTAGAAGGCCCTCTTTTCAAACCG  
+HWI-EAS443:3:13:1765:761#0/1  
aaabb^Z\_ba]a`Y[Vb\_aa^`\_]QSM^Y`\_^YN^^^Xa  
@HWI-EAS443:3:13:32:1031#0/1  
GACTAAGGGAATTTTAGGATTTGTGTTACGCTCACCGTG  
+HWI-EAS443:3:13:32:1031#0/1  
abba^[aabaabbaabaaaa`\_\_a\_aaa\_V\_U[RQ^BBB  
@HWI-EAS443:3:13:368:1069#0/1  
GACTCAGGCACTCCTTCCGTAGAAGGCCCTCTTTTCAAAC  
+HWI-EAS443:3:13:368:1069#0/1  
V\_baba\_Z`bb]]`\_\_aaa^V`[U[\_aaYa\_\_\_\_^`]a\_aW  
@HWI-EAS443:3:13:860:140#0/1  
CACTAATCAGGCATGAAAACAGAATGGTGCTGGCTAGCAC  
+HWI-EAS443:3:13:860:140#0/1  
abb¥]V^aaa\_a`aaaa^aabaaa^aaGa``[`a\_\_\_\_`ZW  
@HWI-EAS443:3:13:891:19#0/1  
GACAAAATGACCATCGTCAACATCCACAGCACTCTGCTGT  
+HWI-EAS443:3:13:891:19#0/1  
ZYY¥¥[¥T`] ]^]NTYFUQSX[UP[YF[VNSRTBBBBBBB  
@HWI-EAS443:3:13:919:892#0/1  
AGAGGGCCTTCTACGGAAGGAGTGCCTGAGTCCATGAGGG  
+HWI-EAS443:3:13:919:892#0/1  
aZOZa`a`^\_Ya`aaa````[aXaYV[[\_a[U]]^a¥\_\_`

@HWI-EAS443:3:14:1032:385#0/1  
GACAAAATGACCATCGTCAACATCCACAGCACTCTGCTGT  
+HWI-EAS443:3:14:1032:385#0/1  
aaaaa`aa^Y]^]W]S`[R\_[XZ]X¥`¥ZZWQQZUZZU  
@HWI-EAS443:3:14:108:83#0/1  
AGGACTGCAGCGTAGACGCTTTGTCCAAAATGCCCTAAAT  
+HWI-EAS443:3:14:108:83#0/1  
aab`PaSRV`ZY\_XXbW[PK¥^MNUYMSVWYVNSZLKQW  
@HWI-EAS443:3:14:1218:944#0/1  
GGGCCTTCTACGGAAGGAGTGCCTGAGTCCATGAGGGAAG  
+HWI-EAS443:3:14:1218:944#0/1  
aba`¥aa`a\_aaS^a\_\_R\_^PZ`QaPMU\_\_¥¥¥`¥W[¥  
@HWI-EAS443:3:14:1248:1552#0/1  
GACTCAGGCACTCCTTCCGTAGAAGGCCCTTTTTCAAAC  
+HWI-EAS443:3:14:1248:1552#0/1  
`[\_`\_`\_¥¥¥b[OZ`^^\_aV\_RFW¥\_a]Q^P]^X[X¥X\_\_  
@HWI-EAS443:3:14:128:826#0/1  
CTCCAGTGTGGTCTGAAAGATGACCTTCTGAAAATTTG  
+HWI-EAS443:3:14:128:826#0/1  
a`aa[aY[]\_`aT`¥]V\_^`a¥`Uaaa^a^PTLXa^]^`  
@HWI-EAS443:3:14:138:717#0/1  
AAAGAGGGCCTTCTACGGAAGGAGTGCCTGAGTCCATGAG  
+HWI-EAS443:3:14:138:717#0/1  
aaaba^]\_aba`\_X`aa]`¥IUU`^^T^VUYVR]¥Y`  
@HWI-EAS443:3:14:1421:684#0/1  
CAAAATGACCATCGTCAACATCCACAGCACTCTGCTGTTC  
+HWI-EAS443:3:14:1421:684#0/1  
abb`]aaa[\_a`aaY^]¥[\_]\_\_\_\_\_ZNT]\_0]¥]WJS^^  
@HWI-EAS443:3:14:1446:1017#0/1  
AAATGACCATCGTCAACATCCACAGCACTCTGCTGTTCCT  
+HWI-EAS443:3:14:1446:1017#0/1  
aa`a`a`\_a`\_\_[]\_]W`\_]Y\_S\_]O\_XU]^\_WY`UYPV\_  
@HWI-EAS443:3:14:1534:581#0/1  
GGGCCTTCTACGGAAGGAGTGCCTGAGTCCATGAGGGAAG  
+HWI-EAS443:3:14:1534:581#0/1  
\_Vaa^aa\_aa\_a`V]^`\_UaW\_VV\_\_¥`WTWX`\_V[\_¥W¥^  
@HWI-EAS443:3:14:167:820#0/1  
ACTAATCAGGCATGAAAACAGAATGGTGTCTGGCTAGCACT  
+HWI-EAS443:3:14:167:820#0/1  
a\_b]aa`aa]a\_a¥]`a[`]`\_a`YVY^YQZ[^YSRHQW  
@HWI-EAS443:3:14:179:677#0/1  
TACGGTTTGAAGAGGGCCTTCTACGGAAGGAGTGCCTG  
+HWI-EAS443:3:14:179:677#0/1  
]P`\_`V`a`aa]T^a^\_]Y]]V\_a^Y]XHTU`\_¥¥¥  
@HWI-EAS443:3:14:337:347#0/1  
AGGGCCTTCTACGGAAGGAGTGCCTGAGTCCATGAGGGAA  
+HWI-EAS443:3:14:337:347#0/1  
abb\_\_a^aa]`\_`\_[aaT]¥\_\_\_\_¥[Y\_S\_\_¥[\_T\_\_]UX  
@HWI-EAS443:3:14:545:1331#0/1  
ATTTTCAAGAAGGTCATCTTTCAGACCAGCACTGGAGCTA

+HWI-EAS443:3:14:545:1331#0/1  
`aaa`^b^`^`^`R^`¥aa^QT`aZZ\_a`V[`]^¥\_\_  
@HWI-EAS443:3:14:894:1603#0/1  
GTAGTGCTAGCCAGCACCATTCTGTTTTTCATGCCTGATTA  
+HWI-EAS443:3:14:894:1603#0/1  
aRY`Y]aaa\_`\_\_^VP\_\_aaa\_`Y¥\_\_\_\_\_YW`\_¥^¥^  
@HWI-EAS443:3:14:918:486#0/1  
GGATTTGTGTTACGCTCACCGTGCCAGTGAGCGAGGAC  
+HWI-EAS443:3:14:918:486#0/1  
`a`aaa[a\_`^¥`¥^^Z[`XZXTYS^TPXS¥R¥TZT¥TZR  
@HWI-EAS443:3:14:98:1845#0/1  
AAAGAGGGCCTTCTACGGAAGGAGTGCCTGAGTCCATGAG  
+HWI-EAS443:3:14:98:1845#0/1  
`[`a`aX]`a\_`a\_`¥[THZ[Y`ZM]ZY\_]`^¥U]VU¥]WB  
@HWI-EAS443:3:15:101:170#0/1  
CAAAGCGTCTACGCTGCAGTCCCTCGCTCACTGGGCACGGT  
+HWI-EAS443:3:15:101:170#0/1  
aa\_¥`^^`\_`aa`¥TX]]^^¥U\_UVRRSSKZUPTNMRU  
@HWI-EAS443:3:15:1220:529#0/1  
CAAATGACCATCGTCAACATCCACAGCACTCTGCTGTTC  
+HWI-EAS443:3:15:1220:529#0/1  
abbbbbbbbaaba`baab`baaaaaaa\_a`a`aa\_a`\_aa  
@HWI-EAS443:3:15:132:190#0/1  
AATGACCATCGTCAACATCCACAGCACTCTGCTGTTCCCTG  
+HWI-EAS443:3:15:132:190#0/1  
WQ`bbaa\_a`YI\_`¥`Z¥`^a\_`¥Z\_`]`ZW[]^Y]a¥OL  
@HWI-EAS443:3:15:1624:729#0/1  
CATCCTAGCTCCAGTCTGGTCTGAAAGATGACCTTCTTG  
+HWI-EAS443:3:15:1624:729#0/1  
aa]\_babaaaa\_a\_V`UW`Z^\_ab\_Wa¥ZIR\_[XYTZW^a  
@HWI-EAS443:3:15:1707:1340#0/1  
TGTTGACAAAATGACCATCGTCAACATCCACAGCACTCTG  
+HWI-EAS443:3:15:1707:1340#0/1  
ObUM¥baabab]]bWb\_XZb\_]Z]L`^a[US]aabX\_Y`Z  
@HWI-EAS443:3:15:19:1843#0/1  
CTTCCCTCATGGACTCAGGCACTCCTTCCGTAGAAGGCCC  
+HWI-EAS443:3:15:19:1843#0/1  
a\_bbbabb\_]W`aba`T\_`bbabbaaa`a``¥aa\_a¥`^  
@HWI-EAS443:3:15:238:2017#0/1  
AATTTTCAAGAAGGTCATCTTTTCAGACCAGCACTGGAGCT  
+HWI-EAS443:3:15:238:2017#0/1  
aaaa`aaa`\_\_^0aa^`\_\_`\_`\_Z\_Z\_`]`^\_WZ[WW  
@HWI-EAS443:3:15:370:100#0/1  
CAAATGACCATCGTCAACATCCACAGCACTCTGCTGTTC  
+HWI-EAS443:3:15:370:100#0/1  
abaXbbaXaabb¥baa¥a`b¥\_b\_a`]\_aJSW`aYa¥^^\_  
@HWI-EAS443:3:15:539:1735#0/1  
GACTCATCCTAGCTCCAGTCTGGTCTGAAAGATGACCTT  
+HWI-EAS443:3:15:539:1735#0/1  
\_``abb`aabb\_a`Y^`b[`YXaaYaaaa\_`aa^`\_`



@HWI-EAS443:3:15:590:348#0/1  
ATCCCCGTcagggccccctcaaagccgagatcgcgagagac  
+HWI-EAS443:3:15:590:348#0/1  
^a]¥]^`^\_`\_¥`\_`\_XY¥^[``]aa`a^¥`a]\_XZ^T^VV  
@HWI-EAS443:3:15:645:1670#0/1  
AAGAGGGCCTTCTACGGAAGGAGTGCCTGAGTCCATGAGG  
+HWI-EAS443:3:15:645:1670#0/1  
abaaa`aaa`\_`\_aaa^\_`\_¥`U`T`\_¥`\_¥]SW`\_¥^¥Z  
@HWI-EAS443:3:15:923:877#0/1  
AAAGAGGGCCTTCTACGGAAGGAGTGCCTGAGTCCATGAG  
+HWI-EAS443:3:15:923:877#0/1  
`a^a\_bbb]\_aba`aa`\_`a^[b¥W][¥aVZVXa`TY\_a  
@HWI-EAS443:3:15:93:284#0/1  
GGGAATTTTAGGATTTGTGTTACGCTCACCGTGCCAGT  
+HWI-EAS443:3:15:93:284#0/1  
aaa`^`a\_aa[¥^[`^¥[a^^a`^^W^^W^^W^UWSUW  
@HWI-EAS443:3:16:1036:547#0/1  
ATTCTTCCCTCATGGACTCAGGCACTCCTTCCGTAGAAGG  
+HWI-EAS443:3:16:1036:547#0/1  
U]babUP\_b]Z\_aTa`RR]aXQYa`aY`JTZaR][aVVZ  
@HWI-EAS443:3:16:1074:1517#0/1  
AGGCTATGGAACAGATGGCTGGATCGAGTGAACAGGCAGC  
+HWI-EAS443:3:16:1074:1517#0/1  
ab`\_Z^a`\_W`Y`a¥N\_]VYK\_]Z`¥a[P^`\_S^S[^]]¥  
@HWI-EAS443:3:16:1135:333#0/1  
CTGCAAATTTTCAAGAAGGTCATCTTTCAGACCAGCACTG  
+HWI-EAS443:3:16:1135:333#0/1  
XabbaRZQZ¥a¥b¥¥`bbba^^`\_bZbb`b\_RRSL\_[XZ  
@HWI-EAS443:3:16:1521:578#0/1  
CTTCCCTCATGGACTCAGGCACTCCTTCCGTAGAAGGCC  
+HWI-EAS443:3:16:1521:578#0/1  
Q\_\_S[Wa`¥\_a]a[¥[ab\_¥[b\_Y[]a`a]\_Q\_aab^F[O  
@HWI-EAS443:3:16:176:175#0/1  
GACTCATCTAGCTCCAGTGTGCTGAAAGATGACCTT  
+HWI-EAS443:3:16:176:175#0/1  
TVVb\_HWX^J^[]¥XY]¥HZVZX[ZQ[S]X]U\_\_XHNT  
@HWI-EAS443:3:16:198:176#0/1  
CAGGCACTCCTTCCGTAGAAGGCCCTTTTTCAAACCGTA  
+HWI-EAS443:3:16:198:176#0/1  
¥RW\_bb\_\_a`\_`[a`aZVV^`U]aa\_]`\_`a]]a`¥LDQP]  
@HWI-EAS443:3:16:453:1719#0/1  
GACAAAATGACCATCGTCAACATCCACAGCACTCTGCTGT  
+HWI-EAS443:3:16:453:1719#0/1  
\_bab`a`babaaa`^]`\_a]]`\_a`\_`\_a\_]\_U`\_W`^Z\_Y  
@HWI-EAS443:3:16:582:400#0/1  
GGCCTTCTACGGAAGGAGTGCCTGAGTCCATGAGGGAAGA  
+HWI-EAS443:3:16:582:400#0/1  
abaaV\_aNVVV\_ZN\_OJ¥G¥NVOXWV[¥N\_\_WaW\_^]\_B  
@HWI-EAS443:3:16:906:750#0/1  
GACTCATCTAGCTCCAGTGTGCTGAAAGATGACCTT

+HWI-EAS443:3:16:906:750#0/1  
KS\_aa`a```\_\_`Wab\_NZ^Q`¥NNa]WX]`aaa`XQ]\_  
@HWI-EAS443:3:16:969:1329#0/1  
CTTCTACGGAAGGAGTGCCTGAGTCCATGAGGGAAGAATA  
+HWI-EAS443:3:16:969:1329#0/1  
`bbbabbbaaabbaaa]aaaaaaa\_aaaaaab\_baaaaaaa  
@HWI-EAS443:3:17:1043:1101#0/1  
CAAAATGACCATCGTCAACATCCACAGCACTCTGCTGTTC  
+HWI-EAS443:3:17:1043:1101#0/1  
ab`a¥`b`ababb¥`abbaba\_abaaaaaaaa`b`a`b\_  
@HWI-EAS443:3:17:1311:1420#0/1  
GCCTTCTACGGAAGGAGTGCCTGAGTCCATGAGGGAAGAA  
+HWI-EAS443:3:17:1311:1420#0/1  
ab]\_PTRWJaaR`[JL\_N\_[Q\_X^ZBBBBBBBBBBBBBBB  
@HWI-EAS443:3:17:1328:1644#0/1  
GGCCTGCAAATTTTCAAGAAGGTCATCTTTCAGACCAGCA  
+HWI-EAS443:3:17:1328:1644#0/1  
¥Z\_\_ORUXU\_a`\_P\_\_¥¥Y^^\_aaabbaabZUO\_]a^[  
@HWI-EAS443:3:17:1422:909#0/1  
AAAATGACCATCGTCAACATCCACAGCACTCTGCTGTTC  
+HWI-EAS443:3:17:1422:909#0/1  
\_`Zaaaa\_aa`]¥\_`W]]a\_XNU\_a\_VT[XV]¥\_aWTFN  
@HWI-EAS443:3:17:214:490#0/1  
CAAAATGACCATCGTCAACATCCACAGCACTCTGCTGTTC  
+HWI-EAS443:3:17:214:490#0/1  
a]abaa[aa[^T\_`UZ\_\_]a^\_\_`ZZXU\_`\_]¥0\_¥¥U[]  
@HWI-EAS443:3:17:328:260#0/1  
GGGAATTTTAGGATTTGTGTTACGCTCACCGTGCCCAGT  
+HWI-EAS443:3:17:328:260#0/1  
`b`a`ba`baa`bb\_aa\_aaa\_a¥[`Z[a¥`X¥\_¥`S  
@HWI-EAS443:3:17:564:1575#0/1  
TGGACTCAGGCACTCCTTCCGTAGAAGGCCCTCTTTTCAA  
+HWI-EAS443:3:17:564:1575#0/1  
aaa\_`ab`a[bbaabaa`a`¥a\_`a\_\_aVZ\_a]\_\_\_\_]`a  
@HWI-EAS443:3:17:795:271#0/1  
GACAAAATGACCATCGTCAACATCCACAGCACTCTGCTGT  
+HWI-EAS443:3:17:795:271#0/1  
aZS\_WFZ``]YQTGSSWYLXGY¥MULJQMMZWNUUUOTRB  
@HWI-EAS443:3:17:855:1016#0/1  
GGAATTTTAGGATTTGTGTTACGCTCACCGTGCCCAGTG  
+HWI-EAS443:3:17:855:1016#0/1  
aa¥`X\_\_`]ZXVY[]PDHRZUTRWVN[K]¥WV¥PTWTBBB  
@HWI-EAS443:3:17:929:572#0/1  
CATGGACTCAGGCACTCCTTCCGTAGAAGGCCCTCTTTTC  
+HWI-EAS443:3:17:929:572#0/1  
aaa\_[[aaa\_a`aa\_aa\_a\_\_\_¥]\_\_[\_]VXaV]T\_\_^]V  
@HWI-EAS443:3:18:150:635#0/1  
TAGGATTTGTGTTACGCTCACCGTGCCCAGTGAGCGAGG  
+HWI-EAS443:3:18:150:635#0/1  
\_aa\_^\_^`aW\_^]``aaaZXX¥aX¥X^¥`^aS`TY¥^XVT

@HWI-EAS443:3:18:331:1952#0/1  
ATTTTAGGATTTGTGTTACGCTCACCGTGCCAGTGAGC  
+HWI-EAS443:3:18:331:1952#0/1  
a]\_a`a\_\_\_\_\_`¥]V`aa¥QbZ¥ZUWXUQ[GU¥¥BBBBB  
@HWI-EAS443:3:18:407:1912#0/1  
CAGTGAGCGAGACTGCAGCGTAGACGCTTTGTCCAAAAT  
+HWI-EAS443:3:18:407:1912#0/1  
`b^^abaaaa`aa\_`a^^V[XW[aa\_NWWW¥XXX\_`UV^¥  
@HWI-EAS443:3:18:589:383#0/1  
TTTGGACAAAGCGTCTACGCTGCAGTCCTCGCTCACTGGG  
+HWI-EAS443:3:18:589:383#0/1  
aaaaaa`a`^^^]`a`^^YU\_`^U¥[^¥[^U^S¥Z¥^  
@HWI-EAS443:3:18:614:763#0/1  
ATCCCGTCAGGCCCTCAAAGCCGAGATCGCGCAGAGAC  
+HWI-EAS443:3:18:614:763#0/1  
aaaaa`^aa`a`a\_^)`Y[\_U^^`UPV^^^WUYW¥WM  
@HWI-EAS443:3:18:690:342#0/1  
CAAGAAGGTCATCTTTCAGACCAGCACTGGAGCTAGGATG  
+HWI-EAS443:3:18:690:342#0/1  
aaa`aba]aaa^aa`\_`a`^\_a\_[`\_[^\_^^\_^^\_^]Y]\_`  
@HWI-EAS443:3:19:1001:1313#0/1  
GTTGACAAAATGACCATCGTCAACATCCACAGCACTCTGC  
+HWI-EAS443:3:19:1001:1313#0/1  
a\_aababa`aa`aa\_¥aX\_^^\_Y\_`Y^\_V^V^XXUX  
@HWI-EAS443:3:19:1020:138#0/1  
CGGTTTGAAAAGAGGGCCTTCTACGGAAGGAGTGCTGAG  
+HWI-EAS443:3:19:1020:138#0/1  
abbZba\_aab`bbbababbbbaaabbaaab\_a]IYba`a`  
@HWI-EAS443:3:19:1539:1437#0/1  
ATTTGTGTTACGCTCACCGTGCCAGTGAGCGAGGACTG  
+HWI-EAS443:3:19:1539:1437#0/1  
a`aaa\_ba\_\_a`a\_¥]^¥^XG[XW¥U`Wa¥¥¥^T]¥USU^  
@HWI-EAS443:3:19:454:612#0/1  
AATTTTCAAGAAGGTCATCTTTCAGACCAGCACTGGAGCT  
+HWI-EAS443:3:19:454:612#0/1  
a\_aa\_]¥^]^¥`^`[]`\_`a`^^[]`\_`VLXV\_VNRBB  
@HWI-EAS443:3:19:629:279#0/1  
ACTAAGGGAATTTTAGGATTTGTGTTACGCTCACCGTGC  
+HWI-EAS443:3:19:629:279#0/1  
`b`b^ZYabaa`ZaaZ]Xaab`V]aa`b`\_\_KOJYY\_V\_S  
@HWI-EAS443:3:1:1580:949#0/1  
GCAAATTTTCAAGAAGGTCATCTTTCAGACCAGCACTGGA  
+HWI-EAS443:3:1:1580:949#0/1  
a`a`¥baabaaaba]`\_]`a¥aaa¥a`\_T]\_`^a[¥a^B  
@HWI-EAS443:3:1:168:927#0/1  
AAAGAGGGCCTTCTACGGAAGGAGTGCCTGAGTCCATGAG  
+HWI-EAS443:3:1:168:927#0/1  
aab^`X`R`P`\_X]aU^^Z\_[`Za¥`SY^\_^\_¥WUZ^BBB  
@HWI-EAS443:3:1:316:330#0/1  
GACAAAATGACCATCGTCAACATCCACAGCACTCTGCTGT

+HWI-EAS443:3:1:316:330#0/1  
ab\_aba\_aa`]aaa\_a^`¥aa^¥\_¥`\_X`V]X^^BBBB  
@HWI-EAS443:3:1:416:1750#0/1  
AGAAGGTCATCTTTCAGACCAGCACTGGAGCTAGGATGAG  
+HWI-EAS443:3:1:416:1750#0/1  
aabbba^\_baaaa`a`a]X\_\_QaQa`\_]Y\_]a`¥¥BBBB  
@HWI-EAS443:3:1:841:587#0/1  
GGGCCTTCTACGGAAGGAGTGCCTGAGTCCATGAGGGAAG  
+HWI-EAS443:3:1:841:587#0/1  
abb\_Y\_\_`a`Zbaa`Xa\_a`ZU``a]¥^`\_`¥`a\_BBB  
@HWI-EAS443:3:1:843:544#0/1  
AATTTTCAAGAAGGTCATCTTTCAGACCAGCACTGGAGCT  
+HWI-EAS443:3:1:843:544#0/1  
\_^^`\_]Z]YaV`aYY\_Y\_a]`[`]ZR[¥aS[^^``¥BBB  
@HWI-EAS443:3:1:95:589#0/1  
GACTCATCTAGCTCCAGTGTCTGGTCTGAAAGATGACCTT  
+HWI-EAS443:3:1:95:589#0/1  
aaa\_aa`^aab`a\_]aa^`¥`^`V`\_\_\_^\_W^^]]]BB  
@HWI-EAS443:3:20:1054:944#0/1  
GAGGGCCTTCTACGGAAGGAGTGCCTGAGTCCATGAGGGA  
+HWI-EAS443:3:20:1054:944#0/1  
^¥[ba`bbbabb]a`aaa¥MYX`^`^\_H¥Q]a`[¥T¥¥\_\_  
@HWI-EAS443:3:20:1240:439#0/1  
GACAAAATGACCATCGTCAACATCCACAGCACTCTGCTGT  
+HWI-EAS443:3:20:1240:439#0/1  
aa`aa^]aaa`\_a\_¥aS\_\_Z]^\_[Z^\_^^Z]LY¥¥ZUZ[O  
@HWI-EAS443:3:20:229:1555#0/1  
AGGCCTGCAAATTTTCAAGAAGGTCATCTTTCAGACCAGC  
+HWI-EAS443:3:20:229:1555#0/1  
[^`^\_aaaabaZab`a`baU`baaW\_aaaa`\_aa\_`aa\_Y]  
@HWI-EAS443:3:20:250:192#0/1  
CCTCTGACTAAGGGAATTTTAGGATTTGTGTTACGCTCA  
+HWI-EAS443:3:20:250:192#0/1  
abaa^aaaa¥IaaaU^P¥a`^`Y[\_Ia\_]¥N\_\_¥\_XYVQ  
@HWI-EAS443:3:20:271:279#0/1  
GTTGACAAAATGACCATCGTCAACATCCACAGCACTCTGC  
+HWI-EAS443:3:20:271:279#0/1  
`\_aaaaa`a`^`^`^`\_`X`^U`\_`^]`\_Y[\_XY]Z]Z  
@HWI-EAS443:3:20:355:1520#0/1  
GGGCCTTCTACGGAAGGAGTGCCTGAGTCCATGAGGGAAG  
+HWI-EAS443:3:20:355:1520#0/1  
\_YSVaR^bbabaaYS^W]ZYR]^`SV¥R^QVQ¥\_^U¥TY`  
@HWI-EAS443:3:20:365:1219#0/1  
GCAAATTTTCAAGAAGGTCATCTTTCAGACCAGCACTGGA  
+HWI-EAS443:3:20:365:1219#0/1  
[aba¥aabaaaa`aa`^bbaaaa`aa`aaa\_a\_a]`]]  
@HWI-EAS443:3:20:366:753#0/1  
GACAAAATGACCATCGTCAACATCCACAGCACTCTGCTGT  
+HWI-EAS443:3:20:366:753#0/1  
\_aaabaa`a`baba`aZ¥a\_Z[a`aaaa\_]I\_\_\_\_\_`]^\_U

@HWI-EAS443:3:20:490:1408#0/1  
GGGAATTTTAGGATTTGTGTTACGCTCACCGTGCCAGT  
+HWI-EAS443:3:20:490:1408#0/1  
abaab^aaaa`baaaaa¥a^\_ab`a`¥a^^`[Sa^[M^\_P  
@HWI-EAS443:3:20:516:356#0/1  
GACAAAATGACCATCGTCAACATCCACAGCACTCTGCTGT  
+HWI-EAS443:3:20:516:356#0/1  
a^aa\_]\_a`\_`aa^V`\_\_\_\_\_]\_]`\_`¥RUY\_HZYM¥U  
@HWI-EAS443:3:20:87:504#0/1  
AATTTTCAAGAAGGTCATCTTTTCAGACCAGCACTGGAGCT  
+HWI-EAS443:3:20:87:504#0/1  
aaaaa`a`[\_`\_a^N`aaaa`^a`\_`\_`\_]`\_`^`]^`^^^`]  
@HWI-EAS443:3:20:962:1363#0/1  
TGTTGACAAAATGACCATCGTCAACATCCACAGCACTCTG  
+HWI-EAS443:3:20:962:1363#0/1  
aa\_aaaaaa^`aa]`a`Y^\_aa\_a`\_a`]`[V\_]\_W\_\_  
@HWI-EAS443:3:21:1019:1004#0/1  
ATTGGGACTCATCCTAGCTCCAGTGCTGGTCTGAAAGATG  
+HWI-EAS443:3:21:1019:1004#0/1  
aa`\_`\_a``aaaa`a\_\_a\_]`aY\_\_^\_]Y^\_\_[Z^^^\_]`  
@HWI-EAS443:3:21:1159:1235#0/1  
GACAAAATGACCATCGTCAACATCCACAGCACTCTGCTGT  
+HWI-EAS443:3:21:1159:1235#0/1  
aa]a¥a]aaaa`\_¥]aU`^^\_]\_\_\_Z]VQ`\_]`\_]`^]^^`]  
@HWI-EAS443:3:21:131:1830#0/1  
CTGGTCTGAAAGATGACCTTCTTAAAAATTTGCAGGCCTA  
+HWI-EAS443:3:21:131:1830#0/1  
aa\_\_Yaa]aaa`\_]Wa`a\_\_a`\_`^`\_a\_\_^^\_a`\_`[^`^a  
@HWI-EAS443:3:21:1359:843#0/1  
TGGACTCAGGCACTCCTTCCGTAGAAGGCCCTCTTTTCAA  
+HWI-EAS443:3:21:1359:843#0/1  
[a^\_TZOX`X^a`QRYPaYV`GYOX^\_OKL¥QYYW[a]Y\_  
@HWI-EAS443:3:21:137:1990#0/1  
GGGAATTTTAGGATTTGTGTTACGCTCACCGTGCCAGT  
+HWI-EAS443:3:21:137:1990#0/1  
\_aX`^ba`aa`V`\_`a`^`\_[[aaaVaW\_\_`\_¥U`^¥N¥WW  
@HWI-EAS443:3:21:1426:643#0/1  
GCAAATTTTCAAGAAGGTCATCTTTTCAGACCAGCACTGGA  
+HWI-EAS443:3:21:1426:643#0/1  
Z\_]VHXYYQTU]Q\_X]U¥¥RX\_XOWG`aZVO[JHZWZZ¥^  
@HWI-EAS443:3:21:511:1324#0/1  
CAAAATGACCATCGTCAACATCCACAGCACTCTGCTGTTC  
+HWI-EAS443:3:21:511:1324#0/1  
a`U`TS`S¥ab[P`TQP\_\_a`PM[¥a¥T\_a\_QQ¥Z¥\_S\_Z  
@HWI-EAS443:3:21:80:1834#0/1  
GACTAAGGGAATTTTAGGATTTGTGTTACGCTCACCGTG  
+HWI-EAS443:3:21:80:1834#0/1  
^a``ZX¥^^¥`aa`^aY``ZZ`]LXV]aa]X[FRaaVOJB  
@HWI-EAS443:3:21:848:359#0/1  
ATTTTCAAGAAGGTCATCTTTTCAGACCAGCACTGGAGCTA

+HWI-EAS443:3:21:848:359#0/1  
a`a`aaa\_Z^]Z[^a[a`[¥aT]^\_[-\_V[^¥V\_N\_Y  
@HWI-EAS443:3:22:1065:1613#0/1  
CAAAATGACCATCGTCAACATCCACAGCACTCTGCTGTTC  
+HWI-EAS443:3:22:1065:1613#0/1  
\_\_a`baX`\_a^a[^PVbUY`\_b\_a`^XYZTZ`^Z]a\_`^  
@HWI-EAS443:3:22:1392:130#0/1  
GACAAAATGACCATCGTCAACATCCACAGCACTCTGCTGT  
+HWI-EAS443:3:22:1392:130#0/1  
aaRaa`abaa¥Zaa]\_\_^\_XK[\_\_0\_X`¥Z\_V^X\_WX^ZZ  
@HWI-EAS443:3:22:1480:1144#0/1  
CAAAATGACCATCGTCAACATCCACAGCACTCTGCTGTTC  
+HWI-EAS443:3:22:1480:1144#0/1  
`\_\_a^]a`\_a]X\_VZ`\_YZ¥^F¥¥^]LXR]V¥YWXVWUN  
@HWI-EAS443:3:22:1768:996#0/1  
TTGGGACTCATCCTAGCTCCAGTGCTGGTCTGAAAGATGA  
+HWI-EAS443:3:22:1768:996#0/1  
aa\_\_VZ\_b\_bb`^^`a¥a\_`a]^\_a\_]Z`\_R\_\_Y^¥ZY  
@HWI-EAS443:3:22:374:1339#0/1  
GATATTCTTCCCTCATGGACTCAGGCACTCCTTCCGTAGA  
+HWI-EAS443:3:22:374:1339#0/1  
`aaaababaab\_abY\_a\_[aa`a\_`bbb`aa`Zaa`W\_^^  
@HWI-EAS443:3:22:709:1101#0/1  
GACAAAATGACCATCGTCAACATCCACAGCACTCTGCTGT  
+HWI-EAS443:3:22:709:1101#0/1  
abaaaabbba`aa\_]aZaaa`aa\_a\_aa\_`a\_\_\_\_\_a^\_\_]  
@HWI-EAS443:3:22:735:1619#0/1  
AAAATGACCATCGTCAACATCCACAGCACTCTGCTGTTC  
+HWI-EAS443:3:22:735:1619#0/1  
]¥¥K`\_\_]b`\_K`\_bab\_baSXSXYFM¥¥\_]aY[¥KZ[TU  
@HWI-EAS443:3:22:867:1079#0/1  
CAGGCACTCCTTCCGTAGAAGGCCCTCTTTTCAAACCGTA  
+HWI-EAS443:3:22:867:1079#0/1  
a\_a]abbaa`[^aaa]ab`]^[^Z`W[``\_aa\_\_`]\_\_X]  
@HWI-EAS443:3:23:1378:790#0/1  
CAGTGAGCGAGGACTGCAGCGTAGACGCTTTGTCCAAAAT  
+HWI-EAS443:3:23:1378:790#0/1  
^^¥\_bab]b`aaX^`][W`\_`¥aaaUaP¥^[a¥PV]\_`^^  
@HWI-EAS443:3:23:1566:1767#0/1  
CAGGCACTCCTTCCGTAGAAGGCCCTCTTTTCAAACCGTA  
+HWI-EAS443:3:23:1566:1767#0/1  
a\_U\_bbaX`a^a\_a]^`a\_[Ta\_]U[TY^\_]\_^RN]XX  
@HWI-EAS443:3:23:168:404#0/1  
AAGAGGGCCTTCTACGGAAGGAGTGCCTGAGTCCATGAGG  
+HWI-EAS443:3:23:168:404#0/1  
aa[X]^`a]^`[X^`[a^¥`^^]]Q`Y^YRN]UV^VSVOXW  
@HWI-EAS443:3:23:22:797#0/1  
GATTTGTGTTACGCTCACCGTGCCAGTGAGCGAGGACT  
+HWI-EAS443:3:23:22:797#0/1  
aa^aaa[```\_]][PQVUYOT[MUTGQKXUUBBBBBBBB

@HWI-EAS443:3:23:232:299#0/1  
GGGCCTTCTACGGAAGGAGTGCCTGAGTCCATGAGGGAAG  
+HWI-EAS443:3:23:232:299#0/1  
a`]¥\_a`\_Z¥]^][XTRWJVW[X¥TSTW[VZ¥W^^ZU¥Z  
@HWI-EAS443:3:23:330:296#0/1  
AATTTTCAAGAAGTCATCTTTTCAGACCAGCACTGGAGCT  
+HWI-EAS443:3:23:330:296#0/1  
aaaaaaaa\_X`¥][T`^^\_\_[\_[a``\_]\_\_\_\_U^^]\_Z]  
@HWI-EAS443:3:23:35:1028#0/1  
ATATTCTTCCCTCATGGACTCAGGCACTCCTTCCGTAGAA  
+HWI-EAS443:3:23:35:1028#0/1  
aba``]^abaa`\_[`a^\_\_`]U¥\_```\_a``\_a[]X\_\_^U  
@HWI-EAS443:3:23:481:1023#0/1  
CAGTGAGCGAGGACTGCAGCGTAGACGCTTTGTCCAAAAT  
+HWI-EAS443:3:23:481:1023#0/1  
aXX]YT\_b^^US^a\_\_[a`Z[W`\_\_W^X\_\_¥XU¥\_`\_U¥S  
@HWI-EAS443:3:23:481:181#0/1  
TGTTGACAAAATGACCATCGTCAACATCCACAGCACTCTG  
+HWI-EAS443:3:23:481:181#0/1  
aa[aba\_aabaaab\_a^aaa[aa`\_aaa]^`^`\_]\_^\_Z¥`  
@HWI-EAS443:3:23:561:812#0/1  
ATTCTTCCCTCATGGACTCAGGCACTCCTTCCGTAGAAGG  
+HWI-EAS443:3:23:561:812#0/1  
aaa`SJ^XR[WYIN\_R^aQ\_[U]``NG\_[R[BBBBBBBBBB  
@HWI-EAS443:3:23:734:182#0/1  
CAAAATGACCATCGTCAACATCCACAGCACTCTGCTGTTC  
+HWI-EAS443:3:23:734:182#0/1  
\_\_Y\_^SPZ[[XSVaVWaXG]^`[\_\_\_\_WaR]QGQR]UXQKWT  
@HWI-EAS443:3:23:992:1810#0/1  
CAAAATGACCATCGTCAACATCCACAGCACTCTGCTGTTC  
+HWI-EAS443:3:23:992:1810#0/1  
abbbbab`^abb`^`ba\_a\_aaaab`aaaa`\_a\_a`GaV  
@HWI-EAS443:3:24:1003:896#0/1  
GGGAATTTTAGGATTTGTGTTACGCTCACCGTGCCAGT  
+HWI-EAS443:3:24:1003:896#0/1  
^¥WwB]U[^V\_aba`b\_SZ\_ZHU`R]Z`[MDXHXOTTKPS  
@HWI-EAS443:3:24:1009:1193#0/1  
GAATTTTAGGATTTGTGTTACGCTCACCGTGCCAGTGA  
+HWI-EAS443:3:24:1009:1193#0/1  
\_\_a`^`aaba`b`aa``¥aaa``^¥ZXY\_Y¥a\_]UZ[TV¥  
@HWI-EAS443:3:24:1219:1870#0/1  
TGCAAATTTTCAAGAAGTCATCTTTTCAGACCAGCACTGG  
+HWI-EAS443:3:24:1219:1870#0/1  
ab`bbbbba\_Vaaaa`a¥aaa\_ab`^baa\_Va\_]b^aa`  
@HWI-EAS443:3:24:1444:765#0/1  
AATTTTCAAGAAGTCATCTTTTCAGACCAGCACTGGAGCT  
+HWI-EAS443:3:24:1444:765#0/1  
ababababaaaabaYaaa`aaa\_a^`\_]```\_]\_aY[`MZ  
@HWI-EAS443:3:24:1480:478#0/1  
CTTCCCTCATGGACTCAGGCACTCCTTCCGTAGAAGGCC

+HWI-EAS443:3:24:1480:478#0/1  
abb`abbbbabbbbabab`b^b``aa\_bb`b\_a\_aaa`^X\_  
@HWI-EAS443:3:24:1642:894#0/1  
TGTTGACAAAATGACCATCGTCAACATCCACAGCACTCTG  
+HWI-EAS443:3:24:1642:894#0/1  
]b]ab\_^aa\_a`a`ba`a`]aa^]Za`\_`[\_]YYVG\_U  
@HWI-EAS443:3:24:284:1642#0/1  
GACAAAATGACCATCGTCAACATCCACAGCACTCTGCTGT  
+HWI-EAS443:3:24:284:1642#0/1  
a]aa^\_¥`abaa`ZZaVWXYaa`a¥YXSW¥a\_R\_]\_\_\_\_VN  
@HWI-EAS443:3:24:362:835#0/1  
GACTCAGGCACTCCTTCCGTAGAAAGGCCCTCTTTTCAAAC  
+HWI-EAS443:3:24:362:835#0/1  
¥¥][`a\_bbbba^W\_¥^\_]`]]RZ\_b`P\_^`aMa`  
@HWI-EAS443:3:24:584:651#0/1  
GAGGACTGCAGCGTAGACGCTTTGTCCAAAATGCCCTAAA  
+HWI-EAS443:3:24:584:651#0/1  
\_¥X`aXVa`a`[^a`aa]X^W`\_]\_[X¥\_ZaaQ^]\_\_W  
@HWI-EAS443:3:24:839:611#0/1  
TTAAATACGTTTGAAAAGAGGGCCTTCTACGGAAGGAGT  
+HWI-EAS443:3:24:839:611#0/1  
`\_]\_^`Y^]]Zaaa\_[]]\_`TZ[ZQZ[\_ZUYVVZ\_VVTN  
@HWI-EAS443:3:24:945:33#0/1  
AATTTTCAAGAAGGTCATCTTTTCAGACCAGCACTGGAGCT  
+HWI-EAS443:3:24:945:33#0/1  
abbabb^ab\_aaba]aaaaaaaa¥`aaYY\_^aa````^\_[\_  
@HWI-EAS443:3:25:1026:929#0/1  
CAAAATGACCATCGTCAACATCCACAGCACTCTGCTGTTC  
+HWI-EAS443:3:25:1026:929#0/1  
abbbbbbbbbbbabbaabbab`aa¥^ab\_a`aaaa`aa\_a\_  
@HWI-EAS443:3:25:1312:1849#0/1  
AATGACCATCGTCAACATCCACAGCACTCTGCTGTTCCCTG  
+HWI-EAS443:3:25:1312:1849#0/1  
abbaba`baU`Zaaa`ba\_^`\_a[¥`]`ZaZUVXZ^¥S`^  
@HWI-EAS443:3:25:1746:1966#0/1  
AAAAGAGGGCCTTCTACGGAAGGAGTGCCTGAGTCCATGA  
+HWI-EAS443:3:25:1746:1966#0/1  
abTOT[0¥a`\_ba]aa`a\_[\_[X\_ZPaSLYa^ZSUN\_Y[Z  
@HWI-EAS443:3:25:210:1568#0/1  
AATCCACAATATCAGGTGCAAGATCCCAATGATATTTGCT  
+HWI-EAS443:3:25:210:1568#0/1  
abaabbabaaa`ba`\_Yaa^aaa`a`aaa\_^aaa``\_\_]\_  
@HWI-EAS443:3:25:600:1462#0/1  
CAAAATGACCATCGTCAACATCCACAGCACTCTGCTGTTC  
+HWI-EAS443:3:25:600:1462#0/1  
aabbbbbbbbabaaaabab\_aabbbbaabb\_baaaY`aV\_a  
@HWI-EAS443:3:25:784:852#0/1  
AAGAGGGCCTTCTACGGAAGGAGTGCCTGAGTCCATGAGG  
+HWI-EAS443:3:25:784:852#0/1  
aaabaabaaaaaaaaba\_\_a`\_a¥`\_`\_`\_`\_¥]\_\_\_\_[[\_\_



@HWI-EAS443:3:25:795:159#0/1  
GGGCCTTCTACGGAAGGAGTGCCTGAGTCCATGAGGGAAG  
+HWI-EAS443:3:25:795:159#0/1  
a¥UDNL[WGTU¥\_WS¥\_NZNWWQQVWVTRNWWVUUW¥QUY  
@HWI-EAS443:3:25:829:1626#0/1  
CTCATGGACTCAGGCACTCCTTCCGTAGAAGGCCCTCTTT  
+HWI-EAS443:3:25:829:1626#0/1  
aab¥`¥`¥`bb`a`^Y¥bUaa]`bba][a]`\_a`V[\_VW`  
@HWI-EAS443:3:26:392:641#0/1  
CACTAATCAGGCATGAAAACAGAATGGTGCTGGCTAGCAC  
+HWI-EAS443:3:26:392:641#0/1  
aaaa]aa]a`X\_aaaa\_aa``]aa``\_UaZa\_`\_^`[N\_^  
@HWI-EAS443:3:26:458:1182#0/1  
CATCCTAGCTCCAGTGCTGGTCTGAAAGATGACCTTCTTG  
+HWI-EAS443:3:26:458:1182#0/1  
a`aaaa\_]a\_\_\_V\_]\_]aaG\_`Y`\_Z^Y^VU¥^¥X`W  
@HWI-EAS443:3:26:83:616#0/1  
AATTTTCAAGAAGGTCATCTTTCAGACCAGCACTGGAGCT  
+HWI-EAS443:3:26:83:616#0/1  
\_T]¥bb`a`a]aa][[]]aa`a`\_Yaaa```a`Y\_`\_a`  
@HWI-EAS443:3:27:1246:1885#0/1  
CAAAATGACCATCGTCAACATCCACAGCACTCTGCTGTTC  
+HWI-EAS443:3:27:1246:1885#0/1  
abababaababaa`aaaSaab\_a¥`[a\_\_\_`\_\_^^^V  
@HWI-EAS443:3:27:1313:1574#0/1  
GTCTGAAAGATGACCTTCTTGAATAATTTGCAGGCCTACCA  
+HWI-EAS443:3:27:1313:1574#0/1  
a`aaa`\_`aa`]a]`aaa`a\_```\_\_^`\_`\_\_[\_`\_^`[\_`\_\_  
@HWI-EAS443:3:27:169:218#0/1  
ATTCTTCCCTCATGGACTCAGGCACTCCTTCCGTAGAAGG  
+HWI-EAS443:3:27:169:218#0/1  
T\_¥¥Z¥`\_]\_¥¥\_ZT\_`^Y\_]\_^b^^^a]a]XYW¥¥¥WZ  
@HWI-EAS443:3:27:1781:70#0/1  
AAAATGACCATCGTCAACATCCACAGCACTCTGCTGTTC  
+HWI-EAS443:3:27:1781:70#0/1  
¥a`aba\_[a`UaYaaa0\_a``\_U``W`Z^WY\_X`aZ\_ZZ  
@HWI-EAS443:3:27:225:946#0/1  
ATCCTAGCTCCAGTGCTGGTCTGAAAGATGACCTTCTTGA  
+HWI-EAS443:3:27:225:946#0/1  
aaabaa\_a`a\_^]]`^^[W\_\_^]\_TQ]XX^¥^]]^]\_¥]  
@HWI-EAS443:3:27:48:341#0/1  
ATTTTCAAGAAGGTCATCTTTCAGACCAGCACTGGAGCTA  
+HWI-EAS443:3:27:48:341#0/1  
[aaaabb`¥QUaaUa^\_aaaaaa^aa`^\_\_Z\_\_``^¥a\_`  
@HWI-EAS443:3:27:558:370#0/1  
TGCAAATTTTCAAGAAGGTCATCTTTCAGACCAGCACTGG  
+HWI-EAS443:3:27:558:370#0/1  
aabbb`bbbaaa`aaaa^aaa^aaaa`aa^`\_a\_a\_\_a\_  
@HWI-EAS443:3:27:588:1277#0/1  
GCGCGATCTCGGCTTTGAGGGGGCCTGACGGGATGATAGA

+HWI-EAS443:3:27:588:1277#0/1  
aabba^¥a`aaa`^¥`X]XYTLXYTDNW^[X¥UX[Y¥]T¥  
@HWI-EAS443:3:28:1326:689#0/1  
GGGAATTTTAGGATTTGTGTTACGCTCACCGTGCCAGT  
+HWI-EAS443:3:28:1326:689#0/1  
a\_]\_Xaaa¥`\_¥¥^\_]V^¥Y]]BBBBBBBBBBBBBBBB  
@HWI-EAS443:3:28:141:1331#0/1  
GGCCTTCTACGGAAGGAGTGCCTGAGTCCATGAGGGAAGA  
+HWI-EAS443:3:28:141:1331#0/1  
abbbbbbabbabaaabb`baab`a`¥abaaaa^aaaa`a  
@HWI-EAS443:3:28:437:573#0/1  
GGGAATTTTAGGATTTGTGTTACGCTCACCGTGCCAGT  
+HWI-EAS443:3:28:437:573#0/1  
`]]aaaaaaaa`aaa`a\_`a\_¥a^¥W¥^^[^¥Y[¥V  
@HWI-EAS443:3:28:602:379#0/1  
GGGCCTTCTACGGAAGGAGTGCCTGAGTCCATGAGGGAAG  
+HWI-EAS443:3:28:602:379#0/1  
^b\_a\_abb`WaZaaTb]¥F^]a`b`a\_U]`a\_\_\_`^a`  
@HWI-EAS443:3:28:892:1916#0/1  
AGGATTTGTGTTACGCTCACCGTGCCAGTGAGCGAGGA  
+HWI-EAS443:3:28:892:1916#0/1  
`^ZP]YW`ZUPT^]]NaG`BBBBBBBBBBBBBBBBBBBB  
@HWI-EAS443:3:29:1205:1996#0/1  
CTCCCTCATGGACTCAGGCACTCCTCCGTAGAAGGCC  
+HWI-EAS443:3:29:1205:1996#0/1  
abbbbababbXbXbbbaab`Zba]]]H^`HaabaaS^aM  
@HWI-EAS443:3:29:1287:875#0/1  
CTCCAGTGCTGGTCTGAAAGATGACCTTCTTAAAAATTG  
+HWI-EAS443:3:29:1287:875#0/1  
aaVa\_R0bbVbZ\_ab¥S`a[aaaaVa`aba]aab`a\_\_\_  
@HWI-EAS443:3:29:1774:812#0/1  
CAAAATGACCATCGTCAACATCCACAGCACTCTGCTGTTC  
+HWI-EAS443:3:29:1774:812#0/1  
aabbbbb`aba`\_ZR]\_b`a^0\_b\_a]aaab`]`ab\_bZ  
@HWI-EAS443:3:29:768:434#0/1  
TGAAAGATGACCTTCTTAAAAATTTGCAGGCCTACCAGAA  
+HWI-EAS443:3:29:768:434#0/1  
aa^baab\_\_bb\_a`\_aab`\_a\_a`a`\_\_\_aYa`a\_a`a\_  
@HWI-EAS443:3:29:773:736#0/1  
AATTTTCAAGAAGGTCATCTTTACAGACCAGCACTGGAGCT  
+HWI-EAS443:3:29:773:736#0/1  
]H\_b¥S\_a\_a`^¥aZaJ^`a]P`][\_QVY`\_0`a^\_]T  
@HWI-EAS443:3:29:858:1535#0/1  
TAGGATTTGTGTTACGCTCACCGTGCCAGTGAGCGAGG  
+HWI-EAS443:3:29:858:1535#0/1  
a]ababaa`a`a\_a`\_[[ST`^W]a^Y^\_U[^Y\_¥¥BB  
@HWI-EAS443:3:2:1470:737#0/1  
AAAATGACCATCGTCAACATCCACAGCACTCTGCTGTTC  
+HWI-EAS443:3:2:1470:737#0/1  
aaaaa^][`aaY\_] ^YTZ[ZT¥ZUM[SZQYZ]^Y^¥Z^XY

@HWI-EAS443:3:2:1671:1243#0/1  
AAGAGGGCCTTCTACGGAAGGAGTGCCTGAGTCCATGAGG  
+HWI-EAS443:3:2:1671:1243#0/1  
aa[aa`bYaaa\_ba`ab\_\_aa\_aZ\_\_Wa`\_^¥YG¥aZ\_Z\_  
@HWI-EAS443:3:2:657:451#0/1  
GCCTTCTACGGAAGGAGTGCCTGAGTCCATGAGGGAAGAA  
+HWI-EAS443:3:2:657:451#0/1  
aXQQYJRMFWYLNLR`XaNZVTQNUYFLTL^[TZZZBBBB  
@HWI-EAS443:3:2:844:264#0/1  
GCCTGCAAATTTTCAAGAAGGTCATCTTTCAGACCAGCAC  
+HWI-EAS443:3:2:844:264#0/1  
a`X\_VQ\_a\_Z`]``]Ra¥]`a¥Za\_a\_a\_\_Za¥N\_X]X]^  
@HWI-EAS443:3:2:883:1704#0/1  
CAAGAAGGTCATCTTTCAGACCAGCACTGGAGCTAGGATG  
+HWI-EAS443:3:2:883:1704#0/1  
aba`]aa¥SUa``\_XaZaa\_[[XaVVU¥`\_]¥Z]W`] [U\_  
@HWI-EAS443:3:2:957:1038#0/1  
GCAAATTTTCAAGAAGGTCATCTTTCAGACCAGCACTGGA  
+HWI-EAS443:3:2:957:1038#0/1  
a^aUS¥VZ`\_¥Z]^0\_\_T]]X]XX^]]UTTX]R^XY\_¥V  
@HWI-EAS443:3:2:958:1440#0/1  
TGACAAAATGACCATCGTCAACATCCACAGCACTCTGCTG  
+HWI-EAS443:3:2:958:1440#0/1  
\_Z` [ `]Y^aaaWLXYOZZ]^ [Q[\_I]VP[¥S^^ZYVYQ¥B  
@HWI-EAS443:3:30:1374:1322#0/1  
GACAAAATGACCATCGTCAACATCCACAGCACTCTGCTGT  
+HWI-EAS443:3:30:1374:1322#0/1  
^Y`\_W\_] [ `aaaaaWX`a¥a^aaaa[\_a¥G`]aa^]Y¥YV  
@HWI-EAS443:3:30:274:683#0/1  
GATTTGTGTTACGCTCACCGTGCCAGTGAGCGAGGACT  
+HWI-EAS443:3:30:274:683#0/1  
`\_aaaaaaaa\_aa`aa]aaa\_`]\_a`a` [ ` `¥aa`] ^YKZ  
@HWI-EAS443:3:30:501:1556#0/1  
TGACAAAATGACCATCGTCAACATCCACAGCACTCTGCTG  
+HWI-EAS443:3:30:501:1556#0/1  
¥U¥b` `aaKW¥b^Z]b`M`aaa^Z`\_P[XXaU¥^Y[W¥PN  
@HWI-EAS443:3:30:737:691#0/1  
GACAAAATGACCATCGTCAACATCCACAGCACTCTGCTGT  
+HWI-EAS443:3:30:737:691#0/1  
]aaaabbbaba[V¥]^\_bbaa\_Za` [[a`UZ¥]]¥]T¥XW  
@HWI-EAS443:3:31:1077:1174#0/1  
ATTTGTGTTACGCTCACCGTGCCAGTGAGCGAGGACTG  
+HWI-EAS443:3:31:1077:1174#0/1  
aabb` `^Y`aaa]a]`\_] [ ]¥` `Z^` [¥`a¥^]\_ ^a¥` ZZ  
@HWI-EAS443:3:31:1657:403#0/1  
CGCTCACCGTGCCAGTGAGCGAGGACTGCAGCGTAGACG  
+HWI-EAS443:3:31:1657:403#0/1  
` `aaaa^Z\_aaa\_aaaYaaa\_aaaa\_[aaa`a\_a^` \_\_ [F  
@HWI-EAS443:3:31:571:1257#0/1  
GGGCCTTCTACGGAAGGAGTGCCTGAGTCCATGAGGGAAG

+HWI-EAS443:3:31:571:1257#0/1  
^\_`aaabbbbabaaaWV\_Z`baaa]`U`a`]^`^a^`\_`^V  
@HWI-EAS443:3:31:683:73#0/1  
GGGAATTTTAGGATTTGTGTTACGCTCACCGTGCCAGT  
+HWI-EAS443:3:31:683:73#0/1  
abb]aaaa`ba\_aaaa^a^^`a`^[VU\_¥¥¥U^ZUWW¥S  
@HWI-EAS443:3:31:707:1459#0/1  
CACTAATCAGGCATGAAAACAGAATGGTGCTGGCTAGCAC  
+HWI-EAS443:3:31:707:1459#0/1  
aaZa]]\_ba[aa[a`b`\_Ubaaaa`ZUMU``\_`aYS\_\_]R  
@HWI-EAS443:3:31:710:1634#0/1  
CAGTGAGCGAGGACTGCAGCGTAGACGCTTTGTCCAAAAT  
+HWI-EAS443:3:31:710:1634#0/1  
aZVZ^¥^baaa`\_`\_`aaa`]Ra\_aa\_\_\_UWUV¥UZaZ^S  
@HWI-EAS443:3:31:71:1653#0/1  
GGGCCTTCTACGGAAGGAGTGCCTGAGTCCATGAGGGAAG  
+HWI-EAS443:3:31:71:1653#0/1  
aa^b\_]\_b`\_b\_Z`aa]\_]S¥aa`[W]Ya`]\_]\_]\_[Xa]  
@HWI-EAS443:3:31:744:1576#0/1  
CATCCTAGCTCCAGTGCTGGTCTGAAAGATGACCTTCTTG  
+HWI-EAS443:3:31:744:1576#0/1  
a`]a]MVR\_W`[S\_00^^]VQ[`]X`]`[]VTZQS^Z^¥`]  
@HWI-EAS443:3:31:760:1229#0/1  
ACAAAATGACCATCGTCAACATCCACAGCACTCTGCTGTT  
+HWI-EAS443:3:31:760:1229#0/1  
a`¥Y¥S`[[`baa\_`Waa]^\_]a`a\_a`ZVUZ\_WY\_^`\_\_  
@HWI-EAS443:3:32:36:943#0/1  
AAATGACCATCGTCAACATCCACAGCACTCTGCTGTTCCCT  
+HWI-EAS443:3:32:36:943#0/1  
aa[\_\_\_a`a`\_a]R]VZ^W¥aZT\_]LX\_\_Q¥UM\_RWYS]WX  
@HWI-EAS443:3:32:38:1794#0/1  
CTCTGCGGATCTCGGCTTTGAGGGGCCTGACGGGATGA  
+HWI-EAS443:3:32:38:1794#0/1  
aaaaZbab\_``a\_a]`a``aK[YUYS`^]MUP^SSPQTQY  
@HWI-EAS443:3:32:39:2029#0/1  
ATTGGGACTCATCCTAGCTCCAGTGCTGGTCTGAAAGATG  
+HWI-EAS443:3:32:39:2029#0/1  
aa`\_[]`baa]Y\_aVSX\_¥aa`^V]\_^TUW]XPP][W]WS  
@HWI-EAS443:3:32:439:299#0/1  
CACTCCTTCCGTAGAAGGCCCTTTTTCAAACCGTATTTA  
+HWI-EAS443:3:32:439:299#0/1  
0^`bb`\_``[]a\_S\_^^``\_bZ[YVY\_]\_bbZb\_G\_R\_^]  
@HWI-EAS443:3:32:49:1216#0/1  
GACAAAGCGTCTACGCTGCAGTCCTCGCTCACTGGGCACG  
+HWI-EAS443:3:32:49:1216#0/1  
``a```a`\_a\_`\_¥`\_`^``\_N]^`^]¥\_ZaX`]XVTa^^[  
@HWI-EAS443:3:32:534:1290#0/1  
CTATGTTGACAAAATGACCATCGTCAACATCCACAGCACT  
+HWI-EAS443:3:32:534:1290#0/1  
abbaaababb¥¥\_ba\_aaaa`aa^aaaaaaaabZ[¥b`]`X

@HWI-EAS443:3:32:542:1976#0/1  
AAATTTTCAAGAAGGTCATCTTTCAGACCAGCACTGGAGC  
+HWI-EAS443:3:32:542:1976#0/1  
\_`\_`\_`\_`ab`¥\_`¥^Uaa¥\_`^X`[\_`\_^X\_`TLMX^]\_  
@HWI-EAS443:3:32:677:1155#0/1  
CATCCTAGCTCCAGTGCTGGTCTGAAAGATGACCTTCTTG  
+HWI-EAS443:3:32:677:1155#0/1  
a`baba`baaaaXZY`\_`a]\_]\_\_`^\_aX\_a\_[]a\_]\_  
@HWI-EAS443:3:32:784:585#0/1  
GACAAAATGACCATCGTCAACATCCACAGCACTCTGCTGT  
+HWI-EAS443:3:32:784:585#0/1  
^^\_¥^a¥V^`bbab`¥a^\_`aaabaX\_]Z[a\_a^baa\_  
@HWI-EAS443:3:33:1374:1840#0/1  
GCCTTCTACGGAAGGAGTGCCTGAGTCCATGAGGGAAGAA  
+HWI-EAS443:3:33:1374:1840#0/1  
aa`aZ`W\_`a`U]Y¥\_\_Ta^[[¥Y^ZU[ZZ^NR[¥YYUX]  
@HWI-EAS443:3:33:1465:741#0/1  
CTTCCCTCATGGACTCAGGCACTCCTTCCGTAGAAGGCC  
+HWI-EAS443:3:33:1465:741#0/1  
abababbabbbaabbbbabab`aaa\_Zaaaa]a\_]\_[\_`^  
@HWI-EAS443:3:33:1679:209#0/1  
AAAATGACCATCGTCAACATCCACAGCACTCTGCTGTCC  
+HWI-EAS443:3:33:1679:209#0/1  
aba`\_]\_]\_[`aX^\_`^`Ua]YZ[M¥`R¥NNSRVXXSRKKP  
@HWI-EAS443:3:33:663:1412#0/1  
GGGCCTTCTACGGAAGGAGTGCCTGAGTCCATGAGGGAAG  
+HWI-EAS443:3:33:663:1412#0/1  
aZaaaaa`aaYXa`[¥M¥YX\_a\_\_\_\_`Y\_`^\_\_¥R^X^X`¥  
@HWI-EAS443:3:33:681:170#0/1  
GATTTGTGTTACGCTCACCGTCCCCAGTGAGCGAGGACT  
+HWI-EAS443:3:33:681:170#0/1  
a`aaaa\_a`aaZ`^\_SYQVU¥TYUU^UQSSTNDLQVVSKP  
@HWI-EAS443:3:33:733:1139#0/1  
GACTCATCCTAGCTCCAGTGCTGGTCTGAAAGATGACCTT  
+HWI-EAS443:3:33:733:1139#0/1  
a\_ba```bb\_Y`b`bbb`[\_a\_aa\_aa`\_`^`^`````[``  
@HWI-EAS443:3:33:739:461#0/1  
CGTCTACGCTGCAGTCCTCGCTCACTGGGCACGGTGAGCG  
+HWI-EAS443:3:33:739:461#0/1  
aa^¥Waaa¥ZR¥JZU\_`[\_`^PUYQPPU[[U[UUVUUBBBB  
@HWI-EAS443:3:33:943:362#0/1  
GGAATTTTAGGATTTGTGTTACGCTCACCGTCCCCAGTG  
+HWI-EAS443:3:33:943:362#0/1  
aba`ba`aW\_aaaa¥a]¥^\_`]¥^a¥YV^WXWSP¥WSTW^  
@HWI-EAS443:3:34:1050:1712#0/1  
CTTCCCTCATGGACTCAGGCACTCCTTCCGTAGAAGGCC  
+HWI-EAS443:3:34:1050:1712#0/1  
abbbabbbba`bbabb`aabbbbababababaaaa]\_Z`  
@HWI-EAS443:3:34:1401:566#0/1  
TGCAAATTTTCAAGAAGGTCATCTTTCAGACCAGCACTGG

+HWI-EAS443:3:34:1401:566#0/1  
\_¥`baaaaa`]a`aYY\_YY\_`^\_\_\_\_Ya\_\_\_\_V¥\_0]ZZYW  
@HWI-EAS443:3:34:1425:823#0/1  
GGACTCAGGCACTCCTTCCGTAGAAGGCCCTCTTTTCAAA  
+HWI-EAS443:3:34:1425:823#0/1  
aaaabaabaaaaaaa`a`aa\_`¥``Z\_\_Z^\_S`\_\_[Y¥SB  
@HWI-EAS443:3:34:1454:186#0/1  
GGACTCAGGCACTCCTTCCGTAGAAGGCCCTCTTTTCAAA  
+HWI-EAS443:3:34:1454:186#0/1  
ab¥bb]a`aa`babVb`^[b``\_aa`V[^^\_Q^]¥UYBB  
@HWI-EAS443:3:34:352:1759#0/1  
CTTCCCTCATGGACTCAGGCACTCCTTCCGTAGAAGGCC  
+HWI-EAS443:3:34:352:1759#0/1  
`\_Zb`babbaa`b\_\_babUbabbbbbbabaUabaa`]aa\_a  
@HWI-EAS443:3:34:406:1690#0/1  
GTTGTATATGAGGCCCATGCAACTGGCAAGTGCACCAGTT  
+HWI-EAS443:3:34:406:1690#0/1  
a`ababbbaaa]\_babba^`baaa\_`a`a`Y\_`\_^`]Y]\_  
@HWI-EAS443:3:34:411:26#0/1  
CTTCCCTCATGGACTCAGGCACTCCTTCCGTAGAAGGCC  
+HWI-EAS443:3:34:411:26#0/1  
a\_[`\_\_¥\_[Oba^^¥^¥Q\_\_[\_`a\_¥0¥Ya\_UT][X\_YZRS  
@HWI-EAS443:3:34:421:428#0/1  
GACTCATCTAGCTCCAGTGCTGGTCTGAAAGATGACCTT  
+HWI-EAS443:3:34:421:428#0/1  
aaa`ab`bbababaaaaZaaa\_a^`a`P^`\_a`^aX]\_\_  
@HWI-EAS443:3:34:536:1841#0/1  
AAATGACCATCGTCAACATCCACAGCACTCTGCTGTTCCCT  
+HWI-EAS443:3:34:536:1841#0/1  
^^^`^aaabab]Rbb`\_]\_Y]Z^baXQ]``^WQ^UUUVLTV  
@HWI-EAS443:3:34:959:1455#0/1  
GTGCTAGCCAGCACCATTTCTGTTTTTCATGCCTGATTAGTG  
+HWI-EAS443:3:34:959:1455#0/1  
a]aaa\_X`\_R\_aaa]Y\_aa`aZ\_\_\_\_\_`\_a`Za`R^ZV]TZ  
@HWI-EAS443:3:35:1036:1531#0/1  
CAGCGTAGACGCTTTGTCCAAAATGCCCTAAATGGGAATG  
+HWI-EAS443:3:35:1036:1531#0/1  
`aZ\_^`¥b`¥`\_a``Yaa`]\_\_ZaV``\_a````¥^^` []  
@HWI-EAS443:3:35:1400:831#0/1  
TGGACTCAGGCACTCCTTCCGTAGAAGGCCCTCTTTTCAA  
+HWI-EAS443:3:35:1400:831#0/1  
abaabbabbaababab`aaZbVX[\_ab[abaaaaba`a`b  
@HWI-EAS443:3:35:1466:877#0/1  
TGCCCAGTGAGCGAGGACTGCAGCGTAGACGCTTTGTCCA  
+HWI-EAS443:3:35:1466:877#0/1  
abaaa^b^babaa`aaa\_`a^`^`]`Y`[aaaa`^`\_`WaNU  
@HWI-EAS443:3:35:1532:1642#0/1  
AAGAAGGTCATCTTTCAGACCAGCACTGGAGCTAGGATGA  
+HWI-EAS443:3:35:1532:1642#0/1  
aaaaaa^^aabaaa`¥`aa^¥aZ\_a\_a]]^a`]]]Z[^W\_

@HWI-EAS443:3:35:1555:511#0/1  
ATTCTTCCTCATGGACTCAGGCACTCCTTCCGTAGAAGG  
+HWI-EAS443:3:35:1555:511#0/1  
abaX\_`aba`\_a`a`\_``\_\_a`\_\_`aW¥^ba\_`\_\_Y[U¥  
@HWI-EAS443:3:35:158:1883#0/1  
TTGGGACTCATCCTAGCTCCAGTGTCTGGTCTGAAAGATGA  
+HWI-EAS443:3:35:158:1883#0/1  
a``U[ababb`aaaa\_a^a\_a¥YU\_\_`SS\_]```^`]P¥  
@HWI-EAS443:3:35:1662:792#0/1  
AAAATGACCATCGTCAACATCCACAGCACTCTGCTGTTCC  
+HWI-EAS443:3:35:1662:792#0/1  
¥\_I\_`a¥TYa^\_a`]¥baZU`[b¥^[aHbaa`W^Z[S^V]  
@HWI-EAS443:3:35:386:1815#0/1  
GTTGACAAAATGACCATCGTCAACATCCACAGCACTCTGC  
+HWI-EAS443:3:35:386:1815#0/1  
aab\_ab\_`^ababbb]aaa\_a[`Waaa^Zb]\_YS][\_\_W\_  
@HWI-EAS443:3:35:754:564#0/1  
CTTCCCTCATGGACTCAGGCACTCCTTCCGTAGAAGGCC  
+HWI-EAS443:3:35:754:564#0/1  
aaZ\_aaa```b\_a\_`\_\_Za¥][`\_a`¥aaV¥S^^[¥\_^\_  
@HWI-EAS443:3:35:757:1535#0/1  
ATGTTGACAAAATGACCATCGTCAACATCCACAGCACTCT  
+HWI-EAS443:3:35:757:1535#0/1  
S¥¥\_XY¥^¥a\_\_\_V^^bba^U[b\_ZN`Sba]a\_[-¥`¥Z`  
@HWI-EAS443:3:36:1046:974#0/1  
GGGCCTTCTACGGAAGGAGTGCCTGAGTCCATGAGGGAAG  
+HWI-EAS443:3:36:1046:974#0/1  
aaaba]aaa`a`[XX¥\_[[Wa\_`a^`\_¥\_`¥¥`S\_Z^X]`  
@HWI-EAS443:3:36:156:946#0/1  
AATTTTCAAGAAGGCATCTTTTCAAGACCAGCACTGGAGCT  
+HWI-EAS443:3:36:156:946#0/1  
ZX\_ba^a^`b`[`bTba^aaa`a`a`bTJYbaaaa]S]aW  
@HWI-EAS443:3:36:169:157#0/1  
CATTCCCATTAGGGCATTGACAAAAGCGTCTACGCTG  
+HWI-EAS443:3:36:169:157#0/1  
aa]aab]]`TGUW^XXW``XTaa]¥`R`X``SPUX`PZMV  
@HWI-EAS443:3:36:1744:1168#0/1  
CTCAGGCACTCCTTCCGTAGAAGGCCCTTTTTCAAACCG  
+HWI-EAS443:3:36:1744:1168#0/1  
`bb]bbbbbabbabbbababbabab`\_]\_abaaRa`b`X`  
@HWI-EAS443:3:36:219:1964#0/1  
CAGGCACTCCTTCCGTAGAAGGCCCTTTTTCAAACCGTA  
+HWI-EAS443:3:36:219:1964#0/1  
aba`a`bbbaabbbY\_`bba`bbb`a``aaabbaa`W]  
@HWI-EAS443:3:36:448:21#0/1  
AGGCCTGCAAATTTTCAAGAAGGCATCTTTTCAAGACCAGC  
+HWI-EAS443:3:36:448:21#0/1  
Yaab`Y`b`b^b\_b¥^¥Z`b`^]SWVZaa^VY\_a`\_TQ`a  
@HWI-EAS443:3:36:478:985#0/1  
CTCGCTCACTGGGCACGGTGAAGCGTGAACACAAATCCTAA

+HWI-EAS443:3:36:478:985#0/1  
a`aaa\_aVa[]U^a`\_\_`Q`[\_`\_Y[L[a^\_V^^^`\_¥a^  
@HWI-EAS443:3:36:647:1713#0/1  
AATGACCATCGTCAACATCCACAGCACTCTGCTGTTCCCTG  
+HWI-EAS443:3:36:647:1713#0/1  
aaaababa\_`¥[^S^V[UYZ`]ZZ\_`UQZSTTMFQY``]V  
@HWI-EAS443:3:36:78:612#0/1  
GACAAAATGACCATCGTCAACATCCACAGCACTCTGCTGT  
+HWI-EAS443:3:36:78:612#0/1  
a`a\_]S^`¥^a\_Q¥a\_P`a[]W¥^a\_\_`TPT\_0¥S]`[RW  
@HWI-EAS443:3:36:811:1974#0/1  
GAATTTTAGGATTTGTGTTCCACGCTCACCGTGCCAGTGA  
+HWI-EAS443:3:36:811:1974#0/1  
X¥```aaa\_U^baaa\_aa]aabaaZ``W``UW\_XaXDNVG  
@HWI-EAS443:3:36:844:1399#0/1  
AGGCTATGGAACAGATGGCTGGATCGAGTGAACAGGCAGC  
+HWI-EAS443:3:36:844:1399#0/1  
`¥¥`X\_\_Z^`b]W`S]aa^¥X\_Z\_\_^[MXa][[S[a`RY  
@HWI-EAS443:3:36:928:357#0/1  
AAAATGACCATCGTCAACATCCACAGCACTCTGCTGTTCC  
+HWI-EAS443:3:36:928:357#0/1  
abba\_a`aaaaa\_aZV]``a`T`a\_]`[[`\_¥V¥[Y¥W^  
@HWI-EAS443:3:36:936:252#0/1  
GGGCCTTCTACGGAAGGAGTGCCTGAGTCCATGAGGGAAG  
+HWI-EAS443:3:36:936:252#0/1  
\_TX]``[aU\_]VZPX^[KQHYSUSSPZNRUUGNQVV[VVW  
@HWI-EAS443:3:37:13:206#0/1  
ATTGGGACTCATCCTAGCTCCAGTGCTGGTCTGAAAGATG  
+HWI-EAS443:3:37:13:206#0/1  
W`aba]¥aa`XX`YS^UWWZ]0¥F¥UITVVYRURUWTREX  
@HWI-EAS443:3:37:1465:678#0/1  
CAGTGAGCGAGGACTGCAGCGTAGACGCTTTGTCCAAAAT  
+HWI-EAS443:3:37:1465:678#0/1  
\_V[W``aX`a]aWX\_V]Z`a]U¥]^M[Q\_aVVZ¥^]W¥  
@HWI-EAS443:3:37:554:134#0/1  
AAAATGACCATCGTCAACATCCACAGCACTCTGCTGTTCC  
+HWI-EAS443:3:37:554:134#0/1  
a`ababa`aaaaa^a`¥`\_aa\_]a]\_\_`V\_^]`Z\_ZW]T  
@HWI-EAS443:3:37:969:926#0/1  
AAAATGACCATCGTCAACATCCACAGCACTCTGCTGTTCC  
+HWI-EAS443:3:37:969:926#0/1  
aabaaaaaab`aa^aaa]aab]\_`]V]aUa`^`^\_¥^]Y  
@HWI-EAS443:3:38:1038:1580#0/1  
CTTCCCTCATGGACTCAGGCACTCCTTCCGTAGAAGGCCC  
+HWI-EAS443:3:38:1038:1580#0/1  
aab\_]ba]ZVa`[`¥a\_ba\_a]]aaXU^a\_S\_[]WP[OJL  
@HWI-EAS443:3:38:103:1048#0/1  
ATCCTAGCTCCAGTGCTGGTCTGAAAGATGACCTTCTTGA  
+HWI-EAS443:3:38:103:1048#0/1  
ababaaababb\_\_Waaaa`¥aa`[a\_a`\_]`\_`aa\_\_\_\_



@HWI-EAS443:3:38:1056:299#0/1  
CAACTGGTGCACCTTGCCAGTTGCATGGGCCTCATATACAA  
+HWI-EAS443:3:38:1056:299#0/1  
ab]abbbaaa`aaaaa`\_`aaa`a`\_aU¥WZ¥^V`¥\_Y  
@HWI-EAS443:3:38:1123:982#0/1  
TATTCTTCCCTCATGGACTCAGGCACTCCTTCCGTAGAAG  
+HWI-EAS443:3:38:1123:982#0/1  
abbaaaabaa`aa\_`aaaaaa¥aaa`ab^^\_[aV`a¥`^  
@HWI-EAS443:3:38:1224:770#0/1  
GGACTCAGGCACTCCTTCCGTAGAAGGCCCTCTTTTCAA  
+HWI-EAS443:3:38:1224:770#0/1  
a]bb]bbababab`a`aaab^a`aa`a`¥DMYa\_aa][`U  
@HWI-EAS443:3:38:1317:384#0/1  
CTCAGGCACTCCTTCCGTAGAAGGCCCTCTTTTCAAACCG  
+HWI-EAS443:3:38:1317:384#0/1  
abbbbabbb^\_aabababaabaaa\_aaa`\_aa`W`a\_^¥  
@HWI-EAS443:3:38:1389:482#0/1  
CAAGAAGGTCATCTTTCAGACCAGCACTGGAGCTAGGATG  
+HWI-EAS443:3:38:1389:482#0/1  
Y`V\_Z\_¥aS[aa]\_baabbaX^`^ba`\_YPX[`a^`[[Y  
@HWI-EAS443:3:38:1492:1033#0/1  
AAAGAGGGCCTTCTACGGAAGGAGTGCCTGAGTCCATGAG  
+HWI-EAS443:3:38:1492:1033#0/1  
aa^X`^Q`]Qa\_M¥ZM]`\_\_^]W]T\_¥V¥TNGGNYQVTTY  
@HWI-EAS443:3:38:149:1223#0/1  
AAAATGACCATCGTCAACATCCACAGCACTCTGCTGTCC  
+HWI-EAS443:3:38:149:1223#0/1  
W^¥0]^S^\_\_SQ^`\_`¥[TZ^]]\_Z\_^]\_YVYVW¥SFX^V  
@HWI-EAS443:3:38:151:1282#0/1  
GACAAAATGACCATCGTCAACATCCACAGCACTCTGCTGT  
+HWI-EAS443:3:38:151:1282#0/1  
aU`a`\_V`X^a[`¥¥a`abaa^0]XZ]VJZ¥PY]RMZ]XQ  
@HWI-EAS443:3:38:1577:995#0/1  
CTTCCCTCATGGACTCAGGCACTCCTTCCGTAGAAGGCCC  
+HWI-EAS443:3:38:1577:995#0/1  
a]aaa]aa]]Z\_Y[^YaXVYa`^b\_]`^`UW¥¥`\_H[T]G  
@HWI-EAS443:3:38:1642:379#0/1  
CTTCCCTCATGGACTCAGGCACTCCTTCCGTAGAAGGCCC  
+HWI-EAS443:3:38:1642:379#0/1  
abbWWW`\_U\_b^]P`W\_WUY`\_aVTY`XQ¥T^Z\_¥ZYPSR  
@HWI-EAS443:3:38:1706:1238#0/1  
CCACAATATCAGGTGCAAGATCCCAATGATATTTGCTGCA  
+HWI-EAS443:3:38:1706:1238#0/1  
\_]a\_X`^a^\_\_\_\_^¥^^`\_¥]\_]^aaab`a]TTZ\_\_SXXYS  
@HWI-EAS443:3:38:1744:339#0/1  
GGCCTTCTACGGAAGGAGTGCCTGAGTCCATGAGGGAAGA  
+HWI-EAS443:3:38:1744:339#0/1  
abbbabaab`ba^Uaa^bU`a`aa¥a^Sa¥VPU`]`V¥^W  
@HWI-EAS443:3:38:1751:1764#0/1  
CTGACTAAGGGAATTTTAGGATTTGTGTTCCACGCTCACCG

+HWI-EAS443:3:38:1751:1764#0/1  
abba`bba¥a`aaabaaaa`aa]WYa[ZLW[QRNRXONO  
@HWI-EAS443:3:38:362:305#0/1  
AAATGACCATCGTCAACATCCACAGCACTCTGCTGTTCCCT  
+HWI-EAS443:3:38:362:305#0/1  
]Y\_ababa¥aba^`]QZa`\_aaaa\_aa\_\_^^]V^`SYVYS  
@HWI-EAS443:3:38:458:1530#0/1  
GATATTCTTCCCTCATGGACTCAGGCACTCCTTCCGTAGA  
+HWI-EAS443:3:38:458:1530#0/1  
]Q\_H^^[\_S\_a\_^`U`\_ab]b`U^a\_a¥Z^a]aaa\_^^[  
@HWI-EAS443:3:38:464:659#0/1  
GAAAAGAGGGCCTTCTACGGAAGGAGTGCCTGAGTCCATG  
+HWI-EAS443:3:38:464:659#0/1  
a¥Za^`\_aa^`a`\_X\_a¥SH¥aYQZRa^W\_[L]\_V]P]V  
@HWI-EAS443:3:38:524:1956#0/1  
TTTGAAAAGAGGGCCTTCTACGGAAGGAGTGCCTGAGTCC  
+HWI-EAS443:3:38:524:1956#0/1  
`\_aab\_aa]b`aa`^Z^baaa`aa\_XY^`PVVN^UZVFKL  
@HWI-EAS443:3:38:563:533#0/1  
GACAAAATGACCATCGTCAACATCCACAGCACTCTGCTGT  
+HWI-EAS443:3:38:563:533#0/1  
a`aaaaZY¥a\_\_\_\_\_`a^`V`^a`W^^\_ZOFQW]]X^]]  
@HWI-EAS443:3:38:620:1347#0/1  
GGGAATTTTAGGATTTGTGTTACGCTCACCGTGCCCGT  
+HWI-EAS443:3:38:620:1347#0/1  
\_¥XX\_a^`¥¥\_Z¥`^ZXWVS]]\_`OZSYLER¥V]¥YRD  
@HWI-EAS443:3:38:860:678#0/1  
GACAAAATGACCATCGTCAACATCCACAGCACTCTGCTGT  
+HWI-EAS443:3:38:860:678#0/1  
a\_a^`^a]a`\_^\_\_`^`\_]\_^Z[`^^]YFVW^SYRN]]S  
@HWI-EAS443:3:39:1021:77#0/1  
CACCTCTGACTAAGGGAATTTTAGGATTTGTGTTACGCT  
+HWI-EAS443:3:39:1021:77#0/1  
abb\_]UK\_UY]V`U`b\_I][aR`b\_PVT[`Y\_Y\_aU^XBB  
@HWI-EAS443:3:39:110:1517#0/1  
GGGCCTTCTACGGAAGGAGTGCCTGAGTCCATGAGGGAAG  
+HWI-EAS443:3:39:110:1517#0/1  
`bbbbbbbbbabaabb\_ba\_]baa`^Z]]ba`aab\_\_\_b\_  
@HWI-EAS443:3:39:1545:1083#0/1  
AGCGTCTACGCTGCAGTCCTCGCTCACTGGGCACGGTGAG  
+HWI-EAS443:3:39:1545:1083#0/1  
`baaaabaa`a`¥`a^^\_aW¥[WYQWU[a\_S¥R\_\_UUWM  
@HWI-EAS443:3:39:356:584#0/1  
CAGGCACTCCTTCCGTAGAAGGCCCTCTTTTCAAACCGTA  
+HWI-EAS443:3:39:356:584#0/1  
aaaaaa\_`aa```\_a][\_YT[^\_\_\_TVY^^[W^]\_^Z\_U^  
@HWI-EAS443:3:39:396:1562#0/1  
AAATGACCATCGTCAACATCCACAGCACTCTGCTGTTCCCT  
+HWI-EAS443:3:39:396:1562#0/1  
abaa\_bbabaa\_^`a]\_a\_aX\_]\_\_`\_`\_\_\_\_\_^\_]\_^

@HWI-EAS443:3:39:403:1659#0/1  
AAAATGACCATCGTCAACATCCACAGCACTCTGCTGTTCC  
+HWI-EAS443:3:39:403:1659#0/1  
ab`]`^babaaa]\_aa`\_a\_W\_\_\_\_\_]Z`a\_]ZZ\_¥]Z\_\_Z  
@HWI-EAS443:3:39:481:434#0/1  
GGGAATTTTAGGATTTGTGTTCCACGCTCACCGTGCCAGT  
+HWI-EAS443:3:39:481:434#0/1  
Y\_bUaaababa^]baaaRaa\_aaa^a¥`aa¥]¥`S¥¥Y`M  
@HWI-EAS443:3:39:504:323#0/1  
CAAATTTTCAAGAAGGTCATCTTTTCAGACCAGCACTGGAG  
+HWI-EAS443:3:39:504:323#0/1  
\_[¥\_bbaab`U`a]baXa`a`a``aaaaa^`aa`\_\_^\_  
@HWI-EAS443:3:39:687:380#0/1  
CCCTCATGGACTCAGGCACTCCTTCCGTAGAAGGCCCTCT  
+HWI-EAS443:3:39:687:380#0/1  
aab\_a`ab]\_b\_aaa]`a`[\_`\_Ya`[VV\_\_¥¥[\_\_\_\_ZZ¥  
@HWI-EAS443:3:3:1447:1247#0/1  
TATTCTTCCCTCATGGACTCAGGCACTCCTTCCGTAGAAG  
+HWI-EAS443:3:3:1447:1247#0/1  
aa`a]^\_QV\_`^`\_\_`\_\_¥\_¥[W¥Z^¥QS¥NVOXS¥]VBB  
@HWI-EAS443:3:3:1791:1340#0/1  
ATTCTTCCCTCATGGACTCAGGCACTCCTTCCGTAGAAGG  
+HWI-EAS443:3:3:1791:1340#0/1  
`aa[bbaa]ab`a`a\_[b`aa\_]a`\_`\_\_`¥XaZ\_a\_\_VQ  
@HWI-EAS443:3:3:194:1512#0/1  
GTGAGCGAGGACTGCAGCGTAGACGCTTTGTCCAAAATGC  
+HWI-EAS443:3:3:194:1512#0/1  
aYXZ^]\_aa[¥`]FZX¥]ST]U[YZ¥[XaS^R[VSHWBB  
@HWI-EAS443:3:3:350:1401#0/1  
TGTTGACAAAATGACCATCGTCAACATCCACAGCACTCTG  
+HWI-EAS443:3:3:350:1401#0/1  
`]P¥¥\_\_a`aaaa[Va\_RUT¥`]G^Z^PZYQS]]QZVBB  
@HWI-EAS443:3:3:463:916#0/1  
GTTGACAAAATGACCATCGTCAACATCCACAGCACTCTGC  
+HWI-EAS443:3:3:463:916#0/1  
a^\_\_]]`\_]`\_Y^Z]]^U`XX]Y]]]XXXUUXYXXUWXXB  
@HWI-EAS443:3:40:1018:1647#0/1  
ACGGTGAGCGTGAACACAAATCCTAAAATTCCTTAGTCA  
+HWI-EAS443:3:40:1018:1647#0/1  
a`a\_Y````\_]\_\_\_\_\_a\_a`Z^`\_\_\_YG¥]^Z]^]]]Y\_\_  
@HWI-EAS443:3:40:1055:1532#0/1  
CAAAATGACCATCGTCAACATCCACAGCACTCTGCTGTTC  
+HWI-EAS443:3:40:1055:1532#0/1  
\_`bb`b`bbba^\_]XZ\_¥^T\_`\_^\_[\_L[\_a^^a¥`XZZ  
@HWI-EAS443:3:40:1424:73#0/1  
TGTTGACAAAATGACCATCGTCAACATCCACAGCACTCTG  
+HWI-EAS443:3:40:1424:73#0/1  
ababaaaaaaaaa^\_[aa^a^a\_\_X^Y[\_`R]\_^\_^^]^]  
@HWI-EAS443:3:40:153:542#0/1  
CGCTCACCGTGCCAGTGAGCGAGGACTGCAGCGTAGACG

+HWI-EAS443:3:40:153:542#0/1  
abbaa^]a`ba`a`\_¥a`aa\_S¥^\_W^¥\_]\_^UY^¥¥]  
@HWI-EAS443:3:40:1754:905#0/1  
TGGTAGGCCTGCAAATTTTCAAGAAGGTCATCTTTCAGAC  
+HWI-EAS443:3:40:1754:905#0/1  
aba^]a\_SX^a^a\_\_\_a\_T^\_[a\_^\_]0a`Z]¥Y\_¥PX\_Y  
@HWI-EAS443:3:40:616:568#0/1  
CTTCCCTCATGGACTCAGGCACTCCTTCCGTAGAAGGCC  
+HWI-EAS443:3:40:616:568#0/1  
aaabab`\_`a¥^\_abaa`])^baa`]Ua`aV`[Z`^[a\_\_\_  
@HWI-EAS443:3:40:777:124#0/1  
CGCTCACCGTGCCAGTGAGCGAGGACTGCAGCGTAGACG  
+HWI-EAS443:3:40:777:124#0/1  
`bbbabbbaaba`aab])^a```\_a\_¥^TUUYU^^P[Y¥W¥  
@HWI-EAS443:3:40:885:808#0/1  
AATTTTCAAGAAGGTCATCTTTCAGACCAGCACTGGAGCT  
+HWI-EAS443:3:40:885:808#0/1  
^abbb`abaa\_aaaXaaaaaaaaa`\_¥Y])aa^^])\_`^  
@HWI-EAS443:3:40:942:1047#0/1  
AAAGAGGGCCTTCTACGGAAGGAGTGCCTGAGTCCATGAG  
+HWI-EAS443:3:40:942:1047#0/1  
a```\_\_\_^^^`^a`a`\_b`^aa\_V[Q0[`[a^a^`V])Y\_  
@HWI-EAS443:3:42:1137:446#0/1  
CAGGCACTCCTTCCGTAGAAGGCCCTTTTTCAAACCGTA  
+HWI-EAS443:3:42:1137:446#0/1  
`a\_bbbabbbaabb])bba`aa^a^a\_bbaaabbaa\_a\_a  
@HWI-EAS443:3:42:1380:971#0/1  
TGACAAAATGACCATCGTCAACATCCACAGCACTCTGCTG  
+HWI-EAS443:3:42:1380:971#0/1  
`\_\_bbbVaa^^¥^`aaa\_X¥¥]a¥IOY`][¥¥XYX\_a\_¥`  
@HWI-EAS443:3:42:1445:50#0/1  
CTCCAGTGCTGGTCTGAAAGATGACCTTCTTGAAAATTTG  
+HWI-EAS443:3:42:1445:50#0/1  
H\_¥Uab`¥¥a¥T^aWaaT`b\_]`b]0¥`b```\_`babaa`a  
@HWI-EAS443:3:42:1661:254#0/1  
AAAATGACCATCGTCAACATCCACAGCACTCTGCTGTTC  
+HWI-EAS443:3:42:1661:254#0/1  
a\_aab`a`aabaa`aa]a^\_¥`\_a`\_¥]\_`\_]\_a]\_ZV  
@HWI-EAS443:3:42:1768:603#0/1  
CAAAATGACCATCGTCAACATCCACAGCACTCTGCTGTTC  
+HWI-EAS443:3:42:1768:603#0/1  
`a^^^\_b`¥H]WVXOX\_^QS[[XSJZWOZ¥YQ^XXW[UXZ  
@HWI-EAS443:3:42:505:427#0/1  
CAAAATGACCATCGTCAACATCCACAGCACTCTGCTGTTC  
+HWI-EAS443:3:42:505:427#0/1  
a\_Kbbb`]aabbabQ]a``\_]\_````¥a\_[a^aa\_\_aYVa¥  
@HWI-EAS443:3:42:564:598#0/1  
GCTGCAGTCTCGTCACTGGGCACGGTGAGCGTGAACAC  
+HWI-EAS443:3:42:564:598#0/1  
^\_bbbbbbbb`ab`])\_aa`aa\_U\_aUa`]QZ\_aaa]aW

@HWI-EAS443:3:42:565:1258#0/1  
GACAAAATGACCATCGTCAACATCCACAGCACTCTGCTGT  
+HWI-EAS443:3:42:565:1258#0/1  
¥UbaWWZ¥UV\_V]S\_S^]aQZ]ZNZLFU¥[LX`\_WM¥^`  
@HWI-EAS443:3:42:772:134#0/1  
CAGGCACTCCTTCCGTAGAAAGGCCCTCTTTTCAAACCGTA  
+HWI-EAS443:3:42:772:134#0/1  
aa`aaaa`]a\_aaa]^`\_[\_]a]\_ZV^^^]Y^¥Y¥X^RX  
@HWI-EAS443:3:43:1081:1480#0/1  
TGCAGCGTAGACGCTTTGTCCAAAATGCCCTAAATGGGAA  
+HWI-EAS443:3:43:1081:1480#0/1  
^babaabSba\_`ab`aaa^`abaaa\_b`[[`aaa`a\_\_[\_  
@HWI-EAS443:3:43:1403:856#0/1  
AATTTTCAAGAAGGTCATCTTTTCAGACCAGCACTGGAGCT  
+HWI-EAS443:3:43:1403:856#0/1  
[ba`¥Z[a`X]^a\_`Y]]a]a`¥\_`]^`SPYP]¥SW¥Q  
@HWI-EAS443:3:43:1426:1845#0/1  
GTGCTAGCCAGCACCATCTGTTTTTCATGCCTGATTAGTG  
+HWI-EAS443:3:43:1426:1845#0/1  
`U\_]ZU^YVXUYZXU[^`abZ^`^¥¥^a^]^a^`]YZV]  
@HWI-EAS443:3:43:165:30#0/1  
CAGTGAGCGAGGACTGCAGCGTAGACGCTTTGTCCAAAAT  
+HWI-EAS443:3:43:165:30#0/1  
aab]a]Z]RZ\_a]`Rb\_aX`aN]SYa\_`N¥YPZKRV\_ZN  
@HWI-EAS443:3:43:1771:1404#0/1  
GGCCTGCAAATTTTCAAGAAGGTCATCTTTTCAGACCAGCA  
+HWI-EAS443:3:43:1771:1404#0/1  
]\_Z\_\_\_\_\_Za``bbaS[¥\_H^X\_MU]ba`¥ZW^[`^H^¥Sa  
@HWI-EAS443:3:43:380:1578#0/1  
GGACTCAGGCACTCCTTCCGTAGAAAGGCCCTCTTTTCAA  
+HWI-EAS443:3:43:380:1578#0/1  
\_[^ababaaabaaaabaaaa\_a^`a]¥\_\_a`^`a``a``a  
@HWI-EAS443:3:43:640:1946#0/1  
GGGCTTCTACGGAAGGAGTGCCTGAGTCCATGAGGGAAG  
+HWI-EAS443:3:43:640:1946#0/1  
aUSY\_b¥VT\_`b`XZU]\_a¥SaZ\_]XZM^[¥QMSa`bS`\_  
@HWI-EAS443:3:43:727:45#0/1  
AAAATGACCATCGTCAACATCCACAGCACTCTGCTGTTC  
+HWI-EAS443:3:43:727:45#0/1  
WXRIXXW\_\_Z^\_^Za``¥TZ\_]Z\_ZXa`ZQ]XZ`VYVXFM  
@HWI-EAS443:3:43:817:863#0/1  
CGGTTTGAAGAGGGCCTTCTACGGAAGGAGTGCCTGAG  
+HWI-EAS443:3:43:817:863#0/1  
abba]]b[]W^b`bbb`\_[aXUN[ba^\_aaXYXa\_Z[^`\_  
@HWI-EAS443:3:43:896:597#0/1  
TGGACTCAGGCACTCCTTCCGTAGAAAGGCCCTCTTTTCAA  
+HWI-EAS443:3:43:896:597#0/1  
abbaaaaaa^aaaaa\_`\_`\_`aa`\_`\_`\_¥Z``^^]\_`  
@HWI-EAS443:3:43:984:1779#0/1  
GTGAGCGAGGACTGCAGCGTAGACGCTTTGTCCAAAATGC

+HWI-EAS443:3:43:984:1779#0/1  
aaabaZ``Z``^¥\_\_a^\_aW\_^¥NWy[a\_`ILN`^]\_ZYG  
@HWI-EAS443:3:44:1127:434#0/1  
GTGCTGGTCTGAAAGATGACCTTCTTAAAAATTTGCAGGC  
+HWI-EAS443:3:44:1127:434#0/1  
a]a`a`[X`\_`a`\_\_`a`¥\_a\_[a^`]a`\_a[`\_\_]\_\_U  
@HWI-EAS443:3:44:1520:647#0/1  
CTGGTGCACCTTGCCAGTTGCATGGGCCTCATATACAACAG  
+HWI-EAS443:3:44:1520:647#0/1  
¥TXTHVZTWW[`VZ\_aNZ`U\_ZTZZ`QZ]U)`[WZ]\_`Y^  
@HWI-EAS443:3:44:371:1311#0/1  
GGCCTTCTACGGAAGGAGTGCCTGAGTCCATGAGGGAAGA  
+HWI-EAS443:3:44:371:1311#0/1  
ababbbbbba`b^]a[]\_`aabbab\_aaaabZa`a\_aaa  
@HWI-EAS443:3:44:668:468#0/1  
CTCAGGCACTCCTTCCGTAGAAGGCCCTCTTTTCAAACCG  
+HWI-EAS443:3:44:668:468#0/1  
aaaa`a`b\_aaaa`a\_a`V`aa^`Za\_`aa^Z¥Q\_\_Ya  
@HWI-EAS443:3:44:734:1084#0/1  
AGGATTTGTGTTACGCTCACCGTGCCAGTGAGCGAGGA  
+HWI-EAS443:3:44:734:1084#0/1  
^ba`aabbT^a`aaaa`^¥M¥X[[¥^Y]Y¥V\_UTPXSNT  
@HWI-EAS443:3:44:812:489#0/1  
ACTAATCAGGCATGAAAACAGAATGGTGGCTAGCACT  
+HWI-EAS443:3:44:812:489#0/1  
a`bba`aba\_babaaaaaba\_`a\_Yaa`a`^\_\_a\_\_]¥  
@HWI-EAS443:3:45:1083:330#0/1  
CTTCTACGGAAGGAGTGCCTGAGTCCATGAGGGAAGAATA  
+HWI-EAS443:3:45:1083:330#0/1  
abbaaabbaaaaa`b\_aaa\_b`\_a\_aa\_baa^aa\_aa`  
@HWI-EAS443:3:45:1692:707#0/1  
GACAAAATGACCATCGTCAACATCCACAGCACTCTGCTGT  
+HWI-EAS443:3:45:1692:707#0/1  
ab`aabaaaa`\_aaa\_W`a\_`^\_]a¥]\_aZ\_\_^`^^Z]]W  
@HWI-EAS443:3:45:299:572#0/1  
CAGTGAGCGAGGACTGCAGCGTAGACGCTTTGTCCAAAAT  
+HWI-EAS443:3:45:299:572#0/1  
`X\_`aa`b`a^b\_`^]aaX[F]aa^`¥aaRH¥Z`a\_a`X  
@HWI-EAS443:3:45:37:1579#0/1  
GGGCCTTCTACGGAAGGAGTGCCTGAGTCCATGAGGGAAG  
+HWI-EAS443:3:45:37:1579#0/1  
`bbbbbbbbbbbaaa`a`aaaaa`aaaaZ`aa[a]  
@HWI-EAS443:3:45:495:1700#0/1  
ATCCTAGCTCCAGTGCTGGTCTGAAAGATGACCTTCTTGA  
+HWI-EAS443:3:45:495:1700#0/1  
]H^ORWVYWSMWUV¥]^UR[QTNLLR\_\_`[XQVV[DXZTV  
@HWI-EAS443:3:45:669:691#0/1  
GGGCCTTCTACGGAAGGAGTGCCTGAGTCCATGAGGGAAG  
+HWI-EAS443:3:45:669:691#0/1  
a\_`^X^`\_`¥Naa¥Q`S\_V\_SW^[U\_V¥SN¥\_U\_^]US^

@HWI-EAS443:3:45:806:1201#0/1  
GAAAAGAGGGCCTTCTACGGAAGGAGTGCCTGAGTCCATG  
+HWI-EAS443:3:45:806:1201#0/1  
`PQ]T`]\_\_a^^S[`RL]^MQ^QTNG¥NOMRQWUWVNV\_  
@HWI-EAS443:3:46:1030:1087#0/1  
AAATGACCATCGTCAACATCCACAGCACTCTGCTGTTCCCT  
+HWI-EAS443:3:46:1030:1087#0/1  
a`Waaa`aaaaW\_aYZ\_a`\_\_\_\_`\_\_¥W[¥]Y¥\_\_\_\_¥W[¥  
@HWI-EAS443:3:46:103:1352#0/1  
GGACTCAGGCACTCCTTCCGTAGAAGGCCCTCTTTTCAAA  
+HWI-EAS443:3:46:103:1352#0/1  
Y\_¥\_S\_^Yaaa`^Z]W^b\_XYY]]U^WPLRN`^)] [V¥`  
@HWI-EAS443:3:46:1232:420#0/1  
AAATGACCATCGTCAACATCCACAGCACTCTGCTGTTCCCT  
+HWI-EAS443:3:46:1232:420#0/1  
aaabbb]¥^^]b\_`\_] [ `a`^ [ ^\_a` [ ^YZ`\_W^a^]V]X  
@HWI-EAS443:3:46:1303:1033#0/1  
CAAAATGACCATCGTCAACATCCACAGCACTCTGCTGTTC  
+HWI-EAS443:3:46:1303:1033#0/1  
aa^` [ `bbaa\_]a]^aba\_a\_a[¥` `[ [ `]Z^]]Y¥\_[]\_  
@HWI-EAS443:3:46:1505:277#0/1  
ATTGCAGCAAATATCATTGGGATCTTGACCTGATATTGT  
+HWI-EAS443:3:46:1505:277#0/1  
a` ``^a\_a\_Z^\_]\_`aa`T¥\_a\_aaa` ``\_Y]aZ\_\_a\_a^  
@HWI-EAS443:3:46:1527:1867#0/1  
GACAAAATGACCATCGTCAACATCCACAGCACTCTGCTGT  
+HWI-EAS443:3:46:1527:1867#0/1  
a\_aZQT\_b`XF[M[[UN`\_\_^a¥QU[JSUS^^\_0a\_YRLT  
@HWI-EAS443:3:46:1532:931#0/1  
GGCCTTCTACGGAAGGAGTGCCTGAGTCCATGAGGGAAGA  
+HWI-EAS443:3:46:1532:931#0/1  
Z\_b\_` `b`^`baWaa`abQa[a`a^aYTY[TZ^a\_¥ZZ^X  
@HWI-EAS443:3:46:177:197#0/1  
GACAAAATGACCATCGTCAACATCCACAGCACTCTGCTGT  
+HWI-EAS443:3:46:177:197#0/1  
abaaaaabaaaa\_a\_bW`a` [ `a]\_a¥` `V` \_`\_aX[Z][  
@HWI-EAS443:3:46:497:348#0/1  
GGGAATTTTAGGATTTGTGTTACGCTCACCGTGCCCGT  
+HWI-EAS443:3:46:497:348#0/1  
`baa\_`ba`aa`\_aaabMb``]aaaaTa\_`YYO]W¥¥¥`S  
@HWI-EAS443:3:46:532:874#0/1  
TTTAGGATTTGTGTTACGCTCACCGTGCCCGTGGAGCGA  
+HWI-EAS443:3:46:532:874#0/1  
aaaab^XWZaX`]^¥¥ZX¥VSVVSYSTONQPNSP^VBBBB  
@HWI-EAS443:3:46:861:1393#0/1  
TGTATATGAGGCCCATGCAACTGGCAAGTGCACCAGTTGA  
+HWI-EAS443:3:46:861:1393#0/1  
a`^aaa` ``]\_Z¥`^^`¥a^`^\_\_Z[¥¥XW^[^WZ\_\_W[ZW  
@HWI-EAS443:3:47:1276:115#0/1  
GACTAAGGGAATTTTAGGATTTGTGTTACGCTCACCGTG

+HWI-EAS443:3:47:1276:115#0/1  
aabbabbabbbbaabb`aaabZbZ`a`\_`¥¥\_¥¥[V^  
@HWI-EAS443:3:47:1490:1347#0/1  
GTTGTATATGAGGCCATGCAACTGGCAAGTGCACCAGTT  
+HWI-EAS443:3:47:1490:1347#0/1  
\_[aaZ[]`aa\_ULU`\_]\_\_Y]]VWRPRV^^SUUUUYUY]YV  
@HWI-EAS443:3:47:1575:263#0/1  
CCCTCATGGACTCAGGCACTCCTTCCGTAGAAGGCCCTCT  
+HWI-EAS443:3:47:1575:263#0/1  
`aaabbbba`aaa\_b`bba`\_\_`a`\_aZ`^]]a^¥Y^ZSV  
@HWI-EAS443:3:47:1637:704#0/1  
ATCCCGTCAGGCCCCCTCAAAGCCGAGATCGCGCAGAGAC  
+HWI-EAS443:3:47:1637:704#0/1  
aa`abb]a`aaVa]aZ^^\_^^]SY\_`MFX\_^^YU¥WW]W  
@HWI-EAS443:3:47:230:597#0/1  
CCTAGCTCCAGTGCTGGTCTGAAAGATGACCTTCTTGAAA  
+HWI-EAS443:3:47:230:597#0/1  
aaba`a`ab\_bUa`a^a[a`b]aa]aa]aaaa¥aaba\_a  
@HWI-EAS443:3:47:292:863#0/1  
CTCATGGACTCAGGCACTCCTTCCGTAGAAGGCCCTCTTT  
+HWI-EAS443:3:47:292:863#0/1  
a`Zabbaaaababaabaaaa`[\_`\_`a\_\_`a`¥\_`X`aa  
@HWI-EAS443:3:47:619:615#0/1  
GGCCTGCAAATTTTCAAGAAGGTCATCTTTCAGACCAGCA  
+HWI-EAS443:3:47:619:615#0/1  
aaa`\_U\_b`\_X^\_X\_bb`X[`Q^\_`\_\_U^`ZYRV\_R[  
@HWI-EAS443:3:47:702:940#0/1  
TGGACTCAGGCACTCCTTCCGTAGAAGGCCCTCTTTCAA  
+HWI-EAS443:3:47:702:940#0/1  
^a`U`bb\_\_`SZ\_ba^^¥`UX]`[¥aYWYW^\_RXa[aaaa  
@HWI-EAS443:3:47:990:33#0/1  
CTGGTCTGAAAGATGACCTTCTTGAAAATTTGCAGGCCTA  
+HWI-EAS443:3:47:990:33#0/1  
abbbbaabbbabbbabbbabbbabbbab`bb^abb`[ba  
@HWI-EAS443:3:48:1100:726#0/1  
TGCAAATTTTCAAGAAGGTCATCTTTCAGACCAGCACTGG  
+HWI-EAS443:3:48:1100:726#0/1  
\_`a^aZbbbab¥^a`YabXa`a`ba]`a]aa`aa[`^\_a^  
@HWI-EAS443:3:48:1215:1952#0/1  
TAGGATTTGTGTTACGCTCACCGTGCCAGTGAGCGAGG  
+HWI-EAS443:3:48:1215:1952#0/1  
^\_\_TW¥\_TV`\_a¥`WIT[X\_\_BBBBBBBBBBBBBBBBBB  
@HWI-EAS443:3:48:1221:1259#0/1  
TATCAGGTGCAAGATCCCAATGATATTTGCTGCAATAACG  
+HWI-EAS443:3:48:1221:1259#0/1  
`aa`aaU[\_a\_a]\_aa\_a\_`^]a\_aa\_`^`\_\_a^a\_]P¥^^  
@HWI-EAS443:3:48:498:548#0/1  
GATTTGTGTTACGCTCACCGTGCCAGTGAGCGAGGACT  
+HWI-EAS443:3:48:498:548#0/1  
a`Z`\_b¥b¥X`\_a`YGV\_`¥\_M]YWWUMU¥U\_UY[UYUWM



@HWI-EAS443:3:48:52:1743#0/1  
CAAAATGACCATCGTCAACATCCACAGCACTCTGCTGTTC  
+HWI-EAS443:3:48:52:1743#0/1  
a\_abb\_¥UZ\_^Y\_YRW^\_¥XVS`¥G¥ZV[[V]Y^L^HQXJ  
@HWI-EAS443:3:48:585:156#0/1  
AATGACCATCGTCAACATCCACAGCACTCTGCTGTTCCTG  
+HWI-EAS443:3:48:585:156#0/1  
aaabaaaaab^`\_a\_aa]aRY\_aN\_]\_]\_\_X\_]\_TX`\_  
@HWI-EAS443:3:48:626:1877#0/1  
AGCAAATATCATTGGGATCTTGCACCTGATATTGTGGATT  
+HWI-EAS443:3:48:626:1877#0/1  
`a^W`¥¥Ya`a¥SNMP`T^\_VJ¥a]``ZN`a``\_VQF\_``  
@HWI-EAS443:3:48:911:628#0/1  
TGACAAAATGACCATCGTCAACATCCACAGCACTCTGCTG  
+HWI-EAS443:3:48:911:628#0/1  
aaaaaaa`aaaa\_`aa^]\_a^Waa\_[]\_`^Z^Z\_^\_`^\_\_  
@HWI-EAS443:3:49:103:275#0/1  
ACAATATCAGGTGCAAGATCCCAATGATATTTGCTGCAAT  
+HWI-EAS443:3:49:103:275#0/1  
^¥\_aaa\_a^`^Z`]`a`aZ¥¥Zaaaaaba\_\_^^`¥`¥`  
@HWI-EAS443:3:49:1136:726#0/1  
GATTTGTGTTACGCTCACCGTGCCAGTGAGCGAGGACT  
+HWI-EAS443:3:49:1136:726#0/1  
a\_bbbbaababba]a`aZaaQb\_ab\_XS]`a^`Zaaa¥`  
@HWI-EAS443:3:49:1152:1566#0/1  
AAAATGACCATCGTCAACATCCACAGCACTCTGCTGTTC  
+HWI-EAS443:3:49:1152:1566#0/1  
^Za`b\_a`bbb`aa\_a\_baa\_]¥ab`a\_a\_`\_TW`T[X`  
@HWI-EAS443:3:49:1162:1684#0/1  
GCAAATTTTCAAGAAGGTCATCTTTCAGACCAGCACTGGA  
+HWI-EAS443:3:49:1162:1684#0/1  
^aX`^\_TN^0^aaY¥bbWZaV¥]^^`\_^W]\_`M[U\_\_`]  
@HWI-EAS443:3:49:1325:1809#0/1  
GAATTTTAGGATTTGTGTTACGCTCACCGTGCCAGTGA  
+HWI-EAS443:3:49:1325:1809#0/1  
abbbbbbbbaaababab\_\_aa`a¥\_\_\_^Q[`a\_Z]¥\_V^\_  
@HWI-EAS443:3:49:146:544#0/1  
TTCTTCCCTCATGGACTCAGGCACTCCTTCCGTAGAAGGC  
+HWI-EAS443:3:49:146:544#0/1  
aa\_ba\_`ab\_aaa`a`aaaa\_\_a\_a\_\_a^a`\_\_`\_`a`\_\_  
@HWI-EAS443:3:49:1641:58#0/1  
AATTTTCAAGAAGGTCATCTTTCAGACCAGCACTGGAGCT  
+HWI-EAS443:3:49:1641:58#0/1  
\_\_bWS^\_aa`^WT\_U^\_aVSUZ`aa]WJ¥`W]^X\_YM^BB  
@HWI-EAS443:3:49:195:933#0/1  
GTTGACAAAATGACCATCGTCAACATCCACAGCACTCTGC  
+HWI-EAS443:3:49:195:933#0/1  
aabbaaabbaaaa`aa\_a\_\_aa^aa\_[\_\_aaZ`])`\_a\_\_  
@HWI-EAS443:3:49:270:278#0/1  
AAAGAGGGCCTTCTACGGAAGGAGTGCCTGAGTCCATGAG

+HWI-EAS443:3:49:270:278#0/1  
abababab`a`a¥aa]¥bYaaaaaQ^Y^aa^`Z^`]^RQa  
@HWI-EAS443:3:49:874:873#0/1  
CAAAATGACCATCGTCAACATCCACAGCACTCTGCTGTTC  
+HWI-EAS443:3:49:874:873#0/1  
abb¥\_abba`bb]b`bbbabababaab¥ba¥aa`^`a`bY  
@HWI-EAS443:3:4:1323:1811#0/1  
AGAGGGCCTTCTACGGAAGGAGTGCCTGAGTCCATGAGGG  
+HWI-EAS443:3:4:1323:1811#0/1  
aab\_]`a`aaS`\_¥a]\_``]^\_^^`ZW``¥\_UYS\_]¥`\_B  
@HWI-EAS443:3:4:1618:1927#0/1  
TAATCAGGCATGAAAACAGAATGGTGCTGGCTAGCACTAC  
+HWI-EAS443:3:4:1618:1927#0/1  
aa[\_\_\_aa]\_Za[XU[TM[U¥\_Z¥OIWR]^UUXBBBBBBBB  
@HWI-EAS443:3:4:538:658#0/1  
TGCTAGCCAGCACCATTCTGTTTTTCATGCCTGATTAGTGG  
+HWI-EAS443:3:4:538:658#0/1  
abbababa`aaa^aaaaaab\_aaa^aaa]Yaa\_aa\_a^a\_  
@HWI-EAS443:3:4:55:63#0/1  
AAAATGACCATCGTCAACATCCACAGCACTCTGCTGTTC  
+HWI-EAS443:3:4:55:63#0/1  
aa`aaa^¥`M]¥FRZSQYXZ]]XNVXTRSWS]W^ZXXX  
@HWI-EAS443:3:4:776:811#0/1  
AATTTTCAAGAAGTCATCTTTTCAGACCAGCACTGGAGCT  
+HWI-EAS443:3:4:776:811#0/1  
\_U`aaaabaa`aa\_\_¥\_a\_aaa¥[``]\_`\_¥\_^\_\_^^\_Y^  
@HWI-EAS443:3:4:86:721#0/1  
CAAAGCGTCTACGCTGCAGTCCTCGCTCACTGGGCACGGT  
+HWI-EAS443:3:4:86:721#0/1  
a^`aaa`\_`aaa^[]a^`[V^Y¥`^a[\_UZ]¥Y`[TZ¥]B  
@HWI-EAS443:3:50:1062:475#0/1  
CAAAATGACCATCGTCAACATCCACAGCACTCTGCTGTTC  
+HWI-EAS443:3:50:1062:475#0/1  
abbbbabbaabaabaaa\_Z]^]a\_\_`a]a^\_\_aVZ``X`\_  
@HWI-EAS443:3:50:1069:1210#0/1  
CGTCAGGCCCCCTCAAAGCCGAGATCGCGCAGAGACTGGA  
+HWI-EAS443:3:50:1069:1210#0/1  
`^babbb`^\_abb]bb\_¥``aaaaa`^\_\_```aaaXb``^  
@HWI-EAS443:3:50:1174:1559#0/1  
GACAAAATGACCATCGTCAACATCCACAGCACTCTGCTGT  
+HWI-EAS443:3:50:1174:1559#0/1  
aba\_babTb\_a\_aaab]^a^a`b\_a`a[`¥Y^`W\_\_aa  
@HWI-EAS443:3:50:1216:1824#0/1  
CCTAGCTCCAGTGCTGGTCTGAAAGATGACCTTCTTAAAA  
+HWI-EAS443:3:50:1216:1824#0/1  
[abbbba]aabbabbaab\_MWaz`aa]baaaa`\_`abbaab  
@HWI-EAS443:3:50:1228:1231#0/1  
GACAAAATGACCATCGTCAACATCCACAGCACTCTGCTGT  
+HWI-EAS443:3:50:1228:1231#0/1  
aaaaaa`aaa`aaa\_W`\_`¥\_\_a¥^`^a\_\_[\_\_\_¥a^YWW

@HWI-EAS443:3:50:1360:797#0/1  
TGACAAAATGACCATCGTCAACATCCACAGCACTCTGCTG  
+HWI-EAS443:3:50:1360:797#0/1  
\_] ^a`\_`abaaaaaba`a`Xa`¥Z¥Xaa``[][\_Z¥^`  
@HWI-EAS443:3:50:1585:1622#0/1  
ATTCTTCCCTCATGGACTCAGGCACTCCTTCCGTAGAAGG  
+HWI-EAS443:3:50:1585:1622#0/1  
a`a^aUWZ`UUGZXa[\_[XXYYY¥VROFO[\_YZOS\_XX]W  
@HWI-EAS443:3:50:1648:1873#0/1  
TGGACTCAGGCACTCCTTCCGTAGAAGGCCCTCTTTTCAA  
+HWI-EAS443:3:50:1648:1873#0/1  
X]\_Q\_a^`aaYba`Q`bb`[\_X`^Z`a]\_U]aU```^FV\_  
@HWI-EAS443:3:50:175:2005#0/1  
GACAAAATGACCATCGTCAACATCCACAGCACTCTGCTGT  
+HWI-EAS443:3:50:175:2005#0/1  
^`bab`\_UU`Y`b\_V`[\_`bSa0IX]H[aabba][`a¥QJ  
@HWI-EAS443:3:50:1775:774#0/1  
GTAGGCCTGCAAATTTTCAAGAAGGTCATCTTTCAGACCA  
+HWI-EAS443:3:50:1775:774#0/1  
a^aa\_aabaaab`baaaa`\_\_\_\_`\_]¥¥`a¥aaa`\_\_\_\_¥[^  
@HWI-EAS443:3:50:734:388#0/1  
AGGGAATTTTAGGATTTGTGTTACGCTCACCGTGCCAG  
+HWI-EAS443:3:50:734:388#0/1  
\_]`\_\_bb`bbbbabb\_a`baaaa```````[a`¥^[¥[^a  
@HWI-EAS443:3:50:971:510#0/1  
CAAAATGACCATCGTCAACATCCACAGCACTCTGCTGTTC  
+HWI-EAS443:3:50:971:510#0/1  
abbbbbbbb`bbababba`bbaa`bbababab`aaa`a`  
@HWI-EAS443:3:51:1176:1204#0/1  
ATTTTCAAGAAGGTCATCTTTCAGACCAGCACTGGAGCTA  
+HWI-EAS443:3:51:1176:1204#0/1  
abbbb`\_bbb\_aaH^b```bba```a^\_a]\_\_aa`ab`a`  
@HWI-EAS443:3:51:1177:527#0/1  
GATTTGTGTTACGCTCACCGTGCCAGTGAGCGAGGACT  
+HWI-EAS443:3:51:1177:527#0/1  
aabbaa]aaa]\_X^^aURWS]]`WHS\_\_EZLTEXVR^^BB  
@HWI-EAS443:3:51:1183:1665#0/1  
GACTAAGGGAATTTTAGGATTTGTGTTACGCTCACCGTG  
+HWI-EAS443:3:51:1183:1665#0/1  
\_¥`b`a`a`abaaaaW]¥abbb`babaaa]aba\_a^a\_b  
@HWI-EAS443:3:51:1231:1905#0/1  
GAAAAGAGGGCCTTCTACGGAAGGAGTGCCTGAGTCCATG  
+HWI-EAS443:3:51:1231:1905#0/1  
a^aTa`bba\_W\_baTbaabaIbbbIYIY\_S]a^a¥XHGab  
@HWI-EAS443:3:51:1321:71#0/1  
CAAATTTTCAAGAAGGTCATCTTTCAGACCAGCACTGGAG  
+HWI-EAS443:3:51:1321:71#0/1  
ababbbbbabbbbbbbbbbb^bbb`babb^bb\_babbbab  
@HWI-EAS443:3:51:1496:251#0/1  
CTCATGGACTCAGGCACTCCTTCCGTAGAAGGCCCTCTT

+HWI-EAS443:3:51:1496:251#0/1  
abbbbbbbbabbbbaababbbbbb`bbabbbbbaaaa^babbbb  
@HWI-EAS443:3:51:213:501#0/1  
TTCAAGAAGGTCATCTTTCAGACCAGCACTGGAGCTAGGA  
+HWI-EAS443:3:51:213:501#0/1  
aaaa]\_ZaabZaaa^`baT[^`\_]a^\_]``]R]\_]XZU  
@HWI-EAS443:3:51:532:1577#0/1  
TTTGAAAAGAGGGCCTTCTACGGAAGGAGTGCCTGAGTCC  
+HWI-EAS443:3:51:532:1577#0/1  
abaa]`^^a]a^`aaaa`\_`V¥][\_¥`[\_Y\_[RURX\_WV¥  
@HWI-EAS443:3:51:561:1059#0/1  
GGCCTTCTACGGAAGGAGTGCCTGAGTCCATGAGGGAAGA  
+HWI-EAS443:3:51:561:1059#0/1  
aababbbbaab`bbabaabaaba`]`ba`ba^bba[aa`  
@HWI-EAS443:3:51:748:492#0/1  
ATCCTAGCTCCAGTGCTGGTCTGAAAGATGACCTTCTTGA  
+HWI-EAS443:3:51:748:492#0/1  
`baaaba\_^¥\_abaa\_aaa\_\_aaaa`baa`\_aaaa\_ba]`  
@HWI-EAS443:3:51:981:1077#0/1  
ATCCTAGCTCCAGTGCTGGTCTGAAAGATGACCTTCTTGA  
+HWI-EAS443:3:51:981:1077#0/1  
`^^TZabX^P[L[UaZ][aVX¥OWVR\_XHZPS]V¥¥^XXU  
@HWI-EAS443:3:52:1031:1779#0/1  
CGTCAGGCCCTCAAAGCCGAGATCGCGCAGAGACTGGA  
+HWI-EAS443:3:52:1031:1779#0/1  
ababb]bb\_aR^aabb`bWaa`[H`X\_`aZXaVa[FY``X  
@HWI-EAS443:3:52:113:1293#0/1  
GGCCTTCTACGGAAGGAGTGCCTGAGTCCATGAGGGAAGA  
+HWI-EAS443:3:52:113:1293#0/1  
T\_\_SSb\_a^Ybba[aa¥\_P`¥`¥¥\_aaST`PWabZV^T`P  
@HWI-EAS443:3:52:1360:607#0/1  
ATATTCTTCCCTCATGGACTCAGGCACTCCTTCCGTAGAA  
+HWI-EAS443:3:52:1360:607#0/1  
`b`a\_[aaa`a]a\_b]\_^Z\_^`XR``\_]`[\_]\_V`W\_]X\_  
@HWI-EAS443:3:52:1643:1217#0/1  
GACAAAATGACCATCGTCAACATCCACAGCACTCTGCTGT  
+HWI-EAS443:3:52:1643:1217#0/1  
¥bbbabbbabaaaba\_Z^[a¥b\_¥\_a``W]aZa]`a`aa\_  
@HWI-EAS443:3:52:602:510#0/1  
GACAAAATGACCATCGTCAACATCCACAGCACTCTGCTGT  
+HWI-EAS443:3:52:602:510#0/1  
a`S\_aaaaa\_]¥[R^`^]ZYVaa`\_XQ]`¥¥QLY]aQ`¥P  
@HWI-EAS443:3:52:667:958#0/1  
CAAAATGACCATCGTCAACATCCACAGCACTCTGCTGTTC  
+HWI-EAS443:3:52:667:958#0/1  
`bbbaaaaa`baaa\_`a`V``\_\_`^\_]`\_^a^``^`\_]\_]`  
@HWI-EAS443:3:52:801:1537#0/1  
TTCCCTCATGGACTCAGGCACTCCTTCCGTAGAAGGCCCT  
+HWI-EAS443:3:52:801:1537#0/1  
abaaaaaaaa`aaaa`aaa\_b[a`aaa¥`a\_\_a\_`\_\_[RY^

@HWI-EAS443:3:52:834:1062#0/1  
CGCTCACCGTGCCAGTGAGCGAGGACTGCAGCGTAGACG  
+HWI-EAS443:3:52:834:1062#0/1  
`Z`a\_¥]X¥\_WZ\_baaYa]XY`]b\_VT¥` `]^`aVab^]\_  
@HWI-EAS443:3:53:1145:912#0/1  
AGGACTGCAGCGTAGACGCTTTGTCCAAAATGCCCTAAAT  
+HWI-EAS443:3:53:1145:912#0/1  
¥U\_¥bb\_VaaR^PaY^I]¥\_]a]H` `W][Q]^Q]\_b\_a\_Z  
@HWI-EAS443:3:53:1177:117#0/1  
GAAAAGAGGGCCTTCTACGGAAGGAGTGCCTGAGTCCATG  
+HWI-EAS443:3:53:1177:117#0/1  
\_bbabbabb^` ` \_V\_a`ba` `b`^`\_[a^Z`\_]aUZUZ[¥  
@HWI-EAS443:3:53:1193:1790#0/1  
CAAAATGACCATCGTCAACATCCACAGCACTCTGCTGTTC  
+HWI-EAS443:3:53:1193:1790#0/1  
[bbabbbbbb[bbbbabbbbab]Wb\_ba\_bba^ab¥ba^b¥  
@HWI-EAS443:3:53:1199:208#0/1  
GGGCTTCTACGGAAGGAGTGCCTGAGTCCATGAGGGAAG  
+HWI-EAS443:3:53:1199:208#0/1  
R[aZ\_¥`\_\_`a`\_` ` `aT^FZY¥b`aa]S¥Z`^K¥a` `^b  
@HWI-EAS443:3:53:1218:141#0/1  
CTCTGACTAAGGGAATTTTAGGATTTGTGTTACGCTCAC  
+HWI-EAS443:3:53:1218:141#0/1  
^[a^`\_I\_`ab\_]aaaba¥ababbbba\_ab]b^`\_aadM  
@HWI-EAS443:3:53:1302:1203#0/1  
CAAAATGACCATCGTCAACATCCACAGCACTCTGCTGTTC  
+HWI-EAS443:3:53:1302:1203#0/1  
`a\_`bbbaa`a\_¥R`aba¥[`\_aaba]baTa`abbbaY  
@HWI-EAS443:3:53:1344:884#0/1  
CCCTCATGGACTCAGGCACTCCTTCCGTAGAAGGCCCTCT  
+HWI-EAS443:3:53:1344:884#0/1  
a\_JXX\_PQ\_^^\_aabb^]SX¥NUa]]G¥[^WNOHQ\_]GYU  
@HWI-EAS443:3:53:202:1195#0/1  
CTTCCCTCATGGACTCAGGCACTCCTTCCGTAGAAGGCCC  
+HWI-EAS443:3:53:202:1195#0/1  
aabaabababbabbabaaaaa\_P\_aaaa`^aa` `a`\_P[  
@HWI-EAS443:3:53:519:606#0/1  
CTCTGACTAAGGGAATTTTAGGATTTGTGTTACGCTCAC  
+HWI-EAS443:3:53:519:606#0/1  
abbbbabbb\_bbbbbbbbbbbbbbbbbbababababbaaa^  
@HWI-EAS443:3:53:565:975#0/1  
ACTCATCCTAGCTCCAGTGCTGGTCTGAAAGATGACCTTC  
+HWI-EAS443:3:53:565:975#0/1  
`aa]aa\_ab^\_]\_]a\_[a\_[RXT\_` `[\_[ZZ[]\_R]\_] ]  
@HWI-EAS443:3:53:989:1440#0/1  
GGGAATTTTAGGATTTGTGTTACGCTCACCGTGCCAGT  
+HWI-EAS443:3:53:989:1440#0/1  
a`\_]`babaa`aSa`\_^0aPVZ\_XP^W^W¥]WU\_WZUSTS  
@HWI-EAS443:3:54:1187:1496#0/1  
ATTTTCAAGAAGGTCATCTTTCAGACCAGCACTGGAGCTA

+HWI-EAS443:3:54:1187:1496#0/1  
`bab`bb]0\_abLI]¥¥`\_Z[YaYW\_\_W`a``ZG¥XU]¥  
@HWI-EAS443:3:54:1479:1060#0/1  
AATTTTCAAGAAGGTCATCTTTTCAGACCAGCACTGGAGCT  
+HWI-EAS443:3:54:1479:1060#0/1  
a^bbbbbbbaaaaa\_aba`aaa\_Ya`\_a]a\_a]aZ^  
@HWI-EAS443:3:54:1531:1389#0/1  
GACTCAGGCACTCCTTCCGTAGAAGGCCCTCTTTTCAAAC  
+HWI-EAS443:3:54:1531:1389#0/1  
abY`bba`^]`YVb^Z`a`\_\_\_\_\_RXLT^aa`ZW]\_`W  
@HWI-EAS443:3:54:1784:643#0/1  
GCAAATTTTCAAGAAGGTCATCTTTTCAGACCAGCACTGGA  
+HWI-EAS443:3:54:1784:643#0/1  
a\_TY\_ab¥TR\_TR]`[MO]Z^`aaa¥\_]¥WY[YU^YVRXY  
@HWI-EAS443:3:54:277:537#0/1  
GATTTGTGTTACGCTCACCGTGCCAGTGAGCGAGGACT  
+HWI-EAS443:3:54:277:537#0/1  
a\_aa`T^\_\_¥\_\_^[ZPUZU[UNYSWUTSSTRNQLQTXRNT  
@HWI-EAS443:3:54:42:856#0/1  
CAAATGACCATCGTCAACATCCACAGCACTCTGCTGTTC  
+HWI-EAS443:3:54:42:856#0/1  
a¥V¥aba]bb\_b¥^W¥[a]VH\_`bW]WTZ`a¥[ZN\_¥]¥  
@HWI-EAS443:3:54:578:600#0/1  
GAATTTTAGGATTTGTGTTACGCTCACCGTGCCAGTGA  
+HWI-EAS443:3:54:578:600#0/1  
`abaaaaaaaaab^aaa`aaa\_^\_\_^^\_Wa\_¥YV][[  
@HWI-EAS443:3:54:67:1041#0/1  
TGGACTCAGGCACTCCTTCCGTAGAAGGCCCTCTTTTCAA  
+HWI-EAS443:3:54:67:1041#0/1  
abbaa^aa`aaaaaa\_a`a]\_`\_]`ZW^¥Y`\_W^`  
@HWI-EAS443:3:54:772:361#0/1  
CAGCAAATATCATTGGGATCTTGACCTGATATTGTGGAT  
+HWI-EAS443:3:54:772:361#0/1  
aaY`Yaa\_aaaa¥[^\_W¥]\_a^^`Xaa^`\_`\_`¥¥¥a  
@HWI-EAS443:3:54:954:604#0/1  
GGTCTGAAAGATGACCTTCTTGAAAATTTGCAGGCCTACC  
+HWI-EAS443:3:54:954:604#0/1  
Va¥\_U\_PM[Q¥bZZ¥VW¥\_Zab\_Z^\_a\_\_XW^ZZS\_\_\_QW  
@HWI-EAS443:3:55:1495:167#0/1  
GGGCCTTCTACGGAAGGAGTGCCTGAGTCCATGAGGGAAG  
+HWI-EAS443:3:55:1495:167#0/1  
ab]¥Zbaa\_a]S]¥Y`\_`\_S^U`\_W\_W¥UW^\_W\_\_XMV]  
@HWI-EAS443:3:55:1616:406#0/1  
GACAAAATGACCATCGTCAACATCCACAGCACTCTGCTGT  
+HWI-EAS443:3:55:1616:406#0/1  
^`aba\_¥b`b`Ubb\_SUZ\_bI\_Z\_^aa\_Q\_aa]ZZU¥a^P  
@HWI-EAS443:3:55:327:17#0/1  
GGCCTGCAAATTTTCAAGAAGGTCATCTTTTCAGACCAGCA  
+HWI-EAS443:3:55:327:17#0/1  
aa\_\_^b[\_\_\_aa`\_]\_^a^a`YY^\_Y`\_[VW\_YYX]]YY

@HWI-EAS443:3:55:43:747#0/1  
GTCACCTCTGACTAAGGGAATTTTAGGATTTGTGTTACCG  
+HWI-EAS443:3:55:43:747#0/1  
¥aa\_a`babab^a\_aabaa]\_a\_aaaa^aaaa`a` [¥` \_\_  
@HWI-EAS443:3:55:539:1532#0/1  
CTGGTAGGCCTGCAAATTTTCAAGAAGGTCATCTTTCAGA  
+HWI-EAS443:3:55:539:1532#0/1  
aa\_RG^^a\_^a^b¥Vababa`baaaaa`Y]\_aaa`a^¥¥a  
@HWI-EAS443:3:55:972:332#0/1  
CTCAGGCACTCCTTCCGTAGAAGGCCCTCTTTTCAAACCG  
+HWI-EAS443:3:55:972:332#0/1  
ab]aaaaa`aa^aaa`a\_`^`\_\_`Z[``\_``]^^`WWa  
@HWI-EAS443:3:56:1313:1085#0/1  
AGGCACTCCTTCCGTAGAAGGCCCTCTTTTCAAACCGTAT  
+HWI-EAS443:3:56:1313:1085#0/1  
a`aaaaaaaaa\_a`X`][[¥`¥\_aadW\_aa\_Z`Y\_a  
@HWI-EAS443:3:56:146:33#0/1  
GACAAAATGACCATCGTCAACATCCACAGCACTCTGCTGT  
+HWI-EAS443:3:56:146:33#0/1  
`QX¥GZ\_]a]¥YY¥QUTYNVZXUUVVRSQJQNQOOVTURB  
@HWI-EAS443:3:56:1729:1917#0/1  
CGTGAACACAAATCCTAAAATCCCTTAGTCAGAGGTGAC  
+HWI-EAS443:3:56:1729:1917#0/1  
^^`^`baa`ba\_\_`Zaaaa`aaXYWaaaa\_\_`a`ZZa`¥  
@HWI-EAS443:3:56:218:1286#0/1  
GGGCCTTCTACGGAAGGAGTGCCTGAGTCCATGAGGGAAG  
+HWI-EAS443:3:56:218:1286#0/1  
`T`X`aaa\_Z[Z[`UW\_W^`W\_YT\_ZXTT¥\_M\_`¥PVY  
@HWI-EAS443:3:56:252:1299#0/1  
CAAAATGACCATCGTCAACATCCACAGCACTCTGCTGTTC  
+HWI-EAS443:3:56:252:1299#0/1  
ab]] [aaa]Z]aR`a[RZLP` `a`aXN\_\_^\_a\_[P[`YNQ  
@HWI-EAS443:3:56:371:1605#0/1  
GGGCCTTCTACGGAAGGAGTGCCTGAGTCCATGAGGGAAG  
+HWI-EAS443:3:56:371:1605#0/1  
^`\_aaaabababaa`]]`a[]a\_`¥VNX^XNTWQ]\_\_Y\_^  
@HWI-EAS443:3:56:398:143#0/1  
ATCCTAGCTCCAGTGCTGGTCTGAAAGATGACCTTCTTGA  
+HWI-EAS443:3:56:398:143#0/1  
]`\_aX\_\_¥¥\_ZX]V¥¥[\_¥RY¥^¥V]]]Z[UYX[[]][SE  
@HWI-EAS443:3:56:398:361#0/1  
AAGAGGGCCTTCTACGGAAGGAGTGCCTGAGTCCATGAGG  
+HWI-EAS443:3:56:398:361#0/1  
` `a^aaaa`a`aa`^`^Y\_^`^`S\_X]`\_SYT¥`YV`STL  
@HWI-EAS443:3:56:646:2012#0/1  
CACCTCTGACTAAGGGAATTTTAGGATTTGTGTTACCGCT  
+HWI-EAS443:3:56:646:2012#0/1  
WY\_ITO\_ba` `b]`^ab^¥\_]W¥¥\_a`a¥QW\_UW¥]\_ba[  
@HWI-EAS443:3:56:828:1750#0/1  
TGAAAGATGACCTTCTTGAATAATTTGCAGGCCTACCAGAA

+HWI-EAS443:3:56:828:1750#0/1  
]]`¥`]'W``WNY\_]U\_`a`\_UVa\_`^X^Z`\_^[\_a]^  
@HWI-EAS443:3:57:117:224#0/1  
GGCCTTCTACGGAAGGAGTGCCTGAGTCCATGAGGGAAGA  
+HWI-EAS443:3:57:117:224#0/1  
`bbaa]aaaaa\_]a`X`ZZ\_a`\_\_`[^\_^^^Va\_`V^^U  
@HWI-EAS443:3:57:1190:1270#0/1  
CCGTCAGGCCCTCAAAGCCGAGATCGCGCAGAGACTGG  
+HWI-EAS443:3:57:1190:1270#0/1  
`YW^SZ\_]\_ZXQOQ¥\_JZ]VU^Y`^R^a\_`HEUTNYSWSB  
@HWI-EAS443:3:57:1480:102#0/1  
GGATTTGTGTTACGCTCACCGTGCCAGTGAGCGAGGAC  
+HWI-EAS443:3:57:1480:102#0/1  
aZ^[baa`b]a¥`SaaPXVHV`URONLXBBBBBBBBBB  
@HWI-EAS443:3:57:1500:283#0/1  
AATTTTCAAGAAGTCATCTTTCAGACCAGCACTGGAGCT  
+HWI-EAS443:3:57:1500:283#0/1  
`\_abaaaaabaa``]aaaaaa\_a``¥Y\_a\_a\_^^`Y\_  
@HWI-EAS443:3:57:42:1450#0/1  
CAGGCACTCCTTCCGTAGAAGGCCCTTTTTCAAACCGTA  
+HWI-EAS443:3:57:42:1450#0/1  
`a\_R\_b`bU`^`b[``aTQR\_]¥R[^a^babUTXPUBB  
@HWI-EAS443:3:57:432:2030#0/1  
AGGCCTGCAAATTTTCAAGAAGTCATCTTTCAGACCAGC  
+HWI-EAS443:3:57:432:2030#0/1  
T^V\_R¥U^a`aaaX]aaa\_aaa^FM`]R¥]a]^Ua\_]\_^U  
@HWI-EAS443:3:57:945:1241#0/1  
GGCCTTCTACGGAAGGAGTGCCTGAGTCCATGAGGGAAG  
+HWI-EAS443:3:57:945:1241#0/1  
\_`aba\_ababab\_a\_abaa]\_a^ba\_a\_aYaba`abbH^`  
@HWI-EAS443:3:58:1009:1416#0/1  
GATTTGTGTTACGCTCACCGTGCCAGTGAGCGAGGACT  
+HWI-EAS443:3:58:1009:1416#0/1  
^^`b\_\_P¥\_aaa``aX]WT\_YN¥UUN]SR¥YD[XZ¥`JMV  
@HWI-EAS443:3:58:1388:96#0/1  
ATCCTAGCTCCAGTGCTGGTCTGAAAGATGACCTTCTTGA  
+HWI-EAS443:3:58:1388:96#0/1  
^U^Y`\_b¥\_NV¥]`IV]aa]^a\_XQZ\_POSVSRG]U\_[Z^  
@HWI-EAS443:3:58:1711:958#0/1  
GCTCCAGTGCTGGTCTGAAAGATGACCTTCTTAAAAATTT  
+HWI-EAS443:3:58:1711:958#0/1  
aa`\_^ab¥a¥`\_a[Z`^Z^¥`¥^¥^W^a`^a\_[Z]\_¥^W\_  
@HWI-EAS443:3:58:1723:1378#0/1  
GACAAAATGACCATCGTCAACATCCACAGCACTCTGCTGT  
+HWI-EAS443:3:58:1723:1378#0/1  
\_XXMW\_]\_I]`V¥X¥]YKW[NLTYQLM¥BBBBBBBBBBBBBB  
@HWI-EAS443:3:58:395:1214#0/1  
CACCTCTGACTAAGGGAATTTTAGGATTTGTGTTACGCT  
+HWI-EAS443:3:58:395:1214#0/1  
a\_aaaaa][T]XaaZaYL[^T\_`Z¥V][P¥VVTU\_\_UKXW



@HWI-EAS443:3:58:530:311#0/1  
GACAAAATGACCATCGTCAACATCCACAGCACTCTGCTGT  
+HWI-EAS443:3:58:530:311#0/1  
``ba^aZ`aa^QZa\_[Zaa^\_``^ZXZaaaa`ZZ\_^¥XZ  
@HWI-EAS443:3:59:1012:650#0/1  
TGCCCAGTGAGCGAGGACTGCAGCGTAGACGCTTTGTCCA  
+HWI-EAS443:3:59:1012:650#0/1  
abaaaa`a\_aaa`a^`\_^`aa`a]`a\_aaU^Z\_TW¥W¥  
@HWI-EAS443:3:59:1293:1804#0/1  
GGACTGCAGCGTAGACGCTTTGTCCAAAATGCCCTAAATG  
+HWI-EAS443:3:59:1293:1804#0/1  
aba^Uabab¥aabab\_aaaaa[aa\_bababNU¥a\_WNMR  
@HWI-EAS443:3:59:142:1251#0/1  
CCCTCATGGACTCAGGCACTCCTTCCGTAGAAGGCCCTCT  
+HWI-EAS443:3:59:142:1251#0/1  
abaaabbaaa^a¥aa`aaa``aa\_aa`¥\_\_\_Y¥¥¥WW¥YW  
@HWI-EAS443:3:59:175:382#0/1  
GACAAAATGACCATCGTCAACATCCACAGCACTCTGCTGT  
+HWI-EAS443:3:59:175:382#0/1  
``Z`¥aaa\_aaaa\_YUW[[Z\_Q\_a]\_^\_a]PW]XYV]^R  
@HWI-EAS443:3:59:233:922#0/1  
AAAATGACCATCGTCAACATCCACAGCACTCTGCTGTCC  
+HWI-EAS443:3:59:233:922#0/1  
J¥aY]0[baa]a]YaRV[a`^[OY]^`^Q]U]GXT[GTRHI  
@HWI-EAS443:3:59:31:424#0/1  
GACAAAATGACCATCGTCAACATCCACAGCACTCTGCTGT  
+HWI-EAS443:3:59:31:424#0/1  
aabb`\_Uab^^a]`aaUaa`\_a\_a`\_a¥^\_`^W\_\_^RR[\_]  
@HWI-EAS443:3:59:444:1239#0/1  
GACAAAATGACCATCGTCAACATCCACAGCACTCTGCTGT  
+HWI-EAS443:3:59:444:1239#0/1  
ababaa]babaaaaa¥a`a\_aaa`\_`\_S\_aaU\_^^RR^UW  
@HWI-EAS443:3:59:462:79#0/1  
CTATGTTGACAAAATGACCATCGTCAACATCCACAGCACT  
+HWI-EAS443:3:59:462:79#0/1  
abbbbbbb`b`\_`bbbbaaa^b\_aV`¥]]`aa[Y]^YM\_Z^  
@HWI-EAS443:3:59:549:1311#0/1  
GCAAATTTTCAAGAAGGTCATCTTTTCAGACCAGCACTGGA  
+HWI-EAS443:3:59:549:1311#0/1  
a`^`aaaaaaaaaaa]`^aaaabaaaaaaaa`a\_aZZ`^^  
@HWI-EAS443:3:59:682:479#0/1  
TGCCCAGTGAGCGAGGACTGCAGCGTAGACGCTTTGTCCA  
+HWI-EAS443:3:59:682:479#0/1  
a`aaabb¥aaabaX`[a^\_a¥`a\_aSaaaa\_Qa\_aVU\_S^  
@HWI-EAS443:3:59:865:20#0/1  
GACTAAGGGAATTTTAGGATTTGTGTTACGCTCACCGTG  
+HWI-EAS443:3:59:865:20#0/1  
a[^[Y\_aa`Z\_¥\_¥`\_a\_W¥¥¥aW`WZ[[¥[PUVXWSWWT  
@HWI-EAS443:3:59:912:385#0/1  
AAAATGACCATCGTCAACATCCACAGCACTCTGCTGTCC

+HWI-EAS443:3:59:912:385#0/1  
aaaaaaaa`aa`aV[a`Za`\_`\_\_a`^^Z`\_Ya]`YY^XR  
@HWI-EAS443:3:5:1446:1826#0/1  
AAATGACCATCGTCAACATCCACAGCACTCTGCTGTTCCCT  
+HWI-EAS443:3:5:1446:1826#0/1  
abbbb[Uab¥0¥R^^\_IaY` `\_a\_bYS\_^U`a\_^aQGNPB  
@HWI-EAS443:3:5:187:822#0/1  
AAAATGACCATCGTCAACATCCACAGCACTCTGCTGTTCC  
+HWI-EAS443:3:5:187:822#0/1  
abbb`aaa\_aaaa[¥aa¥`a¥X`[aa]`V[U` `^\_\_X\_VB  
@HWI-EAS443:3:5:536:1002#0/1  
CAAATTTTCAAGAAGGTCATCTTTTCAGACCAGCACTGGAG  
+HWI-EAS443:3:5:536:1002#0/1  
ab¥]ab`\_`aaa[[\_WW]\_\_a`\_YV\_\_aaTa^a\_U[`¥BB  
@HWI-EAS443:3:60:1002:76#0/1  
GACAAAATGACCATCGTCAACATCCACAGCACTCTGCTGT  
+HWI-EAS443:3:60:1002:76#0/1  
aaa`a`aa`a^[\_a]a\_^]RYY`URSSZV¥UWYV¥^S[[]]  
@HWI-EAS443:3:60:1362:269#0/1  
CTCTGACTAAGGAATTTTAGGATTTGTGTTCCACGCTCAC  
+HWI-EAS443:3:60:1362:269#0/1  
abaaba]aaaabb]aabb`a\_b`a\_abaaaa`a[\_\_\_¥`\_U  
@HWI-EAS443:3:60:1481:295#0/1  
GGCACTCCTTCCGTAGAAGGCCCTCTTTTCAAACCGTATT  
+HWI-EAS443:3:60:1481:295#0/1  
aaab`ba[ `b`aa`aaaaaa[^\_\_]` `a`\_\_`WXaX`\_^  
@HWI-EAS443:3:60:1495:1167#0/1  
TGGACTCAGGCACTCCTTCCGTAGAAGGCCCTCTTTTCAA  
+HWI-EAS443:3:60:1495:1167#0/1  
aaa\_]aa`a^[\_a`a`a`\_`\_`\_\_[^[aZ]]]^X][\_]UYX  
@HWI-EAS443:3:60:1564:128#0/1  
TGCAAATTTTCAAGAAGGTCATCTTTTCAGACCAGCACTGG  
+HWI-EAS443:3:60:1564:128#0/1  
`b`ba`aaaaaaa`\_ba\_]`a¥`aa[a`\_]`^`¥`Z¥^`\_`  
@HWI-EAS443:3:60:413:1924#0/1  
CAGCGTAGACGCTTTGTCCAAAATGCCCTAAATGGGAATG  
+HWI-EAS443:3:60:413:1924#0/1  
abX\_]`[\_[^QZQ`a][\_`U`^Q`ITLQZ^¥SM\_NY\_U\_¥Z  
@HWI-EAS443:3:60:777:1030#0/1  
ATATTCTTCCCTCATGGACTCAGGCACTCCTTCCGTAGAA  
+HWI-EAS443:3:60:777:1030#0/1  
ab^ba`aaaaaaa]aa]a``aaaZ` `` `a[\_` `` `¥`\_X[  
@HWI-EAS443:3:60:856:1376#0/1  
GACAAAATGACCATCGTCAACATCCACAGCACTCTGCTGT  
+HWI-EAS443:3:60:856:1376#0/1  
aaabab\_aaaa`a\_a¥F¥a¥^a`\_a\_\_aZL]aZ¥¥Z^\_[S  
@HWI-EAS443:3:60:931:892#0/1  
CTCAGGCACTCCTTCCGTAGAAGGCCCTCTTTTCAAACCG  
+HWI-EAS443:3:60:931:892#0/1  
aaaa[aabaaaa^`aaa][\_`aY\_[[V\_]a`\_\_Y\_Z\_^[\_

@HWI-EAS443:3:60:939:270#0/1  
GAATTTTAGGATTTGTGTTACGCTCACCGTGCCCAGTGA  
+HWI-EAS443:3:60:939:270#0/1  
`Z]\_\_\_\_`^`[\_¥`Za^^^`^^[U¥¥¥U^U^SUUUUU[U  
@HWI-EAS443:3:60:953:1303#0/1  
CAAAATGACCATCGTCAACATCCACAGCACTCTGCTGTTC  
+HWI-EAS443:3:60:953:1303#0/1  
abbbbbbbbaabbababb`Wb\_ba\_¥baaaaaaaaa\_\_aW`¥  
@HWI-EAS443:3:60:966:47#0/1  
TGGACTCAGGCACTCCTTCCGTAGAAGGCCCTCTTTTCAA  
+HWI-EAS443:3:60:966:47#0/1  
aabaab`abaa]]aa`aa^a`^a`^`]]^[^X\_\_aUTT[  
@HWI-EAS443:3:61:1047:983#0/1  
TGAAAGATGACCTTCTTAAAAATTTGCAGGCCTACCAGAA  
+HWI-EAS443:3:61:1047:983#0/1  
`ba]a\_]\_\_a\_]\_a`[]`^K¥aa\_a`a`\_a^^Y^X^]X  
@HWI-EAS443:3:61:1254:471#0/1  
CAAAATGACCATCGTCAACATCCACAGCACTCTGCTGTTC  
+HWI-EAS443:3:61:1254:471#0/1  
`bbbbbbbbbb]`a¥`bba`aa\_¥a````W]]]ZMWYZ  
@HWI-EAS443:3:61:1378:1277#0/1  
ATTCTTCCCTCATGGACTCAGGCACTCCTTCCGTAGAAGG  
+HWI-EAS443:3:61:1378:1277#0/1  
]baW`\_bbbbabaa`bbb`babbb]bbbab\_]^aa[aa`  
@HWI-EAS443:3:61:249:281#0/1  
GACAAAATGACCATCGTCAACATCCACAGCACTCTGCTGT  
+HWI-EAS443:3:61:249:281#0/1  
a`YRXX]Q]]Y¥Y]NYSSSNVQRW¥HZQLPYYUYVUSVGQ  
@HWI-EAS443:3:61:277:151#0/1  
ATCCTAGCTCCAGTGCTGGTCTGAAAGATGACCTTCTTGA  
+HWI-EAS443:3:61:277:151#0/1  
^Z\_ba]^`\_`\_`R^ZX]NXJLLXY[[ZUUVVY]Y^Y^U  
@HWI-EAS443:3:61:444:270#0/1  
CACTAATCAGGCATGAAAACAGAATGGTGCTGGCTAGCAC  
+HWI-EAS443:3:61:444:270#0/1  
abbbbbbbbabbb`Yabb`W`aa¥aaa`a\_\_a\_Z\_X  
@HWI-EAS443:3:61:450:2044#0/1  
AGGGCCTTCTACGGAAGGAGTGCCTGAGTCCATGAGGGAA  
+HWI-EAS443:3:61:450:2044#0/1  
^\_`a````aaa¥aa`a\_Z[VWX`a[Y]¥T`^[NPLRGRU^  
@HWI-EAS443:3:61:514:1013#0/1  
CAAAATGACCATCGTCAACATCCACAGCACTCTGCTGTTC  
+HWI-EAS443:3:61:514:1013#0/1  
a]bbbbbbbaabYa^]aa`a\_ab\_a`\_a\_aY`XV\_]¥V]V  
@HWI-EAS443:3:61:534:143#0/1  
GGCACGGTGAGCGTGAACACAAATCCTAAAATCCCTTAG  
+HWI-EAS443:3:61:534:143#0/1  
aa[`[aa[^U]]VN^YTRLVYLORX`YL[PUUWWRURXWR  
@HWI-EAS443:3:61:814:303#0/1  
AAAGAGGGCCTTCTACGGAAGGAGTGCCTGAGTCCATGAG

+HWI-EAS443:3:61:814:303#0/1  
a\_ab]`a\_a`X`aaSH^Xa¥]^G\_^]]\_¥^USYTPPPW  
@HWI-EAS443:3:62:1022:1574#0/1  
CCCTCATGGACTCAGGCACTCCTTCCGTAGAAAGGCCCTCT  
+HWI-EAS443:3:62:1022:1574#0/1  
]bbb`[^a^]Za\_Z\_aaab`]b\_¥\_UZba\_^[FQX[\_`  
@HWI-EAS443:3:62:1195:694#0/1  
GGATTTGTGTTACGCTCACCGTGCCAGTGAGCGAGGAC  
+HWI-EAS443:3:62:1195:694#0/1  
TWZbbbSM]`abaab\_]ba\_¥NqJDX]aGaX[Z[0[\_V^  
@HWI-EAS443:3:62:1414:1290#0/1  
ATCATCCCGTCAGGCCCCCTCAAAGCCGAGATCGCGCAGA  
+HWI-EAS443:3:62:1414:1290#0/1  
\_XUG]]]XT`ZXKTY\_OW[]]YUXUPXXETYSBBBBBBBB  
@HWI-EAS443:3:62:1536:1361#0/1  
TGGACTCAGGCACTCCTTCCGTAGAAAGGCCCTCTTTTCAA  
+HWI-EAS443:3:62:1536:1361#0/1  
a[baaabbb`a]`b`abb``aba`XZa`ab\_ba\_`¥a`a`  
@HWI-EAS443:3:62:1563:446#0/1  
GACAAAATGACCATCGTCAACATCCACAGCACTCTGCTGT  
+HWI-EAS443:3:62:1563:446#0/1  
]O^WOP\_XXV^X¥UTaXZQHYWZLVLTBBBBBBBBBBBB  
@HWI-EAS443:3:62:157:1609#0/1  
GACTCAGGCACTCCTTCCGTAGAAAGGCCCTCTTTTCAAAC  
+HWI-EAS443:3:62:157:1609#0/1  
¥Sa\_bb][^aZZ`]Y`aZSVX¥`OVNW¥]a\_\_\_\_\_¥Z\_^¥  
@HWI-EAS443:3:62:1681:561#0/1  
CTGGTCTGAAAGATGACCTTCTTAAAAATTTGCAGGCCTA  
+HWI-EAS443:3:62:1681:561#0/1  
^]aZNZ`¥Q]aQU^TS`aaY^aZTTP]^THRQR]UDETJN  
@HWI-EAS443:3:62:266:675#0/1  
AAGGCTATGGAACAGATGGCTGGATCGAGTGAACAGGCAG  
+HWI-EAS443:3:62:266:675#0/1  
aaba`aaa`a[\_]a¥RZ\_¥a\_\_`^^[\_`aW\_[^U[U[^Z  
@HWI-EAS443:3:62:36:1832#0/1  
AAAATGACCATCGTCAACATCCACAGCACTCTGCTGTCC  
+HWI-EAS443:3:62:36:1832#0/1  
abaaa\_b``¥`TY``aY][\_`^Z[FW\_\_YYVRVWURX\_V  
@HWI-EAS443:3:62:423:708#0/1  
TGGTAGGCCTGCAAATTTTCAAGAAGTCATCTTTCAGAC  
+HWI-EAS443:3:62:423:708#0/1  
aba`a\_X\_aaaaaZaaaa`aa`a`aa¥\_XV`a`a^^`X^  
@HWI-EAS443:3:62:526:1703#0/1  
ACTAAGGGAATTTTAGGATTTGTGTTACGCTCACCGTGC  
+HWI-EAS443:3:62:526:1703#0/1  
aaaaa]X`a^a``\_a\_¥a``a¥]¥``aa^a¥`\_XRUU`¥  
@HWI-EAS443:3:62:723:728#0/1  
CAAAATGACCATCGTCAACATCCACAGCACTCTGCTGTTC  
+HWI-EAS443:3:62:723:728#0/1  
^T¥a`TW¥`baa]\_P¥XKUba^][\_\_Z\_ZZ[]]¥T^¥\_V`]

@HWI-EAS443:3:62:744:1131#0/1  
GACAAAATGACCATCGTCAACATCCACAGCACTCTGCTGT  
+HWI-EAS443:3:62:744:1131#0/1  
ababbbbbaaaa`aaa\_`b^`aaaaa`~~~~`a\_a\_`\_`]  
@HWI-EAS443:3:62:813:1755#0/1  
CTTCCCTCATGGACTCAGGCACTCCTCCGTAGAAGGCC  
+HWI-EAS443:3:62:813:1755#0/1  
a`bbbbbbbaabbbabbabbbbaaaabbbab`aaaa`aa  
@HWI-EAS443:3:62:839:677#0/1  
GCCAGTGAGCGAGGACTGCAGCGTAGACGCTTTGTCCAA  
+HWI-EAS443:3:62:839:677#0/1  
abaaab]aab\_ba`a]\_aaaa`a^`a`a\_a^\_aa\_¥aa`  
@HWI-EAS443:3:62:892:1071#0/1  
GGGCTTCTACGGAAGGAGTGCCTGAGTCCATGAGGGAAG  
+HWI-EAS443:3:62:892:1071#0/1  
a\_^ab^baaaabaaaaba\_aY\_\_a`a^a`aa`U]X]U``  
@HWI-EAS443:3:62:933:346#0/1  
CACGCTCACCGTCCCAGTGAGCGAGGACTGCAGCGTAGA  
+HWI-EAS443:3:62:933:346#0/1  
ababa`aZ¥]ZV\_`^U[N^]R]YTVZ]^YNQS¥U^M[^V  
@HWI-EAS443:3:63:1002:1974#0/1  
AAAATGACCATCGTCAACATCCACAGCACTCTGCTGTCC  
+HWI-EAS443:3:63:1002:1974#0/1  
ab`Z]a`[^aV^aZaa\_\_`¥][`a\_]`^¥^U^XX^[SBBB  
@HWI-EAS443:3:63:1004:1955#0/1  
AAAGAGGGCCTTCTACGGAAGGAGTGCCTGAGTCCATGAG  
+HWI-EAS443:3:63:1004:1955#0/1  
abbaaaaaabaUb\_bbbba\_abbbWaSaU^a\_Z`b[`a`a  
@HWI-EAS443:3:63:1021:153#0/1  
CCACAATATCAGGTGCAAGATCCCAATGATATTTGCTGCA  
+HWI-EAS443:3:63:1021:153#0/1  
¥b\_X\_b^ab`^a`Zab``Z`a]¥Y]\_aba]`ab`[KZaa\_  
@HWI-EAS443:3:63:1024:1371#0/1  
TGGGACTCATCCTAGCTCCAGTGCTGGTCTGAAAGATGAC  
+HWI-EAS443:3:63:1024:1371#0/1  
V]¥YVVVZ\_¥T\_Y^\_b^^bVTGa`JaaXabT`aSXa`]Z]  
@HWI-EAS443:3:63:116:1410#0/1  
ATTCTTCCCTCATGGACTCAGGCACTCCTCCGTAGAAGG  
+HWI-EAS443:3:63:116:1410#0/1  
Z\_ba`abb`bbba]abbaa```bbabbb`a`VN[PTW`TP  
@HWI-EAS443:3:63:1171:374#0/1  
AGGATTTGTGTTACGCTCACCGTCCCAGTGAGCGAGGA  
+HWI-EAS443:3:63:1171:374#0/1  
a`^``bbb]a¥a[a[aaYZ¥RZTS^^`[U]MZ^^[^[Y]B  
@HWI-EAS443:3:63:1303:1013#0/1  
GACAAAATGACCATCGTCAACATCCACAGCACTCTGCTGT  
+HWI-EAS443:3:63:1303:1013#0/1  
¥`bbbaabaaaa\_b]`]aaaWba]`[Ya\_]`^¥a``[^]]  
@HWI-EAS443:3:63:1339:1140#0/1  
GTTGACAAAATGACCATCGTCAACATCCACAGCACTCTGC

+HWI-EAS443:3:63:1339:1140#0/1  
a]a\_`^\_\_^`\_`\_X^```^]`^\_\_\_\_^^VXW]ZUVSY]Y]]  
@HWI-EAS443:3:63:1370:445#0/1  
CTTCCCTCATGGACTCAGGCACTCCTTCCGTAGAAGGCC  
+HWI-EAS443:3:63:1370:445#0/1  
abaabbbbbbaabbbbbbabbbbabaaaabababbab`  
@HWI-EAS443:3:63:1523:1139#0/1  
GGGCCTTCTACGGAAGGAGTGCCTGAGTCCATGAGGGAAG  
+HWI-EAS443:3:63:1523:1139#0/1  
aabb`abaaaaba`aabaa\_a\_a`a`a`U\_]`a\_aa\_]`\_`  
@HWI-EAS443:3:63:1582:536#0/1  
CGCTCACCGTGCCAGTGAGCGAGGACTGCAGCGTAGACG  
+HWI-EAS443:3:63:1582:536#0/1  
`bbb`b]ababa`aab\_ba\_`bb¥a````]`^aU][`\_`\_`a  
@HWI-EAS443:3:63:1588:1035#0/1  
GGAATTTTAGGATTTGTGTTACGCTCACCGTGCCAGTG  
+HWI-EAS443:3:63:1588:1035#0/1  
abbbababab\_\_bbbaabababaa^aaaP`V]`Z^]`Z`  
@HWI-EAS443:3:63:1626:763#0/1  
GTGAGCGAGGACTGCAGCGTAGACGCTTTGTCCAAAATGC  
+HWI-EAS443:3:63:1626:763#0/1  
aQ^Za¥^0a`WWZGX¥`P¥¥NNNN`¥QQ¥SSNWPUUWVR  
@HWI-EAS443:3:63:1740:779#0/1  
GCGGATCTCGGCTTTGAGGGGGCCTGACGGGATGATAGA  
+HWI-EAS443:3:63:1740:779#0/1  
abbb\_aaaaaa]`a\_]Z`^ab`¥ZUVT`]MP[T^Ta`  
@HWI-EAS443:3:63:323:1400#0/1  
TGGGACTCATCCTAGCTCCAGTGCTGGTCTGAAAGATGAC  
+HWI-EAS443:3:63:323:1400#0/1  
a[a`b\_aYaa`]\_]\_JVa`YRVa][GF[[¥HWT`]`^[\_`  
@HWI-EAS443:3:63:323:662#0/1  
TGGTCTGAAAGATGACCTTCTTGAAAATTTGCAGGCCTAC  
+HWI-EAS443:3:63:323:662#0/1  
^^^abbb^abbaaabbaaaaab`\_baaaa`^`aa`a\_a  
@HWI-EAS443:3:63:434:77#0/1  
CTACGCTGCAGTCCTCGCTCACTGGGCACGGTGAGCGTGA  
+HWI-EAS443:3:63:434:77#0/1  
aabbaababZa[abUb\_b`\_Z[R\_aa`\_\_a^S]Z^ZRFVQ  
@HWI-EAS443:3:63:453:20#0/1  
CAAAATGACCATCGTCAACATCCACAGCACTCTGCTGTTC  
+HWI-EAS443:3:63:453:20#0/1  
a`aaaabaa`aa\_`[^YHUa^^]¥¥^[TY]]`WZ^U¥Z  
@HWI-EAS443:3:63:485:295#0/1  
ATTCTTCCCTCATGGACTCAGGCACTCCTTCCGTAGAAGG  
+HWI-EAS443:3:63:485:295#0/1  
aaaaaaaa^\_aaa`a\_a`\_a\_\_\_a`^a^`¥\_`X`¥\_¥U  
@HWI-EAS443:3:64:1011:793#0/1  
AAAGAGGGCCTTCTACGGAAGGAGTGCCTGAGTCCATGAG  
+HWI-EAS443:3:64:1011:793#0/1  
W^]W\_b\_WZ\_QZ]baa`[a```\_`^P^`[^a\_a]`^UTJ`N

@HWI-EAS443:3:64:1042:809#0/1  
GGGCCTTCTACGGAAGGAGTGCCTGAGTCCATGAGGGAAG  
+HWI-EAS443:3:64:1042:809#0/1  
``^`\_Y`]aaXW¥JW¥¥`W^Za[\_[¥WU[[¥\_U^\_\_XRZ  
@HWI-EAS443:3:64:1052:334#0/1  
ATCATCCCGTCAGGCCCTCAAAGCCGAGATCGCGCAGA  
+HWI-EAS443:3:64:1052:334#0/1  
aa\_aaaaaa^`a^^a^\_a^^^^\_`]ZV]P`¥¥^`W¥WW]U  
@HWI-EAS443:3:64:1243:794#0/1  
CTAATCAGGCATGAAAACAGAATGGTGCTGGCTAGCACTA  
+HWI-EAS443:3:64:1243:794#0/1  
a`ZX[b^^\_¥`ba[\_`aa`abaa`WUW[`abaaab``U\_a  
@HWI-EAS443:3:64:1554:1983#0/1  
AGCAAATATCATTGGGATCTTGCACCTGATATTGTGGATT  
+HWI-EAS443:3:64:1554:1983#0/1  
XY]\_¥\_]a¥^`\_¥a`aXWTR````\_YG[`]a\_aaa^^`Ya  
@HWI-EAS443:3:64:1670:1083#0/1  
GACTGCAGCGTAGACGCTTTGTCCAAAATGCCCTAAATGG  
+HWI-EAS443:3:64:1670:1083#0/1  
^\_bbbbbbab\_b\_b^babaaaab`aaabbbTJVabaaaa  
@HWI-EAS443:3:64:323:1026#0/1  
TACGGTTTGAAGAGGGCCTTCTACGGAAGGAGTGCCTG  
+HWI-EAS443:3:64:323:1026#0/1  
\_bb`baa`¥a\_aabb]`aaaaaaaa`¥H[\_]\_¥\_`\_Z\_  
@HWI-EAS443:3:64:364:1013#0/1  
CTCCAGTGCTGGTCTGAAAGATGACCTTCTTGAAAATTTG  
+HWI-EAS443:3:64:364:1013#0/1  
aaabaaV`a^`Y`¥\_\_\_[\_]\_]\_WV^^¥`X^\_¥R¥WWTW  
@HWI-EAS443:3:64:546:477#0/1  
GCACGGTGAGCGTGAACACAAATCCTAAAATCCCTTAGT  
+HWI-EAS443:3:64:546:477#0/1  
`aaaabH^aa\_a]a\_aa\_`¥[a\_^a^`\_]\_`\_\_\_a[\_\_\_V  
@HWI-EAS443:3:64:740:172#0/1  
GGCCTGCAAATTTCAAGAAGGTCATCTTTCAGACCAGCA  
+HWI-EAS443:3:64:740:172#0/1  
`bbaabab`baaaaaabaaaa]aaa\_aaaaaa`\_a\_\_a  
@HWI-EAS443:3:64:769:1371#0/1  
TCACCGTGCCAGTGAGCGAGGACTGCAGCGTAGACGCTT  
+HWI-EAS443:3:64:769:1371#0/1  
aaabab\_aabaaa]a`]b`a¥ZZ`^Z\_\_X]V¥aXaG^¥\_`  
@HWI-EAS443:3:64:852:1061#0/1  
ATTGCAGCAAATATCATTGGGATCTTGCACCTGATATTGT  
+HWI-EAS443:3:64:852:1061#0/1  
abbabbaaaaaa`aaaaa^`a]`\_aaa`\_\_`aa^`a^`^  
@HWI-EAS443:3:64:923:665#0/1  
CTCTGACTAAGGGAATTTTAGGATTTGTGTTACGCTCAC  
+HWI-EAS443:3:64:923:665#0/1  
abbbabbbbabba\_bbbbbbaabaabbab\_aba``a`a`a  
@HWI-EAS443:3:65:1182:664#0/1  
GATTTGTGTTACGCTCACCGTGCCAGTGAGCGAGGACT

+HWI-EAS443:3:65:1182:664#0/1  
`VU`¥RXY`][QZ[TYFPNNUUQQT`[[[BBBBBBBBB  
@HWI-EAS443:3:65:154:150#0/1  
GCCTTCTACGGAAGGAGTGCCTGAGTCCATGAGGGAAGAA  
+HWI-EAS443:3:65:154:150#0/1  
aa\_]\_^\_\_\_\_[\_V\_\_WWW¥¥¥WSUWYWYYWTPUY[WSWVY  
@HWI-EAS443:3:65:480:675#0/1  
GGGAATTTTAGGATTTGTGTTACGCTCACCGTGCCAGT  
+HWI-EAS443:3:65:480:675#0/1  
\_```aaaaaa`abaaaa\_aaa`^aU`^\_ZW¥`^ZS]T  
@HWI-EAS443:3:65:56:1556#0/1  
ATTGCAGCAAATATCATTGGGATCTTGCACCTGATATTGT  
+HWI-EAS443:3:65:56:1556#0/1  
YY\_Y`^]aX¥\_\_U^^`XX]UVYZ`^]]^a`¥`¥[]¥UYSL  
@HWI-EAS443:3:65:607:45#0/1  
GACTAAGGGAATTTTAGGATTTGTGTTACGCTCACCGTG  
+HWI-EAS443:3:65:607:45#0/1  
aaaaaa]ba\_Zaaa`a^`]a`aa¥`¥\_\_`[¥`¥¥X[^ZW^  
@HWI-EAS443:3:65:626:761#0/1  
GCCTTCTACGGAAGGAGTGCCTGAGTCCATGAGGGAAGAA  
+HWI-EAS443:3:65:626:761#0/1  
aaaaa`\_Xaaa¥`a`[`Ua`a`````]a^W`a`a`\_`\_`\_^\_  
@HWI-EAS443:3:65:645:1265#0/1  
GACTAAGGGAATTTTAGGATTTGTGTTACGCTCACCGTG  
+HWI-EAS443:3:65:645:1265#0/1  
`bb`[``^`\_babaabaaaabbba`\_abaaZa^a]a]^SW  
@HWI-EAS443:3:65:939:995#0/1  
CAAATTTTCAAGAAGGTCATCTTTTCCAGACCAGCACTGGAG  
+HWI-EAS443:3:65:939:995#0/1  
a^`Y^aaV^aaa¥^VYW\_aa\_\_a[^aY^][[ZP¥MZZWYS  
@HWI-EAS443:3:65:950:1168#0/1  
GACAAAATGACCATCGTCAACATCCACAGCACTCTGCTGT  
+HWI-EAS443:3:65:950:1168#0/1  
aaa`\_a]a\_aaaaWY]M]Z¥^`¥[[]`¥TX`\_\_X\_^V^a¥  
@HWI-EAS443:3:66:1046:240#0/1  
CAGTGAGCGAGGACTGCAGCGTAGACGCTTTGTCCAAAAT  
+HWI-EAS443:3:66:1046:240#0/1  
aaa^aabababaa`aaaa\_a^a\_aUa¥]¥`\_U¥]`a`\_¥  
@HWI-EAS443:3:66:1152:1084#0/1  
TGGACTCAGGCACTCCTTCCGTAGAAGGCCCTCTTTTCAA  
+HWI-EAS443:3:66:1152:1084#0/1  
`a[``Z`W\_a¥P]aaa``\_a\_QVUSZa\_aa\_¥\_\_`aNU¥  
@HWI-EAS443:3:66:1449:1781#0/1  
CAAATTTTCAAGAAGGTCATCTTTTCCAGACCAGCACTGGAG  
+HWI-EAS443:3:66:1449:1781#0/1  
ab``babbbaabaaaa\_]baaaba`ba\_aXaaaa^]a\_a\_  
@HWI-EAS443:3:66:1486:961#0/1  
CTCATGGACTCAGGCACTCCTTCCGTAGAAGGCCCTCTTT  
+HWI-EAS443:3:66:1486:961#0/1  
\_ [¥Rjb]\_ [\_ [TaaWT] `b¥a`bRKRI\_QR]aXU\_Z¥HT]



@HWI-EAS443:3:66:1666:720#0/1  
AGGACTGCAGCGTAGACGCTTTGTCCAAAATGCCCTAAAT  
+HWI-EAS443:3:66:1666:720#0/1  
`b\_a\_\_bba\_aa¥aaa\_a`aaaZU¥¥^\_\_a\_a\_W^`NWUa  
@HWI-EAS443:3:66:1693:1021#0/1  
ATTGGGACTCATCCTAGCTCCAGTGCTGGTCTGAAAGATG  
+HWI-EAS443:3:66:1693:1021#0/1  
aaaa\_b`X]aaaaaaaa¥a`aaa[aa\_]VN[XY`^UU]U  
@HWI-EAS443:3:66:1749:266#0/1  
GGCCTTCTACGGAAGGAGTGCCTGAGTCCATGAGGGAAGA  
+HWI-EAS443:3:66:1749:266#0/1  
]ab\_bbabb¥ba`aaaa]`a\_aa`b`\_\_a[\_Wa`[[\_a`  
@HWI-EAS443:3:66:508:753#0/1  
ATTCTTCCCTCATGGACTCAGGCACTCCTTCCGTAGAAGG  
+HWI-EAS443:3:66:508:753#0/1  
abbaa`bba`^`a`^`aaaZZ\_\_``aaaaa``Ya^^\_\_^  
@HWI-EAS443:3:66:515:543#0/1  
ACGCTGCAGTCCTCGCTCACTGGGCACGGTGAGCGTGAAC  
+HWI-EAS443:3:66:515:543#0/1  
a`a\_ZVa[WVa^[]\_]^[ZUZRPUU¥ZTPKQW^¥WMRRP  
@HWI-EAS443:3:66:740:293#0/1  
GCCTTCTACGGAAGGAGTGCCTGAGTCCATGAGGGAAGAA  
+HWI-EAS443:3:66:740:293#0/1  
\_VN^¥\_R[¥X\_^TS¥KQQQS^]ZUDTSRS¥Z¥BBBBBBBB  
@HWI-EAS443:3:66:765:716#0/1  
AGTGCTAGCCAGCACCATTCTGTTTTCATGCCTGATTAGT  
+HWI-EAS443:3:66:765:716#0/1  
`aUaa`aa`a`\_\_`\_`\_a`\_\_a]\_`\_`\_`\_[\_\_a]\_^ZXX  
@HWI-EAS443:3:67:1066:2045#0/1  
GGCCTTCTACGGAAGGAGTGCCTGAGTCCATGAGGGAAGA  
+HWI-EAS443:3:67:1066:2045#0/1  
H[b\_\_¥`\_W¥¥W\_\_V`RYXV¥\_b\_QZb\_\_Z[`T\_¥^X]  
@HWI-EAS443:3:67:1585:1907#0/1  
CAAAATGACCATCGTCAACATCCACAGCACTCTGCTGTTC  
+HWI-EAS443:3:67:1585:1907#0/1  
abbbaaaa`aa`aaX\_aa^`\_a`\_a\_]\_\_^]\_[][T\_]  
@HWI-EAS443:3:67:223:1993#0/1  
AGTCTCTGCGCATCTCGGCTTTGAGGGGGCCTGACGGGA  
+HWI-EAS443:3:67:223:1993#0/1  
a^]aab\_a`]\_`\_¥\_¥a`Z`^`\_`V[UU^M¥¥]WSTUU[PS  
@HWI-EAS443:3:67:844:657#0/1  
GACAAAATGACCATCGTCAACATCCACAGCACTCTGCTGT  
+HWI-EAS443:3:67:844:657#0/1  
]aabb]bb`bbb`aaX]\_YU^U`a`\_aa¥]]bZ]Y\_`aa]  
@HWI-EAS443:3:67:868:118#0/1  
GACAAAATGACCATCGTCAACATCCACAGCACTCTGCTGT  
+HWI-EAS443:3:67:868:118#0/1  
¥Zb]a\_Z`baba\_]¥\_¥YXQV`V^VUZ]\_Q\_^]S\_WOZaZ  
@HWI-EAS443:3:67:896:352#0/1  
CGAGGACTGCAGCGTAGACGCTTTGTCCAAAATGCCCTAA

+HWI-EAS443:3:67:896:352#0/1  
]ZW]PZ`M]¥aaaaPa`a\_\_\_\_[Z\_`¥^W]\_^ZPZ[^R^XO  
@HWI-EAS443:3:67:932:617#0/1  
GGAATTTTAGGATTTGTGTTACGCTCACCGTGCCAGTG  
+HWI-EAS443:3:67:932:617#0/1  
a\_VZYaaVaa\_[aaaaTT]\_\_`a\_`¥¥¥¥W[[ZV¥^W^W^  
@HWI-EAS443:3:67:971:285#0/1  
GACTCAGGCACTCCTTCCGTAGAAGGCCCTTTTTCAAAC  
+HWI-EAS443:3:67:971:285#0/1  
a`\_aaaaaa^\_]¥`^^^a]\_^¥\_Z[RUYZ]\_]^[^W  
@HWI-EAS443:3:68:1237:619#0/1  
CTTCCCTCATGGACTCAGGCACTCCTTCCGTAGAAGGCC  
+HWI-EAS443:3:68:1237:619#0/1  
a\_W\_P`^`]aU^^¥RXYb\_Y\_XU¥[Q]a`N\_YTR[M^VJM  
@HWI-EAS443:3:68:1294:46#0/1  
TTTTAGGATTTGTGTTACGCTCACCGTGCCAGTGAGCG  
+HWI-EAS443:3:68:1294:46#0/1  
abbaa`]]abb\_`Z``]SEQS^PRPPNS¥BBBBBBBBBB  
@HWI-EAS443:3:68:1674:1217#0/1  
CAAAATGACCATCGTCAACATCCACAGCACTCTGCTGTTC  
+HWI-EAS443:3:68:1674:1217#0/1  
a\_^^`¥0]YU\_aaaZ`ZXS`YT\_```aS¥Z]`\_WU\_T[`]  
@HWI-EAS443:3:68:233:989#0/1  
GGCACTCCTTCCGTAGAAGGCCCTTTTTCAAACCGTATT  
+HWI-EAS443:3:68:233:989#0/1  
aU`^aab```aa\_Z^[YZ\_`a`\_]``\_]\_a\_\_\_\_TTR\_] ]  
@HWI-EAS443:3:68:250:1443#0/1  
ACGGTTTGAAAAGAGGGCCTTCTACGGAAGGAGTGCCTGA  
+HWI-EAS443:3:68:250:1443#0/1  
^^bb]bbT^b`ZY¥Z`a`a\_aaVSY¥a````RSSUTSNYL  
@HWI-EAS443:3:68:327:457#0/1  
GCCTTCTACGGAAGGAGTGCCTGAGTCCATGAGGGAAGAA  
+HWI-EAS443:3:68:327:457#0/1  
aba\_]a`R`\_ZS^\_a[WTU¥a\_[R¥X`\_VP`X\_\_\_Z\_¥¥¥  
@HWI-EAS443:3:68:457:780#0/1  
GGGAATTTTAGGATTTGTGTTACGCTCACCGTGCCAGT  
+HWI-EAS443:3:68:457:780#0/1  
a`aaa\_]Taa`Y```]`¥[¥Xaa]^UK]^VSSN^¥UVUVK  
@HWI-EAS443:3:68:466:1736#0/1  
CACGCTCACCGTGCCAGTGAGCGAGGACTGCAGCGTAGA  
+HWI-EAS443:3:68:466:1736#0/1  
abZO^^¥`\_^WVRaaWJ\_Q\_X¥`¥WDOTNJJYZJ]YHQTV  
@HWI-EAS443:3:68:69:175#0/1  
CTTCCCTCATGGACTCAGGCACTCCTTCCGTAGAAGGCC  
+HWI-EAS443:3:68:69:175#0/1  
abaaa`aaaa````]`aaa\_[a^\_a]\_¥]\_\_U]XZRPWXU  
@HWI-EAS443:3:68:752:73#0/1  
GACAAAATGACCATCGTCAACATCCACAGCACTCTGCTGT  
+HWI-EAS443:3:68:752:73#0/1  
\_aabb```a\_^[aa\_\_U]`^U\_a]\_[]aXG¥FST`¥U`^^^

@HWI-EAS443:3:68:821:795#0/1  
ACAAAATGACCATCGTCAACATCCACAGCACTCTGCTGTT  
+HWI-EAS443:3:68:821:795#0/1  
`a\_a\_abbaaa]aaaaa\_S]]\_b\_\_aa\_\_\_\_`a[-`\_`\_`\_`\_  
@HWI-EAS443:3:69:1011:485#0/1  
CTGGTCTGAAAGATGACCTTCTTGAAAATTTGCAGGCCTA  
+HWI-EAS443:3:69:1011:485#0/1  
aa`]Xabb]aaZ``\_ba`X`a\_``^T[-[a`a\_\_`]Waa`  
@HWI-EAS443:3:69:1042:129#0/1  
AAAATGACCATCGTCAACATCCACAGCACTCTGCTGTTCC  
+HWI-EAS443:3:69:1042:129#0/1  
aaab``a\_``^a]^a\_X\_\_[R[R\_\_V]V[U[^YZRU[YY  
@HWI-EAS443:3:69:1057:133#0/1  
GACAAAATGACCATCGTCAACATCCACAGCACTCTGCTGT  
+HWI-EAS443:3:69:1057:133#0/1  
aba[bb`abba\_baaa\_Uaa\_aaa\_^aa¥a\_\_\_\_[[[\_V  
@HWI-EAS443:3:69:141:1099#0/1  
CCTAGCTCCAGTGCTGGTCTGAAAGATGACCTTCTTGAAA  
+HWI-EAS443:3:69:141:1099#0/1  
ab`aaa^aa[aSXV[^[^N``ZQVUSSPU^`¥\_¥\_UWZ[U  
@HWI-EAS443:3:69:518:803#0/1  
GGCCTGCAAATTTTCAAGAAGGTCATCTTTCAGACCAGCA  
+HWI-EAS443:3:69:518:803#0/1  
aaaaaabaU\_aa`aa`^R^]U`a``a``\_]`\_\_a\_`^`  
@HWI-EAS443:3:69:529:1842#0/1  
CAAATTTTCAAGAAGGTCATCTTTCAGACCAGCACTGGAG  
+HWI-EAS443:3:69:529:1842#0/1  
ab^T`aa^aa``a``\_0a``\_\_^``a^aa``¥a`\_^¥X\_R  
@HWI-EAS443:3:69:613:1127#0/1  
TGCTGGTCTGAAAGATGACCTTCTTGAAAATTTGCAGGCC  
+HWI-EAS443:3:69:613:1127#0/1  
a`a[[]]bb`b¥W\_Yaa[abbaba\_¥\_Q\_\_abaabaaba  
@HWI-EAS443:3:69:877:529#0/1  
TGGACTCAGGCACTCCTTCCGTAGAAGGCCCTCTTTTCAA  
+HWI-EAS443:3:69:877:529#0/1  
abb[baaaaaabbbaaaba\_aWZ¥ZZY¥a\_a\_`a\_\_a¥``  
@HWI-EAS443:3:6:1064:531#0/1  
AAAATGACCATCGTCAACATCCACAGCACTCTGCTGTTCC  
+HWI-EAS443:3:6:1064:531#0/1  
abbabba¥`\_a`a`¥``]`aU¥`S`\_Ra\_\_Ya]0^aZ`ZU  
@HWI-EAS443:3:6:1239:138#0/1  
AGGACTGCAGCGTAGACGCTTTGTCCAAAATGCCCTAAAT  
+HWI-EAS443:3:6:1239:138#0/1  
ab[a\_ab\_aa\_aZa`\_Za`a¥\_U\_VW[``\_`bZKETQNB  
@HWI-EAS443:3:6:1247:241#0/1  
GACTAAGGGAATTTTAGGATTTGTGTTACGCTCACCGTG  
+HWI-EAS443:3:6:1247:241#0/1  
`baaba\_UV[`aaa\_aaa\_aY`bGb¥``aWa\_¥UXSBBBB  
@HWI-EAS443:3:6:1347:718#0/1  
CTAAGGGAATTTTAGGATTTGTGTTACGCTCACCGTGCC

+HWI-EAS443:3:6:1347:718#0/1  
`bbbbbabbabbabbbbab\_babb\_aba^\_aaWa\_b[\_  
@HWI-EAS443:3:6:1440:1168#0/1  
GGGCTTCTACGGAAGGAGTGCCTGAGTCCATGAGGGAAG  
+HWI-EAS443:3:6:1440:1168#0/1  
`bbb^`a`ba^b``abaaaaX[\_`XaZ^\_S¥aQa`^S¥`  
@HWI-EAS443:3:6:627:483#0/1  
ATTTGTGTTACGCTCACCGTGCCAGTGAGCGAGGACTG  
+HWI-EAS443:3:6:627:483#0/1  
abbbb¥a`a`a`\_`^]VV[P^VT]¥]PWVYP¥W¥¥BBBB  
@HWI-EAS443:3:6:713:782#0/1  
GGTCATCTTTCAGACCAGCACTGGAGCTAGGATGAGTCCC  
+HWI-EAS443:3:6:713:782#0/1  
ab`a`a]aa`[aba\_`a`^a^`\_`\_^]¥aa¥^\_a`^]YX^  
@HWI-EAS443:3:70:1091:1496#0/1  
ATTTGTGTTACGCTCACCGTGCCAGTGAGCGAGGACTG  
+HWI-EAS443:3:70:1091:1496#0/1  
aaab^¥a^aaaa¥aSa[] [] [¥¥ZUKTX^XXV¥¥X^MVQ  
@HWI-EAS443:3:70:1095:1846#0/1  
GACAAAATGACCATCGTCAACATCCACAGCACTCTGCTGT  
+HWI-EAS443:3:70:1095:1846#0/1  
\_babbbbababaaab`]ababb` `\_babba`Oa`\_`¥`  
@HWI-EAS443:3:70:1181:1300#0/1  
ATTGGGACTCATCCTAGCTCCAGTGCTGGTCTGAAAGATG  
+HWI-EAS443:3:70:1181:1300#0/1  
a\_baa[`a`baa`b^aaa\_aa\_\_Va`a`\_Y`a[V^\_\_^]Y  
@HWI-EAS443:3:70:1295:773#0/1  
GACAAAATGACCATCGTCAACATCCACAGCACTCTGCTGT  
+HWI-EAS443:3:70:1295:773#0/1  
a[`¥¥Z[]bb`a]aX`Y`^^`a]S\_\_`X\_VXVVa`¥Y]]  
@HWI-EAS443:3:70:1414:251#0/1  
GGGAATTTTAGGATTTGTGTTACGCTCACCGTGCCAGT  
+HWI-EAS443:3:70:1414:251#0/1  
aa`¥`aaa^`a`K`V\_^U]NXTa]]KTUTHK^WRORSWUU  
@HWI-EAS443:3:70:1581:1394#0/1  
TGACAAAATGACCATCGTCAACATCCACAGCACTCTGCTG  
+HWI-EAS443:3:70:1581:1394#0/1  
[aaa¥¥`abab\_a\_aab\_a`]b[aaa^]a\_a`a`]UaX  
@HWI-EAS443:3:70:351:431#0/1  
ATTCCCATTTAGGGCATTGTTGGACAAAGCGTCTACGCTGC  
+HWI-EAS443:3:70:351:431#0/1  
^`\_`a`\_`^aa`\_]a^` `aaa\_Za^`^`]aY`aa^W]X\_]`  
@HWI-EAS443:3:70:378:1123#0/1  
CCACTAATCAGGCATGAAAACAGAATGGTGCTGGCTAGCA  
+HWI-EAS443:3:70:378:1123#0/1  
aaaa`aa`\_`a`\_aaaaaZRYaa`b\_]aZU\_\_\_\_^`]a]\_\_  
@HWI-EAS443:3:70:55:397#0/1  
ATTGGGACTCATCCTAGCTCCAGTGCTGGTCTGAAAGATG  
+HWI-EAS443:3:70:55:397#0/1  
aa`aaaababa\_aaaa`aaaa`aYaa`\_`Va^\_X]Y]^^Z

@HWI-EAS443:3:70:606:1824#0/1  
GGGCCTTCTACGGAAGGAGTGCCTGAGTCCATGAGGGAAG  
+HWI-EAS443:3:70:606:1824#0/1  
abbbbaabbbba\_b]abb]^\`a`aabaZaaaa]aa\_a\_a`  
@HWI-EAS443:3:70:765:605#0/1  
GGGAATTTTAGGATTTGTGTTACGCTCACCGTGCCAGT  
+HWI-EAS443:3:70:765:605#0/1  
^aaaaa`a`aab\_aa`][`a\_aaa]\_Wa`^YXY]]¥\_SVU  
@HWI-EAS443:3:70:799:886#0/1  
CTCTGACTAAGGGAATTTTAGGATTTGTGTTACGCTCAC  
+HWI-EAS443:3:70:799:886#0/1  
abaabababbbbaabba\_aaa[aaaa[aa\_aa`\_`^`a]  
@HWI-EAS443:3:70:885:708#0/1  
CAGGCACTCCTTCCGTAGAAGGCCCTTTTTCAAACCGTA  
+HWI-EAS443:3:70:885:708#0/1  
^`a\_babaaba`\_`VX^`S¥Zaa`^a]\_Ya`W]`\_^X¥X¥  
@HWI-EAS443:3:71:1019:1481#0/1  
CAGGCACTCCTTCCGTAGAAGGCCCTTTTTCAAACCGTA  
+HWI-EAS443:3:71:1019:1481#0/1  
a^^R]b`Y[a[\_b¥^\_aaa`\_XN]``]]^JJ``aa\_\_\_R\_  
@HWI-EAS443:3:71:1125:576#0/1  
TAGGATTTGTGTTACGCTCACCGTGCCAGTGAGCGAGG  
+HWI-EAS443:3:71:1125:576#0/1  
aabaabbbbZb]a`aa^]Y¥`]X[^a`Z]P]¥aZ¥N\_W\_¥  
@HWI-EAS443:3:71:1597:1209#0/1  
CTTCCCTCATGGACTCAGGCACTCCTTCCGTAGAAGGCC  
+HWI-EAS443:3:71:1597:1209#0/1  
`bba\_abbbbbbaabbbbbbaabbbbbbaabbbbb`^a  
@HWI-EAS443:3:71:303:1763#0/1  
TGACAAAATGACCATCGTCAACATCCACAGCACTCTGCTG  
+HWI-EAS443:3:71:303:1763#0/1  
\_¥^bb\_baba`bbbabb]aa[\_b`a``ab`aaa`aYQ^\_a  
@HWI-EAS443:3:71:325:34#0/1  
CAAATGACCATCGTCAACATCCACAGCACTCTGCTGTTC  
+HWI-EAS443:3:71:325:34#0/1  
aX]Z\_\_\_\_]\_^`aVYS¥]GOY\_[YNY\_]QLYVVXY¥BBBBB  
@HWI-EAS443:3:71:384:1137#0/1  
AAATGACCATCGTCAACATCCACAGCACTCTGCTGTTCCT  
+HWI-EAS443:3:71:384:1137#0/1  
`bab\_aba]aaa]aa`a\_\_`a`[^a``^`^\_\_^`^]`]]  
@HWI-EAS443:3:71:466:1475#0/1  
ATTTGTGTTACGCTCACCGTGCCAGTGAGCGAGGACTG  
+HWI-EAS443:3:71:466:1475#0/1  
`aa\_Z¥¥^aba`Z]¥aaaa^Y]a^`V\_S[^ZUM[[USNV  
@HWI-EAS443:3:71:623:83#0/1  
GACAAAATGACCATCGTCAACATCCACAGCACTCTGCTGT  
+HWI-EAS443:3:71:623:83#0/1  
aaabaaabaa\_\_`a\_a]\_[\_Y^^]`^^\_\_\_\_^\_]\_]`^U  
@HWI-EAS443:3:71:670:661#0/1  
CAGTGAGCGAGGACTGCAGCGTAGACGCTTTGTCCAAAAT

+HWI-EAS443:3:71:670:661#0/1  
aba\_bbbab]bb`bbaaaa`baaaaa`Xa`ab^\_\_\_\_  
@HWI-EAS443:3:71:712:719#0/1  
ATTCCCATTAGGGCATTGGACAAAGCGTCTACGCTGC  
+HWI-EAS443:3:71:712:719#0/1  
abbbaaabbaa\_]`baaaaaa\_a`^aaa\_aa]^`a]ZT  
@HWI-EAS443:3:71:764:338#0/1  
CTCATGGACTCAGGCACTCCTCCGTAGAAGGCCCTCTTT  
+HWI-EAS443:3:71:764:338#0/1  
WX^^Va`V`\_a]a`^^R^\_aaa`]Qaa`a\_\_\_\_¥ZXY^\_X  
@HWI-EAS443:3:71:773:2029#0/1  
GAGGACTGCAGCGTAGACGCTTTGTCCAAAATGCCCTAAA  
+HWI-EAS443:3:71:773:2029#0/1  
aa[Ybba[babbVU¥`bbaaaa^[\_bba`aa`aaaaa`  
@HWI-EAS443:3:71:883:464#0/1  
CAAAATGACCATCGTCAACATCCACAGCACTCTGCTGTTC  
+HWI-EAS443:3:71:883:464#0/1  
abbbbbbbbaaa`\_]\_Va`aa`aaaa^`\_aaaaa]\_W`^  
@HWI-EAS443:3:71:934:45#0/1  
ATGTTGACAAAATGACCATCGTCAACATCCACAGCACTCT  
+HWI-EAS443:3:71:934:45#0/1  
aabaababbababaa^aaa¥a\_Za]Z`\_`\_]Z`\_]`^\_  
@HWI-EAS443:3:71:990:1187#0/1  
ATTTGTGTTACGCTCACCGTGCCAGTGAGCGAGGACTG  
+HWI-EAS443:3:71:990:1187#0/1  
]Xaa`GWZUaWaR`¥a]a¥MQ]]^TFJF]¥WNQVVLT¥\_  
@HWI-EAS443:3:71:999:1823#0/1  
CTCCAGTGCTGGTCTGAAAGATGACCTTCTTAAAAATTTG  
+HWI-EAS443:3:71:999:1823#0/1  
^\_bbb`bbbabba\_0]\_abab^Wa]bbbbab\_``baa\_aa  
@HWI-EAS443:3:72:1286:668#0/1  
TGACAAAATGACCATCGTCAACATCCACAGCACTCTGCTG  
+HWI-EAS443:3:72:1286:668#0/1  
abaaaabaaaa`ba]aZ`a]]aa`\_`\_`a\_aa\_\_^¥¥`a  
@HWI-EAS443:3:72:1586:1353#0/1  
AAAGAGGGCCTTCTACGGAAGGAGTGCCTGAGTCCATGAG  
+HWI-EAS443:3:72:1586:1353#0/1  
aa[b^\_[aa]\_a^\_X¥aa[¥`R\_W\_UU^\_[^WW]Y¥UQ\_  
@HWI-EAS443:3:72:158:184#0/1  
GTTGACAAAATGACCATCGTCAACATCCACAGCACTCTGC  
+HWI-EAS443:3:72:158:184#0/1  
a¥¥aa^`S]]]Y\_a]a]¥[R\_WWY¥WYSZ]]UT[PRUSUY  
@HWI-EAS443:3:72:1737:901#0/1  
AGAGGGCCTTCTACGGAAGGAGTGCCTGAGTCCATGAGGG  
+HWI-EAS443:3:72:1737:901#0/1  
^`¥baabaaaa`a`aaaaa`ZU]^\_aZaYU]^`[Va\_a  
@HWI-EAS443:3:72:1791:1625#0/1  
CTCTGACTAAGGAATTTTAGGATTTGTGTTACGCTCAC  
+HWI-EAS443:3:72:1791:1625#0/1  
aaaaaa^WZa^¥¥a`a^\_a`¥`^`^\_\_\_\_[^\_`¥¥UWURU

@HWI-EAS443:3:72:273:106#0/1  
GACTAAGGGAATTTTAGGATTTGTGTTCCACGCTCACCGTG  
+HWI-EAS443:3:72:273:106#0/1  
ab¥baabaabbbb`bab`aa\_aa\_a`\_\_\_\_[\_a¥[¥U[USY  
@HWI-EAS443:3:72:284:1330#0/1  
GACAAAATGACCATCGTCAACATCCACAGCACTCTGCTGT  
+HWI-EAS443:3:72:284:1330#0/1  
aabb\_bab[bbb\_\_bb]`aba[abbaaaZ`aSZPSa^\_aZ  
@HWI-EAS443:3:72:485:89#0/1  
AAATGACCATCGTCAACATCCACAGCACTCTGCTGTTCCCT  
+HWI-EAS443:3:72:485:89#0/1  
aaaaa`\_a`a]a^^\_^^\_\_^]^^\_\_YXX]]^[\_^ZXUUU  
@HWI-EAS443:3:72:643:1080#0/1  
GGGCCTTCTACGGAAGGAGTGCCTGAGTCCATGAGGGAAG  
+HWI-EAS443:3:72:643:1080#0/1  
`\_^a`Xa\_aZ`¥NVV]WUWV^UJZV¥N¥WUU¥S\_^SLMV  
@HWI-EAS443:3:72:769:1846#0/1  
AAAATGACCATCGTCAACATCCACAGCACTCTGCTGTTCC  
+HWI-EAS443:3:72:769:1846#0/1  
]`]ZYR\_a¥aaZ]LZV`a\_a\_\_adWa\_[H\_ZU[TPSZ^Z  
@HWI-EAS443:3:72:794:1196#0/1  
AGGATTTGTGTTCCACGCTCACCGTGCCAGTGAGCGAGGA  
+HWI-EAS443:3:72:794:1196#0/1  
\_¥TQ]]aa\_]\_a`b]Y\_\_aa`a^]aa]\_[aW^^^`YXHF¥  
@HWI-EAS443:3:72:921:1887#0/1  
GGGCCTTCTACGGAAGGAGTGCCTGAGTCCATGAGGGAAG  
+HWI-EAS443:3:72:921:1887#0/1  
`^\_bbbaaaa\_ba\_aa`aXV\_``\_]`¥W`a\_\_a`a\_a\_a\_  
@HWI-EAS443:3:72:943:889#0/1  
GACTCAGGCACTCCTTCCGTAGAAGGCCCTCTTTTCAAAC  
+HWI-EAS443:3:72:943:889#0/1  
^¥]]`a`\_b`bbb^`aaa`\_Y`\_T]U^UR[Saa\_YS^a`Z  
@HWI-EAS443:3:72:984:42#0/1  
GACAAAATGACCATCGTCAACATCCACAGCACTCTGCTGT  
+HWI-EAS443:3:72:984:42#0/1  
a`W^^`\_^\_^]YX¥aV]WY¥W[]¥WY¥¥YYYYXZY]Y]]U  
@HWI-EAS443:3:73:1109:437#0/1  
CAAAATGACCATCGTCAACATCCACAGCACTCTGCTGTTCC  
+HWI-EAS443:3:73:1109:437#0/1  
``baab`aa^adW\_]\_`bZ`\_[\_\_¥a\_Ya\_^Y`\_^aa^\_X  
@HWI-EAS443:3:73:1117:1318#0/1  
GATTTGTGTTCCACGCTCACCGTGCCAGTGAGCGAGGACT  
+HWI-EAS443:3:73:1117:1318#0/1  
ZW]OK^HTZW]X`^`VMONWZR]TVYXBBBBBBBBBBBBB  
@HWI-EAS443:3:73:1151:1054#0/1  
TGCAAATTTTCAAGAAGGTCATCTTTTCCAGACCAGCACTGG  
+HWI-EAS443:3:73:1151:1054#0/1  
aaab``bbbaaaaaaaaaX[aaaaaa\_aaa\_]`\_\_\_\_^\_^\_  
@HWI-EAS443:3:73:1277:1333#0/1  
GGACTCAGGCACTCCTTCCGTAGAAGGCCCTCTTTTCAAA

+HWI-EAS443:3:73:1277:1333#0/1  
O\_`ab`¥Wbb`bbbbba`````bbbba\_bbb^bbbabbbb  
@HWI-EAS443:3:73:1315:770#0/1  
GGGAATTTTAGGATTTGTGTTACGCTCACCGTGCCAGT  
+HWI-EAS443:3:73:1315:770#0/1  
aa^]abbbaba``aaab^`^]ab`a]¥Z`VU^\_`]W^¥`S  
@HWI-EAS443:3:73:1353:1917#0/1  
CGCTCACTGGGCACGGTGAGCGTGAACACAAATCCTAAAA  
+HWI-EAS443:3:73:1353:1917#0/1  
aaaa\_bb`aaa`b]b`¥`ab¥a\_aaa````aa^[Saaaaa  
@HWI-EAS443:3:73:173:1432#0/1  
CTTCCCTCATGGACTCAGGCACTCCTTCCGTAGAAGGCC  
+HWI-EAS443:3:73:173:1432#0/1  
aPO\_ba[`RPO^UXQ`\_[JZ]SYaZFNZ`VFPSZXTTZWQ  
@HWI-EAS443:3:73:1754:601#0/1  
AGGGCCTTCTACGGAAGGAGTGCCTGAGTCCATGAGGGAA  
+HWI-EAS443:3:73:1754:601#0/1  
a\_a]a^`¥Z\_U\_\_Z\_SXD0YaIS]\_¥\_YWT¥\_ZWWUVOR  
@HWI-EAS443:3:73:252:628#0/1  
GCTGCCTGTTCACTCGATCCAGCCATCTGTTCCATAGCCT  
+HWI-EAS443:3:73:252:628#0/1  
`aa\_baaa^`\_aa`\_a\_Z\_\_YY]`R[\_[^Y¥U]S¥YVP[¥  
@HWI-EAS443:3:73:38:1834#0/1  
AAAATGACCATCGTCAACATCCACAGCACTCTGCTGTTCC  
+HWI-EAS443:3:73:38:1834#0/1  
aa¥X¥`[aa\_``[Sa¥I[a¥^]]^^VZ\_]Z\_ZW\_XUUZ^W  
@HWI-EAS443:3:73:432:1088#0/1  
CTTCTACGGAAGGAGTGCCTGAGTCCATGAGGGAAGAATA  
+HWI-EAS443:3:73:432:1088#0/1  
abababba\_abaaaa`\_baa]W^\_aa\_aa[^`]Vaa`a]^  
@HWI-EAS443:3:73:437:1103#0/1  
CTCATCCTAGCTCCAGTGCTGGTCTGAAAGATGACCTTCT  
+HWI-EAS443:3:73:437:1103#0/1  
aabaabbaa]aaaa`^a^^[`]aaX[`V]`\_a^\_`\_`\_`  
@HWI-EAS443:3:73:553:515#0/1  
GGCACTCCTTCCGTAGAAGGCCCTCTTTTCAAACCGTATT  
+HWI-EAS443:3:73:553:515#0/1  
aabbaY`aaaa`\_\_aY^aP\_U]FO\_``^\_]YZ[\_TS\_\_`  
@HWI-EAS443:3:73:554:518#0/1  
GAATTTTAGGATTTGTGTTACGCTCACCGTGCCAGTGA  
+HWI-EAS443:3:73:554:518#0/1  
aaaaa`aaaa\_\_a\_a^a¥`\_`\_^¥¥¥¥^]W^¥¥WSUSUU  
@HWI-EAS443:3:73:919:288#0/1  
GACAAAATGACCATCGTCAACATCCACAGCACTCTGCTGT  
+HWI-EAS443:3:73:919:288#0/1  
aa`aa`R`aa]XS[aZP[a]YT]Z¥Y[[MY`U\_ZWXTX\_S  
@HWI-EAS443:3:73:959:520#0/1  
GGCCTGCAAATTTTCAAGAAGGTCATCTTTTCAGACCAGCA  
+HWI-EAS443:3:73:959:520#0/1  
`ba`]aab\_aaaaaaa]`\_a`X^]``\_aa`\_a^Z^aaZa



@HWI-EAS443:3:74:1014:1918#0/1  
ATTTTCAAGAAGGTCATCTTTCAGACCAGCACTGGAGCTA  
+HWI-EAS443:3:74:1014:1918#0/1  
abaaabbbbaaa\_aU\_a`\_aa\_aa\_a`\_Z`\_\_\_\_`W`\_W`  
@HWI-EAS443:3:74:1218:1111#0/1  
AAGGTCATCTTTCAGACCAGCACTGGAGCTAGGATGAGTC  
+HWI-EAS443:3:74:1218:1111#0/1  
``ababbbbbbaaaa^`abab`aa^`]`aba\_`^a``[\_  
@HWI-EAS443:3:74:1347:1841#0/1  
TGTTGACAAAATGACCATCGTCAACATCCACAGCACTCTG  
+HWI-EAS443:3:74:1347:1841#0/1  
]b[^b[bbbbbb`Z`\_QVY#aJP\_aN\_K^]HOXJUaa#RBB  
@HWI-EAS443:3:74:1539:1489#0/1  
GAATTTTAGGATTTGTGTTACGCTCACCGTGCCAGTGA  
+HWI-EAS443:3:74:1539:1489#0/1  
aa`abbb]Y^a`ab^a`aaaaSb`SQaUNaS\_\_\_\_H\_QUZ`  
@HWI-EAS443:3:74:1550:301#0/1  
TAGGCCTGCAAATTTTCAAGAAGGTCATCTTTCAGACCAG  
+HWI-EAS443:3:74:1550:301#0/1  
Wa`aaaa`\_\_\_\_a^T`abbaMX\_ZTM]QOY\_`aU[]WDZR  
@HWI-EAS443:3:74:1680:762#0/1  
ATTCTTCCCTCATGGACTCAGGCACTCCTTCCGTAGAAGG  
+HWI-EAS443:3:74:1680:762#0/1  
abbaabbaabb`bbbaabbbba`a^abZaa]Z^^`^`aX0  
@HWI-EAS443:3:74:1736:817#0/1  
TATTCTTCCCTCATGGACTCAGGCACTCCTTCCGTAGAAG  
+HWI-EAS443:3:74:1736:817#0/1  
^[bb`b^RS`aUbab^]^`b^R#aSaaaa\_\_\_\_b]^`U^  
@HWI-EAS443:3:74:235:1361#0/1  
TGGACTCAGGCACTCCTTCCGTAGAAGGCCCTTTTTCAA  
+HWI-EAS443:3:74:235:1361#0/1  
ab^ZaaaS\_abababbaabaa[a#^aa`aa\_a^]\_`a`a  
@HWI-EAS443:3:74:272:222#0/1  
TAAGGGAATTTTAGGATTTGTGTTACGCTCACCGTGCCC  
+HWI-EAS443:3:74:272:222#0/1  
aa#aaa`aaaaa`a``\_a`aV\_\_^`^`^#WWW#YW^T#XTV  
@HWI-EAS443:3:74:385:1950#0/1  
CTTCCCTCATGGACTCAGGCACTCCTTCCGTAGAAGGCC  
+HWI-EAS443:3:74:385:1950#0/1  
`]^\_```]a`WS`\_[[[\_``]ZZ[SS]a[R`TTVVUXZ]  
@HWI-EAS443:3:74:392:1742#0/1  
CATTCCCATTTAGGGCATTGTTGGACAAAGCGTCTACGCTG  
+HWI-EAS443:3:74:392:1742#0/1  
\_ZX`abbX^[[]MKZ#[]\_\_`\_\_\_\_`aTZa`W#^a\_S#¥T  
@HWI-EAS443:3:74:452:1570#0/1  
TGCAAATTTTCAAGAAGGTCATCTTTCAGACCAGCACTGG  
+HWI-EAS443:3:74:452:1570#0/1  
`\_``#b\_abaa#S`W`^Sa`aab`abb`ba]a]T]a^`\_  
@HWI-EAS443:3:74:659:869#0/1  
GACAAAATGACCATCGTCAACATCCACAGCACTCTGCTGT



@HWI-EAS443:3:76:1120:1602#0/1  
AATTTTCAAGAAGGTCATCTTTCAGACCAGCACTGGAGCT  
+HWI-EAS443:3:76:1120:1602#0/1  
aaaaaa`aaa`a\_Zaa`\_``a`\_`^a\_^`]]]]\_\_WZ  
@HWI-EAS443:3:76:1177:1042#0/1  
TGACAAAATGACCATCGTCAACATCCACAGCACTCTGCTG  
+HWI-EAS443:3:76:1177:1042#0/1  
^aaTX`a`[\_a`\_^`a`YW]TZ[\_\_MVY\_^XZOU\_ZTP¥W  
@HWI-EAS443:3:76:1385:157#0/1  
GGACTCAGGCACTCCTTCCGTAGAAGGCCCTCTTTTCAAA  
+HWI-EAS443:3:76:1385:157#0/1  
abb\_\_Z[aa`QT\_¥UR^X^aT\_[¥[T\_QWWWU[\_\_\_US¥^  
@HWI-EAS443:3:76:16:1809#0/1  
AAAGAGGGCCTTCTACGGAAGGAGTGCCTGAGTCCATGAG  
+HWI-EAS443:3:76:16:1809#0/1  
a^^`^a\_\_ba`a\_a`\_`[\_`\_U`^W^^¥W¥\_[W`\_¥UUW[  
@HWI-EAS443:3:76:1720:209#0/1  
CGGTTTGAAGAGGGCCTTCTACGGAAGGAGTGCCTGAG  
+HWI-EAS443:3:76:1720:209#0/1  
abbabbbbabab`¥baab\_S`¥\_aaa\_\_S`YN¥\_X`  
@HWI-EAS443:3:76:528:1961#0/1  
CTTCCCTCATGGACTCAGGCACTCCTTCCGTAGAAGGCC  
+HWI-EAS443:3:76:528:1961#0/1  
ab`baaab`b`]a\_aa`\_aaa^`aS¥aa`N¥^a\_\_VSNT  
@HWI-EAS443:3:76:769:843#0/1  
AAGAAGGTCATCTTTCAGACCAGCACTGGAGCTAGGATGA  
+HWI-EAS443:3:76:769:843#0/1  
^aXa\_bb`abaaaaabaaaaaaaaa[``\_a`aa``a`a`\_`^  
@HWI-EAS443:3:76:796:76#0/1  
GCACTCCTTCCGTAGAAGGCCCTCTTTTCAAACCGTATTT  
+HWI-EAS443:3:76:796:76#0/1  
aa`\_Y`\_baaaa^a\_¥^`^^`^[\_`^aZ]^ZXV`UW^X]  
@HWI-EAS443:3:77:1005:2031#0/1  
TTGGGACTCATCCTAGCTCCAGTGCTGGTCTGAAAGATGA  
+HWI-EAS443:3:77:1005:2031#0/1  
abaaaaabaaaaYa`a`a¥^`Za`a]`\_\_a`a]`]^a  
@HWI-EAS443:3:77:1469:1182#0/1  
TTAGGGCATTTTGGACAAAGCGTCTACGCTGCAGTCCTCG  
+HWI-EAS443:3:77:1469:1182#0/1  
abaaaaabbbaaaa`aaaa\_aV\_aa^a^\_SS^`\_]\_XW]]  
@HWI-EAS443:3:77:1492:262#0/1  
TTCTGGTAGGCCTGCAAATTTTCAAGAAGGTCATCTTTCA  
+HWI-EAS443:3:77:1492:262#0/1  
aaaaaaaaaaa`aaaaababaaa`aaa`ab]]a`^aaa\_\_  
@HWI-EAS443:3:77:1567:238#0/1  
ACGGTGAGCGTGAACACAAATCCTAAAATCCCTTAGTCA  
+HWI-EAS443:3:77:1567:238#0/1  
`b¥ba[`b[a`a[a]`a\_a`Saa\_aaaaXSR[\_`^`^]\_  
@HWI-EAS443:3:77:1605:392#0/1  
AGGGCCTTCTACGGAAGGAGTGCCTGAGTCCATGAGGGAA

+HWI-EAS443:3:77:1605:392#0/1  
ab¥a`^baaba\_aa\_aaZ`\_`a\_Yaa¥a^W¥a`^a¥\_Z\_  
@HWI-EAS443:3:77:1720:679#0/1  
ACTCCTTCCGTAGAAAGGCCCTCTTTTCAAACCGTATTTAA  
+HWI-EAS443:3:77:1720:679#0/1  
IYVRZ\_Y\_`a¥aa\_Y^[]¥[\_\_bbba\_^Z`XD^¥^¥a\_]Z  
@HWI-EAS443:3:77:1756:1990#0/1  
CGCTCACTGGGCACGGTGAGCGTGAACACAAATCCTAAAA  
+HWI-EAS443:3:77:1756:1990#0/1  
` `aV`YXLSX\_\_UU[[IXDT¥\_UT[RNU¥Z¥¥[TV¥ZWVG  
@HWI-EAS443:3:77:34:1151#0/1  
CCCTCATGGACTCAGGCACTCCTTCCGTAGAAAGGCCCTCT  
+HWI-EAS443:3:77:34:1151#0/1  
abbaaa]aaaaa`\_Xbba\_aa\_\_\_a`[¥^\_[[V`\_\_^^^  
@HWI-EAS443:3:77:444:1015#0/1  
AGGGCCTTCTACGGAAGGAGTGCCTGAGTCCATGAGGGAA  
+HWI-EAS443:3:77:444:1015#0/1  
abbbbaabaaaba`\_`aaaZaaaa`a`¥a`\_``\_a`\_]a  
@HWI-EAS443:3:77:500:295#0/1  
ACAAAATGACCATCGTCAACATCCACAGCACTCTGCTGTT  
+HWI-EAS443:3:77:500:295#0/1  
\_a^abbbabbbbaaaa\_baa^aa`aaaa¥a`U\_a\_``aaV`  
@HWI-EAS443:3:77:739:562#0/1  
CTCCAGTGCTGGTCTGAAAGATGACCTTCTTGAAAATTTG  
+HWI-EAS443:3:77:739:562#0/1  
^X]]a]Z`]]ZX¥aaba^ZT]H[a\_UQP^`^XP[NT^^V\_  
@HWI-EAS443:3:77:785:1306#0/1  
GGGCCTTCTACGGAAGGAGTGCCTGAGTCCATGAGGGAAG  
+HWI-EAS443:3:77:785:1306#0/1  
¥\_^ZabXbbbbZVUR[X\_^¥\_V\_`^YaMaP\_QYLb\_\_\_`b\_  
@HWI-EAS443:3:77:854:1544#0/1  
CTTCCCTCATGGACTCAGGCACTCCTTCCGTAGAAAGCCC  
+HWI-EAS443:3:77:854:1544#0/1  
abb`aab^a\_^a^ababaaabaabba`b\_`0aaaa¥K¥aa  
@HWI-EAS443:3:77:915:895#0/1  
CACTAATCAGGCATGAAAACAGAATGGTGCTGGCTAGCAC  
+HWI-EAS443:3:77:915:895#0/1  
aaaaabbbbbabbbabbaaaababaa` `babab`aab\_a\_  
@HWI-EAS443:3:77:939:876#0/1  
TGACAAAATGACCATCGTCAACATCCACAGCACTCTGCTG  
+HWI-EAS443:3:77:939:876#0/1  
\_``]a]babaa`aba` `]]aa\_`aaaa`aba\_aa``a\_\_\_  
@HWI-EAS443:3:78:1109:1230#0/1  
CGCTCACCGTGCCAGTGAGCGAGGACTGCAGCGTAGACG  
+HWI-EAS443:3:78:1109:1230#0/1  
a¥`^^`\_aXQ]^`^^`¥QXZW\_a¥ZXX¥`]Y[``¥Y``]Z^  
@HWI-EAS443:3:78:1126:1209#0/1  
TGACTAAGGGAATTTTAGGATTTGTGTTACAGCTCACCGT  
+HWI-EAS443:3:78:1126:1209#0/1  
aa`aaaaabaaaaa`ba\_``a`Z¥`\_\_\_a\_``[[\_Z¥UT

@HWI-EAS443:3:78:1344:354#0/1  
CTTCCCTCATGGACTCAGGCACTCCTTCCGTAGAAGGCC  
+HWI-EAS443:3:78:1344:354#0/1  
abbabZb`bbbbabbbaaababbXbbT`babbbbbbba^a  
@HWI-EAS443:3:78:159:1250#0/1  
GGCCTTCTACGGAAGGAGTGCCTGAGTCCATGAGGGAAGA  
+HWI-EAS443:3:78:159:1250#0/1  
`ababJb\_bab^b`aaaaZ\_aaS\_bXaaRaa\_`bb^\_a\_  
@HWI-EAS443:3:79:1006:612#0/1  
CTGCAGCGTAGACGCTTTGTCCAAAATGCCCTAAATGGGA  
+HWI-EAS443:3:79:1006:612#0/1  
ababbbbb`aba`aabaaba\_bbaaaaba\_[aa\_a\_b]a`  
@HWI-EAS443:3:79:1282:1445#0/1  
GAAAAGAGGGCCTTCTACGGAAGGAGTGCCTGAGTCCATG  
+HWI-EAS443:3:79:1282:1445#0/1  
aaaXH^YH¥aXZ[[¥``]Z\_``VXY\_KXNPQVHVNGTY`]  
@HWI-EAS443:3:79:1366:896#0/1  
TACGGTTTGAAGAGGGCCTTCTACGGAAGGAGTGCCTG  
+HWI-EAS443:3:79:1366:896#0/1  
aa`a`aabbab`aa¥bbba\_a`^aa\_aaaa`^[a[\_]X\_a  
@HWI-EAS443:3:79:1572:1209#0/1  
TGTTGACAAAATGACCATCGTCAACATCCACAGCACTCTG  
+HWI-EAS443:3:79:1572:1209#0/1  
`a`¥`^`^[ba\_¥^^b`bV`a]WV^`LaPZ^T`P^F^Z  
@HWI-EAS443:3:79:1760:1466#0/1  
CAAGAAGGTCATCTTTCAGACCAGCACTGGAGCTAGGATG  
+HWI-EAS443:3:79:1760:1466#0/1  
ababba`Z0\_bb`bbbUa`^¥RaY`a\_]Y]T\_a\_a^\_\_¥\_  
@HWI-EAS443:3:79:379:1701#0/1  
ATTCTTCCCTCATGGACTCAGGCACTCCTTCCGTAGAAGG  
+HWI-EAS443:3:79:379:1701#0/1  
aaaaaabababaa`\_aa`aa]R\_aa\_aa`\_a`]]`W\_\_[]  
@HWI-EAS443:3:79:497:788#0/1  
CAAAATGACCATCGTCAACATCCACAGCACTGTGCTGTTC  
+HWI-EAS443:3:79:497:788#0/1  
a\_K`^]RZWXVPM[NZ¥^a¥VU\_[aa`ZX`]]`^X¥UX[]R  
@HWI-EAS443:3:79:562:1002#0/1  
TAGGATTTGTGTTACGCTCACCGTGCCAGTGAGCGAGG  
+HWI-EAS443:3:79:562:1002#0/1  
^^\_\_¥aaabaaa`abbab^]a``QU¥`aUHIVX[SOGOR  
@HWI-EAS443:3:79:573:1199#0/1  
GTTTGAAGAGGGCCTTCTACGGAAGGAGTGCCTGAGTC  
+HWI-EAS443:3:79:573:1199#0/1  
a`aaaaaaaaa\_[\_aaa`\_]a\_``^X^V^^W\_a¥¥¥¥W\_  
@HWI-EAS443:3:79:600:1219#0/1  
CTCTGACTAAGGGAATTTTAGGATTTGTGTTACGCTCAC  
+HWI-EAS443:3:79:600:1219#0/1  
`ba``\_\_ba`\_¥````bbab`\_Z\_ab``aaab`\_]``aaa  
@HWI-EAS443:3:79:631:1582#0/1  
AGCTCCAGTGCTGGTCTGAAAGATGACCTTCTTAAAAATT

+HWI-EAS443:3:79:631:1582#0/1  
`bYb`\_aUab]¥^U\_\_aUP\_\_a]X[[a`\_\_^[Z\_\_`S^^  
@HWI-EAS443:3:79:718:522#0/1  
TAGGATTTGTGTTACGCTCACCGTGCCAGTGAGCGAGG  
+HWI-EAS443:3:79:718:522#0/1  
Q¥\_bX`^`b\_bZ[^`TYYO]]0[^`aa¥¥\_TLV]a^RW  
@HWI-EAS443:3:79:964:102#0/1  
CCTCTGACTAAGGGAATTTTAGGATTTGTGTTACGCTCA  
+HWI-EAS443:3:79:964:102#0/1  
`bbbbbb`aZ`bbb^bbbbbbbabbbbaababa`b]a\_`  
@HWI-EAS443:3:7:1742:1737#0/1  
AAATGACCATCGTCAACATCCACAGCACTCTGCTGTTCCCT  
+HWI-EAS443:3:7:1742:1737#0/1  
a`Za¥^aabXWb^a\_aG^]¥M`^`\_G[U\_GXaZ^`W\_OW\_  
@HWI-EAS443:3:7:476:902#0/1  
TTCCCTCATGGACTCAGGCACTCCTTCCGTAGAAGGCCCT  
+HWI-EAS443:3:7:476:902#0/1  
\_`a`\_aaa[a`a`]a^aaa\_X`]¥`]\_Z`T\_S¥XYW[U^N  
@HWI-EAS443:3:7:638:831#0/1  
CACTCCTTCCGTAGAAGGCCCTTTTTCAAACCGTATTTA  
+HWI-EAS443:3:7:638:831#0/1  
ababaabbbbaXbb`\_aab^\_aaaaaab[a\_]a^abaaa  
@HWI-EAS443:3:7:951:441#0/1  
ATTTTCAAGAAGGTCATCTTTCAGACCAGCACTGGAGCTA  
+HWI-EAS443:3:7:951:441#0/1  
aa`baW^bbabbaRZaa`bbbUa]`[V``0¥`YPRaa[a\_  
@HWI-EAS443:3:7:954:1286#0/1  
AGGGCCTTCTACGGAAGGAGTGCCTGAGTCCATGAGGGAA  
+HWI-EAS443:3:7:954:1286#0/1  
\_bb\_]\_aa`WW\_b^`]`V]V¥Xa`SNX¥\_\_U\_\_PR\_^P\_  
@HWI-EAS443:3:7:989:428#0/1  
GACTCATCTAGCTCCAGTGCTGGTCTGAAAGATGACCTT  
+HWI-EAS443:3:7:989:428#0/1  
aaZ`^aa\_\_aa\_WGRa[¥aQ\_`RS]`\_\_\_0`Z[R]]X`^  
@HWI-EAS443:3:80:1014:795#0/1  
CATTCCCATTTAGGGCATTGACAAAGCGTCTACGCTG  
+HWI-EAS443:3:80:1014:795#0/1  
VRb)`XT[aa\_R]X[abX[X¥¥[b]a`aZTab`)]`0``ba  
@HWI-EAS443:3:80:1084:304#0/1  
GACAAAATGACCATCGTCAACATCCACAGCACTCTGCTGT  
+HWI-EAS443:3:80:1084:304#0/1  
[K]\_bb\_aS`aWWa^b`aa[`aa^a¥W\_a\_`]`Y\_a^T  
@HWI-EAS443:3:80:1551:1753#0/1  
GACAAAATGACCATCGTCAACATCCACAGCACTCTGCTGT  
+HWI-EAS443:3:80:1551:1753#0/1  
abba`baa\_Ka¥\_Z]bTa[MX`WQIZ`]^\_Sa[a¥Z]^B  
@HWI-EAS443:3:80:1719:1463#0/1  
CAAAAATGACCATCGTCAACATCCACAGCACTCTGCTGTTT  
+HWI-EAS443:3:80:1719:1463#0/1  
`bbbbbbbaaab`b\_aaa`aa\_aa¥`a``\_a^aa^aa\_aZ

@HWI-EAS443:3:80:1754:1254#0/1  
AAAATGACCATCGTCAACATCCACAGCACTCTGCTGTTCC  
+HWI-EAS443:3:80:1754:1254#0/1  
^bZa\_]aaabY0^U]aTY\_bb`Z^^UXLXa¥^XJ¥QRSJ  
@HWI-EAS443:3:80:430:109#0/1  
TGAAAGATGACCTTCTTGAAAATTTGCAGGCCTACCAGAA  
+HWI-EAS443:3:80:430:109#0/1  
abbabbbabaaabaabbbbabaaaab`abaaZaaa`aba`  
@HWI-EAS443:3:80:521:1363#0/1  
CTGGTCTGAAAGATGACCTTCTTGAAAATTTGCAGGCCTA  
+HWI-EAS443:3:80:521:1363#0/1  
a^aaY`\_R]]a`aYW^\_a]Ta`[`T`\_a\_\_\_\_\_`X^]a\_`  
@HWI-EAS443:3:80:560:427#0/1  
AGGCCTGCAATTTTCAAGAAGGTCATCTTTCAGACCAGC  
+HWI-EAS443:3:80:560:427#0/1  
aa`aa`ab`baaaaaaaaa`ZWa`aZa\_a`a\_a]^`\_]  
@HWI-EAS443:3:80:584:1899#0/1  
CTGACTAAGGGAATTTTAGGATTTGTGTTACGCTCACCG  
+HWI-EAS443:3:80:584:1899#0/1  
[a`bb`WW[a`^\_IU`X\_RR\_\_Z`¥b`¥¥U^a[¥HGZ¥GV  
@HWI-EAS443:3:80:630:643#0/1  
TGGACTCAGGCACTCCTTCCGTAGAAGGCCCTCTTTTCAA  
+HWI-EAS443:3:80:630:643#0/1  
[\_]\_\_`]b[b`bbaYbbbba`[``b\_bb]\_aabba`bbaa  
@HWI-EAS443:3:80:779:1385#0/1  
GACAAAATGACCATCGTCAACATCCACAGCACTCTGCTGT  
+HWI-EAS443:3:80:779:1385#0/1  
\_a\_a`baaababbaaaP`aaaa\_aa]aYaa`^Y^[\_]\_a]  
@HWI-EAS443:3:81:1058:508#0/1  
TGAAAGATGACCTTCTTGAAAATTTGCAGGCCTACCAGAA  
+HWI-EAS443:3:81:1058:508#0/1  
Yb\_baaW^^aXaaJT\_]baa`aaa`\_a`a\_\_a^aaaa\_X  
@HWI-EAS443:3:81:1129:761#0/1  
CTCTGCGGATCTCGGCTTTGAGGGGGCCTGACGGGATGA  
+HWI-EAS443:3:81:1129:761#0/1  
`baababbaaabbbaabaab`X^`a\_\_LX^a^¥`aY^`X  
@HWI-EAS443:3:81:1164:166#0/1  
ATGTTGACAAAATGACCATCGTCAACATCCACAGCACTCT  
+HWI-EAS443:3:81:1164:166#0/1  
abb^aba`ba\_aaa`aaa\_a]\_^\_]`^^\_X\_\_¥\_VX[]  
@HWI-EAS443:3:81:135:553#0/1  
AAAATGACCATCGTCAACATCCACAGCACTCTGCTGTTCC  
+HWI-EAS443:3:81:135:553#0/1  
a[ZZ\_aa`¥`aaU[[¥[¥\_aa\_\_\_^¥`Z\_a`\_\_WaY^ZZ  
@HWI-EAS443:3:81:1449:125#0/1  
TGGACTCAGGCACTCCTTCCGTAGAAGGCCCTCTTTTCAA  
+HWI-EAS443:3:81:1449:125#0/1  
aaaa\_b`aa\_aa¥aY\_b``a`a`\_GUXZX\_]\_RYO  
@HWI-EAS443:3:81:262:1839#0/1  
CAAAATGACCATCGTCAACATCCACAGCACTCTGCTGTTC

+HWI-EAS443:3:81:262:1839#0/1  
a¥[^`^Raba^ab`^\_Z^^`¥`\_^aa^\_aZ[TYV]JVGUL  
@HWI-EAS443:3:81:293:1161#0/1  
GACAAAATGACCATCGTCAACATCCACAGCACTCTGCTGT  
+HWI-EAS443:3:81:293:1161#0/1  
`aabb¥bbbab`Y`bbabaa\_bab`a^aaabbbbaaaaa\_  
@HWI-EAS443:3:81:876:1221#0/1  
GAAAAGAGGGCCTTCTACGGAAGGAGTGCCTGAGTCCATG  
+HWI-EAS443:3:81:876:1221#0/1  
aa`\_^]`aaa`a\_\_\_aa`Y]\_]\_]\_\_U^^``^[¥R^]\_]\_  
@HWI-EAS443:3:81:878:1009#0/1  
AGGGCCTTCTACGGAAGGAGTGCCTGAGTCCATGAGGGAA  
+HWI-EAS443:3:81:878:1009#0/1  
Q\_X\_[^Z]^X\_abXOZ^VHT^QLUQRV[]ZU][WV\_a]JZ  
@HWI-EAS443:3:81:966:1104#0/1  
ATTCTTCCCTCATGGACTCAGGCACTCCTTCCGTAGAAGG  
+HWI-EAS443:3:81:966:1104#0/1  
]a`abb\_YP[a`\_]\_]`UYbaa]bab`aa]a^][aba]`X  
@HWI-EAS443:3:82:1025:481#0/1  
CTGACTAAGGGAATTTTAGGATTTGTGTTACGCTCACCG  
+HWI-EAS443:3:82:1025:481#0/1  
aba`^^^babaSZbTbabbb\_YW\_aYa^R^\_aa`Y\_`Z\_Y  
@HWI-EAS443:3:82:1035:1904#0/1  
GCAAATTTTCAAGAAGGTCATCTTTCAGACCAGCACTGGA  
+HWI-EAS443:3:82:1035:1904#0/1  
`abbaaabaabaaa`\_\_¥`aaaaa``aa``¥a\_^\_\_\_\_`\_\_  
@HWI-EAS443:3:82:1110:305#0/1  
CTAAGGGAATTTTAGGATTTGTGTTACGCTCACCGTGCC  
+HWI-EAS443:3:82:1110:305#0/1  
abbbbababbbaabbbbaabaabba`aa\_a`[`a¥^SWa\_¥  
@HWI-EAS443:3:82:1117:1390#0/1  
TTTGTGTTACGCTCACCGTGCCAGTGAGCGAGGACTGC  
+HWI-EAS443:3:82:1117:1390#0/1  
abbb^aaaaba`a¥``[\_]^a\_a`^^YY^`Y^^^]¥S^^S  
@HWI-EAS443:3:82:1410:1160#0/1  
AAATGACCATCGTCAACATCCACAGCACTCTGCTGTTCCCT  
+HWI-EAS443:3:82:1410:1160#0/1  
\_aWaa`b`\_aa`aa]aYab[KK`S`ba¥`\_aaaab`a0\_a  
@HWI-EAS443:3:82:145:1011#0/1  
TGGGACTCATCCTAGCTCCAGTGCTGGTCTGAAAGATGAC  
+HWI-EAS443:3:82:145:1011#0/1  
`bbbbbaaT`bb^Yabab`aa\_b`Ra\_]a\_a^]a]a\_\_\_^  
@HWI-EAS443:3:82:1508:1684#0/1  
GACAAAATGACCATCGTCAACATCCACAGCACTCTGCTGT  
+HWI-EAS443:3:82:1508:1684#0/1  
`b`abbabba`ab`aa`^bbXbaa\_a^aa\_b¥b\_aa\_\_a`  
@HWI-EAS443:3:82:1525:825#0/1  
GGGAATTTTAGGATTTGTGTTACGCTCACCGTGCCAGT  
+HWI-EAS443:3:82:1525:825#0/1  
^a]XN]aa]aa^Y`a``UY^Z[`YV[[UPZ[]PZZSNSSF



@HWI-EAS443:3:82:1553:1106#0/1  
GGCCTGCAAATTTTCAAGAAGGTCATCTTTCAGACCAGCA  
+HWI-EAS443:3:82:1553:1106#0/1  
ab\_bbaabb\_bbaaaa^baa]aaaa\_a`aa``SV[R``  
@HWI-EAS443:3:82:212:14#0/1  
AATTTTCAAGAAGGTCATCTTTCAGACCAGCACTGGAGCT  
+HWI-EAS443:3:82:212:14#0/1  
^\_ba]^[\_`XW¥¥DW`^]a\_`¥`¥T^`\_^`a¥]]\_U  
@HWI-EAS443:3:82:238:1209#0/1  
CTCAGGCACTCCTTCCGTAGAAGGCCCTCTTTTCAAACCG  
+HWI-EAS443:3:82:238:1209#0/1  
aabaa\_\_baaaaaaaaa\_`[\_^`a`\_`\_`a\_`a]UY\_\_  
@HWI-EAS443:3:82:506:999#0/1  
CTGAAAGATGACCTTCTTAAAATTTGCAGGCCTACCAGA  
+HWI-EAS443:3:82:506:999#0/1  
ab`¥¥babaabbabbabaabaWaaab^ab\_`b\_abba`aY  
@HWI-EAS443:3:82:553:1480#0/1  
GAGGACTGCAGCGTAGACGCTTTGTCCAAAATGCCCTAAA  
+HWI-EAS443:3:82:553:1480#0/1  
]LWbbabZ]b]ZZ]^ab[a]U`¥^ZUab``aaa\_aWaP]P  
@HWI-EAS443:3:82:592:942#0/1  
CAAAATGACCATCGTCAACATCCACAGCACTCTGCTGTTC  
+HWI-EAS443:3:82:592:942#0/1  
aYYaV^```]aaaaX^`[a¥`SZZOZ[`[\_aY\_a\_a^^\_  
@HWI-EAS443:3:83:1147:1214#0/1  
AAAATGACCATCGTCAACATCCACAGCACTCTGCTGTTC  
+HWI-EAS443:3:83:1147:1214#0/1  
[\_VU¥aa^\_ab^¥`^`bYI^^¥]^`^`\_]aYaPDS\_Q^ML  
@HWI-EAS443:3:83:1369:520#0/1  
TGACAAAATGACCATCGTCAACATCCACAGCACTCTGCTG  
+HWI-EAS443:3:83:1369:520#0/1  
aaaZb\_`\_`a\_a`^`\_] [WWa\_[\_XRPW\_¥P¥RS\_^\_W`\_  
@HWI-EAS443:3:83:1561:41#0/1  
GACAAAATGACCATCGTCAACATCCACAGCACTCTGCTGT  
+HWI-EAS443:3:83:1561:41#0/1  
aaaaabbaaaa\_`b`baa`aR`aX`^`0`a^\_U\_Za^W``]  
@HWI-EAS443:3:83:546:1591#0/1  
GACAAAATGACCATCGTCAACATCCACAGCACTCTGCTGT  
+HWI-EAS443:3:83:546:1591#0/1  
`aa^¥\_S^a\_b`[W\_NY\_¥¥\_]S]\_`\_X¥Q]\_\_ZZ^¥aZ  
@HWI-EAS443:3:83:769:654#0/1  
GACAAAATGACCATCGTCAACATCCACAGCACTCTGCTGT  
+HWI-EAS443:3:83:769:654#0/1  
^¥^W]\_] ^XZZ]^\_\_X\_XZW\_ZZZ^TXXV`]\_^ [MWY¥Z  
@HWI-EAS443:3:84:1115:1066#0/1  
CAGGCACTCCTTCCGTAGAAGGCCCTCTTTTCAAACCGTA  
+HWI-EAS443:3:84:1115:1066#0/1  
ab^]\_a^aaZa^a[aaa]\_\_¥Z^\_ZVW``¥`¥aaa[Y`Y[  
@HWI-EAS443:3:84:1200:236#0/1  
AGGCCTGCAAATTTTCAAGAAGGTCATCTTTCAGACCAGC

+HWI-EAS443:3:84:1200:236#0/1  
a^Xaaababaaba`¥abU][abVH` ` \_N]P\_\_[aaRUa` [  
@HWI-EAS443:3:84:127:711#0/1  
CTTCCCTCATGGACTCAGGCACTCCTTCCGTAGAAGGCC  
+HWI-EAS443:3:84:127:711#0/1  
abbbbbbbbababaaabba`baa\_aa\_`aaa^aa`a¥^Y]\_  
@HWI-EAS443:3:84:1301:254#0/1  
GGGCCTTCTACGGAAGGAGTGCCTGAGTCCATGAGGGAAG  
+HWI-EAS443:3:84:1301:254#0/1  
a` `aaaa\_a`^aa\_\_aa\_a¥a]\_a`\_a¥U^¥a\_Va\_` ]^\_  
@HWI-EAS443:3:84:1373:1804#0/1  
AATTTTAGGATTTGTGTTACGCTCACCGTGCCAGTGAG  
+HWI-EAS443:3:84:1373:1804#0/1  
V`^bbbZ`Wa^W^bRb]` ]Saaa^\_aaa]^ba\_Y]aP`HZ  
@HWI-EAS443:3:84:1412:247#0/1  
AATTTTAGGATTTGTGTTACGCTCACCGTGCCAGTGAG  
+HWI-EAS443:3:84:1412:247#0/1  
Q¥Z`X\_abb\_ZW¥TM\_\_XJ\_TO]ZQ^Qa\_R¥¥ULO]Q]Z`  
@HWI-EAS443:3:84:1532:1665#0/1  
AGGGCCTTCTACGGAAGGAGTGCCTGAGTCCATGAGGGAA  
+HWI-EAS443:3:84:1532:1665#0/1  
ZFYb\_\_aaa\_aTSZX^` ]`QYUXY¥XSVaG]`Y\_\_¥^G\_  
@HWI-EAS443:3:84:159:824#0/1  
TTTGTGTTACGCTCACCGTGCCAGTGAGCGAGGACTGC  
+HWI-EAS443:3:84:159:824#0/1  
` `\_\_GR`R`a`\_ZXQ]`aYa`\_WWW¥^¥^]]OSVUJN`a  
@HWI-EAS443:3:84:1693:371#0/1  
TACGGTTTGAAGAGGGCCTTCTACGGAAGGAGTGCCTG  
+HWI-EAS443:3:84:1693:371#0/1  
aaabbabb`TZ` ` \_VS¥FLML¥Z[\_Z]^YY]aUXGWSXMM  
@HWI-EAS443:3:84:210:602#0/1  
CAAAATGACCATCGTCAACATCCACAGCACTCTGCTGTTC  
+HWI-EAS443:3:84:210:602#0/1  
\_R\_YPNMQQ[ZV¥BBBBBBBBBBBBBBBBBBBBBBBBBB  
@HWI-EAS443:3:84:221:1202#0/1  
CTGGTAGGCCTGCAAATTTTCAAGAAGGTCATCTTTCAGA  
+HWI-EAS443:3:84:221:1202#0/1  
aa¥\_¥` ` \_aa`\_a^\_S`\_aa\_Za[[\_]Q`\_Z`^`^`^`^`  
@HWI-EAS443:3:84:258:1301#0/1  
GATTTGTGTTACGCTCACCGTGCCAGTGAGCGAGGACT  
+HWI-EAS443:3:84:258:1301#0/1  
^V]bb`T`a¥bb`X`^J¥XVZXR]YFQVL[^ZYVBBBBB  
@HWI-EAS443:3:84:309:330#0/1  
GTTGACAAAATGACCATCGTCAACATCCACAGCACTCTGC  
+HWI-EAS443:3:84:309:330#0/1  
a` ` `^\_W¥a\_^]\_^`\_\_`U¥0[¥\_]\_[Z¥X^WMSU]] [T  
@HWI-EAS443:3:84:433:1058#0/1  
ACGGTTTGAAGAGGGCCTTCTACGGAAGGAGTGCCTGA  
+HWI-EAS443:3:84:433:1058#0/1  
aabaJ¥a`a`b\_aaY` ]\_¥^^^aaaa`MS]aT[P[[^Z^^

@HWI-EAS443:3:84:611:603#0/1  
AATTTTCAAGAAGGTCATCTTTCAGACCAGCACTGGAGCT  
+HWI-EAS443:3:84:611:603#0/1  
a`\_aaa`aa\_[\_aV\_a\_\_a\_a`\_a`\_\_aa\_]^\_\_]]\_X  
@HWI-EAS443:3:84:628:1350#0/1  
ATTGGGACTCATCCTAGCTCCAGTGCTGGTCTGAAAGATG  
+HWI-EAS443:3:84:628:1350#0/1  
[T\_[V][baaV`T[aYFSZa]S]Y^a\_a]^\_\_b`^aaa^X  
@HWI-EAS443:3:84:655:1482#0/1  
CGCTCACTGGGCACGGTGAGCGTGAACACAAATCCTAAAA  
+HWI-EAS443:3:84:655:1482#0/1  
a[a\_a`a]a¥^a`\_YSU[Z\_\_W^\_\_¥a¥WNYNWW¥TFR  
@HWI-EAS443:3:84:817:1503#0/1  
GCCTTCTACGGAAGGAGTGCCTGAGTCCATGAGGGAAGAA  
+HWI-EAS443:3:84:817:1503#0/1  
a`¥P\_a`^Y¥M\_VT^R¥EXMa^P¥[YOU[\_]UYPSS^NZU  
@HWI-EAS443:3:84:903:611#0/1  
CTCAGGCACTCCTTCCGTAGAAGGCCCTCTTTTCAAACCG  
+HWI-EAS443:3:84:903:611#0/1  
aabbabbabaabaaaabaabaaaa\_`Y^aaaaaaaaa\_a  
@HWI-EAS443:3:84:984:551#0/1  
GAGGGCCTTCTACGGAAGGAGTGCCTGAGTCCATGAGGGA  
+HWI-EAS443:3:84:984:551#0/1  
¥a`aba\_`b`aa[]a`aa\_[`Ya\_`aa[a¥¥^\_adW\_aa^  
@HWI-EAS443:3:85:1022:1135#0/1  
TGGACTCAGGCACTCCTTCCGTAGAAGGCCCTCTTTTCAA  
+HWI-EAS443:3:85:1022:1135#0/1  
aba]abbaaab`aab\_`S`aa[`a^aaa\_¥\_UQaa]Sa¥Y  
@HWI-EAS443:3:85:1109:954#0/1  
GTGCTAGCCAGCACCATTCTGTTTTTCATGCCTGATTAGTG  
+HWI-EAS443:3:85:1109:954#0/1  
aaaaabbbabbab\_abaaaab`aaa`aaa`^ab`aba`\_a  
@HWI-EAS443:3:85:1475:81#0/1  
CAAATTTTCAAGAAGGTCATCTTTCAGACCAGCACTGGAG  
+HWI-EAS443:3:85:1475:81#0/1  
`bb\_abbba\_bababba`a`^bba¥aba`Sab\_a^aa`]a  
@HWI-EAS443:3:85:1552:1084#0/1  
TCTGACTAAGGGAATTTTAGGATTTGTGTTCCAGCTCACC  
+HWI-EAS443:3:85:1552:1084#0/1  
a\_a`Zaa`^`aa\_`aaaa`\_a\_aaa^Za\_`[\_^V[\_T^WT  
@HWI-EAS443:3:85:157:1255#0/1  
TACGGTTTGAAGAGGGCCTTCTACGGAAGGAGTGCCTG  
+HWI-EAS443:3:85:157:1255#0/1  
a[aba\_a\_`aaaY`aa[``aX\_`¥N\_^WW¥\_TUZS[[T¥T  
@HWI-EAS443:3:85:1749:493#0/1  
GGACTCAGGCACTCCTTCCGTAGAAGGCCCTCTTTTCAA  
+HWI-EAS443:3:85:1749:493#0/1  
a\_`S\_abX]a[`ZV^\_¥¥]Z]¥\_`T^Z¥RVW^^\_`W¥\_¥  
@HWI-EAS443:3:85:356:1162#0/1  
TGTTGACAAAATGACCATCGTCAACATCCACAGCACTCTG

+HWI-EAS443:3:85:356:1162#0/1  
a\_aaaaababa`aaaaa\_`\_a`a`^`^`\_`\_Zaa^^`\_`  
@HWI-EAS443:3:85:605:738#0/1  
AAATGACCATCGTCAACATCCACAGCACTCTGCTGTTCCCT  
+HWI-EAS443:3:85:605:738#0/1  
a]aaaa`\_¥` [Z`\_Ua\_a\_]NX\_X^]\_`\_^]\_^`S]¥  
@HWI-EAS443:3:85:618:1292#0/1  
GCCTTCTACGGAAGGAGTGCCTGAGTCCATGAGGGAAGAA  
+HWI-EAS443:3:85:618:1292#0/1  
abbabbaZbabab\_¥`\_`\_aa\_aaaa\_a`aaaZaa``a`\_`a  
@HWI-EAS443:3:85:673:88#0/1  
ATTCTTCCCTCATGGACTCAGGCACTCCTTCCGTAGAAGG  
+HWI-EAS443:3:85:673:88#0/1  
`ba^aaZS`U`aabUV[\_aZV][\_\_NPZZ]\_RPG\_\_G[X^  
@HWI-EAS443:3:85:697:497#0/1  
GCAGCAAATATCATTGGGATCTTGCACCTGATATTGTGGA  
+HWI-EAS443:3:85:697:497#0/1  
abaaabaabaaaaa]X`W`a`\_a`\_`\_aa`a^`aXa`  
@HWI-EAS443:3:85:698:1867#0/1  
AGGCCTGCAAATTTTCAAGAAGGTCATCTTTCAGACCAGC  
+HWI-EAS443:3:85:698:1867#0/1  
aaaaa\_abbabbaabbaaba^aZaba\_aa`aaaaaaa`a  
@HWI-EAS443:3:85:71:1729#0/1  
AGGGCCTTCTACGGAAGGAGTGCCTGAGTCCATGAGGGAA  
+HWI-EAS443:3:85:71:1729#0/1  
aa]\_\_P\_¥`^aa`^^V^X¥PEOSZZZQGL]RQ¥NY¥LTRW  
@HWI-EAS443:3:85:779:25#0/1  
GAGGGCCTTCTACGGAAGGAGTGCCTGAGTCCATGAGGGA  
+HWI-EAS443:3:85:779:25#0/1  
a^a`a^VT^R[^V]ZPZ`^P^Y¥V[U^W\_TQPY[¥S[^S  
@HWI-EAS443:3:85:834:1378#0/1  
GGGAATTTTAGGATTTGTGTTACGCTCACCGTGCCAGT  
+HWI-EAS443:3:85:834:1378#0/1  
a`^]¥aabaaaa`aaa]a`aaa``¥]a¥[\_Y`^^^` [[  
@HWI-EAS443:3:85:922:1342#0/1  
AAAATGACCATCGTCAACATCCACAGCACTCTGCTGTCC  
+HWI-EAS443:3:85:922:1342#0/1  
a^¥a\_aba]aZ`W\_aa`a`\_a`\_YX^`]T]a\_a`\_a^Z  
@HWI-EAS443:3:86:1243:495#0/1  
TTTTGGACAAAGCGTCTACGCTGCAGTCCTCGCTCACTGG  
+HWI-EAS443:3:86:1243:495#0/1  
a`\_W`\_a^aa][¥aV^aVS\_W\_XMU]UWUYPVU[M¥SSUU  
@HWI-EAS443:3:86:1336:904#0/1  
GACAAAATGACCATCGTCAACATCCACAGCACTCTGCTGT  
+HWI-EAS443:3:86:1336:904#0/1  
`\_``bbba]PXab[b`a`aYab`Z^[\_PZ`W\_\_Z¥RZVM  
@HWI-EAS443:3:86:1464:1453#0/1  
TATGTTGACAAAATGACCATCGTCAACATCCACAGCACTC  
+HWI-EAS443:3:86:1464:1453#0/1  
aab`^`¥]¥b\_aa^0Za\_aaW`ZN¥YG]]Y]\_¥LZZ`G\_X

@HWI-EAS443:3:86:453:658#0/1  
TTTAGGATTTGTGTTACGCTCACCGTGCCAGTGAGCGA  
+HWI-EAS443:3:86:453:658#0/1  
X\_aaW\_S\_UZ\_TTG0]QQ^aTVXY^TORZW¥V\_S]VZYYO  
@HWI-EAS443:3:86:852:1258#0/1  
AGGATTTGTGTTACGCTCACCGTGCCAGTGAGCGAGGA  
+HWI-EAS443:3:86:852:1258#0/1  
``^W``\_¥HUZ`ab¥U\_^][`WPZEXW``PX\_\_ZZ^\_AT  
@HWI-EAS443:3:87:1019:120#0/1  
GTTGACAAAATGACCATCGTCAACATCCACAGCACTCTGC  
+HWI-EAS443:3:87:1019:120#0/1  
\_\_]`\_aaaT```Xaa\_a`\_PW\_^GW\_WLXZU\_ZTLTG\_[P  
@HWI-EAS443:3:87:1162:81#0/1  
TGGACTCAGGCACTCCTTCCGTAGAAGGCCCTCTTTCAA  
+HWI-EAS443:3:87:1162:81#0/1  
abaa\_b`aaaSa[a[]a`\_\_a`aa\_\_]\_Q[U]R\_a^Y\_`  
@HWI-EAS443:3:87:1204:176#0/1  
ATGTTGACAAAATGACCATCGTCAACATCCACAGCACTCT  
+HWI-EAS443:3:87:1204:176#0/1  
I\_aSZ`YY\_a^]\_`a¥Y`\_ZZU`aWS¥[[W\_T\_\_T^\_XRa  
@HWI-EAS443:3:87:1325:18#0/1  
CAAATTTTCAAGAAGGTCATCTTTCAGACCAGCACTGGAG  
+HWI-EAS443:3:87:1325:18#0/1  
\_`ba````\_`¥\_^`^a¥Q¥aXab\_STaa`^WST`X`a]\_`  
@HWI-EAS443:3:87:340:1963#0/1  
AAGAGGGCCTTCTACGGAAGGAGTGCCTGAGTCCATGAGG  
+HWI-EAS443:3:87:340:1963#0/1  
\_S]¥^a`bb```P¥aa[]\_VVXWM]\_`\_U\_TR^`^YX¥¥^  
@HWI-EAS443:3:87:343:830#0/1  
GACTCATCTAGCTCCAGTGCTGGTCTGAAAGATGACCTT  
+HWI-EAS443:3:87:343:830#0/1  
W[^]abb`aa`\_[b`a\_X]aa`b\_S\_abbaaa[``\_\_b`^  
@HWI-EAS443:3:87:411:241#0/1  
GACAAAATGACCATCGTCAACATCCACAGCACTCTGCTGT  
+HWI-EAS443:3:87:411:241#0/1  
aba`ab`bba``aa\_baaa`\_aaa^\_\_a]\_`\_`\_\_\_\_\_a]  
@HWI-EAS443:3:87:66:132#0/1  
AAAGAGGGCCTTCTACGGAAGGAGTGCCTGAGTCCATGAG  
+HWI-EAS443:3:87:66:132#0/1  
aa\_a\_aaba\_```\_]\_aa¥¥a\_U`U\_¥^¥¥Y`UWYW^^W¥  
@HWI-EAS443:3:87:67:284#0/1  
GGCCTTCTACGGAAGGAGTGCCTGAGTCCATGAGGGAAGA  
+HWI-EAS443:3:87:67:284#0/1  
a^bbSaaa[ab`^b`¥a`a`a`aVa¥\_\_U\_a¥``aV\_^  
@HWI-EAS443:3:87:86:498#0/1  
GTTACGCTCACCGTGCCAGTGAGCGAGGACTGCAGCGT  
+HWI-EAS443:3:87:86:498#0/1  
a^```a^`[`]Z`¥X`¥¥Z`^S`ZZ]VN]¥KPUZT¥]RZP  
@HWI-EAS443:3:88:1193:841#0/1  
CTCATCTAGCTCCAGTGCTGGTCTGAAAGATGACCTTCT

+HWI-EAS443:3:88:1193:841#0/1  
abbbbbbb`bb\_b`abbaab^\_a`aaaaba\_baaaa`b  
@HWI-EAS443:3:88:1466:905#0/1  
ACTAATCAGGCATGAAAACAGAATGGTGCTGGCTAGCACT  
+HWI-EAS443:3:88:1466:905#0/1  
aa[]NJ`XXUO`YU^UH^RQY^]X`N\_X\_`R]] [FVI\_  
@HWI-EAS443:3:88:1608:1185#0/1  
CTGCAGTCCTCGCTCACTGGGCACGGTGAGCGTGAACACA  
+HWI-EAS443:3:88:1608:1185#0/1  
a\_bababaa¥[KaY\_I00UQ]T\_ZW¥Raaba\_GUUUa[Q[  
@HWI-EAS443:3:88:1723:1139#0/1  
GACAAAATGACCATCGTCAACATCCACAGCACTCTGCTGT  
+HWI-EAS443:3:88:1723:1139#0/1  
`MabaaabU`\_^`V\_ZQX^Yb\_]Y`V`SUaYa`aUaa\_  
@HWI-EAS443:3:88:172:1946#0/1  
GGGCCTTCTACGGAAGGAGTGCCTGAGTCCATGAGGGAAG  
+HWI-EAS443:3:88:172:1946#0/1  
]]Z\_[R^a\_a\_]]\_aaabN^`T]`\_W`[X[]¥\_\_¥\_^  
@HWI-EAS443:3:88:542:1224#0/1  
AGGCACTCCTTCCGTAGAAAGGCCCTCTTTTCAAACCGTAT  
+HWI-EAS443:3:88:542:1224#0/1  
aZababaa^`ba]Z^Z```a\_ZT^\_aaa`a]Z^]U]a  
@HWI-EAS443:3:88:927:319#0/1  
CTTCCCTCATGGACTCAGGCACTCCTTCCGTAGAAAGGCC  
+HWI-EAS443:3:88:927:319#0/1  
[abaabbbabbaababababbbabbabbbba`ab`bbbab[  
@HWI-EAS443:3:88:949:157#0/1  
GACTCATCTAGCTCCAGTGTCTGAAAGATGACCTT  
+HWI-EAS443:3:88:949:157#0/1  
abaa`b`bbaab`\_bb[aaa`a\_\_aa`a\_aa^\_aXZaa  
@HWI-EAS443:3:89:1258:28#0/1  
TGGACTCAGGCACTCCTTCCGTAGAAAGGCCCTCTTTTCAA  
+HWI-EAS443:3:89:1258:28#0/1  
`a]^bb`bbbbbb`abZ^ab\_ab^T\_aNaaaa`aaV`  
@HWI-EAS443:3:89:1525:700#0/1  
AAAATGACCATCGTCAACATCCACAGCACTCTGCTGTTC  
+HWI-EAS443:3:89:1525:700#0/1  
`bbbabYab`\_Xaaa``¥a^Wa\_¥`Wa\_\_^¥]`Z]WX  
@HWI-EAS443:3:89:1561:1892#0/1  
GACTAAGGGAATTTTAGGATTTGTGTTACGCTCACCGTG  
+HWI-EAS443:3:89:1561:1892#0/1  
¥Z¥`\_[\_W`IVQ\_b\_\_ab`\_]bab`aaaOH\_ULUQ`  
@HWI-EAS443:3:89:1580:591#0/1  
CTTCCCTCATGGACTCAGGCACTCCTTCCGTAGAAAGGCC  
+HWI-EAS443:3:89:1580:591#0/1  
\_a`[\_[aaS\_ba]\_`aW^¥¥[VZba[^abbaa]b`\_MG  
@HWI-EAS443:3:89:204:668#0/1  
GGCCTTCTACGGAAGGAGTGCCTGAGTCCATGAGGGAAGA  
+HWI-EAS443:3:89:204:668#0/1  
aabaaaaaaaa`[Xa^¥`Za```^aW`¥S]`Y]`\_¥^`¥

@HWI-EAS443:3:89:395:138#0/1  
GACTCATCTAGCTCCAGTGTGGTCTGAAAGATGACCTT  
+HWI-EAS443:3:89:395:138#0/1  
¥\_\_bbbbb¥LYa^^^aRa`^^`a`\_\_Z]]^ZZUY\_]  
@HWI-EAS443:3:89:448:85#0/1  
TGTTGACAAAATGACCATCGTCAACATCCACAGCACTCTG  
+HWI-EAS443:3:89:448:85#0/1  
ab`baaaba]a`ZZa^a^\_WW]\_¥\_] ^Pa\_\_a\_XX\_]W  
@HWI-EAS443:3:89:460:317#0/1  
CAAAATGACCATCGTCAACATCCACAGCACTCTGCTGTTC  
+HWI-EAS443:3:89:460:317#0/1  
abbbb`bbaaba]]`bWa``aaaaaaaa`aaa`aaa\_`^  
@HWI-EAS443:3:89:507:1266#0/1  
ATCCCATTTAGGGCATTGGACAAAGCGTCTACGCTGC  
+HWI-EAS443:3:89:507:1266#0/1  
abbb`bb\_]abbab\_Z^aaa`aaaaaZZ\_\_Waaaaa\_\_`  
@HWI-EAS443:3:89:707:510#0/1  
GCAAATTTTCAAGAAGGTCATCTTTCAGACCAGCACTGGA  
+HWI-EAS443:3:89:707:510#0/1  
aabbbbaaababb`aa\_aa\_aaaaaaaa`ab\_aa`a`  
@HWI-EAS443:3:89:761:1039#0/1  
ACAAAATGACCATCGTCAACATCCACAGCACTCTGCTGTT  
+HWI-EAS443:3:89:761:1039#0/1  
`[LR¥aaZHWZZR^aaUUT`^PXFLYaVKE¥^G]YlQWTW  
@HWI-EAS443:3:89:968:466#0/1  
GACAAAATGACCATCGTCAACATCCACAGCACTCTGCTGT  
+HWI-EAS443:3:89:968:466#0/1  
abaaaabaaaa^aab`aa¥aaa`\_a\_aa`a\_`\_`a\_aa^  
@HWI-EAS443:3:8:106:689#0/1  
GACAAAATGACCATCGTCAACATCCACAGCACTCTGCTGT  
+HWI-EAS443:3:8:106:689#0/1  
aTa[R¥`aX\_\_\_`a^V\_]MP¥U`^]\_\_QX^^VPPVNV  
@HWI-EAS443:3:8:1130:936#0/1  
CACTAATCAGGCATGAAAACAGAATGGTGTGGCTAGCAC  
+HWI-EAS443:3:8:1130:936#0/1  
a``bbabKba`bbbba[aa\_Sb`b`X[^`[a`aa^\_a¥XT  
@HWI-EAS443:3:8:324:643#0/1  
GCAAATTTTCAAGAAGGTCATCTTTCAGACCAGCACTGGA  
+HWI-EAS443:3:8:324:643#0/1  
`bZJS\_¥P\_Y^¥VYY`aU`a\_\_Y``\_W^[Y\_]V\_]\_^  
@HWI-EAS443:3:8:39:1701#0/1  
ATTTTCAAGAAGGTCATCTTTCAGACCAGCACTGGAGCTA  
+HWI-EAS443:3:8:39:1701#0/1  
aaaaabba```aa]aa``aaaaaa^\_\_\_\_`\_`\_`\_^^\_]^\_  
@HWI-EAS443:3:8:558:1293#0/1  
GCCTTCTACGGAAGGAGTGCCTGAGTCCATGAGGGAAGAA  
+HWI-EAS443:3:8:558:1293#0/1  
ab]aa\_¥a`a^^UVUV^GYHPZ\_RaT¥T¥\_]PY\_\_S^Z\_X  
@HWI-EAS443:3:8:633:71#0/1  
AATTTTCAAGAAGGTCATCTTTCAGACCAGCACTGGAGCT

+HWI-EAS443:3:8:633:71#0/1  
`Ubbaba\_[a[aba\_\_aa¥]]a`\_bVFJX[UVVY^^[ZH  
@HWI-EAS443:3:90:1210:622#0/1  
ATTGGGACTCATCCTAGCTCCAGTGCTGGTCTGAAAGATG  
+HWI-EAS443:3:90:1210:622#0/1  
abbbbabaabba`aabab`aba\_b`aba^abb`aaaaa  
@HWI-EAS443:3:90:1362:1739#0/1  
CCCTCATGGACTCAGGCACTCCTTCCGTAGAAGGCCCTCT  
+HWI-EAS443:3:90:1362:1739#0/1  
abbbbbbbbabbbababbbbbbbba\_babaaa¥\_aaaZa  
@HWI-EAS443:3:90:1371:999#0/1  
TTCCCTCATGGACTCAGGCACTCCTTCCGTAGAAGGCCCT  
+HWI-EAS443:3:90:1371:999#0/1  
abaaUaaaa`\_a\_aaa`a`aa`a`a¥`\_¥^\_¥TT^  
@HWI-EAS443:3:90:386:1987#0/1  
GCCTGCAATTTTCAAGAAGGTCATCTTTCAGACCAGCAC  
+HWI-EAS443:3:90:386:1987#0/1  
abb)`a[aaaa[\_a`a`aa^`Waa`\_\_`aa[\_]`a\_`]  
@HWI-EAS443:3:90:559:741#0/1  
CTTCCCTCATGGACTCAGGCACTCCTTCCGTAGAAGGCC  
+HWI-EAS443:3:90:559:741#0/1  
abX¥abb\_U\_^]a^`^^Z\_abaaa`a[0^`\_VY\_]ZZ`  
@HWI-EAS443:3:90:815:1395#0/1  
GACAAAATGACCATCGTCAACATCCACAGCACTCTGCTGT  
+HWI-EAS443:3:90:815:1395#0/1  
`Maaabb¥)`^b`^]T[^\_aa][ ]a\_[[[\_\_\_`\_`\_\_\_  
@HWI-EAS443:3:90:864:924#0/1  
AAATGACCATCGTCAACATCCACAGCACTCTGCTGTTCCCT  
+HWI-EAS443:3:90:864:924#0/1  
^\_TT\_\_TV\_]IZL\_`¥]^U[\_SQWaa`¥^]W][Za][\_]Z  
@HWI-EAS443:3:90:958:118#0/1  
GGGCCTTCTACGGAAGGAGTGCCTGAGTCCATGAGGGAAG  
+HWI-EAS443:3:90:958:118#0/1  
abb^aaaaaa\_bbaaa`]a]a]\_]a¥a¥]¥¥\_`¥a^a¥^a  
@HWI-EAS443:3:91:1090:324#0/1  
GATTTGTGTTACGCTCACCGTGCCAGTGAGCGAGGACT  
+HWI-EAS443:3:91:1090:324#0/1  
aaaaa`a\_`\_`¥^¥¥^]]^^U]¥UU¥^W^¥¥S^UU¥WSW  
@HWI-EAS443:3:91:1103:1124#0/1  
GTAGTGCTAGCCAGCACCATTCTGTTTTTCATGCCTGATTA  
+HWI-EAS443:3:91:1103:1124#0/1  
aWWHK[ZS^^^VUTTZR`TUX\_]aN^Z¥SQU¥TT][RUUS  
@HWI-EAS443:3:91:1234:217#0/1  
ATCCTAGCTCCAGTGCTGGTCTGAAAGATGACCTTCTTGA  
+HWI-EAS443:3:91:1234:217#0/1  
aaaaaab`aa`aa`\_`\_aaY\_aa\_a`\_`\_`\_]`Ya`\_`]  
@HWI-EAS443:3:91:1304:1112#0/1  
AGGGCCTTCTACGGAAGGAGTGCCTGAGTCCATGAGGGAA  
+HWI-EAS443:3:91:1304:1112#0/1  
`b]aaaba`aaabb`abaXa`ba`aaXa¥`\_ab`\_`Xb^Ia



@HWI-EAS443:3:91:1420:576#0/1  
TGGACTCAGGCACTCCTTCCGTAGAAGGCCCTCTTTTCAA  
+HWI-EAS443:3:91:1420:576#0/1  
aba`ab`ba\_aa\_a]aa`^\_b\_aa\_\_a`\_QZa]`\_aaX\_\_  
@HWI-EAS443:3:91:1494:440#0/1  
GAATTTTAGGATTTGTGTTACGCTCACCGTGCCCACTGA  
+HWI-EAS443:3:91:1494:440#0/1  
a`\_\_``\_[a^^\_\_¥`\_]SUN[Q`[V¥SWUVWSUNXQWWW  
@HWI-EAS443:3:91:1708:773#0/1  
CGCTCACCGTGCCCACTGAGCGAGGACTGCAGCGTAGACG  
+HWI-EAS443:3:91:1708:773#0/1  
`babbbbabab[^b``ababab\_bba^\_\_a``aa^abaSa  
@HWI-EAS443:3:91:1732:272#0/1  
AAATGACCATCGTCAACATCCACAGCACTCTGCTGTTCCCT  
+HWI-EAS443:3:91:1732:272#0/1  
\_XTV`\_]WQ\_]``]]Y`\_aa^¥]V]YTT¥MWRTZX[aTM¥  
@HWI-EAS443:3:91:308:172#0/1  
AATGACCATCGTCAACATCCACAGCACTCTGCTGTTCCCTG  
+HWI-EAS443:3:91:308:172#0/1  
aaa`\_`[\_]a^¥[\_]^S^\_]^\_U]V¥WW]R^]Z]VYZ¥  
@HWI-EAS443:3:91:539:971#0/1  
AAAGAGGGCCTTCTACGGAAGGAGTGCCTGAGTCCATGAG  
+HWI-EAS443:3:91:539:971#0/1  
ab¥]¥babaaaaa`[aba]^`]¥`]\_a`\_a``V¥^V^\_`  
@HWI-EAS443:3:91:59:1692#0/1  
CTCTGACTAAGGAATTTTAGGATTTGTGTTACGCTCAC  
+HWI-EAS443:3:91:59:1692#0/1  
abbb`abb^YY``Zaaaaaaaa`\_a`\_\_\_¥aa`\_]WZ``  
@HWI-EAS443:3:91:772:761#0/1  
AGGACTGCAGCGTAGACGCTTTGTCCAAAATGCCCTAAAT  
+HWI-EAS443:3:91:772:761#0/1  
aaaa`b]Zab\_b^`aaaa\_a^^aZaU`^XT¥a¥XK```\_S  
@HWI-EAS443:3:91:885:1961#0/1  
ATTCTTCCCTCATGGACTCAGGCACTCCTTCCGTAGAAGG  
+HWI-EAS443:3:91:885:1961#0/1  
aba\_aa`aa`\_a^a\_a\_\_aaY]^aa\_a¥`\_a^aW\_\_\_\_\_¥U  
@HWI-EAS443:3:91:910:930#0/1  
AATTTTCAAGAAGTTCATCTTTTCCAGACCAGCACTGGAGCT  
+HWI-EAS443:3:91:910:930#0/1  
aaaa`aaa`aa`\_`Yaa`\_aaa`a`\_\_^`\_\_`\_^`]\_\_[]  
@HWI-EAS443:3:91:929:1315#0/1  
CTTCCCTCATGGACTCAGGCACTCCTTCCGTAGAAGGCC  
+HWI-EAS443:3:91:929:1315#0/1  
abaabbabbbbabbbbbbbaaaababbaa`a^Z`  
@HWI-EAS443:3:92:1003:253#0/1  
CTCATCTAGCTCCAGTCTGGTCTGAAAGATGACCTTCT  
+HWI-EAS443:3:92:1003:253#0/1  
a```b`¥^ba¥`a`¥X``]^aa]^bb`\_`bbaaaaZ¥`a`a  
@HWI-EAS443:3:92:1233:1356#0/1  
AAATGACCATCGTCAACATCCACAGCACTCTGCTGTTCCCT

+HWI-EAS443:3:92:1233:1356#0/1  
^babbaa^aa]b`a`\_aaa]`WaY`\_a``¥\_\_`\_]Z\_\_  
@HWI-EAS443:3:92:1273:628#0/1  
CAGTGCTGGTCTGAAAGATGACCTTCTTGAAAATTTGCAG  
+HWI-EAS443:3:92:1273:628#0/1  
abaUaaaab\_\_b`a^aa`a`a`\_aaaaaaaa`aa^\_a^aa  
@HWI-EAS443:3:92:1743:551#0/1  
CTGGGCACGGTGAAGCGTGAACACAAATCCTAAAATTCCT  
+HWI-EAS443:3:92:1743:551#0/1  
aa\_Xa\_b\_baY]ba\_`aaaa`]b`Ua\_\_baa`aaaQMYa  
@HWI-EAS443:3:92:201:626#0/1  
AAATGACCATCGTCAACATCCACAGCACTCTGCTGTTCCCT  
+HWI-EAS443:3:92:201:626#0/1  
aYaaaa`a``a¥aa]\_a^\_[YXR¥\_\_[\_\_\_]`\_]\_YUY]  
@HWI-EAS443:3:92:404:652#0/1  
GCAAATTTTCAAGAAGGTCATCTTTCAGACCAGCACTGGA  
+HWI-EAS443:3:92:404:652#0/1  
abaaab`a``a`a^aa]\_`^\_aaa`a`\_`[a``\_^\_^^  
@HWI-EAS443:3:92:452:1627#0/1  
GGAATTTTAGGATTTGTGTTACGCTCACCGTGCCAGTG  
+HWI-EAS443:3:92:452:1627#0/1  
X¥`]XV`^\_\_U`Z`]¥\_V\_Z\_ab\_FDY`SPJa`WYZGB  
@HWI-EAS443:3:92:827:235#0/1  
AGGGCCTTCTACGGAAGGAGTGCCTGAGTCCATGAGGGAA  
+HWI-EAS443:3:92:827:235#0/1  
`bbaaaaaaaaa`a`aa\_a\_a\_¥a`\_a¥[[^`\_Va`¥W¥  
@HWI-EAS443:3:92:937:989#0/1  
CTAAGGGAATTTTAGGATTTGTGTTACGCTCACCGTGCC  
+HWI-EAS443:3:92:937:989#0/1  
abbbbbba\_abbabbbbaabbbaba`aaaaaaaa\_\_a`aa\_  
@HWI-EAS443:3:93:1385:1781#0/1  
CAAGAAGGTCATCTTTCAGACCAGCACTGGAGCTAGGATG  
+HWI-EAS443:3:93:1385:1781#0/1  
abbbU¥¥¥aW\_babbbR\_aaa`baaaabb`\_aXaa`Z[SZ  
@HWI-EAS443:3:93:1713:1334#0/1  
ACGCTGCAGTCCTCGCTCACTGGGCACGGTGAGCGTGAAC  
+HWI-EAS443:3:93:1713:1334#0/1  
\_aaaNNRaaZ`\_XP^¥\_X¥U[\_`RRVXXaW^^UPLJW¥SU  
@HWI-EAS443:3:93:568:473#0/1  
GTAGTGCTAGCCAGCACCATTCTGTTTTCATGCCTGATTA  
+HWI-EAS443:3:93:568:473#0/1  
^VZ\_S\_\_\_`^¥X^^\_a]\_`^^Ya]\_\_\_\_\_^^\_WW[`]^]]  
@HWI-EAS443:3:94:1189:1209#0/1  
GACAAAATGACCATCGTCAACATCCACAGCACTCTGCTGT  
+HWI-EAS443:3:94:1189:1209#0/1  
aaaa\_aaaa`\_\_aaaZ`^a^`\_\_\_\_Z\_\_X\_X^^^^\_`aZ  
@HWI-EAS443:3:94:1229:1763#0/1  
ATTTGTGTTACGCTCACCGTGCCAGTGAGCGAGGACTG  
+HWI-EAS443:3:94:1229:1763#0/1  
`^^`N`a]T`¥W]UZ`XSUS`TTTRZK¥ZYSQTXSYRNU

@HWI-EAS443:3:94:1397:526#0/1  
GAAAAGAGGGCCTTCTACGGAAGGAGTGCCTGAGTCCATG  
+HWI-EAS443:3:94:1397:526#0/1  
aa`a\_ba\_\_\_\_^a`ba^]\_bb]^a\_¥¥0ZWX\_`^]YOIK`R  
@HWI-EAS443:3:94:1559:1066#0/1  
TCCACAATATCAGGTGCAAGATCCCAATGATATTTGCTGC  
+HWI-EAS443:3:94:1559:1066#0/1  
a\_]`Vaaaaa]\_a\_aYaaaaa]\_]`aaaaaa\_a^^aX  
@HWI-EAS443:3:94:1595:903#0/1  
CACTCCTTCCGTAGAAGGCCCTCTTTTCAAACCGTATTTA  
+HWI-EAS443:3:94:1595:903#0/1  
abbbba`ba^a`Za^b\_`^aaaba`a\_`aa\_\_a^\_aaa\_  
@HWI-EAS443:3:94:1671:426#0/1  
TGCAAATTTTCAAGAAGGTCATCTTTTCCAGACCAGCACTGG  
+HWI-EAS443:3:94:1671:426#0/1  
\_Y¥aaaa`a\_a\_`^^`^\_a\_`a[U]`a]R\_`X]R]]\_  
@HWI-EAS443:3:94:171:1368#0/1  
GGGCCTTCTACGGAAGGAGTGCCTGAGTCCATGAGGGAAG  
+HWI-EAS443:3:94:171:1368#0/1  
aaab[Zb¥a]aa\_`[XV[Z\_Z\_MYYYK\_^^]`XXS\_TTX  
@HWI-EAS443:3:94:383:1559#0/1  
AAGAGGGCCTTCTACGGAAGGAGTGCCTGAGTCCATGAGG  
+HWI-EAS443:3:94:383:1559#0/1  
`W¥^aba¥¥\_aaa`aa\_`[\_aU`X`ZRVVU[`\_[[UW\_  
@HWI-EAS443:3:94:915:674#0/1  
CTCTGACTAAGGAATTTTAGGATTTGTGTTACGCTCAC  
+HWI-EAS443:3:94:915:674#0/1  
aaabbaabaa^abaababababaaaaa`ba\_aa\_`\_\_\_\_^^  
@HWI-EAS443:3:95:271:1514#0/1  
CATTCCCATTTAGGGCATTGACAAAGCGTCTACGCTG  
+HWI-EAS443:3:95:271:1514#0/1  
¥aTab]¥b`b]b`¥\_bX`aabb`ba\_X`\_Z`a\_aaX¥^`]  
@HWI-EAS443:3:95:734:1915#0/1  
TAGGATTTGTGTTACGCTCACCGTGCCAGTGAGCGAGG  
+HWI-EAS443:3:95:734:1915#0/1  
]bb`bZ\_^X\_`a^aZaX]\_Ma`ZbaWMaUa```aa^a``U  
@HWI-EAS443:3:95:86:1809#0/1  
GTTACGCTCACCGTGCCAGTGAGCGAGGACTGCAGCGT  
+HWI-EAS443:3:95:86:1809#0/1  
a¥Z\_\_[TZY[NX]PPV]PSPPUZ^VMYN^ZWBBBBBBBBB  
@HWI-EAS443:3:95:983:1032#0/1  
CTTCCCTCATGGACTCAGGCACTCCTTCCGTAGAAGGCCC  
+HWI-EAS443:3:95:983:1032#0/1  
Y^aX[WY\_]ZbT``]\_T[J[a]Zababba\_b`^`ZWQ`I  
@HWI-EAS443:3:96:1267:645#0/1  
AATTTTAGGATTTGTGTTACGCTCACCGTGCCAGTGAG  
+HWI-EAS443:3:96:1267:645#0/1  
aabbaaaaa¥aaa]a[]a[`[0``¥\_^U¥T\_T[Y\_\_W¥¥B  
@HWI-EAS443:3:96:1634:579#0/1  
GTAGTGCTAGCCAGCACCATTTCTGTTTTTCATGCCTGATTA

+HWI-EAS443:3:96:1634:579#0/1  
a^a]SaQ^a\_RTZ\_]`TZW^aN\_\_^^^X\_ZX¥UY^U]\_B  
@HWI-EAS443:3:96:1670:1684#0/1  
AATTTTCAAGAAGGTCATCTTTCAGACCAGCACTGGAGCT  
+HWI-EAS443:3:96:1670:1684#0/1  
`ab\_aaa`aU\_a^]G]a[\_`^¥aS\_0^\_^`a[`0]\_YB  
@HWI-EAS443:3:96:475:93#0/1  
GACAAAATGACCATCGTCAACATCCACAGCACTCTGCTGT  
+HWI-EAS443:3:96:475:93#0/1  
aaababbab``\_ba`b\_\_aa^`a¥`]Z\_a[\_Ra^]]^`\_`]  
@HWI-EAS443:3:96:620:300#0/1  
GACTAAGGGAATTTTAGGATTTGTGTTCCACGCTCACCGTG  
+HWI-EAS443:3:96:620:300#0/1  
aUXa\_aa^UZaaaa\_`]V¥\_a\_dWa\_^¥\_^]UW¥[VWW¥^  
@HWI-EAS443:3:96:692:159#0/1  
GACAAAATGACCATCGTCAACATCCACAGCACTCTGCTGT  
+HWI-EAS443:3:96:692:159#0/1  
aSY\_aaUZ¥][\_\_]\_`]]\_NNX¥¥WQR^]]][U[Z^]URBB  
@HWI-EAS443:3:96:727:1192#0/1  
GAATTTTAGGATTTGTGTTCCACGCTCACCGTGCCCAGTGA  
+HWI-EAS443:3:96:727:1192#0/1  
aY¥``\_b``Wa`S^`0a]\_``\_\_aS\_`U[aNa`^]¥aMP^  
@HWI-EAS443:3:96:875:654#0/1  
CTCAGGCACTCCTTCCGTAGAAGGCCCTCTTTTCAAACCG  
+HWI-EAS443:3:96:875:654#0/1  
a\_`X[`^a\_WNRa`R\_\_¥H¥]YPWVH^Z\_\_a`^¥^YGLL  
@HWI-EAS443:3:96:880:982#0/1  
AAAATGACCATCGTCAACATCCACAGCACTCTGCTGTCC  
+HWI-EAS443:3:96:880:982#0/1  
YU`\_ZTPU^\_WM¥X`TQF¥V[VQZa]WWU`\_WWJN`SRBB  
@HWI-EAS443:3:97:1156:826#0/1  
GGGAATTTTAGGATTTGTGTTCCACGCTCACCGTGCCCAGT  
+HWI-EAS443:3:97:1156:826#0/1  
abbTaa\_b\_I`XbXbbXZXN`\_\_Z¥P`\_[GY\_WHKM\_S  
@HWI-EAS443:3:97:1239:452#0/1  
CTCAGGCACTCCTTCCGTAGAAGGCCCTCTTTTCAAACCG  
+HWI-EAS443:3:97:1239:452#0/1  
aa[^ab\_baba[H^\_^]]`^Y\_YVT]]SaUX\_GZ`a\_]a  
@HWI-EAS443:3:97:1240:1686#0/1  
AGAGGGCCTTCTACGGAAGGAGTGCCTGAGTCCATGAGGG  
+HWI-EAS443:3:97:1240:1686#0/1  
abb`ab[ba`Nab`baaa`[[b¥ba\_ba^b¥WZ]aa\_``\_  
@HWI-EAS443:3:97:1288:208#0/1  
TCCCTCATGGACTCAGGCACTCCTTCCGTAGAAGGCCCTC  
+HWI-EAS443:3:97:1288:208#0/1  
^aaX]R]bba]\_^Xa`^`\_Sa\_\_aaSXaV\_a\_`XSSVFOU  
@HWI-EAS443:3:97:1479:1936#0/1  
GGGCCTTCTACGGAAGGAGTGCCTGAGTCCATGAGGGAAG  
+HWI-EAS443:3:97:1479:1936#0/1  
aba\_]Xa\_^G\_\_Qa¥aG[MXUUZa]`HGDRRUNX`WLWa

@HWI-EAS443:3:97:240:112#0/1  
GACAAAATGACCATCGTCAACATCCACAGCACTCTGCTGT  
+HWI-EAS443:3:97:240:112#0/1  
a`aba^`b\_a[aa]a]aRaS\_a[\_[XR¥0[M^OR\_¥]]X  
@HWI-EAS443:3:97:241:1783#0/1  
GAATTTTAGGATTTGTGTTCCACGCTCACCGTGCCCAGTGA  
+HWI-EAS443:3:97:241:1783#0/1  
aTX`[^aaaa\_a\_[¥¥\_¥^`SX[aU`\_]\_SYGTP¥\_XSHVV  
@HWI-EAS443:3:97:365:1035#0/1  
TCTCTGCGCATCTCGGCTTTGAGGGGGCCTGACGGGATG  
+HWI-EAS443:3:97:365:1035#0/1  
aaa¥aaaaa¥a`\_`Yb^`aa\_UYY`Xa\_PUX^[Z^`\_MUQ  
@HWI-EAS443:3:97:441:1193#0/1  
CAGGCACTCCTTCCGTAGAAGGCCCTTTTTCAAACCGTA  
+HWI-EAS443:3:97:441:1193#0/1  
a`^`Zbba^`\_]a[\_Zaba`[W\_`\_a]aaU``^`VaV\_  
@HWI-EAS443:3:97:97:1733#0/1  
CATTTAGGGCATTGACAAAGCGTCTACGCTGCAGTCC  
+HWI-EAS443:3:97:97:1733#0/1  
\_U\_] [¥`^YVZ^\_YYP\_¥¥SV¥SYU¥^^SQERUBBBBBB  
@HWI-EAS443:3:98:1280:1704#0/1  
AATTTTCAAGAAGGTCATCTTTCAGACCAGCACTGGAGCT  
+HWI-EAS443:3:98:1280:1704#0/1  
ababaaaab``aaa\_`aaa`\_`V\_a\_\_\_a\_Ya^`\_X\_a¥\_  
@HWI-EAS443:3:98:1280:540#0/1  
TTTGAAAAGAGGGCCTTCTACGGAAGGAGTGCCTGAGTCC  
+HWI-EAS443:3:98:1280:540#0/1  
abaaZa[aa`a[``\_a\_Xa`Va``]a\_V\_UaNZ\_`¥aYSQ  
@HWI-EAS443:3:98:1434:895#0/1  
ATTGGGACTCATCCTAGCTCCAGTGCTGGTCTGAAAGATG  
+HWI-EAS443:3:98:1434:895#0/1  
abbaaaa^bbbaaaabaa^`]a`aa[\_\_\_aaaa``a``  
@HWI-EAS443:3:98:337:1638#0/1  
GATTTGTGTTCCACGCTCACCGTGCCCAGTGAGCGAGGACT  
+HWI-EAS443:3:98:337:1638#0/1  
`X^`a]¥]X¥ZZXU^Q0[PP¥KSNSXKXRTTM]Q¥OB BBB  
@HWI-EAS443:3:98:360:816#0/1  
AATGACCATCGTCAACATCCACAGCACTCTGCTGTTCCCTG  
+HWI-EAS443:3:98:360:816#0/1  
a\_bbaaaaa\_`]W¥Z``aaa¥\_\_X[^`\_`^]``^X]^]  
@HWI-EAS443:3:98:634:1984#0/1  
GACAAAATGACCATCGTCAACATCCACAGCACTCTGCTGT  
+HWI-EAS443:3:98:634:1984#0/1  
a`]]`abZH¥a`aaaa]a\_¥]a\_aZ`aa[\_a¥]`\_] ^Z`Y  
@HWI-EAS443:3:98:690:505#0/1  
GGGCTTCTACGGAAGGAGTGCCTGAGTCCATGAGGGAAG  
+HWI-EAS443:3:98:690:505#0/1  
ab`aaaaaaa^aaa`a\_`a¥a¥\_aa\_`\_Z`\_`V^`¥¥`a  
@HWI-EAS443:3:98:799:547#0/1  
CAGTGAGCGAGGACTGCAGCGTAGACGCTTTGTCCAAAAT

+HWI-EAS443:3:98:799:547#0/1  
^OXN\_^\VFU\_b\_]IZZRa]a¥a\_]\_`TYRGRFHDURG[a  
@HWI-EAS443:3:98:920:1177#0/1  
ATTTGTGTTACGCTCACCGTGCCAGTGAGCGAGGACTG  
+HWI-EAS443:3:98:920:1177#0/1  
aaaba¥babaaa]a`aX\_`^aZXY`aW]^\_M`a^aU\_`  
@HWI-EAS443:3:99:1105:211#0/1  
GGCCTTCTACGGAAGGAGTGCCTGAGTCCATGAGGGAAGA  
+HWI-EAS443:3:99:1105:211#0/1  
ab^ab\_\_aa\_a^`Yab\_aW`¥¥`\_][QQJ[]ULaa\_¥¥¥¥  
@HWI-EAS443:3:99:1612:1534#0/1  
ATCCACAATATCAGGTGCAAGATCCCAATGATATTTGCTG  
+HWI-EAS443:3:99:1612:1534#0/1  
aVX`aaW`^`¥a\_`S^`aa`W^S\_a^a``\_a^XZHT`  
@HWI-EAS443:3:99:177:931#0/1  
AGCGAGGACTGCAGCGTAGACGCTTTGTCCAAAATGCCCT  
+HWI-EAS443:3:99:177:931#0/1  
a`aa\_a^\_\_¥`\_`a\_\_¥`\_`W\_\_¥¥¥¥S¥U¥¥¥\_W`SSV¥  
@HWI-EAS443:3:99:239:1153#0/1  
GGACTCAGGCACTCCTTCCGTAGAAGGCCCTCTTTTCAAA  
+HWI-EAS443:3:99:239:1153#0/1  
abaaaabbabbbbaabbbbaa\_`b`a``\_\_a`Za`\_a¥\_aa  
@HWI-EAS443:3:99:268:69#0/1  
AGGGCCTTCTACGGAAGGAGTGCCTGAGTCCATGAGGGAA  
+HWI-EAS443:3:99:268:69#0/1  
ab``aaa]`aW¥ba]`ba\_a¥\_]W`U`S¥¥S¥\_S`\_^UW  
@HWI-EAS443:3:99:455:1621#0/1  
TTTAGGATTTGTGTTACGCTCACCGTGCCAGTGAGCGGA  
+HWI-EAS443:3:99:455:1621#0/1  
`aaa`a\_\_`¥Xa¥`aaa]¥XX¥QS¥S`¥¥¥MYW¥S^S^B  
@HWI-EAS443:3:99:469:1029#0/1  
AAGAAGGTCATCTTTCAGACCAGCACTGGAGCTAGGATGA  
+HWI-EAS443:3:99:469:1029#0/1  
aUbVX\_aH`a[aa`\_ab`\_aa^[a^]\_[a^a\_\_\_\_\_QN`\_  
@HWI-EAS443:3:99:490:44#0/1  
TGCAAATTTTCAAGAAGGTCATCTTTCAGACCAGCACTGG  
+HWI-EAS443:3:99:490:44#0/1  
ab^aa``aaa\_a`a\_\_a`X]\_\_]`aaV``YV^\_X^Y]\_]`  
@HWI-EAS443:3:99:779:803#0/1  
TACGGTTTGAAAAGAGGGCCTTCTACGGAAGGAGTGCCTG  
+HWI-EAS443:3:99:779:803#0/1  
a`abbabbbbaaab^bab]a`a`aa\_ab`\_aa\_`T\_¥YZa  
@HWI-EAS443:3:99:88:1904#0/1  
GACAAAATGACCATCGTCAACATCCACAGCACTCTGCTGT  
+HWI-EAS443:3:99:88:1904#0/1  
`b\_¥\_aVa`Y``]^`Y^ab¥DYRZOZ[QYGUKNQSYBBBB  
@HWI-EAS443:3:9:1042:1574#0/1  
AGGATTTGTGTTACGCTCACCGTGCCAGTGAGCGAGGA  
+HWI-EAS443:3:9:1042:1574#0/1  
]aXXa`¥`\_]XS¥X`a¥SPUMMT¥YBBBBBBBBBBBBBB

@HWI-EAS443:3:9:1211:926#0/1  
AAAATGACCATCGTCAACATCCACAGCACTCTGCTGTTCC  
+HWI-EAS443:3:9:1211:926#0/1  
aaa`a`a\_aaa^aU¥`a^a\_\_]\_]¥^Z[`] `WW  
@HWI-EAS443:3:9:167:1245#0/1  
AAAATGACCATCGTCAACATCCACAGCACTCTGCTGTTCC  
+HWI-EAS443:3:9:167:1245#0/1  
aba` `abaaaa\_aXaa]Qa`aa`\_`^a] ]^\_\_]\_]\_\_Z  
@HWI-EAS443:3:9:331:788#0/1  
ATTCCCATTTAGGGCATTGACAAAGCGTCTACGCTGC  
+HWI-EAS443:3:9:331:788#0/1  
a\_\_\_`T]a` `aa`\_`aa[ZZ\_\_aY` \_\_\_\_\_^\_aWUY¥UY  
@HWI-EAS443:3:9:573:739#0/1  
GCCTTCTACGGAAGGAGTGCCTGAGTCCATGAGGAAGAA  
+HWI-EAS443:3:9:573:739#0/1  
H\_ab[P\_\_b\_babba` `aaabbZ[aV] `baabb\_\_a] `a  
@HWI-EAS443:3:9:608:865#0/1  
AATTTTCAAGAAGTCATCTTTCAGACCAGCACTGGAGCT  
+HWI-EAS443:3:9:608:865#0/1  
` `aaaaaa¥a\_\_a¥Z`a`^`\_`^`^`\_] ^a`^`\_] ^^^^^ZZ  
@HWI-EAS443:3:9:679:2017#0/1  
GACAAAATGACCATCGTCAACATCCACAGCACTCTGCTGT  
+HWI-EAS443:3:9:679:2017#0/1  
ababbbababaaba\_aaXba`a`\_YaYa`^a\_\_Y\_` `\_\_¥  
@HWI-EAS443:3:9:692:1428#0/1  
TGTTGACAAAATGACCATCGTCAACATCCACAGCACTCTG  
+HWI-EAS443:3:9:692:1428#0/1  
ab`^UQ[ ]\_a]a¥a`\_`] `aUS^[R\_YY` `] `ZTN^WX\_  
@HWI-EAS443:3:9:783:246#0/1  
TGAAAGATGACCTTCTTGAAAATTTGCAGGCCTACCAGAA  
+HWI-EAS443:3:9:783:246#0/1  
a`a]\_\_]X]a]^\_] ] `\_] ^`\_W^^^^]\_ZV¥]W^Z]\_ZZ  
@HWI-EAS443:3:9:874:253#0/1  
TGCGCGATCTCGGCTTTGAGGGGGCCTGACGGGATGATAG  
+HWI-EAS443:3:9:874:253#0/1  
a^^^] ]¥\_Y\_]aUX[ ]TTT]Y]]¥U^YZUTTY¥VQPQPU^  
@HWI-EAS443:3:9:892:830#0/1  
ATTCCCATTTAGGGCATTGACAAAGCGTCTACGCTGC  
+HWI-EAS443:3:9:892:830#0/1  
abaa`aaab`a`a\_Yaaa` `a\_\_`\_` `a`\_^] `Z\_W^\_X  
@HWI-EAS443:3:33:1458:1077#0/1  
TACTCCTCTGCATTGTCTCCGAAGAAATAAGAGCCTTCAT  
+HWI-EAS443:3:33:1458:1077#0/1  
aaa`¥aa`aaaaaaa]aaa\_a\_\_a\_a[ ]\_a^ZG[M^]V^[  
@HWI-EAS443:3:59:1023:759#0/1  
TGCGGGGAGTCTCGAGCTCTCGACGAAAAGGCAATGAA  
+HWI-EAS443:3:59:1023:759#0/1  
a]V\_\_UQ^KXYZ`Yaa`RPU]T¥`X[[V]¥QG^VYWUXUW  
@HWI-EAS443:3:26:603:656#0/1  
CGGGGCGGGGAGTCTTCGAGCTCTCGGAAGAAAAGGCAAC

+HWI-EAS443:3:26:603:656#0/1  
¥`a\_\_aaa`\_aZVXT]¥ZMZ\_X]¥^`¥VE]Z`\_\_N\_U]aZ  
@HWI-EAS443:3:2:177:813#0/1  
CGGGGTGGGGAGTCTTCGAGCTCTCGGACGAAAAGGCAAC  
+HWI-EAS443:3:2:177:813#0/1  
\_aa`aUa]aV`\_`\_\_aa¥\_`^`Z`Z`^¥¥\_¥W`\_`^¥^Z`R  
@HWI-EAS443:3:61:212:1743#0/1  
GGGGCGGGGAGTCTTCGAGCTCTCGGACGAACAGGCAACC  
+HWI-EAS443:3:61:212:1743#0/1  
\_Z\_PQPUW]QIGV^Z`¥X[¥^a¥¥ESTYW`[FZPPN¥^BB  
@HWI-EAS443:3:3:536:1224#0/1  
GGCGGGGAGTCTTCGAGCTCTCGGACGAAAAGGCAATGAA  
+HWI-EAS443:3:3:536:1224#0/1  
aa\_¥`b`abXV]b[]V]^¥LOX^^RT`S^a`]YG]YDRaa  
@HWI-EAS443:3:21:1521:663#0/1  
GCCTTTTCGTCGAGAGCTCGAAGACTCCCCGCCCTCTA  
+HWI-EAS443:3:21:1521:663#0/1  
aYSQKQZVQTU^STNPYBBBBBBBBBBBBBBBBBBBBBB  
@HWI-EAS443:3:10:812:381#0/1  
CGGGGCGGGGAGTCTTCGAGCTCTCGGACGAAAAGGCAAC  
+HWI-EAS443:3:10:812:381#0/1  
aa^`a\_aa`\_`\_XW]`\_`Z]WT¥¥Z^Z¥P^Z¥UXRZSX¥T  
@HWI-EAS443:3:26:911:1398#0/1  
TGGGGCGGGGAGTCTTCGAGCTCTCGGACGAAAAGGCAAC  
+HWI-EAS443:3:26:911:1398#0/1  
aa¥^¥`a^R[]¥[[]^¥`UP¥¥¥ZS[¥¥SYZ[^UPSXZ]S  
@HWI-EAS443:3:39:119:471#0/1  
CGGGGCGGGGAGTCTTCGAGCTCTCGGACGAAAAGGCAAC  
+HWI-EAS443:3:39:119:471#0/1  
`a¥`\_`\_`X¥VU]¥XX¥RJY[LQUPY^XXUNZ]TPPX]^I  
@HWI-EAS443:3:52:655:1357#0/1  
TGGGGCGGGGAGTCTTCGAGCTCTCGGACGAAAAGGCAAC  
+HWI-EAS443:3:52:655:1357#0/1  
`\_`\_[^`^`¥ZRV]Y¥VQPUYZ[YPYXQP^XX[`S¥OW¥N  
@HWI-EAS443:3:60:1098:892#0/1  
CGGGGCGGGGAGTCTTCGAGCTCTCGGACGAAAAGGCAAC  
+HWI-EAS443:3:60:1098:892#0/1  
`[a^Y\_[^Waa]^`aQ`^^`¥U[Z^R^X¥^¥Z\_S¥`R  
@HWI-EAS443:3:61:377:1792#0/1  
CGGGGCGGGGAGTCTTCGAGCTCTCGGACGAAAAGGCAAC  
+HWI-EAS443:3:61:377:1792#0/1  
a`]X\_aa`\_a]TZ¥¥a\_W]^`[a`Xa\_R¥]`¥XUKWXF  
@HWI-EAS443:3:65:259:1264#0/1  
TGGGGCGGGGAGTCTTCGAGCTCTCGGACGAAAAGGCAAC  
+HWI-EAS443:3:65:259:1264#0/1  
Z`aaXb]RV\_\_MP[^`¥GW^a]¥QU^a¥KVG¥TP^^[ZQ  
@HWI-EAS443:3:81:307:2034#0/1  
CGGGGCGGGGAGTCTTCGAGCTCTCGGACGAAAAGGCAAC  
+HWI-EAS443:3:81:307:2034#0/1  
aR^X^\_^[K¥¥XZ]T¥[NQ¥R[P¥ZZ[ORWUXZRRTZBB



@HWI-EAS443:3:97:293:910#0/1  
ACCAGGGGCGGGGAGTCTTCGAGCTCTCGGACGAAAAGGC  
+HWI-EAS443:3:97:293:910#0/1  
Z\_\_a\_\_a\_\_\_\_^`¥X\_]\_`\_]`^¥W¥^¥XX¥]RXPY¥¥Z]B  
@HWI-EAS443:3:10:1391:443#0/1  
TTGCCTTTTCGTCCGAGAGCTCGAAGACTCCCCGCCCTG  
+HWI-EAS443:3:10:1391:443#0/1  
a\_^Y^`aaaUa^U[¥Ya^a¥`Y`¥^^^W^UUSU¥PM[UUU  
@HWI-EAS443:3:14:1668:1435#0/1  
GCCTTTTCGTCCGAGAGCTCGAAGACTCCCCGCCCTGGA  
+HWI-EAS443:3:14:1668:1435#0/1  
\_V]Xaaa^]¥PTaU`¥]^¥NY^Y¥UW^US¥STWWSWWWBB  
@HWI-EAS443:3:15:1469:293#0/1  
GTTGCCTTTTCGTCCGAGAGCTCGAAGACTCCCCGCCCT  
+HWI-EAS443:3:15:1469:293#0/1  
a[Za`RXV`¥YaVZMa^`\_ZNOQLPPXUQ]UMYVYUTWWW  
@HWI-EAS443:3:17:563:350#0/1  
TGCCTTTTCGTCCGAGAGCTCGAAGACTCCCCGCCCTGG  
+HWI-EAS443:3:17:563:350#0/1  
\_aaa¥`a`\_`¥]¥a¥\_`W¥^Z^`^`^¥]^Z\_XV^[Z]X^^  
@HWI-EAS443:3:17:844:1179#0/1  
GCCTTTTCGTCCGAGAGCTCGAAGACTCCCCGCCCTGGA  
+HWI-EAS443:3:17:844:1179#0/1  
ab`Z]V¥aYFVXNL]V¥U^][¥]¥¥¥ZUS¥P¥UUU¥WWUS  
@HWI-EAS443:3:23:1459:775#0/1  
CAGGGGCGGGGAGTCTTCGAGCTCTCGGACGAAAAGGCAA  
+HWI-EAS443:3:23:1459:775#0/1  
¥P¥a` `a\_a`VKT¥Z`¥]^N¥TYXVM¥KKVOYN^UBBBB  
@HWI-EAS443:3:30:229:951#0/1  
CTTCCAGGGGCGGGGAGTCTTCGAGCTCTCGGACGAAAAG  
+HWI-EAS443:3:30:229:951#0/1  
aa¥a` ``^X]a¥URXXZ^WW]KNR^S^Z[VXXXURWZRO  
@HWI-EAS443:3:31:651:1405#0/1  
GCCTTTTCGTCCGAGAGCTCGAAGACTCCCCGCCCTGGA  
+HWI-EAS443:3:31:651:1405#0/1  
abbaW\_bbaWVT\_aaa]¥]^¥aXZNUaa\_a[ ]^^XOXT  
@HWI-EAS443:3:34:182:1620#0/1  
TTTCGTCCGAGAGCTCGAAGACTCCCCGCCCTGGAAGGA  
+HWI-EAS443:3:34:182:1620#0/1  
V`]bbabb`aaZZa¥a]aba`\_]ab]YIK^Zaa[IW]LOB  
@HWI-EAS443:3:35:682:1110#0/1  
GTTGCCTTTTCGTCCGAGAGCTCGAAGACTCCCCGCCCT  
+HWI-EAS443:3:35:682:1110#0/1  
`Yaaa`\_a` `a`¥\_`P^^^`UZ[¥¥¥U¥W^`]^W^]¥¥W  
@HWI-EAS443:3:38:1169:702#0/1  
CCAGGGGCGGGGAGTCTTCGAGCTCTCGGACGAAAAGGCA  
+HWI-EAS443:3:38:1169:702#0/1  
``[```Z``aZ¥¥RV^Y]VUPT`Y¥XS^`RNSS¥^ZXROR  
@HWI-EAS443:3:49:1005:1155#0/1  
CAGGGGCGGGGAGTCTTCGAGCTCTCGGACGAAAAGGCAA

+HWI-EAS443:3:49:1005:1155#0/1  
VZa^^^a^ [RT\_TP\_\_`PGZ^^VWGWP¥¥^\_LX\_` [aX`a  
@HWI-EAS443:3:49:1308:191#0/1  
CAGGGGCGGGGAGTCTTCGAGCTCTCGGACGAAAAGGCAA  
+HWI-EAS443:3:49:1308:191#0/1  
V\_]\_\_\_a`a\_[\_]Y[aa^a]Y]\_] [¥\_XT]W\_a\_T]VYY  
@HWI-EAS443:3:64:1256:439#0/1  
CAGGGGCGGGGAGTCTTCGAGCTCTCGGACGAAAAGGCAA  
+HWI-EAS443:3:64:1256:439#0/1  
`aaaaaaaa¥`a`a`\_`^` [\_^a¥`aXT^\_^\_a¥a¥`a  
@HWI-EAS443:3:86:471:2015#0/1  
GCCTTTTCGTCCGAGAGCTCGAAGACTCCCCGCCCTGGA  
+HWI-EAS443:3:86:471:2015#0/1  
`b` [T^\_aaV^V¥H¥Z]a^]Y`^^^Y]^^V[^]VTVTS  
@HWI-EAS443:3:87:1092:228#0/1  
CTTCCAGGGGCGGGGAGTCTTCGAGCTCTCGGACGAAAAG  
+HWI-EAS443:3:87:1092:228#0/1  
\_¥[\_`aa\_TZ\_XZ¥URU[W[]Q]QYR¥ZTP]WXQBBBBBB  
@HWI-EAS443:3:88:610:834#0/1  
GCCTTTTCGTCCGAGAGCTCGAAGACTCCCCGCCCTGGA  
+HWI-EAS443:3:88:610:834#0/1  
aaaaa`aaWaYa]aZ``^`^^¥\_¥¥aY`¥ZS\_`UU\_` [   
@HWI-EAS443:3:89:378:1167#0/1  
TGCCTTTTCGTCCGAGAGCTCGAAGACTCCCCGCCCTGG  
+HWI-EAS443:3:89:378:1167#0/1  
aa`ab`aaa]VbZXT\_` [K^`J^]a¥`X`\_QXU^¥a¥`X  
@HWI-EAS443:3:91:97:220#0/1  
TTTTCGTCCGAGAGCTCGAAGACTCCCCGCCCTGGAAGG  
+HWI-EAS443:3:91:97:220#0/1  
aaaaa¥aaa]b\_``¥a\_^]\_\_^^^¥¥¥¥U\_U¥^ZG[[U  
@HWI-EAS443:3:92:1213:1110#0/1  
CCAGGGGCGGGGAGTCTTCGAGCTCTCGGACGAAAAGGCA  
+HWI-EAS443:3:92:1213:1110#0/1  
T\_aa`aa\_aaaaa^J^^aaa^X\_SS^aaSY`\_¥Ya\_\_X^  
@HWI-EAS443:3:98:1093:944#0/1  
GTTGCCTTTTCGTCCGAGAGCTCGAAGACTCCCCGCCCT  
+HWI-EAS443:3:98:1093:944#0/1  
a\_bb``aaba\_a]Y]b^a``\_]a^``¥U`YMUQ^QW¥SX  
@HWI-EAS443:3:99:428:263#0/1  
CAGGGGCGGGGAGTCTTCGAGCTCTCGGACGAAAAGGCAA  
+HWI-EAS443:3:99:428:263#0/1  
``\_Z\_`¥a¥VWX]TVGUPXTXLKU]X^^FGWZBBBBBBBB
